# Supplementary material for: Quantitative Proteomics Uncovers Novel Factors Involved in Developmental Differentiation of Trypanosoma brucei
Source: PubMed Central journal article supplement (PMC4765897; doi:10.1371/journal.ppat.1005439), 2016-02-24

# Supplemental figure 1

Quantitative proteomics uncovers novel factors for developmental differentiation of *Trypanosoma brucei*

Mario Dejung, Ines Subota, Ferdinand Brucerius, Gülcin Dindar, Anja Freiwald, Markus Engstler, Michael Boshart, Falk Butter, Christian Janzen

Note: Please switch on table of contents.

Example page:

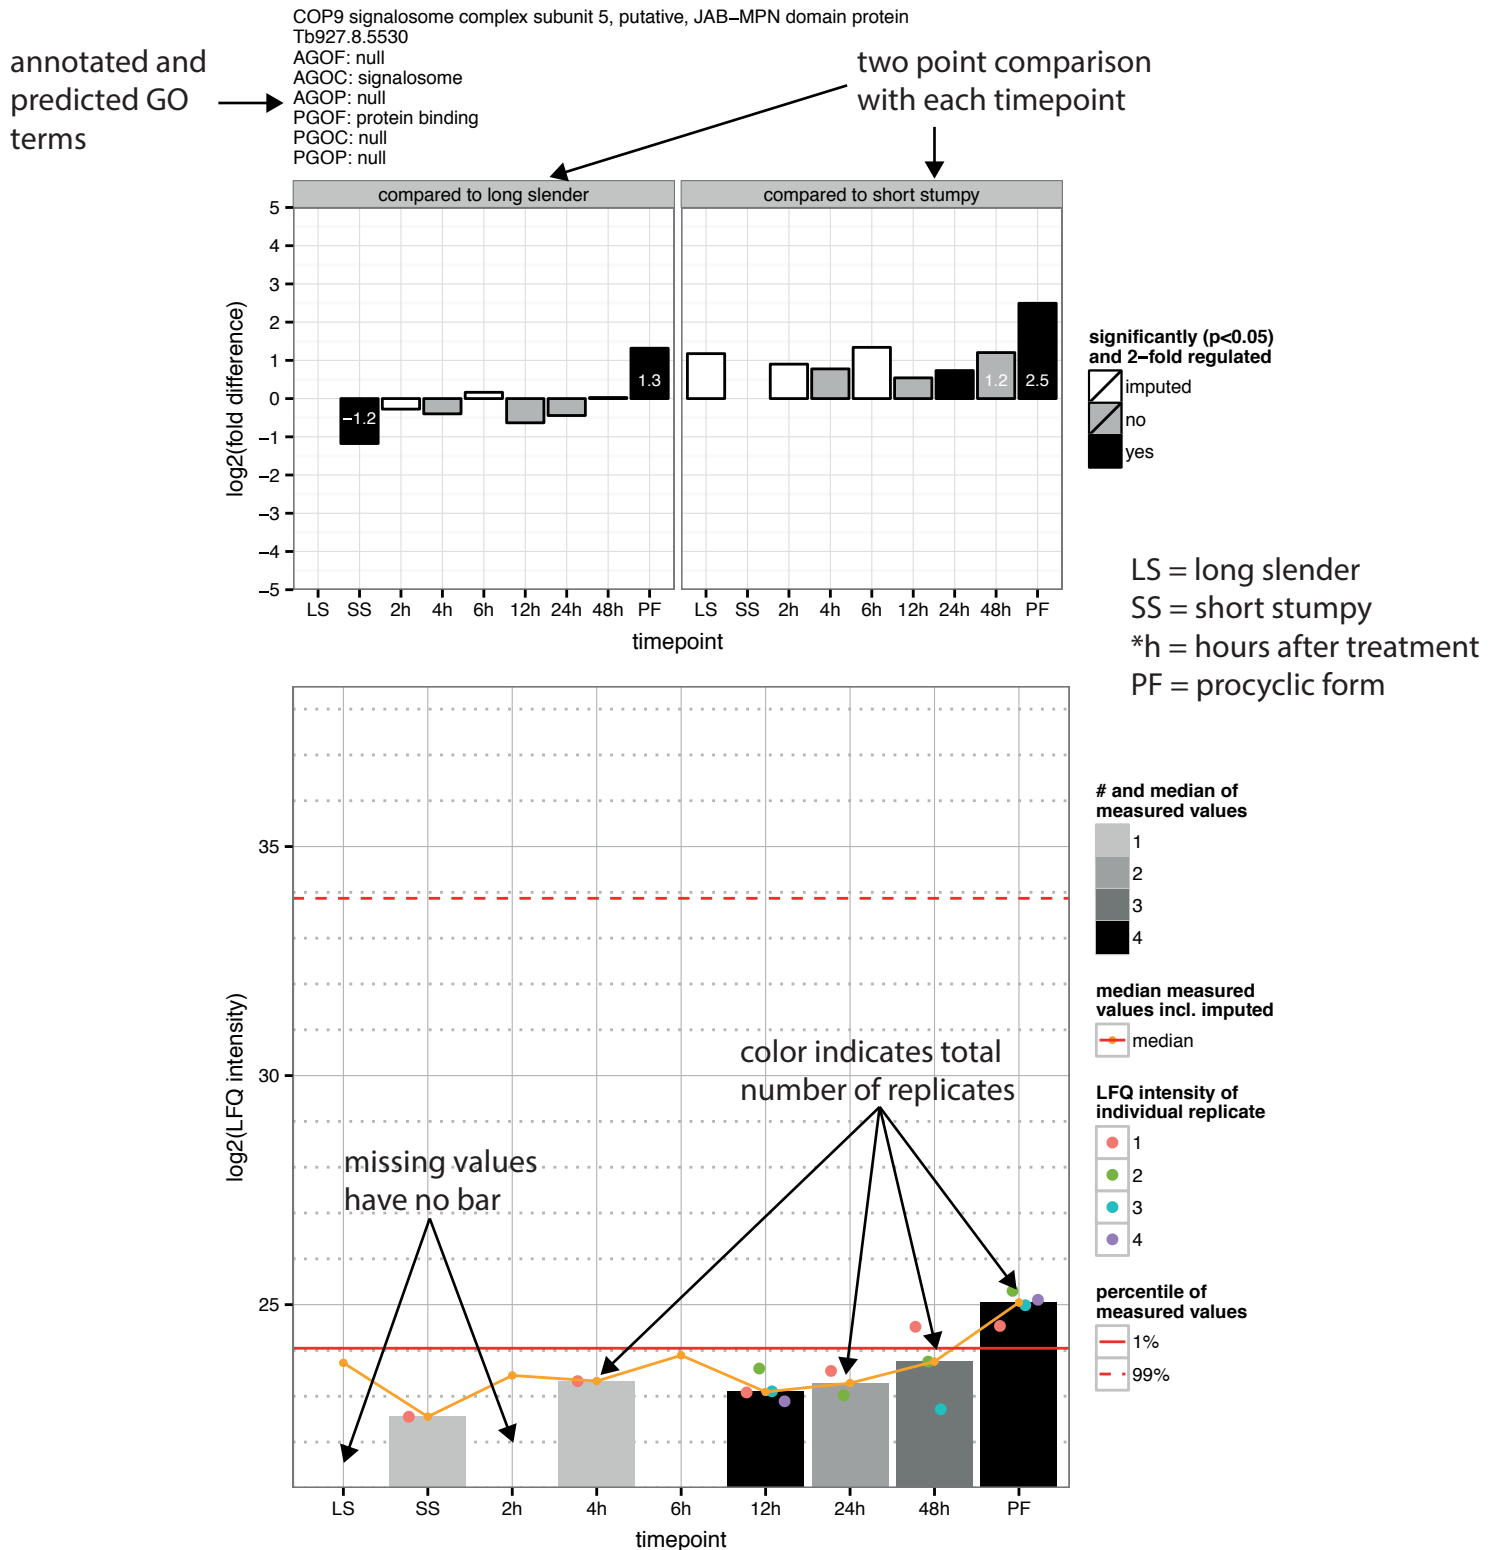

regulated not regulated significant down significant up

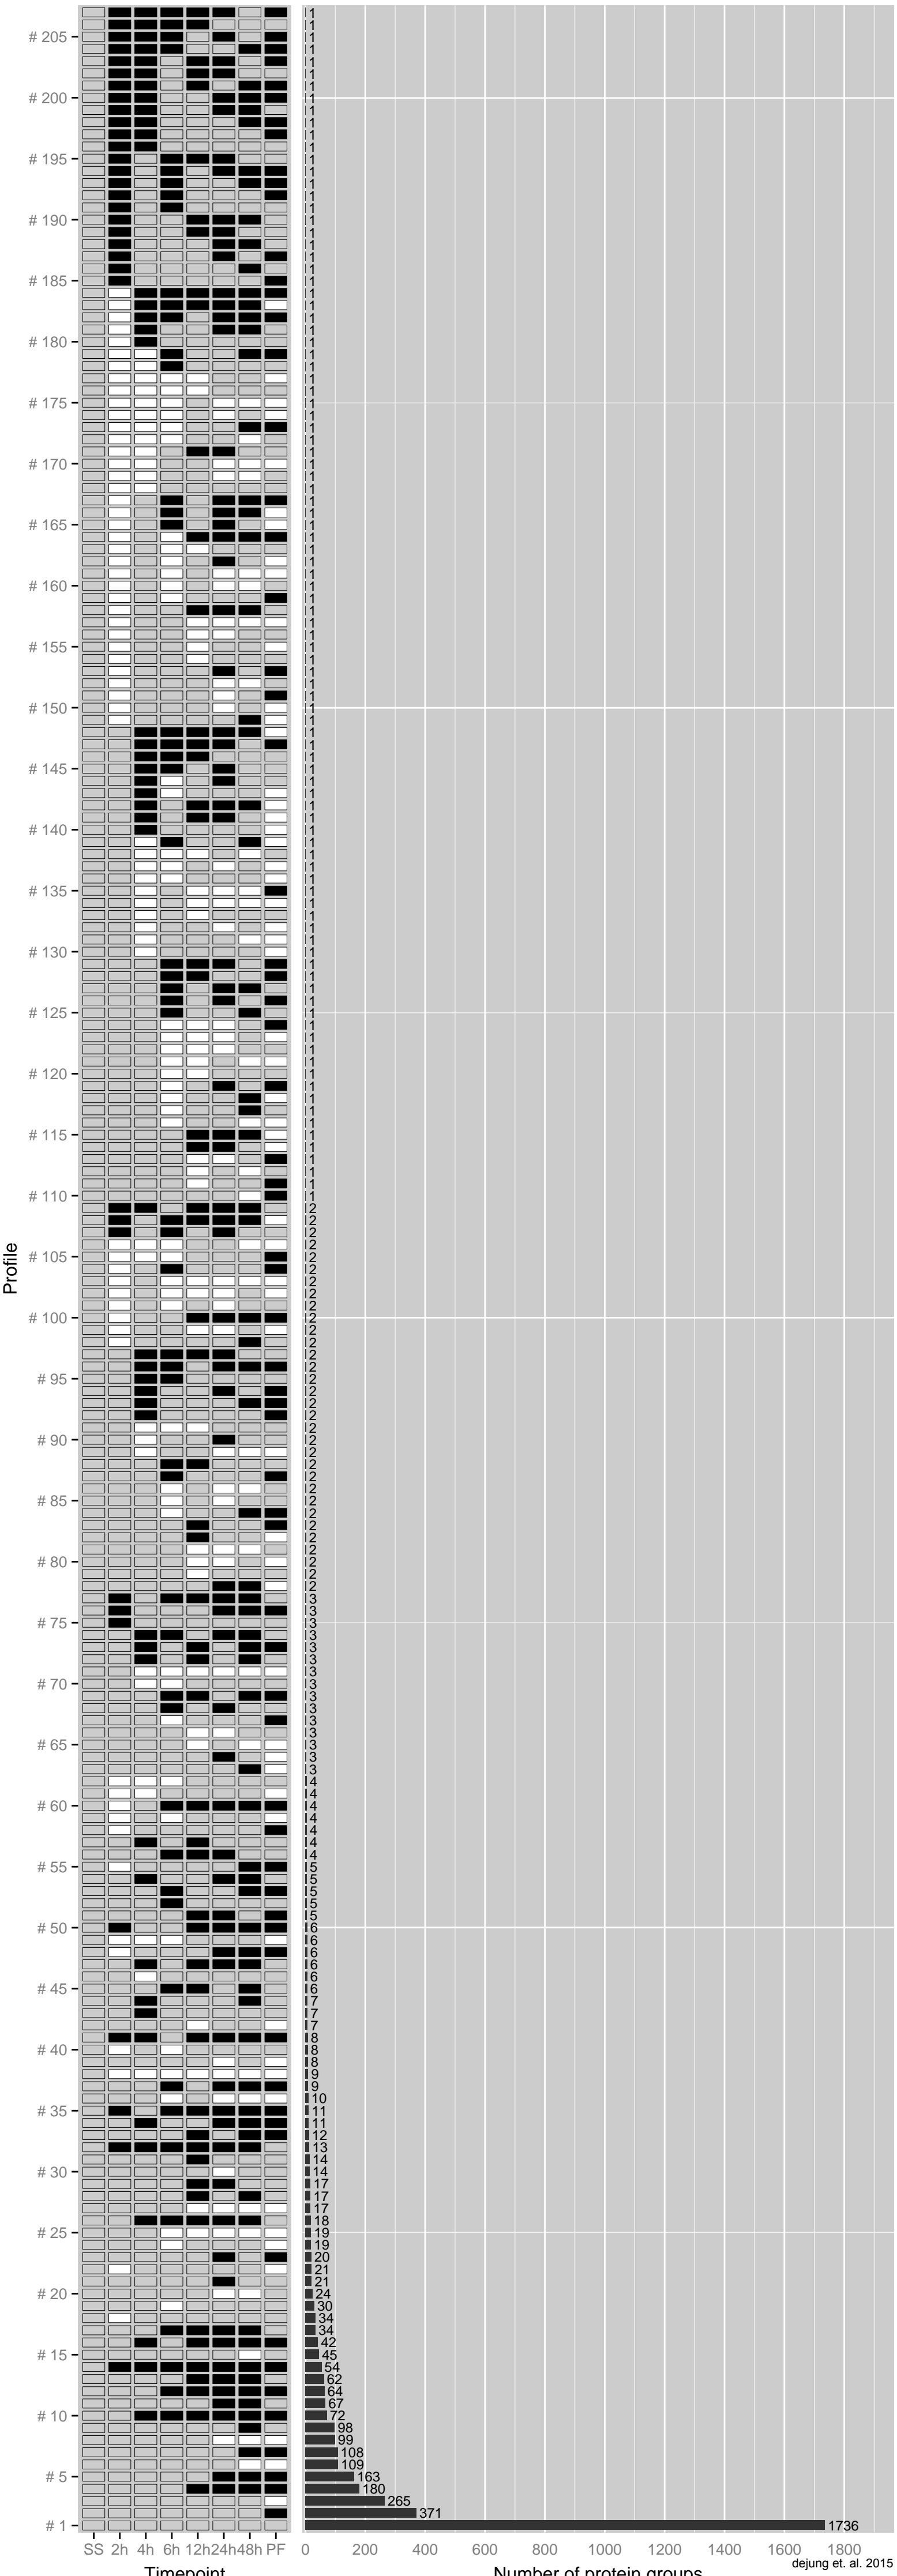

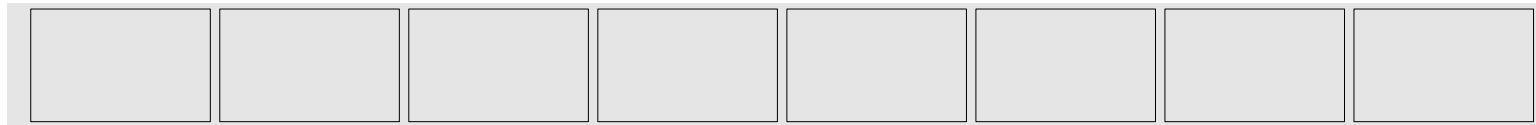

SS

2h

4h

6h

12h

24h

48h

PF

timepoint

**regulated**  not regulated  significant down  significant up

dejung et. al. 2015

major vault protein, putative, BAC from homologous region on chr5, putative (MVP)  
 Tb927.5.4460;Tb05.5K5.110;Tb11.v5.0866  
 AGOF: null  
 AGOC: null  
 AGOP: null  
 PGO: null  
 PGOC: null  
 PGOP: null

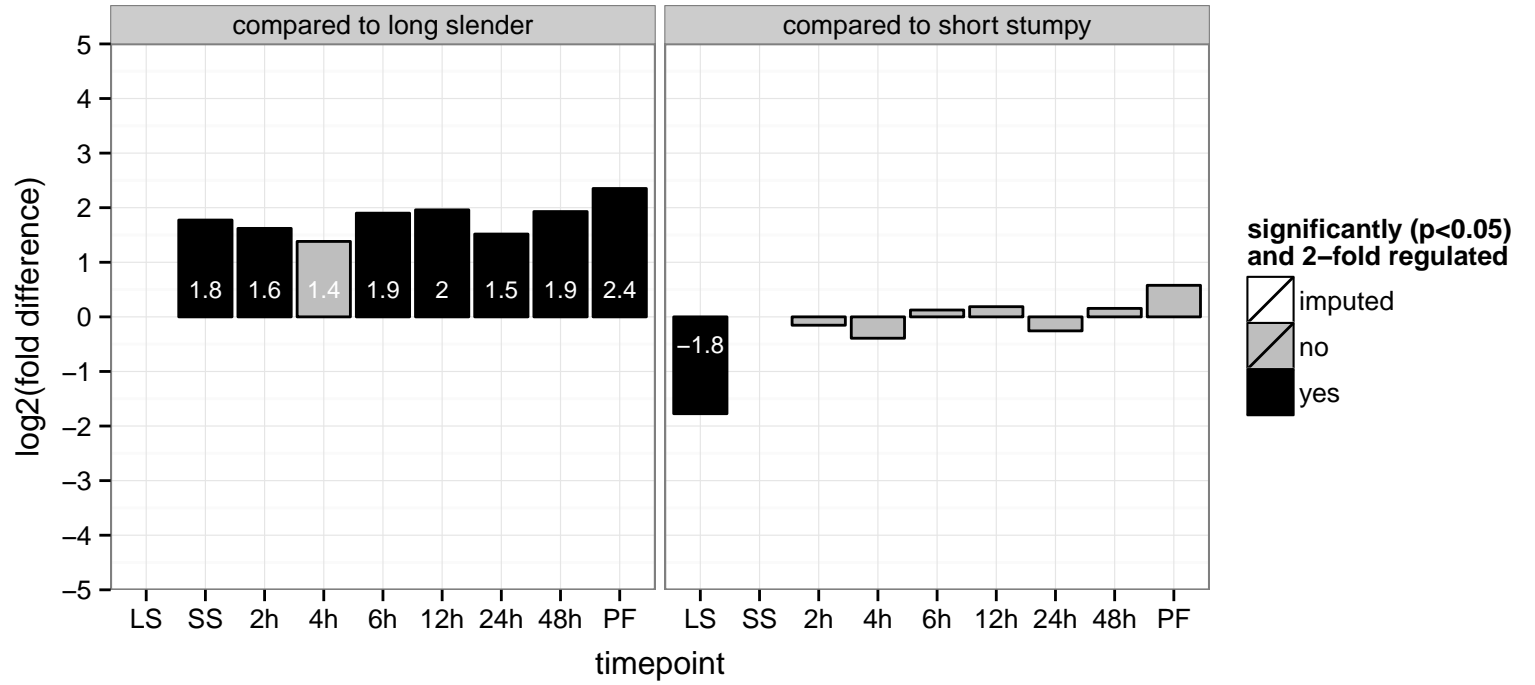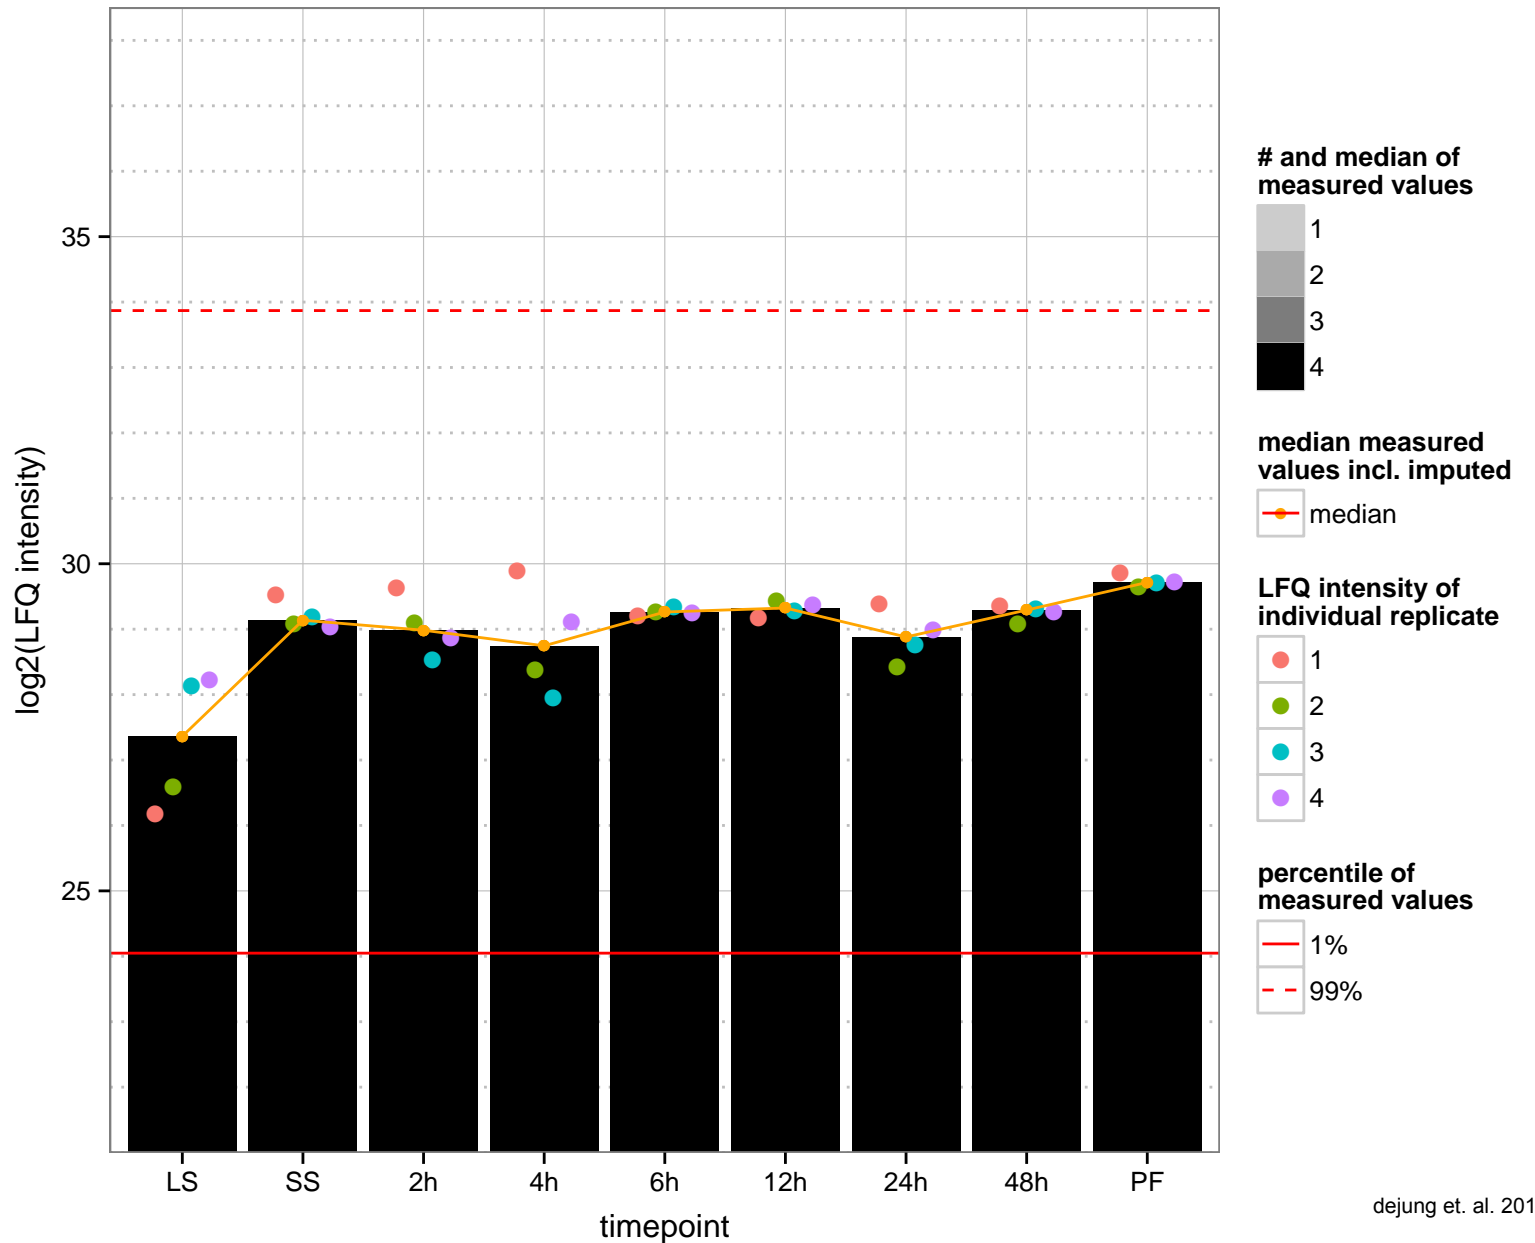



paraflagellar rod component par4, putative, BAC from homologous region on chr5  
 Tb927.5.4480;Tb05.5K5.130  
 AGOF: null  
 AGOC: null  
 AGOP: null  
 PGO: null  
 PGO: null  
 PGO: null  
 PGO: null

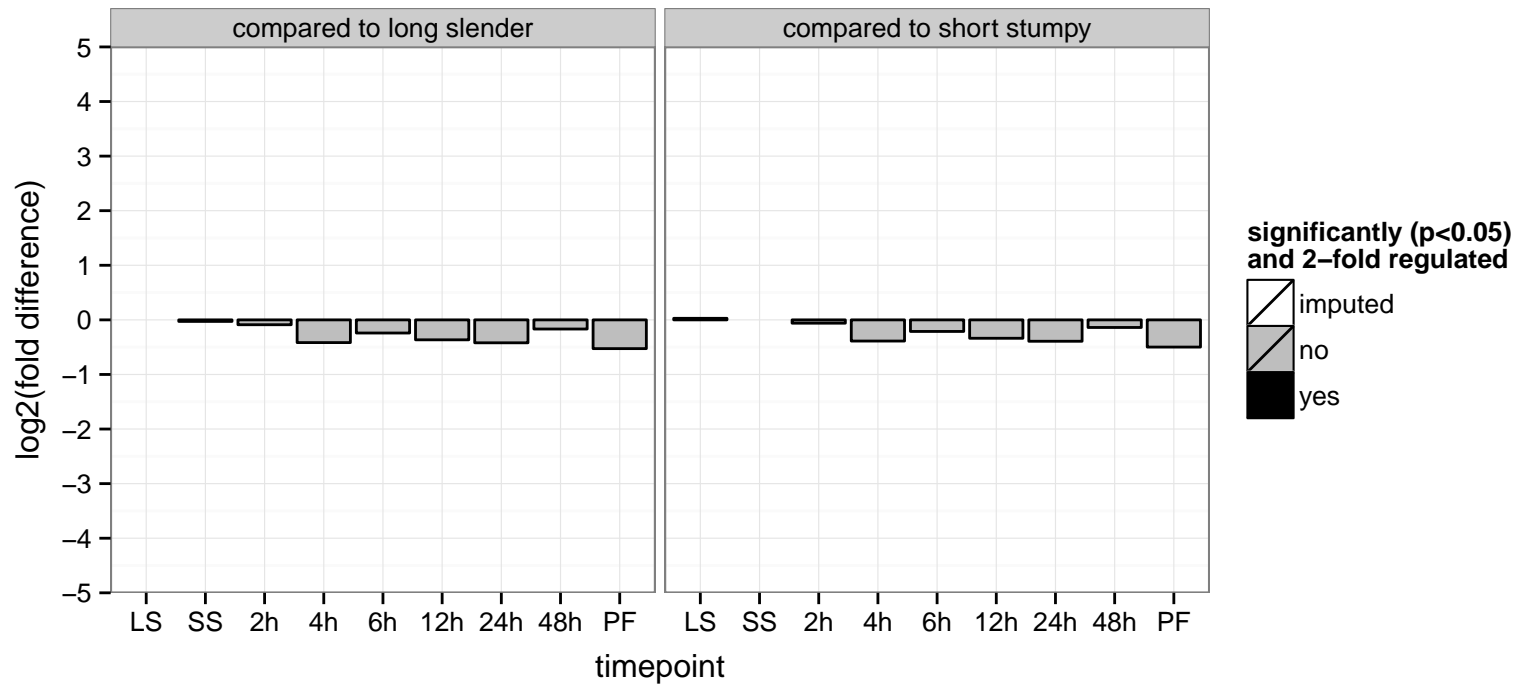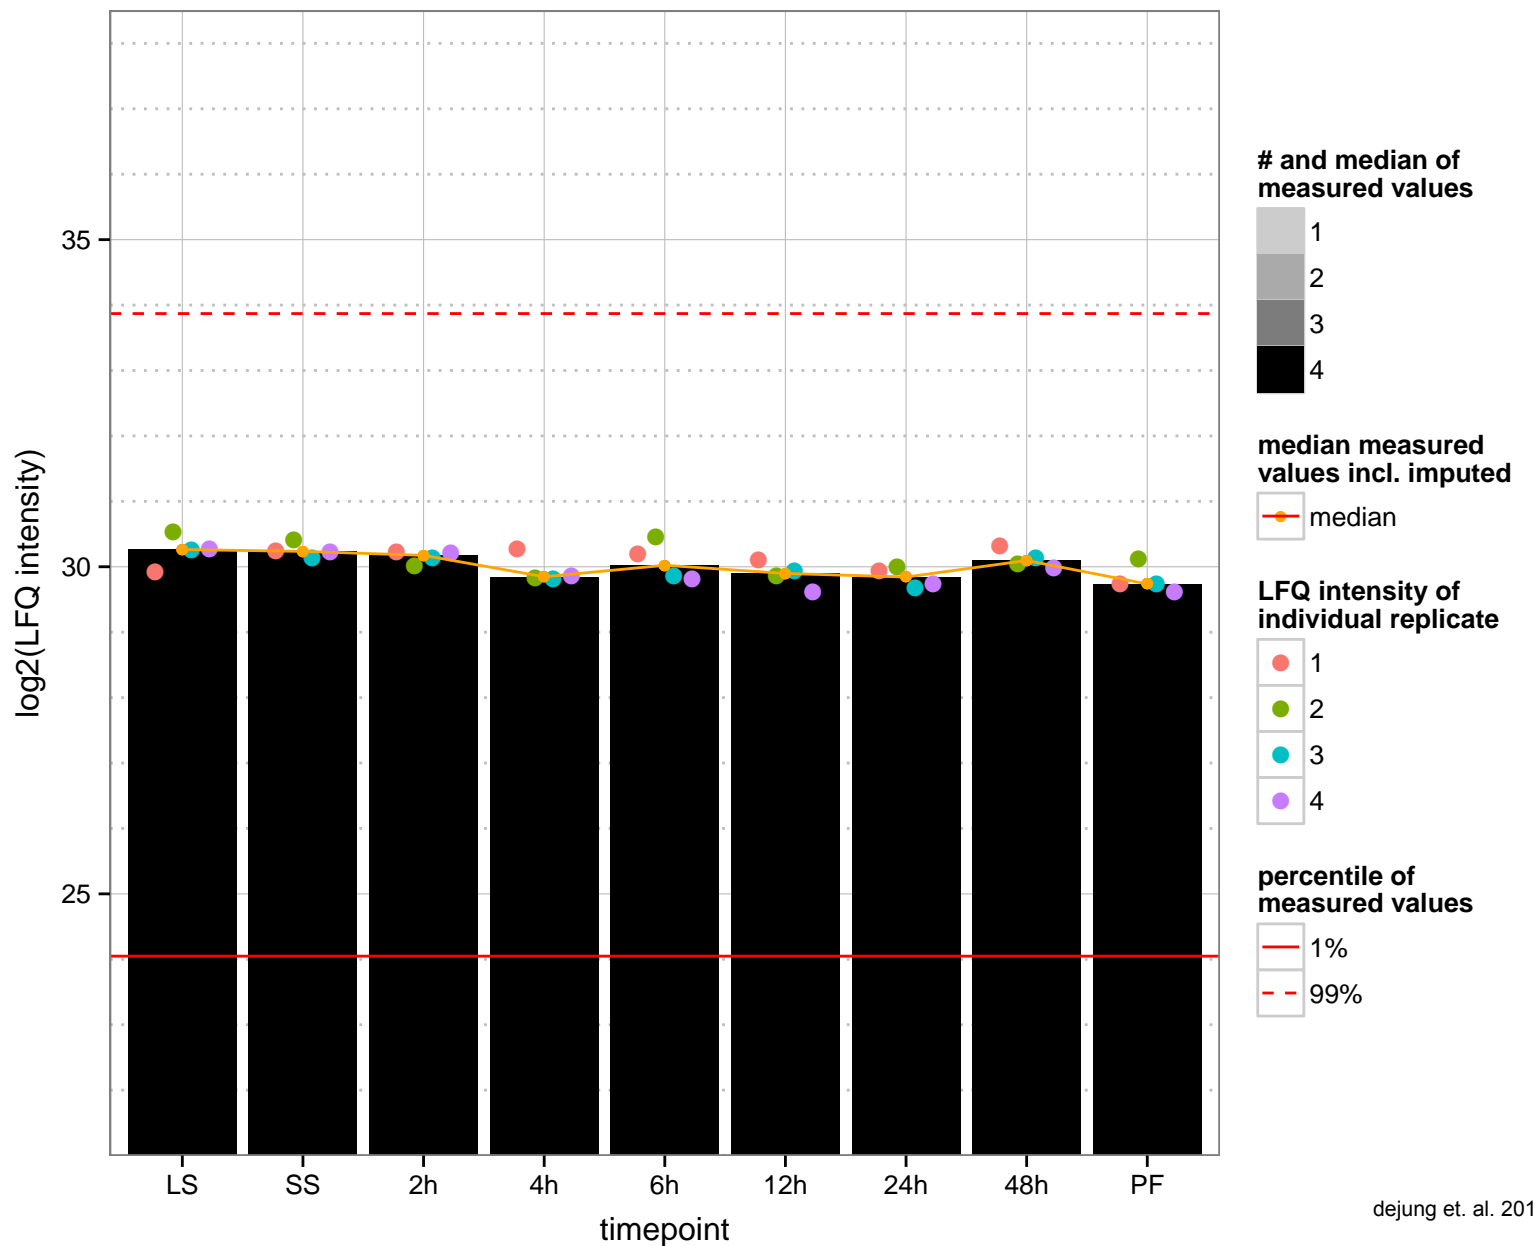

guanine deaminase, putative, guanase, guanine aminase, guanine aminohydrolase, BAC from homologous region on chr5  
 Tb927.5.4560;Tb11.v5.0409;Tb05.5K5.200  
 AGOF: guanine deaminase activity, zinc ion binding, null  
 AGOC: null  
 AGOP: null  
 PGOF: guanine deaminase activity, hydrolase activity, acting on carbon–nitrogen (but not peptide) bonds, zinc ion binding  
 PGOC: null  
 PGOP: null

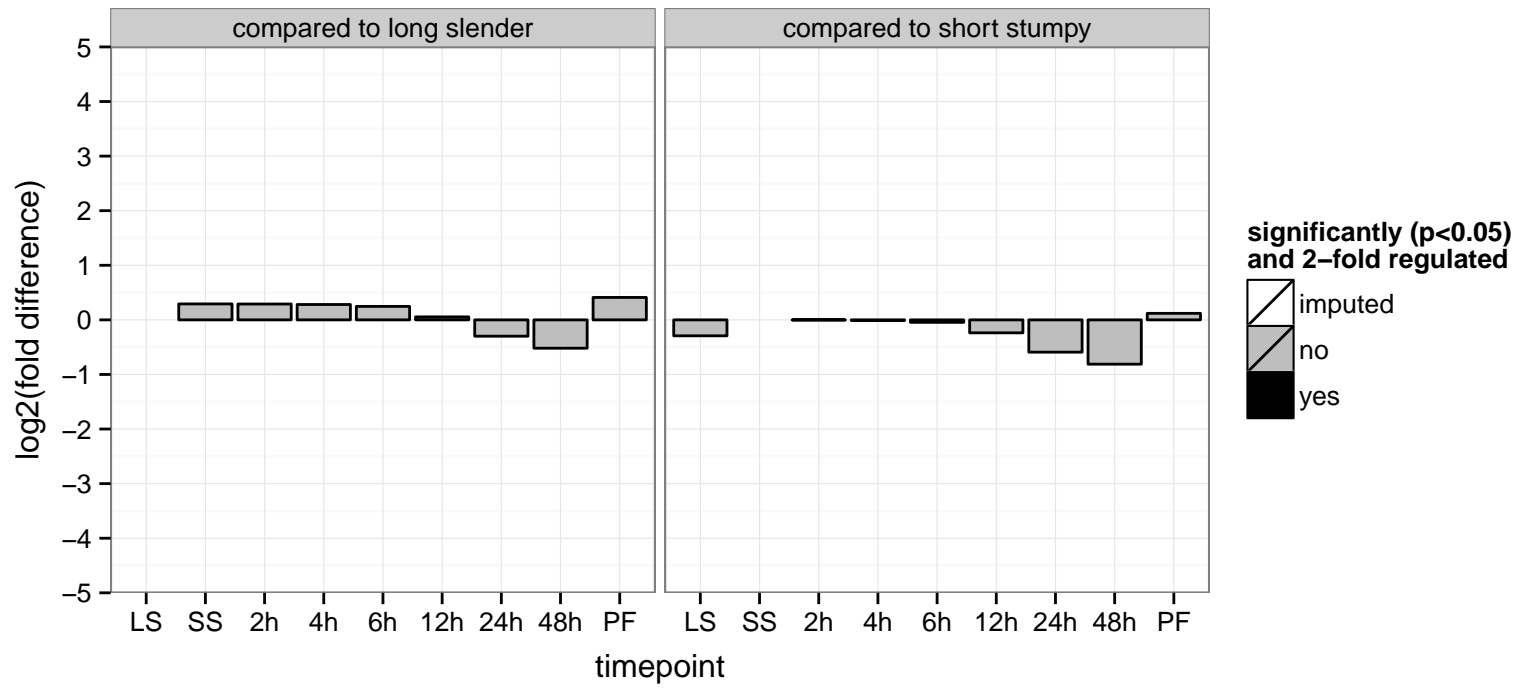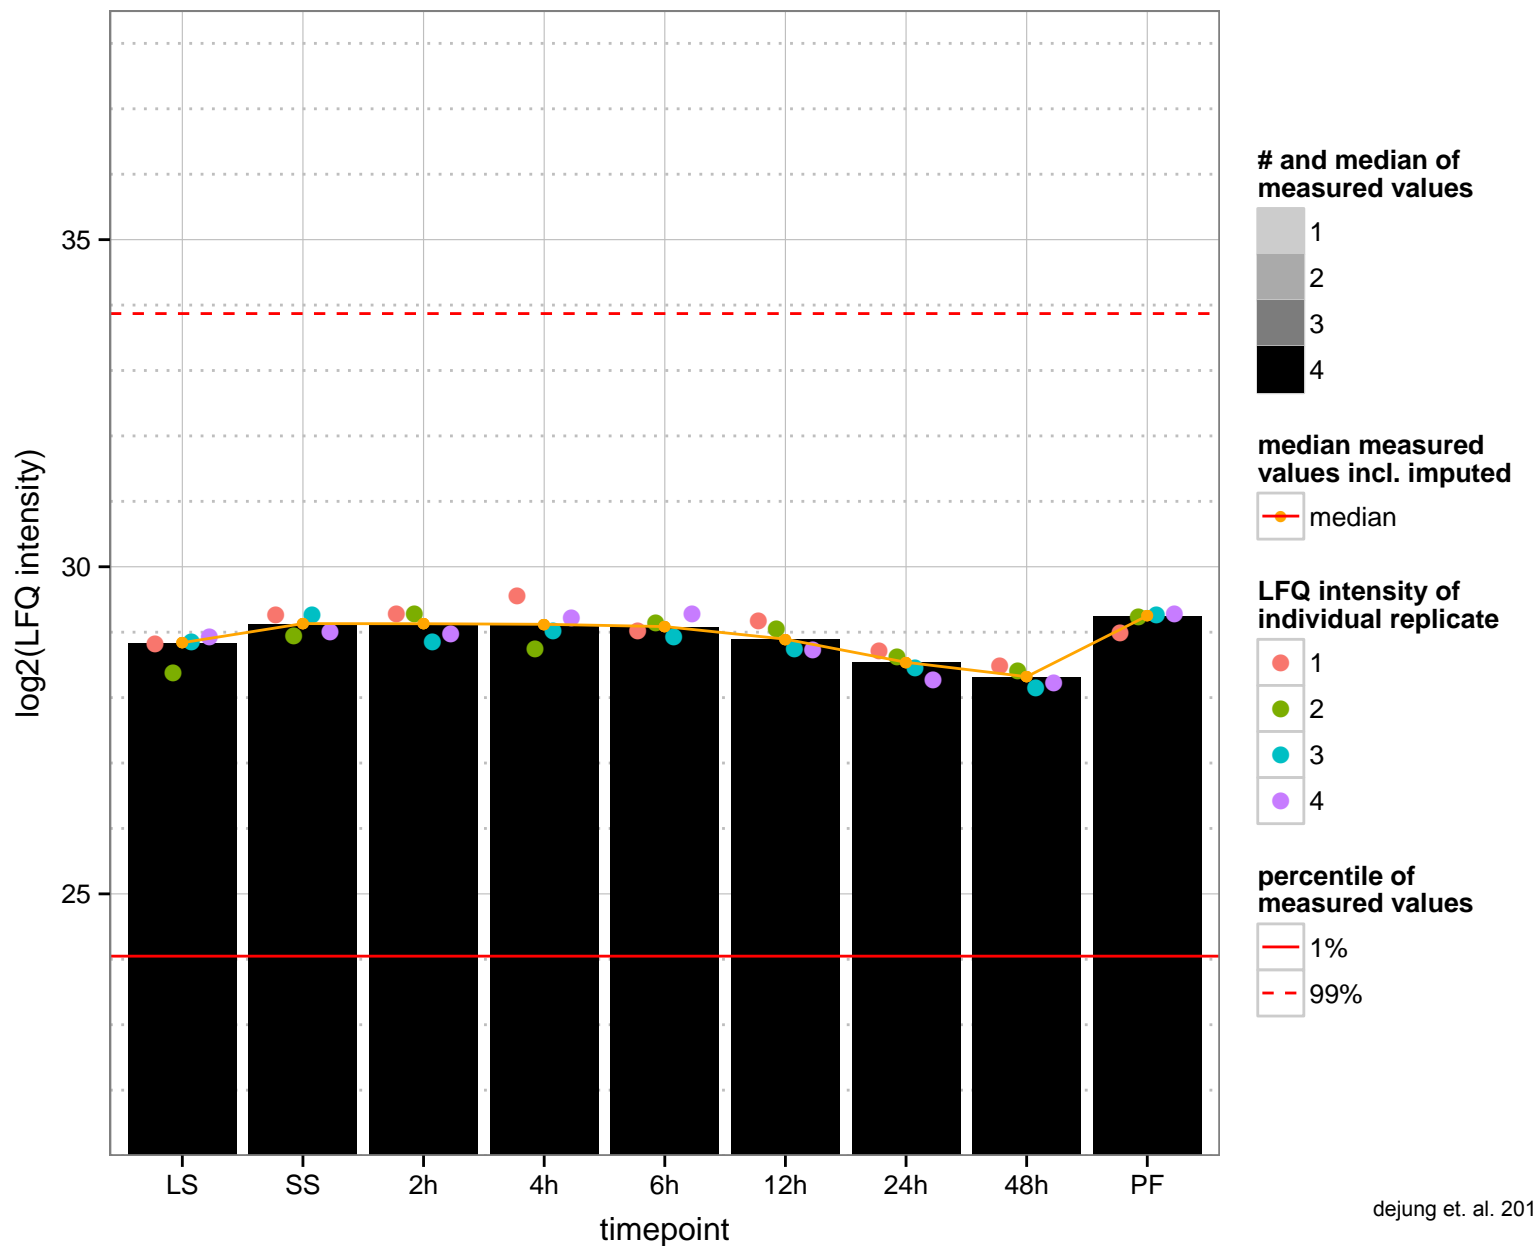

hypothetical protein, conserved, BAC from homologous region on chr5  
 Tb927.5.4400;Tb05.5K5.50  
 AGOF: null  
 AGOC: null  
 AGOP: null  
 PGO: null  
 PGOC: null  
 PGOP: null

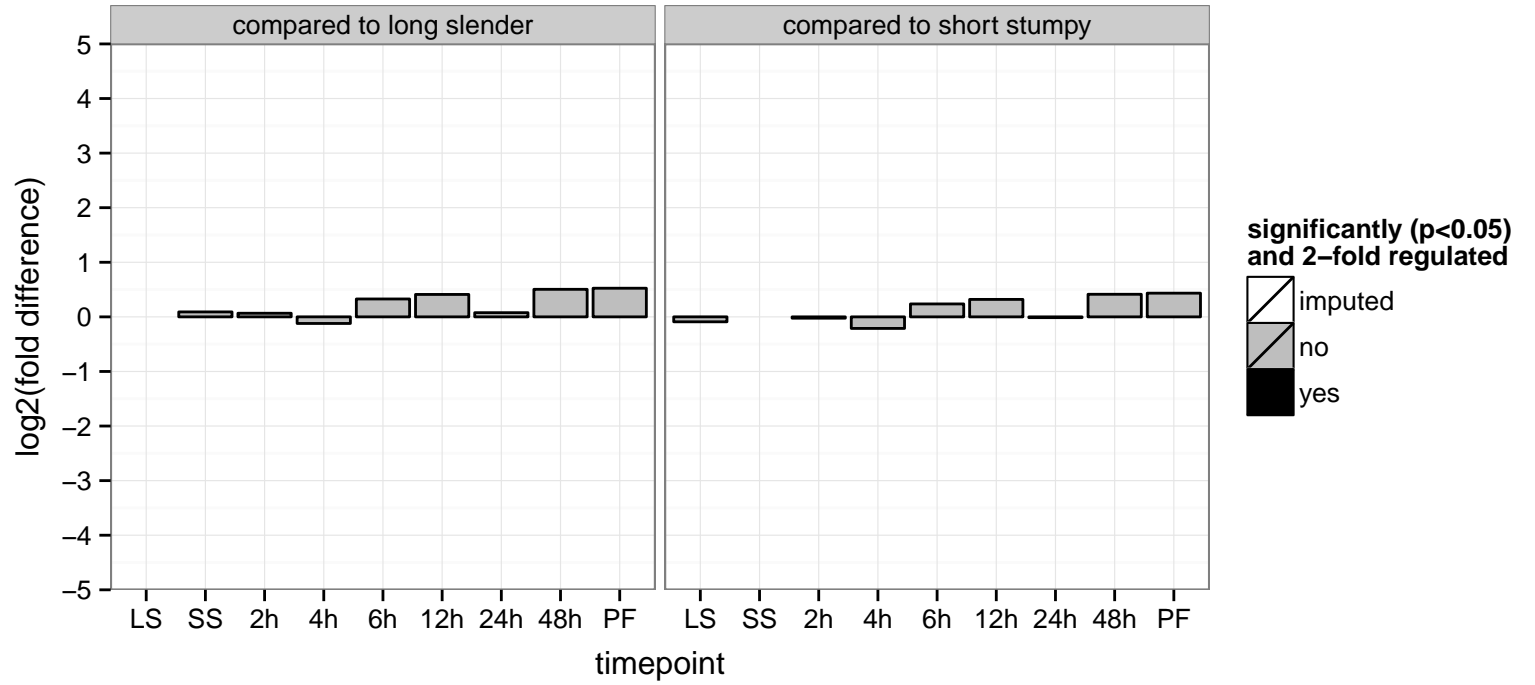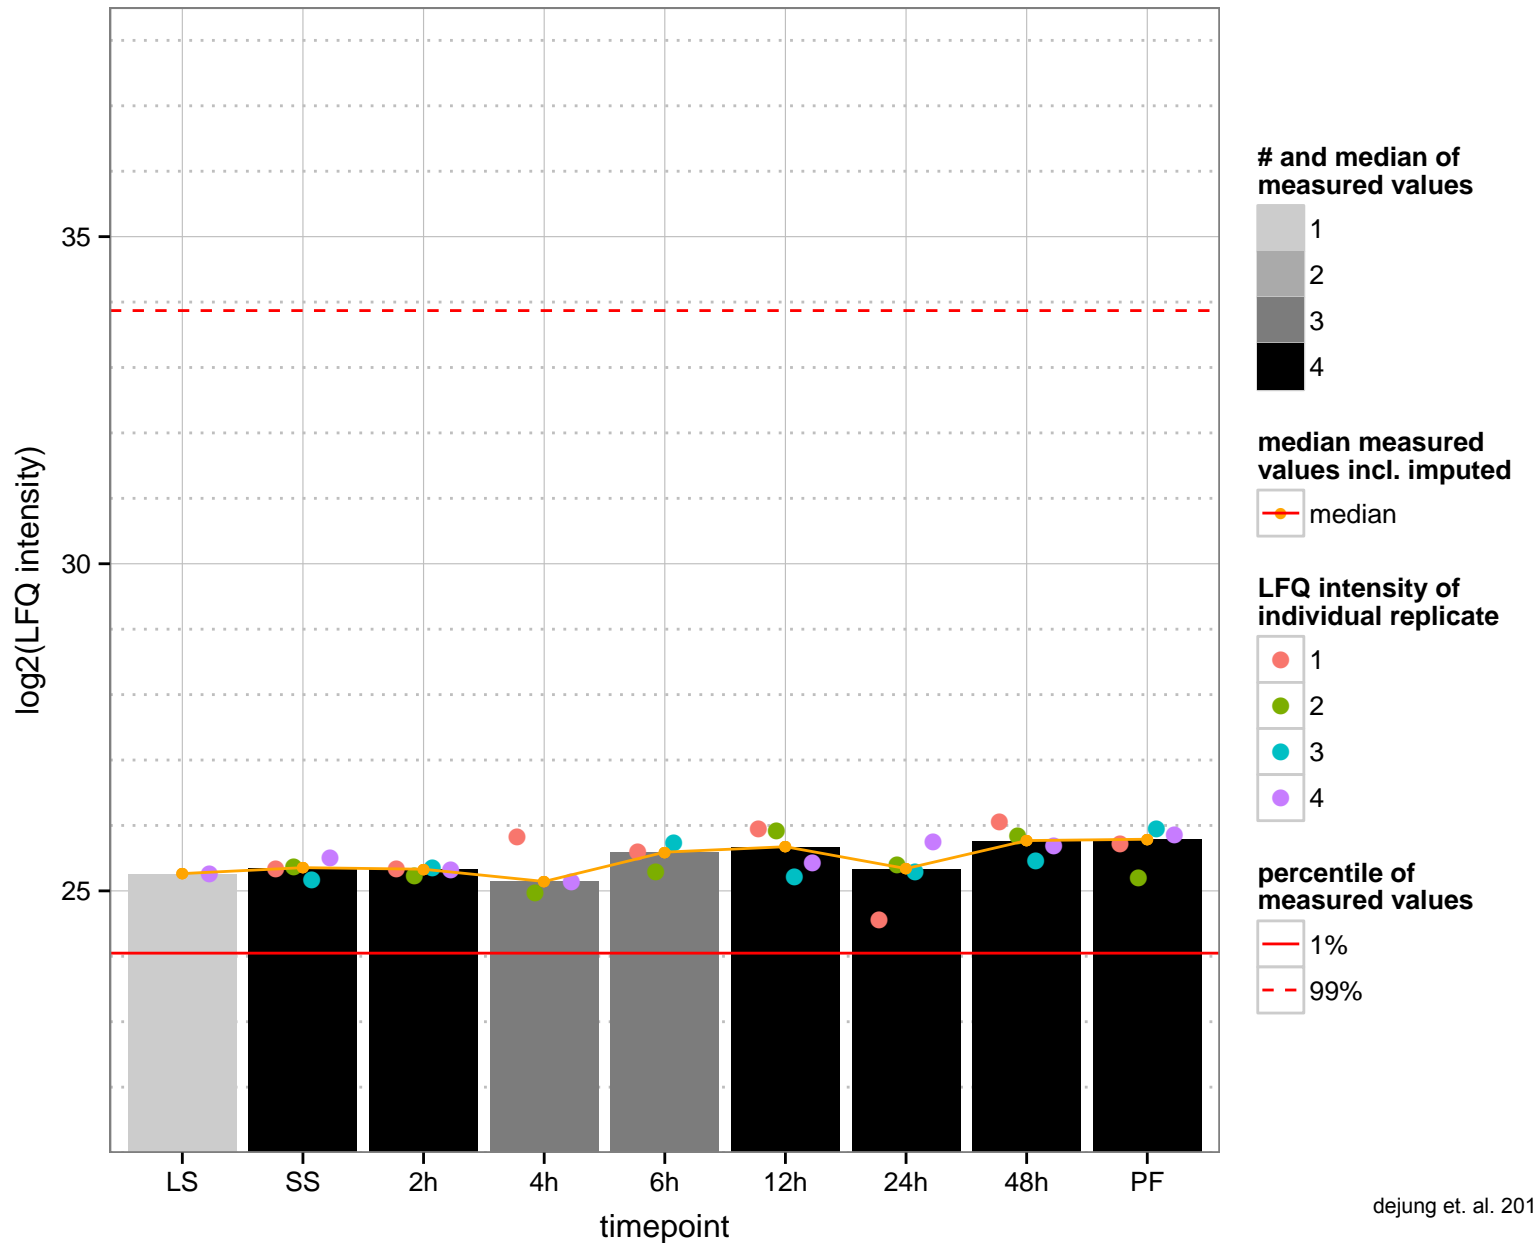

hypothetical protein, conserved, BAC from homologous region on chr5  
 Tb927.5.4410;Tb05.5K5.60  
 AGOF: null  
 AGOC: null  
 AGOP: null  
 PGOF: null  
 PGO: null  
 PGOP: null

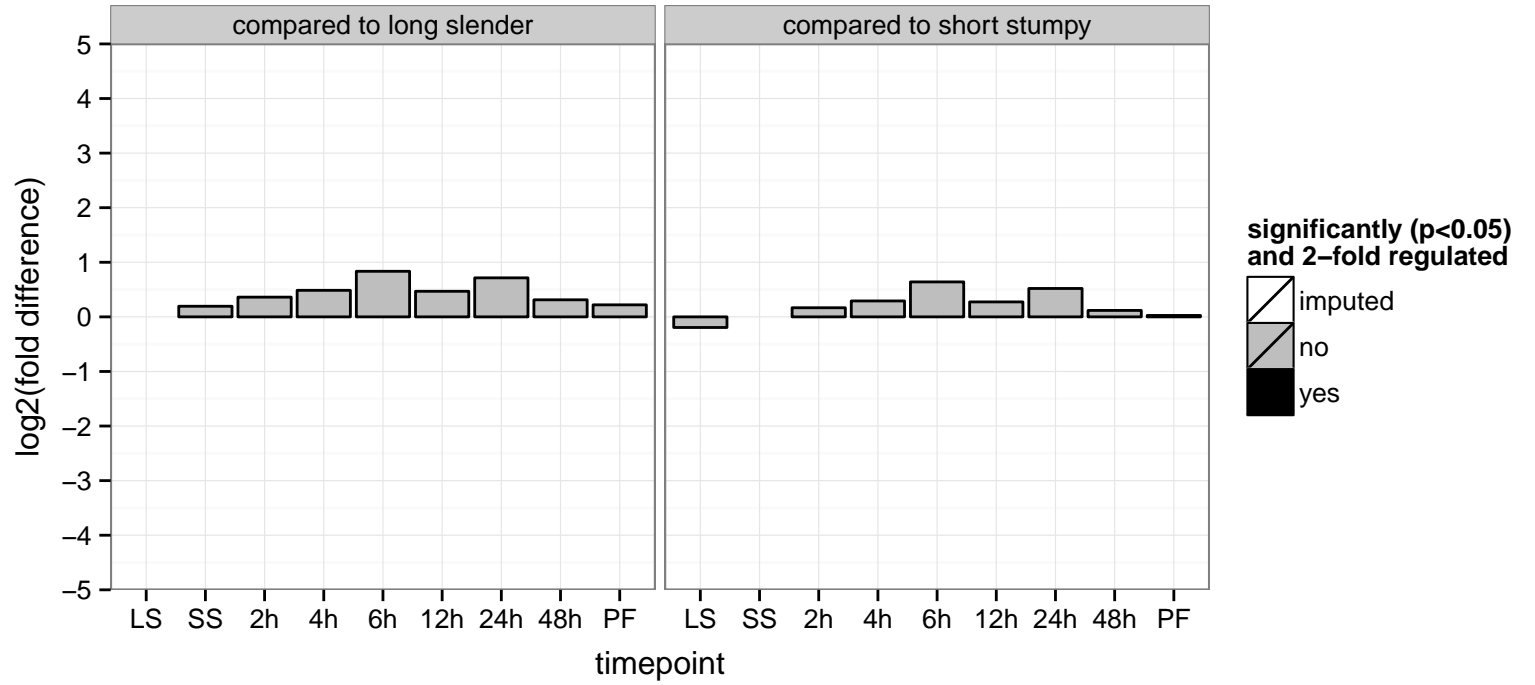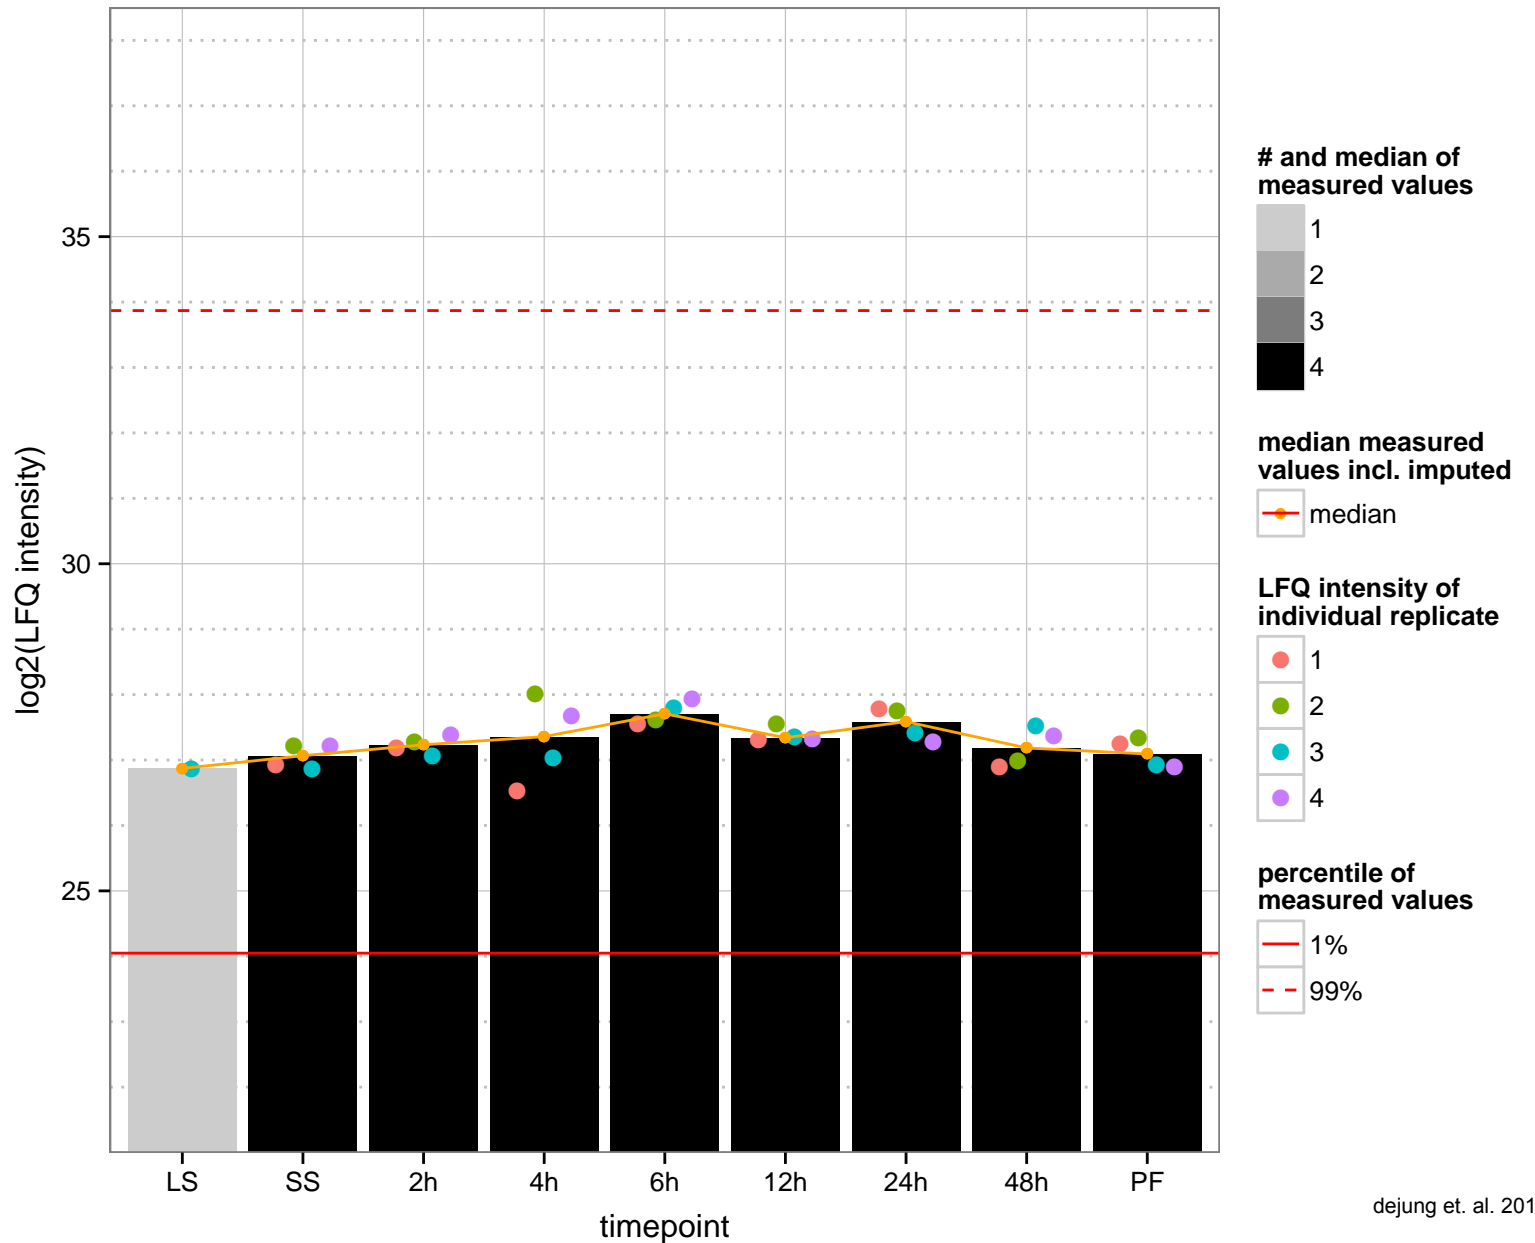

dynein light chain, putative, BAC from homologous region on chr5  
 Tb927.5.4440;Tb05.5K5.90  
 AGOF: microtubule motor activity  
 AGOC: microtubule associated complex  
 AGOP: microtubule-based process  
 PGO: null  
 PGO: microtubule associated complex  
 PGO: microtubule-based process

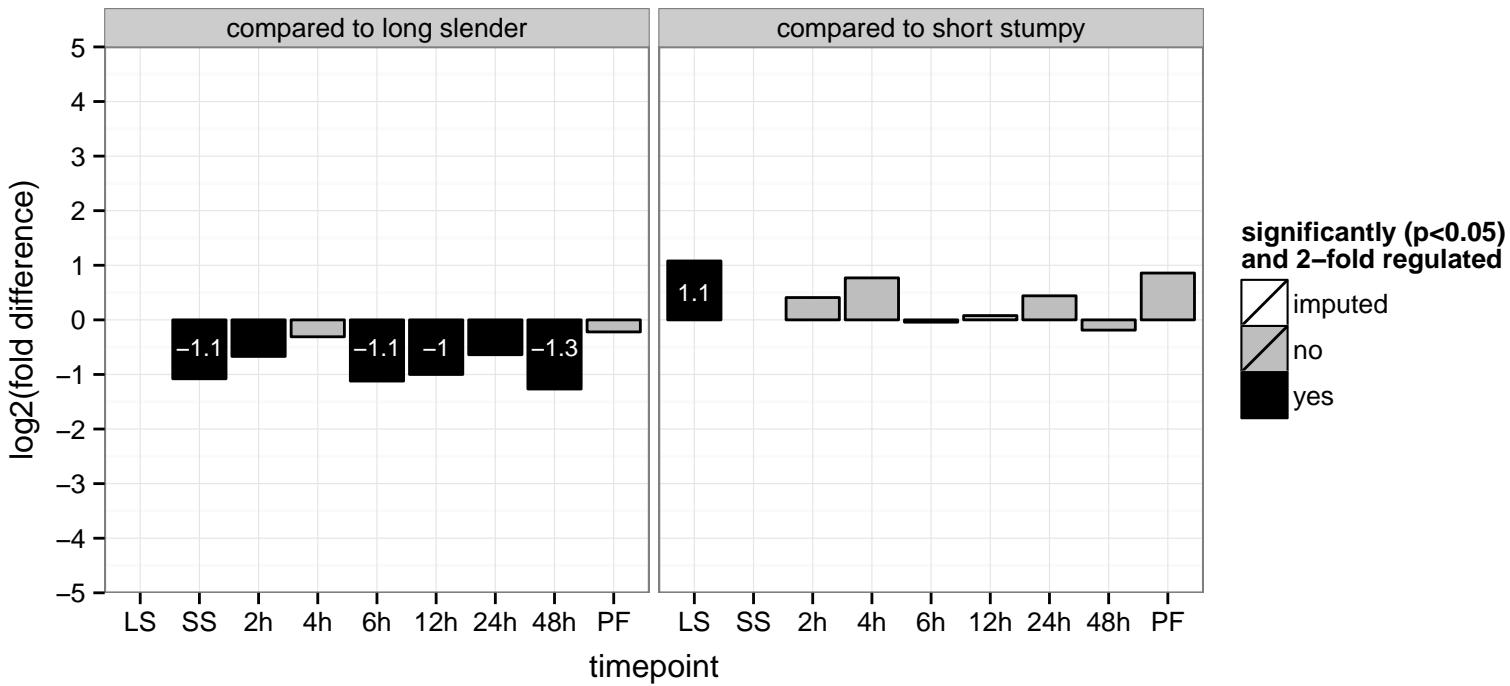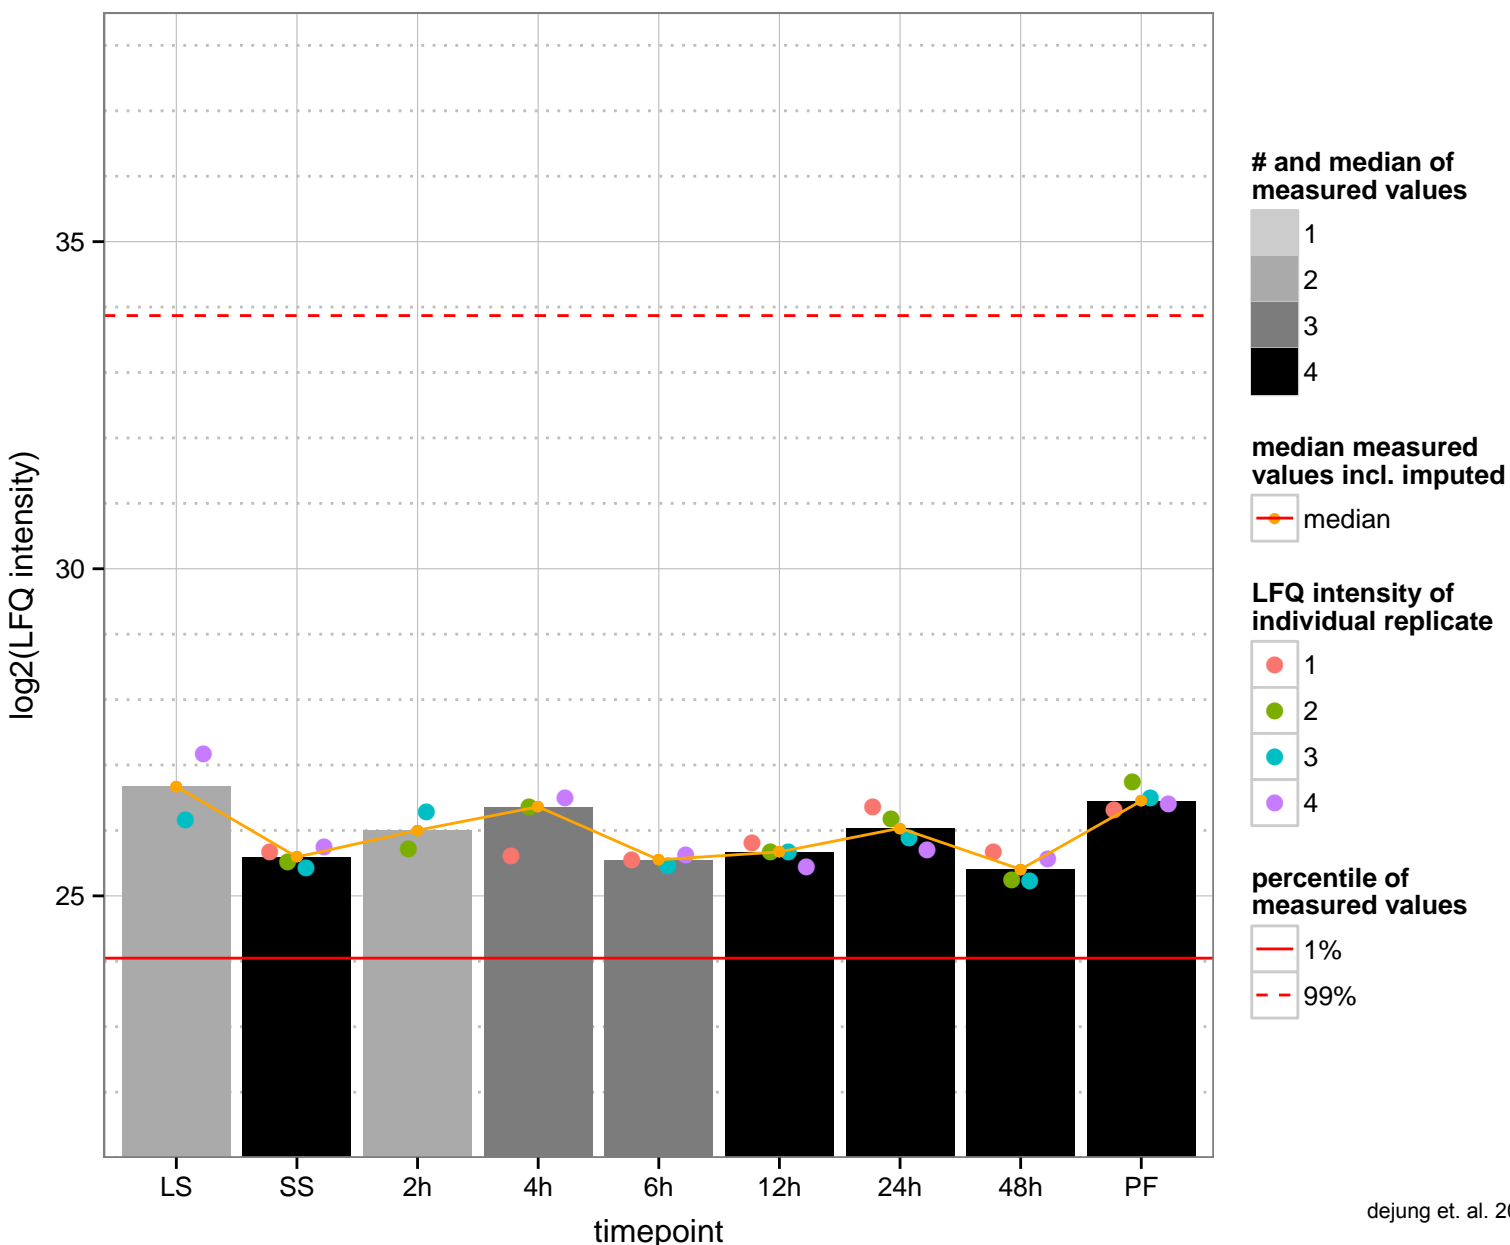

stress-inducible protein STI1-like, putative, chrX additional, unordered contigs, variant surface glycoprotein, fragment  
 Tb927.10.4450;Tb10.v4.0035;Tb11.v5.0757

AGOF: null  
 AGOC: null  
 AGOP: null  
 PGO: protein binding, null  
 PGOC: null  
 PGOP: null

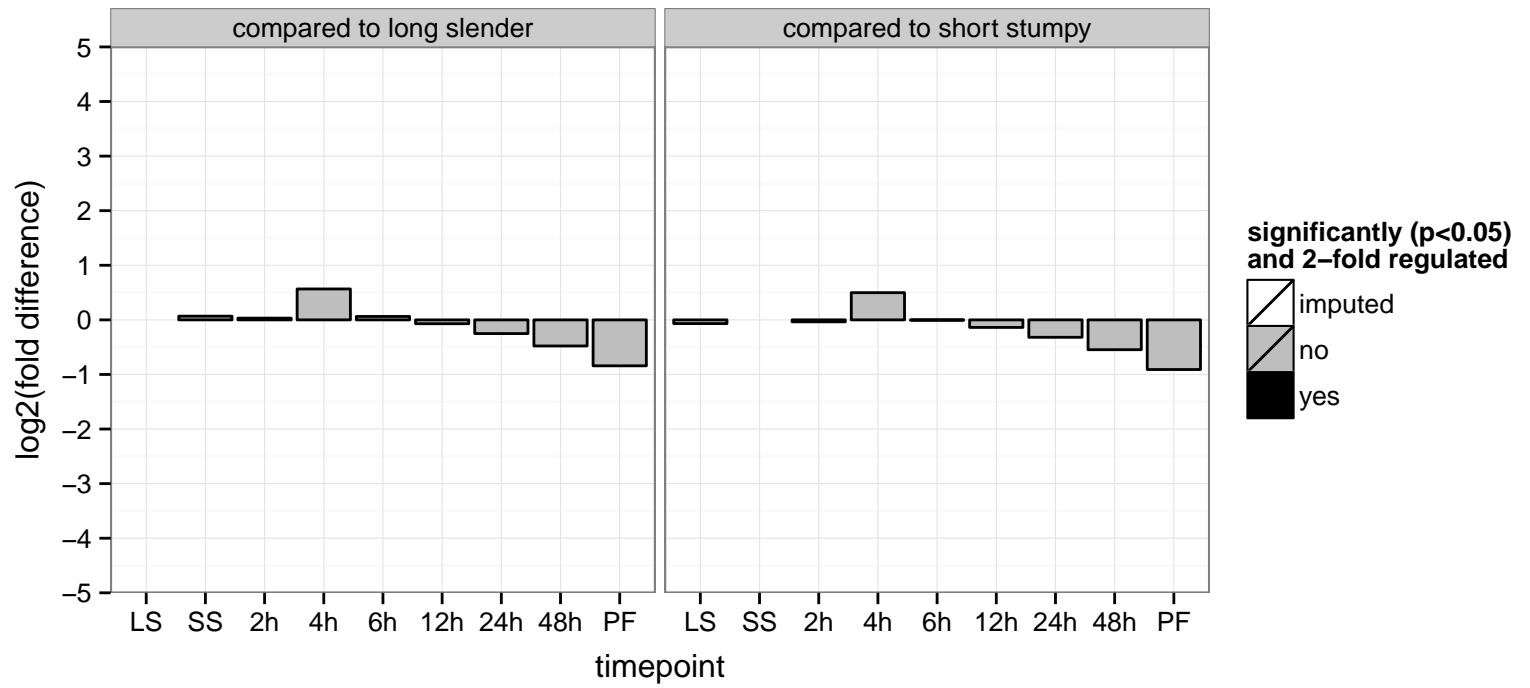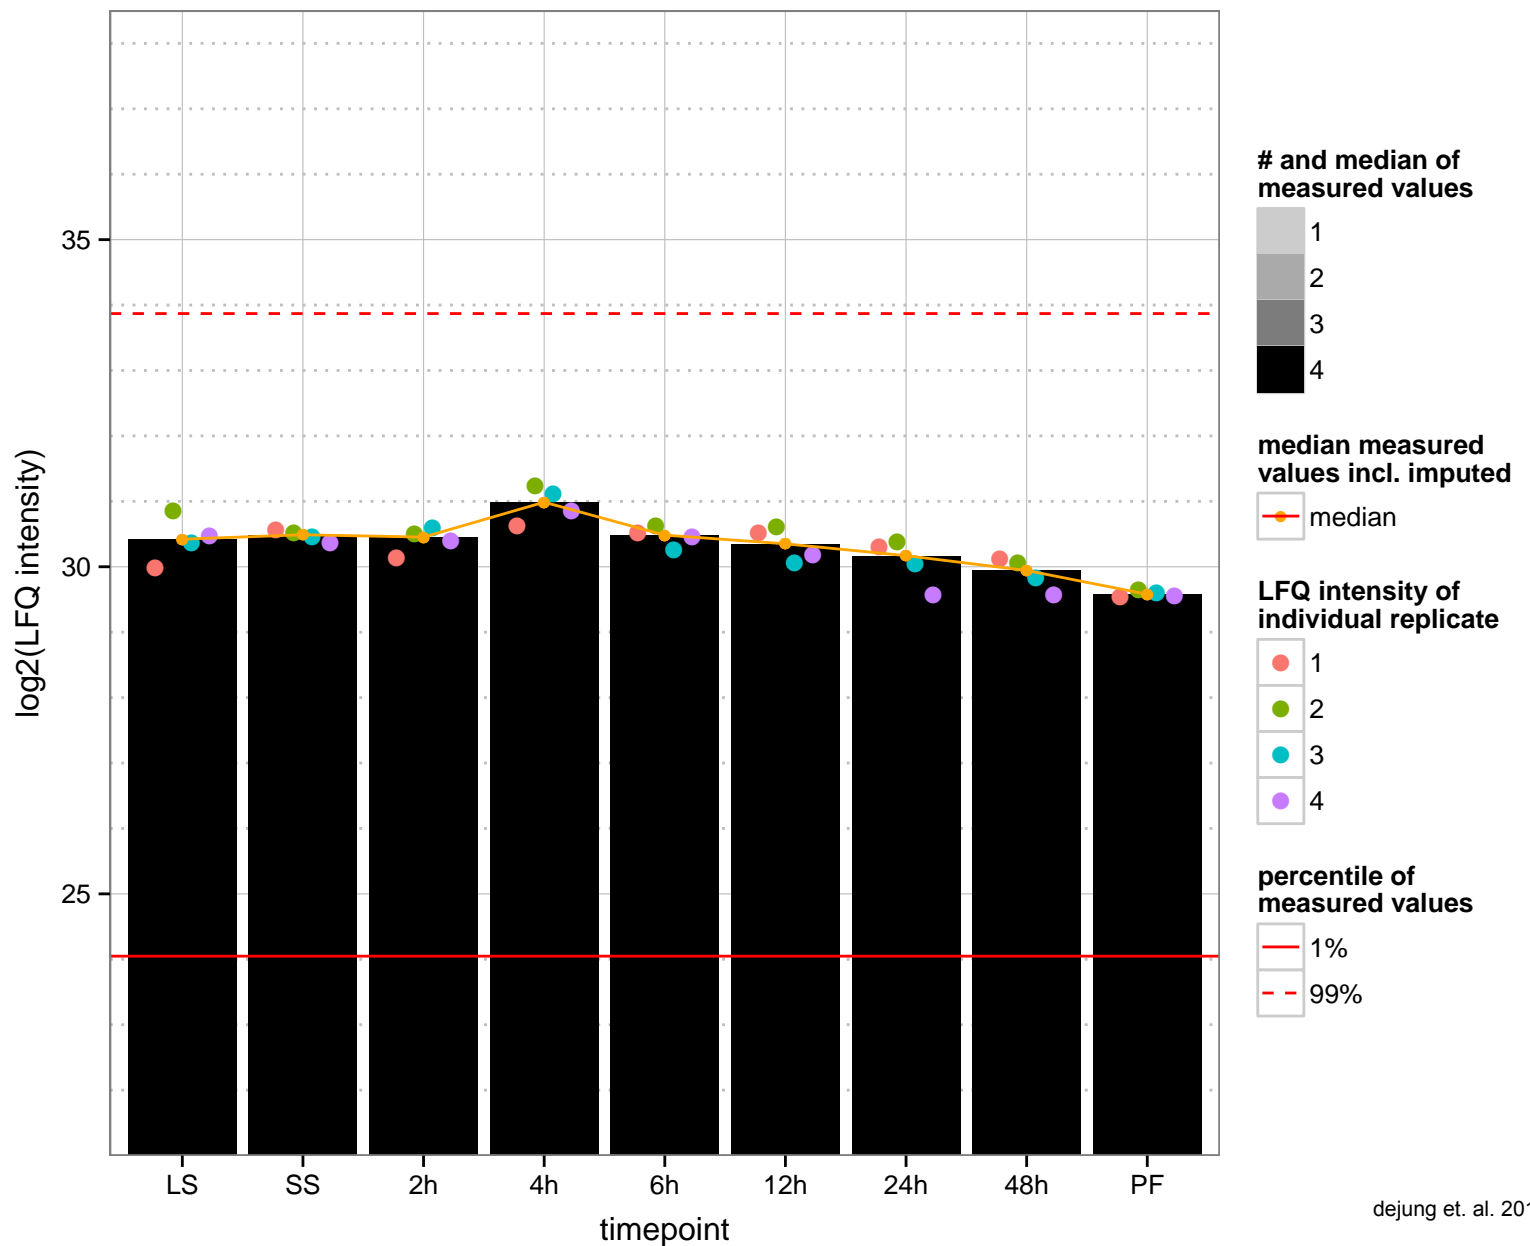

leucine carboxyl methyltransferase, putative, chrX additional, unordered contigs  
 Tb927.10.4460;Tb10.v4.0036  
 AGOF: methyltransferase activity, protein C-terminal carboxyl O-methyltransferase activity  
 AGOC: null  
 AGOP: null, cellular protein modification process  
 PGO: methyltransferase activity  
 PGOC: null  
 PGOP: null

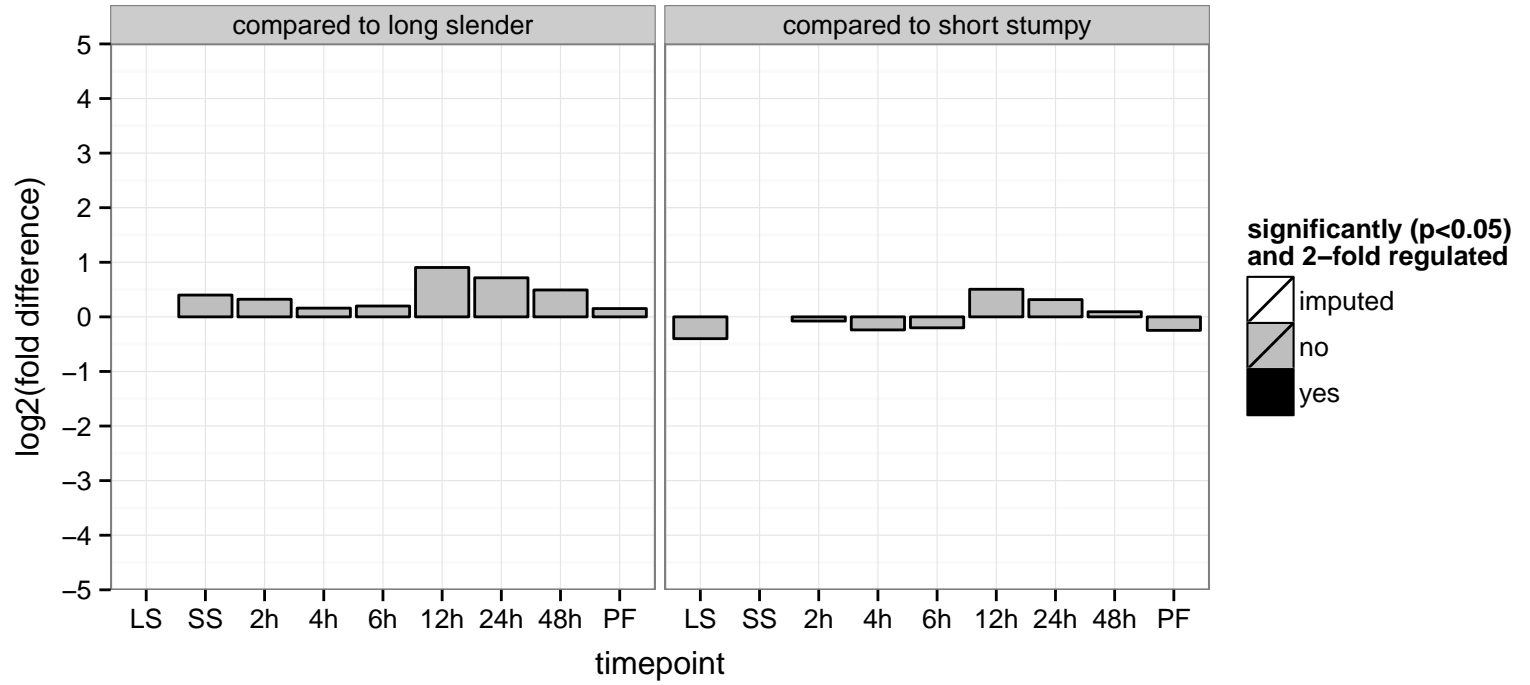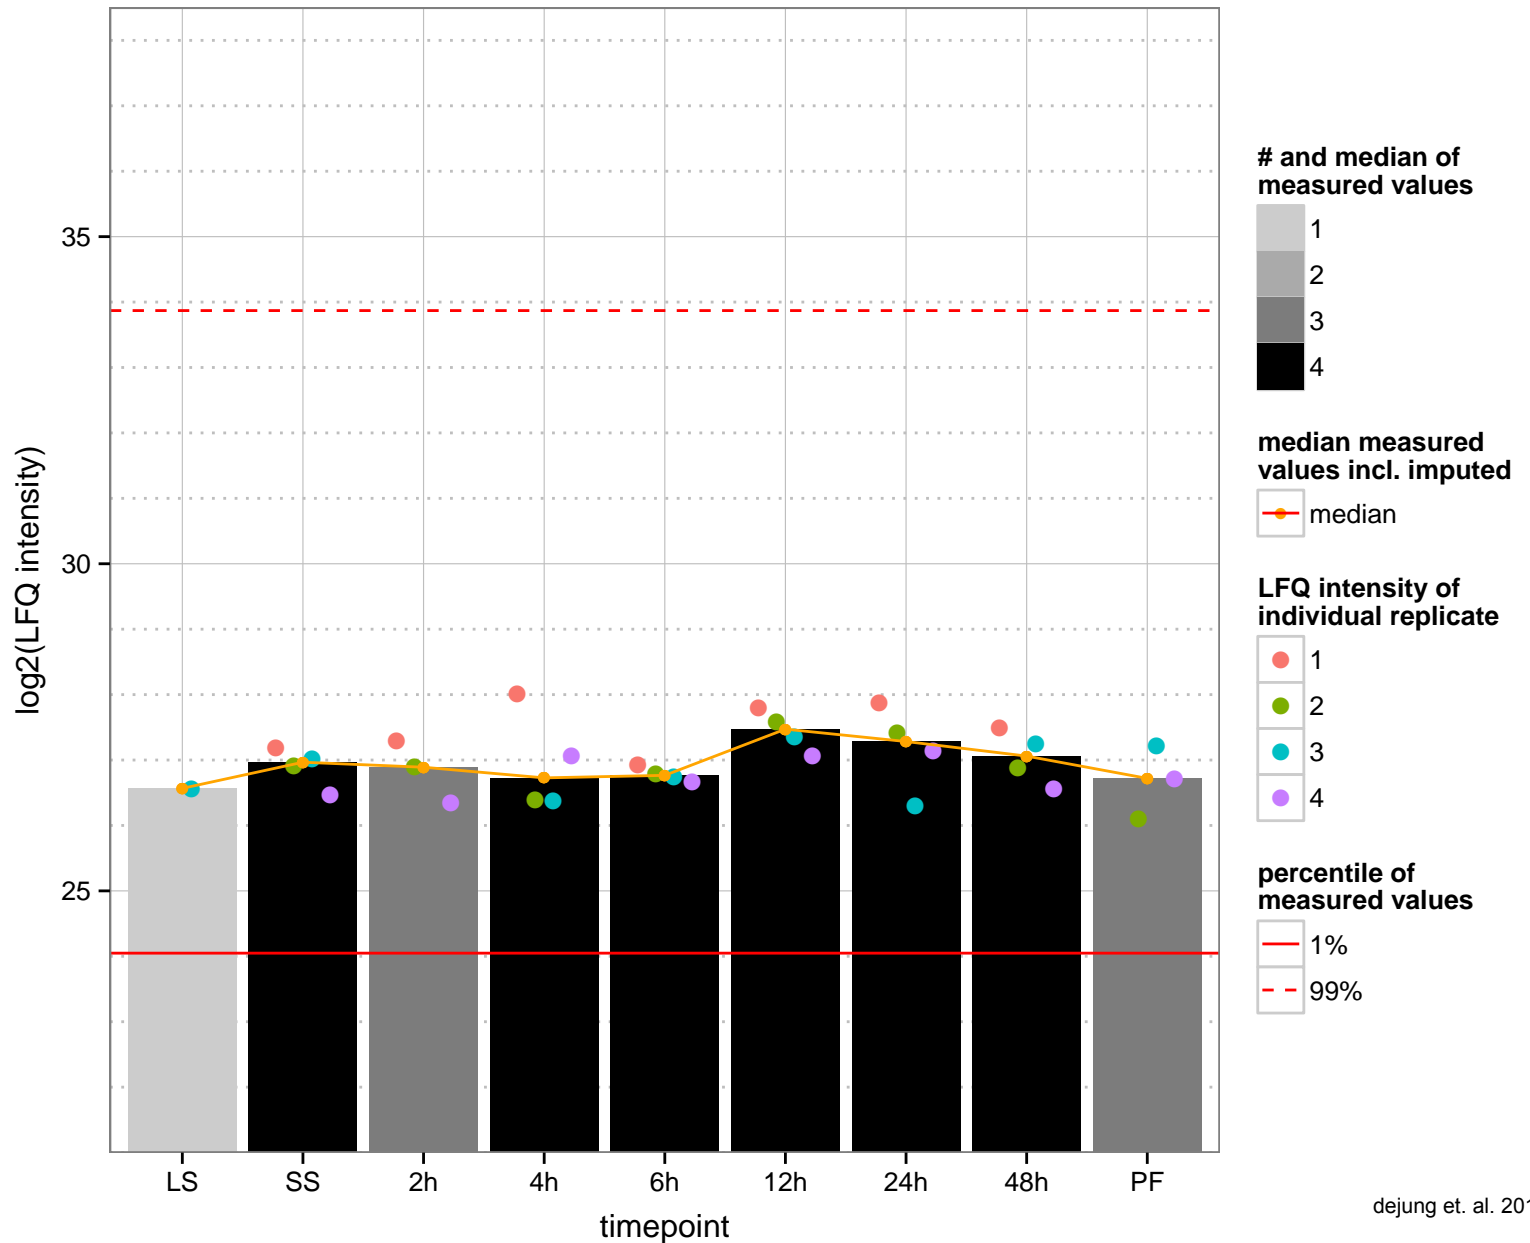

mRNA capping methyltransferase, putative, chrX additional, unordered contigs  
 Tb927.10.4500;Tb10.v4.0040  
 AGOF: null, methyltransferase activity  
 AGOC: null  
 AGOP: 7-methylguanosine mRNA capping  
 PGO: null  
 PGOC: null  
 PGOP: 7-methylguanosine mRNA capping

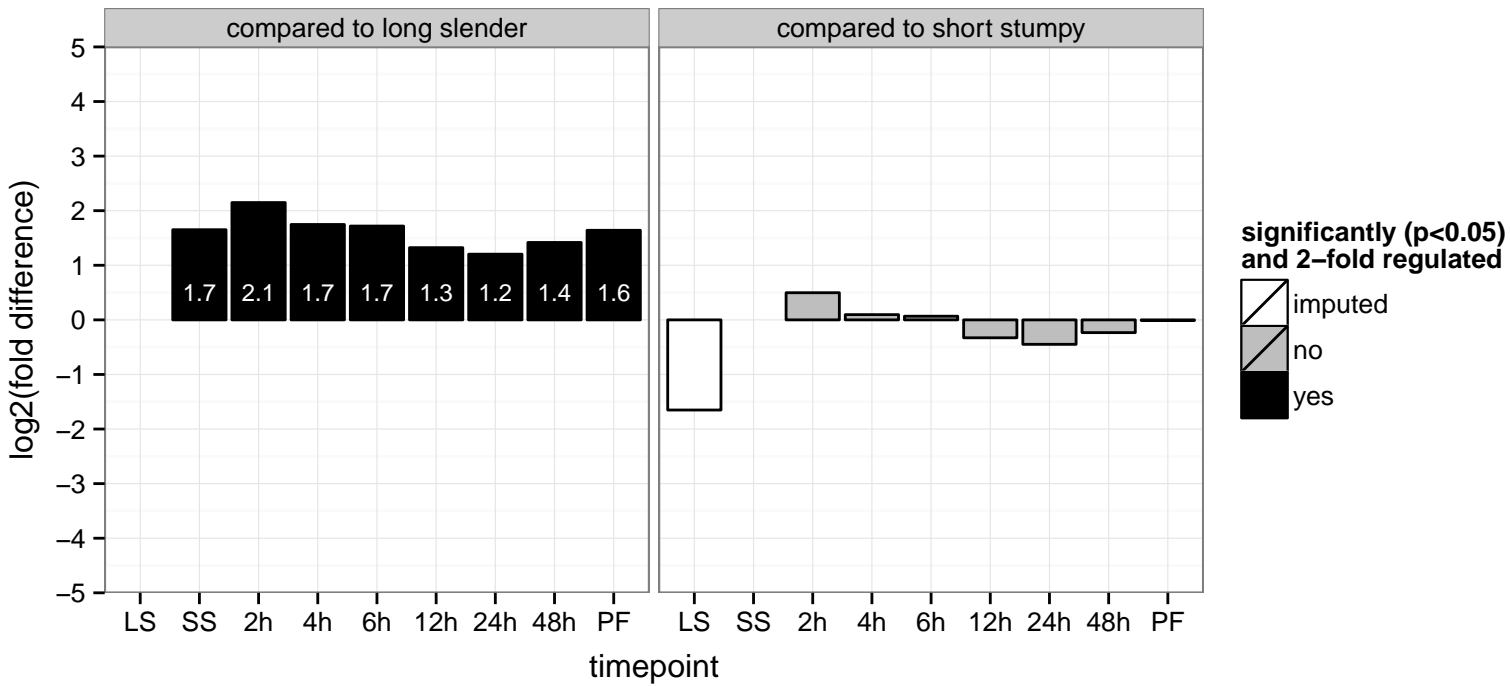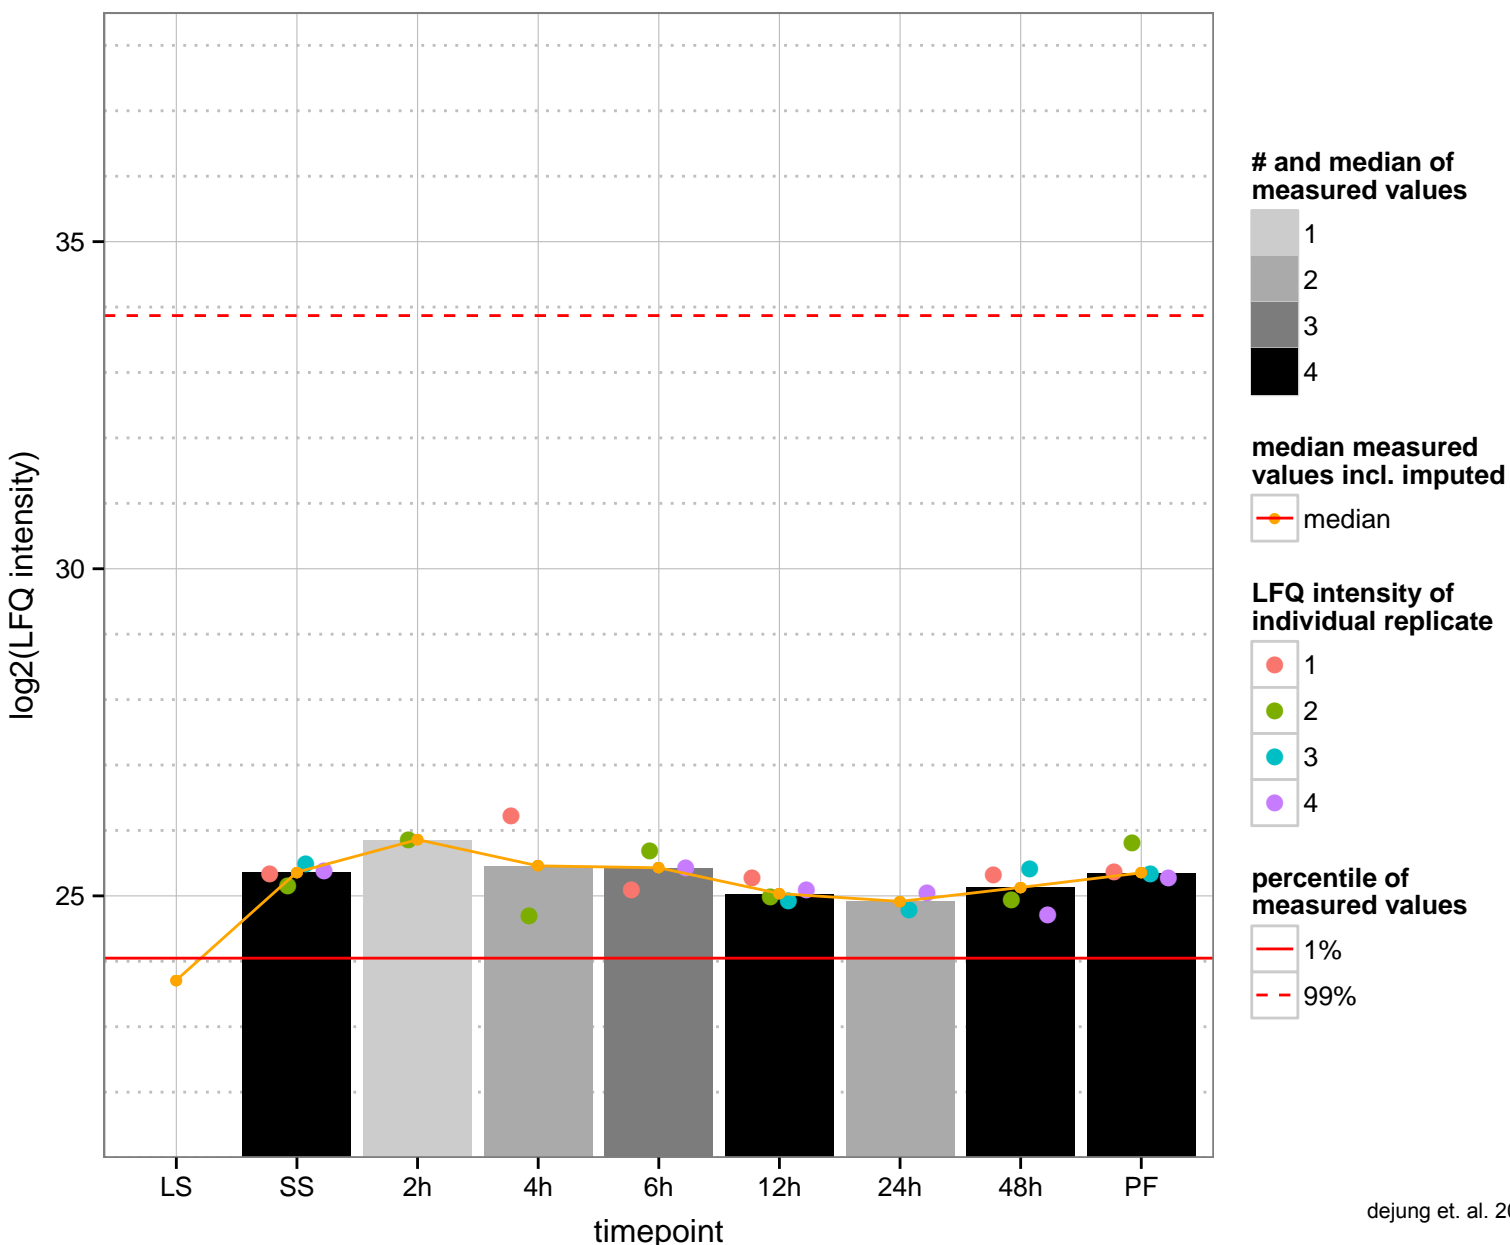



mitochondrial edited mRNA stability factor 1 subunit, putative  
 Tb927.11.7218;Tb11.02.5120b  
 AGOF: RNA binding  
 AGOC: null  
 AGOP: RNA polyadenylation, mRNA stabilization  
 PGO: null  
 PGO: null  
 PGO: null

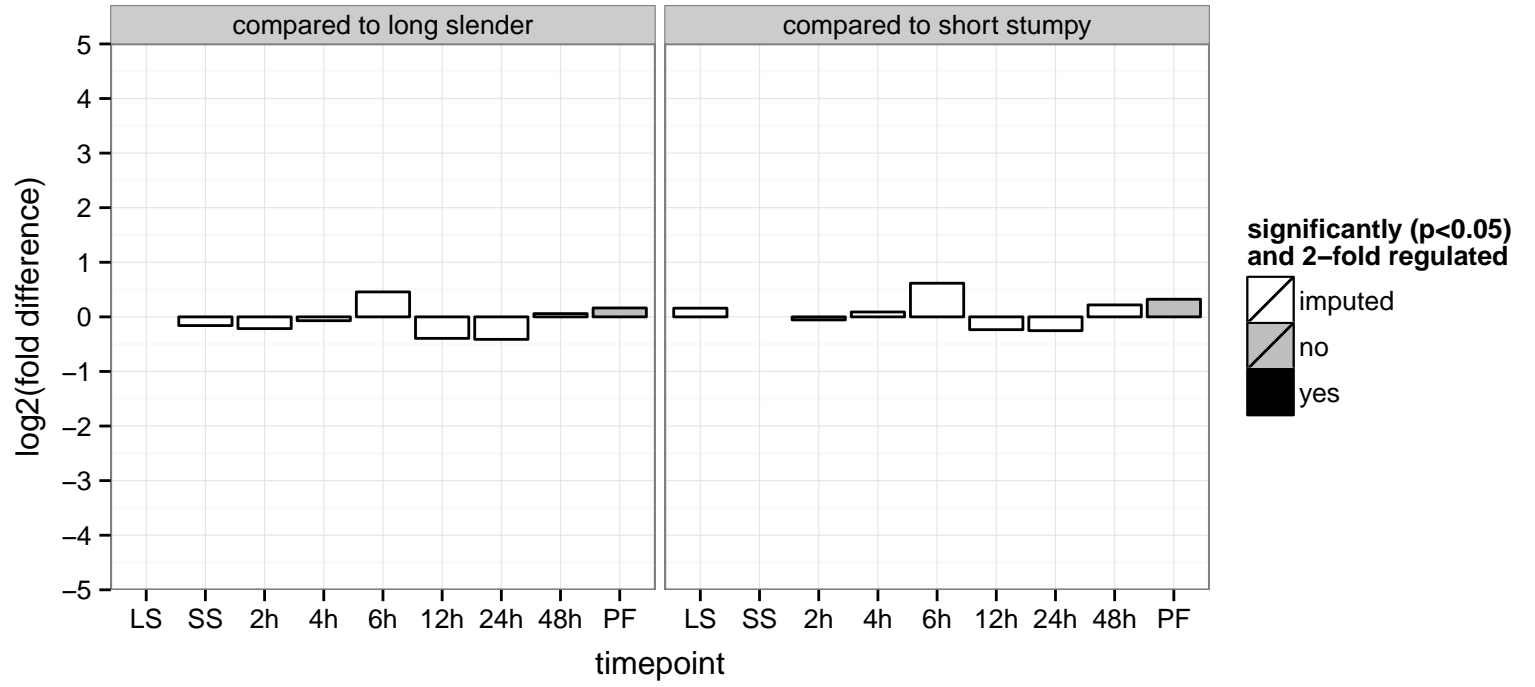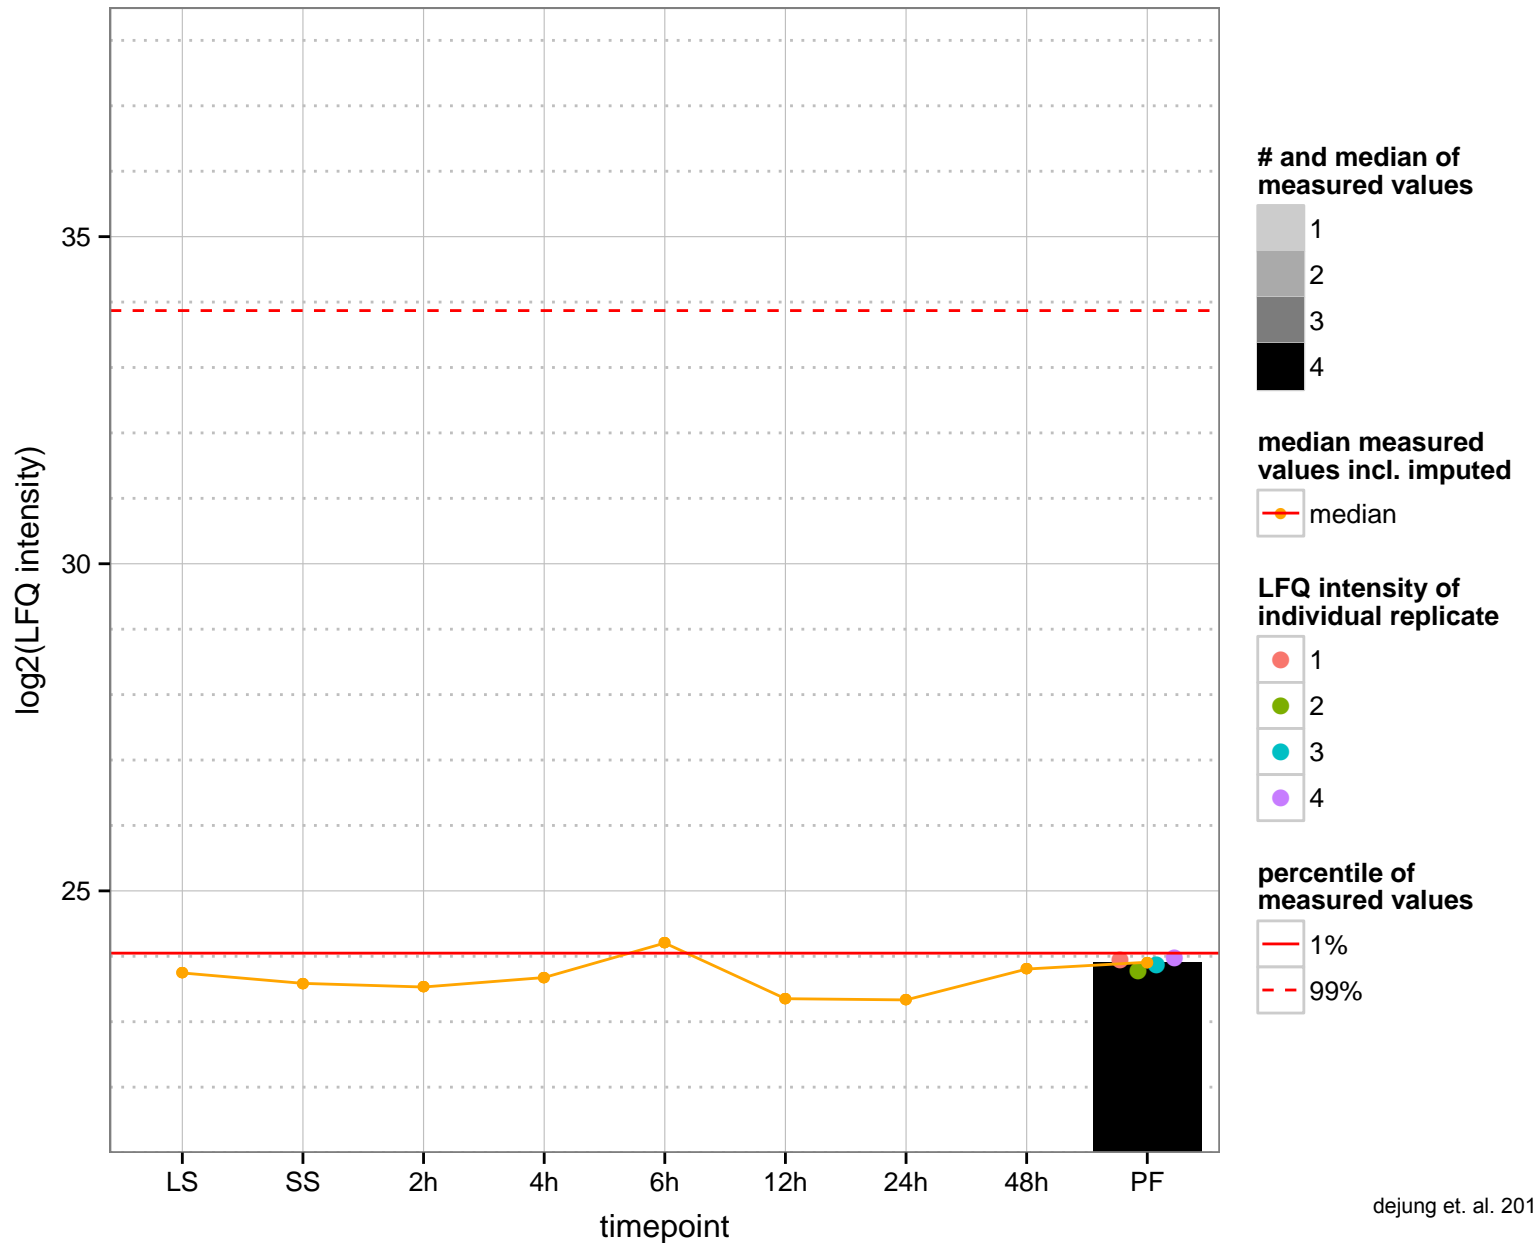

NADPH-cytochrome p450 reductase, putative (CPR), putative

Tb11.02.5420b;Tb11.02.5420

AGOF: FMN binding, electron carrier activity, iron ion binding, oxidoreductase activity

AGOC: integral to membrane

AGOP: oxidation-reduction process

PGOF: FMN binding, oxidoreductase activity

PGOC: null

PGOP: oxidation-reduction process

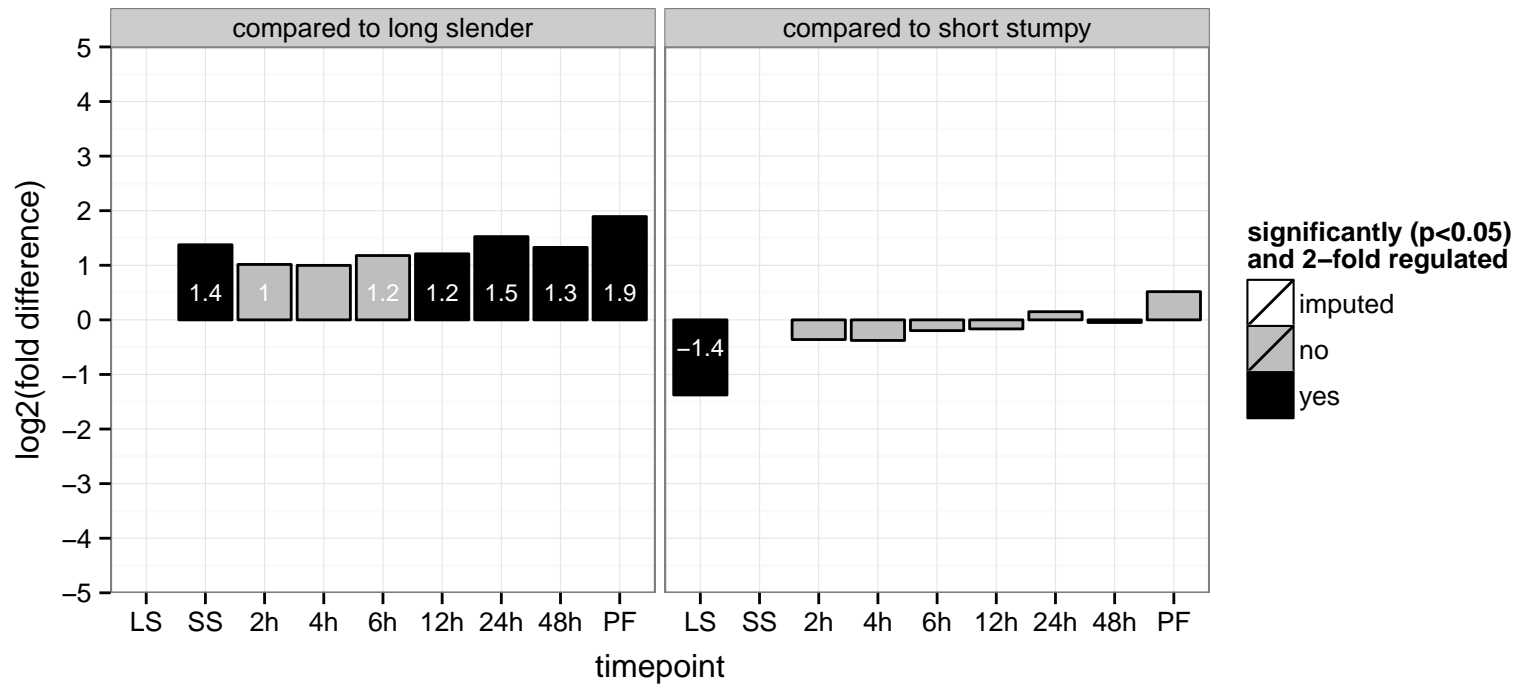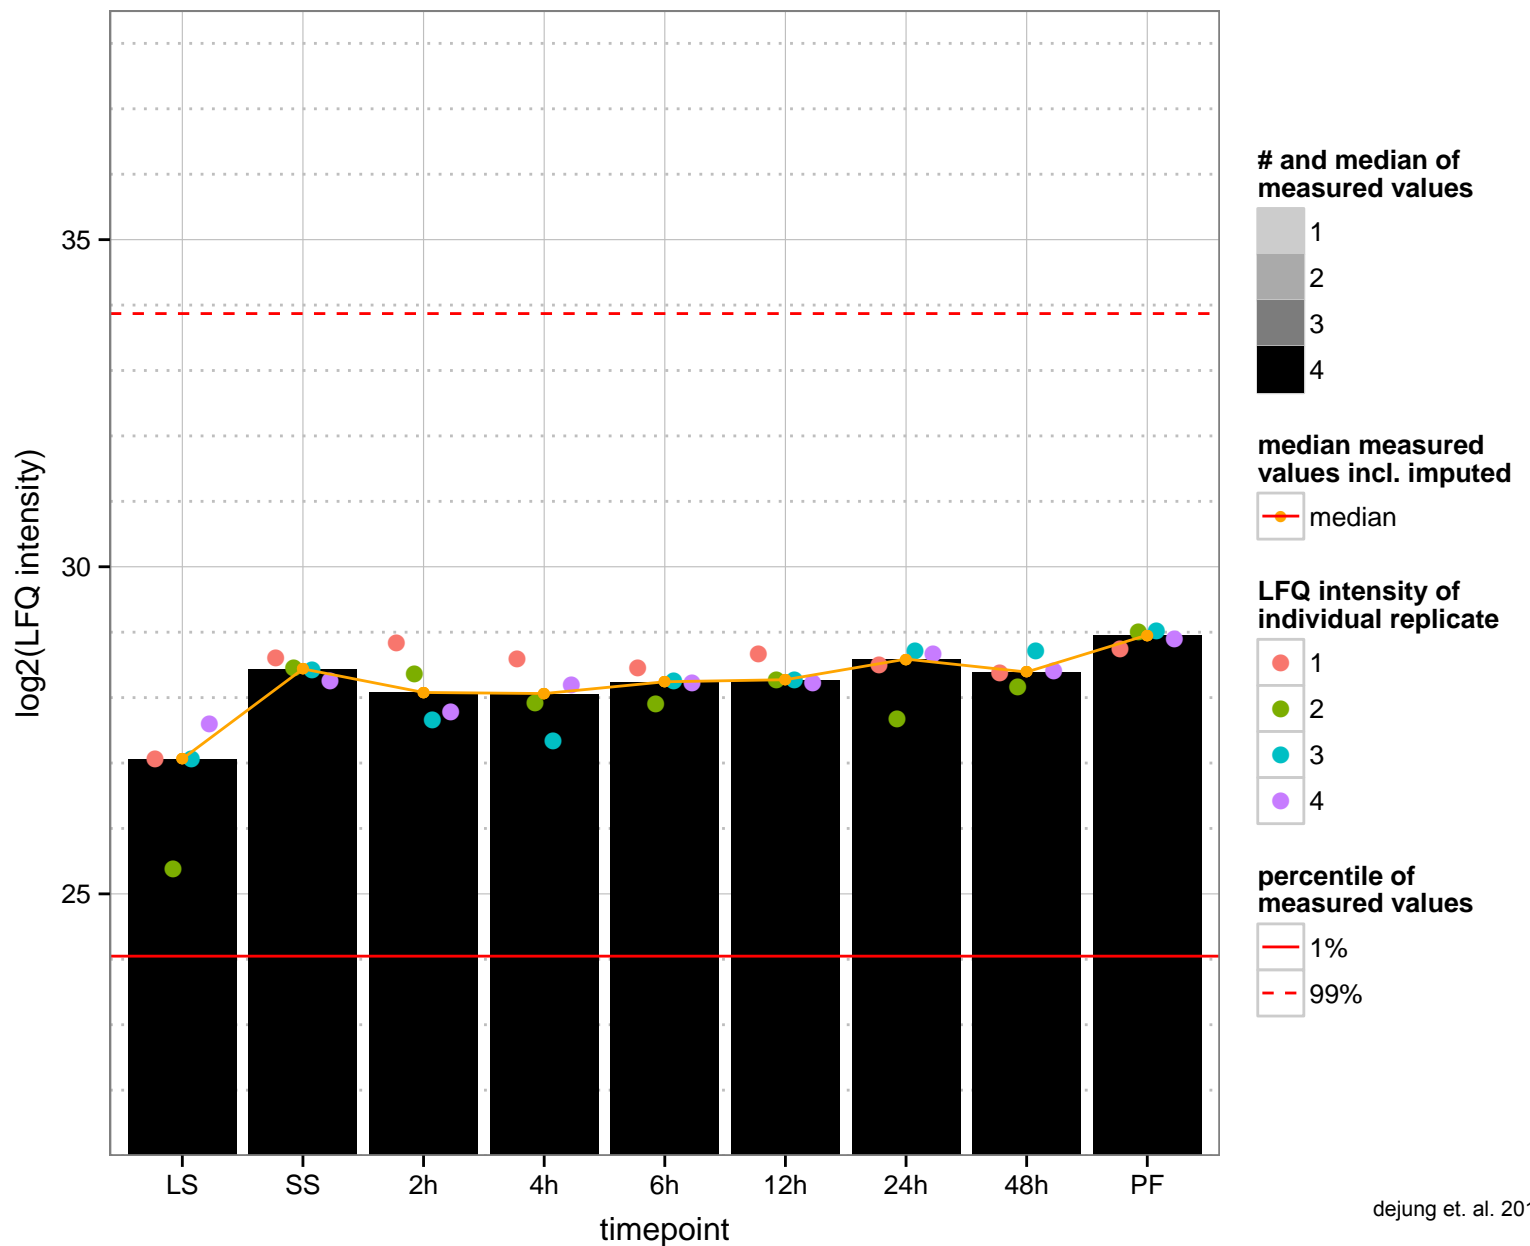

40S ribosomal protein S14, putative, chrXI additional, unordered contigs (RPS14), 40S ribosomal protein S14 (RPS14)  
 Tb927.6.4980;Tb11.0390;Tb11.0290  
 AGOF: structural constituent of ribosome  
 AGOC: intracellular, ribosome, small ribosomal subunit  
 AGOP: translation  
 PGOF: structural constituent of ribosome  
 PGO: intracellular, ribosome  
 PGOP: translation

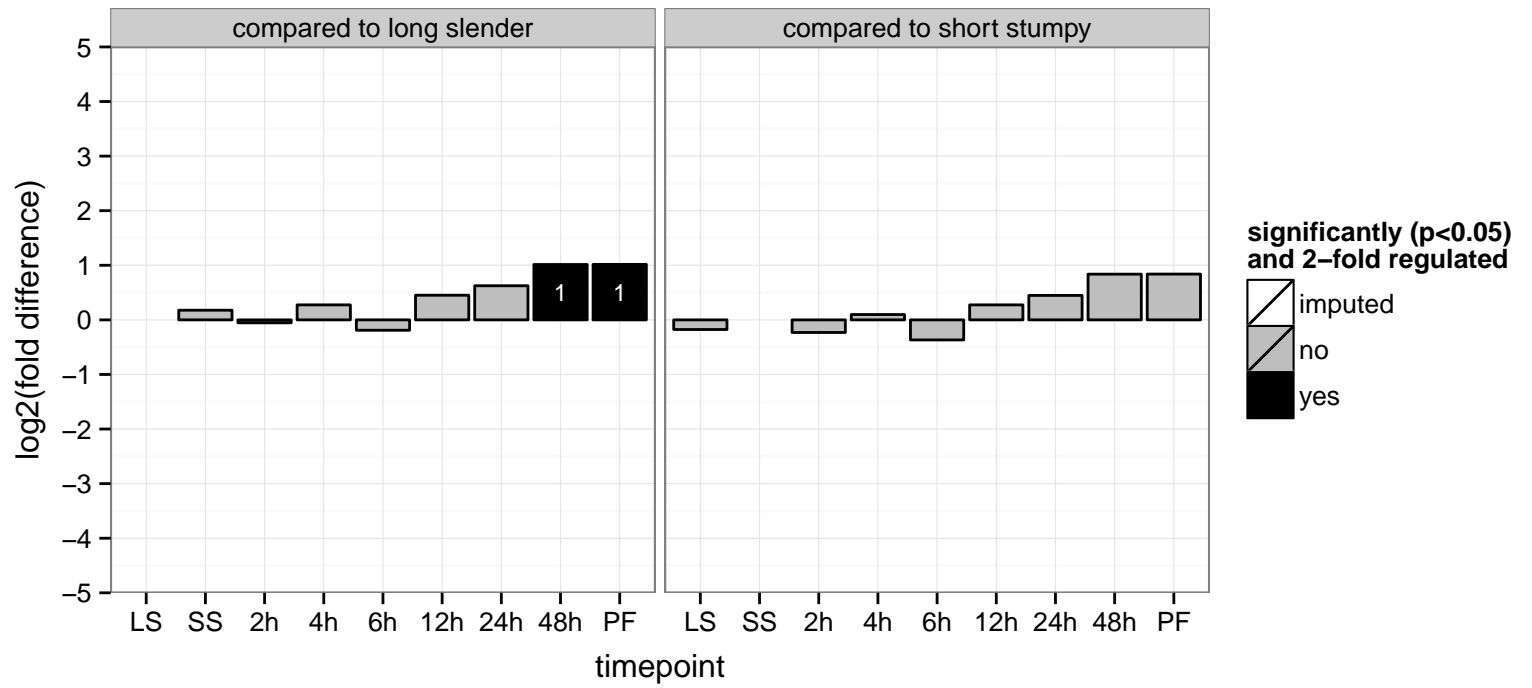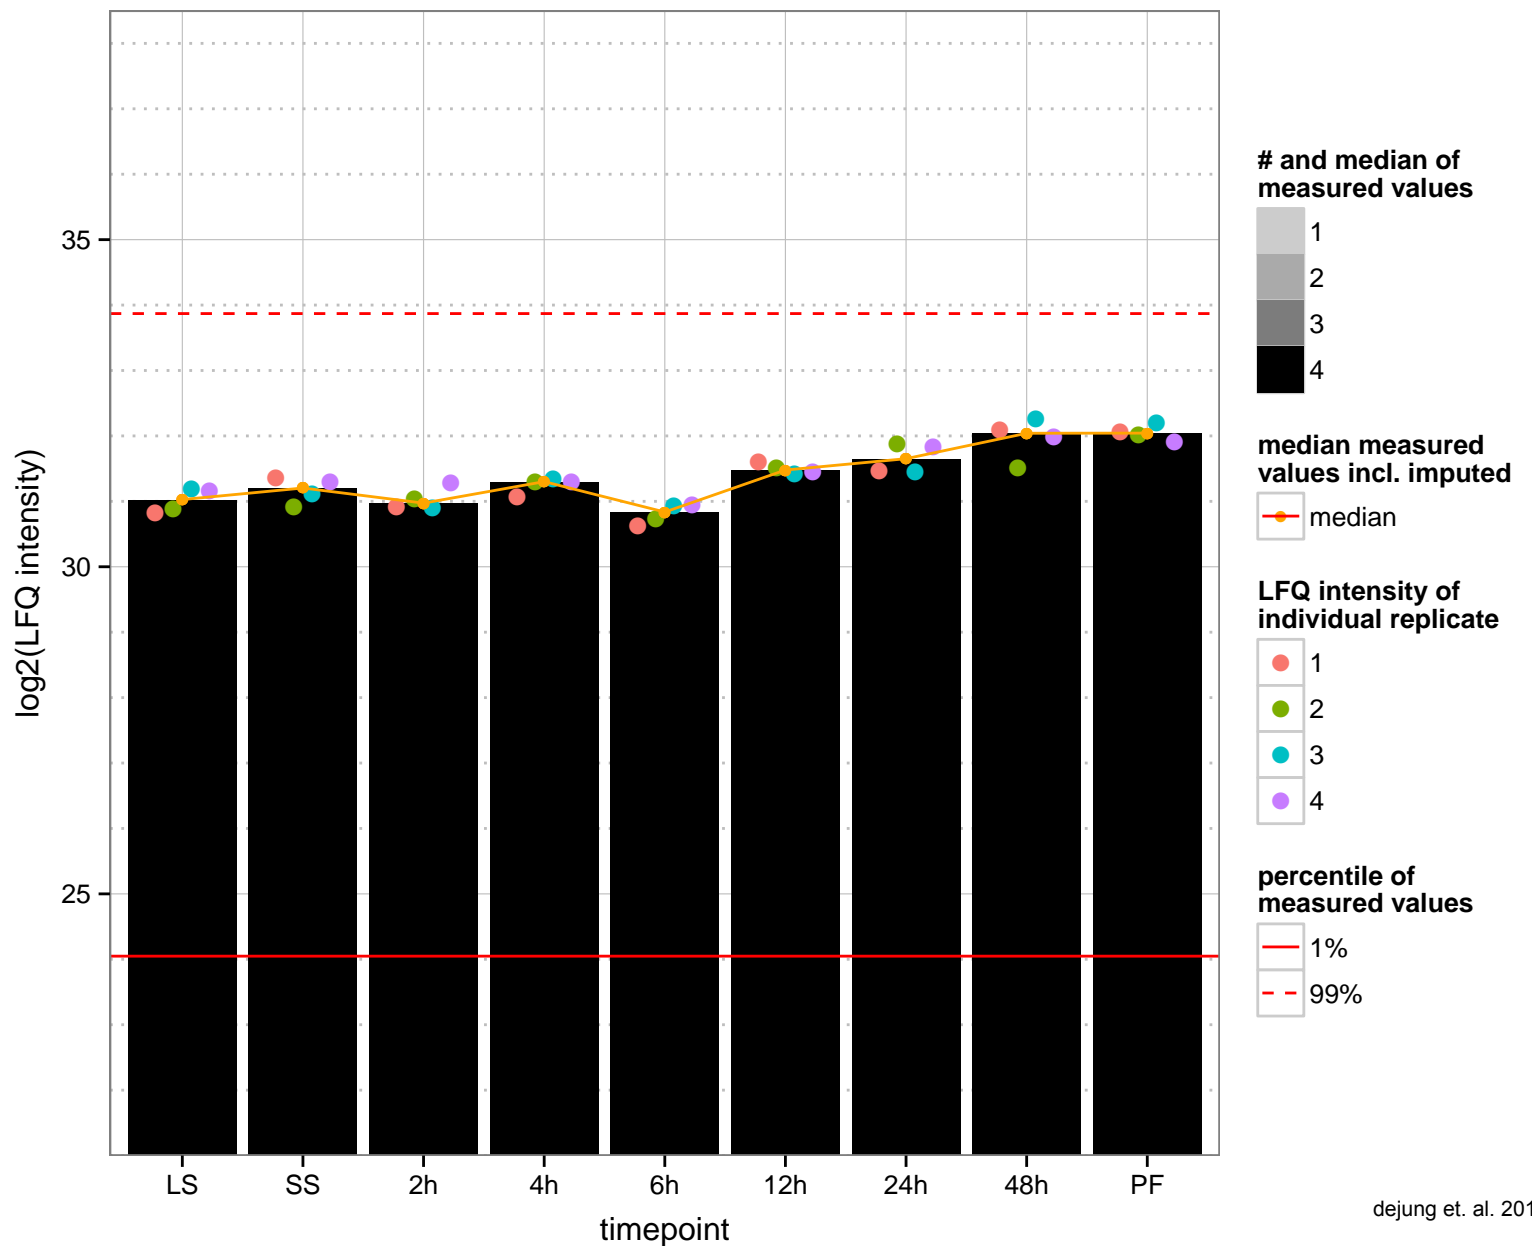

hypothetical protein, chrXI additional, unordered contigs  
 Tb927.11.7670;Tb11.0330  
 AGOF: null  
 AGOC: null  
 AGOP: null  
 PGO: null  
 PGOC: cytoplasm  
 PGOP: peptide cross-linking

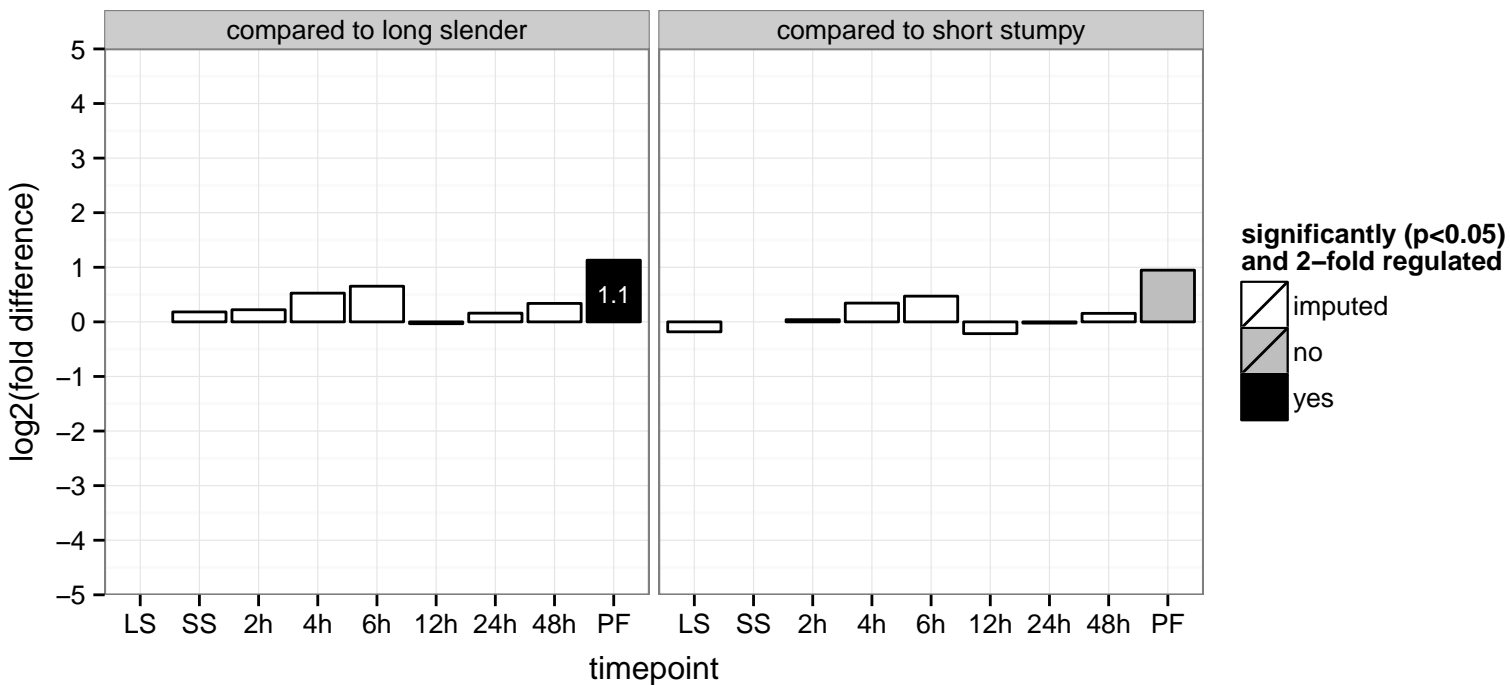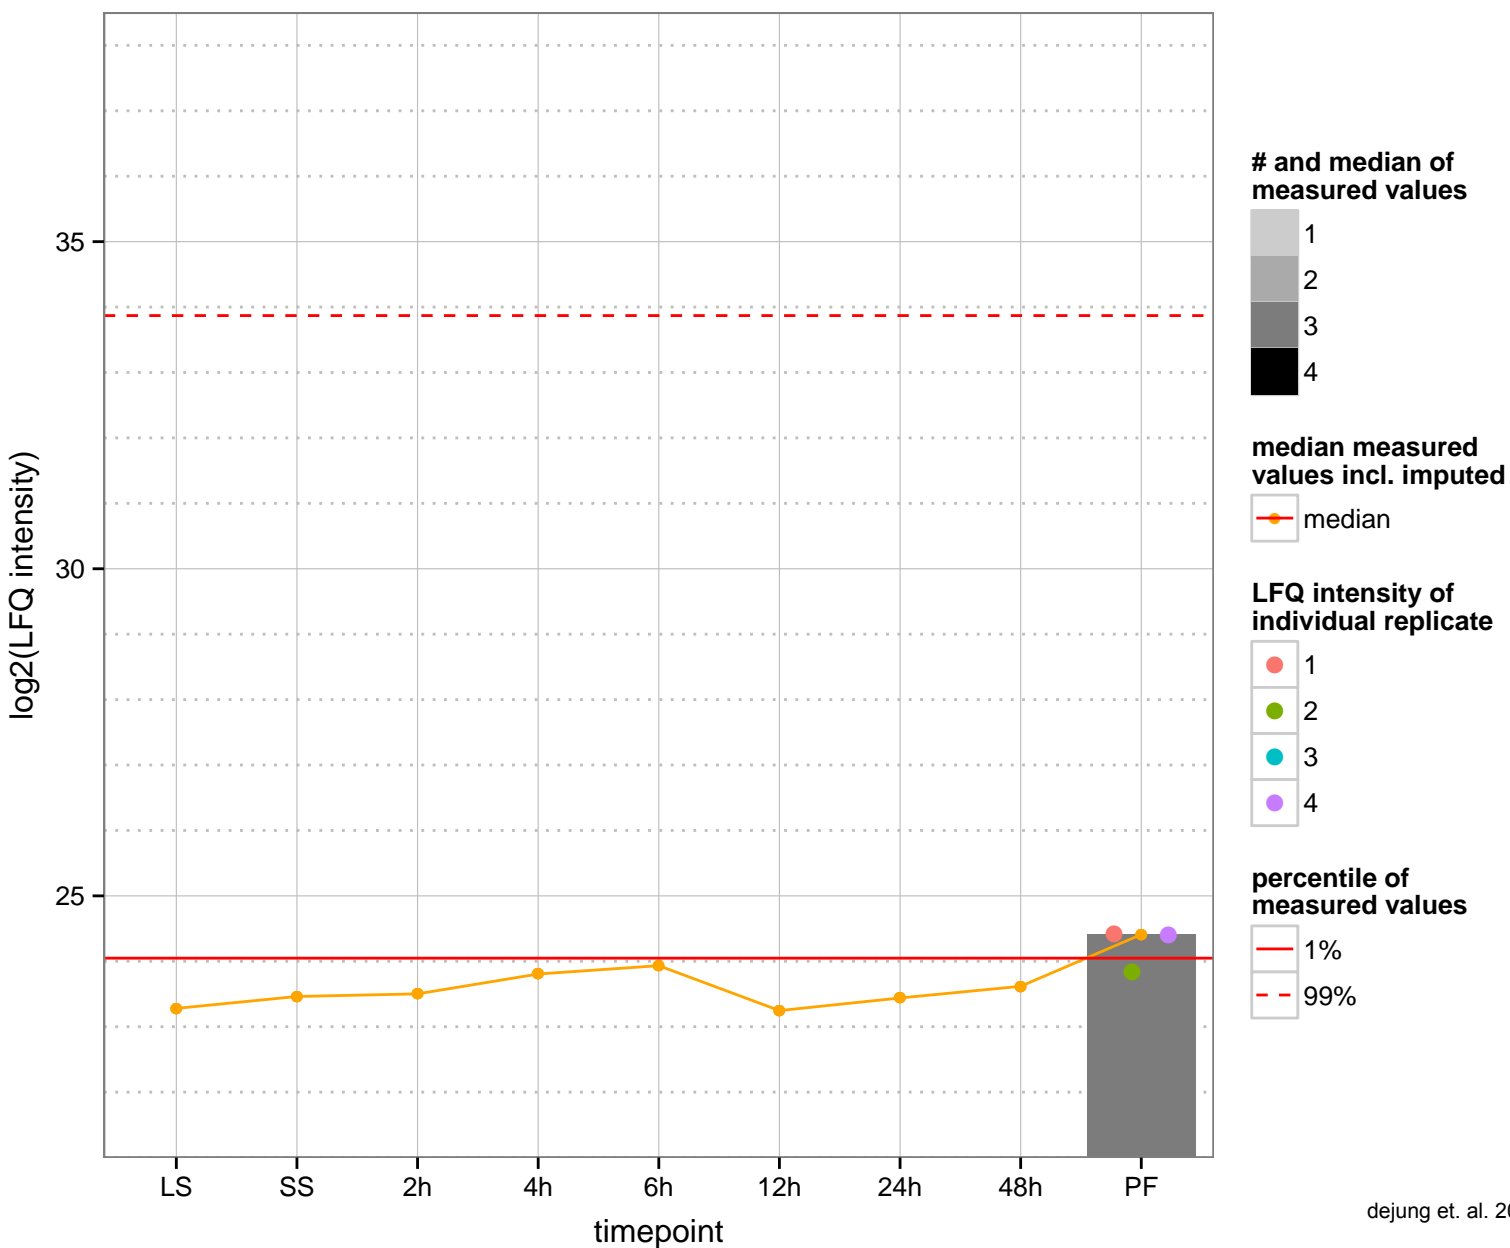

hypothetical protein, chrXI additional, unordered contigs  
 Tb927.11.7650;Tb11.0350  
 AGOF: null  
 AGOC: null  
 AGOP: null  
 PGO: null  
 PGOC: null  
 PGOP: null

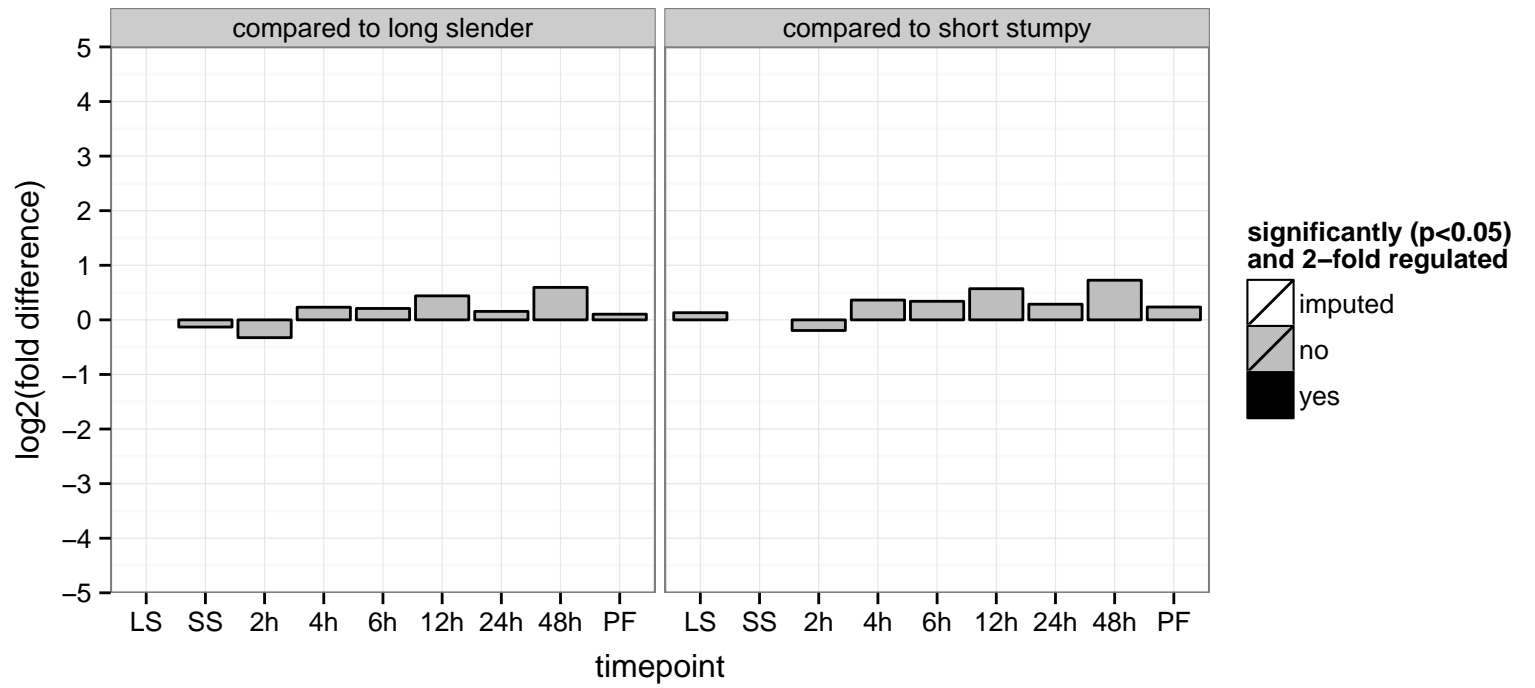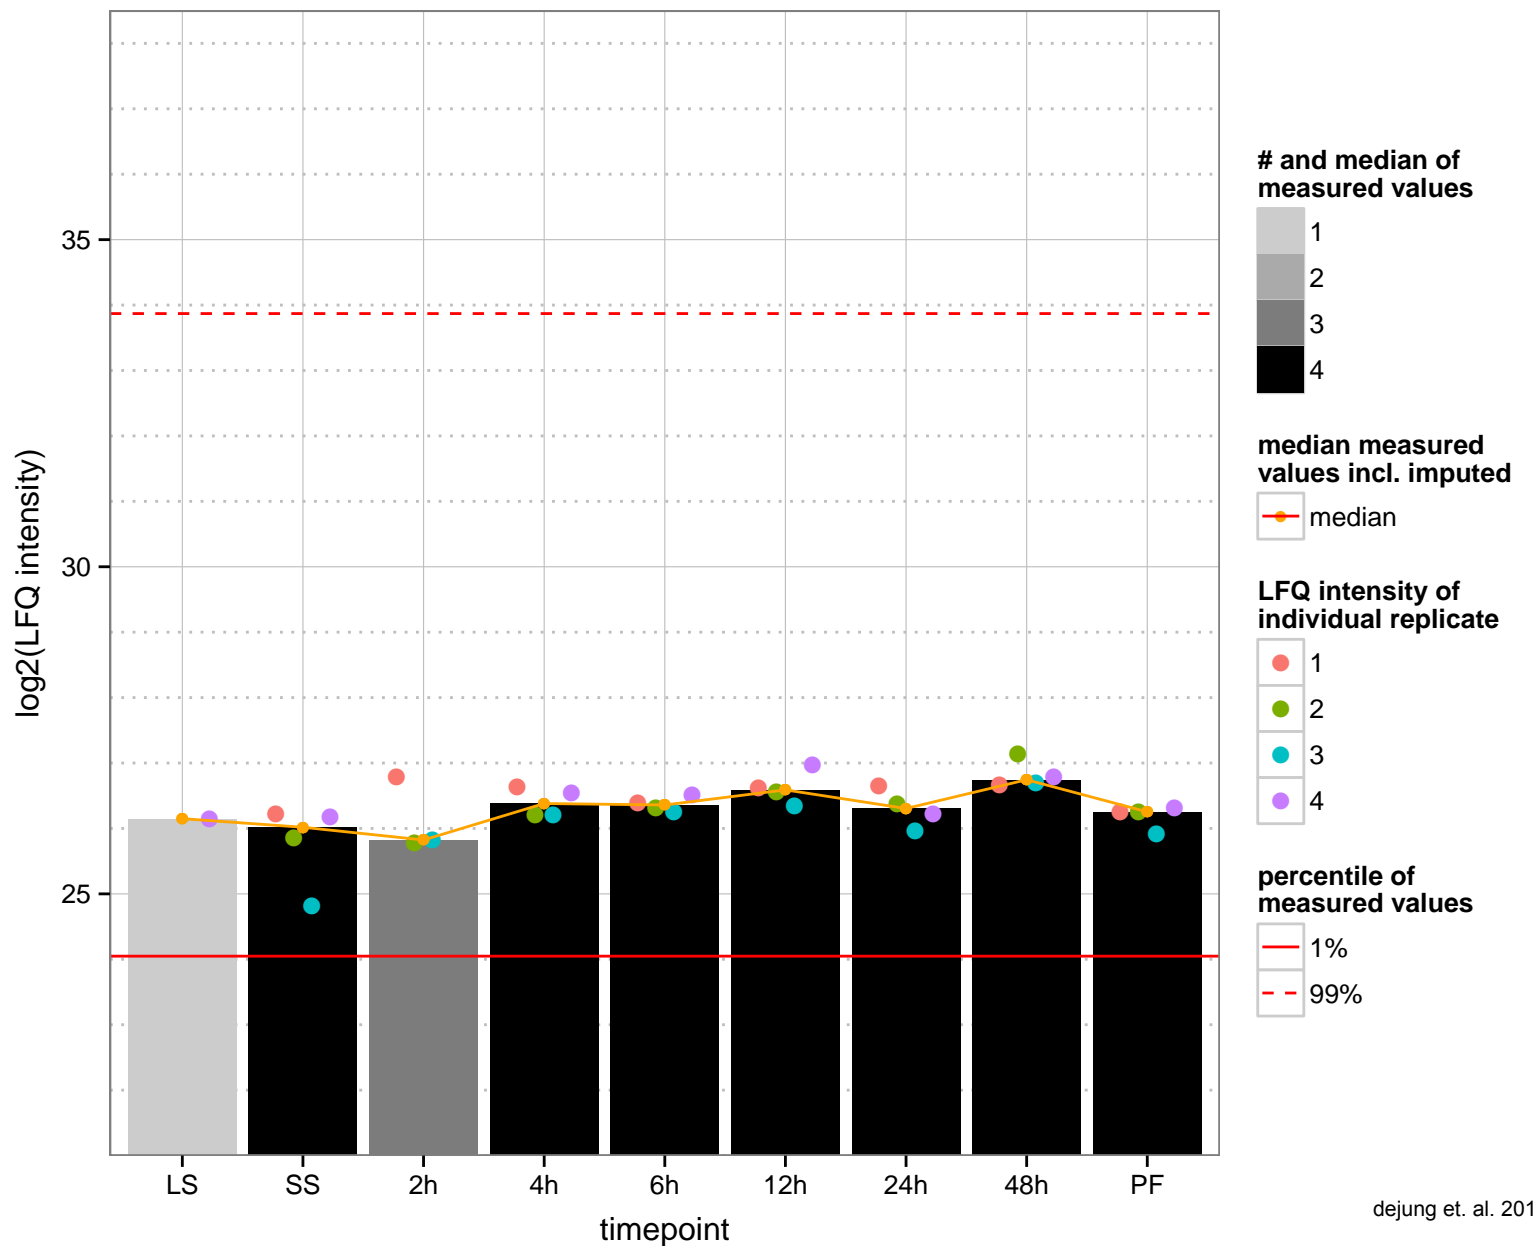

chrX additional, unordered contigs, dynein light chain, putative, dynein arm light chain, axonemal  
 Tb927.10.1130;Tb11.0520  
 AGOF: null, microtubule motor activity  
 AGOC: null, axonemal dynein complex  
 AGOP: null, cellular component movement  
 PGO: null  
 PGOC: null  
 PGOP: null

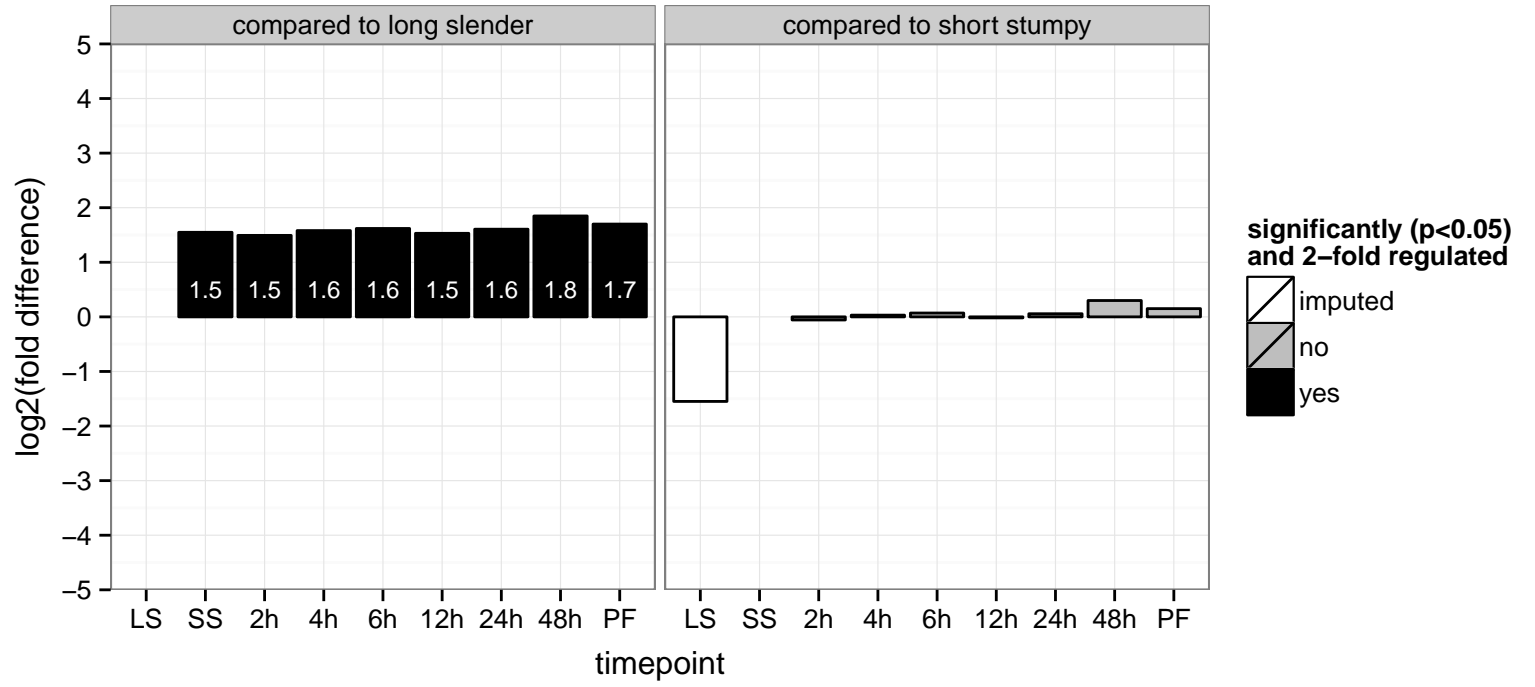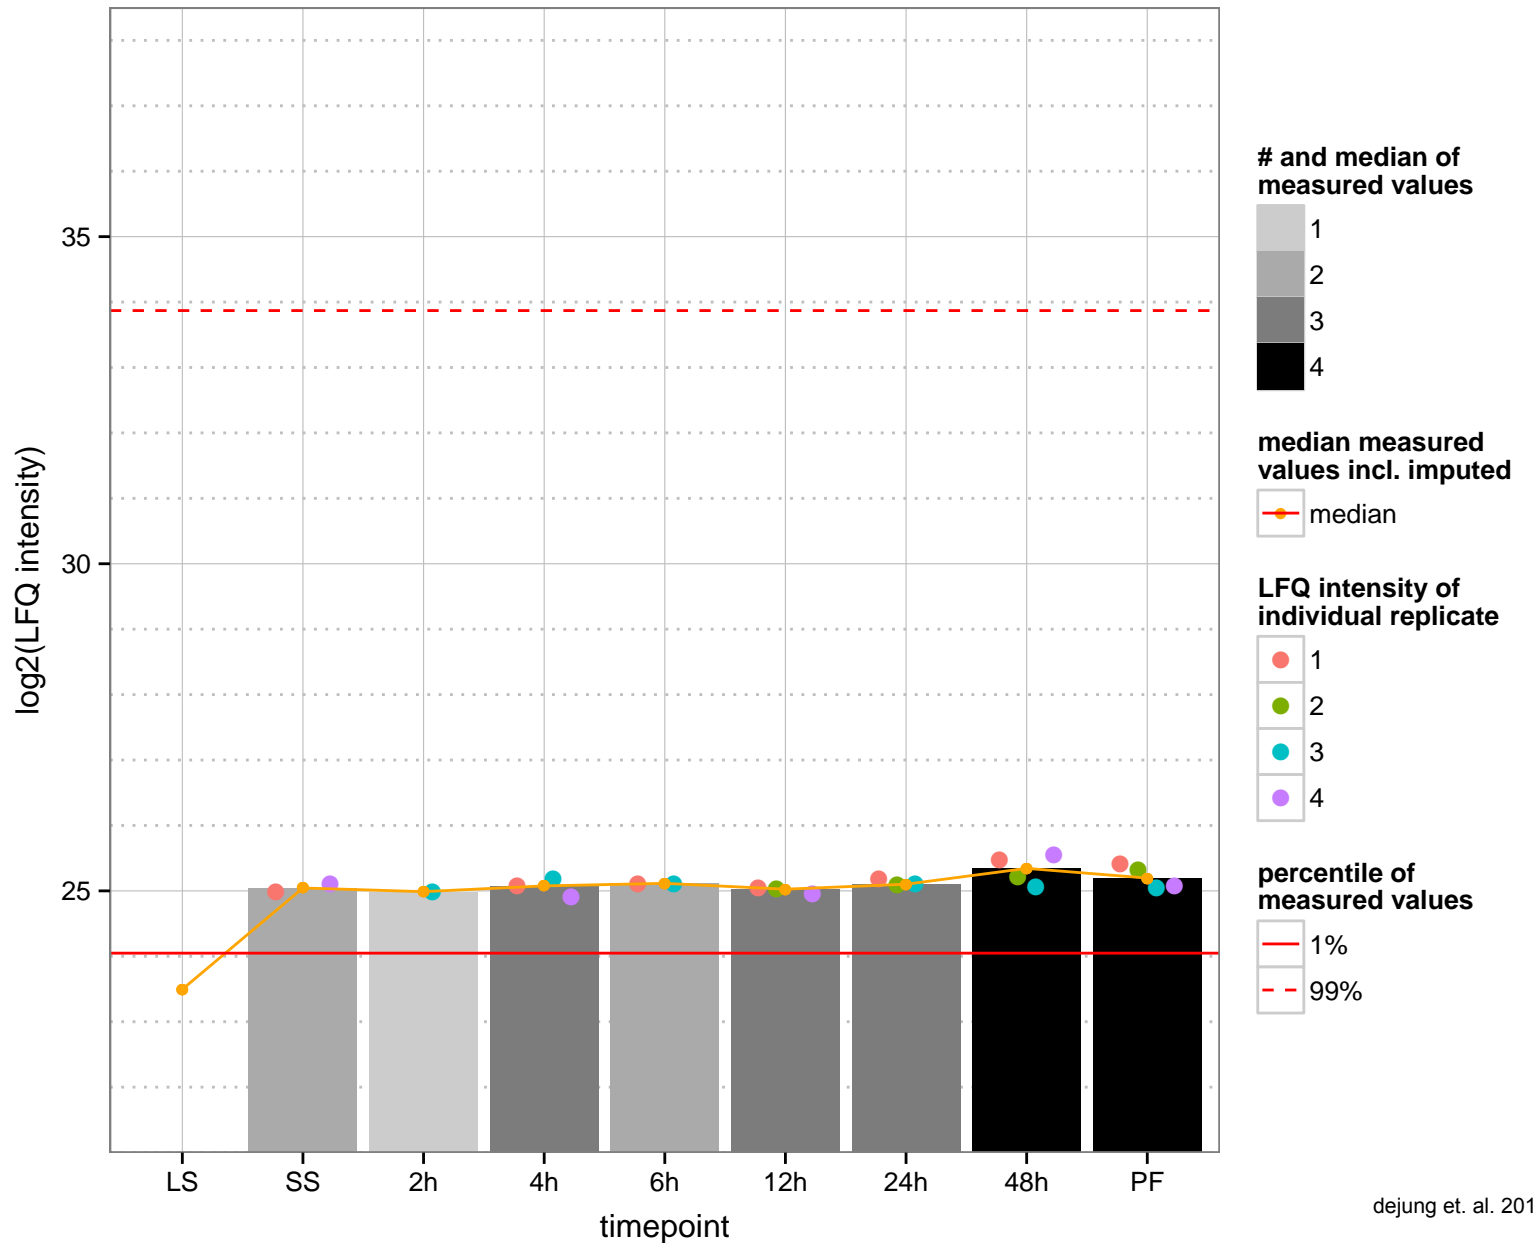

hypothetical protein, chrXI additional, unordered contigs, conserved, paraflagellar rod component, putative (PFC15)  
 Tb11.v5.0996;Tb11.1220;Tb927.10.15250  
 AGOF: null  
 AGOC: null, mitochondrion  
 AGOP: null  
 PGOF: protein binding  
 PGOC: null  
 PGOP: null

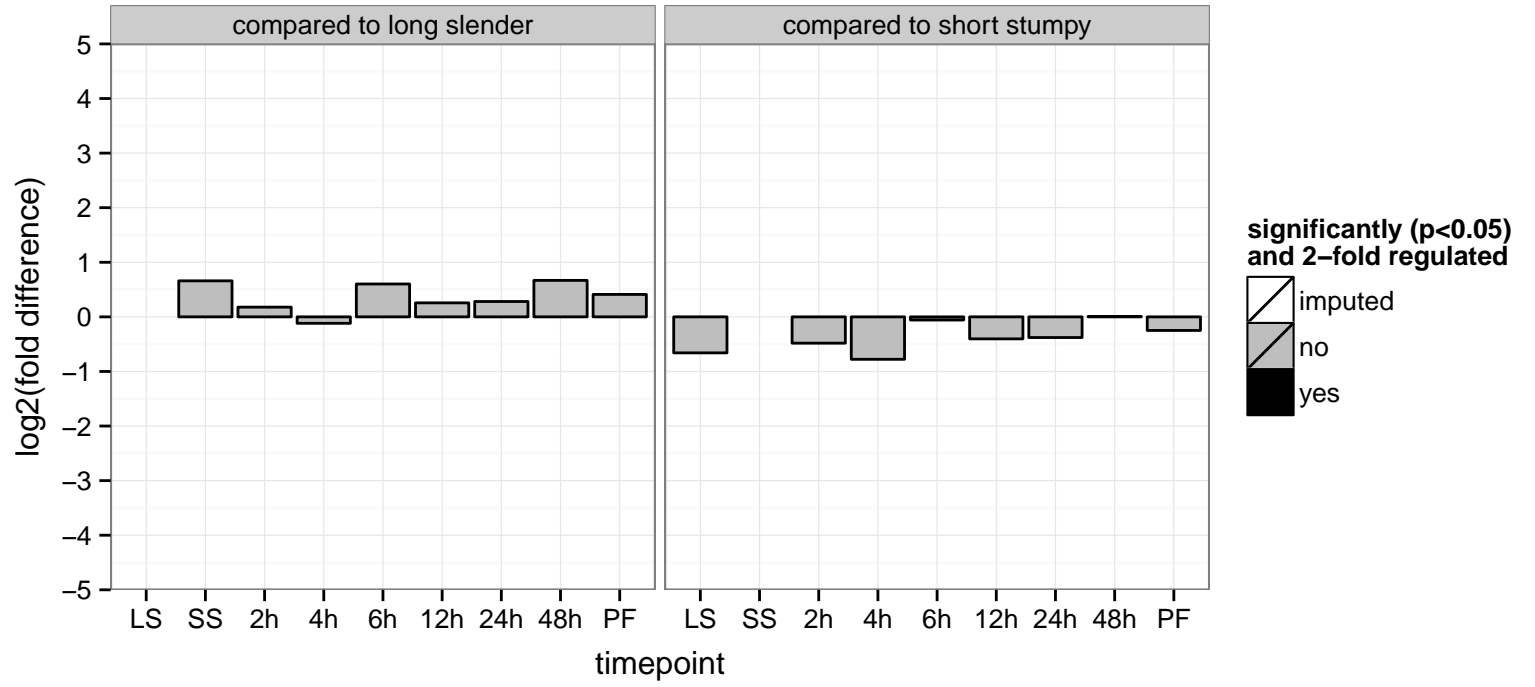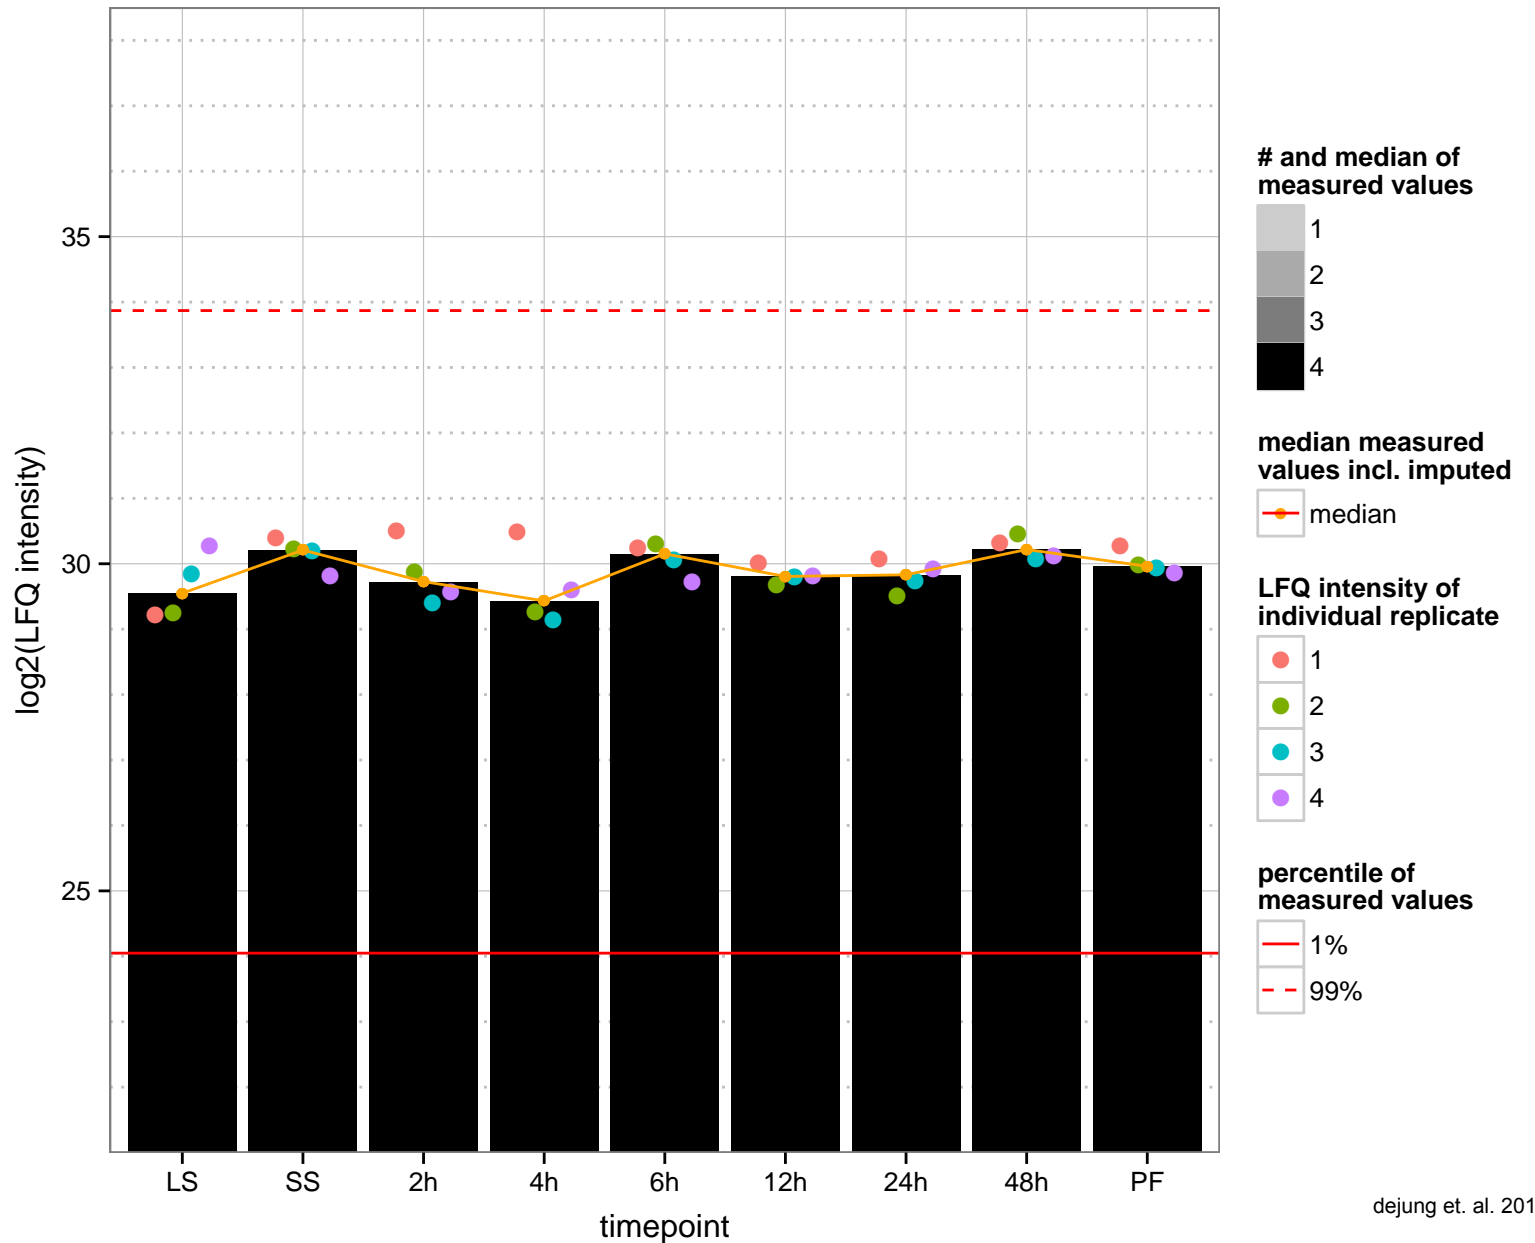

hypothetical protein, conserved  
 Tb927.11.1840;Tb11.1380  
 AGOF: null  
 AGOC: null  
 AGOP: null  
 PGO: null  
 PGOC: null  
 PGOP: null

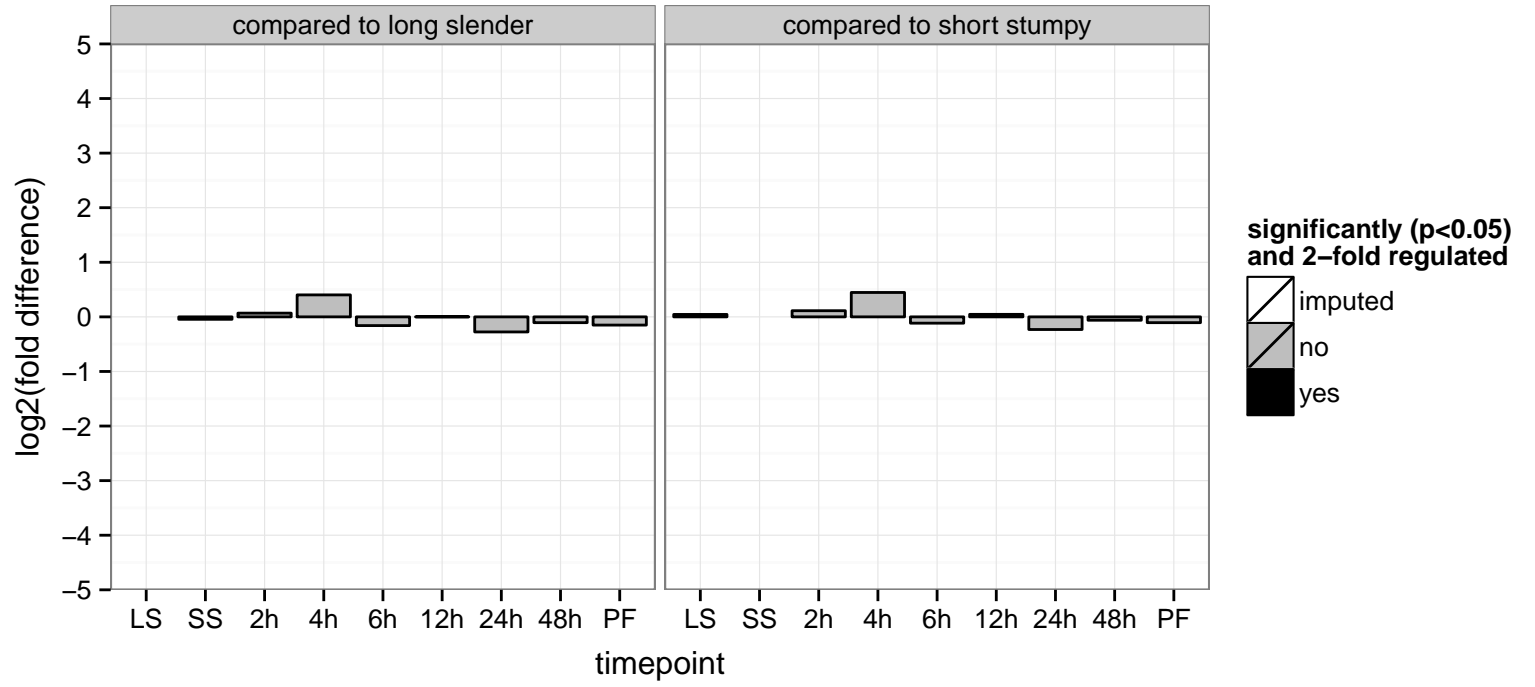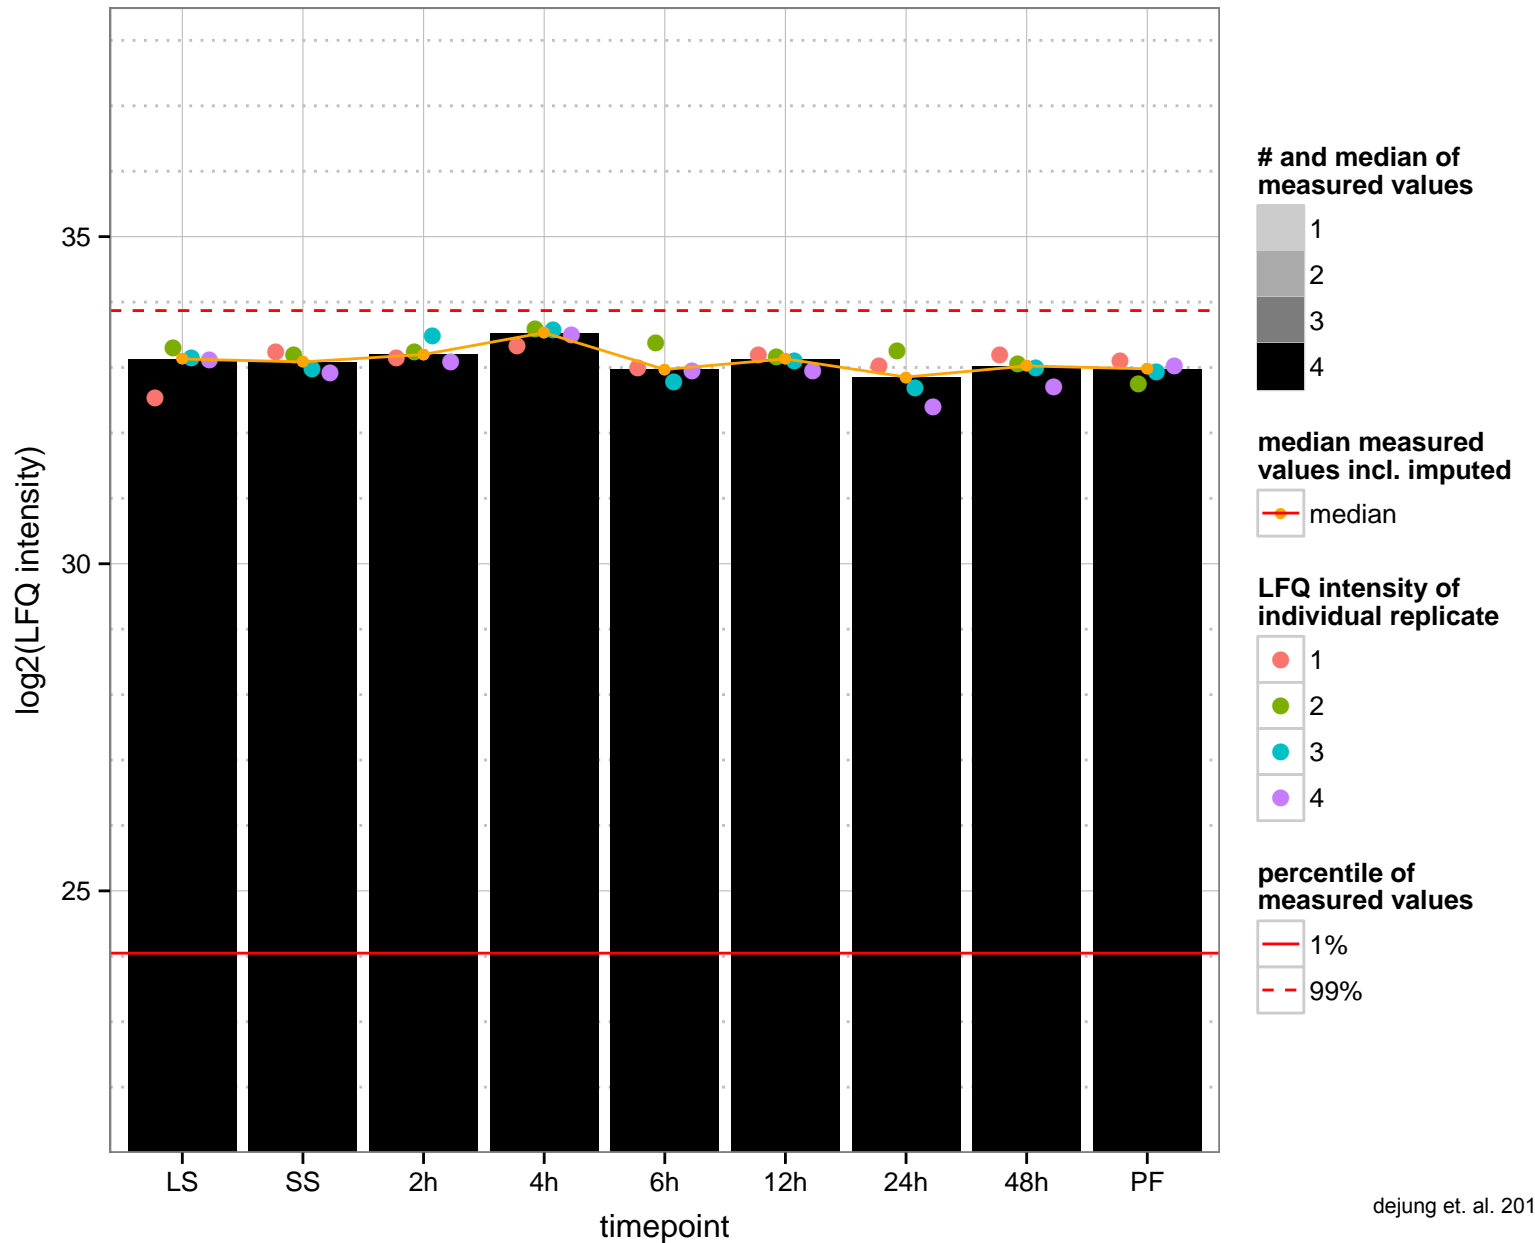



hypothetical protein, conserved  
 Tb927.11.1830;Tb11.1390  
 AGOF: null  
 AGOC: null  
 AGOP: null  
 PGO: null  
 PGOC: null  
 PGOP: null

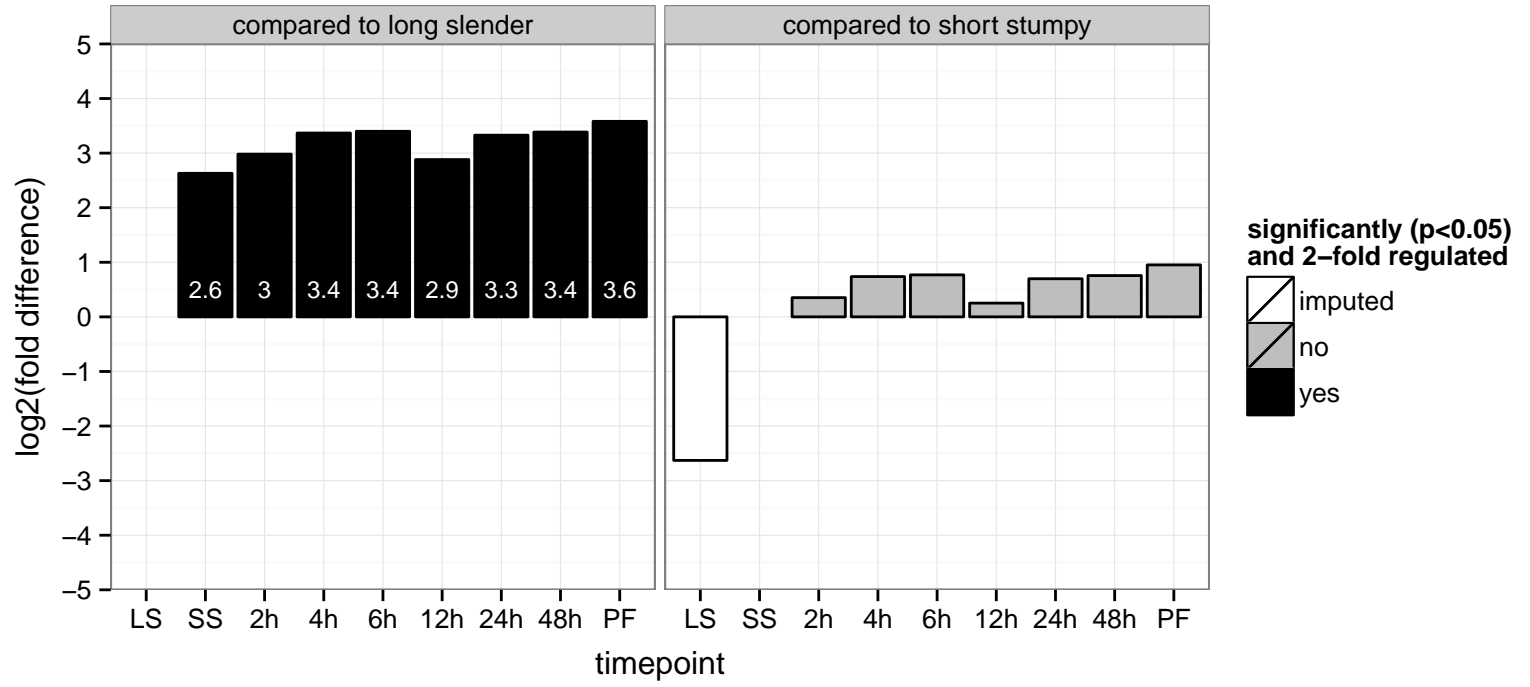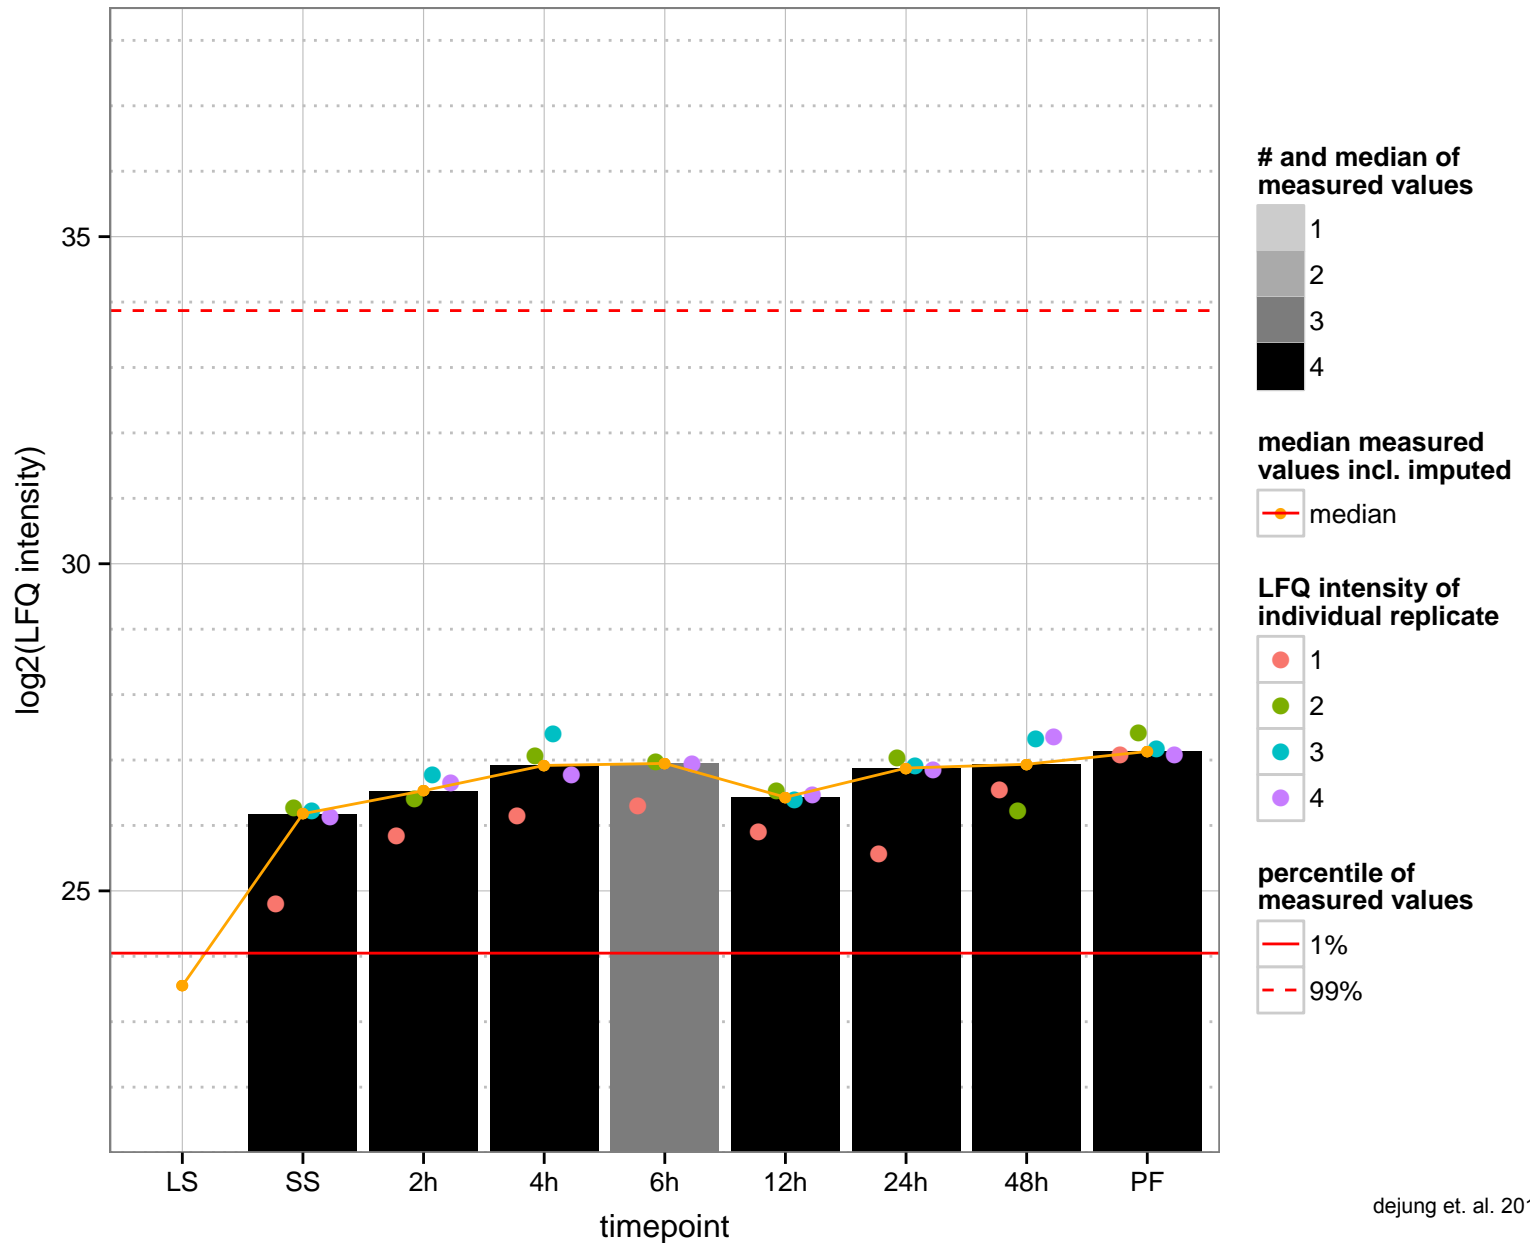

retrotransposon hot spot protein 1 (RHS1, pseudogene), putative  
 Tb11.1780  
 AGOF: null  
 AGOC: null  
 AGOP: null  
 PGOF: null  
 PGO: null  
 PGOP: null

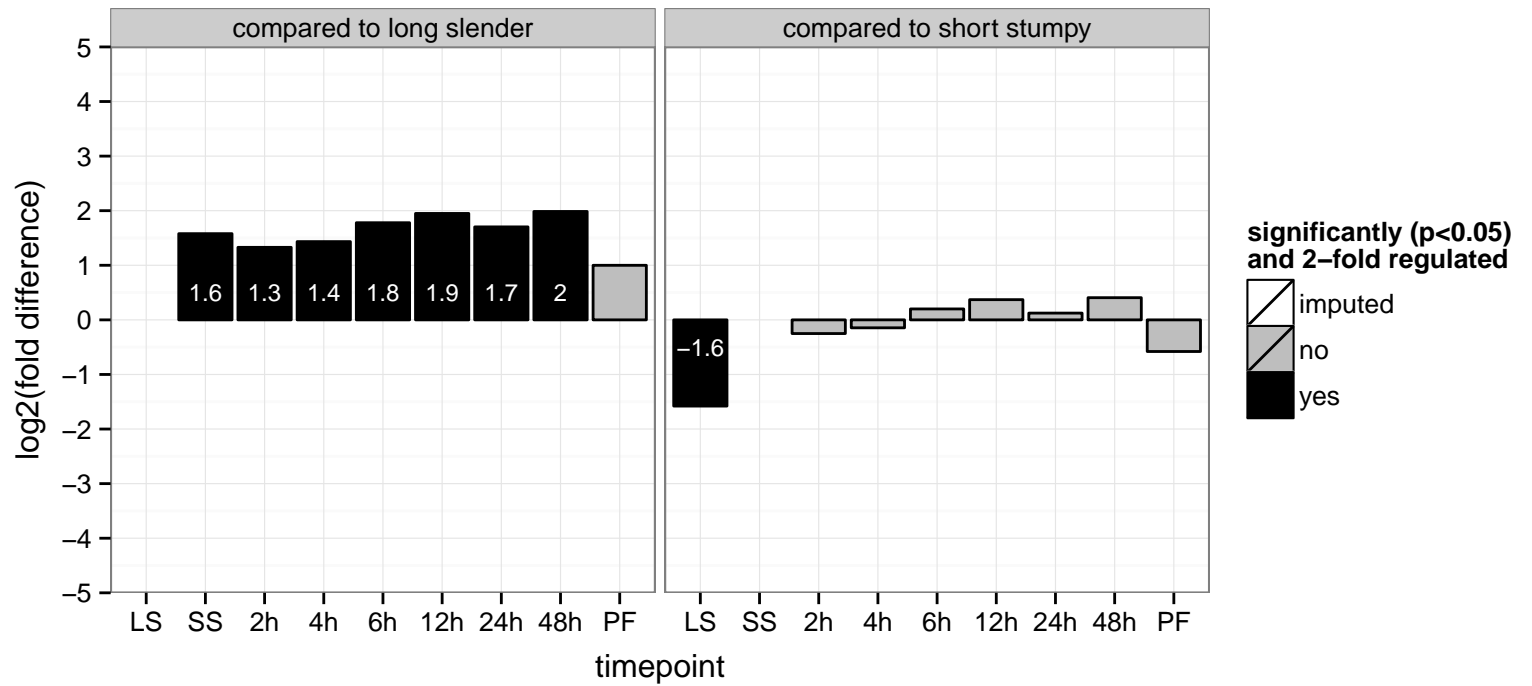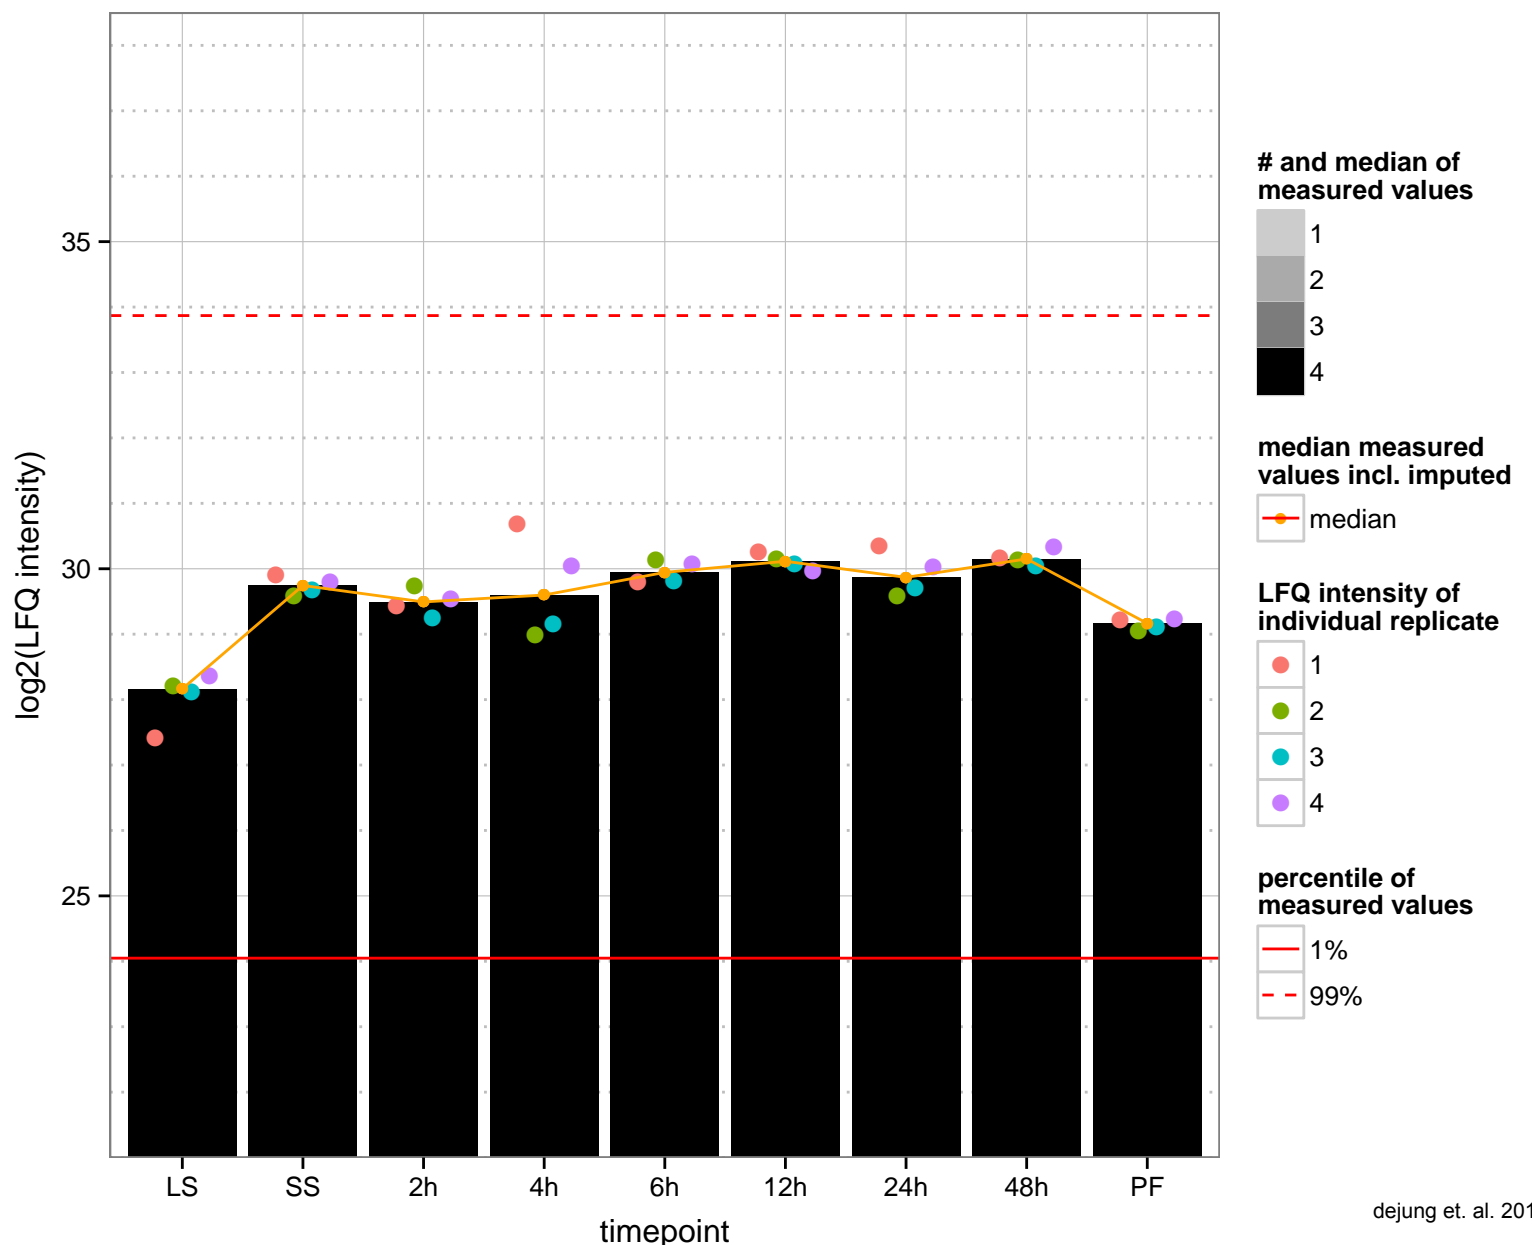

retrotransposon hot spot protein (RHS, pseudogene), putative  
 Tb11.1790  
 AGOF: null  
 AGOC: null  
 AGOP: null  
 PGO: null  
 PGO: null  
 PGO: null

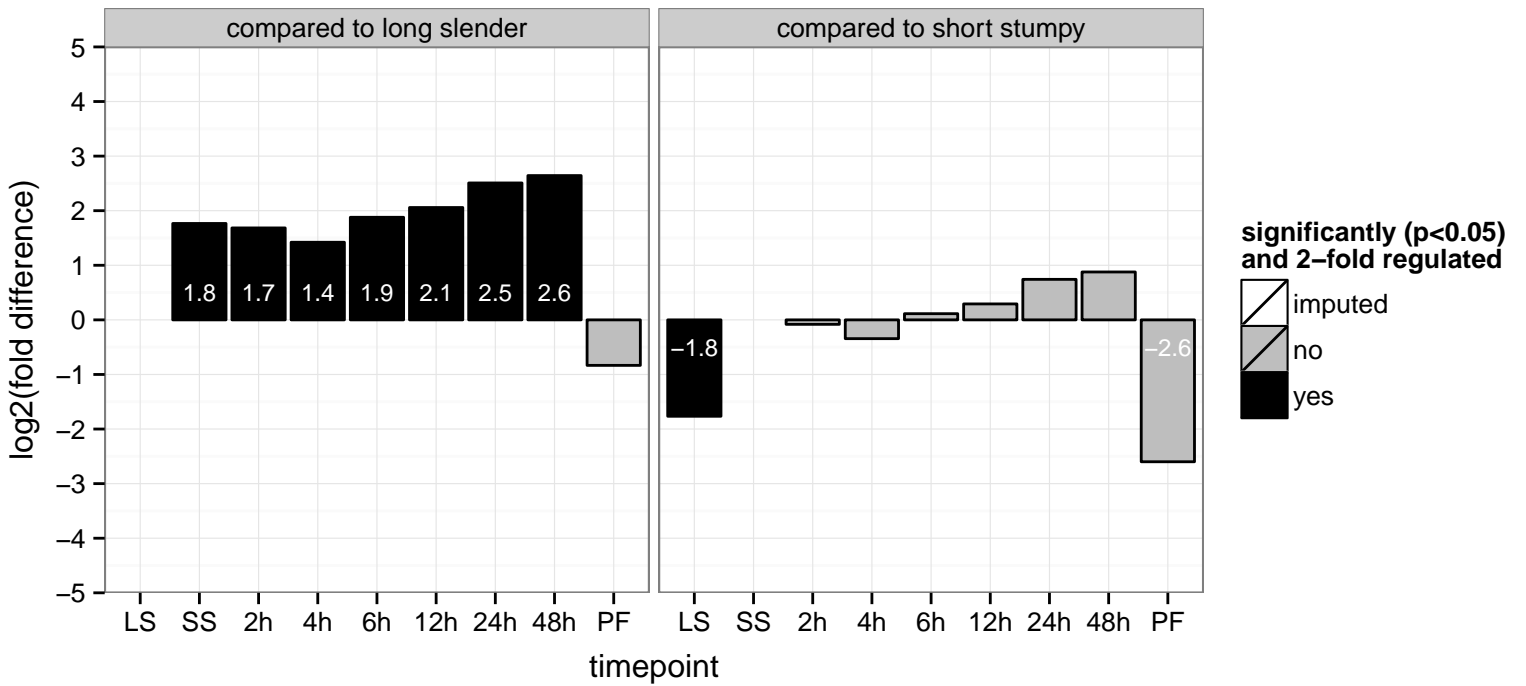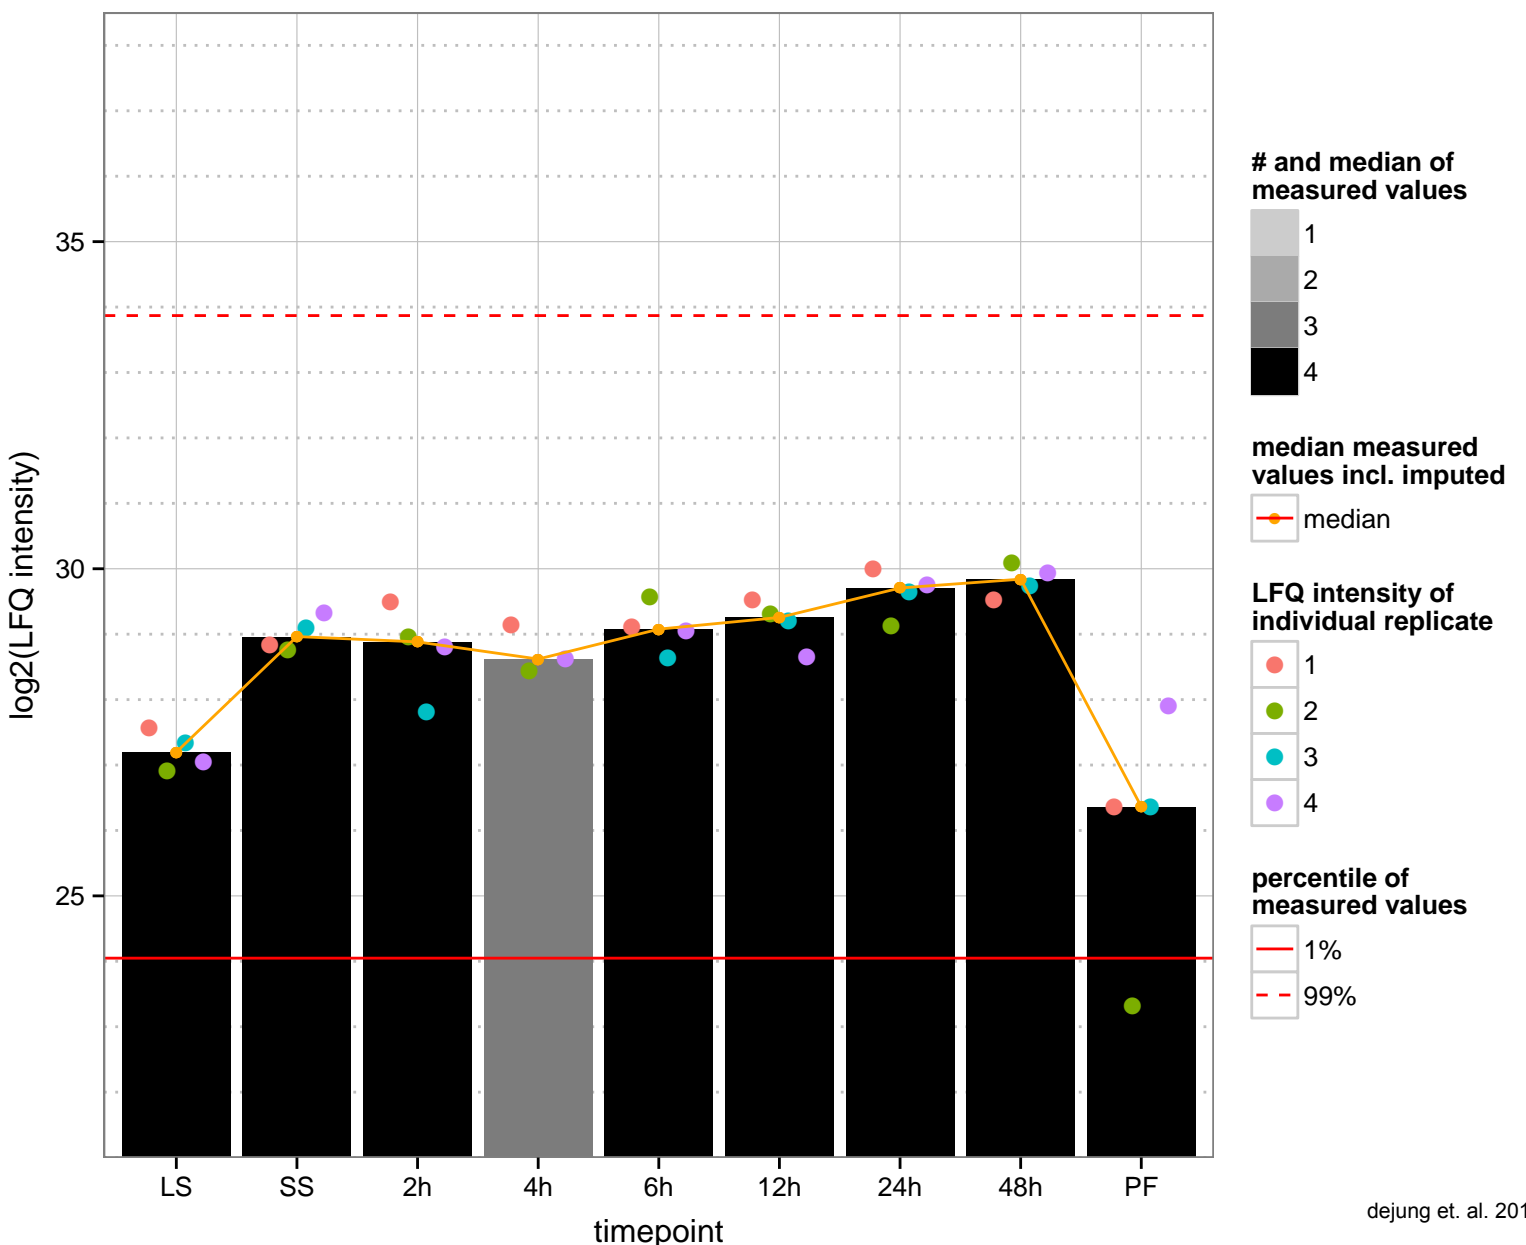

retrotransposon hot spot (RHS) protein, (pseudogene), putative, retrotransposon hot spot protein (RHS, pseudogene)  
 Tb11.1810b;Tb11.1810  
 AGOF: null  
 AGOC: null  
 AGOP: null  
 PGO: null  
 PGOC: null  
 PGOP: null

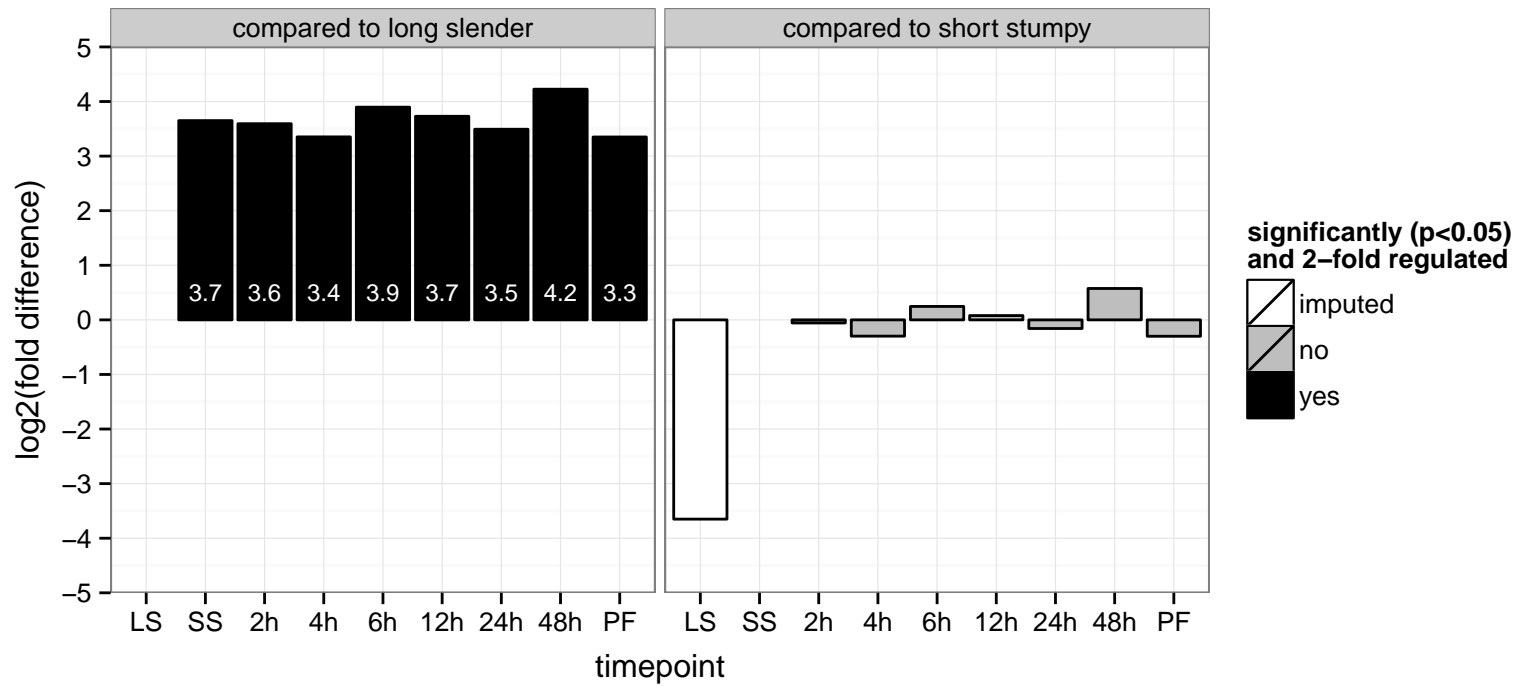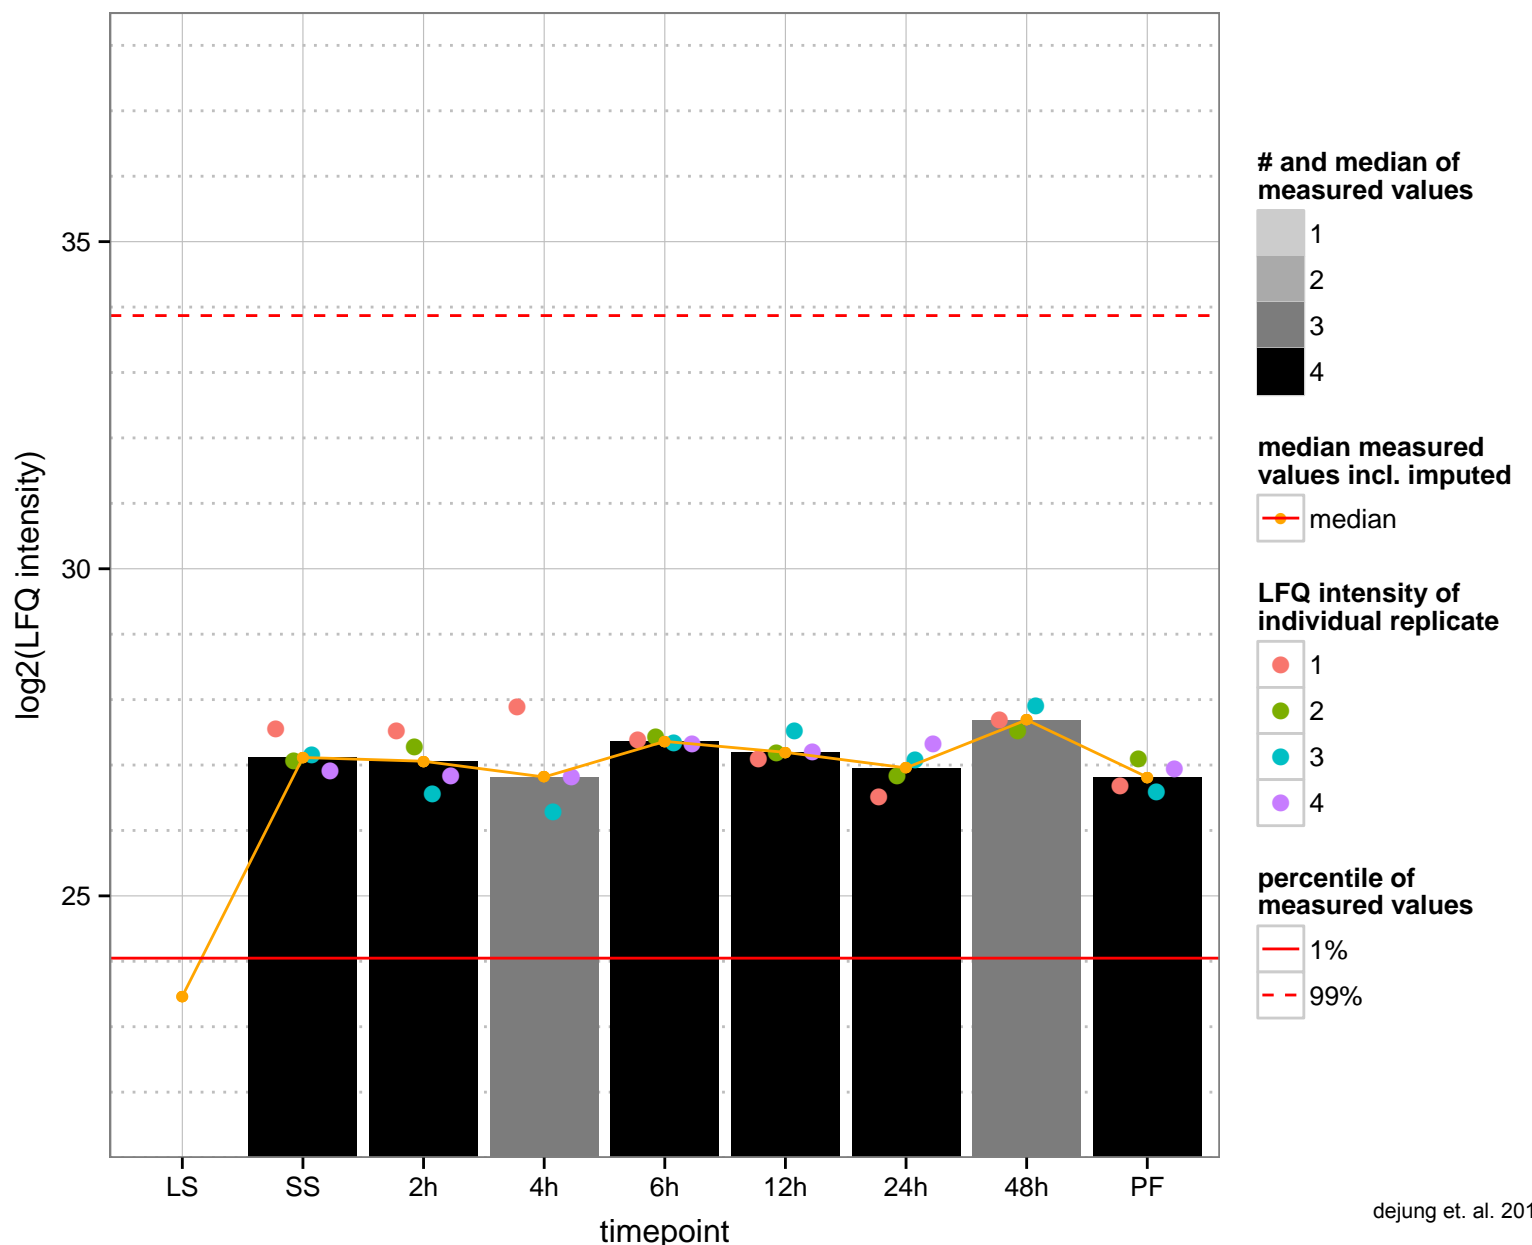

ribosomal RNA processing protein 4, putative, exosome complex exonuclease (RRP4)

Tb927.7.4670;Tb11.v5.0152

AGOF: null, 3'-5'-exoribonuclease activity, RNA binding

AGOC: null, cytoplasmic exosome (RNase complex), exosome (RNase complex), nuclear exosome (RNase complex)

AGOP: null, cell growth, rRNA processing

PGOF: RNA binding

PGOC: null

PGOP: null

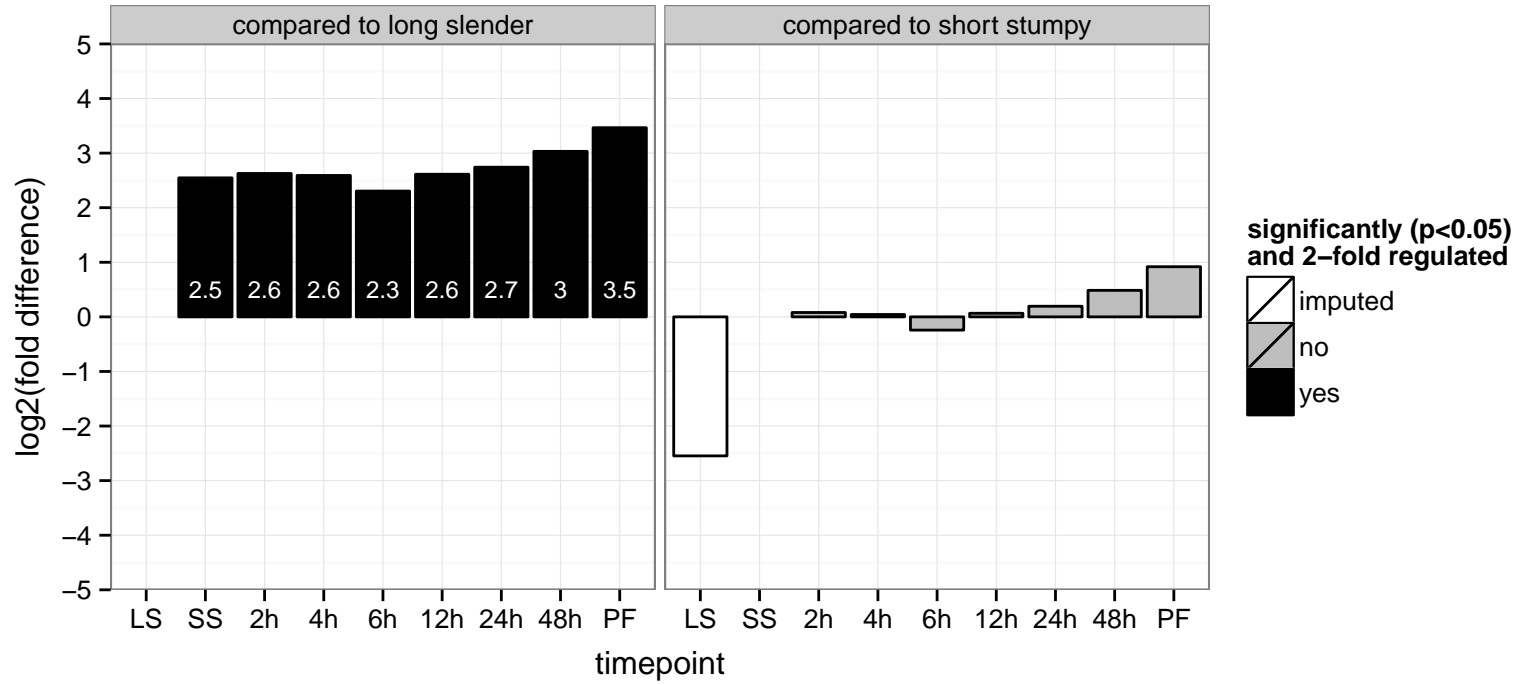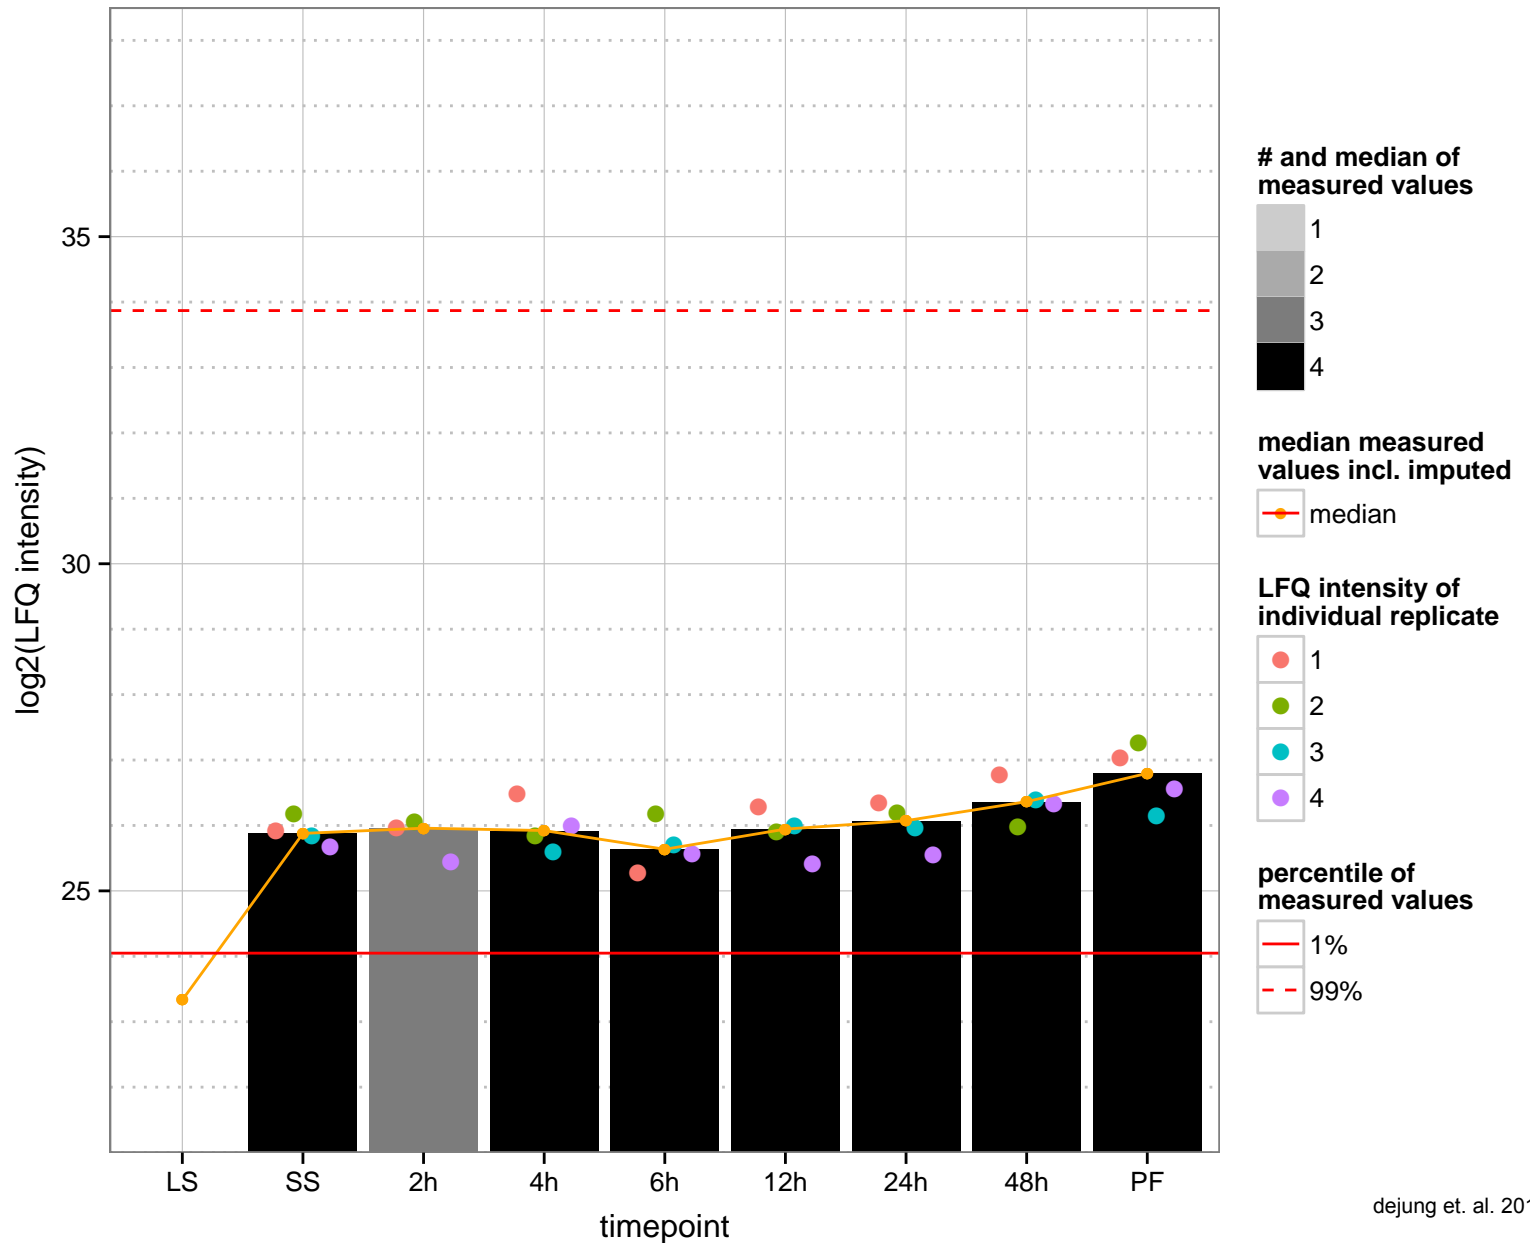

hypothetical protein, conserved  
 Tb11.v5.0154  
 AGOF: null  
 AGOC: null  
 AGOP: null  
 PGO: protein binding  
 PGOC: null  
 PGOP: null

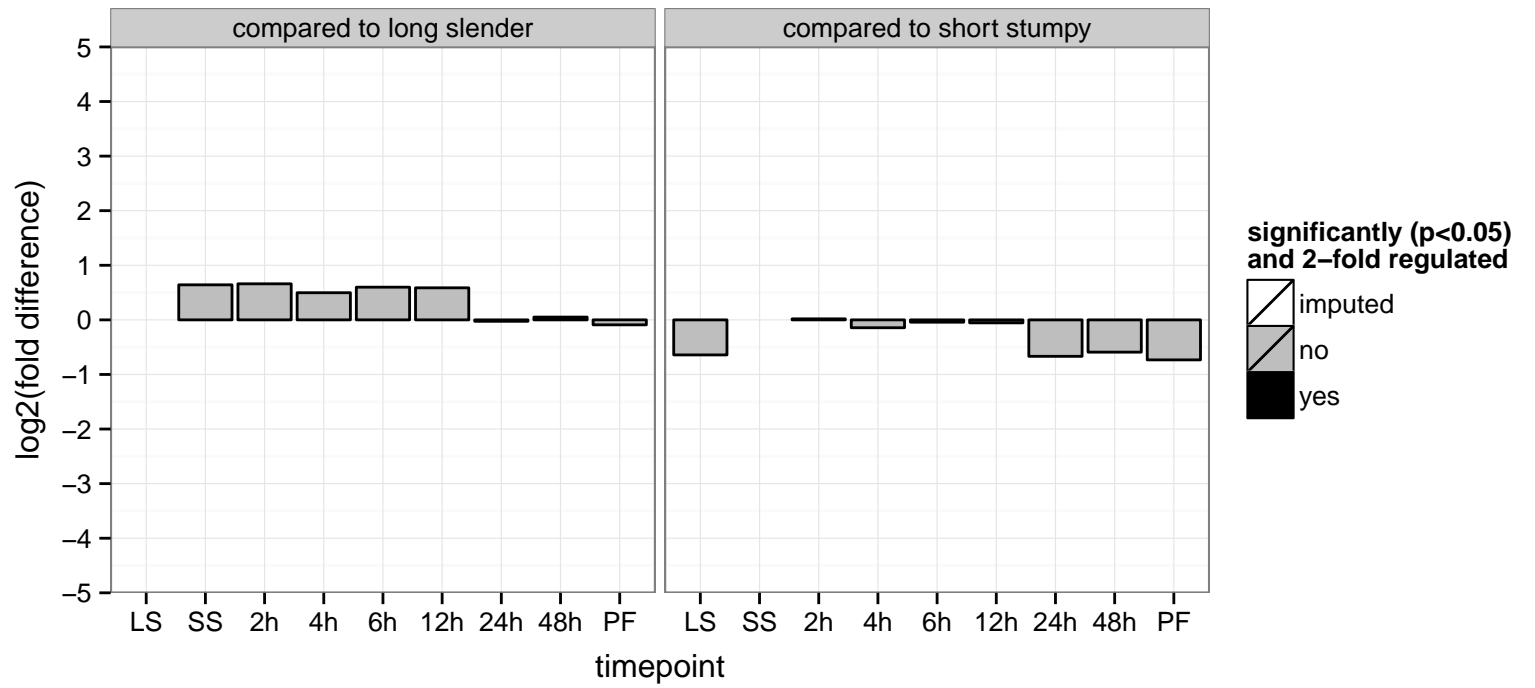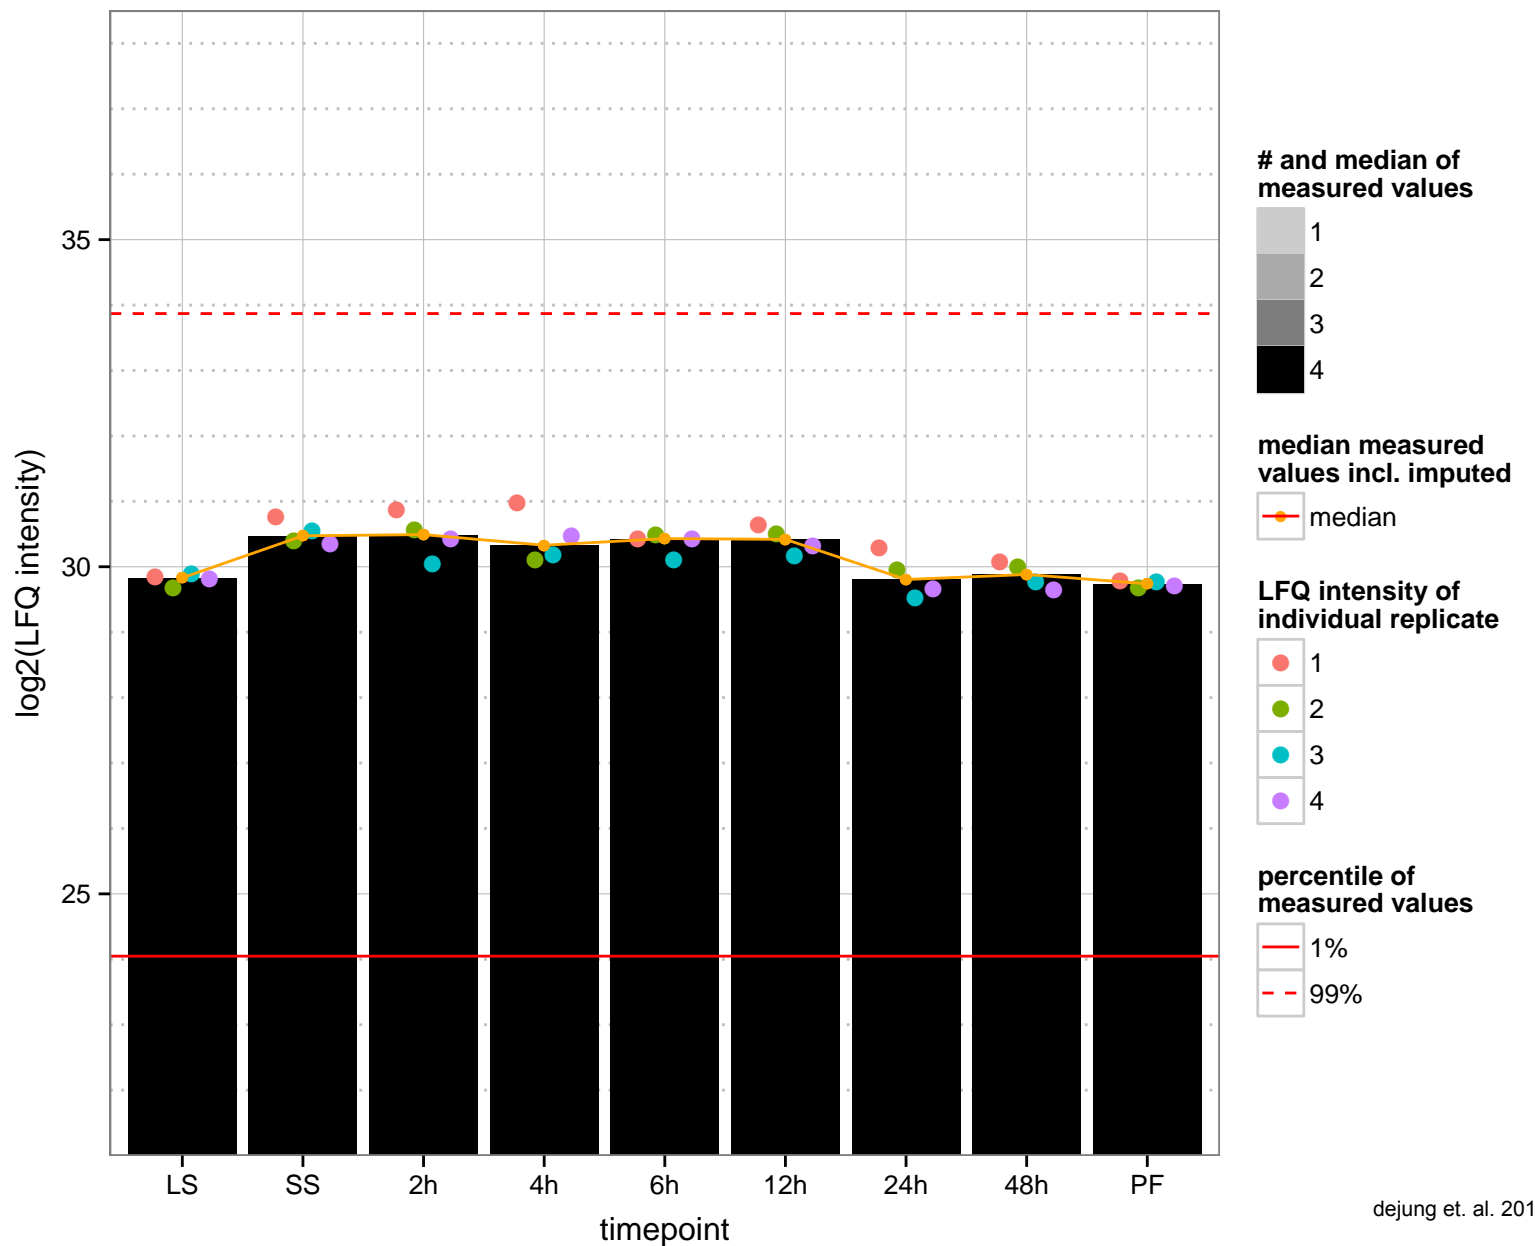

cyclophilin-type peptidyl-prolyl cis-trans isomerase, putative, putative (PPIase)

Tb11.v5.0160;Tb927.7.4770

AGOF: null, peptidyl-prolyl cis-trans isomerase activity

AGOC: null

AGOP: null, protein folding

PGOF: peptidyl-prolyl cis-trans isomerase activity

PGOC: null

PGOP: protein folding

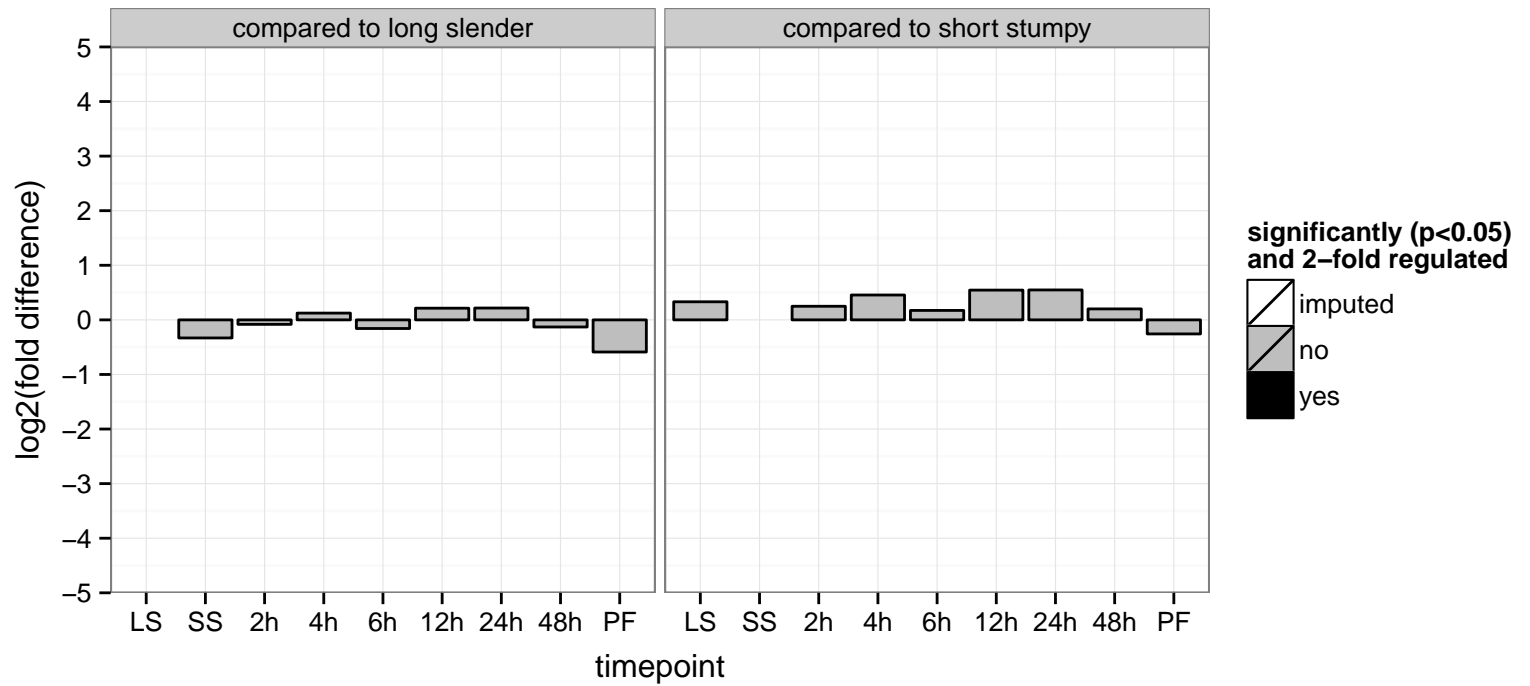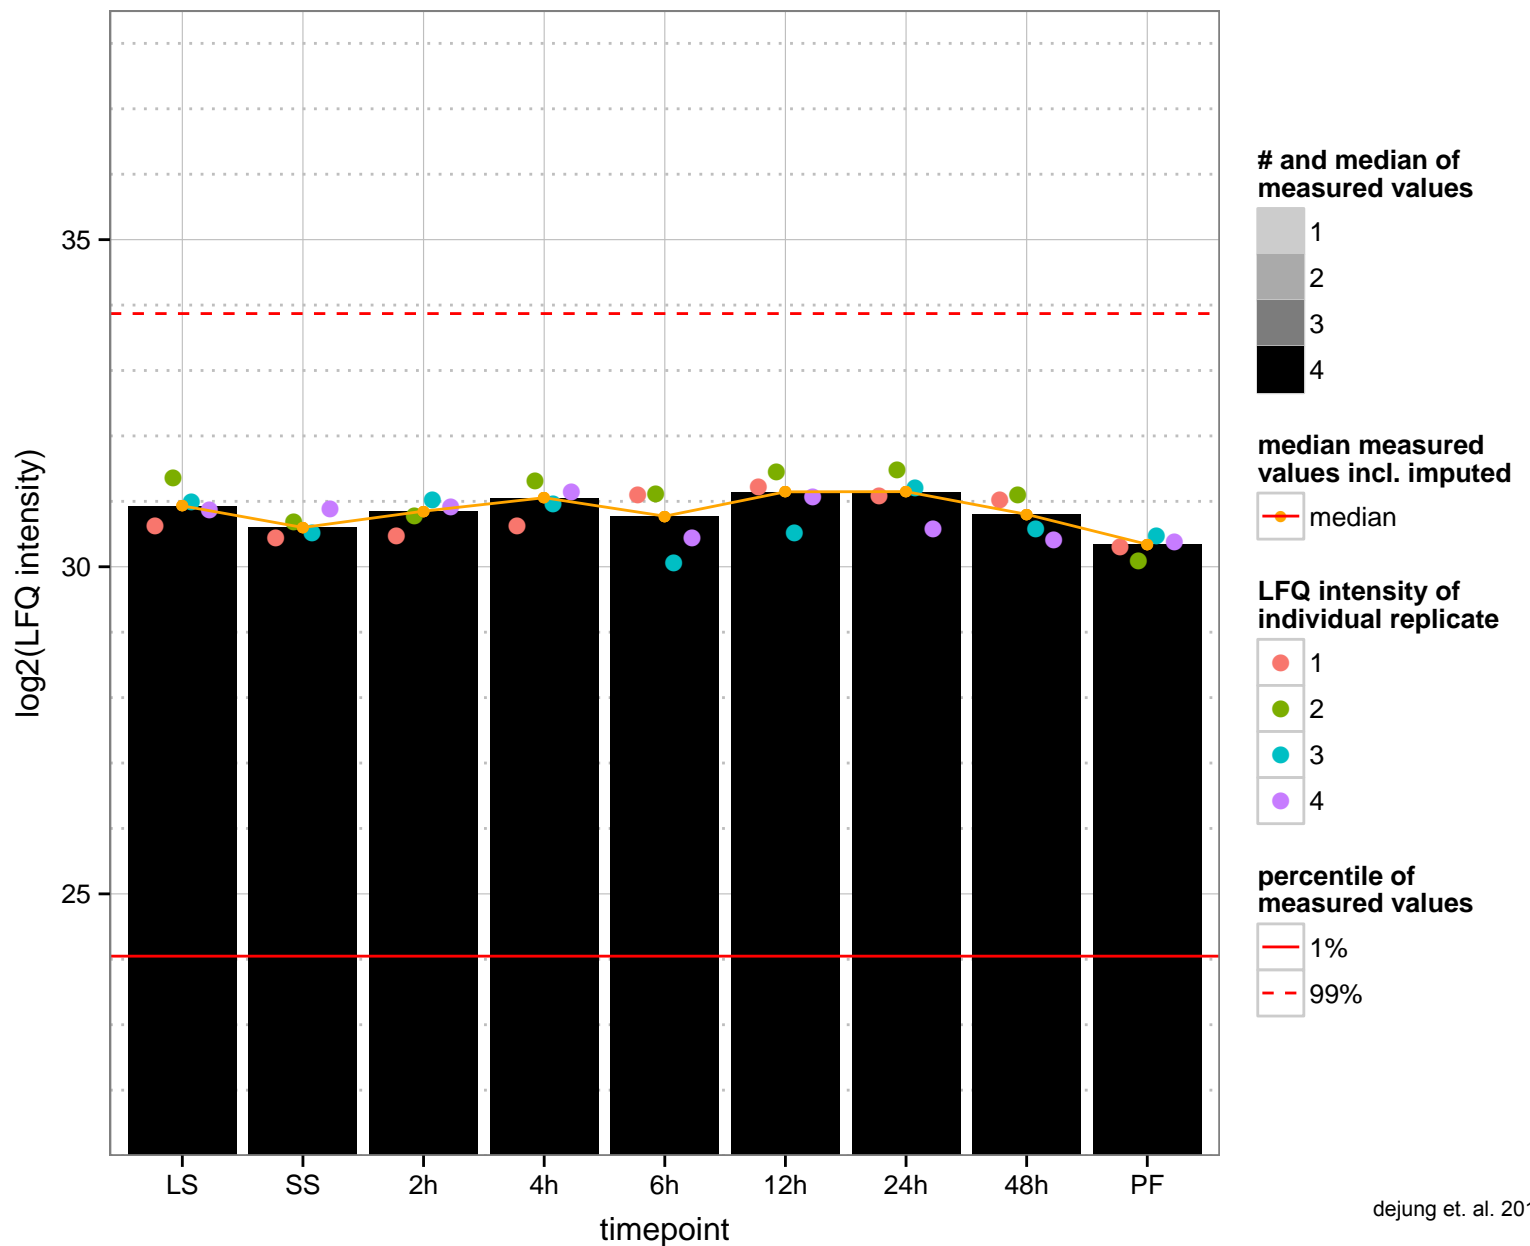

proteasome beta 6 subunit, 20S proteasome beta 6 subunit, putative (BETA6)

Tb927.7.4790;Tb11.v5.0162

AGOF: null, endopeptidase activity, threonine-type endopeptidase activity

AGOC: null, proteasome core complex, proteasome core complex, beta-subunit complex

AGOP: null, ubiquitin-dependent protein catabolic process

PGOF: threonine-type endopeptidase activity

PGOC: proteasome core complex

PGOP: proteolysis involved in cellular protein catabolic process

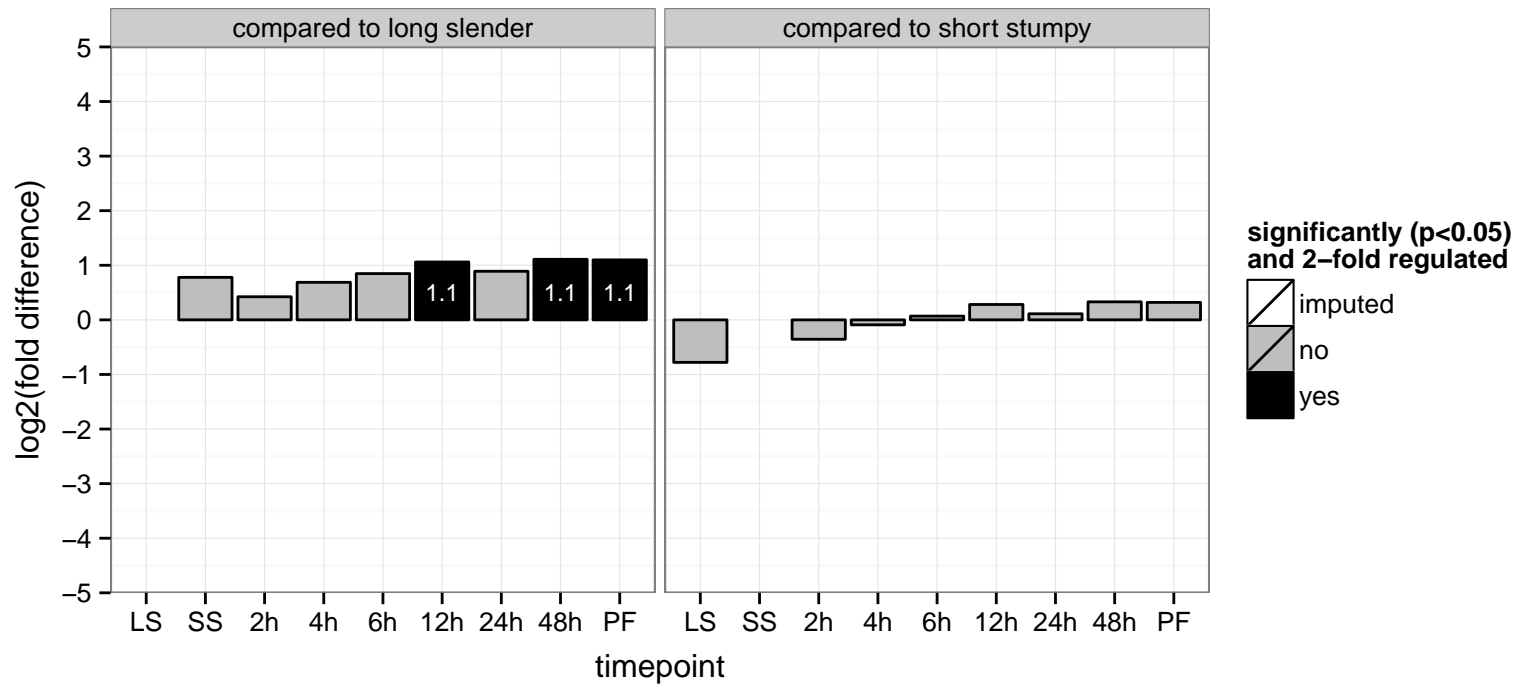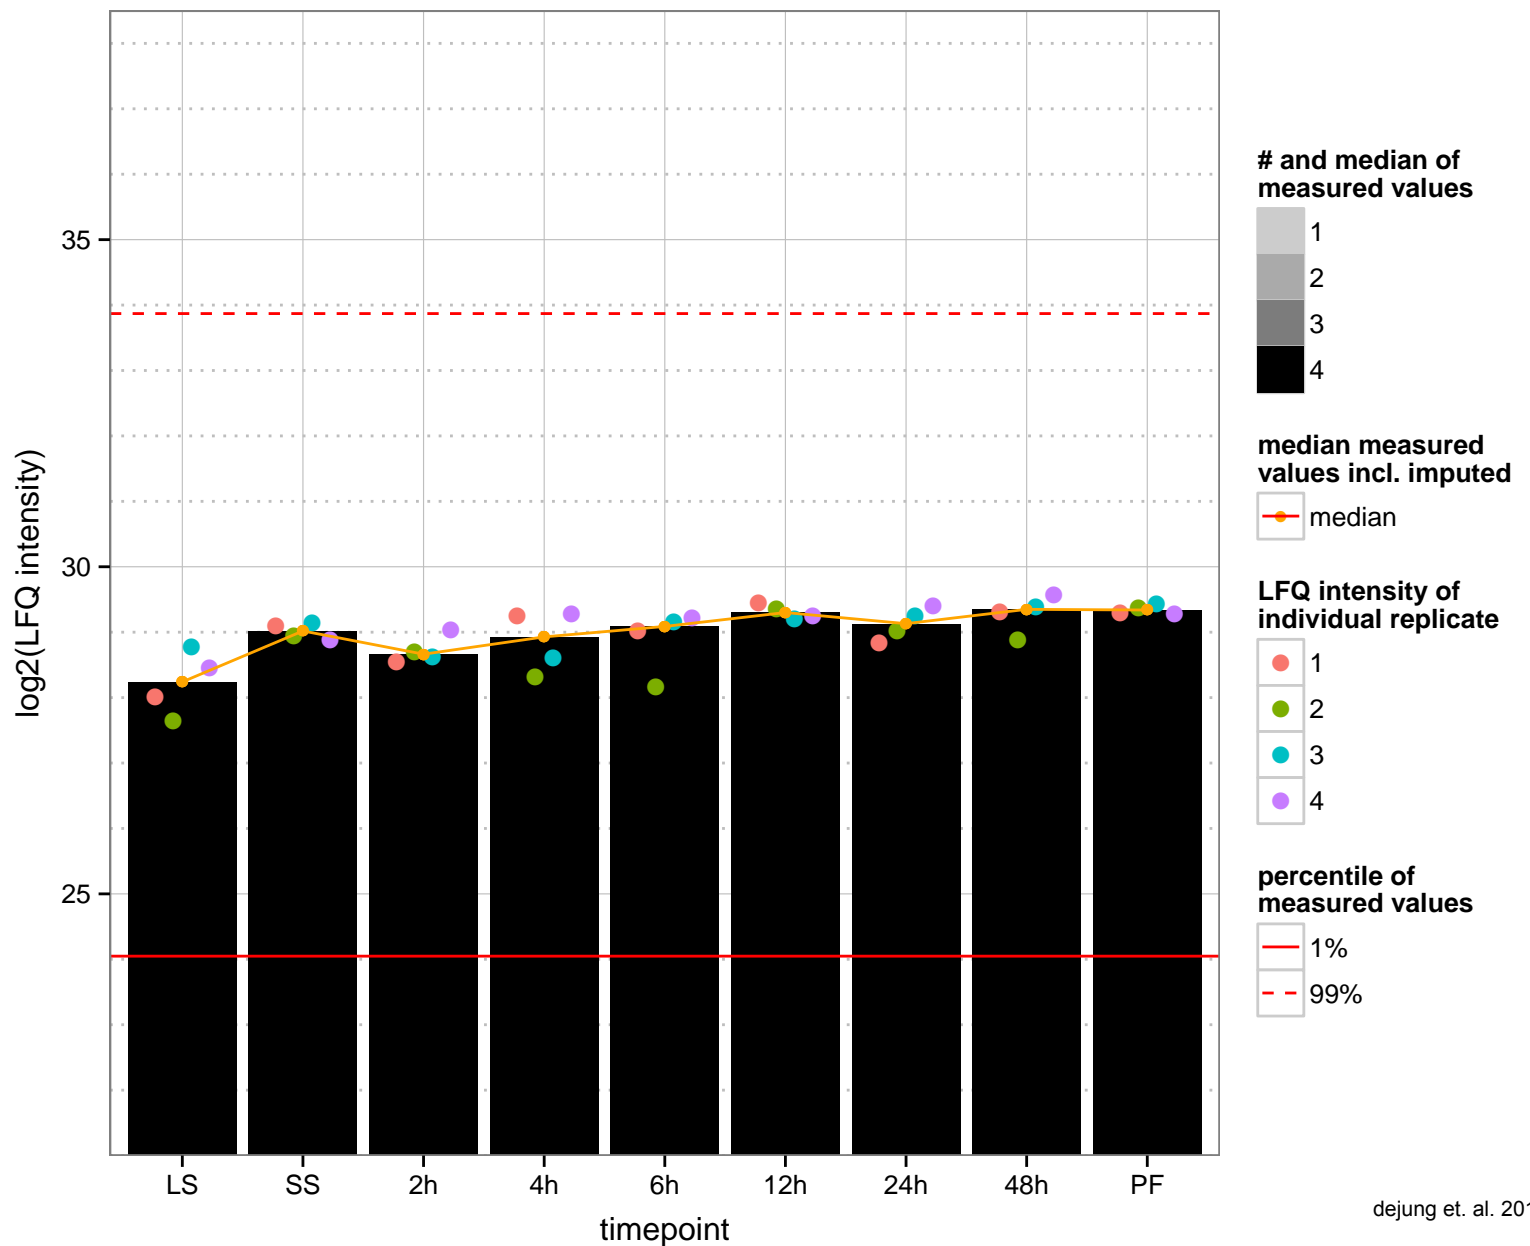



hypothetical protein, conserved  
 Tb927.7.4870;Tb11.v5.0169  
 AGOF: null  
 AGOC: null  
 AGOP: null  
 PGO: null  
 PGOC: null  
 PGOP: null

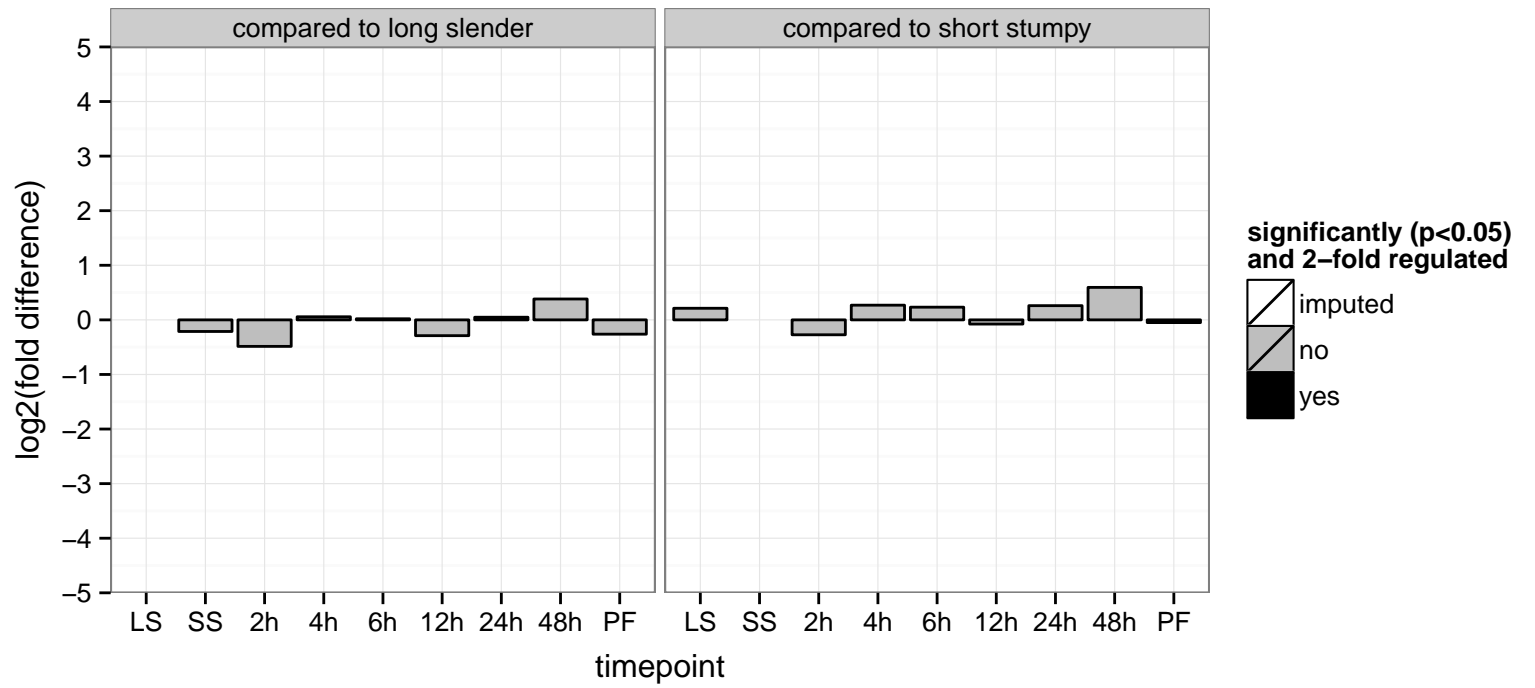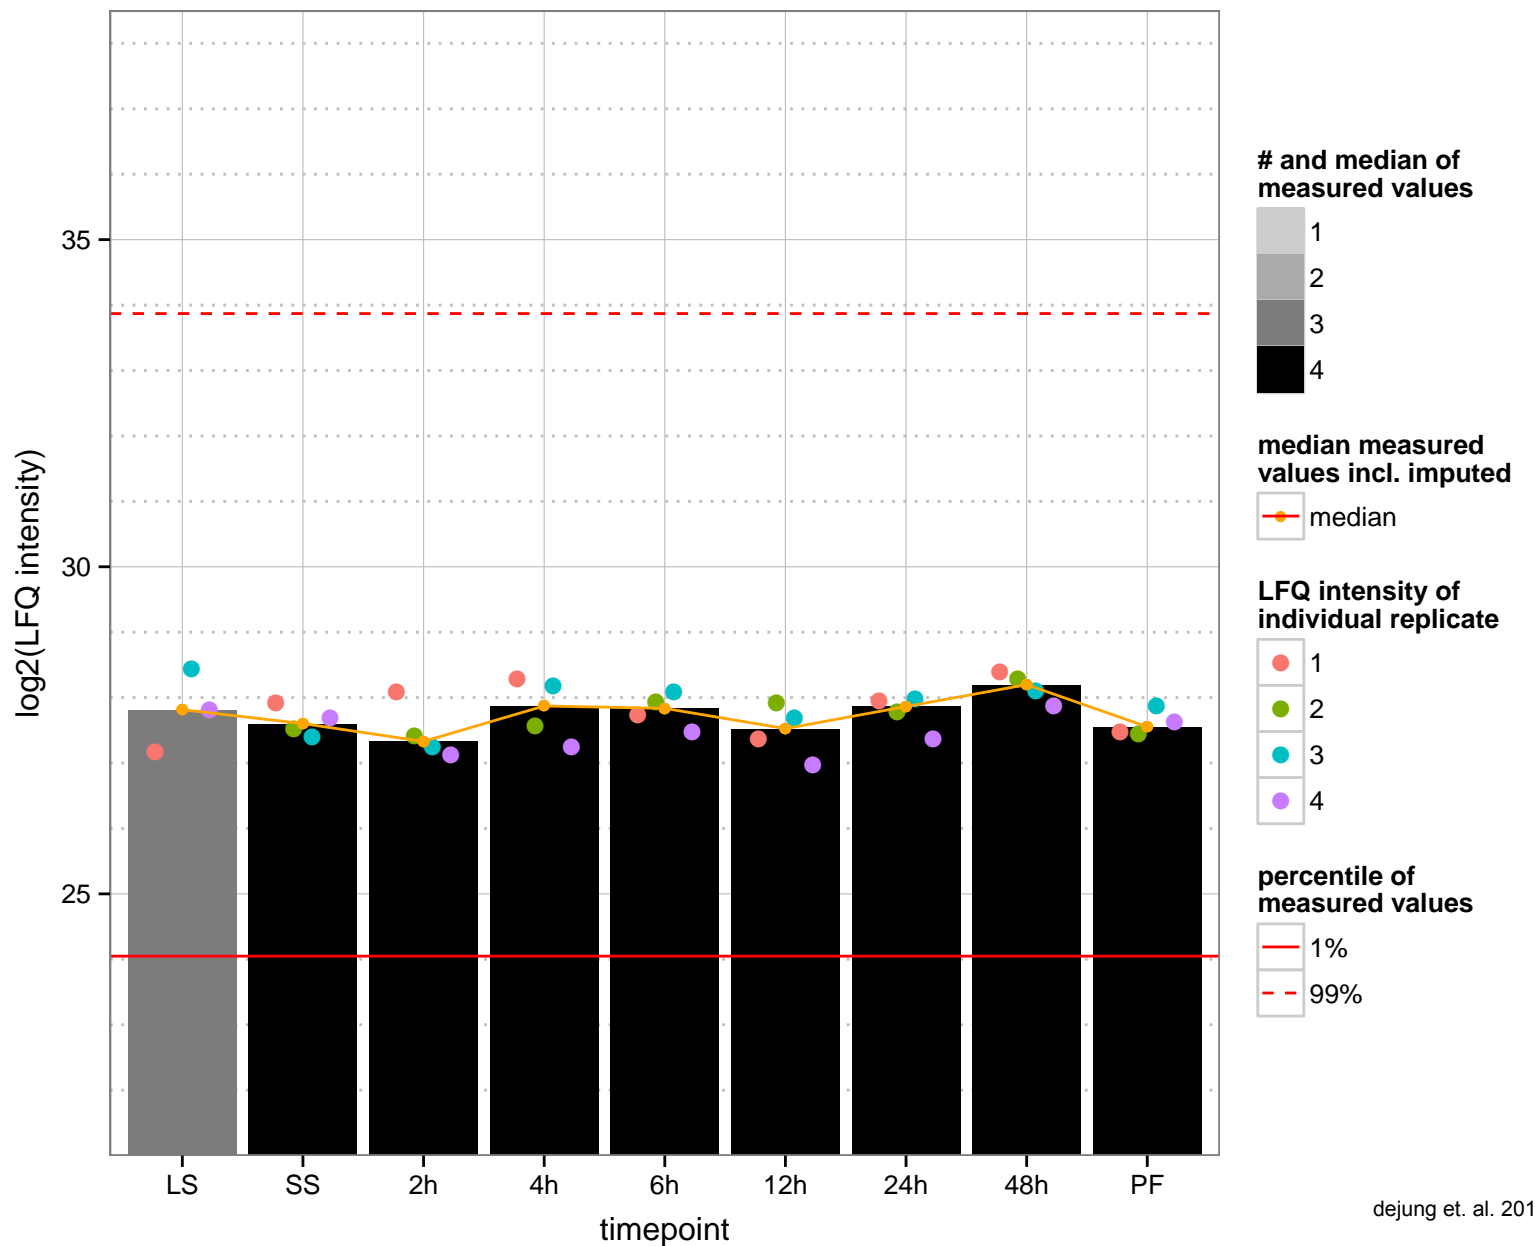

5'-3' exonuclease XRNA, putative, exoribonuclease 1, putative (XRNA)  
 Tb927.7.4900;Tb11.v5.0171  
 AGOF: null, exonuclease activity, nucleic acid binding  
 AGOC: null, intracellular  
 AGOP: null  
 PGOF: exonuclease activity, nucleic acid binding  
 PGO: intracellular  
 PGOP: null

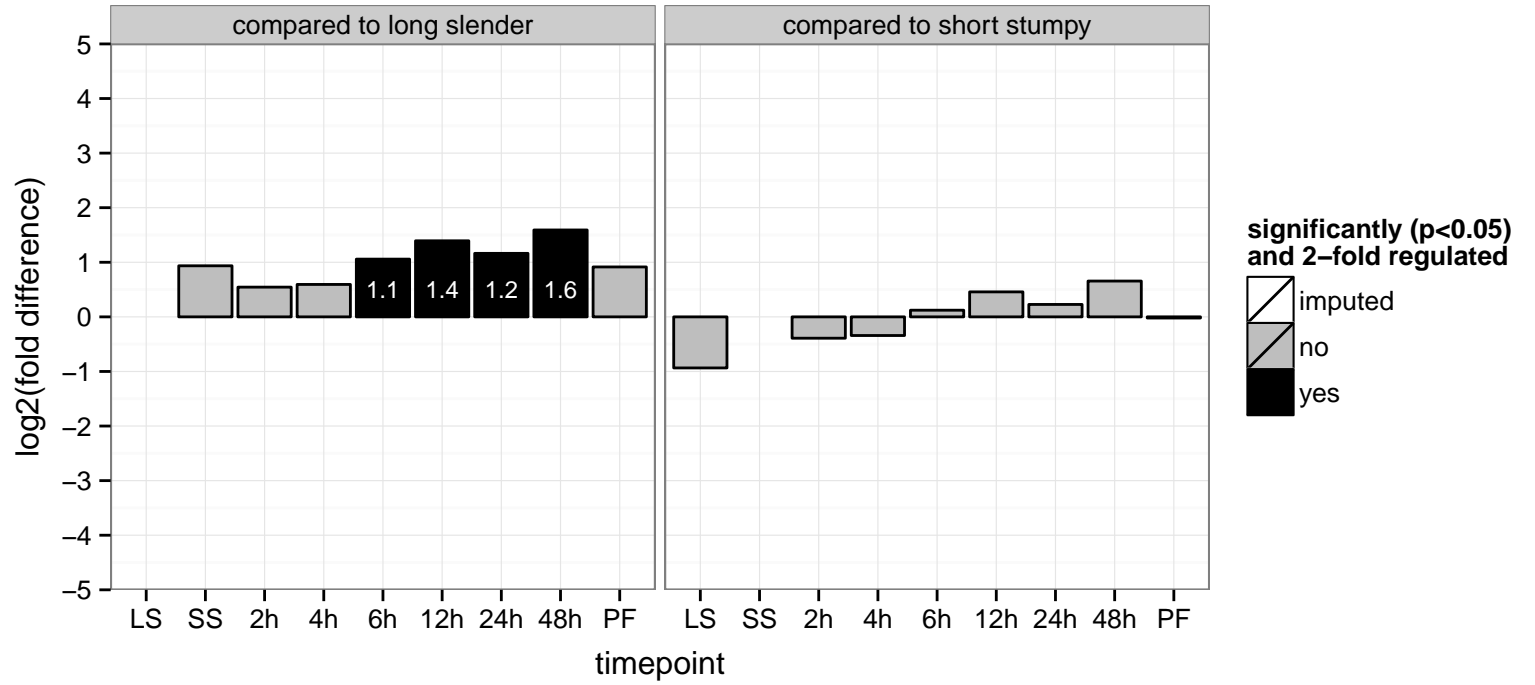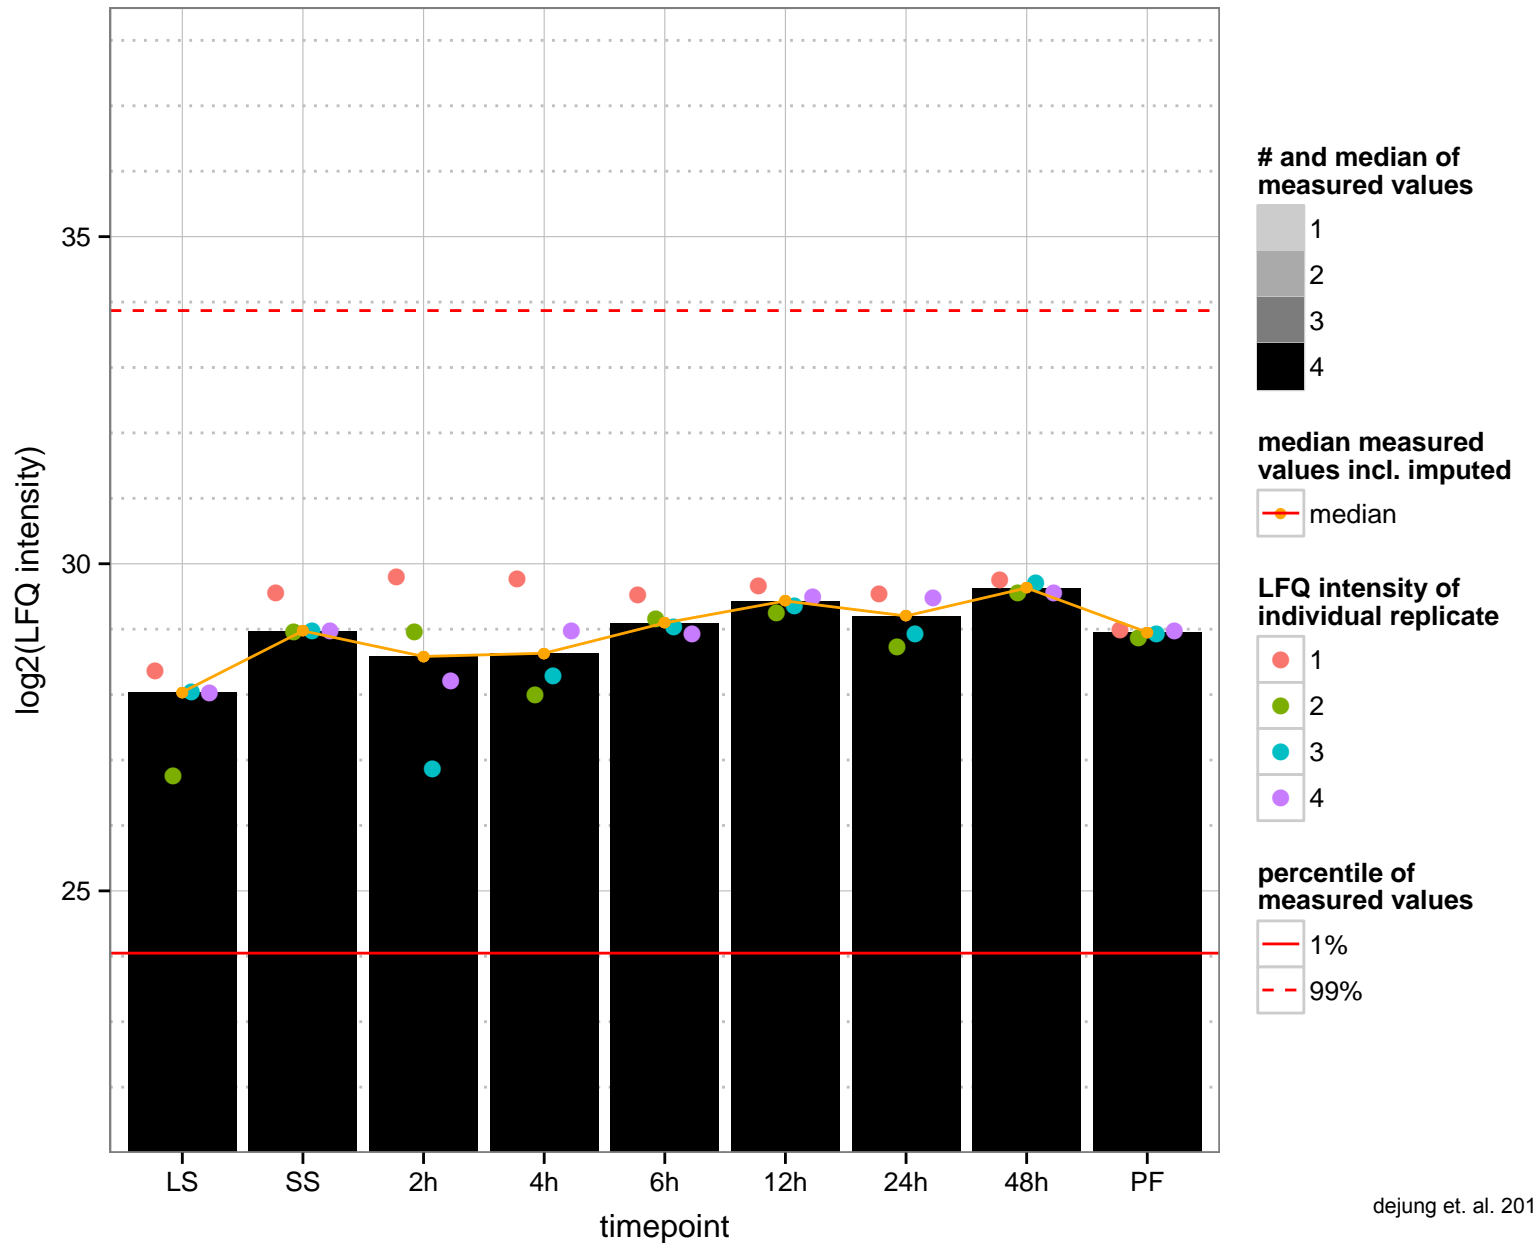

hypothetical protein, conserved  
 Tb927.7.4910;Tb11.v5.0172  
 AGOF: null  
 AGOC: null  
 AGOP: null  
 PGOF: null  
 PGO: null  
 PGOP: null

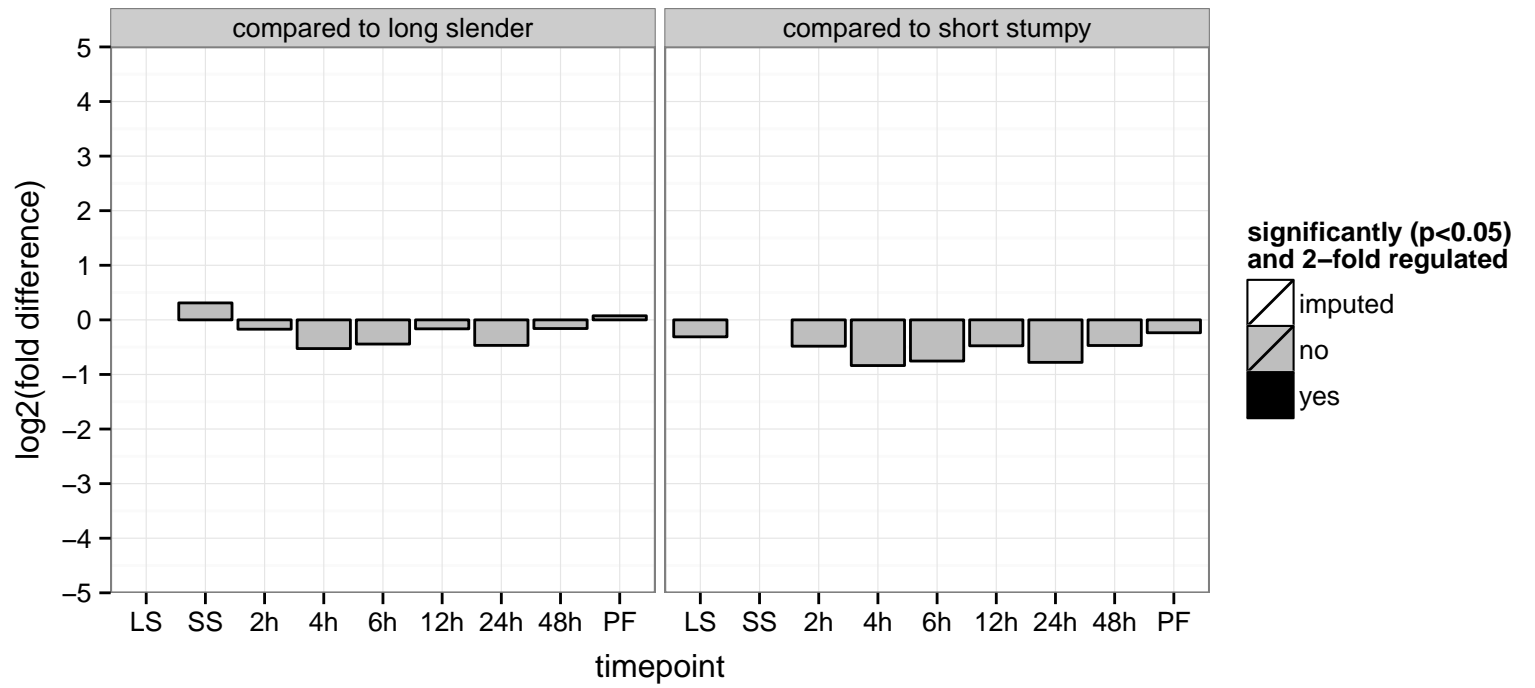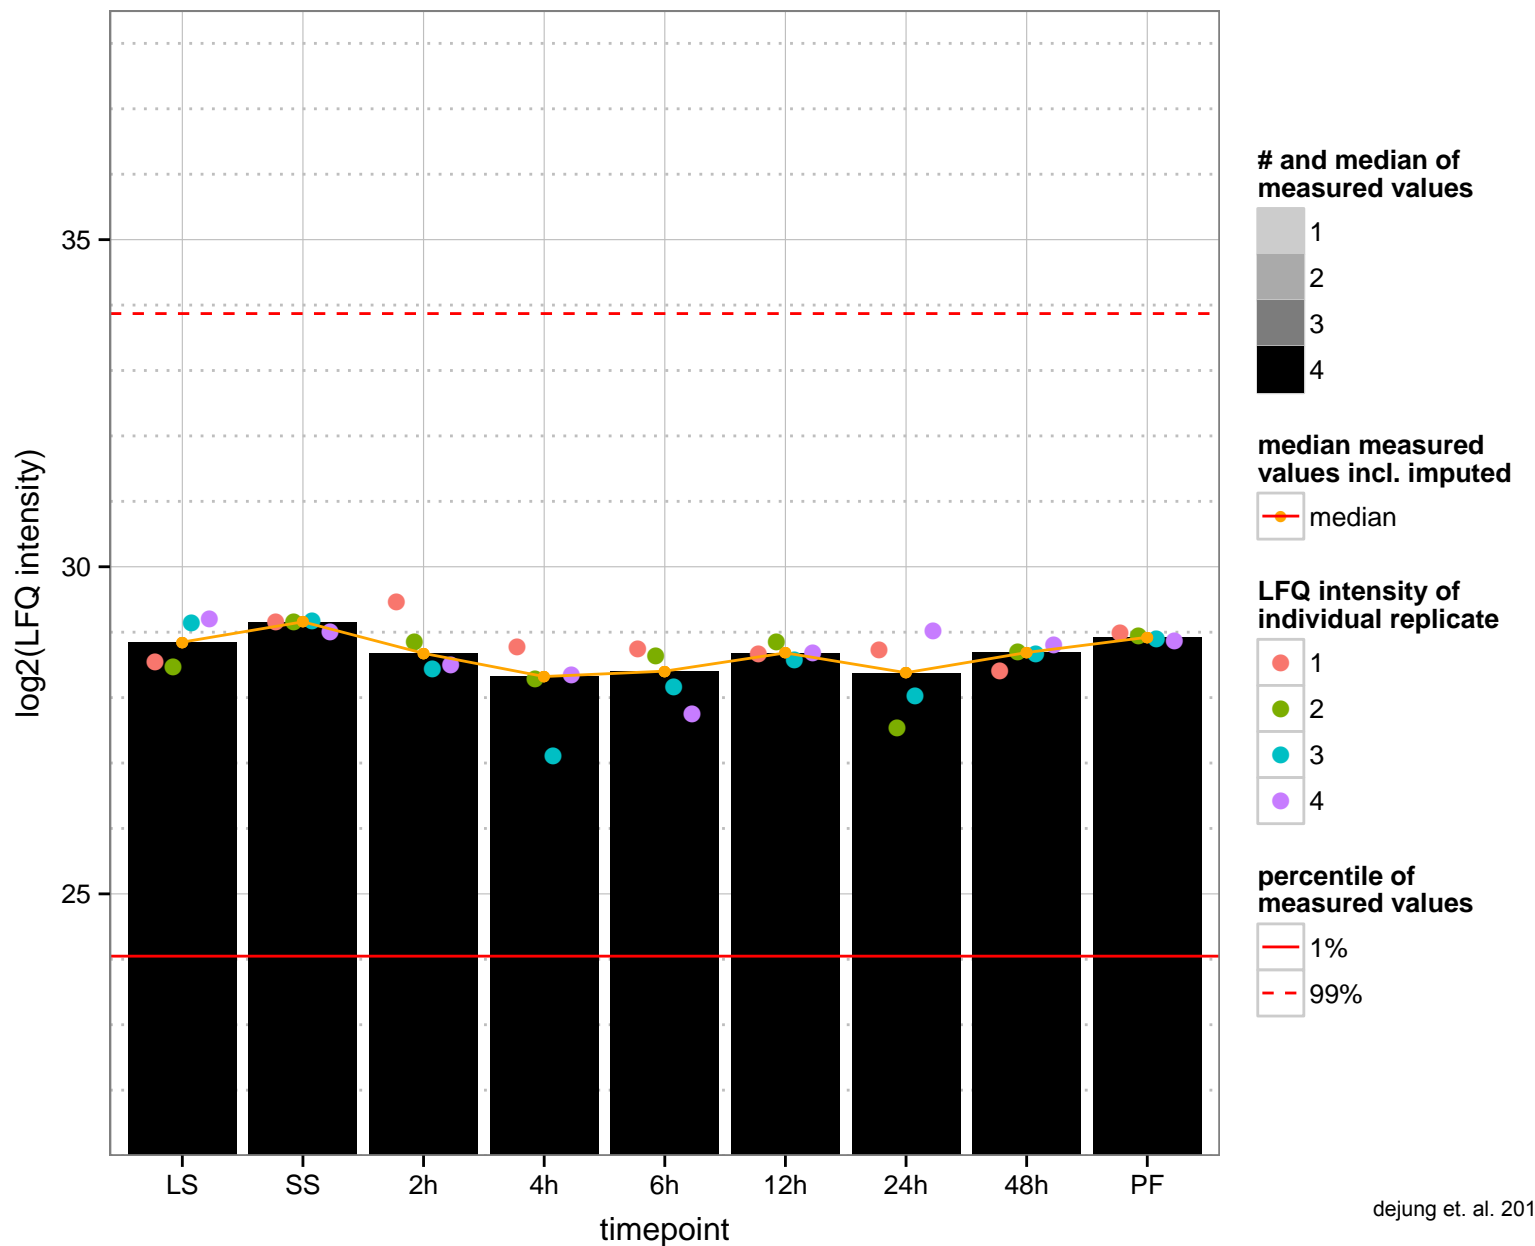

hypothetical protein, conserved  
 Tb927.7.4960;Tb11.v5.0177  
 AGOF: null  
 AGOC: null  
 AGOP: null  
 PGOF: null  
 PGO C: null  
 PGOP: null

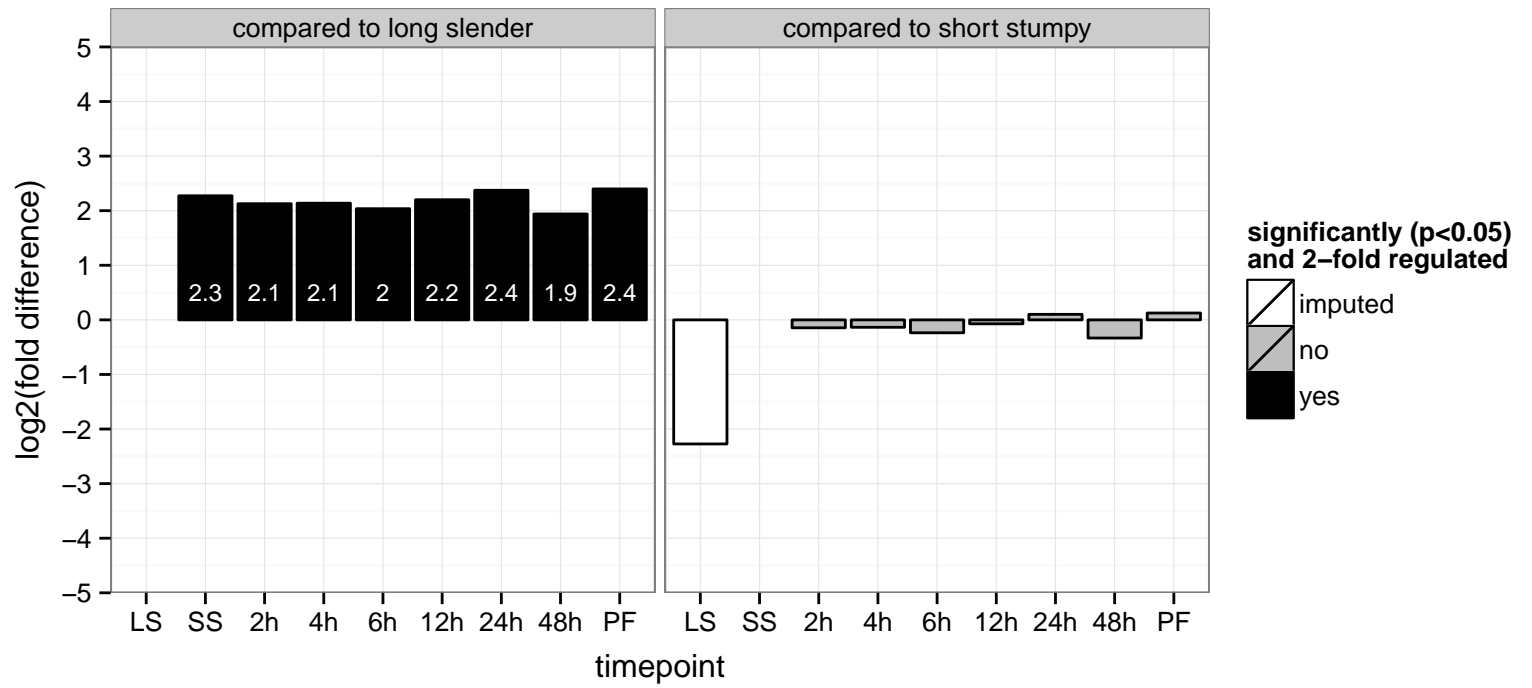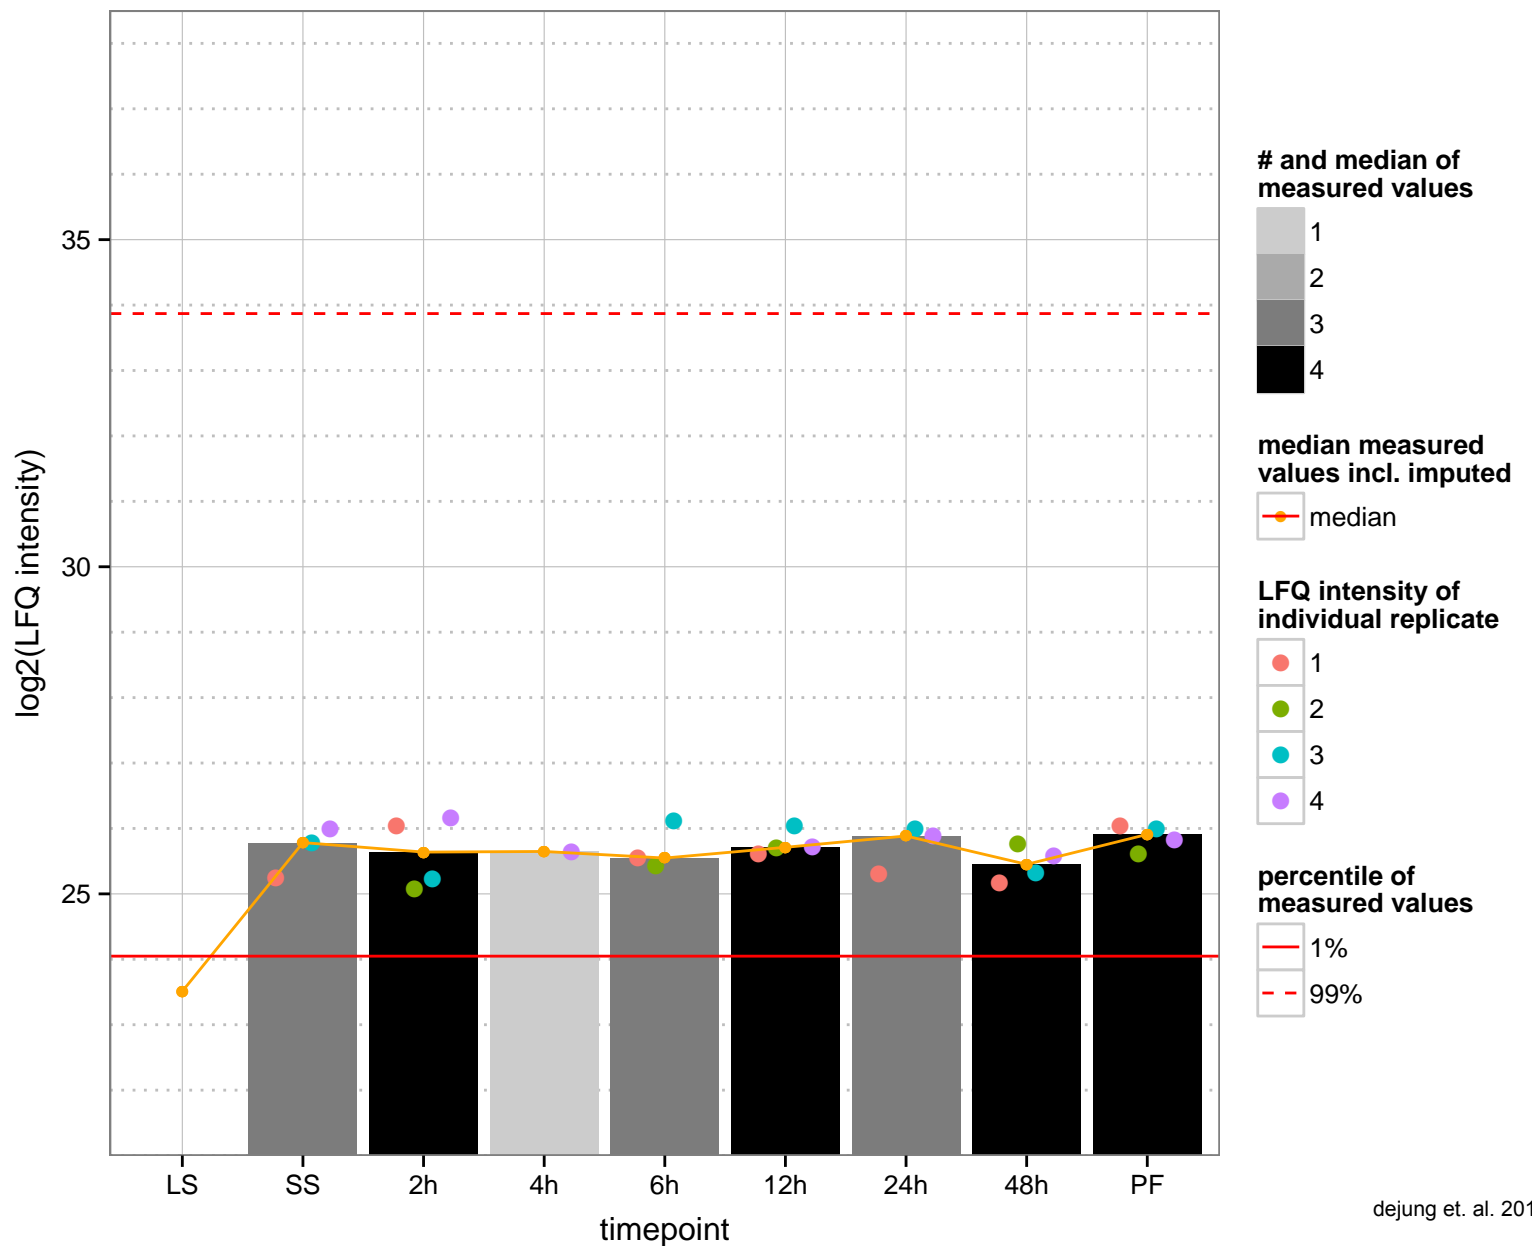

hypothetical protein, conserved, zinc finger protein family member, putative (ZC3H23)  
 Tb927.7.4980;Tb11.v5.0179  
 AGOF: null, RNA binding, zinc ion binding  
 AGOC: null  
 AGOP: null  
 PGOF: nucleic acid binding, zinc ion binding  
 PGOC: null  
 PGOP: null

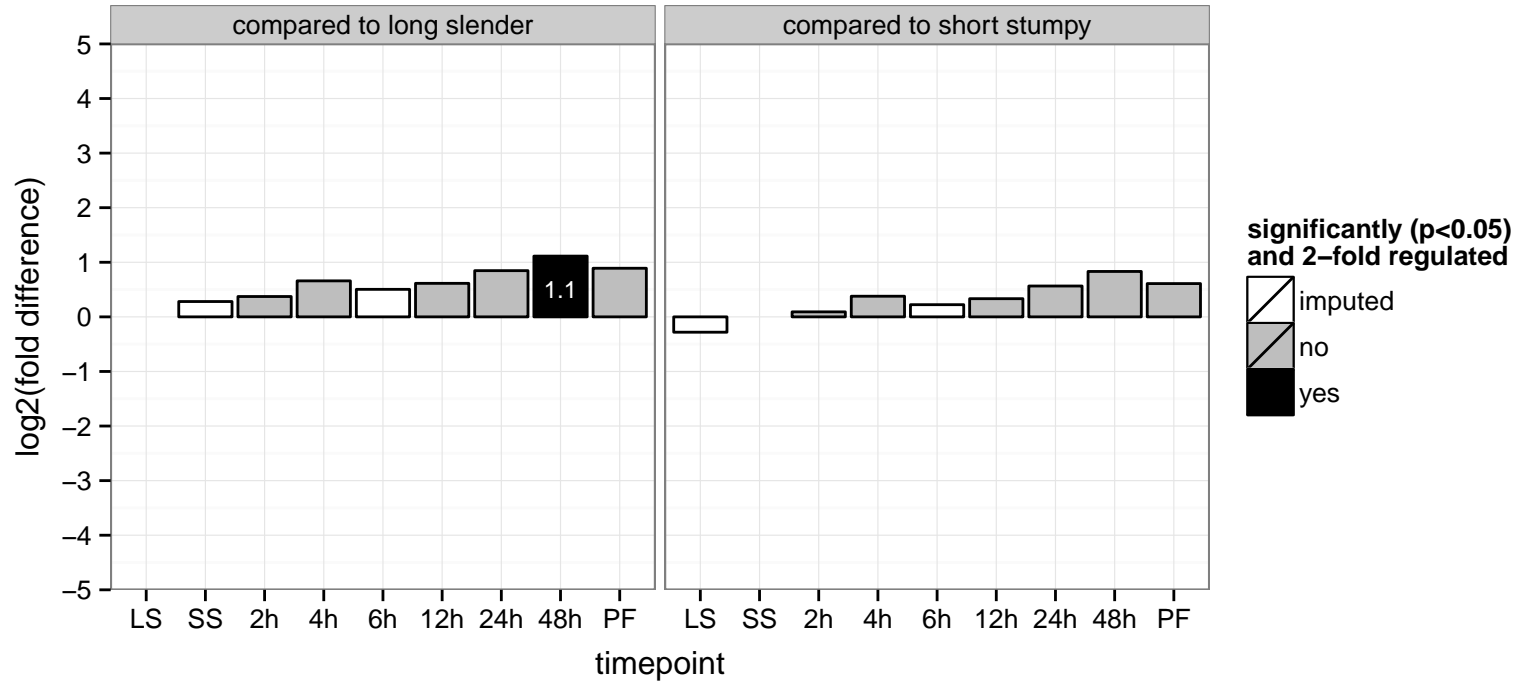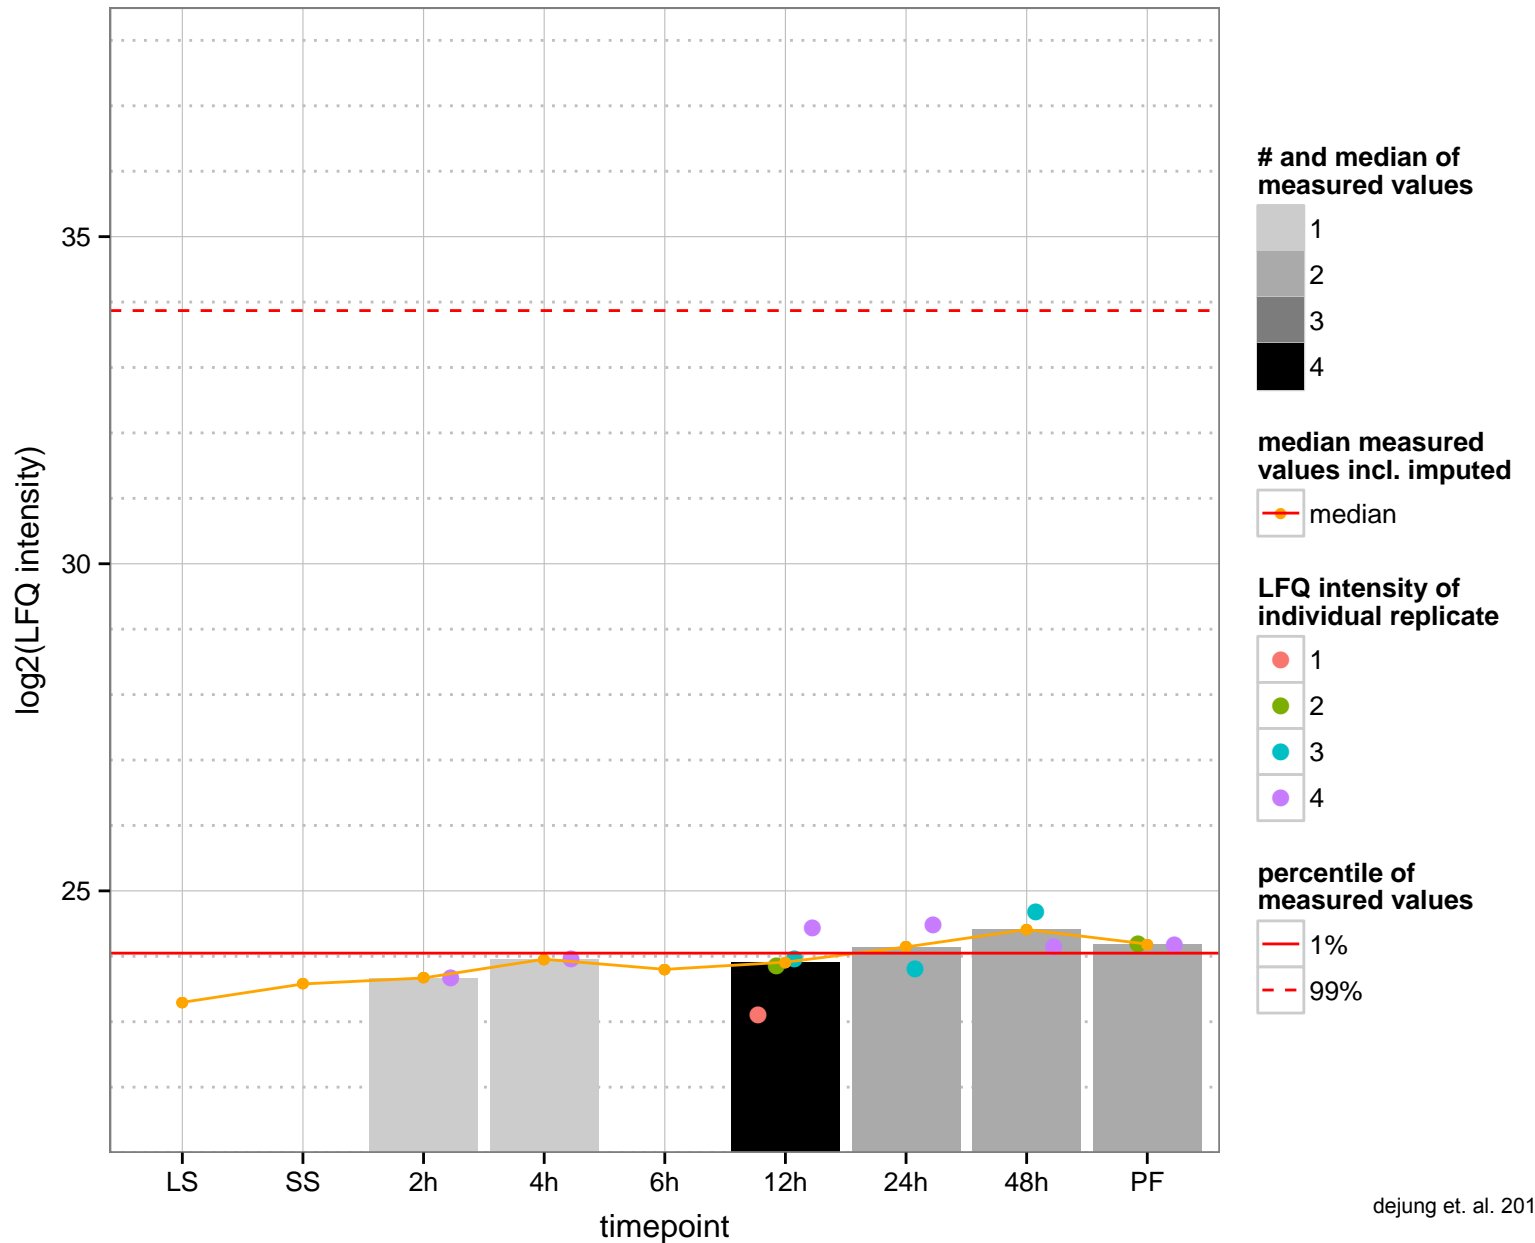

hypothetical protein, conserved  
 Tb927.7.4990;Tb11.v5.0180  
 AGOF: null  
 AGOC: null  
 AGOP: null  
 PGO: null  
 PGOC: null  
 PGOP: null

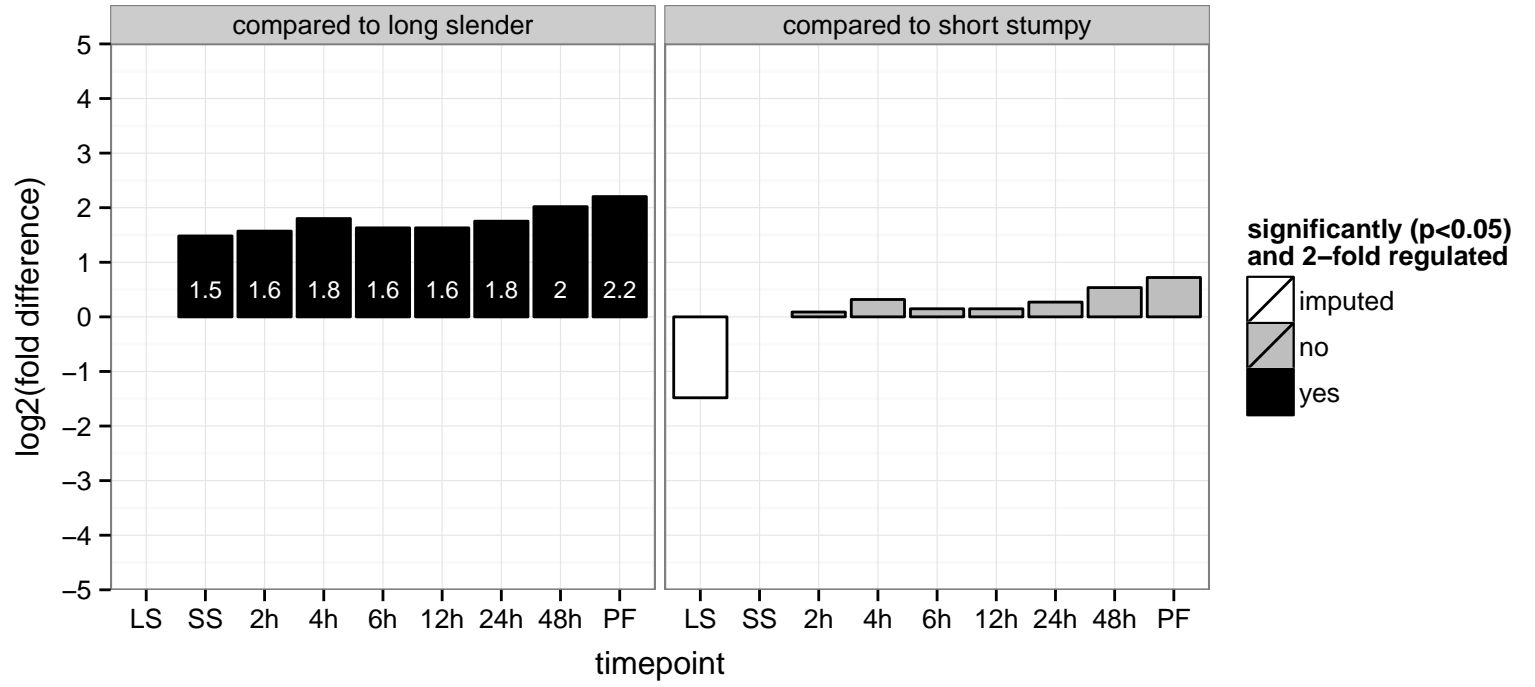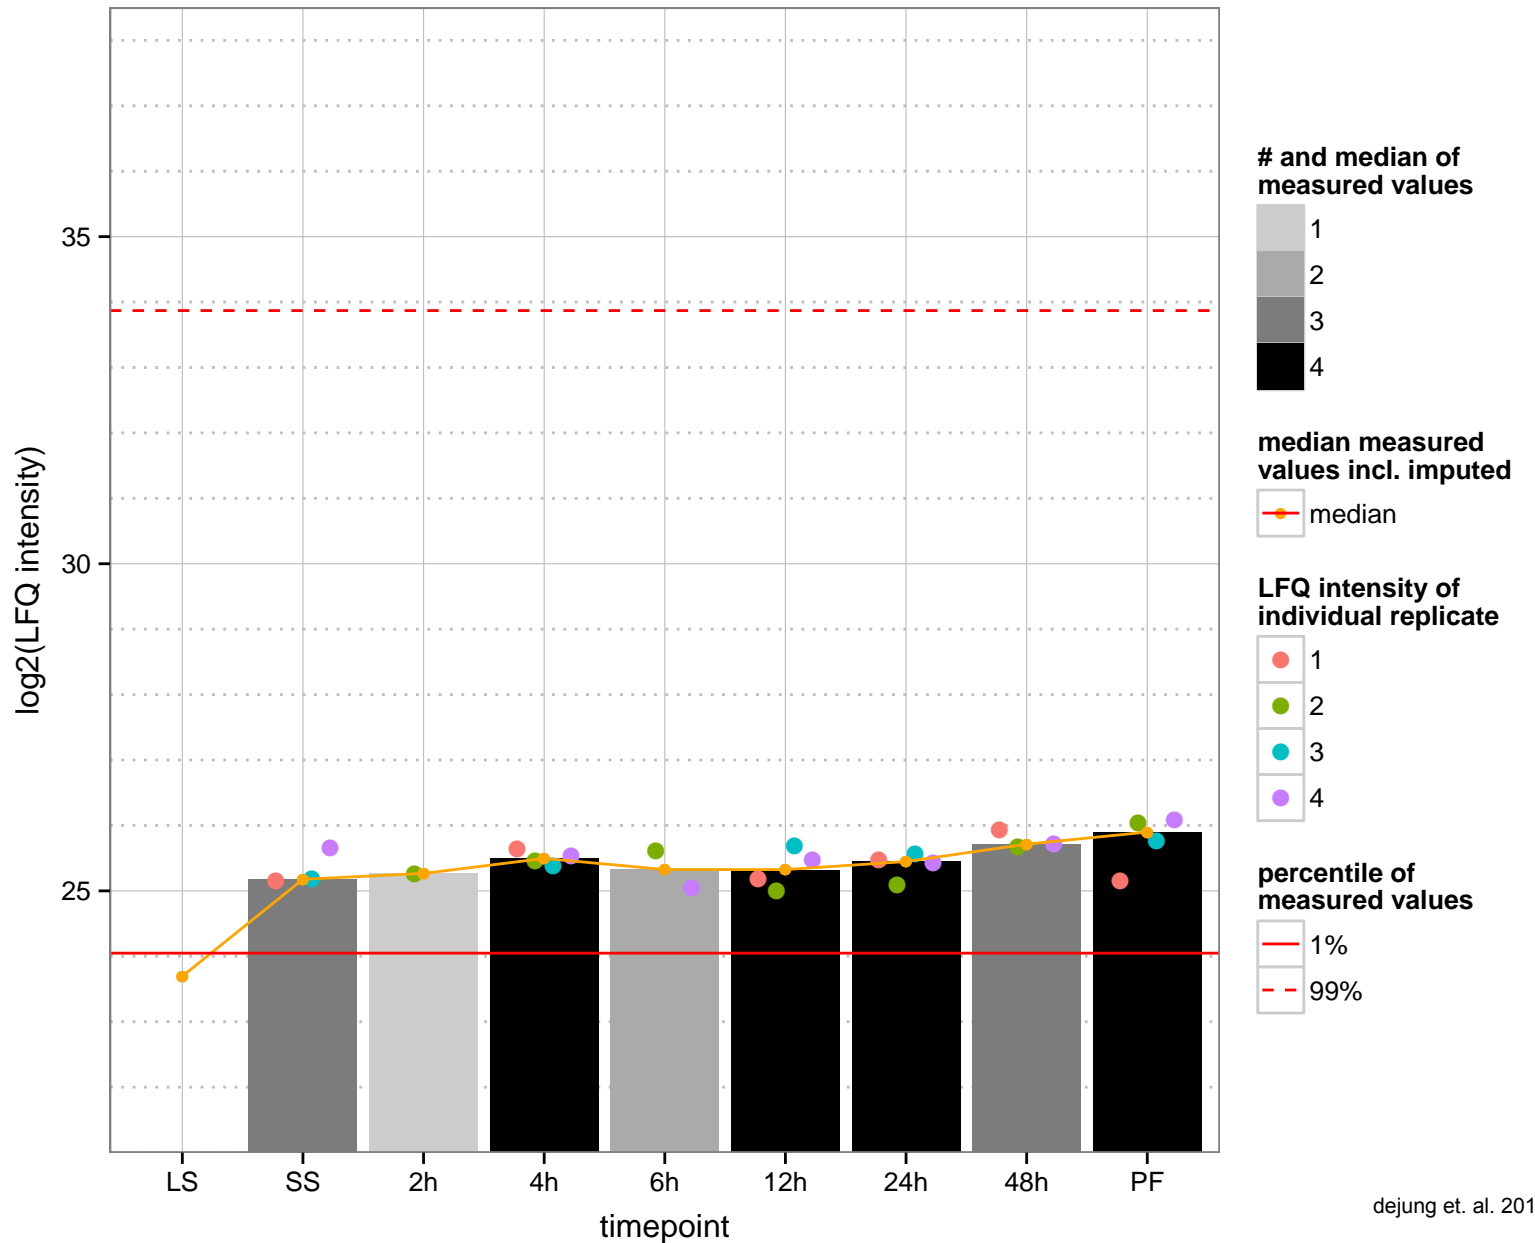

hypothetical protein, conserved  
 Tb927.7.5030;Tb11.v5.0183  
 AGOF: null  
 AGOC: null  
 AGOP: null  
 PGO: null  
 PGOC: null  
 PGOP: null

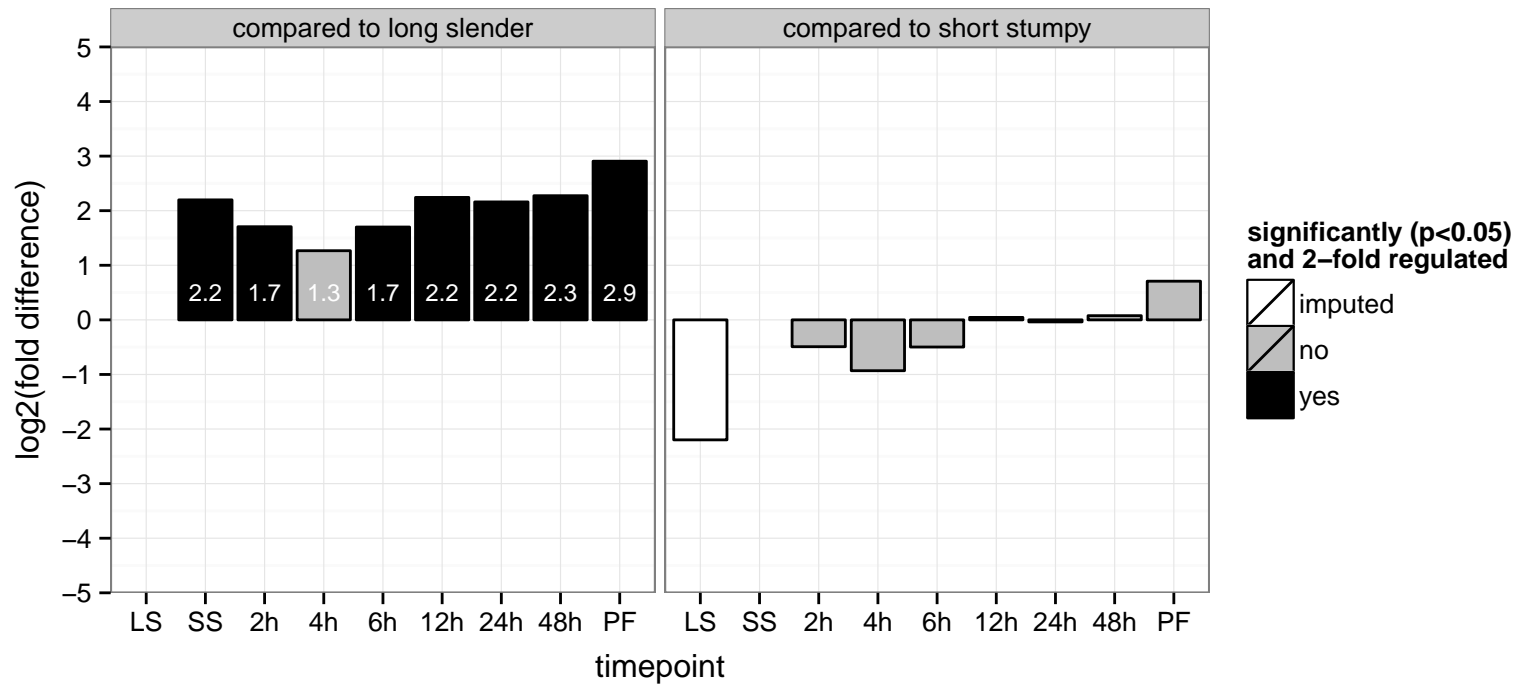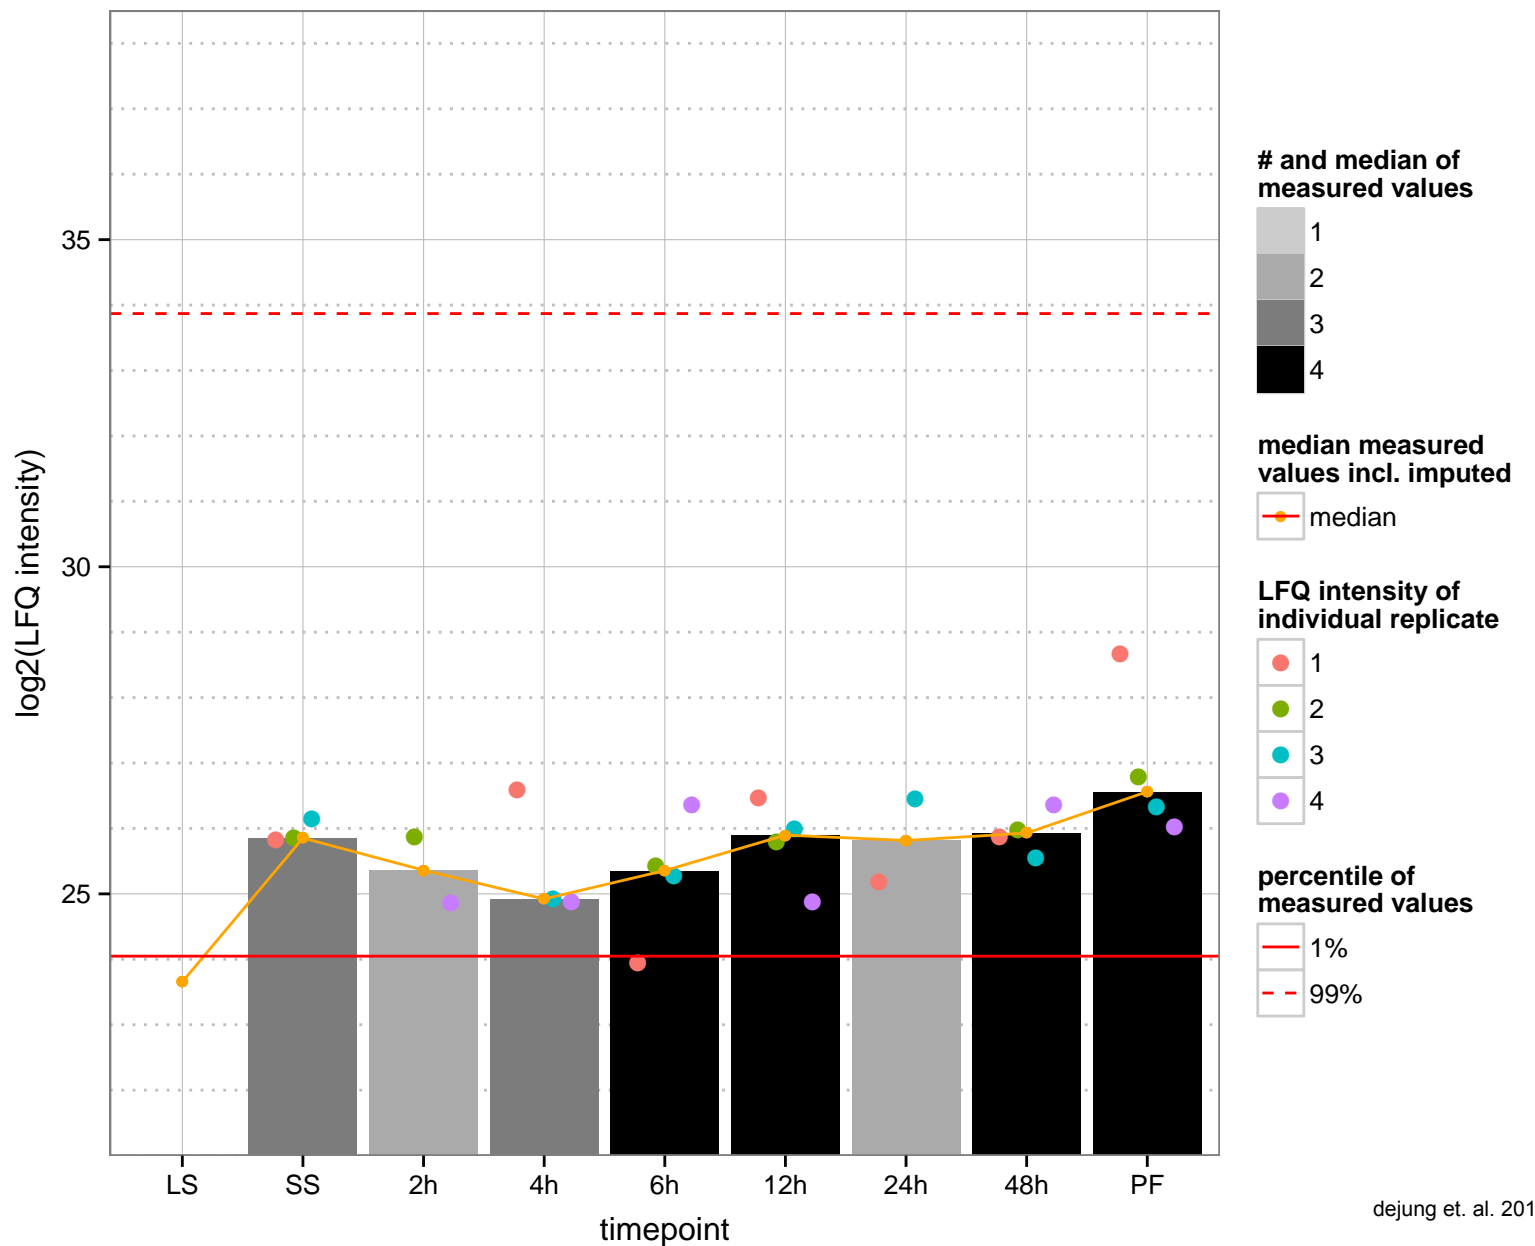

hypothetical protein, conserved  
 Tb927.7.5050;Tb11.v5.0185  
 AGOF: null  
 AGOC: null  
 AGOP: null  
 PGO: null  
 PGOC: null  
 PGOP: null

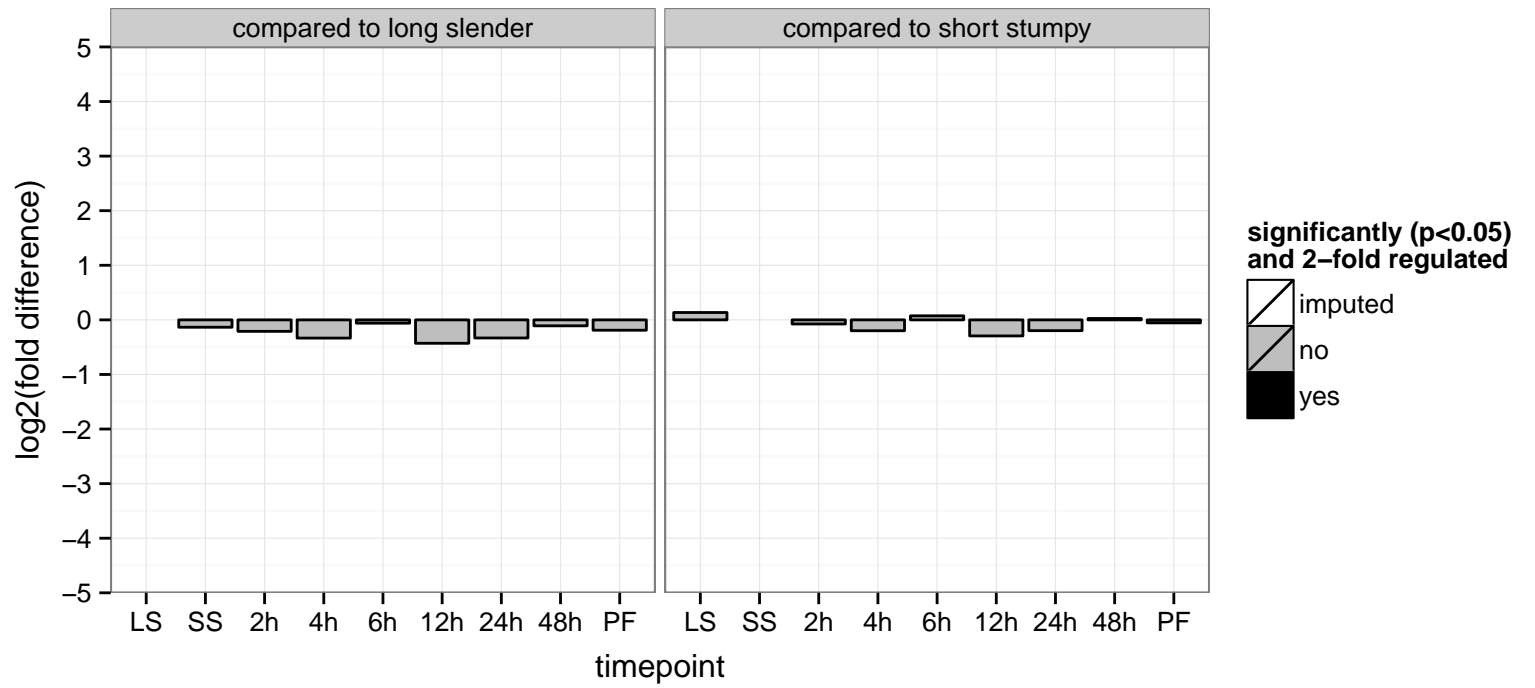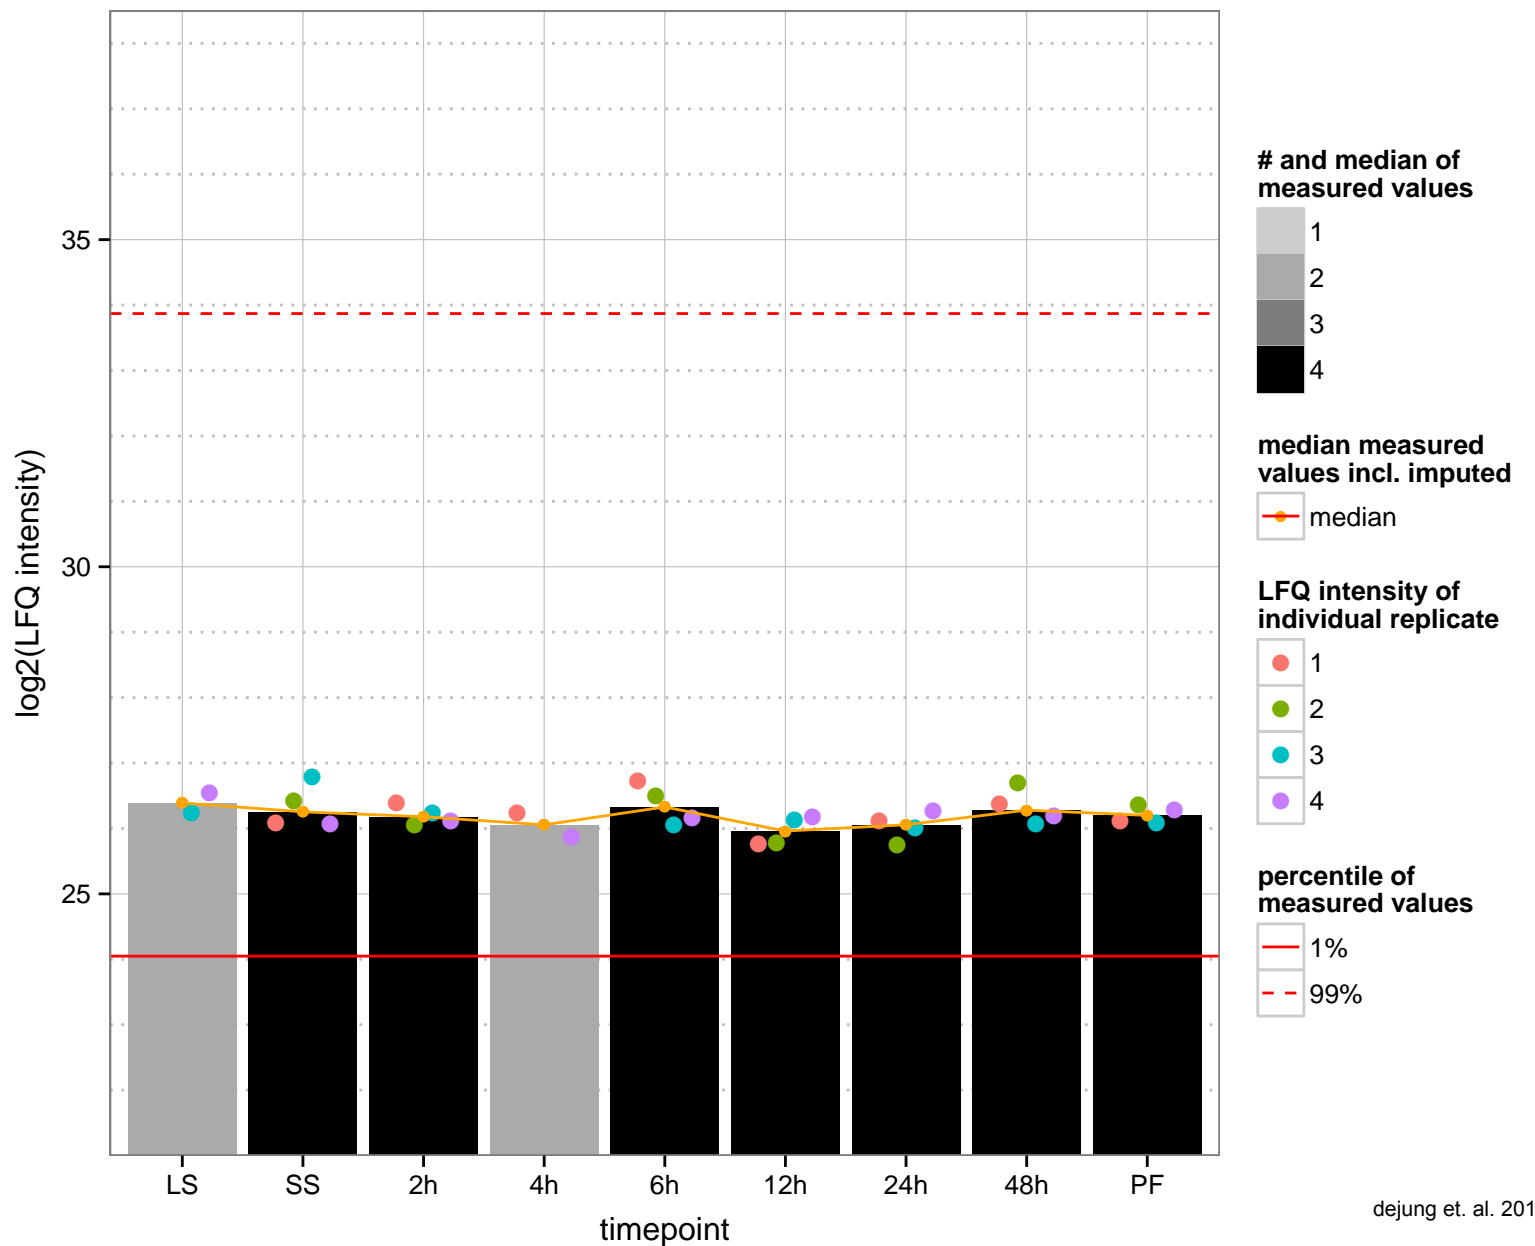



protein kinase, putative, (OTHER) NEK family, HsNEK1-like

Tb927.10.5950;Tb11.v5.0190

AGOF: null, ATP binding, protein serine/threonine kinase activity, protein tyrosine kinase activity

AGOC: null

AGOP: null, modulation of development of symbiont involved in interaction with host, protein phosphorylation, quorum sensing

PGOF: ATP binding, phospholipid binding, protein binding, protein kinase activity, transferase activity, transferring phosphorus

PGOC: null

PGOP: protein phosphorylation

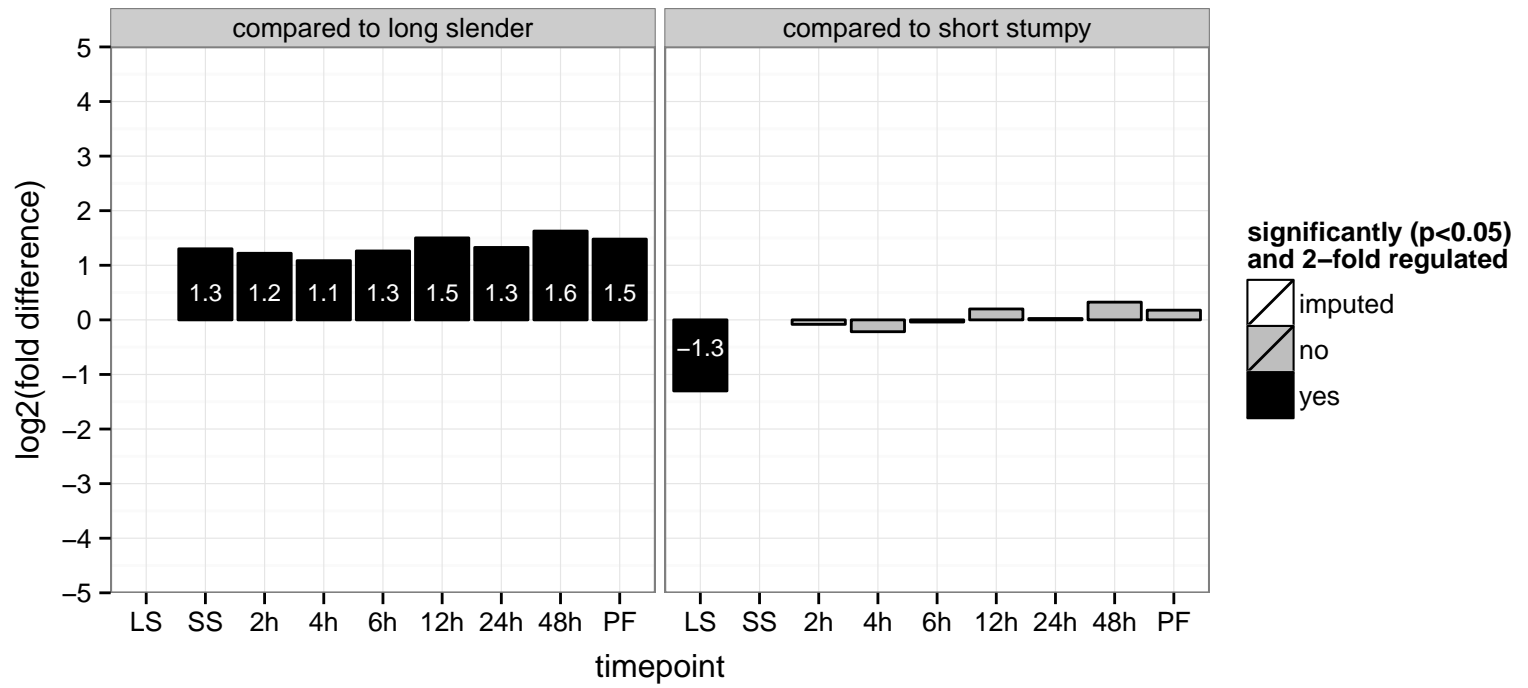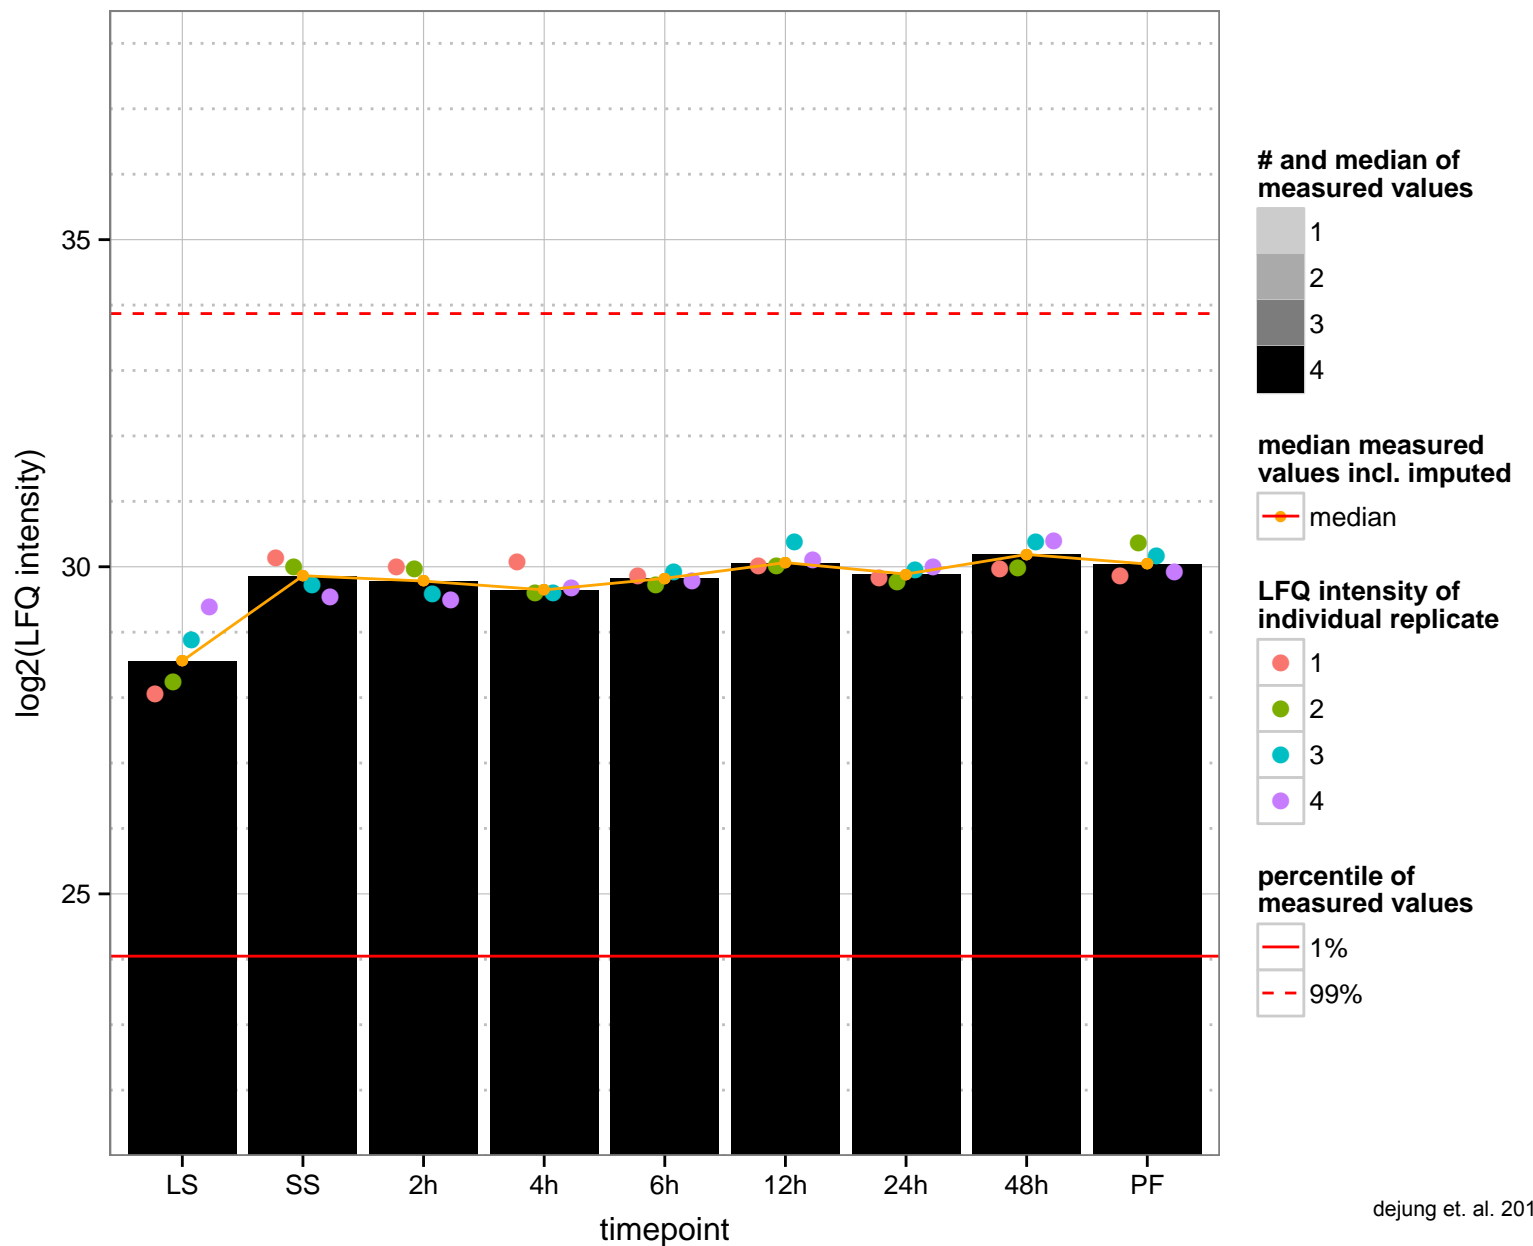

hypothetical protein, conserved, proteasome alpha 1 subunit, putative, 20S proteasome subunit alpha-6, (putative) (TbPSA6)  
 Tb11.v5.0196;Tb927.10.6030  
 AGOF: null, endopeptidase activity, threonine-type endopeptidase activity  
 AGOC: null, mitochondrion, proteasome core complex  
 AGOP: null, ubiquitin-dependent protein catabolic process  
 PGOF: endopeptidase activity, threonine-type endopeptidase activity  
 PGO: proteasome core complex, proteasome core complex, alpha-subunit complex  
 PGO: proteolysis involved in cellular protein catabolic process, ubiquitin-dependent protein catabolic process

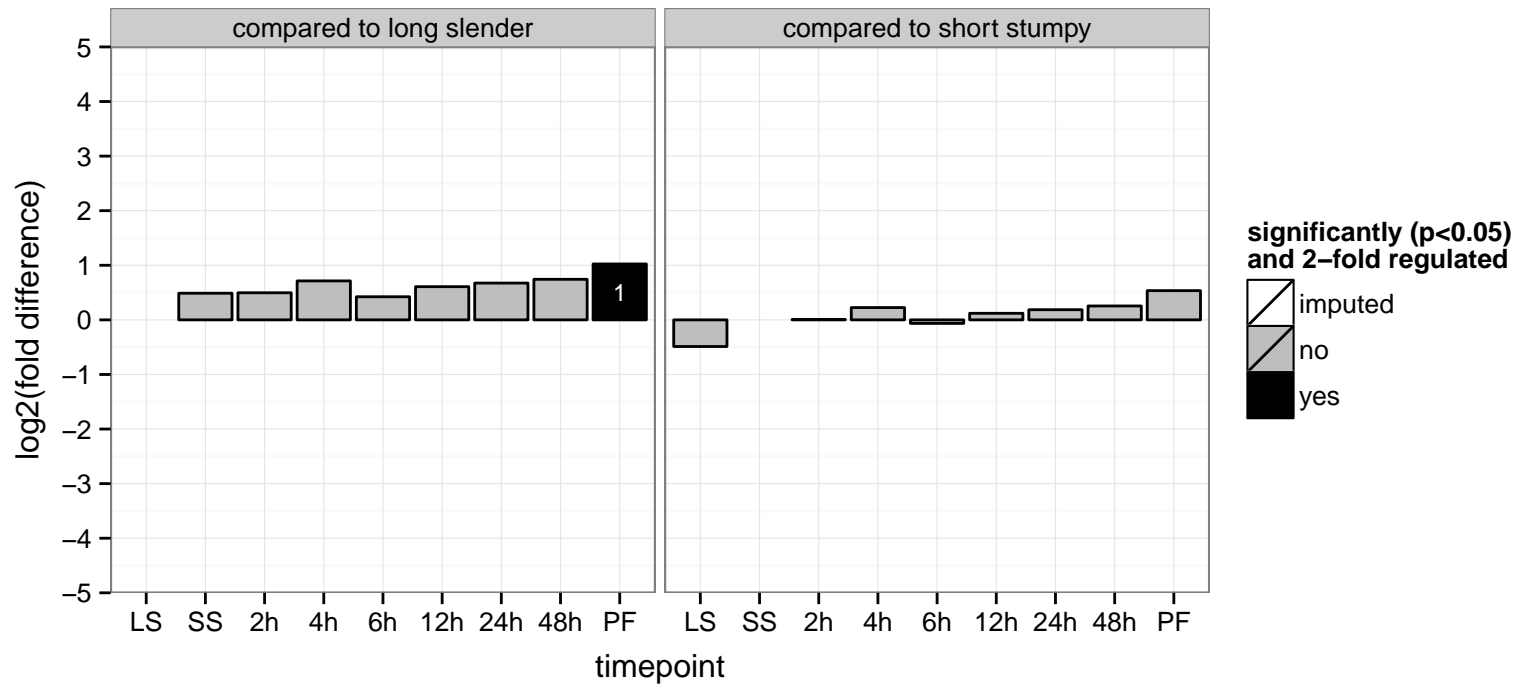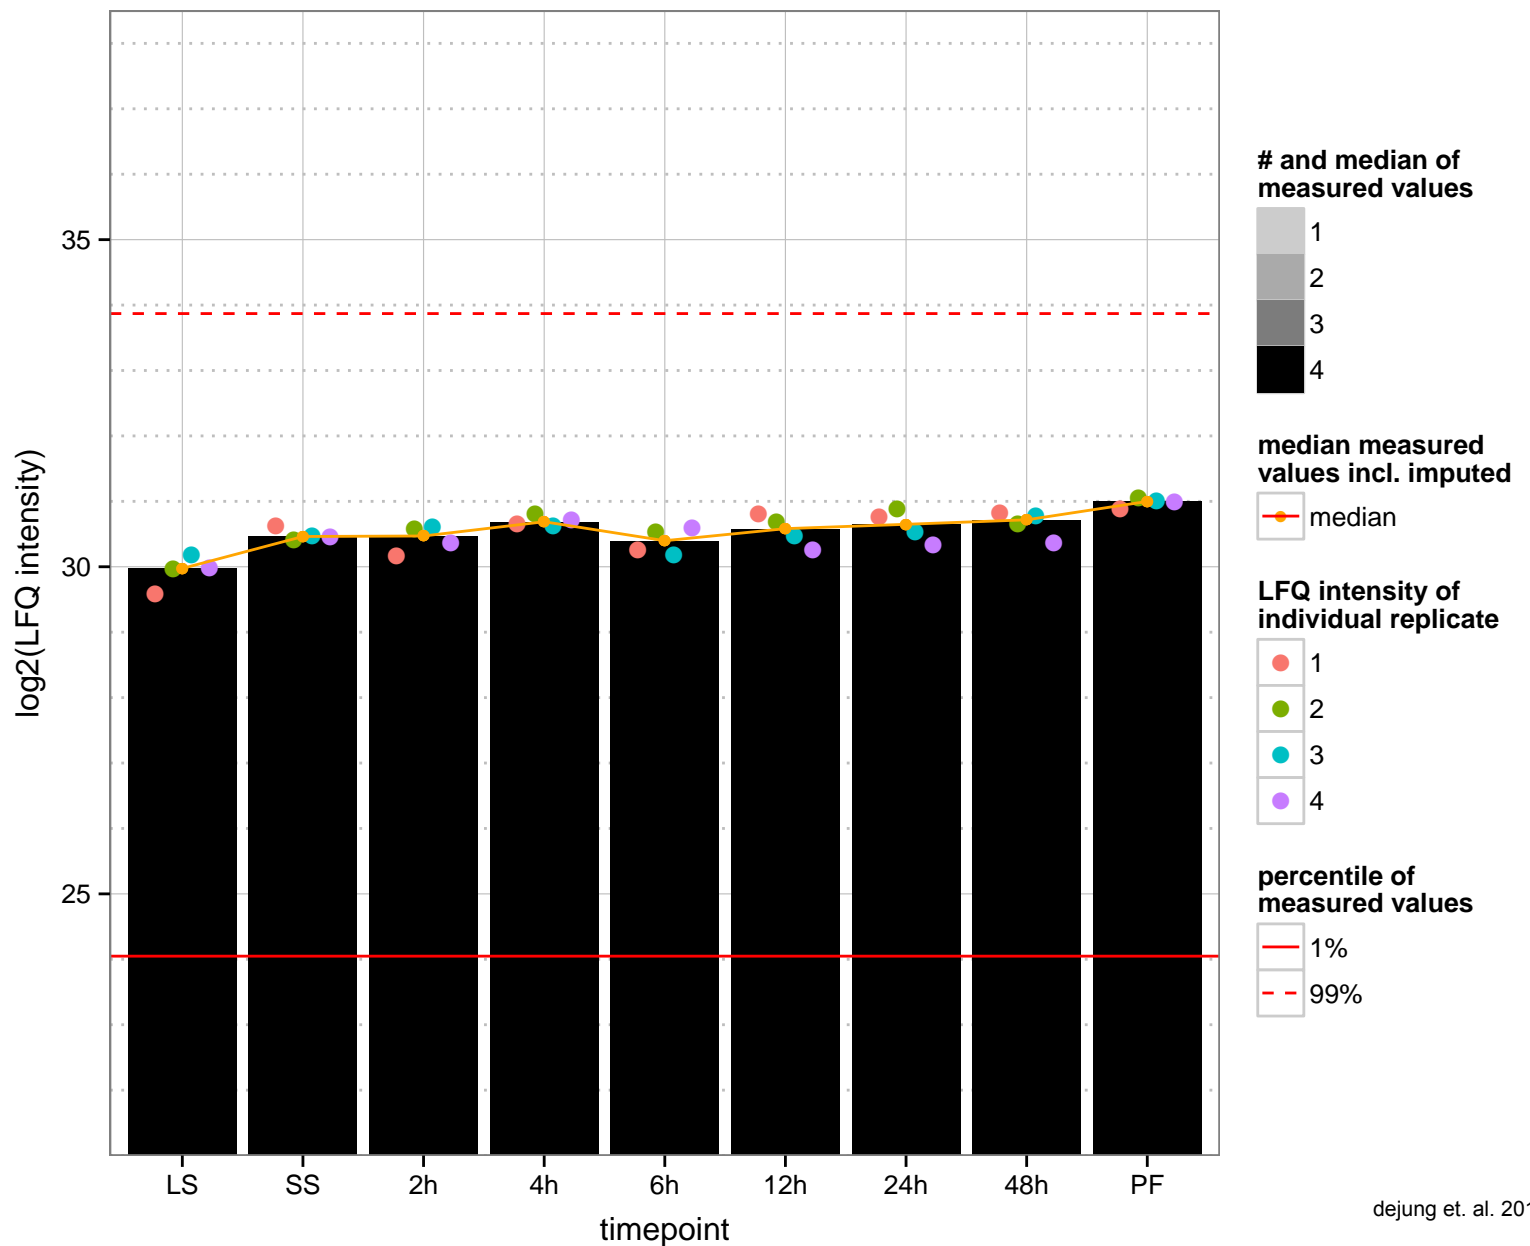

proteasome beta 5 subunit, putative, proteasome beta 5 subunit (PRCE)  
 Tb927.10.6080;Tb11.v5.0200  
 AGOF: null, endopeptidase activity, threonine-type endopeptidase activity  
 AGOC: null, proteasome core complex, proteasome core complex, beta-subunit complex  
 AGOP: null, ubiquitin-dependent protein catabolic process  
 PGO: threonine-type endopeptidase activity  
 PGOC: proteasome core complex  
 PGOP: proteolysis involved in cellular protein catabolic process

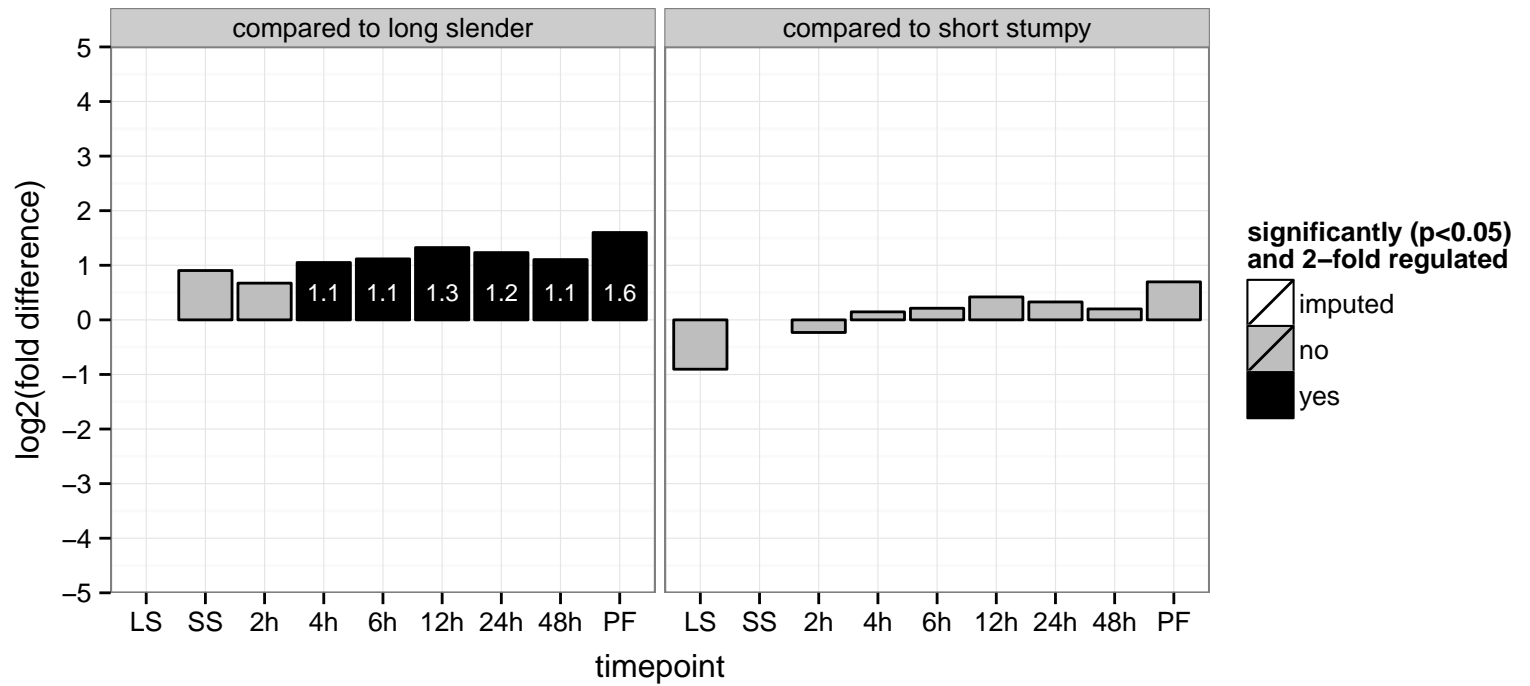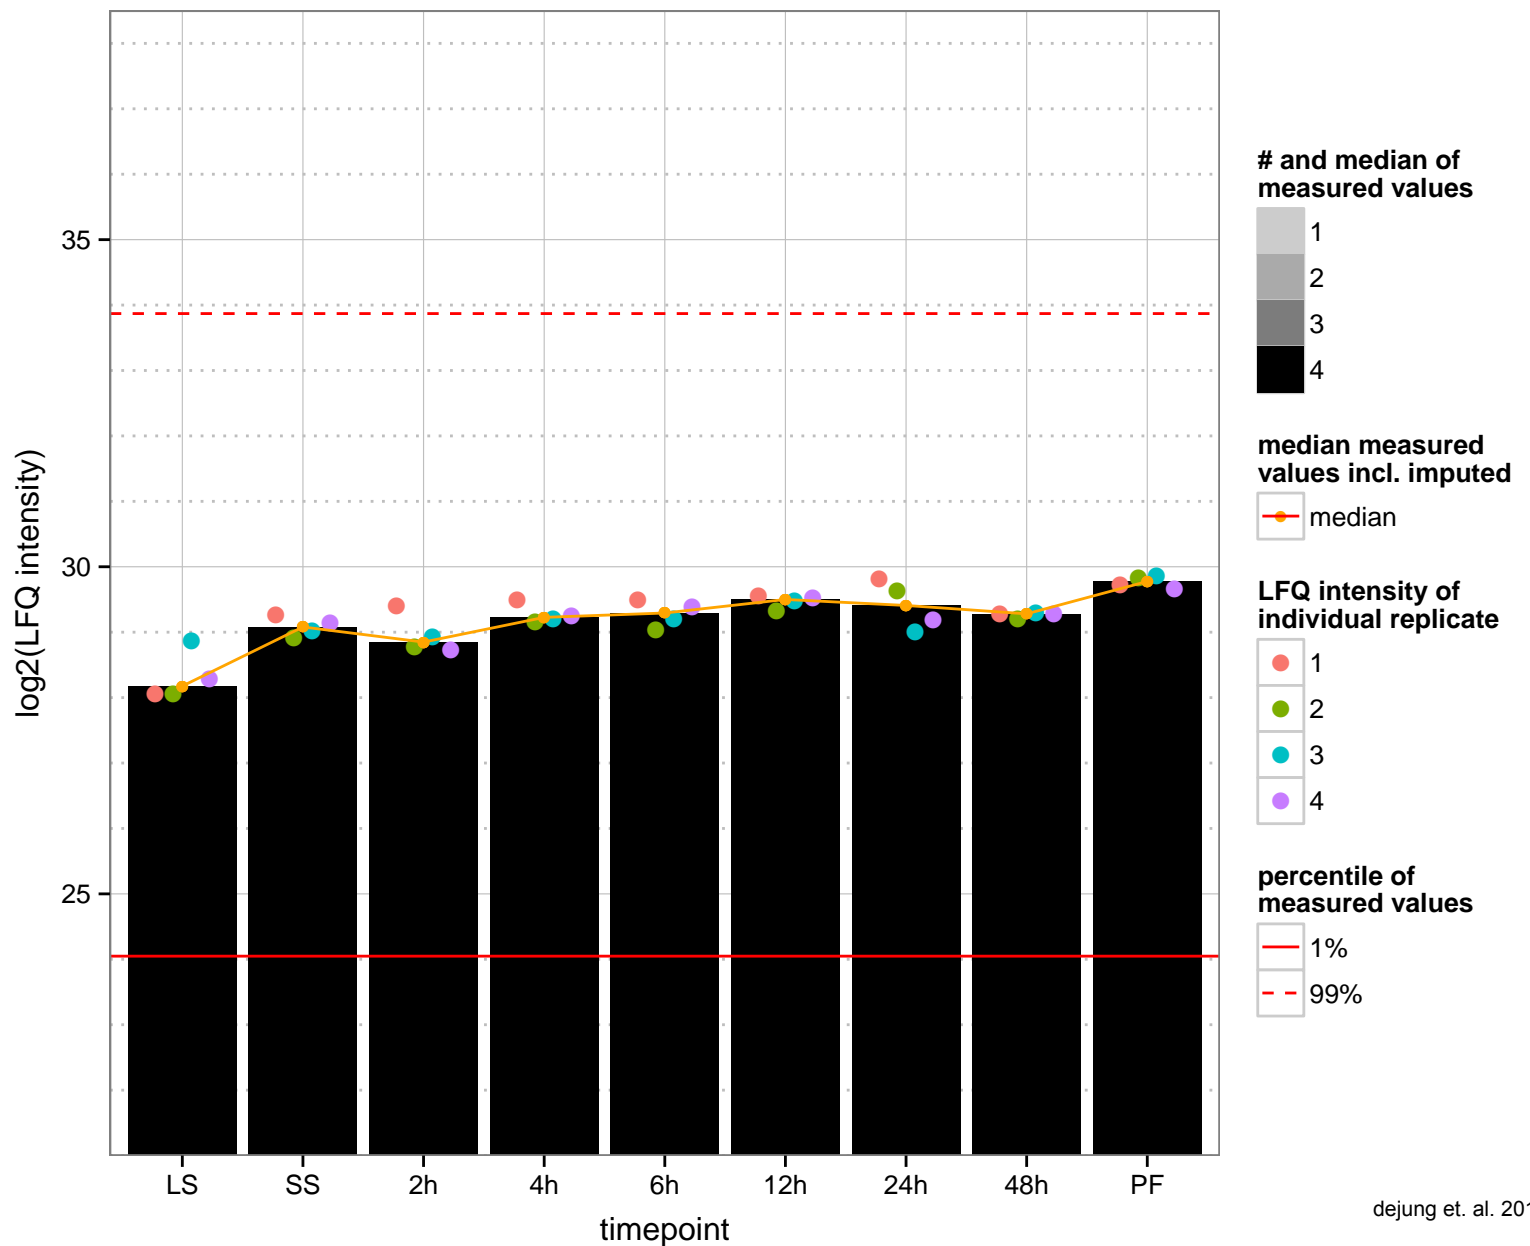

tRNA pseudouridine synthase A, putative  
 Tb11.v5.0201;Tb927.10.6090  
 AGOF: null, RNA binding, pseudouridine synthase activity  
 AGOC: null  
 AGOP: null, pseudouridine synthesis  
 PGOF: RNA binding, pseudouridine synthase activity  
 PGO: null  
 PGOP: RNA modification, pseudouridine synthesis

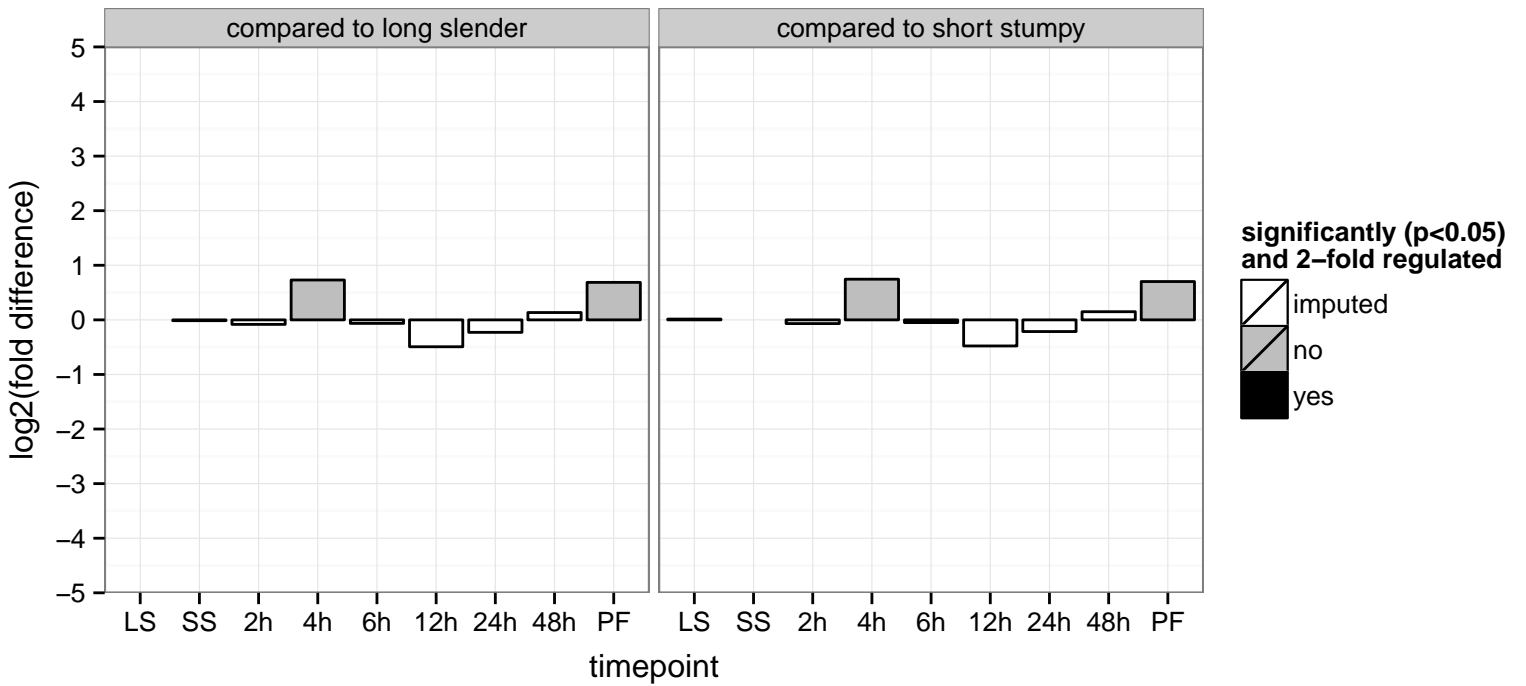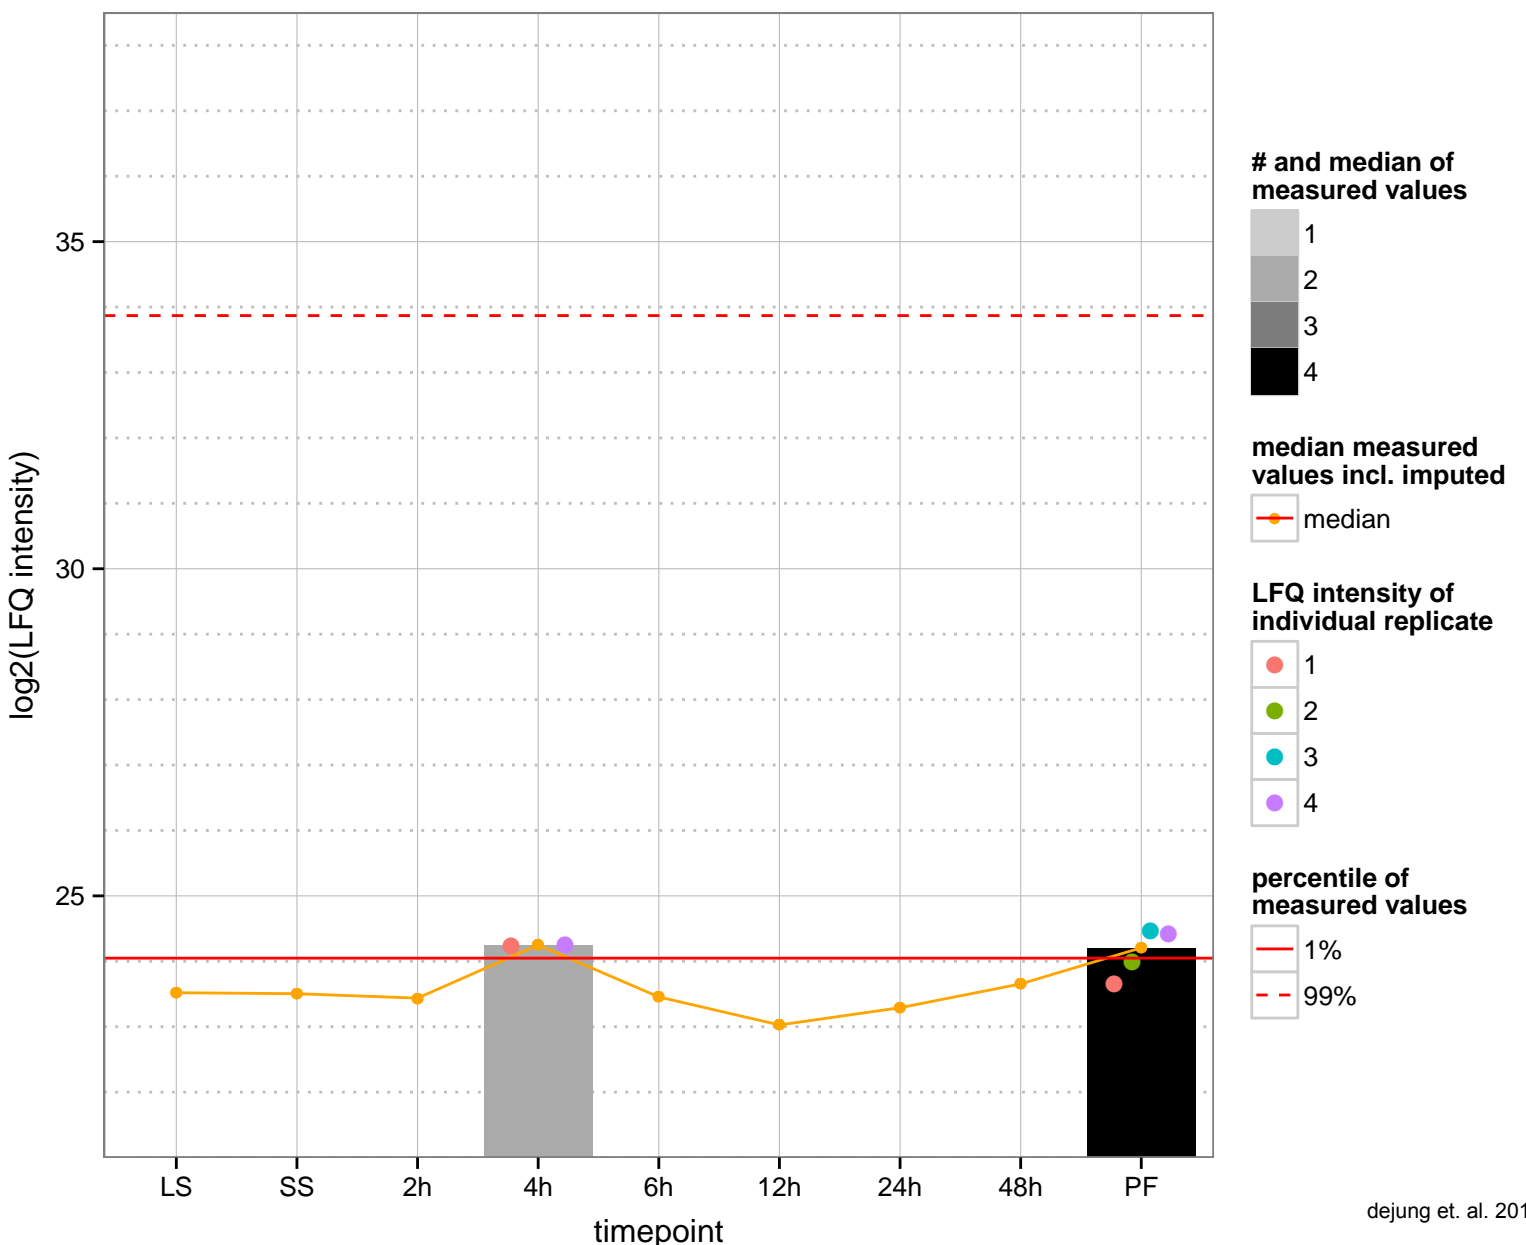

iron/ascorbate oxidoreductase family protein, putative, thymine-7-hydroxylase, putative (TLP5), 2-oxoglutarate (2OG) and Fe  
 Tb927.5.300b;Tb927.5.300;Tb11.v5.0215  
 AGOF: null, ferrous iron binding, oxidoreductase activity, iron ion binding  
 AGOC: null  
 AGOP: null, metabolic process  
 PGO: oxidoreductase activity, oxidoreductase activity, acting on paired donors, with incorporation or reduction of molecular oxygen  
 PGOC: null  
 PGOP: oxidation-reduction process

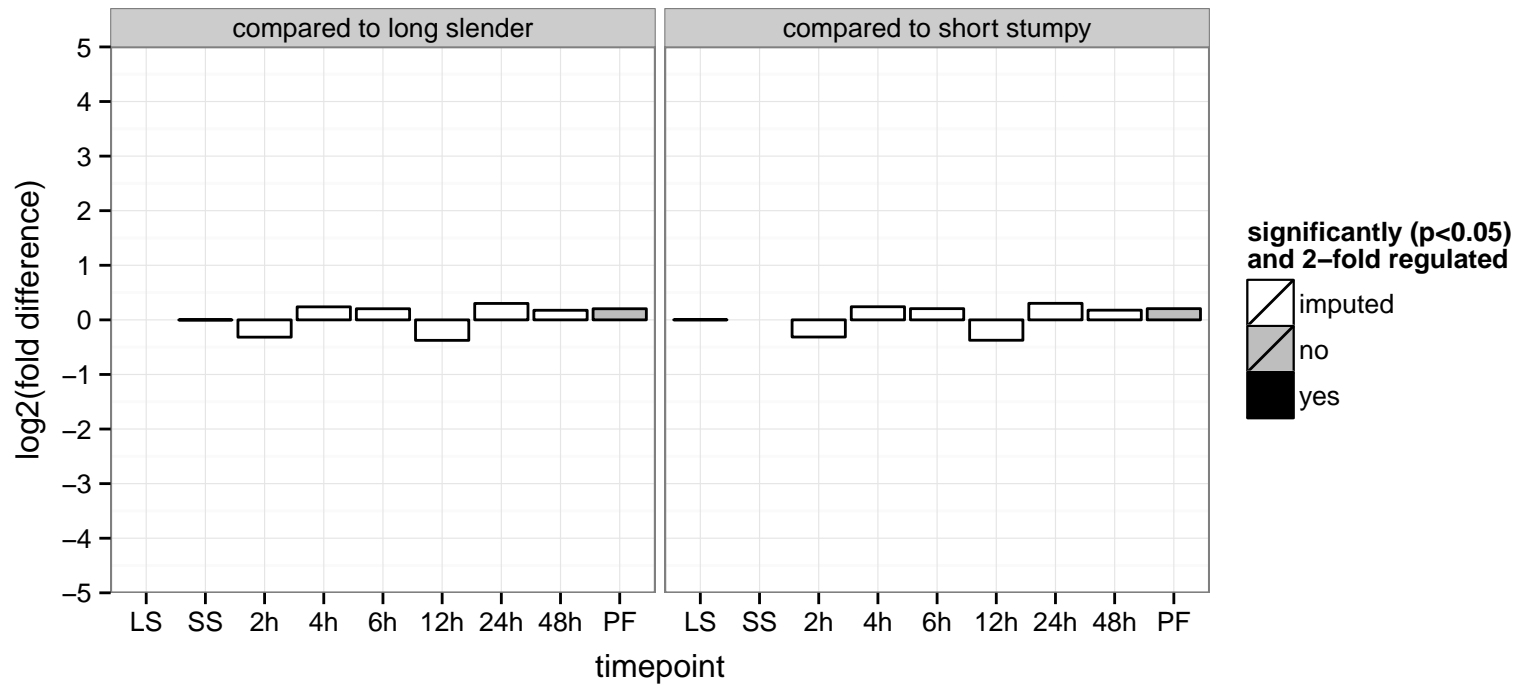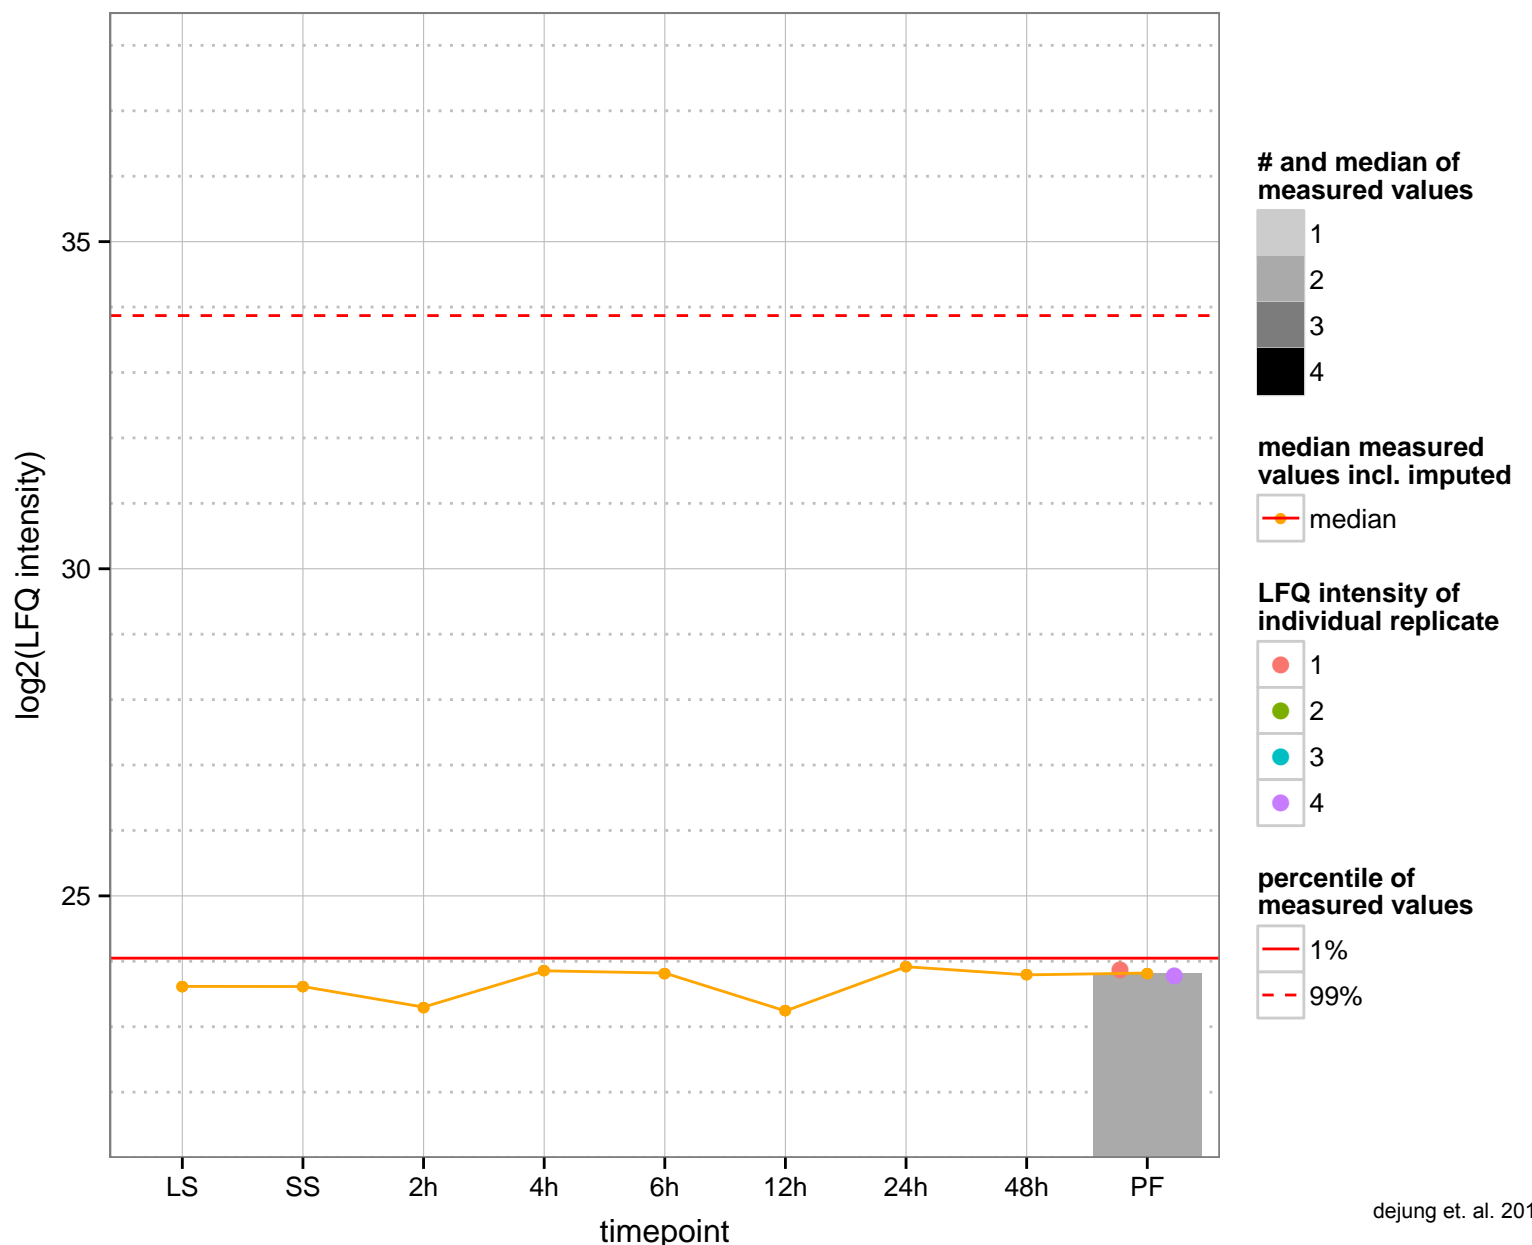

hypothetical protein, conserved  
 Tb927.5.500;Tb11.v5.0218  
 AGOF: null  
 AGOC: null, mitochondrion  
 AGOP: null  
 PGO: null  
 PGOC: null  
 PGOP: null

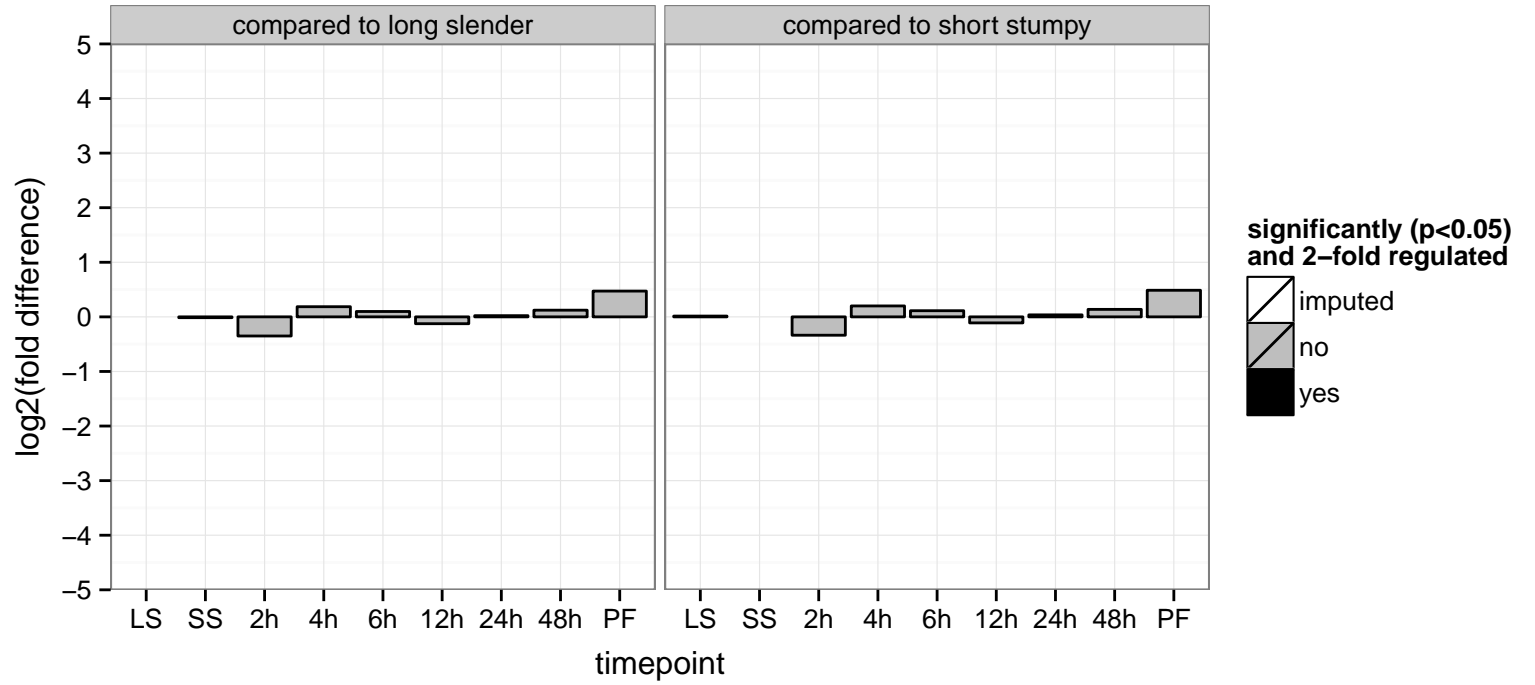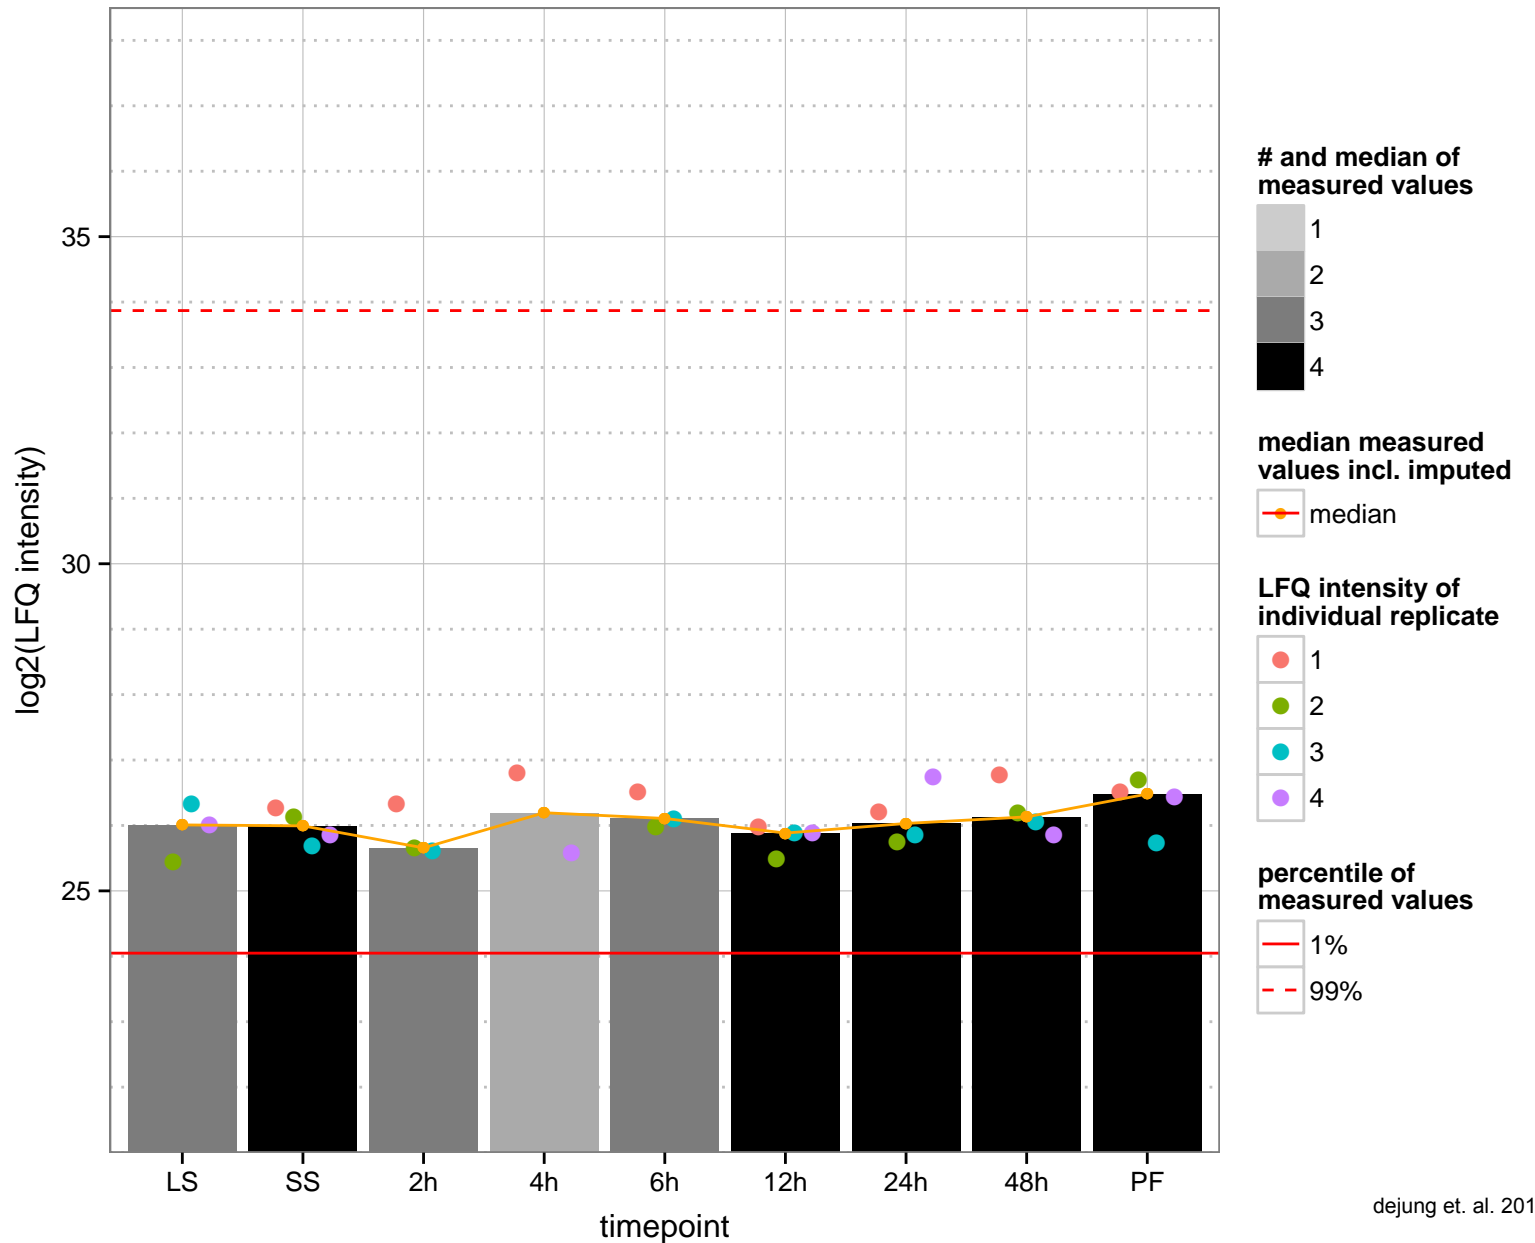

75 kDa invariant surface glycoprotein, putative, putative (ISG75)  
 Tb927.5.400;Tb11.v5.0227;Tb927.5.350;Tb11.v5.0421  
 AGOF: null  
 AGOC: null, plasma membrane  
 AGOP: null  
 PGO: null  
 PGOC: null  
 PGOP: null

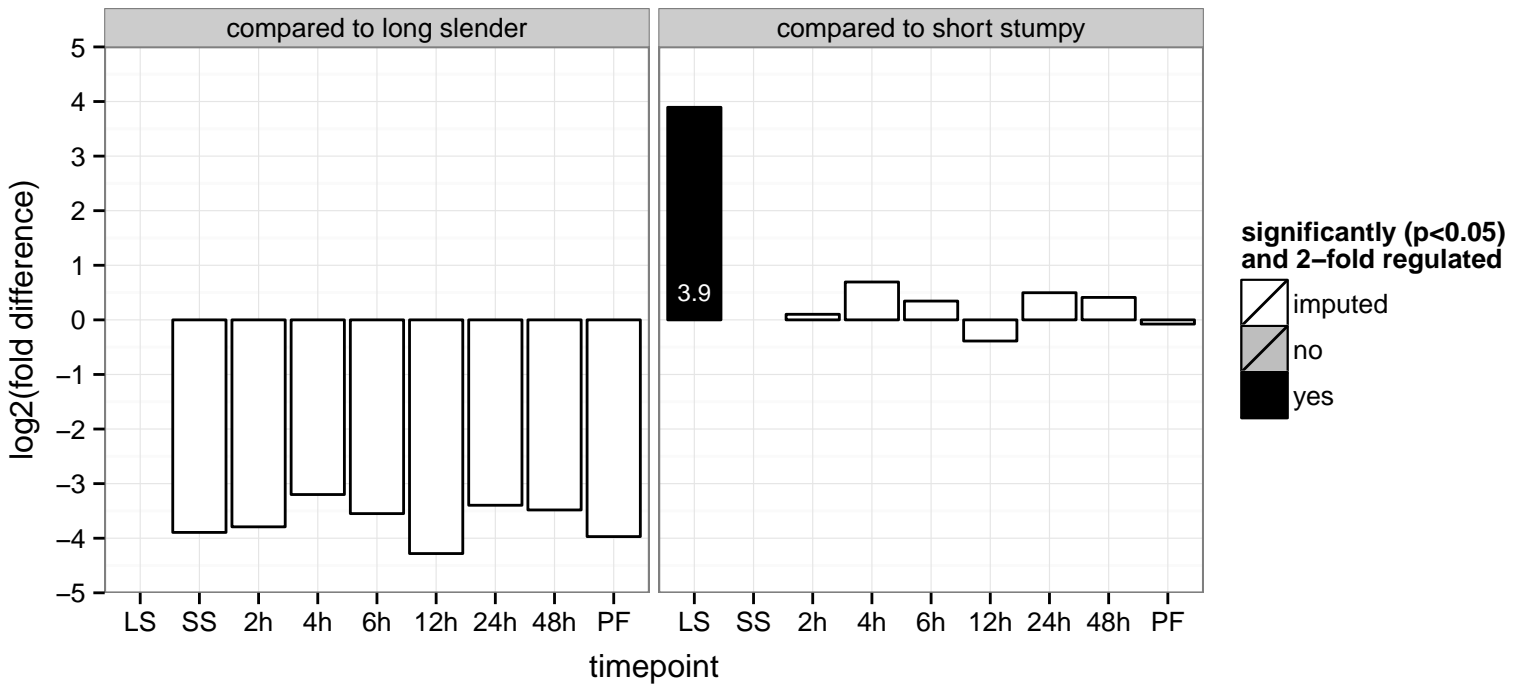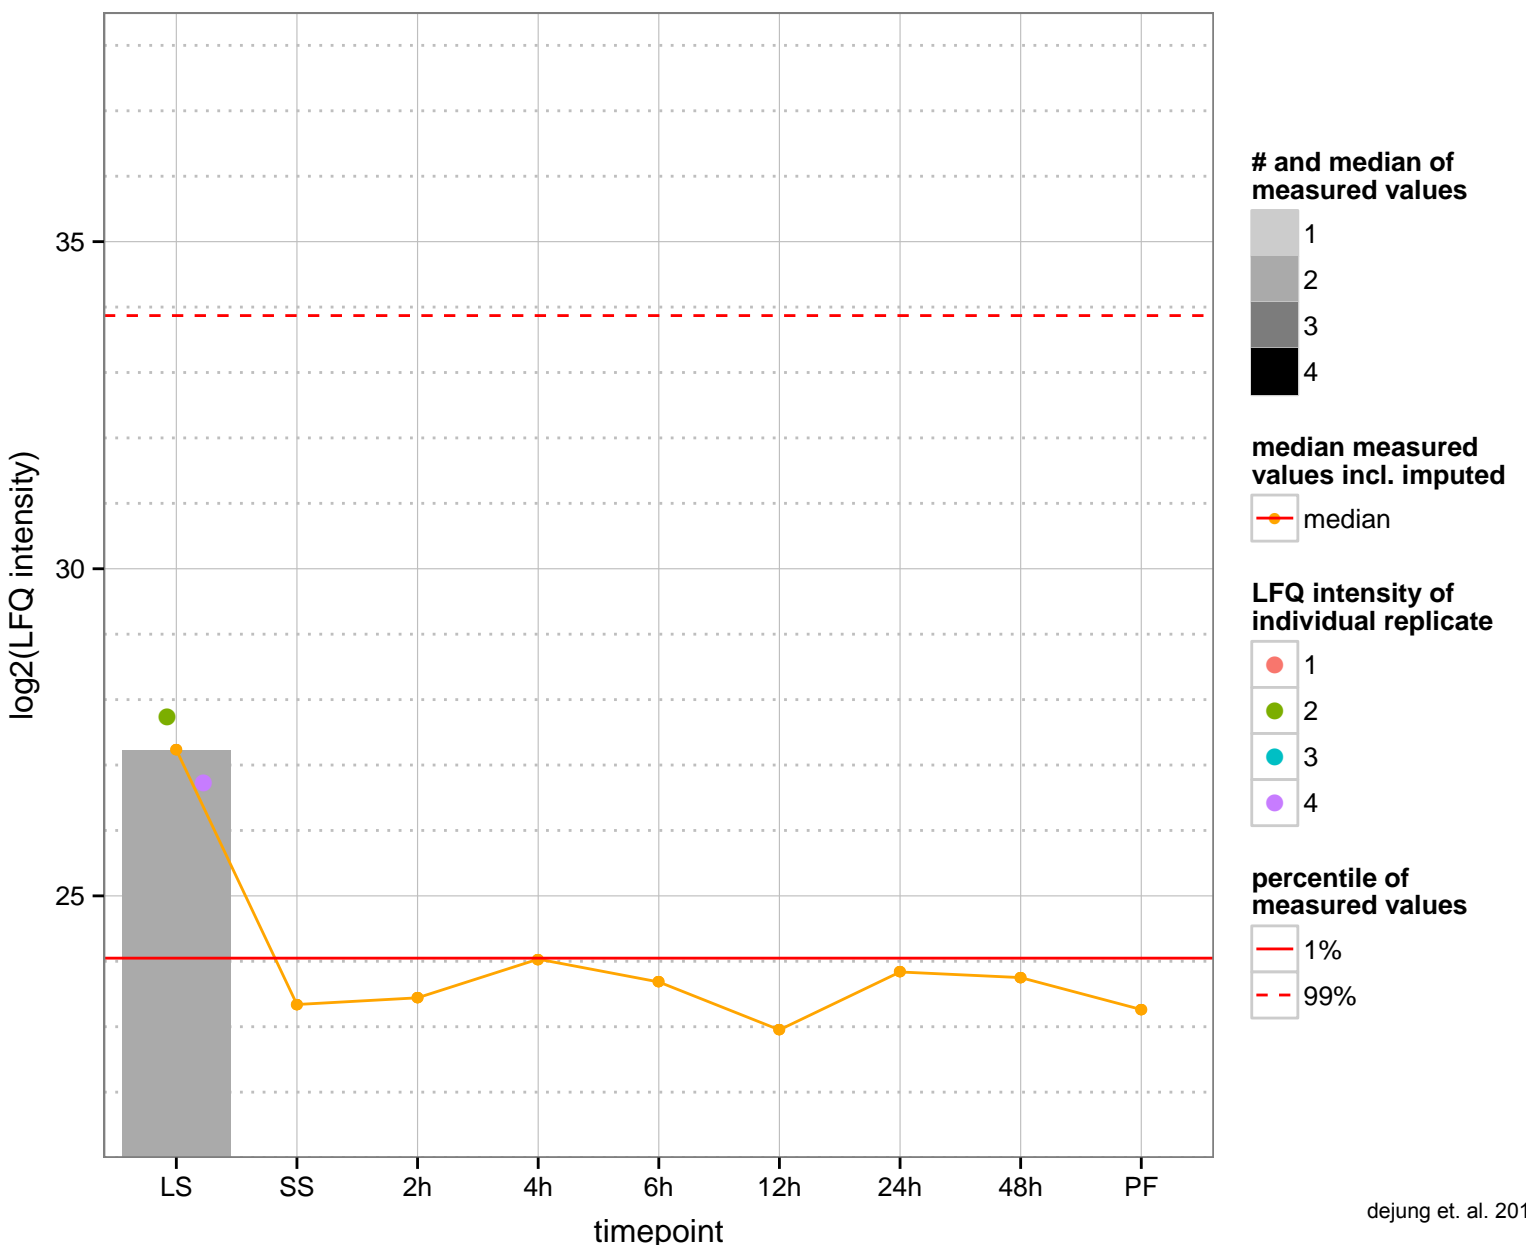

protein kinase, putative, SNF1-related protein kinases

Tb927.10.5310;Tb11.v5.0245

AGOF: null, ATP binding, protein serine/threonine kinase activity, protein tyrosine kinase activity

AGOC: null

AGOP: null, protein phosphorylation

PGOF: ATP binding, protein kinase activity, protein serine/threonine kinase activity, transferase activity, transferring phosphorus

PGOC: null

PGOP: protein phosphorylation

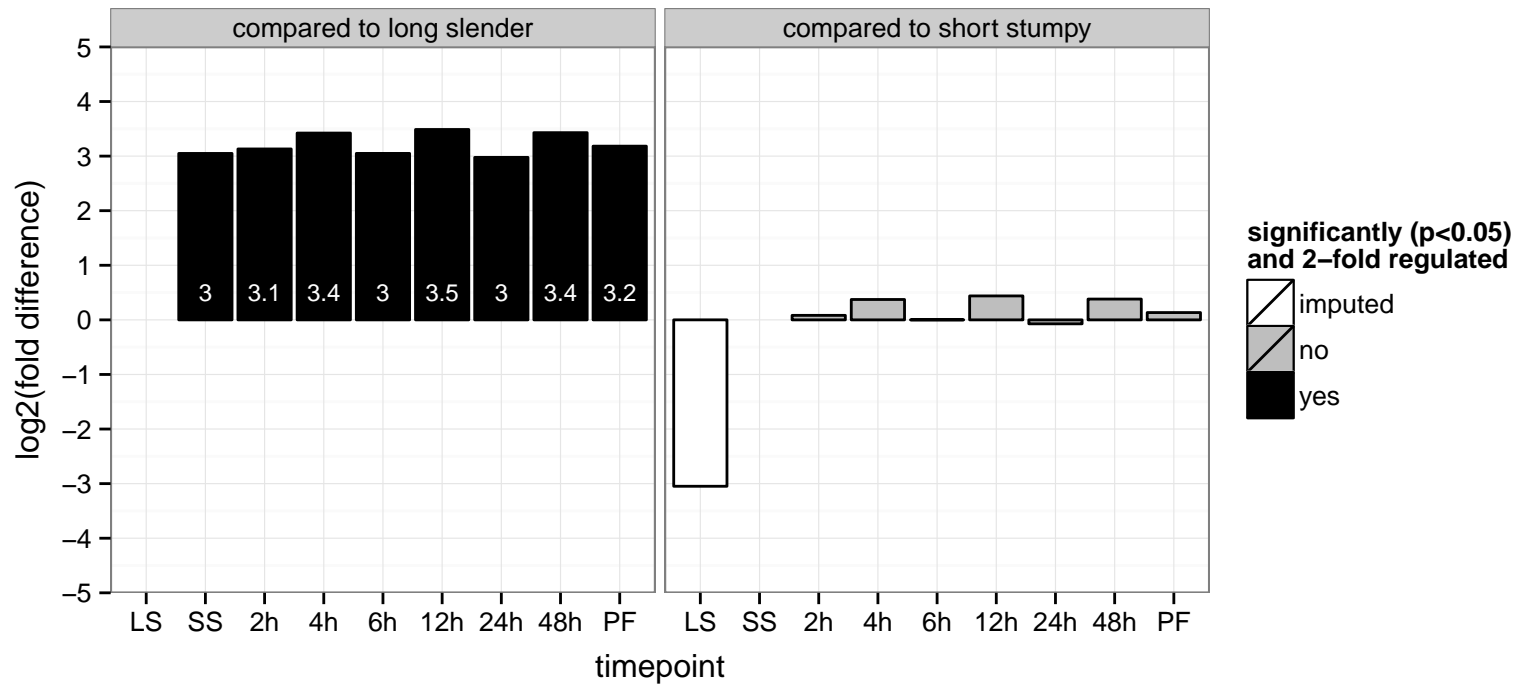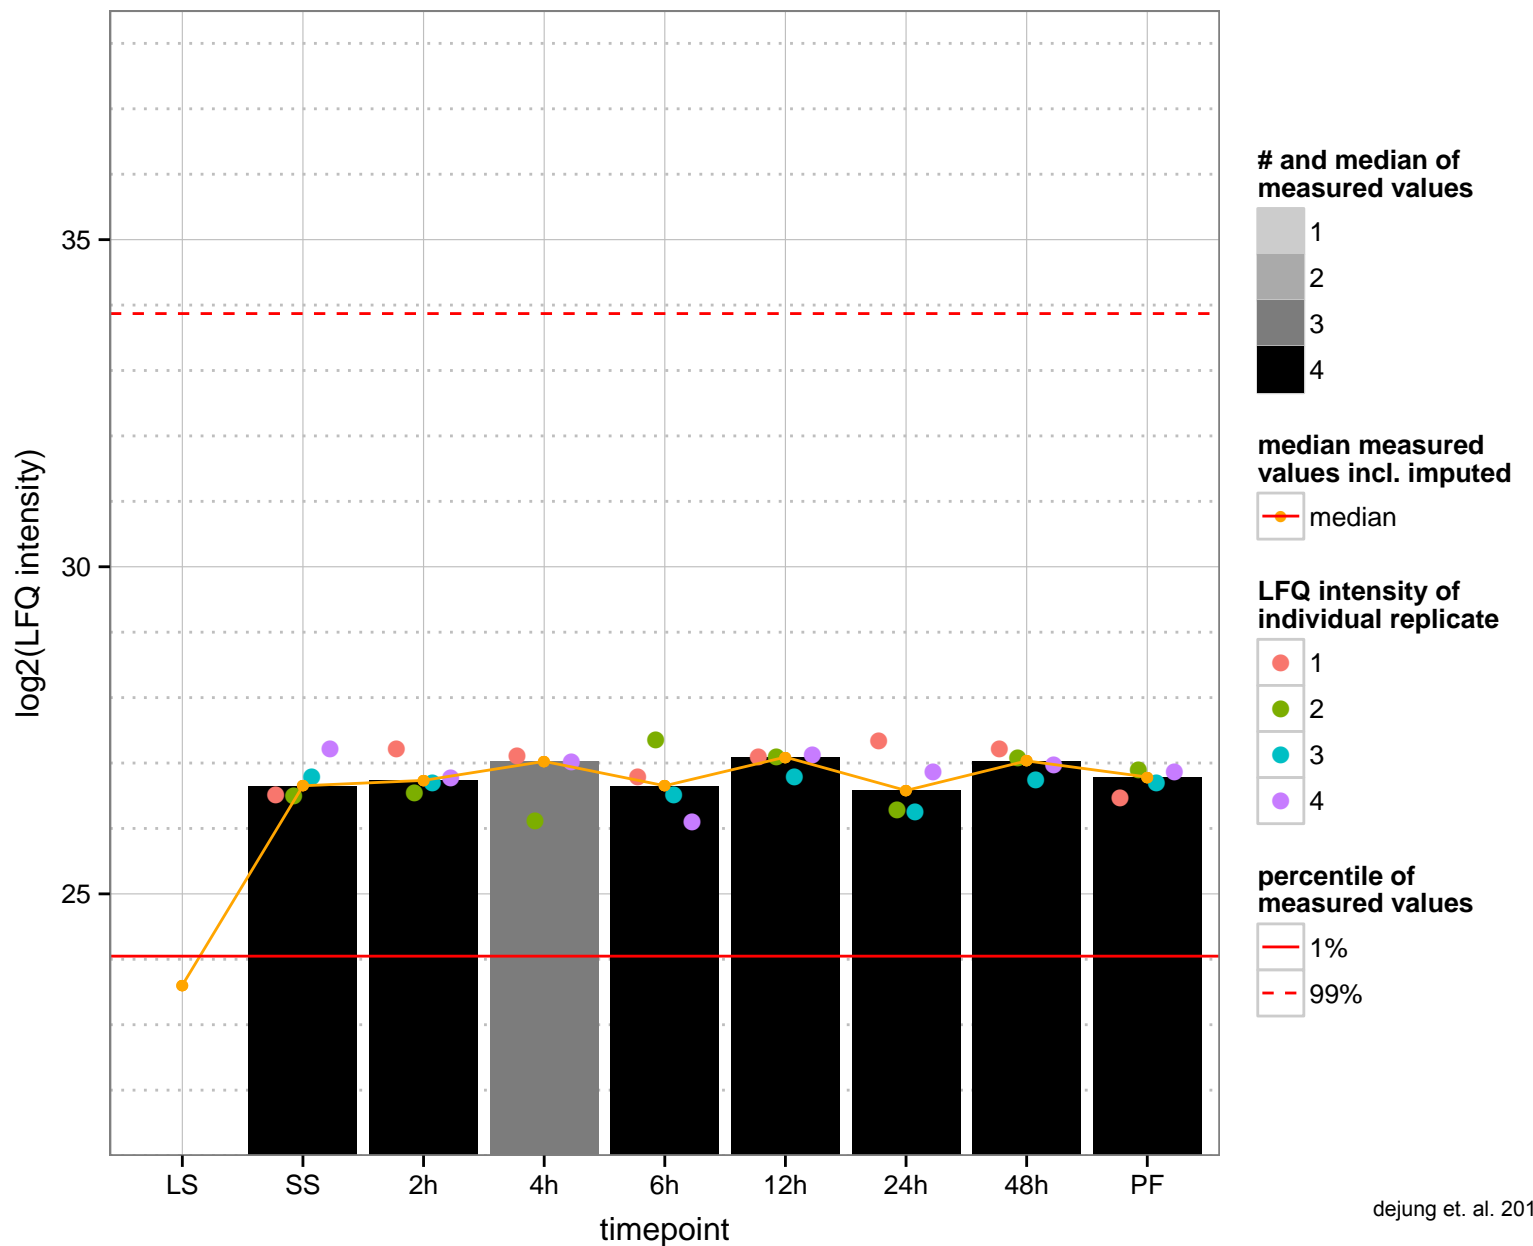



eukaryotic translation initiation factor 6, putative, eukaryotic translation initiation factor 6 (eIF-6)  
 Tb927.10.5300;Tb11.v5.0246  
 AGOF: null, ribosome binding  
 AGOC: null  
 AGOP: null, mature ribosome assembly  
 PGO: ribosome binding  
 PGO: null  
 PGO: mature ribosome assembly

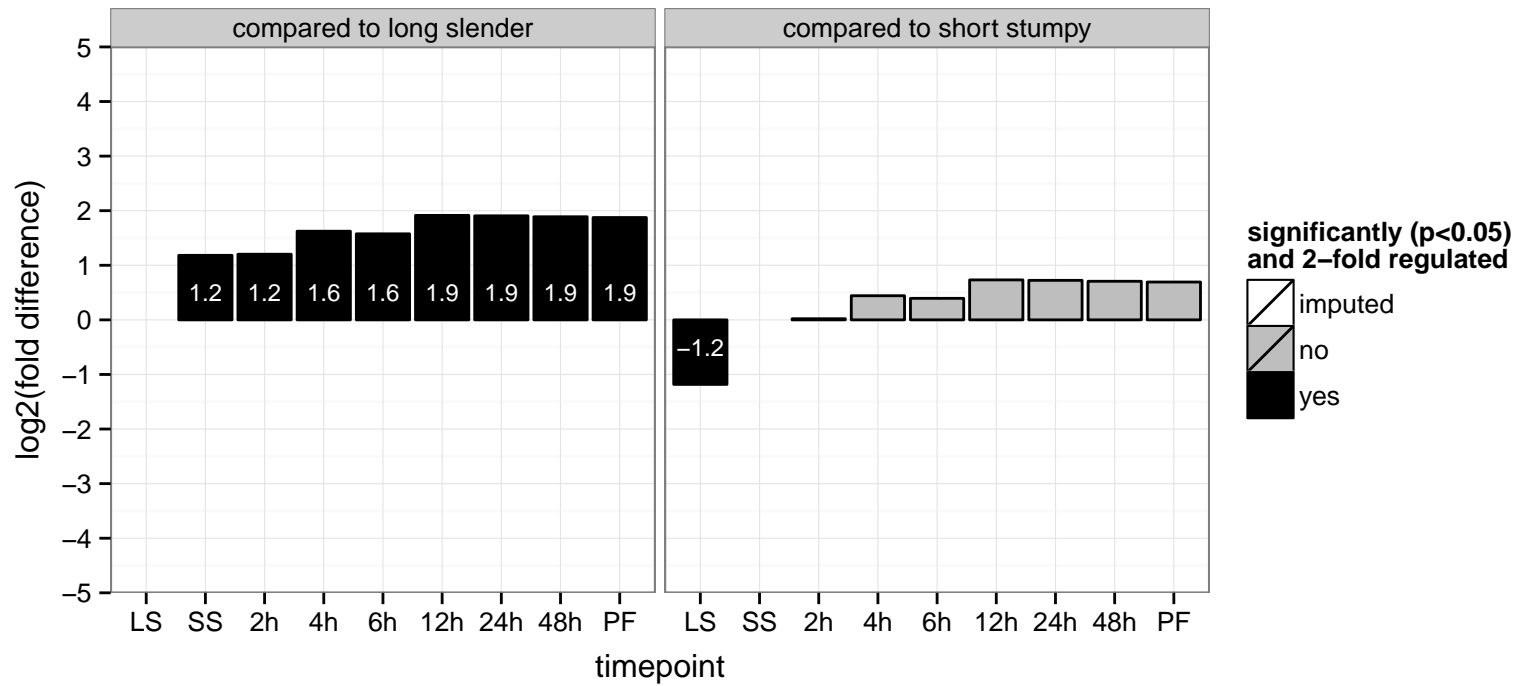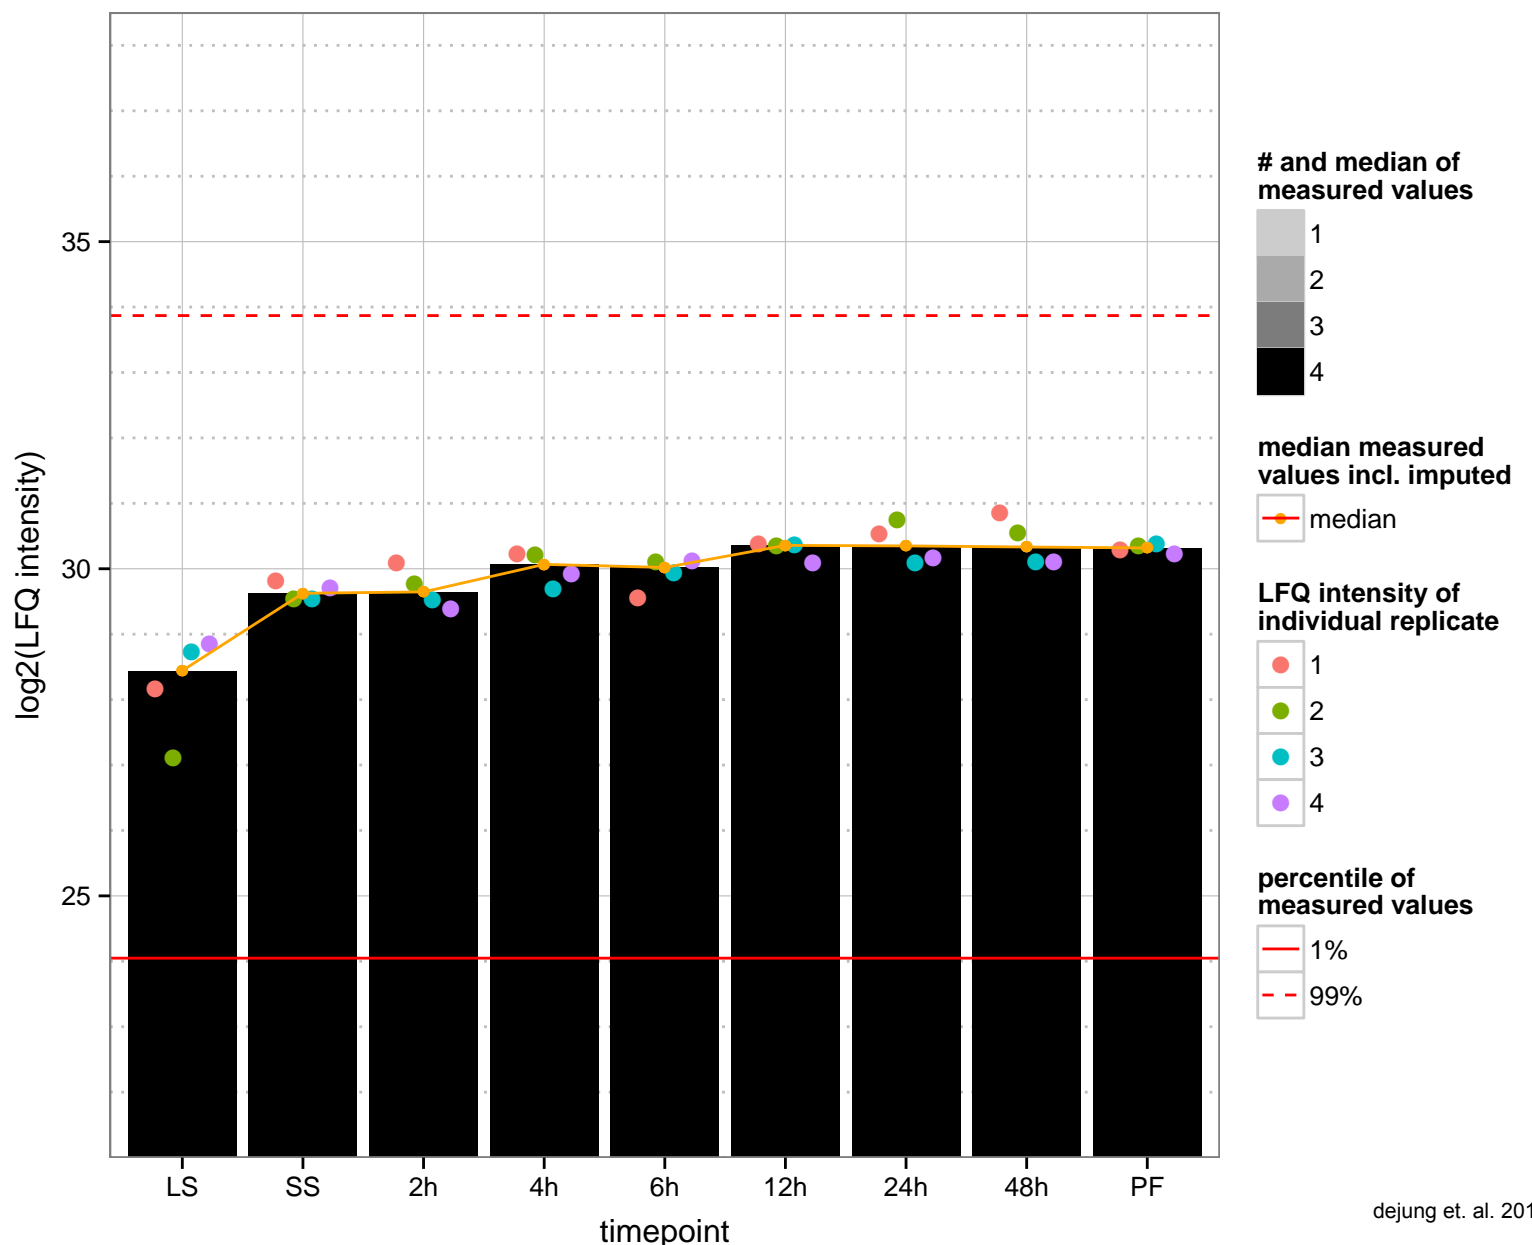

RNA binding protein, putative  
 Tb927.11.7310;Tb11.v5.0252  
 AGOF: null, RNA binding  
 AGOC: null  
 AGOP: null  
 PGO: nucleic acid binding  
 PGOC: null  
 PGOP: null

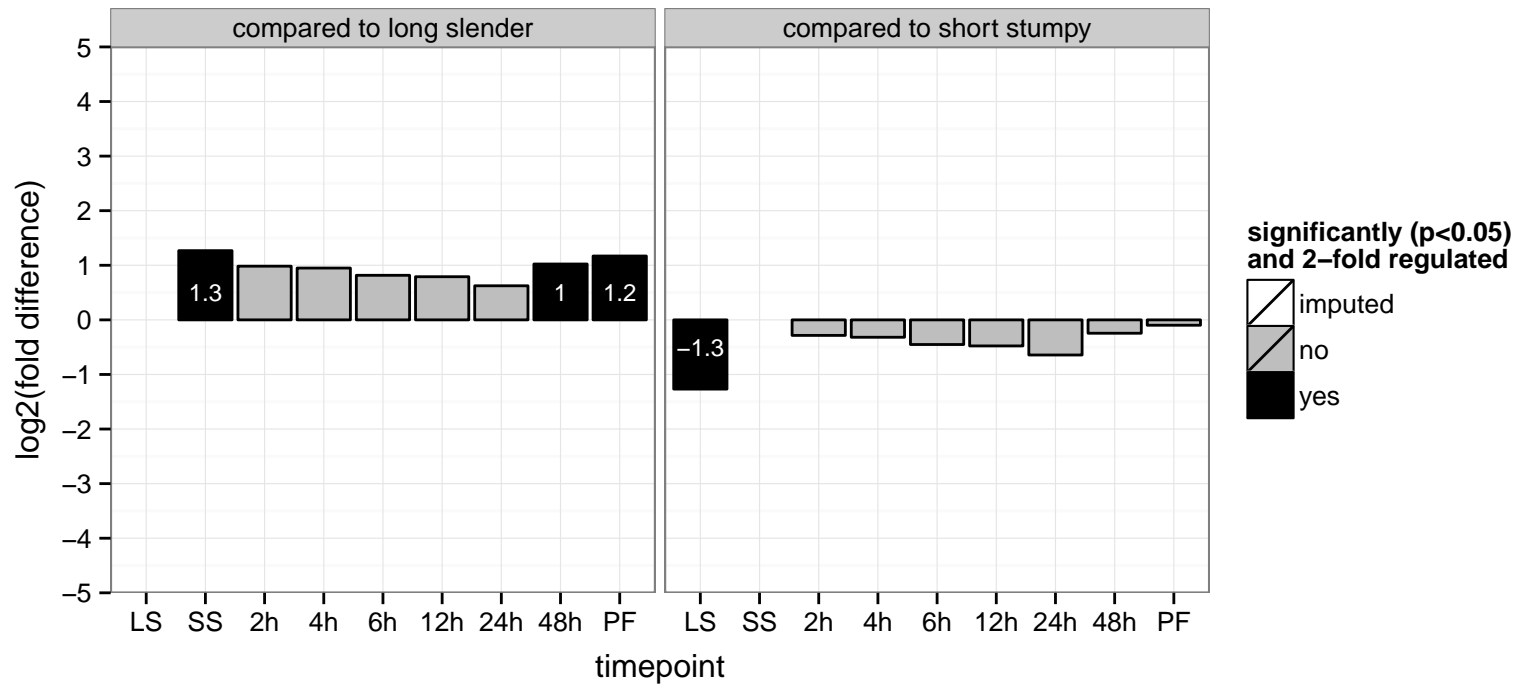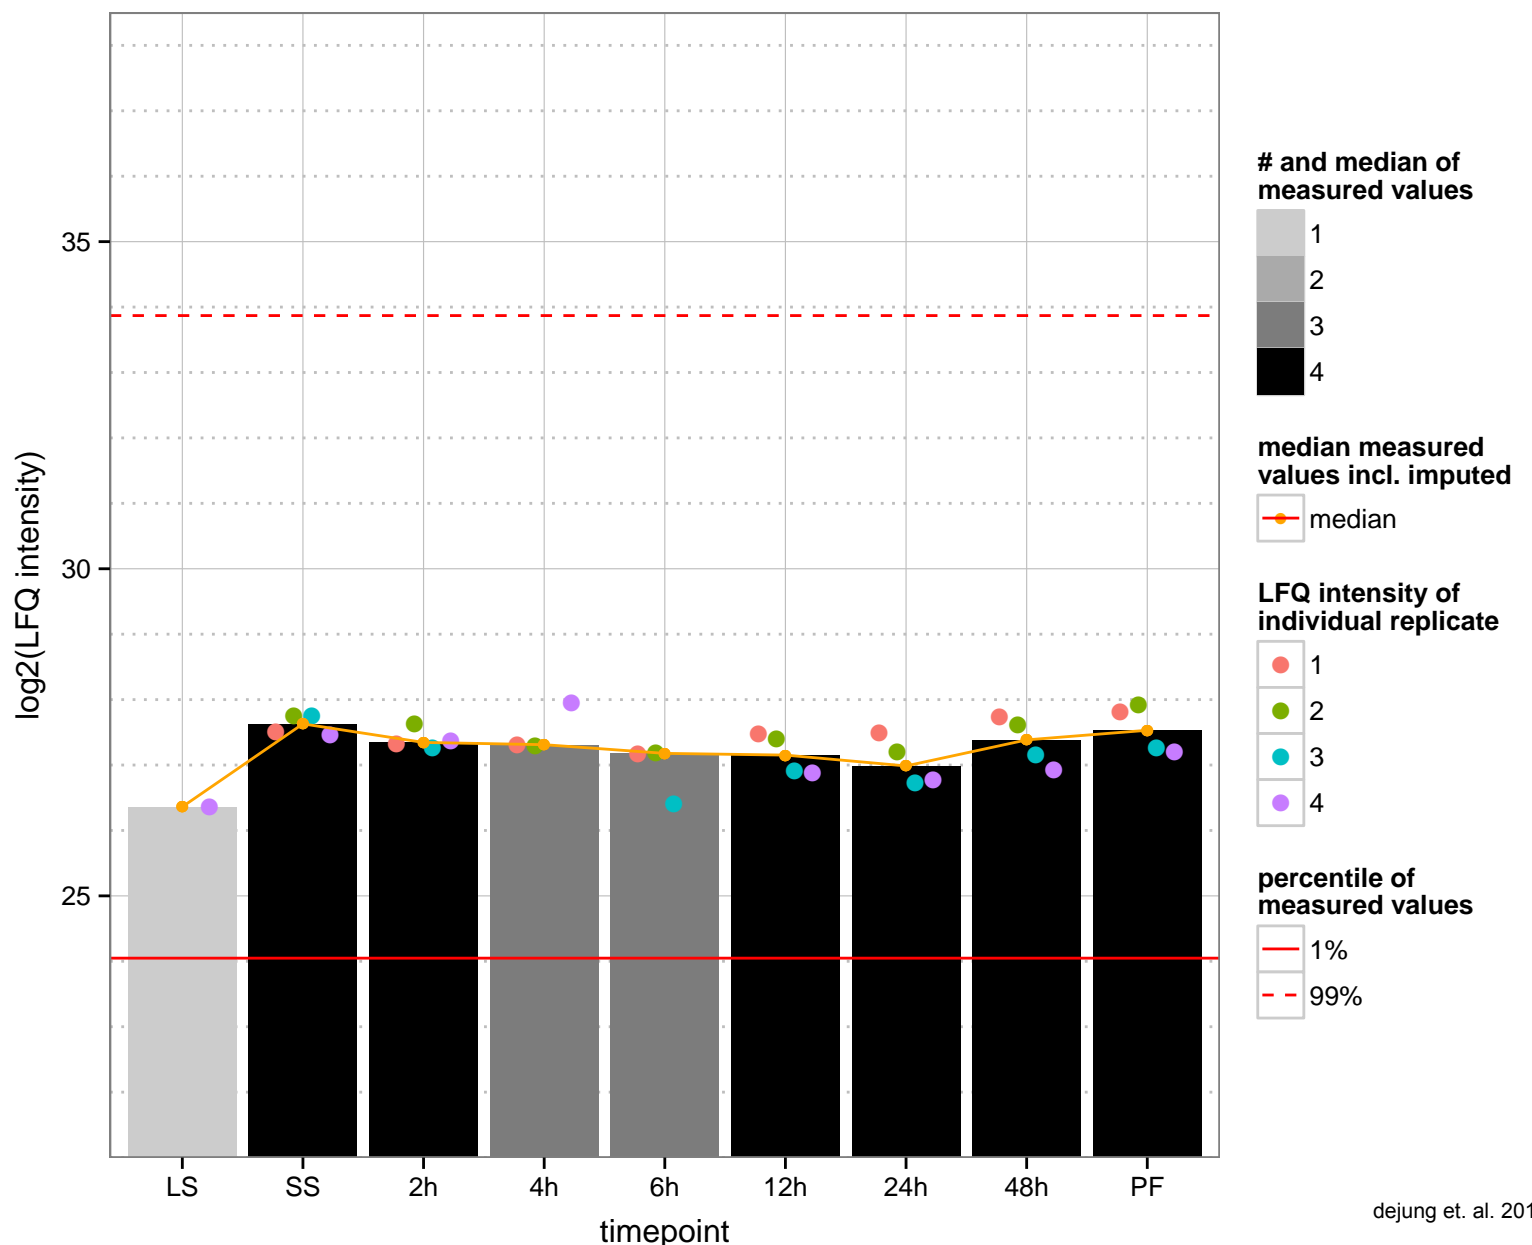

proteasome beta 3 subunit, putative, putative (PSB3)

Tb927.11.7270;Tb11.v5.0256

AGOF: null, endopeptidase activity, threonine-type endopeptidase activity

AGOC: null, proteasome core complex, proteasome core complex, beta-subunit complex

AGOP: null, ubiquitin-dependent protein catabolic process

PGOF: threonine-type endopeptidase activity

PGOC: proteasome core complex

PGOP: proteolysis involved in cellular protein catabolic process

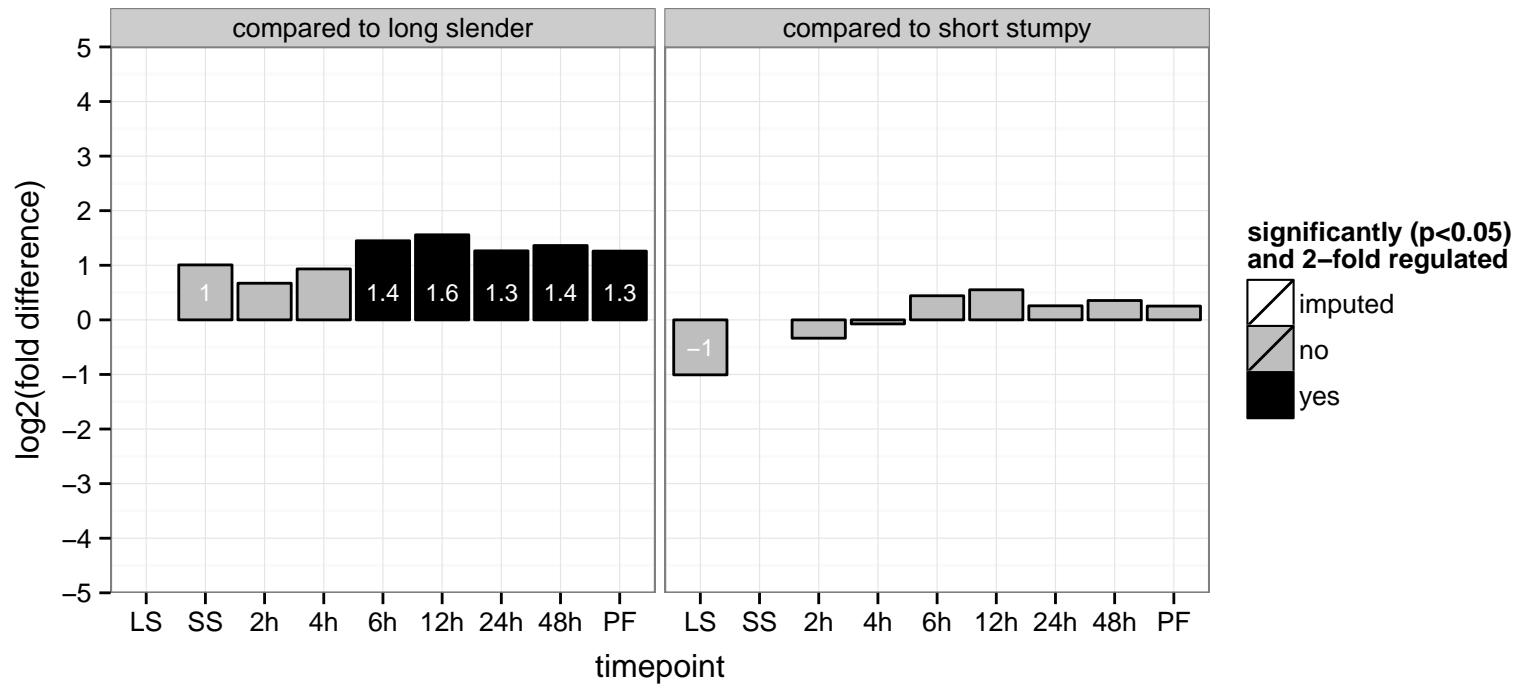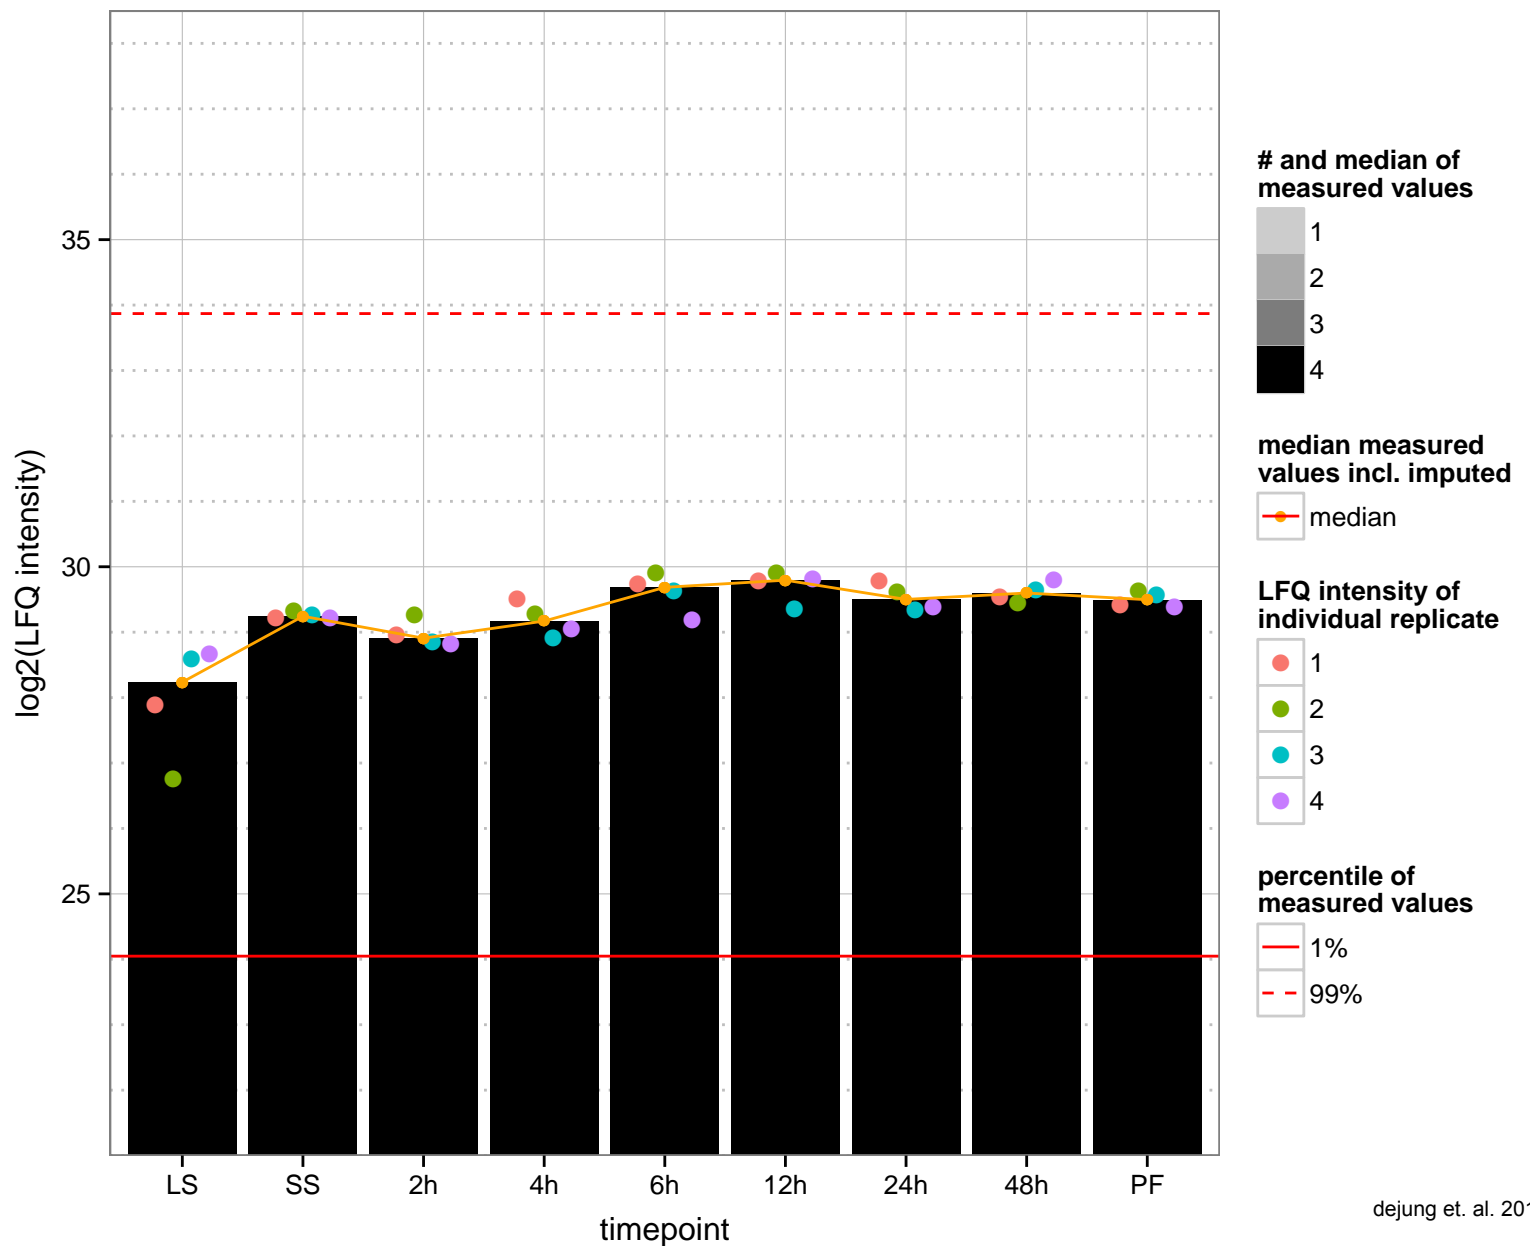

hypothetical protein, conserved, dynein regulatory complex subunit (CMF70)

Tb927.11.7240;Tb11.v5.0258

AGOF: null

AGOC: null, axonemal dynein complex, cilium

AGOP: null, ciliary cell motility, ciliary or flagellar motility

PGOF: null

PGOC: null

PGOP: null

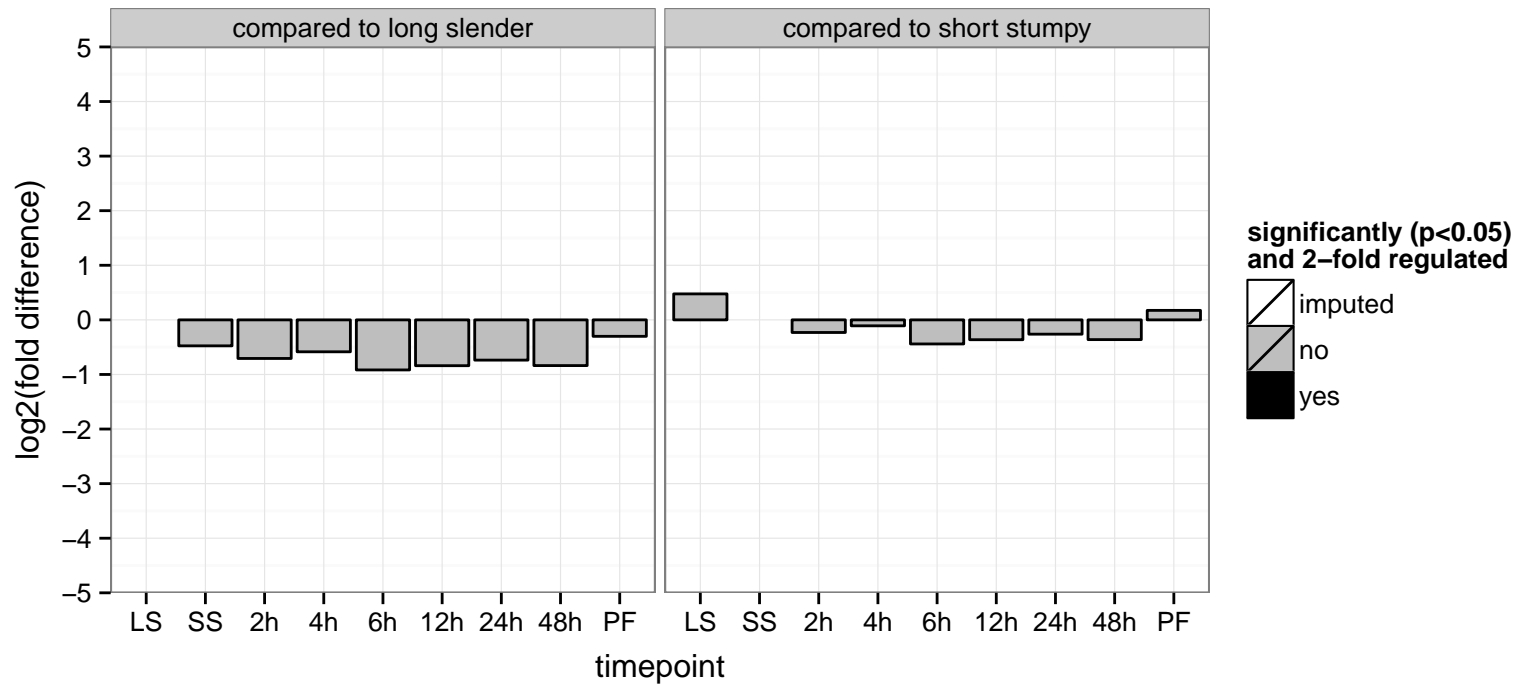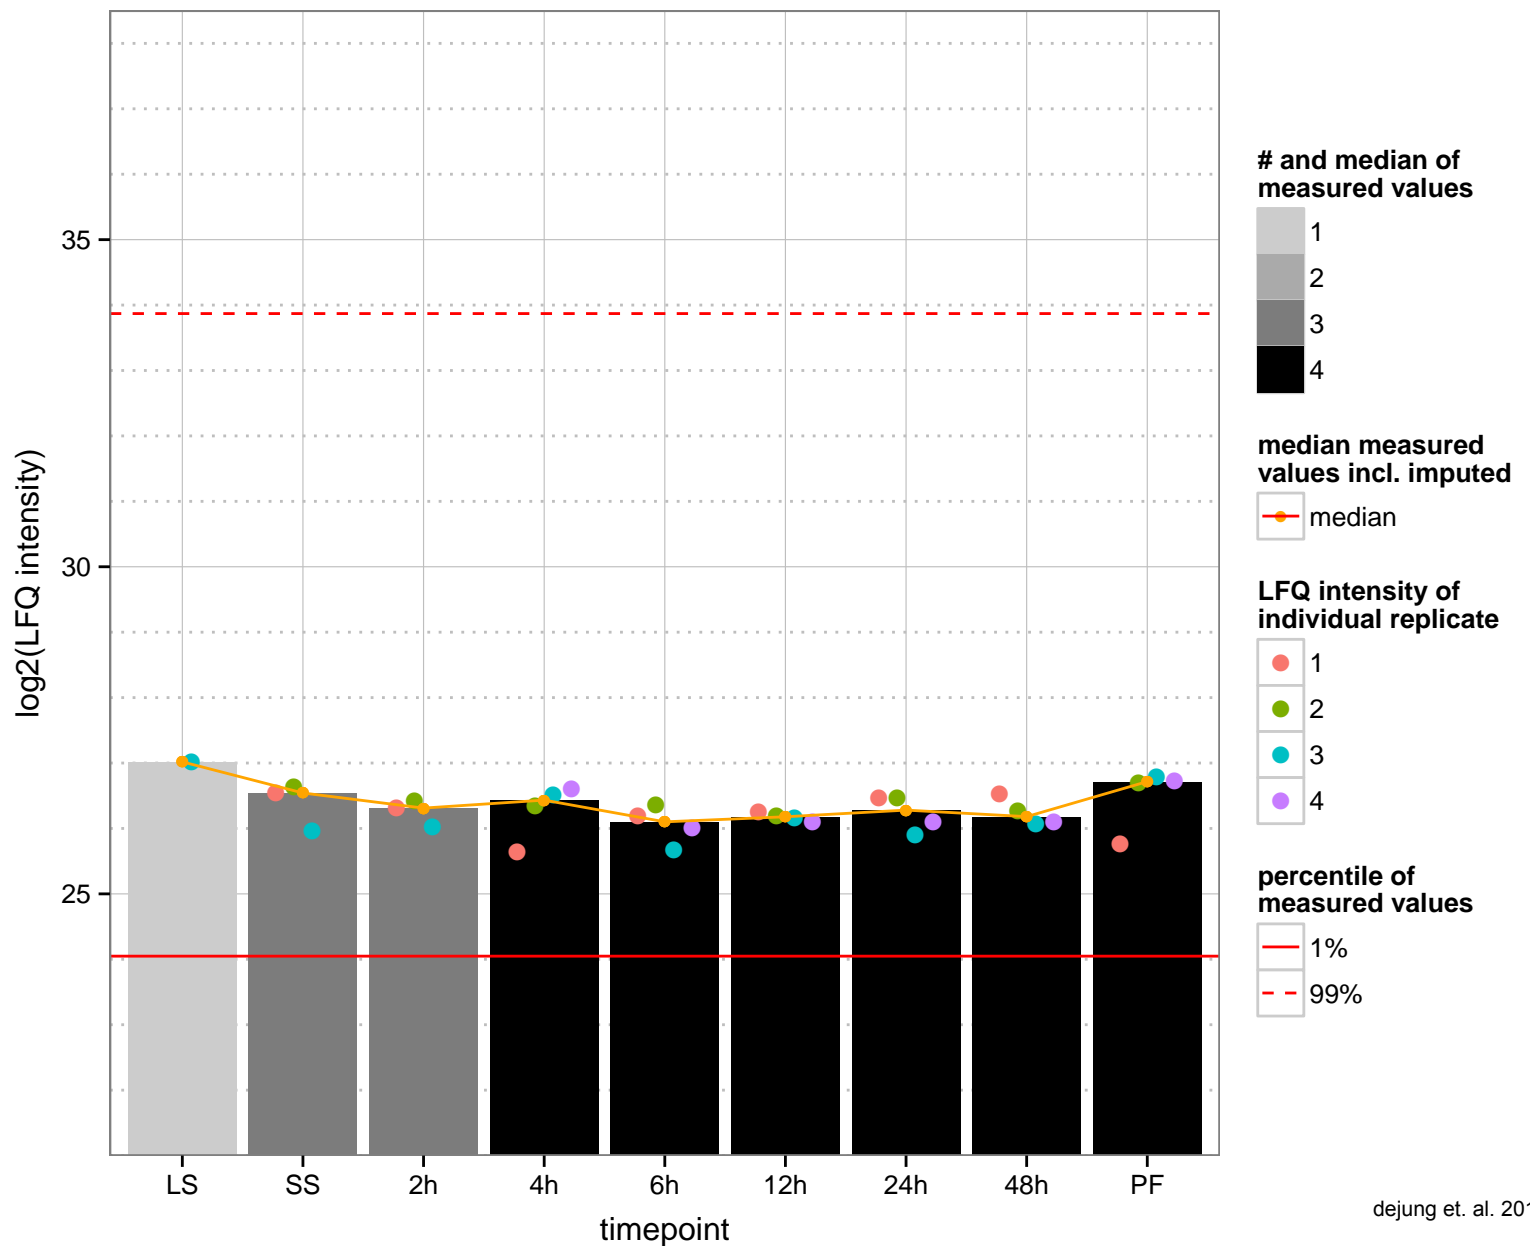

adenosine 5'-monophosphoramidase, putative  
 Tb927.7.4480;Tb11.v5.0261  
 AGOF: null, catalytic activity  
 AGOC: null  
 AGOP: null  
 PGO: catalytic activity  
 PGOC: null  
 PGOP: null

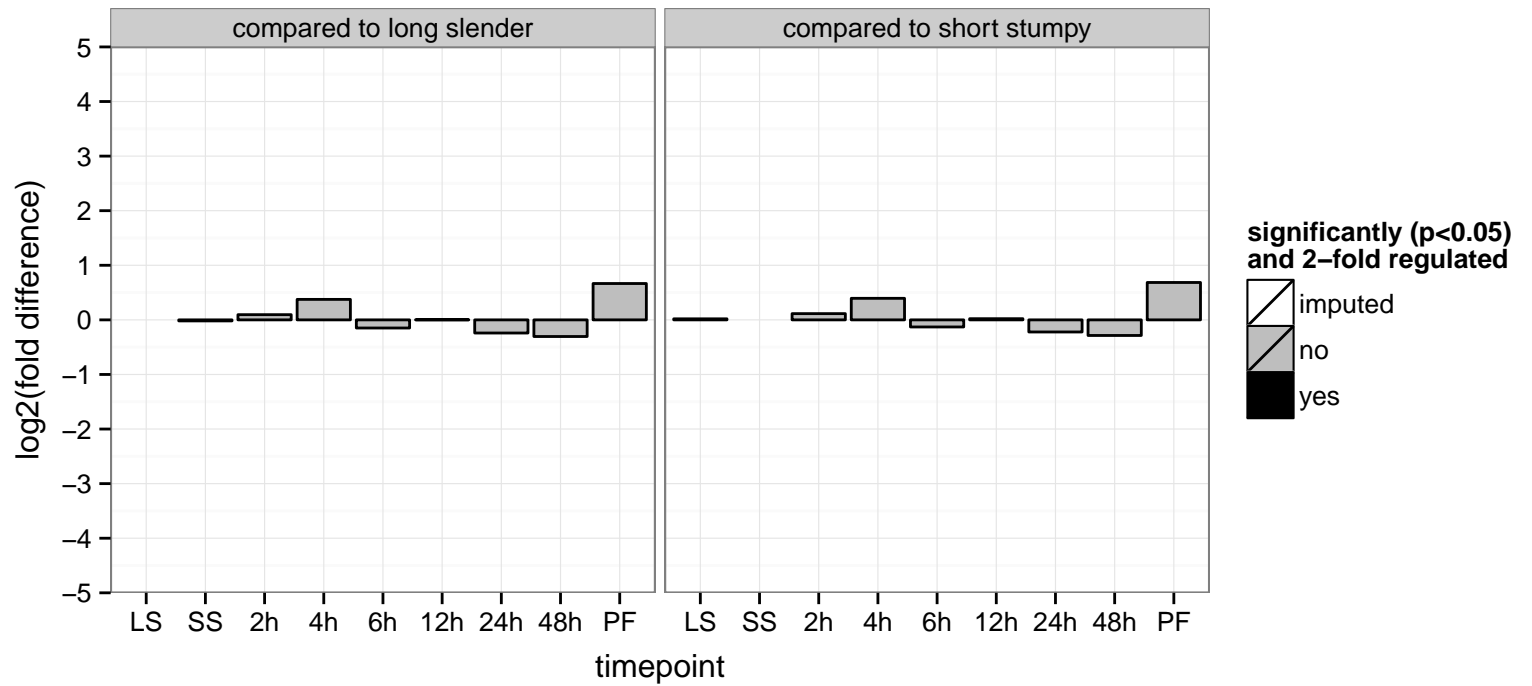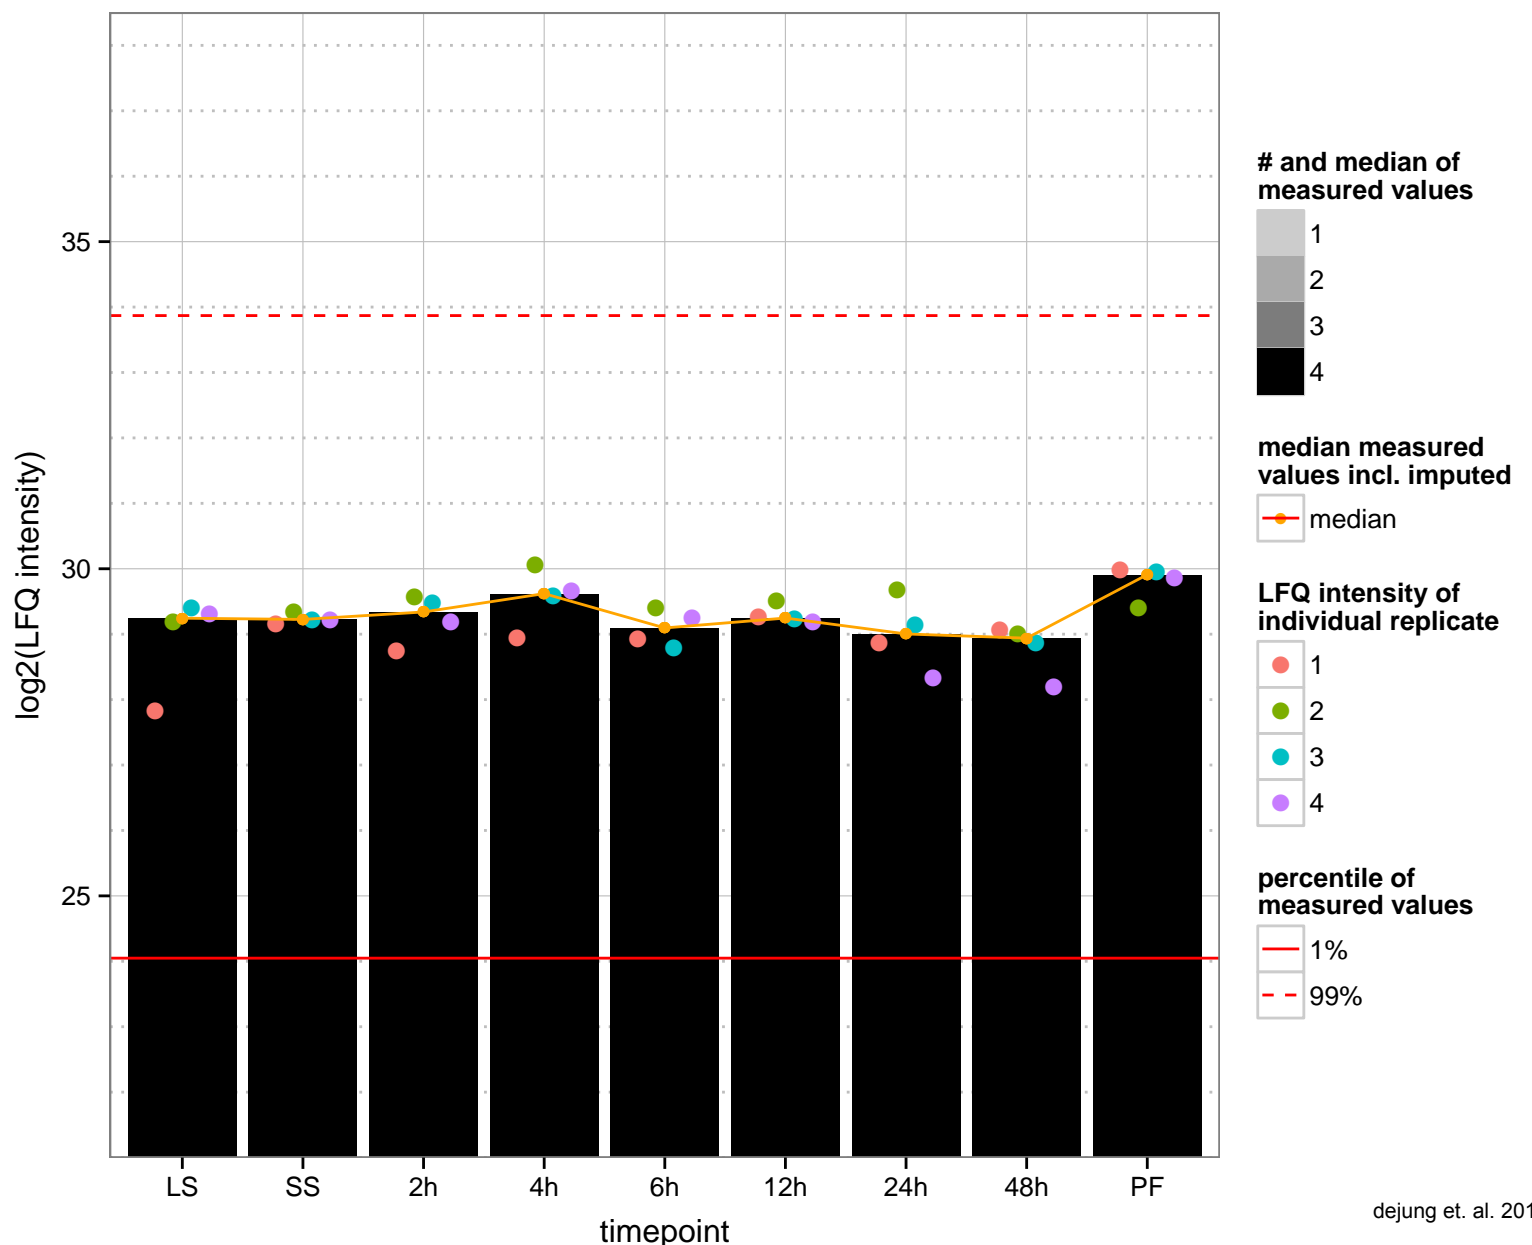

hypothetical protein, conserved  
 Tb927.7.4520;Tb11.v5.0265  
 AGOF: null  
 AGOC: null  
 AGOP: null, cell redox homeostasis  
 PGO: null  
 PGOC: null  
 PGOP: null

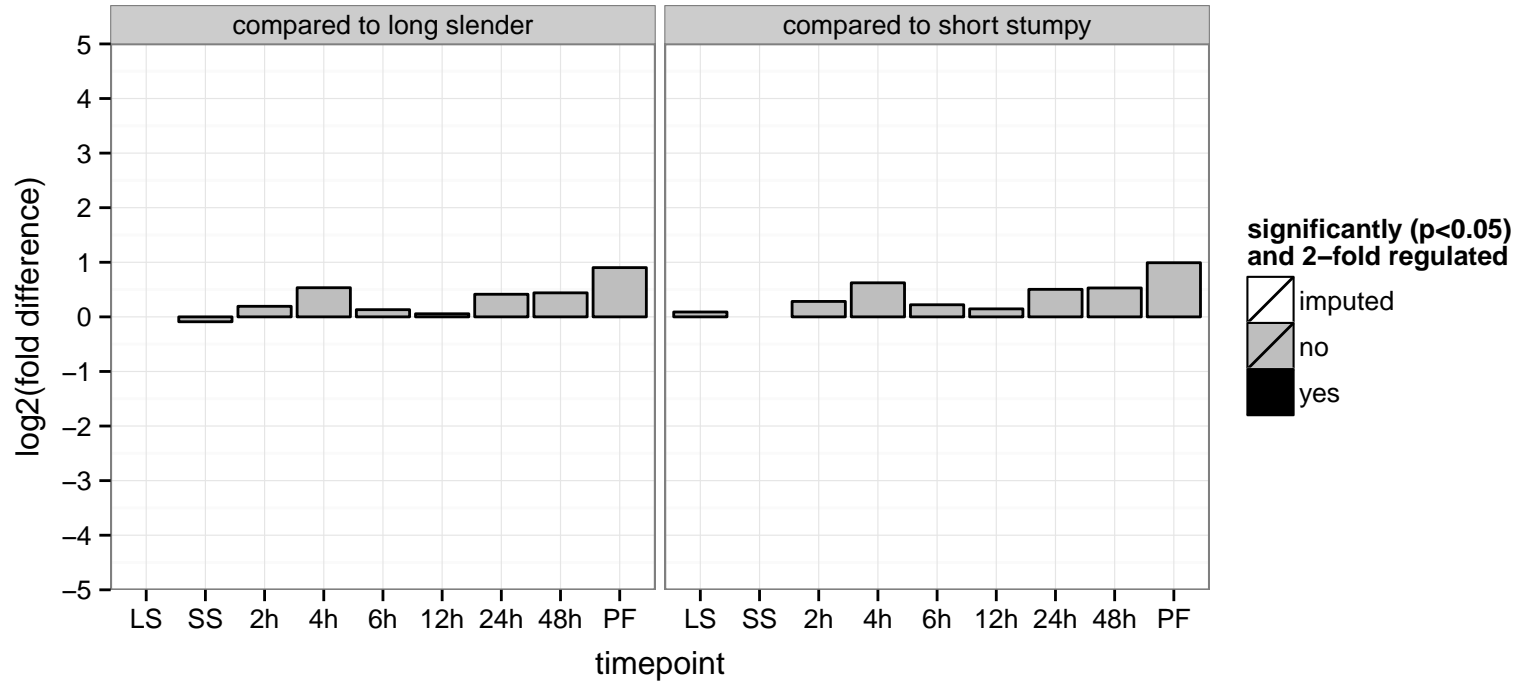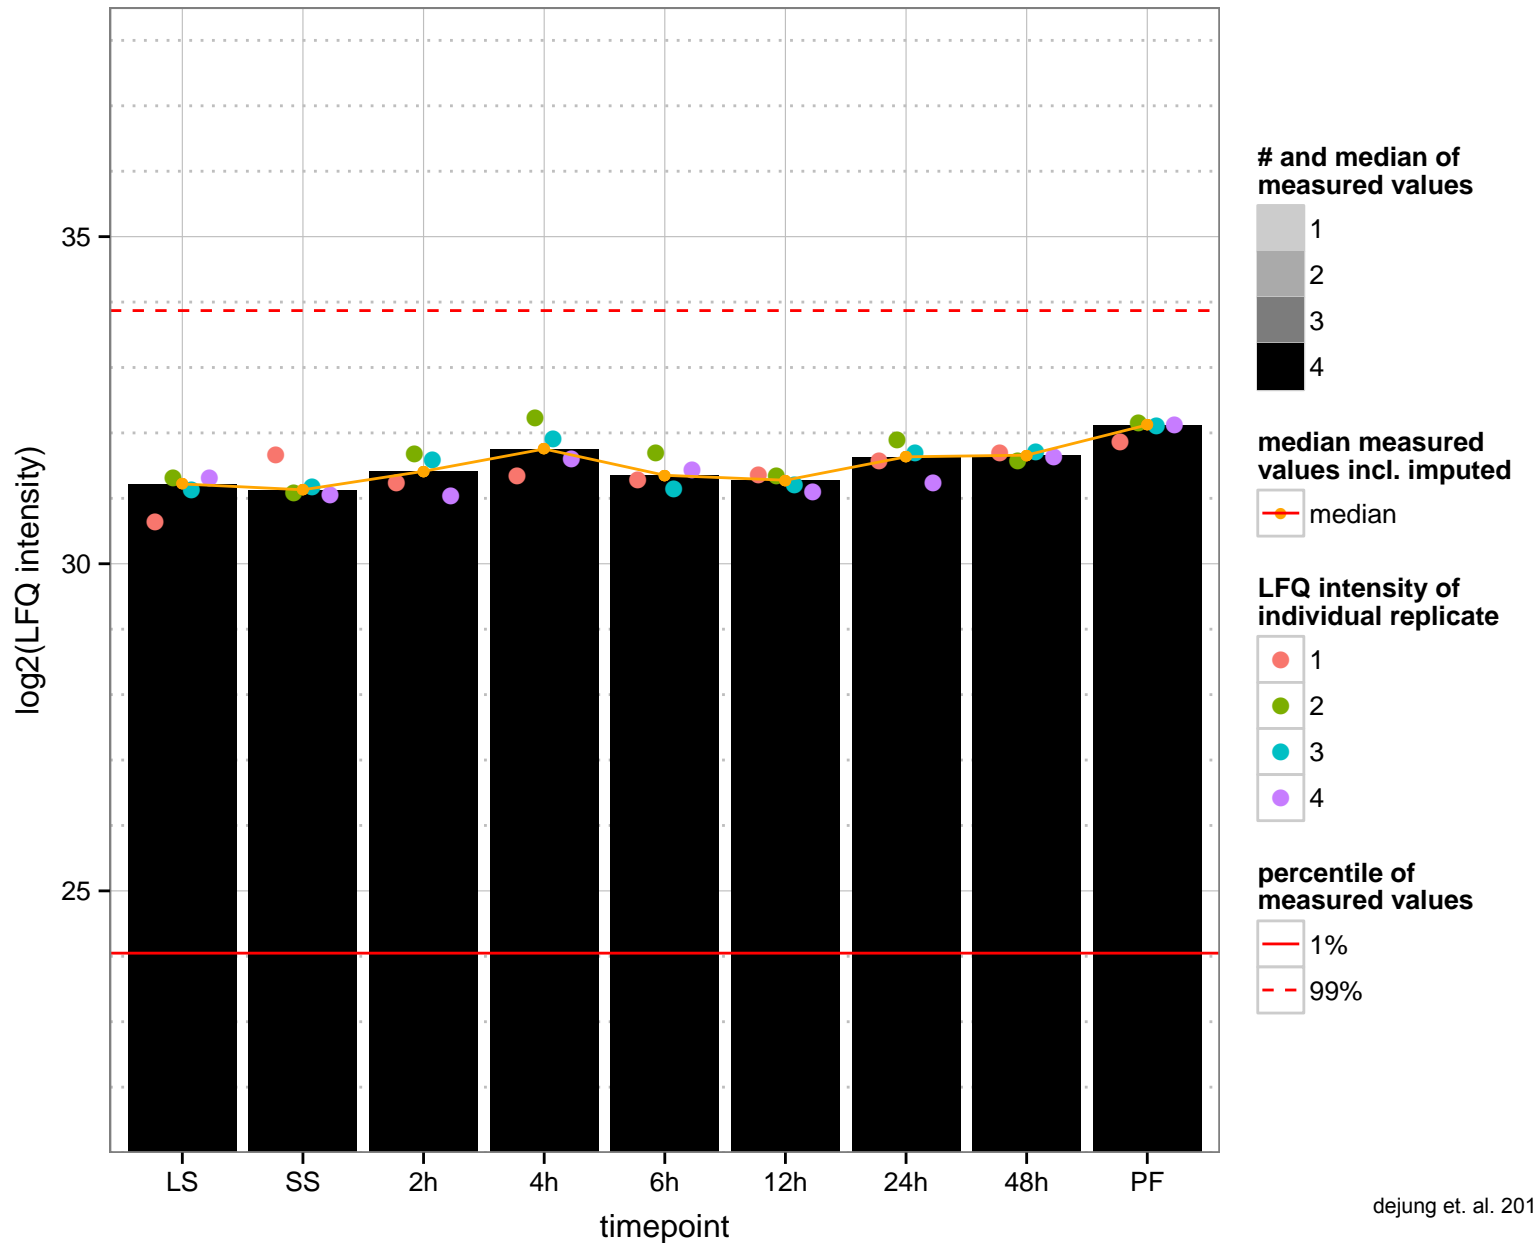

nucleoside hydrolase, putative, inosine-guanine nucleoside hydrolase (IG-NH)  
 Tb927.7.4570;Tb11.v5.0270  
 AGOF: null, inosine nucleosidase activity  
 AGOC: null  
 AGOP: null, guanosine salvage, inosine salvage  
 PGO: null  
 PGOC: null  
 PGOP: null

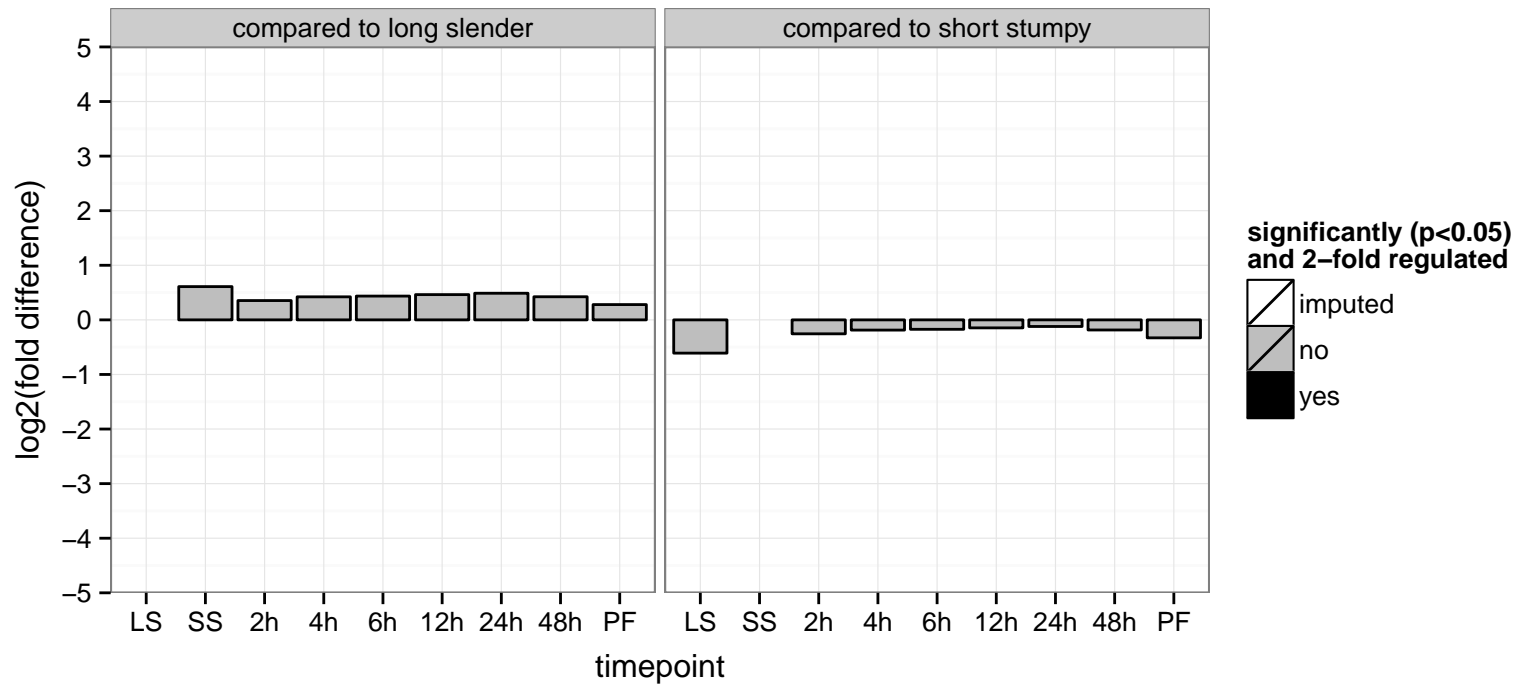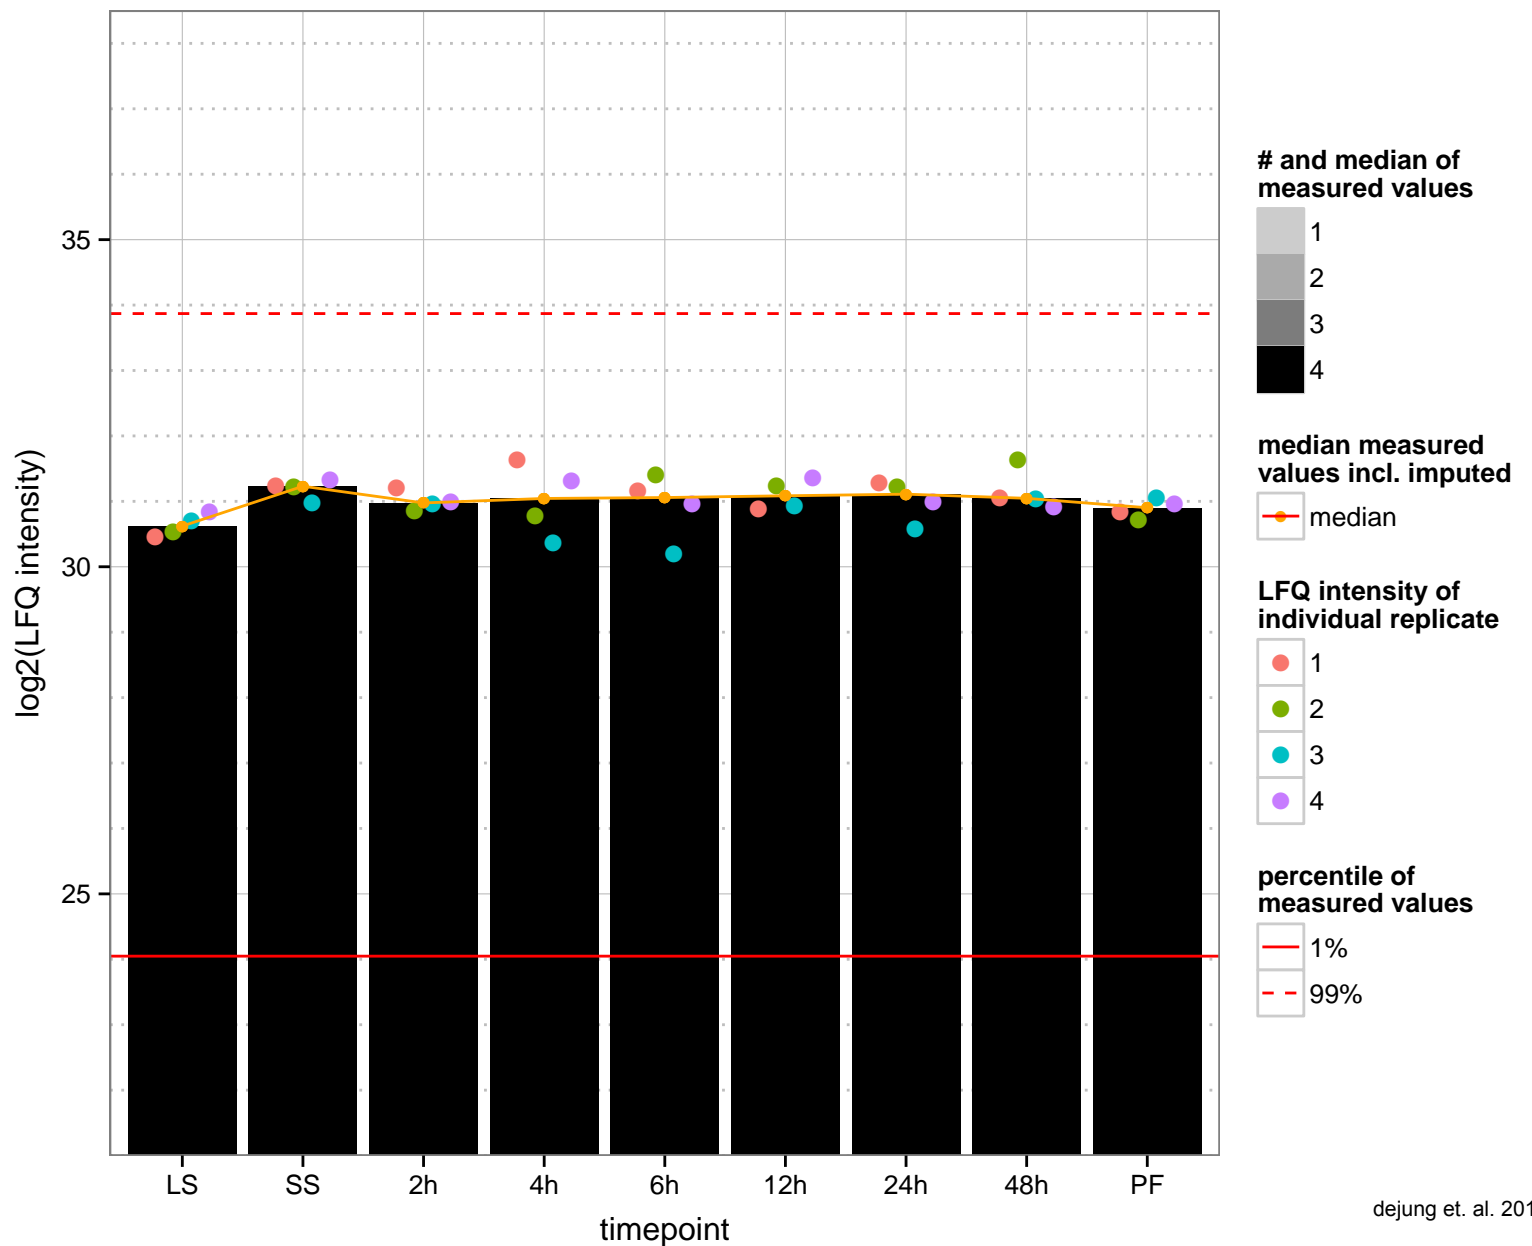

trypanin, putative, trypanin (trypanin)  
 Tb927.10.6350;Tb11.v5.0271  
 AGOF: null  
 AGOC: null, cilium  
 AGOP: null, cellular component movement  
 PGO: null  
 PGO: microtubule-based flagellum  
 PGO: cell motility

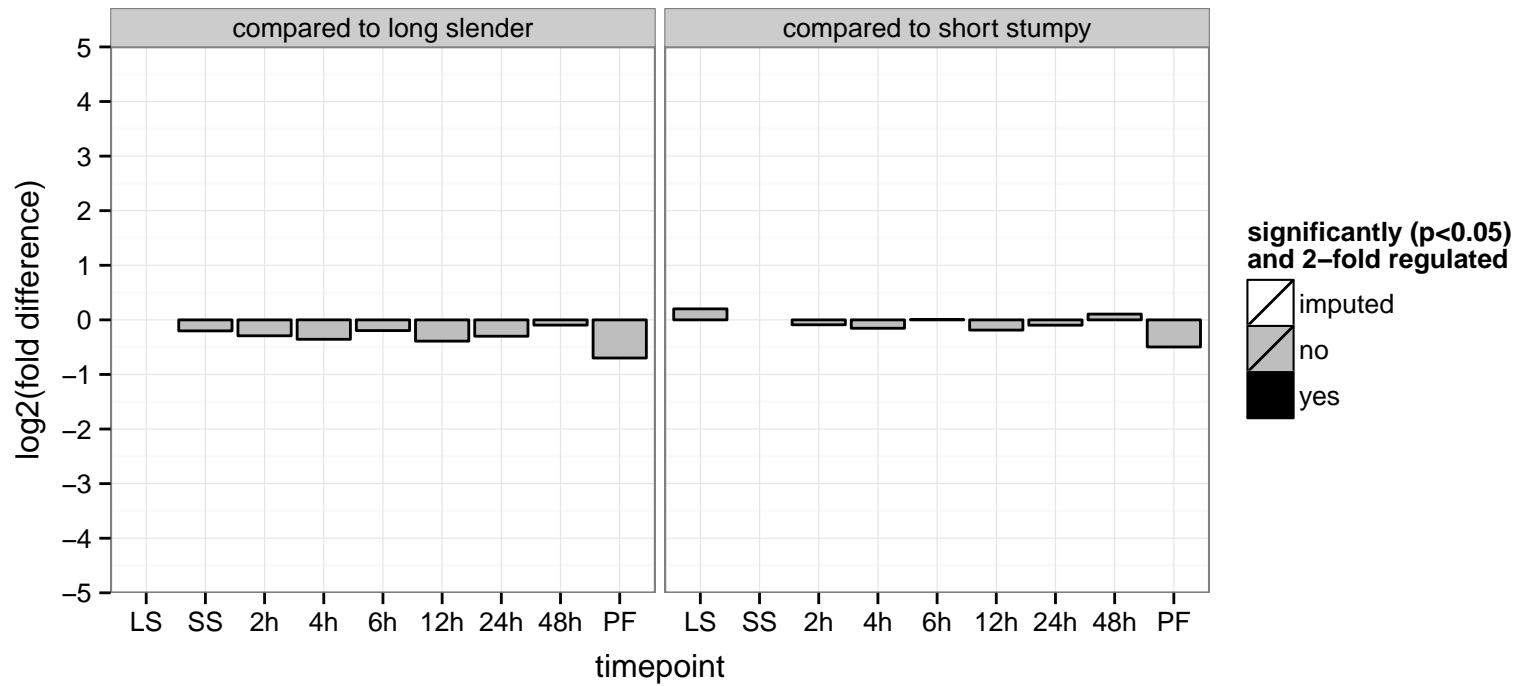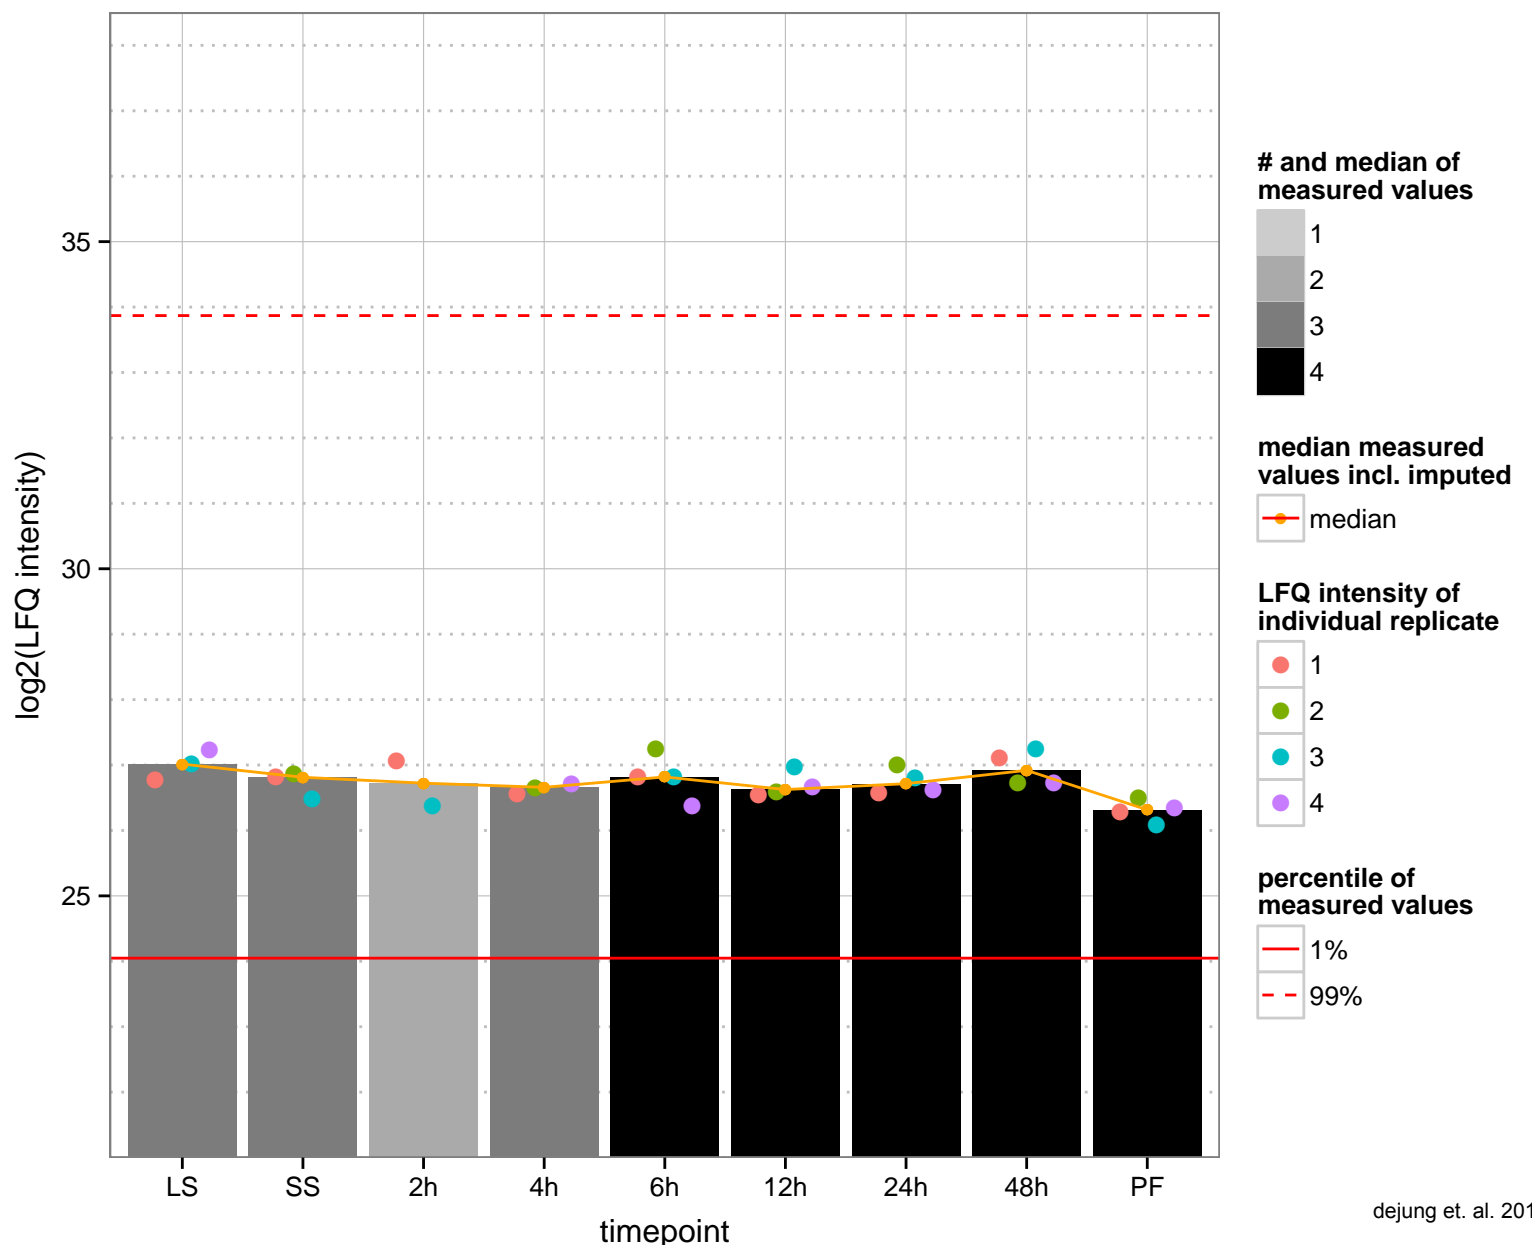



hypothetical protein, conserved, kinetoplastid kinetochore protein 1 (kkt1)  
 Tb927.10.6330;Tb11.v5.0273  
 AGOF: null  
 AGOC: null, kinetochore  
 AGOP: null, chromosome segregation  
 PGO: null  
 PGOC: null  
 PGOP: null

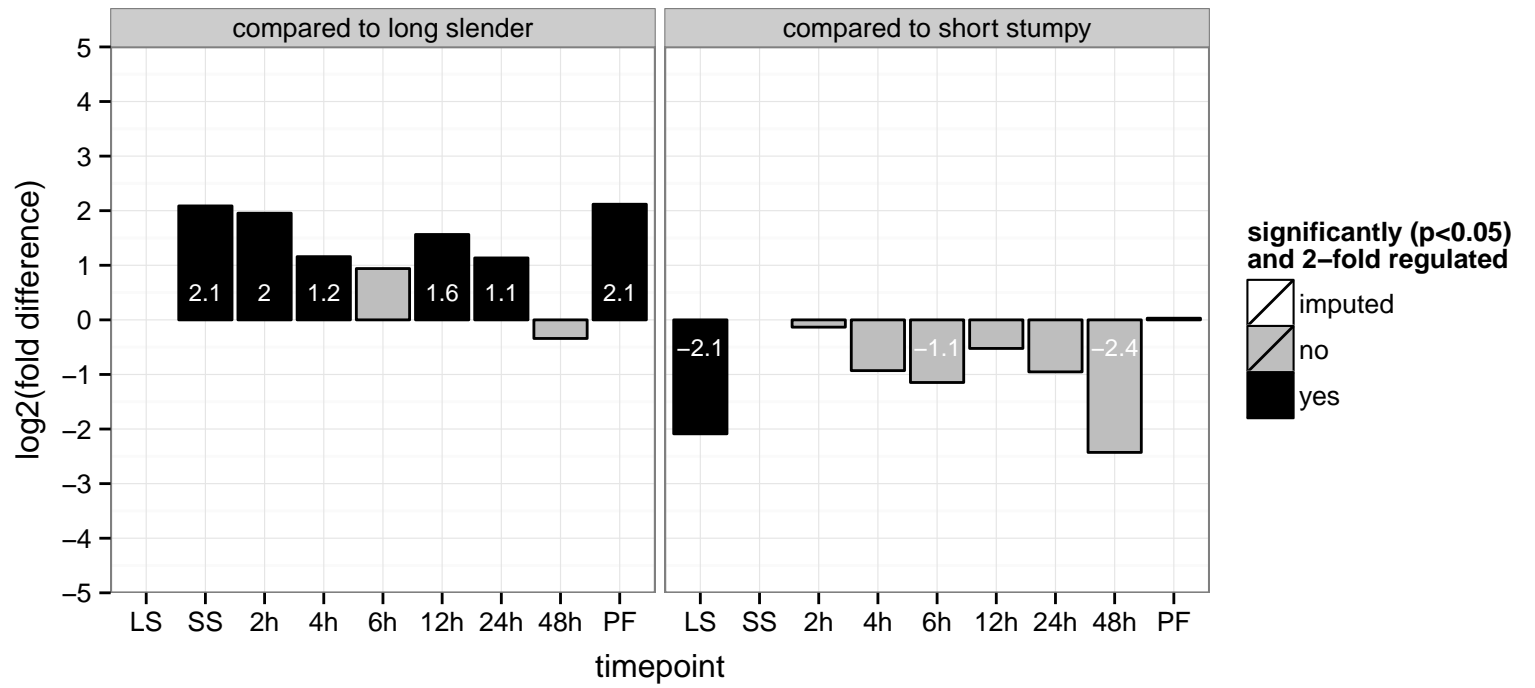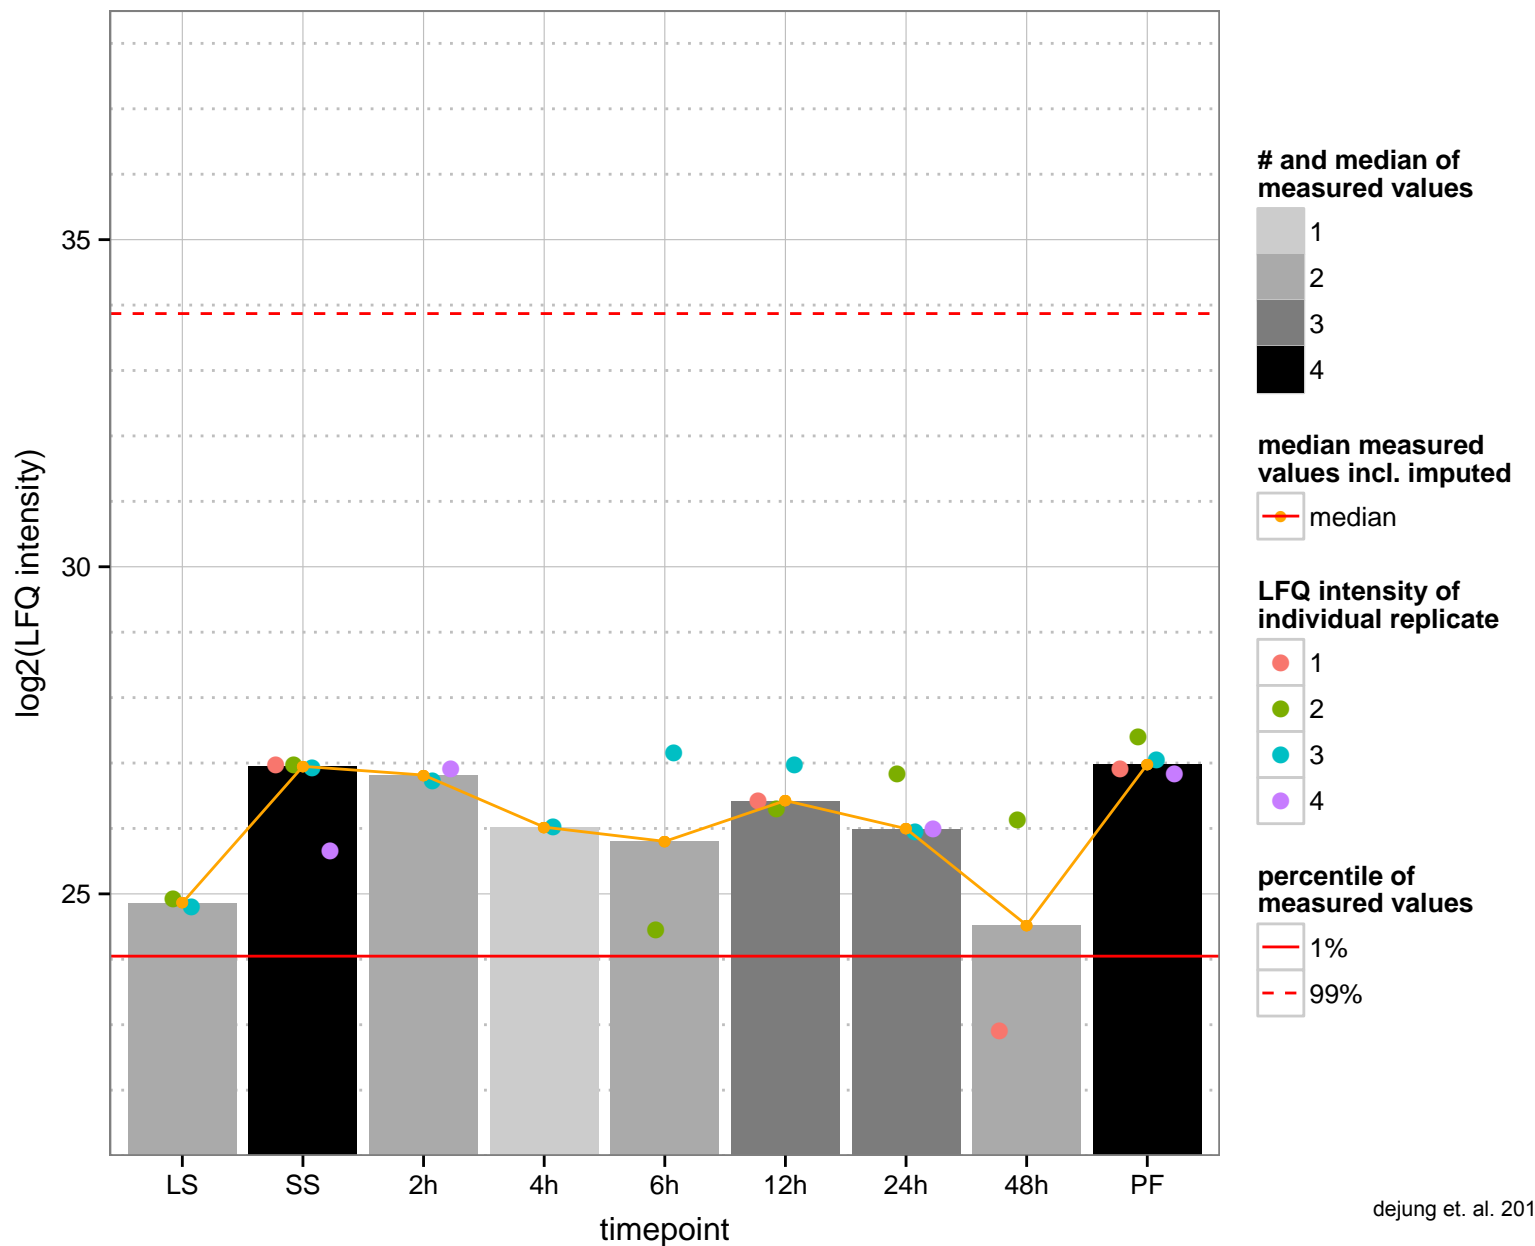

major vault protein, putative, putative (MVP)  
 Tb927.10.6310;Tb11.v5.0275  
 AGOF: null  
 AGOC: null  
 AGOP: null, negative regulation of signaling  
 PGO: null  
 PGO: null  
 PGO: null

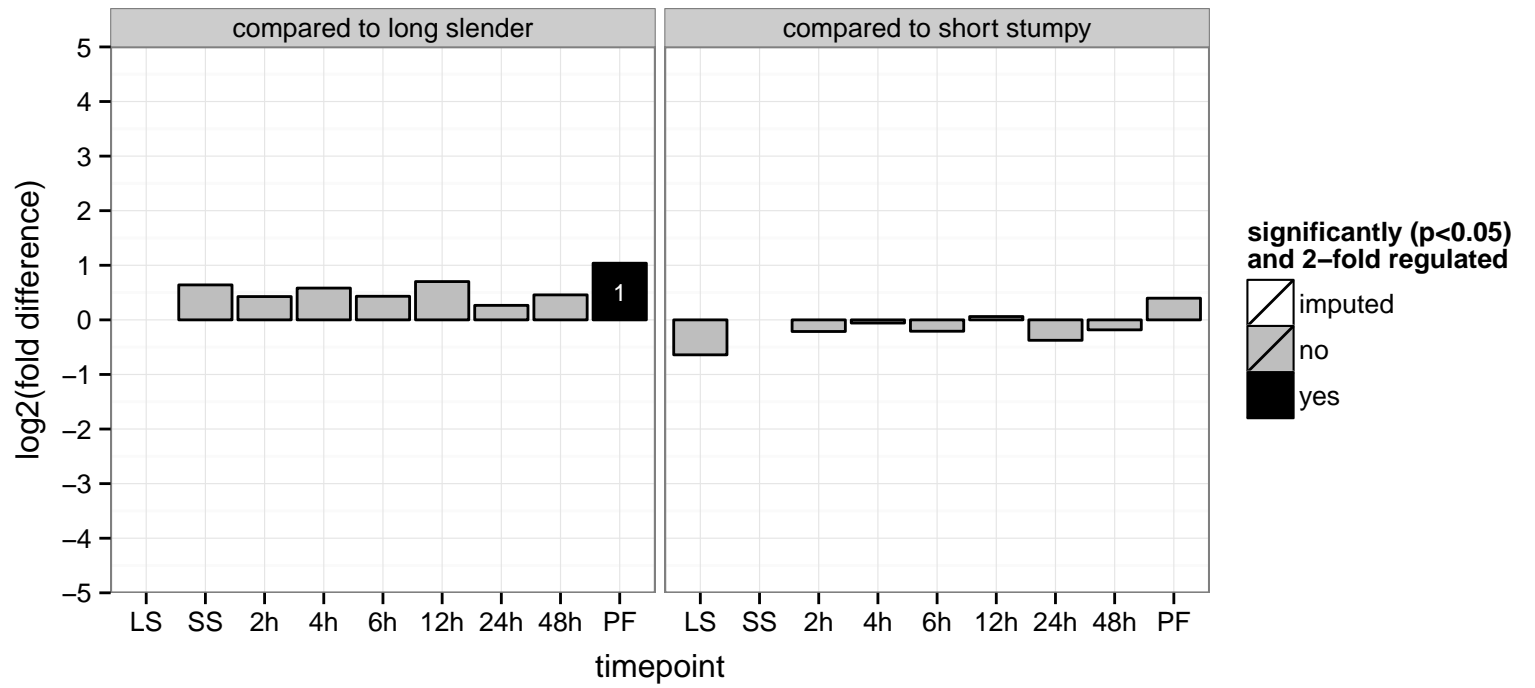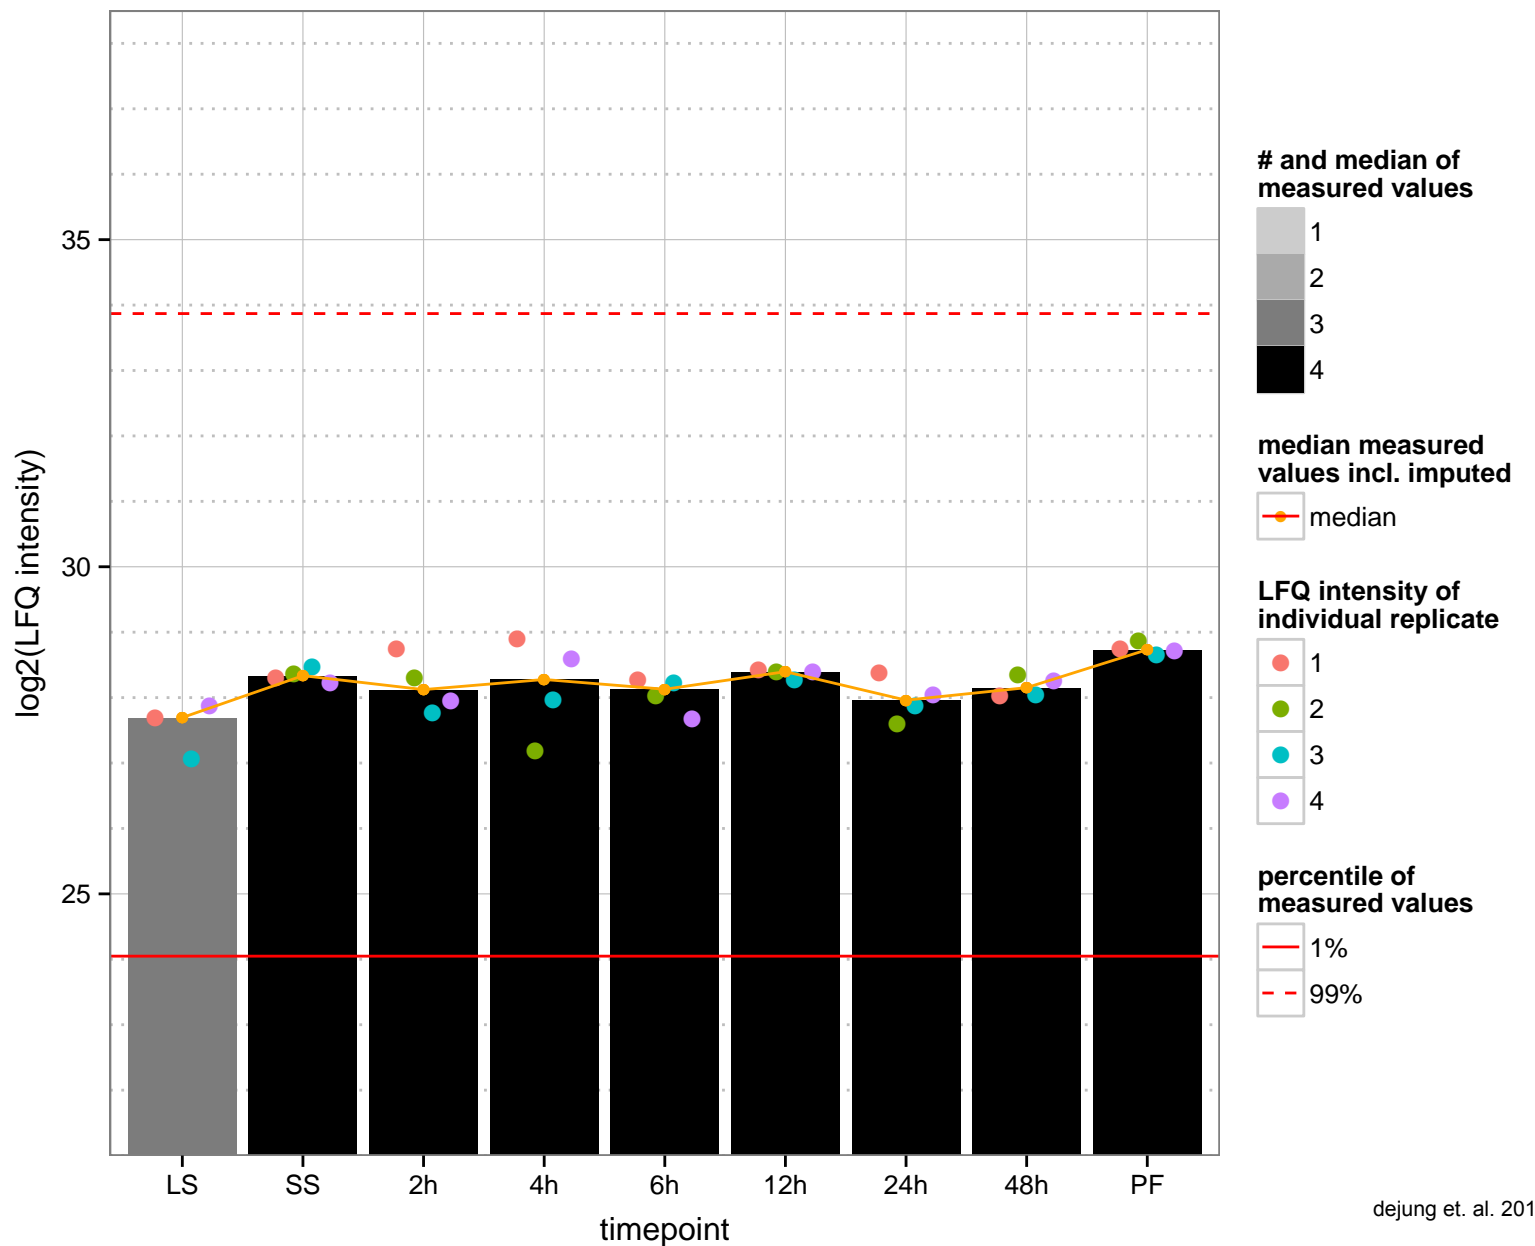

ATP-dependent DEAD/H RNA helicase, putative

Tb927.10.6290;Tb11.v5.0277

AGOF: null, ATP binding, ATP-dependent helicase activity, helicase activity, nucleic acid binding

AGOC: null

AGOP: null, nucleobase-containing compound metabolic process

PGOF: ATP binding, ATP-dependent helicase activity, helicase activity, nucleic acid binding

PGOC: null

PGOP: null

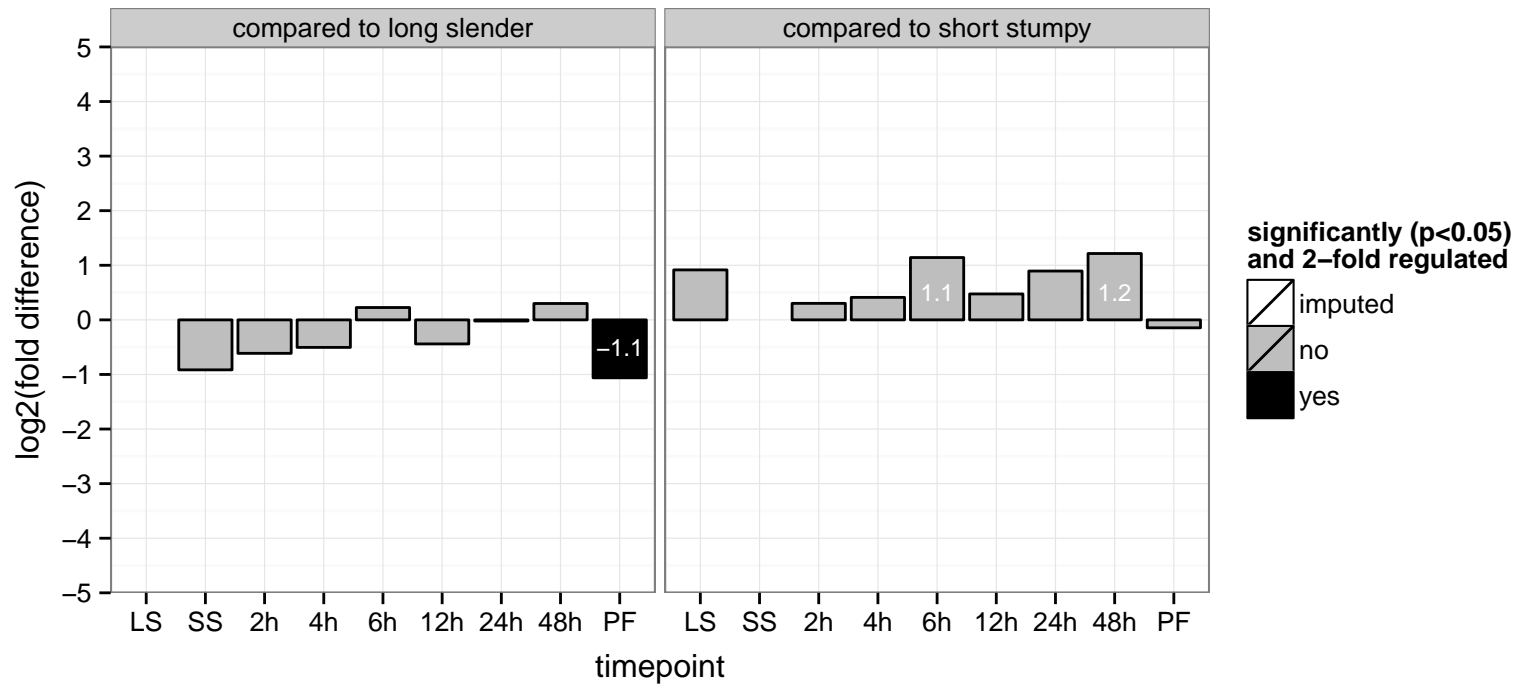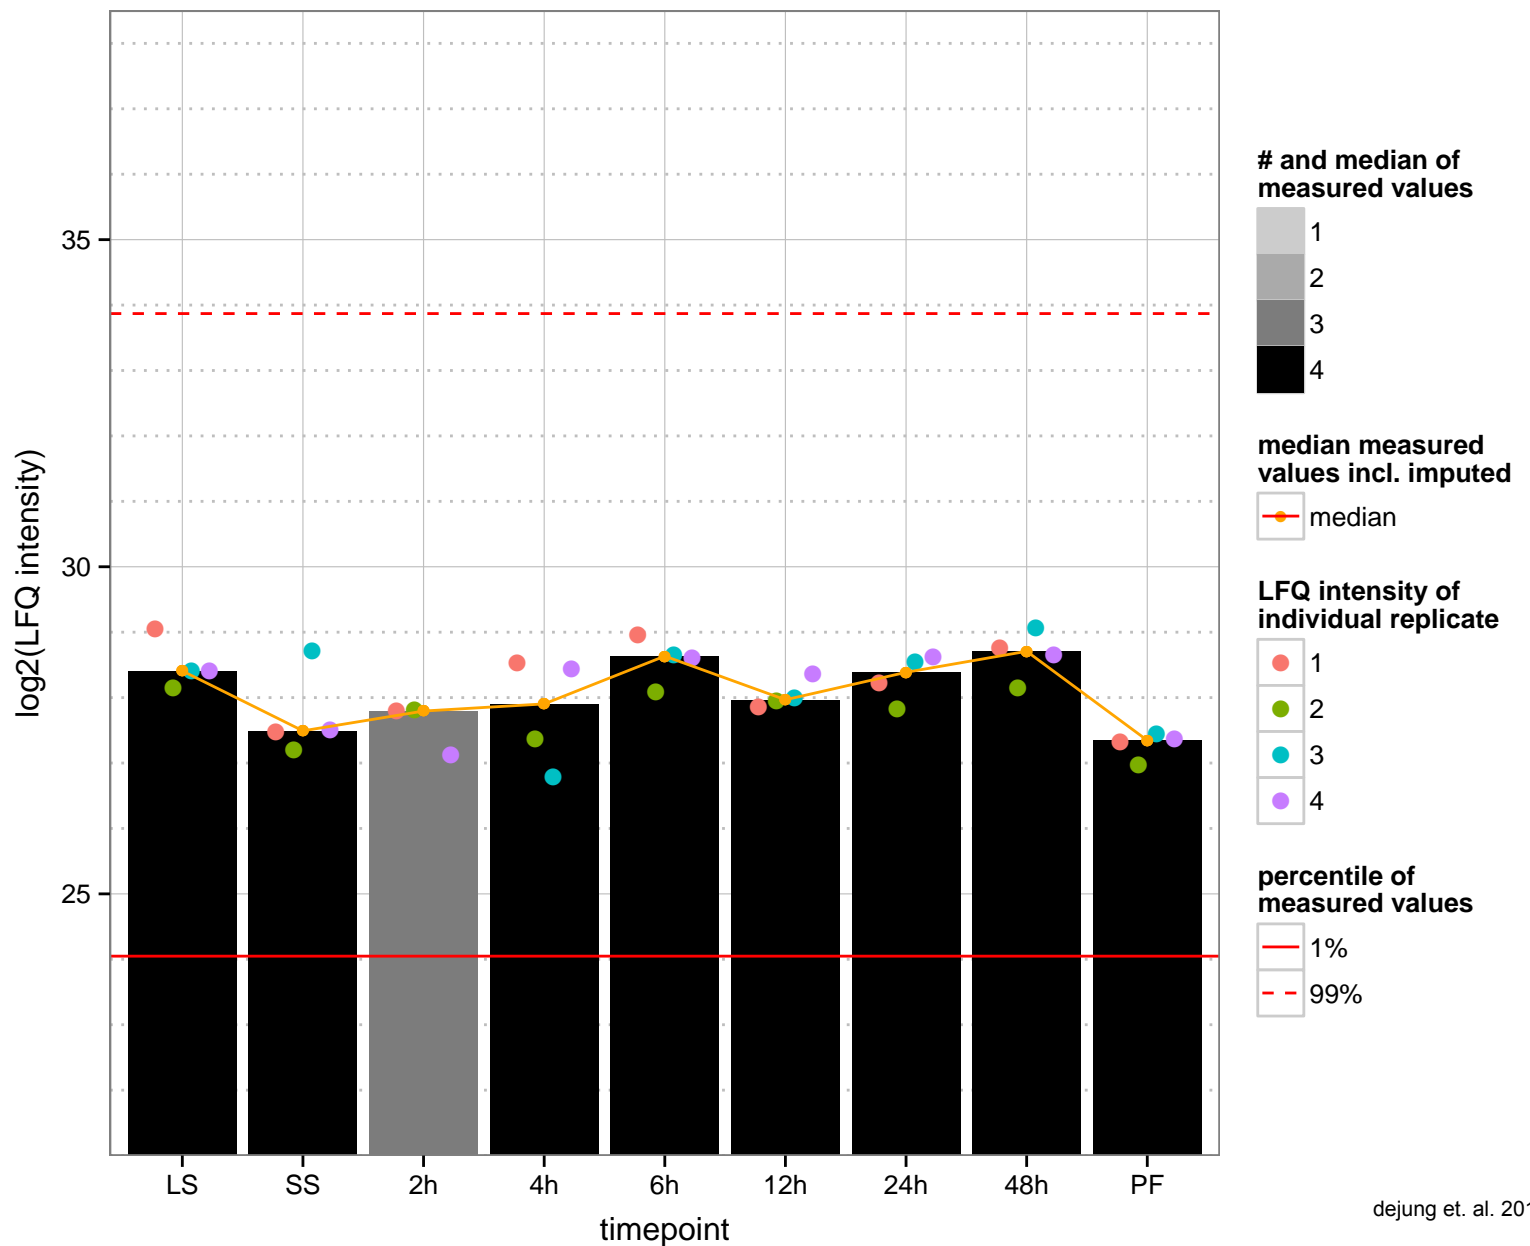

cleavage and polyadenylation specificity factor 30 kDa subunit, putative, CPSF 30 kDa subunit, NS1 effector domain– binding  
 Tb927.11.12750;Tb11.v5.0291  
 AGOF: null, RNA binding, nucleic acid binding, zinc ion binding  
 AGOC: null, mRNA cleavage and polyadenylation specificity factor complex  
 AGOP: null, RNA processing  
 PGO: nucleic acid binding, zinc ion binding  
 PGOC: null  
 PGOP: null

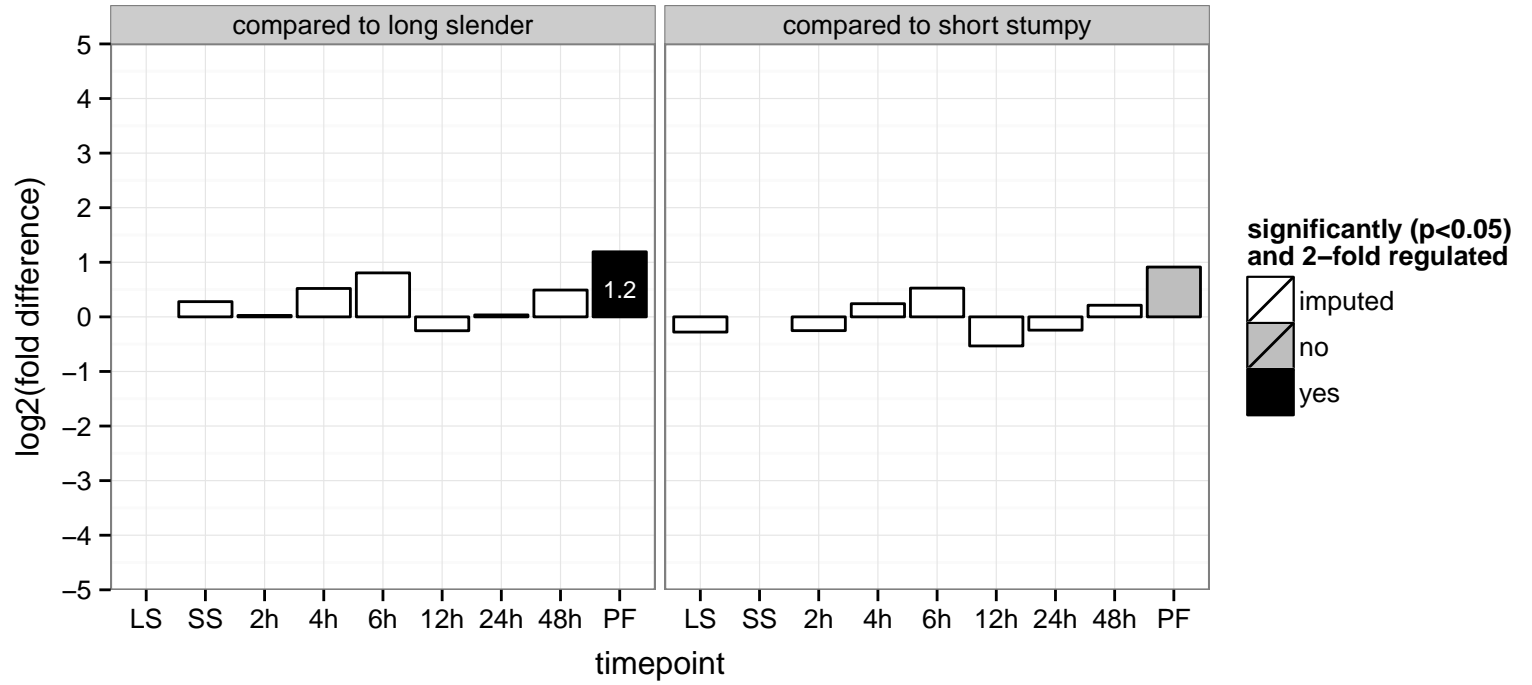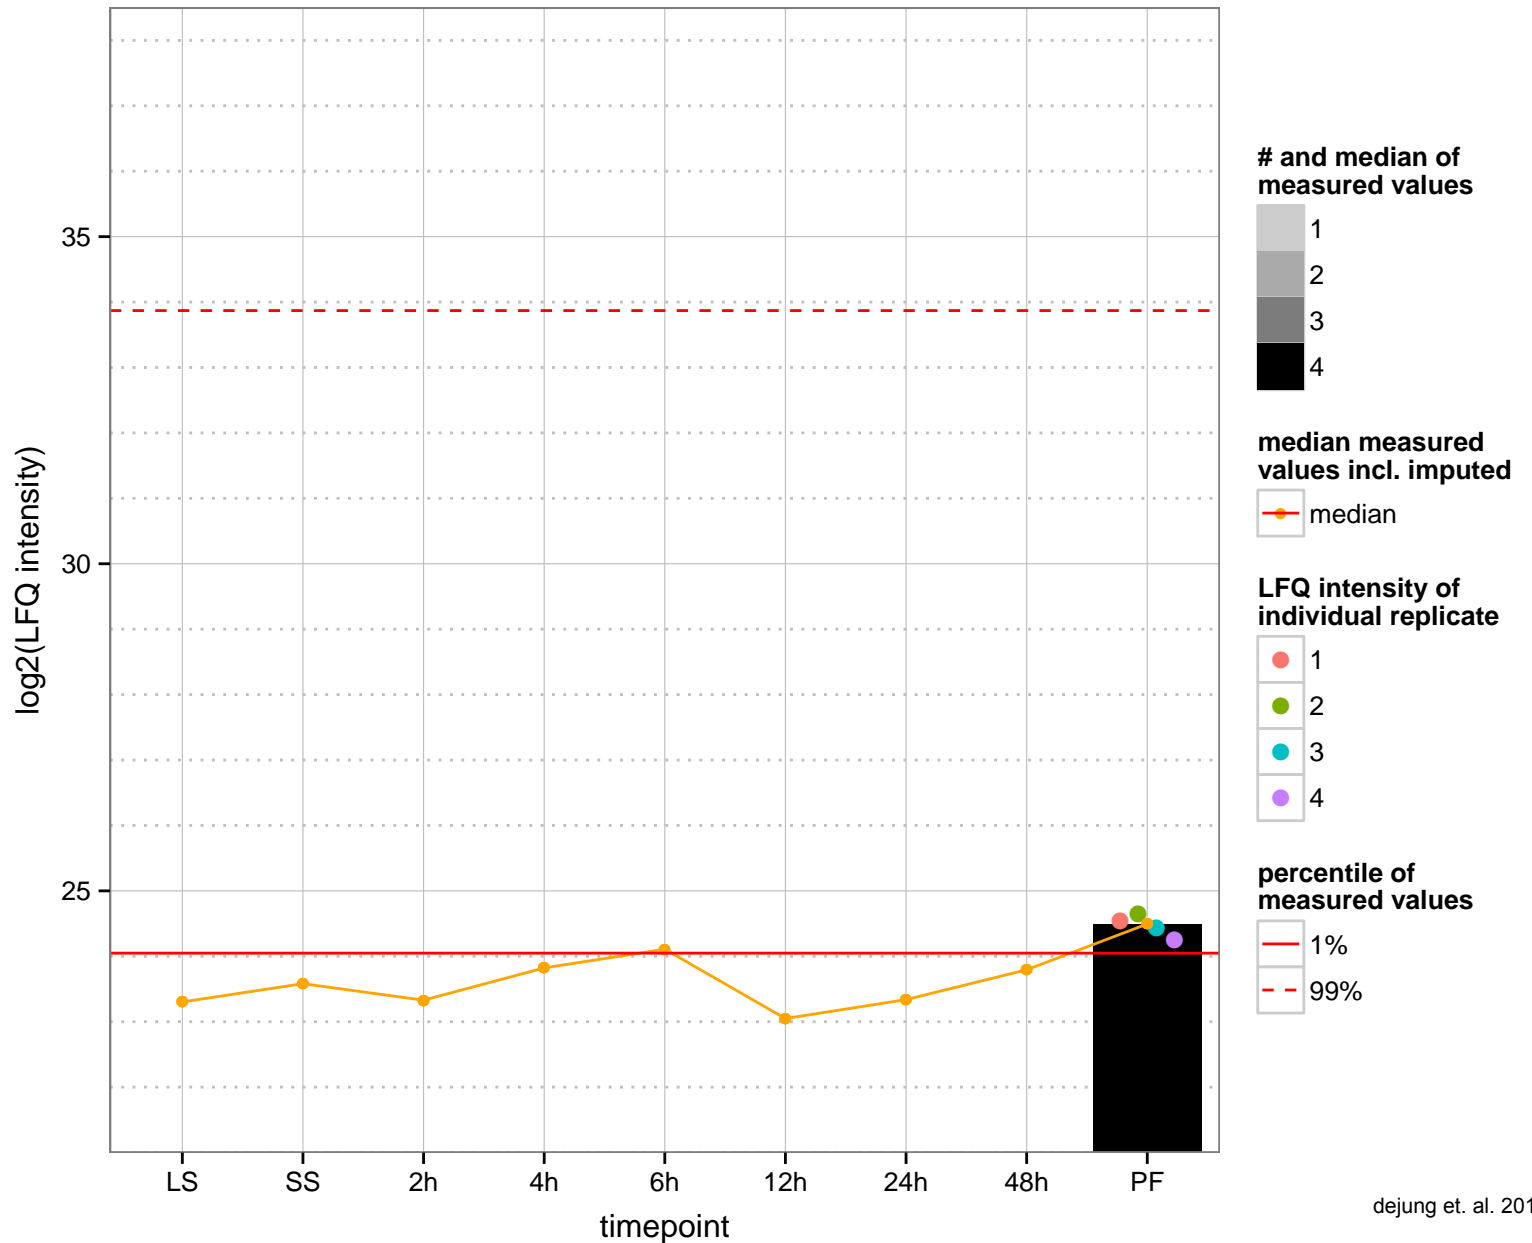

TFIID-like protein, putative, putative (TRF4)  
 Tb927.10.15950;Tb11.v5.0305  
 AGOF: null, DNA binding  
 AGOC: null, nucleus, transcription factor TFIID complex  
 AGOP: null, regulation of transcription, DNA-dependent, transcription initiation from RNA polymerase II promoter  
 PGO: DNA binding  
 PGOC: null  
 PGOP: regulation of transcription, DNA-dependent, transcription initiation from RNA polymerase II promoter

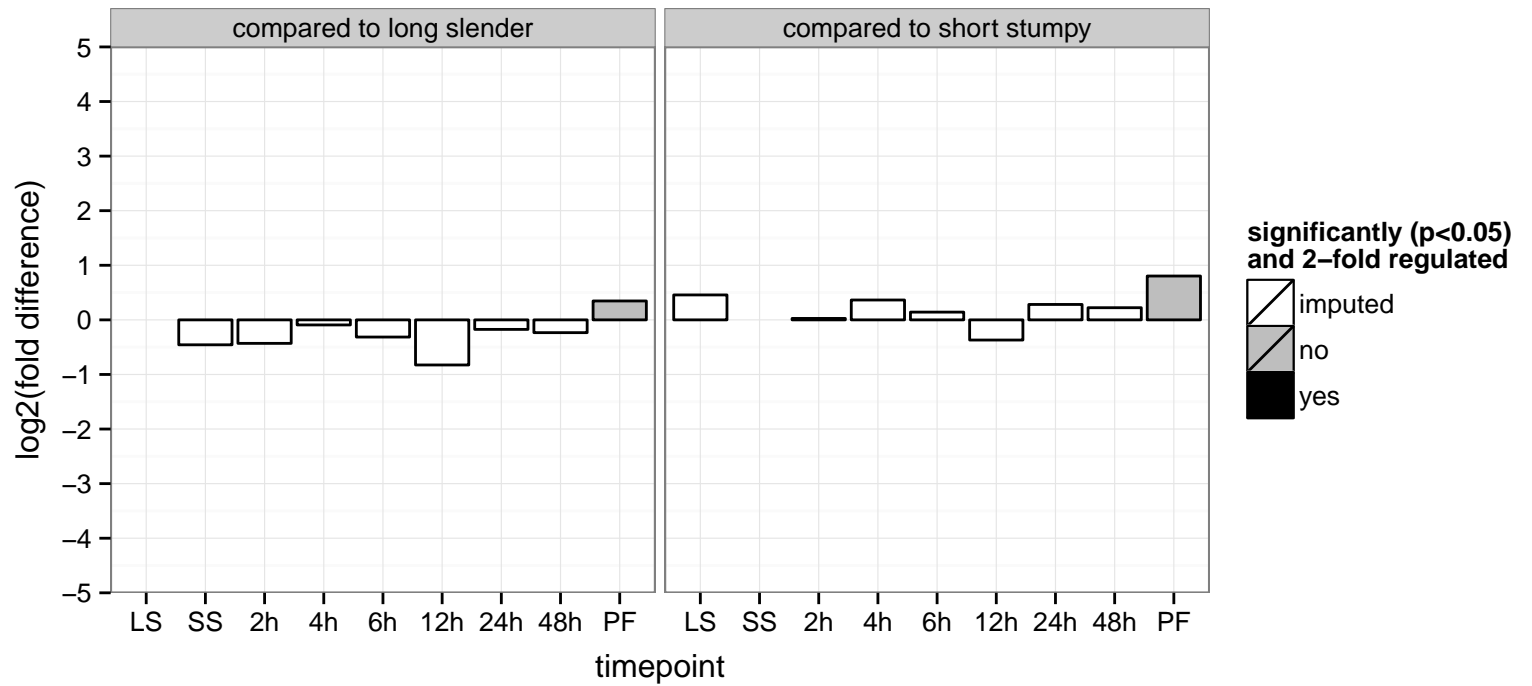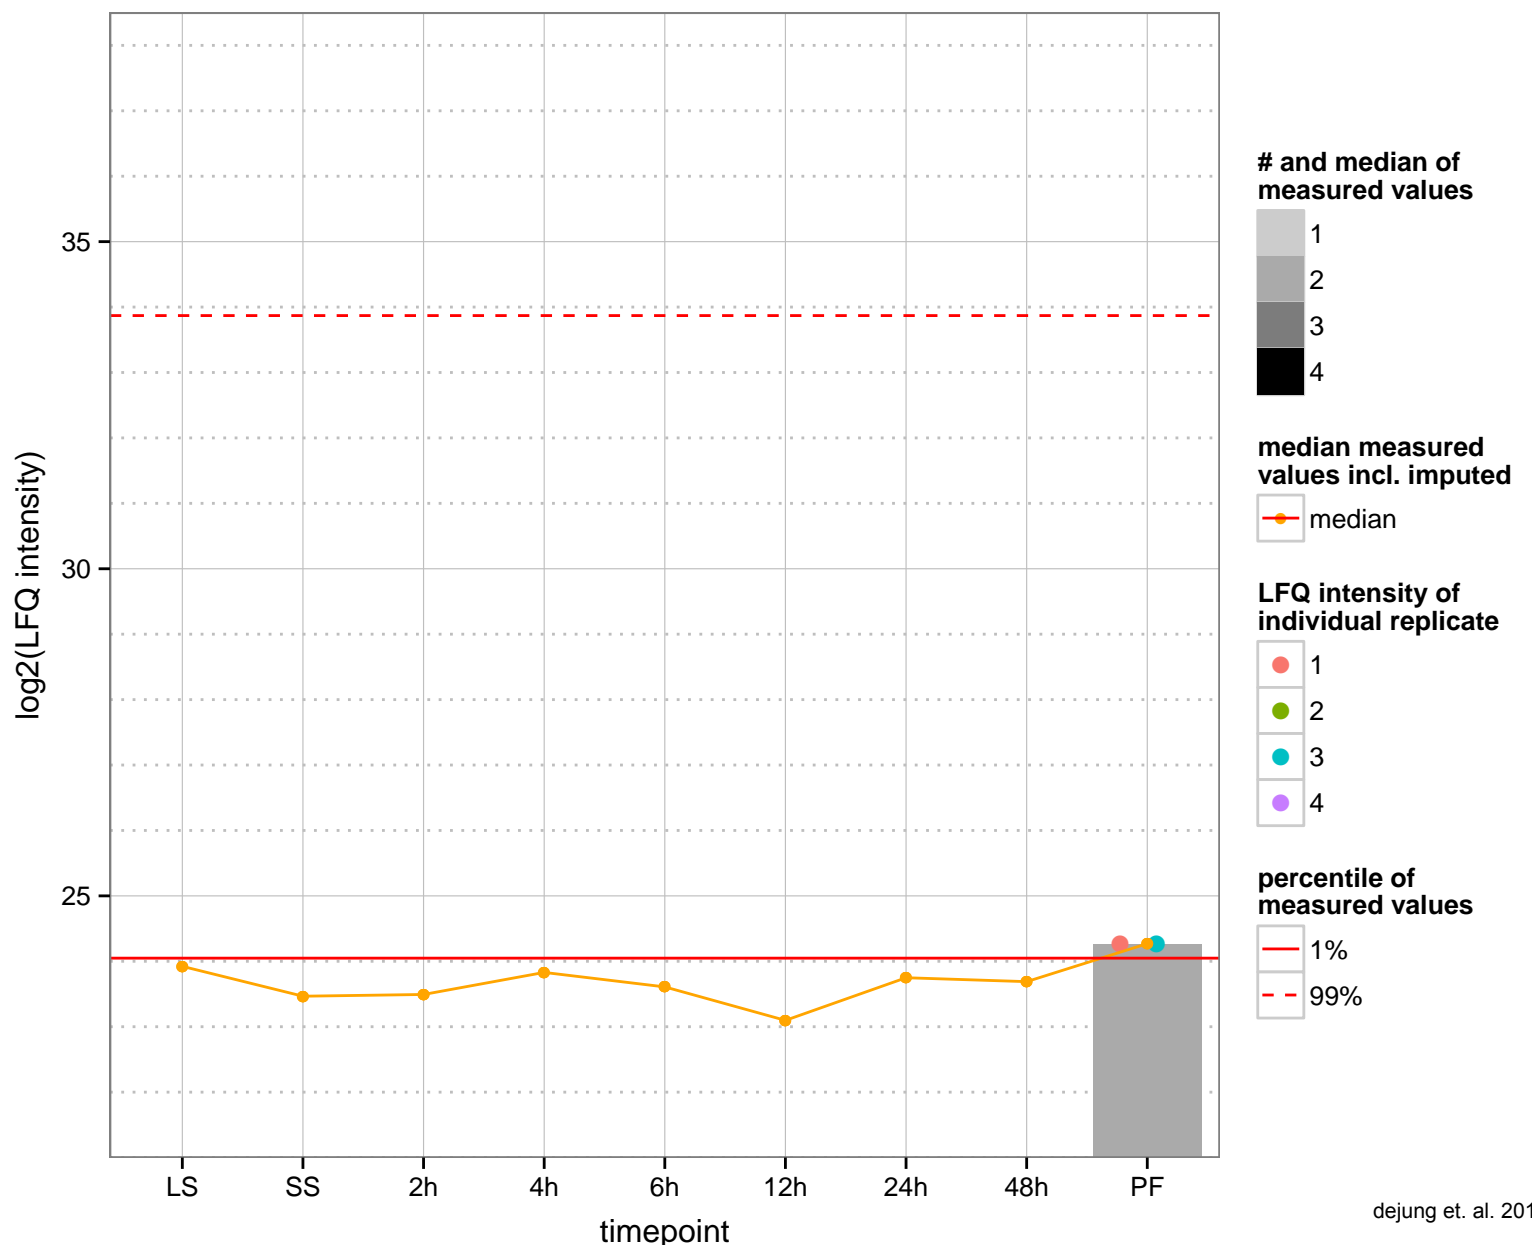

retrotransposon hot spot (RHS) protein, putative  
 Tb11.v5.0325  
 AGOF: null  
 AGOC: null  
 AGOP: null  
 PGOF: null  
 PGO: null  
 PGOP: null

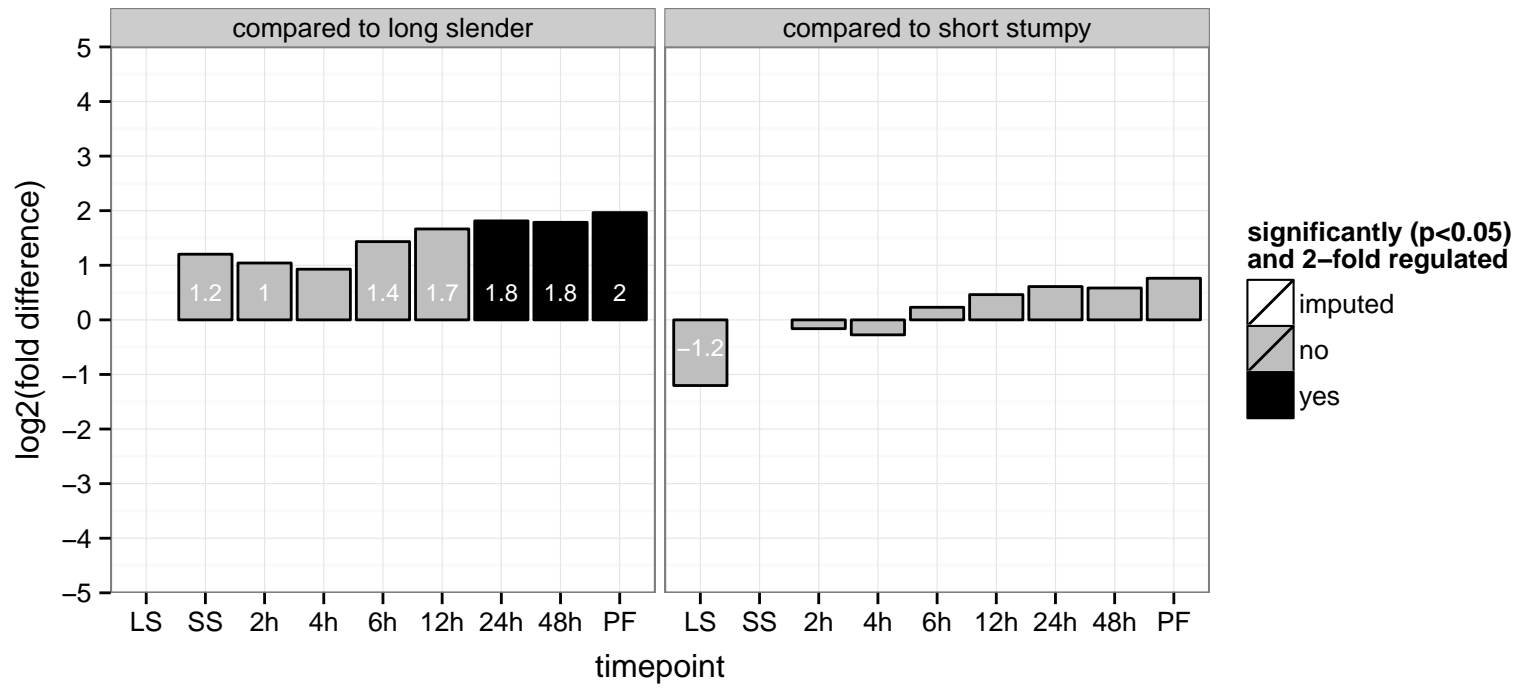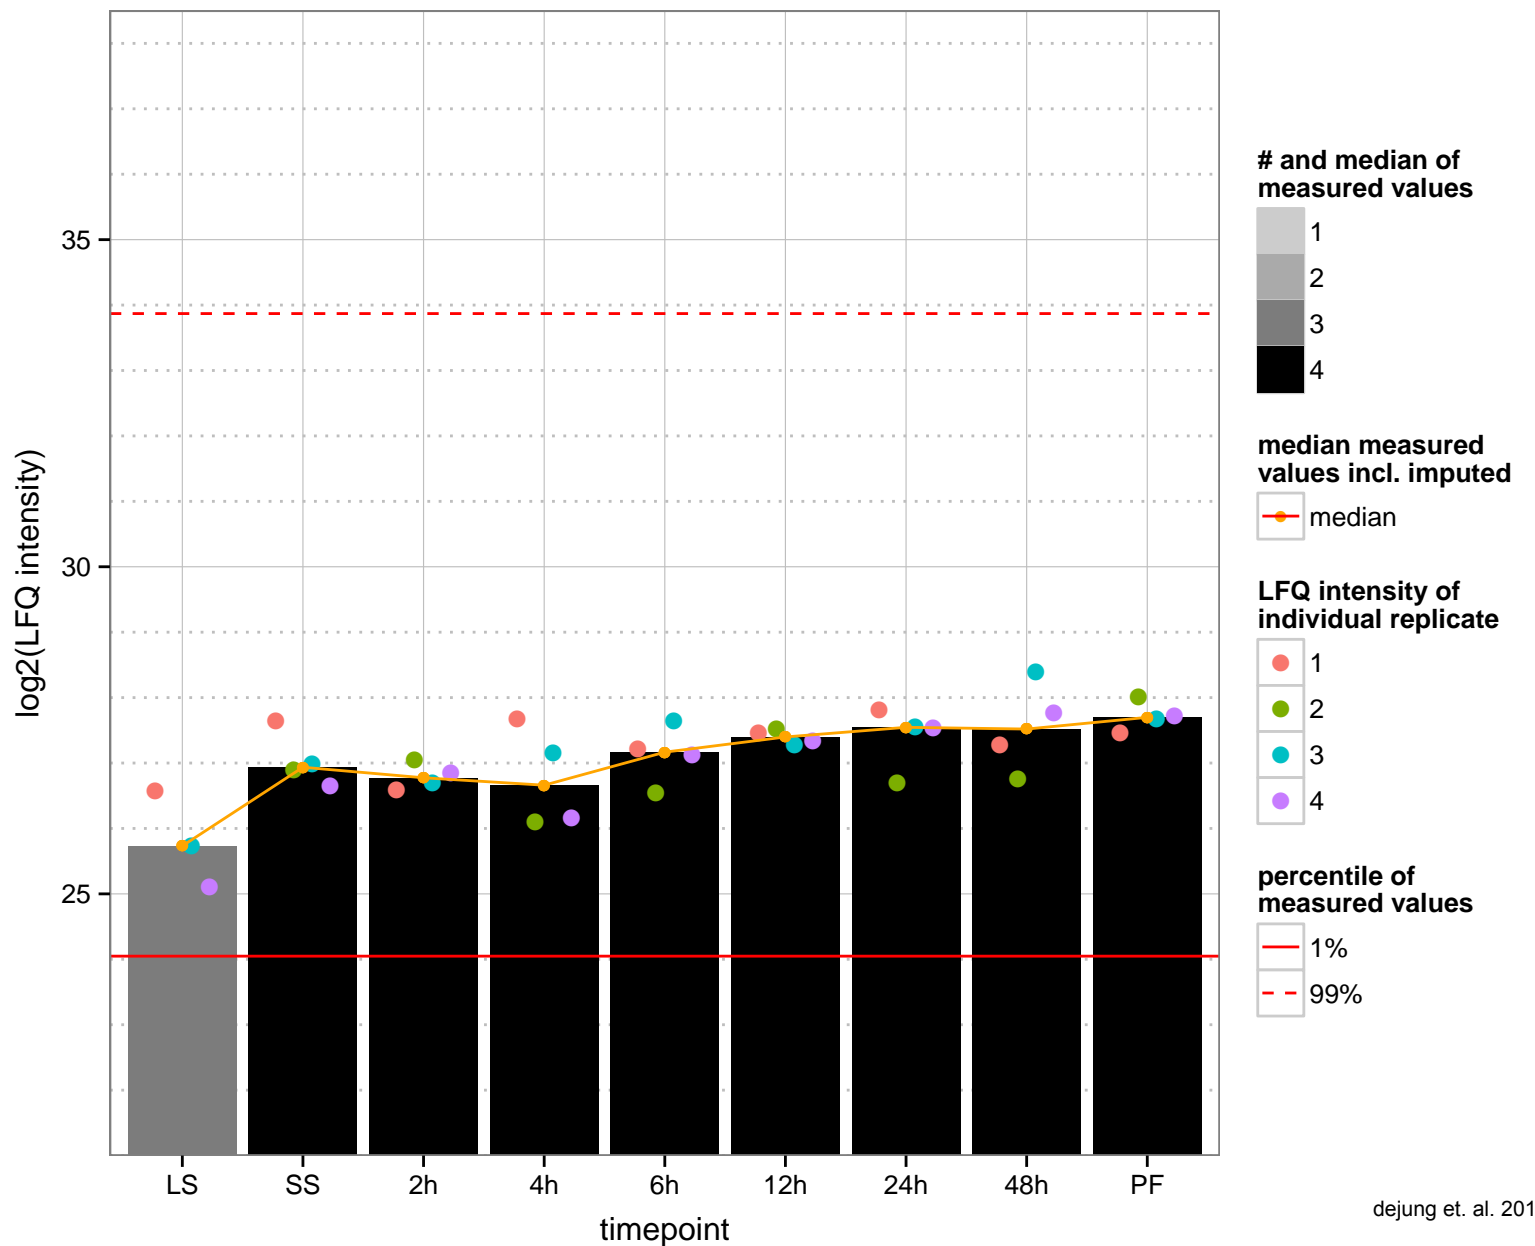

hypothetical protein, conserved, ribonuclease H, putative  
 Tb927.10.5070;Tb11.v5.0340  
 AGOF: null, RNA binding, ribonuclease H activity  
 AGOC: null, nucleus  
 AGOP: null, RNA catabolic process  
 PGOF: nucleic acid binding, ribonuclease H activity  
 PGO: null  
 PGOP: RNA metabolic process

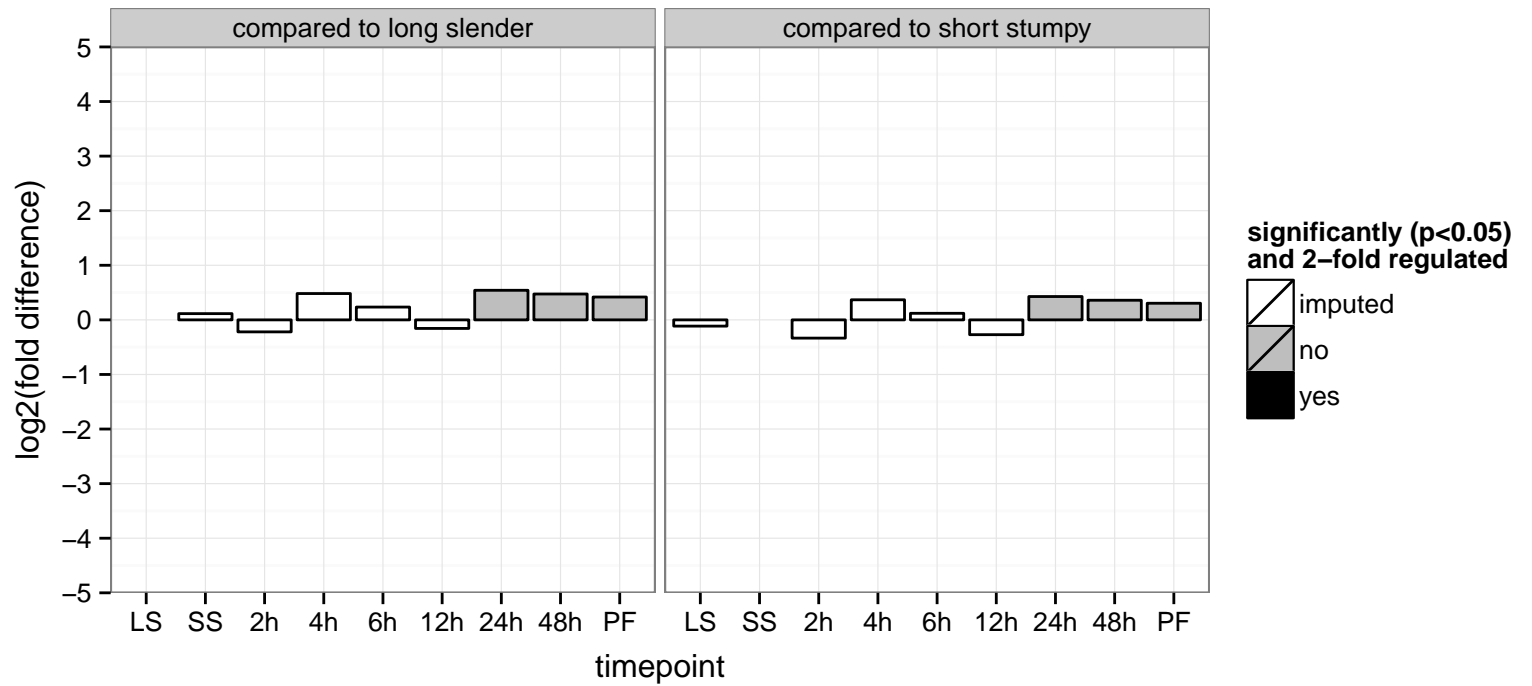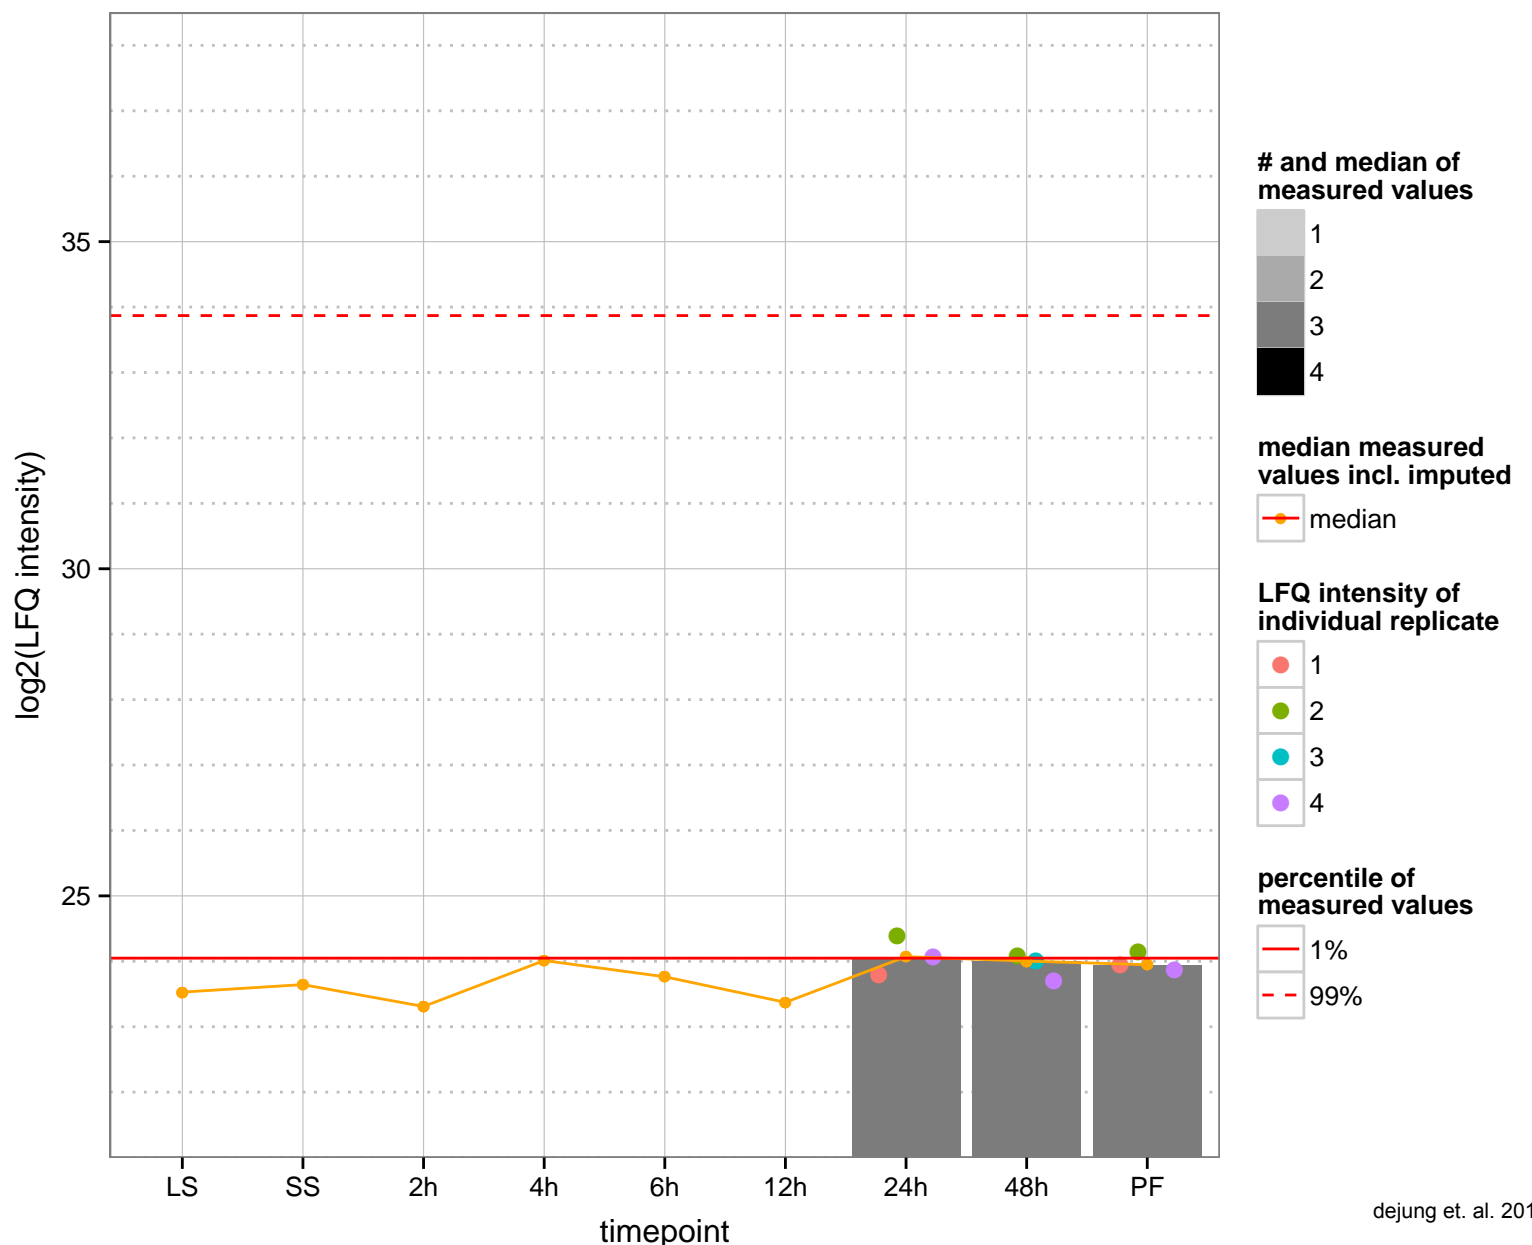

chaperone protein DNAj, putative  
 Tb927.10.5040;Tb11.v5.0342  
 AGOF: null, heat shock protein binding, unfolded protein binding  
 AGOC: null  
 AGOP: null, protein folding  
 PGO: heat shock protein binding  
 PGOC: null  
 PGOP: null

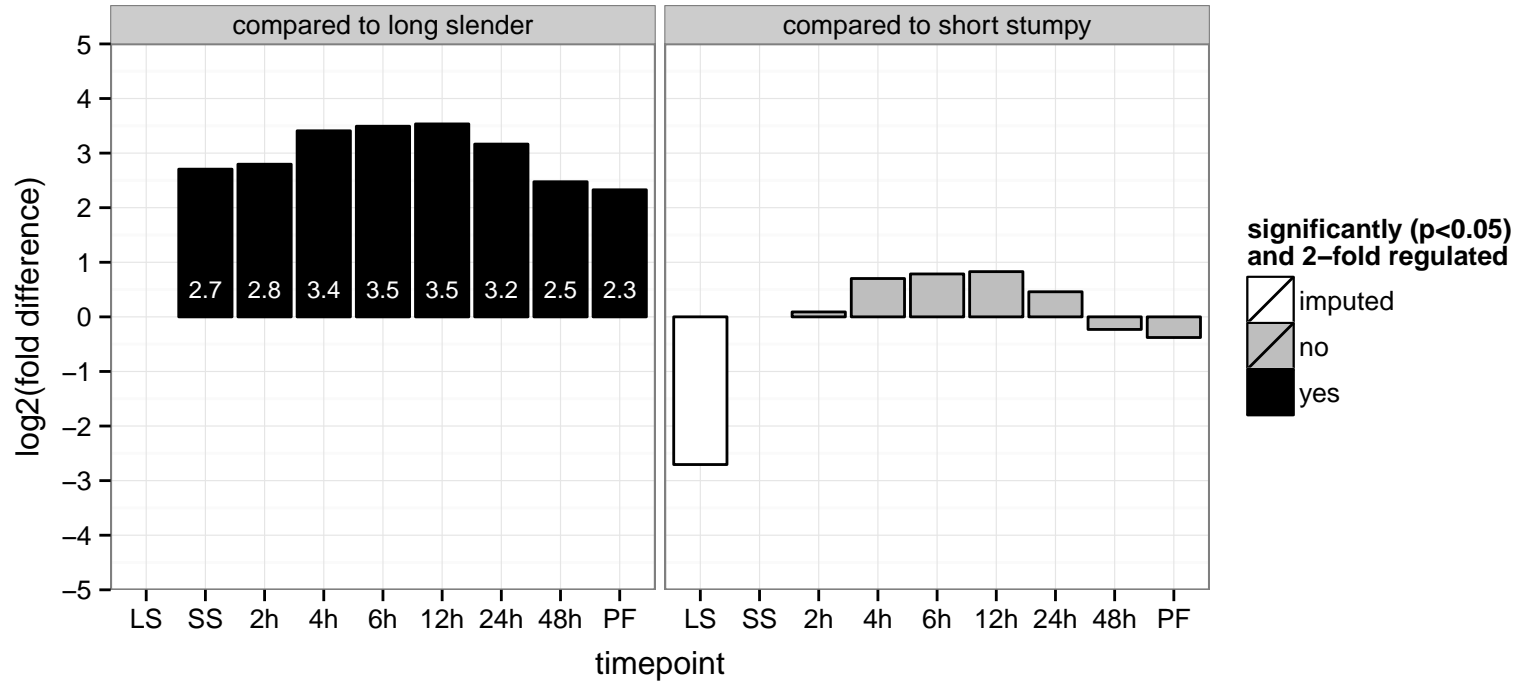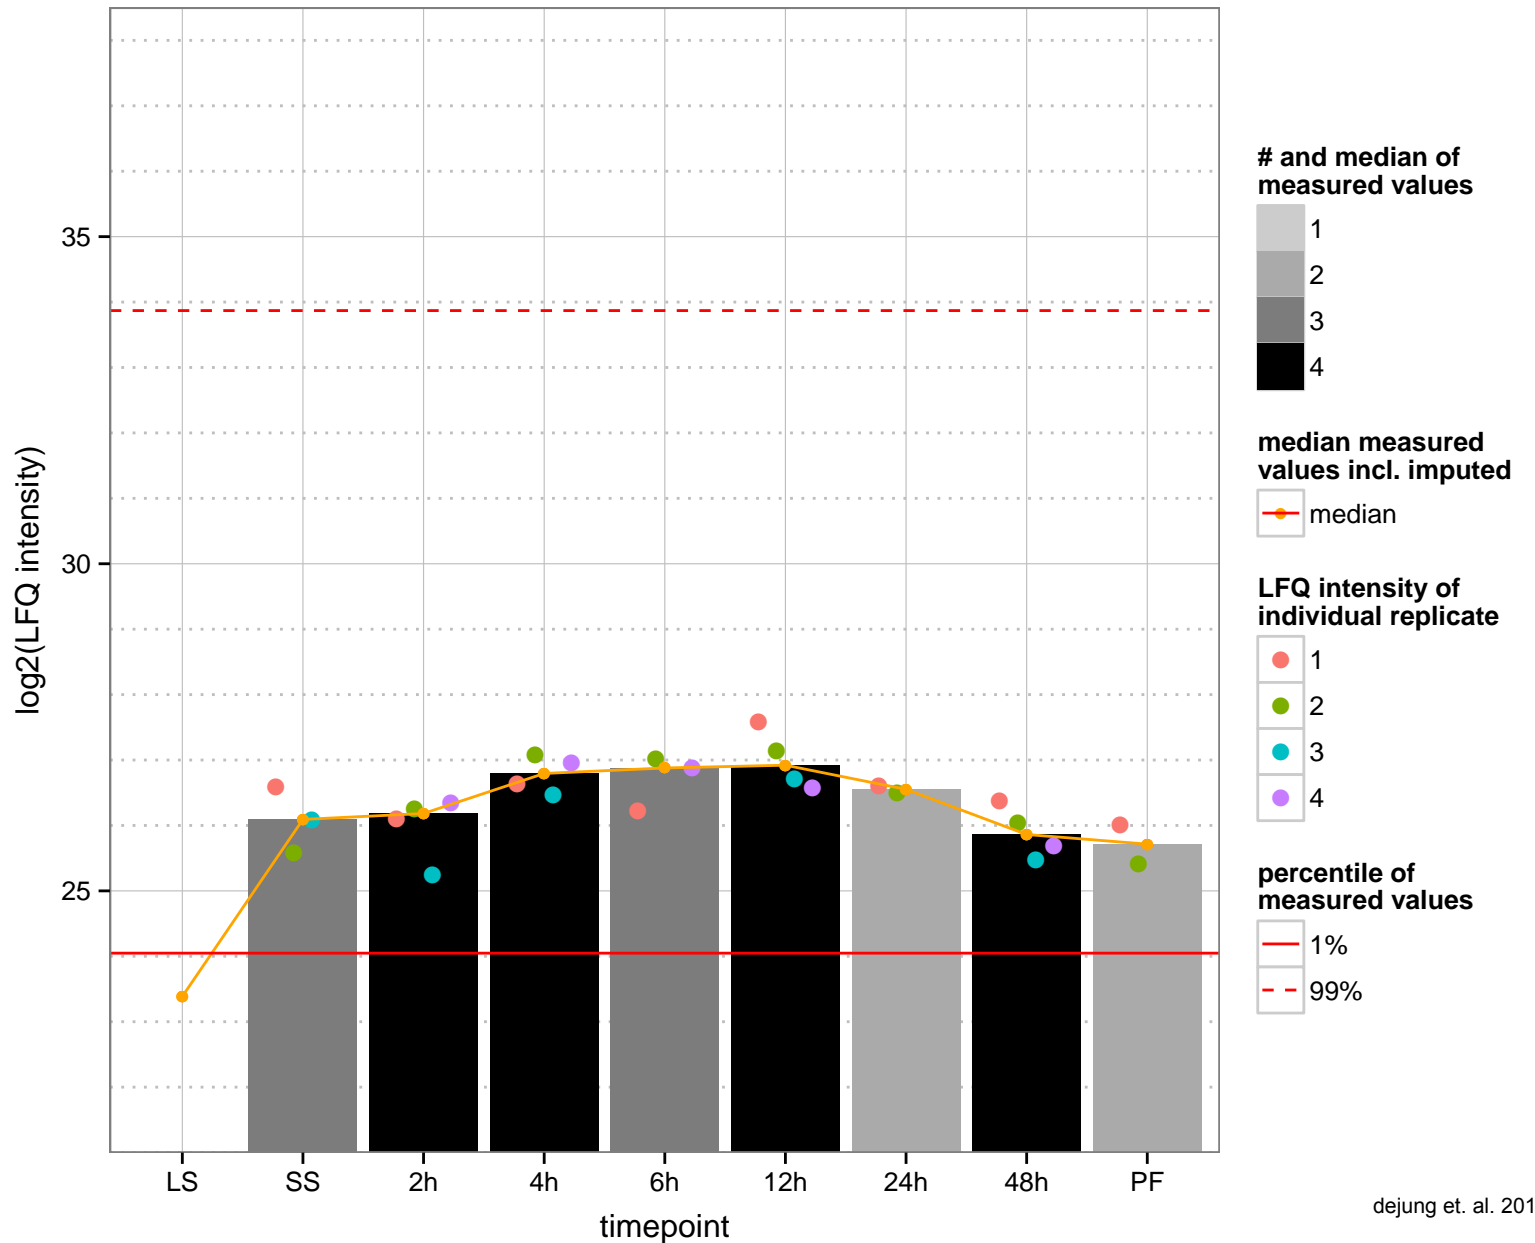



cytidine triphosphate synthase, putative  
 Tb927.1.1240;Tb11.v5.0356  
 AGOF: null, CTP synthase activity  
 AGOC: null, cytosol  
 AGOP: null, CTP biosynthetic process  
 PGO: CTP synthase activity  
 PGO: null  
 PGO: pyrimidine nucleotide biosynthetic process

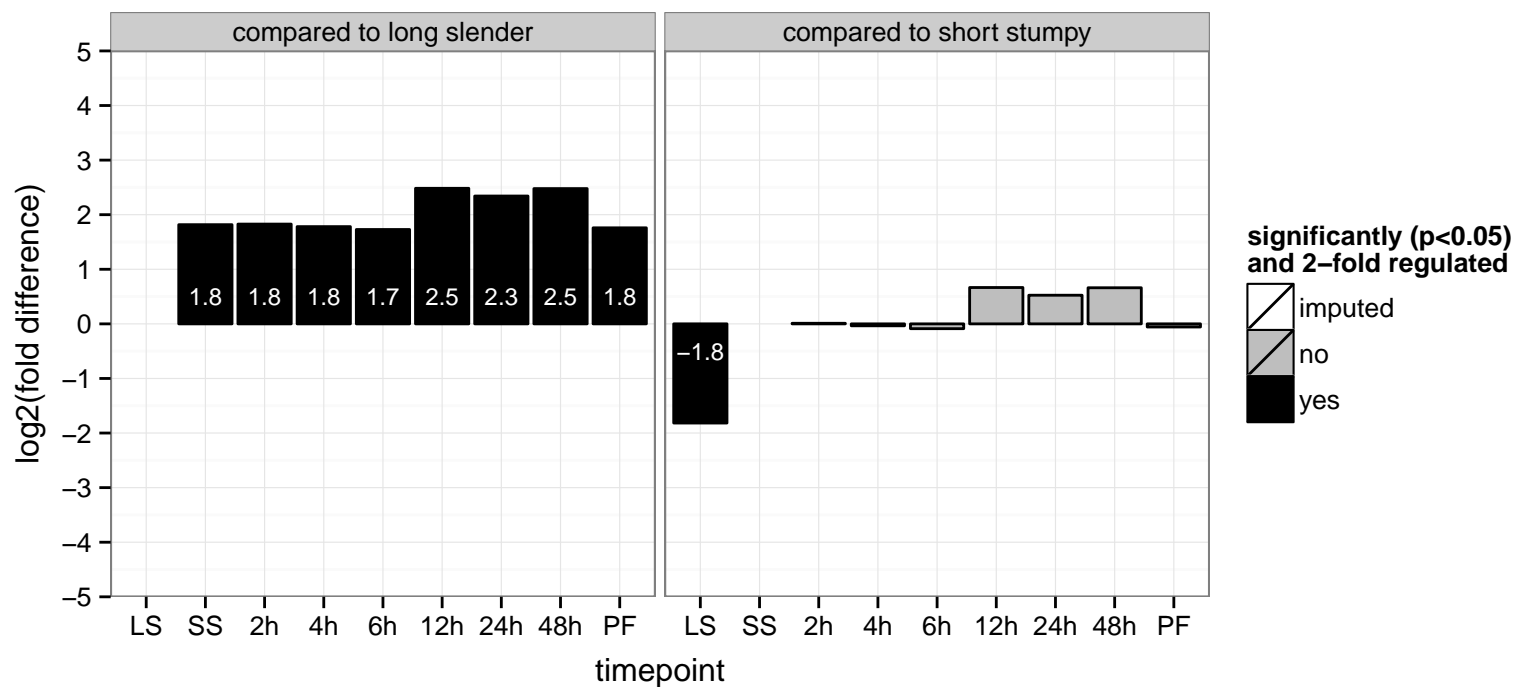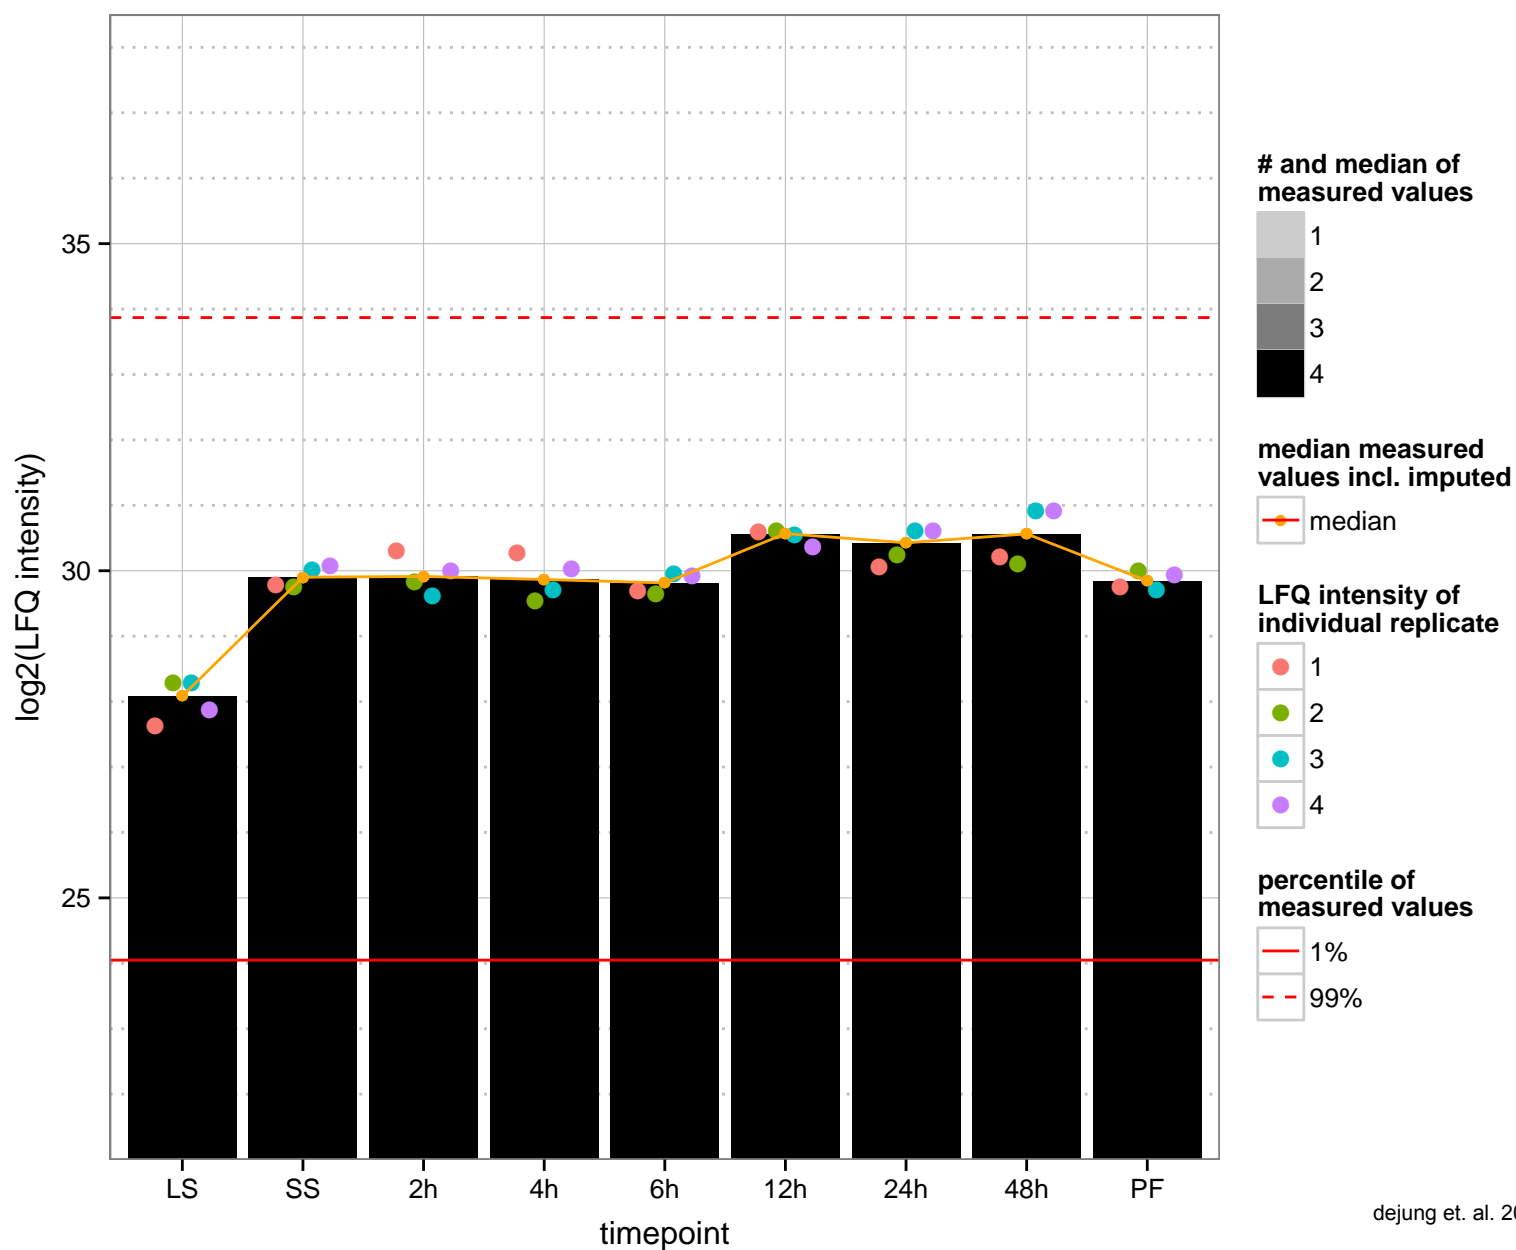

hypothetical protein, conserved, conserved protein  
 Tb11.v5.0366;Tb927.11.12880  
 AGOF: null  
 AGOC: null  
 AGOP: null  
 PGOF: null  
 PGO: null  
 PGOP: null

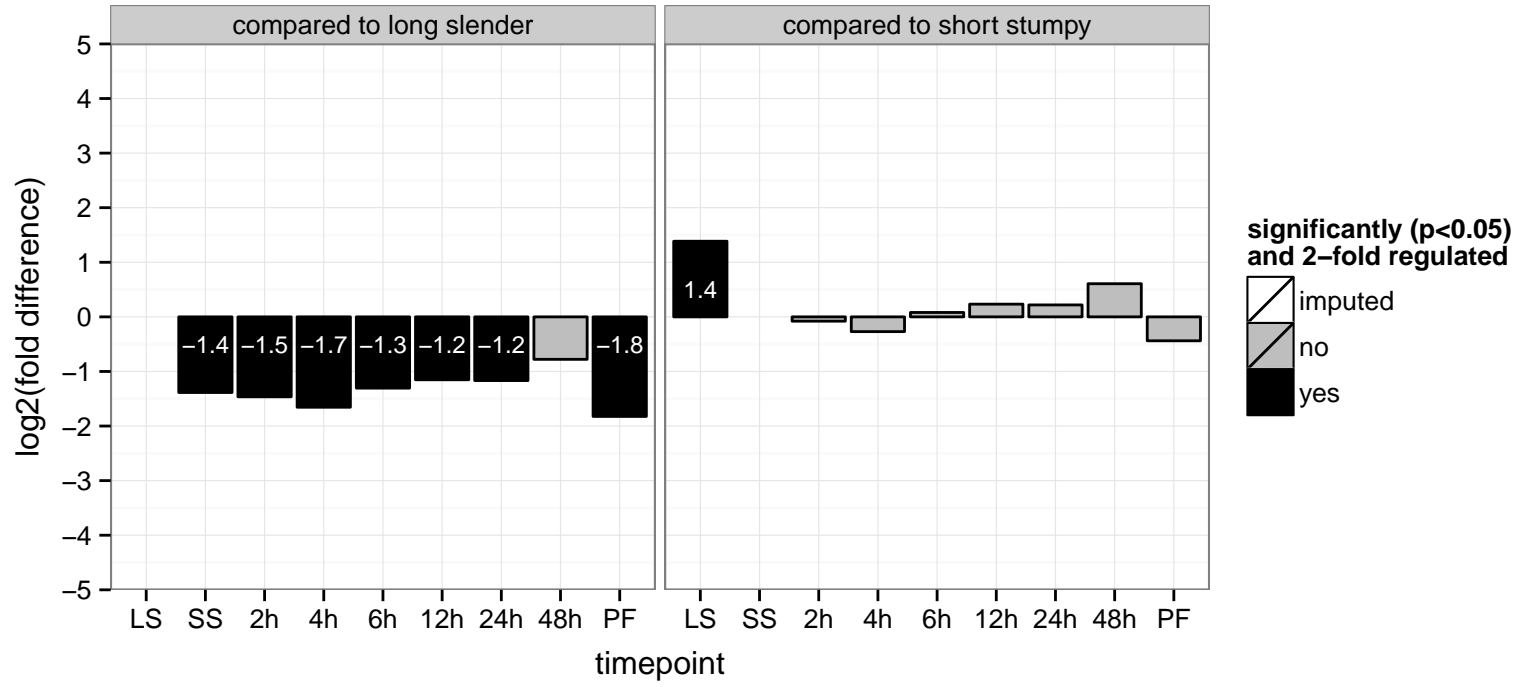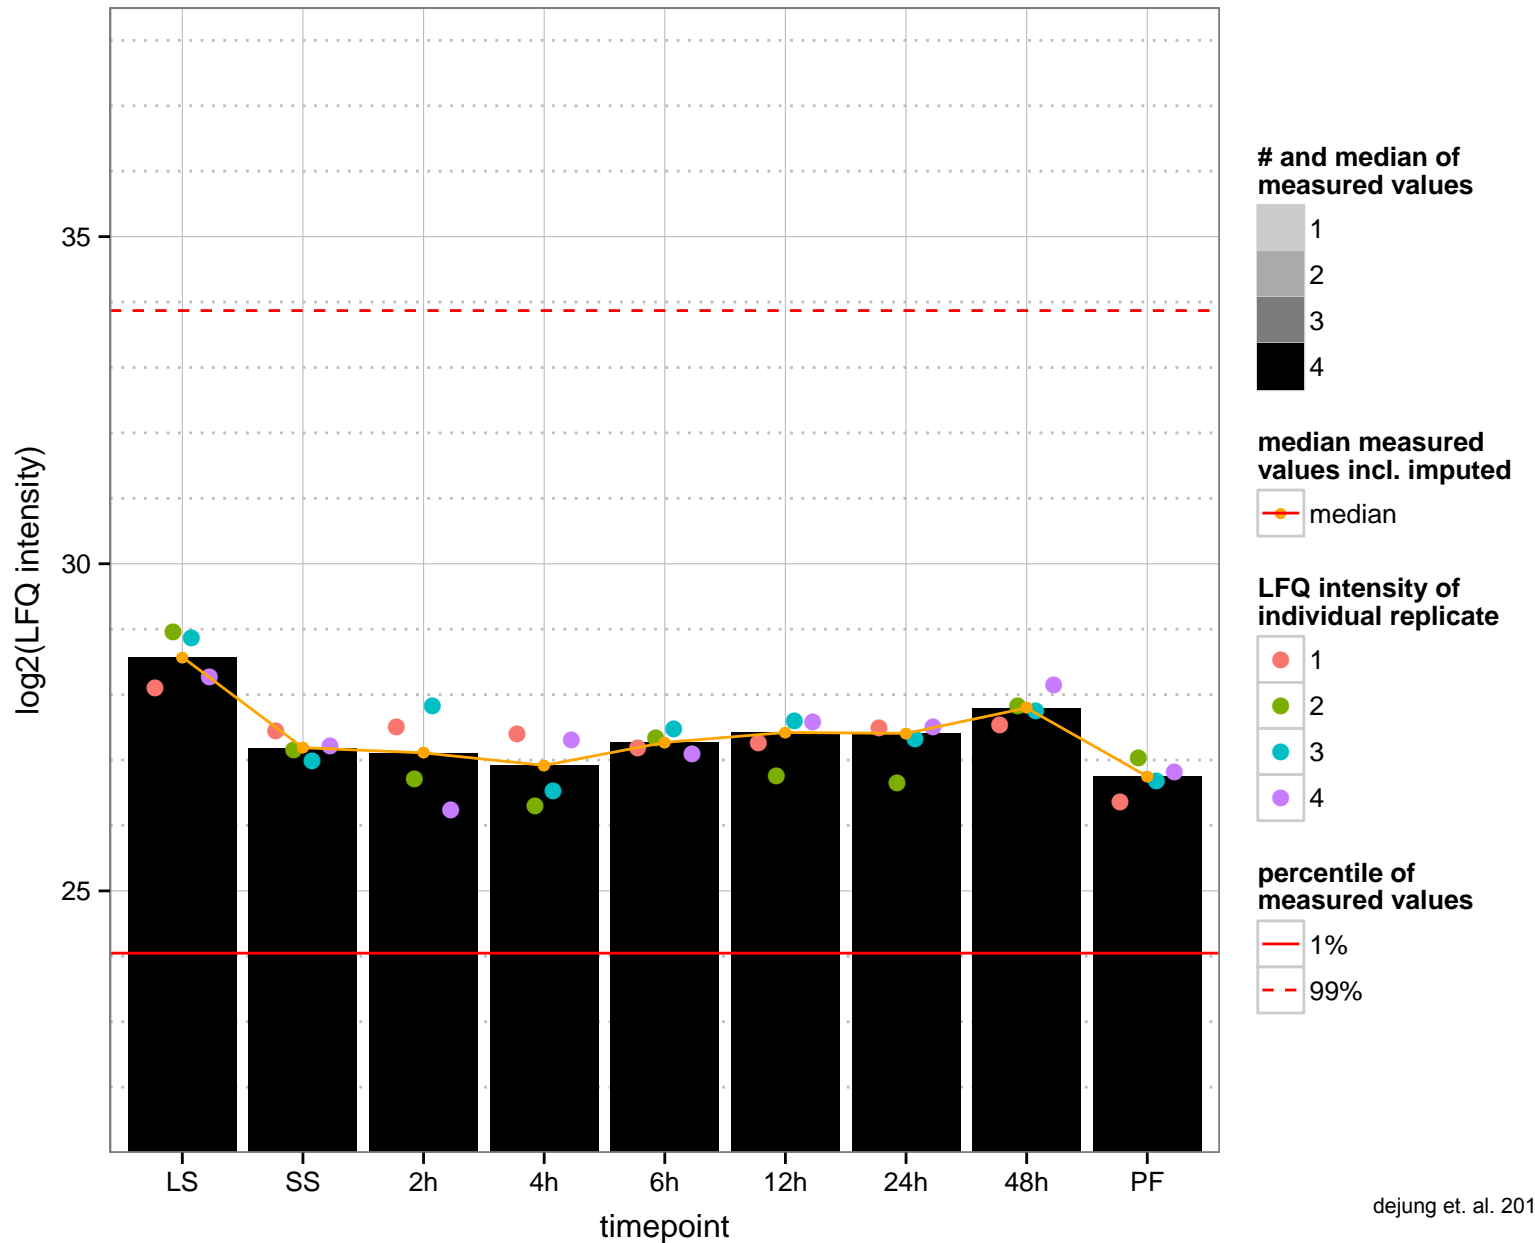

rRNA biogenesis protein, putative  
 Tb927.1.1370;Tb11.v5.0391  
 AGOF: null, RNA binding  
 AGOC: null  
 AGOP: null, rRNA processing  
 PGO: null  
 PGO: null  
 PGO: null

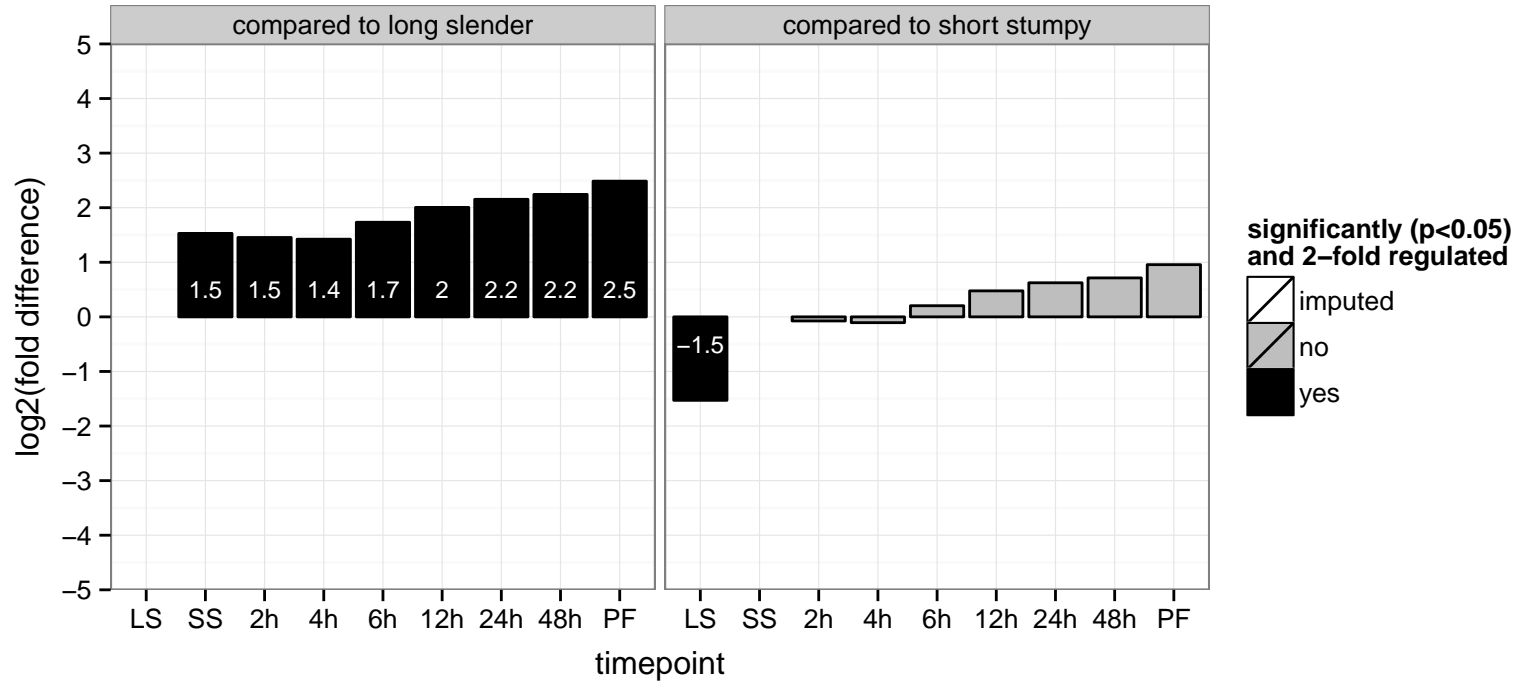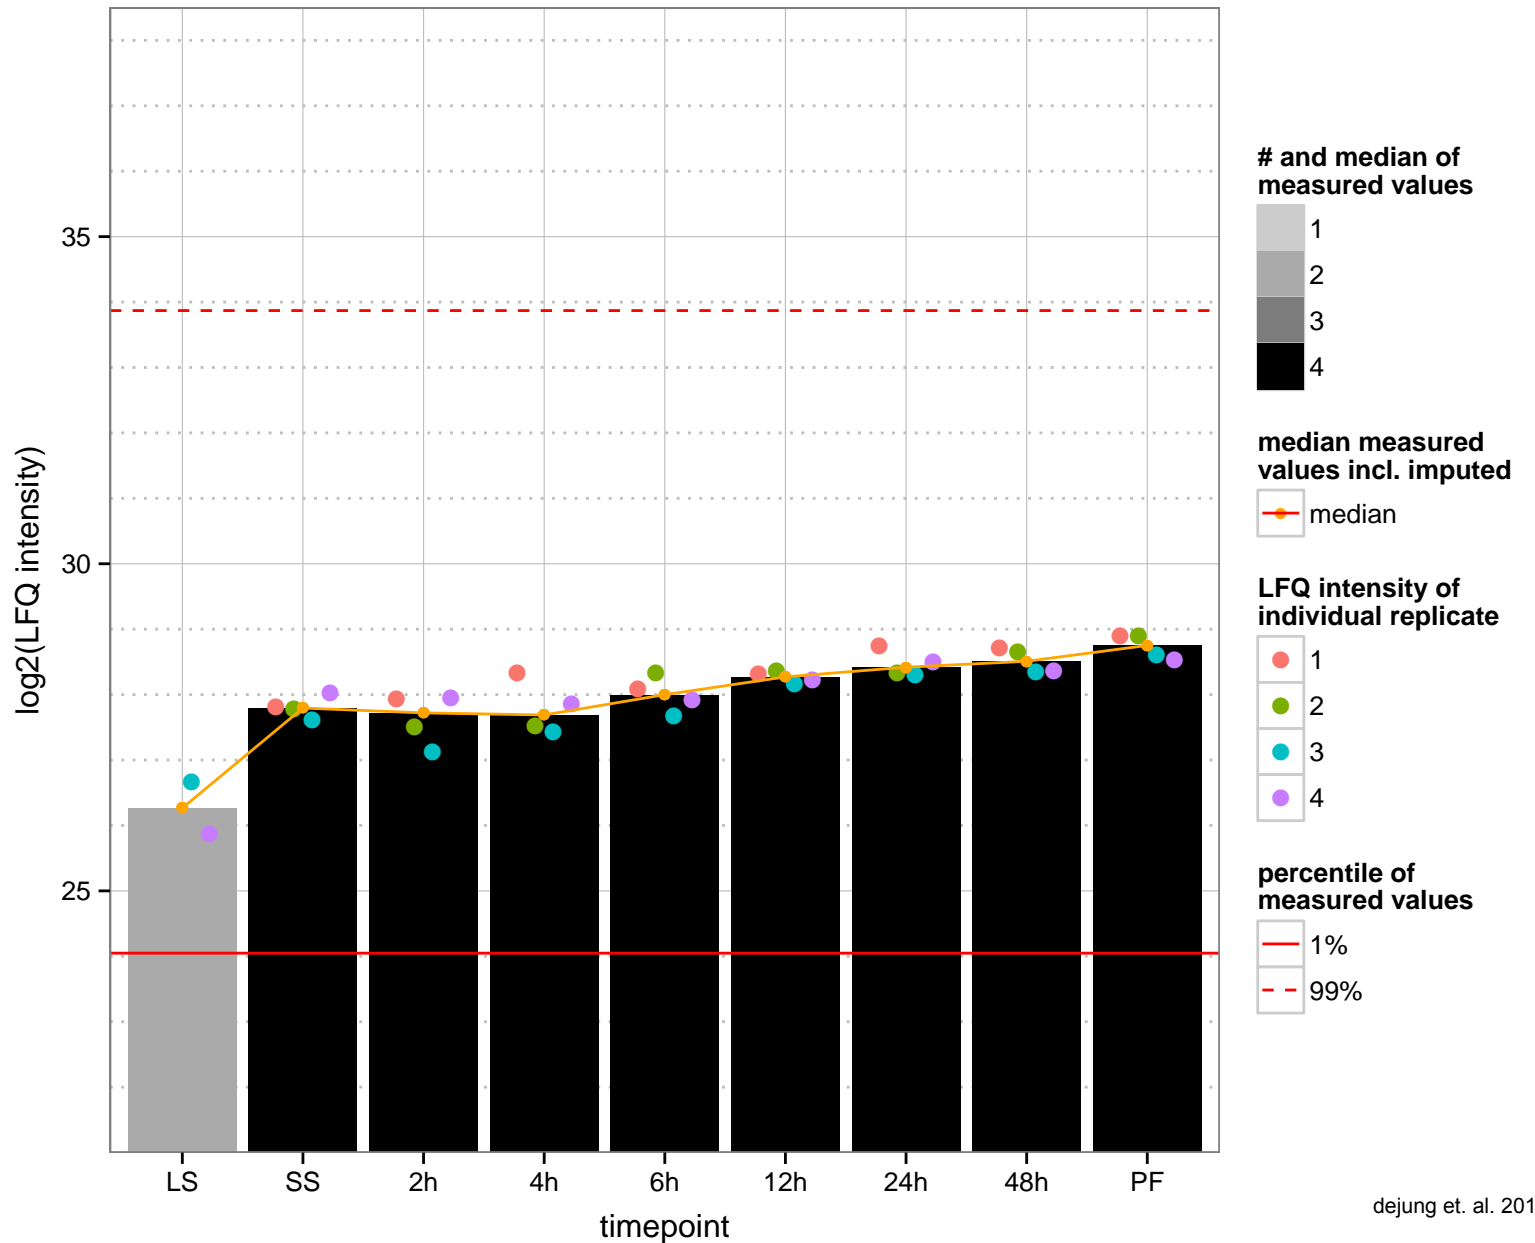

hypothetical protein, conserved  
 Tb11.v5.0394;Tb927.10.15750  
 AGOF: null, zinc ion binding  
 AGOC: null, bacterial-type flagellum basal body  
 AGOP: null  
 PGO: protein binding, zinc ion binding  
 PGOC: null  
 PGOP: null

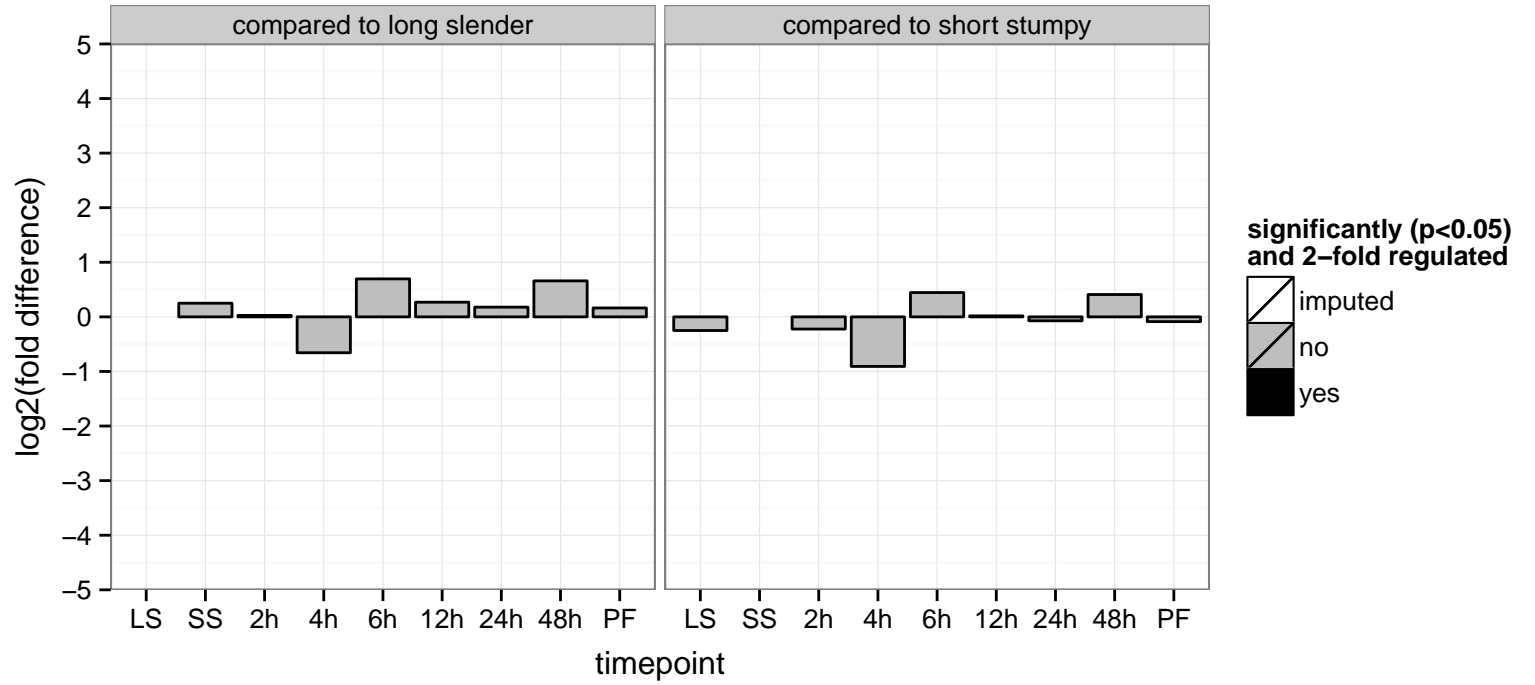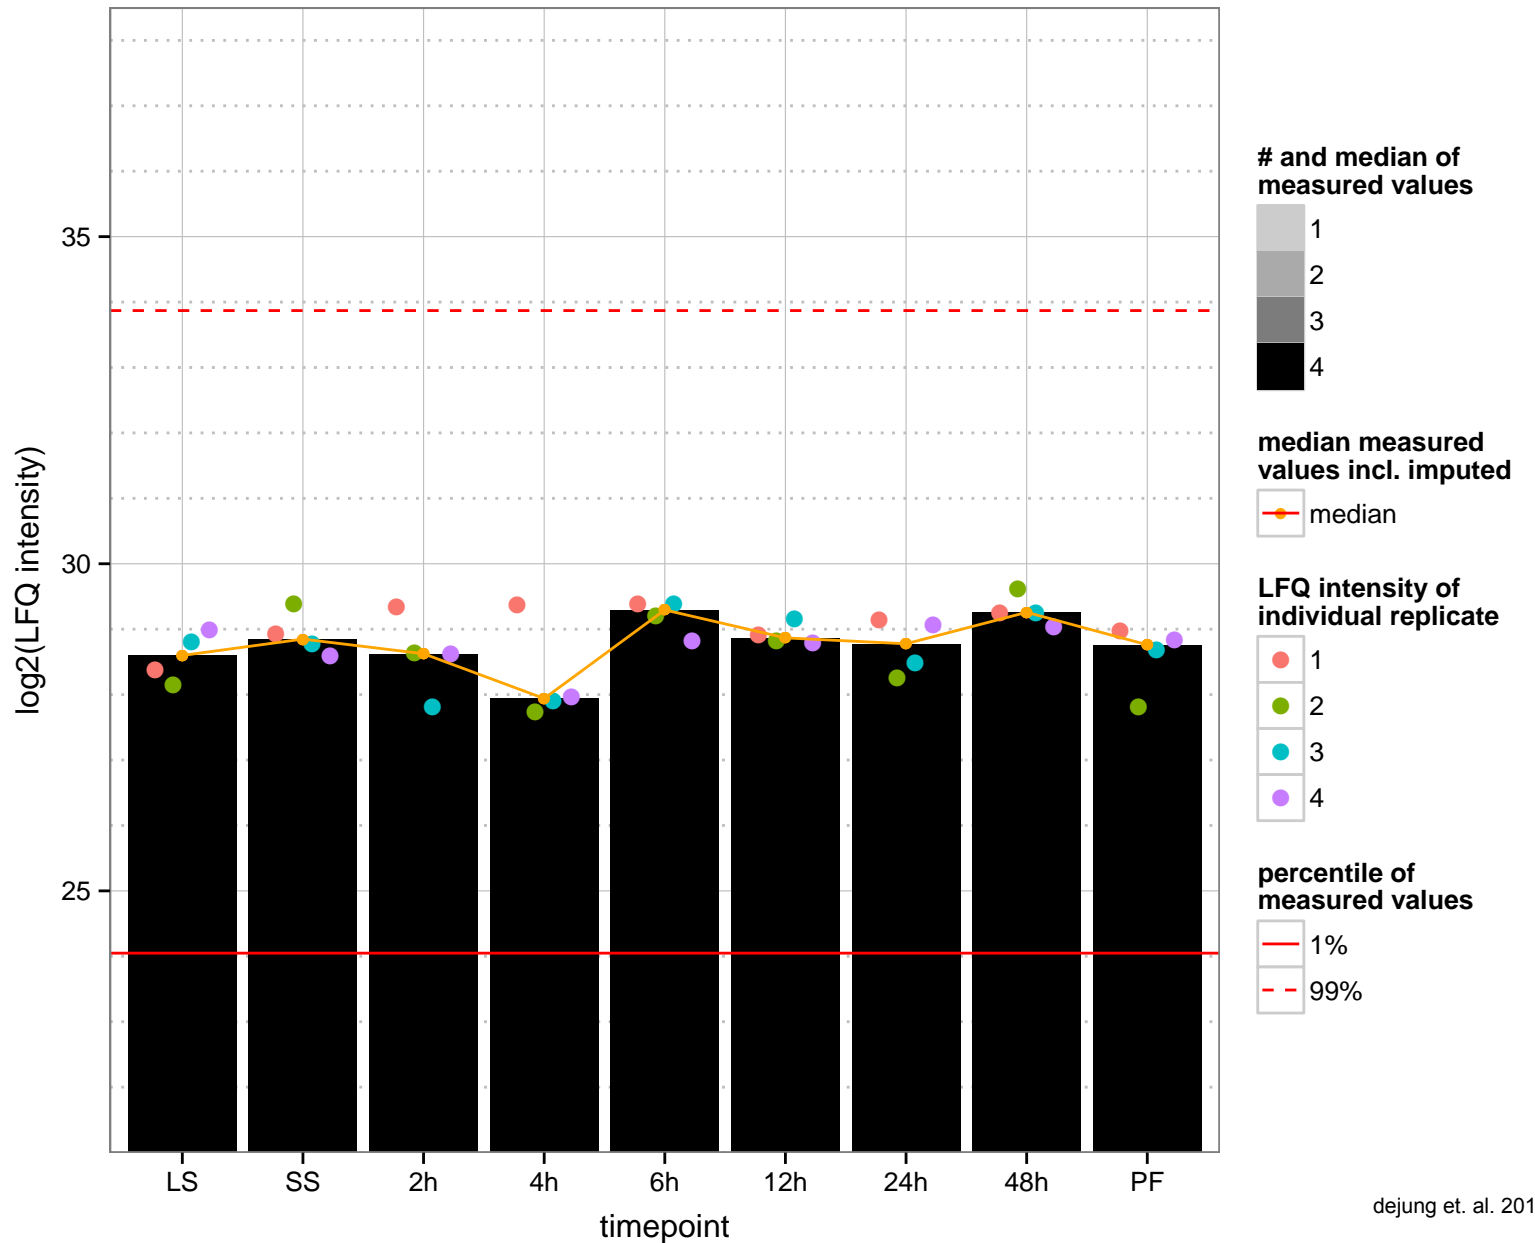

potassium voltage-gated channel, putative

Tb927.10.16170;Tb11.v5.0396

AGOF: null, ATP-activated inward rectifier potassium channel activity, voltage-gated potassium channel activity

AGOC: null, membrane, mitochondrion, voltage-gated potassium channel complex

AGOP: null, potassium ion transport

PGOF: null

PGOC: null

PGOP: protein homooligomerization

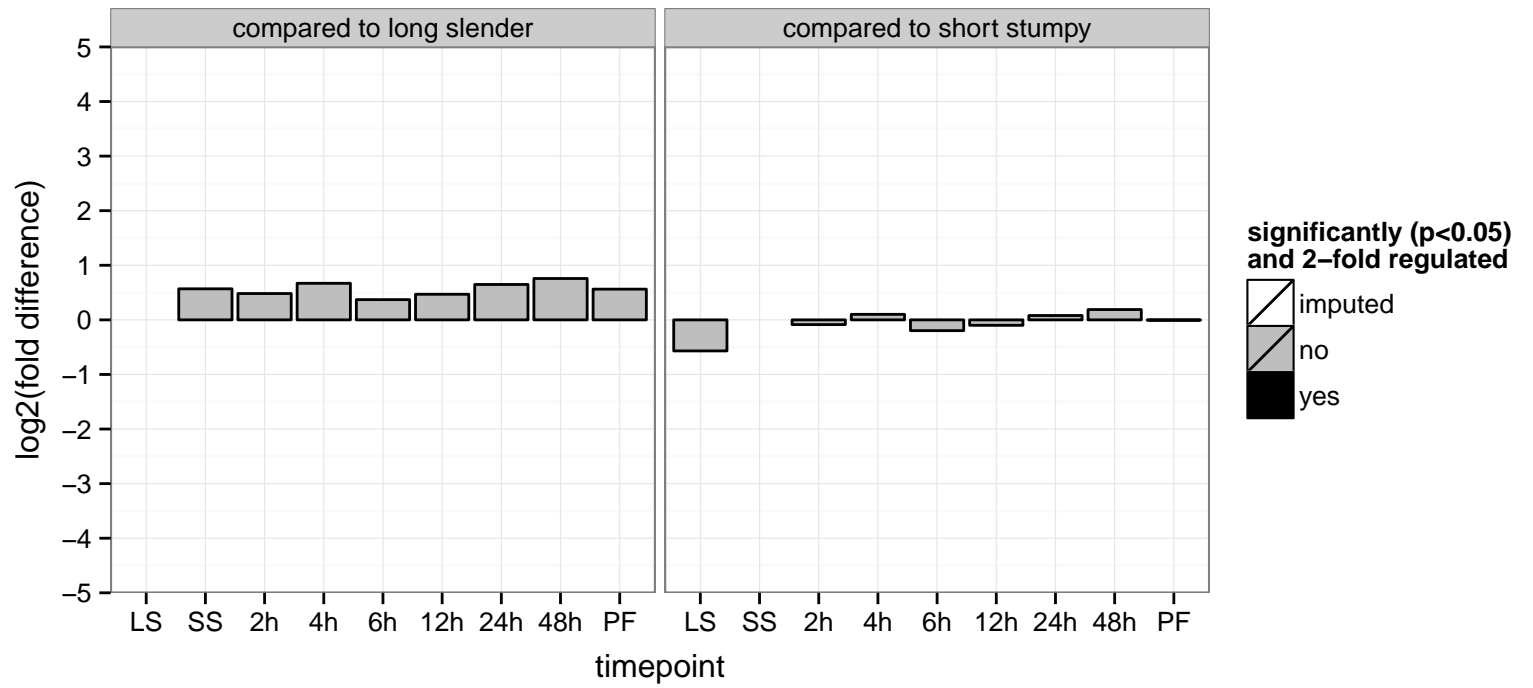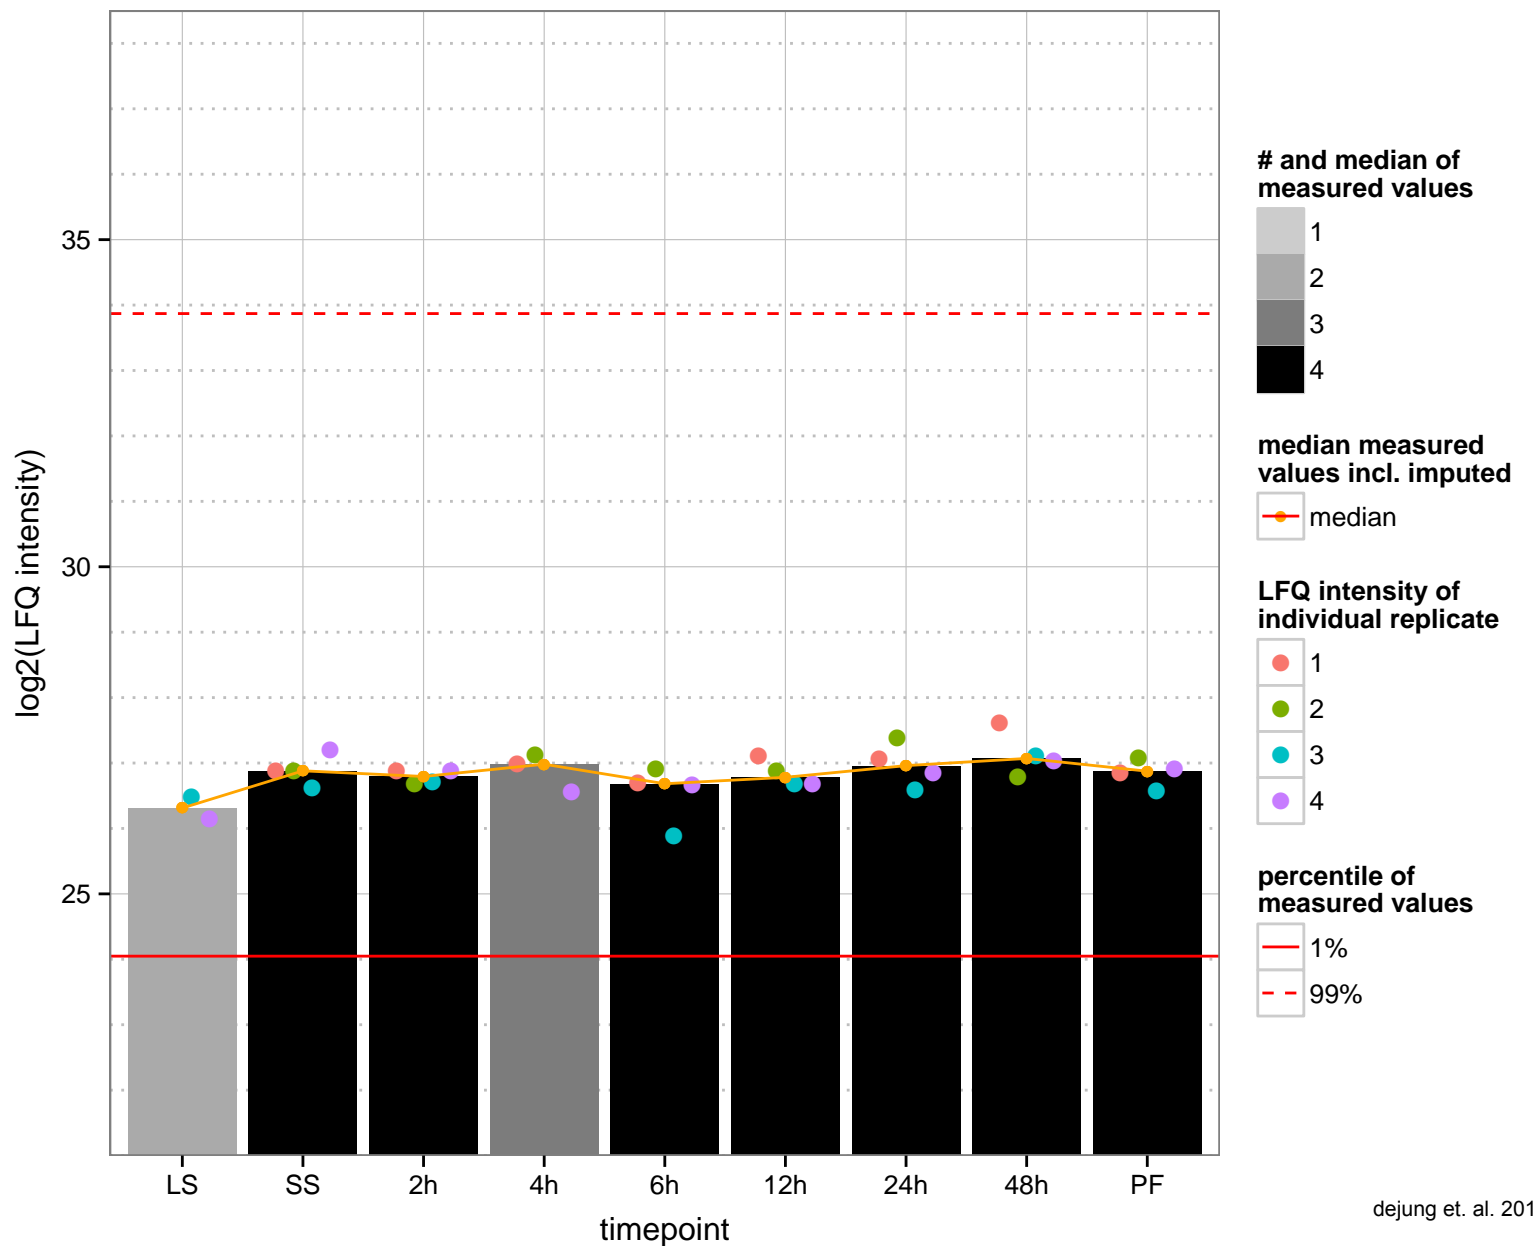

ATP-dependent DEAD/H RNA helicase, putative, DEAD box RNA helicase  
 Tb927.10.540;Tb11.v5.0414  
 AGOF: null, ATP binding, ATP-dependent helicase activity, helicase activity, nucleic acid binding  
 AGOC: null  
 AGOP: null  
 PGOF: ATP binding, ATP-dependent helicase activity, helicase activity, nucleic acid binding  
 PGOC: null  
 PGOP: null

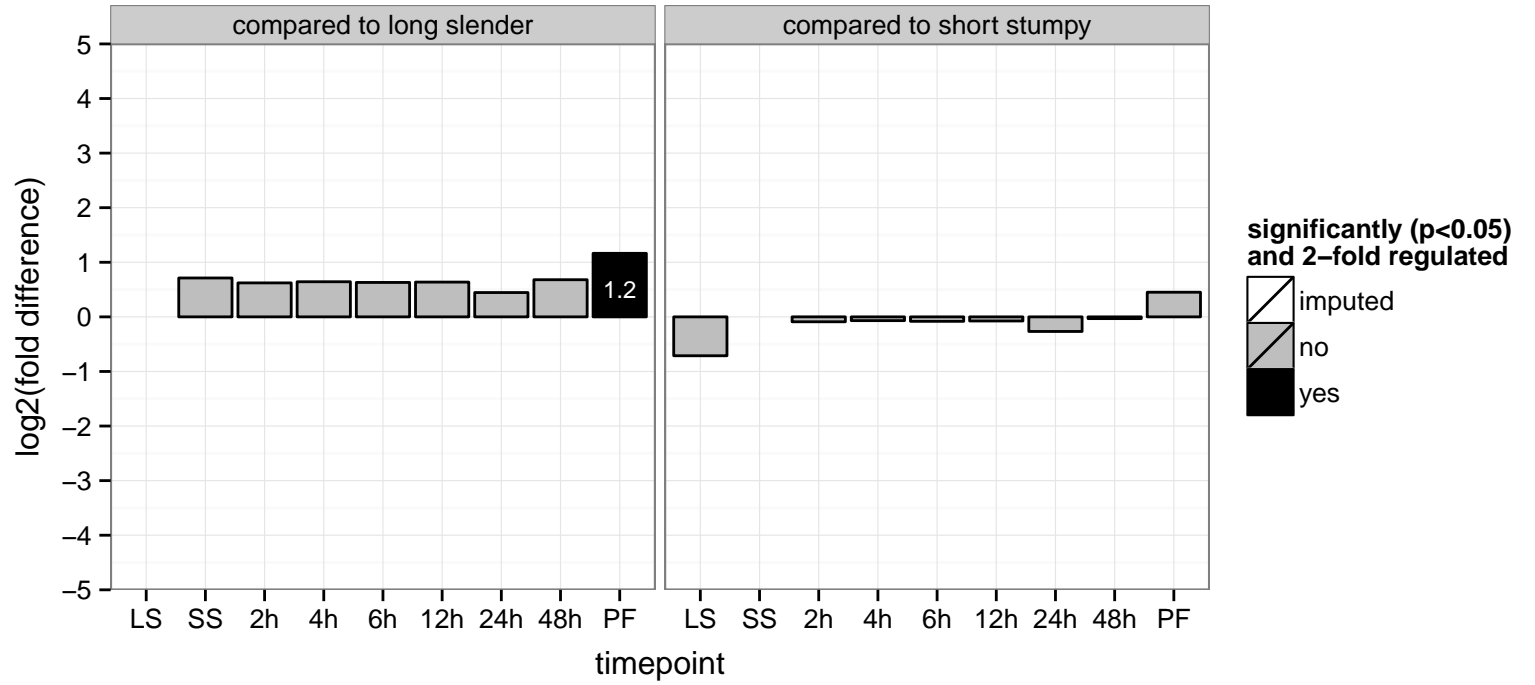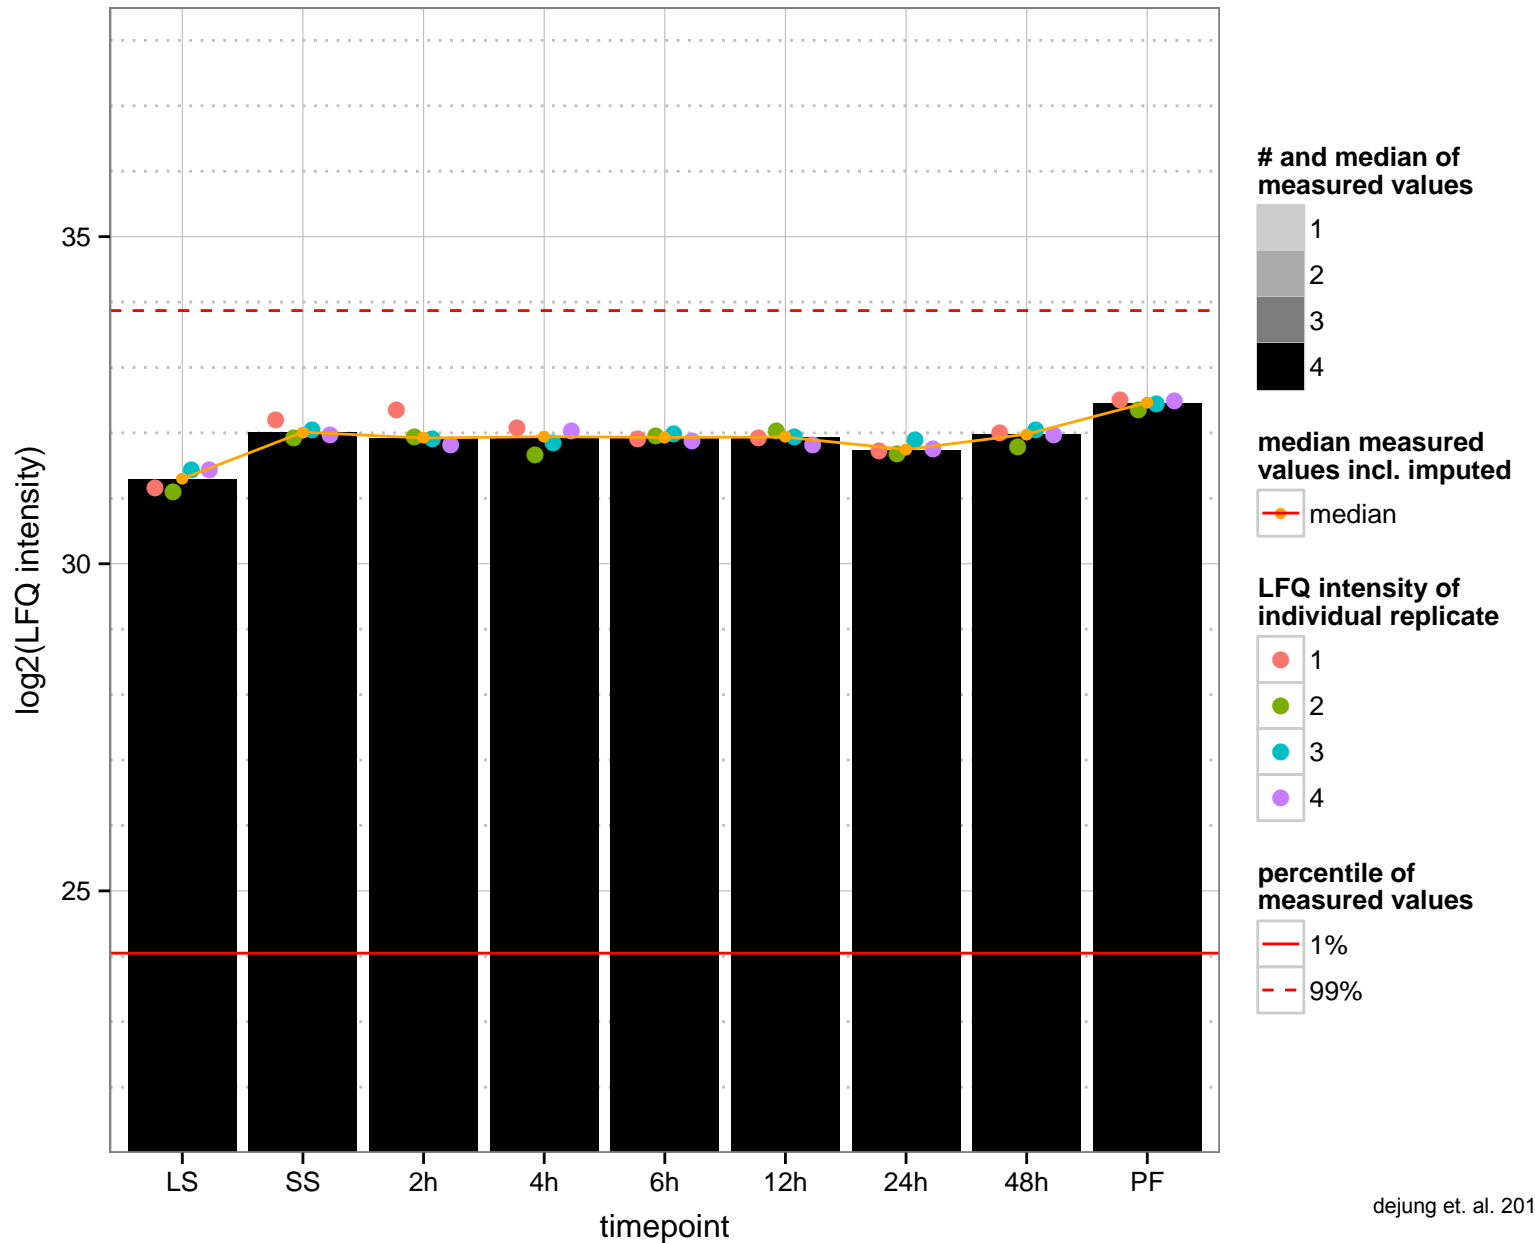

hypothetical protein, conserved  
 Tb927.10.14490;Tb11.v5.0420  
 AGOF: null  
 AGOC: null  
 AGOP: null  
 PGO: null  
 PGOC: null  
 PGOP: null

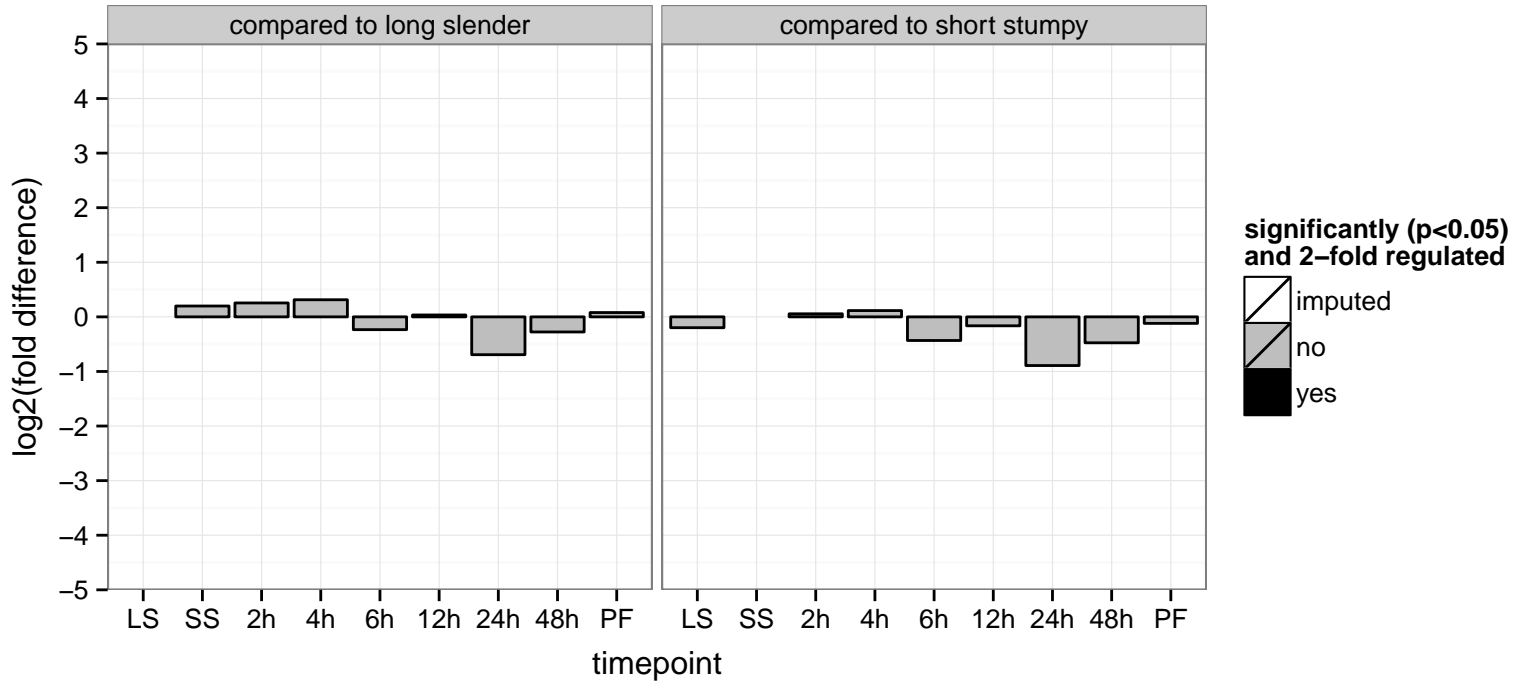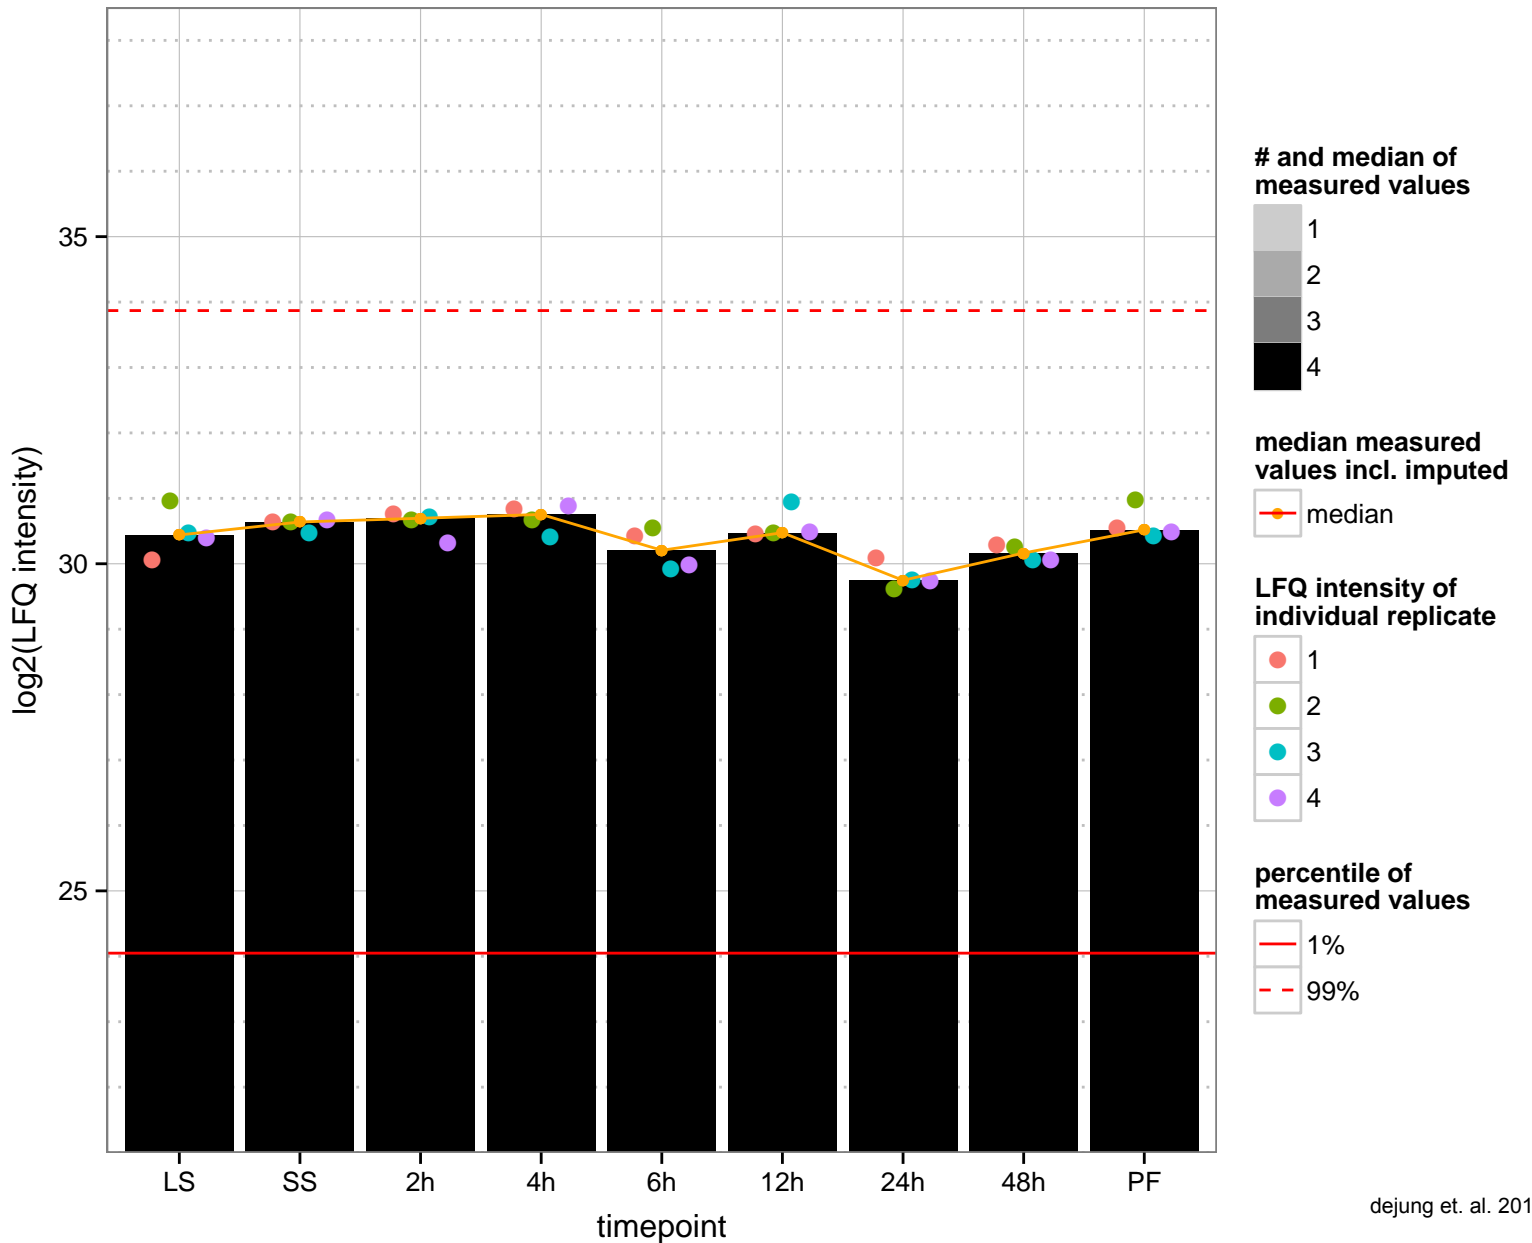

peroxisome assembly protein, putative, peroxin 12, putative (PEX12)

Tb927.10.15850;Tb11.v5.0427

AGOF: null

AGOC: null, glycosome, glycosome membrane, integral to membrane, peroxisomal membrane

AGOP: null, peroxisome organization

PGOF: null

PGOC: null

PGOP: null

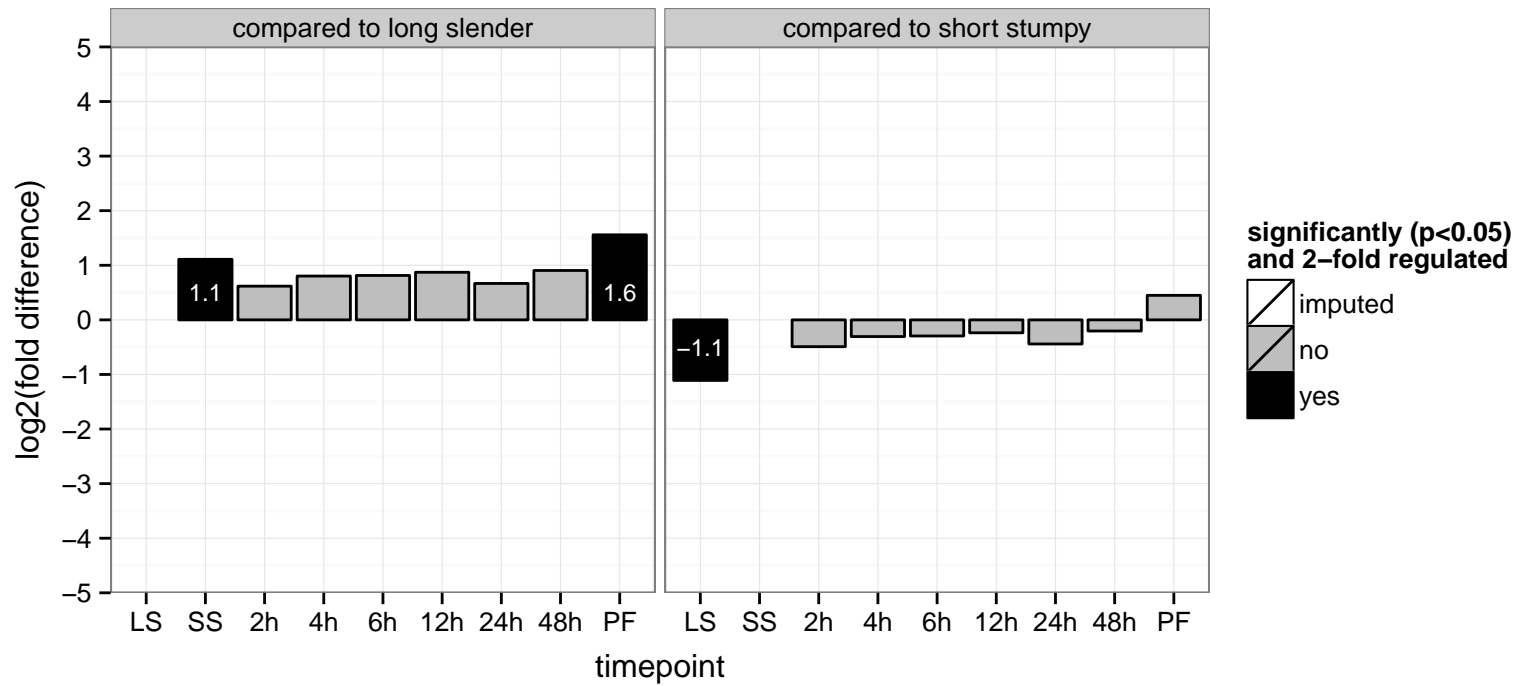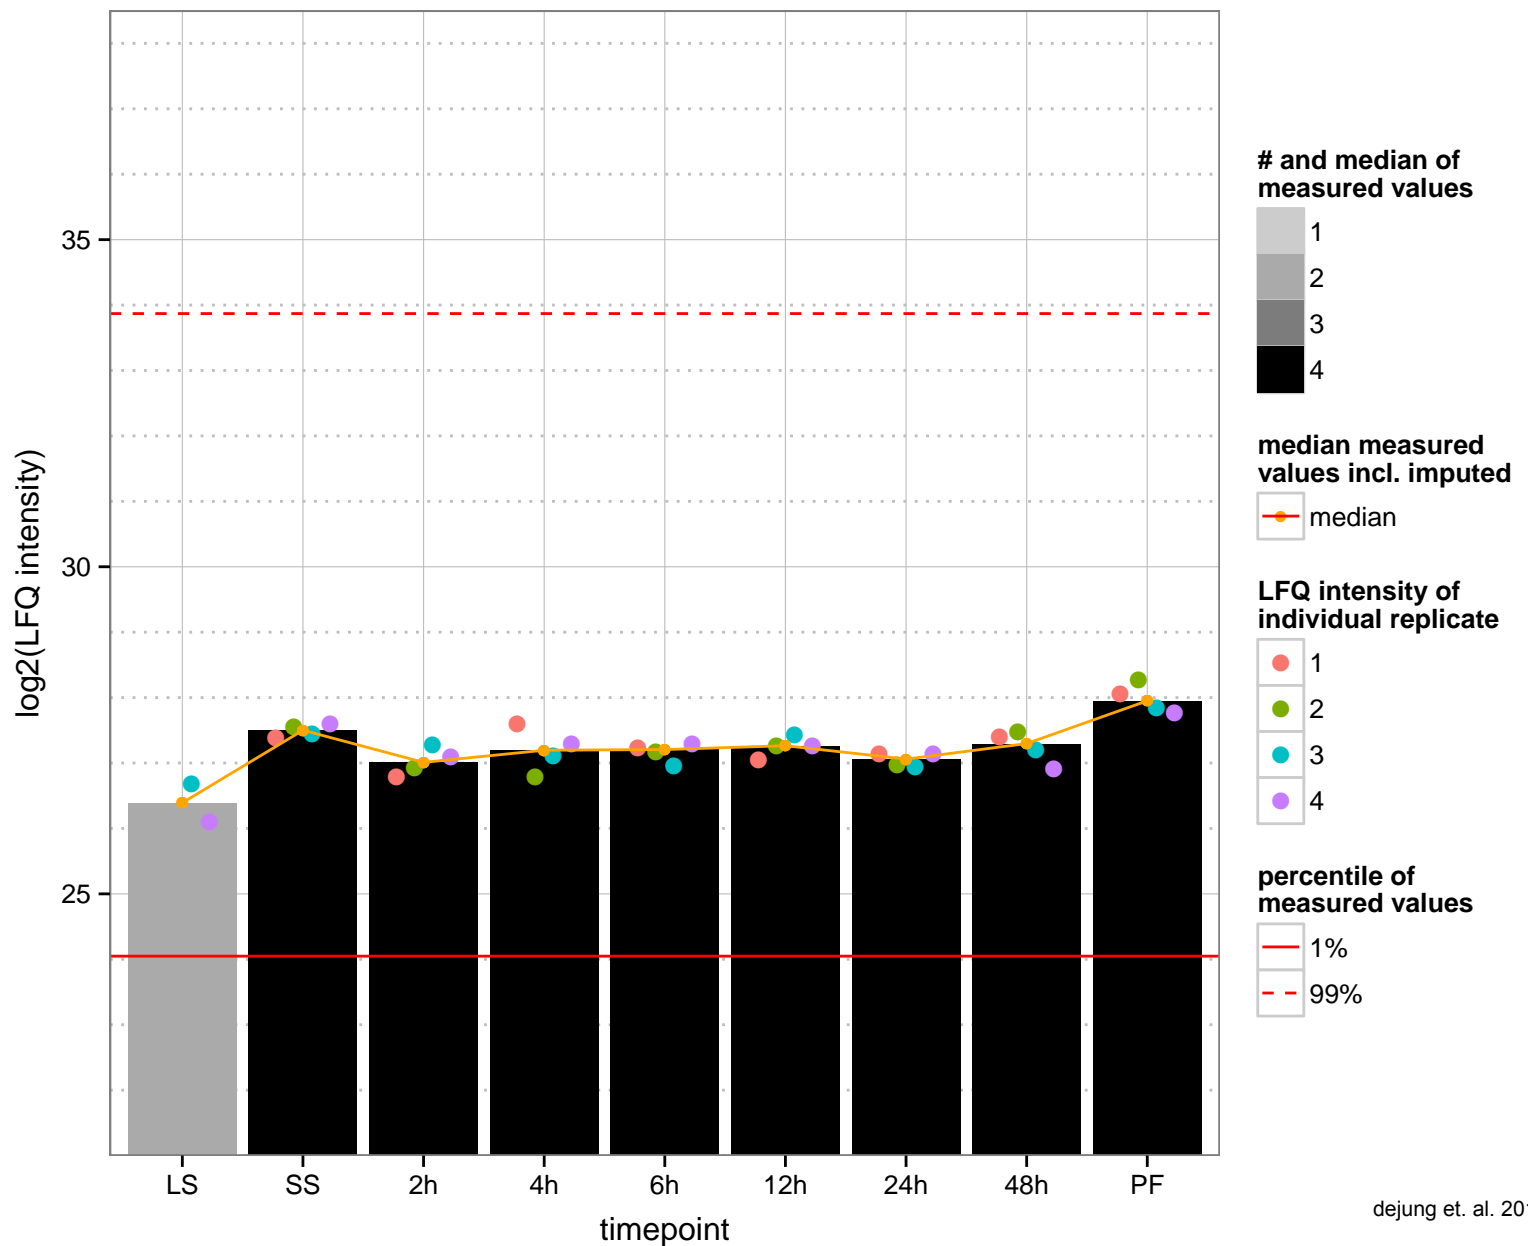



hypothetical protein, conserved, leucine-rich repeat protein (LRRP), putative  
 Tb927.1.1030;Tb11.v5.0436  
 AGOF: null  
 AGOC: null  
 AGOP: null  
 PGO: null  
 PGOC: null  
 PGOP: null

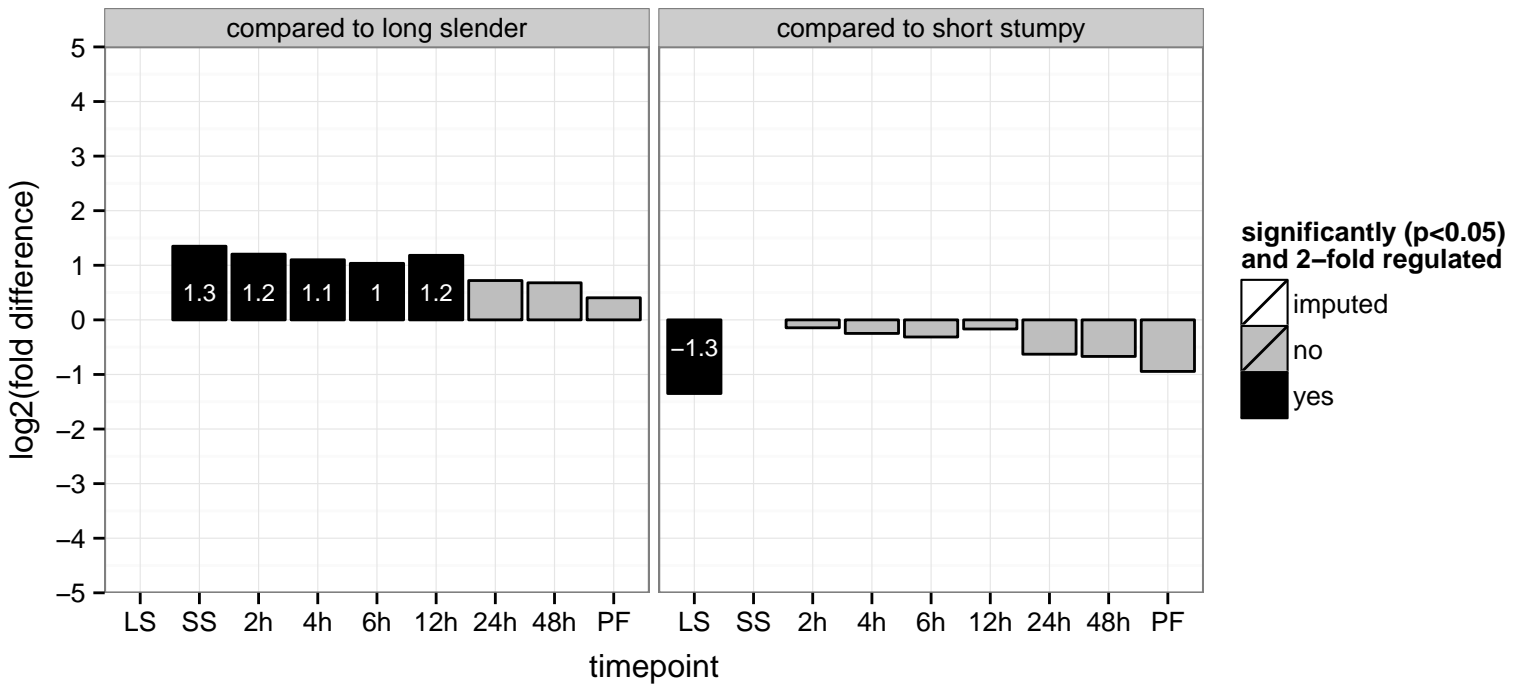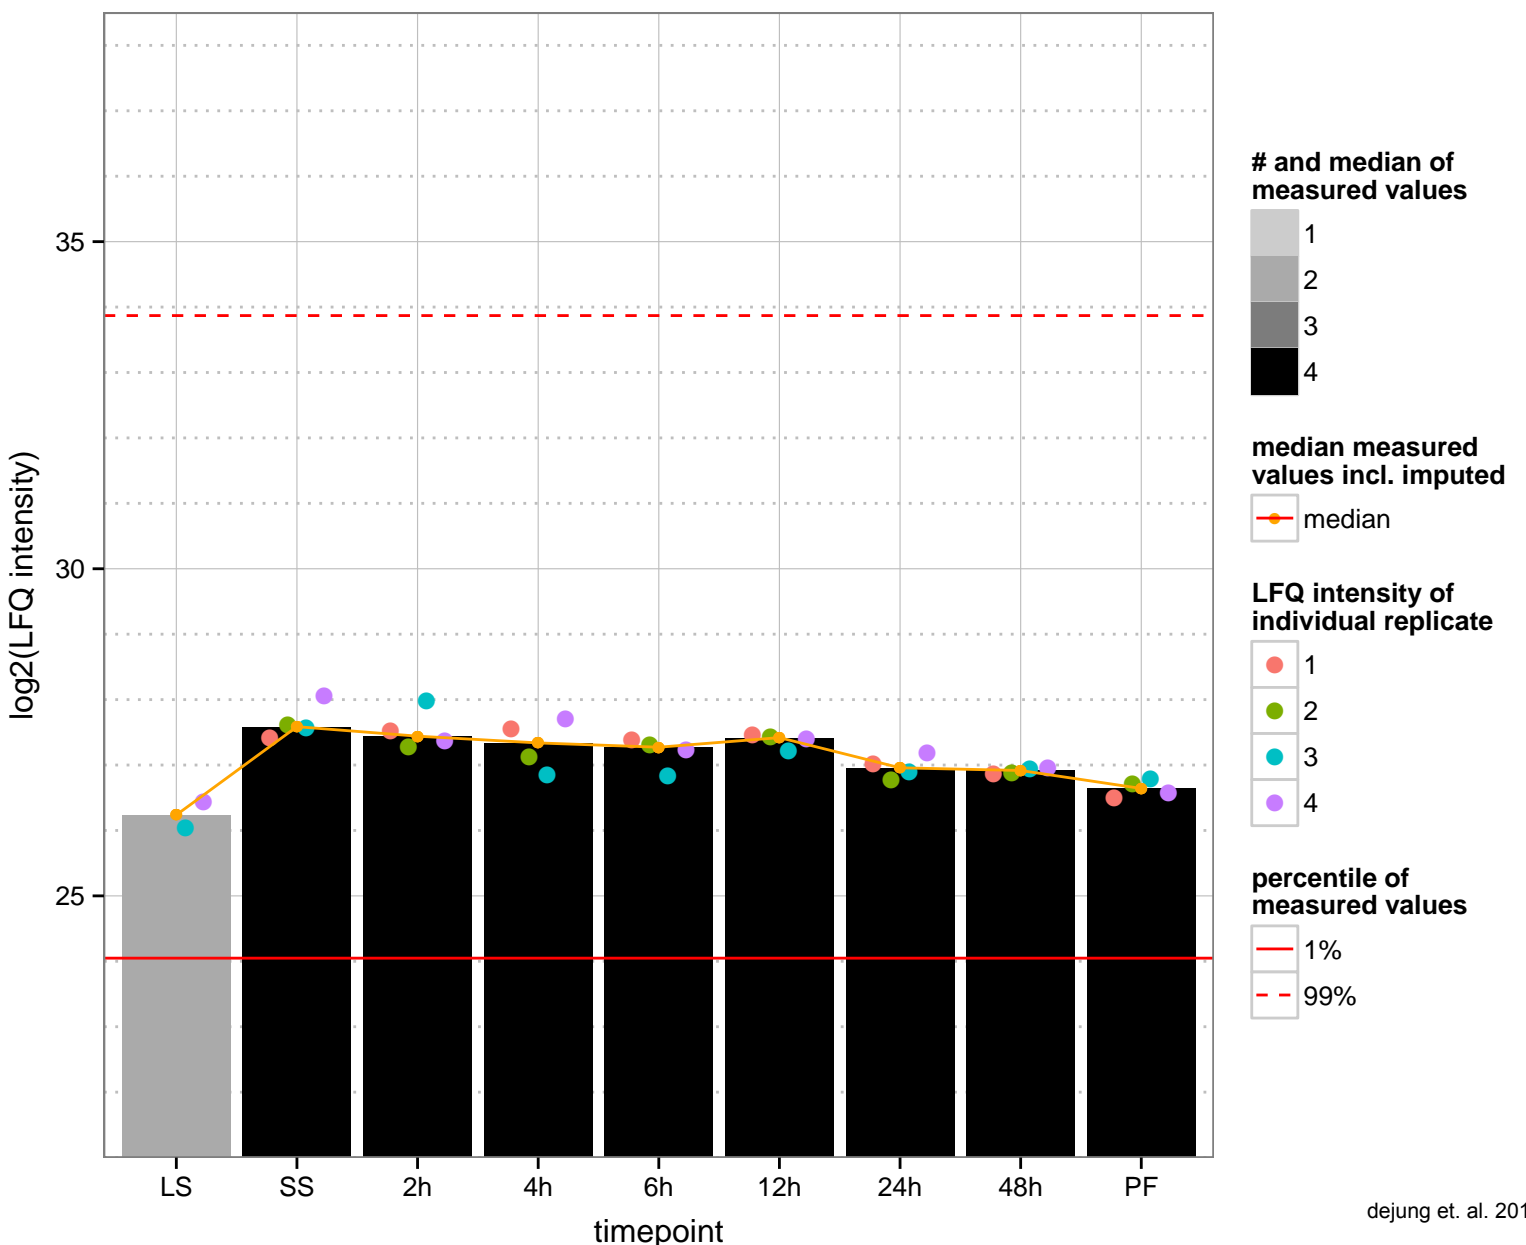

alpha tubulin, putative  
 Tb11.v5.0468  
 AGOF: null  
 AGOC: null  
 AGOP: null  
 PGOF: GTP binding, GTPase activity  
 PGO: protein complex  
 PGO: GTP catabolic process, protein polymerization

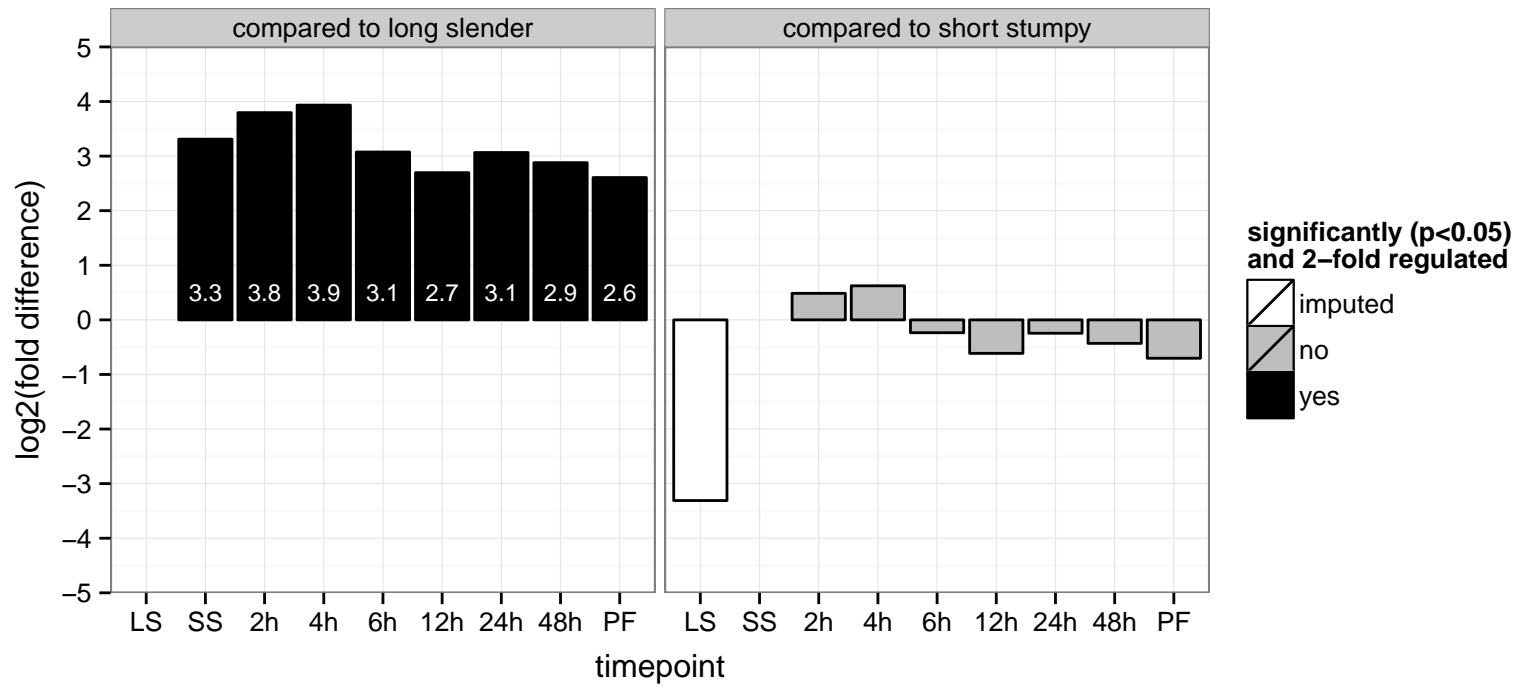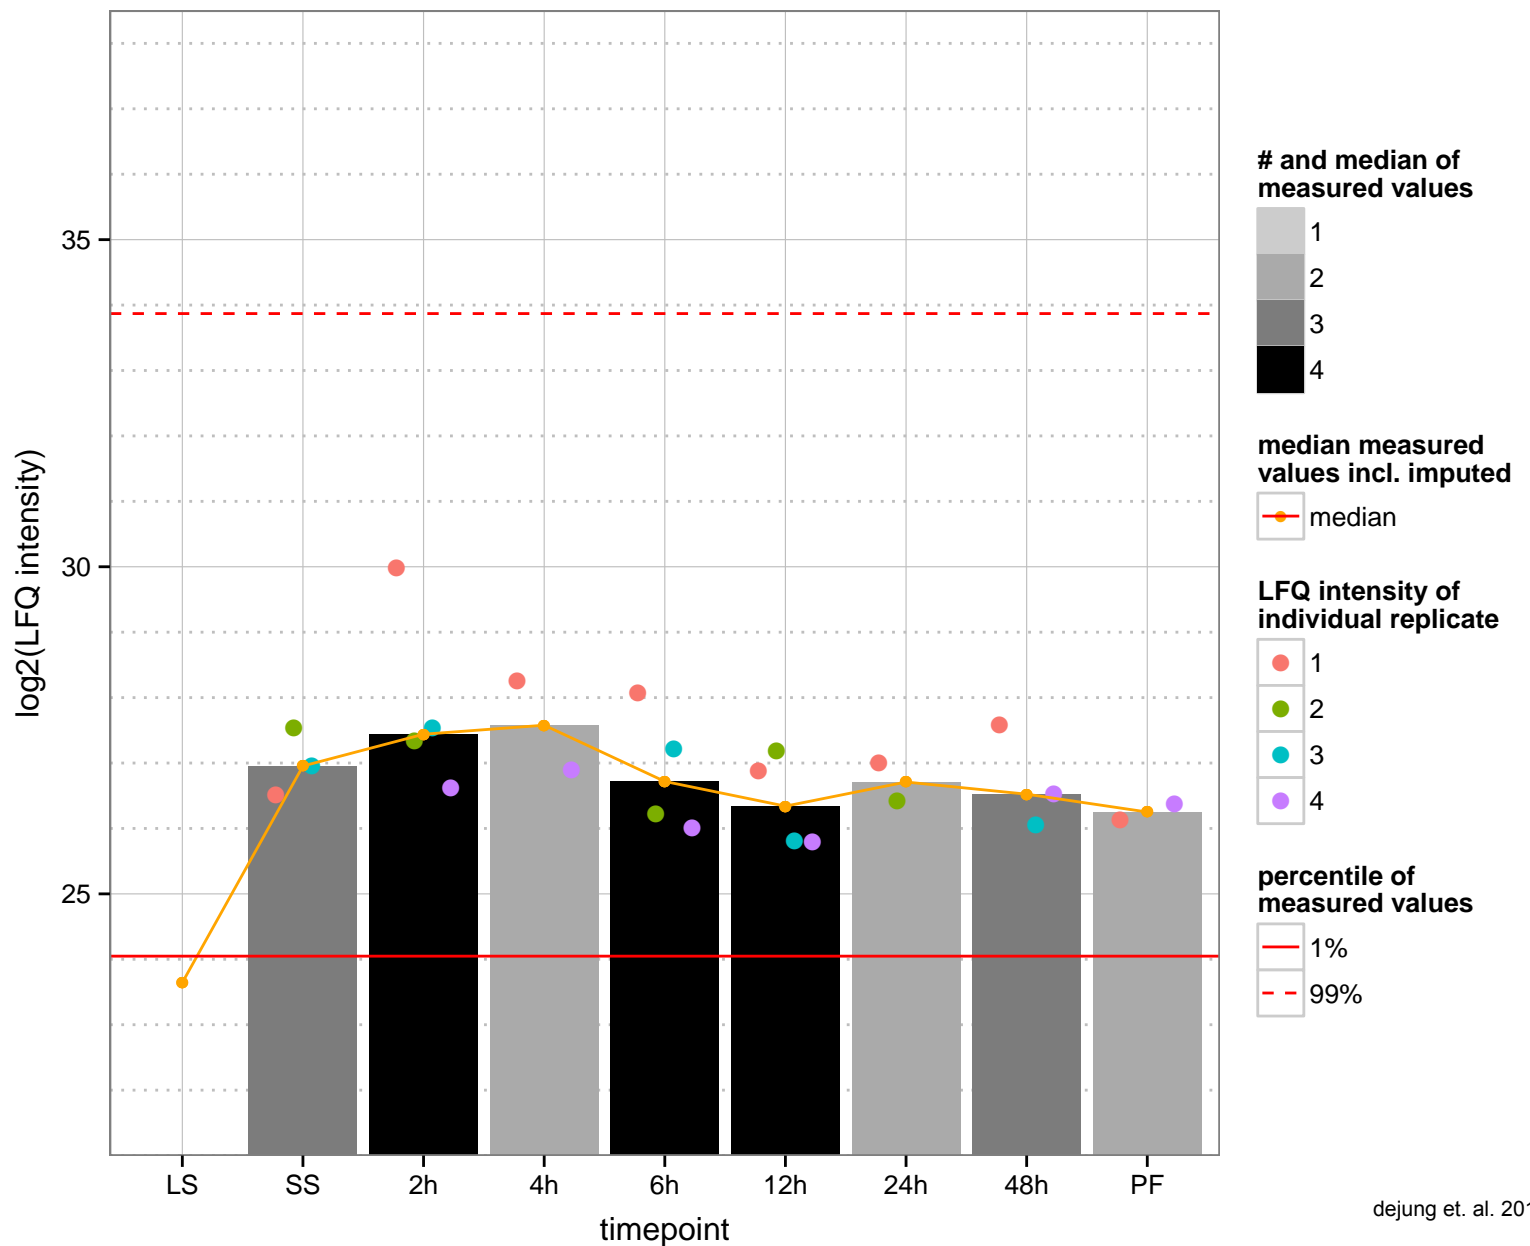

beta tubulin, putative, pseudogene

Tb927.1.2390;Tb927.1.2370;Tb927.1.2350;Tb927.1.2330;Tb11.v5.0469;Tb927.1.2410

AGOF: null, GTP binding, GTPase activity, structural constituent of cytoskeleton, structural molecule activity

AGOC: null, microtubule, protein complex

AGOP: null, cellular component movement, microtubule cytoskeleton organization, microtubule-based movement, protein polymerization

PGOF: GTP binding, GTPase activity, null

PGOC: protein complex, null

PGOP: GTP catabolic process, protein polymerization, null

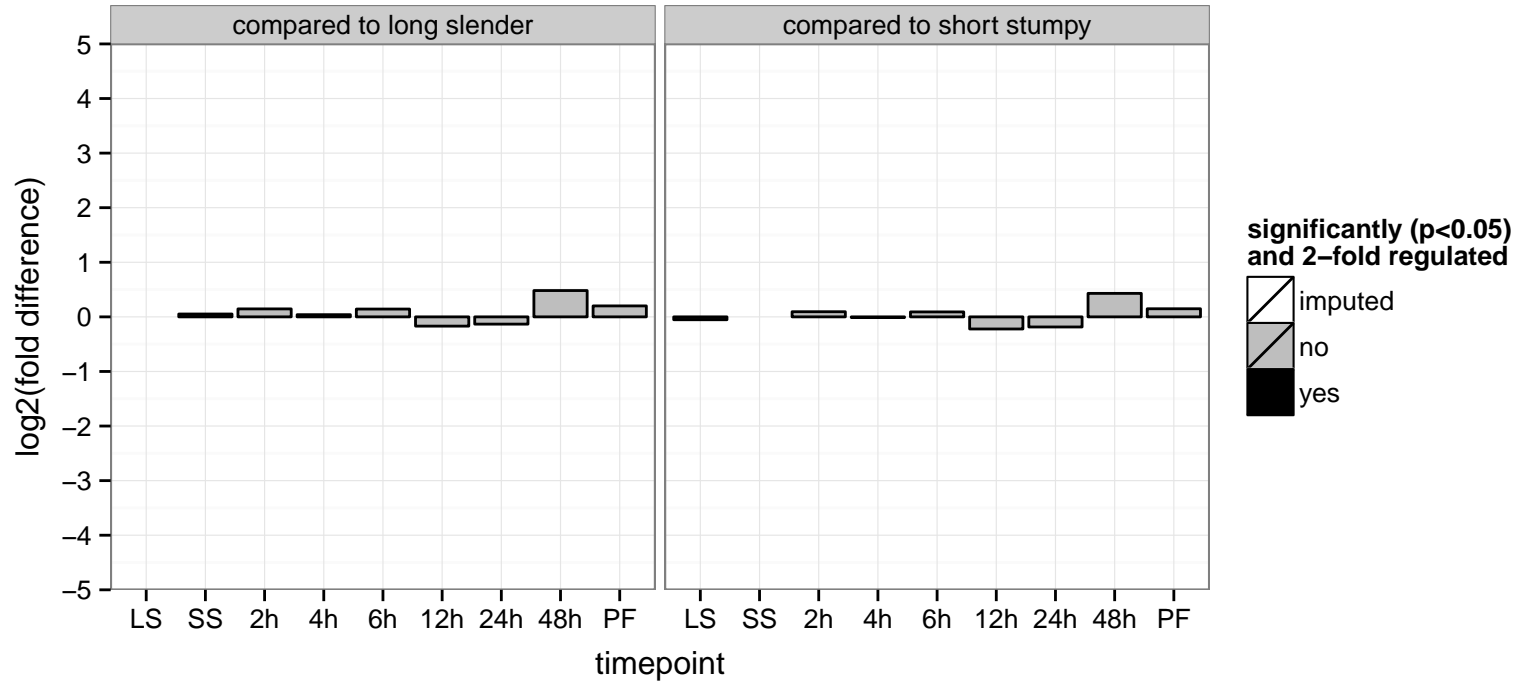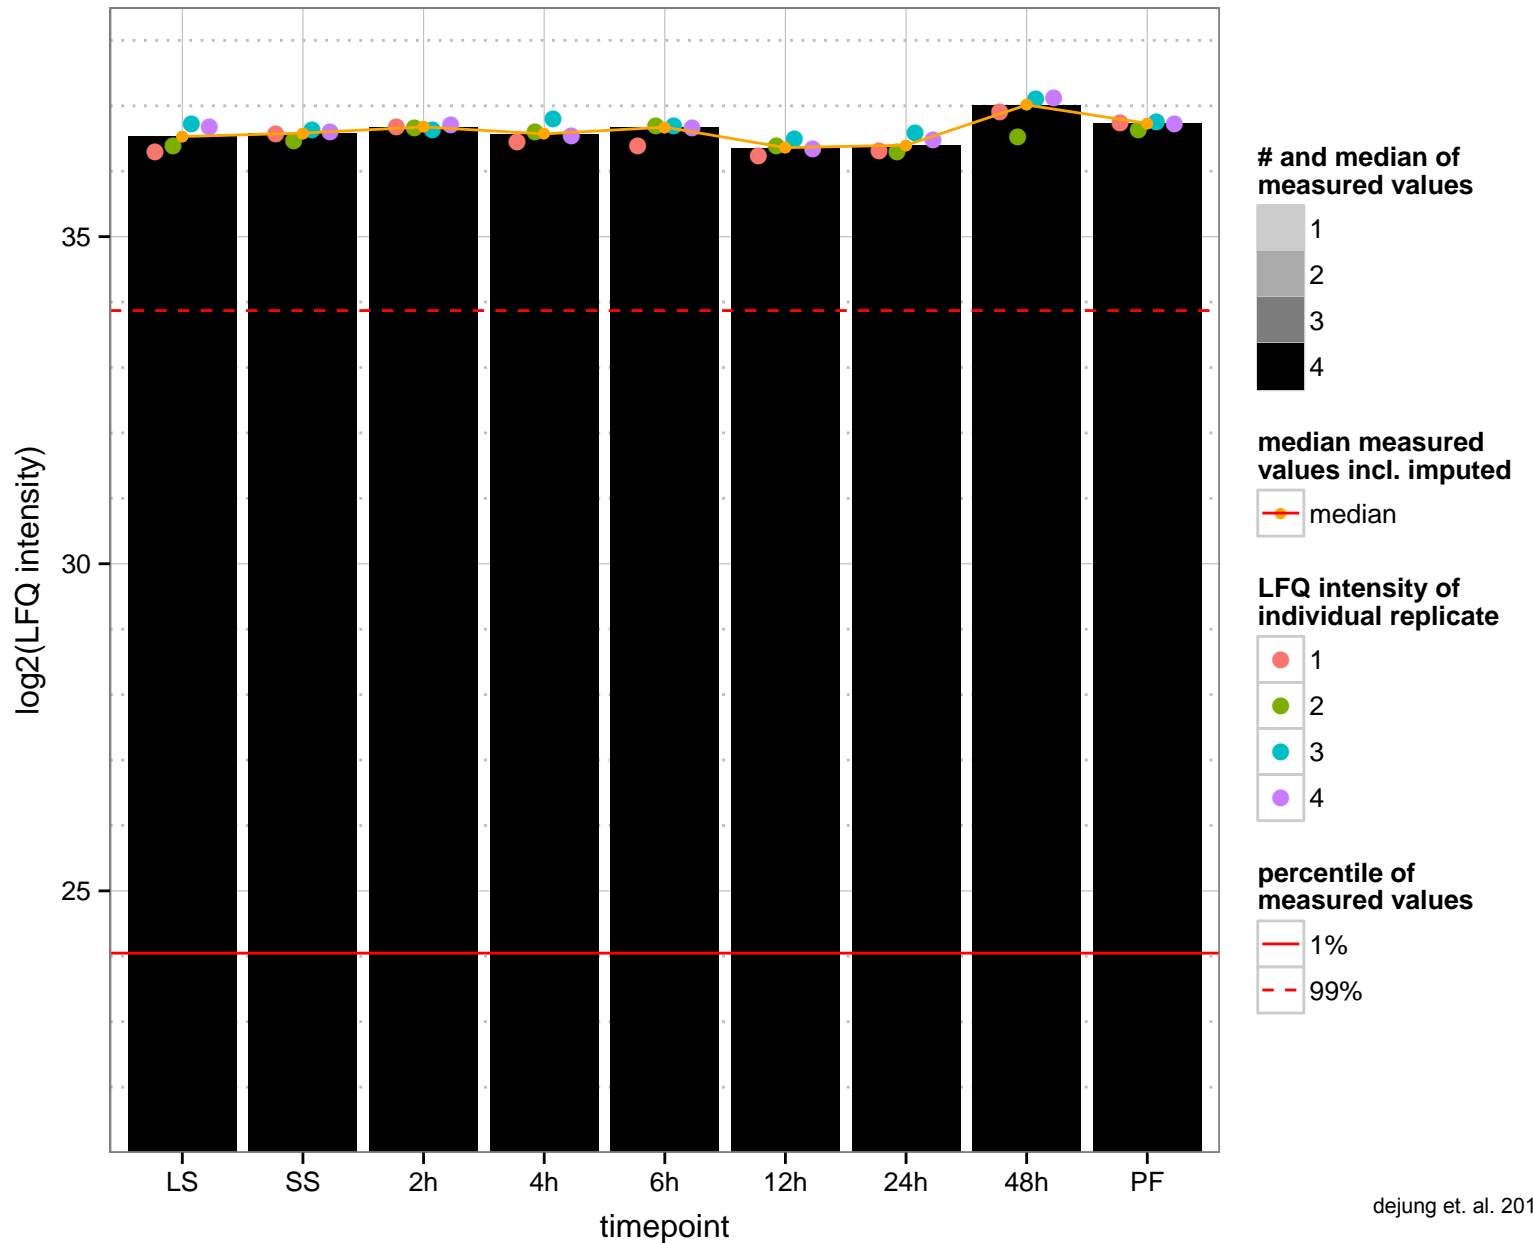

DNA-directed RNA polymerase, alpha subunit, putative, DNA-directed RNA polymerases I and III subunit RPAC1, putative (F Tb11.v5.0480;Tb927.10.15370  
 AGOF: null, DNA binding, DNA-directed RNA polymerase activity, protein dimerization activity  
 AGOC: null  
 AGOP: null, transcription, DNA-dependent  
 PGOF: DNA binding, DNA-directed RNA polymerase activity, protein dimerization activity  
 PGO: null  
 PGO: transcription, DNA-dependent

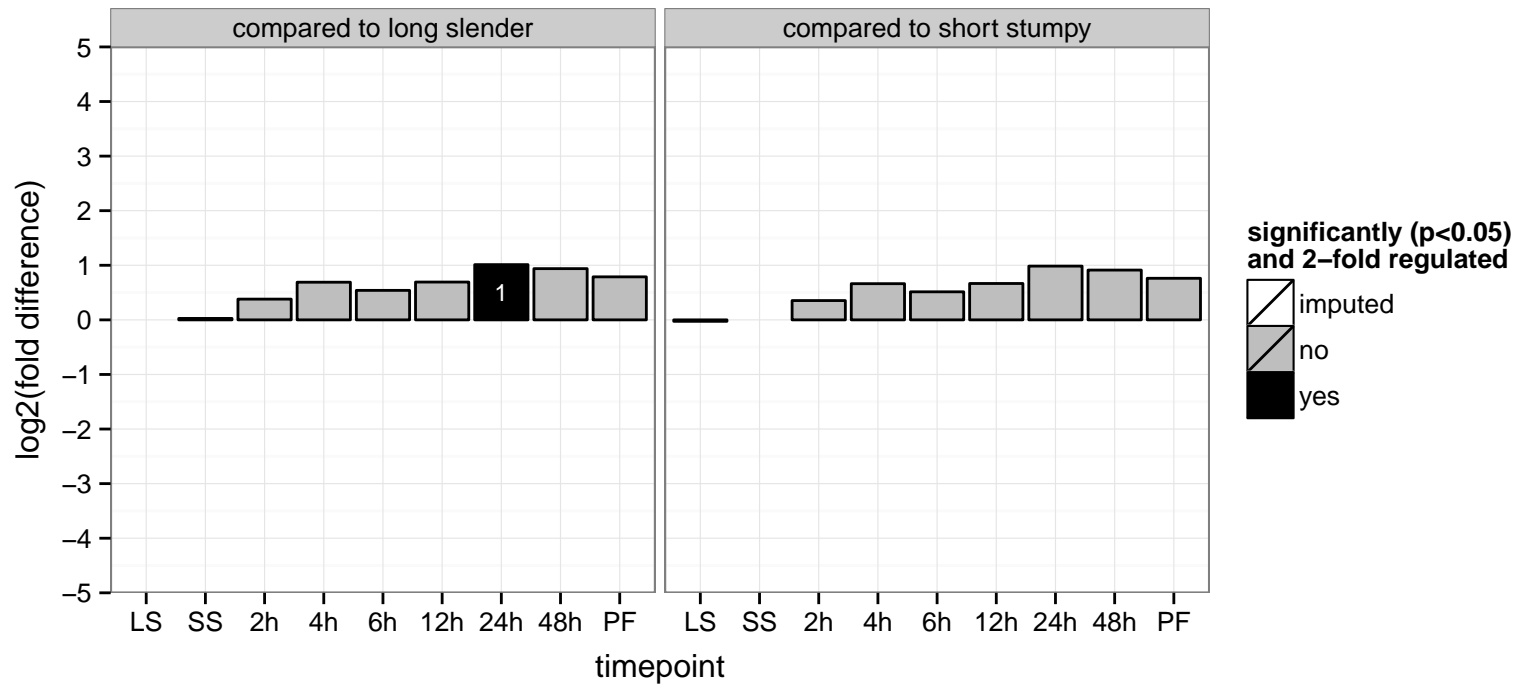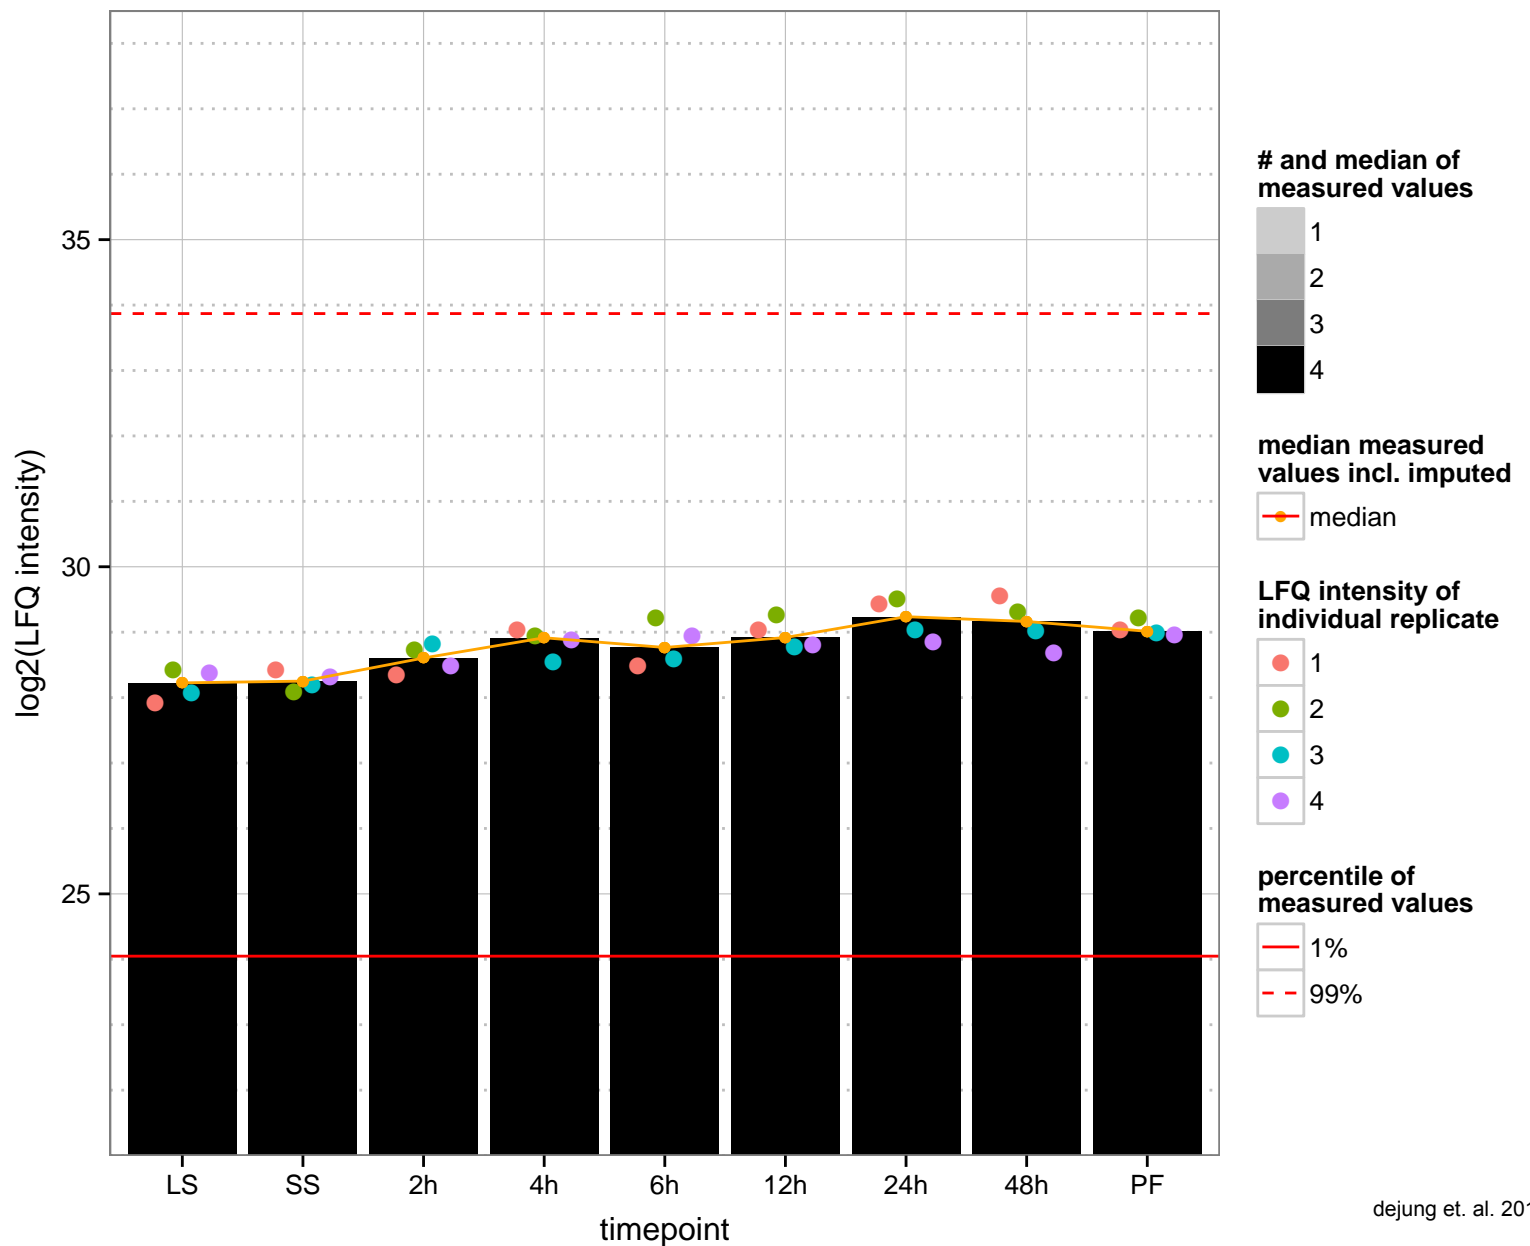

U3 snoRNA-associated protein UTP11, putative  
 Tb927.10.15380;Tb11.v5.0481  
 AGOF: null  
 AGOC: null, ribonucleoprotein complex, small-subunit processome  
 AGOP: null, rRNA processing  
 PGO: null  
 PGOC: small-subunit processome  
 PGOP: rRNA processing

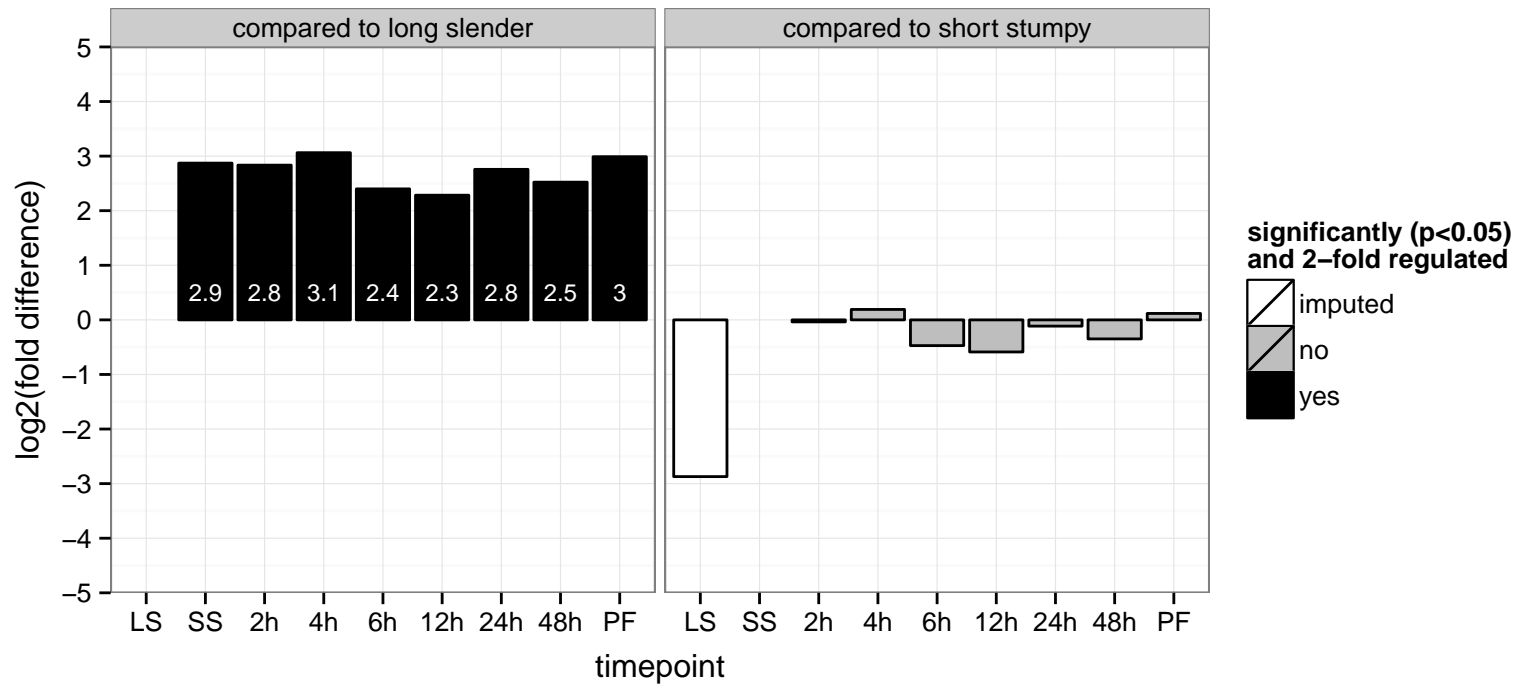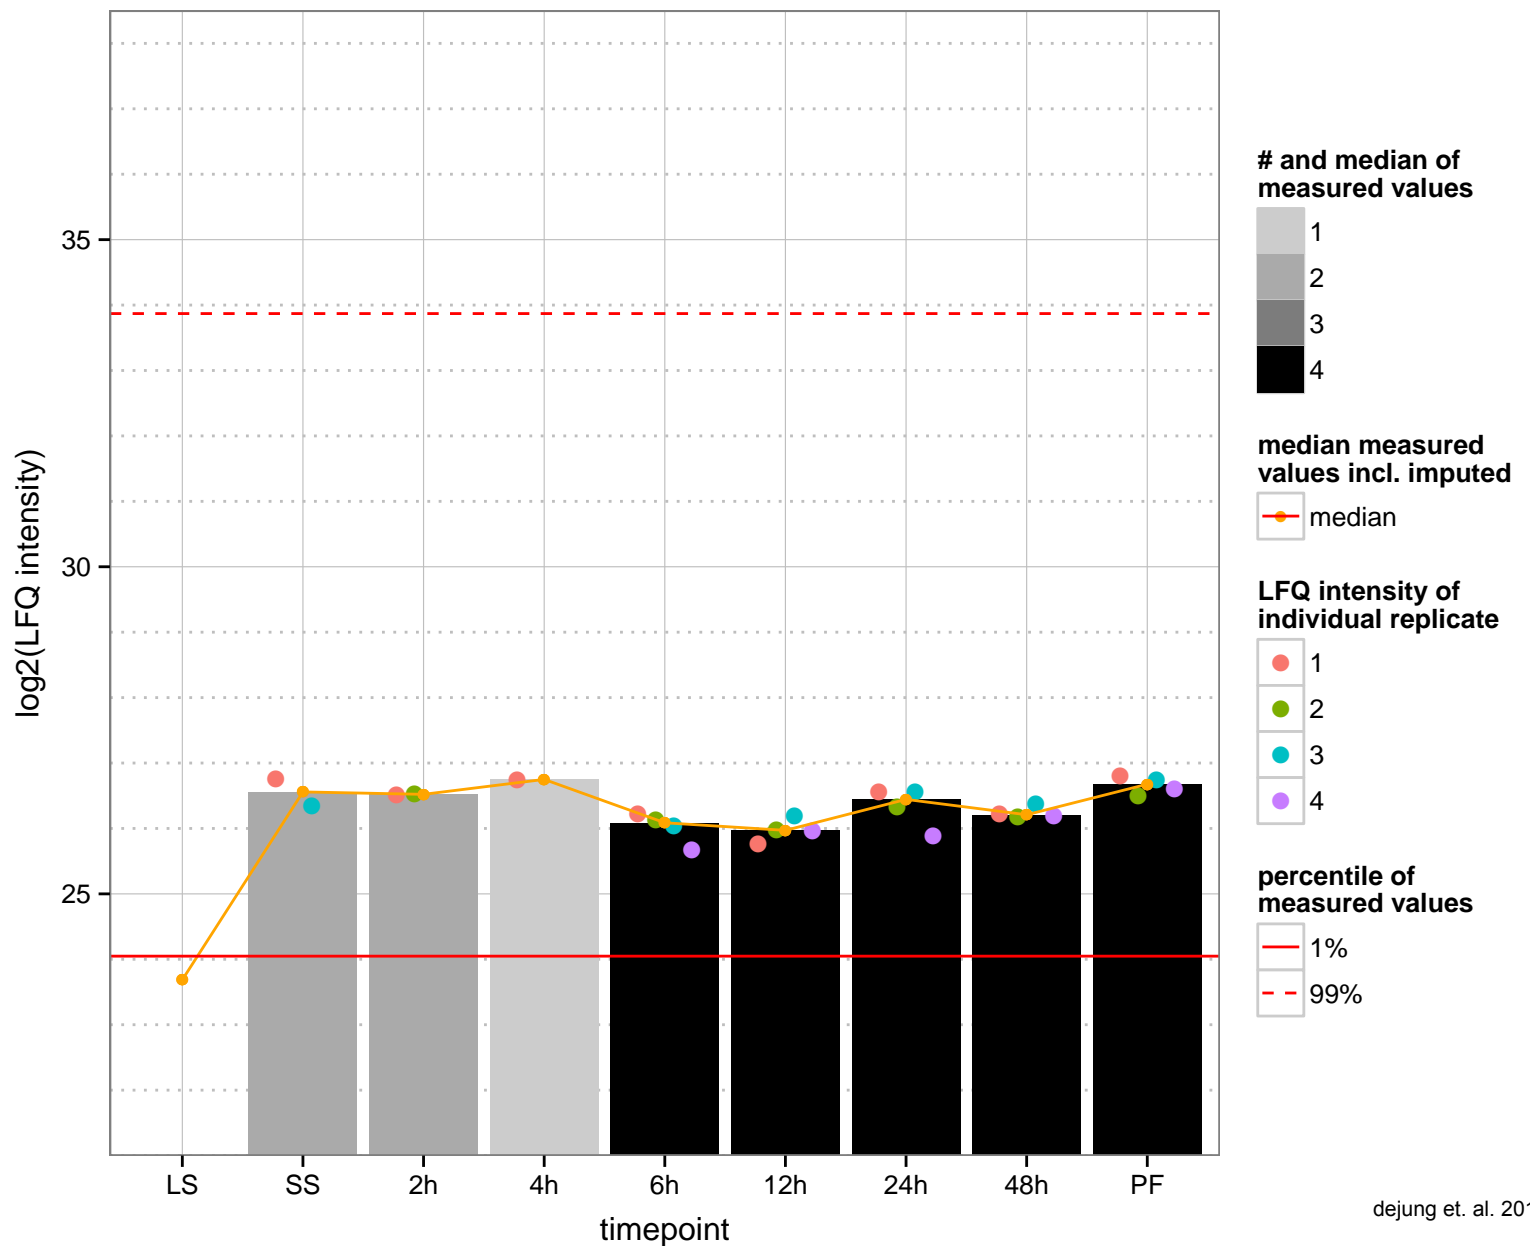

retrotransposon hot spot (RHS) protein, putative  
 Tb11.v5.0489  
 AGOF: null  
 AGOC: null  
 AGOP: null  
 PGO: null  
 PGOC: null  
 PGOP: null

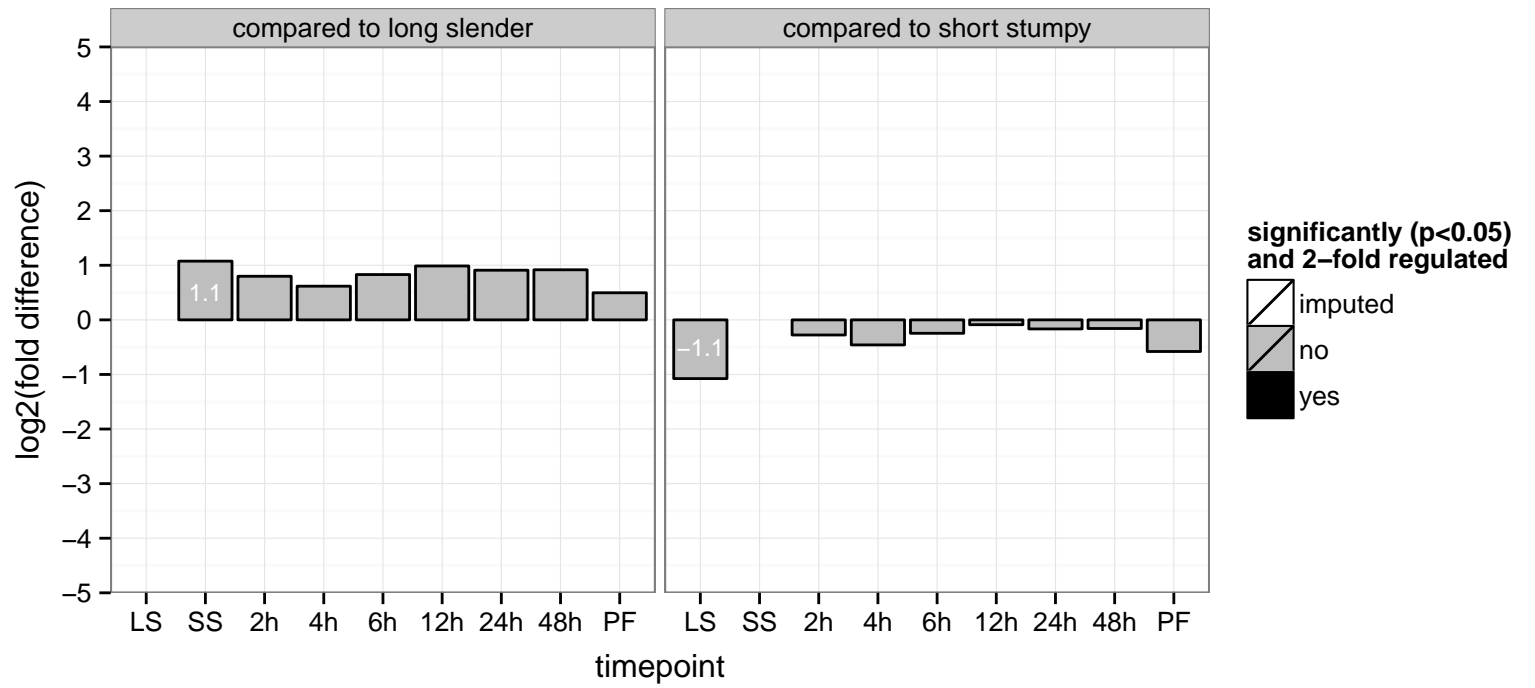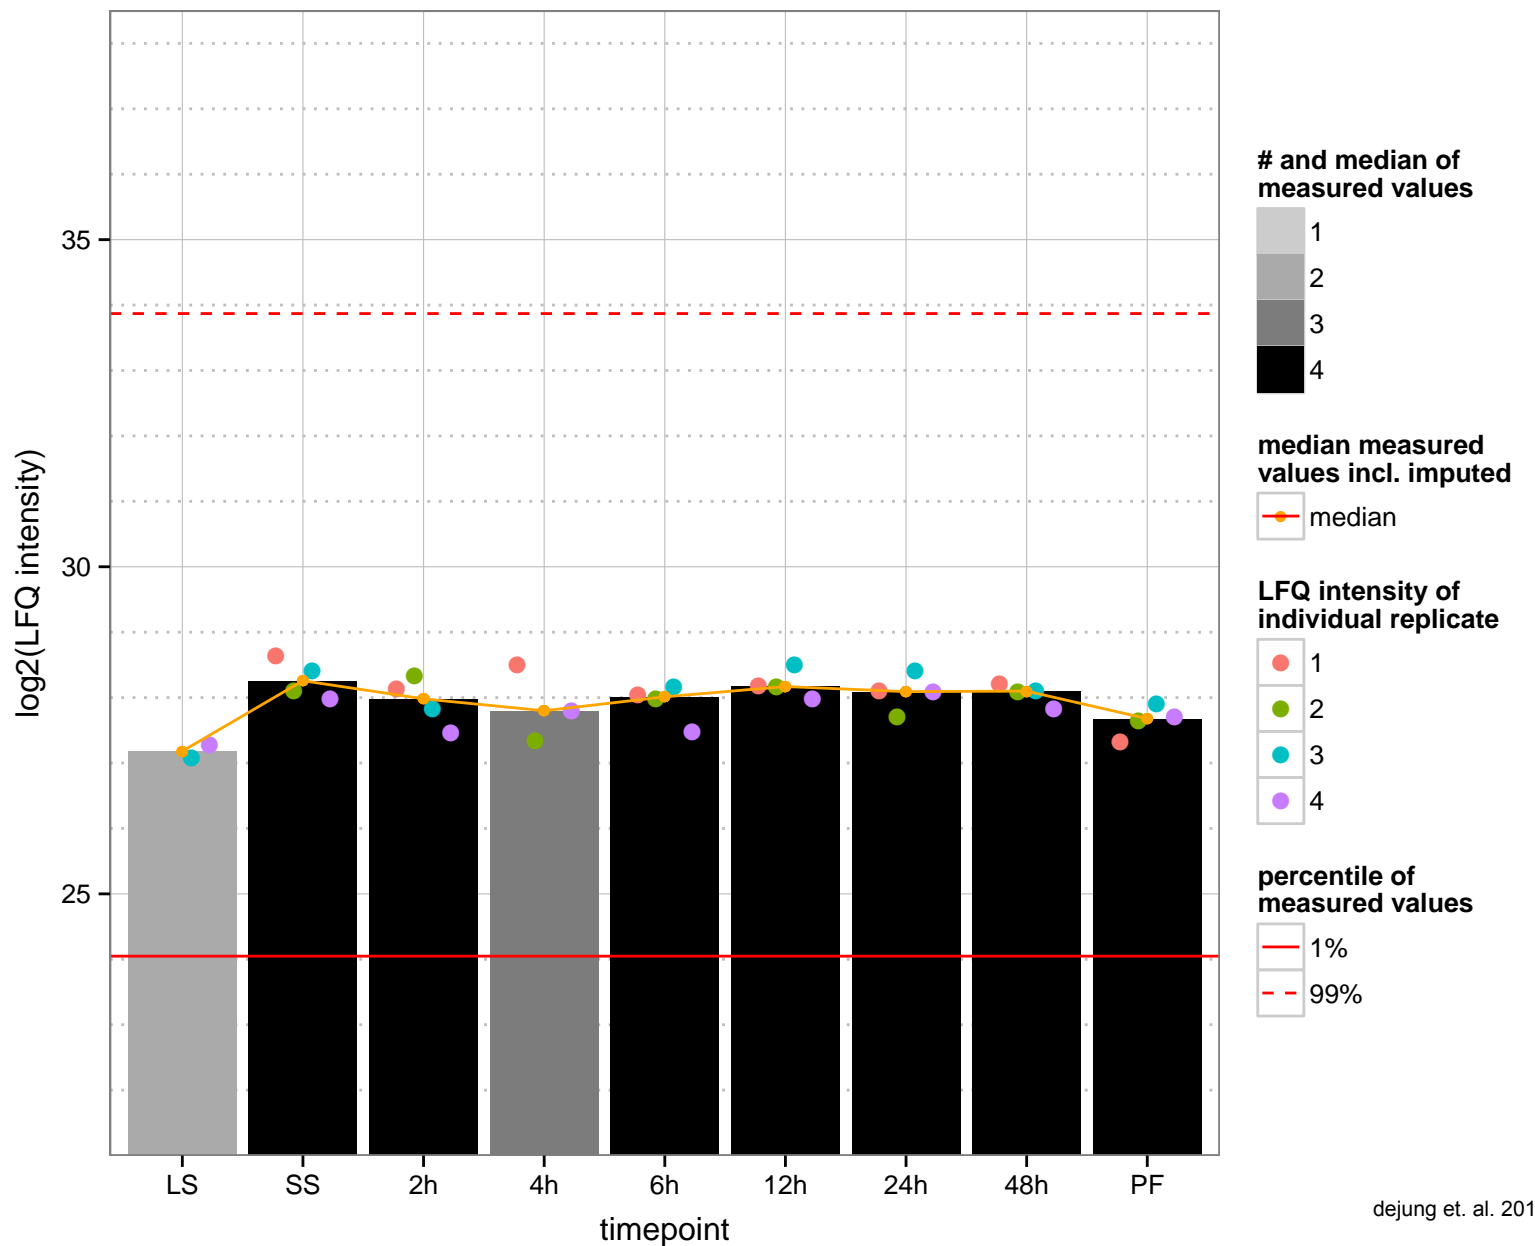

40S ribosomal protein S3A, putative  
 Tb927.10.3940;Tb11.v5.0501;Tb927.10.3930  
 AGOF: null, structural constituent of ribosome  
 AGOC: null, intracellular, ribosome  
 AGOP: null, translation  
 PGO: structural constituent of ribosome  
 PGO: intracellular, ribosome  
 PGO: translation

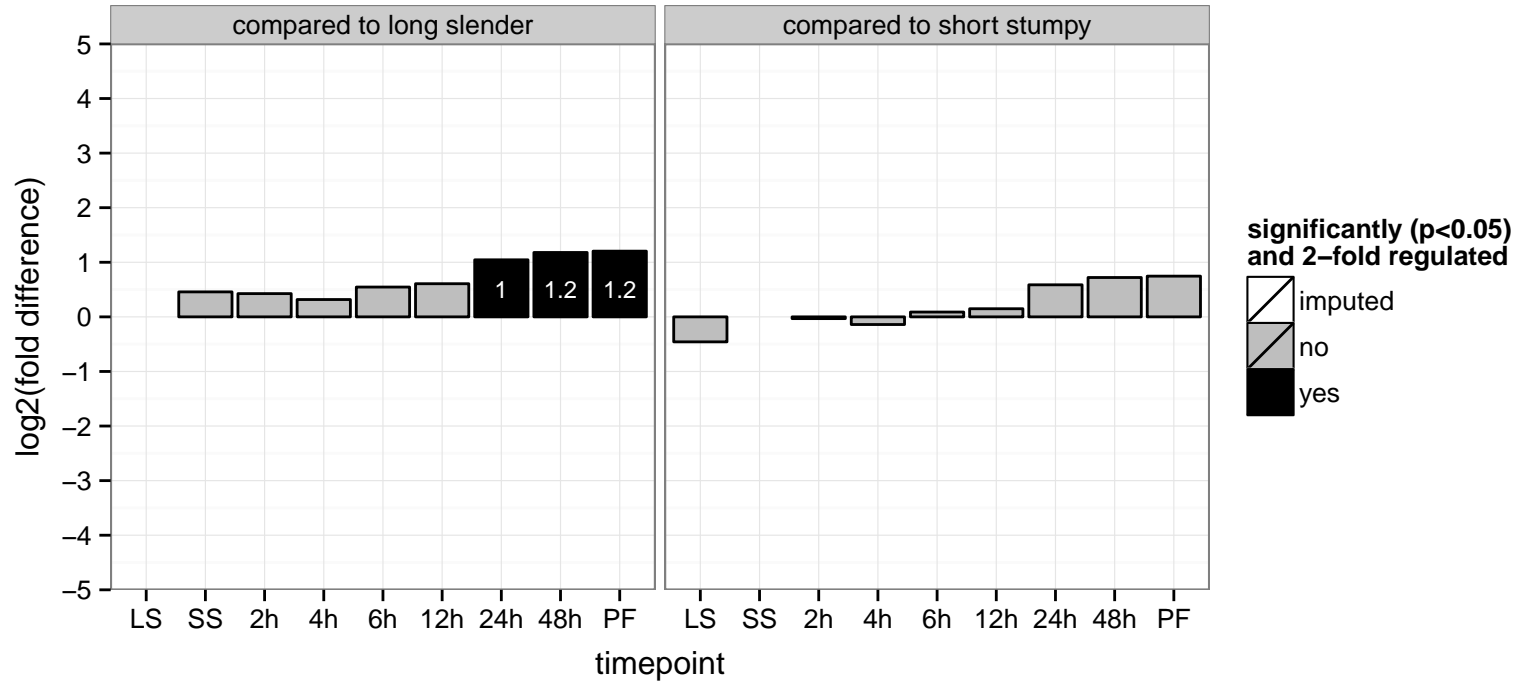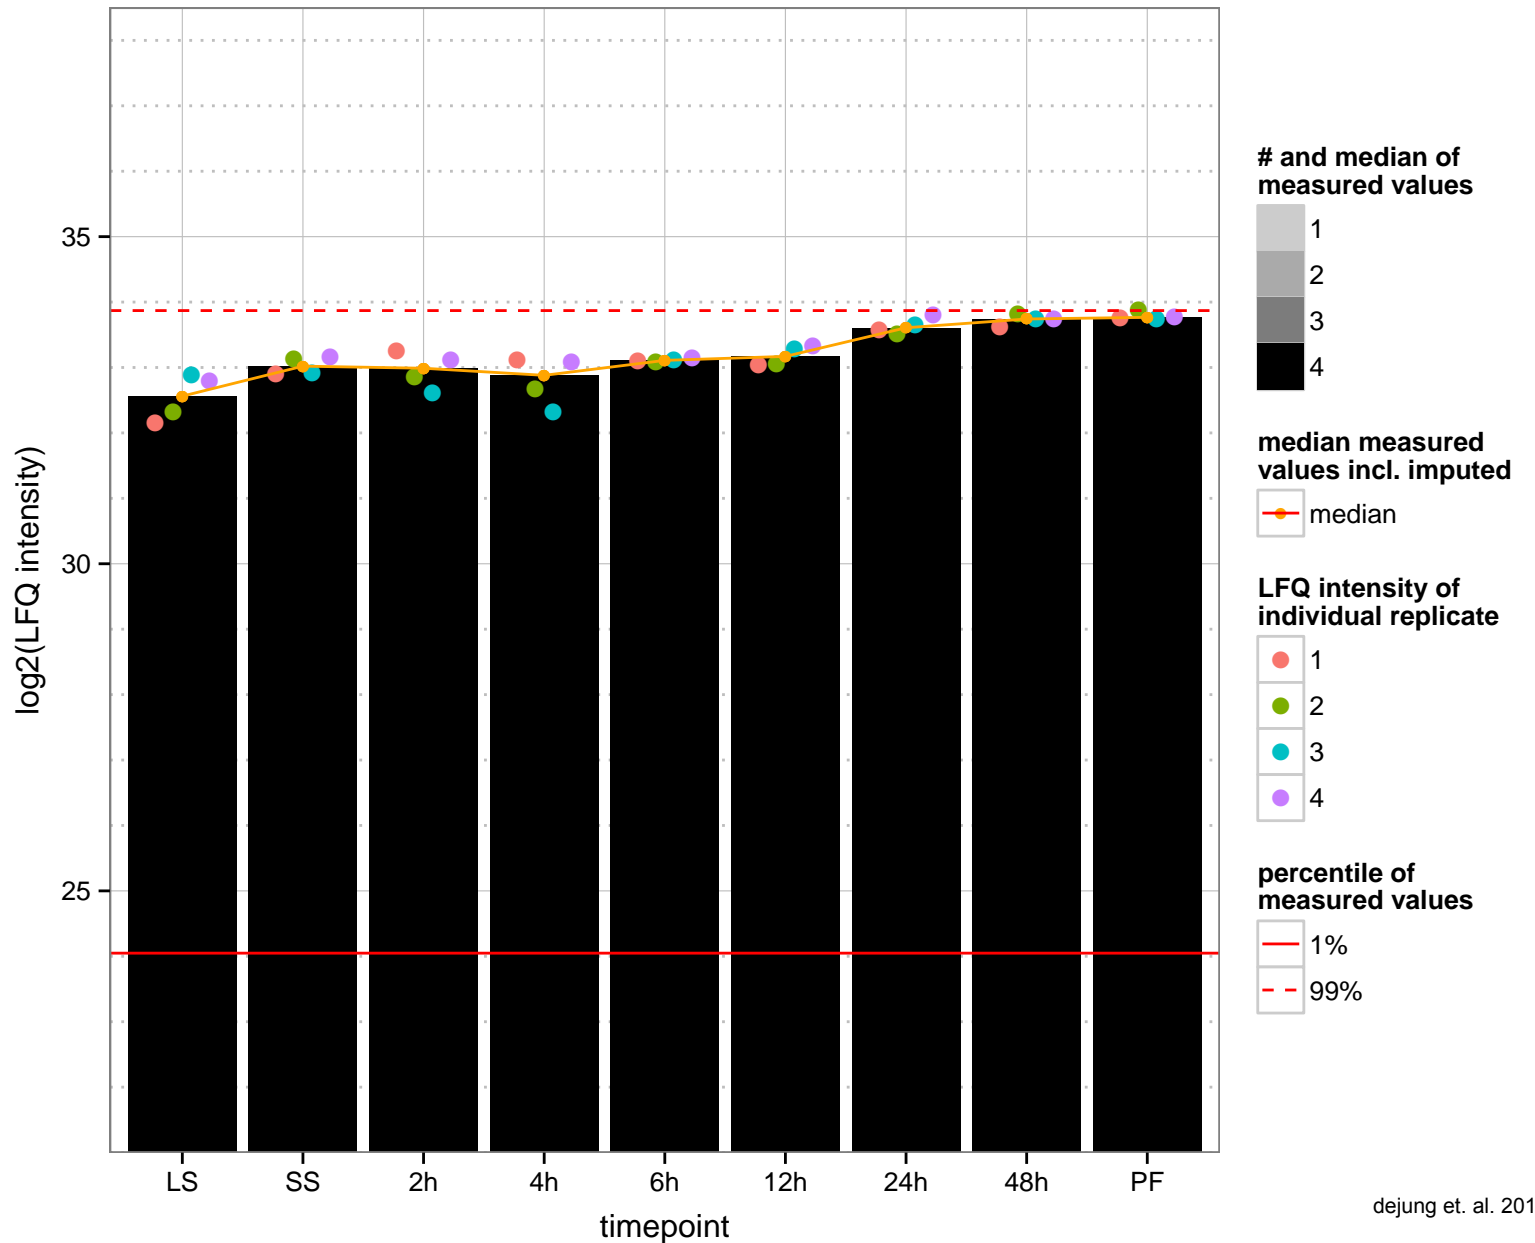

hypothetical protein, conserved  
 Tb927.10.3920;Tb11.v5.0502  
 AGOF: null  
 AGOC: null  
 AGOP: null  
 PGO: null  
 PGOC: null  
 PGOP: null

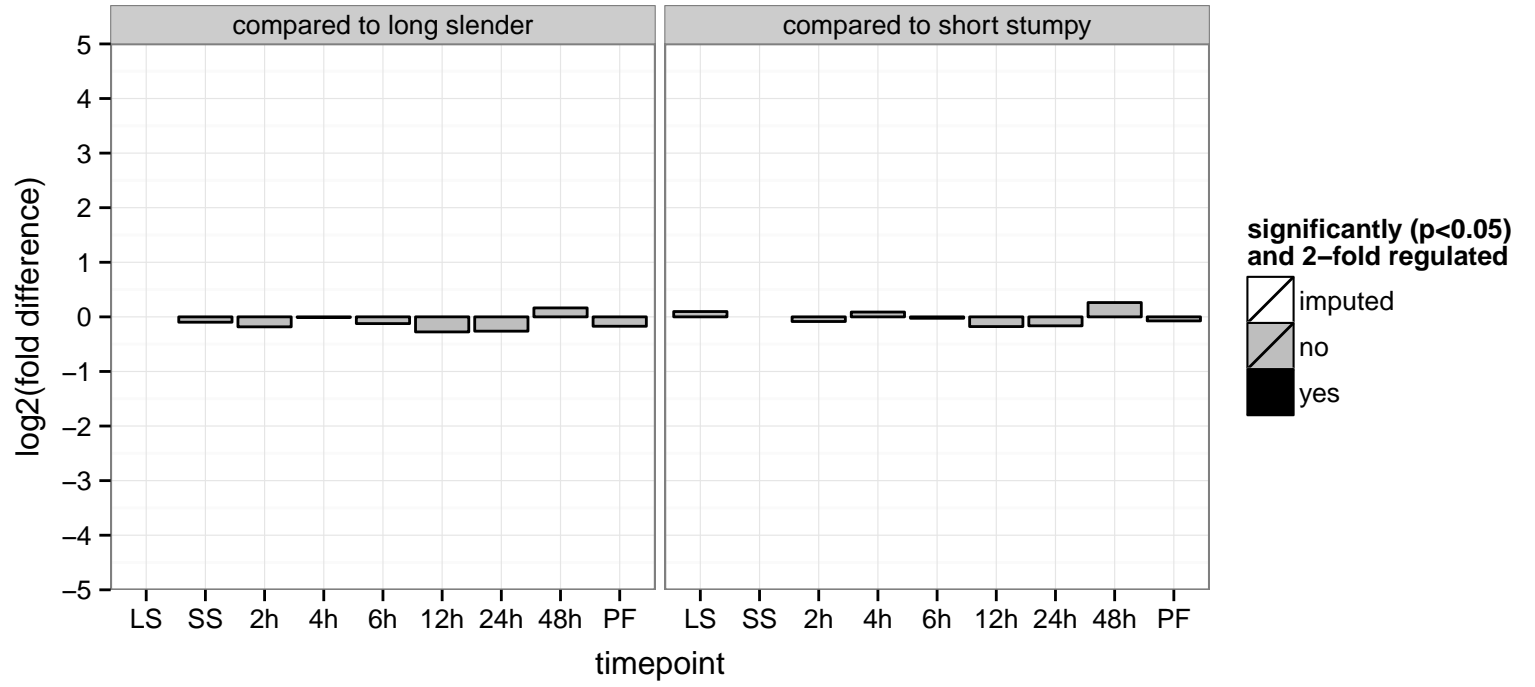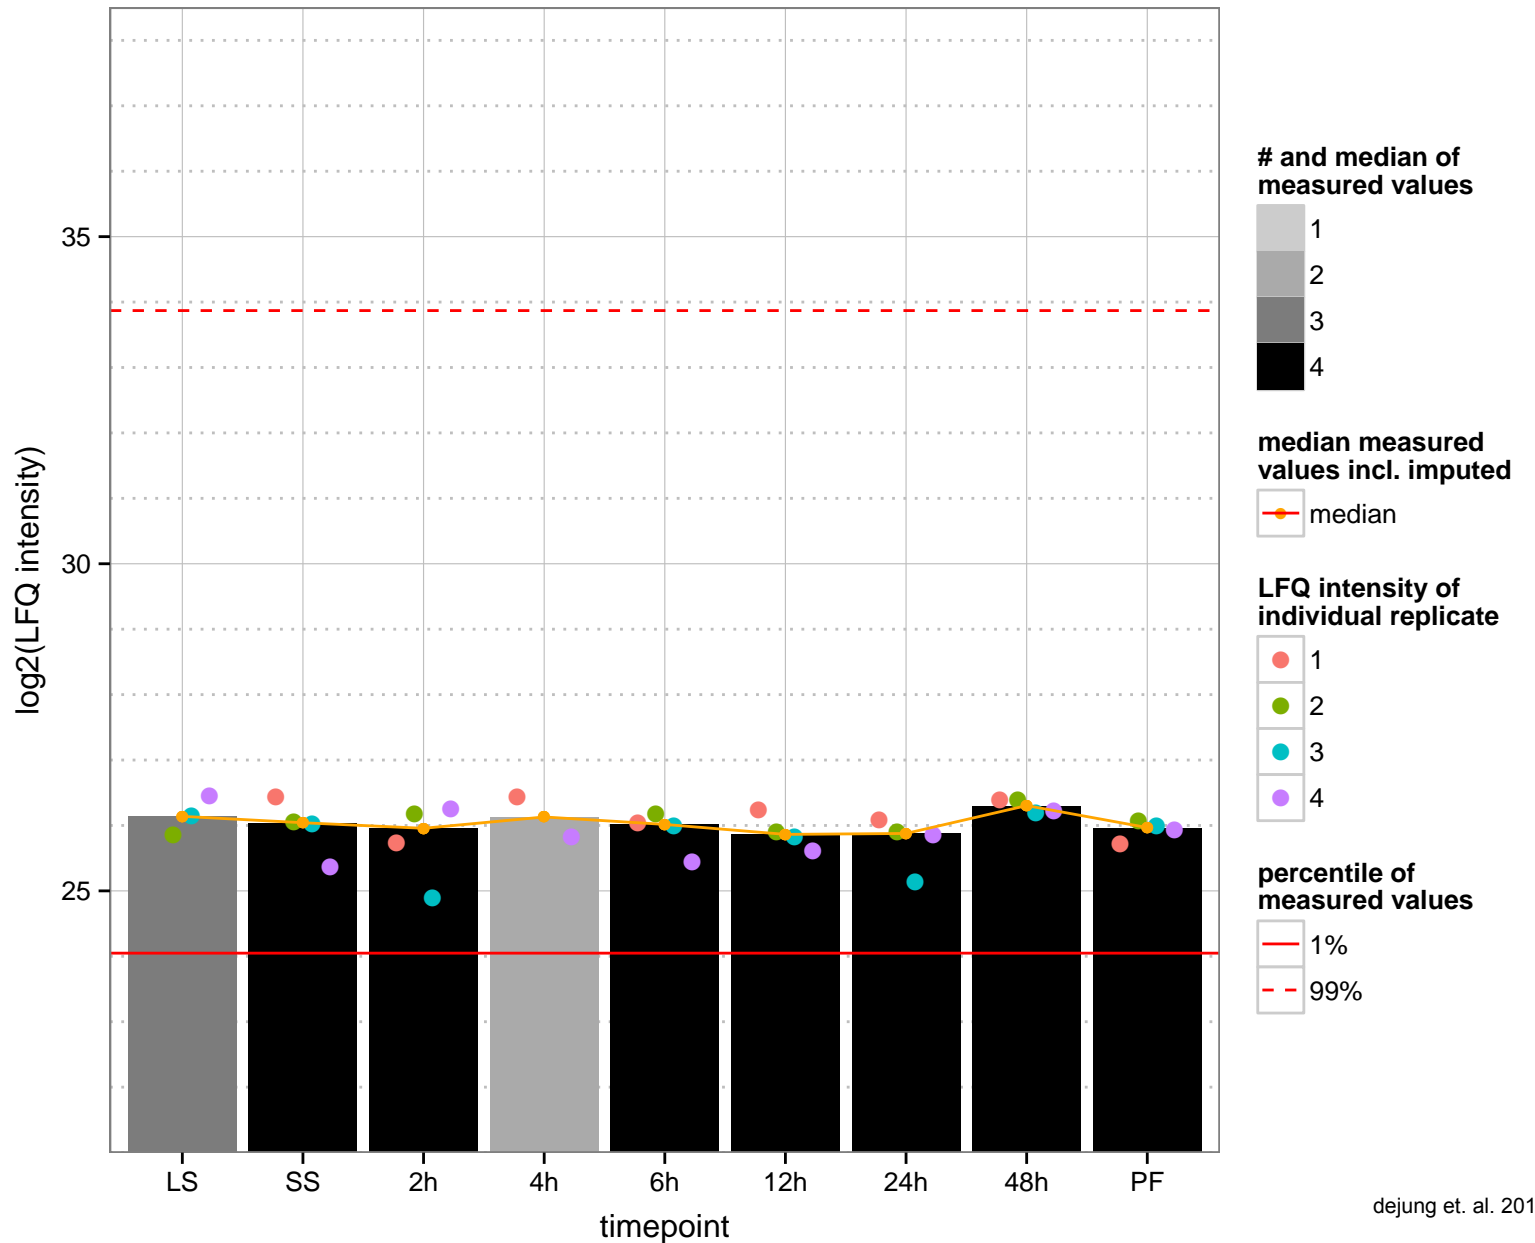



hypothetical protein, conserved  
 Tb927.10.16110;Tb11.v5.0527  
 AGOF: null  
 AGOC: null  
 AGOP: null, ciliary or flagellar motility  
 PGO: protein binding  
 PGOC: null  
 PGOP: null

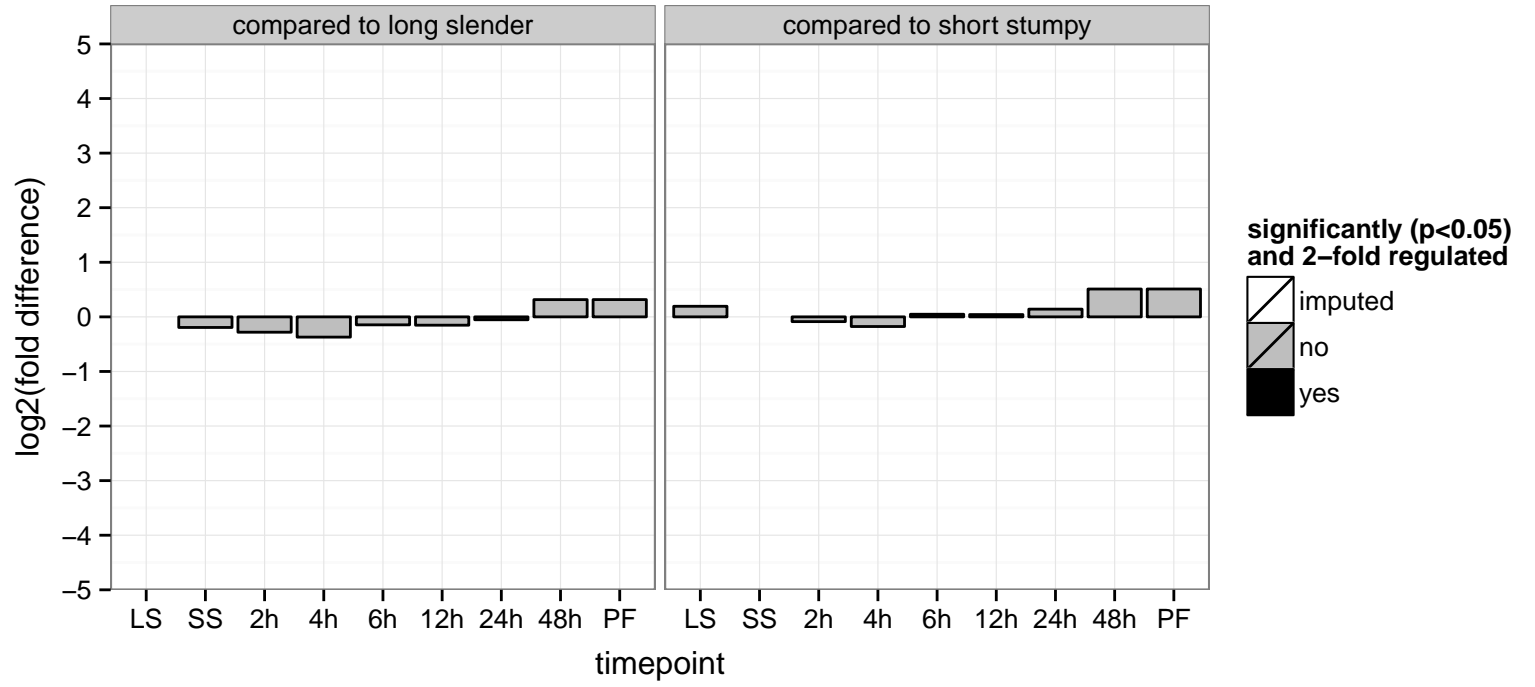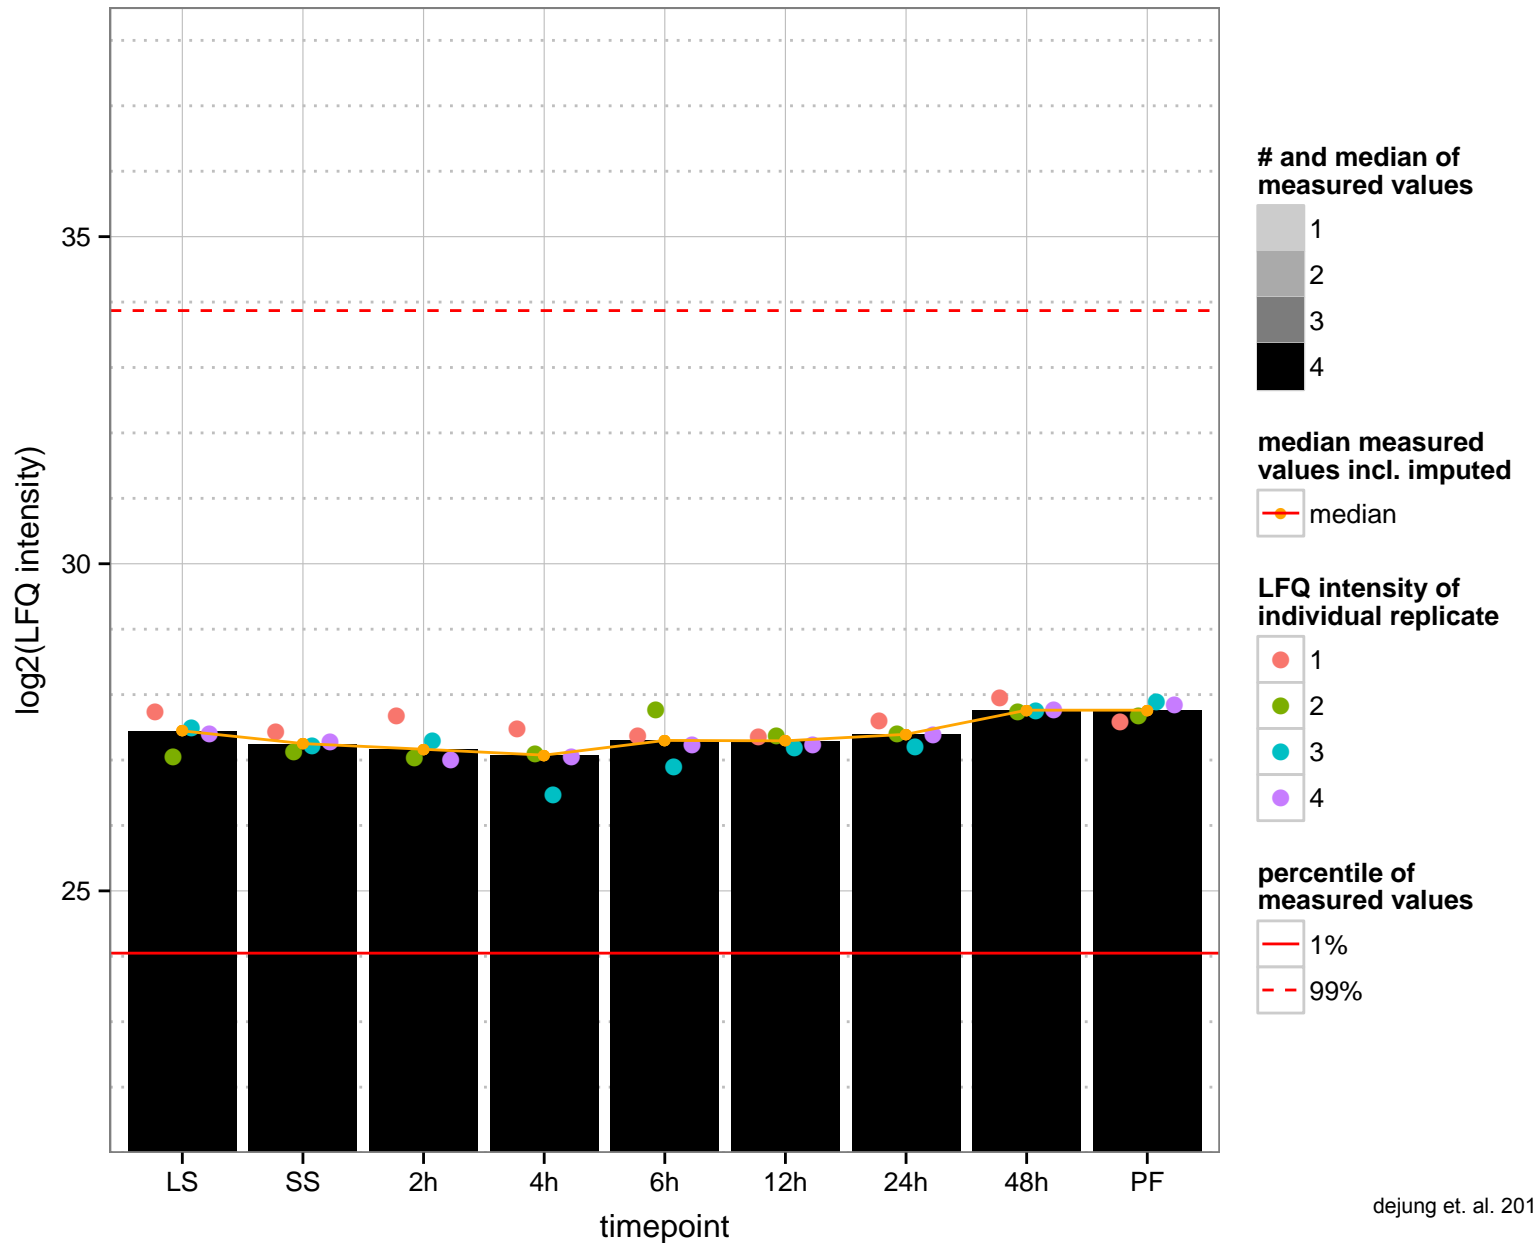

69 kDa paraflagellar rod protein, putative, Paraflagellar rod protein 2, Paraflagellar rod protein A (PFR2)  
 Tb927.8.5010;Tb927.8.5000;Tb927.8.4990;Tb927.8.4980;Tb927.8.4970;Tb11.v5.0538  
 AGOF: null, calmodulin binding  
 AGOC: null, cilium, microtubule-based flagellum  
 AGOP: null, cellular component movement, forward locomotion  
 PGOF: calmodulin binding, null  
 PGO: microtubule-based flagellum, null  
 PGOP: null

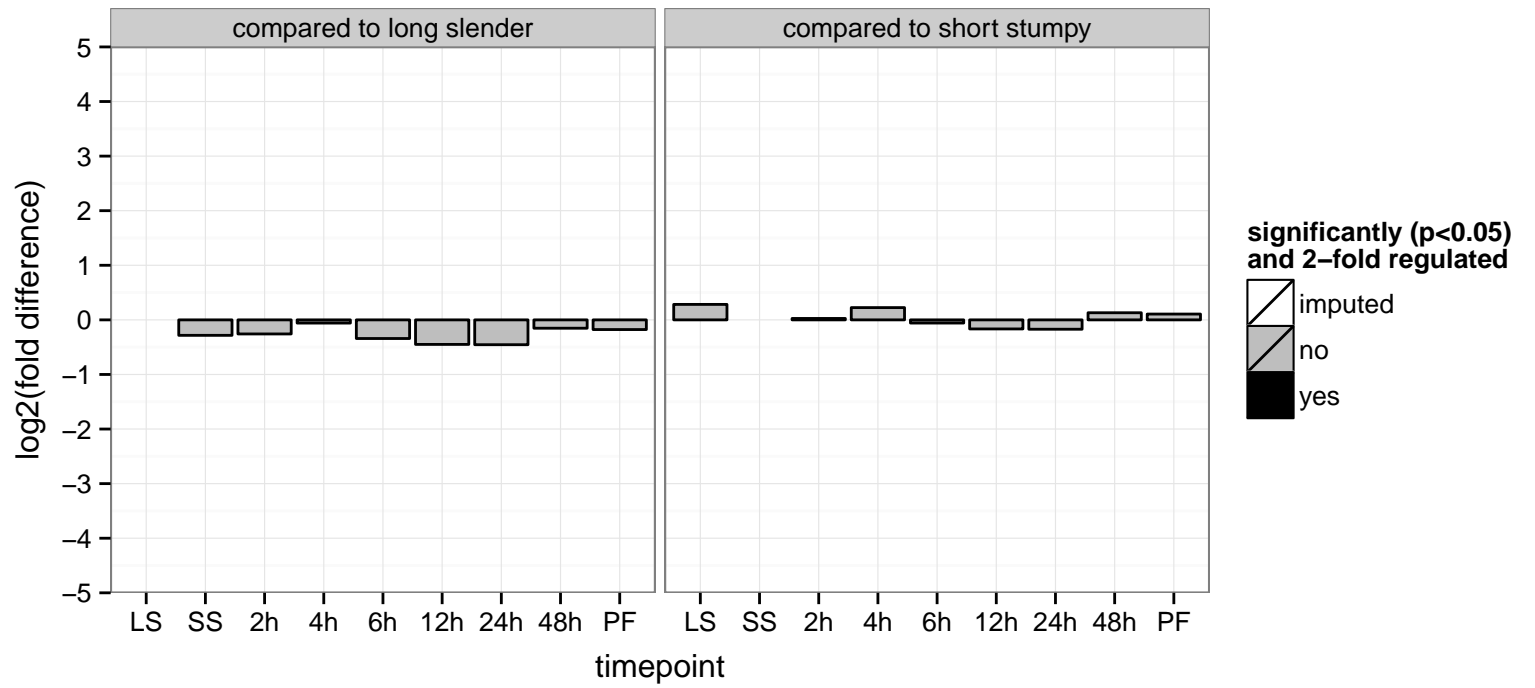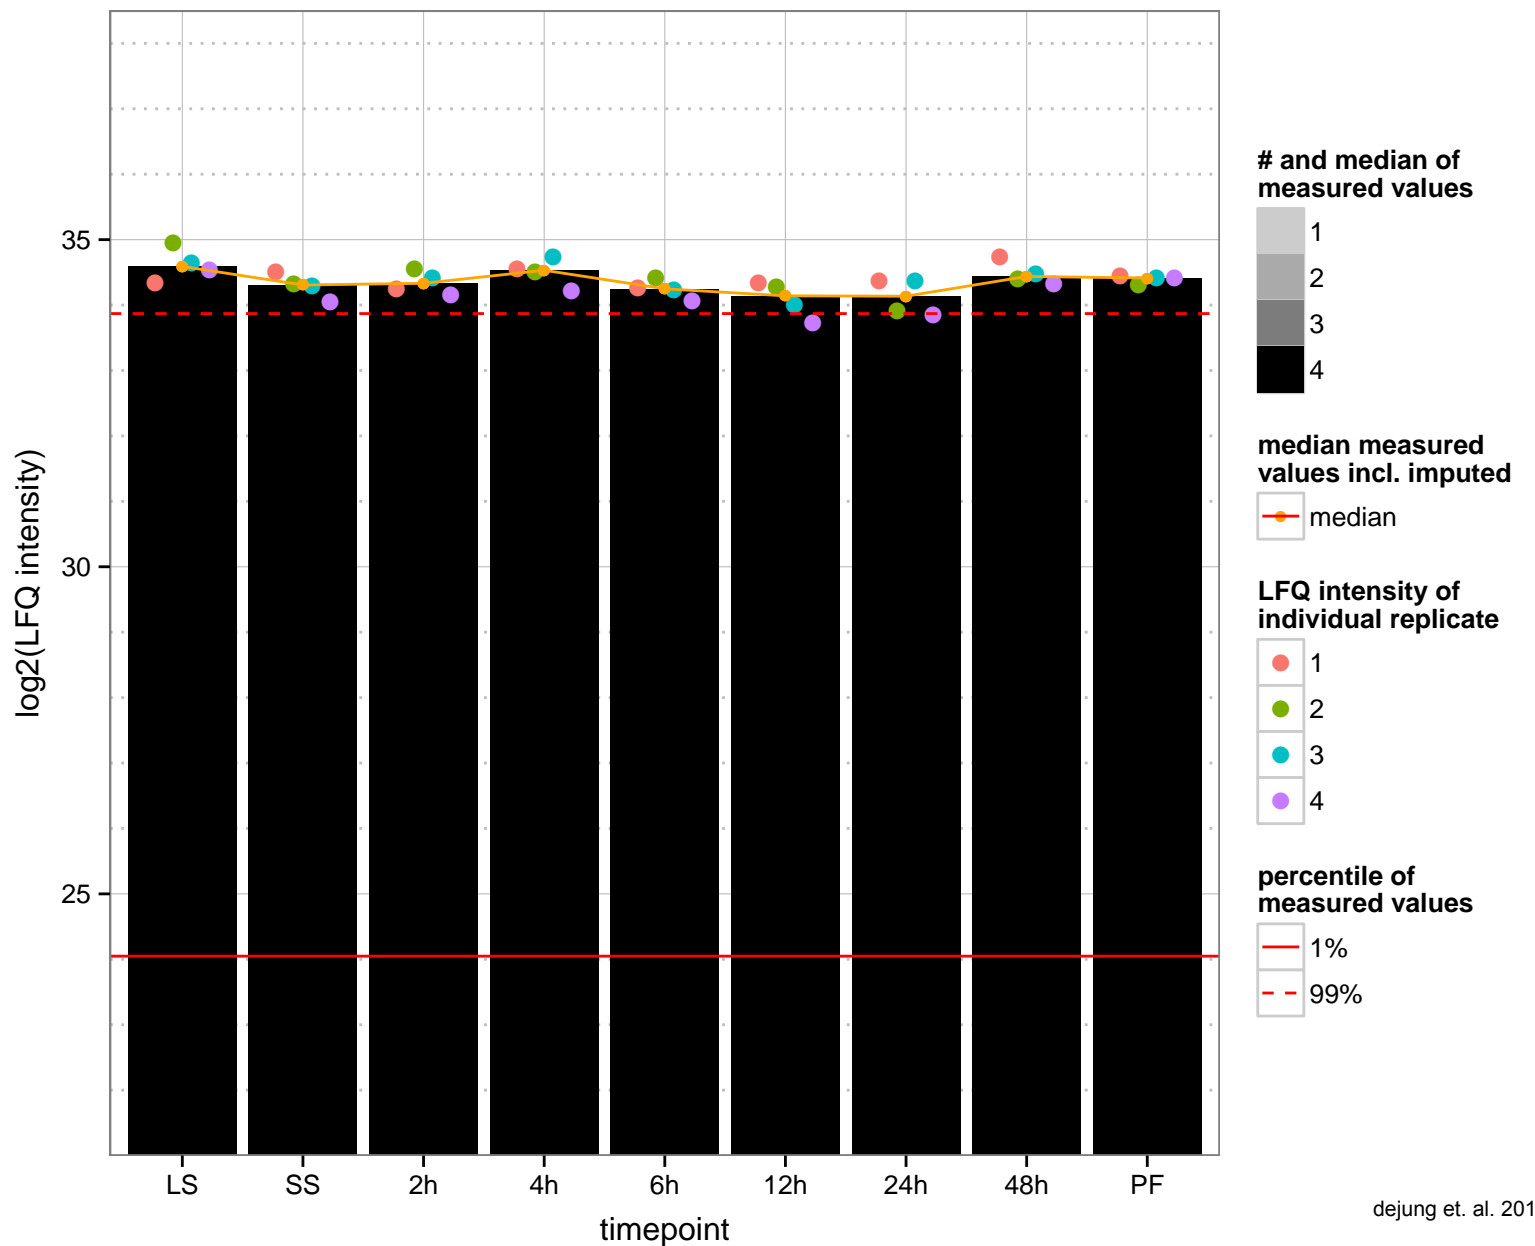

Heat shock protein 83, putative, heat shock protein, heat shock protein 90  
 Tb927.10.10960;Tb927.10.10950;Tb927.10.10940;Tb927.10.10920;Tb927.10.10900;Tb927.10.10890;Tb11.v5.0543;Tb927.10.10920  
 AGOF: null, ATP binding, unfolded protein binding, ATPase activity, coupled  
 AGOC: null, centrosome  
 AGOP: null, protein folding, response to stress, protein refolding, response to unfolded protein  
 PGO: ATP binding, unfolded protein binding, null  
 PGO: null  
 PGO: protein folding, response to stress, null

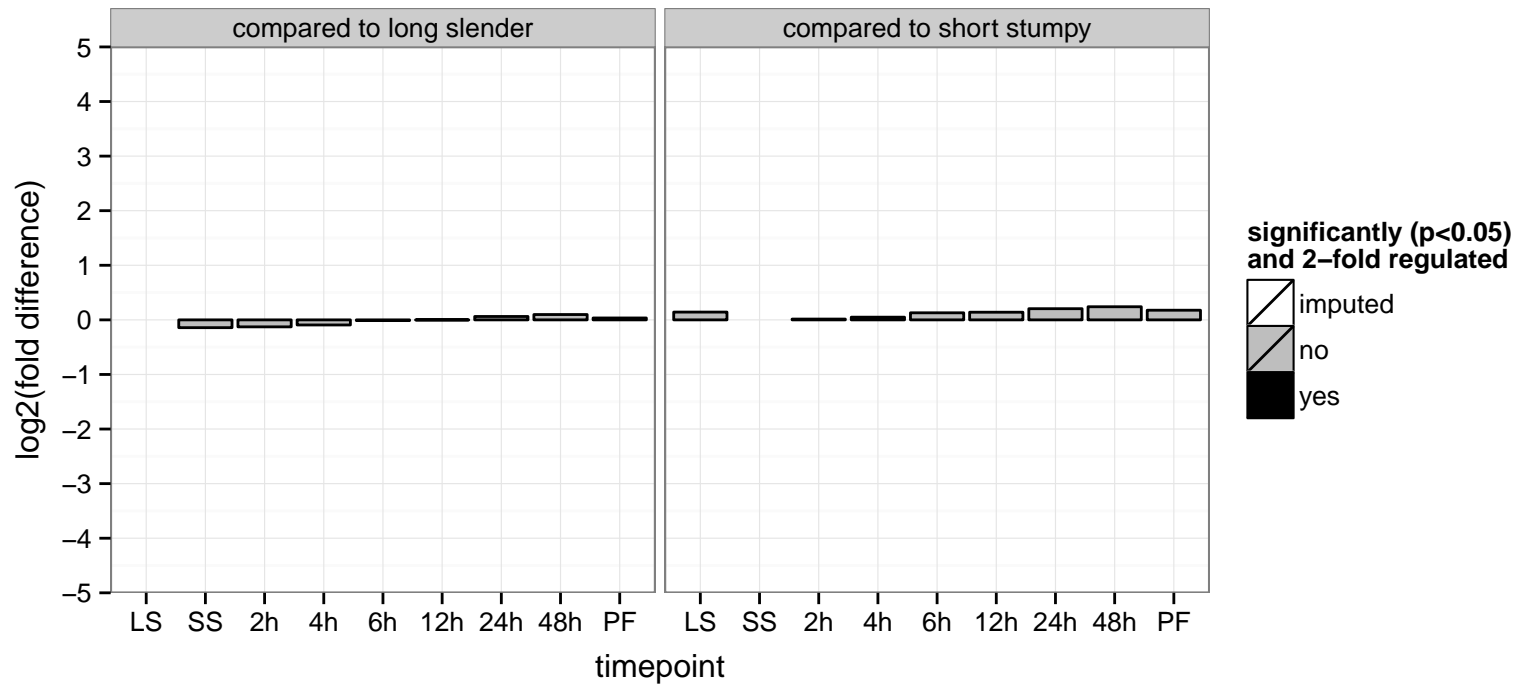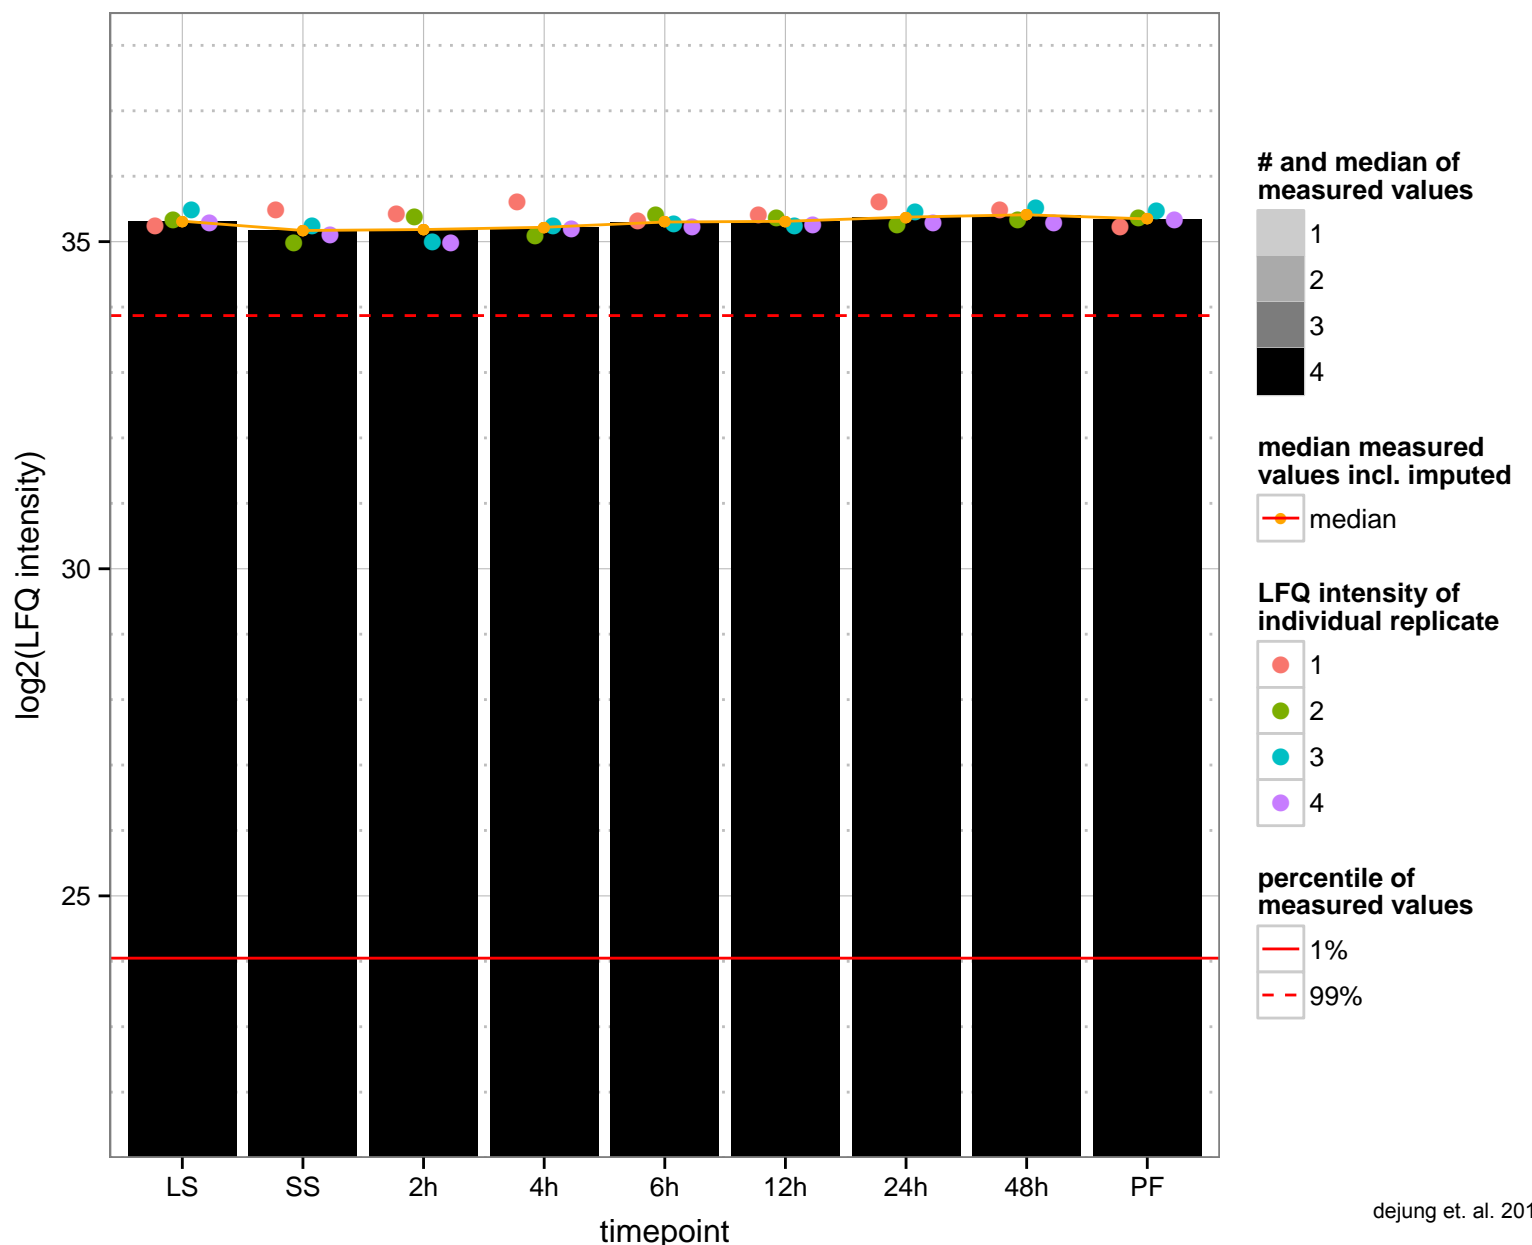

protein kinase, putative

Tb927.10.350;Tb11.v5.0564

AGOF: null, ATP binding, protein kinase activity, protein serine/threonine kinase activity, protein tyrosine kinase activity

AGOC: null

AGOP: null, protein phosphorylation

PGOF: ATP binding, protein kinase activity, transferase activity, transferring phosphorus-containing groups

PGOC: null

PGOP: protein phosphorylation

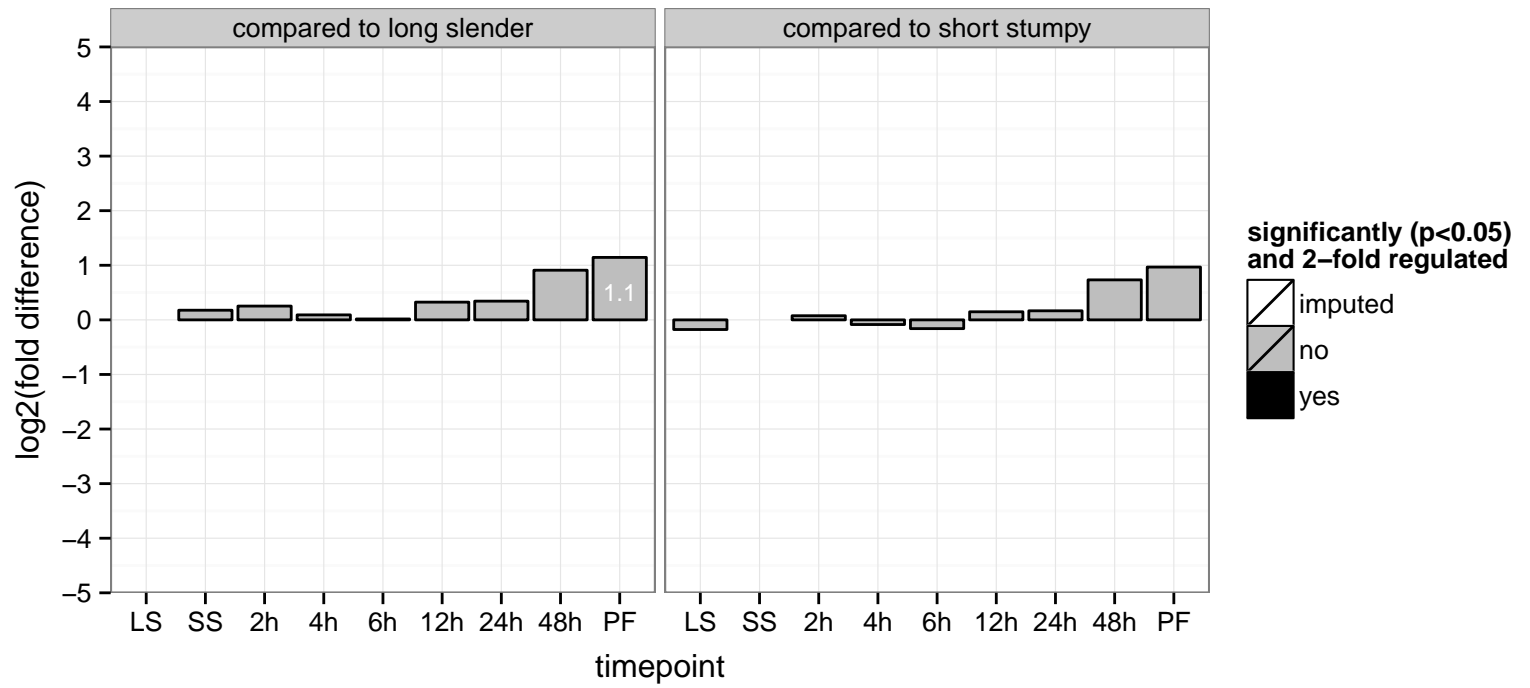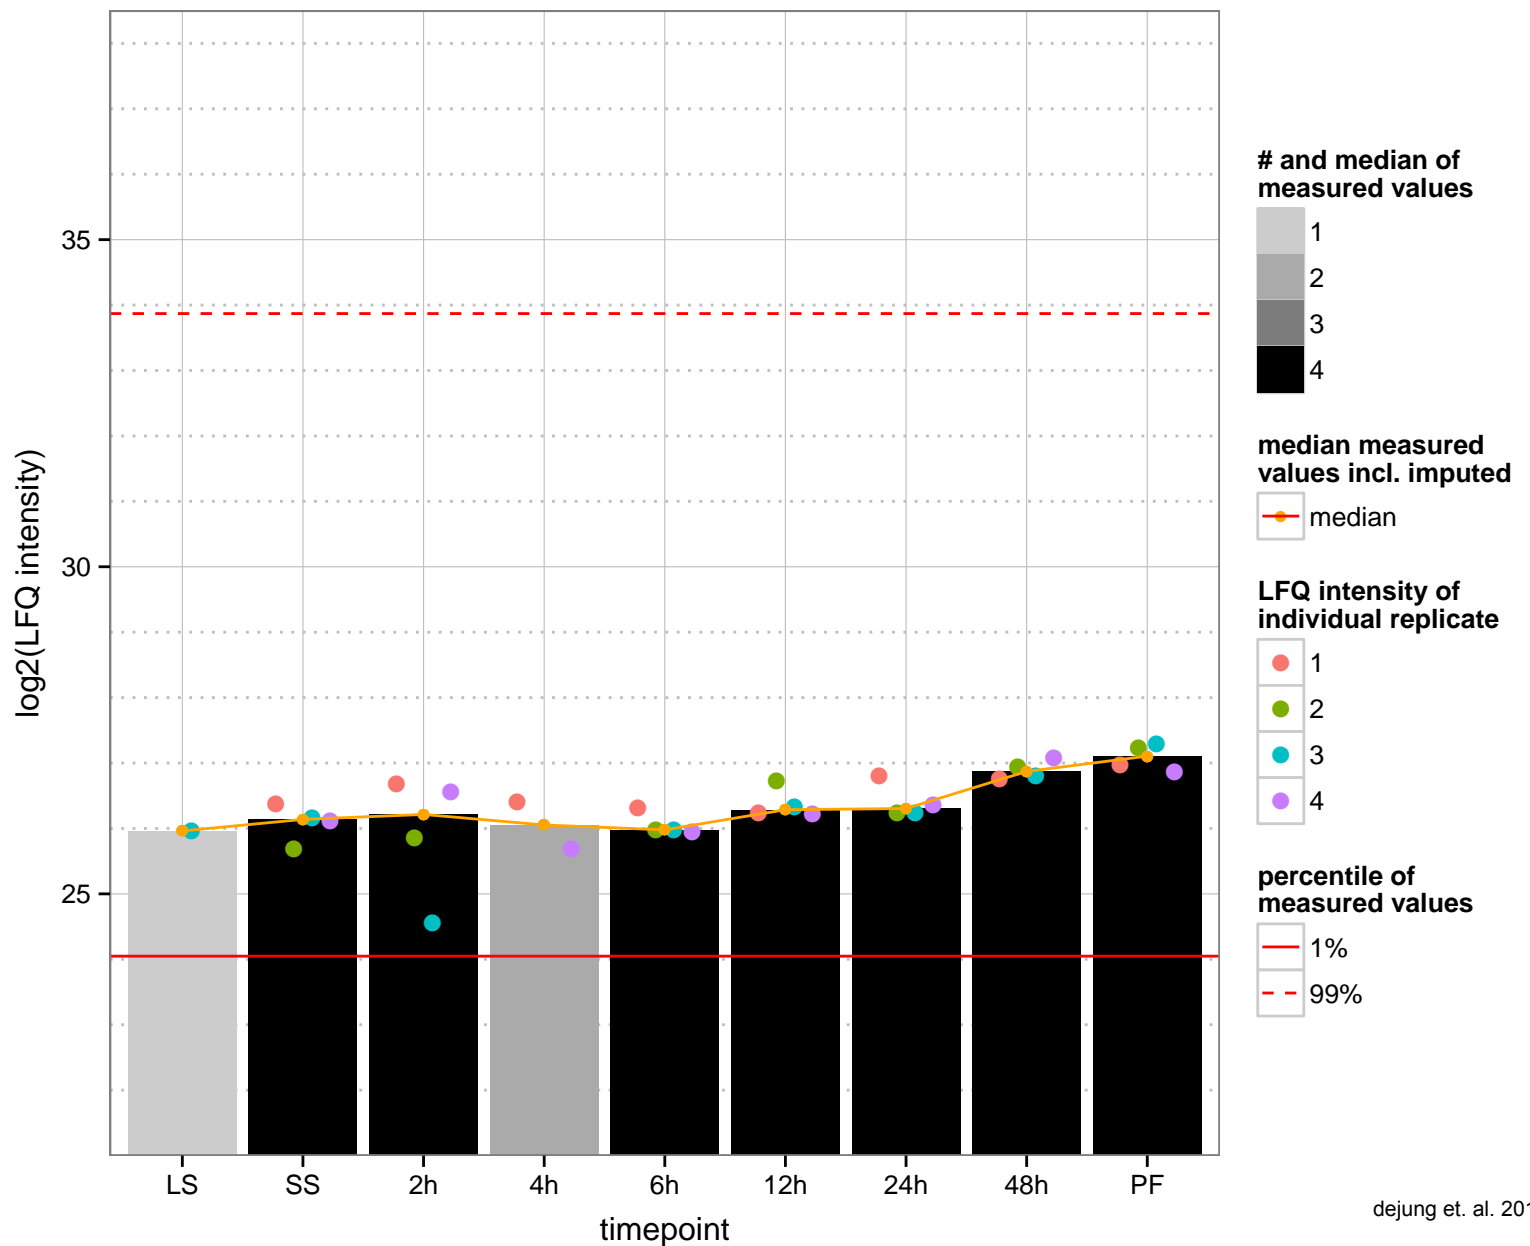

hypothetical protein, conserved  
 Tb927.7.5620;Tb11.v5.0590  
 AGOF: null, zinc ion binding  
 AGOC: null  
 AGOP: null  
 PGO: protein binding, zinc ion binding  
 PGOC: null  
 PGOP: null

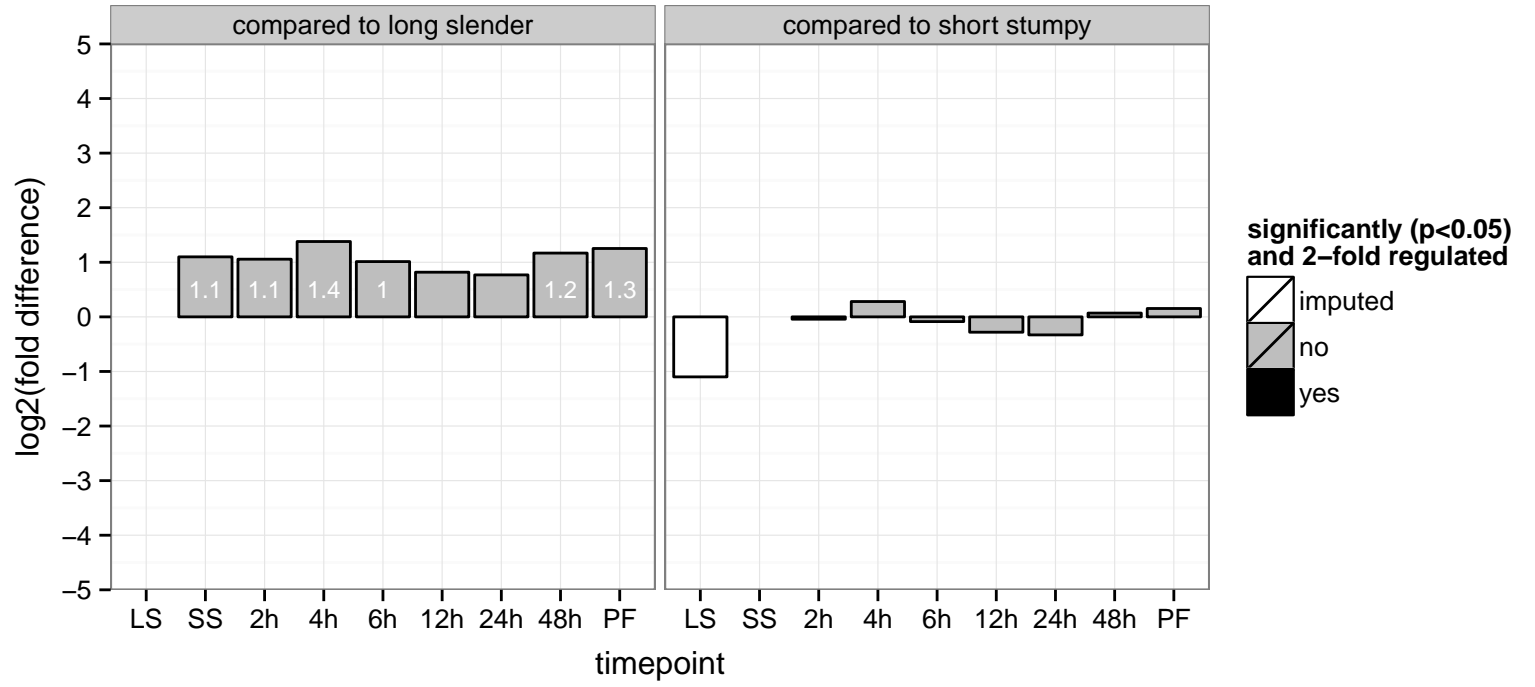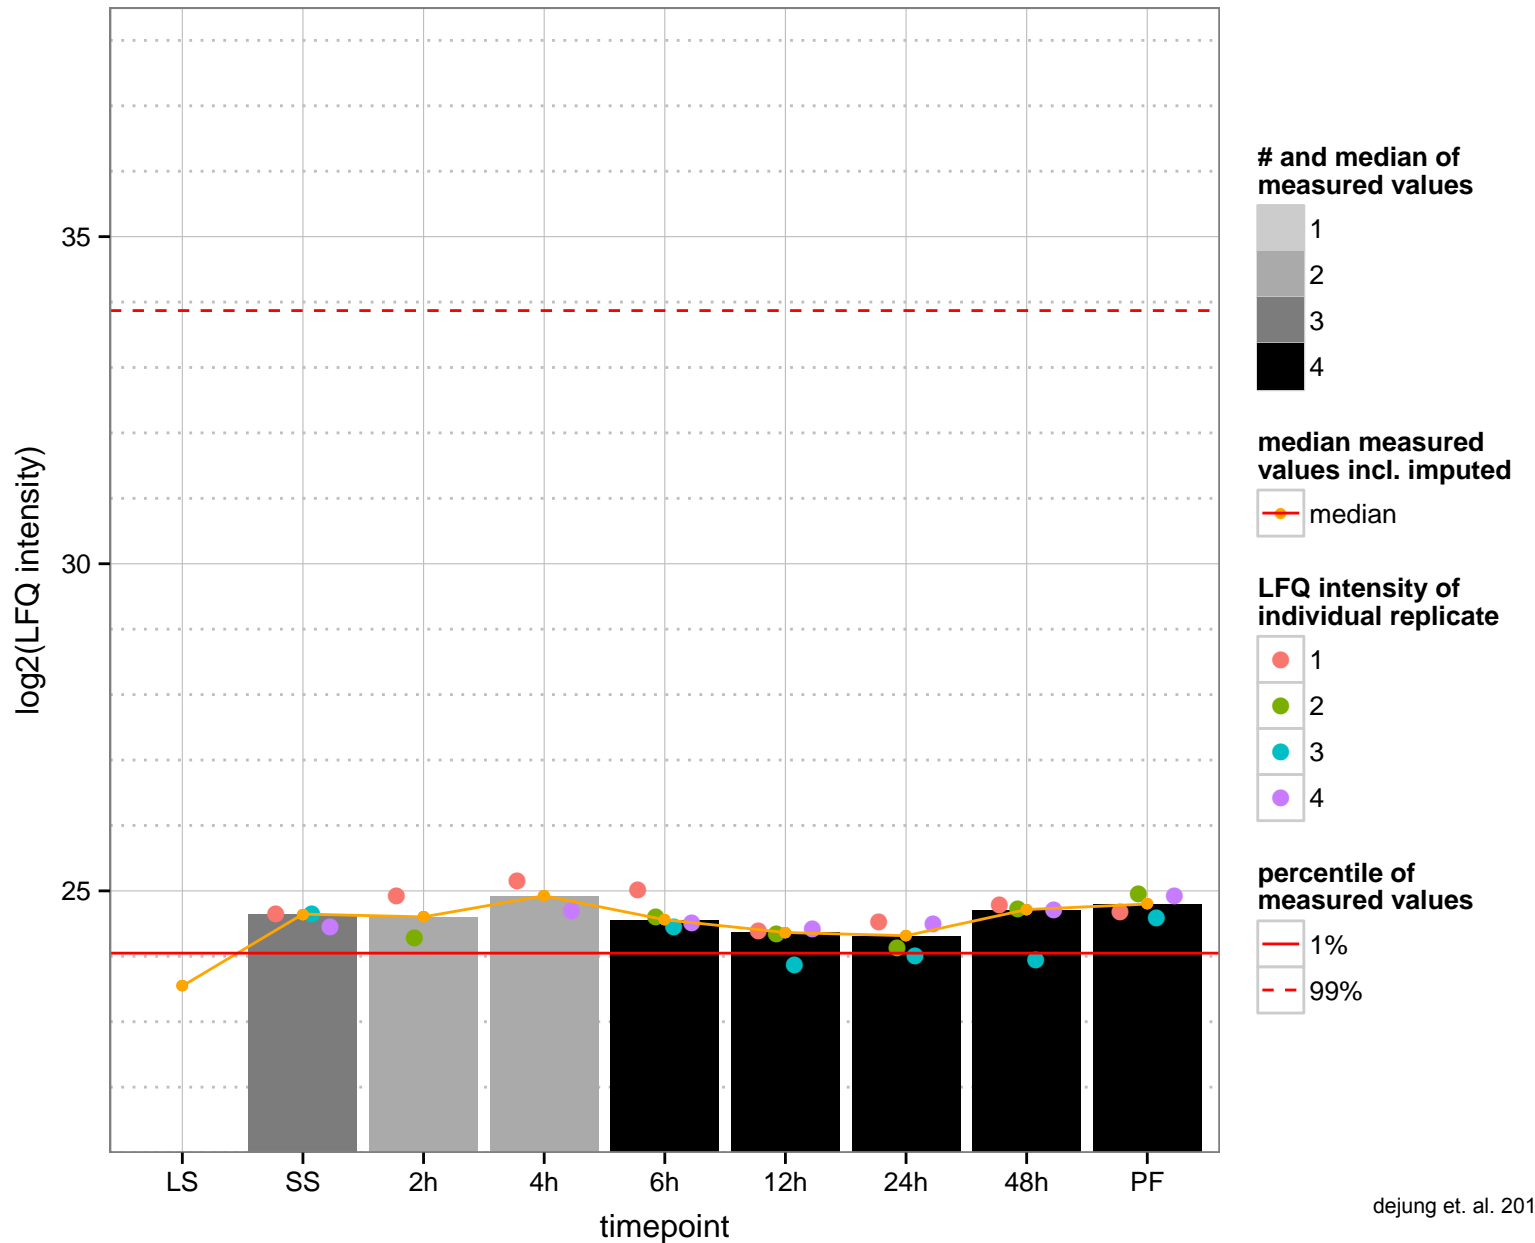

hypothetical protein, conserved, guide RNA associated protein, GAP2, mitochondrial RNA binding protein 1  
 Tb927.7.2570;Tb11.v5.0611  
 AGOF: null, mRNA binding  
 AGOC: null, mitochondrion  
 AGOP: null, mitochondrial RNA processing  
 PGO: null  
 PGO: null  
 PGO: null

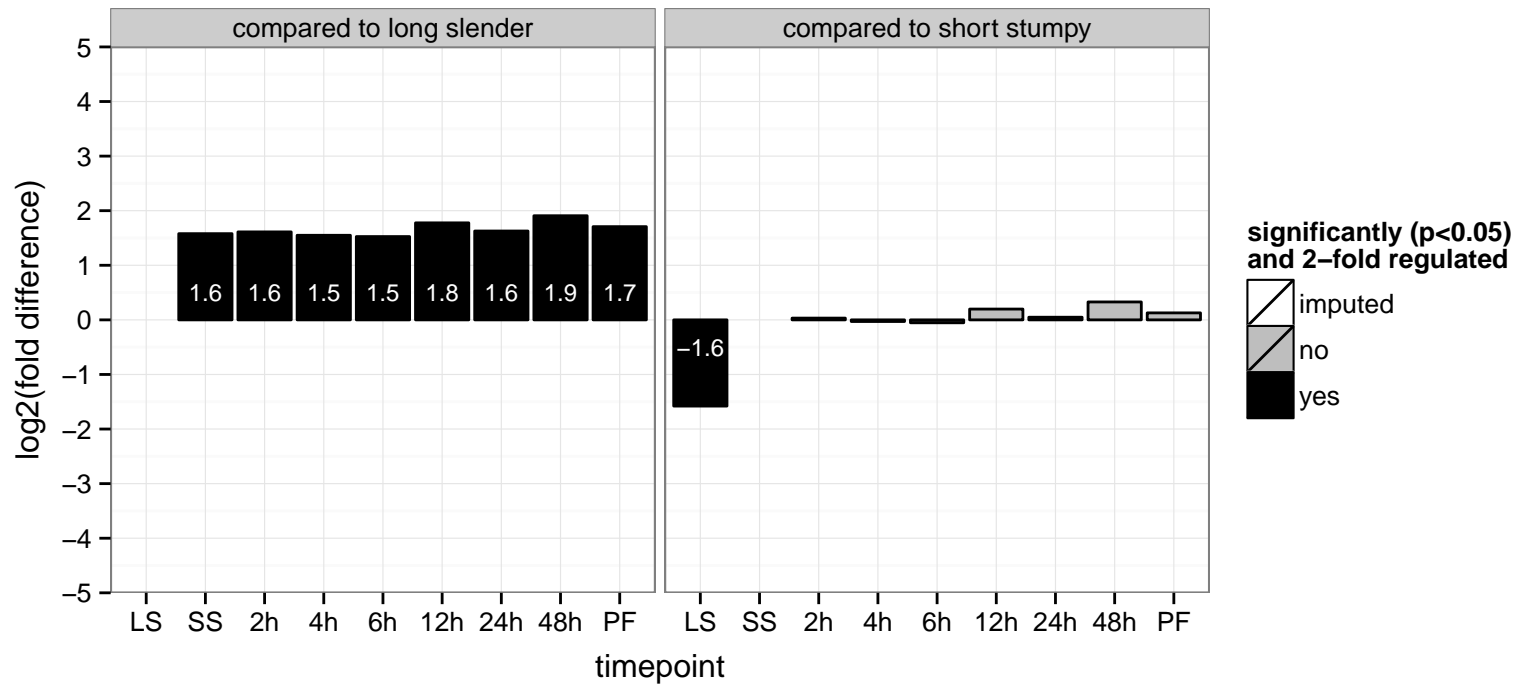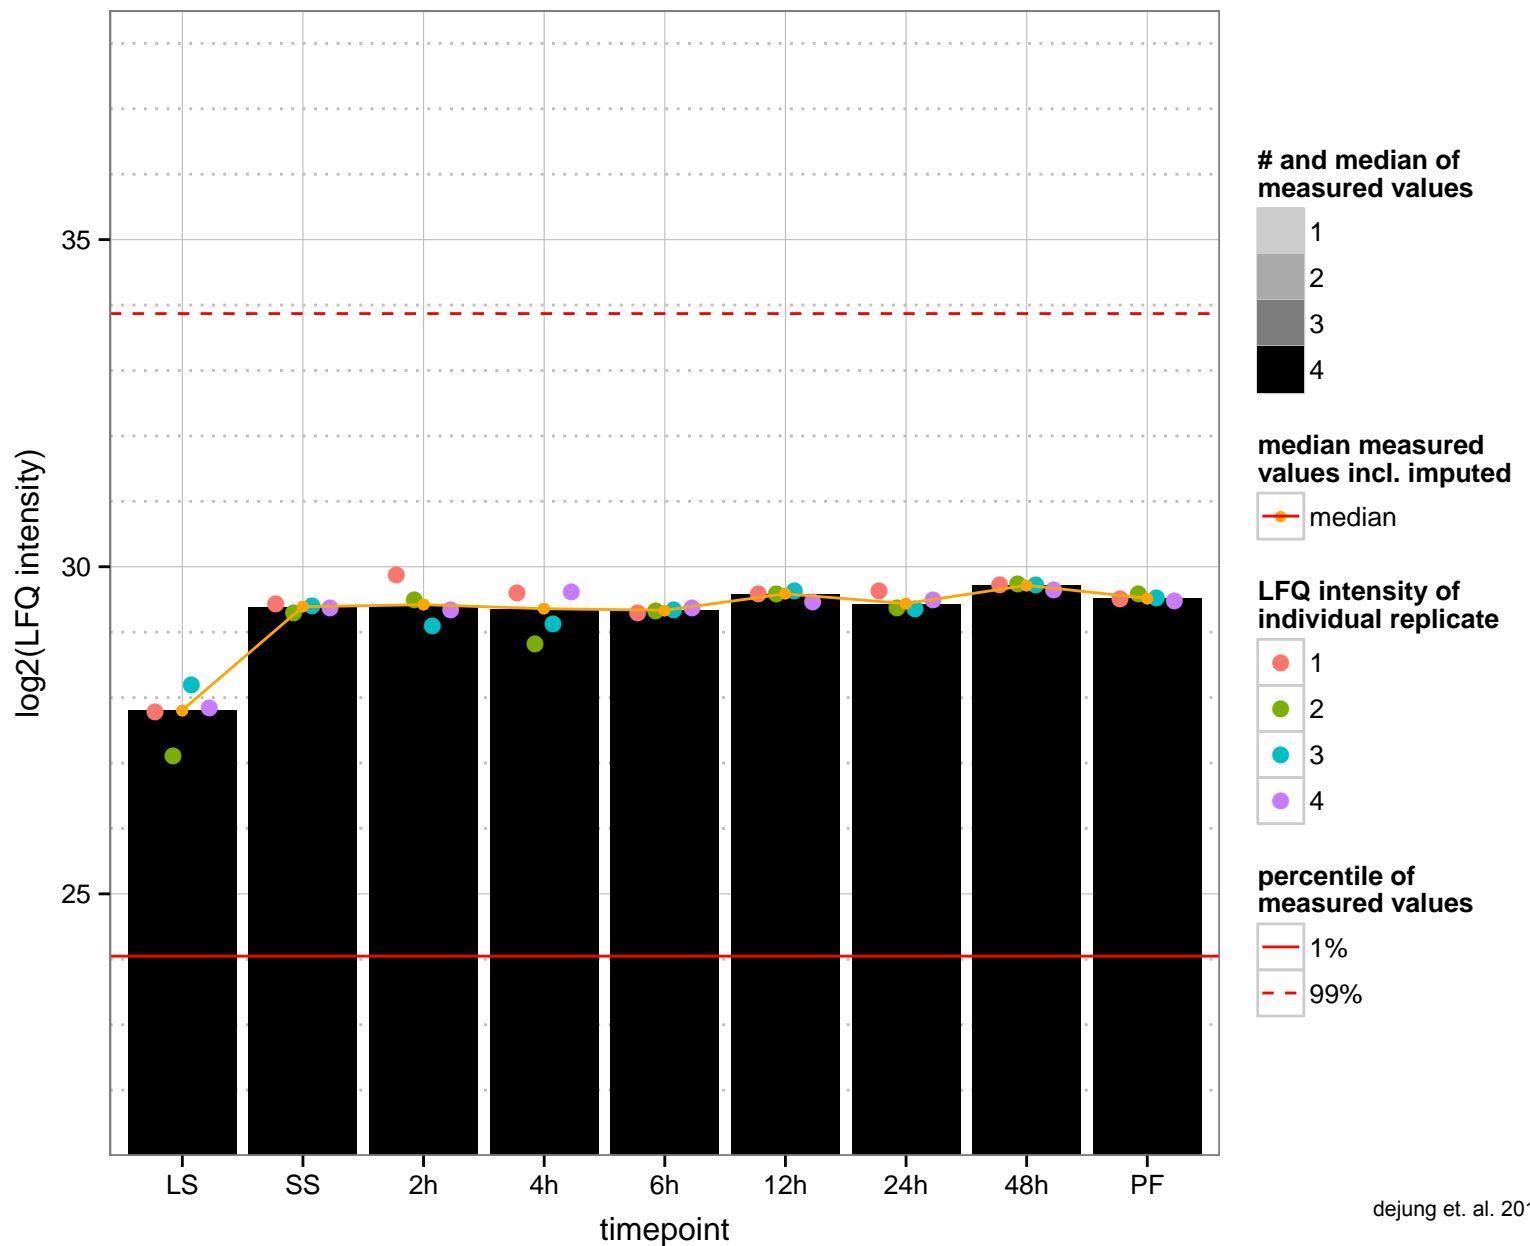

hypothetical protein, conserved  
 Tb927.7.7070;Tb11.v5.0612  
 AGOF: null, zinc ion binding  
 AGOC: null  
 AGOP: null  
 PGOF: zinc ion binding  
 PGOC: null  
 PGOP: null

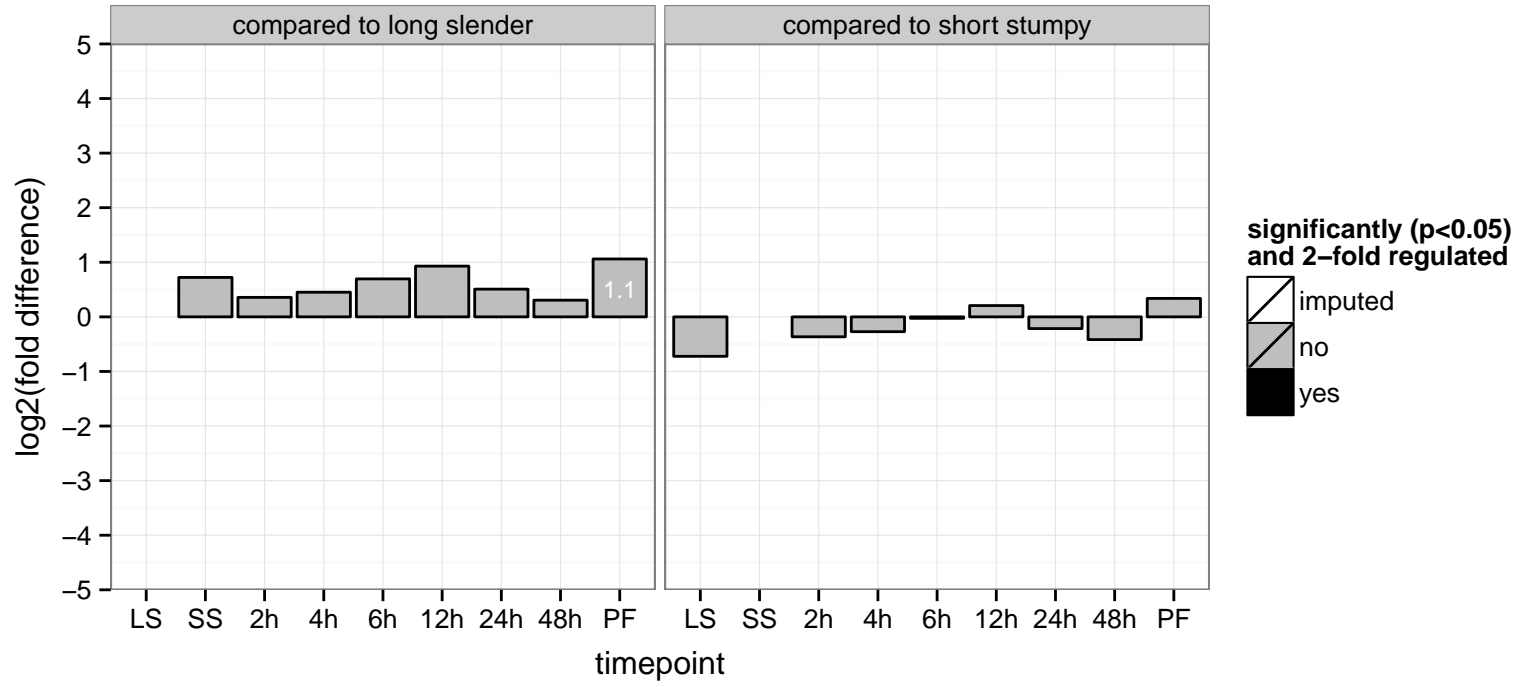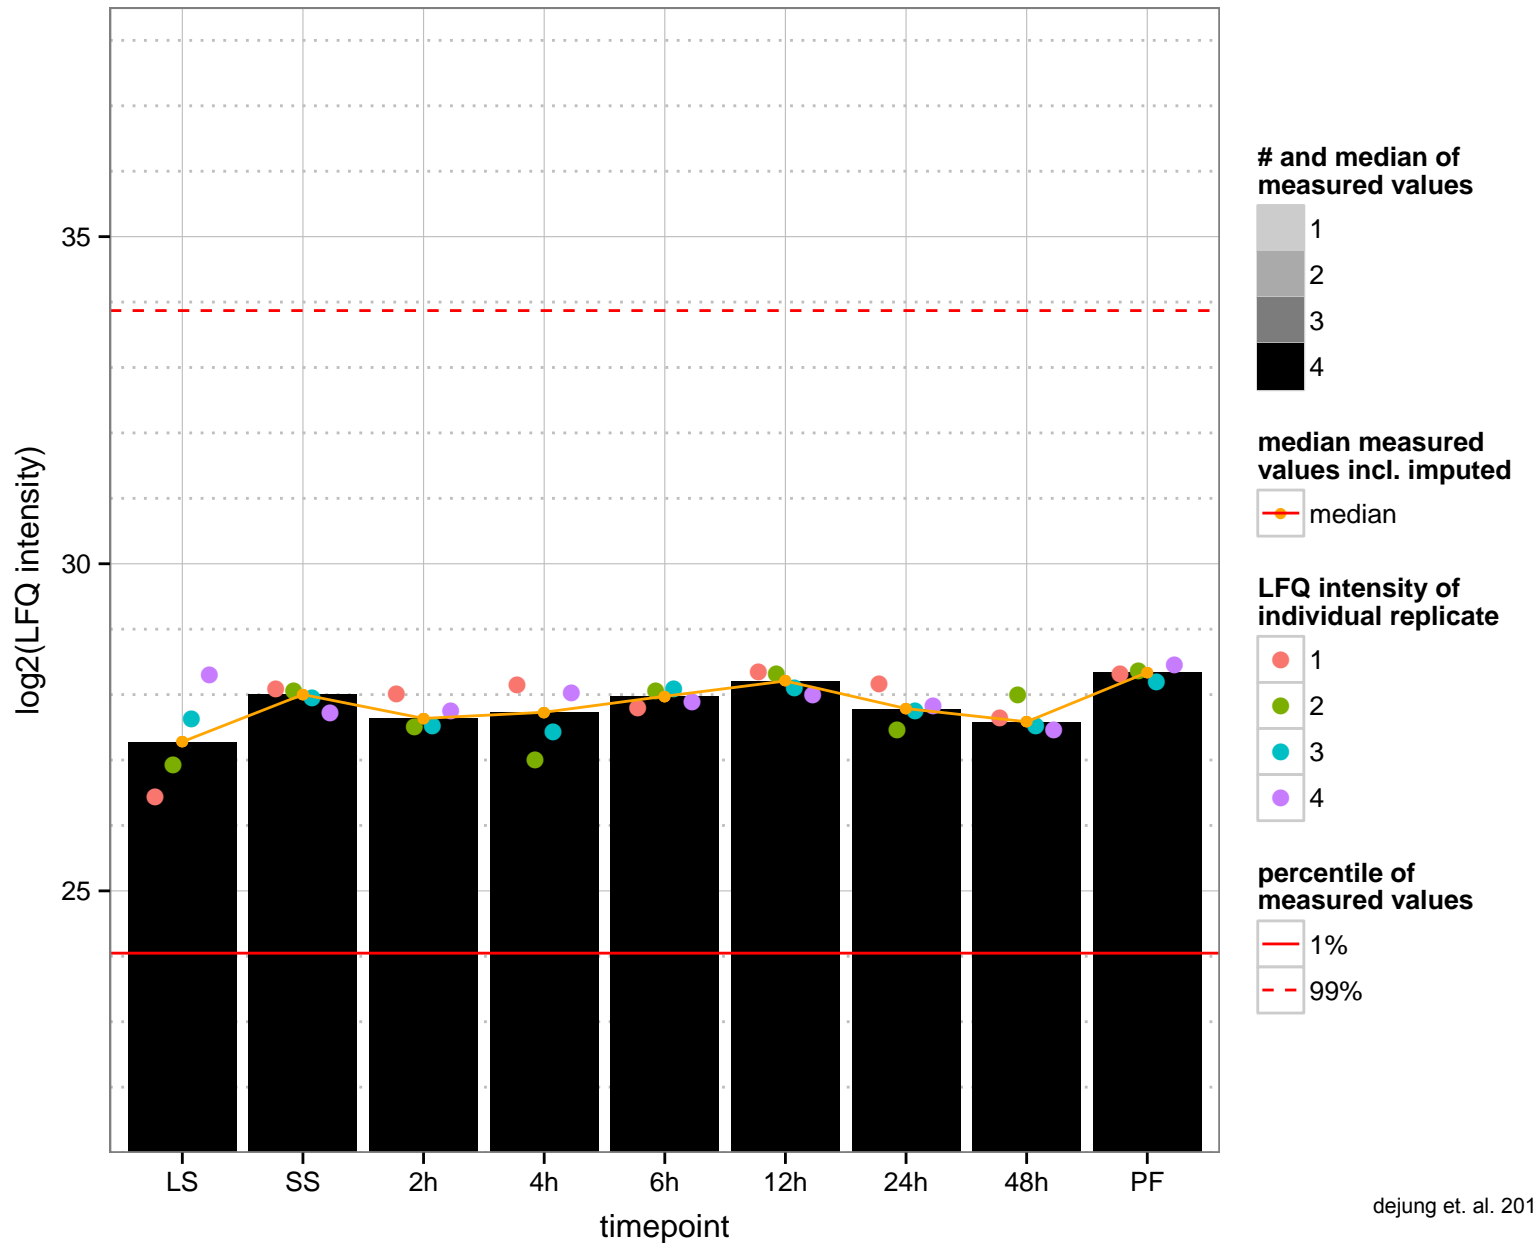

paraflagellar rod protein, putative  
 Tb11.v5.0616  
 AGOF: null  
 AGOC: null  
 AGOP: null  
 PGO: calmodulin binding  
 PGO: microtubule-based flagellum  
 PGO: null

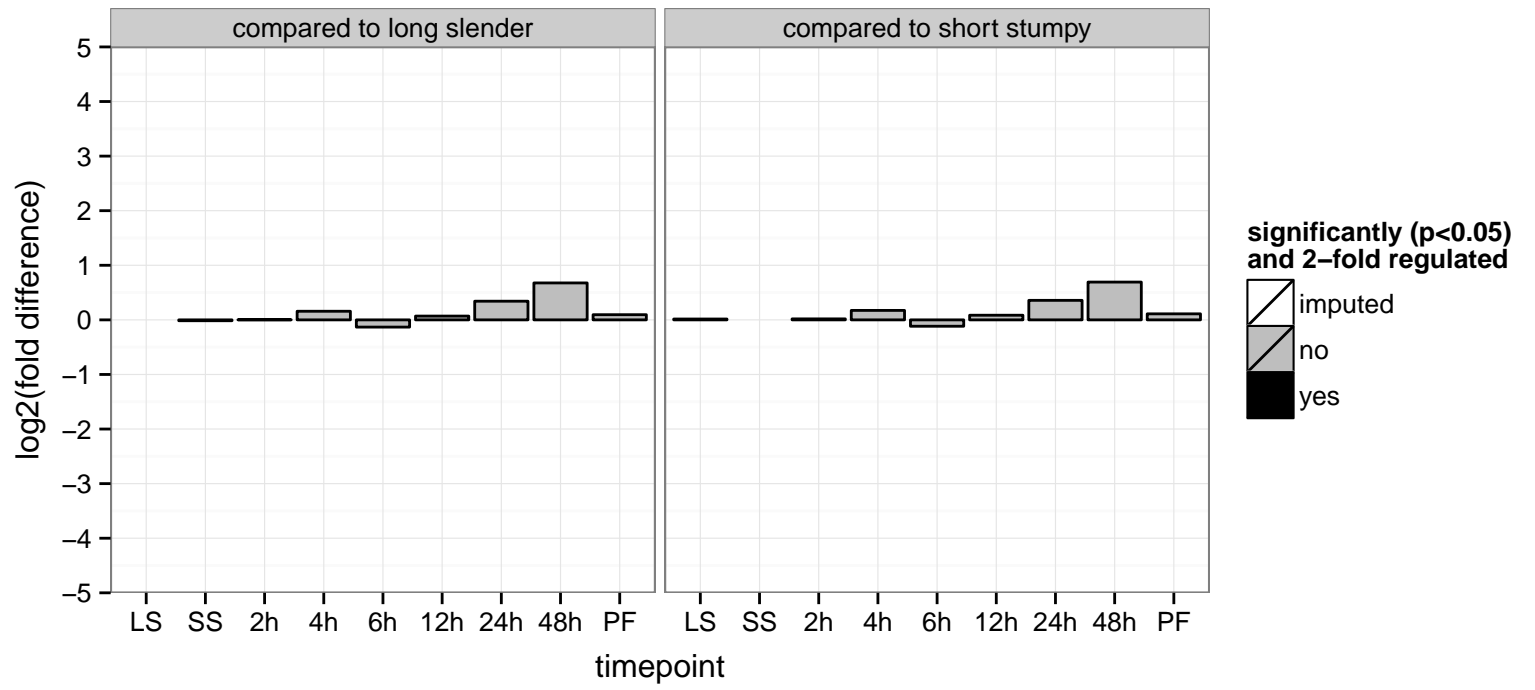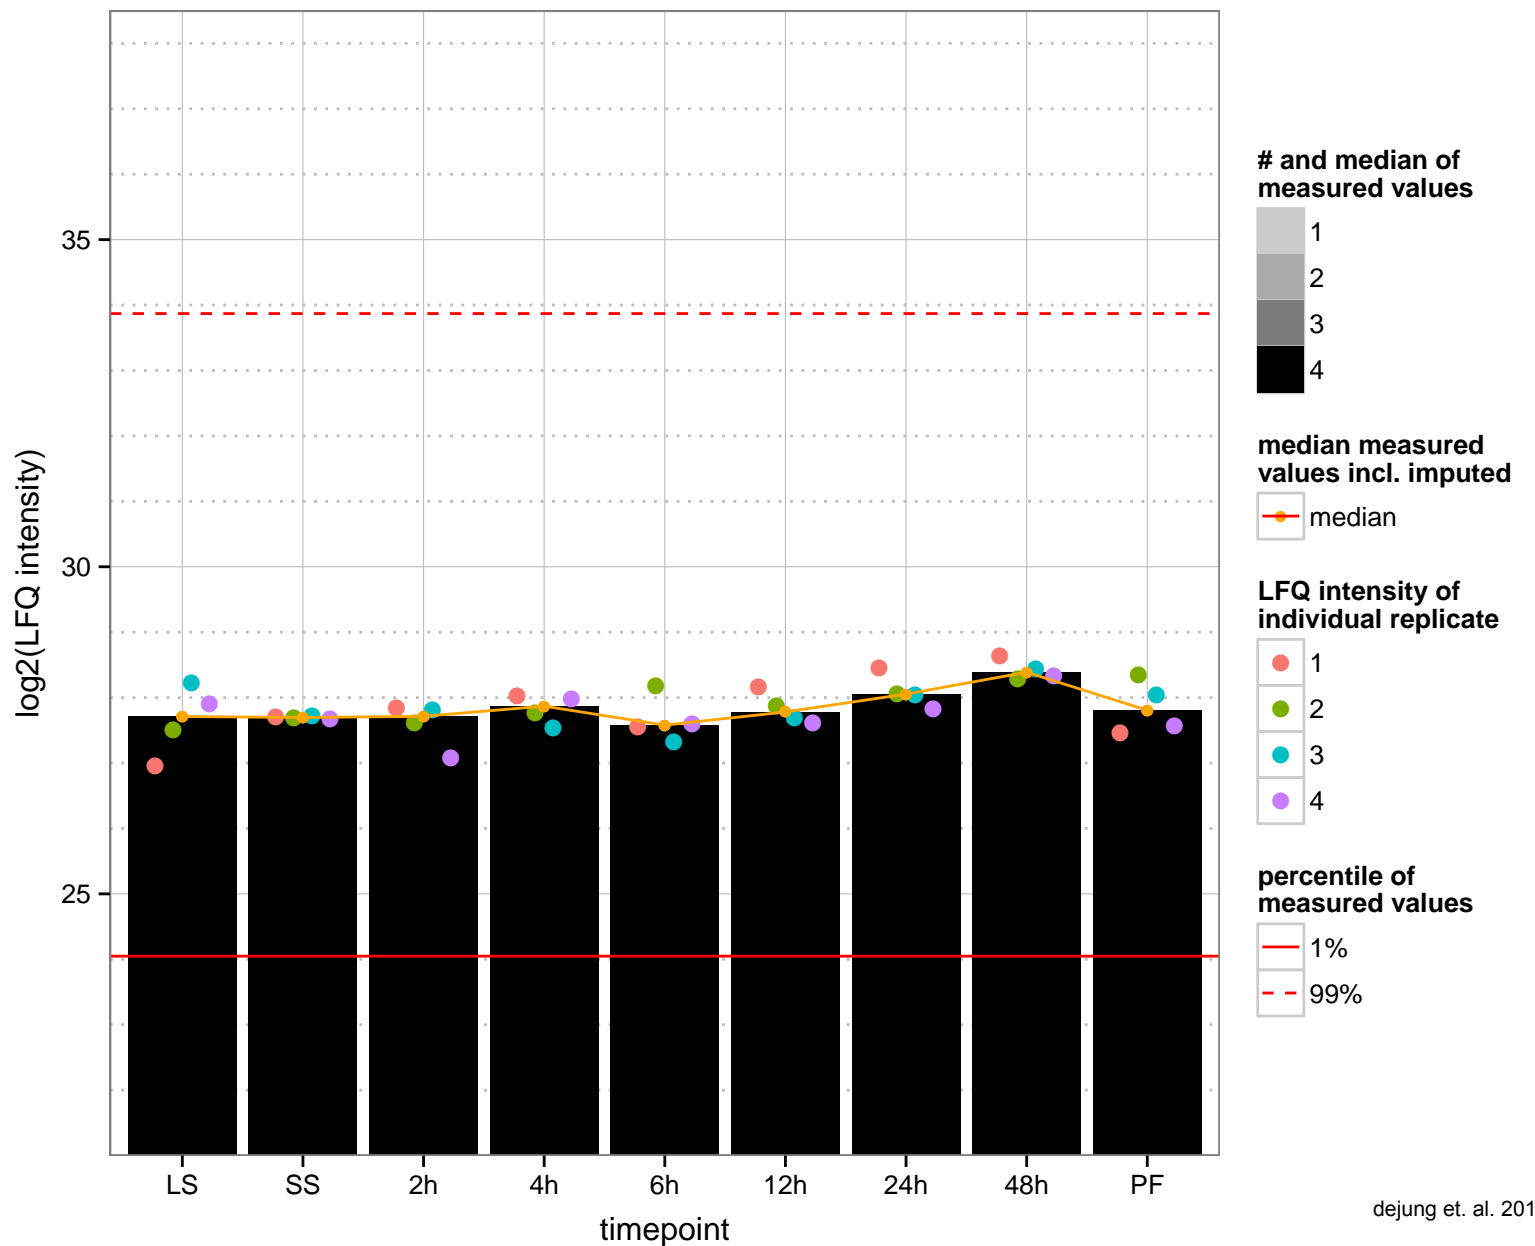



retrotransposon hot spot protein (PHS), putative  
 Tb11.v5.0624  
 AGOF: null  
 AGOC: null  
 AGOP: null  
 PGOF: null  
 PGO: null  
 PGOP: null

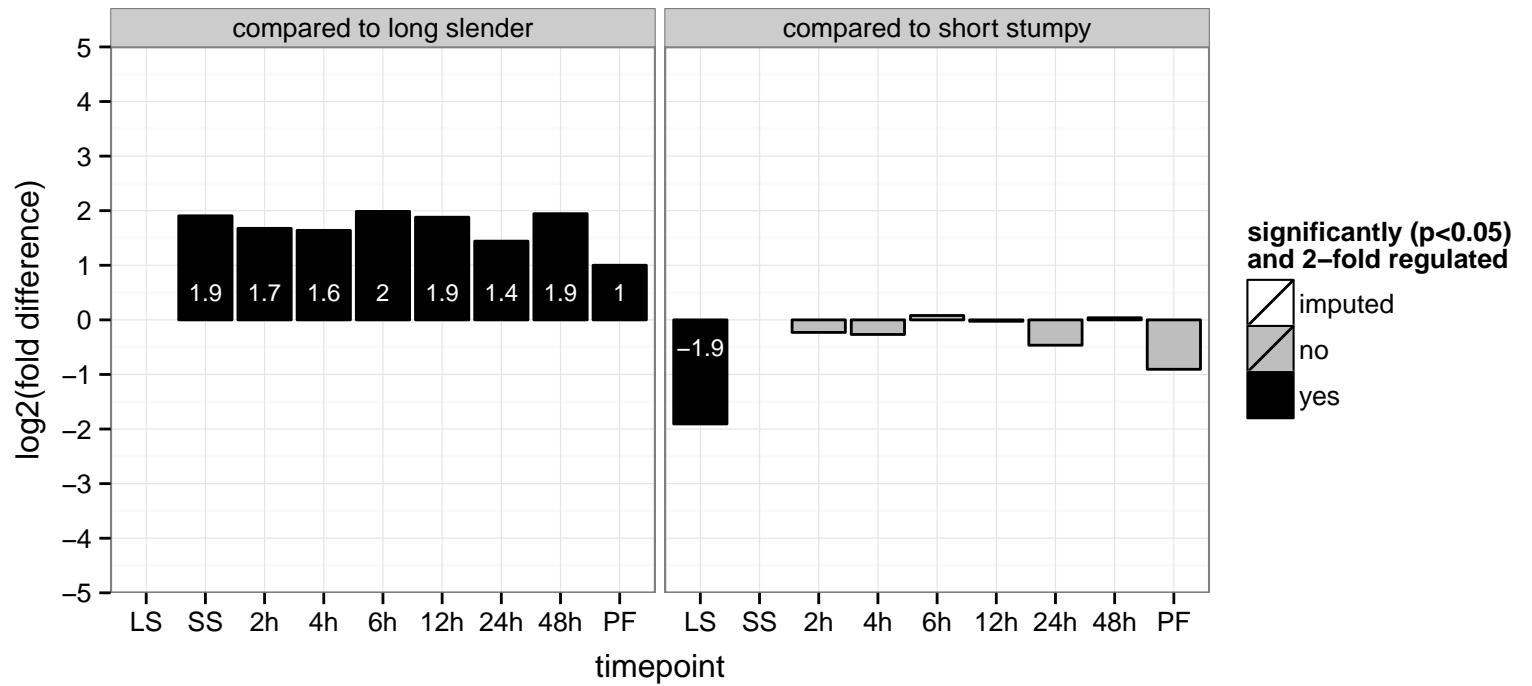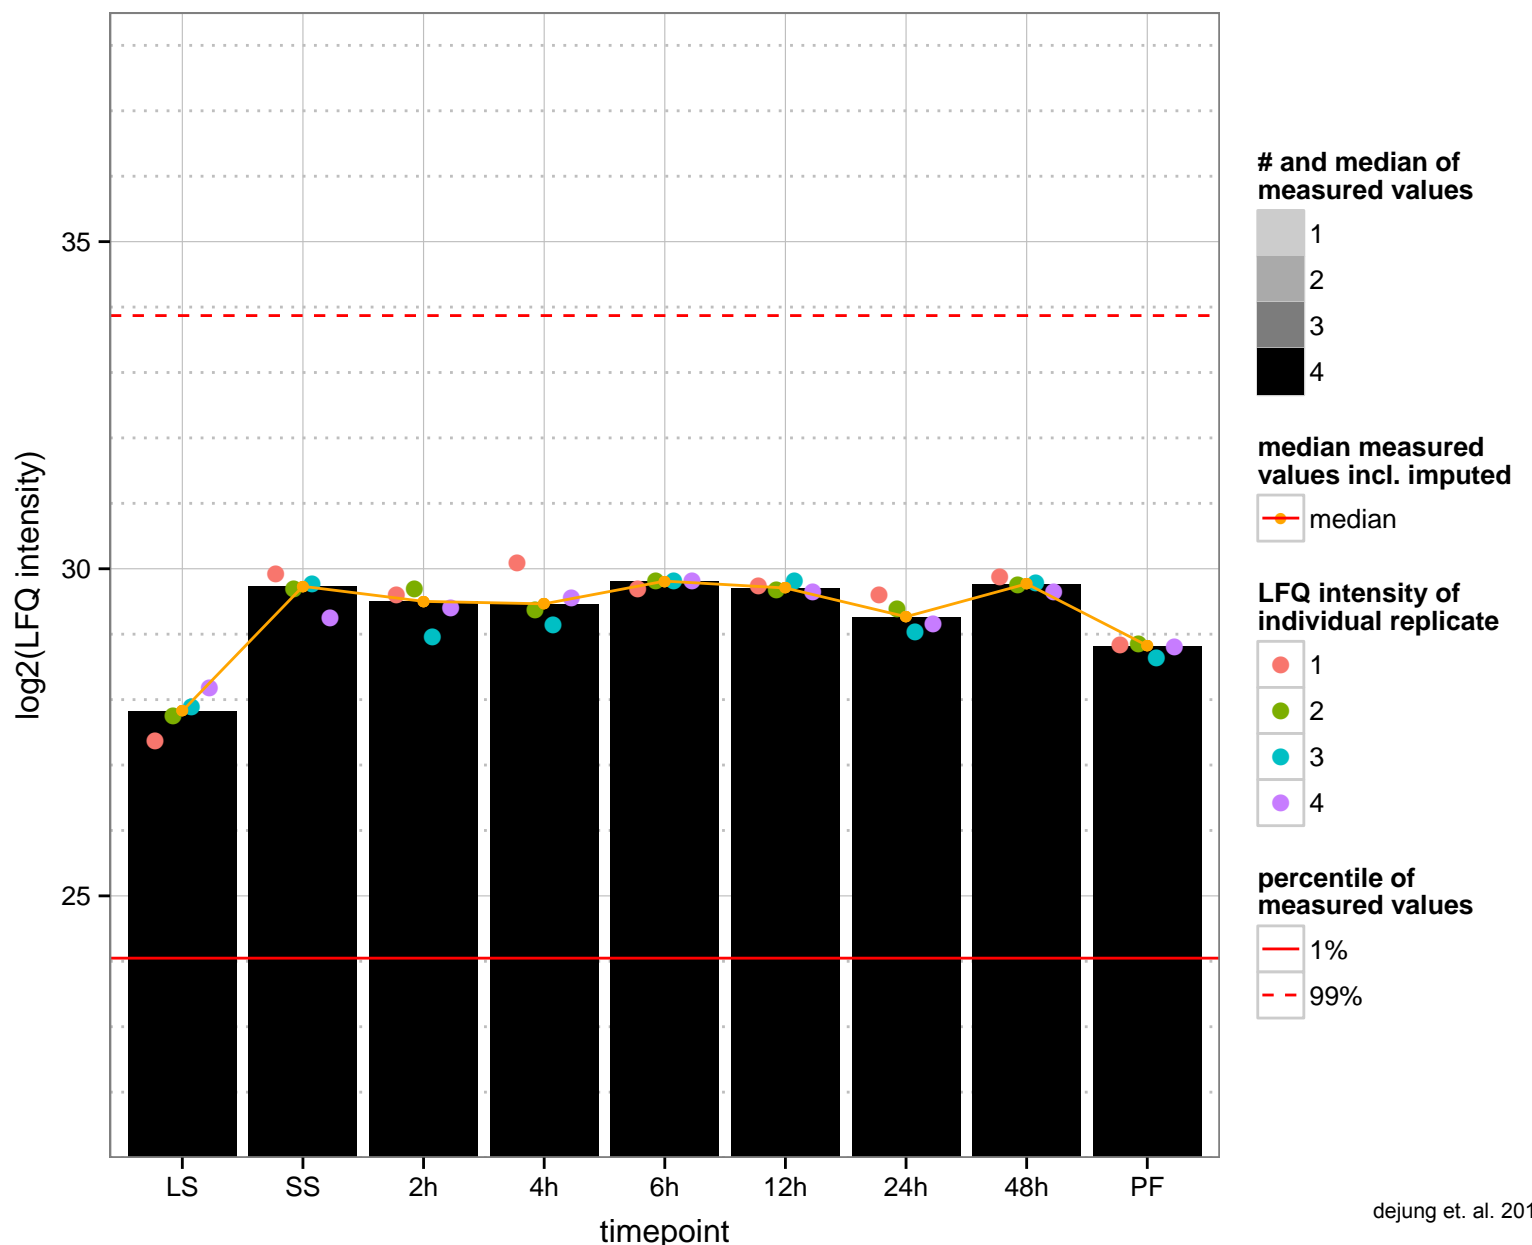

hypothetical protein, conserved  
 Tb927.5.1230;Tb11.v5.0639  
 AGOF: null  
 AGOC: null  
 AGOP: null  
 PGO: null  
 PGOC: null  
 PGOP: null

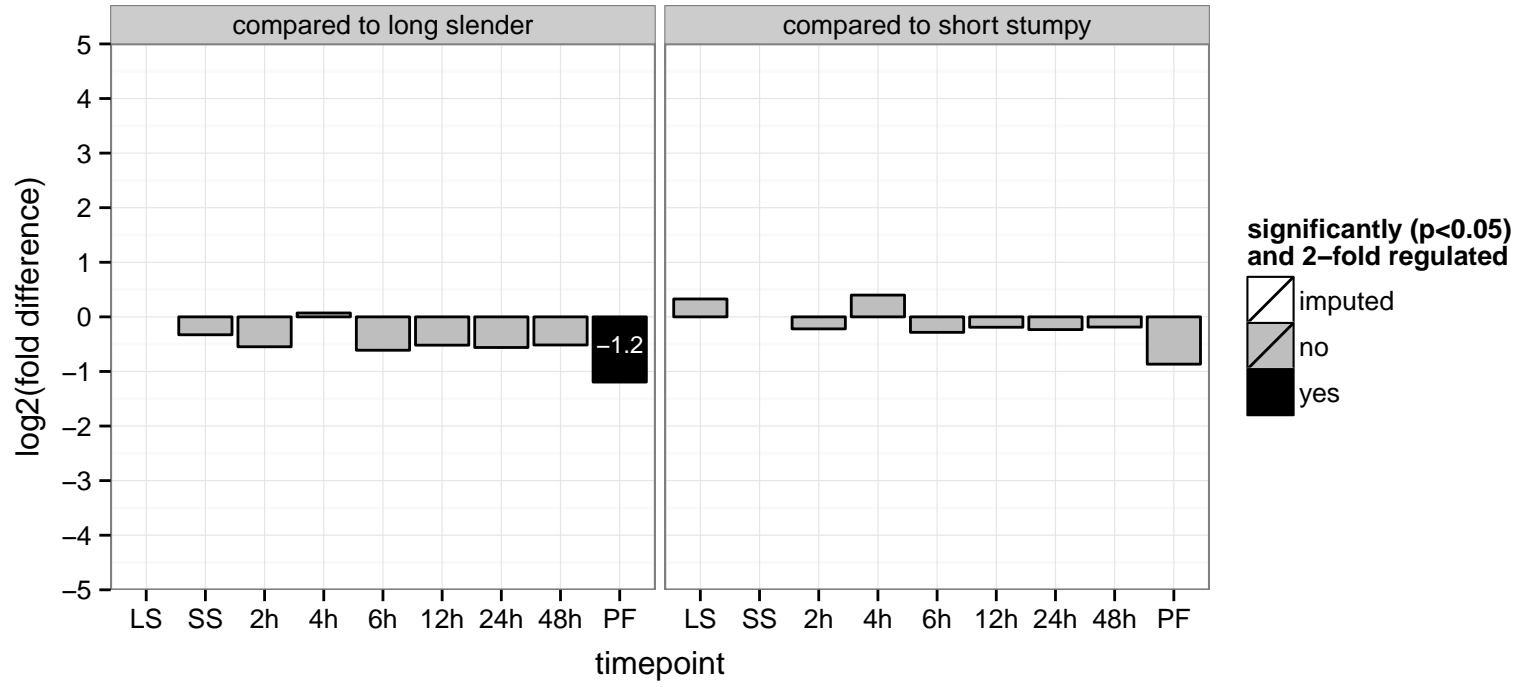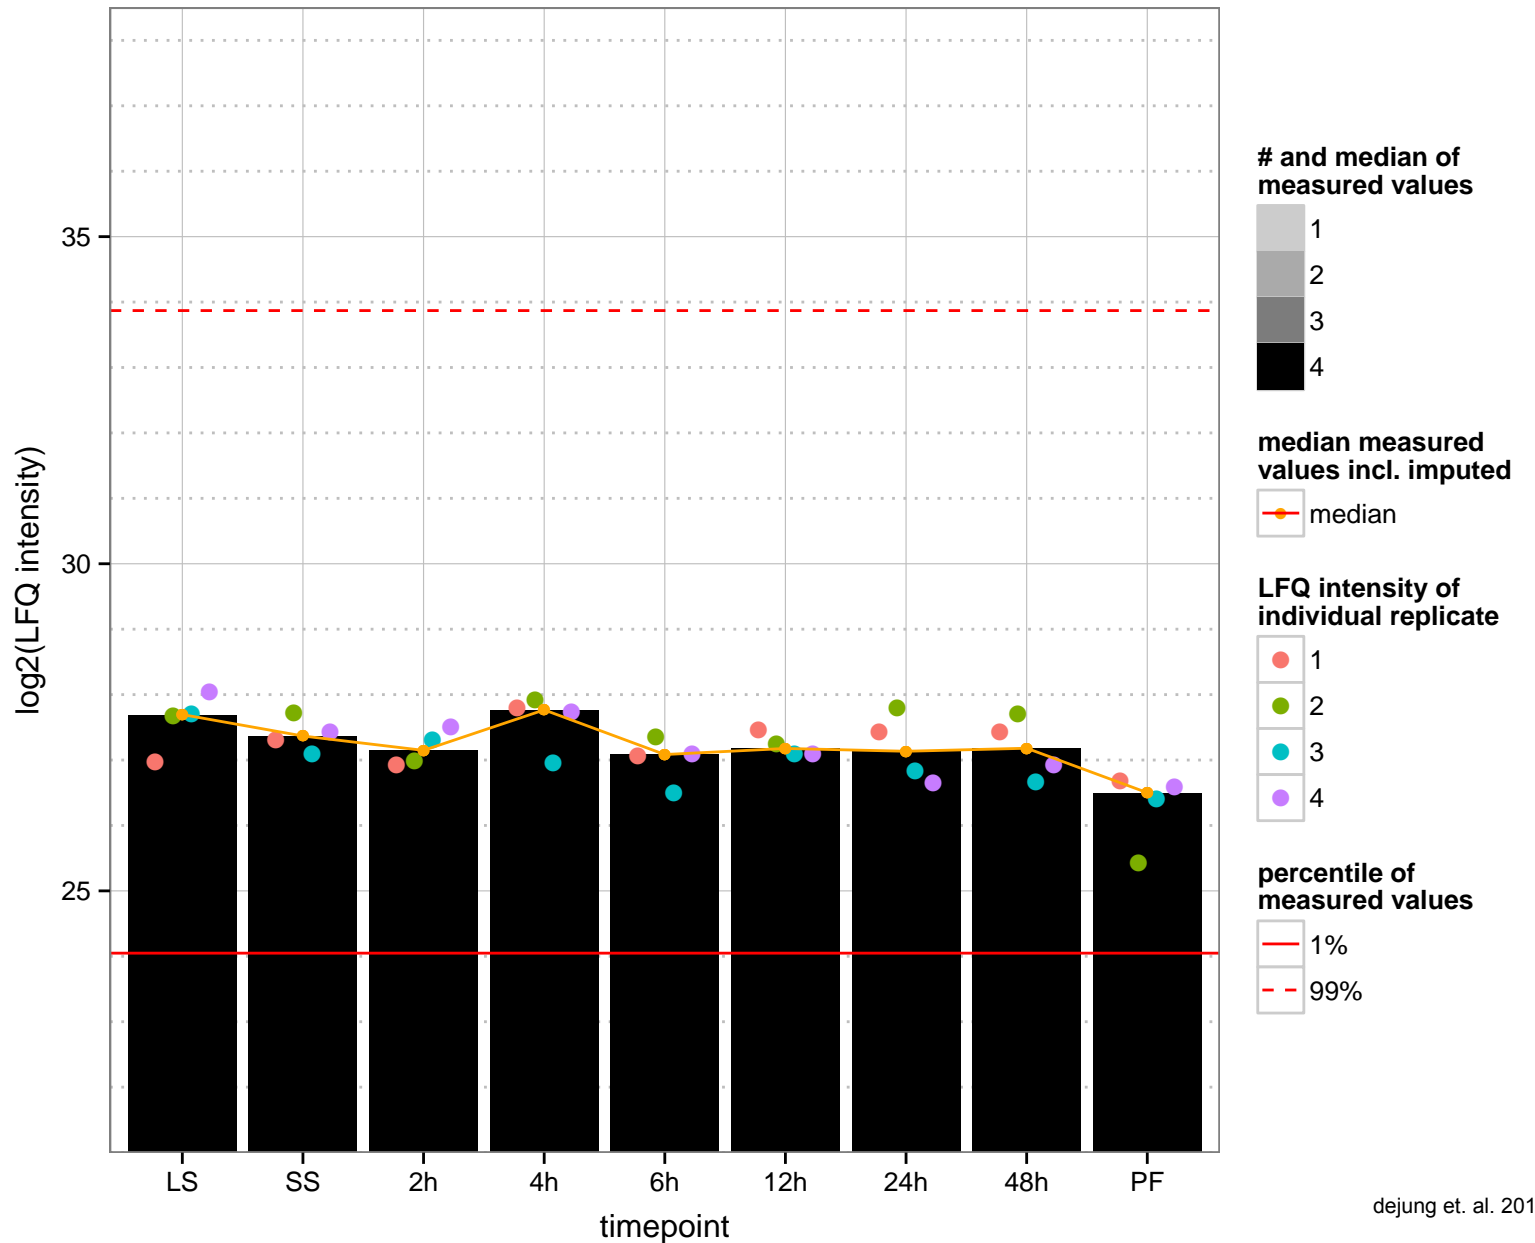

enolase, putative  
 Tb927.10.2890;Tb11.v5.0650  
 AGOF: null, magnesium ion binding, phosphopyruvate hydratase activity  
 AGOC: null, phosphopyruvate hydratase complex  
 AGOP: null  
 PGO: magnesium ion binding, phosphopyruvate hydratase activity  
 PGO: phosphopyruvate hydratase complex  
 PGOP: glycolysis

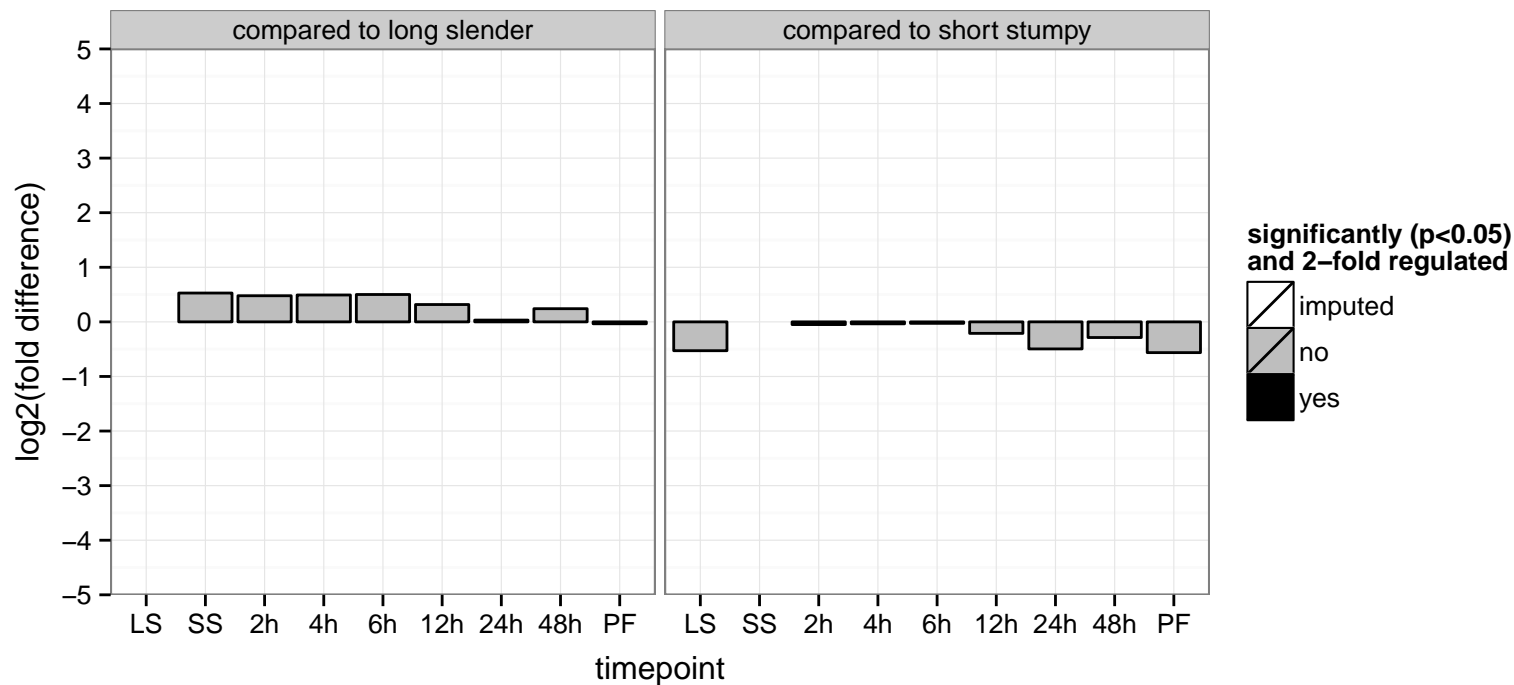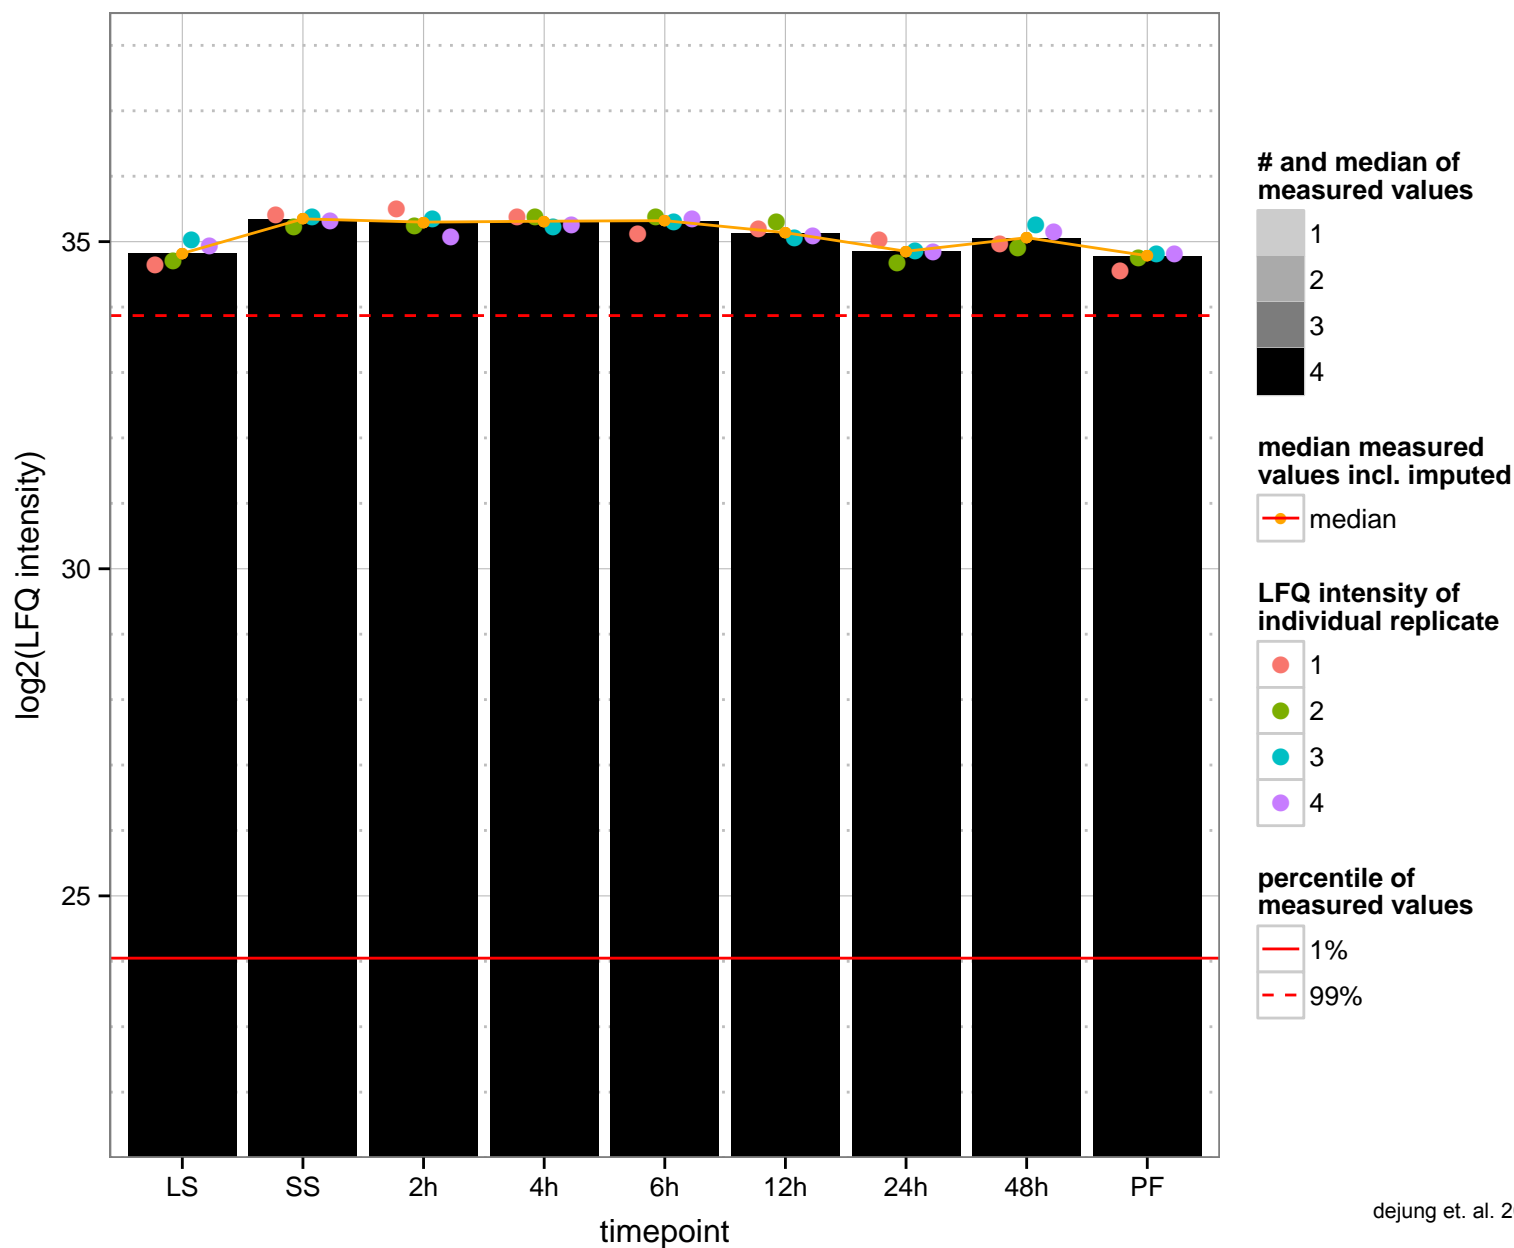

hypothetical protein, conserved, retrotransposon hot spot protein (RHS, pseudogene), putative, retrotransposon hot spot prote  
 Tb927.2.830;Tb11.v5.0655  
 AGOF: null  
 AGOC: null  
 AGOP: null  
 PGO: null  
 PGO: null  
 PGO: null

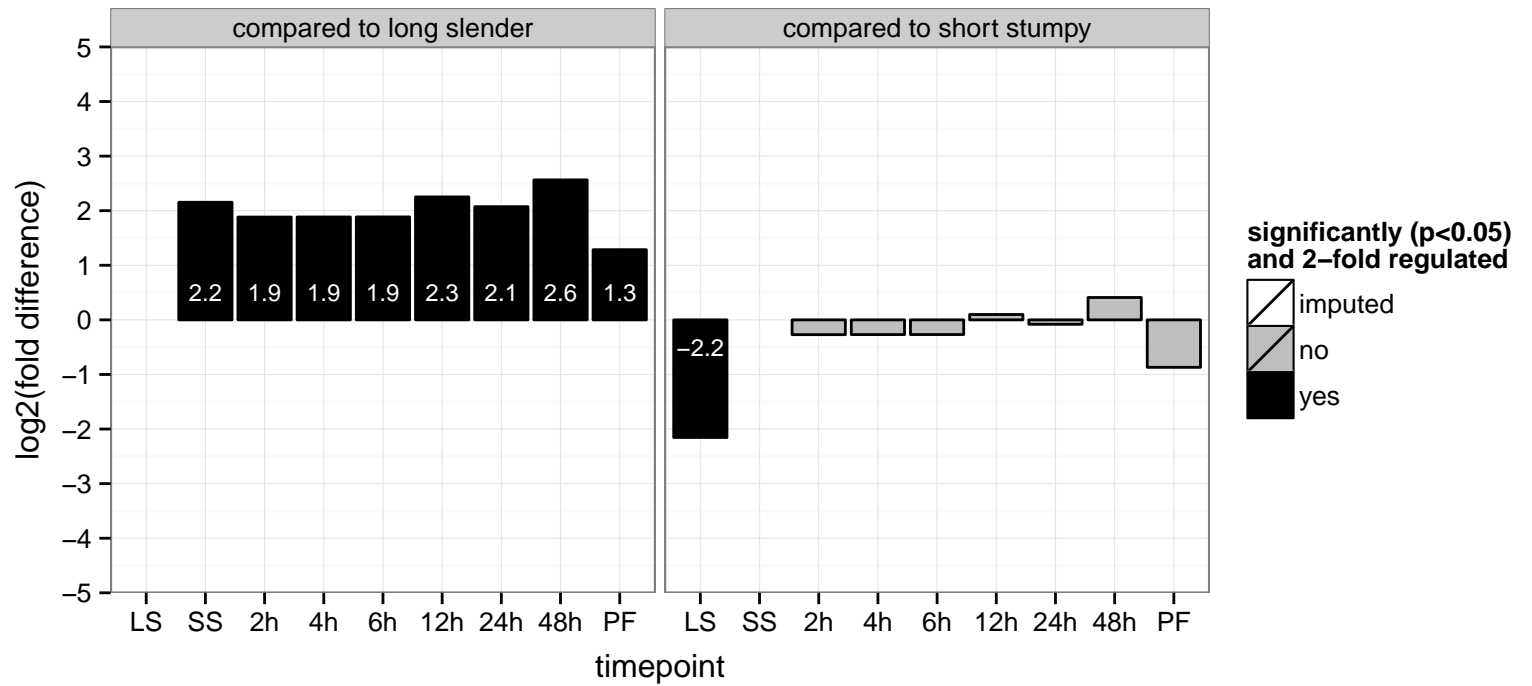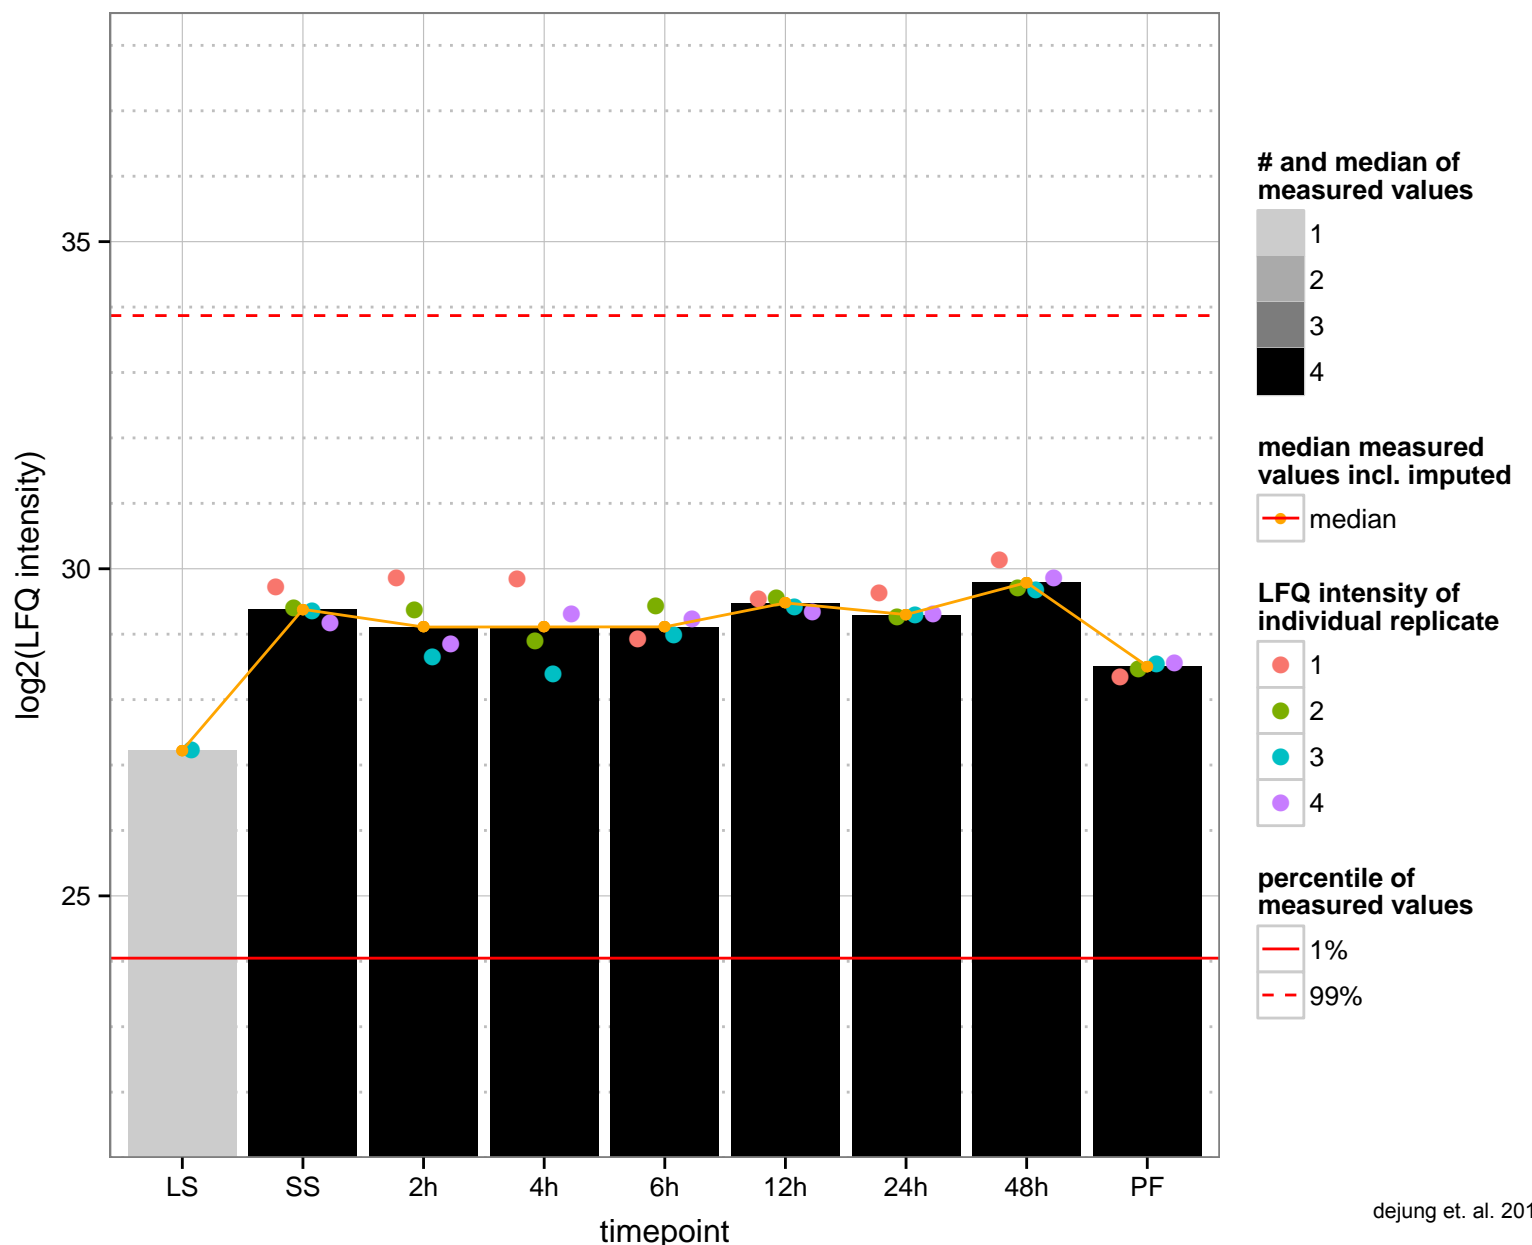

histone deacetylase, putative, histone deacetylase 3 (HDAC3)

Tb11.v5.0660;Tb927.2.2190

AGOF: null, histone deacetylase activity, zinc ion binding

AGOC: null, nucleus

AGOP: null, negative regulation of chromatin silencing, regulation of transcription, DNA-dependent

PGOF: null

PGOC: null

PGOP: null

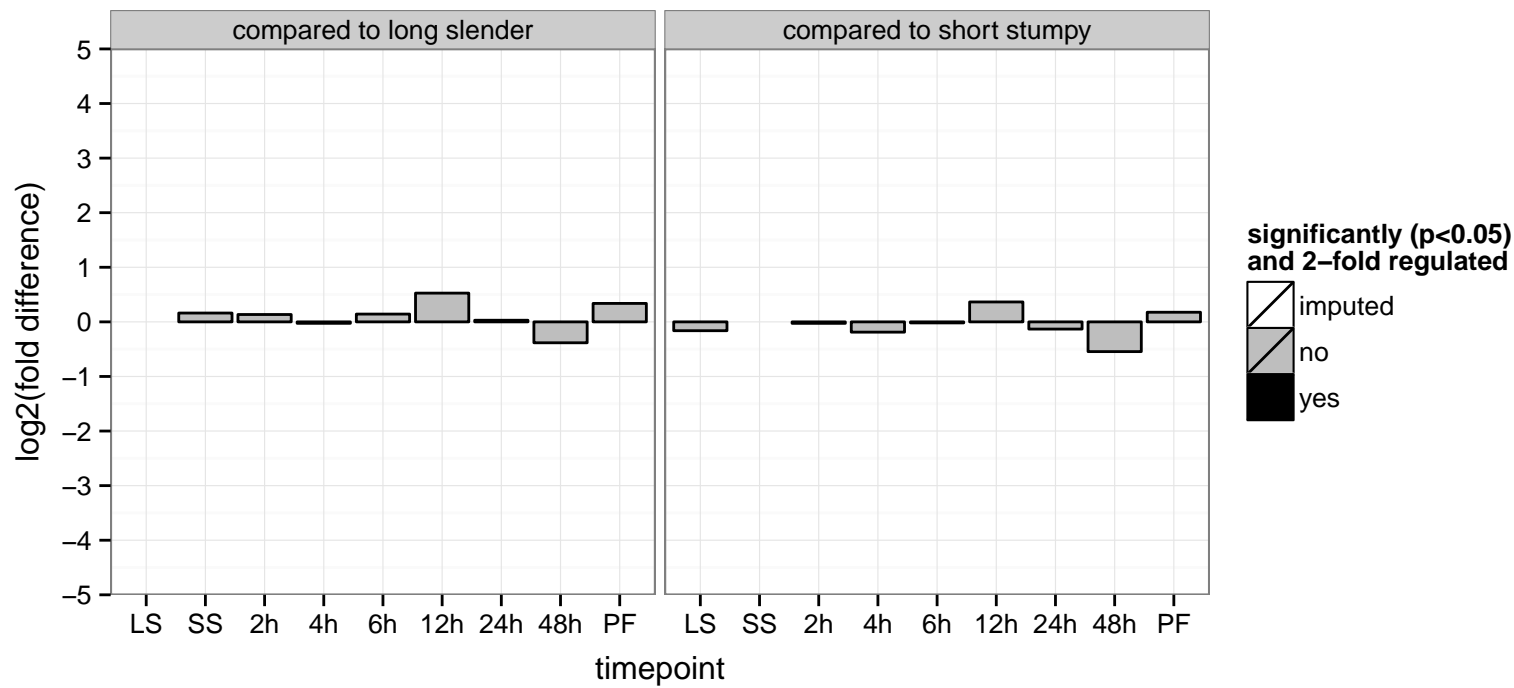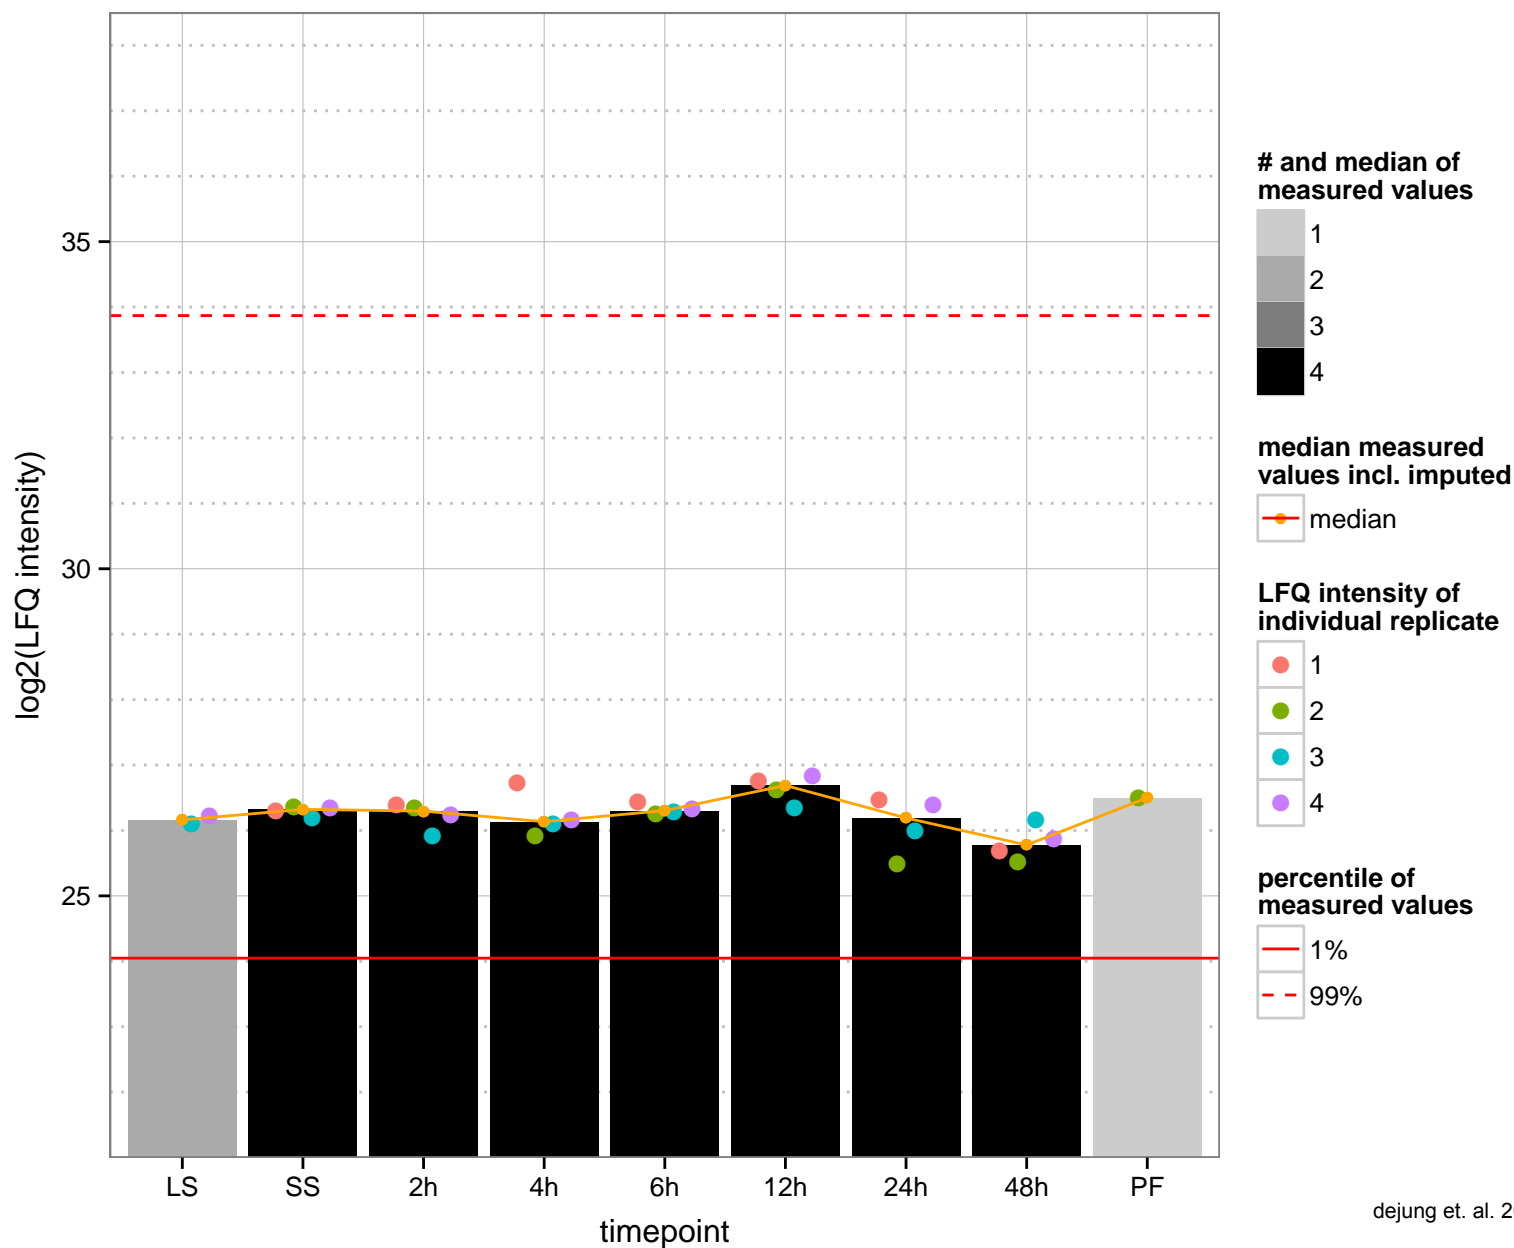

retrotransposon hot spot (RHS) protein, putative  
 Tb11.v5.0670  
 AGOF: null  
 AGOC: null  
 AGOP: null  
 PGOF: null  
 PGO: null  
 PGOP: null

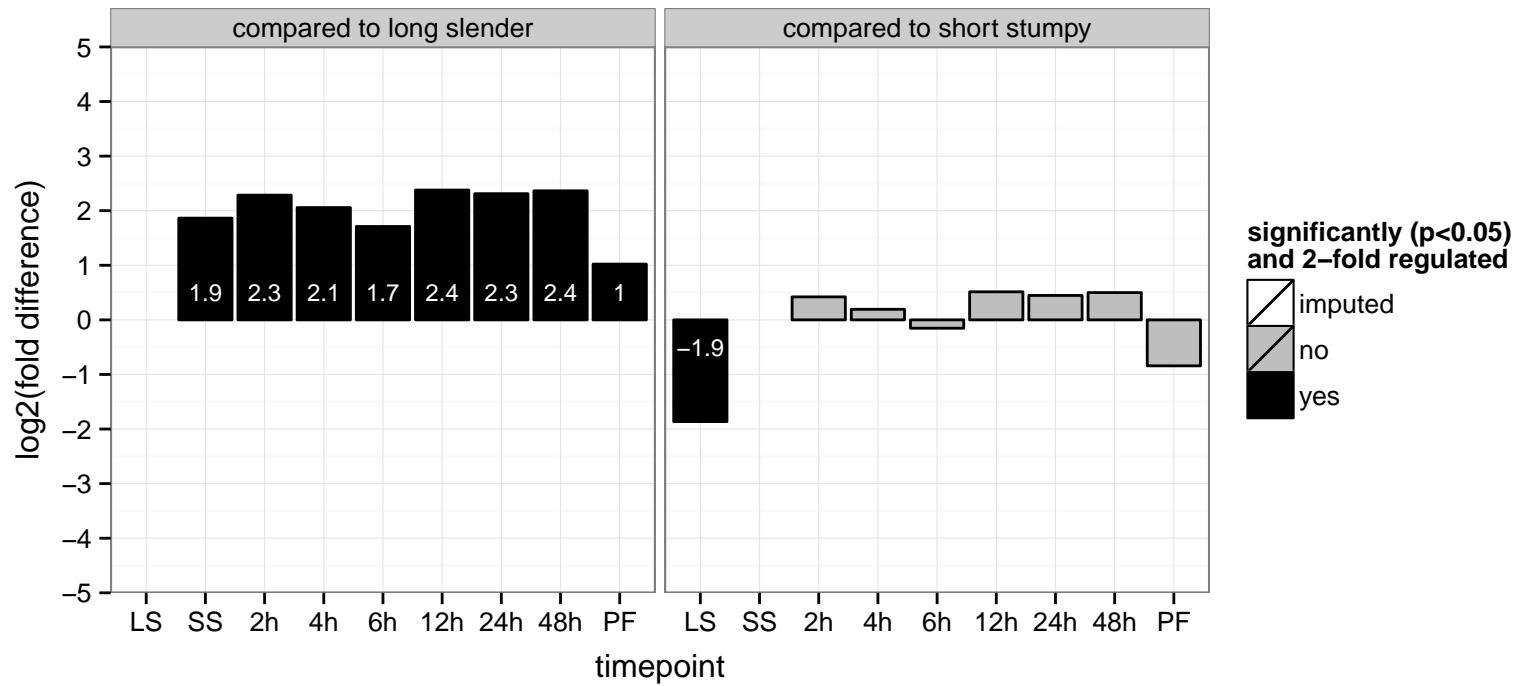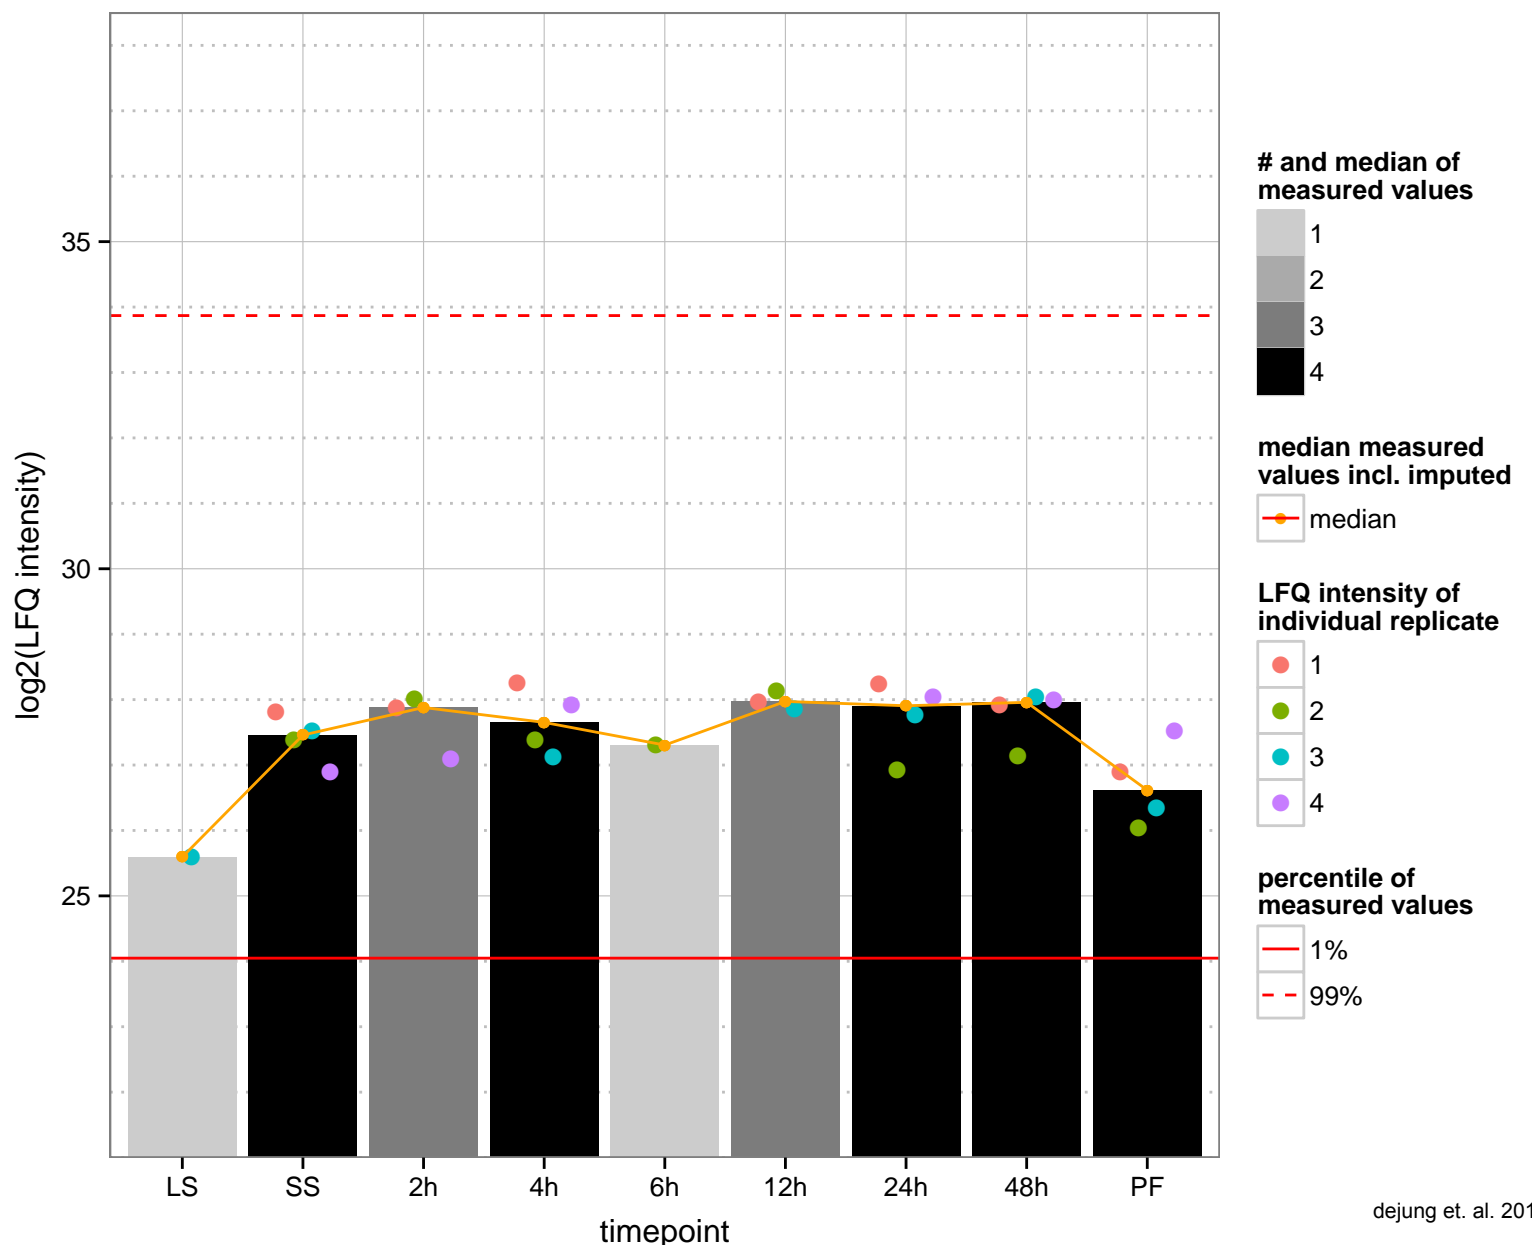

hypothetical protein, conserved  
 Tb11.v5.0692;Tb927.5.3000  
 AGOF: null, thiopurine S-methyltransferase activity  
 AGOC: null, cytoplasm, mitochondrion  
 AGOP: null, metabolic process  
 PGOF: S-adenosylmethionine-dependent methyltransferase activity  
 PGOC: null  
 PGOP: null

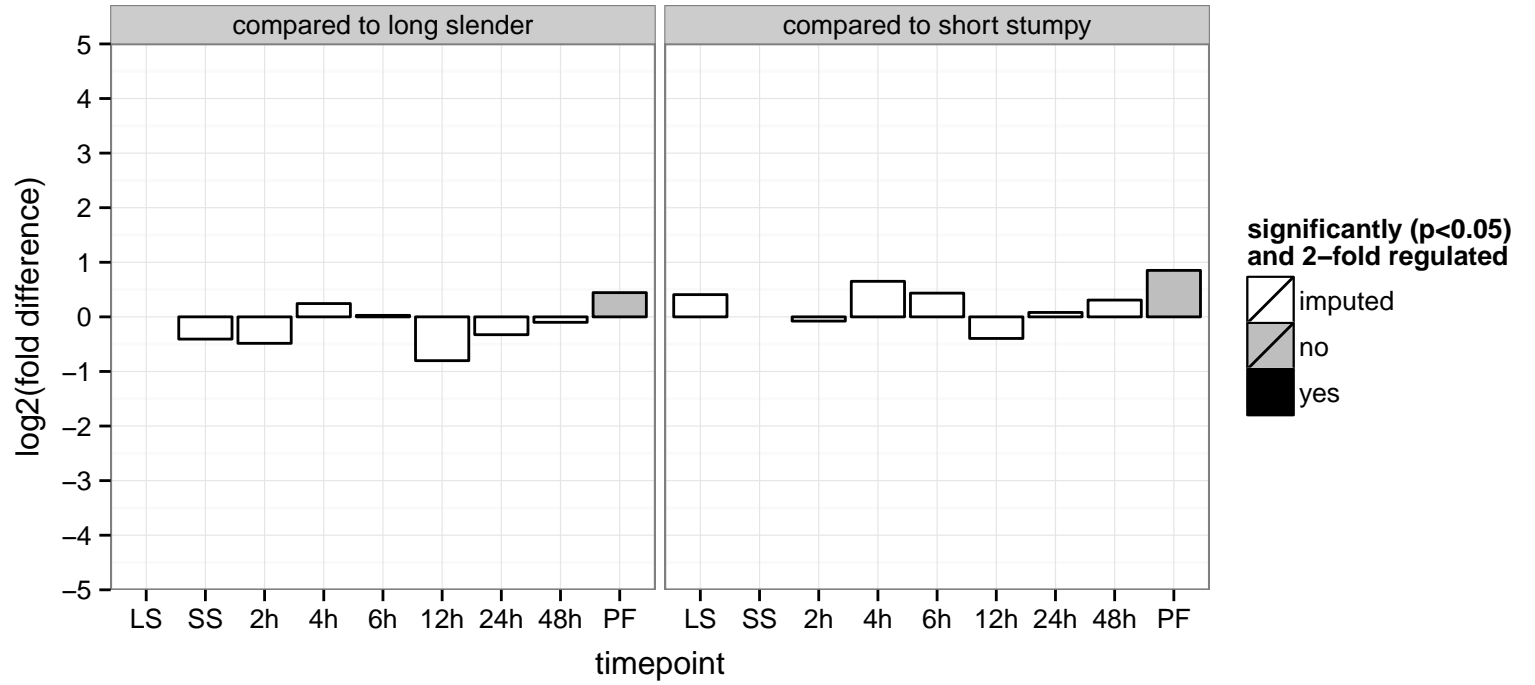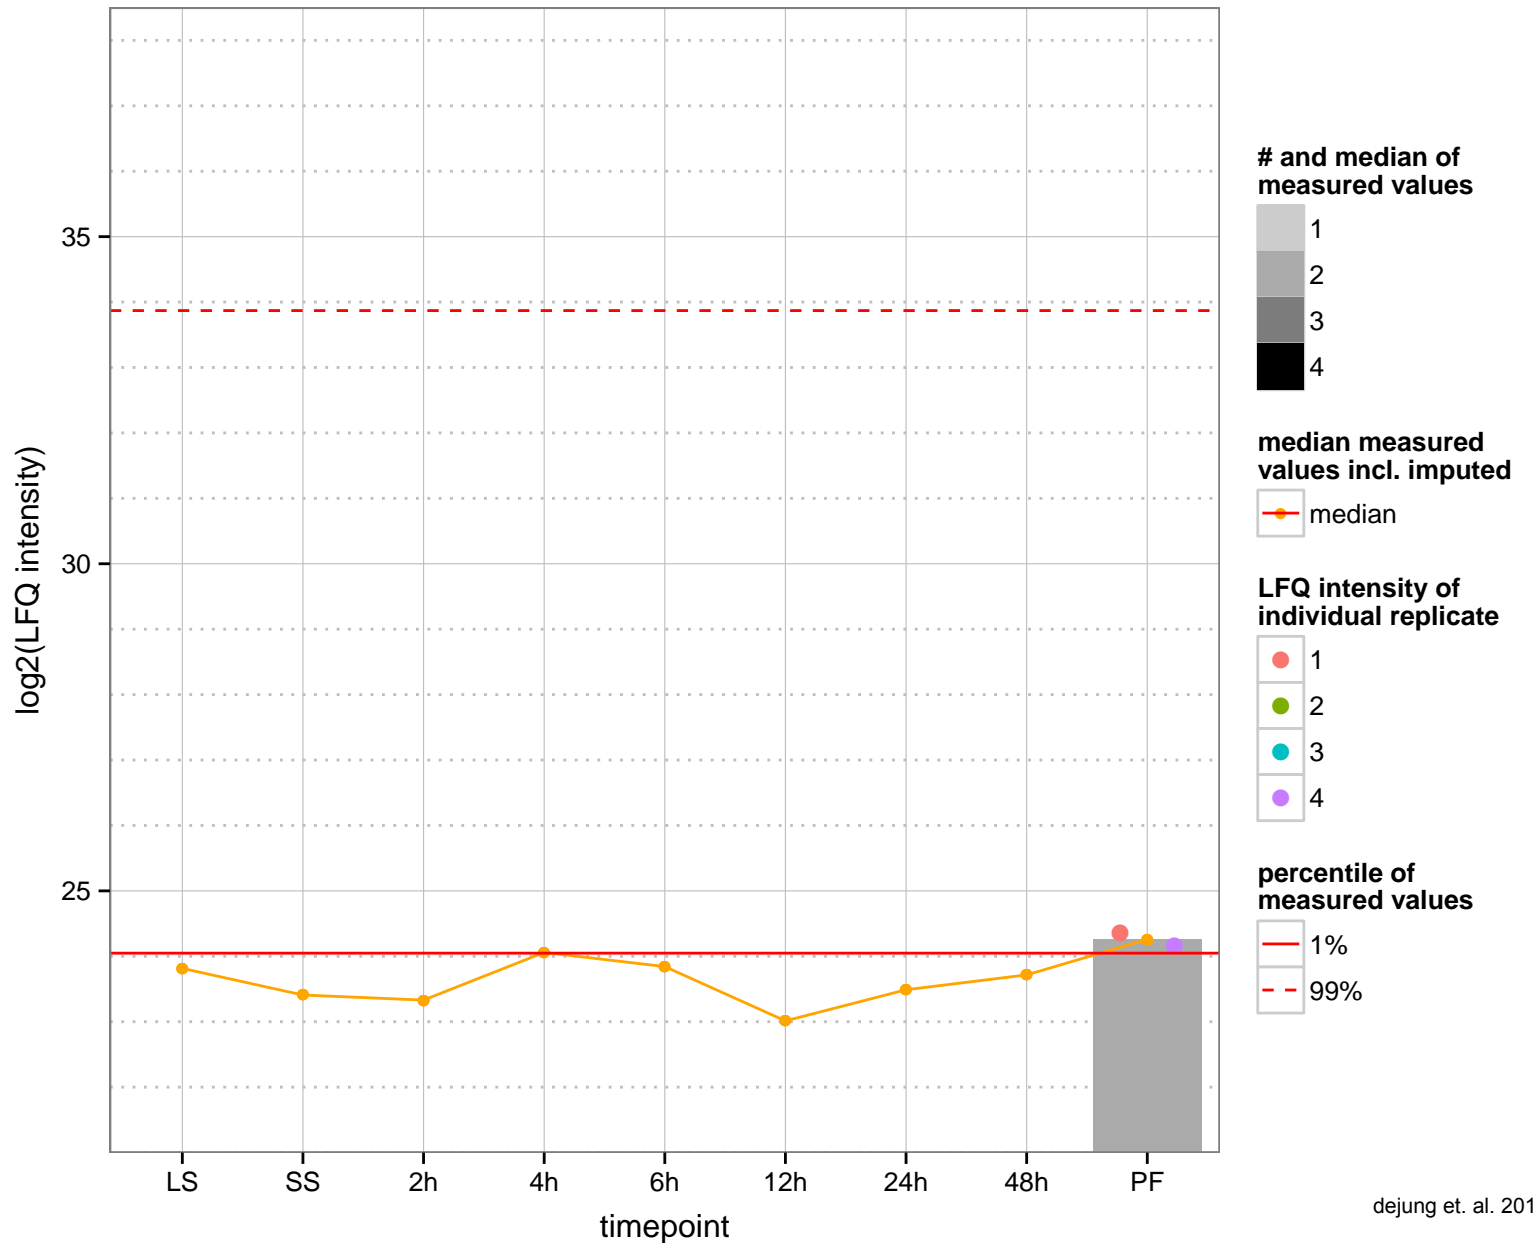

hypothetical protein, conserved  
 Tb927.10.8650;Tb11.v5.0707  
 AGOF: null  
 AGOC: null  
 AGOP: null, intracellular transport  
 PGO: null  
 PGOC: null  
 PGOP: intracellular transport

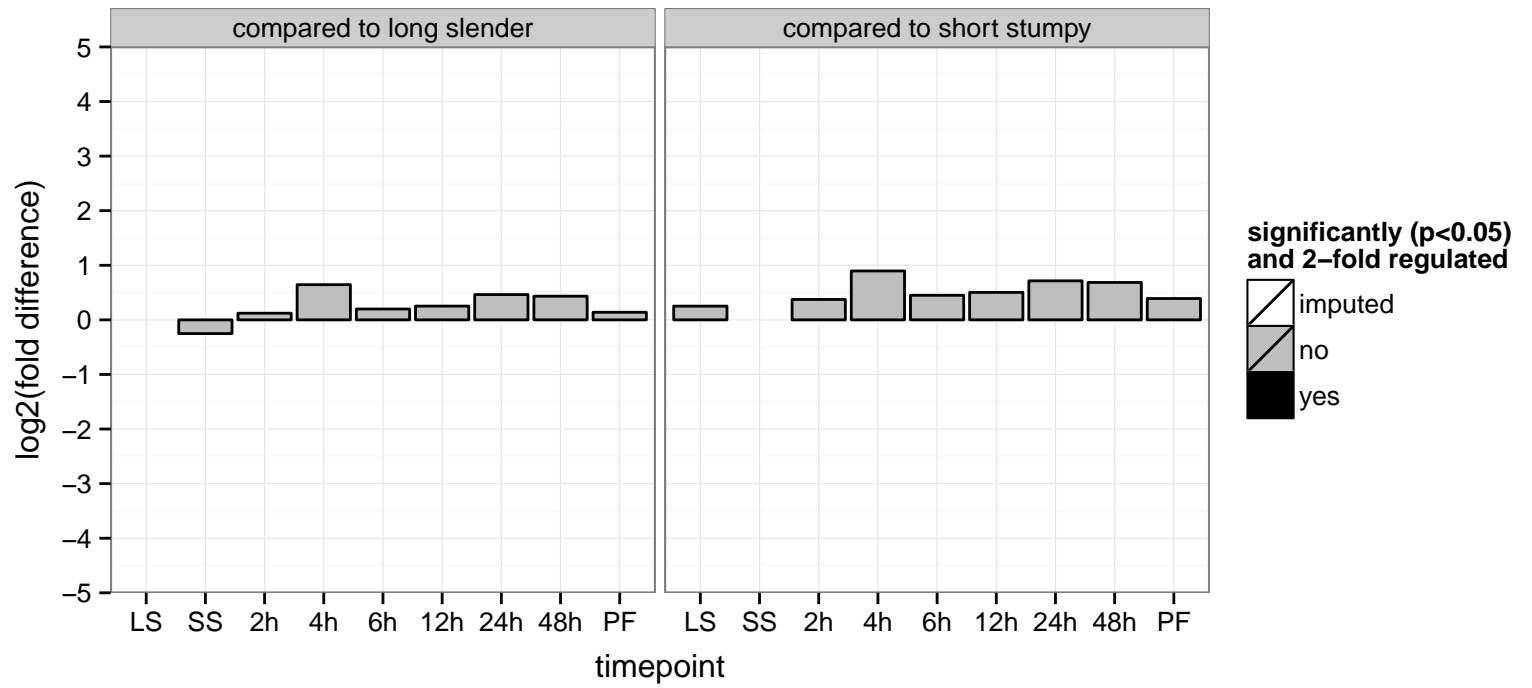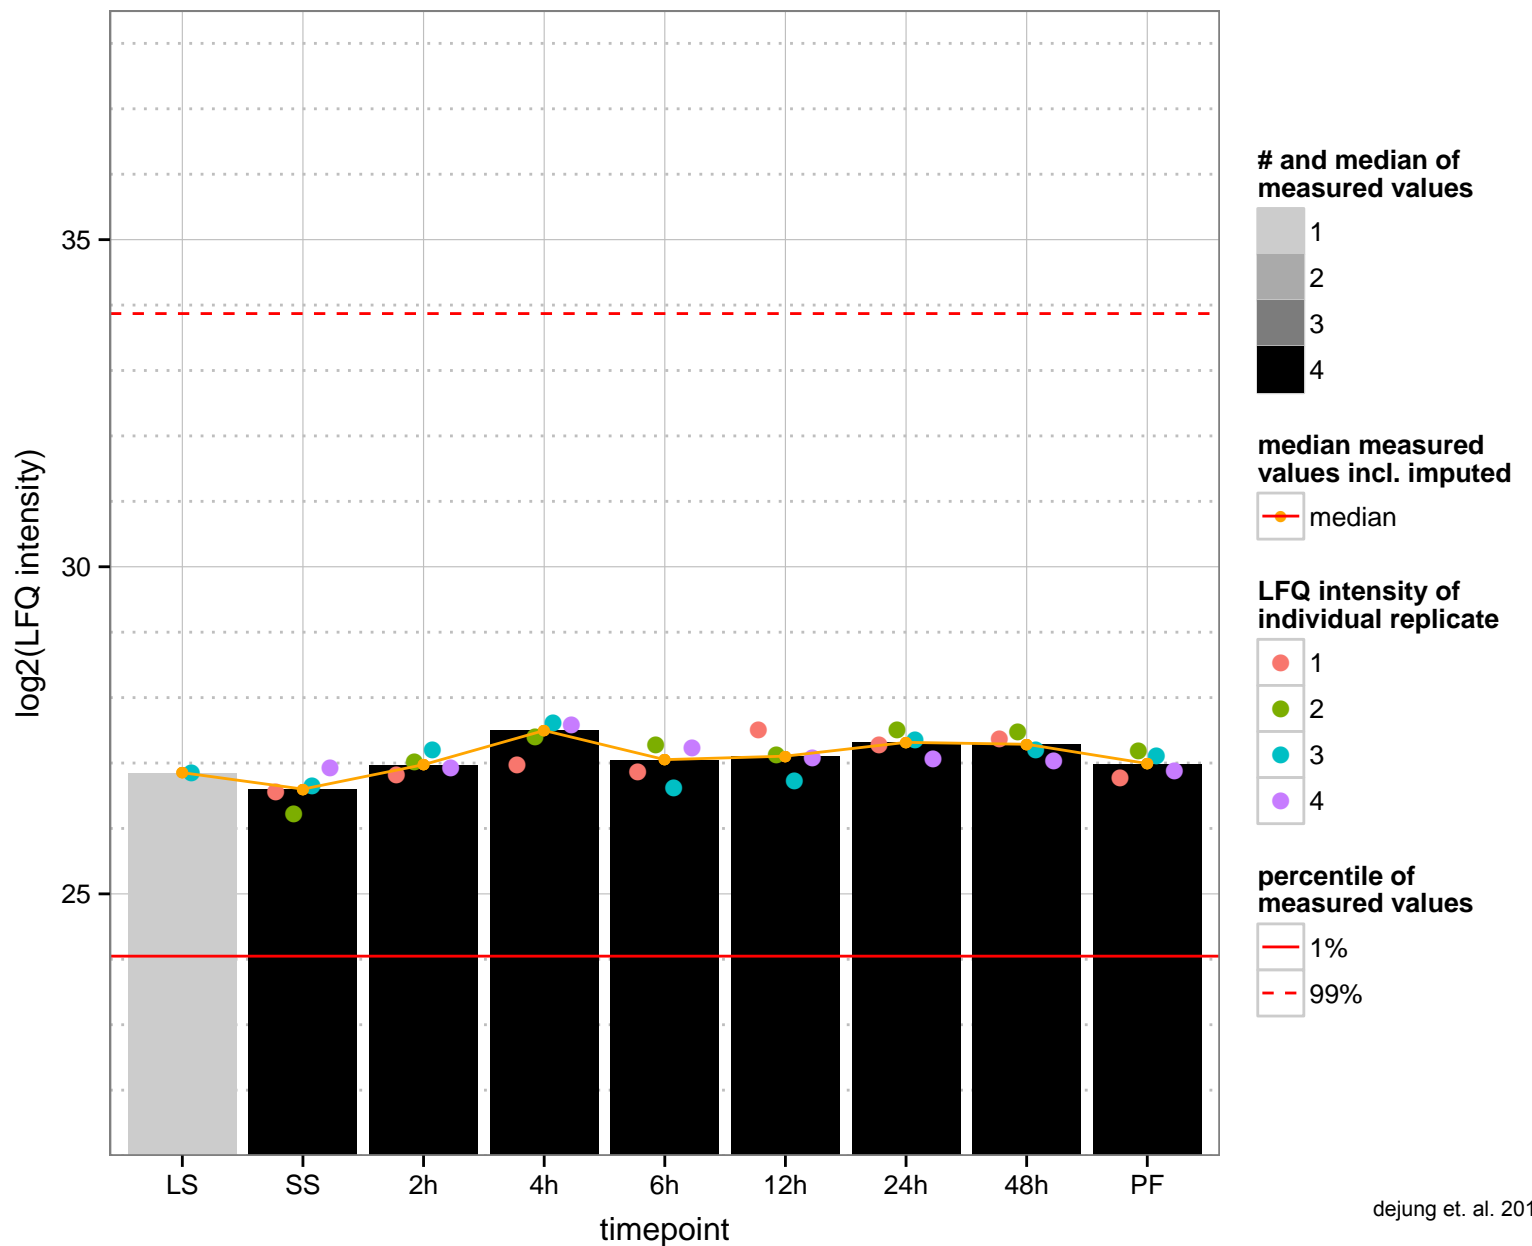



protein kinase, putative, glycogen synthase kinase 3 (GSK3), glycogen synthase kinase-3 alpha  
 Tb927.10.13780;Tb11.v5.0718  
 AGOF: null, ATP binding, protein serine/threonine kinase activity, protein tyrosine kinase activity, protein kinase activity  
 AGOC: null  
 AGOP: null, growth, protein phosphorylation, protein phosphorylation  
 PGOF: ATP binding, protein kinase activity, transferase activity, transferring phosphorus-containing groups  
 PGOC: null  
 PGOP: protein phosphorylation

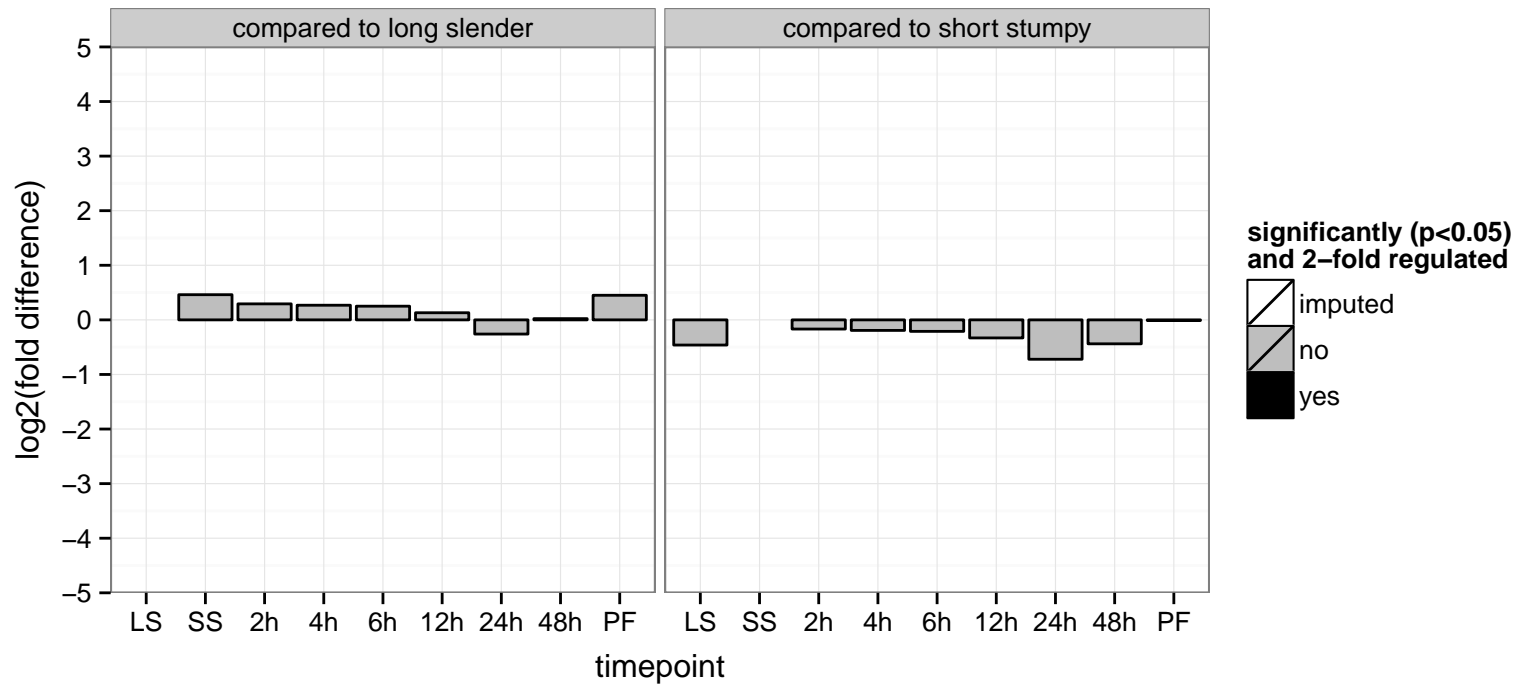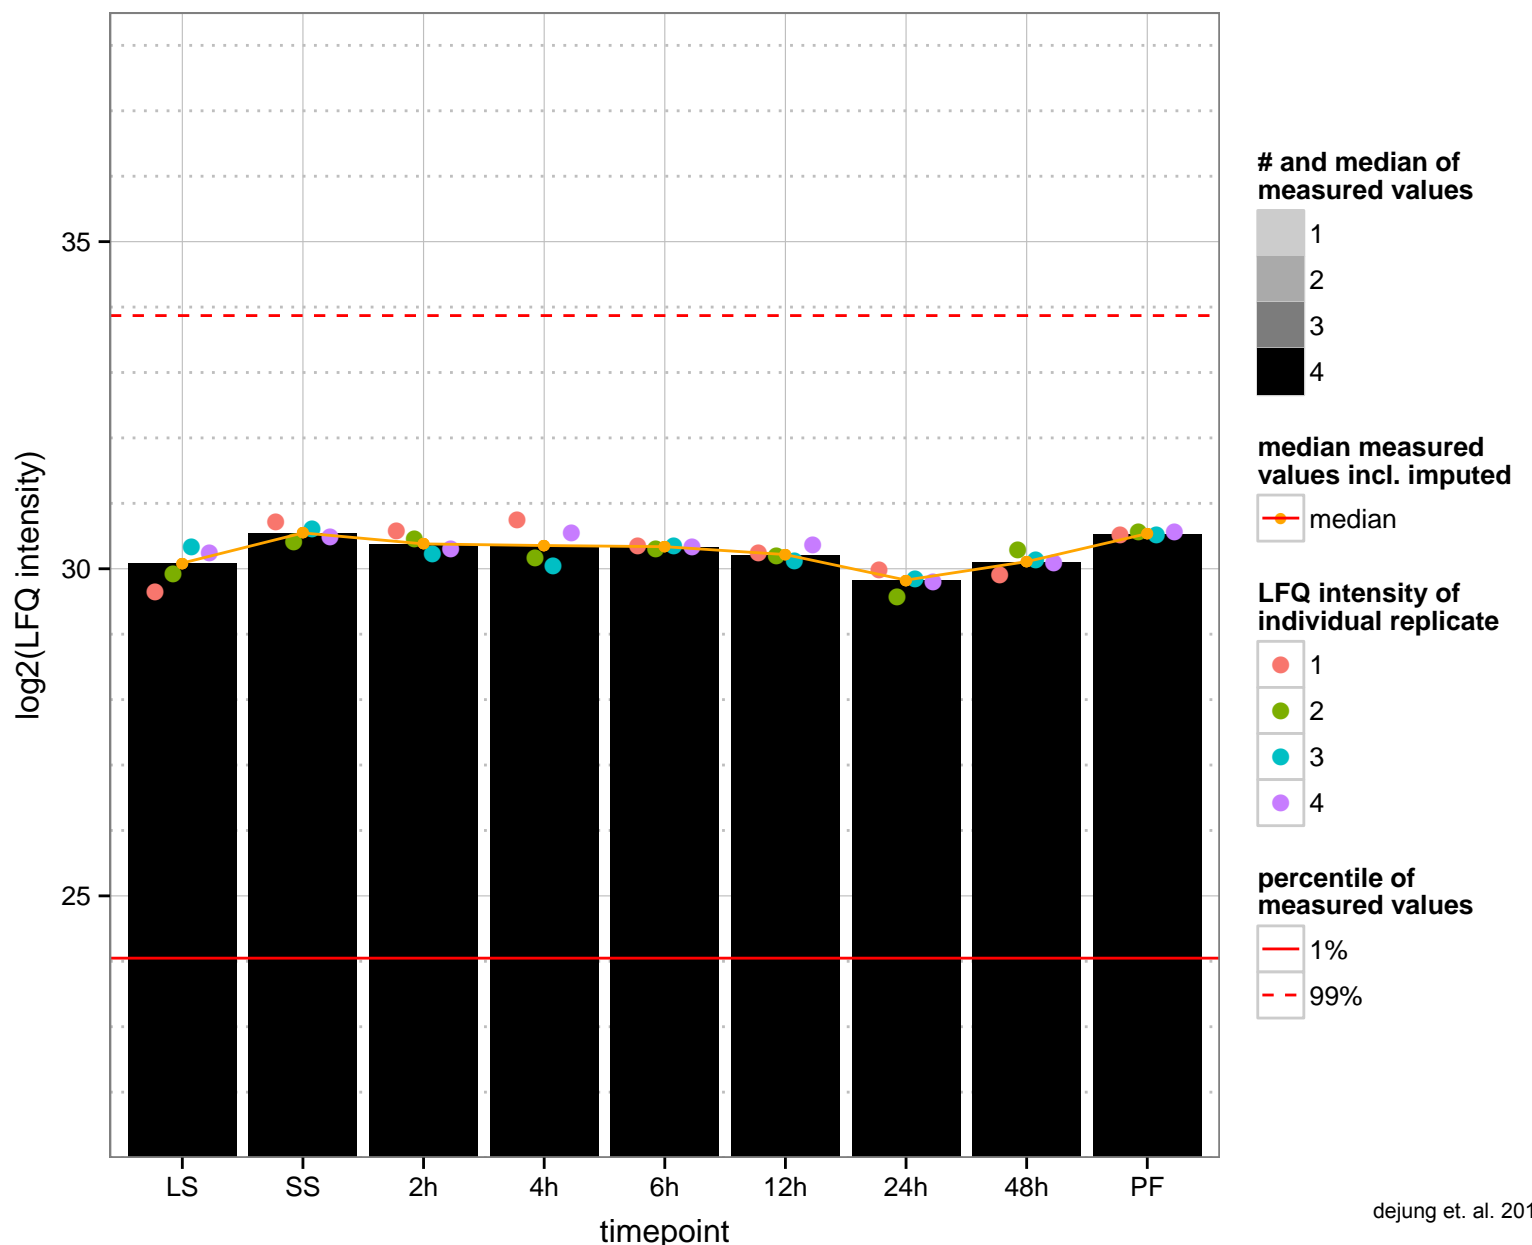

hypothetical protein, conserved, paraflagellar rod component, putative (PFC6)  
 Tb927.3.3790;Tb927.3.3770;Tb11.v5.0741  
 AGOF: null  
 AGOC: null  
 AGOP: null  
 PGOF: null  
 PGO: null  
 PGOP: null

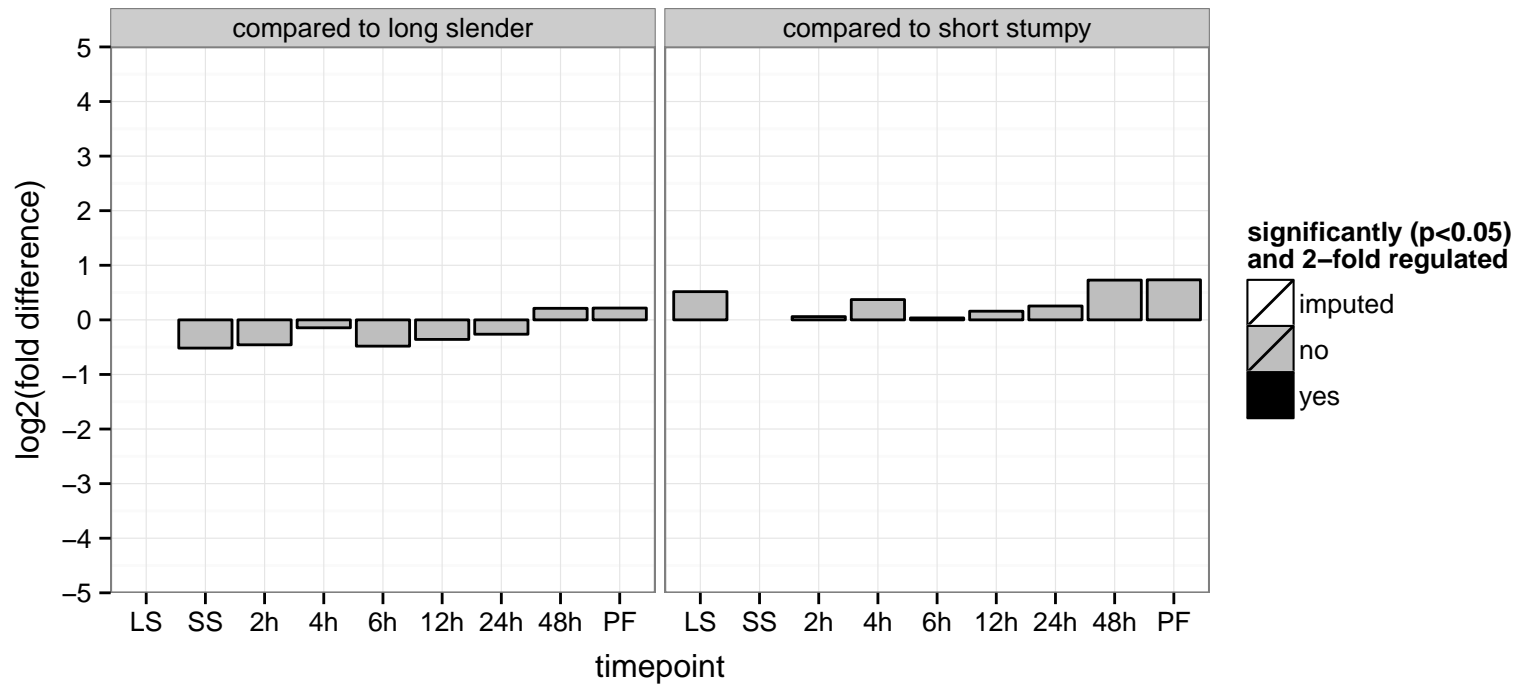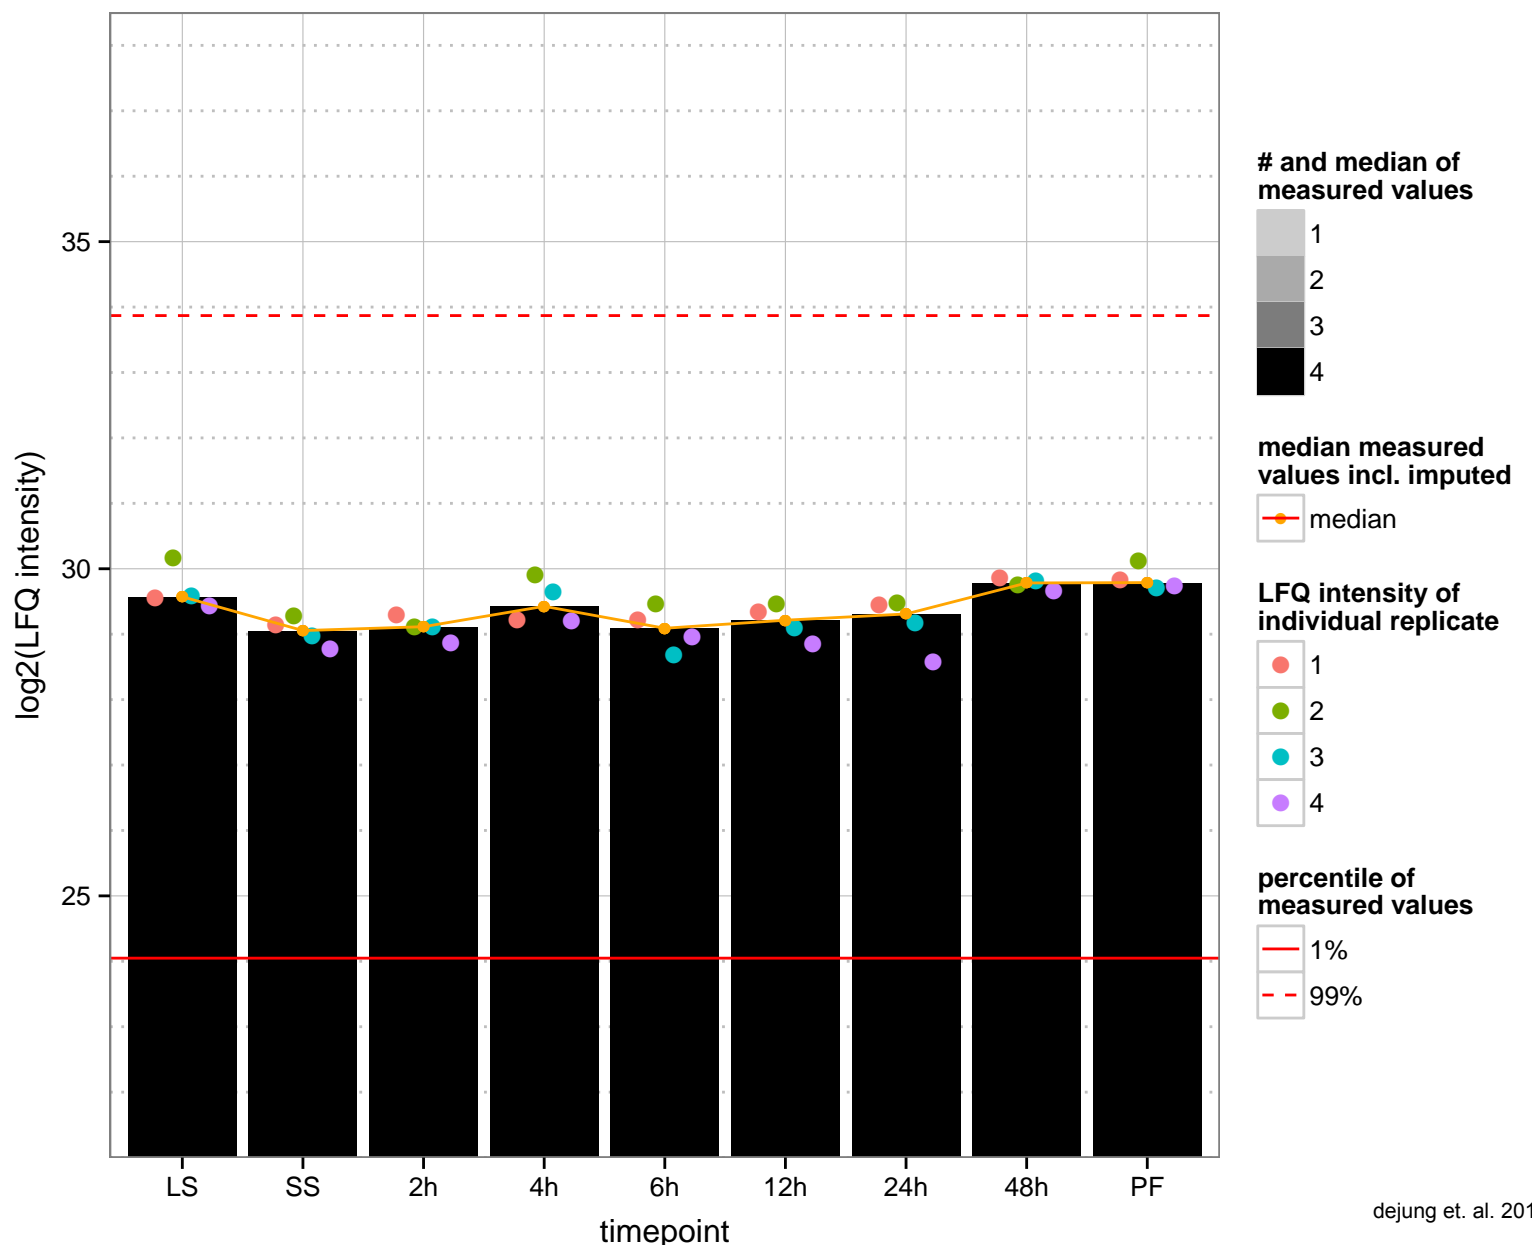

proteasome beta-1 subunit, putative, putative (TbPSB1)

Tb927.6.1260;Tb11.v5.0742

AGOF: null, peptidase activity, acting on L-amino acid peptides, threonine-type endopeptidase activity

AGOC: null, proteasome core complex, proteasome core complex, beta-subunit complex

AGOP: null, protein metabolic process, proteolysis involved in cellular protein catabolic process

PGOF: threonine-type endopeptidase activity

PGOC: proteasome core complex

PGOP: proteolysis involved in cellular protein catabolic process

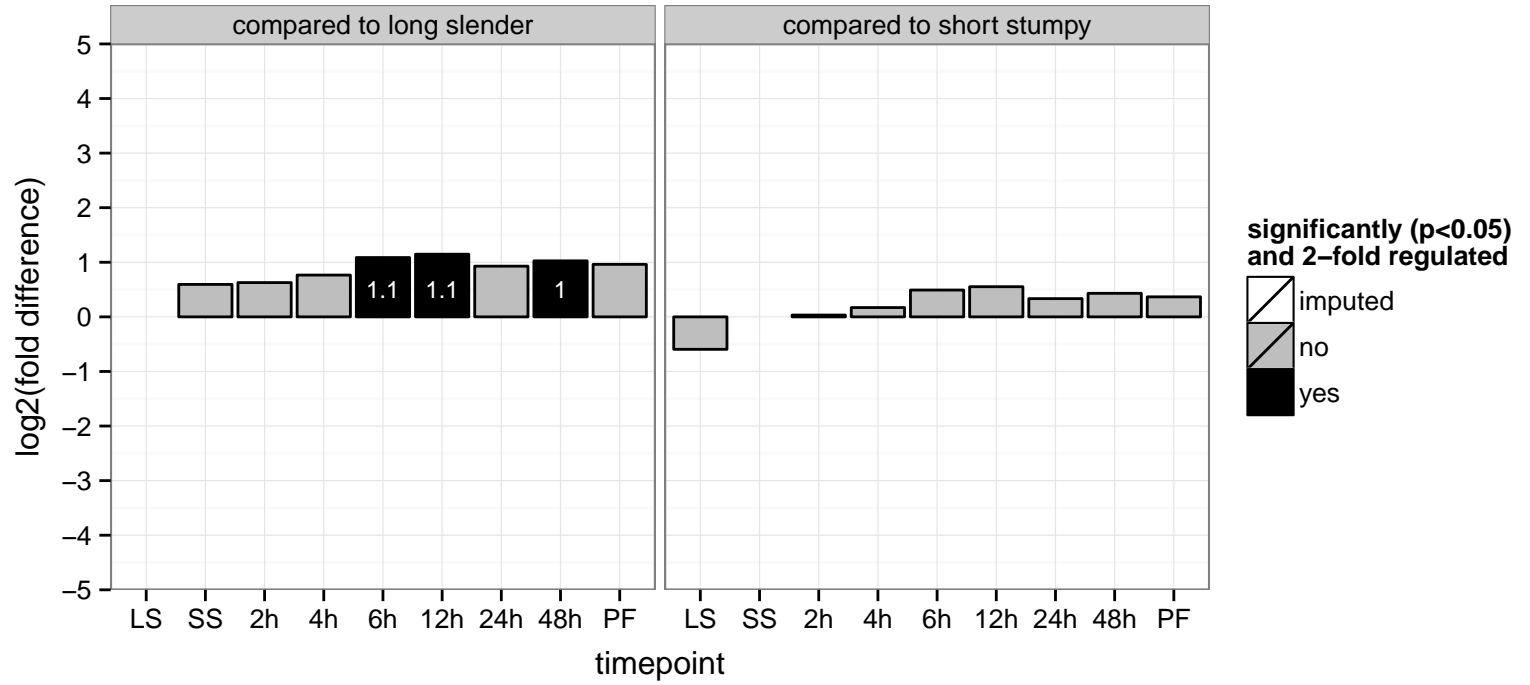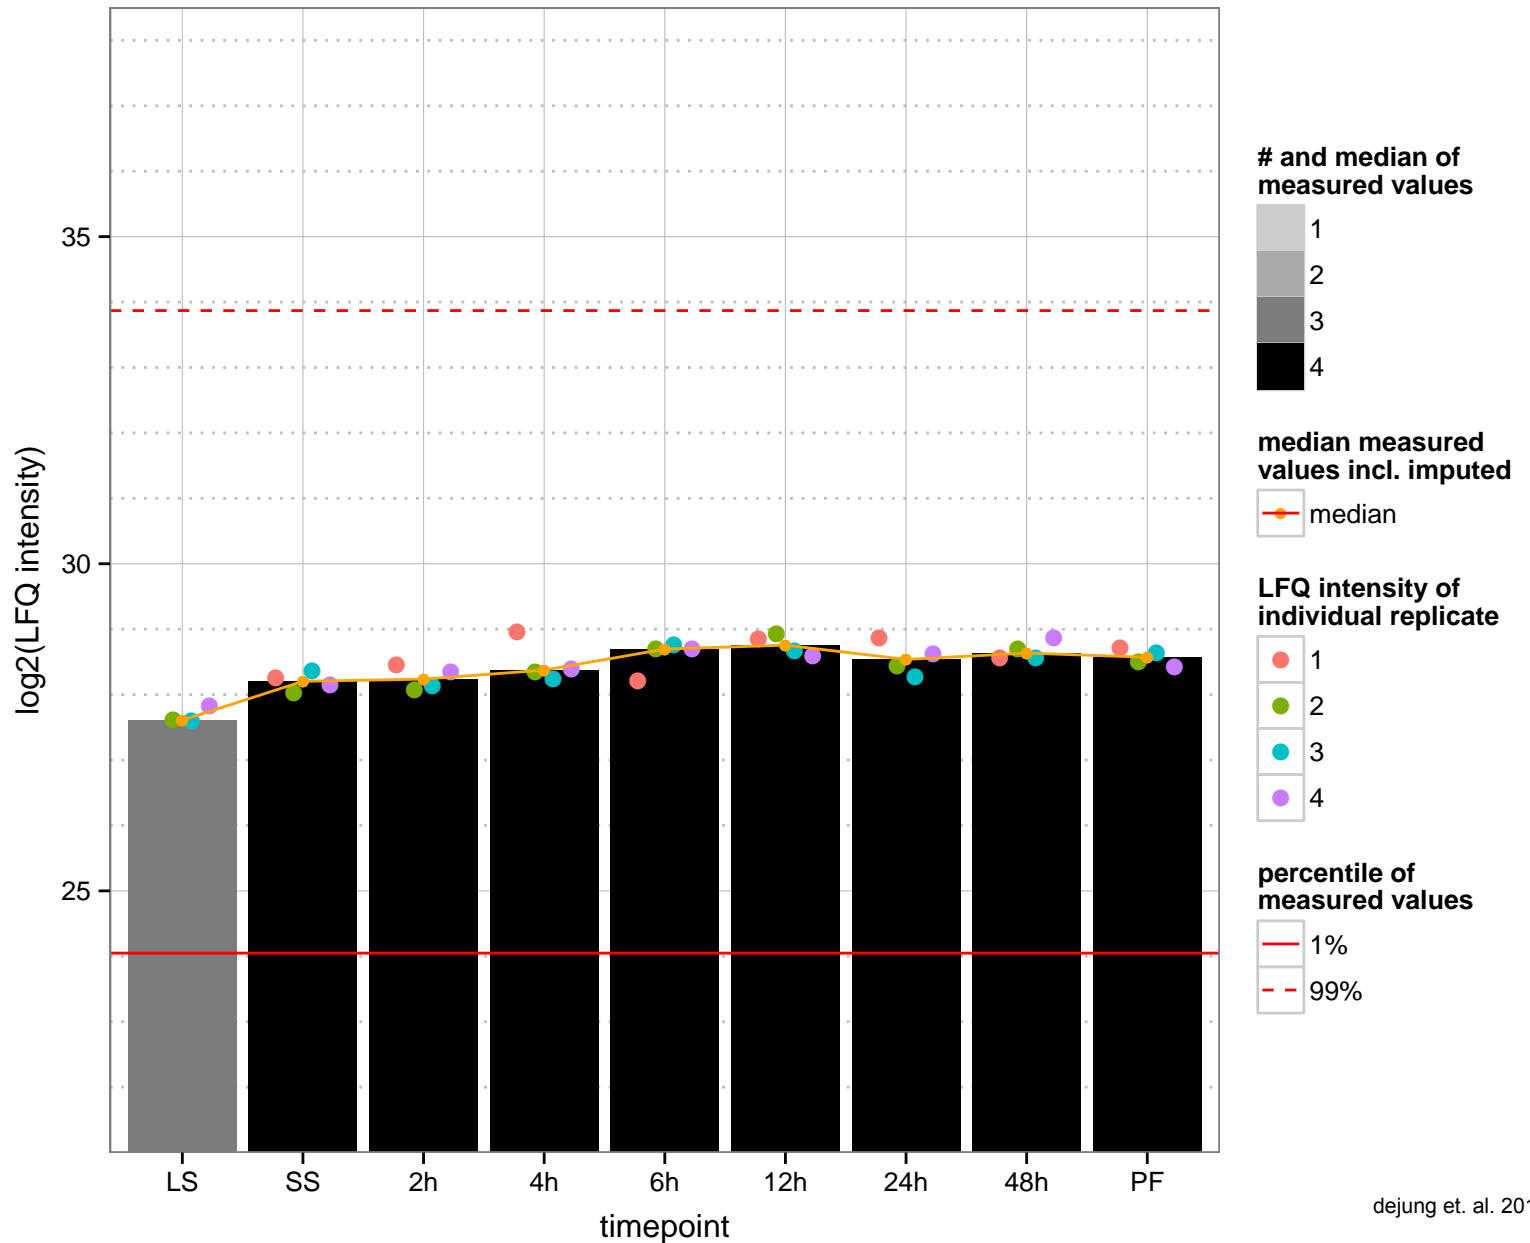

ribonuclease, putative, Poly(A)-specific ribonuclease PARN-3 (parn3)  
 Tb11.v5.0807;Tb927.9.13510  
 AGOF: null, nucleic acid binding  
 AGOC: null, nucleus  
 AGOP: null  
 PGO: nucleic acid binding  
 PGOC: nucleus  
 PGOP: null

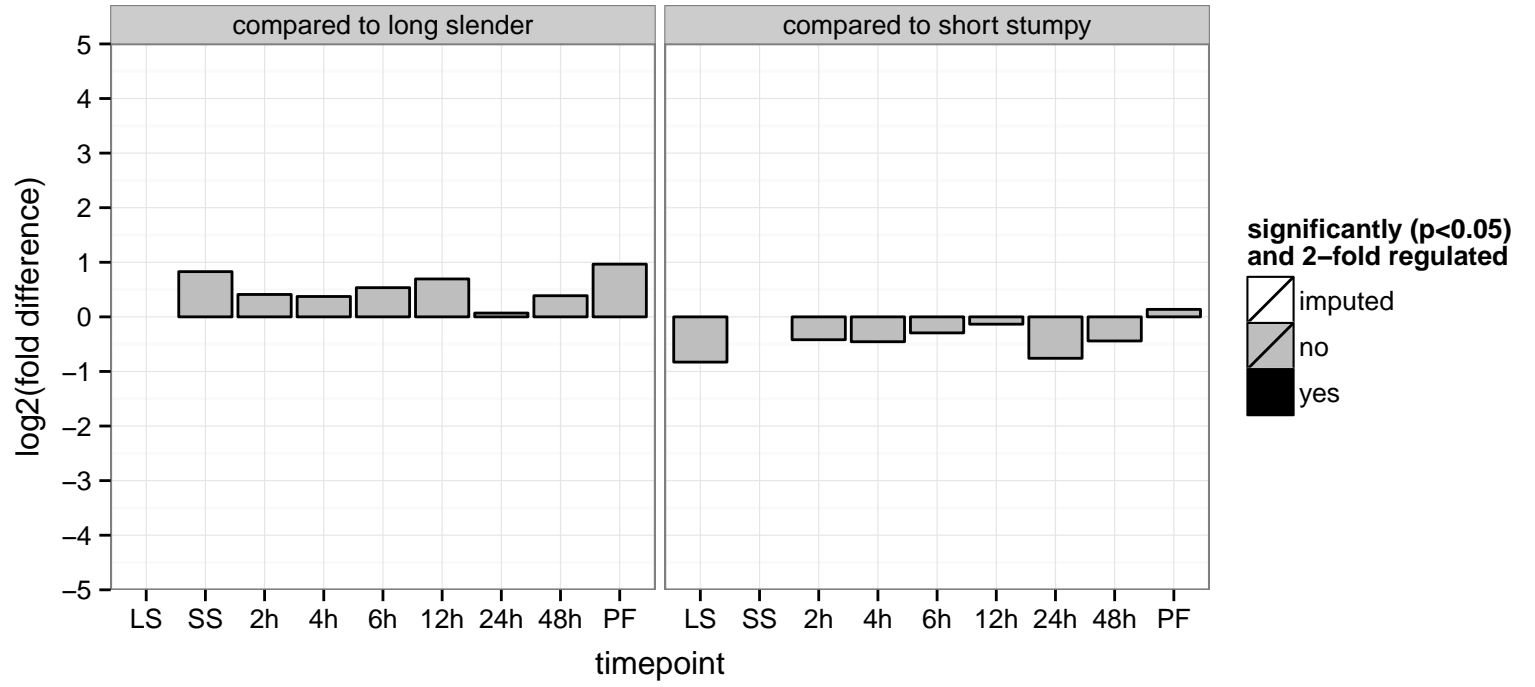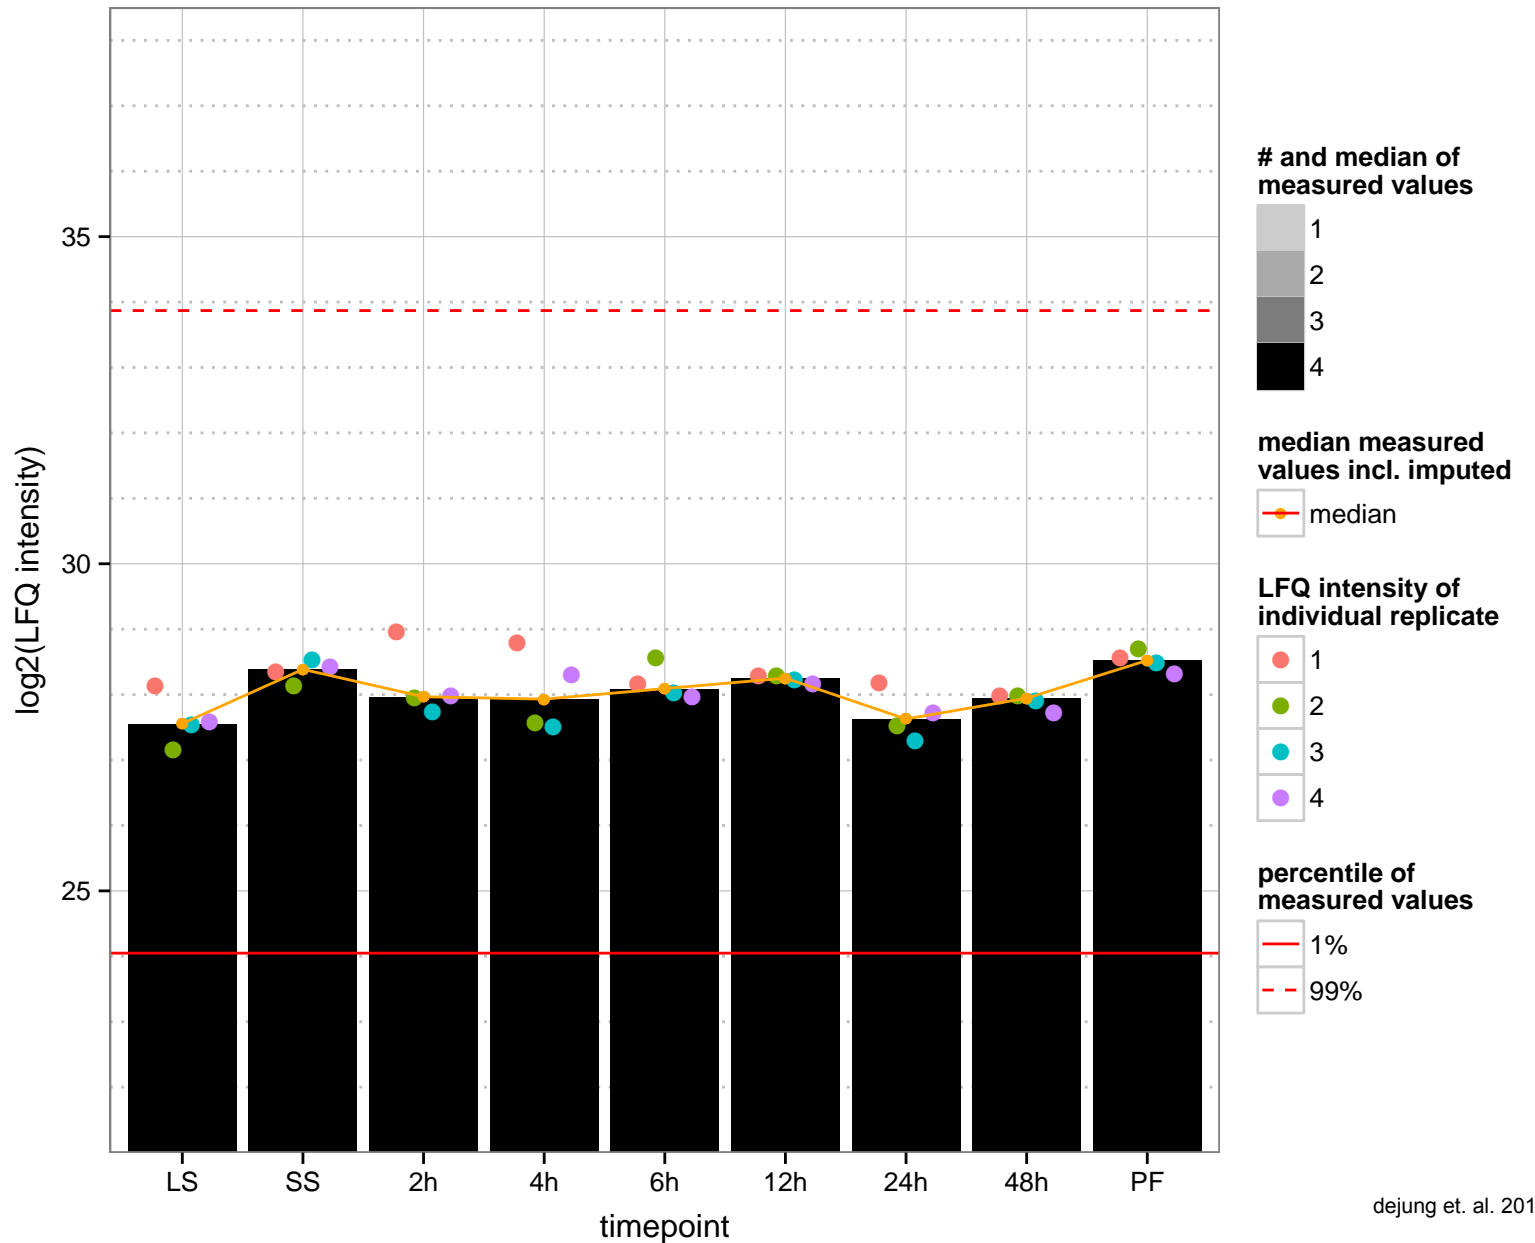

peroxin-2, putative, glycosome import protein (gim1) (PEX2)

Tb927.3.2340;Tb11.v5.0818

AGOF: null, zinc ion binding

AGOC: null, glycosome membrane, peroxisomal membrane

AGOP: null, glycolysis, peroxisome membrane biogenesis, peroxisome organization, protein import

PGOF: protein binding, zinc ion binding

PGOC: null

PGOP: null

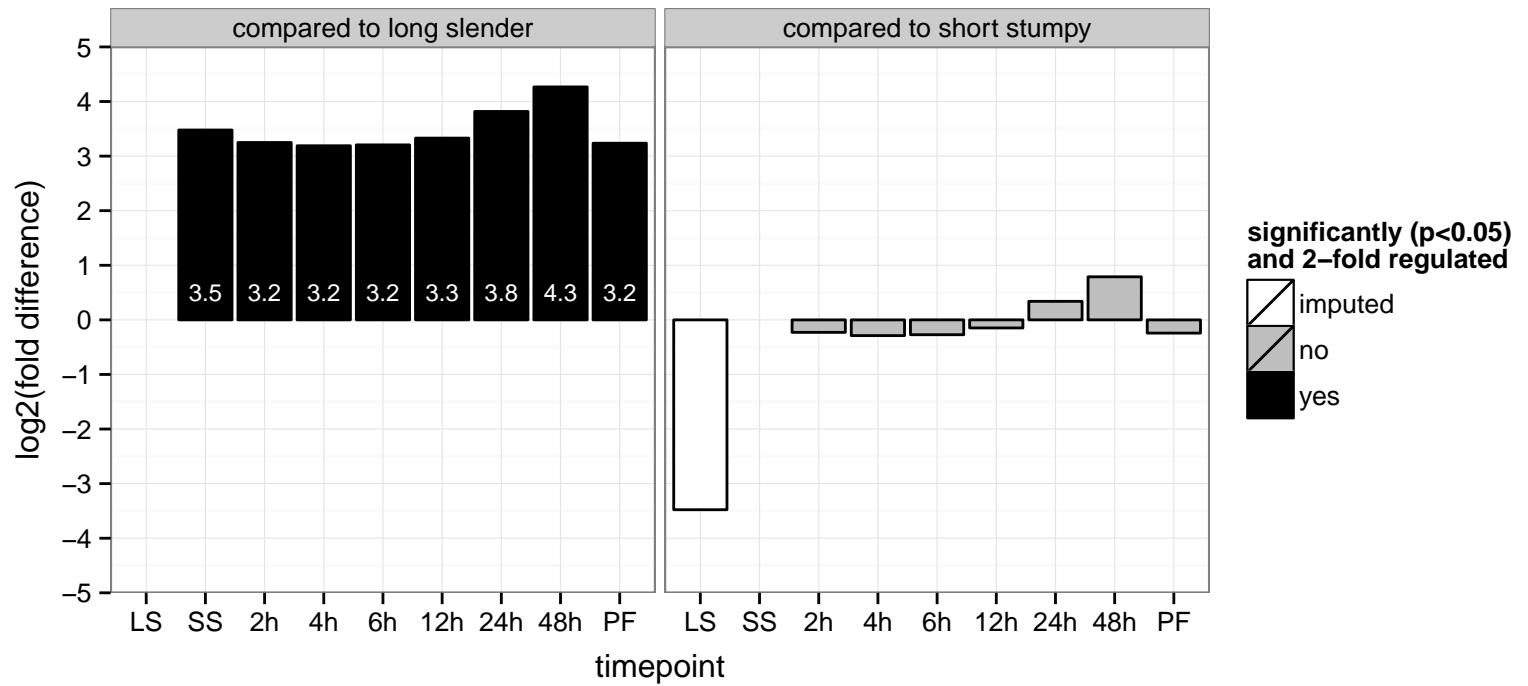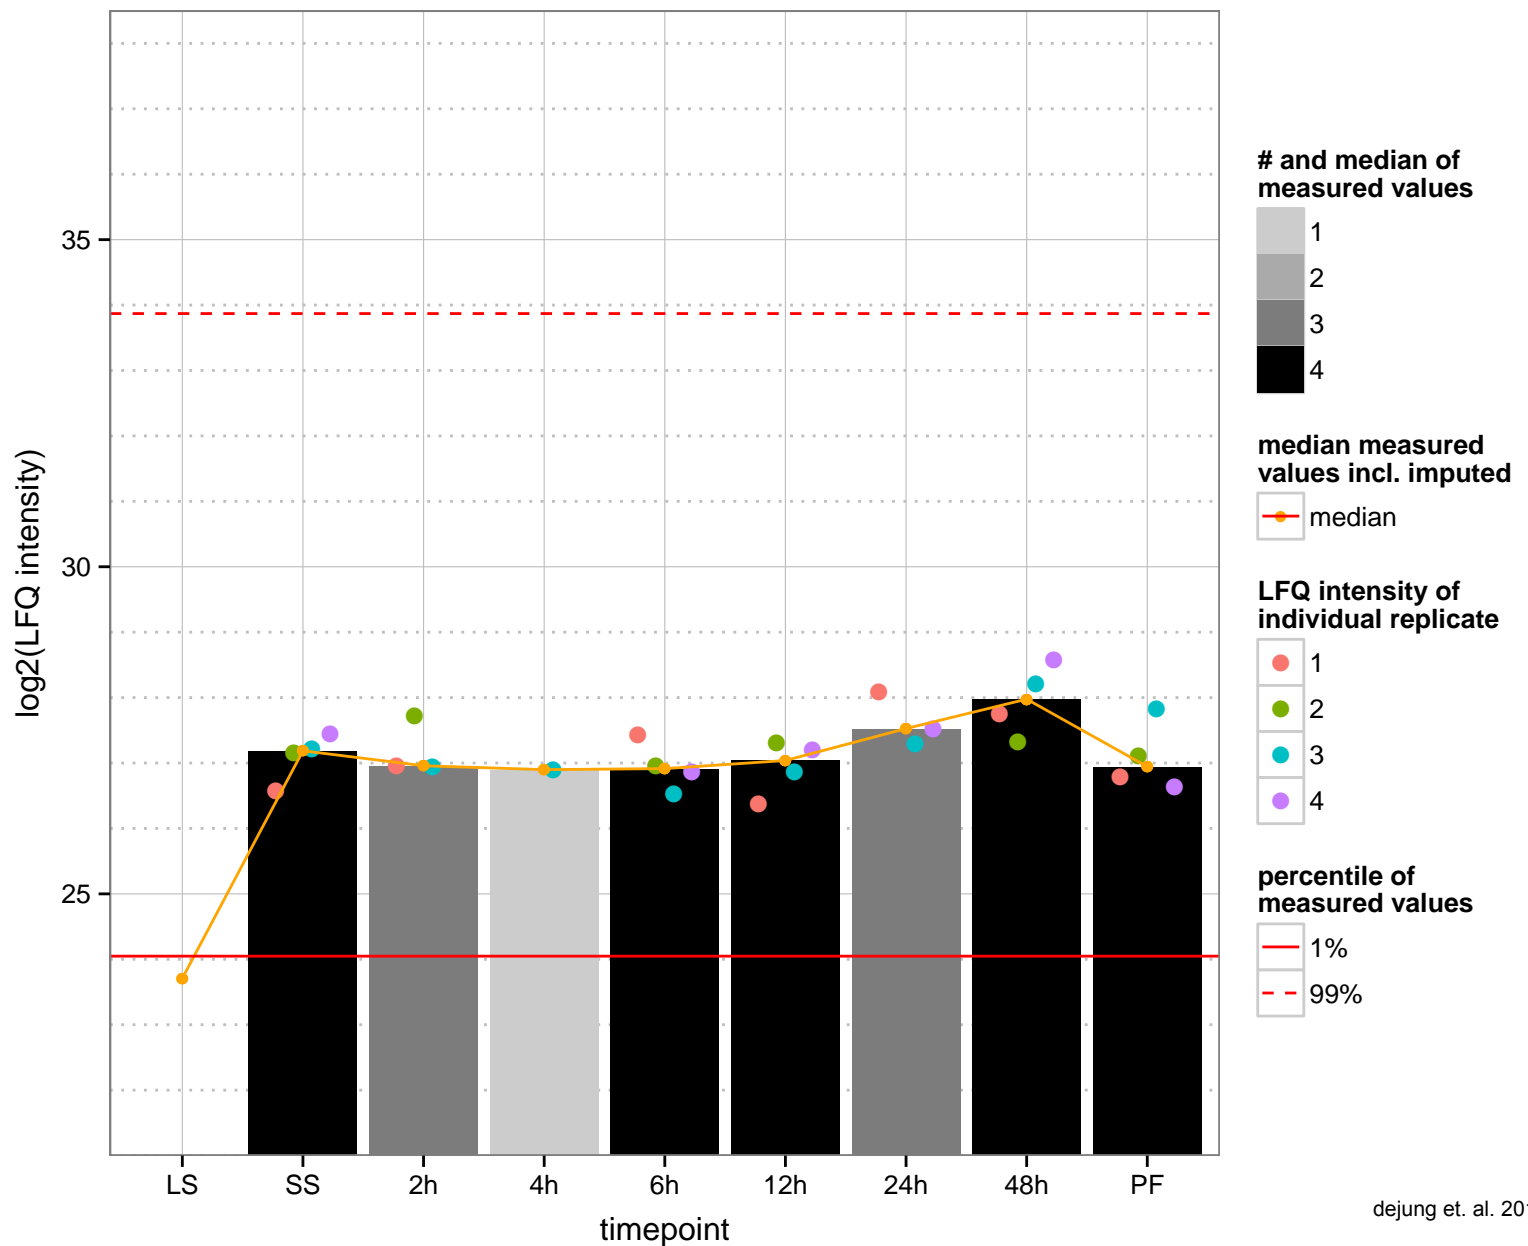

procyclin-associated gene 2-like protein, putative  
 Tb927.11.14600;Tb11.v5.1026  
 AGOF: null  
 AGOC: null  
 AGOP: null, evasion or tolerance of host immune response  
 PGO: null  
 PGO: null  
 PGO: null  
 PGO: evasion or tolerance of host immune response

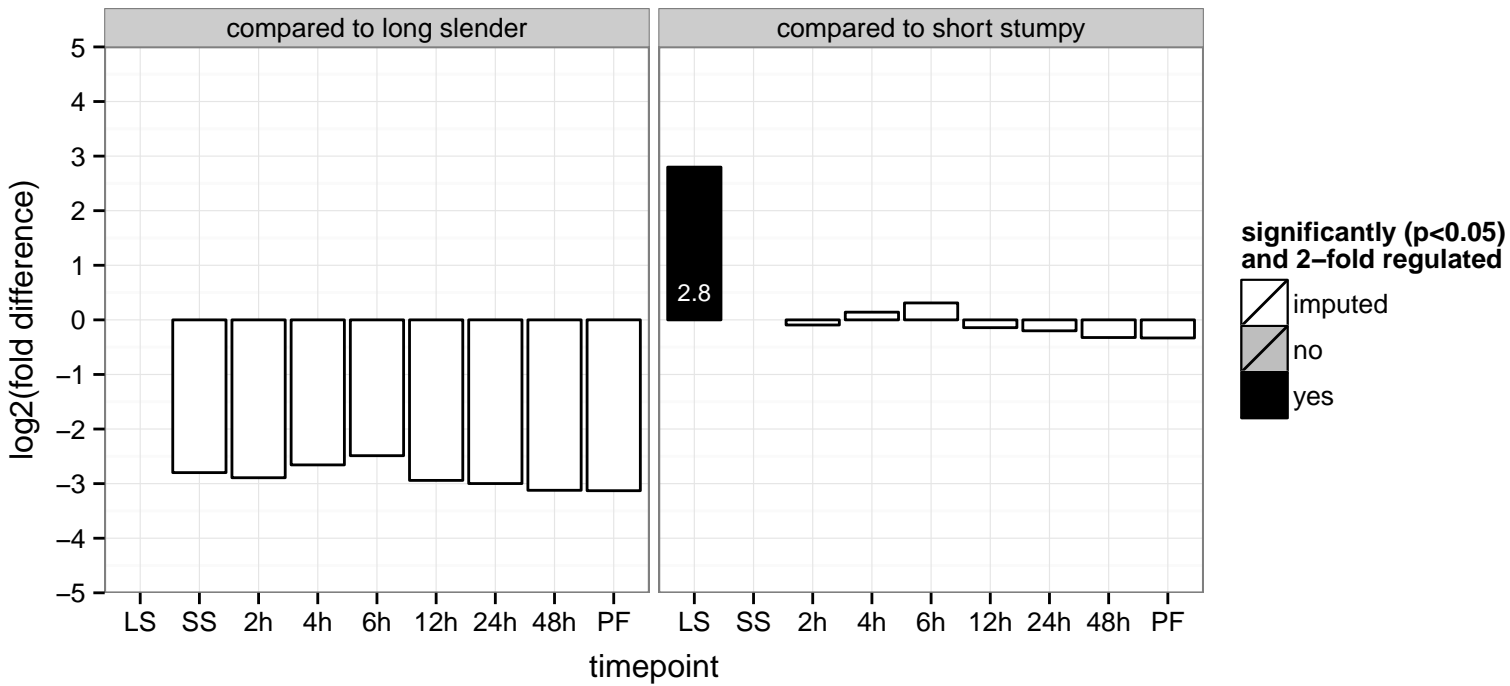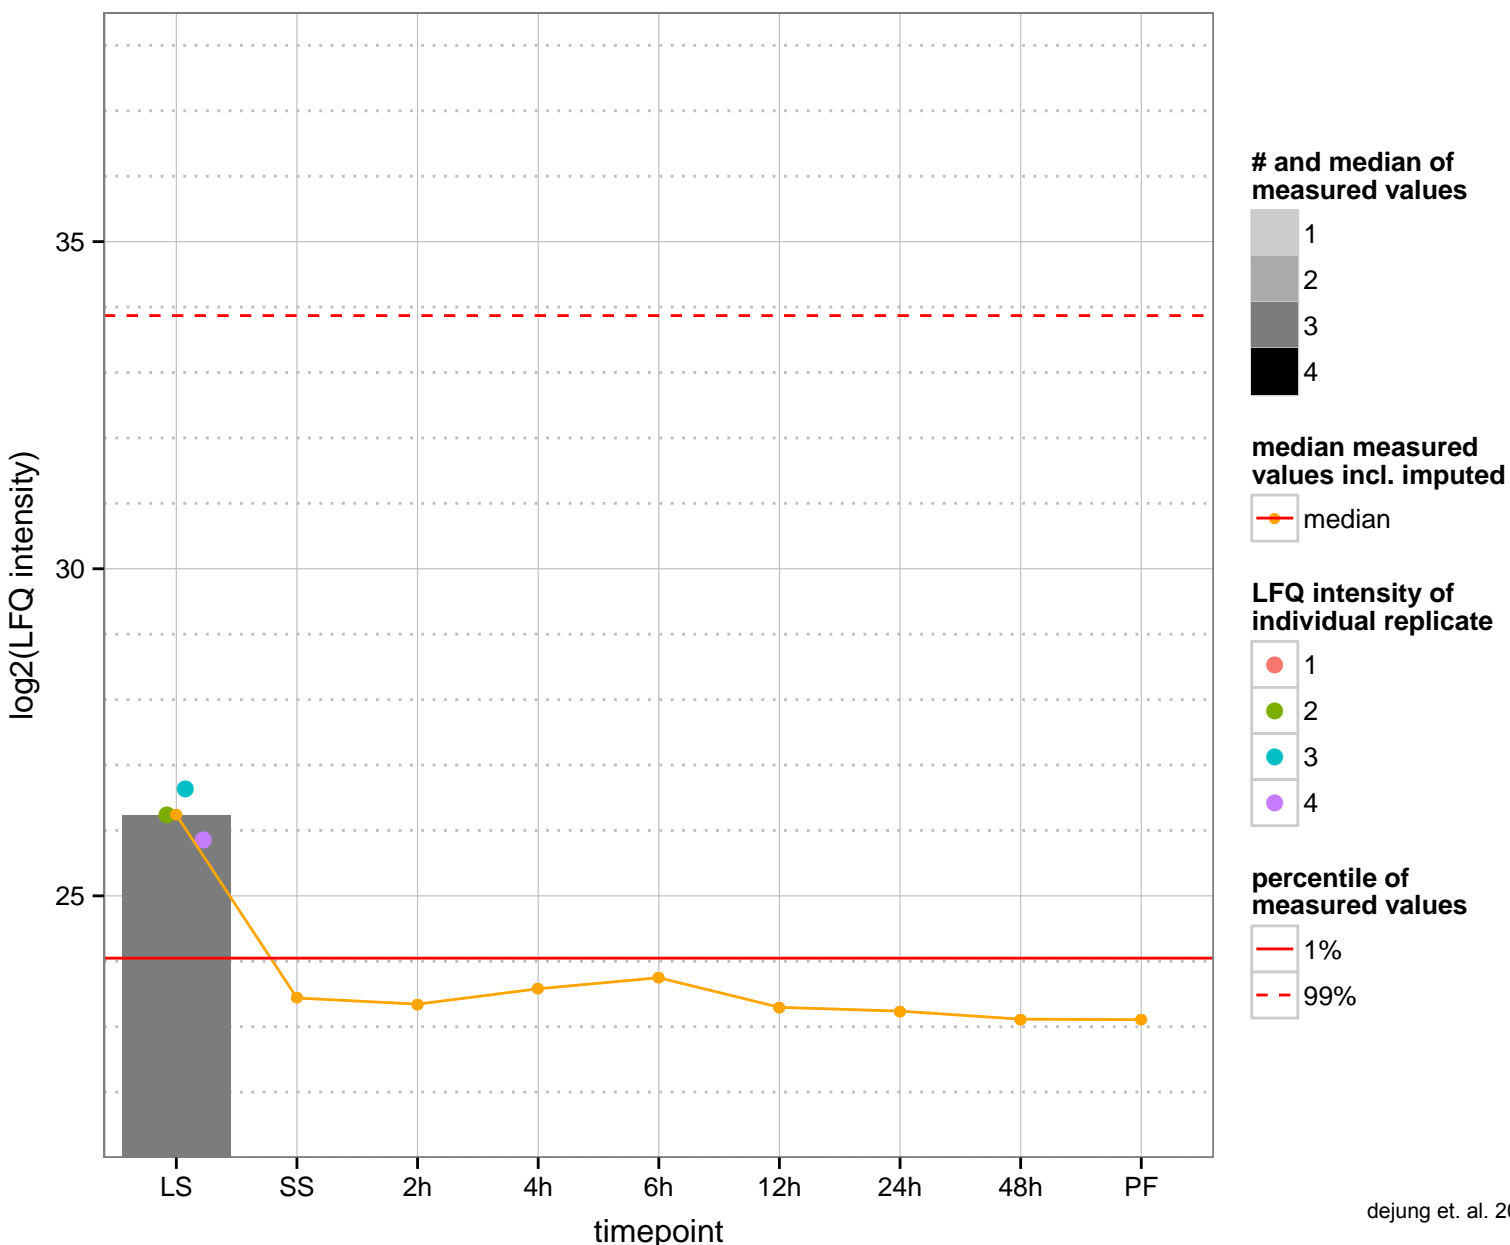

elongation factor 1-alpha, putative, EF-1-alpha (TEF1), elongation factor 1-alpha (TEF1)  
 Tb927.10.2110;Tb927.10.2100;Tb11.v5.1046;Tb927.10.2090  
 AGOF: null, GTP binding, GTPase activity, calmodulin binding, translation elongation factor activity  
 AGOC: null, cytoplasm  
 AGOP: null, calcium-mediated signaling, microtubule-based process, translational elongation  
 PGO: GTP binding, GTPase activity, translation elongation factor activity  
 PGO: cytoplasm  
 PGO: translational elongation

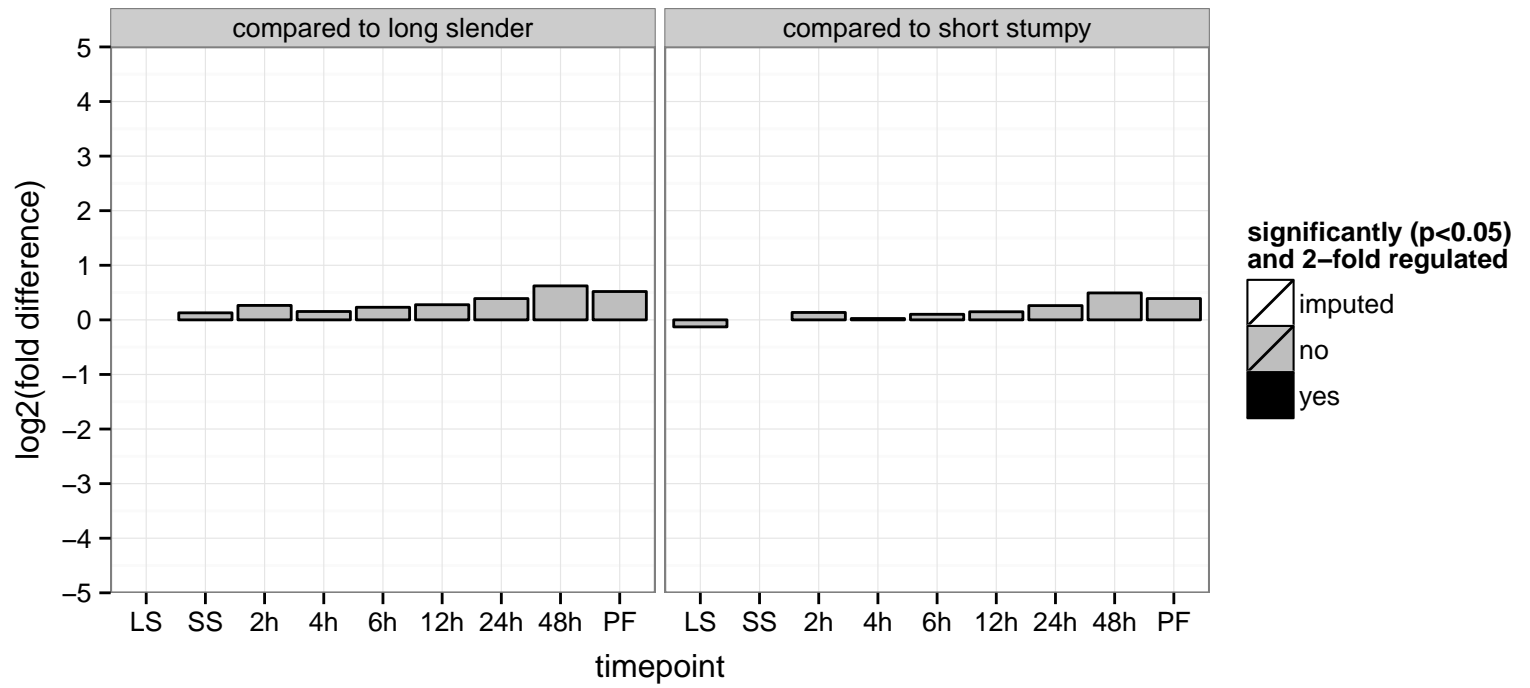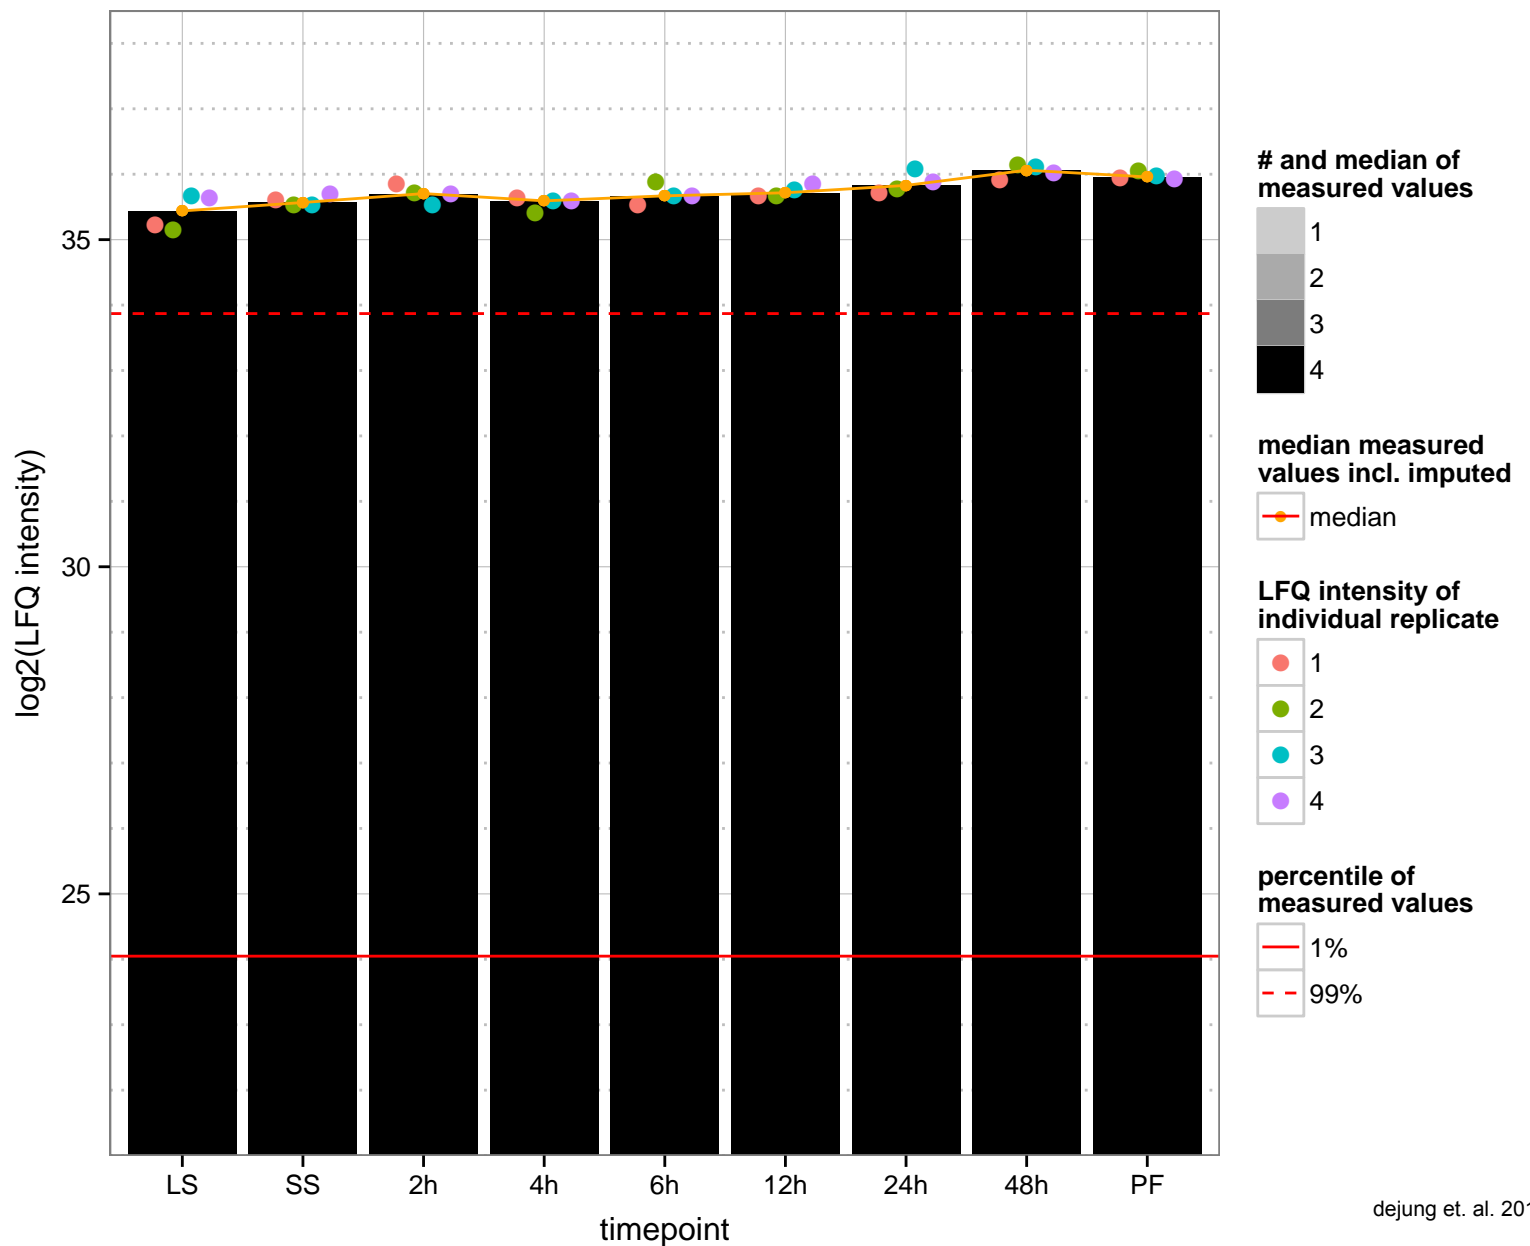

73 kDa paraflagellar rod protein, putative, PFR1 (PFR1)  
 Tb927.3.4330;Tb927.3.4320;Tb927.3.4310;Tb927.3.4300;Tb927.3.4290;Tb11.v5.1055  
 AGOF: null, calmodulin binding, molecular\_function  
 AGOC: null, cilium, microtubule-based flagellum  
 AGOP: null, cellular component movement, forward locomotion  
 PGOF: calmodulin binding, null  
 PGO: microtubule-based flagellum, null  
 PGOP: null

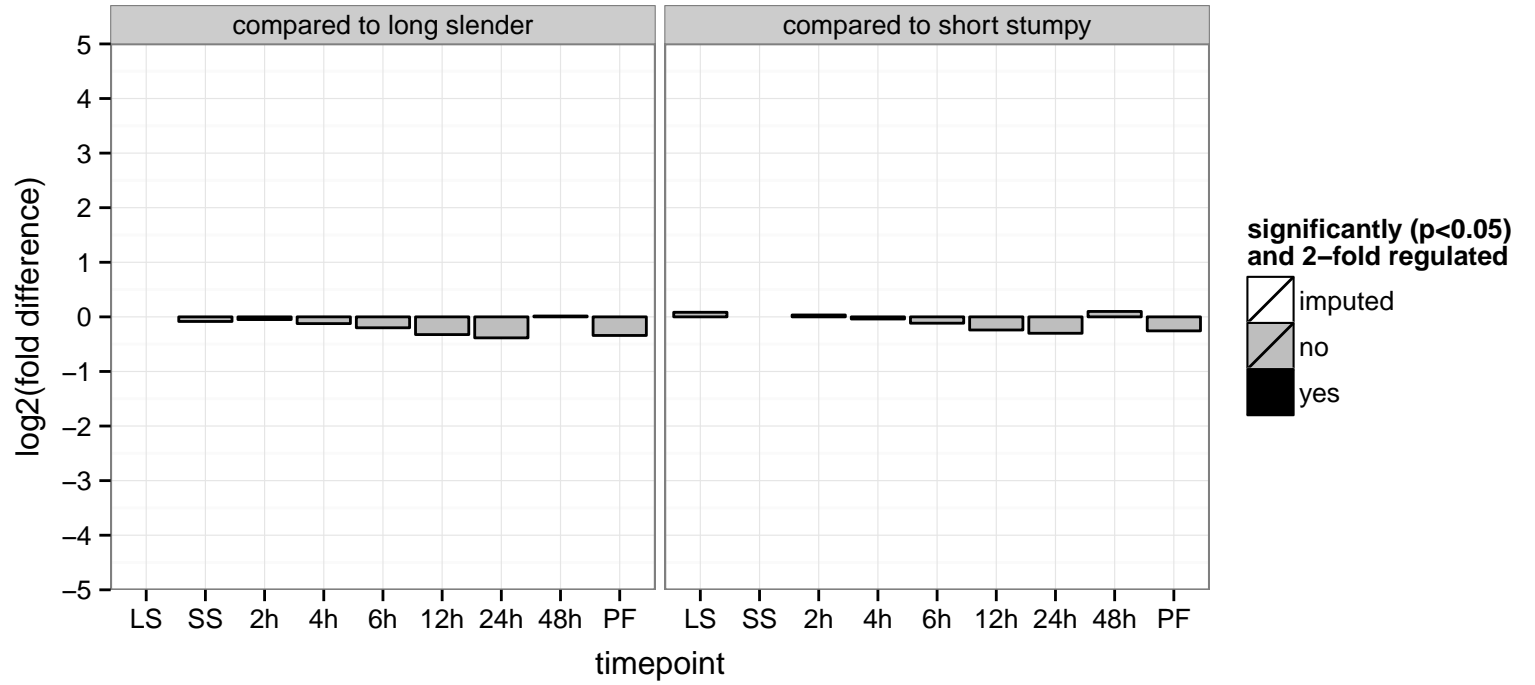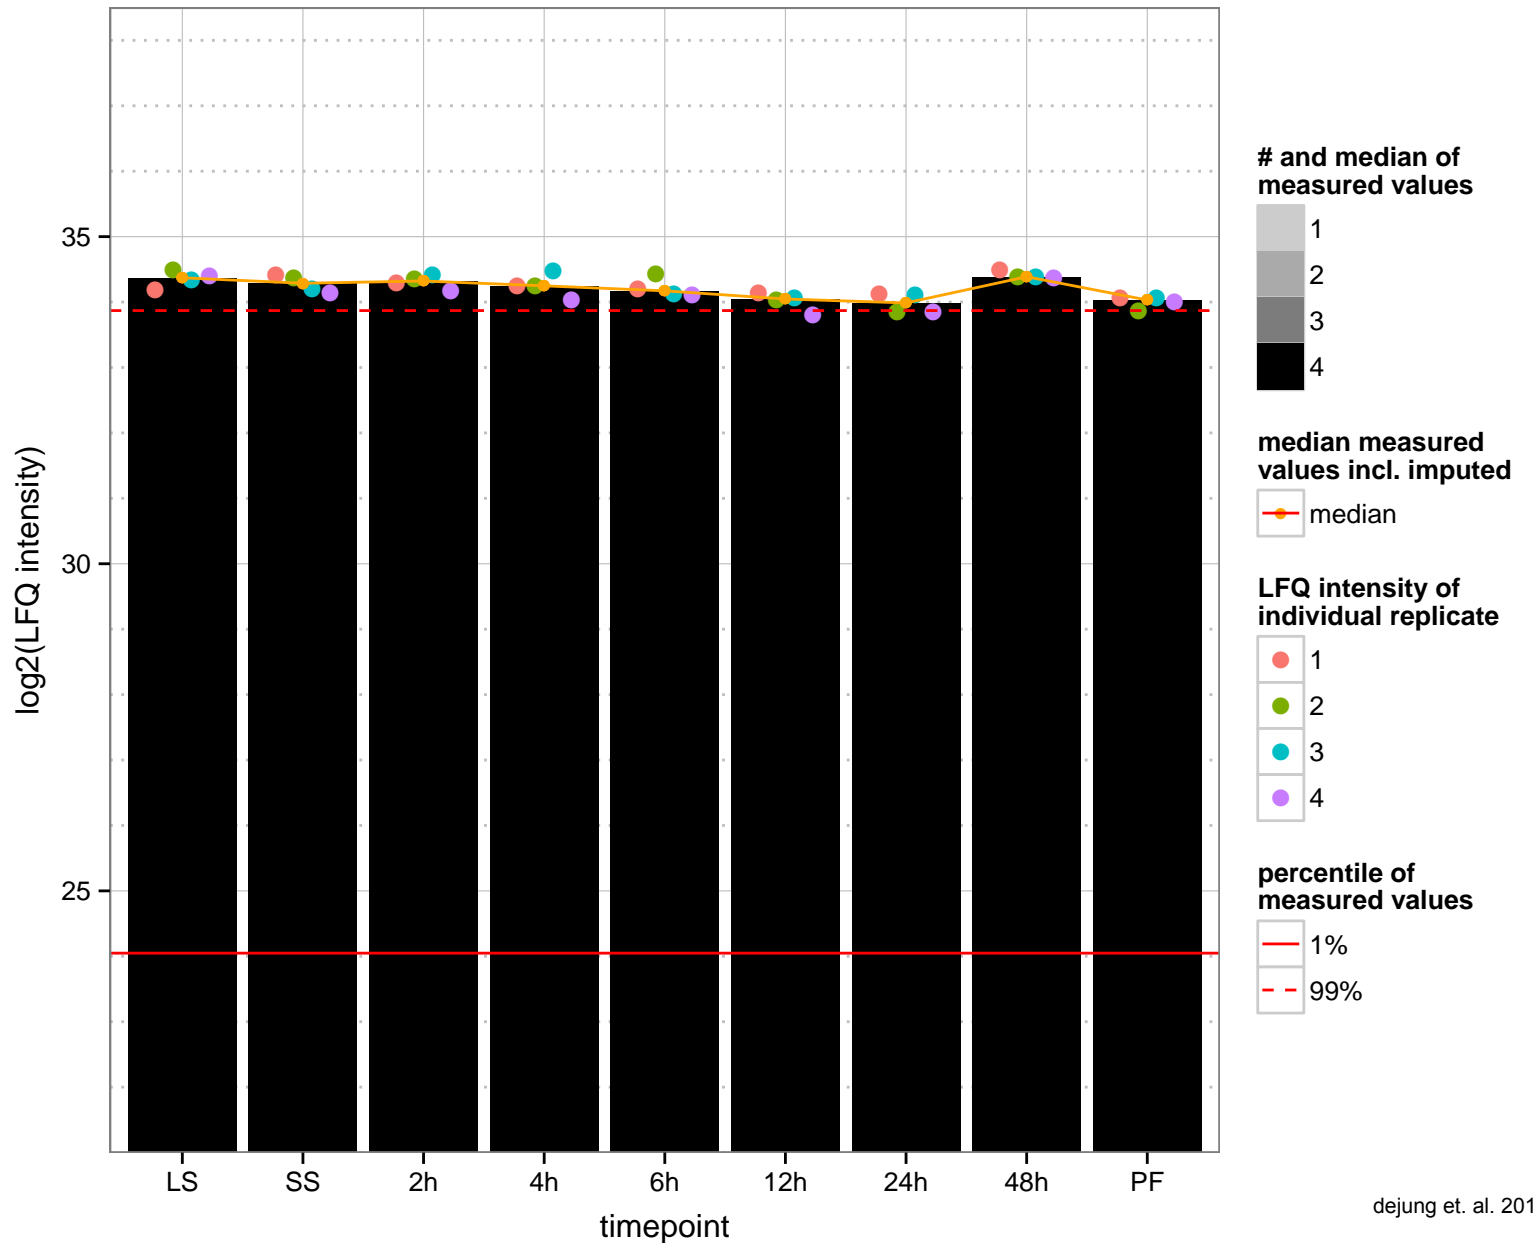



protein kinase, putative, mitogen-activated protein kinase 11

Tb927.10.12040;Tb11.v5.1057

AGOF: null, ATP binding, protein kinase activity, protein serine/threonine kinase activity, protein tyrosine kinase activity

AGOC: null

AGOP: null, protein phosphorylation

PGOF: ATP binding, protein kinase activity, transferase activity, transferring phosphorus-containing groups

PGOC: null

PGOP: protein phosphorylation

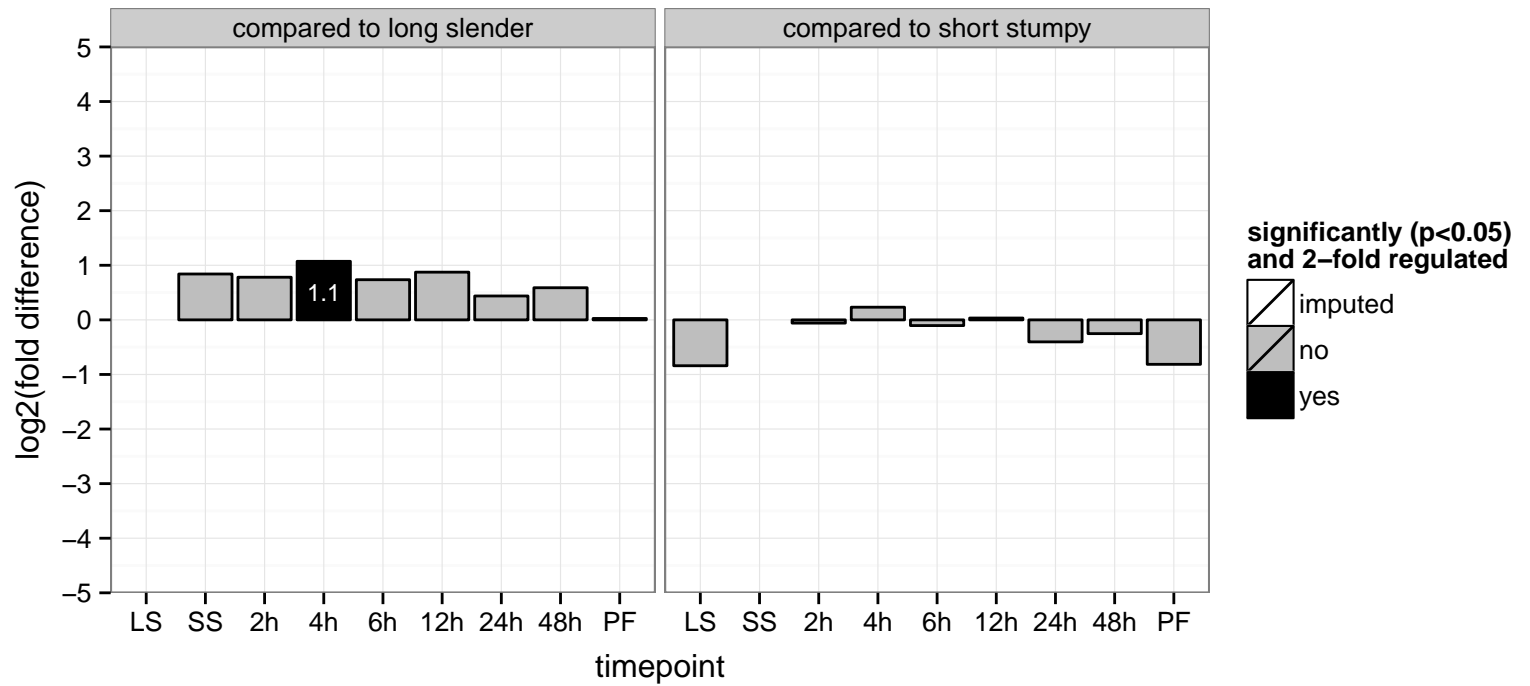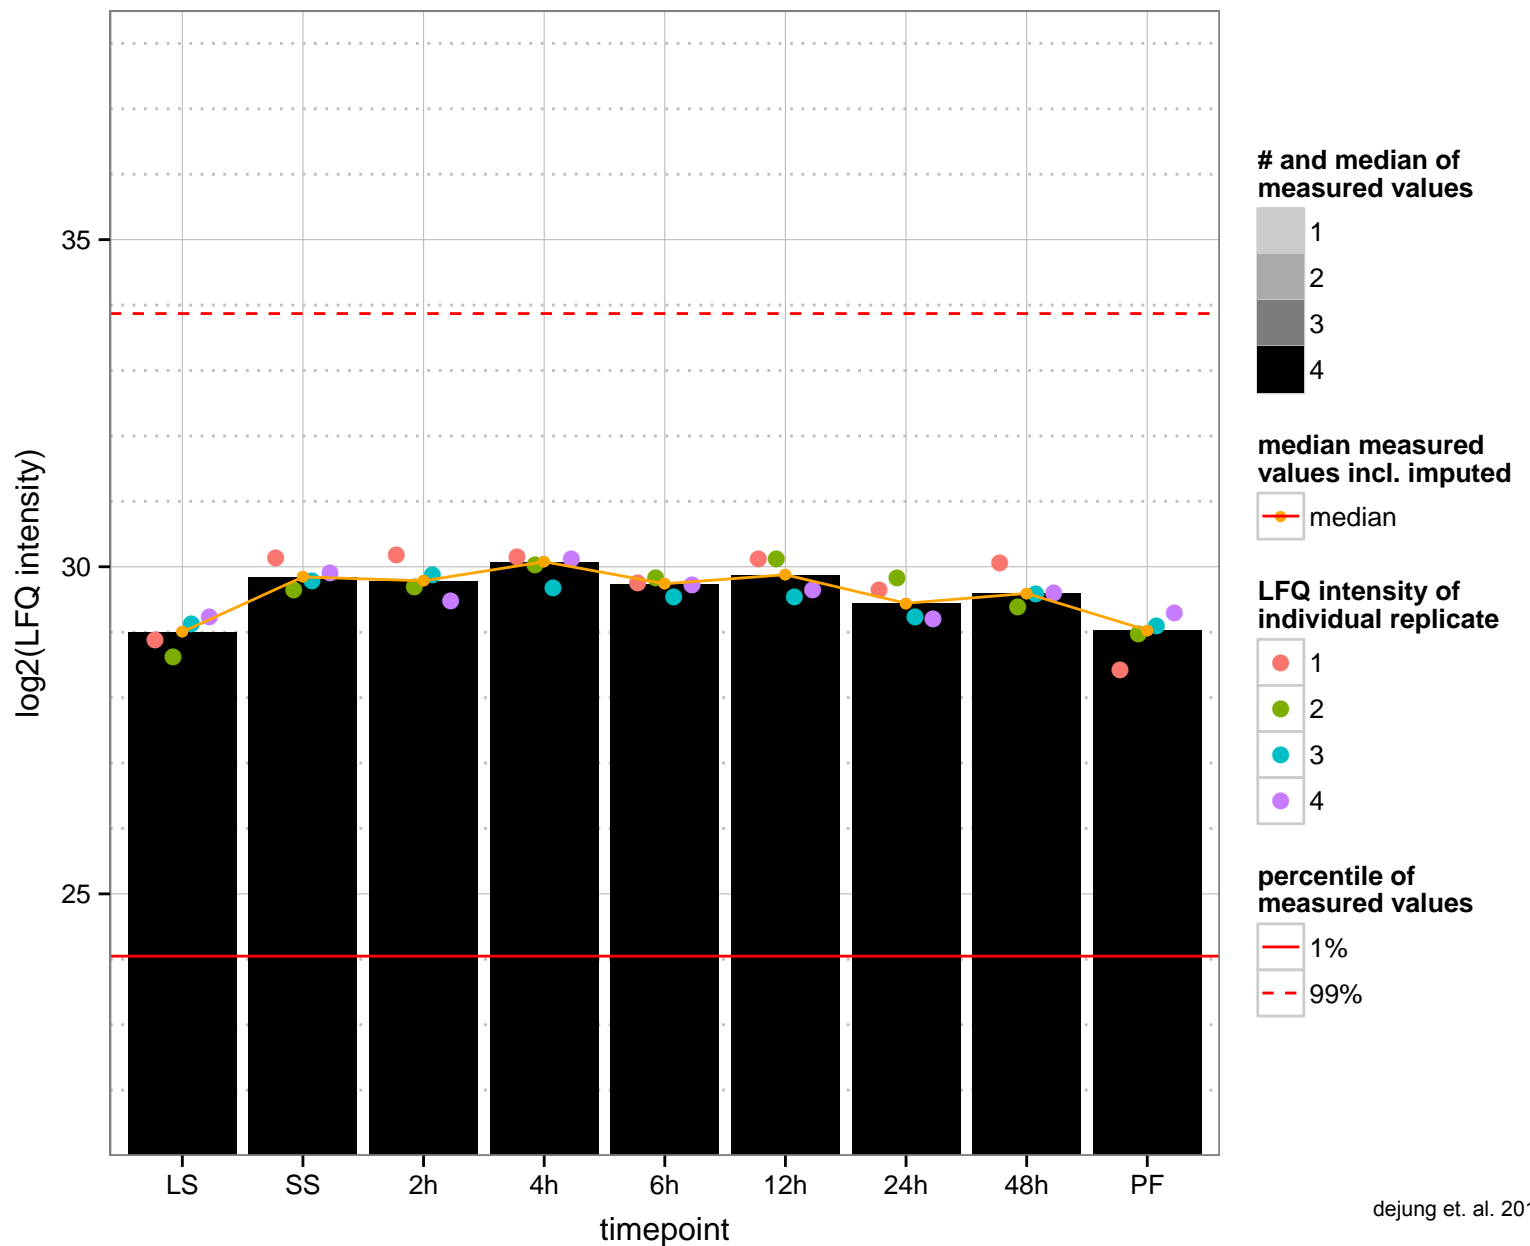

developmentally regulated phosphoprotein  
 Tb927.1.1000  
 AGOF: ATP binding  
 AGOC: mitochondrion  
 AGOP: null  
 PGO: ATP binding  
 PGOC: null  
 PGOP: null

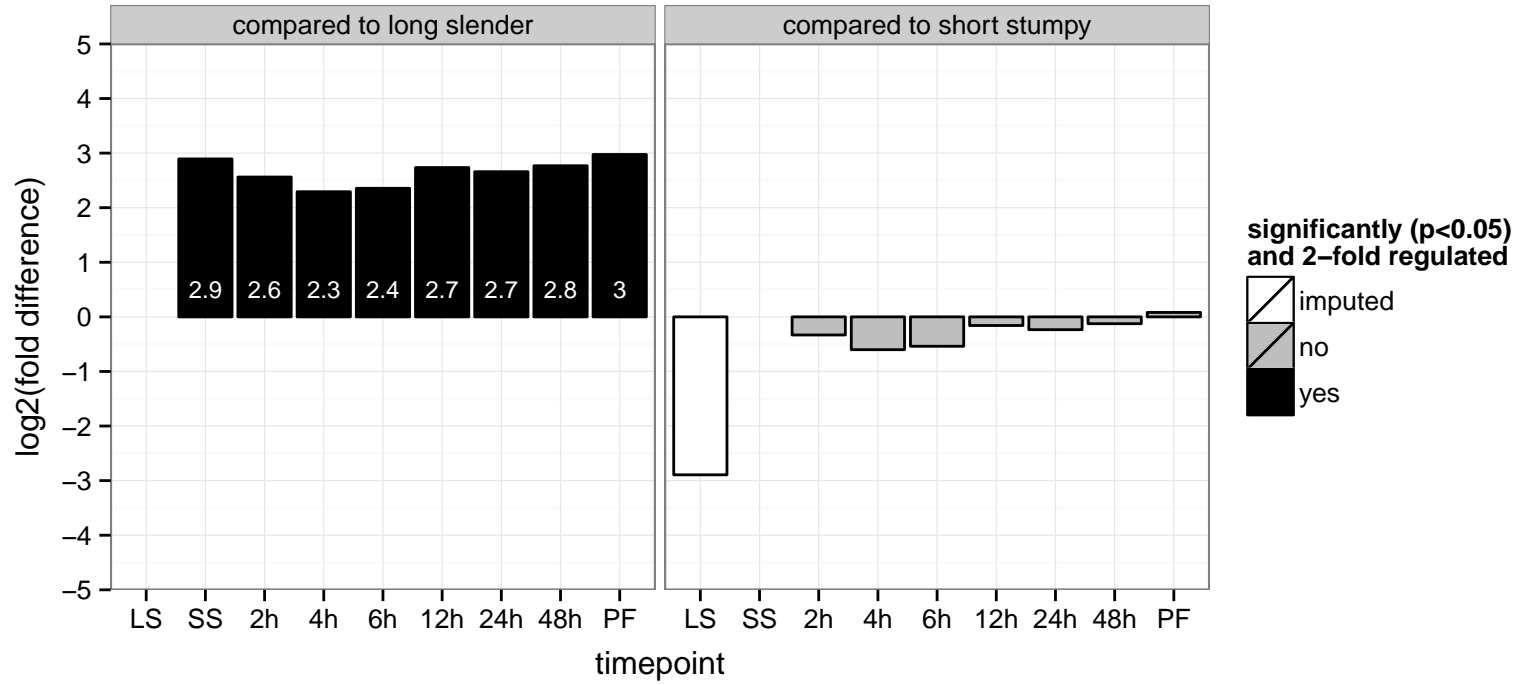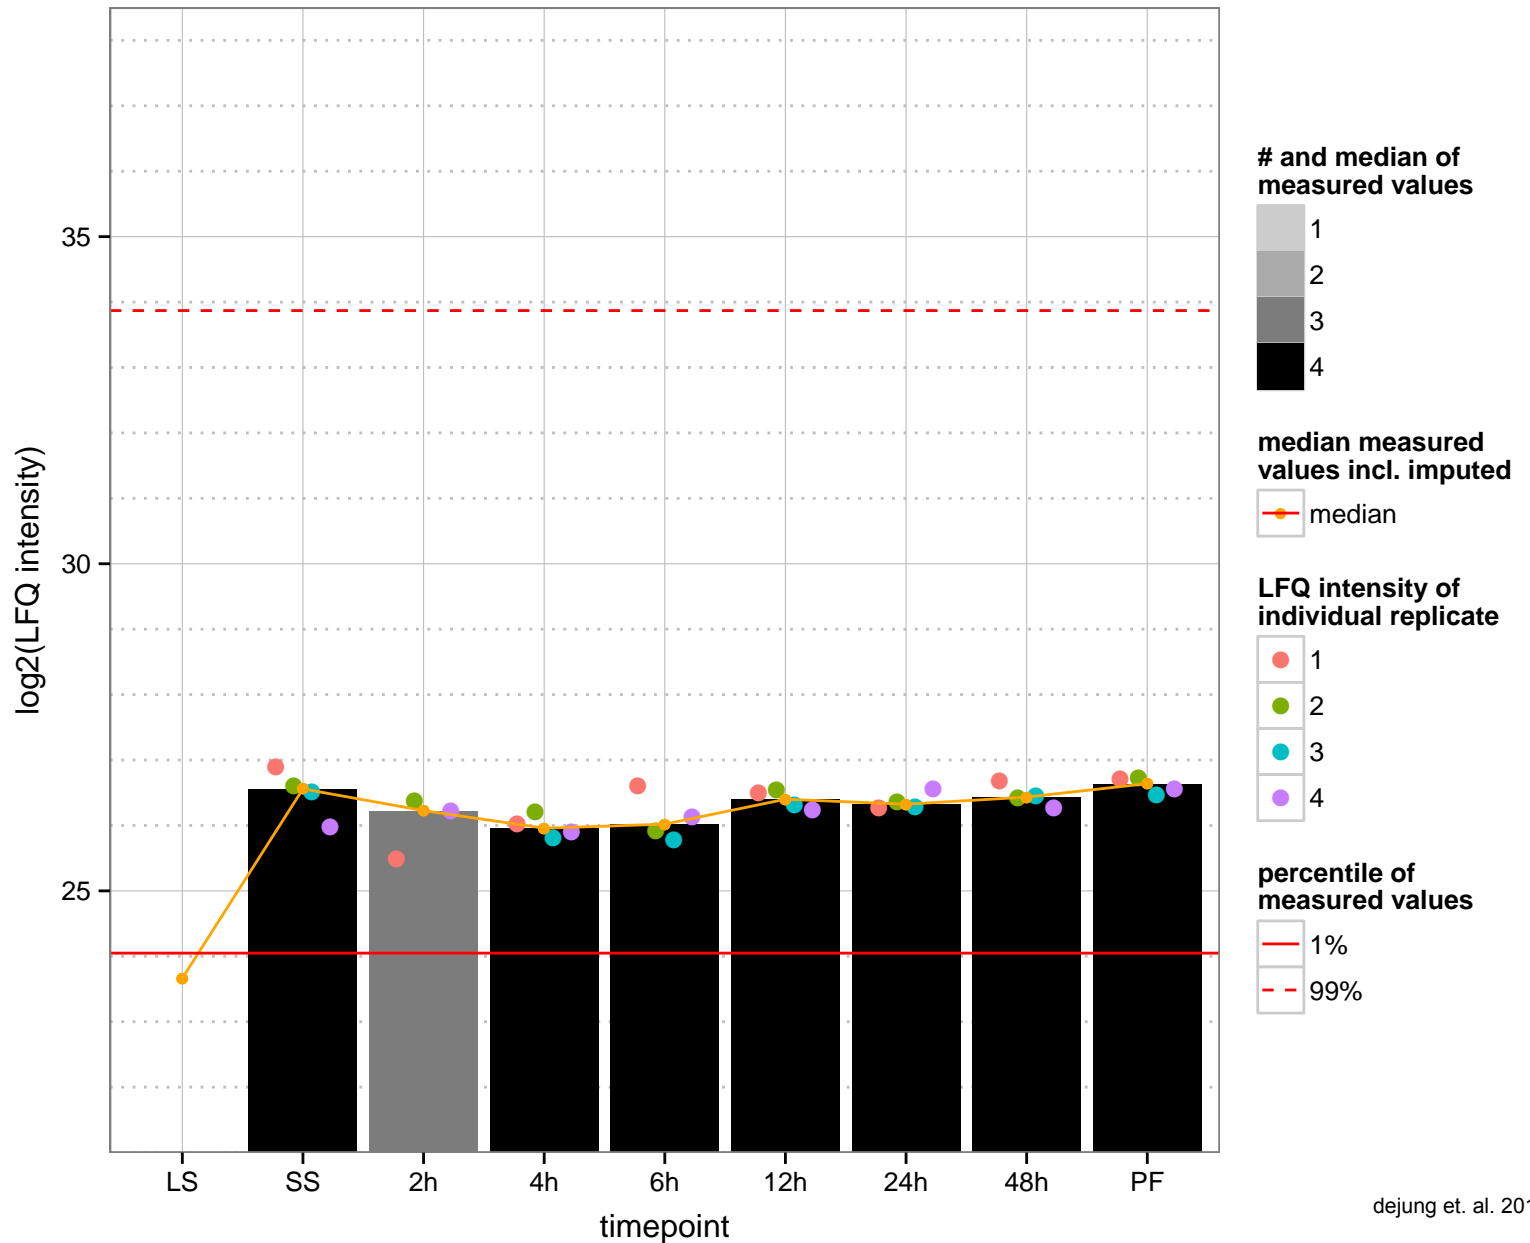

retrotransposon hot spot protein 4 (RHS4), putative  
 Tb927.1.120  
 AGOF: null  
 AGOC: nucleus  
 AGOP: null  
 PGO: null  
 PGO: null  
 PGO: null

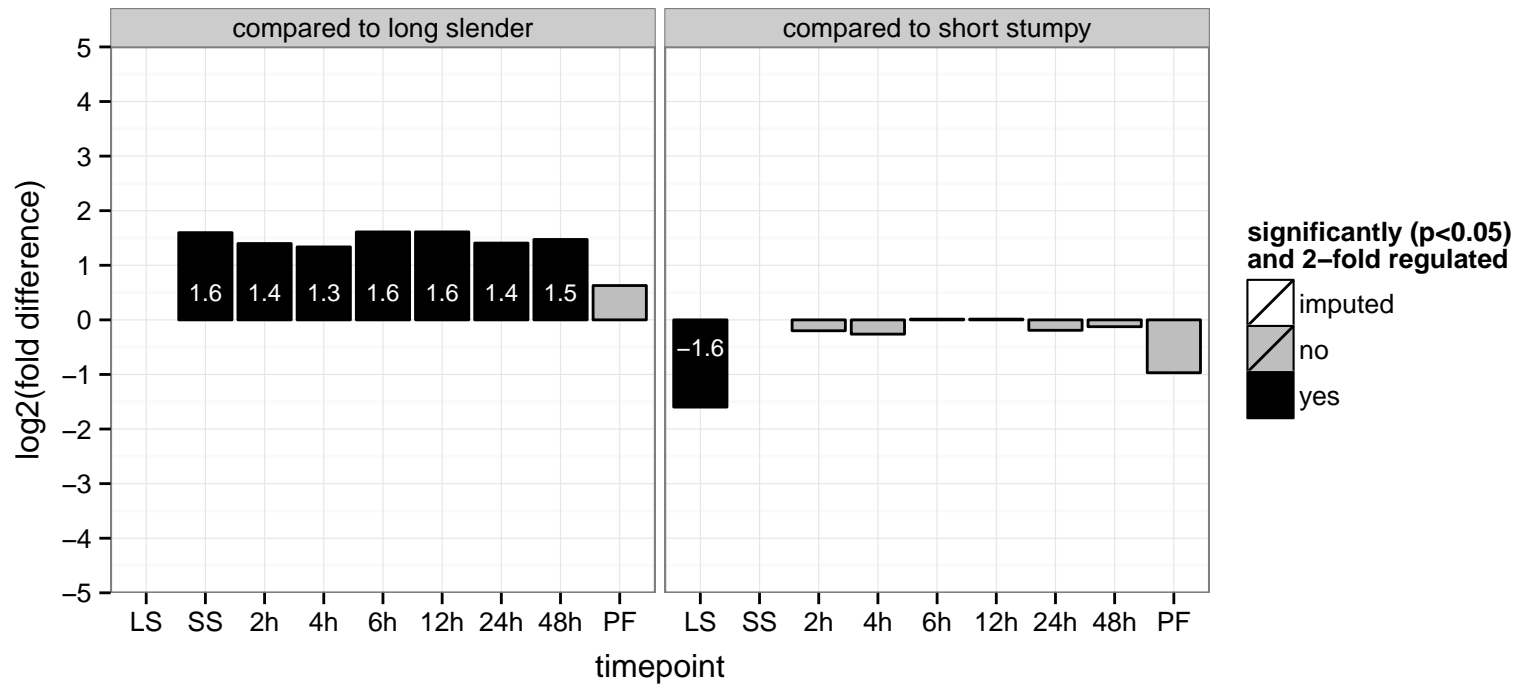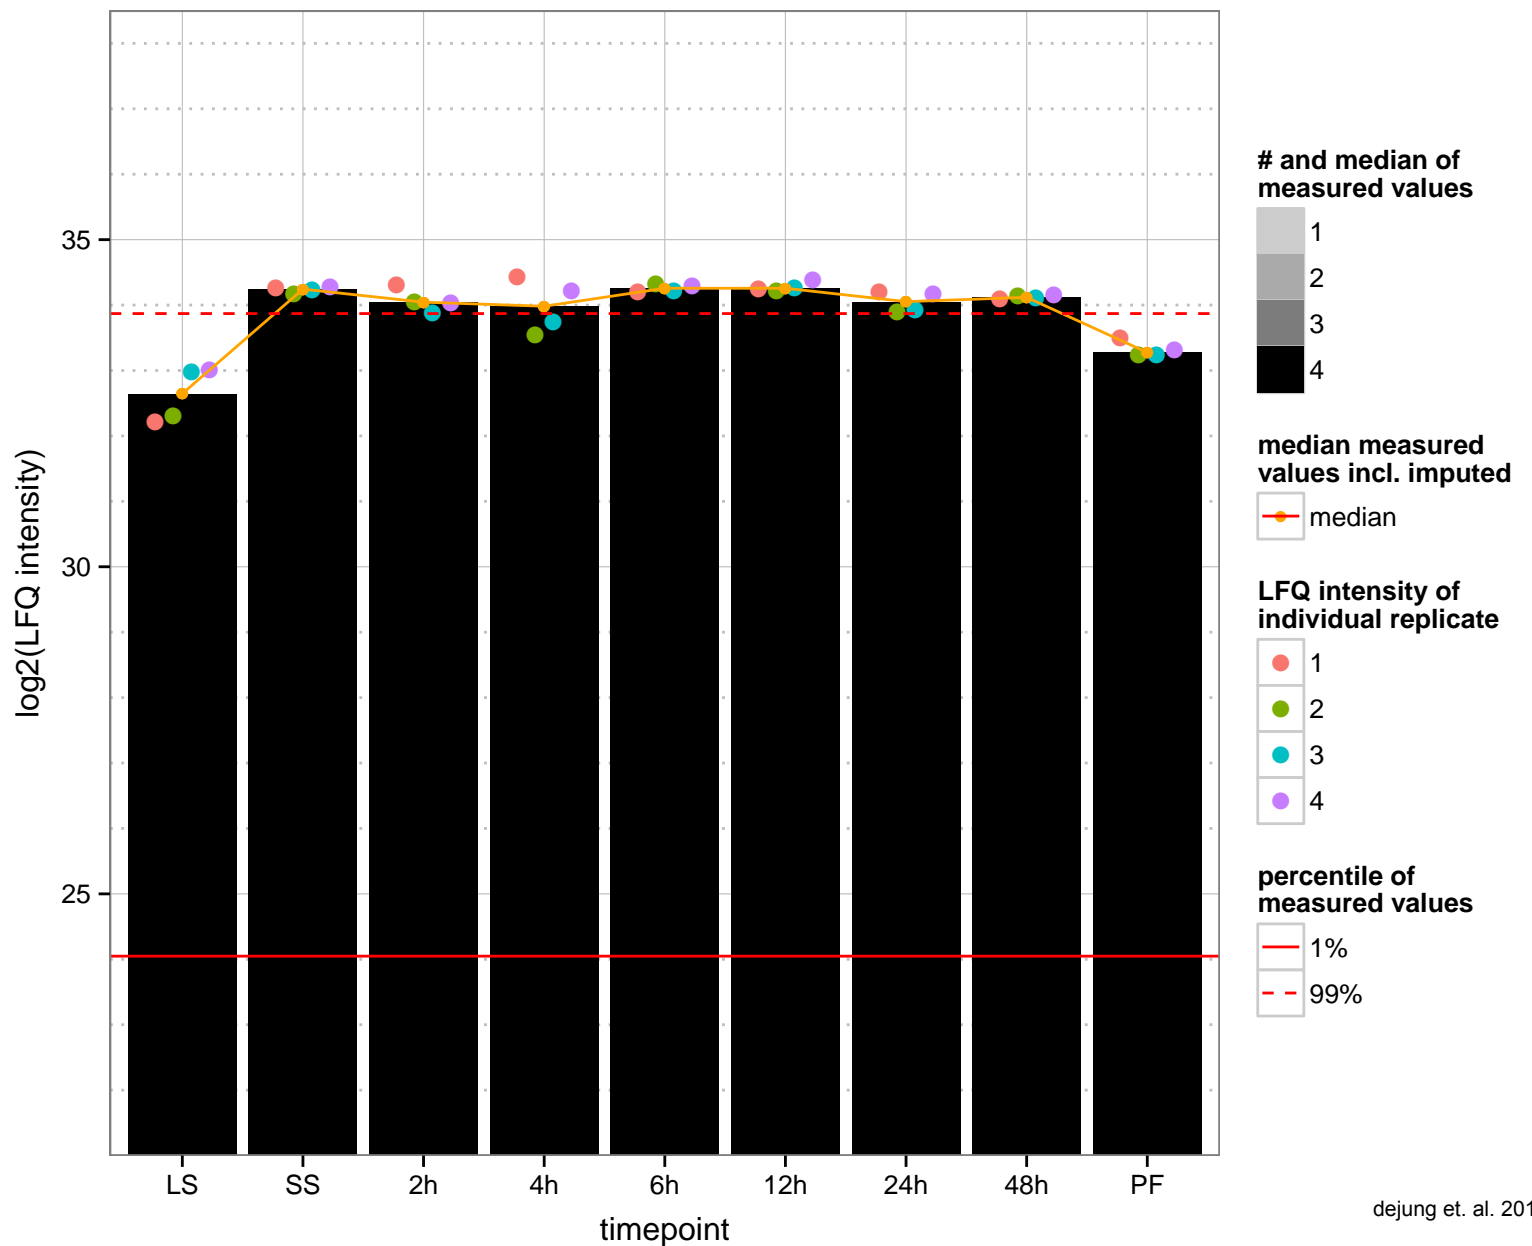

serine/threonine protein phosphatase 2A regulatory subunit, putative  
 Tb927.1.1380;Tb11.v5.0390  
 AGOF: null  
 AGOC: null, protein serine/threonine phosphatase complex  
 AGOP: null, protein dephosphorylation  
 PGO: binding  
 PGOC: null  
 PGOP: null

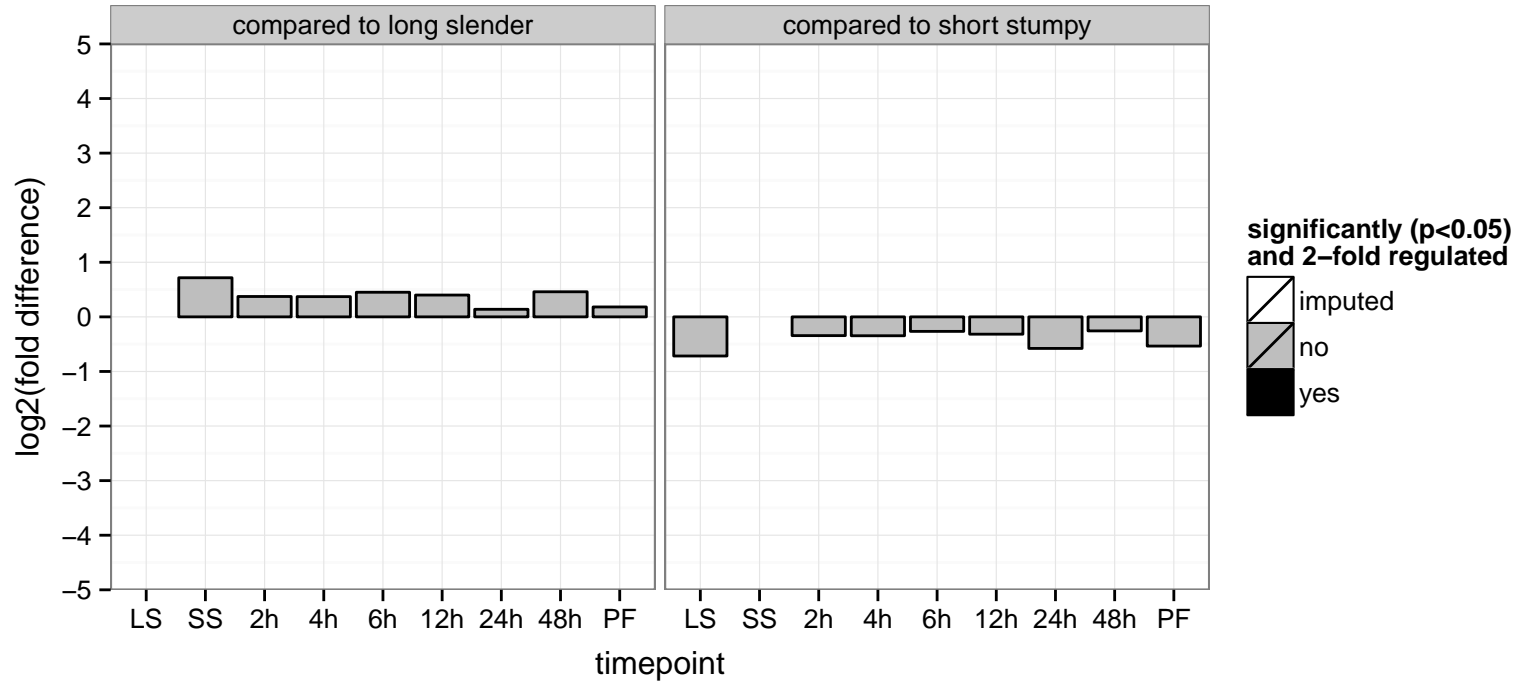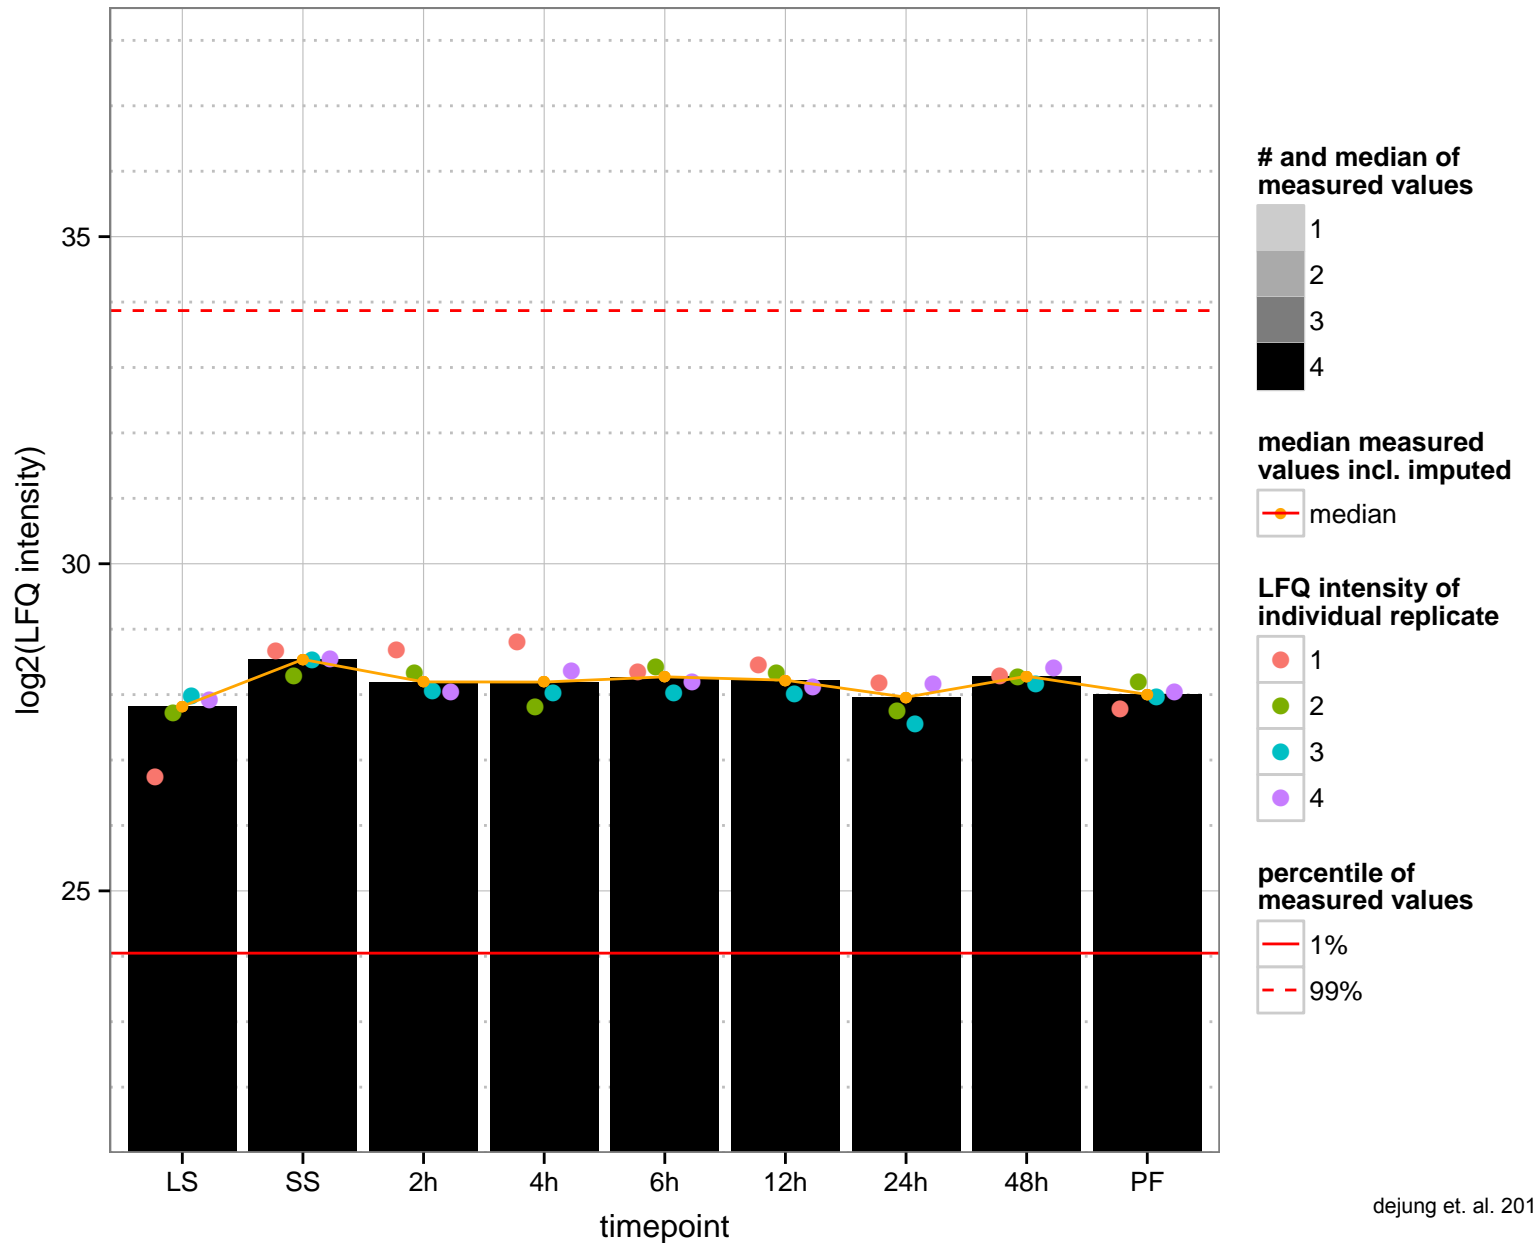

ATP-dependent DEAD/H RNA helicase, putative

Tb927.1.1620

AGOF: null, ATP binding, ATP-dependent RNA helicase activity, nucleic acid binding

AGOC: null

AGOP: null, RNA metabolic process

PGOF: ATP binding, ATP-dependent helicase activity, nucleic acid binding, helicase activity

PGOC: null

PGOP: null

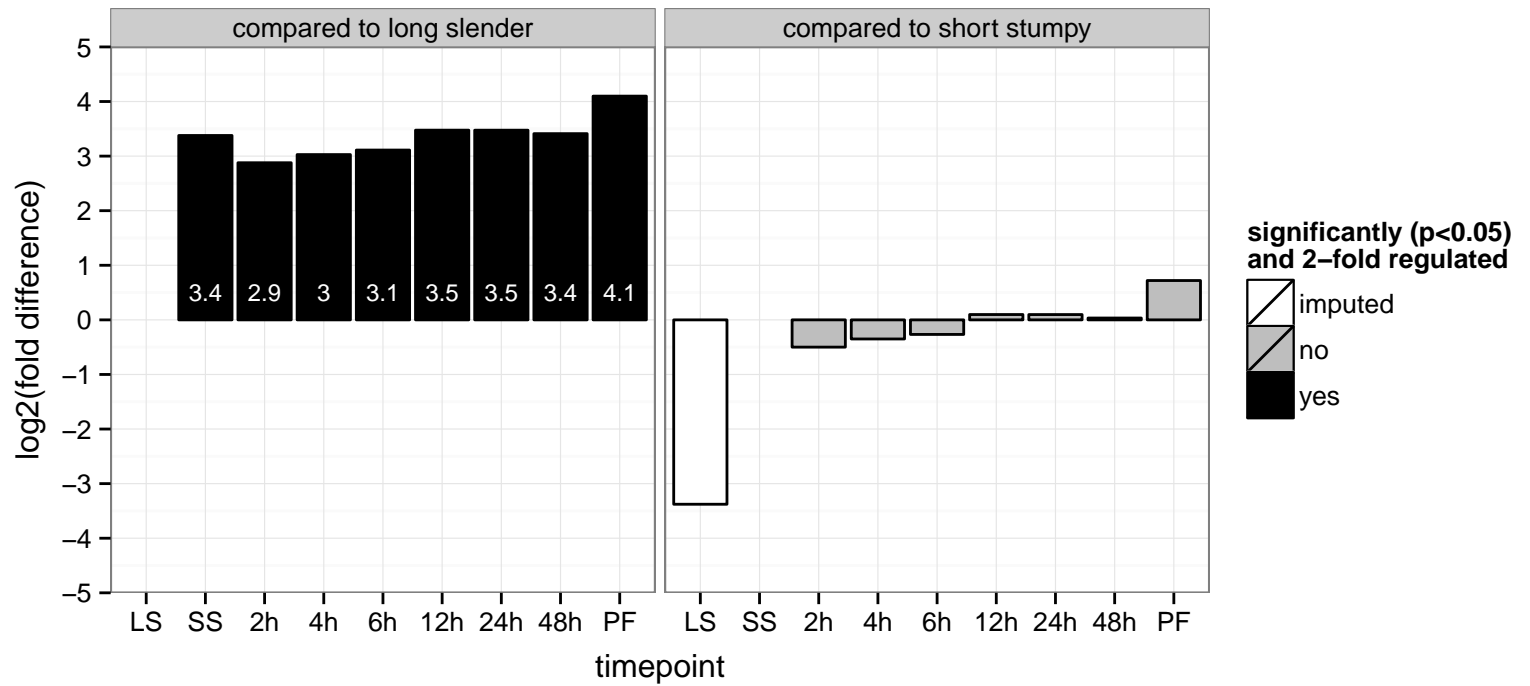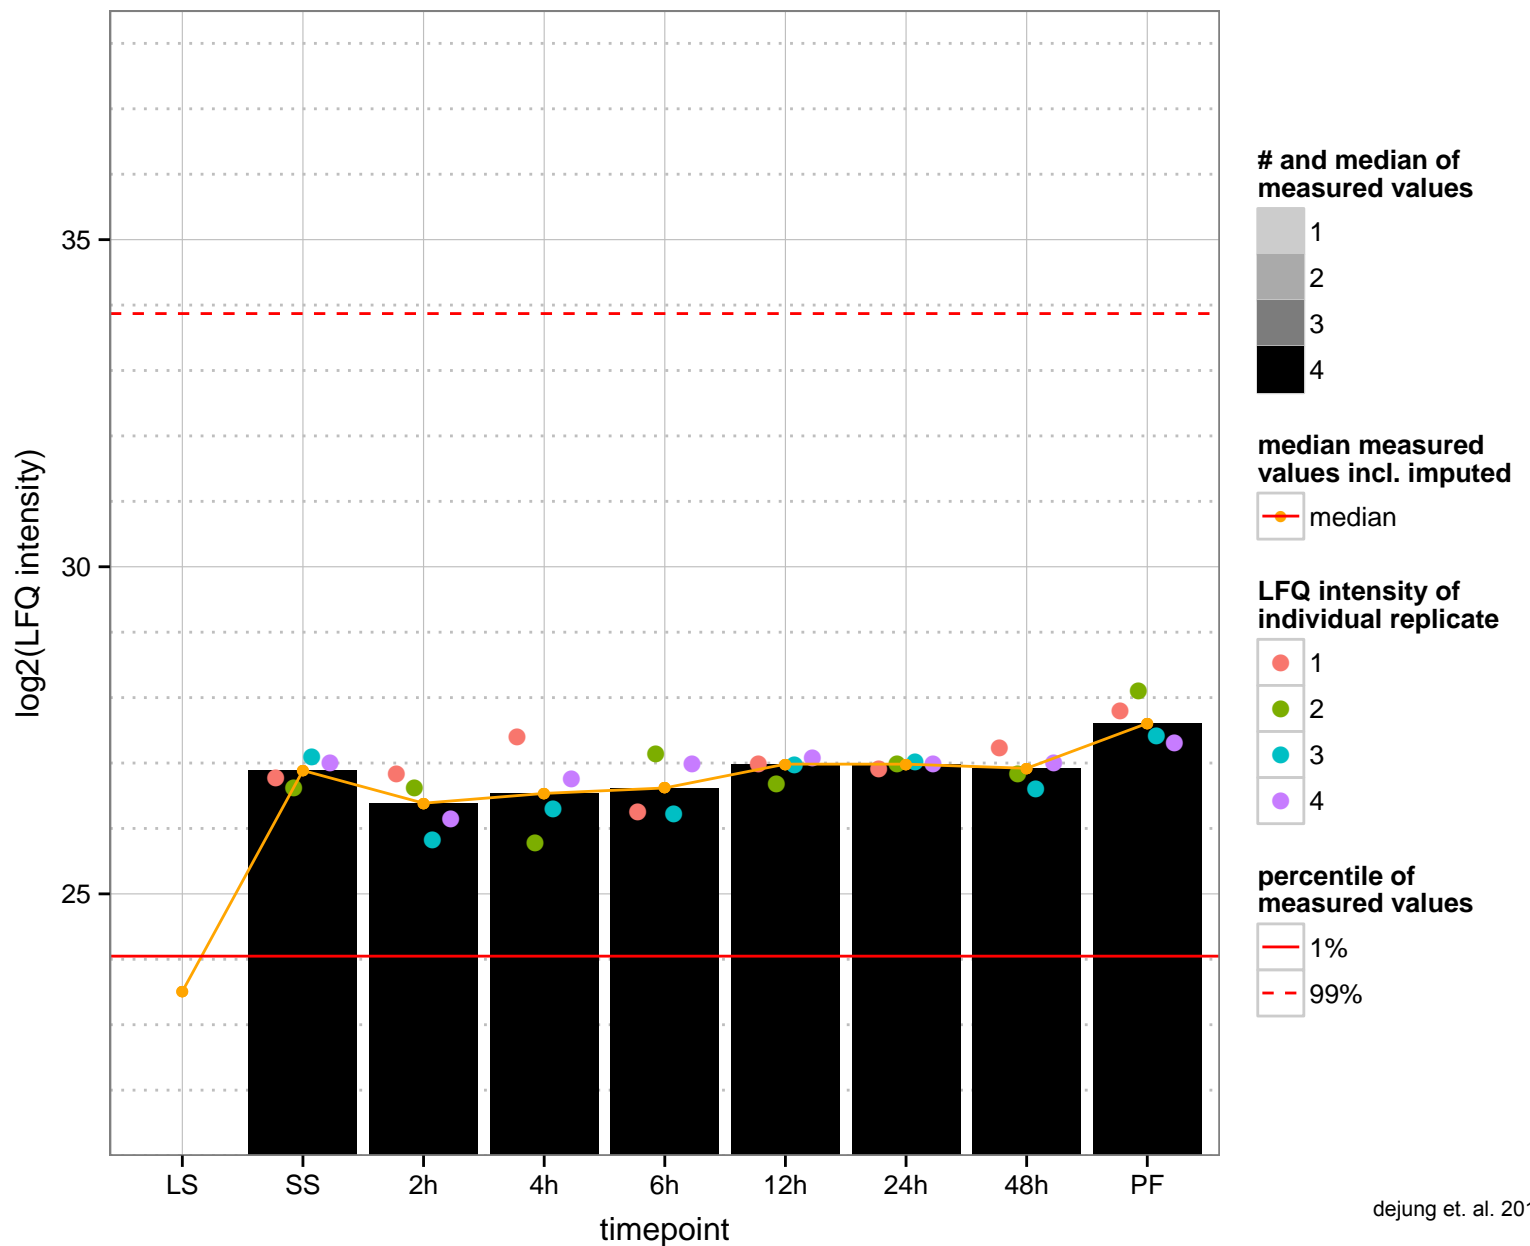

hypothetical protein, conserved, ARM-like helical domain-containing protein  
 Tb927.1.1670  
 AGOF: null  
 AGOC: null  
 AGOP: null  
 PGO: binding  
 PGO: null  
 PGO: null

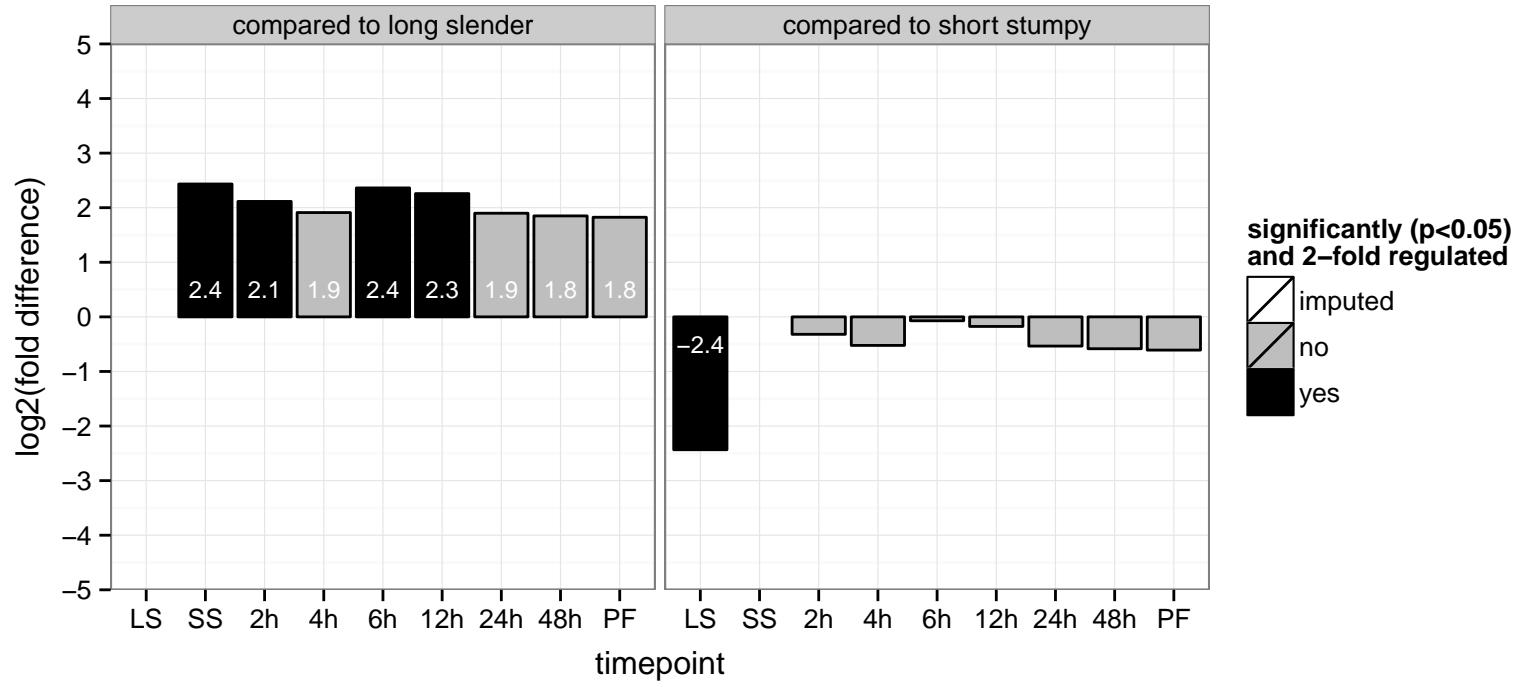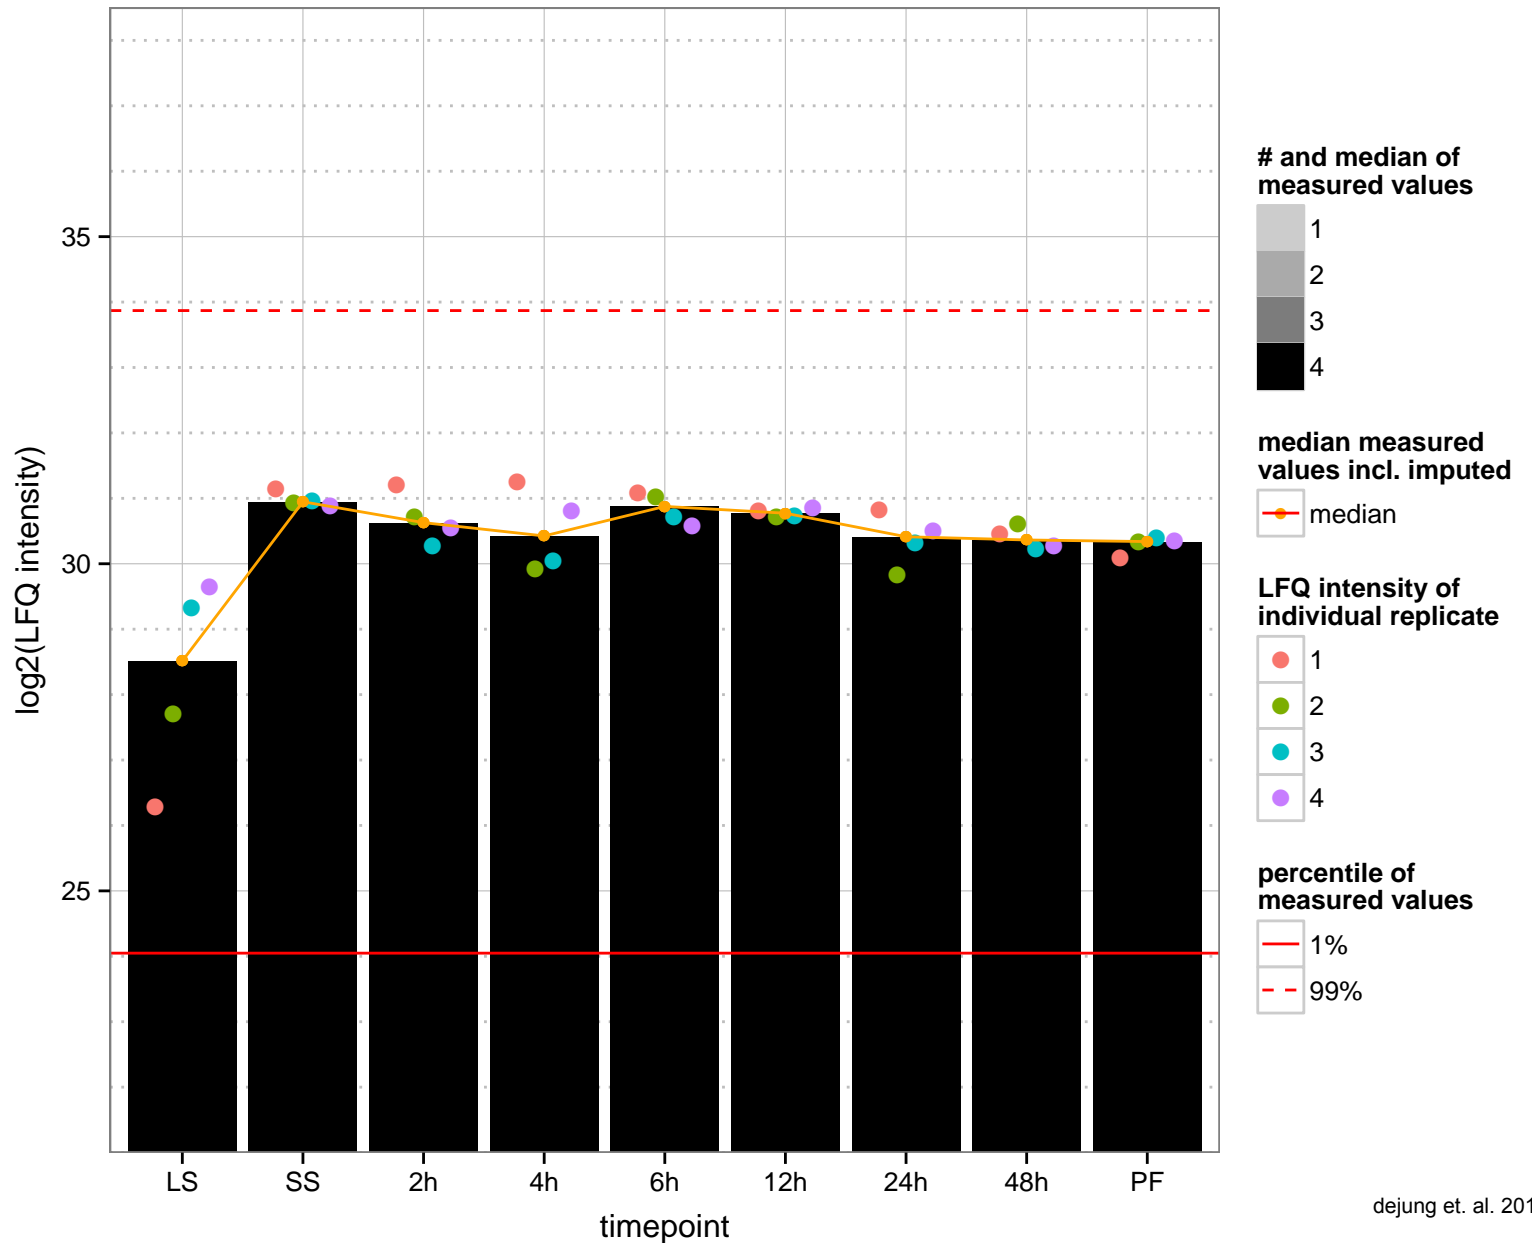

AATF protein, putative  
 Tb927.1.1700  
 AGOF: null  
 AGOC: null  
 AGOP: null  
 PGO: null  
 PGOC: null  
 PGOP: null

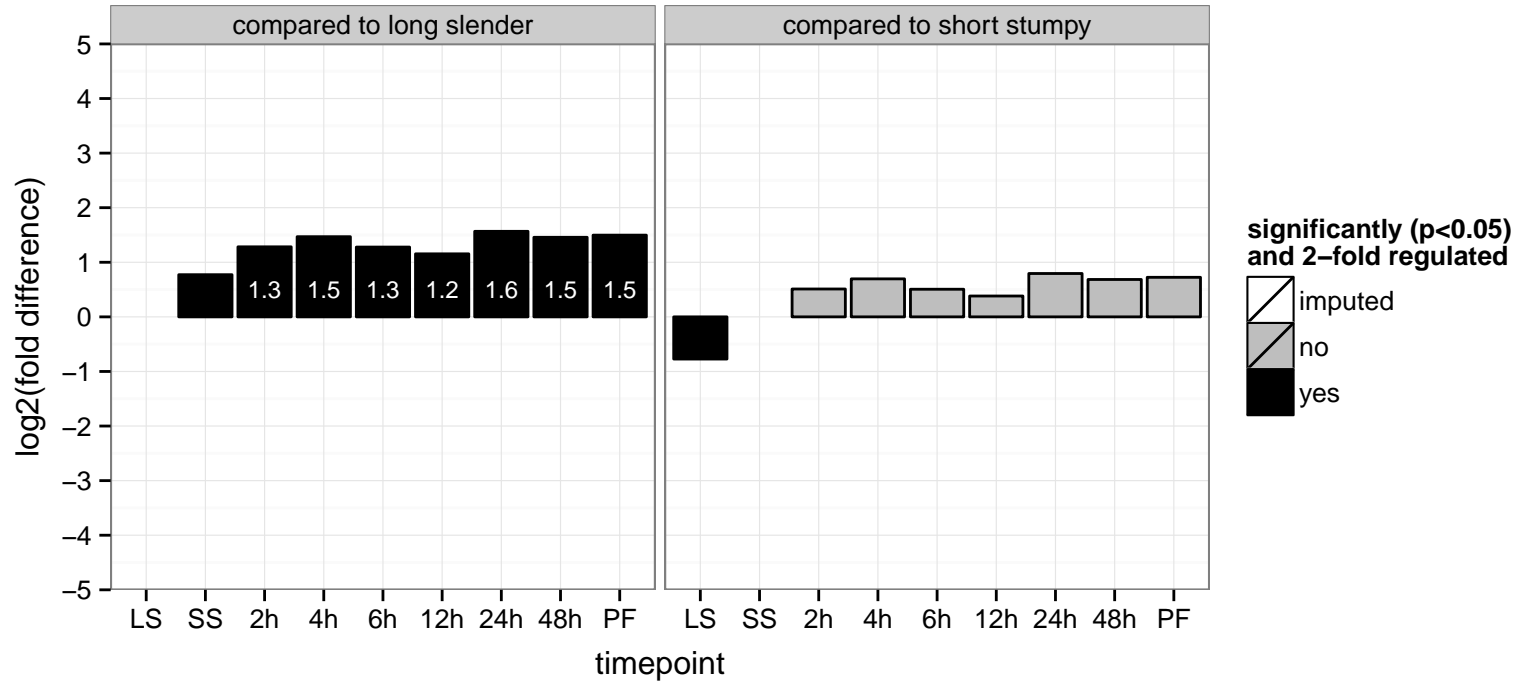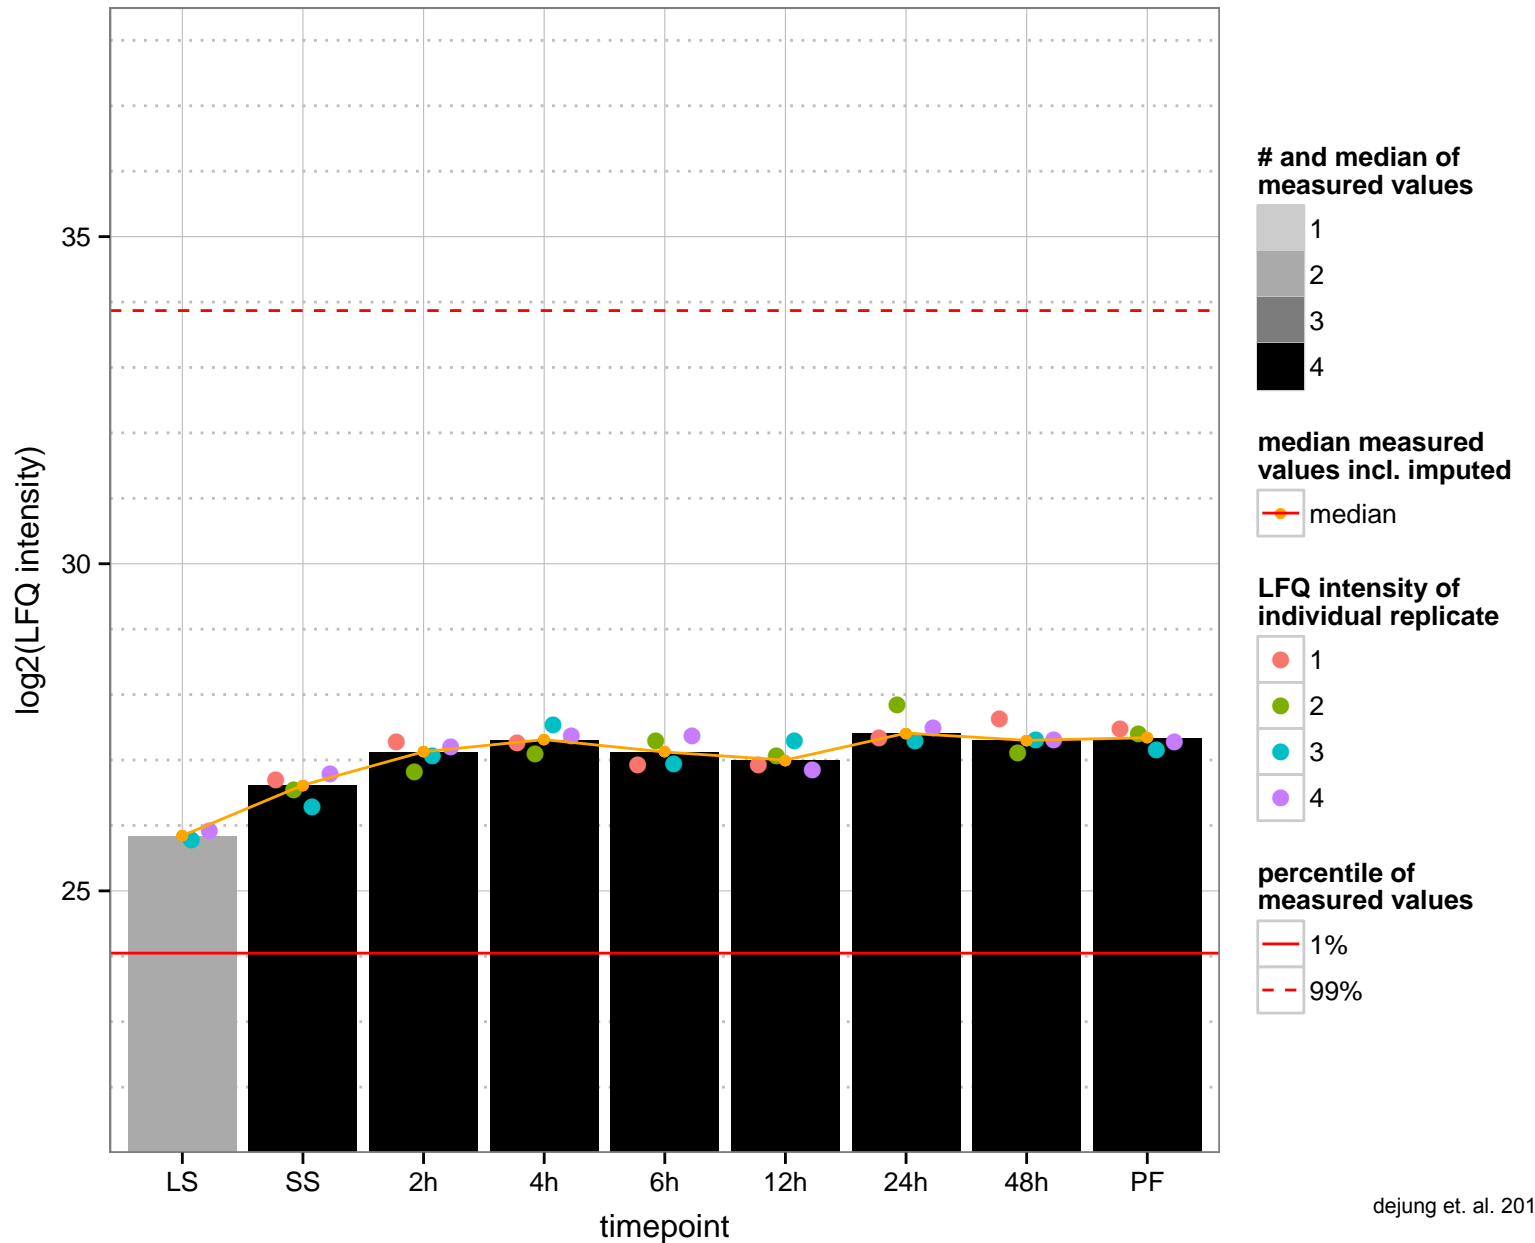

transmembrane protein, conserved  
 Tb927.1.1710  
 AGOF: null  
 AGOC: null  
 AGOP: null  
 PGO: null  
 PGOC: null  
 PGOP: null

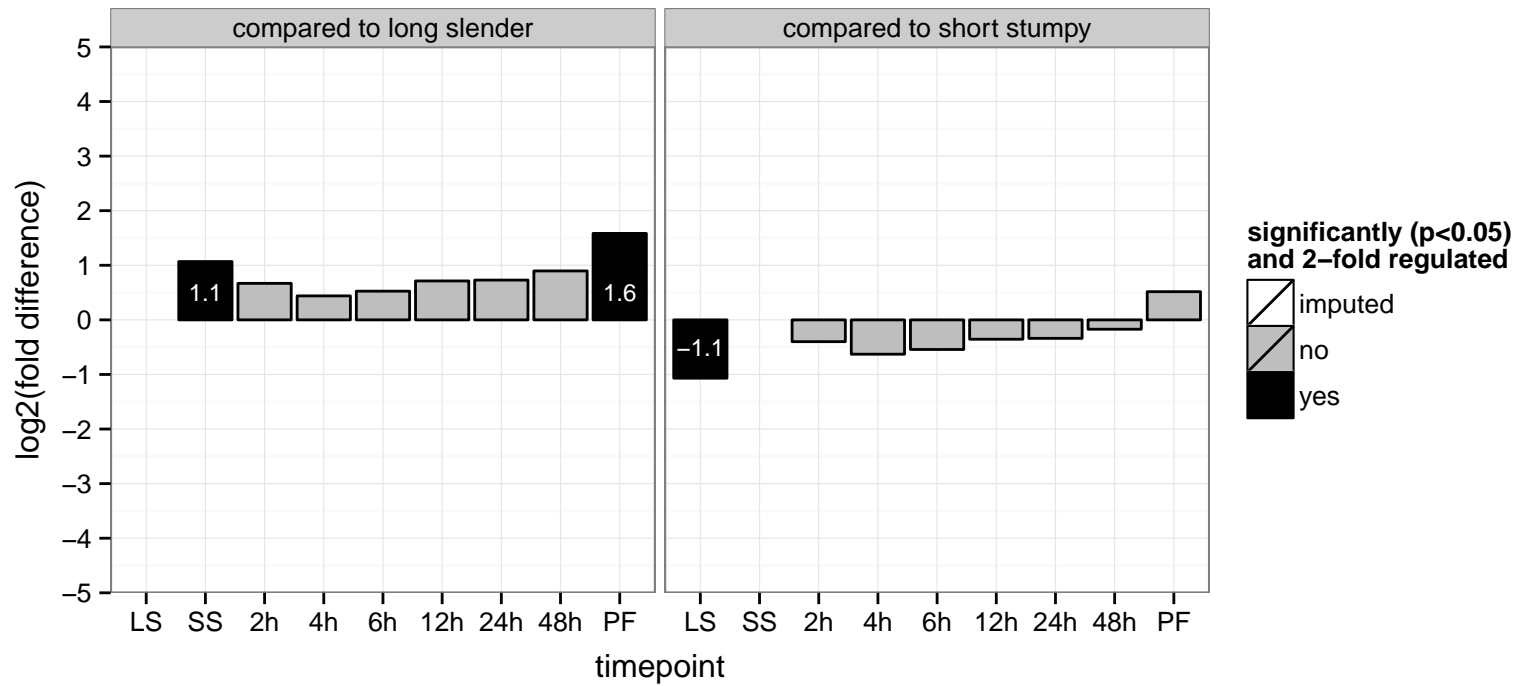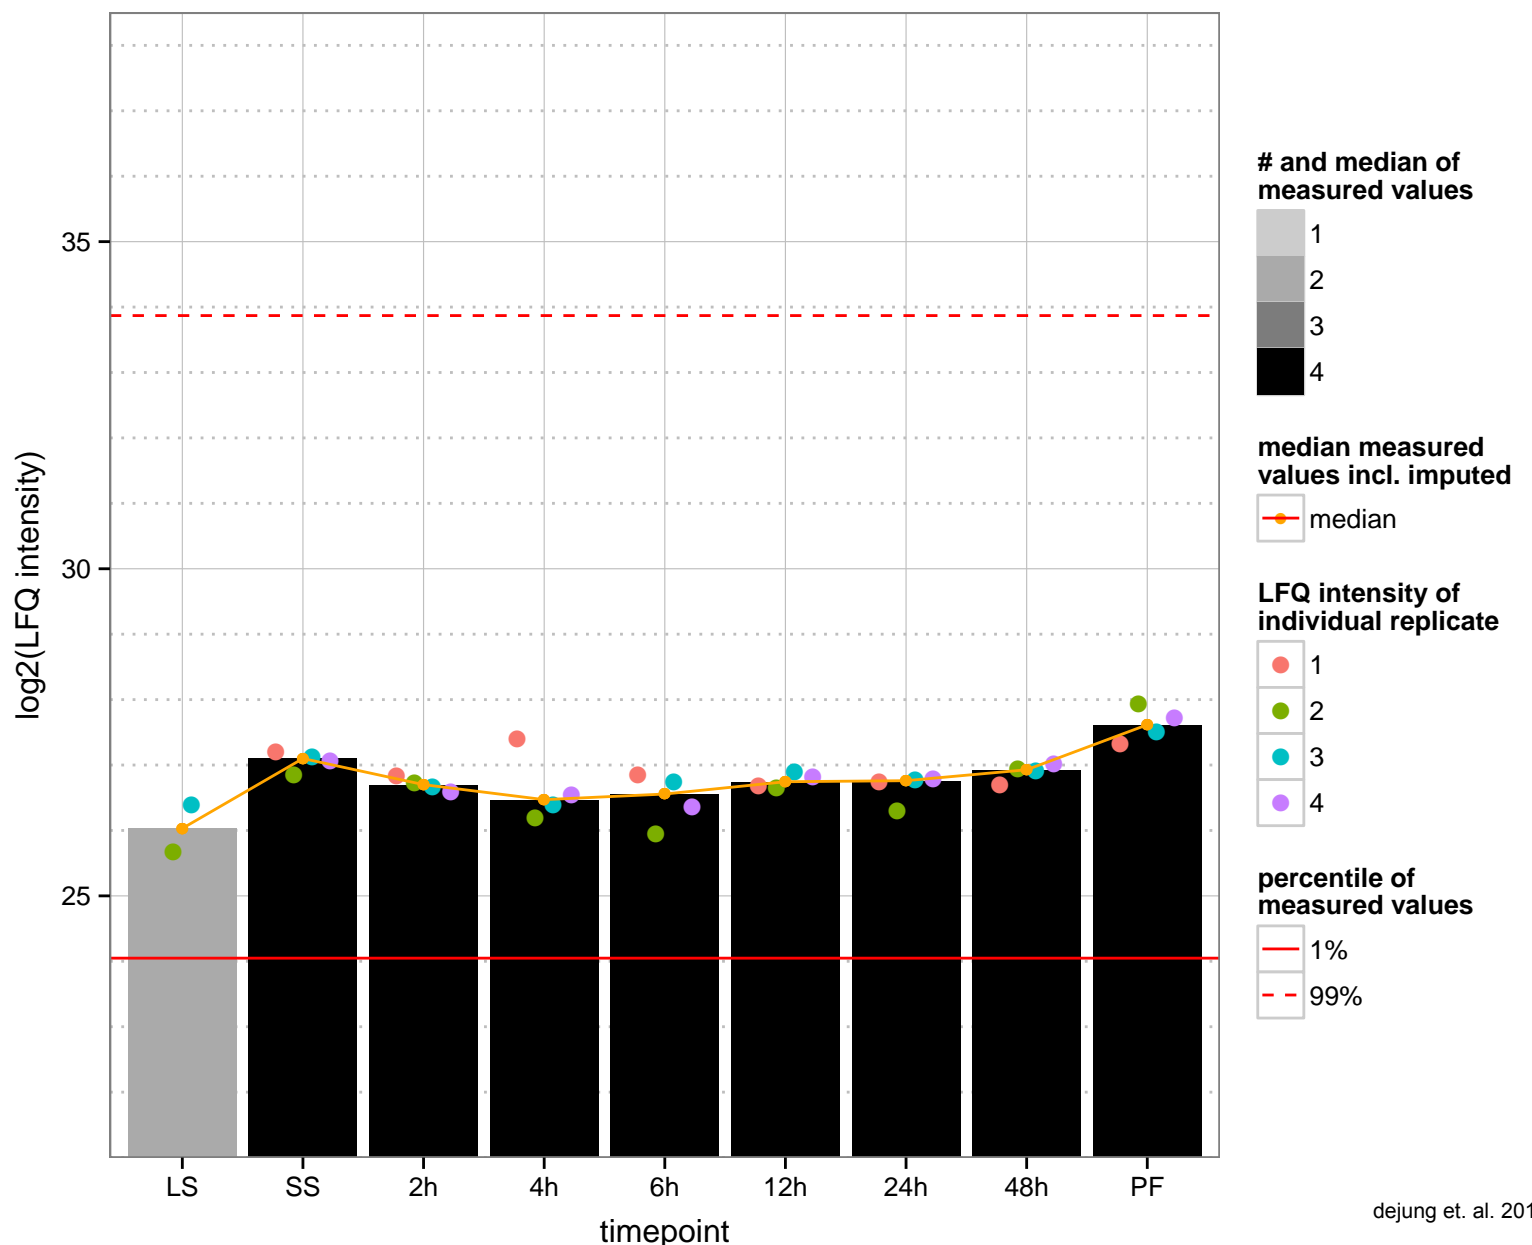



cyclophilin 15, putative  
 Tb927.1.1720  
 AGOF: peptidyl-prolyl cis-trans isomerase activity  
 AGOC: null  
 AGOP: null  
 PGOF: peptidyl-prolyl cis-trans isomerase activity  
 PGO: null  
 PGOP: protein folding

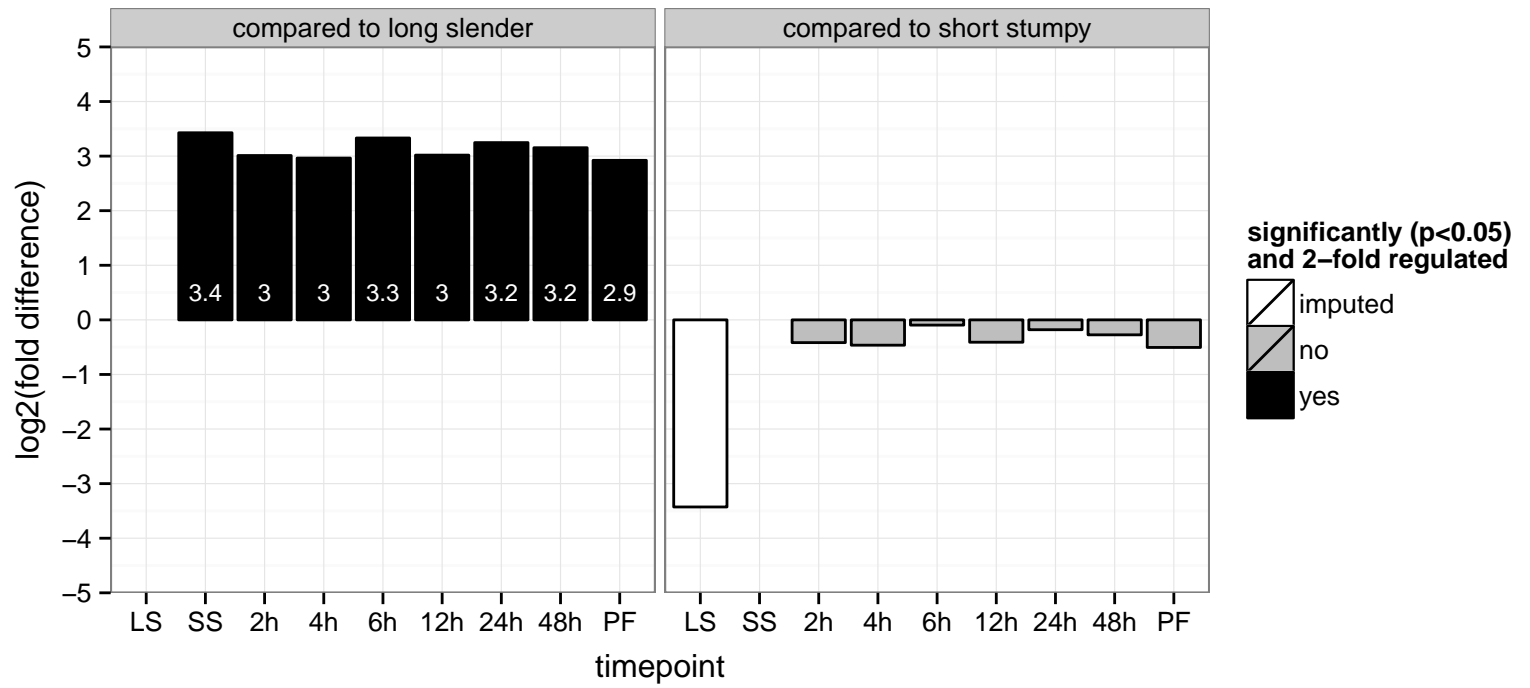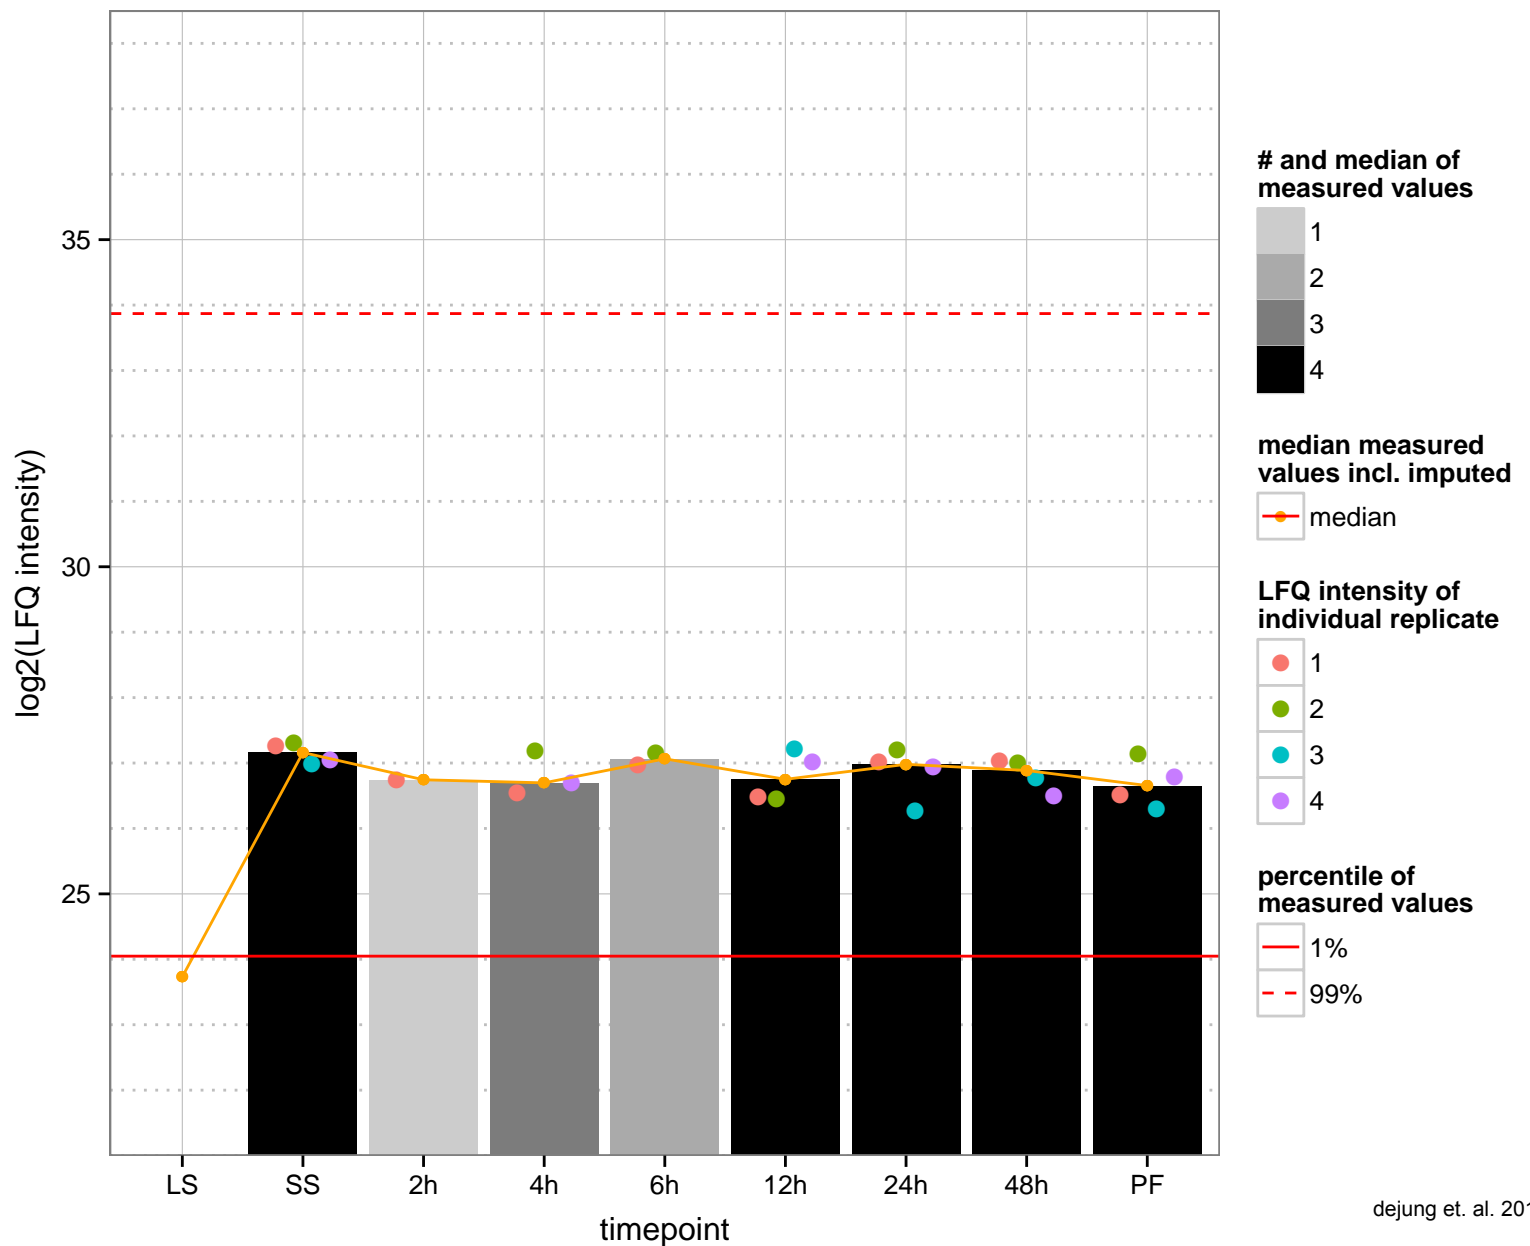

conserved protein, unknown function  
 Tb927.1.1730  
 AGOF: null  
 AGOC: mitochondrion  
 AGOP: null  
 PGO: null  
 PGO: null  
 PGO: null

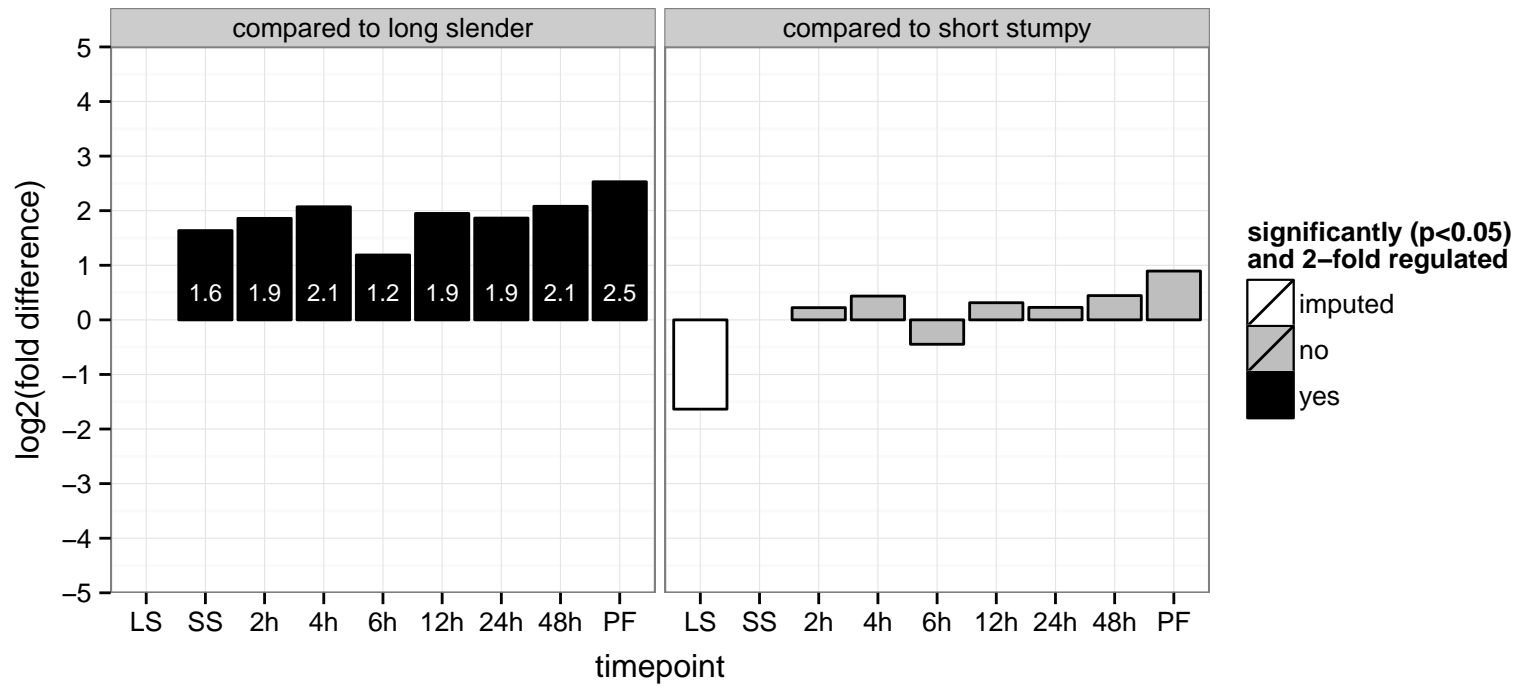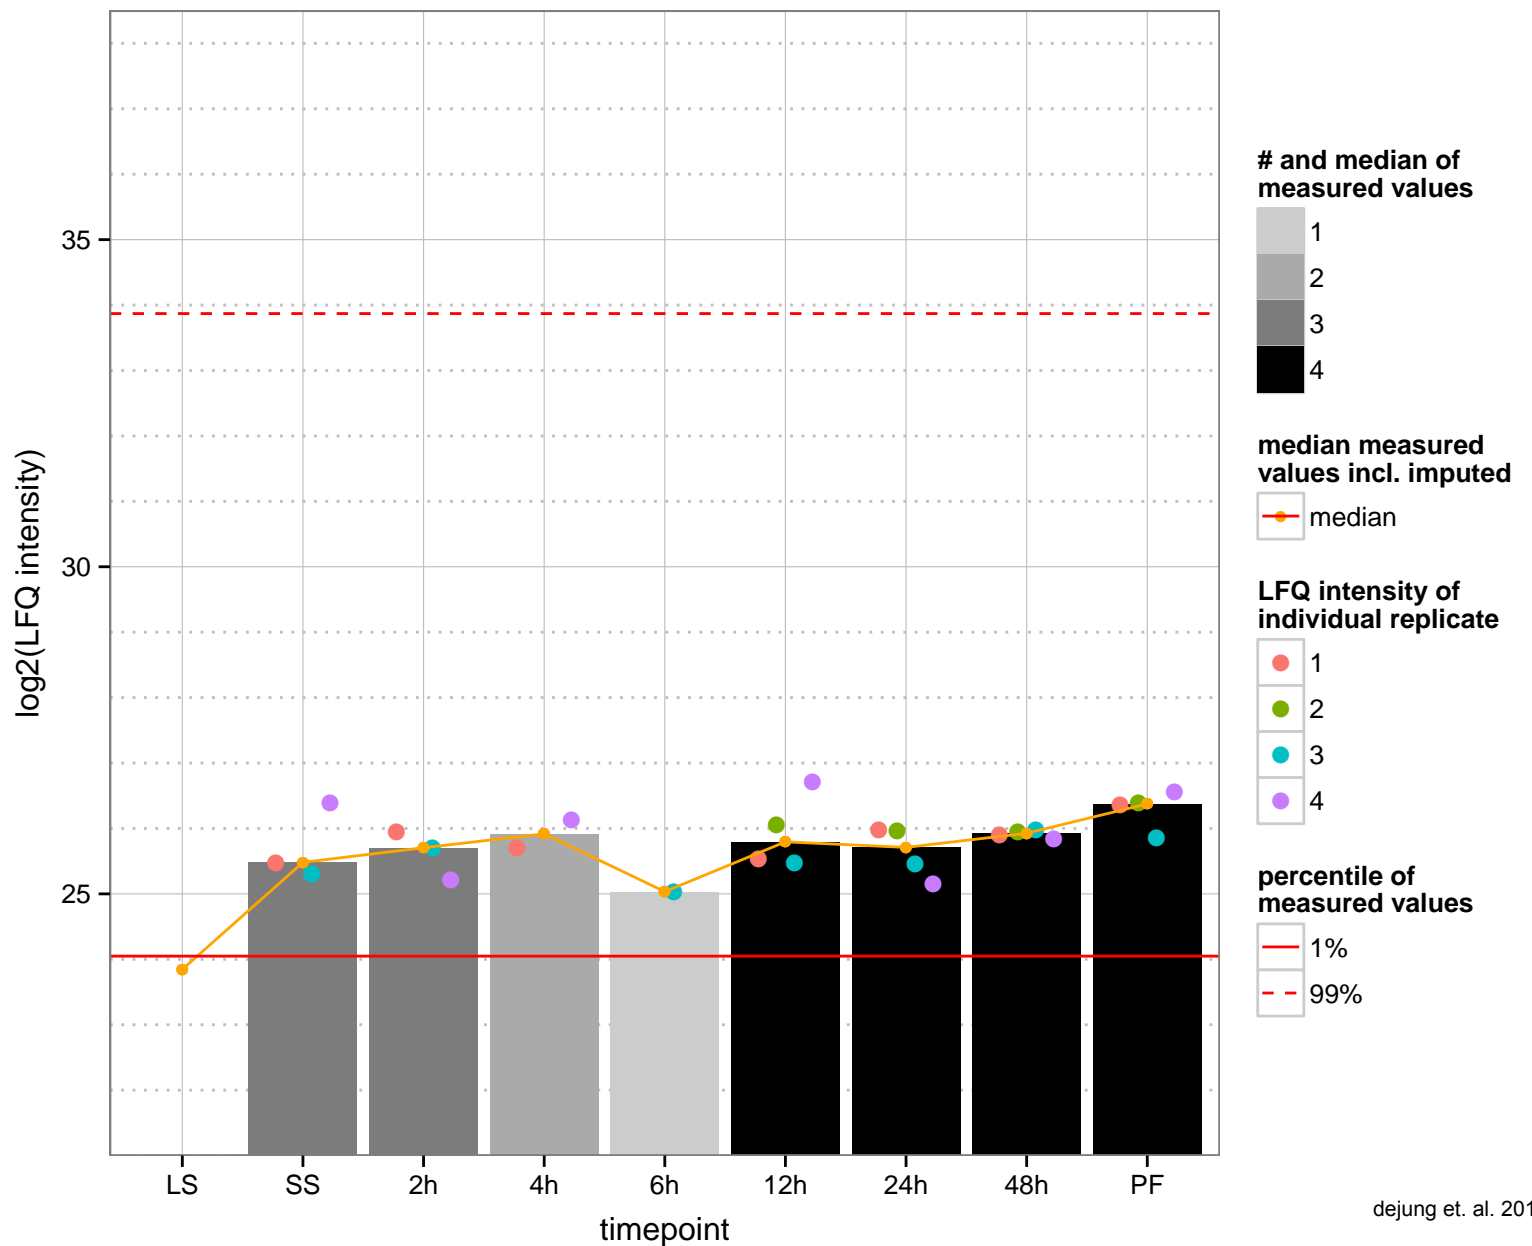

retrotransposon hot spot protein 1 (RHS1), putative

Tb927.1.180

AGOF: null

AGOC: nucleus

AGOP: null

PGOF: null

PGOC: null

PGOP: null

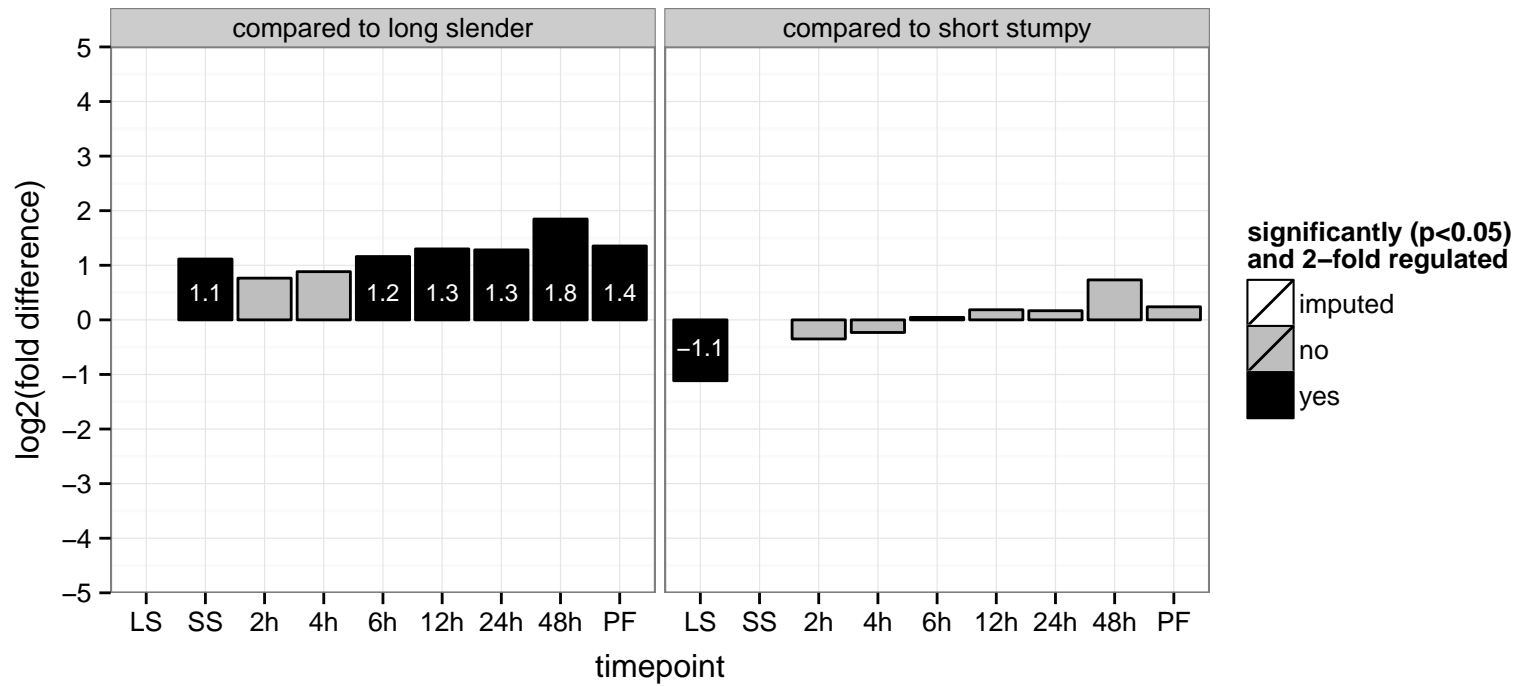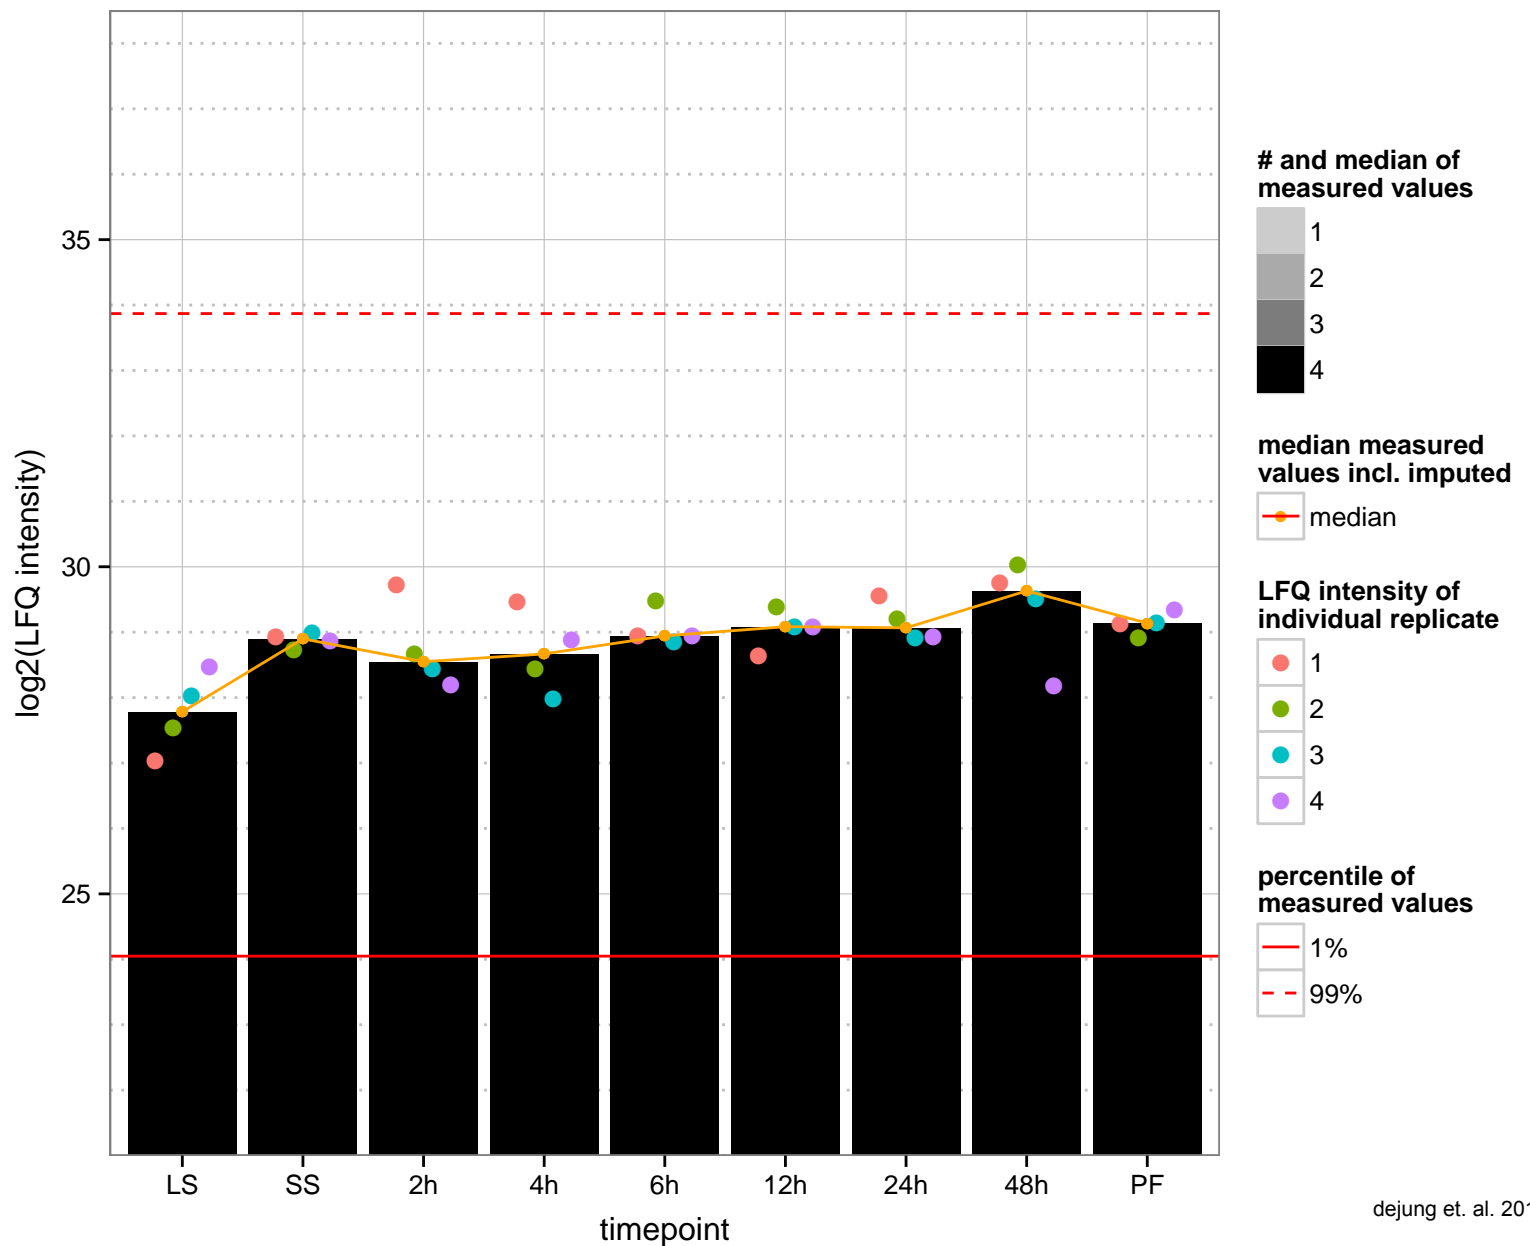

retrotransposon hot spot protein (RHS, pseudogene), putative  
 Tb927.1.190  
 AGOF: null  
 AGOC: null  
 AGOP: null  
 PGOF: null  
 PGO: null  
 PGOP: null

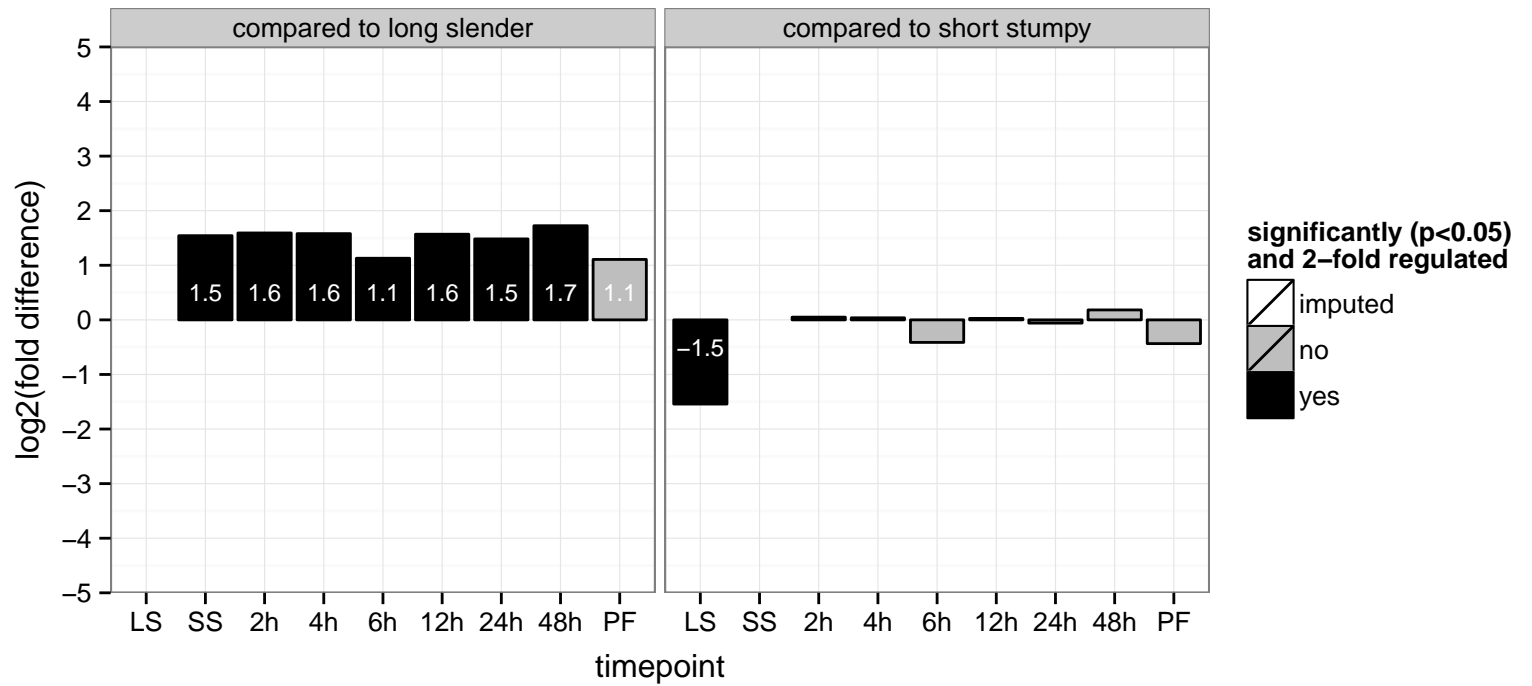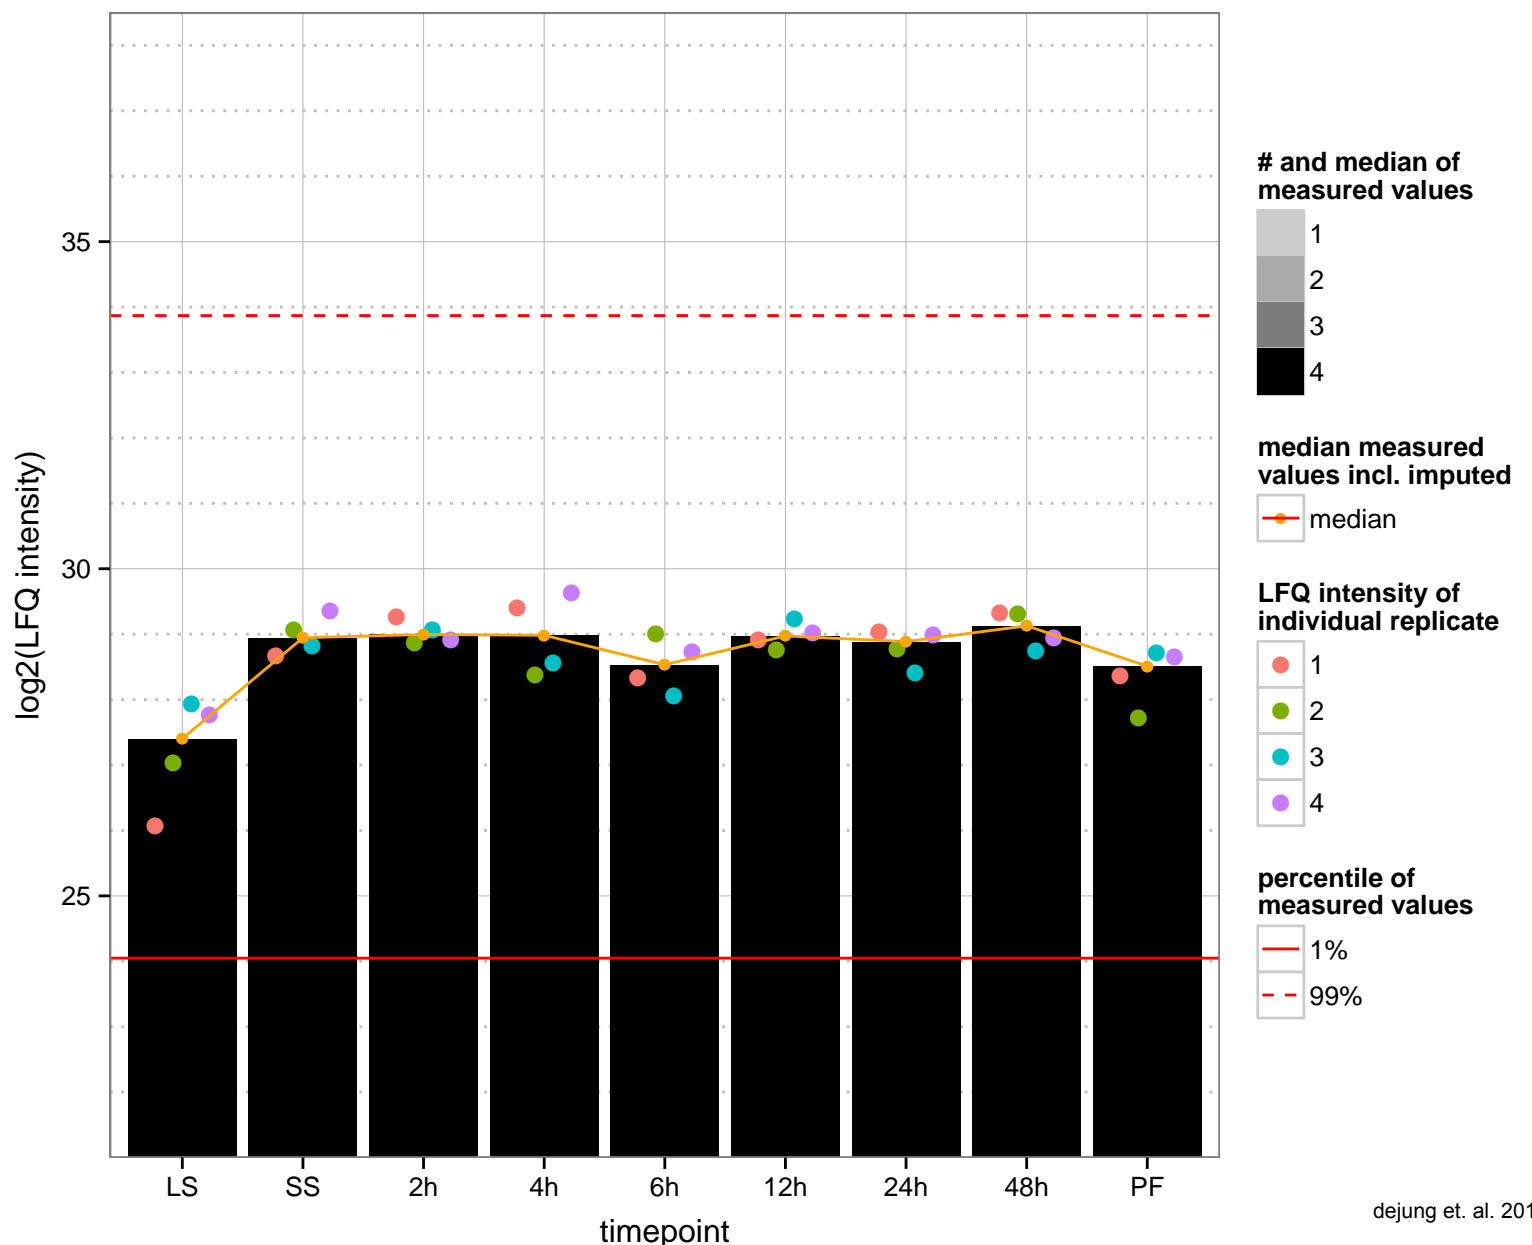

chaperone protein DNAj, putative

Tb927.1.1960

AGOF: DNA binding, heat shock protein binding, unfolded protein binding

AGOC: null

AGOP: protein folding

PGOF: DNA binding, heat shock protein binding

PGOC: null

PGOP: null

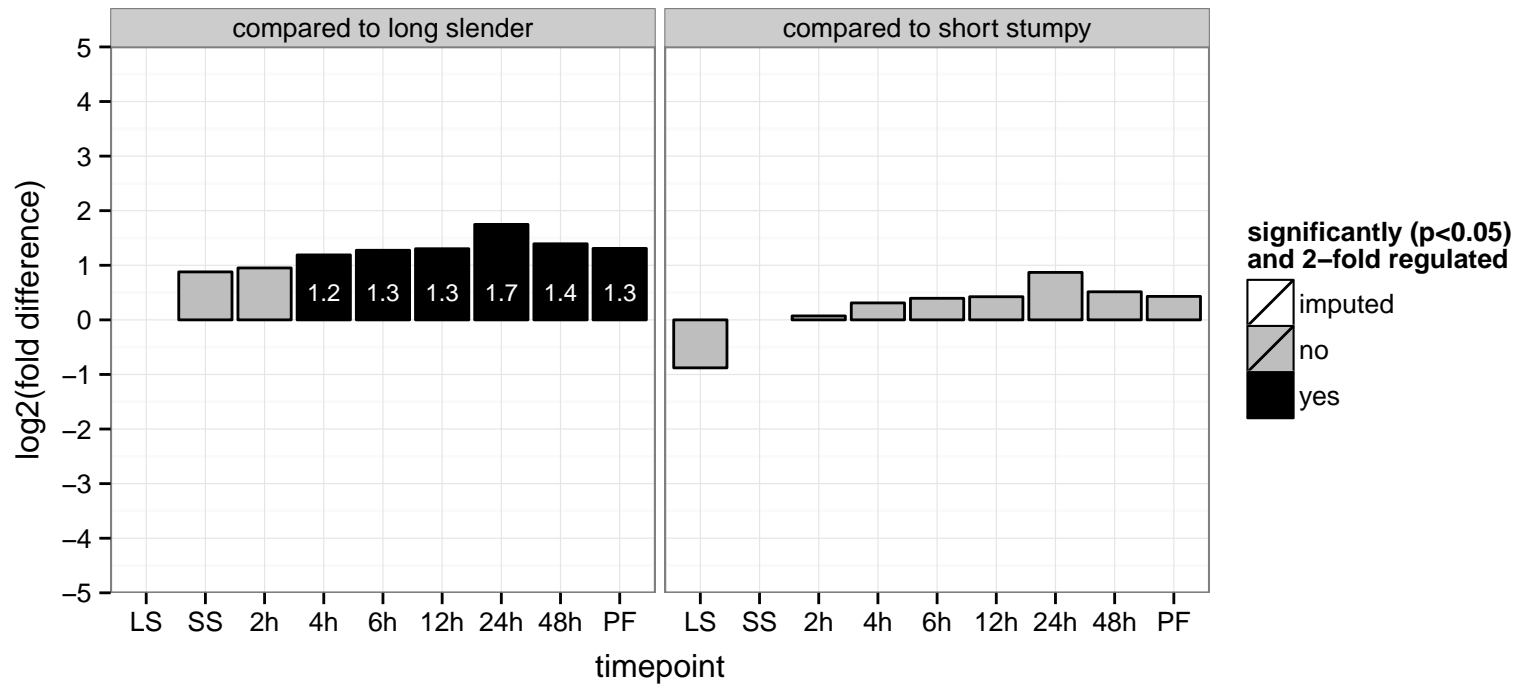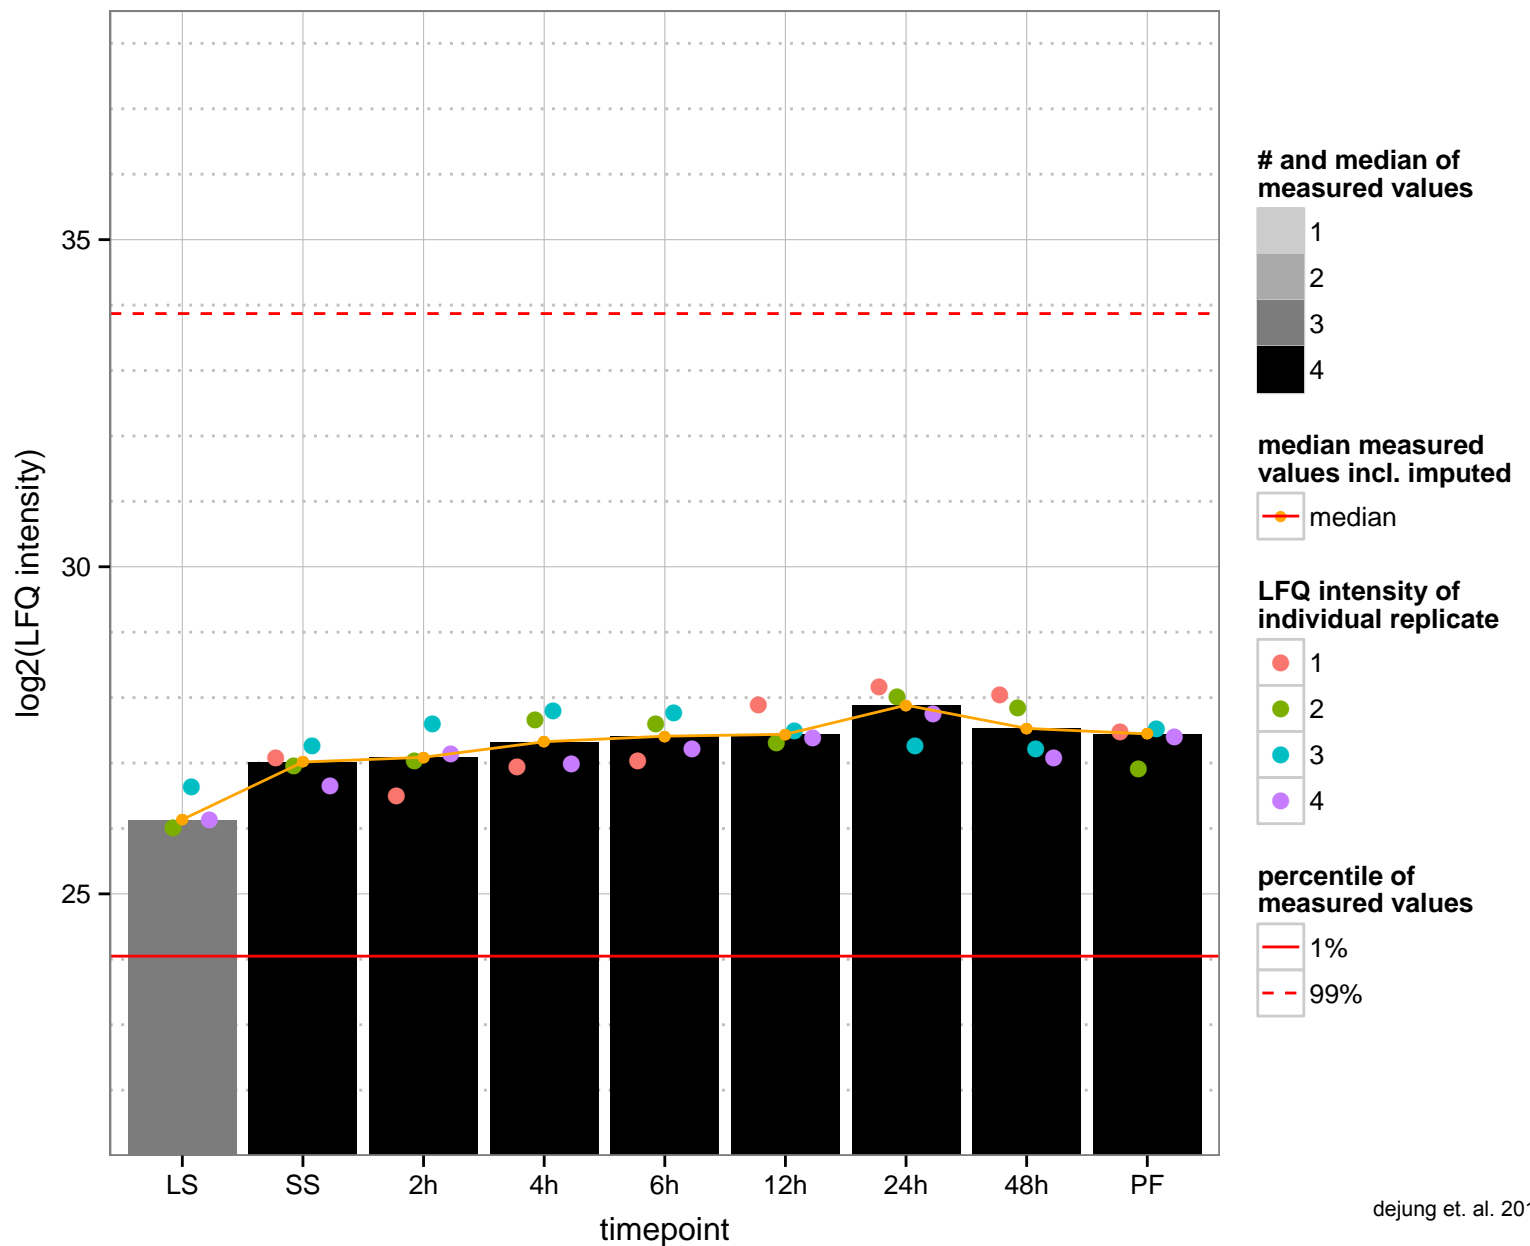

cysteine peptidase, Clan CA, family C2, putative, calpain-like cysteine peptidase  
 Tb927.1.2100  
 AGOF: calcium-dependent cysteine-type endopeptidase activity  
 AGOC: intracellular  
 AGOP: proteolysis  
 PGOF: calcium-dependent cysteine-type endopeptidase activity  
 PGOC: intracellular  
 PGOP: proteolysis

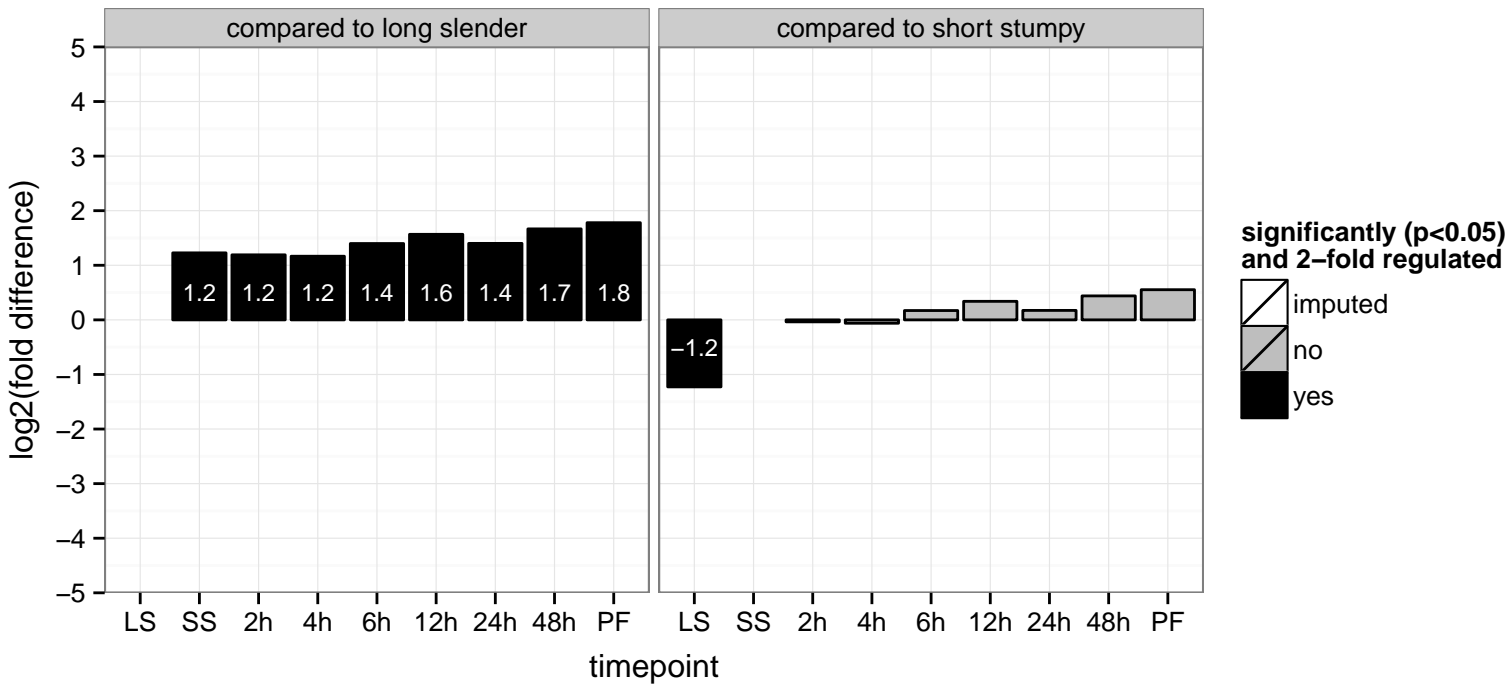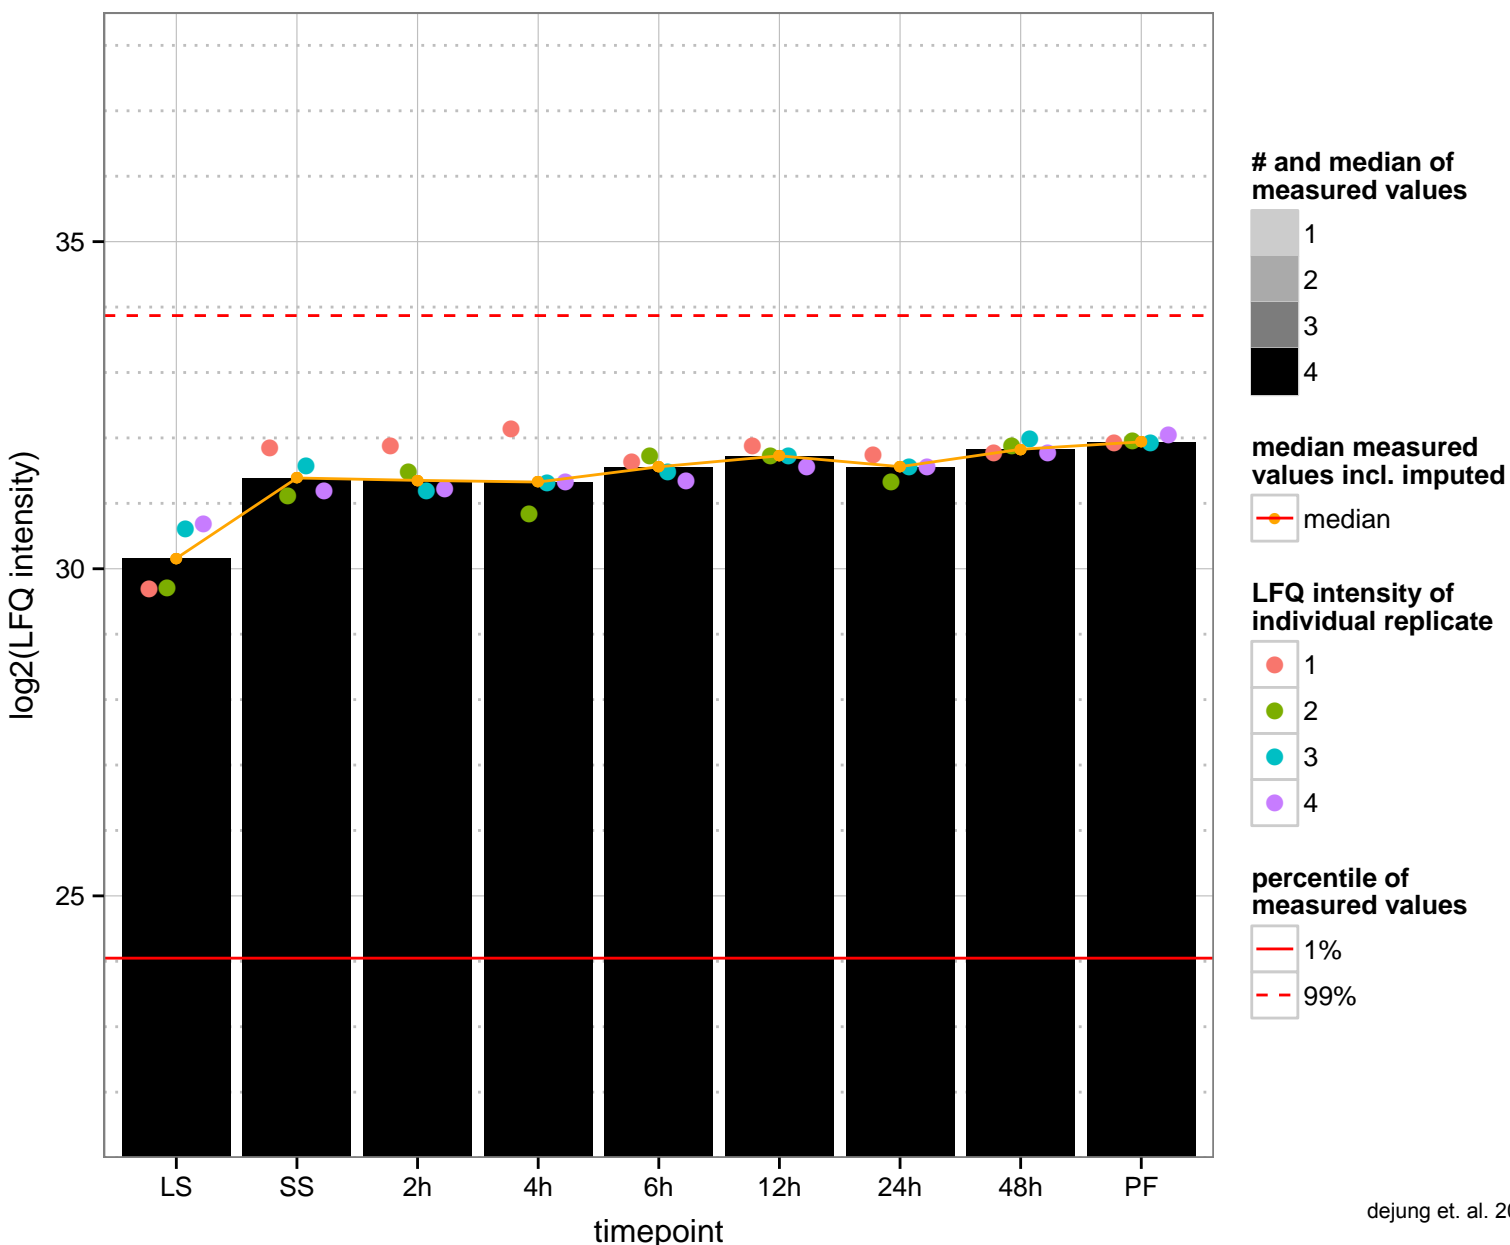

calpain, putative, cysteine peptidase, Clan CA, family C2  
 Tb927.1.2120  
 AGOF: calcium-dependent cysteine-type endopeptidase activity  
 AGOC: intracellular  
 AGOP: proteolysis  
 PGOF: calcium-dependent cysteine-type endopeptidase activity  
 PGOC: intracellular  
 PGOP: proteolysis

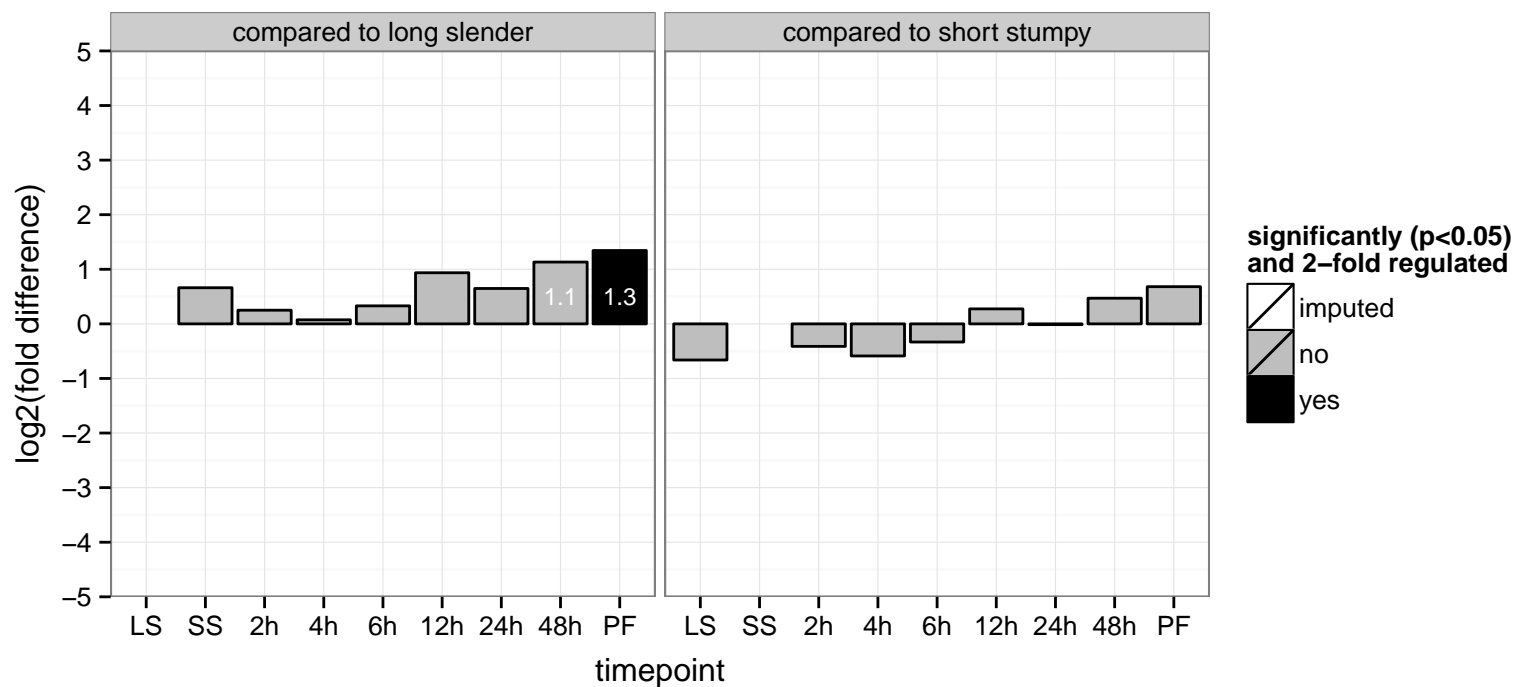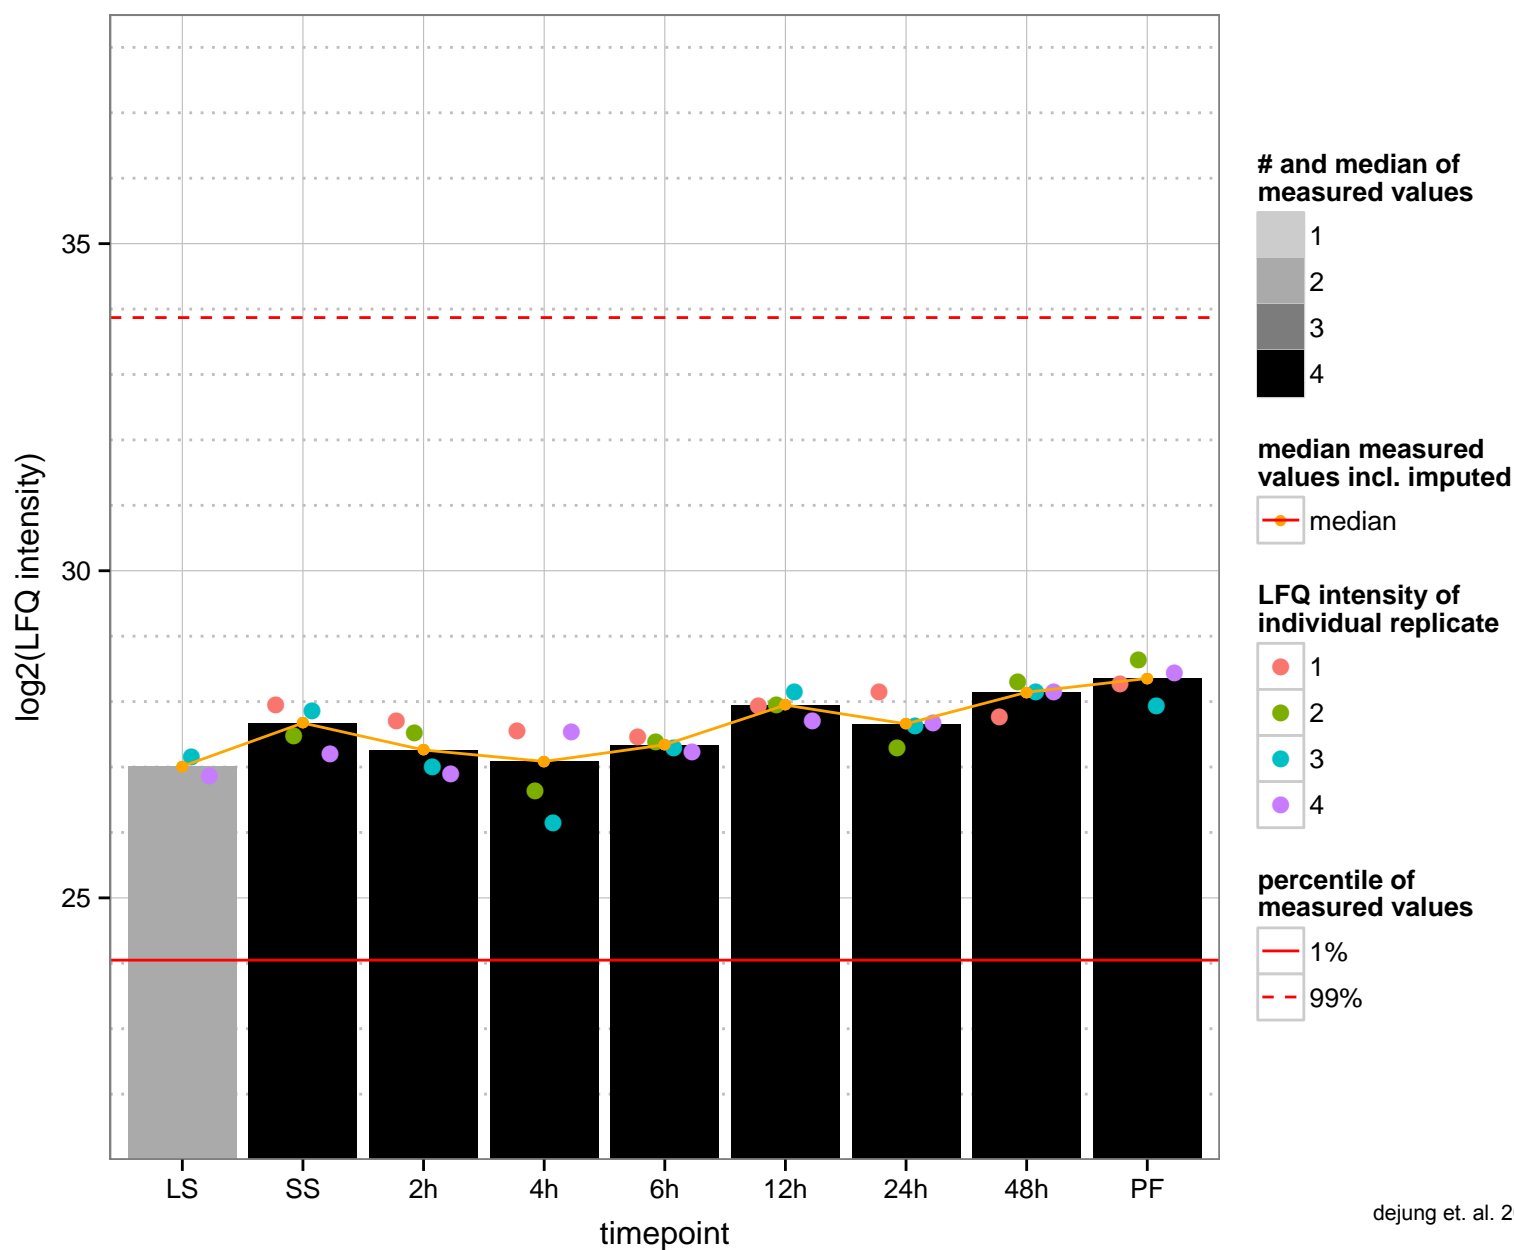

alpha tubulin

Tb927.1.2400;Tb927.1.2380;Tb927.1.2360;Tb927.1.2340

AGOF: GTP binding, GTPase activity, structural constituent of cytoskeleton

AGOC: microtubule, protein complex

AGOP: cellular component movement, microtubule cytoskeleton organization, microtubule-based movement, protein polymerization

PGOF: GTP binding, GTPase activity, null

PGOC: protein complex, null

PGOP: GTP catabolic process, protein polymerization, null

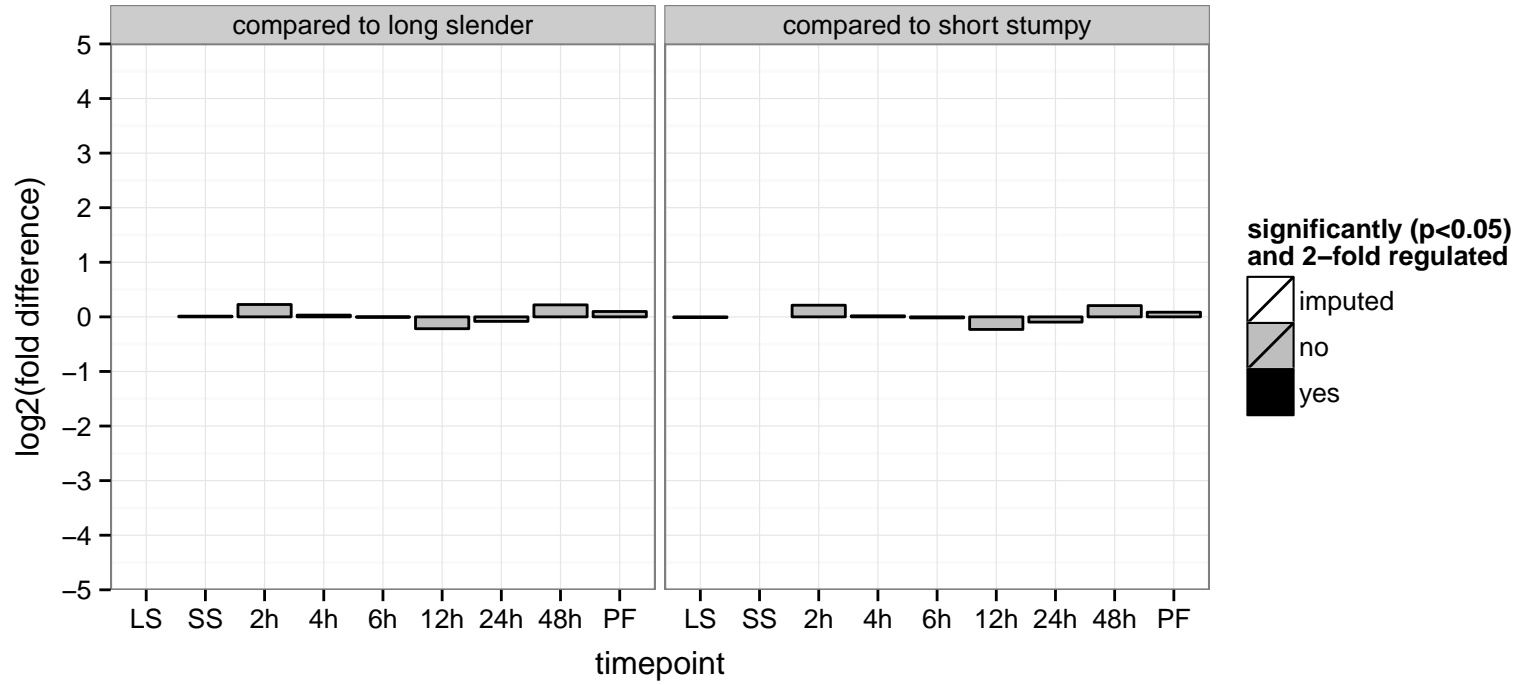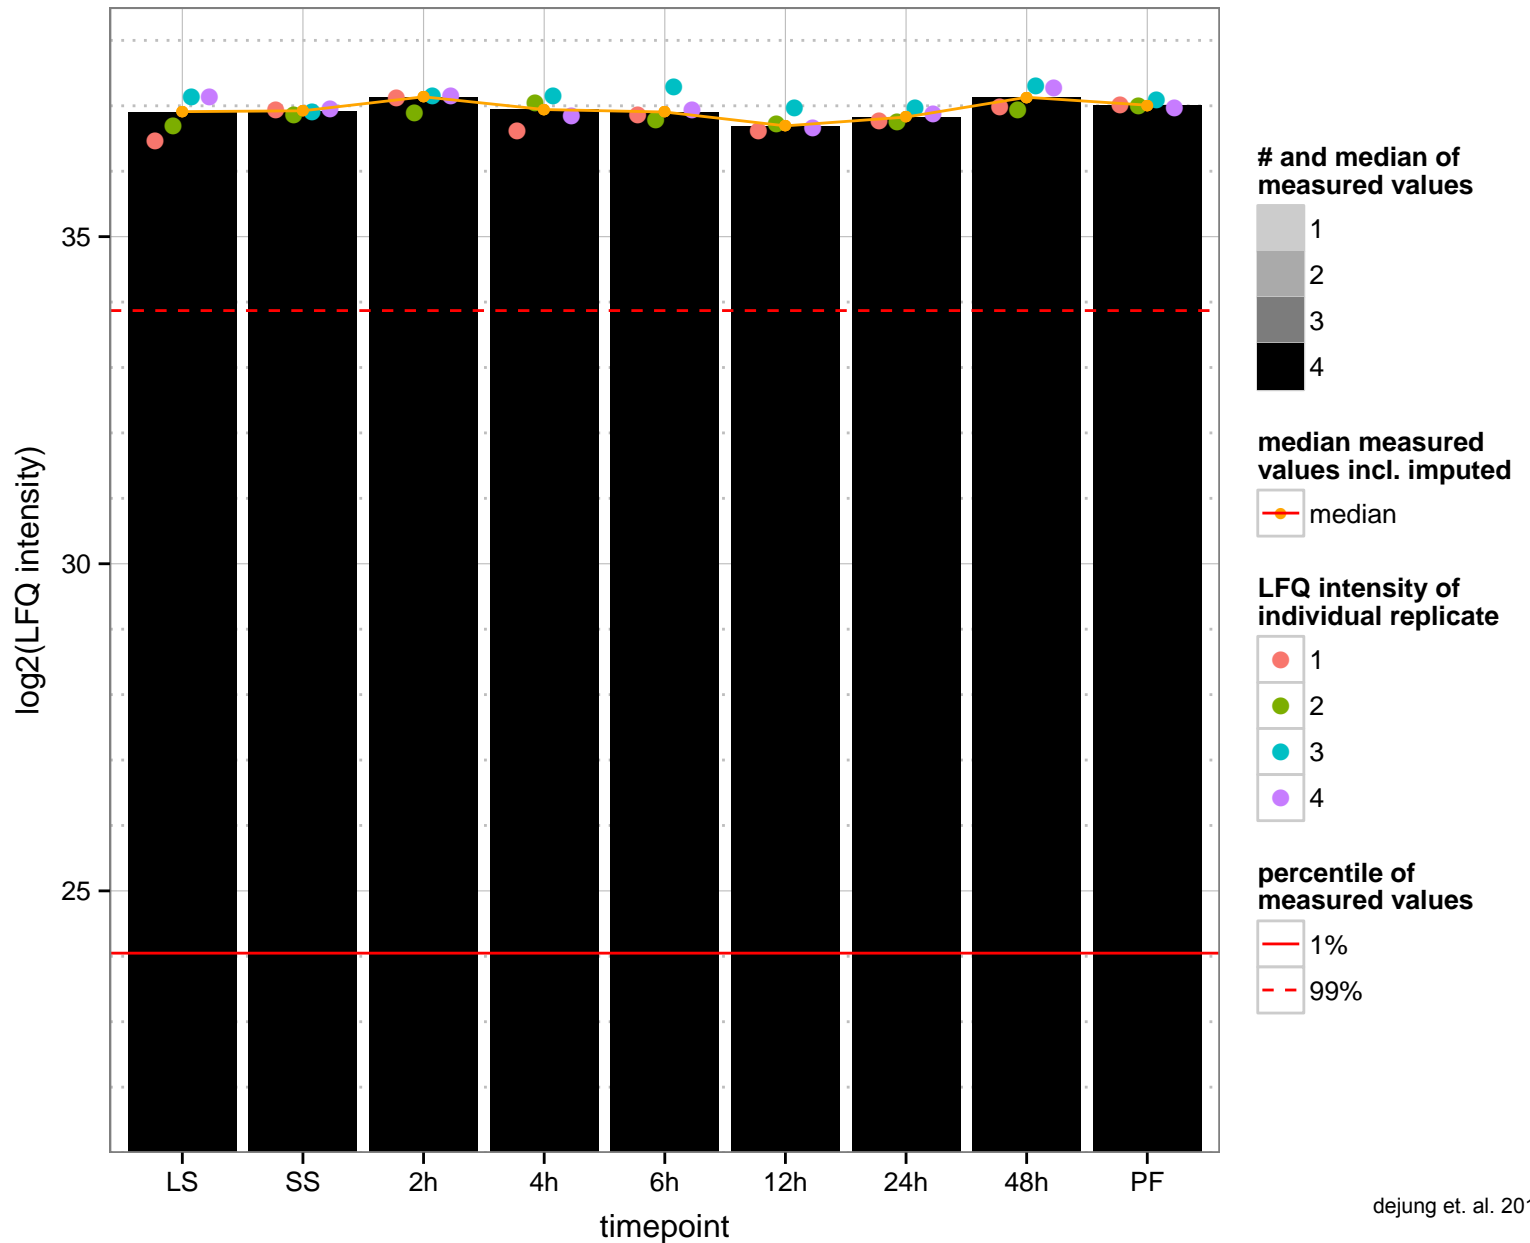



retrotransposon hot spot protein (RHS, pseudogene), putative

Tb927.1.240

AGOF: RNA binding, RNA-directed DNA polymerase activity, ribonuclease H activity, zinc ion binding

AGOC: intracellular

AGOP: RNA-dependent DNA replication

PGOF: RNA binding, RNA-directed DNA polymerase activity, nucleic acid binding, ribonuclease H activity, zinc ion binding

PGOC: intracellular

PGOP: RNA-dependent DNA replication

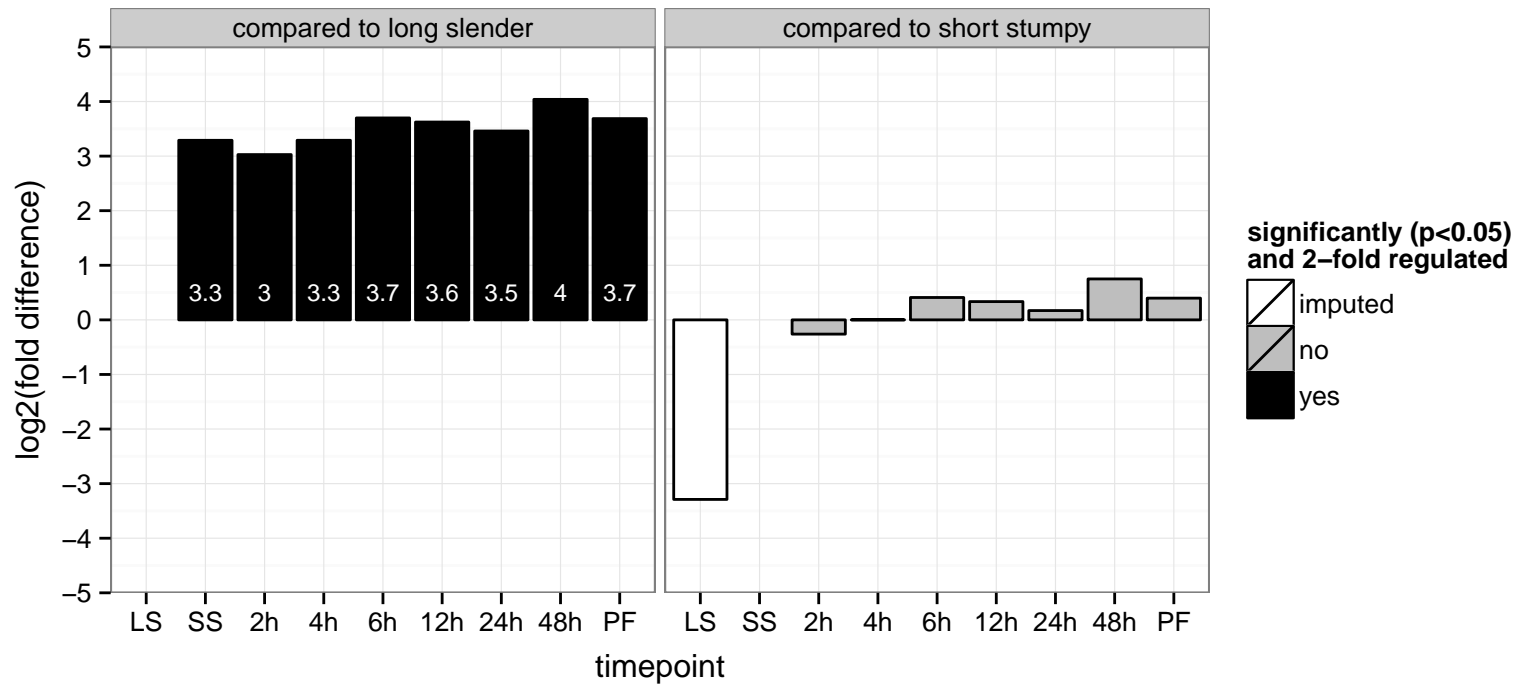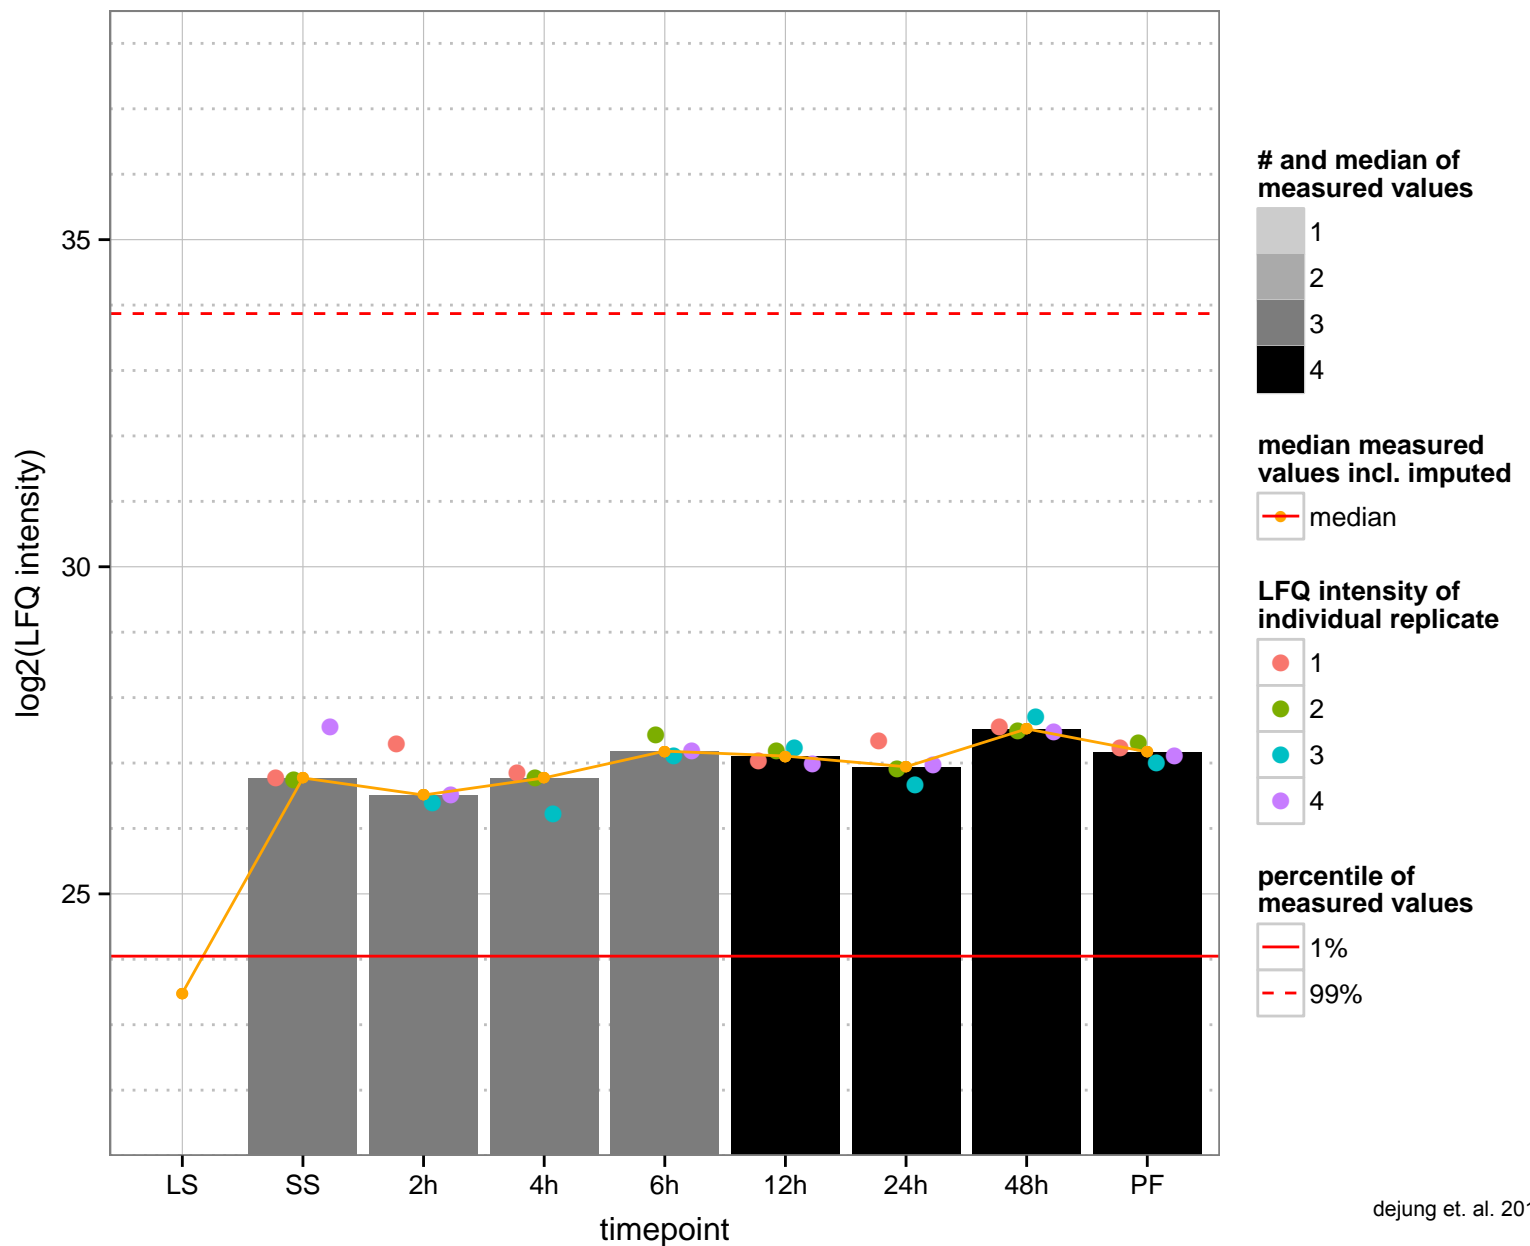

histone H3, putative  
 Tb927.1.2550;Tb927.1.2530;Tb927.1.2510;Tb927.1.2490;Tb927.1.2470;Tb927.1.2450;Tb927.1.2430  
 AGOF: DNA binding  
 AGOC: nucleosome, nucleus  
 AGOP: nucleosome assembly  
 PGO: null, DNA binding  
 PGOC: null, nucleosome  
 PGO: null, nucleosome assembly

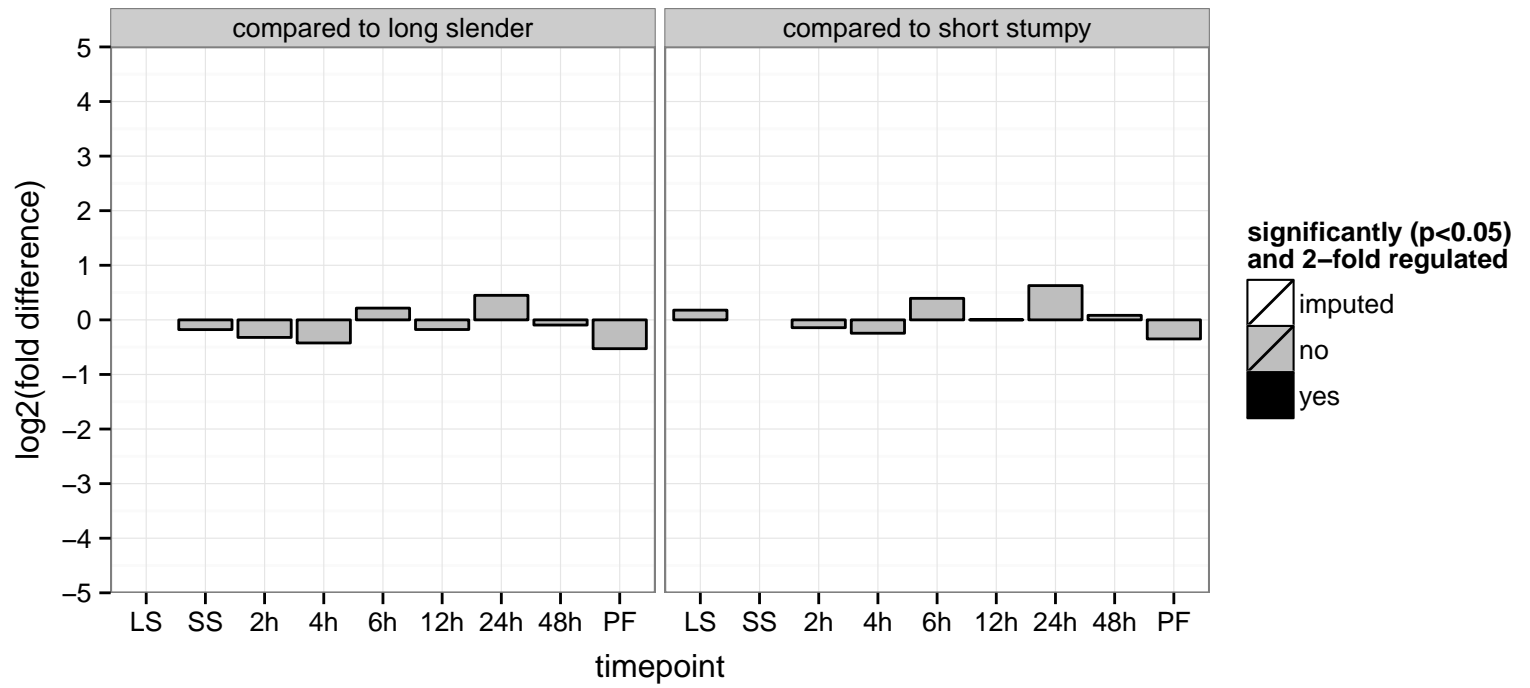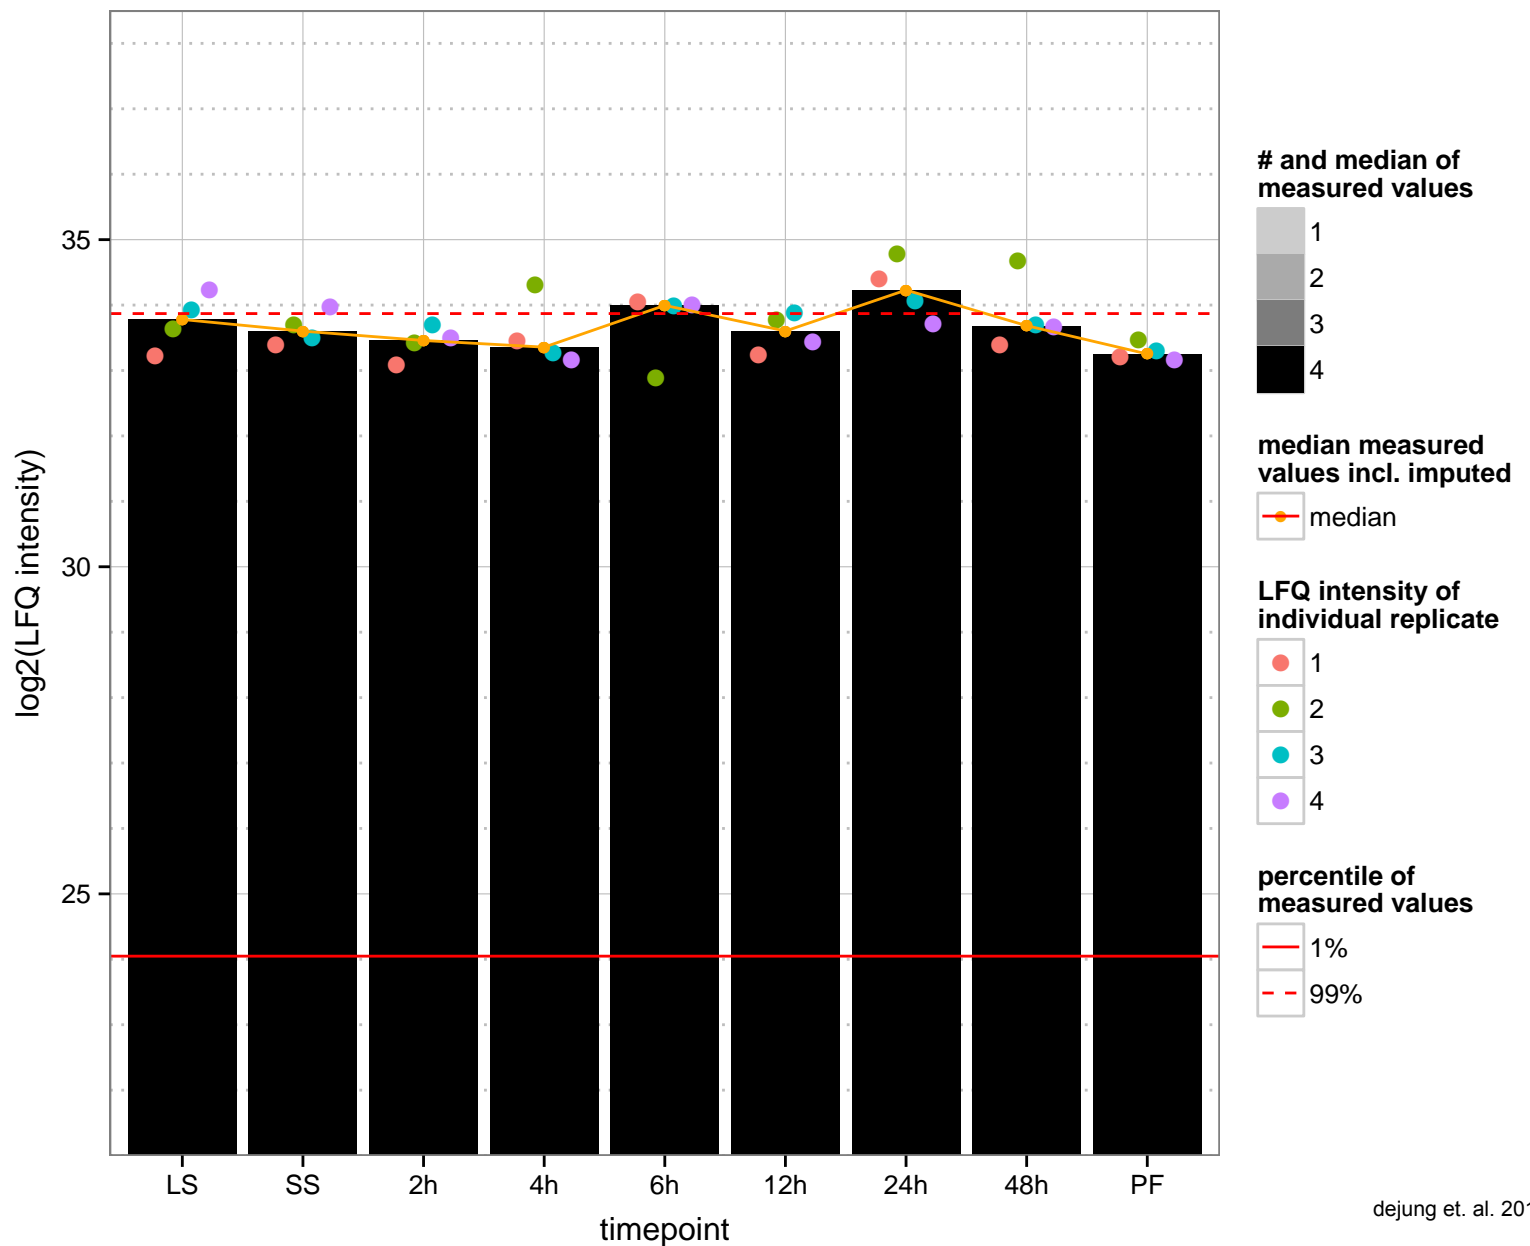

coatamer beta subunit (beta-coP)  
 Tb927.1.2570  
 AGOF: structural molecule activity  
 AGOC: membrane coat  
 AGOP: intracellular protein transport, vesicle-mediated transport  
 PGO: binding, structural molecule activity  
 PGO: COPI vesicle coat, cytoplasm, membrane coat  
 PGO: intracellular protein transport, vesicle-mediated transport

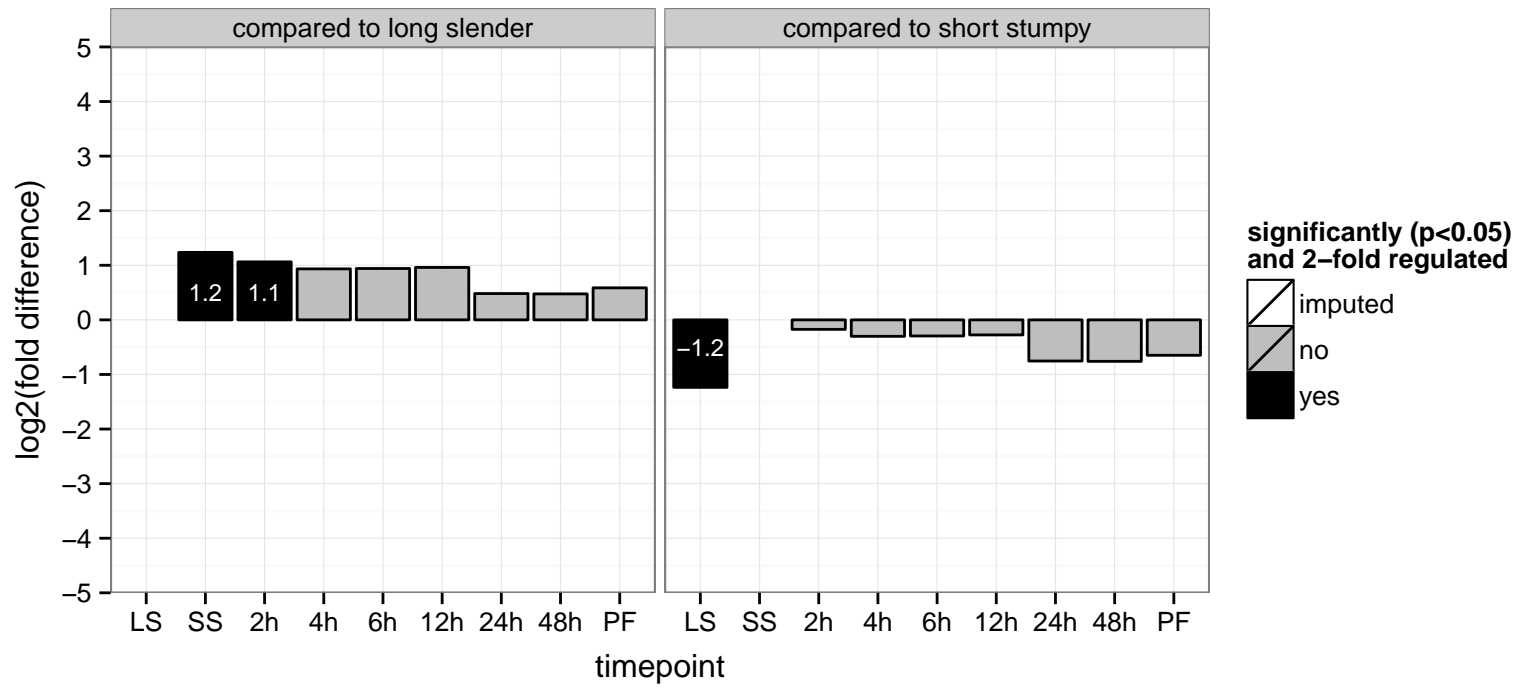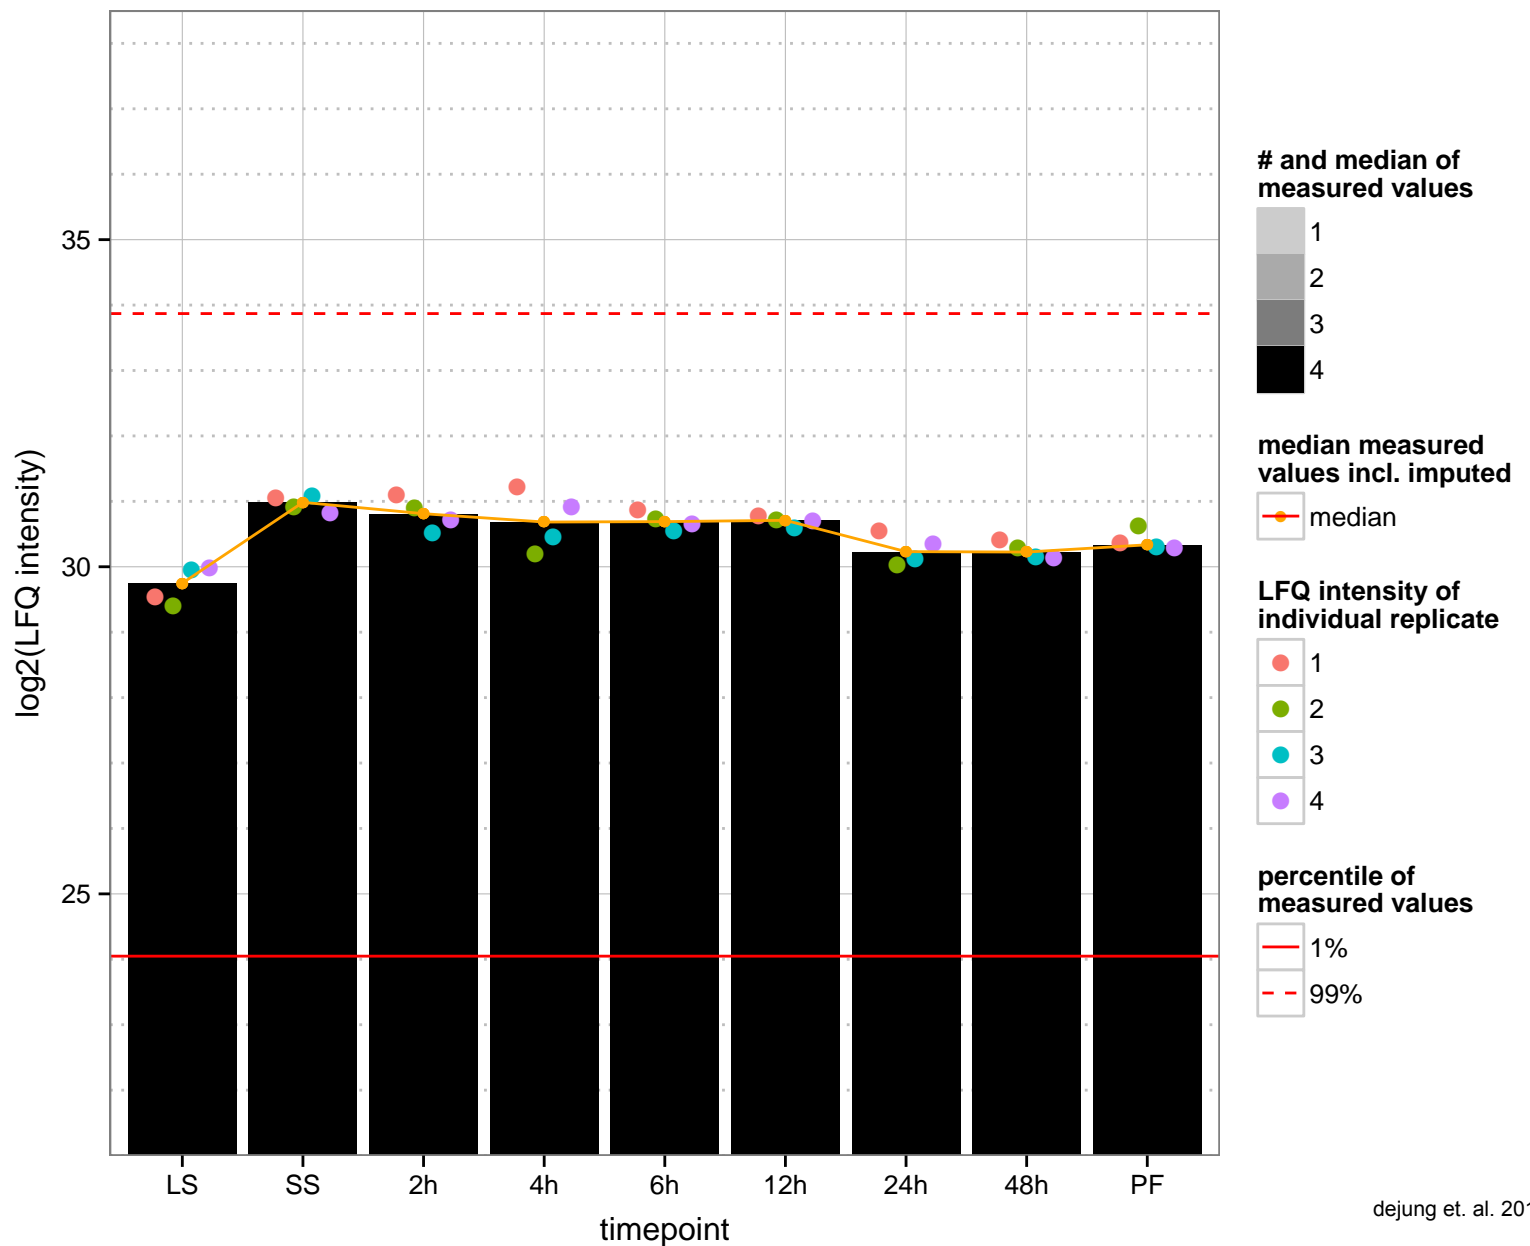

flagellar protein PF16, axoneme central apparatus protein  
 Tb927.1.2670  
 AGOF: null  
 AGOC: axoneme  
 AGOP: axoneme assembly, ciliary or flagellar motility  
 PGO: binding, protein binding  
 PGO: null  
 PGO: null

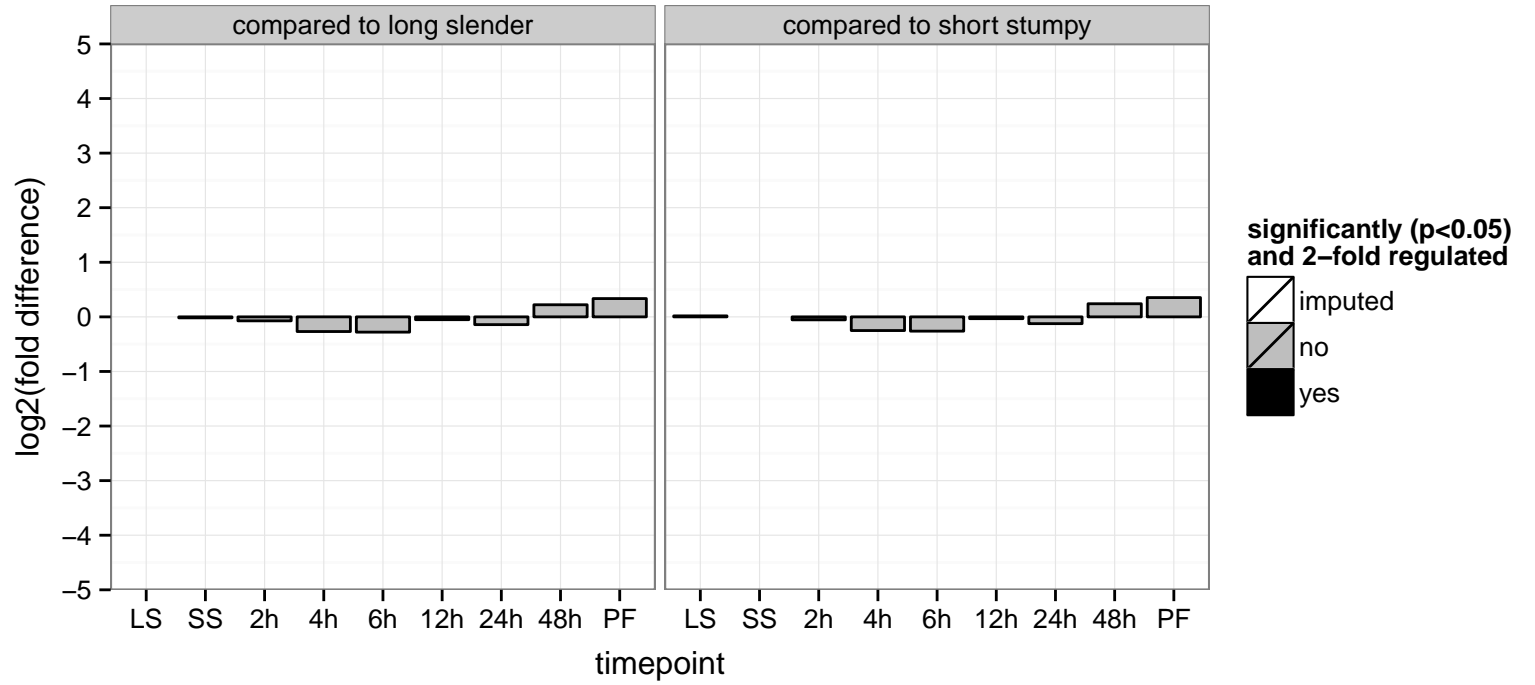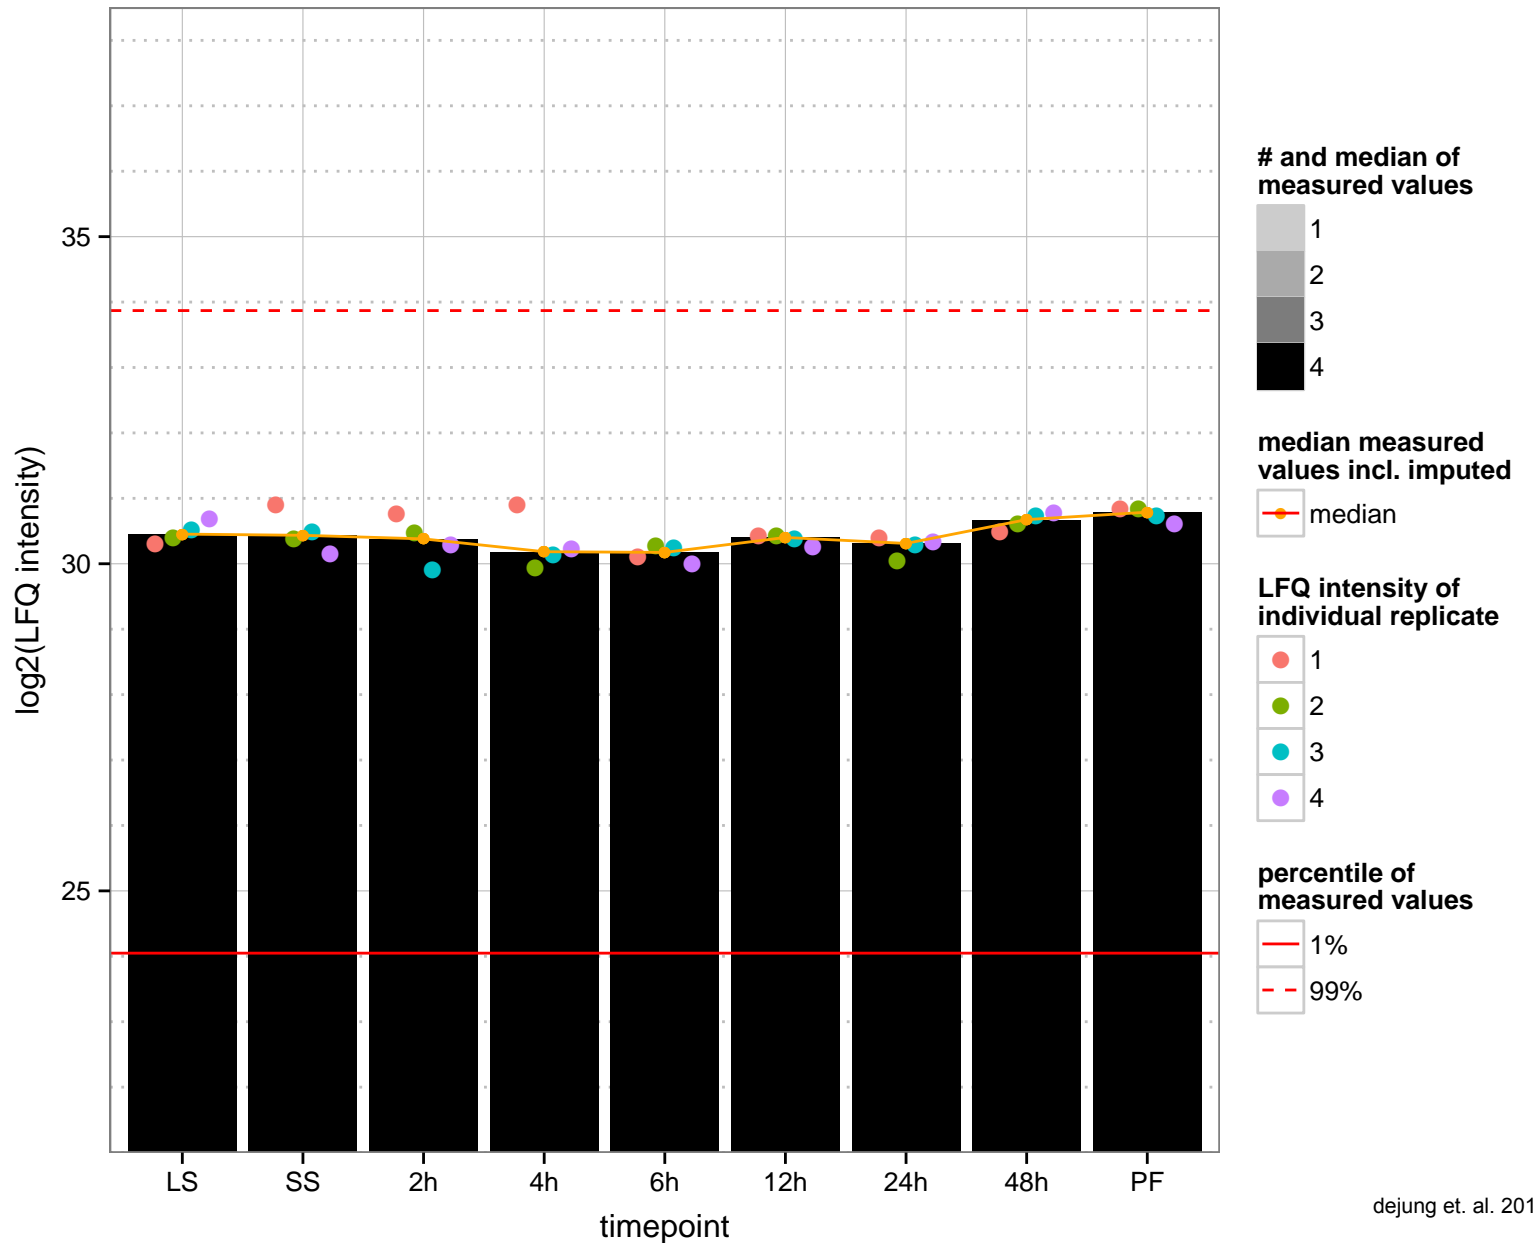

KREL2, RNA-editing complex protein, RNA editing ligase (KREL2)

Tb927.1.3030

AGOF: ATP binding, RNA ligase (ATP) activity

AGOC: mRNA editing complex, mitochondrial mRNA editing complex, mitochondrion

AGOP: mRNA modification

PGOF: ATP binding, RNA ligase (ATP) activity, ligase activity

PGOC: null

PGOP: null

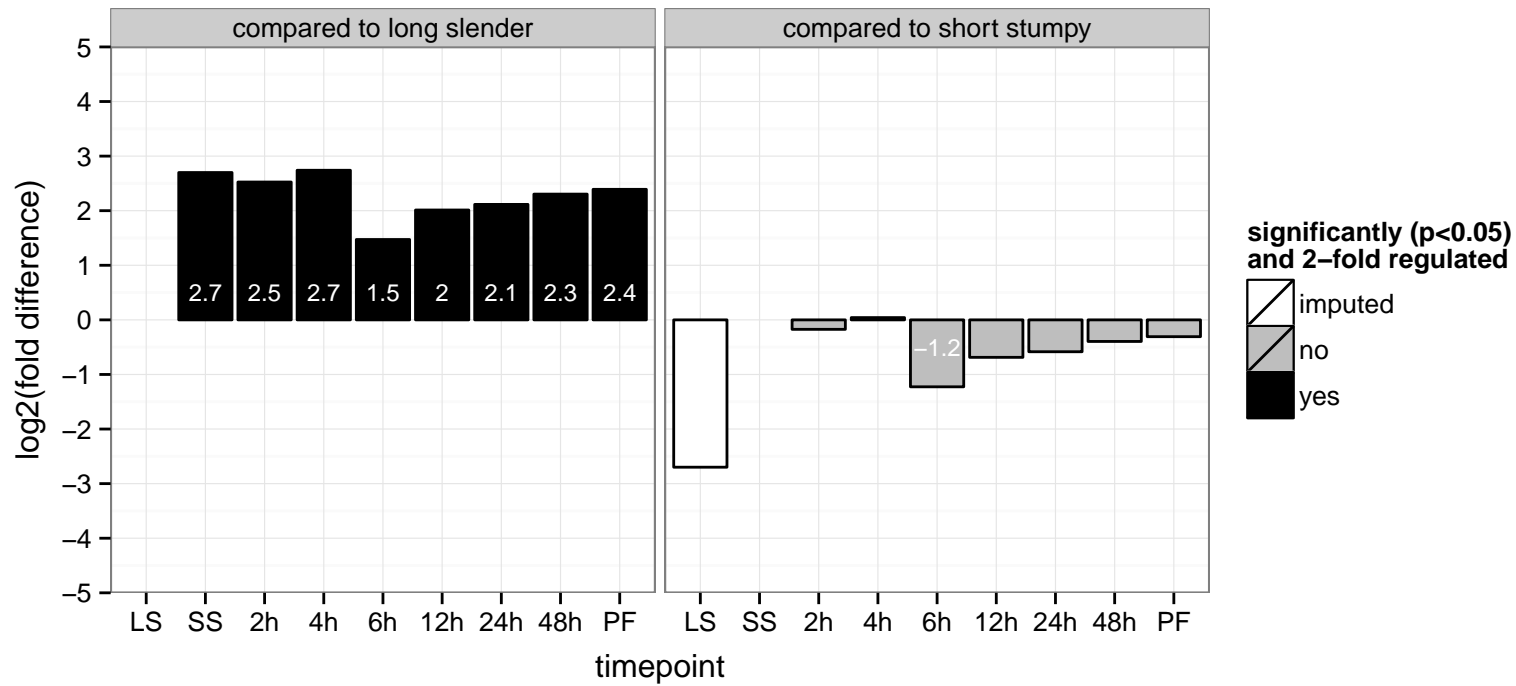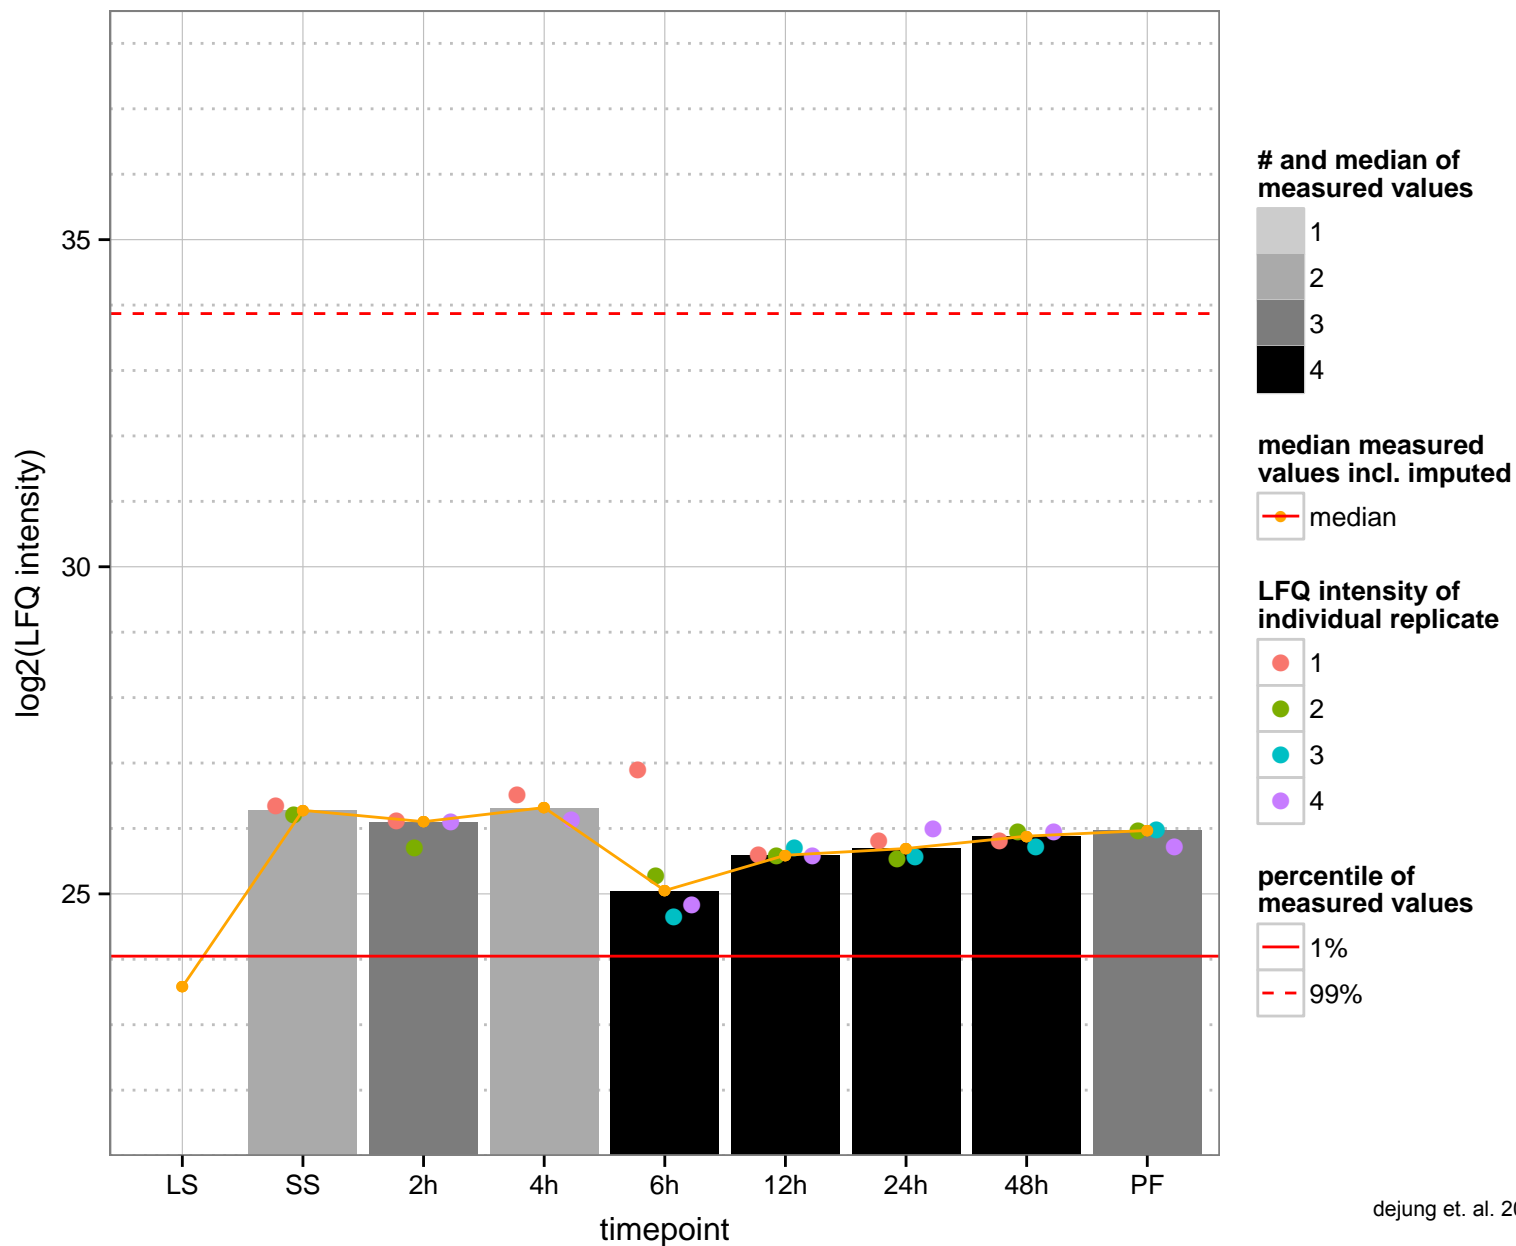

soluble N-ethylmaleimide sensitive factor (NSF) attachment protein, putative  
 Tb927.1.3110  
 AGOF: soluble NSF attachment protein activity  
 AGOC: Golgi apparatus, endoplasmic reticulum  
 AGOP: intracellular protein transport  
 PGO: null  
 PGOC: null  
 PGOP: null

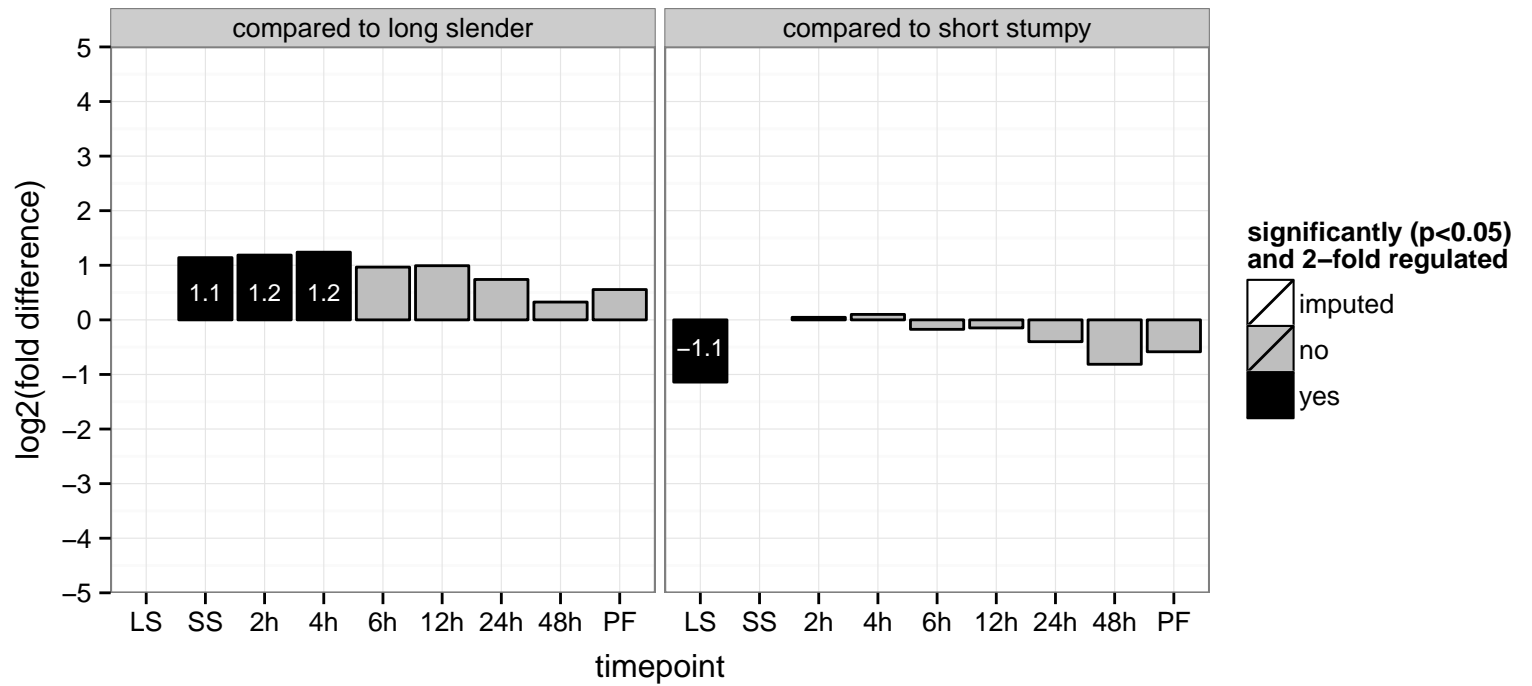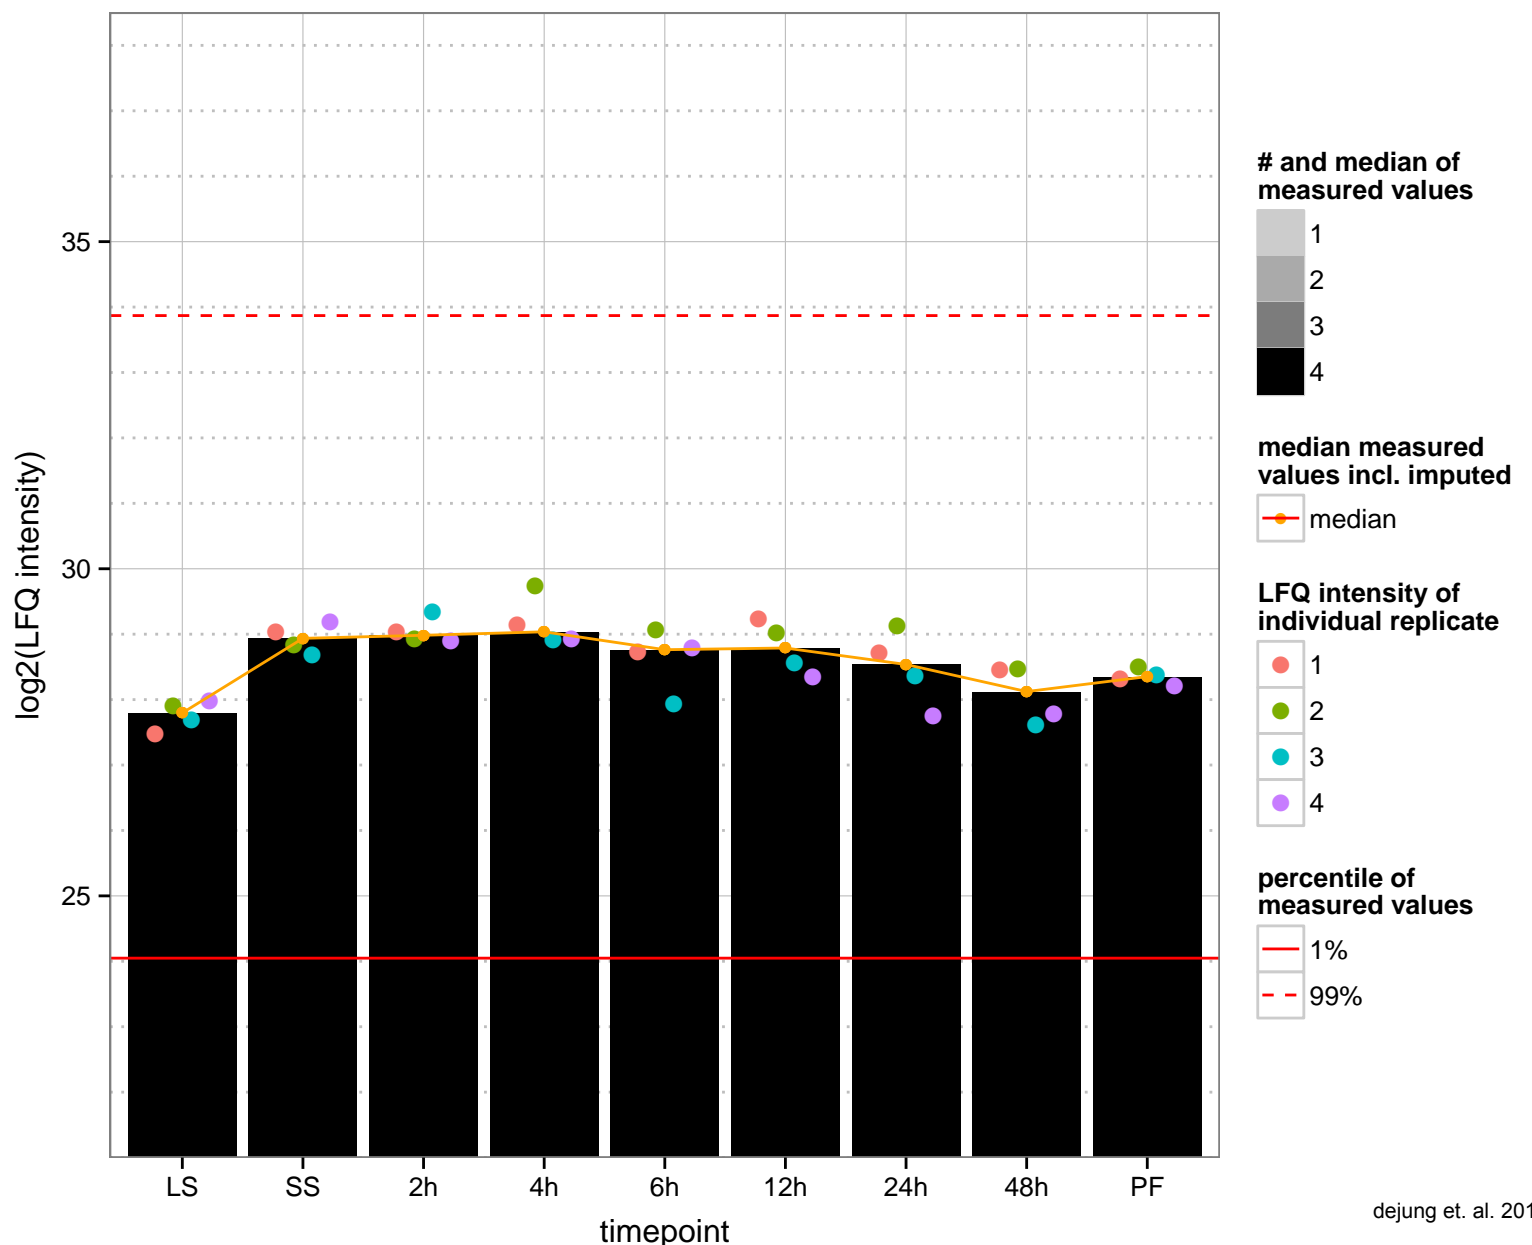

Suppressor of G2 allele of SKP1, putative  
 Tb927.1.3200  
 AGOF: null  
 AGOC: ubiquitin ligase complex  
 AGOP: null  
 PGO: null  
 PGO: null  
 PGO: null

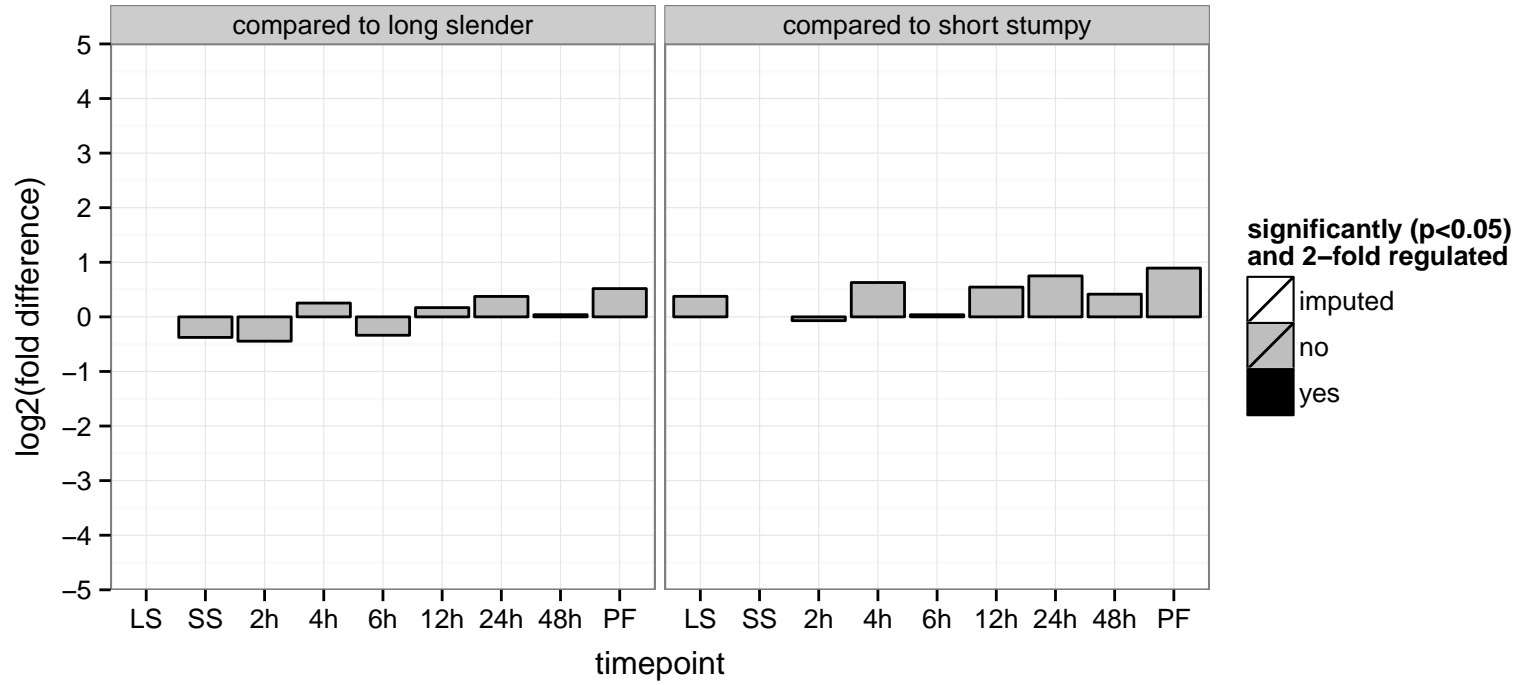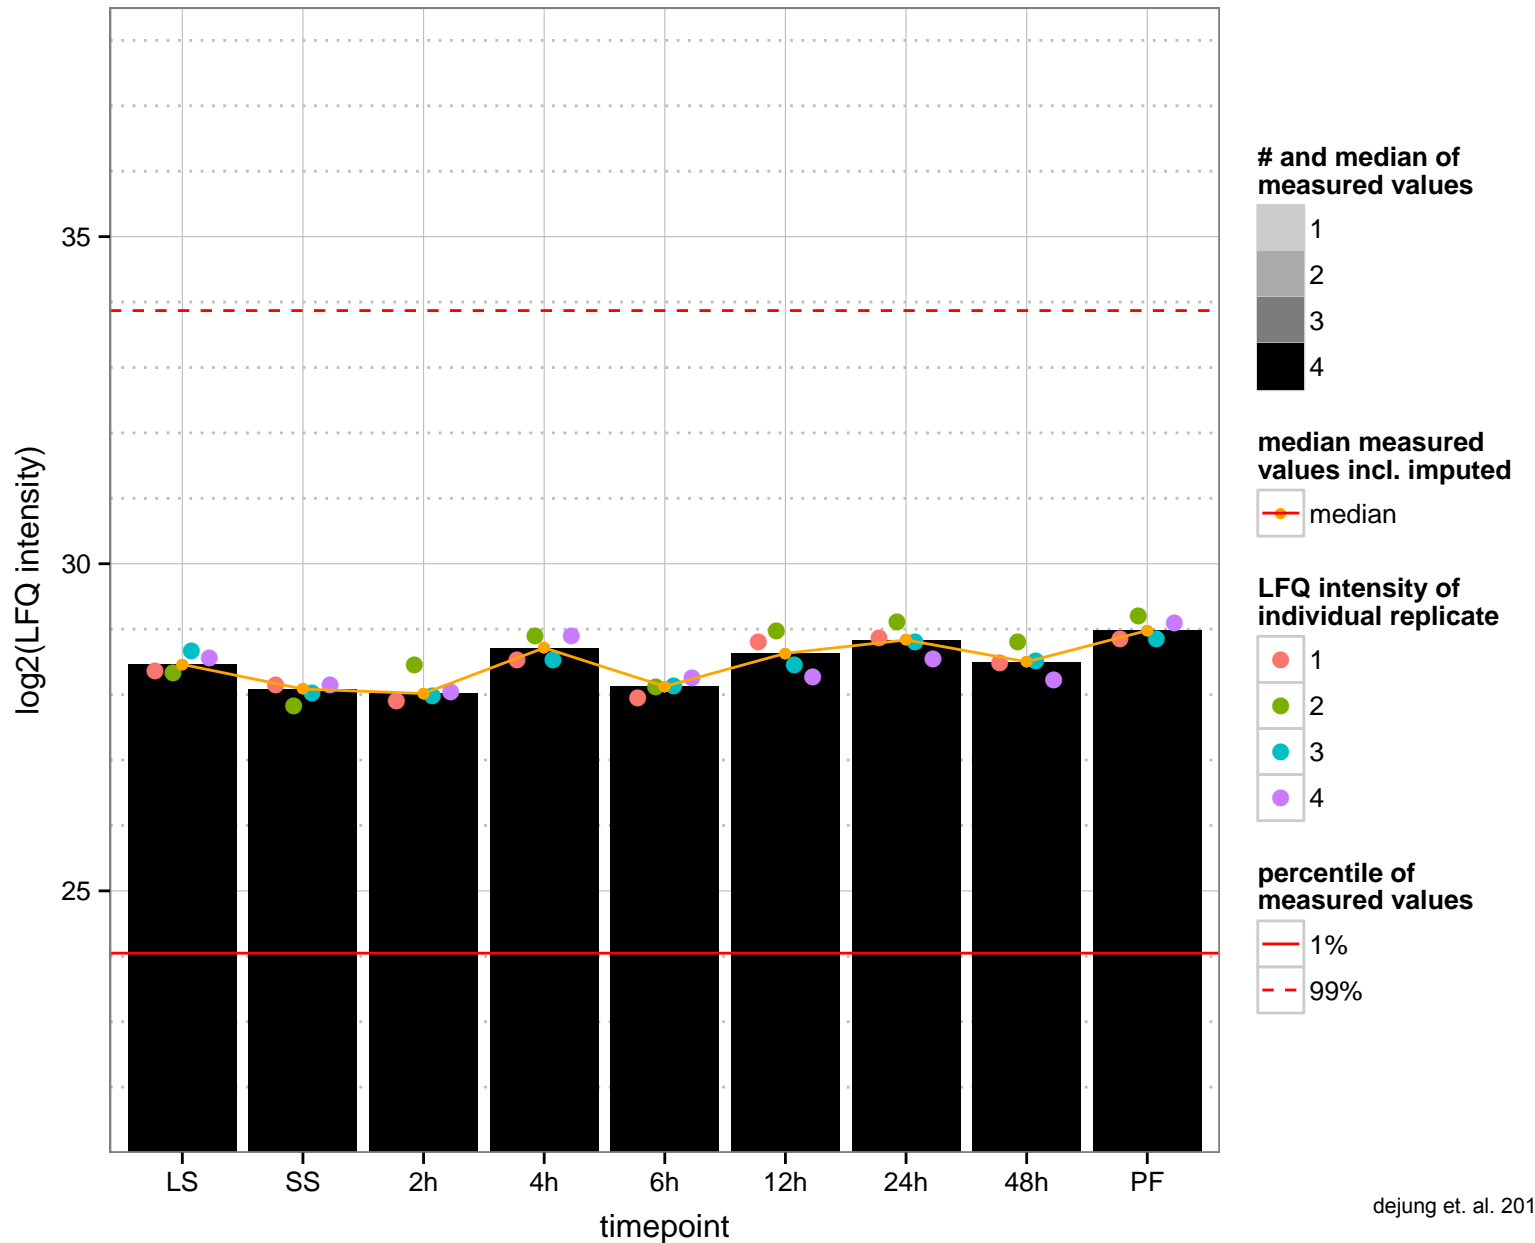

TBC1 domain family member 20/GTPase, putative  
 Tb927.1.3220  
 AGOF: Rab GTPase activator activity  
 AGOC: intracellular  
 AGOP: regulation of Rab GTPase activity  
 PGO: Rab GTPase activator activity  
 PGO: intracellular  
 PGOP: regulation of Rab GTPase activity

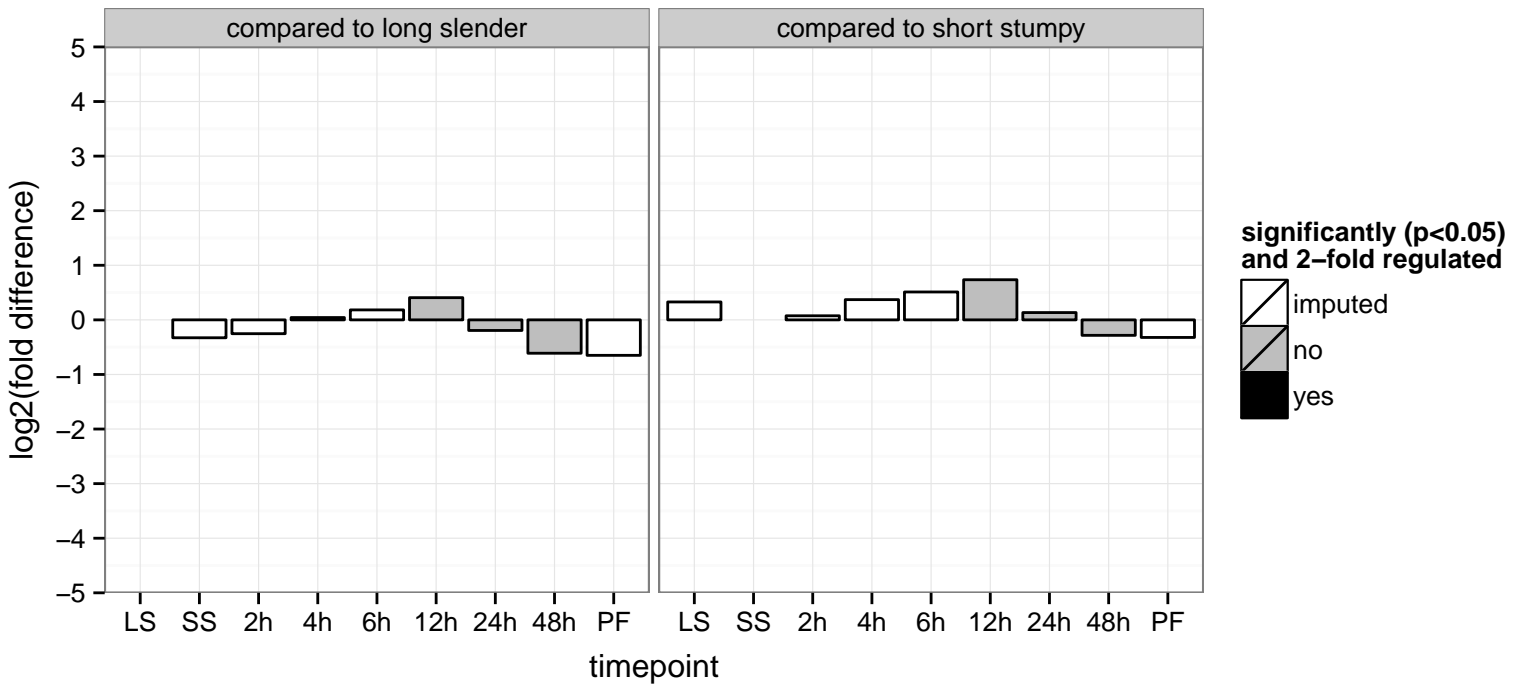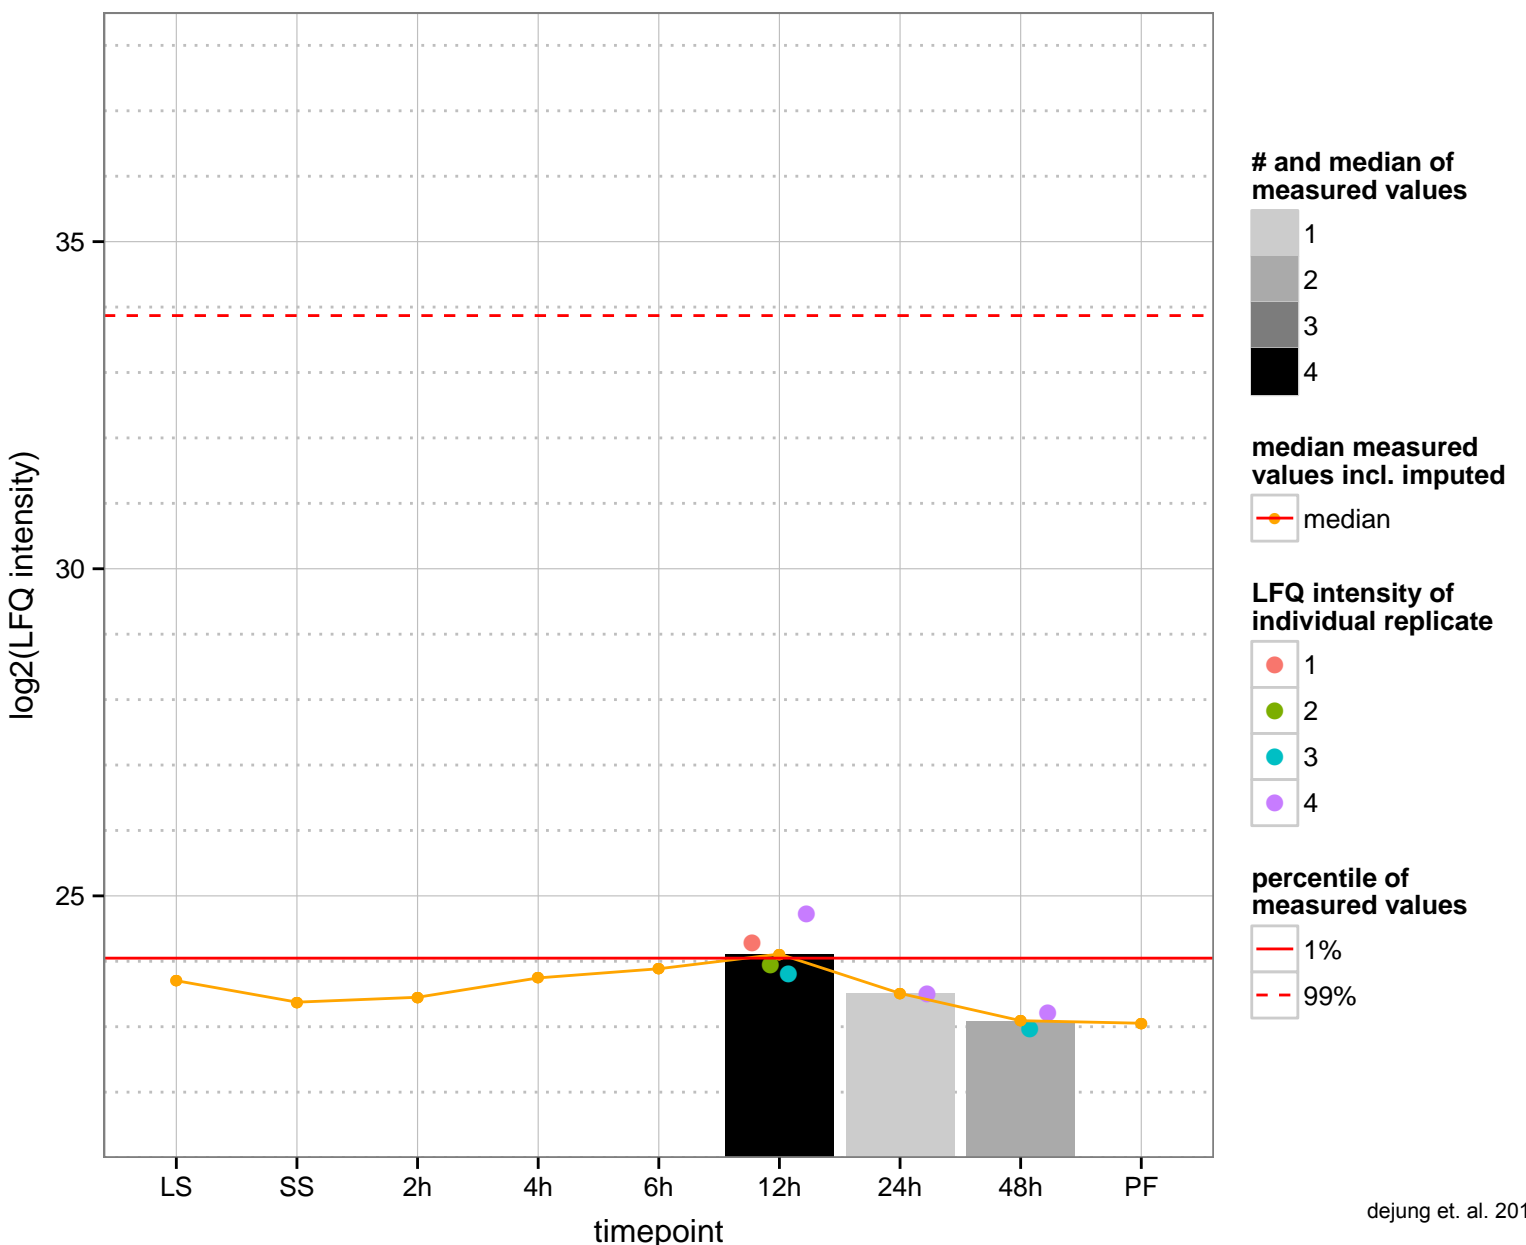



cell division cycle protein, putative  
 Tb927.1.3230  
 AGOF: ATP binding, nucleoside-triphosphatase activity  
 AGOC: null  
 AGOP: null  
 PGO: ATP binding, nucleoside-triphosphatase activity, nucleotide binding  
 PGOC: null  
 PGOP: null

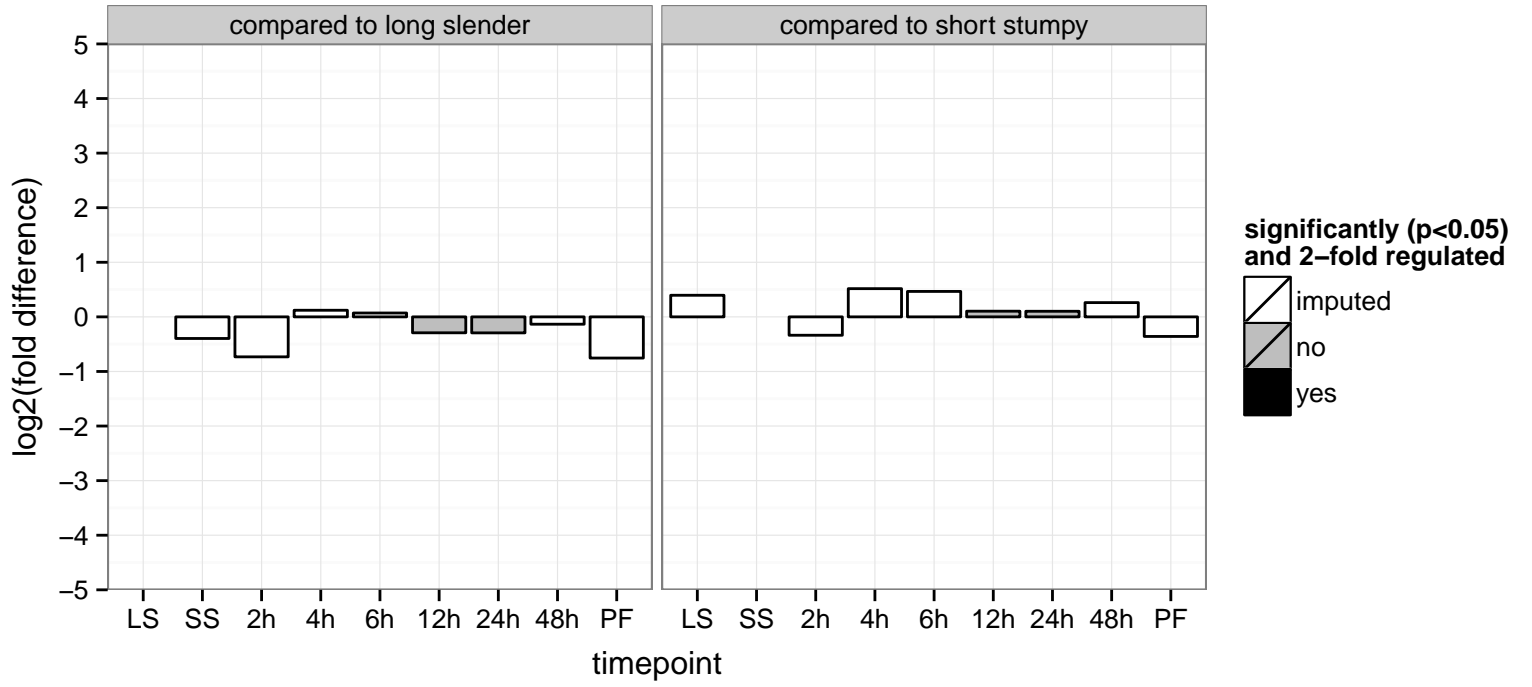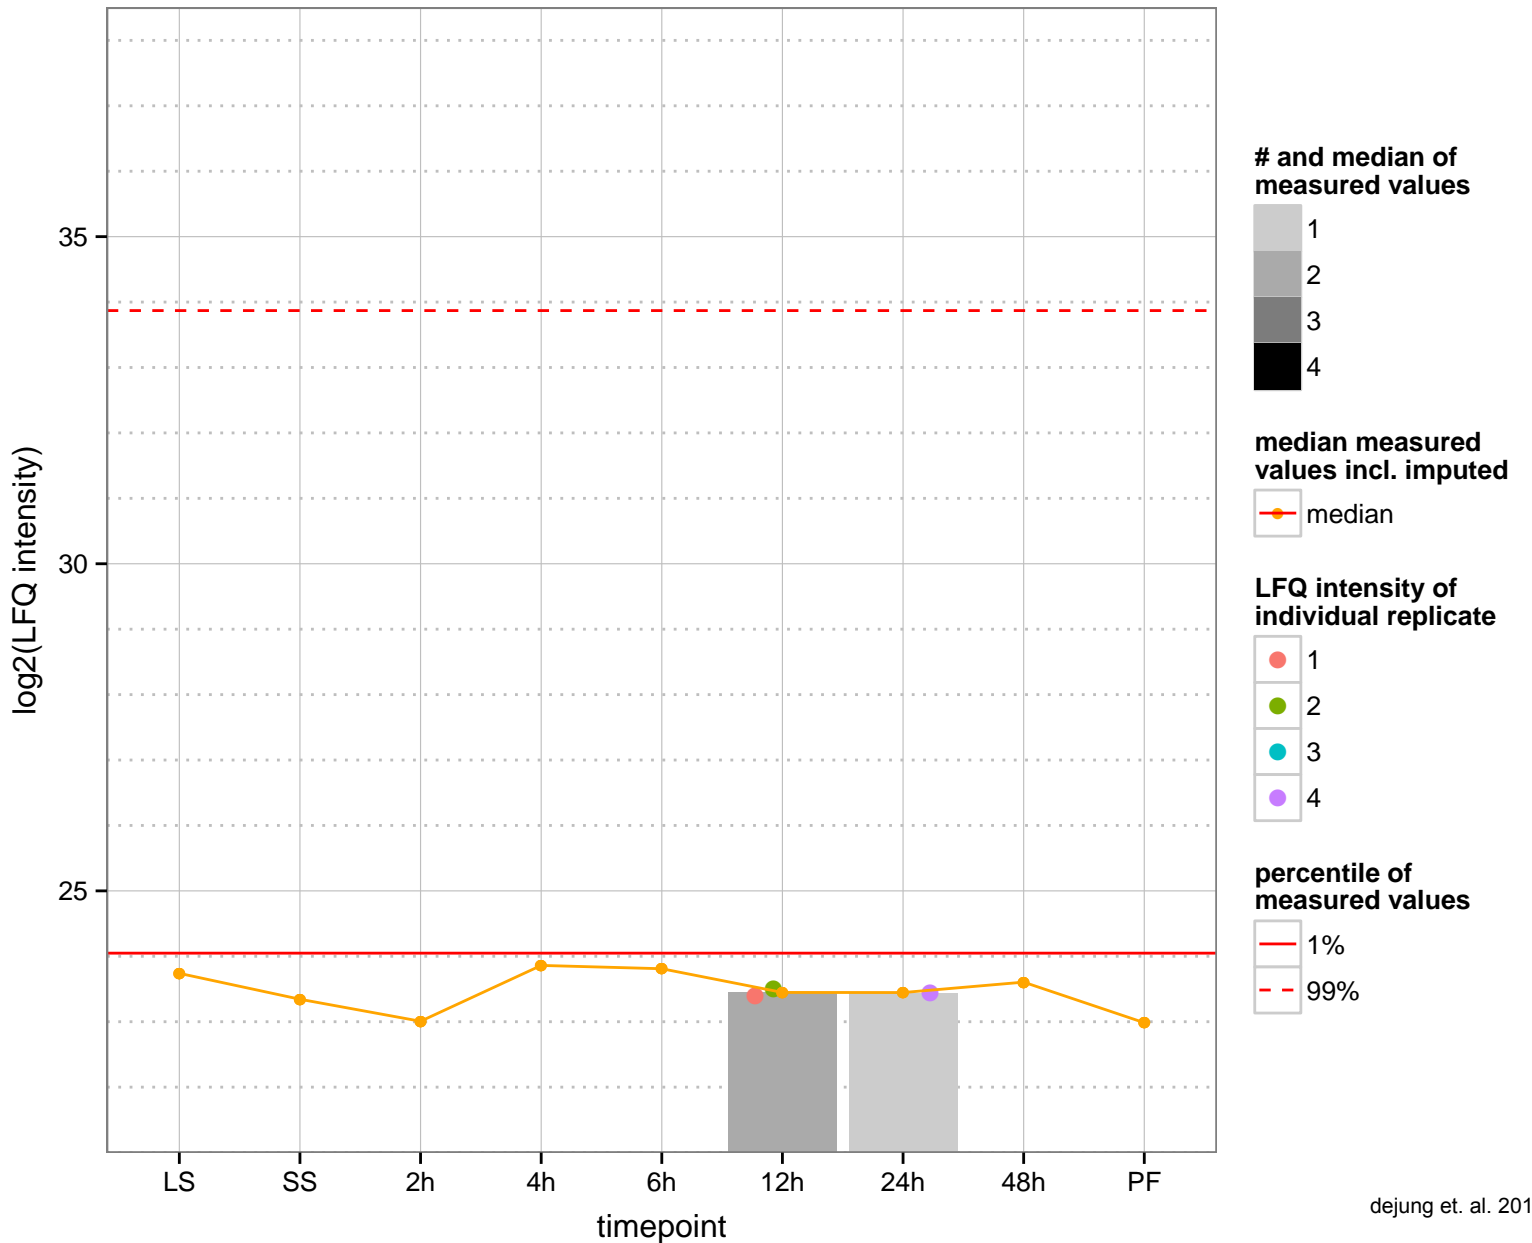

myotubularin, putative, zinc-binding phosphatase  
 Tb927.1.3300  
 AGOF: phosphatase activity  
 AGOC: null  
 AGOP: dephosphorylation  
 PGOF: metal ion binding, phosphatase activity  
 PGOC: null  
 PGOP: dephosphorylation

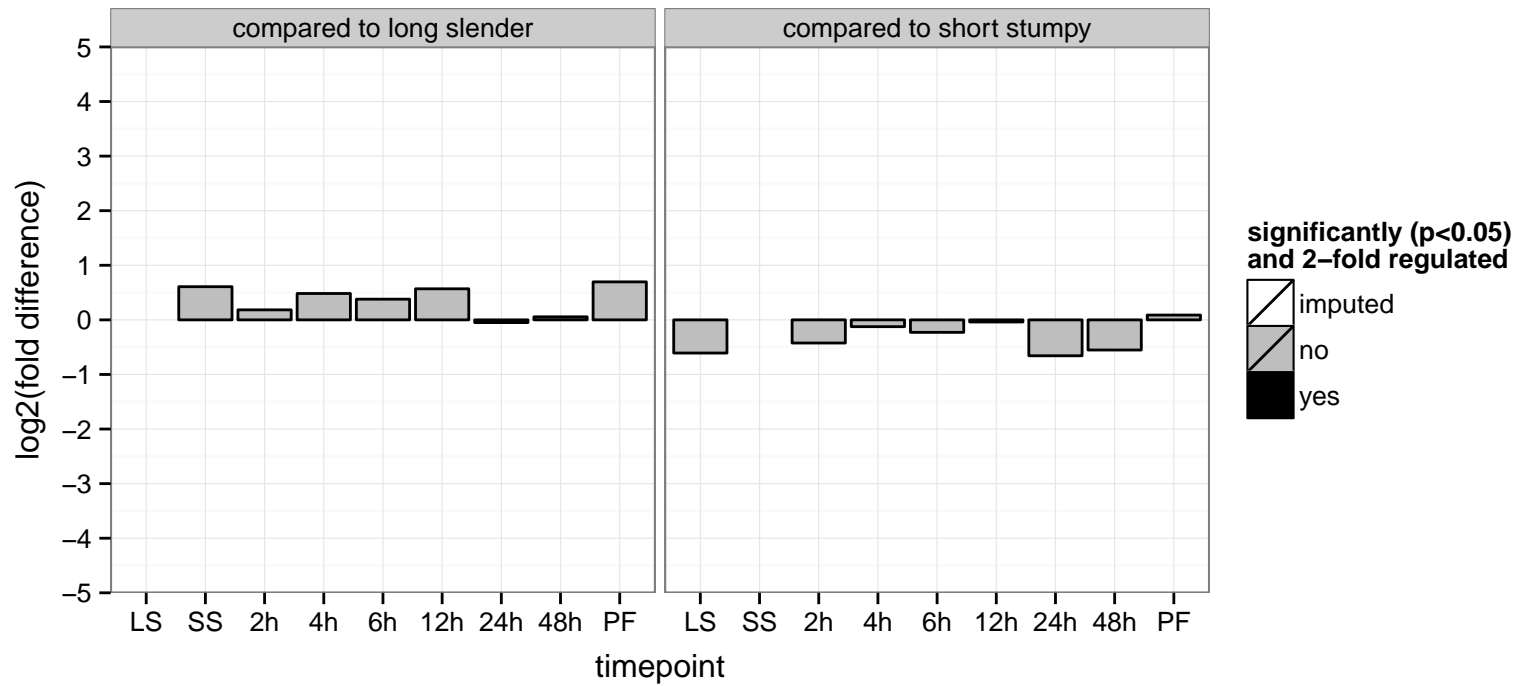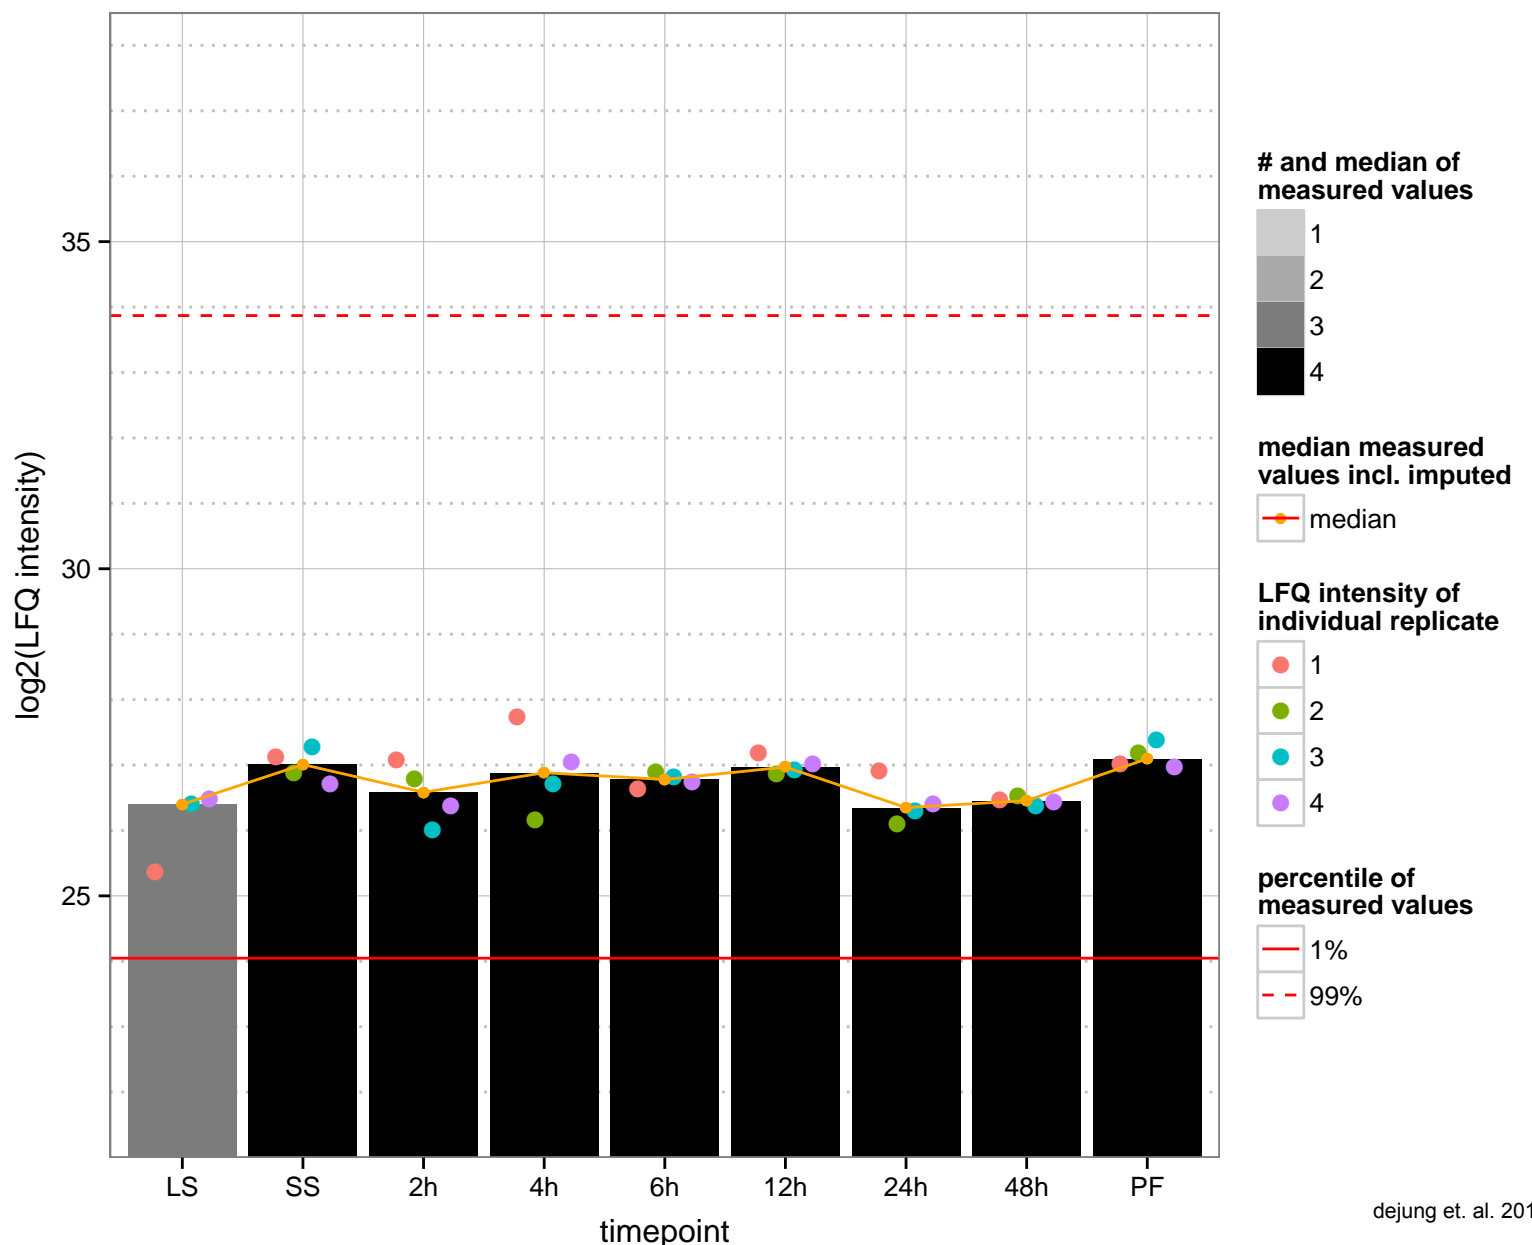

hypothetical protein, conserved  
 Tb927.1.3450;Tb11.v5.0619  
 AGOF: null  
 AGOC: null  
 AGOP: null  
 PGO: null  
 PGOC: null  
 PGOP: null

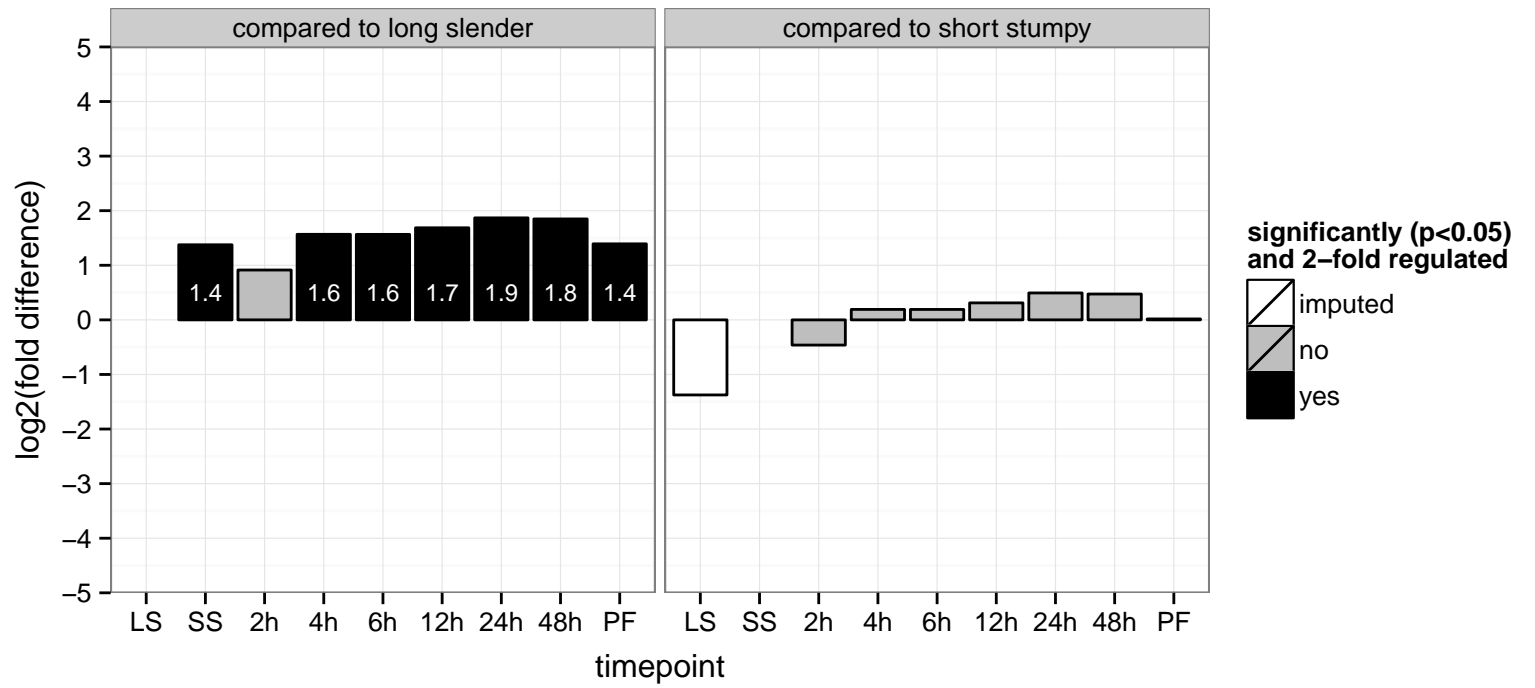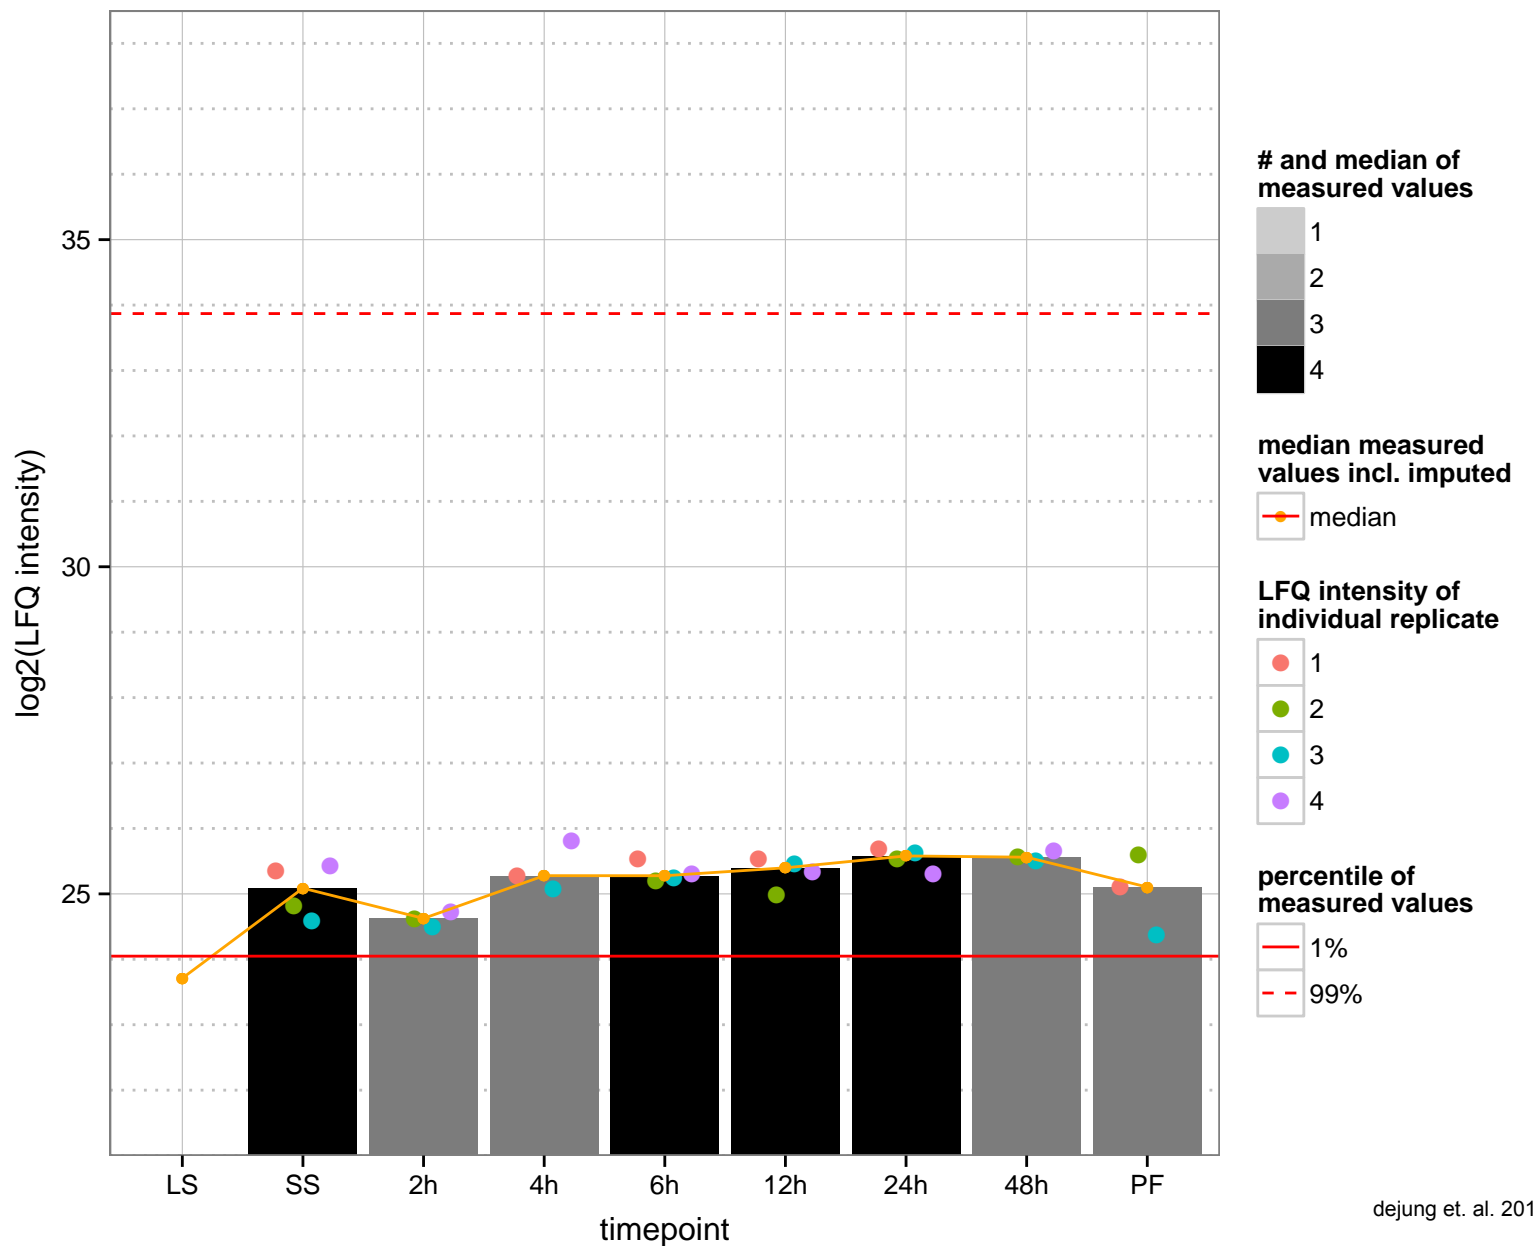

protein phosphatase with EF-Hand domains (PPEF), ser/thr protein phosphatase, putative Tb927.1.4050  
 AGOF: protein serine/threonine phosphatase activity  
 AGOC: protein serine/threonine phosphatase complex  
 AGOP: protein dephosphorylation  
 PGO: hydrolase activity  
 PGOC: null  
 PGOP: null

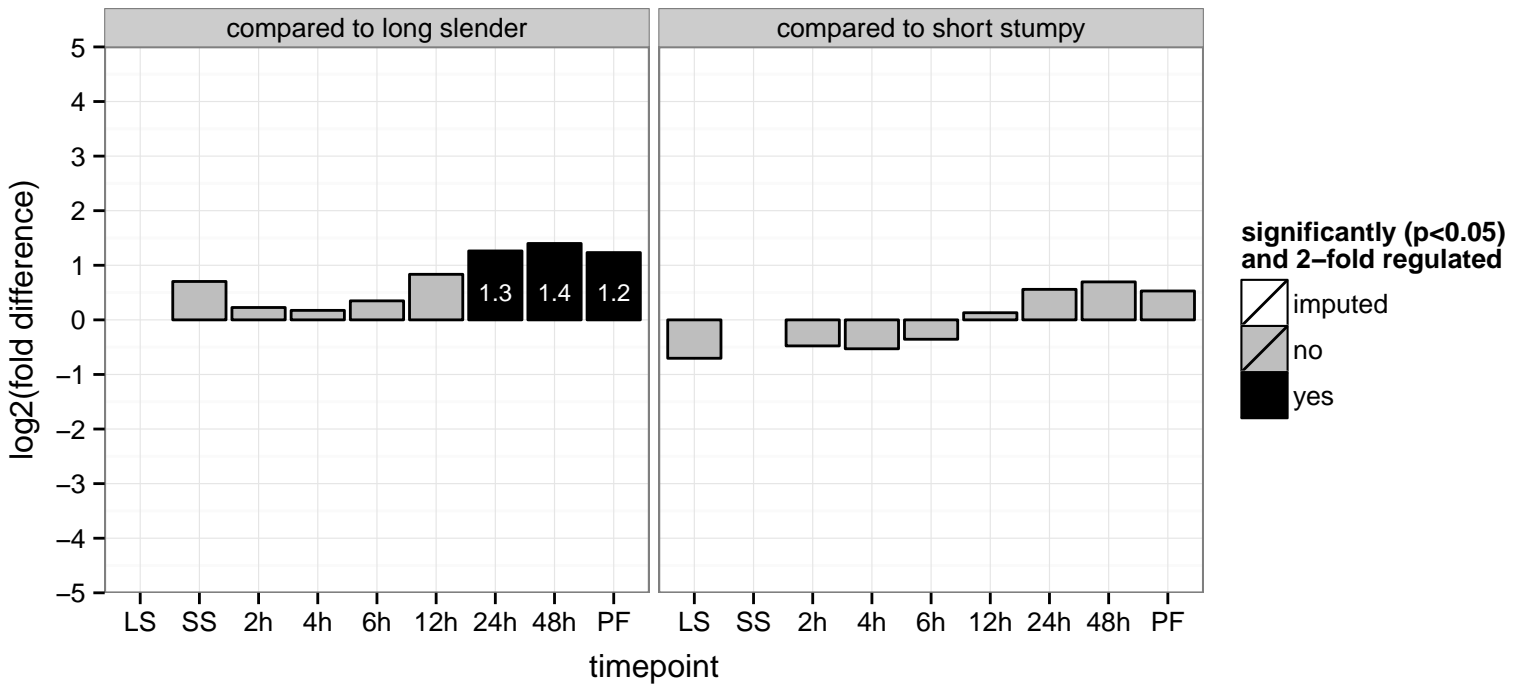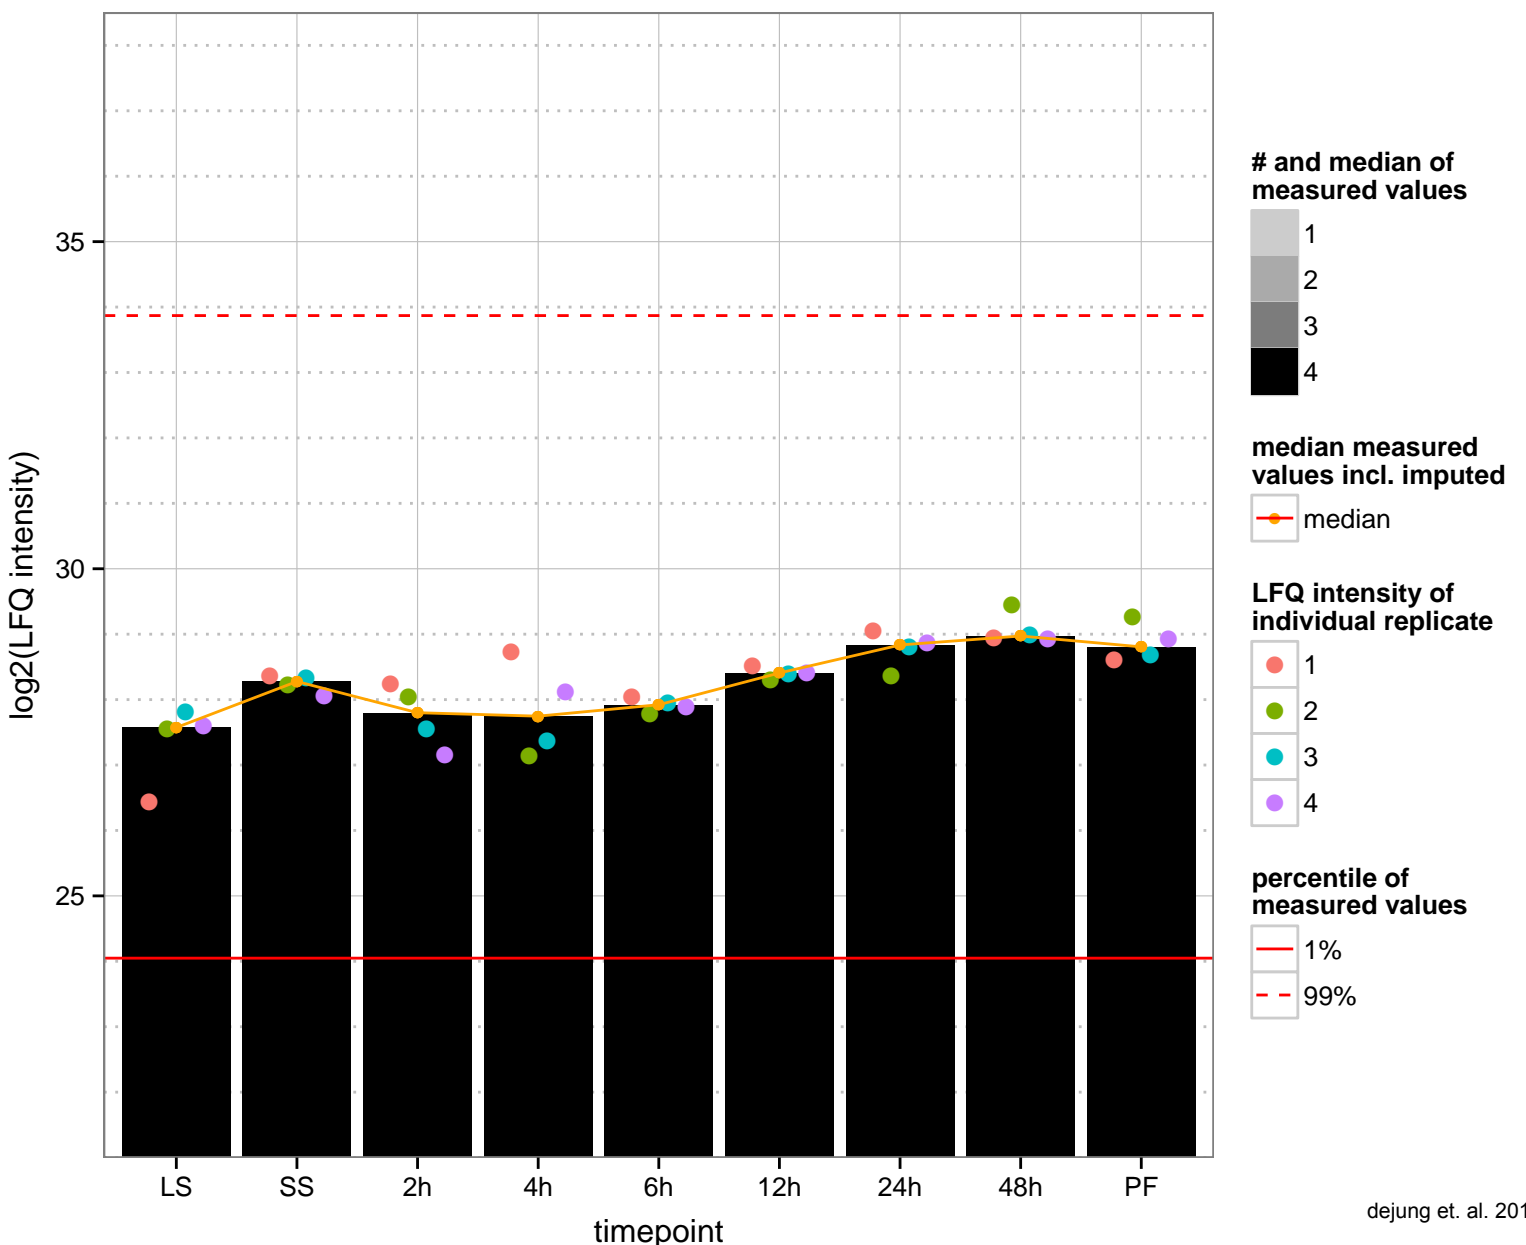

hypothetical protein, conserved  
 Tb927.1.4250  
 AGOF: null  
 AGOC: null  
 AGOP: null  
 PGO: null  
 PGOC: null  
 PGOP: null

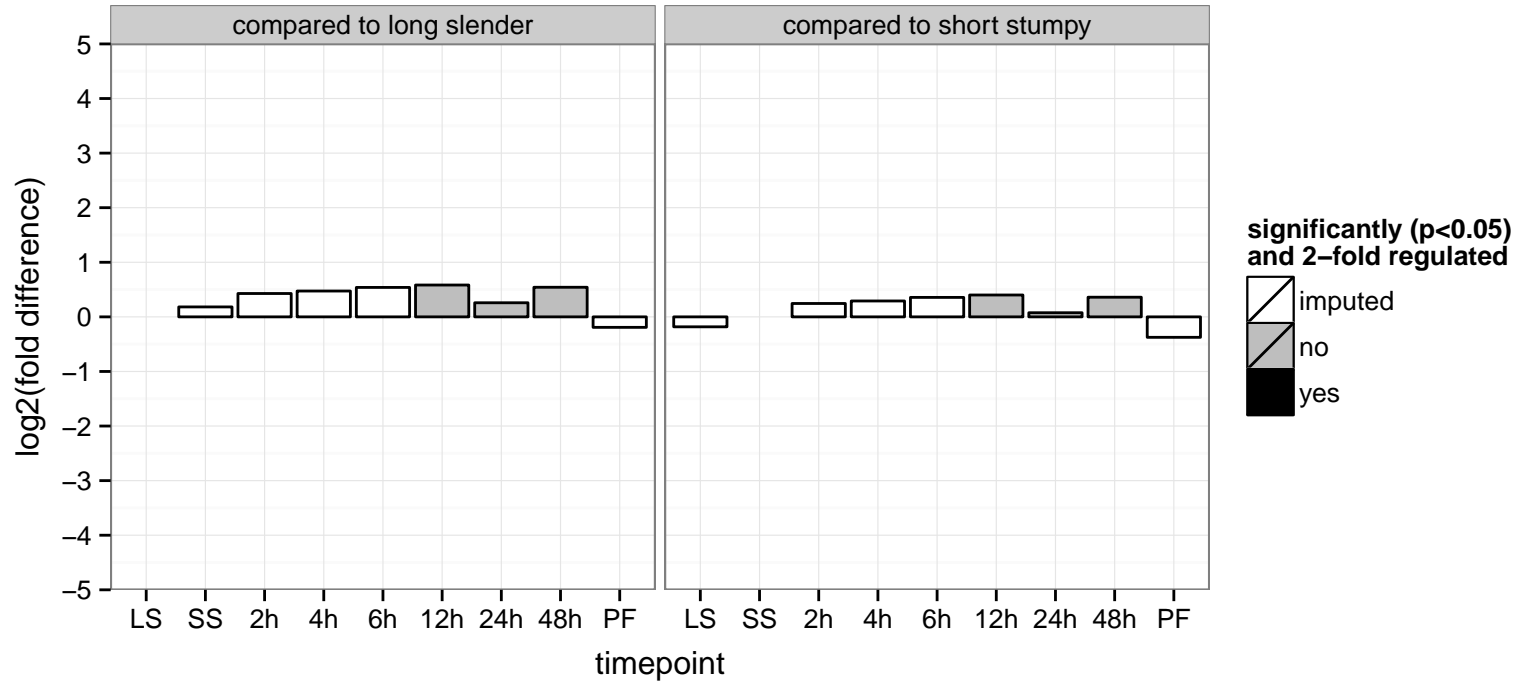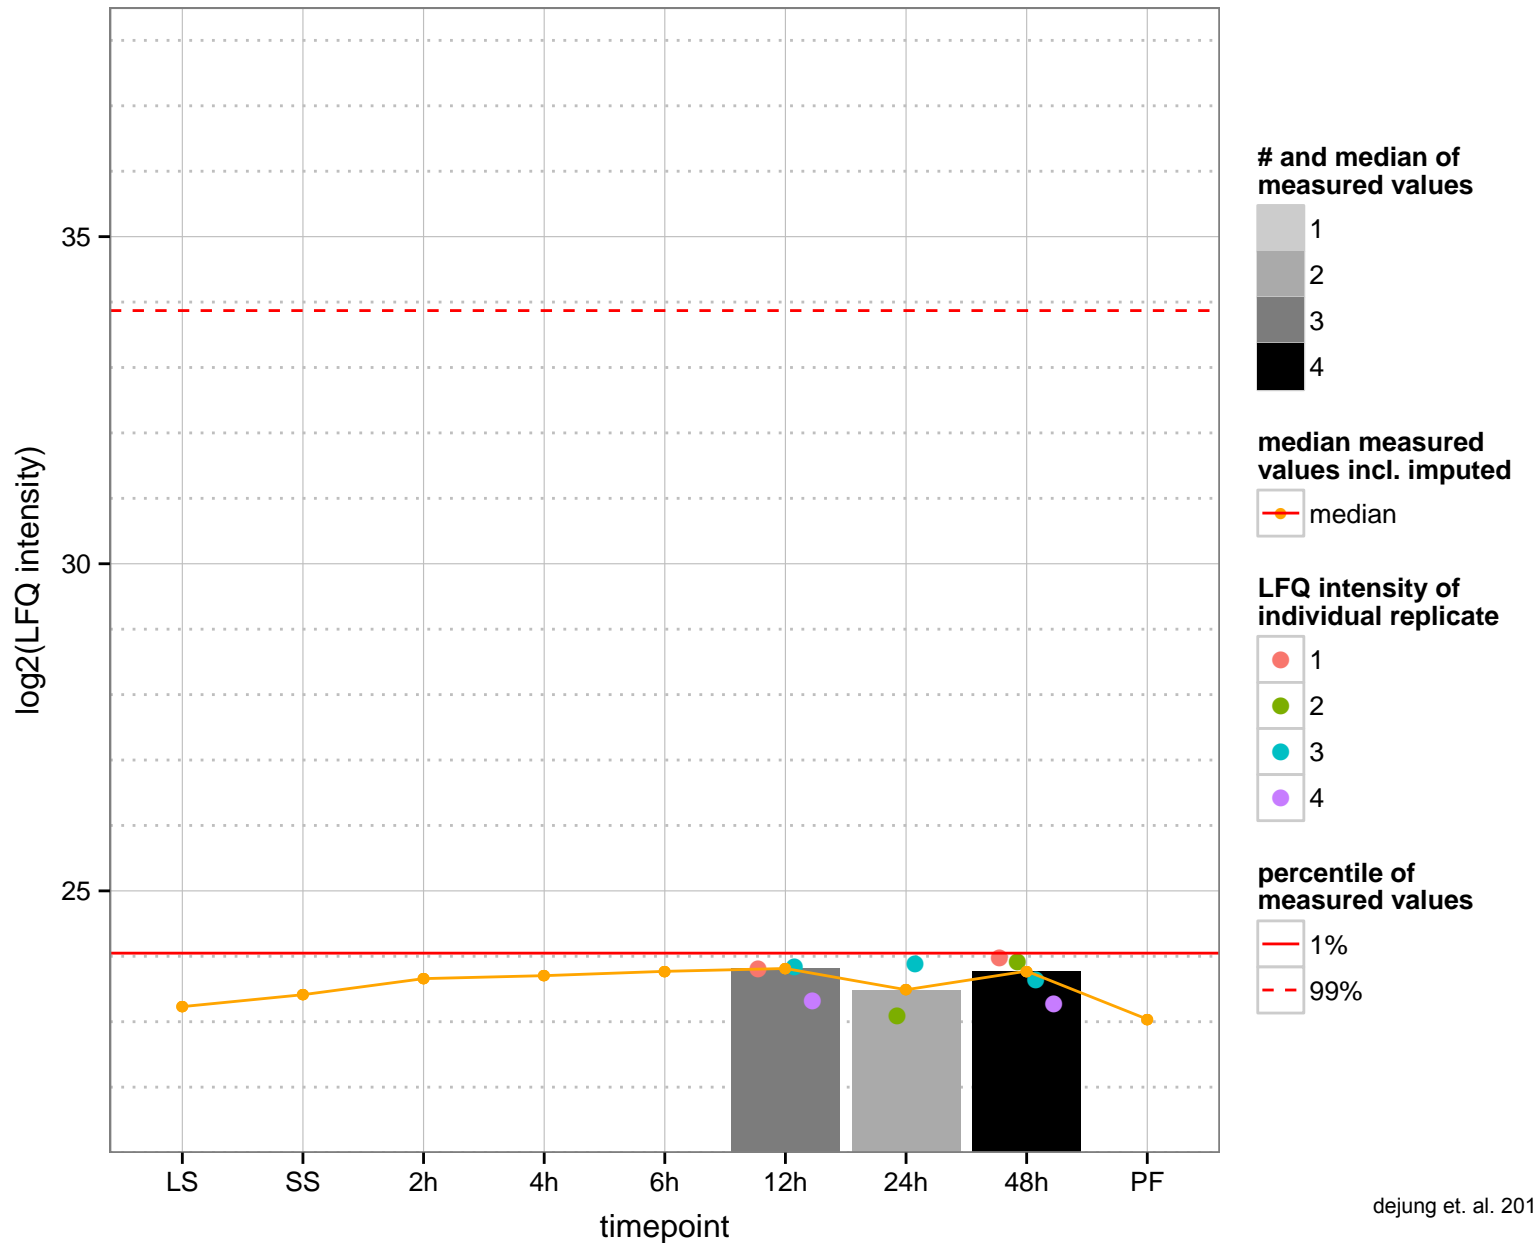

hypothetical protein, conserved  
 Tb927.1.4280  
 AGOF: null  
 AGOC: null  
 AGOP: null  
 PGOF: protein binding  
 PGOC: null  
 PGOP: null

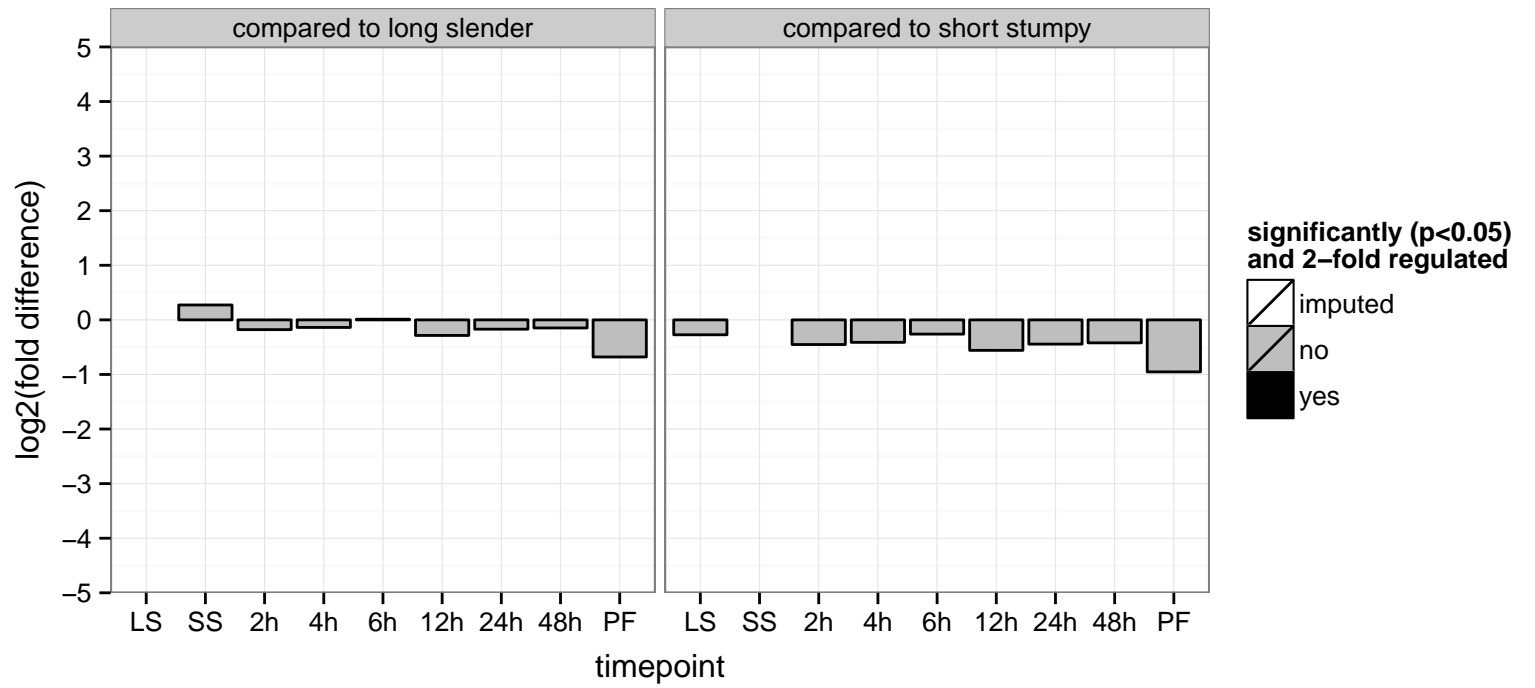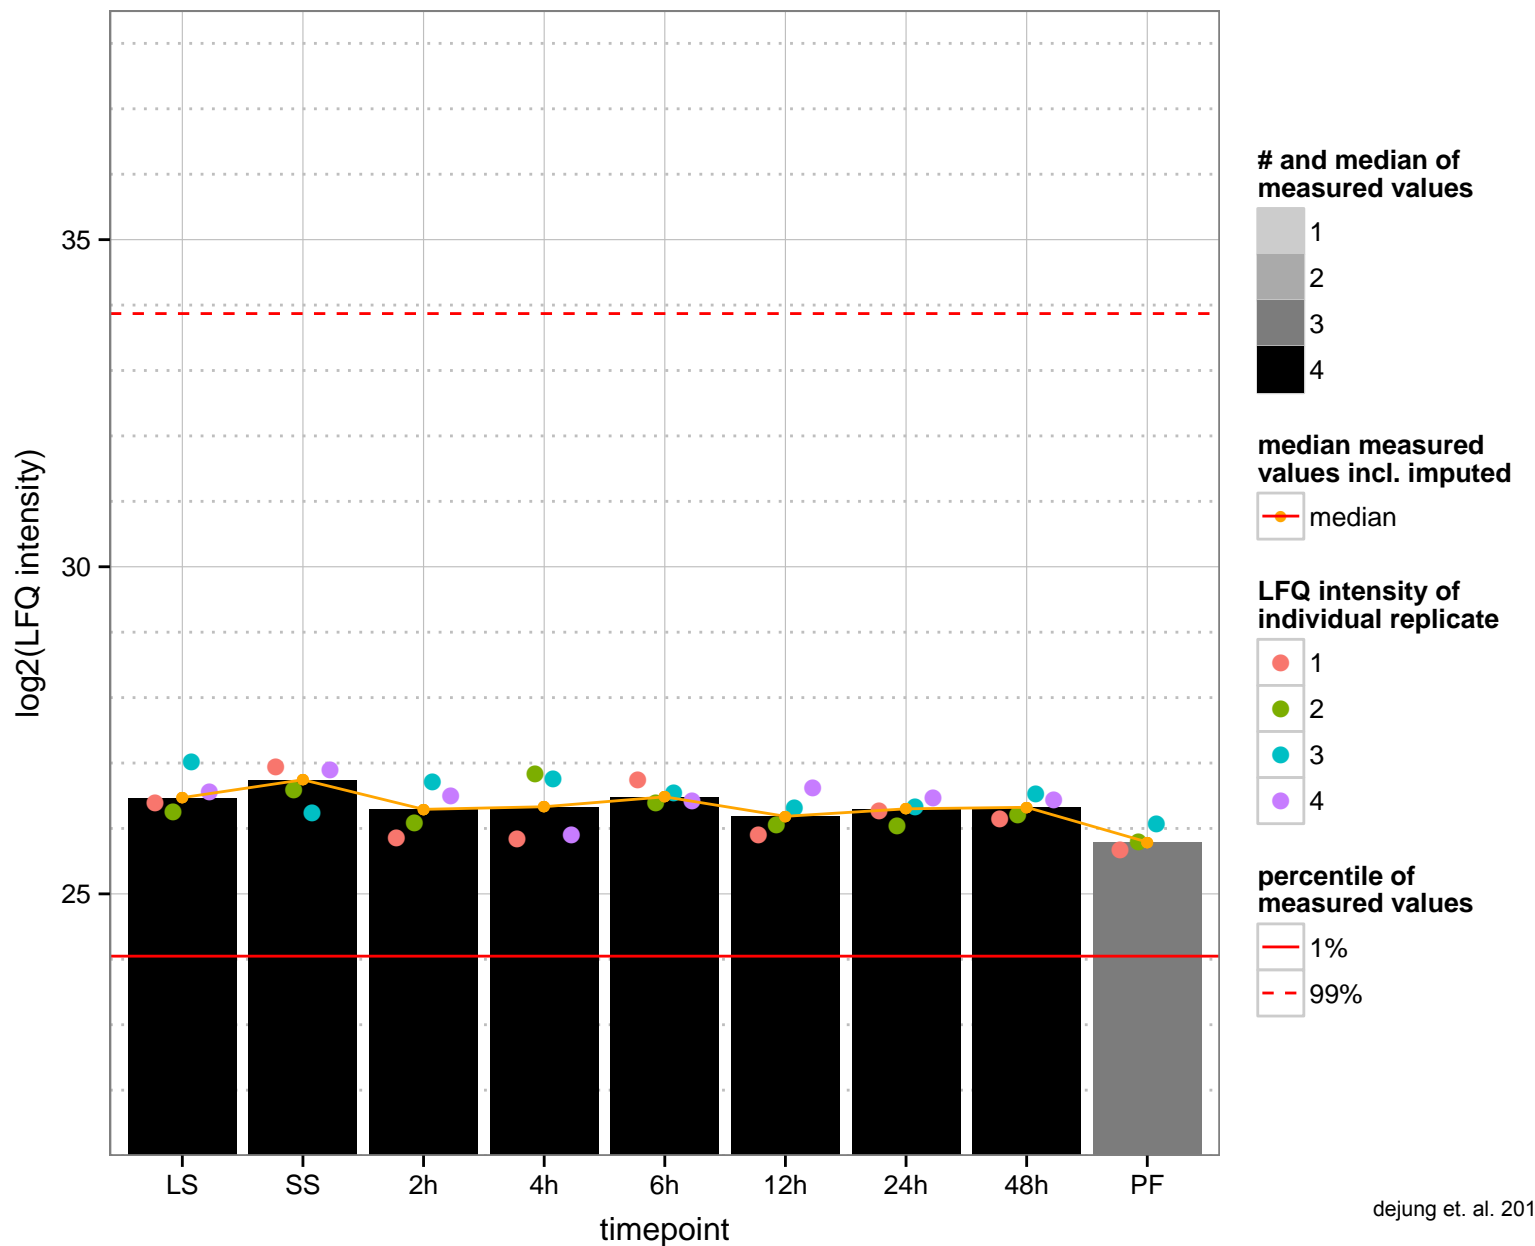

hypothetical protein, conserved  
 Tb927.1.4310  
 AGOF: null  
 AGOC: null  
 AGOP: null  
 PGO: null  
 PGO: null  
 PGO: null

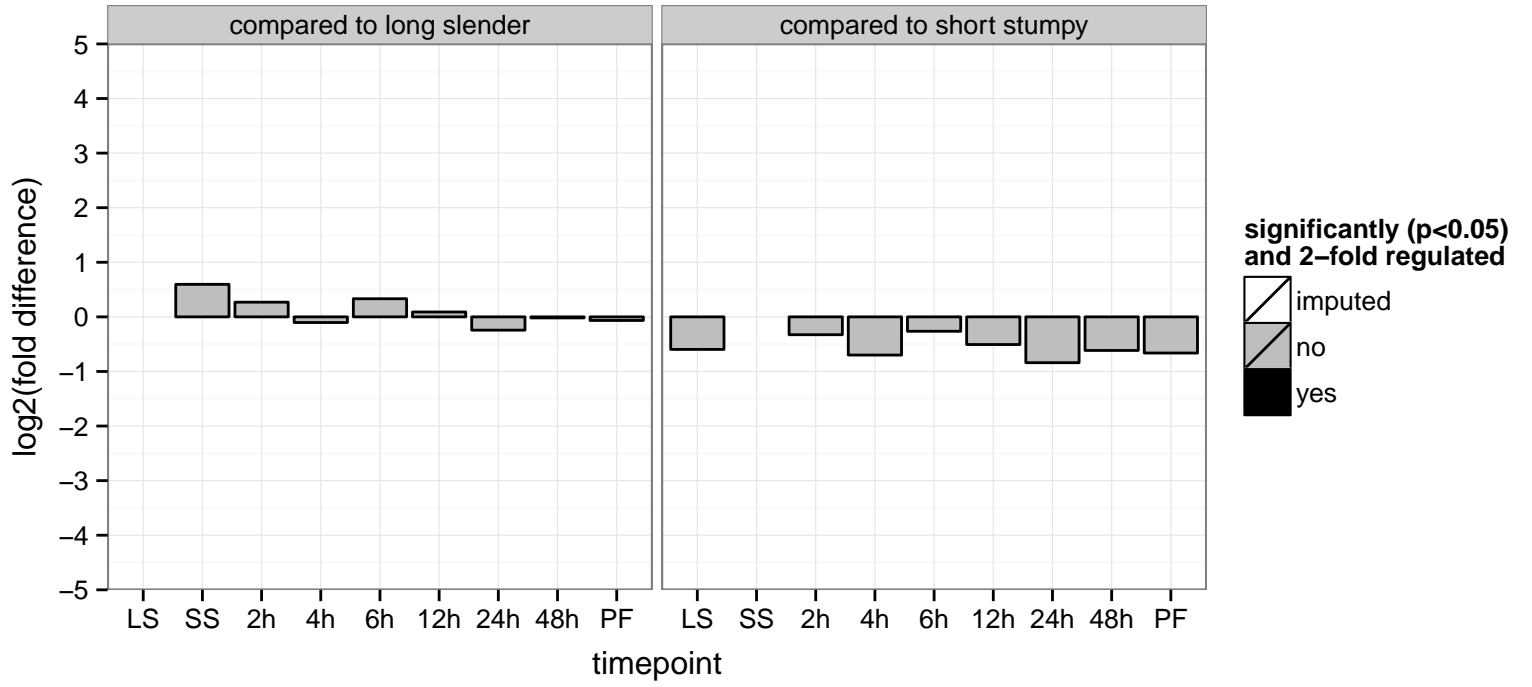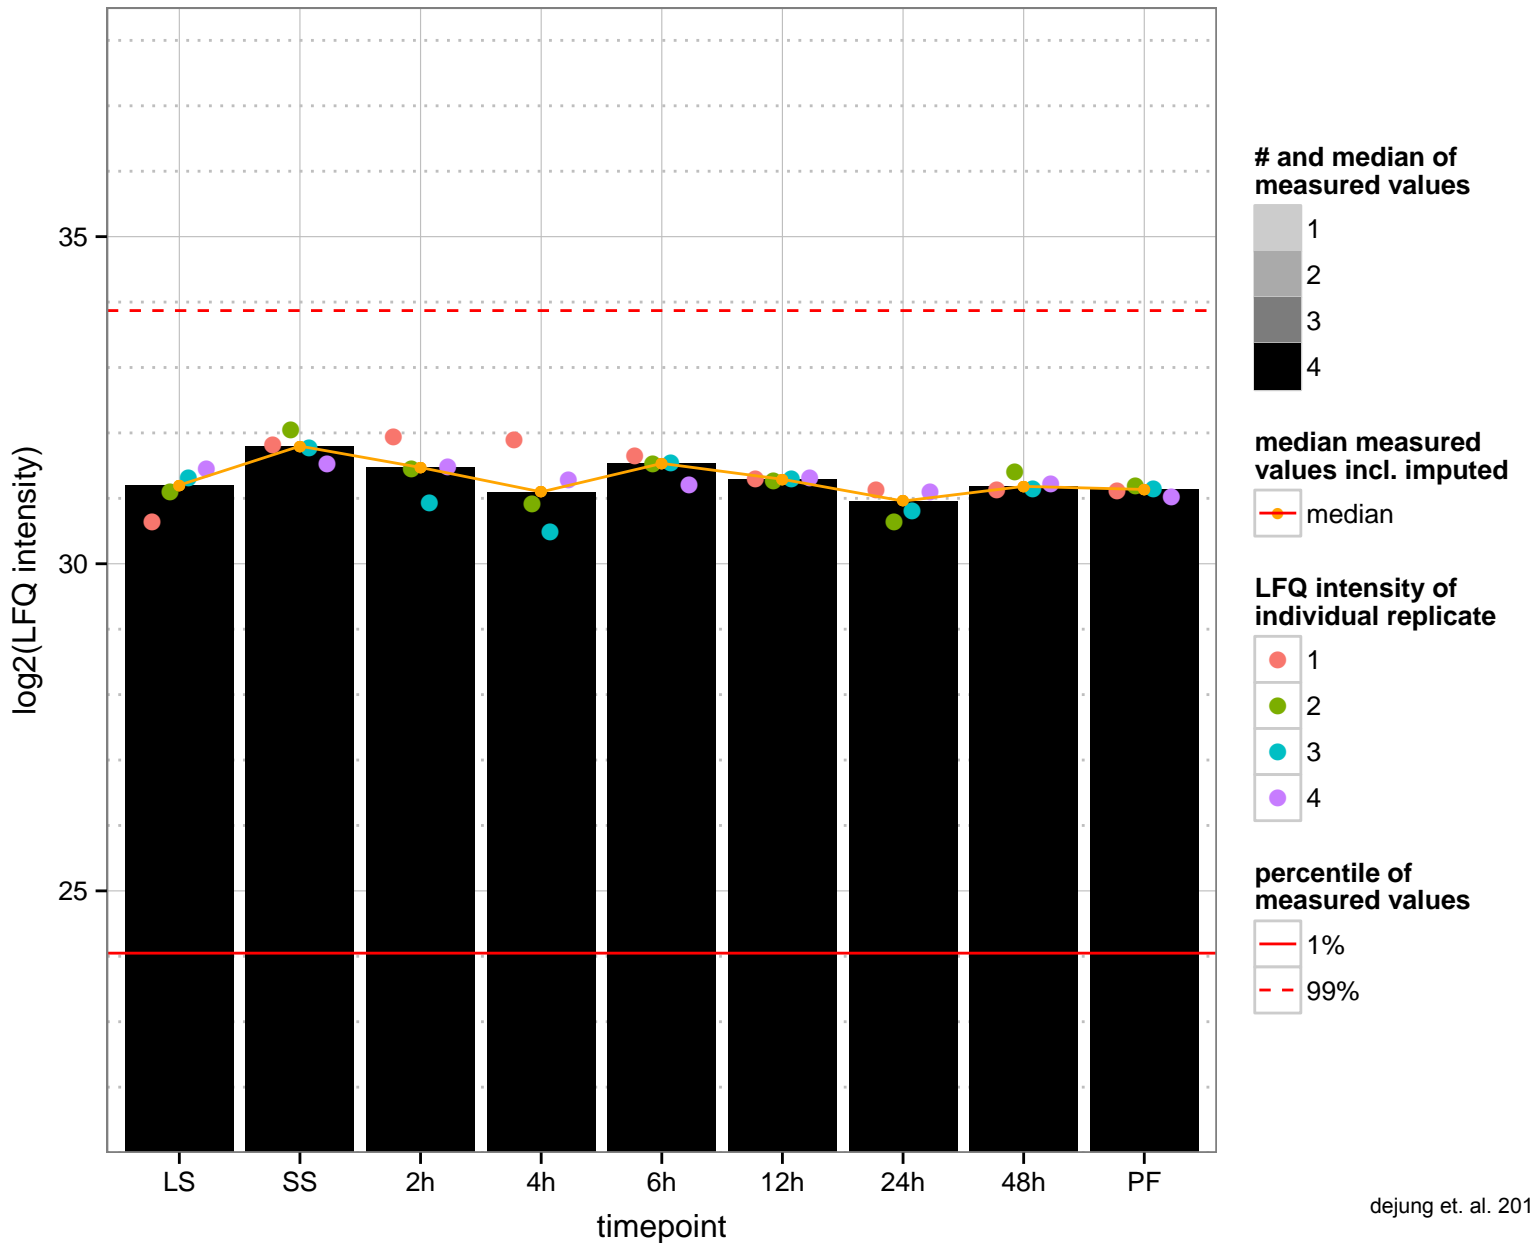

hypothetical protein, conserved  
 Tb927.1.4340  
 AGOF: null  
 AGOC: null  
 AGOP: null  
 PGO: null  
 PGO: null  
 PGO: null

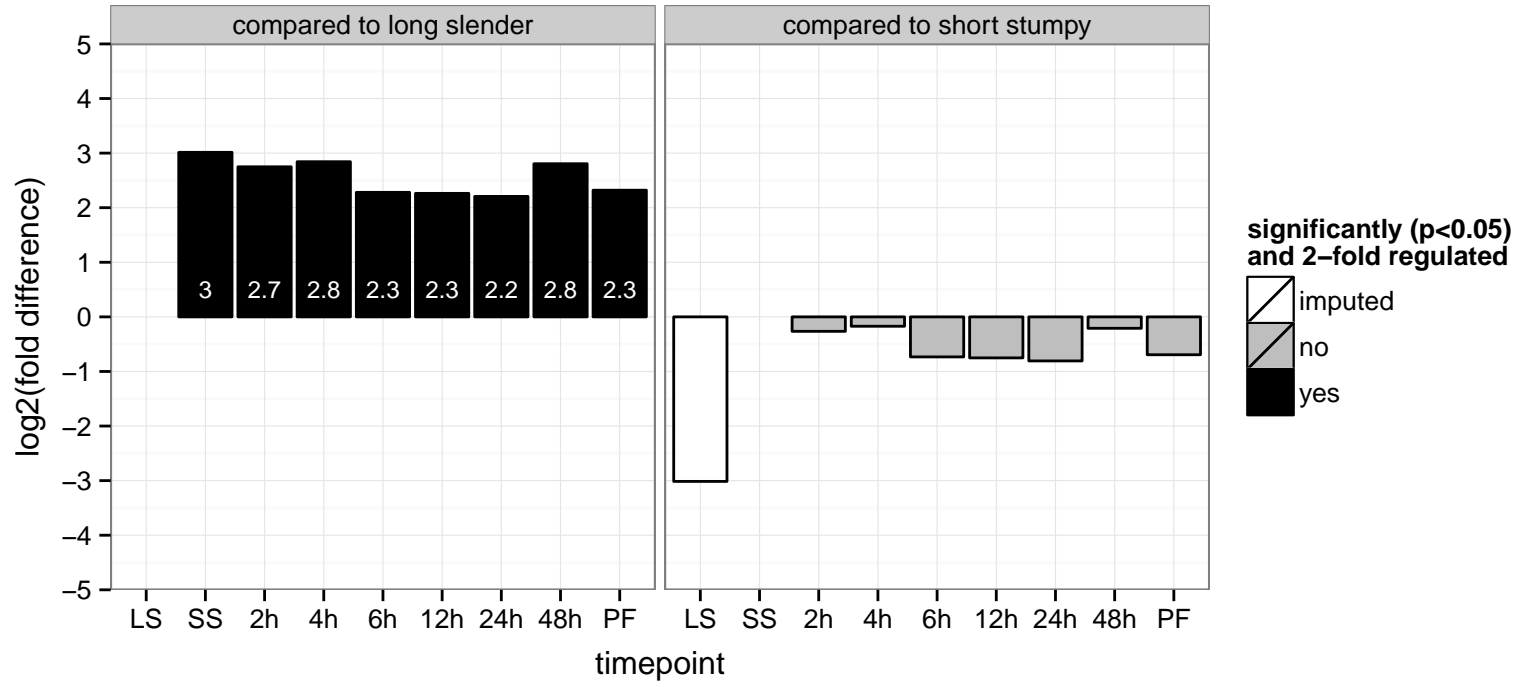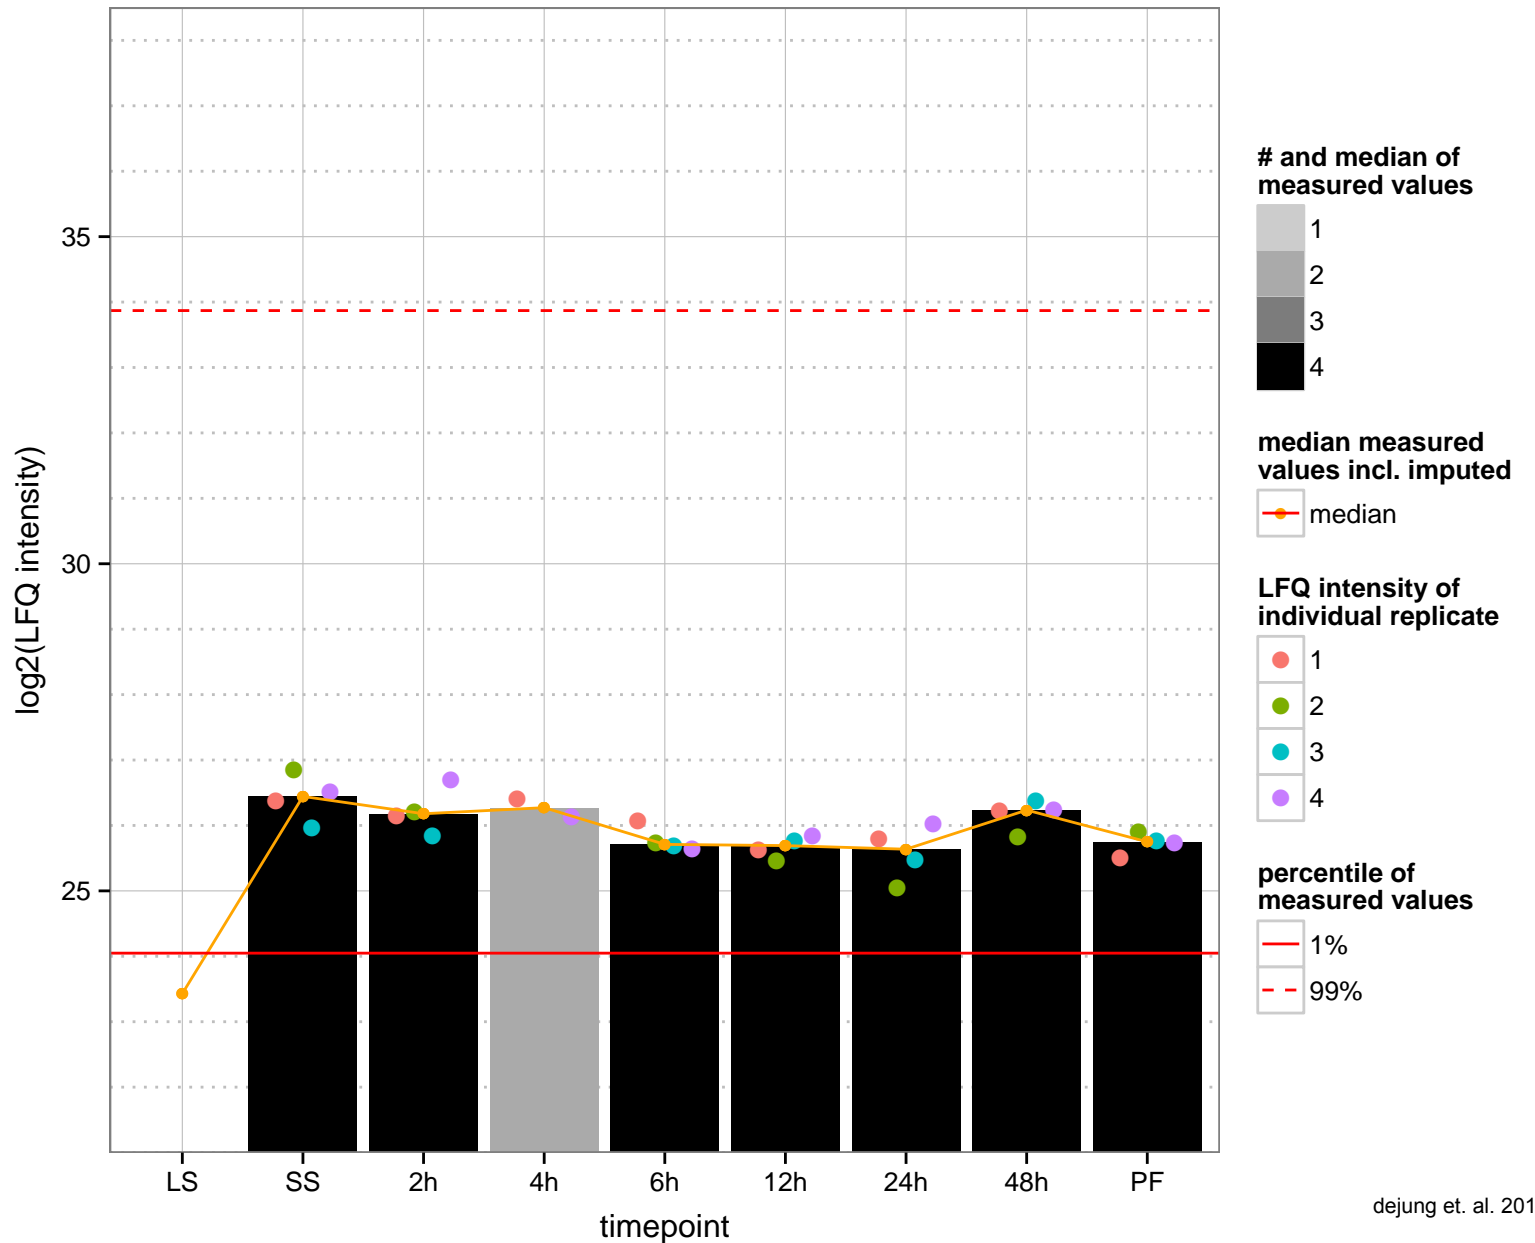



hypothetical protein, conserved  
 Tb927.1.4410  
 AGOF: null  
 AGOC: null  
 AGOP: null  
 PGOF: null  
 PGOC: null  
 PGOP: null

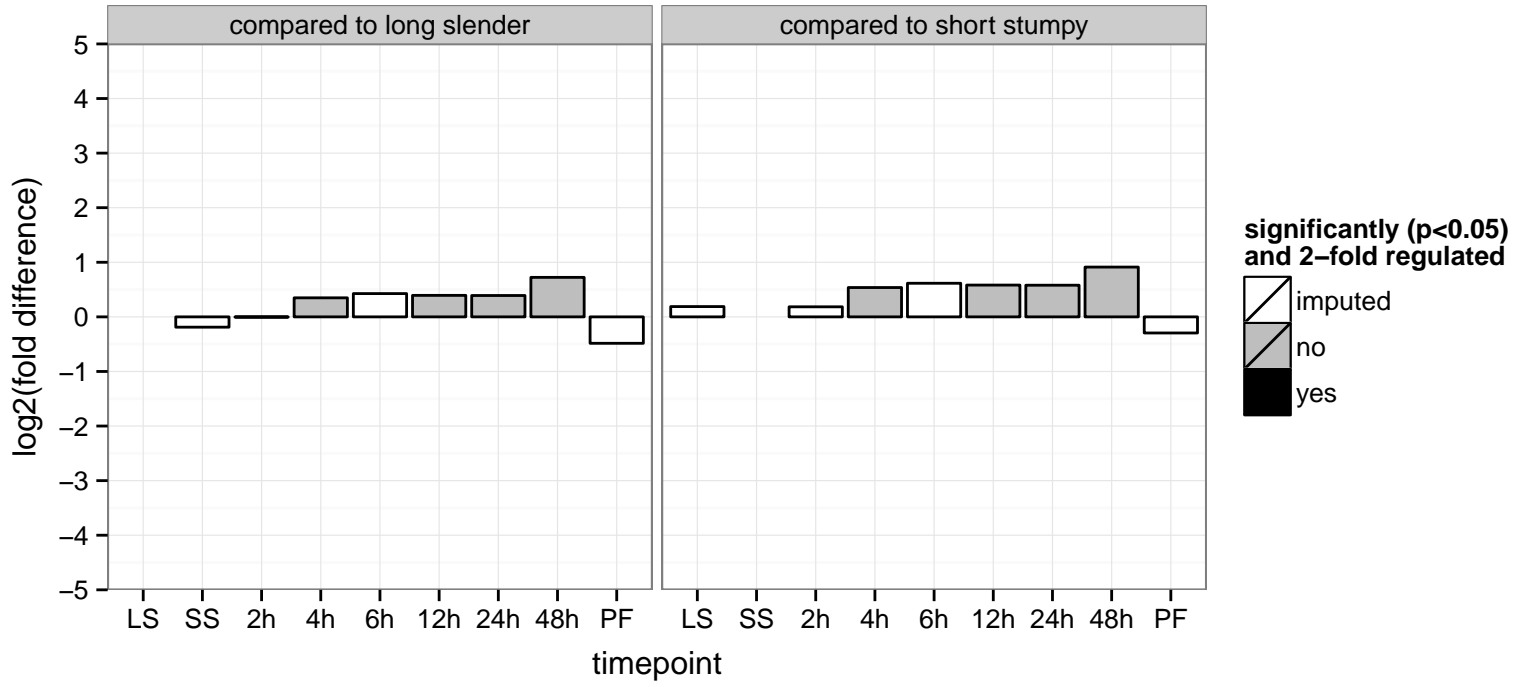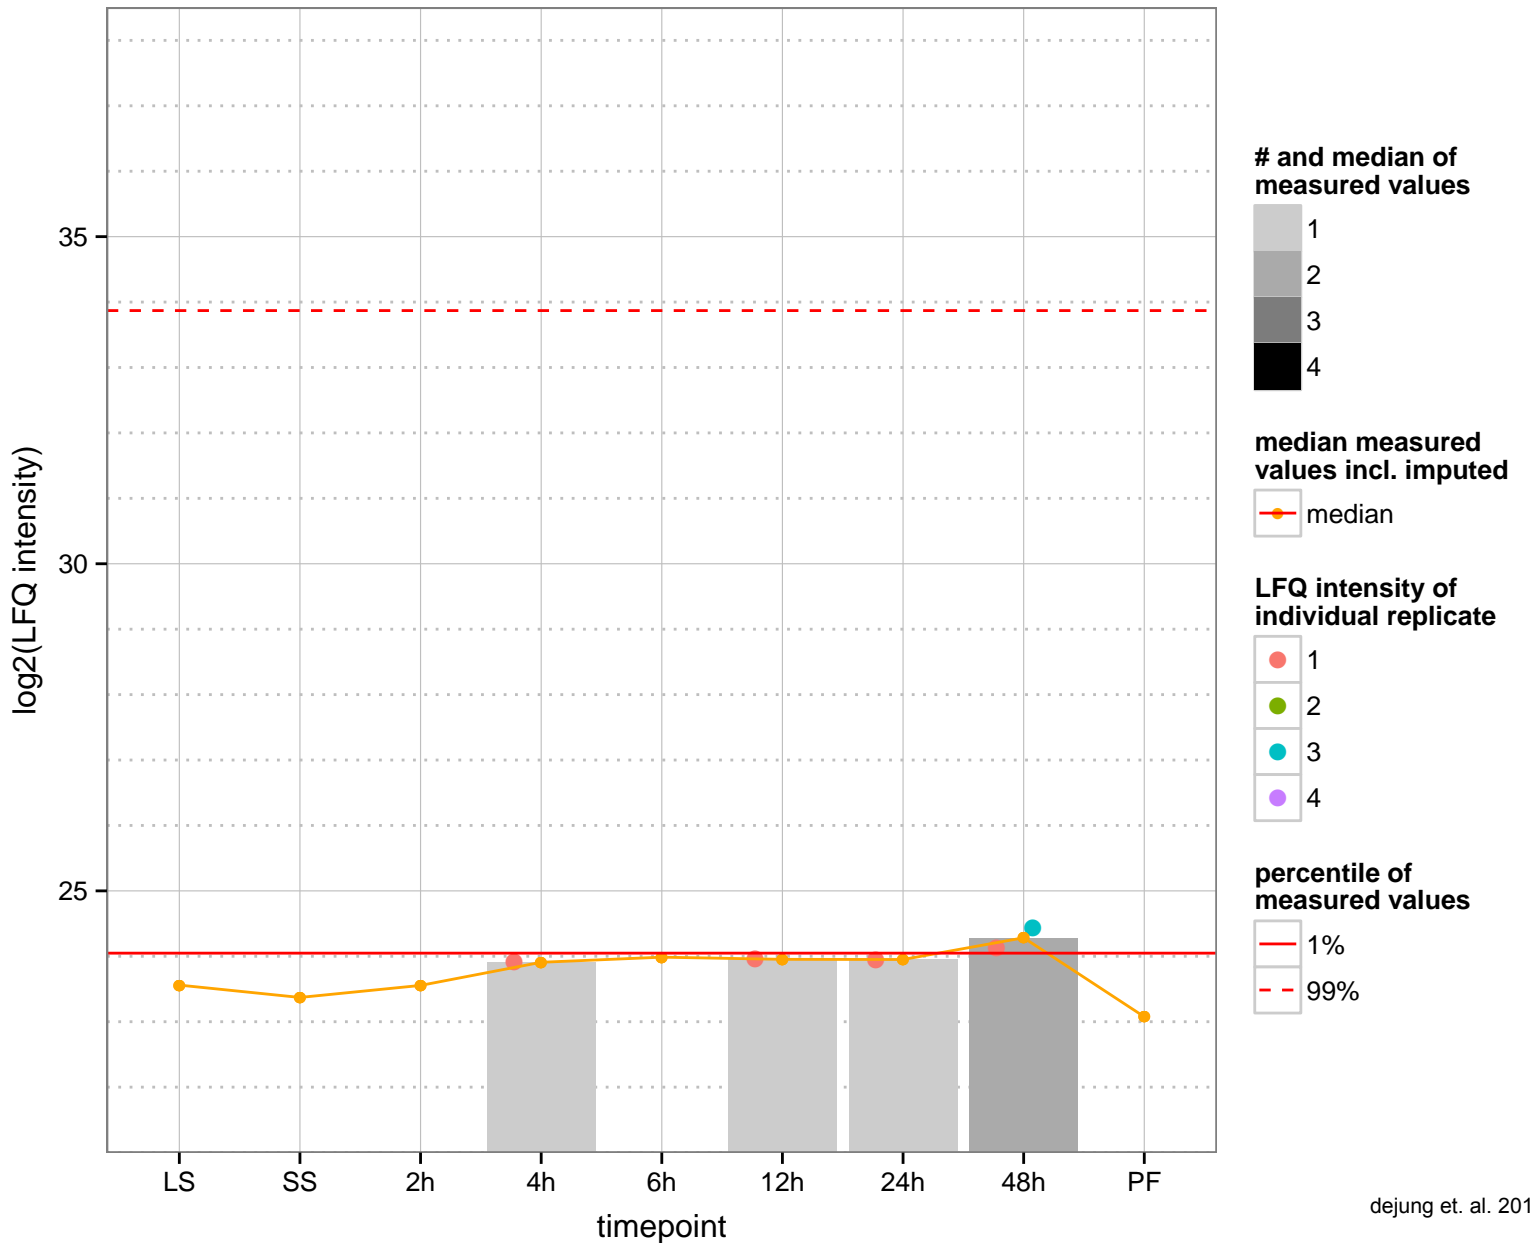

retrotransposon hot spot protein (RHS, pseudogene), putative  
 Tb927.1.450  
 AGOF: null  
 AGOC: null  
 AGOP: null  
 PGOF: null  
 PGOE: null  
 PGOP: null

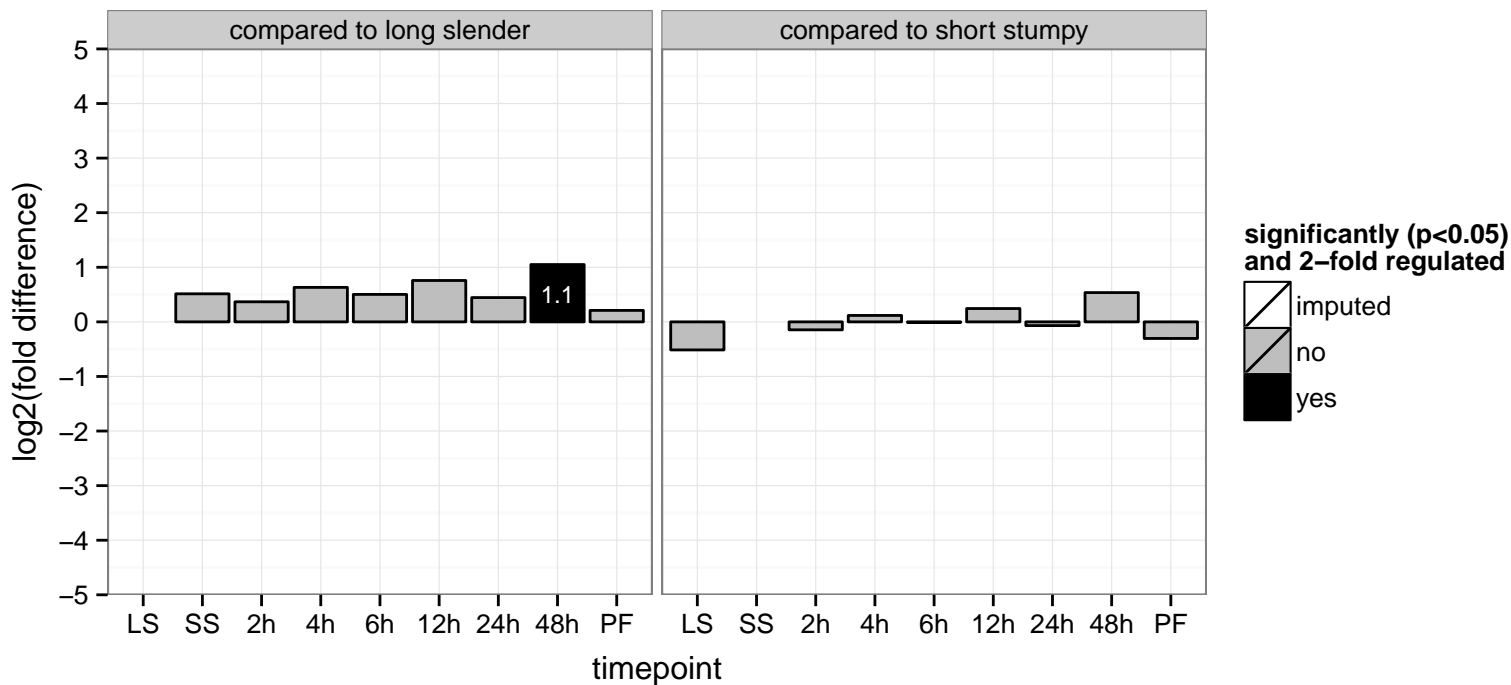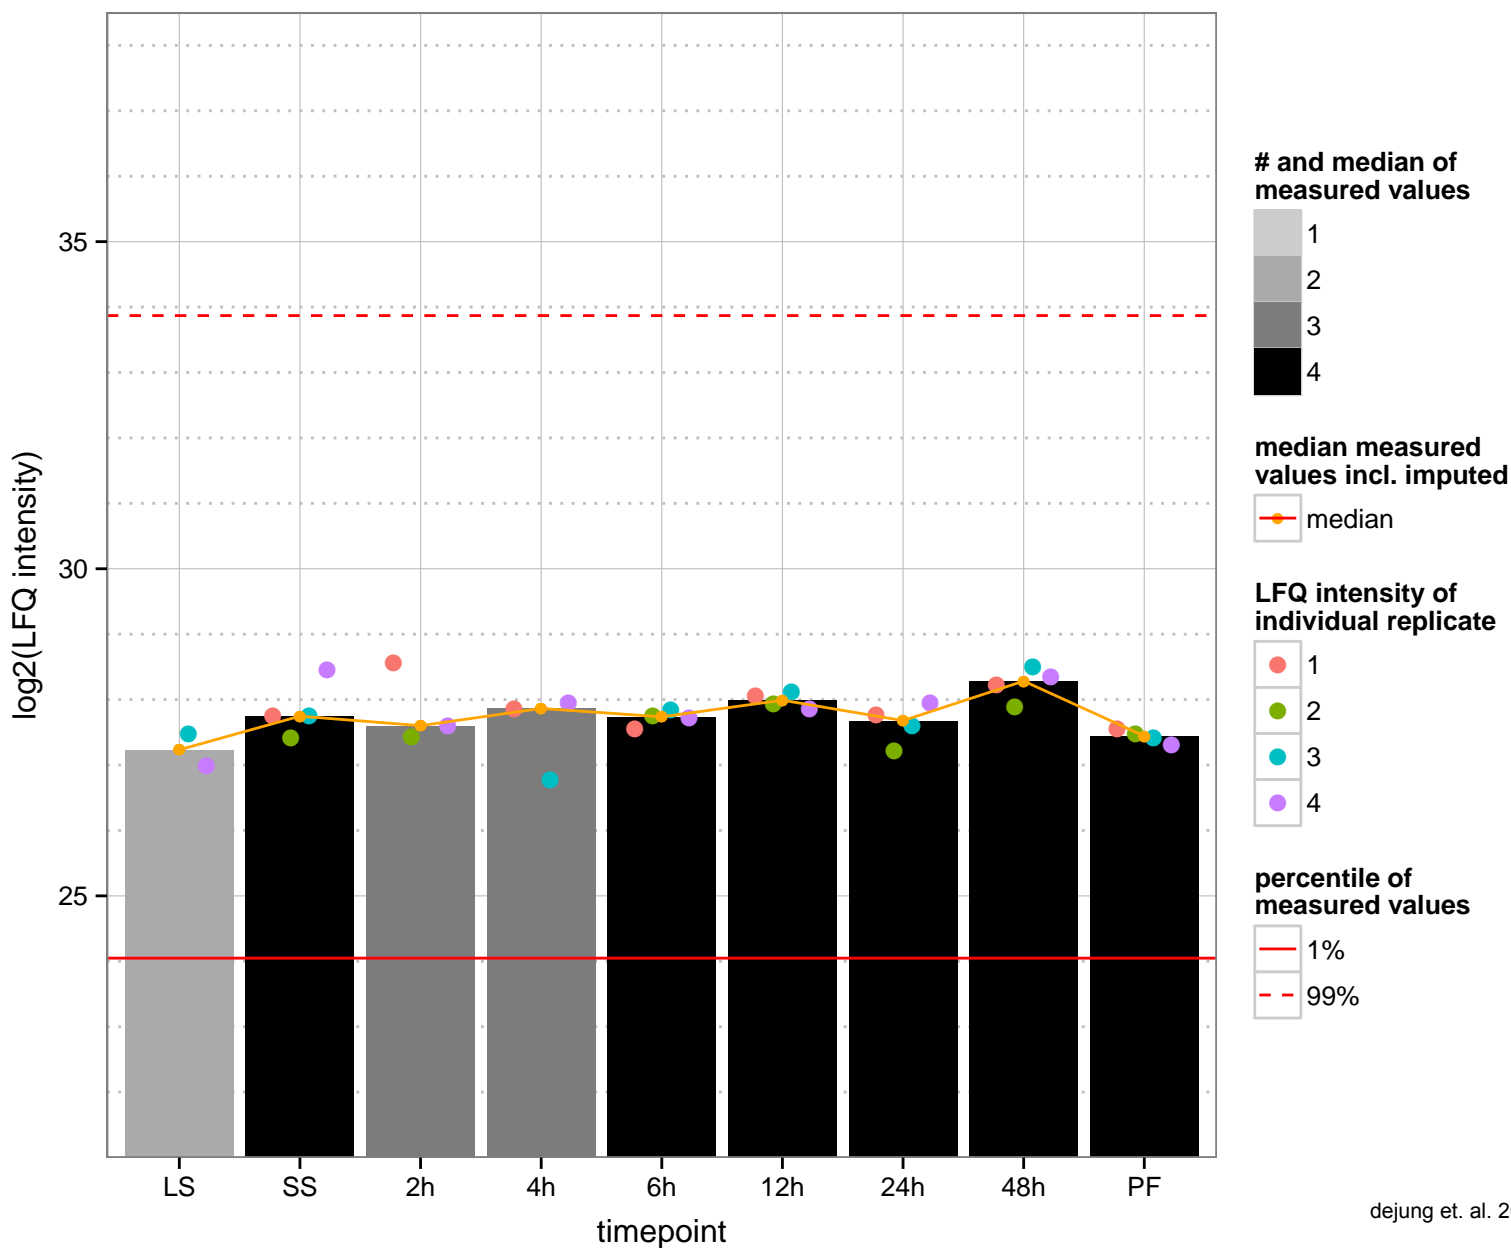

hypothetical protein, conserved  
 Tb927.1.4680  
 AGOF: null  
 AGOC: null  
 AGOP: null  
 PGO: null  
 PGOC: null  
 PGOP: null

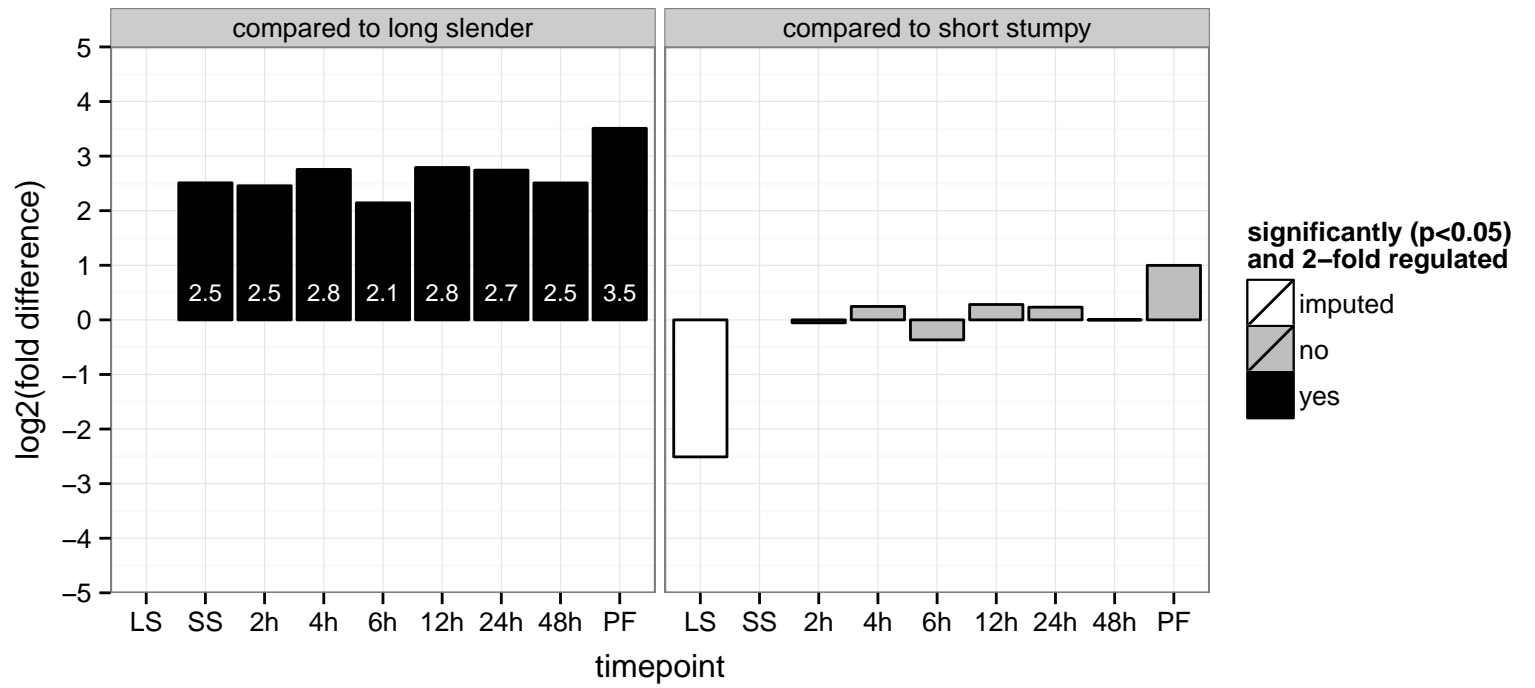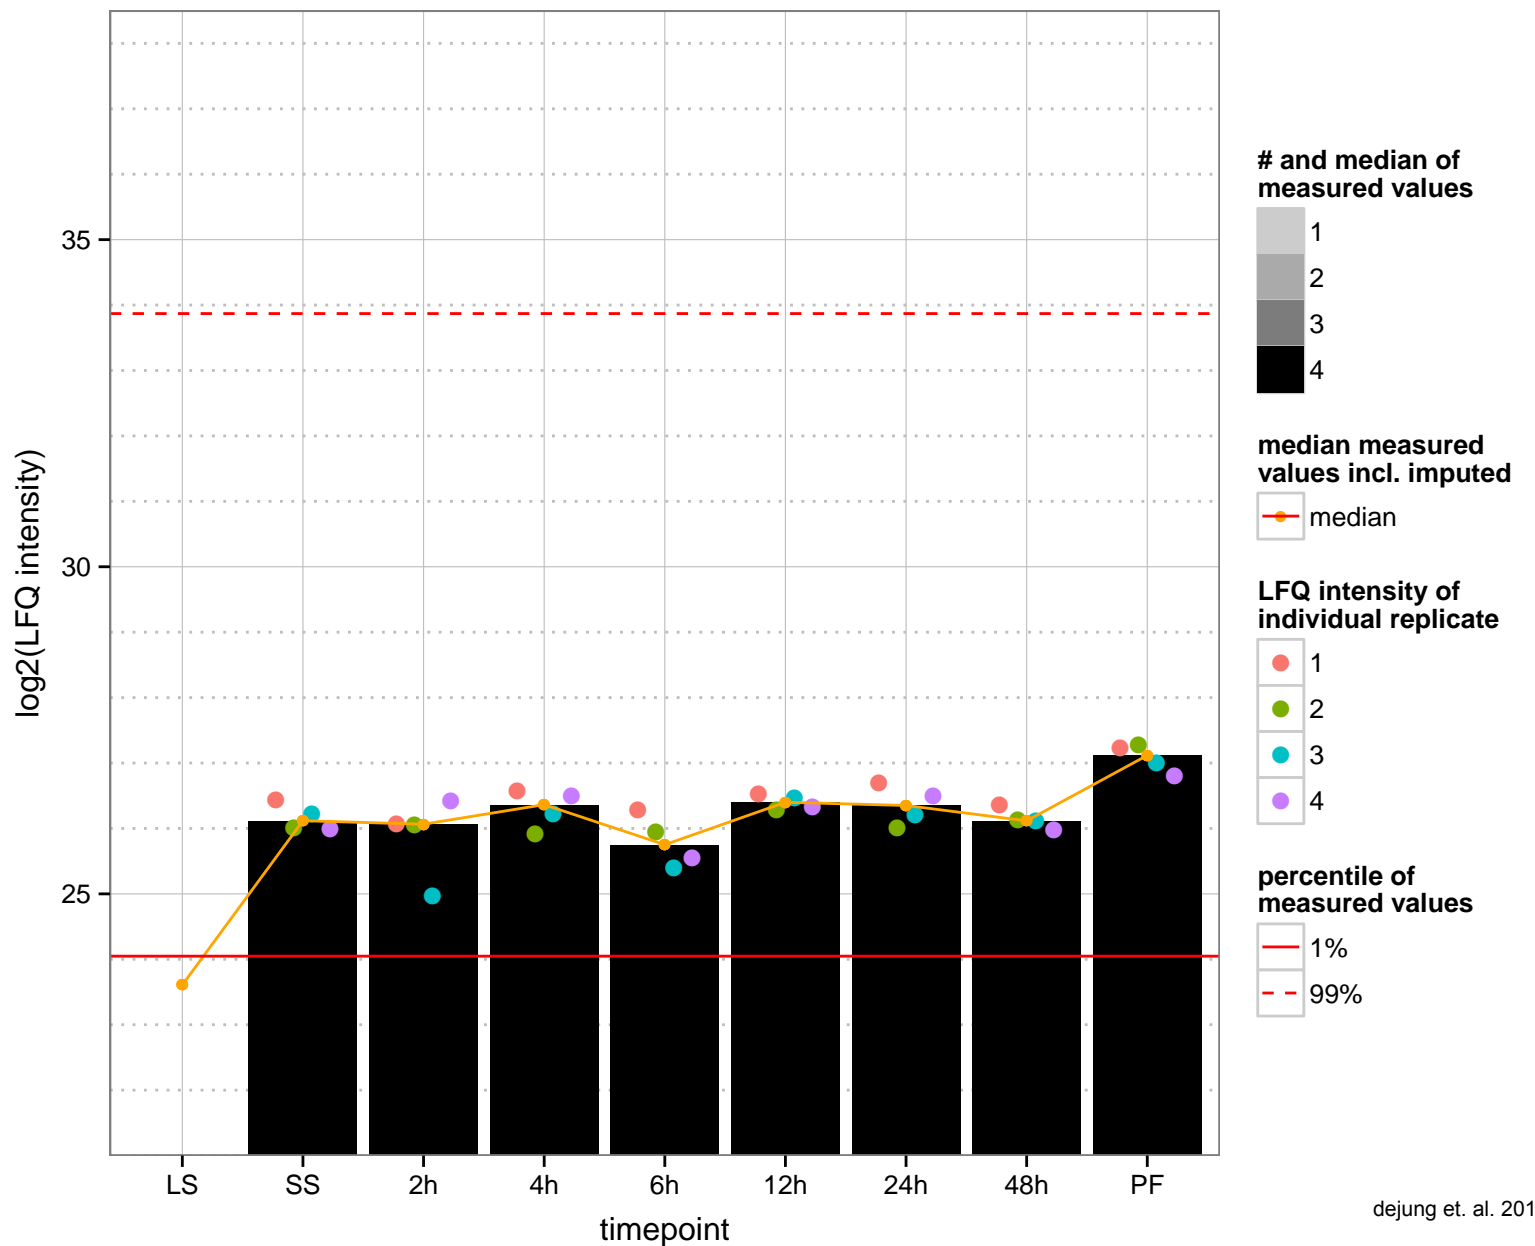

hypothetical protein, conserved  
 Tb927.1.4720  
 AGOF: null  
 AGOC: null  
 AGOP: null  
 PGOF: protein binding  
 PGO: null  
 PGOP: null

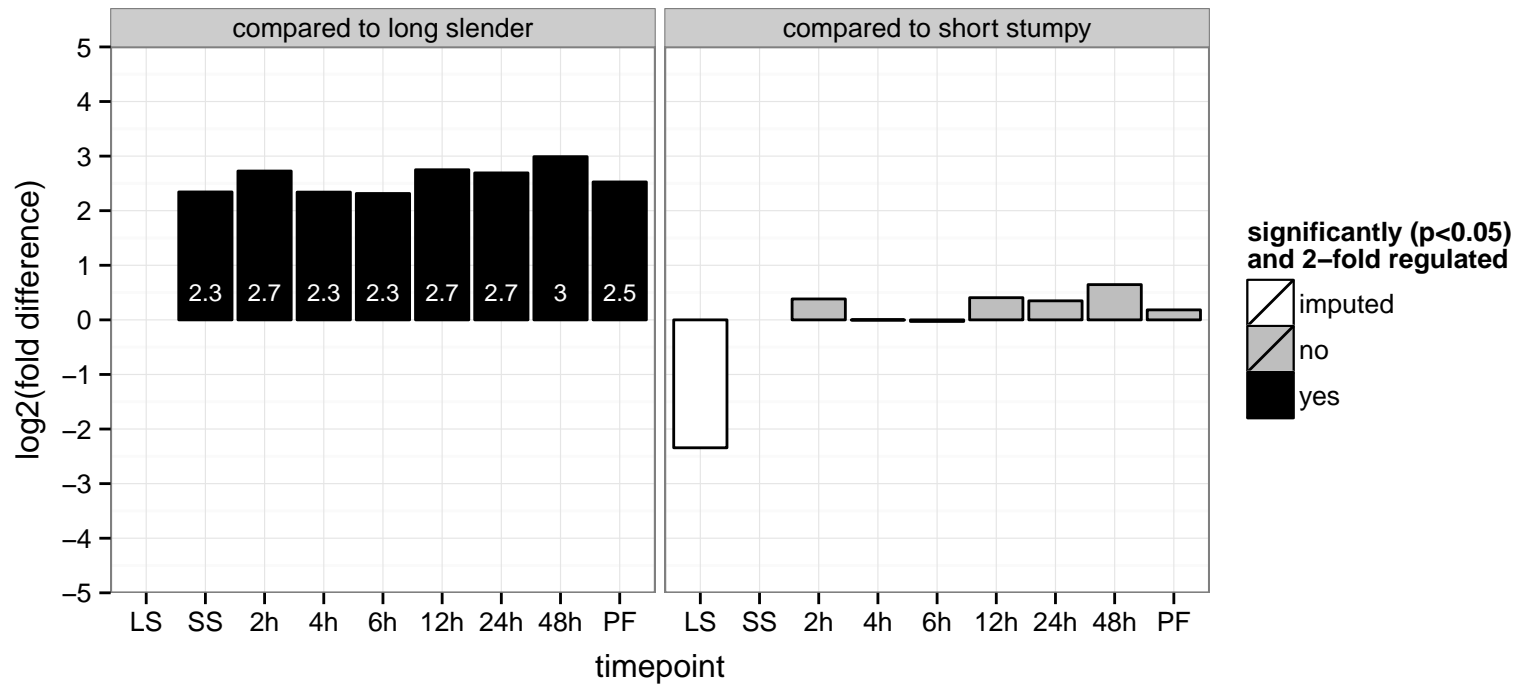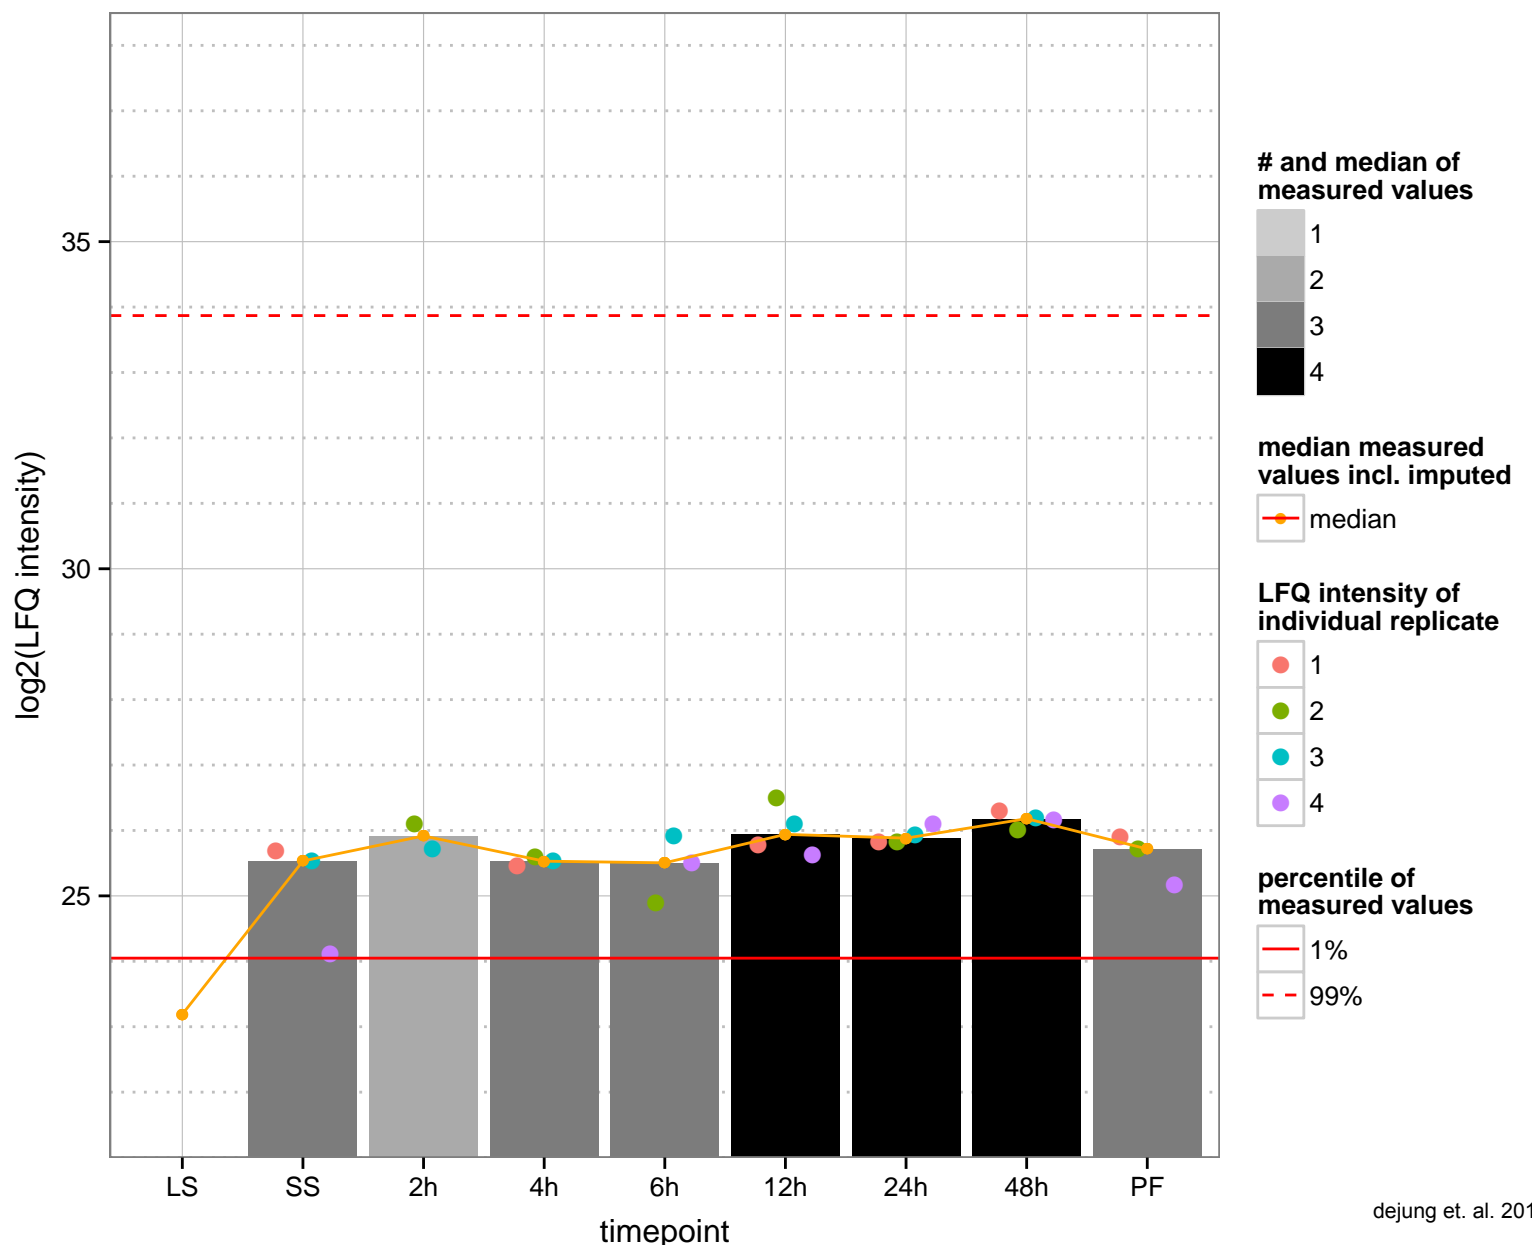

hypothetical protein, conserved  
 Tb927.1.4740  
 AGOF: null  
 AGOC: null  
 AGOP: null  
 PGO: null  
 PGOC: null  
 PGOP: null

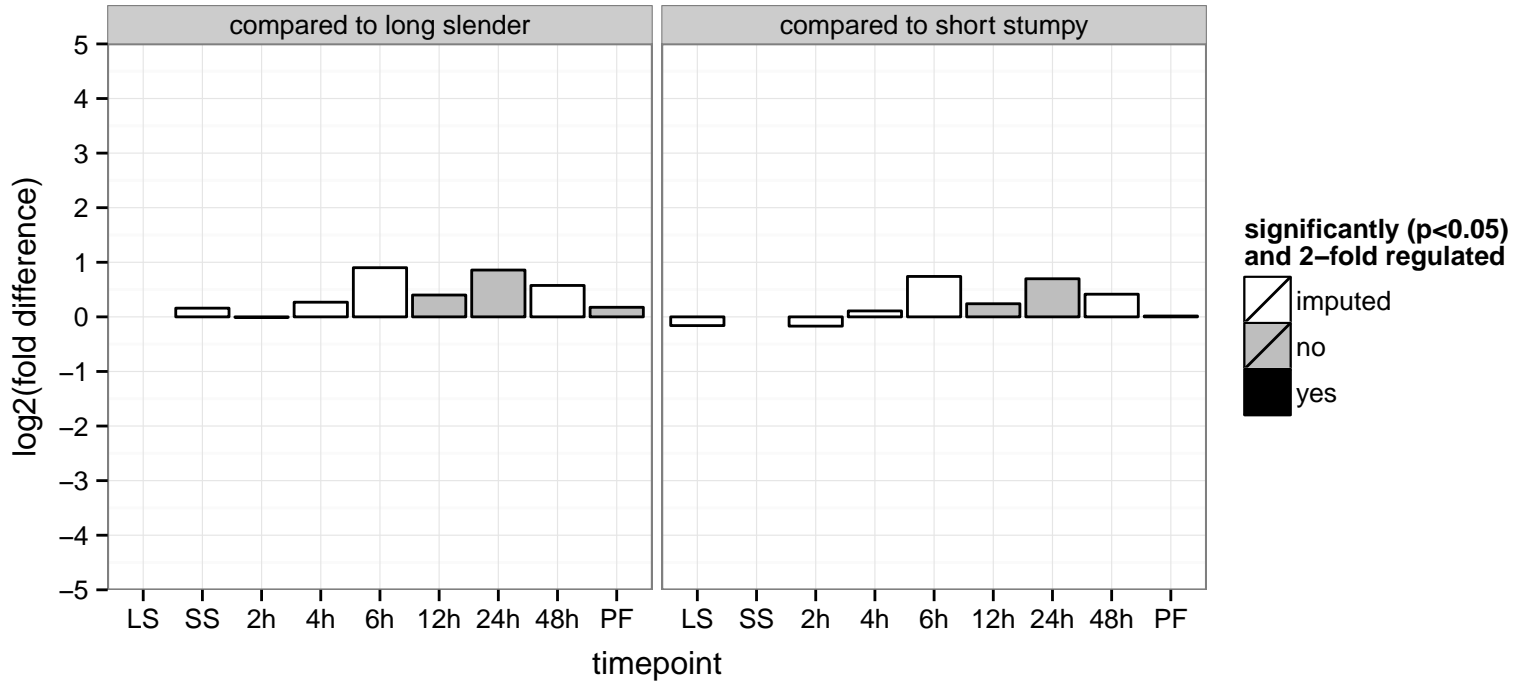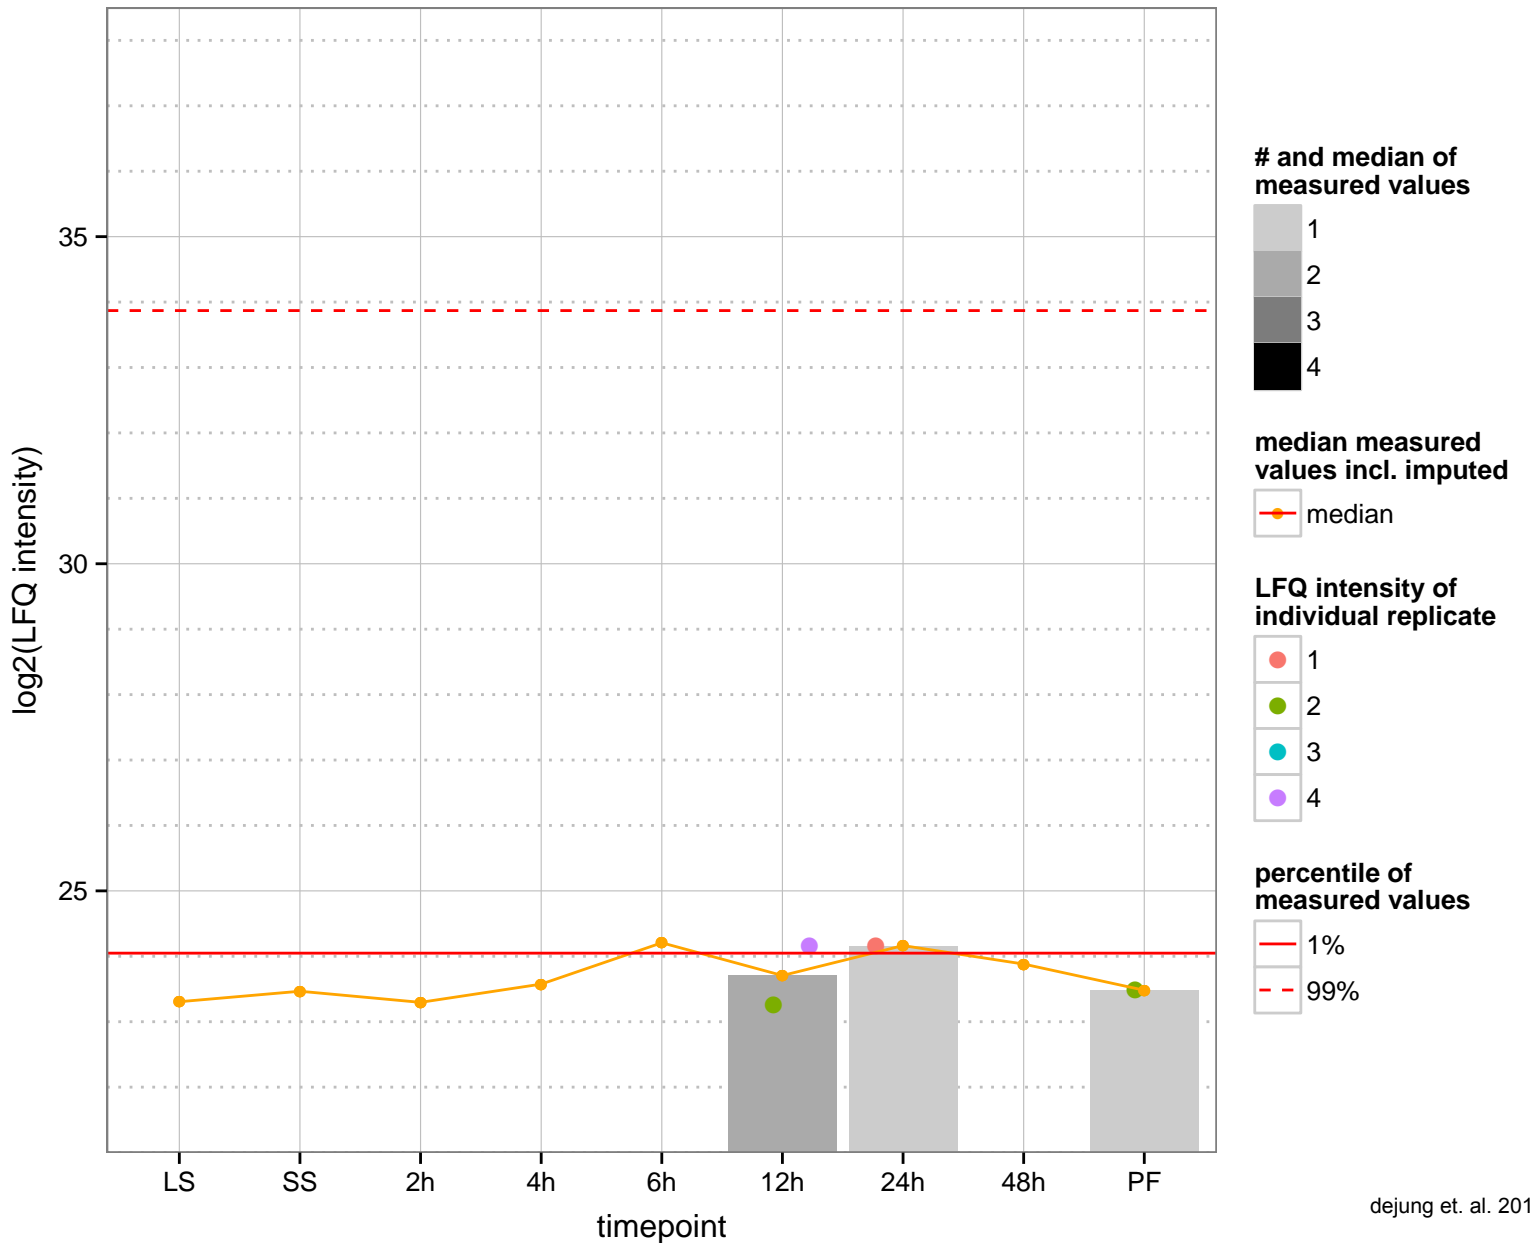

leucine-rich repeat protein (LRRP), putative  
 Tb927.1.5030  
 AGOF: null  
 AGOC: null  
 AGOP: null  
 PGO: protein binding  
 PGOC: null  
 PGOP: null

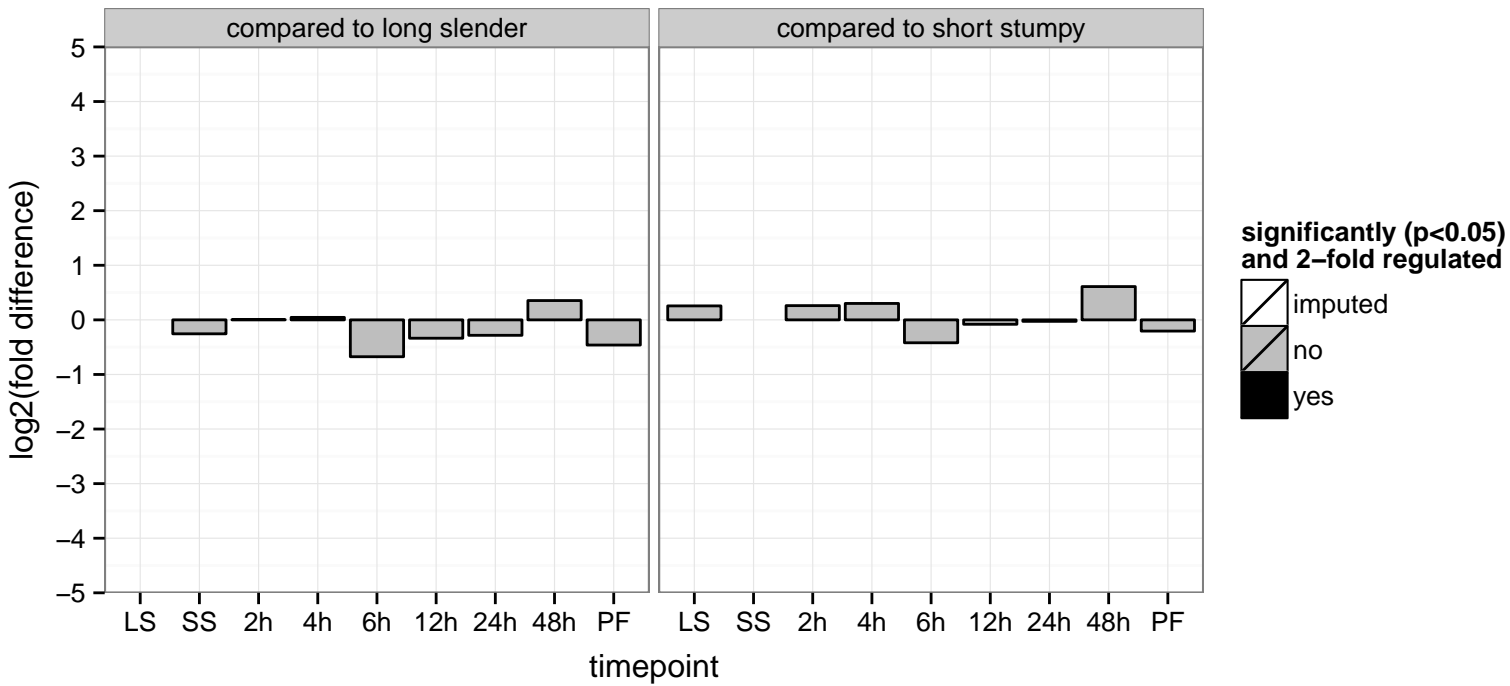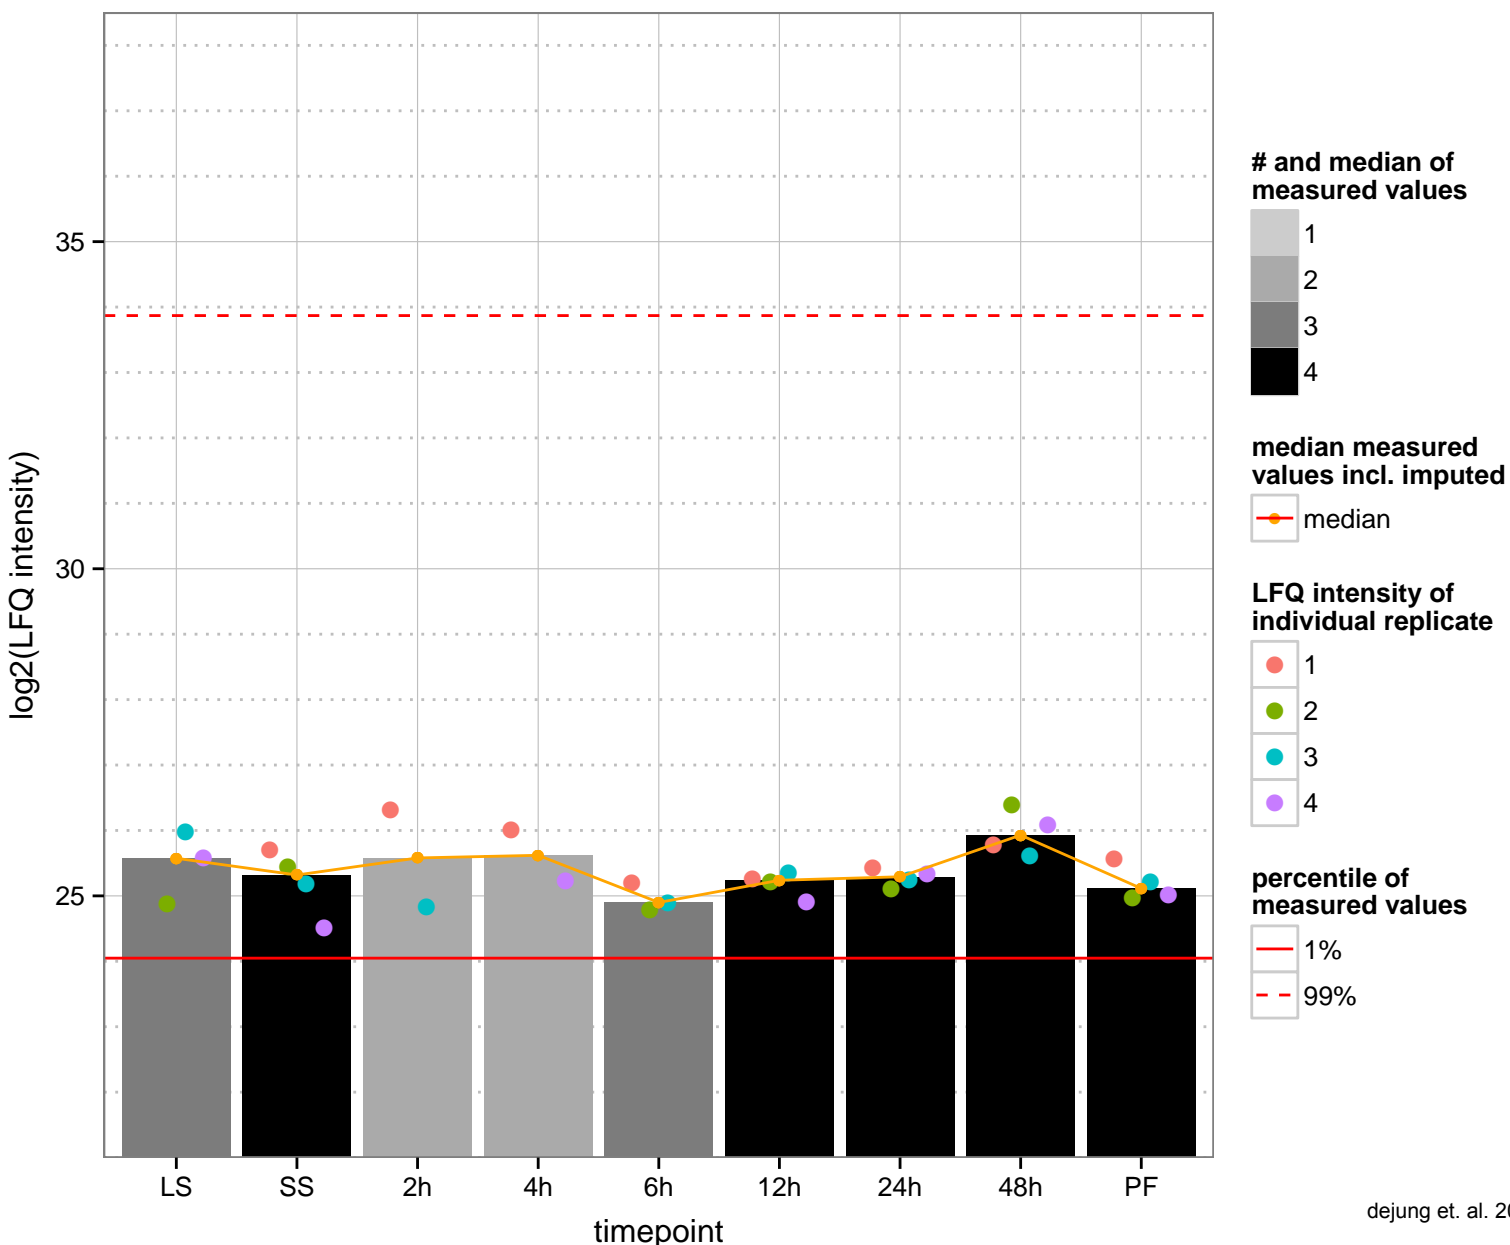

variant surface glycoprotein (VSG)-related, putative  
 Tb927.1.5170  
 AGOF: host cell surface receptor binding  
 AGOC: integral to membrane  
 AGOP: antigenic variation, symbiosis, encompassing mutualism through parasitism  
 PGO: null  
 PGOC: null  
 PGOP: null

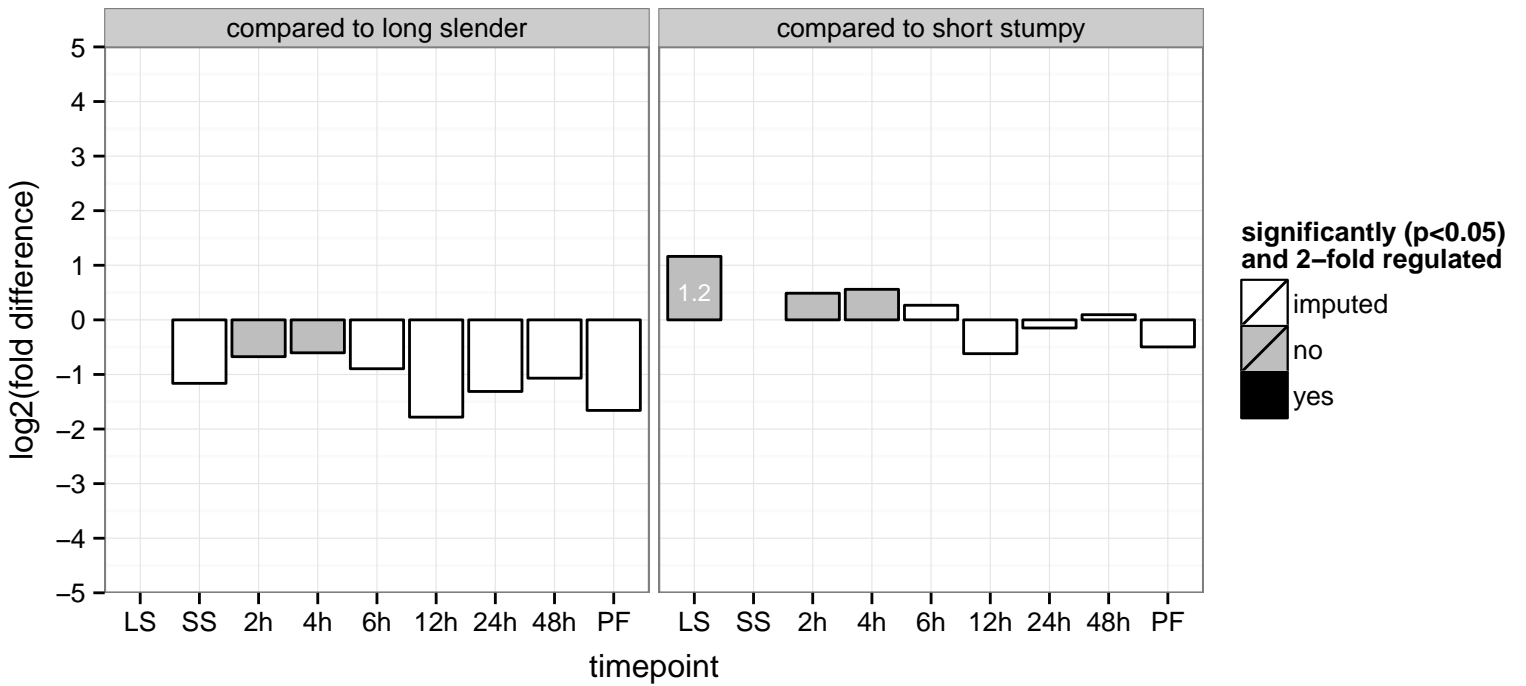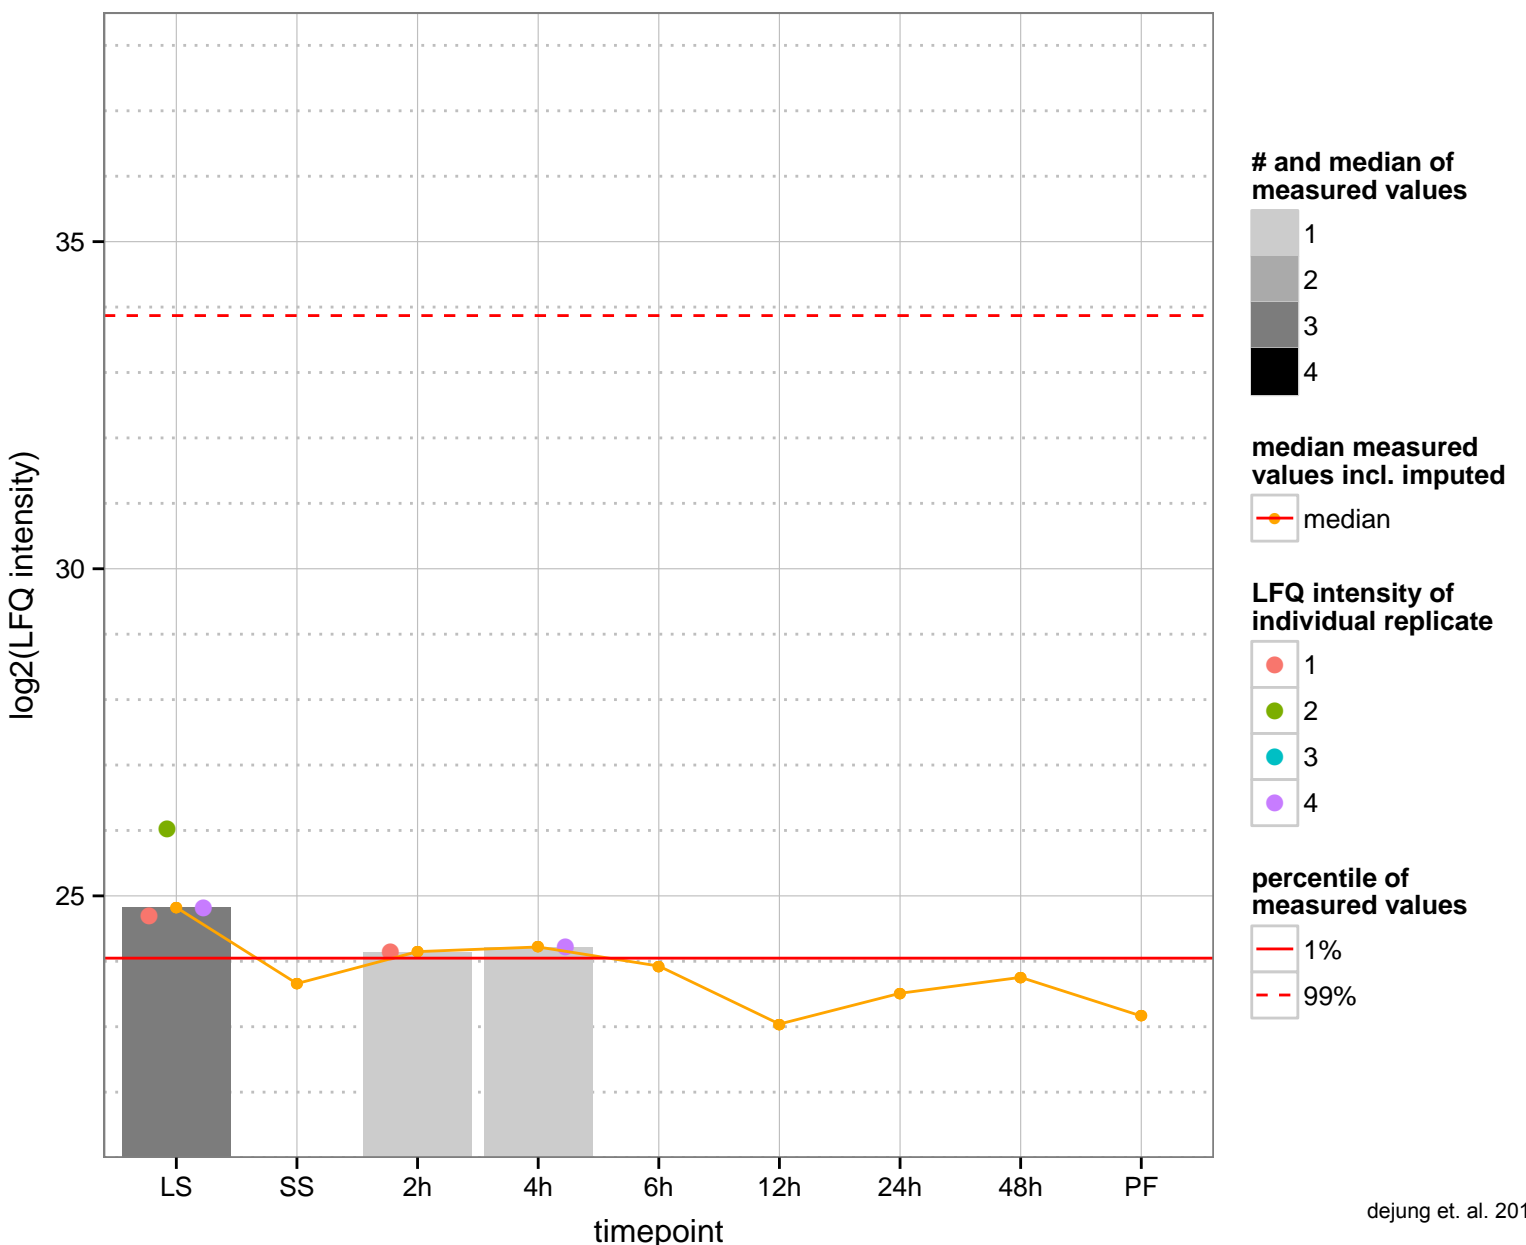

DNA-directed RNA polymerase III, putative, RNA polymerase subunit, putative (RPC128), RNA polymerase (pseudogene), D Tb927.1.540

AGOF: DNA binding, DNA-directed RNA polymerase activity, ribonucleoside binding

AGOC: DNA-directed RNA polymerase III complex, null

AGOP: transcription from RNA polymerase III promoter, transcription, DNA-dependent

PGOF: DNA binding, DNA-directed RNA polymerase activity

PGOC: null

PGOP: transcription, DNA-dependent

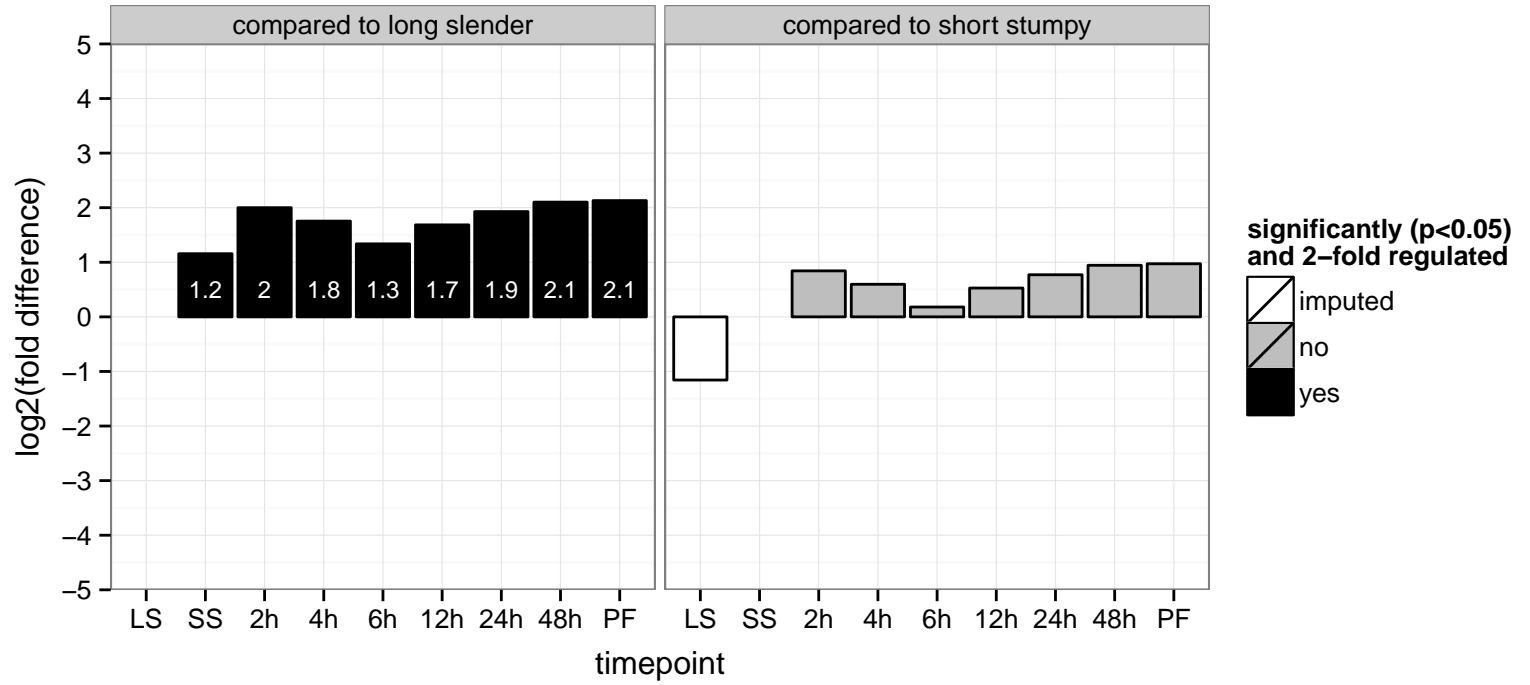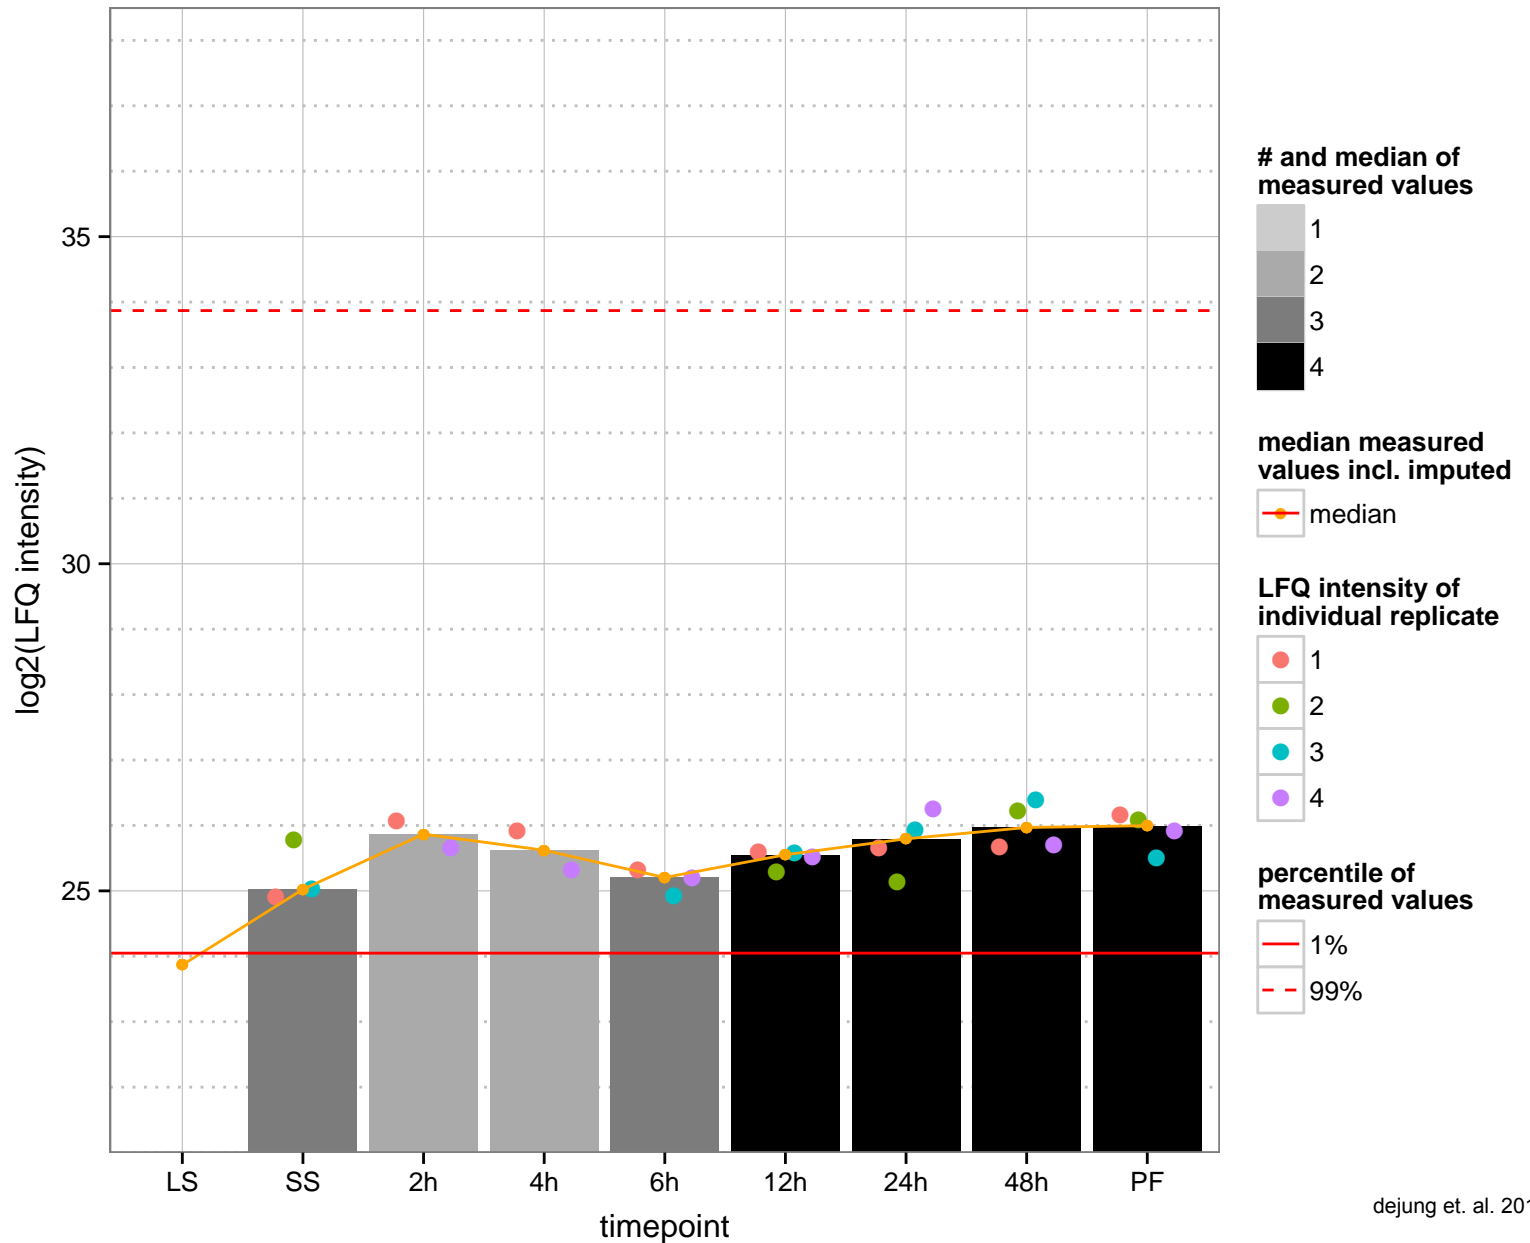



BRCA2  
 Tb927.1.640  
 AGOF: damaged DNA binding  
 AGOC: nucleus  
 AGOP: antigenic variation  
 PGO: null  
 PGOC: null  
 PGO: double-strand break repair via homologous recombination

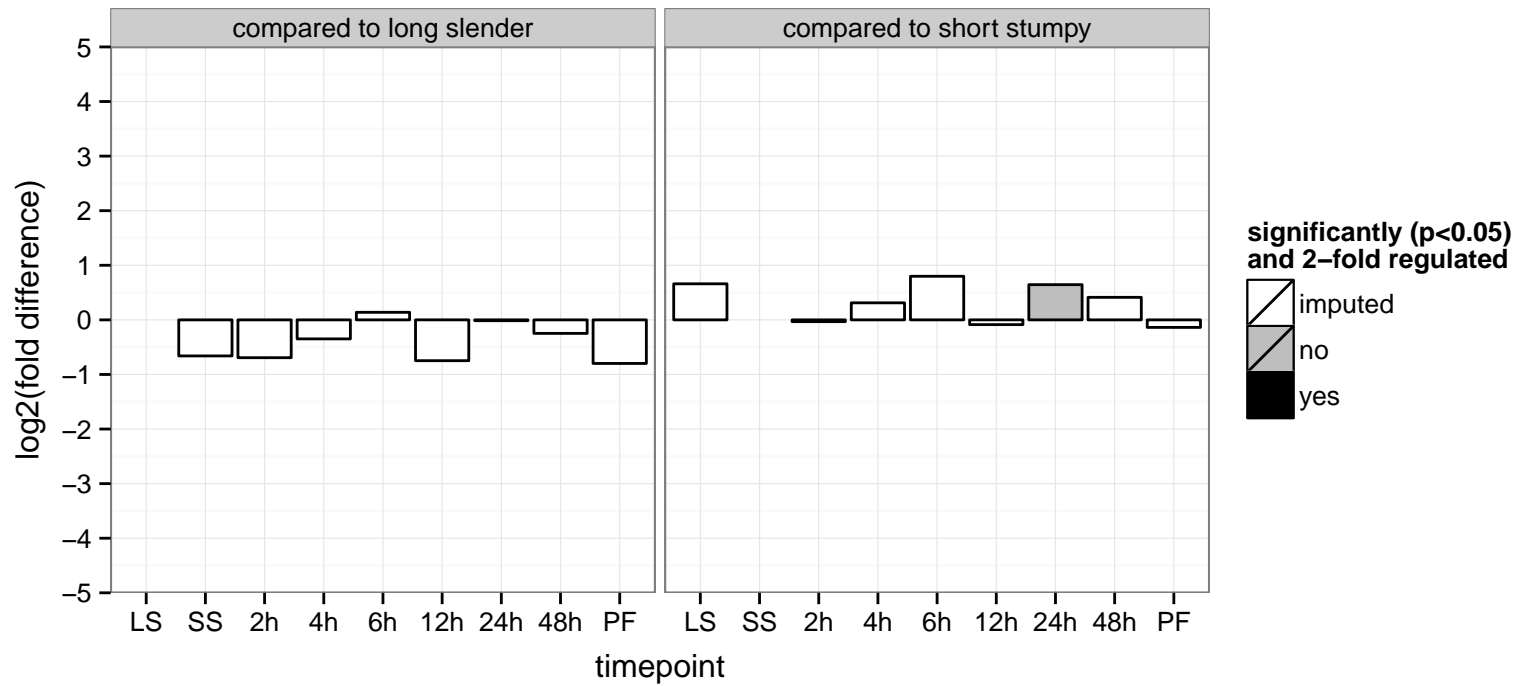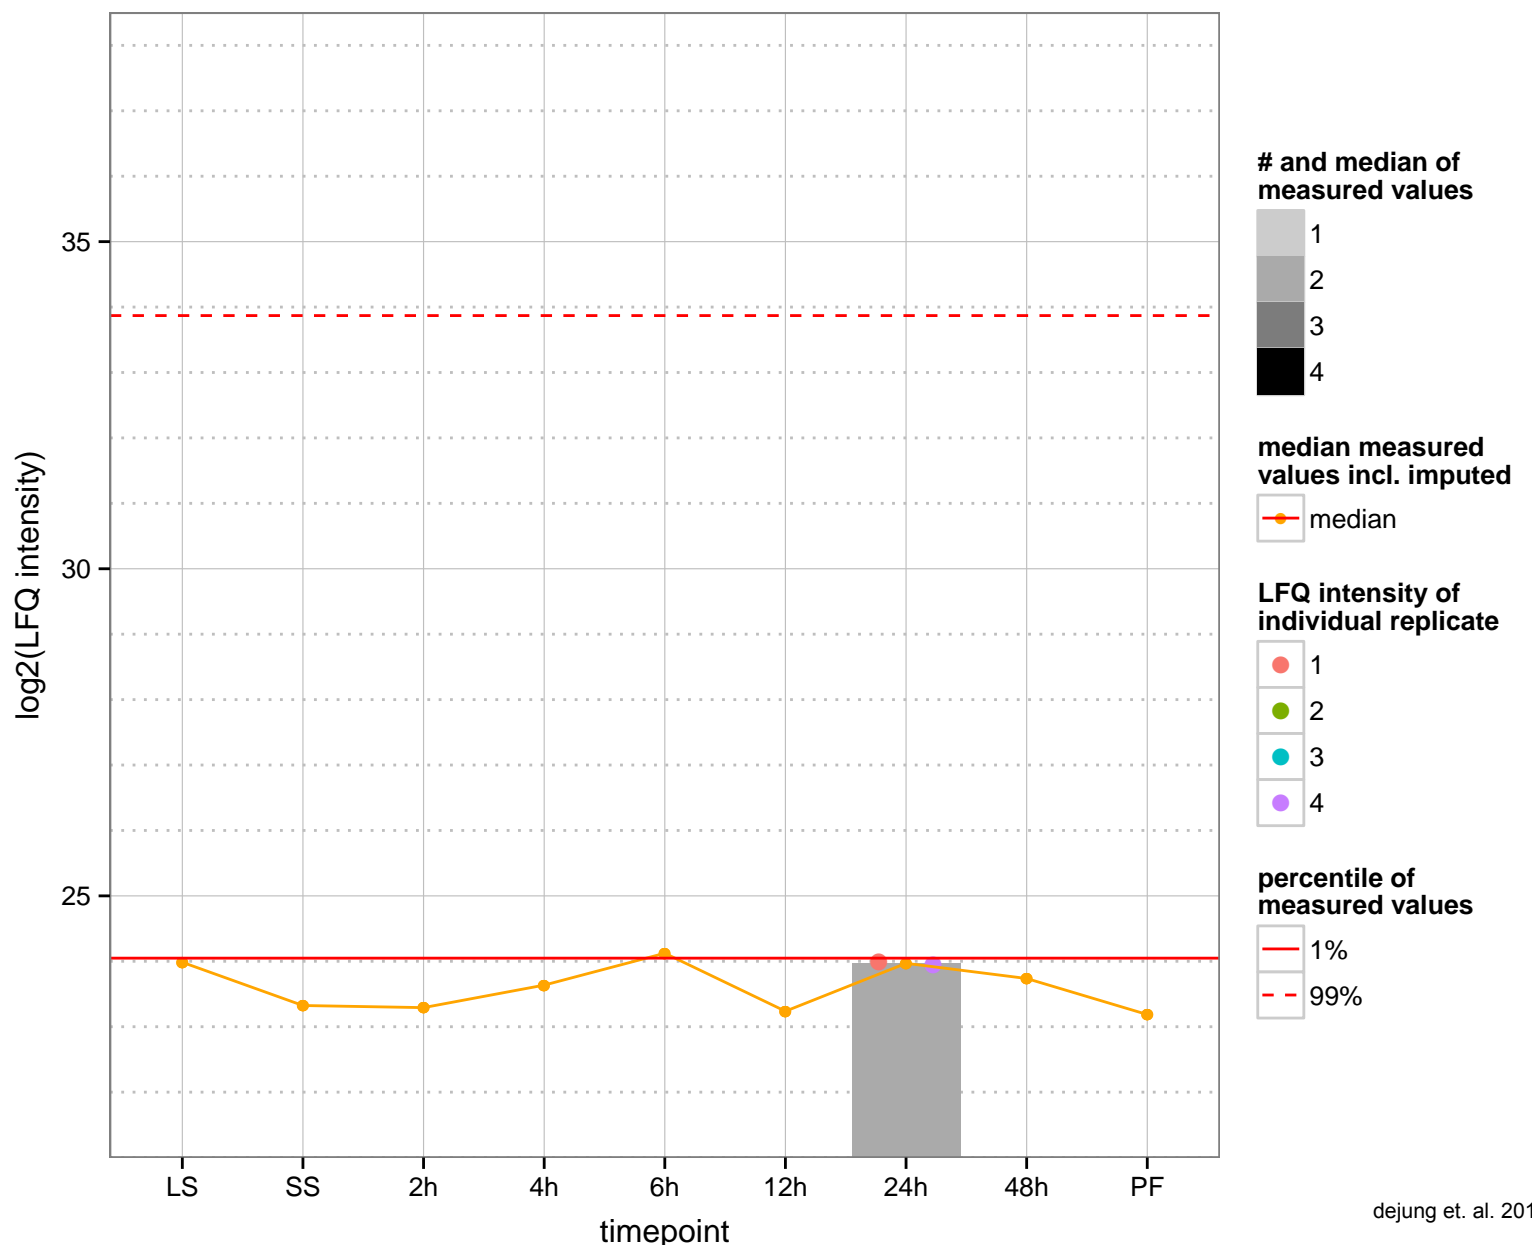

conserved protein, unknown function  
 Tb927.1.670  
 AGOF: null  
 AGOC: null  
 AGOP: null  
 PGO: null  
 PGOC: null  
 PGOP: null

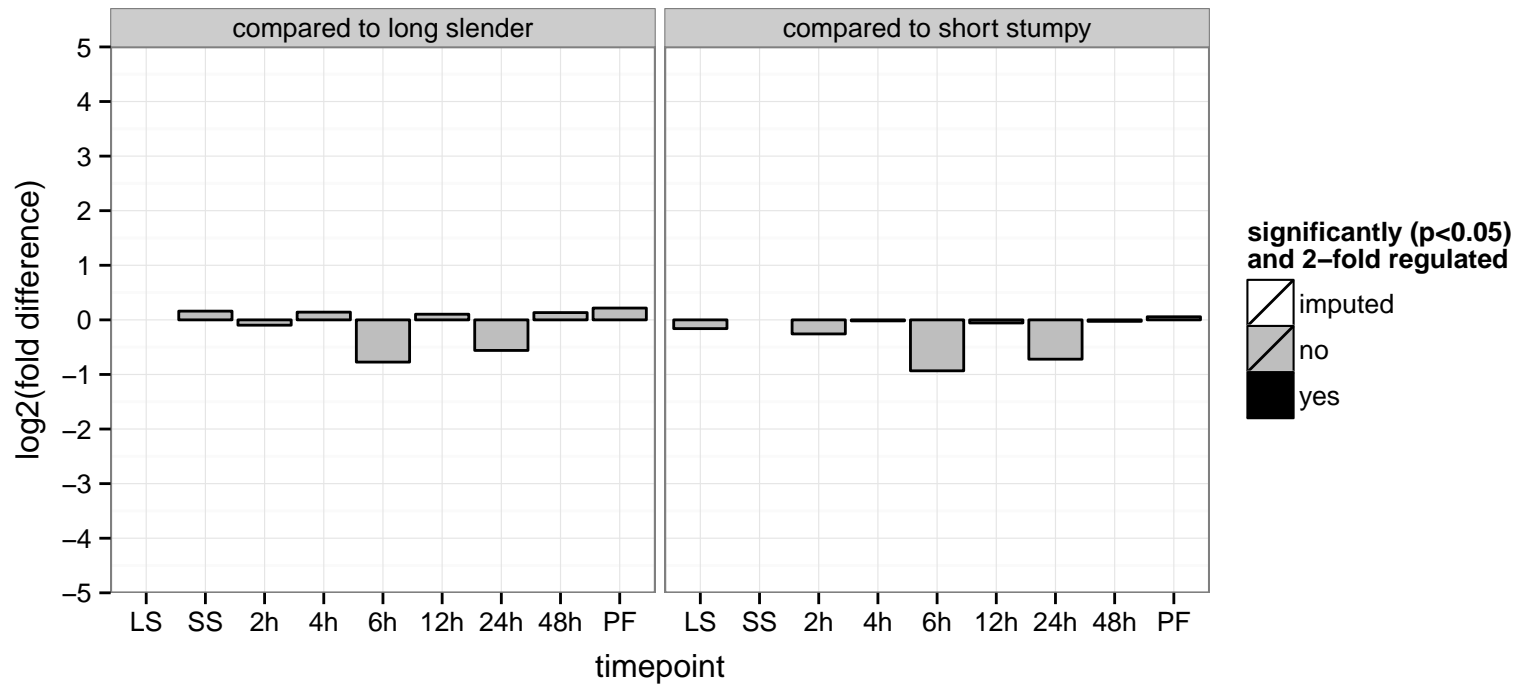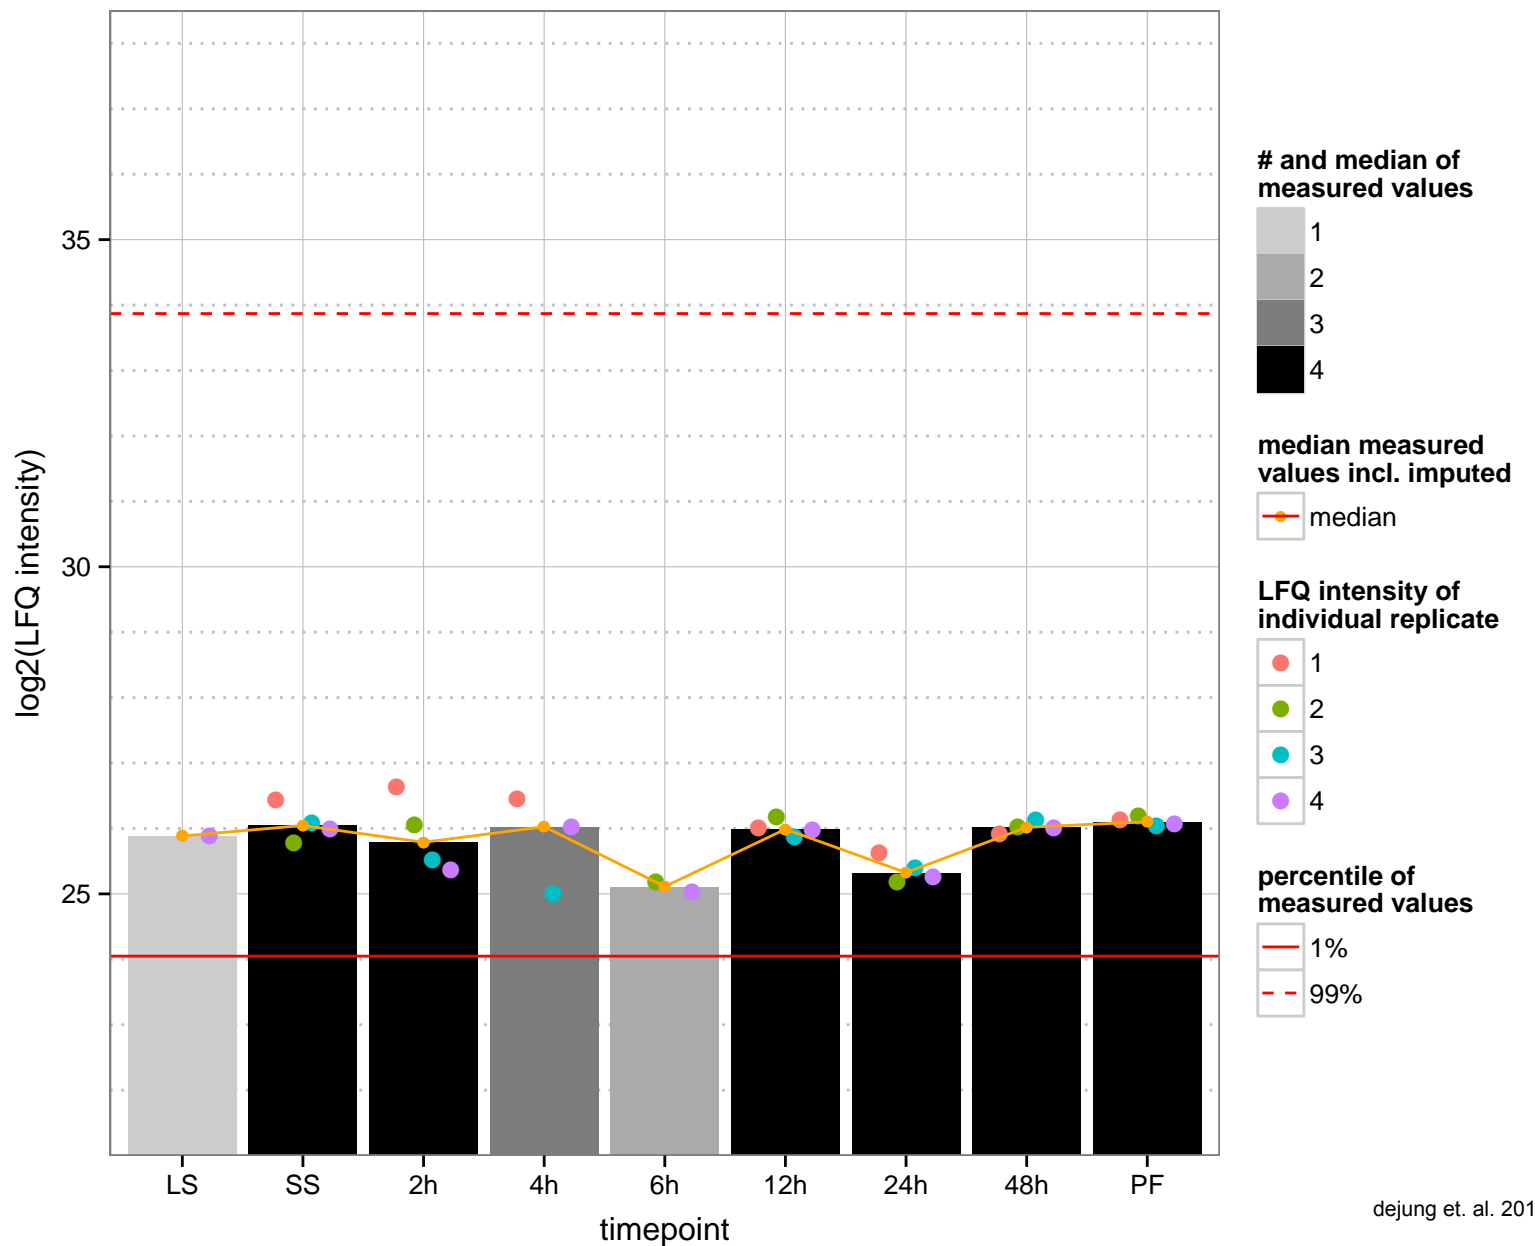

phosphoglycerate kinase (PGKC)  
 Tb927.1.700  
 AGOF: phosphoglycerate kinase activity  
 AGOC: glycosome  
 AGOP: glycolysis  
 PGOF: phosphoglycerate kinase activity  
 PGO: null  
 PGOP: glycolysis

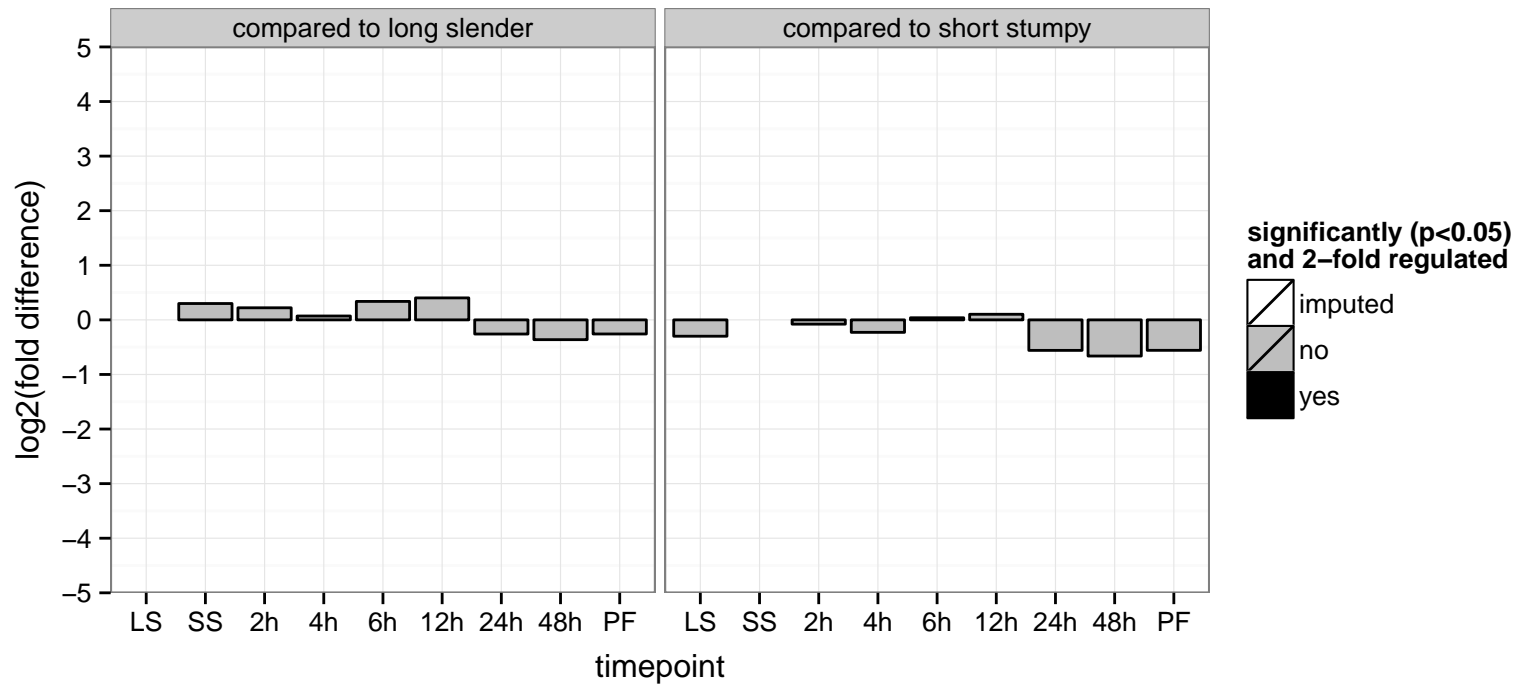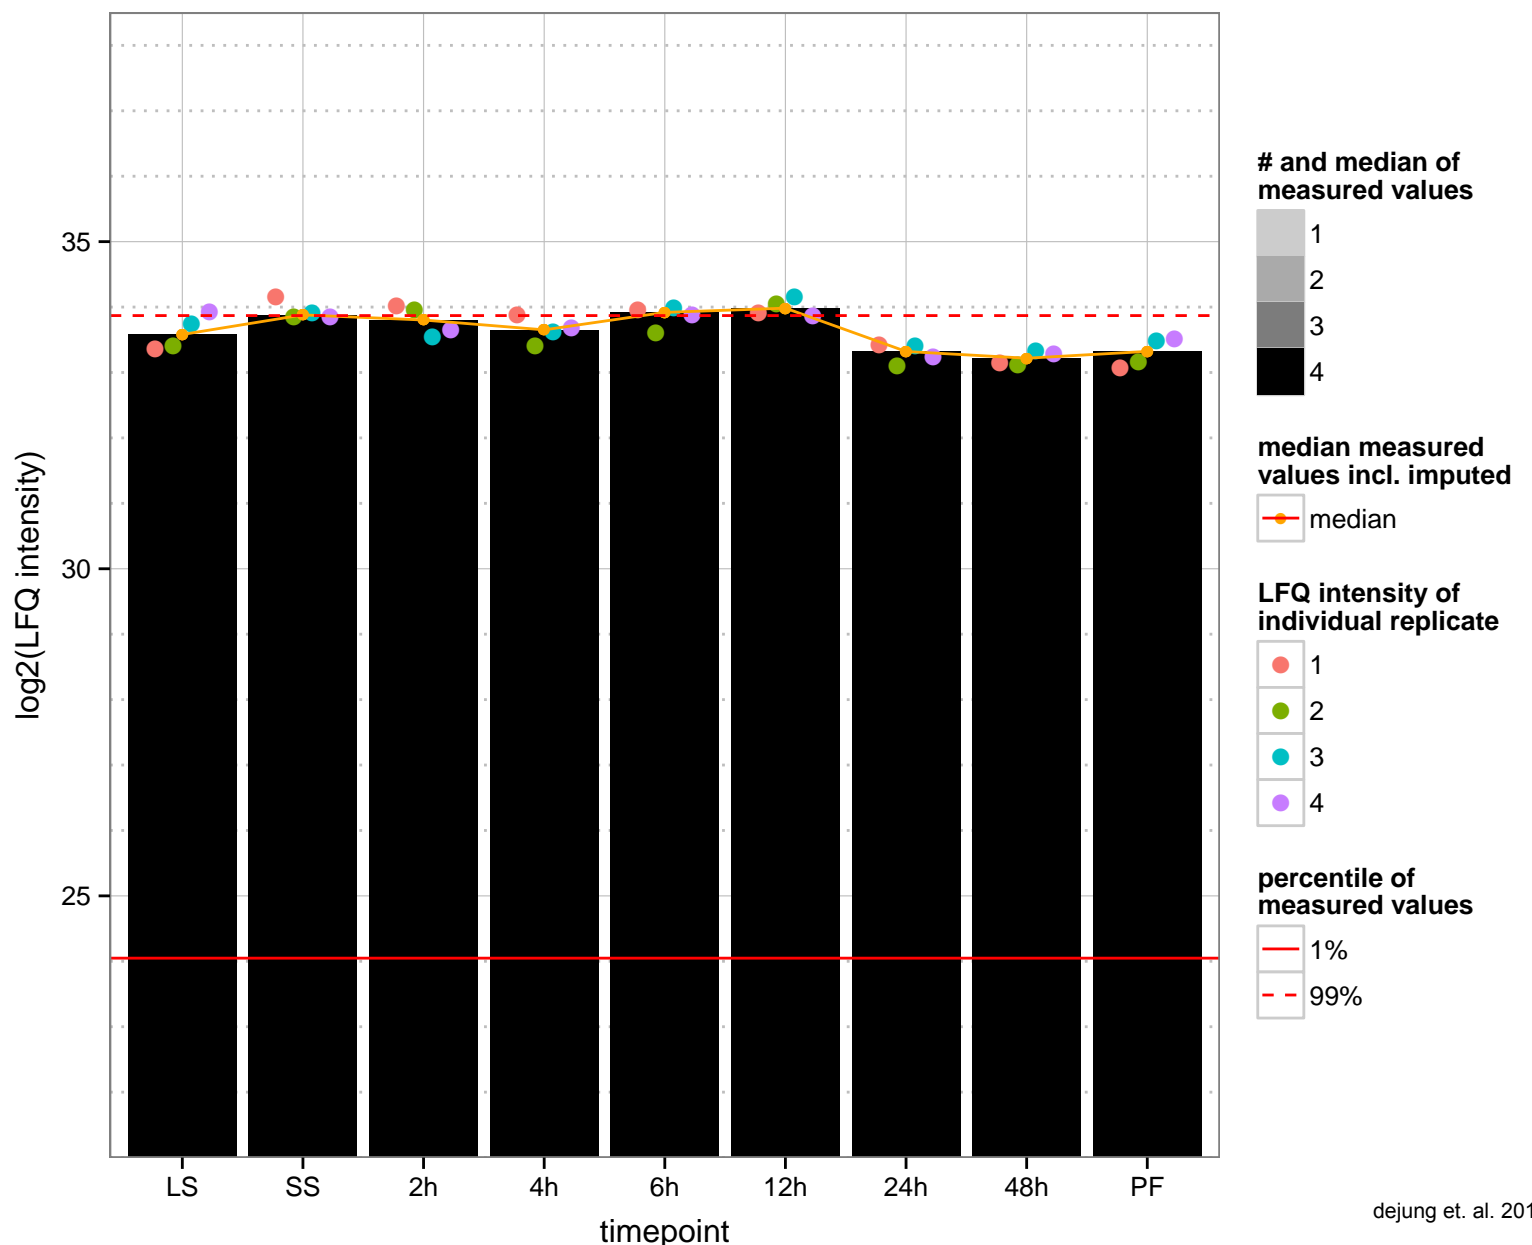

deoxyhypusine synthase, putative

Tb927.1.870

AGOF: null

AGOC: null

AGOP: deoxyhypusine biosynthetic process from spermidine, peptidyl-lysine modification to hypusine

PGOF: null

PGOC: null

PGOP: peptidyl-lysine modification to hypusine

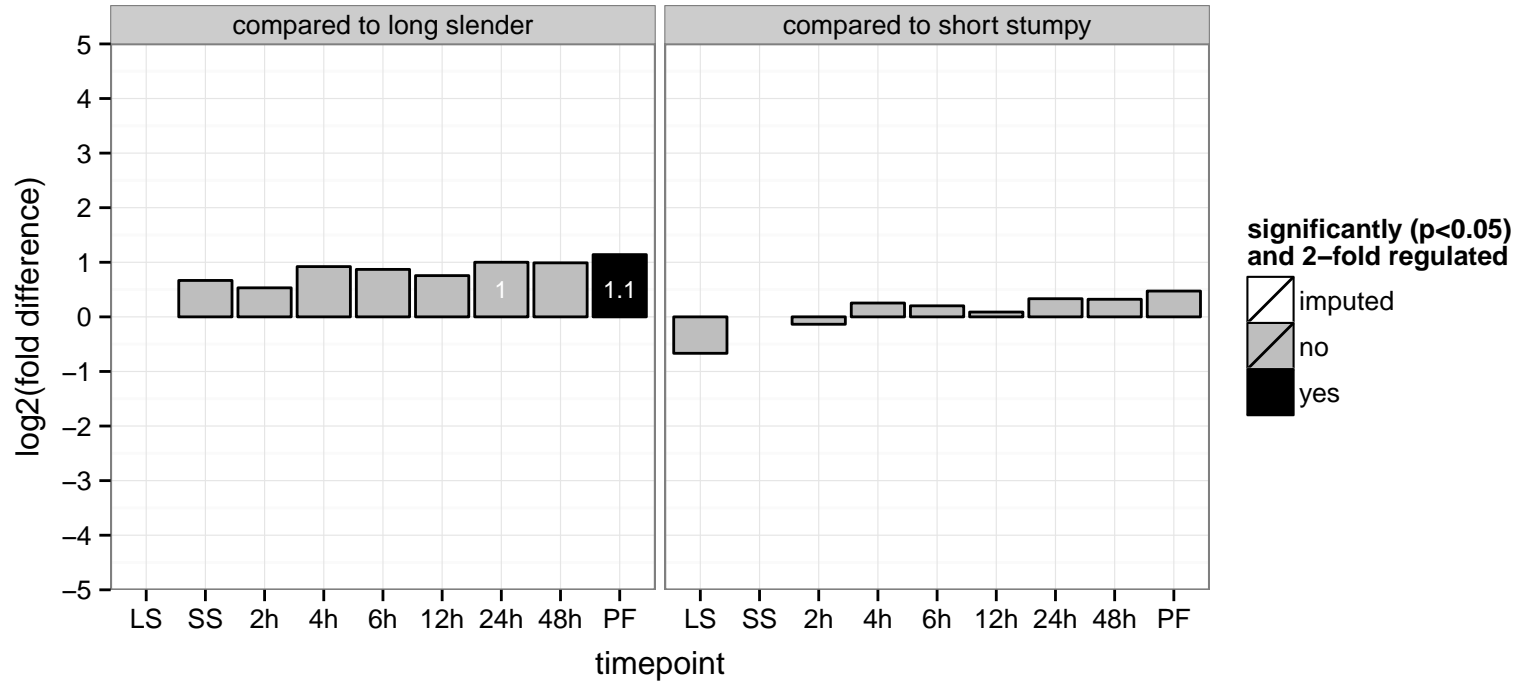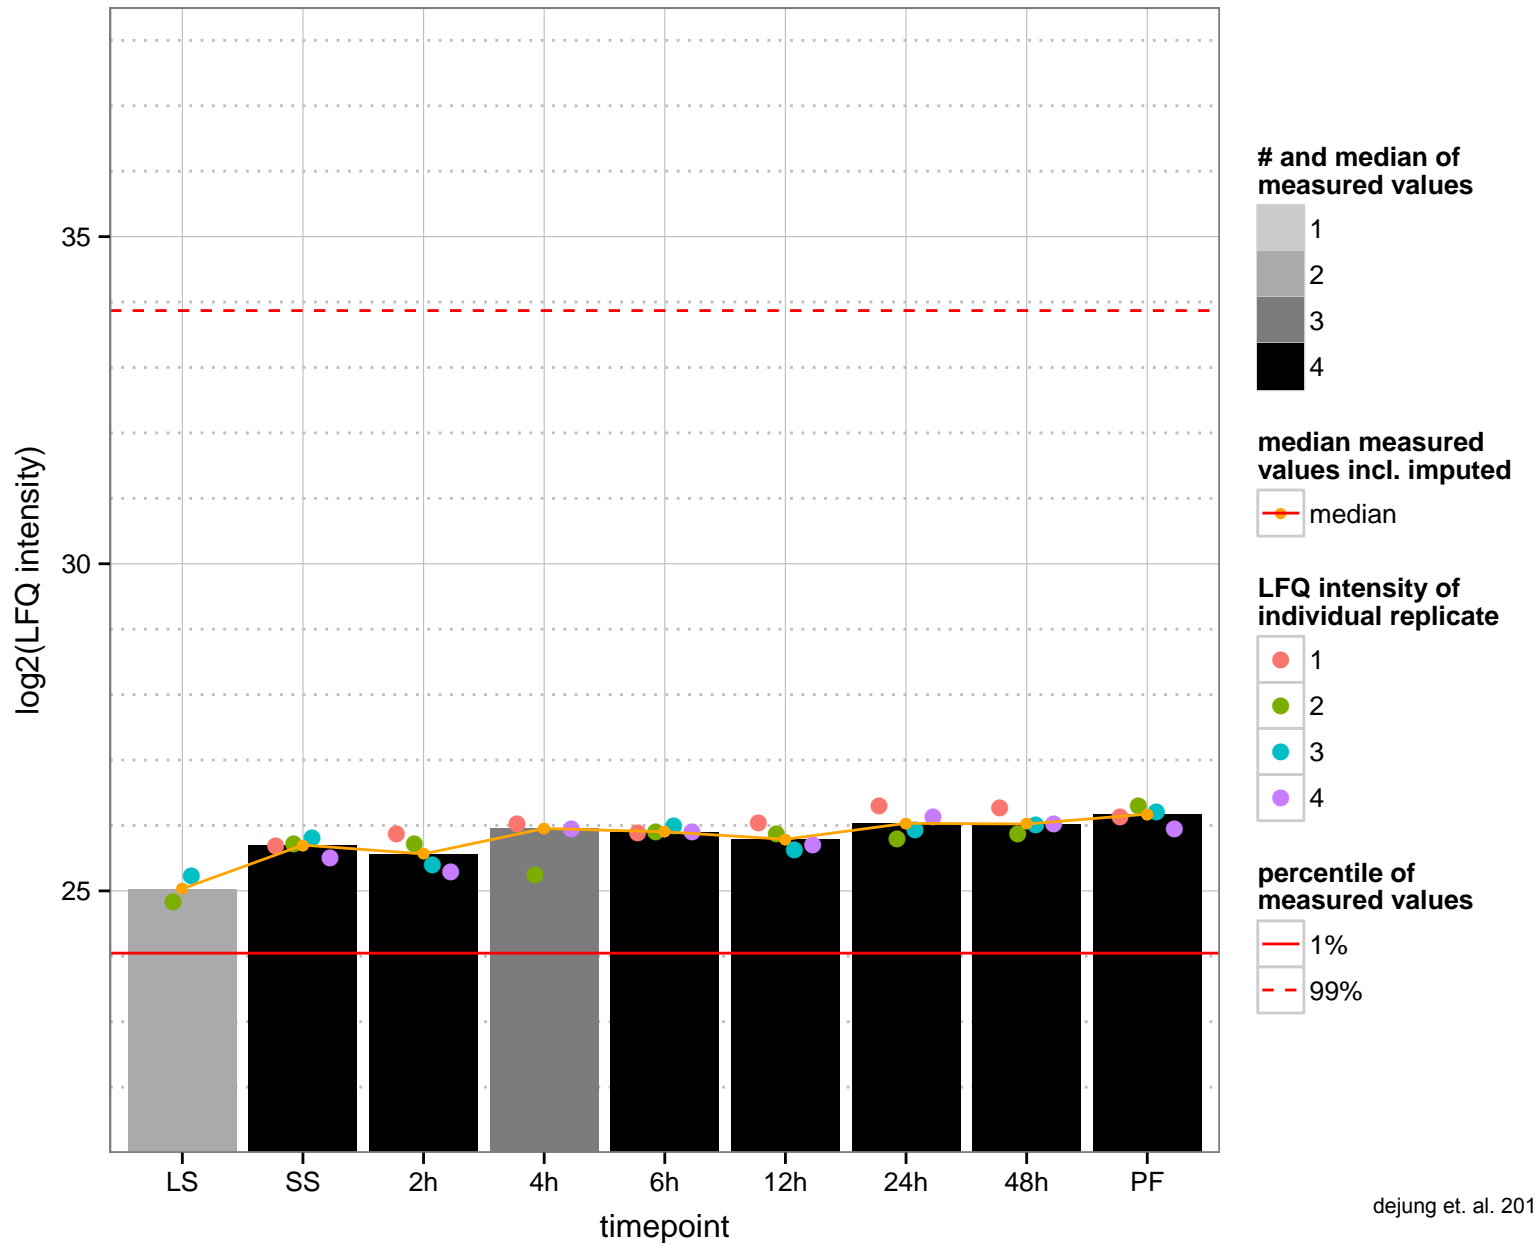

hypothetical protein, conserved, Midasin, putative (MDN1)

Tb927.1.880

AGOF: null, ATP binding, ATPase activity

AGOC: null, nucleus

AGOP: null, regulation of protein complex assembly

PGOF: ATP binding, ATPase activity, nucleoside-triphosphatase activity, nucleotide binding, protein binding

PGOC: null, nucleus

PGOP: null, protein complex assembly

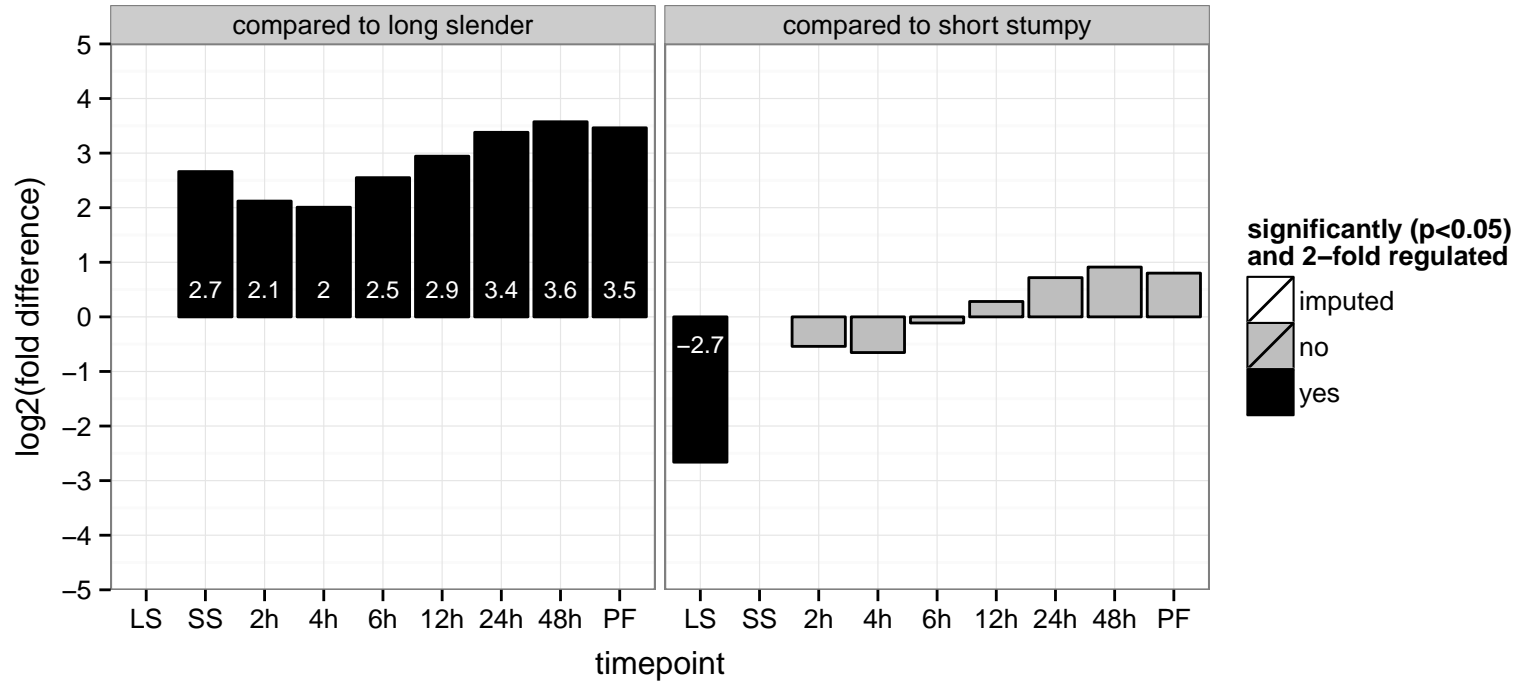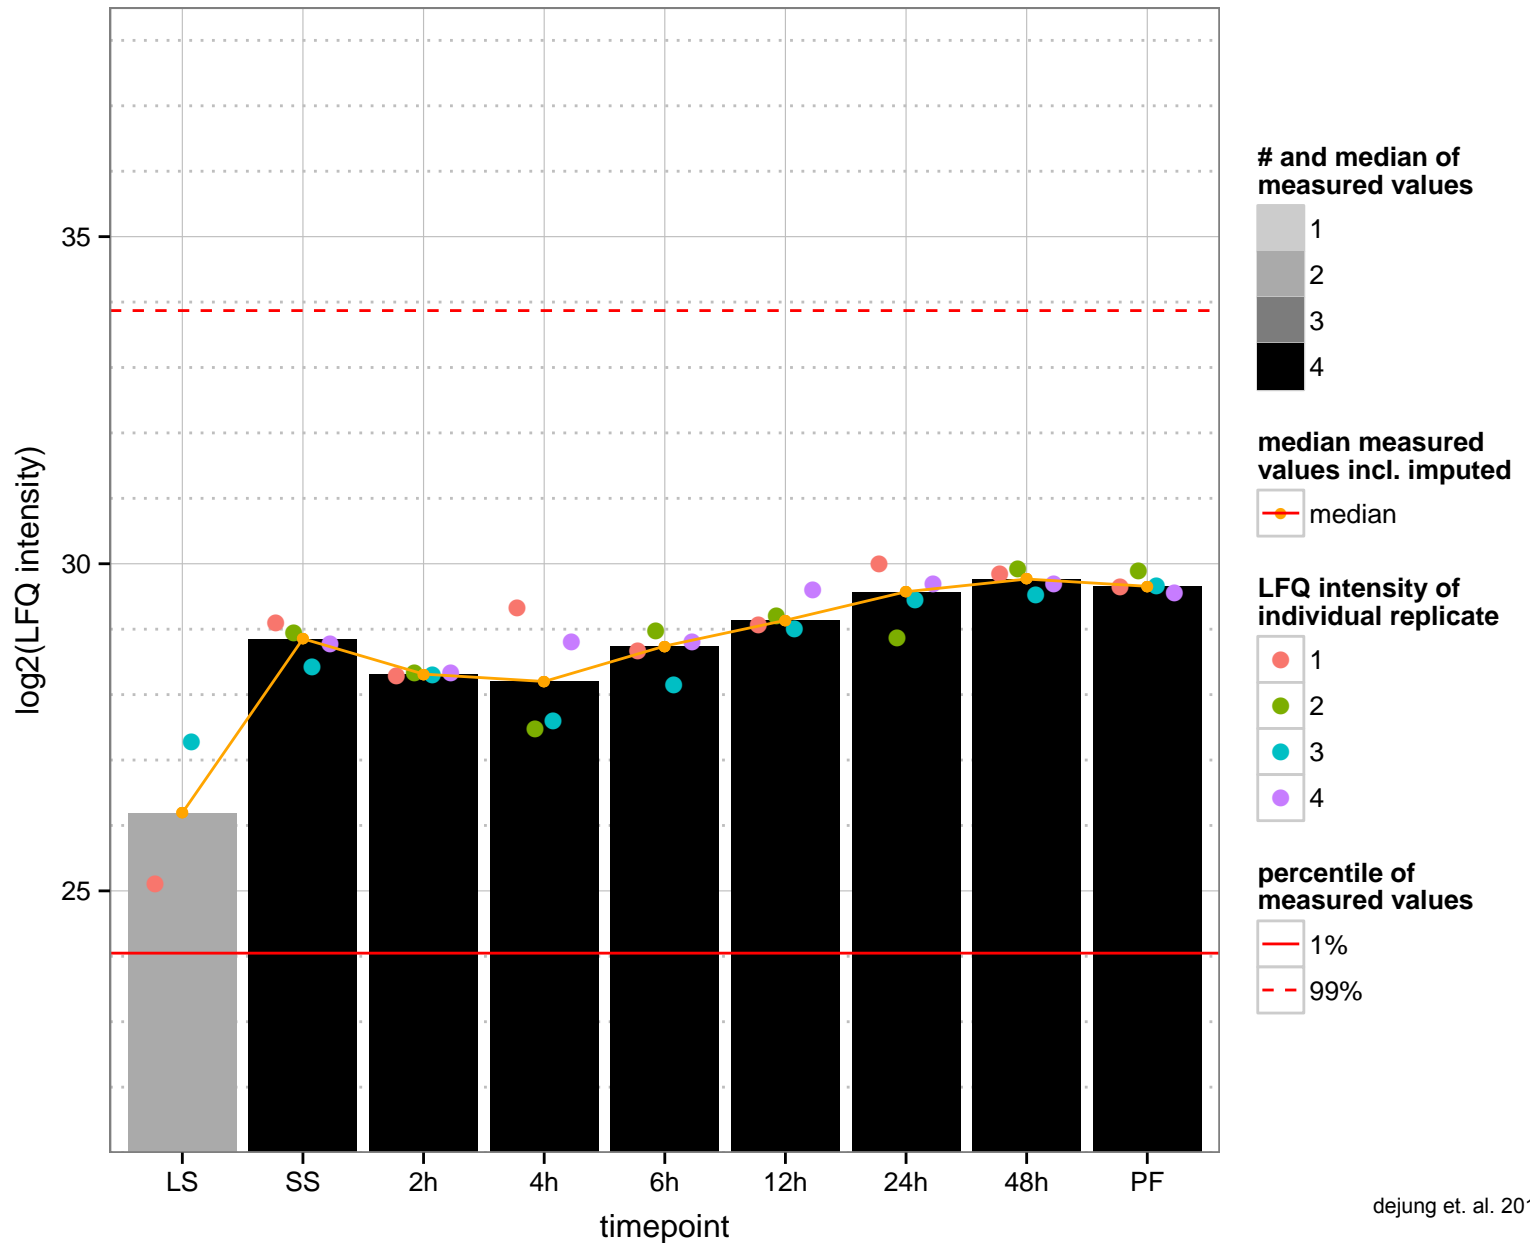

Enkuring domain-containing protein  
 Tb927.1.990  
 AGOF: calmodulin binding  
 AGOC: null  
 AGOP: null  
 PGO: null  
 PGOC: null  
 PGOP: null

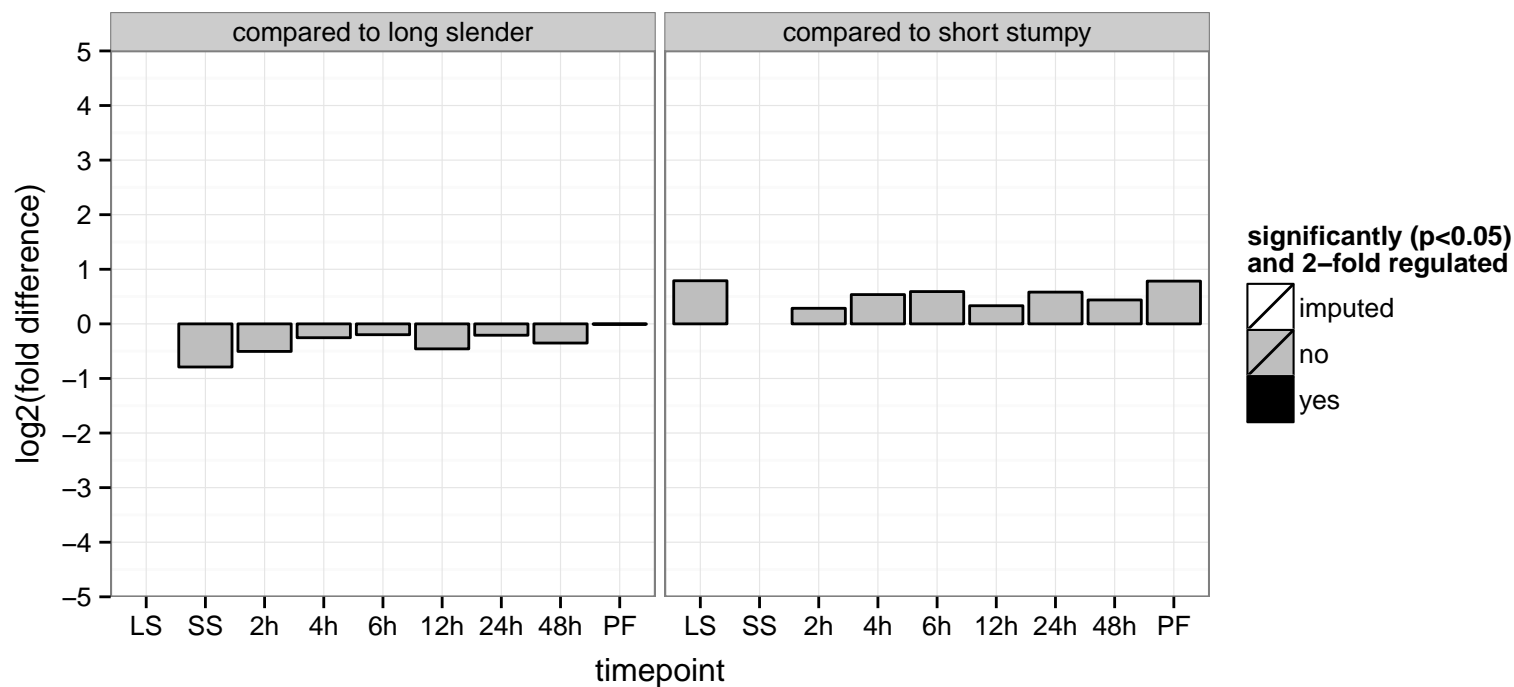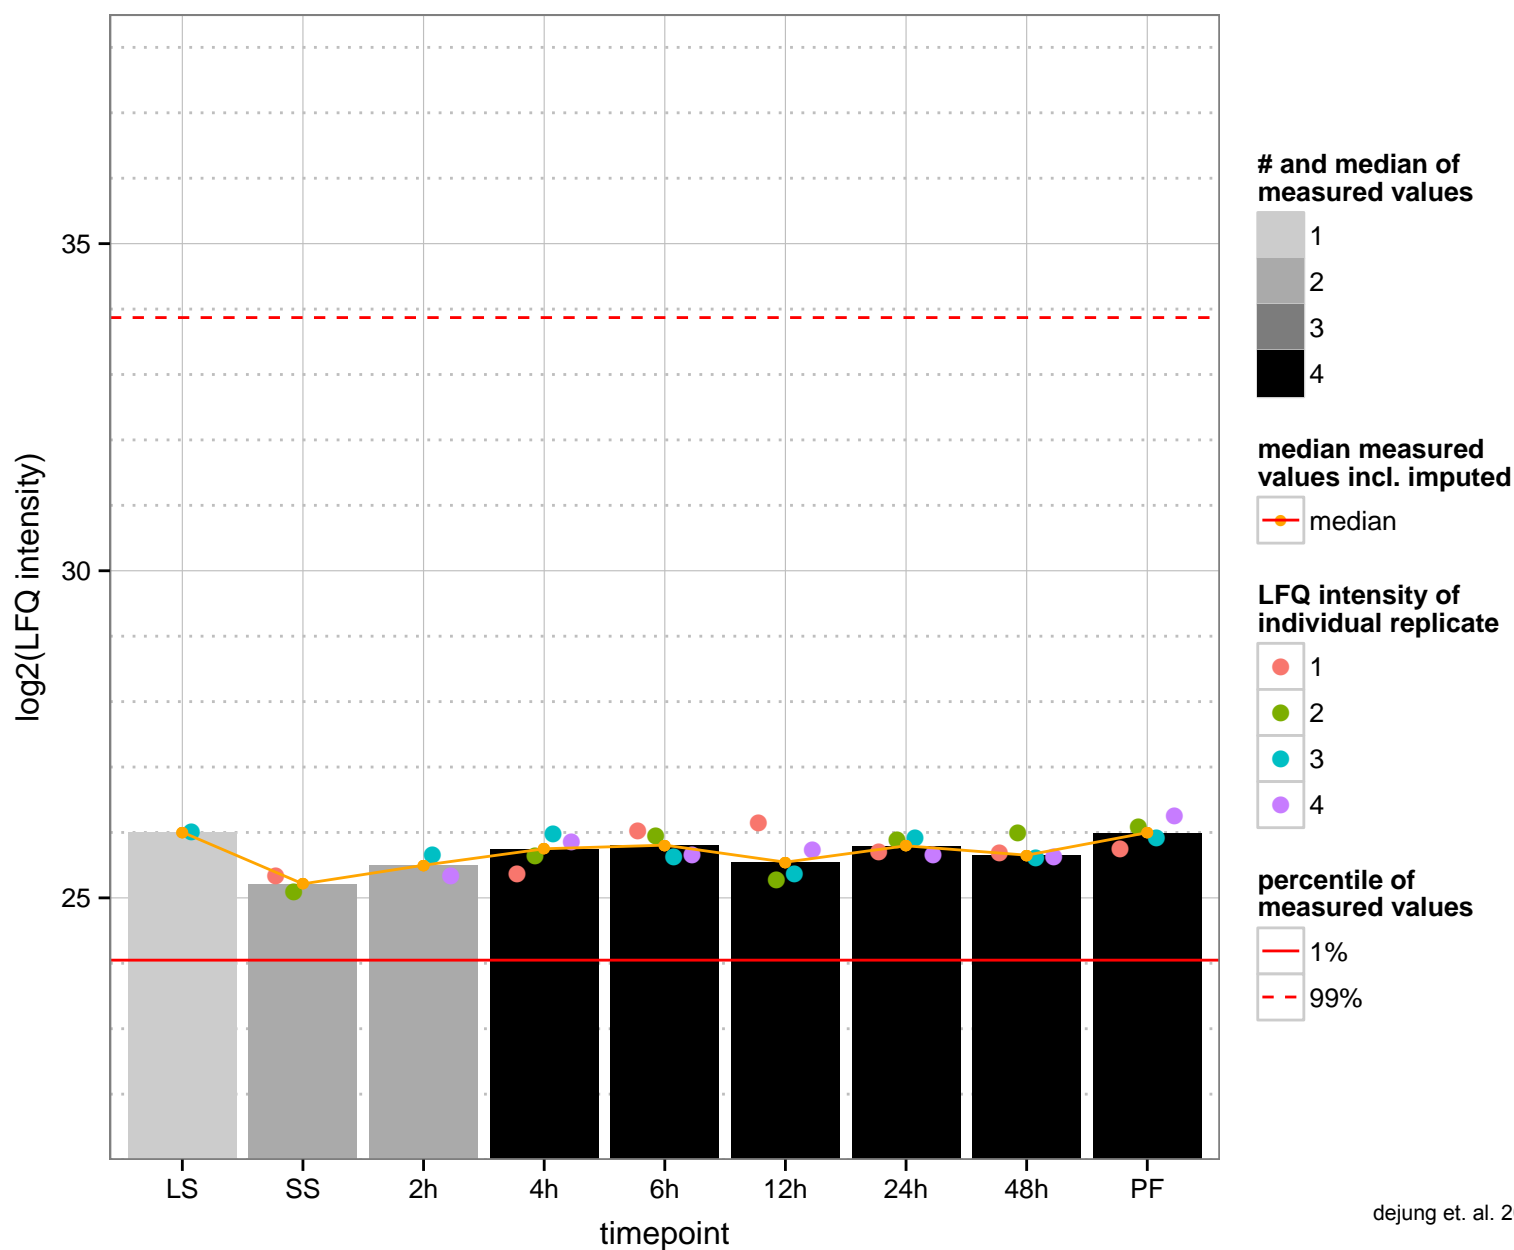

60S acidic ribosomal protein, putative  
 Tb927.10.10010  
 AGOF: structural constituent of ribosome  
 AGOC: intracellular, ribosome  
 AGOP: translation  
 PGO: null  
 PGOC: intracellular  
 PGOP: ribosome biogenesis

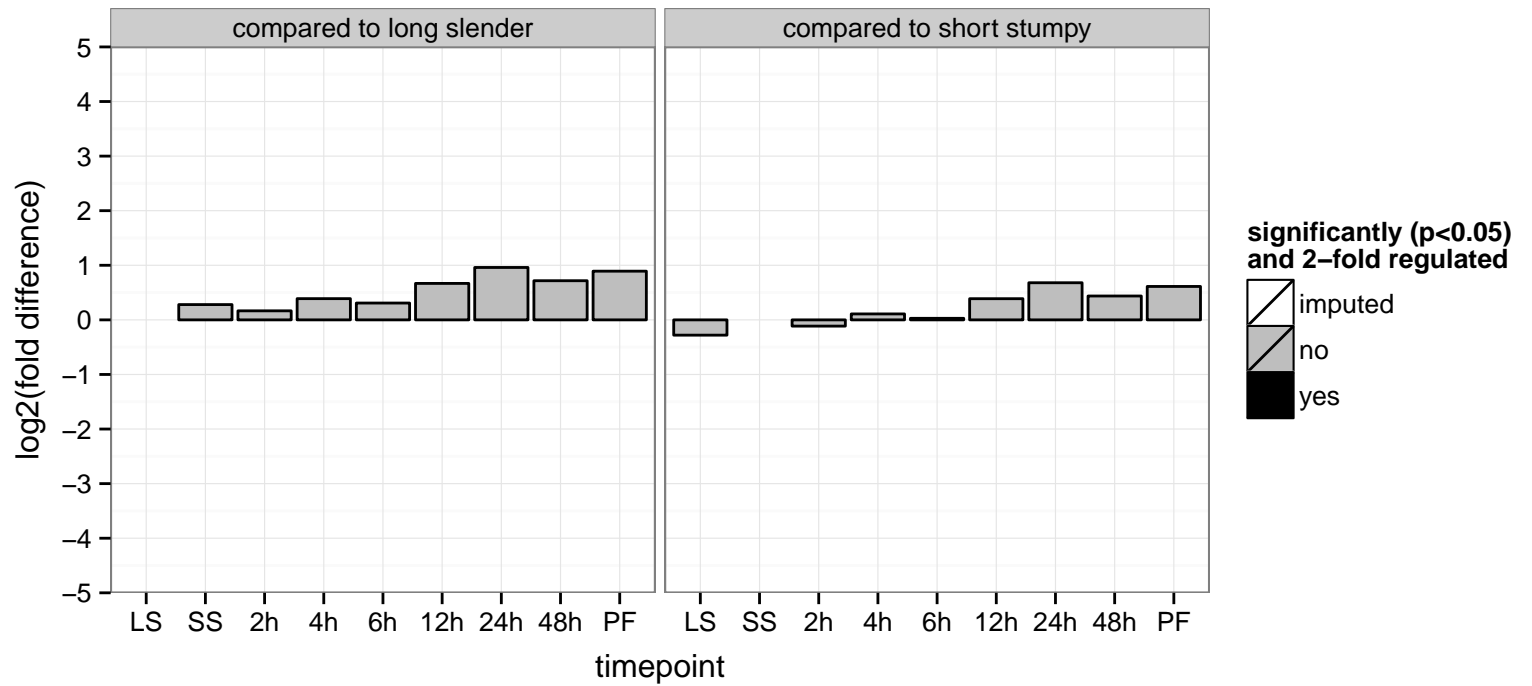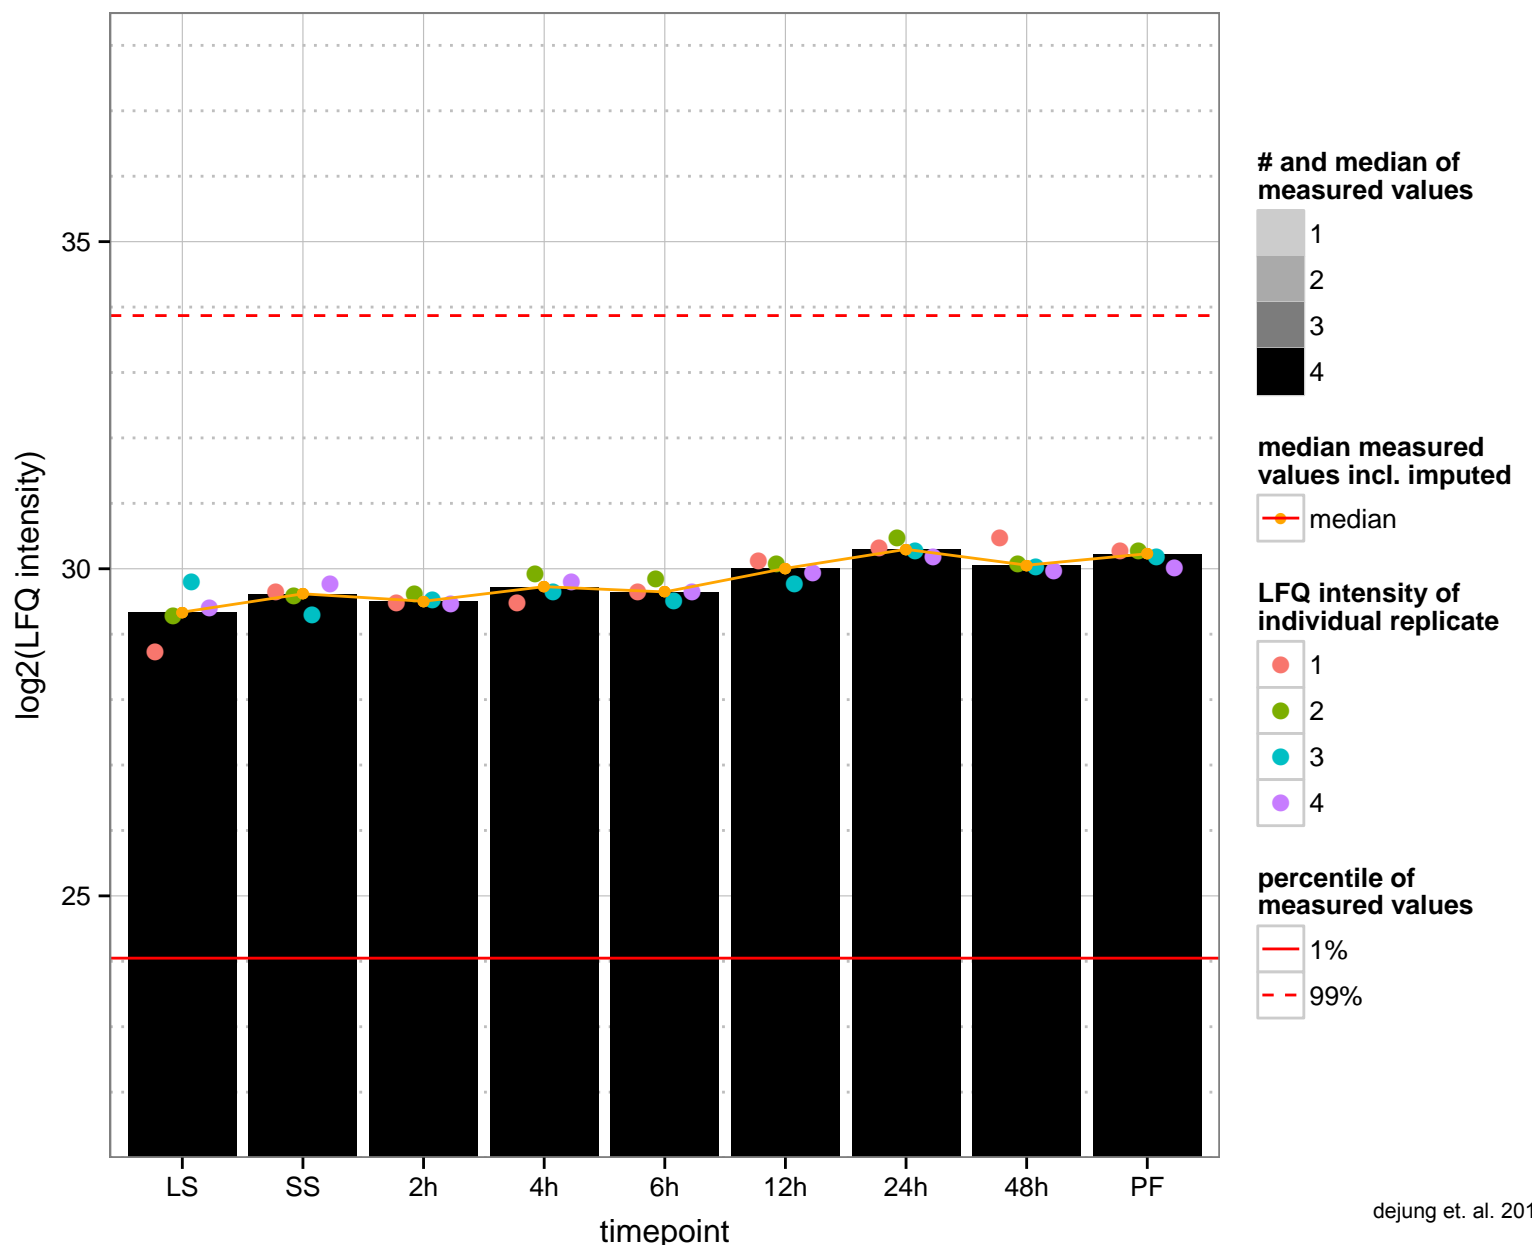

hypothetical protein, conserved  
 Tb927.10.10030  
 AGOF: null  
 AGOC: null  
 AGOP: null  
 PGO: null  
 PGOC: null  
 PGOP: null

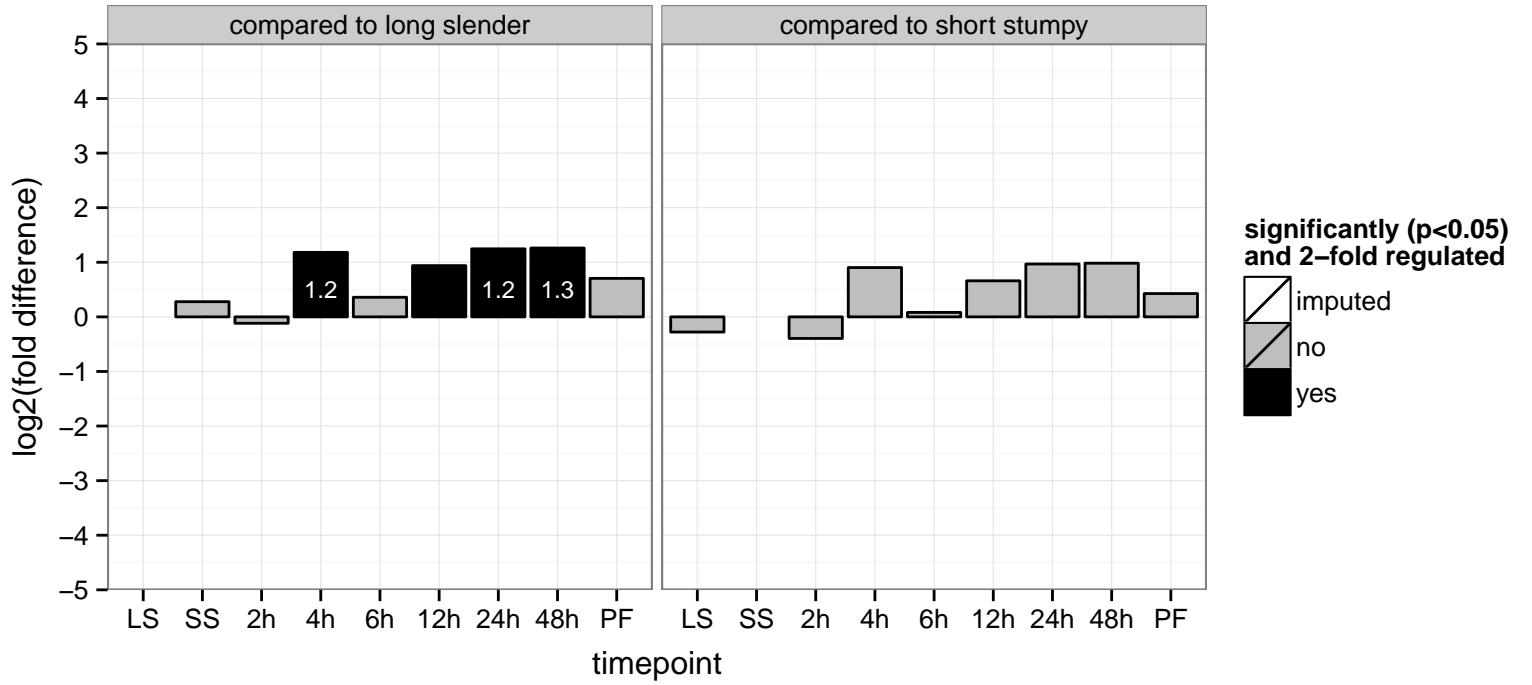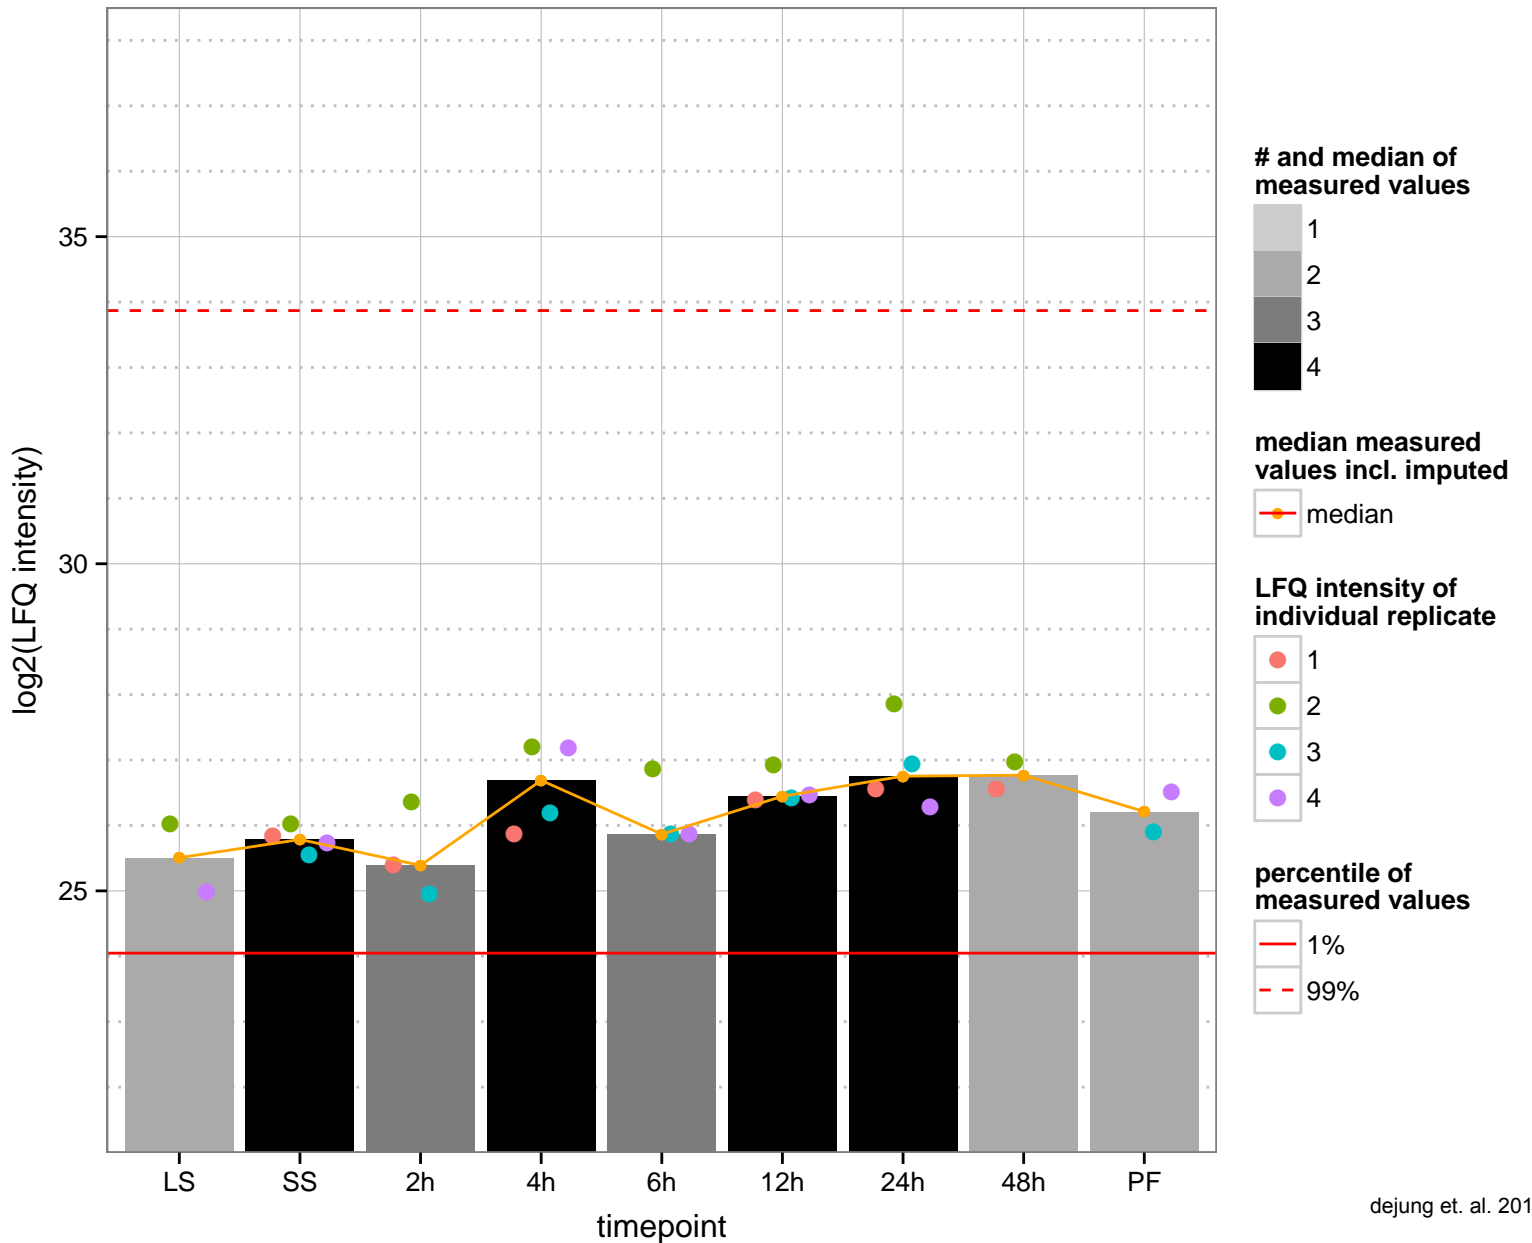



mitochondrial RNA binding complex 1 subunit (MRB10130)  
 Tb927.10.10130  
 AGOF: RNA binding  
 AGOC: mitochondrion  
 AGOP: cytidine to uridine editing, mRNA stabilization  
 PGO: binding  
 PGOC: null  
 PGOP: null

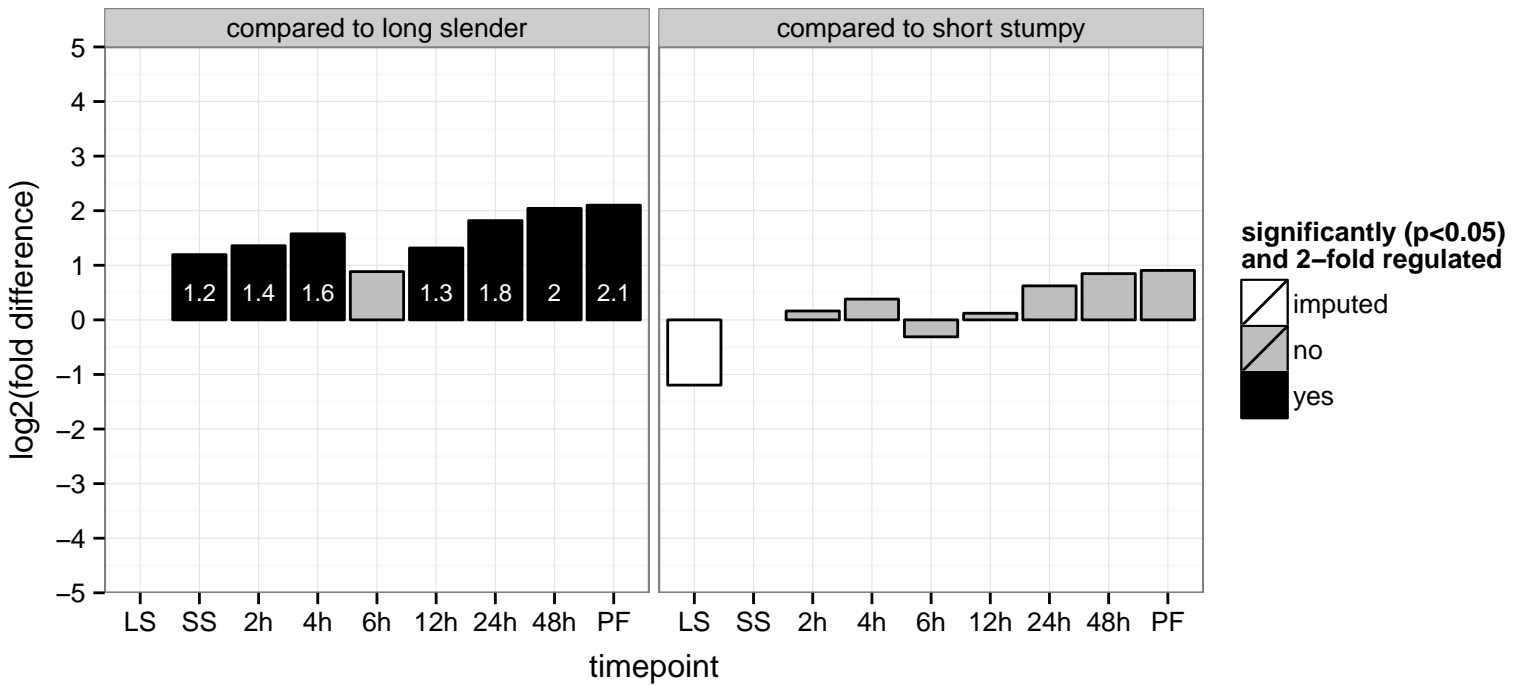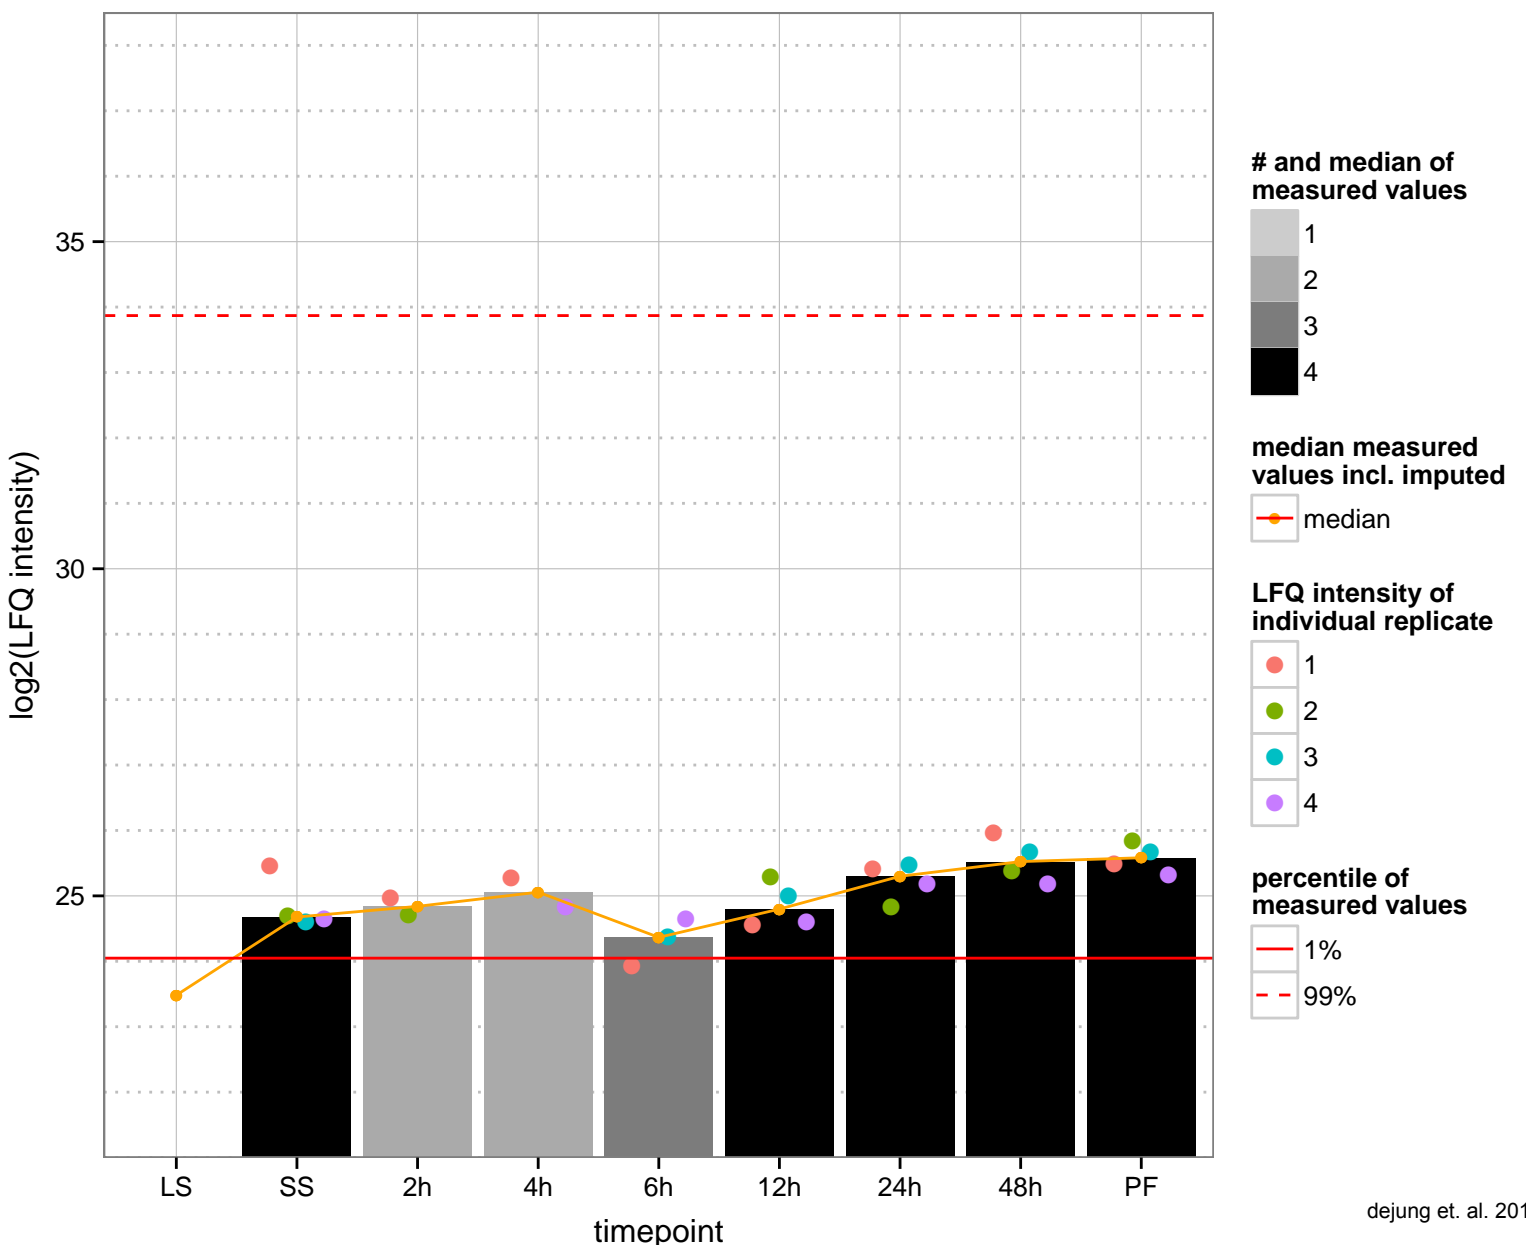

paraflagellar rod component, putative (PFC19)  
 Tb927.10.10140  
 AGOF: null  
 AGOC: null  
 AGOP: null  
 PGOF: null  
 PGO: null  
 PGOP: null

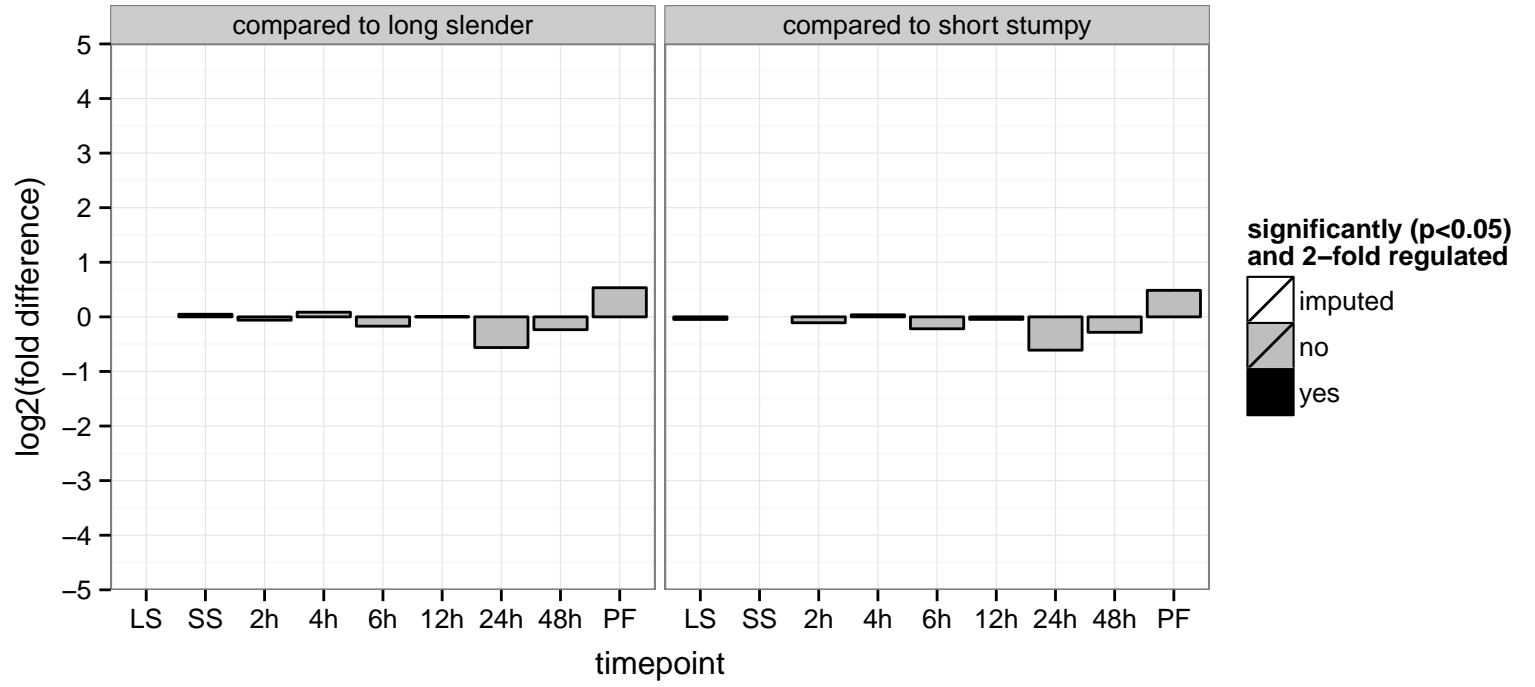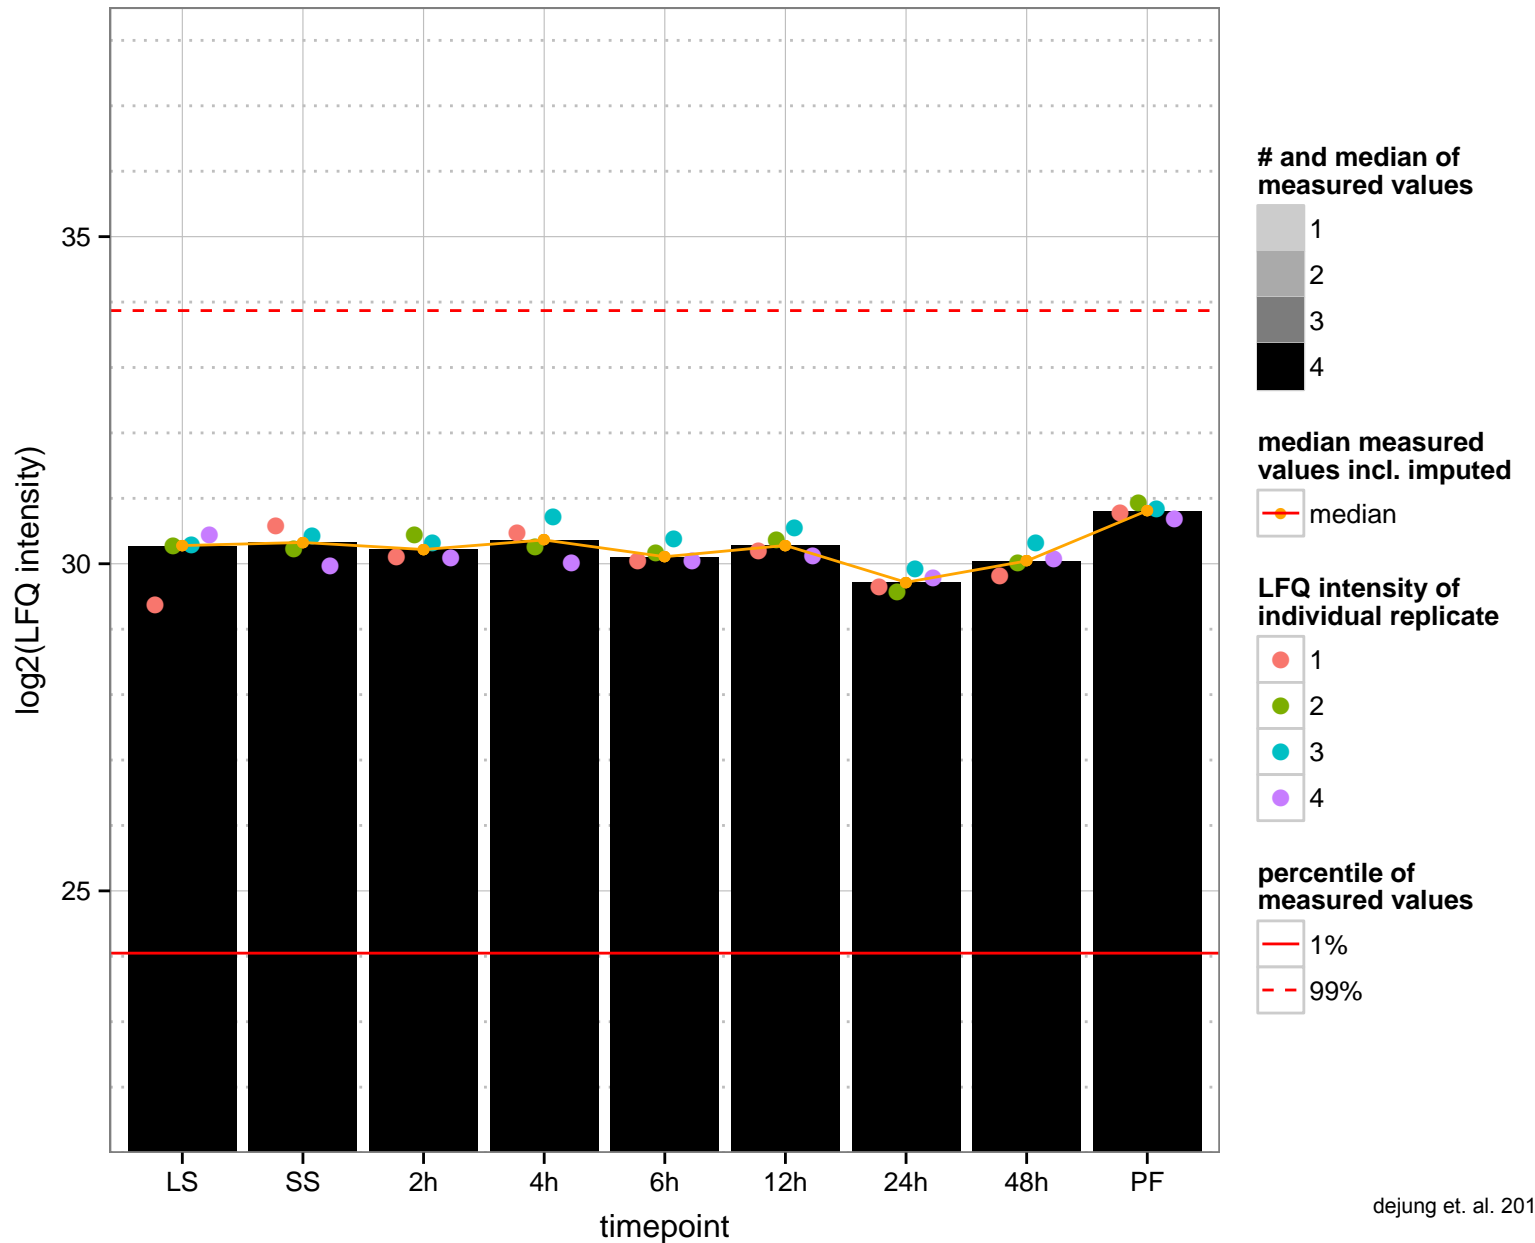

hypothetical protein, conserved  
 Tb927.10.10160  
 AGOF: null  
 AGOC: mitochondrion  
 AGOP: null  
 PGO: null  
 PGO: null  
 PGO: null

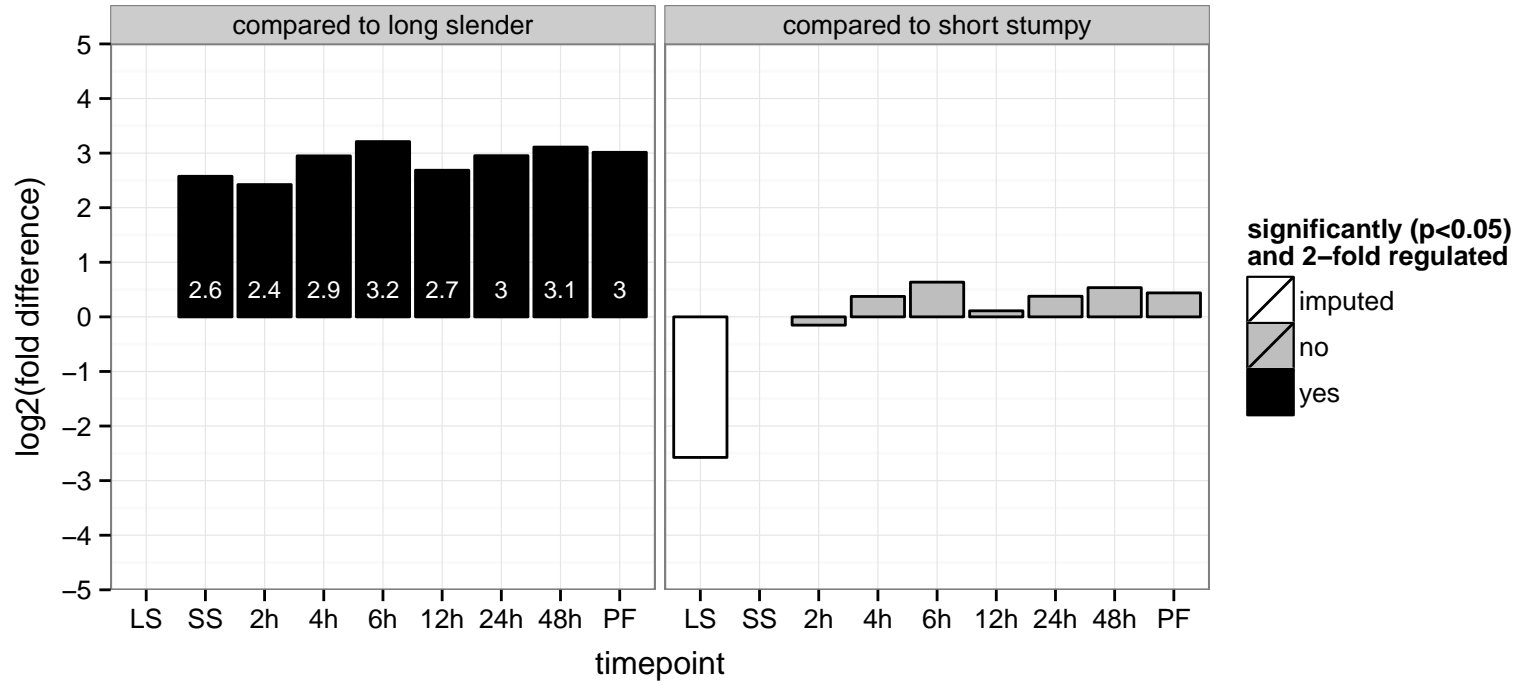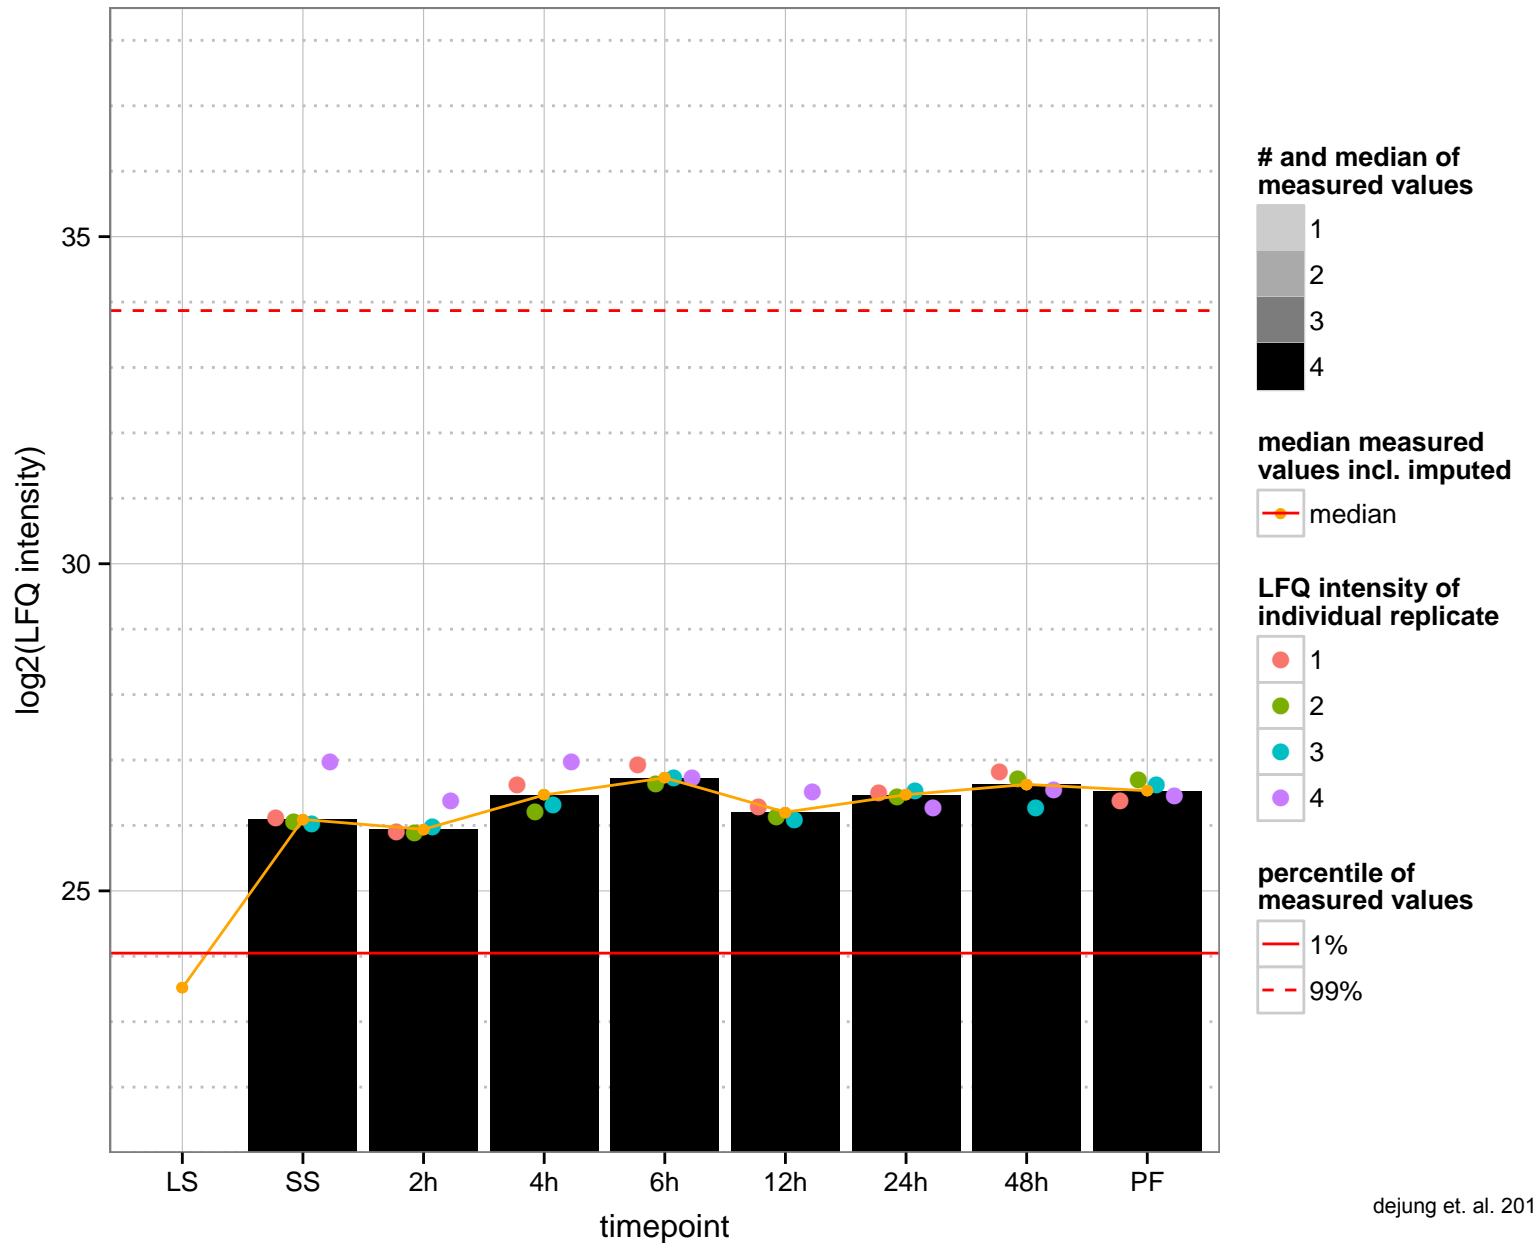

hypothetical protein, conserved  
 Tb927.10.10330  
 AGOF: null  
 AGOC: null  
 AGOP: null  
 PGO: protein binding  
 PGOC: null  
 PGOP: null

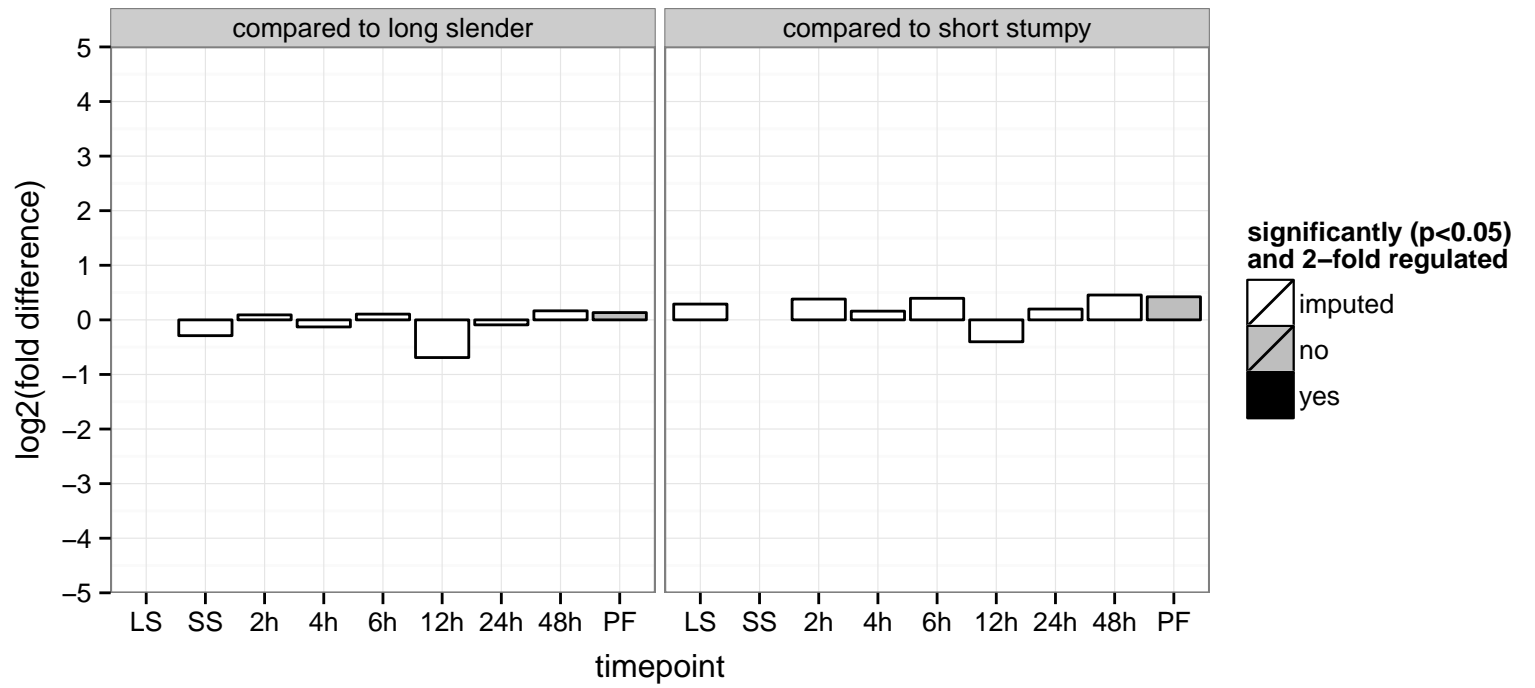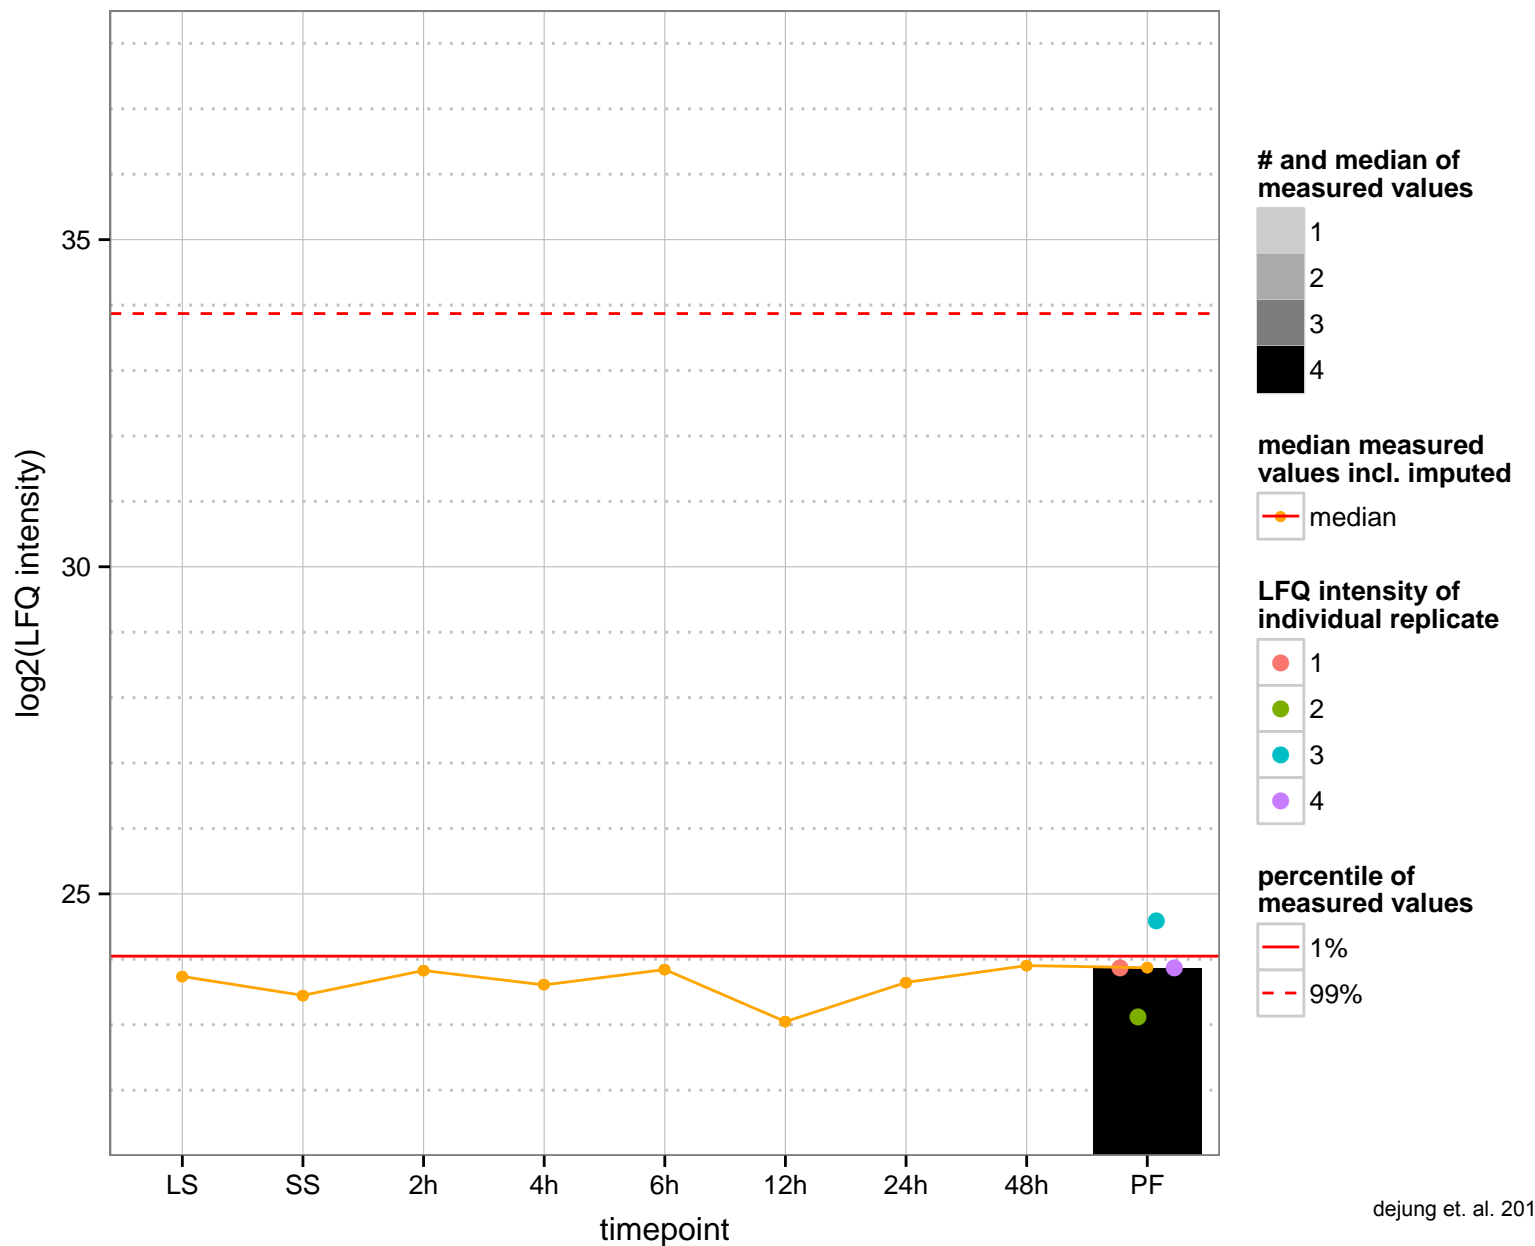

protein kinase, putative

Tb927.10.10350

AGOF: ATP binding, protein serine/threonine kinase activity, protein tyrosine kinase activity

AGOC: null

AGOP: protein phosphorylation

PGOF: ATP binding, protein kinase activity, transferase activity, transferring phosphorus-containing groups

PGOC: null

PGOP: protein phosphorylation

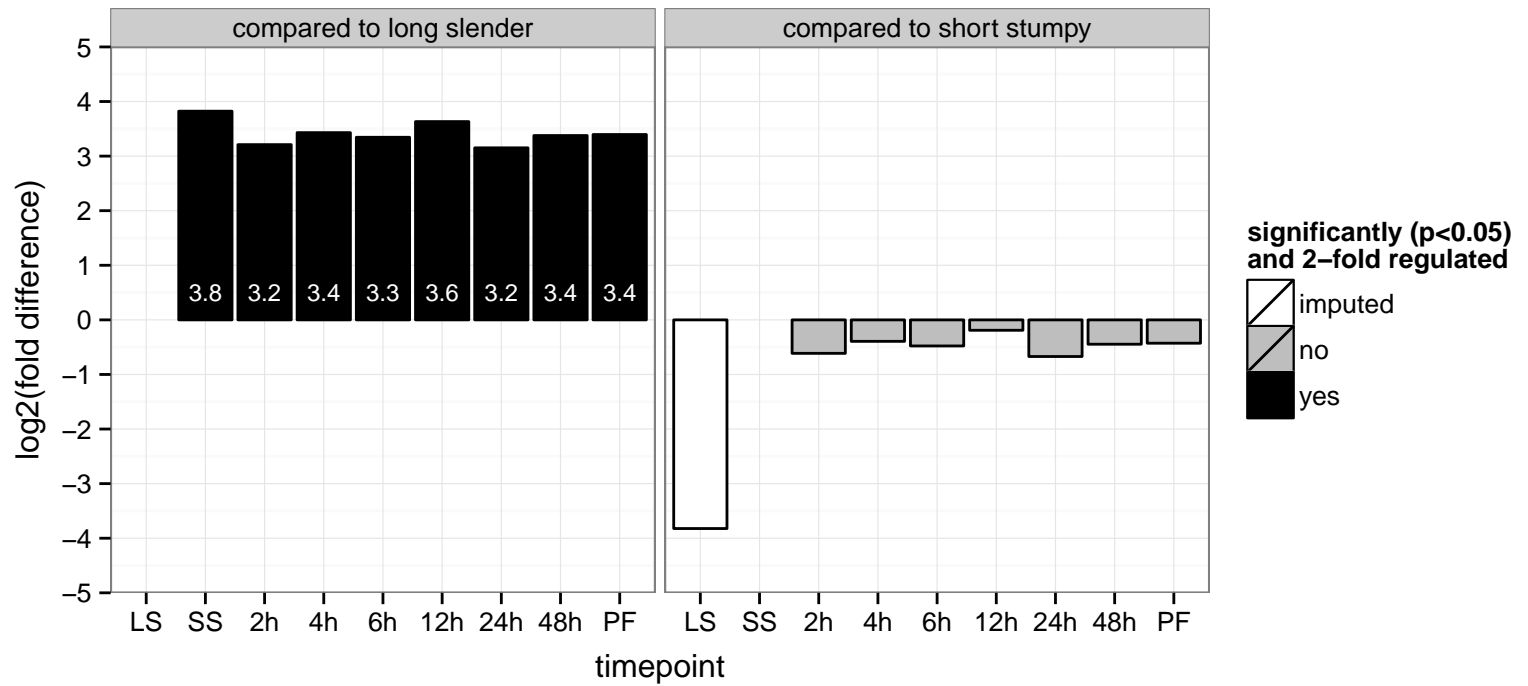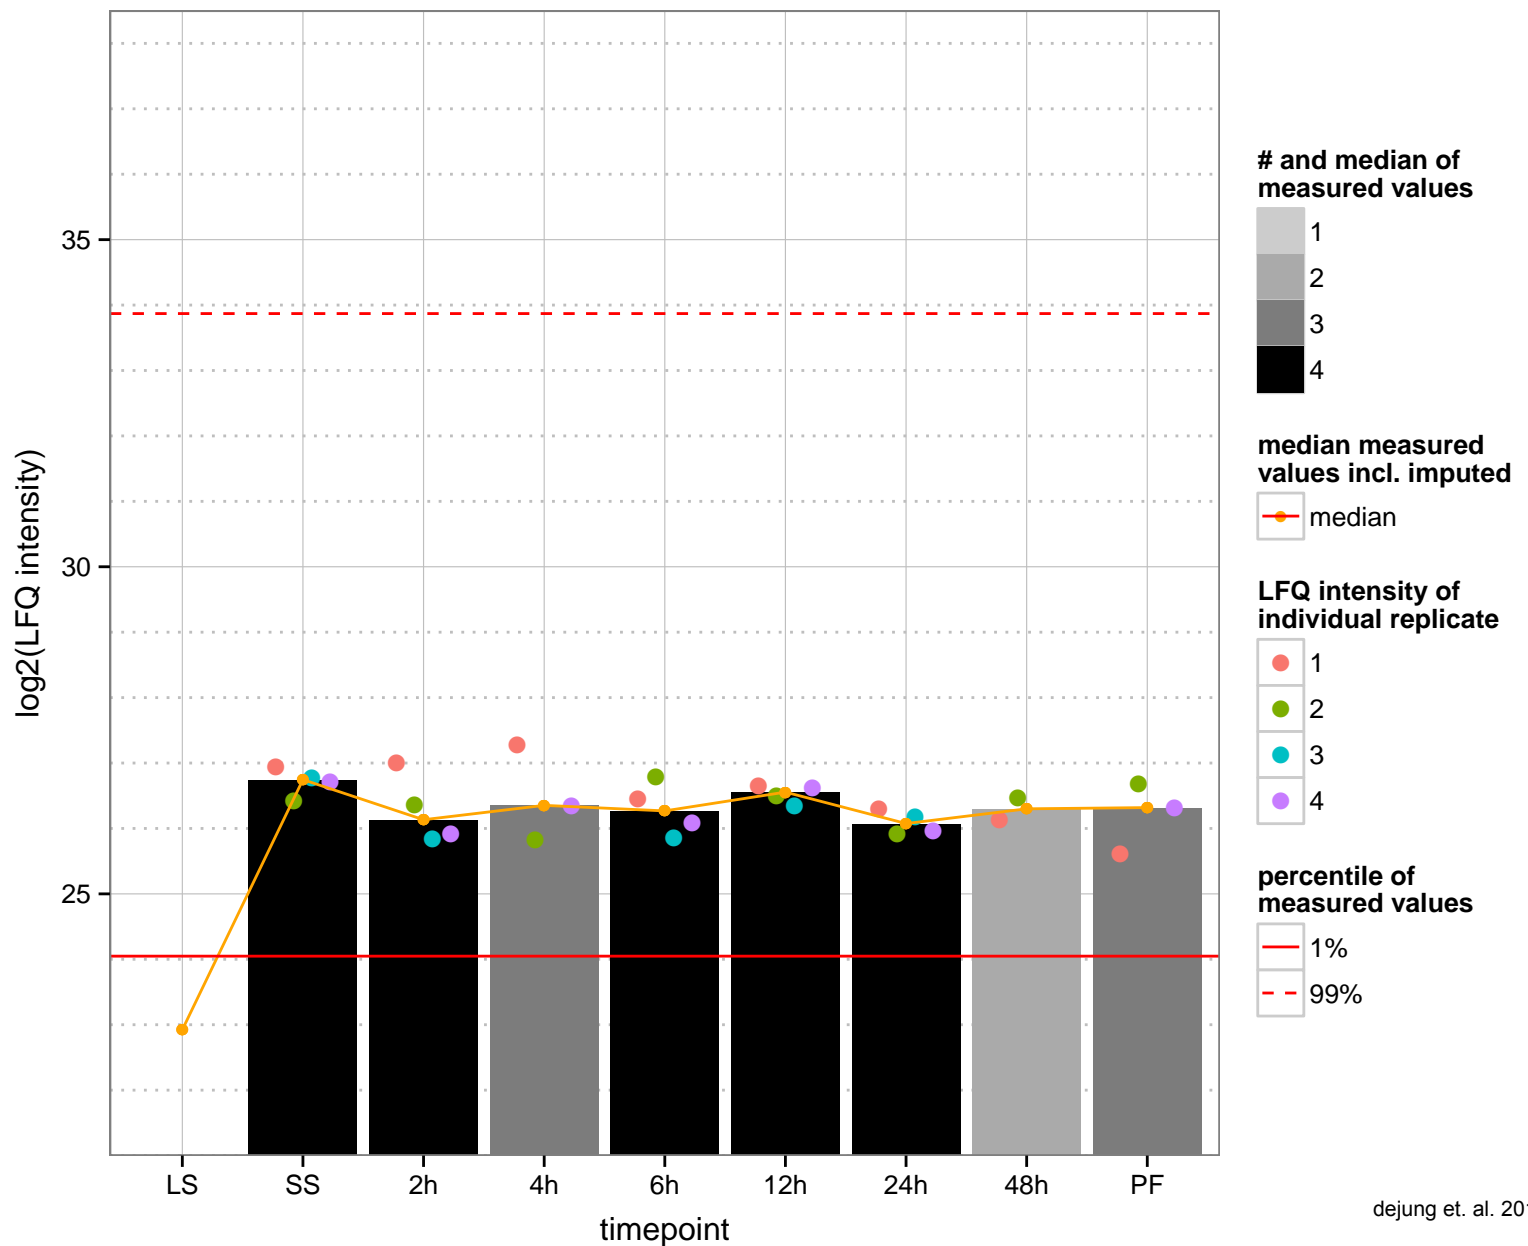

hypothetical protein, conserved  
 Tb927.10.10370;Tb927.10.10290  
 AGOF: null  
 AGOC: null  
 AGOP: null  
 PGOF: null  
 PGOC: null  
 PGOP: null

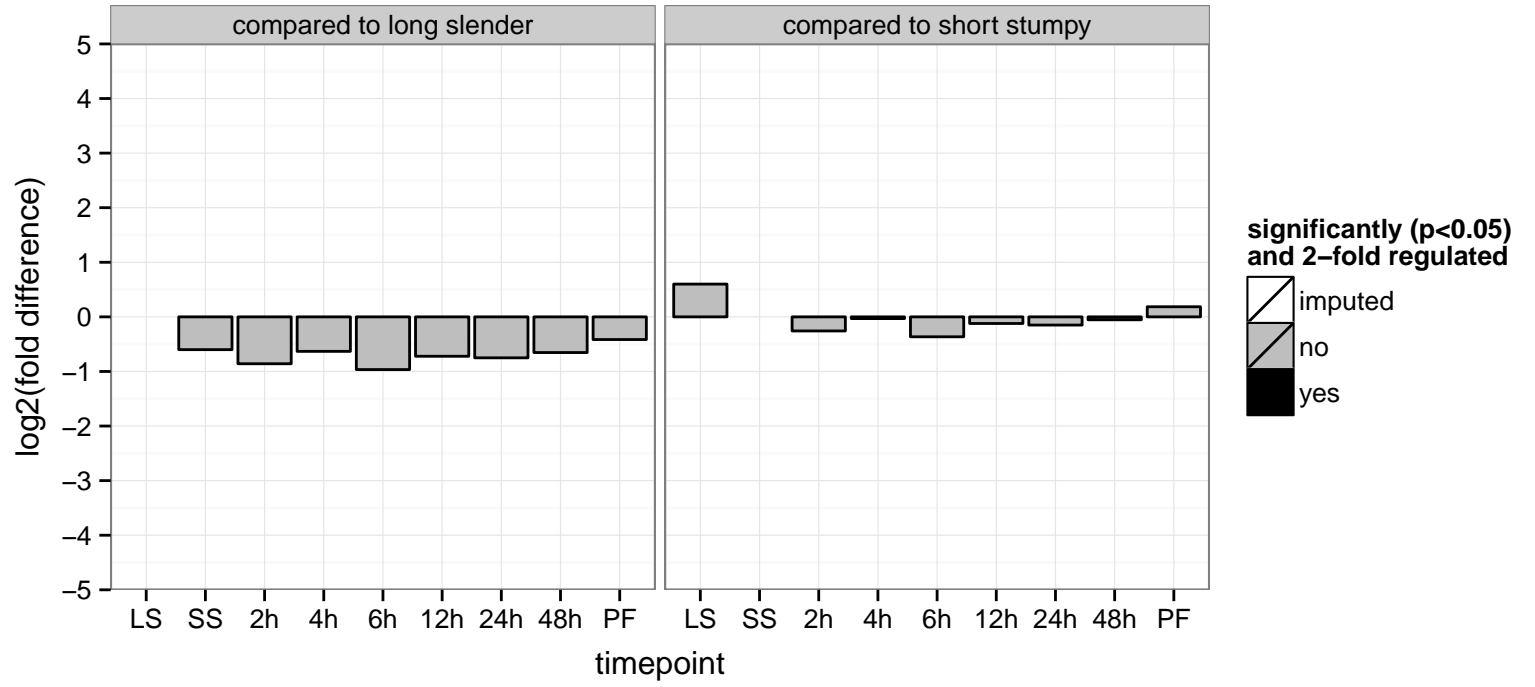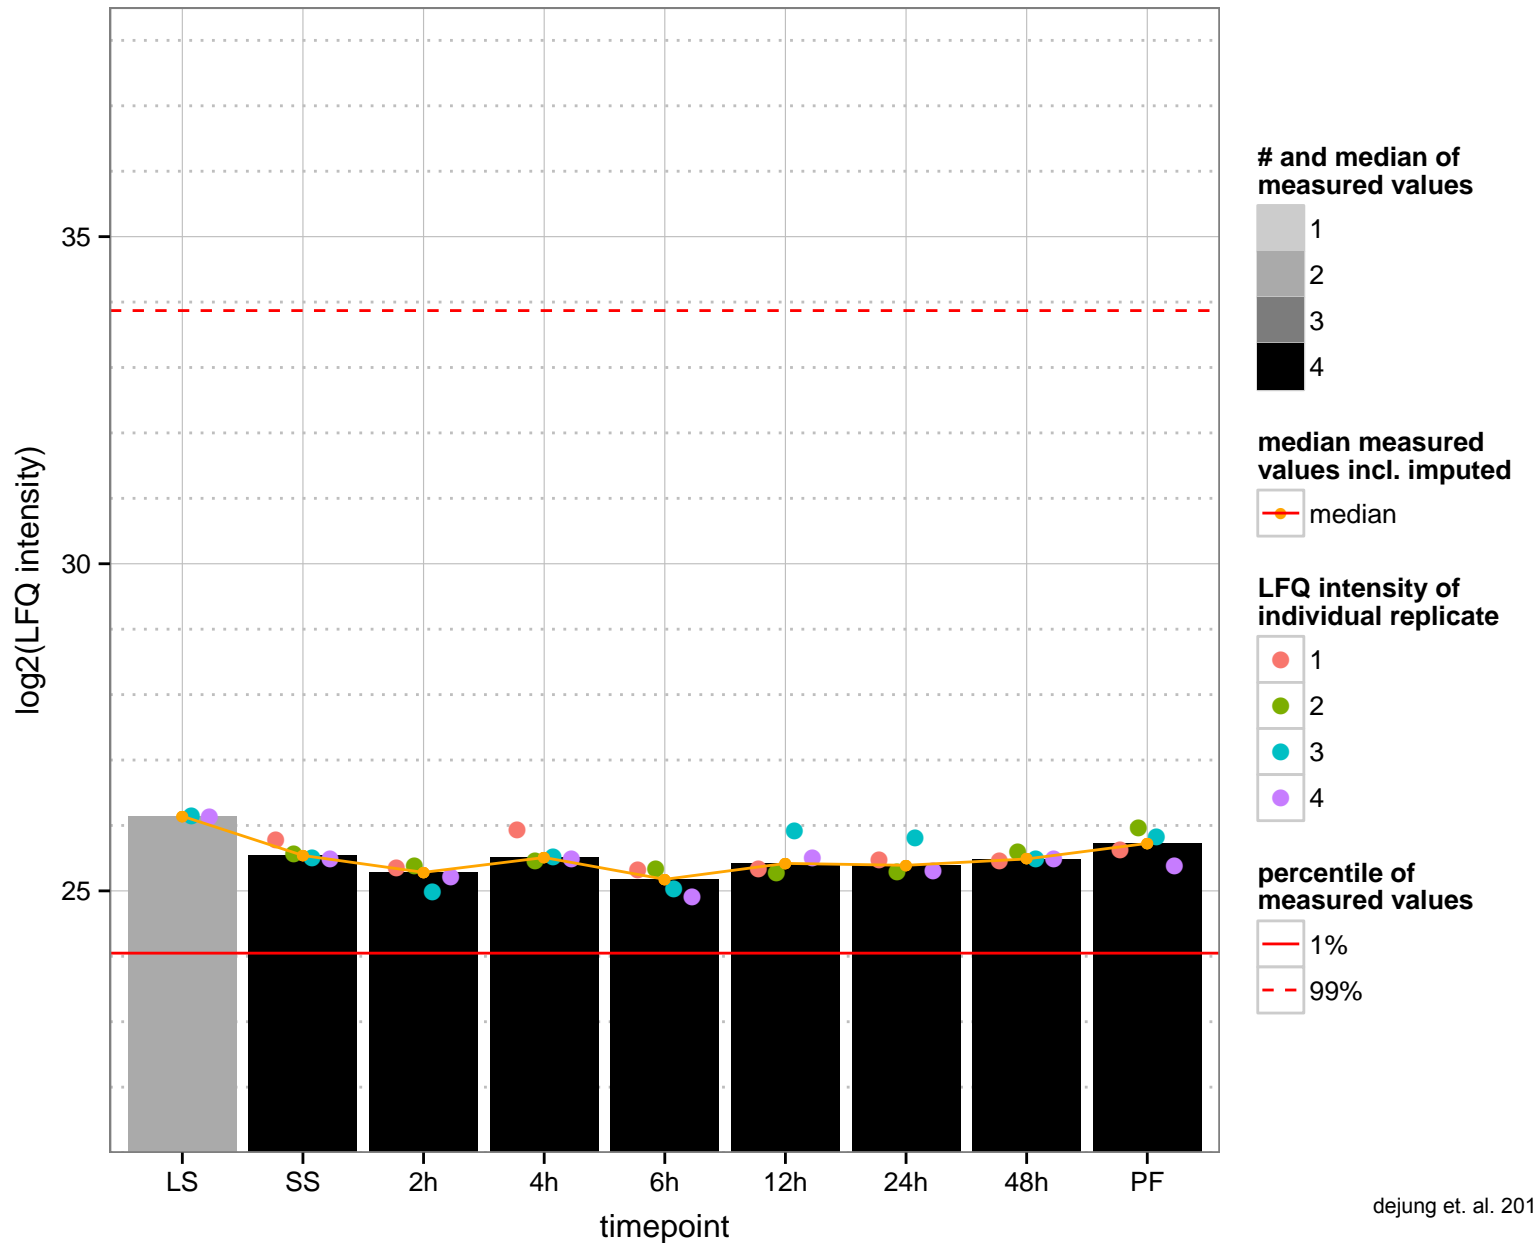

ATP-dependent DEAD/H RNA helicase, putative

Tb927.10.10380

AGOF: ATP binding, ATP-dependent helicase activity, helicase activity, nucleic acid binding

AGOC: null

AGOP: nucleobase-containing compound metabolic process

PGOF: ATP binding, ATP-dependent helicase activity, helicase activity, nucleic acid binding

PGOC: null

PGOP: null

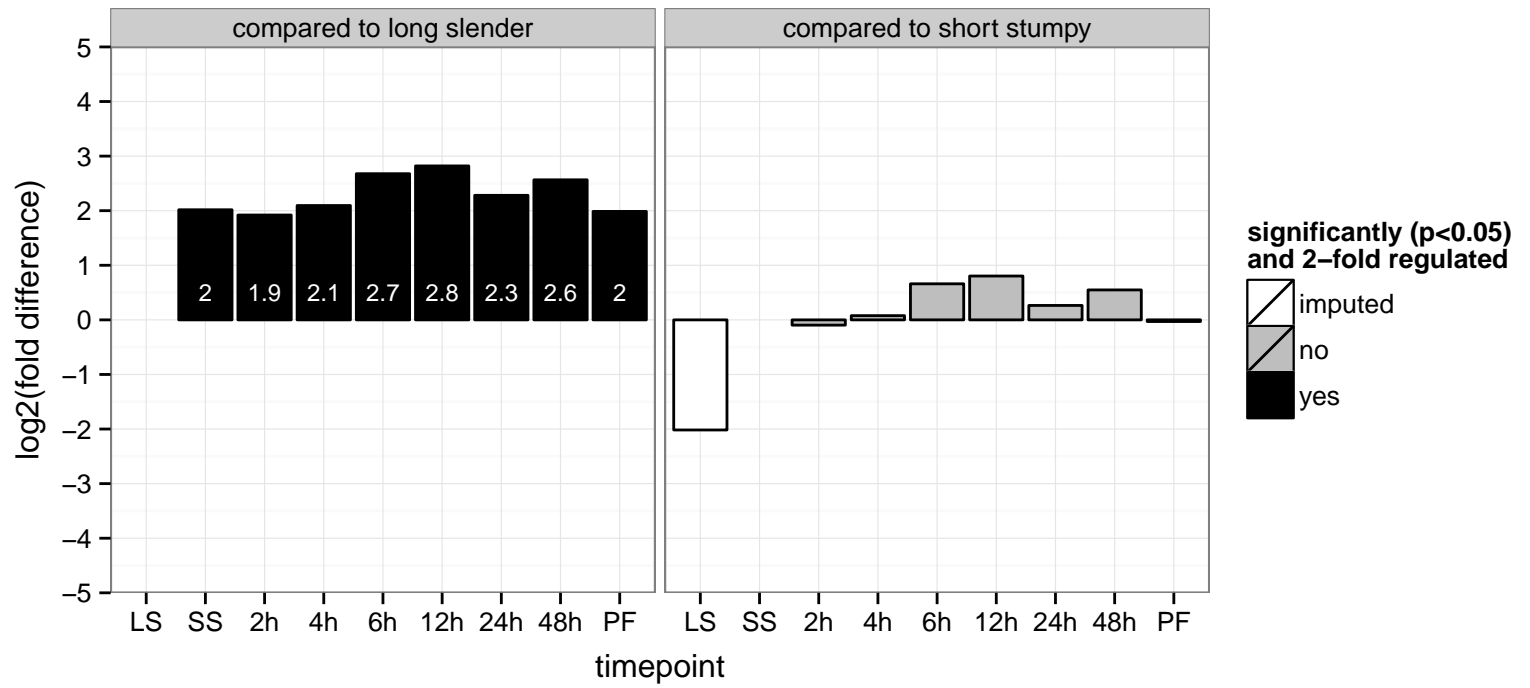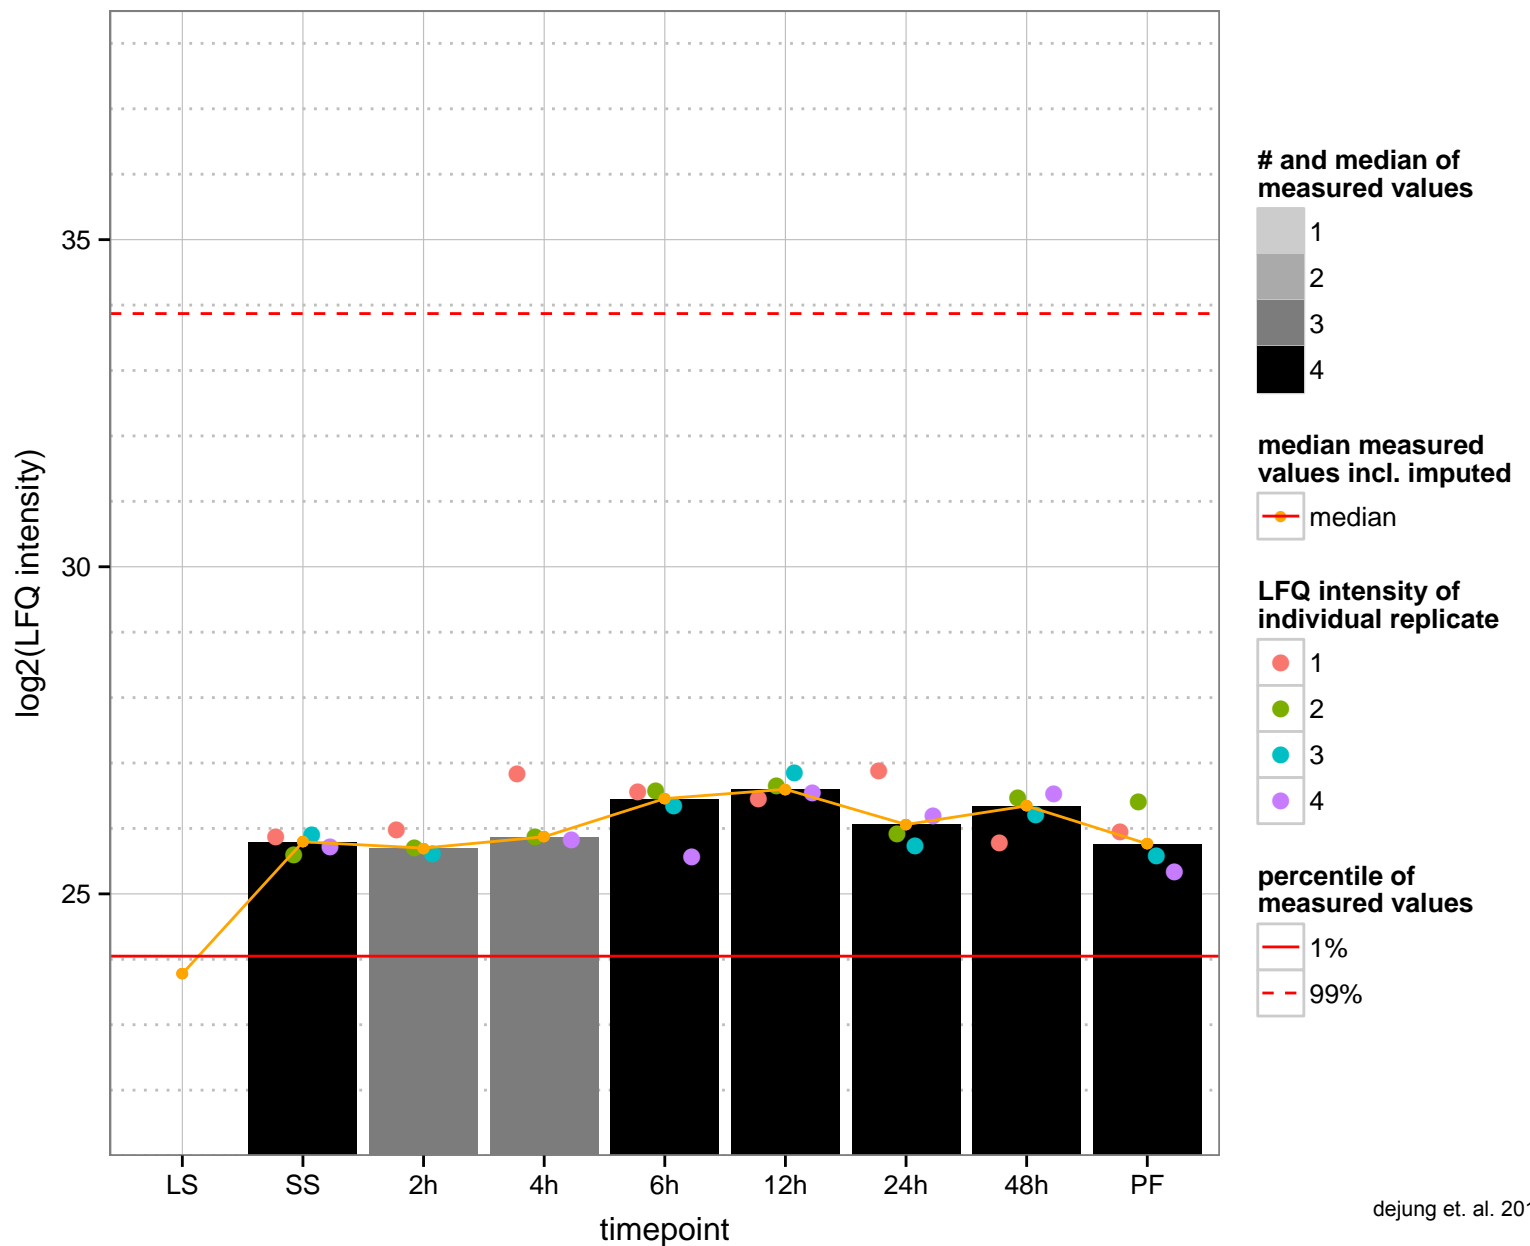

trypanothione reductase

Tb927.10.10390

AGOF: disulfide oxidoreductase activity, flavin adenine dinucleotide binding, trypanothione–disulfide reductase activity

AGOC: cytoplasm

AGOP: cell redox homeostasis, oxidation–reduction process

PGOF: disulfide oxidoreductase activity, flavin adenine dinucleotide binding, oxidoreductase activity

PGOC: cytoplasm

PGOP: cell redox homeostasis, oxidation–reduction process

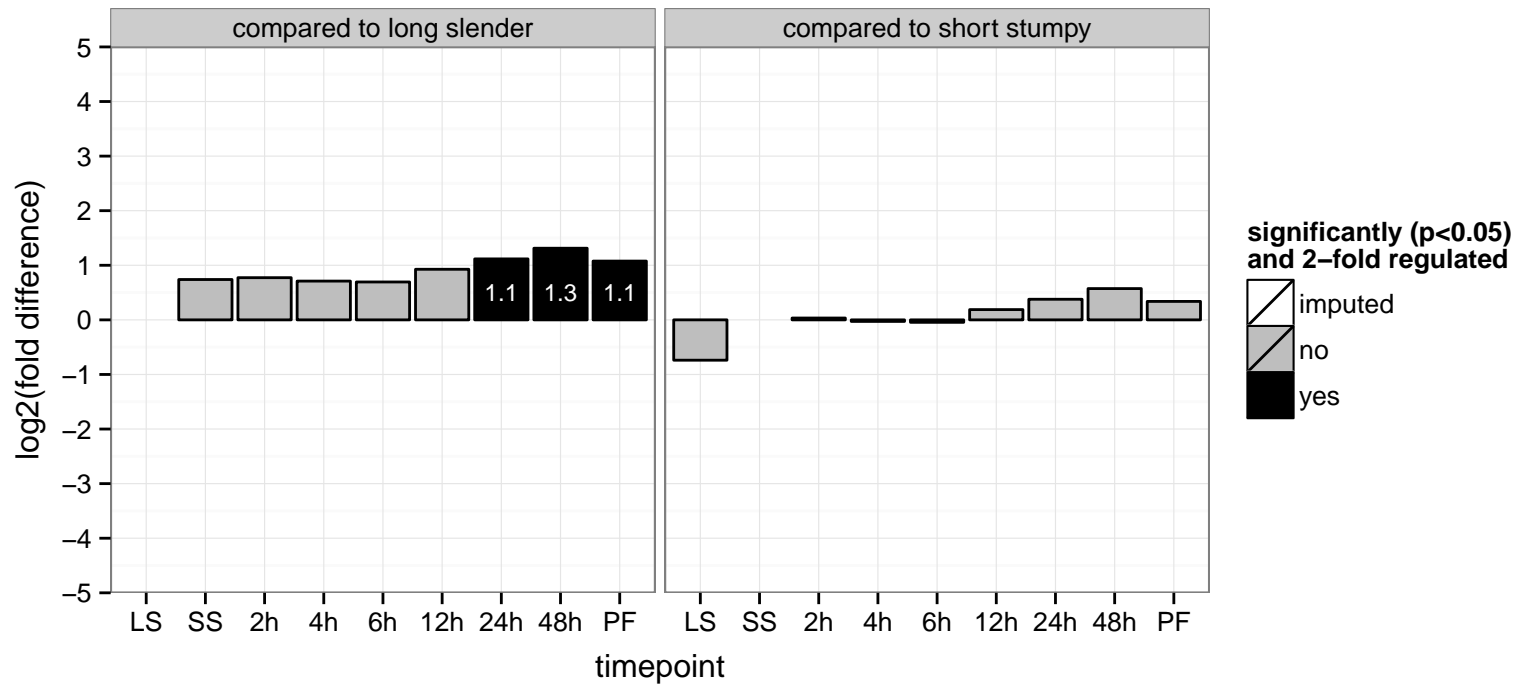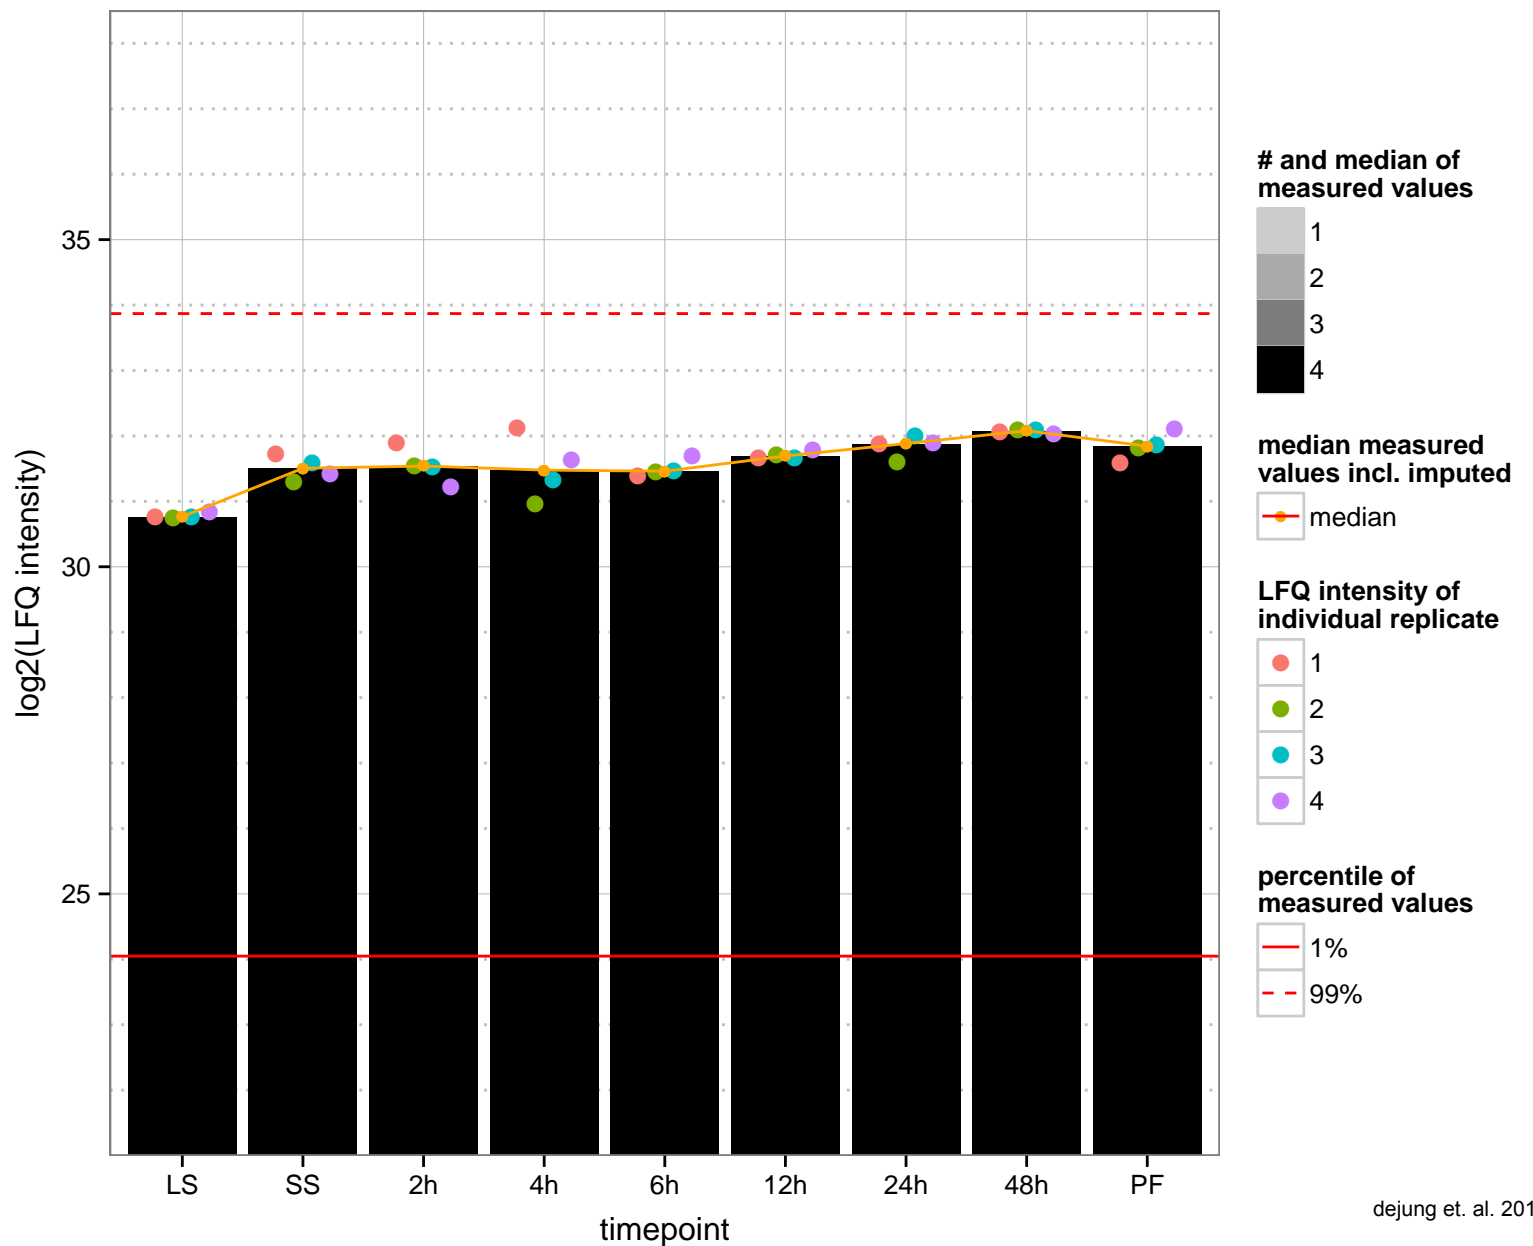



histone H2B, putative

Tb927.10.10590;Tb927.10.10580;Tb927.10.10570;Tb927.10.10560;Tb927.10.10550;Tb927.10.10540;Tb927.10.10530;Tb927.10.10520

AGOF: DNA binding

AGOC: nucleosome, nucleus

AGOP: chromosome organization, nucleosome assembly

PGOF: null, DNA binding

PGOC: null, nucleosome, nucleus

PGOP: null, nucleosome assembly

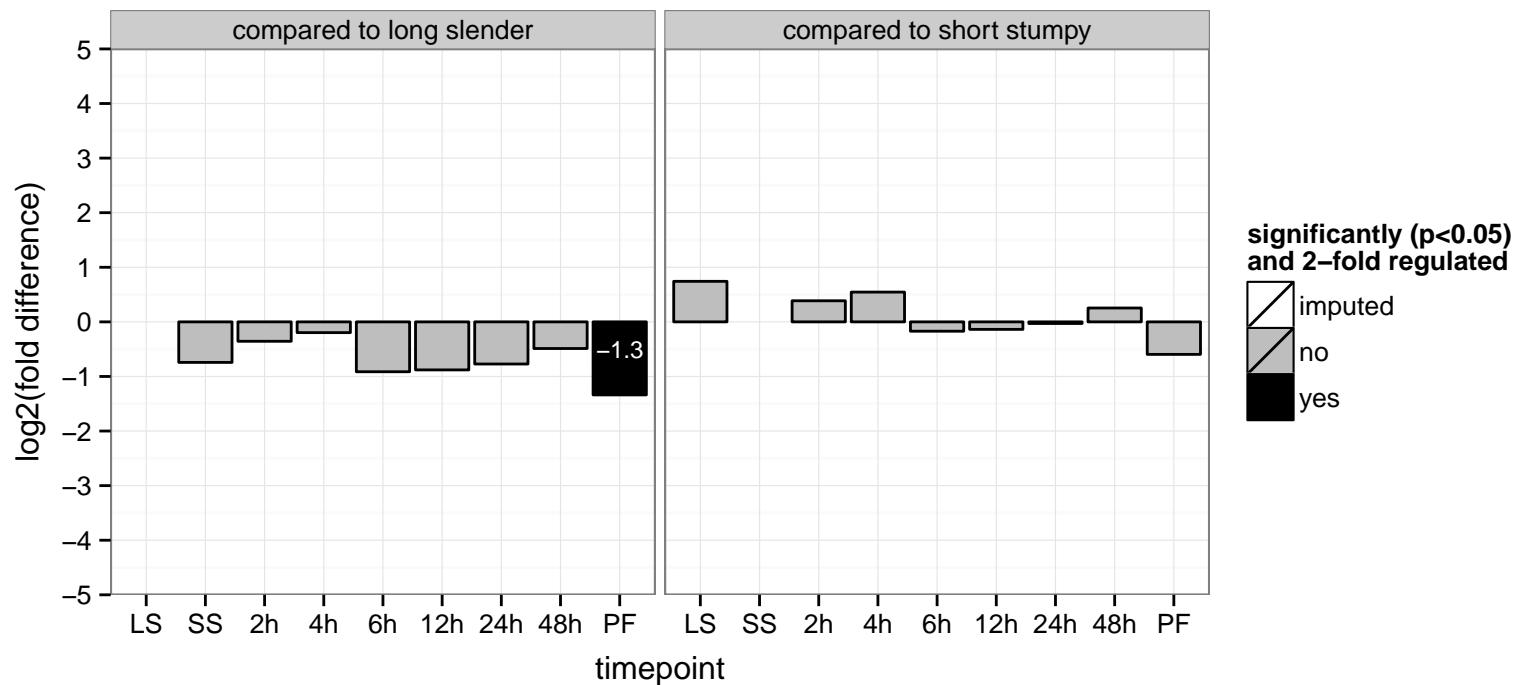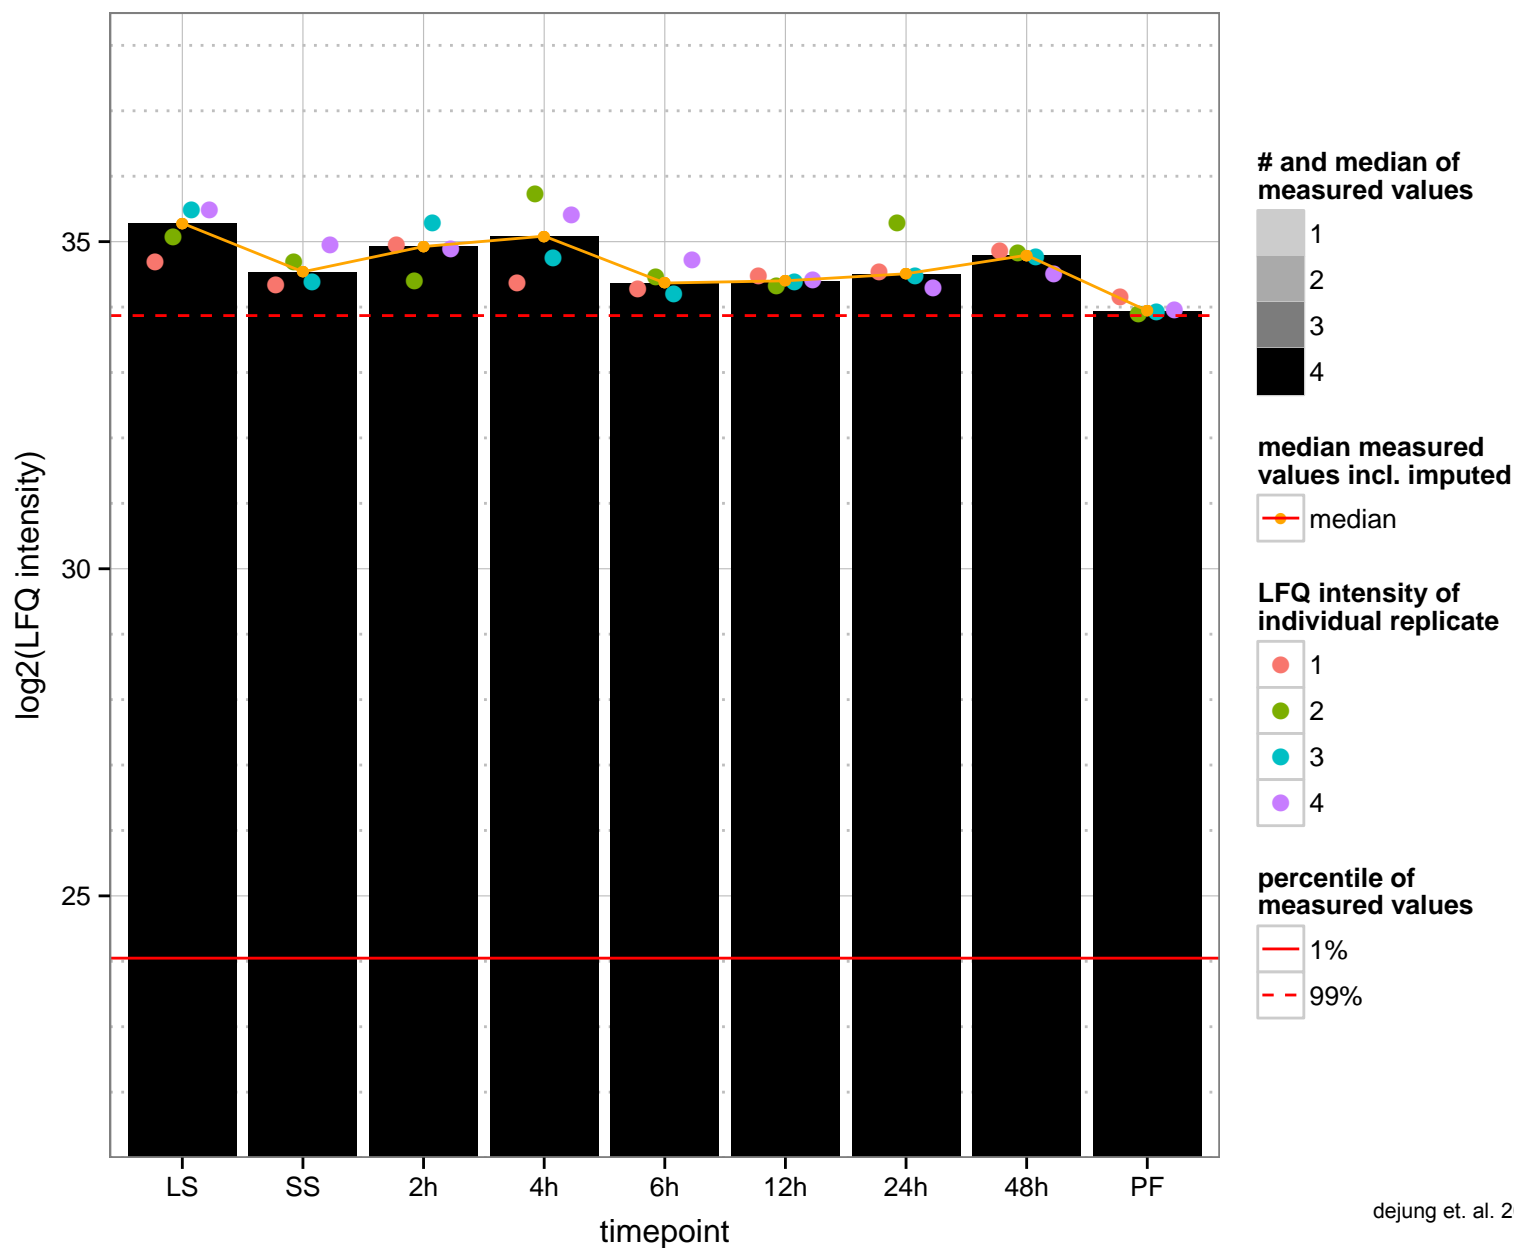

hypothetical protein, conserved  
 Tb927.10.10620  
 AGOF: null  
 AGOC: null  
 AGOP: null  
 PGOF: null  
 PGO C: null  
 PGOP: null

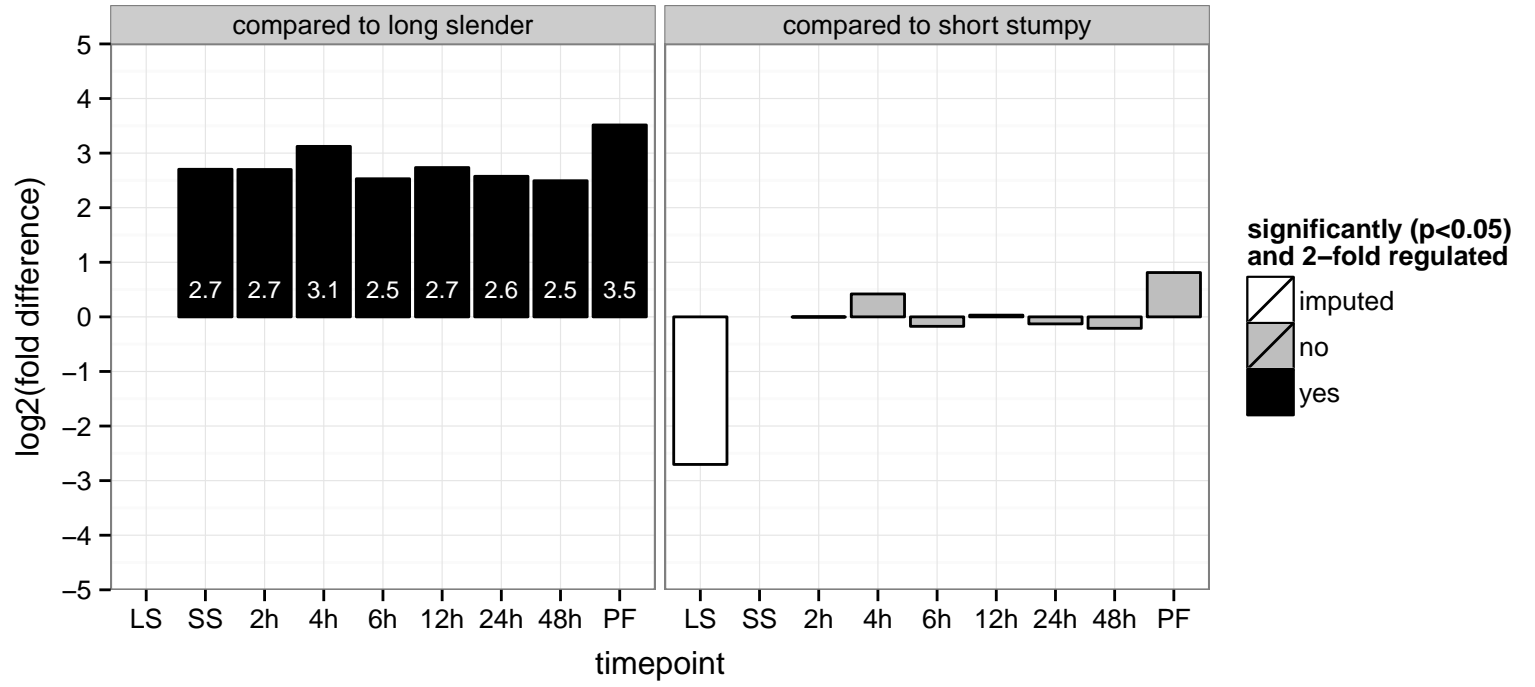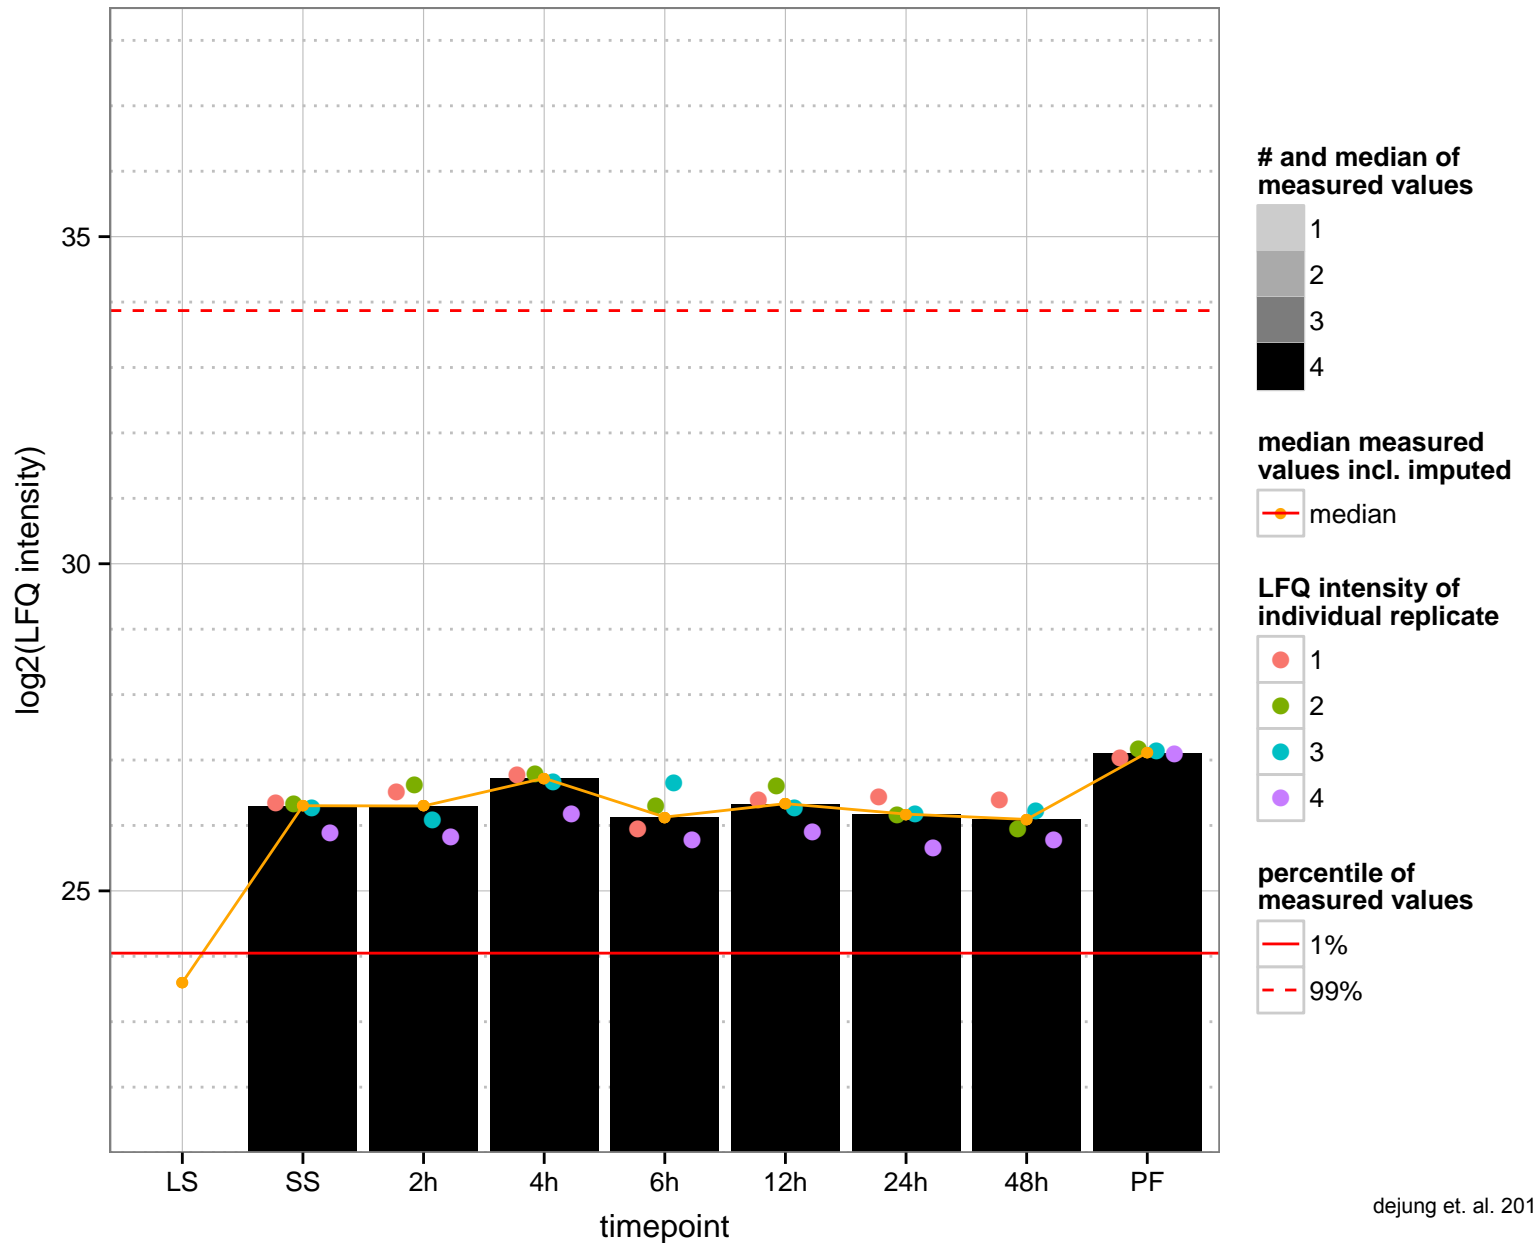

hypothetical protein, conserved  
 Tb927.10.10630  
 AGOF: null  
 AGOC: null  
 AGOP: null  
 PGO: null  
 PGOC: null  
 PGOP: null

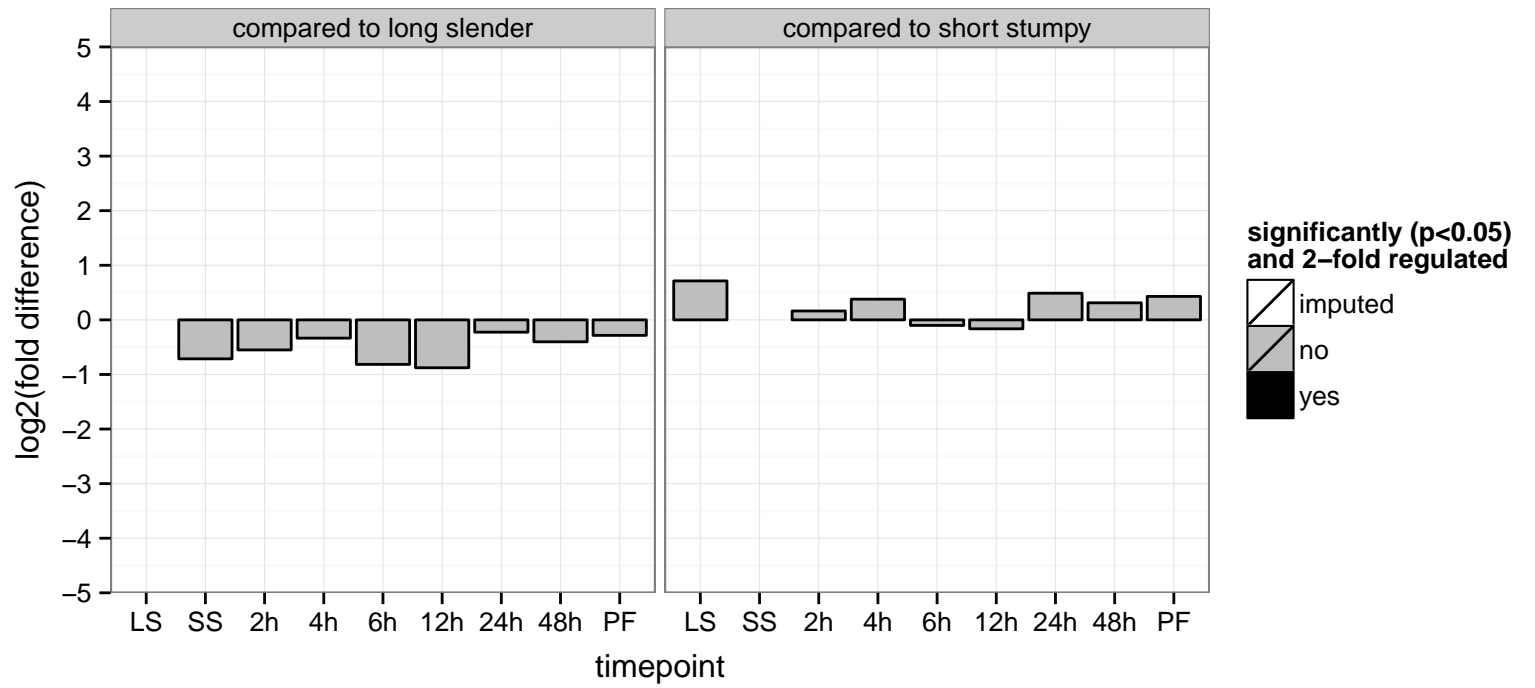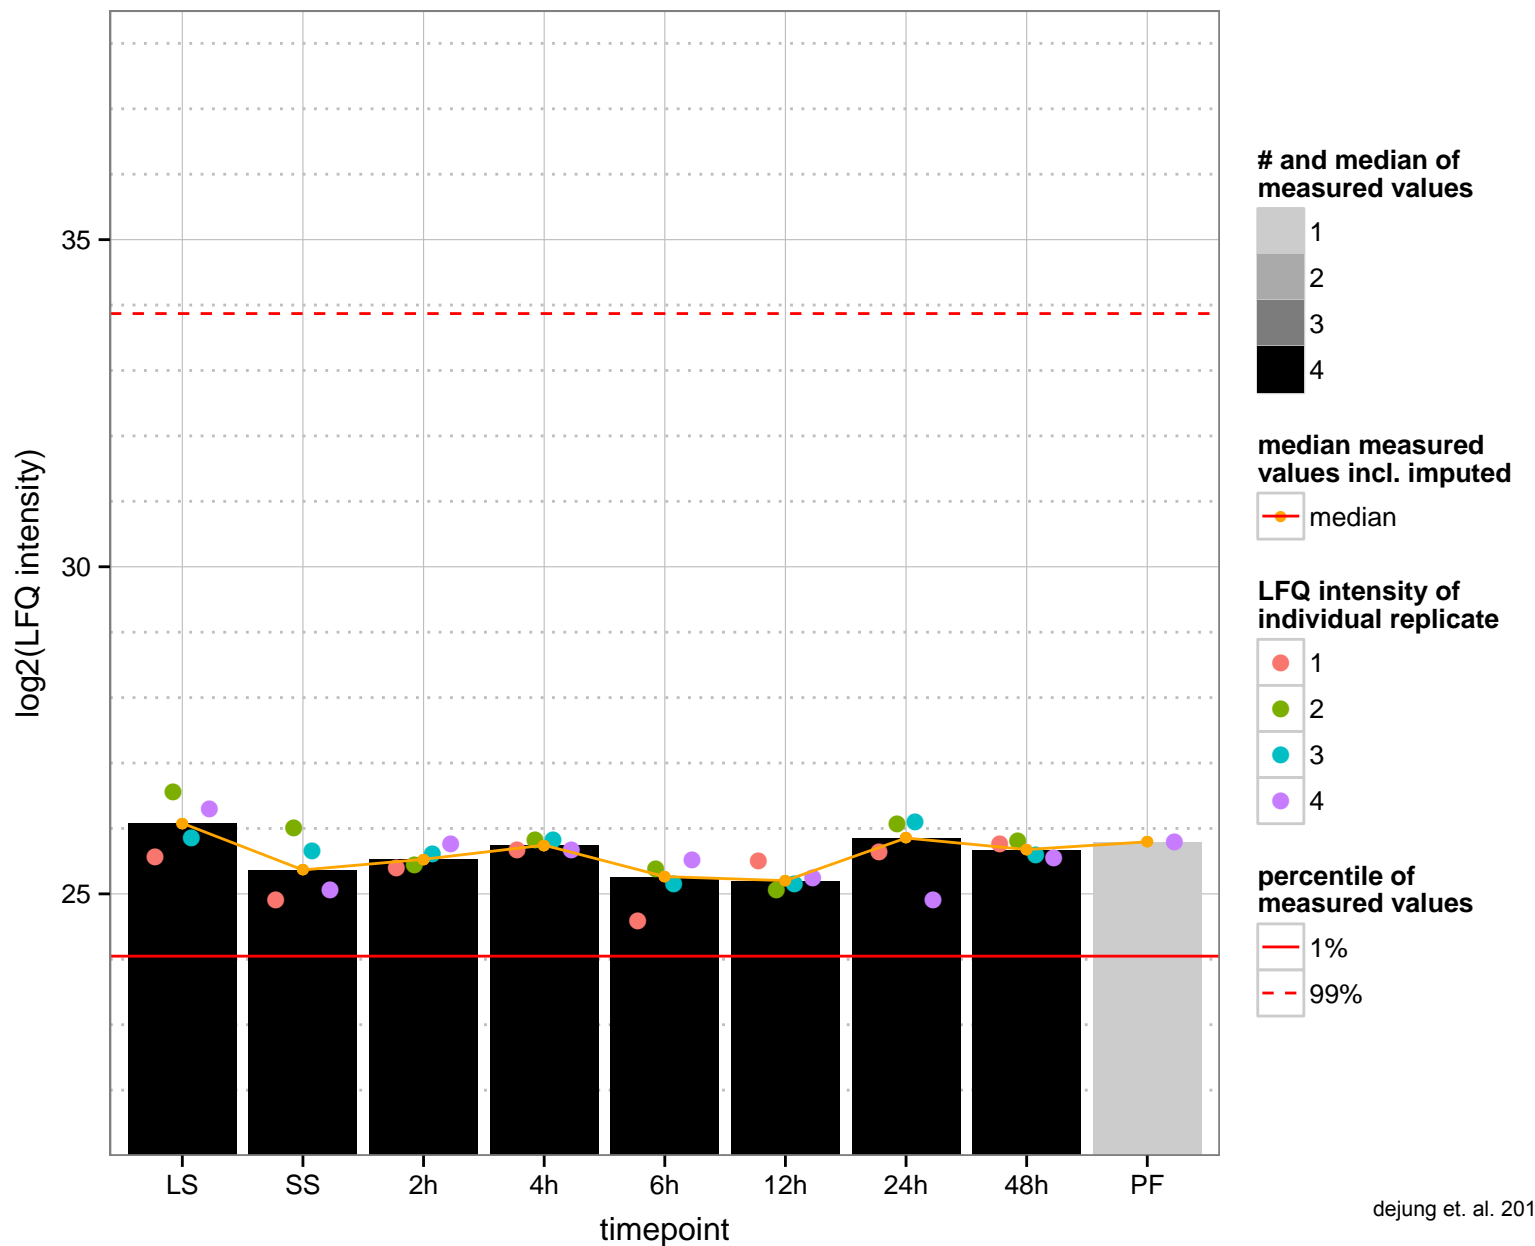

cdc2-related kinase 1, putative, cell division protein kinase 2 homolog 1 (CRK1)

Tb927.10.1070

AGOF: ATP binding, protein serine/threonine kinase activity, protein tyrosine kinase activity

AGOC: cytosol

AGOP: cell cycle, growth, protein phosphorylation

PGOF: ATP binding, protein kinase activity, transferase activity, transferring phosphorus-containing groups

PGOC: null

PGOP: protein phosphorylation

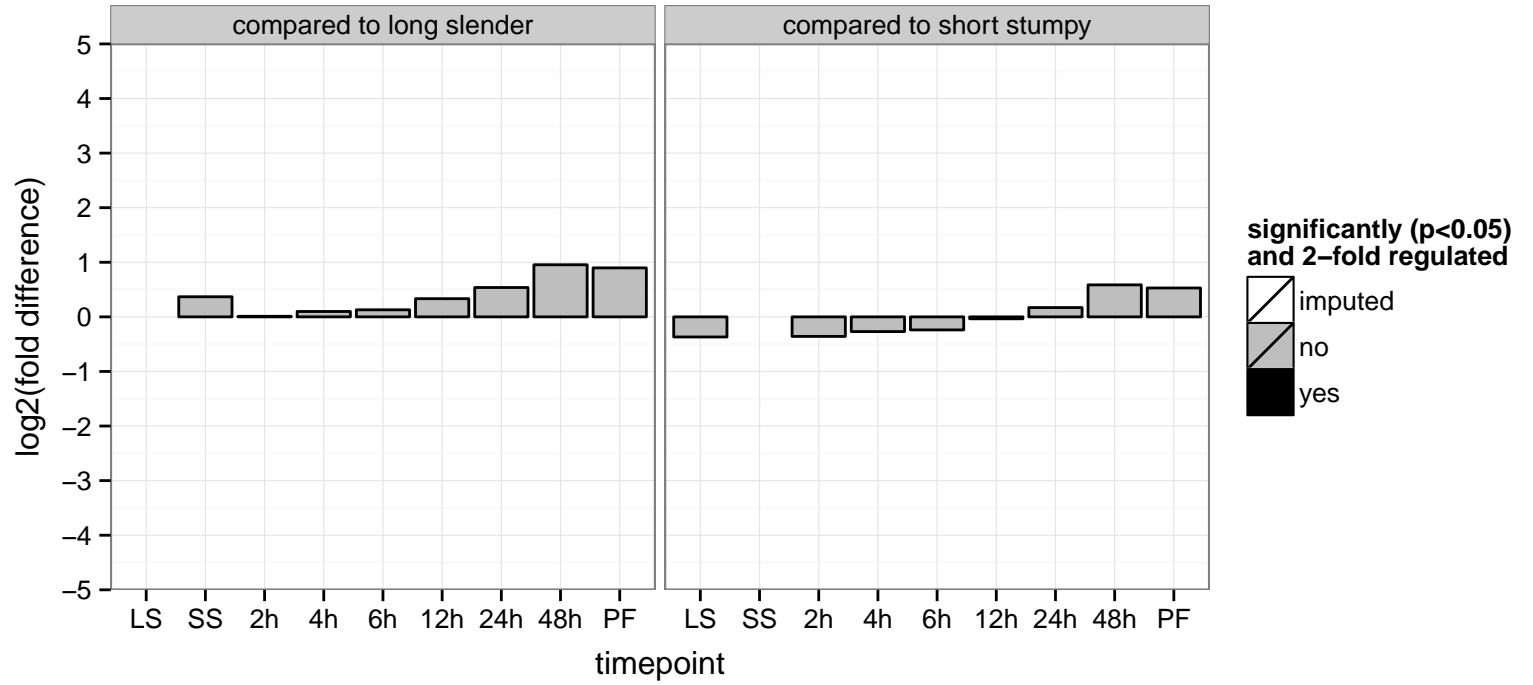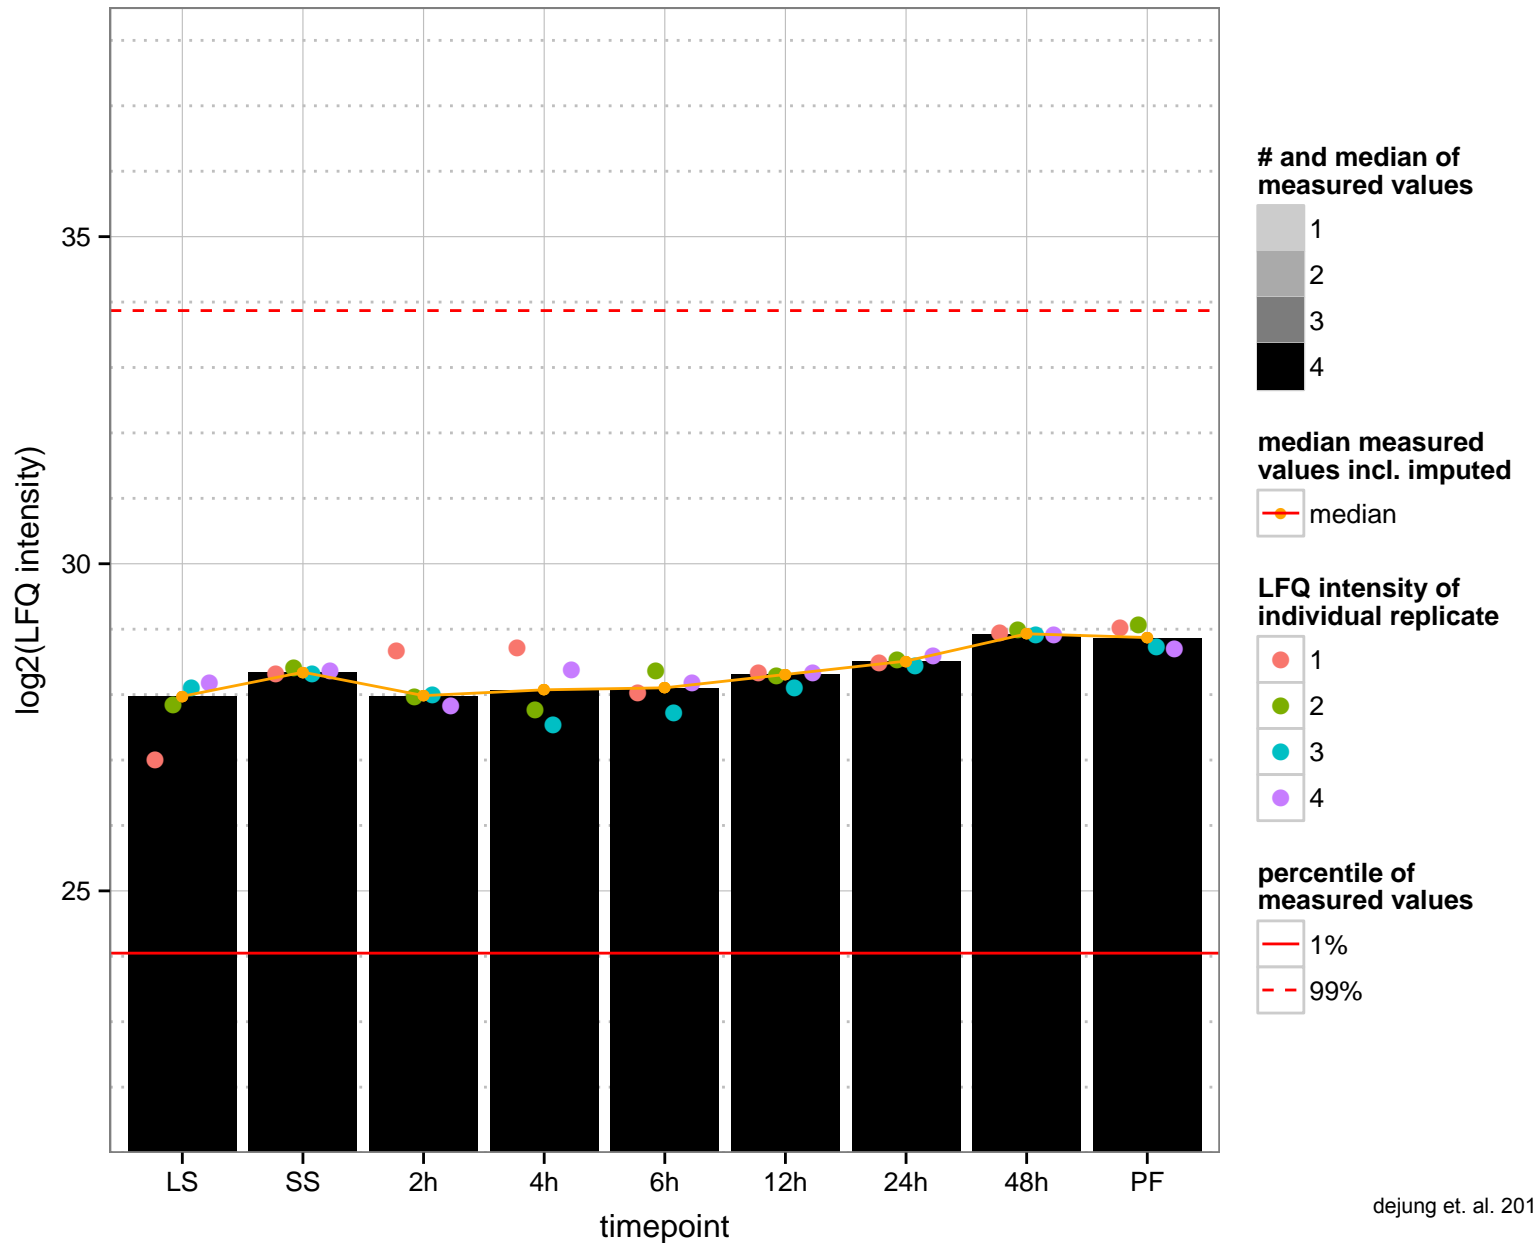

hypothetical protein, conserved  
 Tb927.10.10720  
 AGOF: null  
 AGOC: null  
 AGOP: null  
 PGO: null  
 PGO: integral to membrane  
 PGO: null

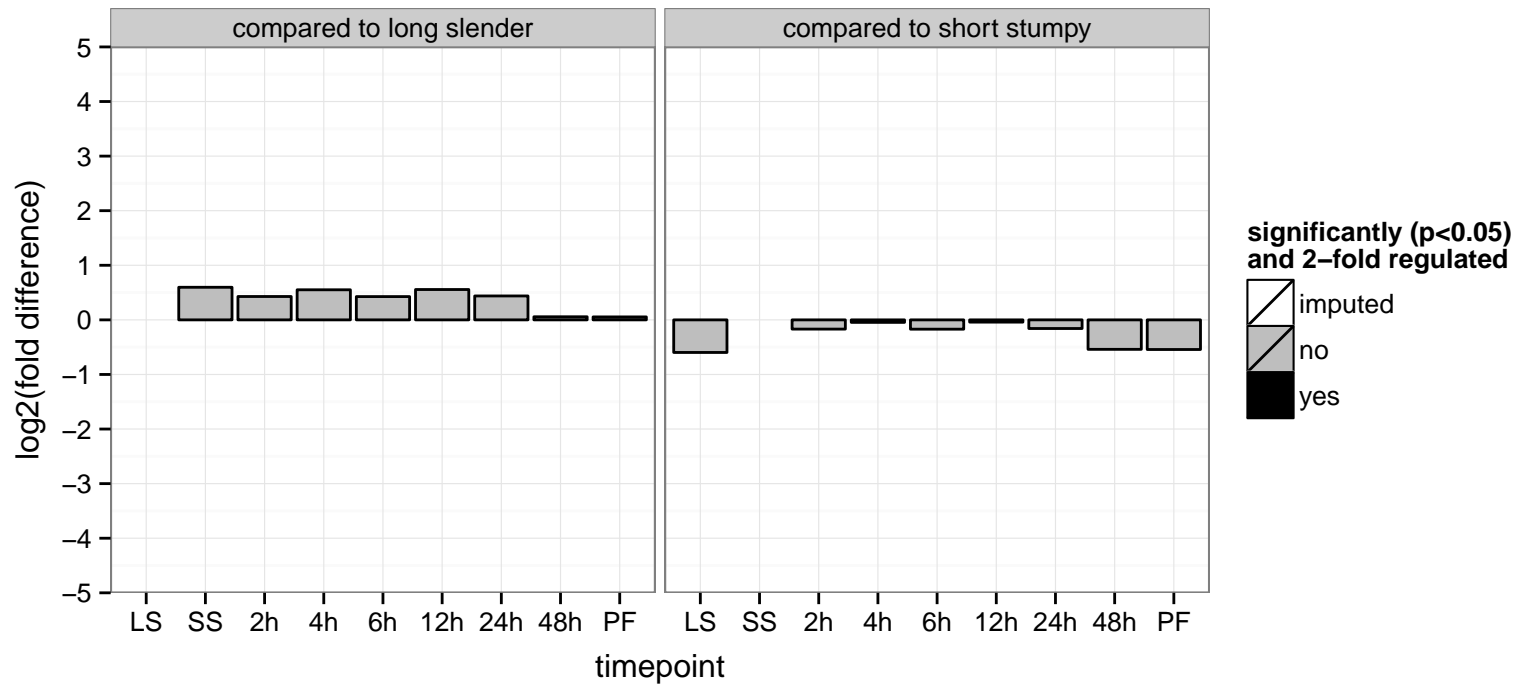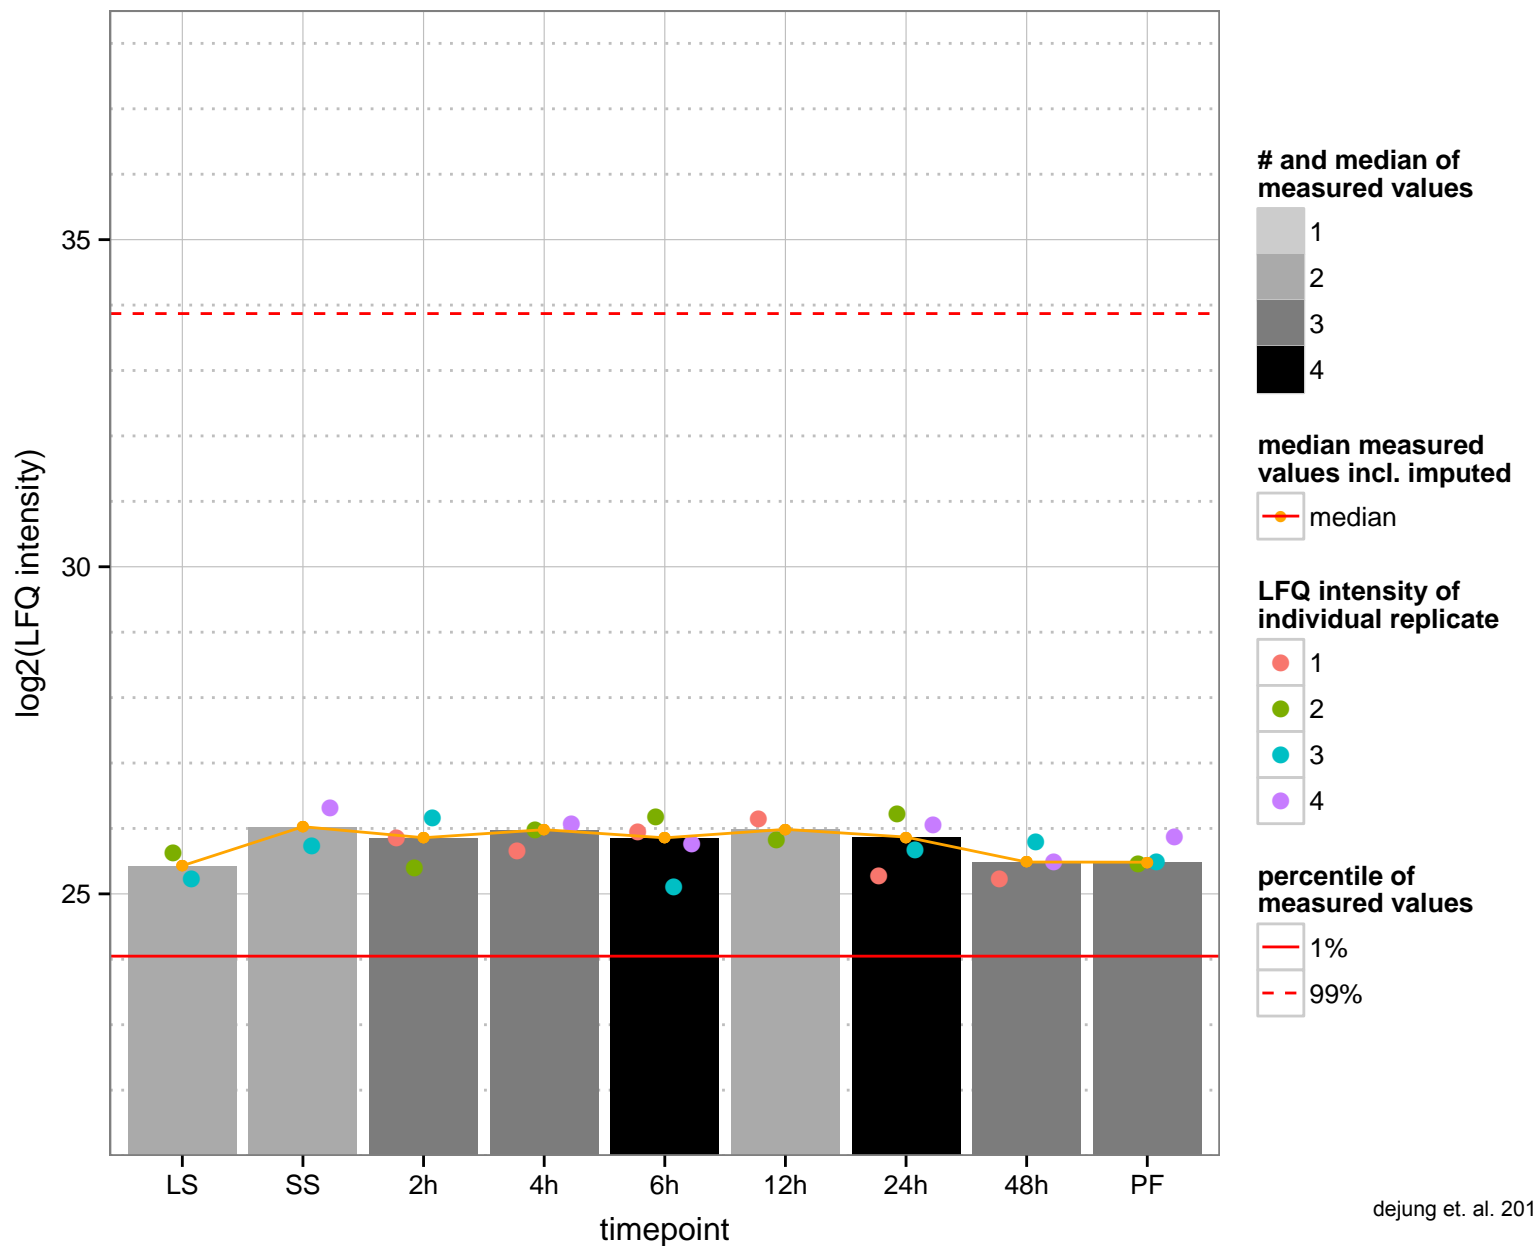

hypothetical protein, conserved  
 Tb927.10.10740  
 AGOF: null  
 AGOC: mitochondrion  
 AGOP: null  
 PGO: null  
 PGO: null  
 PGO: null

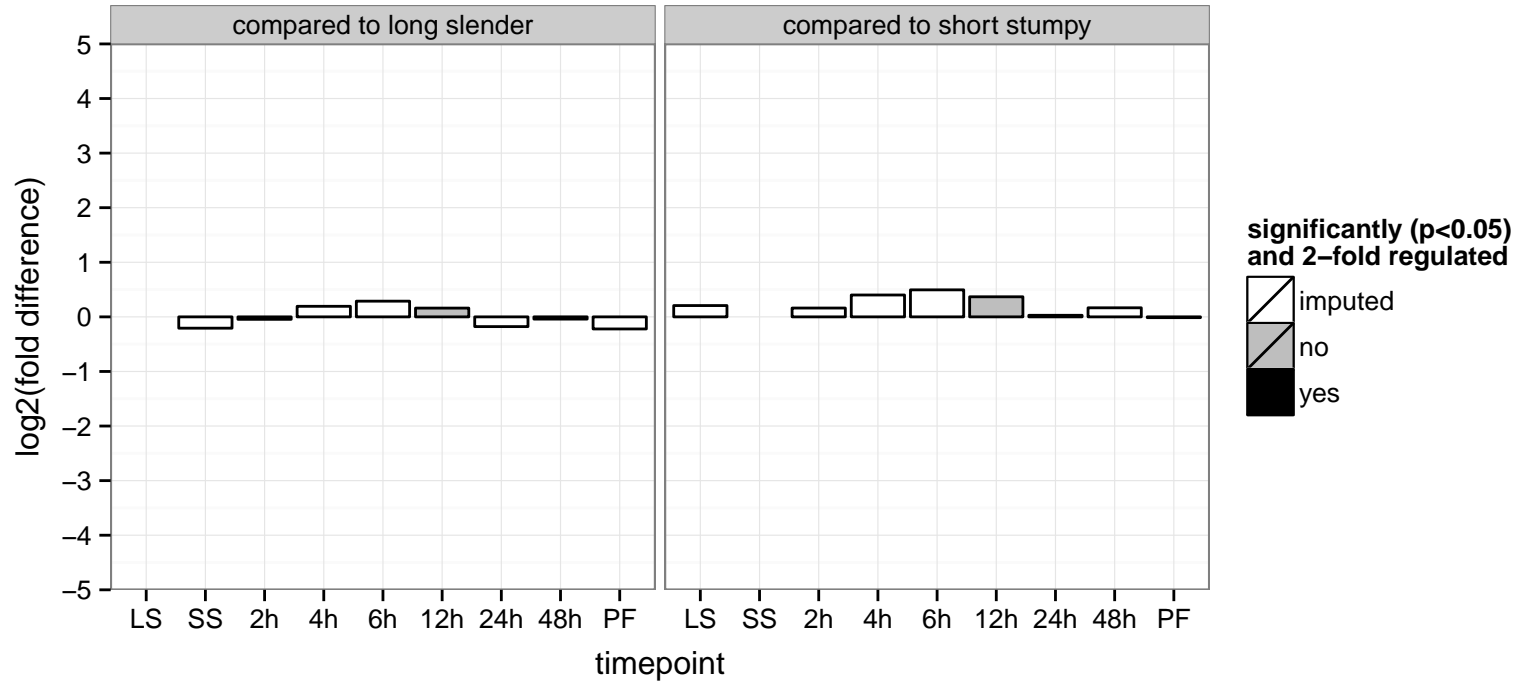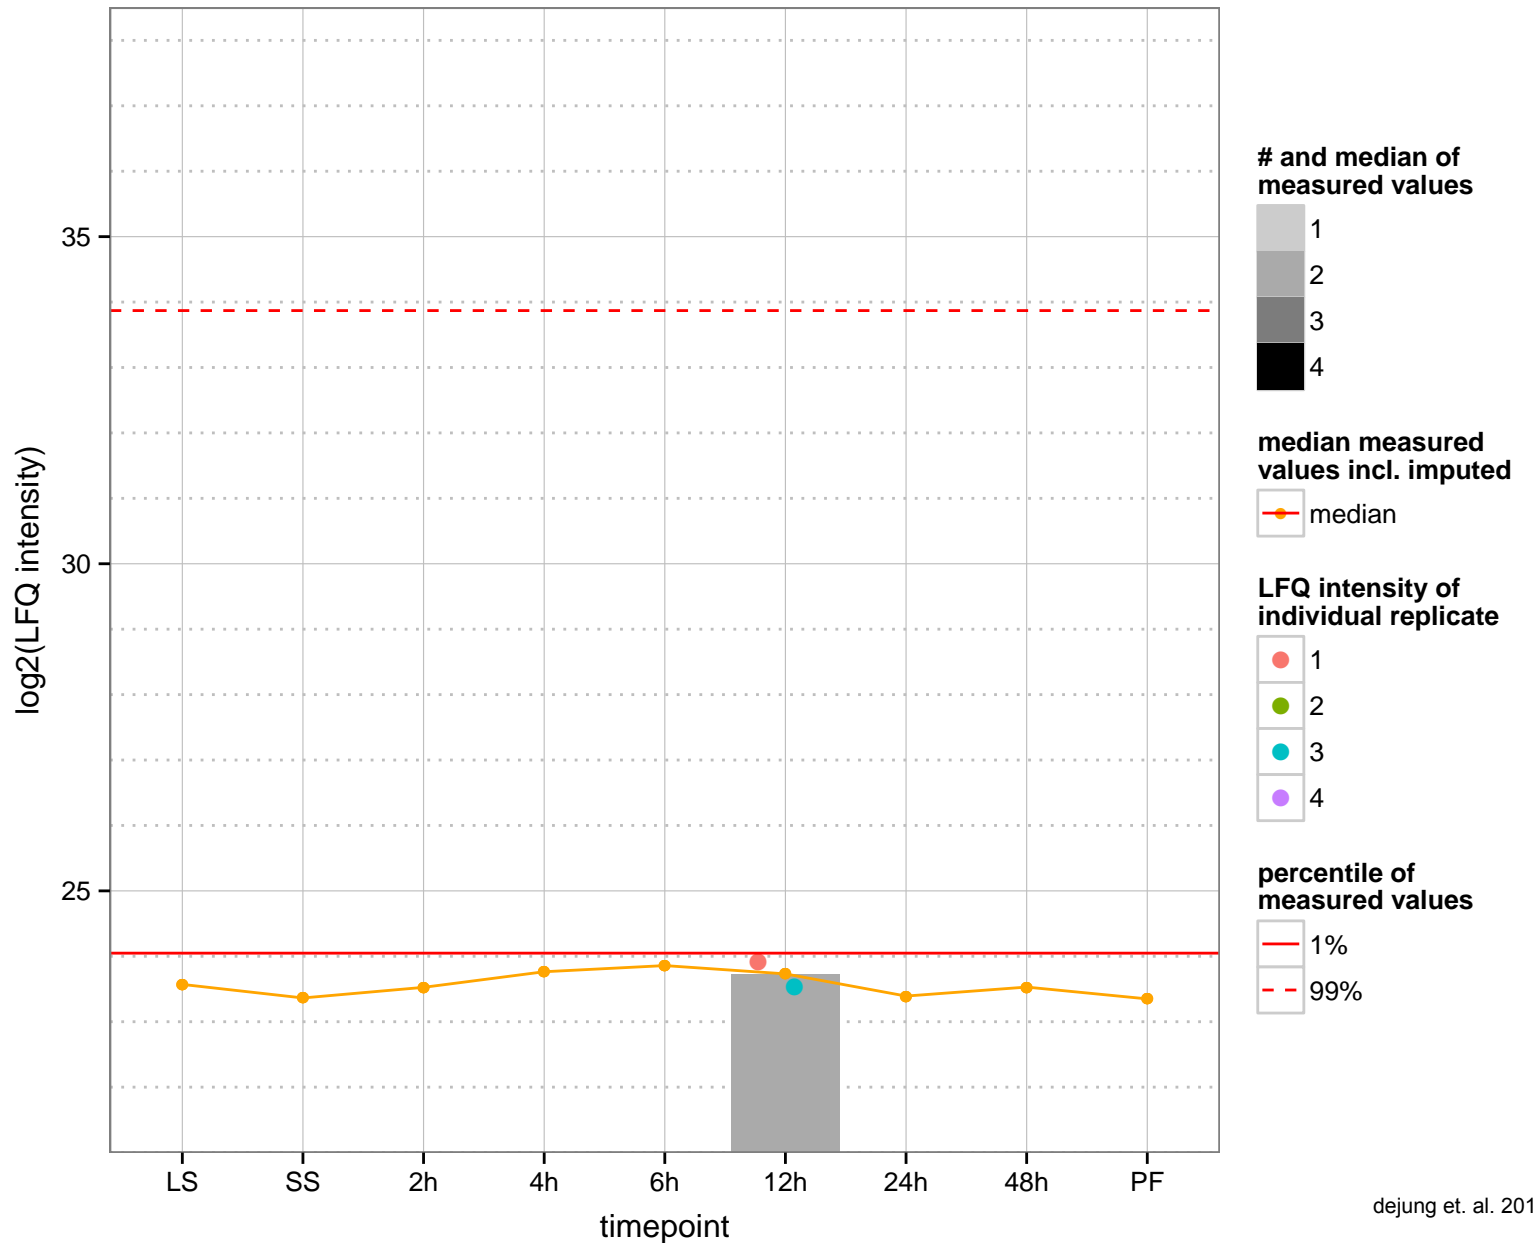

40S ribosomal protein S23, putative (RPS23)  
 Tb927.10.1090;Tb927.10.1080  
 AGOF: RNA binding, structural constituent of ribosome  
 AGOC: intracellular, ribosome, small ribosomal subunit  
 AGOP: translation  
 PGO: structural constituent of ribosome, null  
 PGOC: intracellular, ribosome, small ribosomal subunit, null  
 PGOP: translation, null

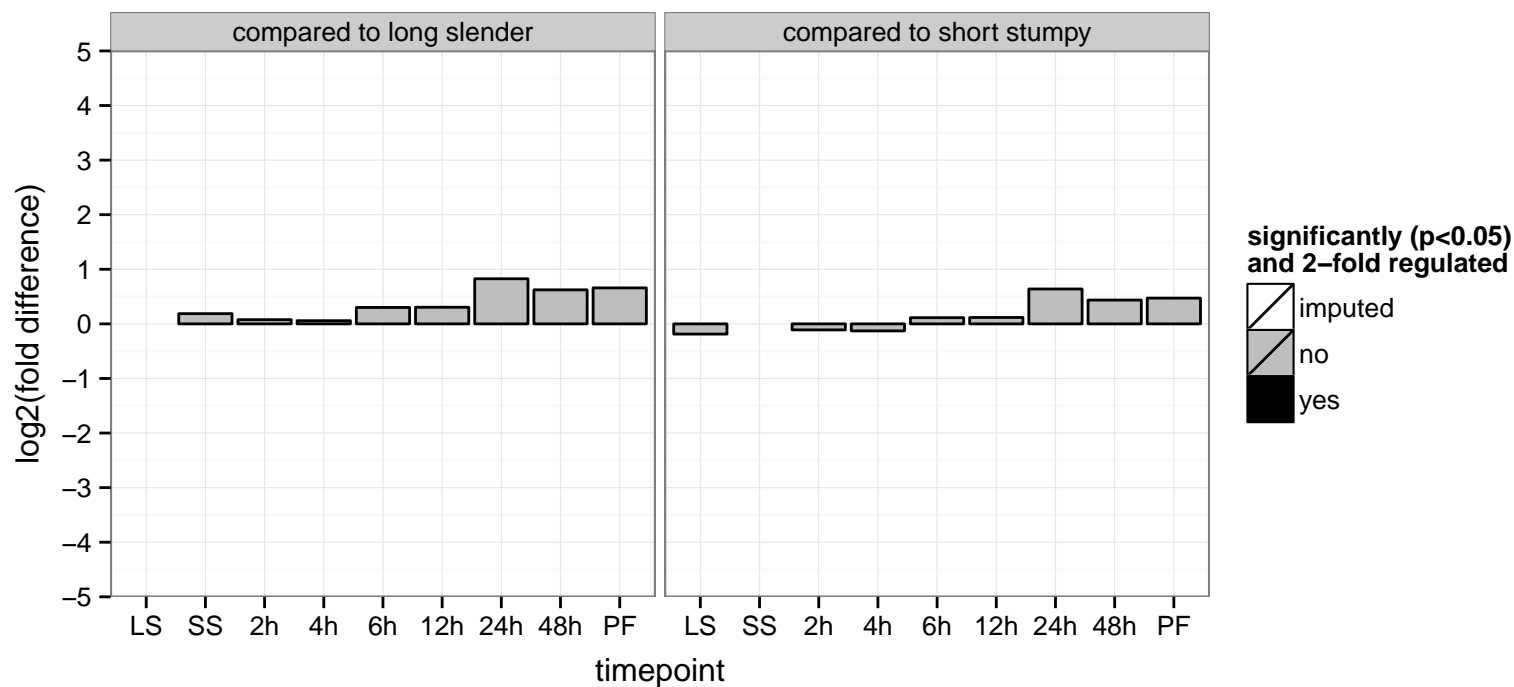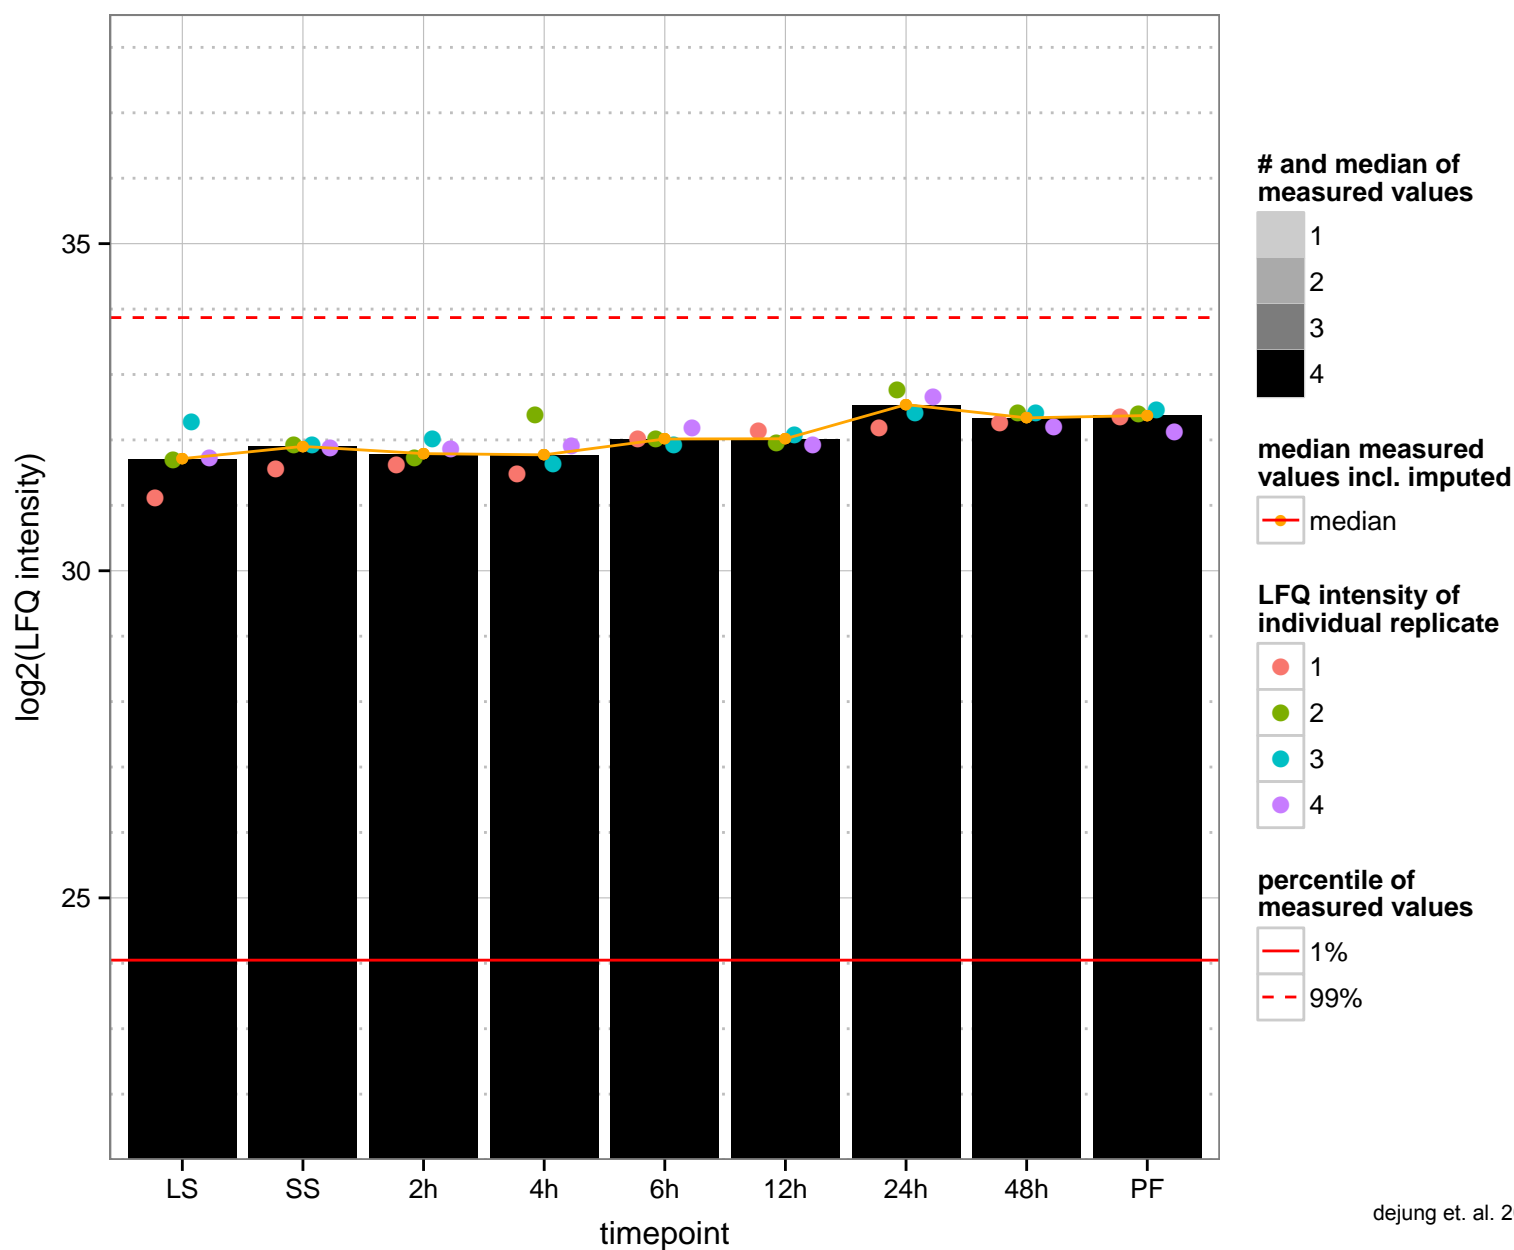

argonaute-like protein (AGO1)  
 Tb927.10.10850  
 AGOF: ribosome binding  
 AGOC: cytoplasm  
 AGOP: RNA interference, production of siRNA involved in RNA interference  
 PGOF: nucleic acid binding, protein binding  
 PGO: null  
 PGOP: null

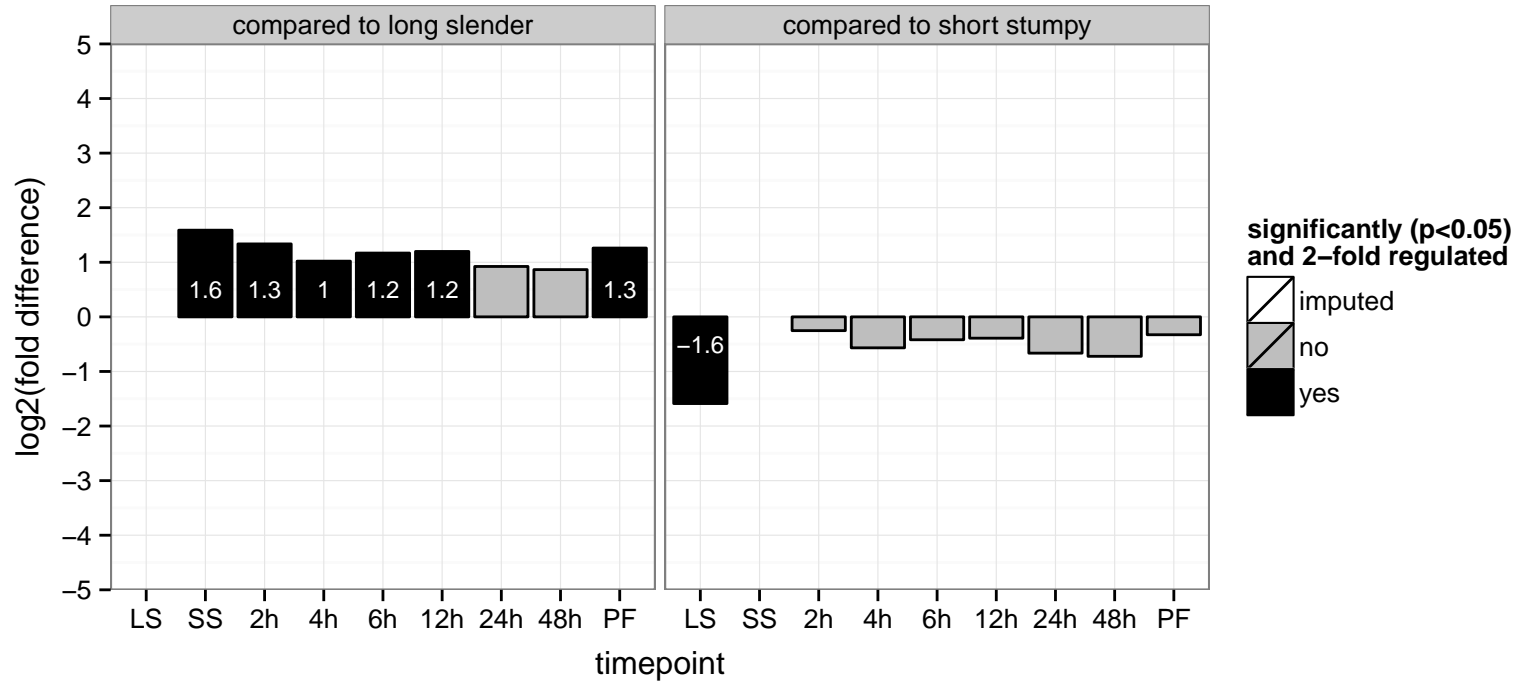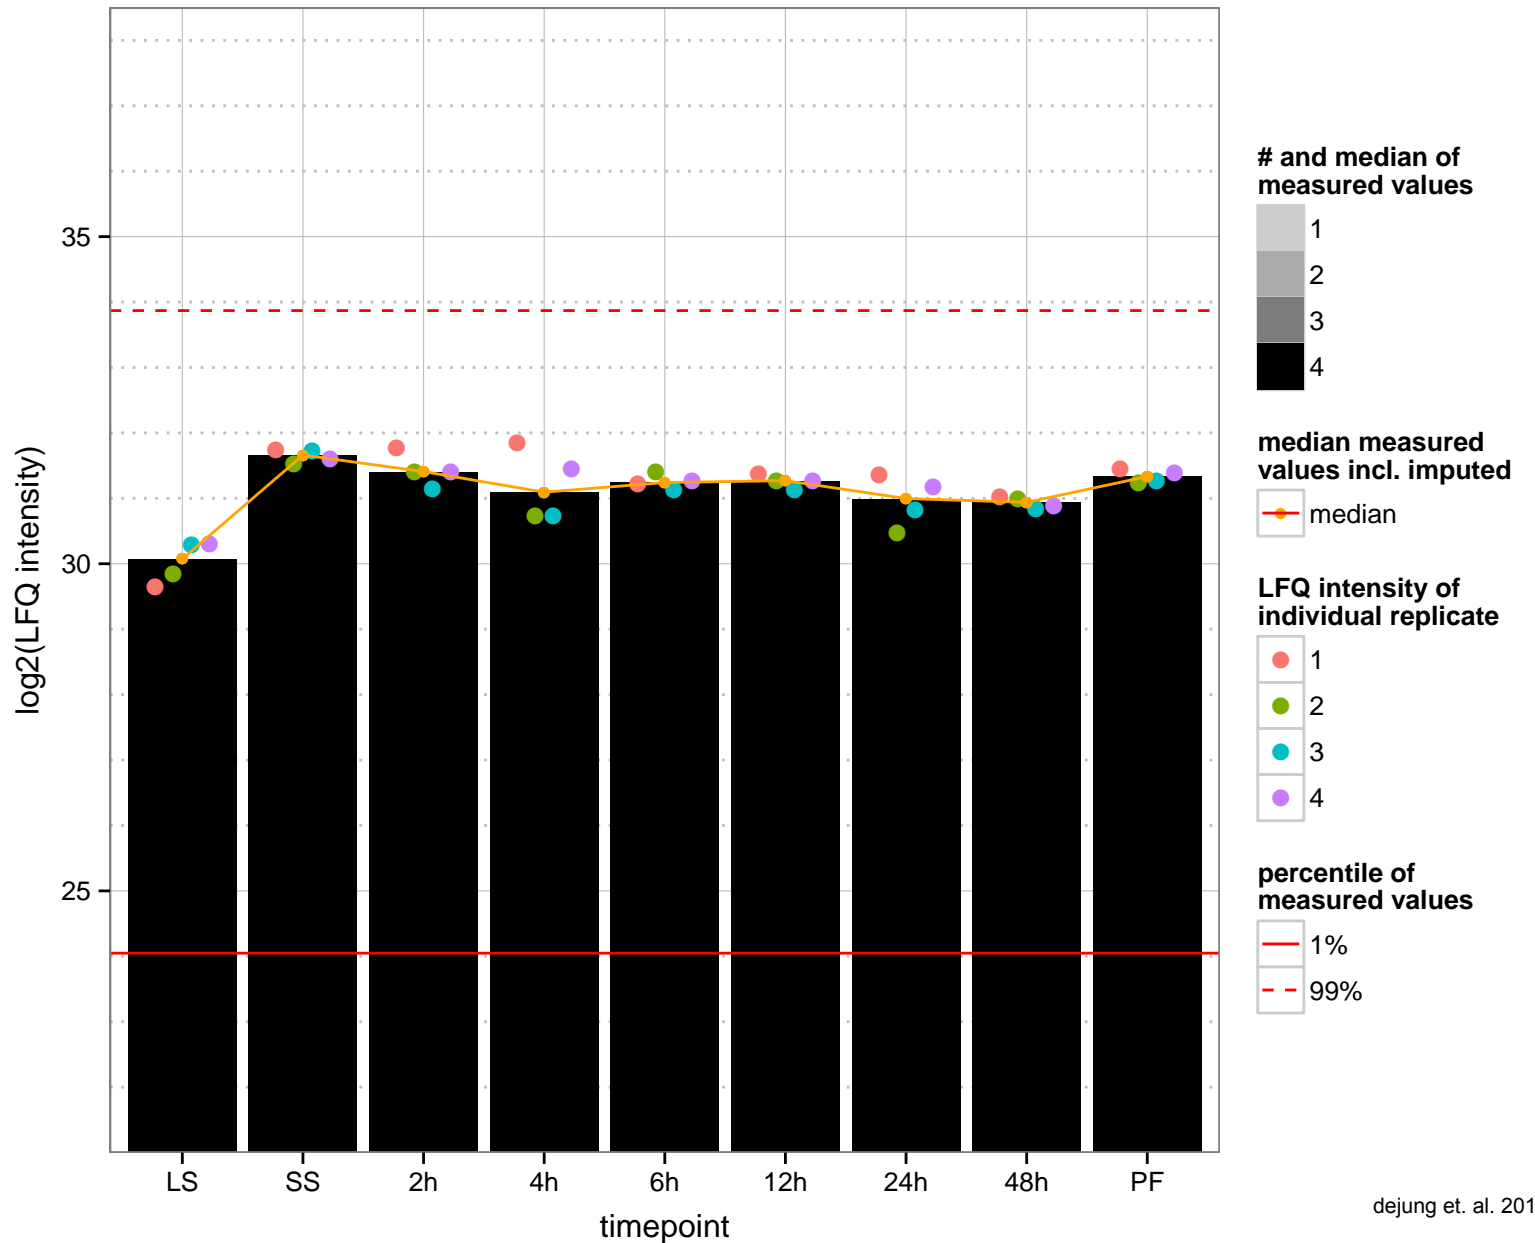



60S ribosomal protein L9, putative  
 Tb927.10.1100;Tb927.6.4690  
 AGOF: rRNA binding, structural constituent of ribosome  
 AGOC: ribosome  
 AGOP: ribosome biogenesis, translation  
 PGOF: rRNA binding, structural constituent of ribosome  
 PGO: ribosome  
 PGOP: translation

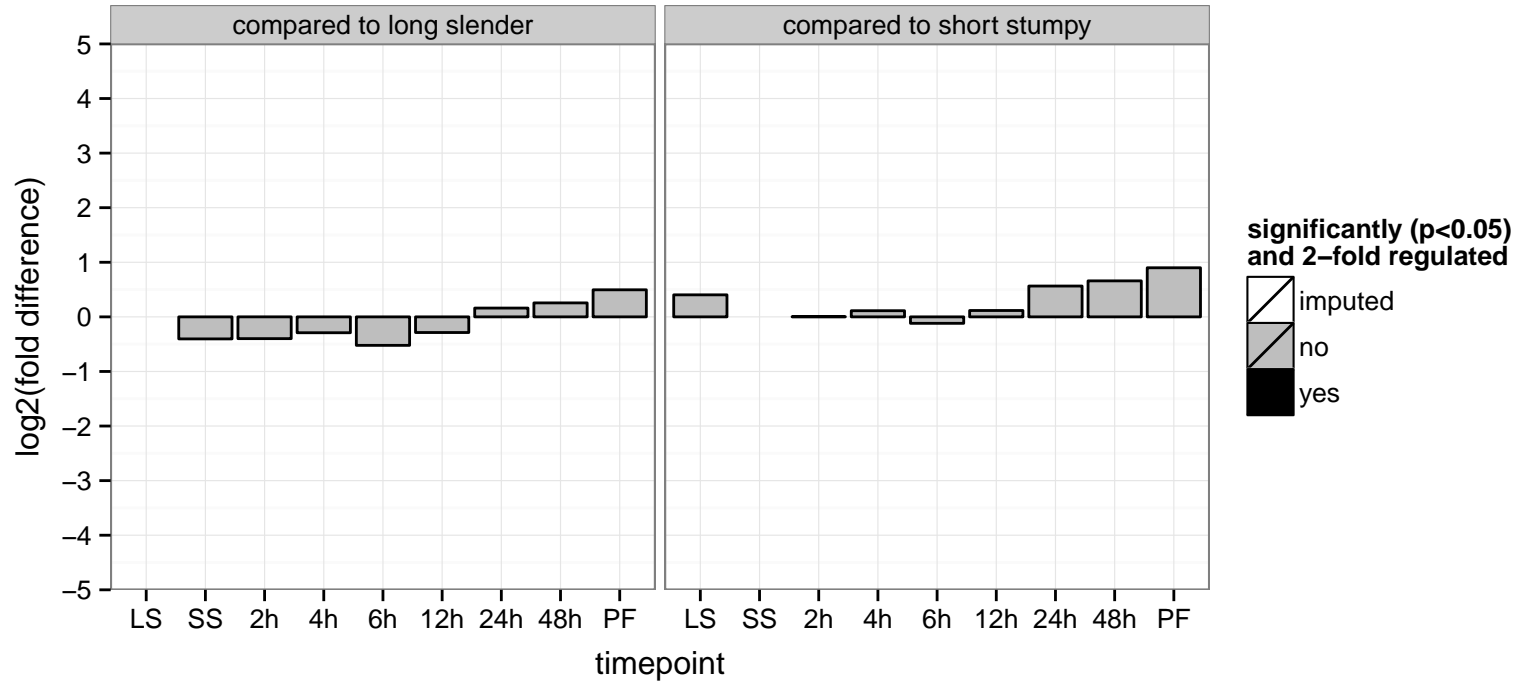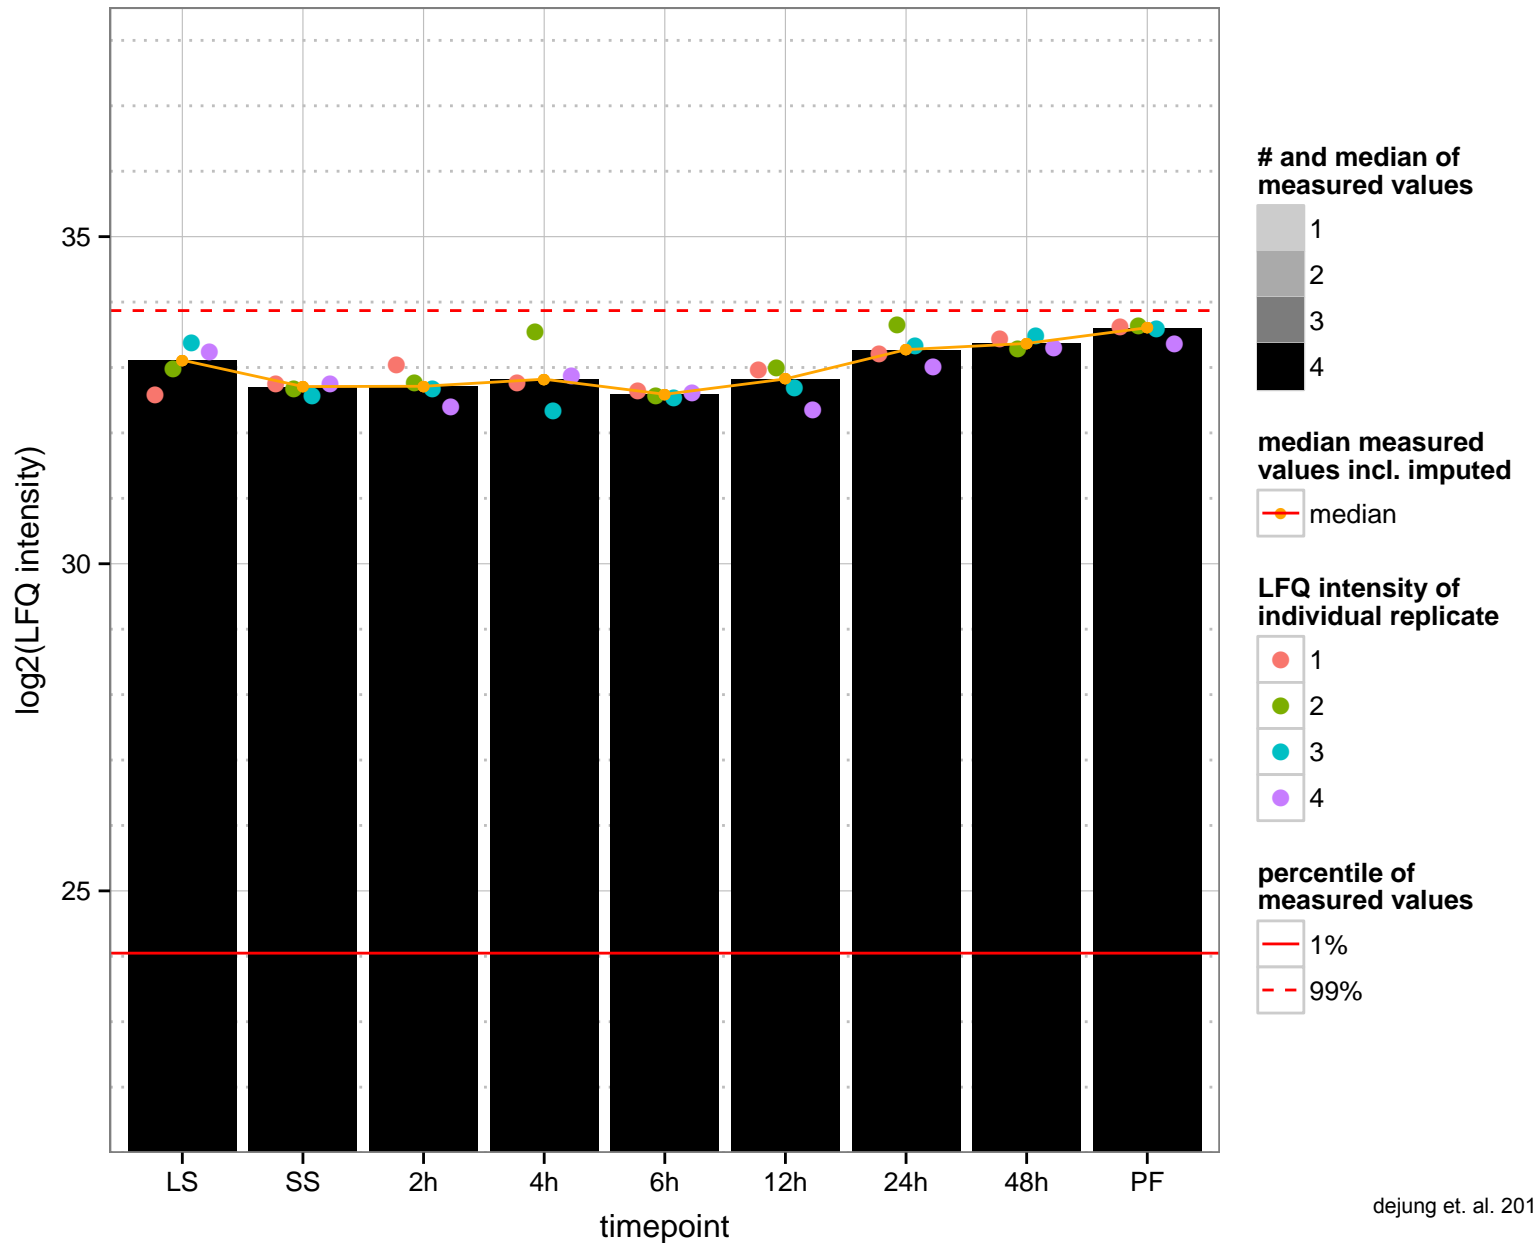

paraflagellar rod protein  
 Tb927.10.11080  
 AGOF: null  
 AGOC: null  
 AGOP: null  
 PGO: null  
 PGOC: null  
 PGOP: null

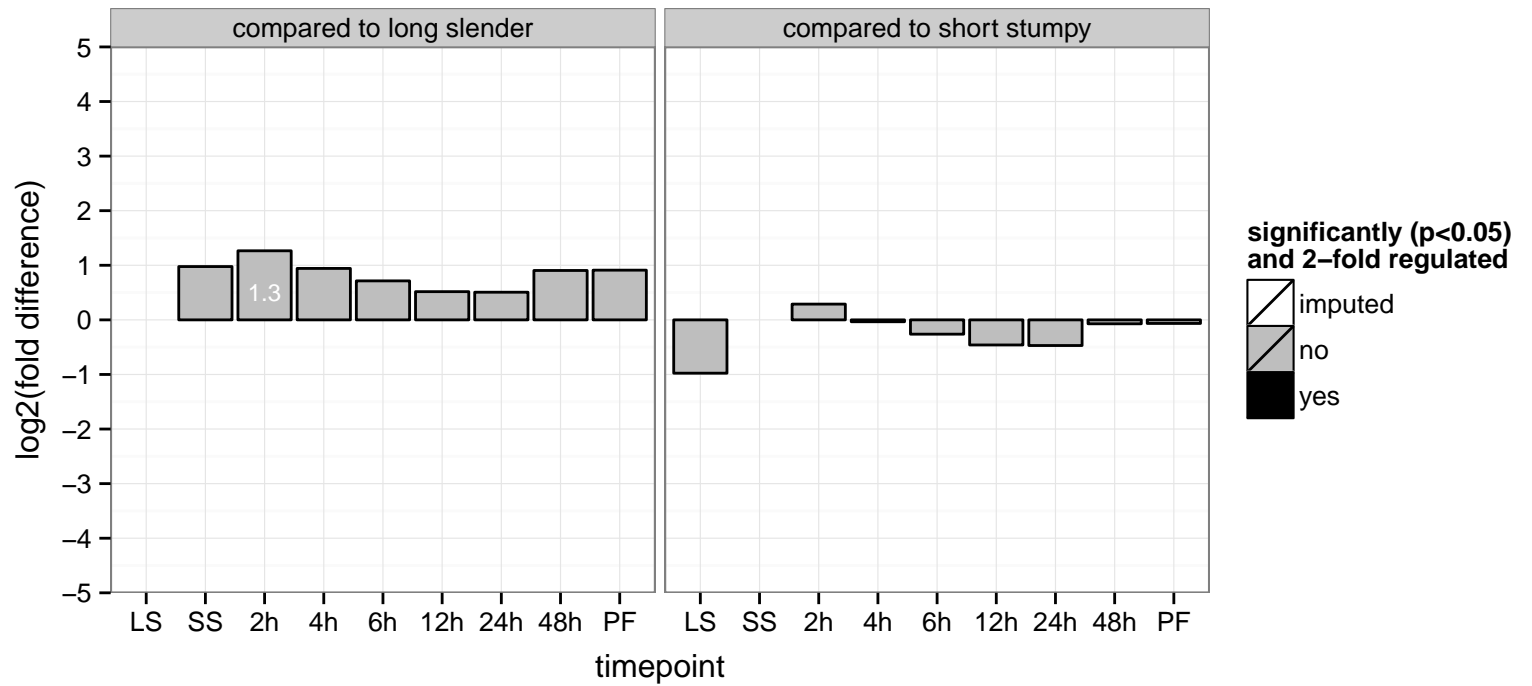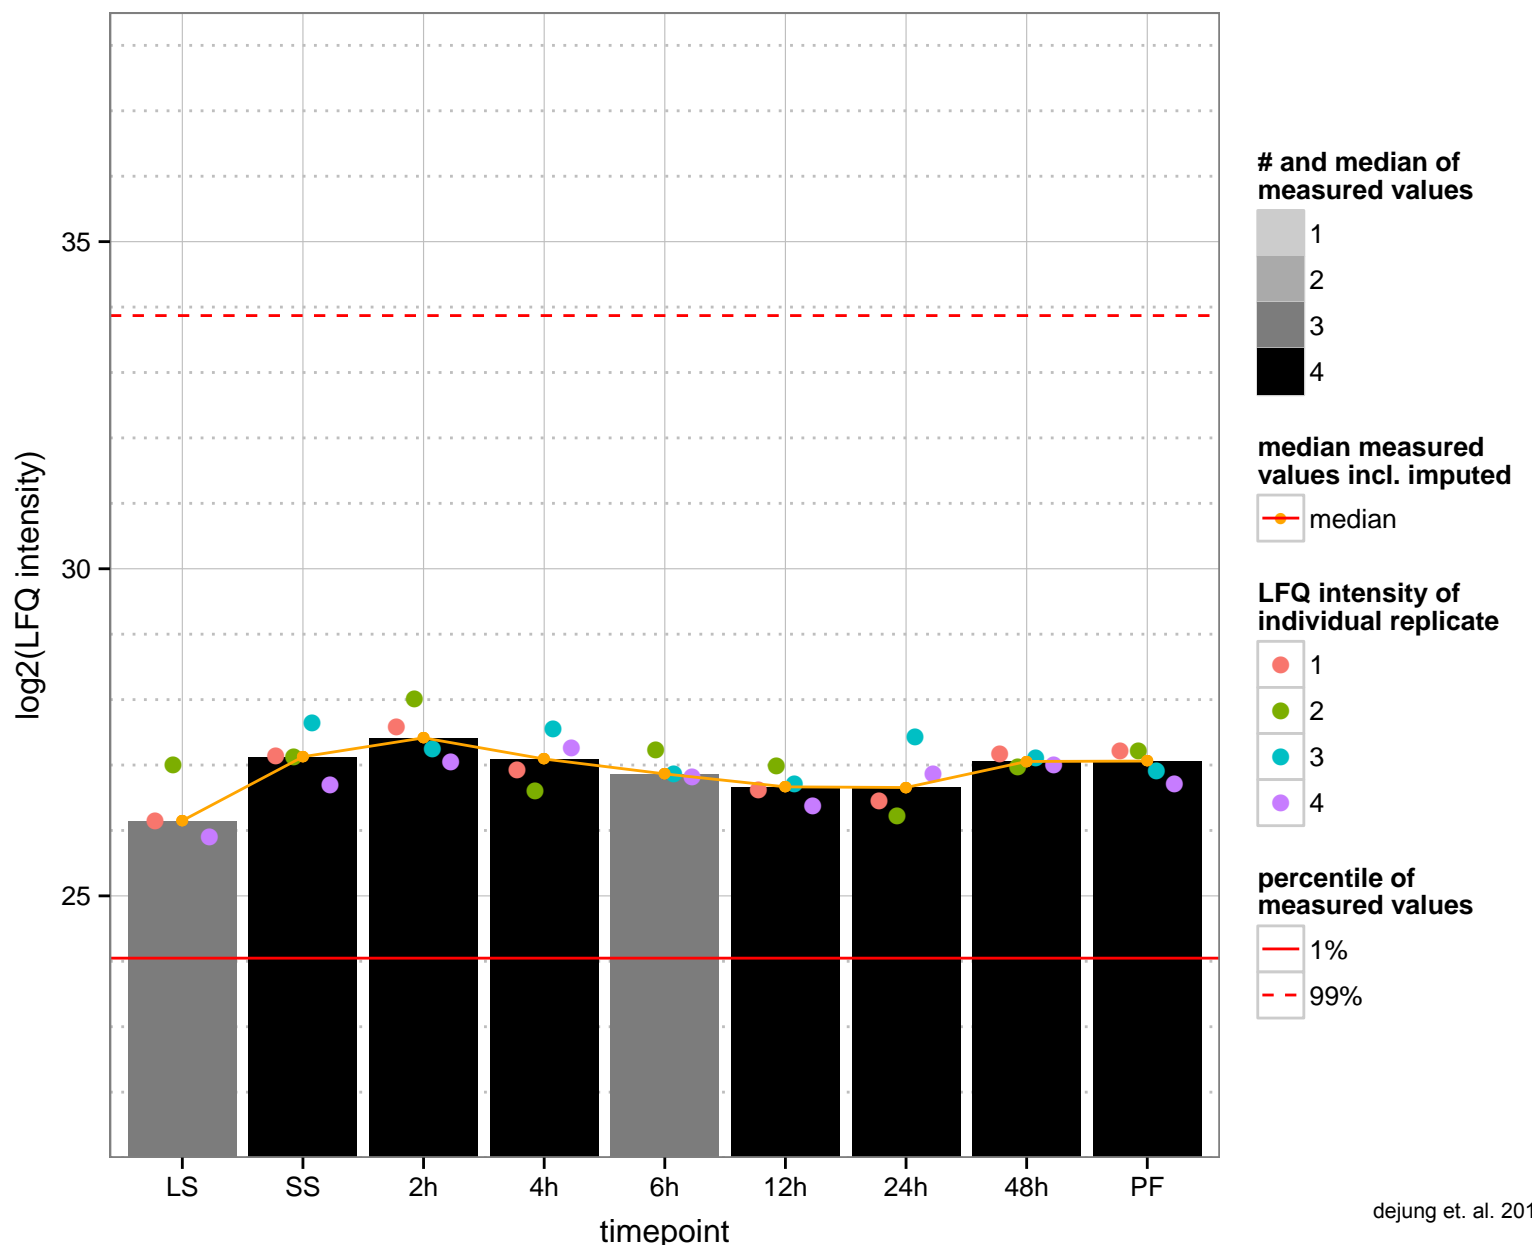

hypothetical protein, conserved  
 Tb927.10.11150  
 AGOF: null  
 AGOC: null  
 AGOP: null  
 PGOF: null  
 PGOC: null  
 PGOP: null

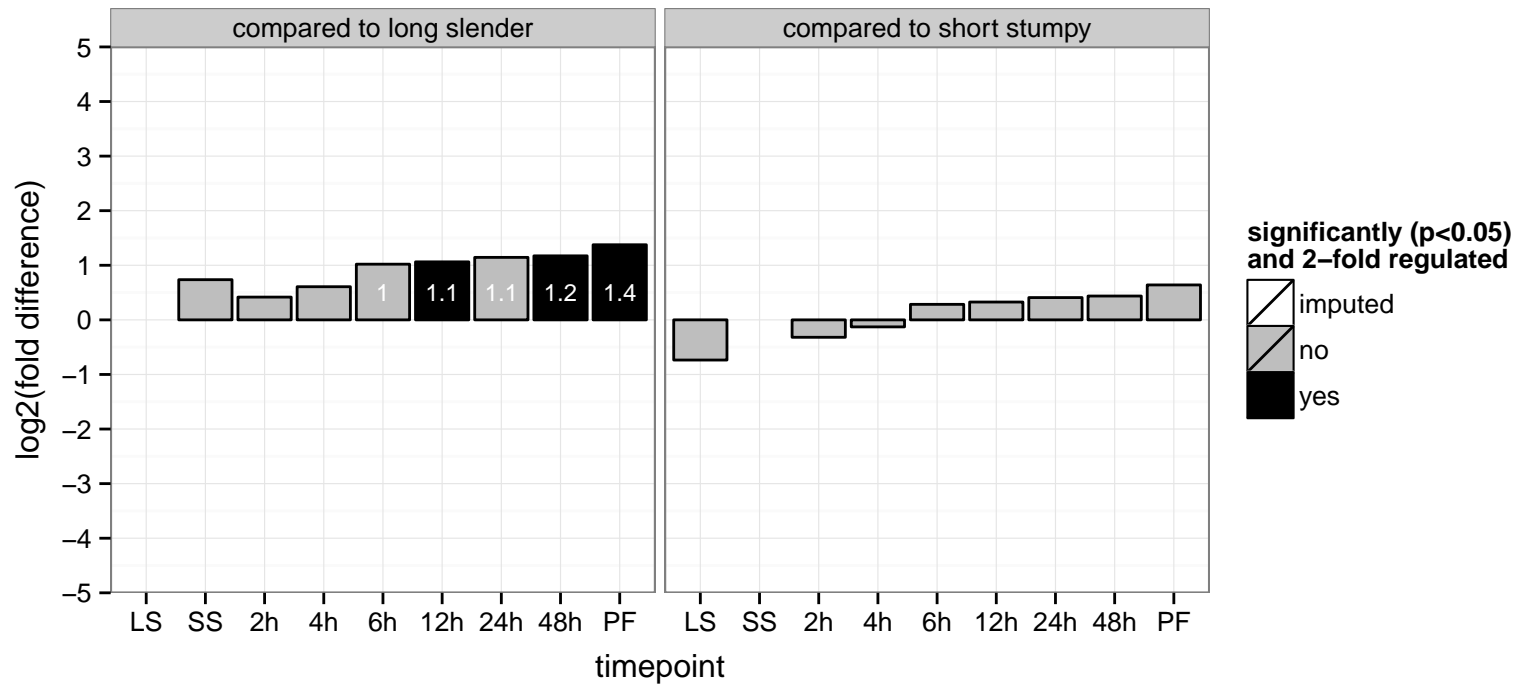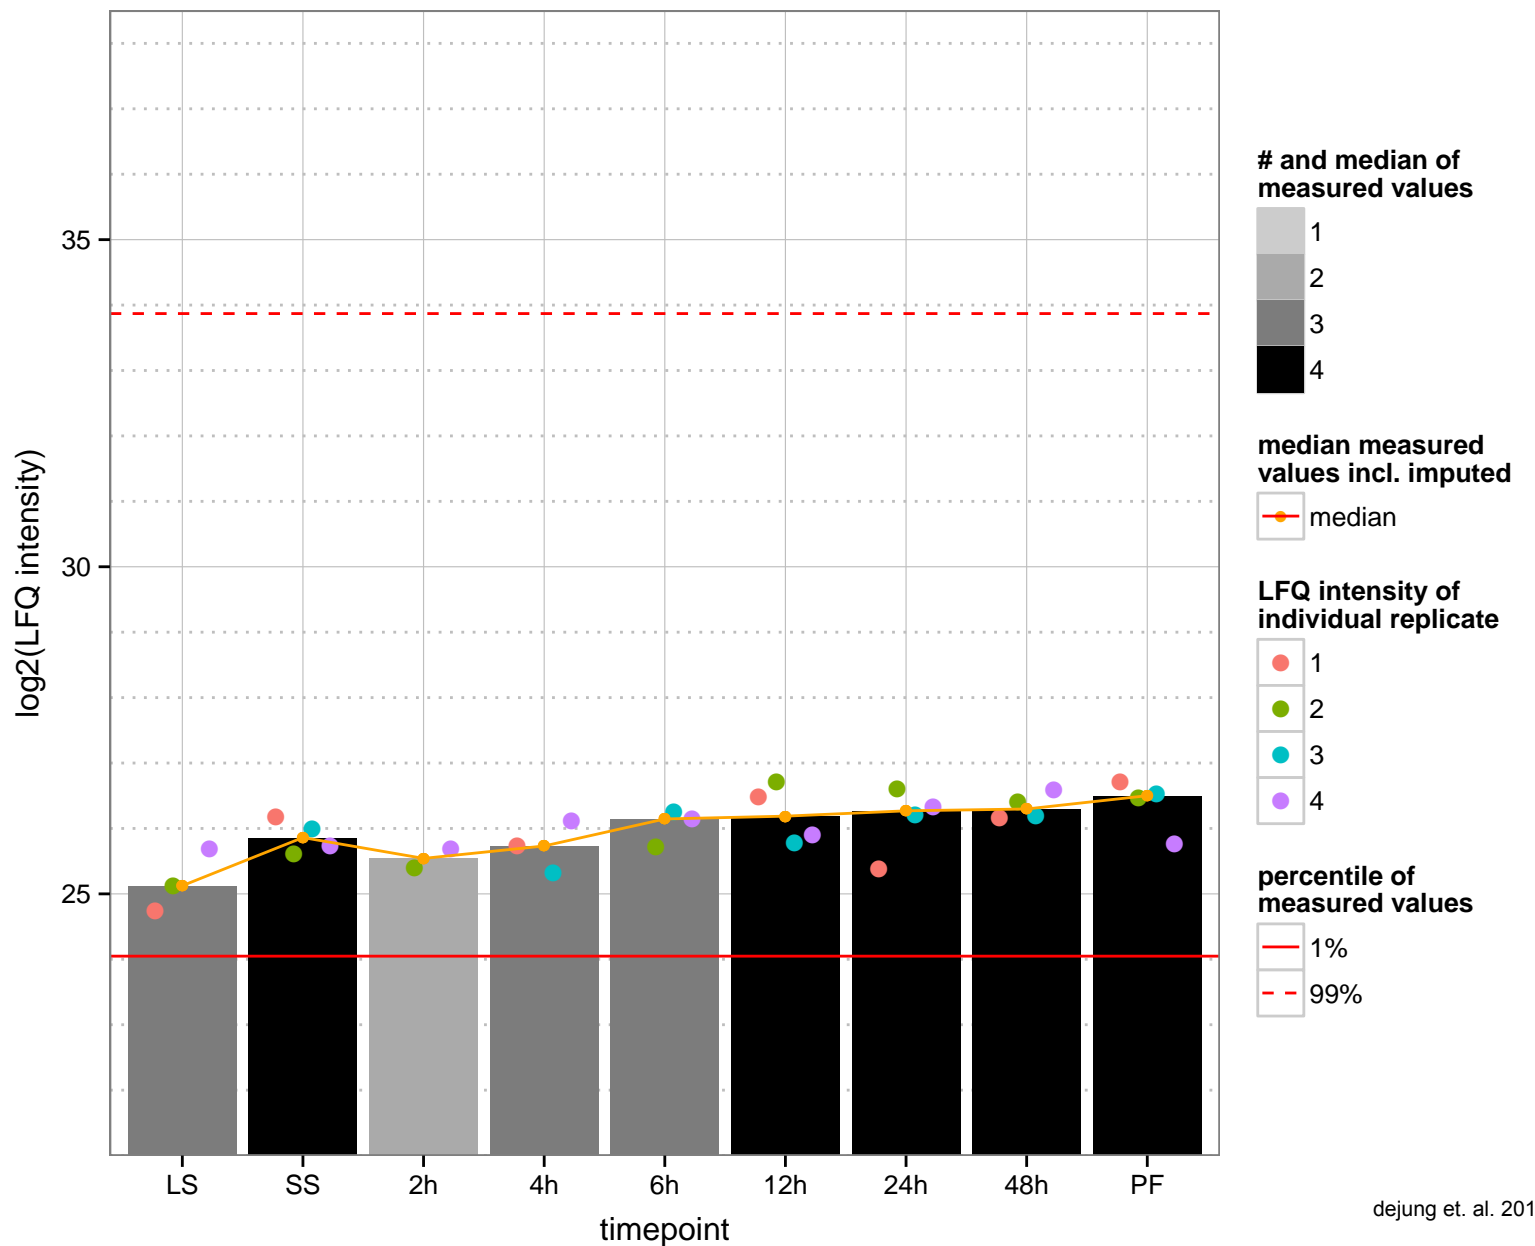

hypothetical protein, conserved  
 Tb927.10.11210  
 AGOF: null  
 AGOC: null  
 AGOP: null  
 PGOF: protein binding  
 PGO: null  
 PGOP: null

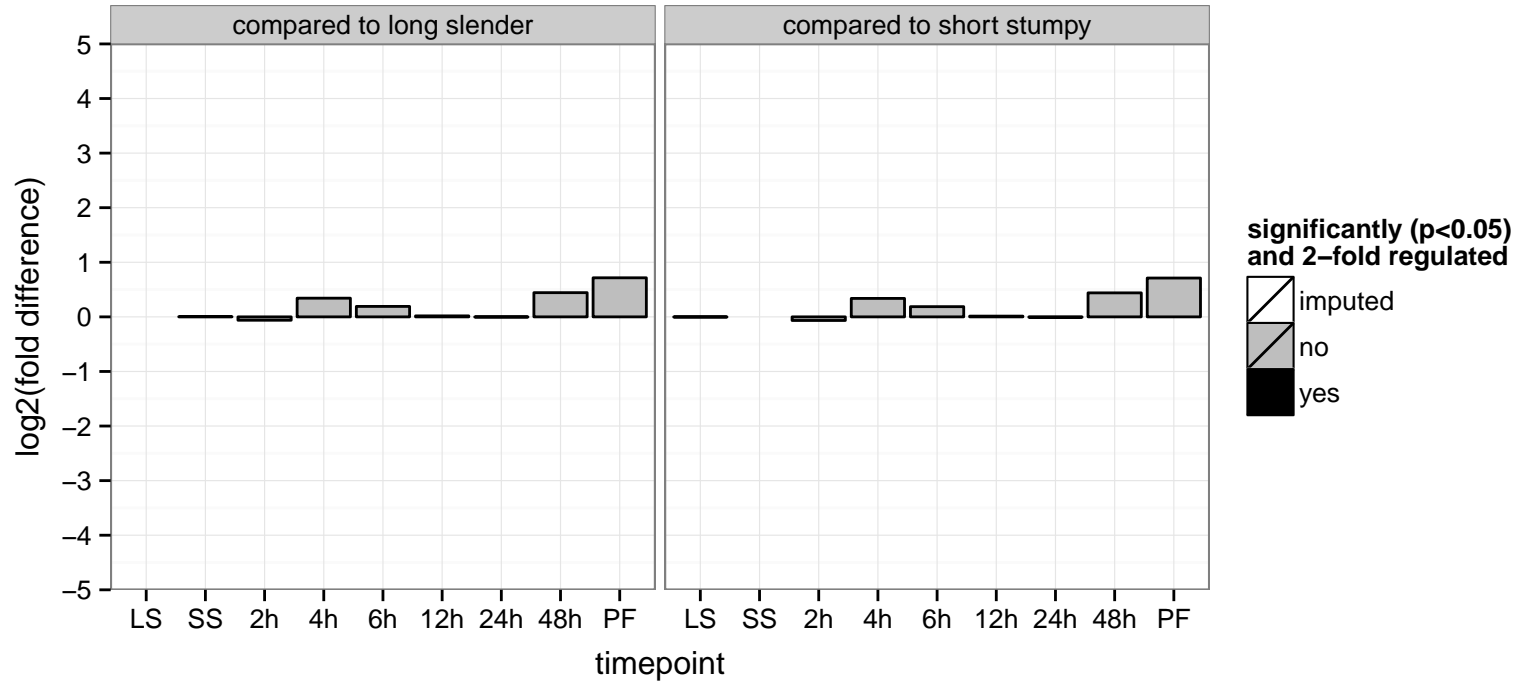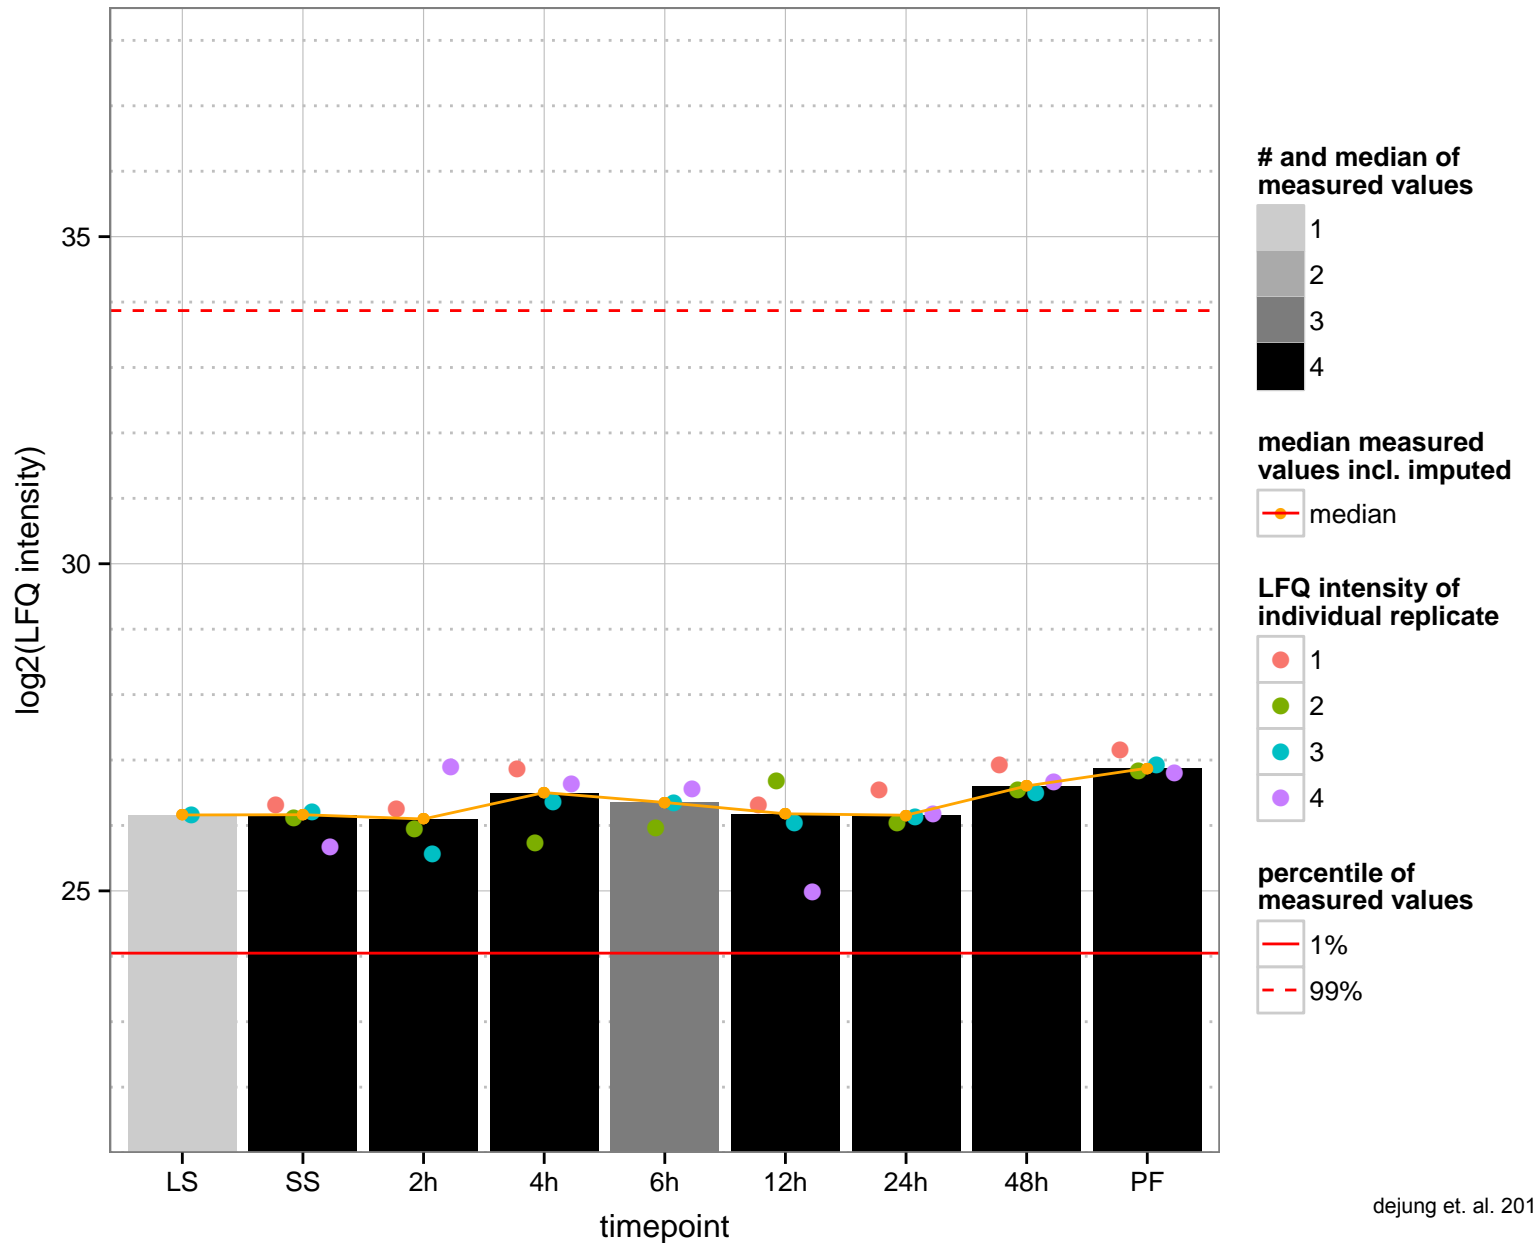

hypothetical protein, conserved  
 Tb927.10.11250;Tb11.v5.0575  
 AGOF: null  
 AGOC: null  
 AGOP: null  
 PGO: null  
 PGOC: null  
 PGOP: null

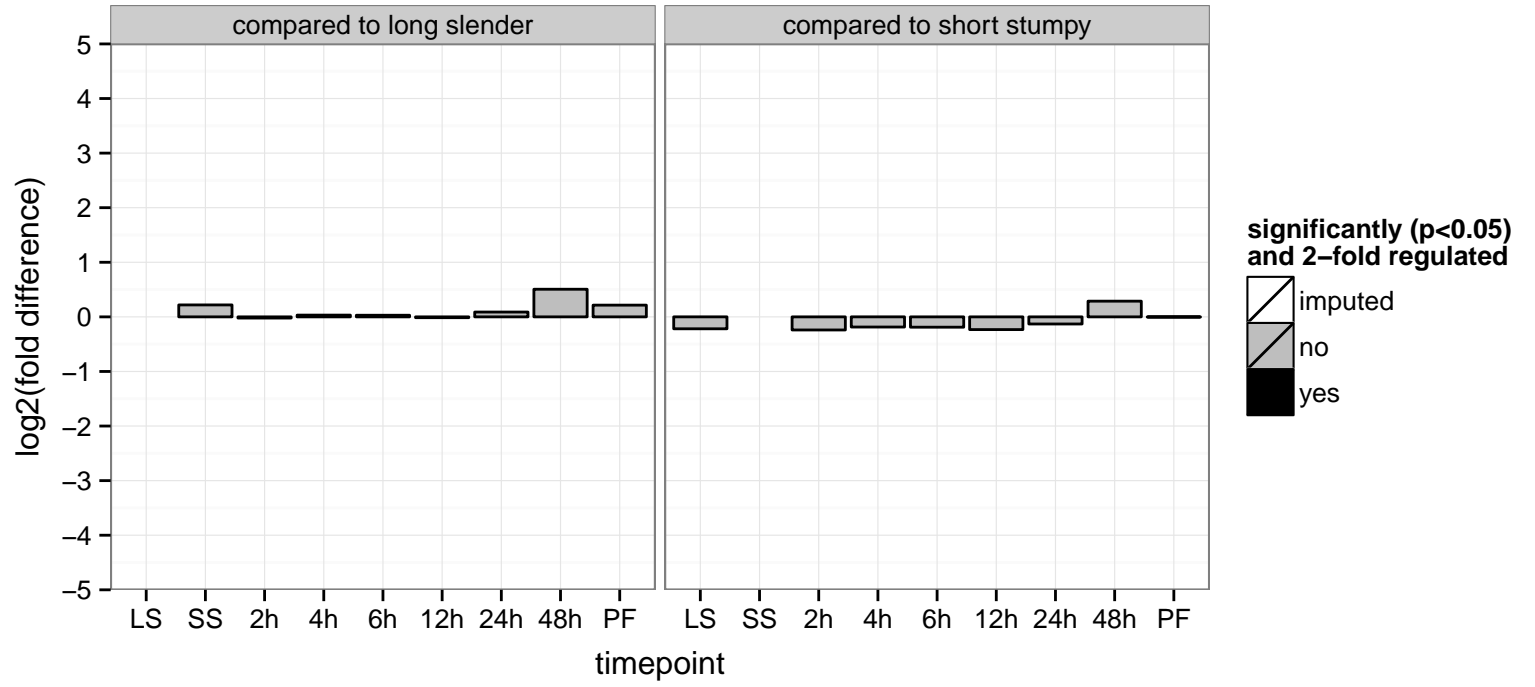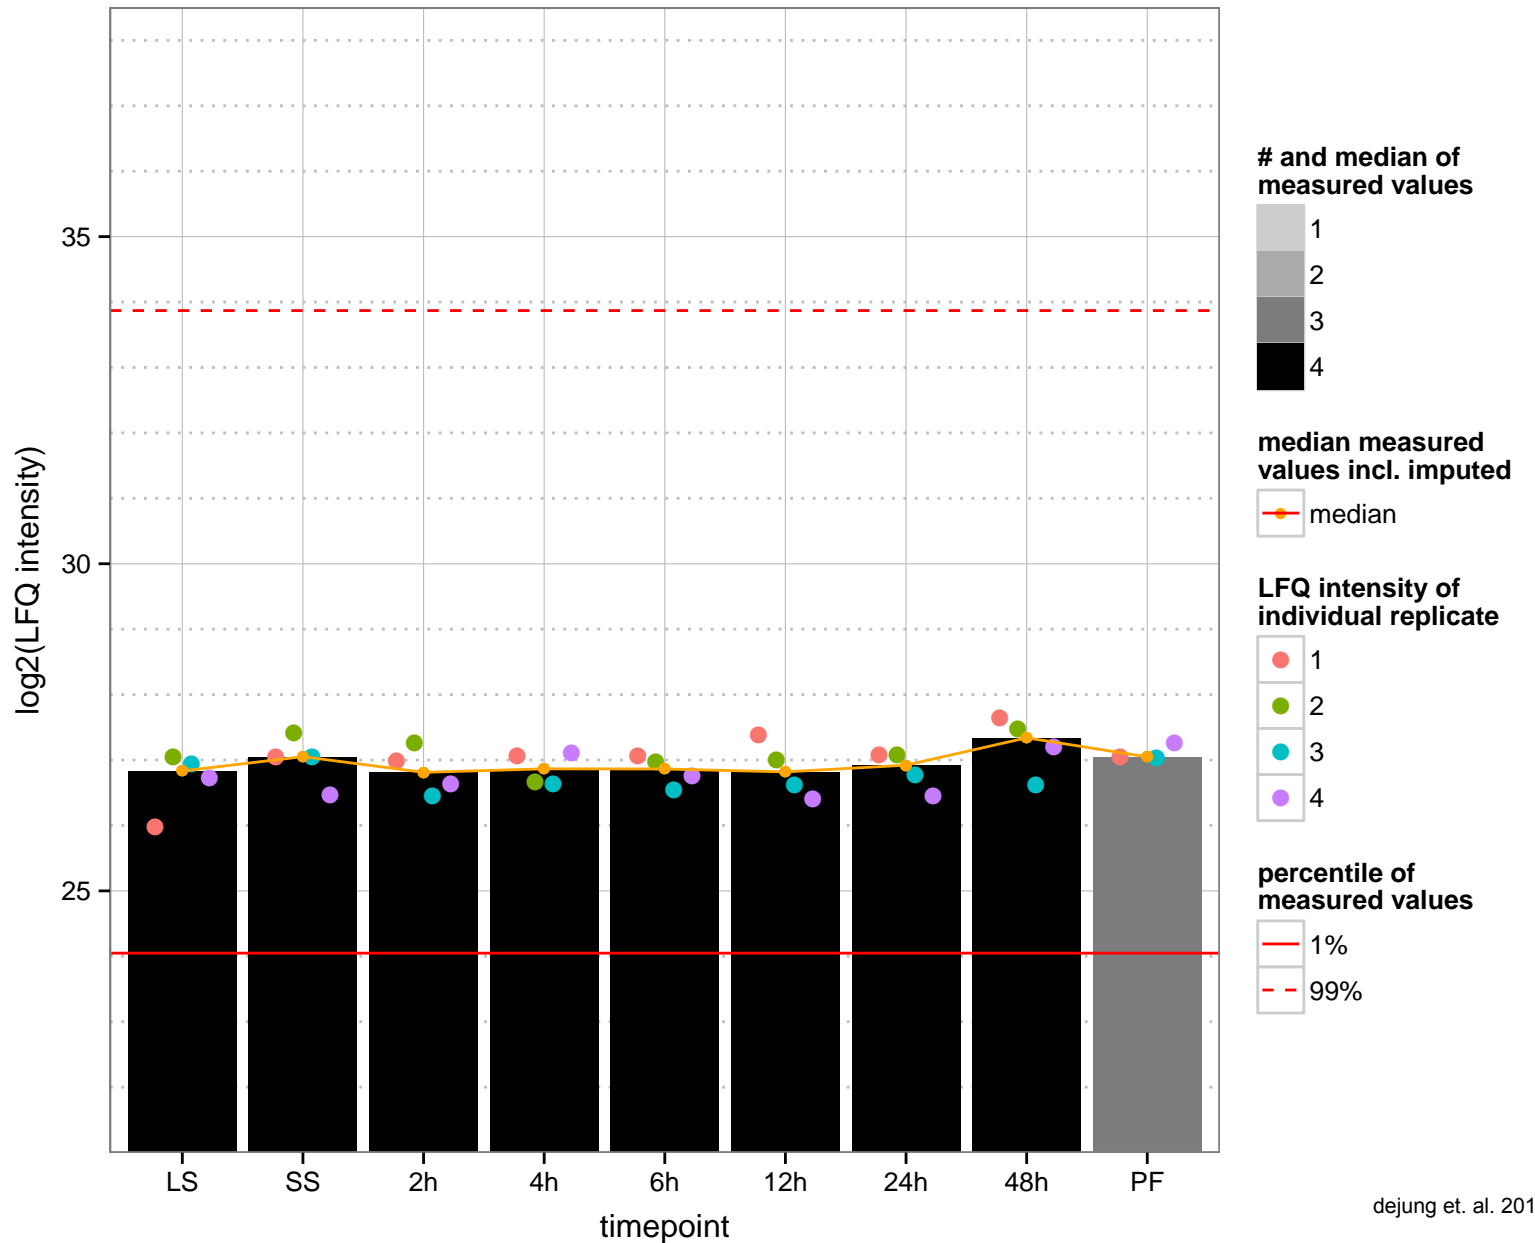

hypothetical protein, conserved  
 Tb927.10.11260  
 AGOF: null  
 AGOC: mitochondrion  
 AGOP: null  
 PGO: null  
 PGO: null  
 PGO: null

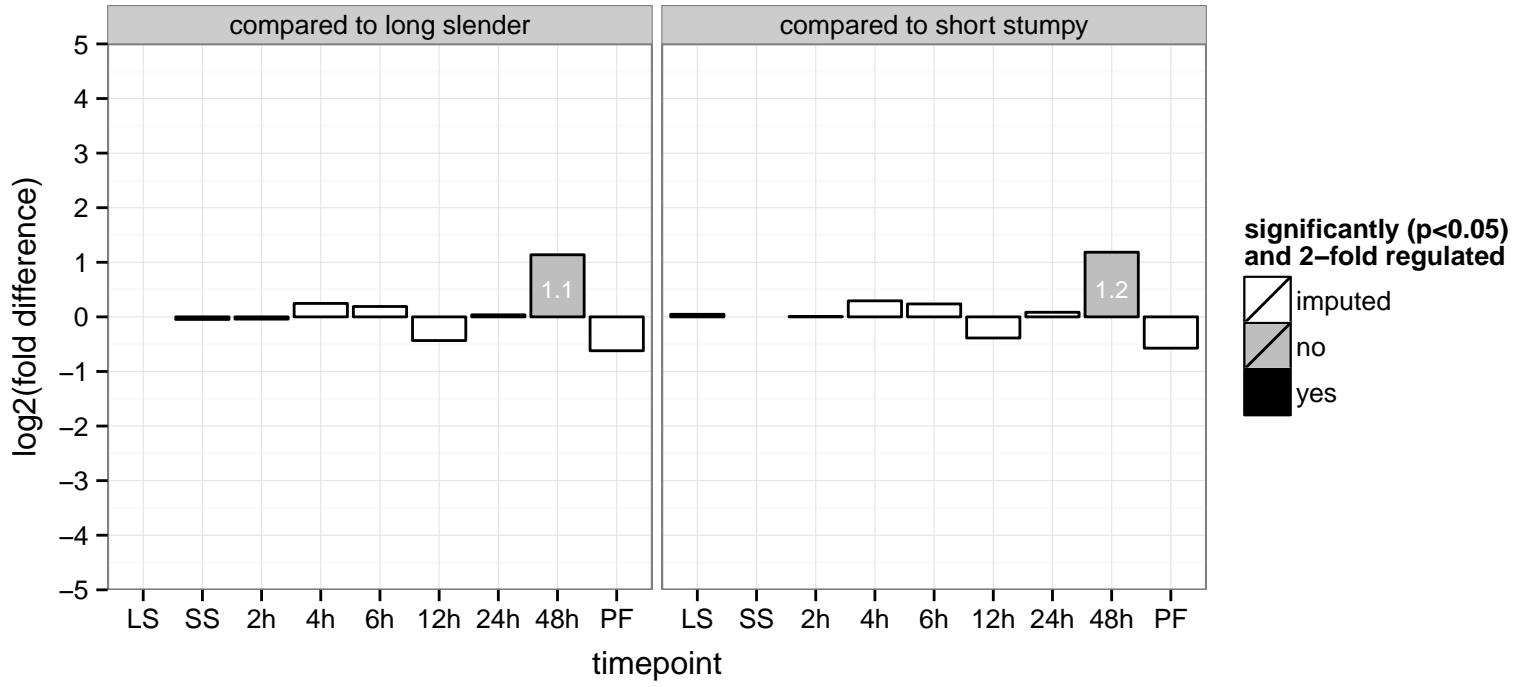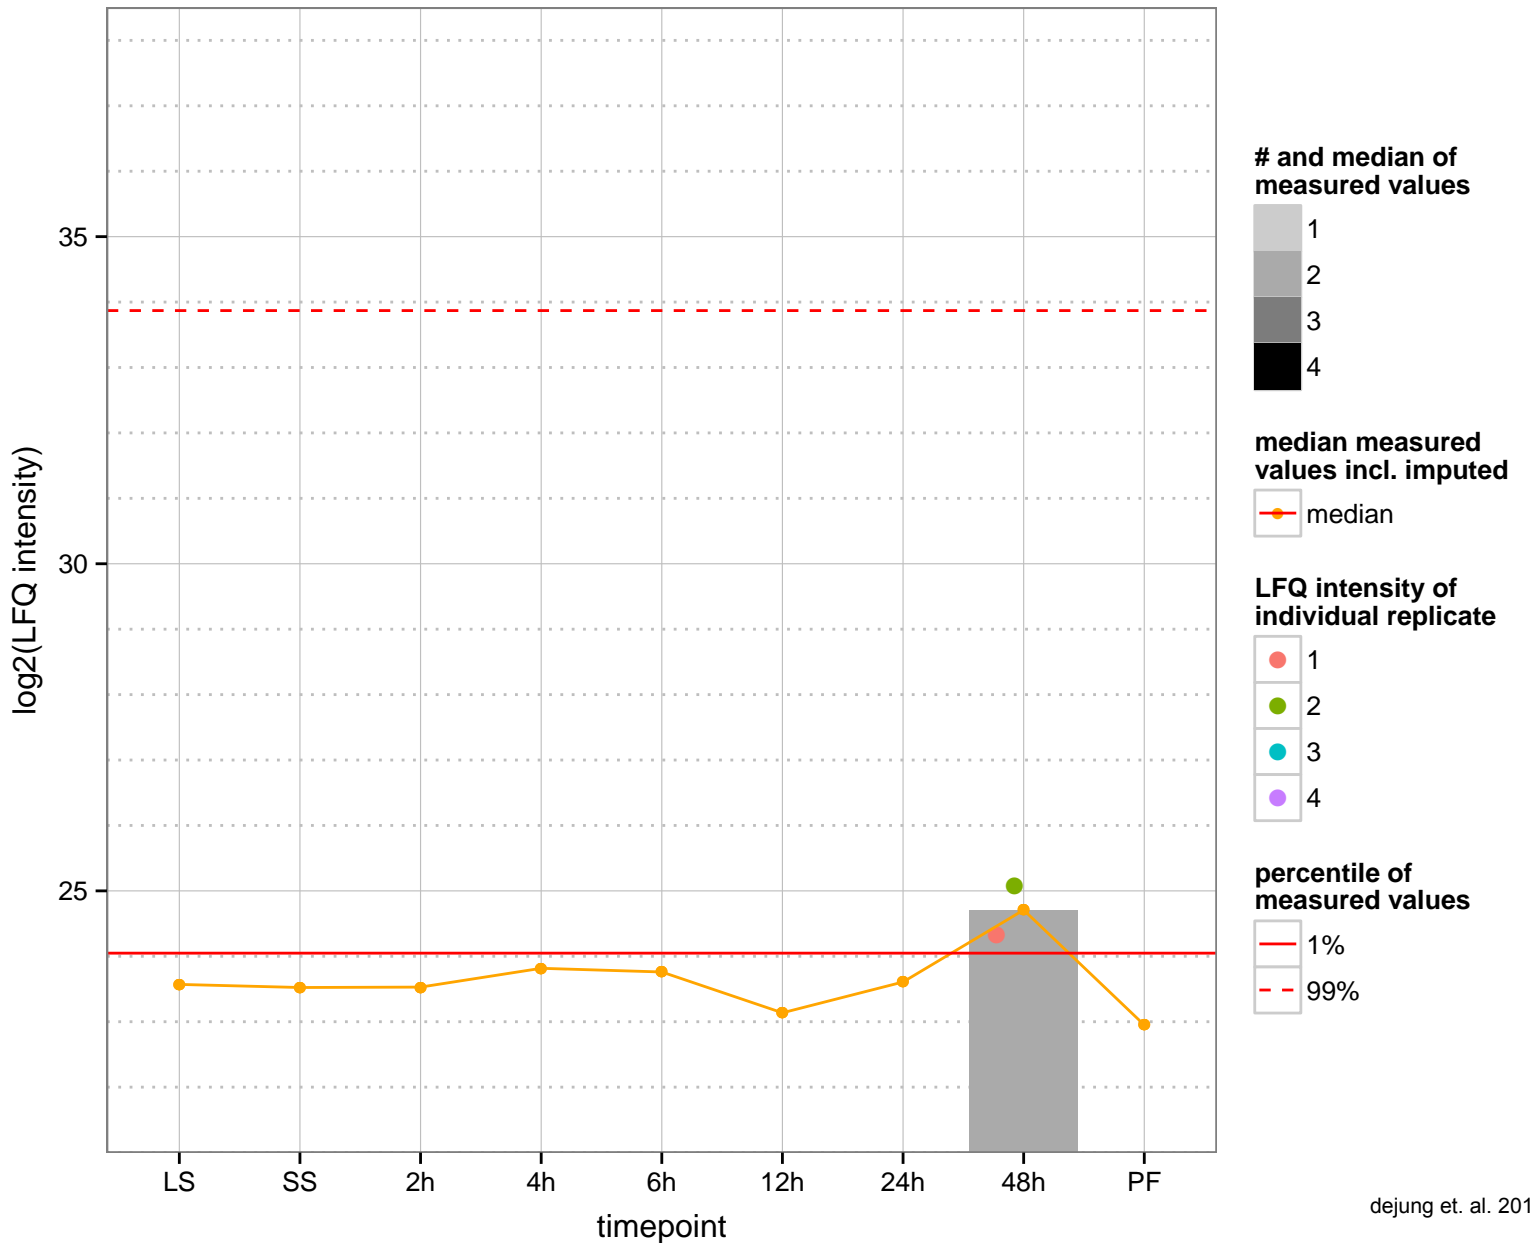

paraflagellar rod component, putative (PFC16)  
 Tb927.10.11300  
 AGOF: null  
 AGOC: eukaryotic translation initiation factor 4F complex  
 AGOP: null  
 PGO: null  
 PGOC: null  
 PGOP: null

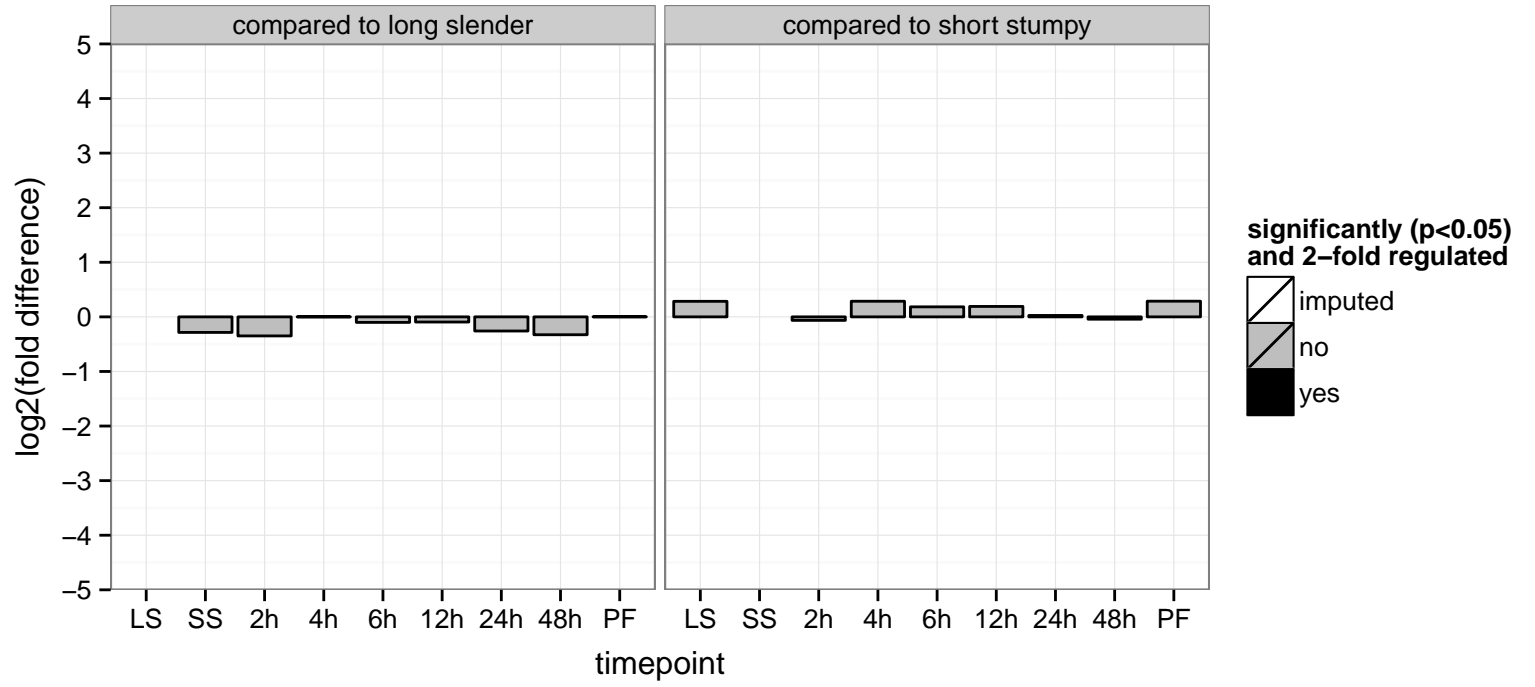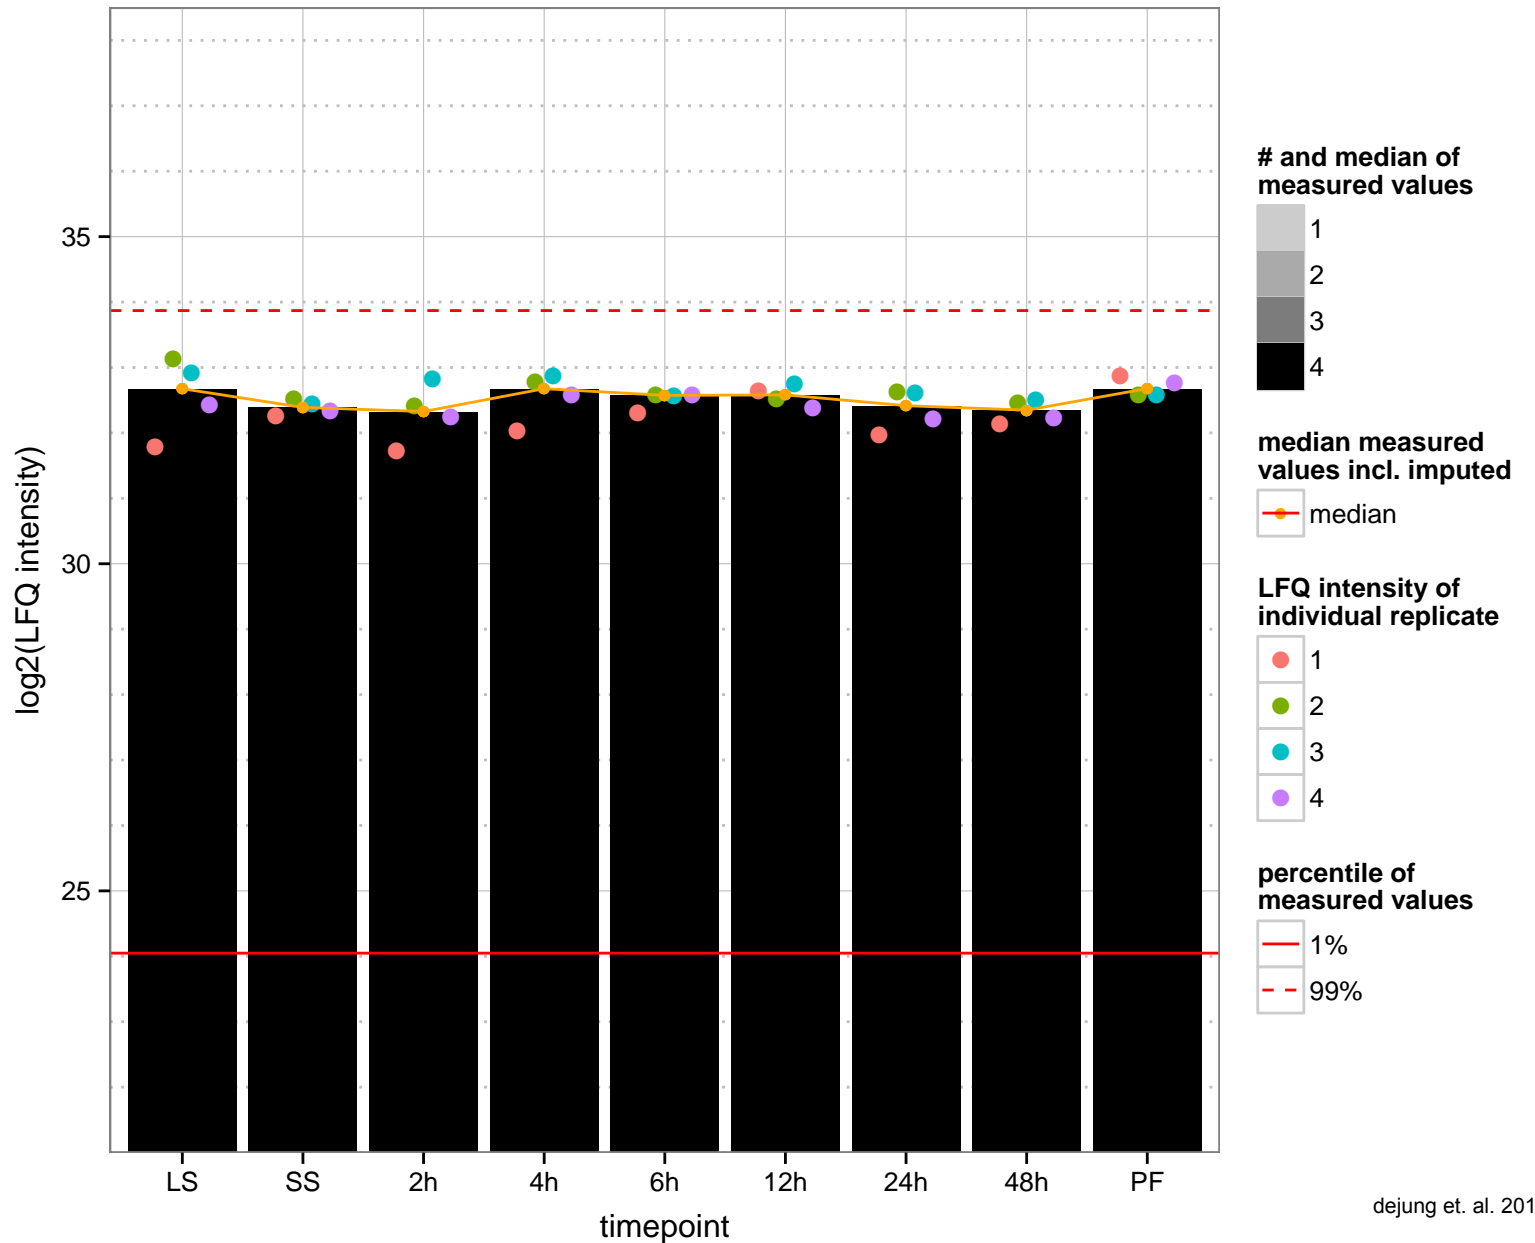

intraflagellar transport protein IFT55/IFT57, putative (IFT57/55)  
 Tb927.10.11310  
 AGOF: null  
 AGOC: null  
 AGOP: null  
 PGOF: null  
 PGO: null  
 PGOP: null

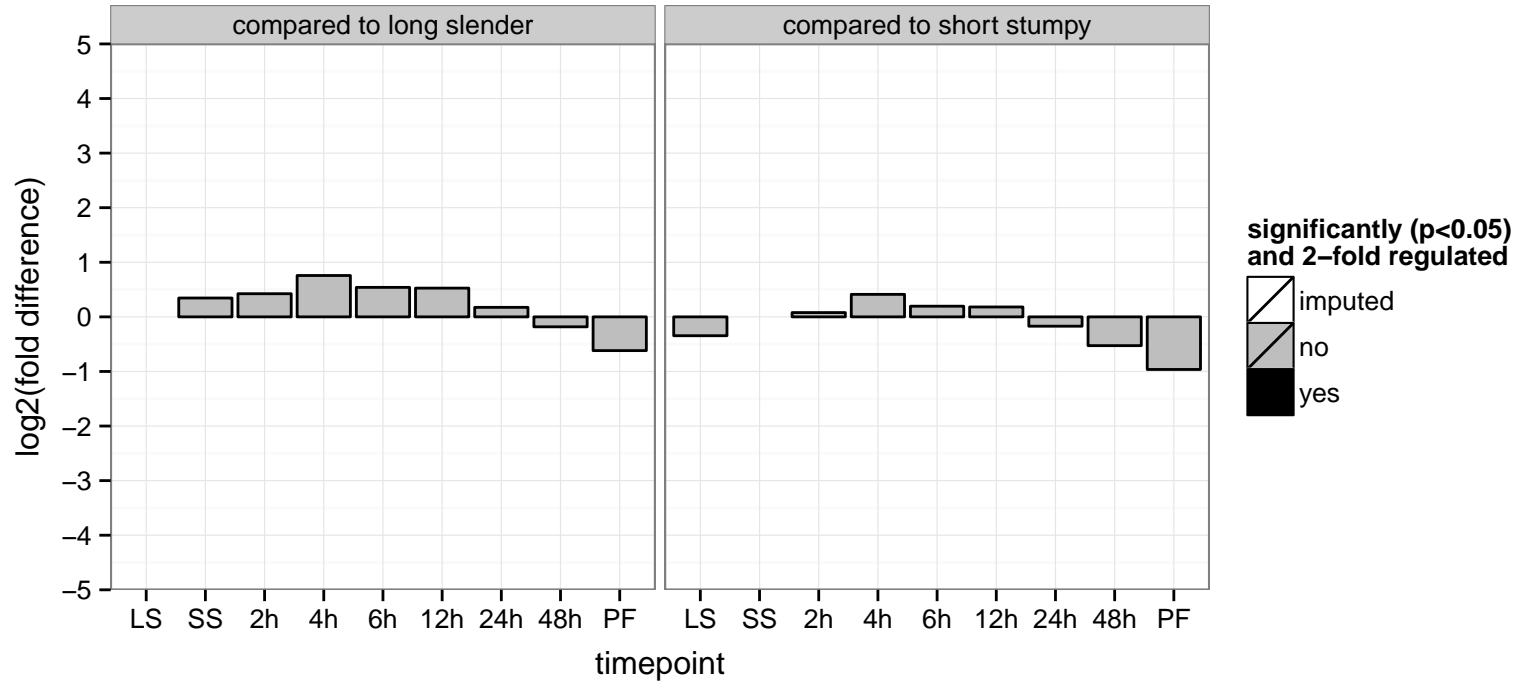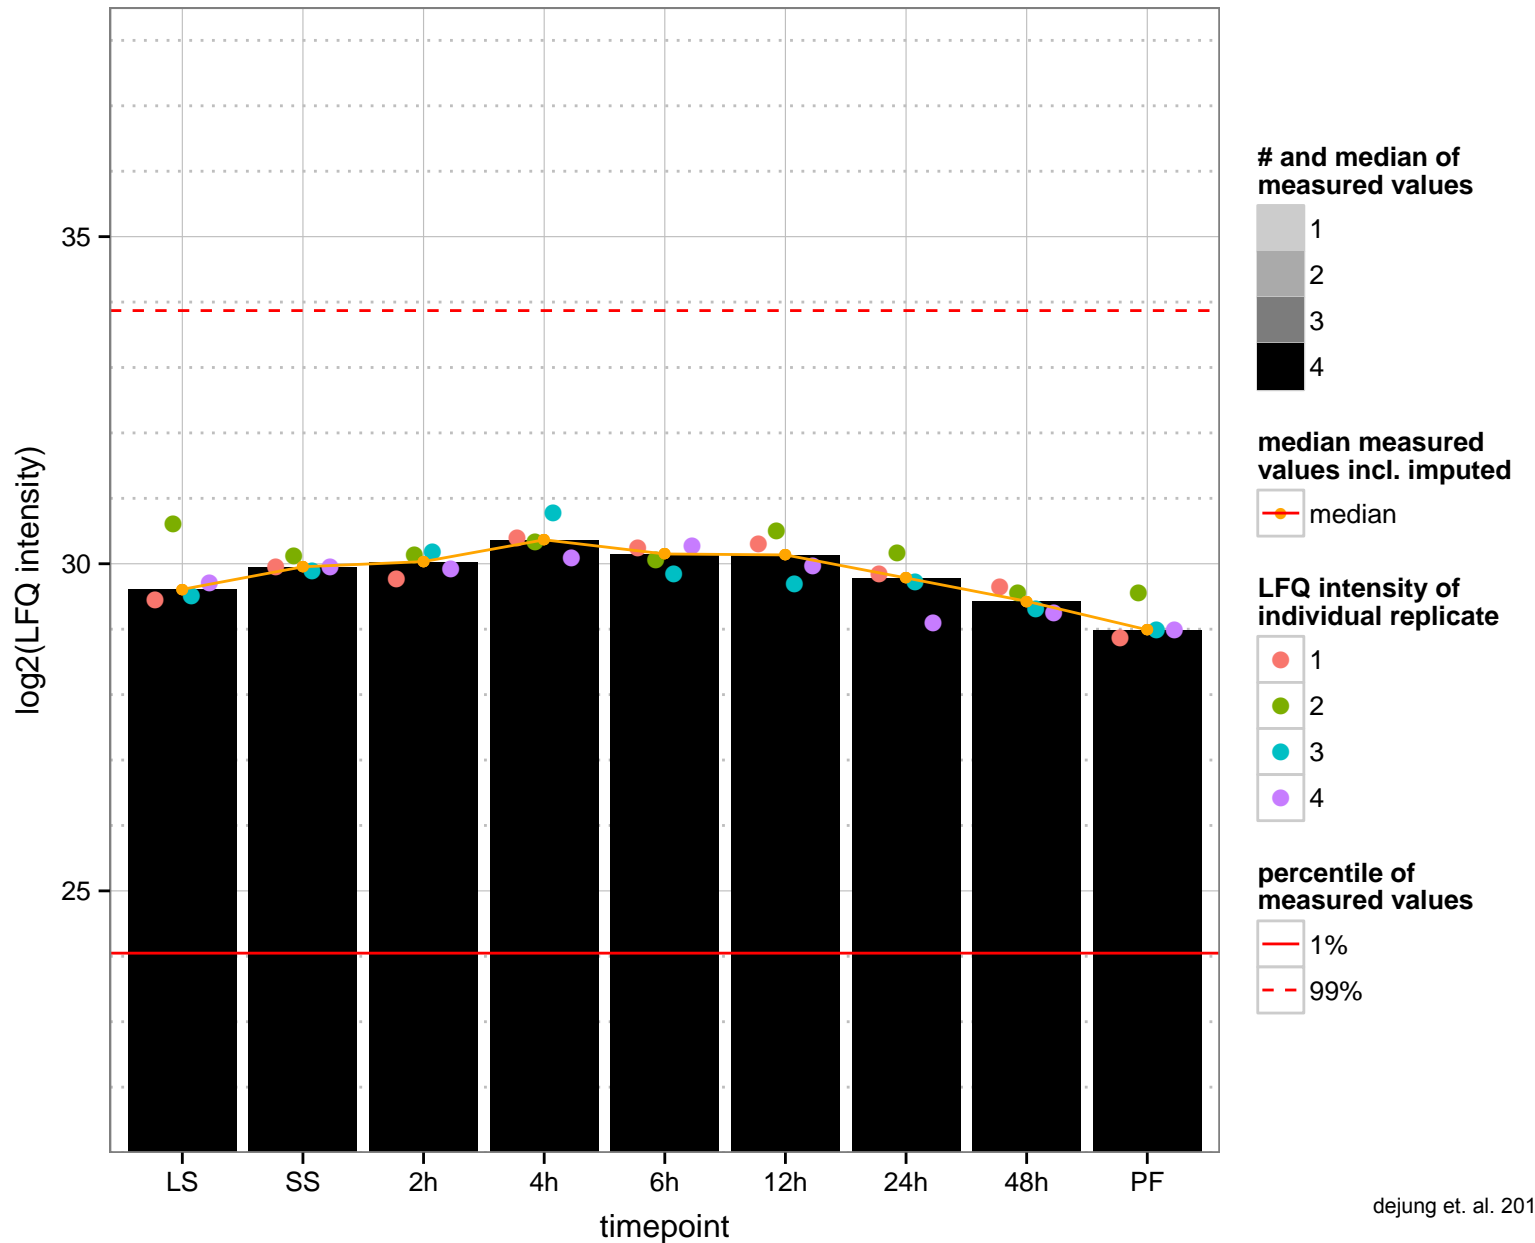



hypothetical protein, conserved  
 Tb927.10.11510  
 AGOF: null  
 AGOC: null  
 AGOP: null  
 PGO: null  
 PGOC: null  
 PGOP: null

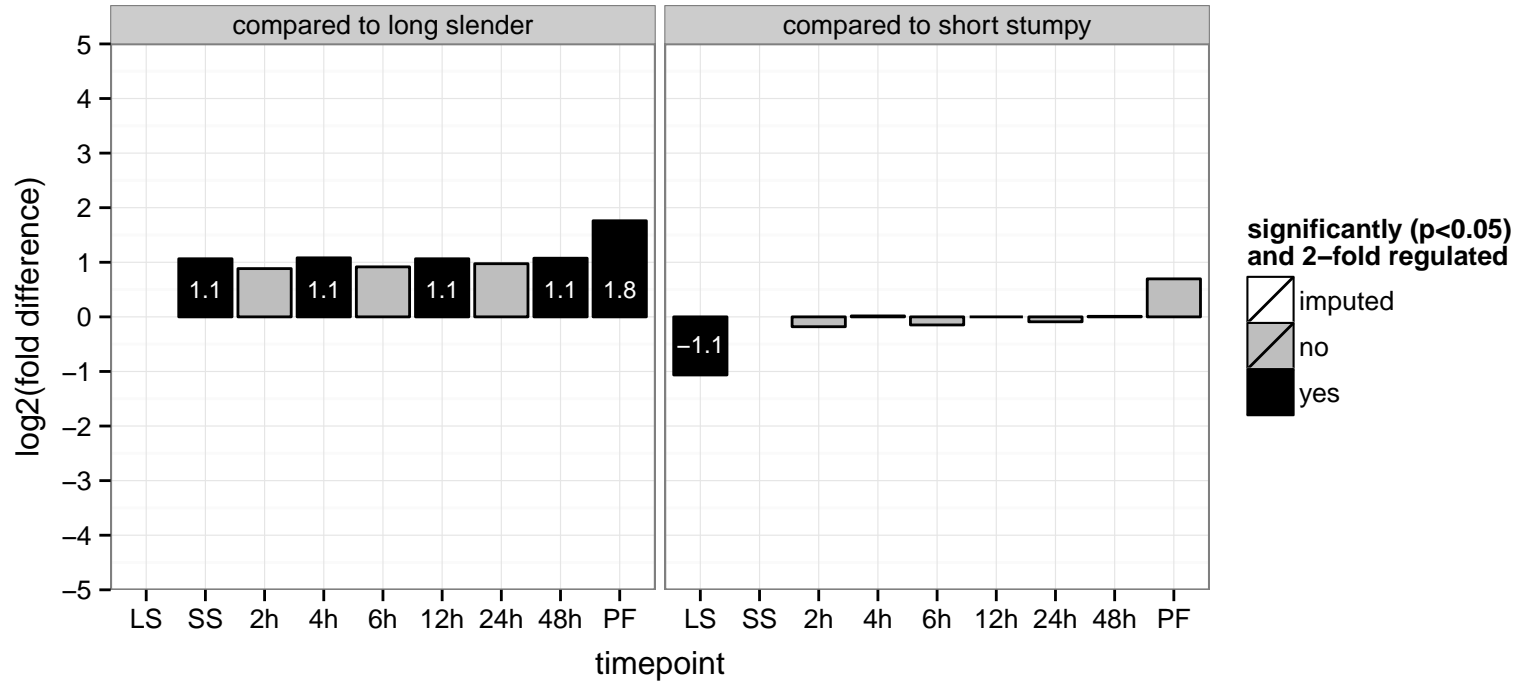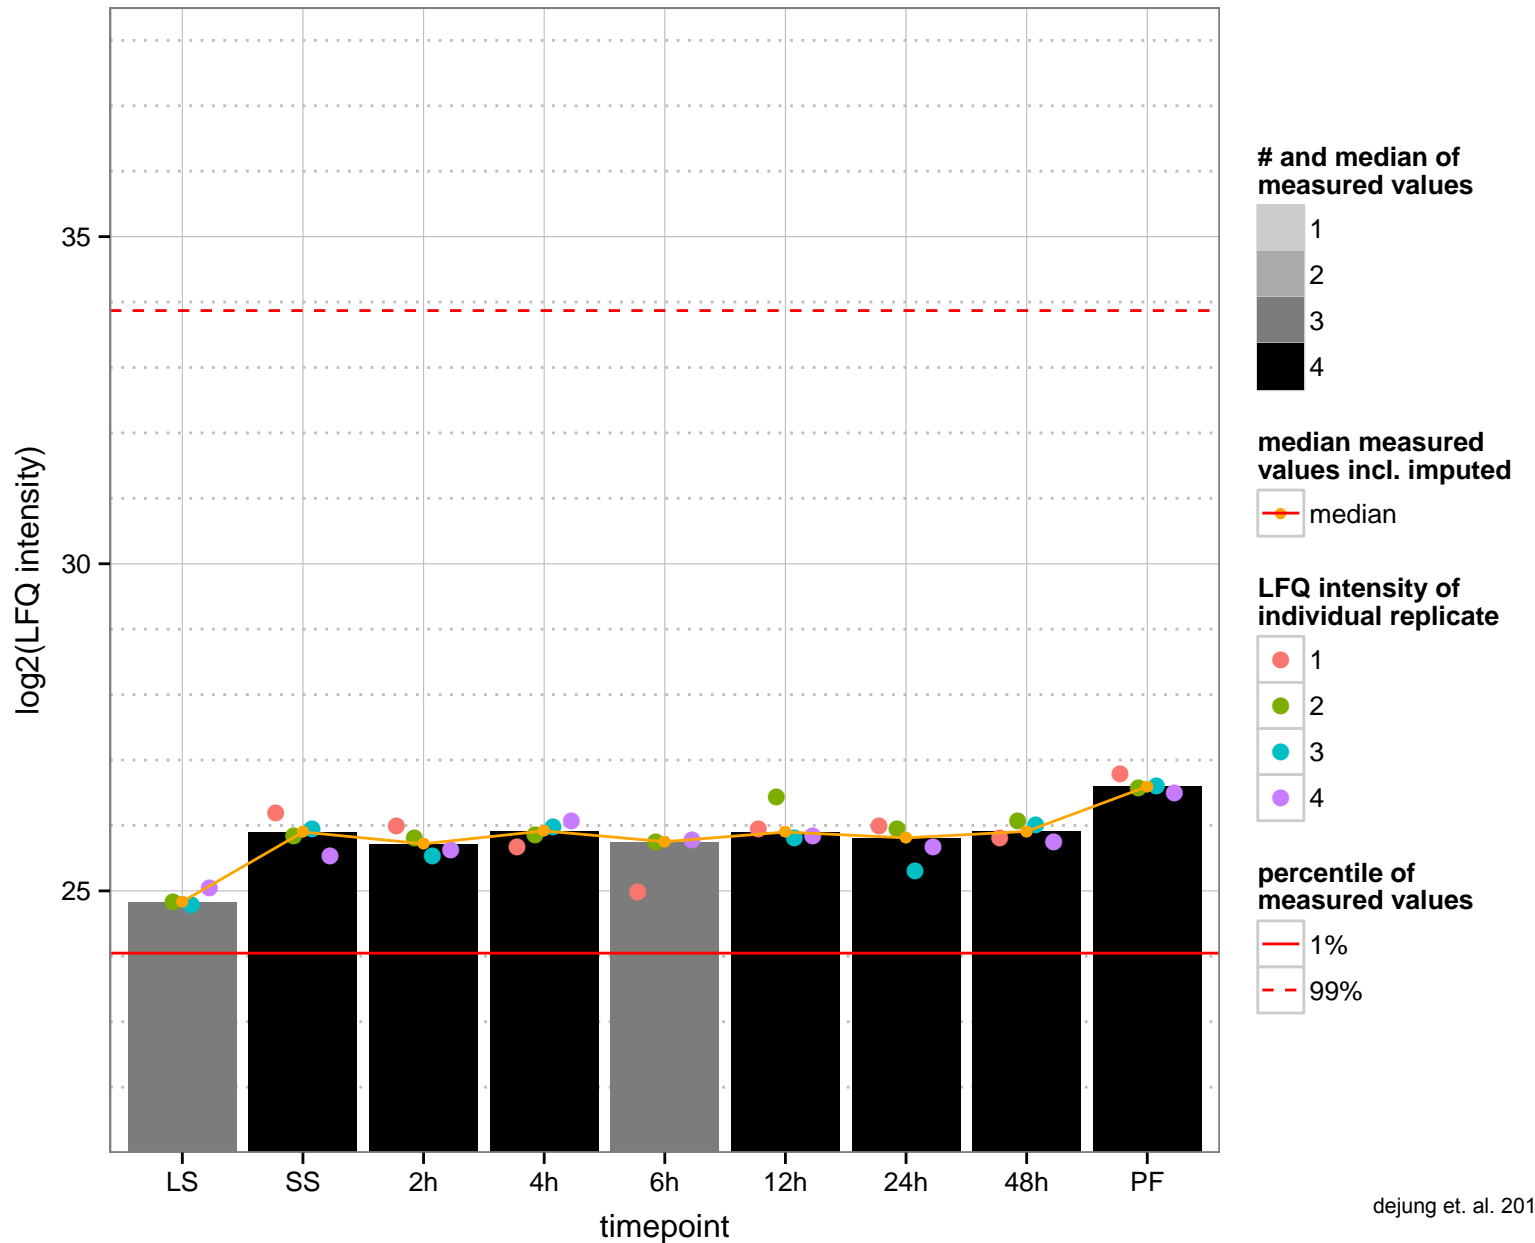

hypothetical protein, conserved  
 Tb927.10.11530  
 AGOF: null  
 AGOC: null  
 AGOP: null  
 PGO: null  
 PGOC: null  
 PGOP: null

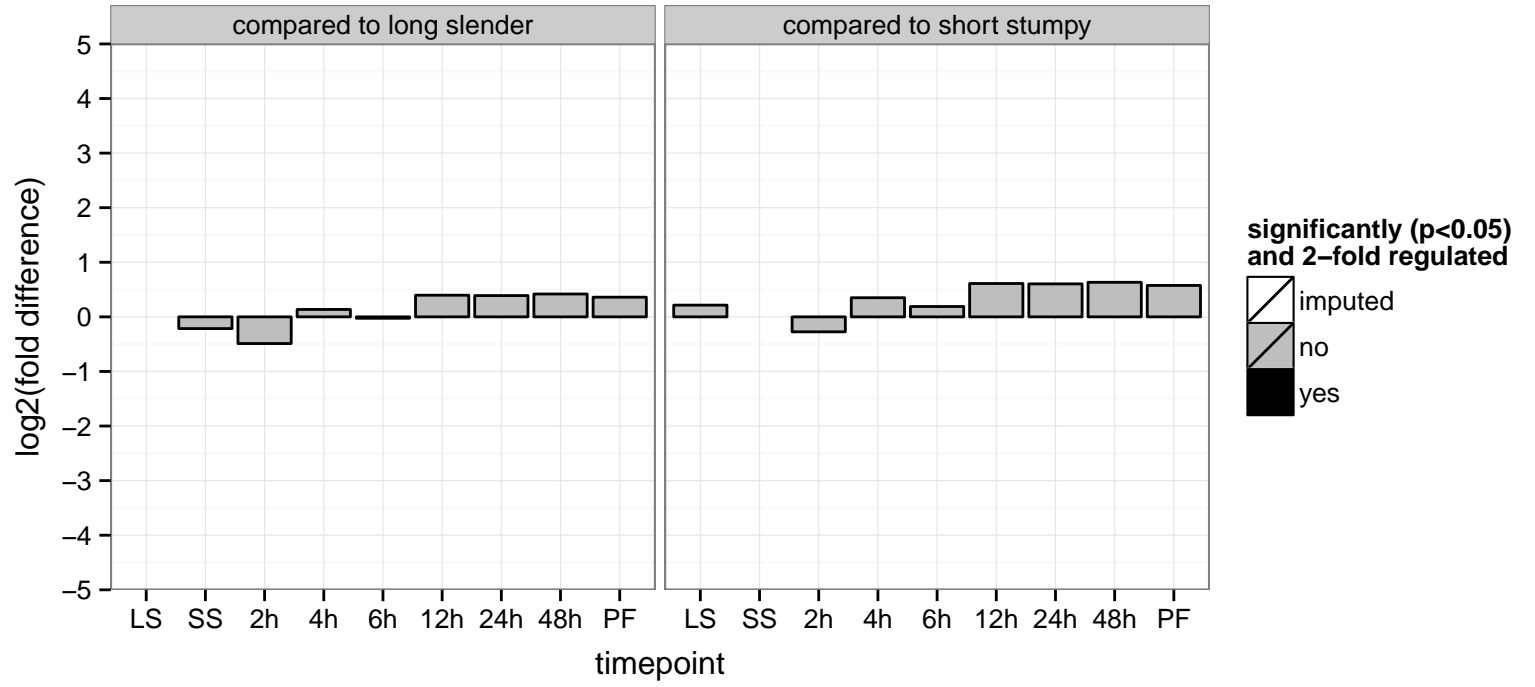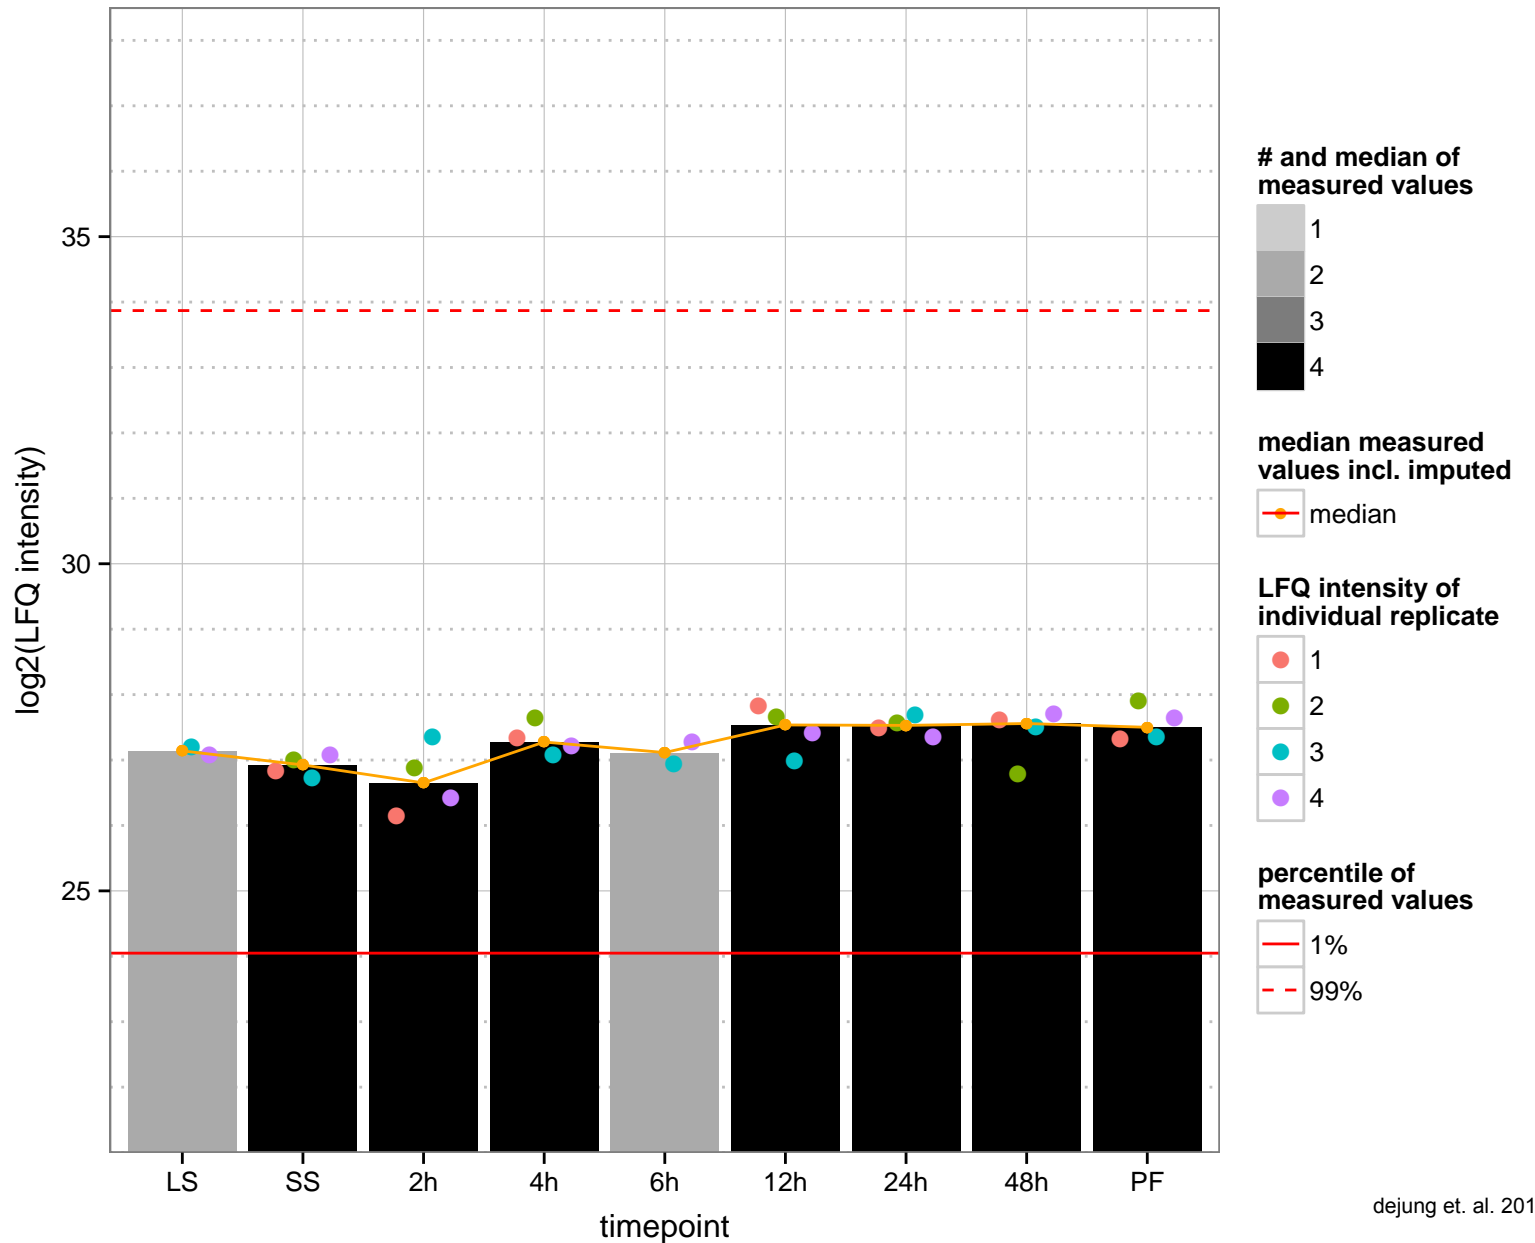

40S ribosomal protein S3, putative (RPS3)  
 Tb927.9.6070;Tb927.10.11540  
 AGOF: RNA binding, nucleic acid binding, structural constituent of ribosome  
 AGOC: intracellular, ribosome, small ribosomal subunit  
 AGOP: ribosome biogenesis, translation  
 PGOF: RNA binding, structural constituent of ribosome  
 PGO: intracellular, ribosome, small ribosomal subunit  
 PGOP: translation

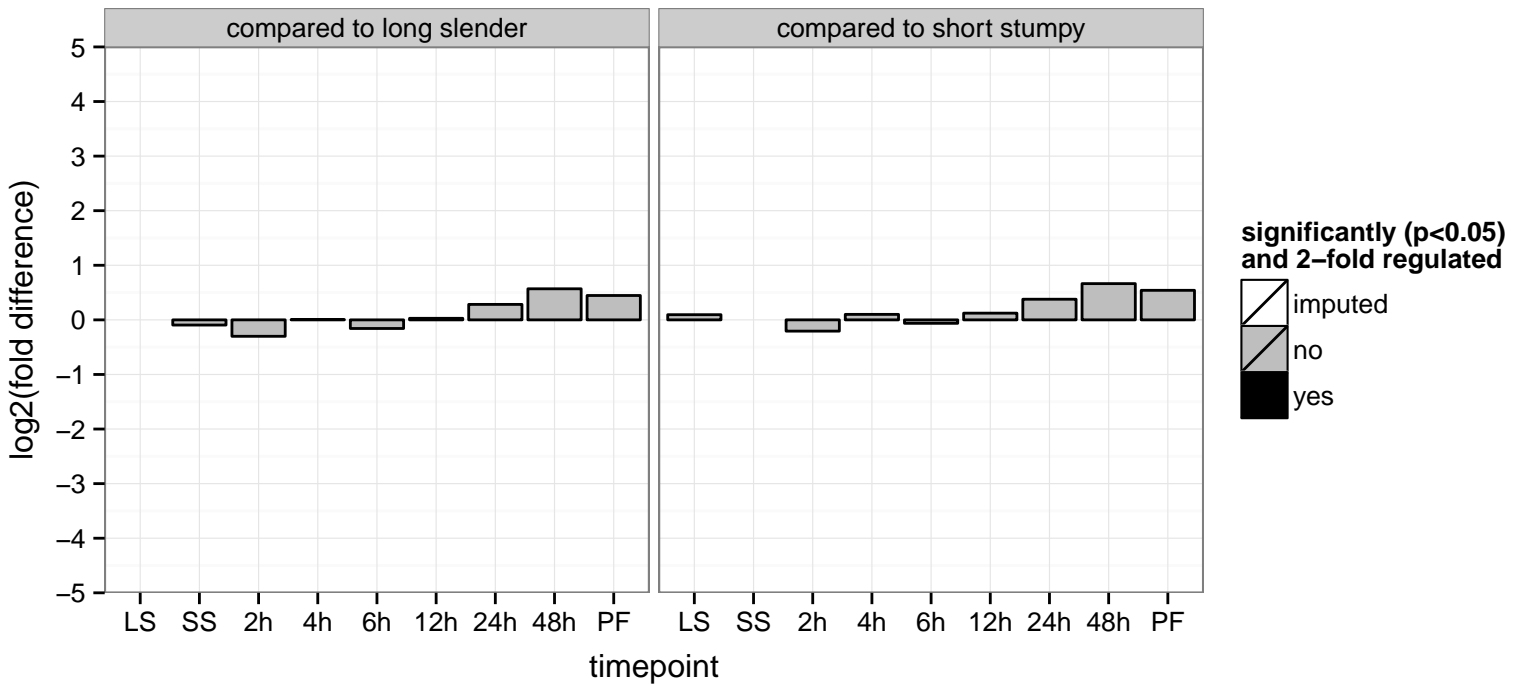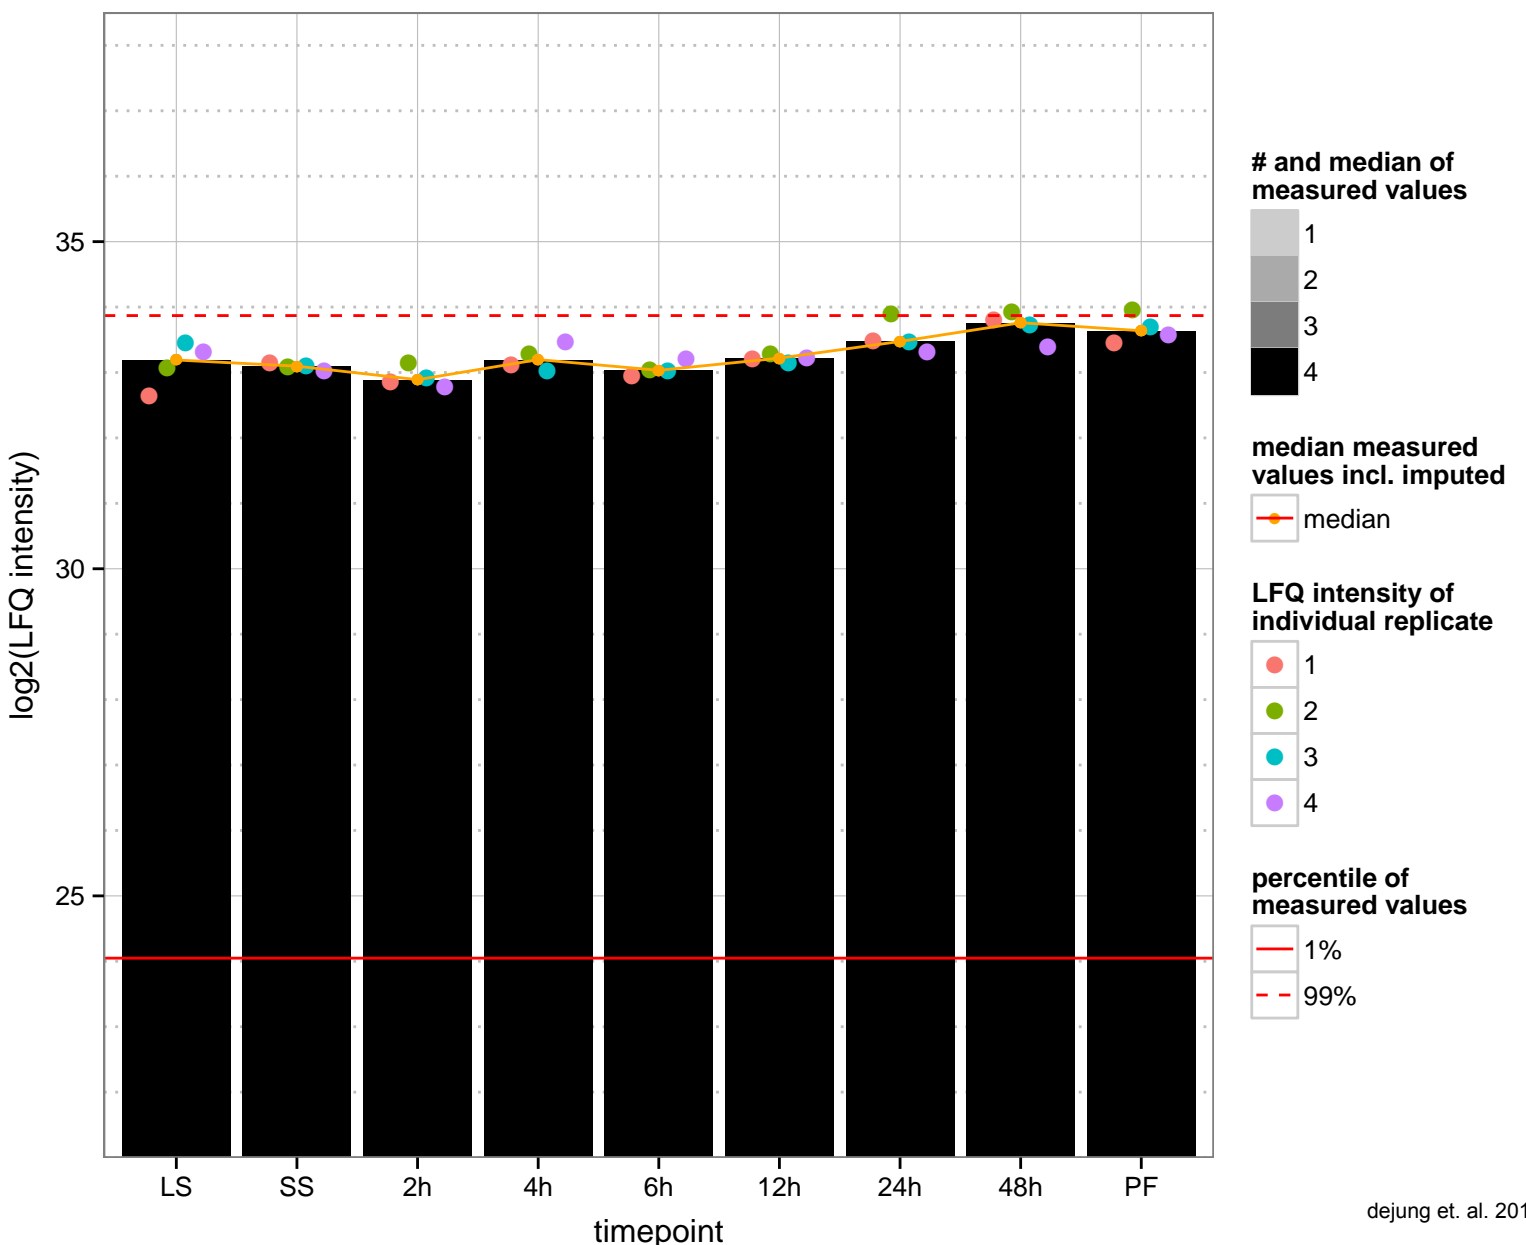

hypothetical protein, conserved  
 Tb927.10.11660  
 AGOF: null  
 AGOC: null  
 AGOP: null  
 PGO: null  
 PGOC: null  
 PGOP: null

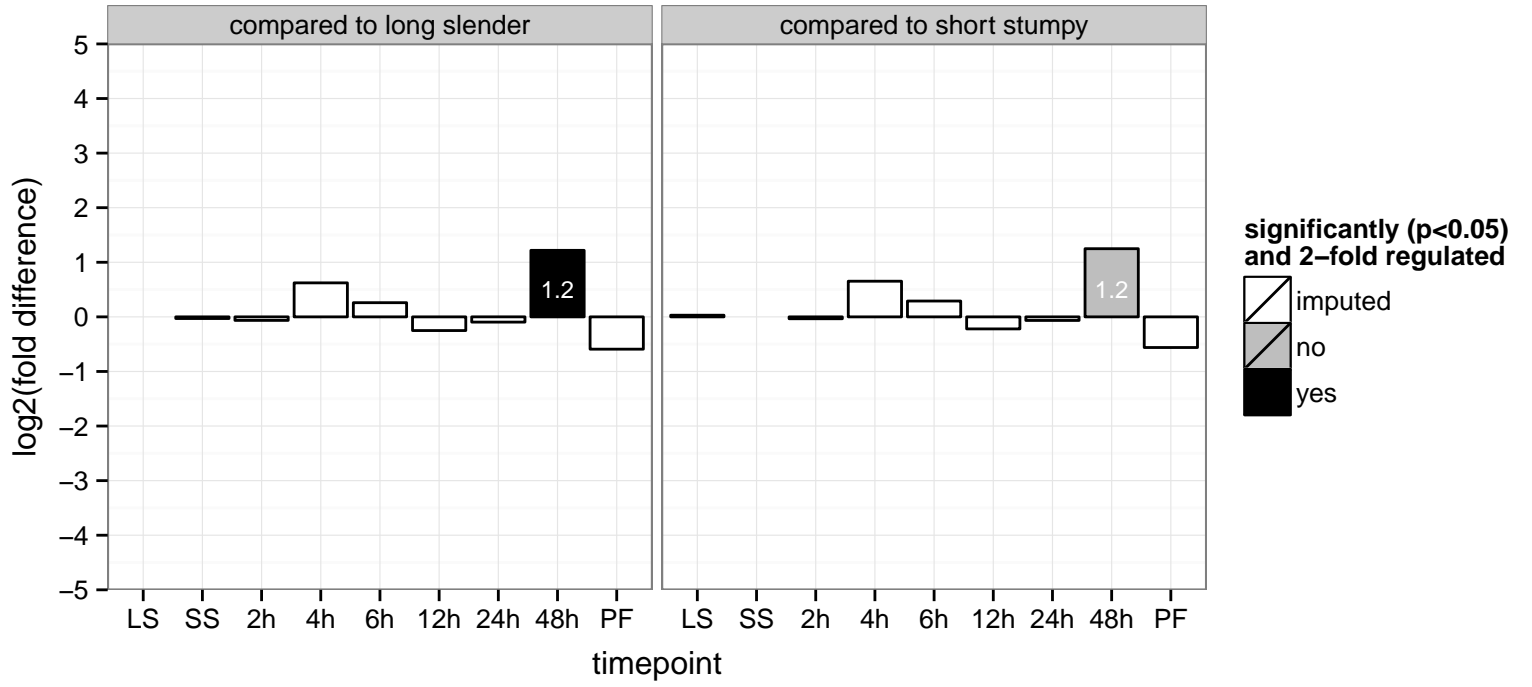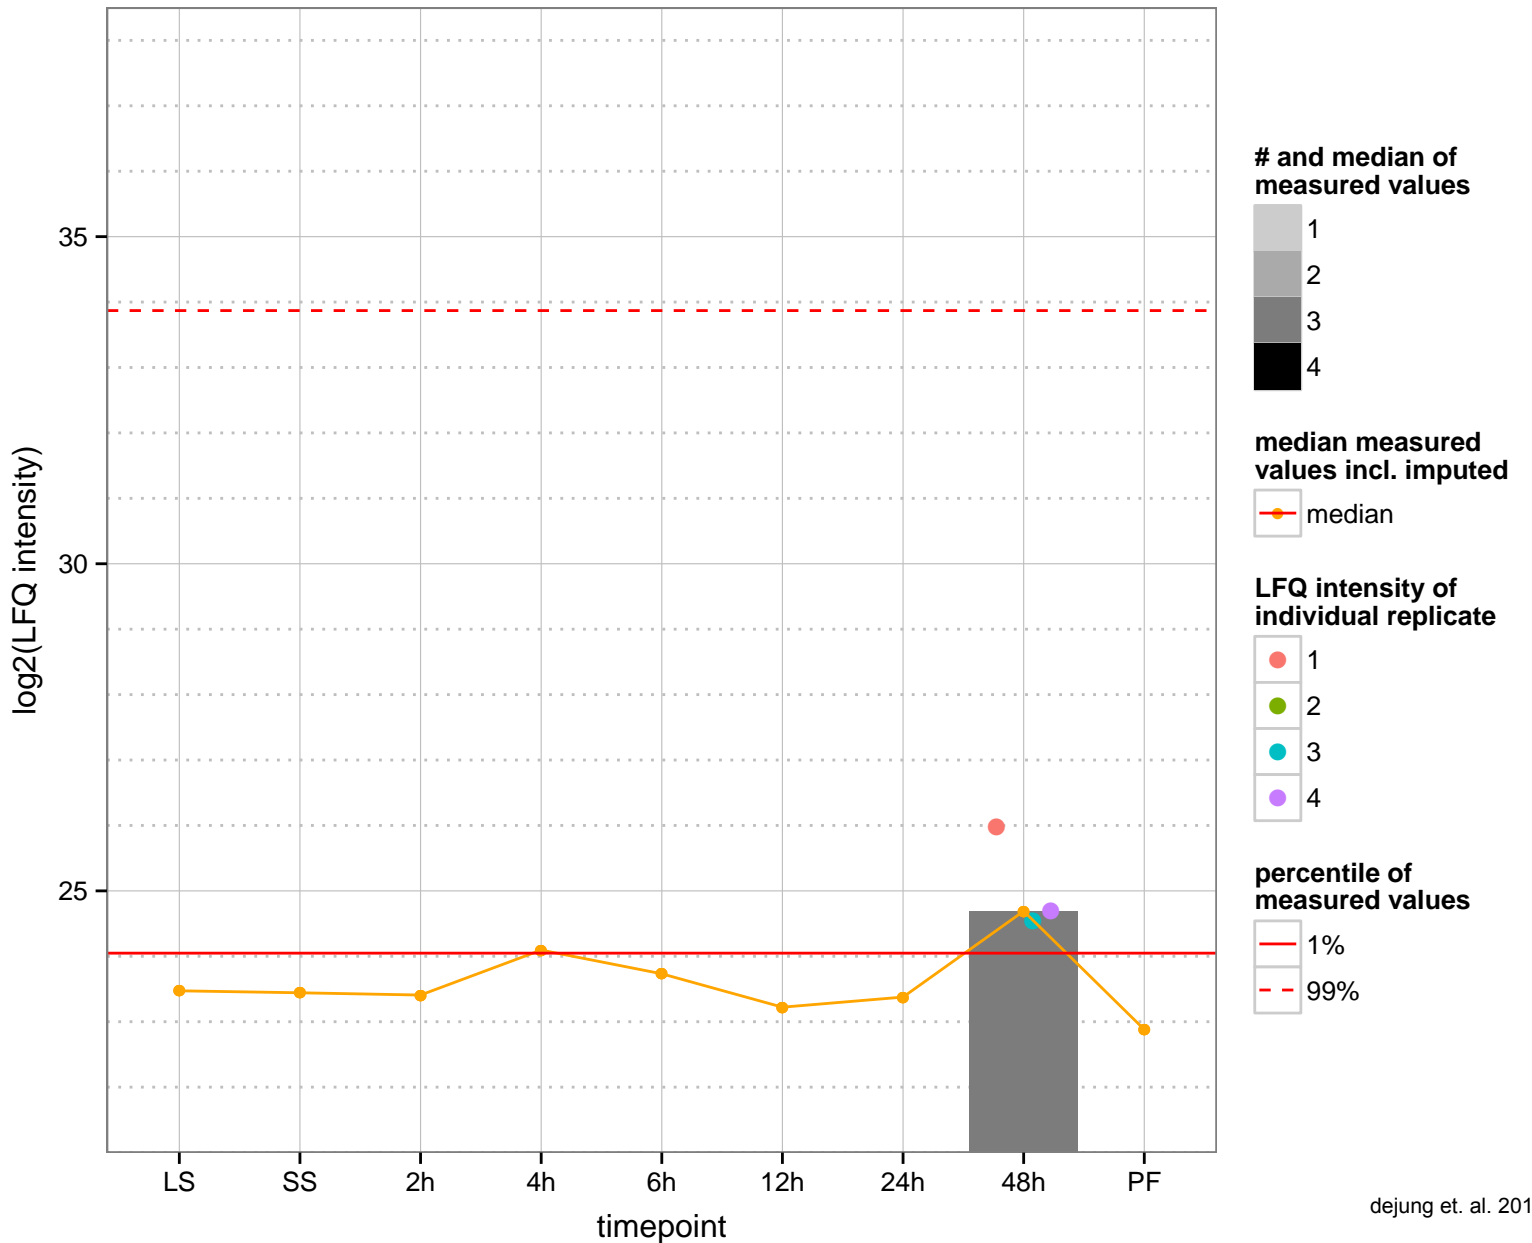

guanylate kinase, putative  
 Tb927.10.11700  
 AGOF: guanylate kinase activity  
 AGOC: null  
 AGOP: nucleobase-containing small molecule interconversion  
 PGO: protein binding  
 PGO: null  
 PGO: null

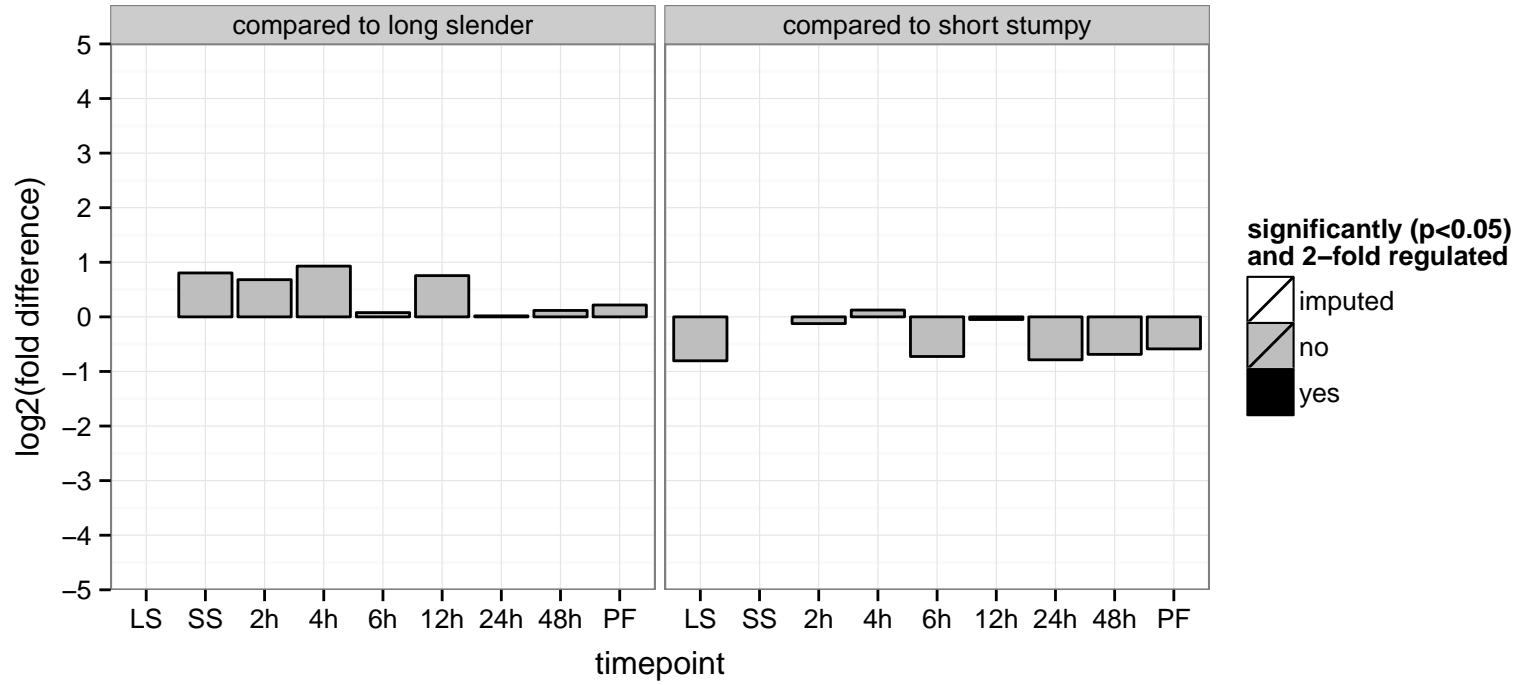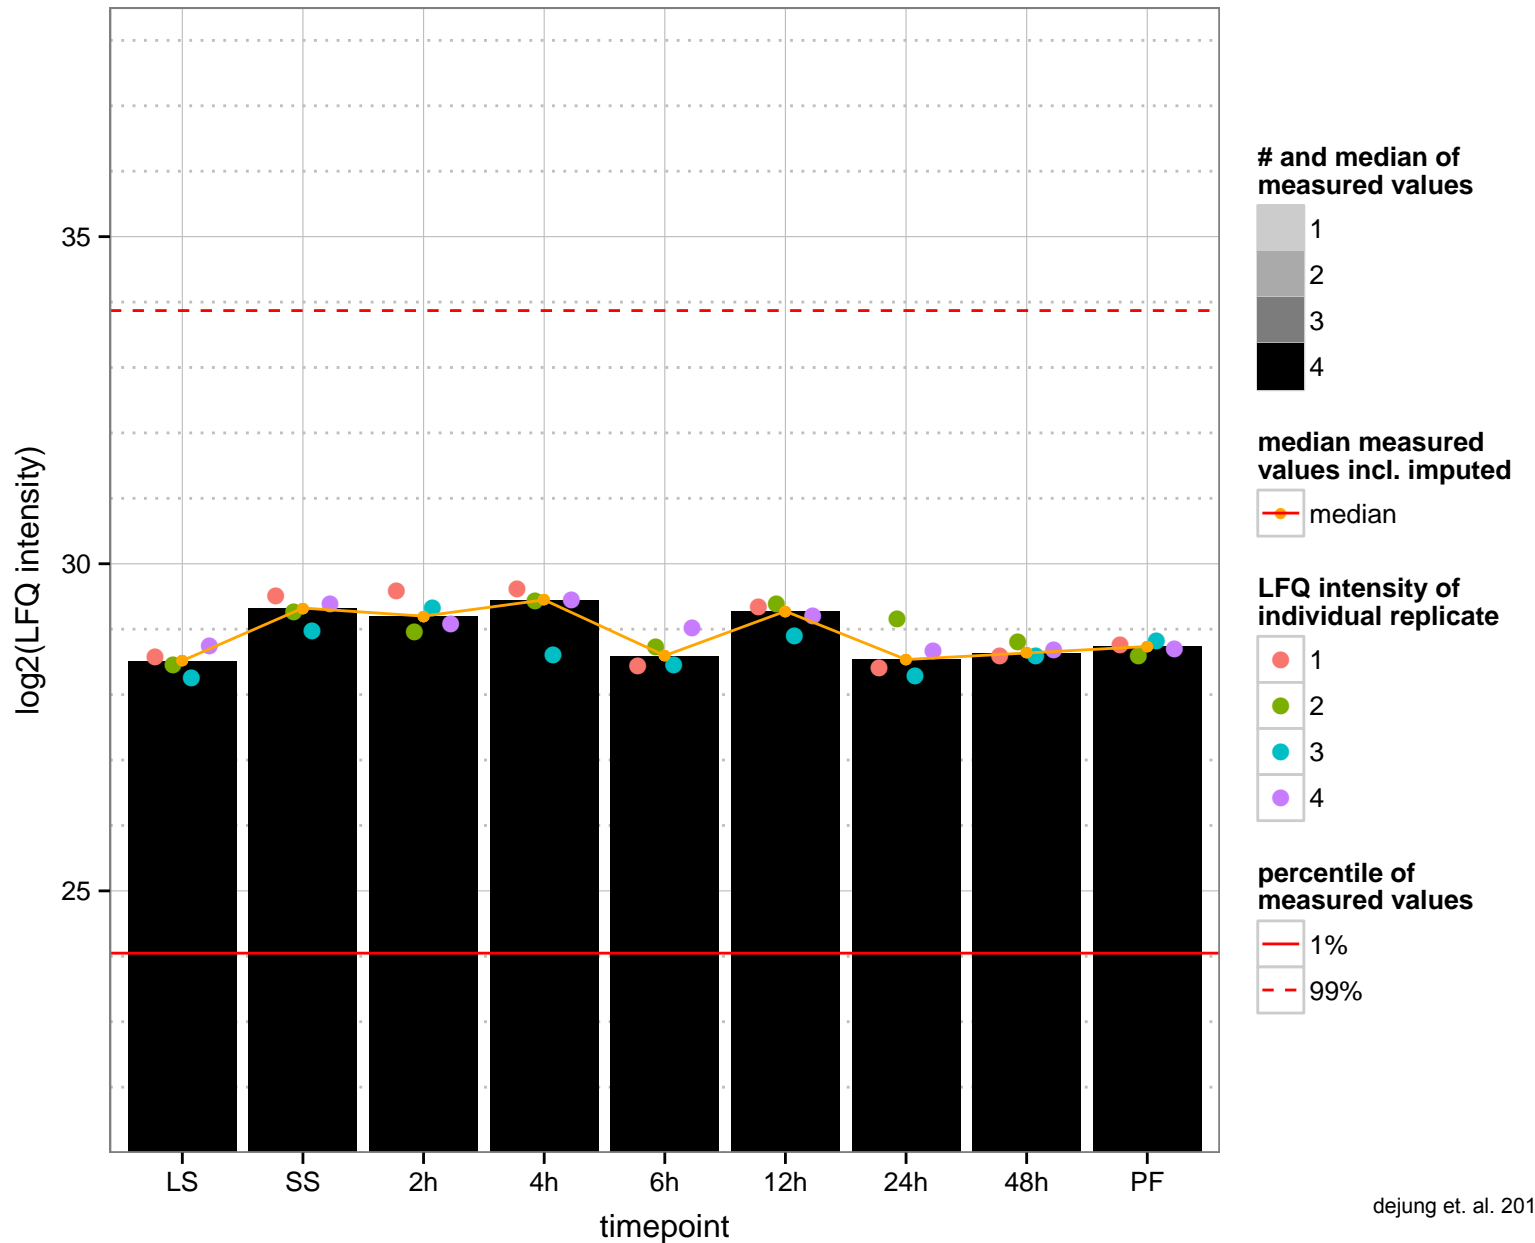

hypothetical protein, conserved  
 Tb927.10.11780  
 AGOF: null  
 AGOC: null  
 AGOP: null  
 PGO: null  
 PGOC: null  
 PGOP: null

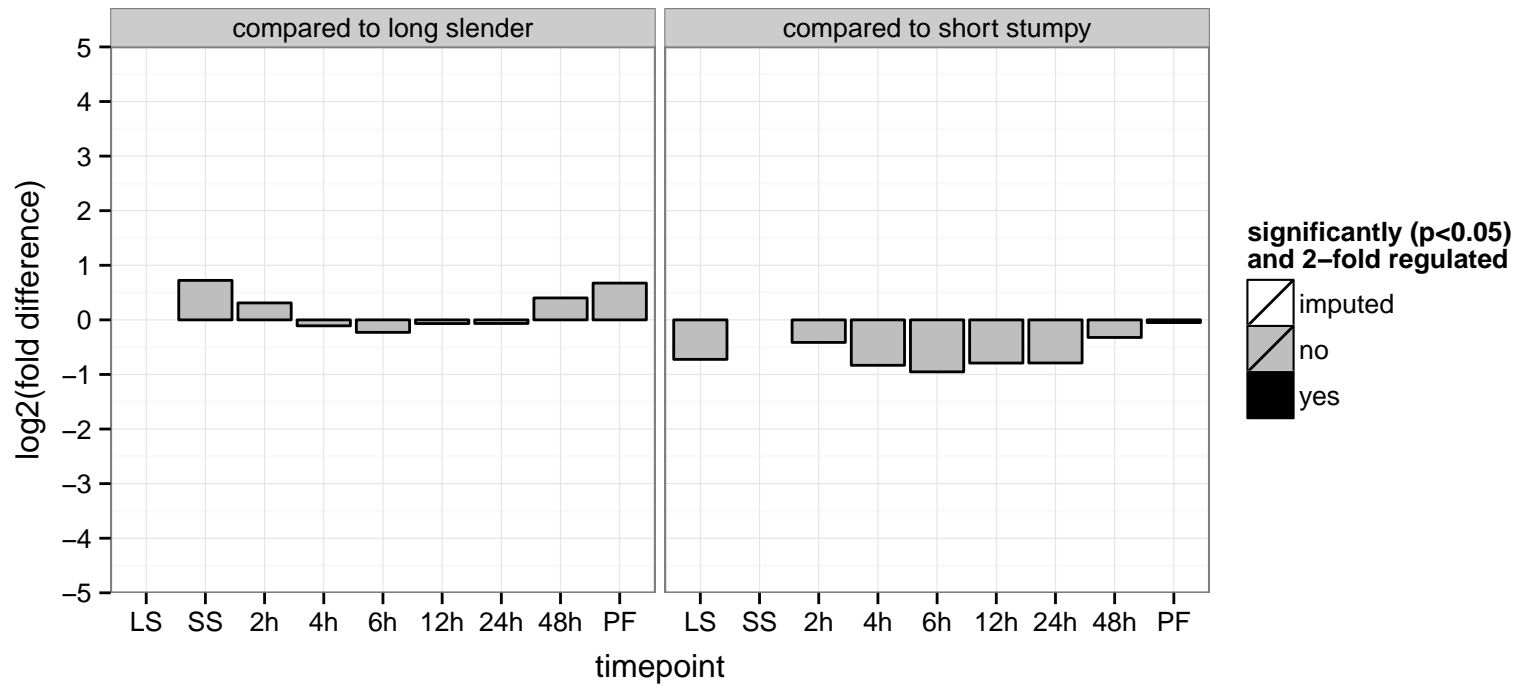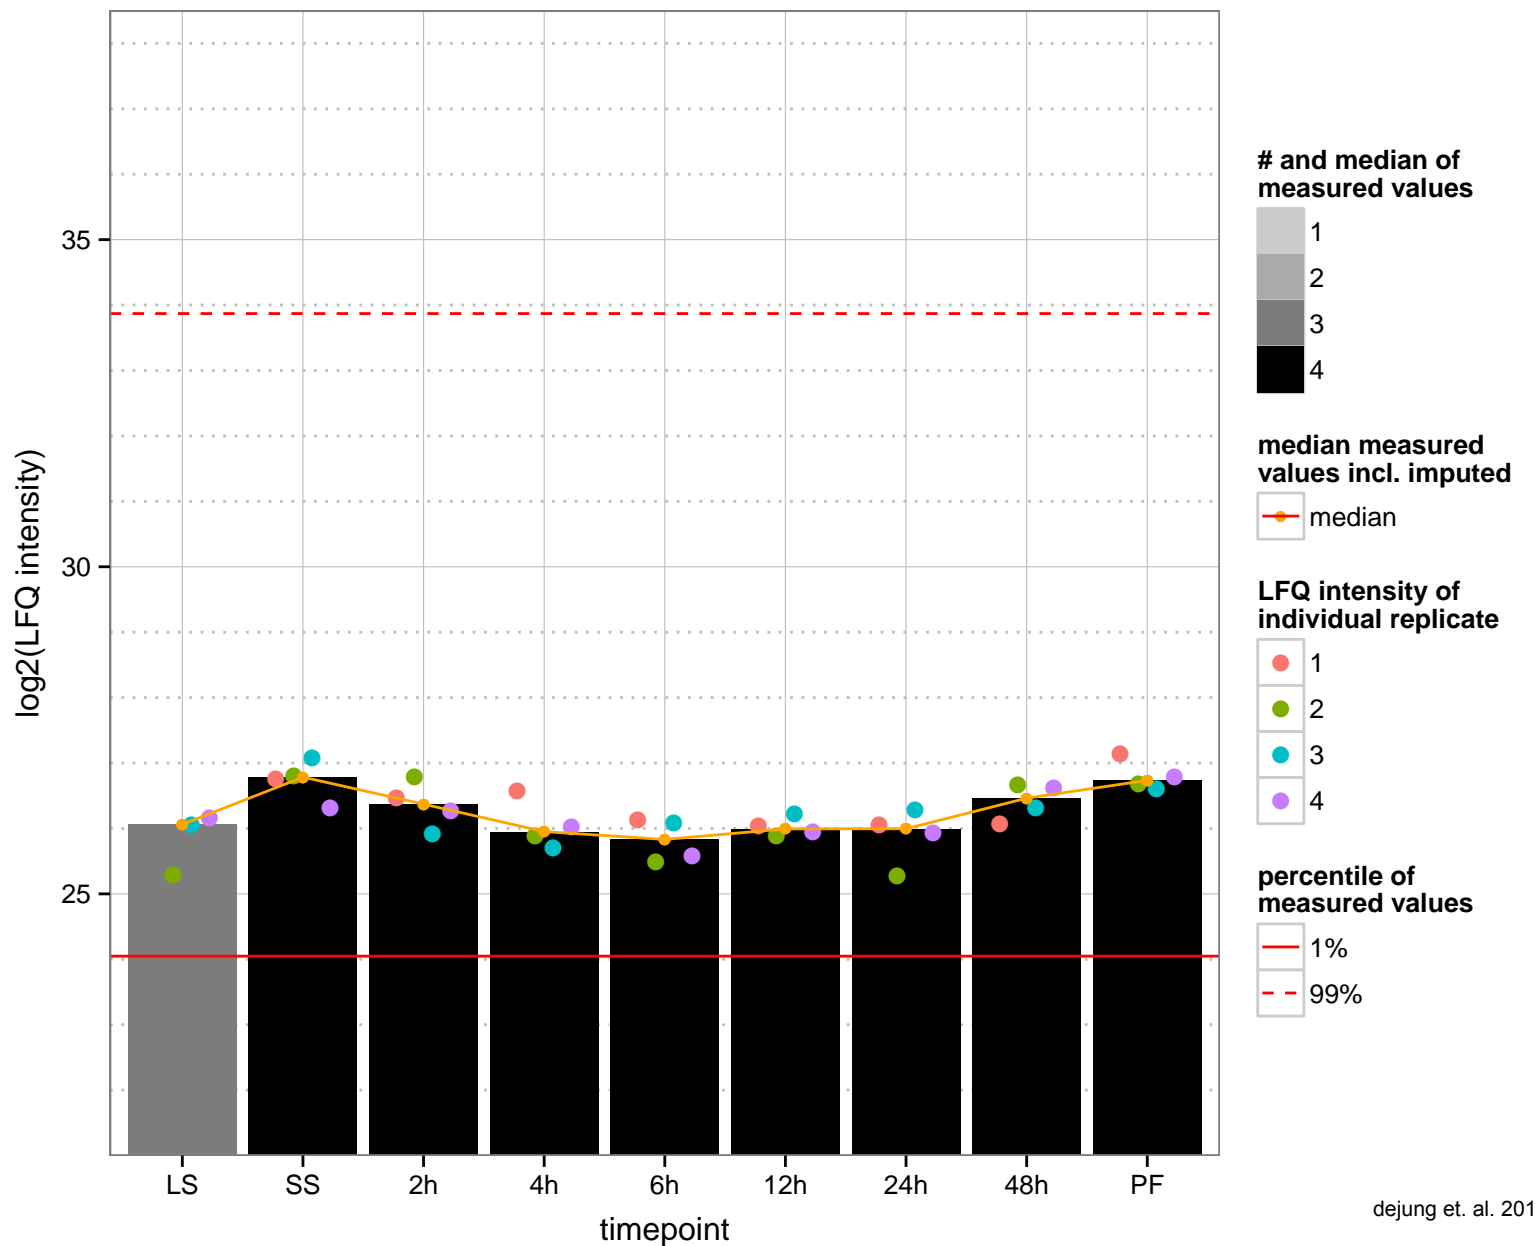

Axonemal inner arm dynein light chain, putative  
 Tb927.10.11800  
 AGOF: microtubule motor activity  
 AGOC: null  
 AGOP: microtubule-based movement  
 PGO: null  
 PGO: null  
 PGO: null

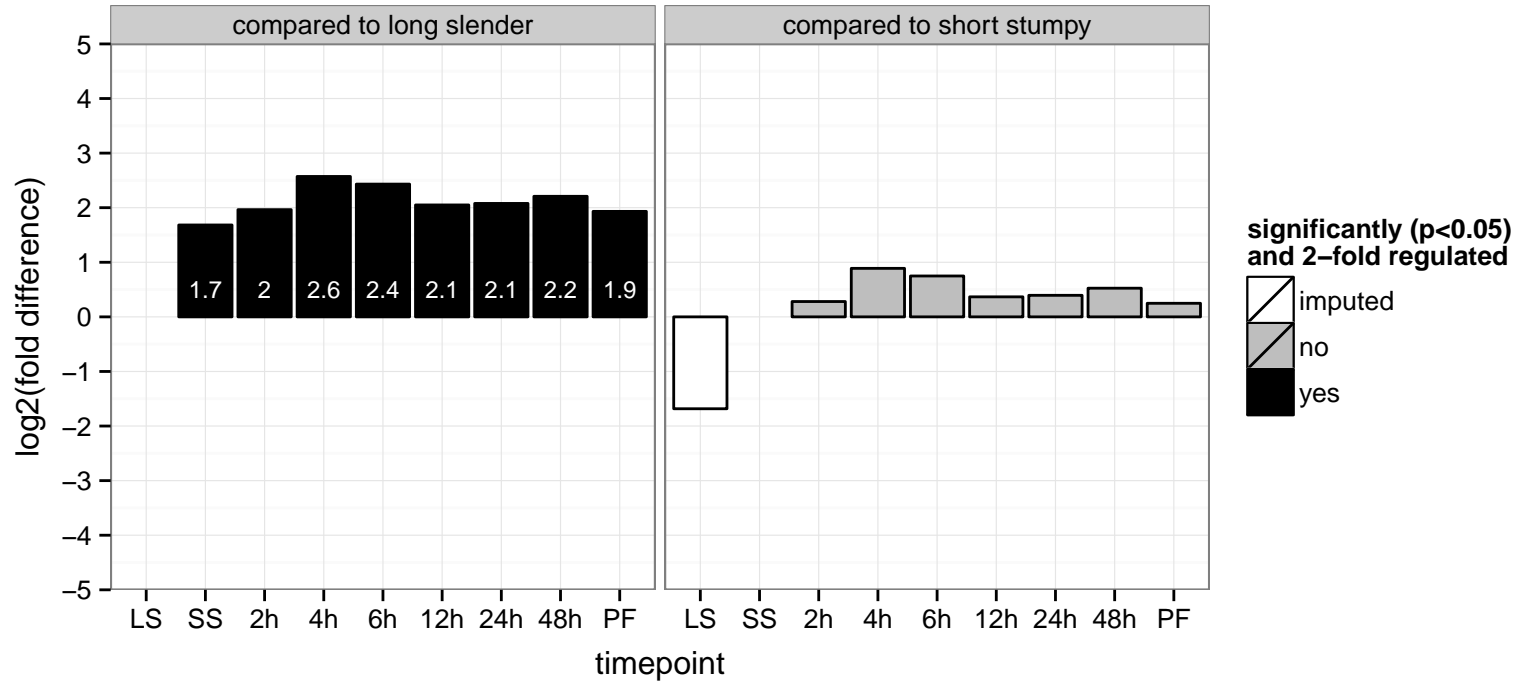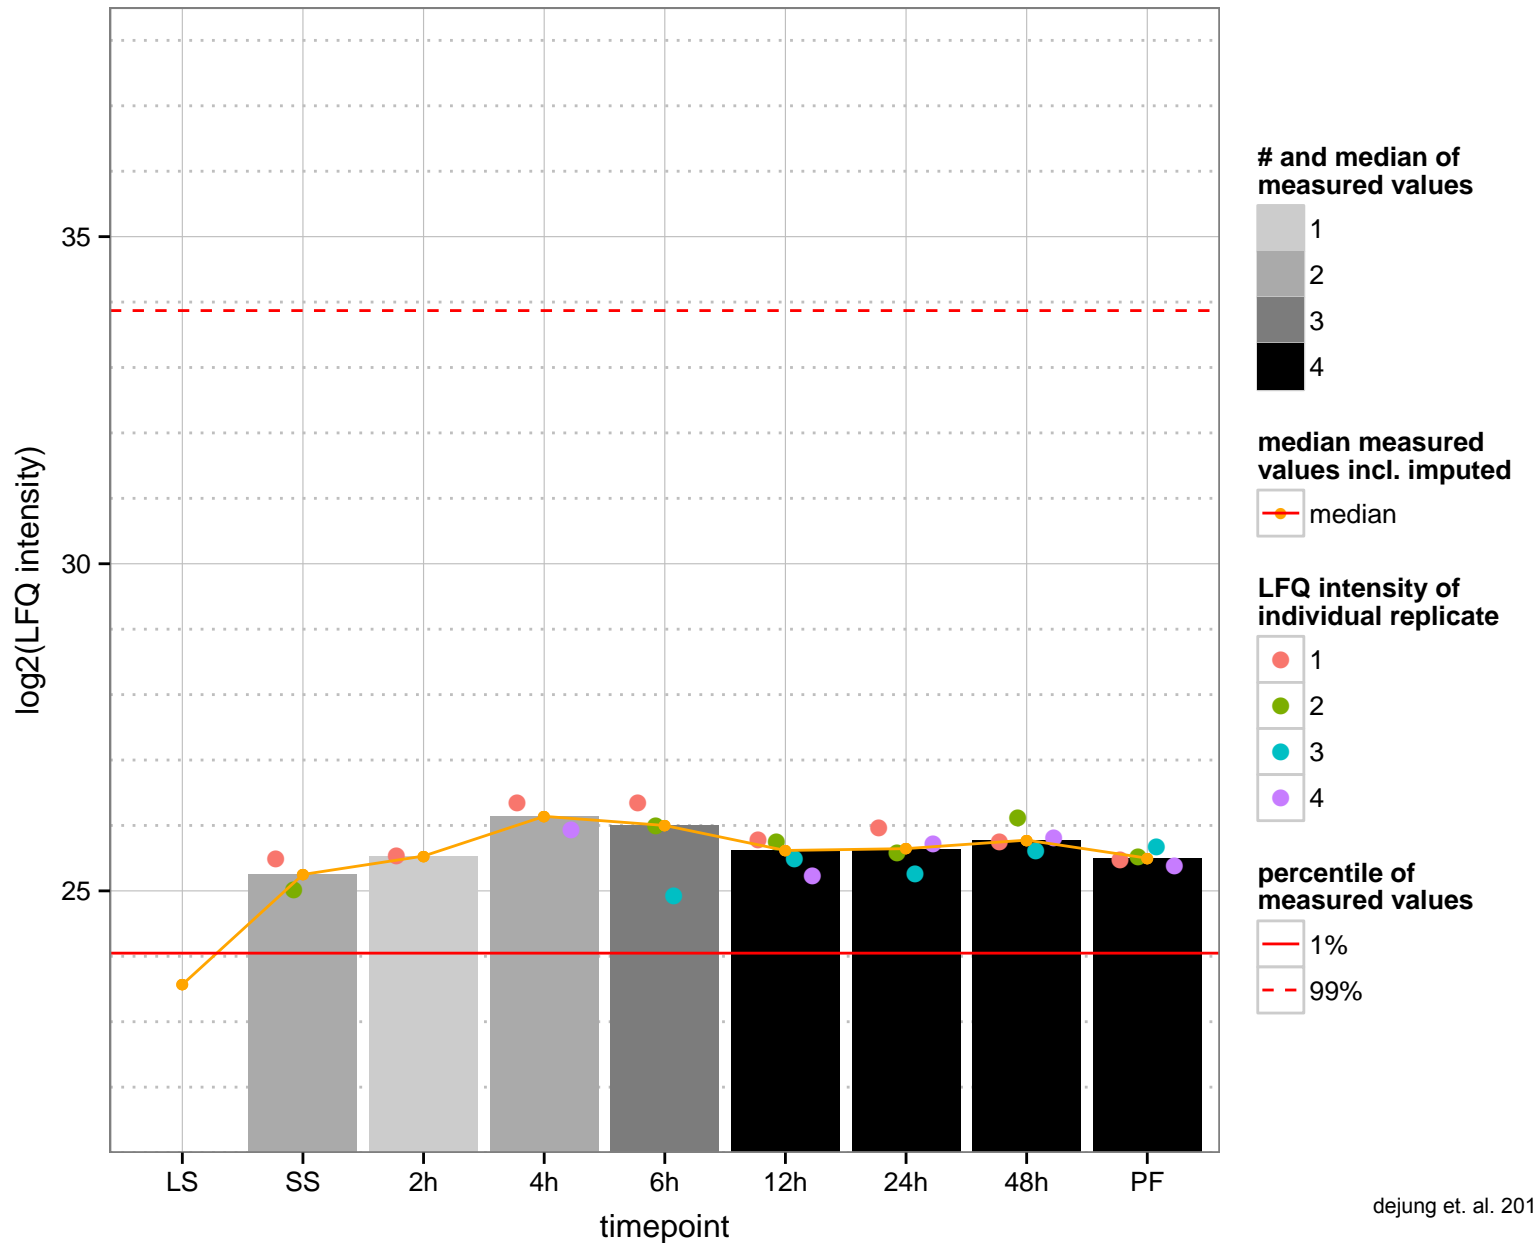

mitochondrial RNA binding protein (MRB11870)  
 Tb927.10.11870  
 AGOF: RNA binding  
 AGOC: mitochondrion  
 AGOP: RNA metabolic process  
 PGO: null  
 PGOC: null  
 PGOP: null

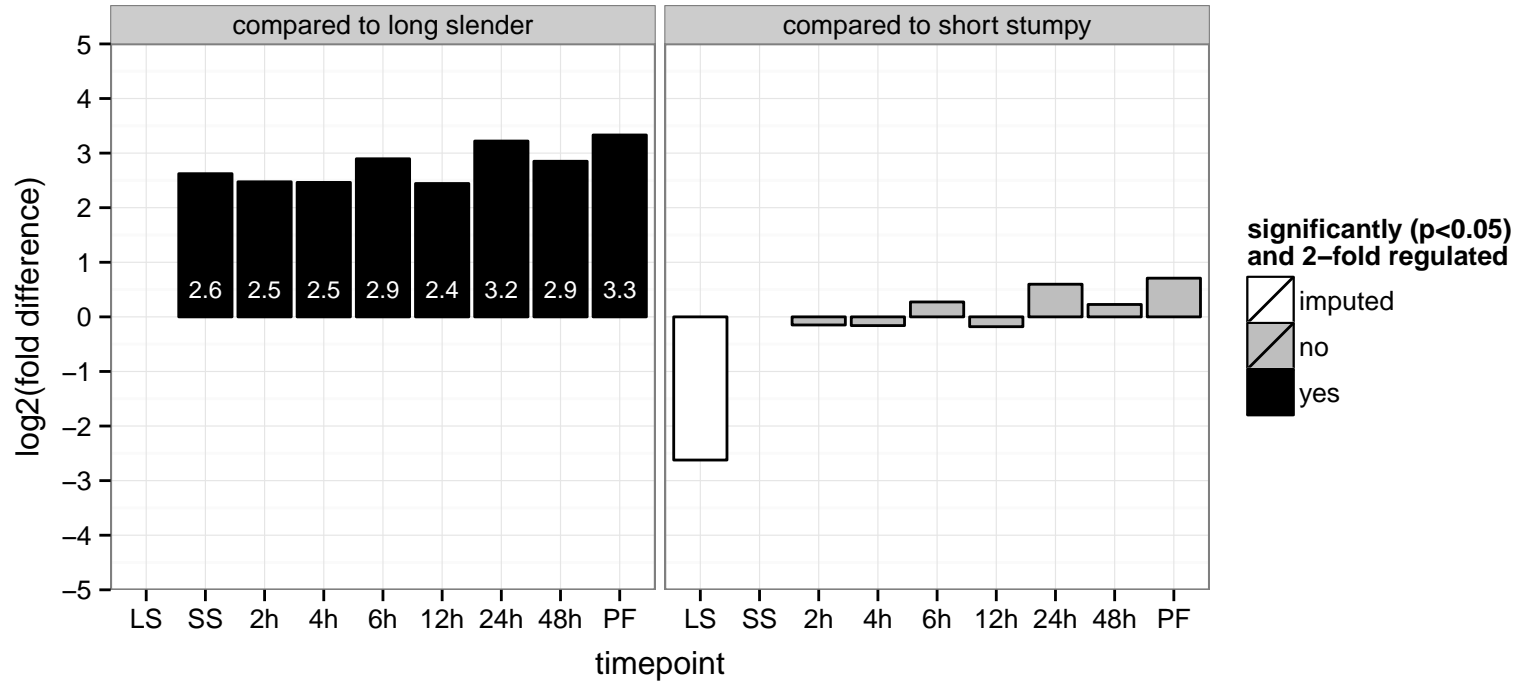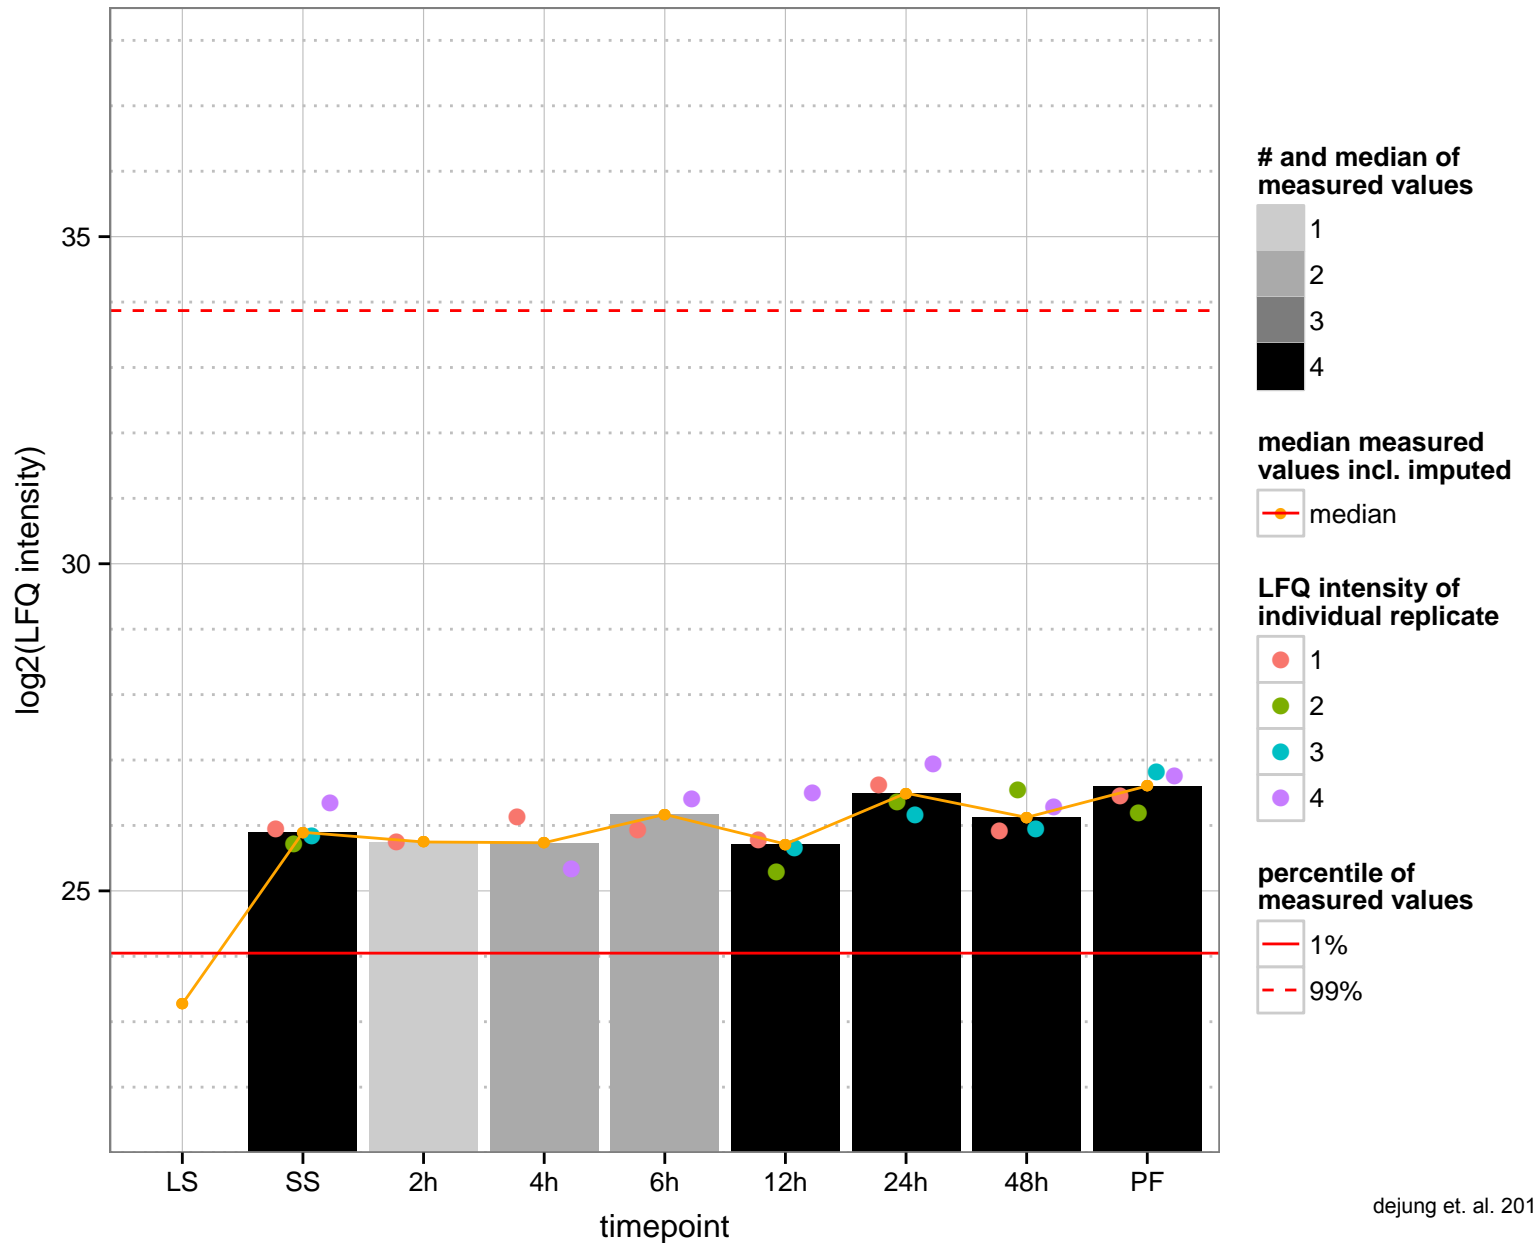



glutamine aminotransferase (GlnAT) (GlnAT)

Tb927.10.11970

AGOF: 1-aminocyclopropane-1-carboxylate synthase activity, L-cysteine:2-oxoglutarate aminotransferase activity, L-glutam

AGOC: cytosol

AGOP: biosynthetic process

PGOF: pyridoxal phosphate binding, transferase activity

PGOC: null

PGOP: biosynthetic process

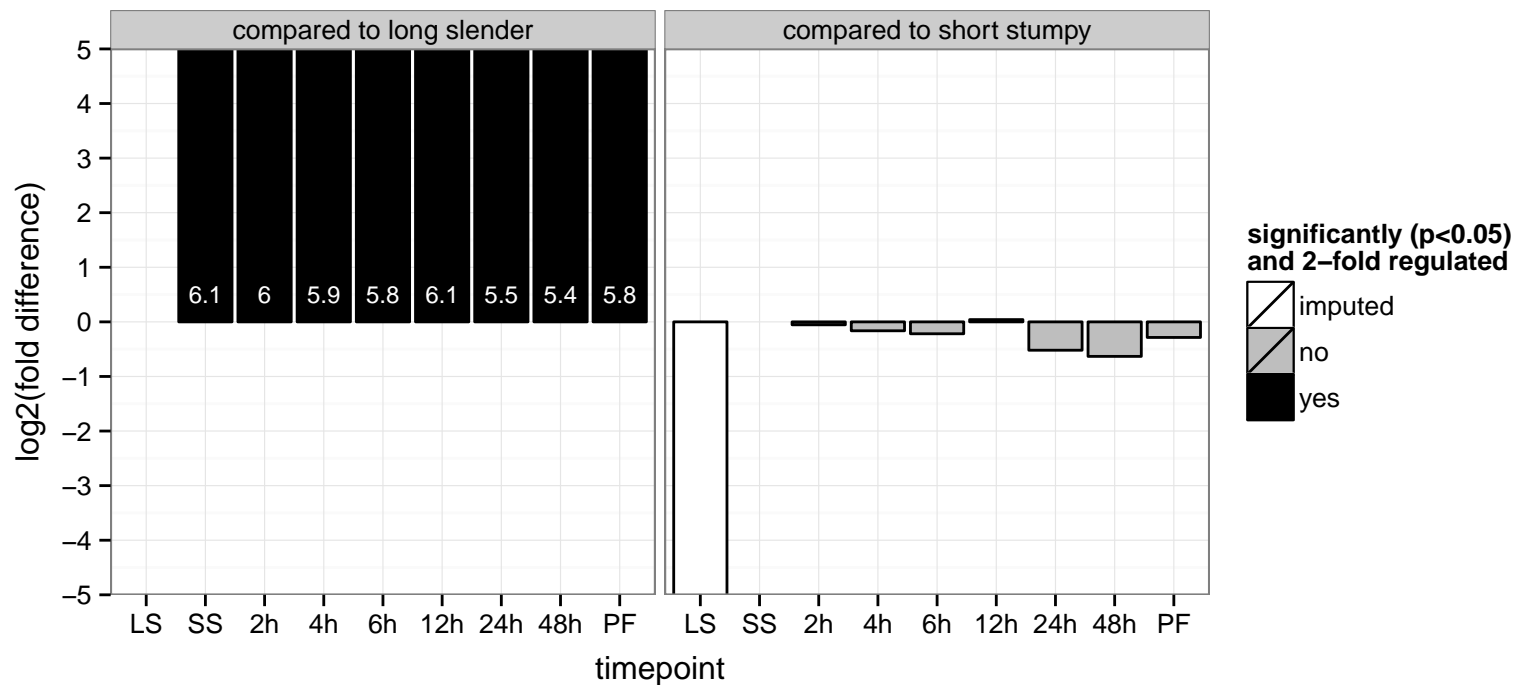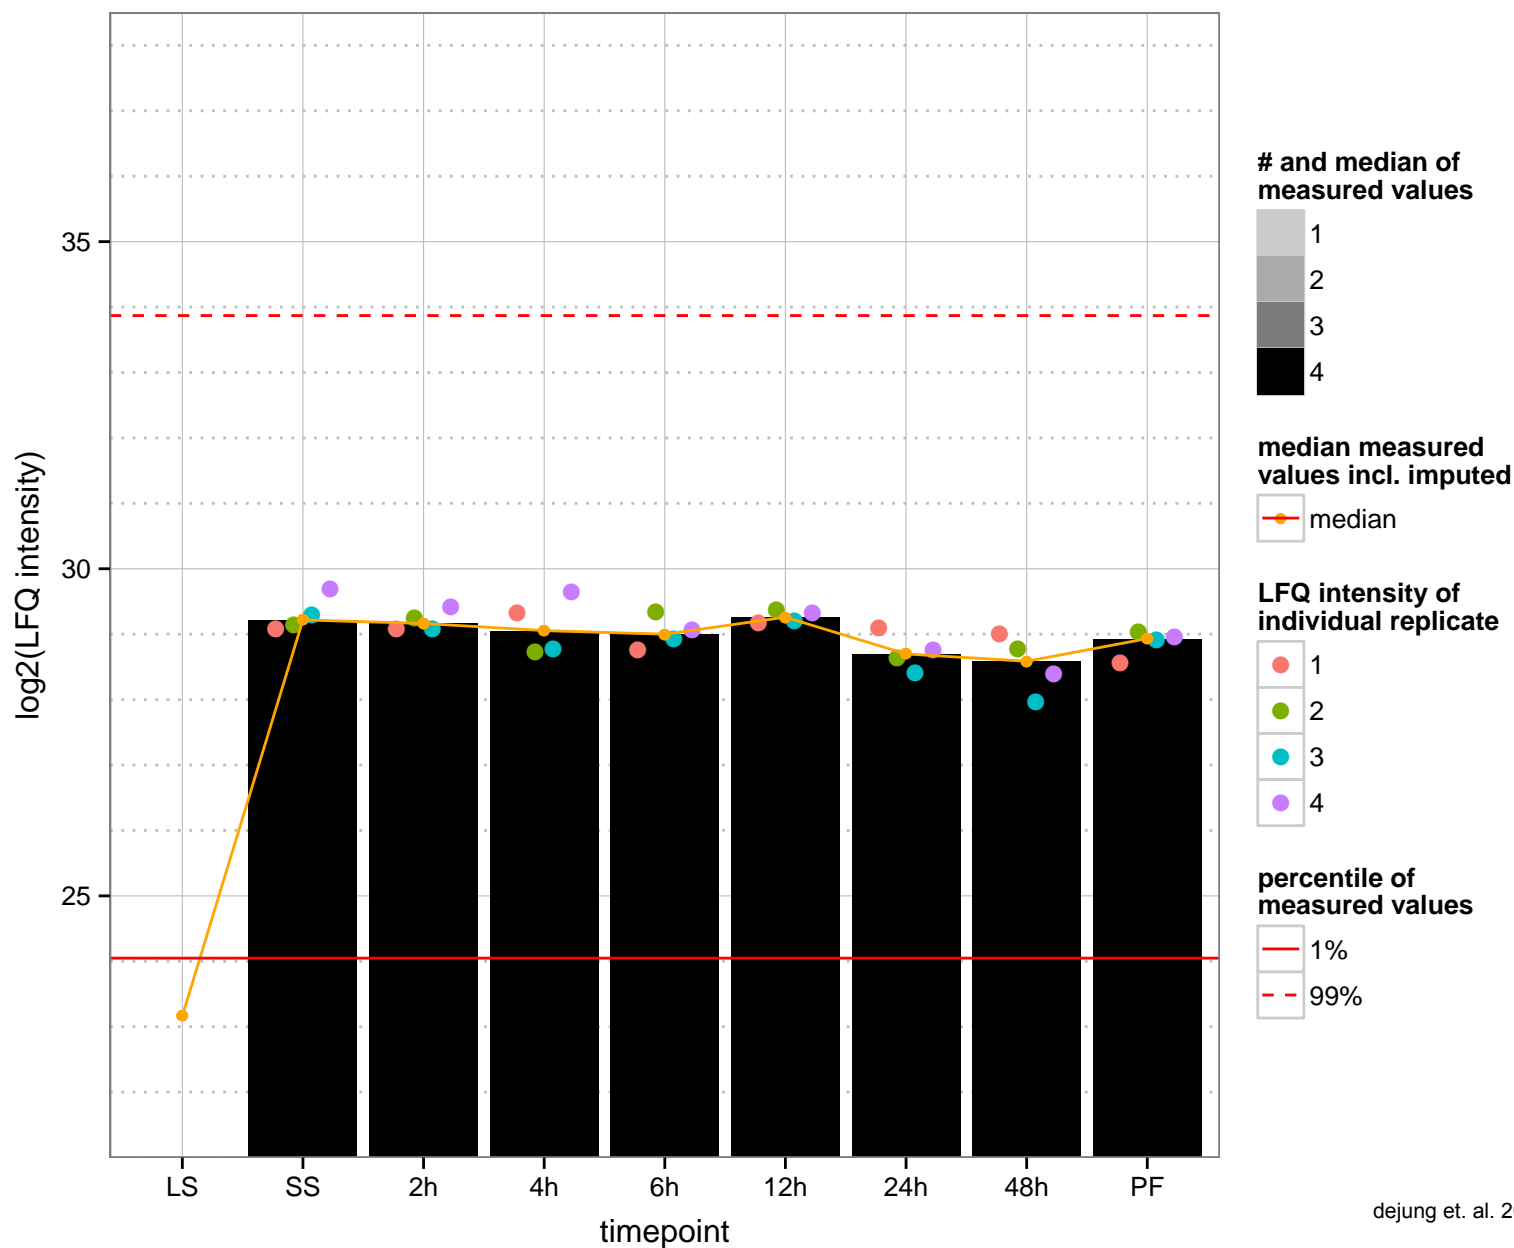

RNA-binding protein  
 Tb927.10.11990  
 AGOF: RNA binding  
 AGOC: null  
 AGOP: null  
 PGOF: RNA binding  
 PGO: nucleus  
 PGOP: ribosome assembly

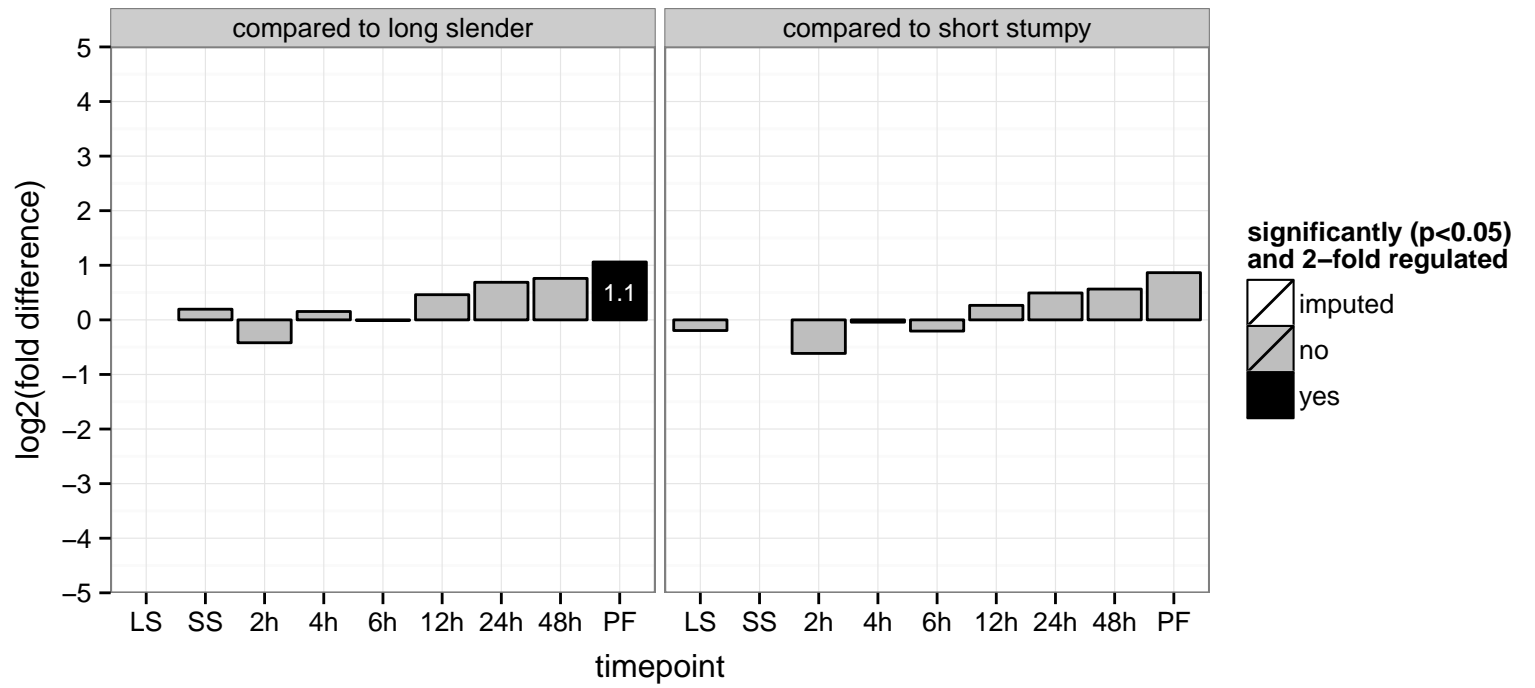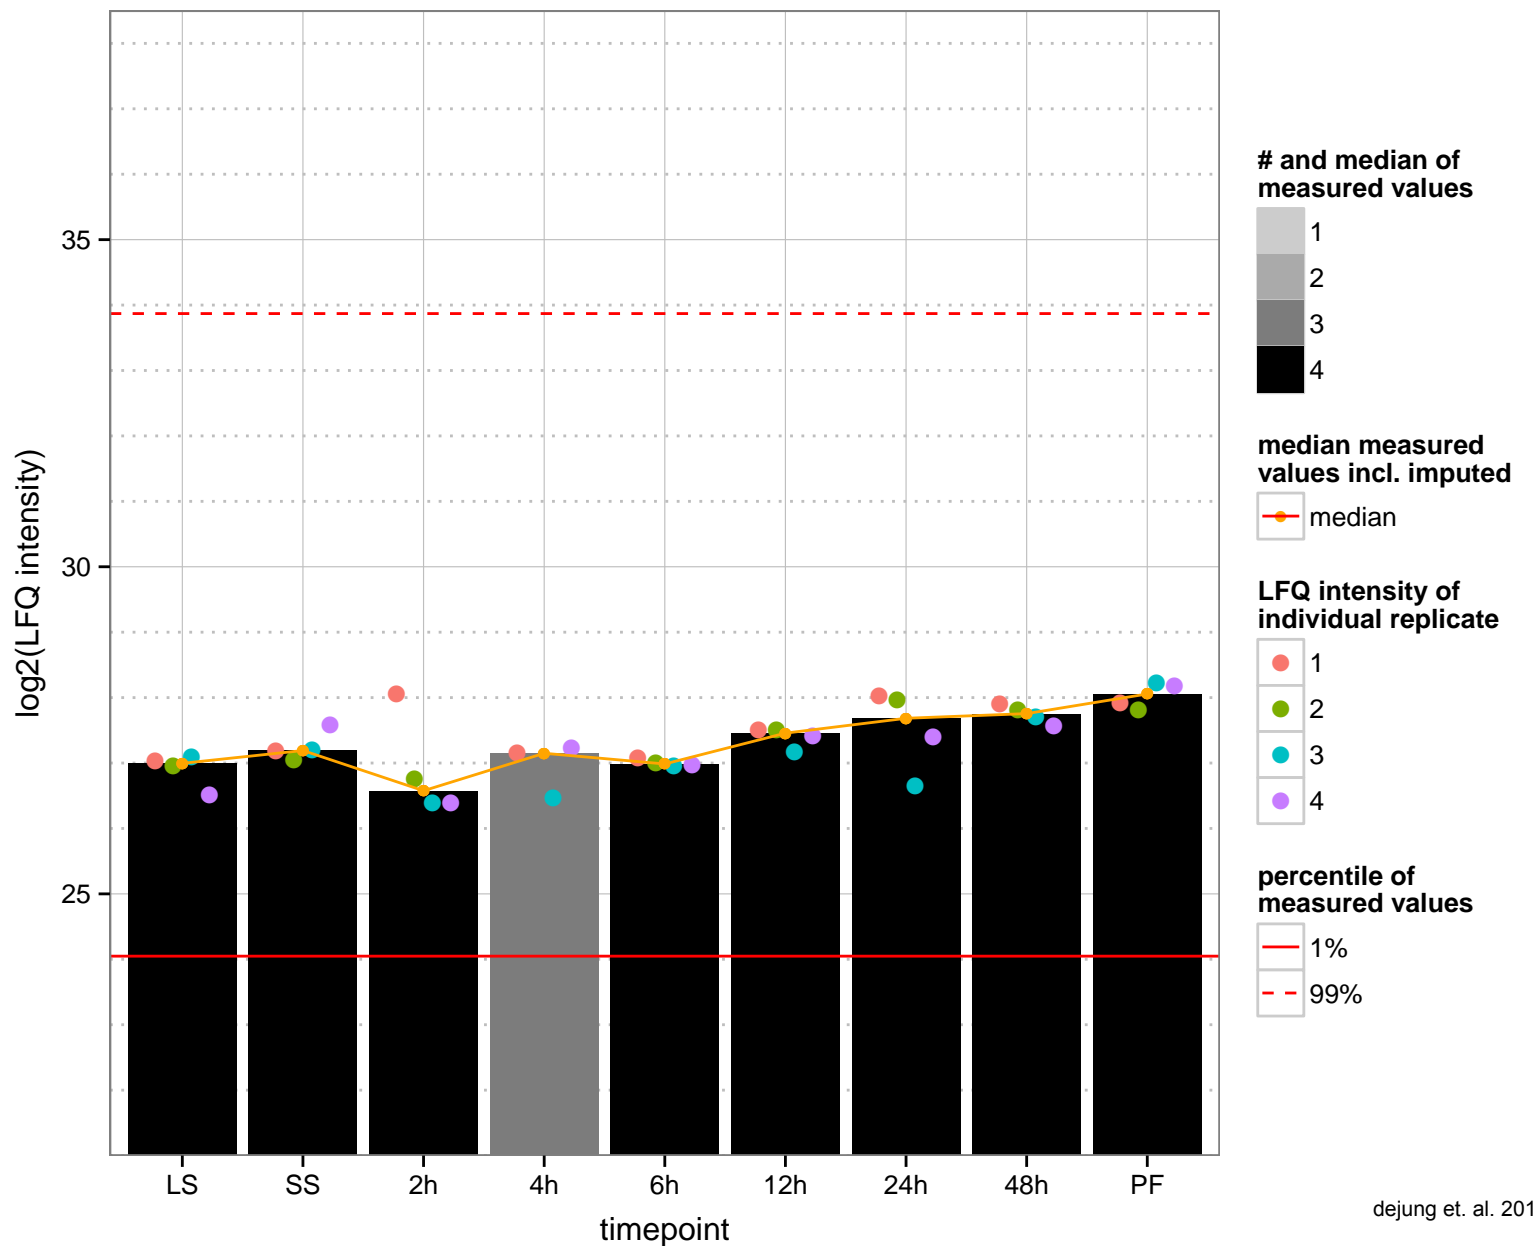

katanin, putative  
 Tb927.10.1210  
 AGOF: null, ATP binding, ATPase activity  
 AGOC: null, katanin complex  
 AGOP: null, endosomal transport  
 PGO: ATP binding, nucleoside-triphosphatase activity, nucleotide binding  
 PGOC: null  
 PGOP: null

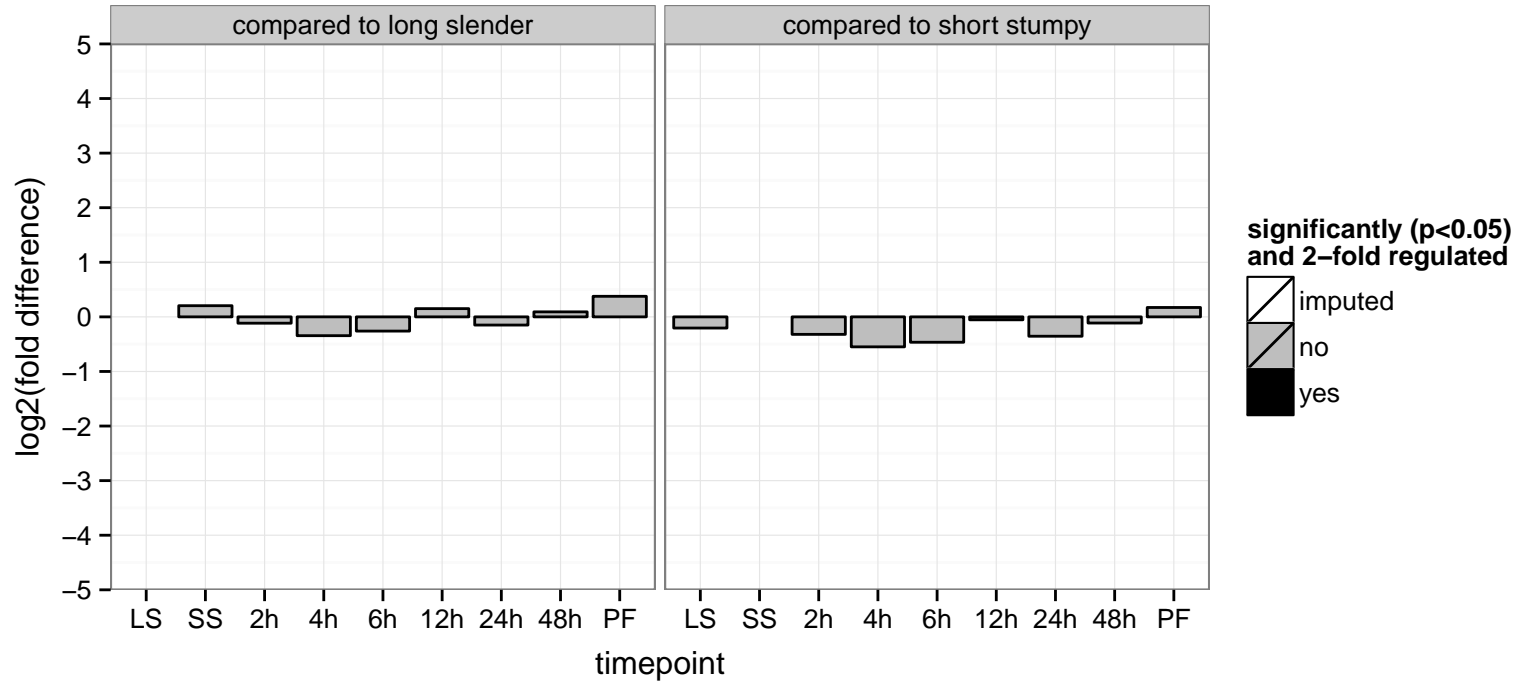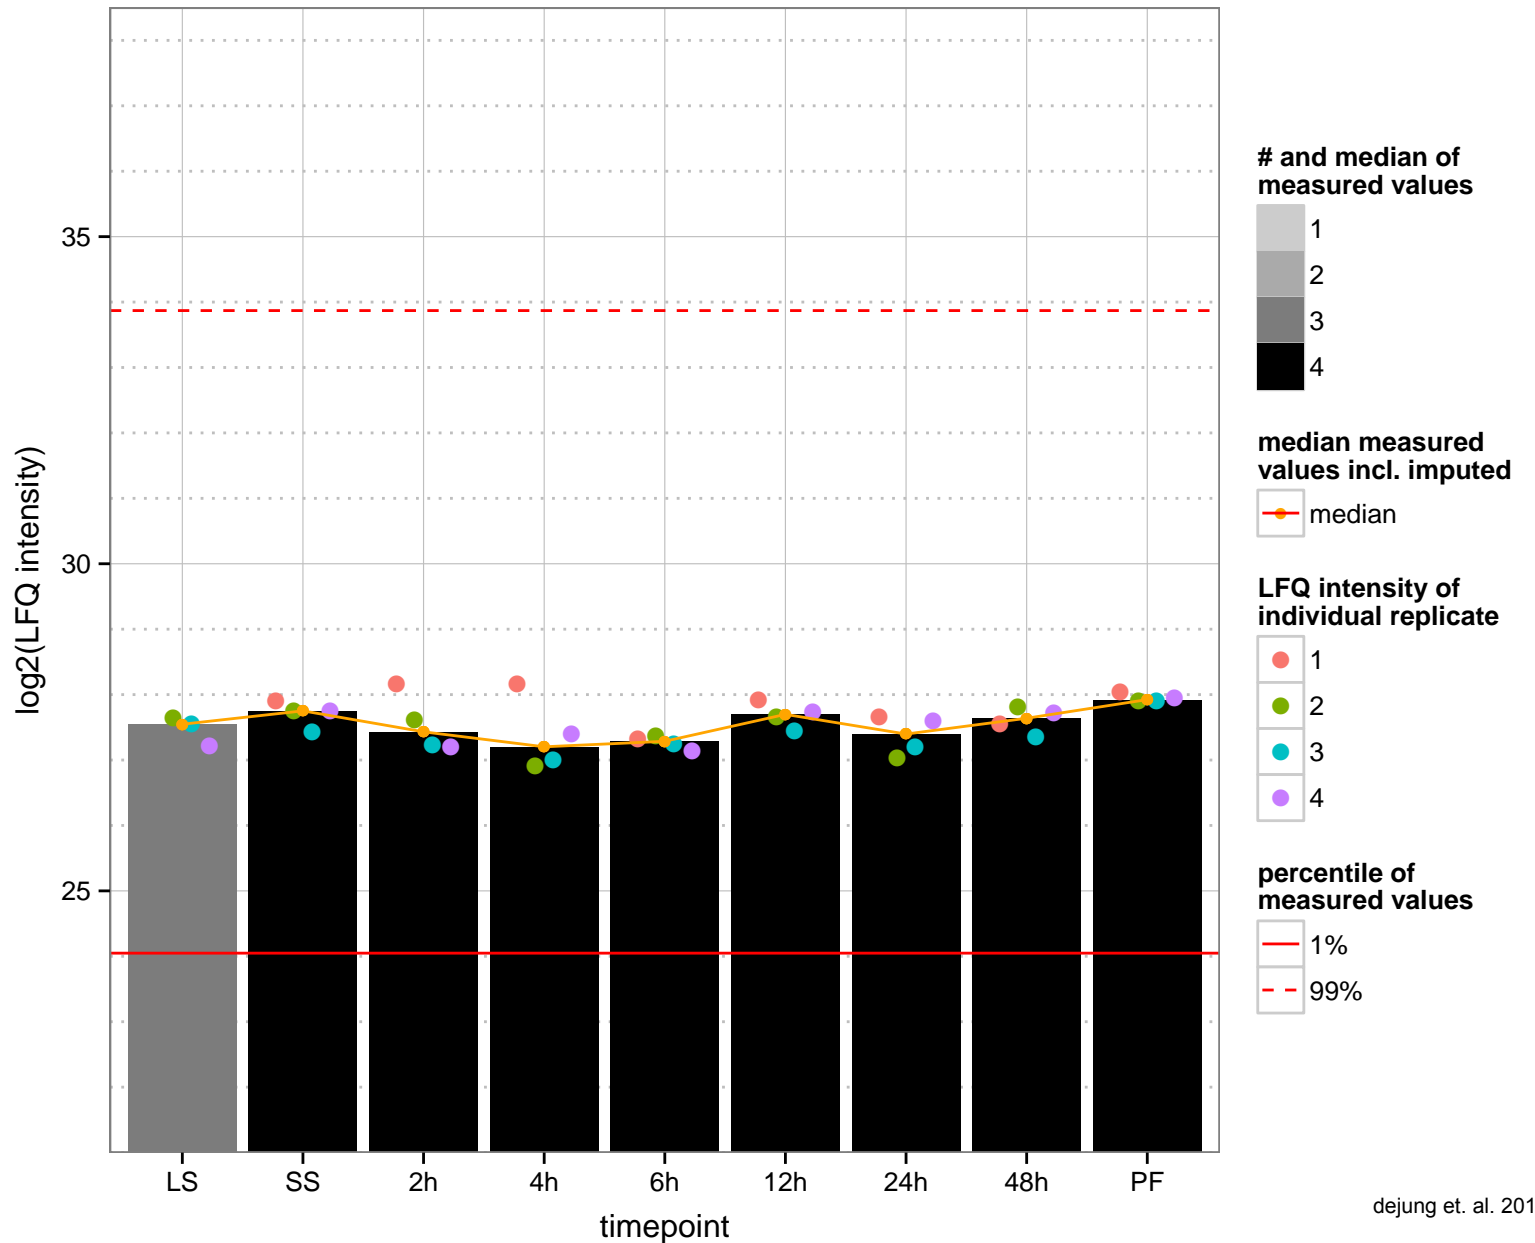

hypothetical protein, conserved  
 Tb927.10.12110  
 AGOF: null  
 AGOC: null  
 AGOP: null  
 PGOF: null  
 PGO: null  
 PGOP: null

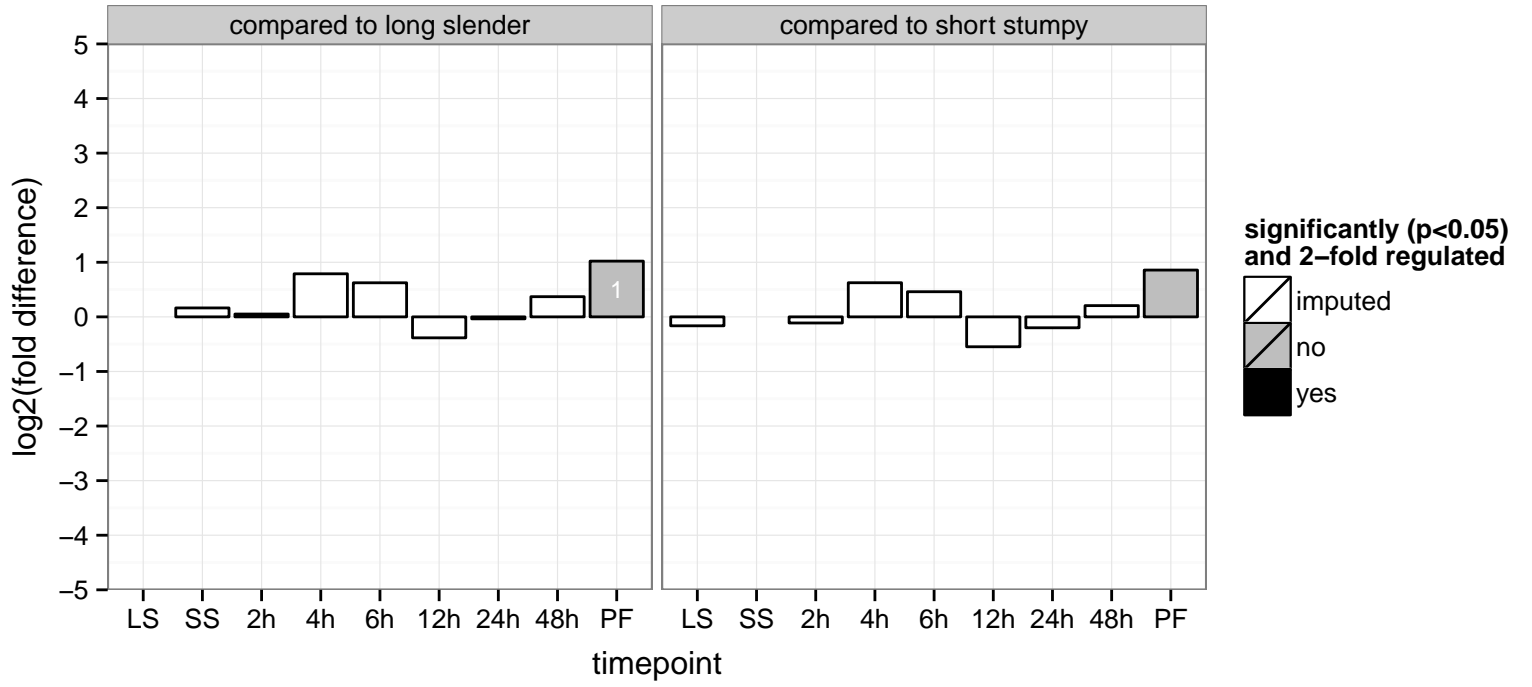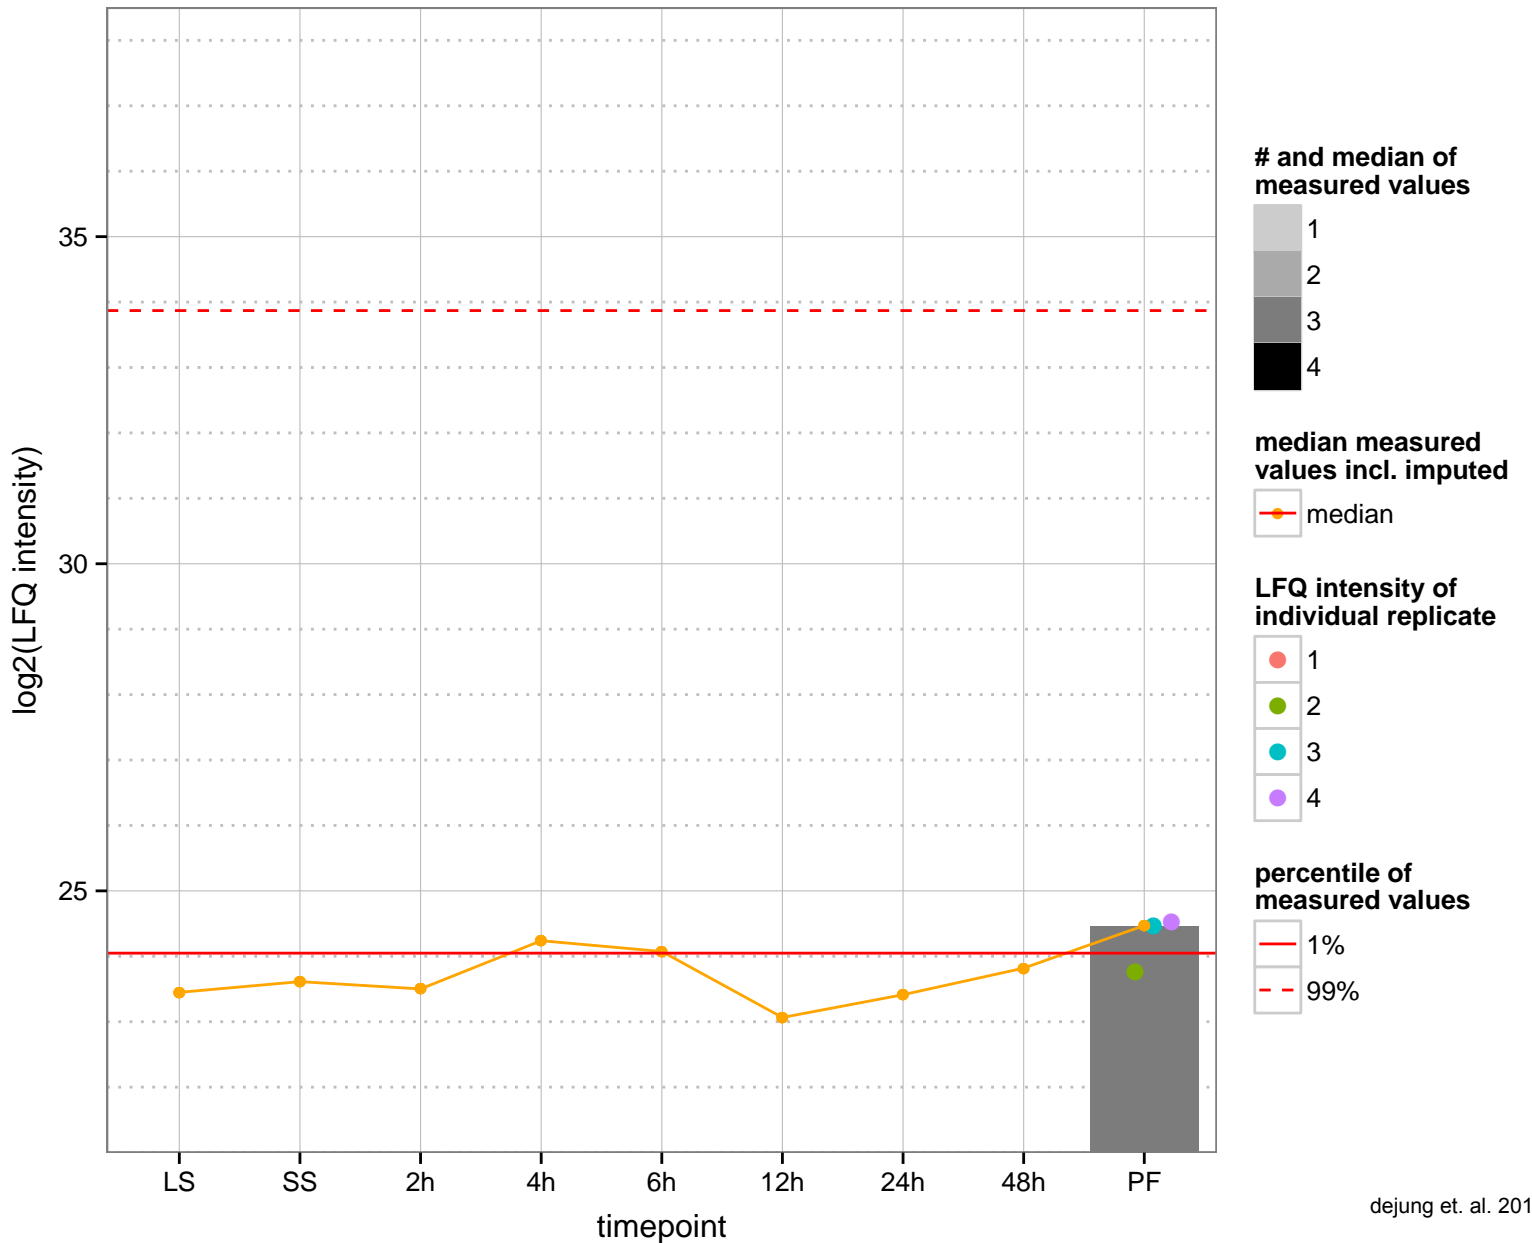

RAB-interacting protein, putative  
 Tb927.10.12190  
 AGOF: Rab GTPase binding  
 AGOC: null  
 AGOP: null  
 PGO: null  
 PGO: null  
 PGO: null

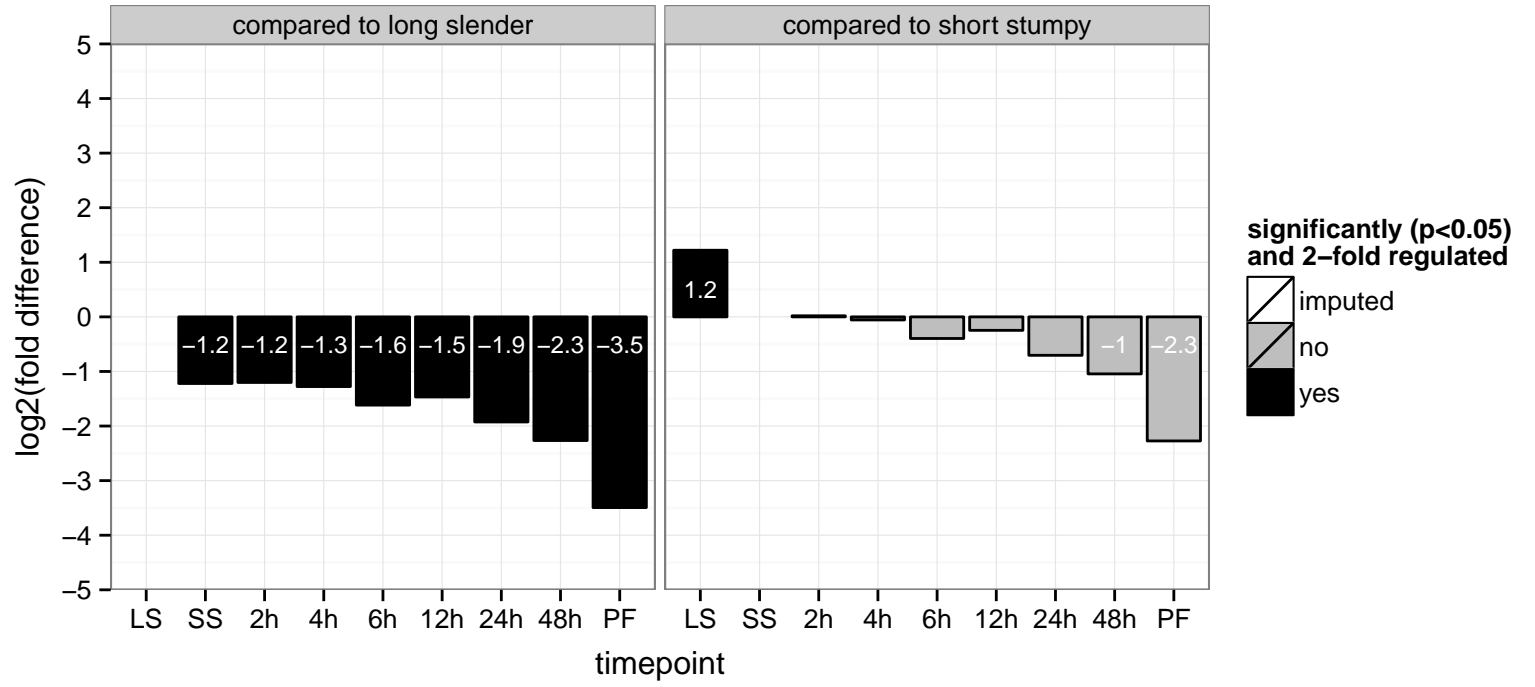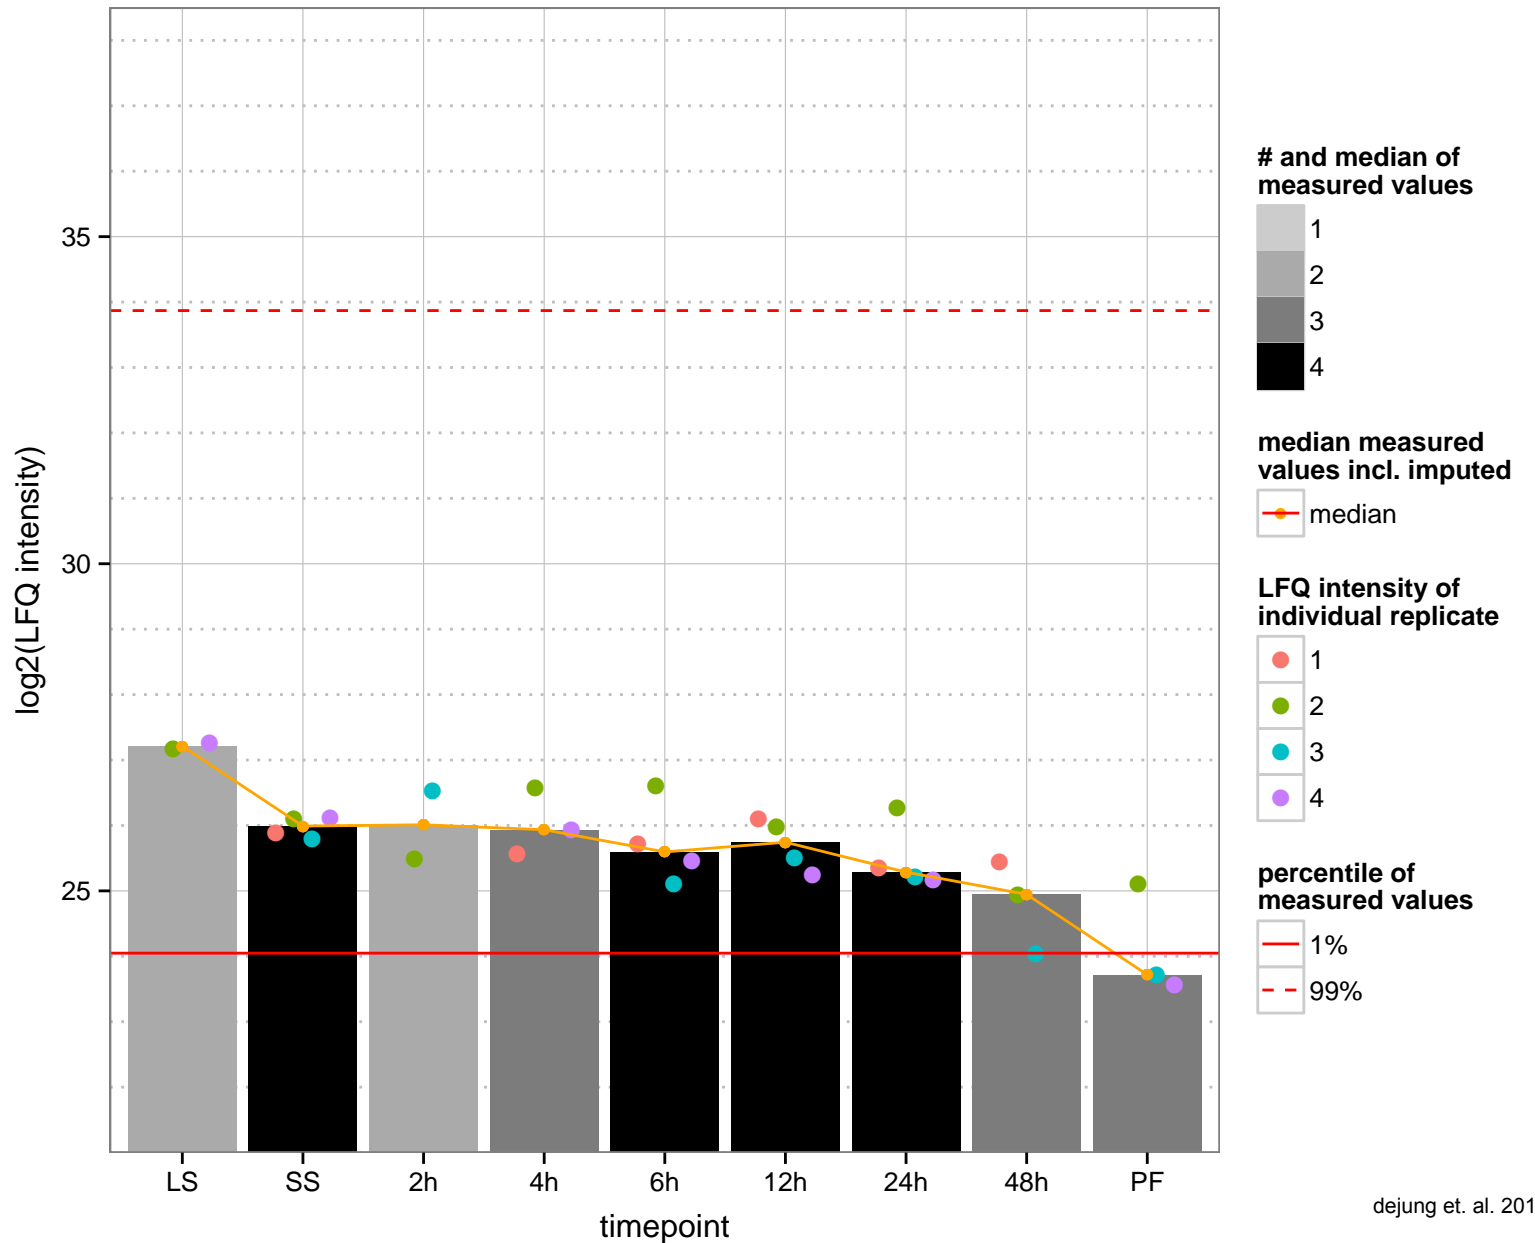

hypothetical protein, conserved  
 Tb927.10.12360  
 AGOF: null  
 AGOC: null  
 AGOP: null  
 PGO: null  
 PGOC: null  
 PGOP: null

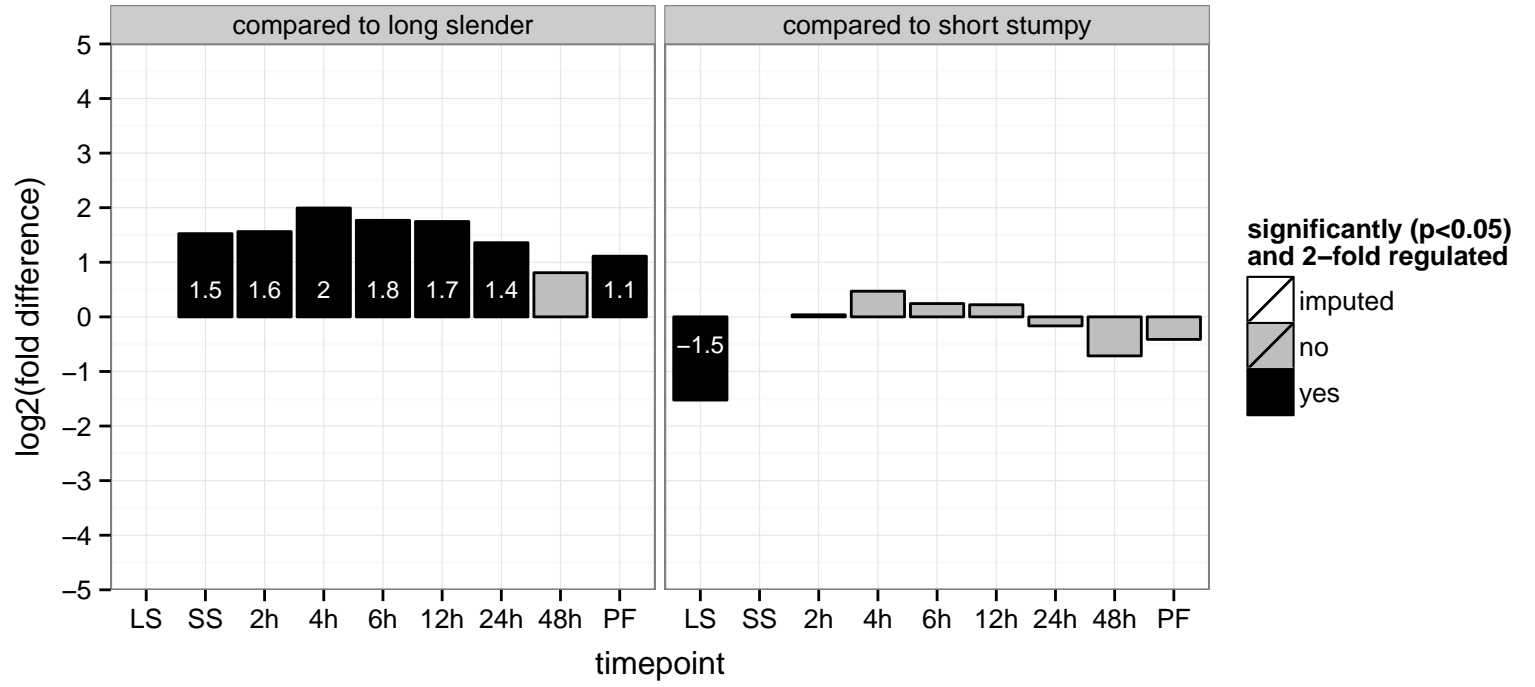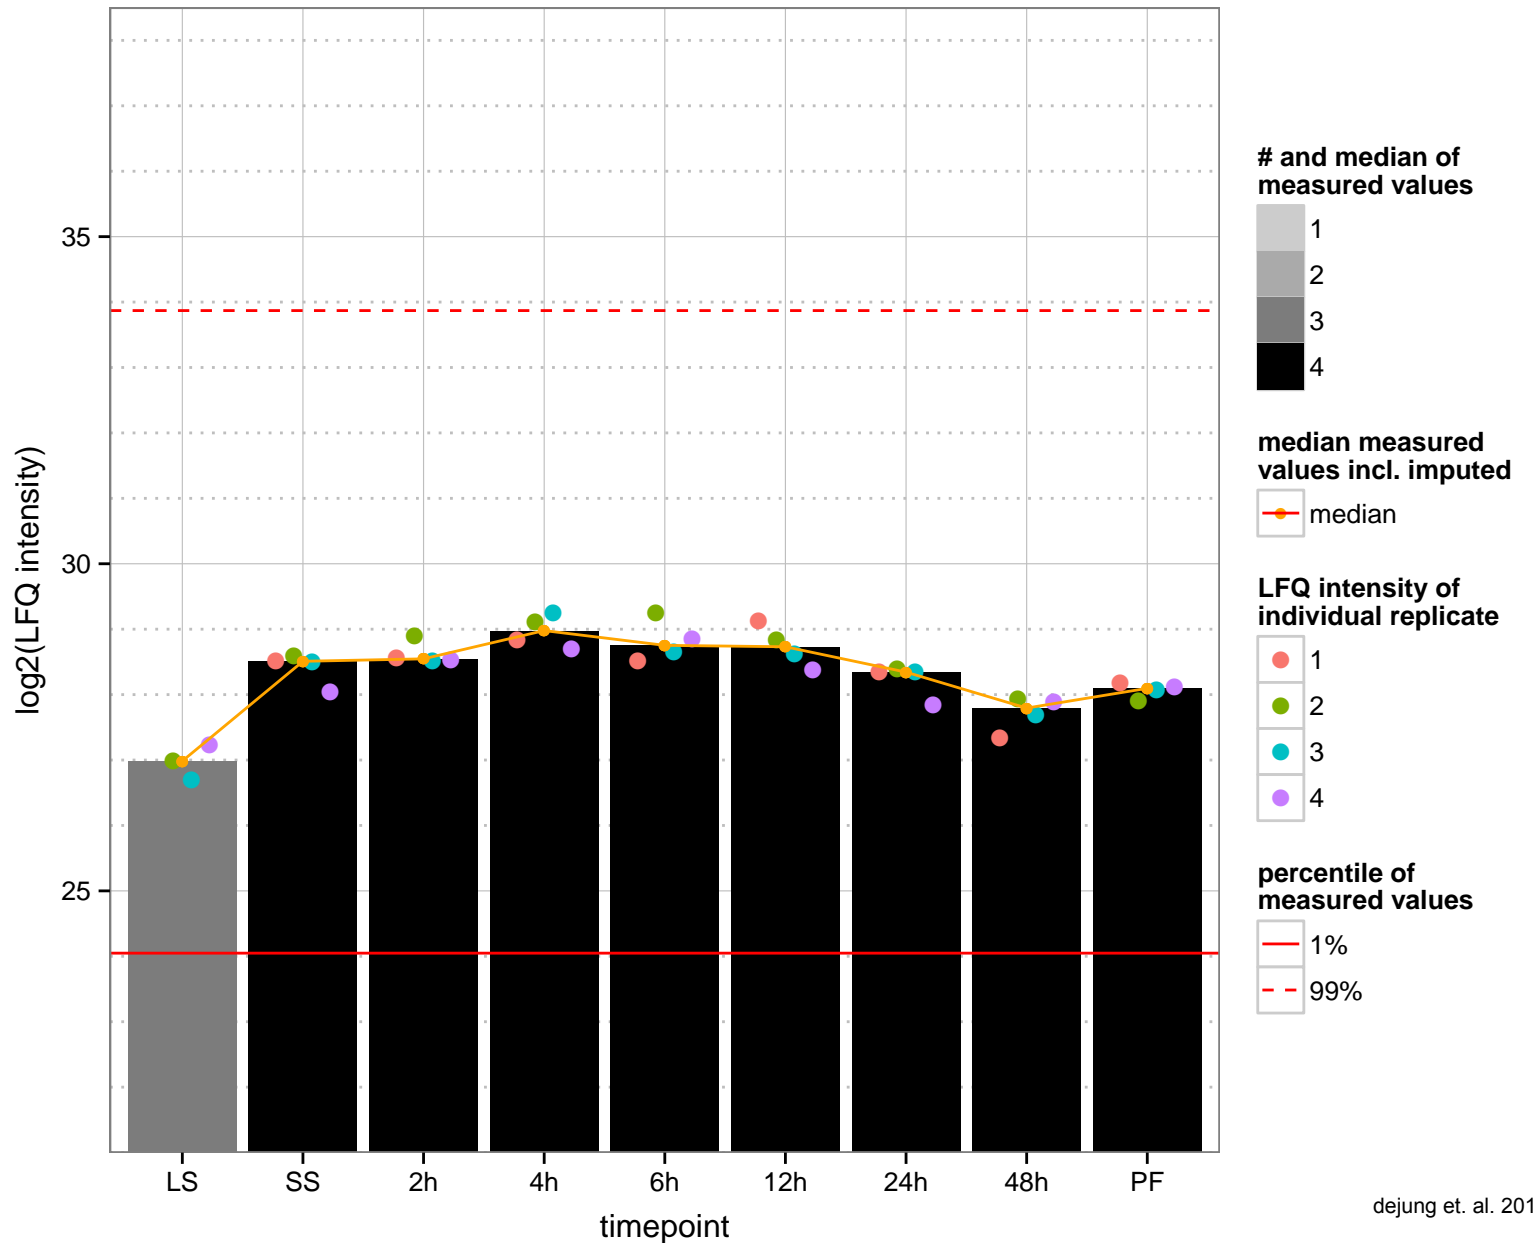

hypothetical protein, conserved  
 Tb927.10.12410  
 AGOF: null  
 AGOC: null  
 AGOP: null  
 PGO: null  
 PGOC: null  
 PGOP: null

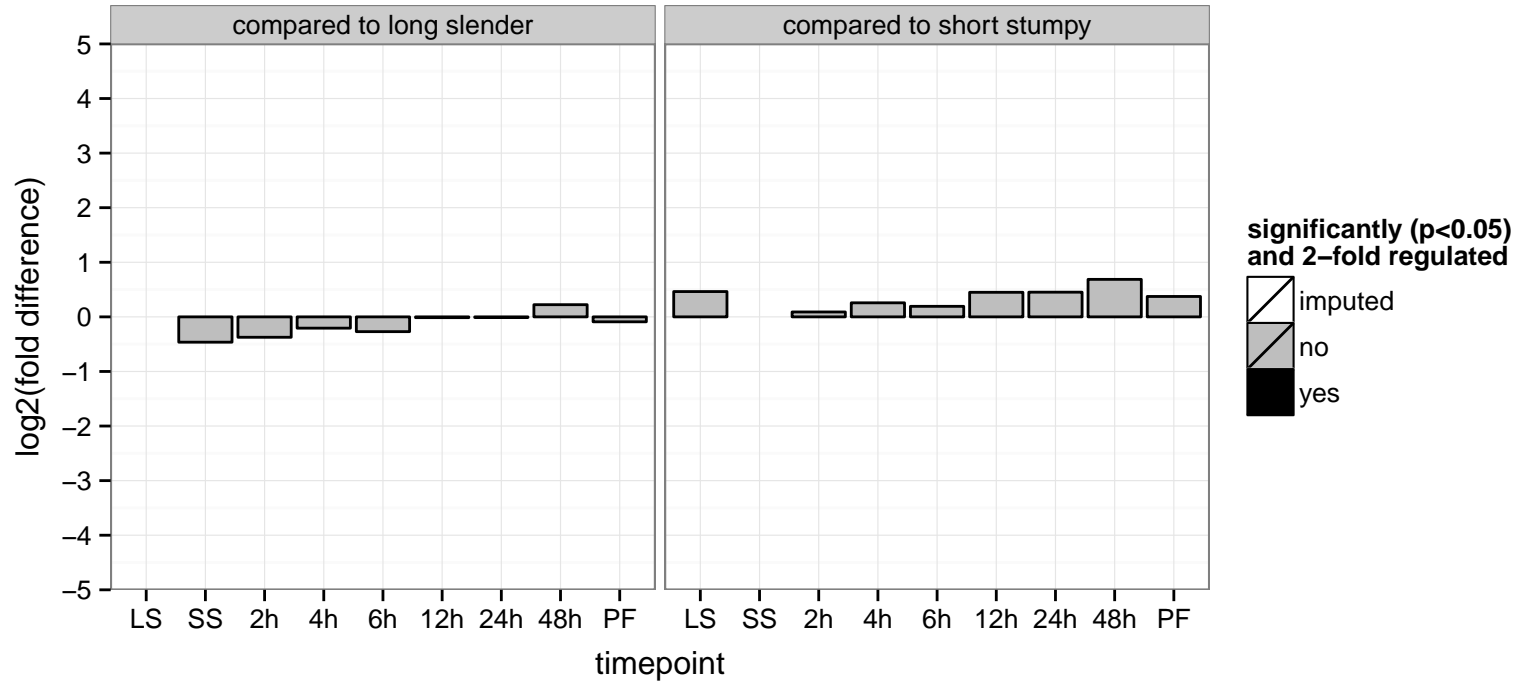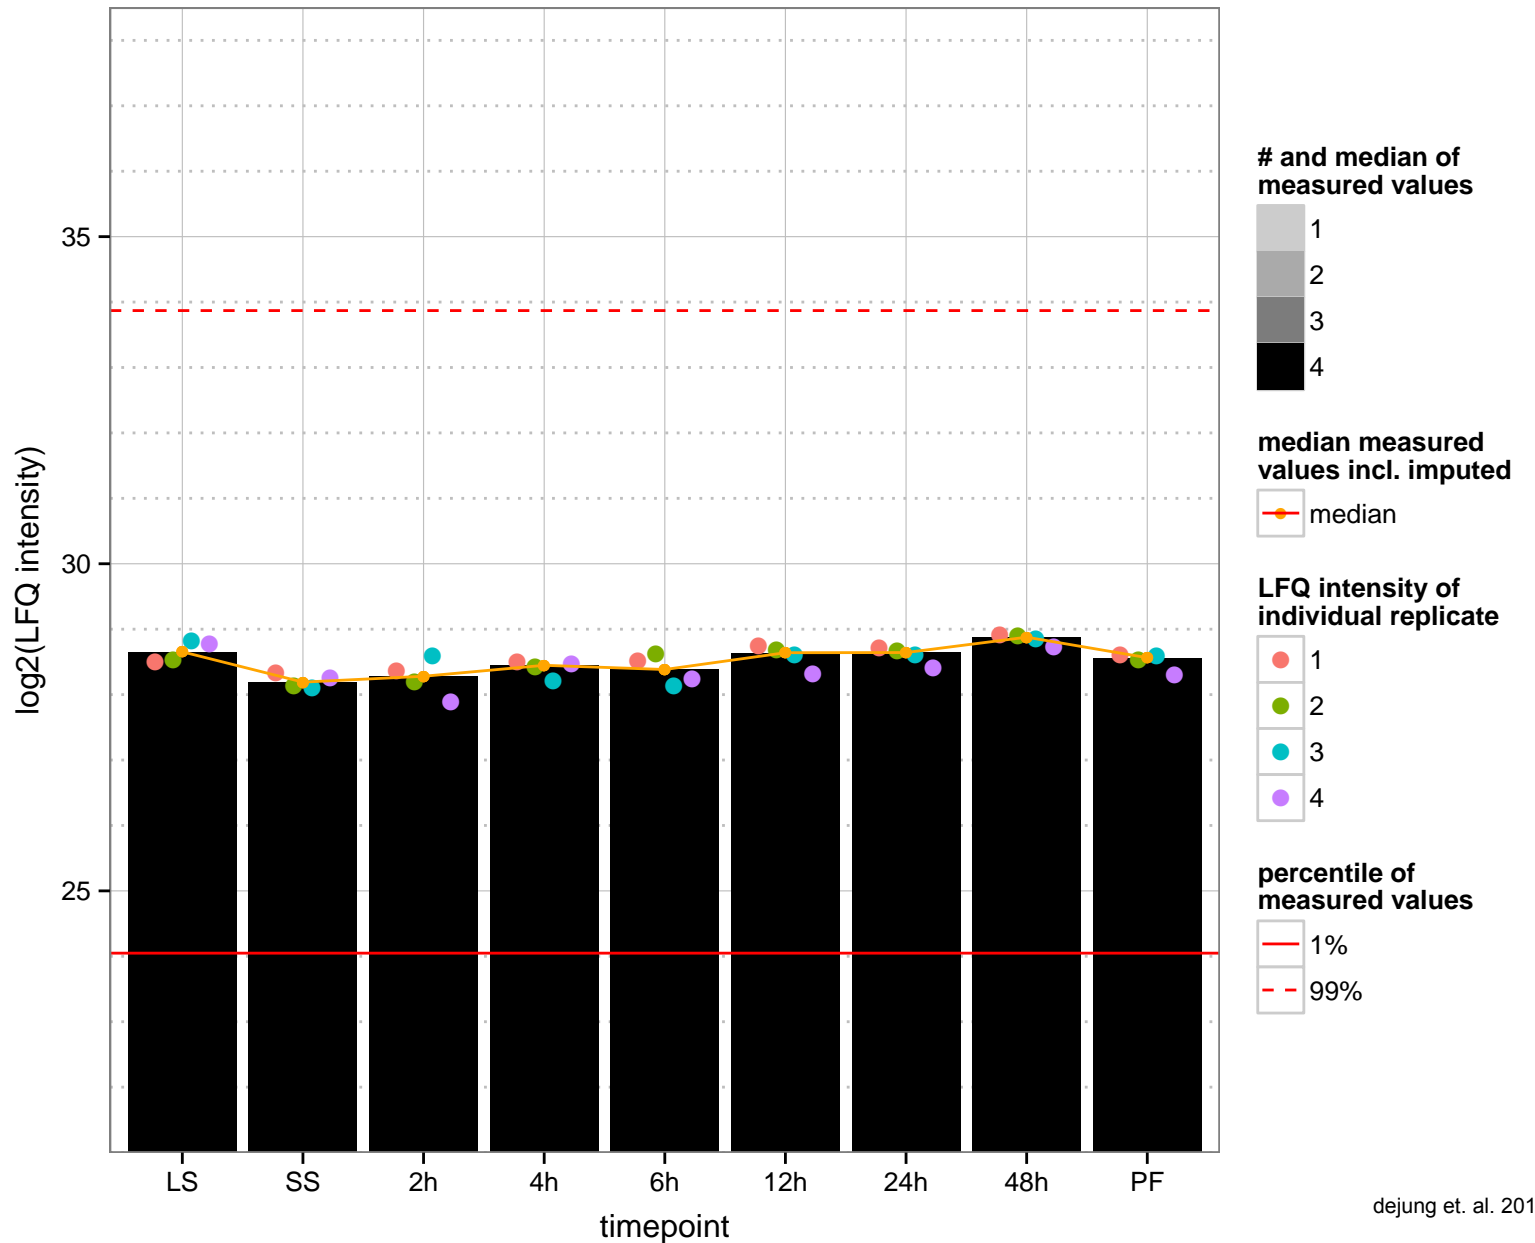

predicted *S. cerevisiae* Got1 homologue  
 Tb927.10.12420  
 AGOF: null  
 AGOC: null  
 AGOP: vesicle-mediated transport  
 PGO: null  
 PGOC: null  
 PGOP: vesicle-mediated transport

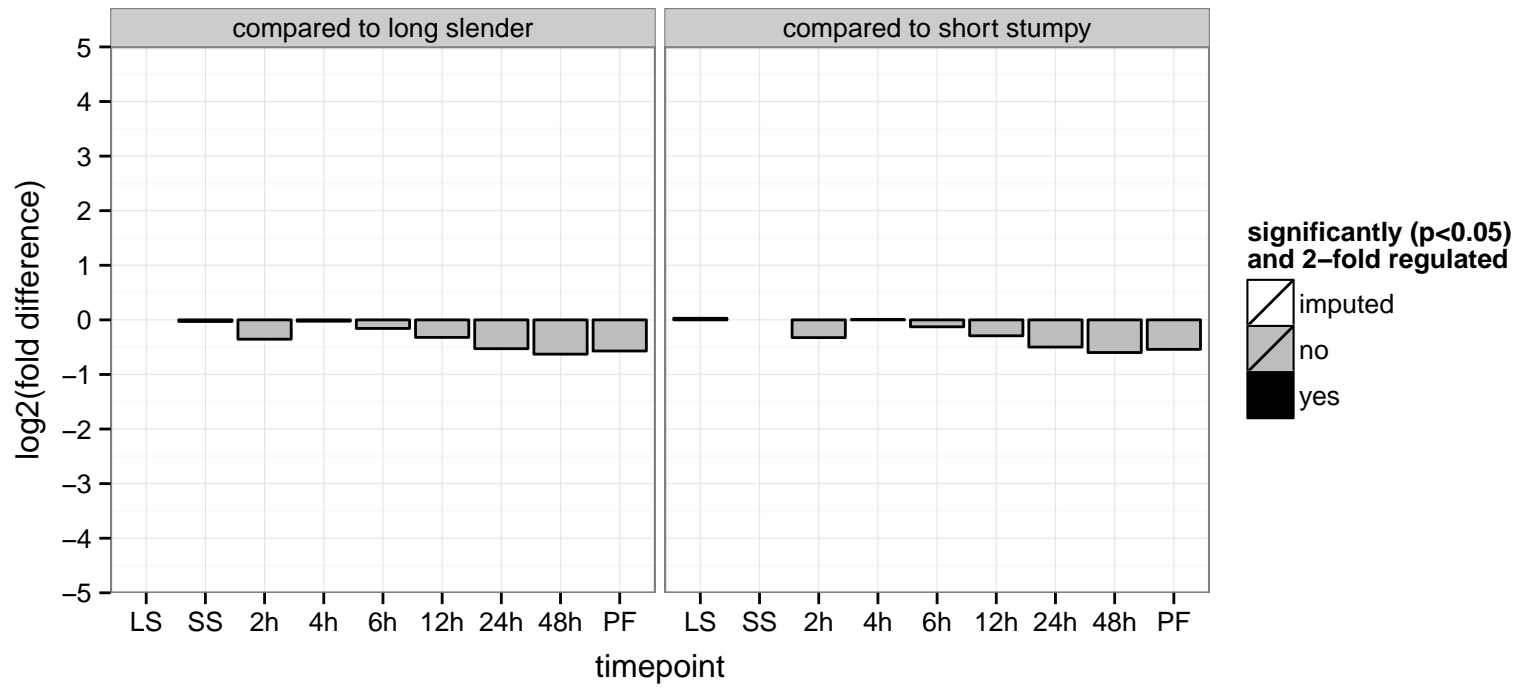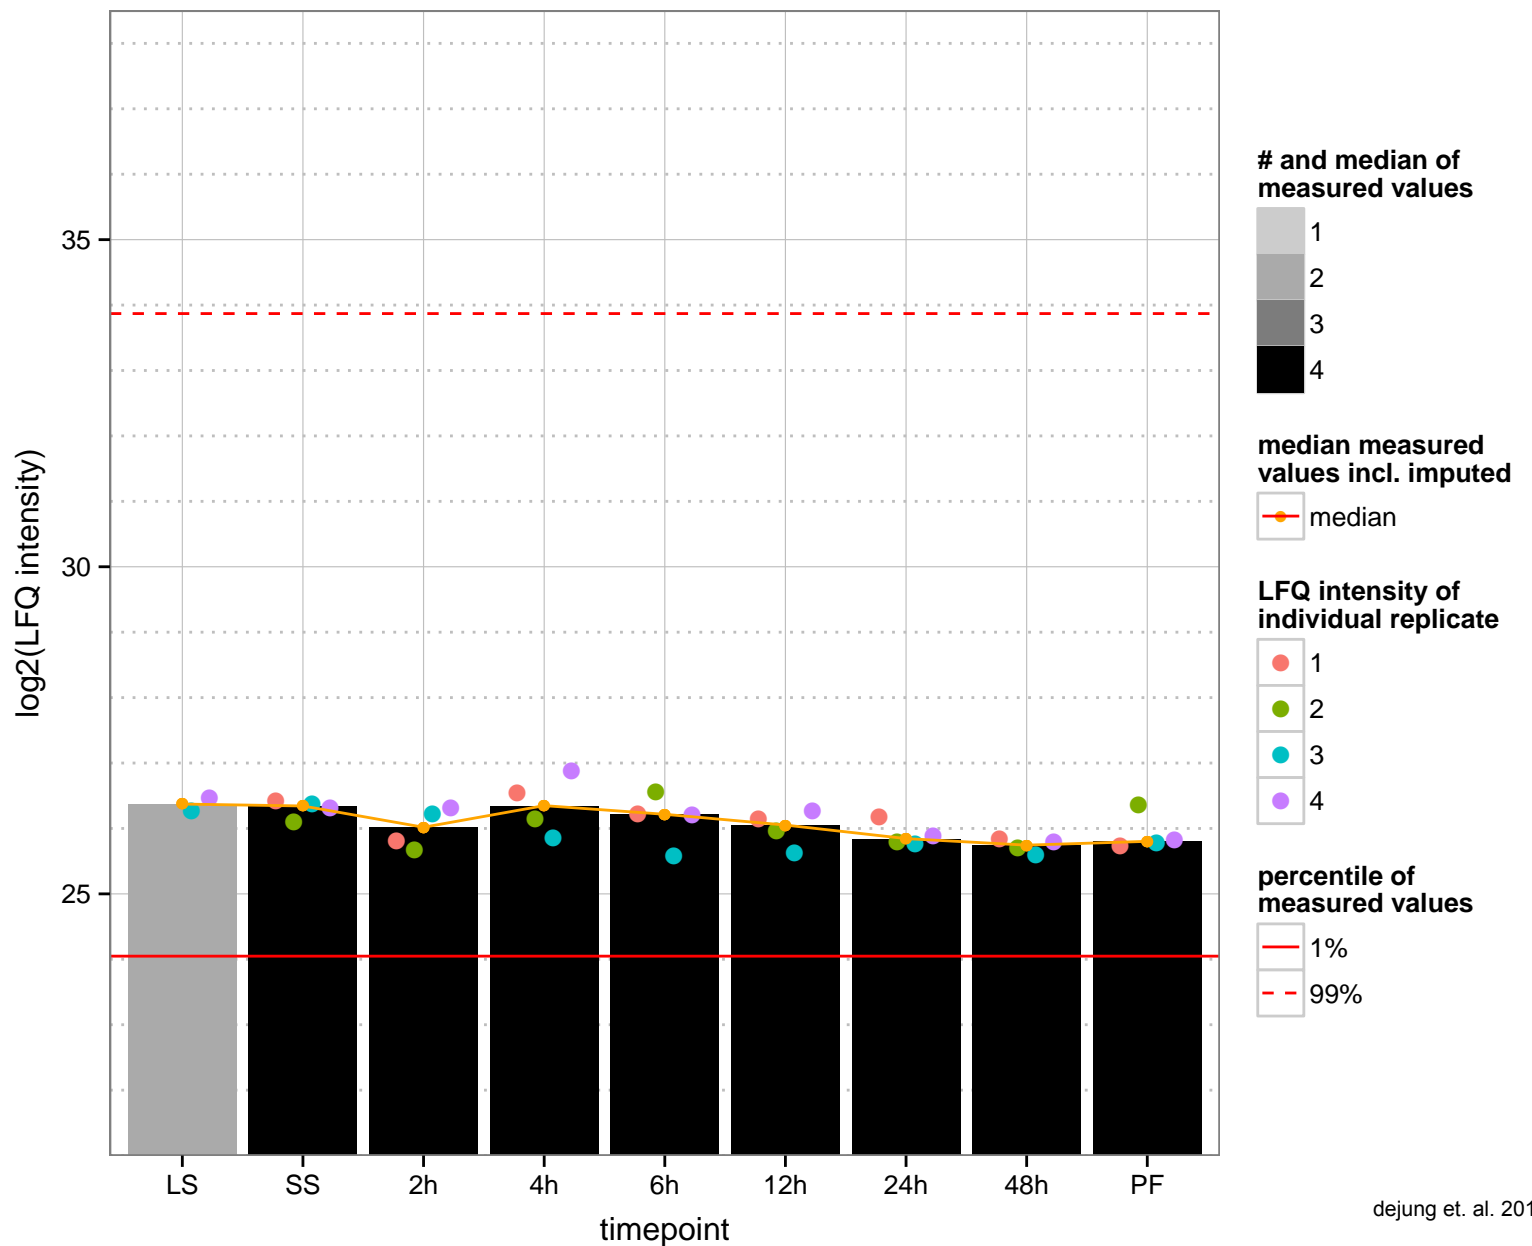



hypothetical protein, conserved  
 Tb927.10.12430  
 AGOF: null  
 AGOC: null  
 AGOP: null  
 PGOF: binding  
 PGO: null  
 PGOP: null

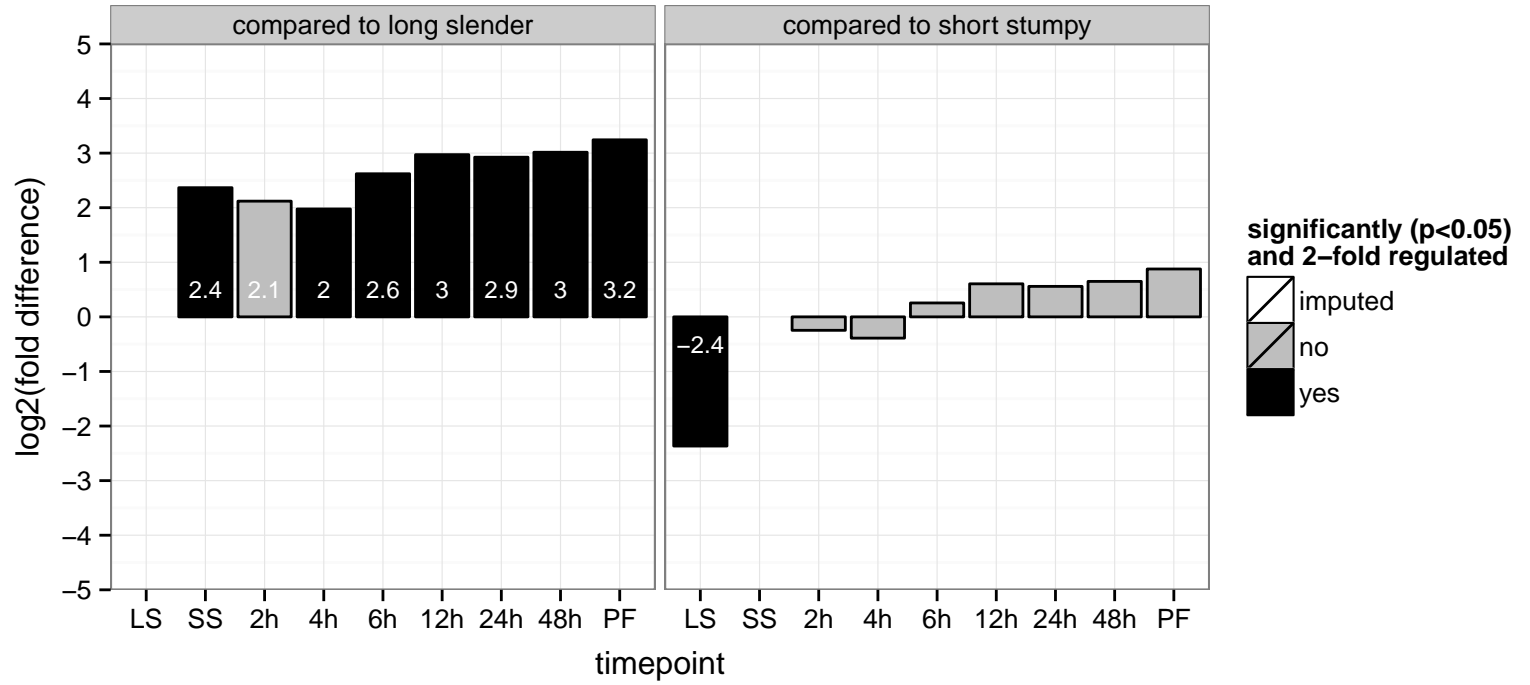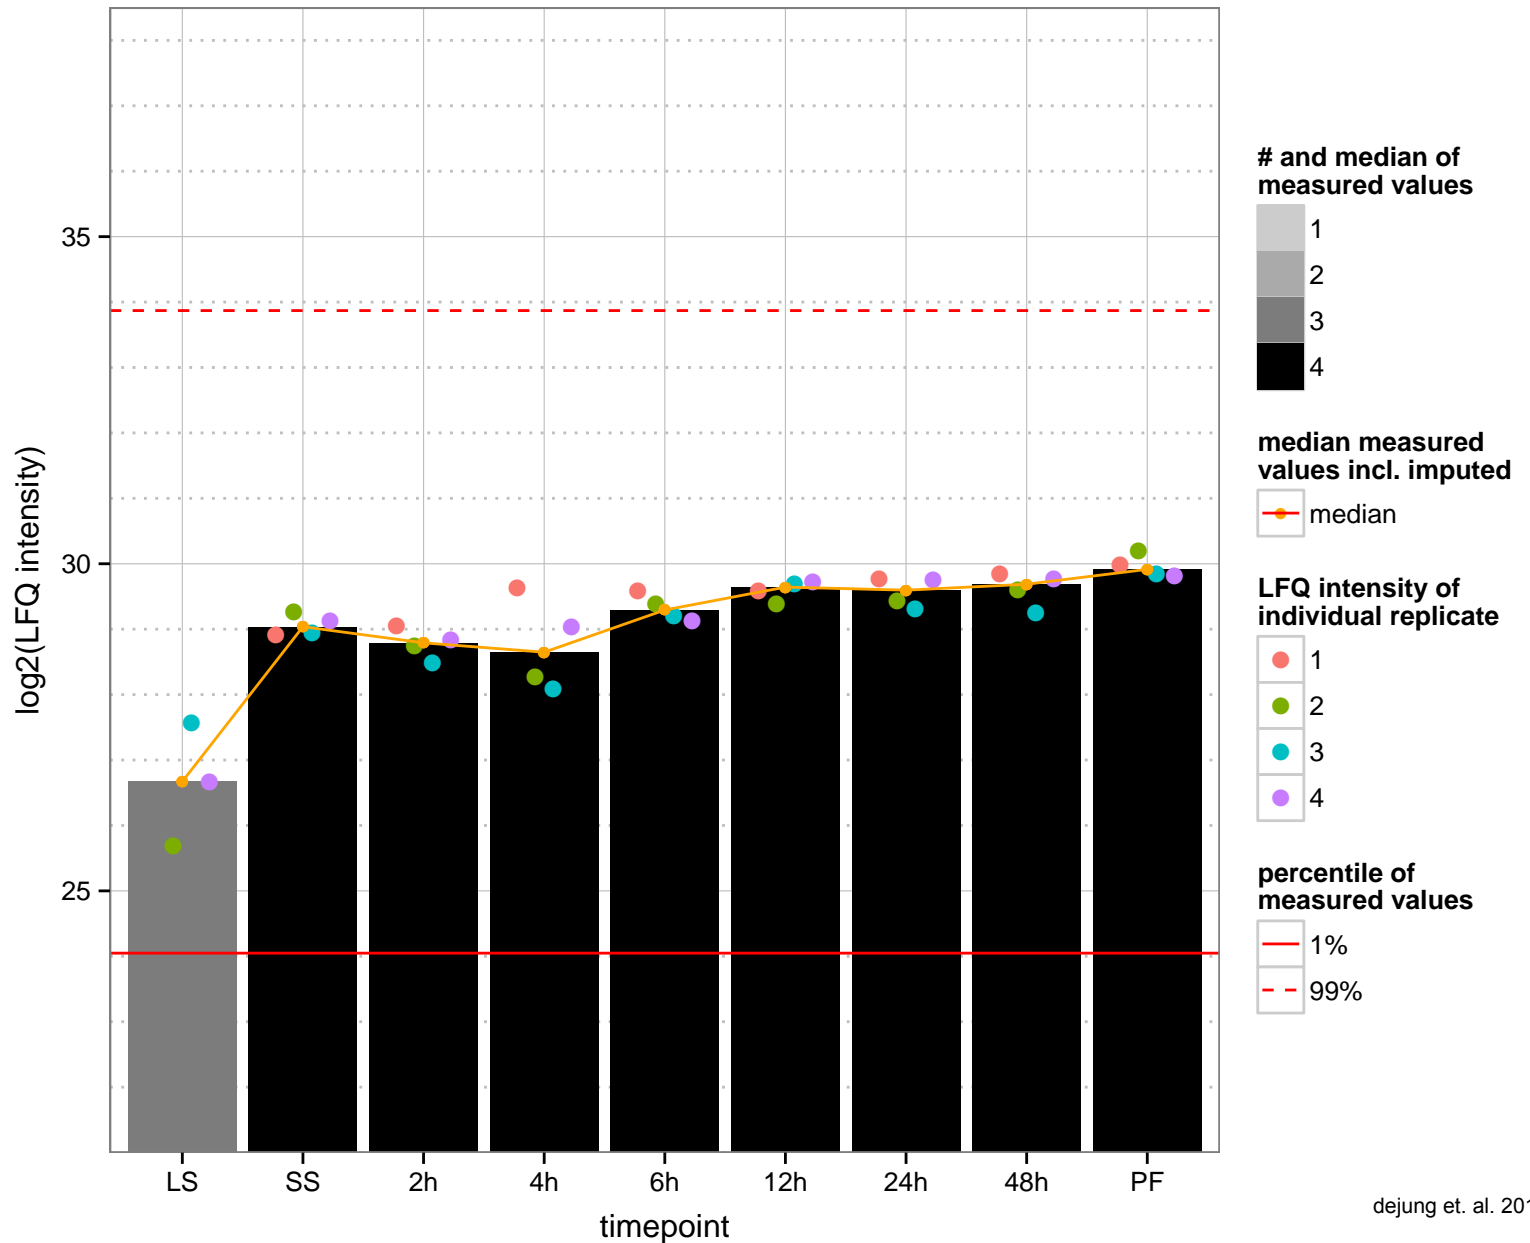

P-type H<sup>+</sup>-ATPase, putative

Tb927.10.12500

AGOF: ATP binding, ATPase activity, coupled to transmembrane movement of ions, phosphorylative mechanism

AGOC: integral to membrane, plasma membrane

AGOP: ATP biosynthetic process, metabolic process, proton transport

PGOF: ATP binding, ATPase activity, coupled to transmembrane movement of ions, phosphorylative mechanism, catalytic activity

PGOC: integral to membrane, membrane

PGOP: ATP biosynthetic process, ATP catabolic process, cation transport, metabolic process

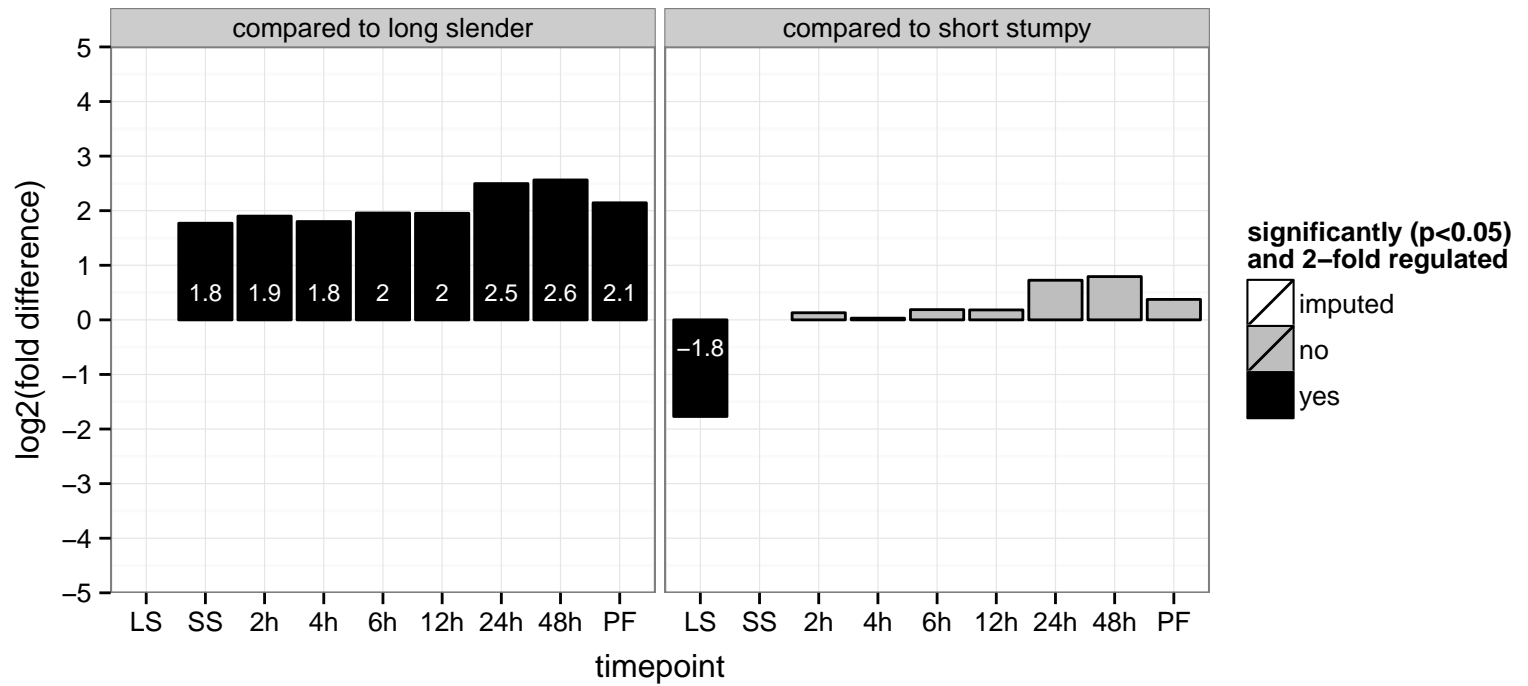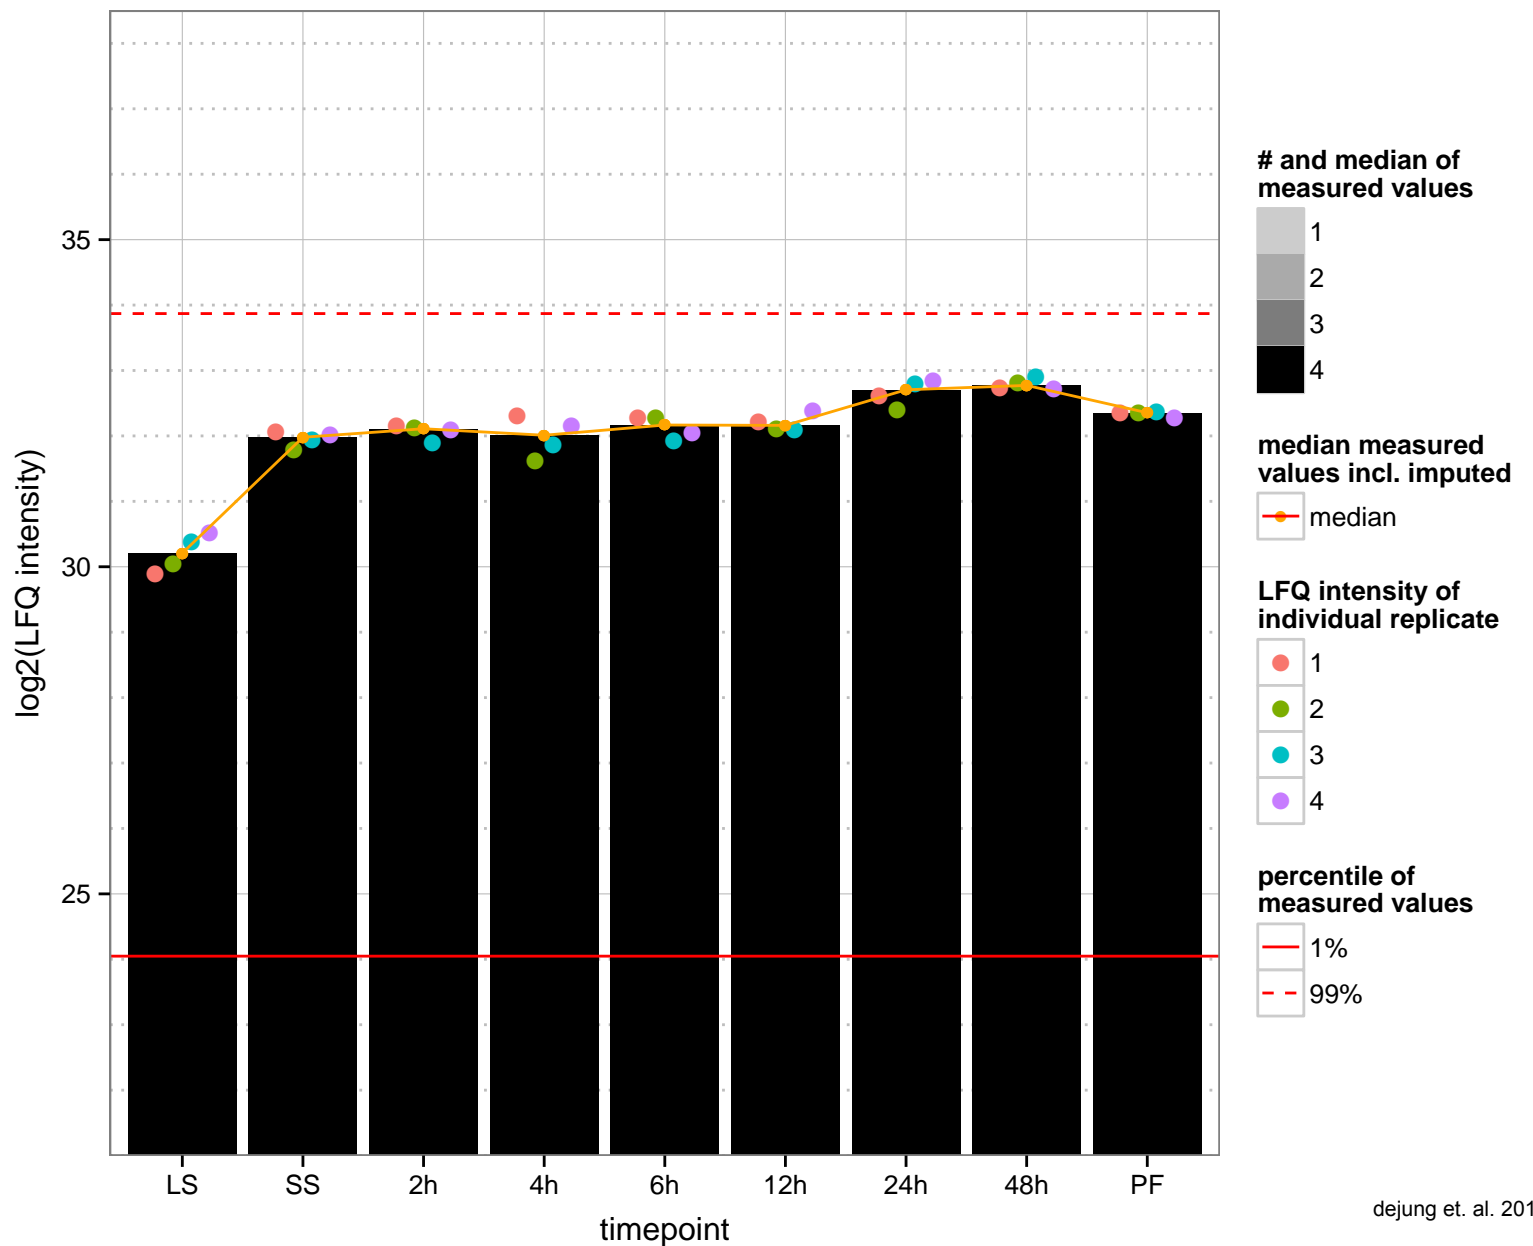

hypothetical protein, conserved  
 Tb927.10.12630  
 AGOF: calcium ion binding  
 AGOC: null  
 AGOP: null  
 PGOF: calcium ion binding  
 PGOC: null  
 PGOP: null

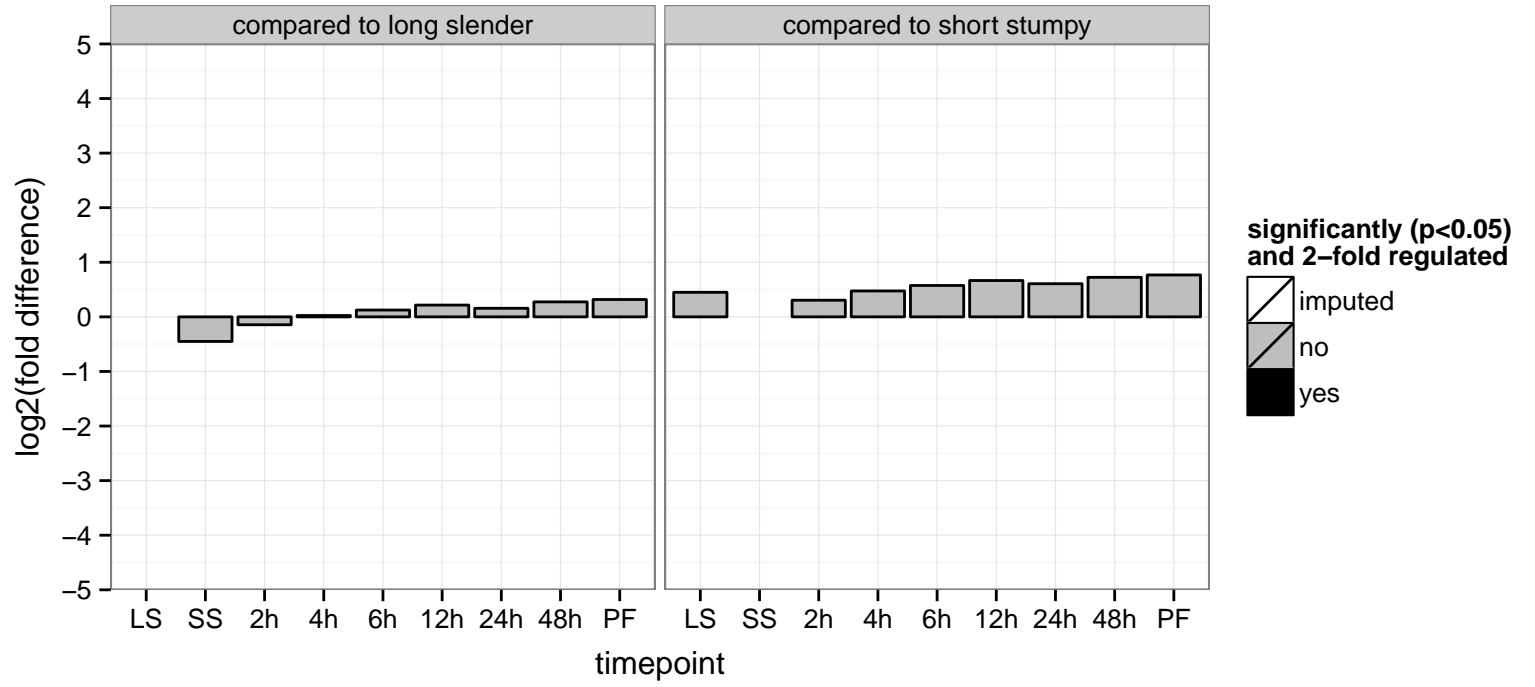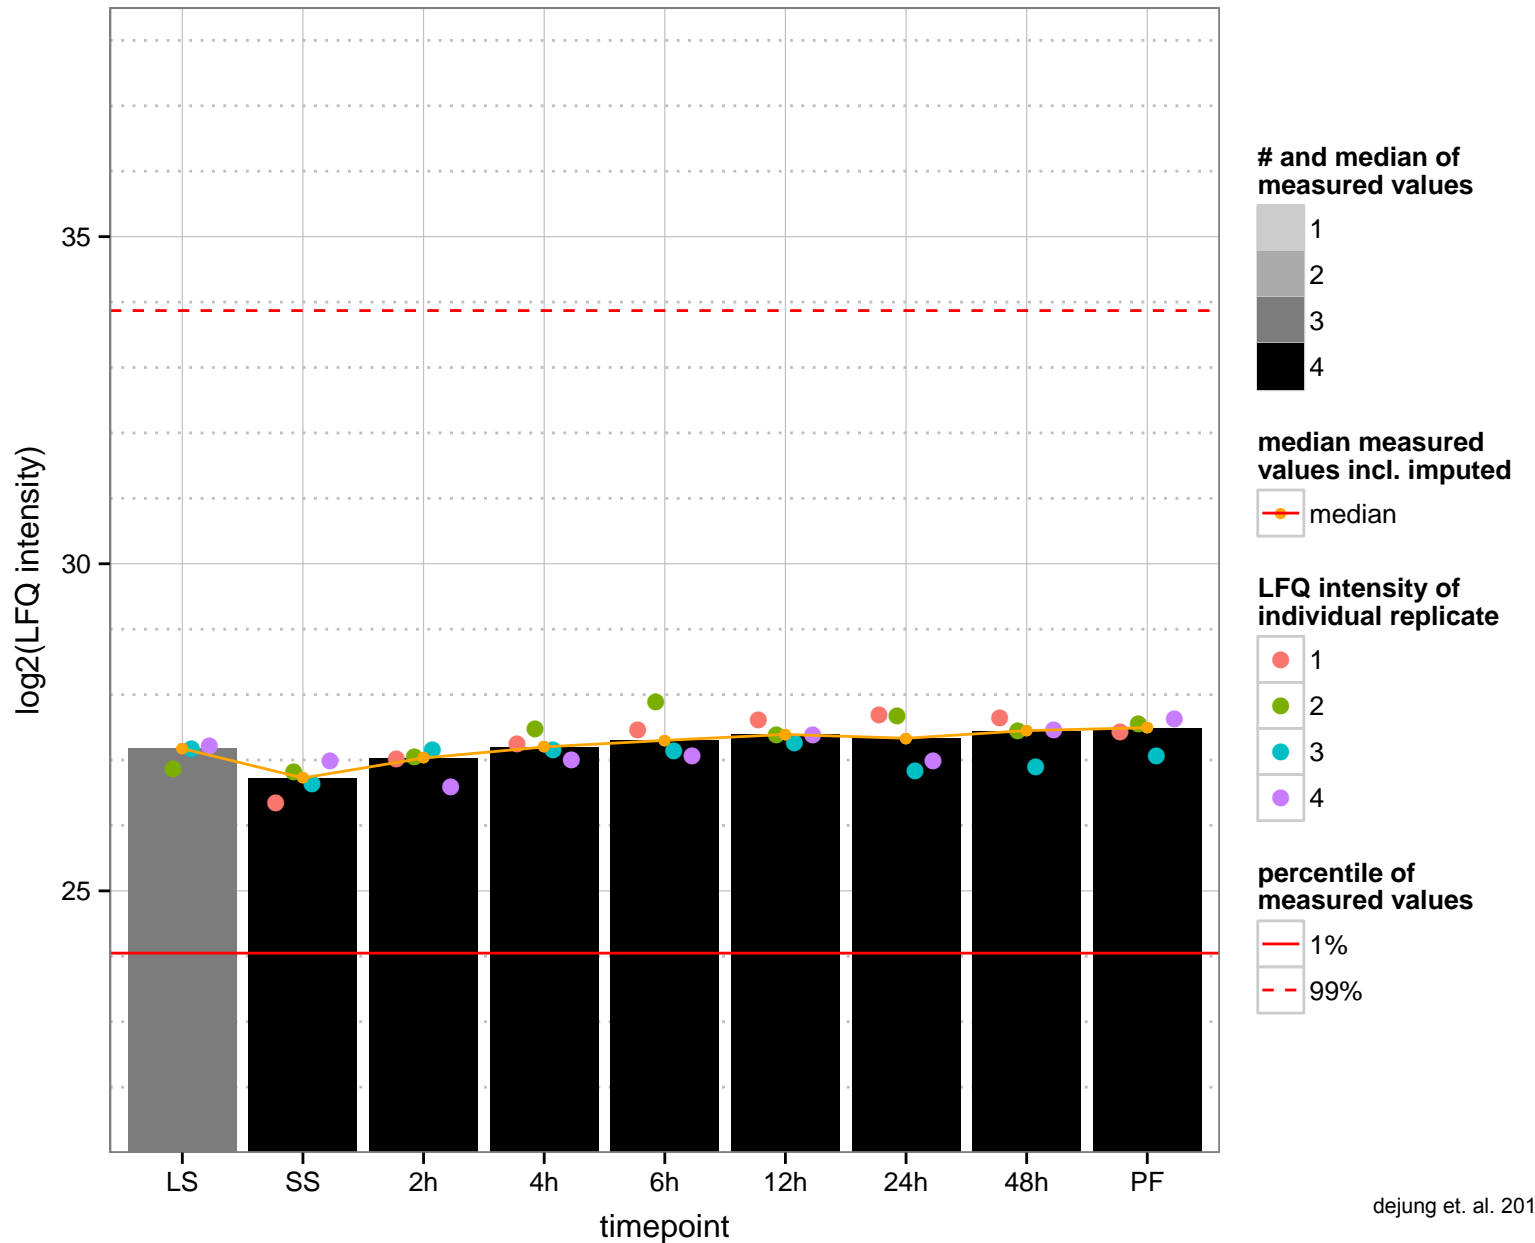

60S ribosomal protein L34, putative  
 Tb927.11.9730;Tb927.10.12680  
 AGOF: structural constituent of ribosome  
 AGOC: intracellular, ribosome  
 AGOP: translation  
 PGOF: structural constituent of ribosome  
 PGO: intracellular, ribosome  
 PGOP: translation

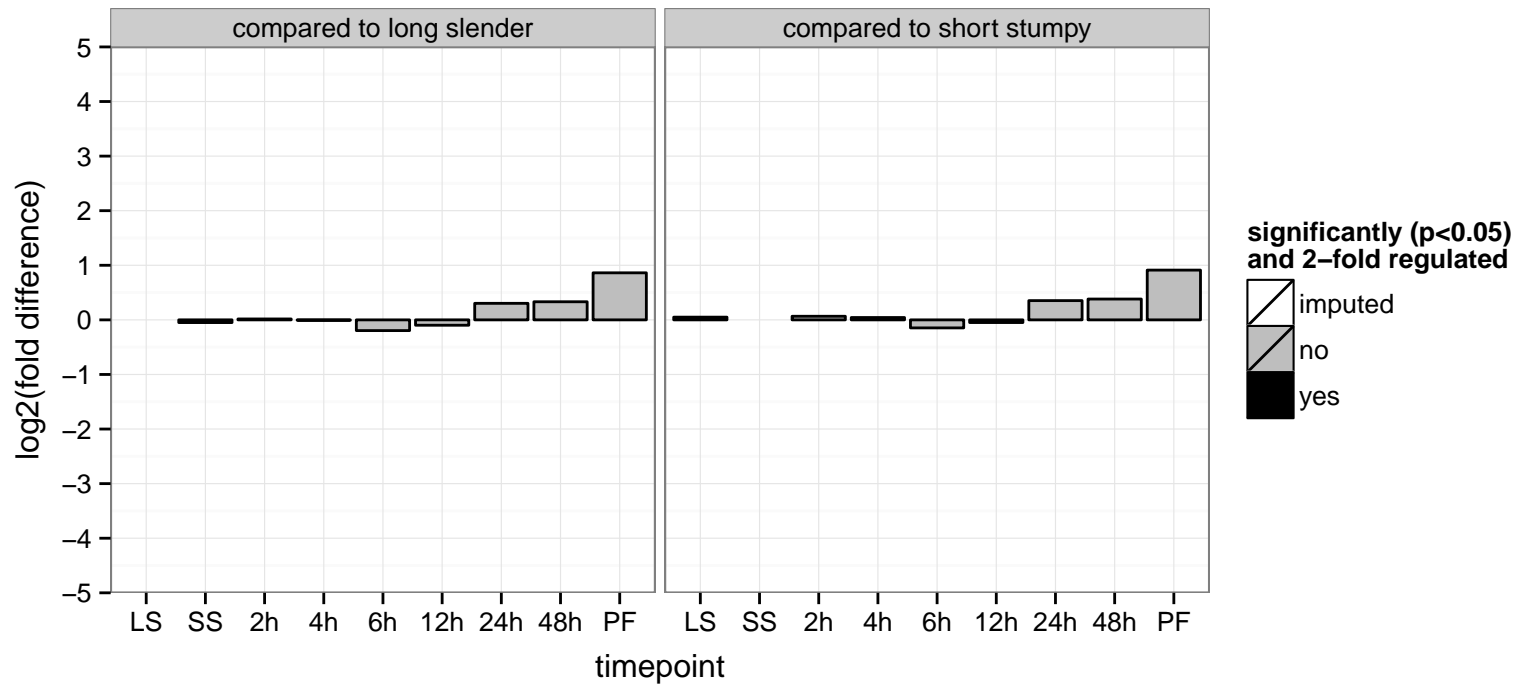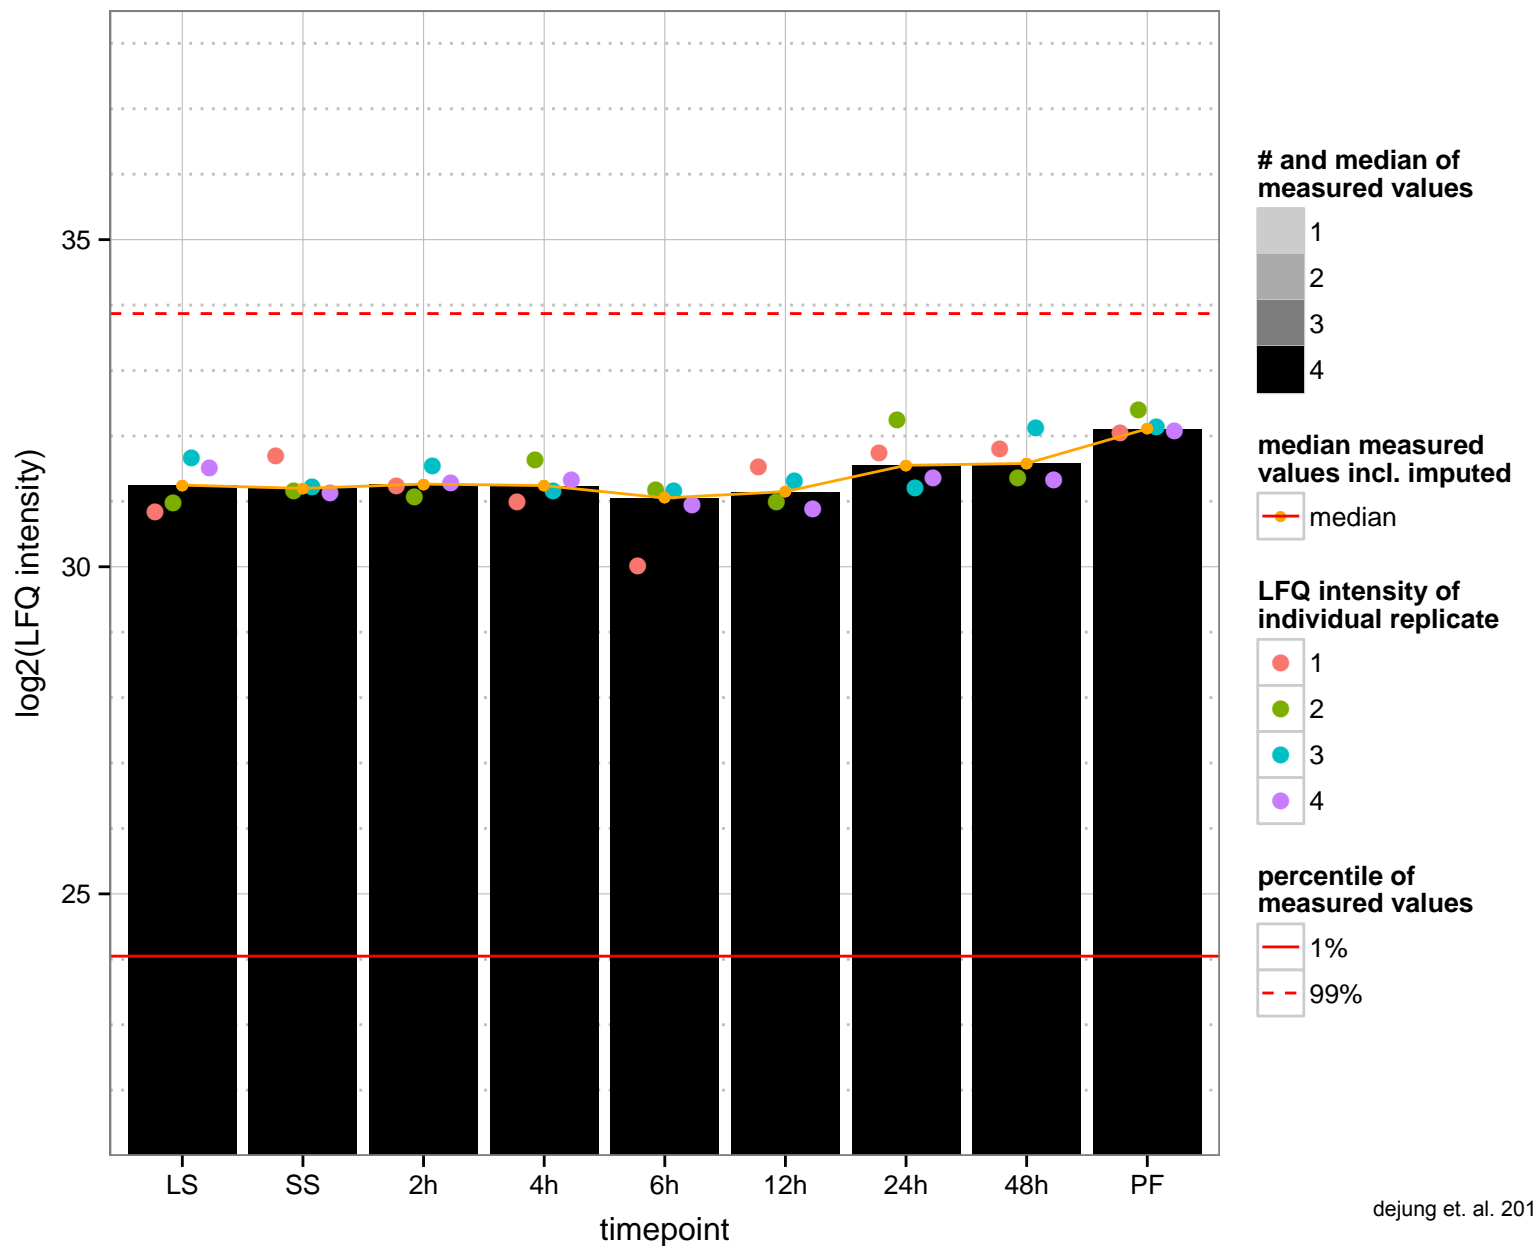

pyruvate dehydrogenase E1 alpha subunit, putative

Tb927.10.12700

AGOF: oxidoreductase activity, acting on the aldehyde or oxo group of donors, disulfide as acceptor

AGOC: mitochondrion

AGOP: null

PGOF: oxidoreductase activity, acting on the aldehyde or oxo group of donors, disulfide as acceptor

PGOC: null

PGOP: metabolic process

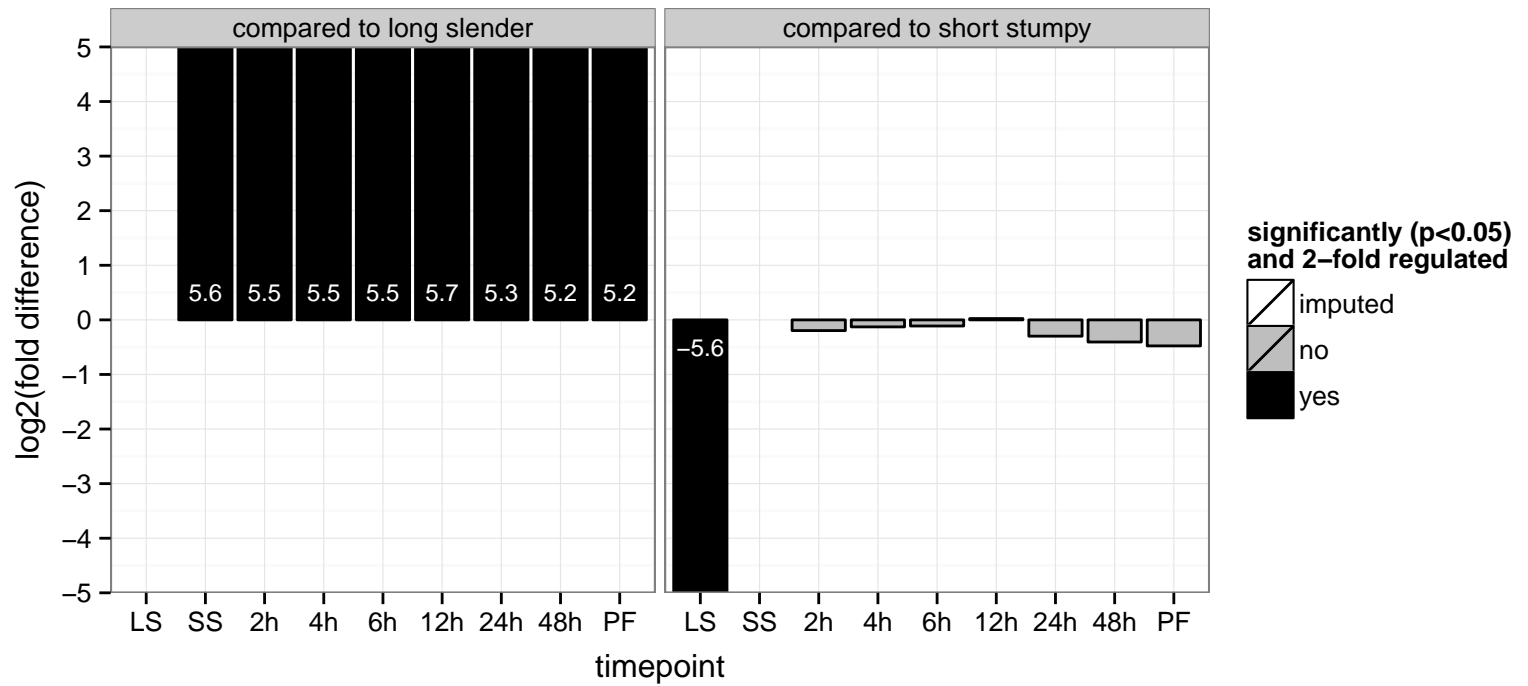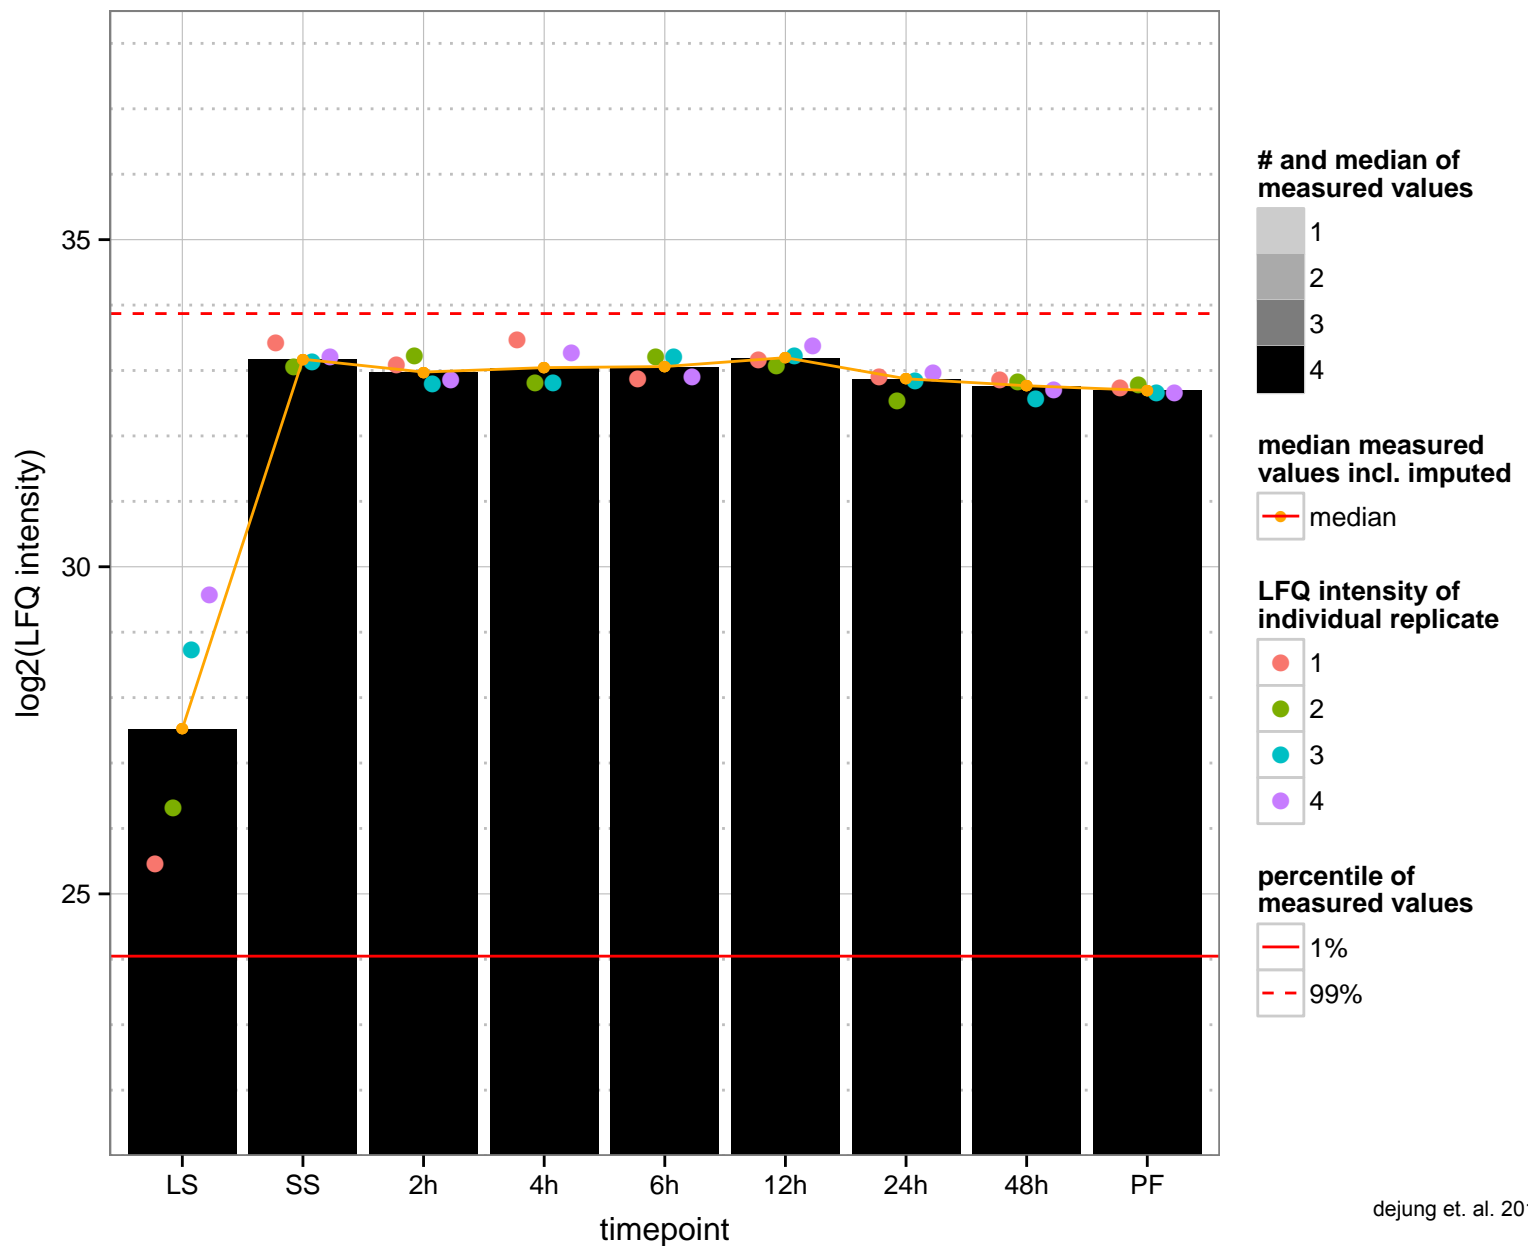

heat shock protein 110, putative  
 Tb927.10.12710  
 AGOF: ATP binding  
 AGOC: null  
 AGOP: null  
 PGO: null  
 PGOC: null  
 PGOP: null

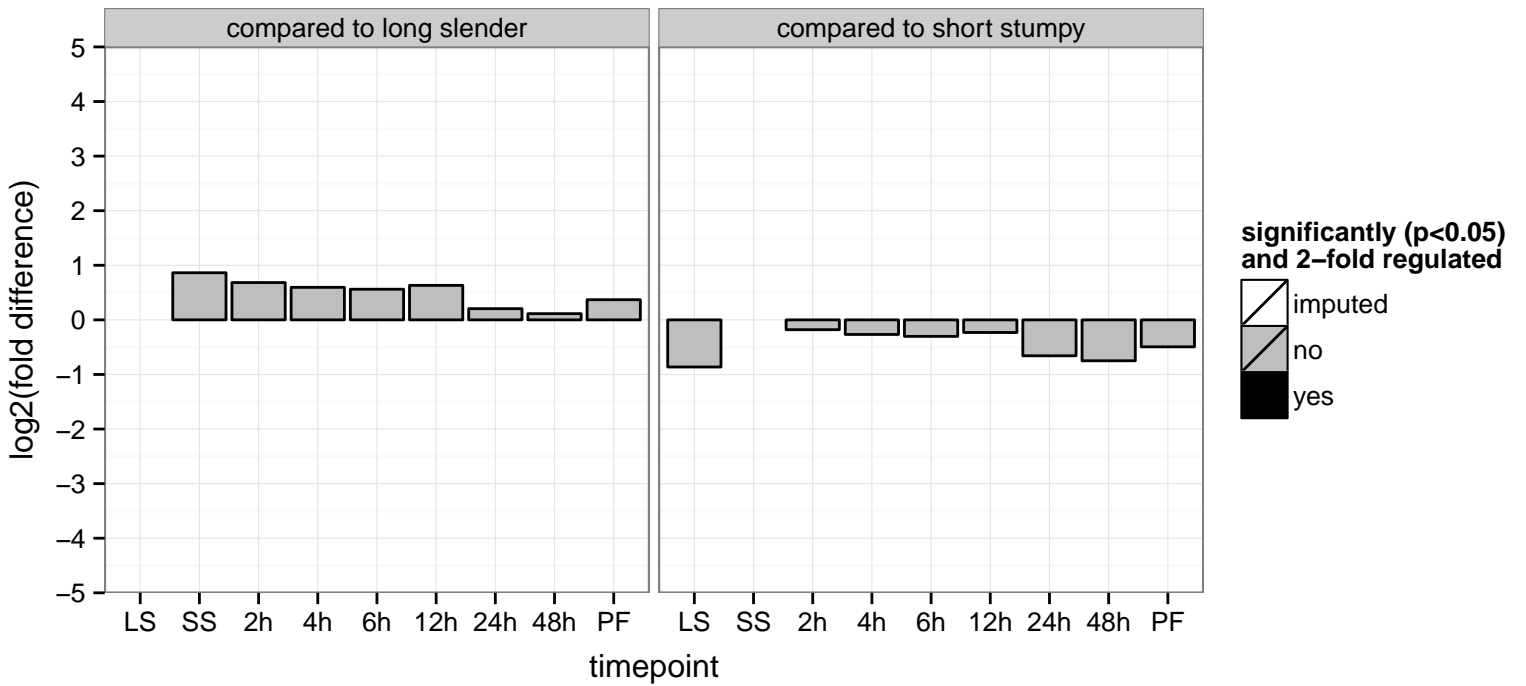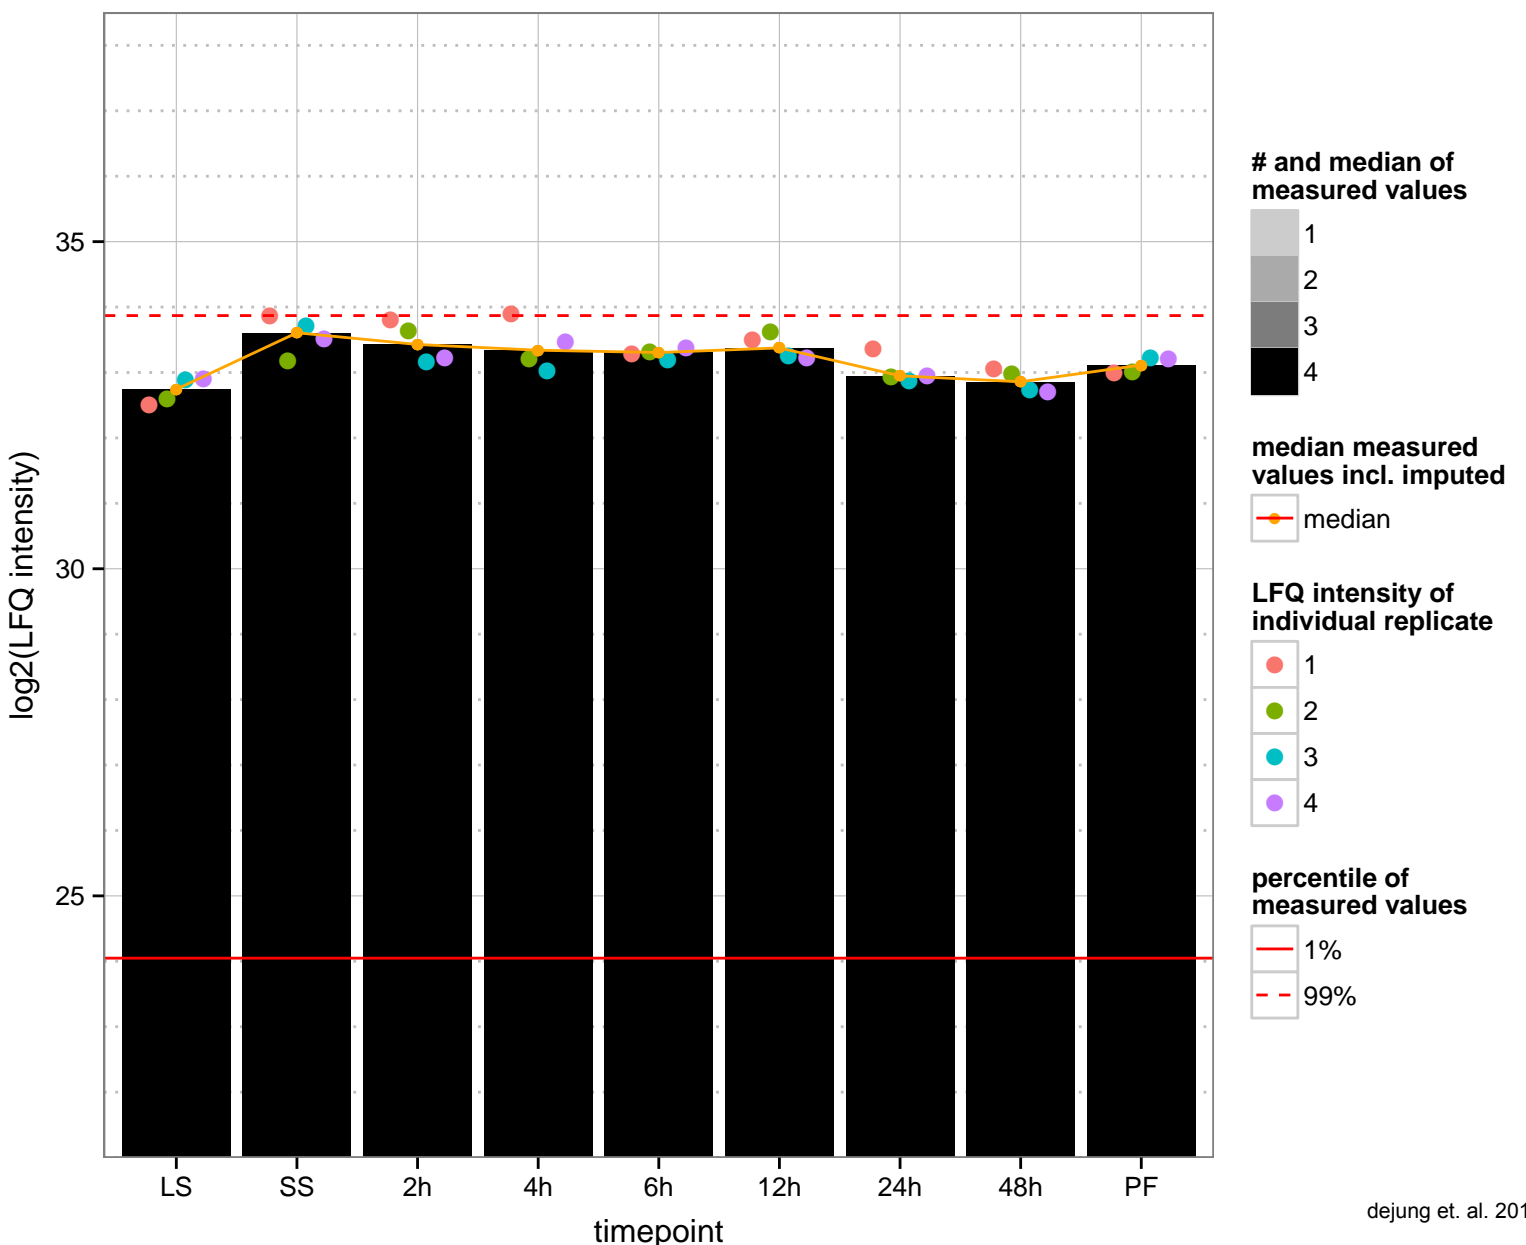

mitochondrial carrier protein (MCP12)  
 Tb927.10.12840  
 AGOF: null  
 AGOC: membrane, mitochondrial inner membrane, mitochondrial part  
 AGOP: transport  
 PGO: null  
 PGO: null  
 PGO: null

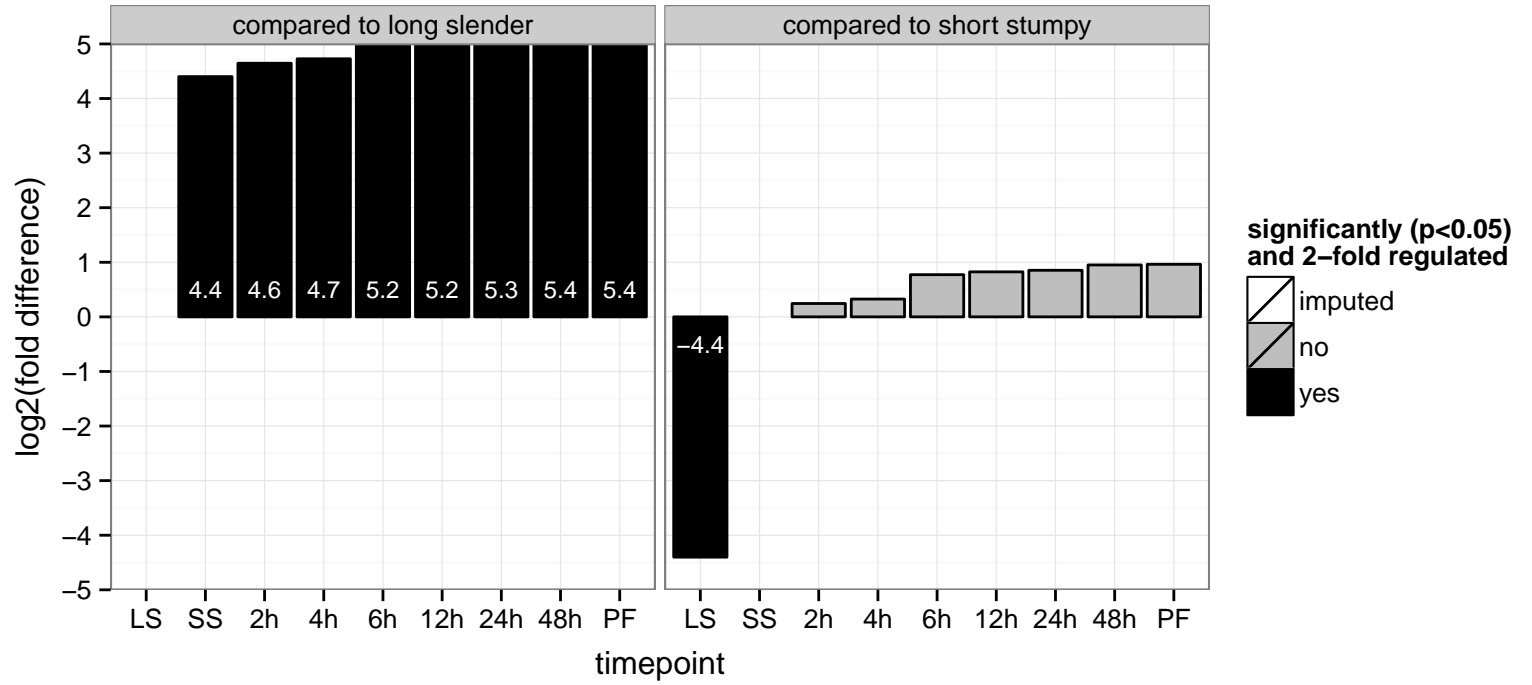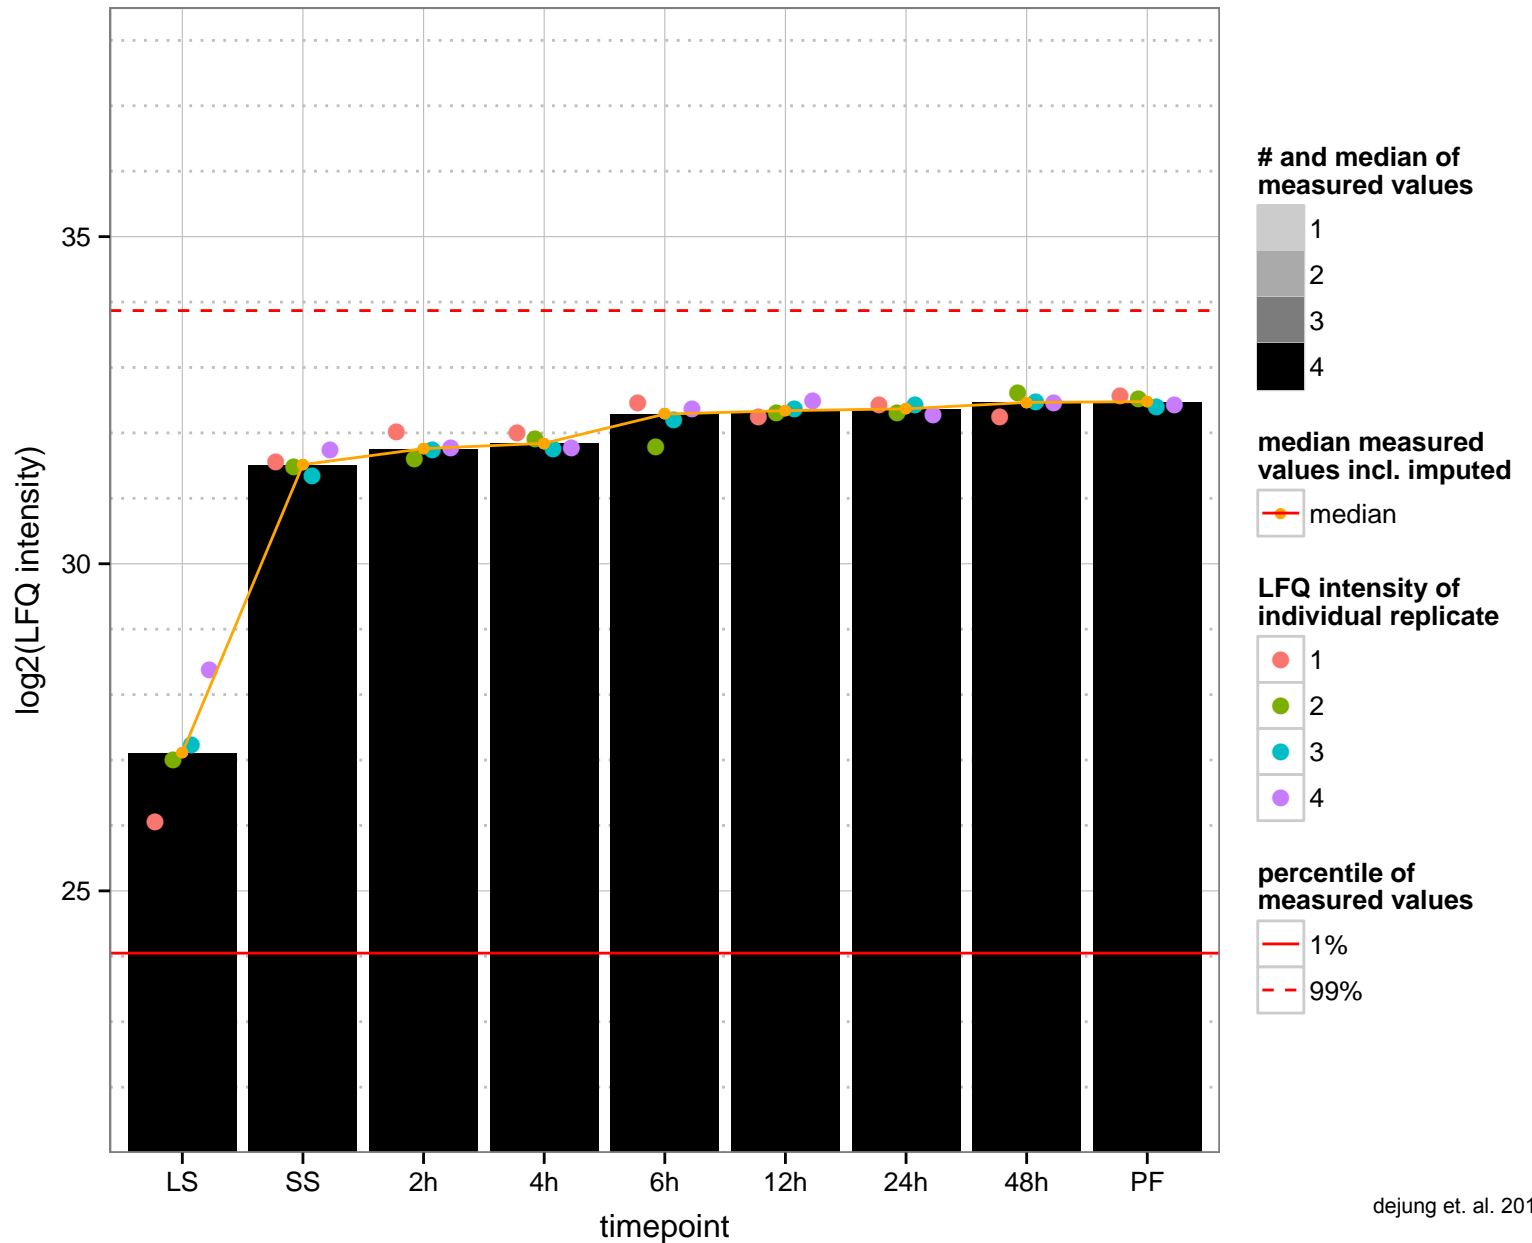

ttagg binding factor  
 Tb927.10.12850  
 AGOF: null  
 AGOC: null  
 AGOP: null  
 PGOF: DNA binding  
 PGO: null  
 PGOP: null

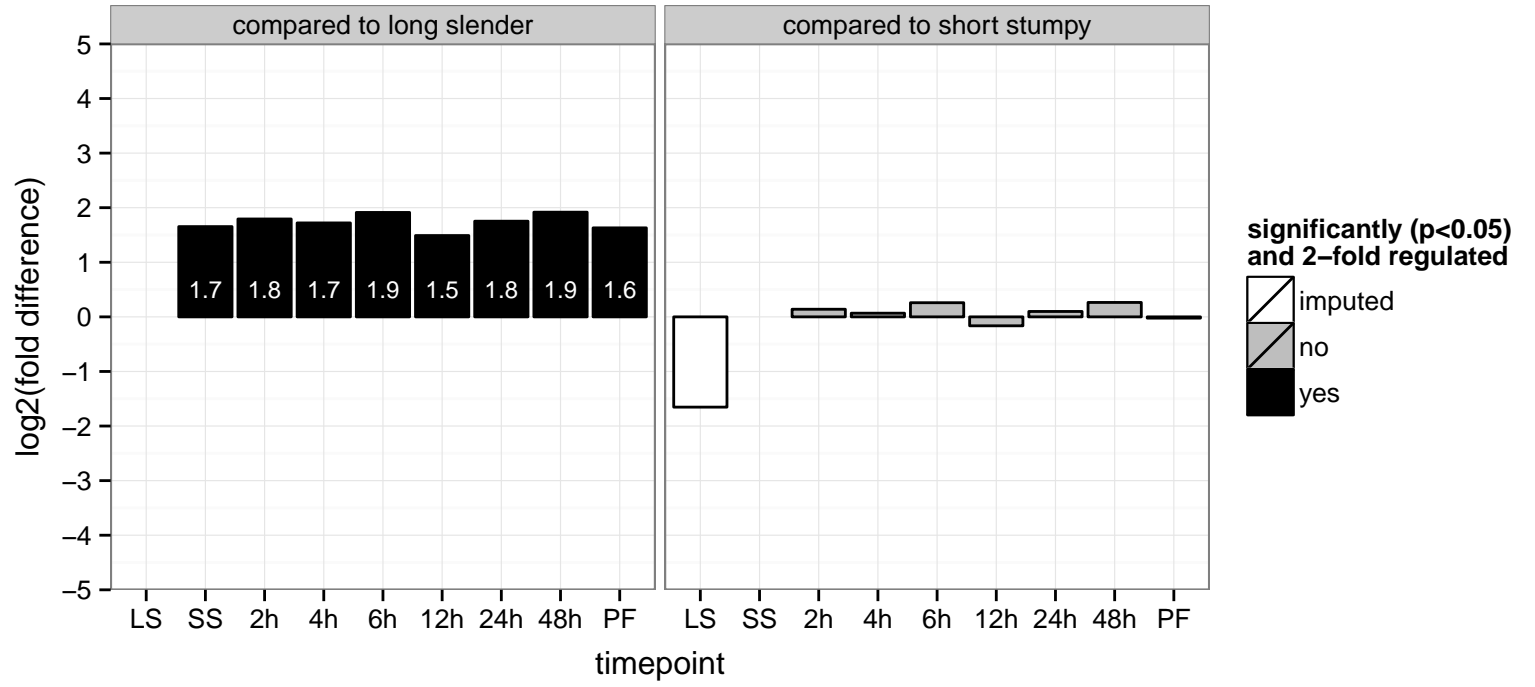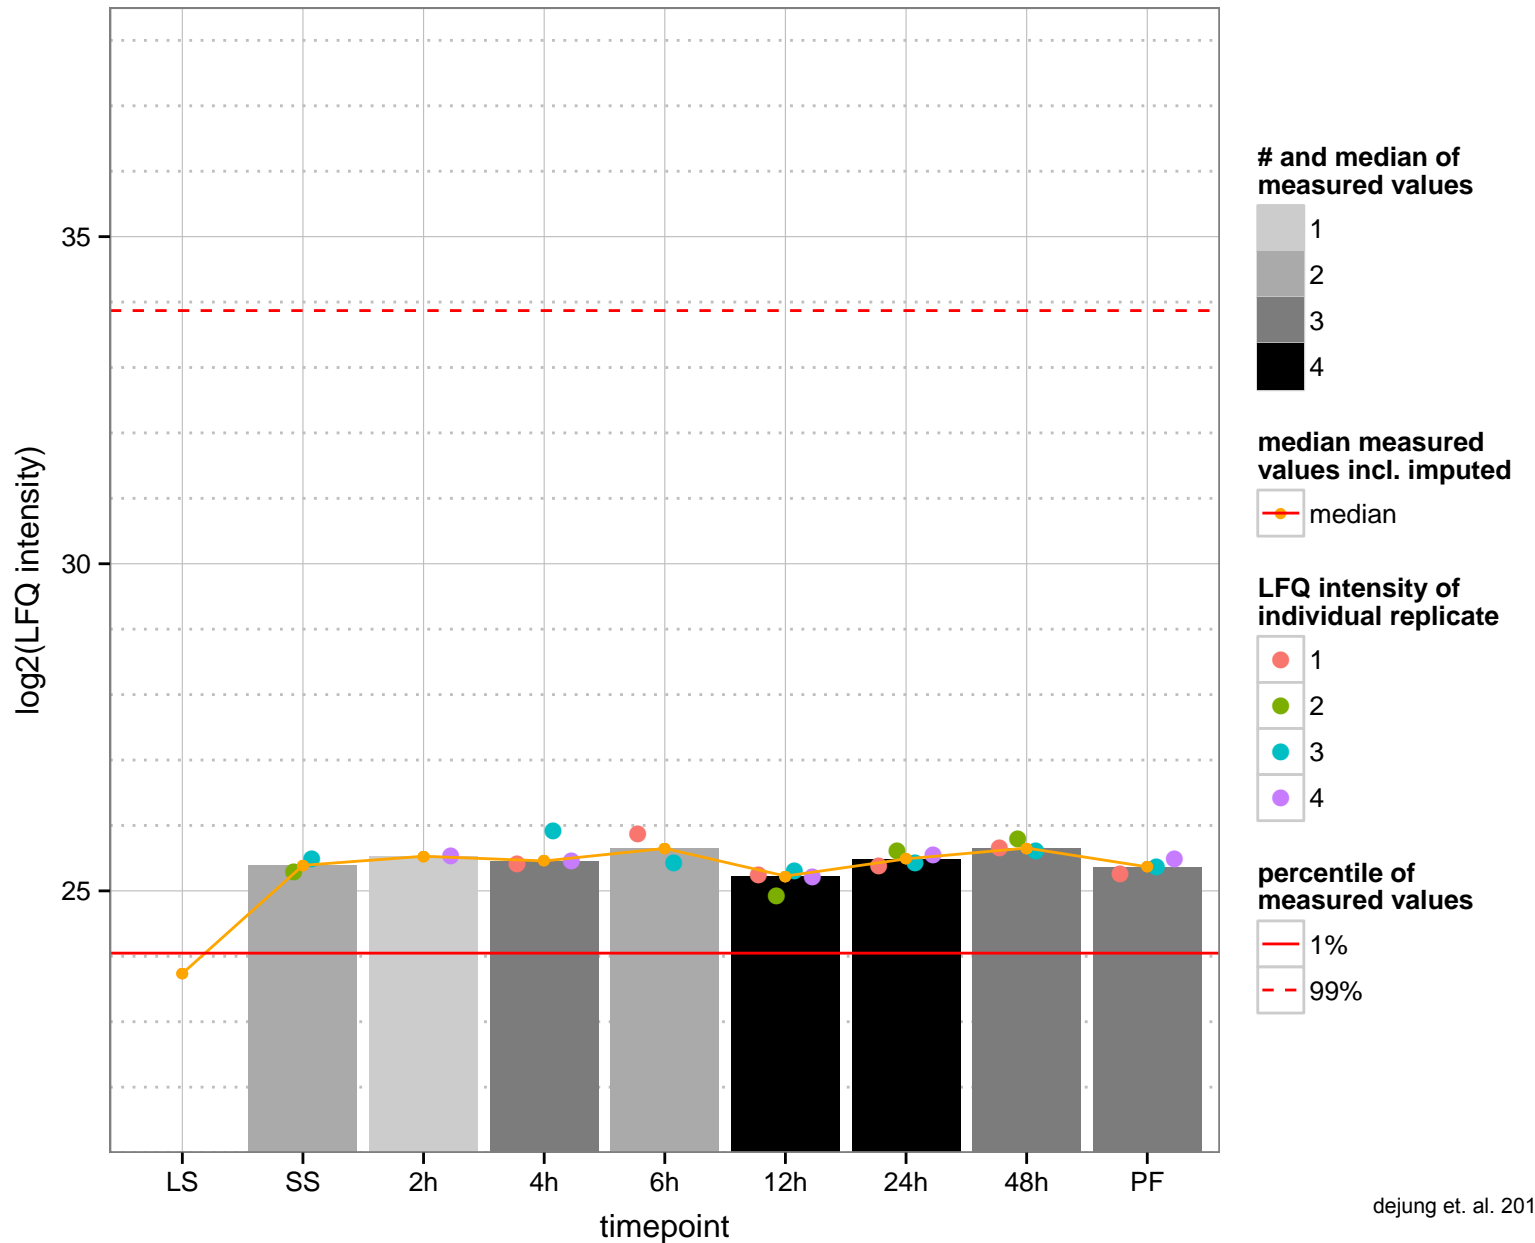



bifunctional aminoacyl-tRNA synthetase, putative

Tb927.10.12890

AGOF: ATP binding, proline-tRNA ligase activity

AGOC: cytoplasm, mitochondrion

AGOP: prolyl-tRNA aminoacylation, translation

PGOF: ATP binding, aminoacyl-tRNA ligase activity, nucleotide binding, proline-tRNA ligase activity

PGOC: cytoplasm

PGOP: prolyl-tRNA aminoacylation, tRNA aminoacylation for protein translation

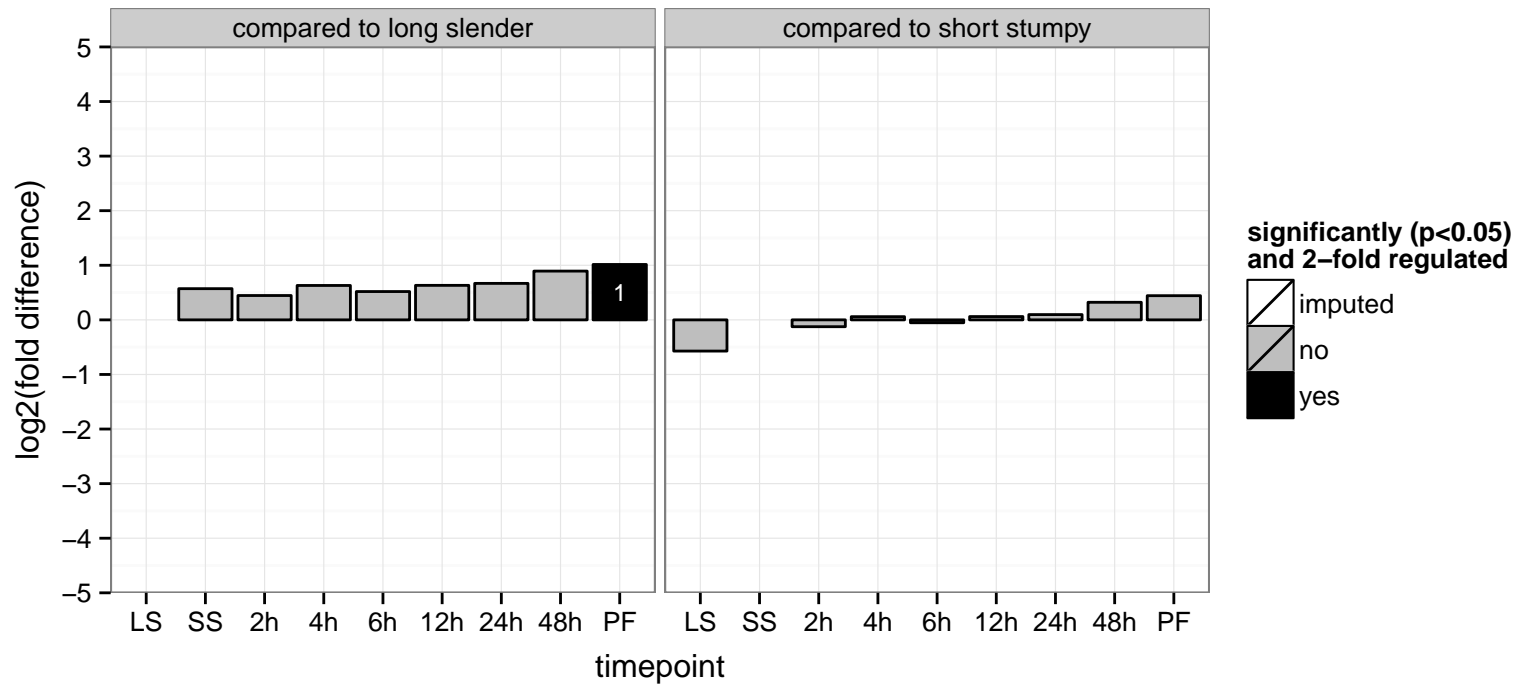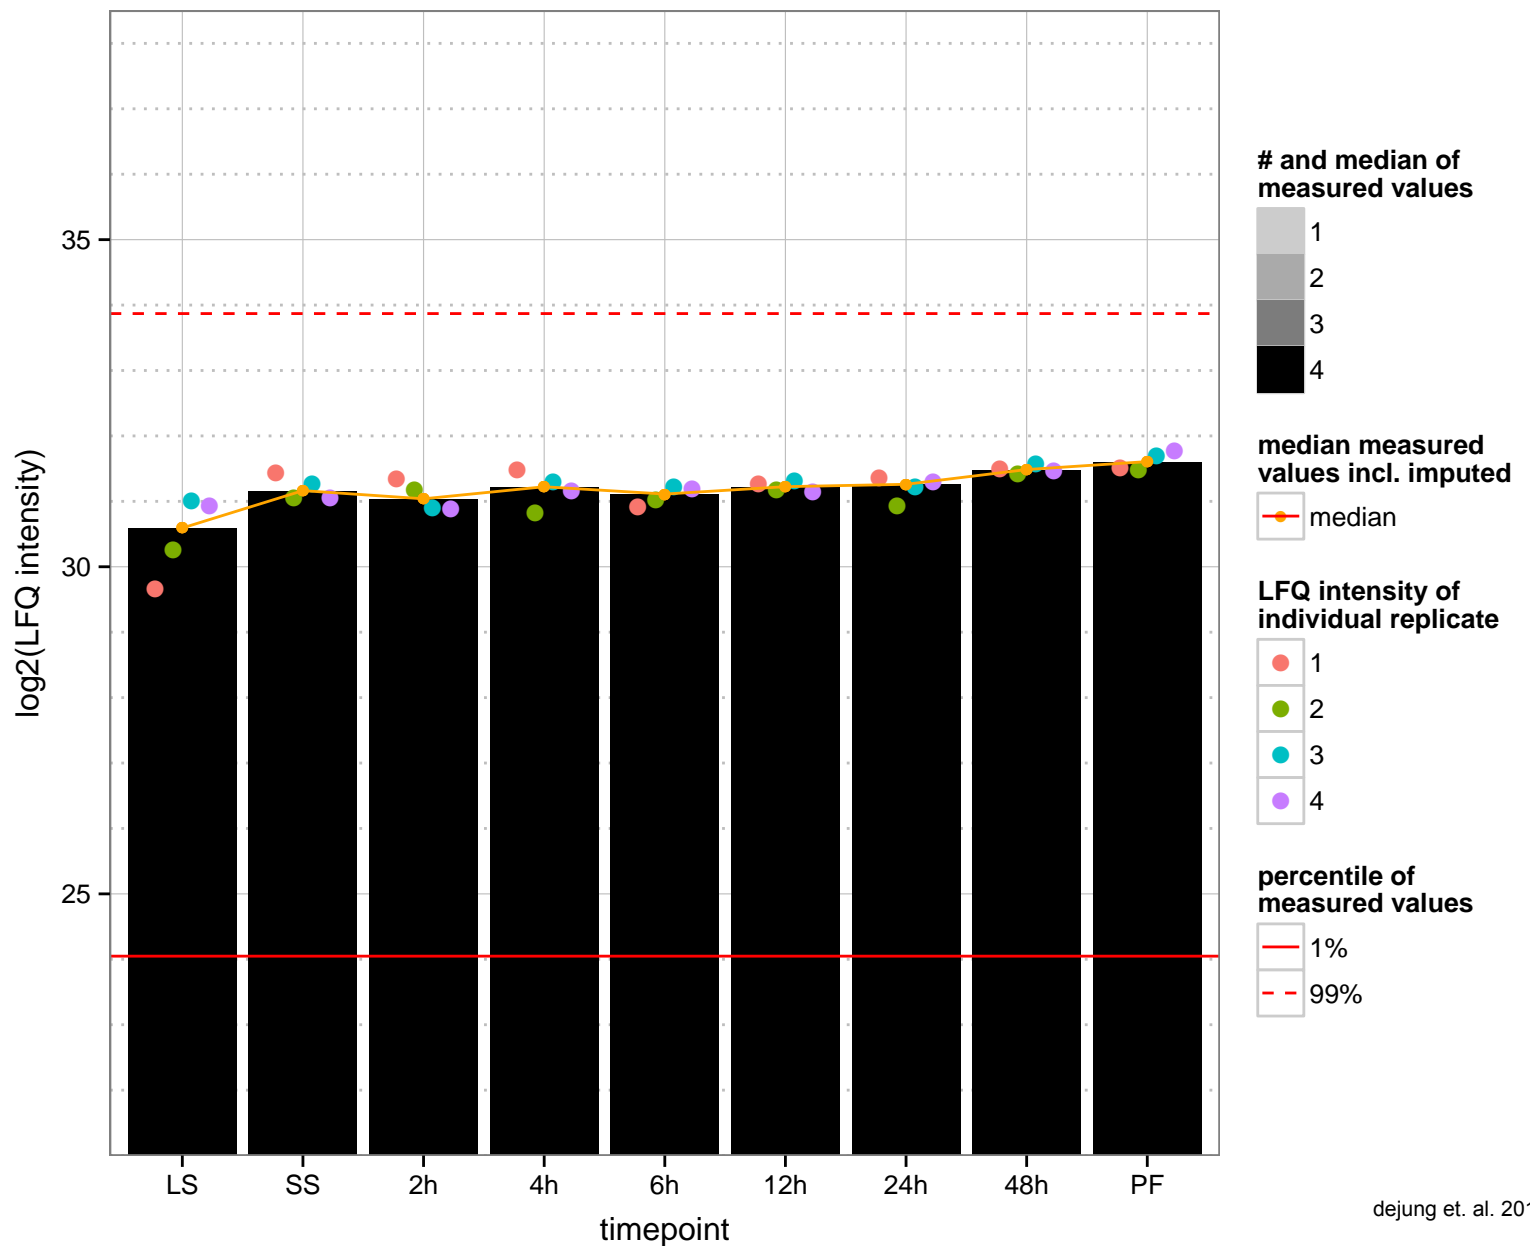

Multisite-specific tRNA:(cytosine-C(5))-methyltransferase, putative, NCL1(Yeast)-related NOL1/NOP2/FMU(SUN) domain-c  
 Tb927.10.12980  
 AGOF: null  
 AGOC: mitochondrion  
 AGOP: tRNA methylation  
 PGO: null  
 PGO: null  
 PGO: null

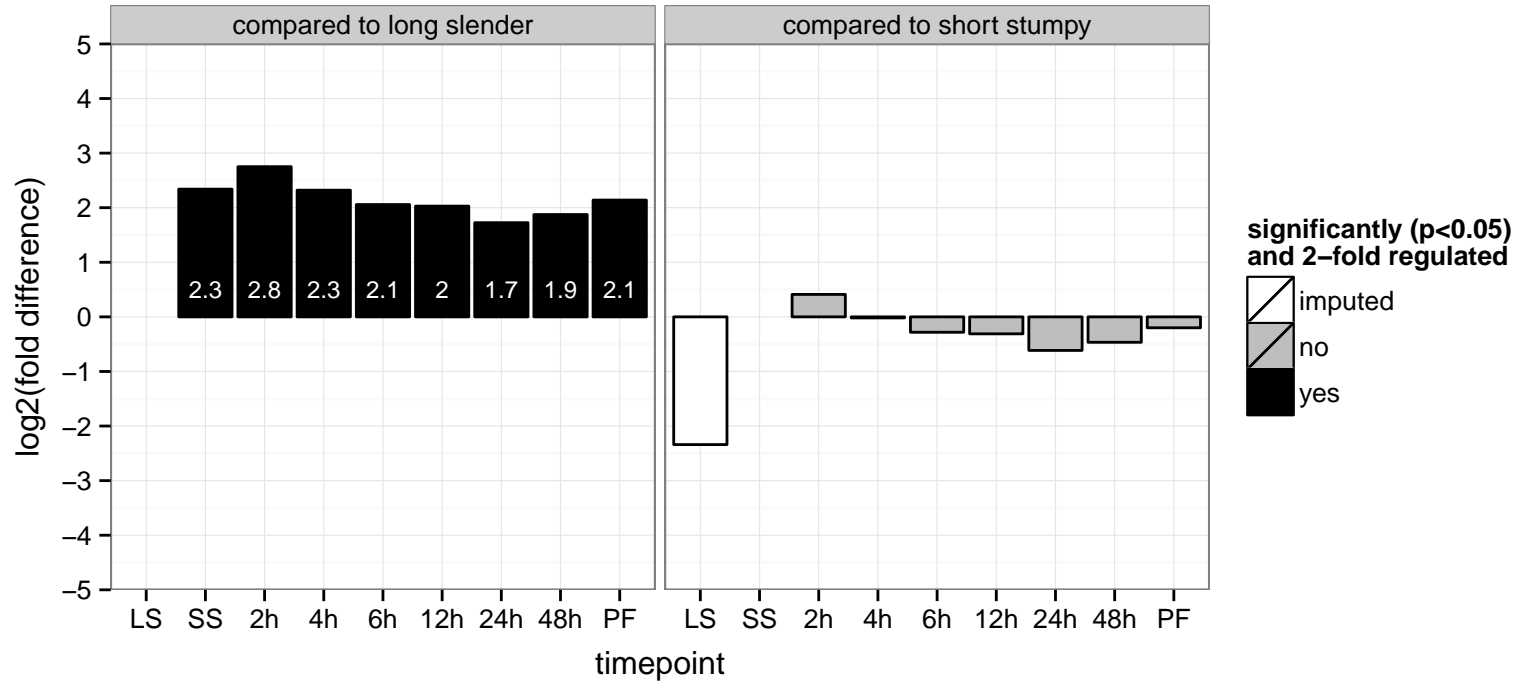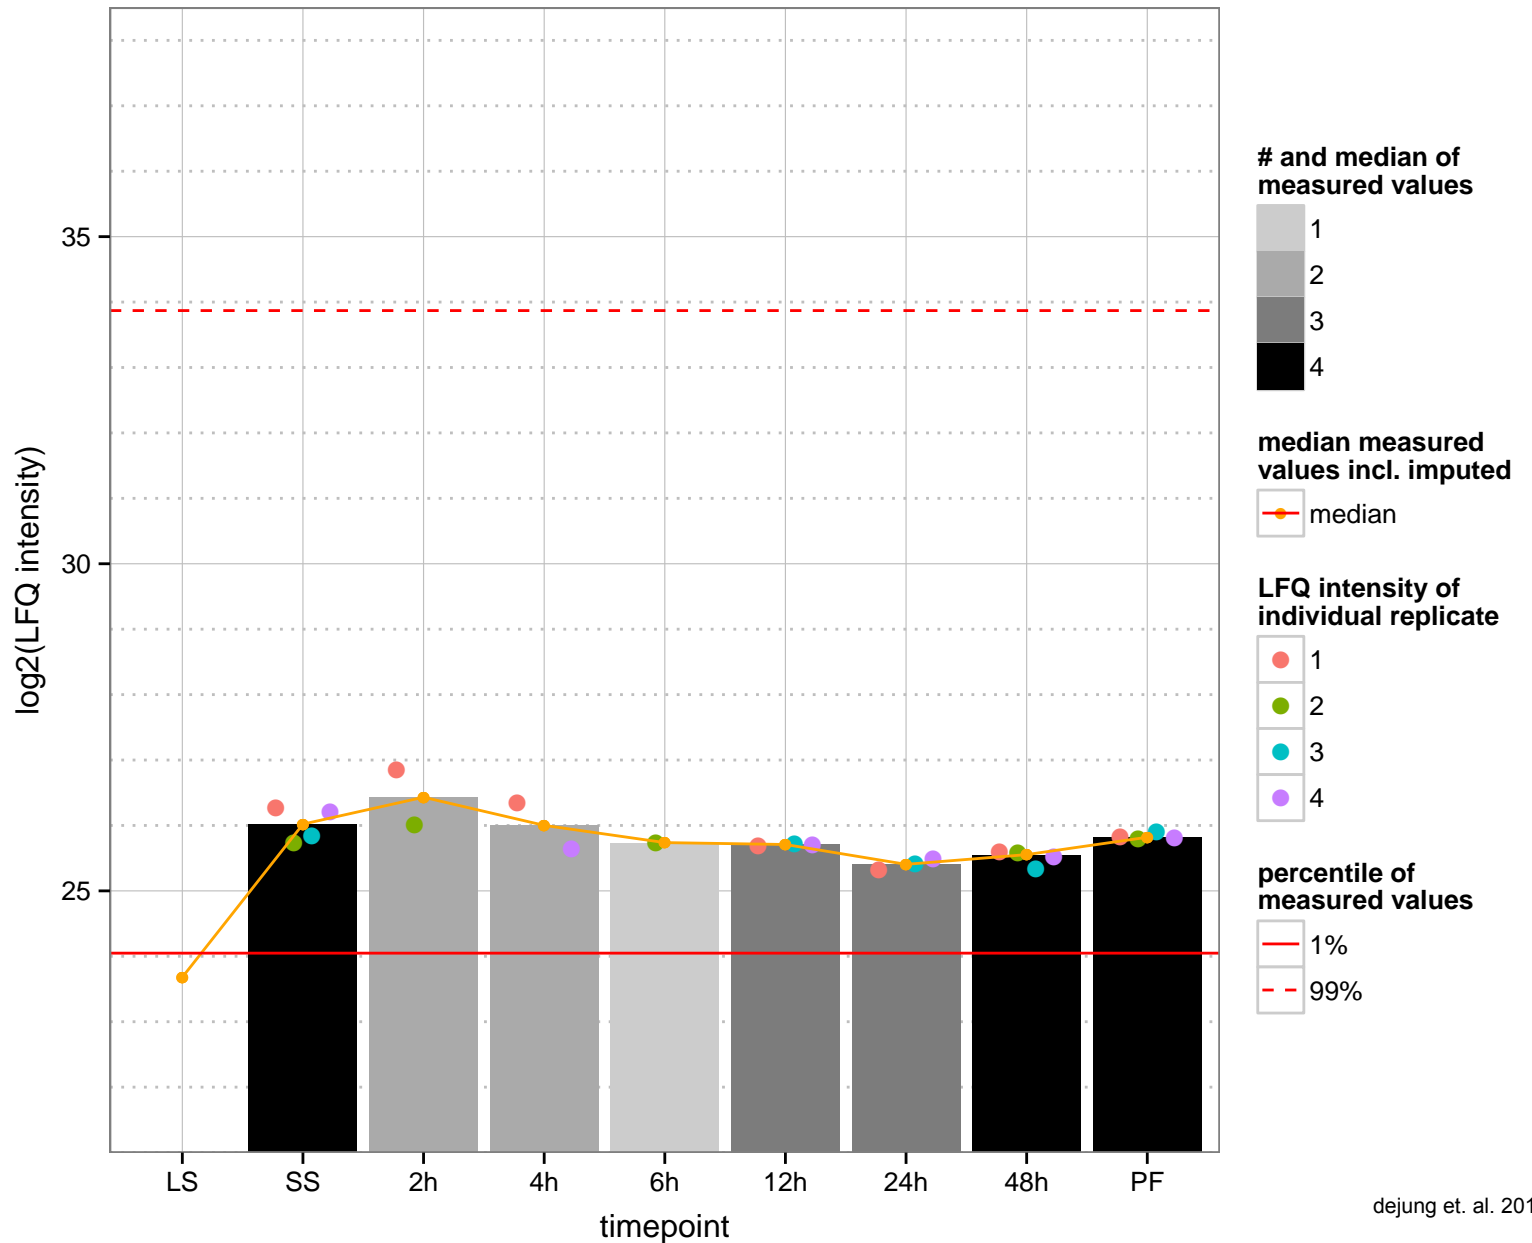

predicted ankyrin repeat family protein  
 Tb927.10.12990  
 AGOF: null  
 AGOC: null  
 AGOP: null  
 PGO: protein binding  
 PGOC: null  
 PGOP: null

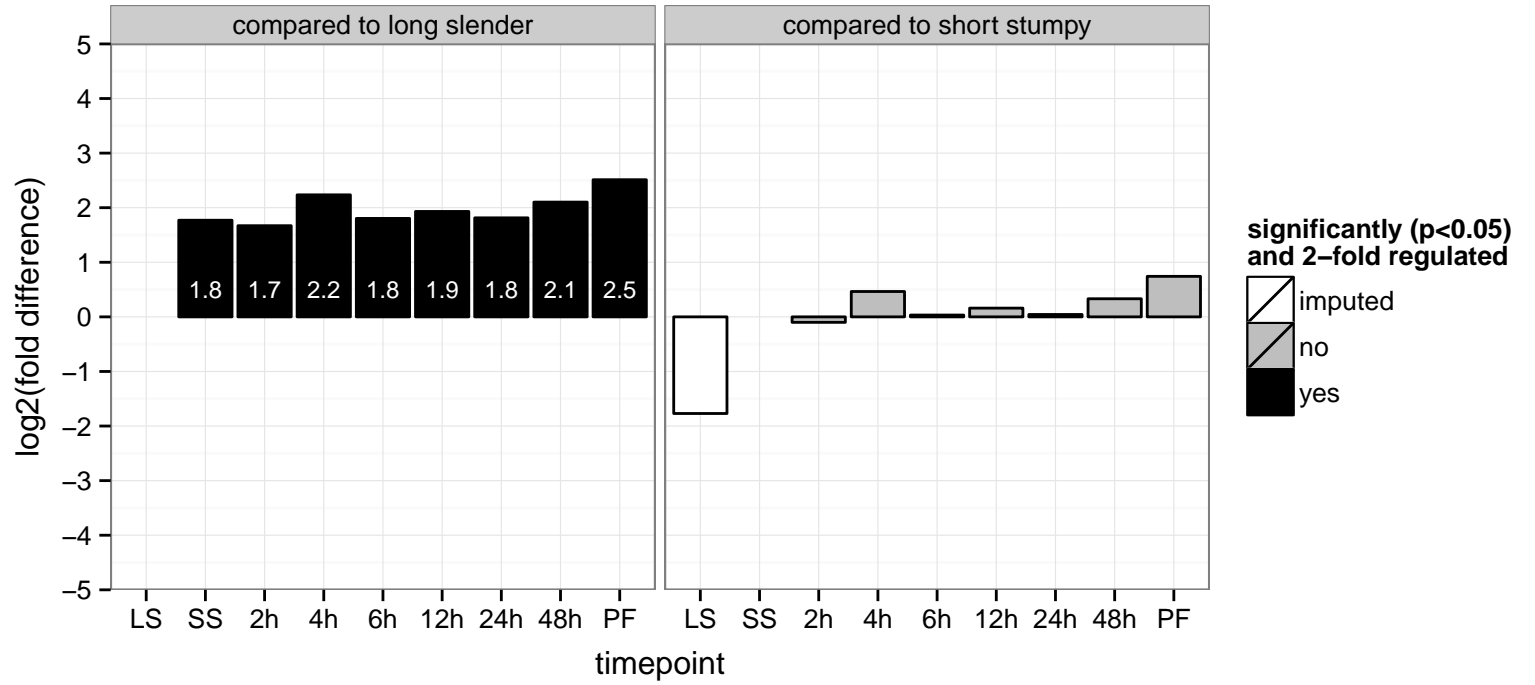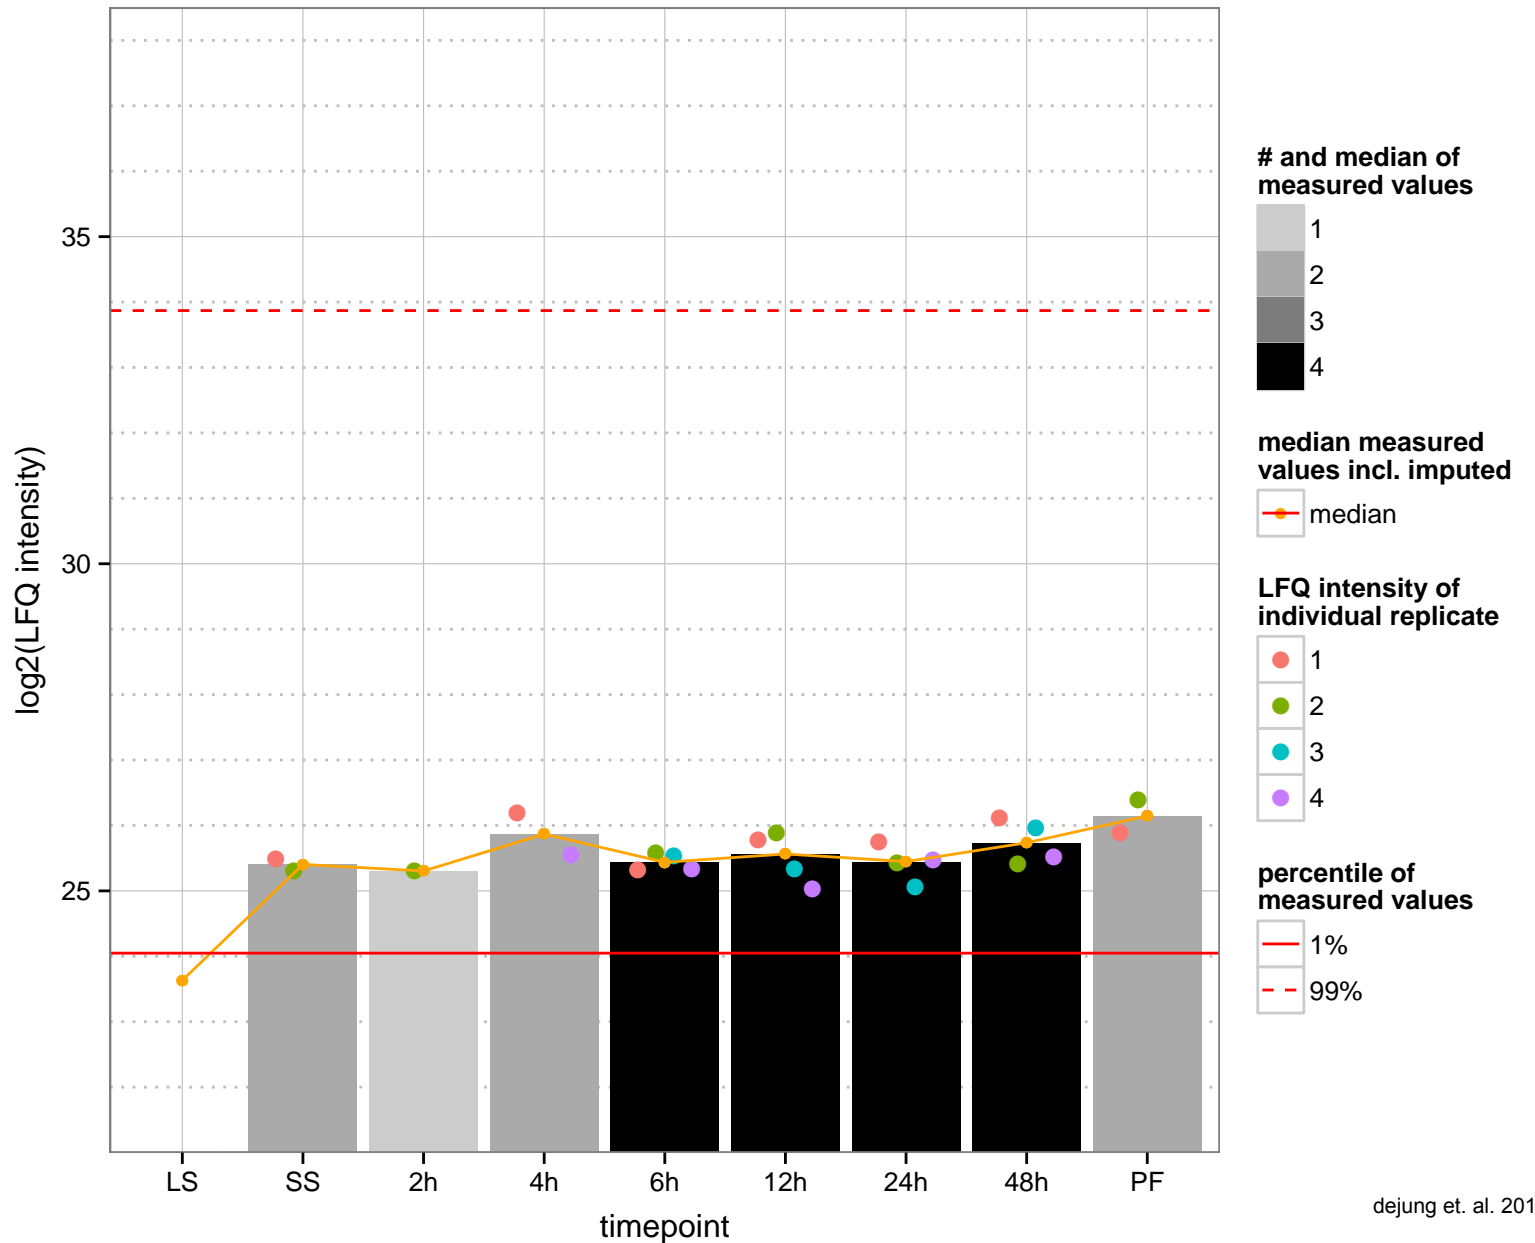

receptor-type adenylate cyclase GRESAG 4, putative, gene related to ESAG4, putative (GRESAG4)  
 Tb927.10.13040  
 AGOF: adenylate cyclase activity  
 AGOC: null  
 AGOP: cyclic nucleotide biosynthetic process, intracellular signal transduction  
 PGO: phosphorus-oxygen lyase activity  
 PGOC: null  
 PGOP: cyclic nucleotide biosynthetic process, intracellular signal transduction

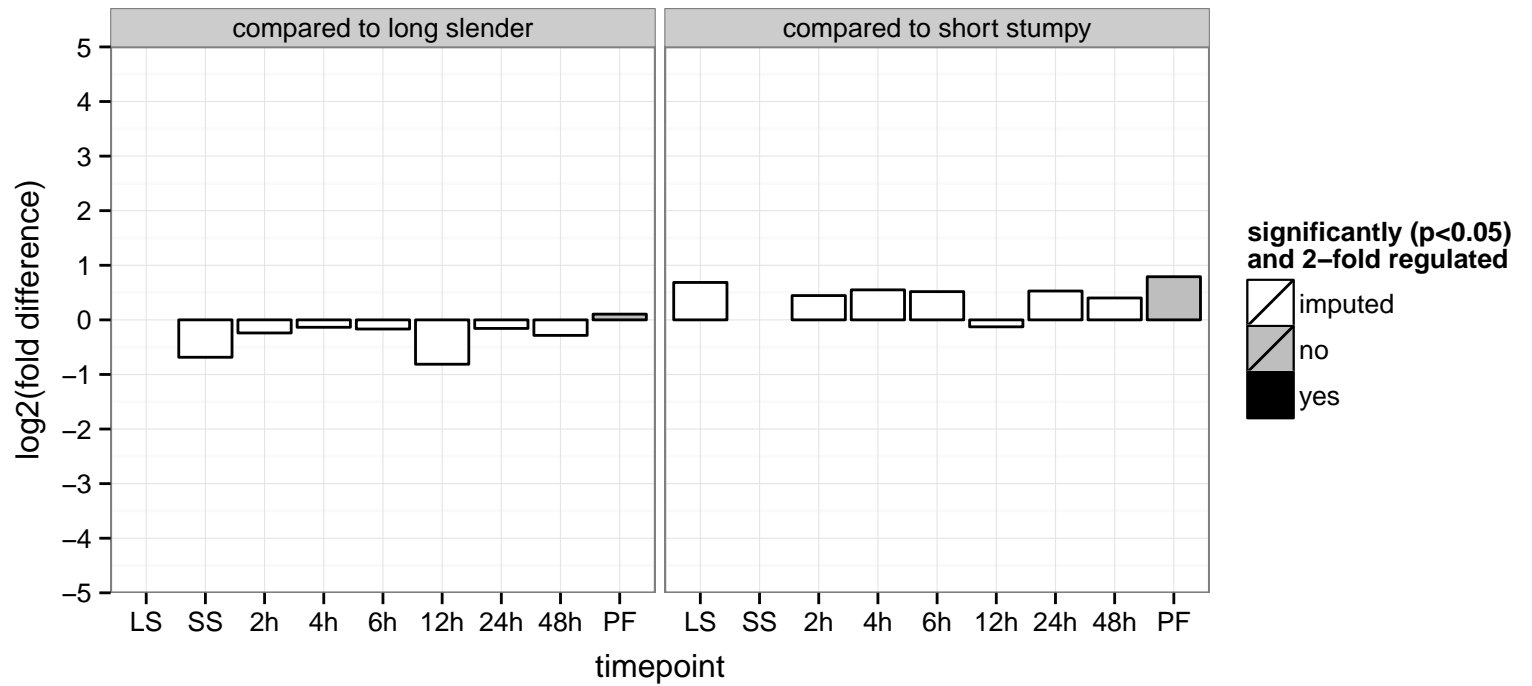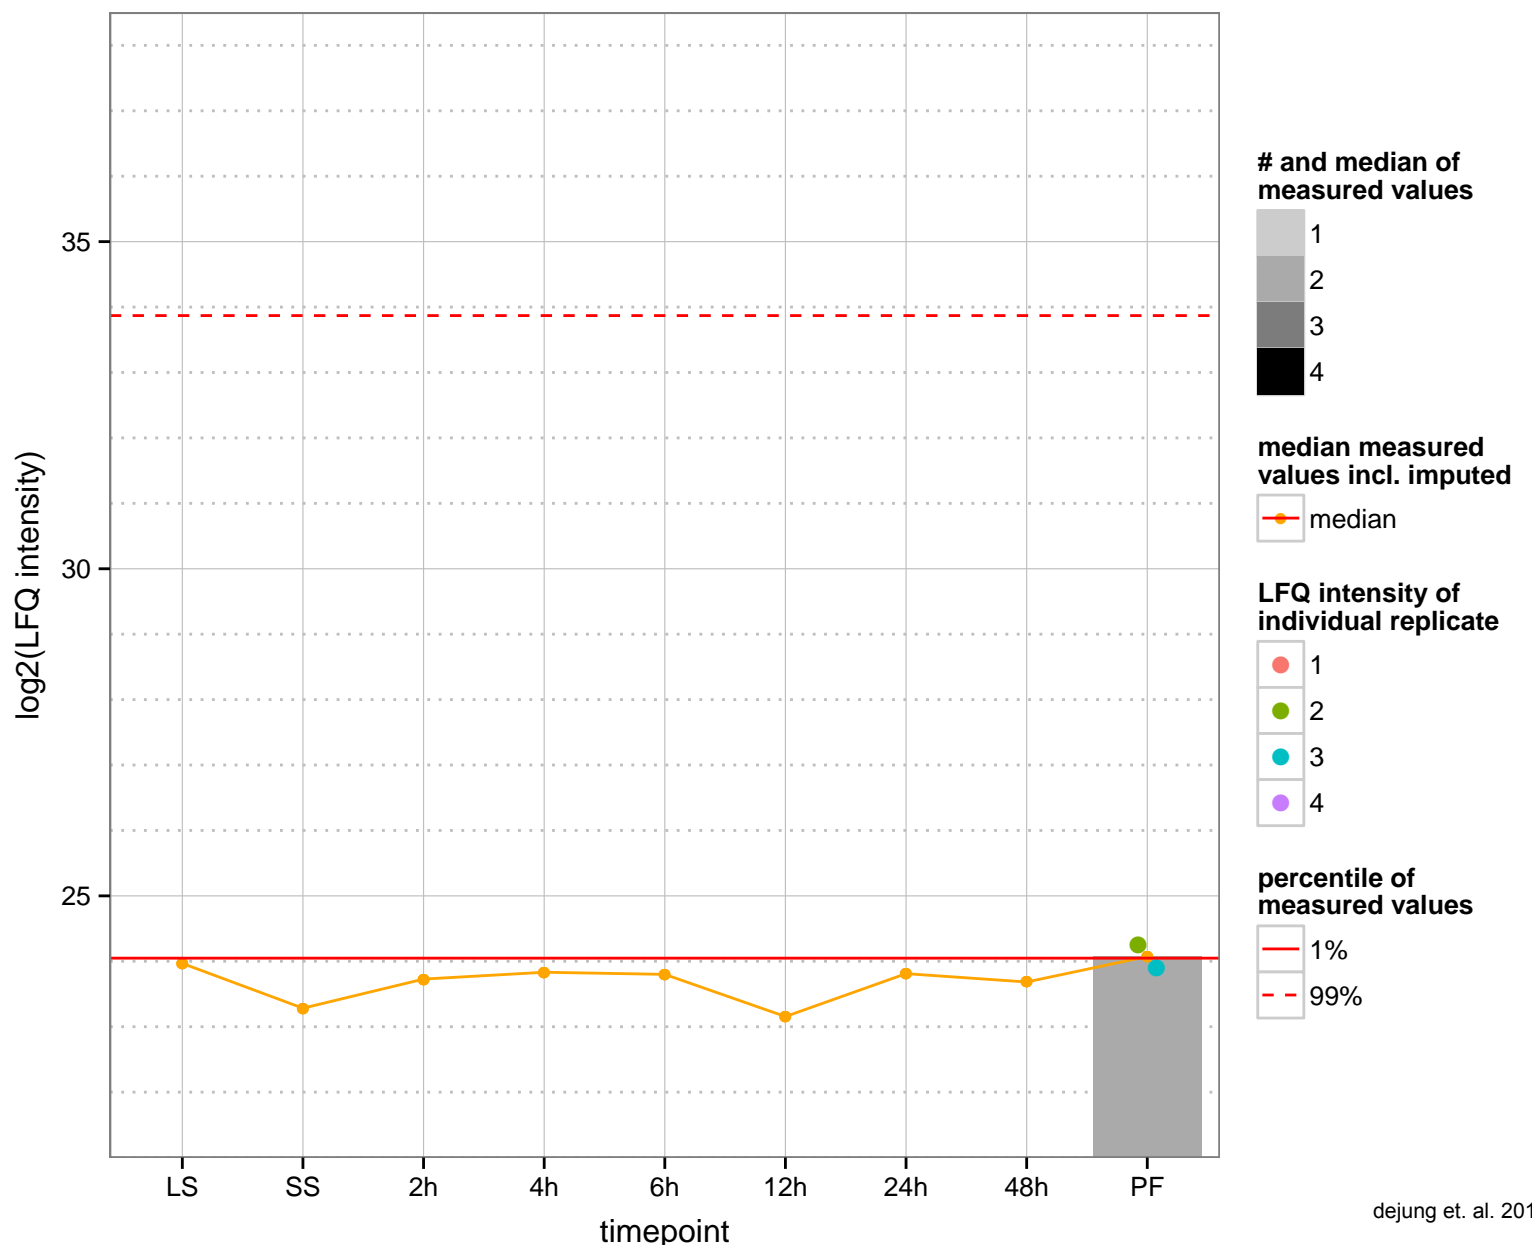

Dynein light chain roadblock-type protein, putative  
 Tb927.10.13110  
 AGOF: microtubule motor activity  
 AGOC: cytoplasmic dynein complex  
 AGOP: microtubule-based movement  
 PGO: null  
 PGOC: null  
 PGOP: null

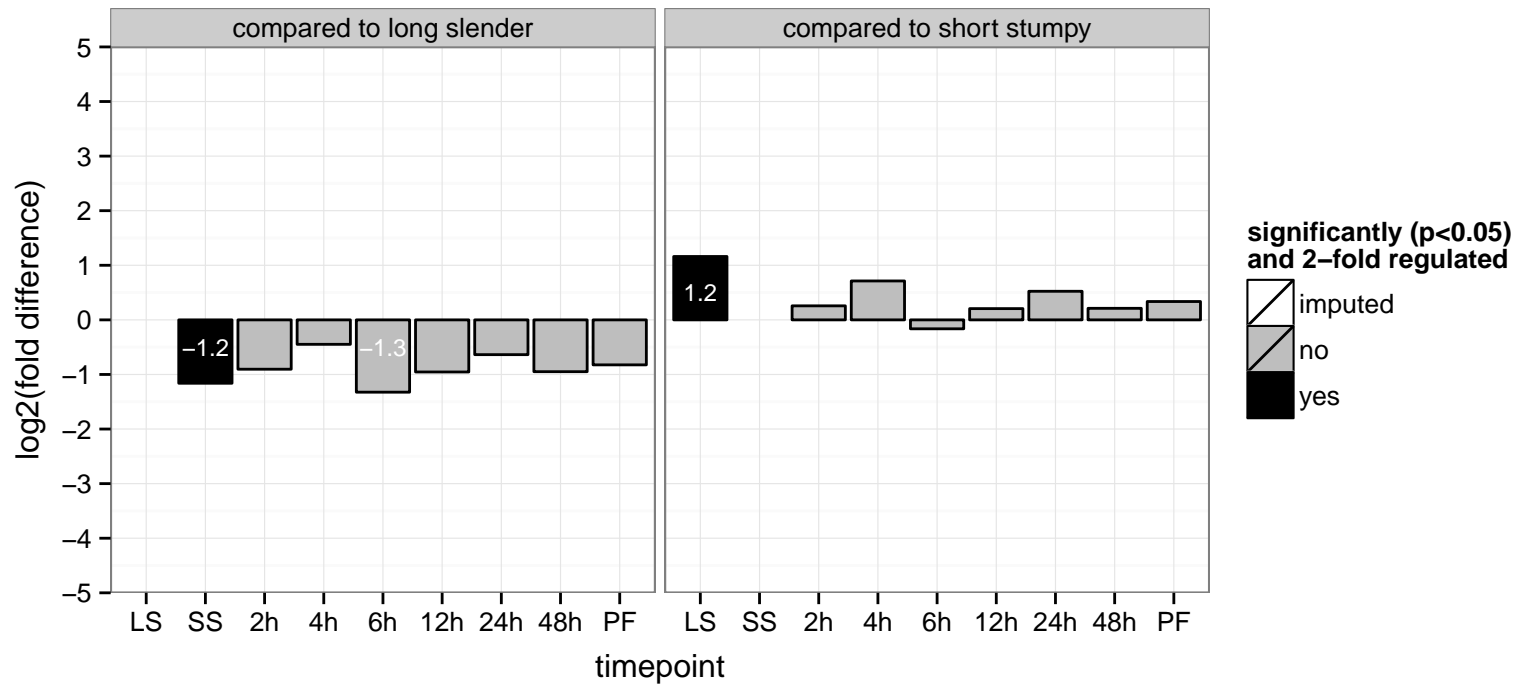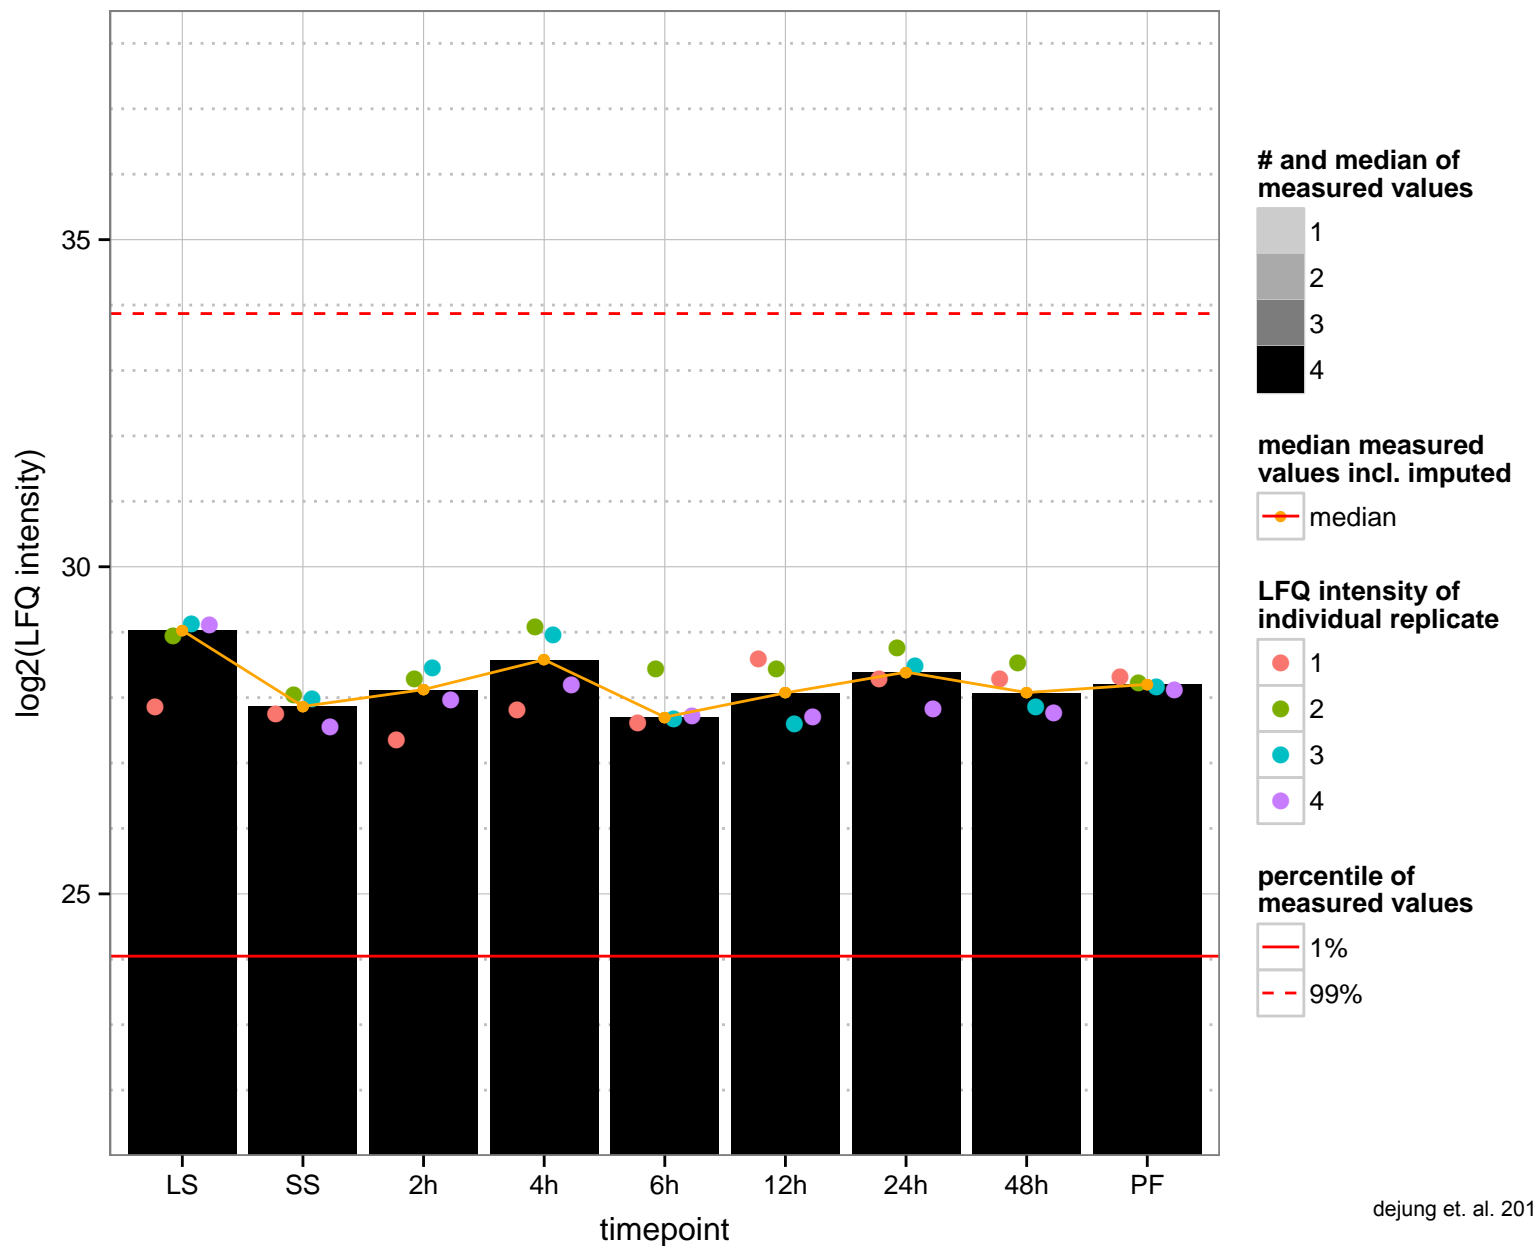

UTP-glucose-1-phosphate uridylyltransferase

Tb927.10.13130

AGOF: UTP:glucose-1-phosphate uridylyltransferase activity, metal ion binding, nucleotidyltransferase activity

AGOC: glycosome

AGOP: UDP-glucose metabolic process

PGOF: nucleotidyltransferase activity

PGOC: null

PGOP: metabolic process

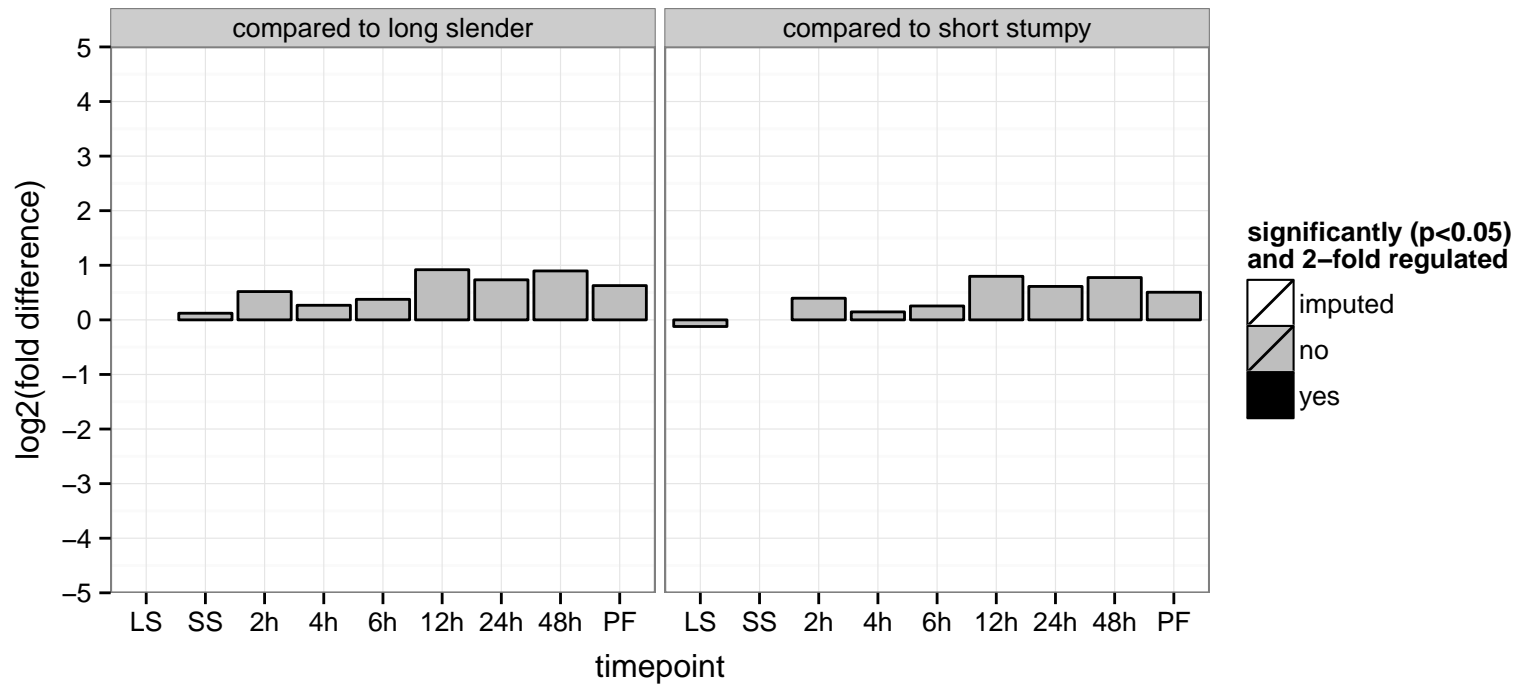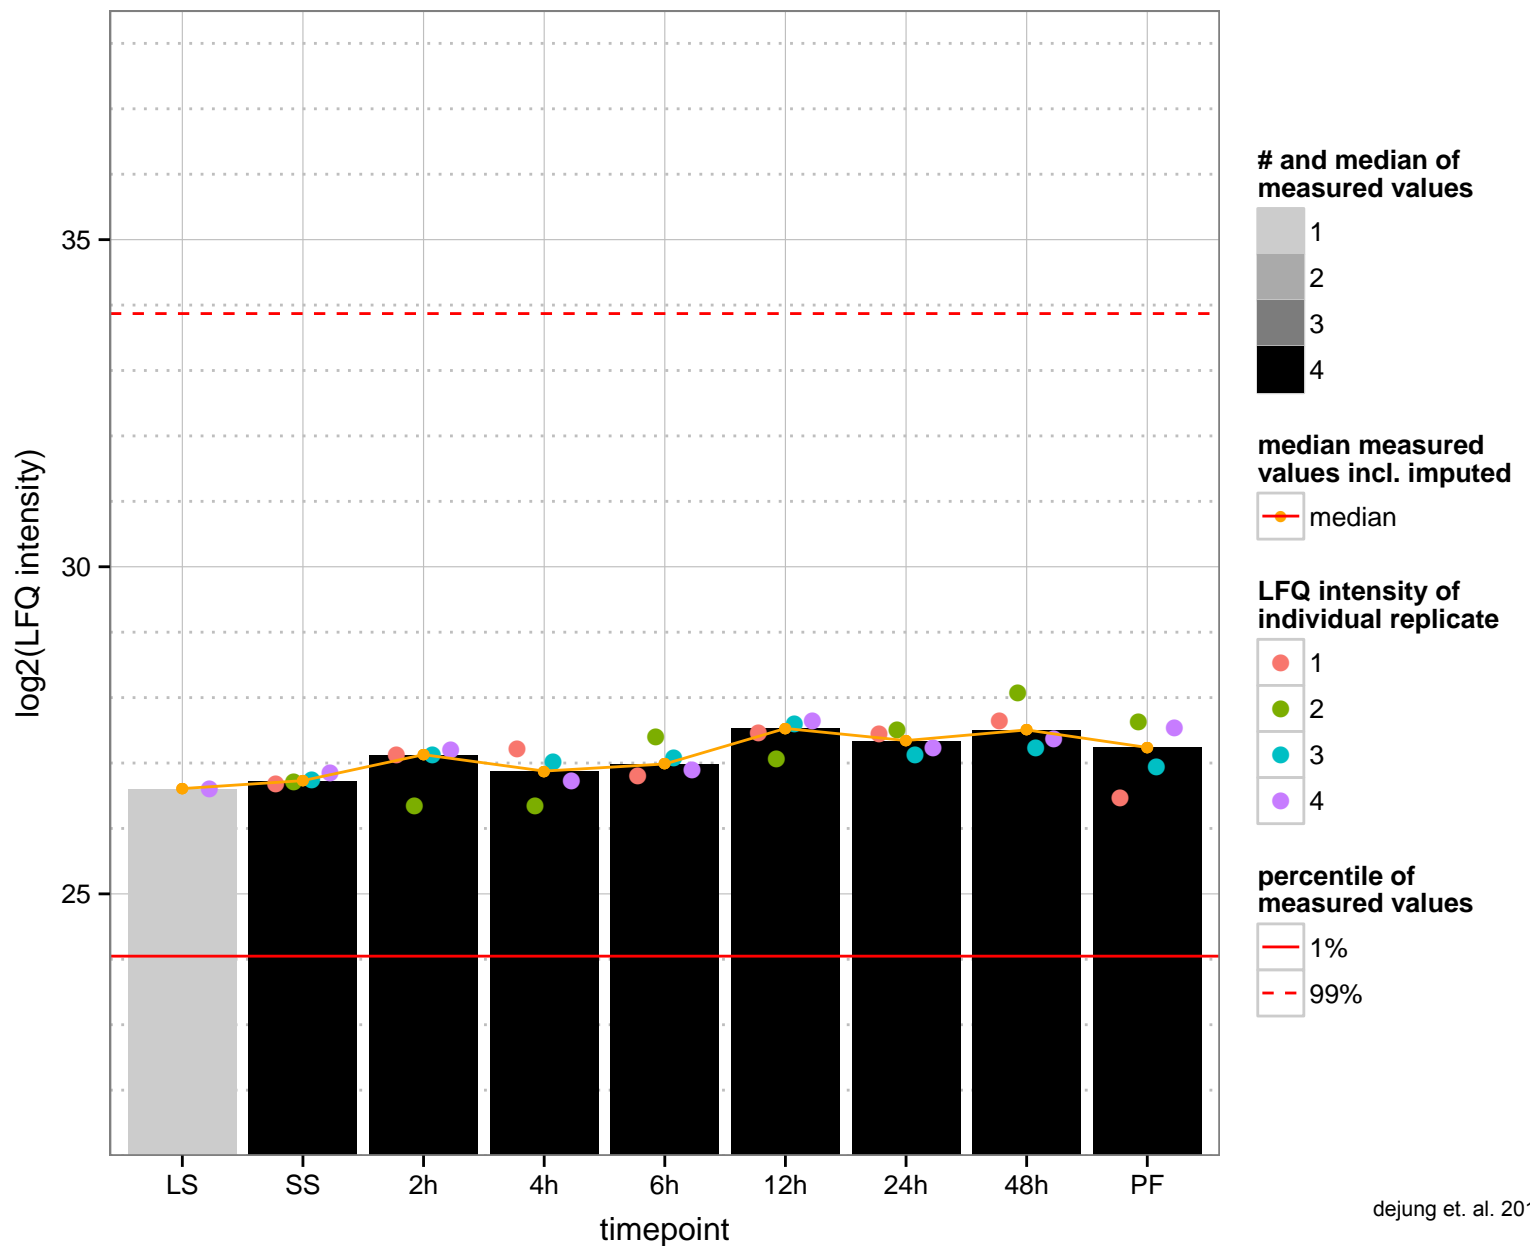

hypothetical protein, conserved

Tb927.10.1320

AGOF: ATP binding, protein kinase activity

AGOC: null

AGOP: protein phosphorylation

PGOF: ATP binding, binding, protein kinase activity, transferase activity, transferring phosphorus-containing groups

PGOC: null

PGOP: protein phosphorylation

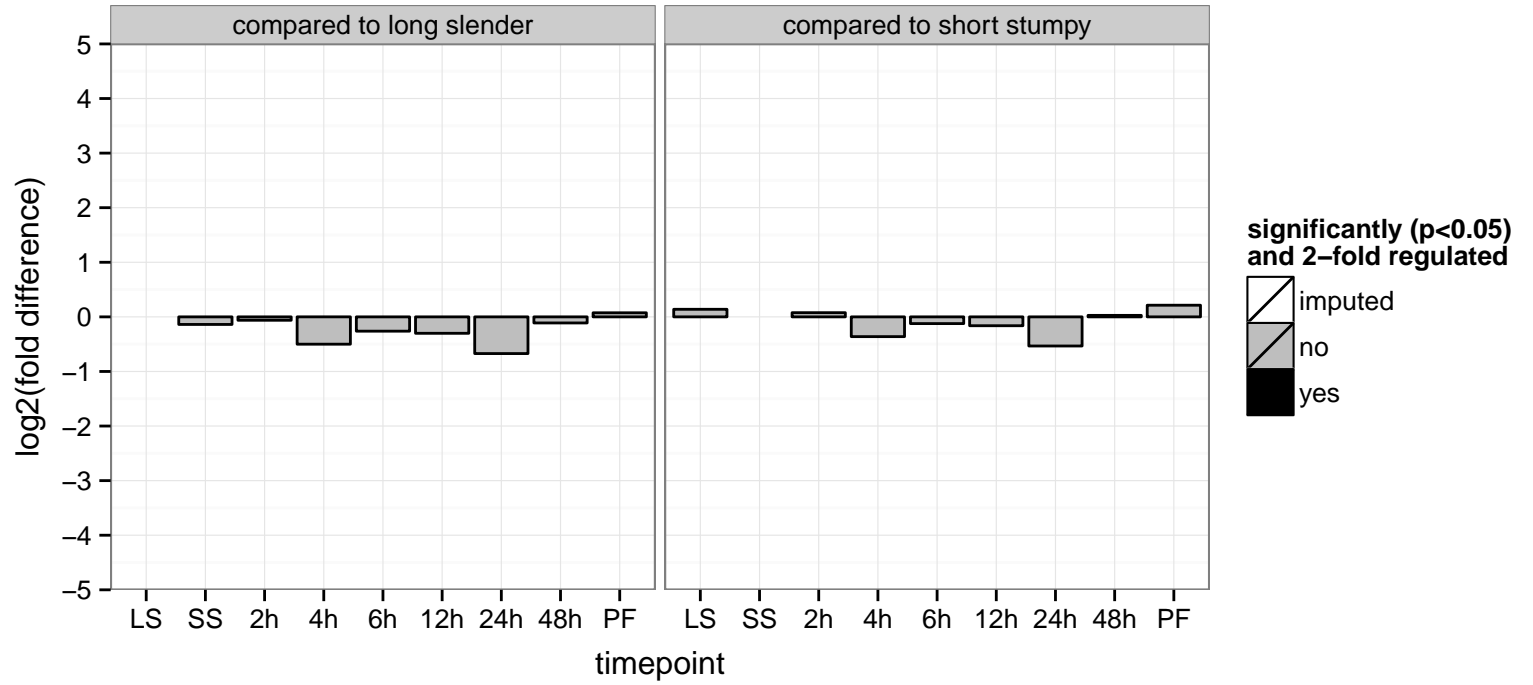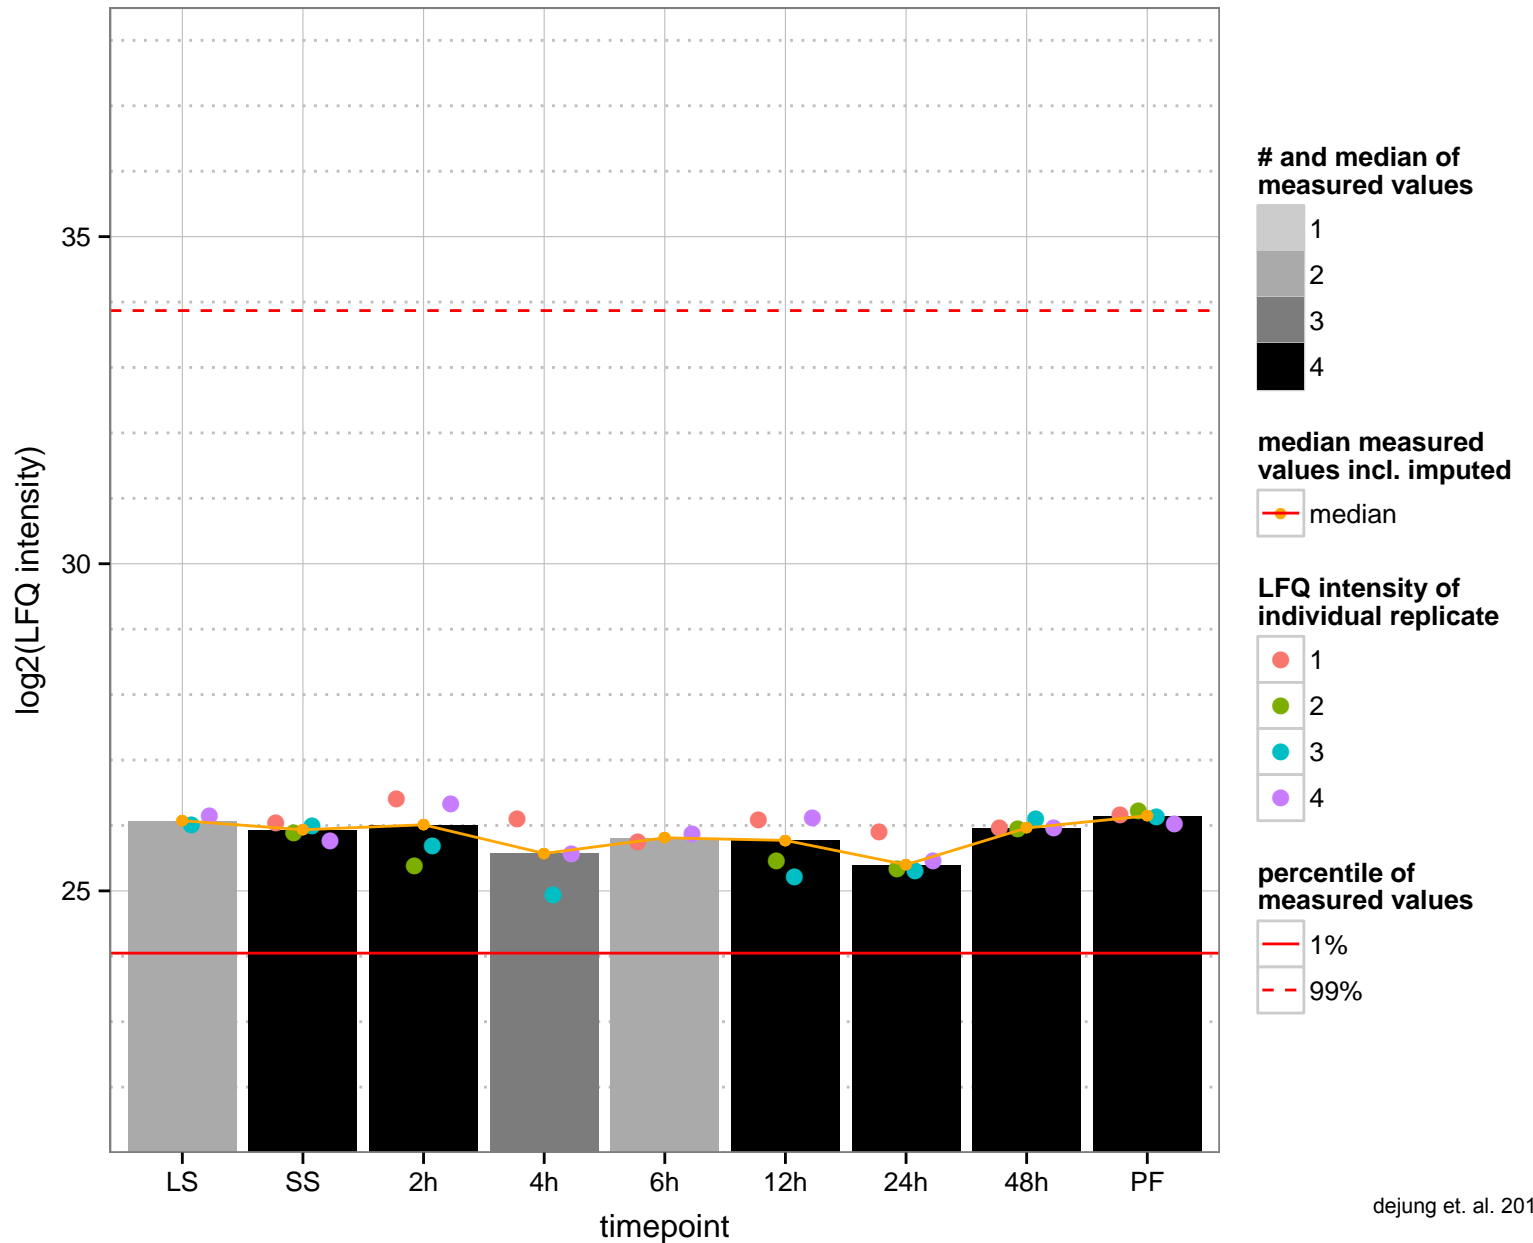

hypothetical protein, conserved  
 Tb927.10.13250  
 AGOF: null  
 AGOC: null  
 AGOP: null  
 PGOF: protein binding  
 PGO: null  
 PGOP: null

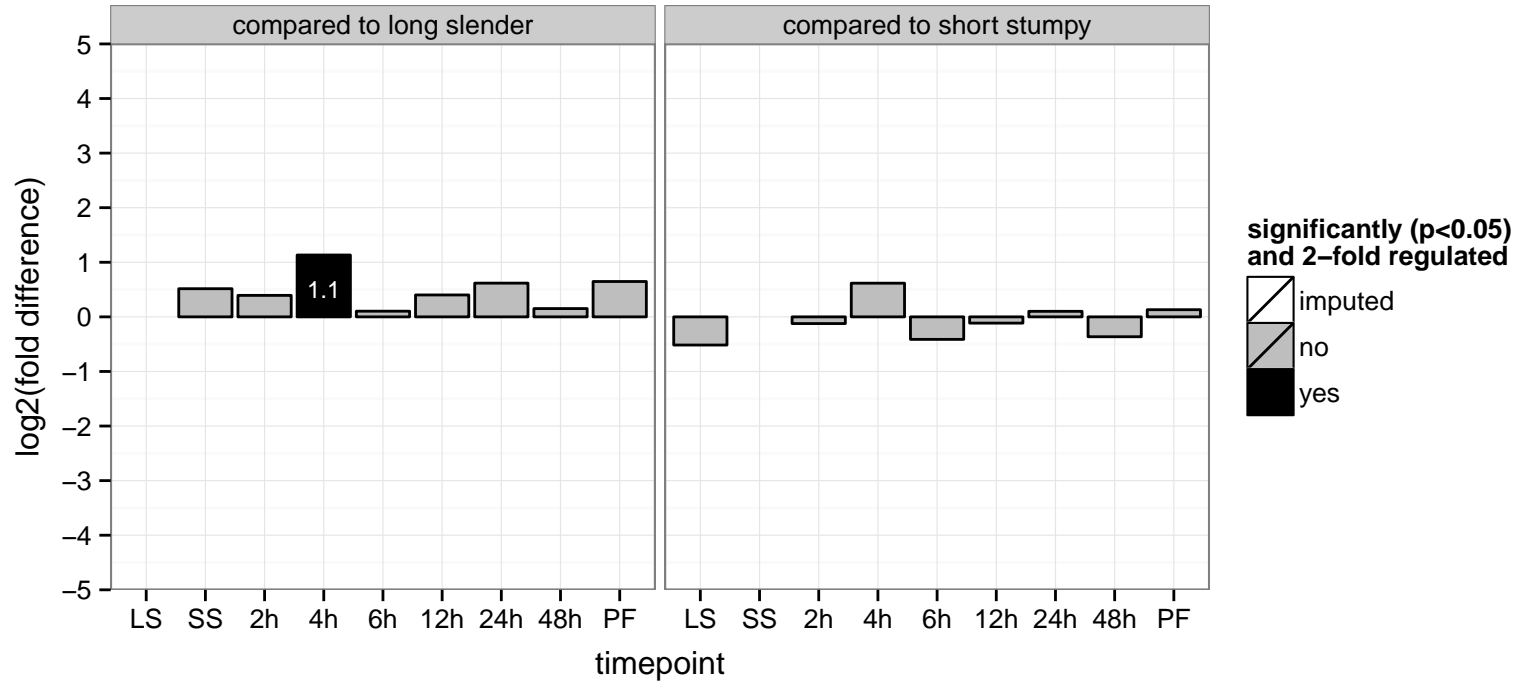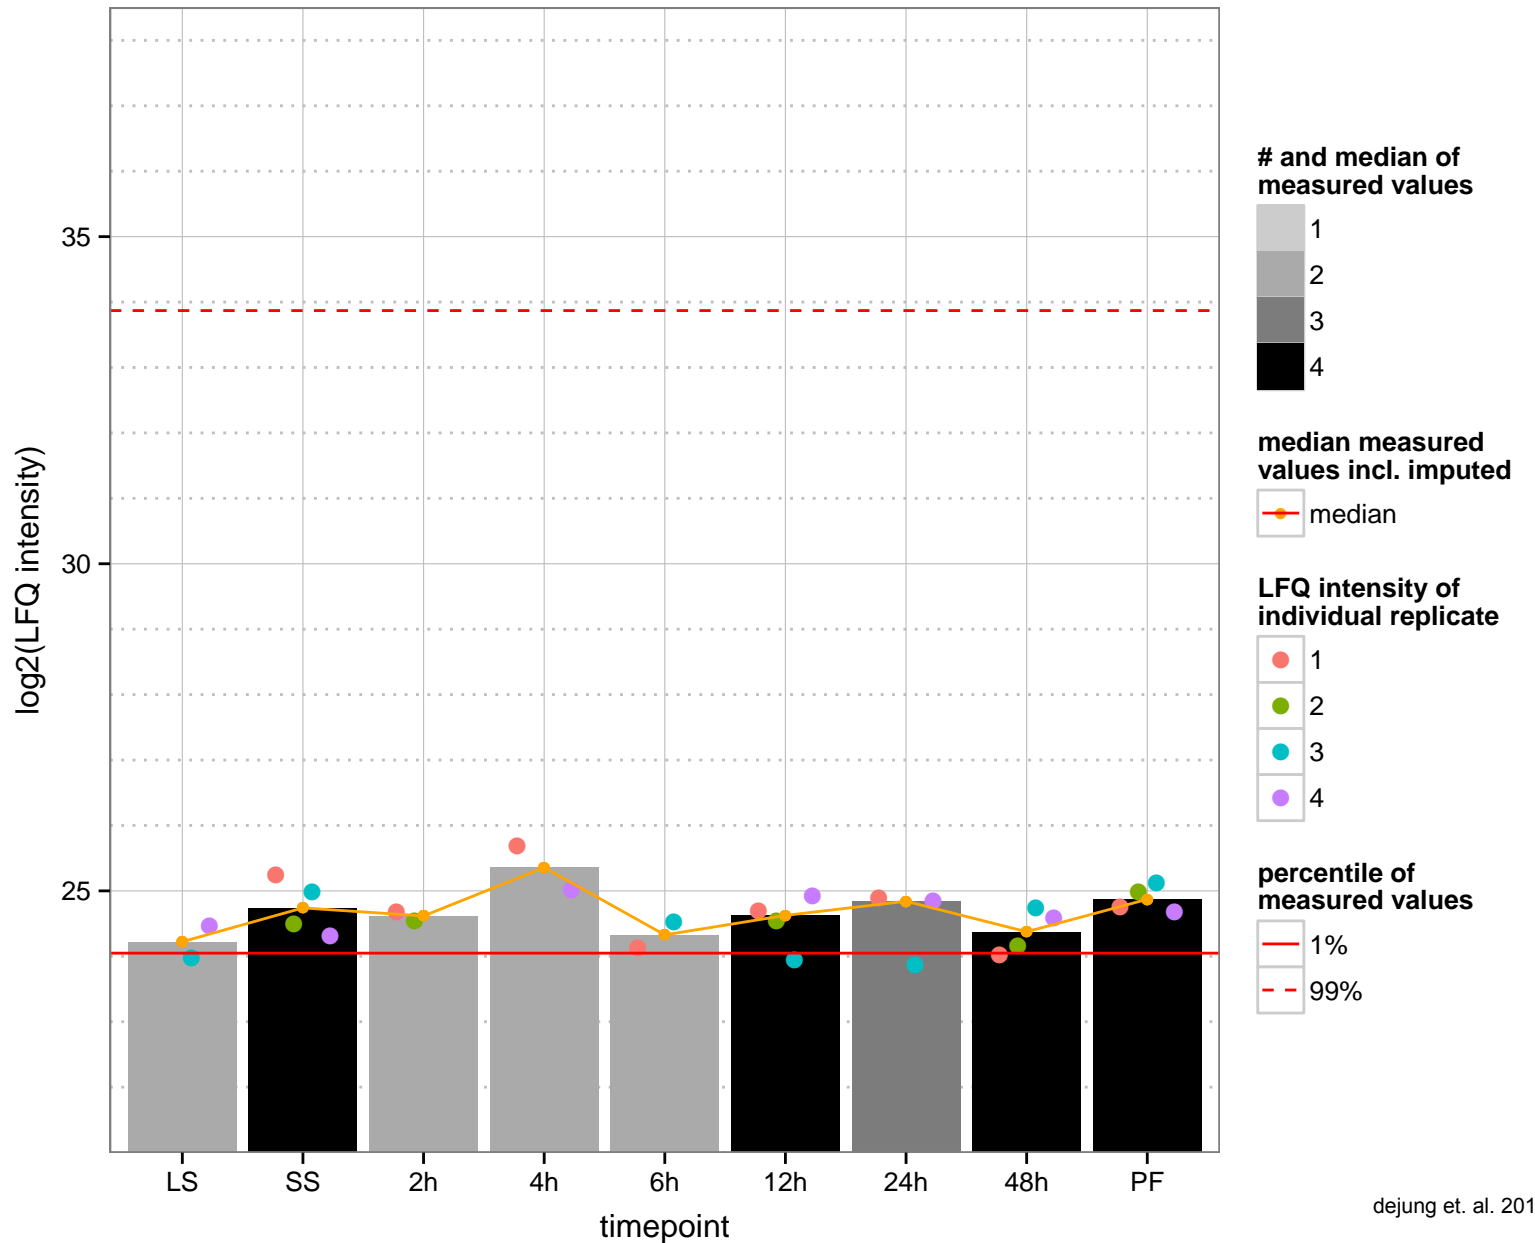



DNA-directed RNA polymerase II/III subunit, putative (RPB5)  
 Tb927.10.13320  
 AGOF: DNA binding, DNA-directed RNA polymerase activity  
 AGOC: nucleus  
 AGOP: transcription, DNA-dependent  
 PGOF: DNA binding, DNA-directed RNA polymerase activity  
 PGO: nucleus  
 PGO: transcription, DNA-dependent

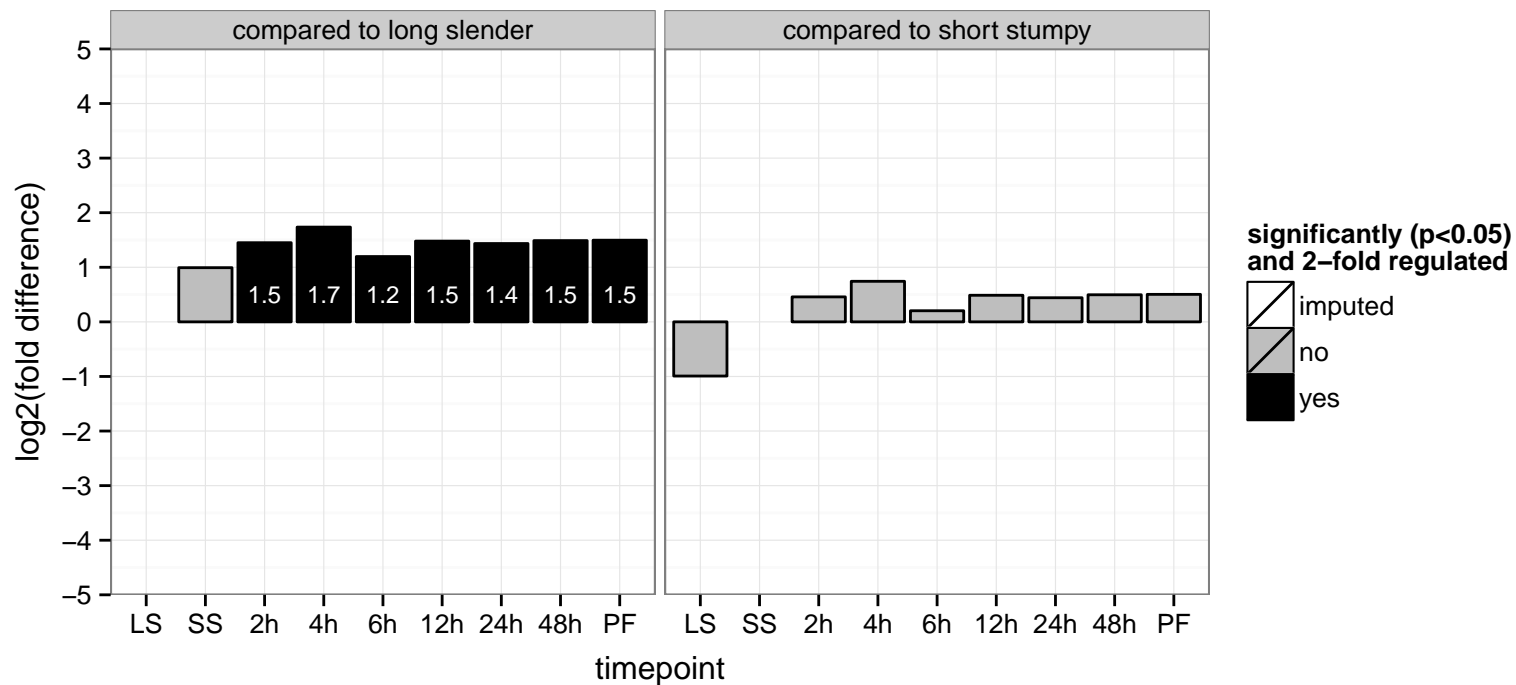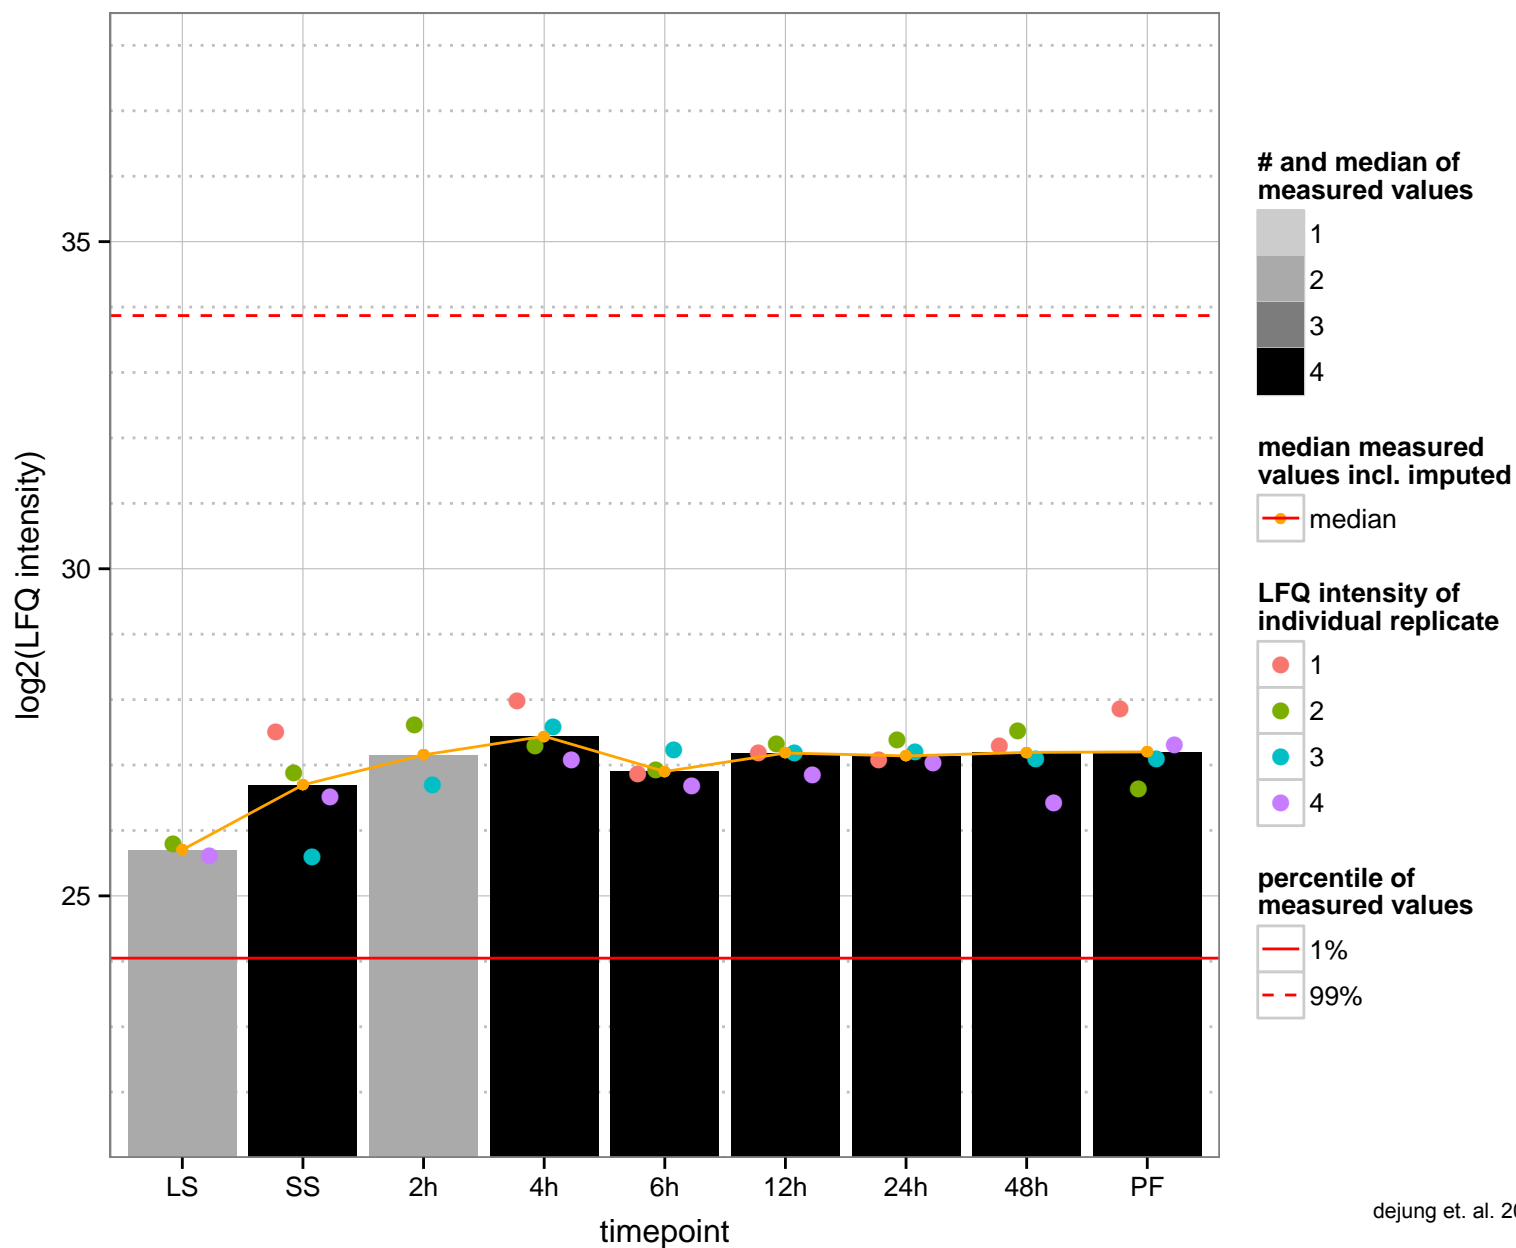

citrate synthase, putative

Tb927.10.13430

AGOF: transferase activity, transferring acyl groups, acyl groups converted into alkyl on transfer

AGOC: mitochondrion

AGOP: cellular carbohydrate metabolic process

PGOF: transferase activity, transferring acyl groups, acyl groups converted into alkyl on transfer

PGOC: null

PGOP: cellular carbohydrate metabolic process

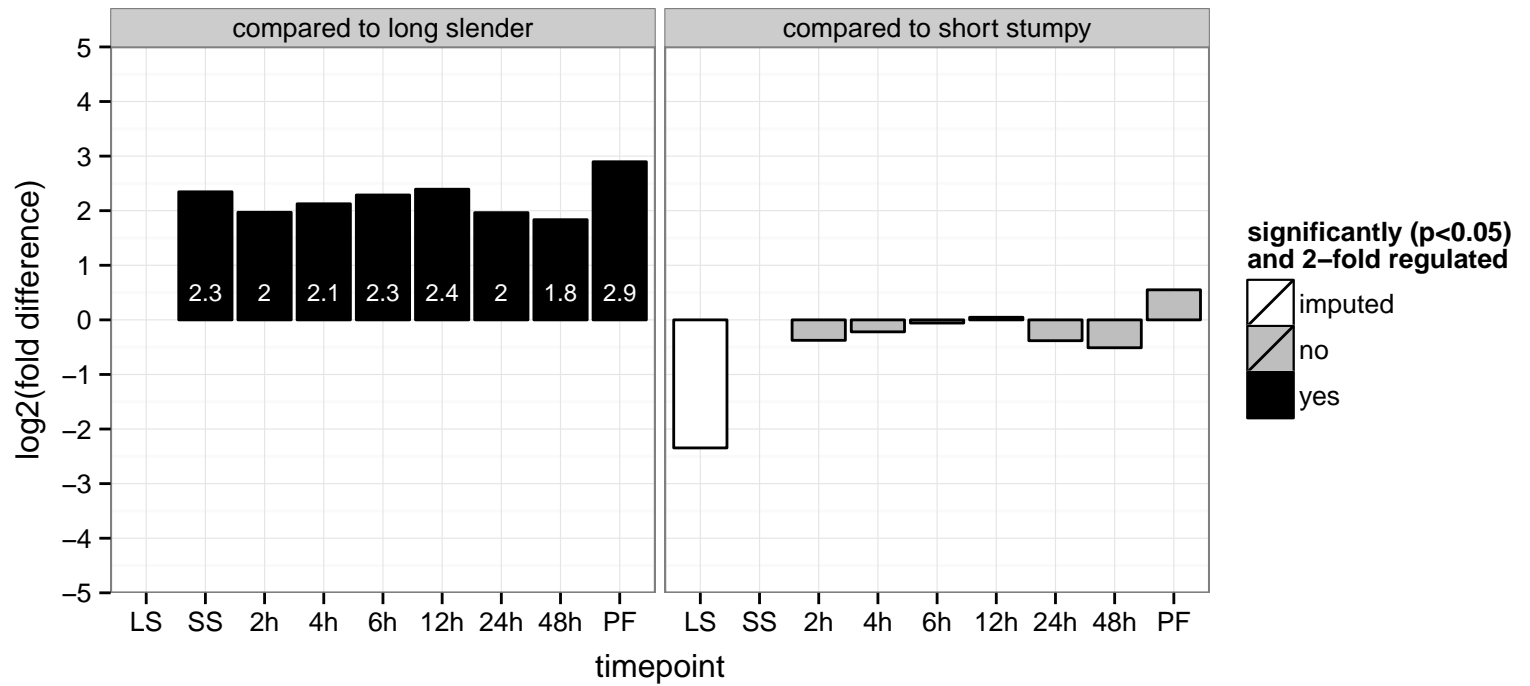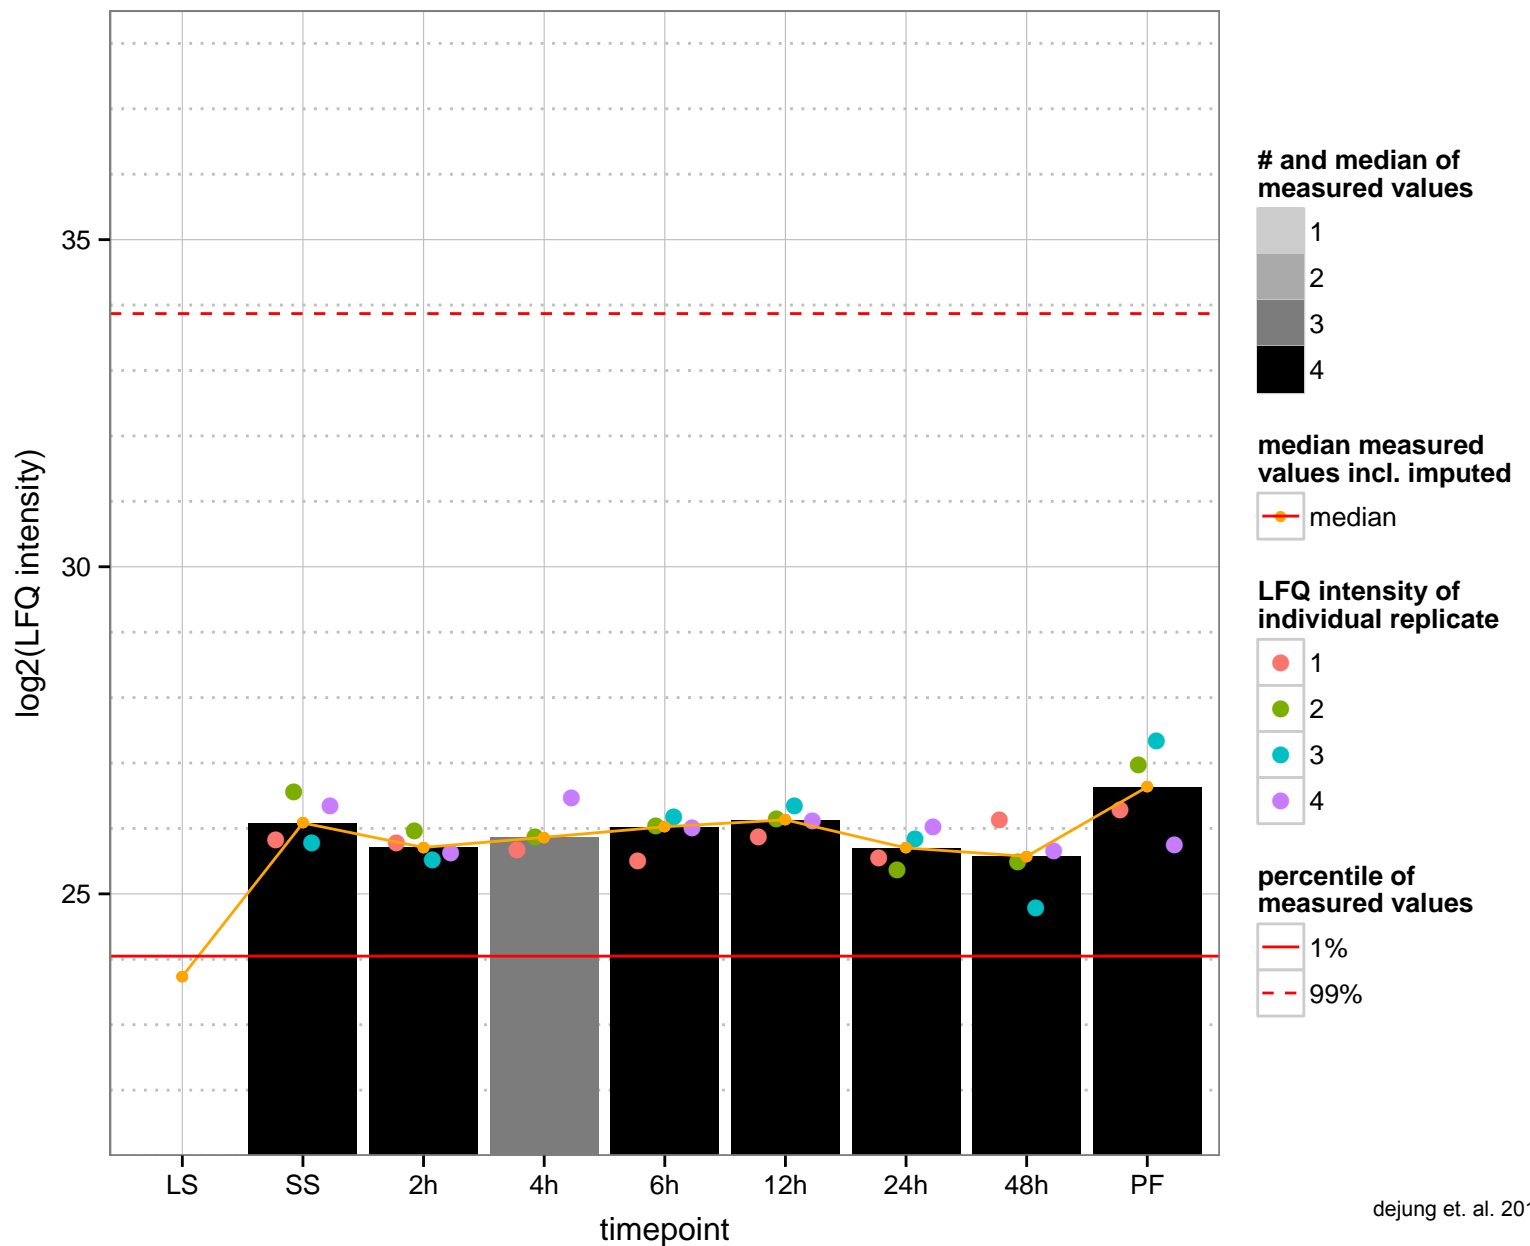

hypothetical protein, conserved  
 Tb927.10.13450  
 AGOF: null  
 AGOC: null  
 AGOP: null  
 PGOF: binding  
 PGO: null  
 PGOP: null

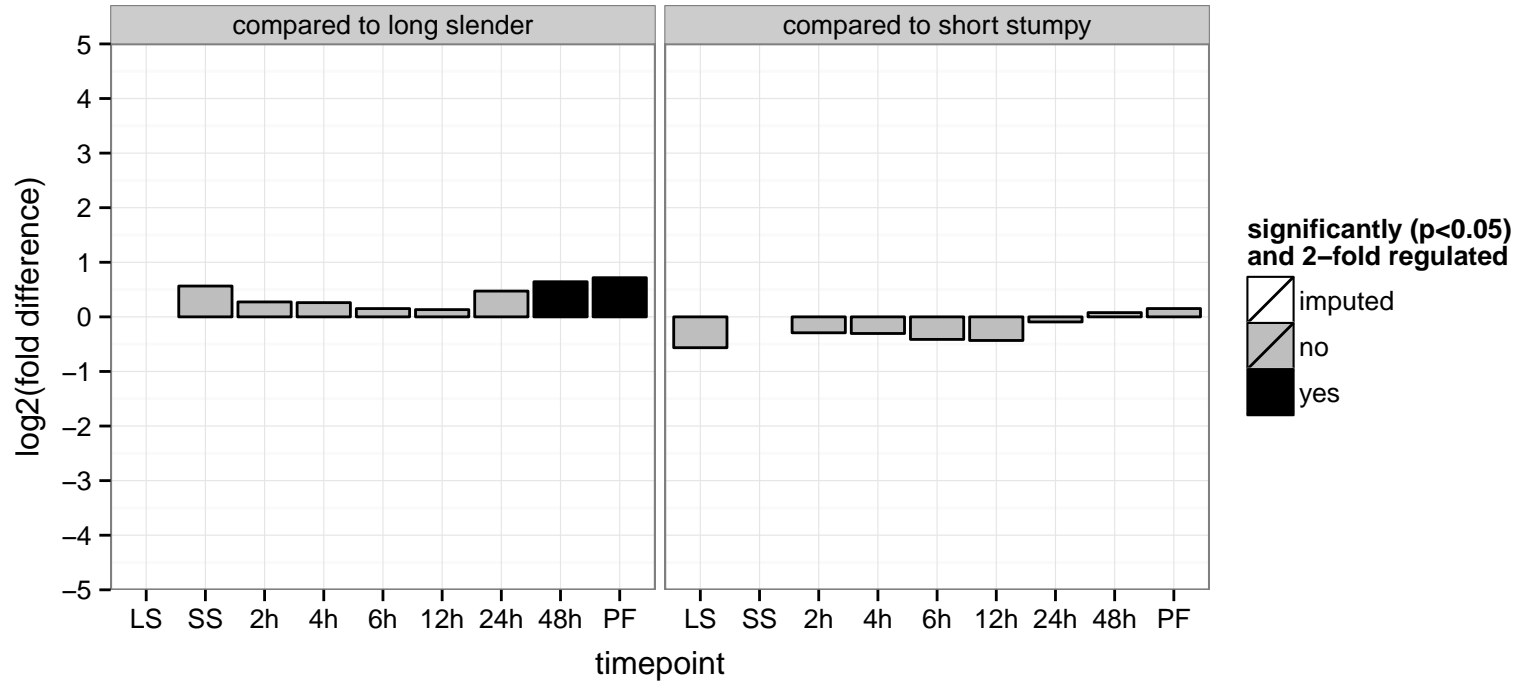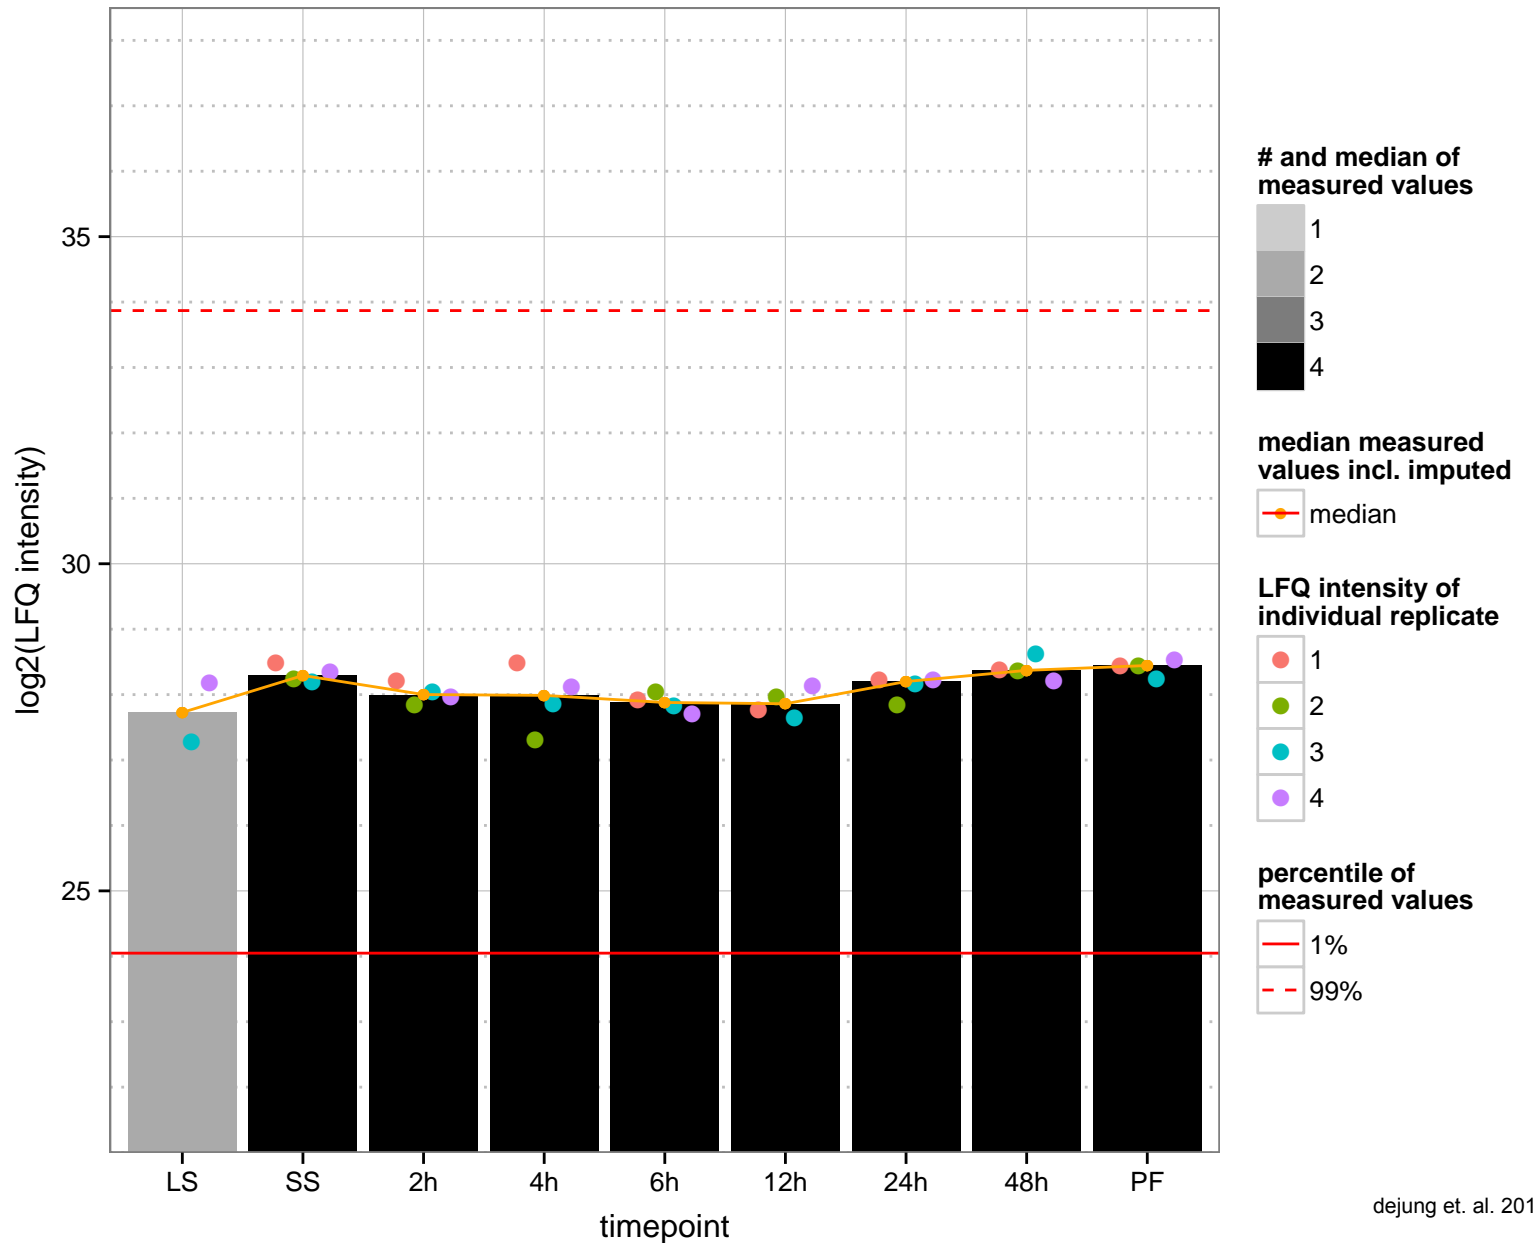

protein kinase, putative

Tb927.10.13480

AGOF: ATP binding, protein serine/threonine kinase activity, protein tyrosine kinase activity

AGOC: mitochondrion

AGOP: protein phosphorylation

PGOF: ATP binding, protein kinase activity, transferase activity, transferring phosphorus-containing groups

PGOC: null

PGOP: protein phosphorylation

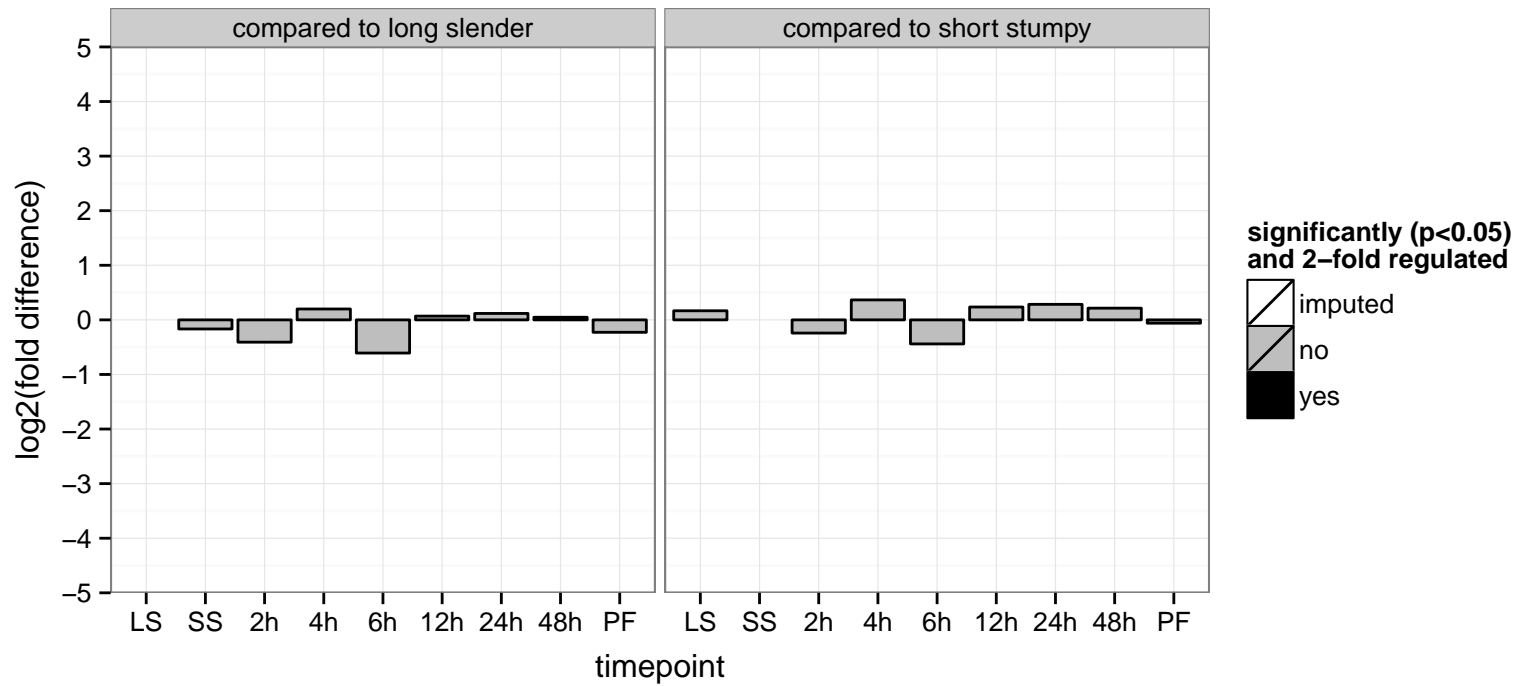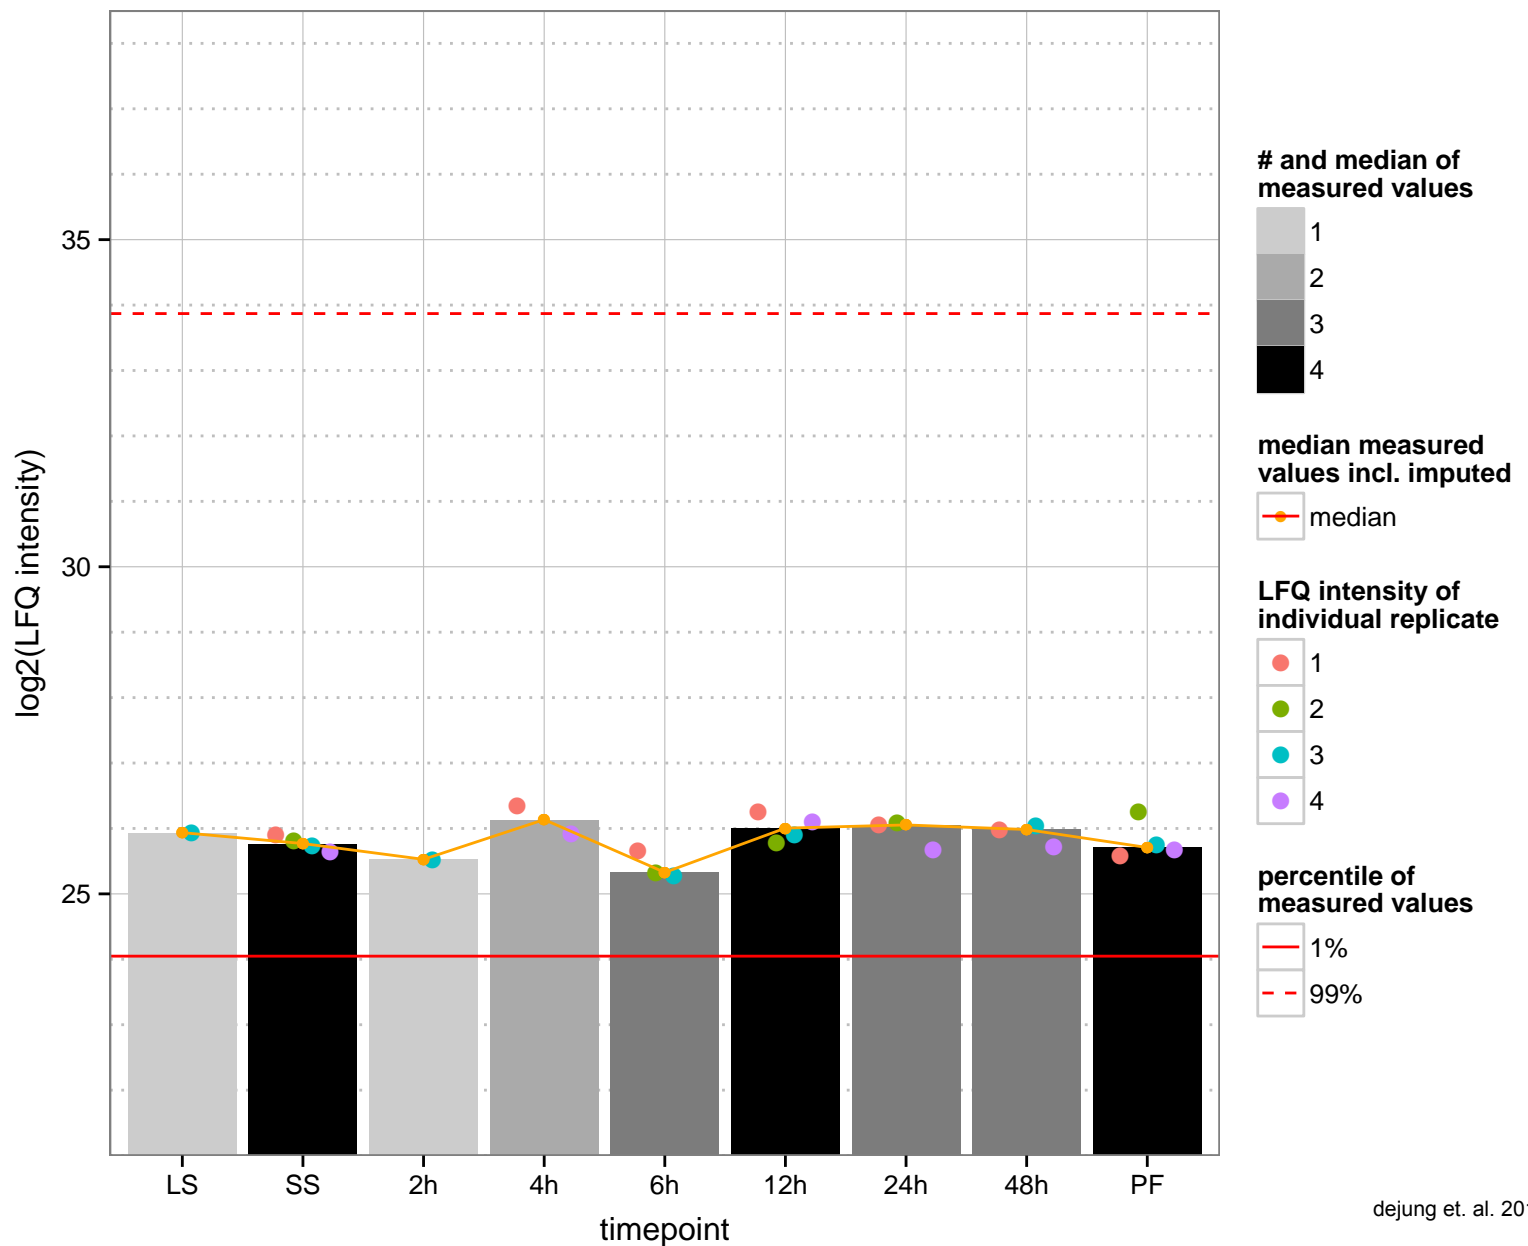

zinc metallopeptidase, putative

Tb927.10.13510

AGOF: ATP binding, metalloendopeptidase activity, nucleoside-triphosphatase activity

AGOC: null

AGOP: proteolysis

PGOF: ATP binding, metalloendopeptidase activity, nucleoside-triphosphatase activity, nucleotide binding

PGOC: null

PGOP: proteolysis

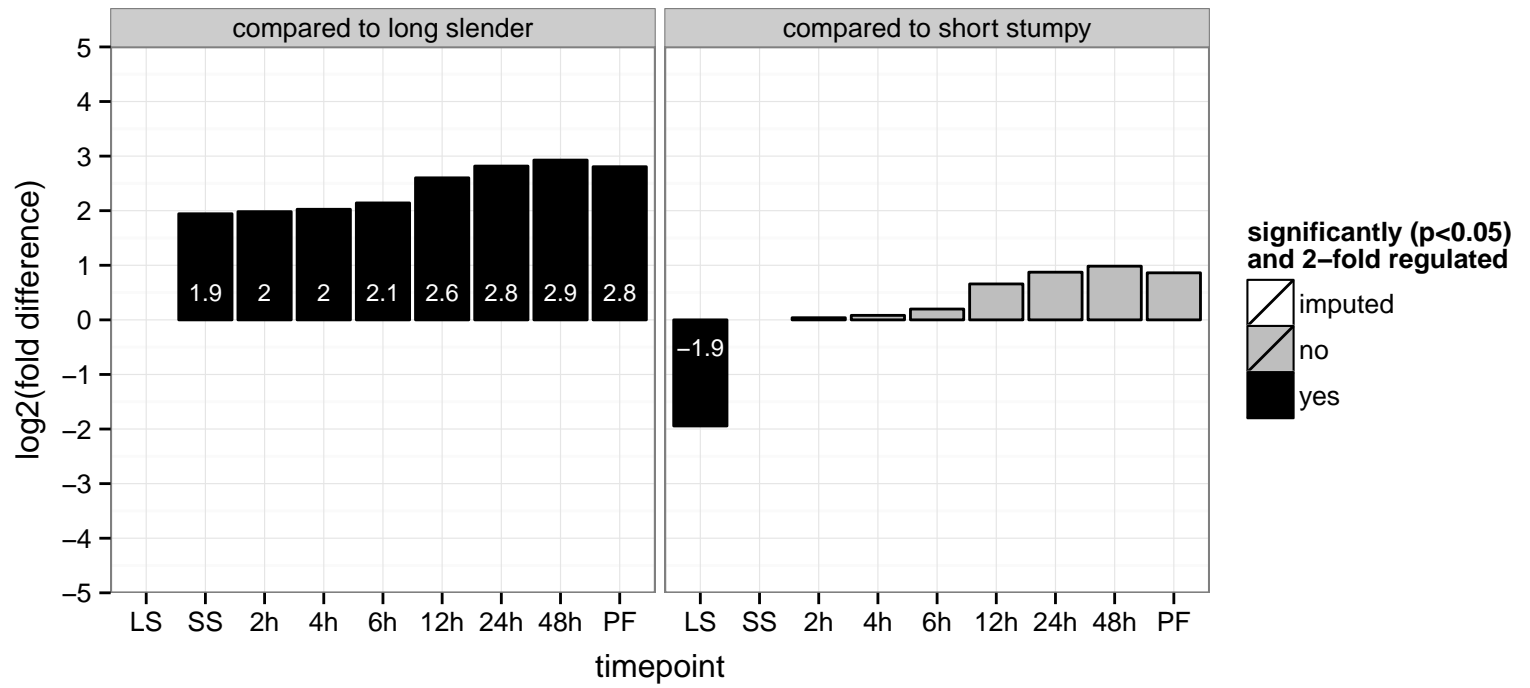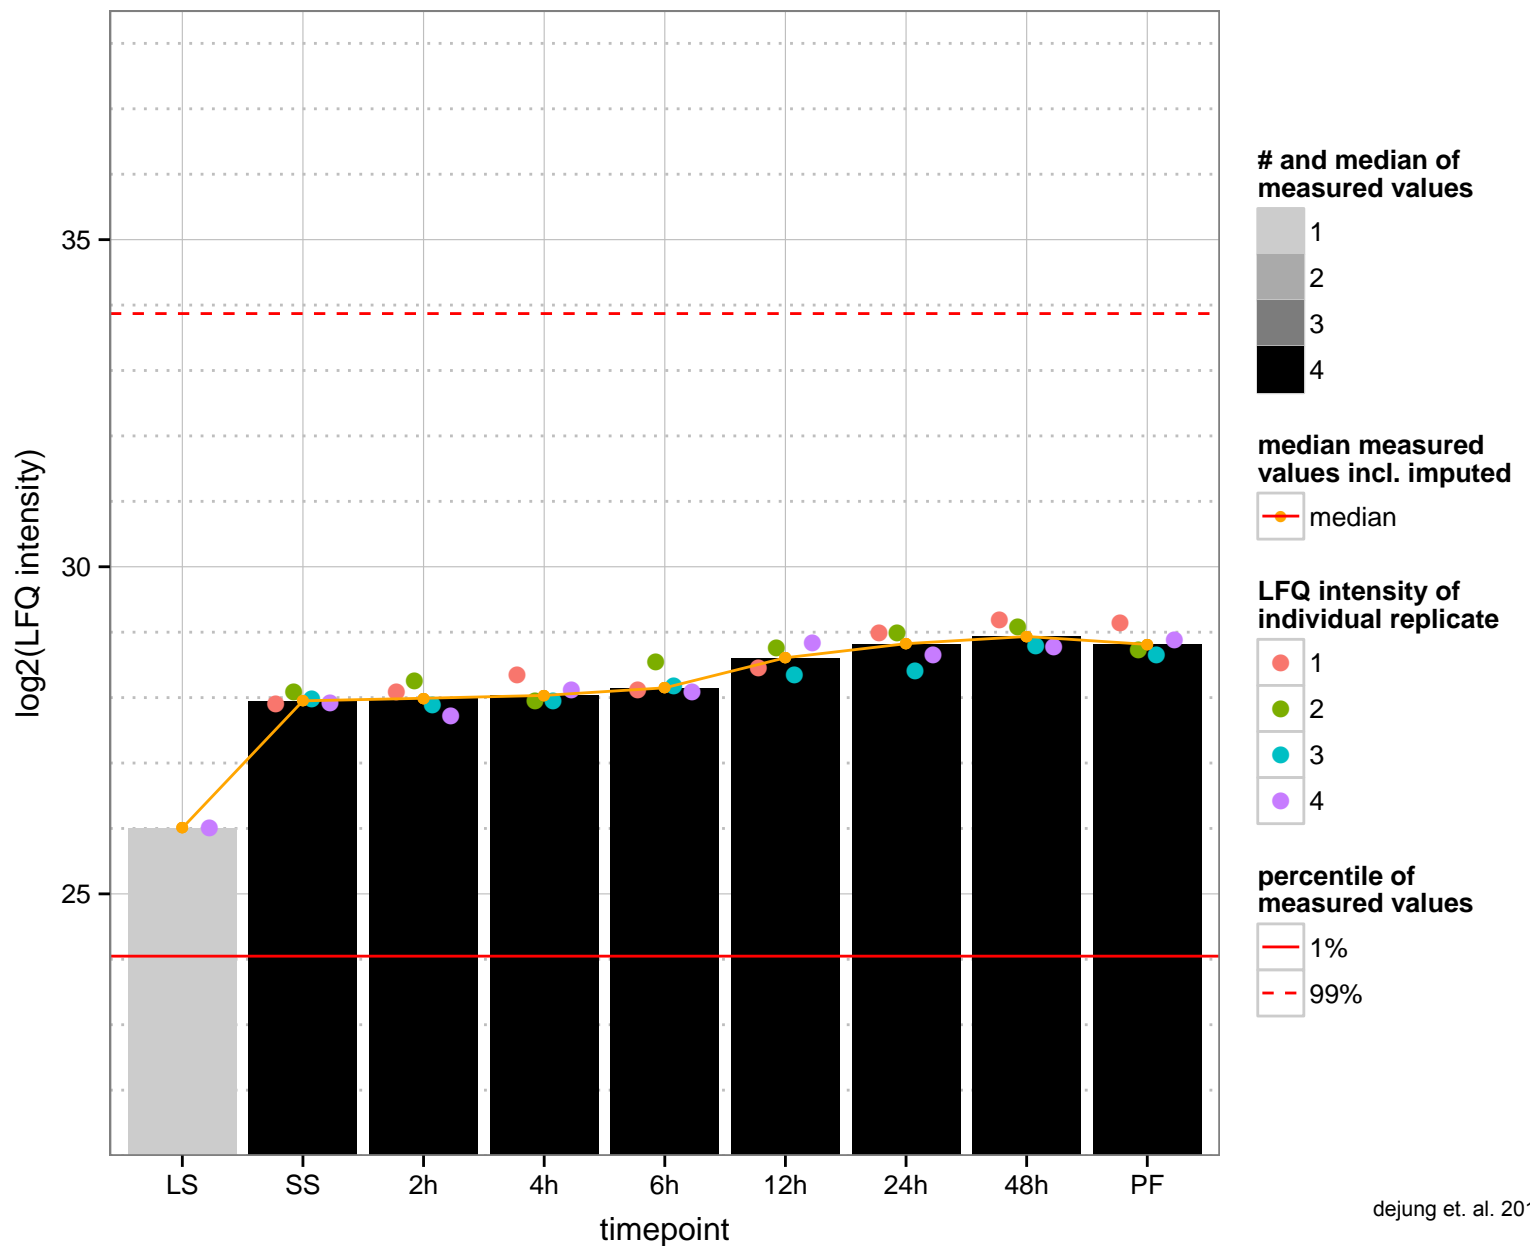

mevalonate-diphosphate decarboxylase, mevalonate diphosphate decarboxylase  
 Tb927.10.13560;Tb927.10.14070  
 AGOF: ATP binding, diphosphomevalonate decarboxylase activity, kinase activity  
 AGOC: null  
 AGOP: isoprenoid biosynthetic process, phosphorylation  
 PGOF: ATP binding, diphosphomevalonate decarboxylase activity  
 PGO: null  
 PGO: null  
 PGO: isoprenoid biosynthetic process

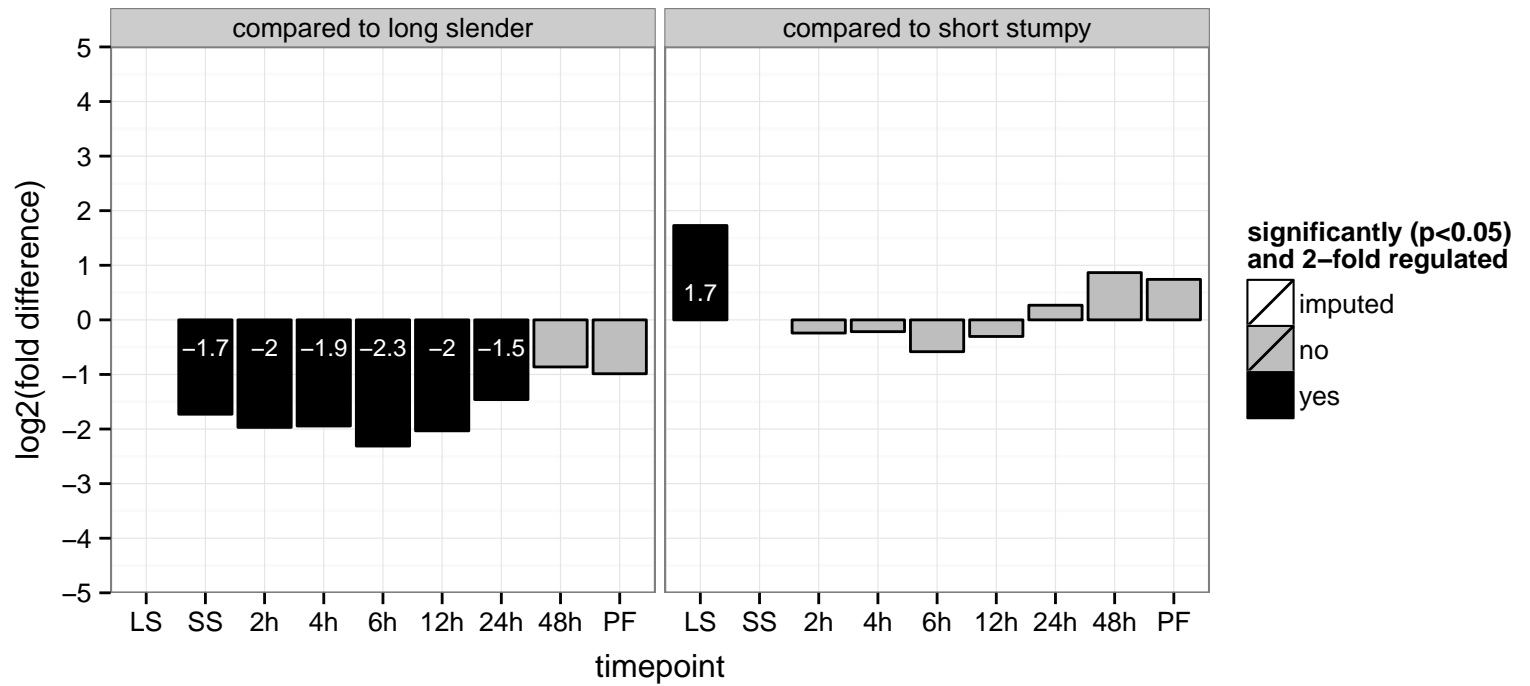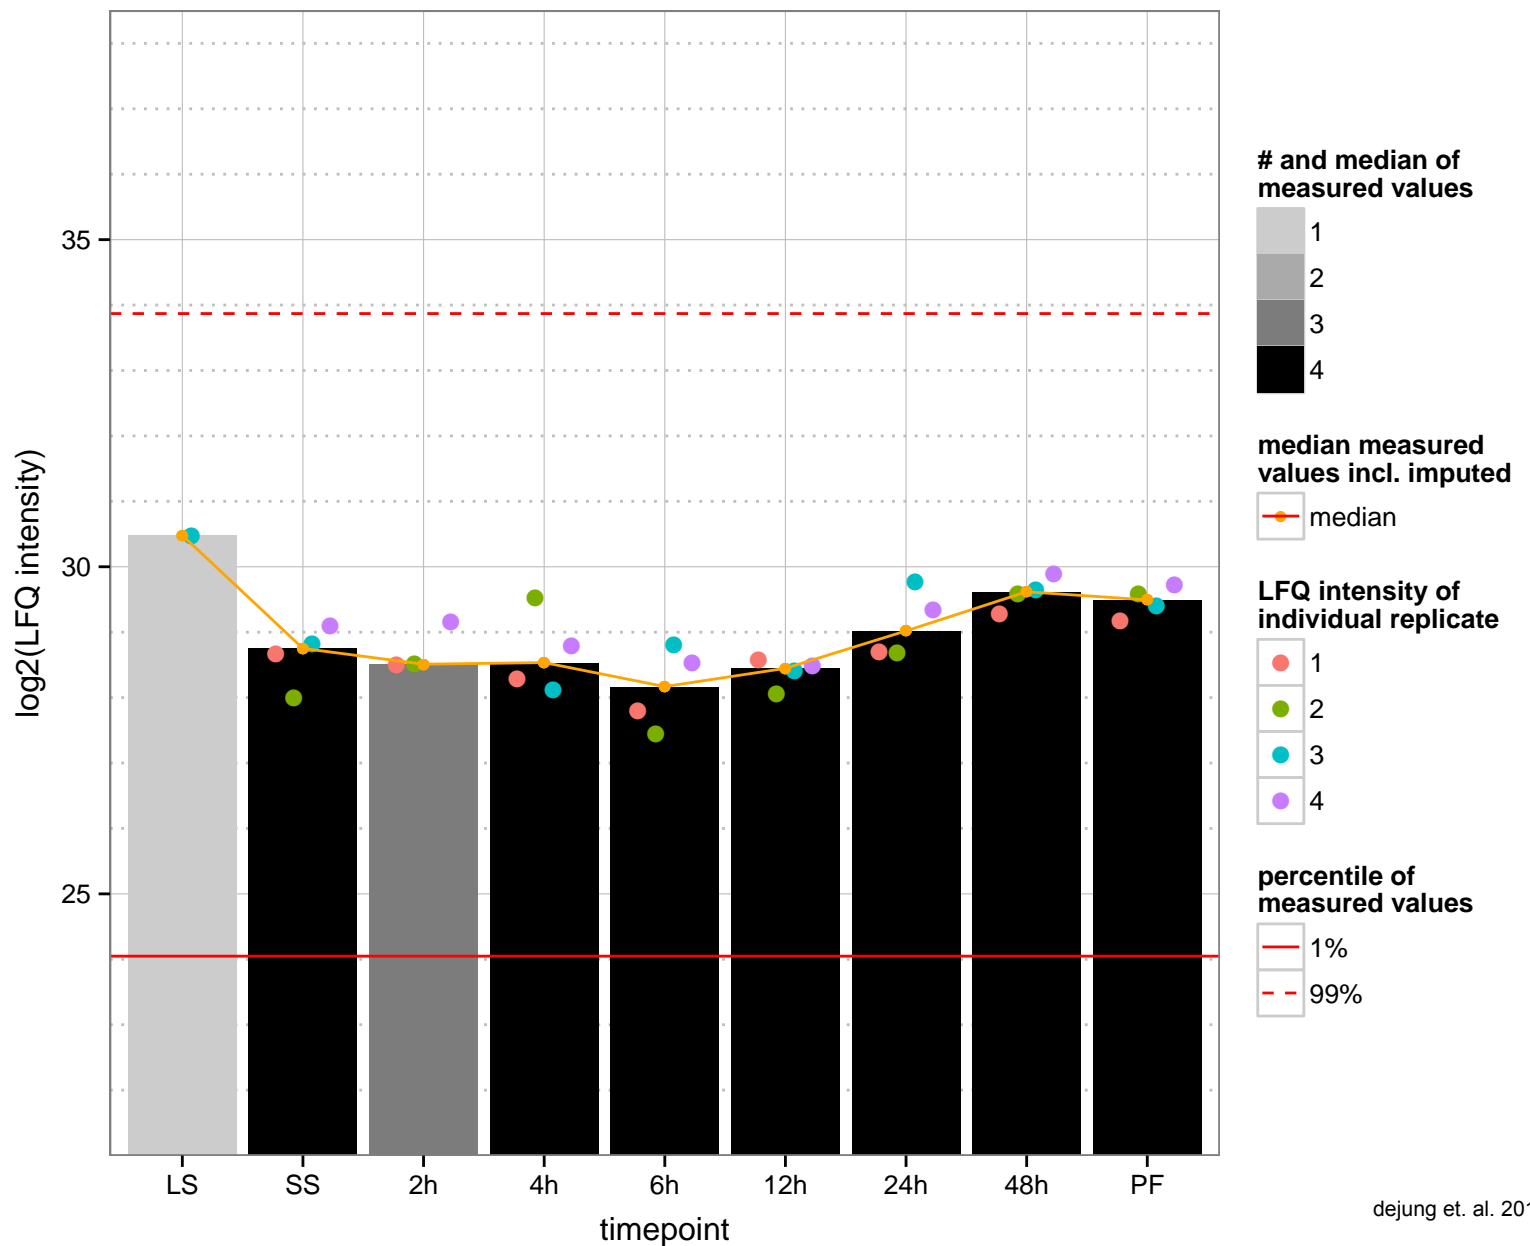

glucosidase, putative  
 Tb927.10.13630  
 AGOF: hydrolase activity, hydrolyzing O-glycosyl compounds  
 AGOC: null  
 AGOP: carbohydrate metabolic process  
 PGOF: carbohydrate binding, catalytic activity, hydrolase activity, hydrolyzing O-glycosyl compounds  
 PGOC: null  
 PGO: carbohydrate metabolic process

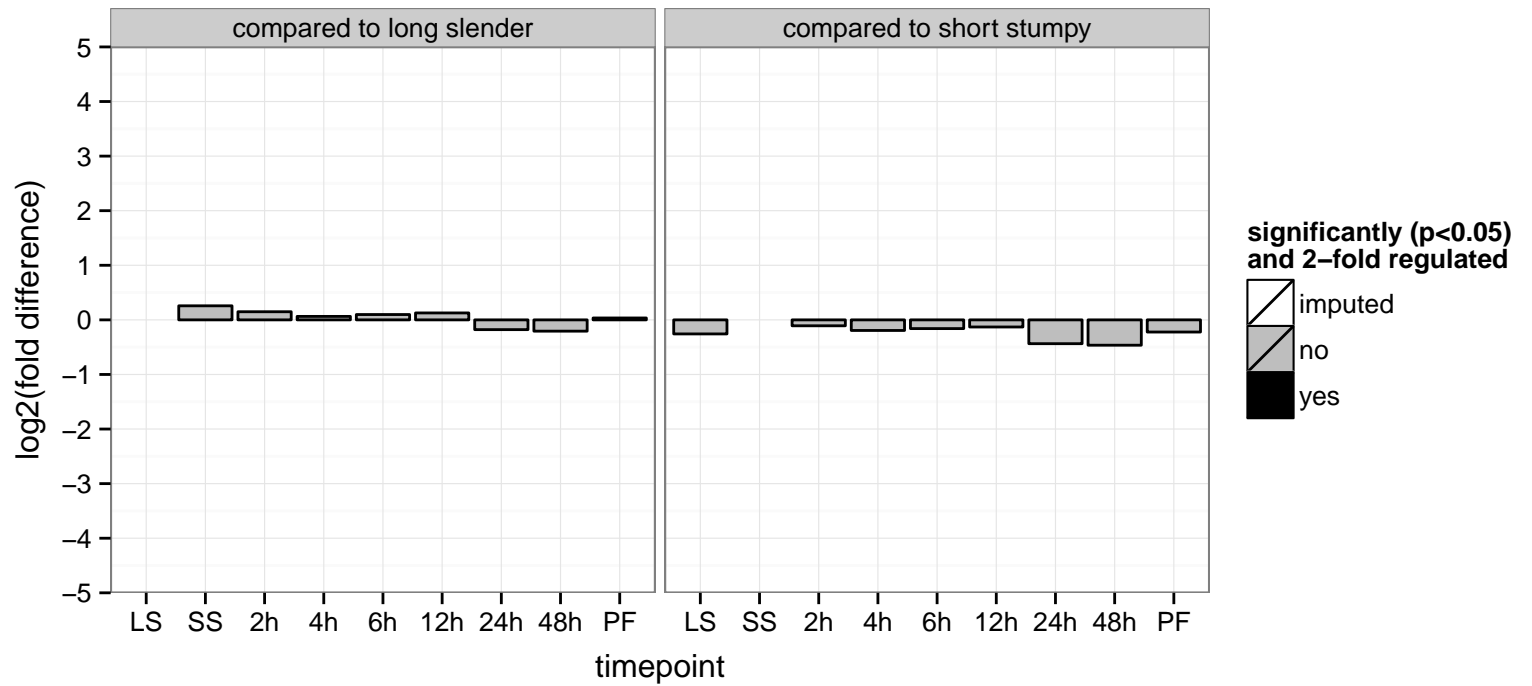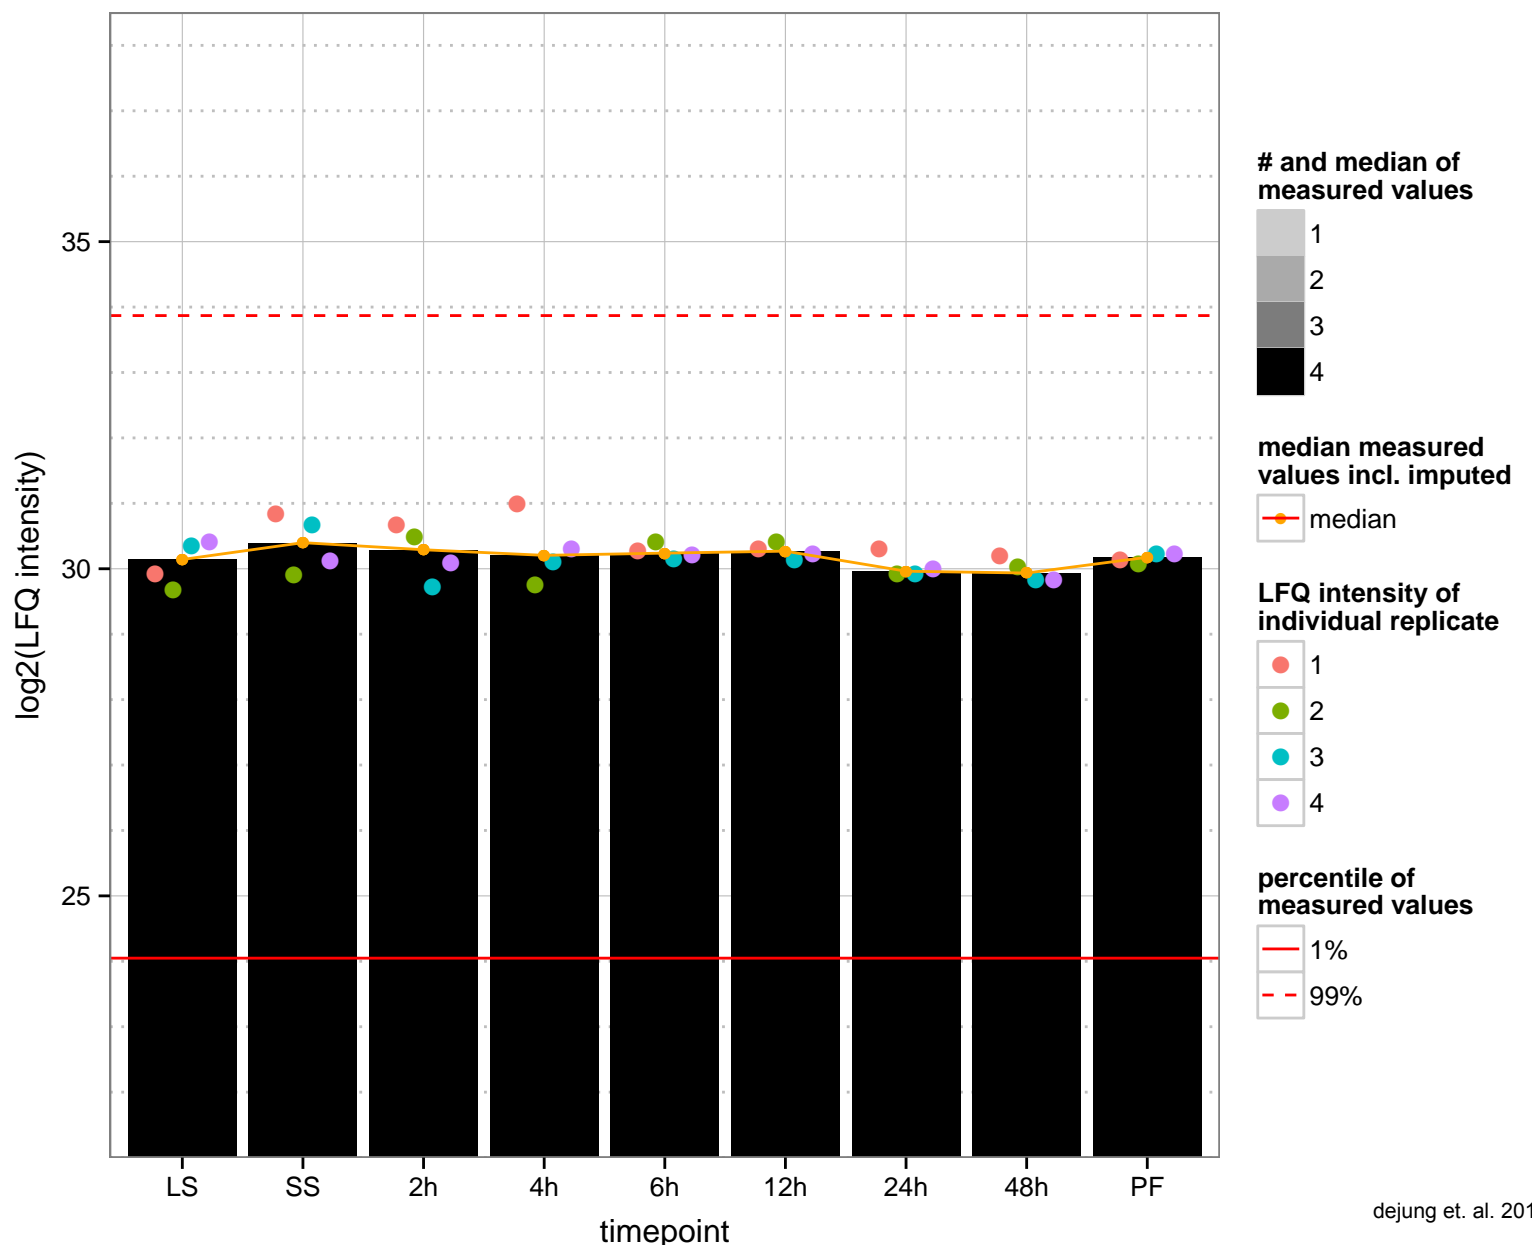

ARF-like 2-binding protein, putative, BART  
 Tb927.10.13650  
 AGOF: null  
 AGOC: null  
 AGOP: null  
 PGOF: null  
 PGOC: null  
 PGOP: null

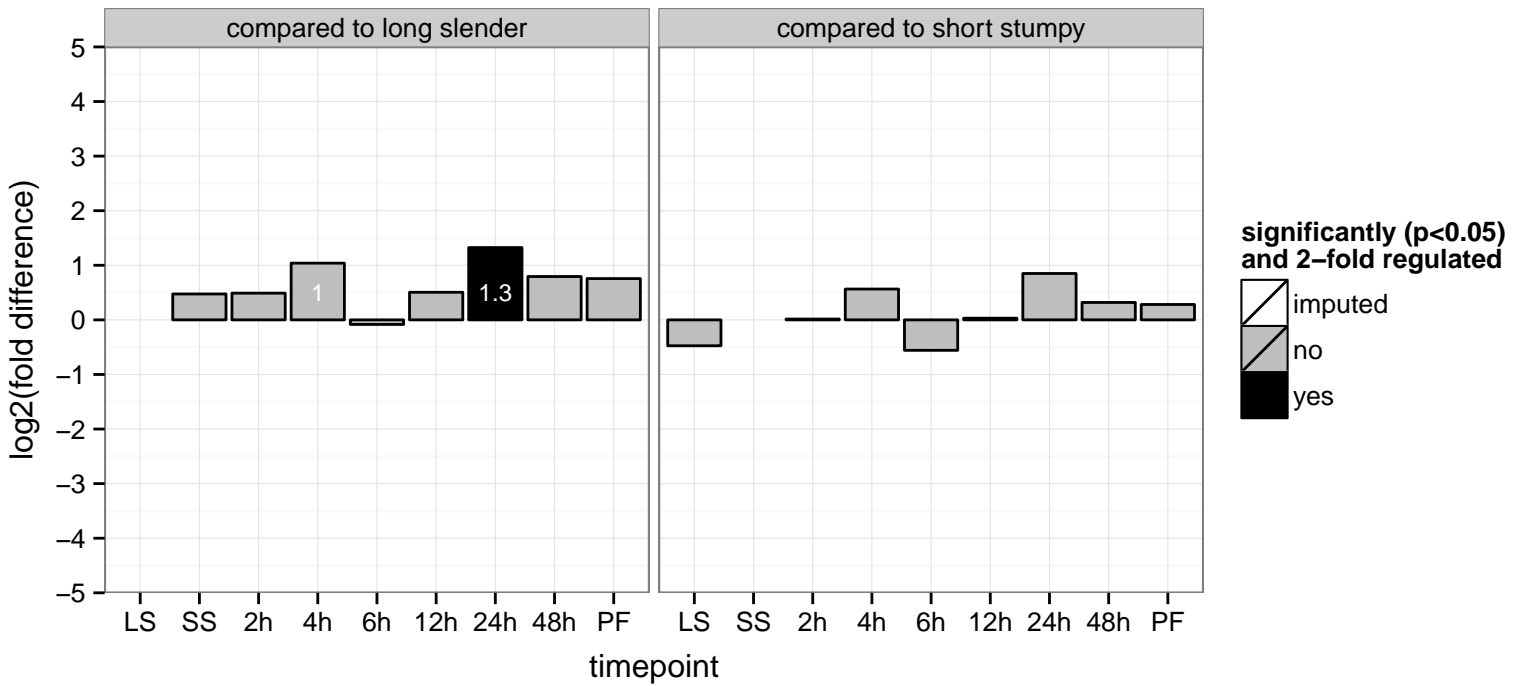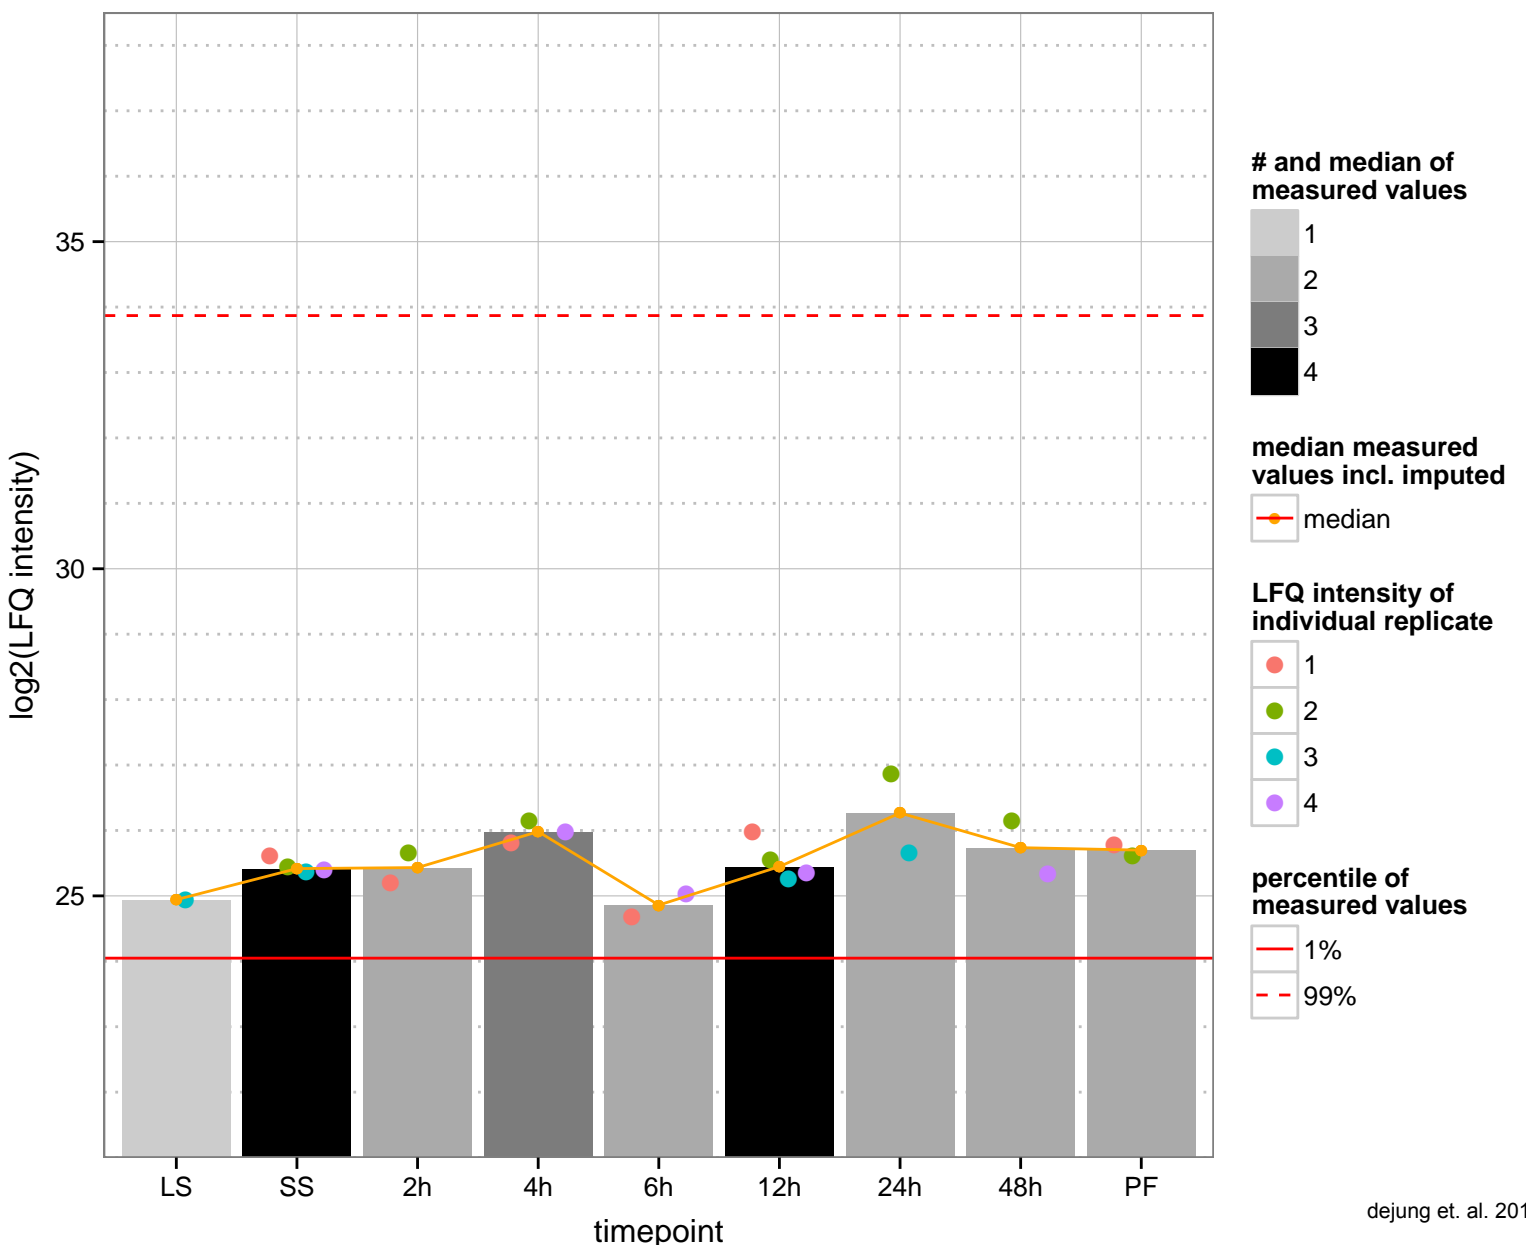



serine/threonine protein phosphatase 5

Tb927.10.13670

AGOF: metal ion binding, protein serine/threonine phosphatase activity

AGOC: cytoplasm, nucleus

AGOP: protein dephosphorylation

PGOF: hydrolase activity, phosphoprotein phosphatase activity, protein binding

PGOC: cytoplasm, nucleus

PGOP: protein dephosphorylation

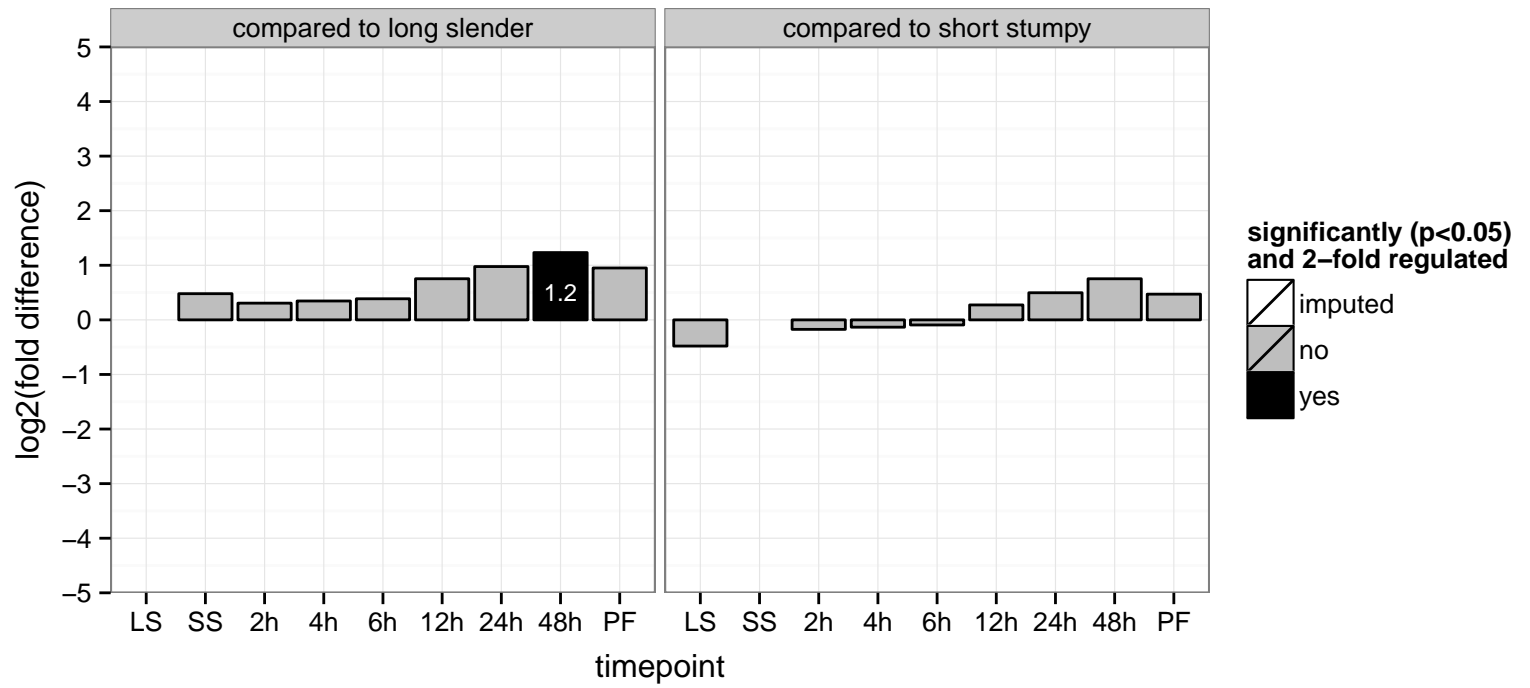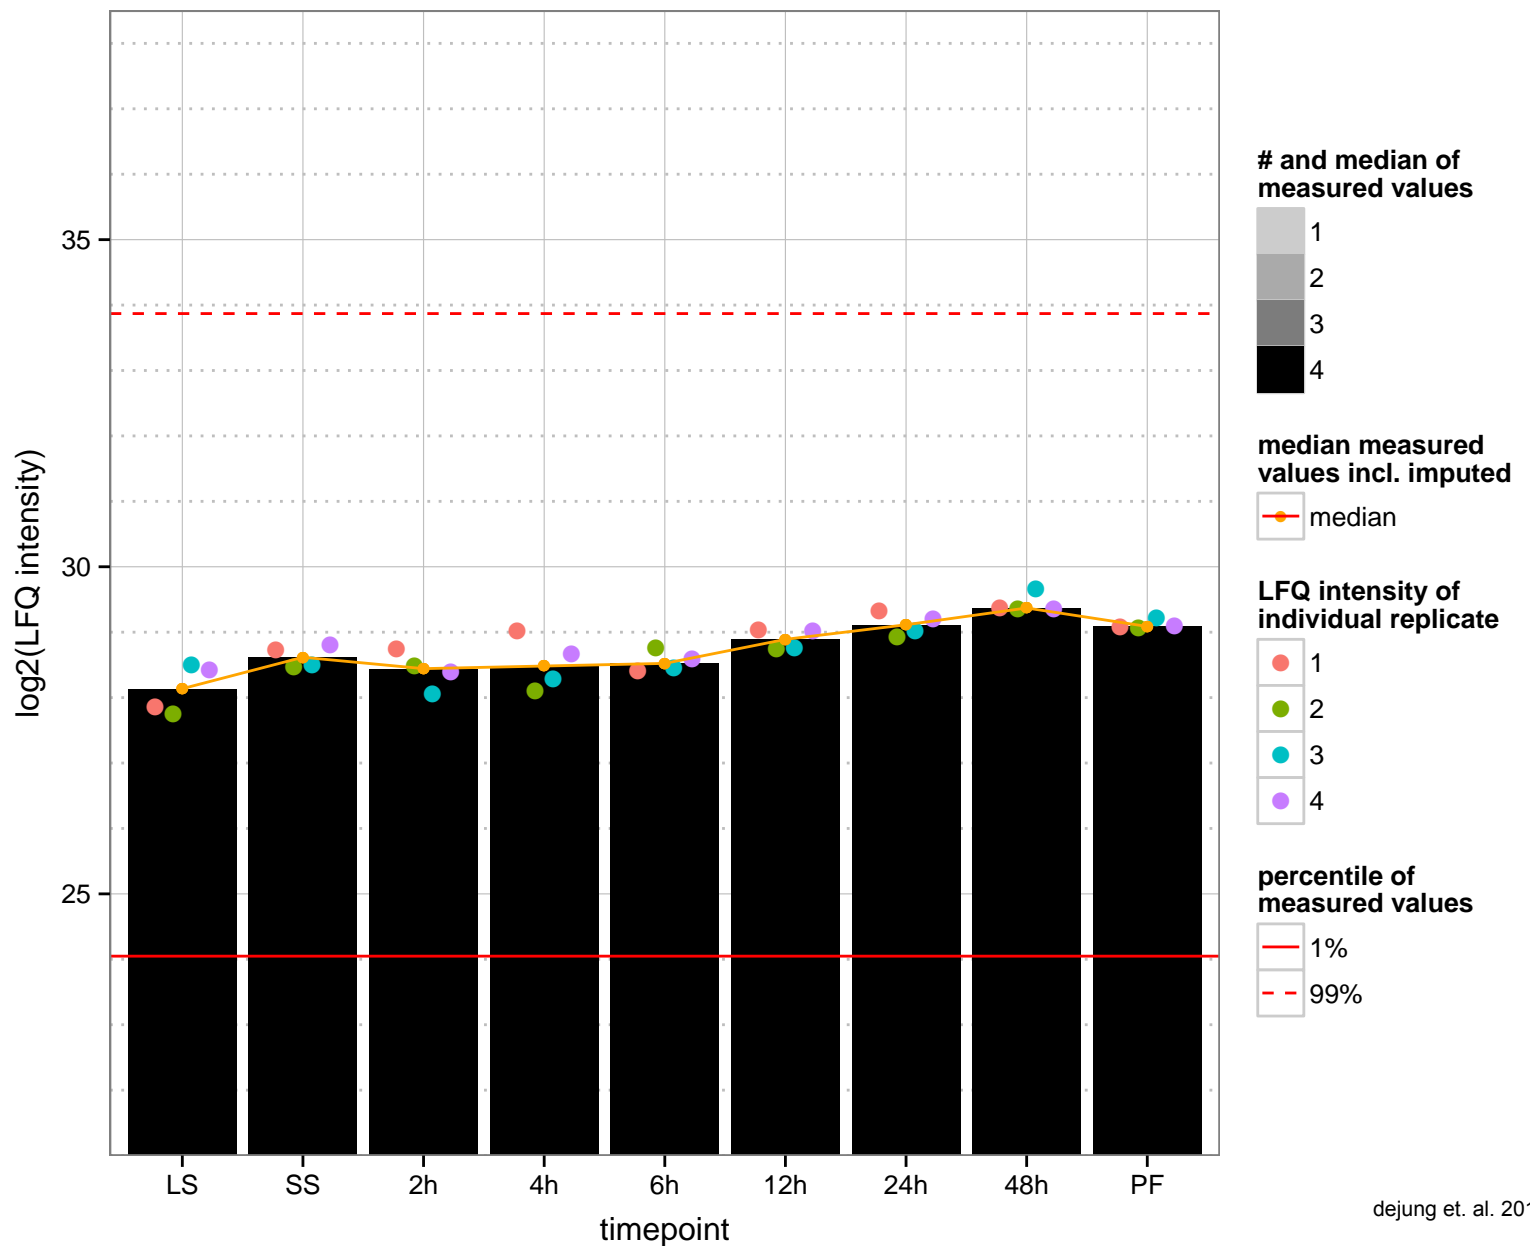

hypothetical protein, conserved  
 Tb927.10.13710  
 AGOF: ATPase activator activity, chaperone binding  
 AGOC: cytoplasm  
 AGOP: response to stress  
 PGOF: ATPase activator activity, chaperone binding  
 PGO: null  
 PGOP: response to stress

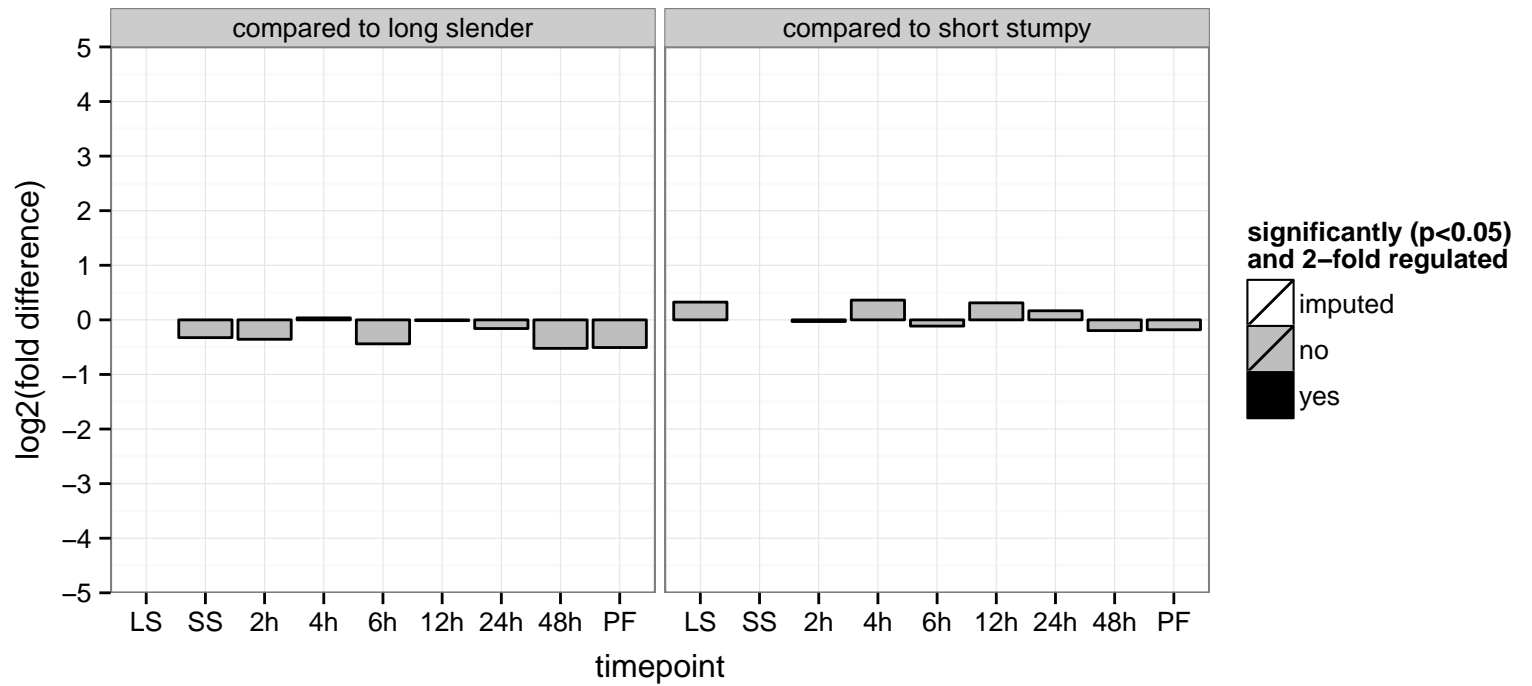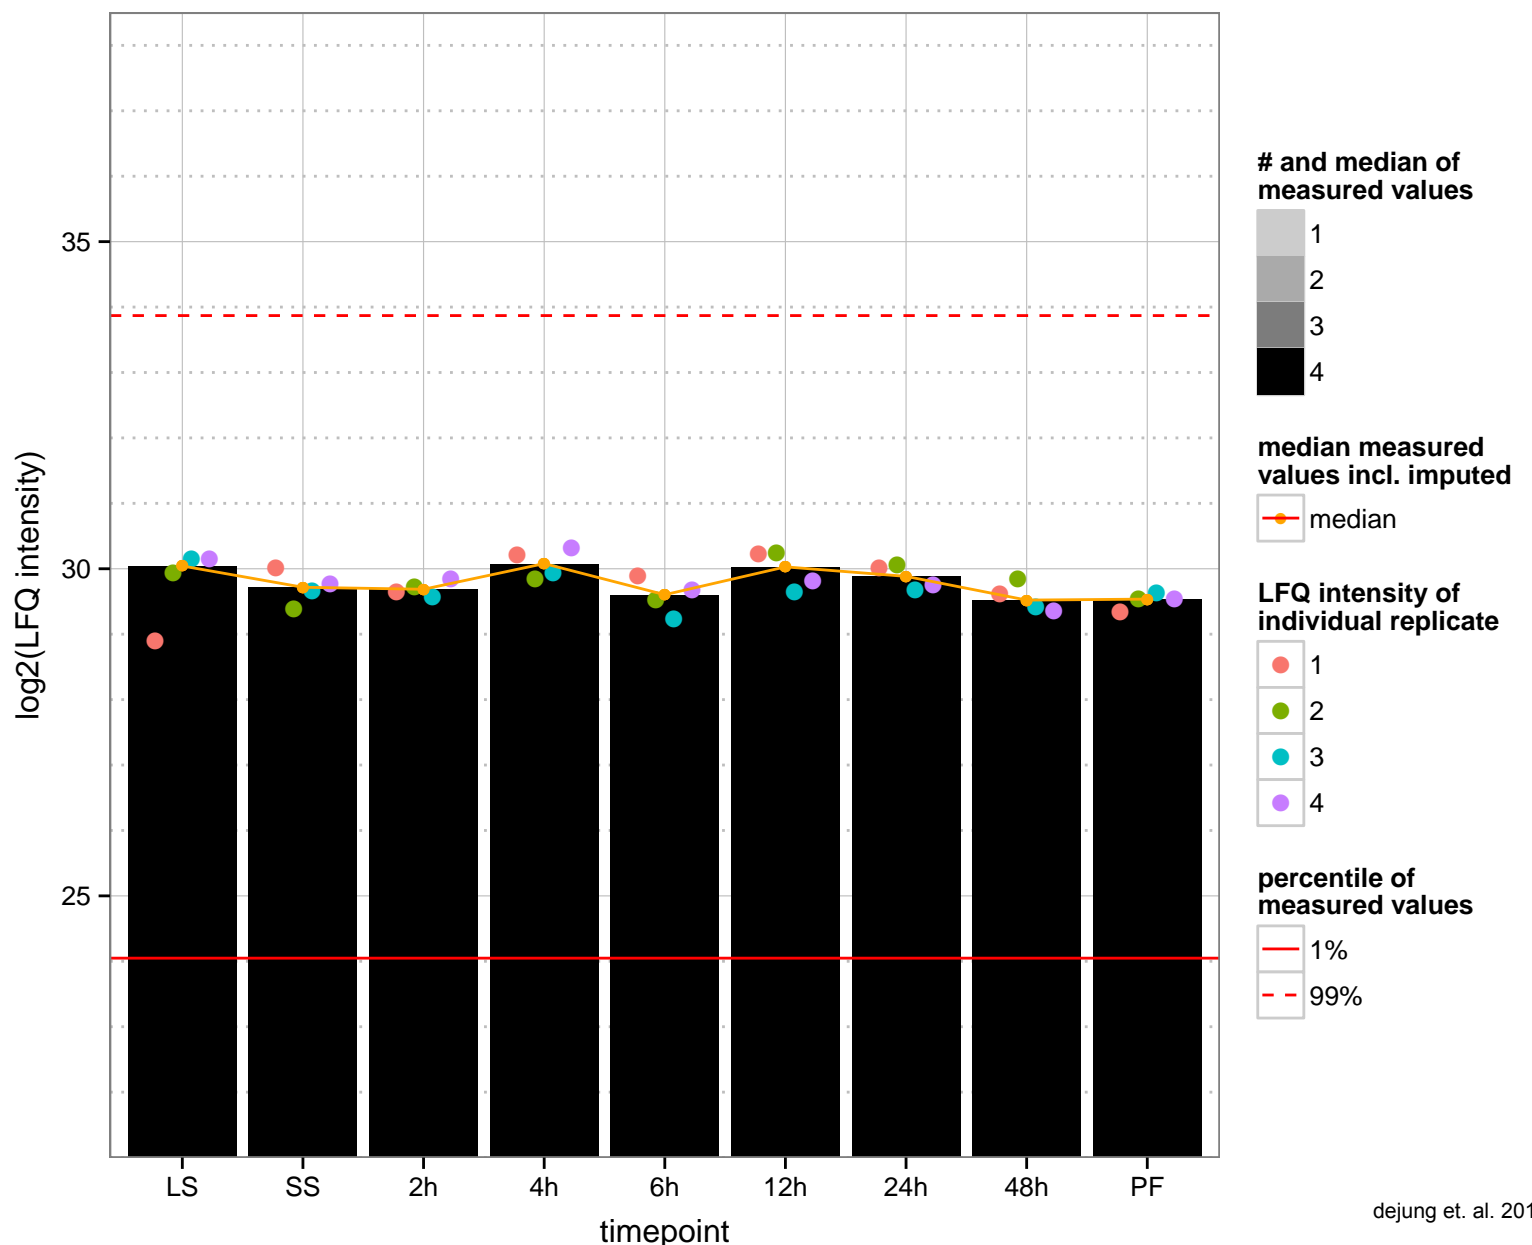

RNA-binding protein 29, putative (RBP29)  
 Tb927.10.13720  
 AGOF: RNA binding  
 AGOC: nucleus  
 AGOP: RNA processing  
 PGOF: nucleic acid binding  
 PGO: null  
 PGOP: null

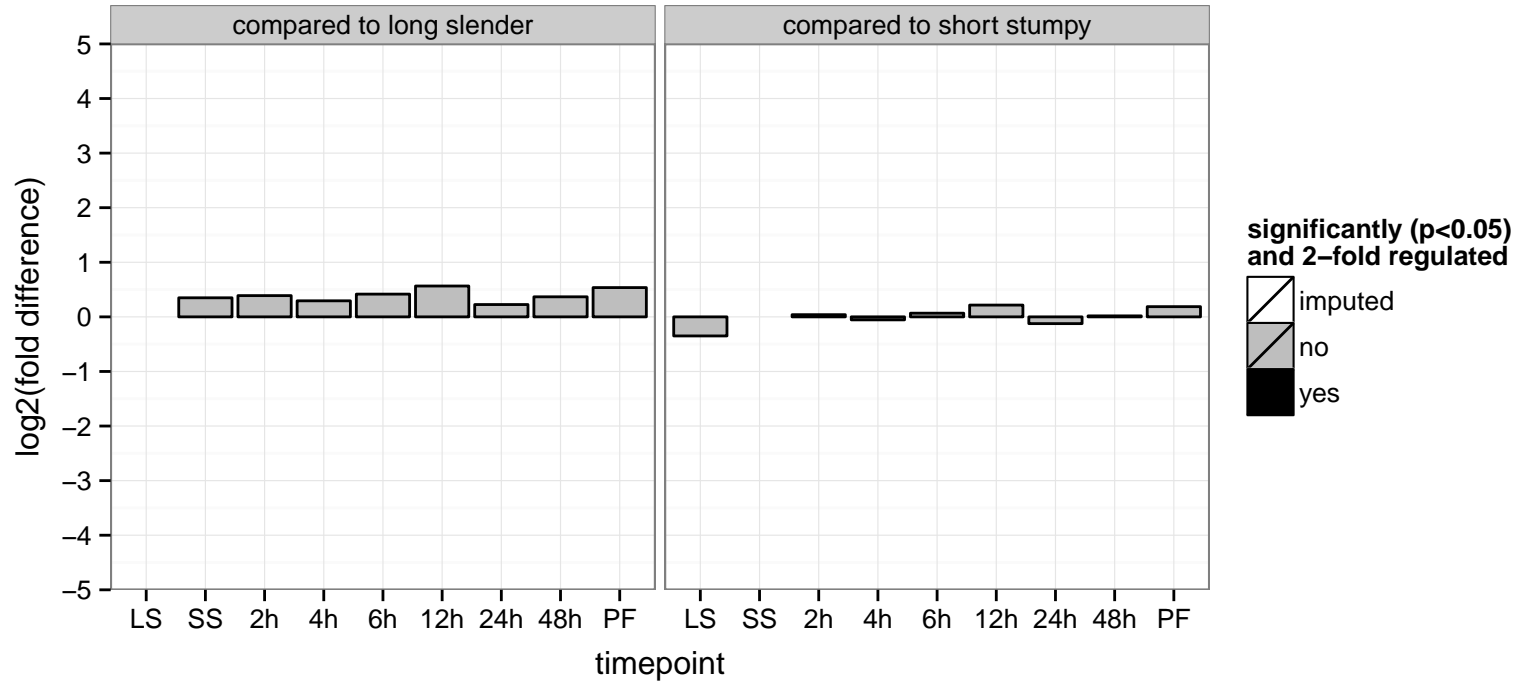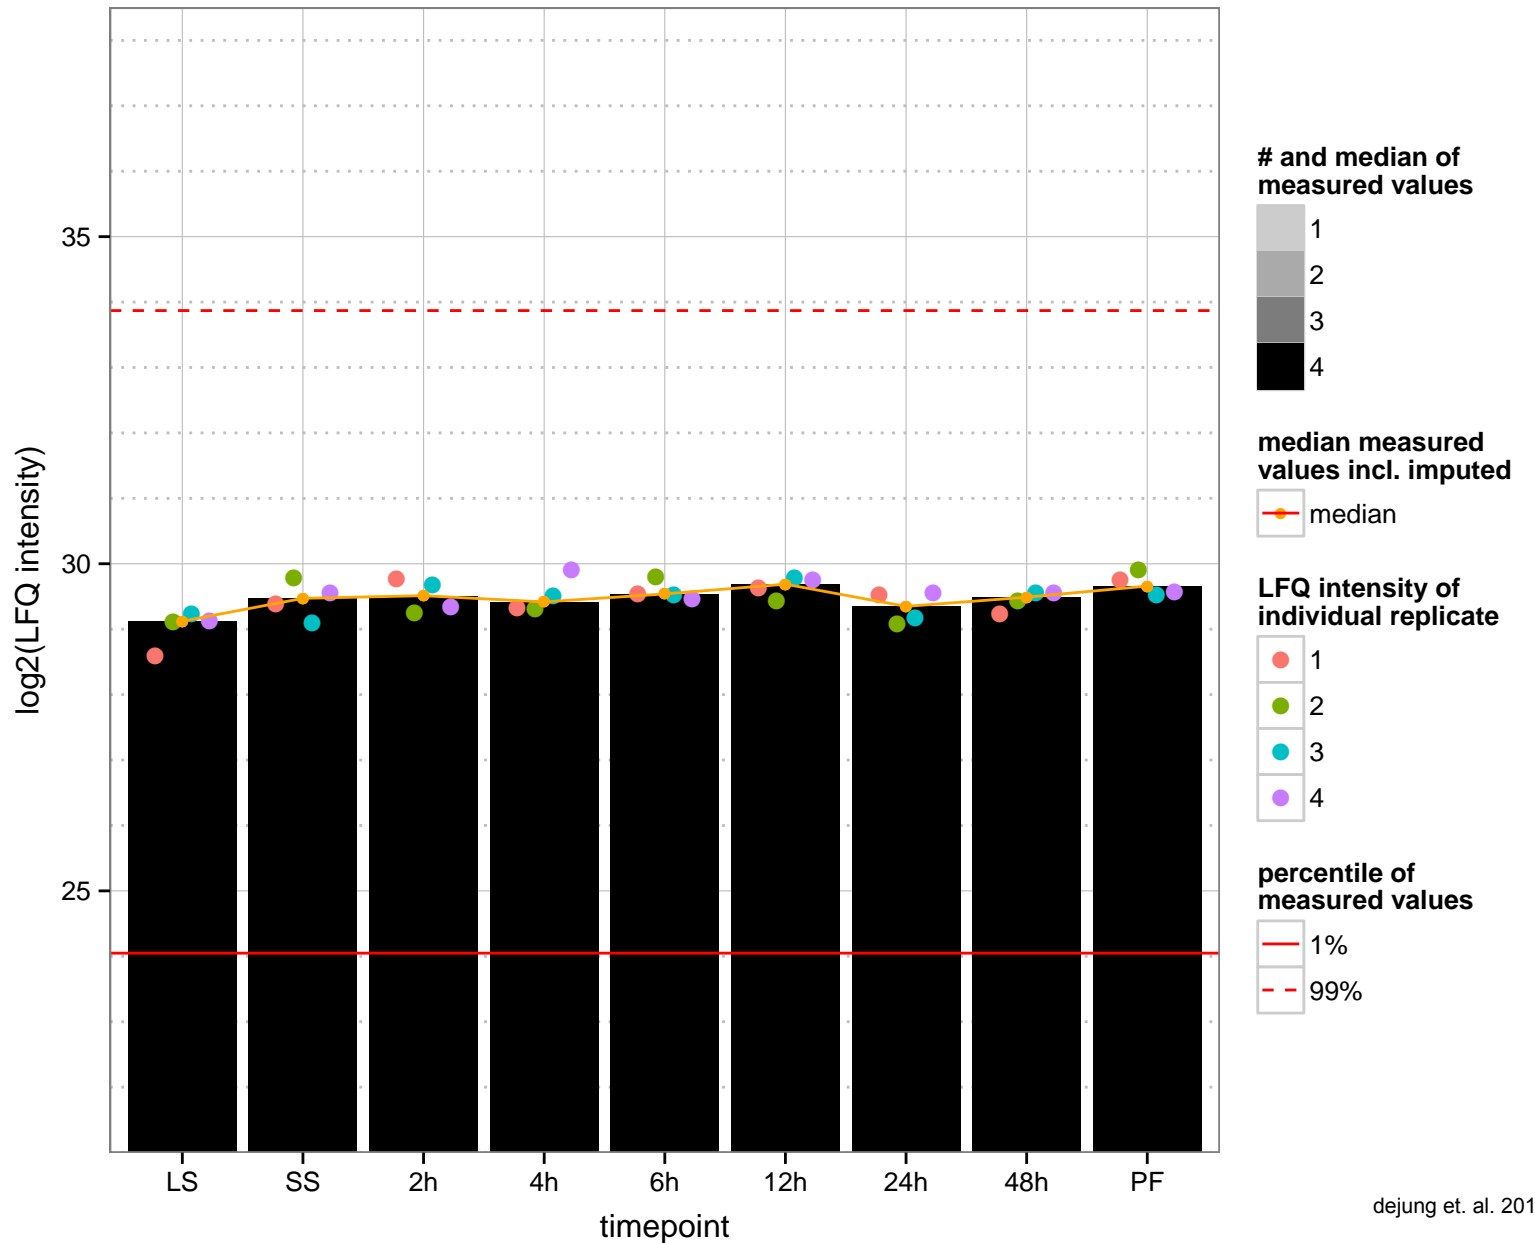

synaptotagmin, putative, calcium-dependent lipid binding protein  
 Tb927.10.13740  
 AGOF: null  
 AGOC: null  
 AGOP: null  
 PGO: protein binding  
 PGO: null  
 PGO: null

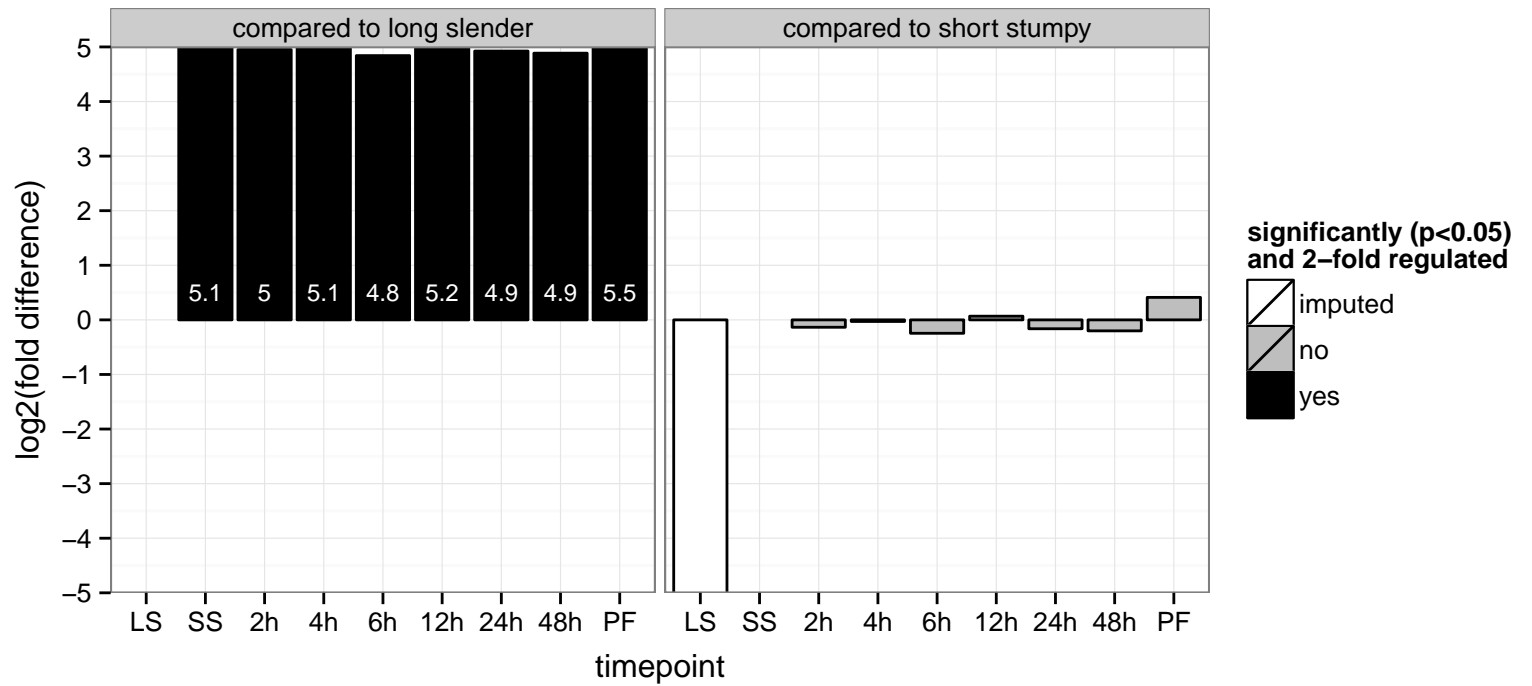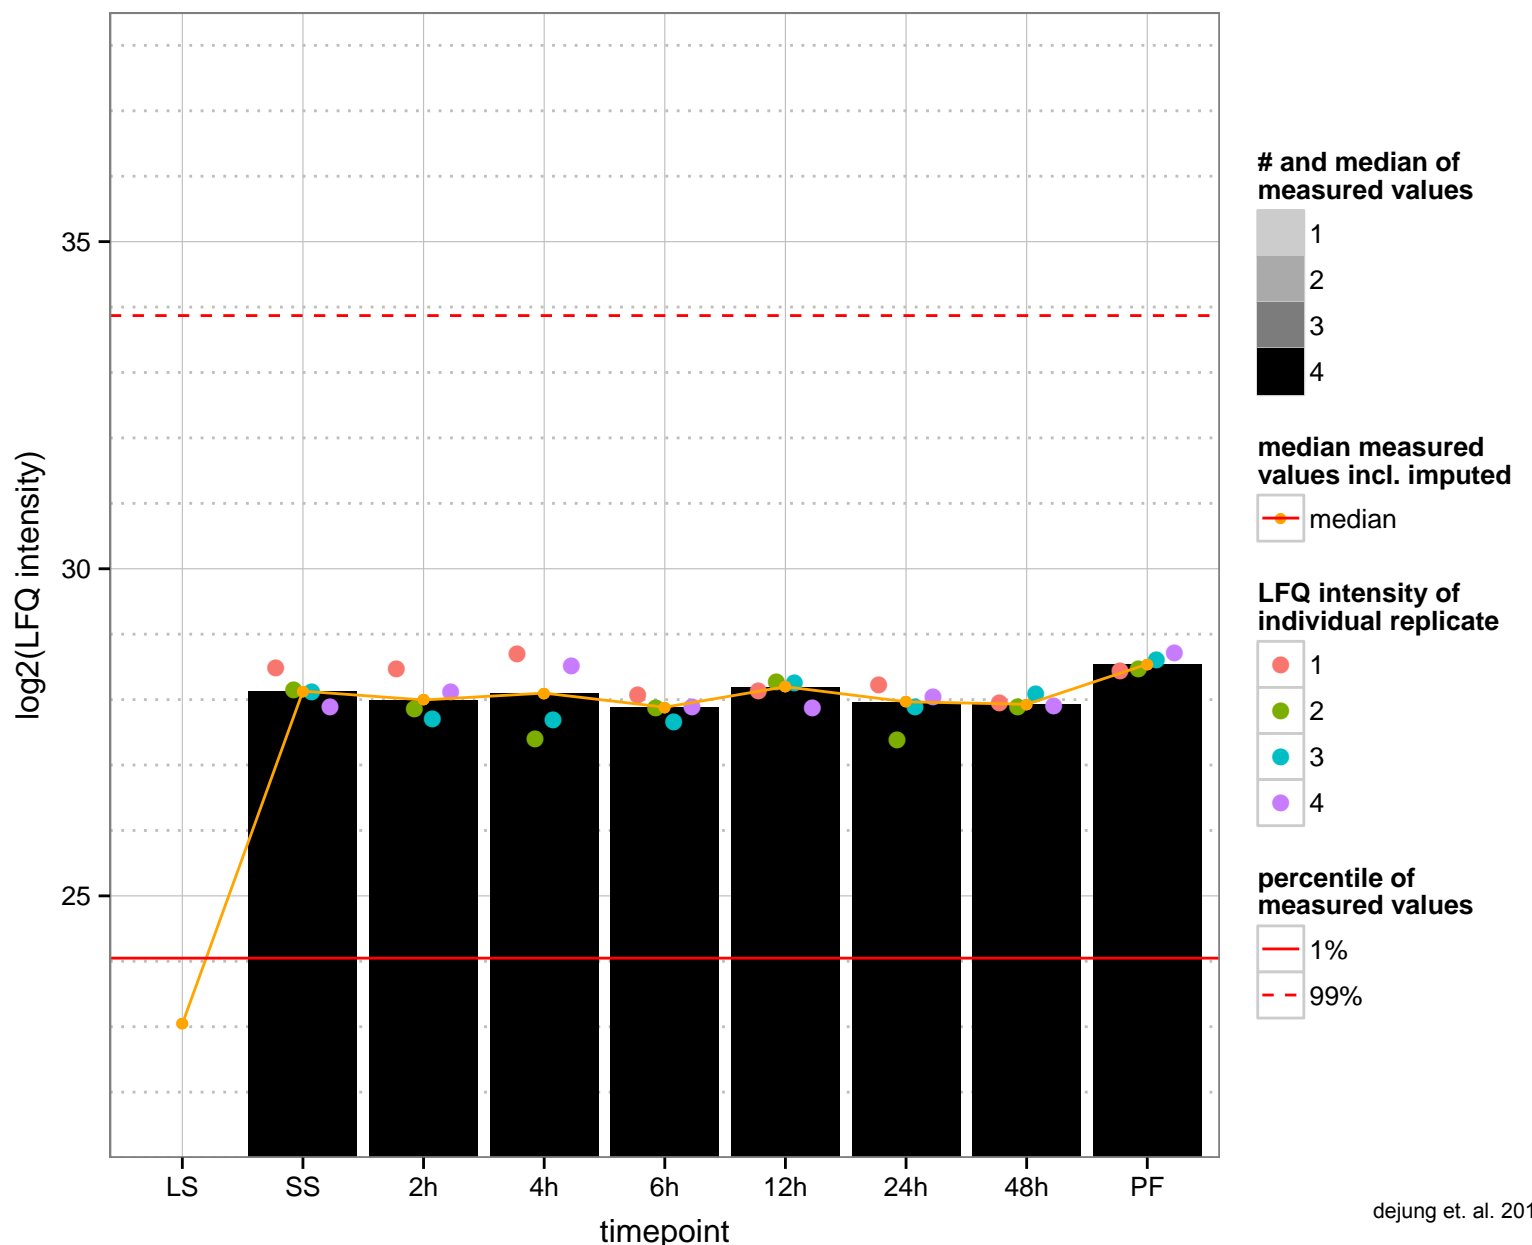

GPI-anchor transamidase subunit 8 (GPI8), cysteine peptidase, Clan CD, family C13  
 Tb927.10.13860  
 AGOF: cysteine-type endopeptidase activity  
 AGOC: null  
 AGOP: proteolysis  
 PGOF: cysteine-type endopeptidase activity  
 PGOC: null  
 PGOP: proteolysis

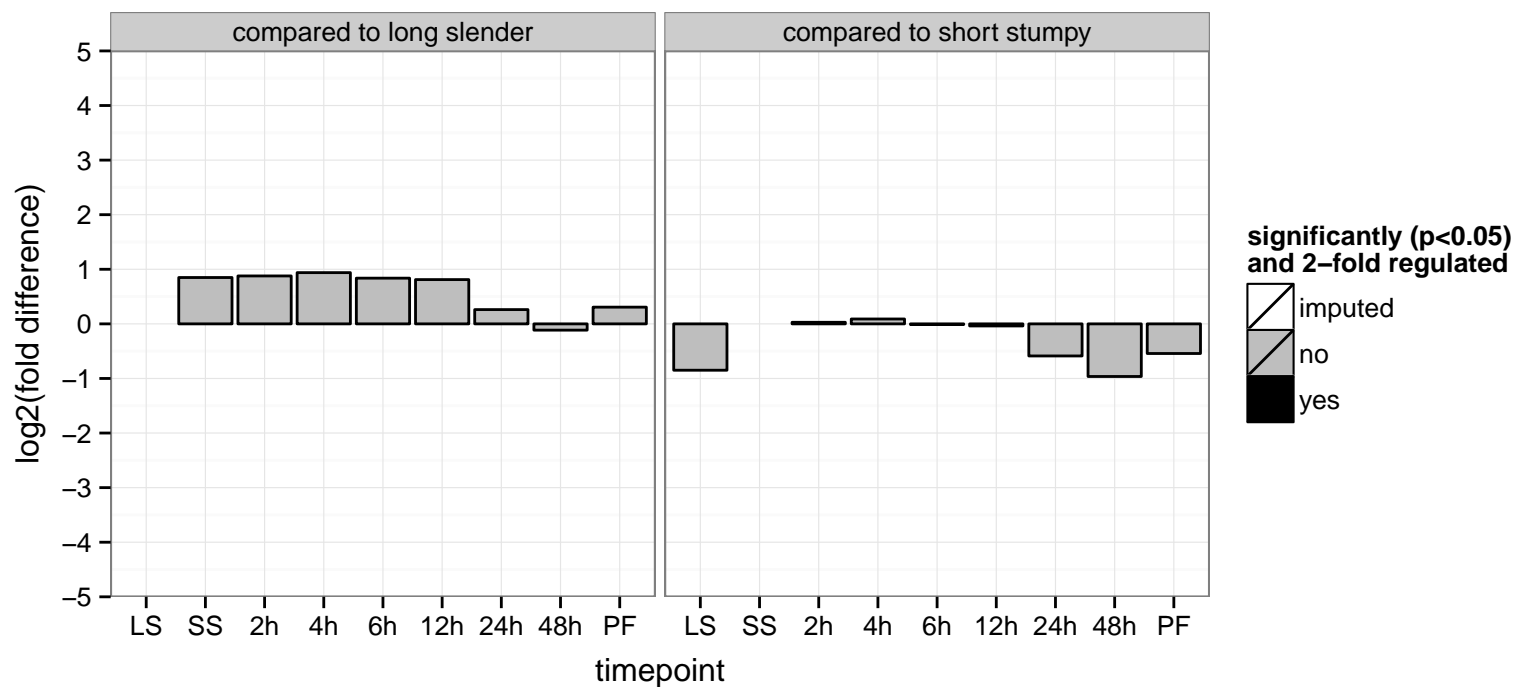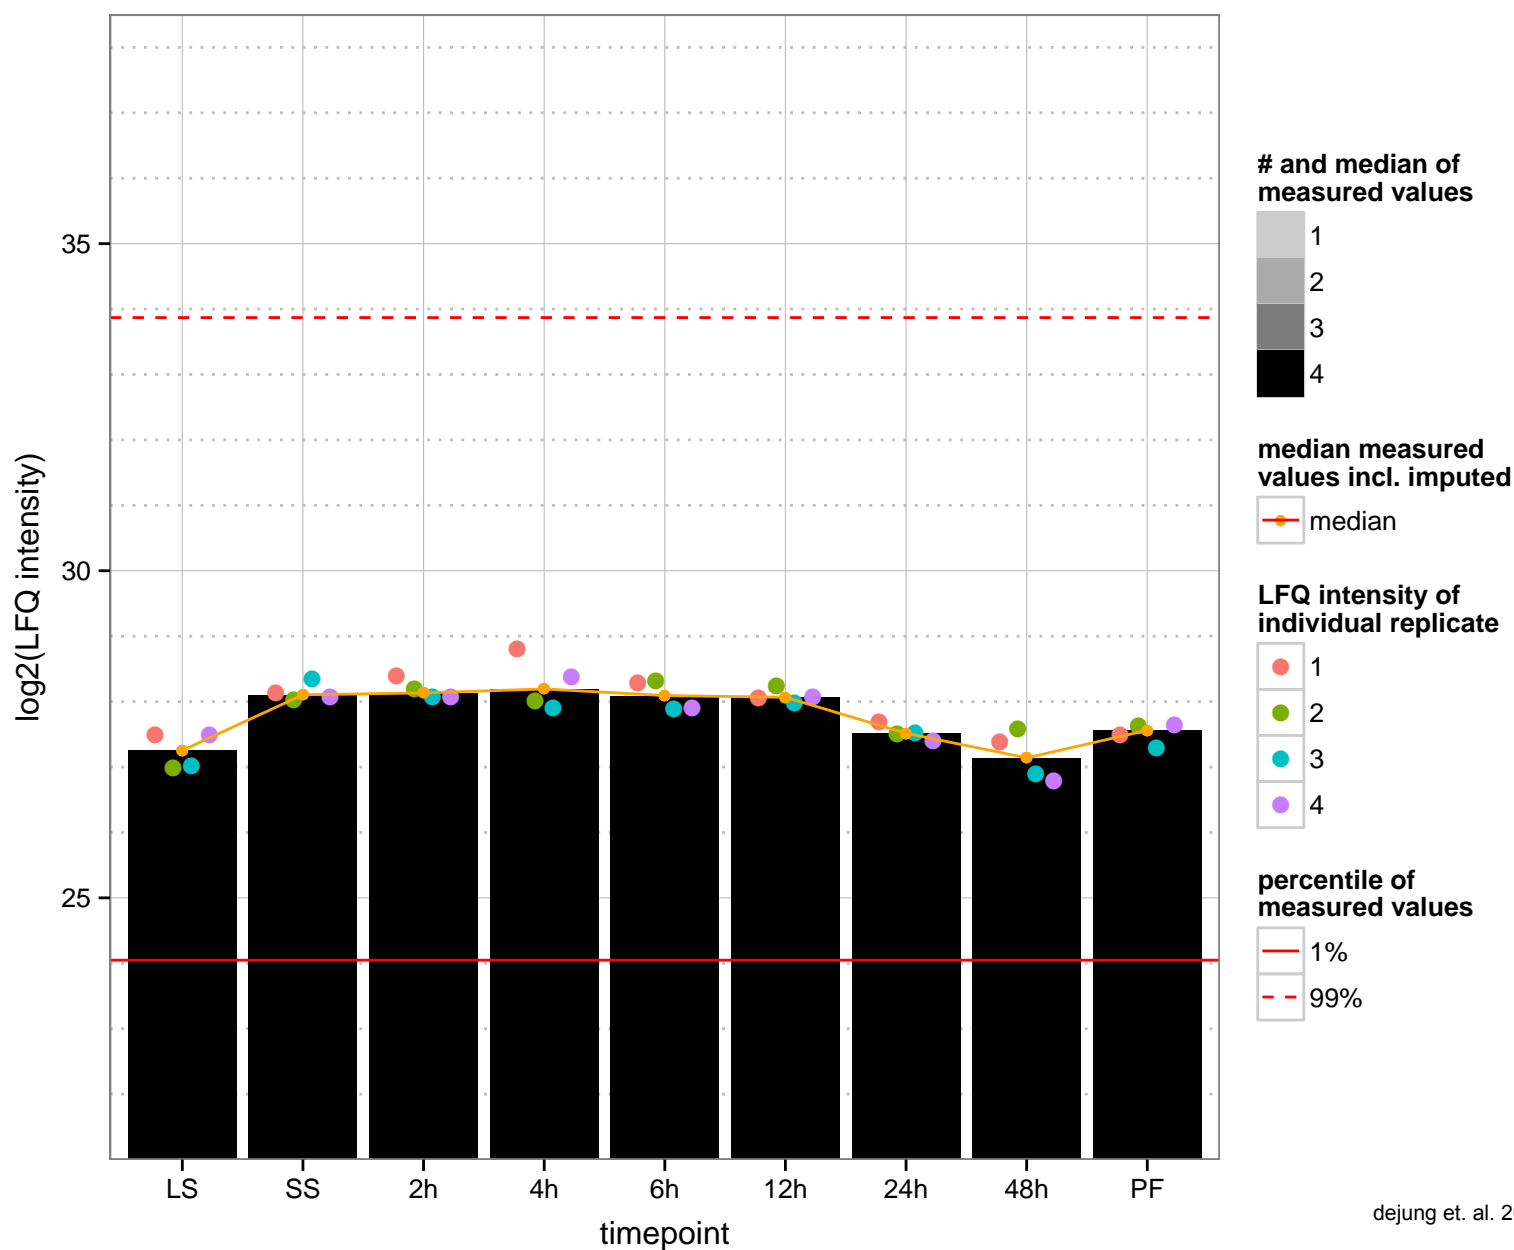

hypothetical protein, conserved  
 Tb927.10.13880  
 AGOF: null  
 AGOC: null  
 AGOP: null  
 PGOF: binding  
 PGO: null  
 PGOP: null

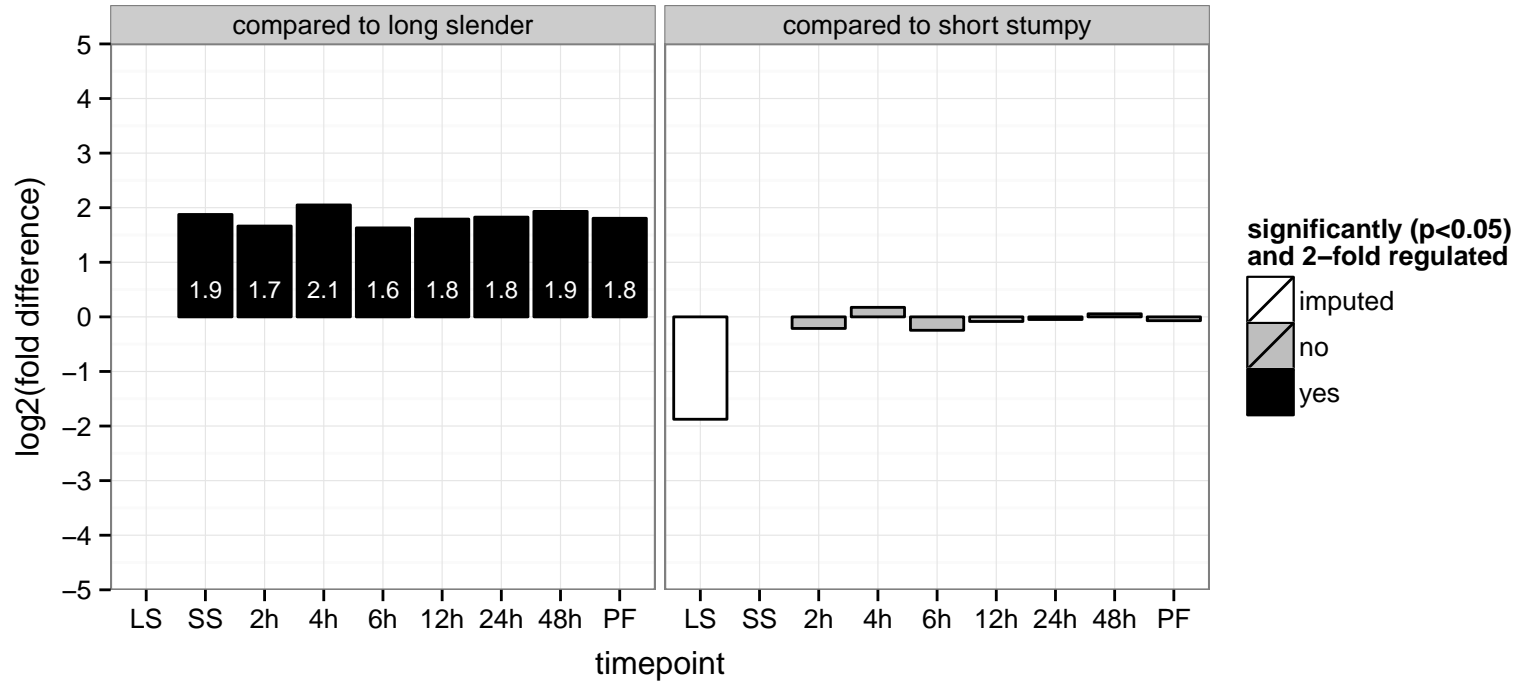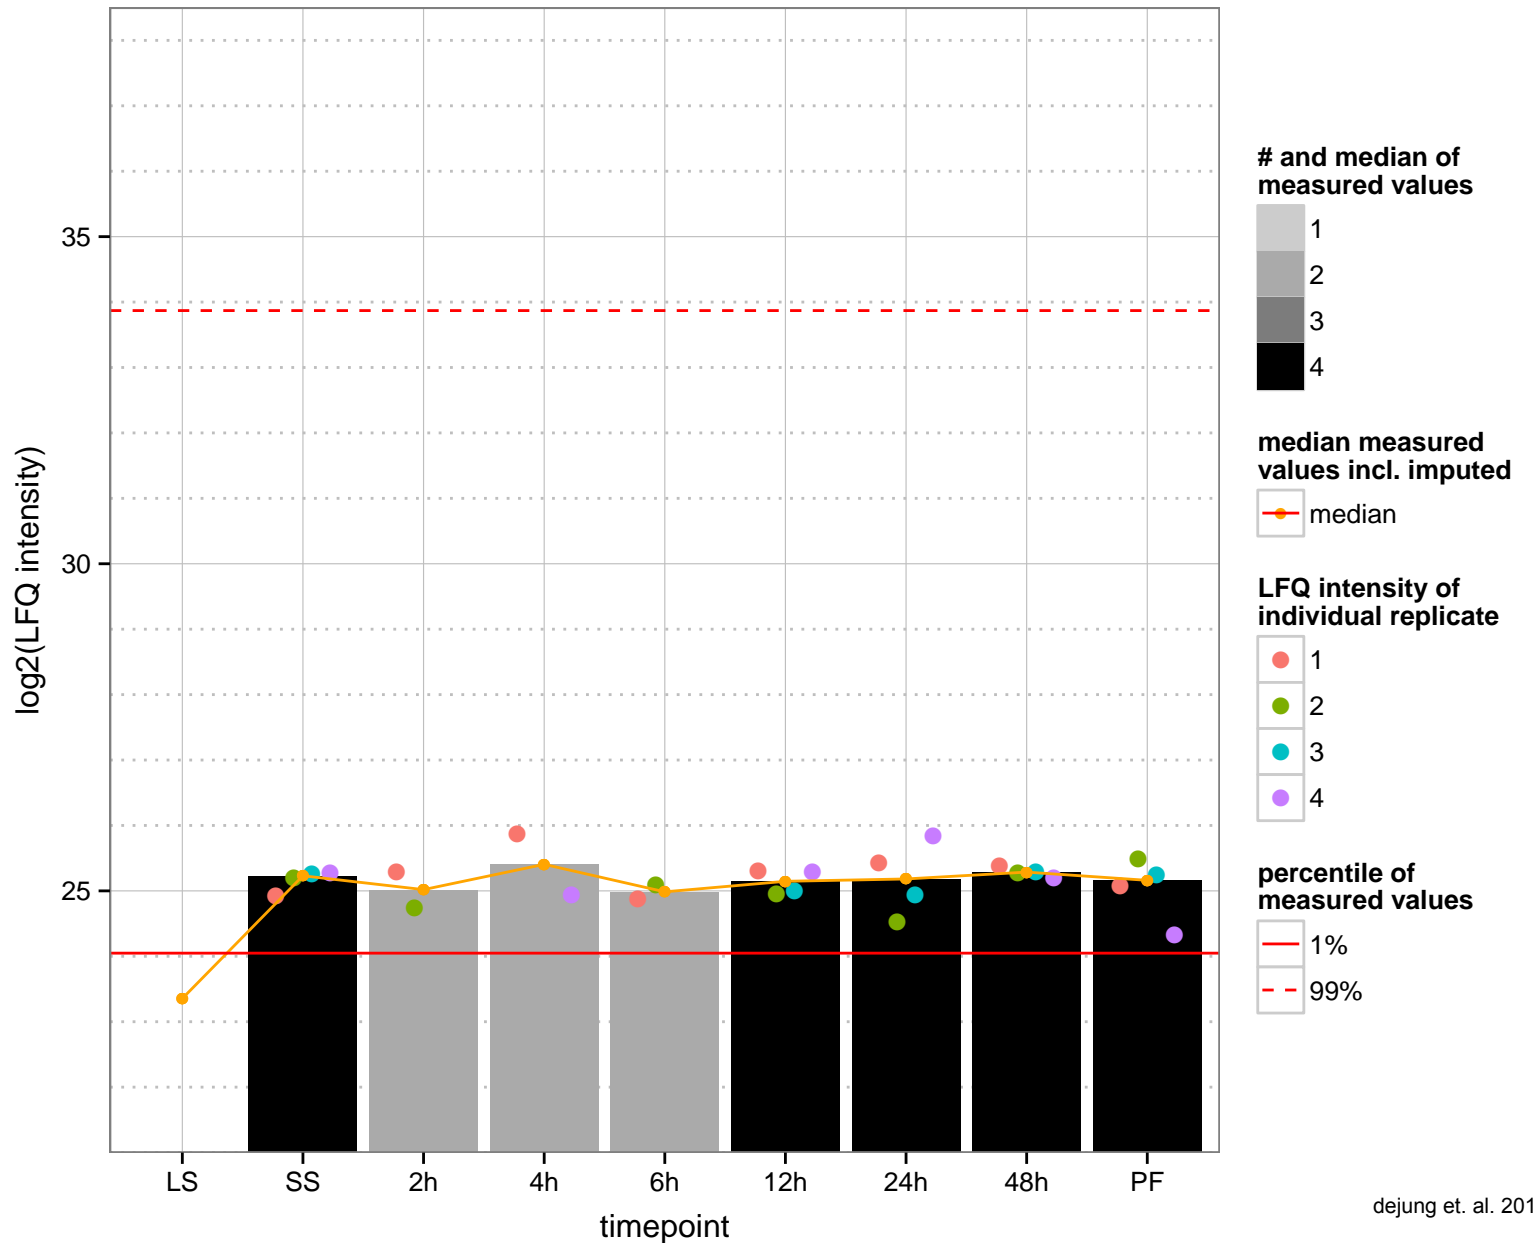

hypoxanthine–guanine phosphoribosyltransferase (HGPRT)  
 Tb927.10.1400;Tb927.10.1470  
 AGOF: hypoxanthine phosphoribosyltransferase activity  
 AGOC: cytoplasm  
 AGOP: purine ribonucleoside salvage  
 PGOF: hypoxanthine phosphoribosyltransferase activity  
 PGOC: cytoplasm  
 PGOP: nucleoside metabolic process, purine ribonucleoside salvage

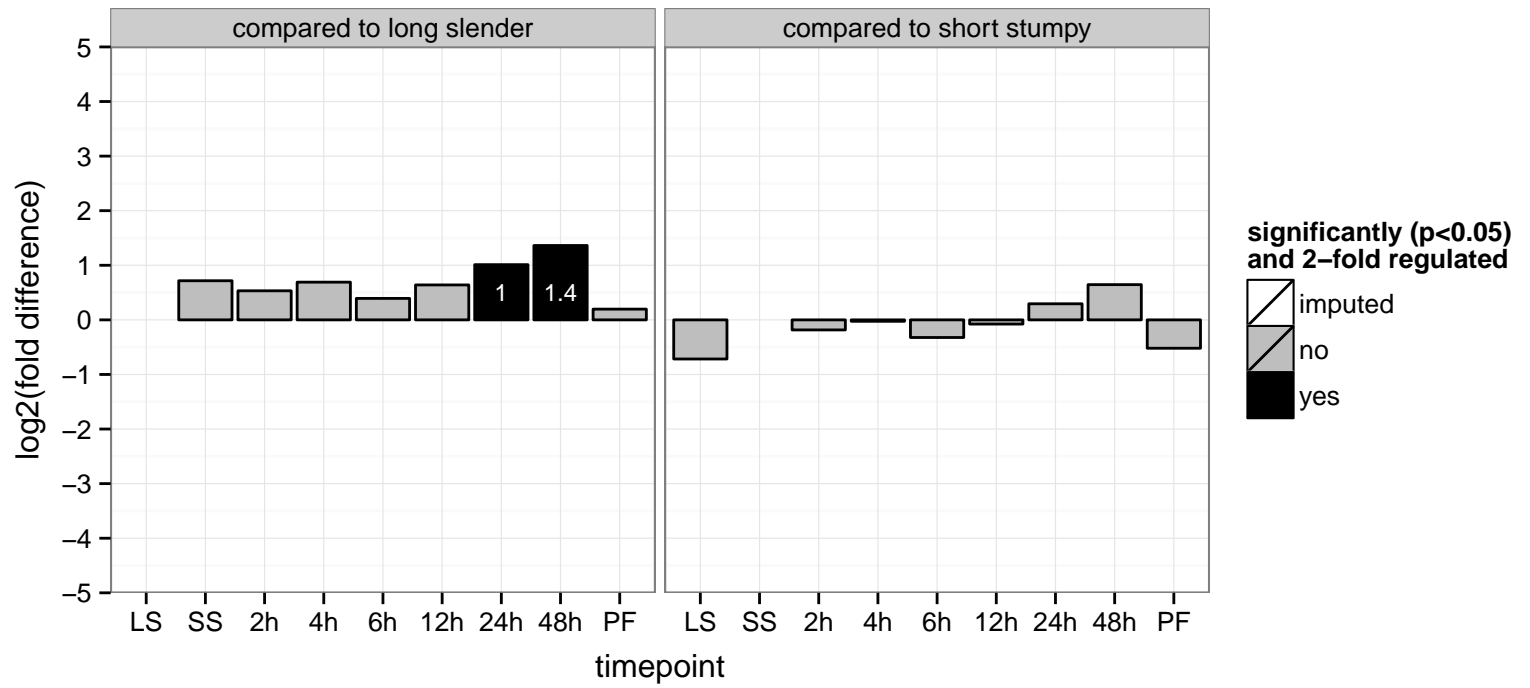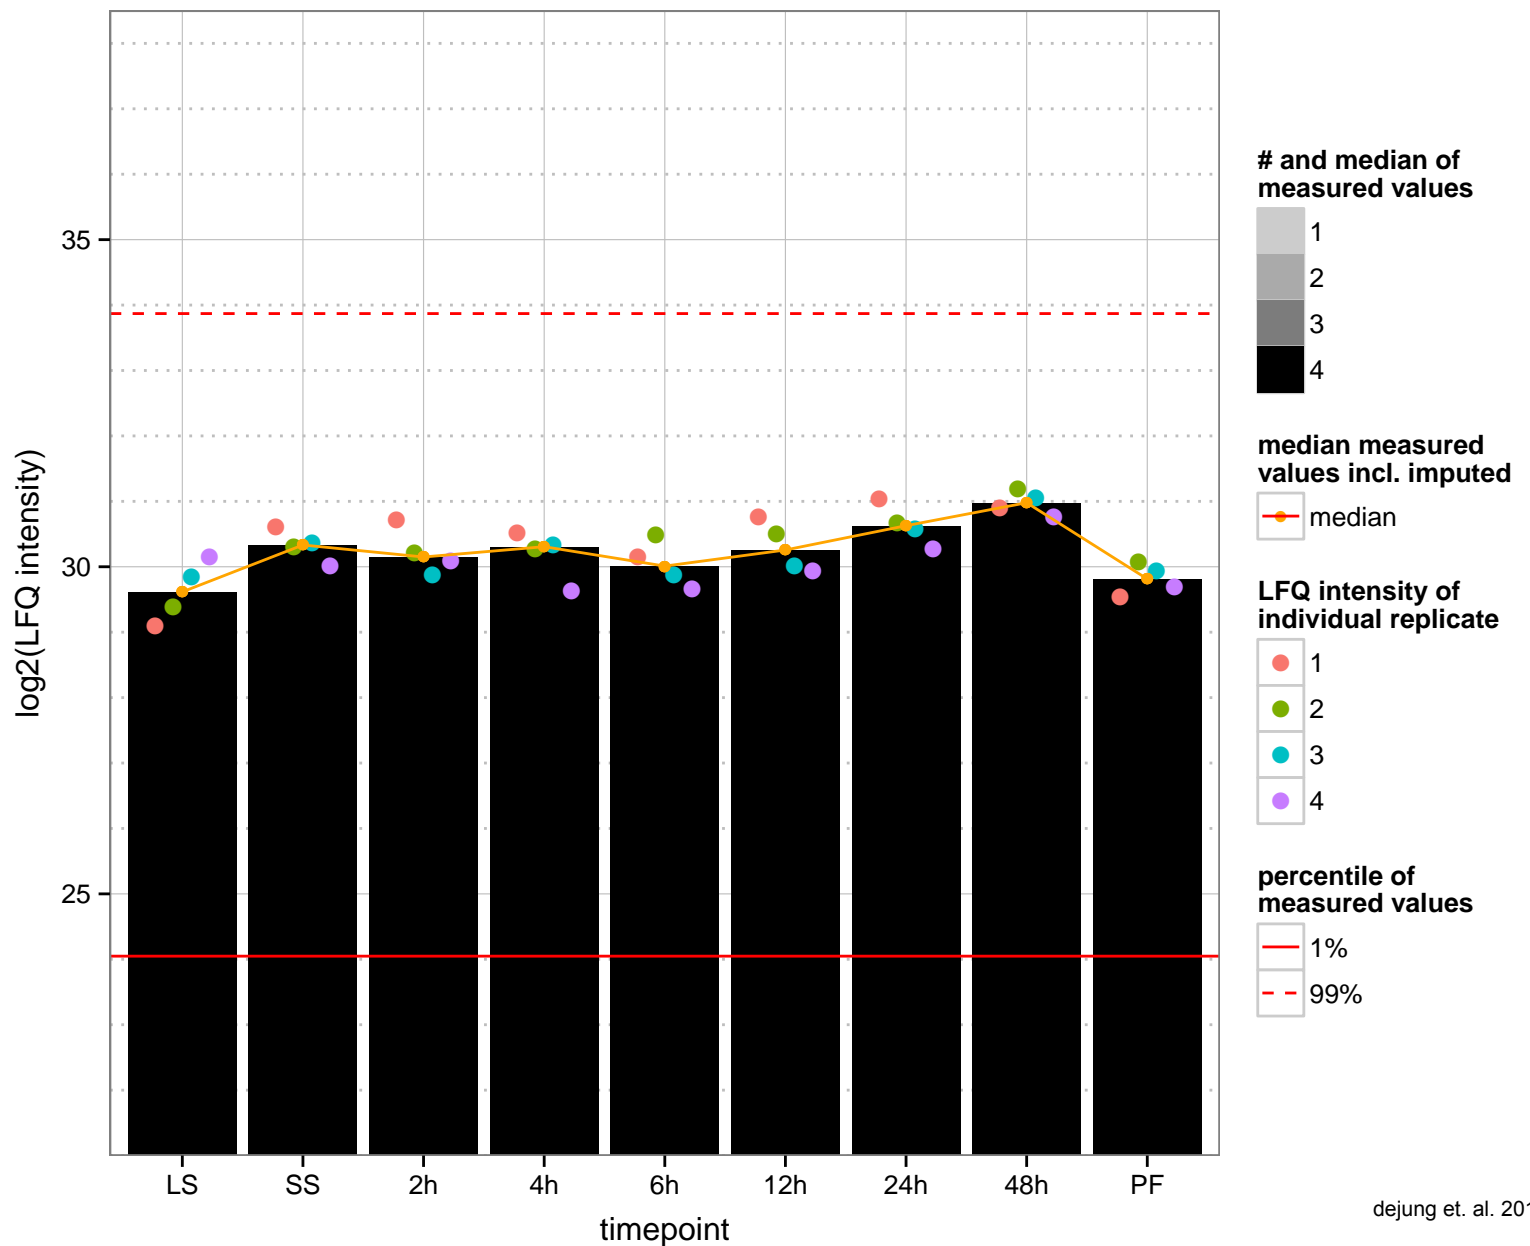

tubulin cofactor C domain-containing protein RP2 (rp2)  
 Tb927.10.14010  
 AGOF: GTPase activator activity  
 AGOC: cilium basal body  
 AGOP: cell morphogenesis, motile cilium assembly, spindle assembly  
 PGO: protein binding  
 PGO: microtubule organizing center  
 PGO: microtubule anchoring

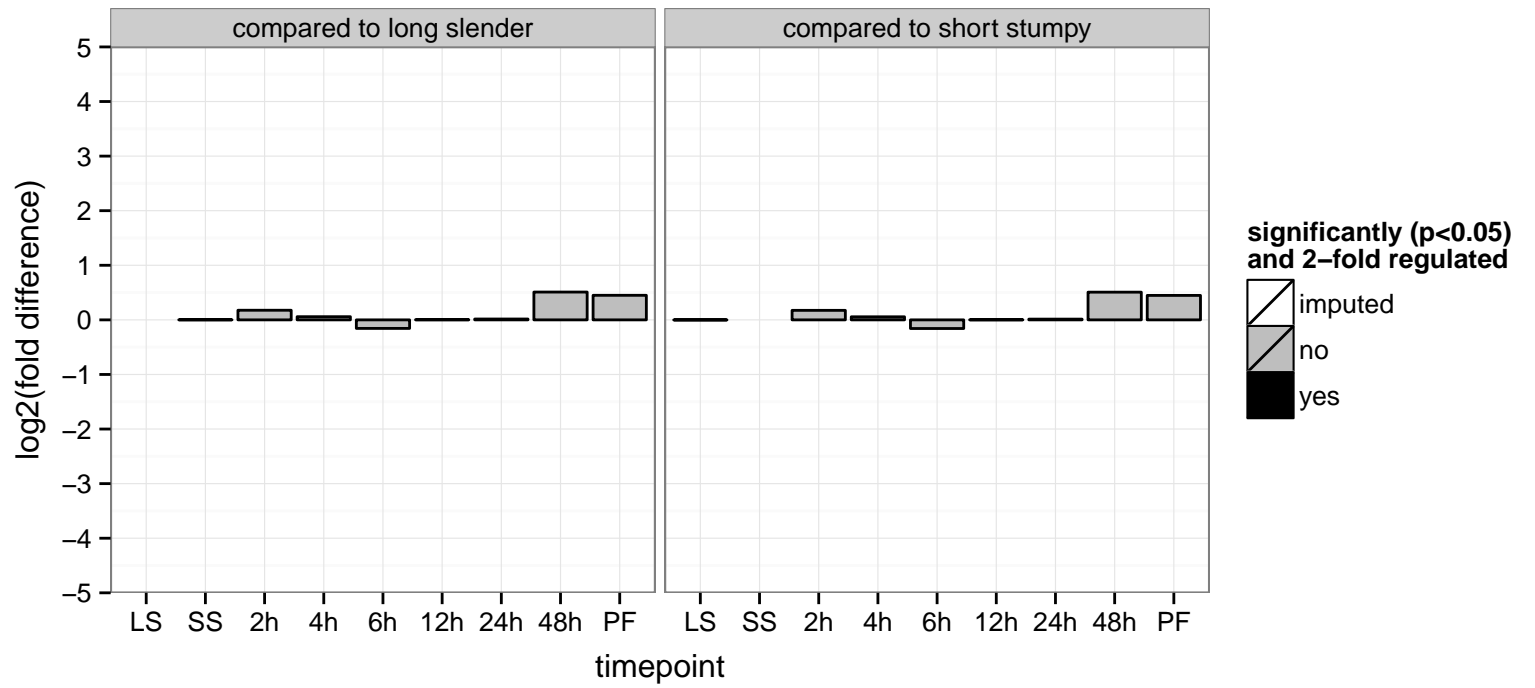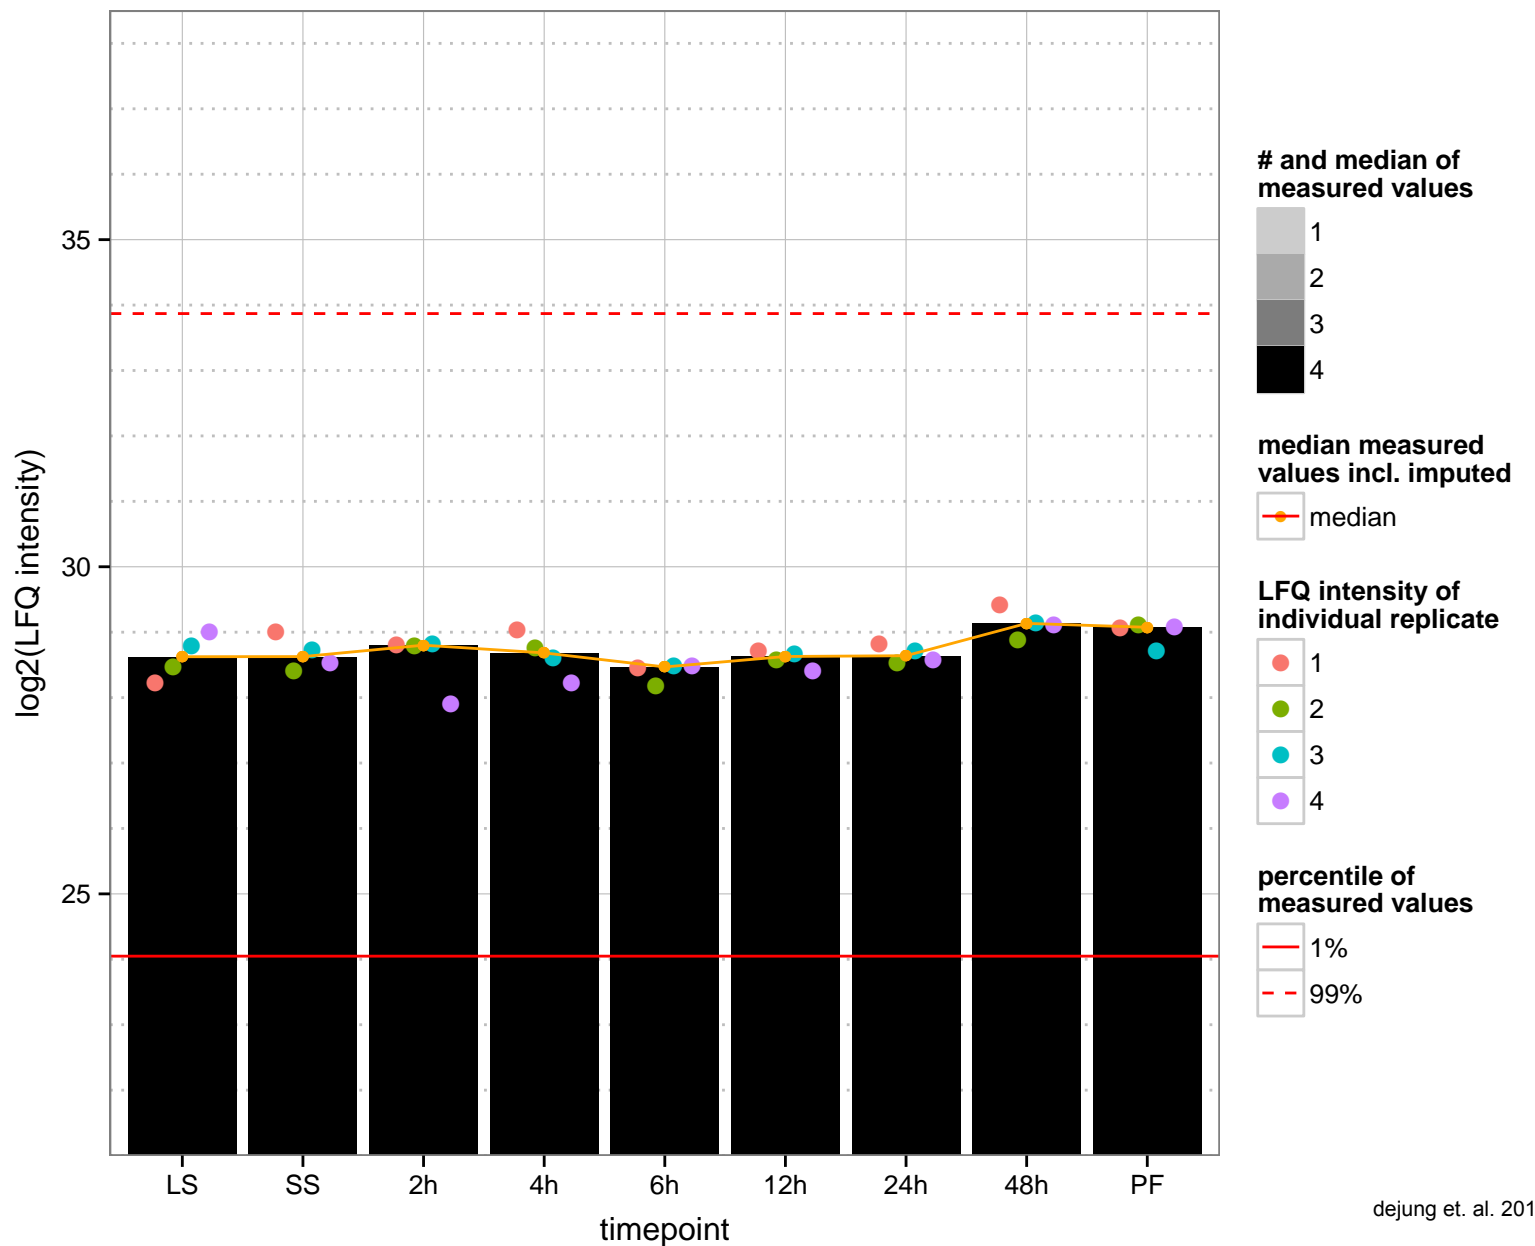



vacuolar ATP synthase subunit c, putative

Tb927.10.14040

AGOF: hydrolase activity, acting on acid anhydrides, catalyzing transmembrane movement of substances

AGOC: proton-transporting V-type ATPase, V1 domain, proton-transporting two-sector ATPase complex

AGOP: ATP synthesis coupled proton transport

PGOF: hydrolase activity, acting on acid anhydrides, catalyzing transmembrane movement of substances

PGOC: proton-transporting V-type ATPase, V1 domain

PGOP: ATP hydrolysis coupled proton transport

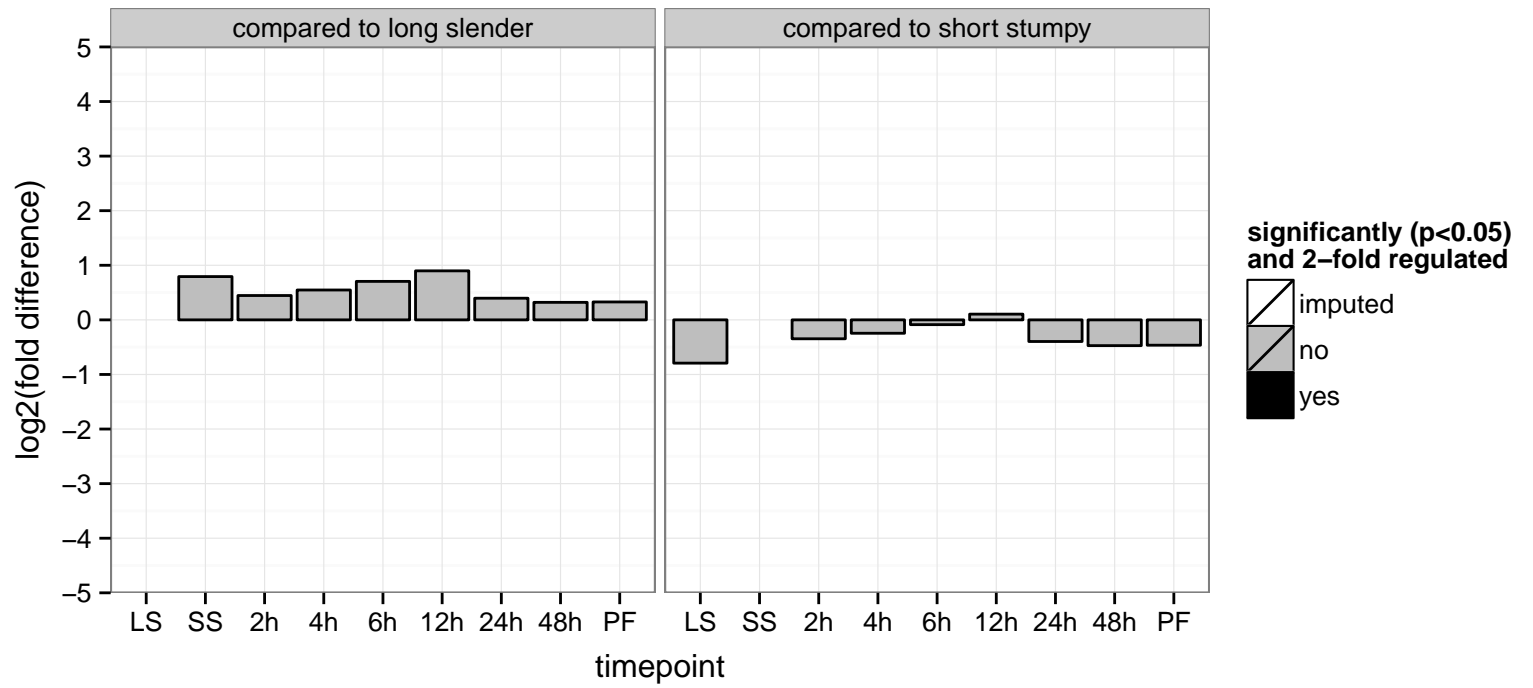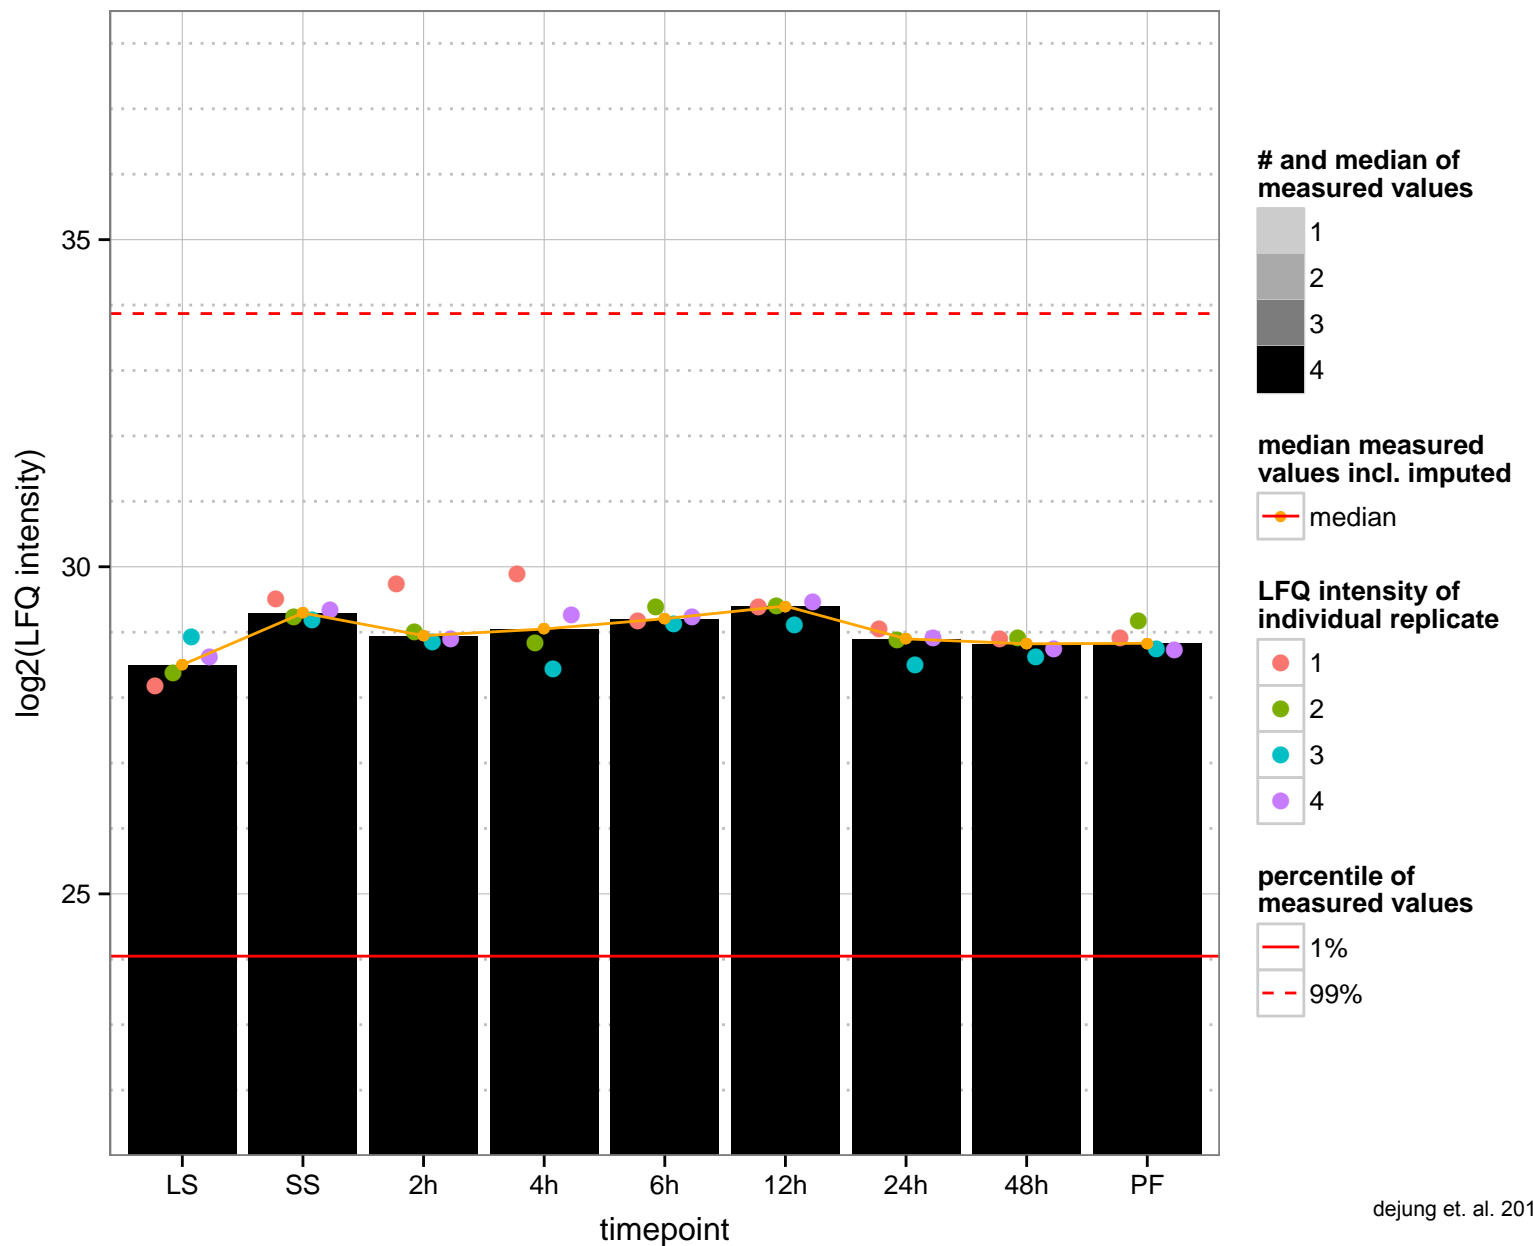

protein transport protein SEC13, putative  
 Tb927.10.14180  
 AGOF: null  
 AGOC: null  
 AGOP: intracellular protein transport, membrane budding  
 PGO: protein binding  
 PGO: null  
 PGO: null

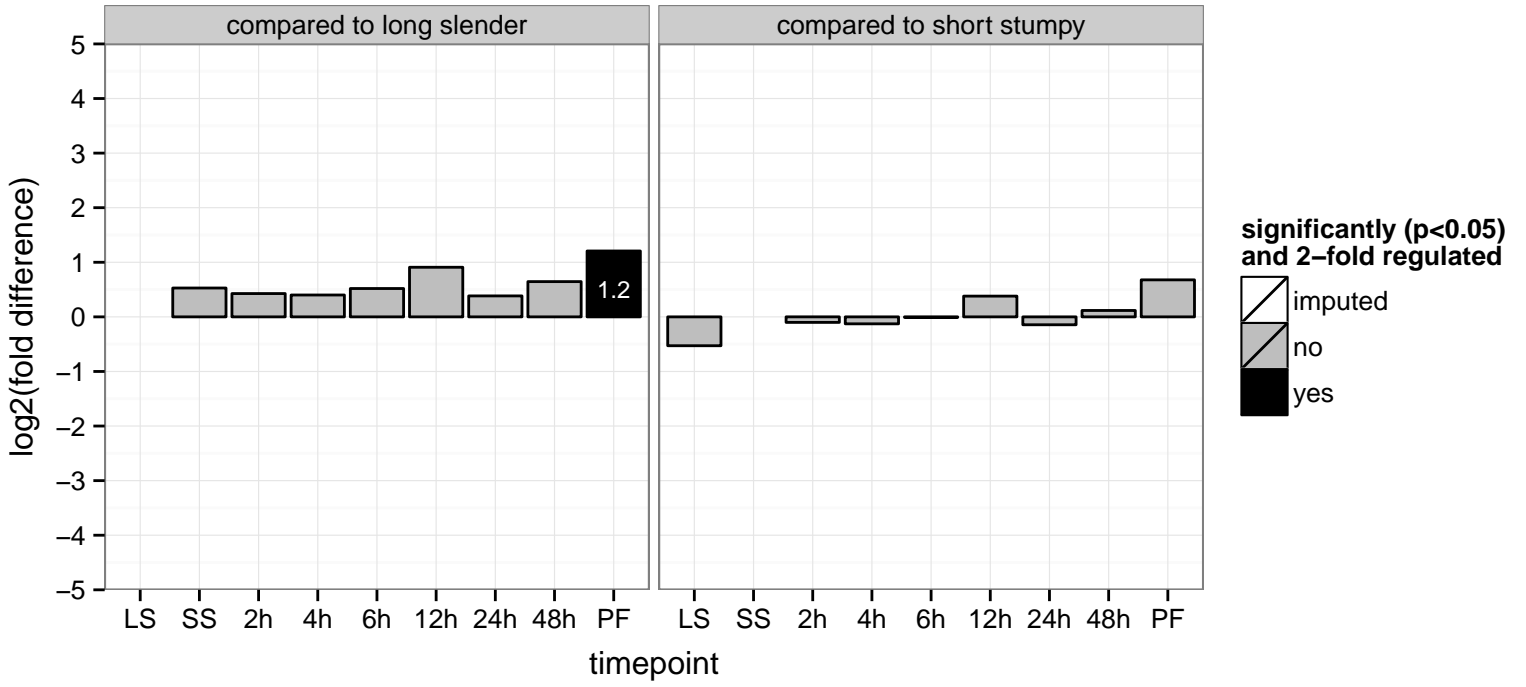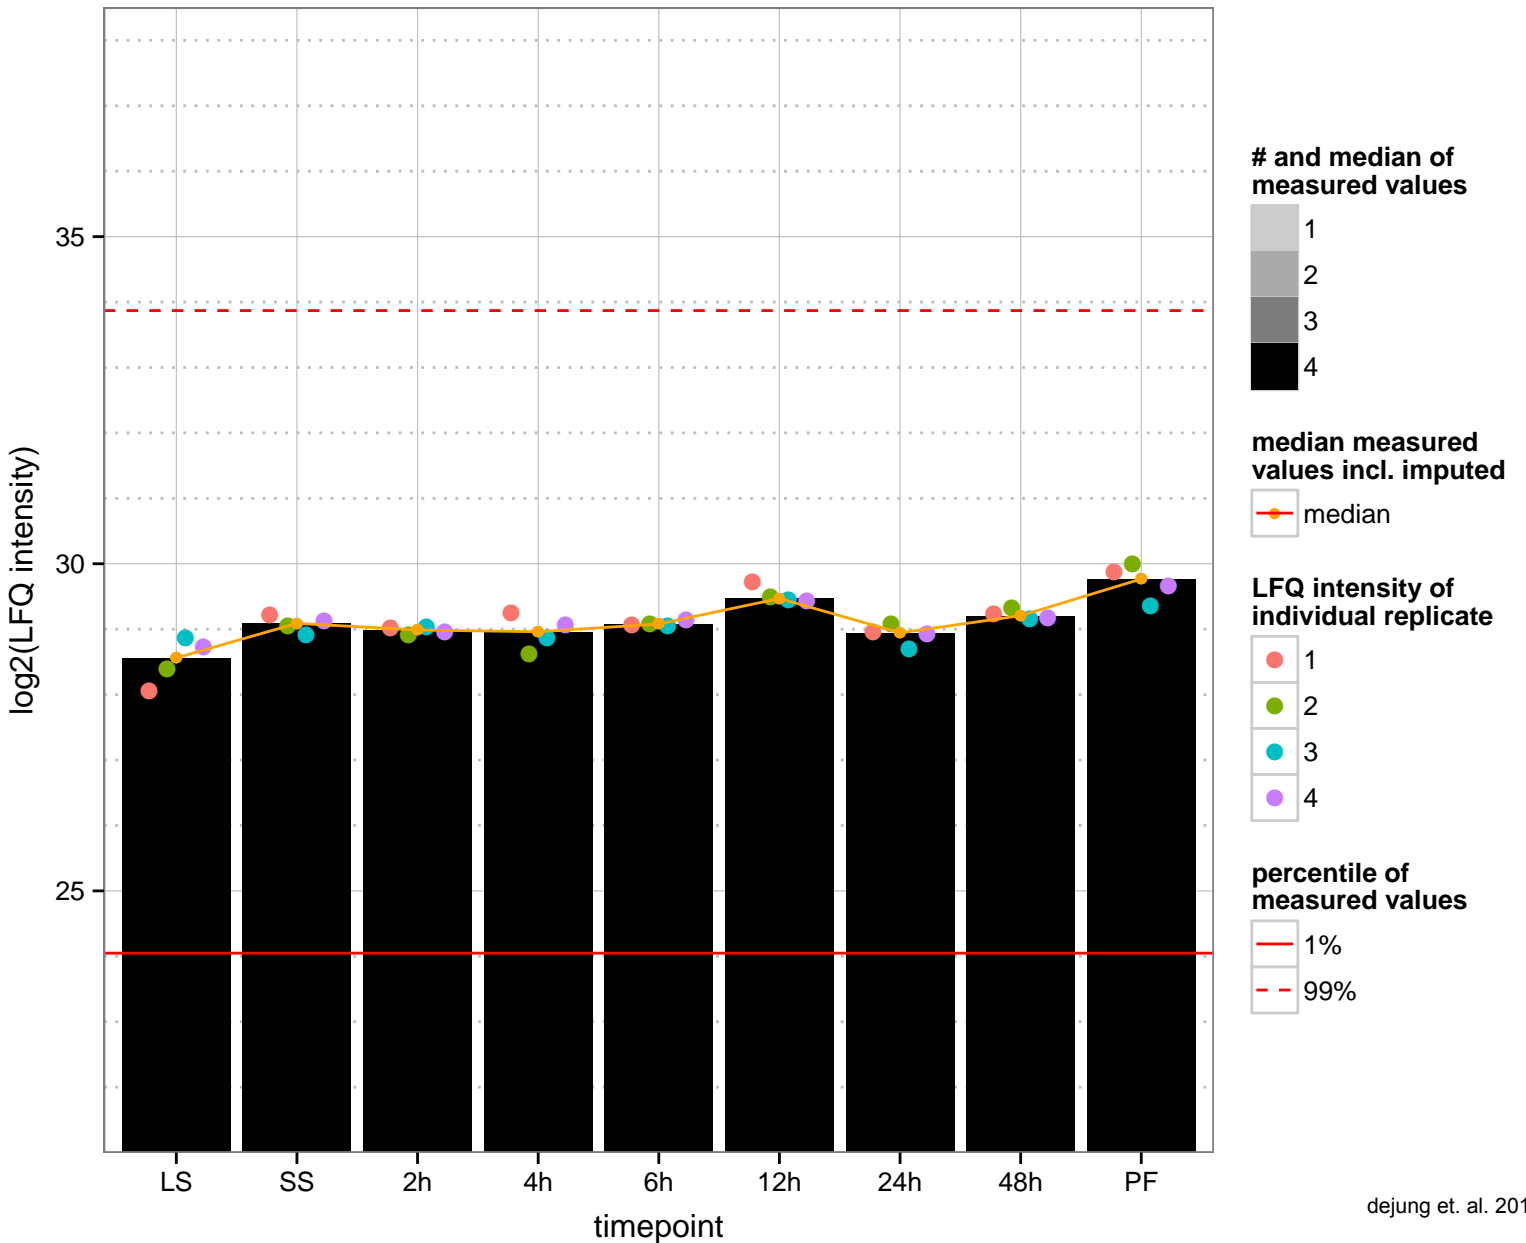

methionine aminopeptidase 2, putative, metallo-peptidase, Clan MG, Family M24, putative (MetAP2)

Tb927.10.1420

AGOF: null, aminopeptidase activity, metallopeptidase activity

AGOC: null

AGOP: null, cellular process, proteolysis

PGOF: null, aminopeptidase activity, metalloexopeptidase activity

PGOC: null

PGOP: cellular process, proteolysis

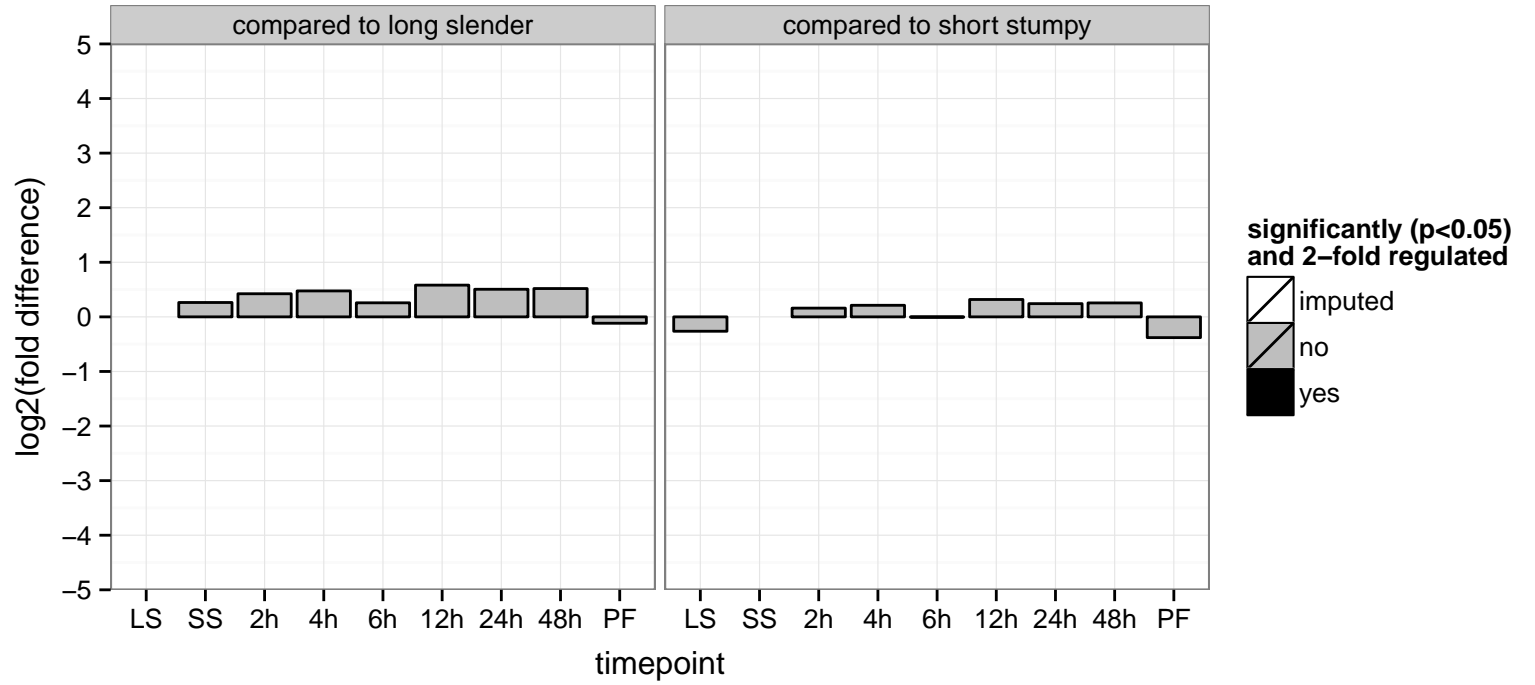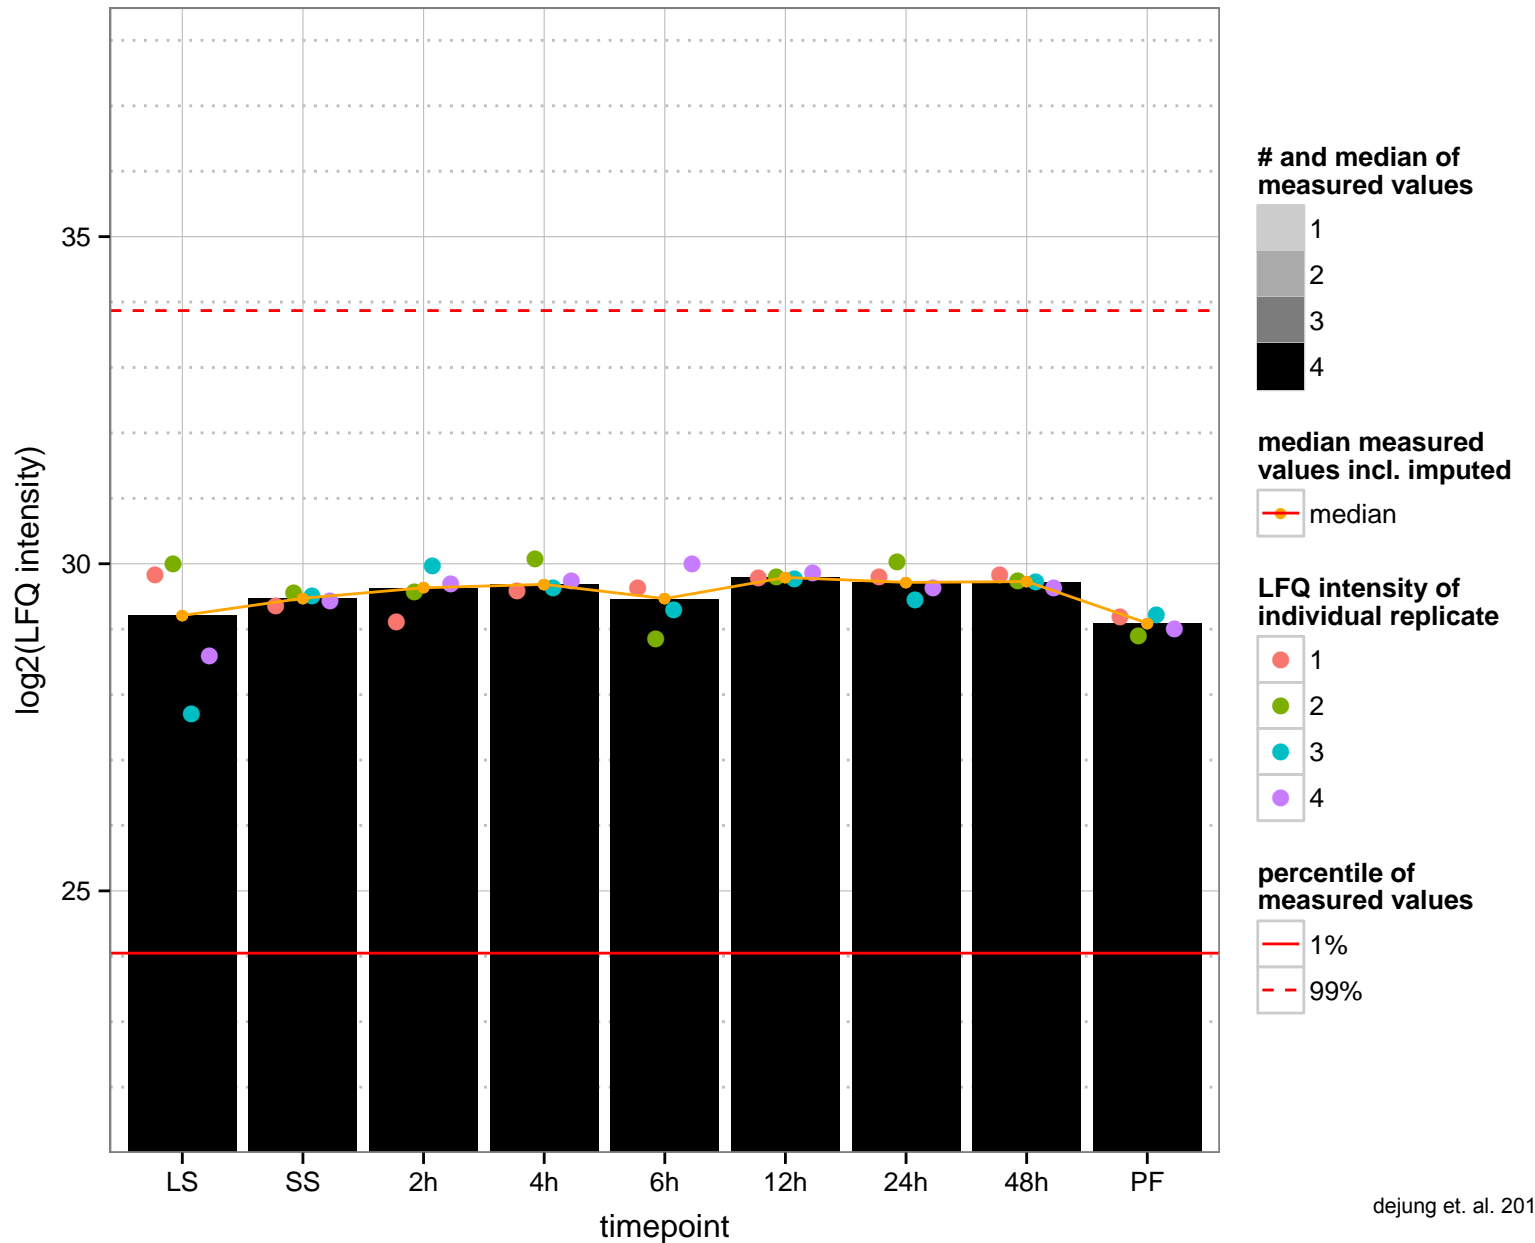

syntaxin 5  
 Tb927.10.14200  
 AGOF: SNAP receptor activity  
 AGOC: membrane  
 AGOP: membrane fusion, vesicle-mediated transport  
 PGO: protein binding  
 PGO: membrane  
 PGO: vesicle-mediated transport

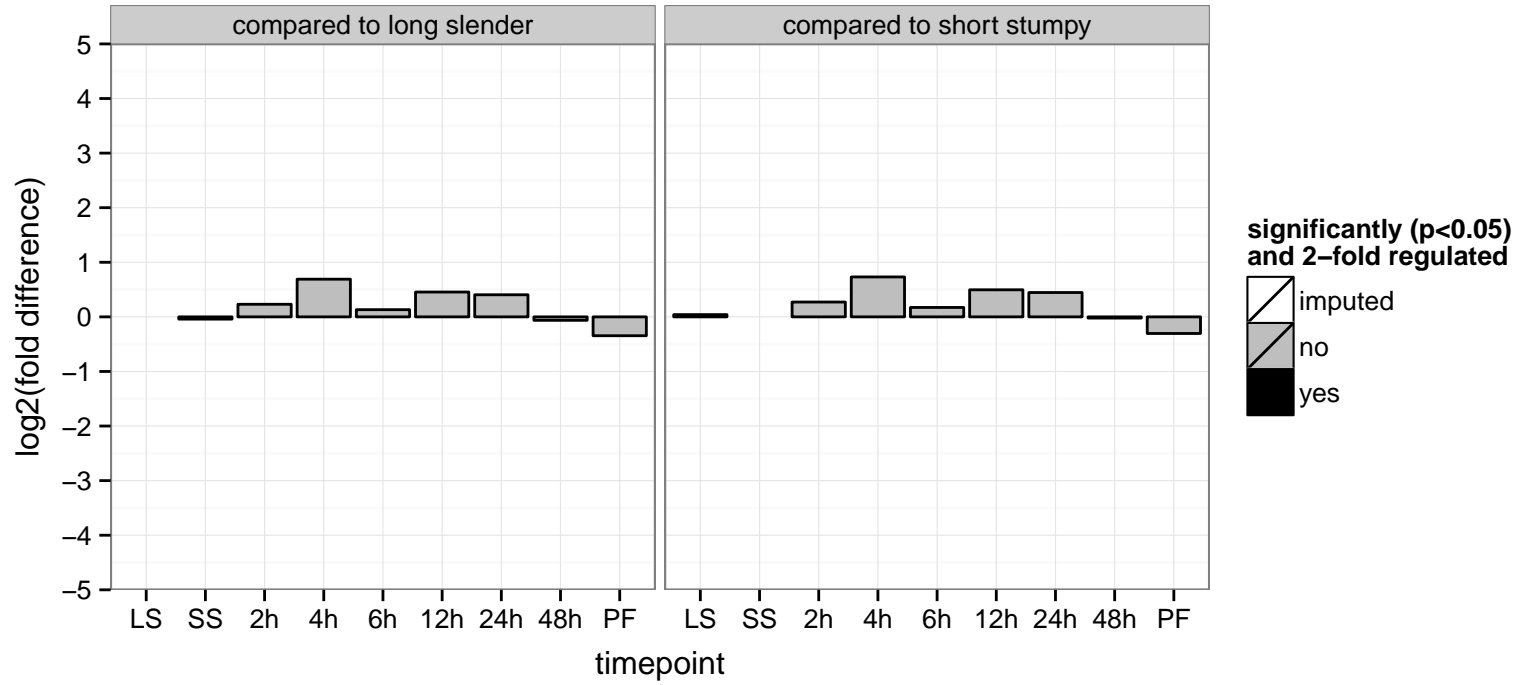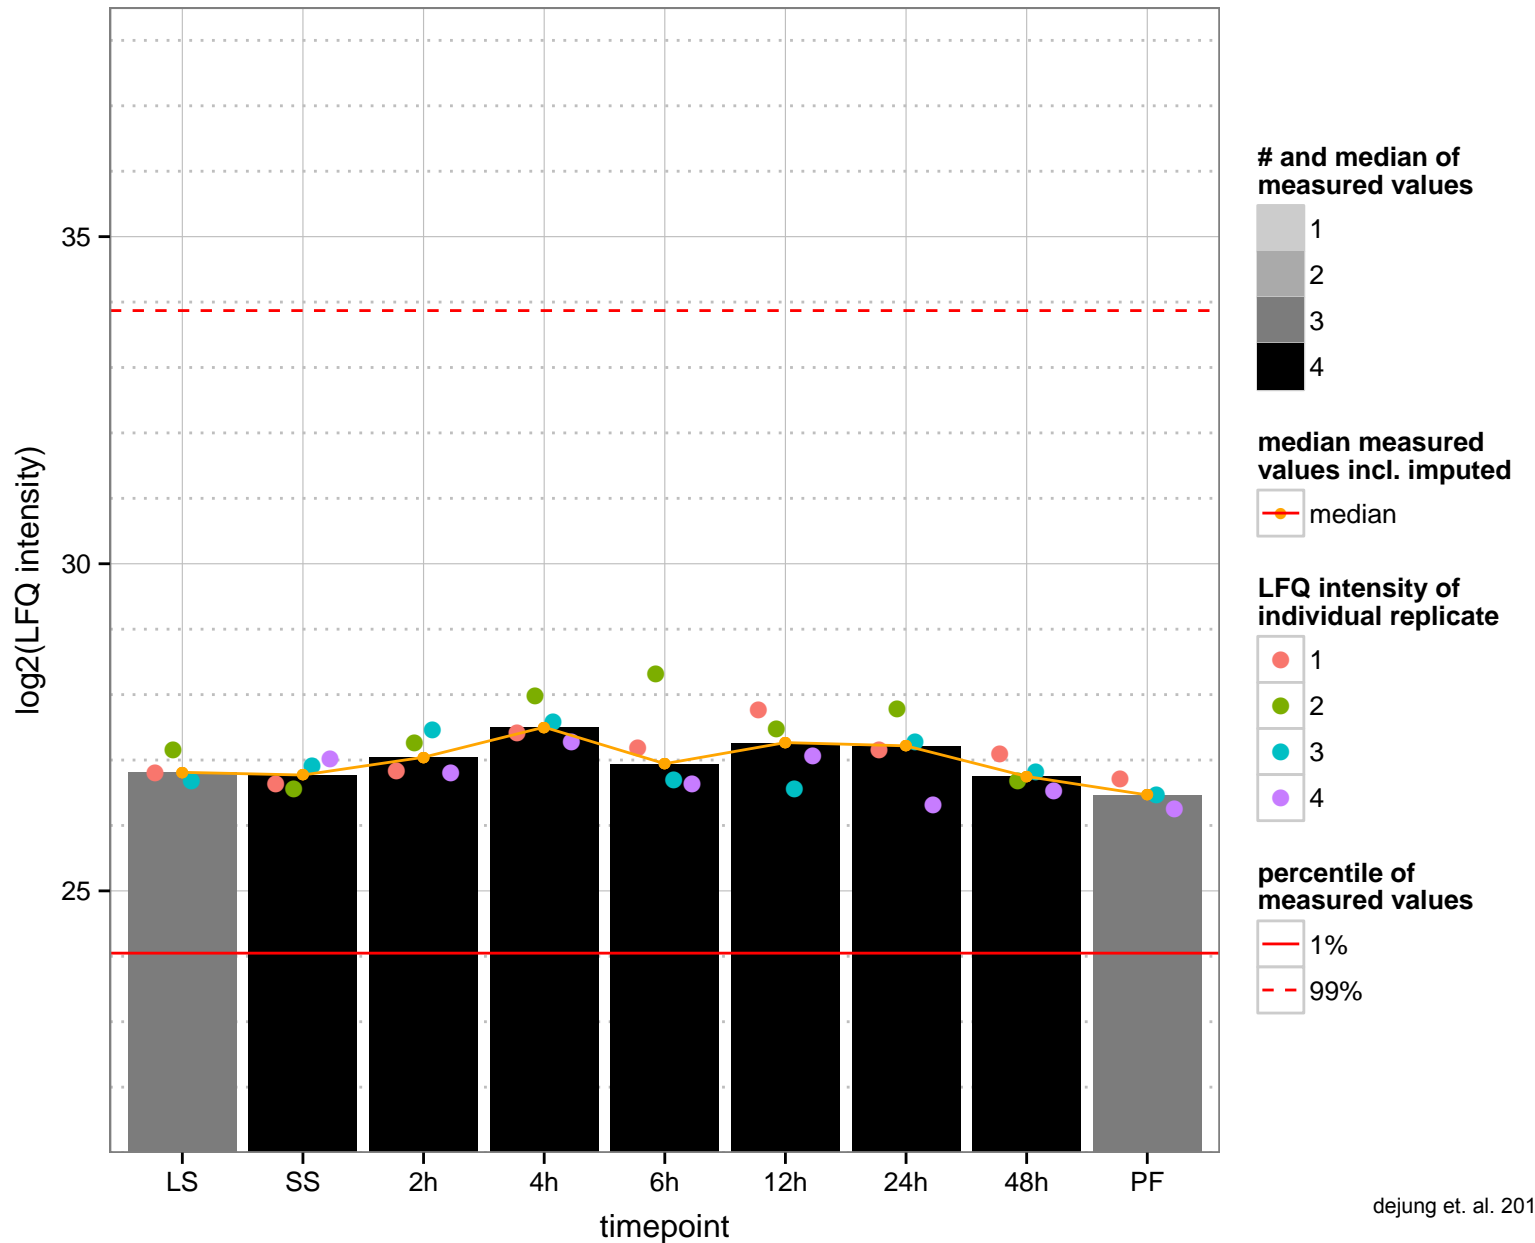

N-myristoyl transferase, putative, N-myristoyltransferase (NMT)  
 Tb927.10.14240;Tb11.v5.0859  
 AGOF: null, glycolpeptide N-tetradecanoyltransferase activity, myristoyltransferase activity  
 AGOC: null  
 AGOP: null, N-terminal protein myristoylation  
 PGOF: glycolpeptide N-tetradecanoyltransferase activity  
 PGO: null  
 PGOP: N-terminal protein myristoylation

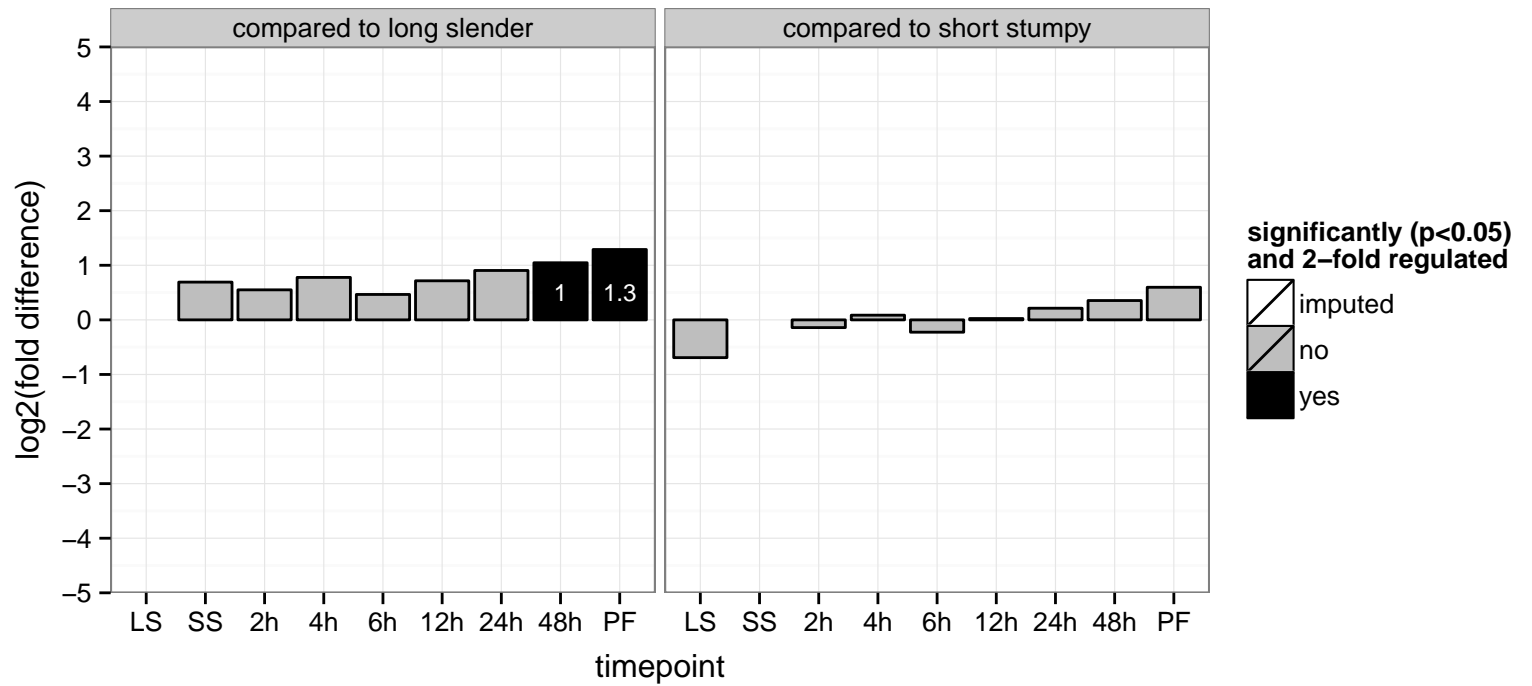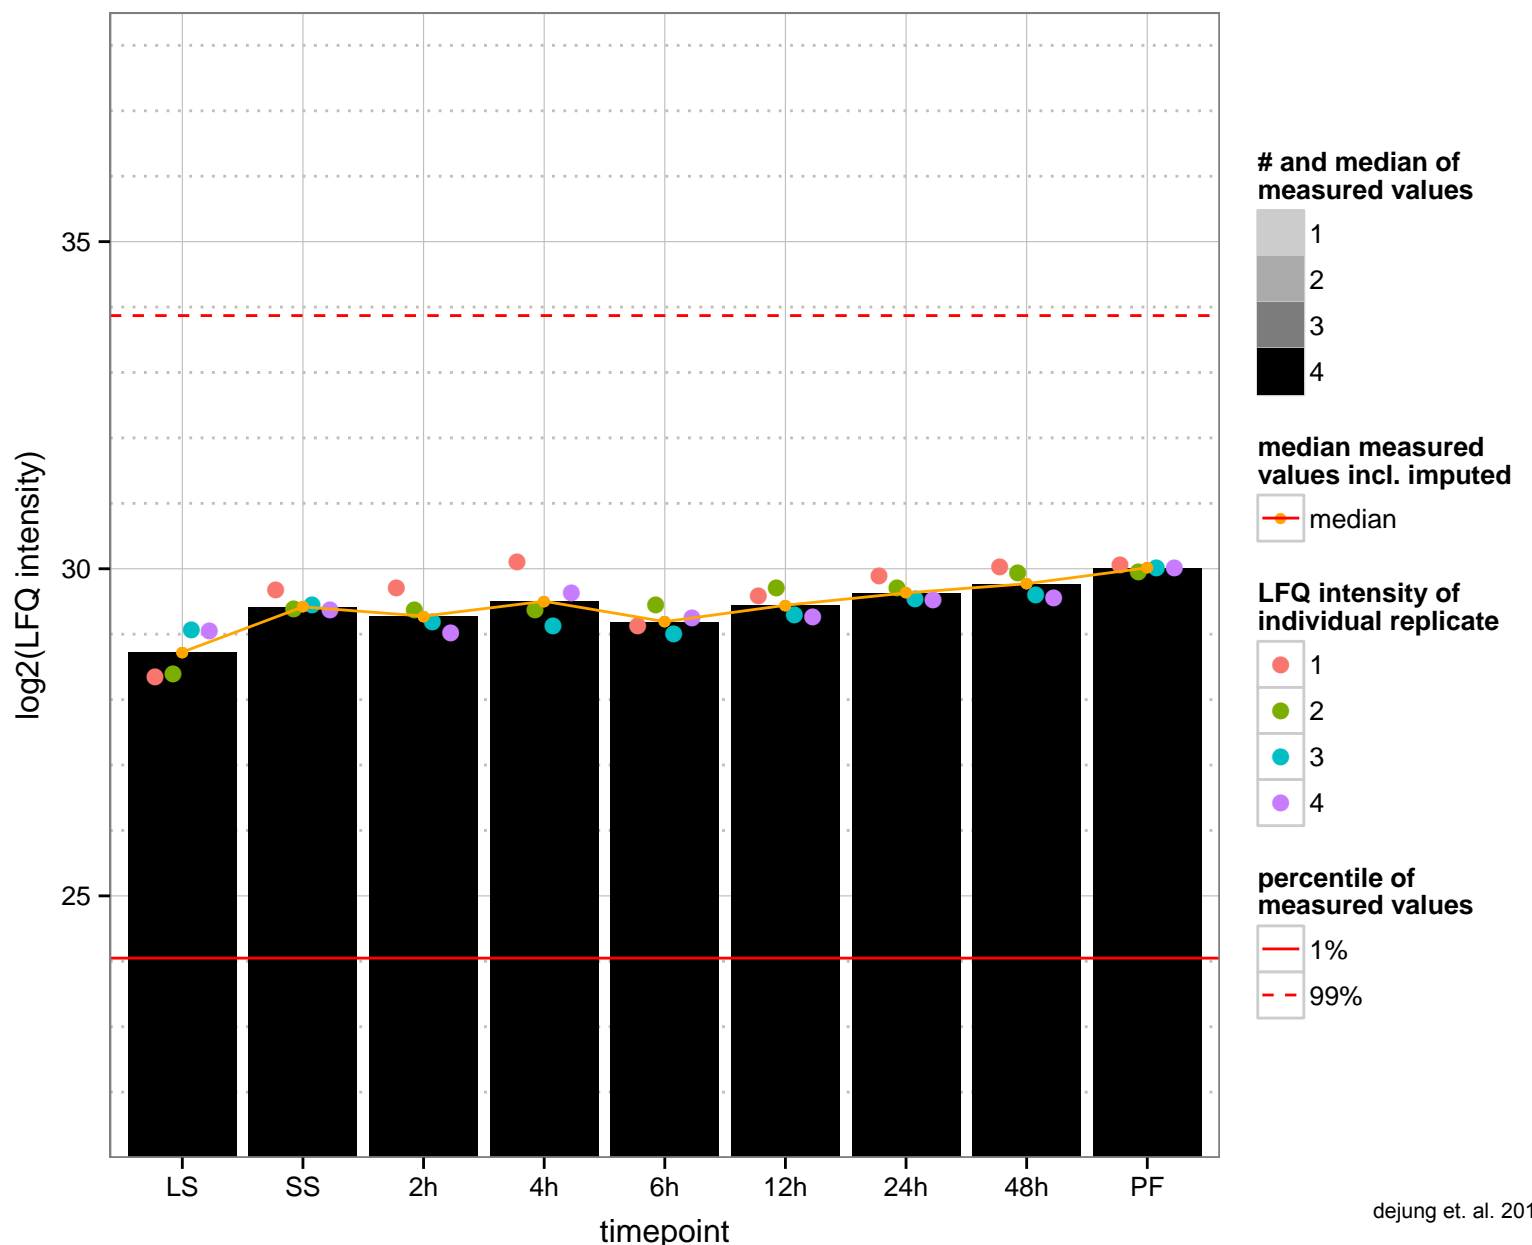

U2 small nuclear ribonucleoprotein 40K (U2\_40K)  
 Tb927.10.14360  
 AGOF: mRNA binding  
 AGOC: U2 snRNP  
 AGOP: nuclear mRNA cis splicing, via spliceosome  
 PGO: null  
 PGOC: null  
 PGOP: null

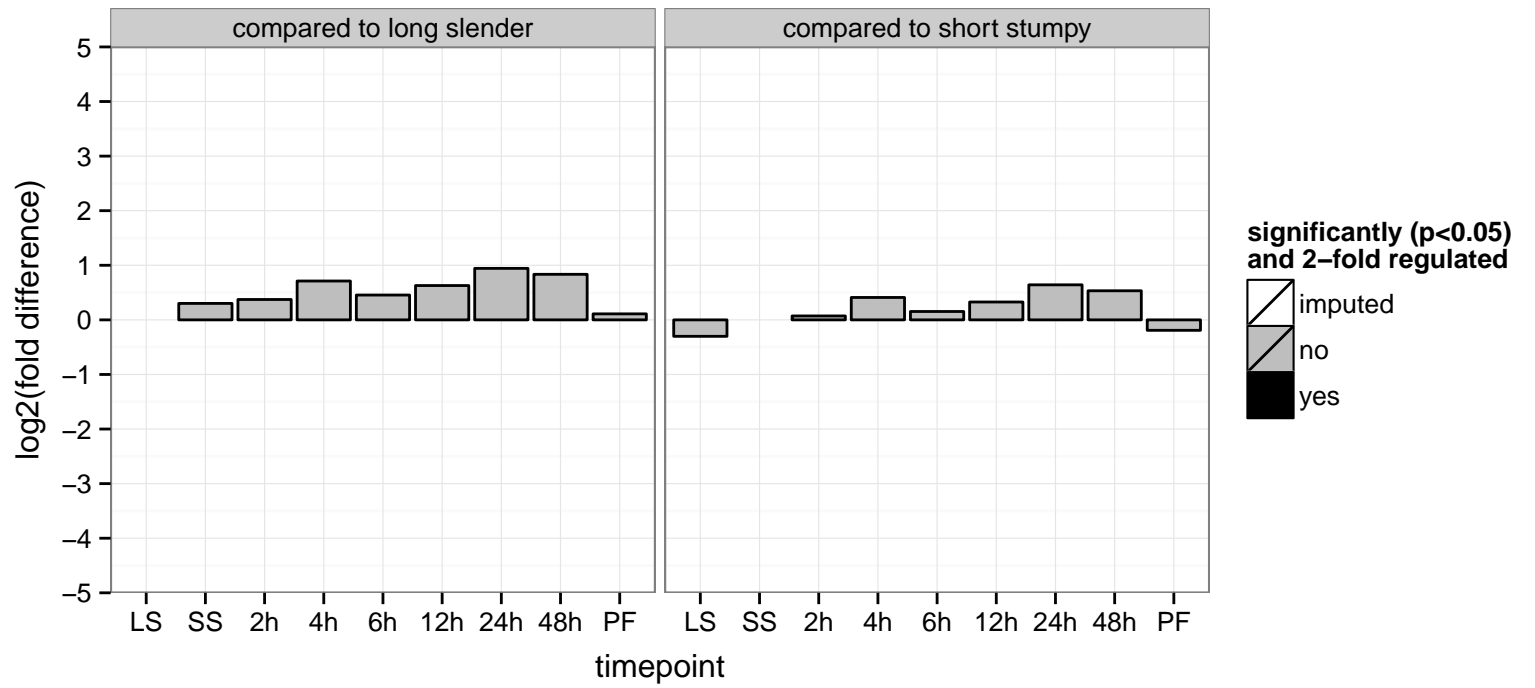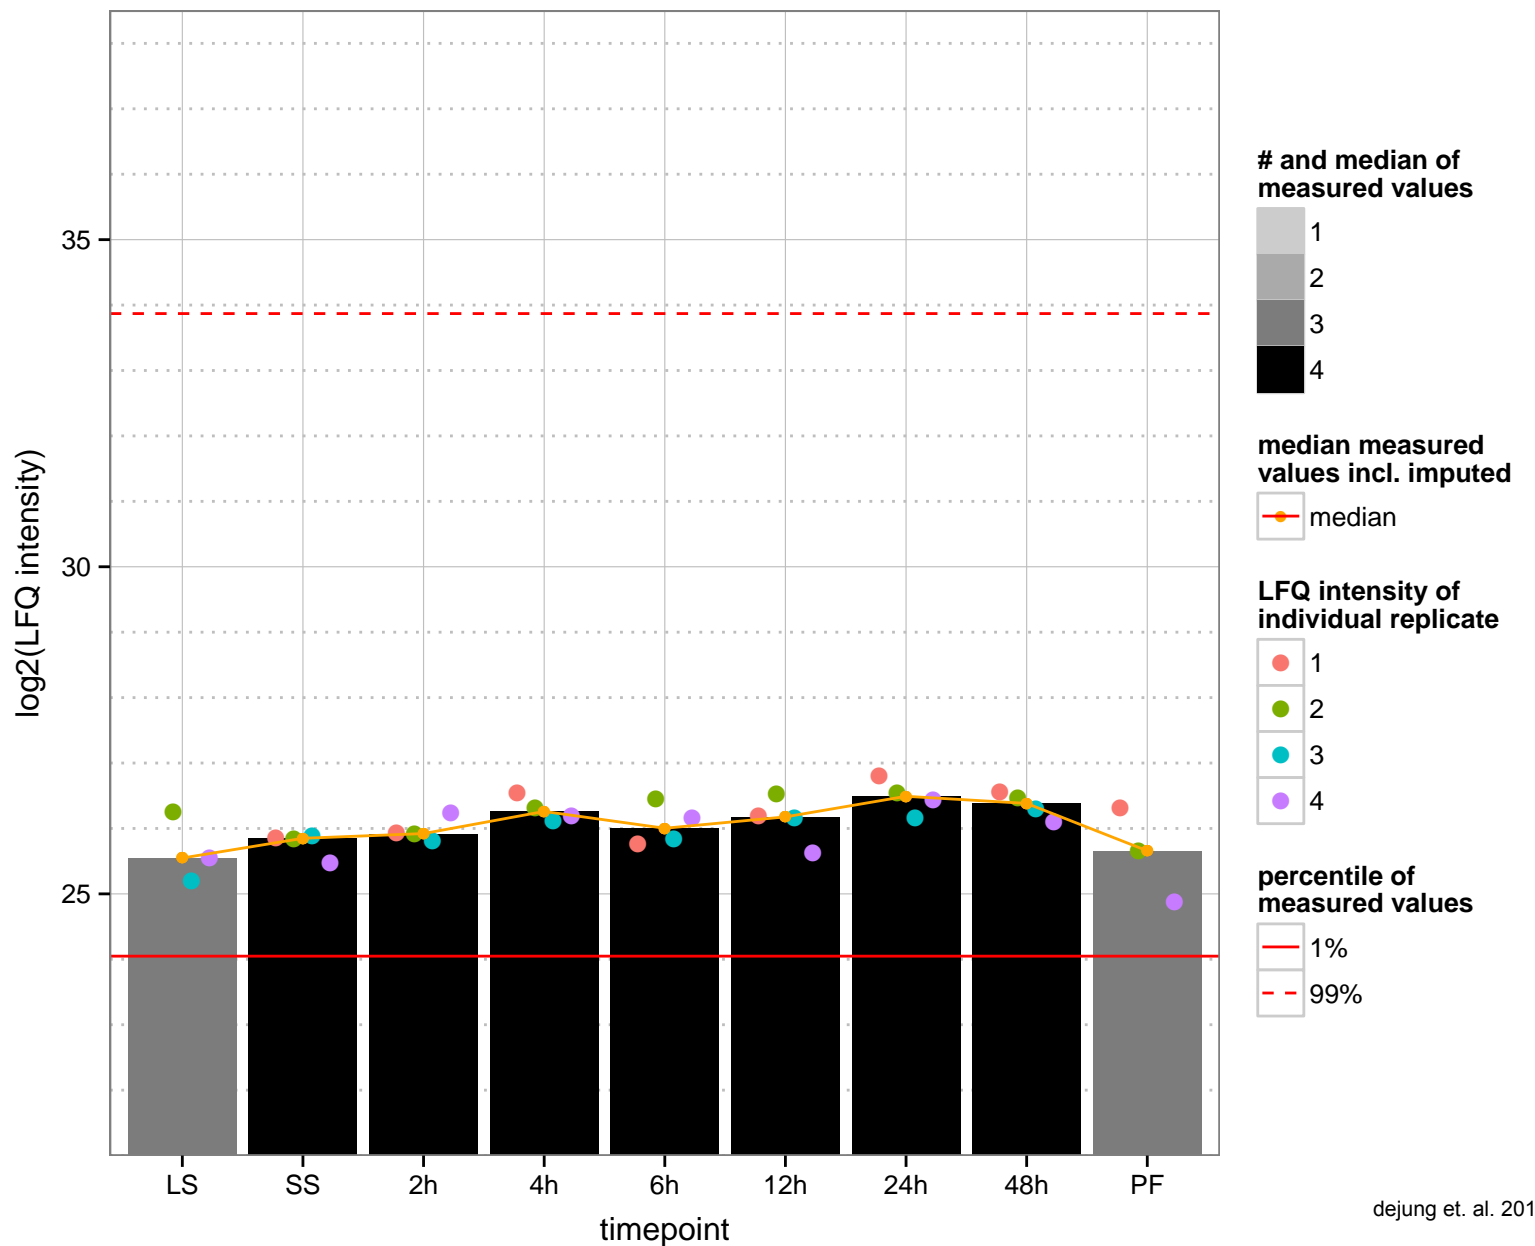

hypothetical protein, conserved  
 Tb927.10.14390  
 AGOF: null  
 AGOC: null  
 AGOP: null  
 PGOF: binding  
 PGO: null  
 PGOP: null

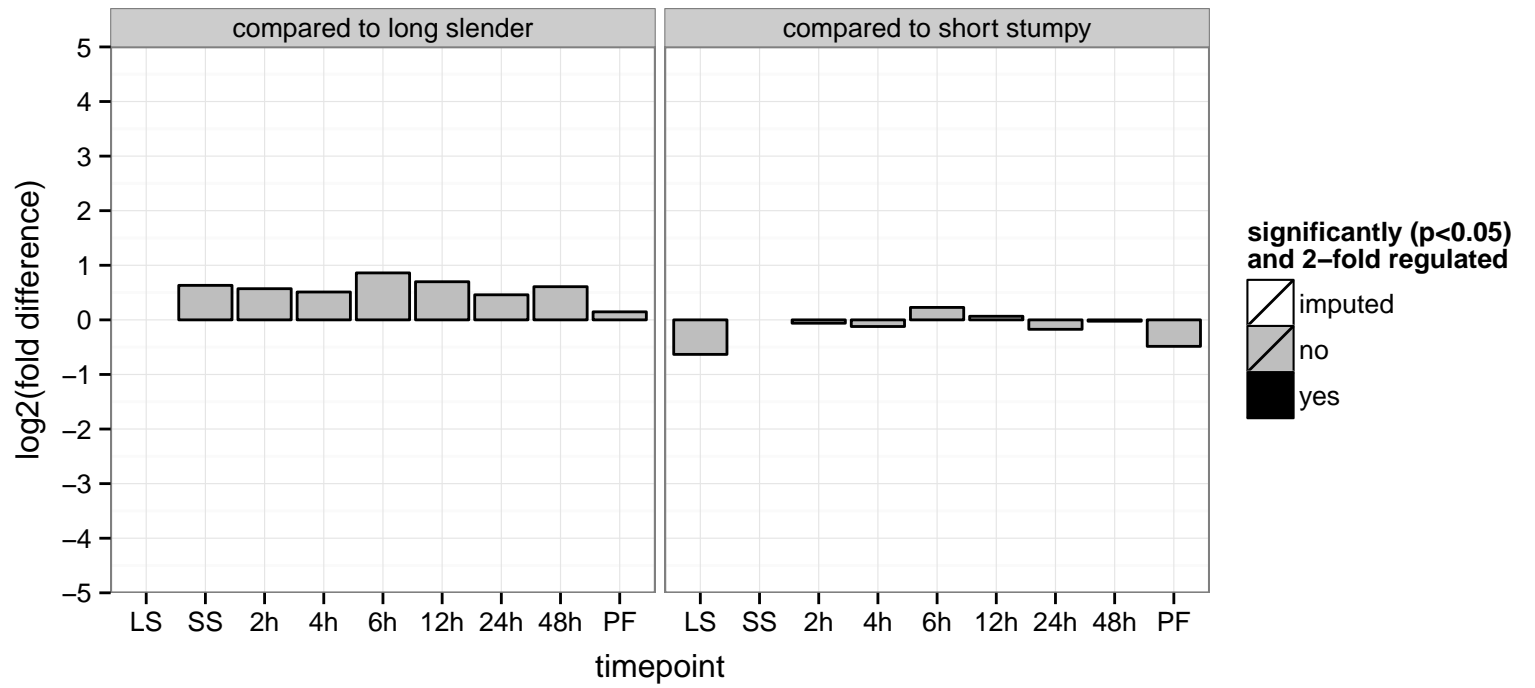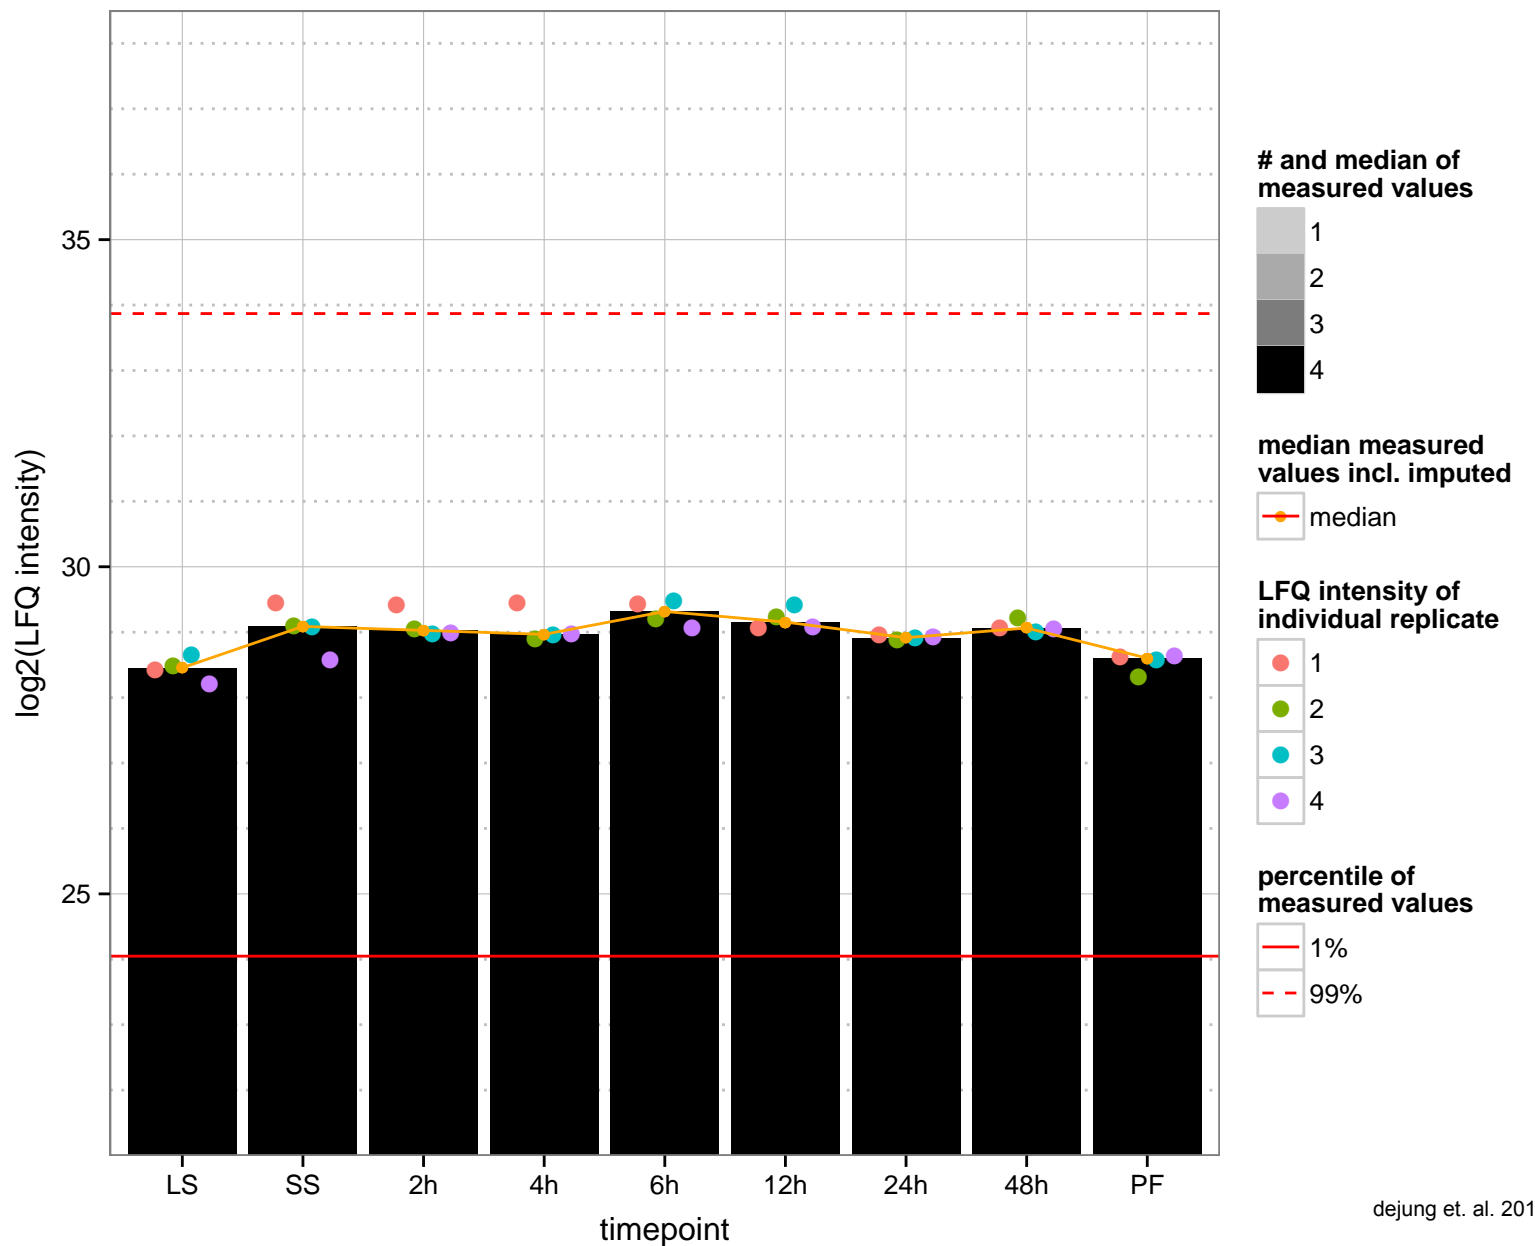

intraflagellar transport protein IFT140, putative (IFT140)  
 Tb927.10.14470  
 AGOF: null  
 AGOC: null  
 AGOP: null  
 PGO: protein binding  
 PGOC: null  
 PGOP: null

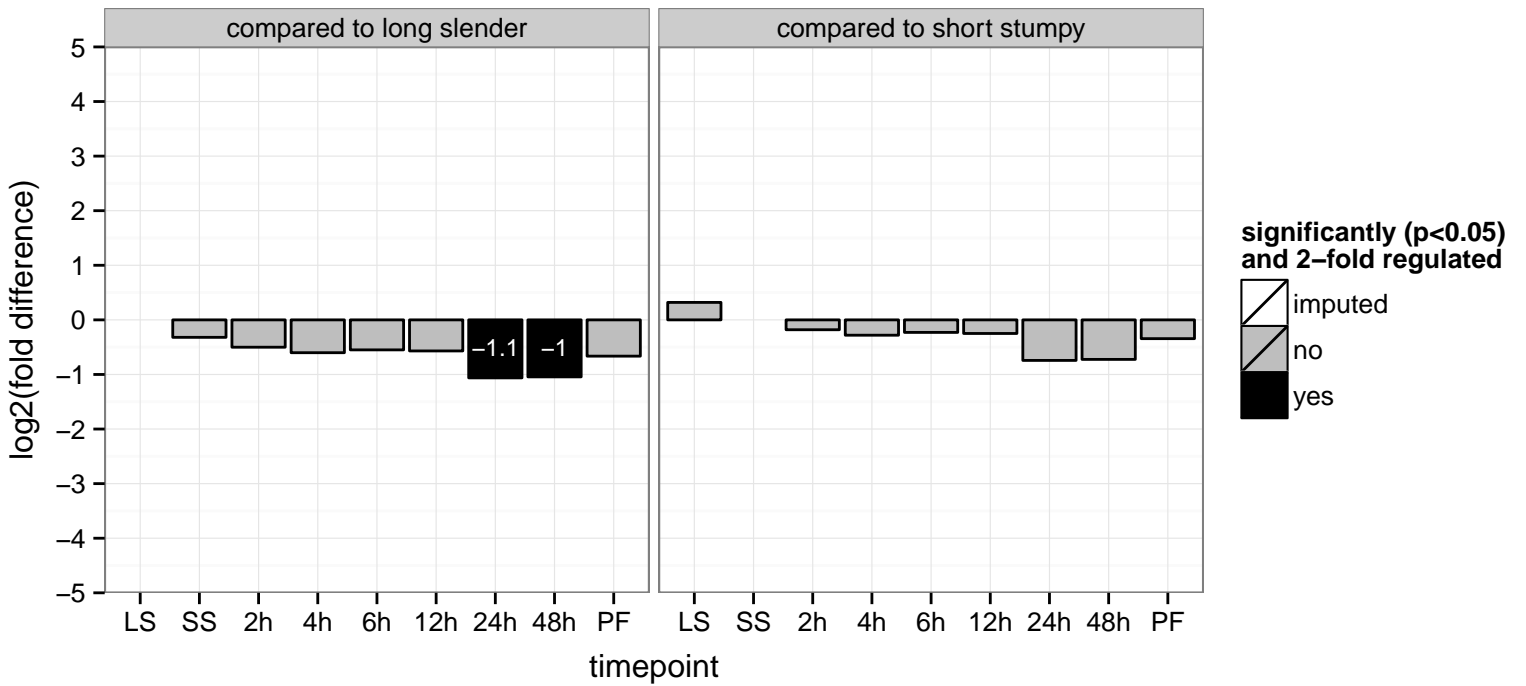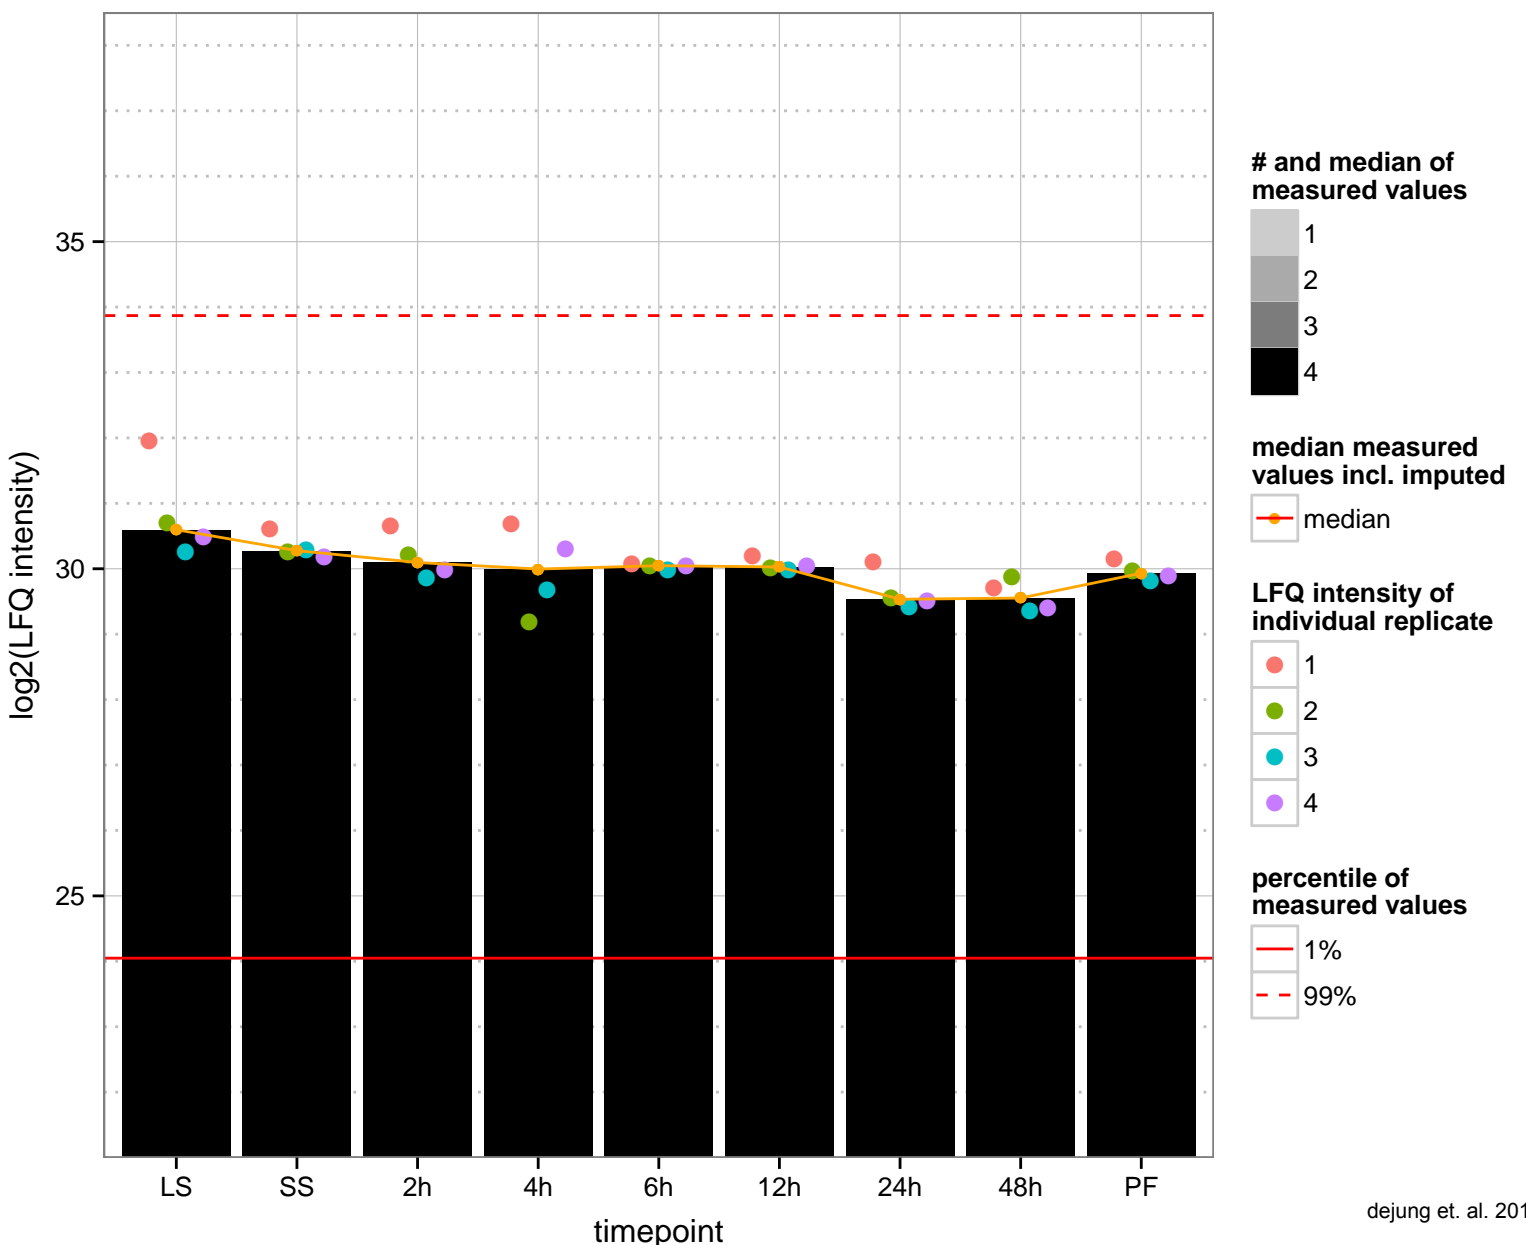



hypothetical protein, conserved  
 Tb927.10.14480  
 AGOF: null  
 AGOC: null  
 AGOP: null  
 PGO: null  
 PGOC: null  
 PGOP: null

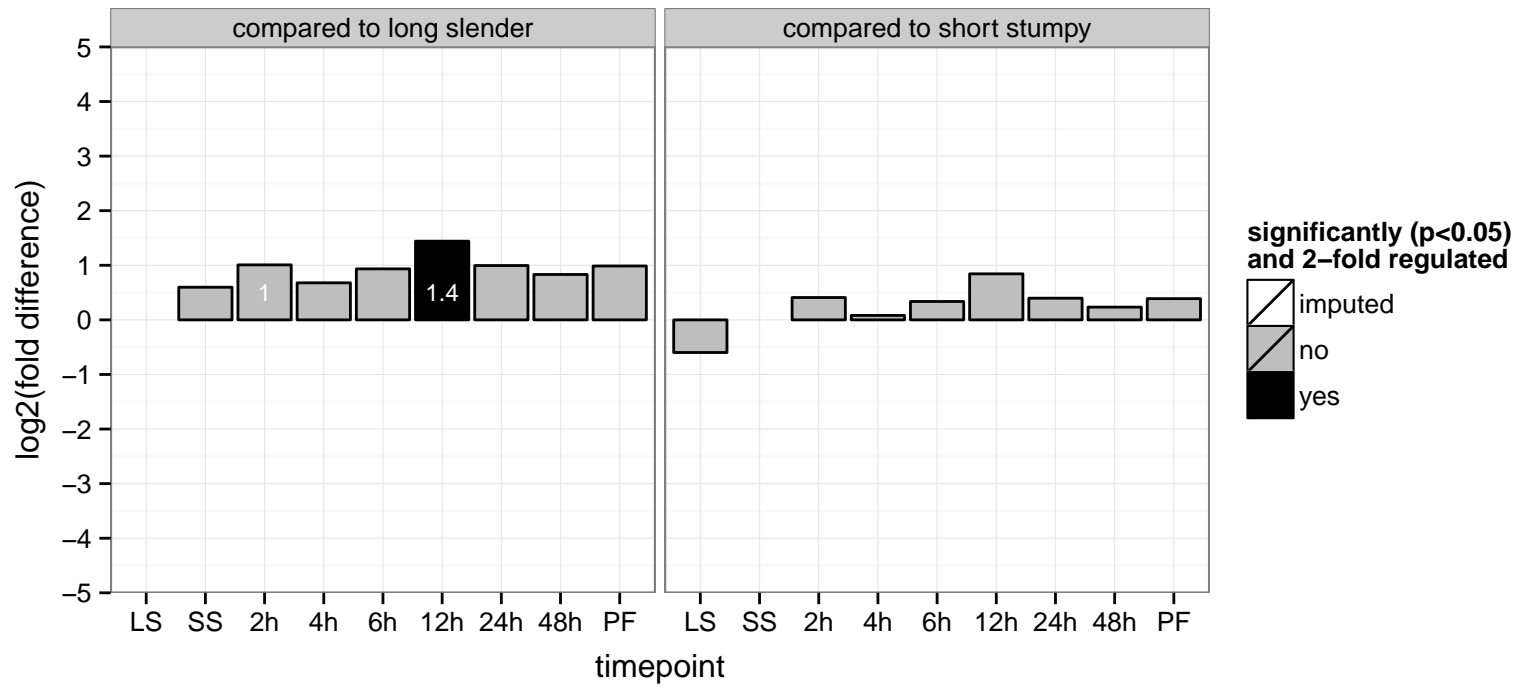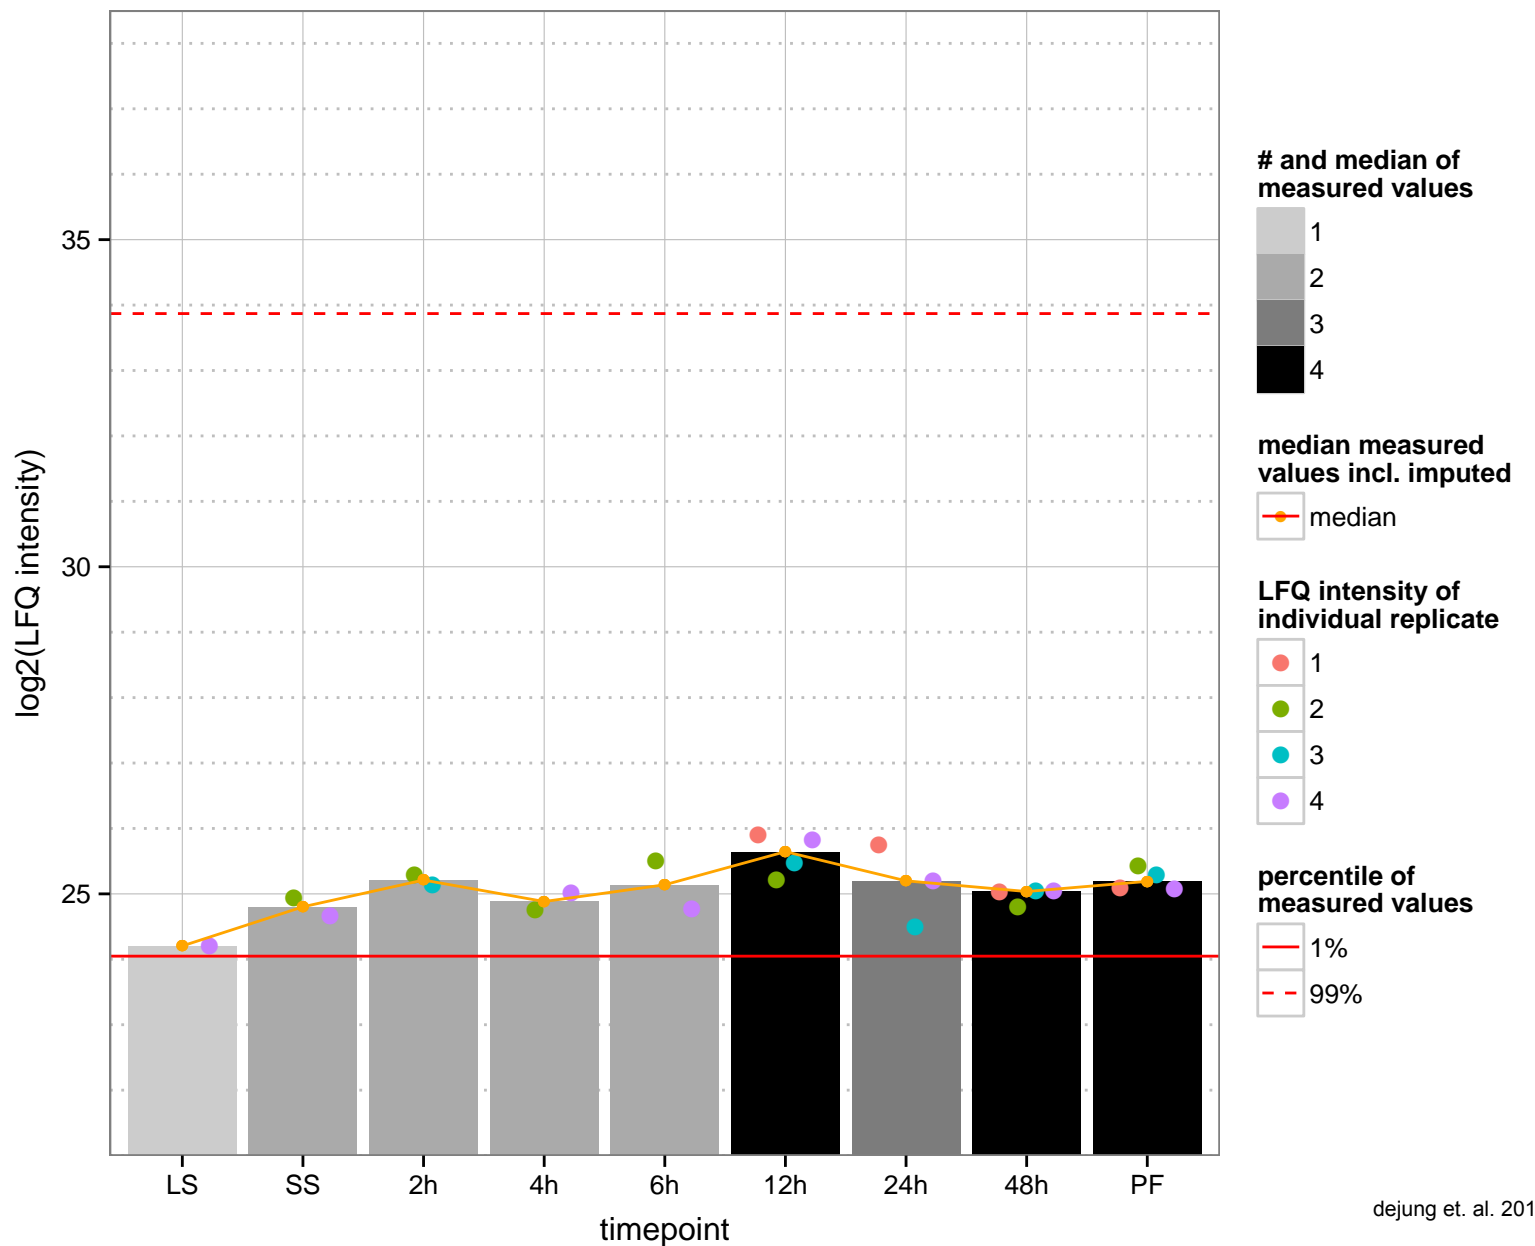

hypothetical protein, conserved  
 Tb927.10.1450  
 AGOF: null  
 AGOC: null  
 AGOP: null  
 PGO: null  
 PGOC: null  
 PGOP: null

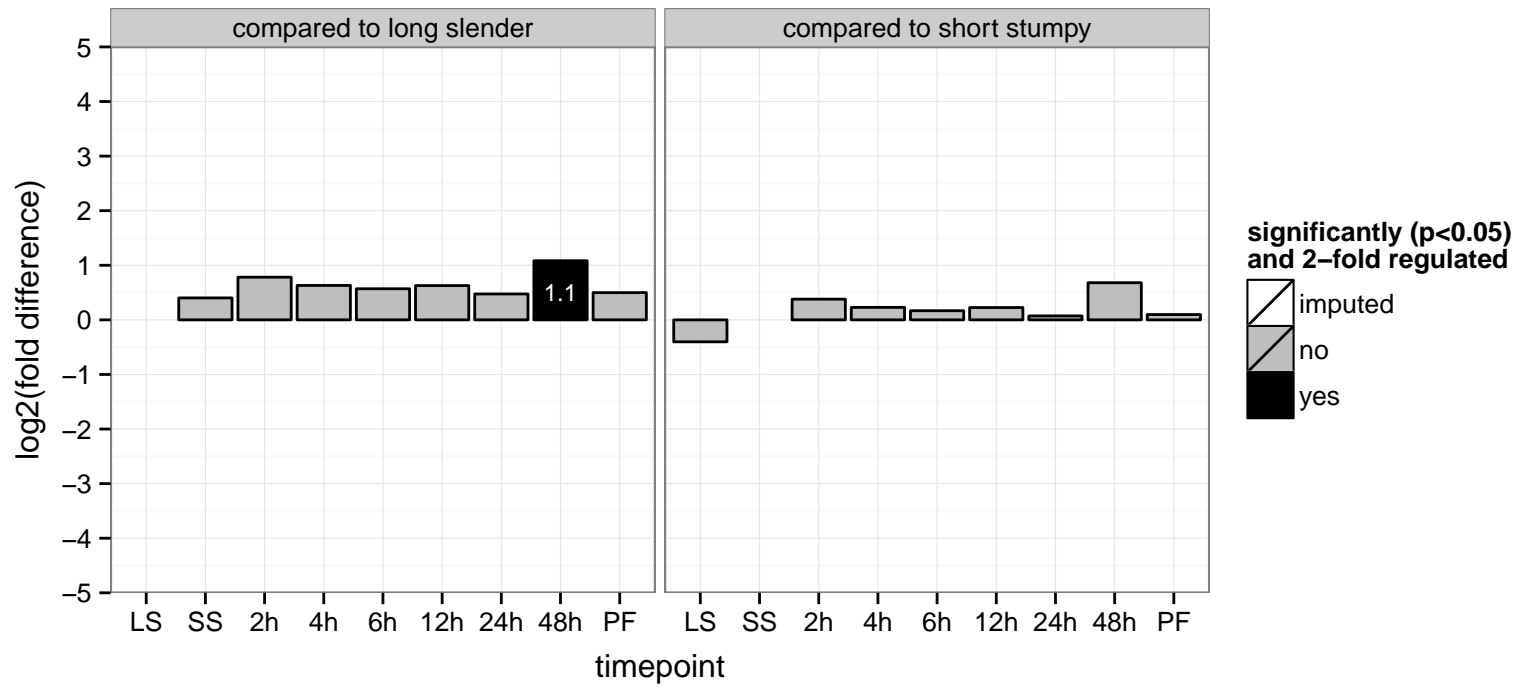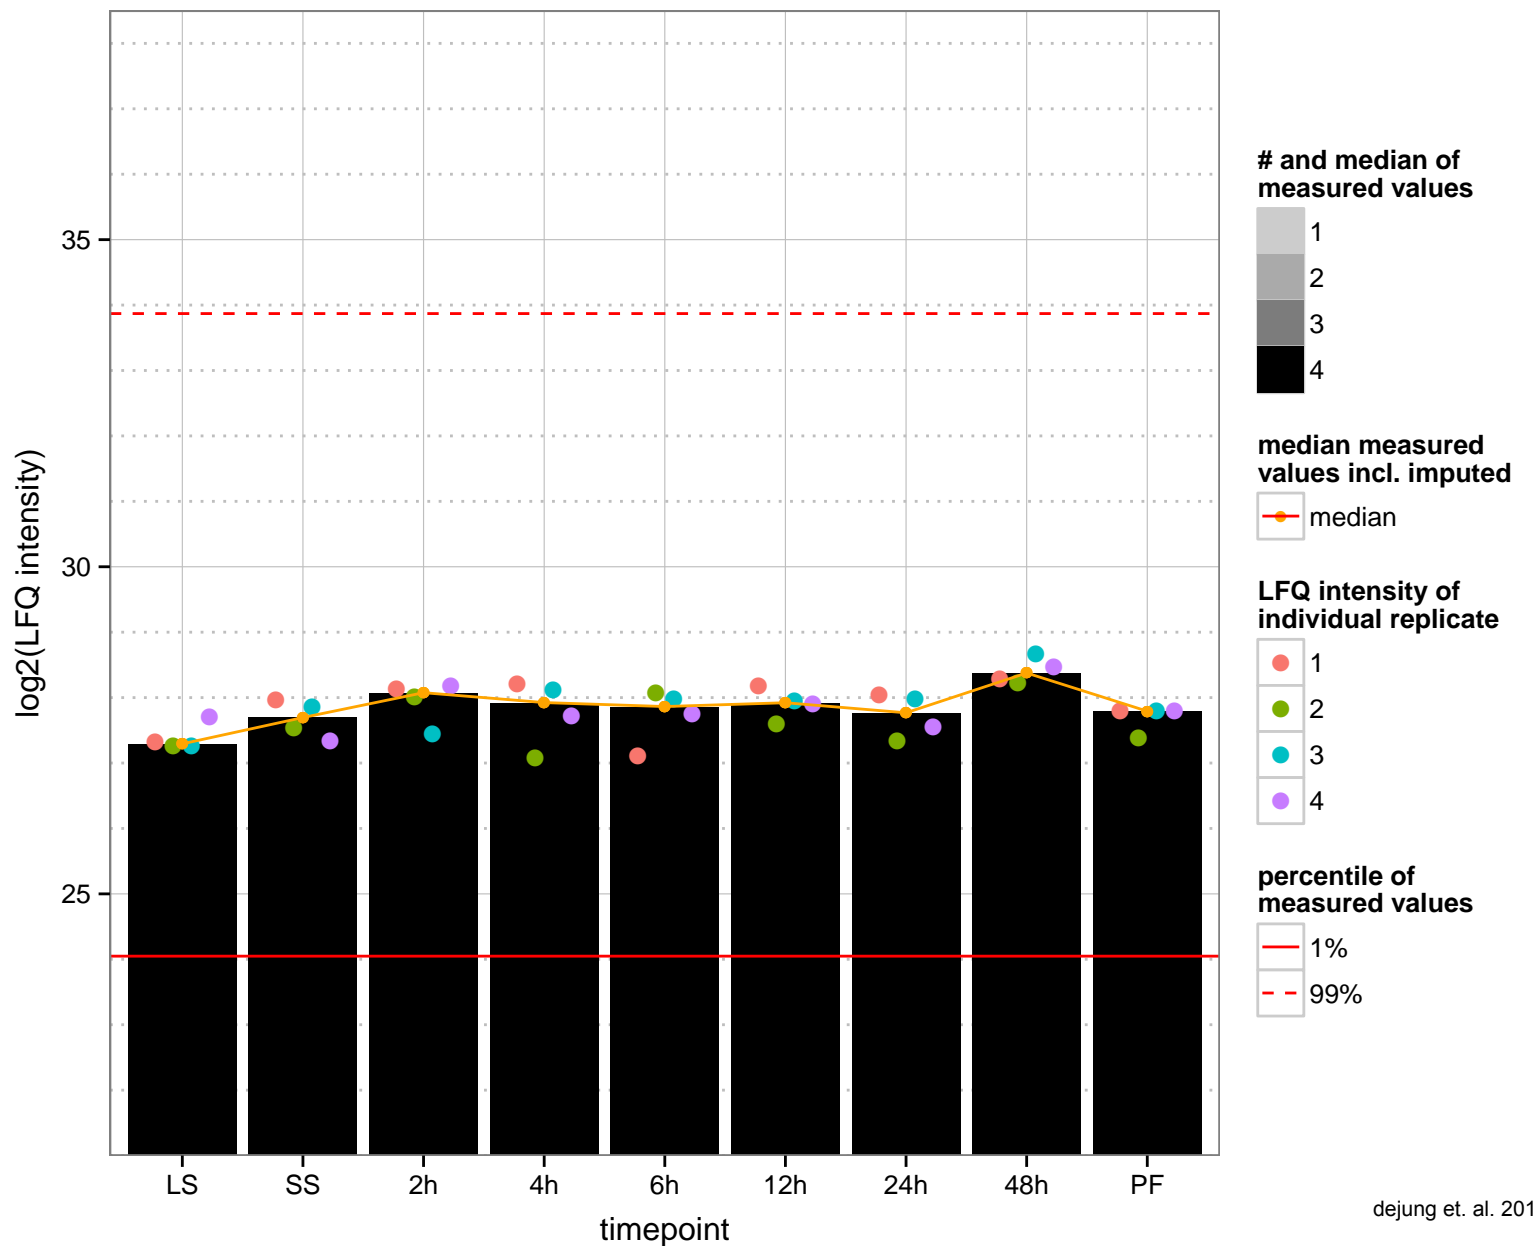

hypothetical protein, conserved  
 Tb927.10.14500  
 AGOF: null  
 AGOC: null  
 AGOP: null  
 PGO: null  
 PGOC: null  
 PGOP: null

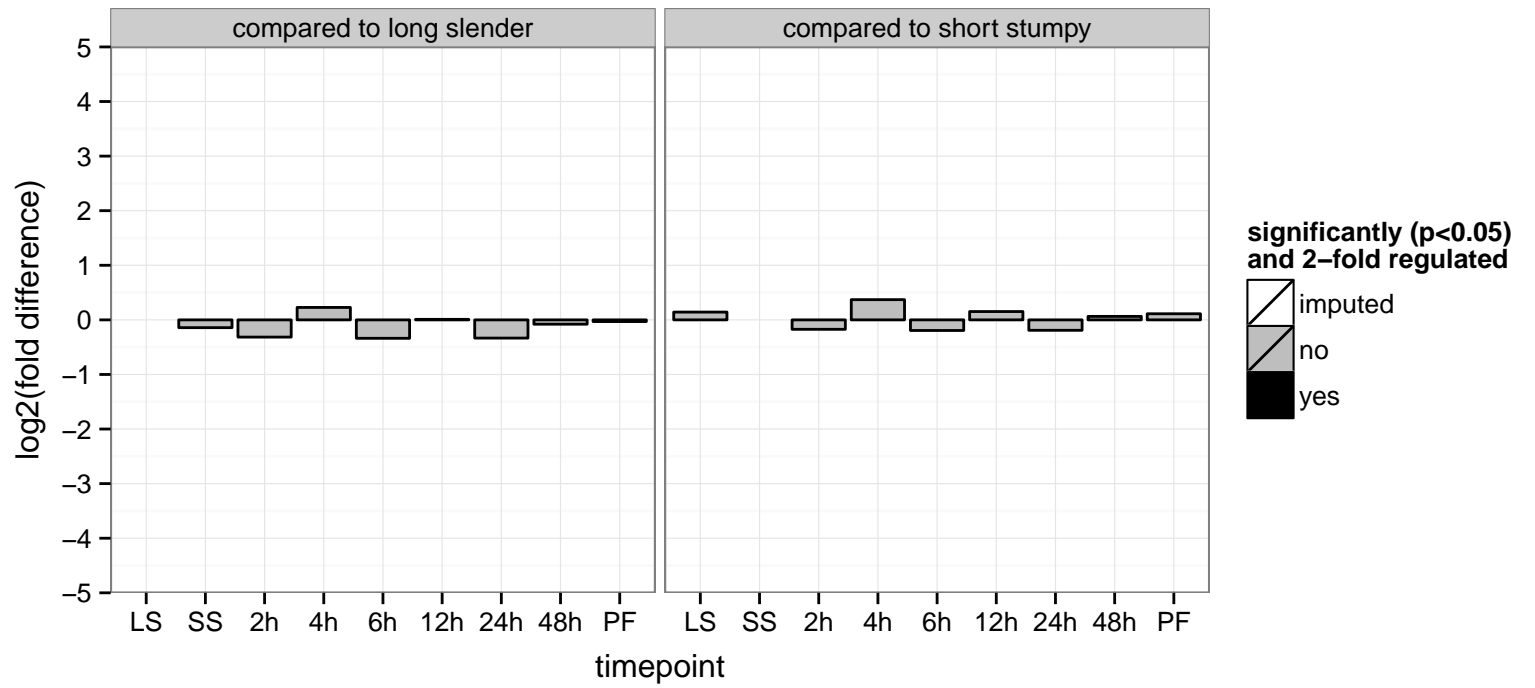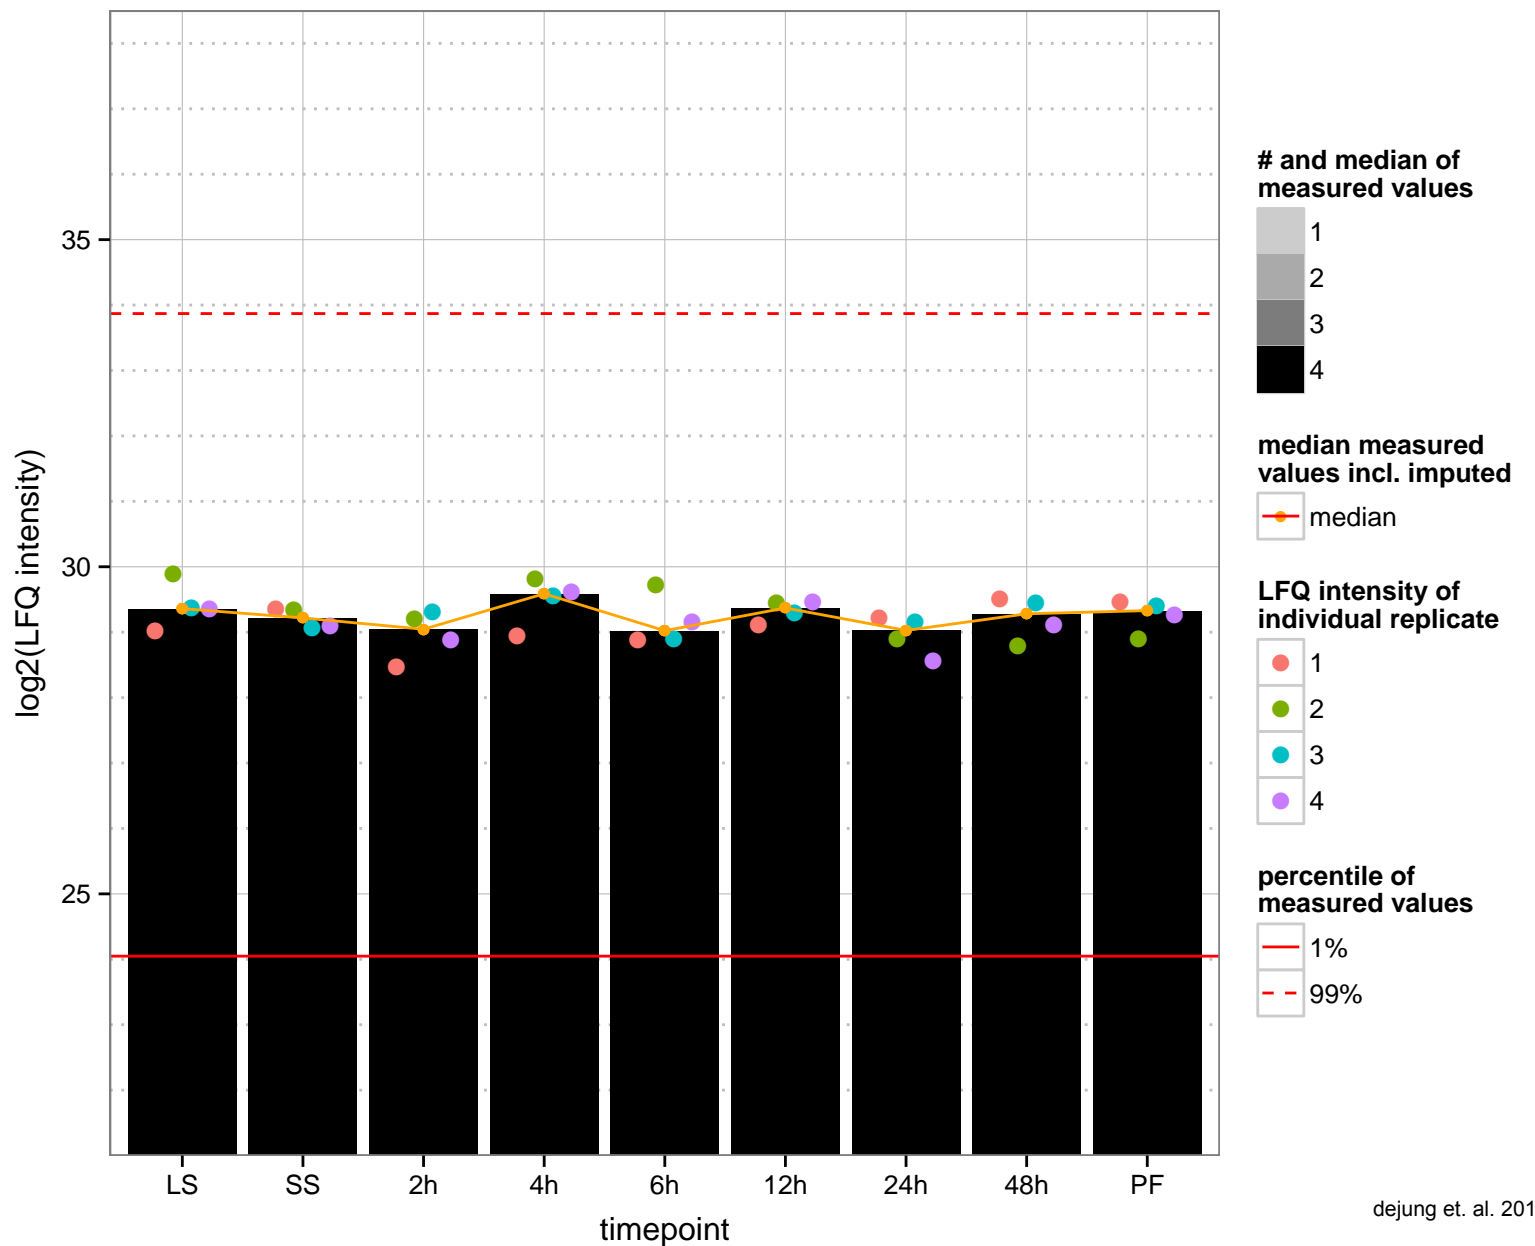

hypothetical protein, conserved  
 Tb927.10.14510  
 AGOF: null  
 AGOC: null  
 AGOP: null  
 PGOF: hydrolase activity, acting on acid anhydrides  
 PGO: null  
 PGOP: null

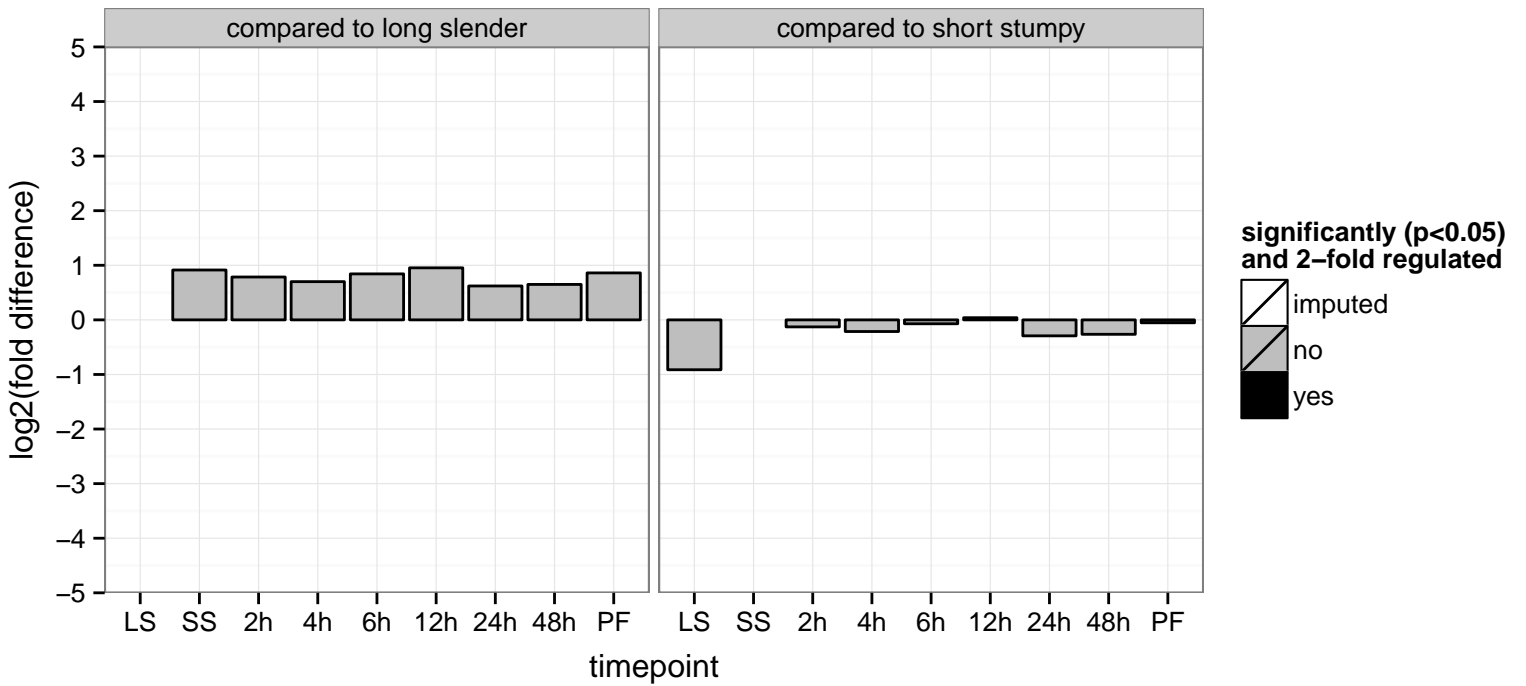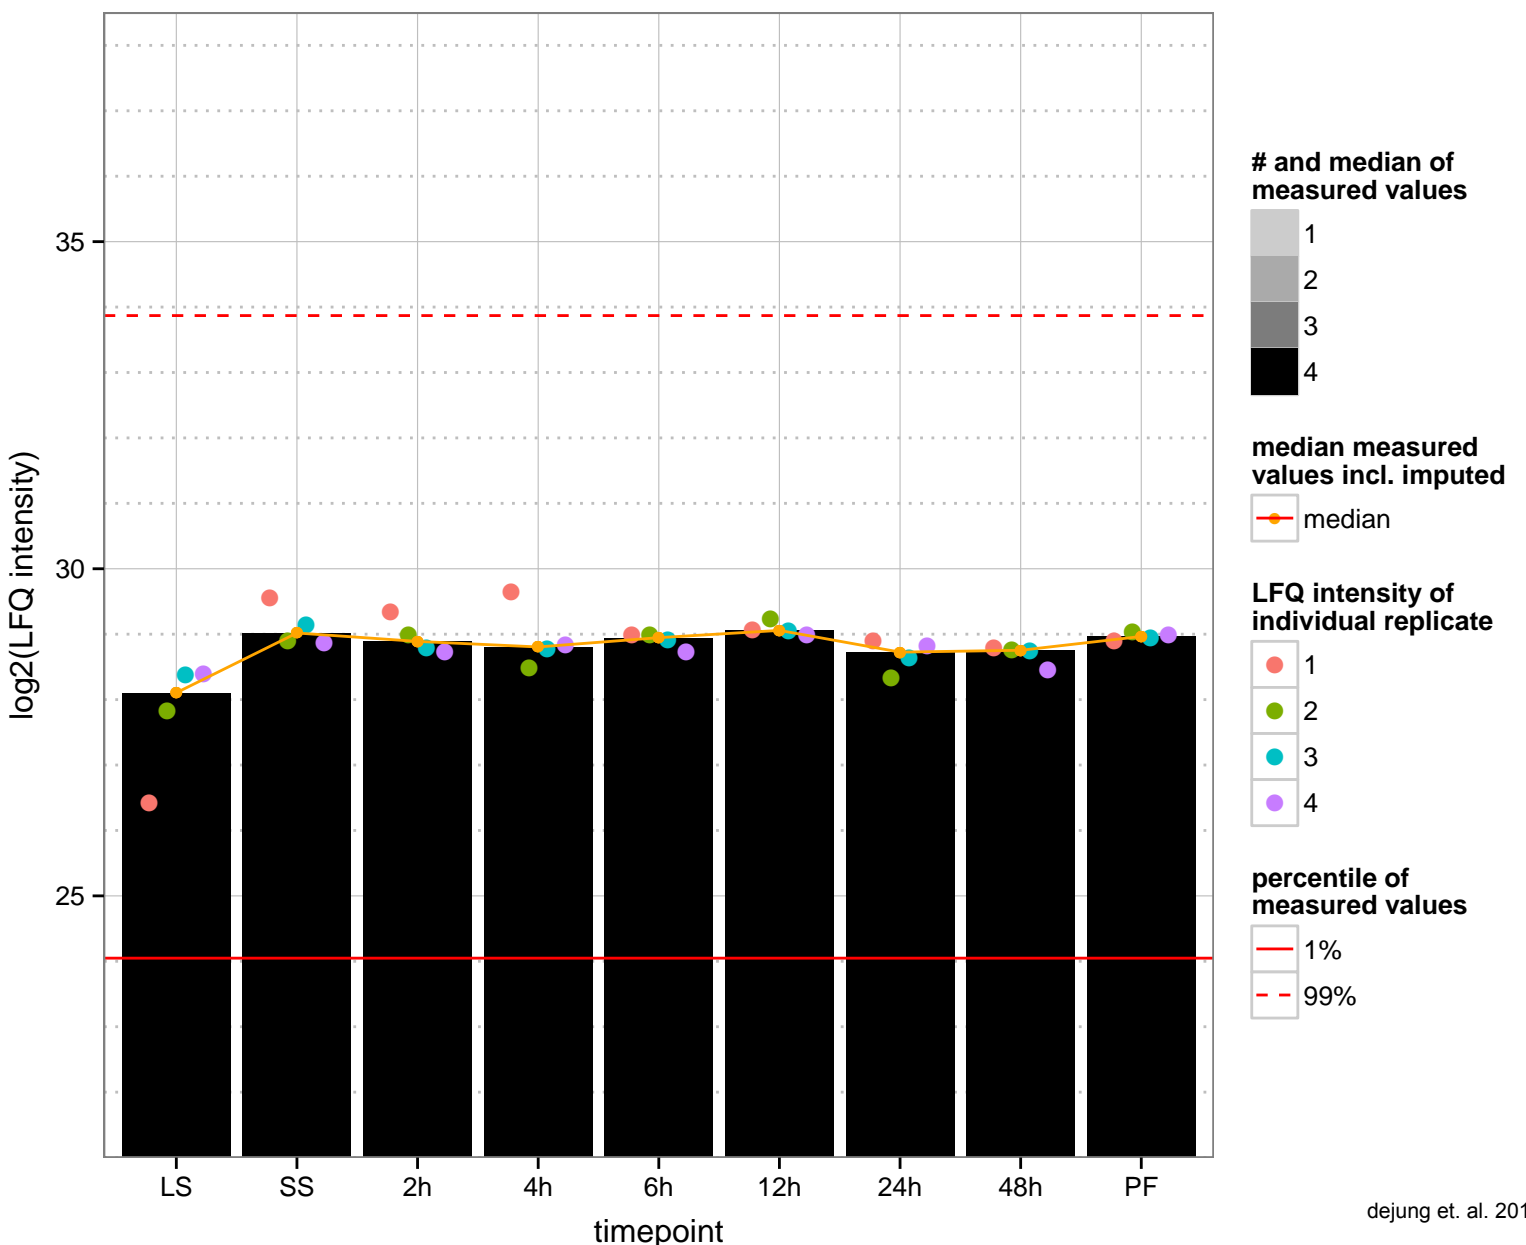

hypothetical protein, conserved  
 Tb927.10.14520  
 AGOF: null  
 AGOC: bacterial-type flagellum basal body  
 AGOP: null  
 PGO: null  
 PGOC: null  
 PGOP: null

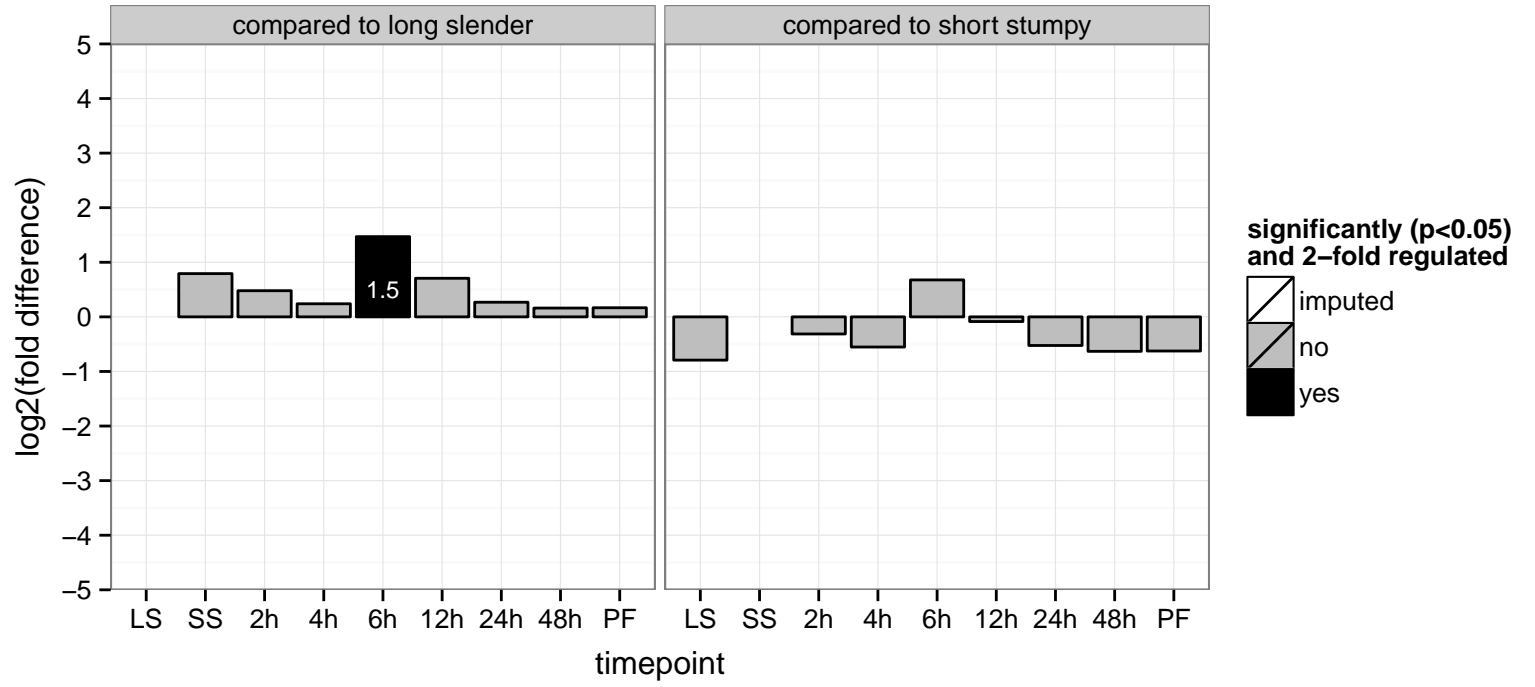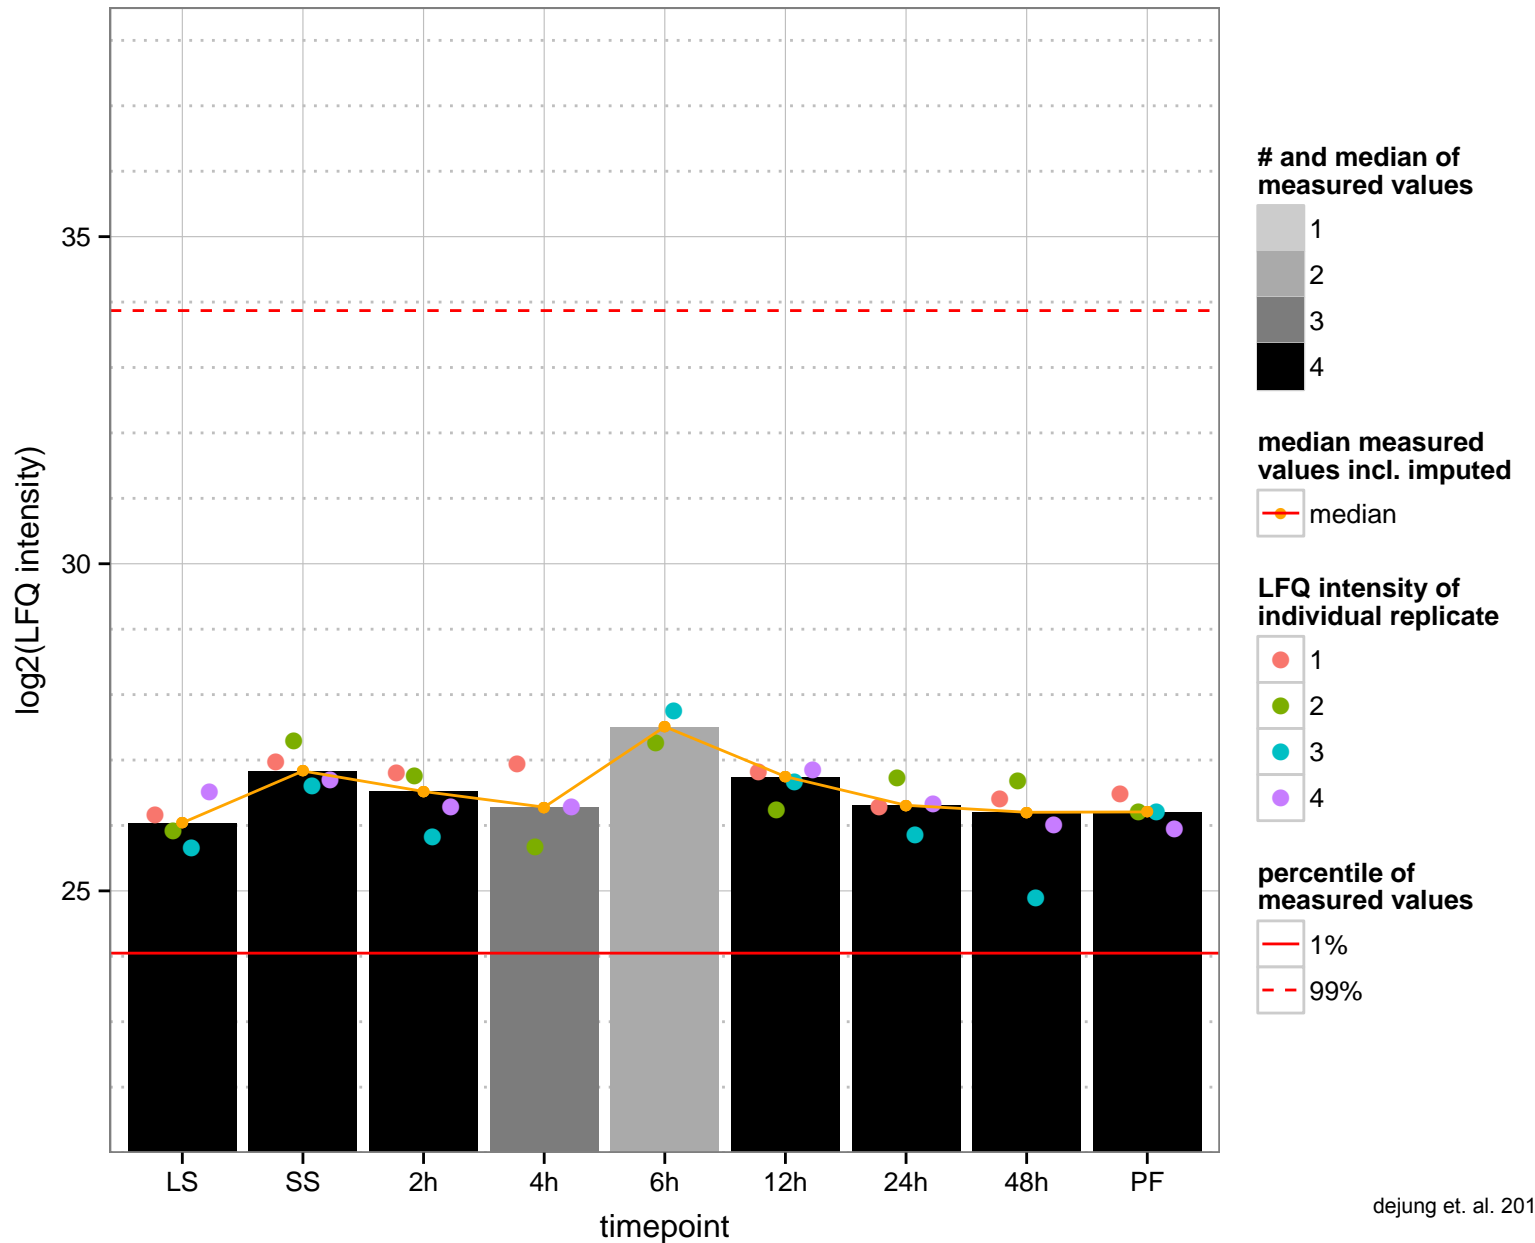

19S proteasome non-atpase subunit 8, 26s proteasome non-atpase regulatory subunit 8 (Rpn8)

Tb927.10.14530

AGOF: endopeptidase activity

AGOC: proteasome regulatory particle

AGOP: cell growth, ubiquitin-dependent protein catabolic process

PGOF: protein binding

PGOC: null

PGOP: null

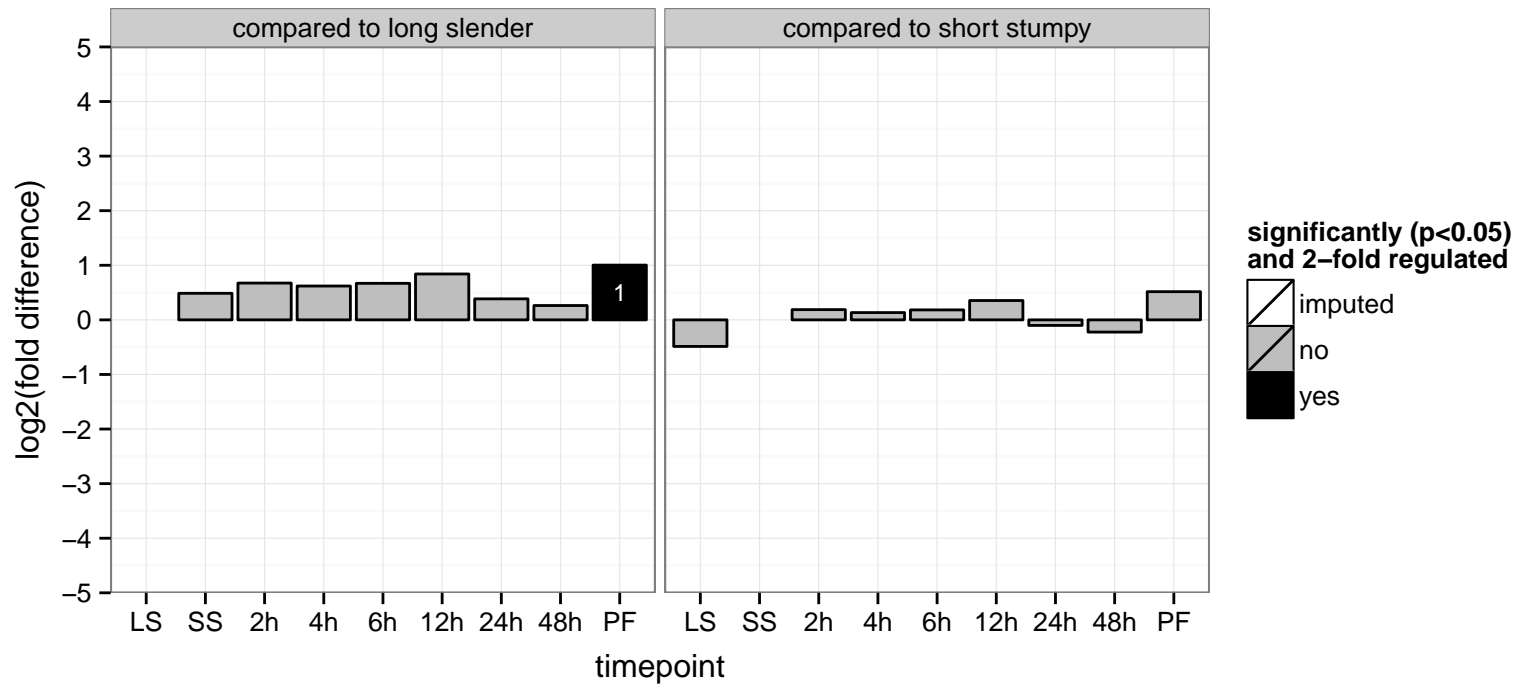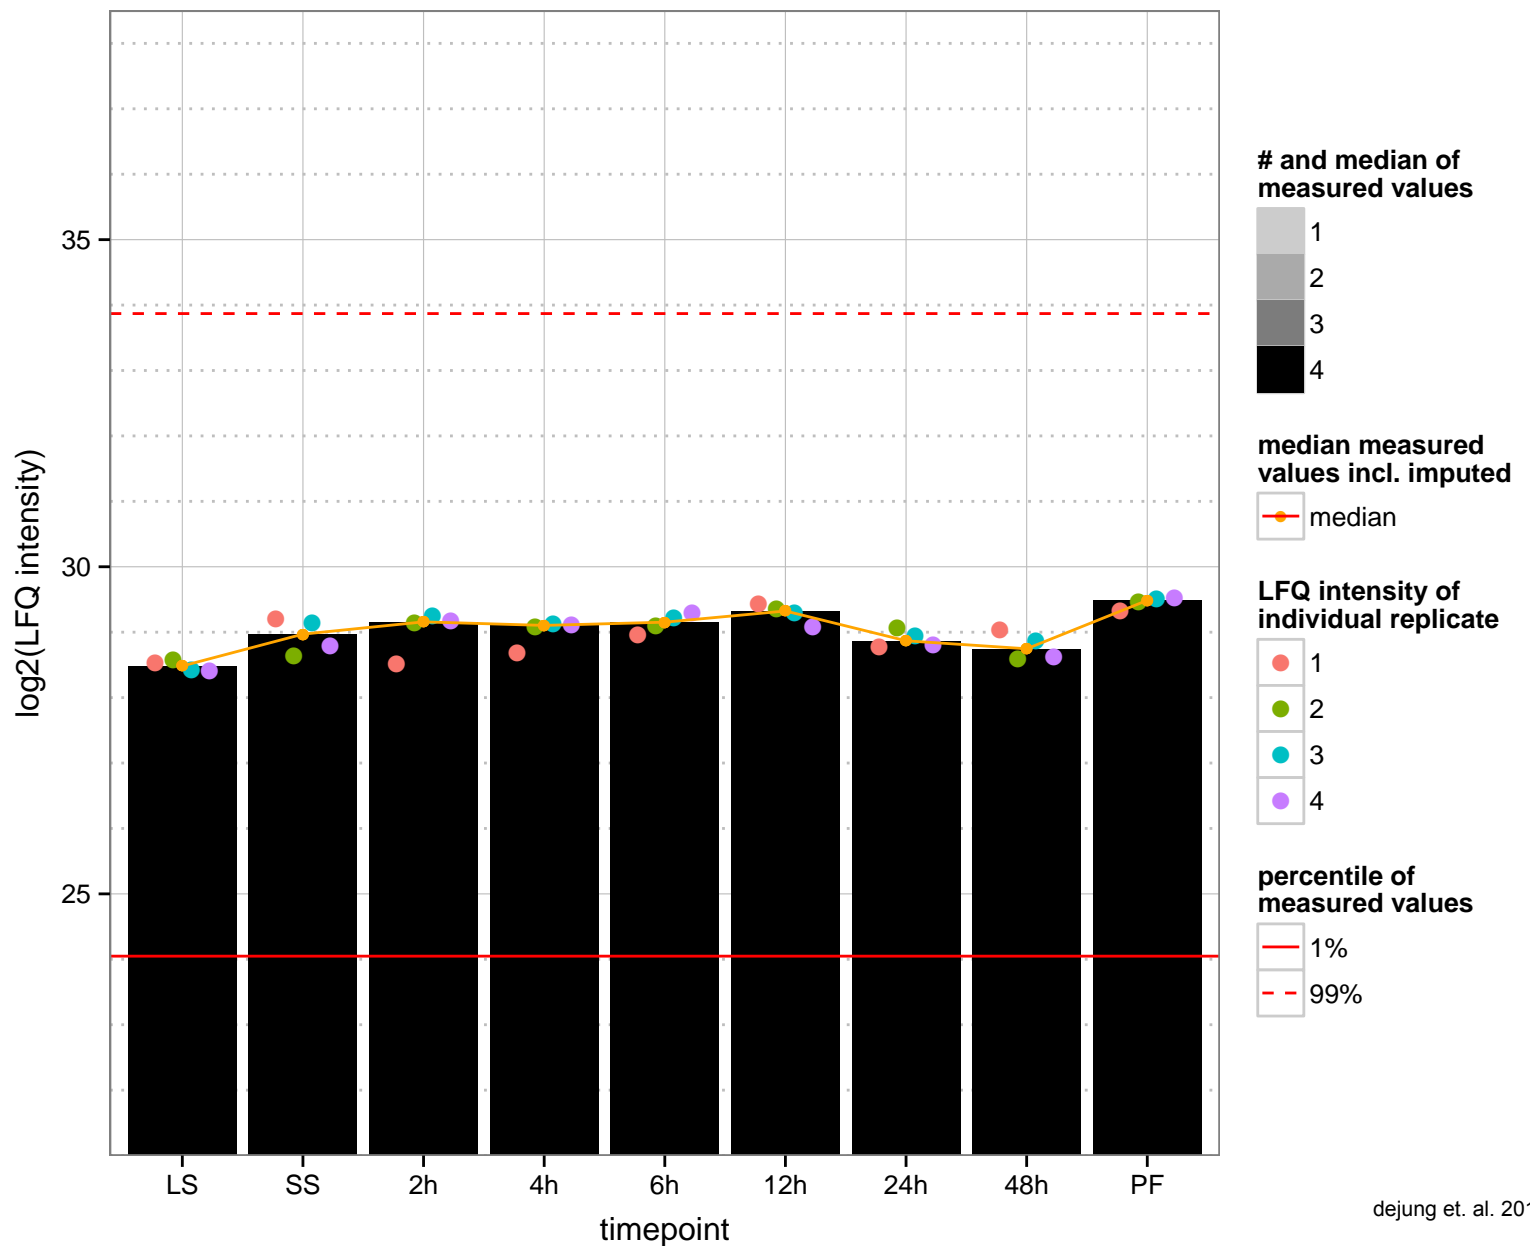

hypothetical protein, conserved  
Tb927.10.14570  
AGOF: ATP binding, microtubule motor activity  
AGOC: null  
AGOP: microtubule-based movement  
PGOF: ATP binding, microtubule motor activity  
PGOC: null  
PGOP: microtubule-based movement

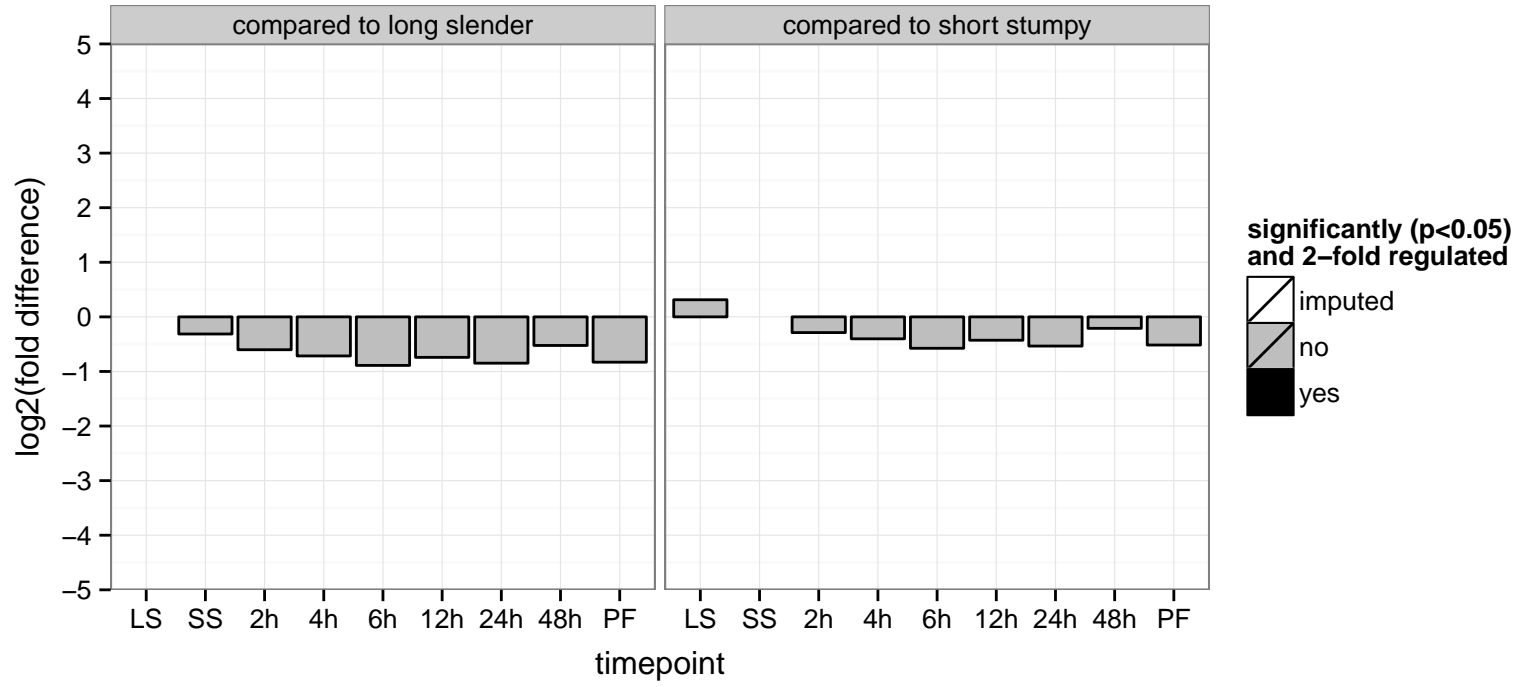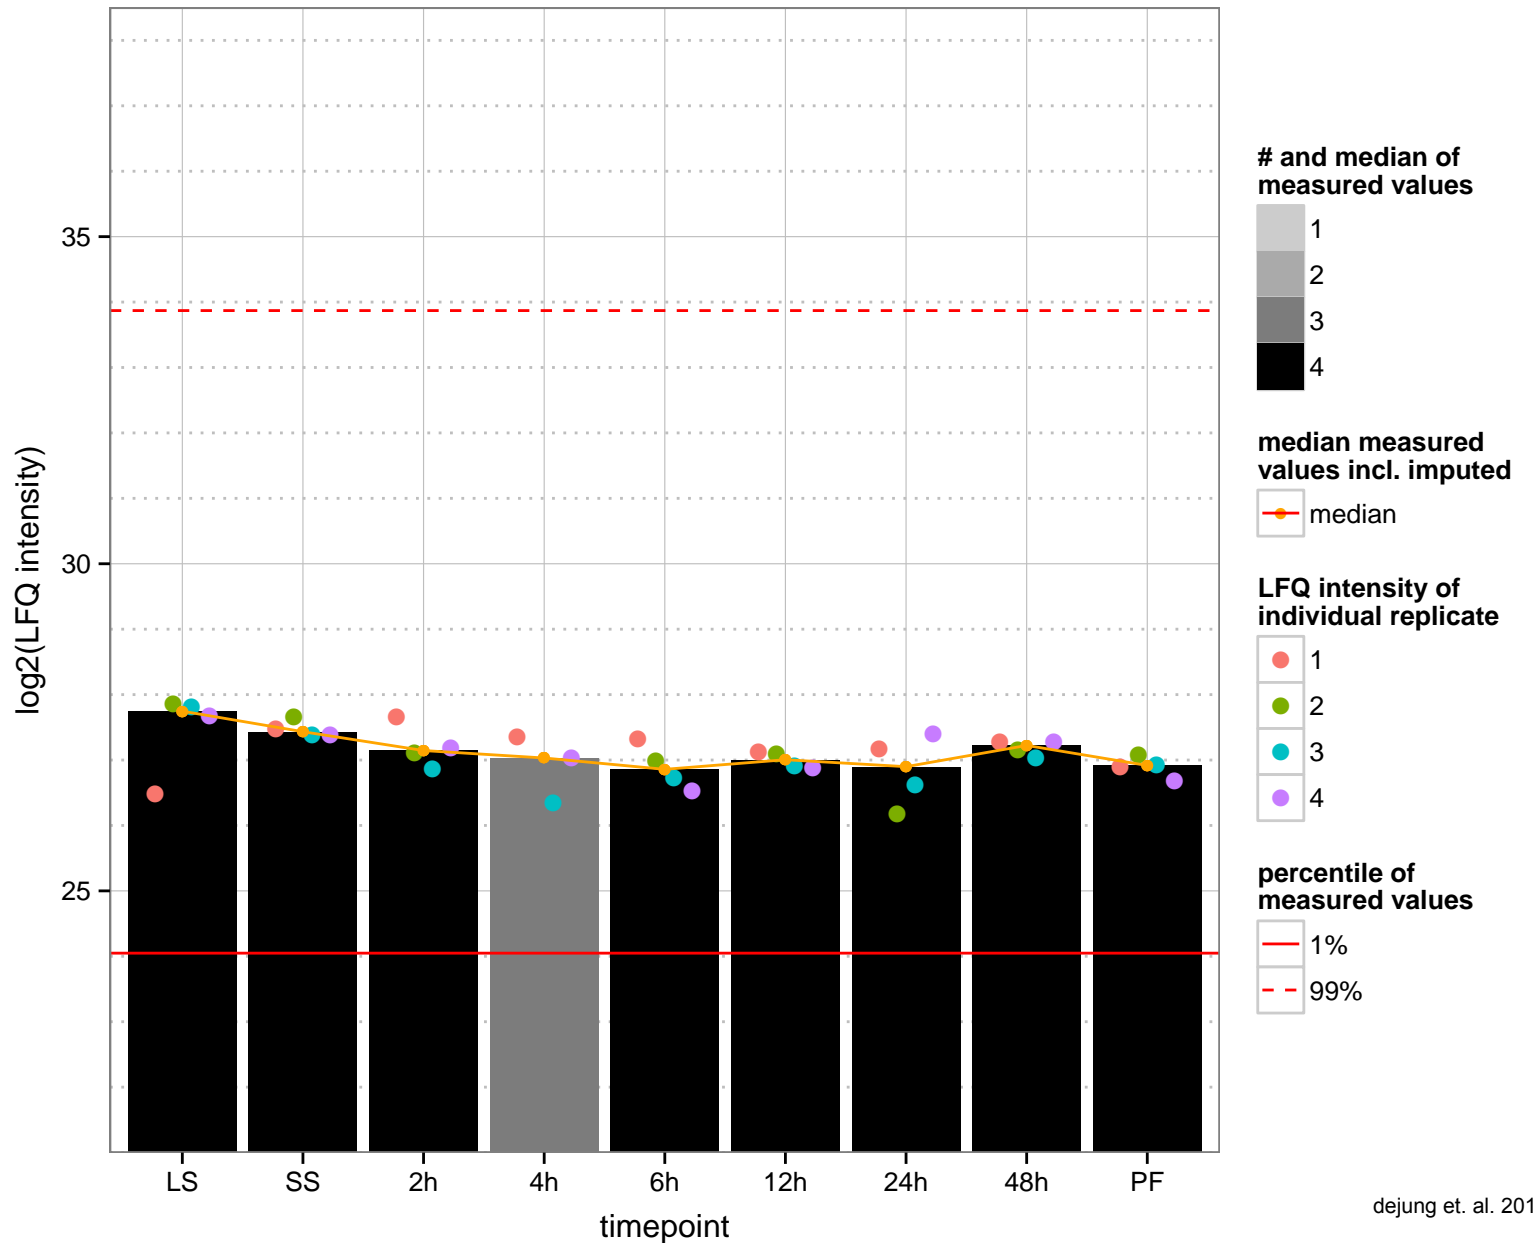

40S ribosomal protein S2, putative (RPS2)  
 Tb927.10.14710;Tb927.10.14600  
 AGOF: RNA binding, structural constituent of ribosome  
 AGOC: intracellular, ribosome, small ribosomal subunit  
 AGOP: translation  
 PGOF: RNA binding, structural constituent of ribosome  
 PGO: intracellular, ribosome, small ribosomal subunit  
 PGOP: translation

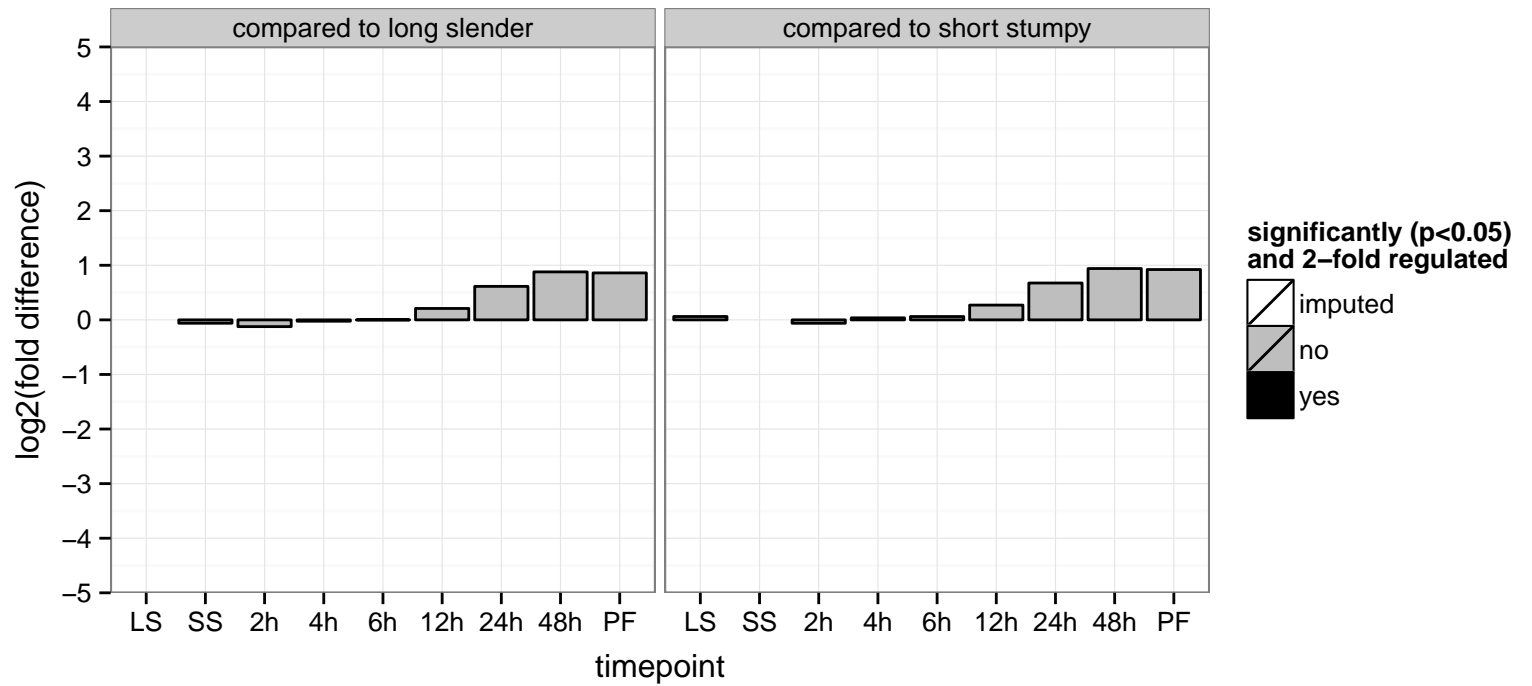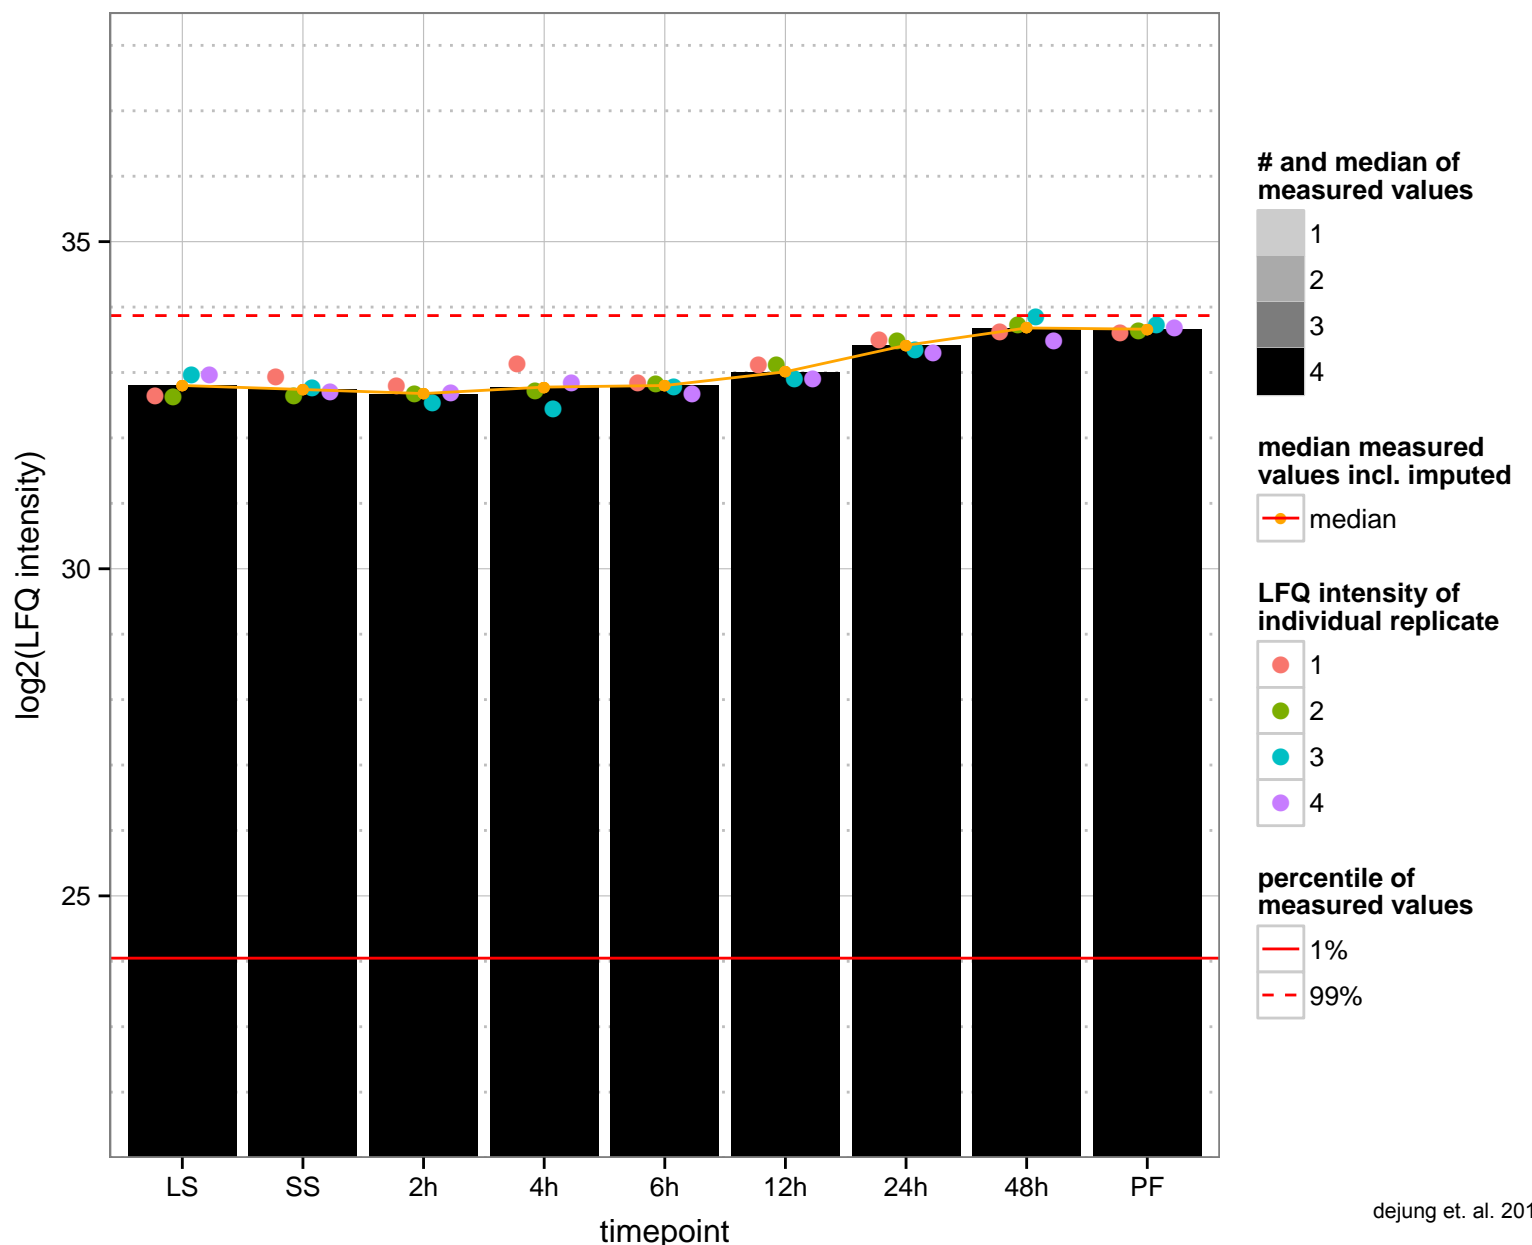



leucine-rich repeat protein (LRRP), putative  
 Tb927.10.14610  
 AGOF: null  
 AGOC: null  
 AGOP: null  
 PGO: null  
 PGOC: null  
 PGOP: null

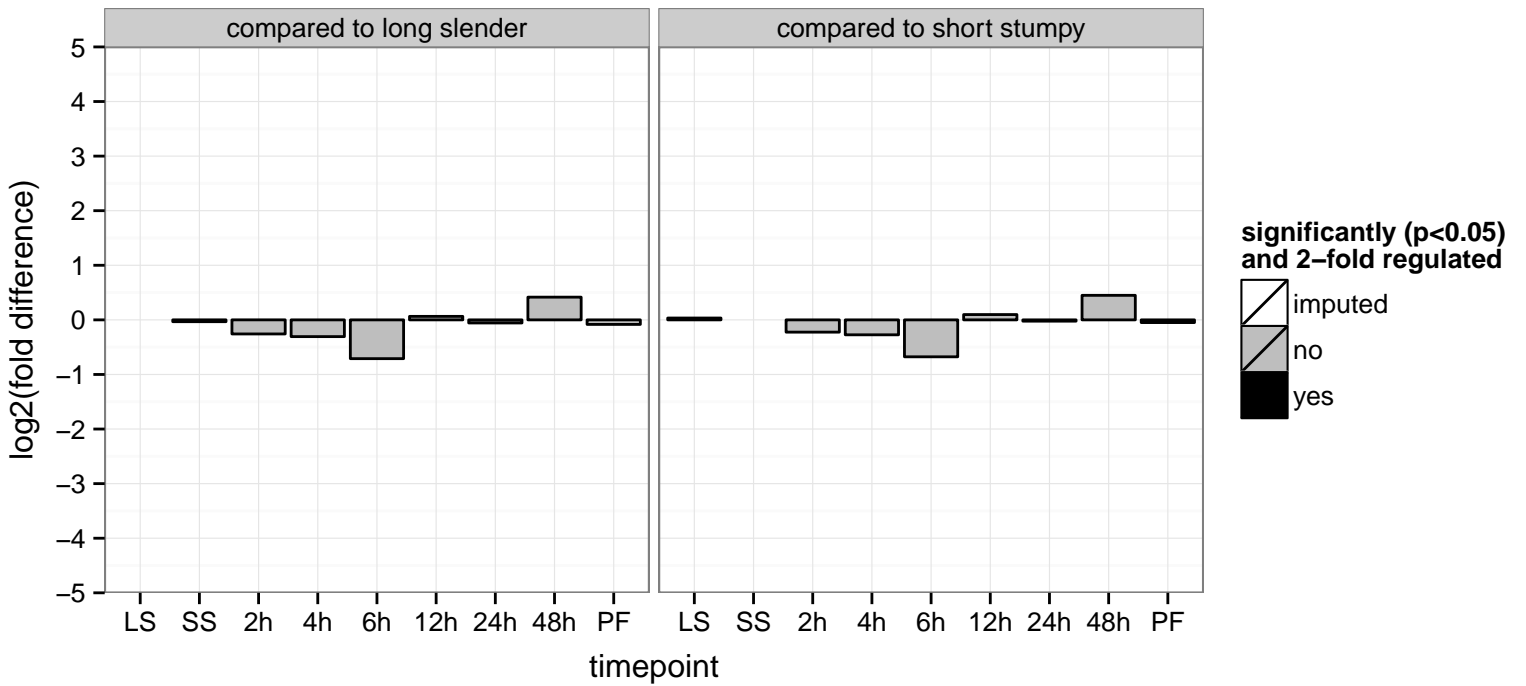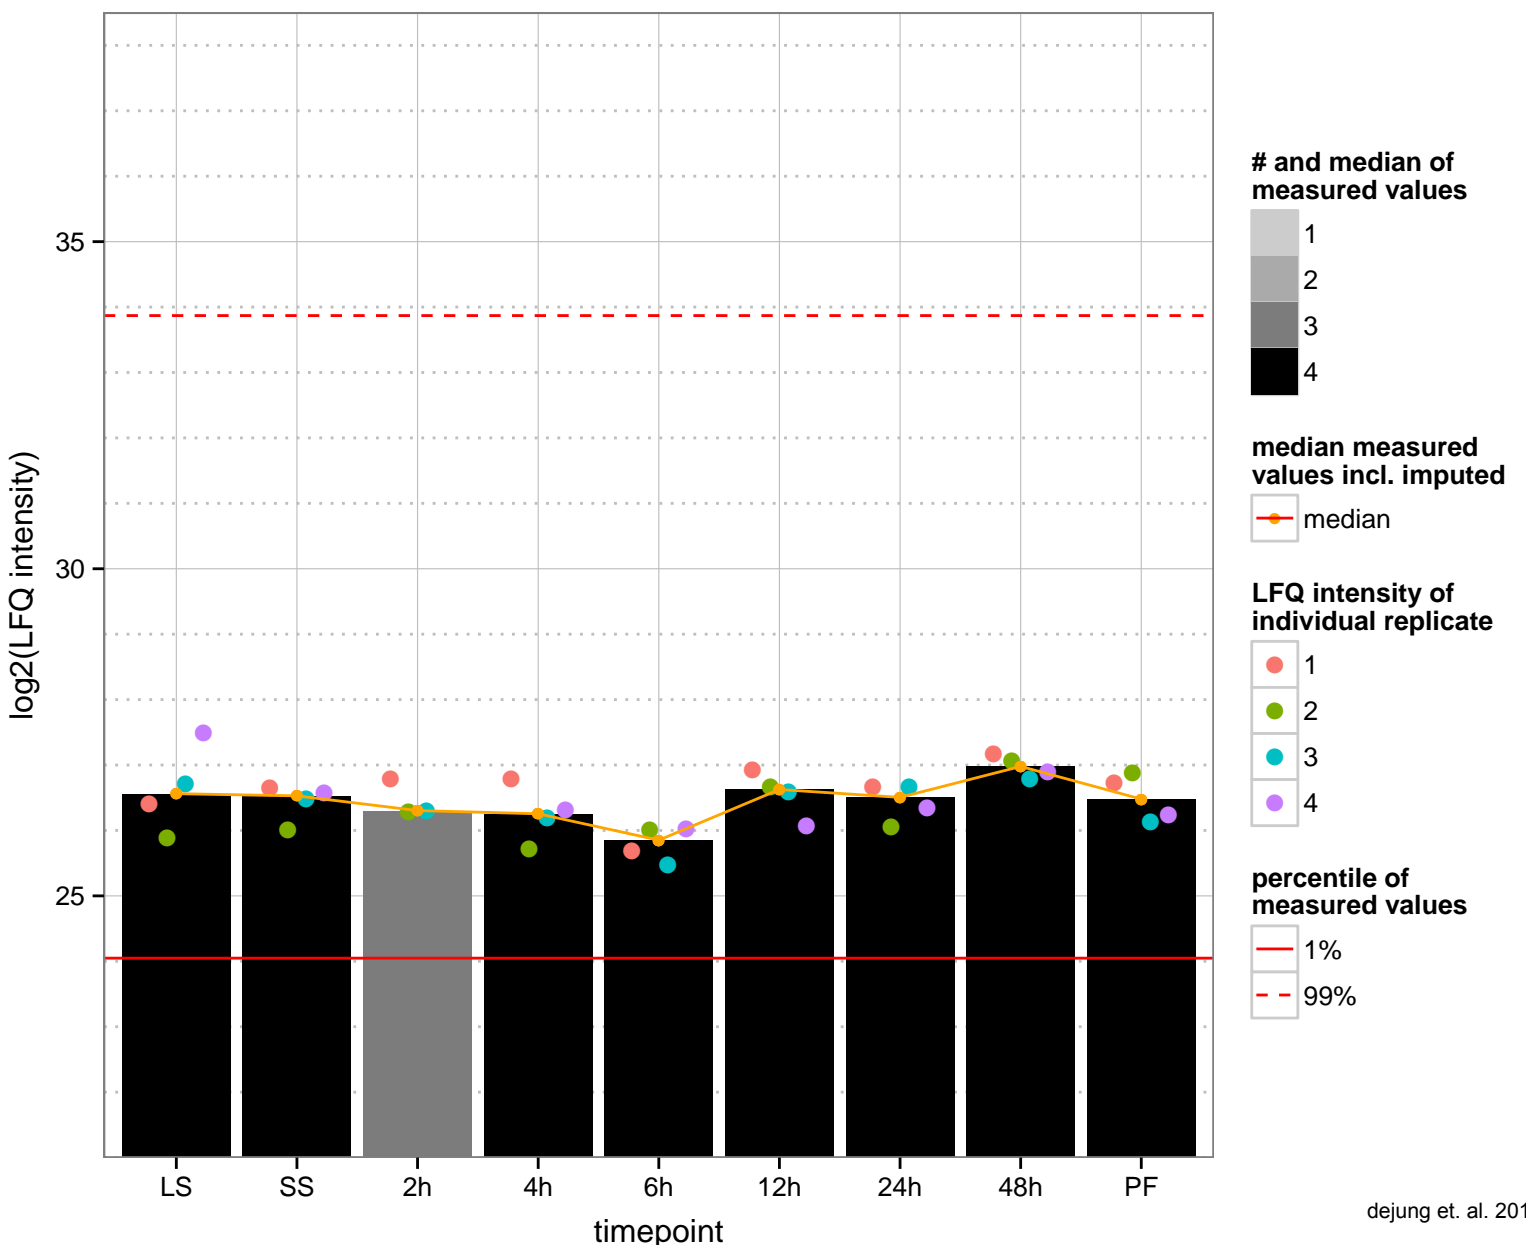

ribosome biogenesis protein, putative  
 Tb927.10.14680  
 AGOF: rRNA binding  
 AGOC: nucleolus  
 AGOP: ribosomal large subunit assembly  
 PGO: null  
 PGOC: null  
 PGOP: null

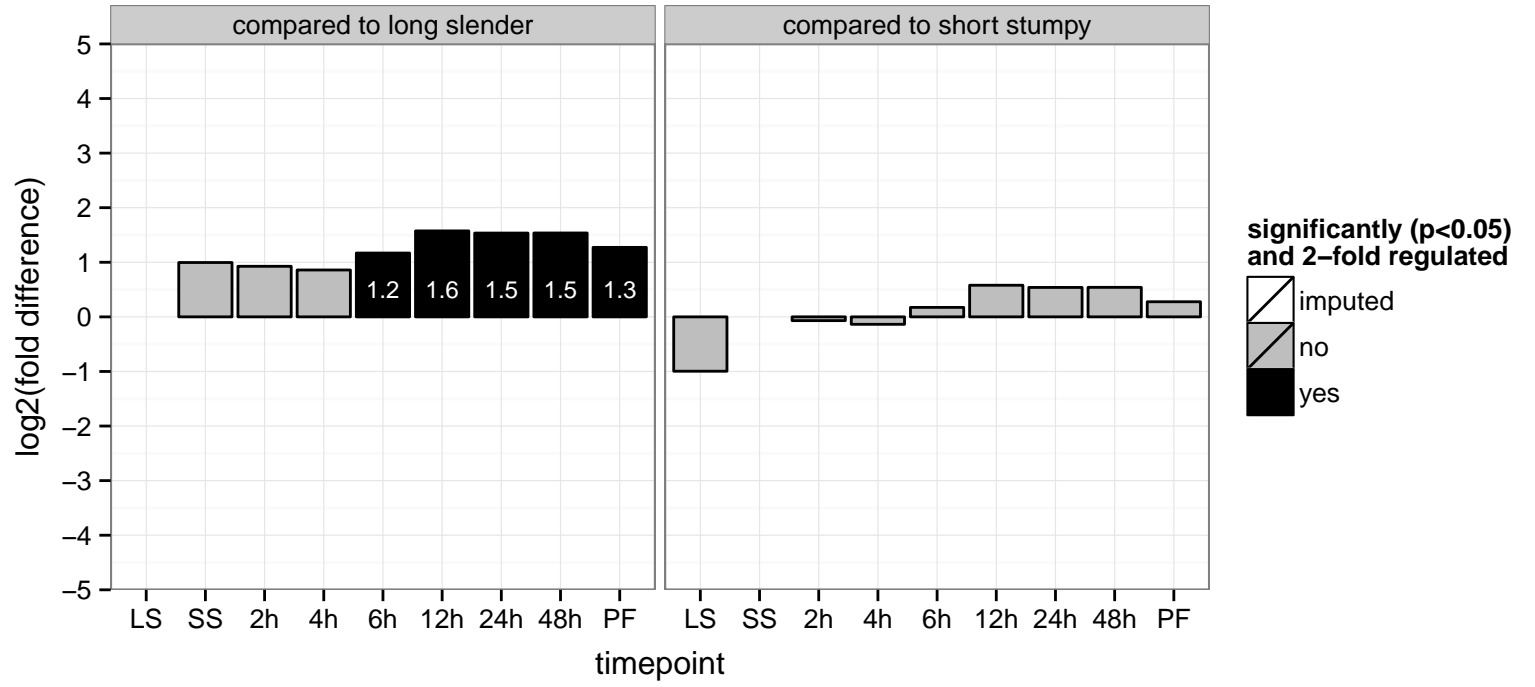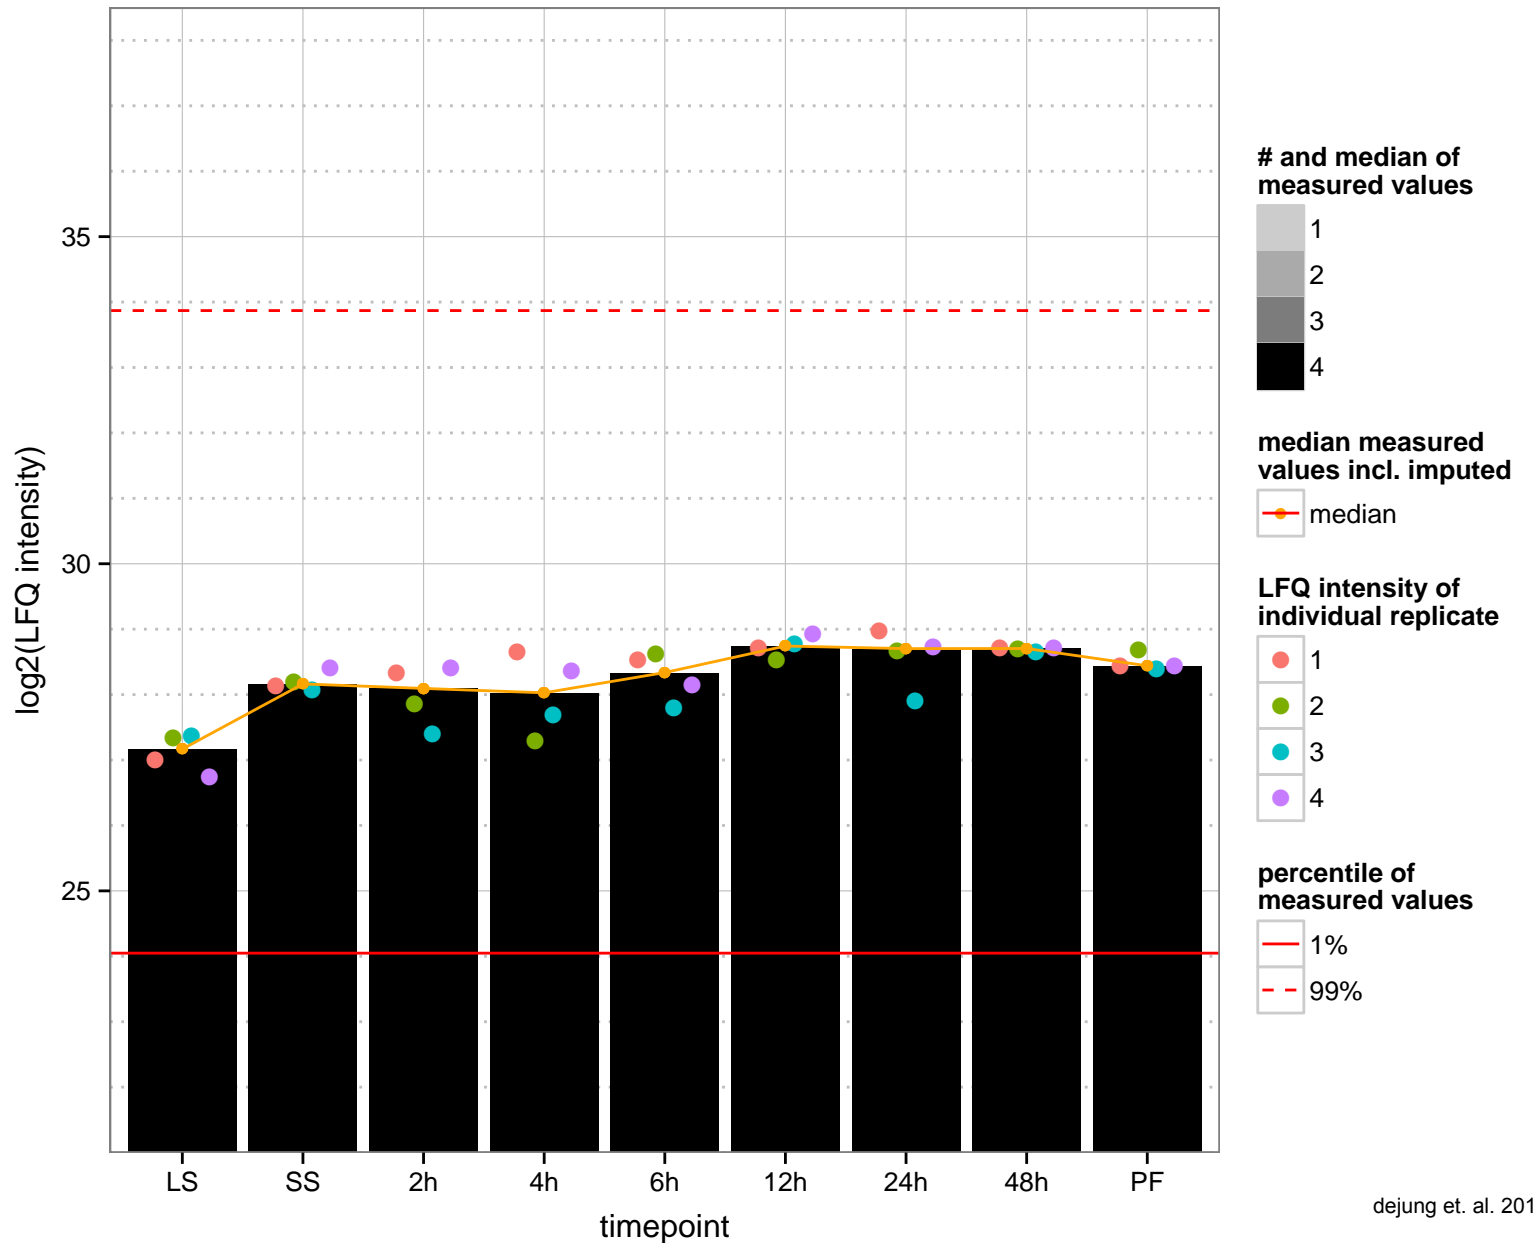

fibrillarin, putative  
 Tb927.10.14750;Tb927.10.14630  
 AGOF: RNA binding  
 AGOC: nucleus  
 AGOP: rRNA processing  
 PGO: RNA binding, methyltransferase activity  
 PGO: null  
 PGO: rRNA processing, tRNA processing

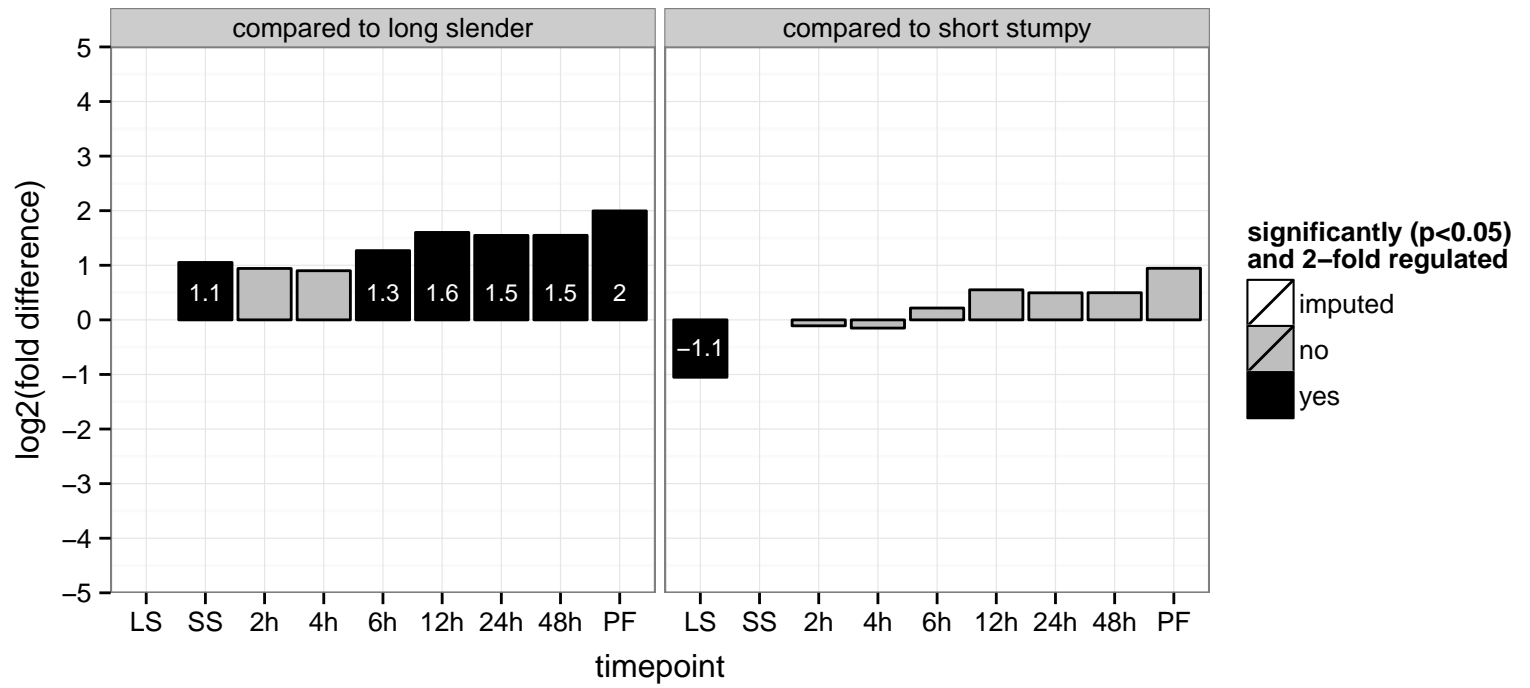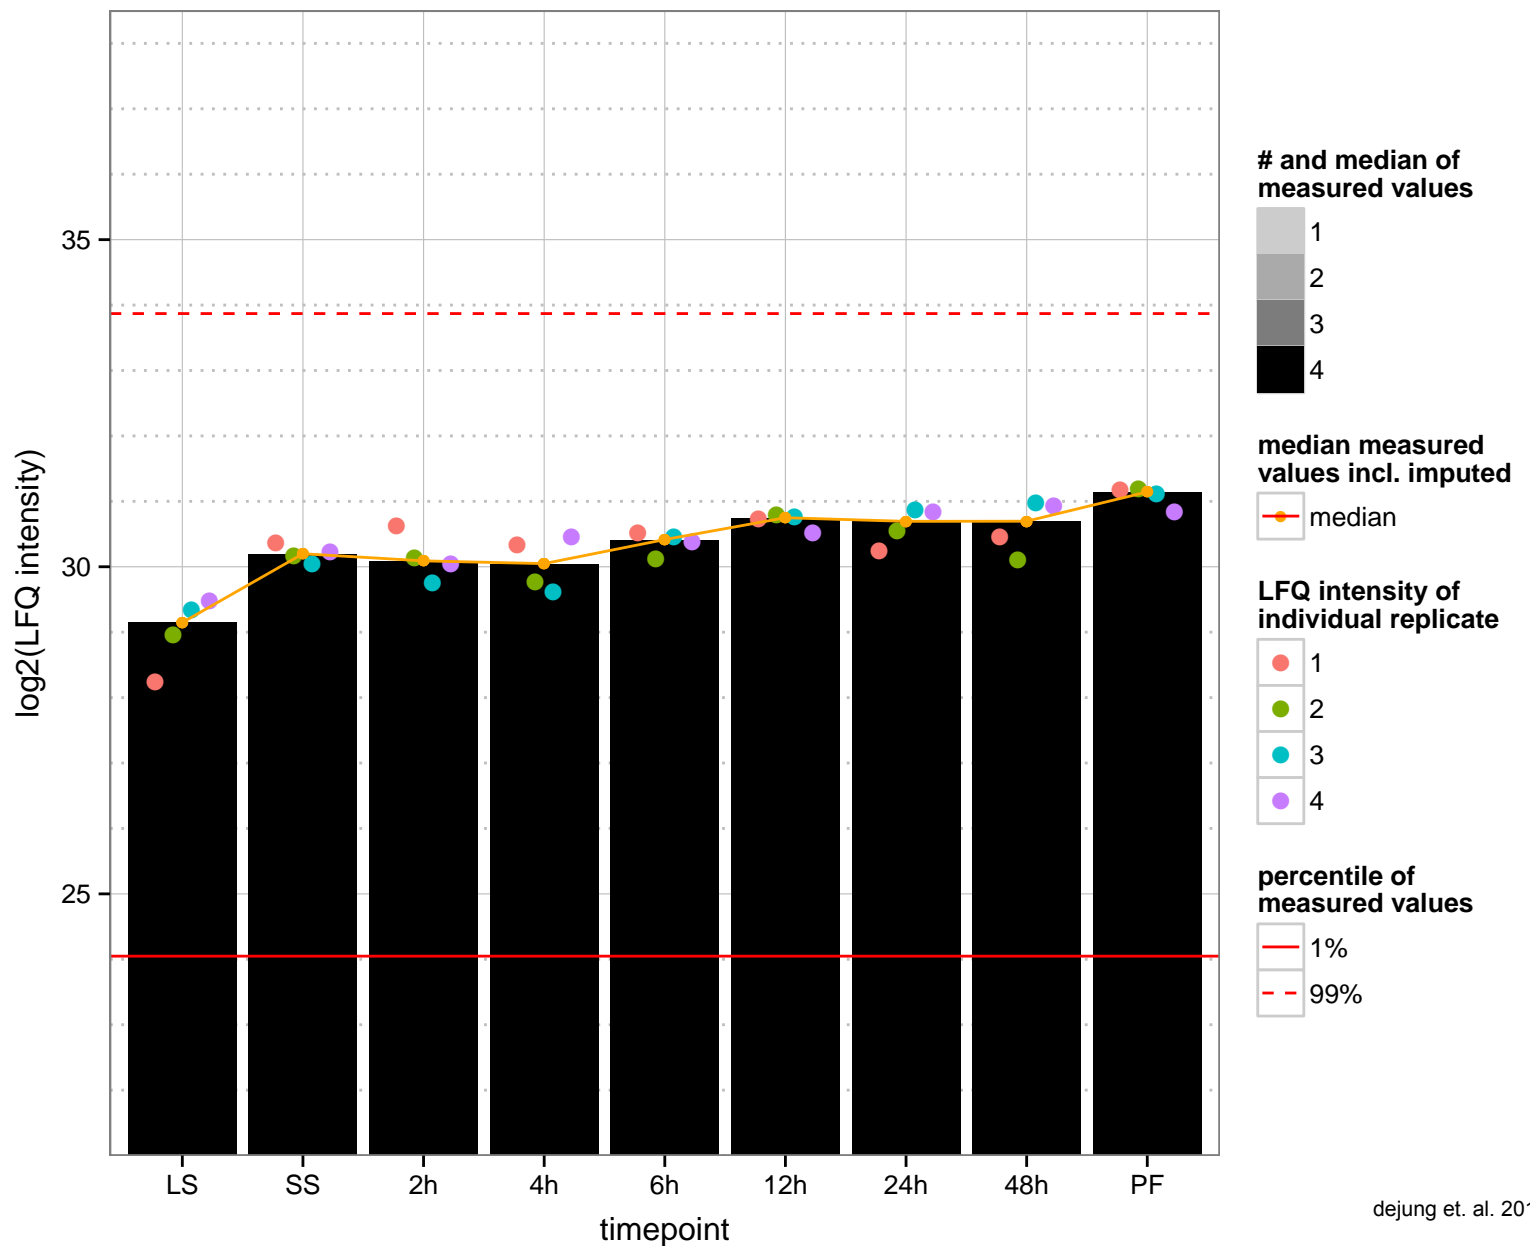

protein kinase, putative

Tb927.10.14770

AGOF: ATP binding, protein serine/threonine kinase activity, protein tyrosine kinase activity

AGOC: null

AGOP: protein phosphorylation

PGOF: ATP binding, protein kinase activity, transferase activity, transferring phosphorus-containing groups

PGOC: null

PGOP: protein phosphorylation

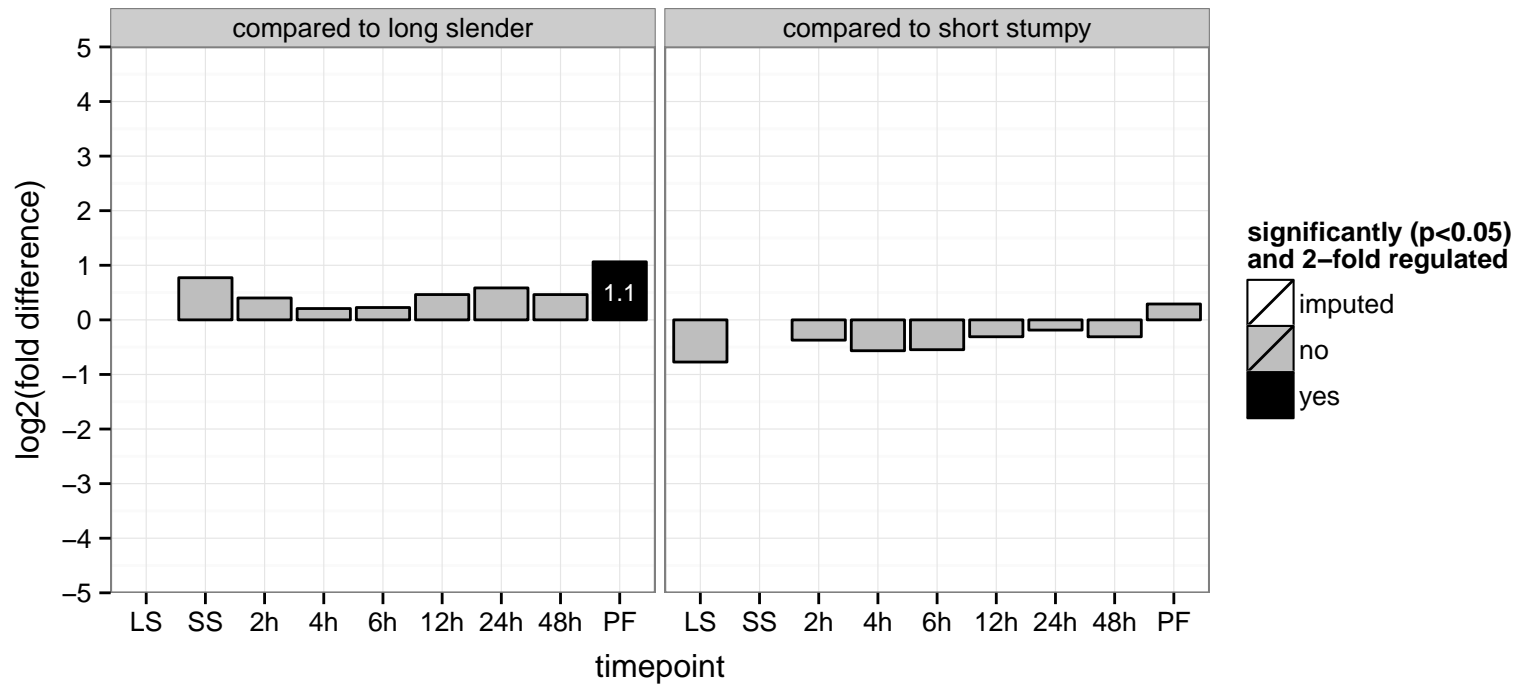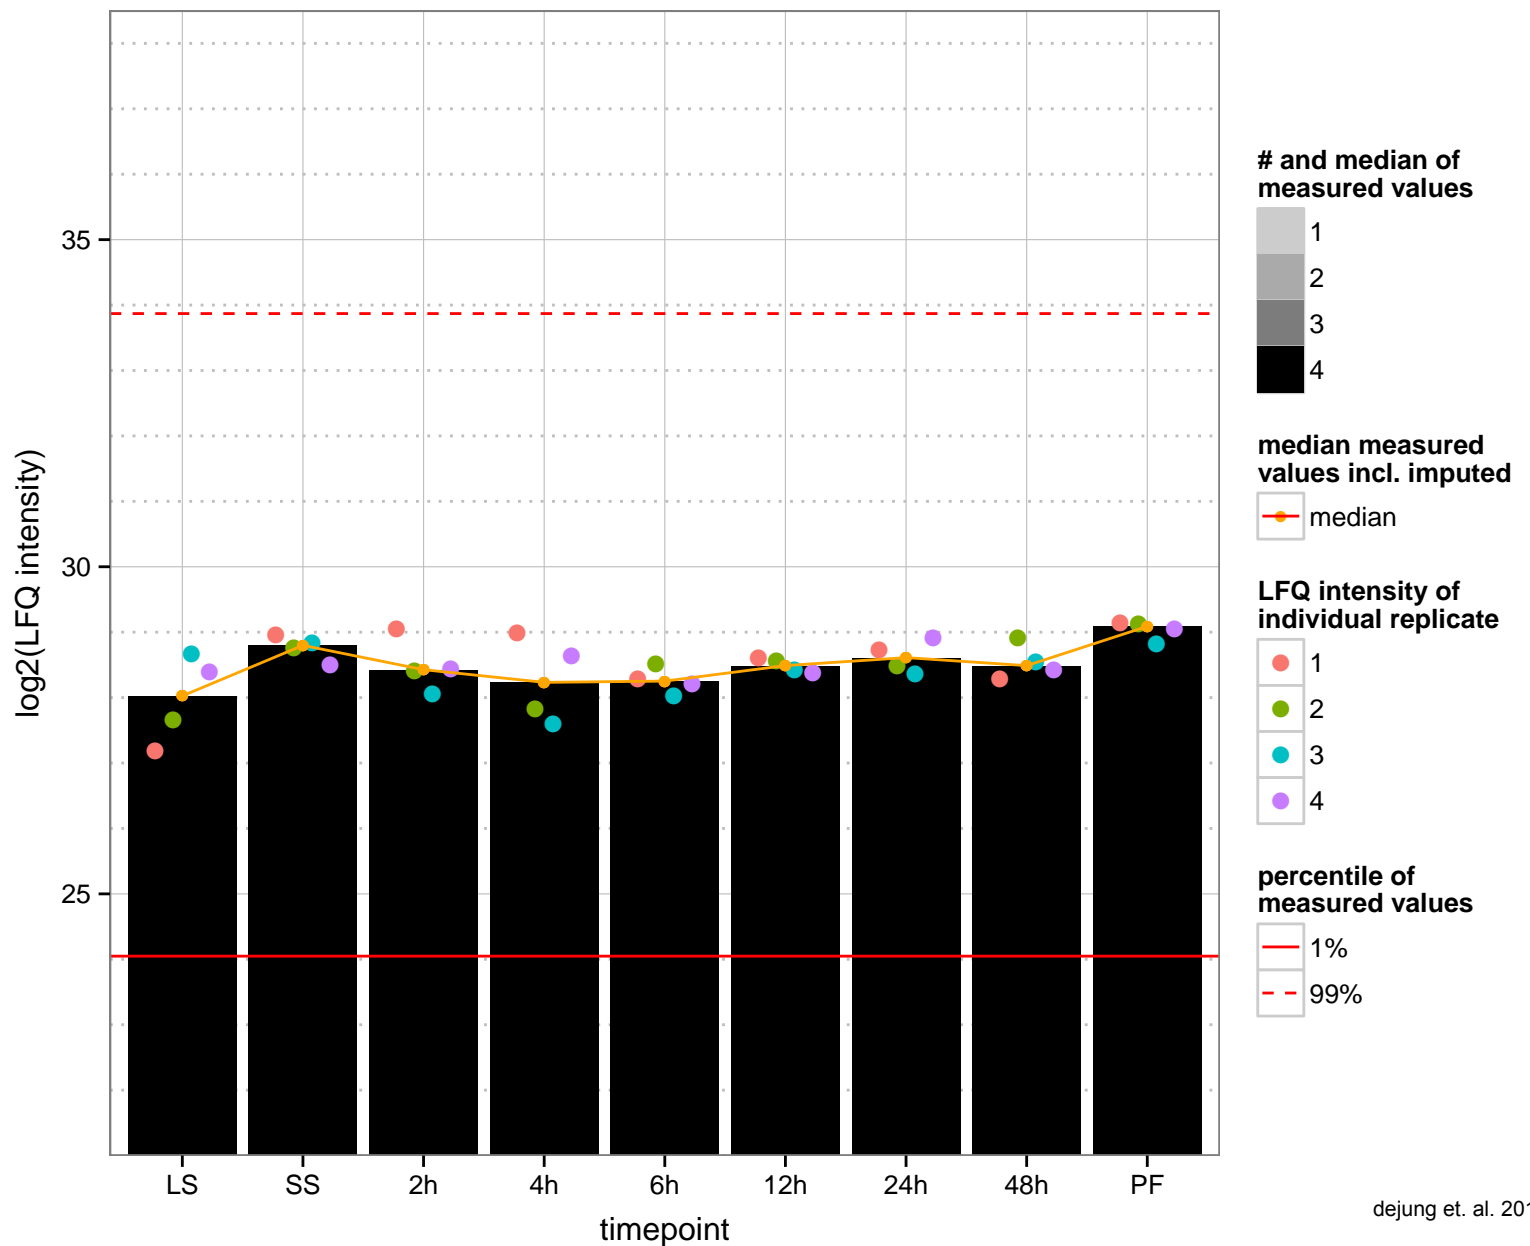

mitogen-activated protein kinase kinase kinase, putative, canertinib-binding protein kinase-1 (CBPK1)  
 Tb927.10.14780  
 AGOF: ATP binding, protein serine/threonine kinase activity, protein tyrosine kinase activity  
 AGOC: null  
 AGOP: protein phosphorylation  
 PGOF: ATP binding, protein kinase activity, transferase activity, transferring phosphorus-containing groups  
 PGOC: null  
 PGOP: protein phosphorylation

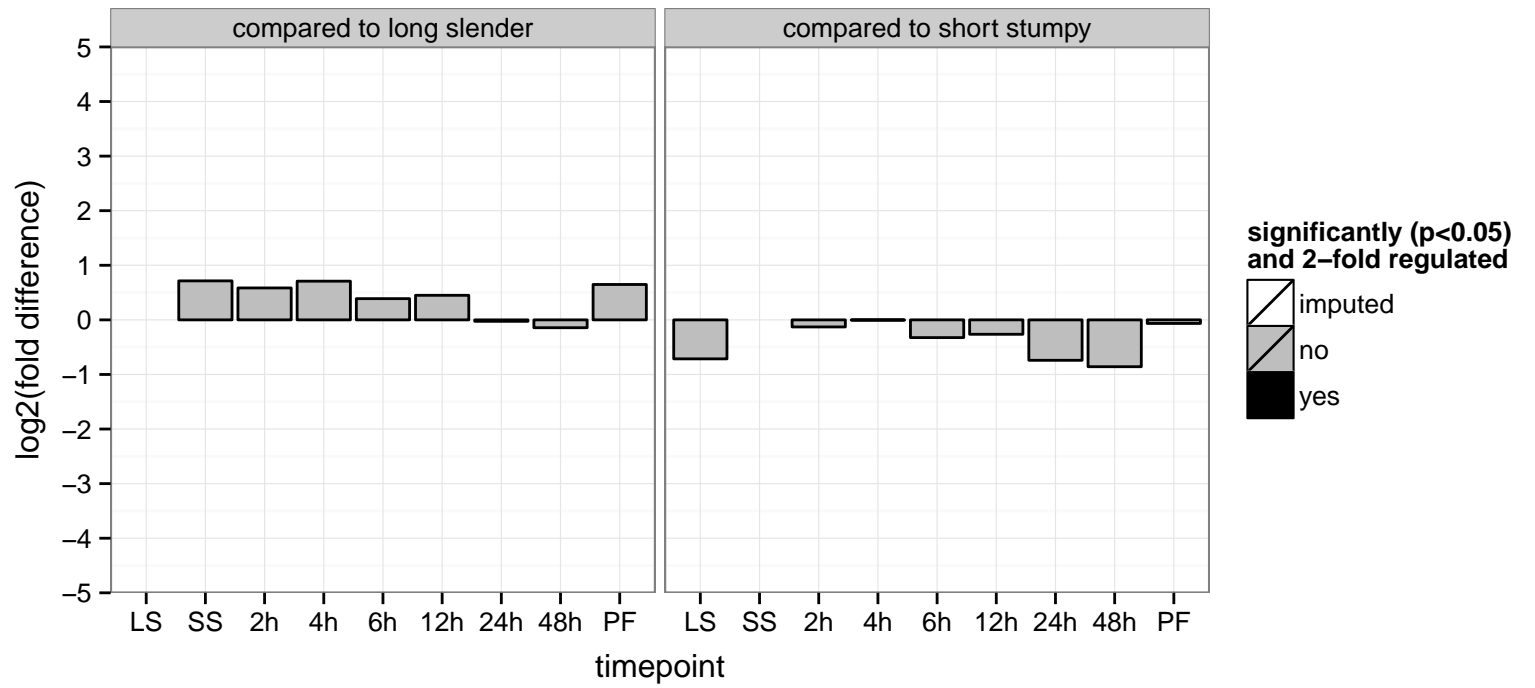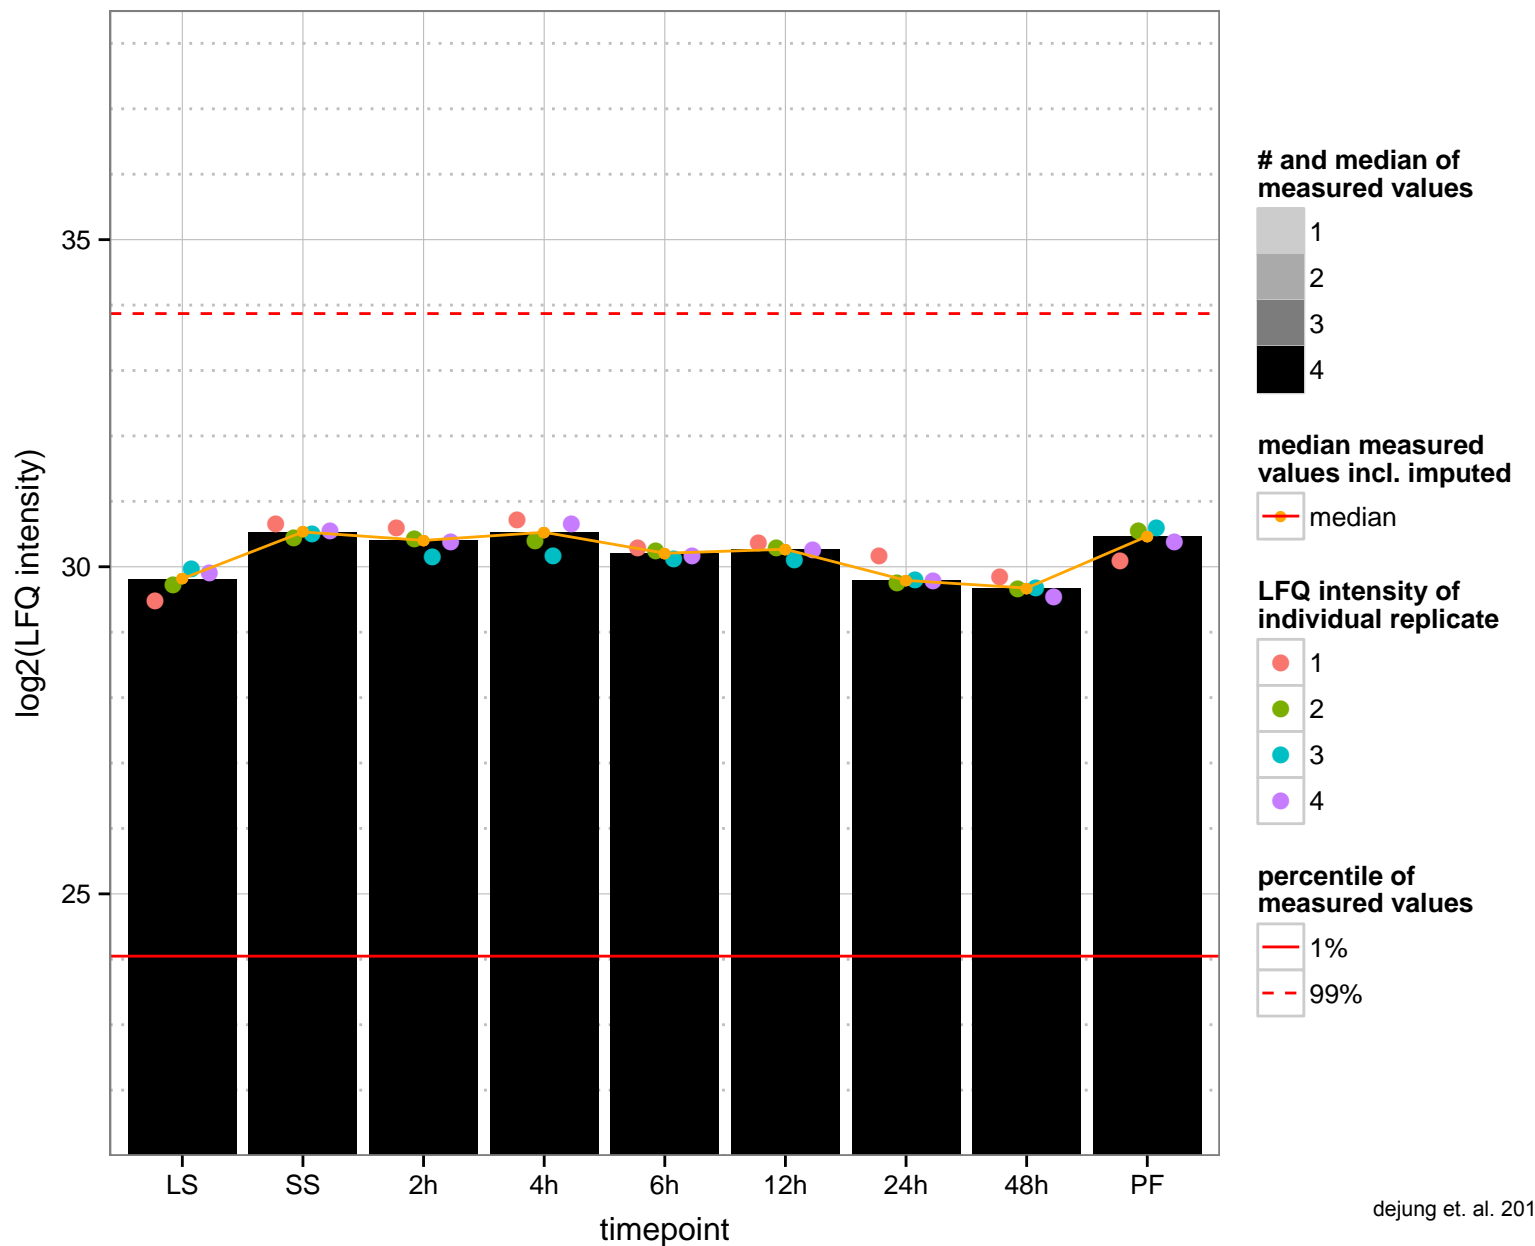

hypothetical protein, conserved  
 Tb927.10.1490  
 AGOF: null  
 AGOC: null  
 AGOP: null  
 PGO: null  
 PGOC: null  
 PGOP: null

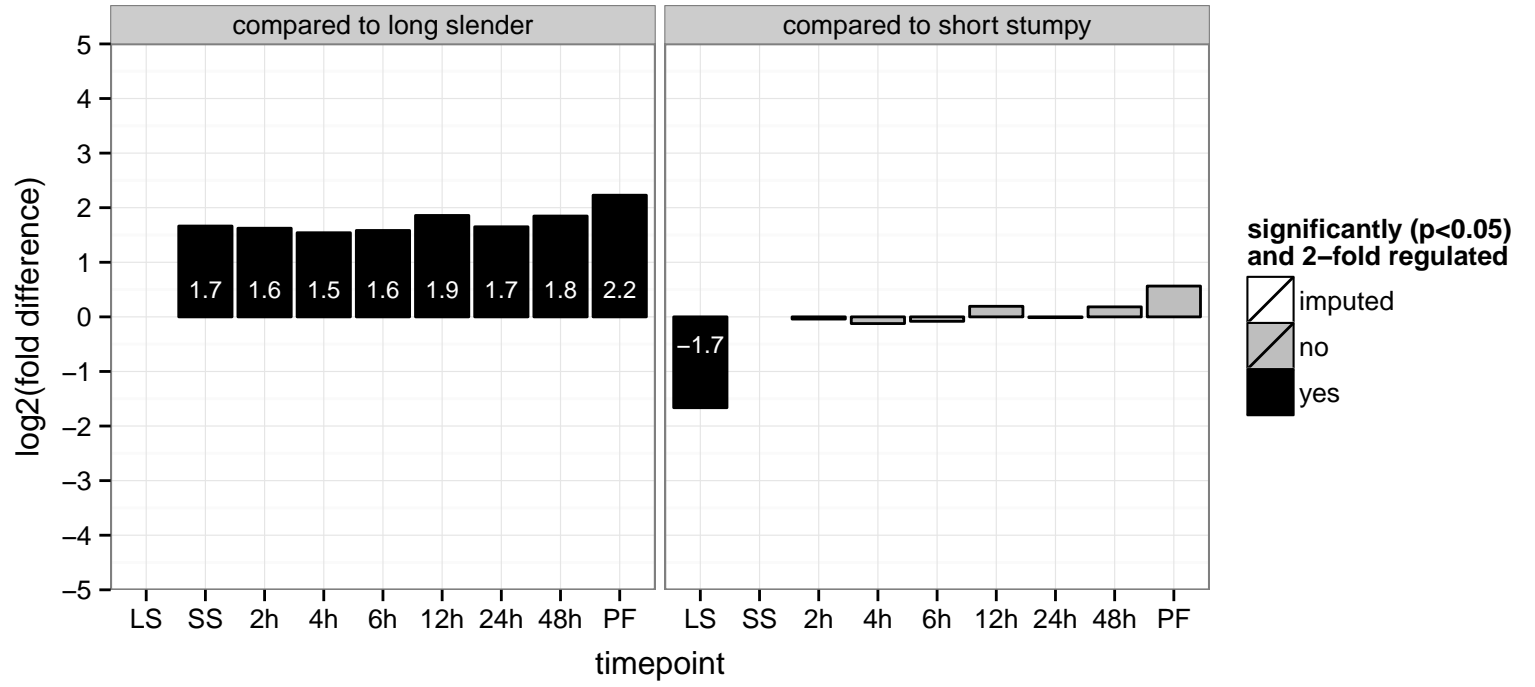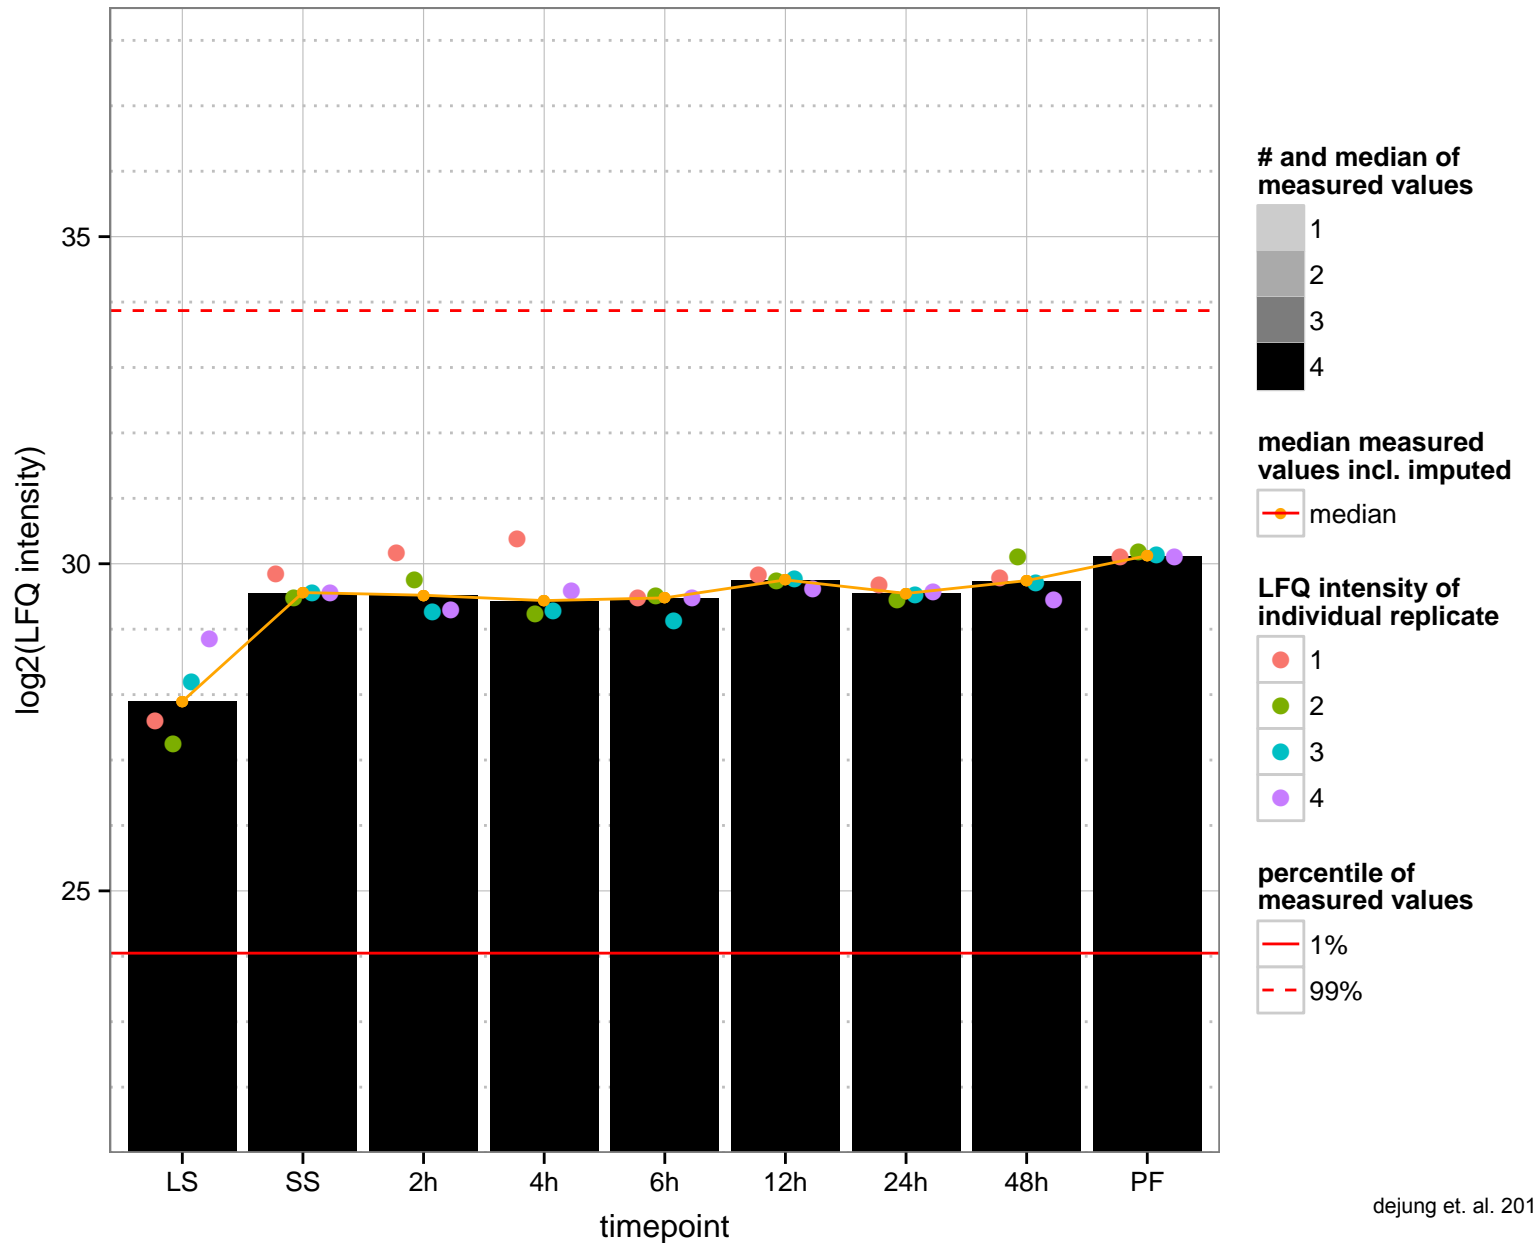

intraflagellar transport protein IFT52, putative (IFT52)  
 Tb927.10.14980  
 AGOF: null  
 AGOC: cilium  
 AGOP: intraflagellar transport  
 PGO: null  
 PGO: null  
 PGO: null

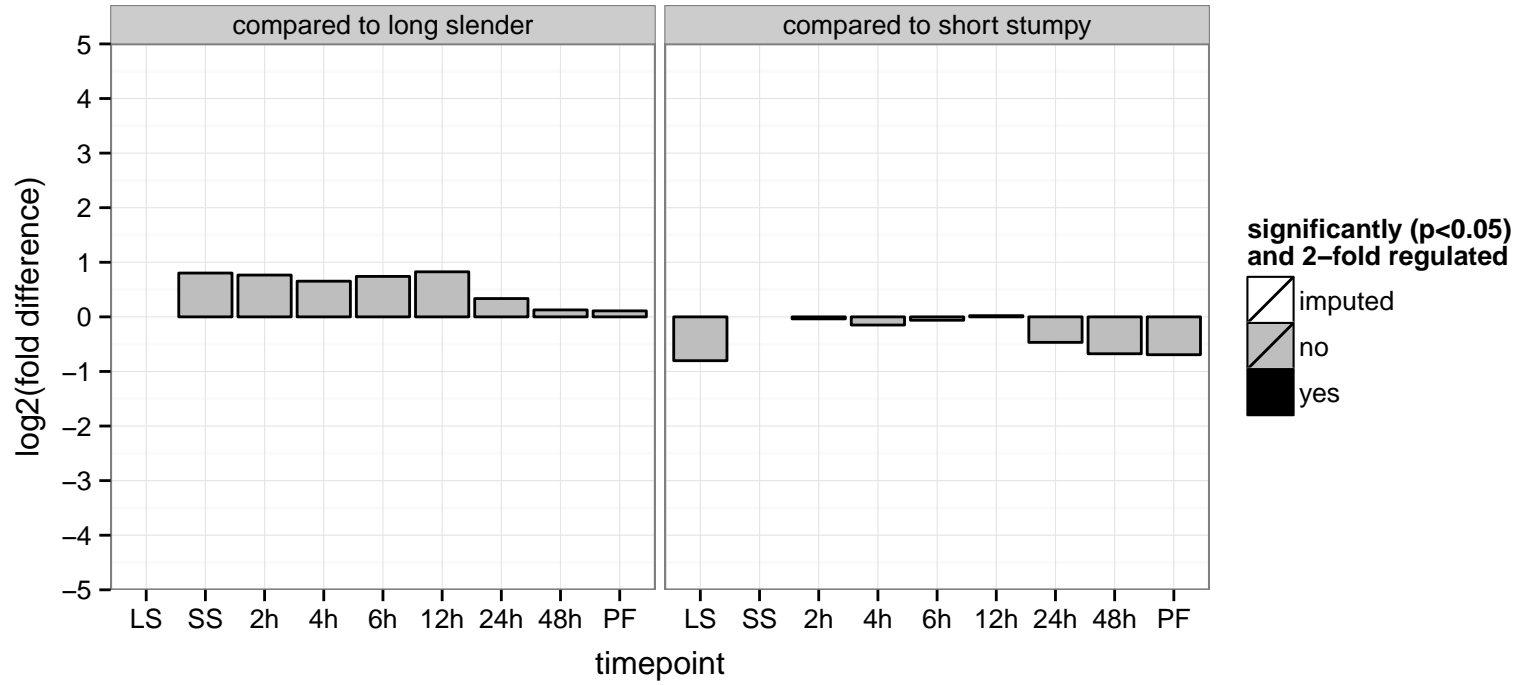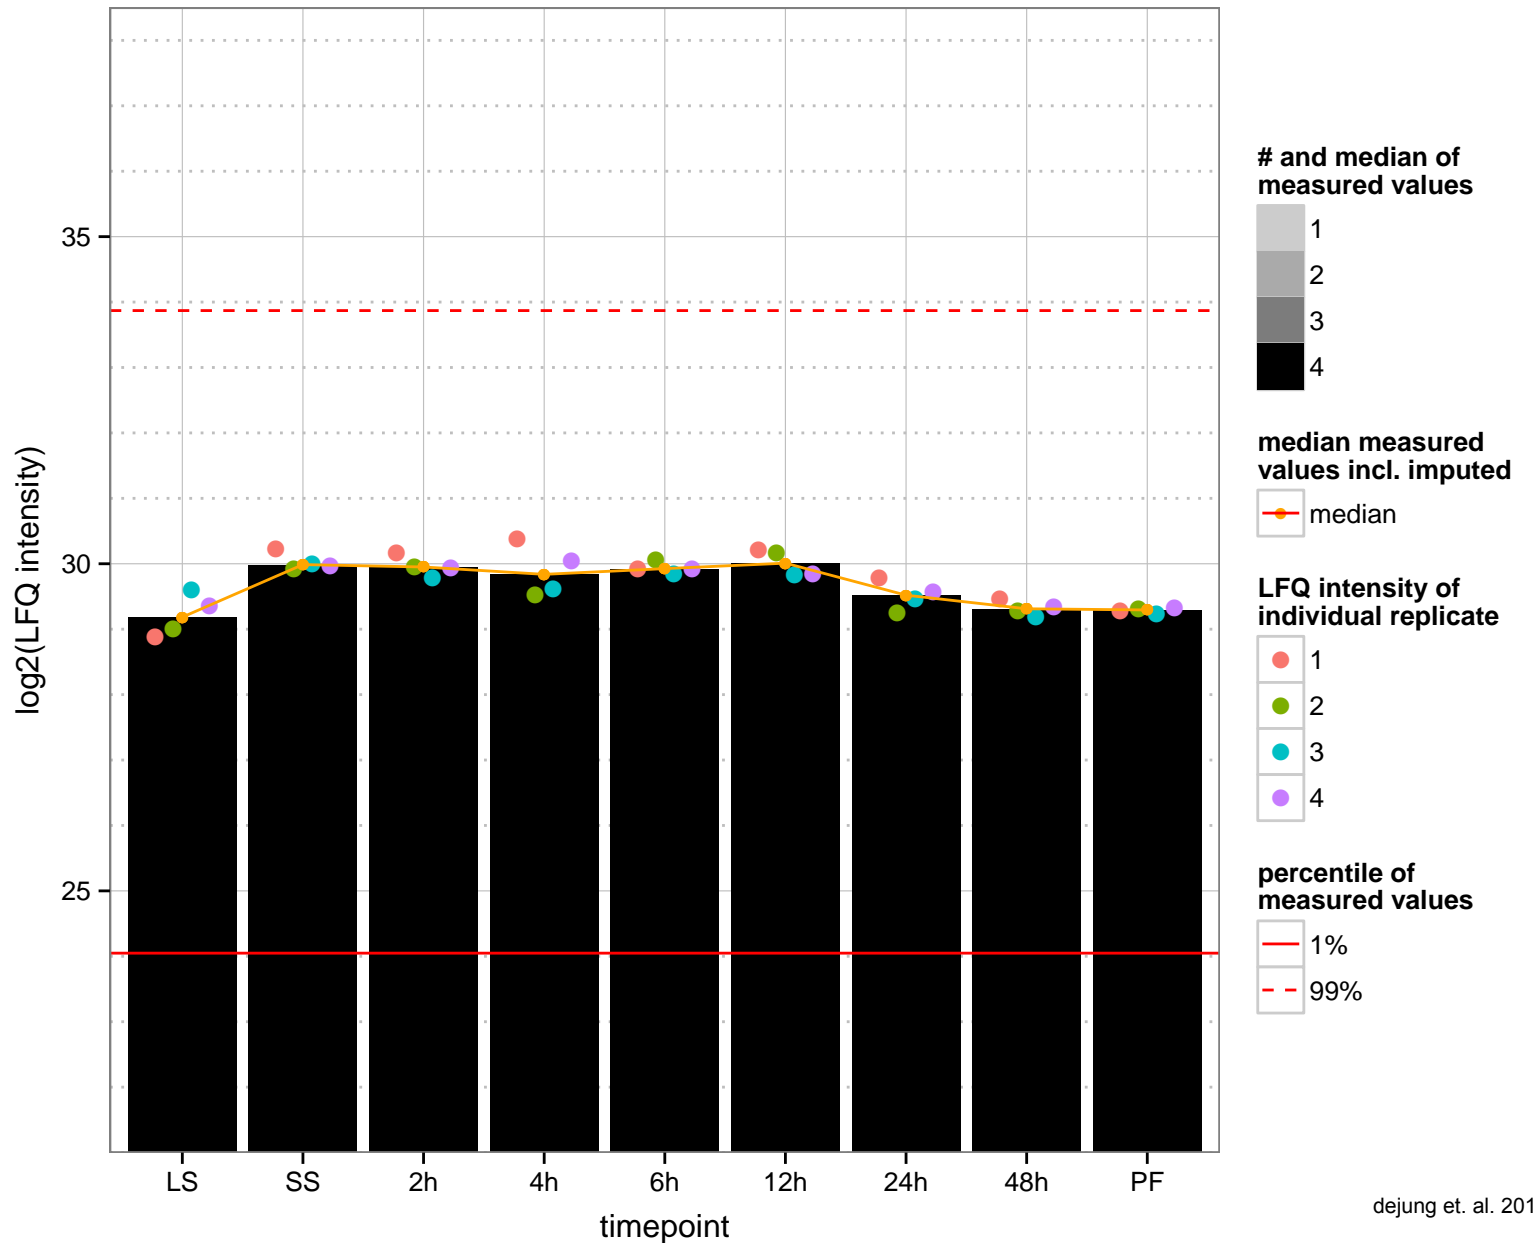

hypothetical protein, conserved  
 Tb927.10.15000  
 AGOF: null  
 AGOC: null  
 AGOP: null  
 PGO: null  
 PGO: nucleus  
 PGO: null

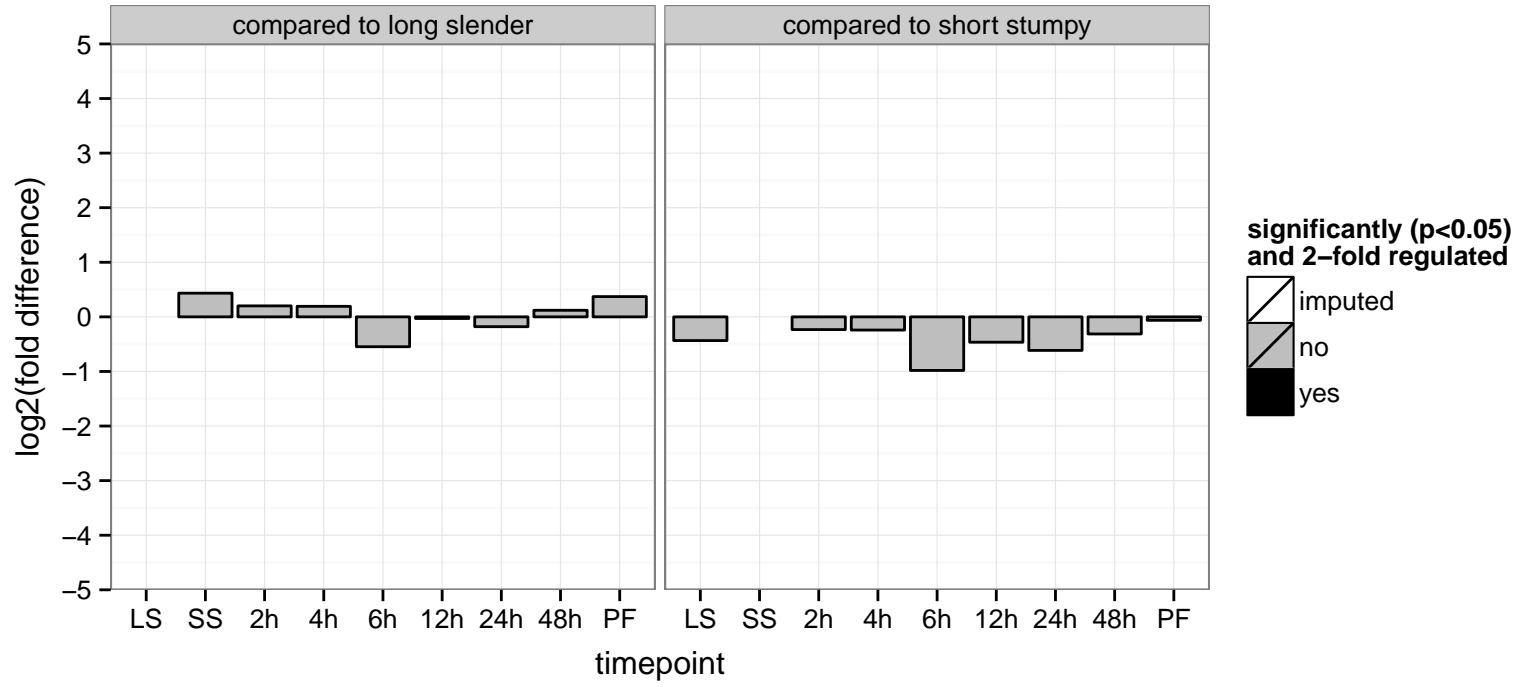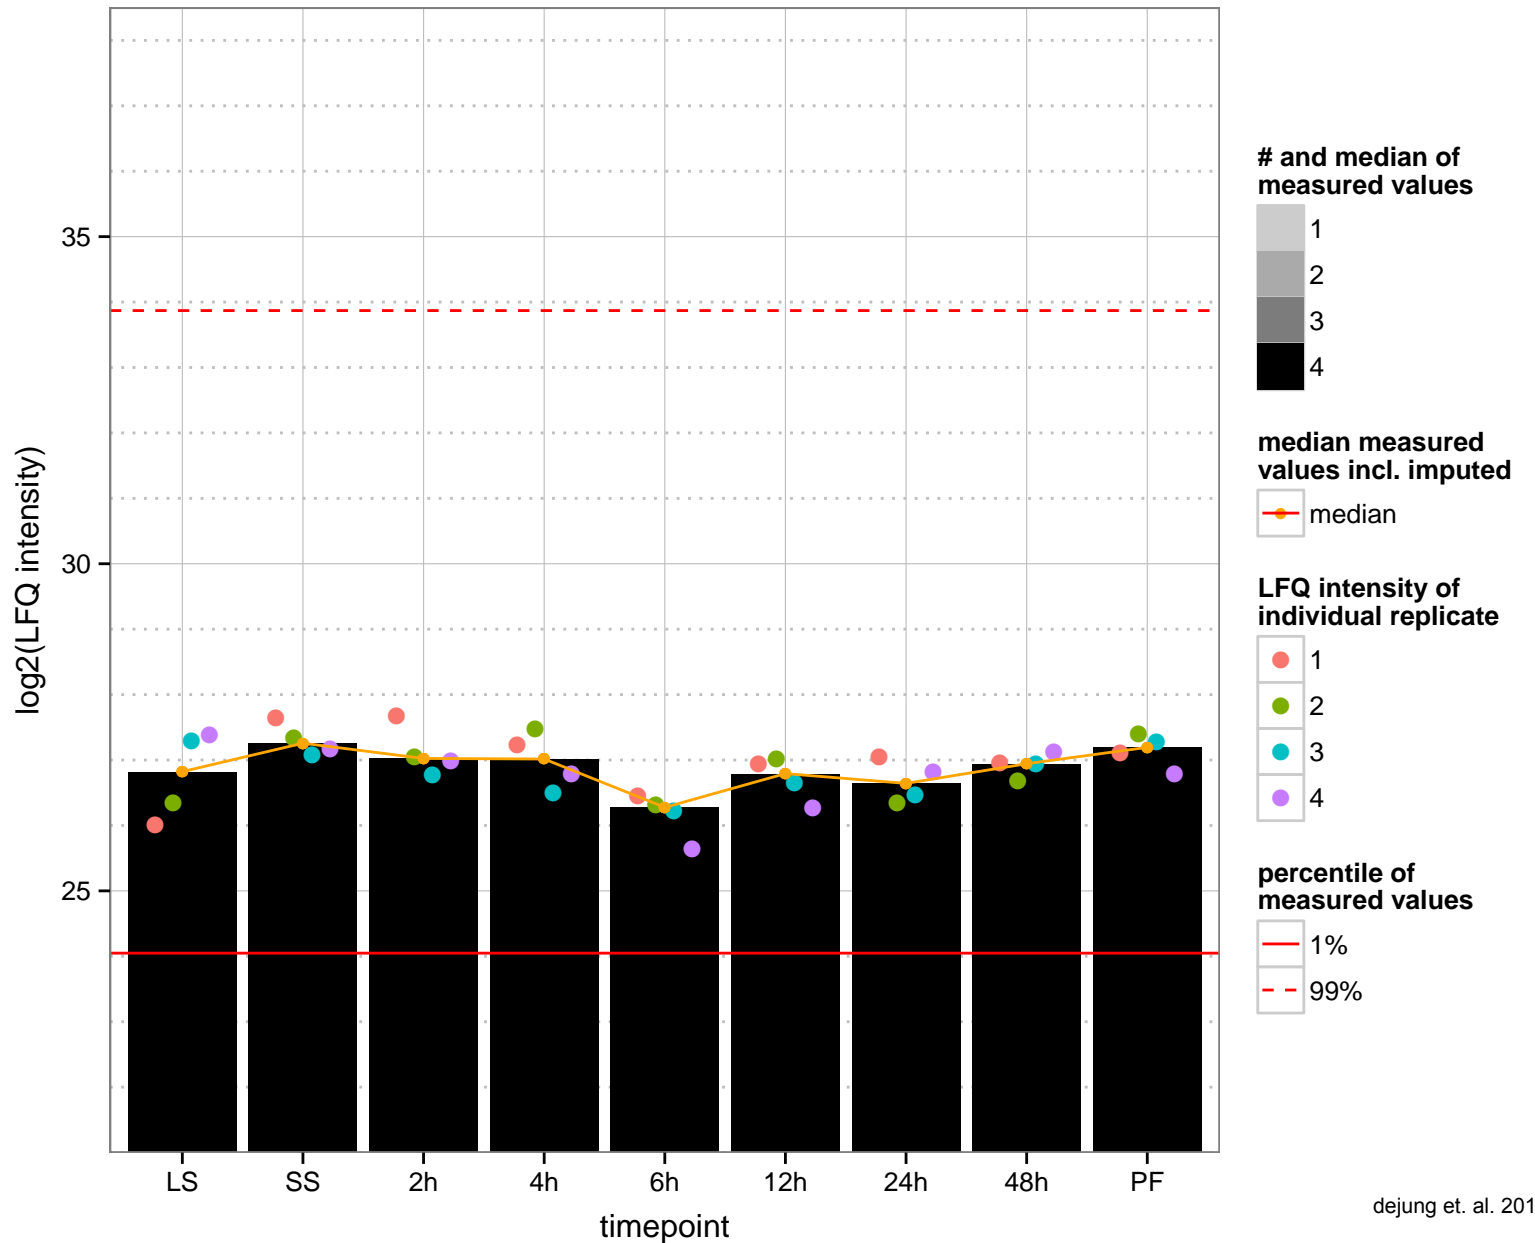



lipoic acid synthetase, mitochondrial precursor, putative

Tb927.10.15010

AGOF: 4 iron, 4 sulfur cluster binding, iron ion binding, lipoate synthase activity

AGOC: mitochondrion

AGOP: lipoate biosynthetic process

PGOF: 4 iron, 4 sulfur cluster binding, catalytic activity, iron-sulfur cluster binding, lipoate synthase activity

PGOC: null

PGOP: lipoate biosynthetic process

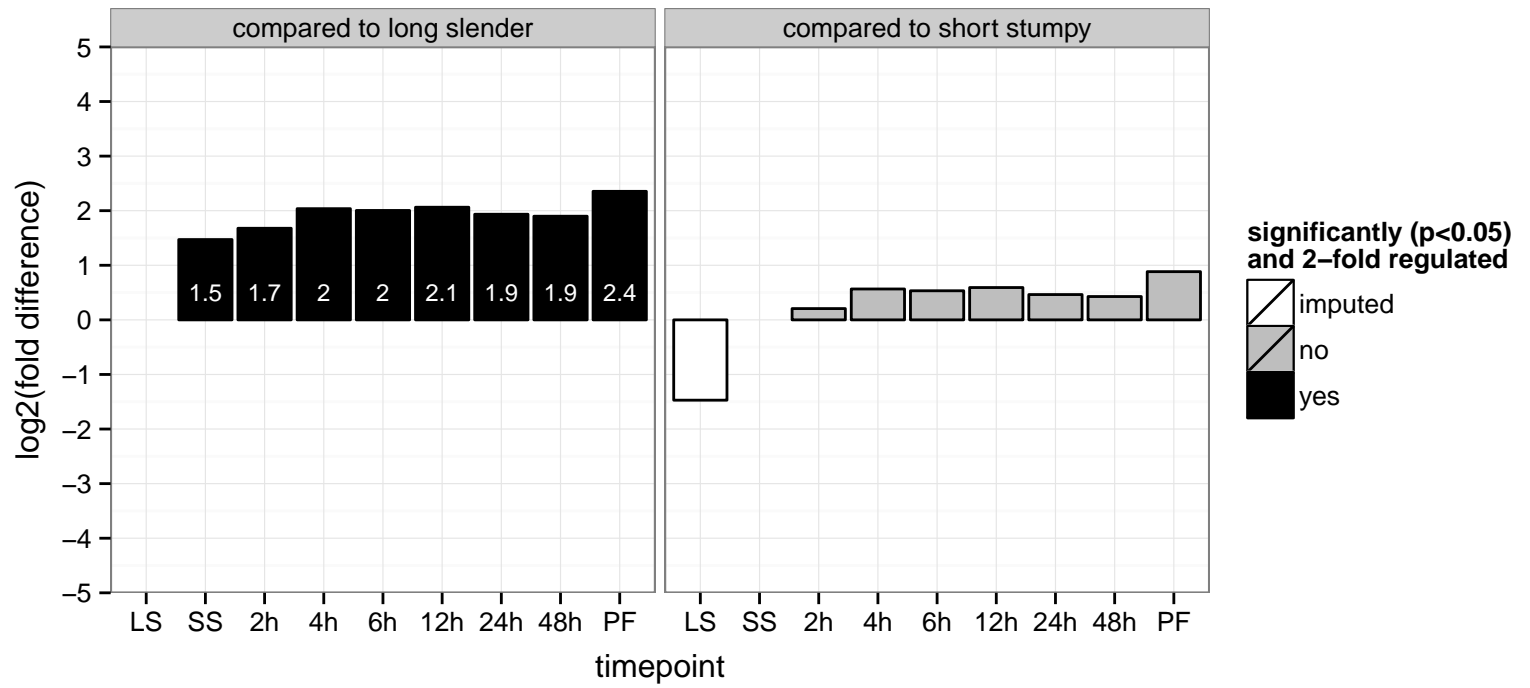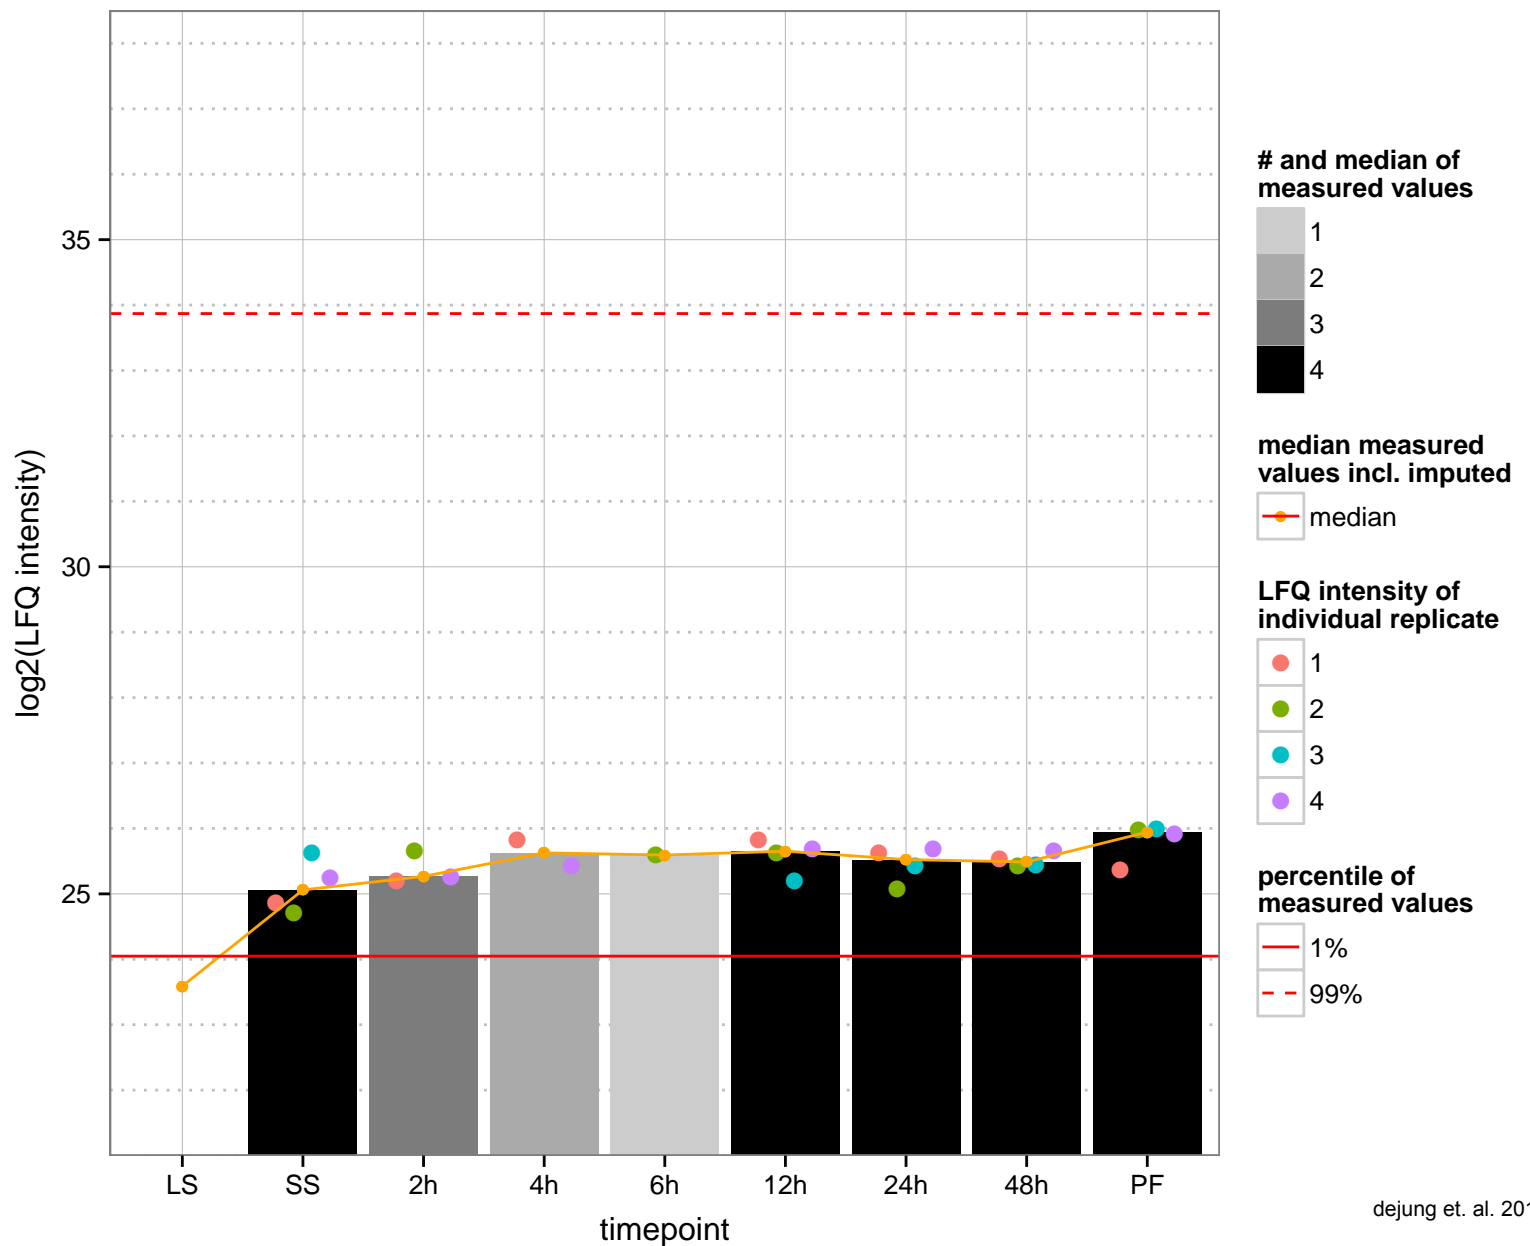

NOT1 (NOT1)  
 Tb927.10.1510  
 AGOF: null  
 AGOC: null  
 AGOP: null  
 PGO: null  
 PGOC: null  
 PGOP: null

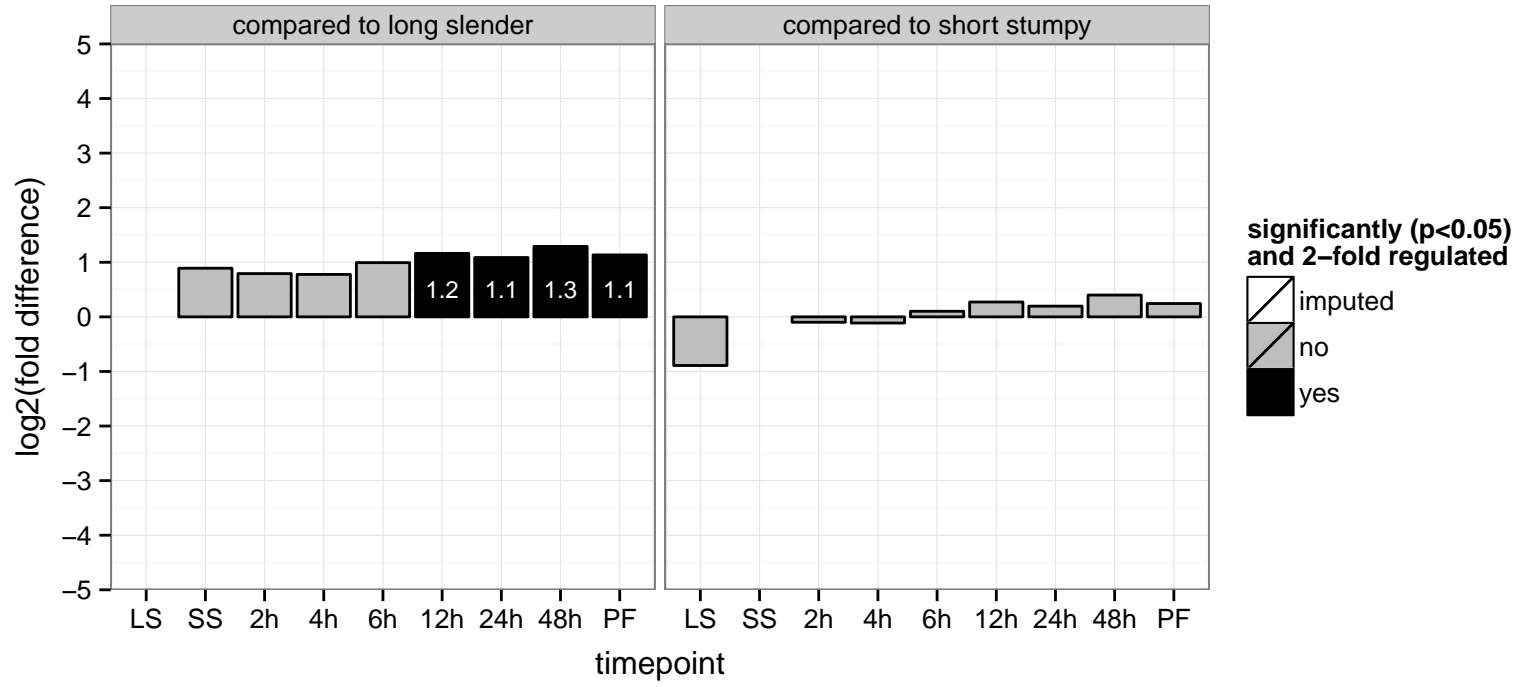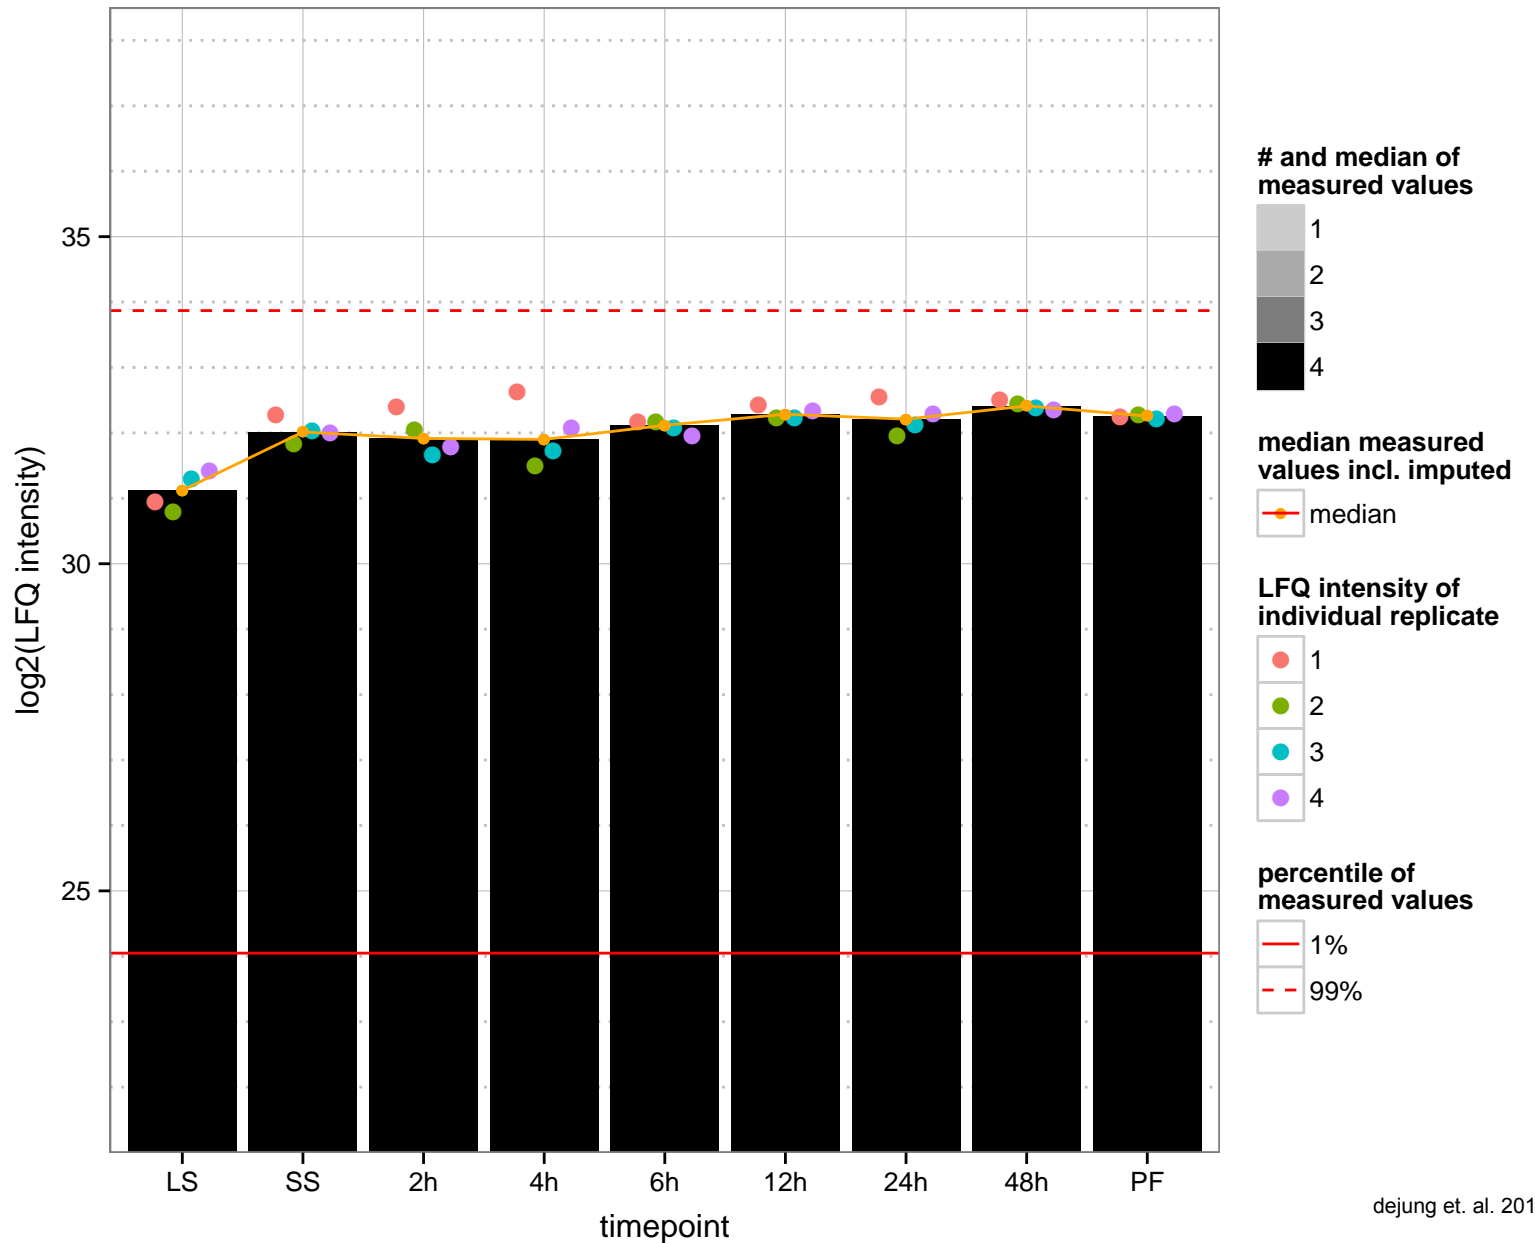

40S ribosomal protein S13, putative  
 Tb927.2.5910;Tb927.10.15120  
 AGOF: structural constituent of ribosome  
 AGOC: intracellular, ribosome  
 AGOP: translation  
 PGOF: structural constituent of ribosome  
 PGO: intracellular, ribosome  
 PGOP: translation

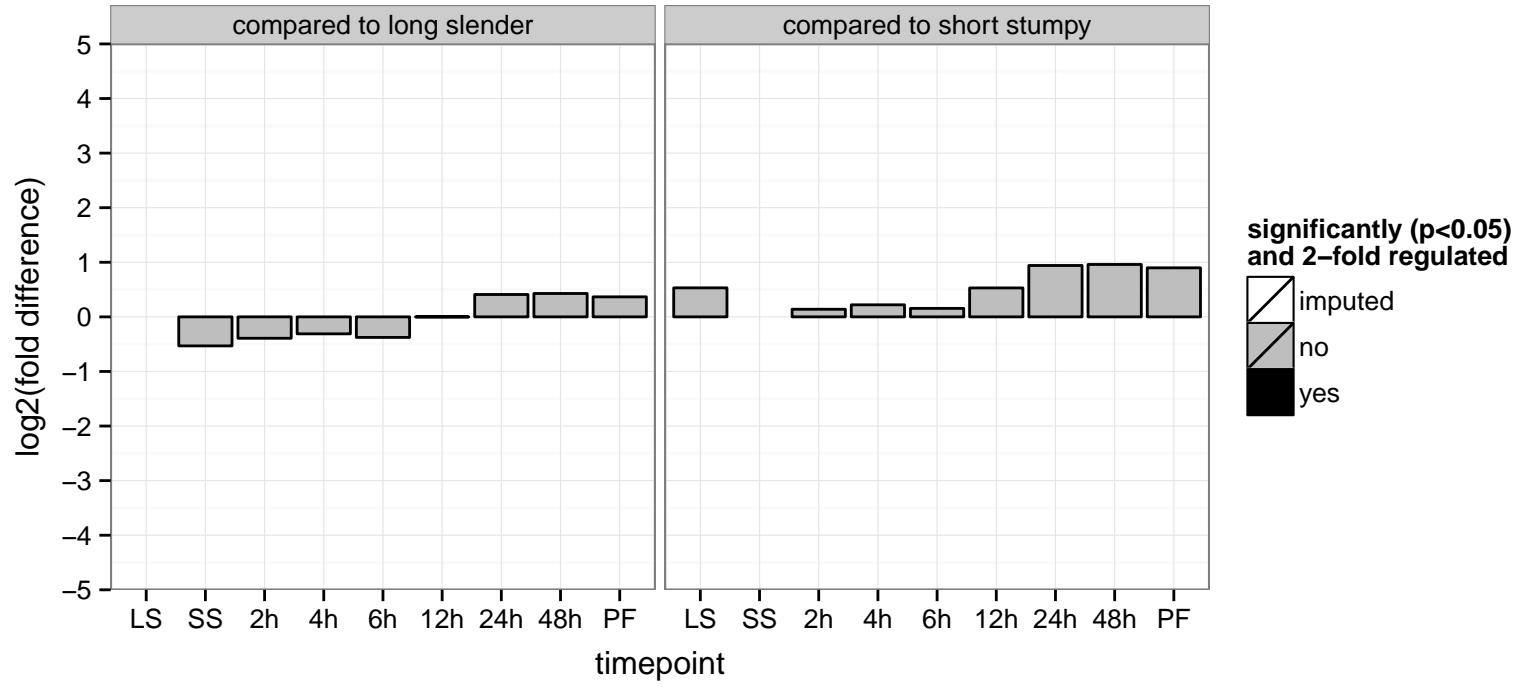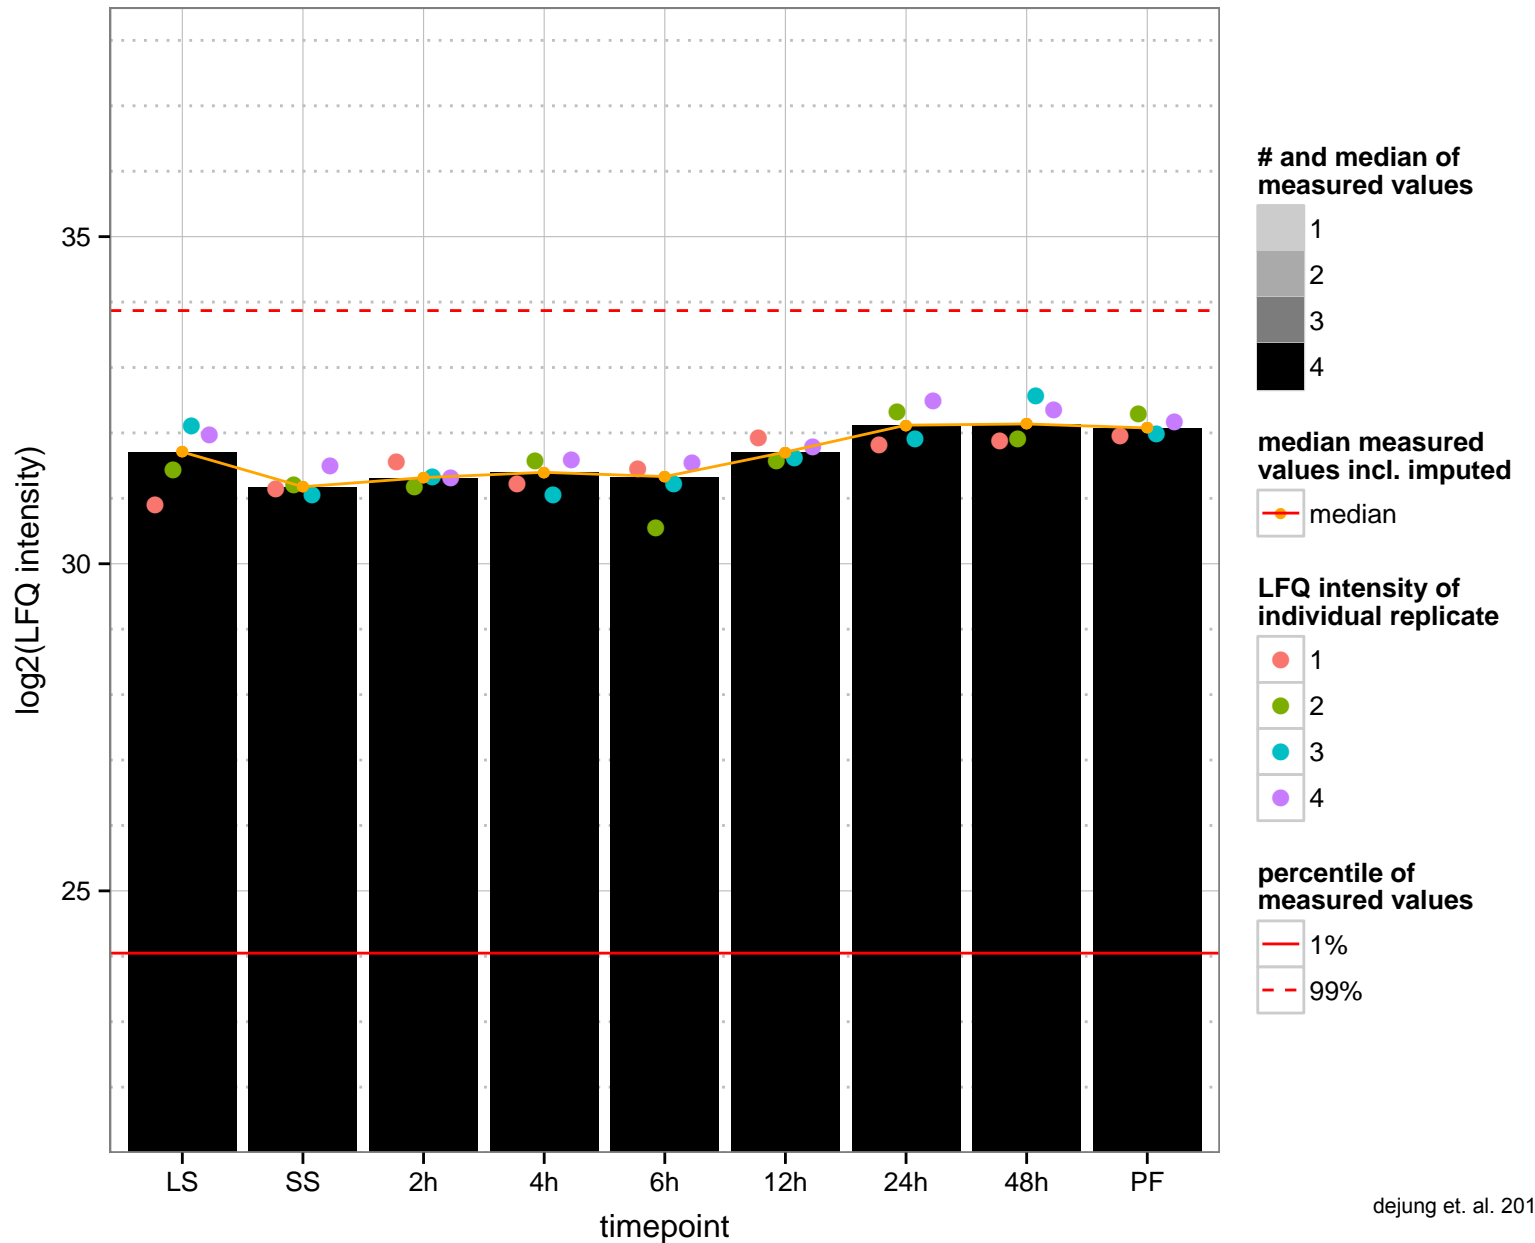

Vesicle-transporting protein SEC22, putative, putative (SEC22)  
 Tb927.10.15130  
 AGOF: SNAP receptor activity  
 AGOC: integral to membrane  
 AGOP: vesicle targeting, vesicle-mediated transport  
 PGO: null  
 PGO: integral to membrane  
 PGO: transport, vesicle-mediated transport

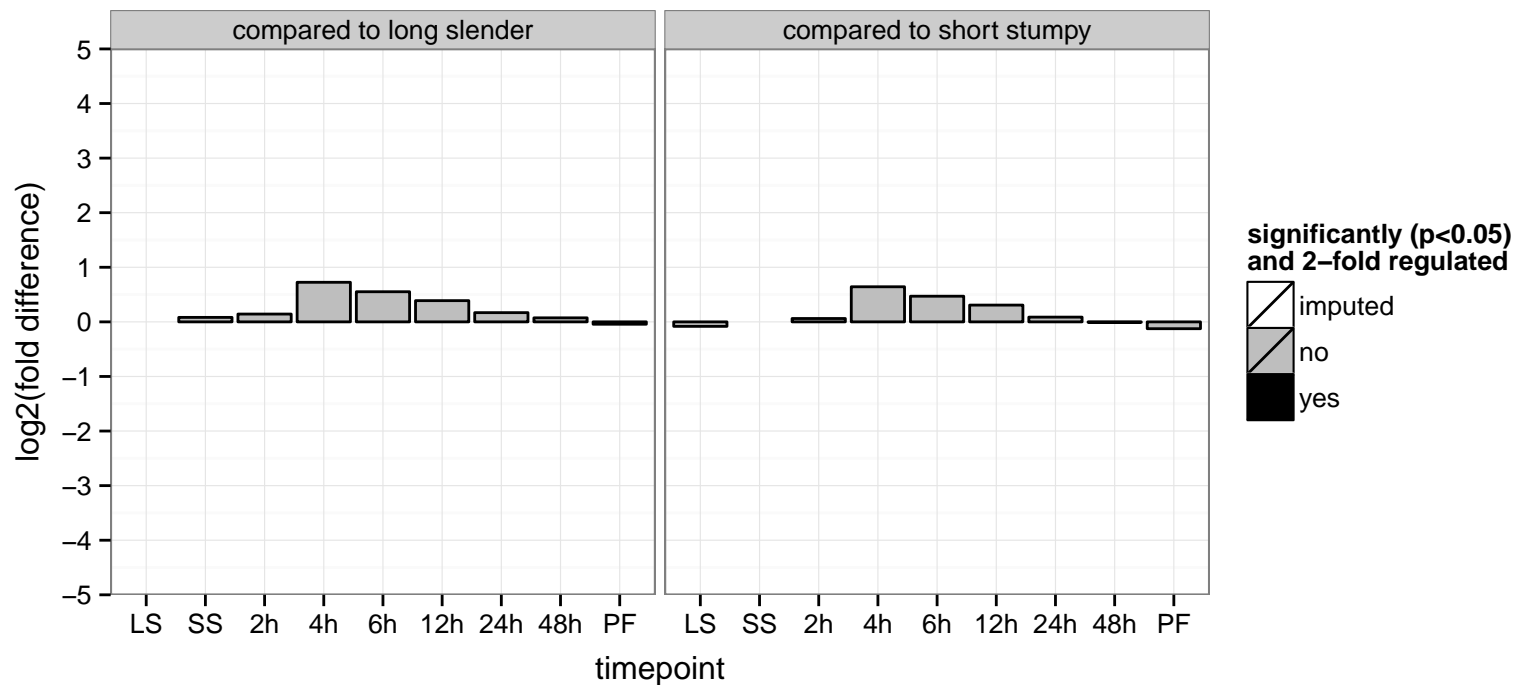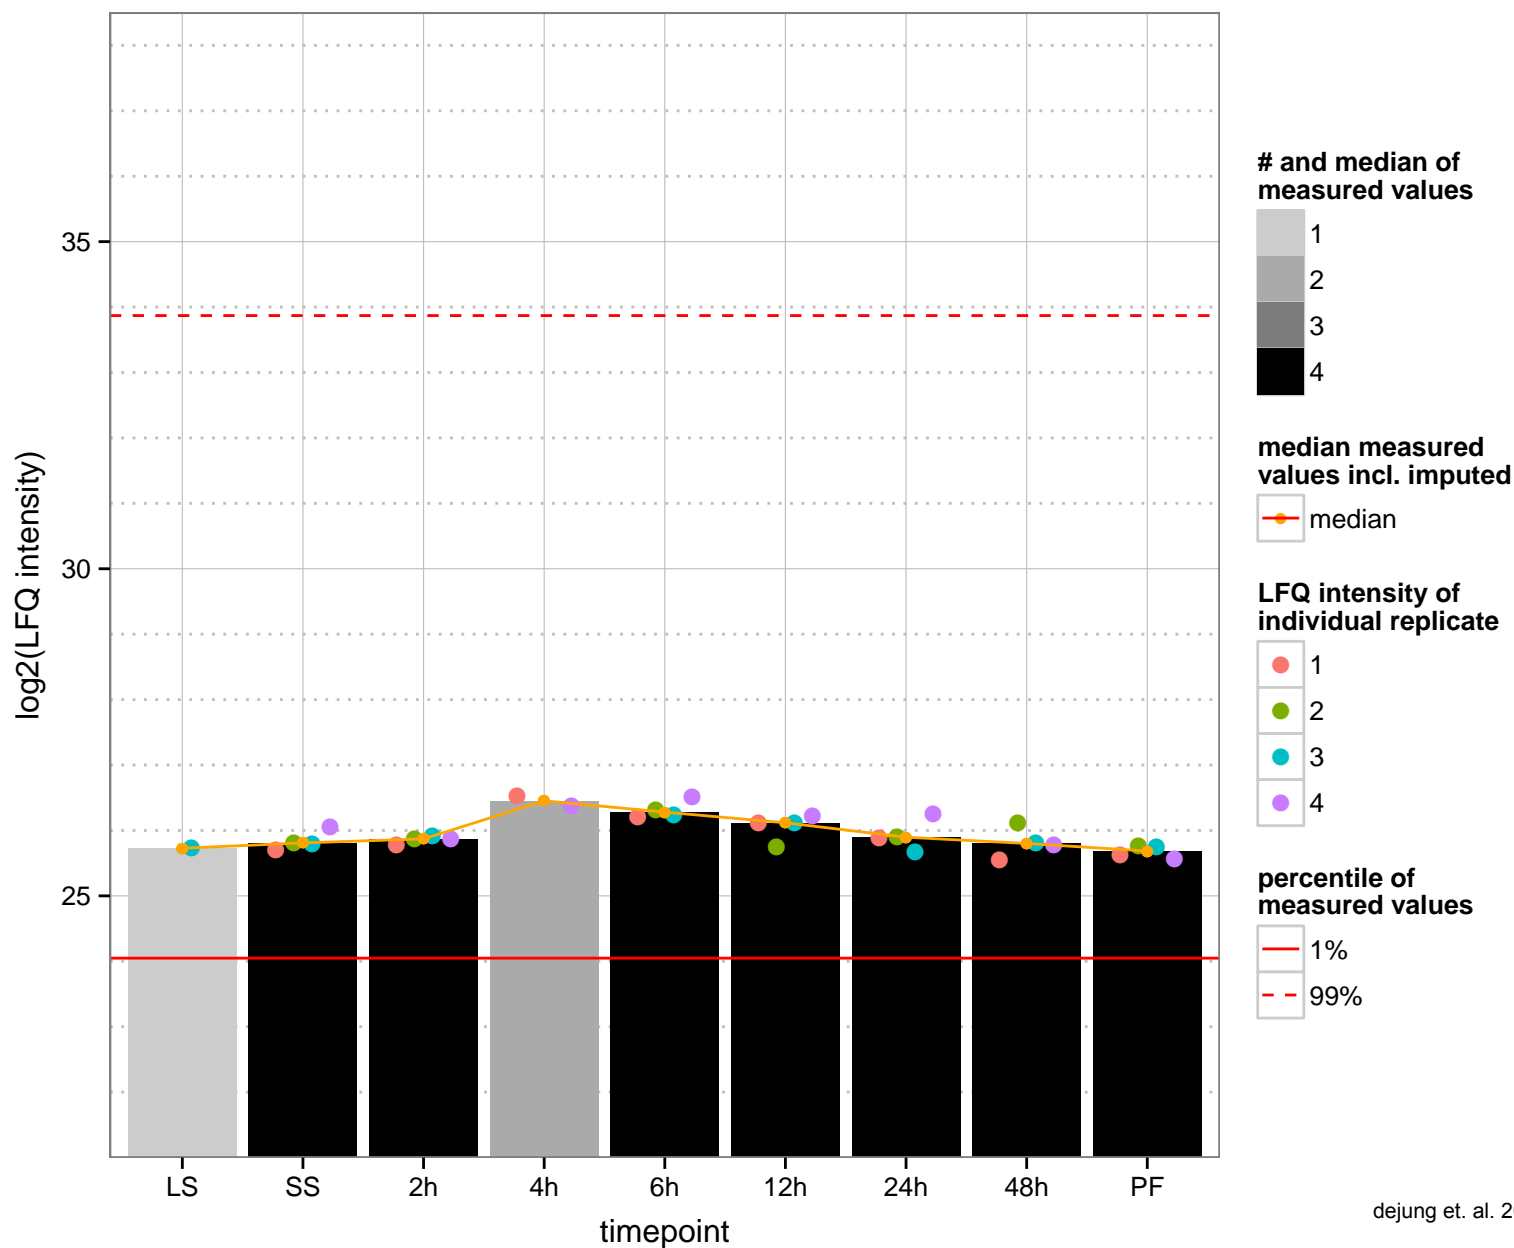

nuclear cap binding complex subunit CBP30 (CBP30)  
 Tb927.10.15210  
 AGOF: null  
 AGOC: mitochondrion, nuclear cap binding complex, nucleus  
 AGOP: null  
 PGO: null  
 PGOC: null  
 PGOP: null

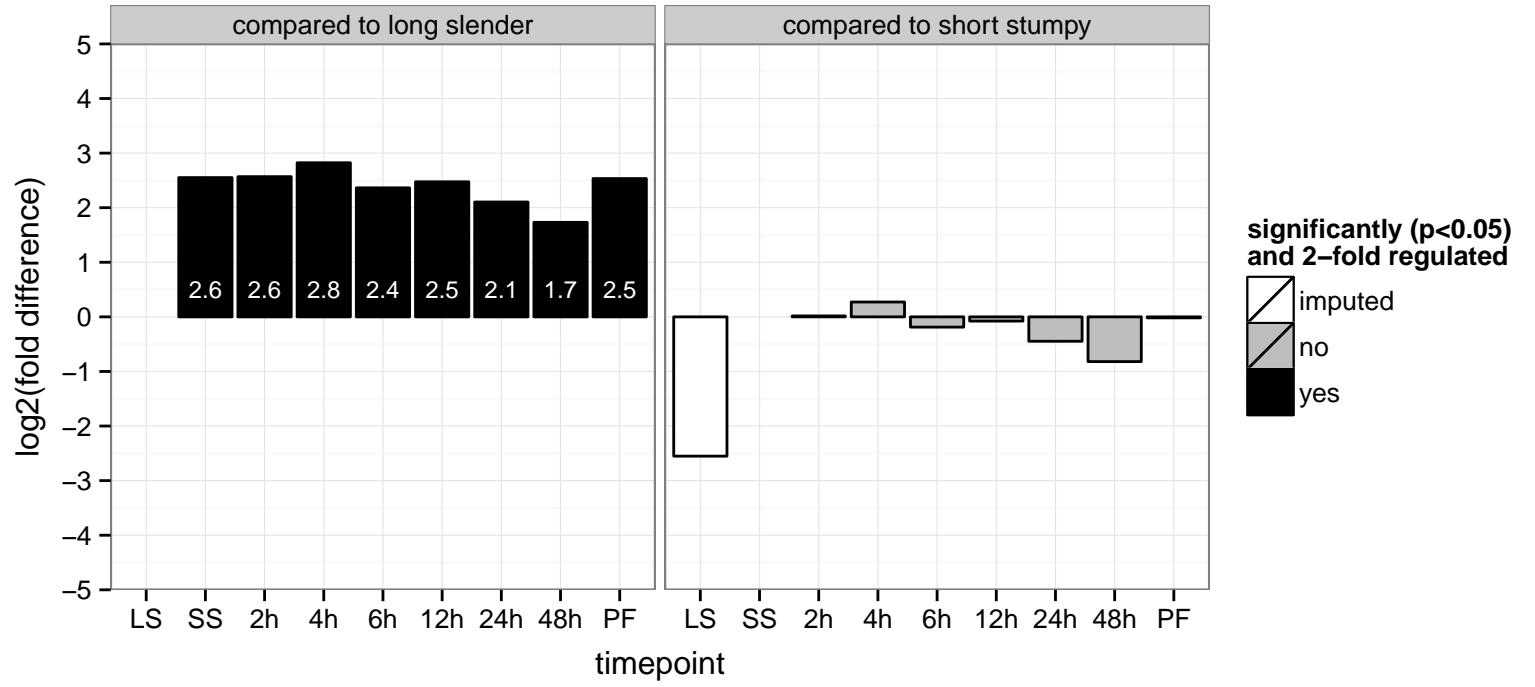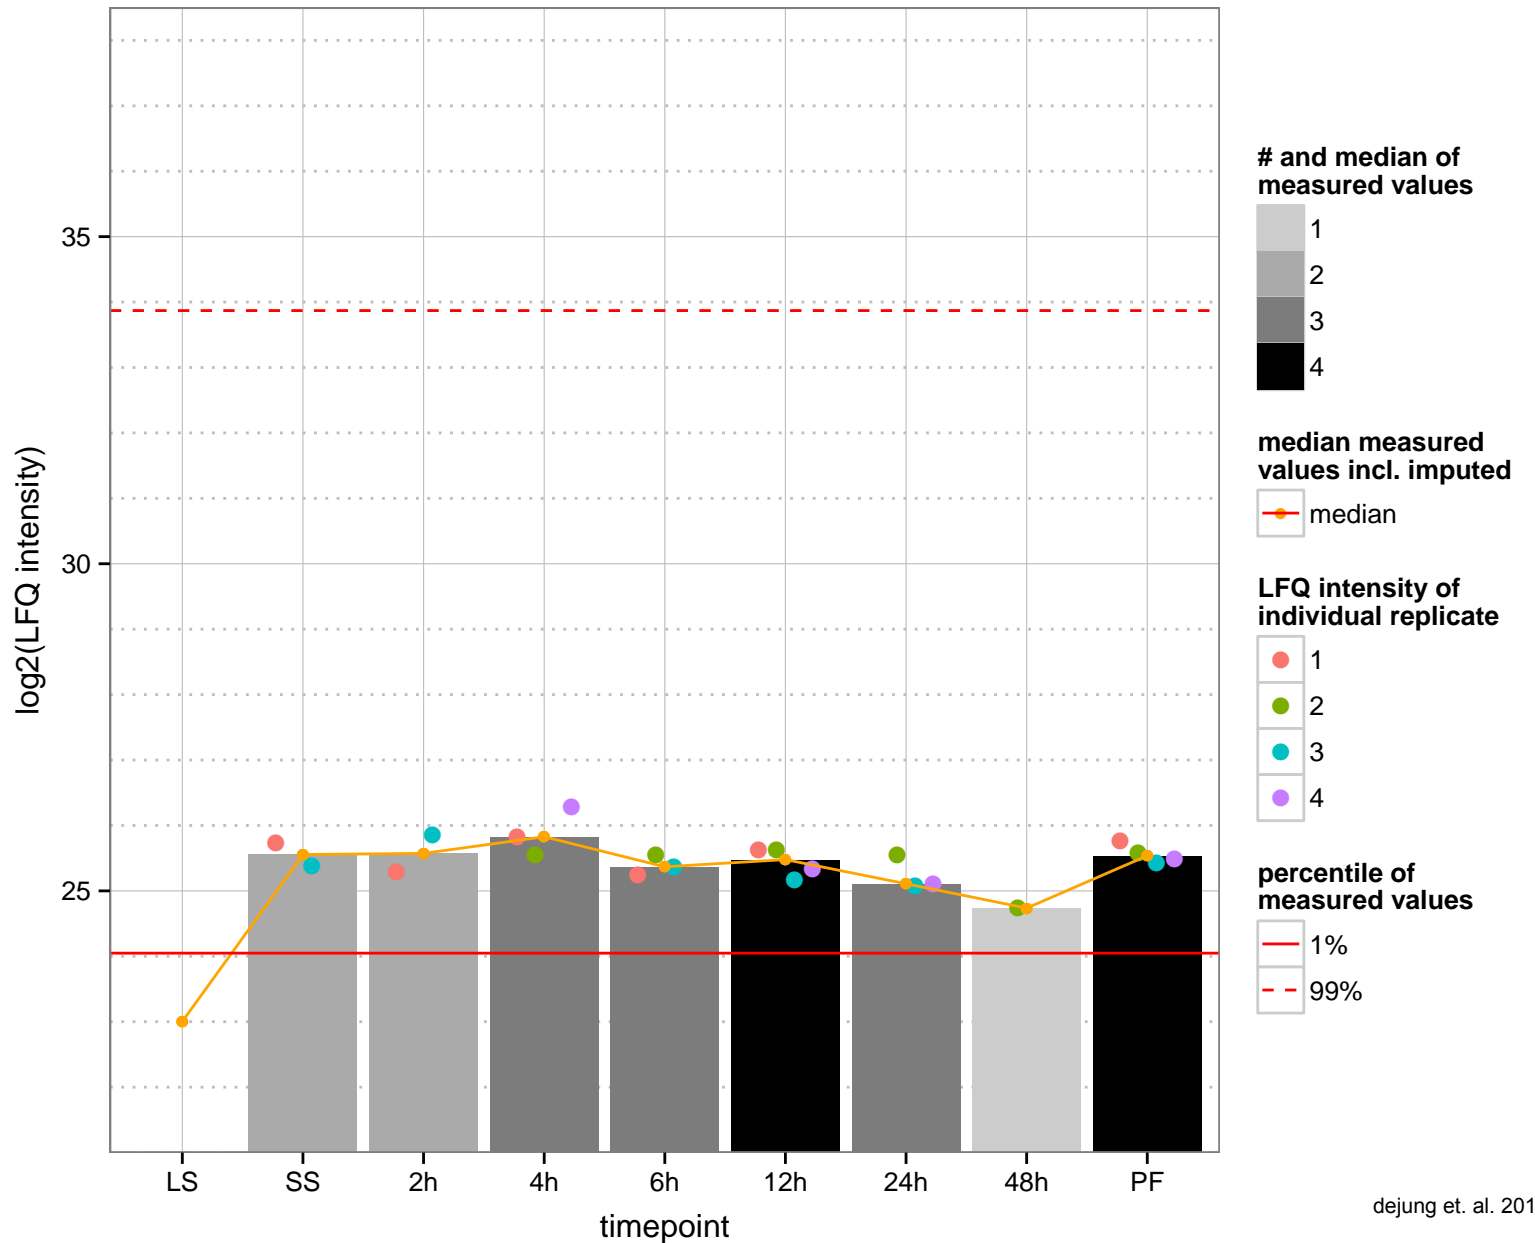

hypothetical protein, conserved

Tb927.10.15290

AGOF: null, ATP binding, protein kinase activity

AGOC: null

AGOP: null, protein phosphorylation

PGOF: null, ATP binding, protein kinase activity, transferase activity, transferring phosphorus-containing groups

PGOC: null

PGOP: null, protein phosphorylation

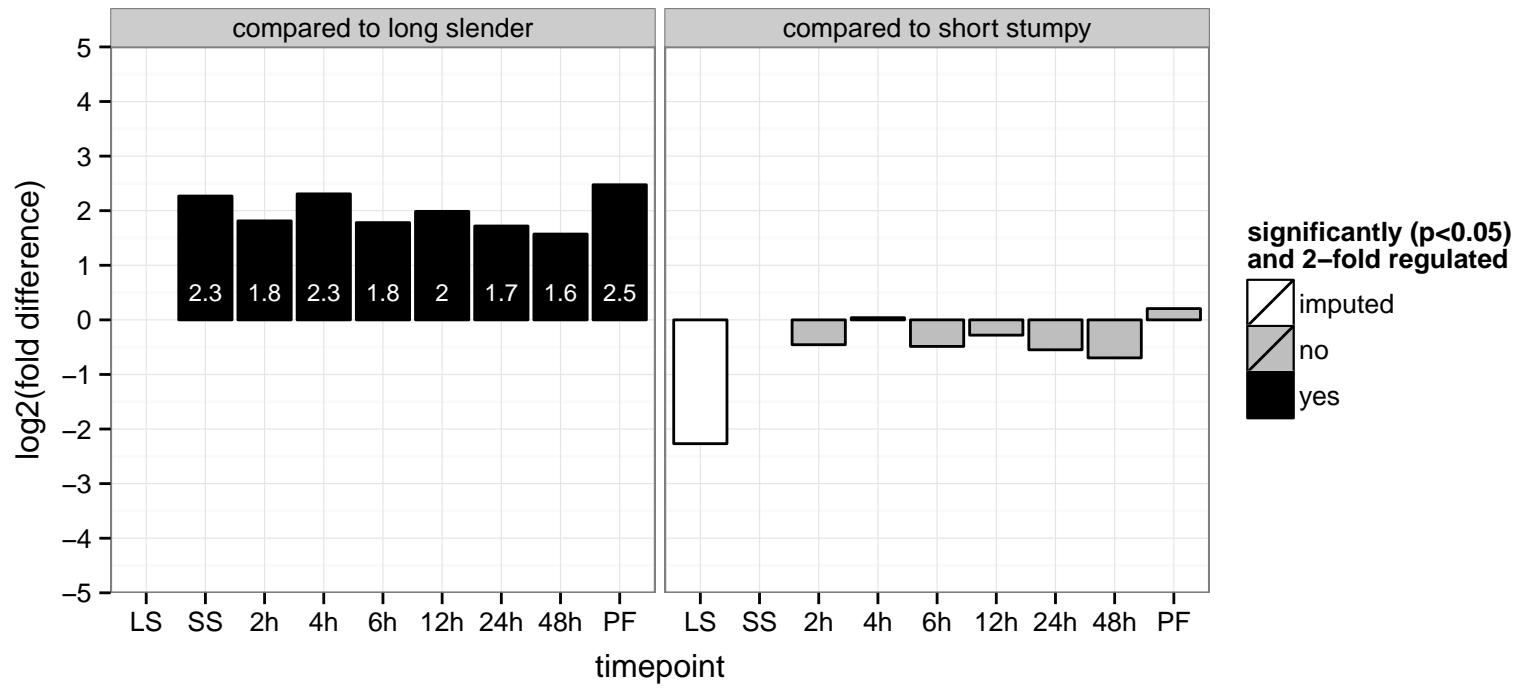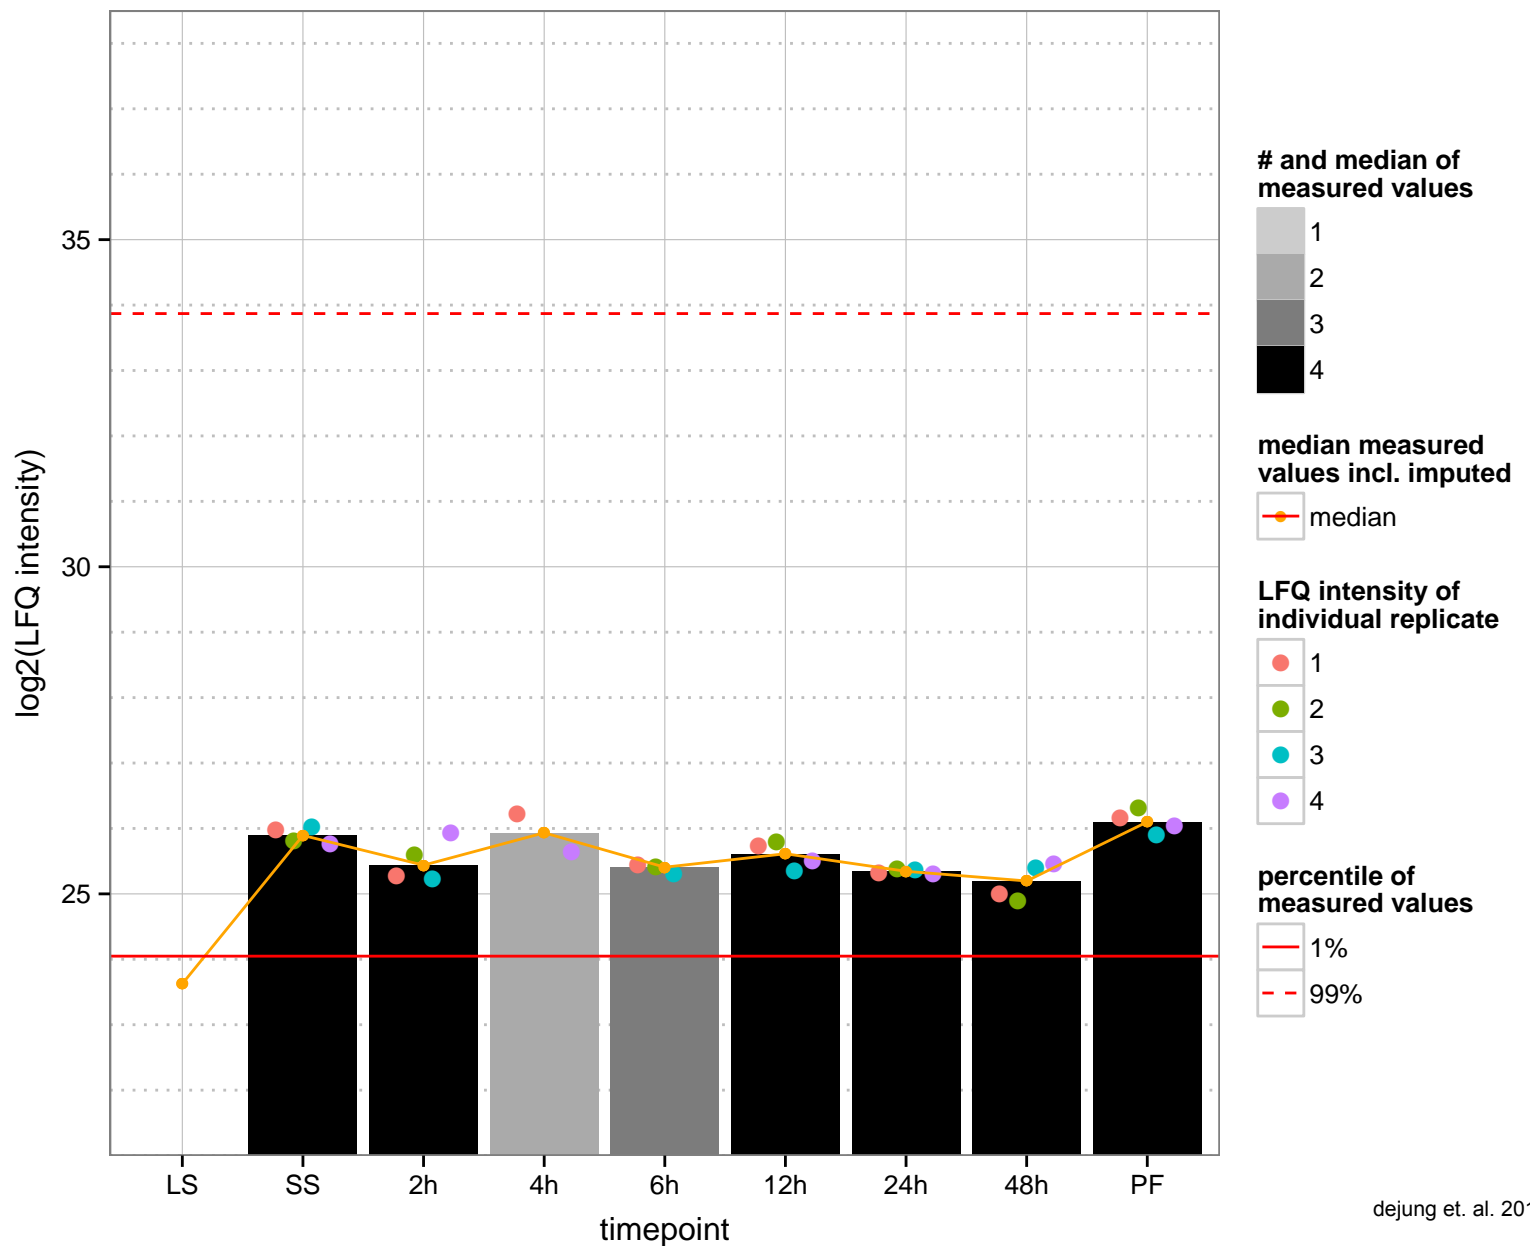

hypothetical protein, conserved  
 Tb927.10.15310  
 AGOF: null  
 AGOC: null  
 AGOP: null  
 PGOF: null  
 PGO: null  
 PGOP: null

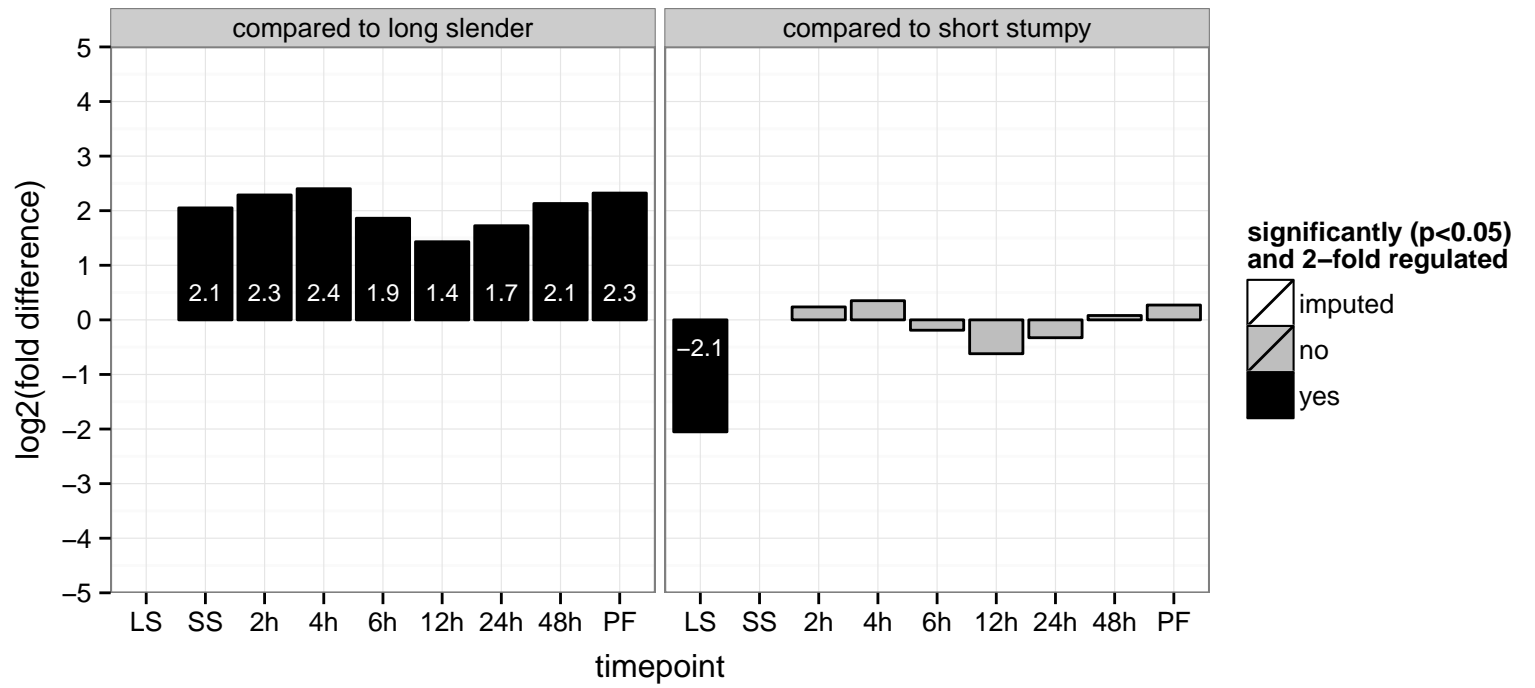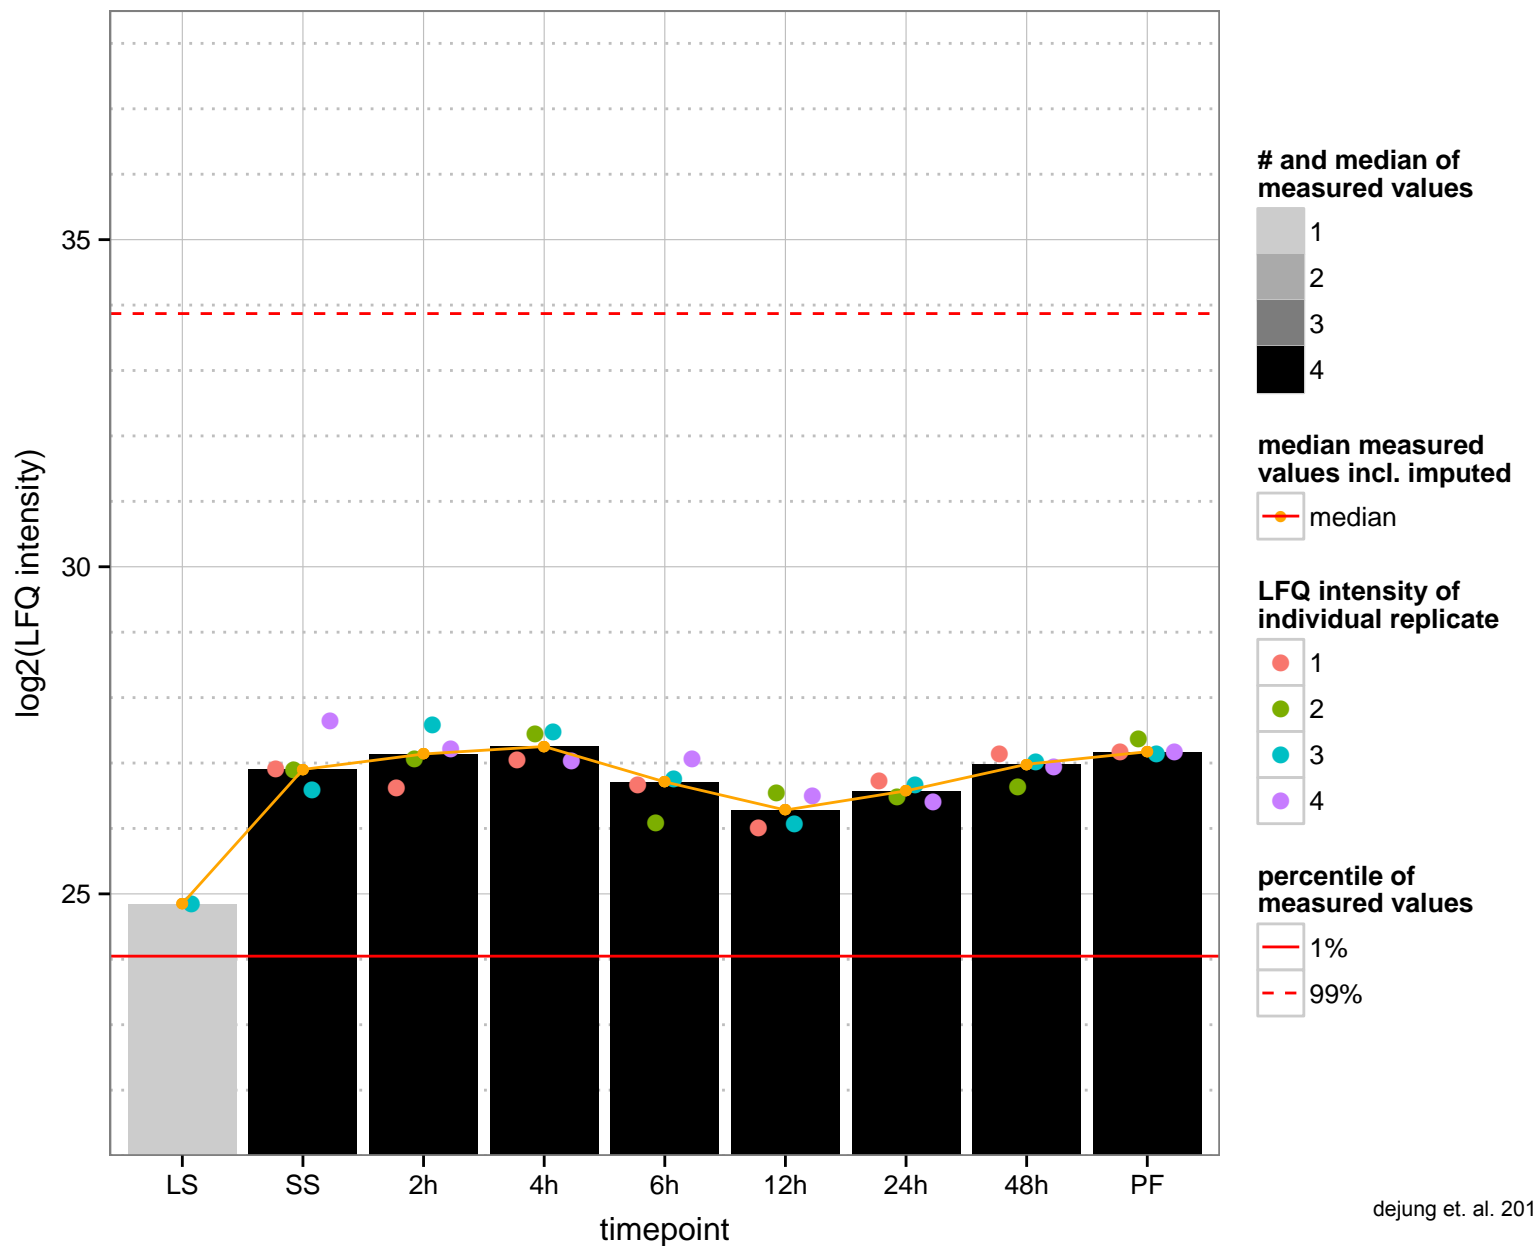

hypothetical protein, conserved  
 Tb927.10.15330;Tb11.v5.0348  
 AGOF: null  
 AGOC: null  
 AGOP: null  
 PGO: null  
 PGOC: null  
 PGOP: null, phosphate-containing compound metabolic process

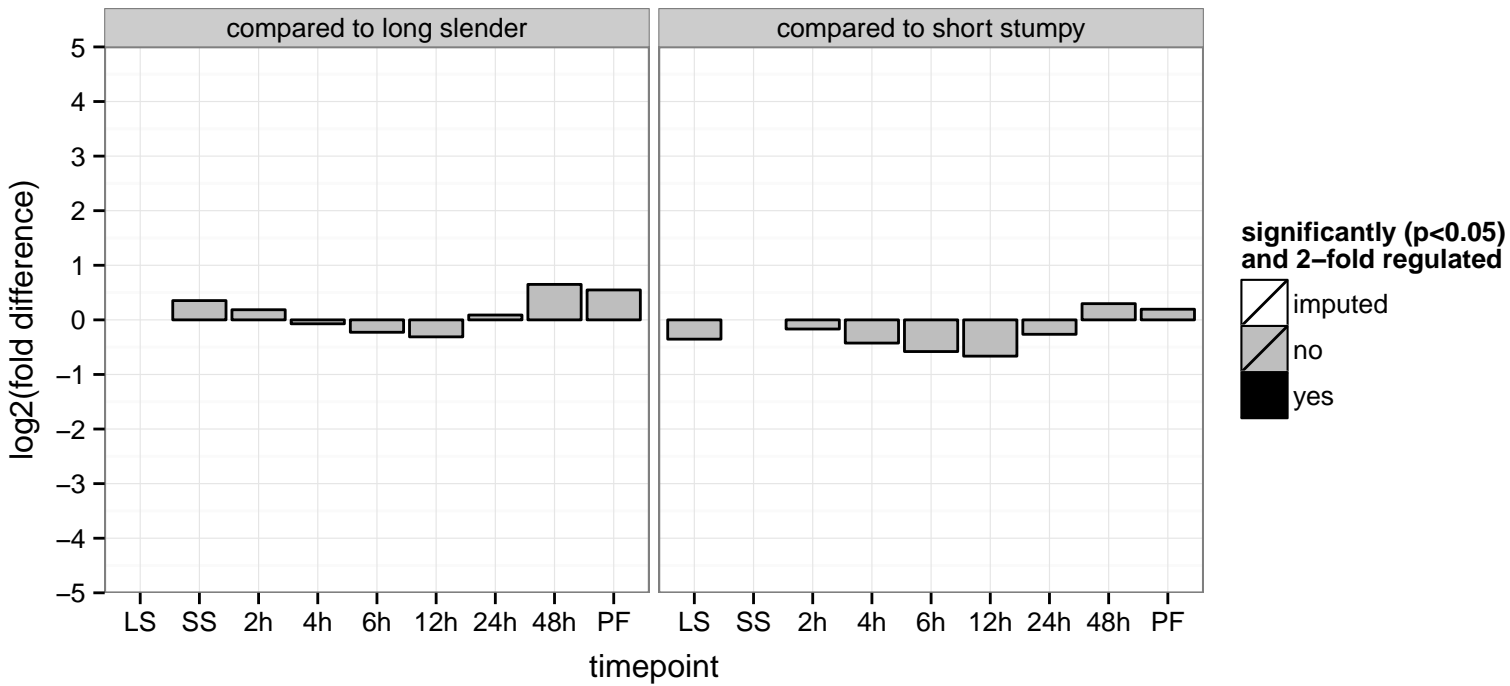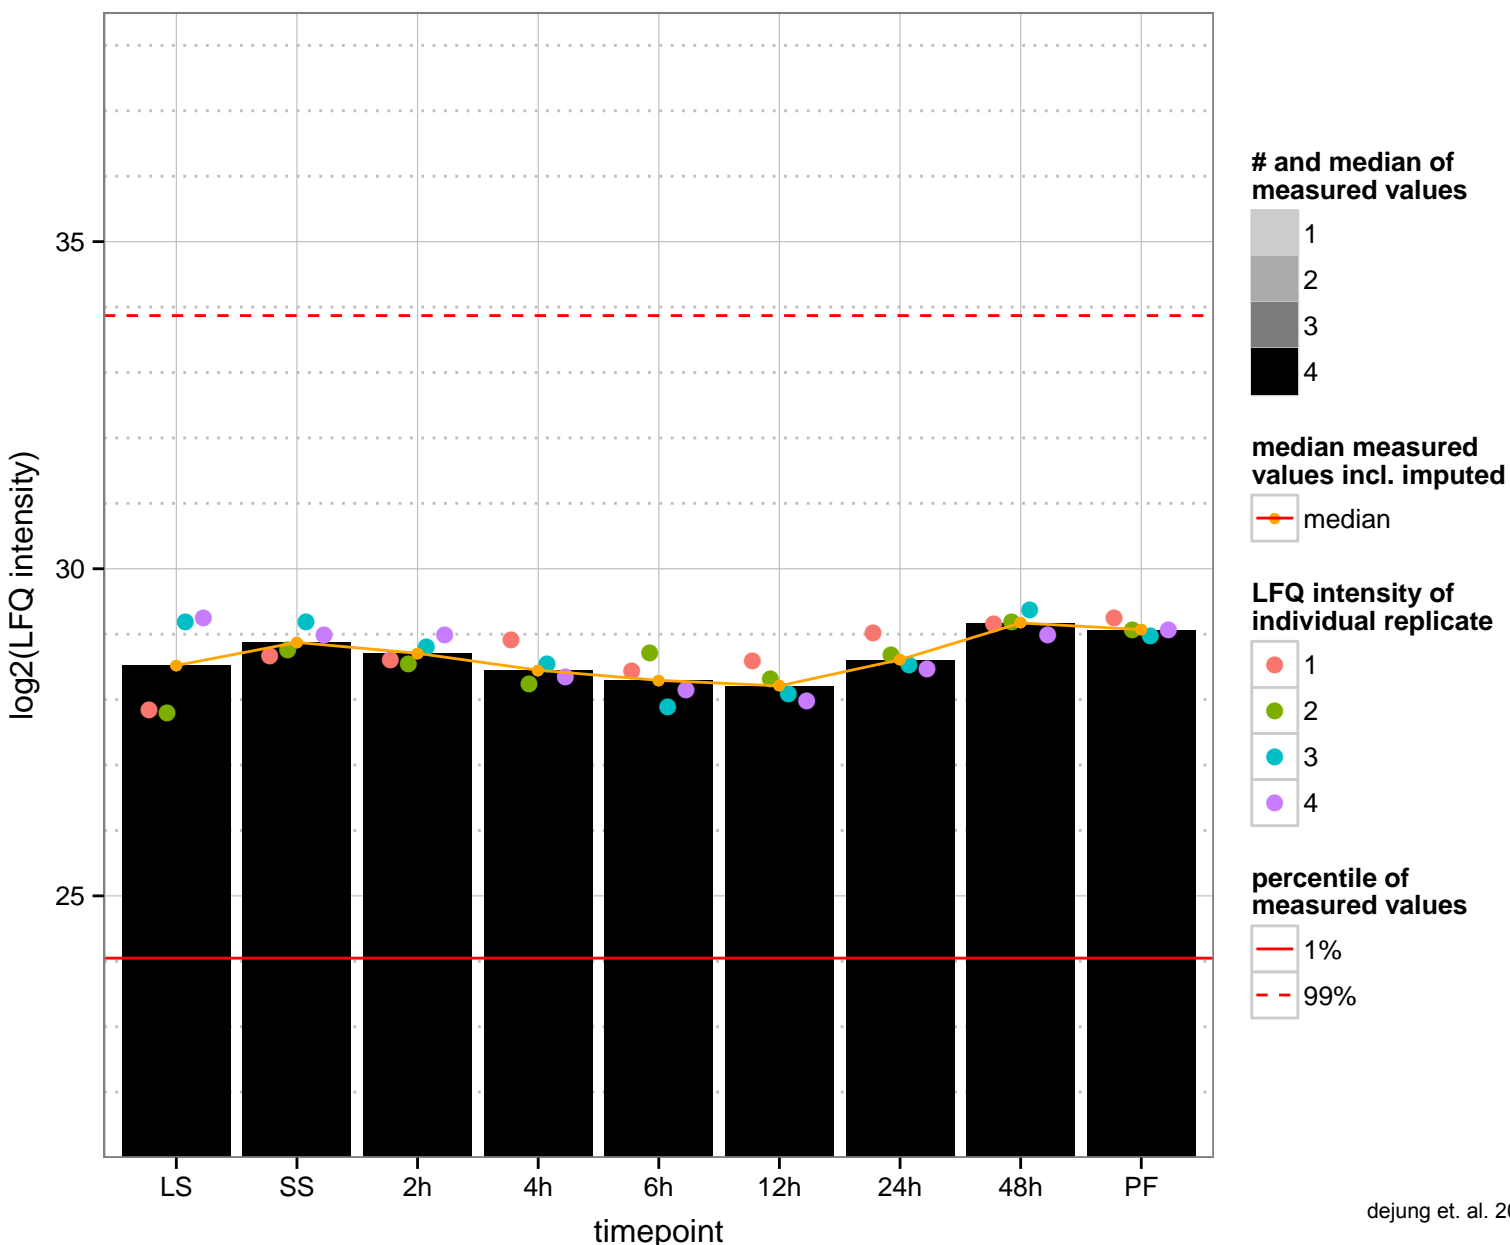



histone H3 variant, H3V (h3vaR)

Tb927.10.15350

AGOF: DNA binding

AGOC: chromosome, telomeric region, nucleosome, nucleus

AGOP: chromosome organization, nucleosome assembly, termination of RNA polymerase II transcription

PGOF: DNA binding

PGOC: nucleosome

PGOP: nucleosome assembly

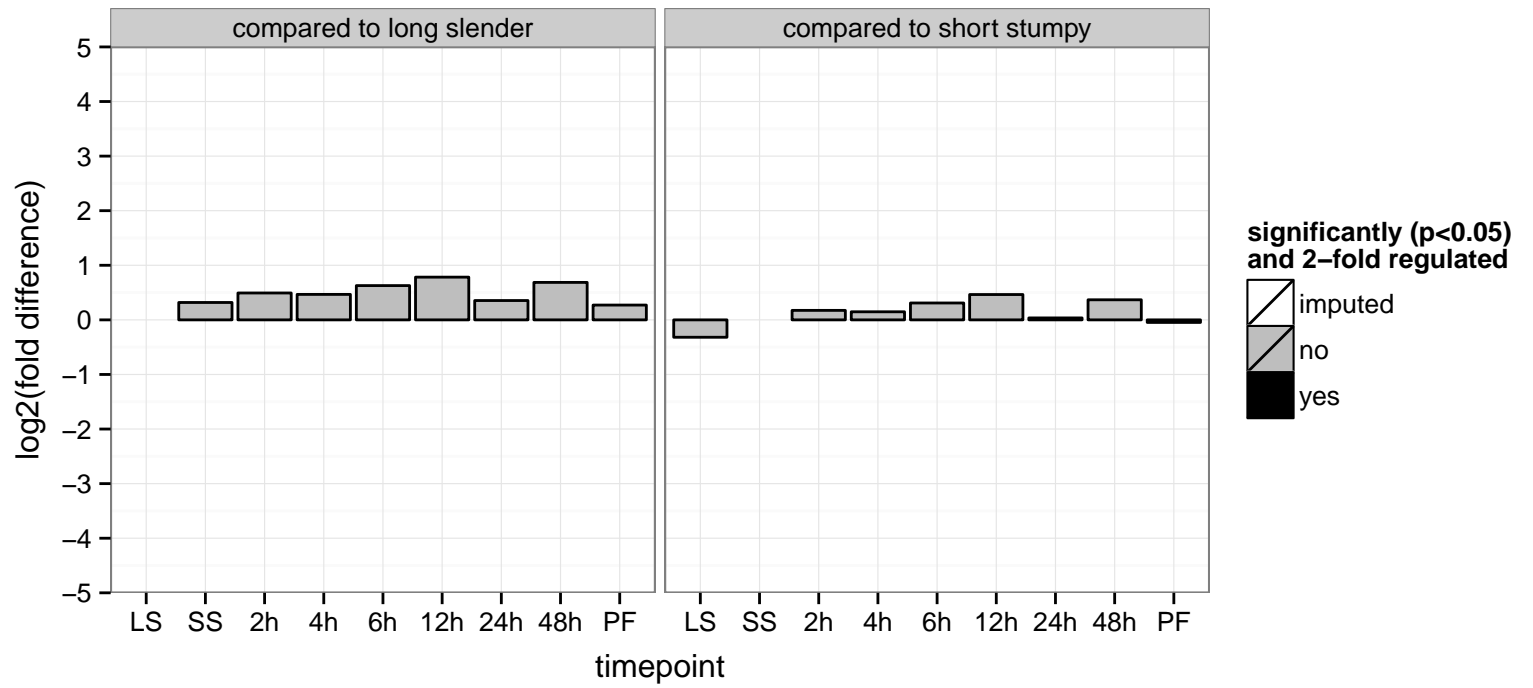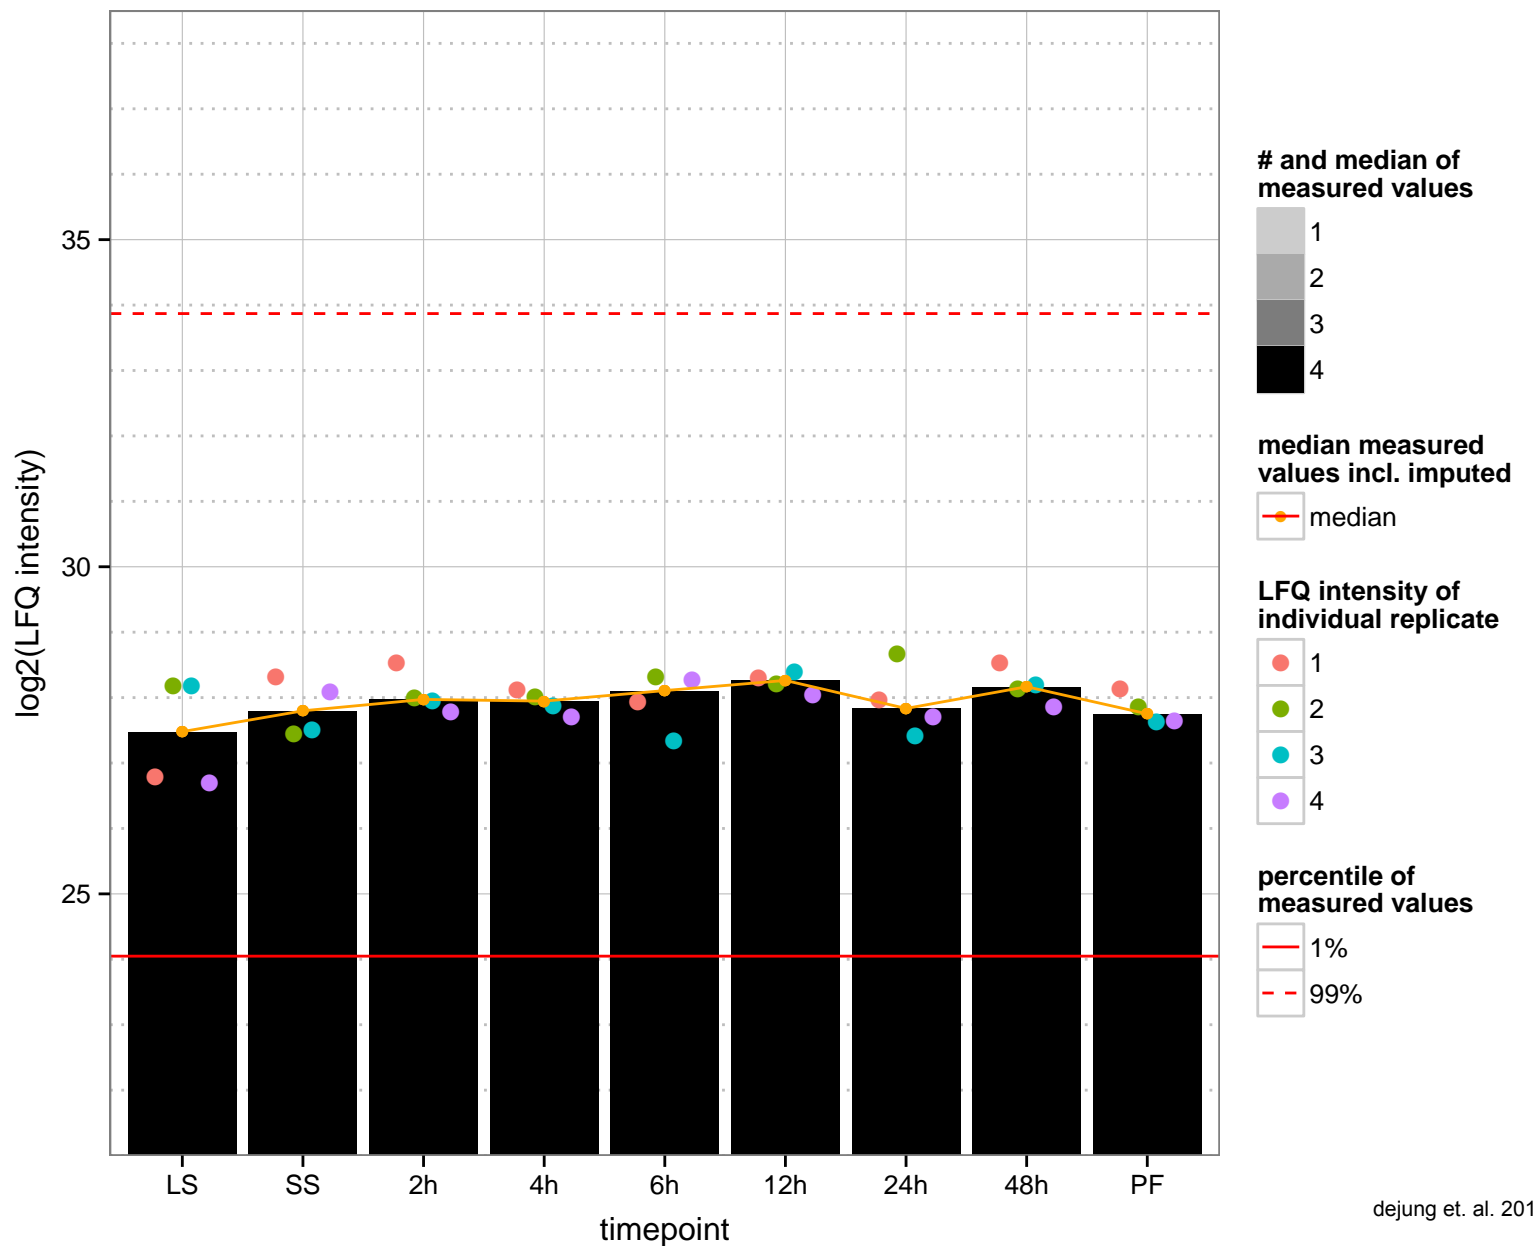

hypothetical protein, conserved

Tb927.10.15360

AGOF: RNA binding

AGOC: null

AGOP: RNA processing

PGOF: ATP binding, ATP-dependent helicase activity, RNA binding, nucleic acid binding

PGOC: null

PGOP: RNA processing

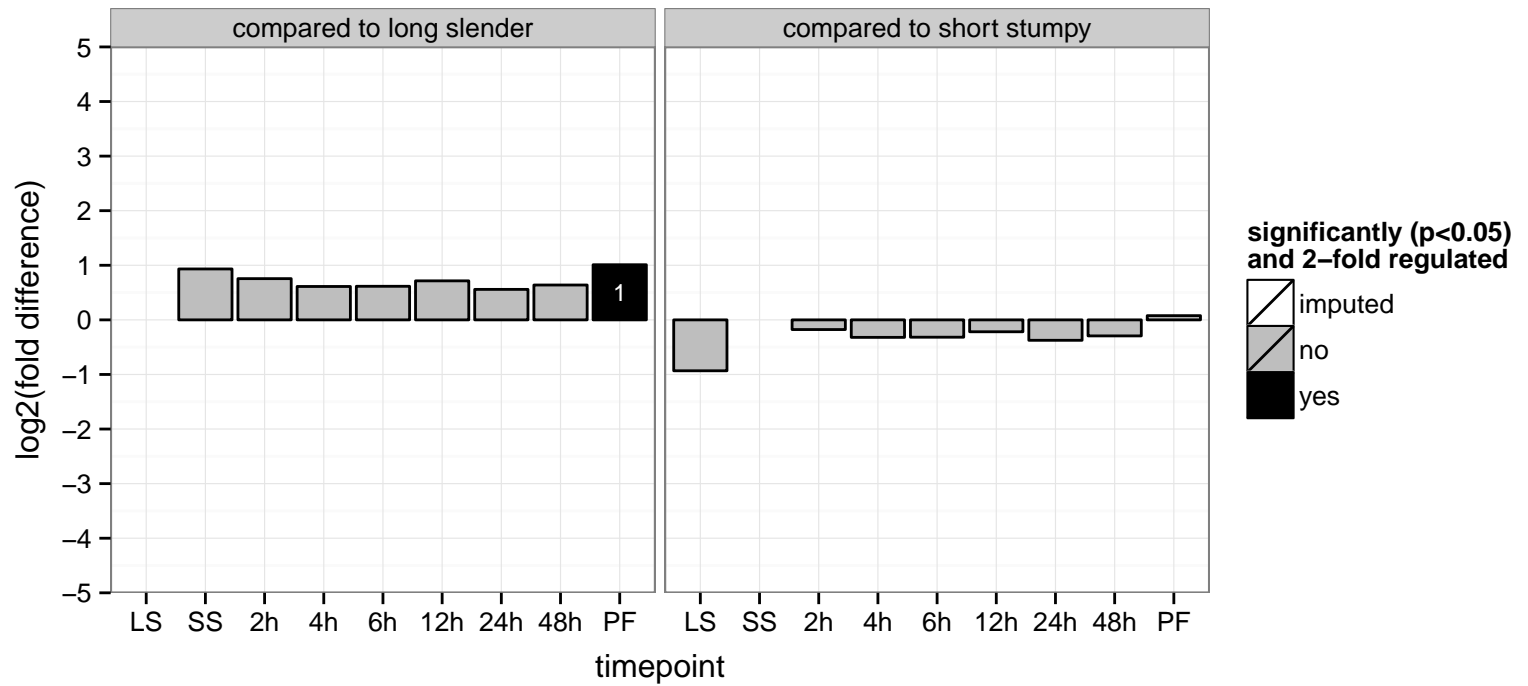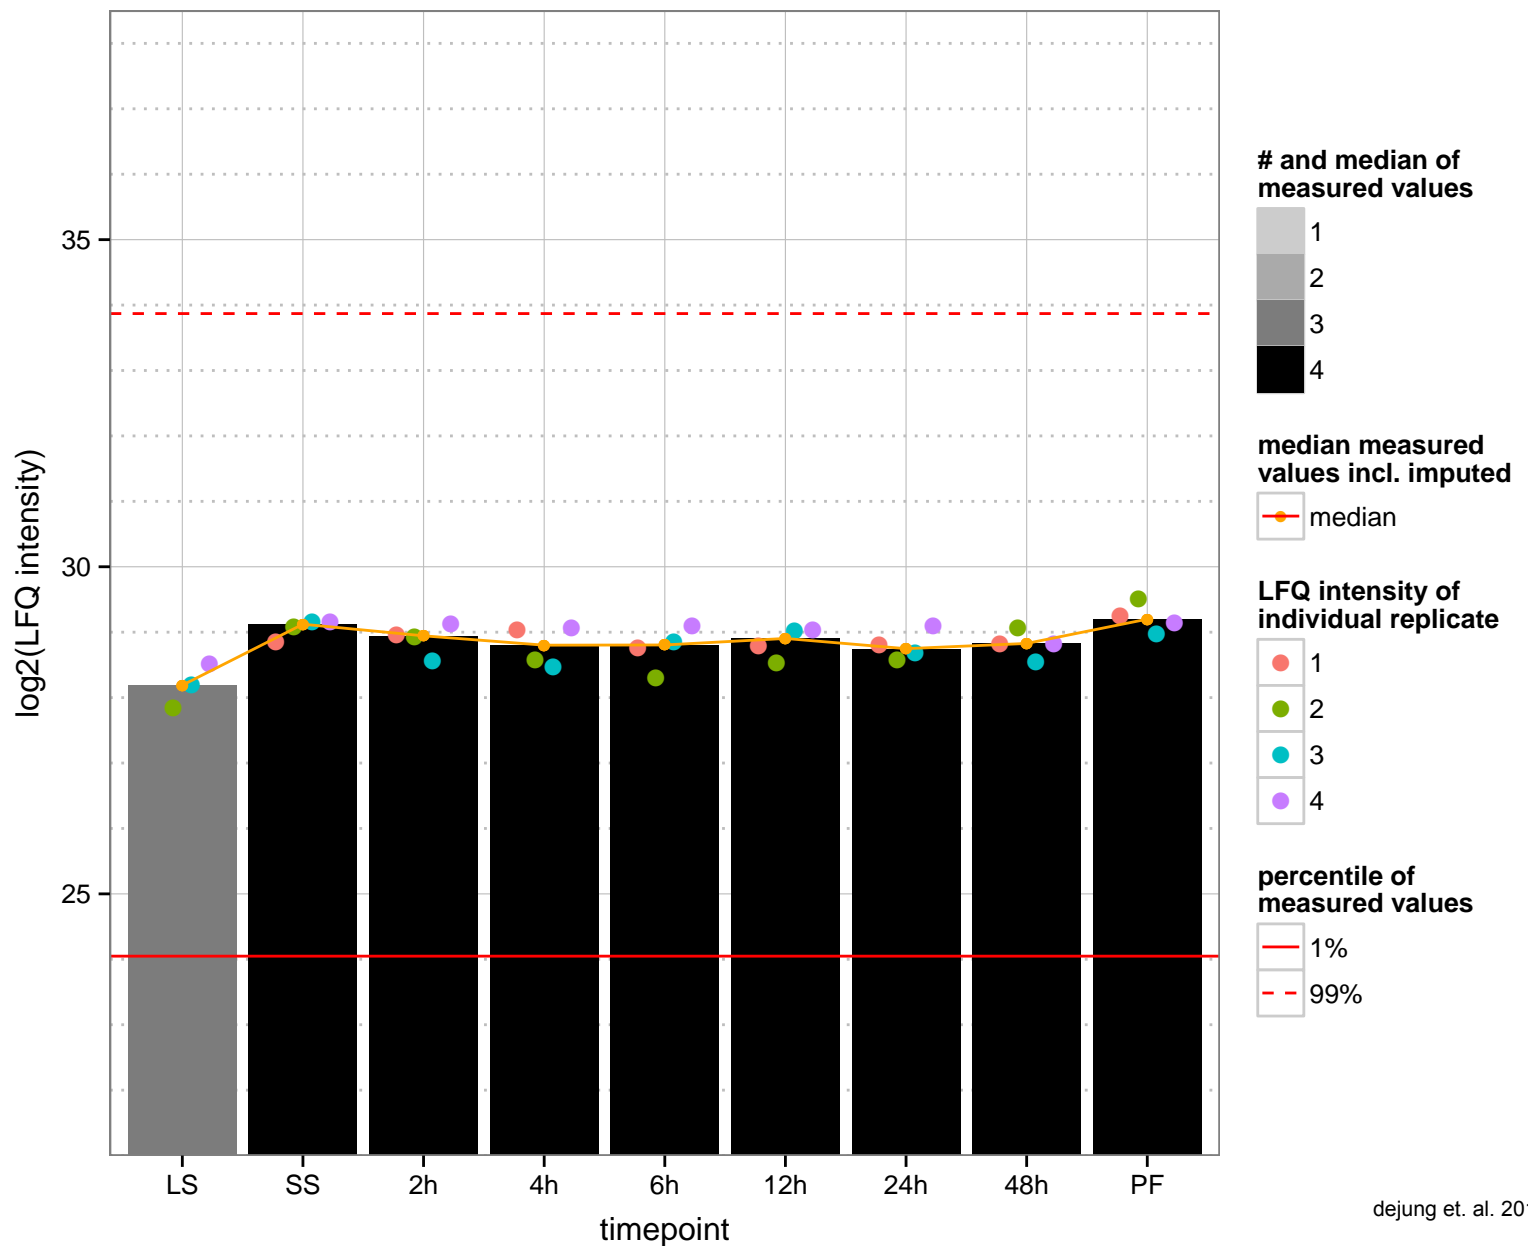

kinesin, putative, hypothetical protein, conserved  
 Tb927.10.15400;Tb11.v5.0849  
 AGOF: null, ATP binding, microtubule motor activity, motor activity  
 AGOC: null, kinesin complex, microtubule associated complex  
 AGOP: null, microtubule-based movement  
 PGOF: null, ATP binding, microtubule motor activity  
 PGOC: null  
 PGOP: null, microtubule-based movement

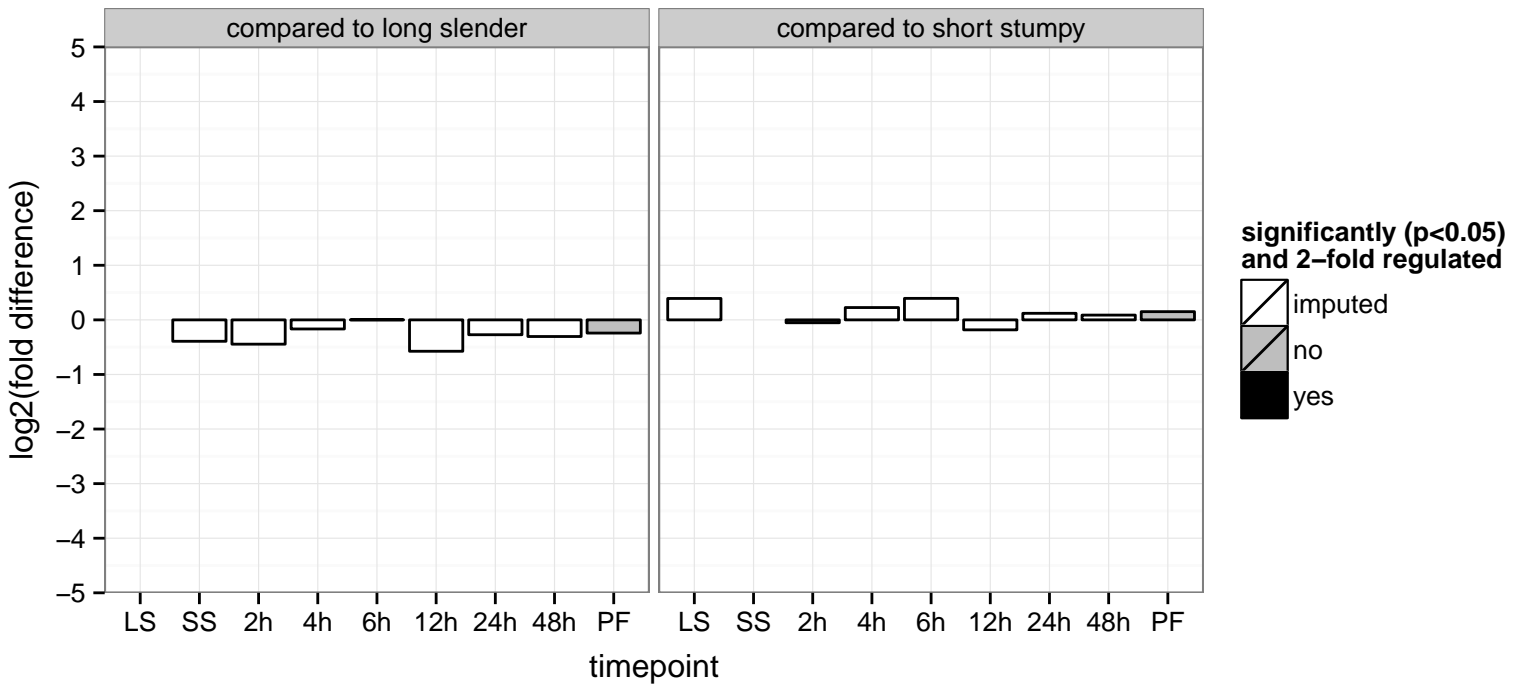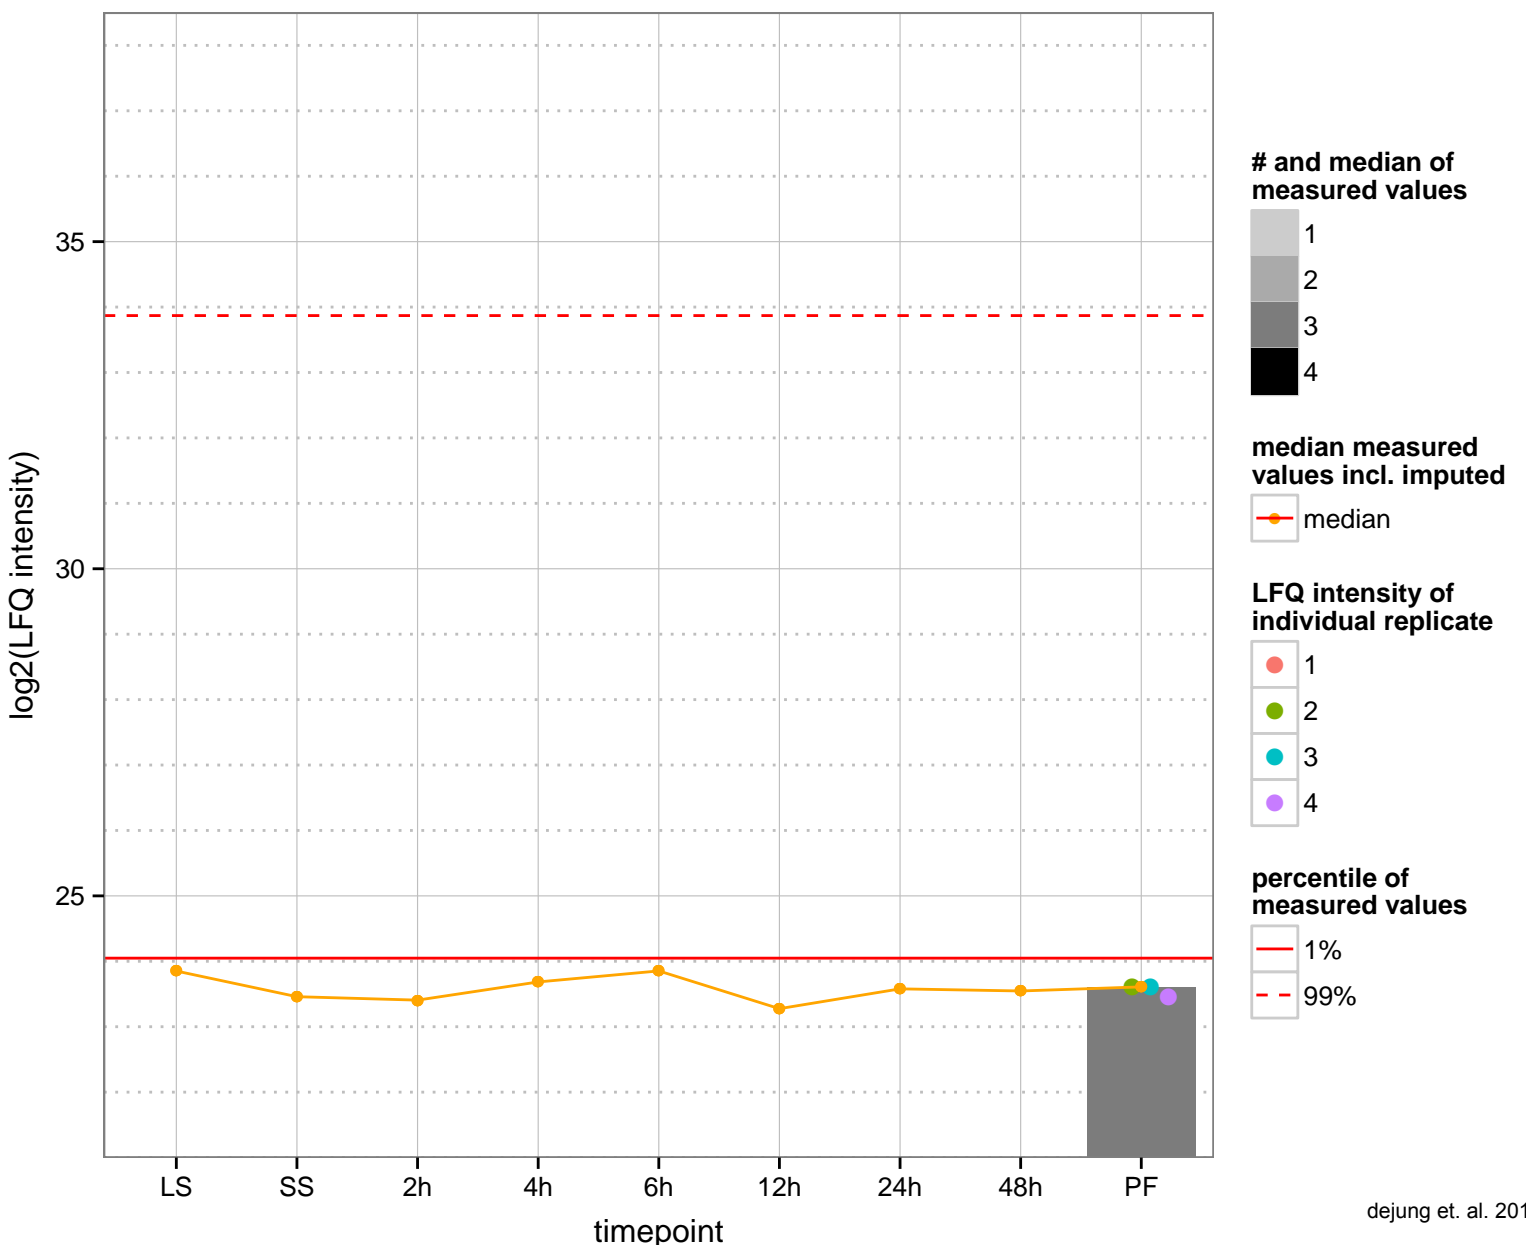

hypothetical protein, conserved  
 Tb927.10.15470  
 AGOF: null  
 AGOC: null  
 AGOP: null  
 PGO: null  
 PGO: null  
 PGO: null

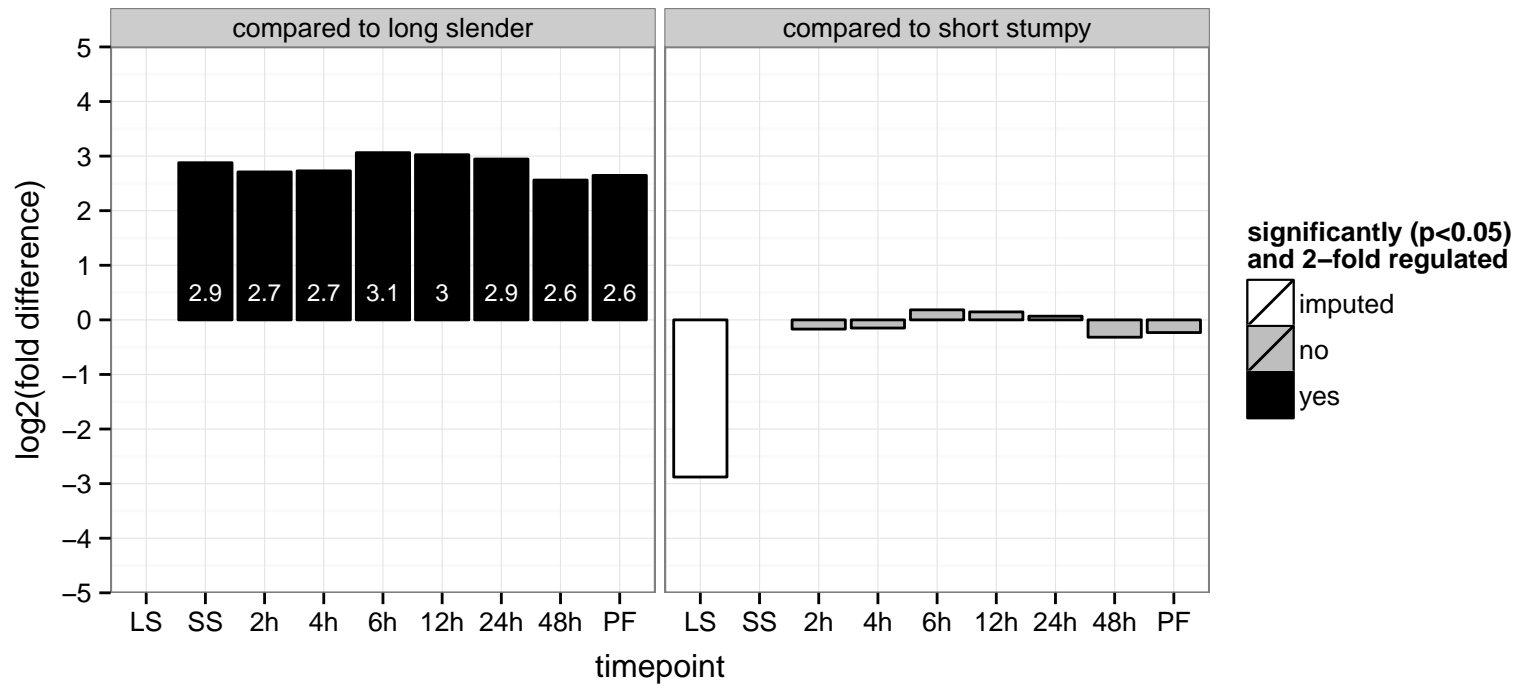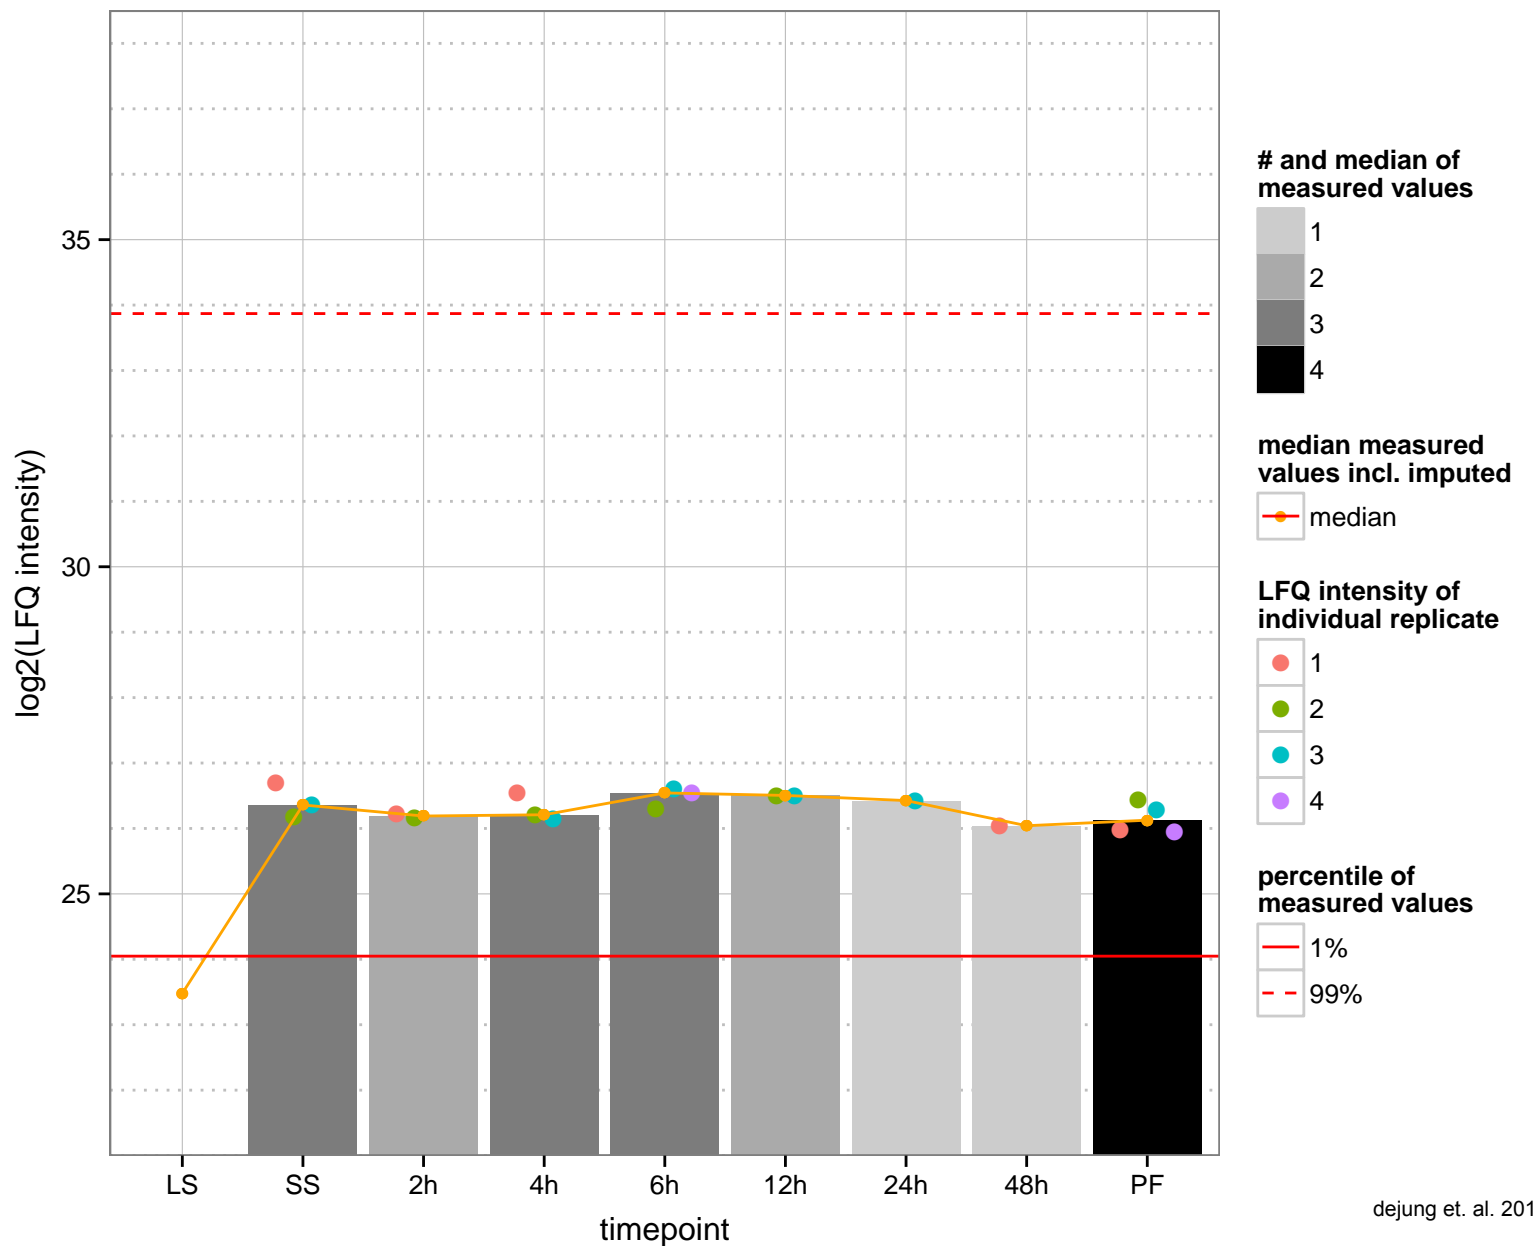

proteasome regulatory non-ATP-ase subunit 5, 19S proteasome regulatory subunit 5 (RPN5)  
 Tb927.10.1550  
 AGOF: endopeptidase activity  
 AGOC: proteasome regulatory particle  
 AGOP: ubiquitin-dependent protein catabolic process  
 PGO: protein binding  
 PGOC: null  
 PGOP: null

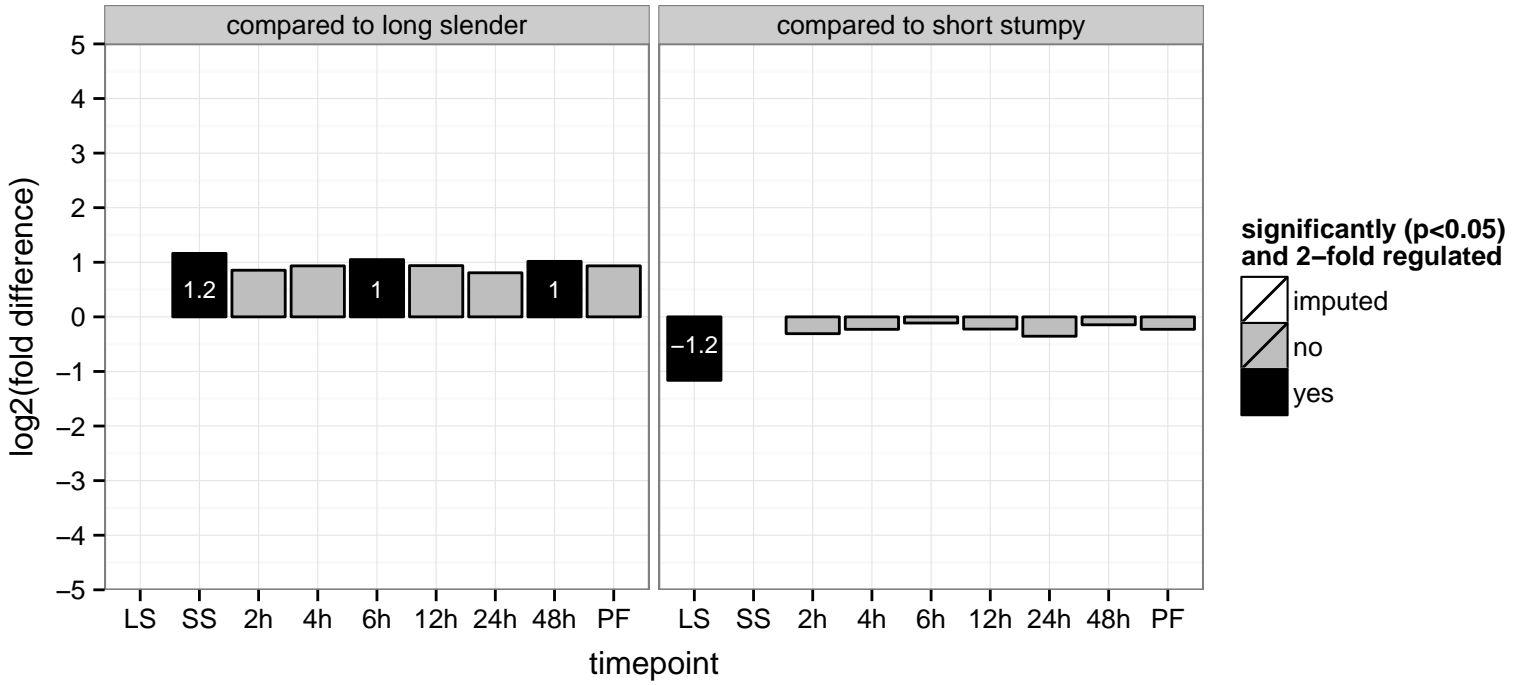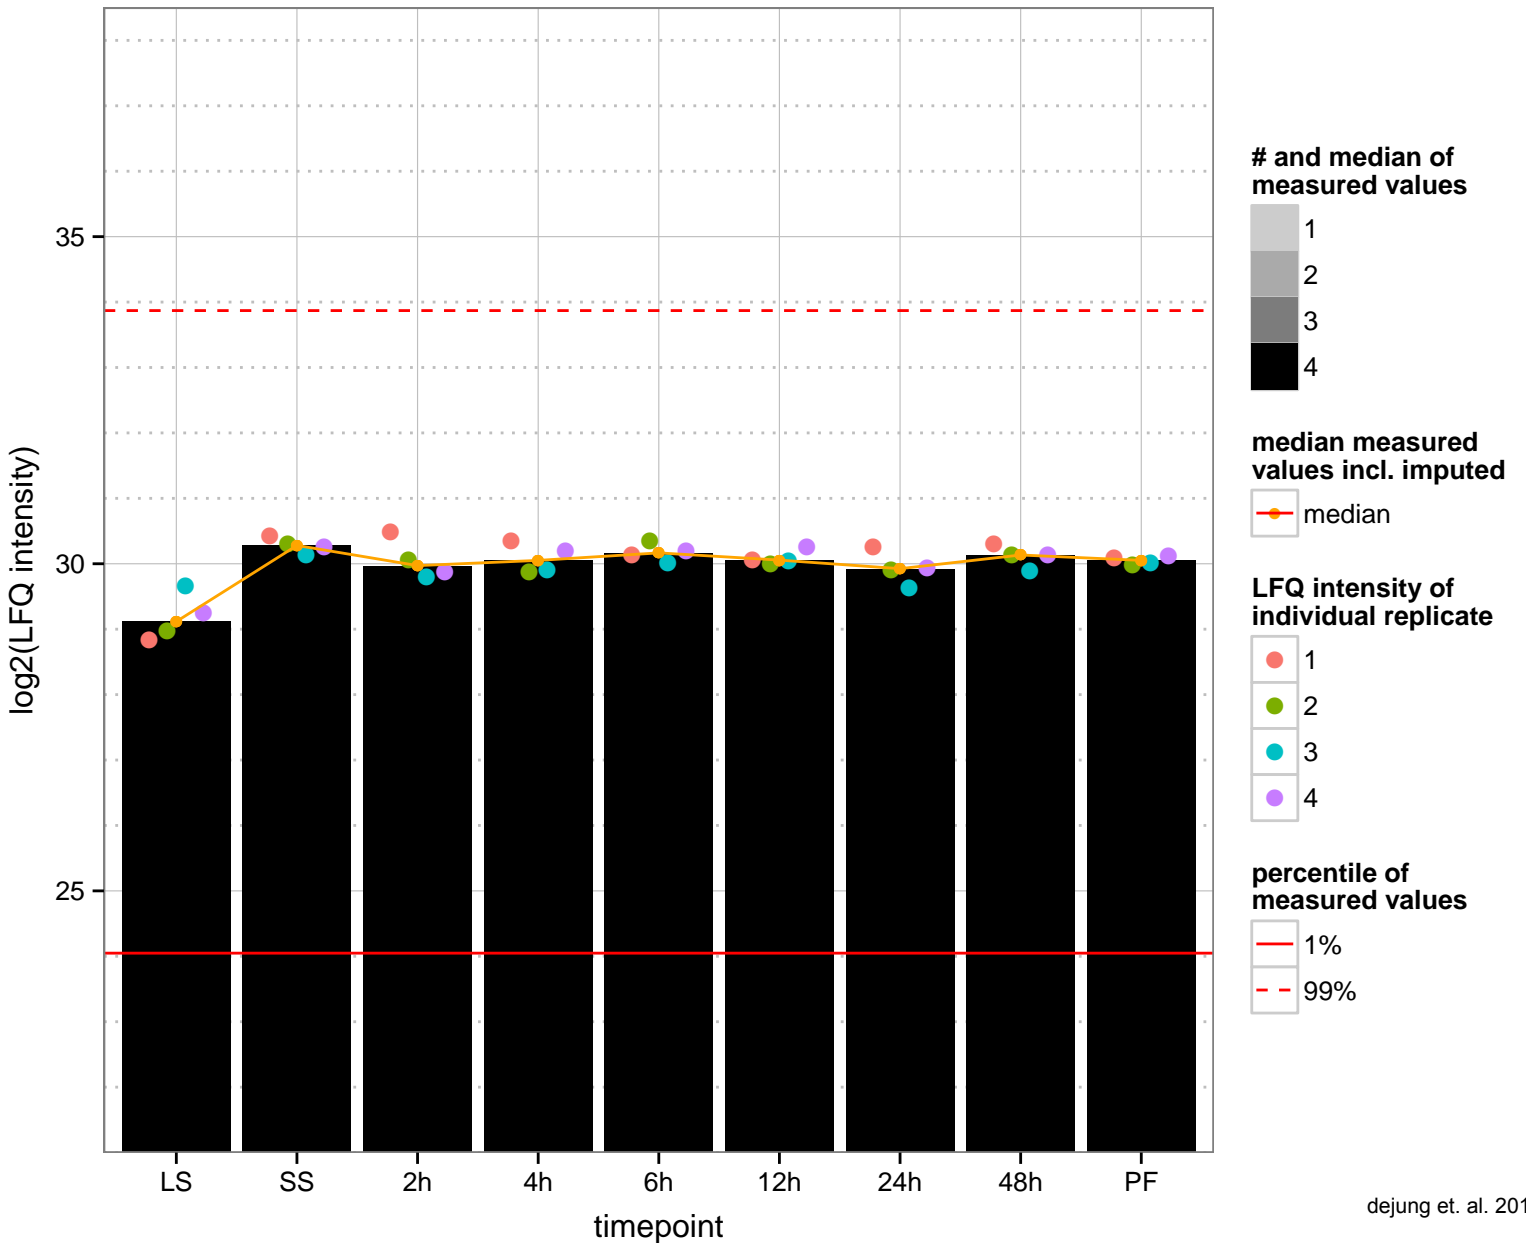

signal recognition particle protein, putative  
 Tb927.10.15520  
 AGOF: 7S RNA binding  
 AGOC: signal recognition particle  
 AGOP: SRP-dependent cotranslational protein targeting to membrane  
 PGO: 7S RNA binding  
 PGO: signal recognition particle  
 PGO: SRP-dependent cotranslational protein targeting to membrane

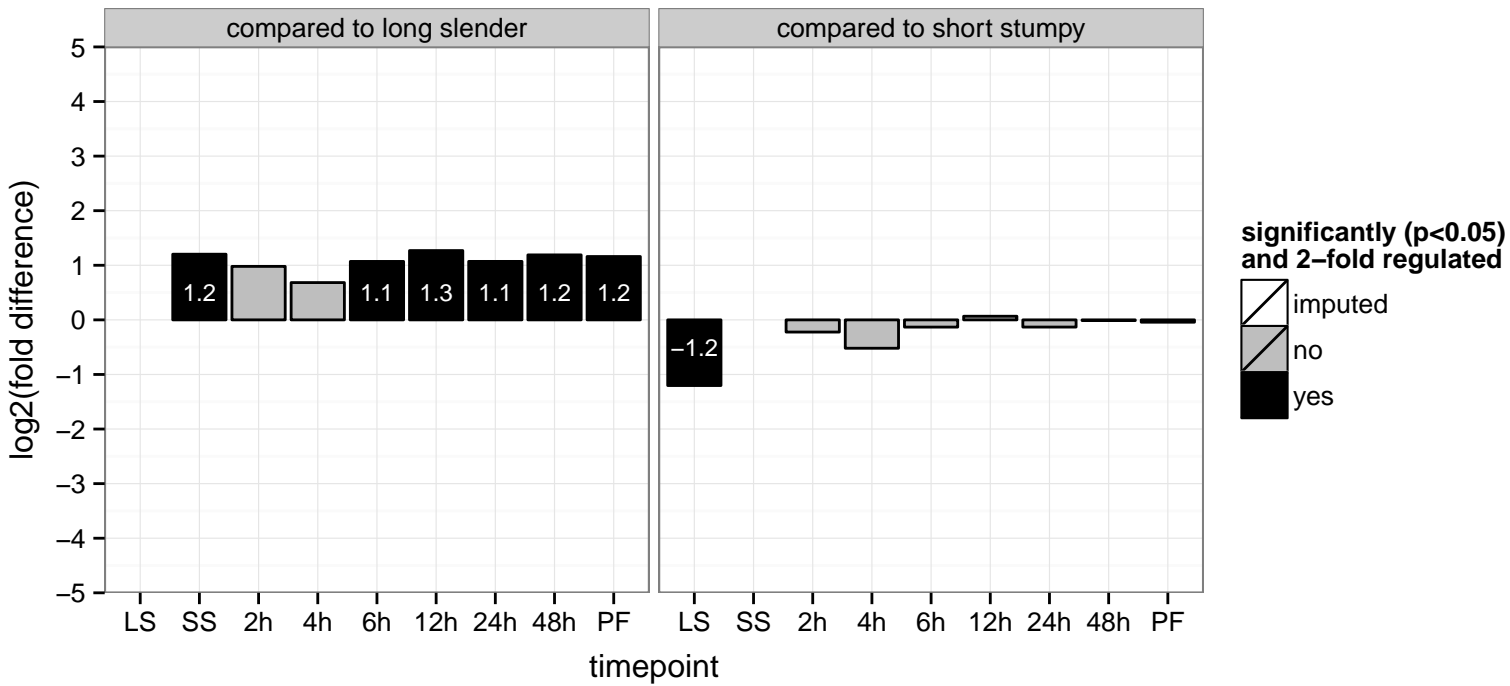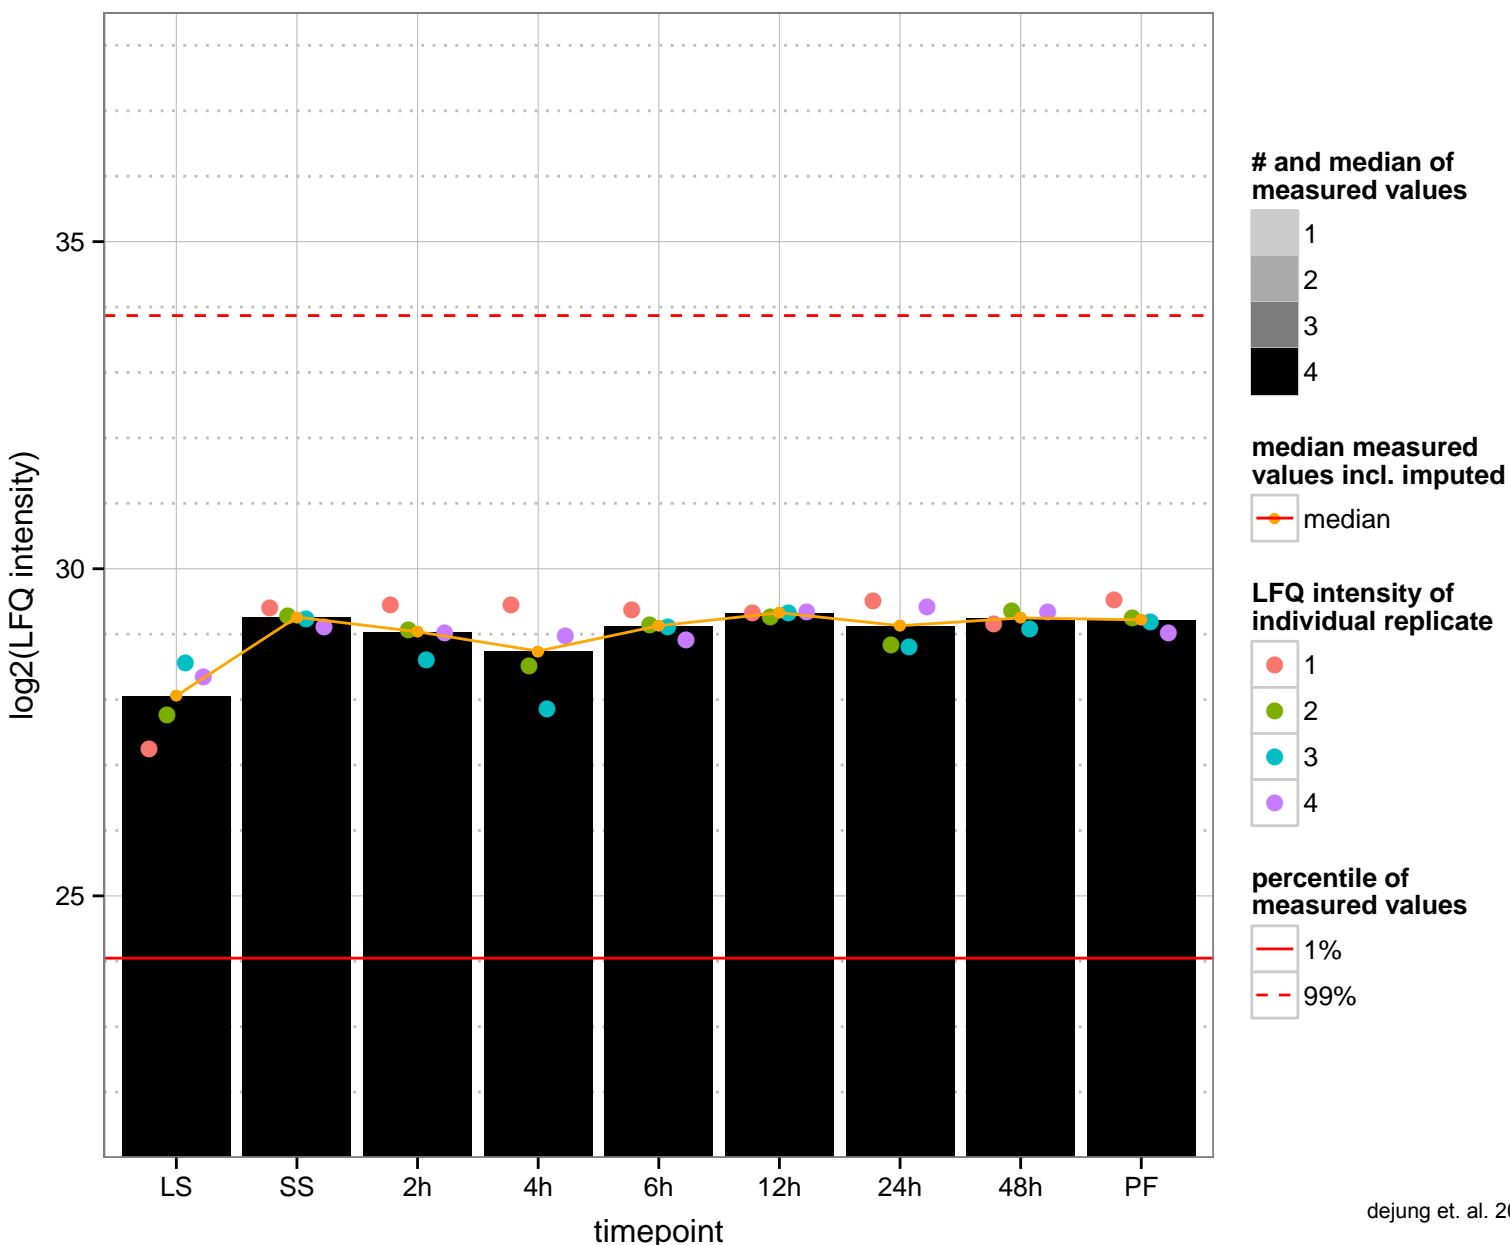

hypothetical protein, conserved  
 Tb927.10.1560  
 AGOF: null  
 AGOC: mitochondrion  
 AGOP: null  
 PGO: null  
 PGO: null  
 PGO: null

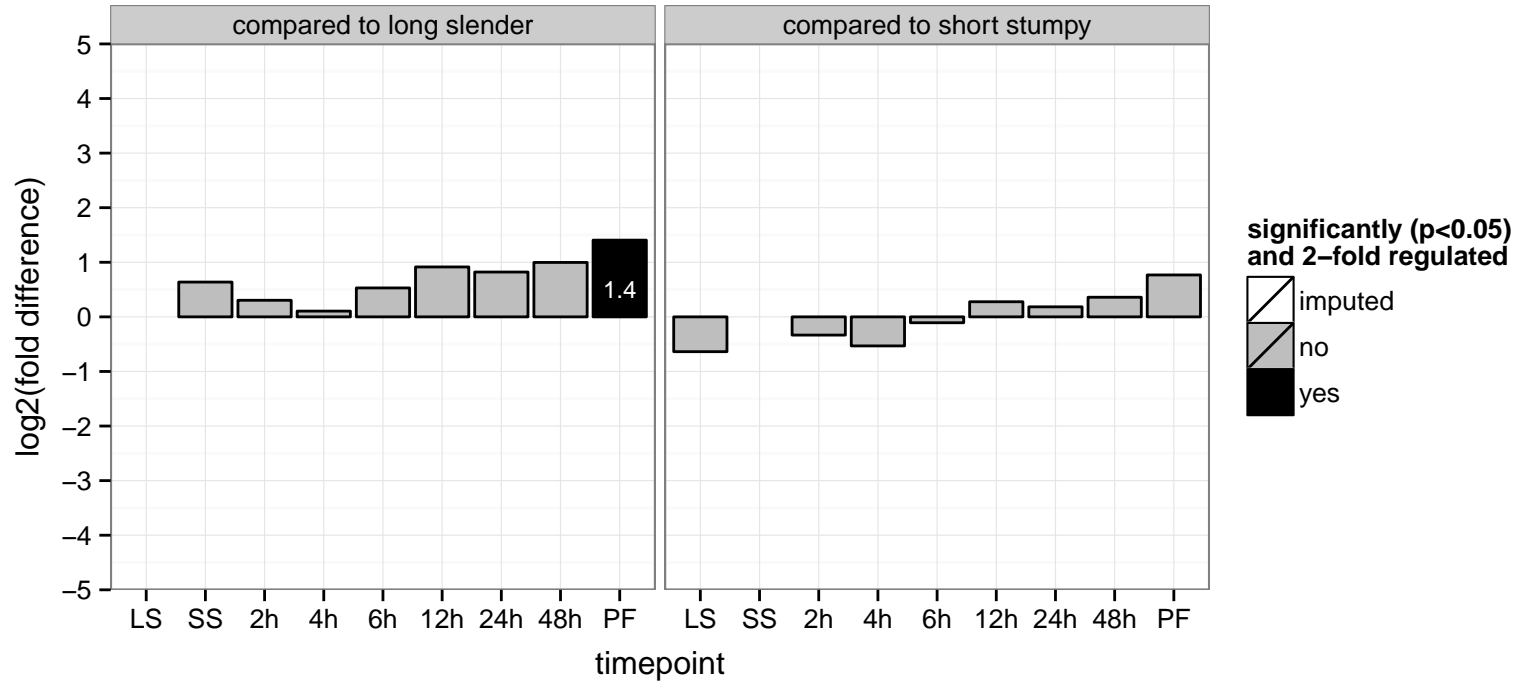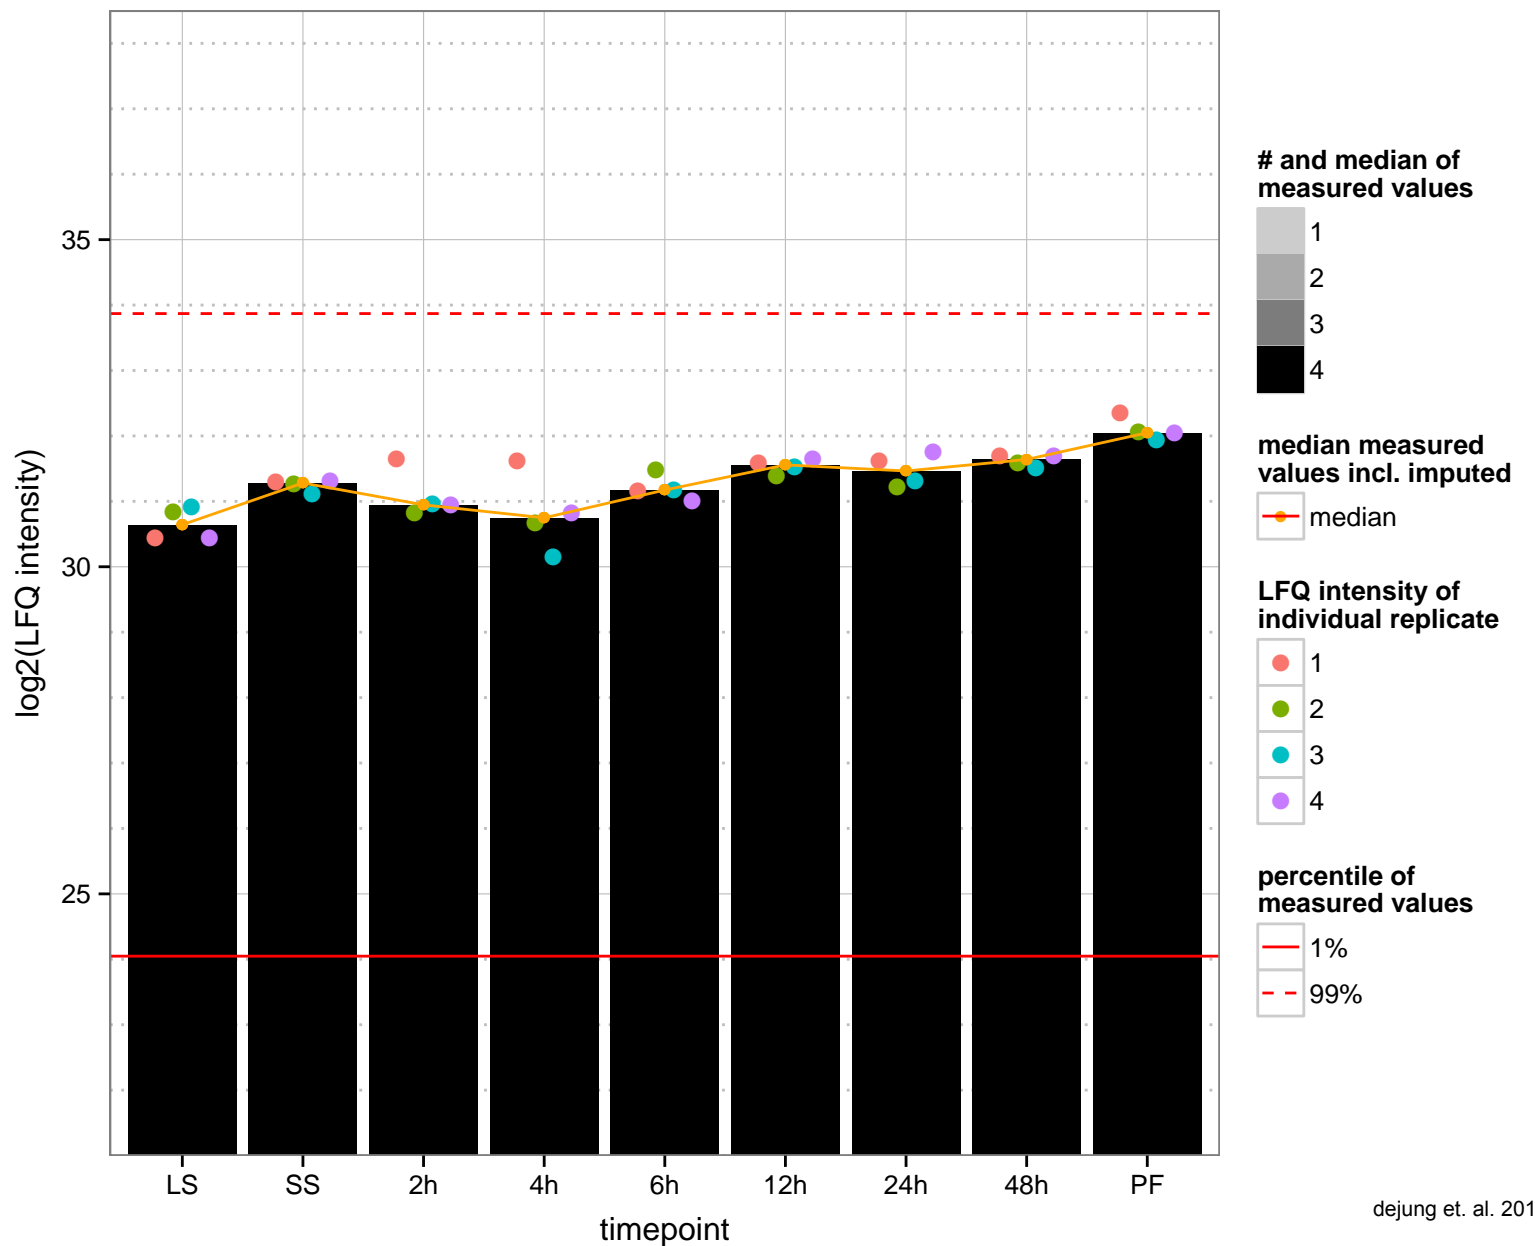

hypothetical protein, conserved  
 Tb927.10.15660  
 AGOF: null  
 AGOC: null  
 AGOP: null  
 PGO: null  
 PGOC: null  
 PGOP: null

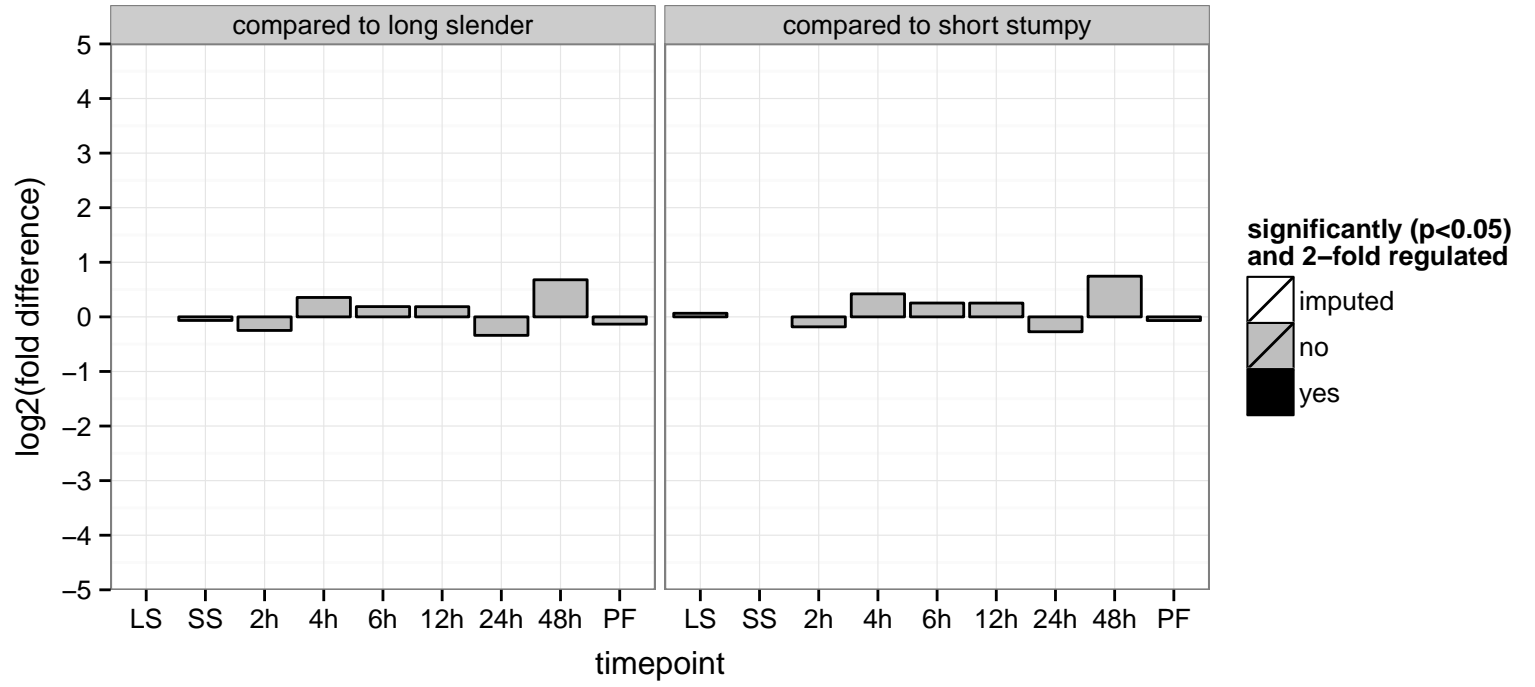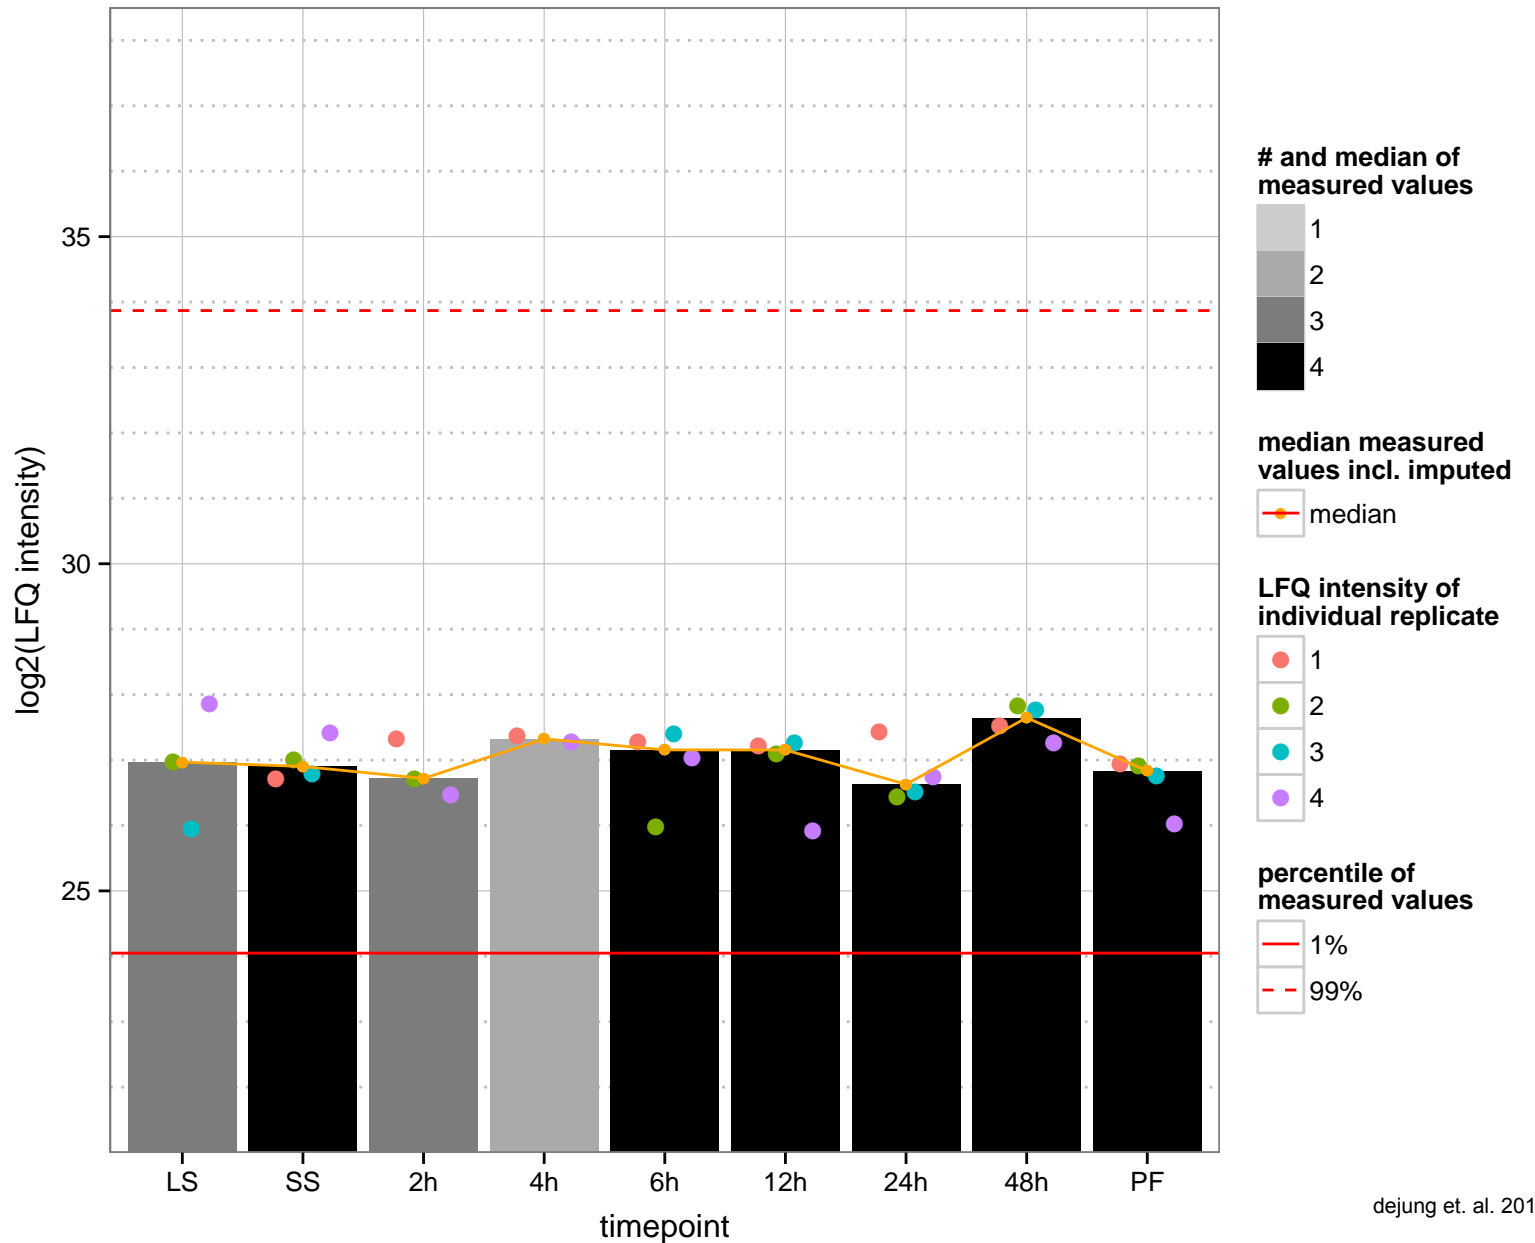



mitochondrial carrier protein (MCP7)  
 Tb927.10.15710  
 AGOF: null  
 AGOC: mitochondrial inner membrane, mitochondrial part  
 AGOP: transport  
 PGO: null  
 PGOC: null  
 PGOP: null

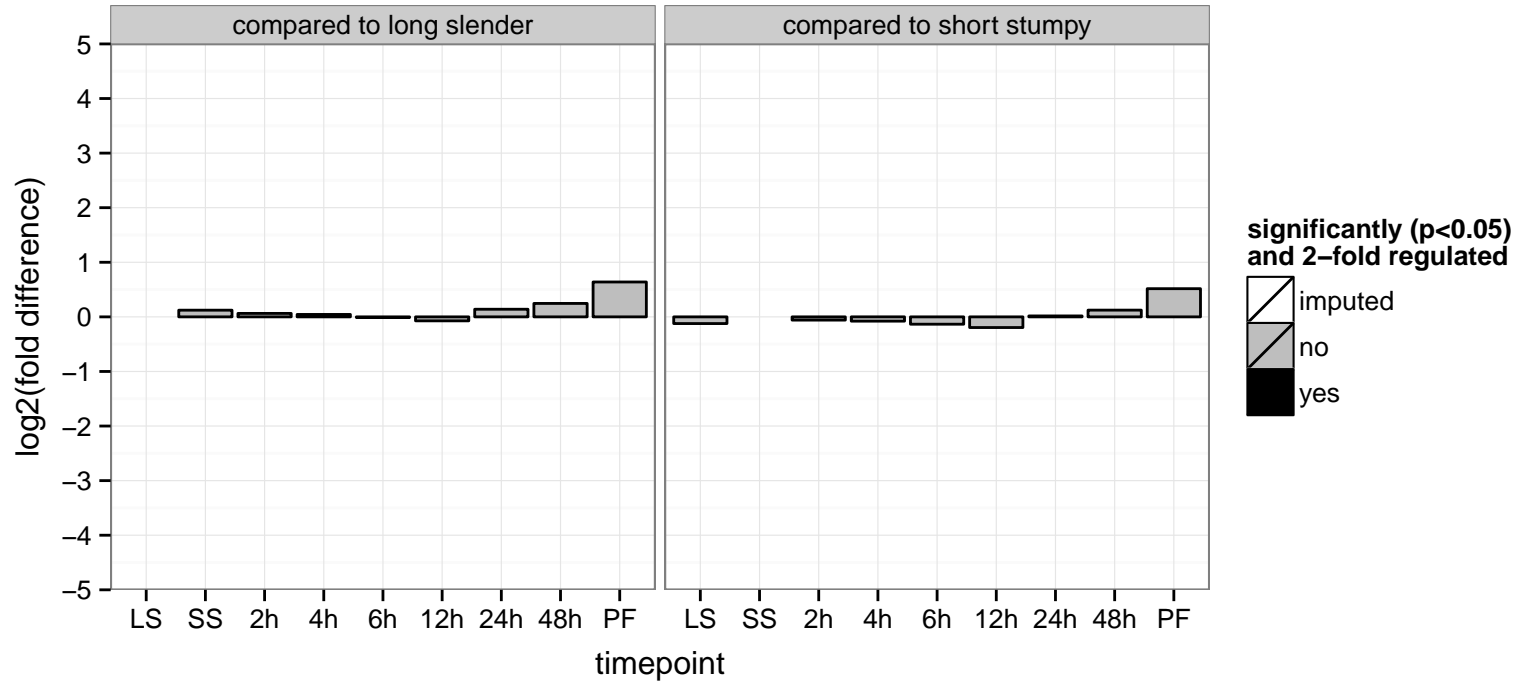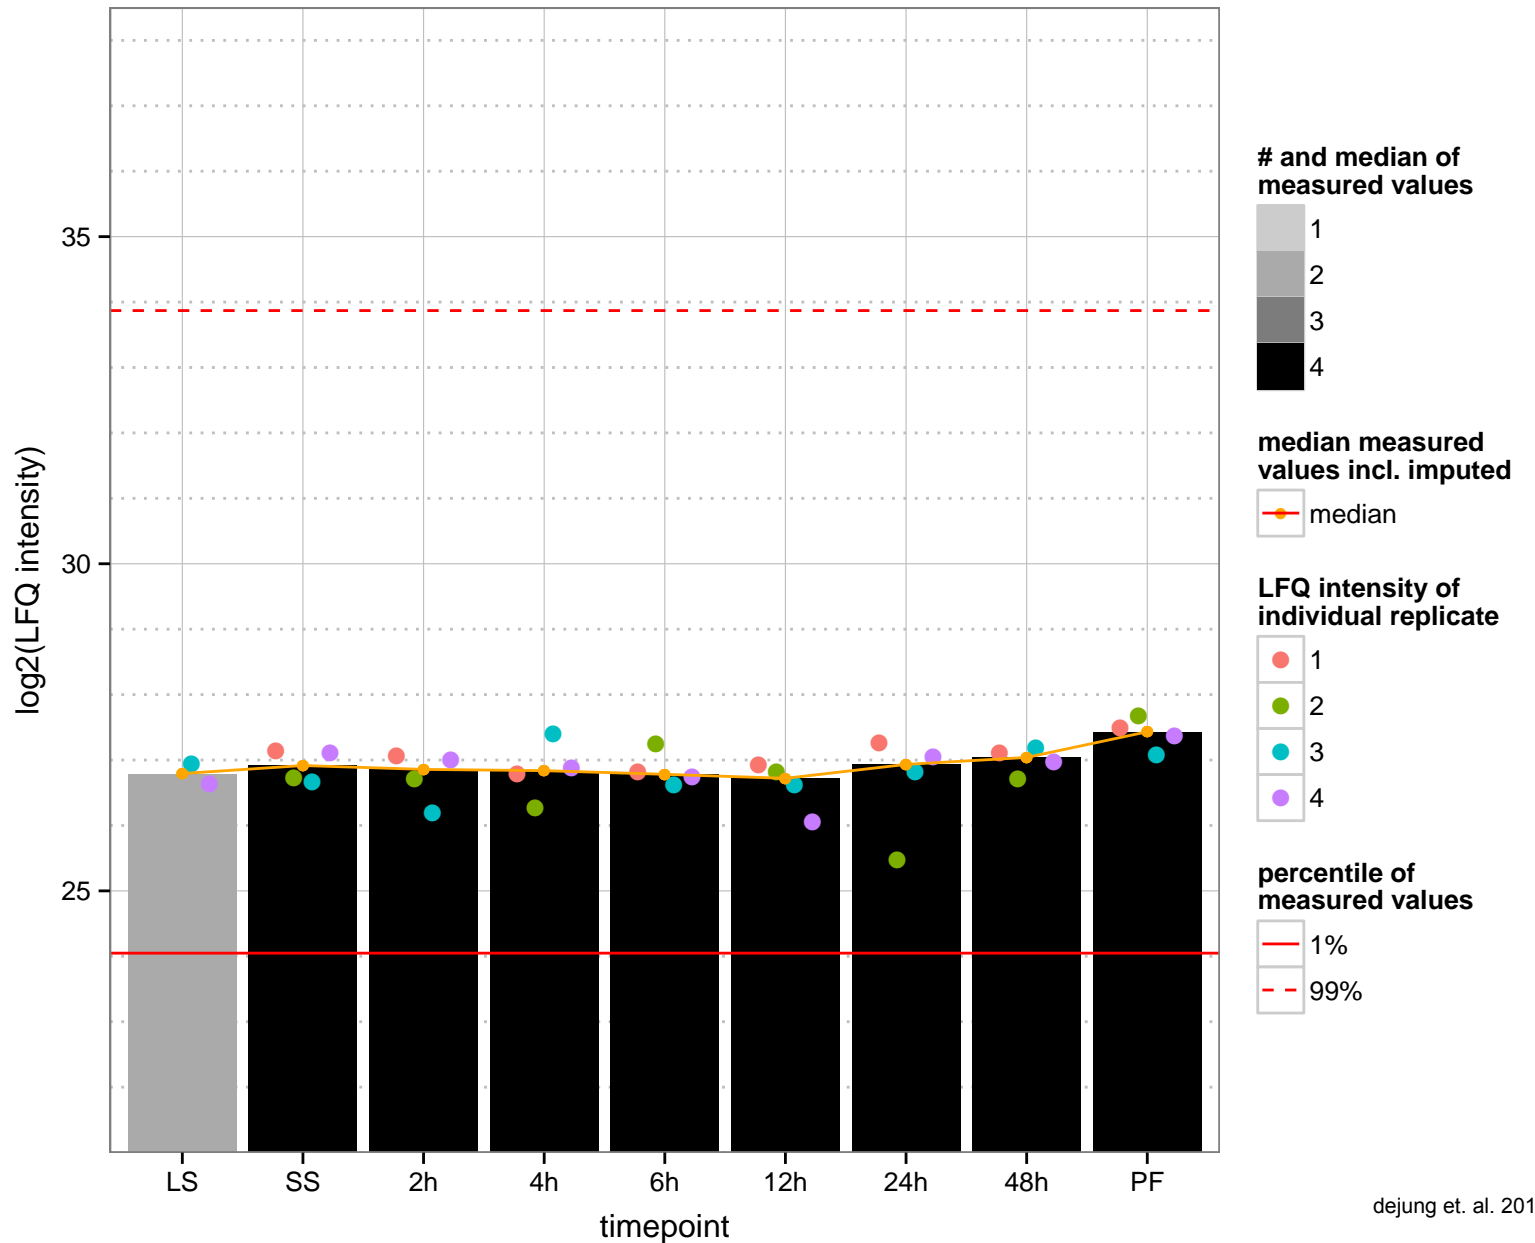

proteasome regulatory non-ATP-ase subunit 9, 19S proteasome regulatory subunit 9 (RPN9)  
 Tb927.10.15720  
 AGOF: endopeptidase activity  
 AGOC: proteasome regulatory particle  
 AGOP: ubiquitin-dependent protein catabolic process  
 PGO: protein binding  
 PGOC: null  
 PGOP: null

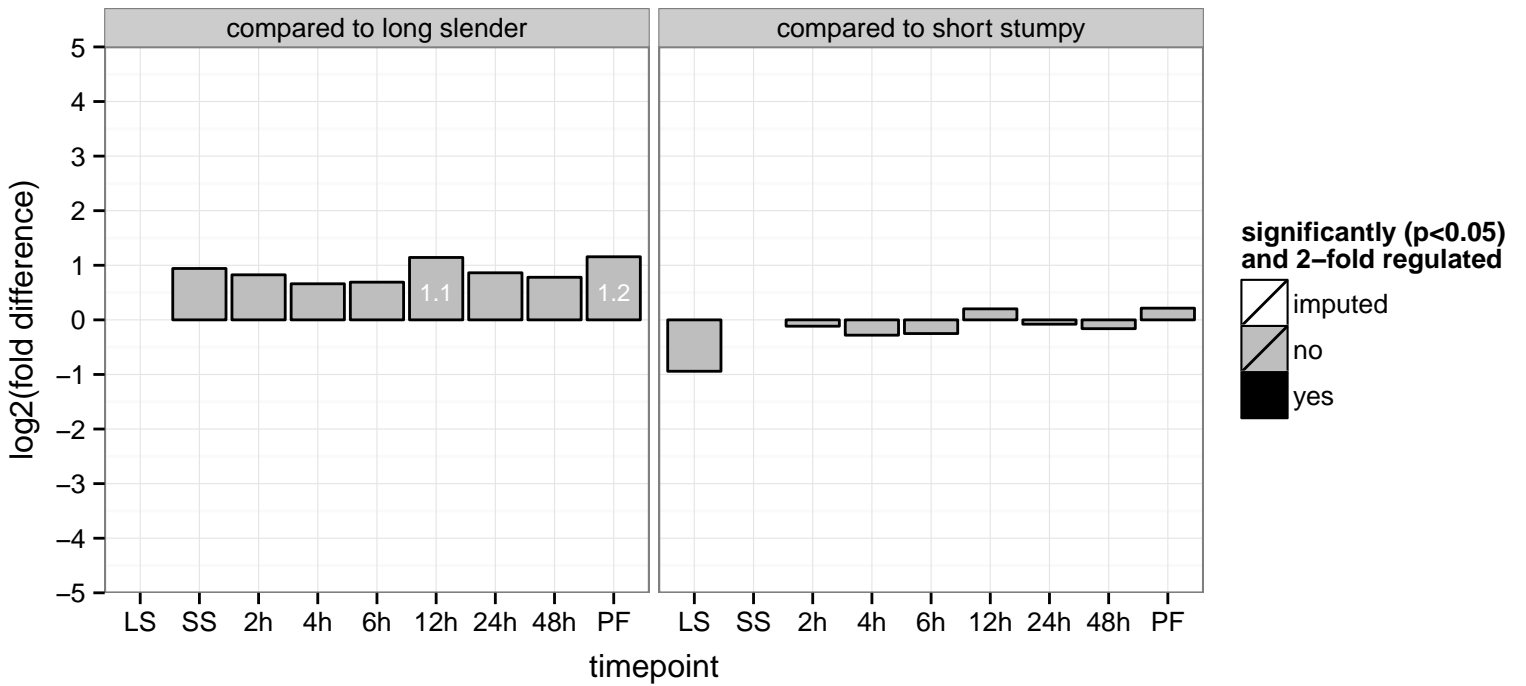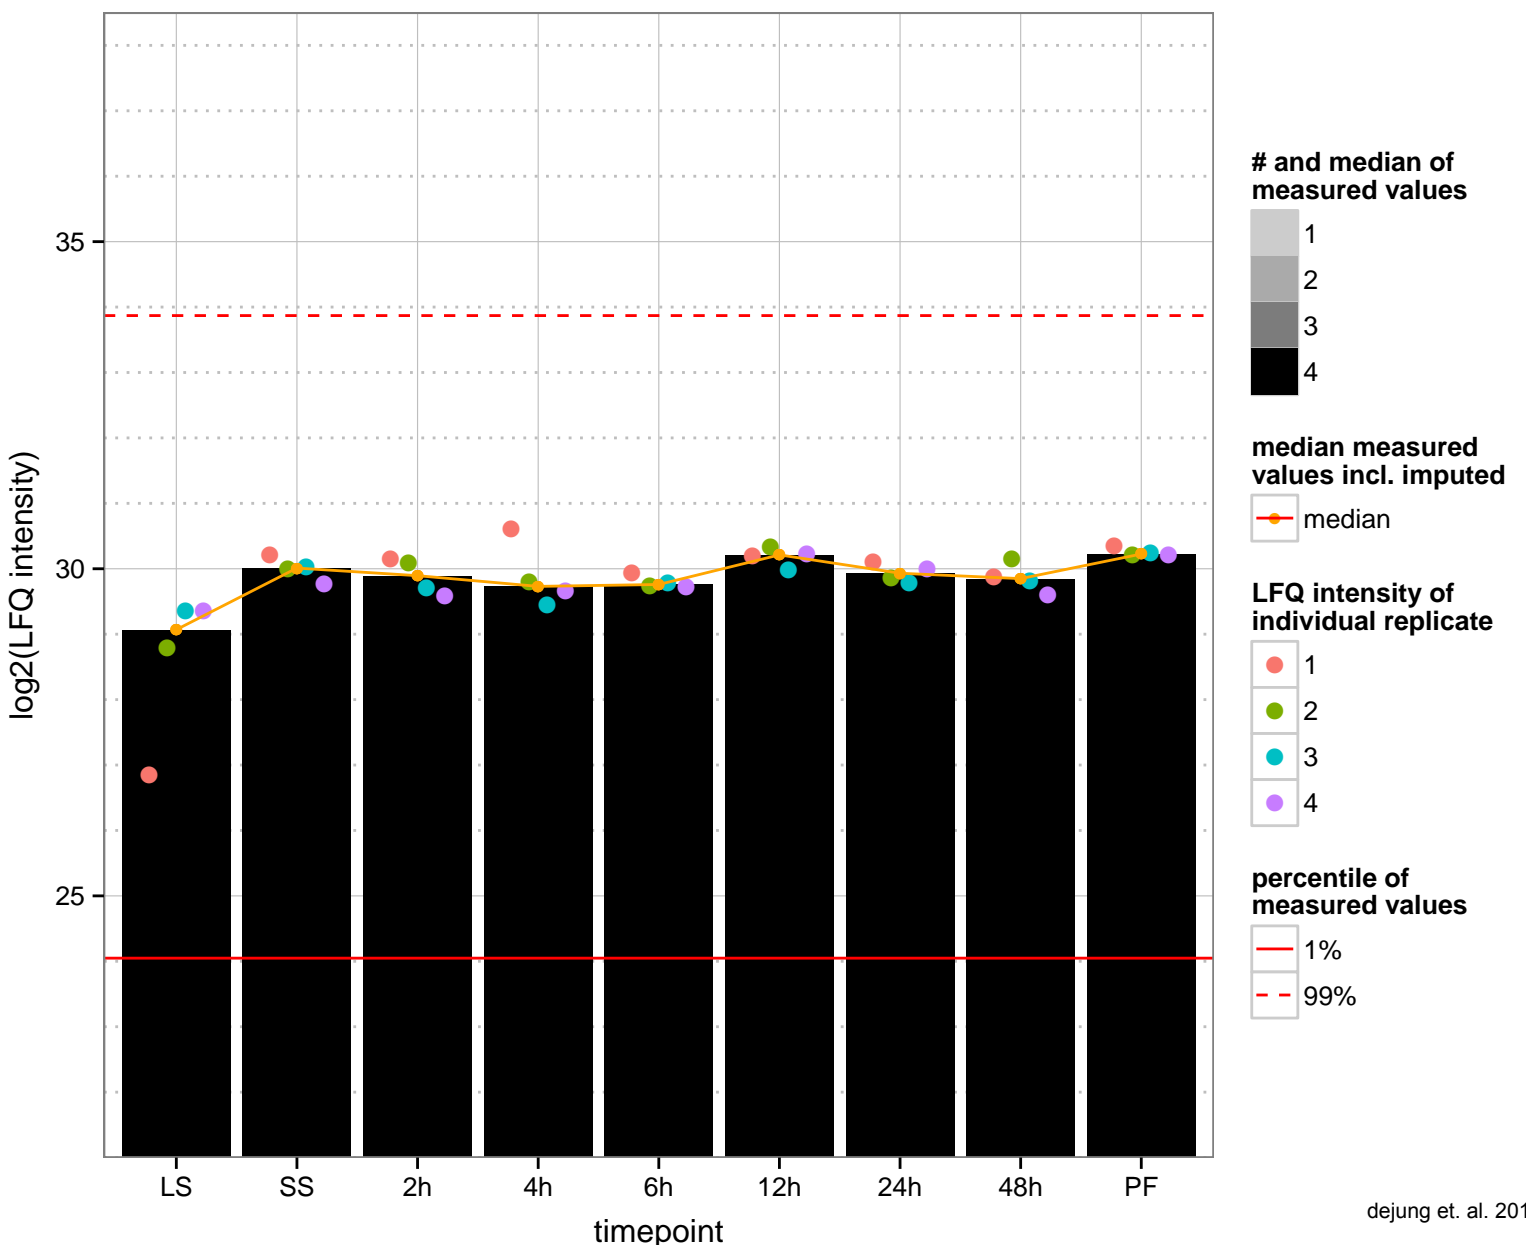

hypothetical protein, conserved  
 Tb927.10.15740  
 AGOF: null  
 AGOC: null  
 AGOP: null  
 PGO: protein binding  
 PGO: null  
 PGO: null

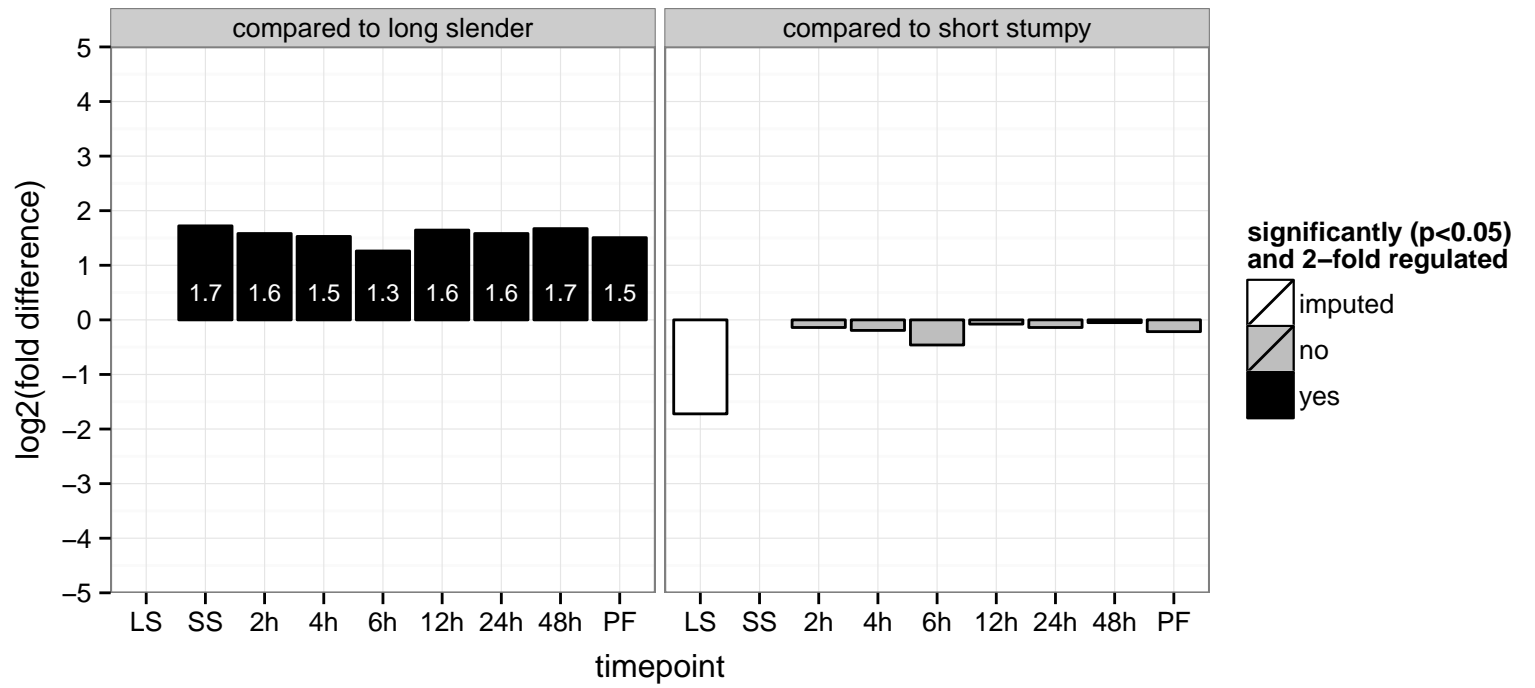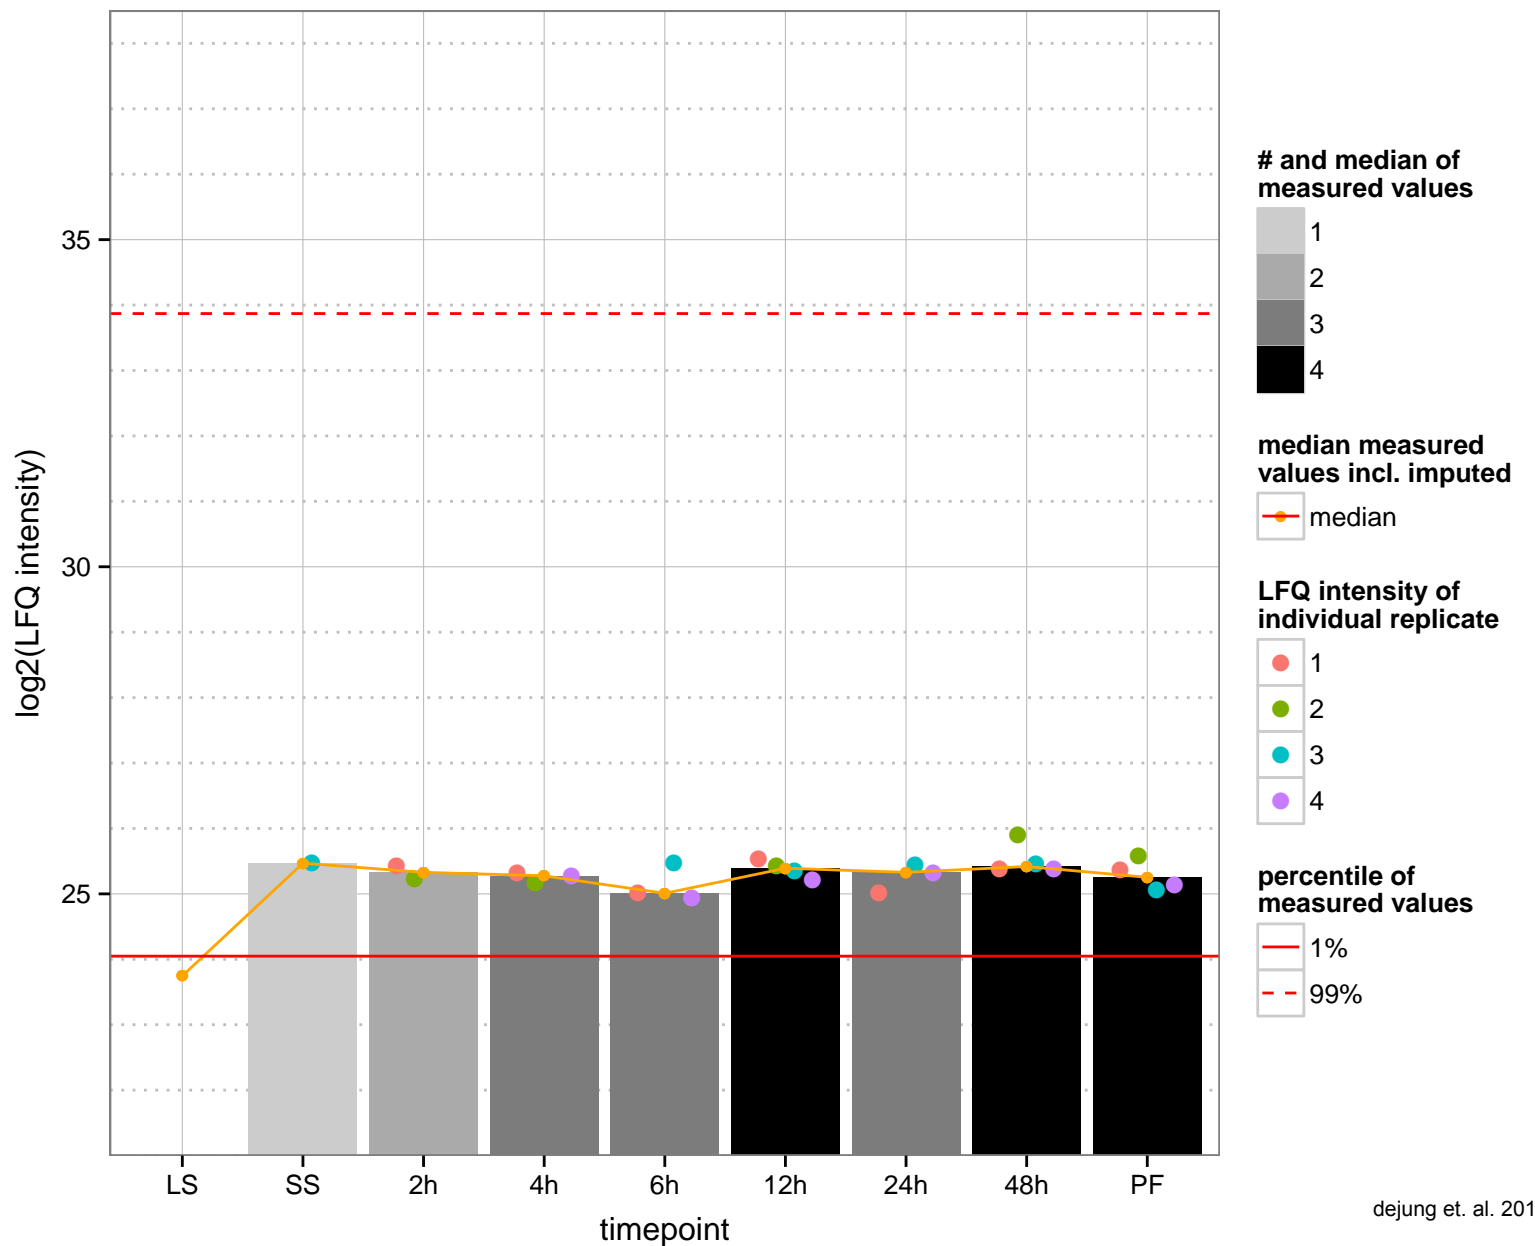

hypothetical protein, conserved  
 Tb927.10.15760  
 AGOF: null  
 AGOC: null  
 AGOP: null  
 PGO: null  
 PGOC: null  
 PGOP: null

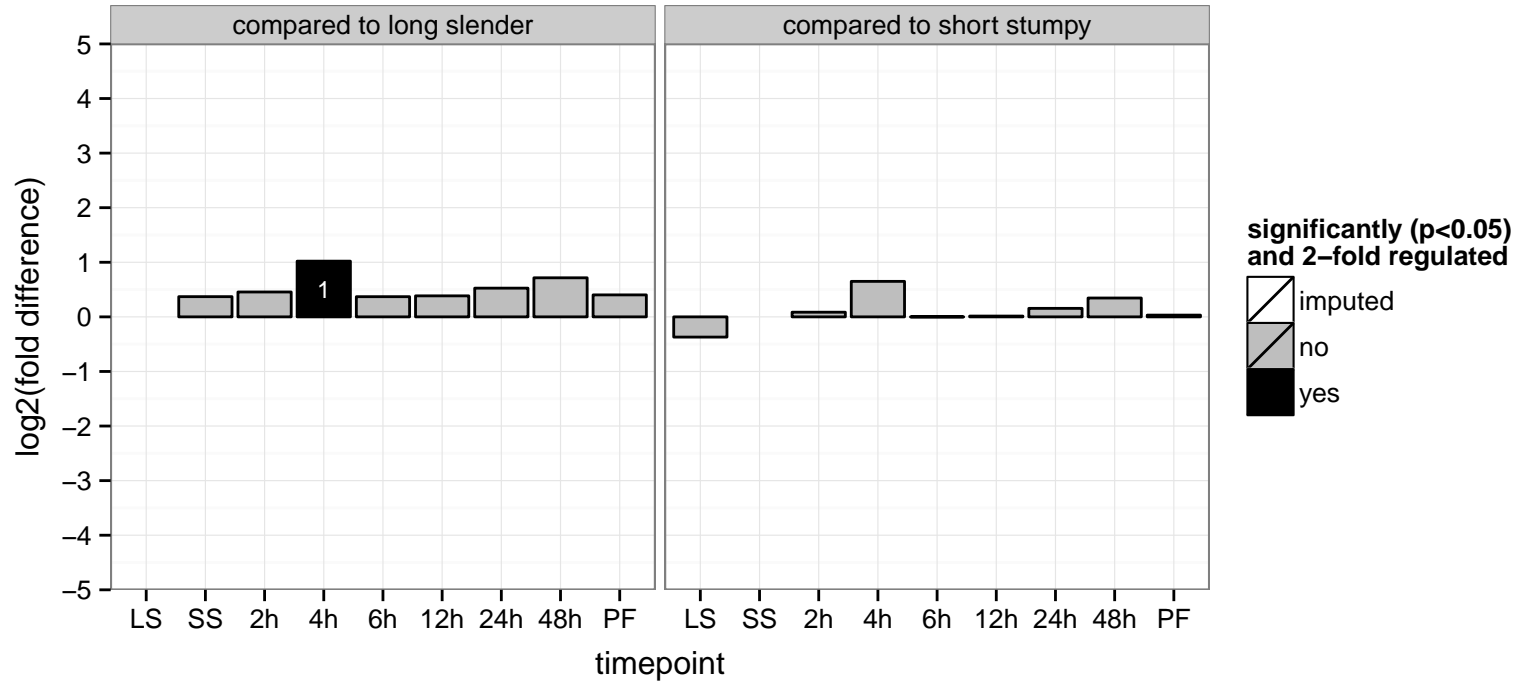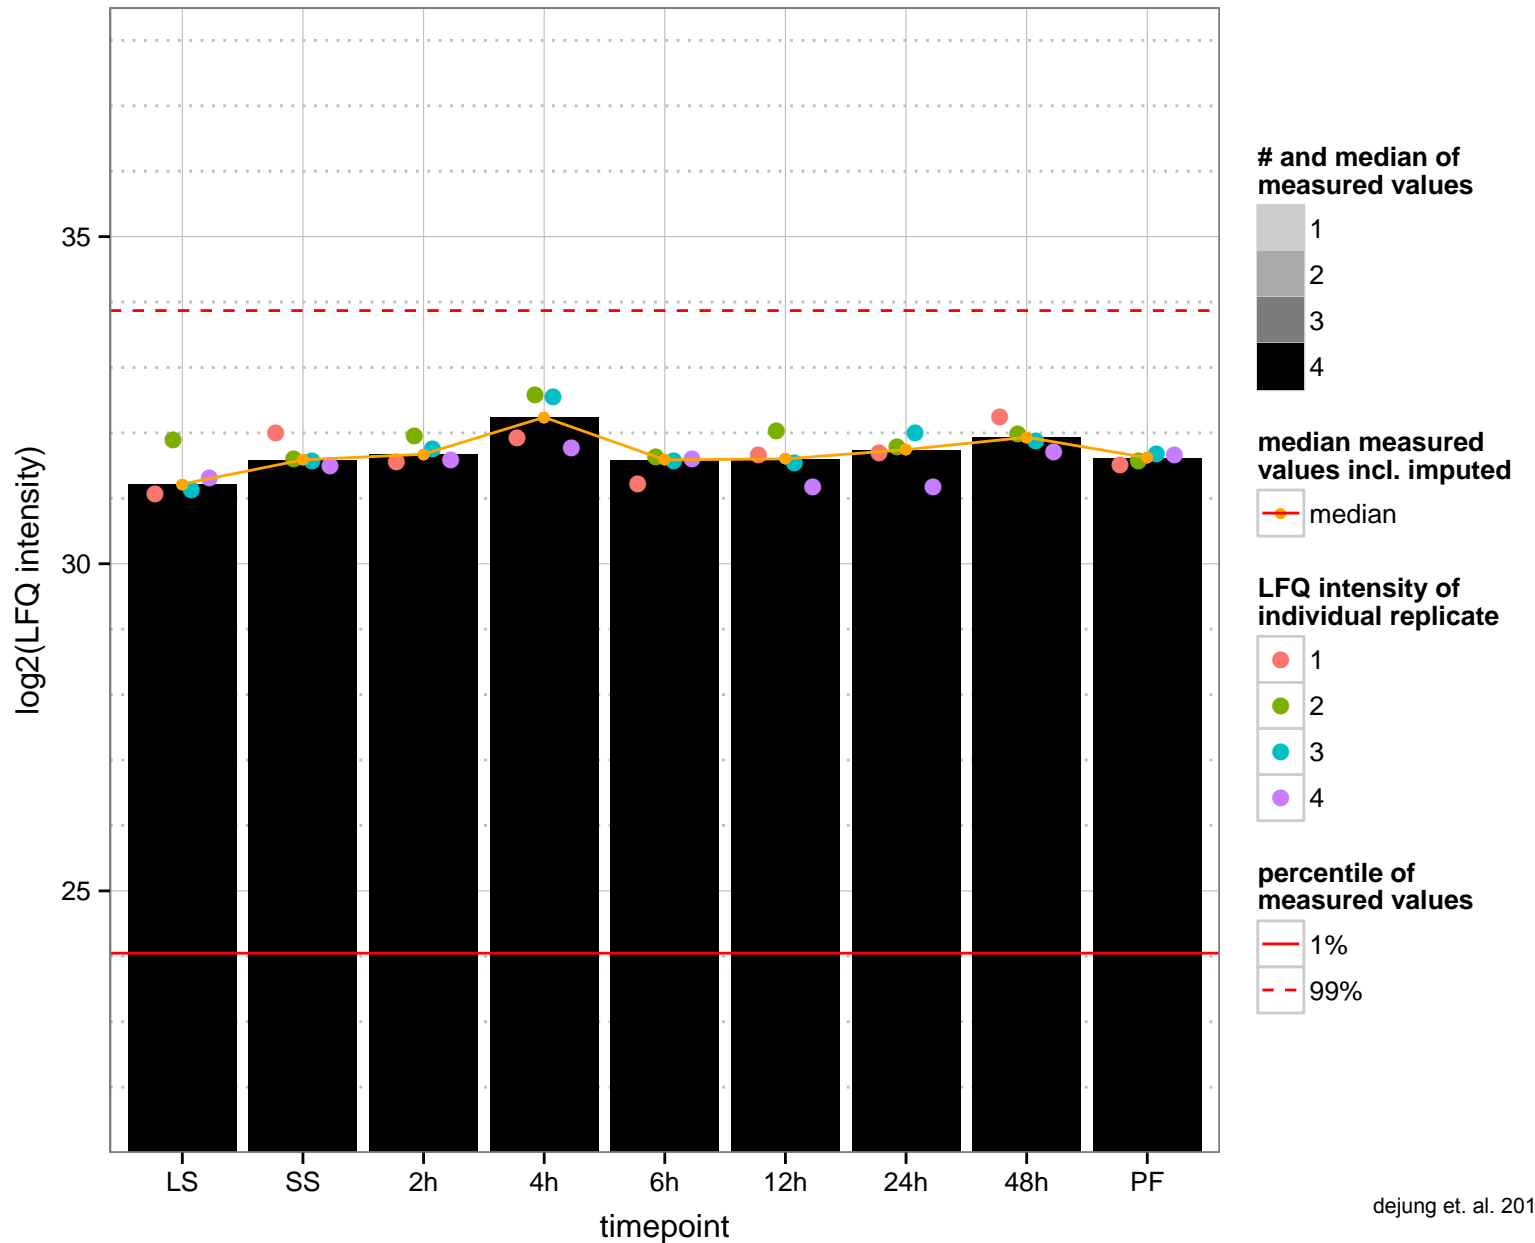

hypothetical protein, conserved  
 Tb927.10.1580  
 AGOF: null  
 AGOC: null  
 AGOP: null  
 PGO: null  
 PGOC: null  
 PGOP: null

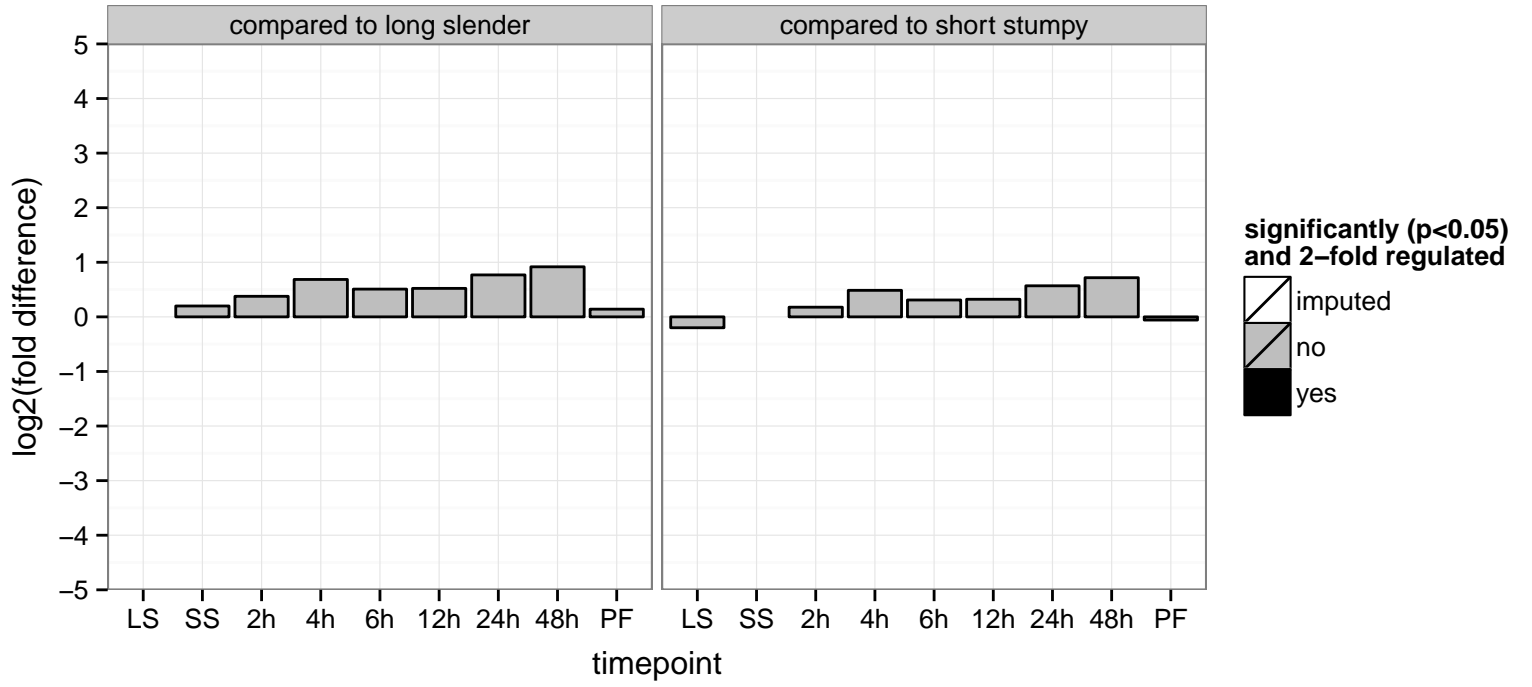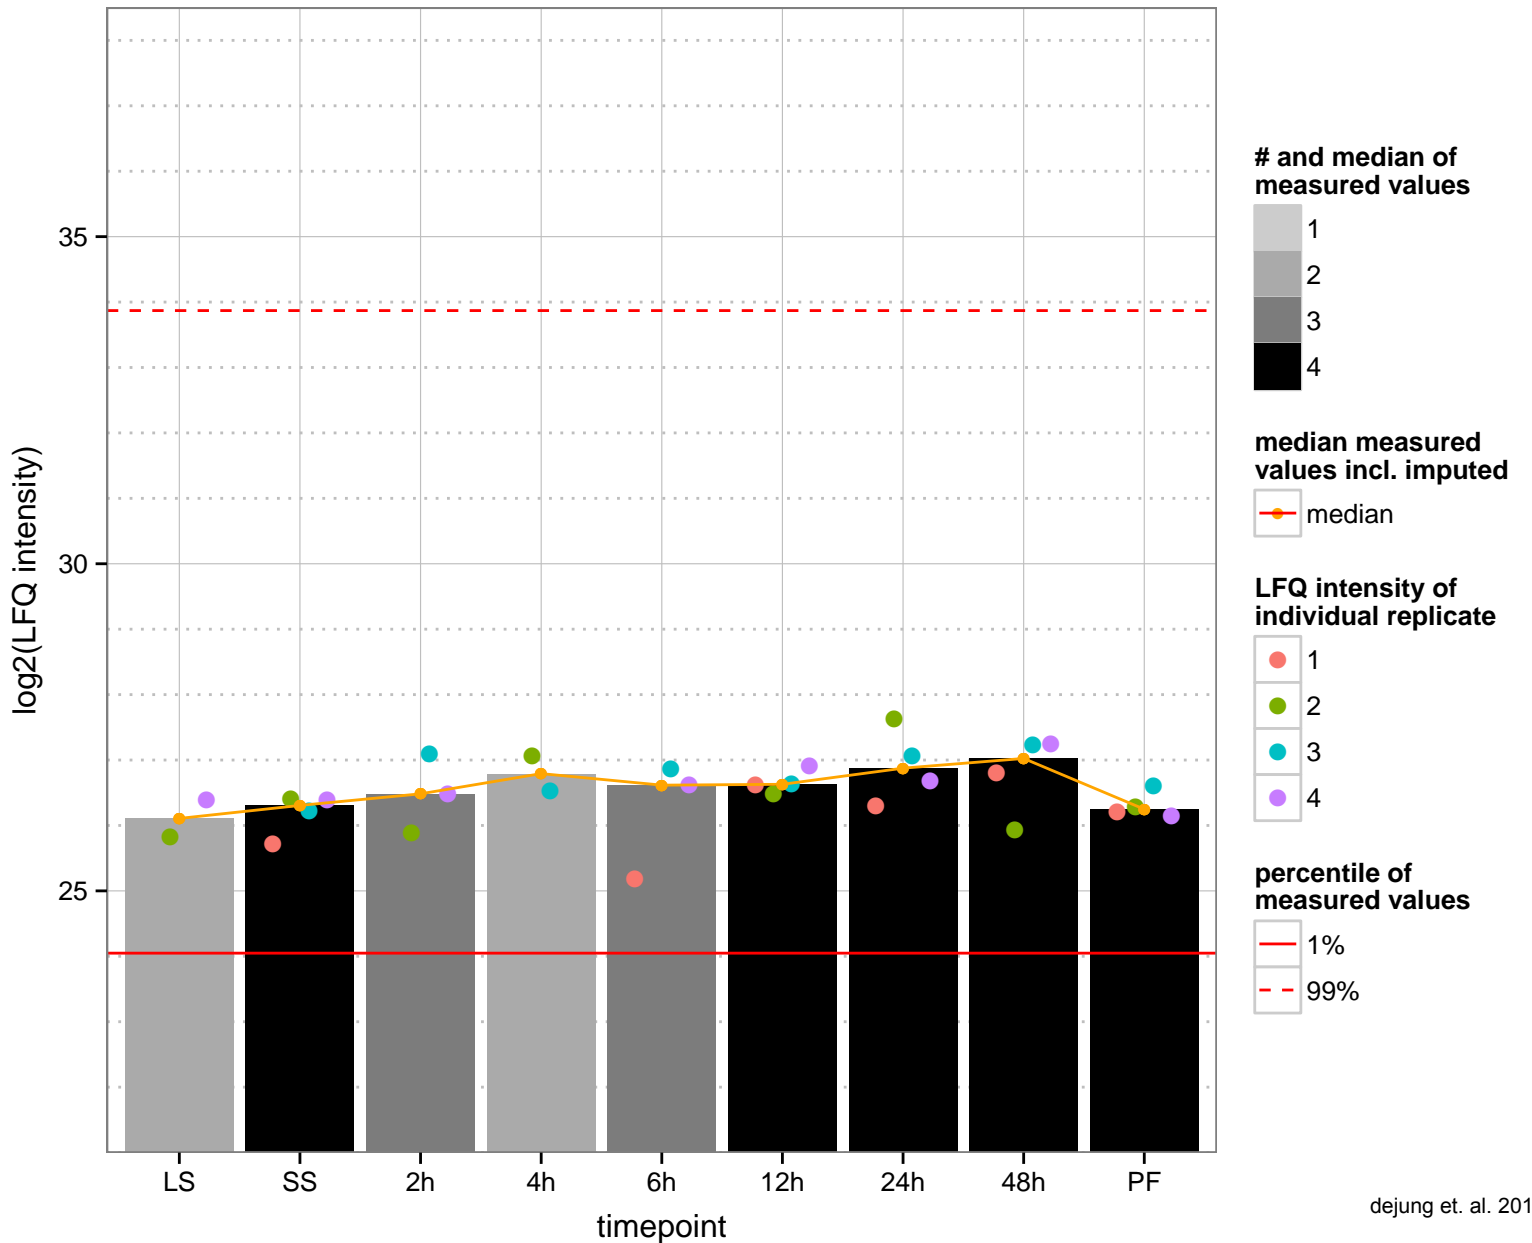

RNA binding protein, putative  
 Tb927.10.15870  
 AGOF: RNA binding  
 AGOC: null  
 AGOP: RNA processing  
 PGO: RNA binding  
 PGOC: null  
 PGOP: RNA processing

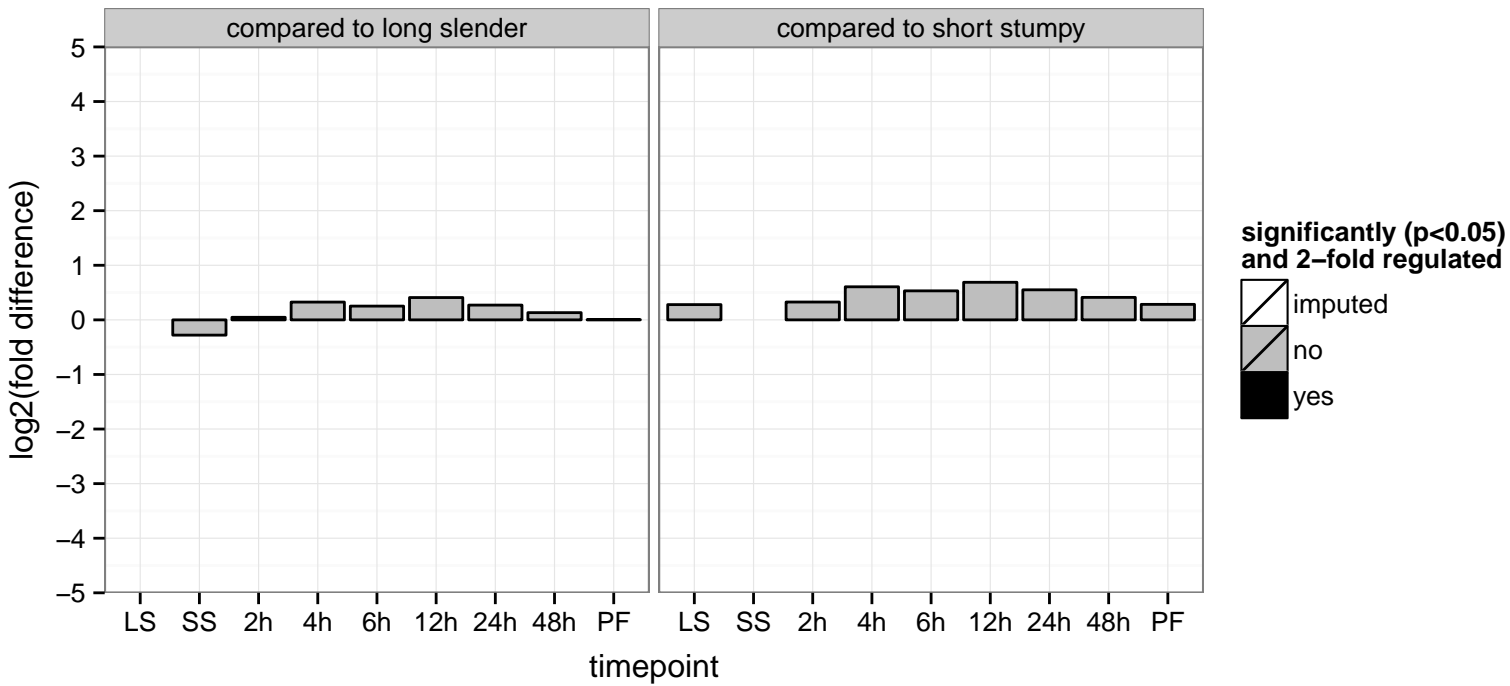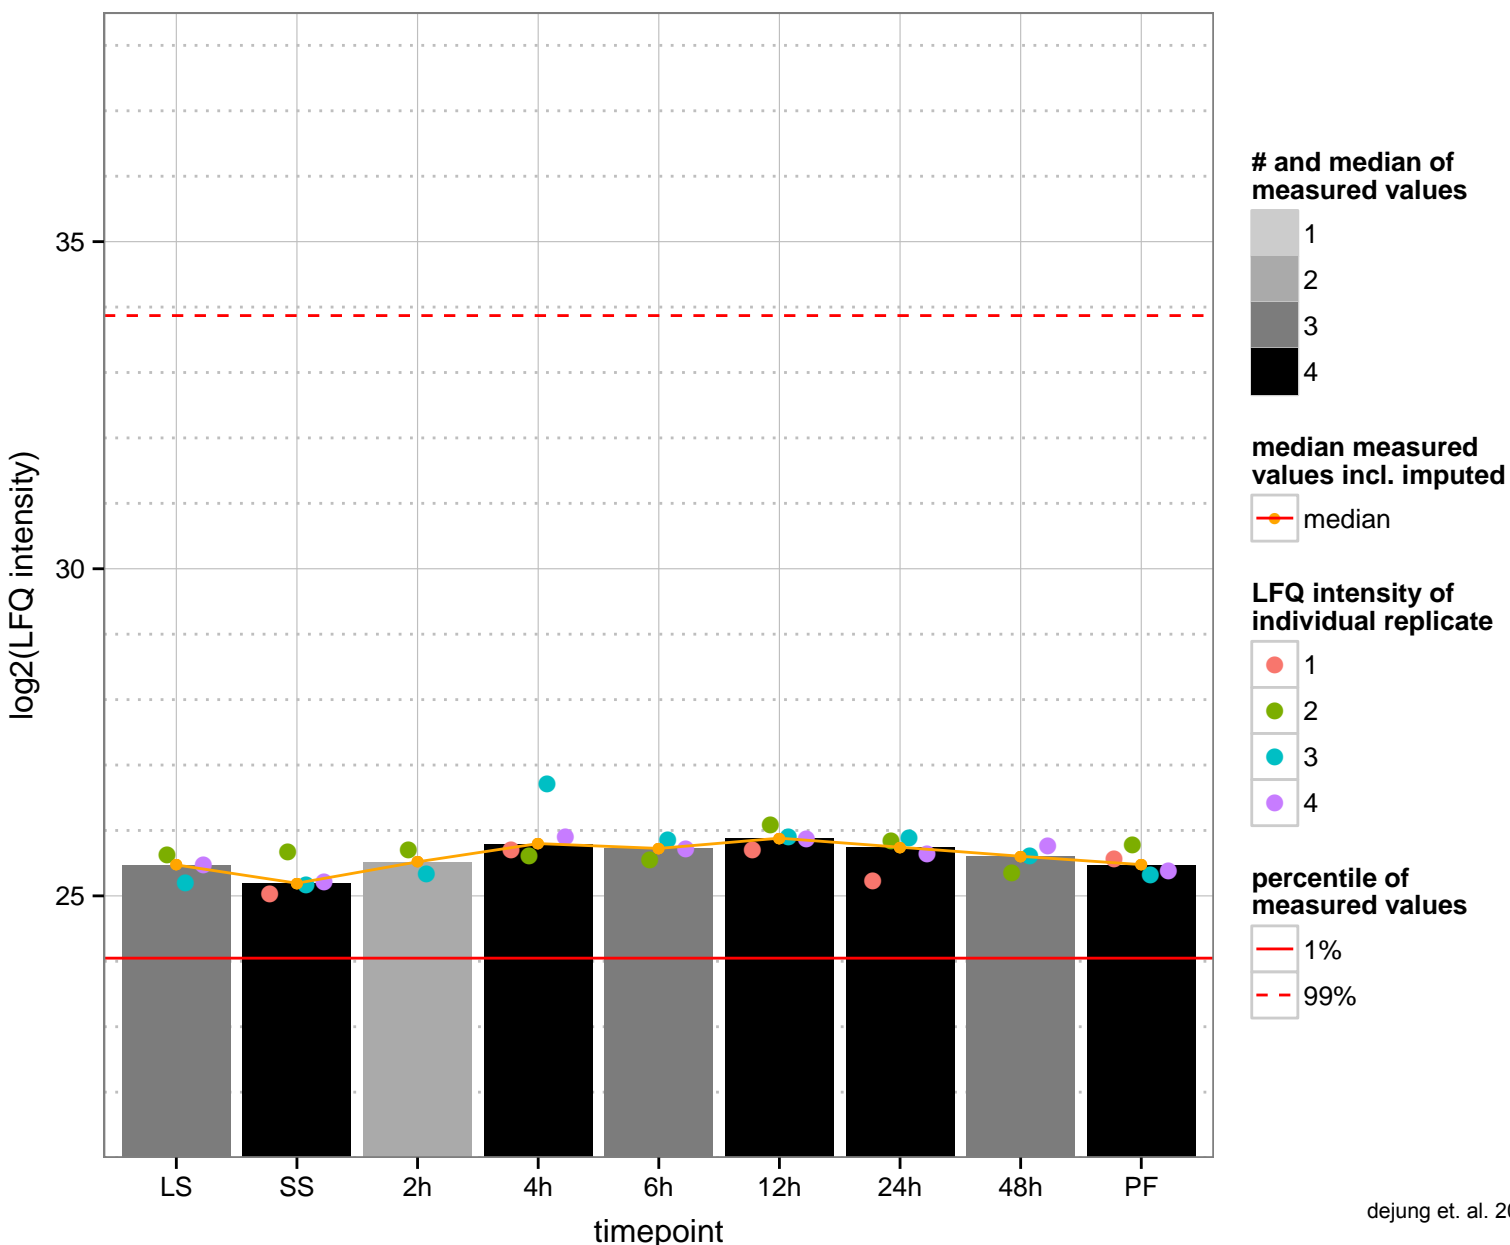

ribosomal protein L36, putative  
 Tb927.9.15210;Tb927.10.1590  
 AGOF: structural constituent of ribosome  
 AGOC: intracellular, ribosome  
 AGOP: translation  
 PGOF: structural constituent of ribosome  
 PGO: intracellular, ribosome  
 PGOP: translation

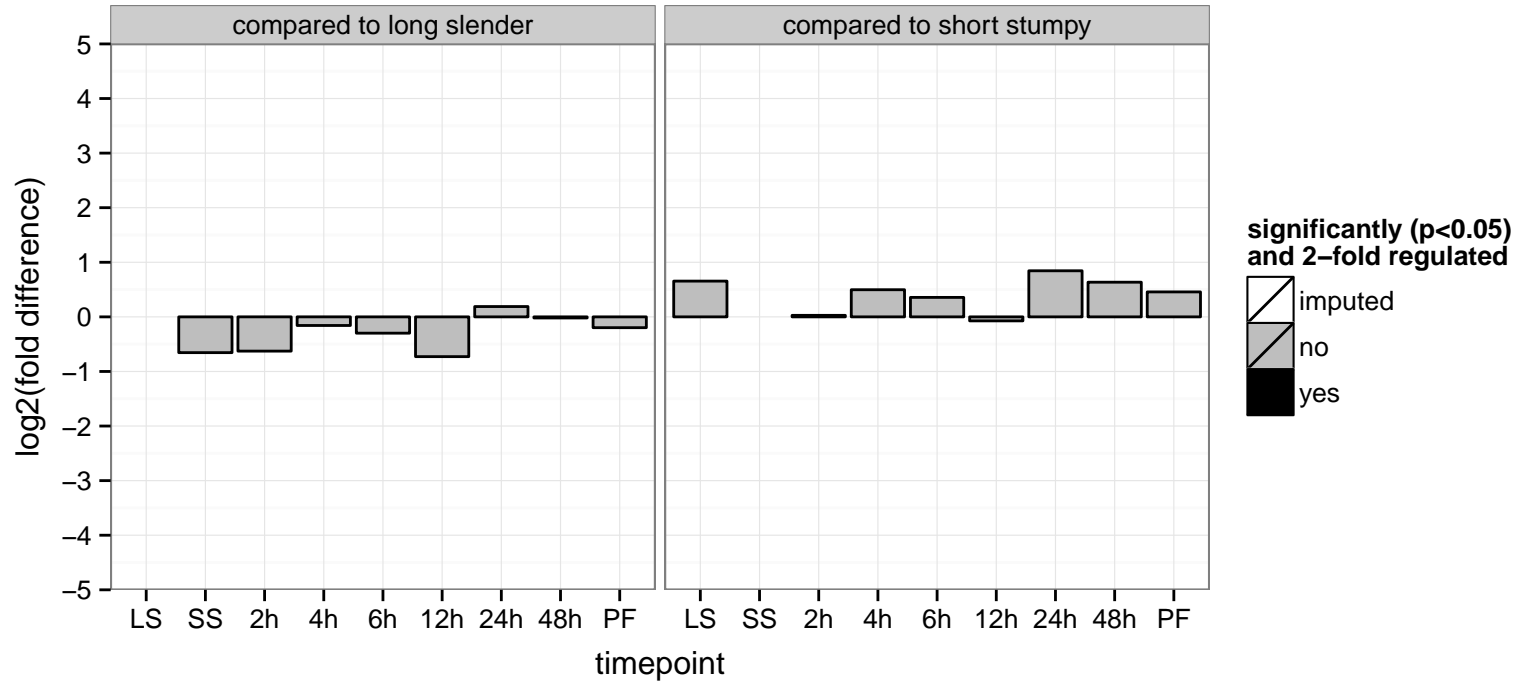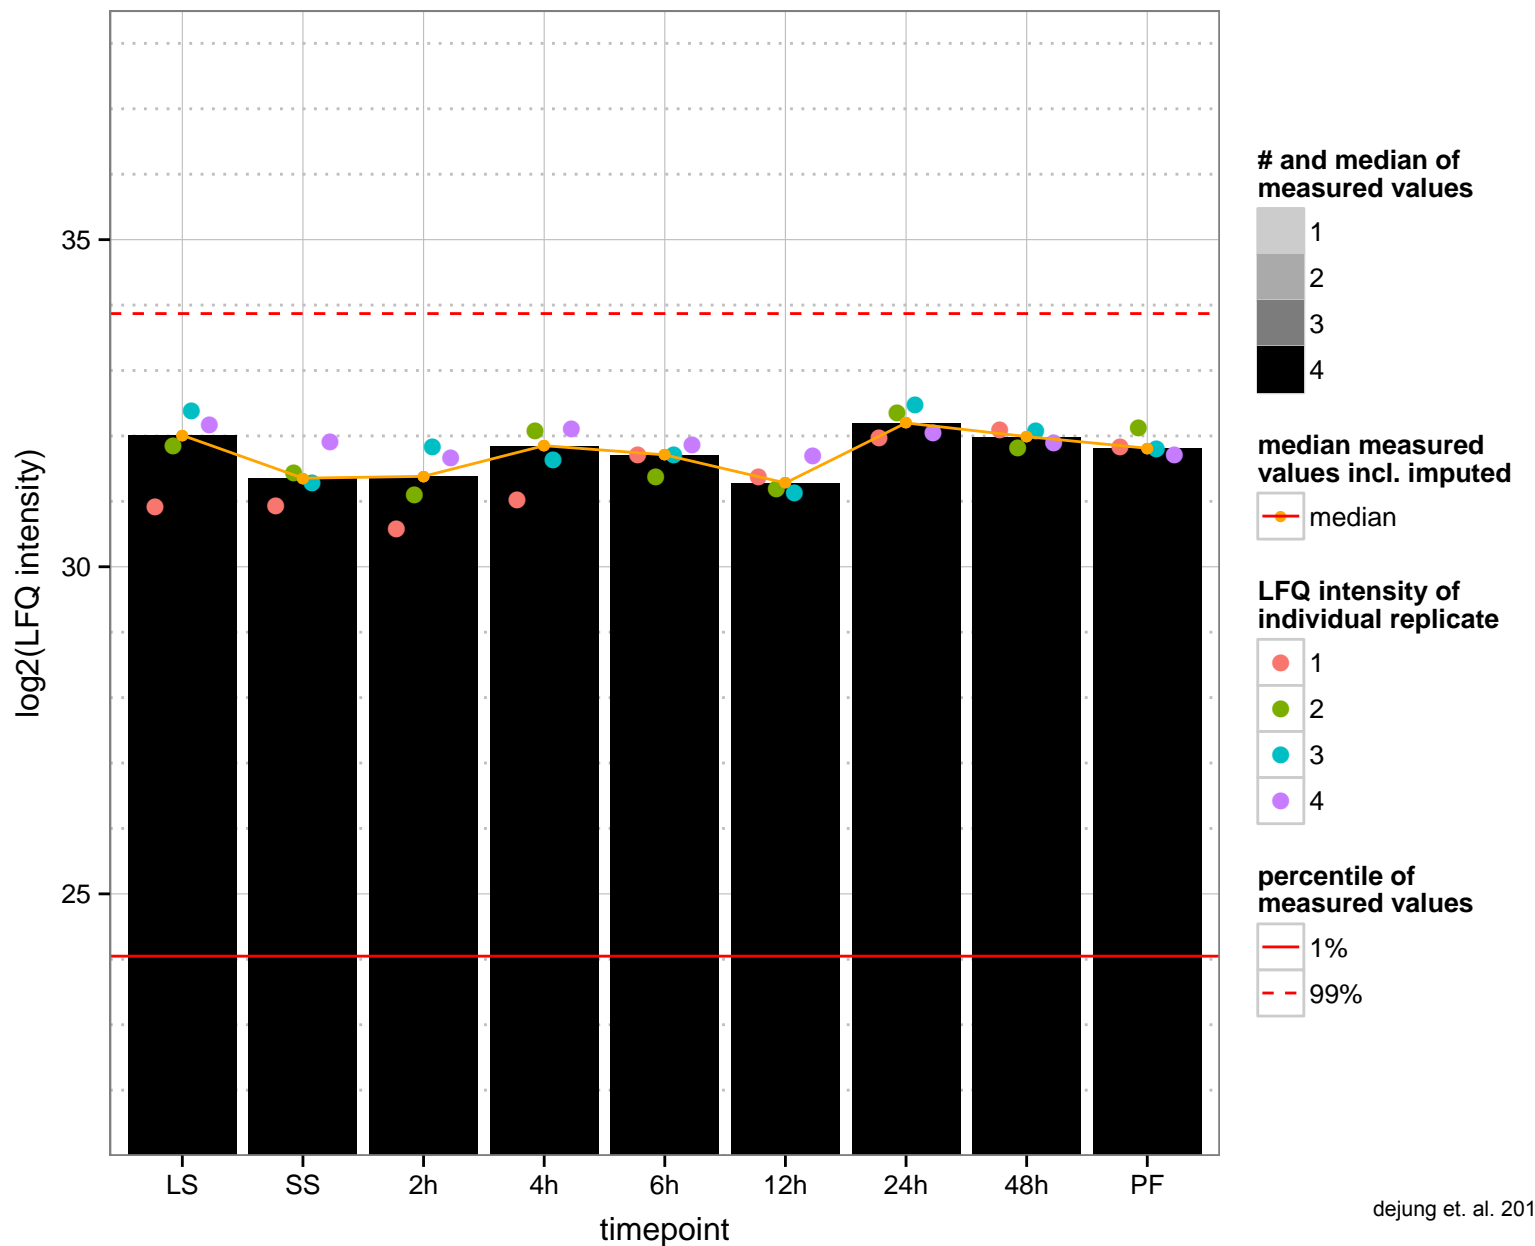

Triglyceride lipase, putative, class 3 lipase  
 Tb927.10.15970;Tb11.v5.0306  
 AGOF: triglyceride lipase activity, zinc ion binding  
 AGOC: null  
 AGOP: lipid metabolic process  
 PGO: triglyceride lipase activity  
 PGOC: null  
 PGOP: lipid metabolic process

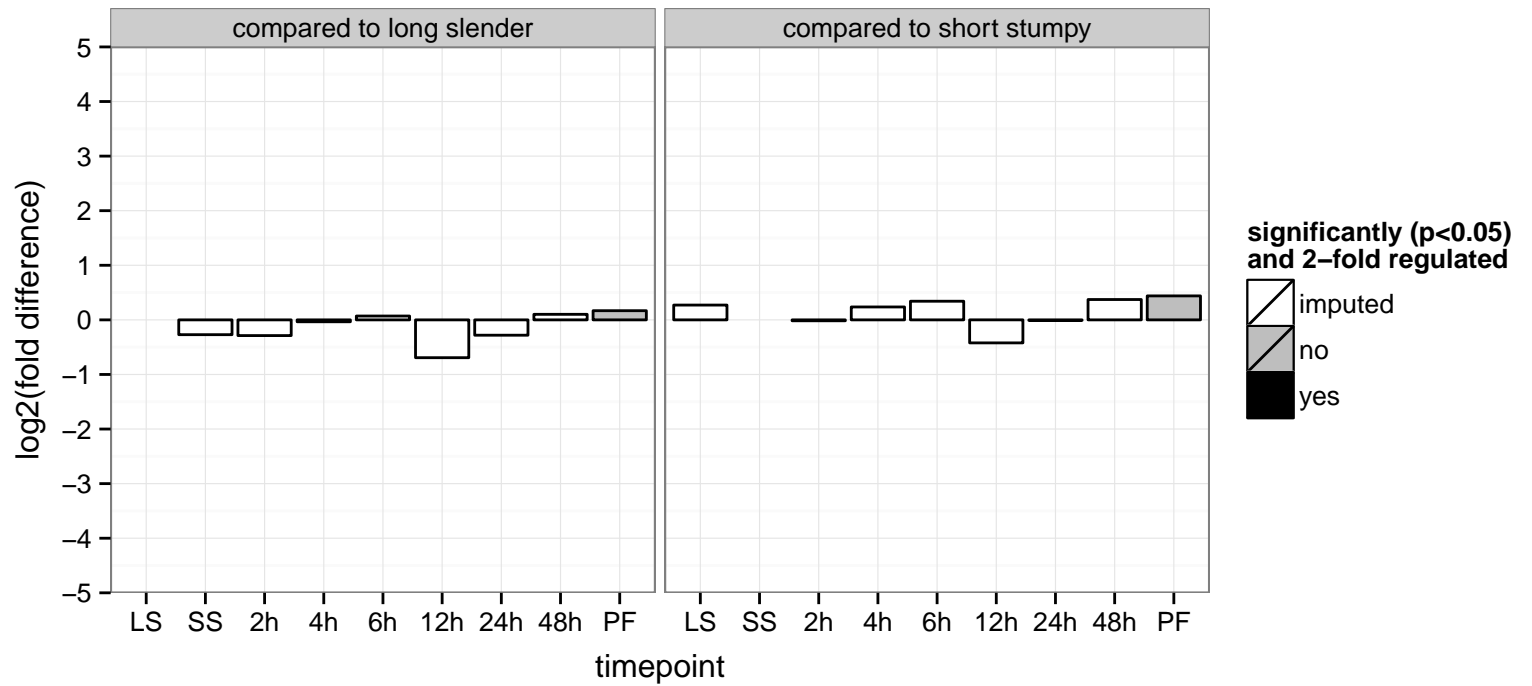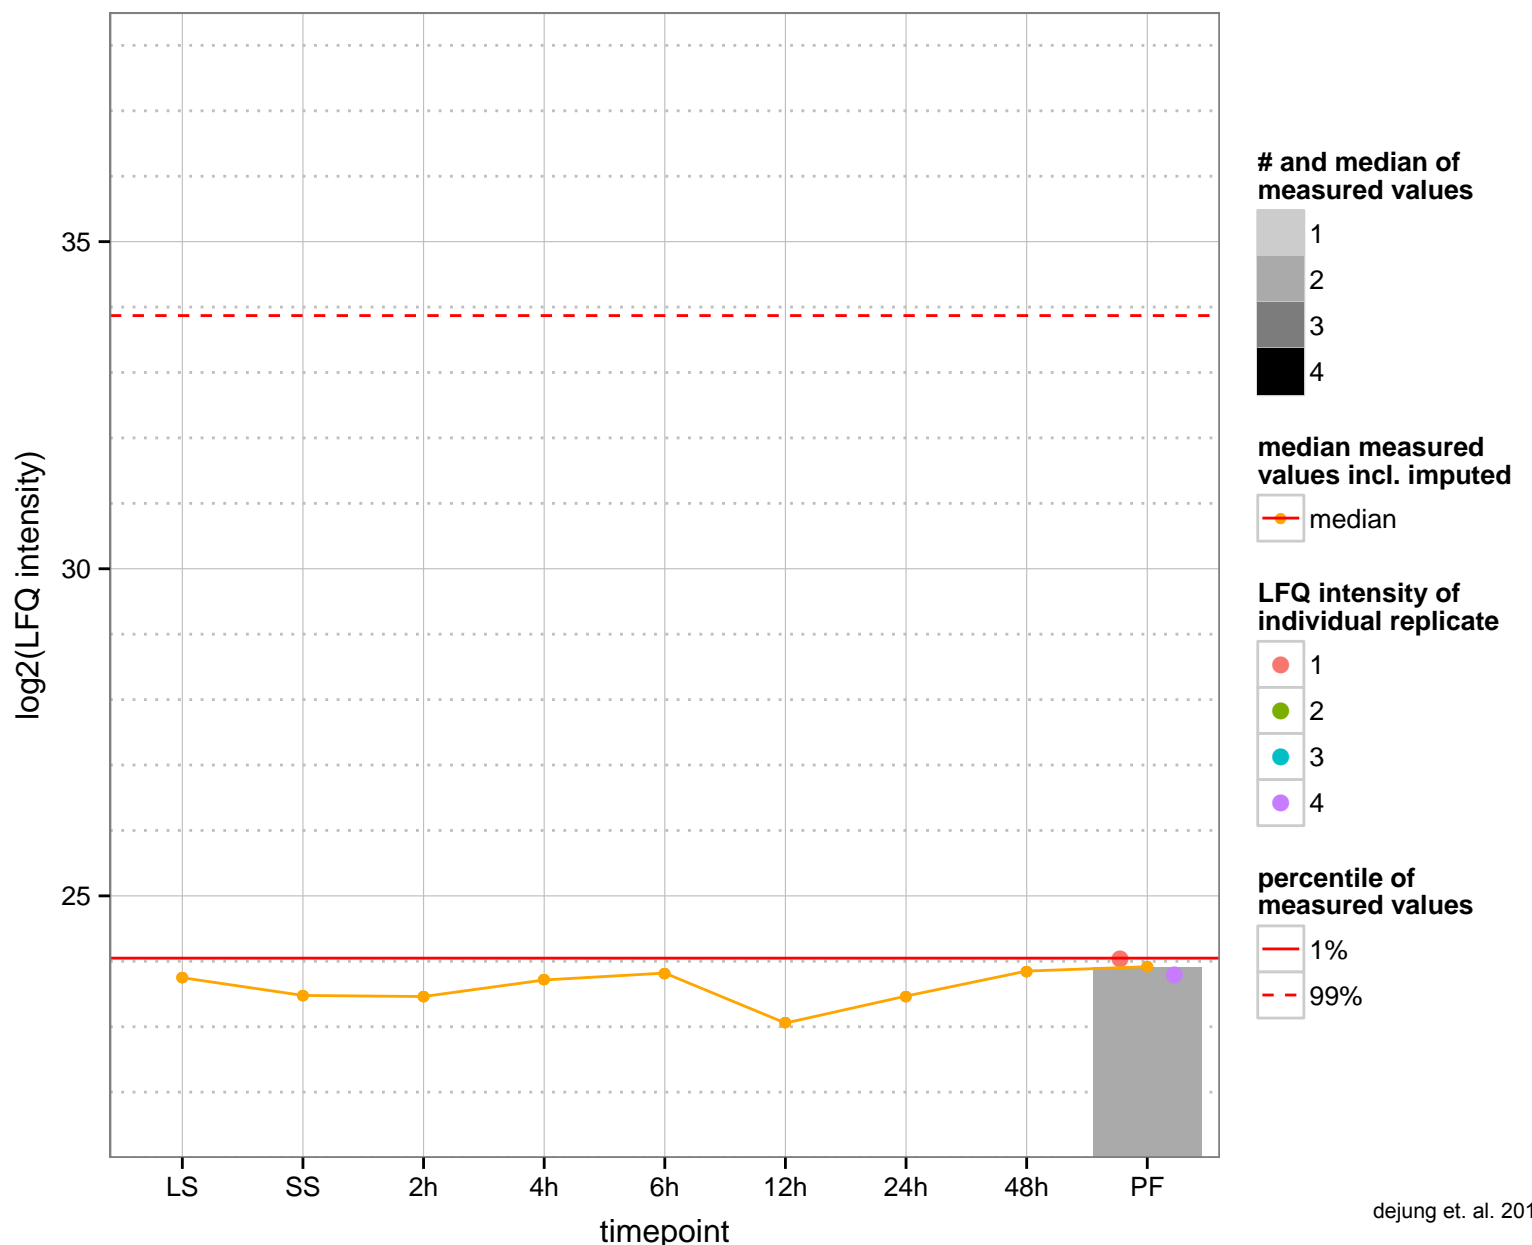



inosine-5'-monophosphate dehydrogenase, IMP dehydrogenase  
 Tb927.10.16120  
 AGOF: IMP dehydrogenase activity  
 AGOC: null  
 AGOP: oxidation-reduction process, purine ribonucleotide biosynthetic process  
 PGO: IMP dehydrogenase activity, catalytic activity, protein binding  
 PGOC: null  
 PGOP: oxidation-reduction process

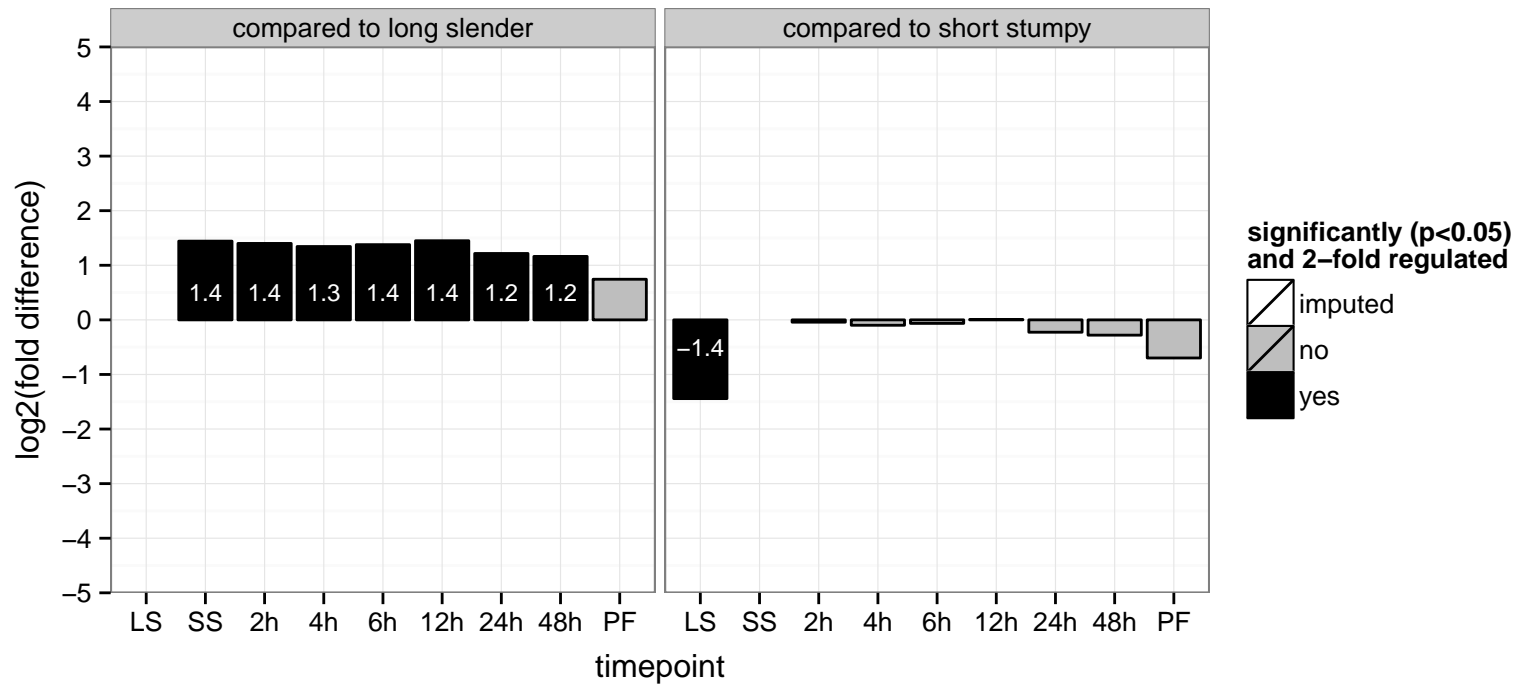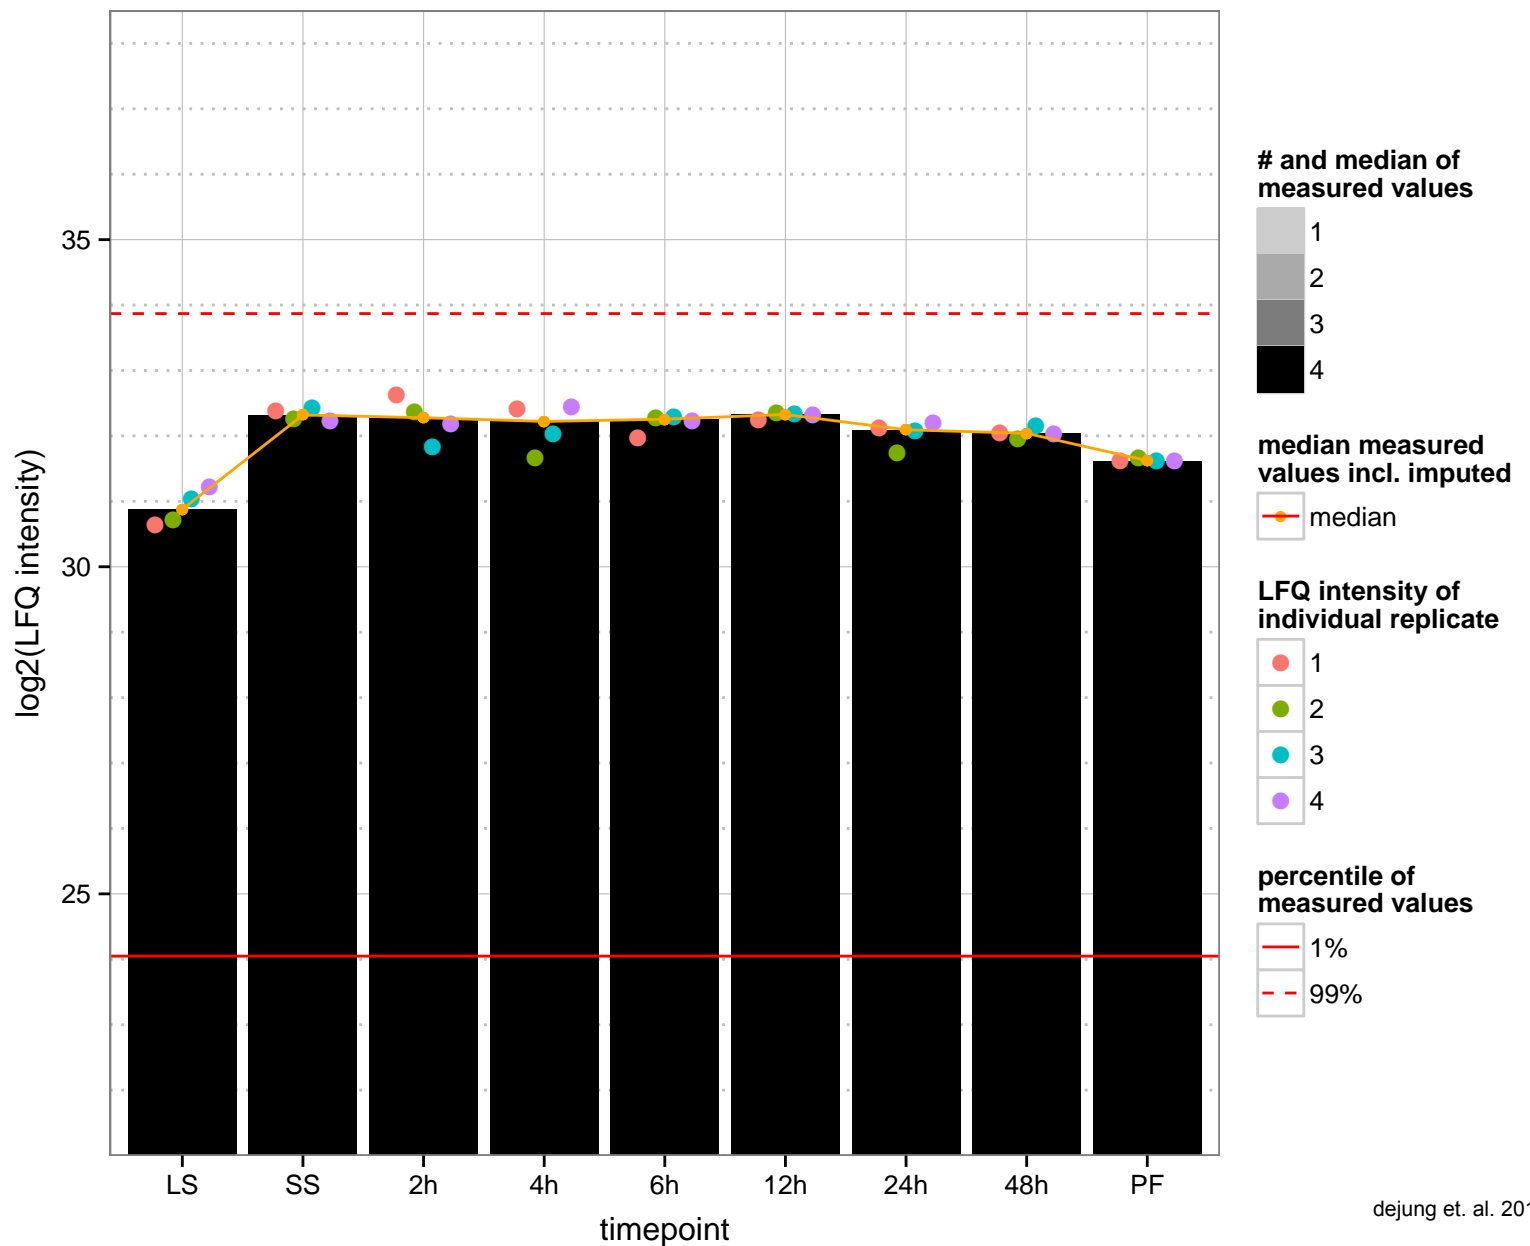

atp-binding cassette sub-family e member 1 (ABCE1)

Tb927.10.1630

AGOF: ATP binding, ATPase activity, electron carrier activity, iron-sulfur cluster binding, ribonuclease activity

AGOC: cytoplasm

AGOP: nuclear-transcribed mRNA catabolic process, exonucleolytic

PGOF: ATP binding, ATPase activity, electron carrier activity, iron-sulfur cluster binding, nucleoside-triphosphatase activity, nucleoside-triphosphatase activity

PGOC: null

PGOP: null

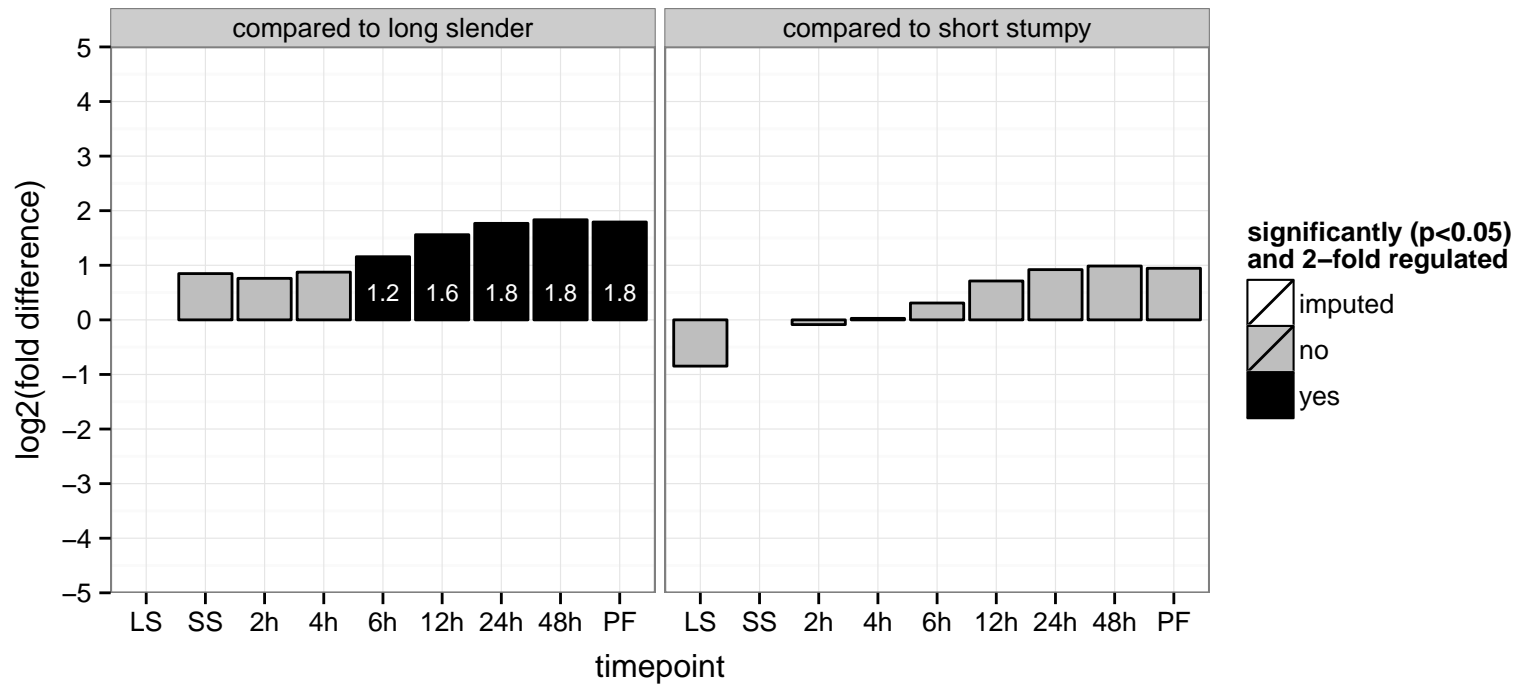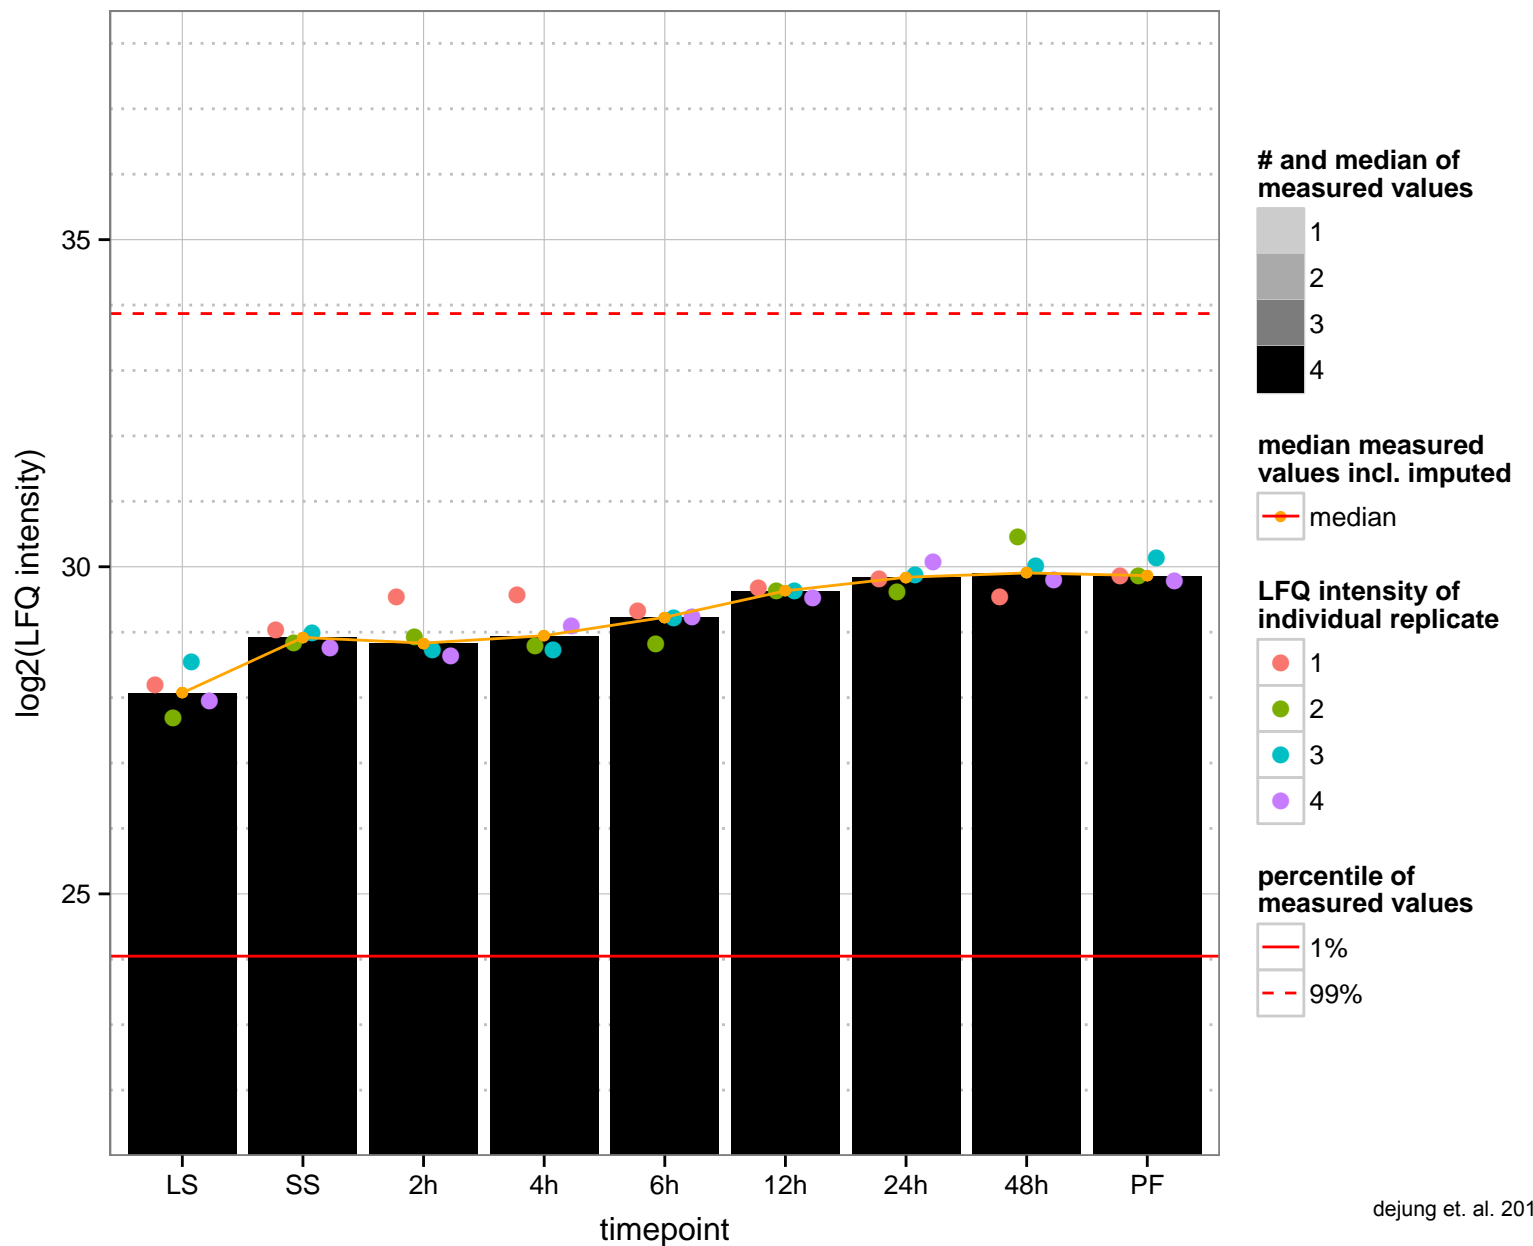

nucleotide binding protein, putative (NBP 1)  
 Tb927.10.1690  
 AGOF: nucleotide binding  
 AGOC: cytosol  
 AGOP: null  
 PGO: null  
 PGO: null  
 PGO: null

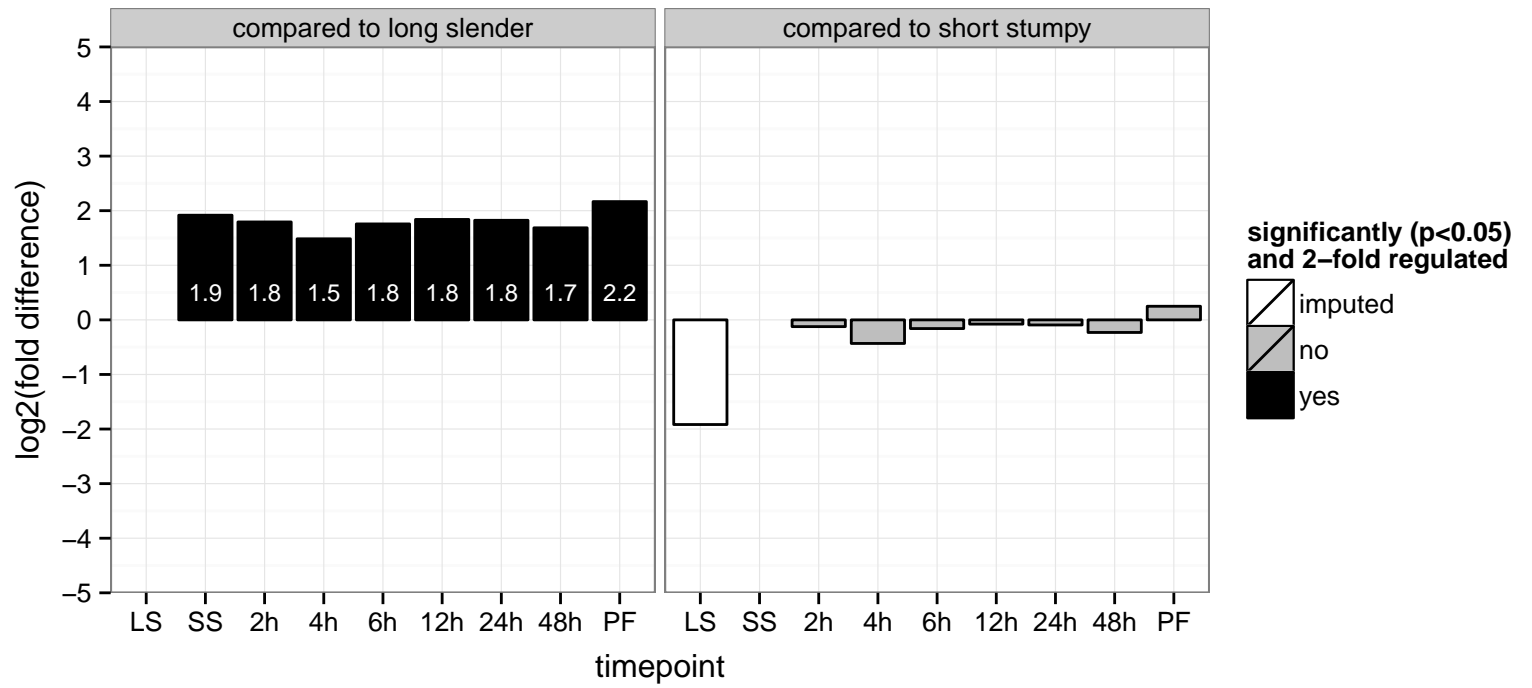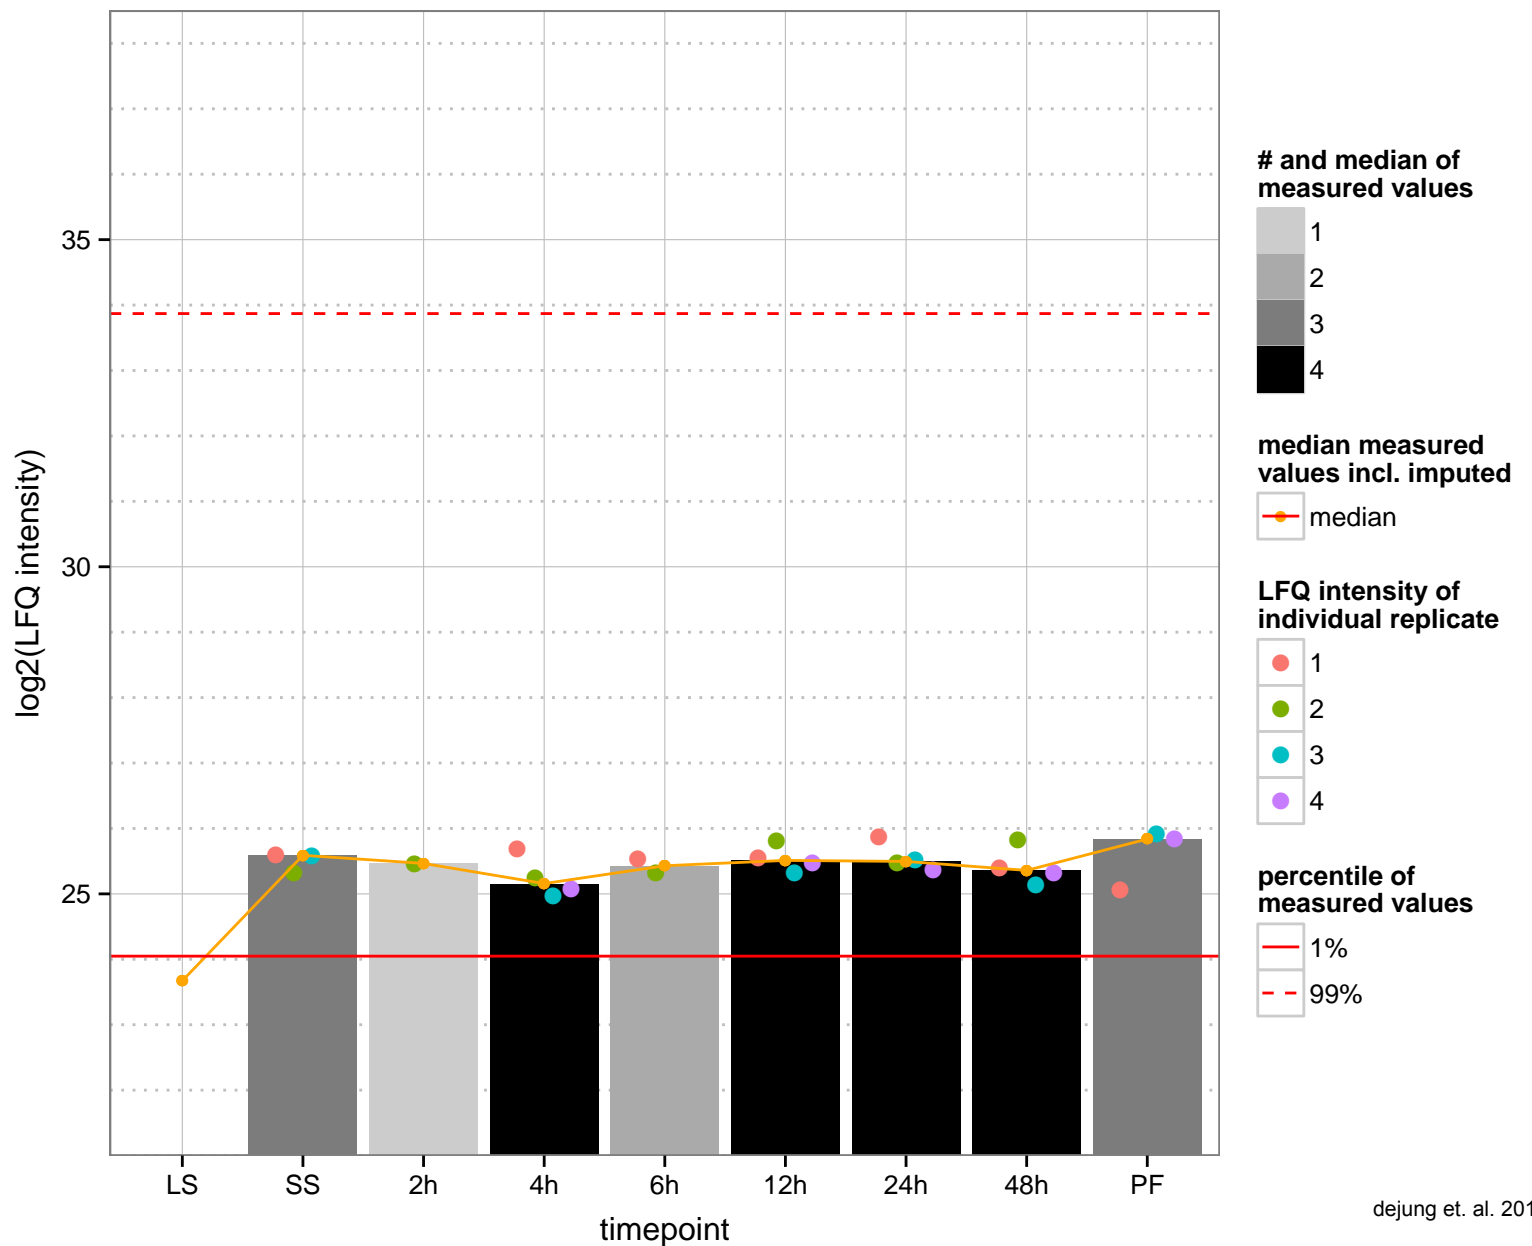

pseudouridine synthase, Cbf5p

Tb927.10.170

AGOF: RNA binding, pseudouridine synthase activity, pseudouridylate synthase activity

AGOC: nucleus

AGOP: RNA processing, pseudouridine synthesis, rRNA modification, tRNA modification

PGOF: RNA binding, pseudouridine synthase activity

PGOC: null

PGOP: RNA modification, RNA processing, pseudouridine synthesis

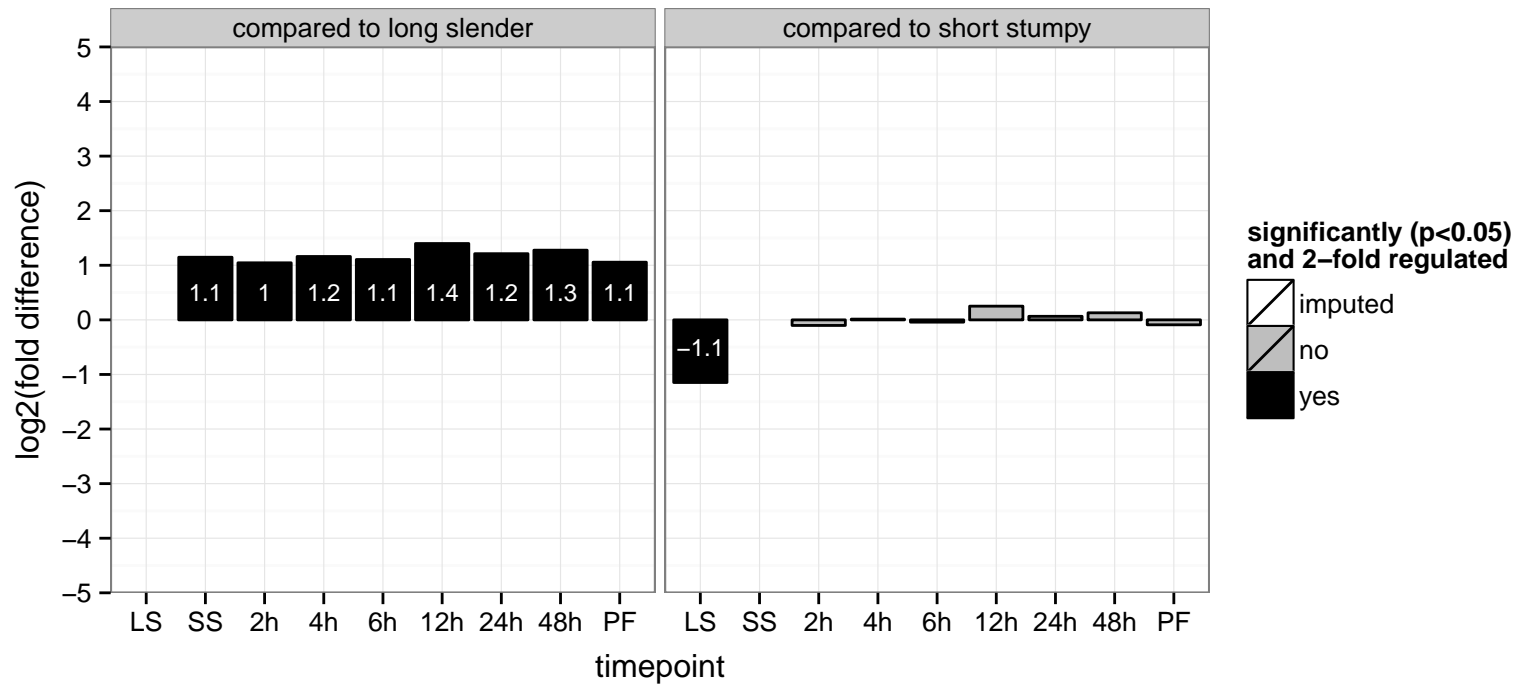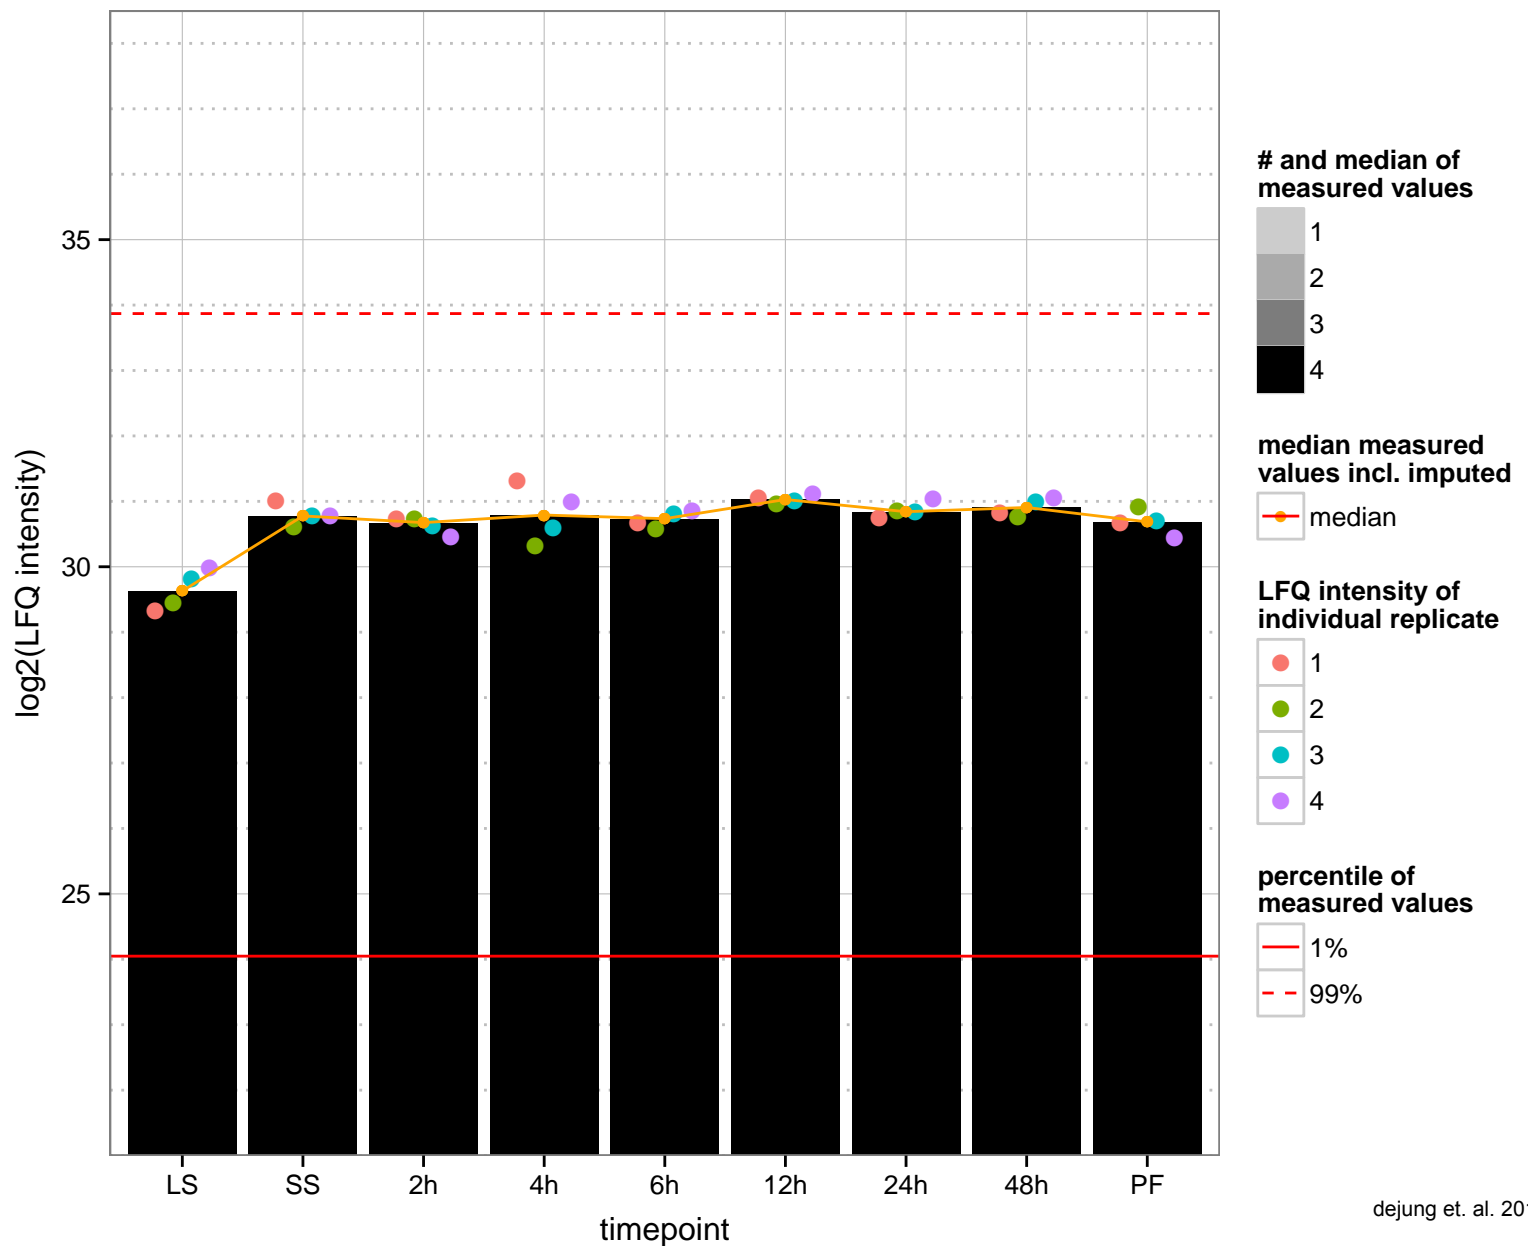

hypothetical protein, conserved  
 Tb927.10.1860  
 AGOF: null  
 AGOC: null  
 AGOP: null  
 PGO: null  
 PGO: null  
 PGO: null

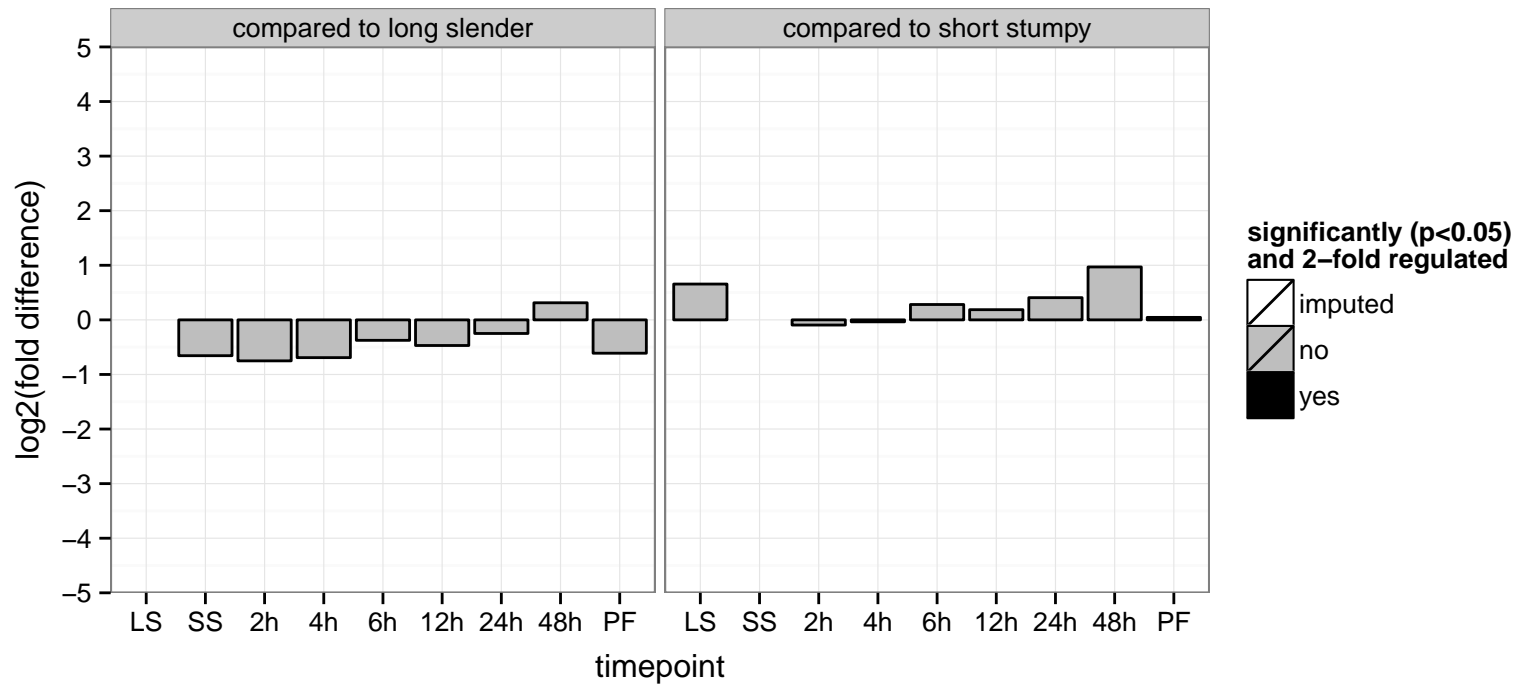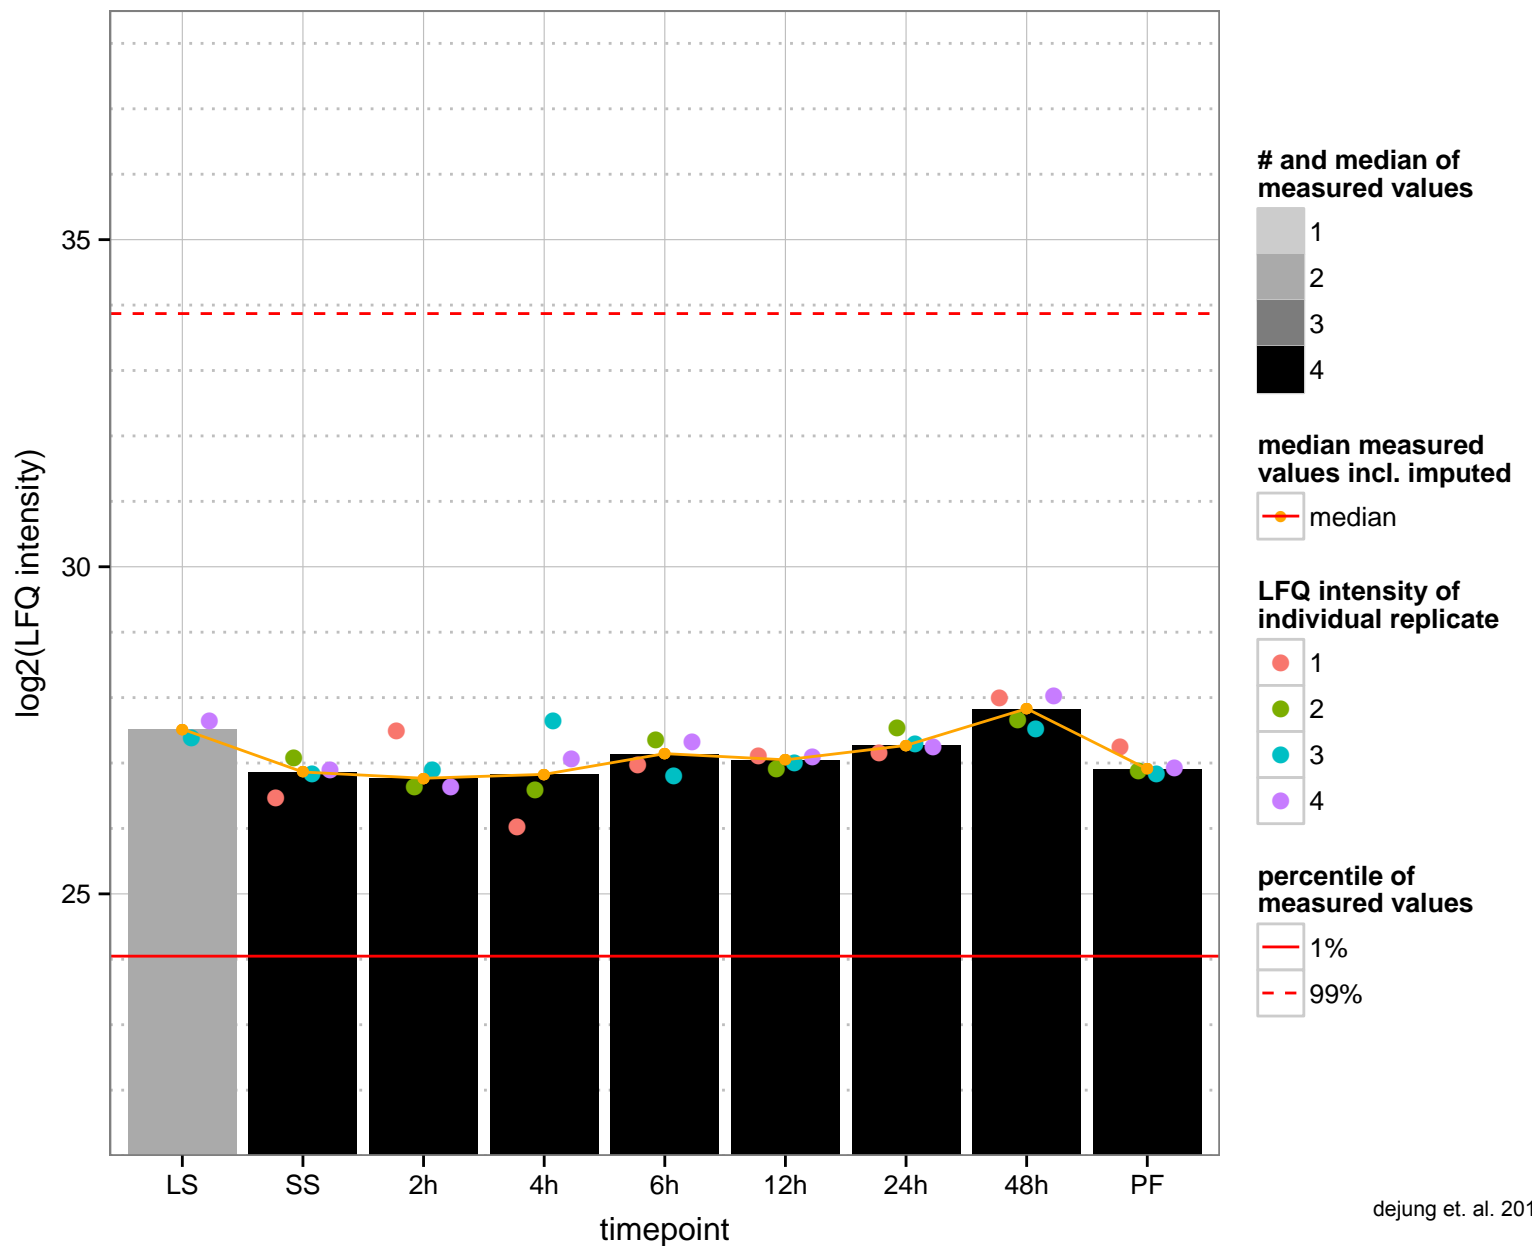

cysteine peptidase, Clan CA, family C2, putative, calpain  
 Tb927.10.1890  
 AGOF: calcium-dependent cysteine-type endopeptidase activity  
 AGOC: intracellular  
 AGOP: proteolysis  
 PGOF: calcium-dependent cysteine-type endopeptidase activity  
 PGOC: intracellular  
 PGOP: proteolysis

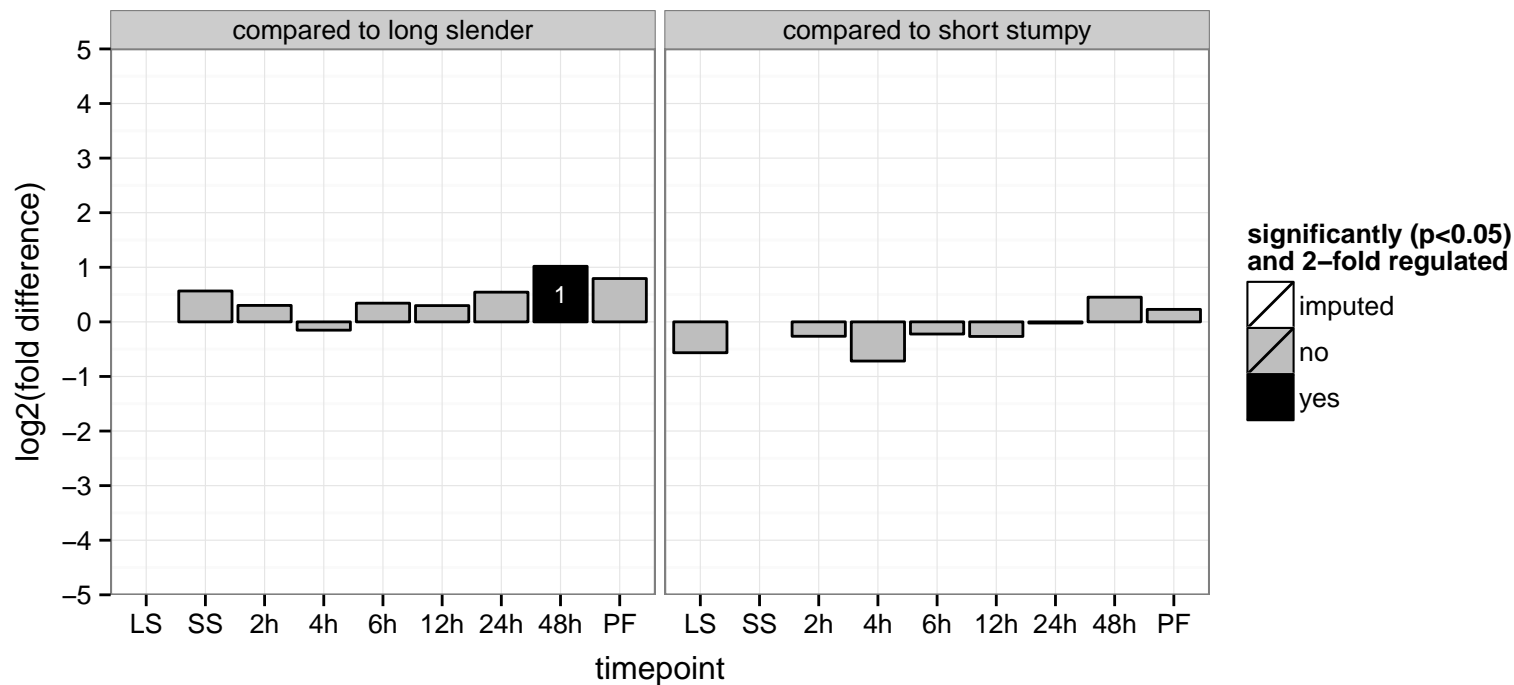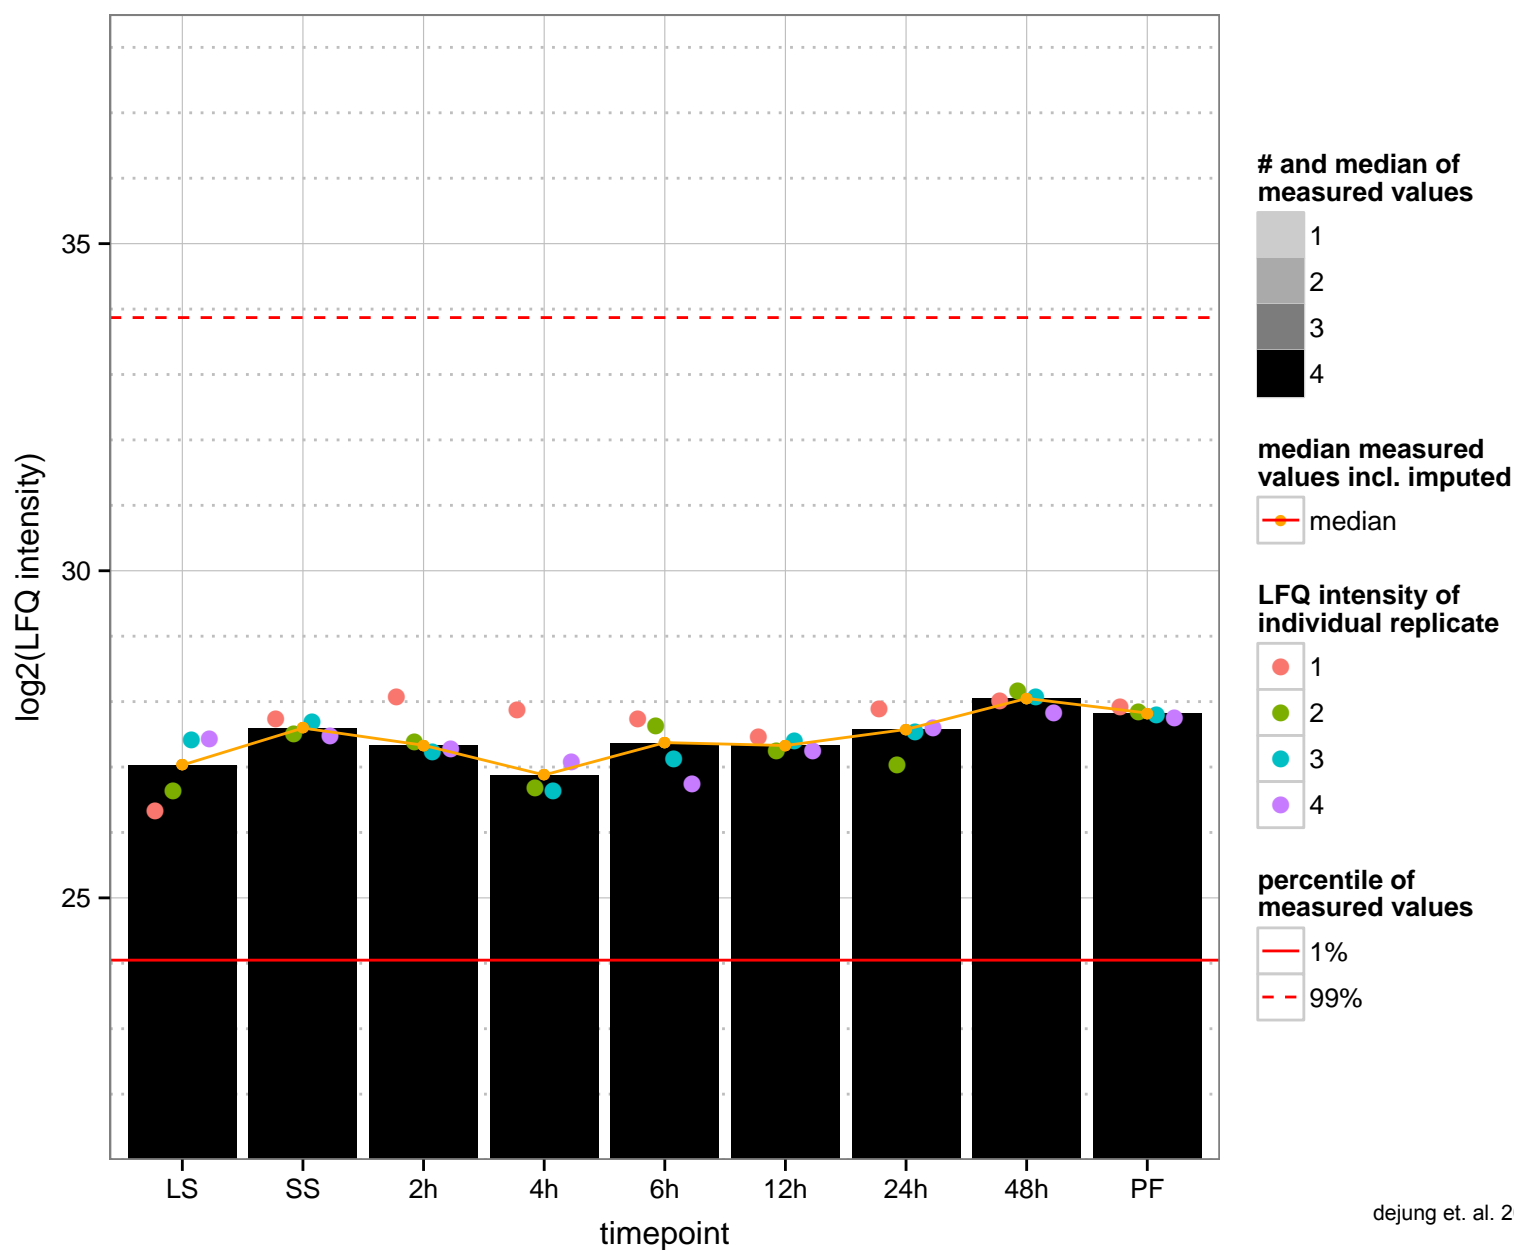

hypothetical protein, conserved  
 Tb927.10.1970  
 AGOF: null  
 AGOC: null  
 AGOP: null  
 PGOF: null  
 PGO C: null  
 PGOP: null

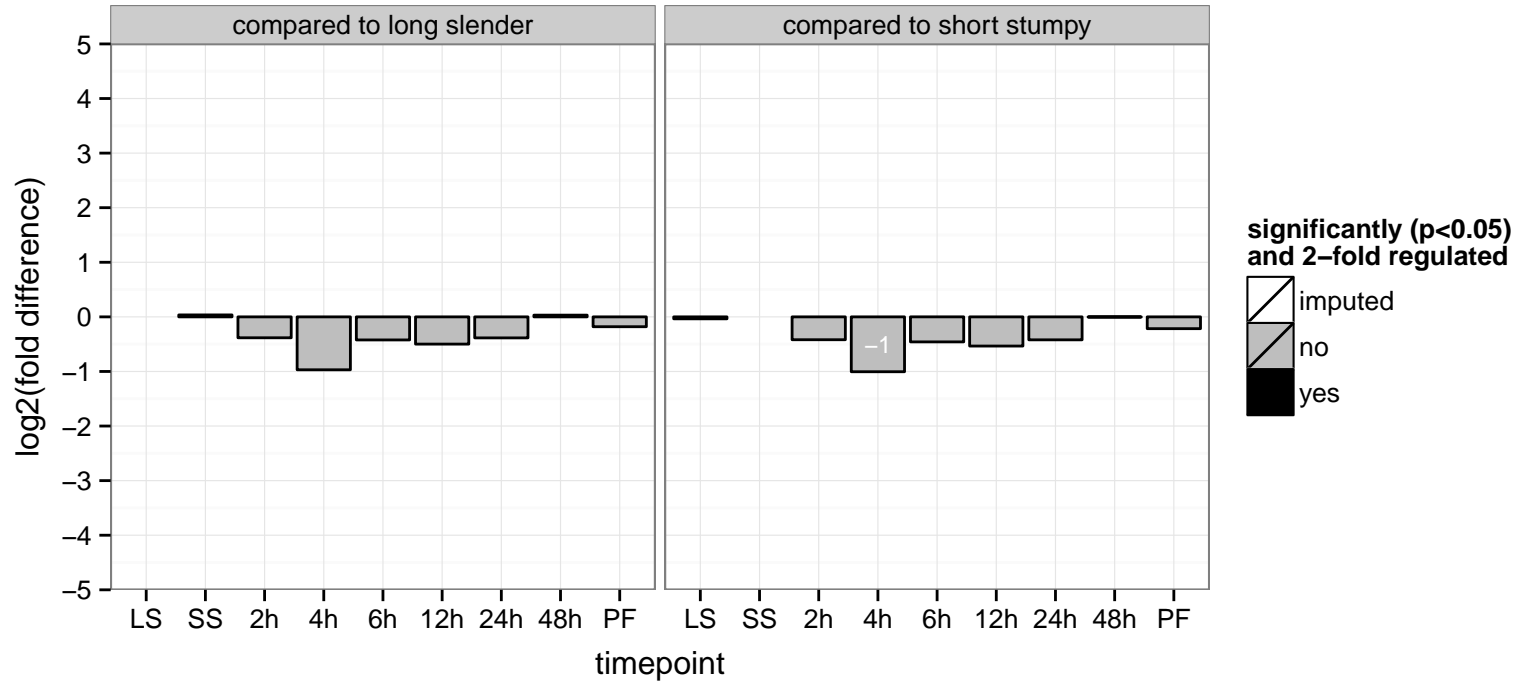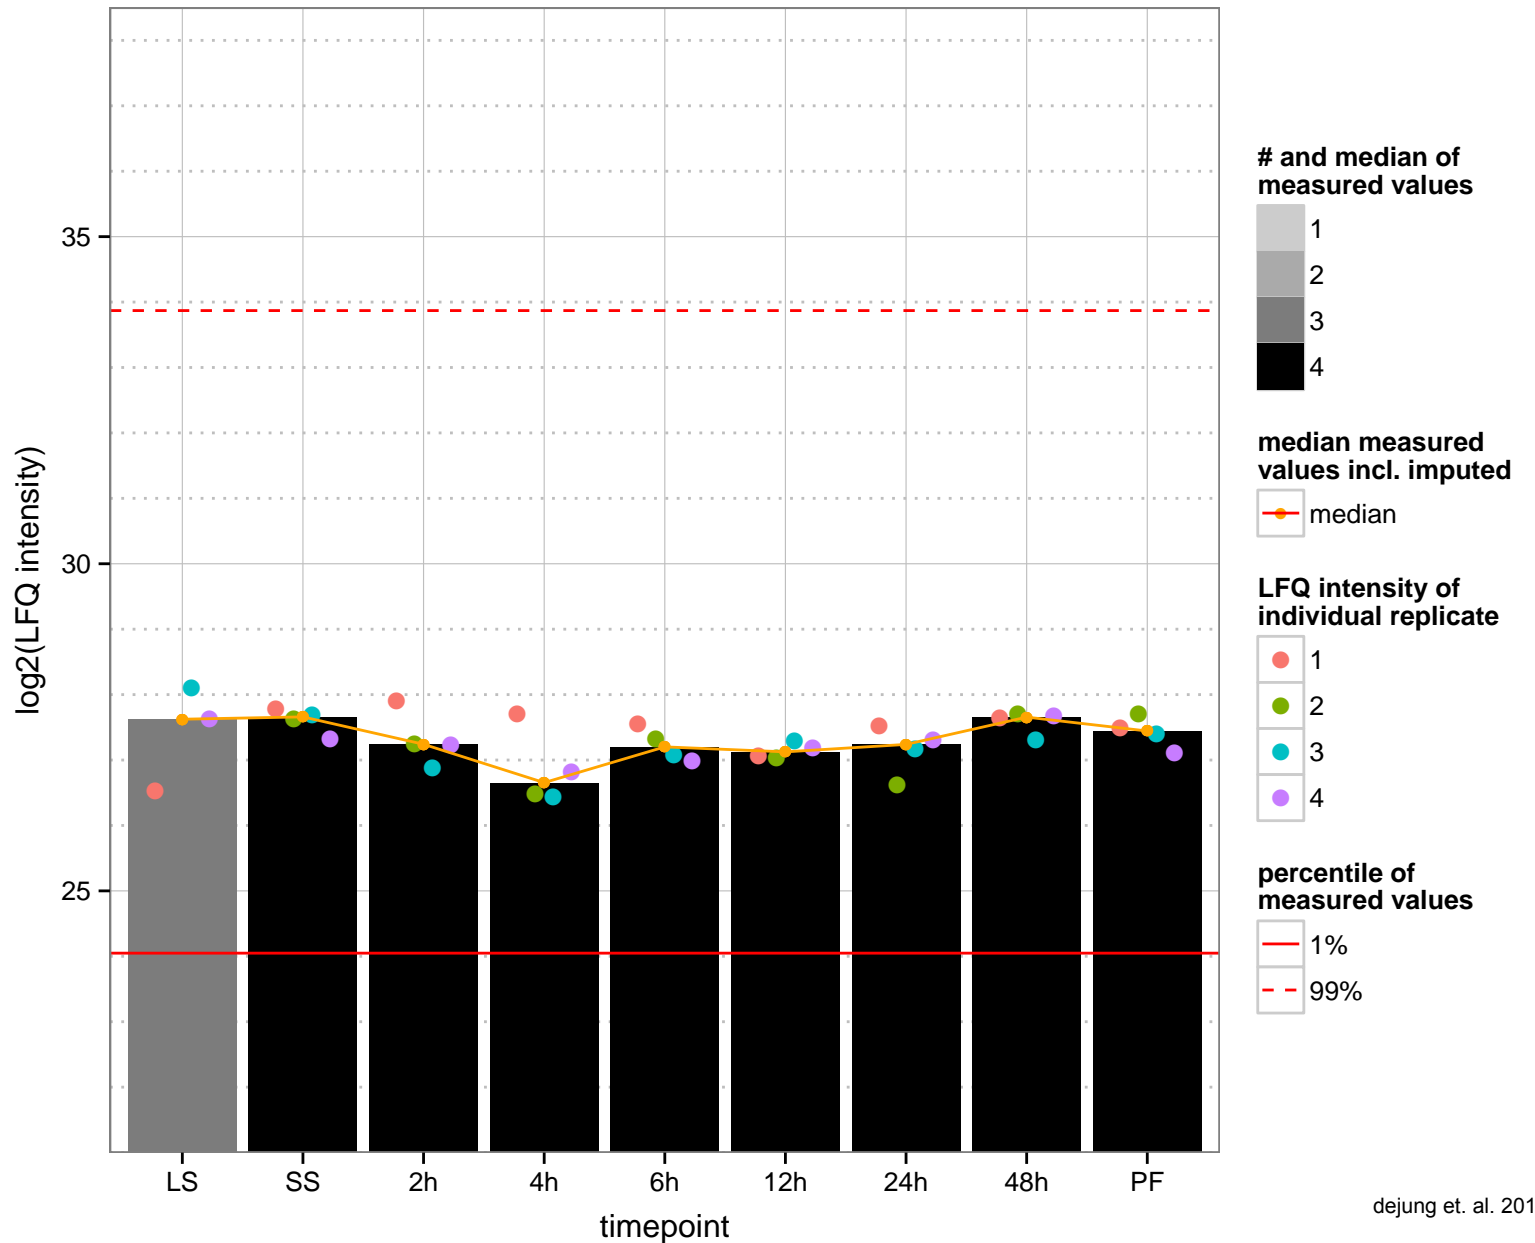

major vault protein, putative, putative (MVP)  
 Tb927.10.1990  
 AGOF: null  
 AGOC: null  
 AGOP: null  
 PGO: null  
 PGOC: null  
 PGOP: null

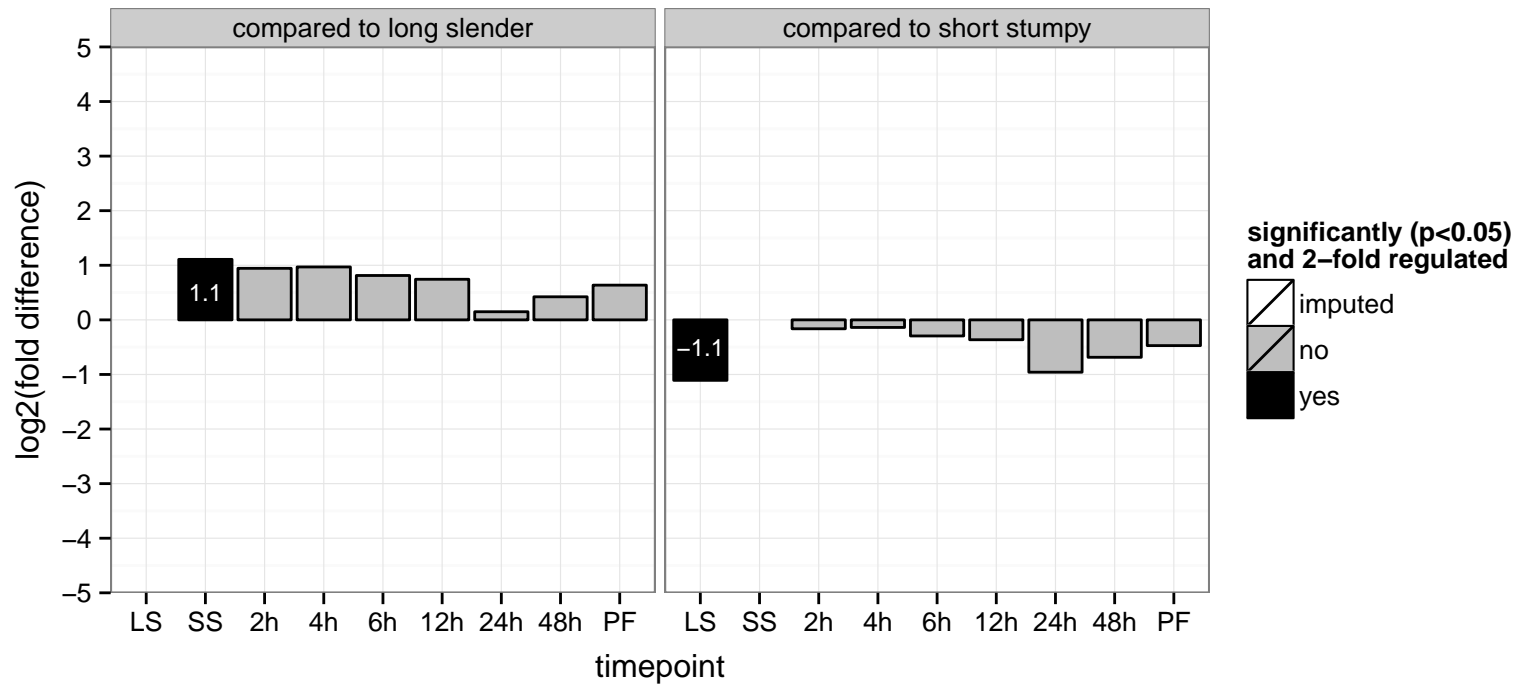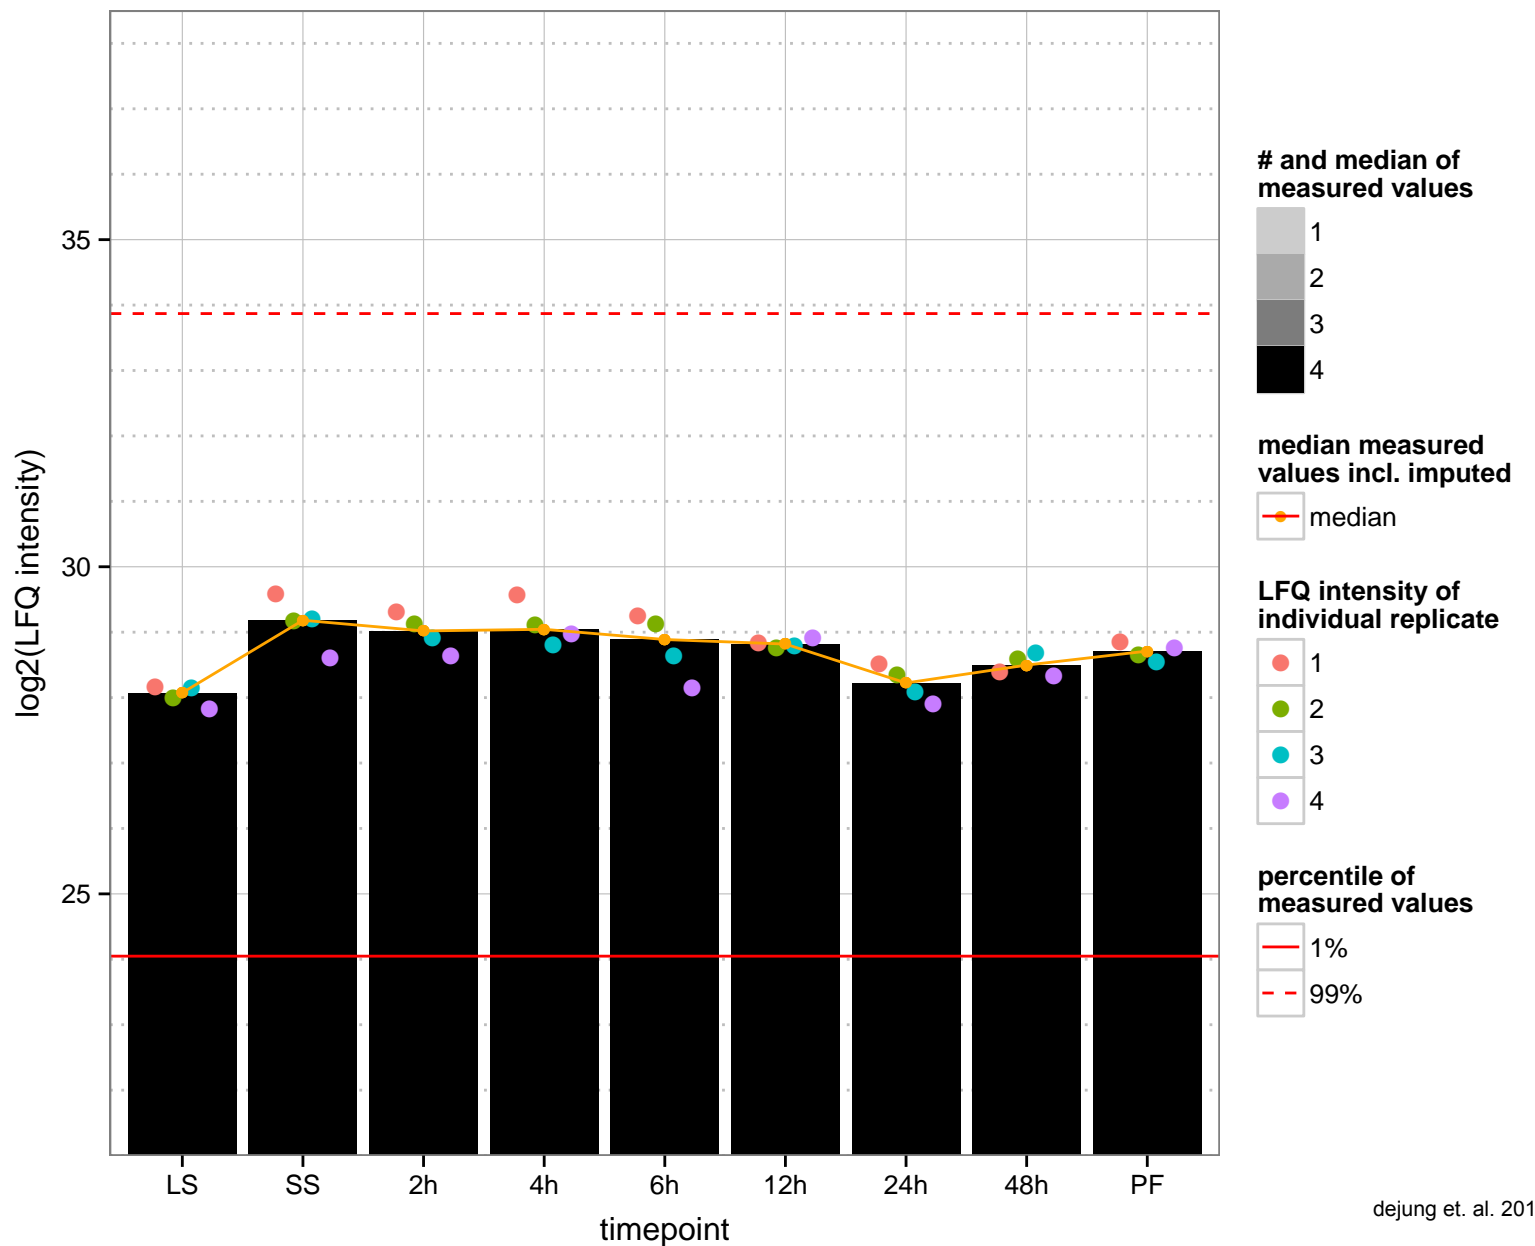



protein kinase, putative

Tb927.10.2040

AGOF: ATP binding, protein serine/threonine kinase activity, protein tyrosine kinase activity

AGOC: null

AGOP: protein phosphorylation

PGOF: ATP binding, protein kinase activity, transferase activity, transferring phosphorus-containing groups

PGOC: null

PGOP: protein phosphorylation

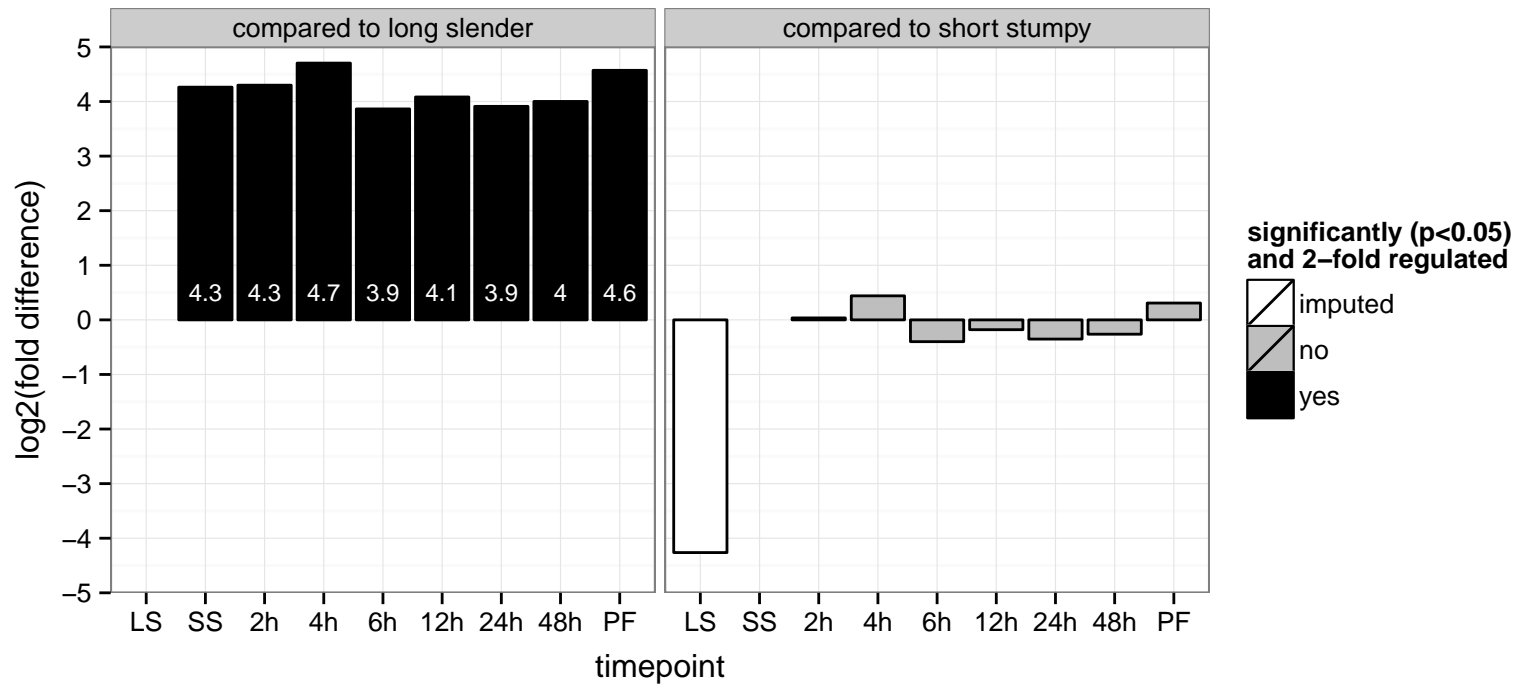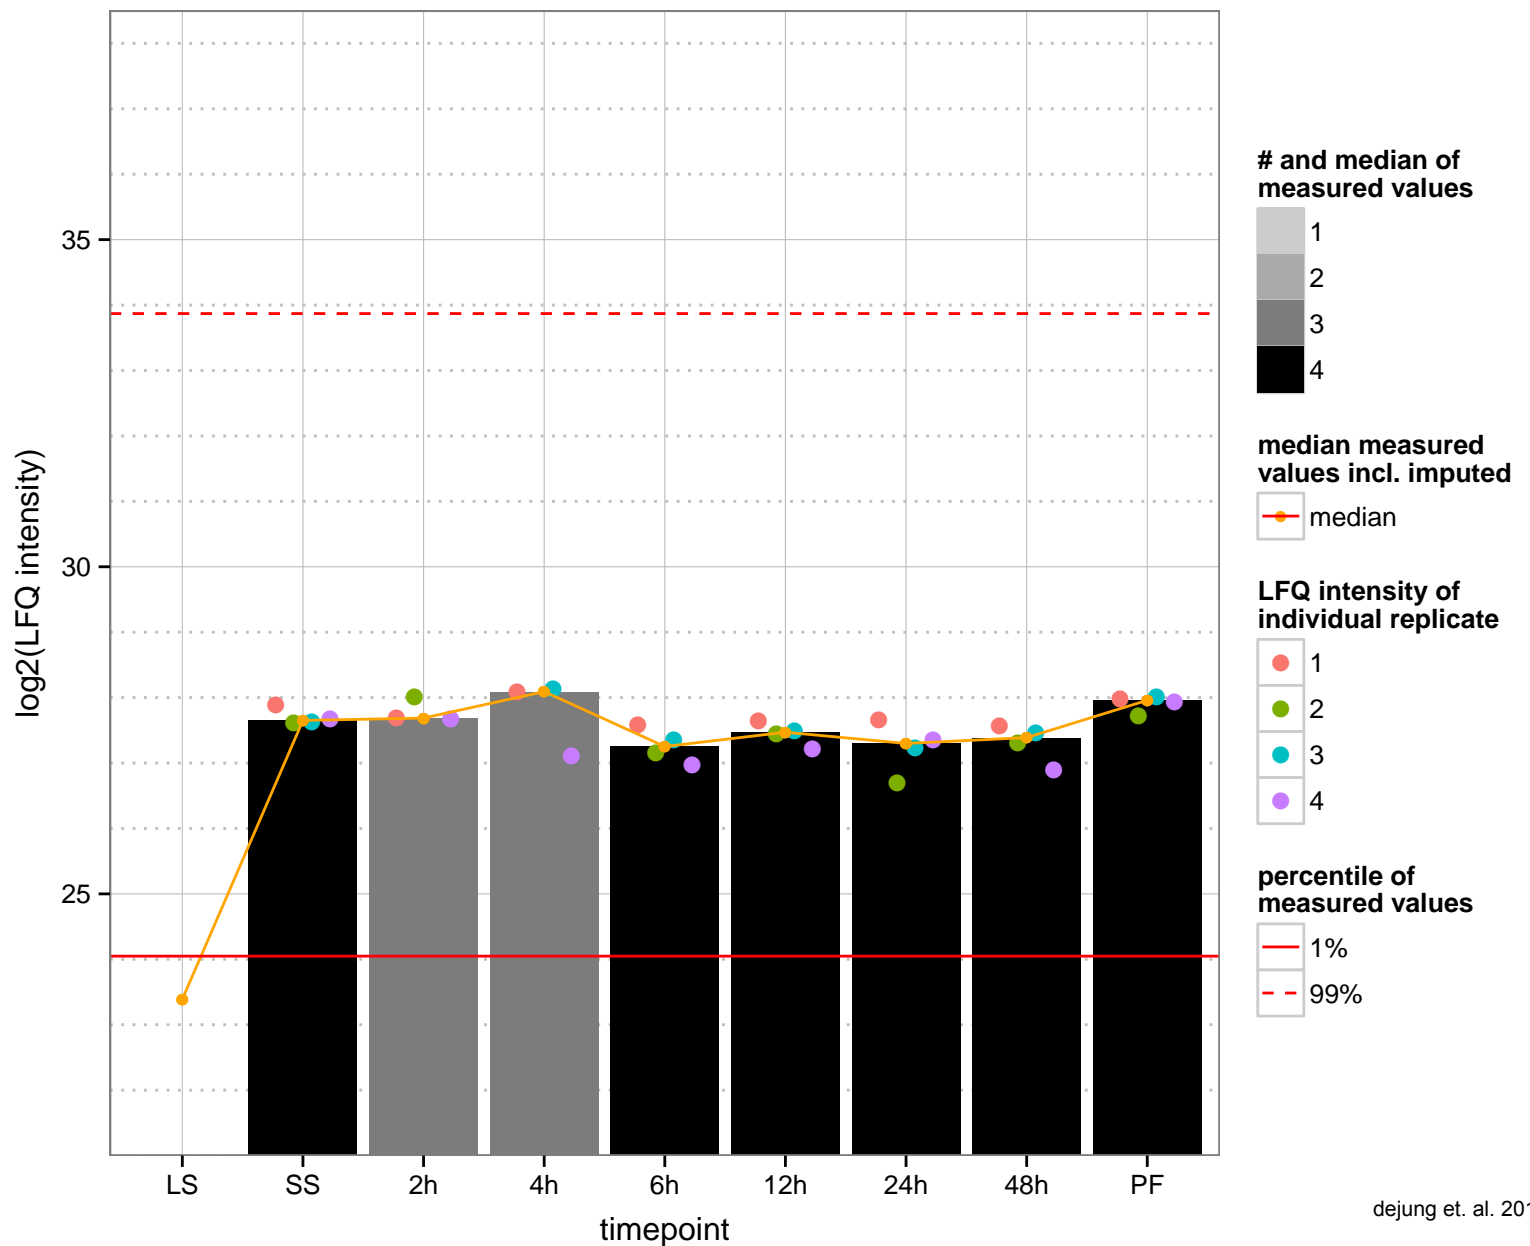

hypothetical protein, conserved  
 Tb927.10.2190  
 AGOF: null  
 AGOC: null  
 AGOP: null  
 PGO: null  
 PGOC: null  
 PGOP: null

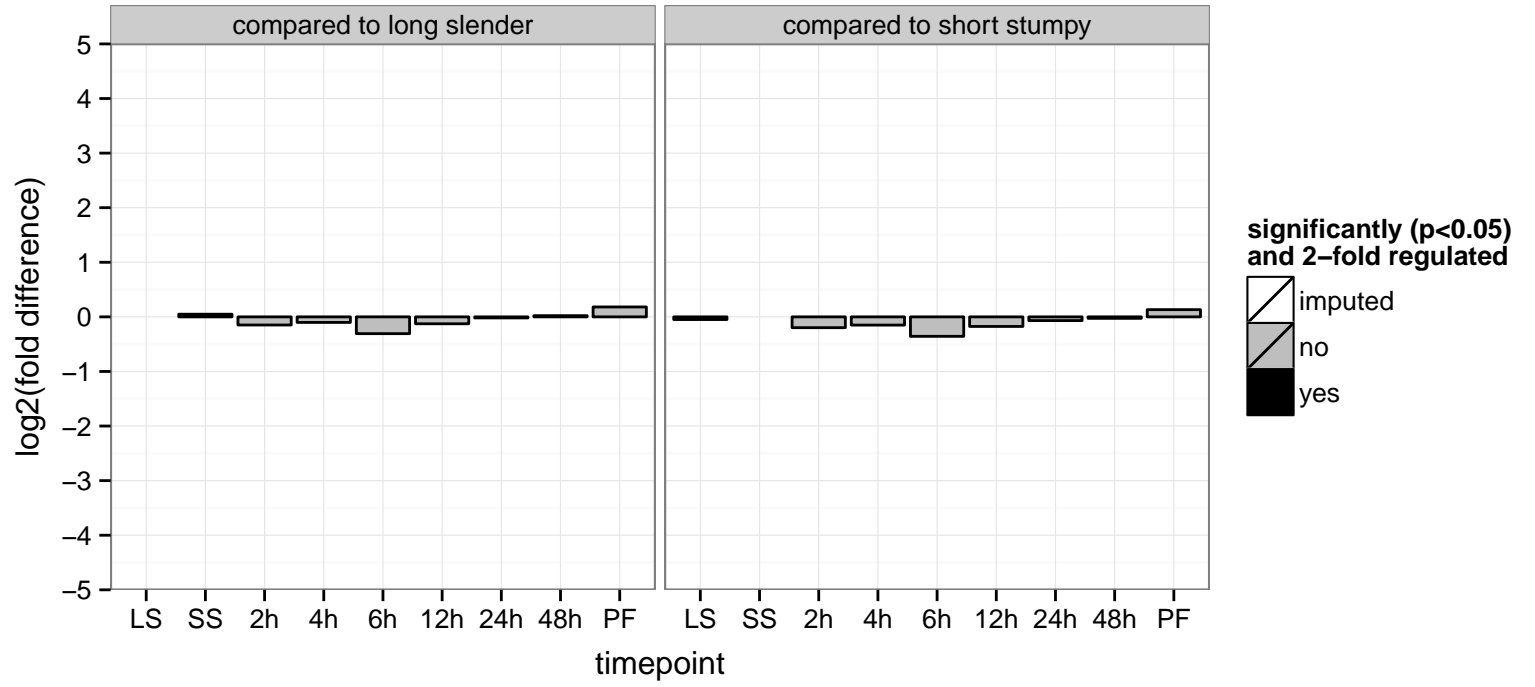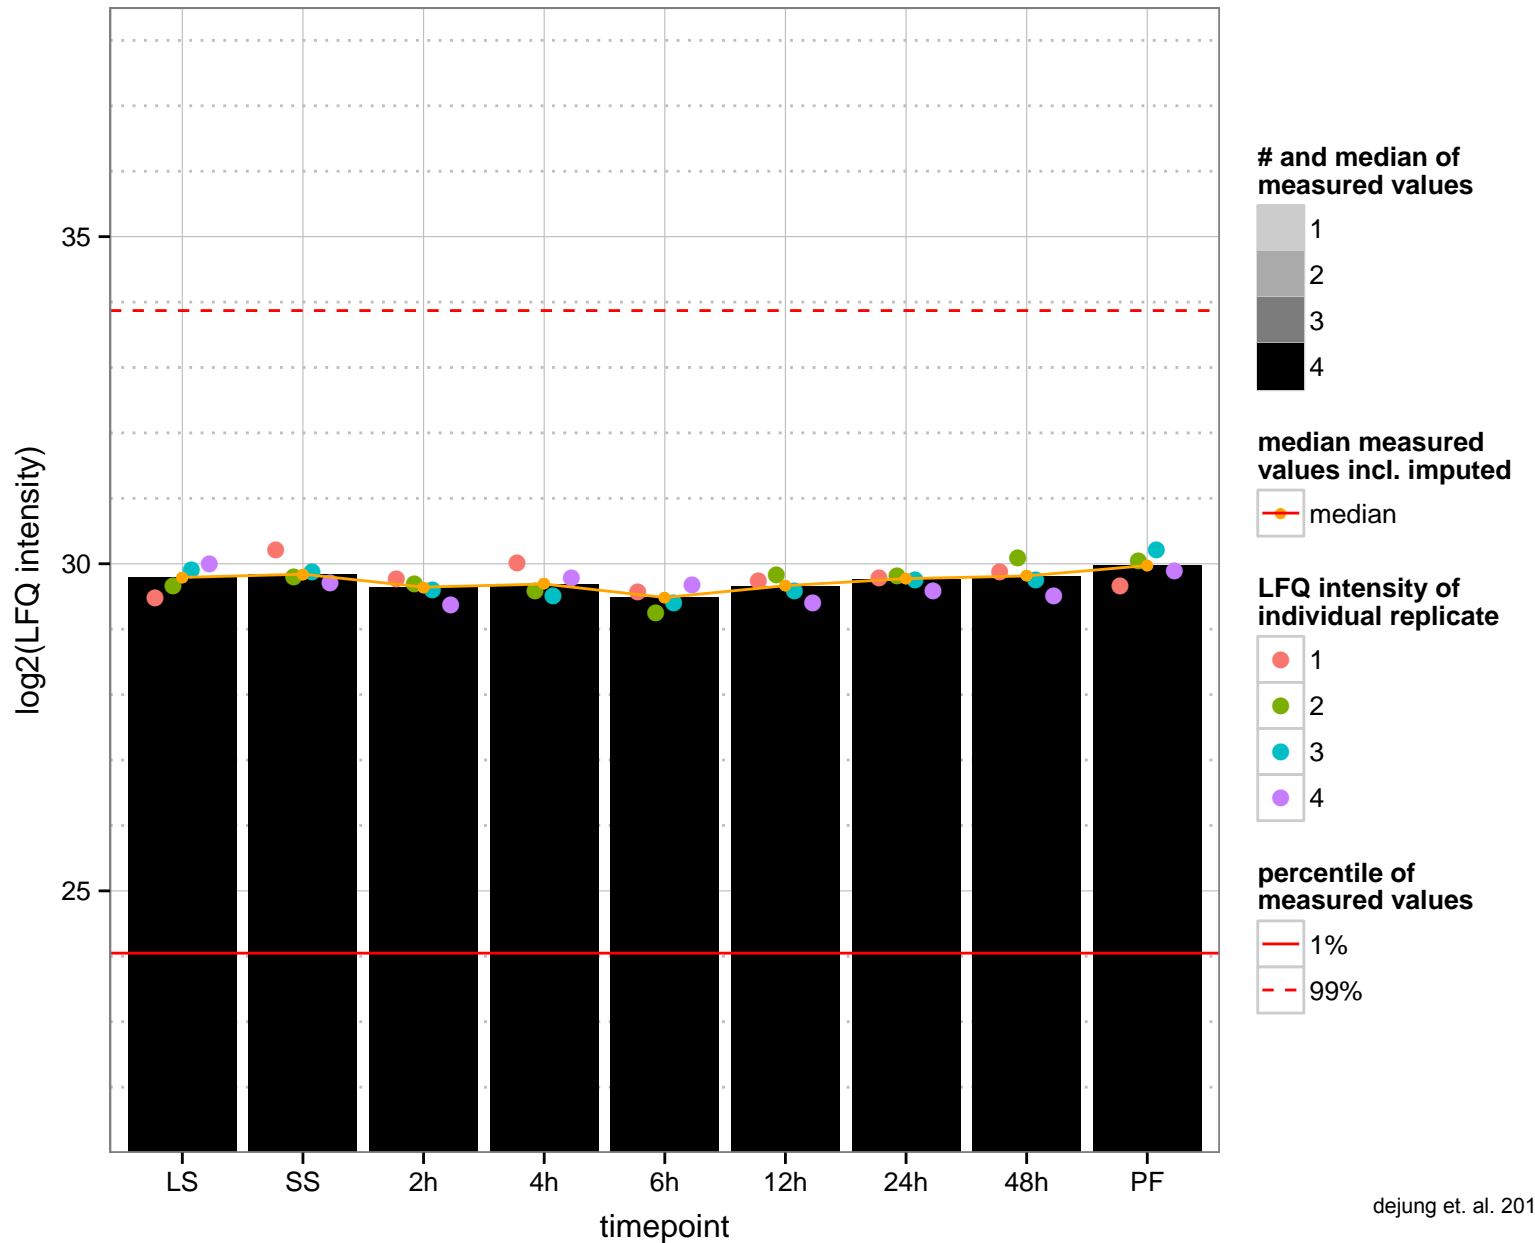

60S ribosomal protein L37a, putative, 60S ribosomal proteins L37  
 Tb927.10.6370;Tb927.10.220  
 AGOF: structural constituent of ribosome, zinc ion binding  
 AGOC: intracellular, ribosome  
 AGOP: translation  
 PGOF: structural constituent of ribosome  
 PGO: intracellular, ribosome  
 PGOP: translation

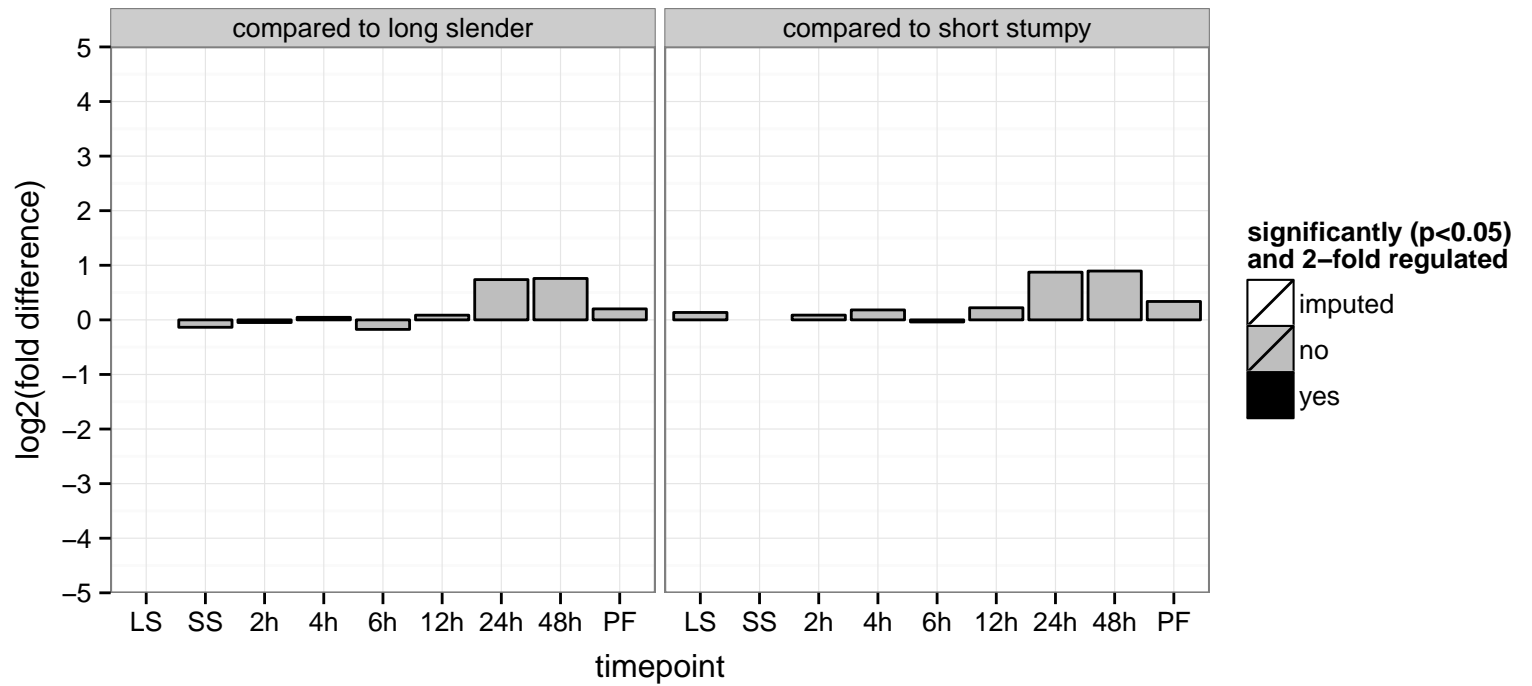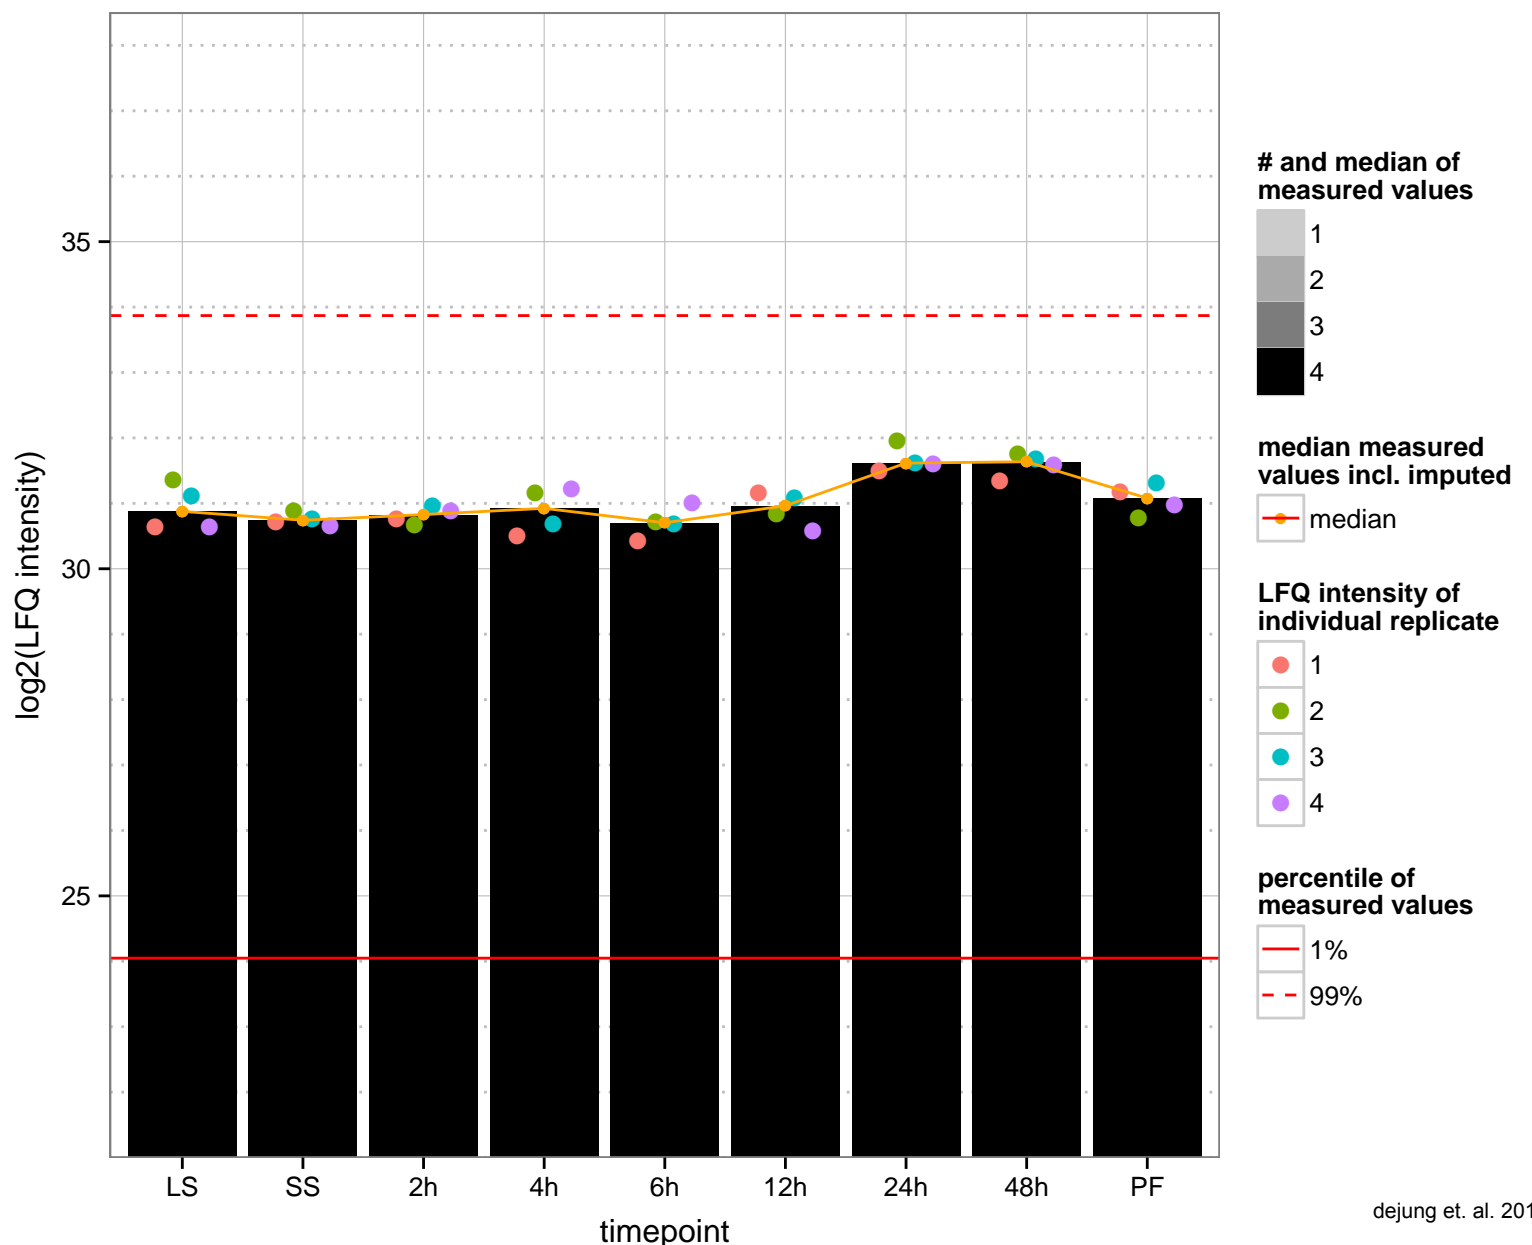

vacuolar protein sorting–associated protein 35, putative  
 Tb927.10.2270  
 AGOF: null  
 AGOC: cytoplasm, membrane  
 AGOP: null  
 PGO: binding  
 PGOC: null  
 PGOP: null

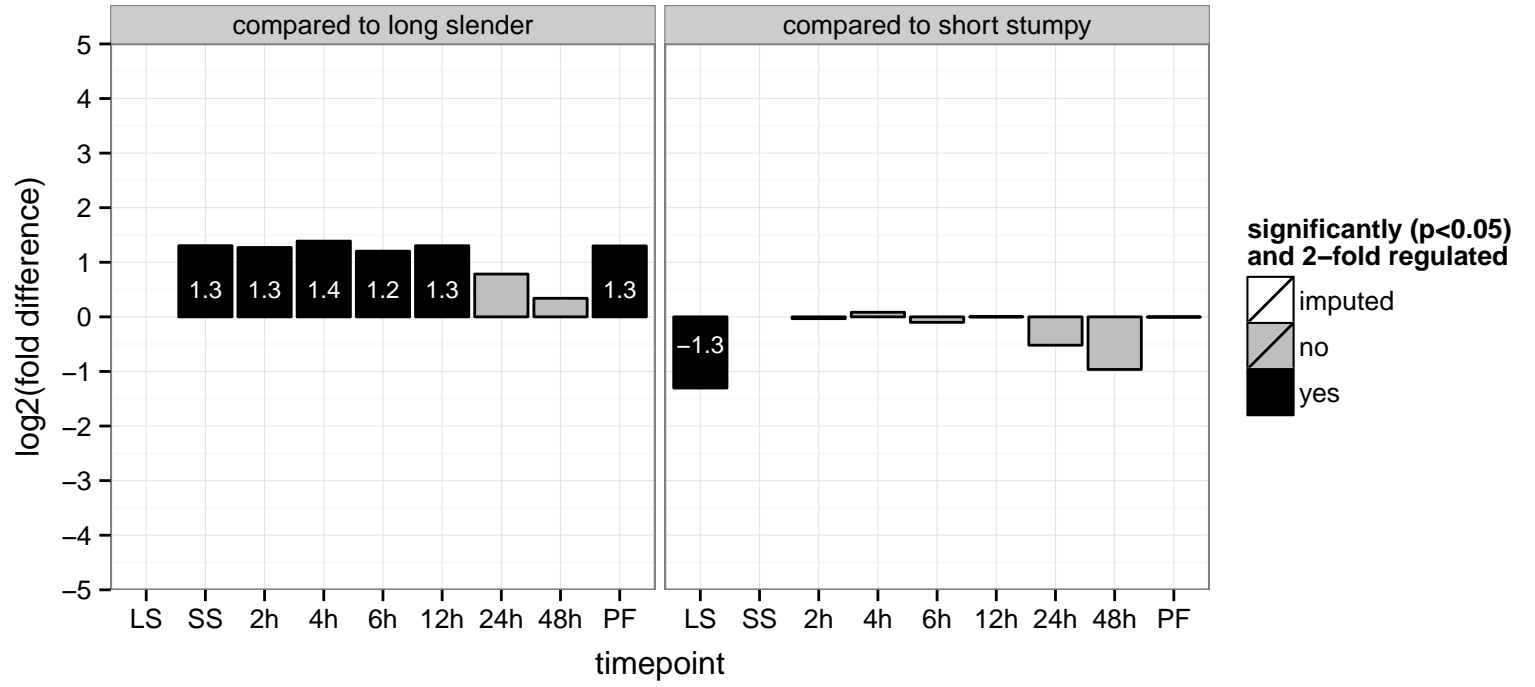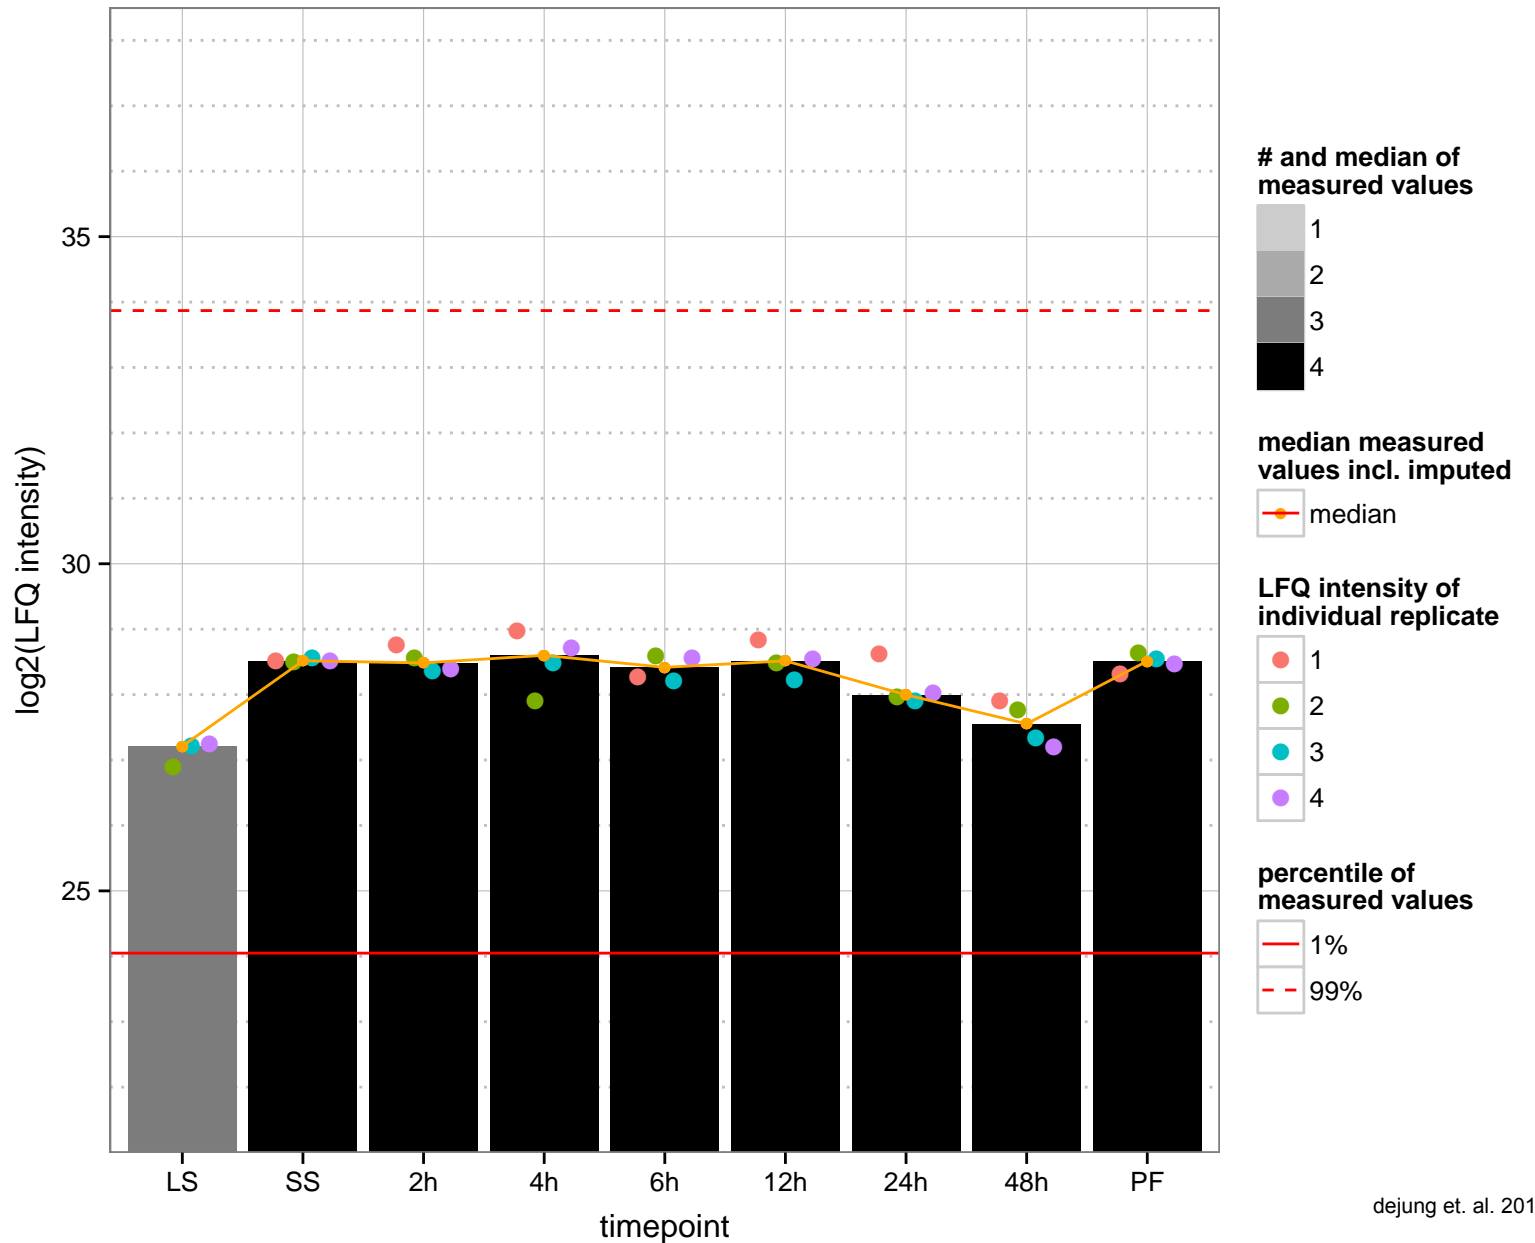

proteasome subunit alpha type-5, putative, 20S proteasome subunit alpha 5

Tb927.10.230

AGOF: threonine-type endopeptidase activity

AGOC: cytosol, nucleus, proteasome core complex

AGOP: ubiquitin-dependent protein catabolic process

PGOF: endopeptidase activity, threonine-type endopeptidase activity

PGOC: proteasome core complex, proteasome core complex, alpha-subunit complex

PGOP: proteolysis involved in cellular protein catabolic process, ubiquitin-dependent protein catabolic process

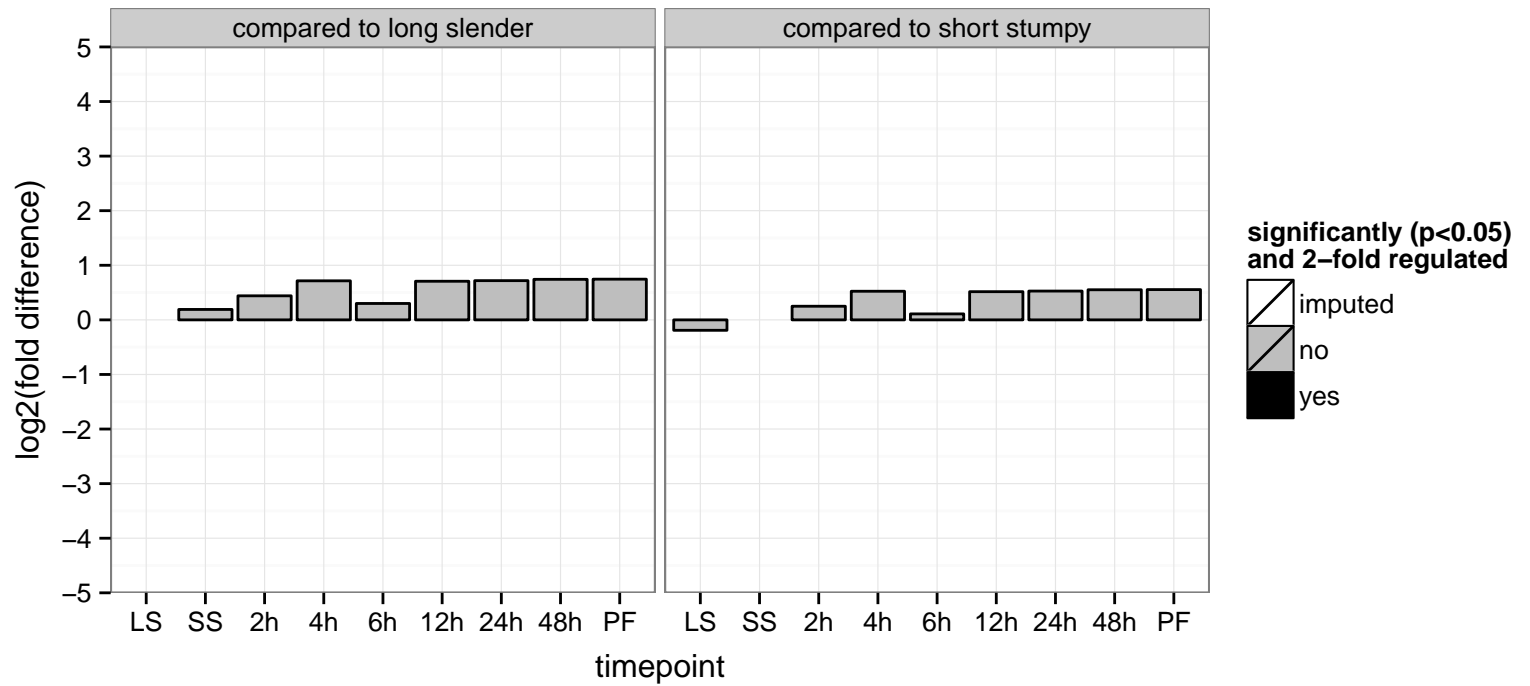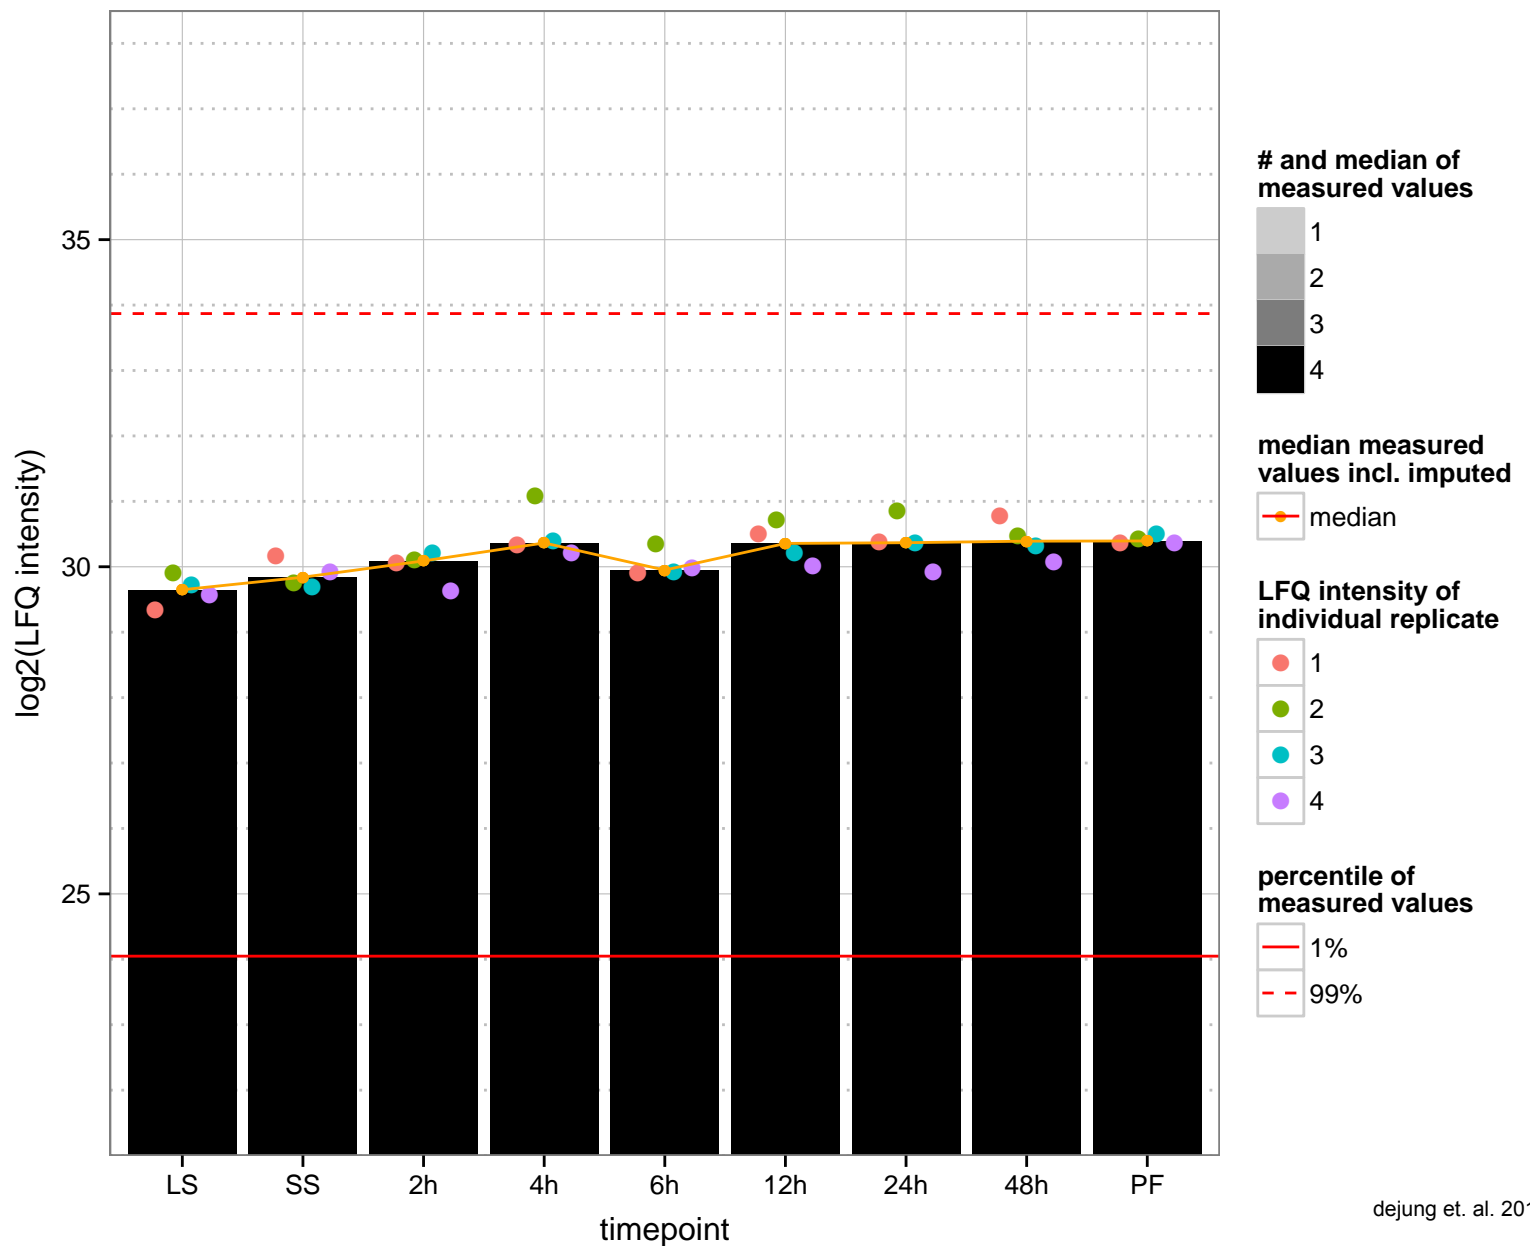

pyruvate dehydrogenase complex E3 binding protein, putative  
 Tb927.10.2350  
 AGOF: biotin binding, dihydrolipoyllysine-residue acetyltransferase activity  
 AGOC: mitochondrion, pyruvate dehydrogenase complex  
 AGOP: generation of precursor metabolites and energy  
 PGO: null  
 PGO: null  
 PGO: null

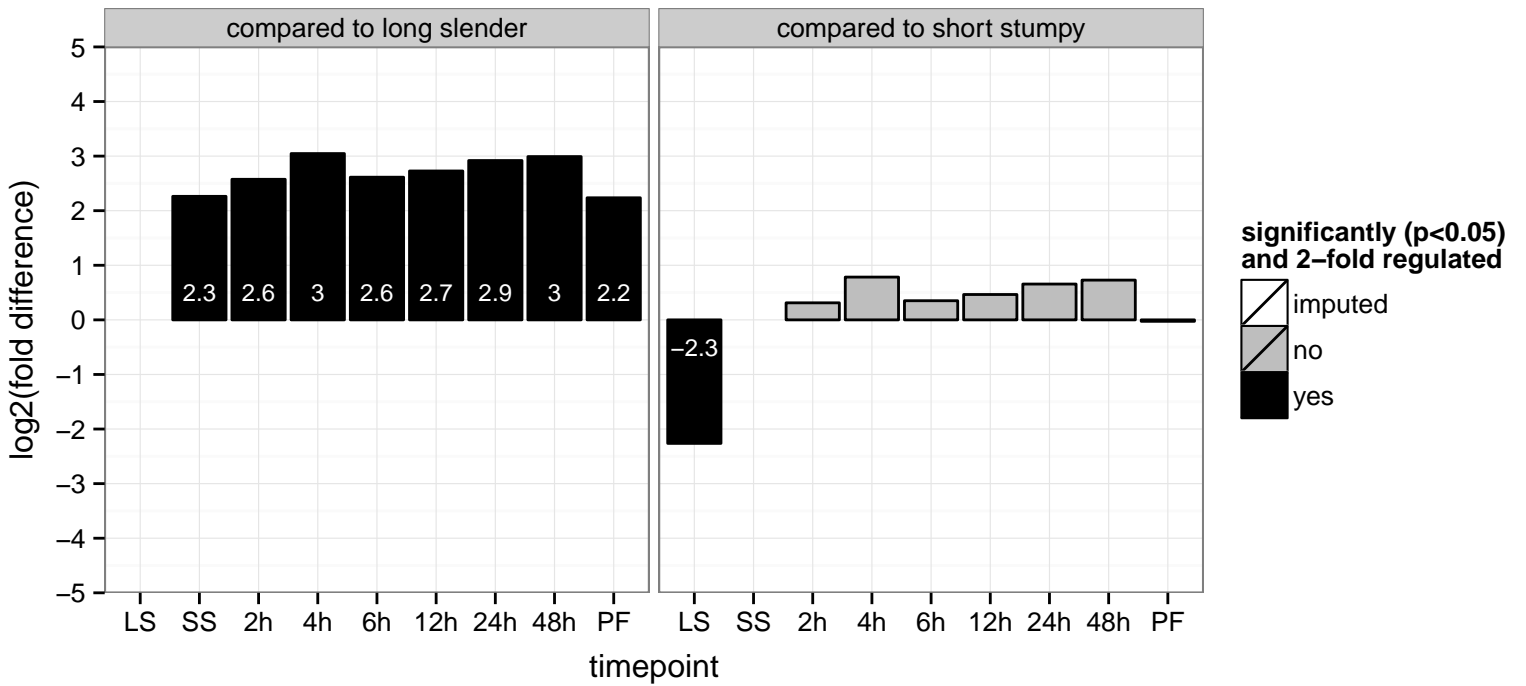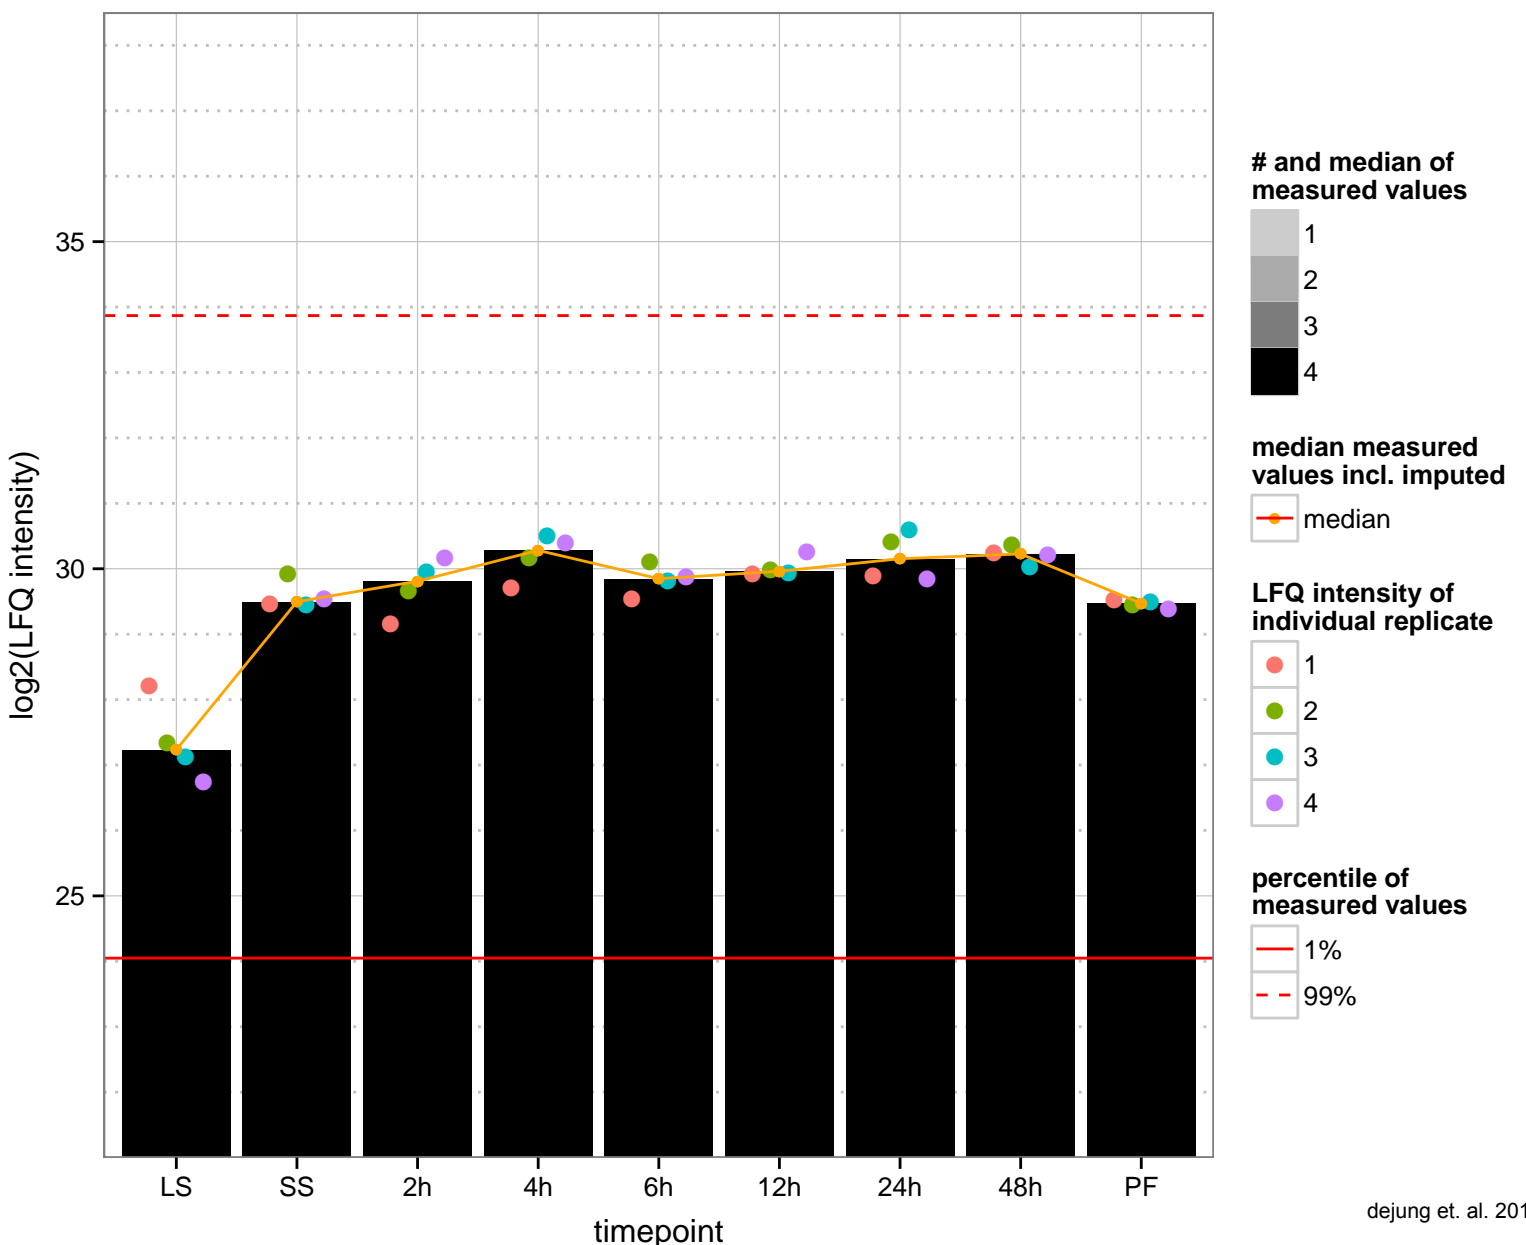

RNA-binding protein, putative (LA)  
 Tb927.10.2370  
 AGOF: RNA binding  
 AGOC: nucleus, ribonucleoprotein complex  
 AGOP: RNA processing  
 PGO: nucleic acid binding  
 PGO: null  
 PGO: null

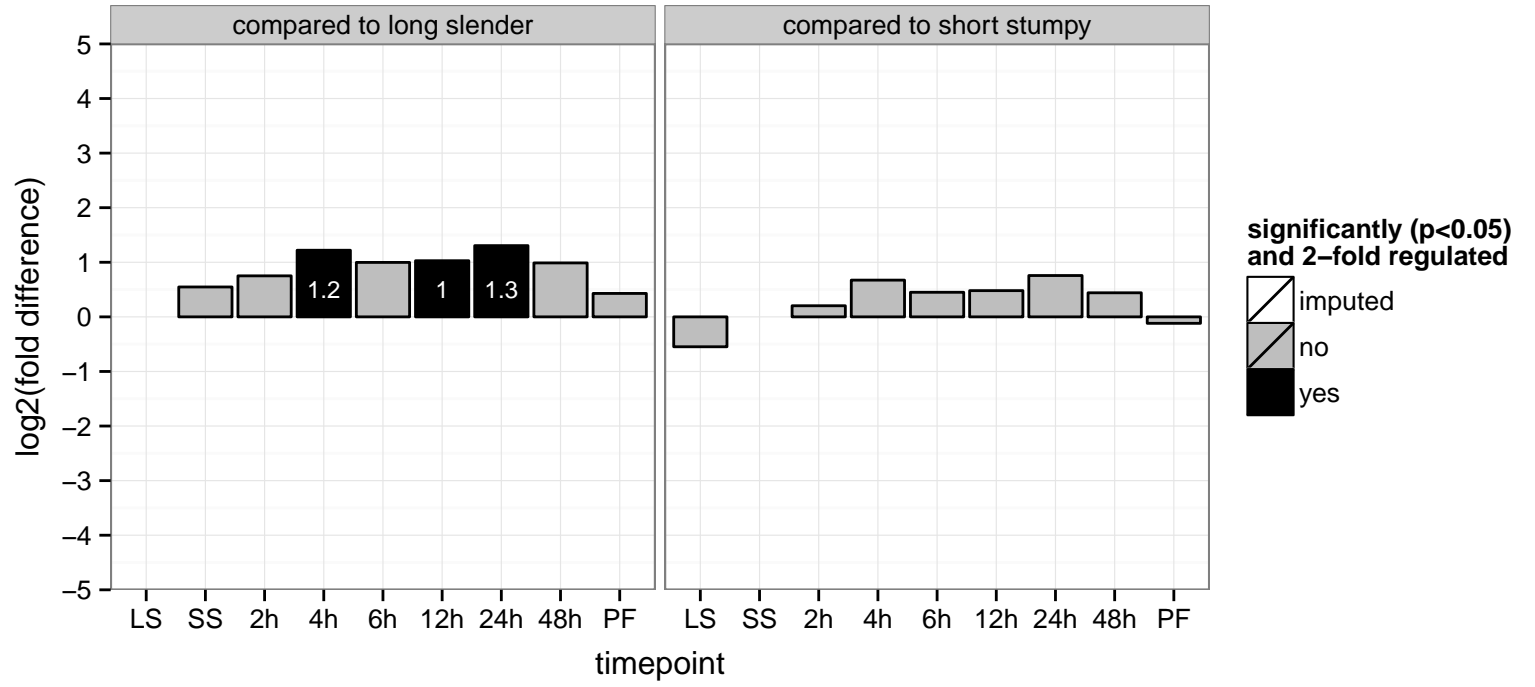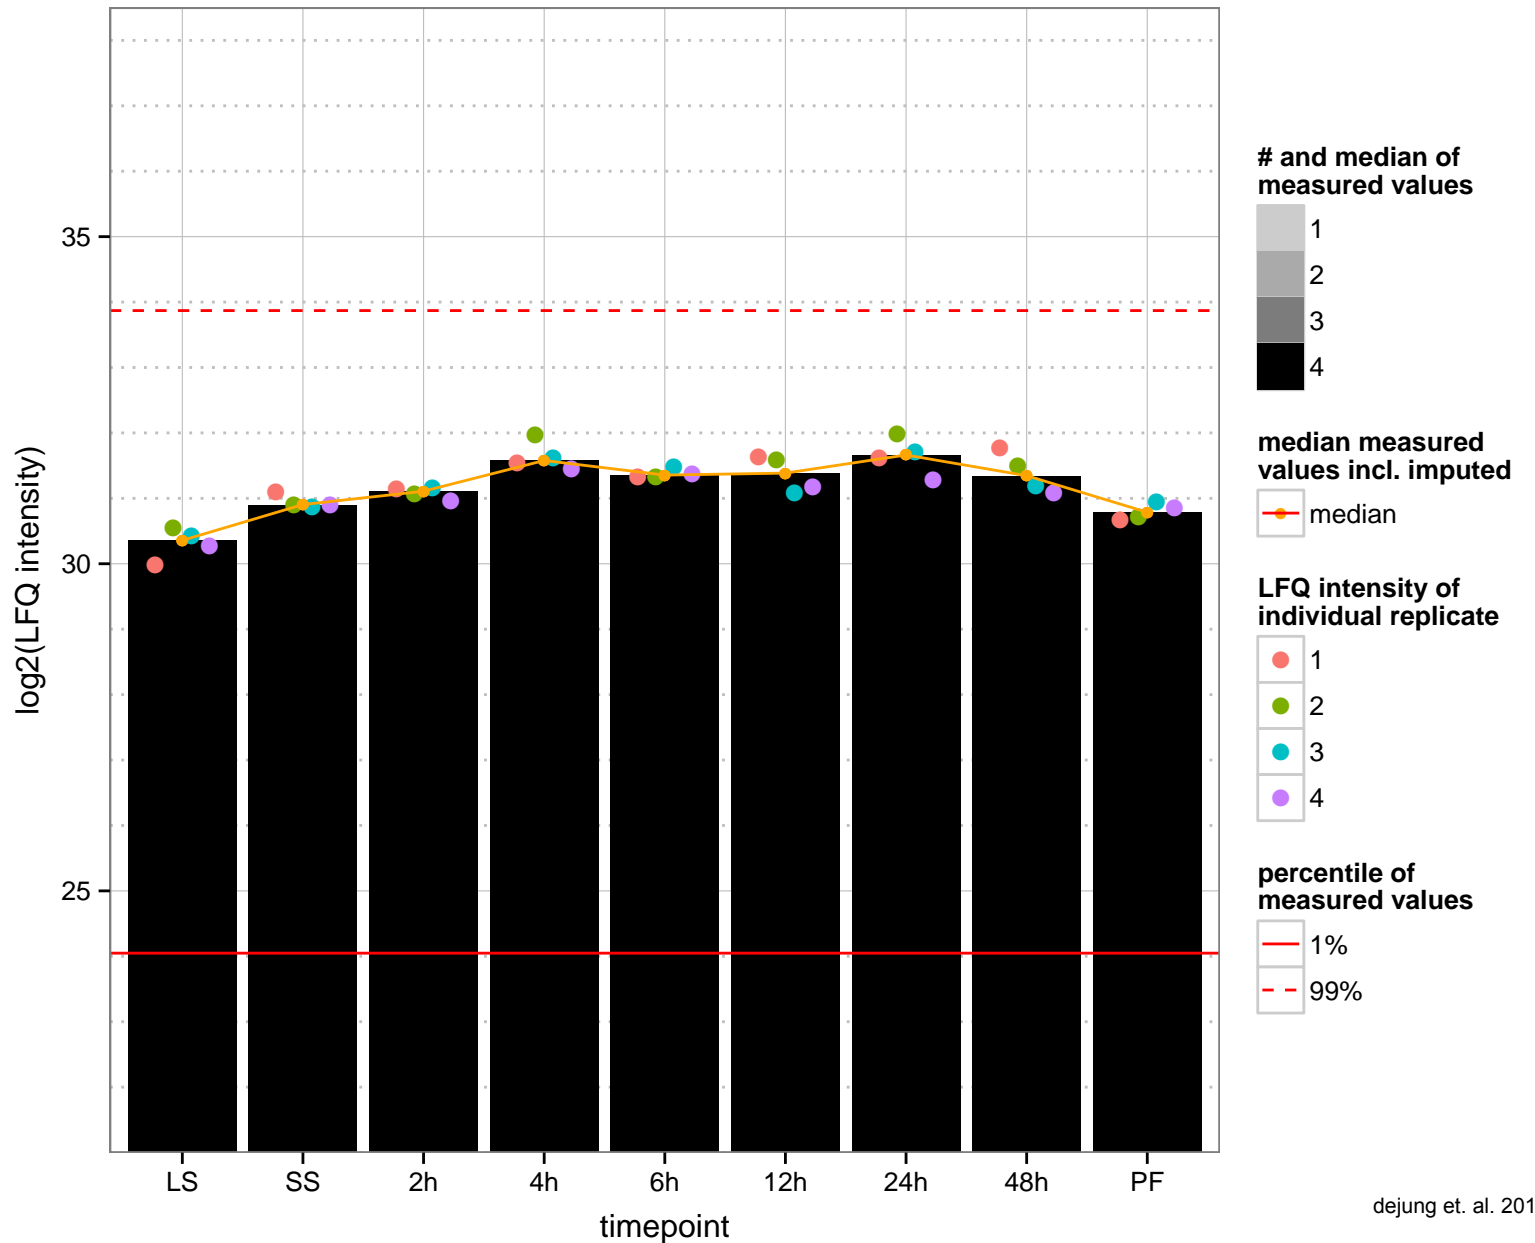

hypothetical protein, conserved  
 Tb927.10.2380  
 AGOF: null  
 AGOC: null  
 AGOP: null  
 PGOF: protein binding  
 PGO: null  
 PGOP: null

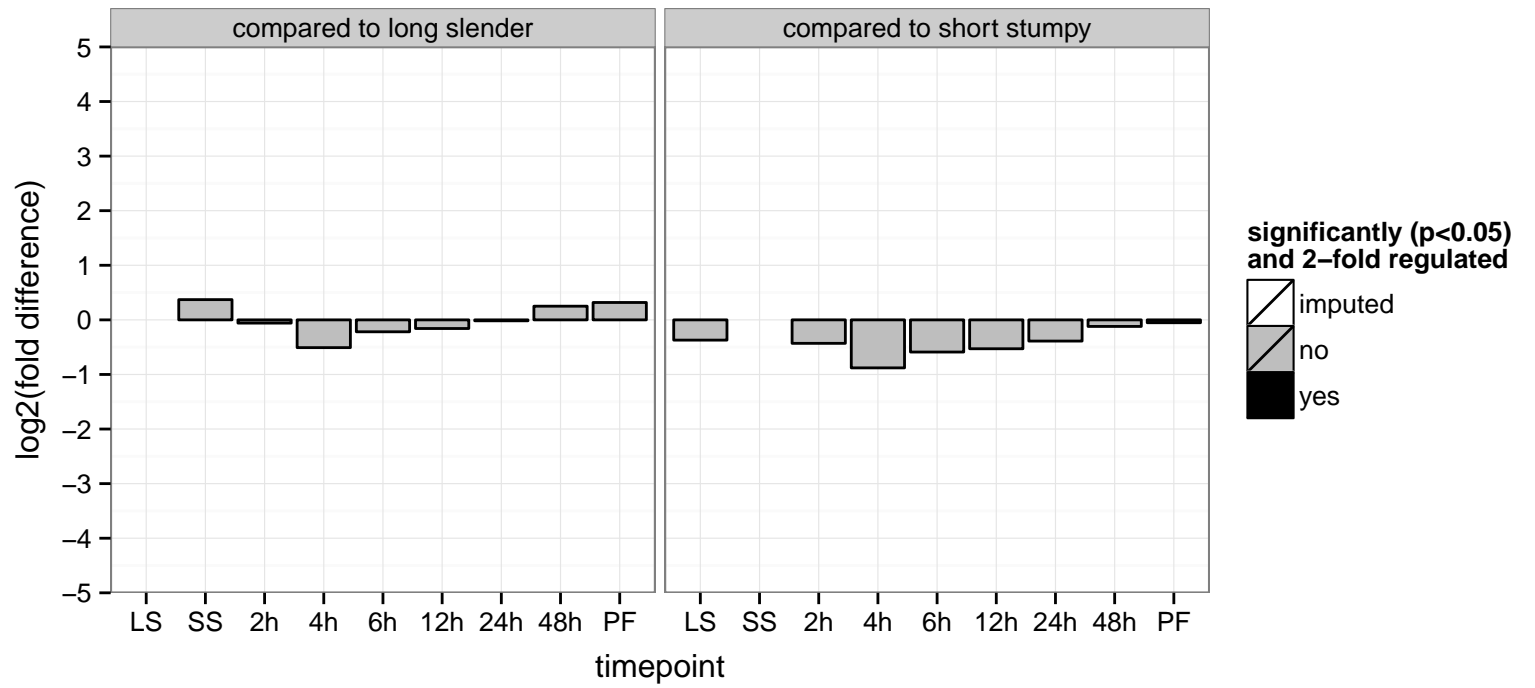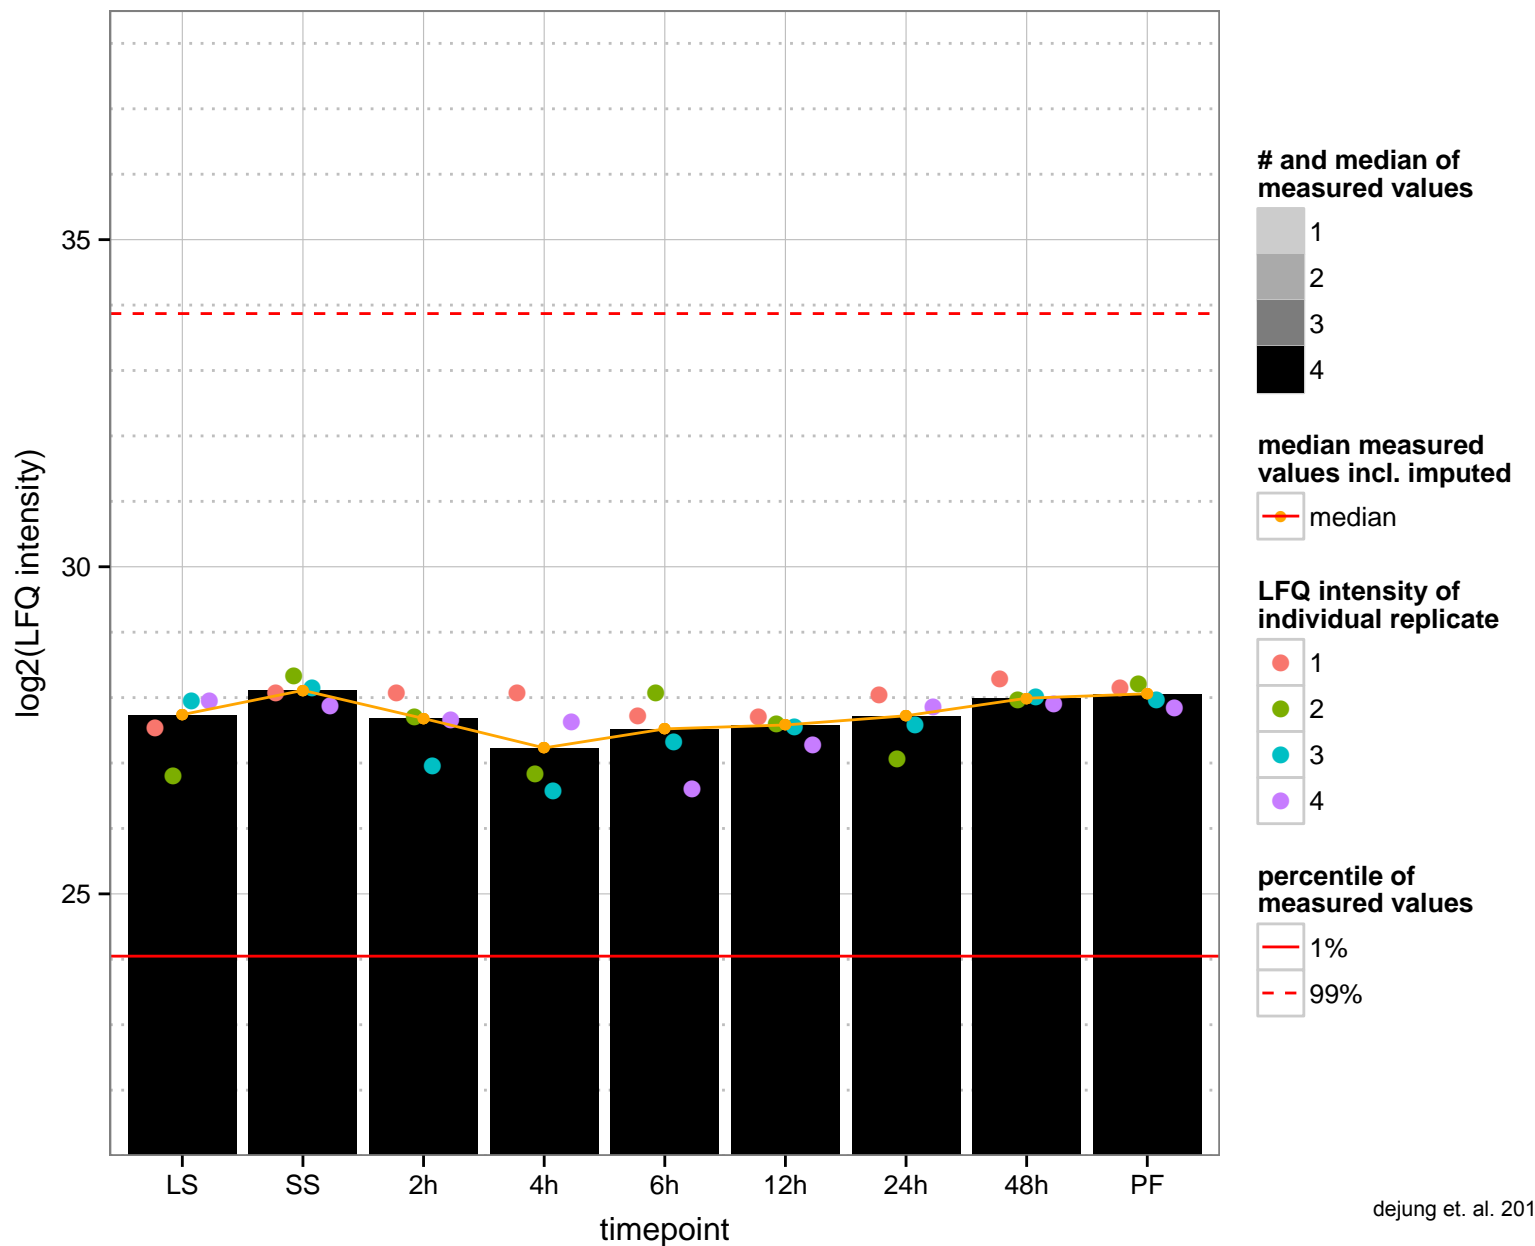



hypothetical protein, conserved  
 Tb927.10.2470  
 AGOF: null  
 AGOC: null  
 AGOP: null  
 PGO: null  
 PGOC: null  
 PGOP: null

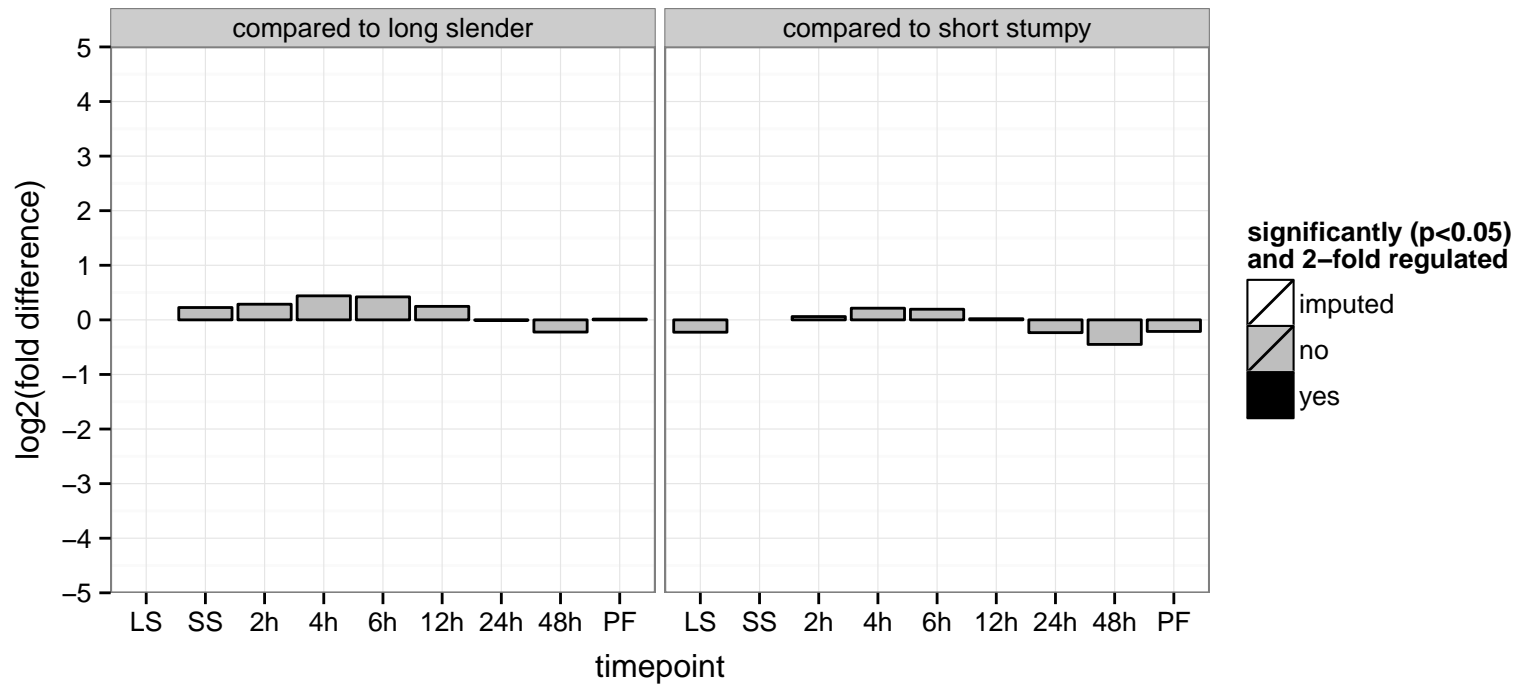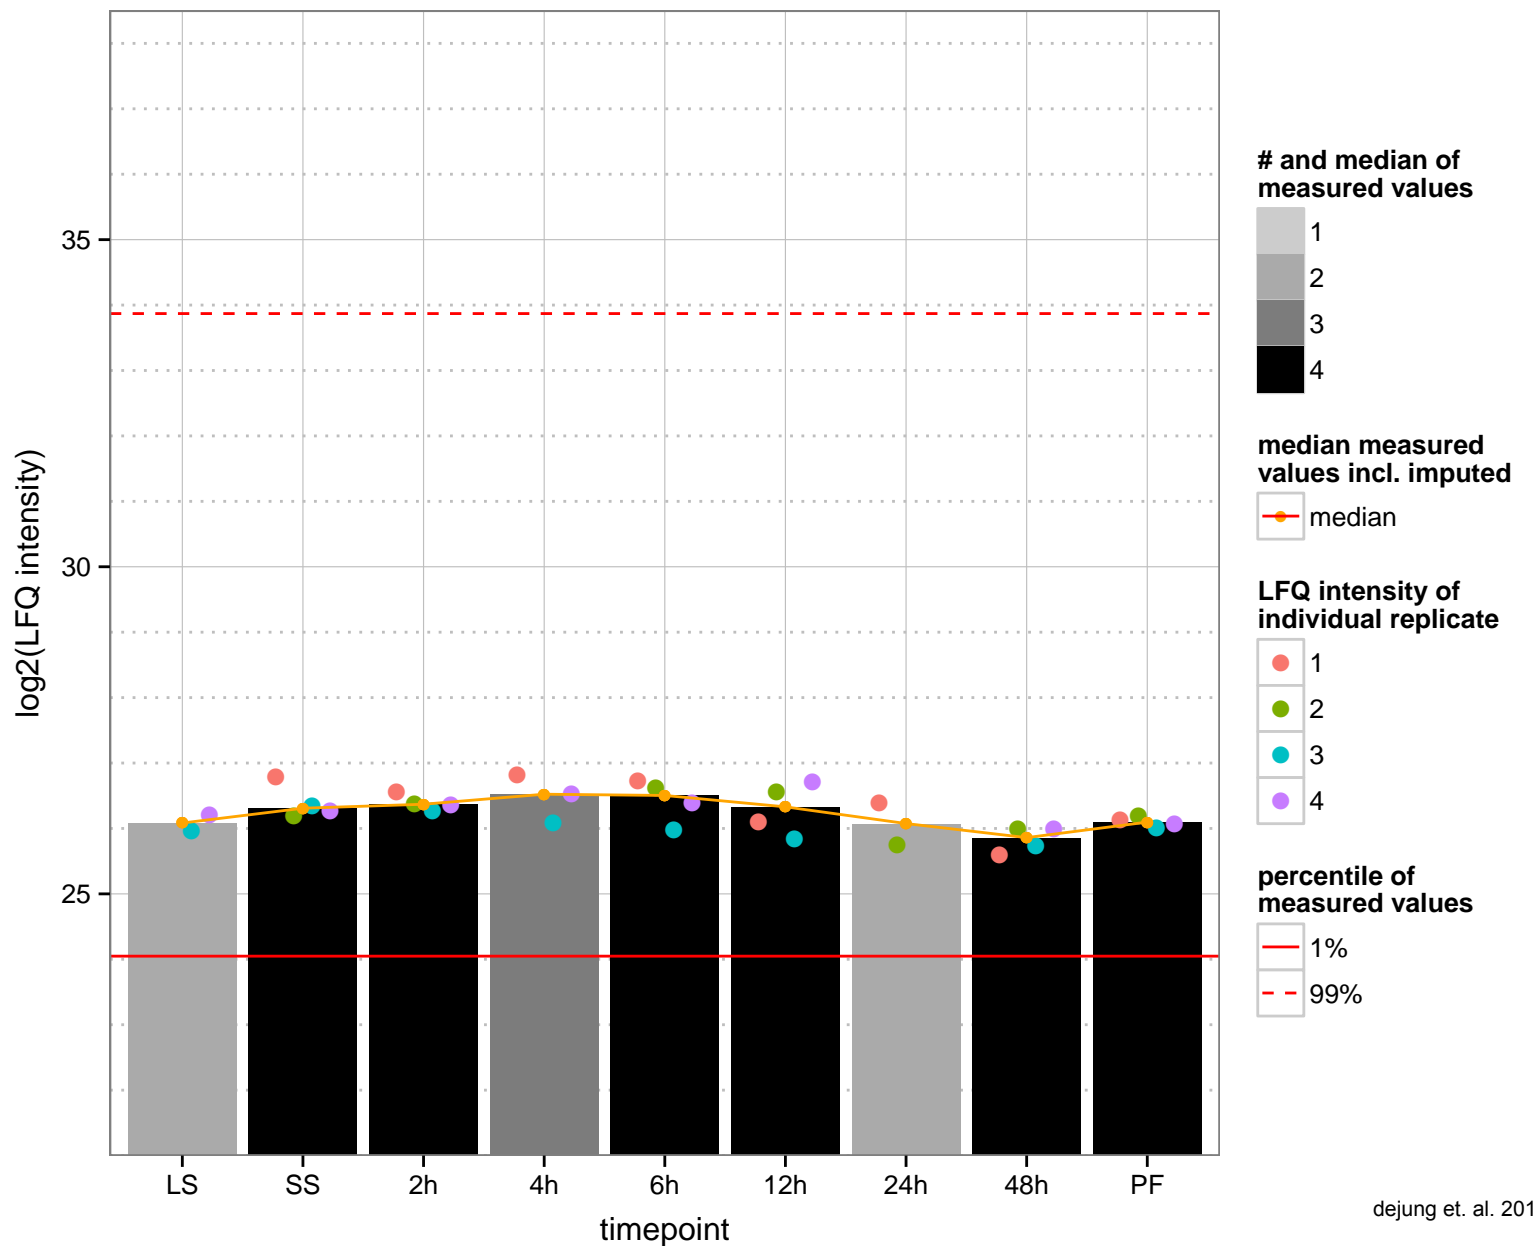

adenylate kinase, putative

Tb927.10.2530

AGOF: ATP binding, adenylate kinase activity

AGOC: null

AGOP: nucleobase-containing compound metabolic process, purine ribonucleotide biosynthetic process

PGOF: ATP binding, adenylate kinase activity, nucleobase-containing compound kinase activity, nucleotide kinase activity, ph

PGOC: null

PGOP: nucleobase-containing compound metabolic process, nucleotide phosphorylation

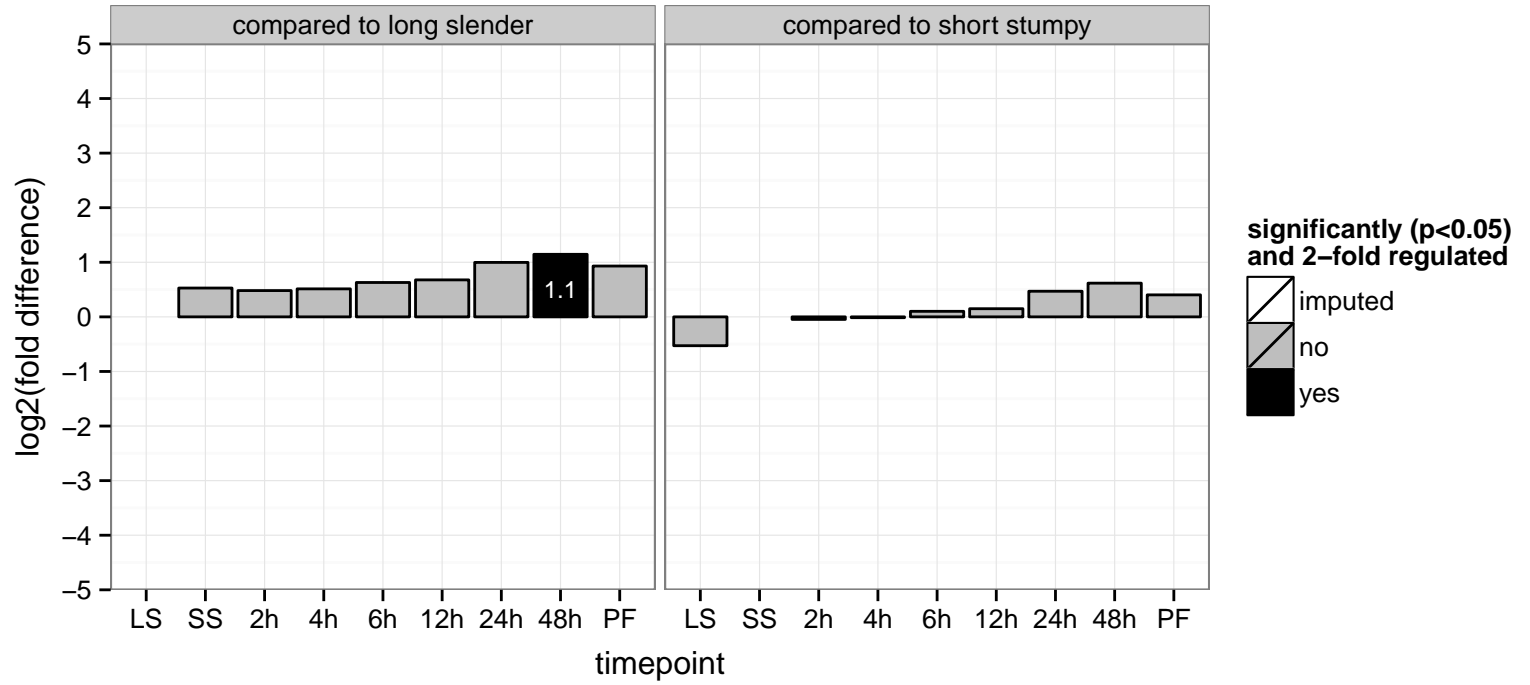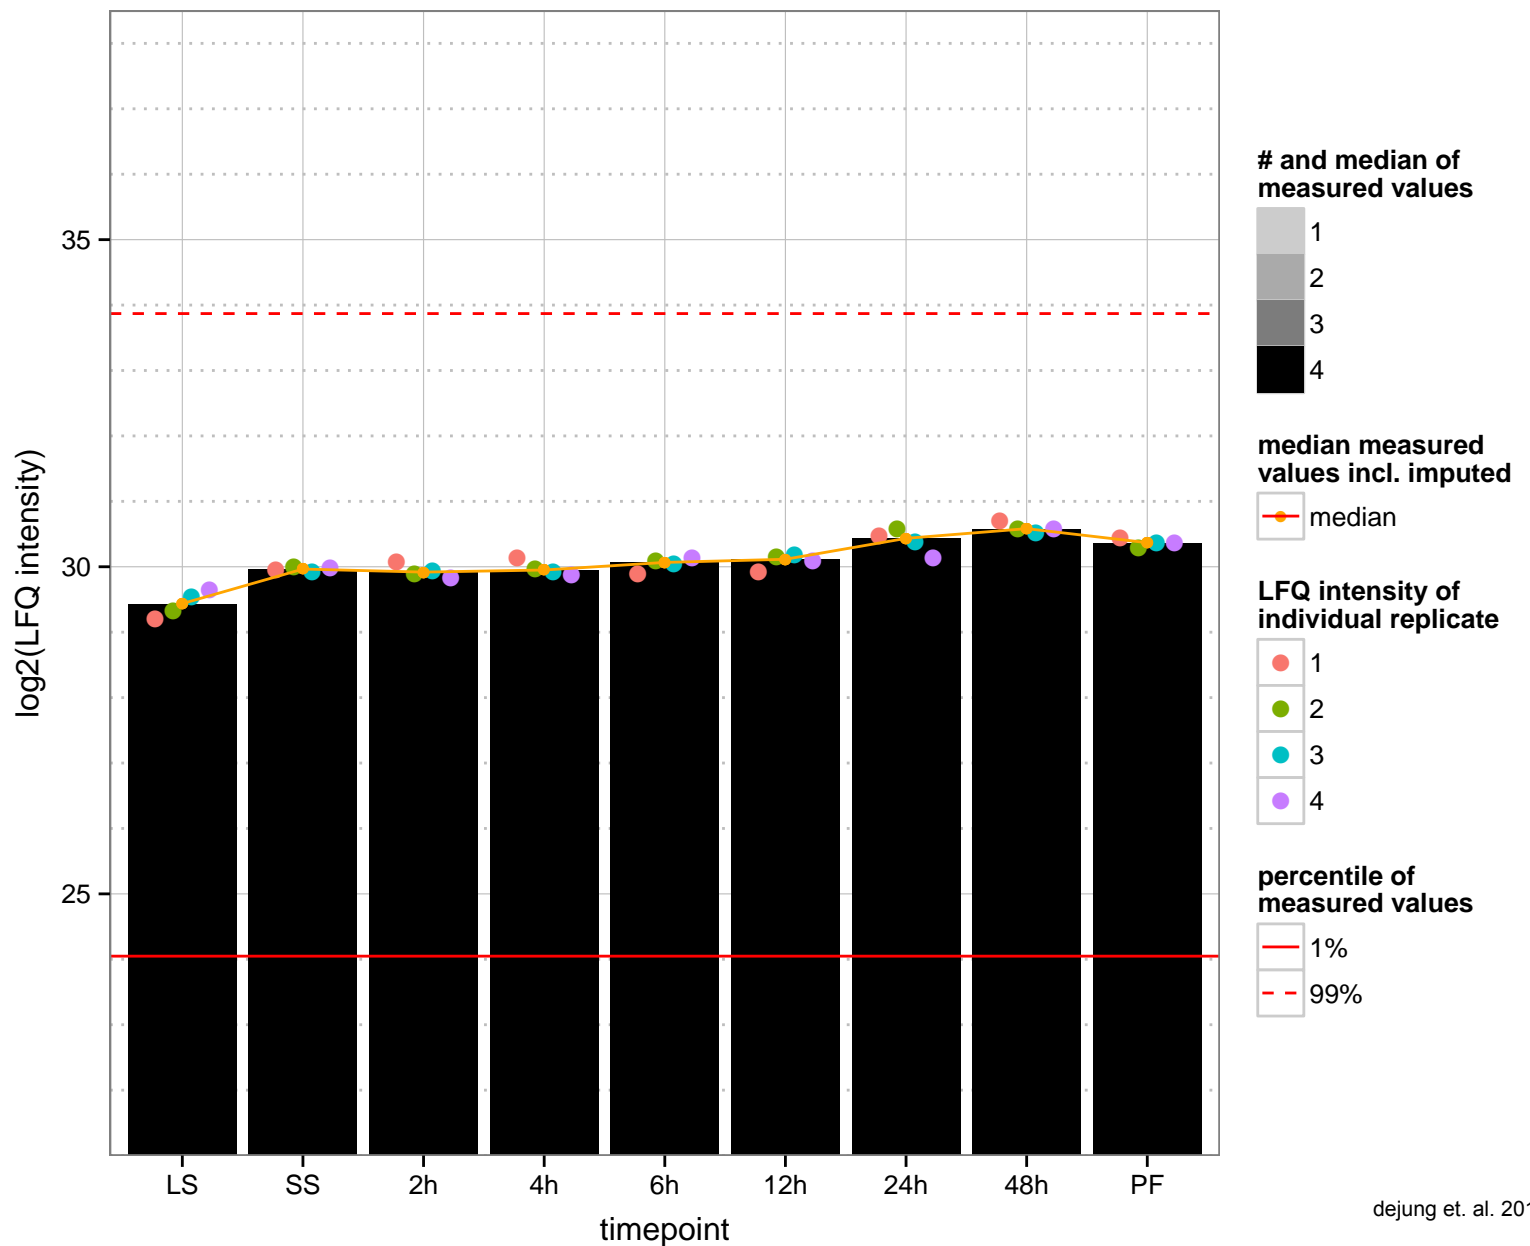

adenylate kinase, putative

Tb927.10.2540

AGOF: ATP binding, adenylate kinase activity

AGOC: cytosol, glycosome, mitochondrion

AGOP: nucleobase-containing compound metabolic process

PGOF: ATP binding, adenylate kinase activity, nucleobase-containing compound kinase activity

PGOC: null

PGOP: nucleobase-containing compound metabolic process

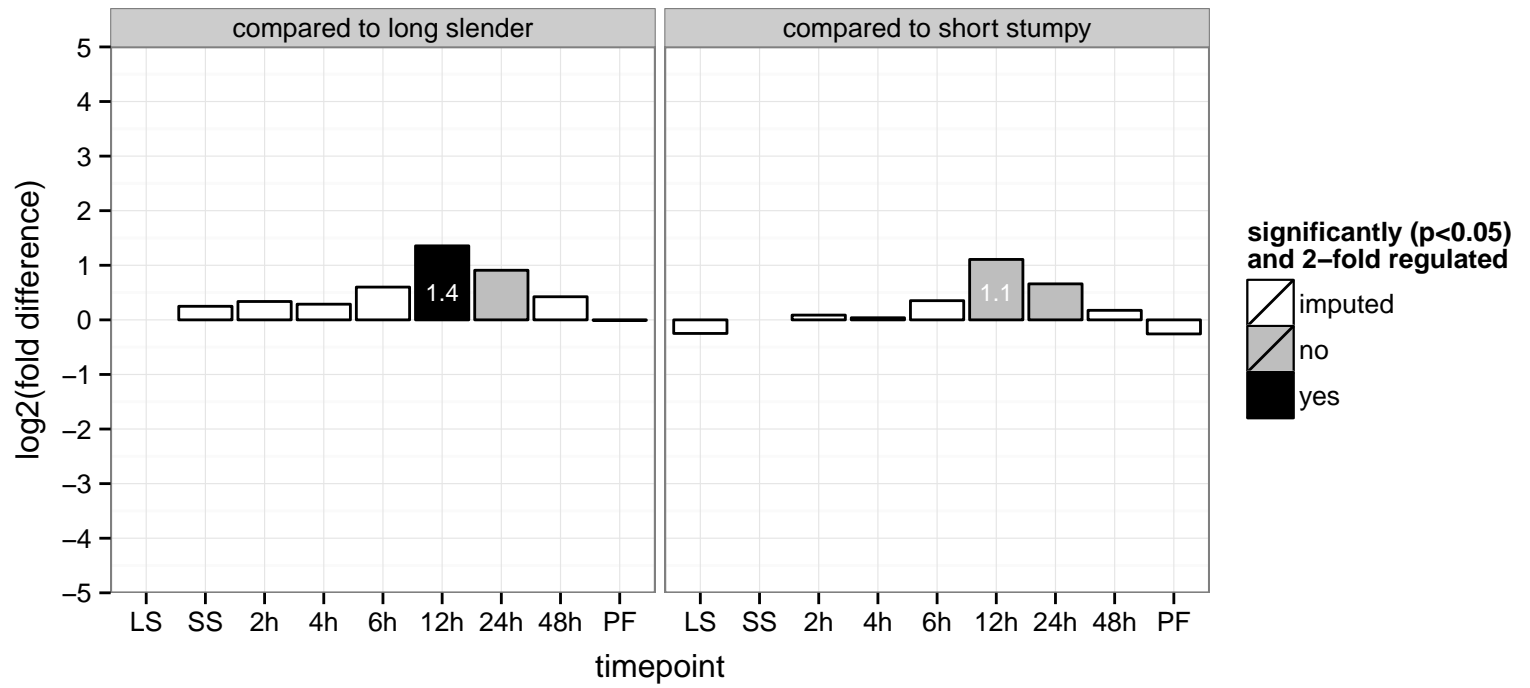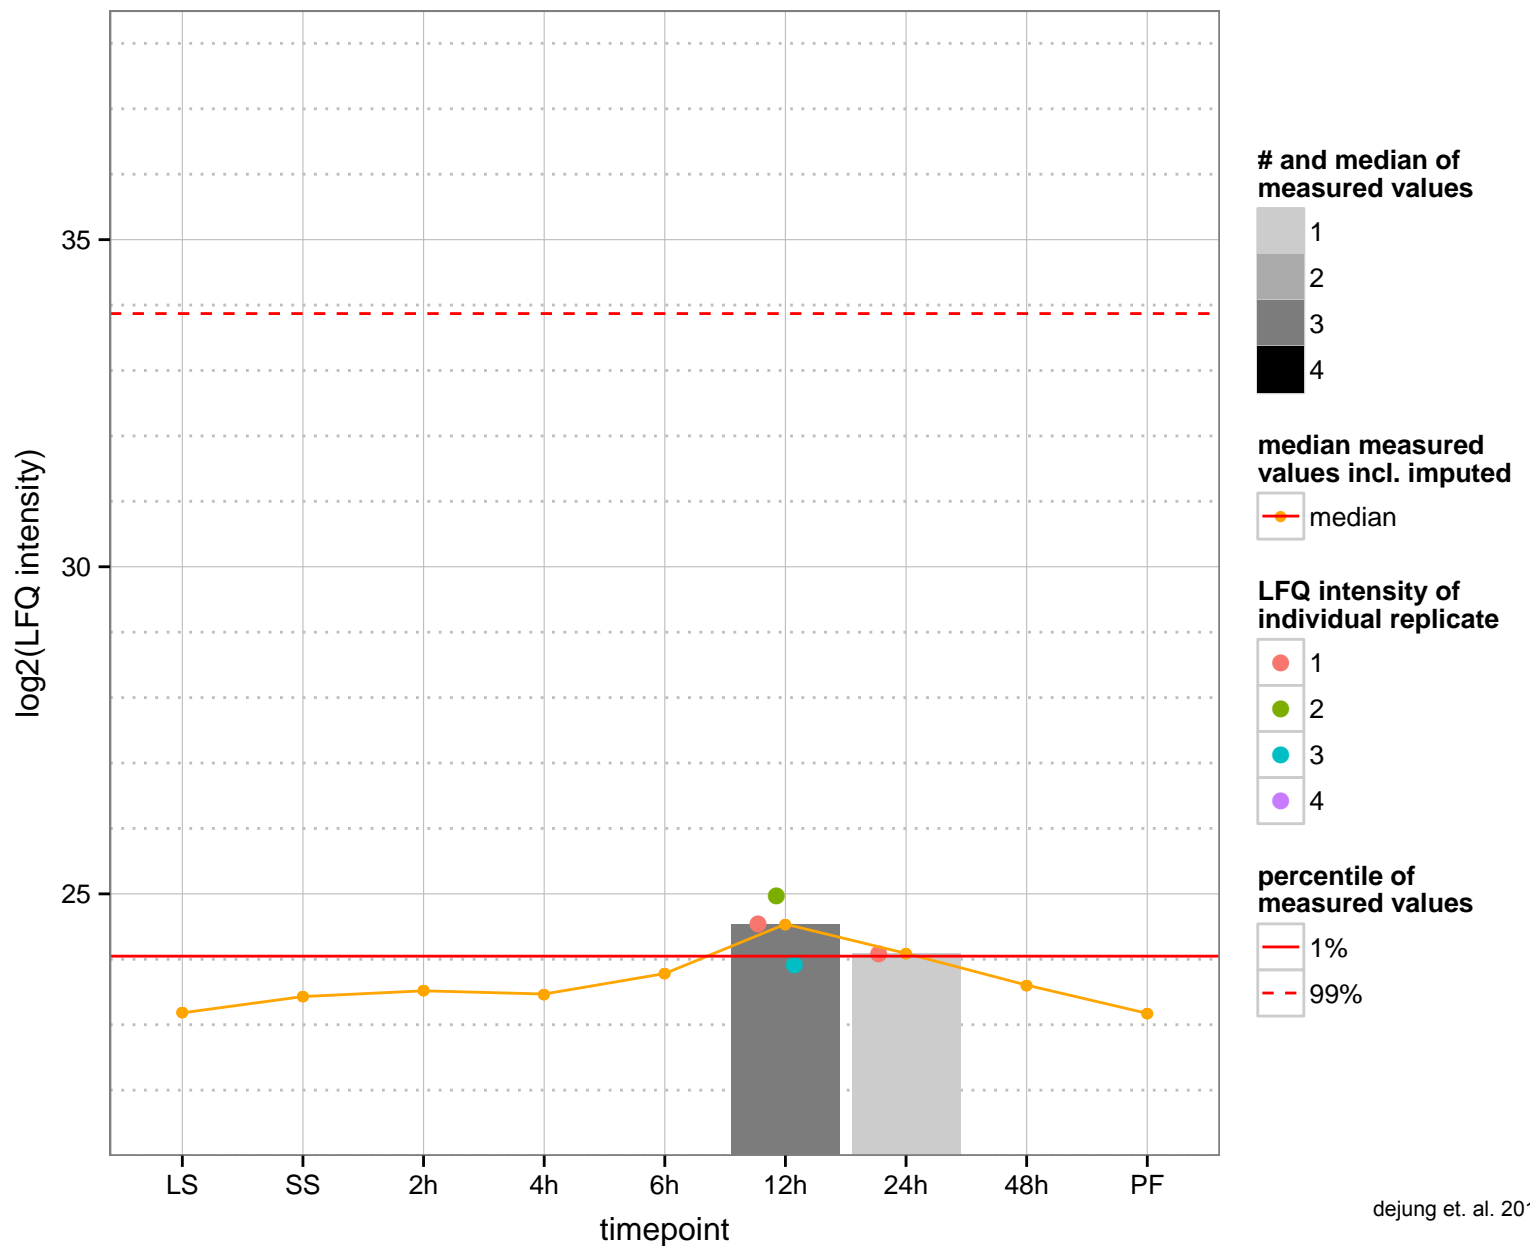

hypothetical protein, conserved  
 Tb927.10.2630  
 AGOF: null  
 AGOC: null  
 AGOP: null  
 PGO: null  
 PGOC: null  
 PGOP: null

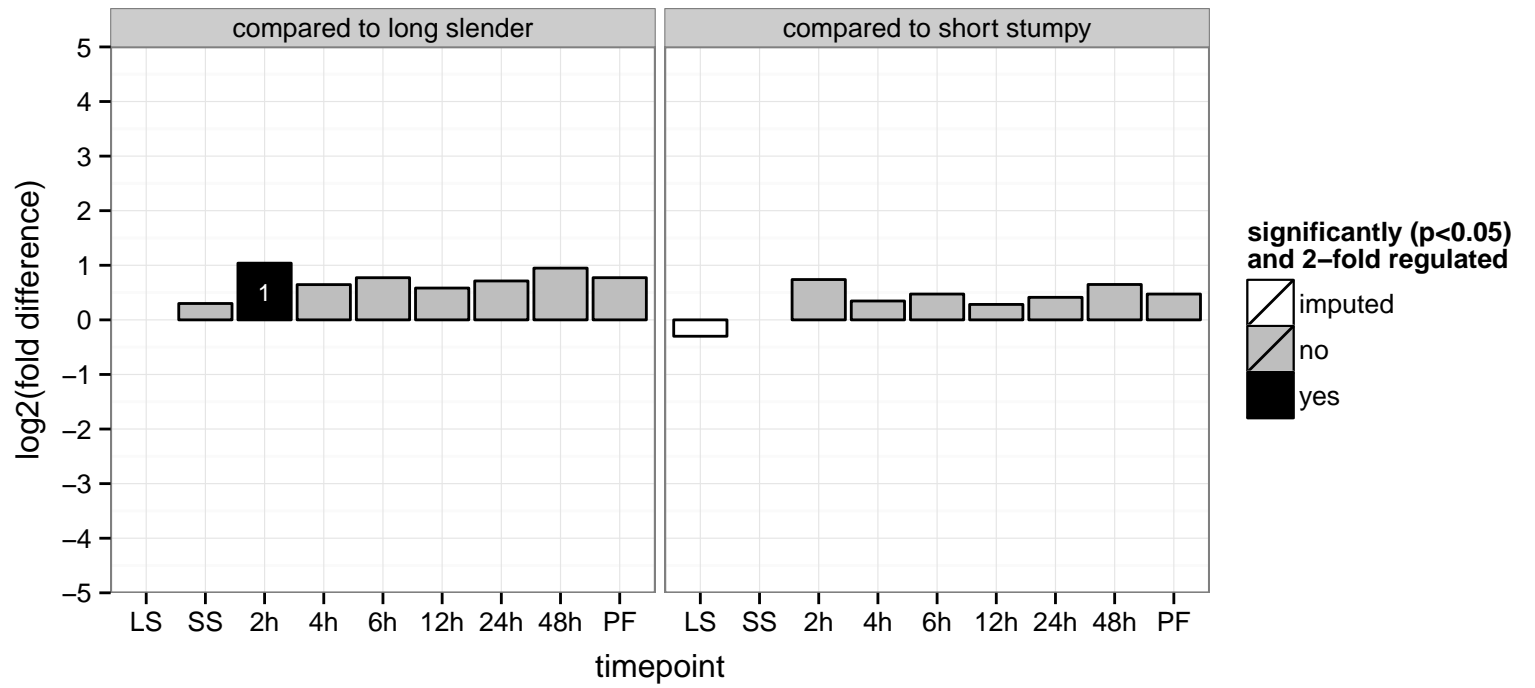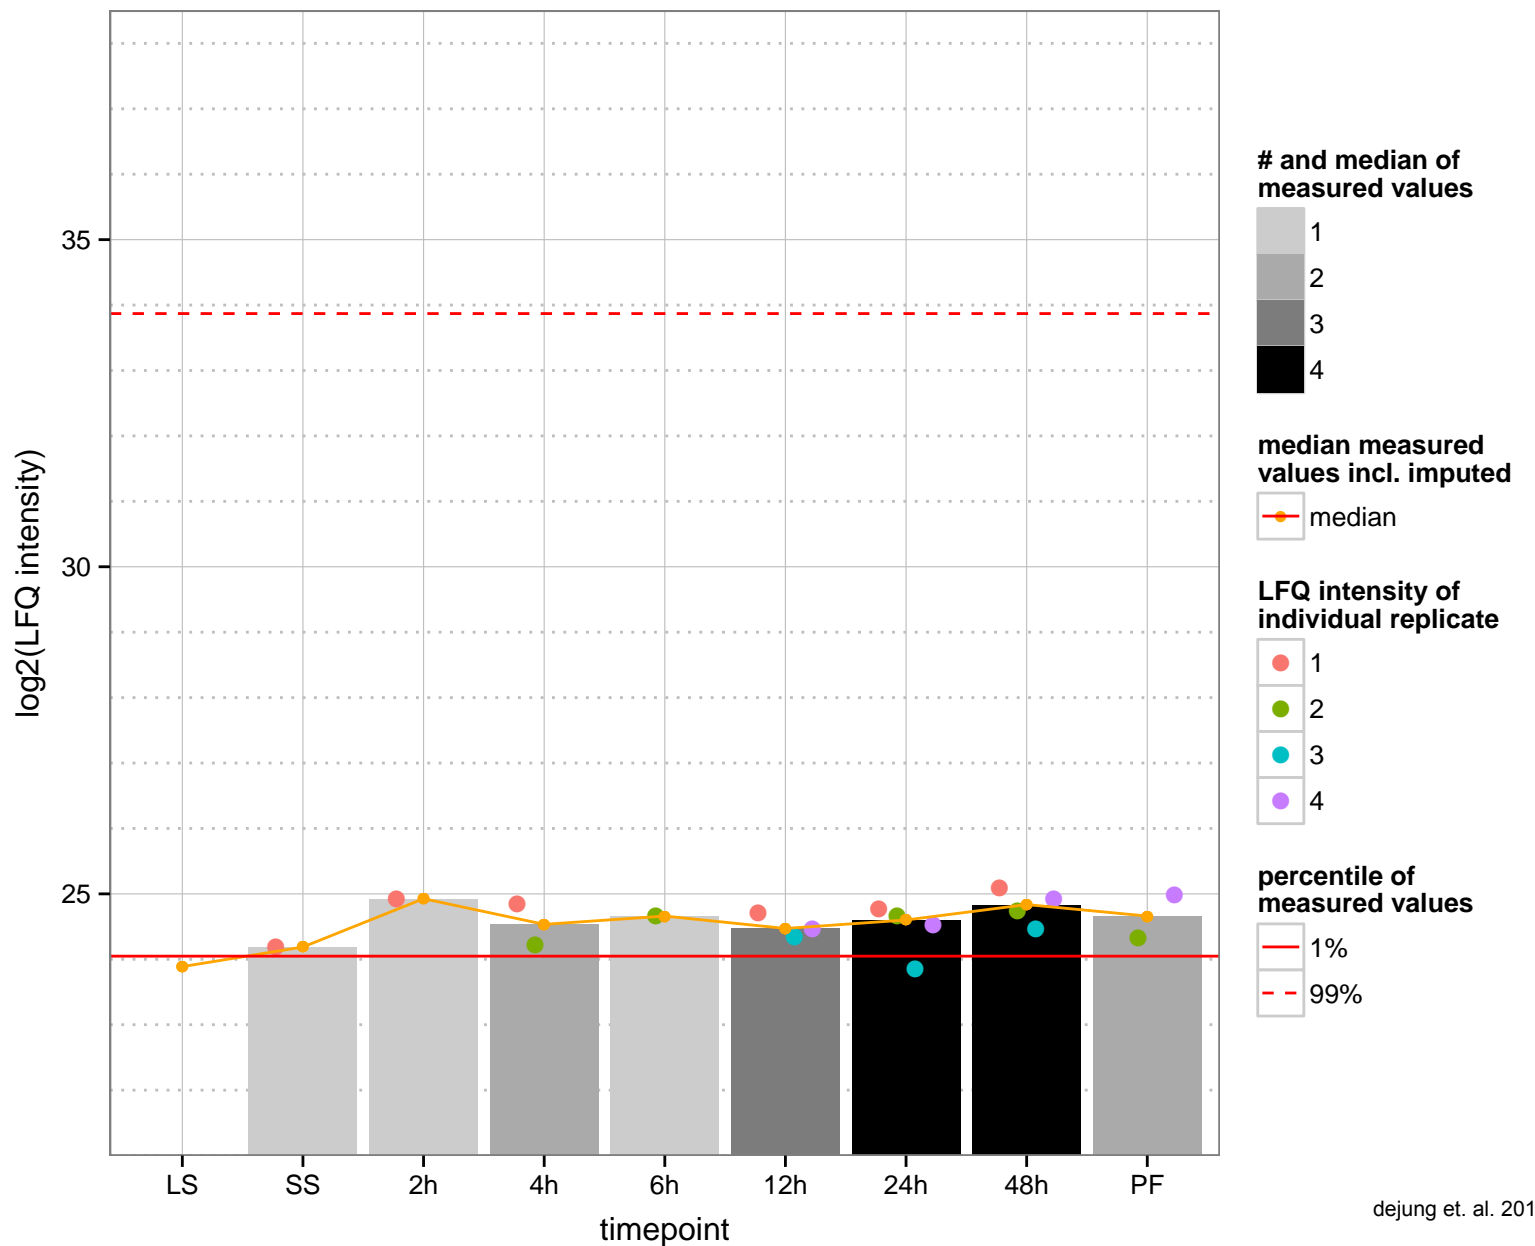

hypothetical protein, conserved, intraflagellar transport protein IFT81, putative  
 Tb927.10.2640;Tb11.v5.0525  
 AGOF: null  
 AGOC: null  
 AGOP: null  
 PGO: null  
 PGOC: null  
 PGOP: null

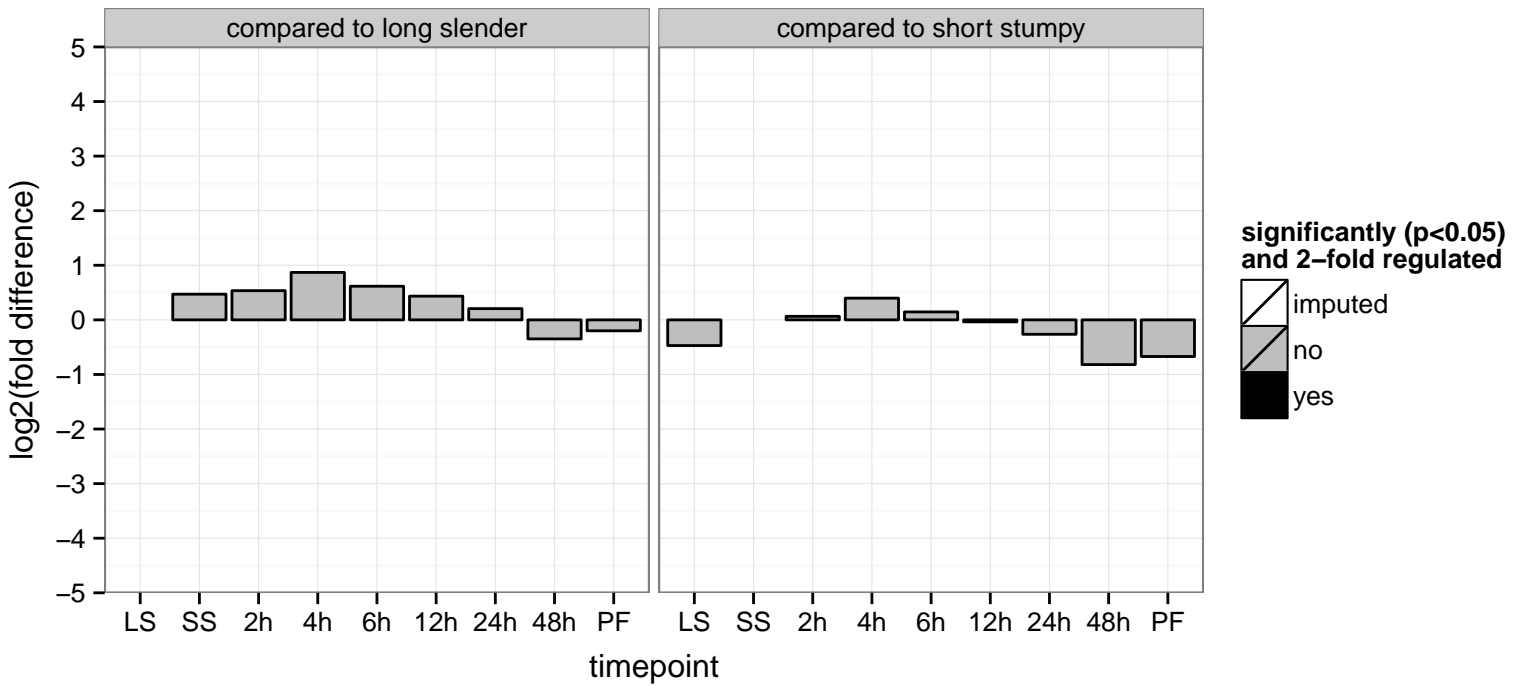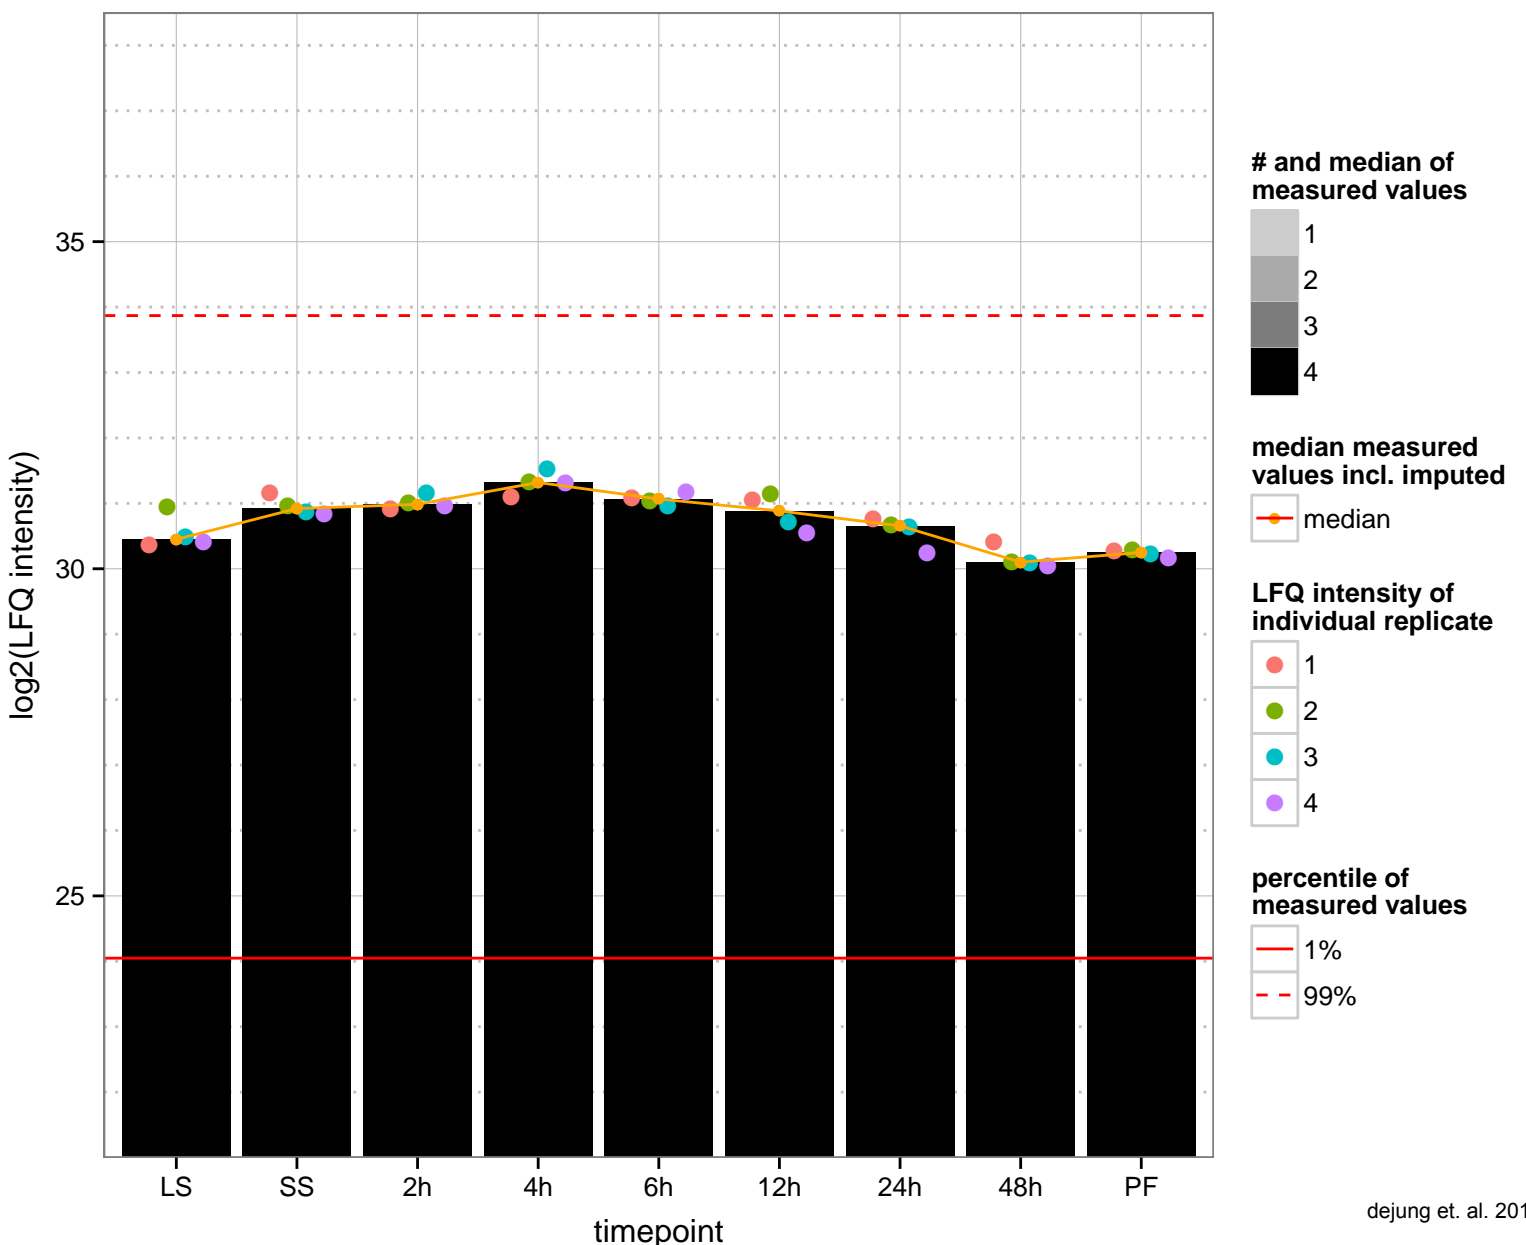

hypothetical protein, conserved  
 Tb927.10.2650  
 AGOF: null  
 AGOC: null  
 AGOP: null  
 PGOF: null  
 PGOC: null  
 PGOP: null

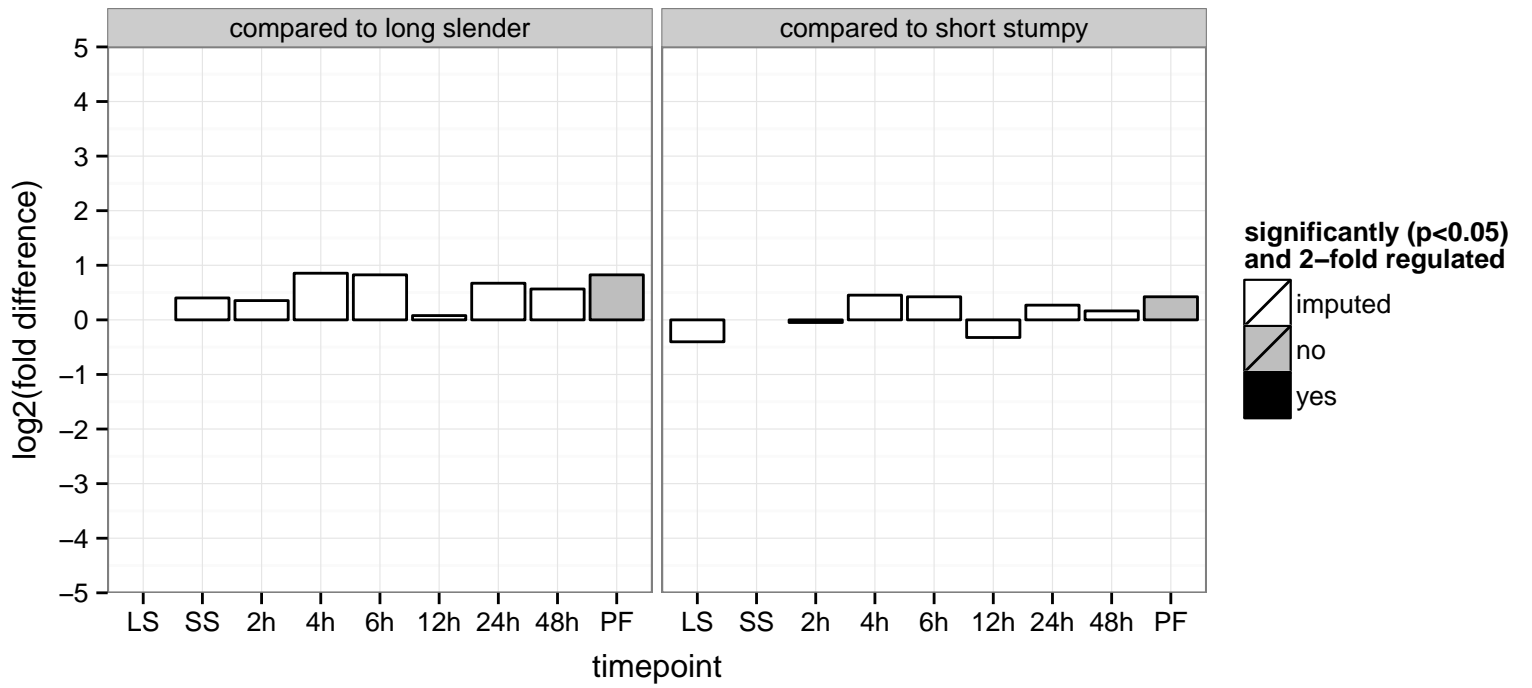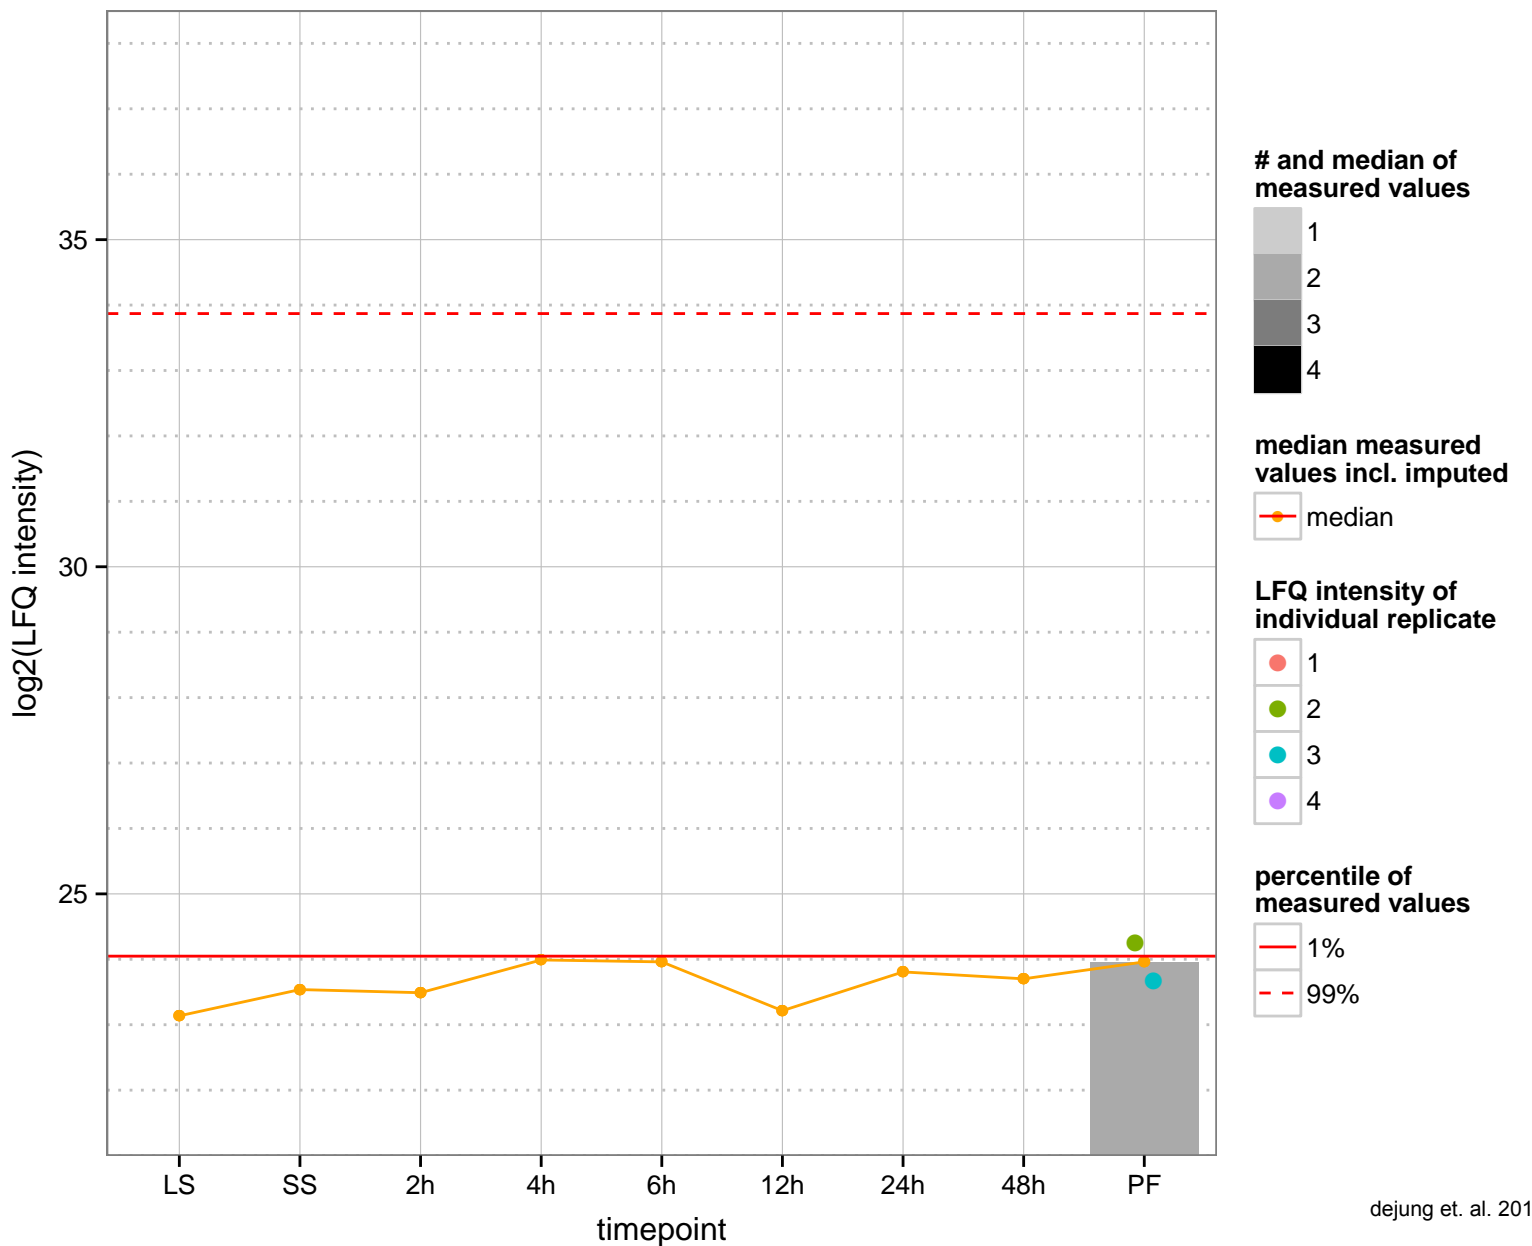

predicted WD40 repeat protein  
 Tb927.10.2700  
 AGOF: null  
 AGOC: null  
 AGOP: null  
 PGO: protein binding  
 PGO: null  
 PGO: null

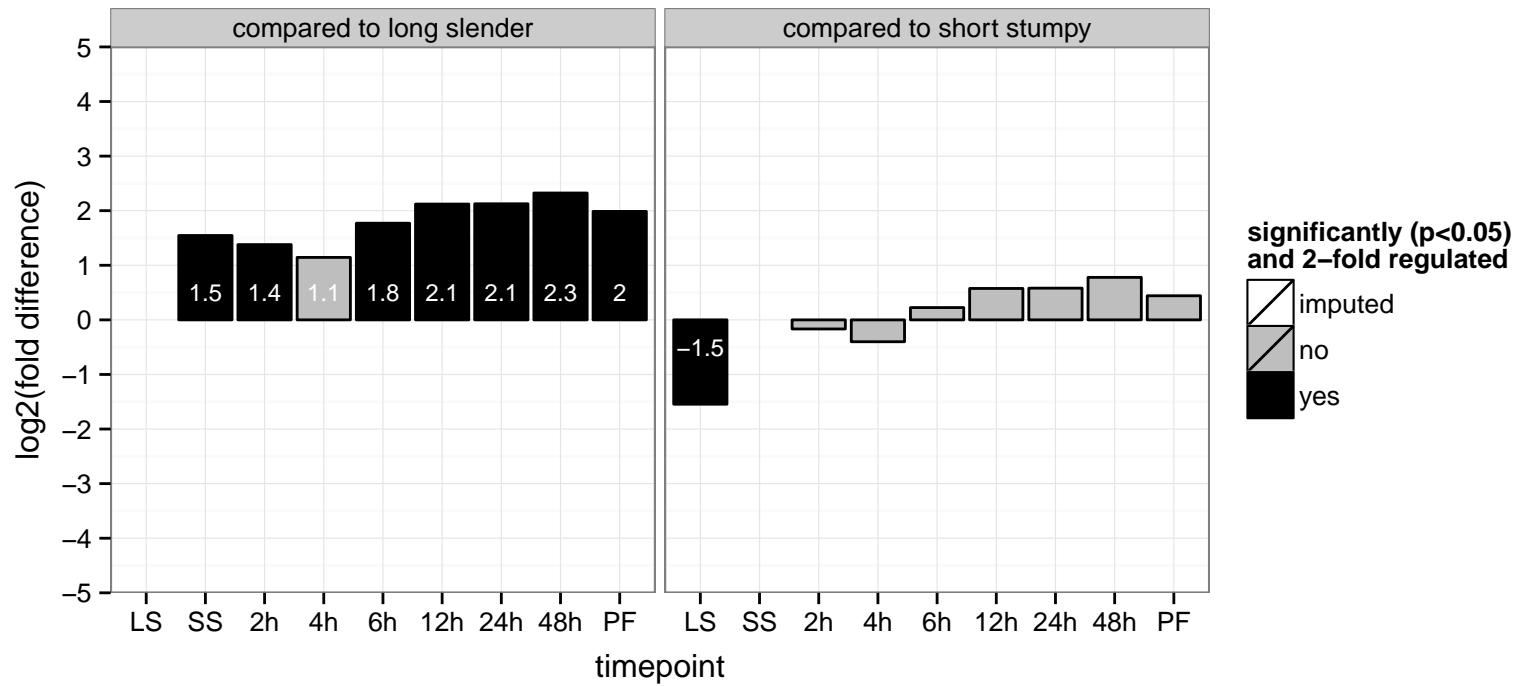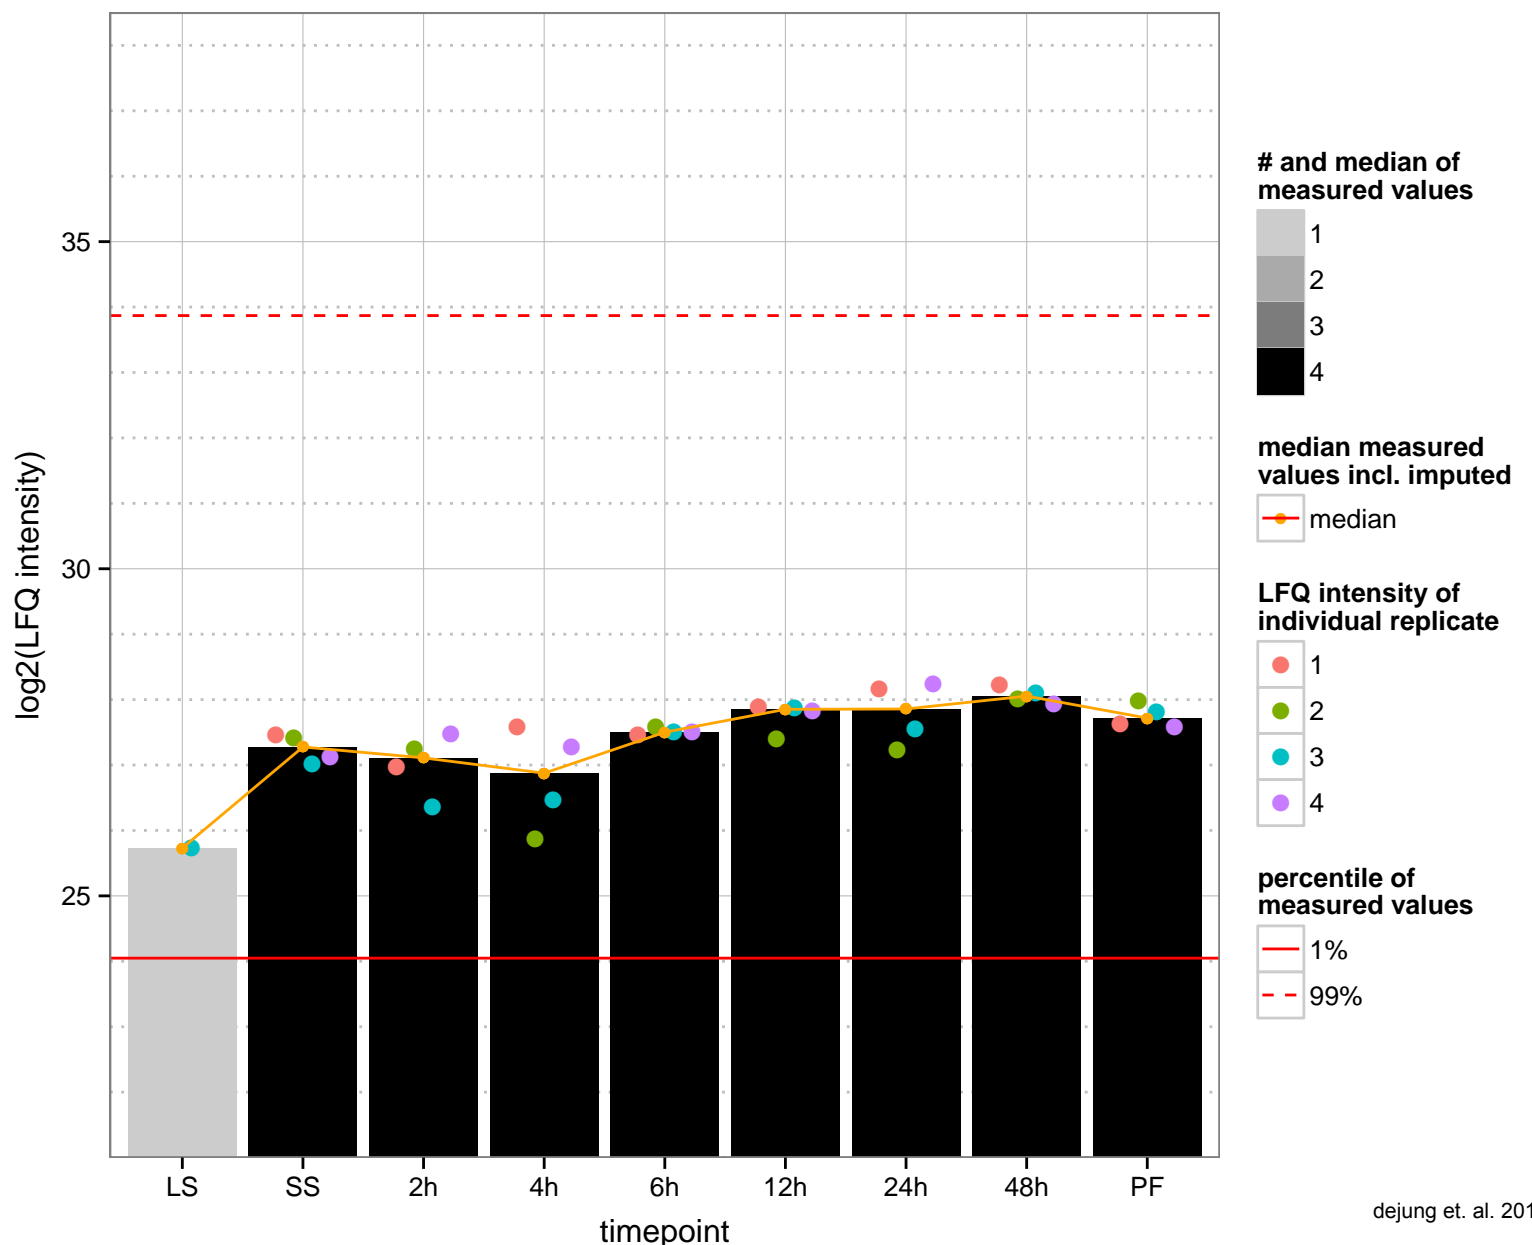

hypothetical protein, conserved  
 Tb927.10.2720  
 AGOF: RNA binding, pseudouridine synthase activity  
 AGOC: null  
 AGOP: pseudouridine synthesis  
 PGOF: RNA binding, pseudouridine synthase activity  
 PGOC: null  
 PGOP: RNA modification, pseudouridine synthesis

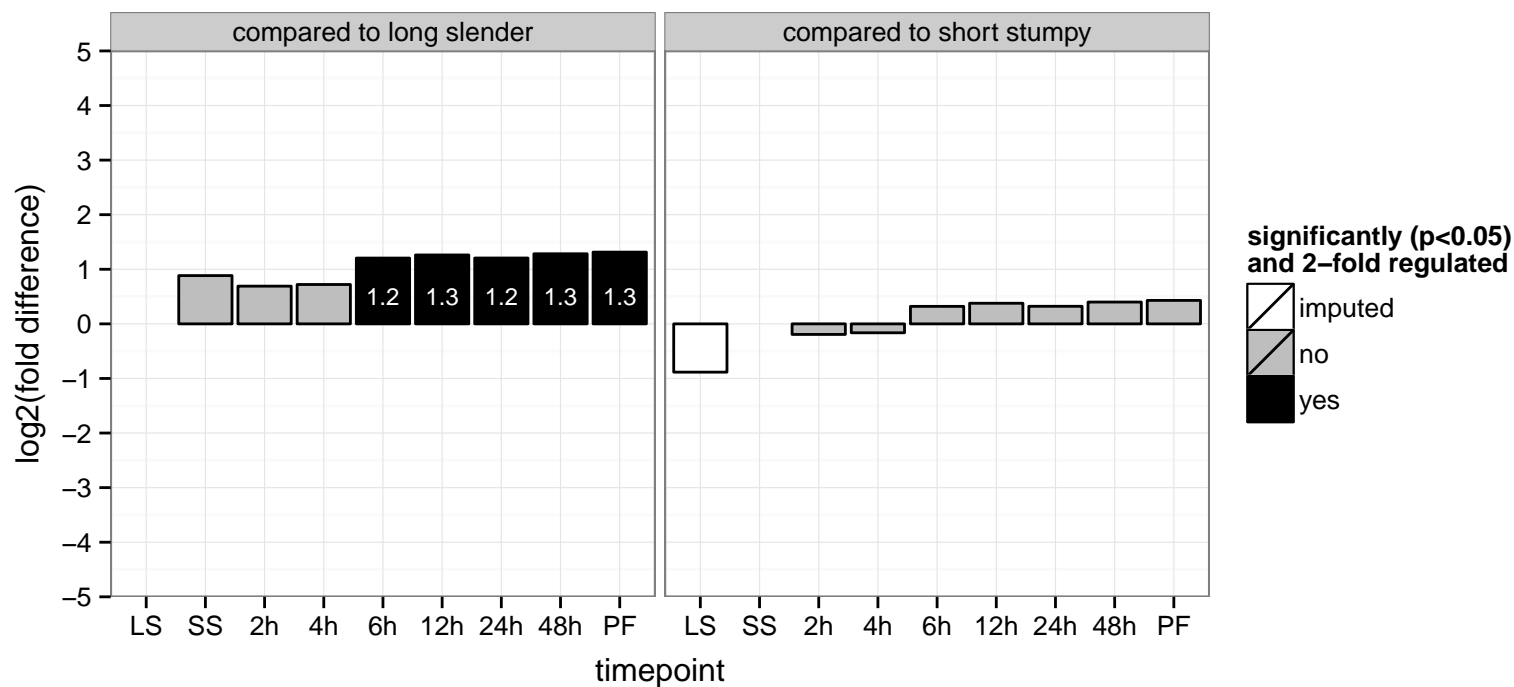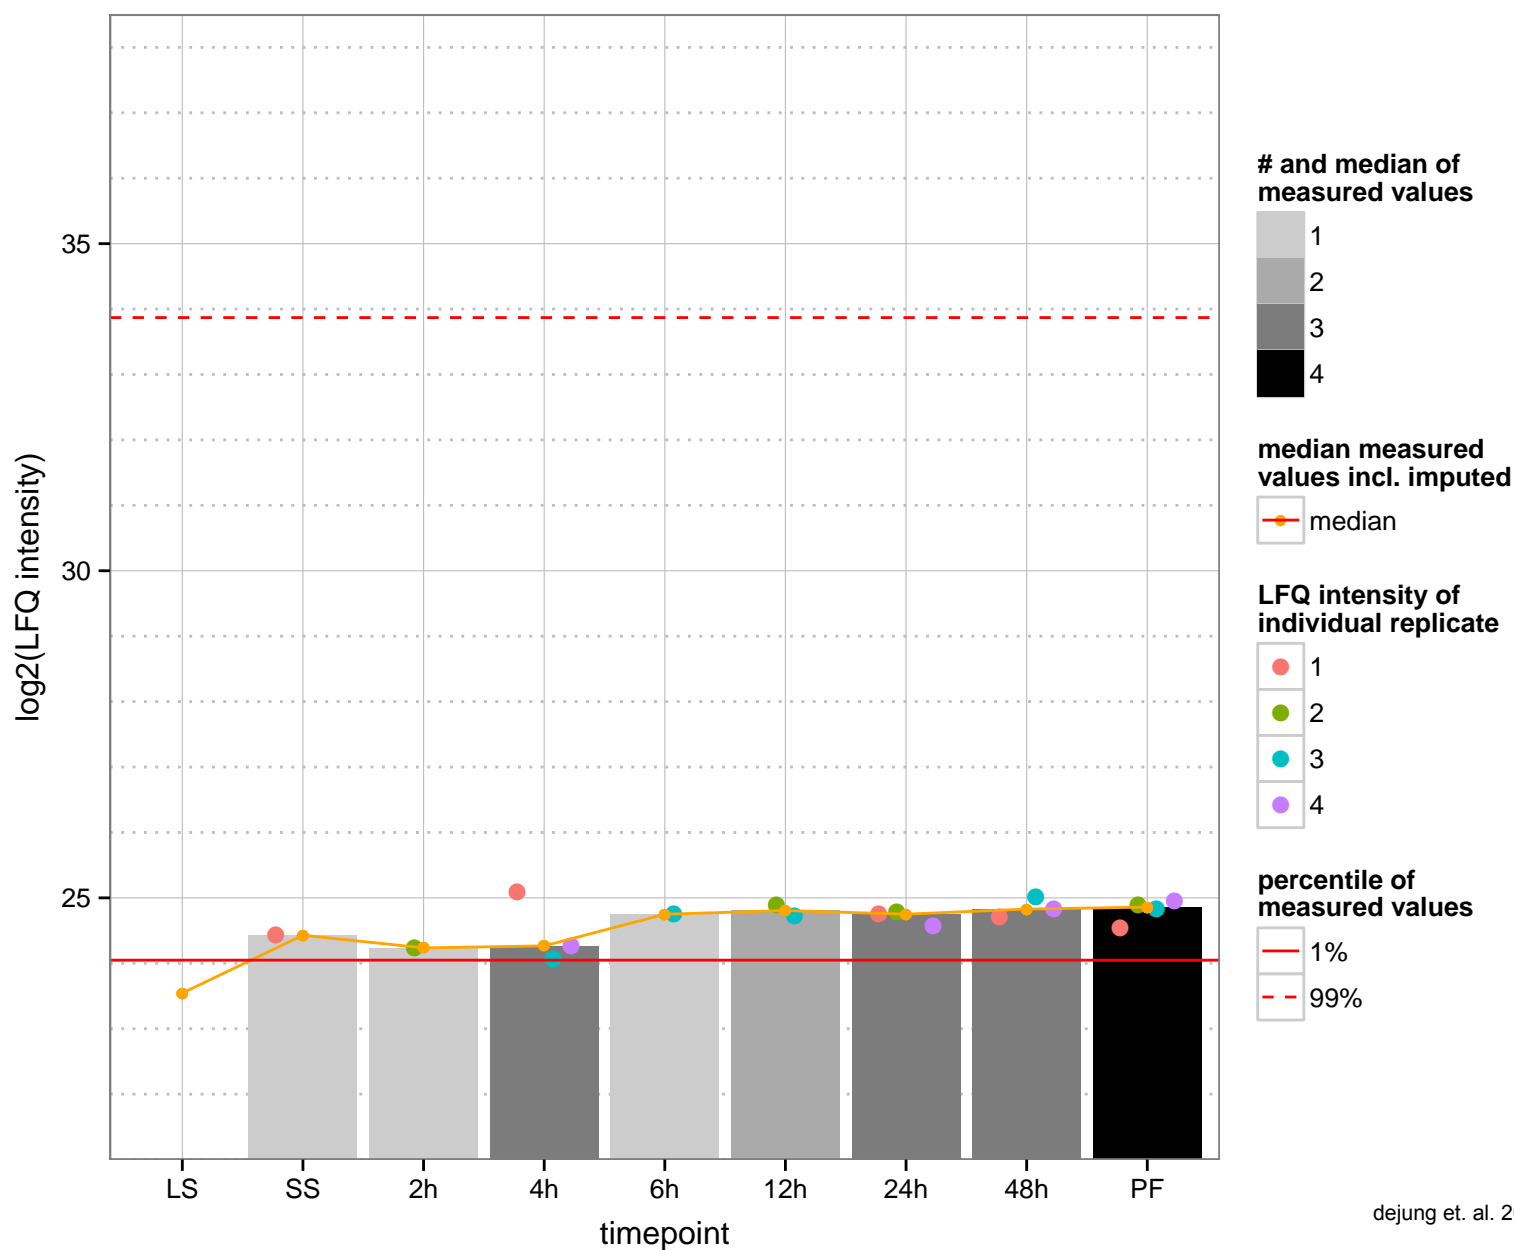



hypothetical protein, conserved  
 Tb927.10.2730  
 AGOF: null  
 AGOC: null  
 AGOP: null  
 PGO: null  
 PGOC: null  
 PGOP: null

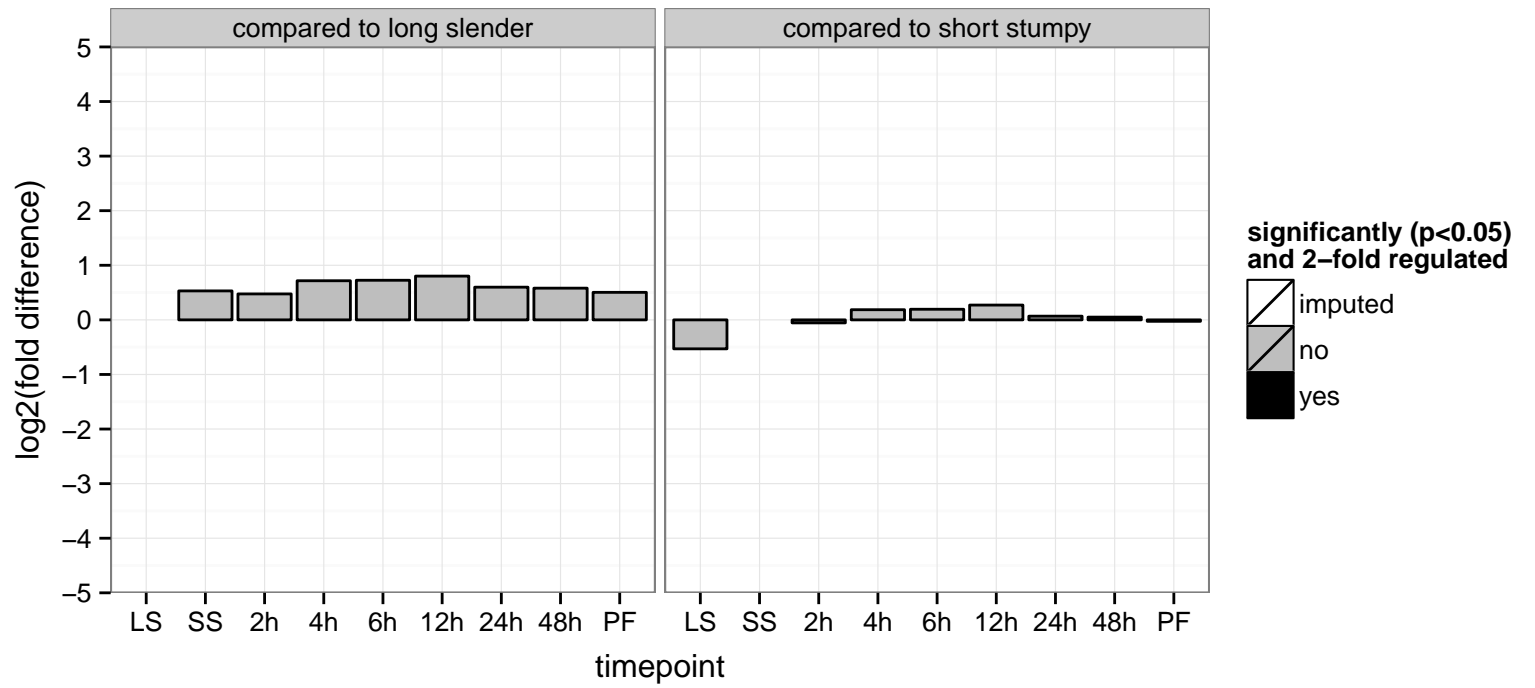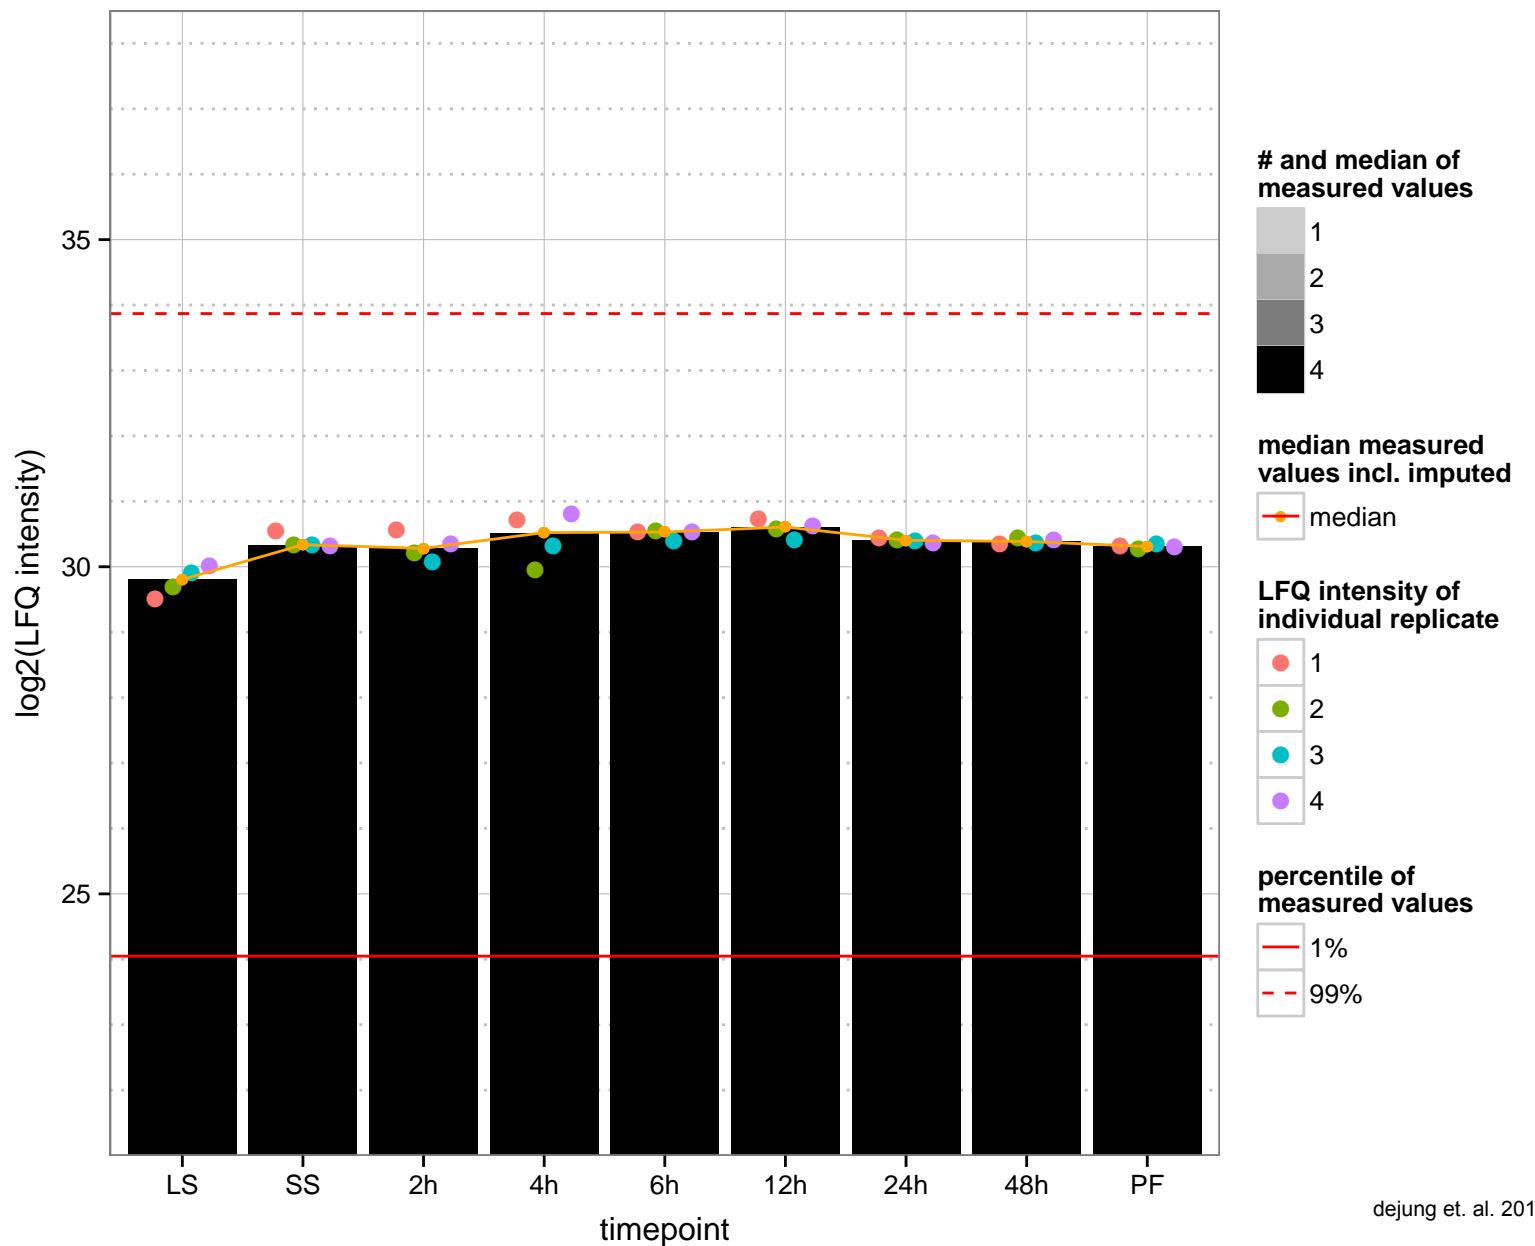

DNA-directed RNA polymerase III largest subunit, putative, DNA-directed RNA polymerase III subunit C1, DNA-directed RN  
 Tb927.10.2780

AGOF: null, DNA binding, DNA-directed RNA polymerase activity, ribonucleoside binding, zinc ion binding

AGOC: null, nucleus

AGOP: null, transcription, DNA-dependent

PGOF: DNA binding, DNA-directed RNA polymerase activity

PGOC: null

PGOP: transcription, DNA-dependent

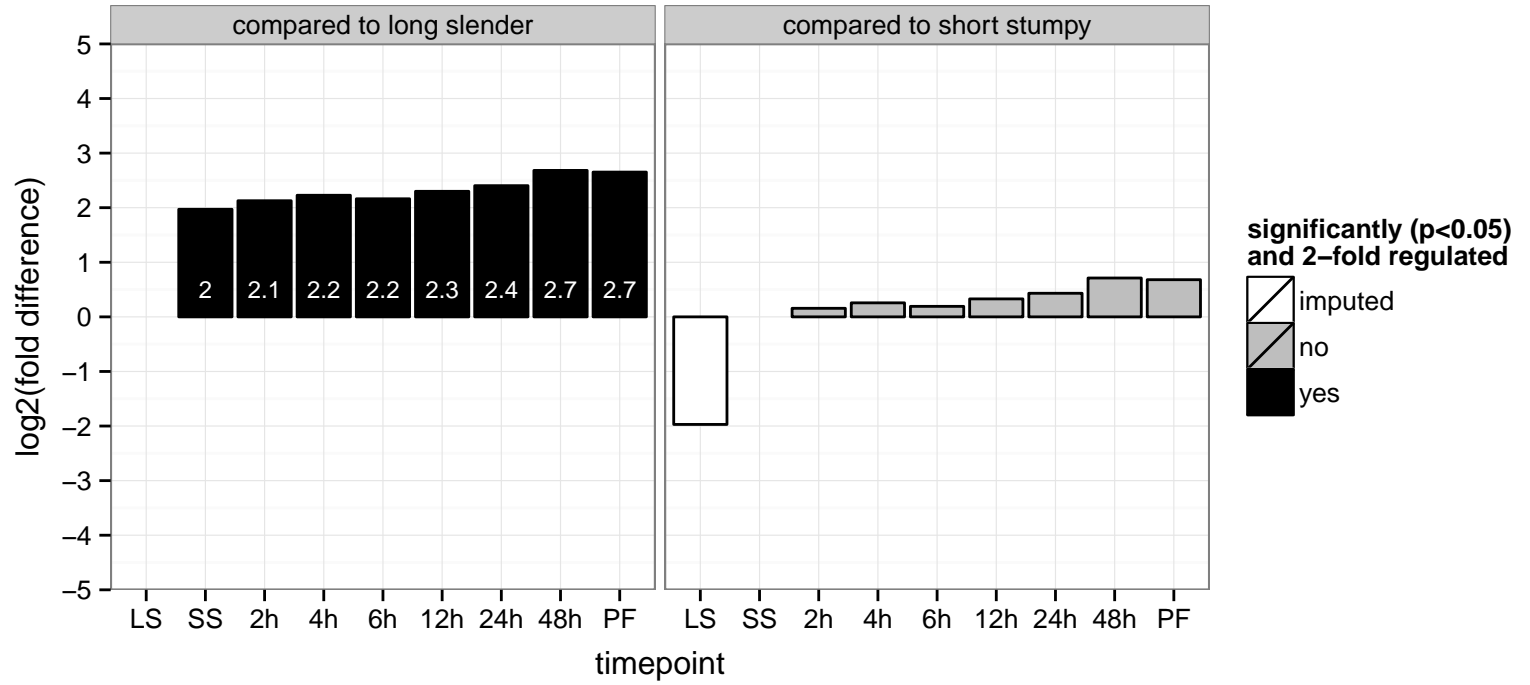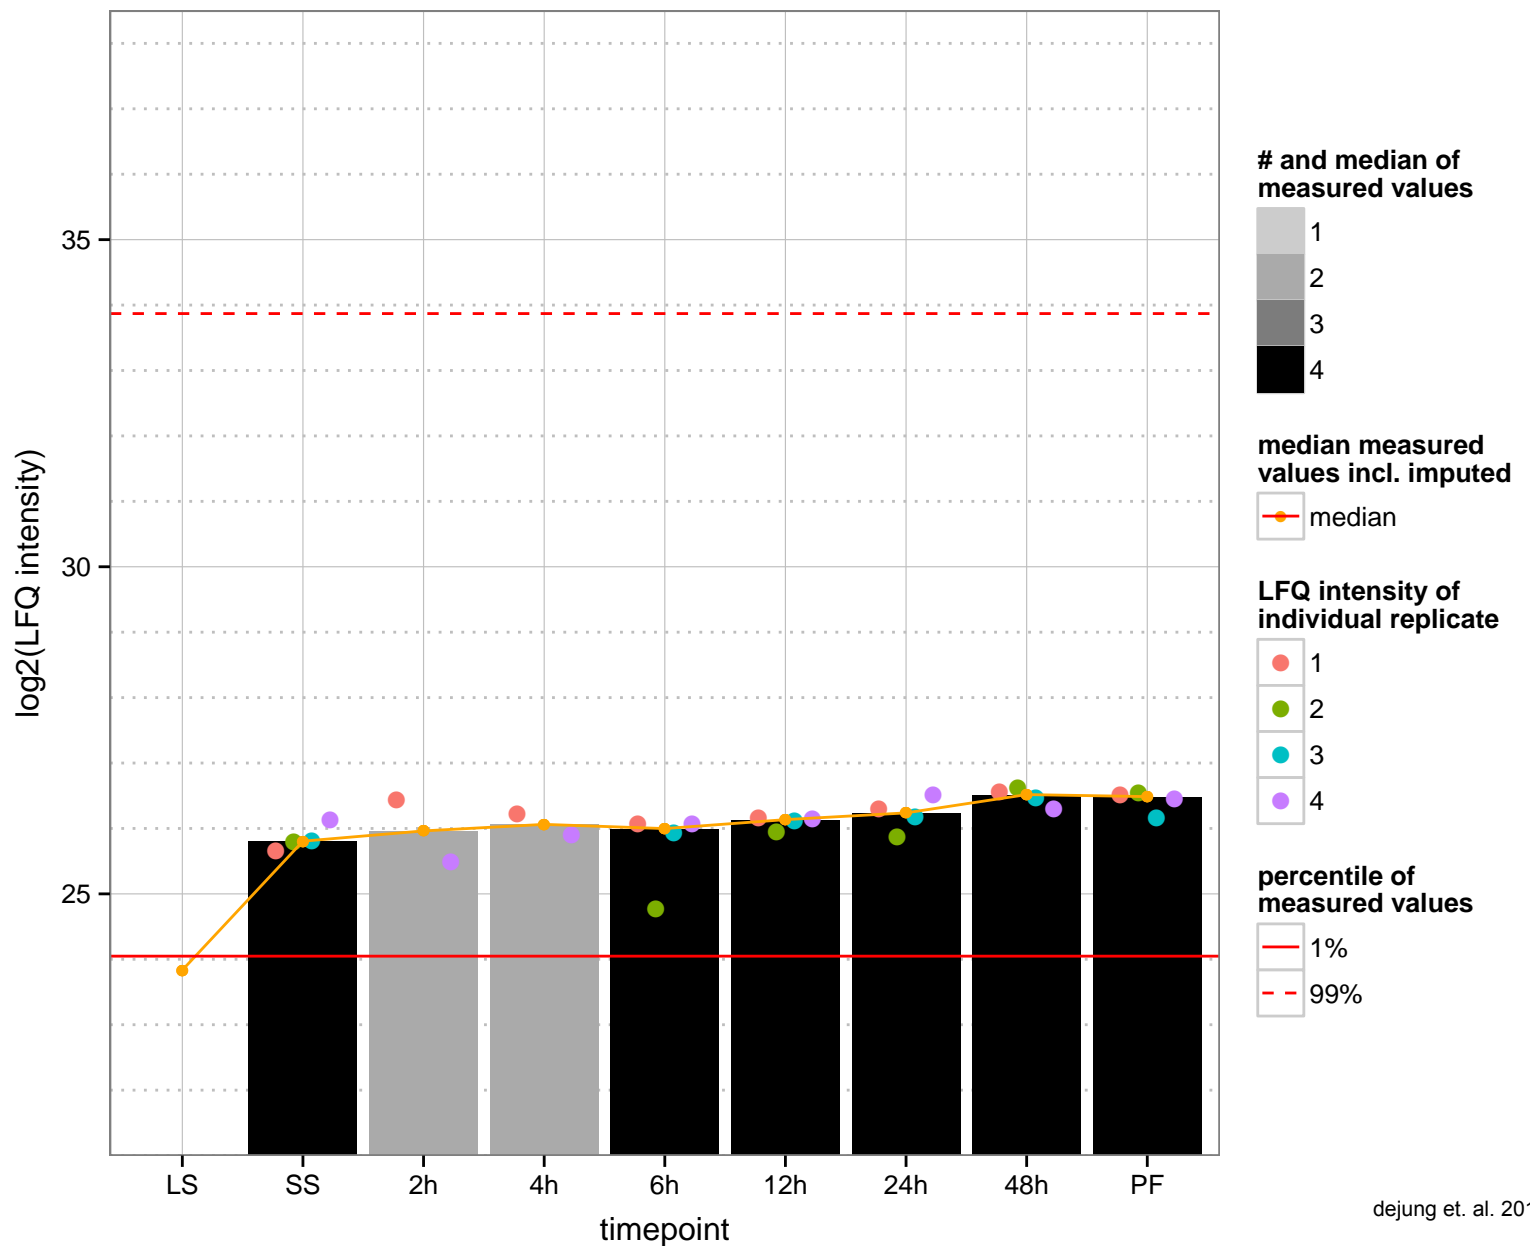

hypothetical protein, conserved  
 Tb927.10.2810  
 AGOF: null  
 AGOC: null  
 AGOP: null  
 PGOF: null  
 PGO C: null  
 PGOP: null

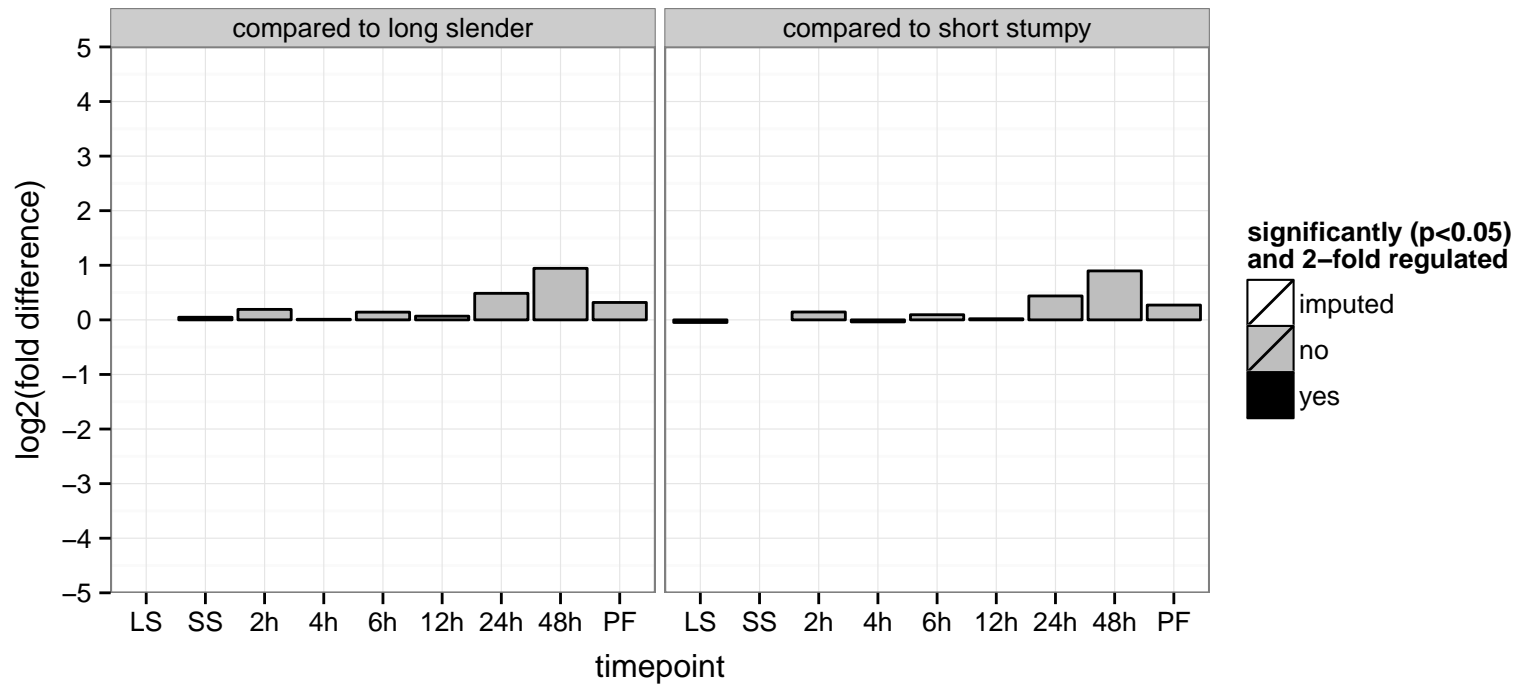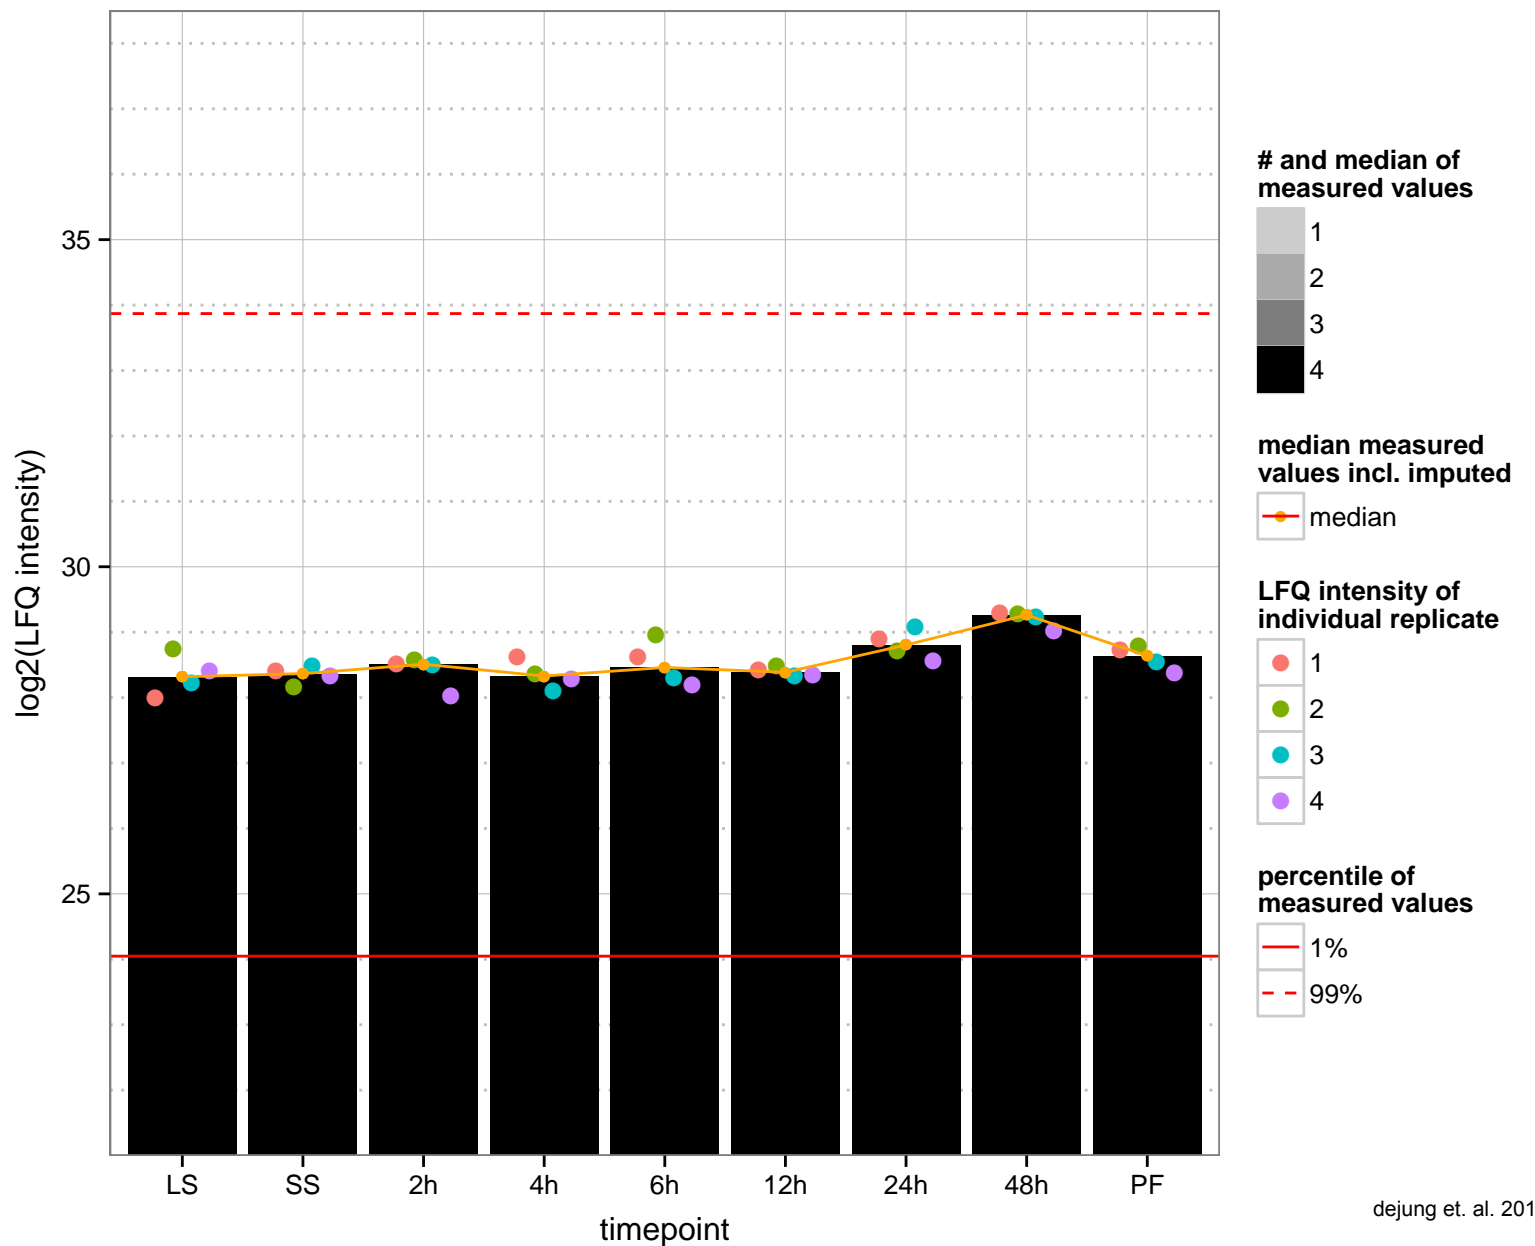

ribosomal protein S25, putative, 40S ribosomal protein S25  
 Tb927.3.1370;Tb927.10.2840  
 AGOF: structural constituent of ribosome, null  
 AGOC: ribosome, null  
 AGOP: translation, null  
 PGO: null  
 PGOC: null  
 PGOP: null

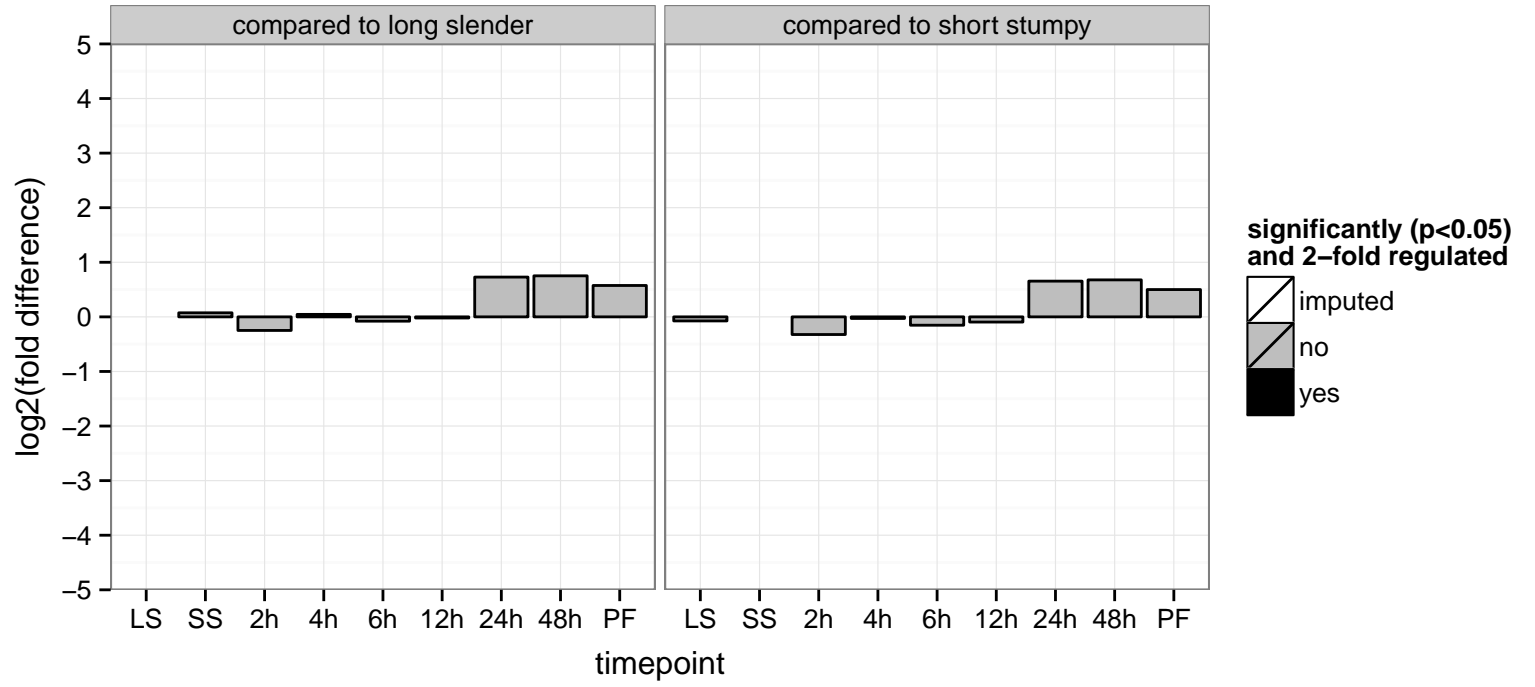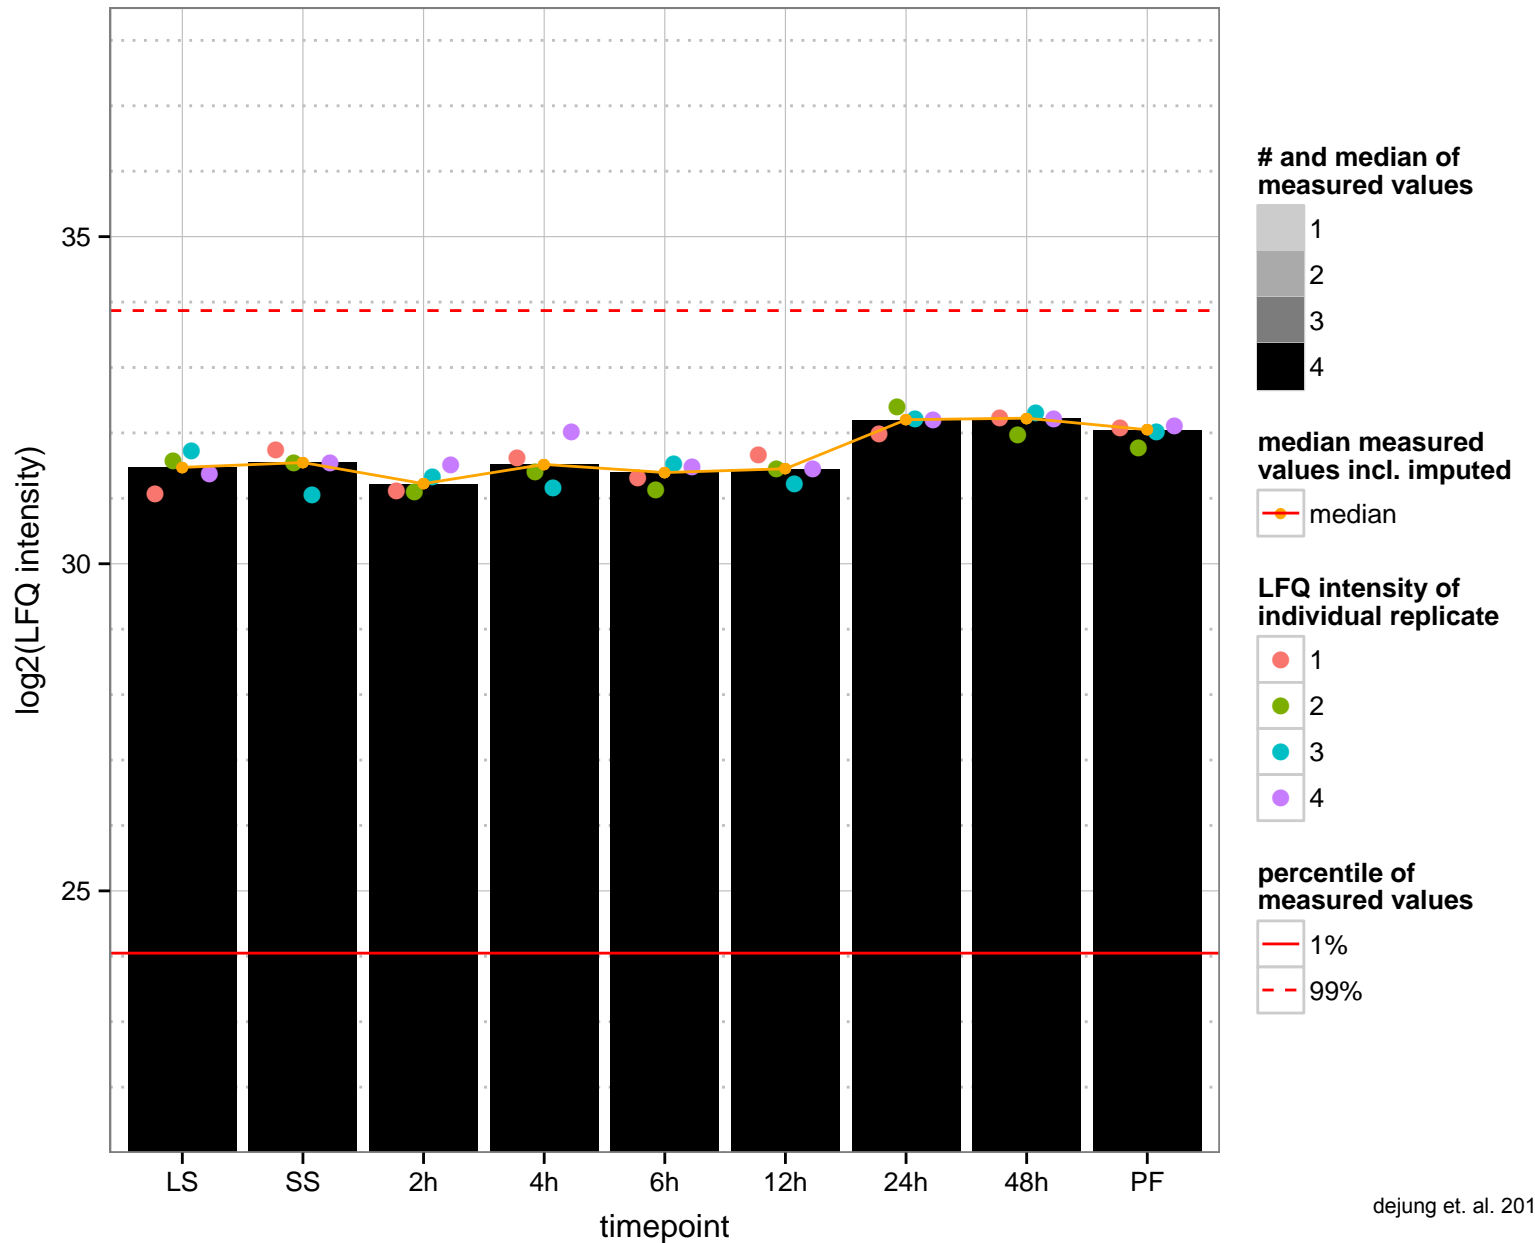

hypothetical protein, conserved  
 Tb927.10.2860  
 AGOF: null  
 AGOC: bacterial-type flagellum basal body  
 AGOP: null  
 PGO: protein binding  
 PGOC: null  
 PGOP: null

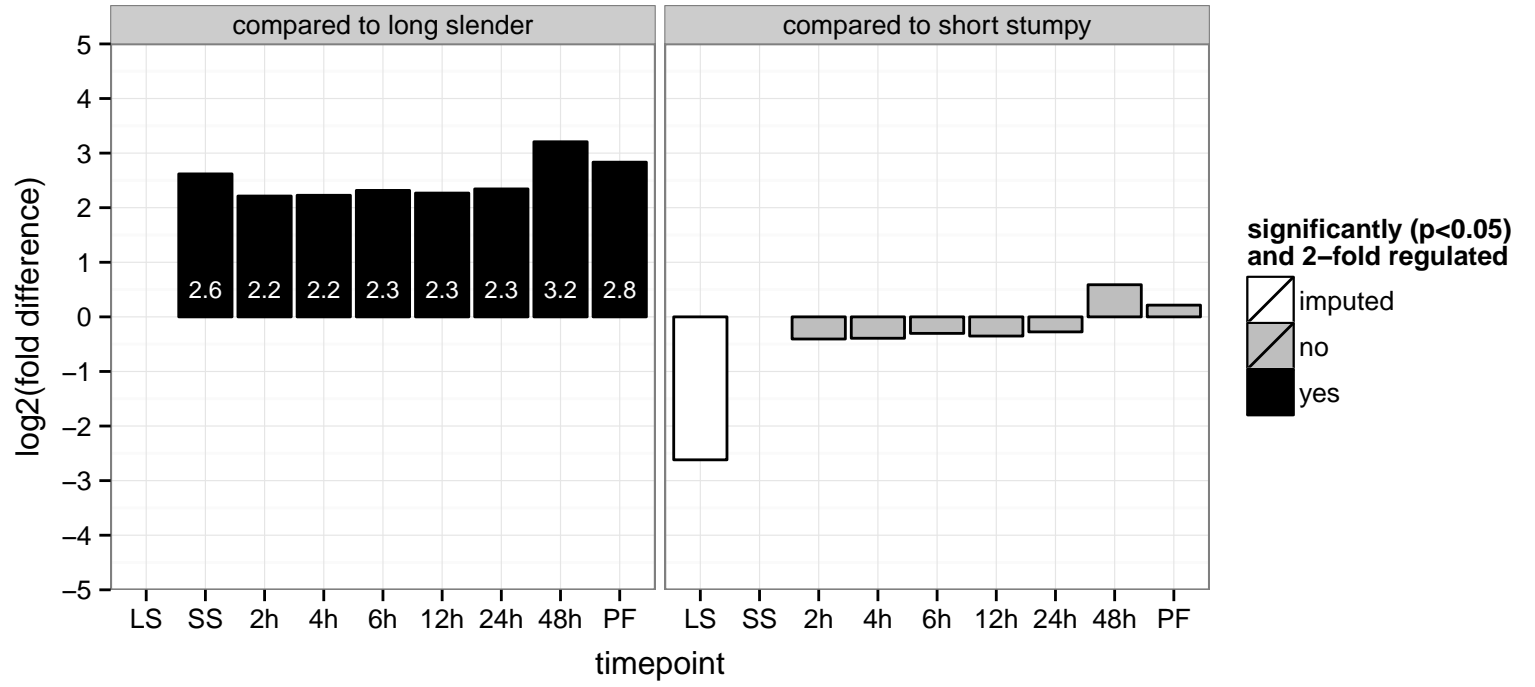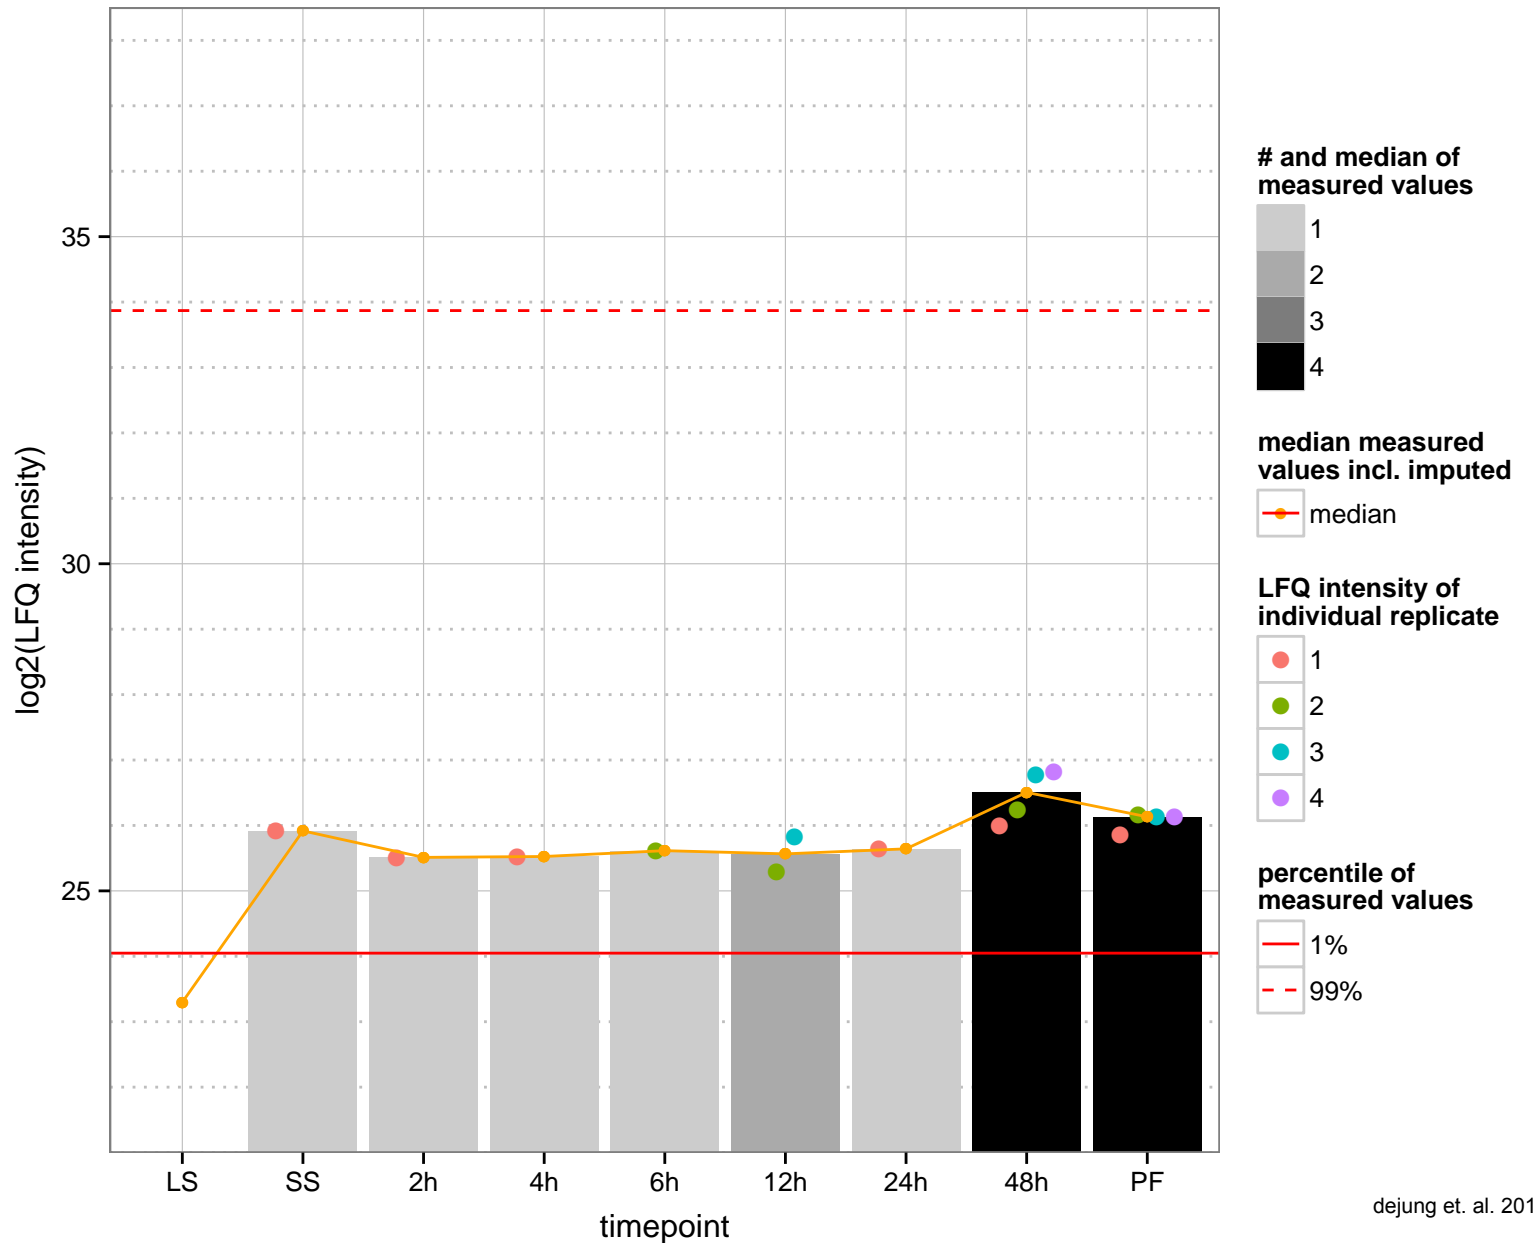

calcium channel protein, putative  
 Tb927.10.2880  
 AGOF: ion channel activity  
 AGOC: null  
 AGOP: ion transport  
 PGOF: ion channel activity  
 PGO: membrane  
 PGO: ion transport, transmembrane transport

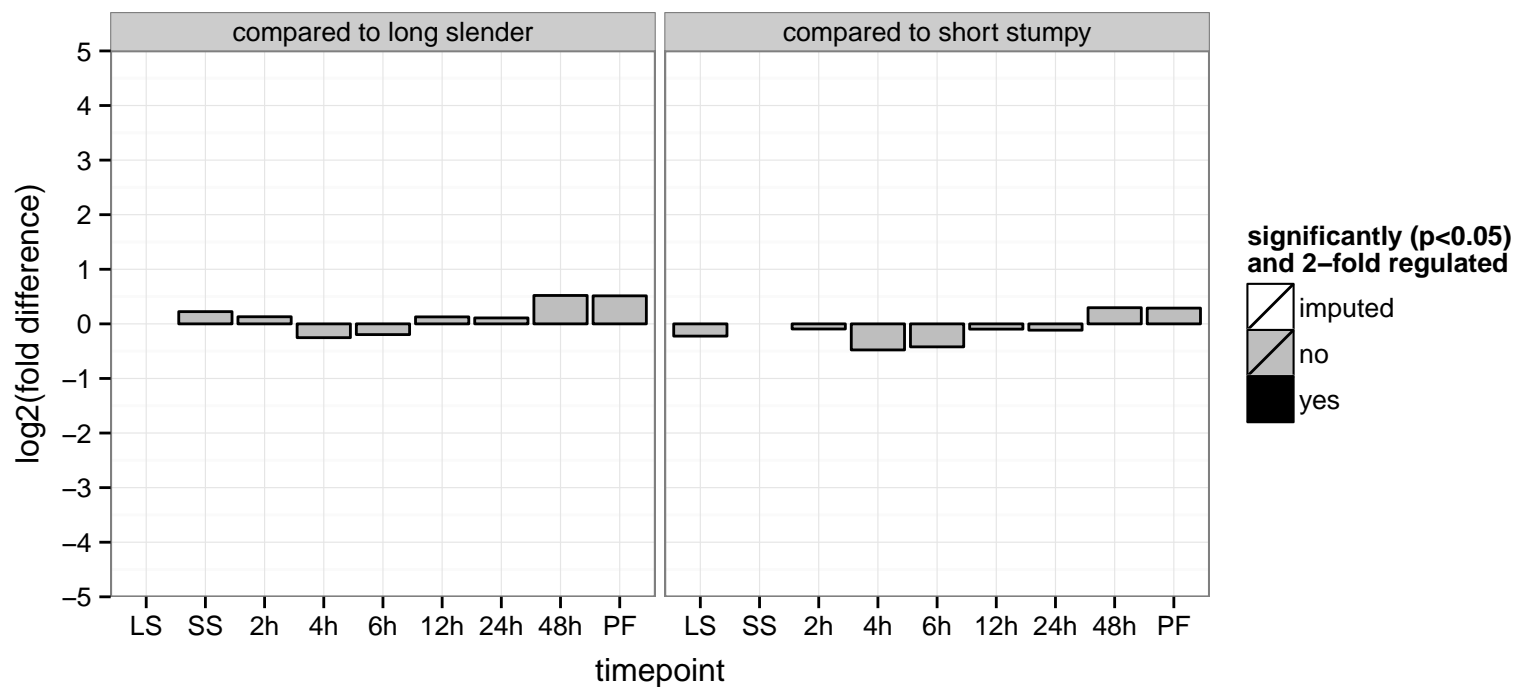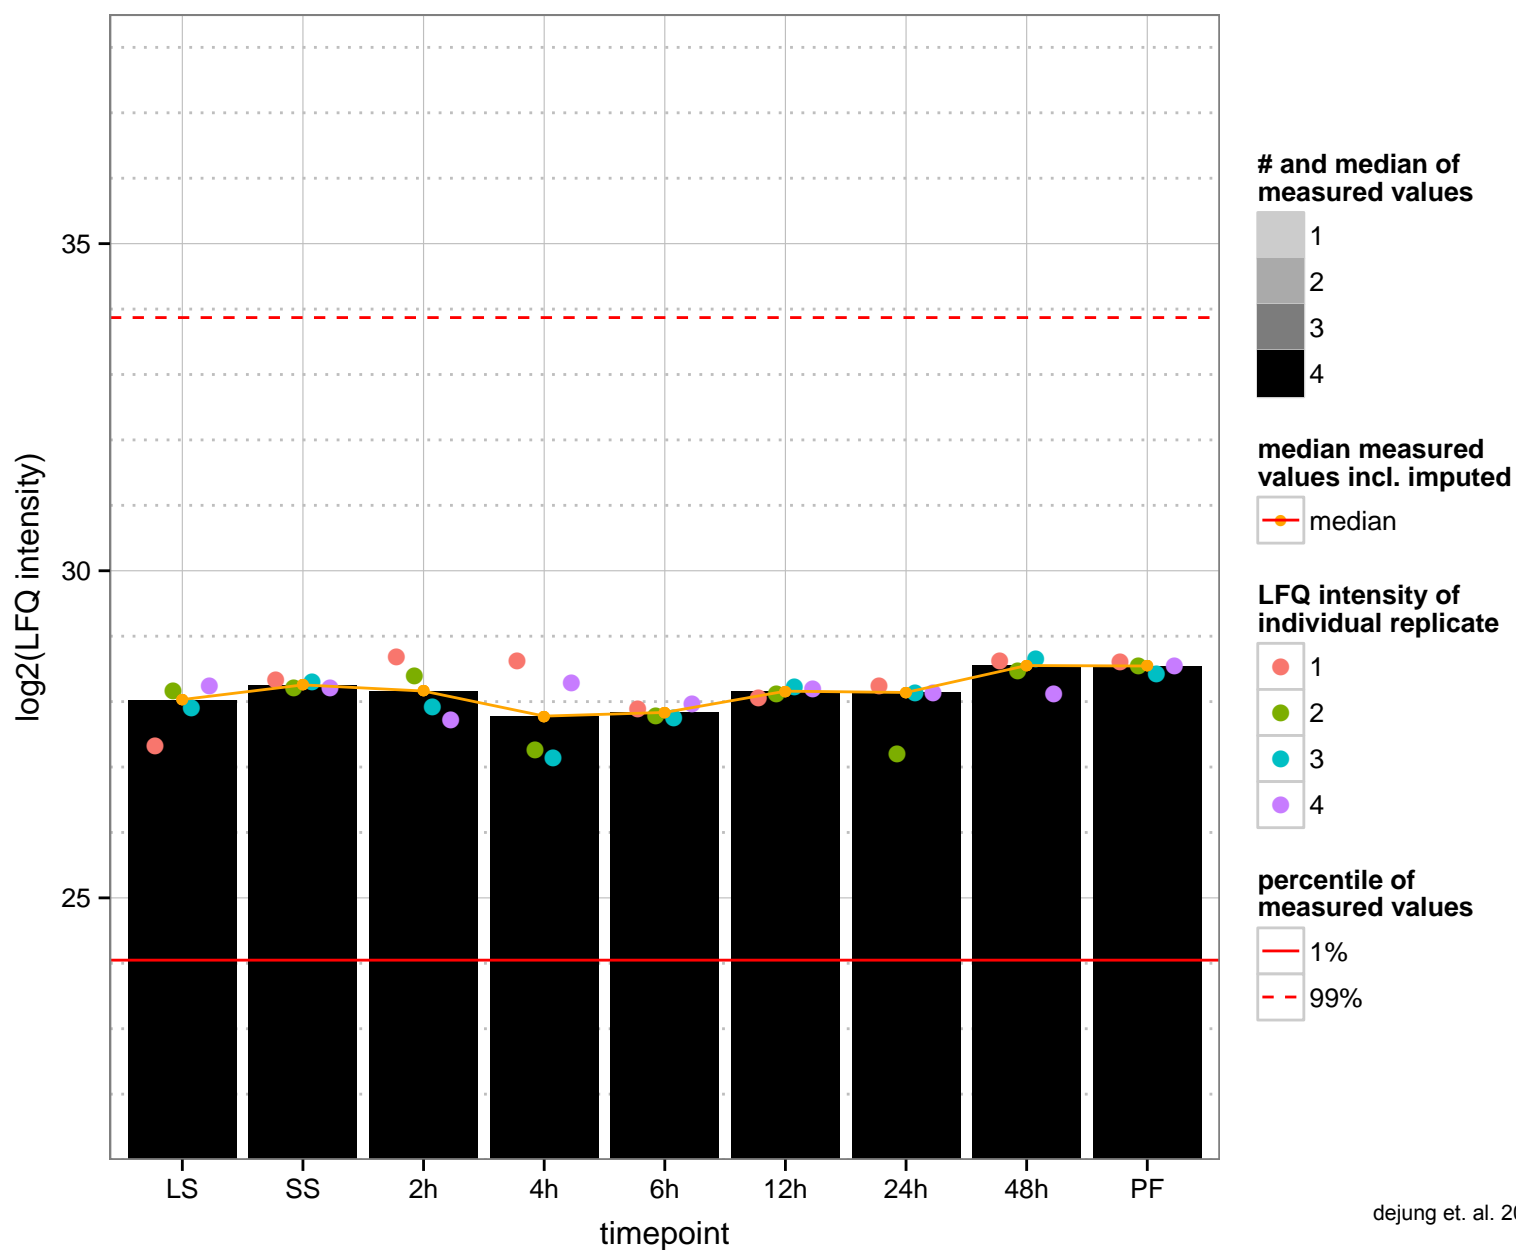

proteasome alpha 2 subunit, putative

Tb927.10.290

AGOF: endopeptidase activity, threonine-type endopeptidase activity

AGOC: proteasome core complex

AGOP: ubiquitin-dependent protein catabolic process

PGOF: endopeptidase activity, threonine-type endopeptidase activity

PGOC: proteasome core complex, proteasome core complex, alpha-subunit complex

PGOP: proteolysis involved in cellular protein catabolic process, ubiquitin-dependent protein catabolic process

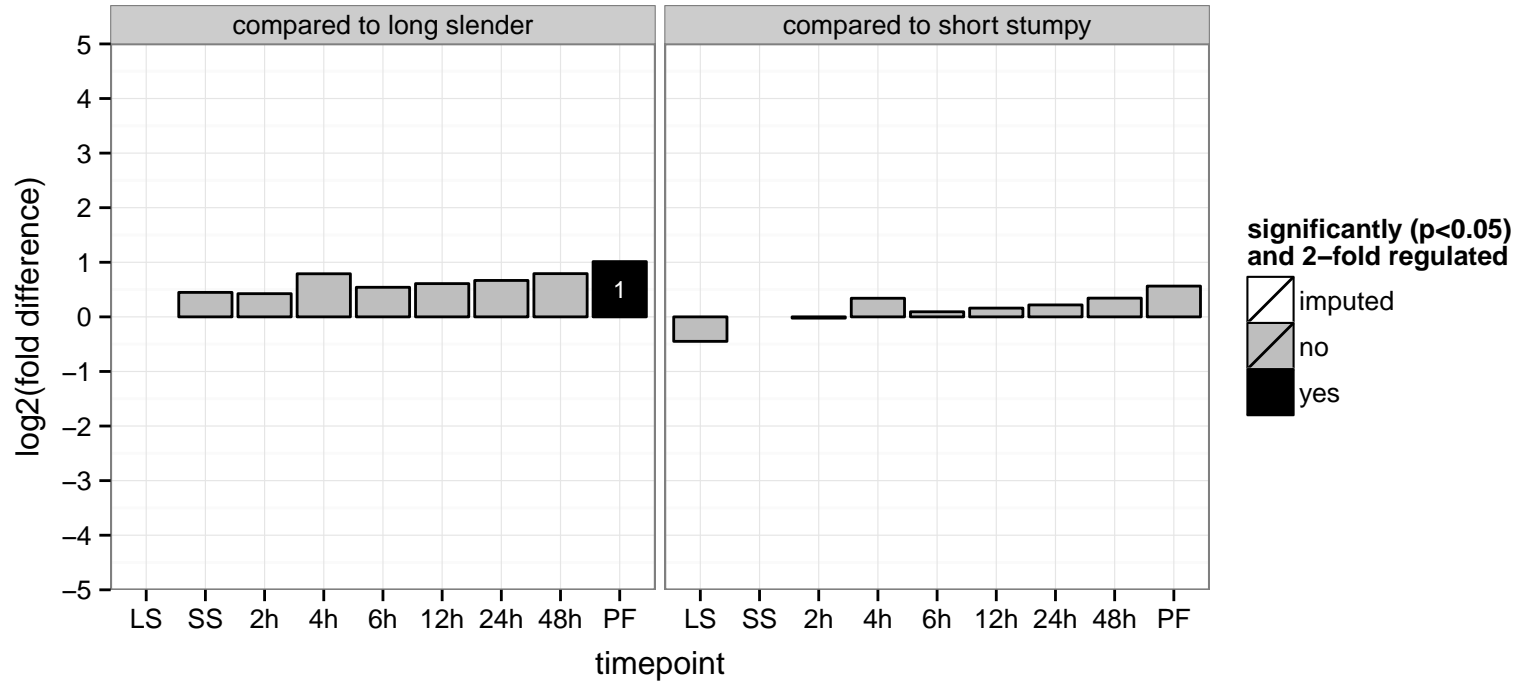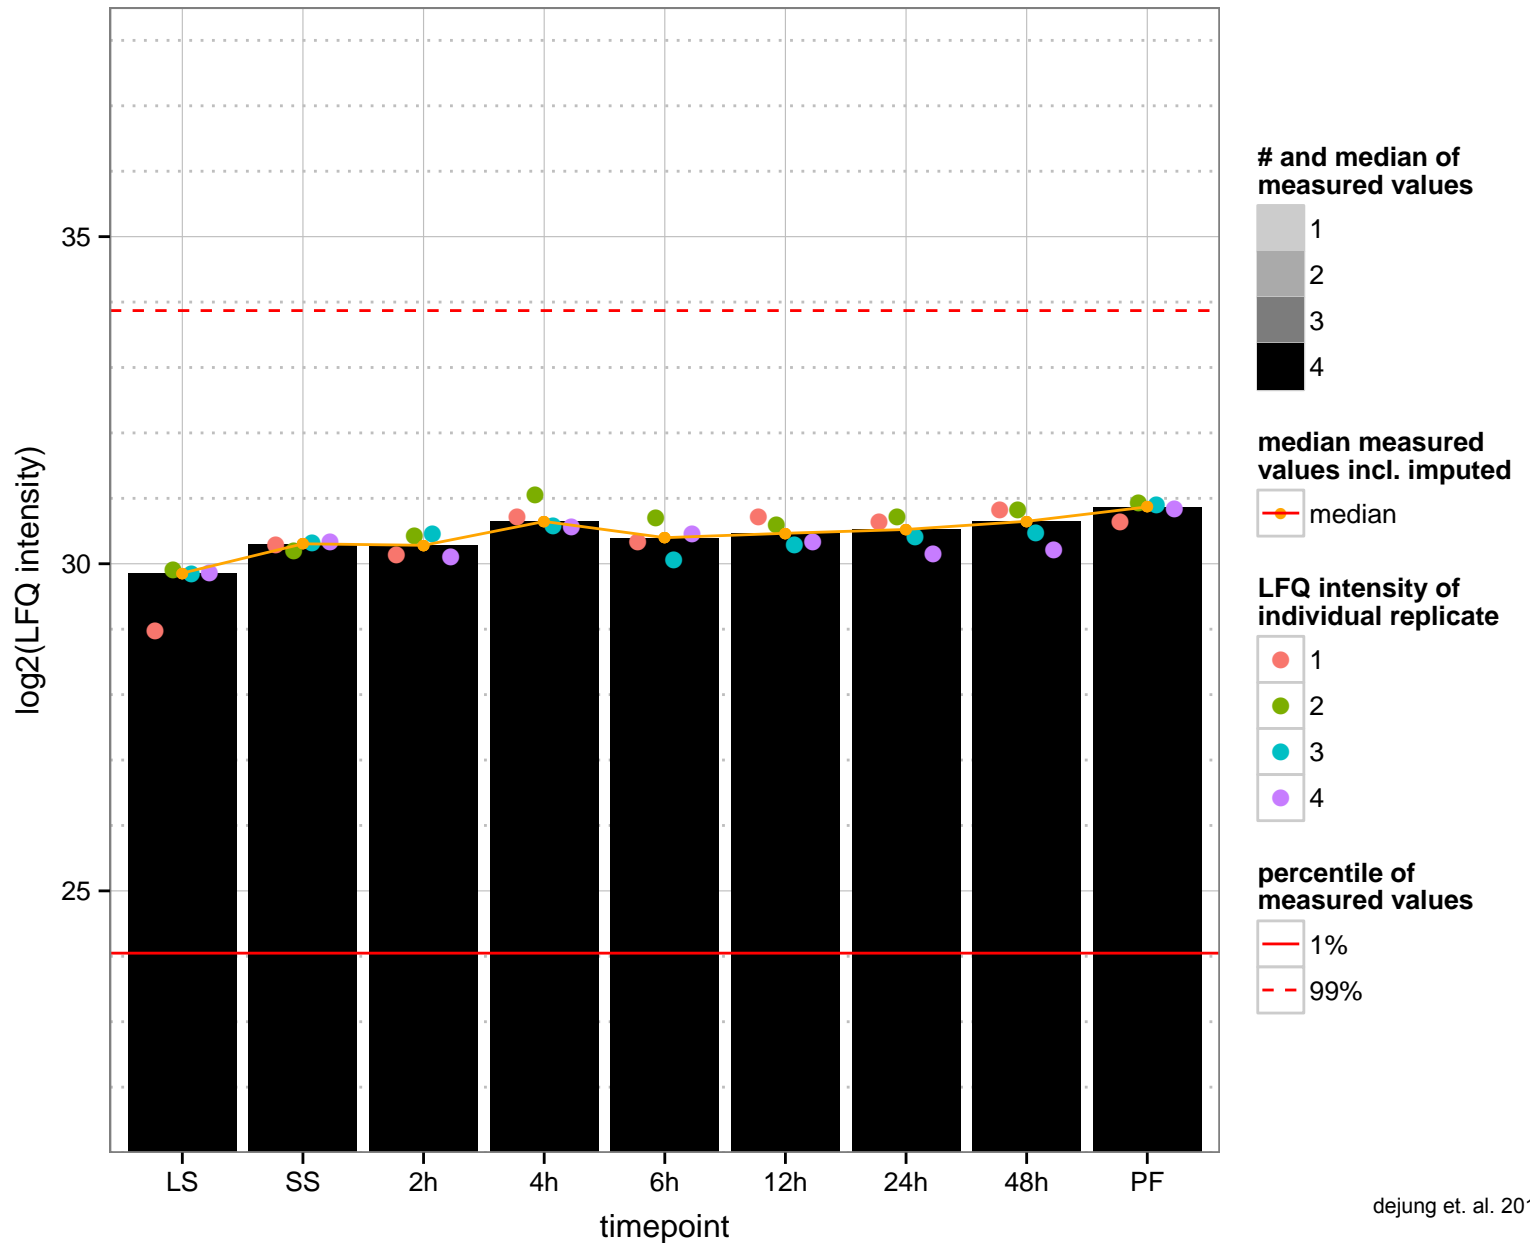

importin beta-1 subunit, putative  
 Tb927.10.2900;Tb11.v5.0837  
 AGOF: null, protein transporter activity  
 AGOC: null, cytoplasm, nuclear pore, nucleus  
 AGOP: null, intracellular protein transport, nuclear import, protein import into nucleus, docking  
 PGO: binding, protein transporter activity  
 PGO: null  
 PGO: intracellular protein transport

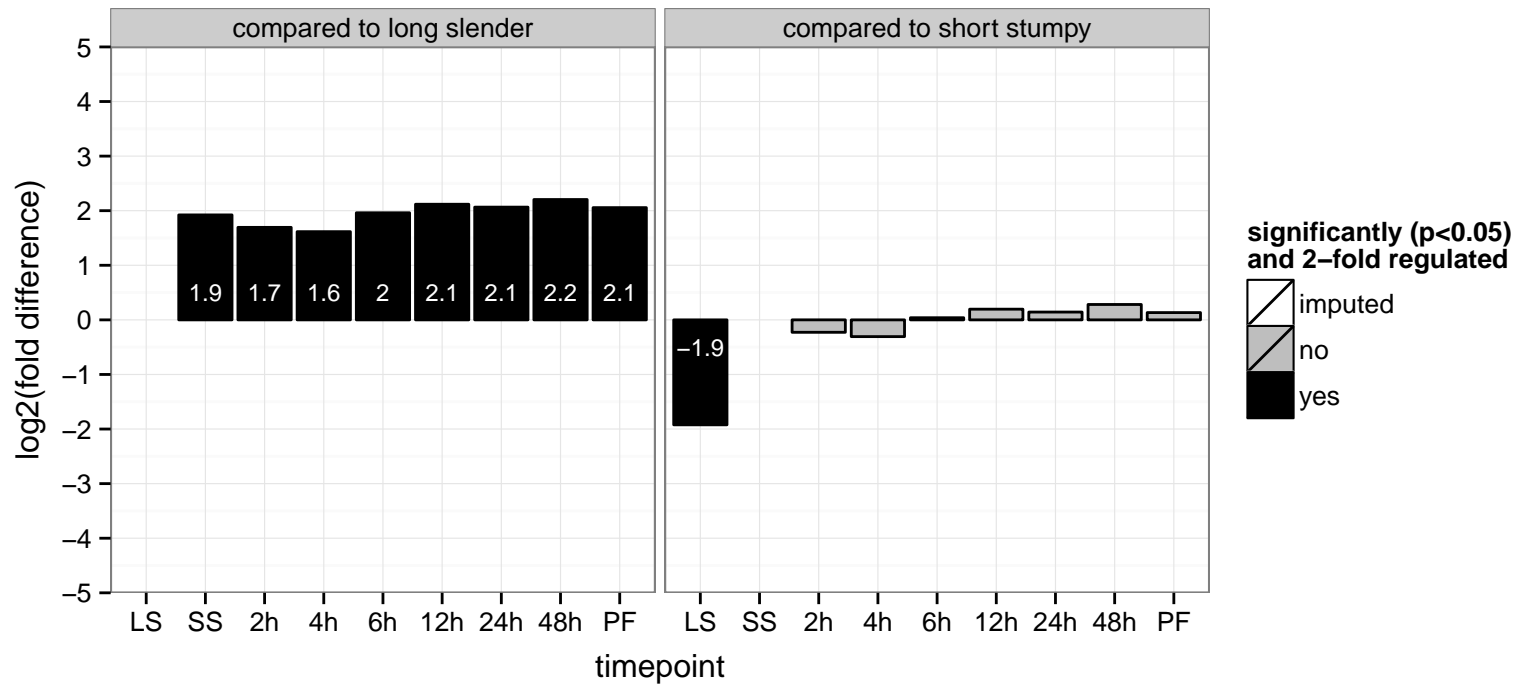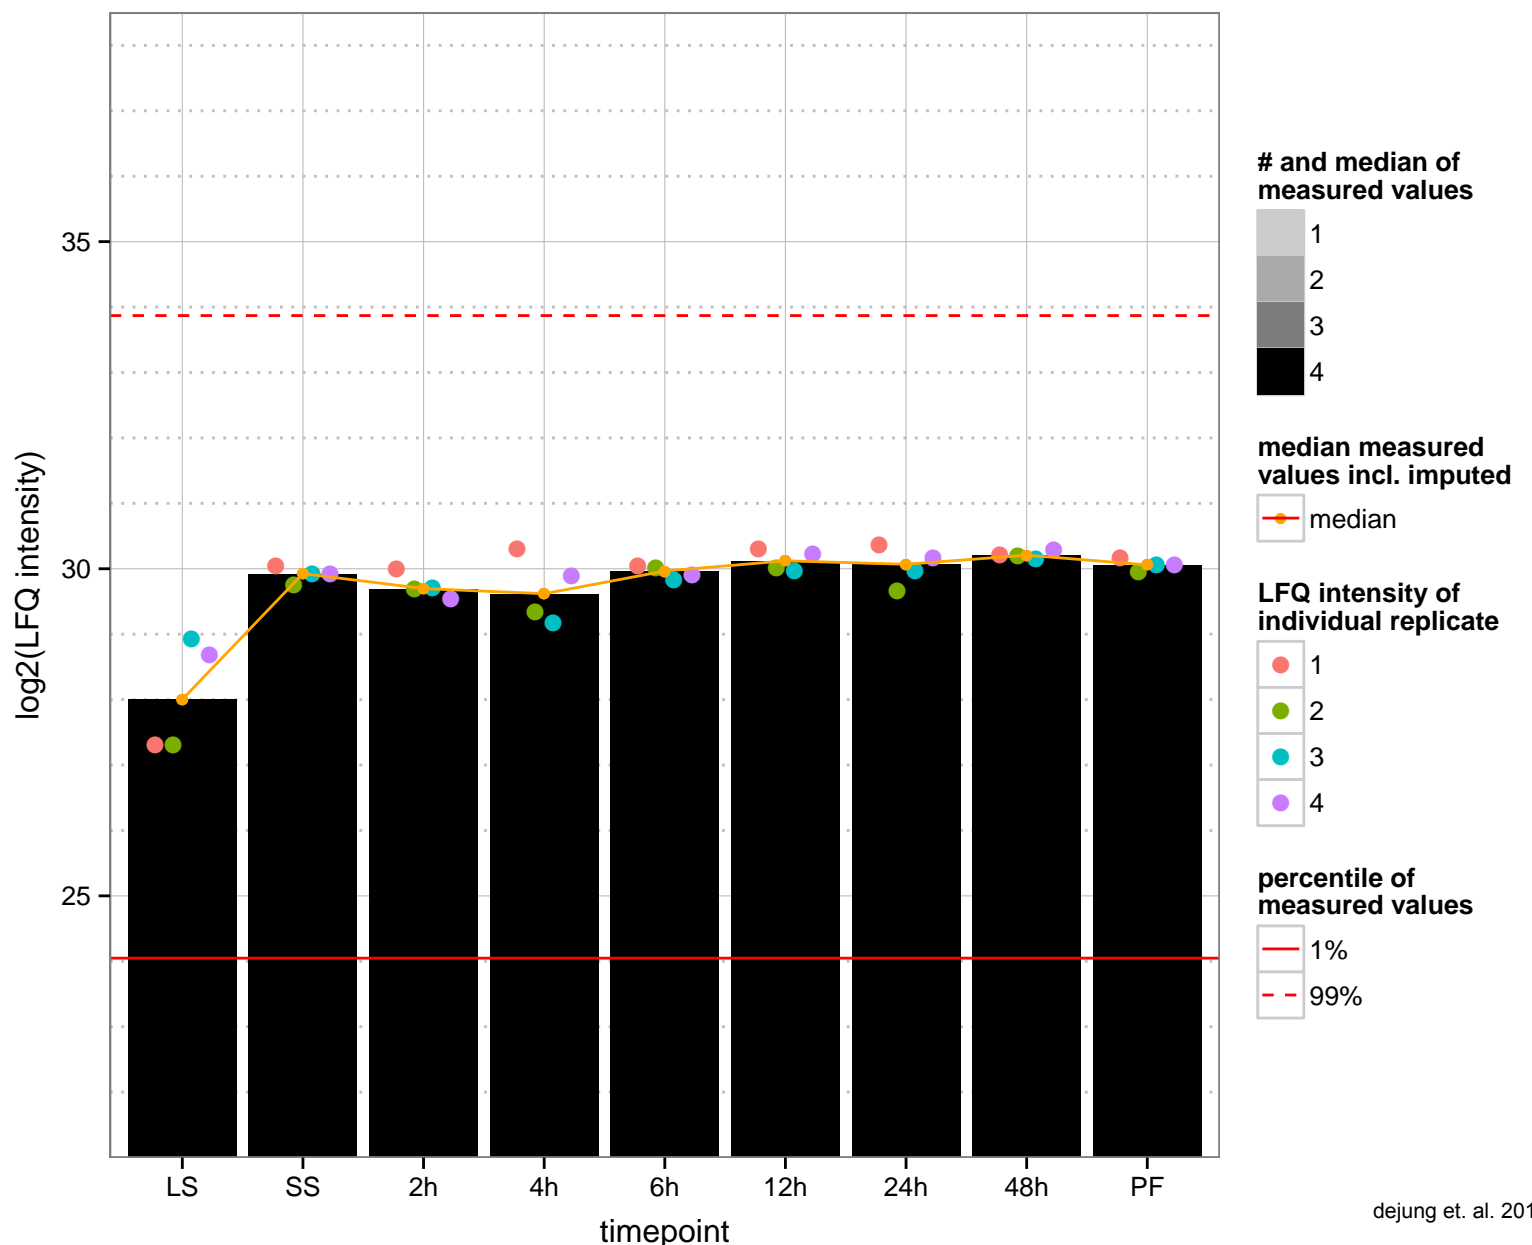



splicing factor PTRS1 interacting protein (TSR1IP)  
 Tb927.10.2910  
 AGOF: RNA binding  
 AGOC: nucleus  
 AGOP: nuclear mRNA splicing, via spliceosome  
 PGO: null  
 PGOC: null  
 PGOP: null

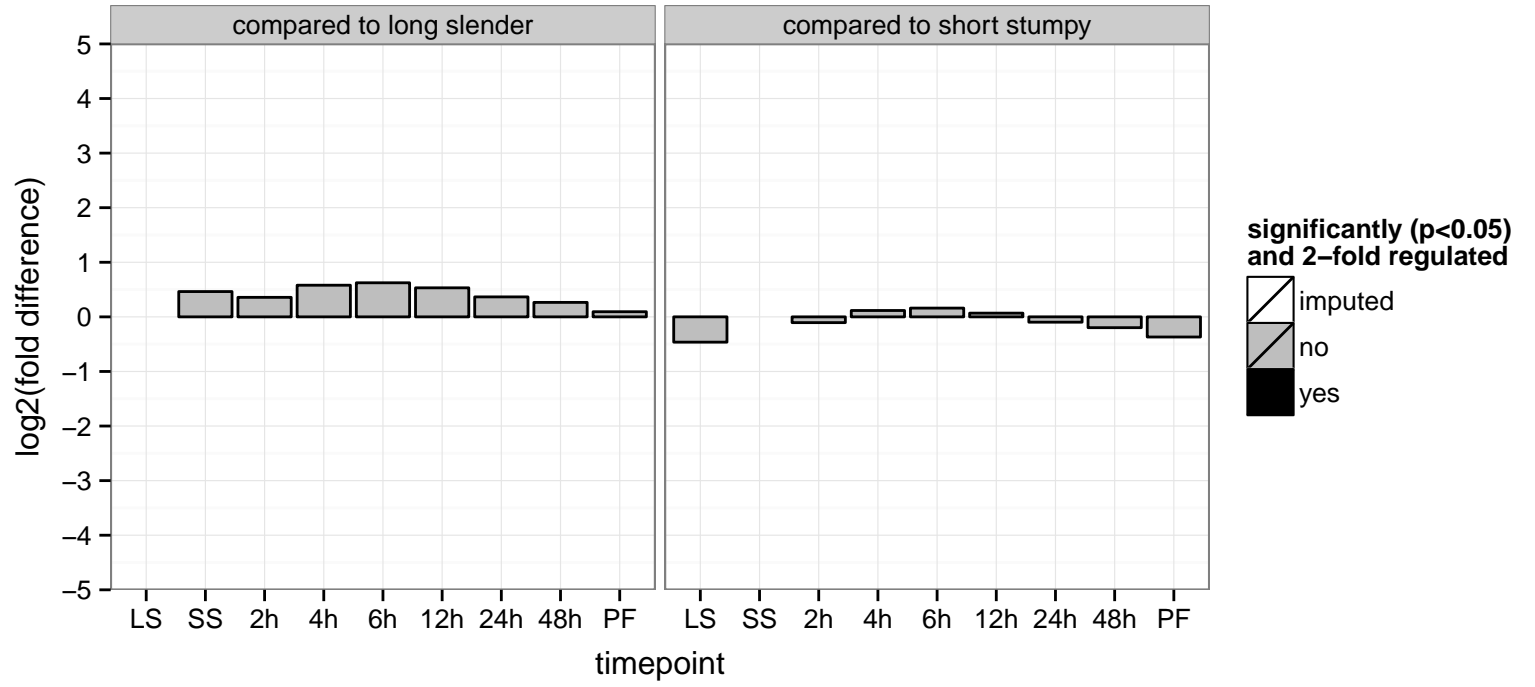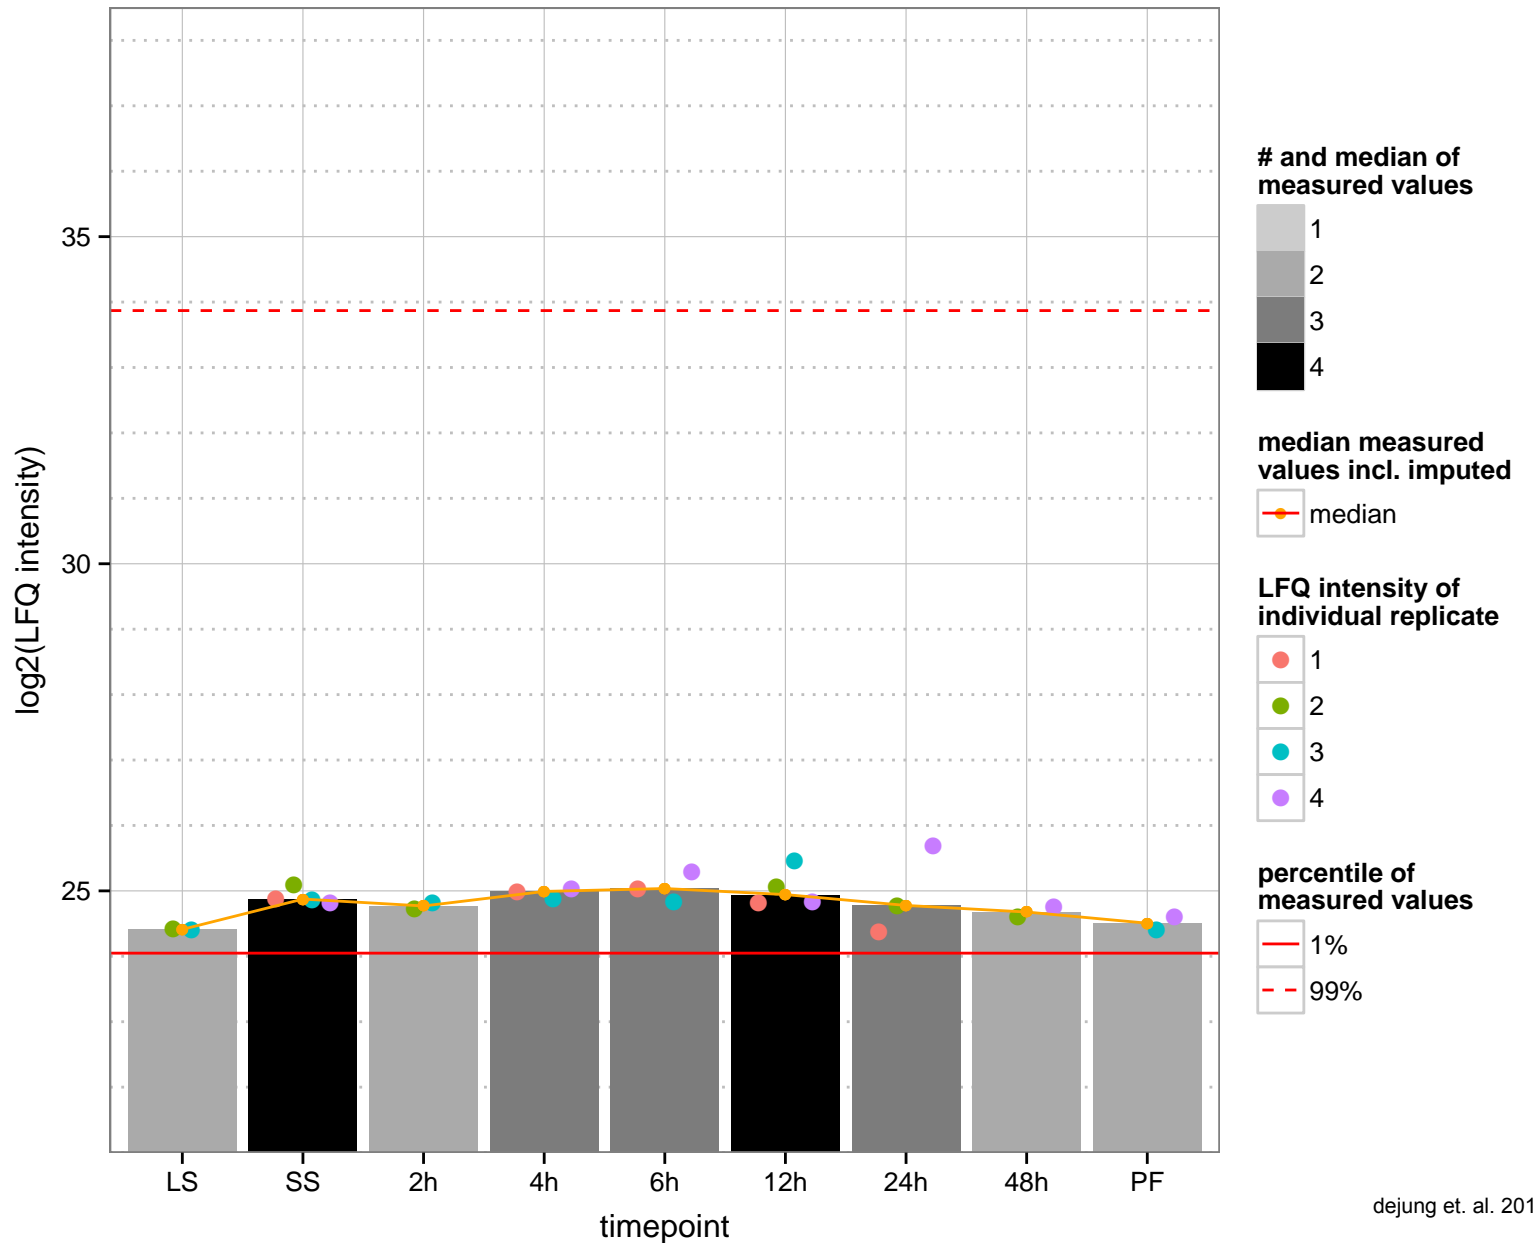

hypothetical protein, conserved  
 Tb927.10.2950  
 AGOF: null  
 AGOC: null  
 AGOP: null  
 PGOF: null  
 PGO C: null  
 PGOP: null

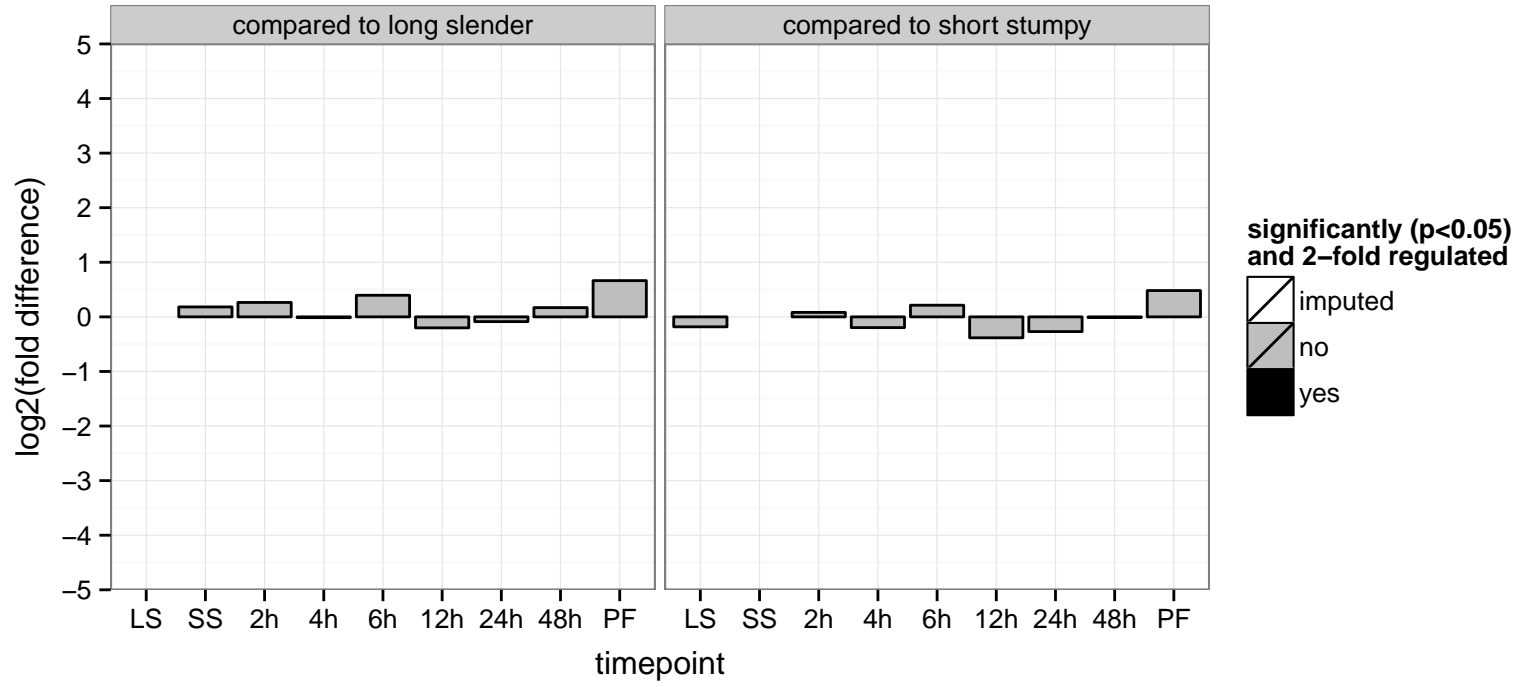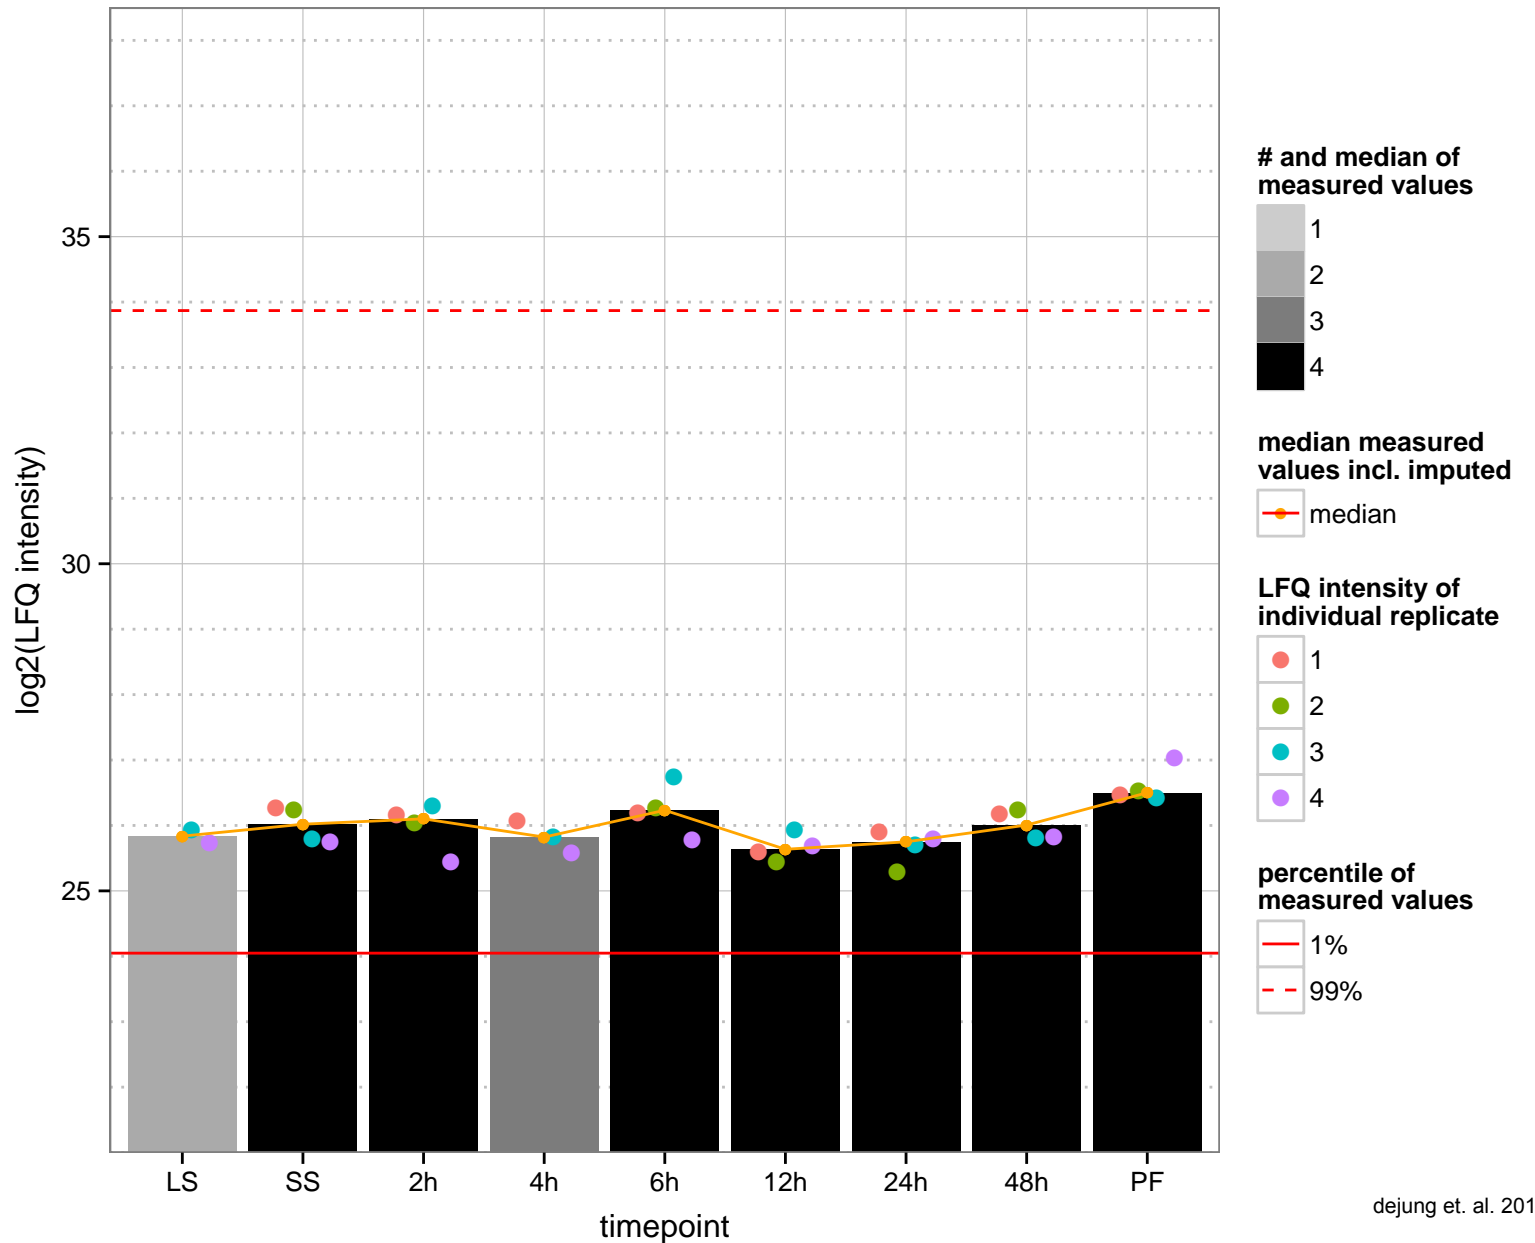

proteasome regulatory non-ATPase subunit 11, Metallo-peptidase, Clan MP, Family M67, 19S proteasome regulatory subunit  
 Tb927.10.3030;Tb927.10.2980  
 AGOF: null, endopeptidase activity  
 AGOC: proteasome regulatory particle  
 AGOP: cell growth, ubiquitin-dependent protein catabolic process  
 PGO: protein binding  
 PGO: null  
 PGO: null

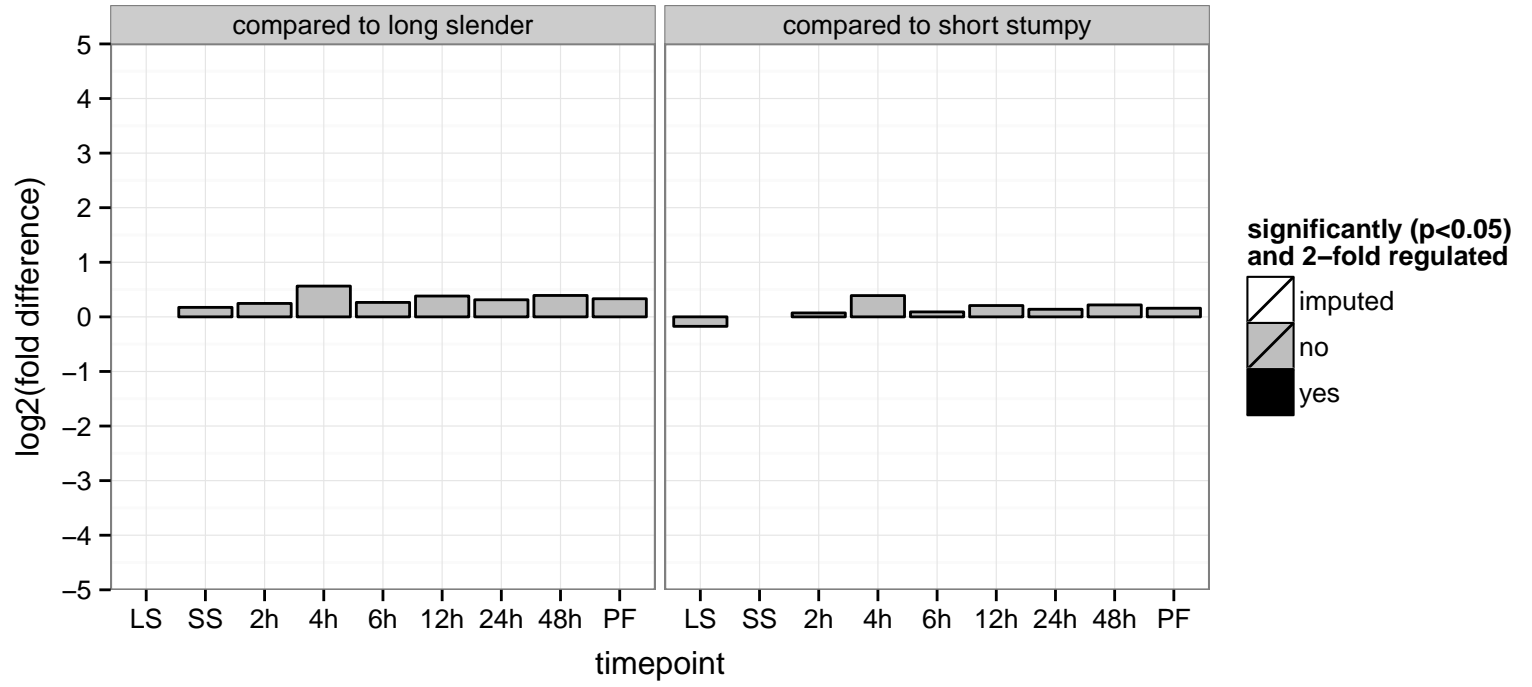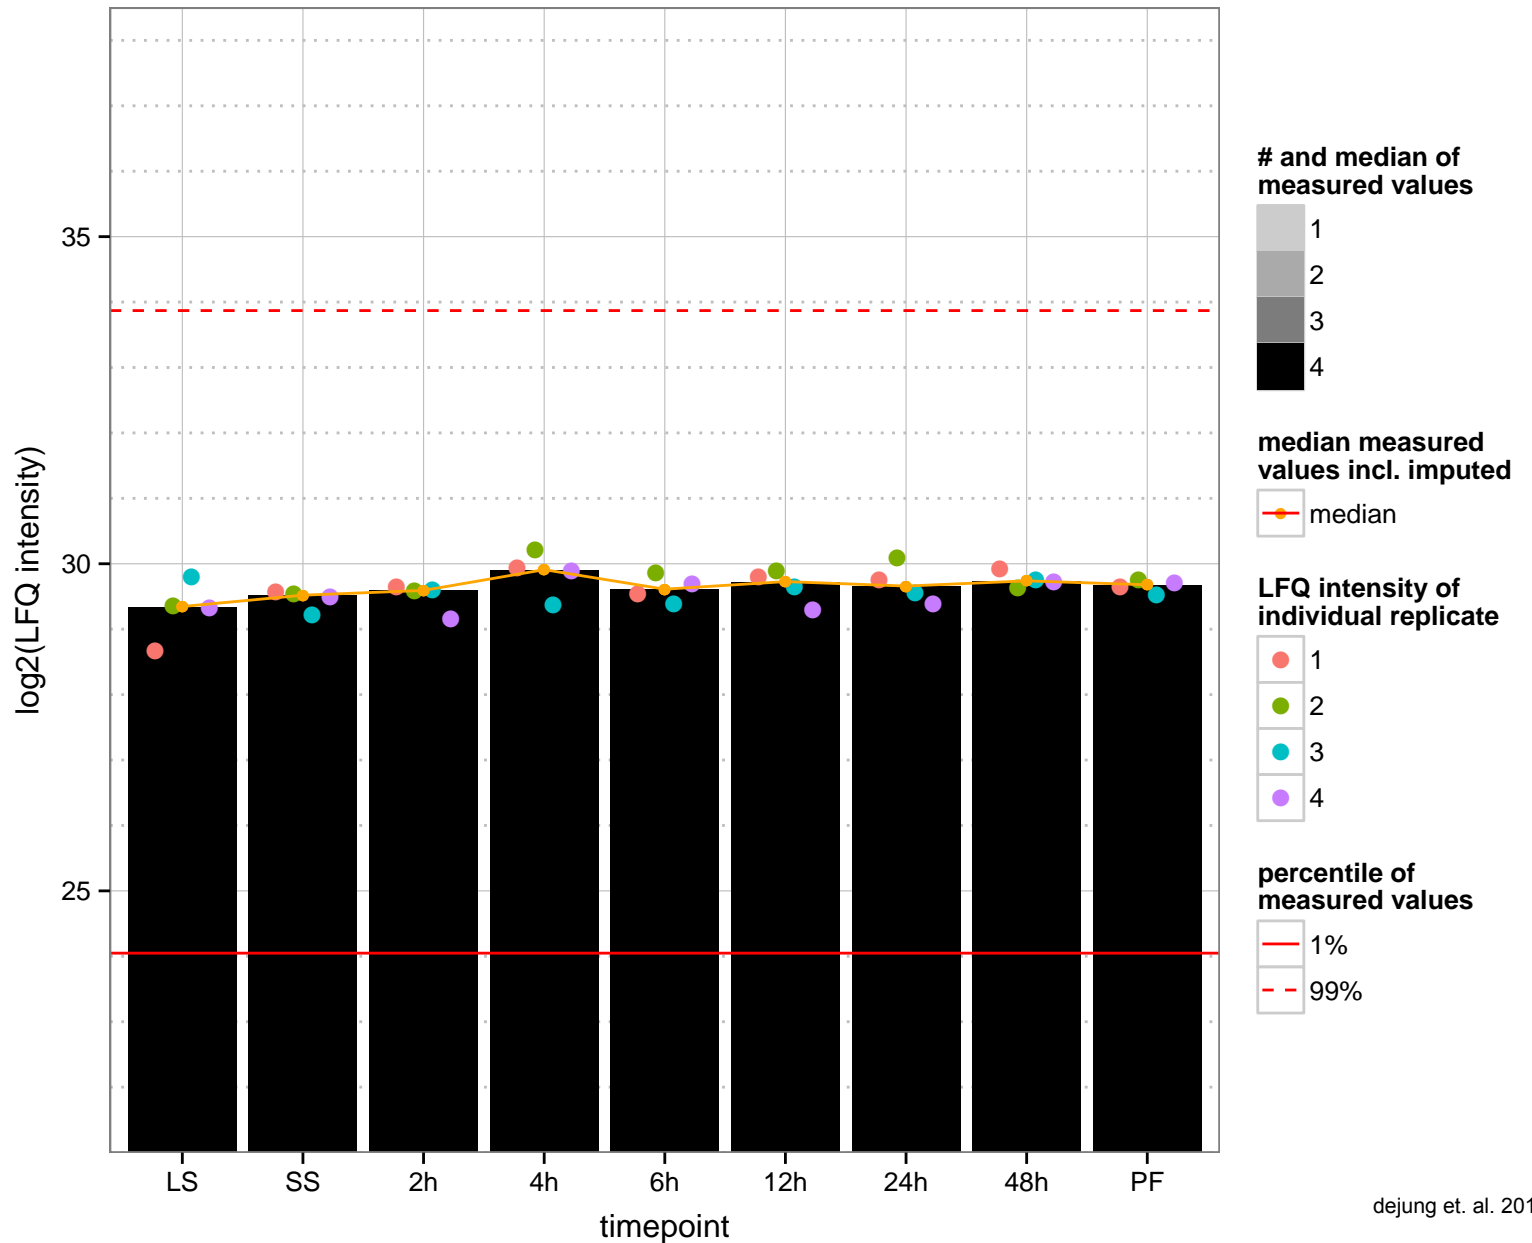

hypothetical protein, conserved  
 Tb927.10.3010  
 AGOF: null  
 AGOC: null  
 AGOP: null  
 PGO: null  
 PGOC: null  
 PGOP: null

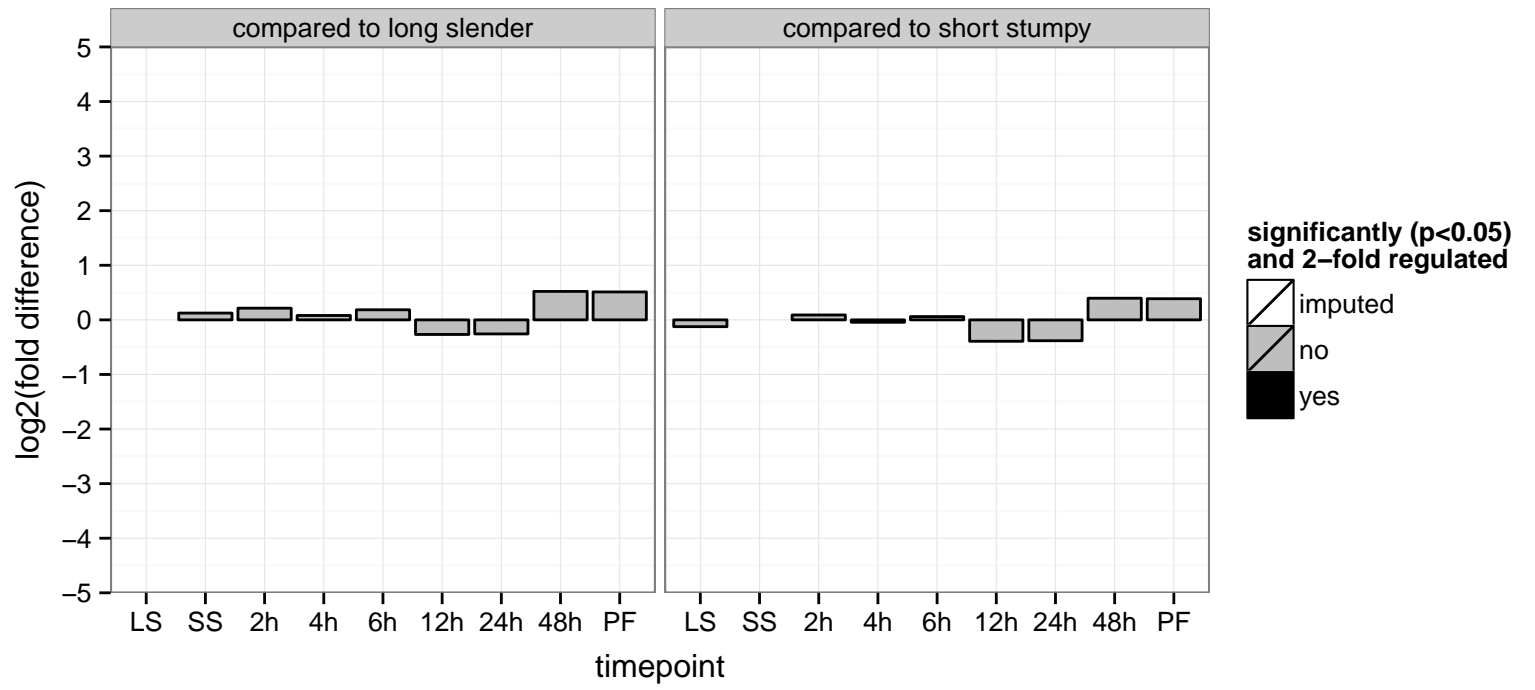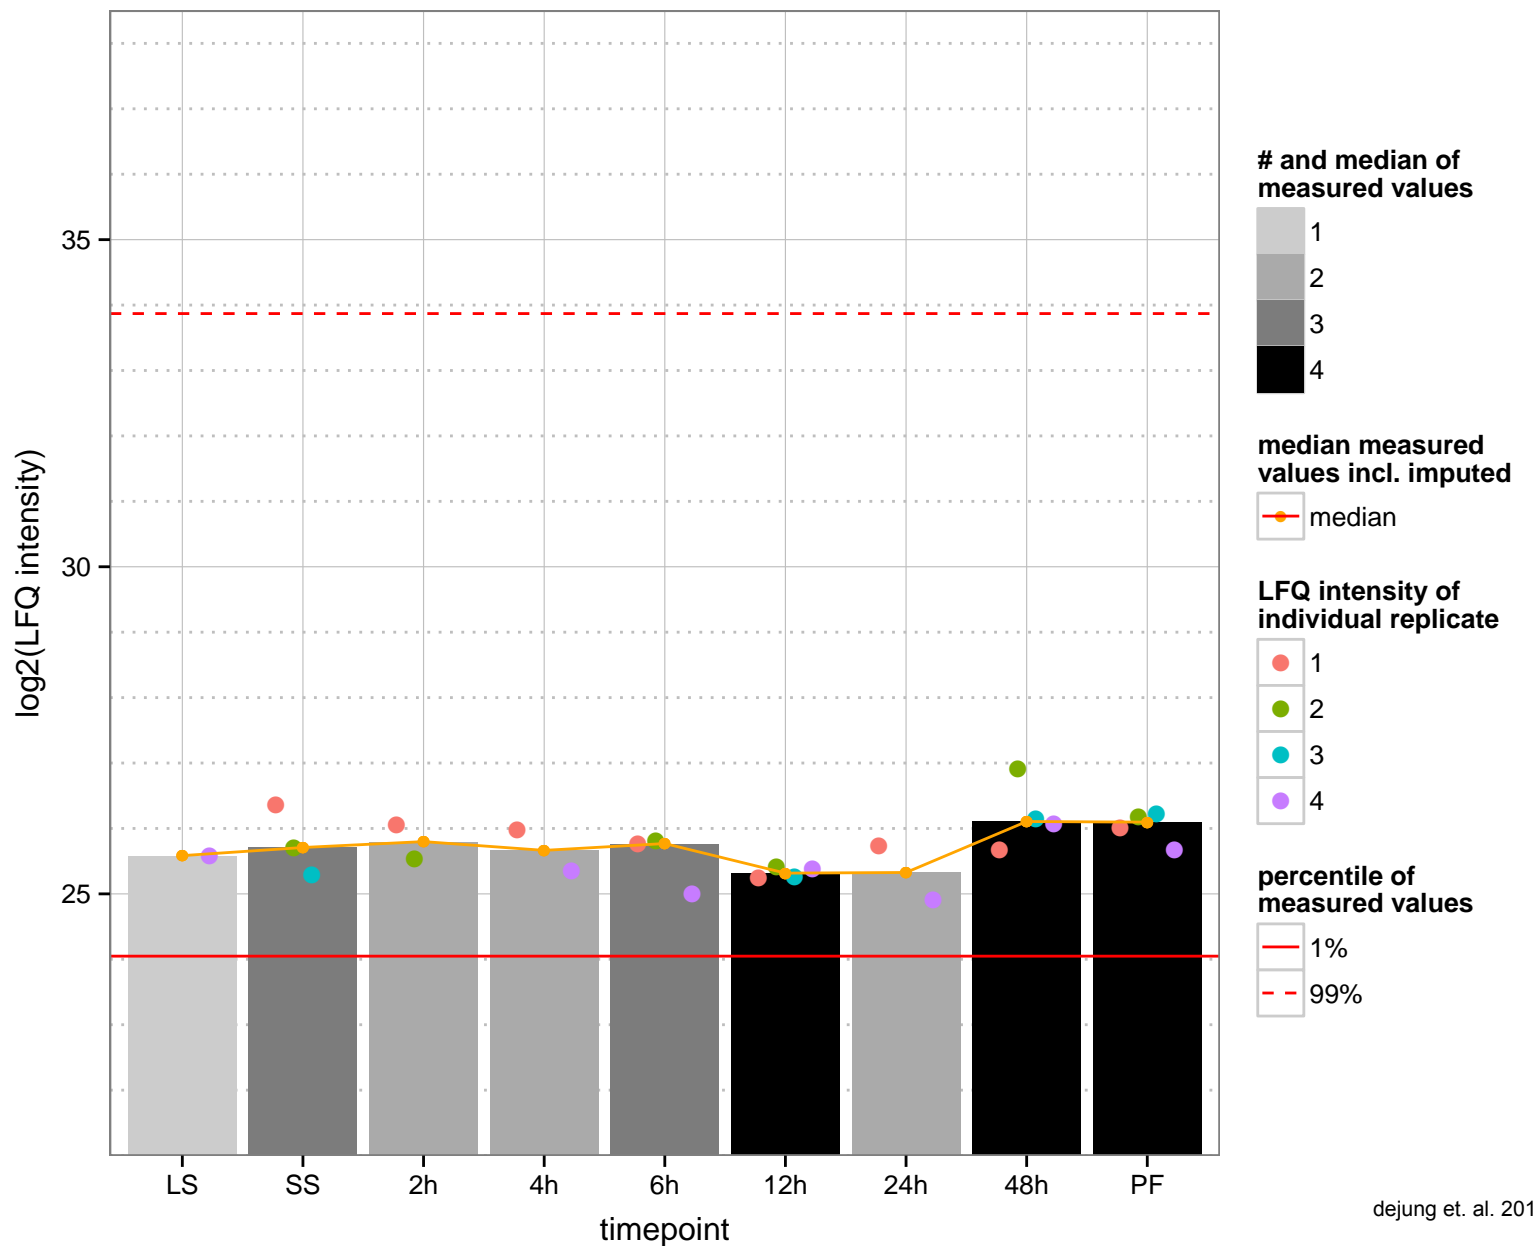

hypothetical protein, conserved  
 Tb927.10.3070  
 AGOF: null  
 AGOC: null  
 AGOP: null  
 PGOF: null  
 PGO C: null  
 PGOP: null

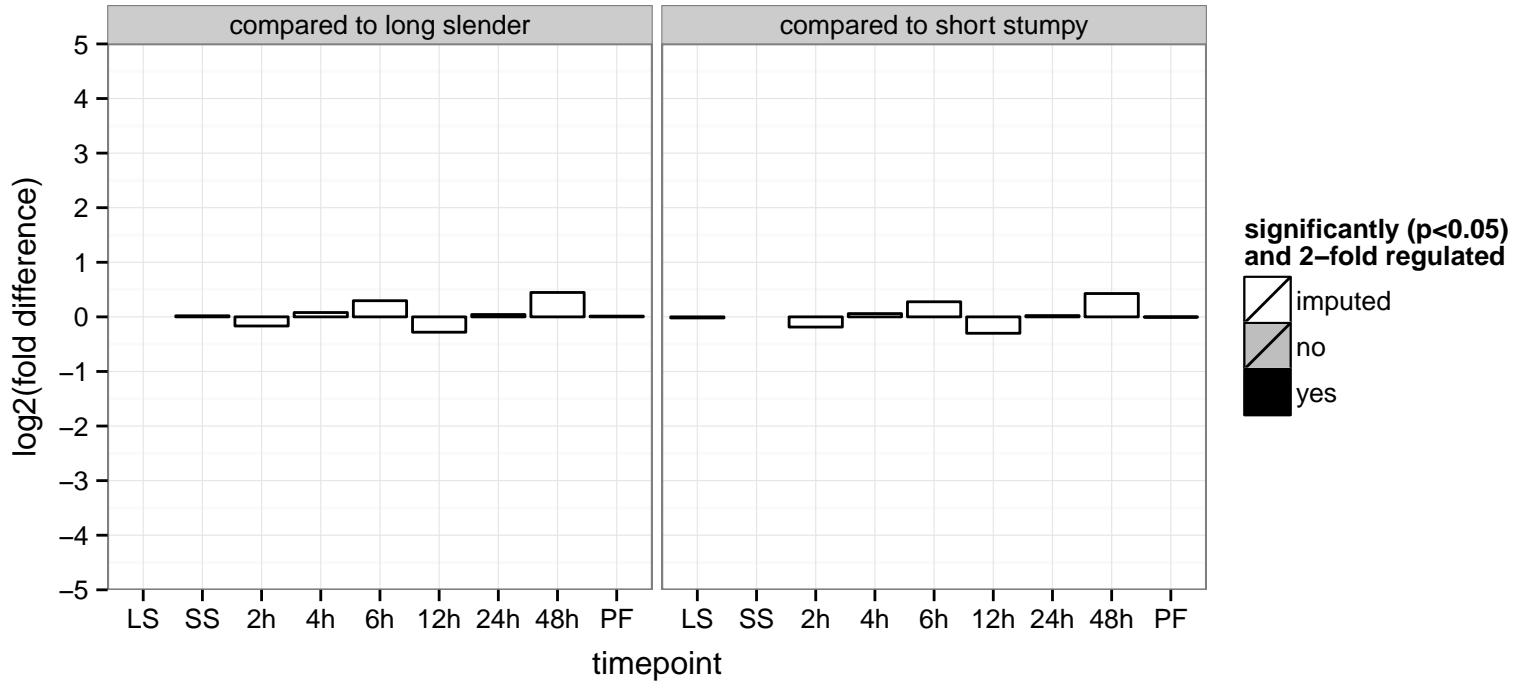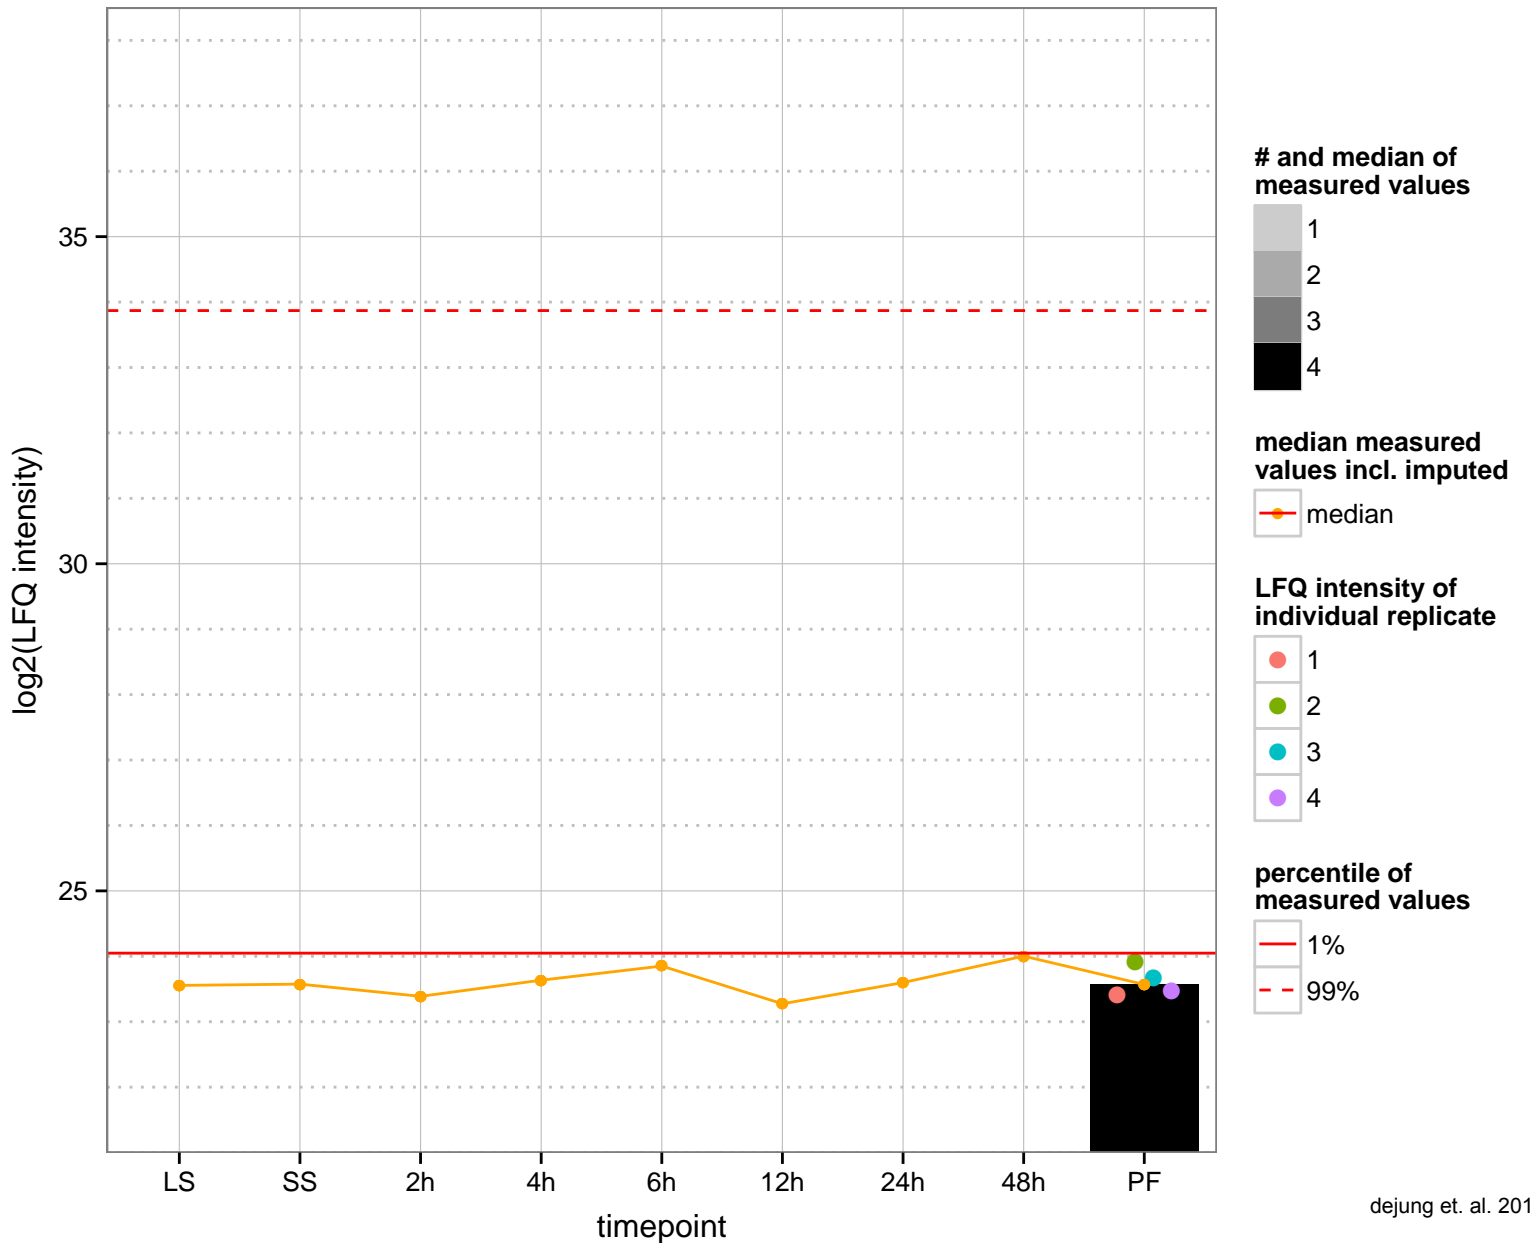

methionine biosynthetic protein, putative  
 Tb927.10.3080  
 AGOF: null  
 AGOC: mitochondrial inner membrane  
 AGOP: null  
 PGO: transferase activity  
 PGOC: null  
 PGOP: null

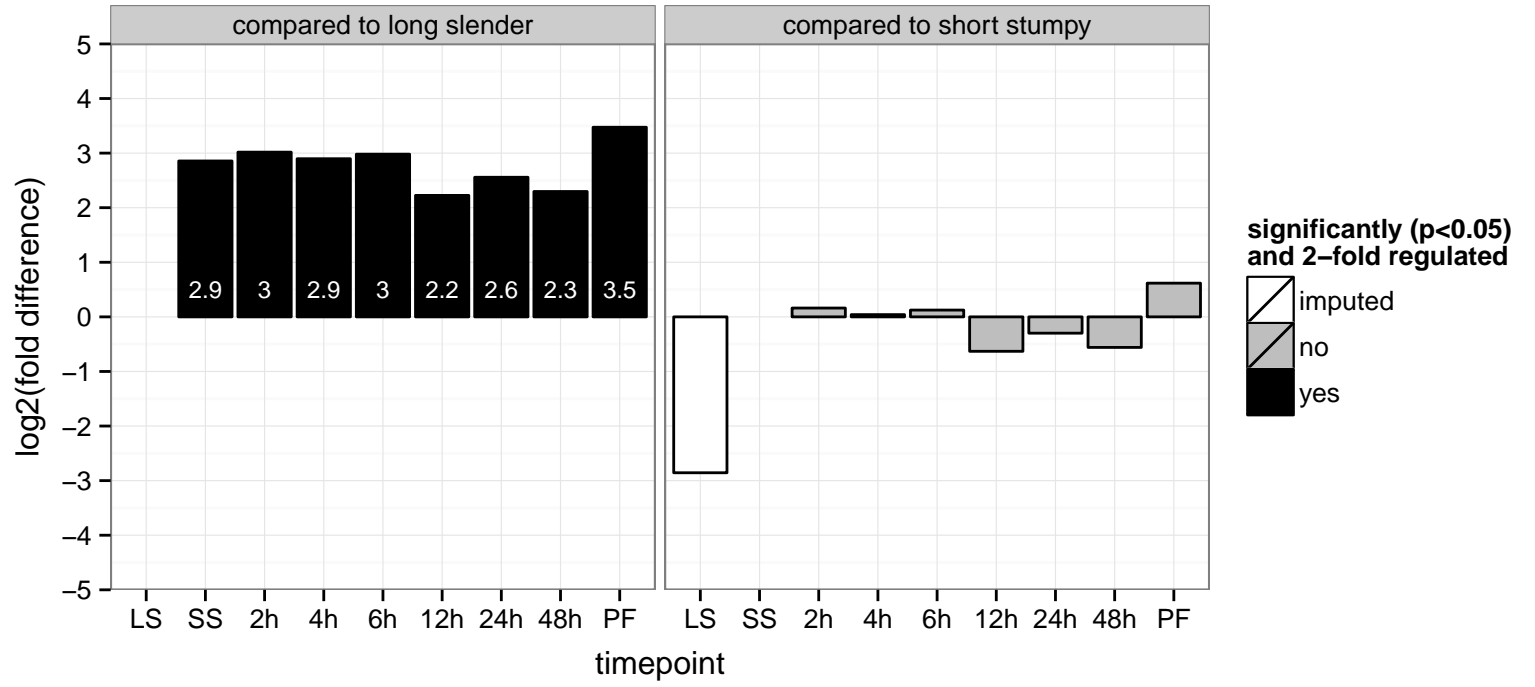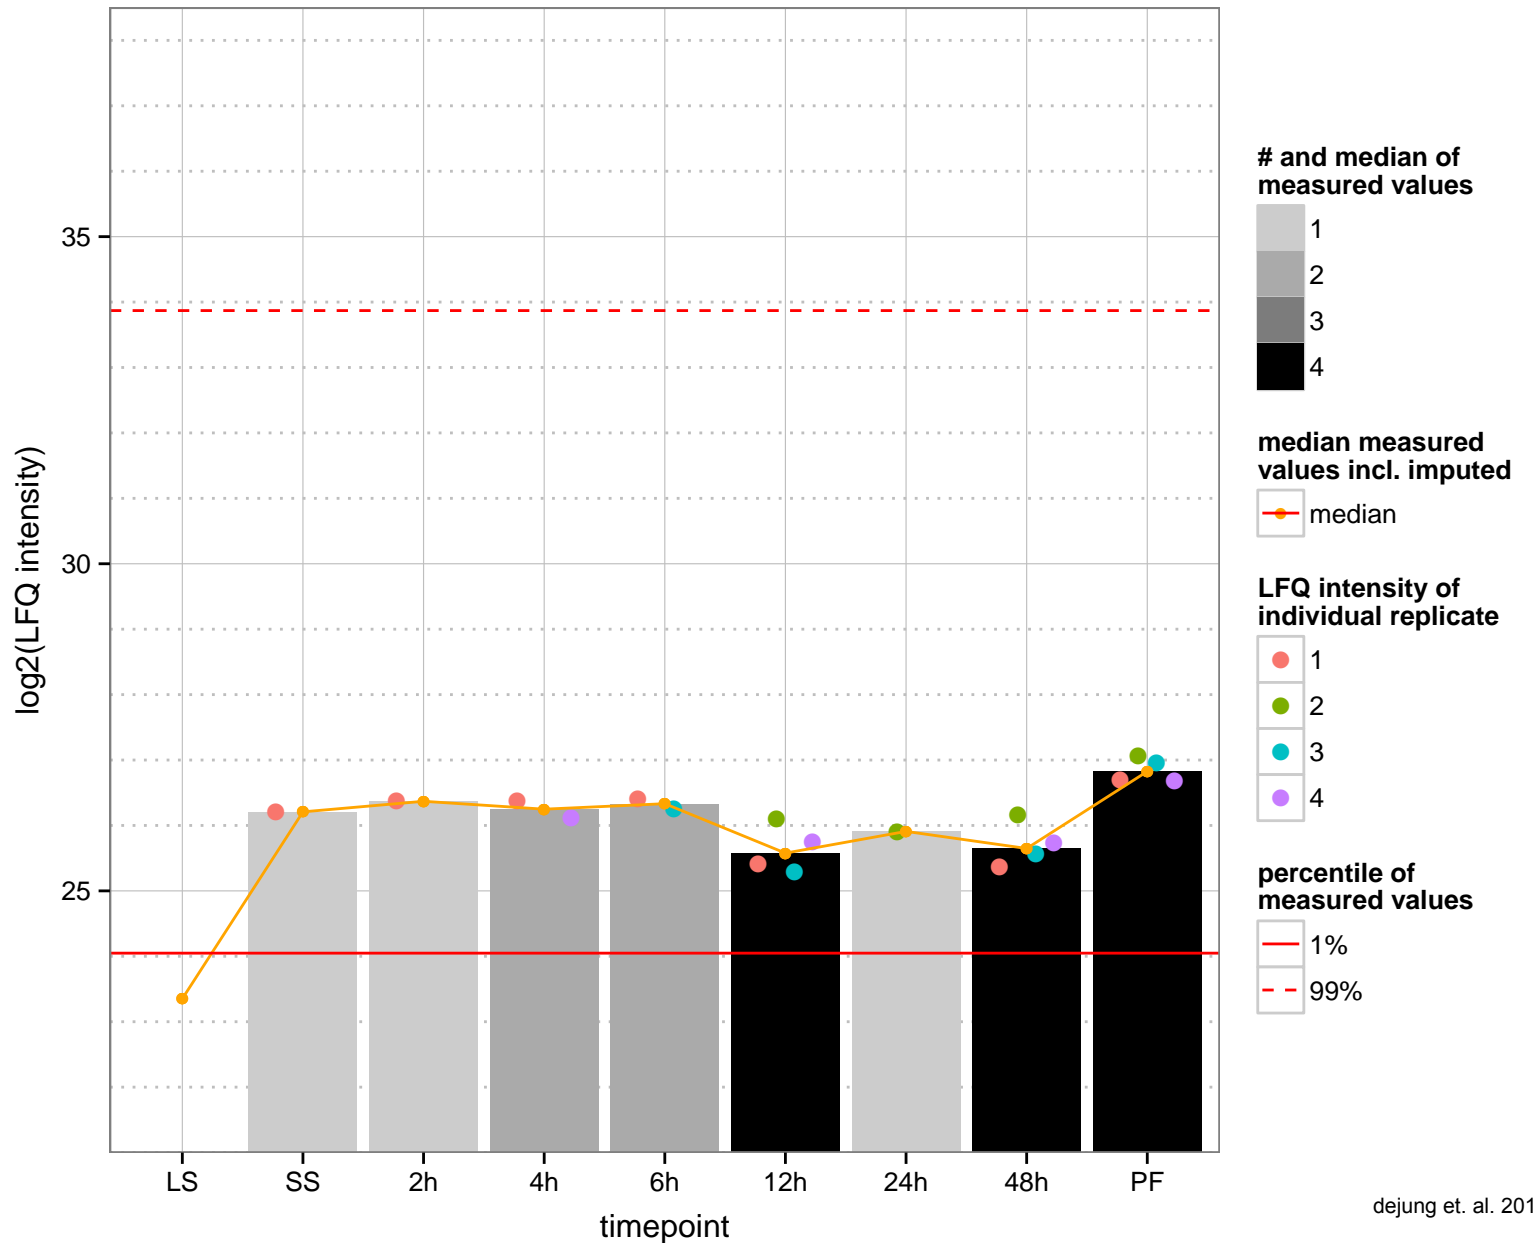

hypothetical protein, conserved  
 Tb927.10.3090  
 AGOF: null  
 AGOC: null  
 AGOP: null  
 PGO: null  
 PGOC: null  
 PGOP: null

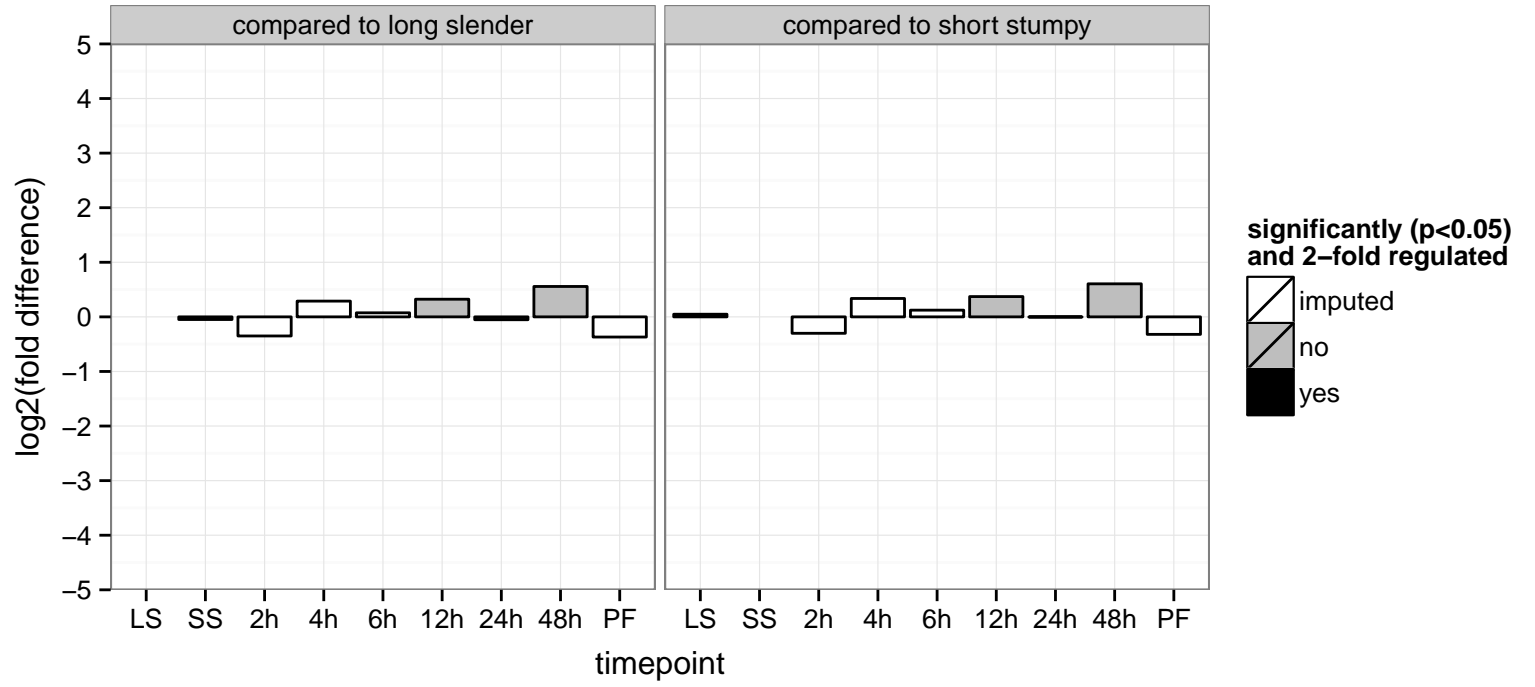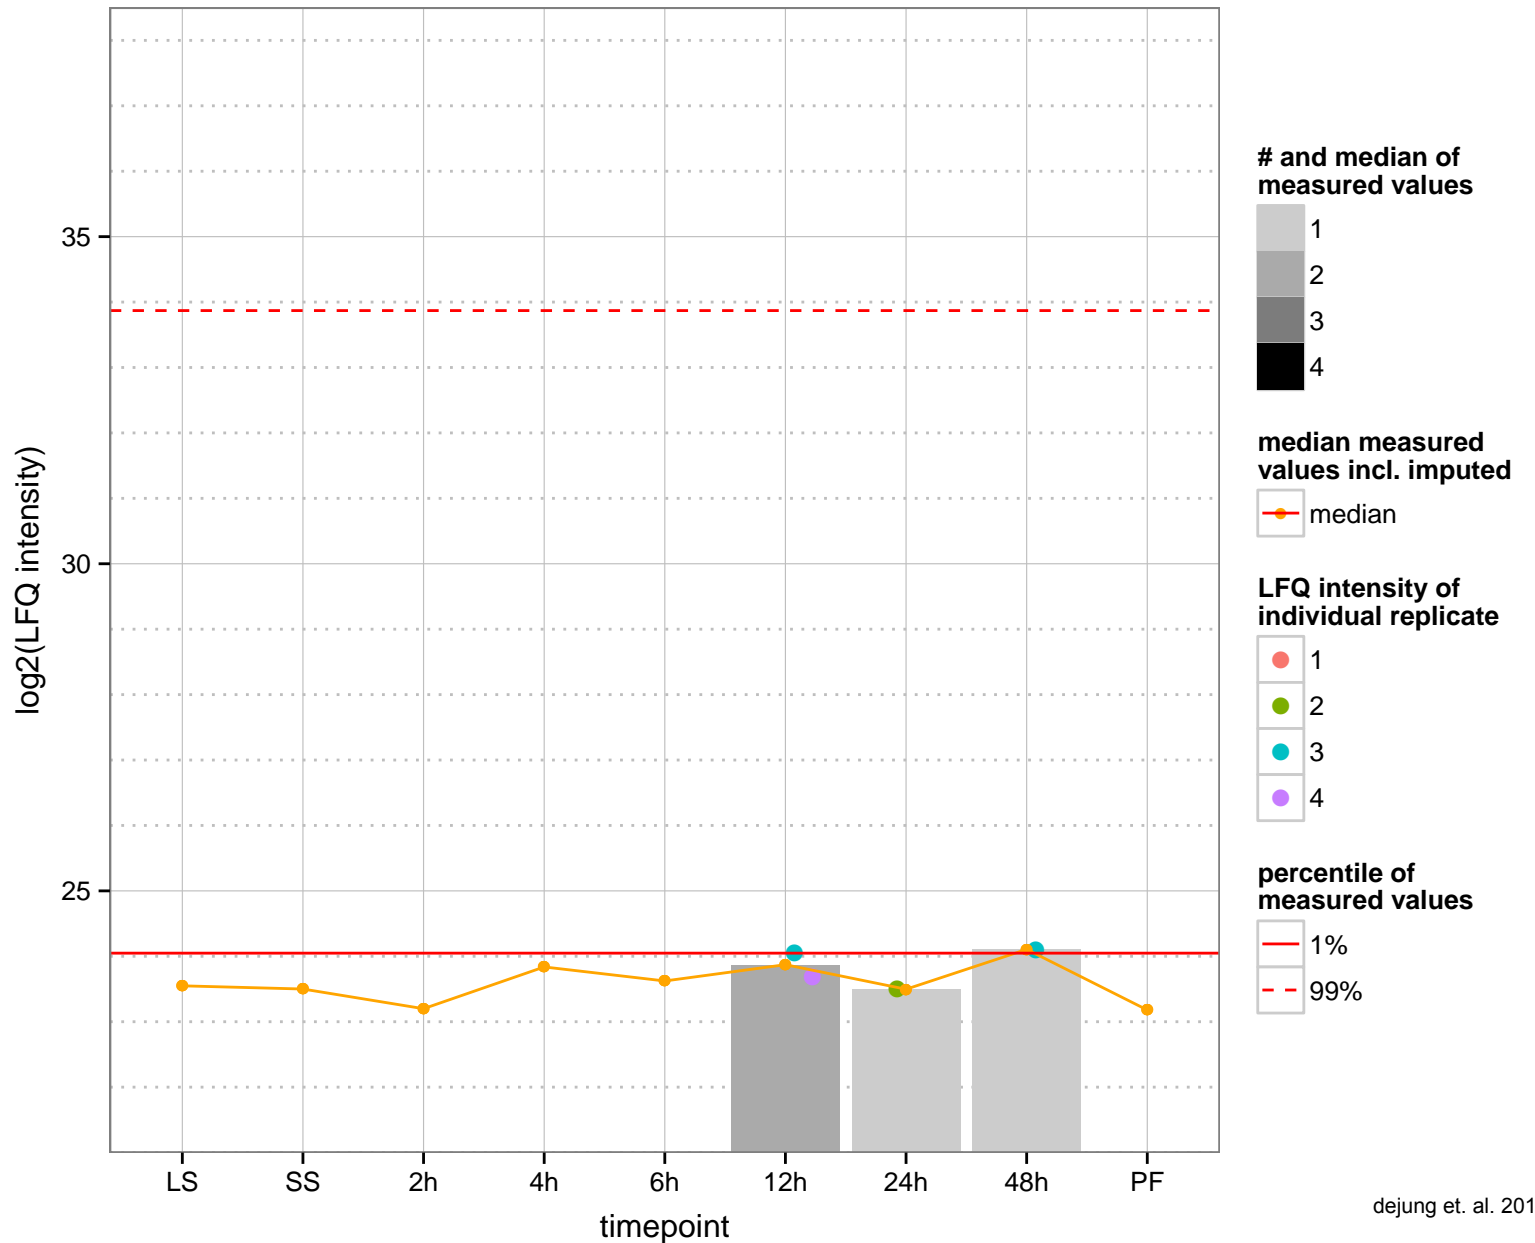

N-acetyltransferase, putative  
 Tb927.10.3150  
 AGOF: N-acetyltransferase activity  
 AGOC: null  
 AGOP: metabolic process  
 PGOF: N-acetyltransferase activity  
 PGO: null  
 PGOP: null

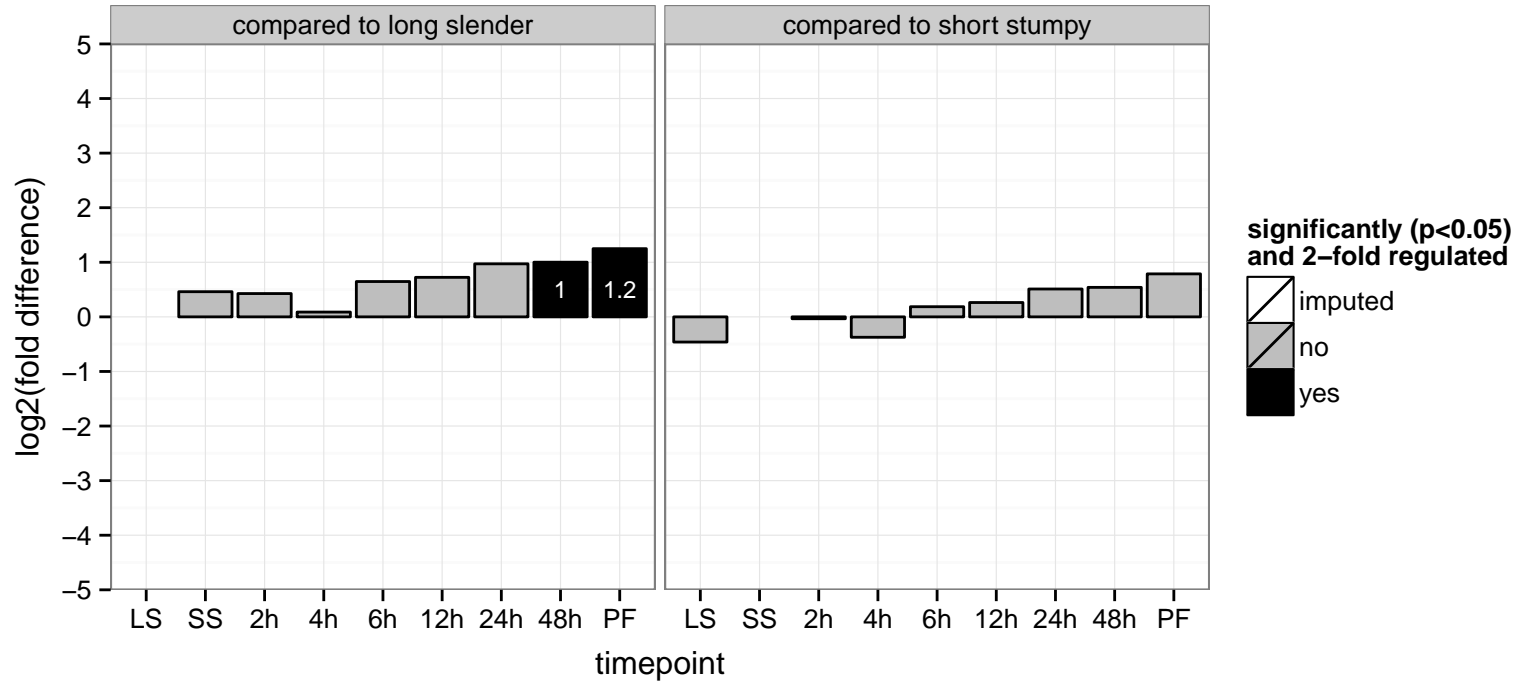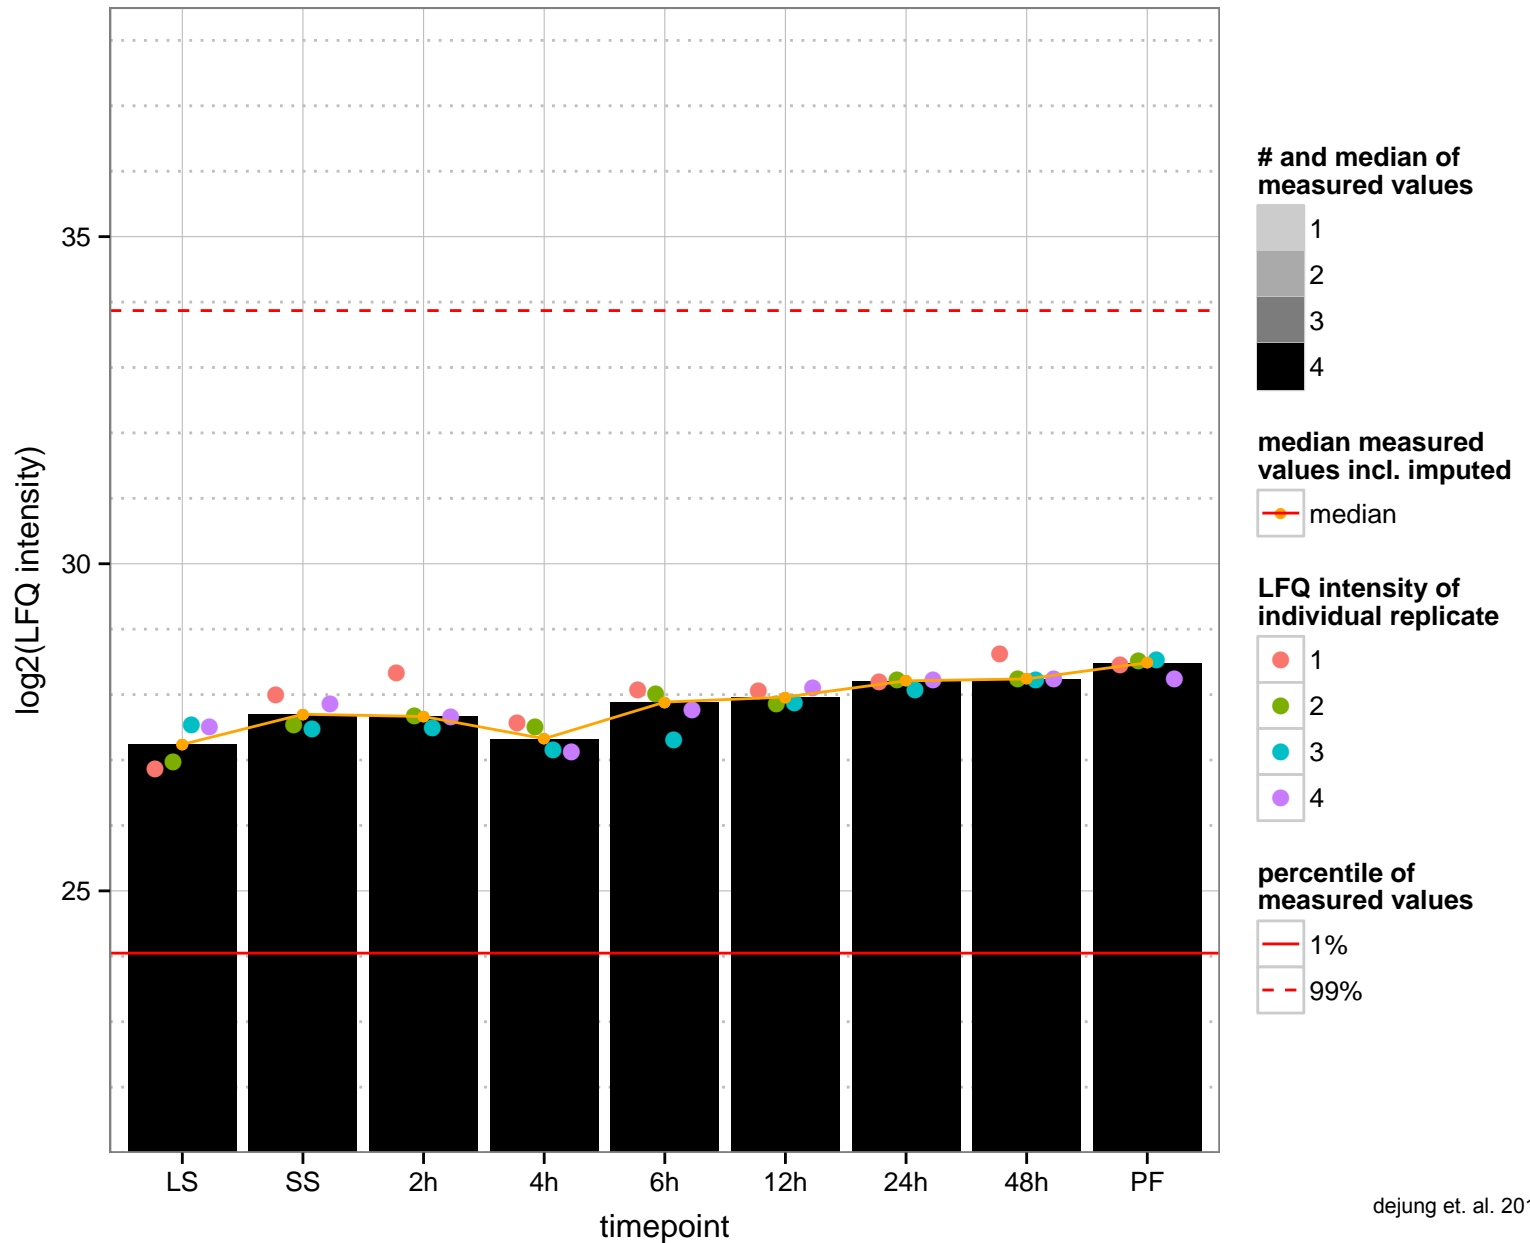



U2 splicing auxiliary factor, putative (U2AF35)

Tb927.10.3200

AGOF: RNA binding, zinc ion binding

AGOC: nuclear speck, nucleus

AGOP: RNA splicing, RNA splicing, via transesterification reactions, mRNA processing

PGOF: nucleic acid binding, zinc ion binding

PGOC: null

PGOP: null

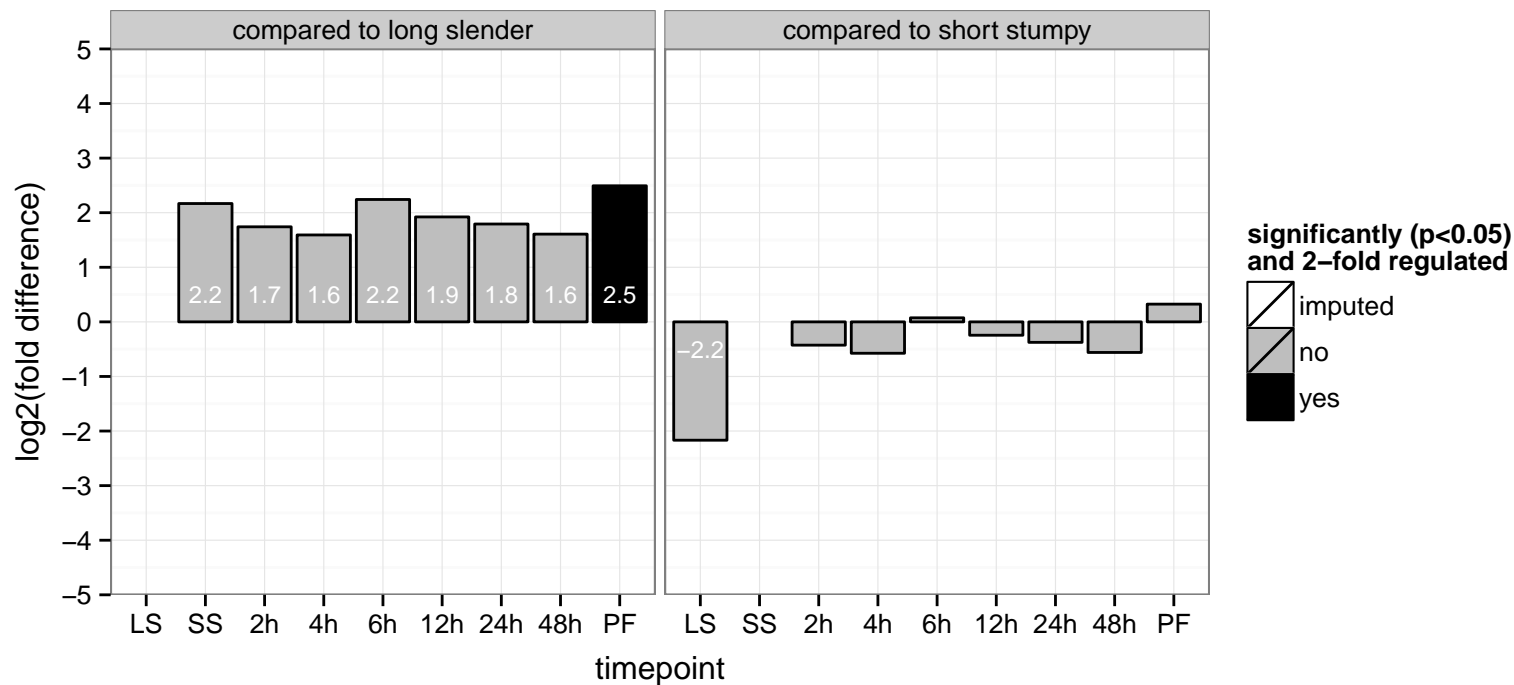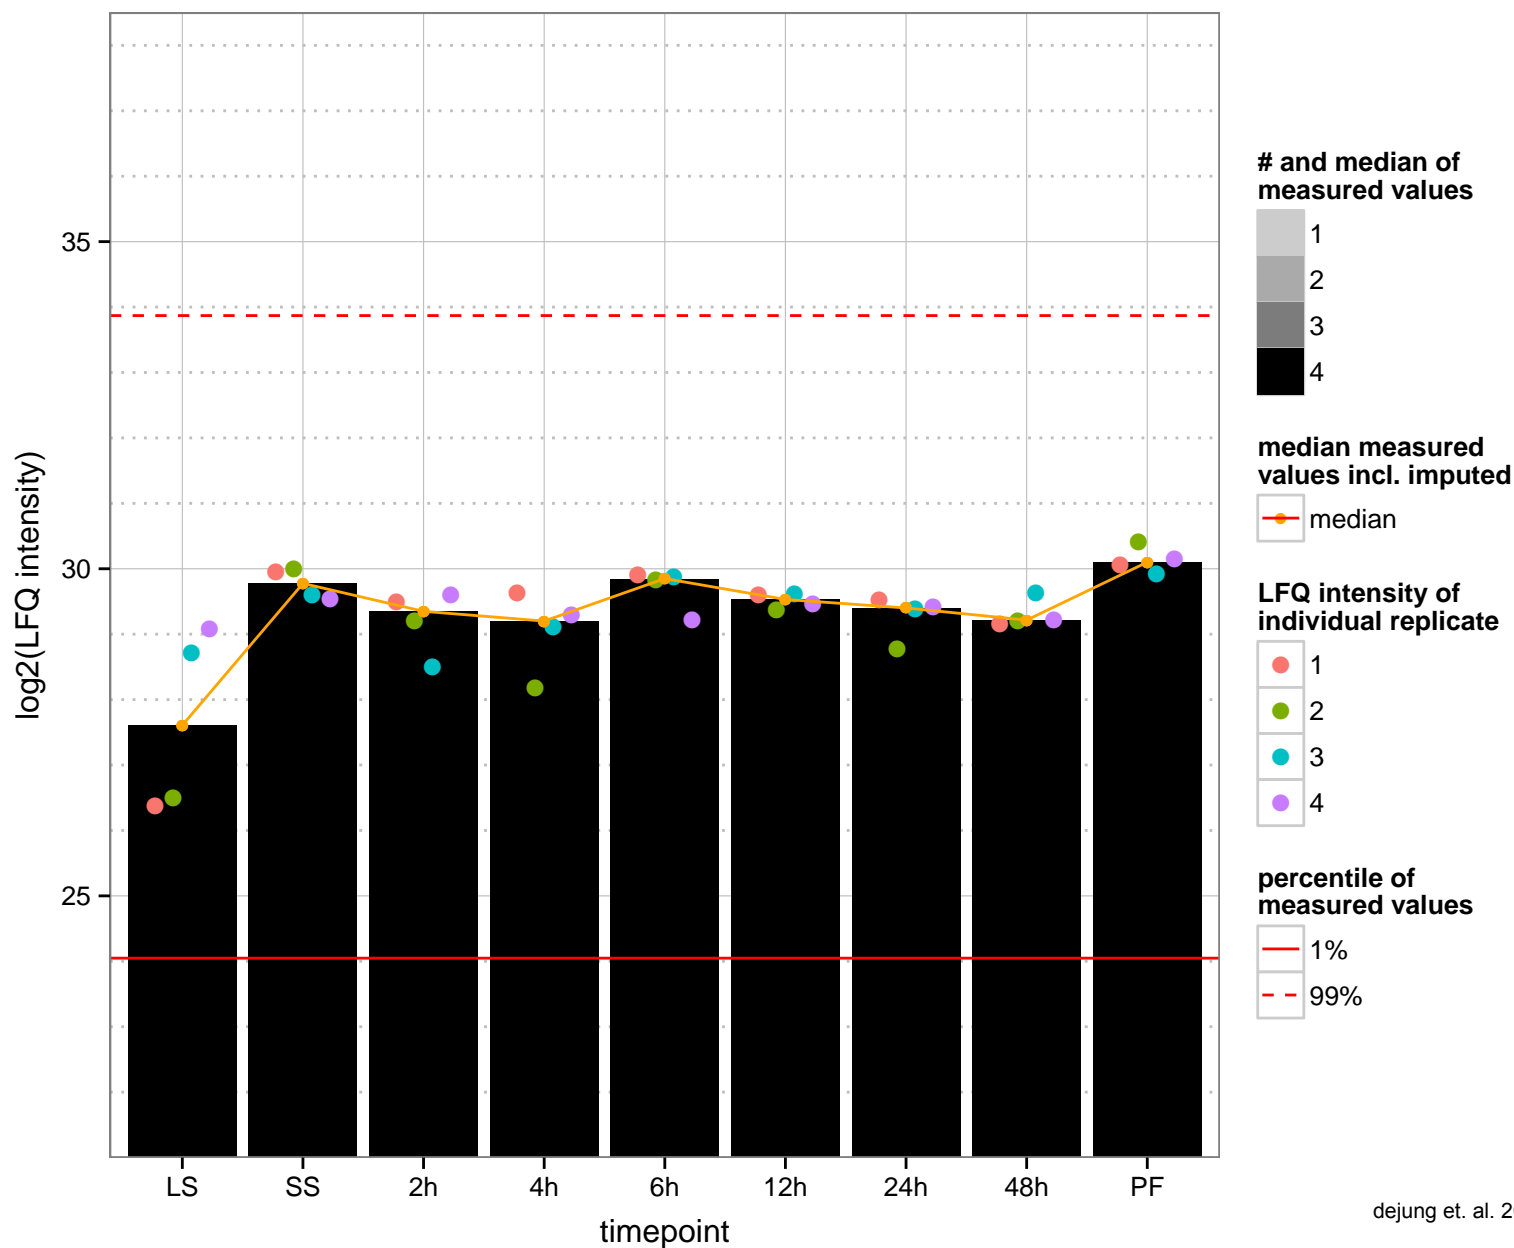

delta-1-pyrroline-5-carboxylate dehydrogenase, putative

Tb927.10.3210

AGOF: 1-pyrroline-5-carboxylate dehydrogenase activity, 3-chloroallyl aldehyde dehydrogenase activity

AGOC: mitochondrial matrix, mitochondrion

AGOP: oxidation-reduction process, proline biosynthetic process, proline catabolic process

PGOF: 1-pyrroline-5-carboxylate dehydrogenase activity, oxidoreductase activity

PGOC: mitochondrial matrix

PGOP: metabolic process, oxidation-reduction process, proline biosynthetic process

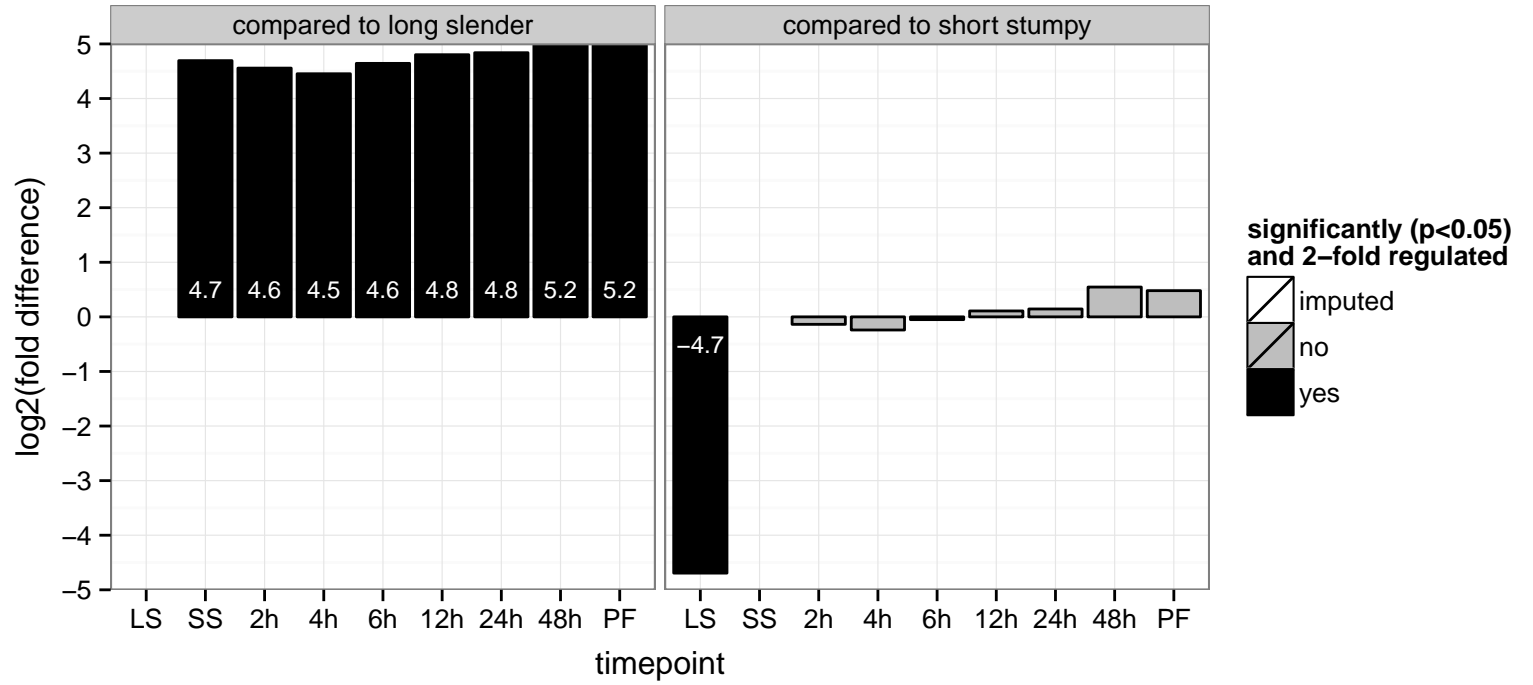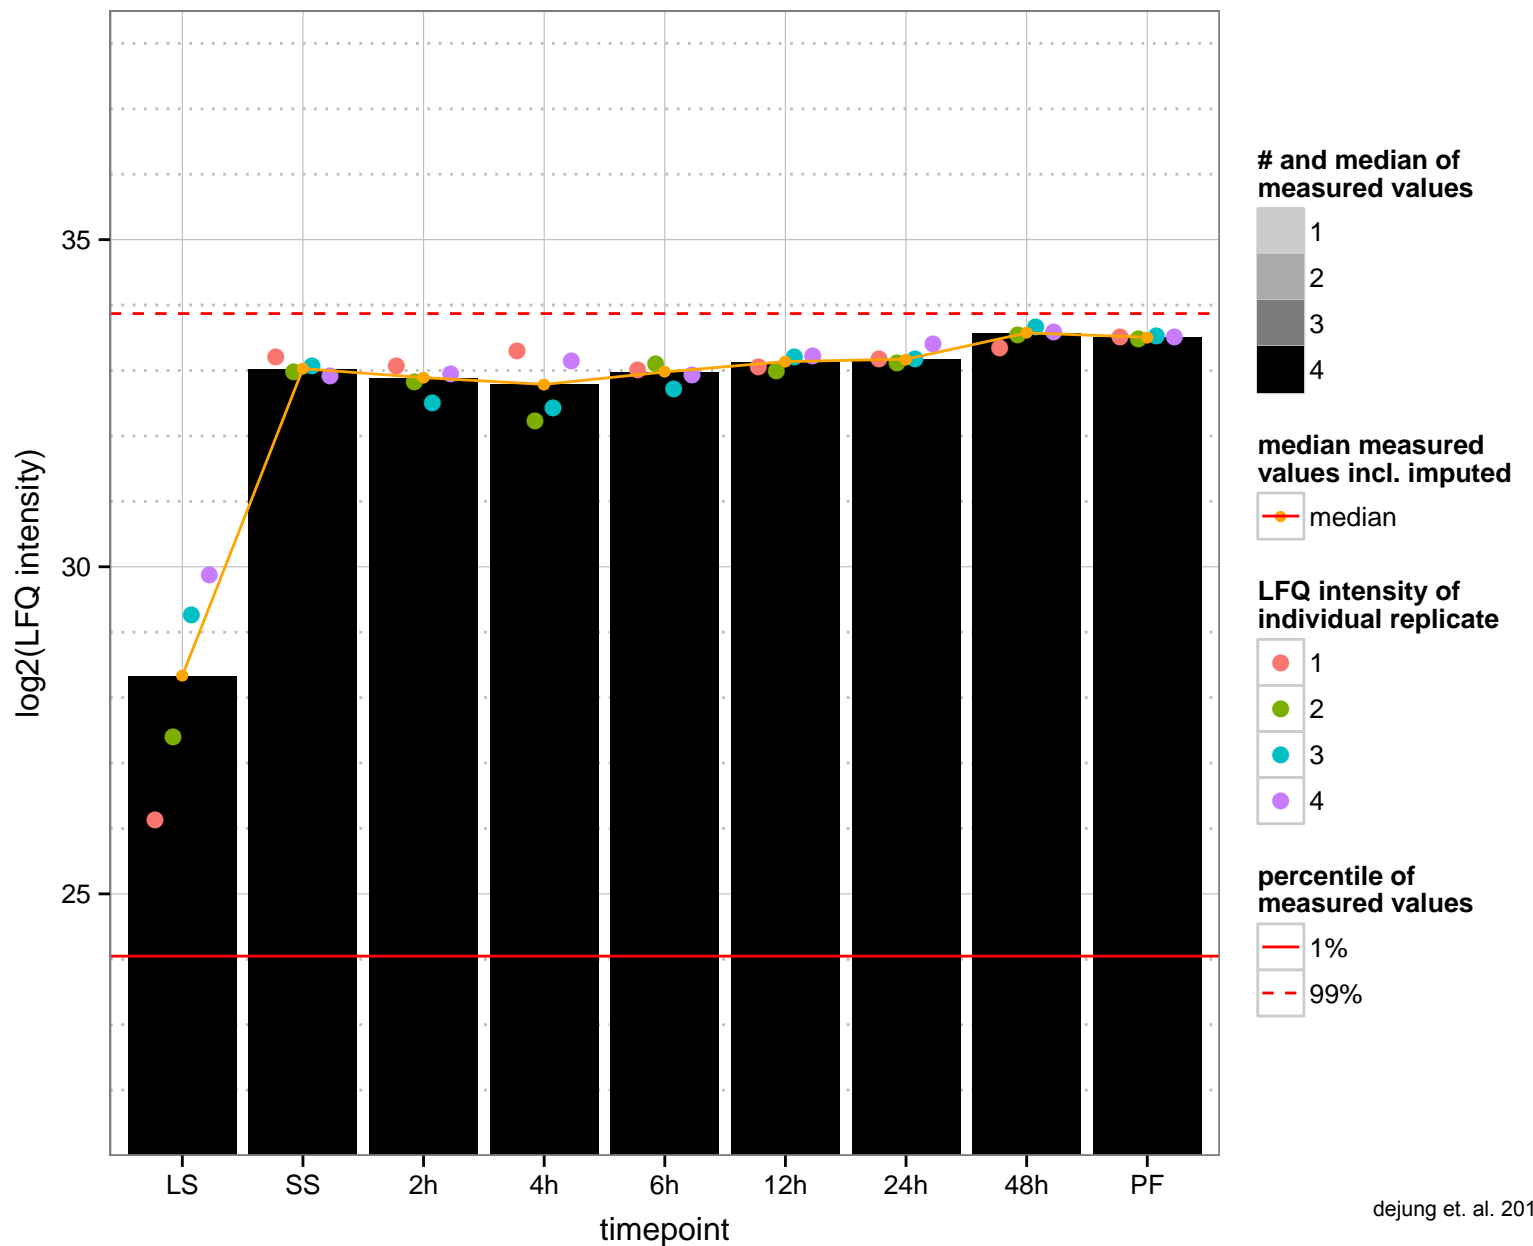

hypothetical protein, conserved  
 Tb927.10.330  
 AGOF: null  
 AGOC: null  
 AGOP: null  
 PGO: null  
 PGOC: null  
 PGOP: null

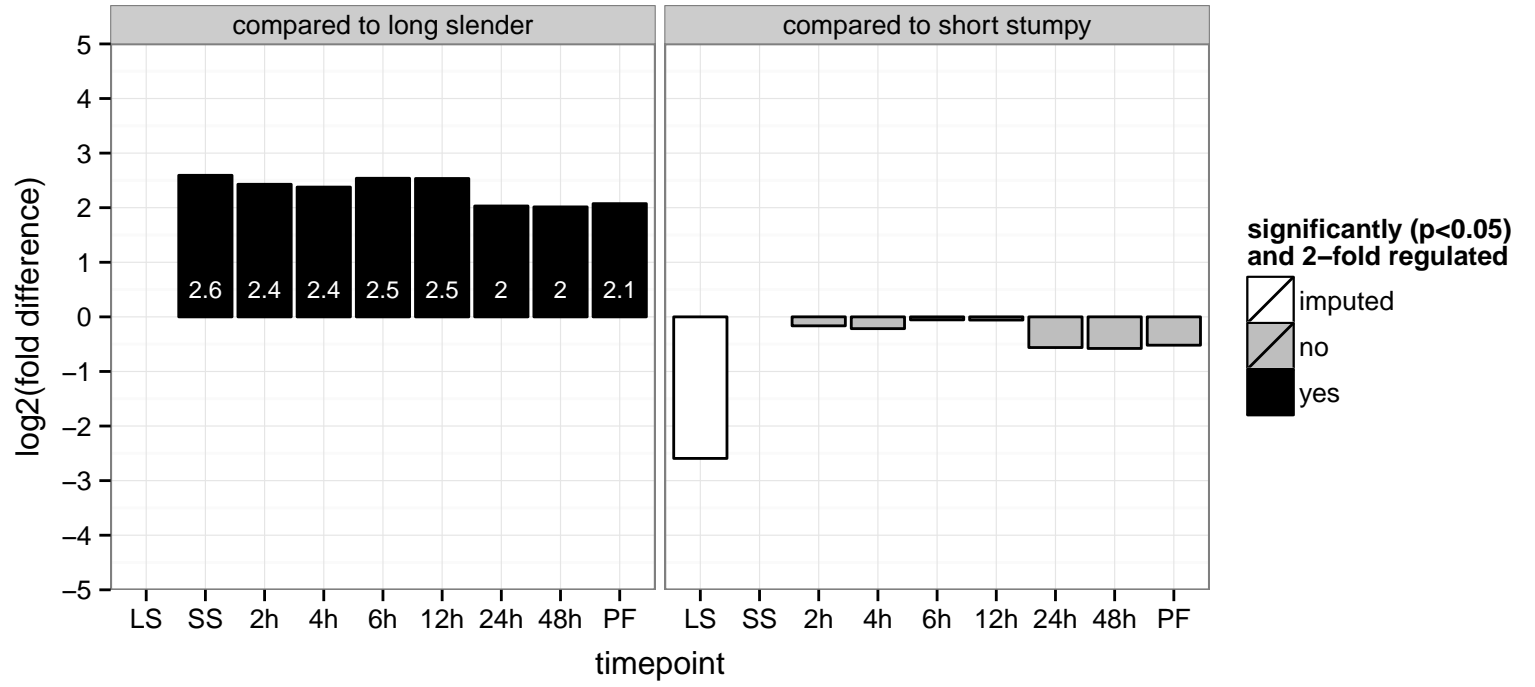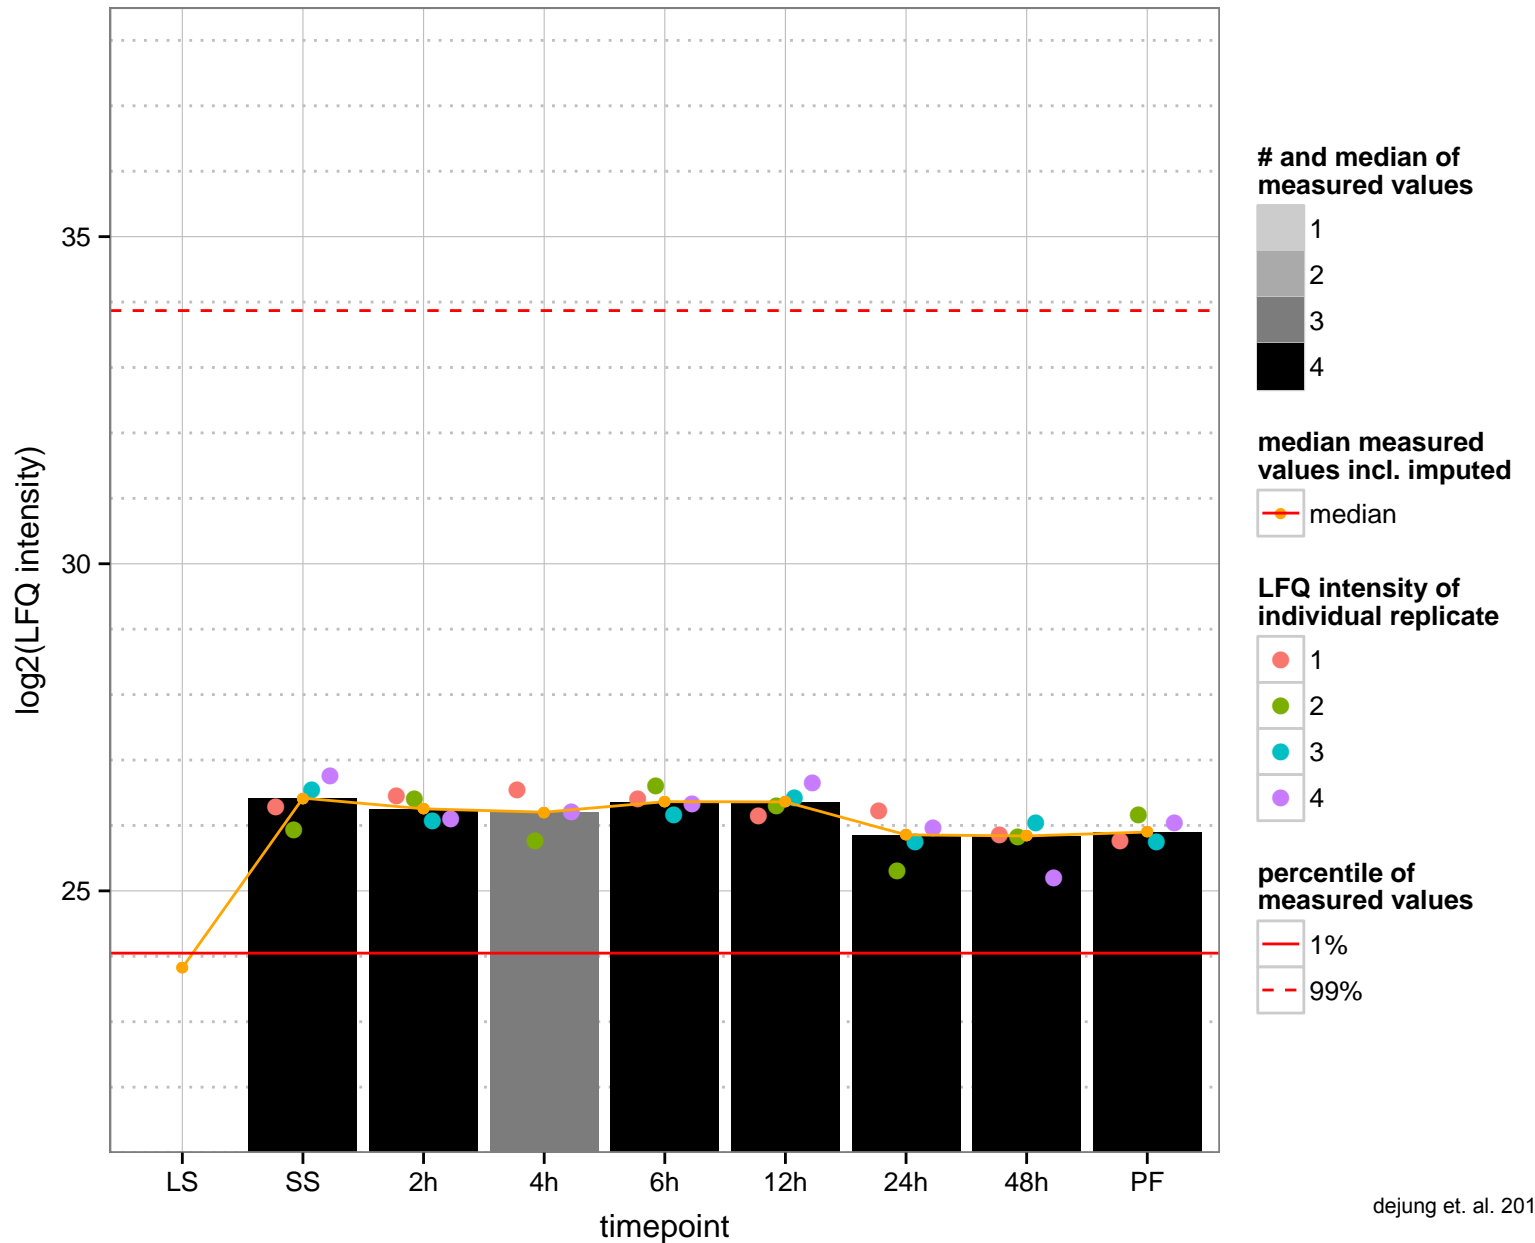

hypothetical protein, conserved, predicted TLD domain protein  
 Tb927.10.3390;Tb11.v5.0724  
 AGOF: null  
 AGOC: null  
 AGOP: null  
 PGO: null  
 PGO: null  
 PGO: null

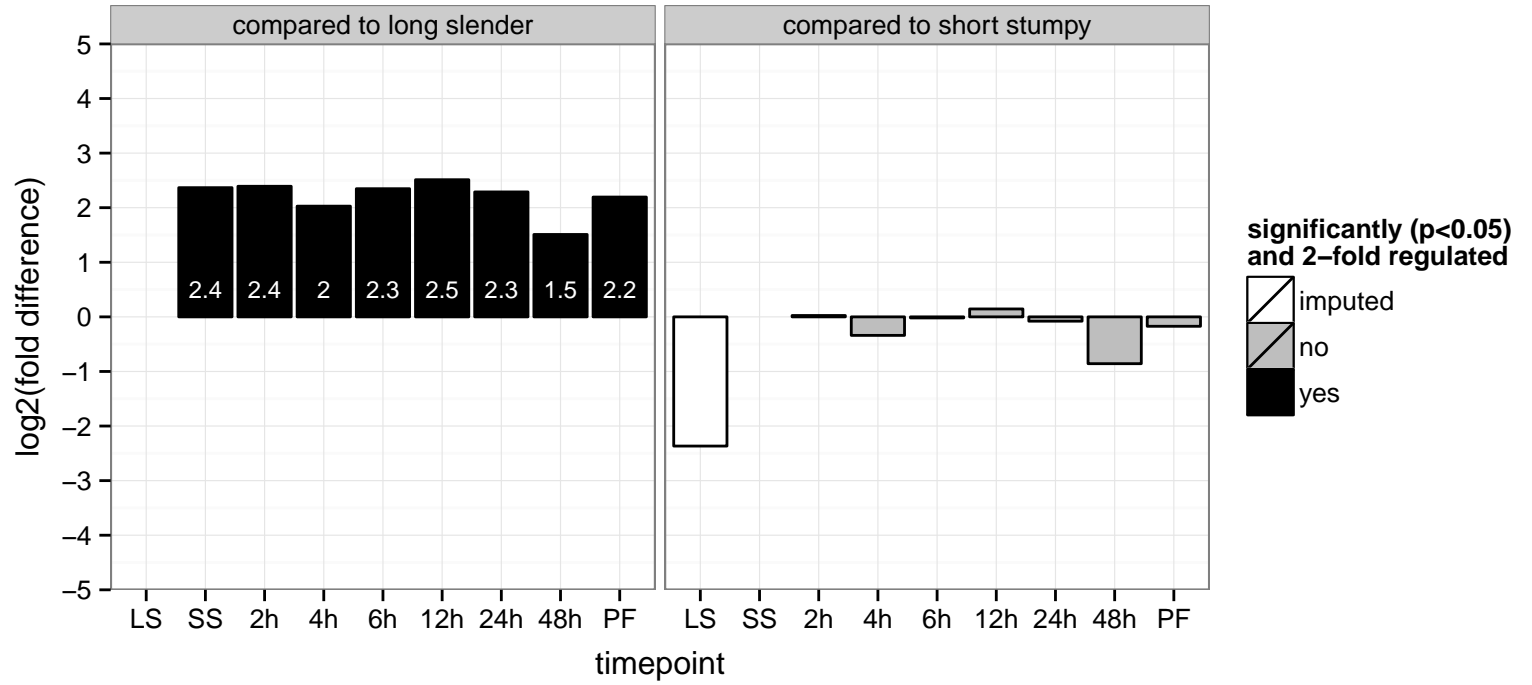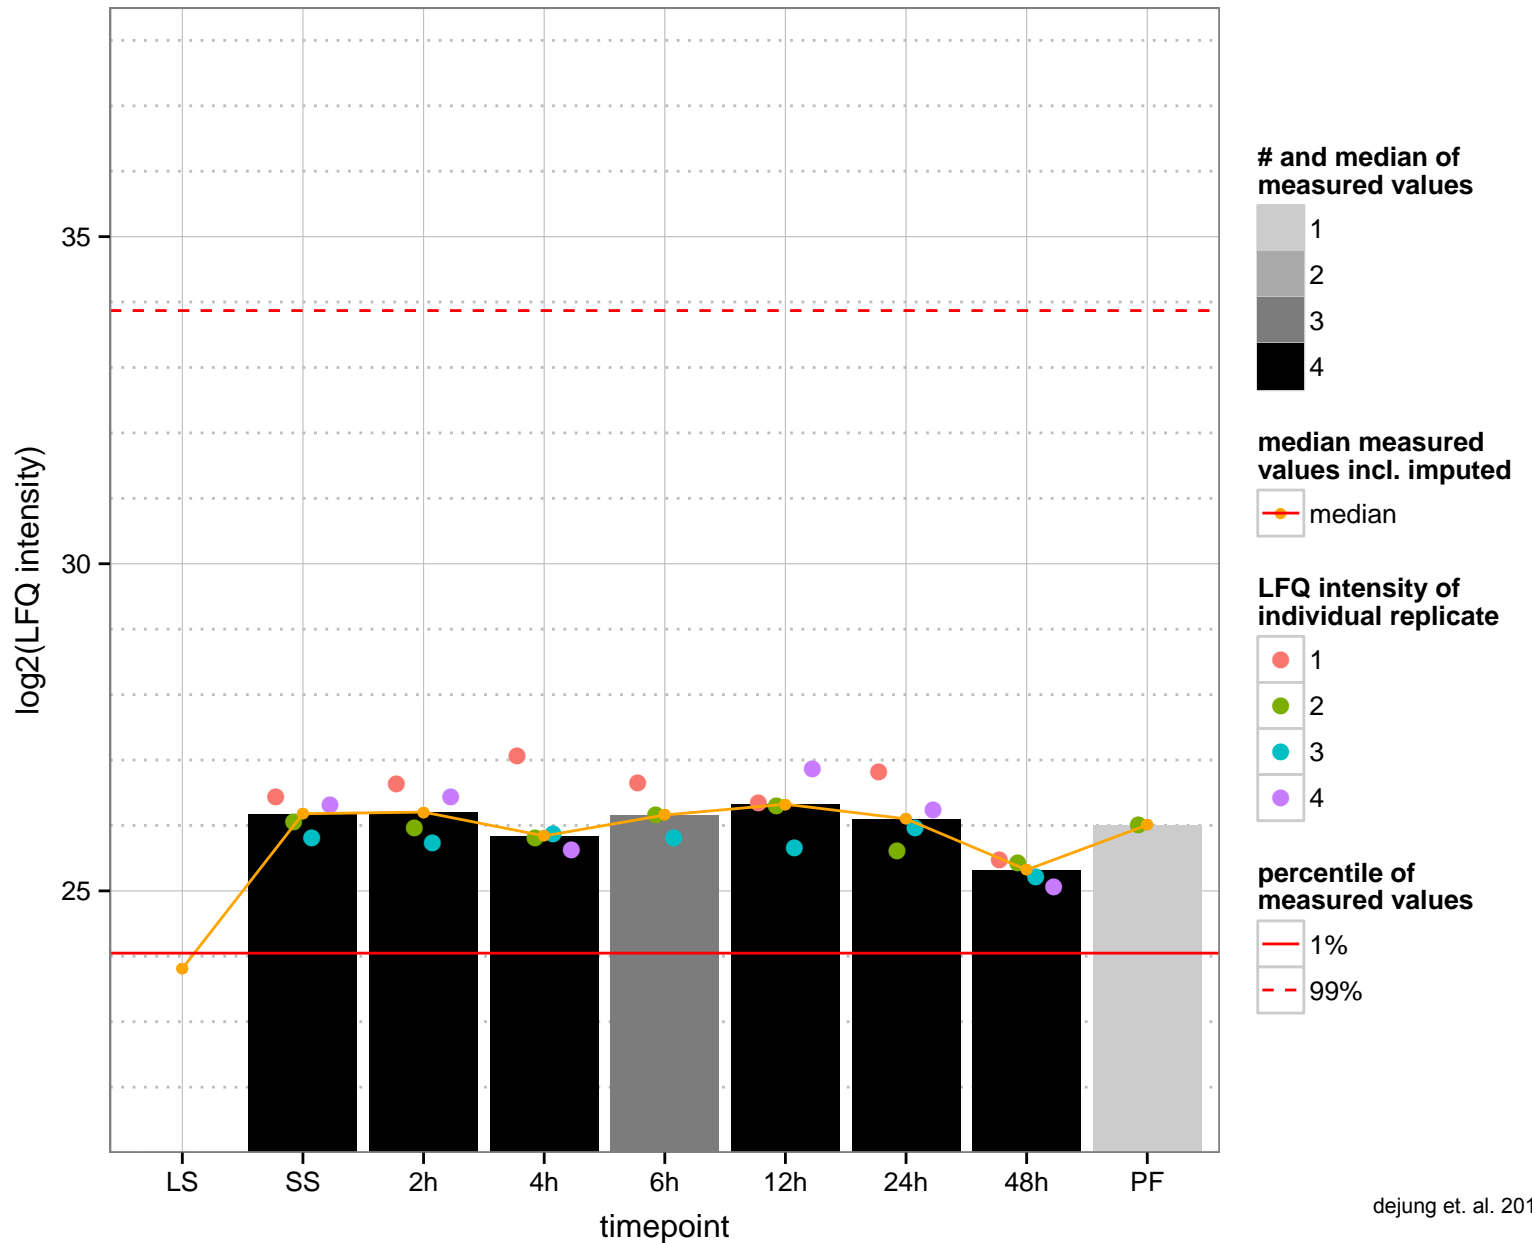

RNA-binding protein, putative (RBSR4)  
 Tb927.10.3500  
 AGOF: RNA binding  
 AGOC: null  
 AGOP: RNA processing  
 PGO: nucleic acid binding  
 PGO: null  
 PGO: null

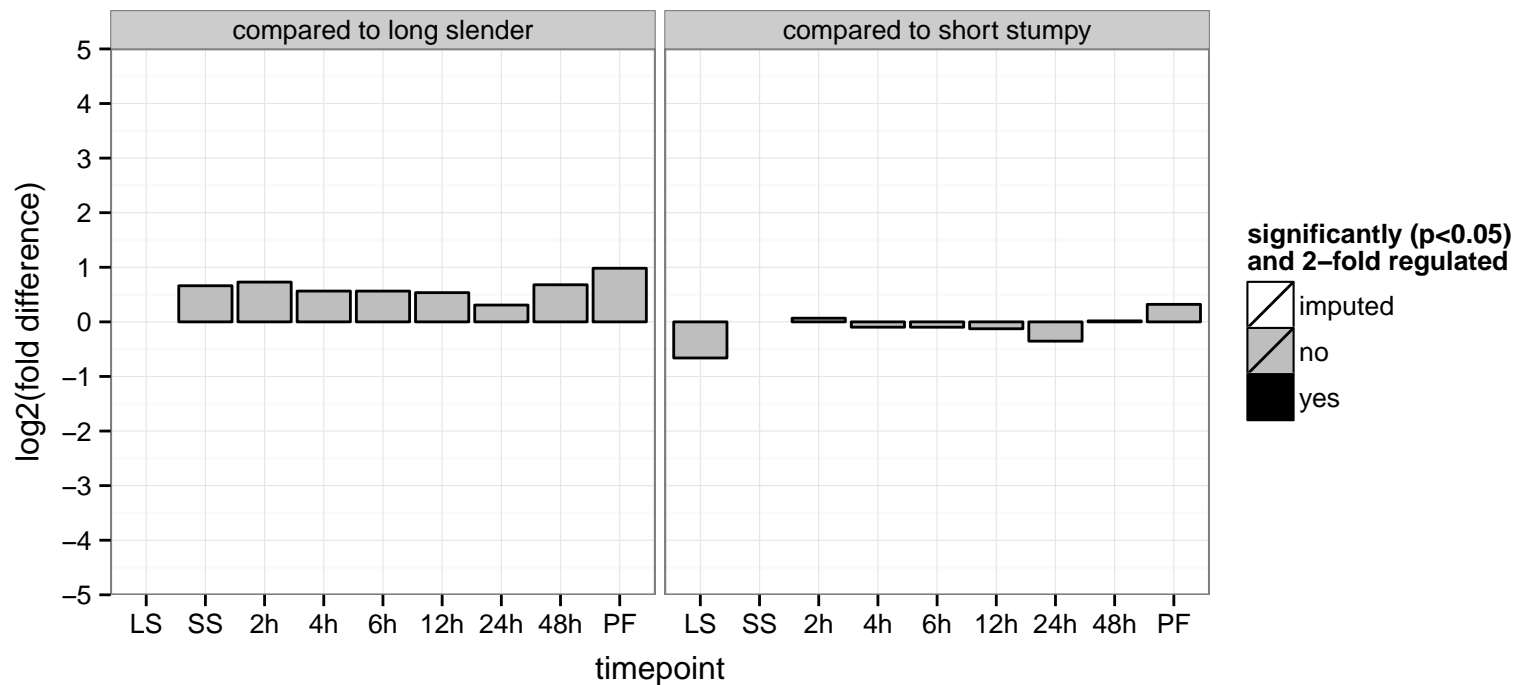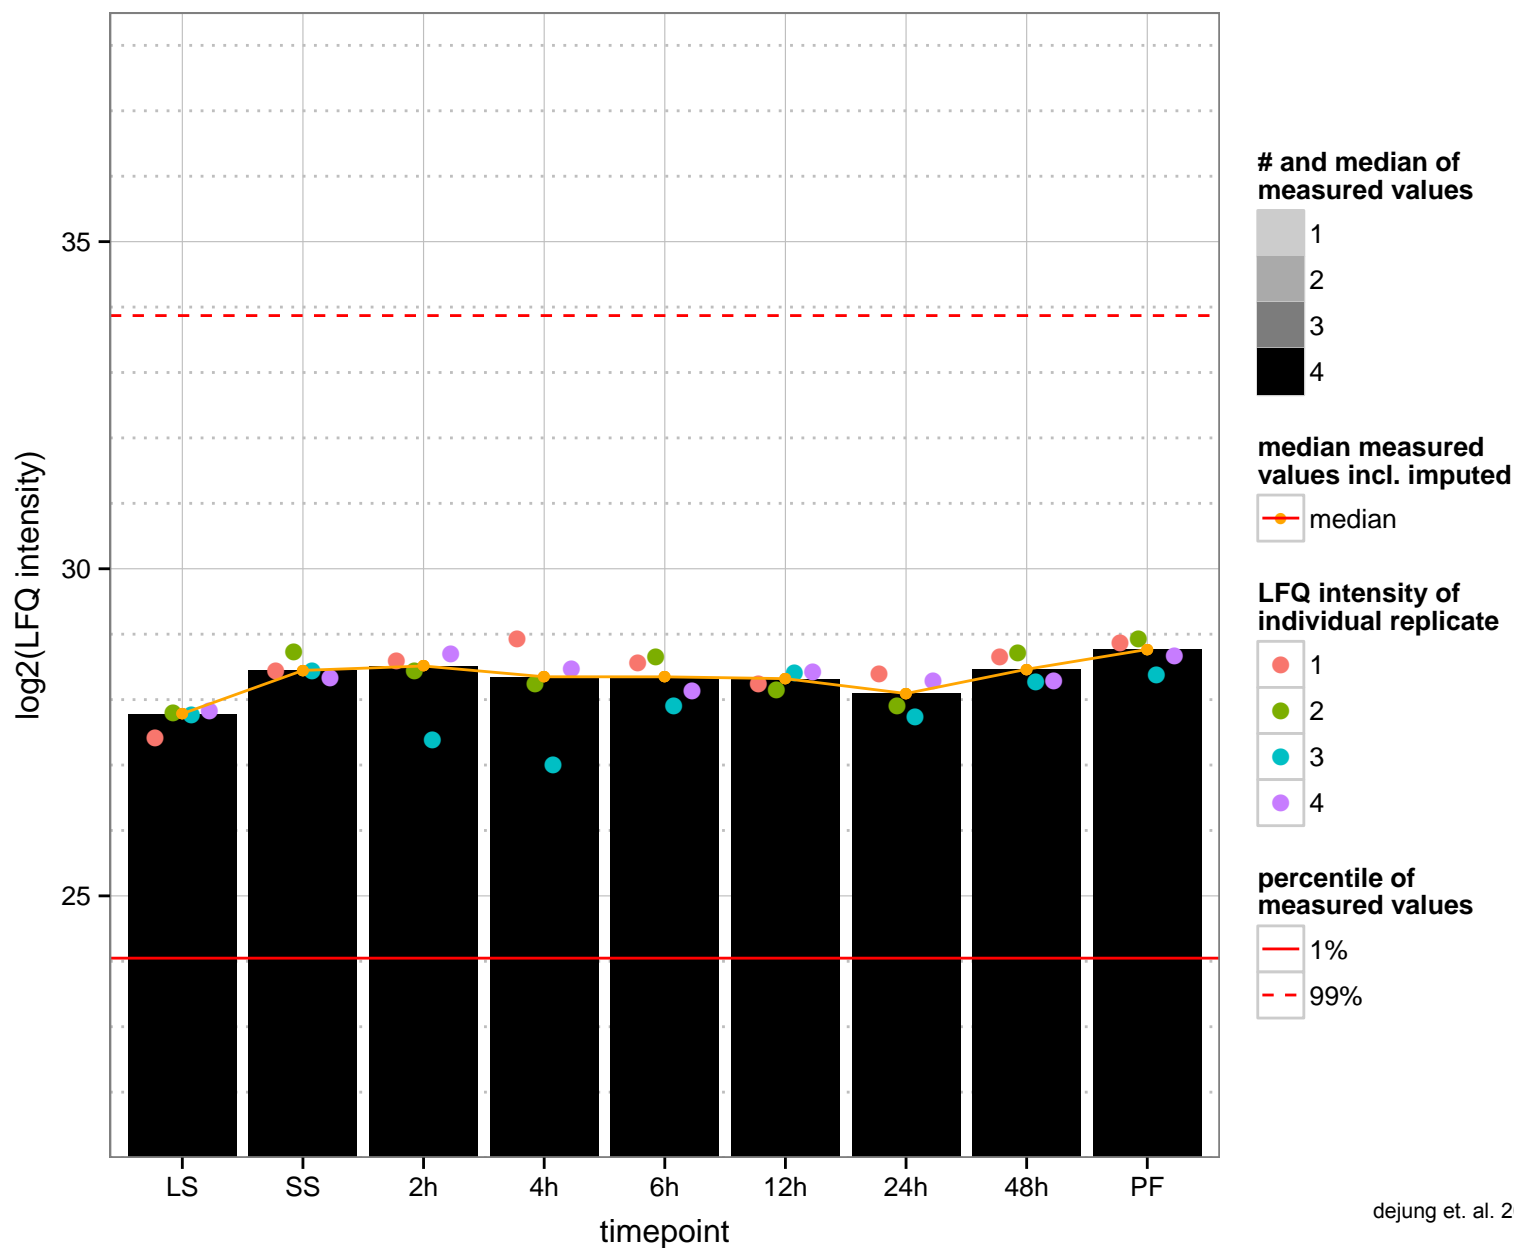

protease regulatory ATPase subunit 4 (RPT4)

Tb927.10.3520

AGOF: ATP binding, ATPase activity

AGOC: cytoplasm, nucleus, proteasome regulatory particle

AGOP: ubiquitin-dependent protein catabolic process

PGOF: ATP binding, hydrolase activity, nucleoside-triphosphatase activity, nucleotide binding

PGOC: cytoplasm

PGOP: protein catabolic process

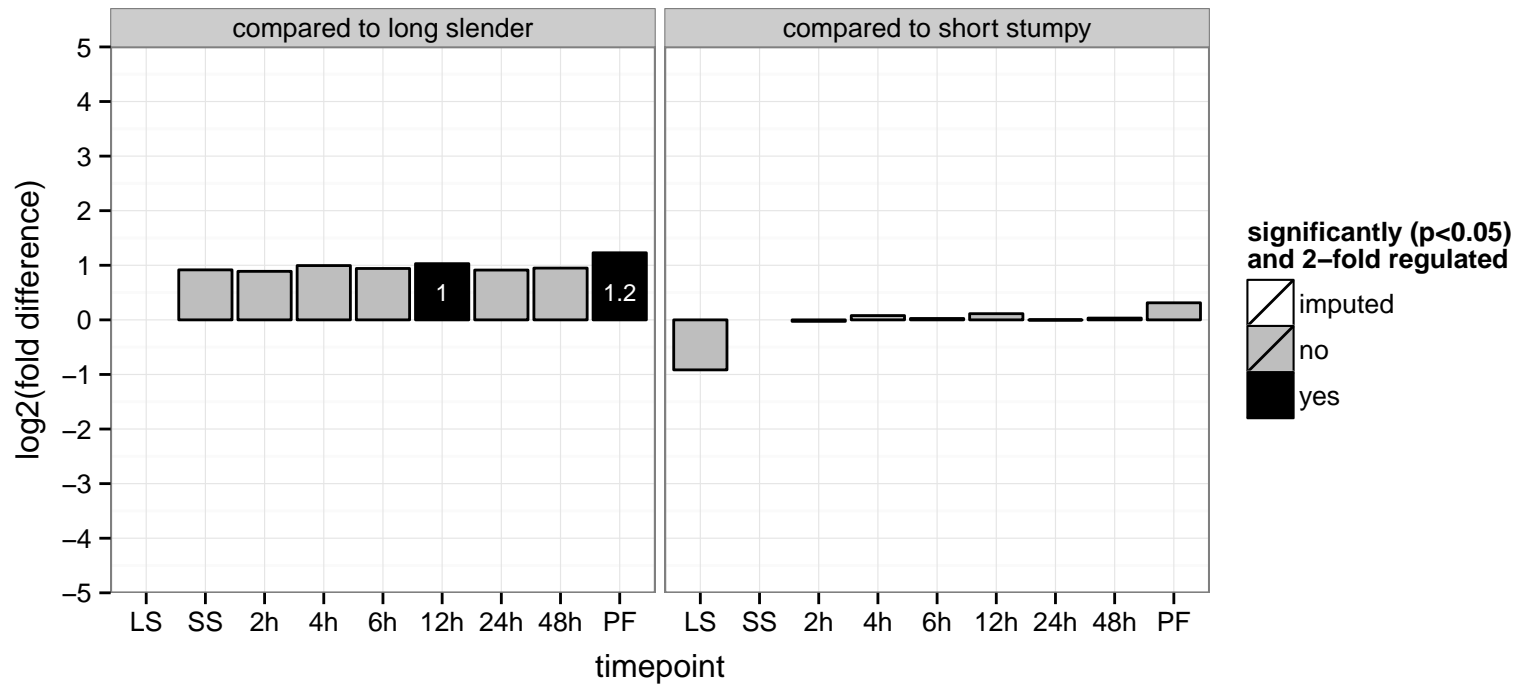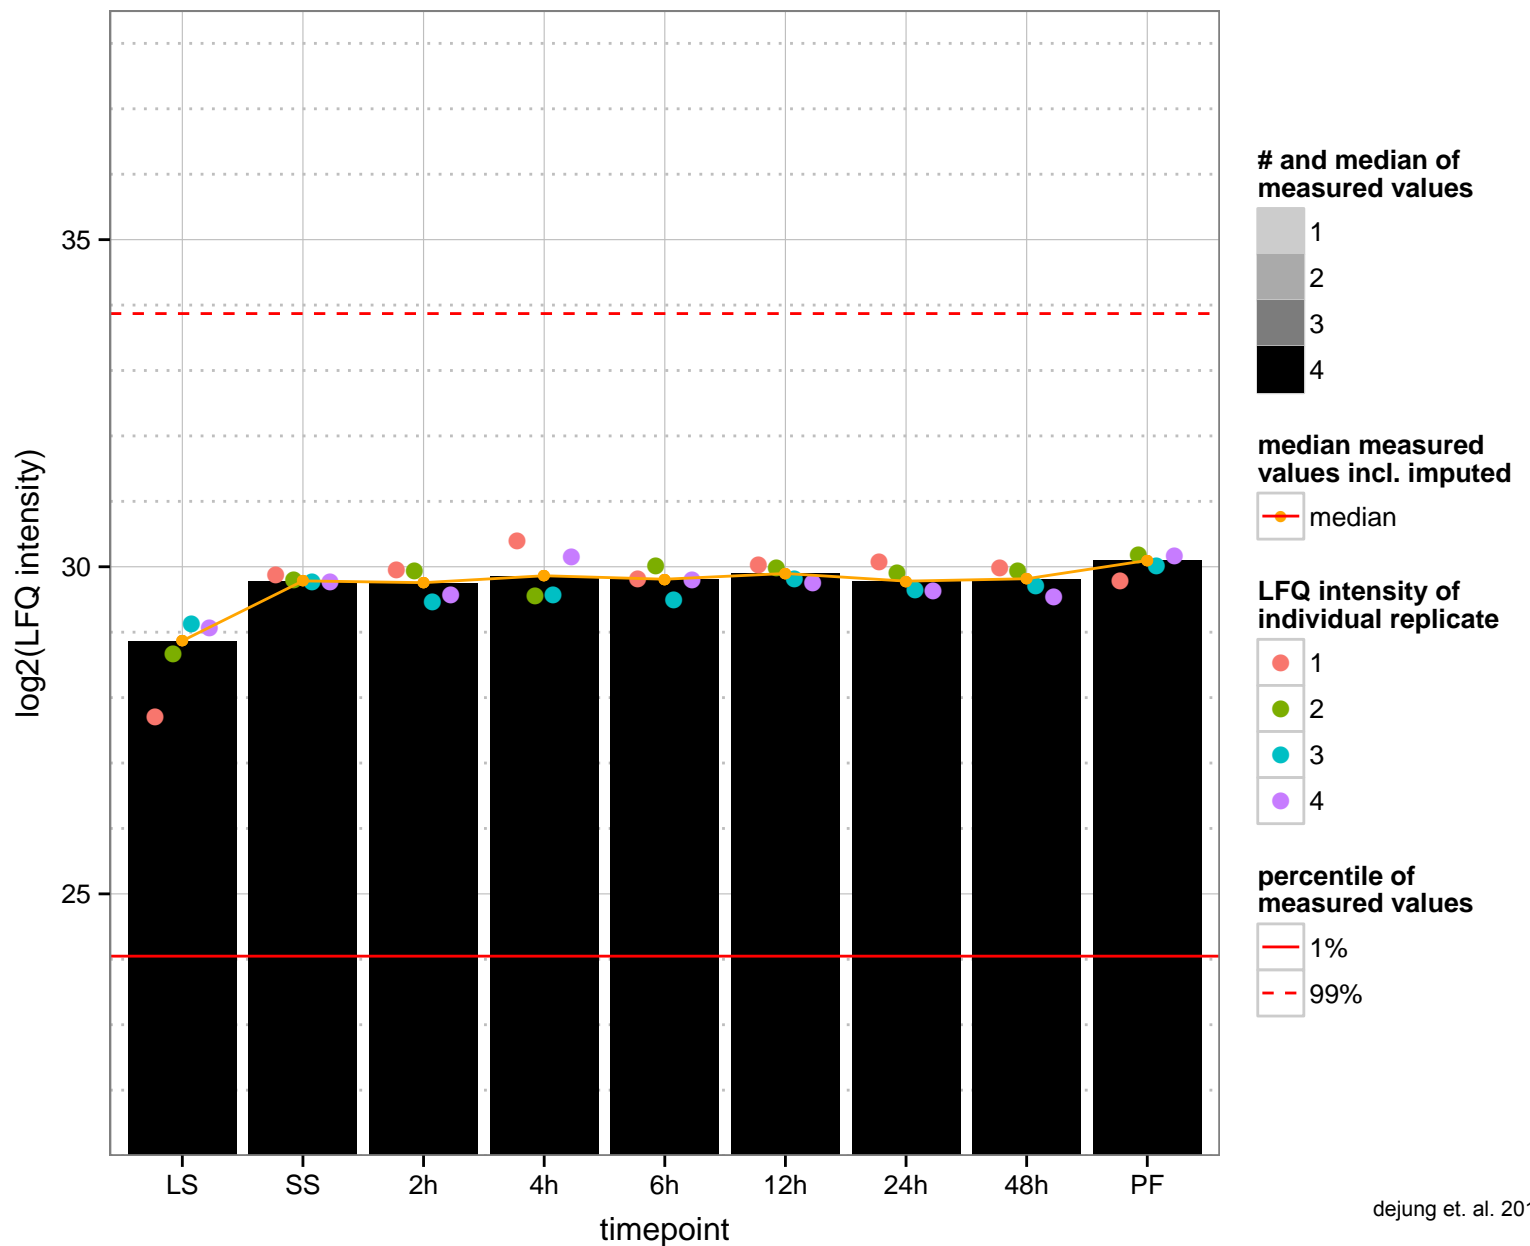

hypothetical protein, conserved  
 Tb927.10.3540  
 AGOF: null  
 AGOC: null  
 AGOP: null  
 PGOF: null  
 PGOC: null  
 PGOP: null

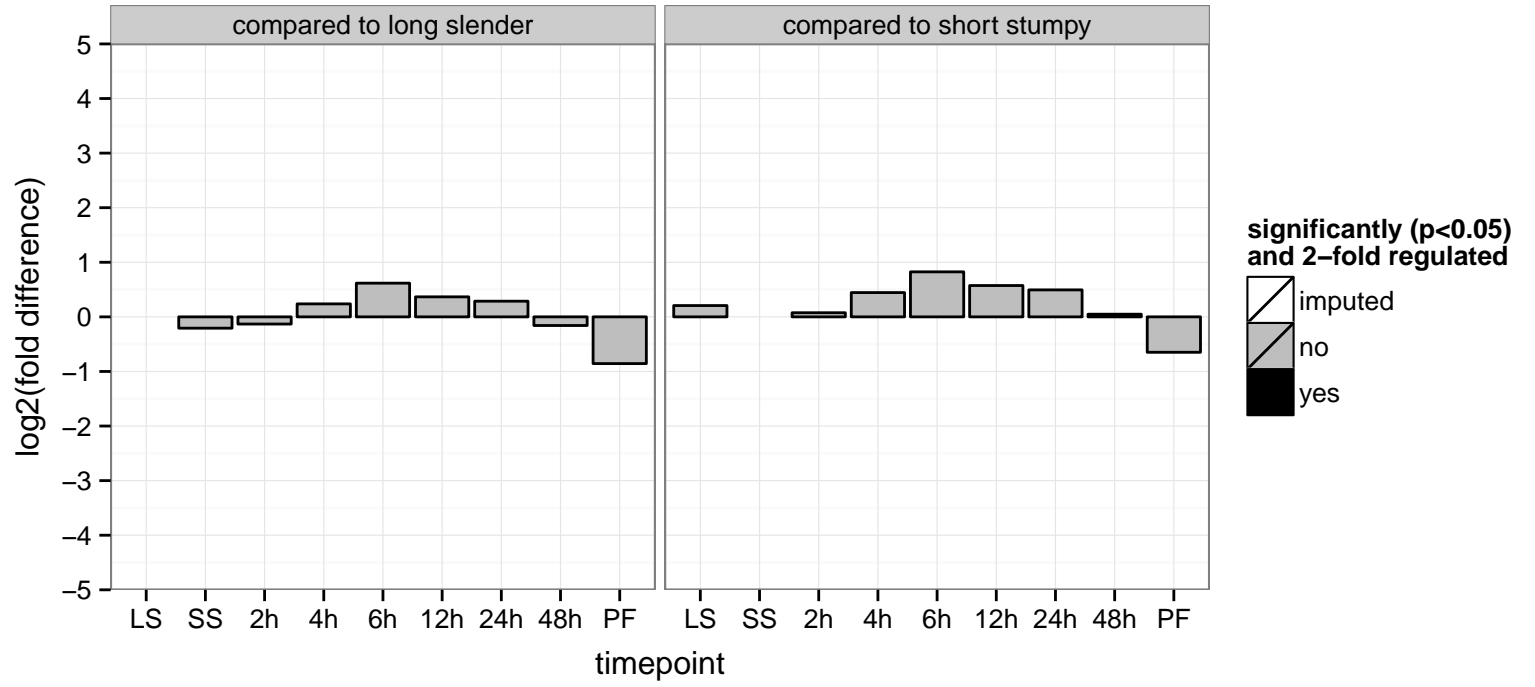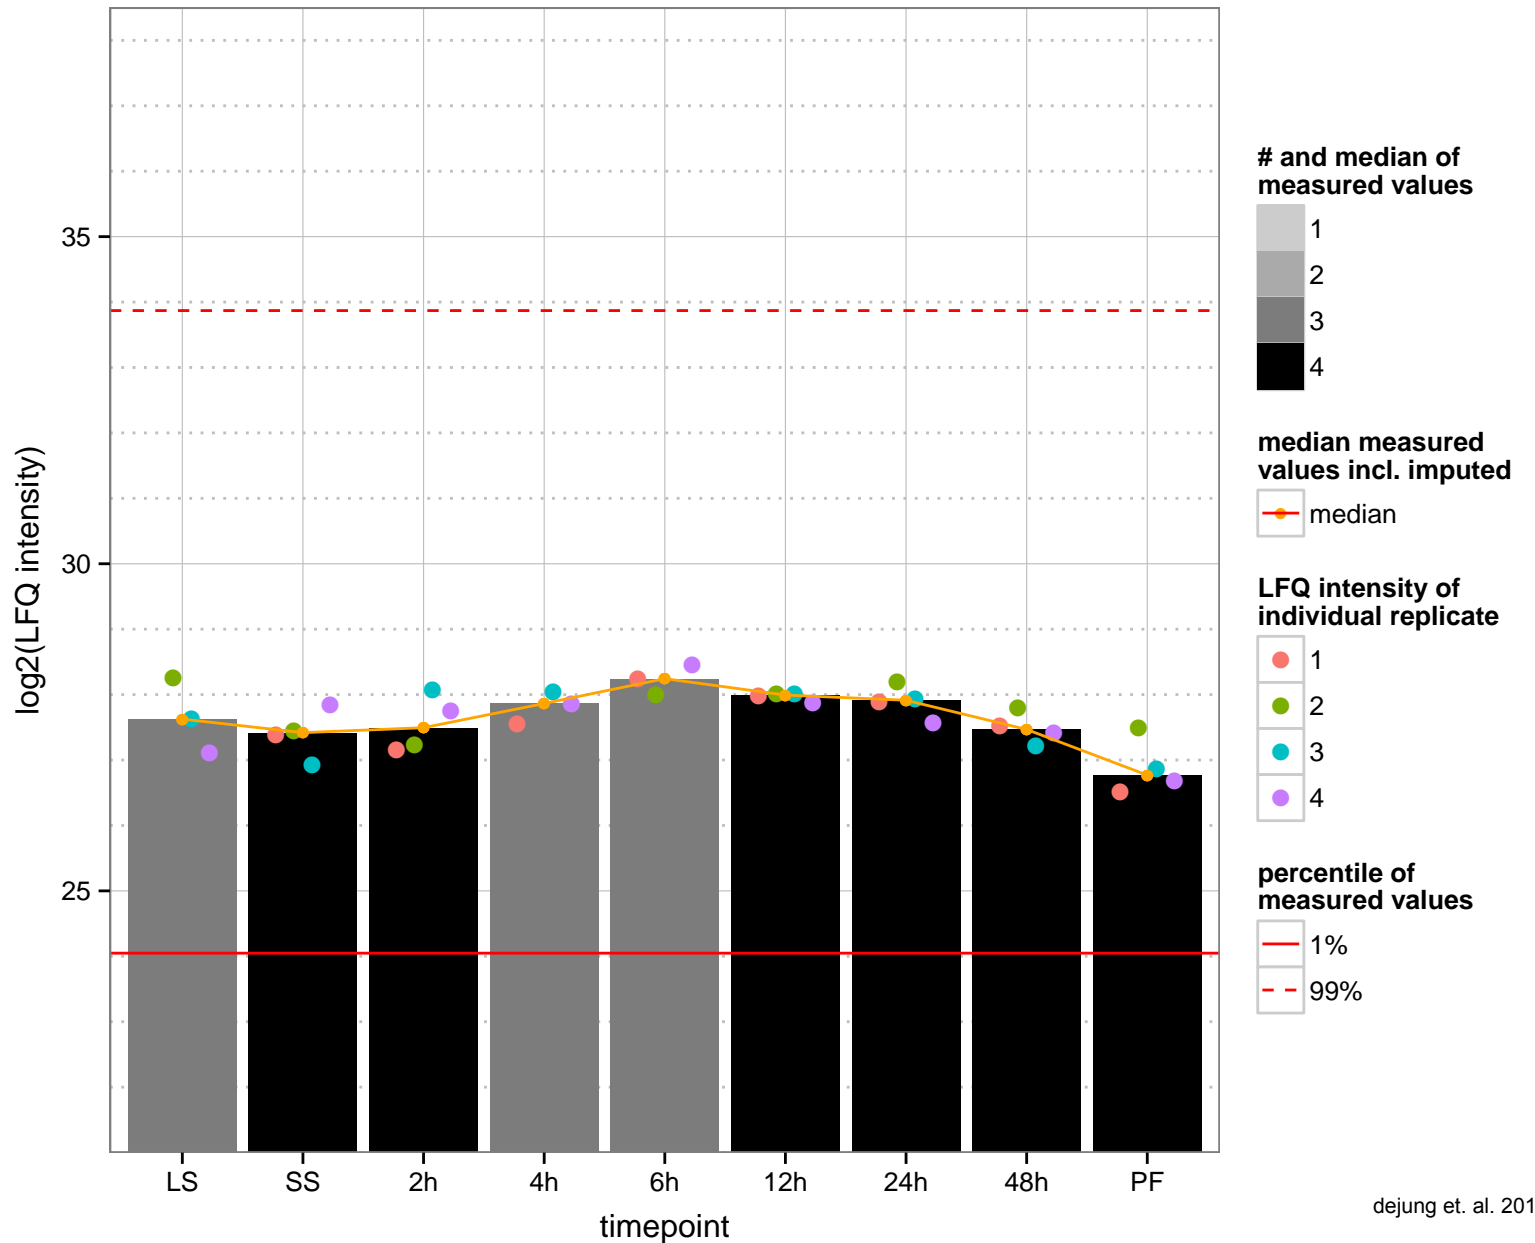

arginine N-methyltransferase, putative  
 Tb927.10.3560  
 AGOF: histone-arginine N-methyltransferase activity  
 AGOC: histone methyltransferase complex  
 AGOP: histone methylation  
 PGO: null  
 PGO: null  
 PGO: null

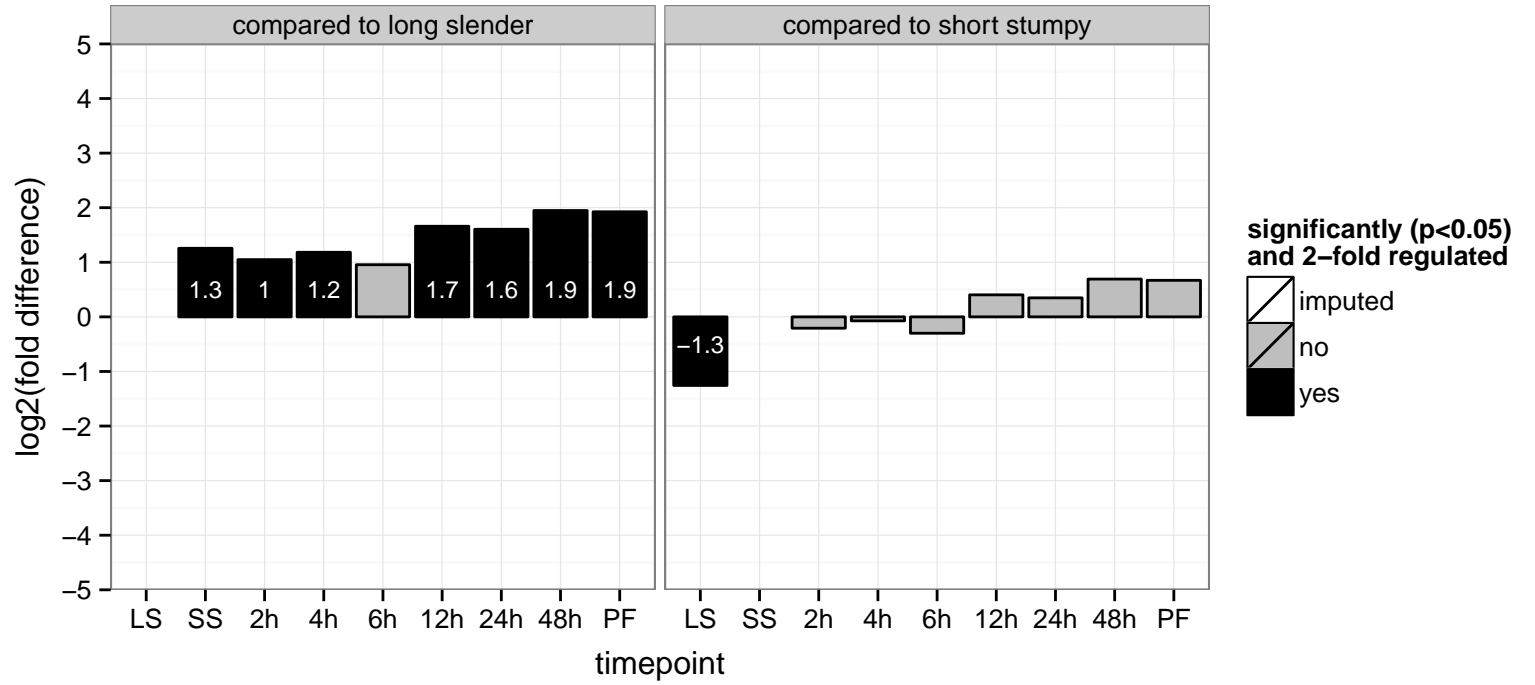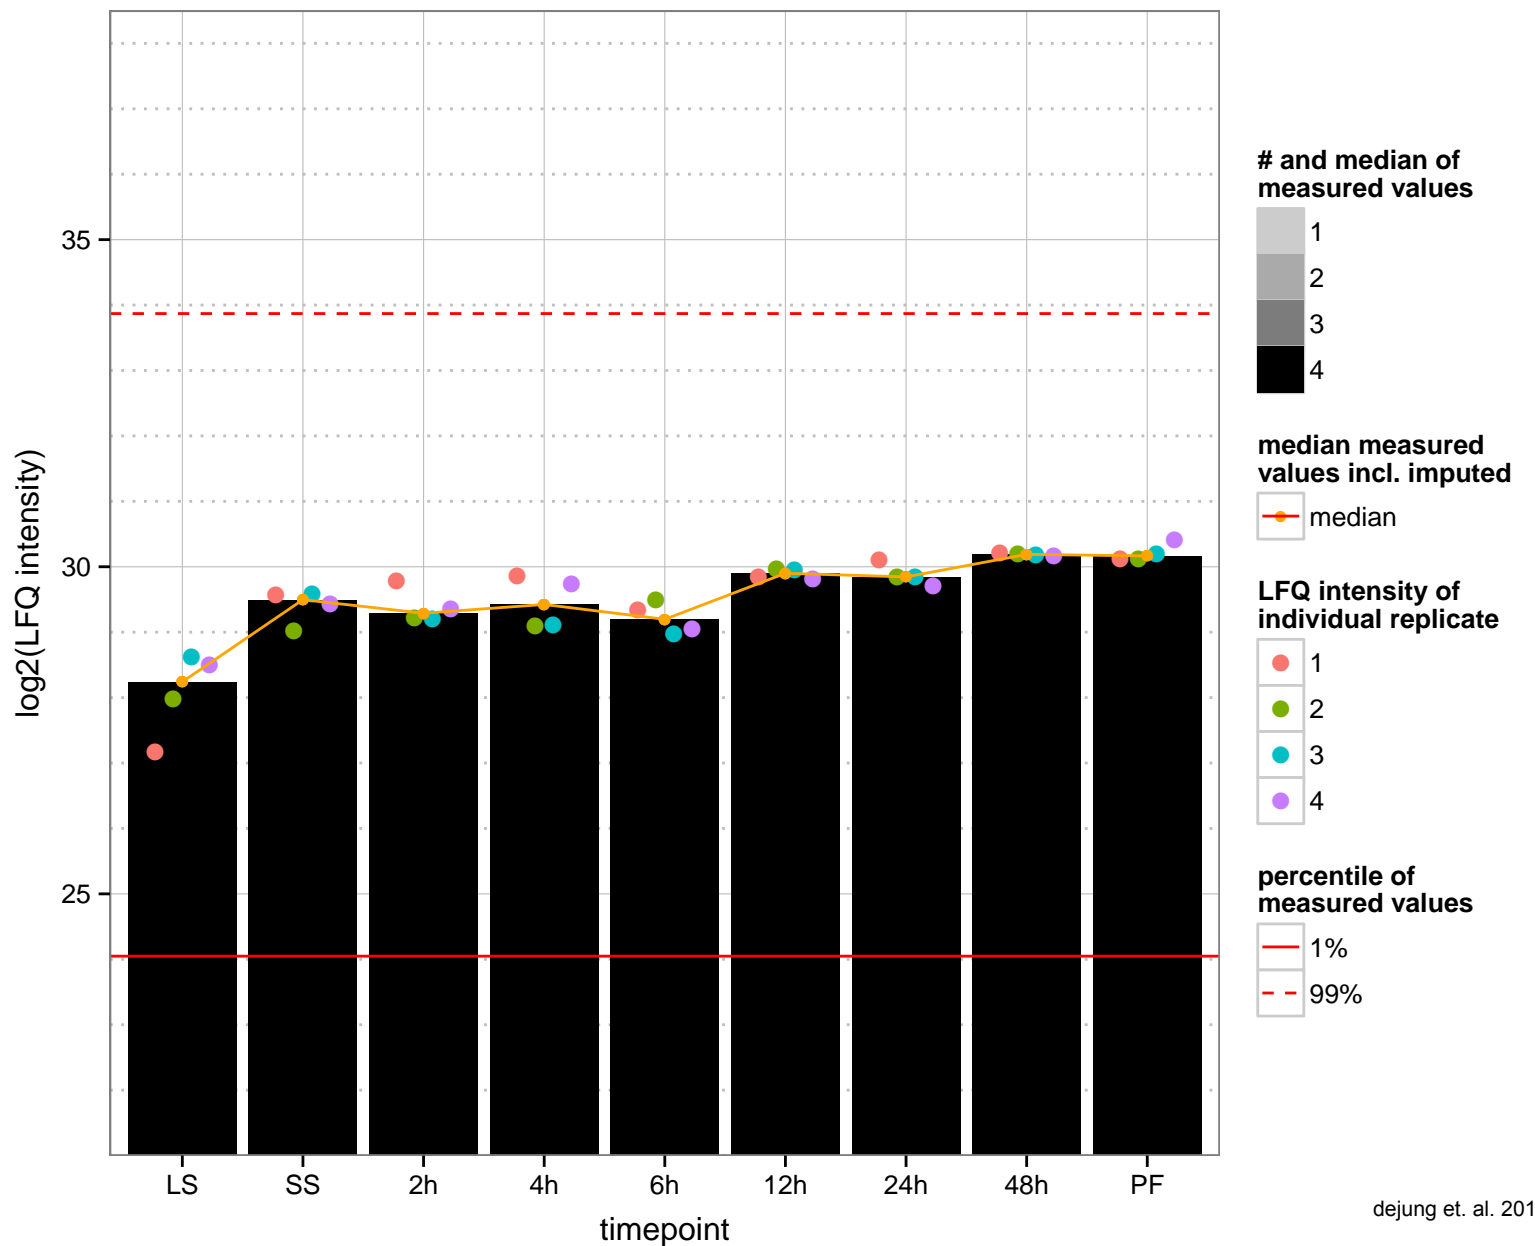



RNA-editing complex protein, putative, RNA editing exonuclease 2, RNA editing 3' exouridylylase, RNA-editing complex prote  
 Tb927.10.3570  
 AGOF: null  
 AGOC: null, mitochondrial mRNA editing complex, mitochondrion  
 AGOP: null, RNA modification  
 PGO: null  
 PGOC: null  
 PGOP: null

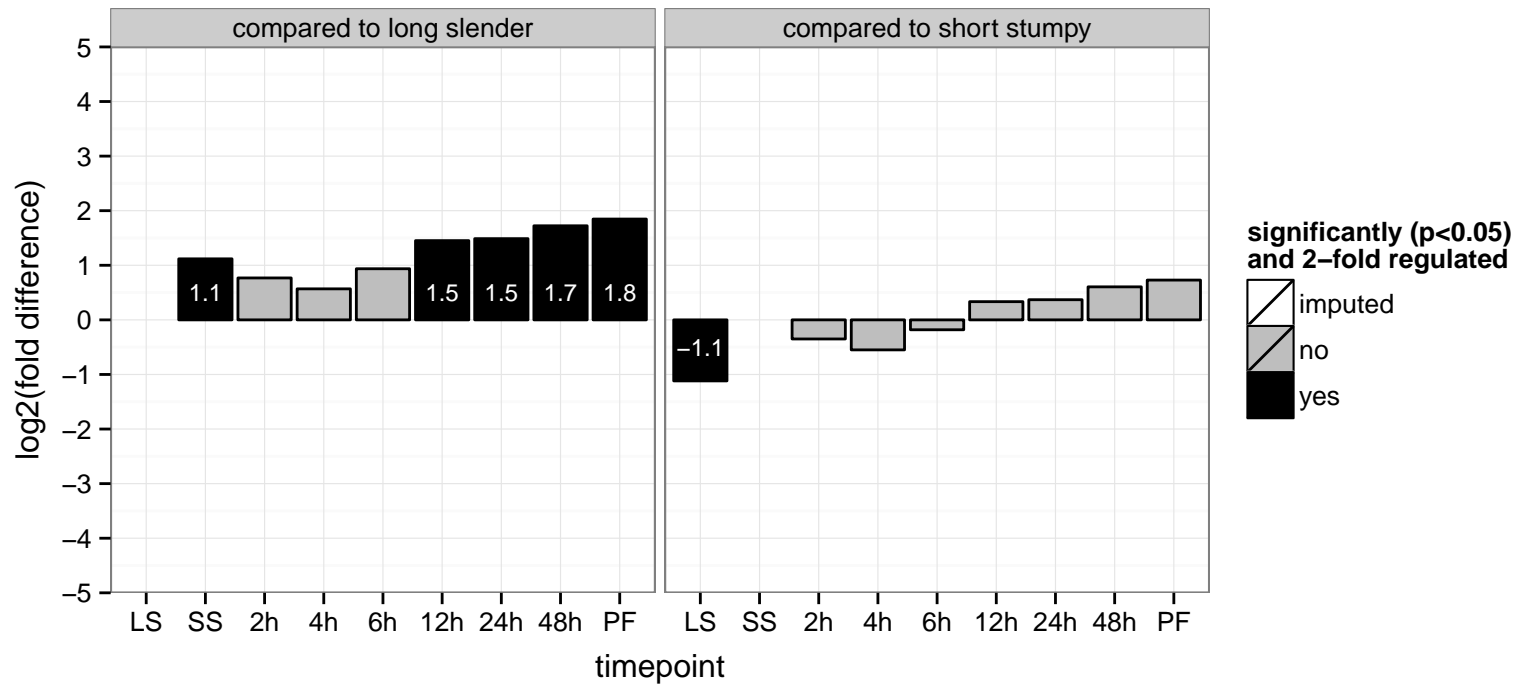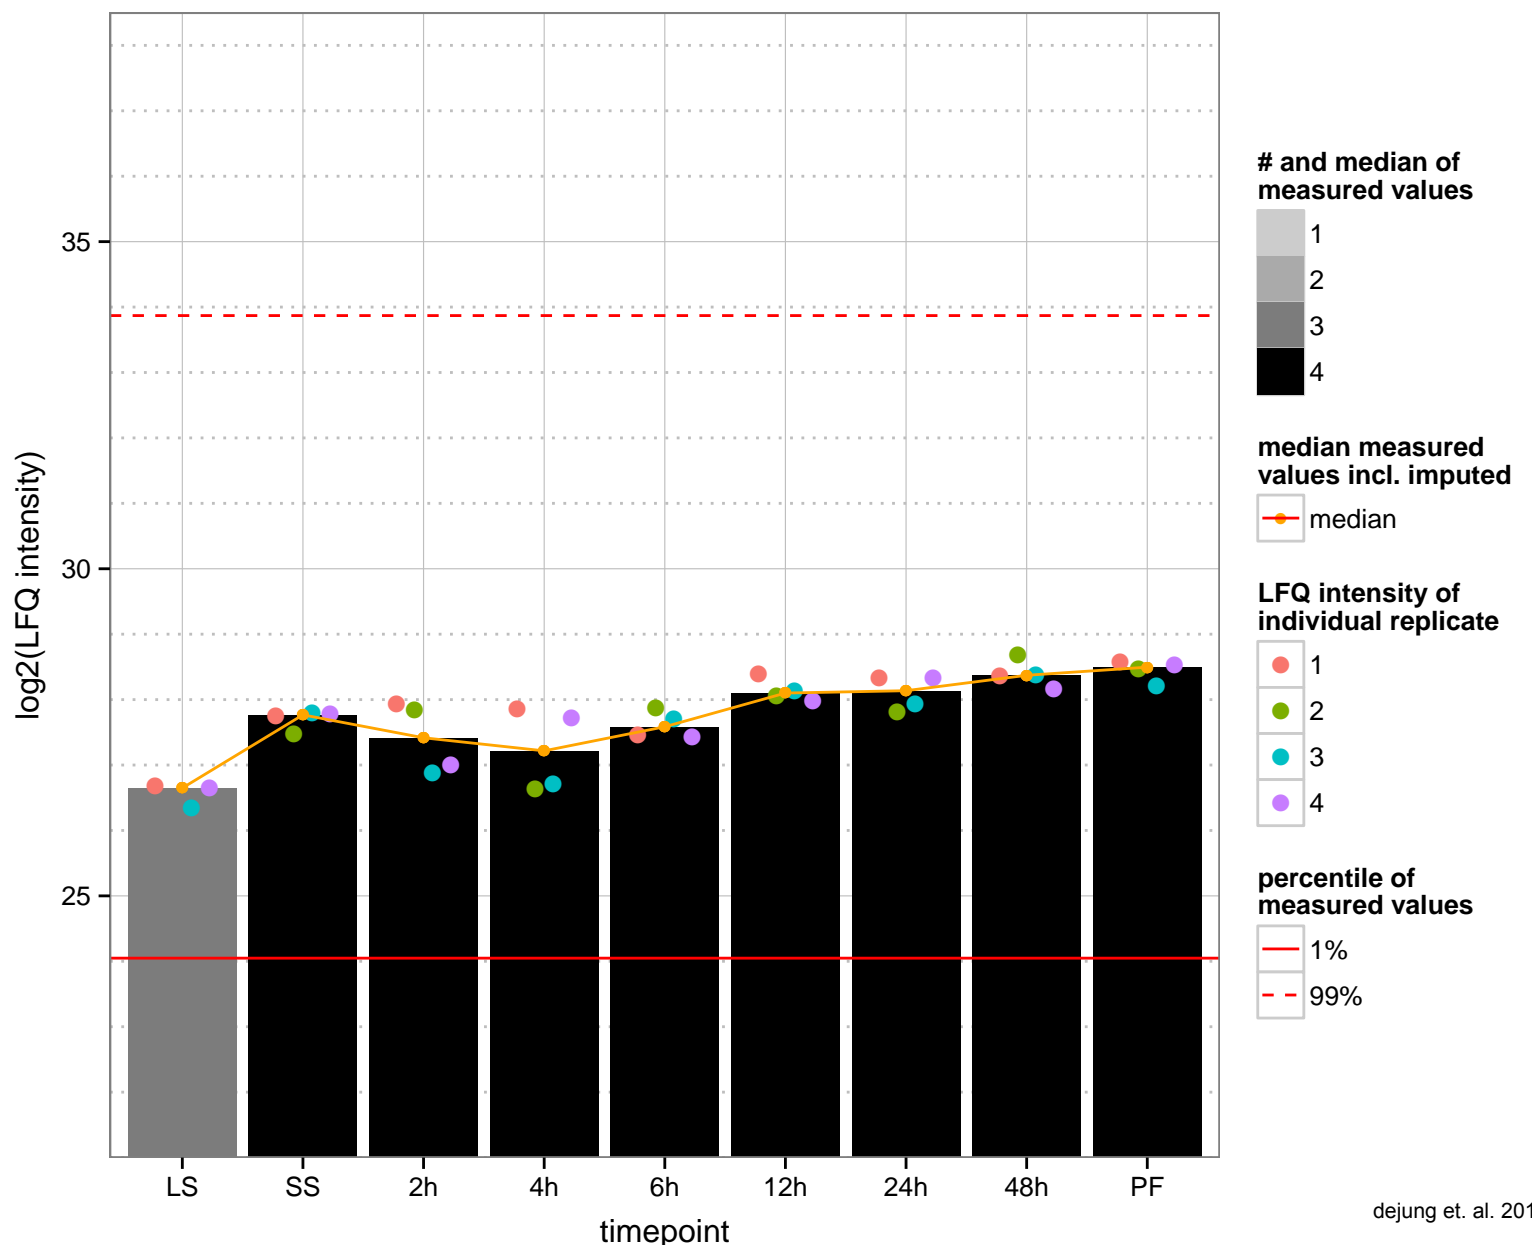

hypothetical protein, conserved  
 Tb927.10.3590  
 AGOF: null  
 AGOC: mitochondrion  
 AGOP: null  
 PGO: null  
 PGO: null  
 PGO: null

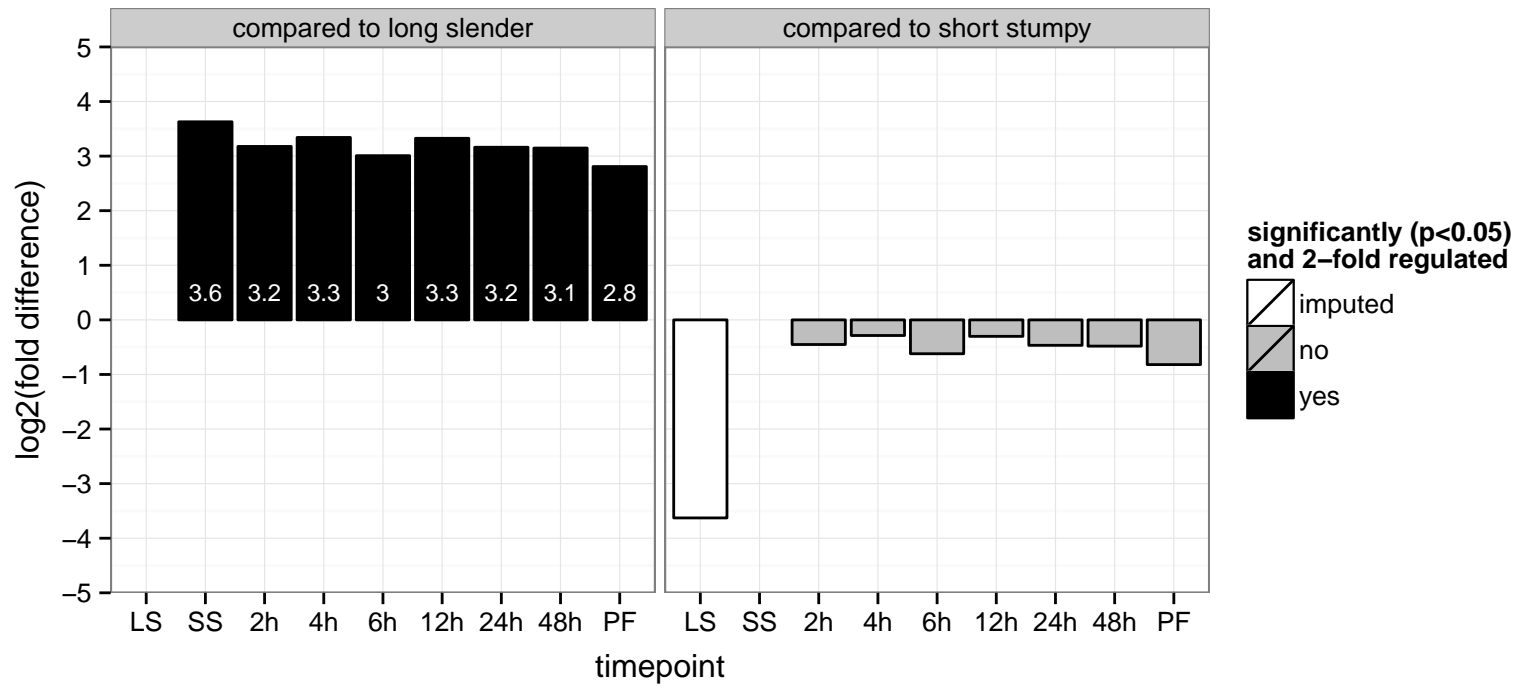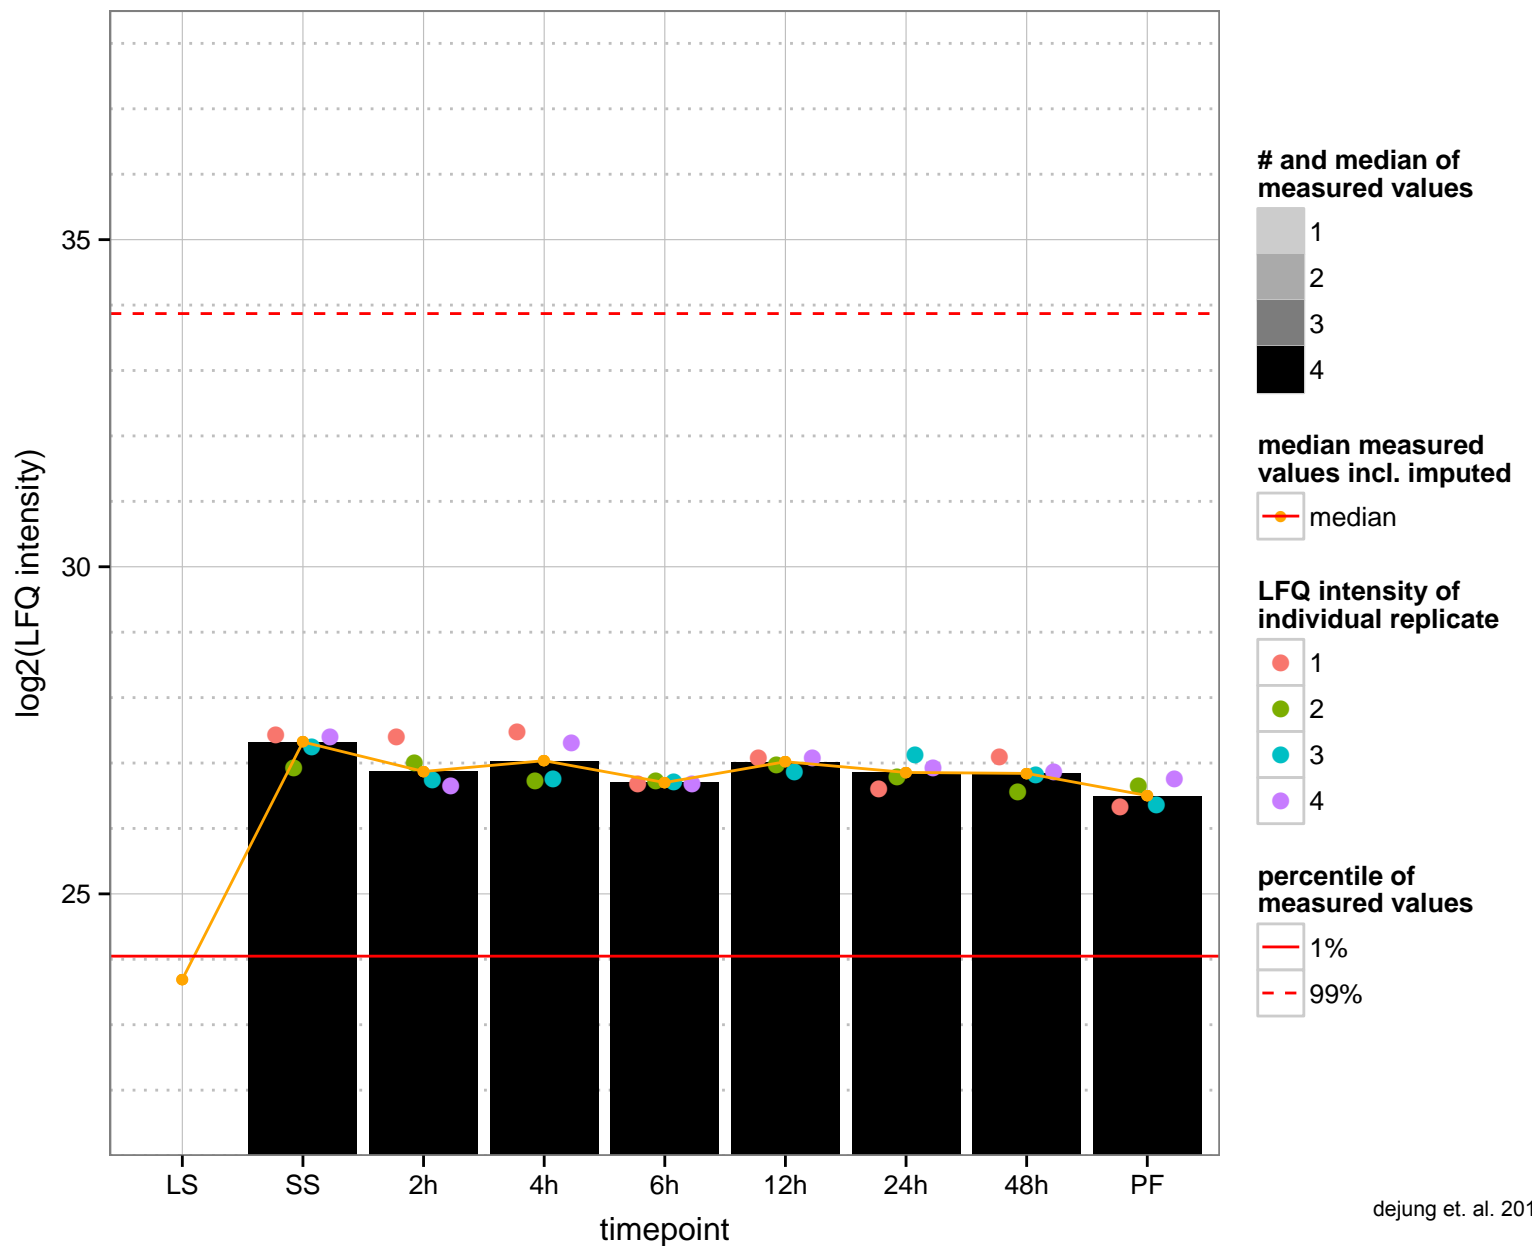

hypothetical protein, conserved  
 Tb927.10.3640  
 AGOF: null  
 AGOC: null  
 AGOP: null  
 PGO: null  
 PGOC: null  
 PGOP: null

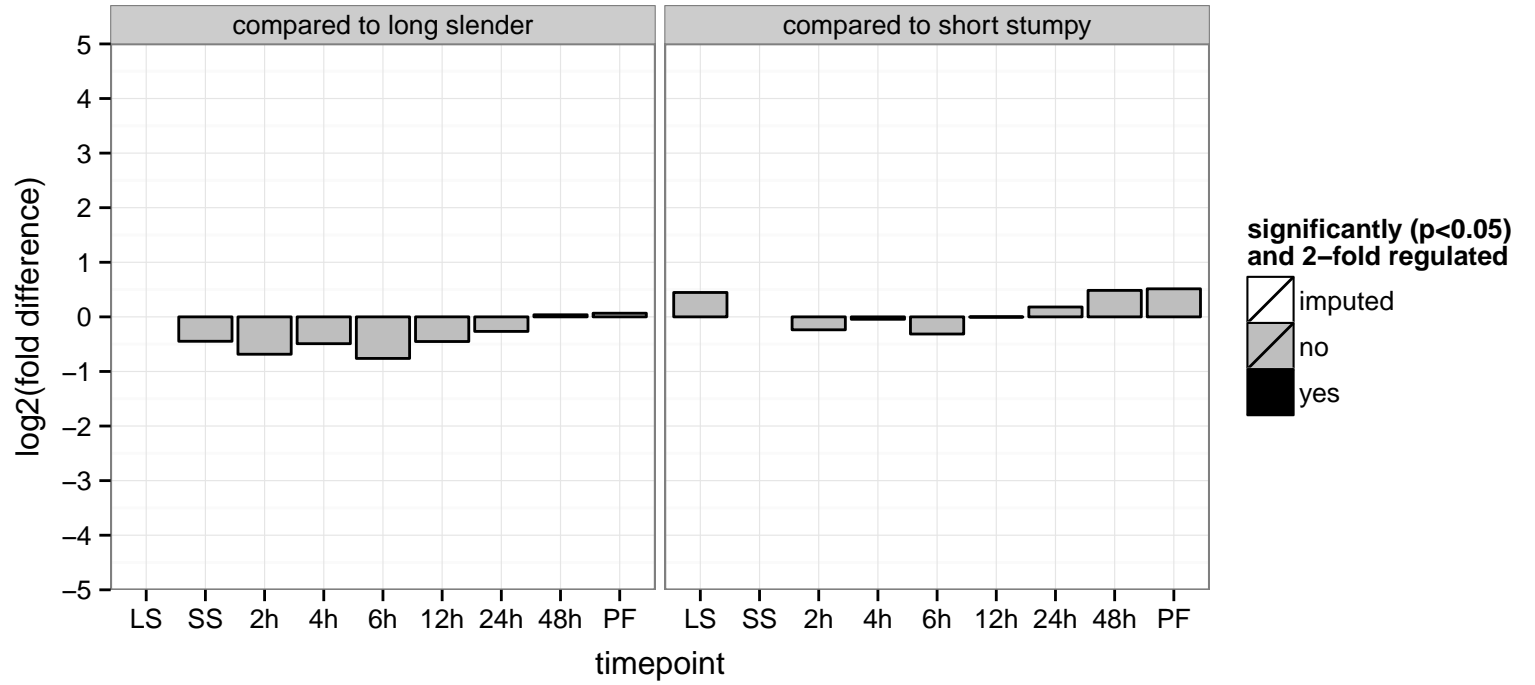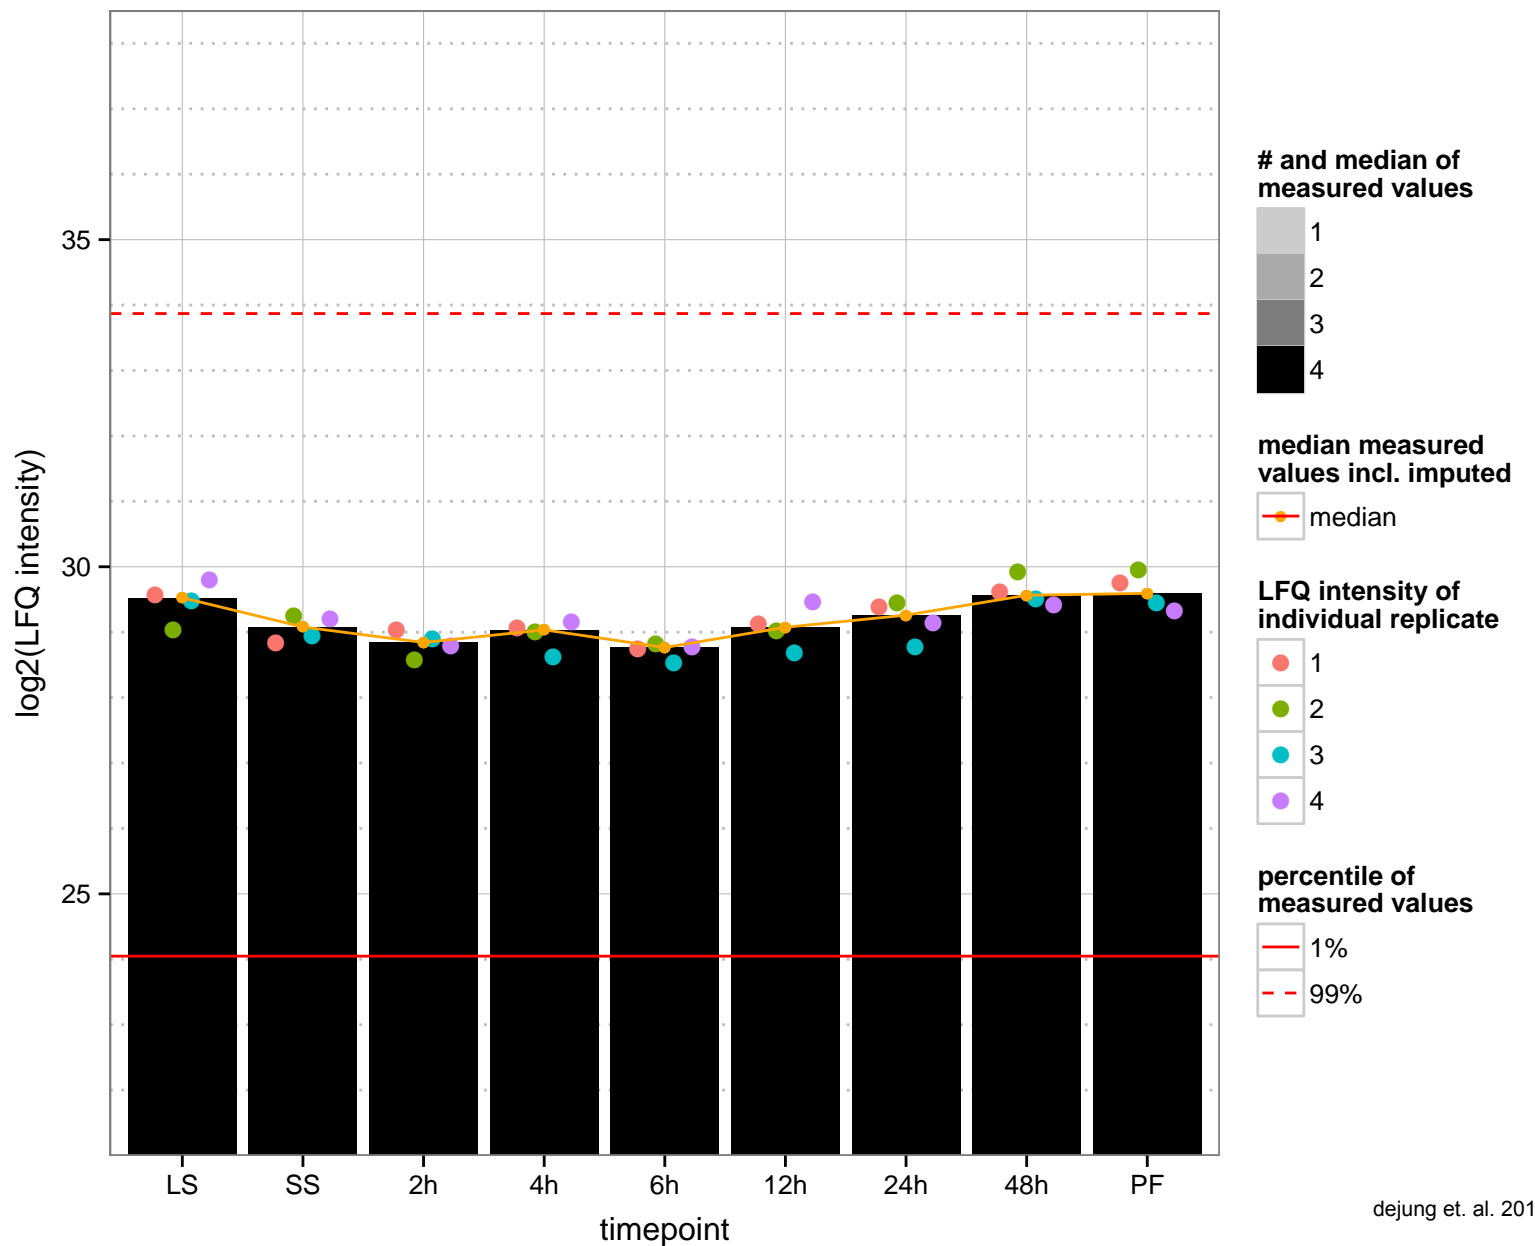

predicted CBS domain protein  
 Tb927.10.3700  
 AGOF: null  
 AGOC: null  
 AGOP: null  
 PGOF: protein binding  
 PGO: null  
 PGOP: null

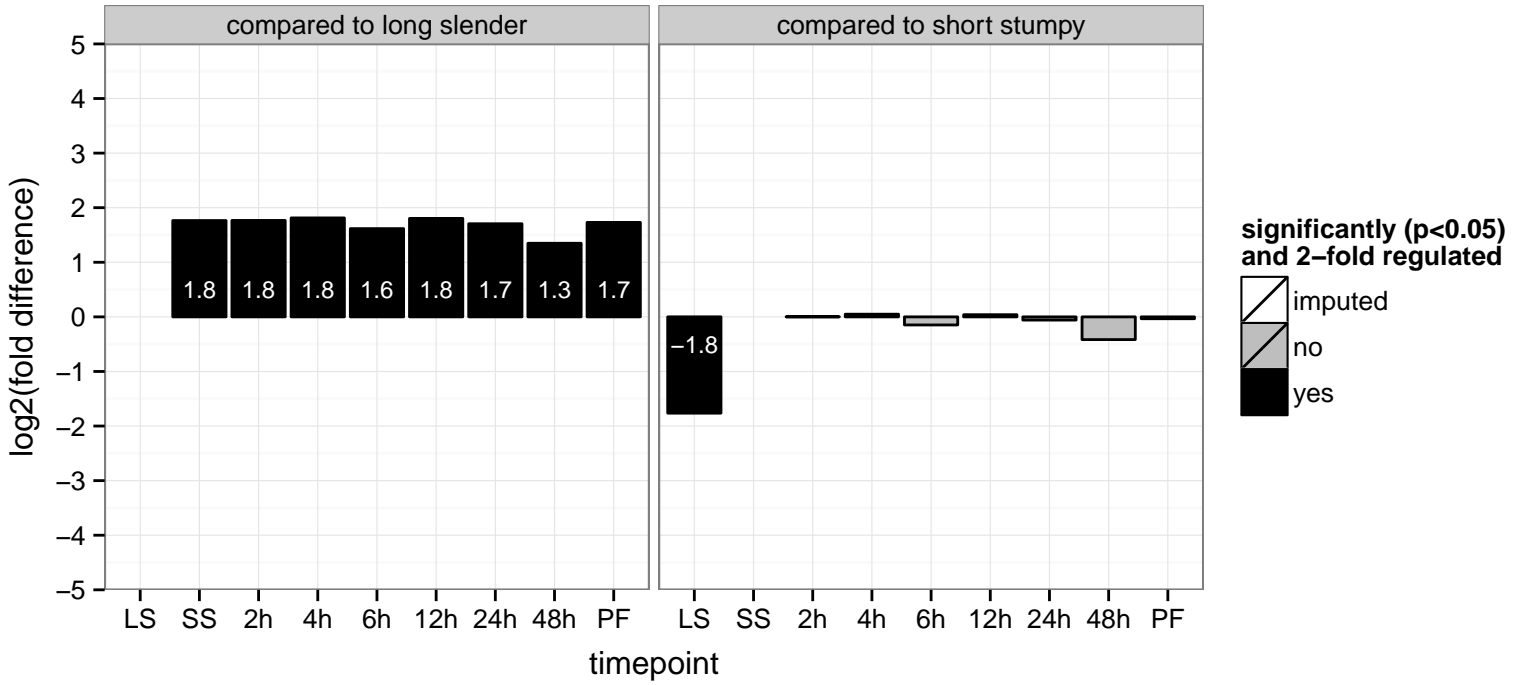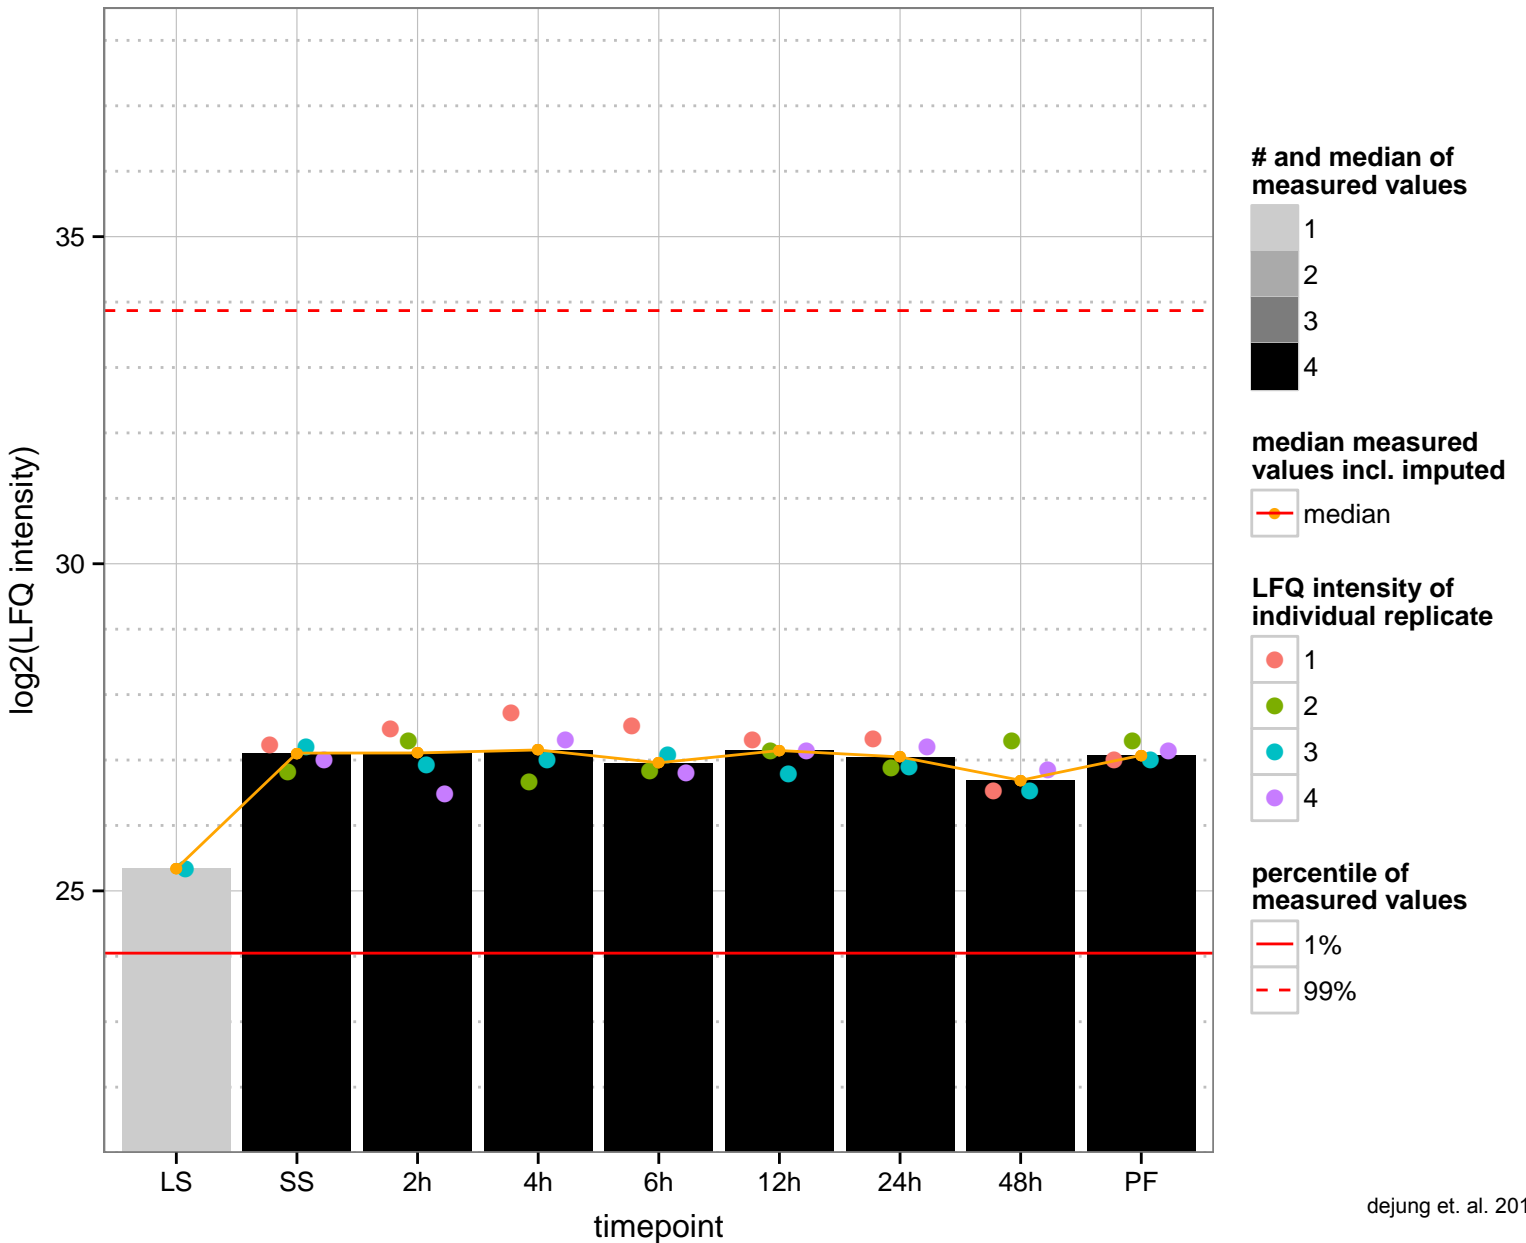

proteasome activator protein pa26, putative, proteasome activator protein PA26 (pa26)  
 Tb927.10.3710;Tb11.v5.0761  
 AGOF: null  
 AGOC: null, proteasome activator complex  
 AGOP: null, proteolysis, regulation of proteasomal protein catabolic process  
 PGO: null  
 PGO: proteasome activator complex  
 PGO: null

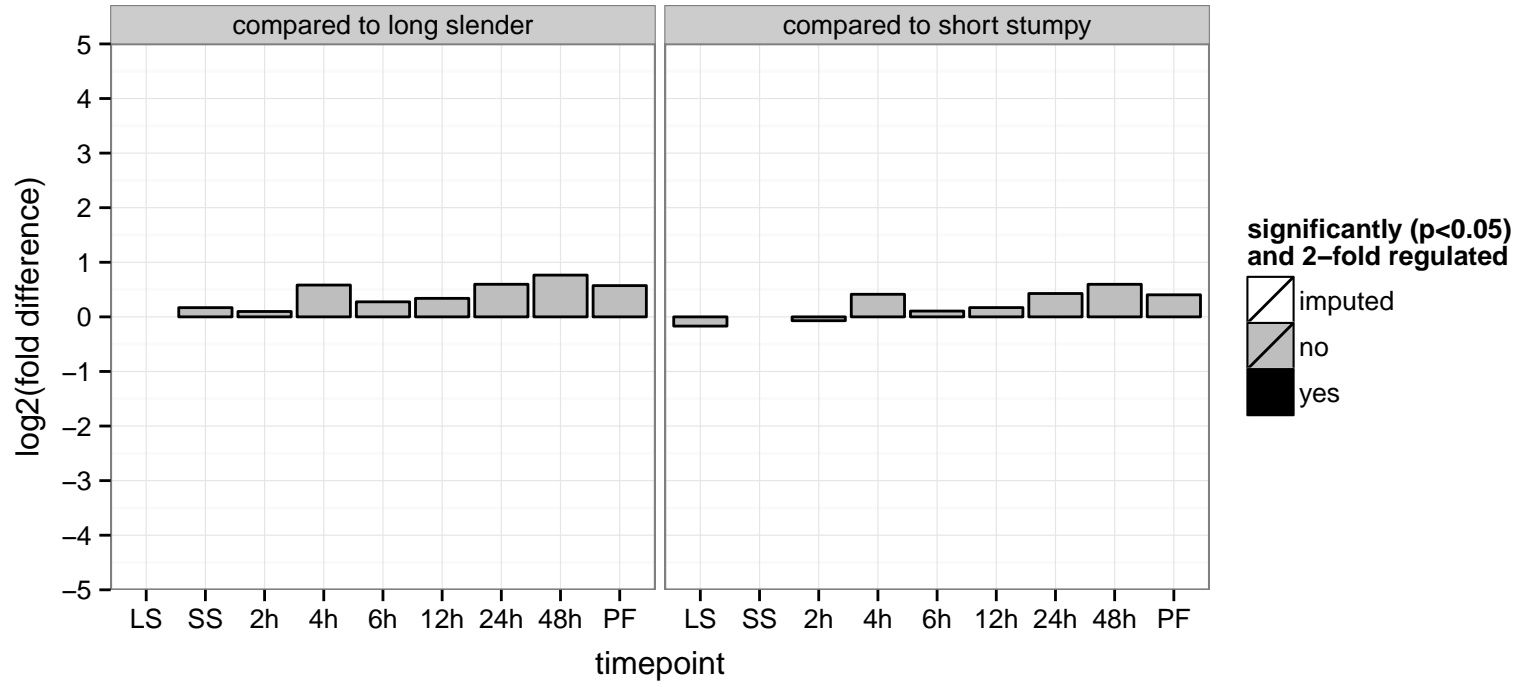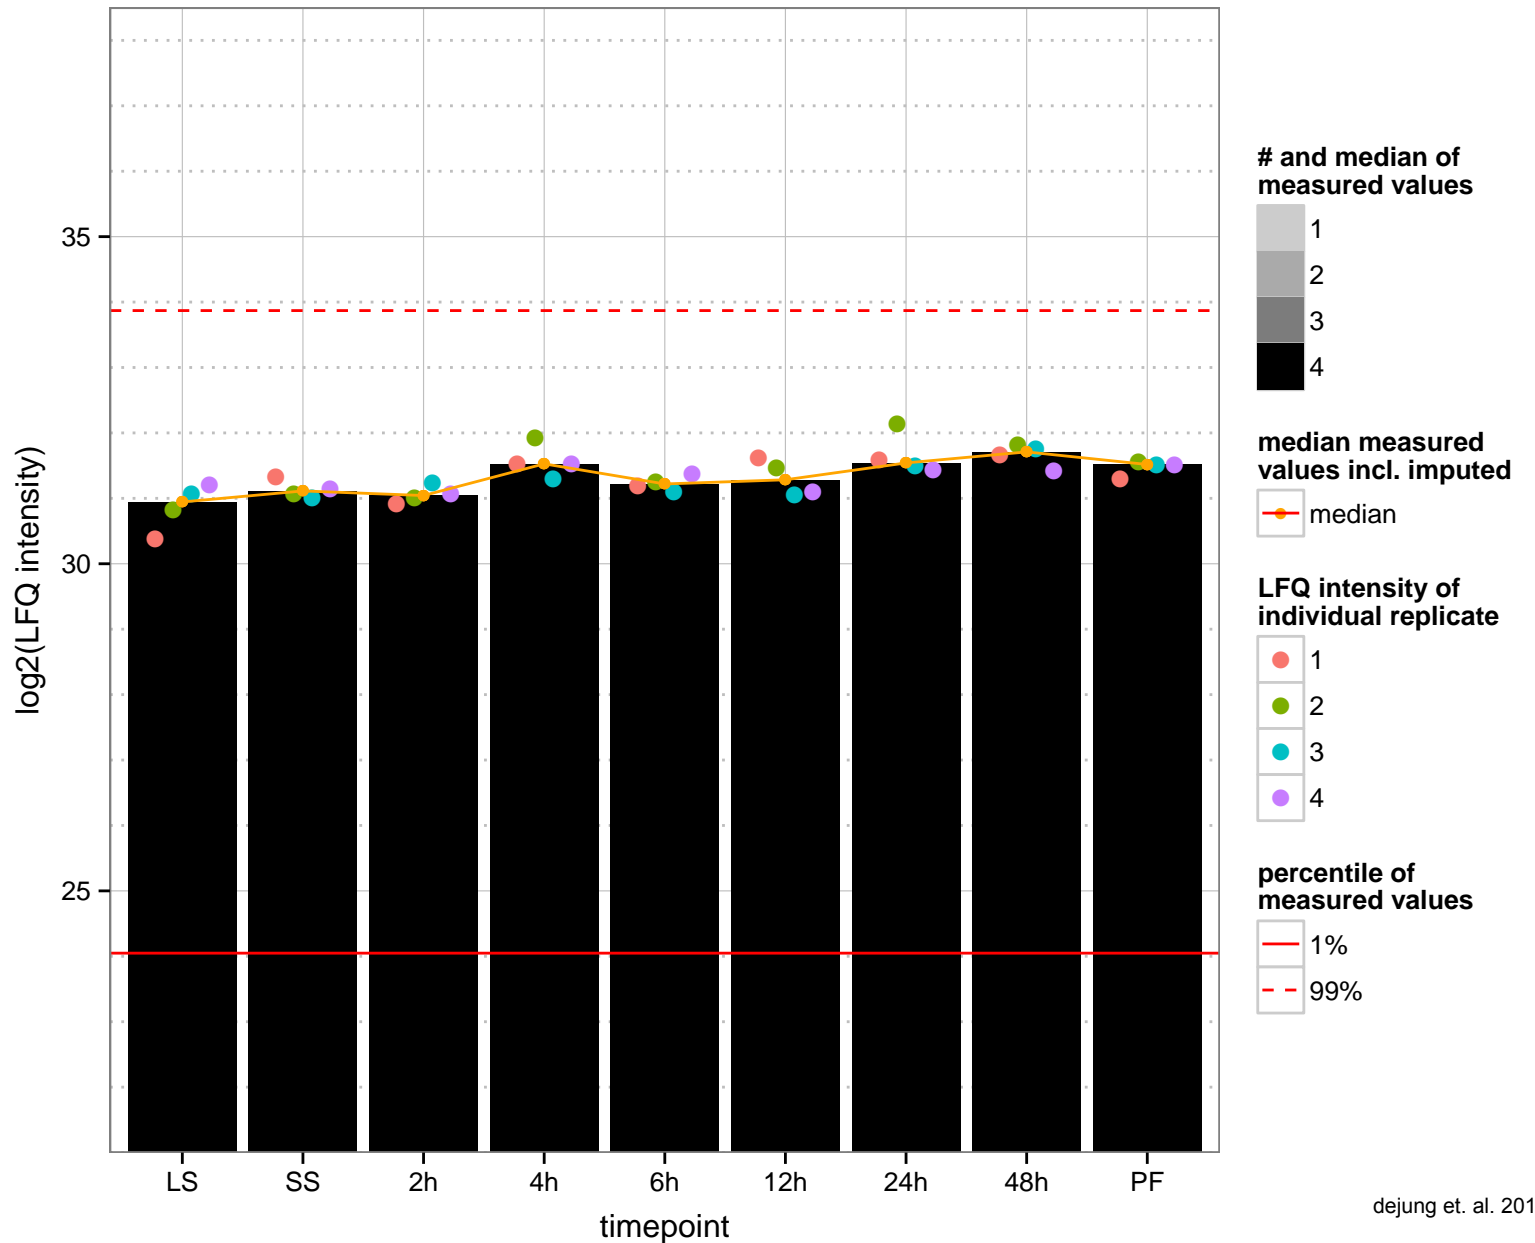

vacuolar ATP synthase subunit d, putative

Tb927.10.3760

AGOF: hydrogen-exporting ATPase activity, phosphorylative mechanism, proton-transporting ATPase activity, rotational mech

AGOC: proton-transporting two-sector ATPase complex, catalytic domain, vacuolar proton-transporting V-type ATPase com

AGOP: ATP hydrolysis coupled proton transport, ATP synthesis coupled proton transport

PGOF: ATPase activity, coupled to transmembrane movement of substances

PGOC: null

PGOP: null

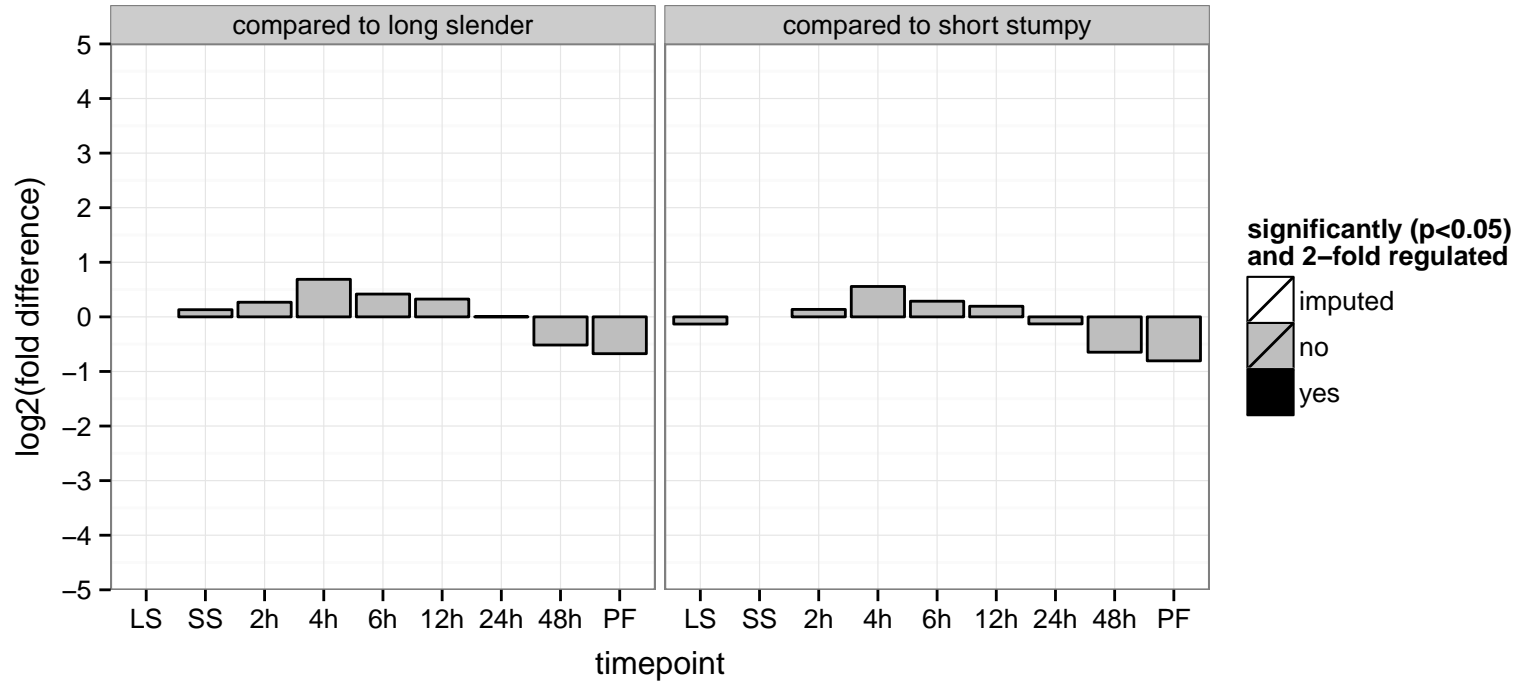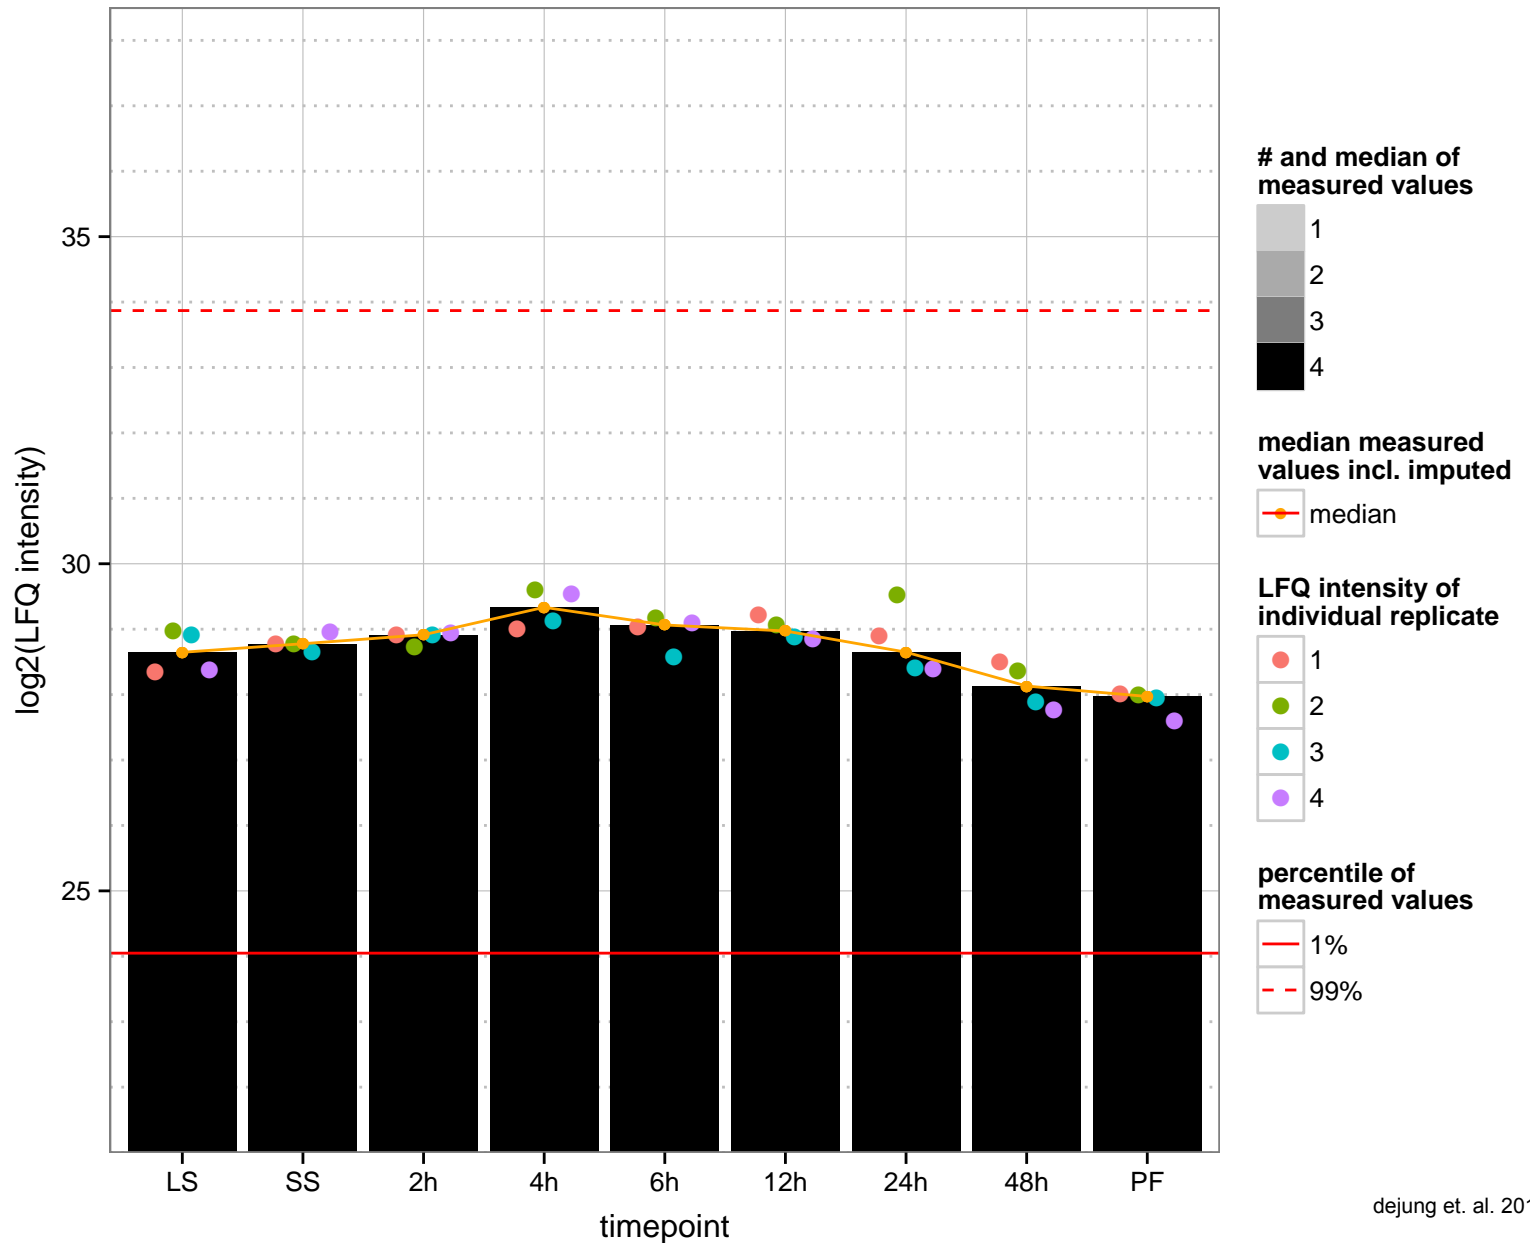

predicted TPR repeat protein  
 Tb927.10.3770  
 AGOF: null  
 AGOC: mitochondrion  
 AGOP: null  
 PGO: protein binding  
 PGOC: null  
 PGOP: null

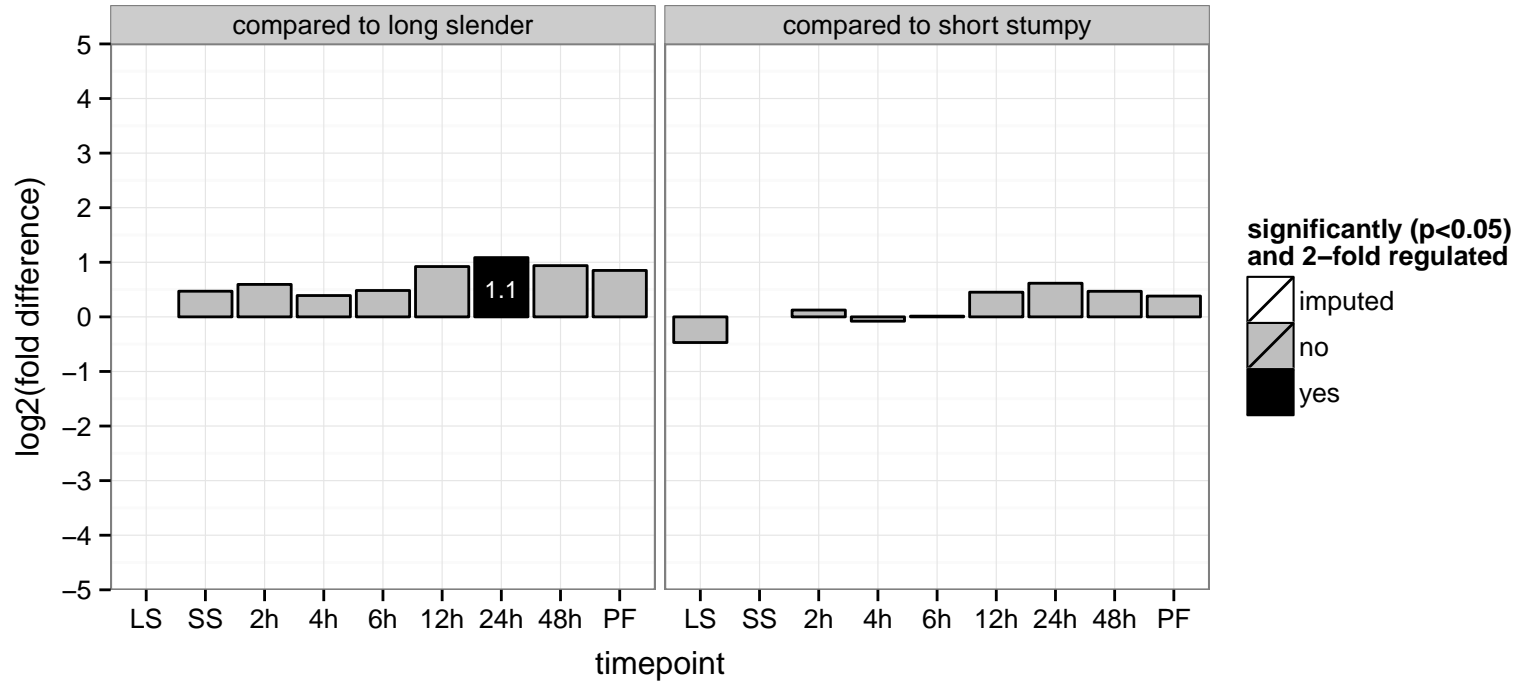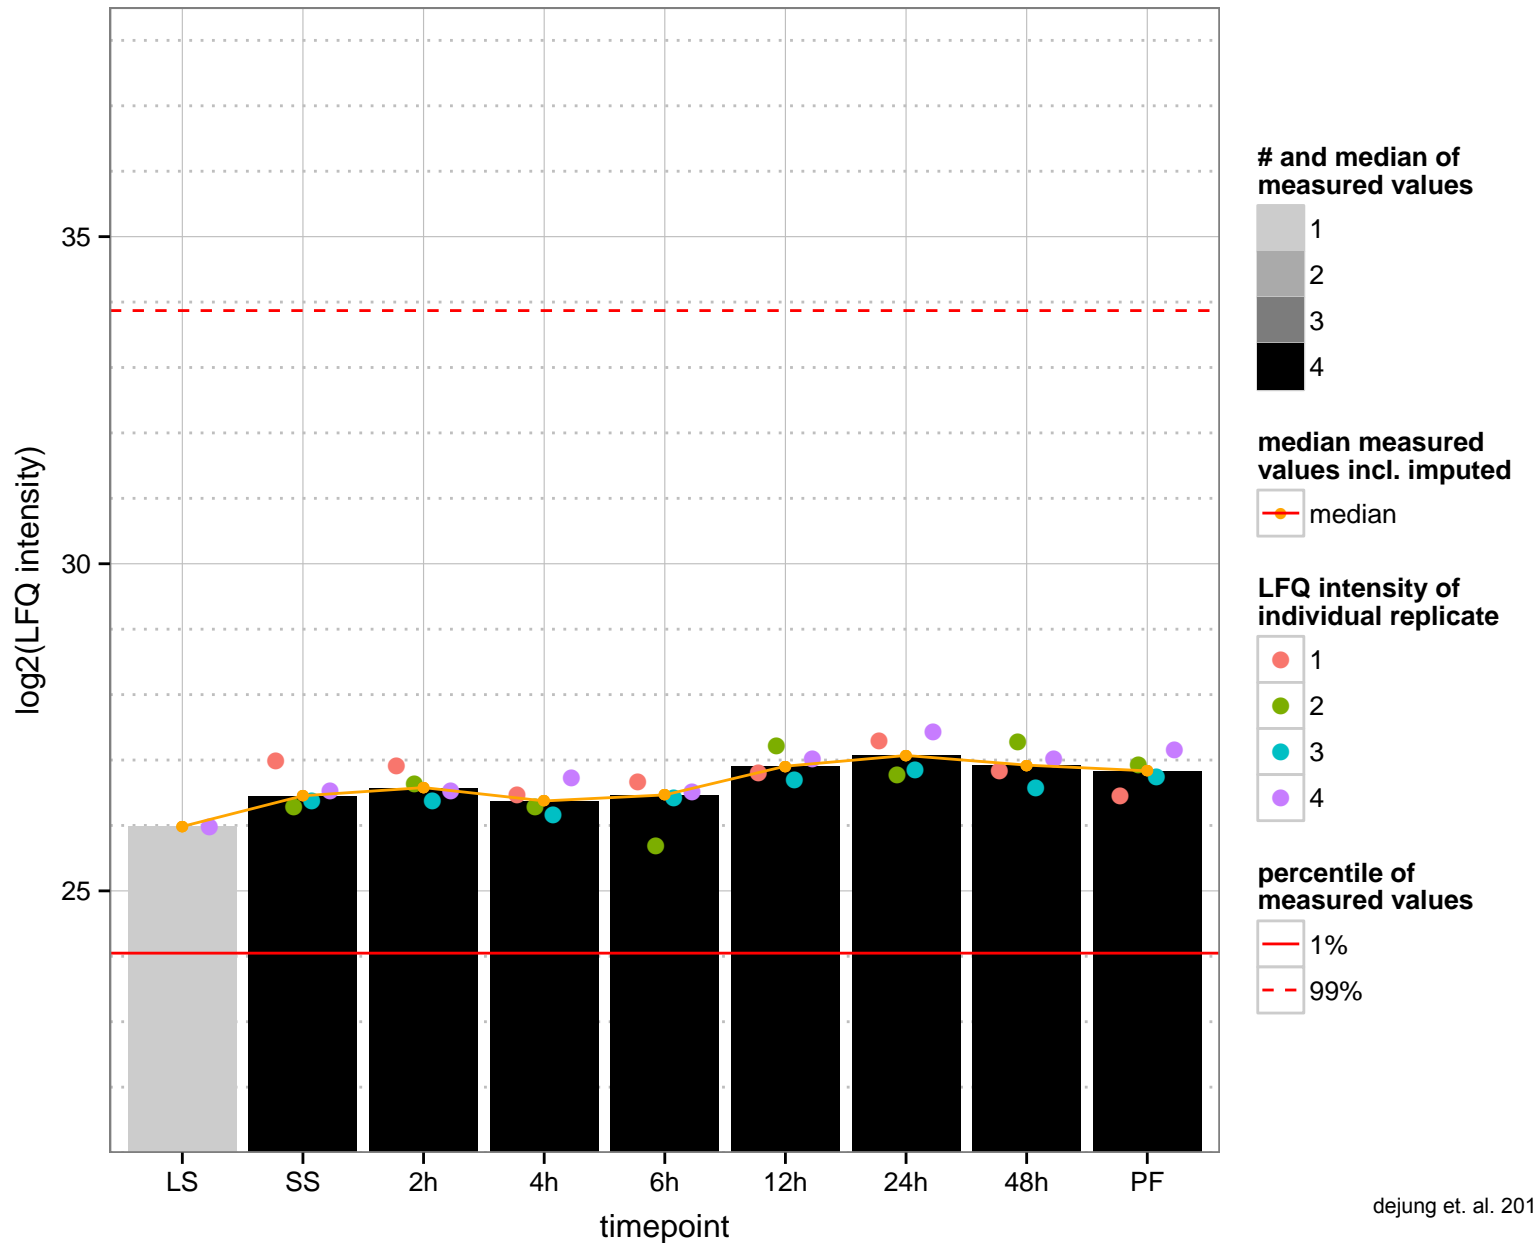

hypothetical protein, conserved  
 Tb927.10.3820  
 AGOF: null  
 AGOC: null  
 AGOP: null  
 PGOF: null  
 PGOC: null  
 PGOP: null

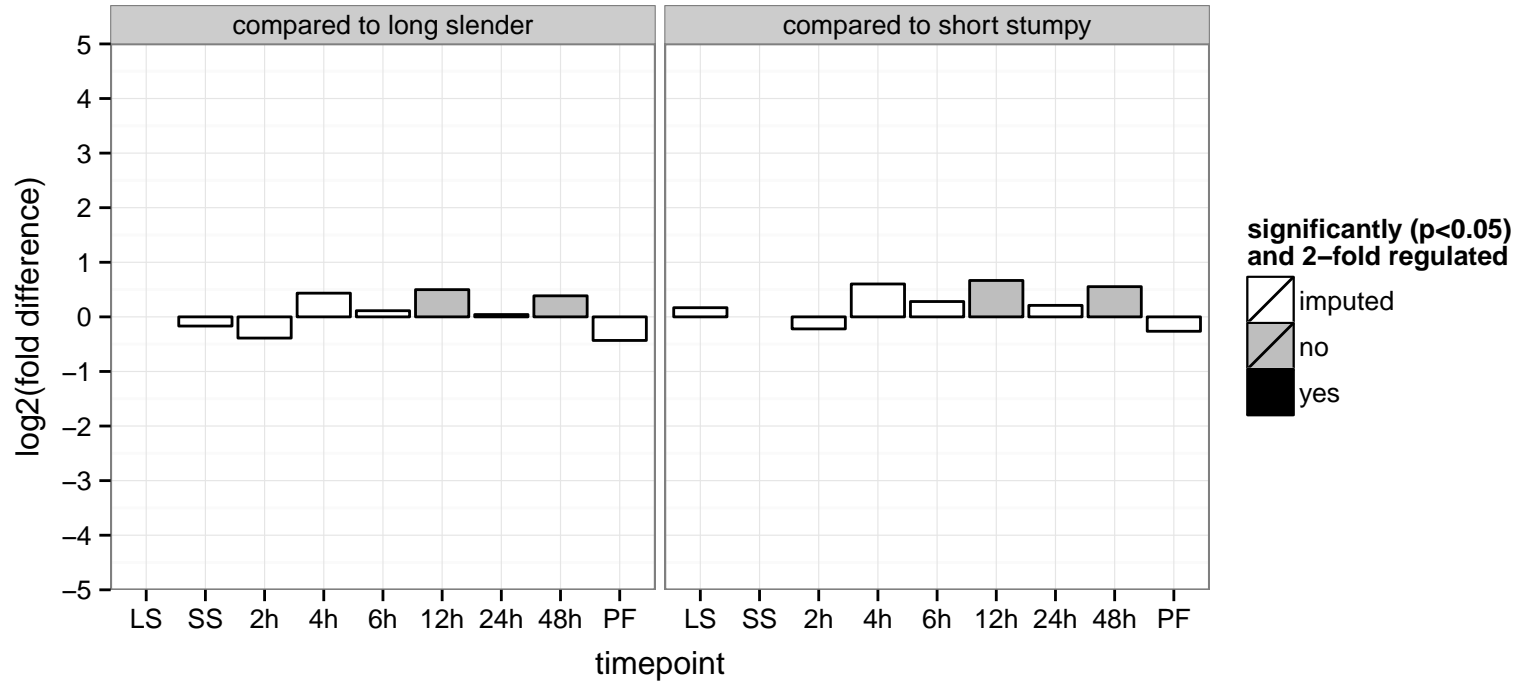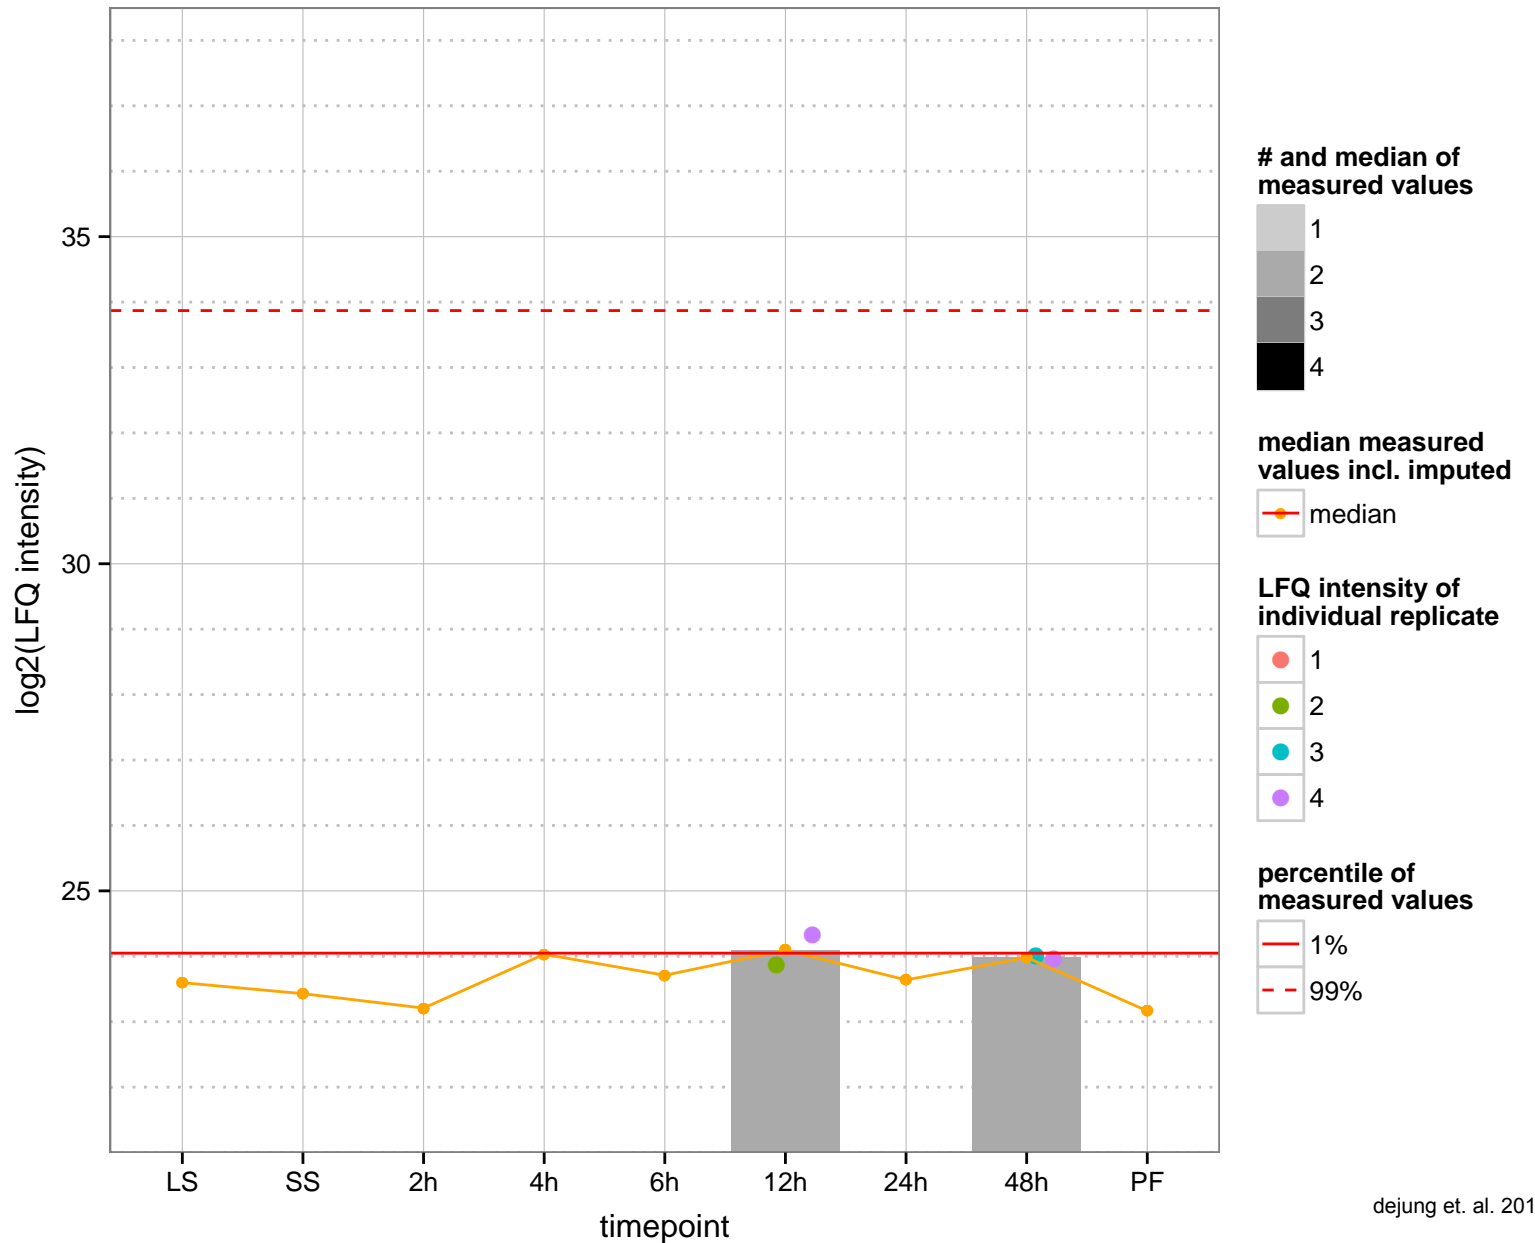



60S ribosomal protein L18a, putative, ribosomal protein L18  
 Tb927.11.14130;Tb927.10.3840  
 AGOF: structural constituent of ribosome  
 AGOC: intracellular, ribosome  
 AGOP: translation  
 PGOF: structural constituent of ribosome  
 PGO: ribosome  
 PGOP: translation

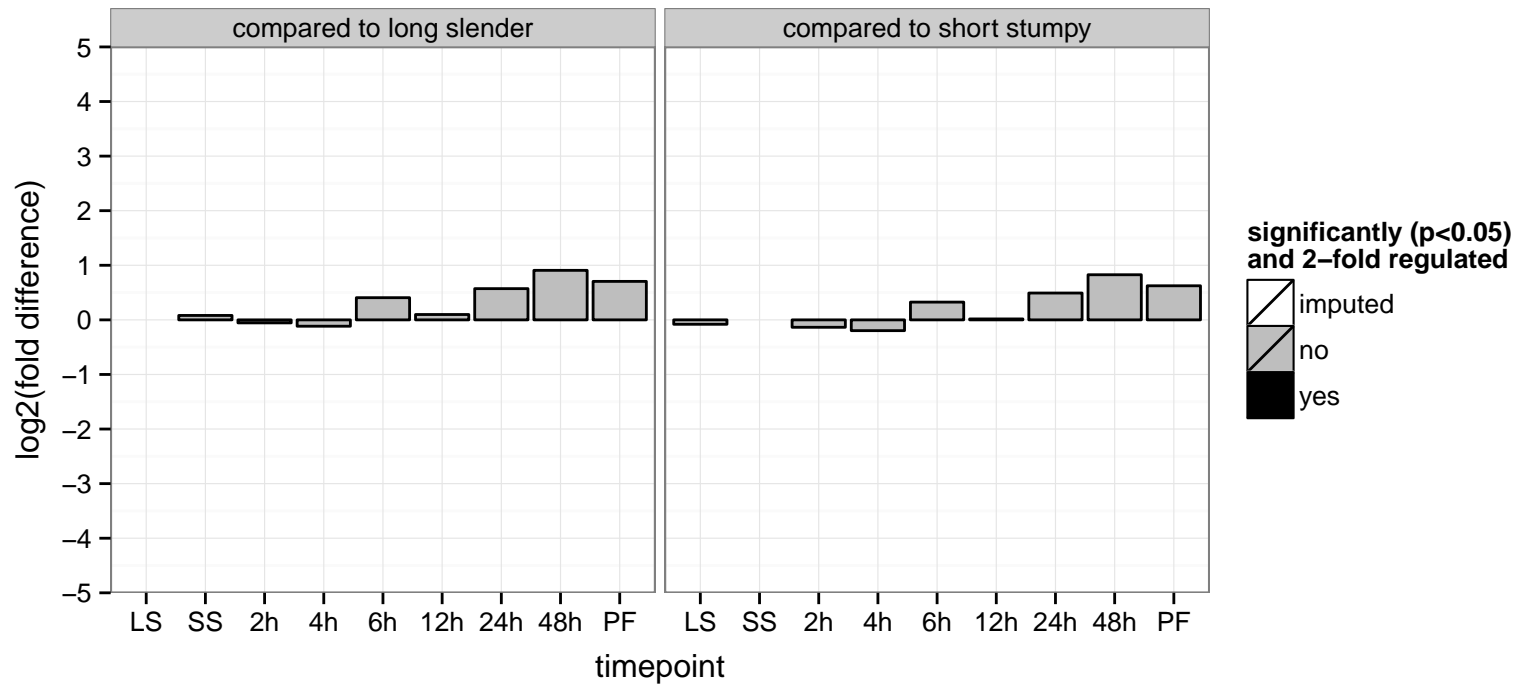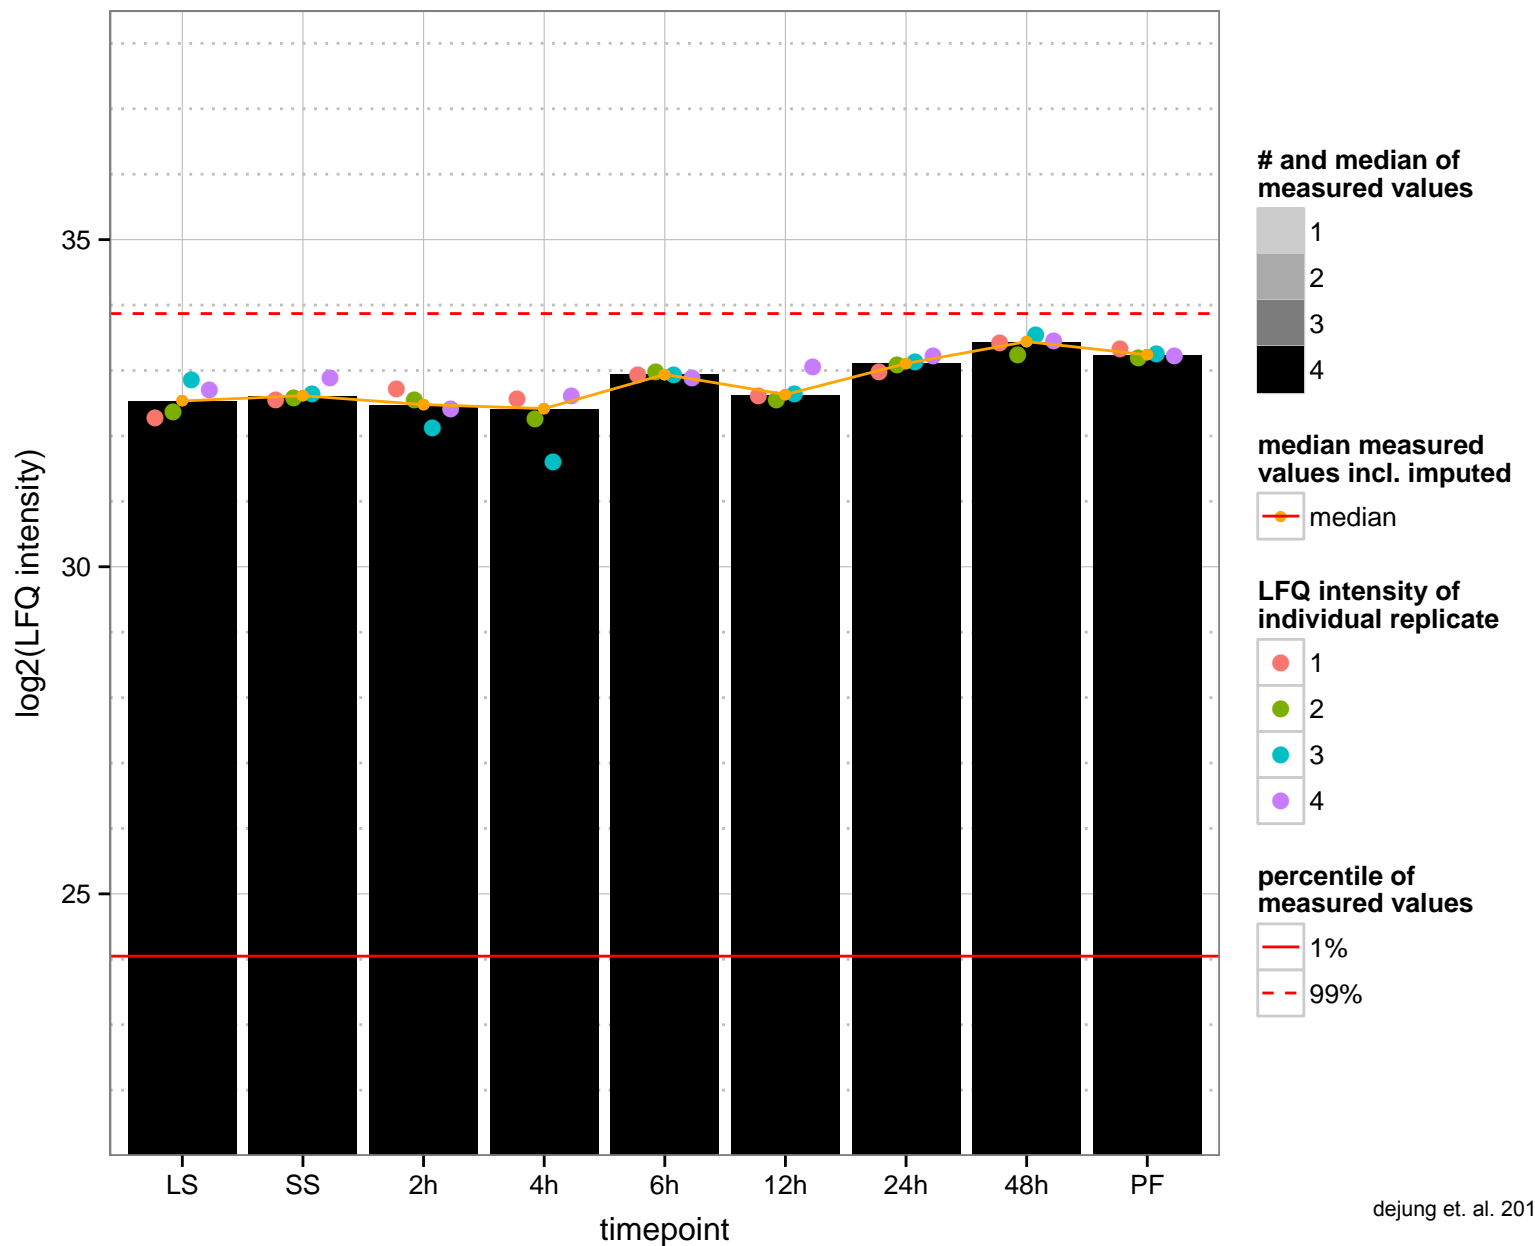

hypothetical protein, conserved  
 Tb927.10.3950  
 AGOF: null  
 AGOC: null  
 AGOP: null  
 PGOF: null  
 PGO: null  
 PGOP: null

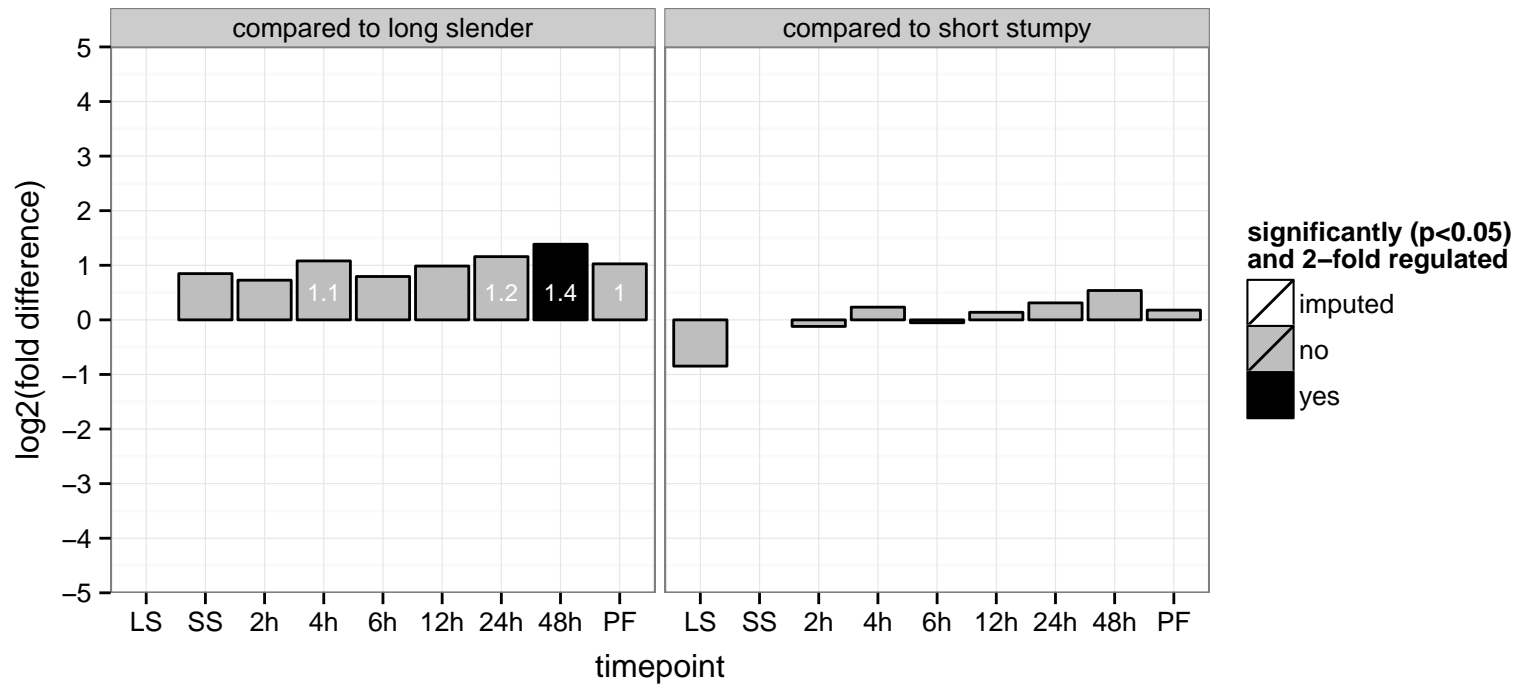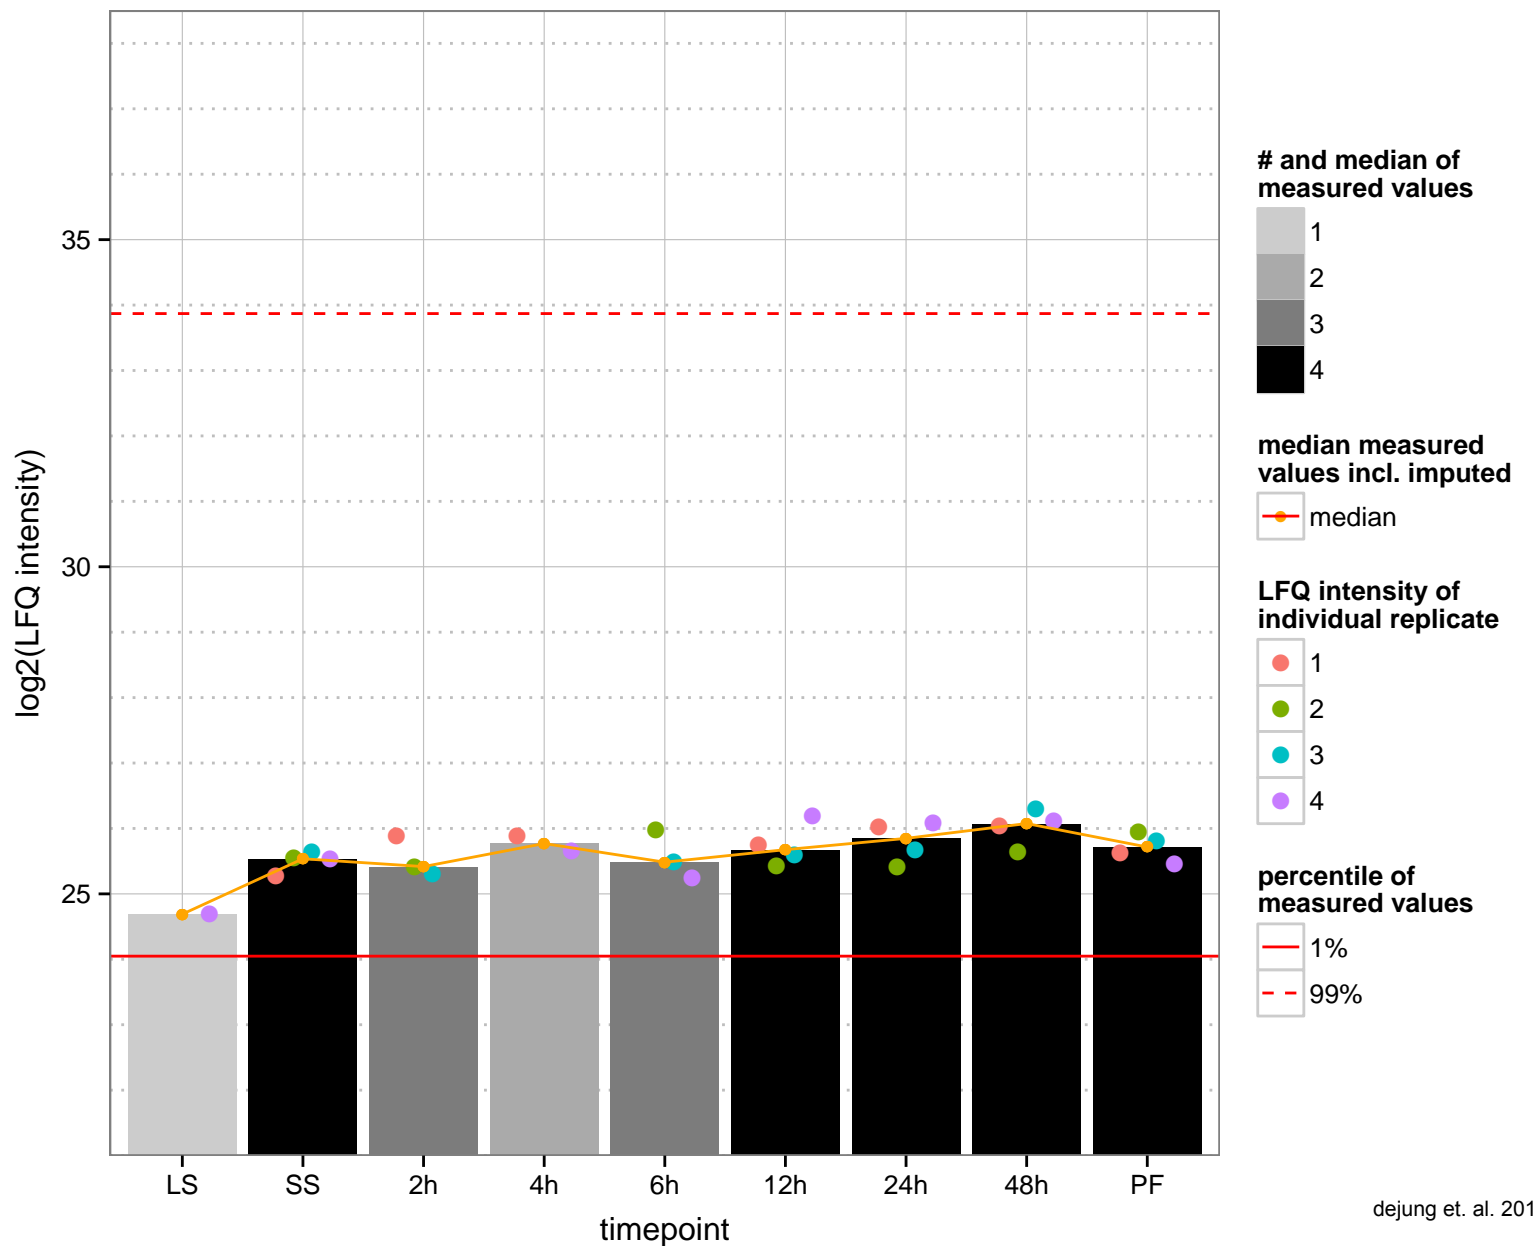

DHH1 (DHH1)

Tb927.10.3990

AGOF: ATP binding, ATP-dependent helicase activity, helicase activity, nucleic acid binding

AGOC: null

AGOP: nucleobase-containing compound metabolic process

PGOF: ATP binding, ATP-dependent helicase activity, helicase activity, nucleic acid binding

PGOC: null

PGOP: null

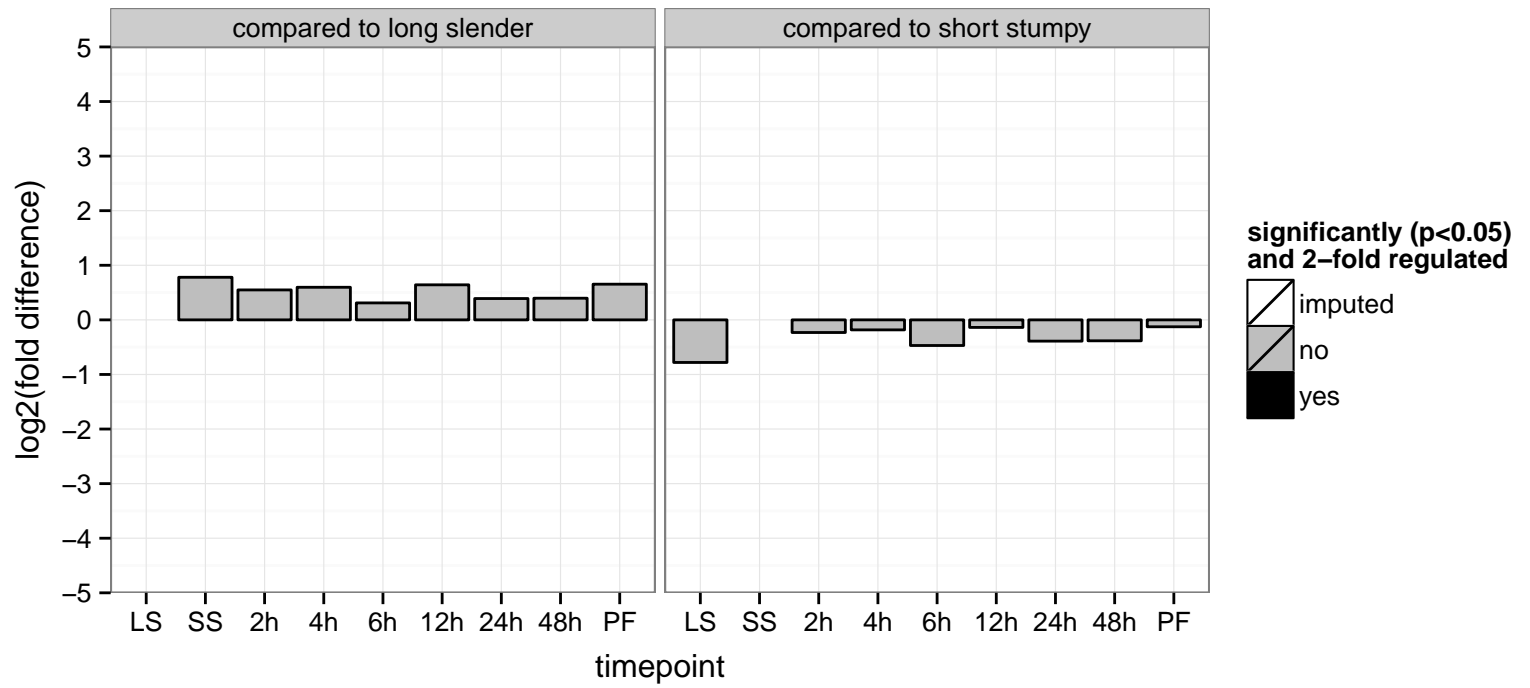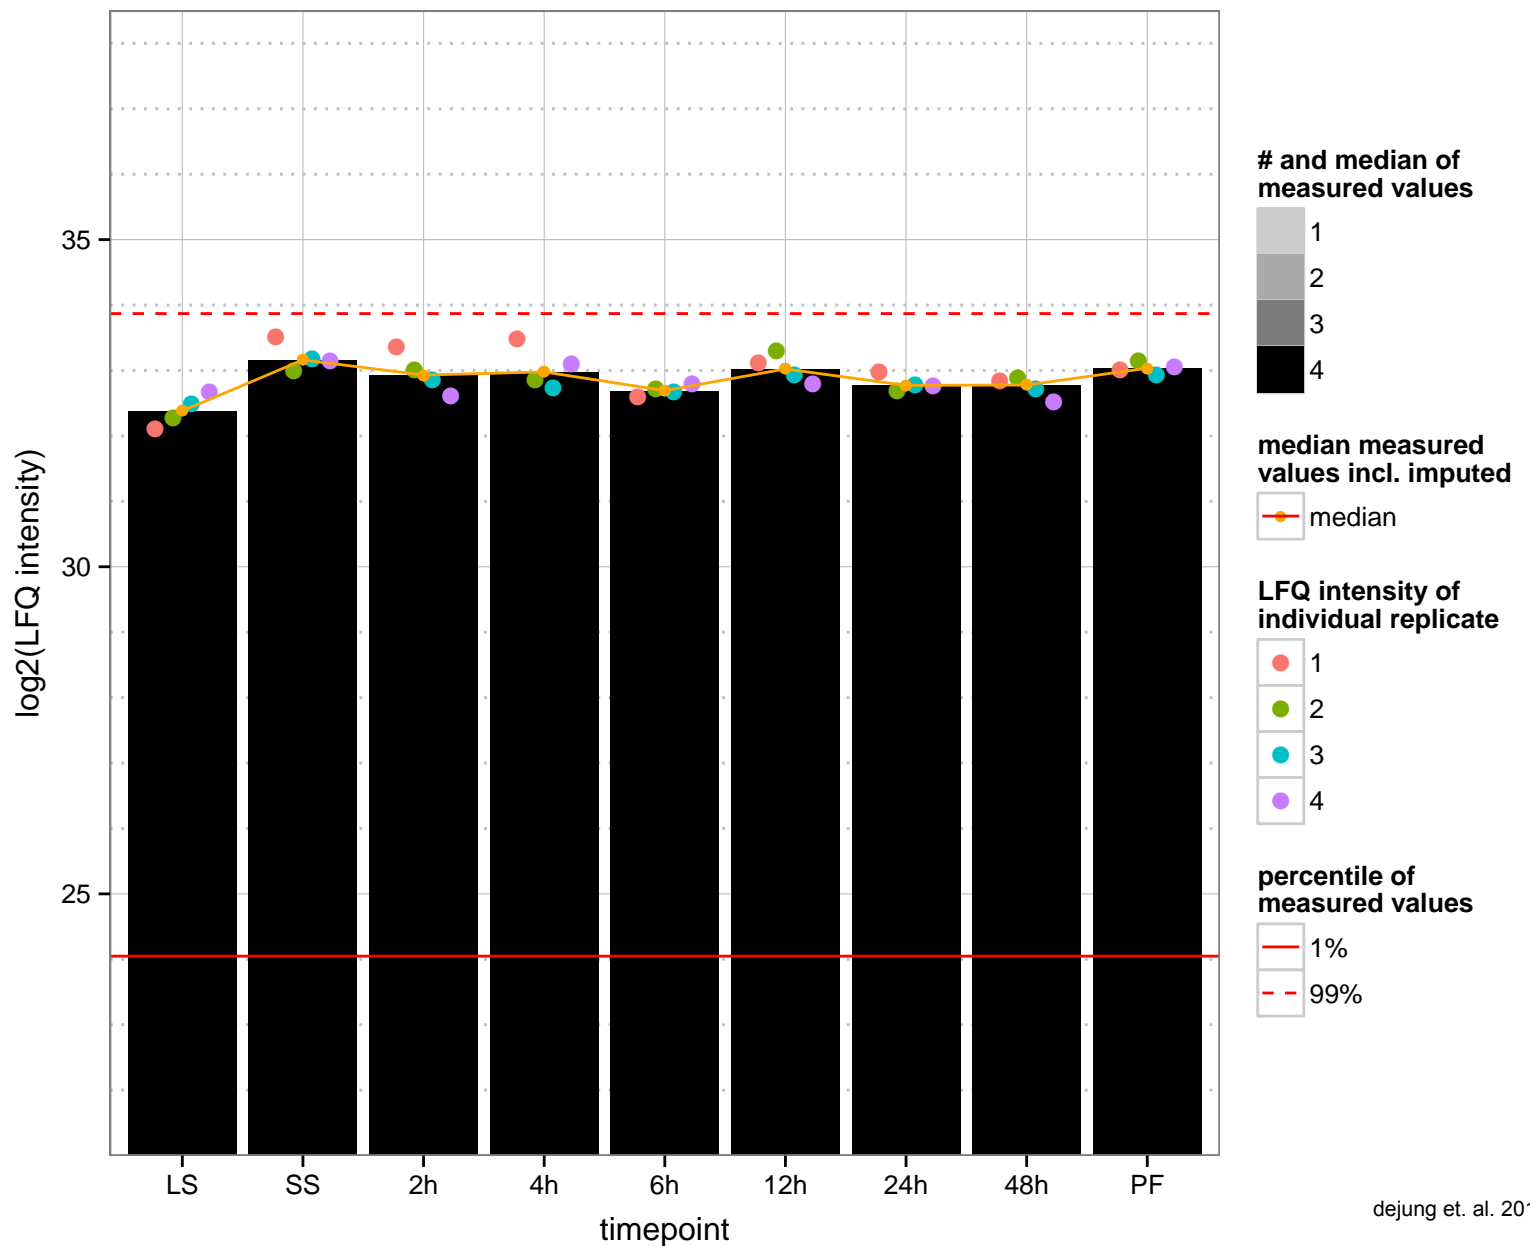

methylglutaconyl-CoA hydratase, mitochondrial precursor, putative  
 Tb927.10.4000  
 AGOF: catalytic activity  
 AGOC: mitochondrion  
 AGOP: metabolic process  
 PGO: catalytic activity  
 PGO: null  
 PGO: metabolic process

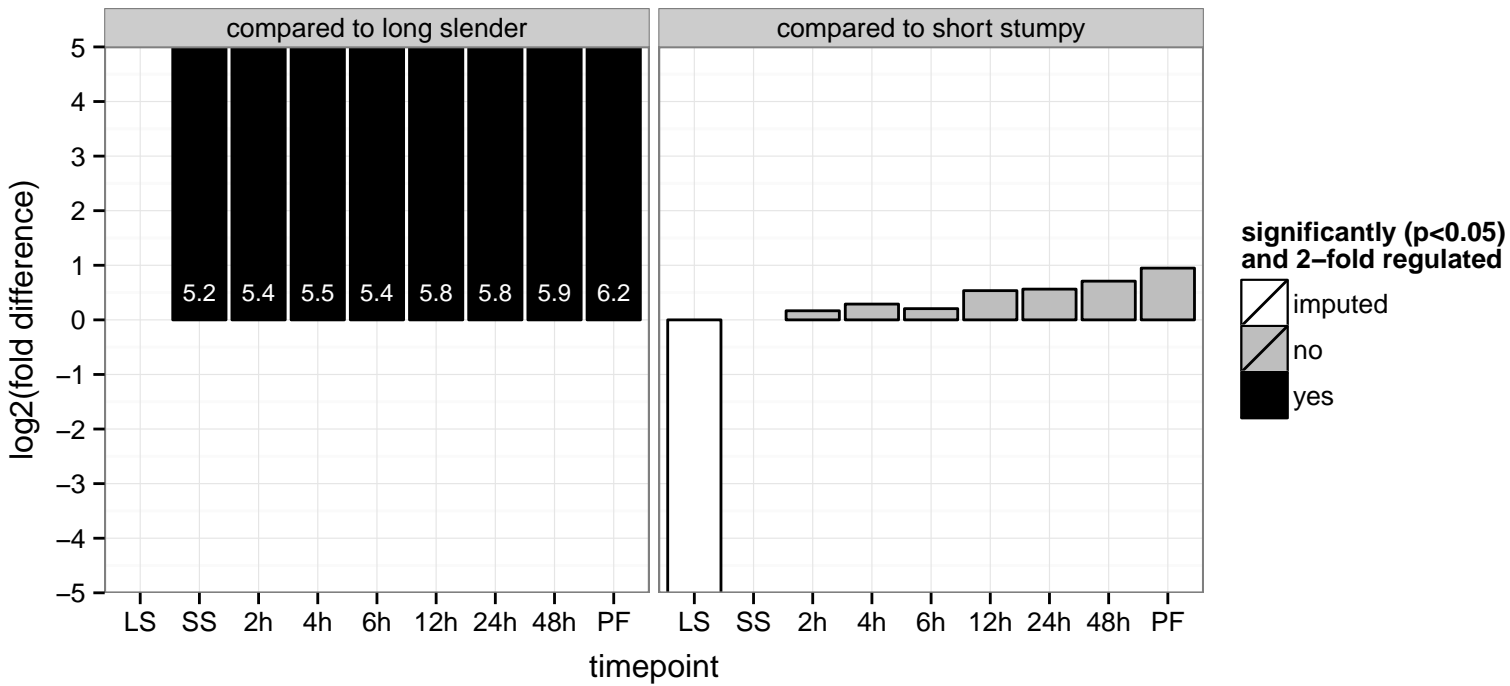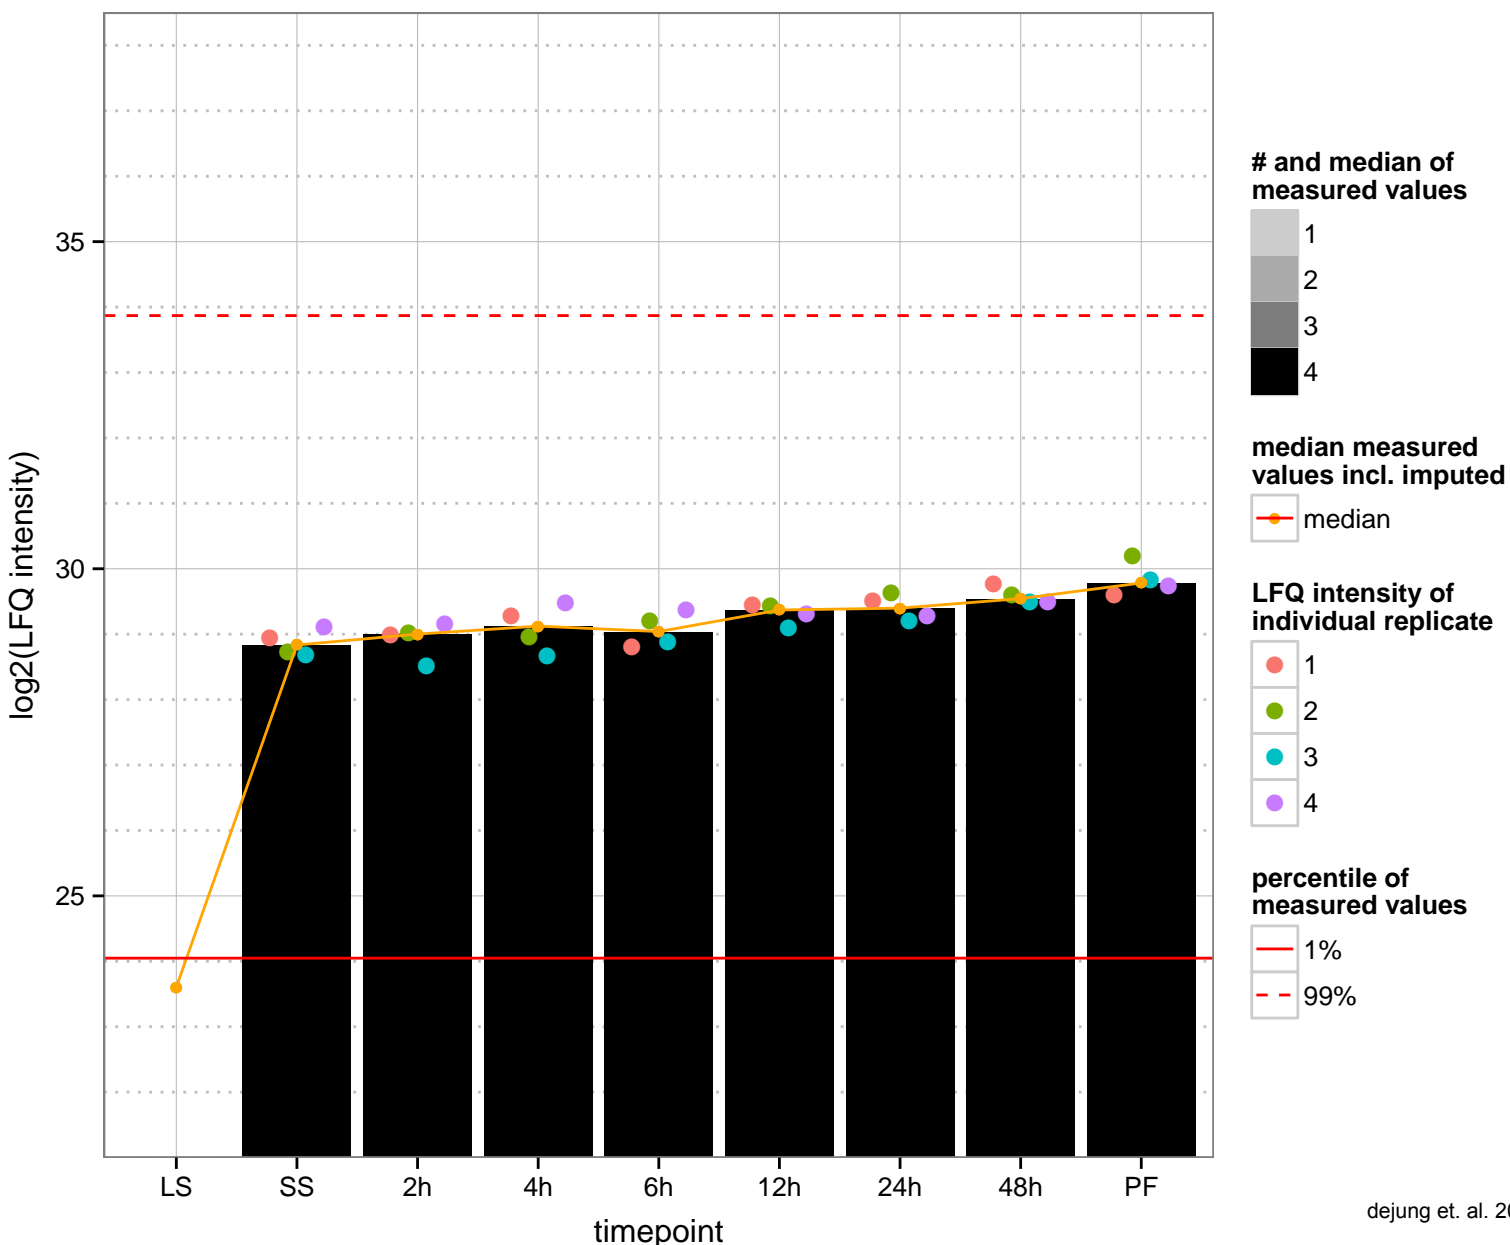

hypothetical protein, conserved  
 Tb927.10.4010  
 AGOF: null  
 AGOC: null  
 AGOP: null  
 PGO: null  
 PGO: null  
 PGO: null

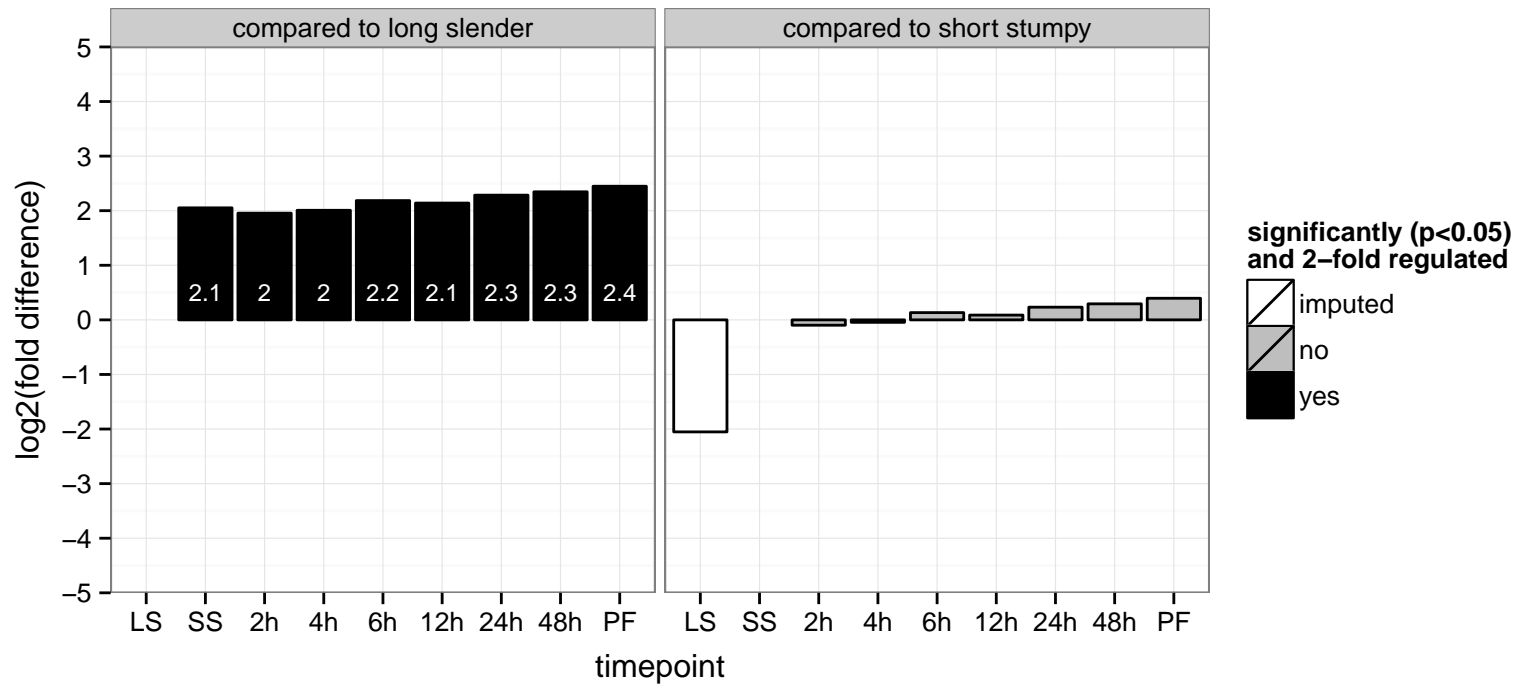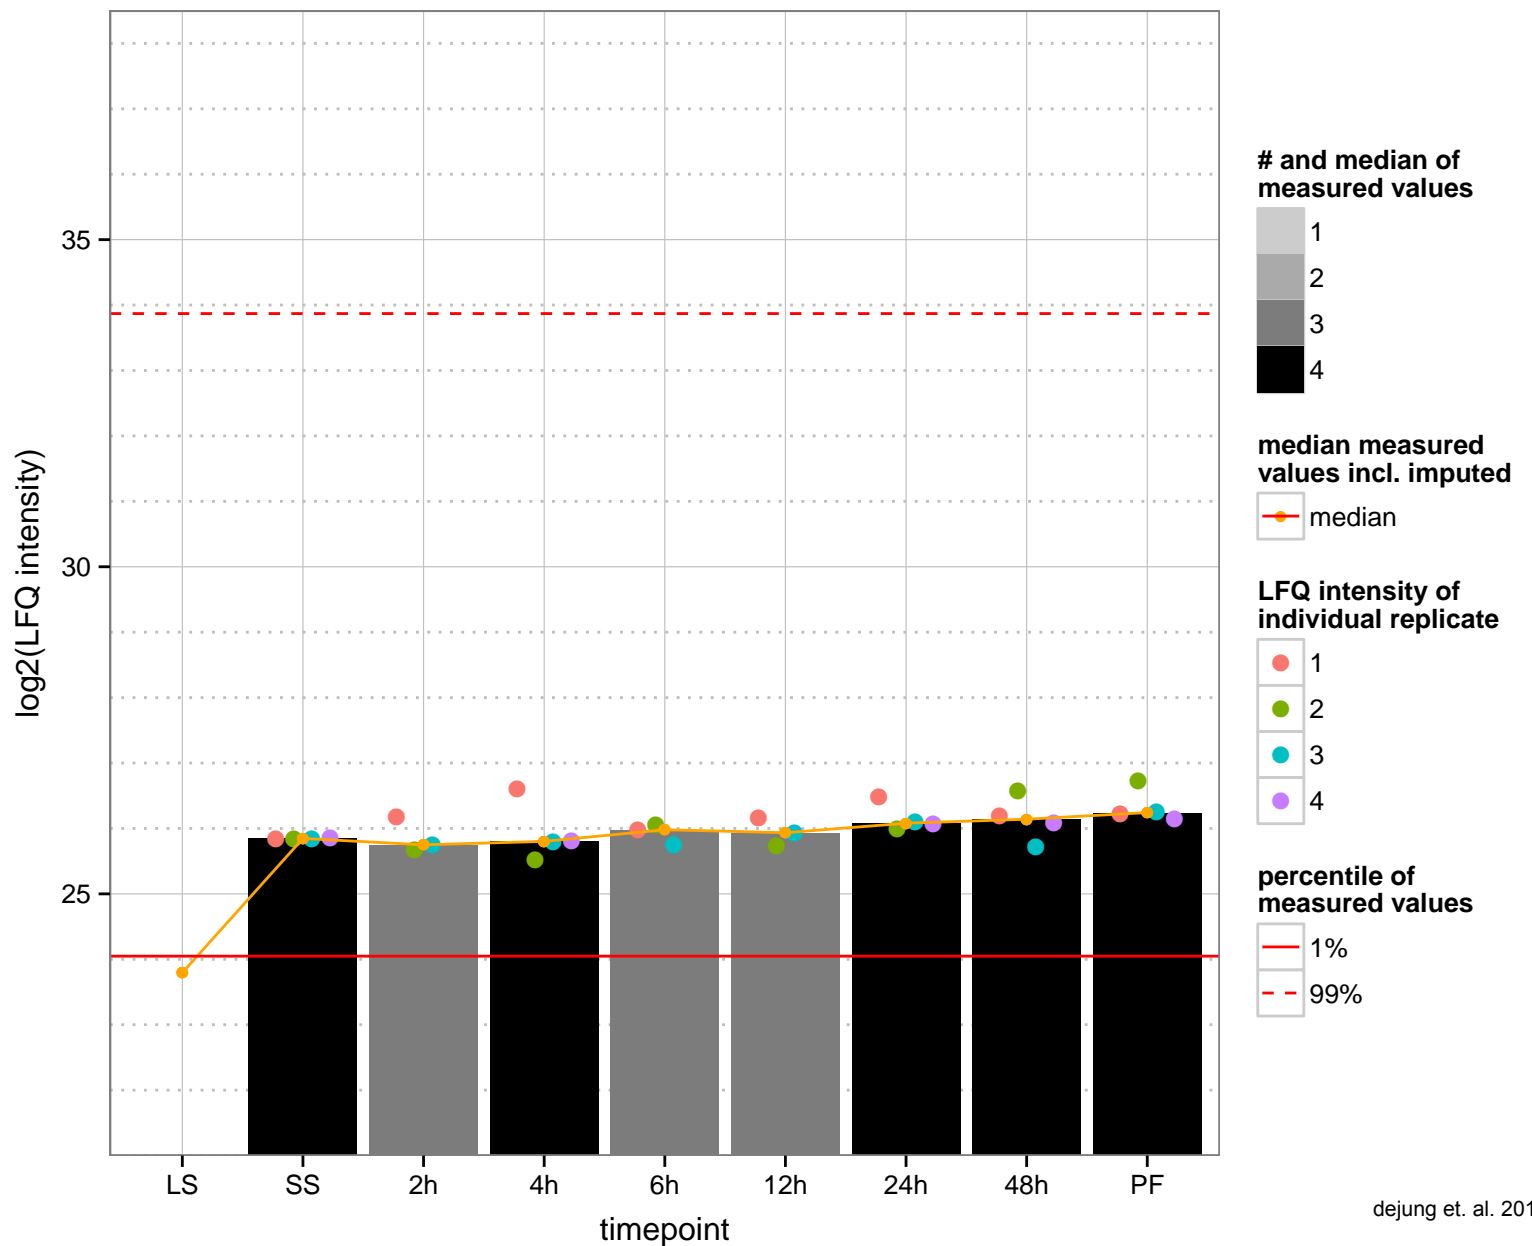

3-keto-dihydrosphingosine reductase  
 Tb927.10.4040  
 AGOF: 3-dehydrosphinganine reductase activity  
 AGOC: endoplasmic reticulum membrane  
 AGOP: fatty acid biosynthetic process  
 PGO: oxidoreductase activity  
 PGOC: null  
 PGOP: metabolic process

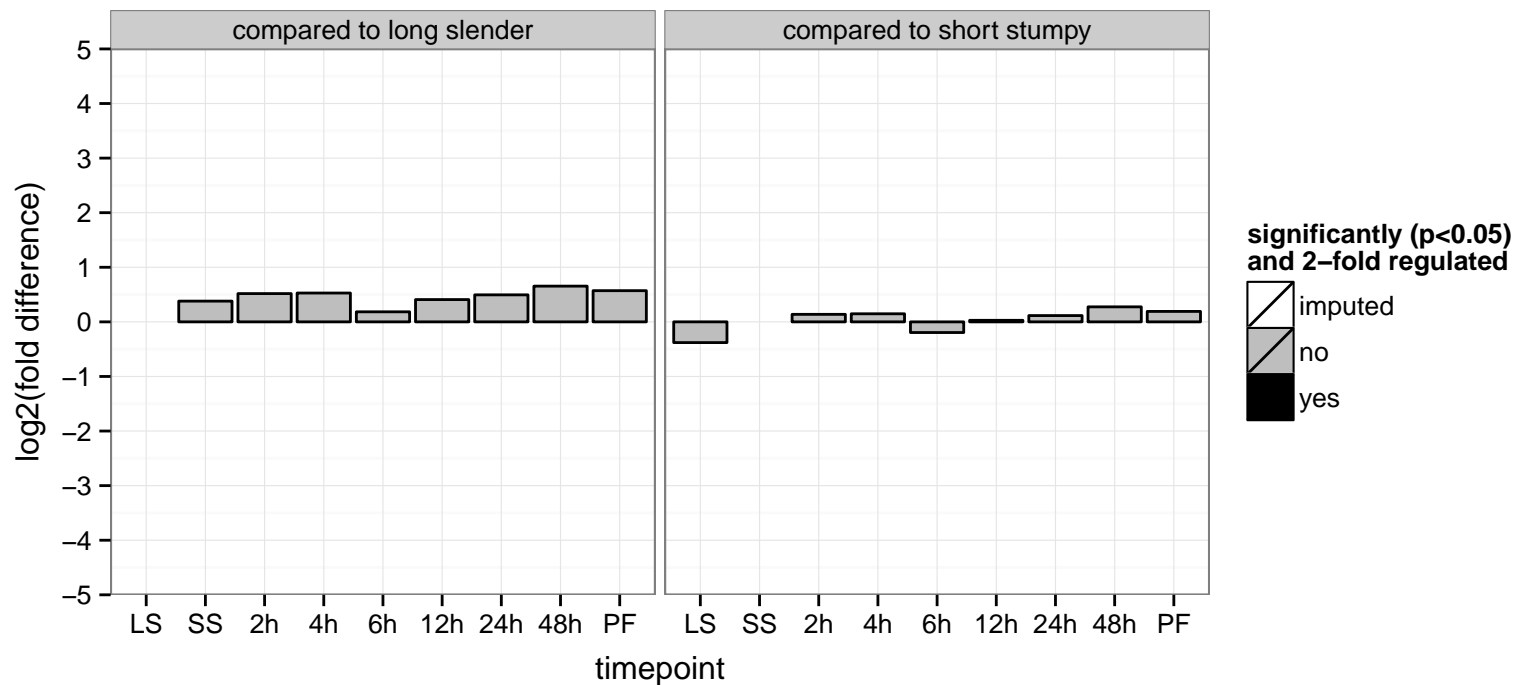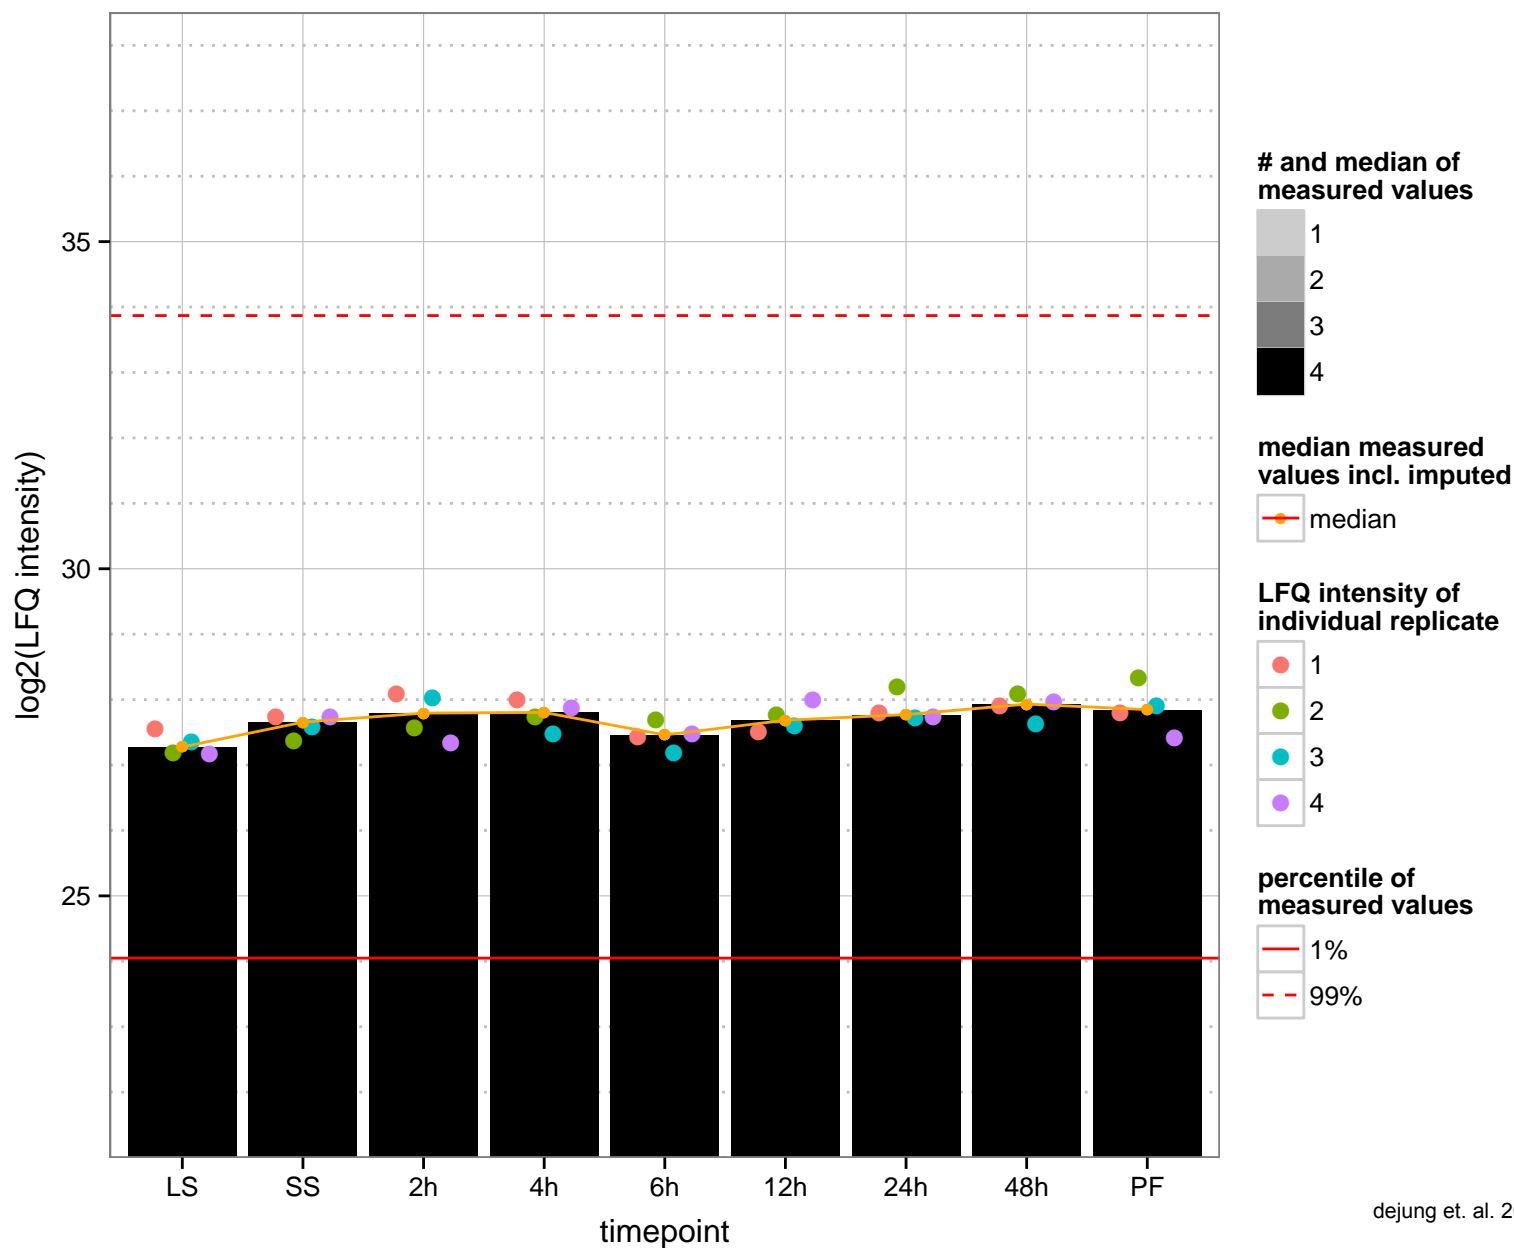

hypothetical protein, conserved  
 Tb927.10.4060  
 AGOF: null  
 AGOC: null  
 AGOP: null  
 PGO: protein binding  
 PGOC: null  
 PGOP: null

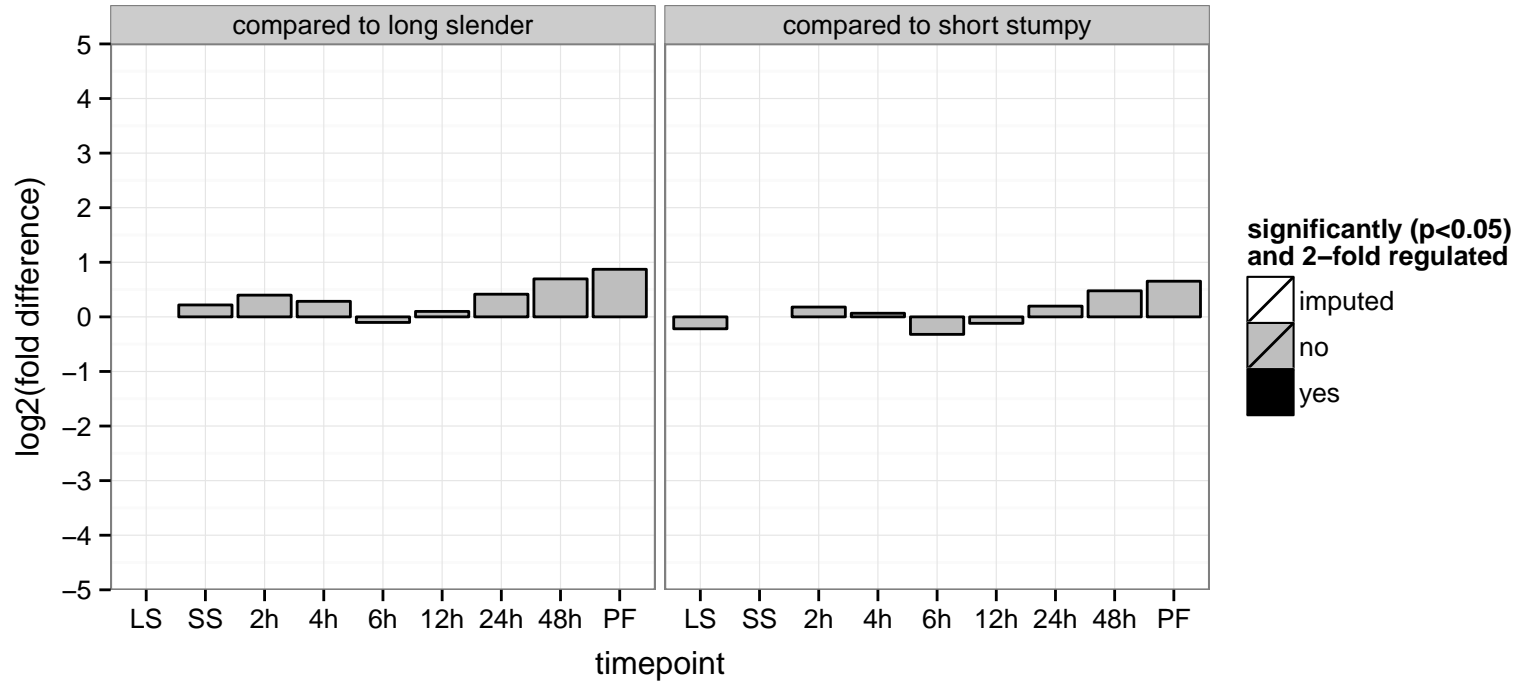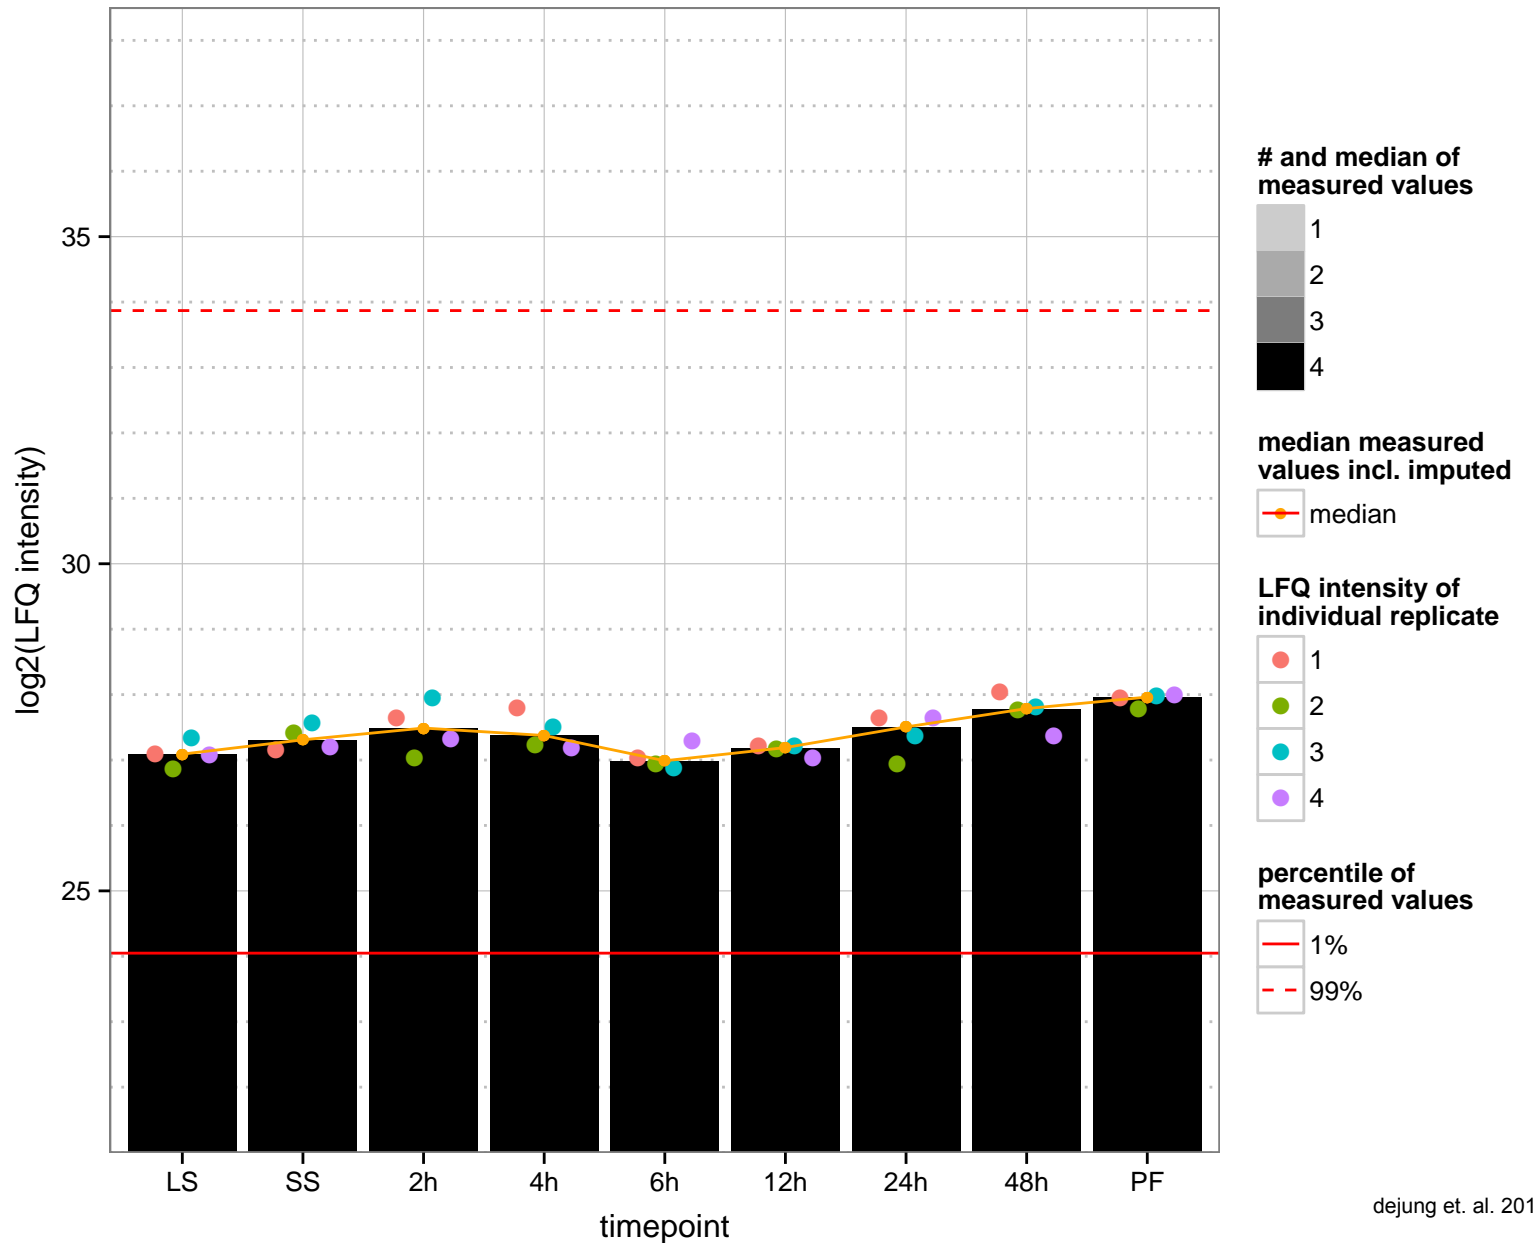

60S ribosomal protein L30 (RPL30)  
 Tb927.10.4120;Tb927.10.4110  
 AGOF: structural constituent of ribosome  
 AGOC: ribosome, intracellular, ribosome  
 AGOP: translation  
 PGO: null  
 PGOC: null  
 PGOP: null

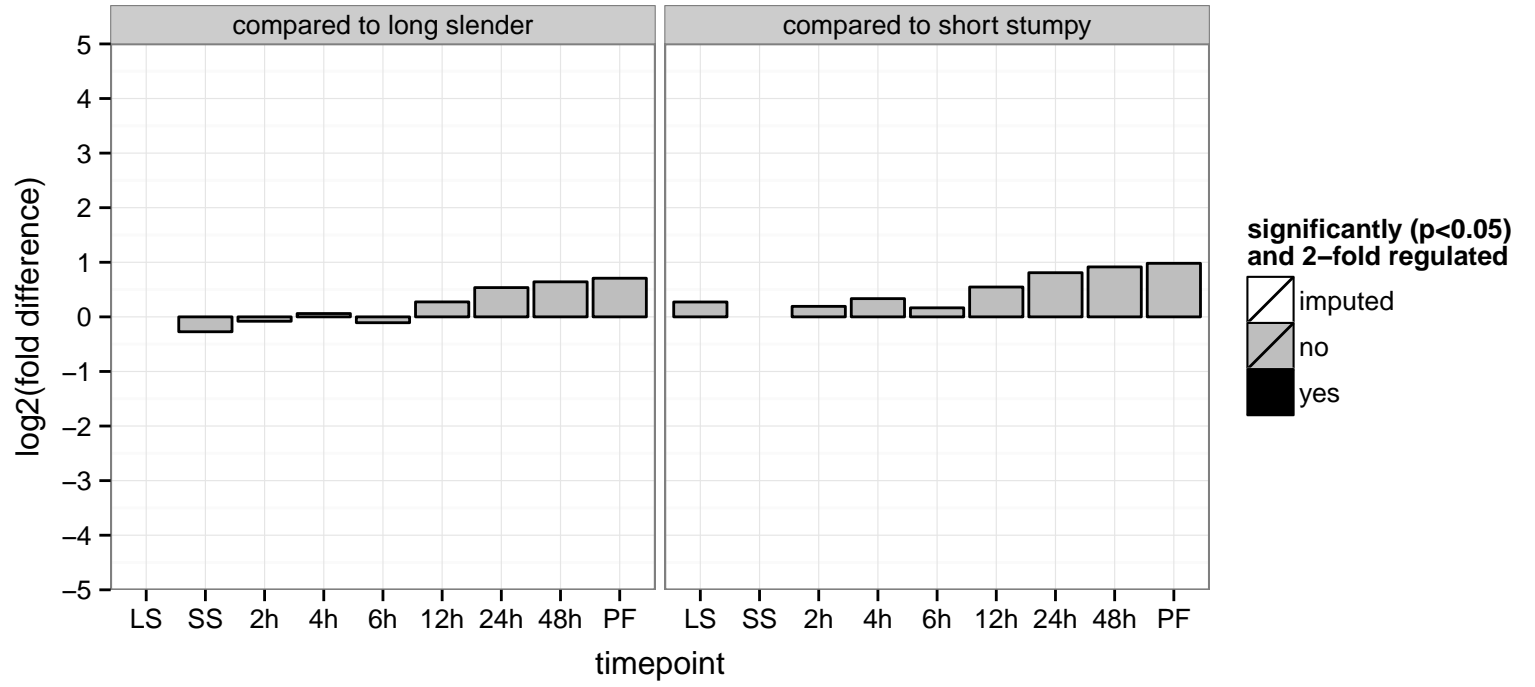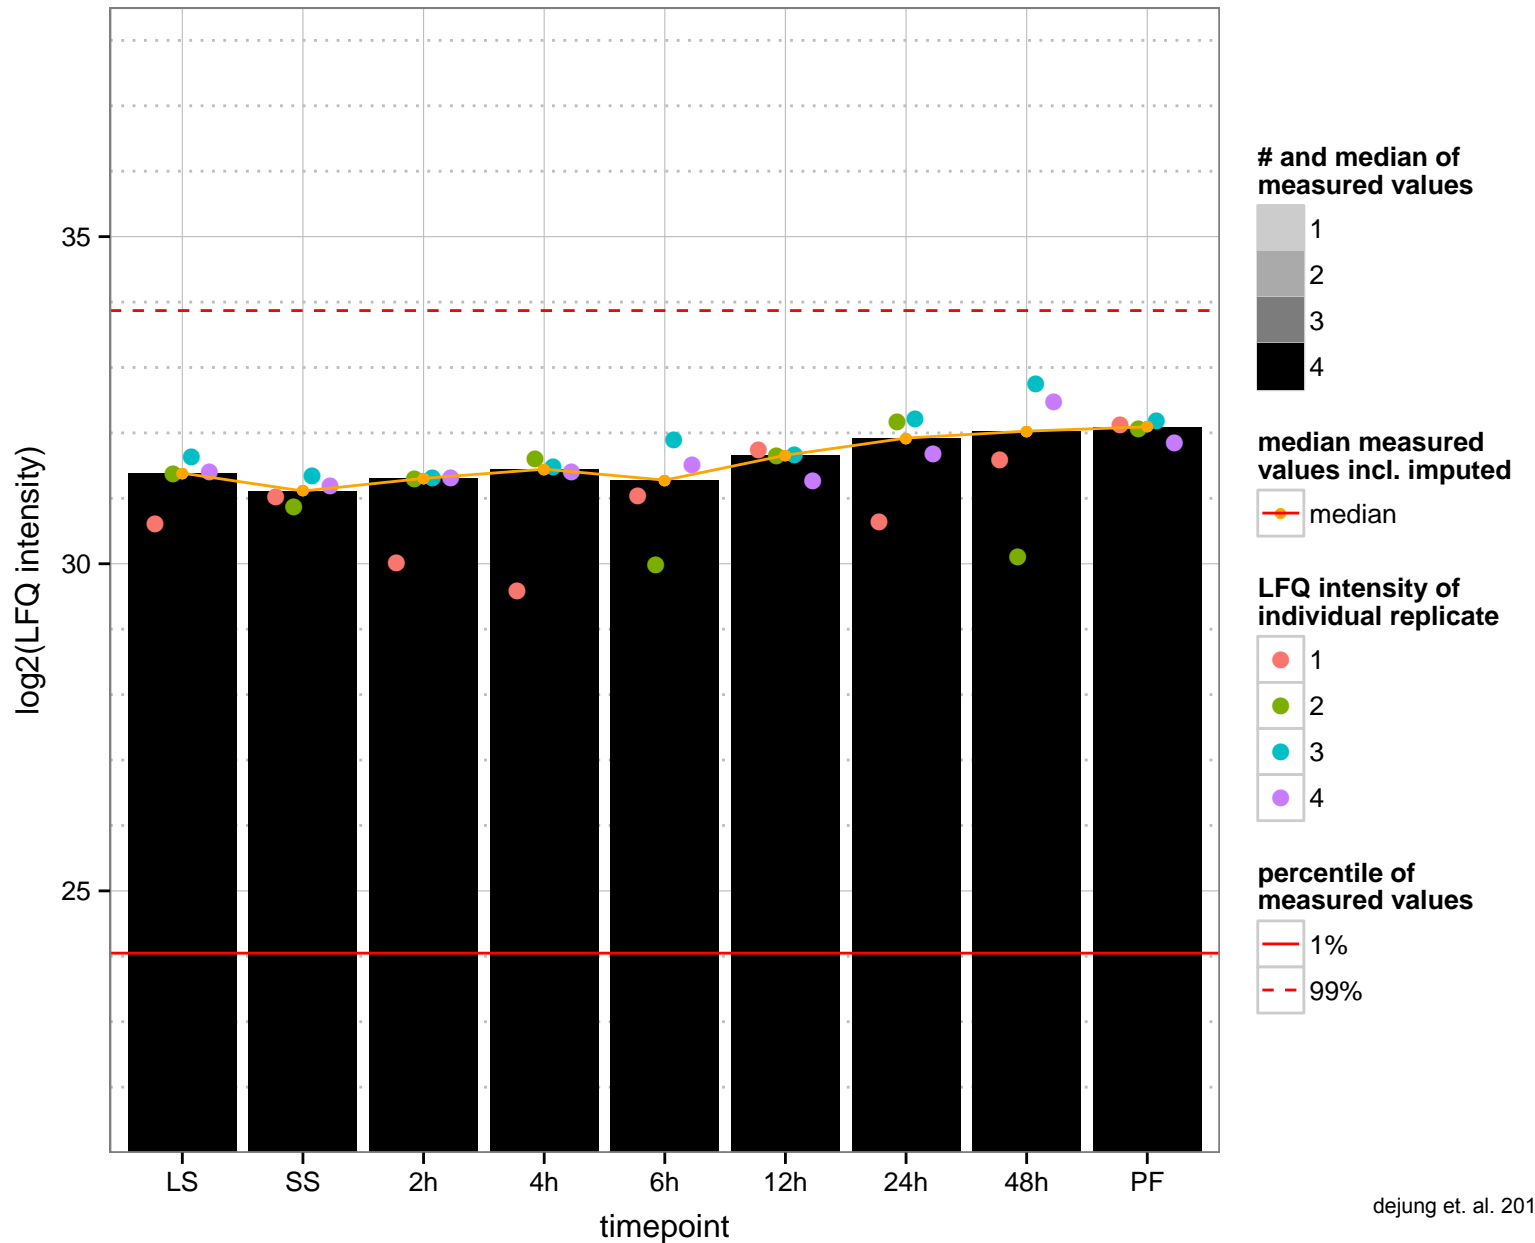



ADP-ribosylation factor-like 2, arl2 (ARL2)

Tb927.10.4250

AGOF: null

AGOC: cytoplasm, intracellular

AGOP: cytokinesis, intracellular protein transport, small GTPase mediated signal transduction

PGOF: GTP binding

PGOC: intracellular

PGOP: intracellular protein transport, small GTPase mediated signal transduction

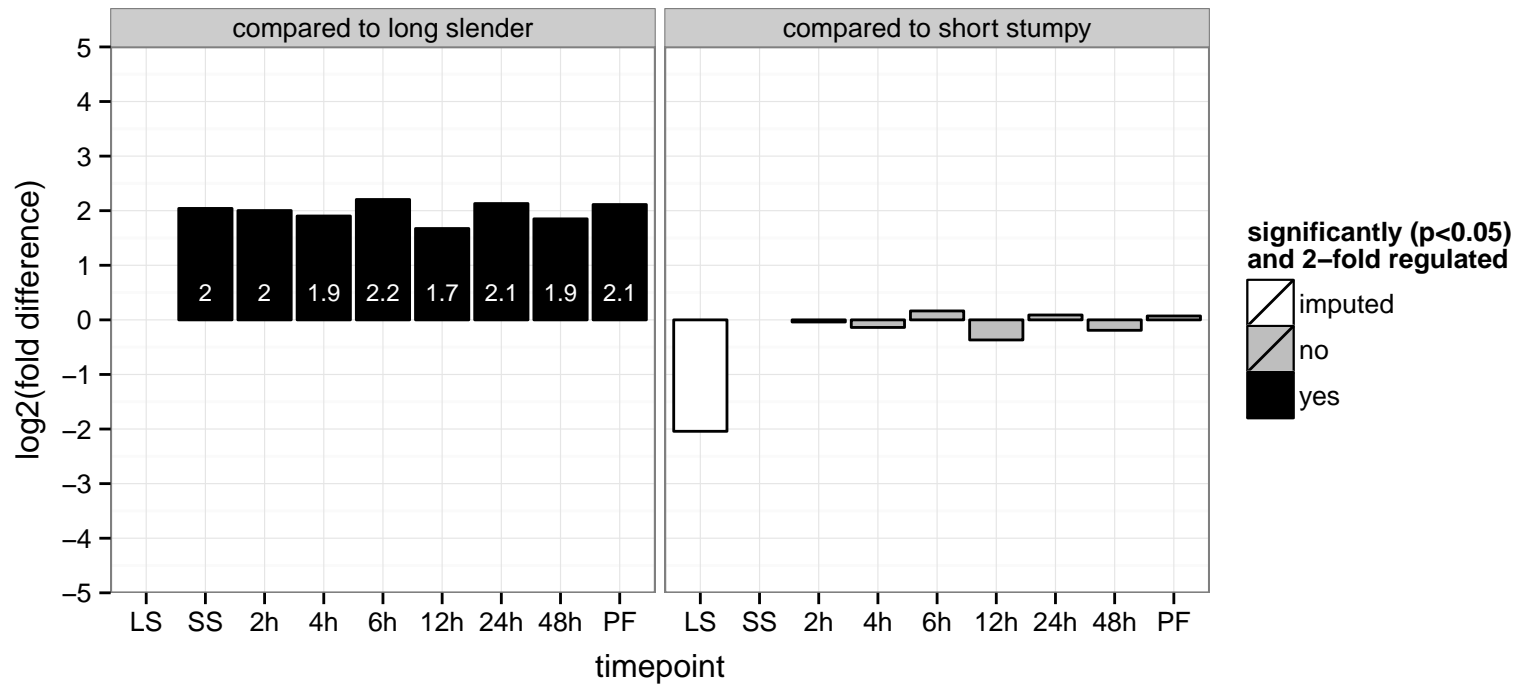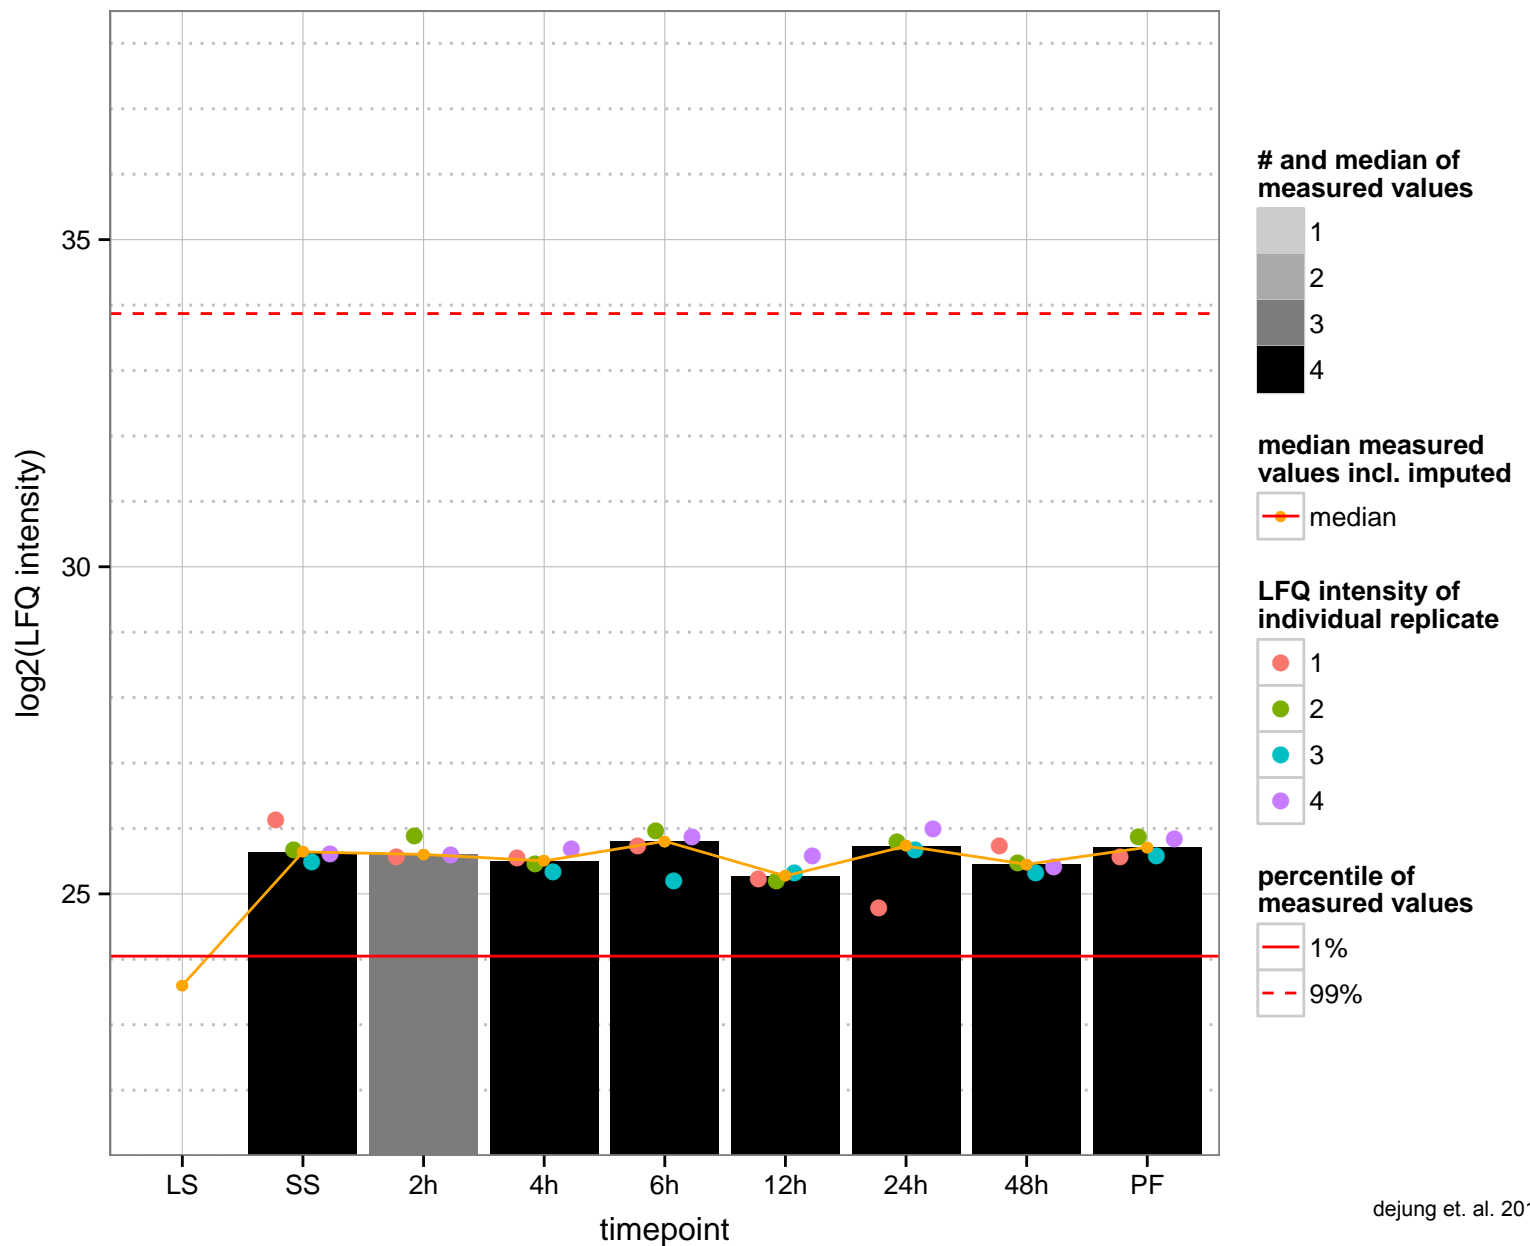

dolicholphosphate-mannose synthase, putative (DPMS)  
 Tb927.10.4610  
 AGOF: dolichyl-phosphate beta-D-mannosyltransferase activity  
 AGOC: null  
 AGOP: GPI anchor biosynthetic process  
 PGOF: null  
 PGO: null  
 PGOP: null

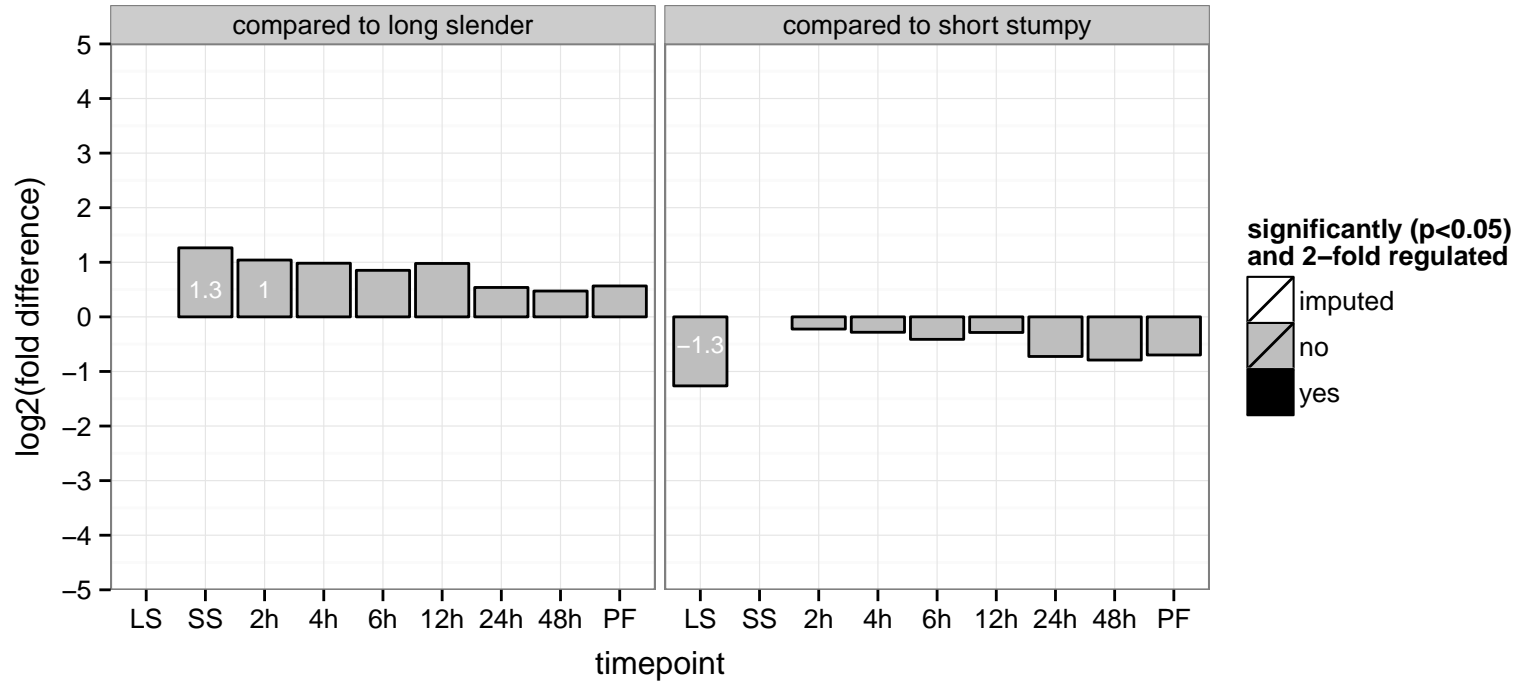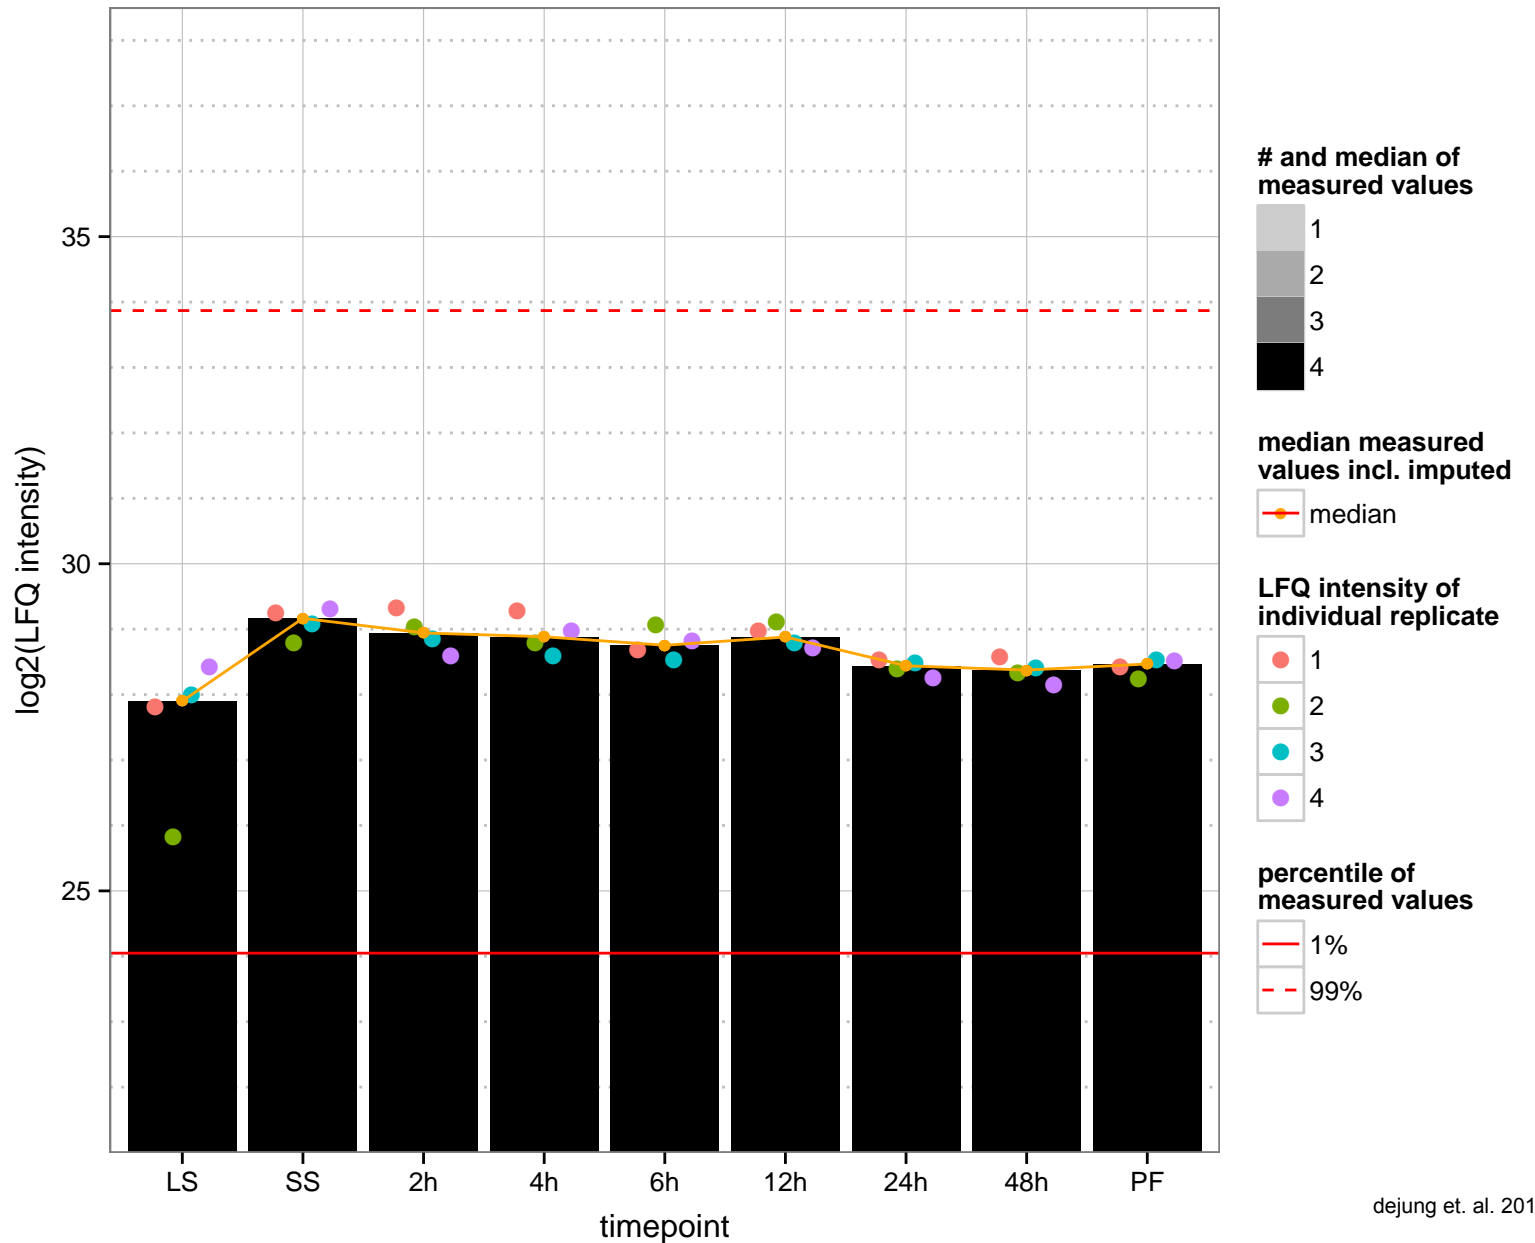

eukaryotic translation initiation factor 3 subunit L, putative (EIF3L)  
 Tb927.10.4640  
 AGOF: translation initiation factor activity  
 AGOC: eukaryotic translation initiation factor 3 complex  
 AGOP: translational initiation  
 PGO: null  
 PGOC: null  
 PGOP: null

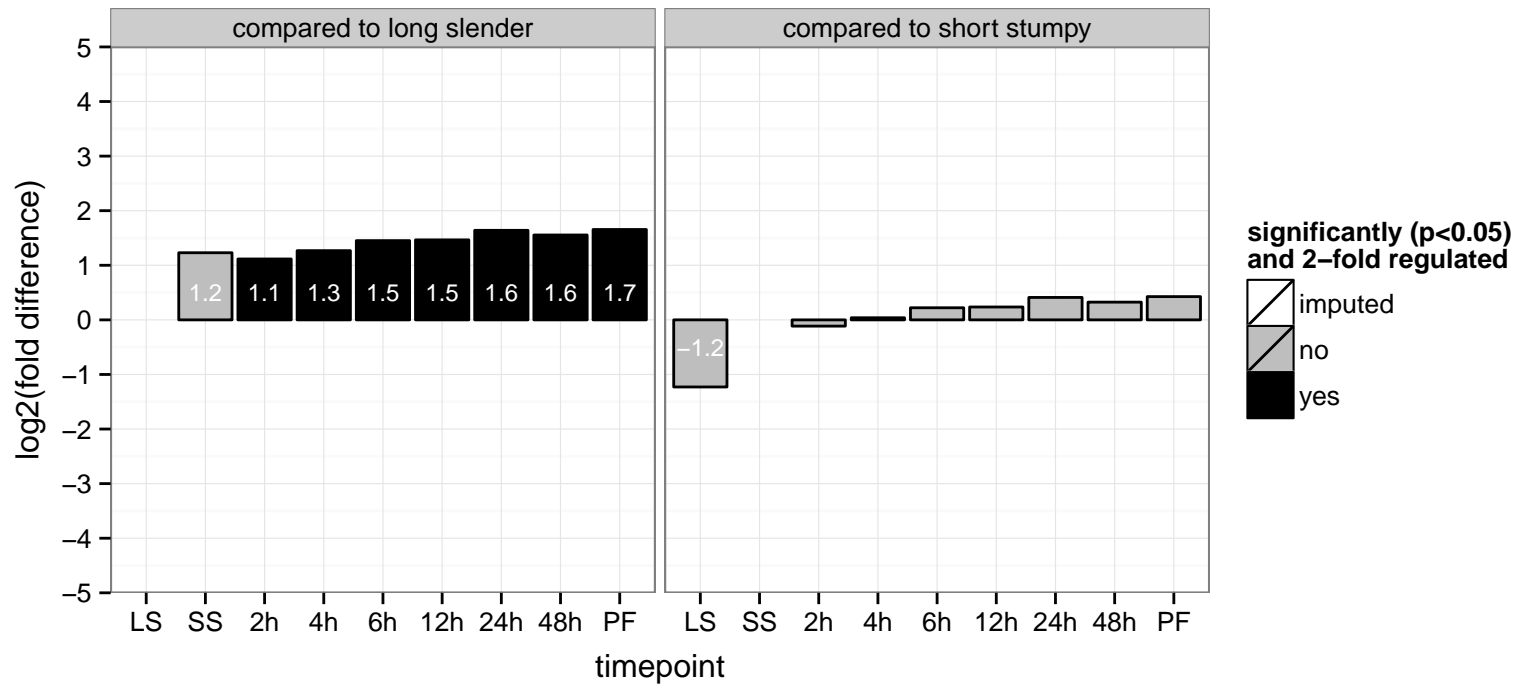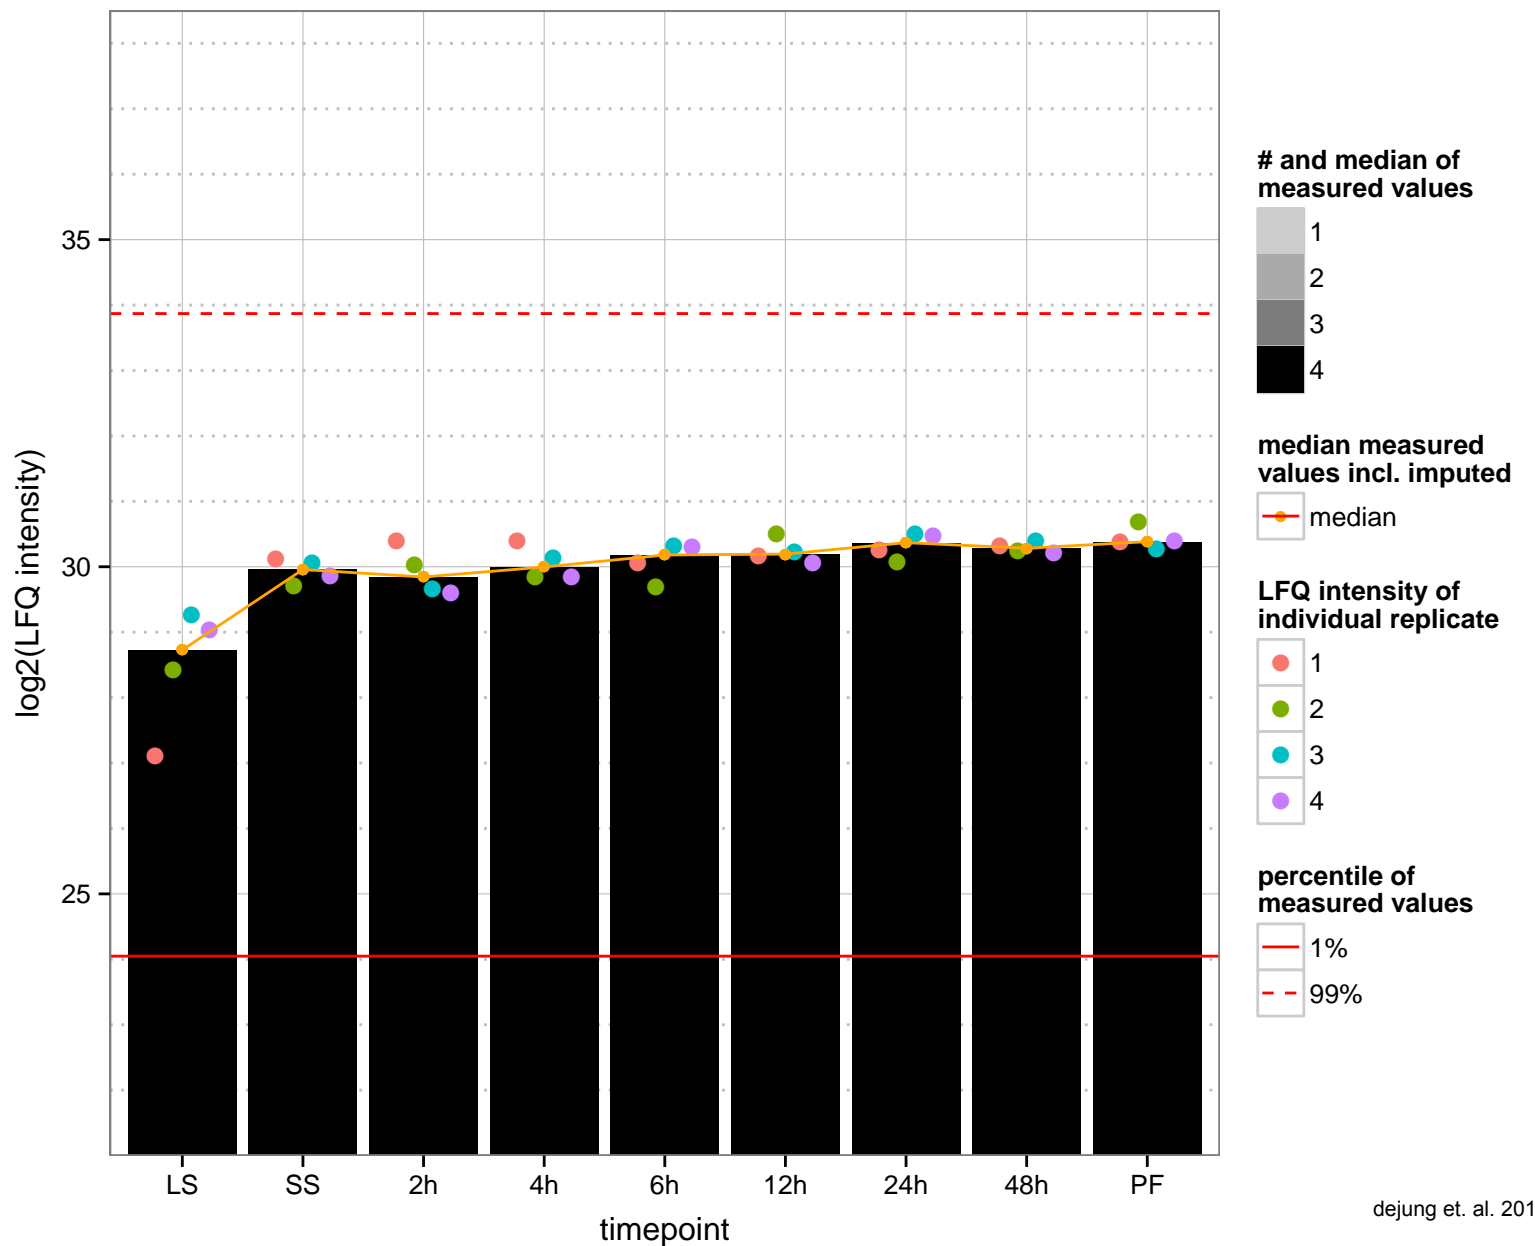

hypothetical protein, conserved  
 Tb927.10.4660  
 AGOF: null  
 AGOC: null  
 AGOP: transcription, DNA-dependent  
 PGO: null  
 PGO: null  
 PGO: null  
 PGO: transcription, DNA-dependent

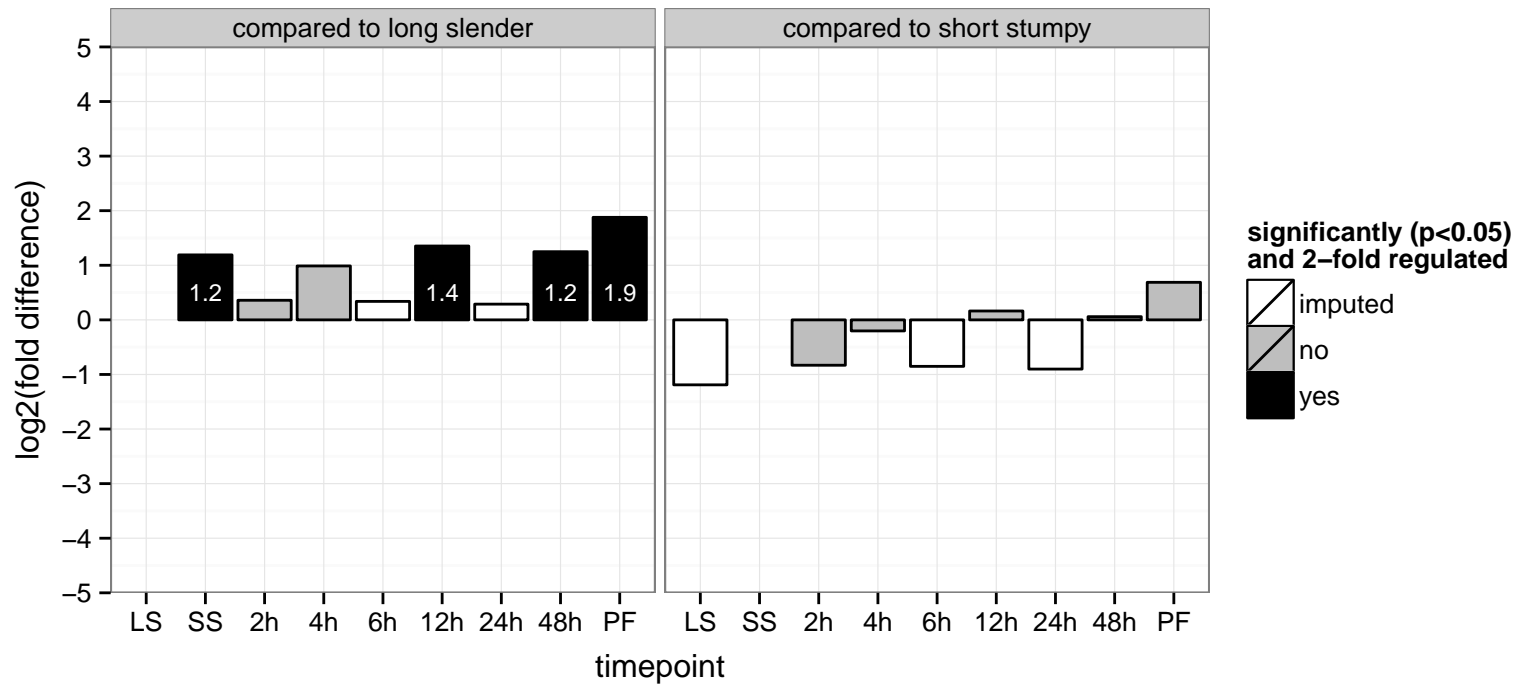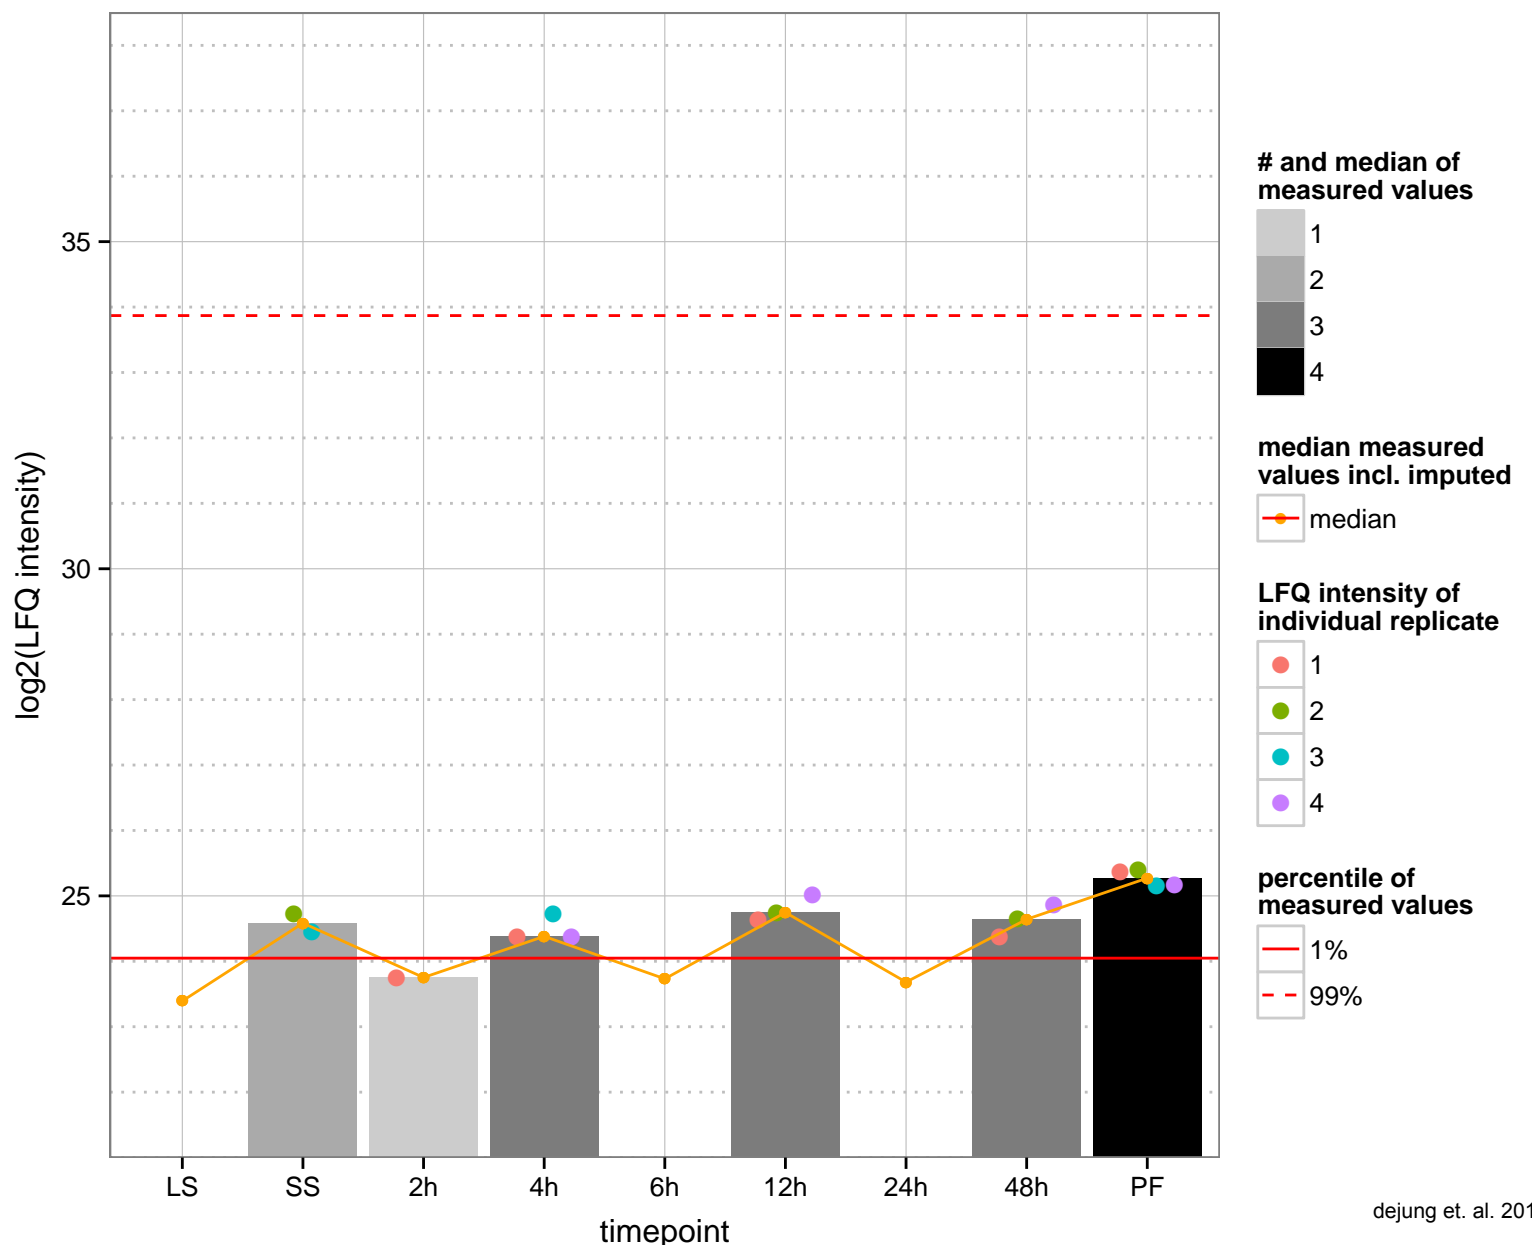

dynein light chain, putative  
 Tb927.10.4690  
 AGOF: microtubule motor activity  
 AGOC: microtubule associated complex  
 AGOP: microtubule-based process  
 PGO: null  
 PGO: microtubule associated complex  
 PGO: microtubule-based process

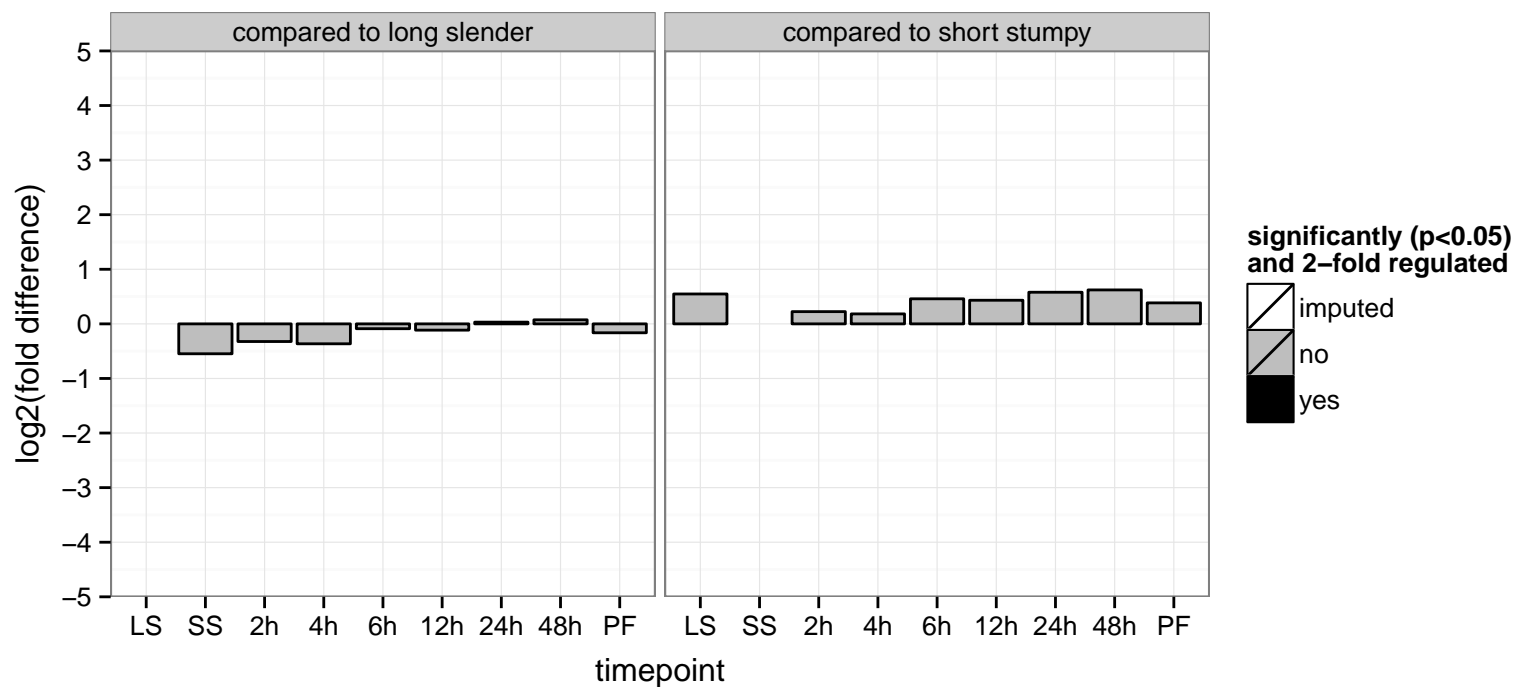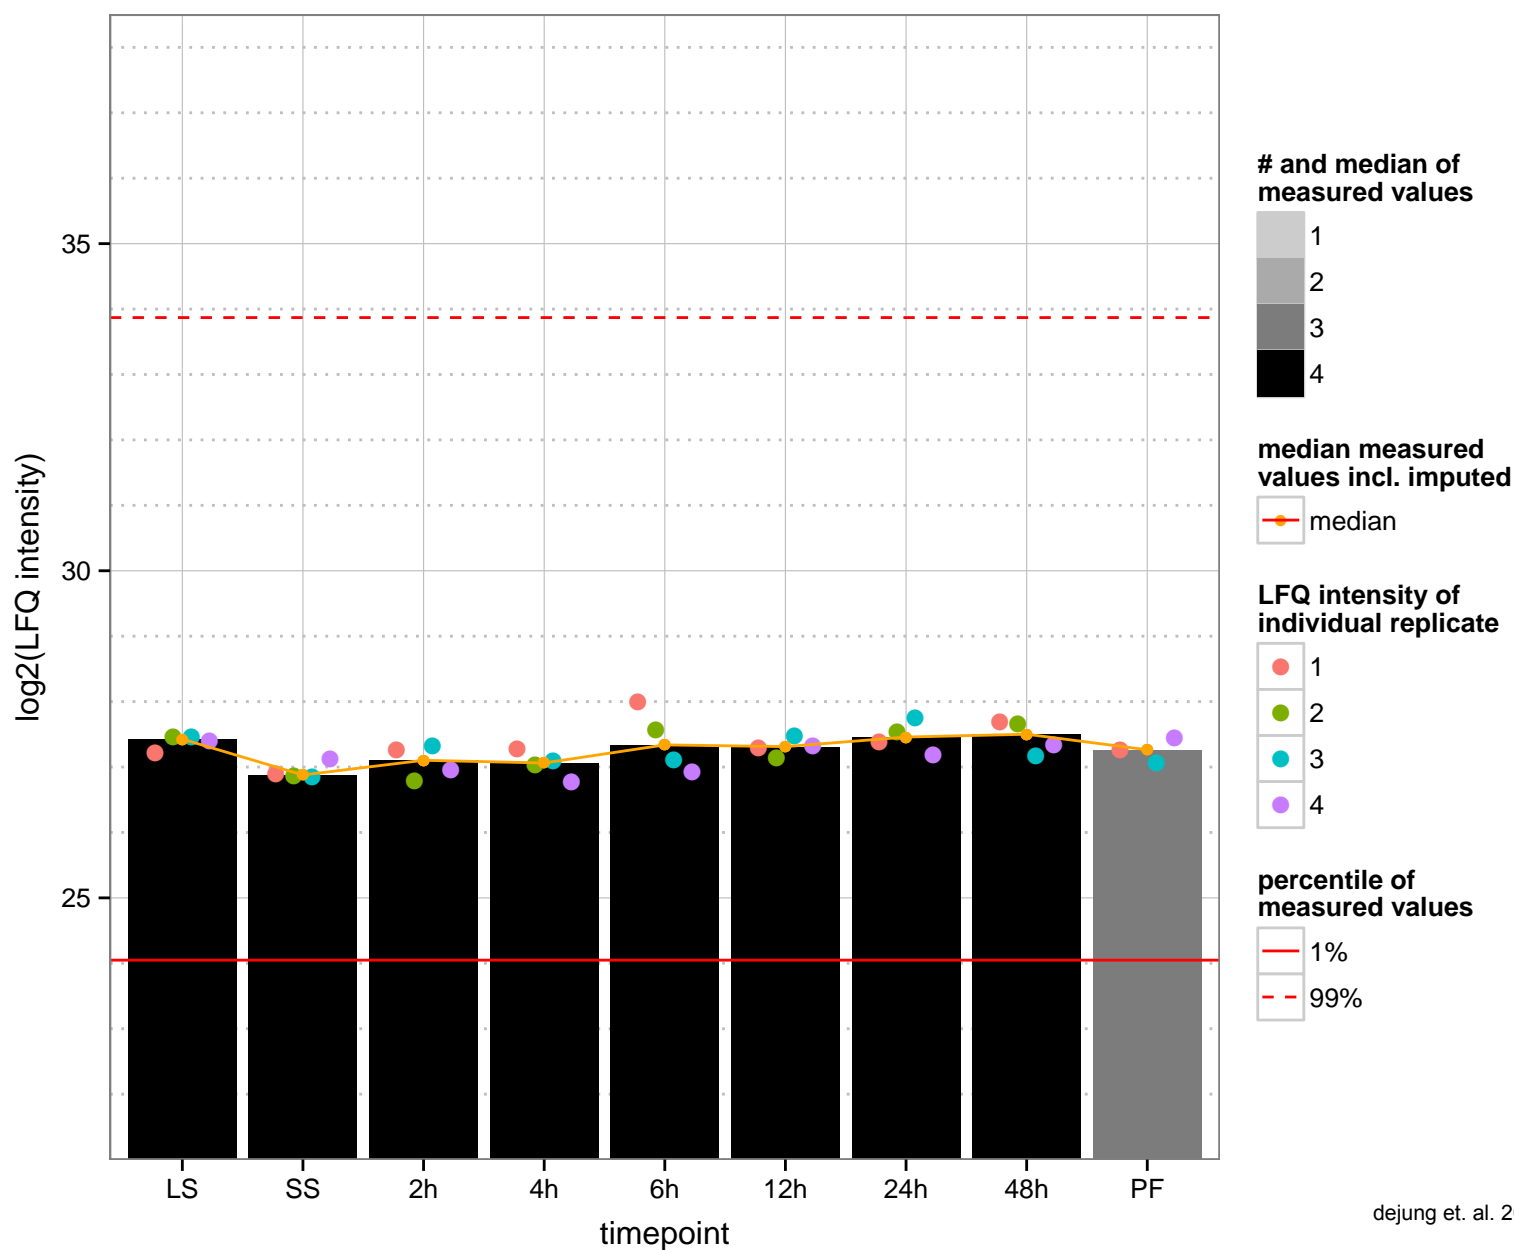

dolicholphosphate-mannose synthase, putative  
 Tb927.10.4700  
 AGOF: dolichyl-phosphate beta-D-mannosyltransferase activity  
 AGOC: endoplasmic reticulum membrane  
 AGOP: dolichol-linked oligosaccharide biosynthetic process  
 PGO: null  
 PGOC: null  
 PGOP: null

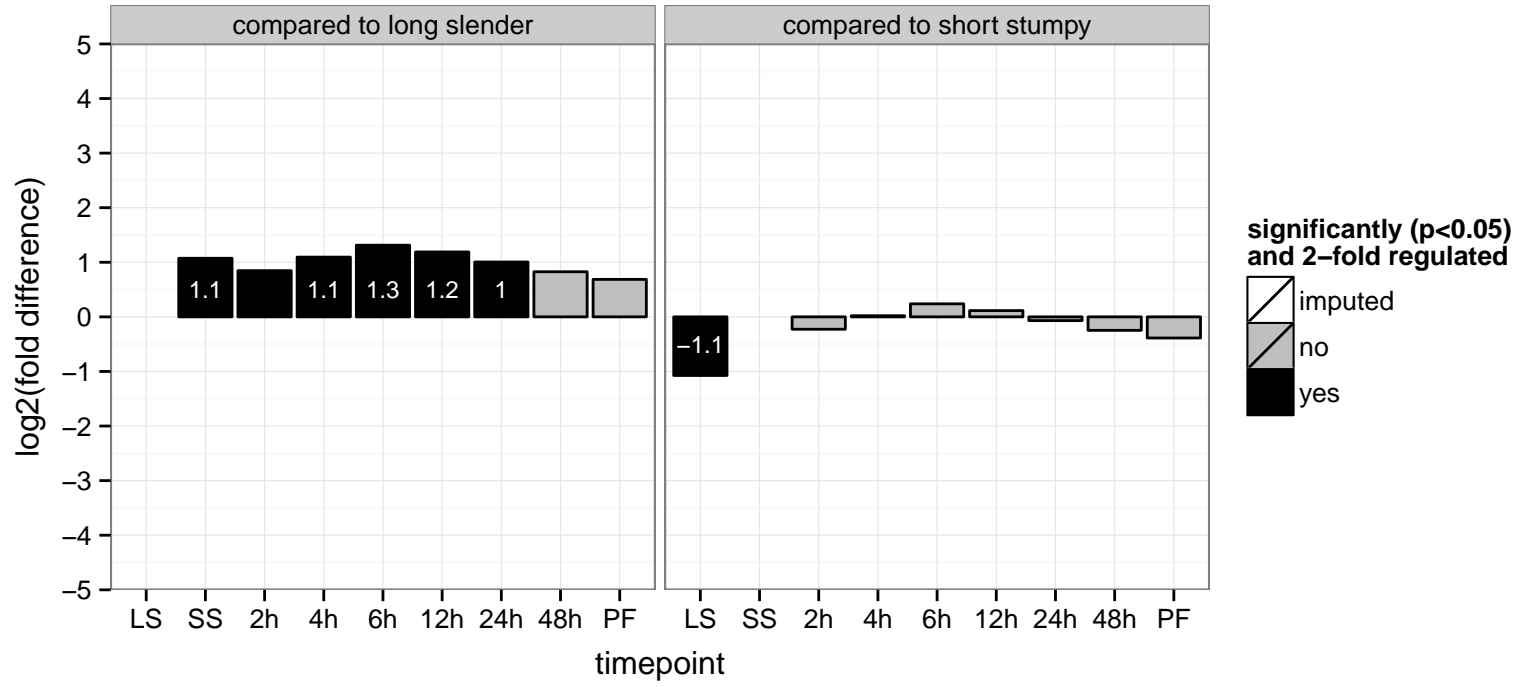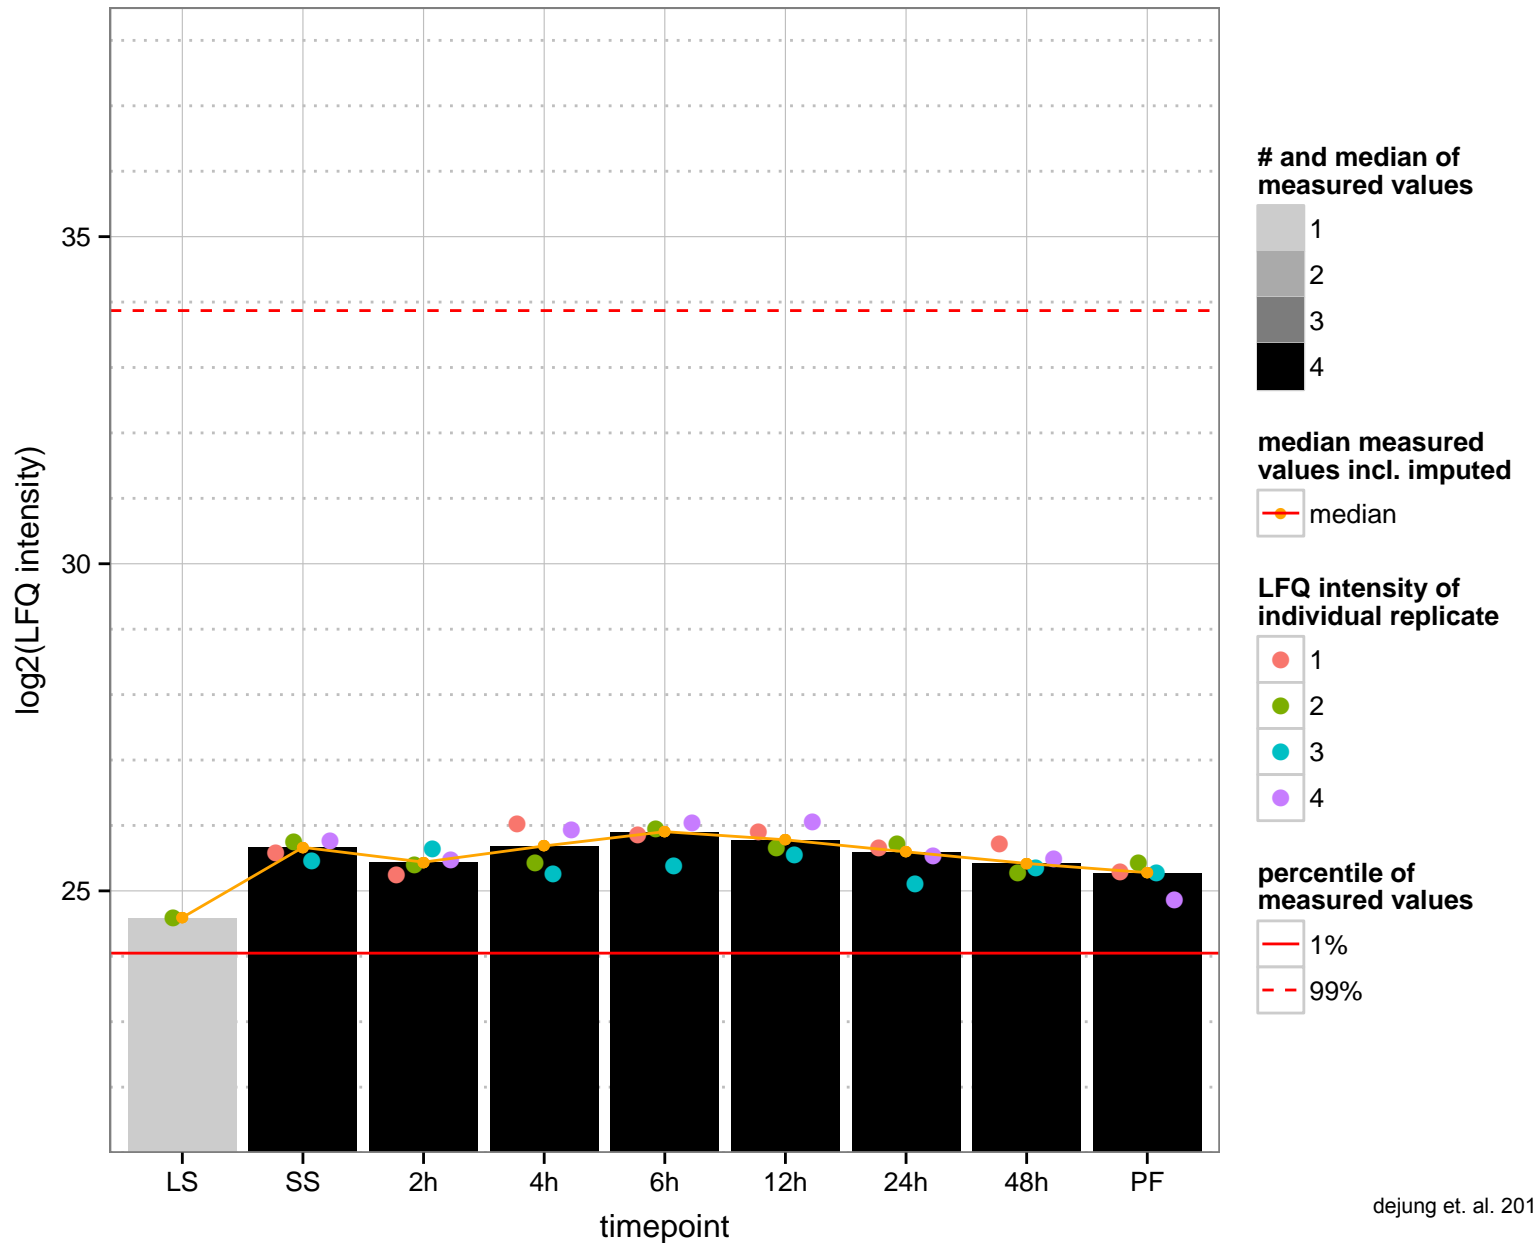

proteasome beta 2 subunit, putative, 20S proteasome subunit

Tb927.10.4710

AGOF: endopeptidase activity, threonine-type endopeptidase activity

AGOC: proteasome core complex, proteasome core complex, beta-subunit complex

AGOP: ubiquitin-dependent protein catabolic process

PGOF: threonine-type endopeptidase activity

PGOC: proteasome core complex

PGOP: proteolysis involved in cellular protein catabolic process

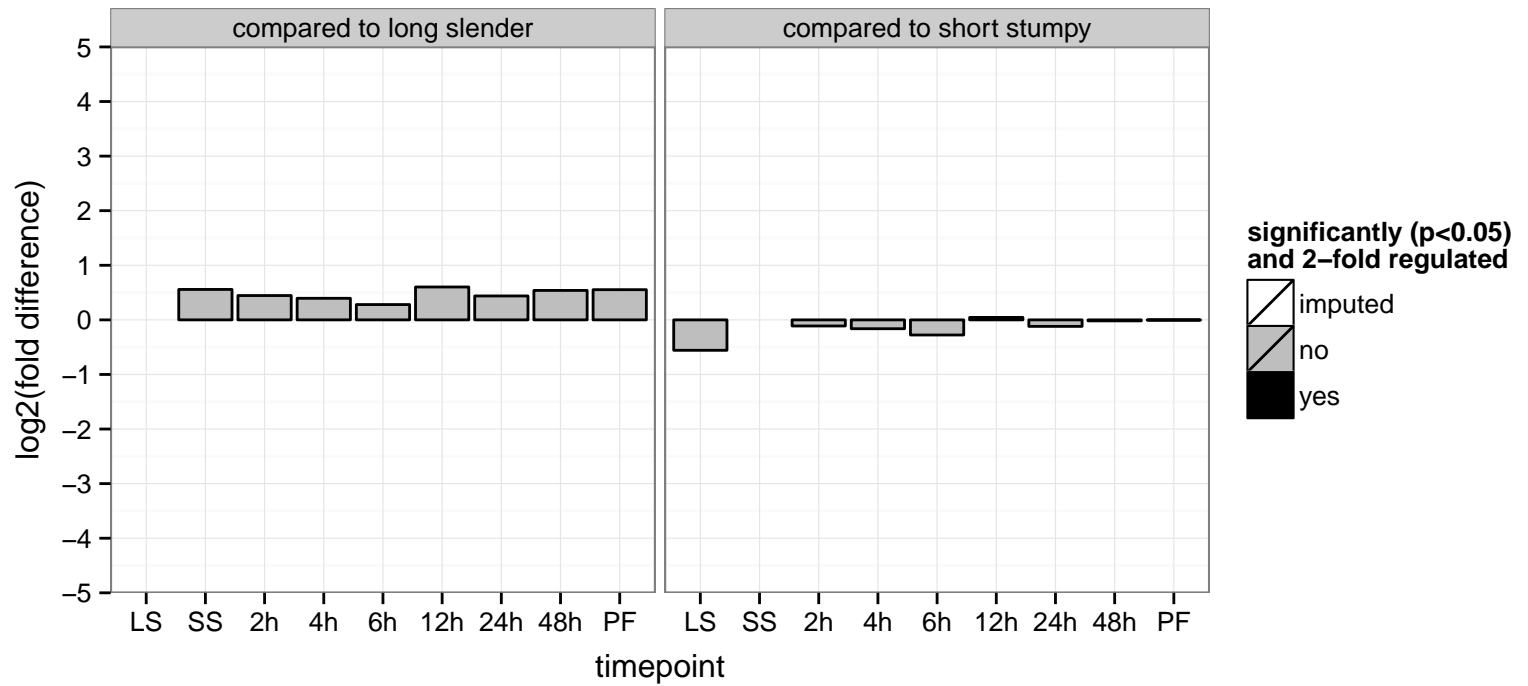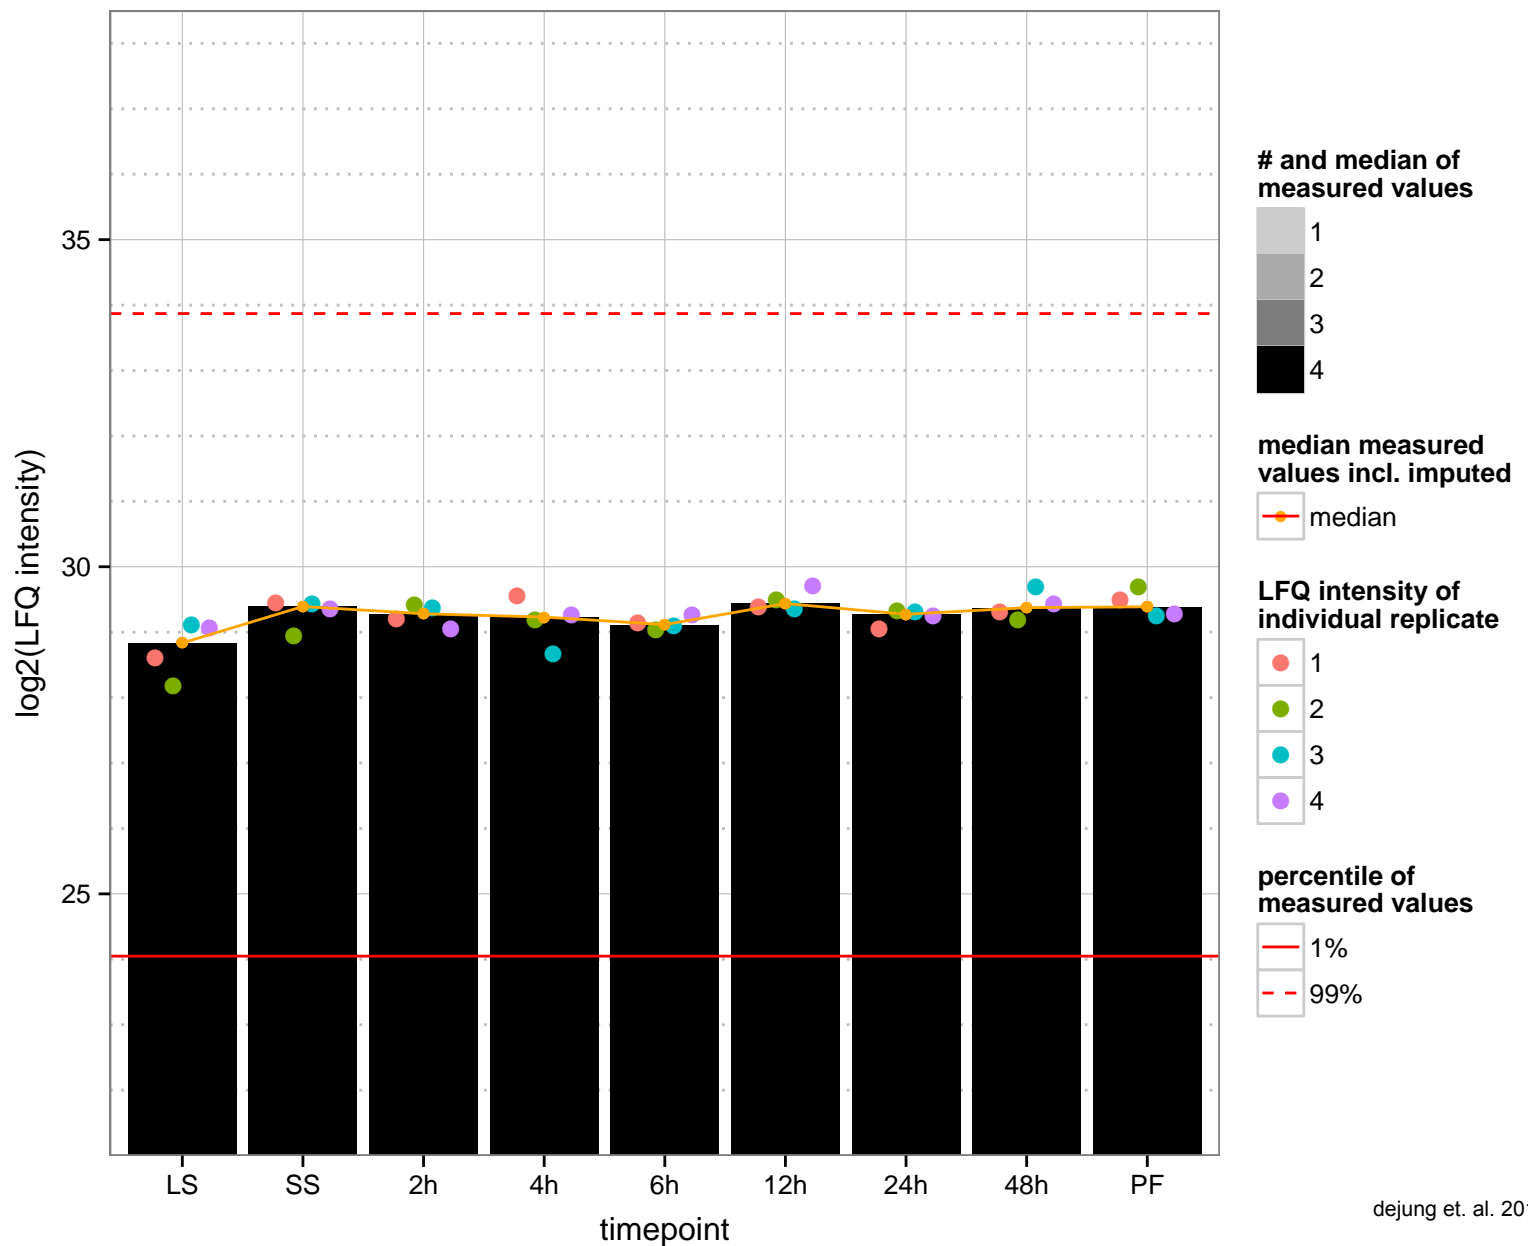

hypothetical protein, conserved  
 Tb927.10.4850  
 AGOF: null  
 AGOC: mitochondrion  
 AGOP: null  
 PGO: null  
 PGO: null  
 PGO: null

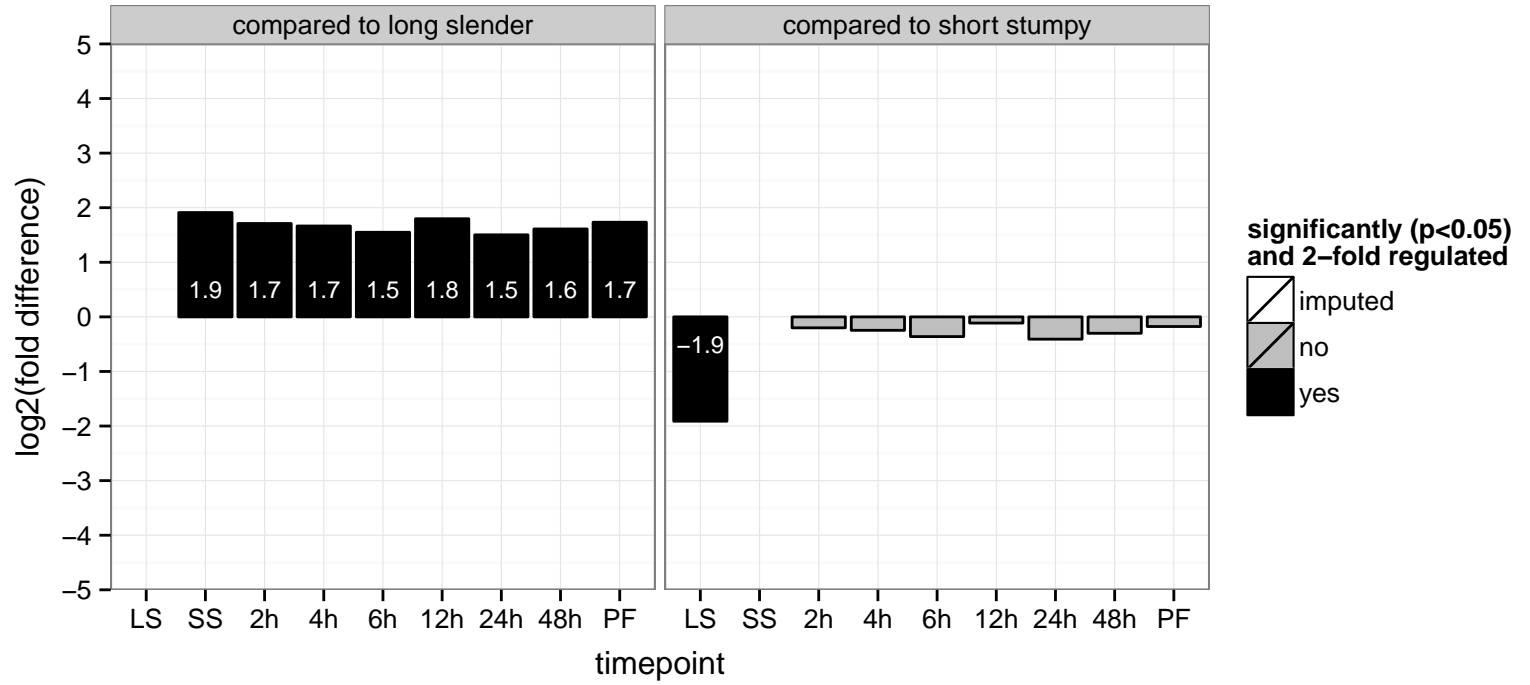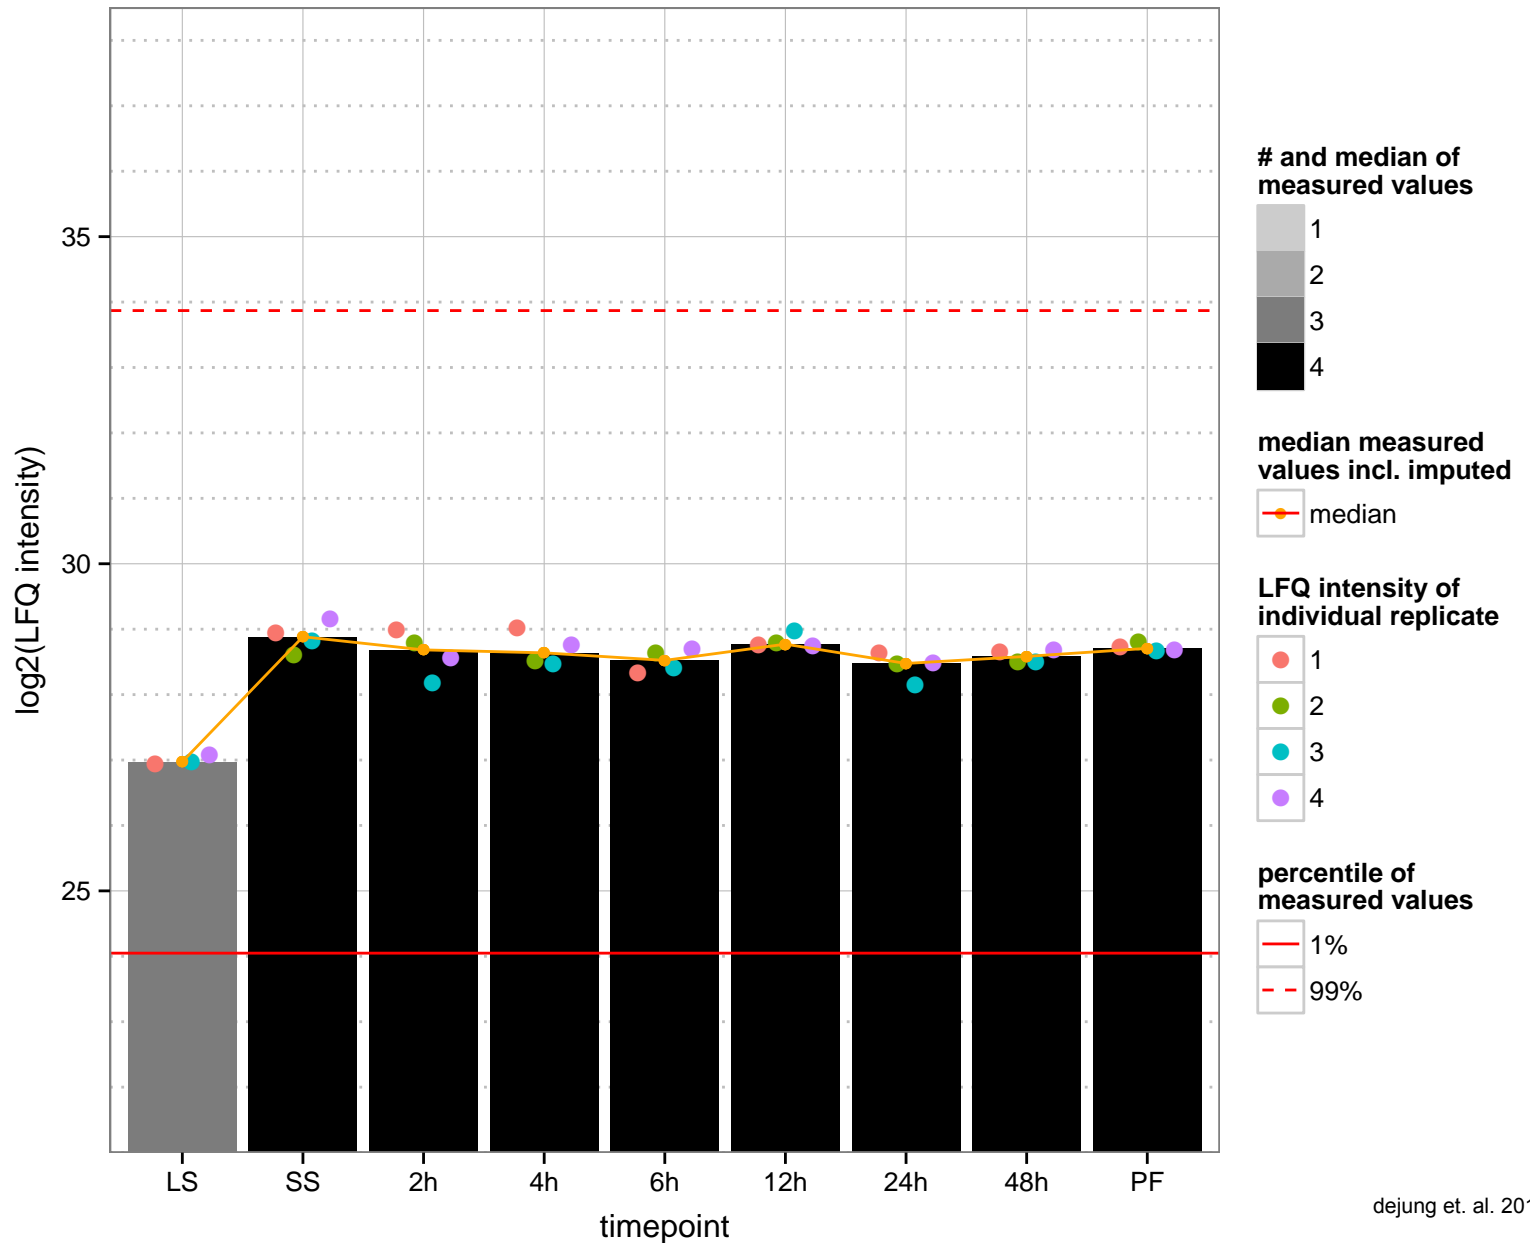



protein phosphatase 2C, putative  
 Tb927.10.4930  
 AGOF: phosphatase activity  
 AGOC: protein serine/threonine phosphatase complex  
 AGOP: dephosphorylation  
 PGO: catalytic activity  
 PGOC: null  
 PGOP: null

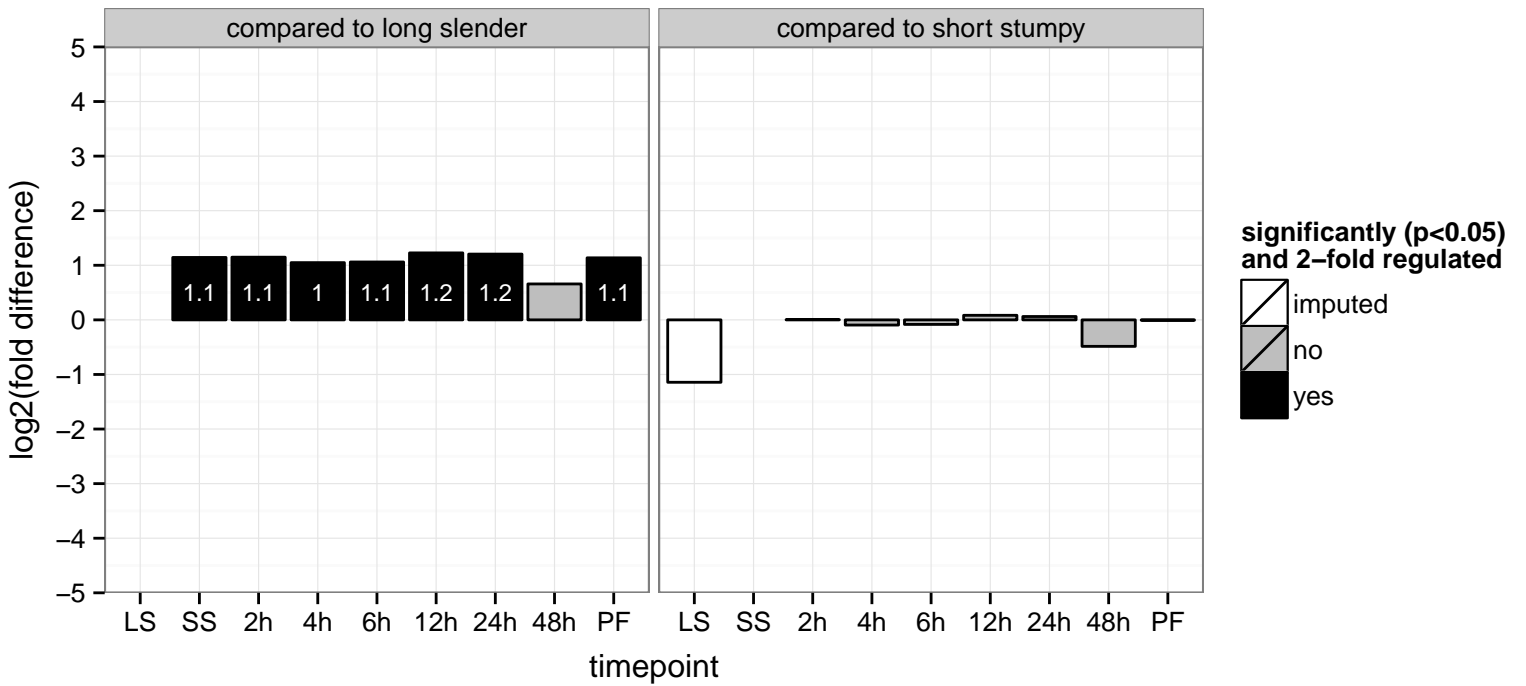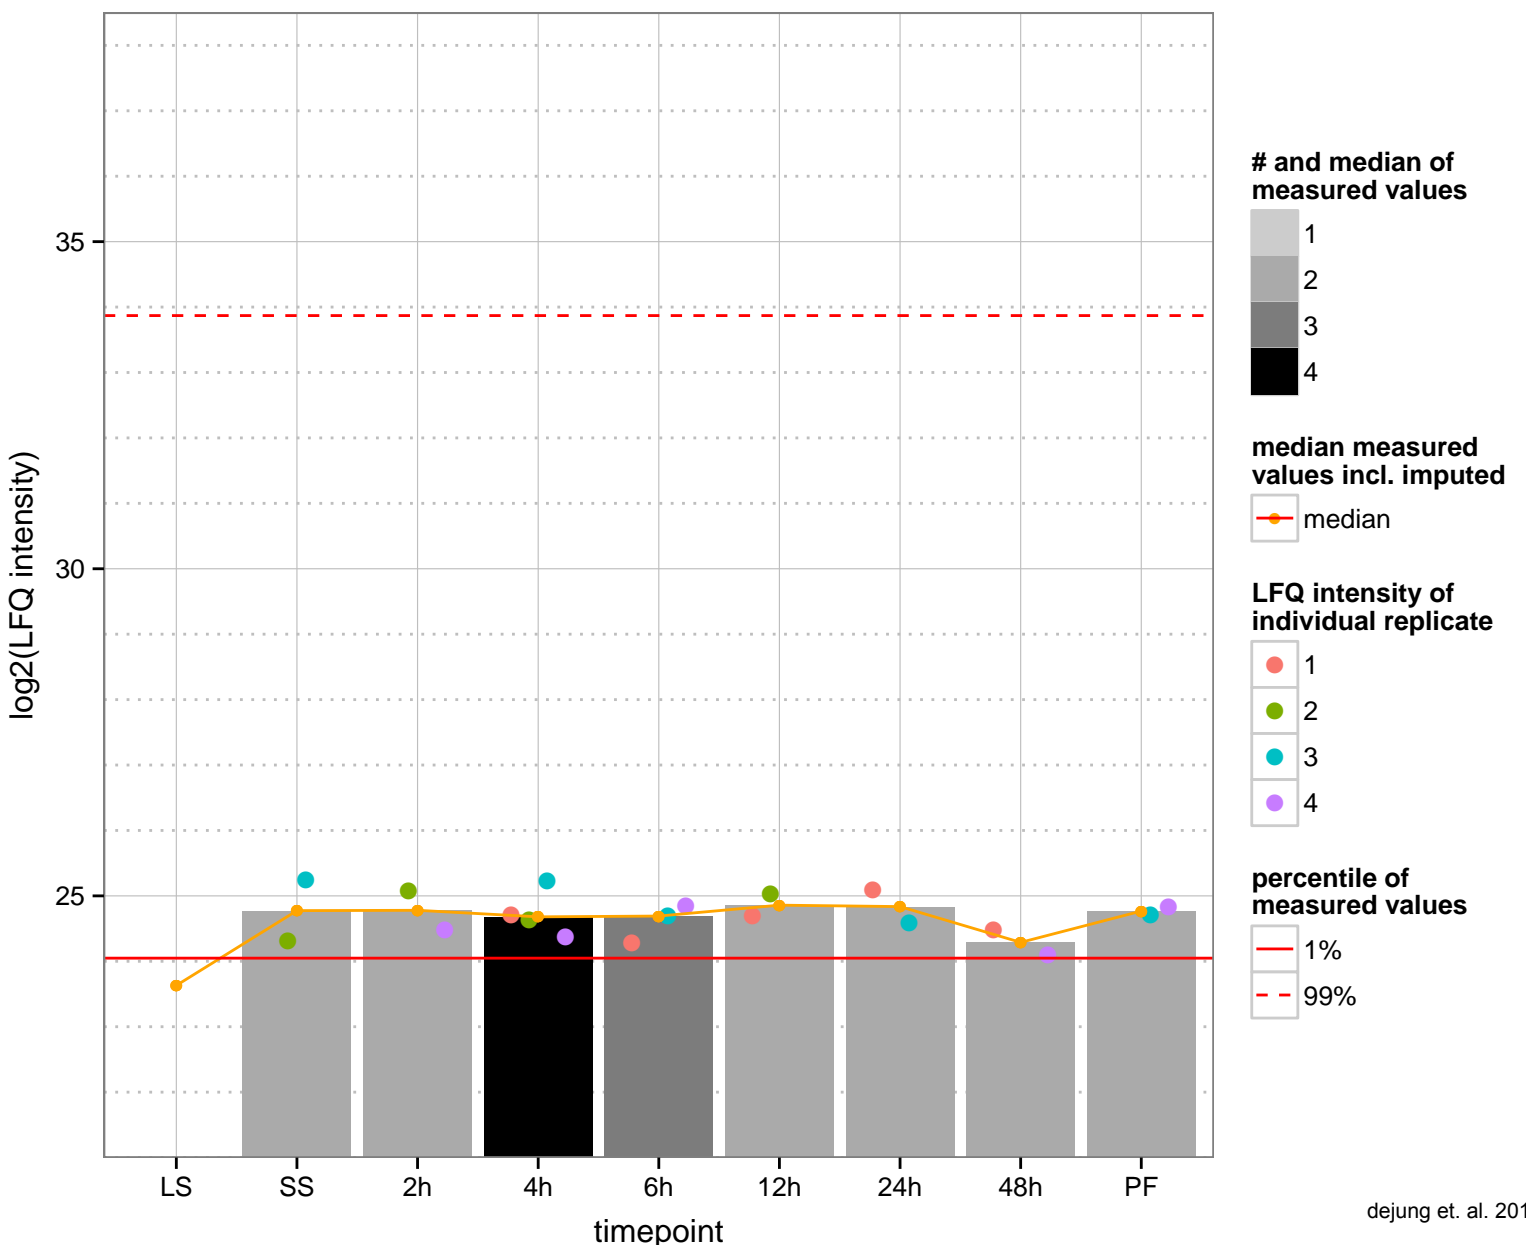

serine/threonine protein kinase, putative, Nuclear Dbf2-related kinase (PK50)

Tb927.10.4940;Tb11.v5.0596

AGOF: null, ATP binding, protein kinase activity, protein tyrosine kinase activity

AGOC: null, cytosol, kinetoplast

AGOP: null, cytokinesis, growth, protein phosphorylation, regulation of cell cycle

PGOF: ATP binding, protein kinase activity, transferase activity, transferring phosphorus-containing groups

PGOC: null

PGOP: protein phosphorylation

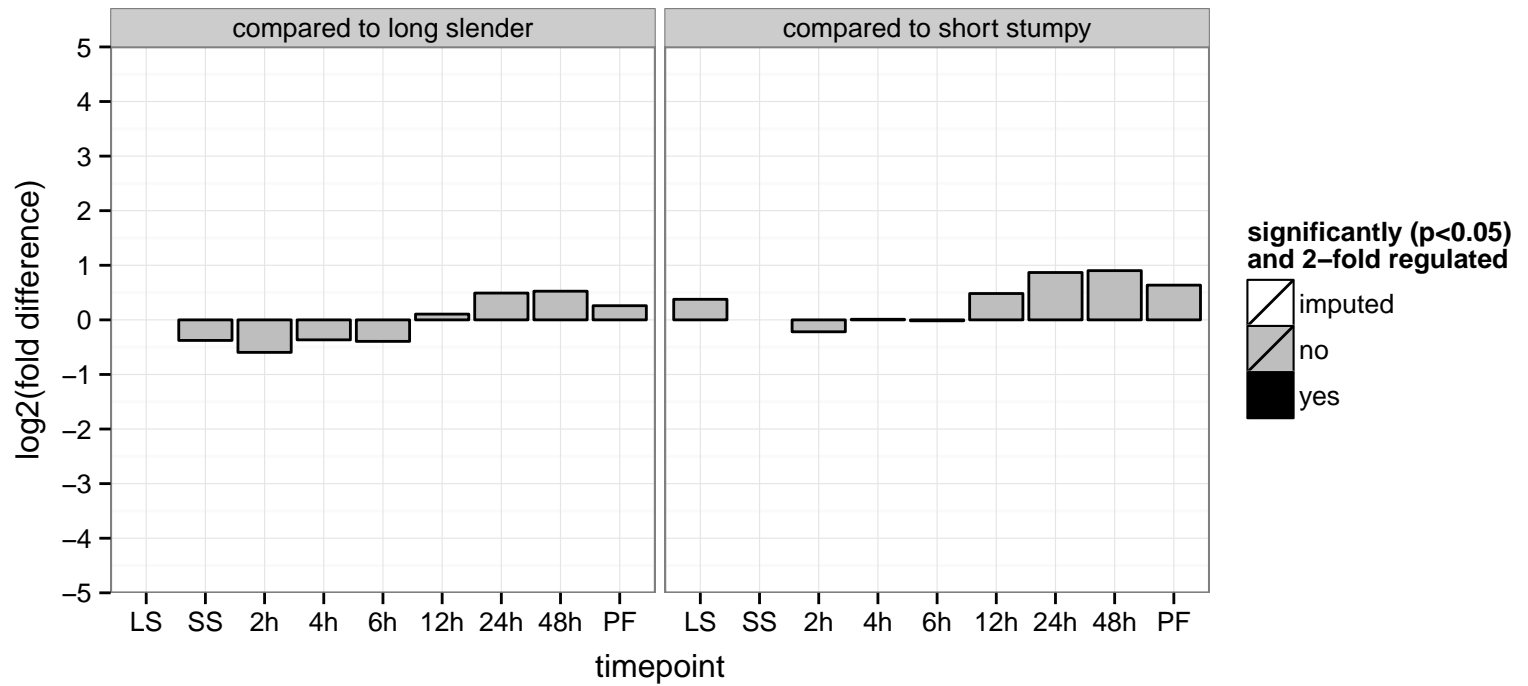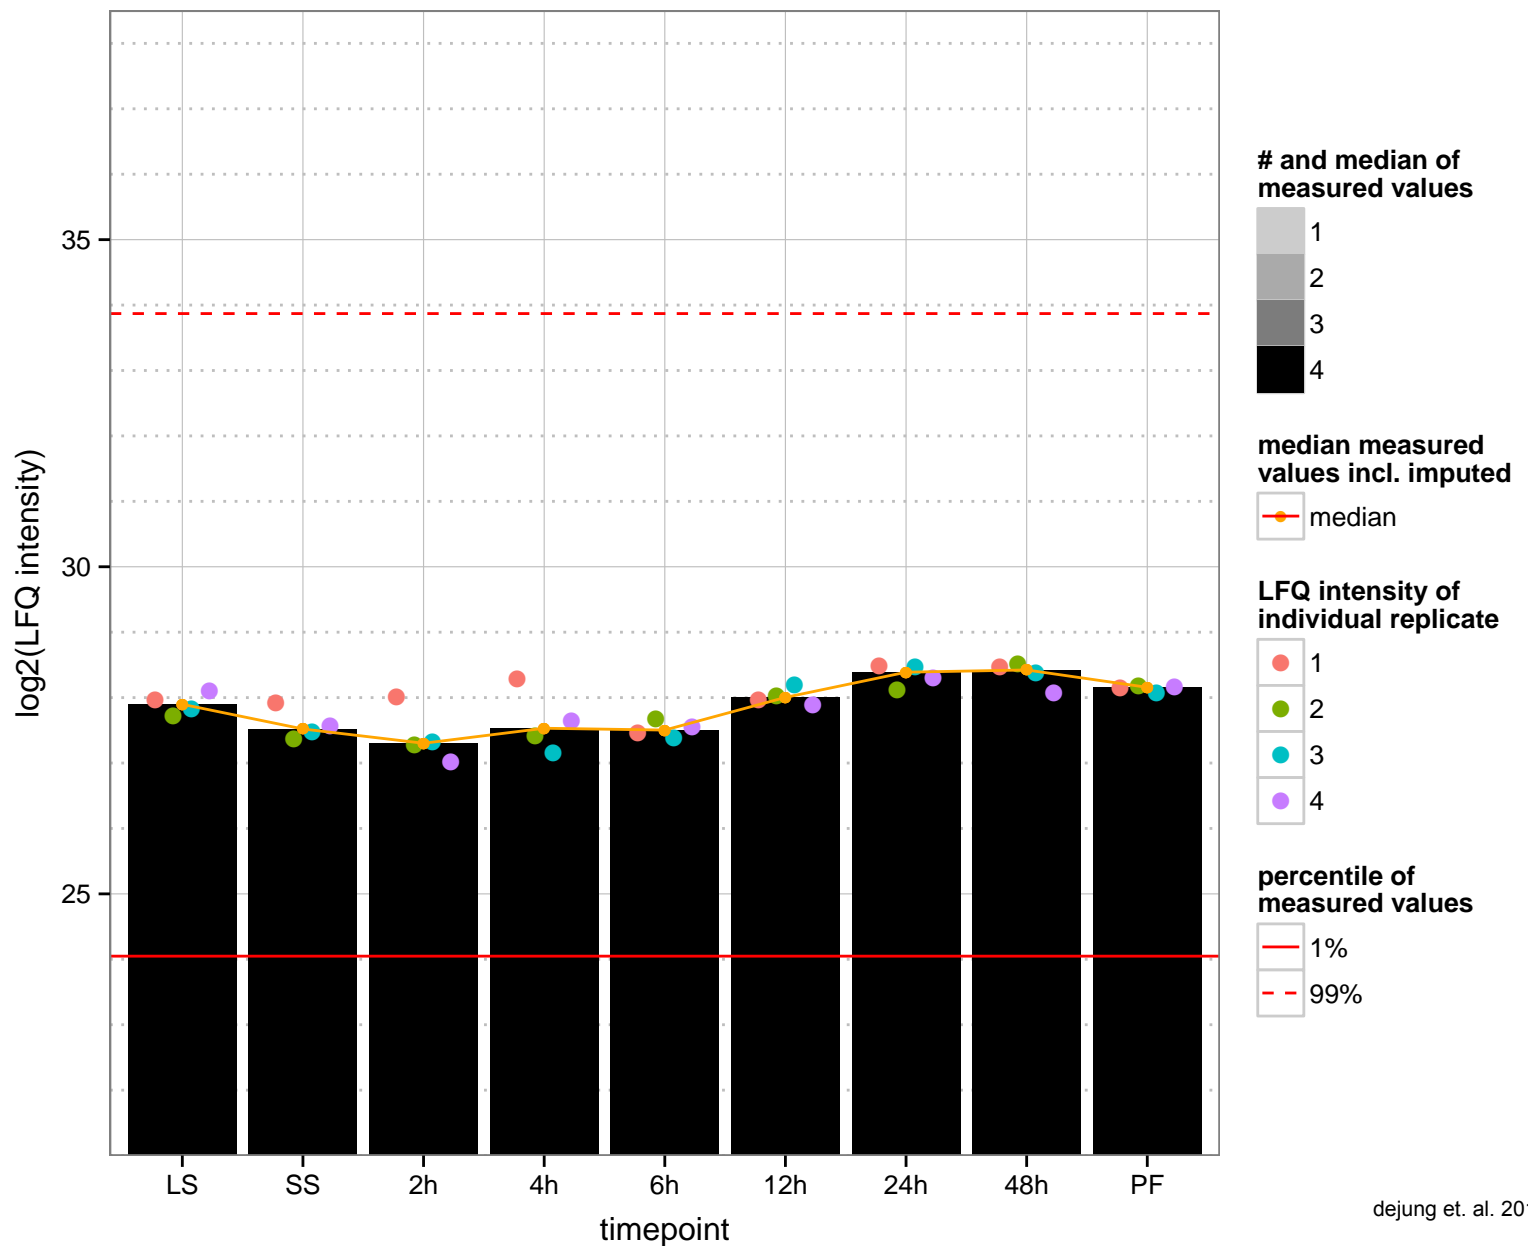

ubiquitin-like protein DSK2, putative (DSK2)

Tb927.10.4980

AGOF: protein binding, bridging

AGOC: null

AGOP: DNA replication, chromosome organization, chromosome segregation

PGOF: protein binding

PGOC: null

PGOP: null

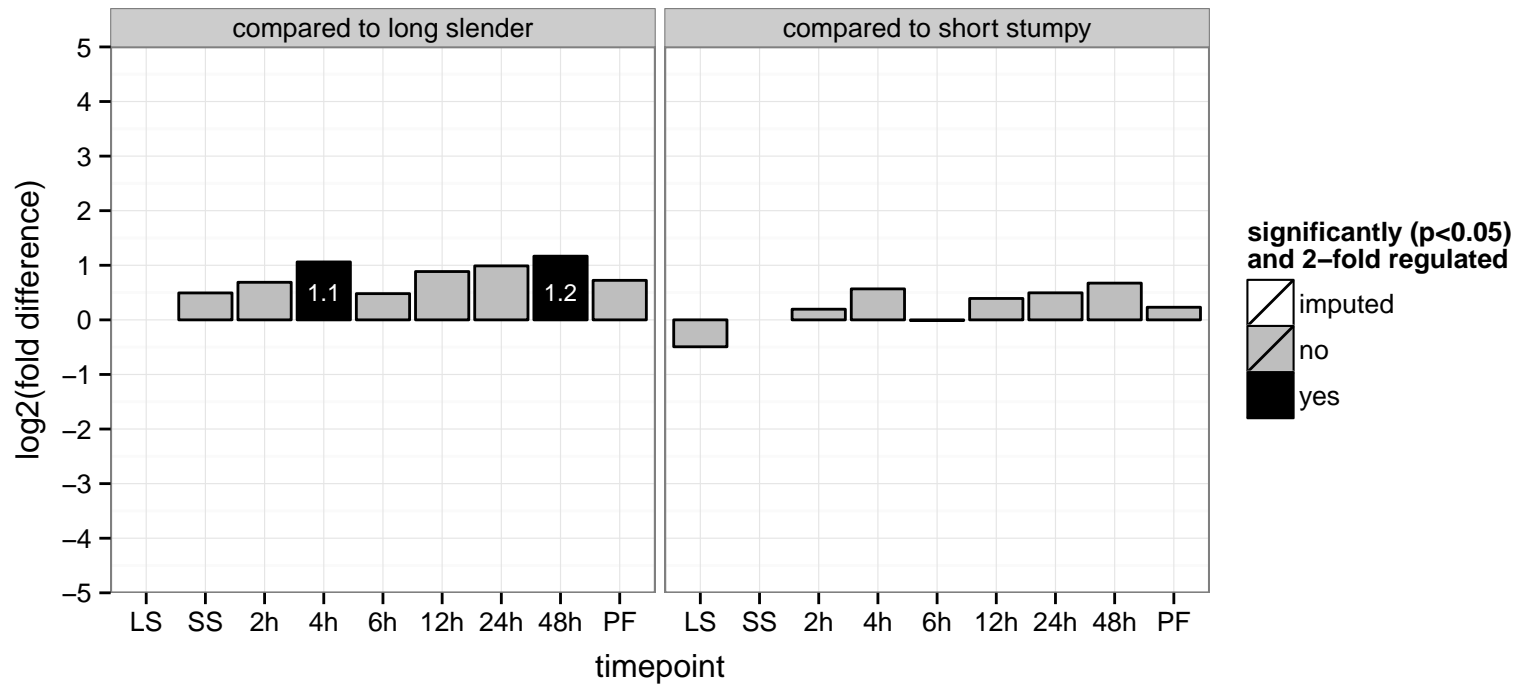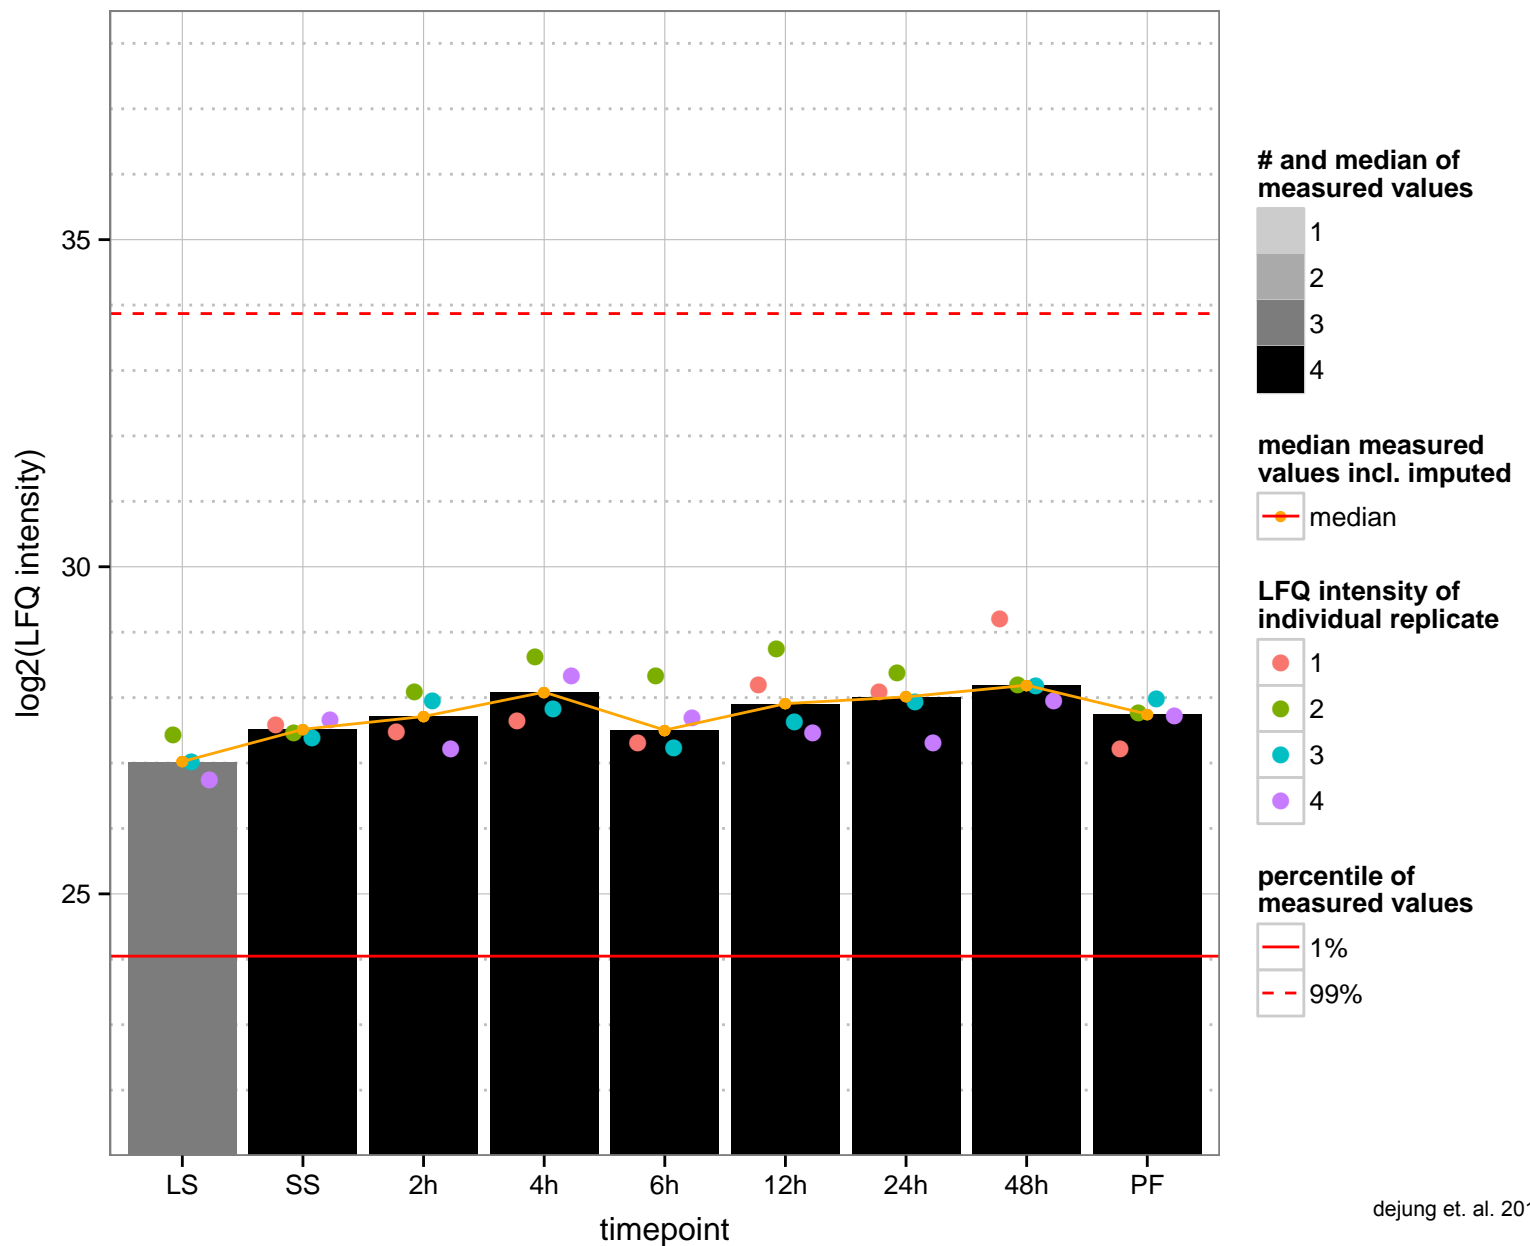

ADP-ribosylation factor-like protein, putative, ADP-ribosylation factor

Tb927.10.5230

AGOF: null, GTP binding

AGOC: null, intracellular

AGOP: null, intracellular protein transport, protein transport, small GTPase mediated signal transduction

PGOF: GTP binding, cAMP-dependent protein kinase regulator activity

PGOC: intracellular

PGOP: small GTPase mediated signal transduction, intracellular protein transport, signal transduction, small GTPase mediated

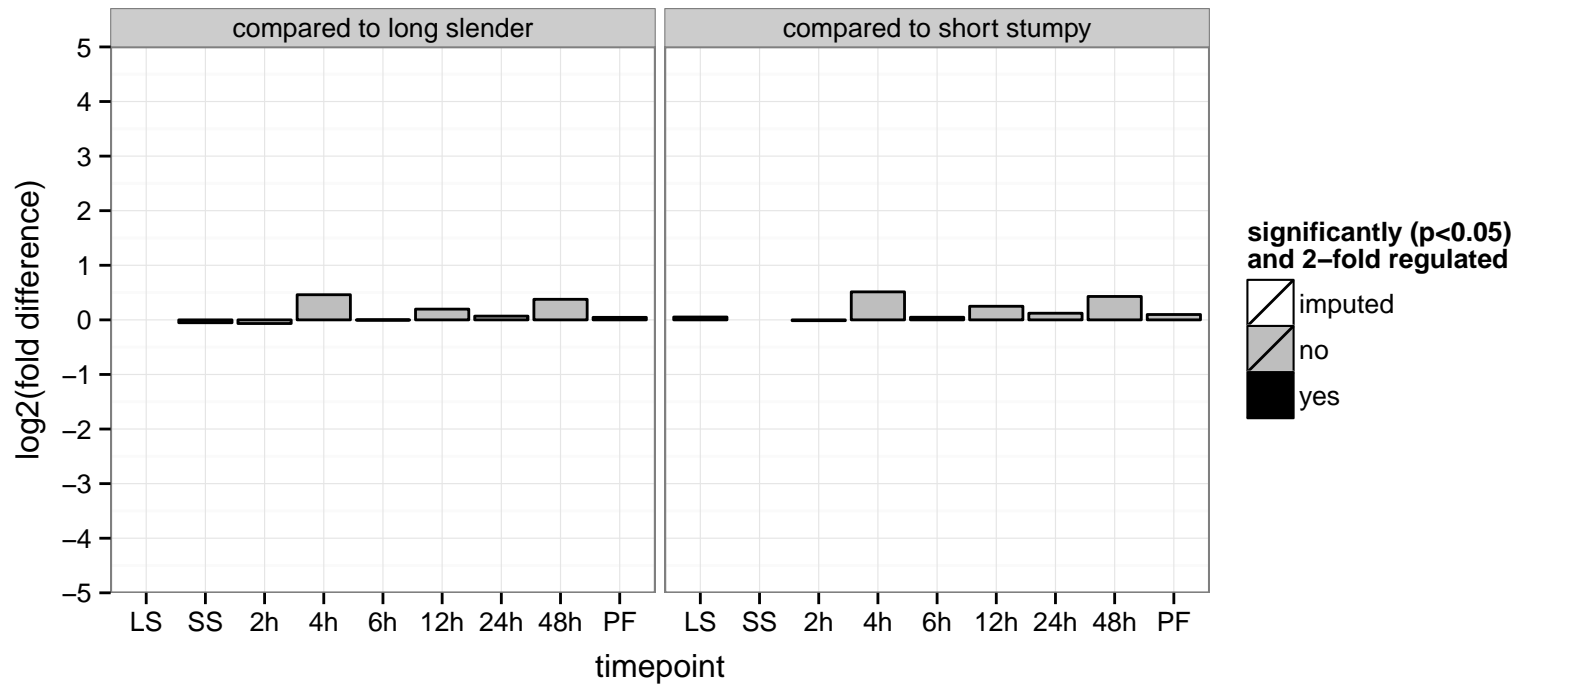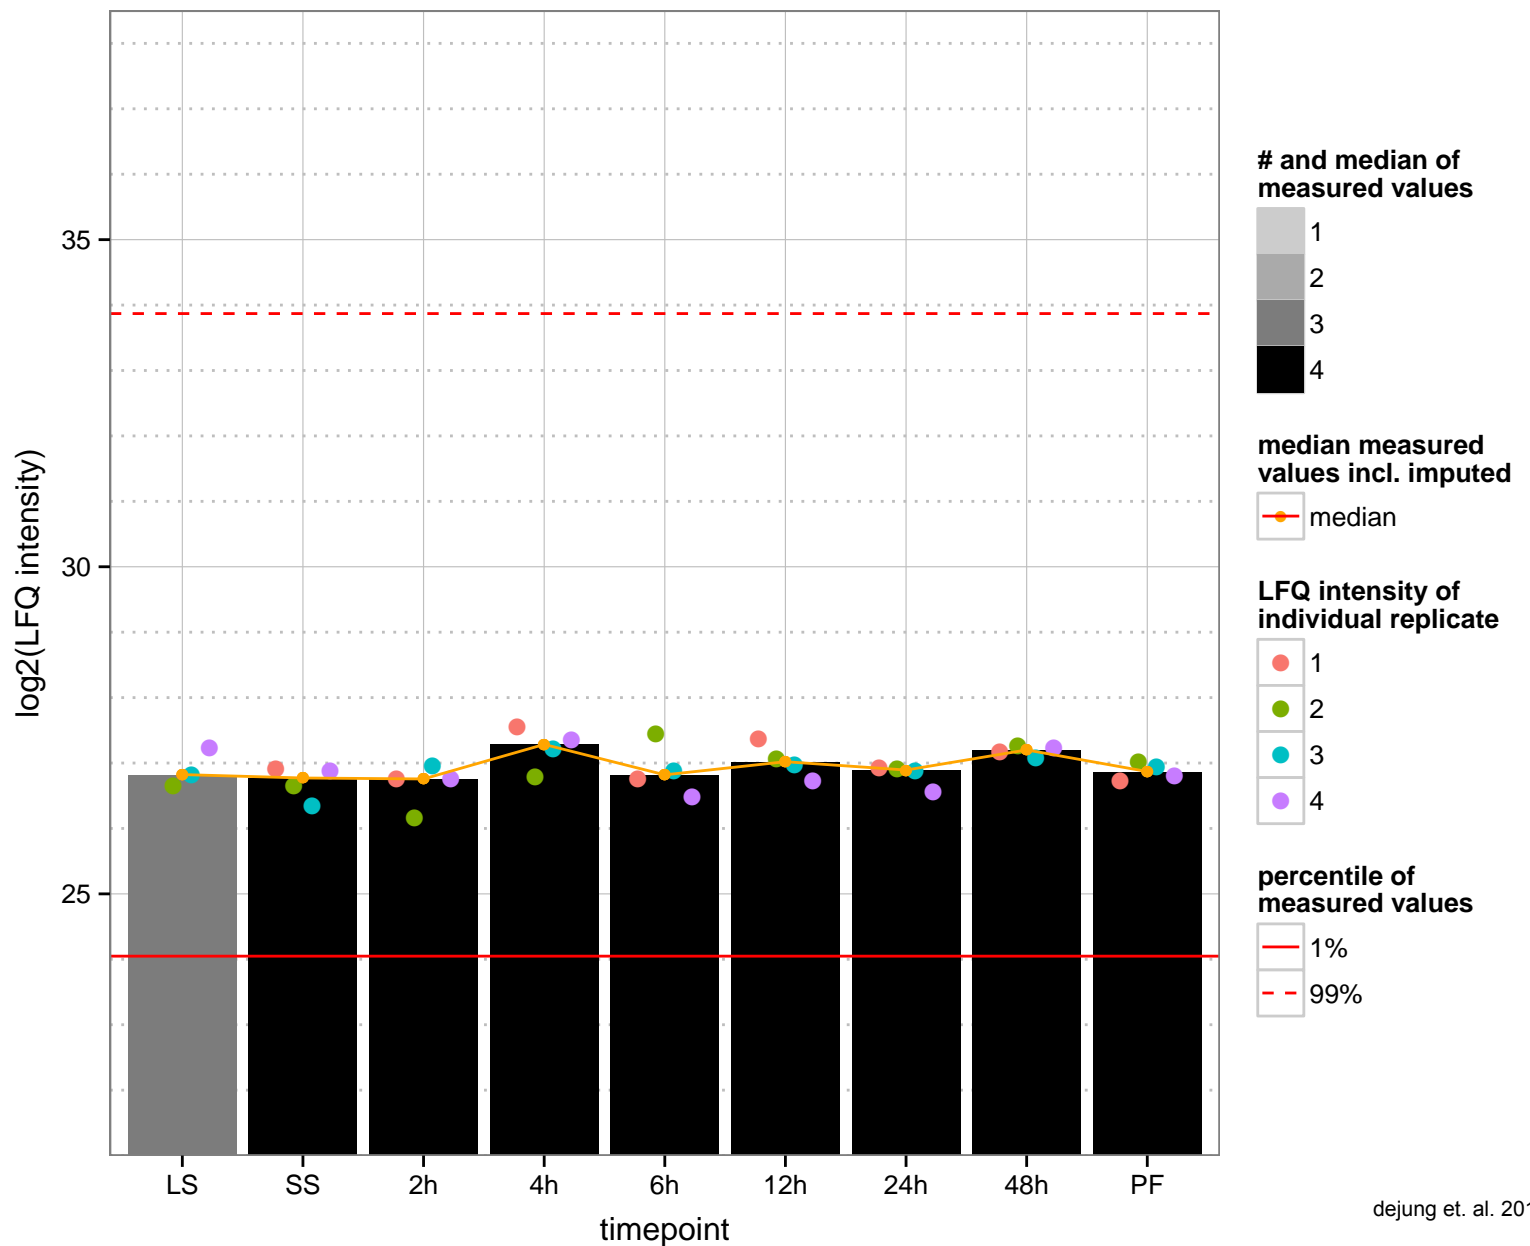

dynein heavy chain, putative  
 Tb927.10.5350;Tb11.v5.0242  
 AGOF: null, ATP binding, ATPase activity, microtubule motor activity  
 AGOC: null, dynein complex  
 AGOP: null, microtubule-based movement  
 PGO: microtubule motor activity, null  
 PGOC: dynein complex, null  
 PGOP: microtubule-based movement, null

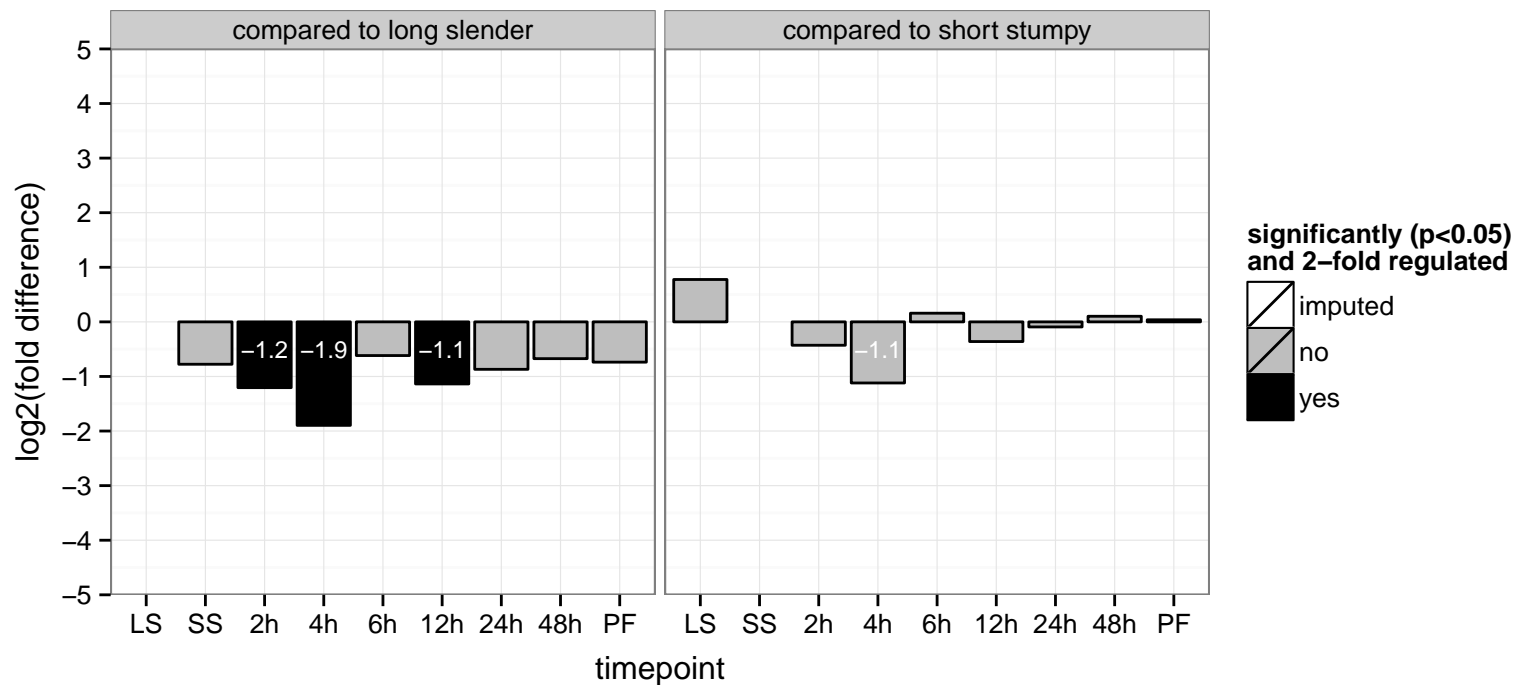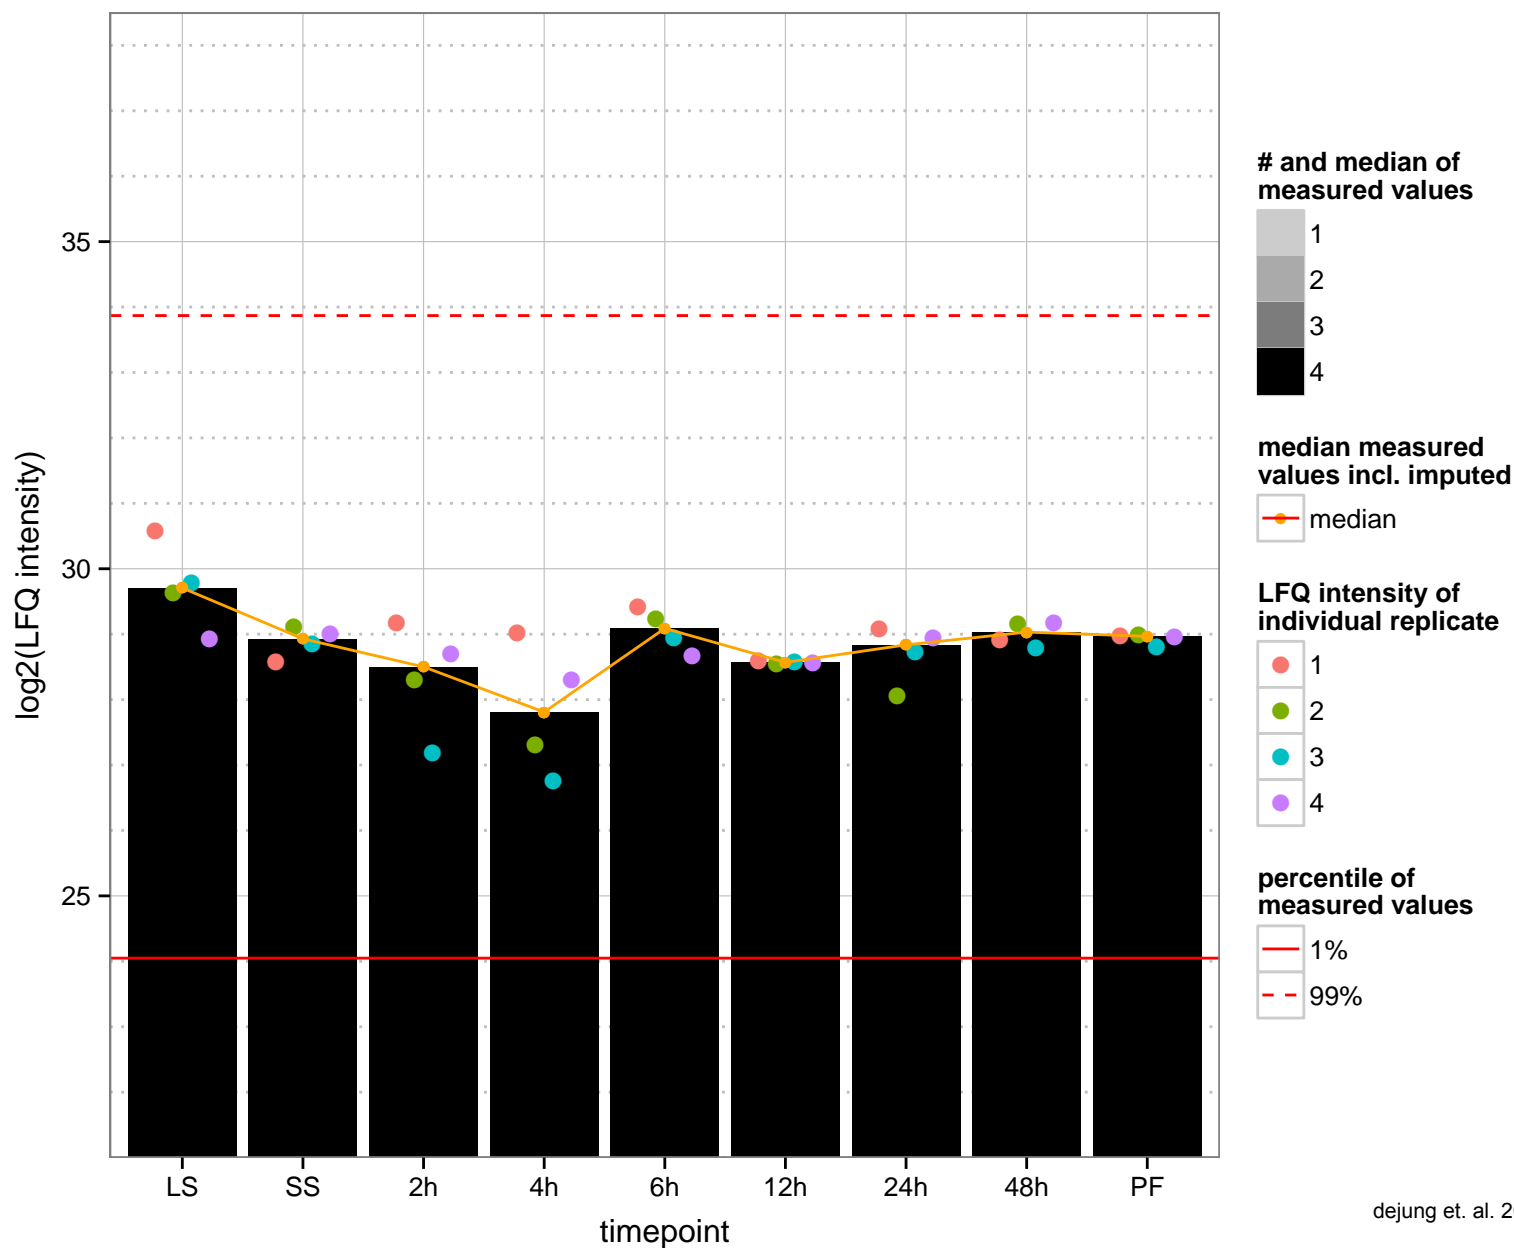

hypothetical protein, conserved, intraflagellar transport protein IFT122, putative  
 Tb927.10.5380;Tb11.v5.0337  
 AGOF: null  
 AGOC: null  
 AGOP: null  
 PGO: protein binding  
 PGOC: null  
 PGOP: null

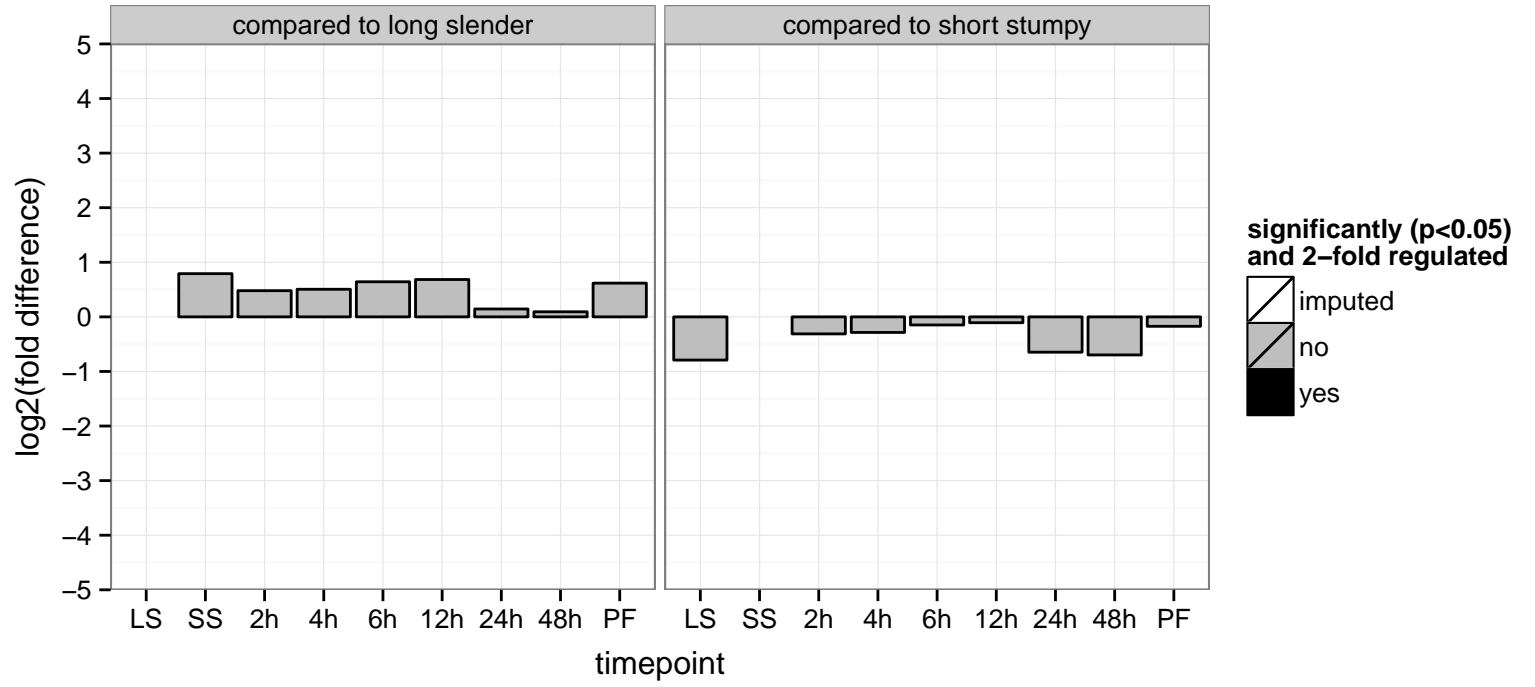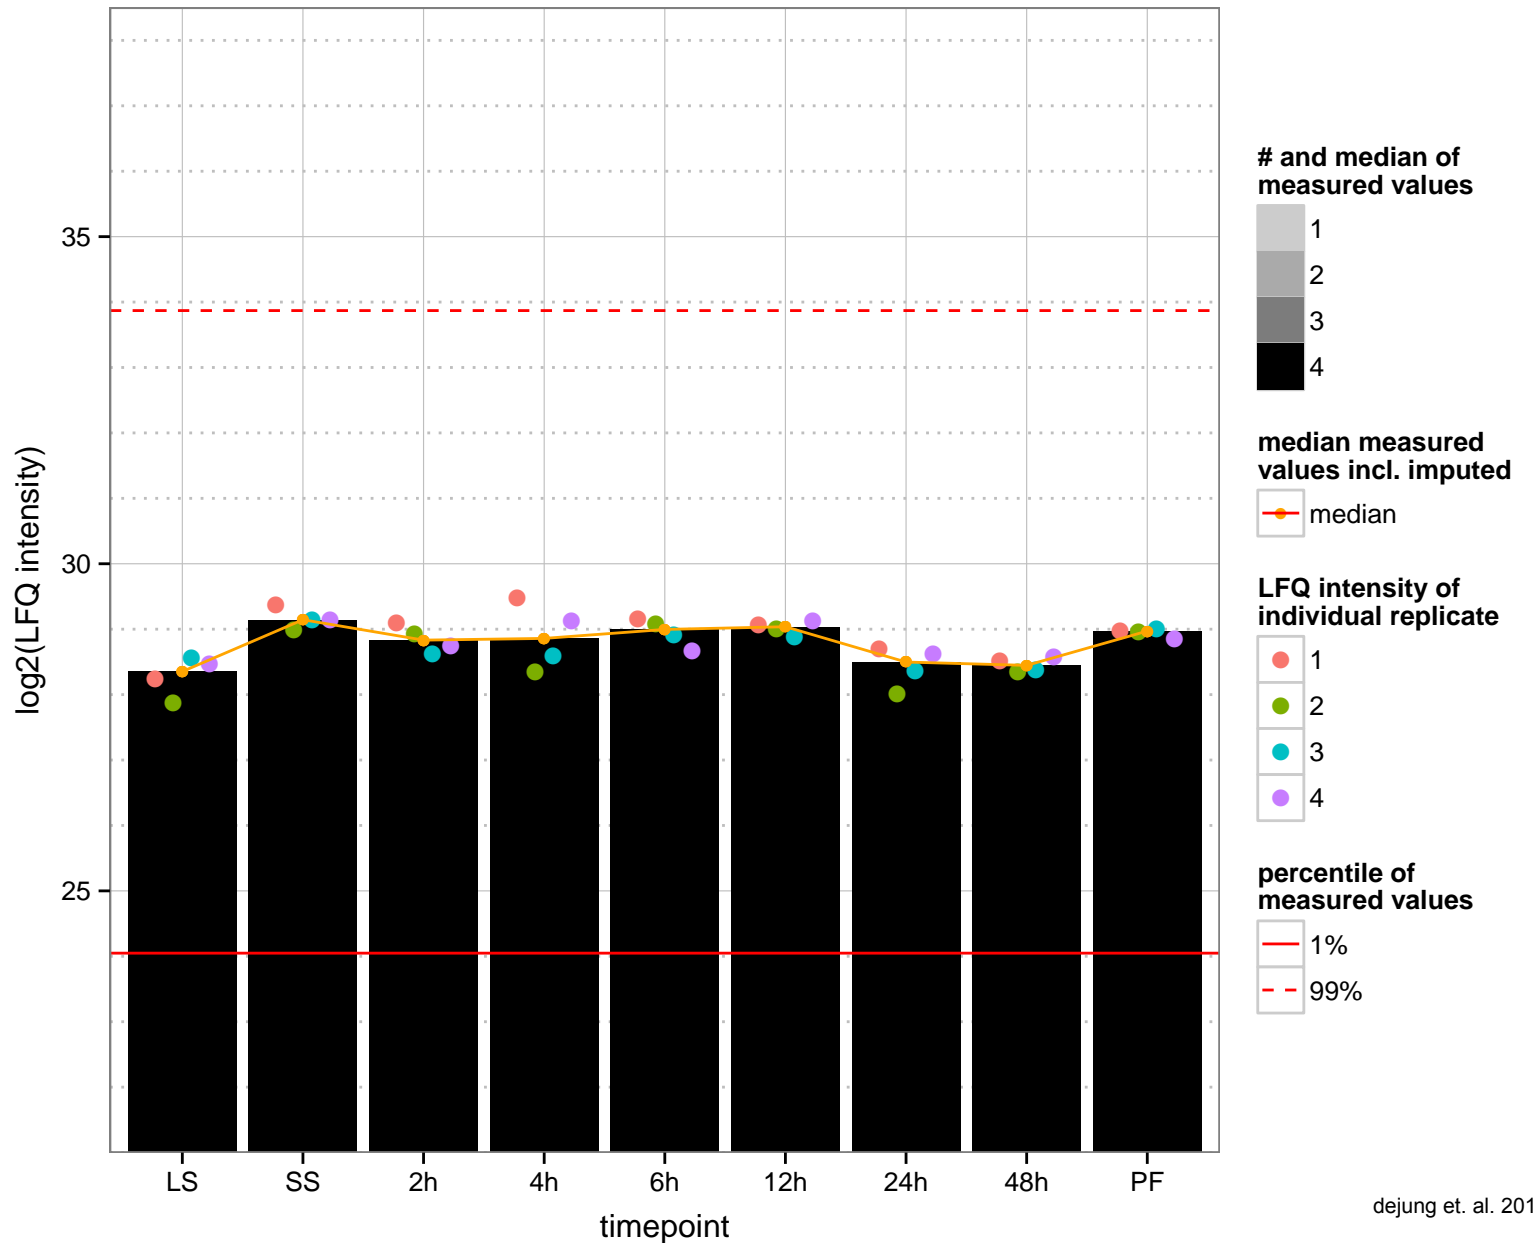

hypothetical protein, conserved  
 Tb927.10.5430  
 AGOF: null  
 AGOC: null  
 AGOP: null  
 PGOF: null  
 PGO: null  
 PGOP: null

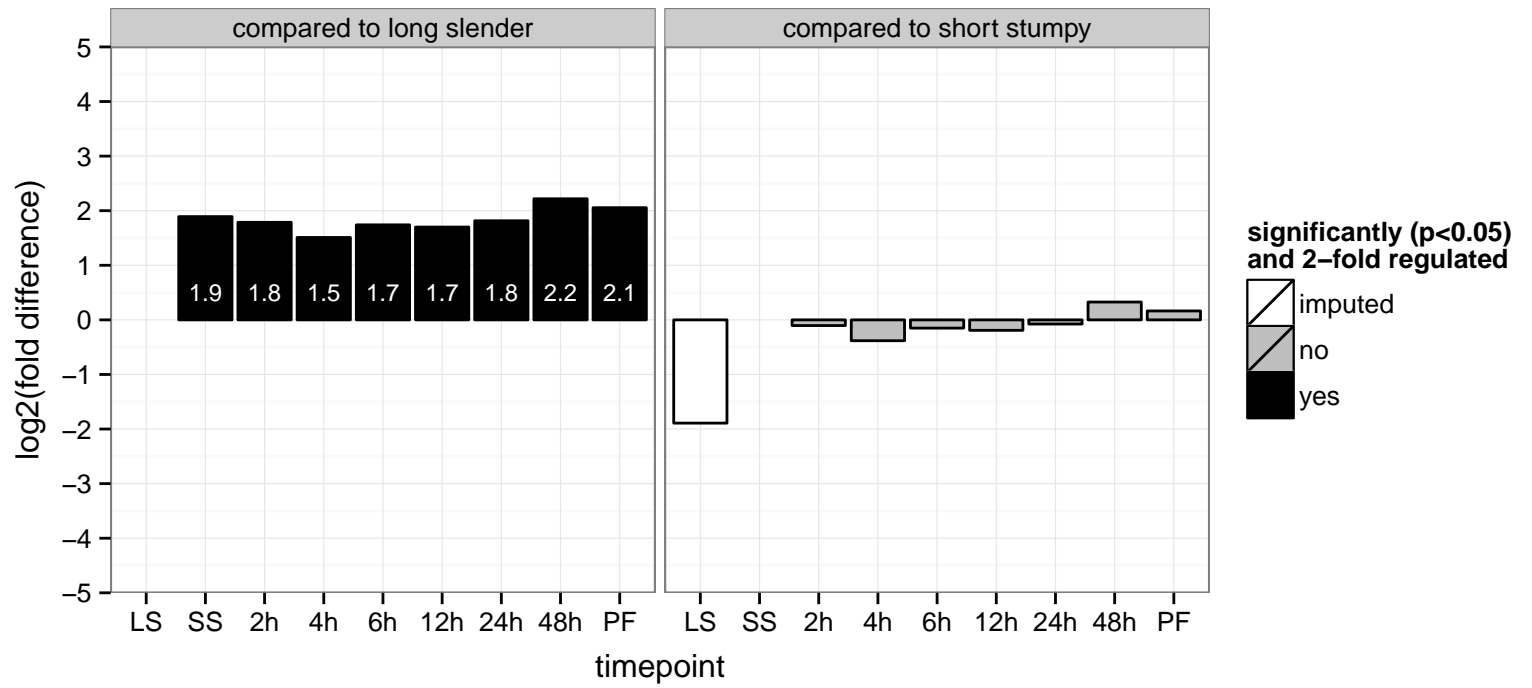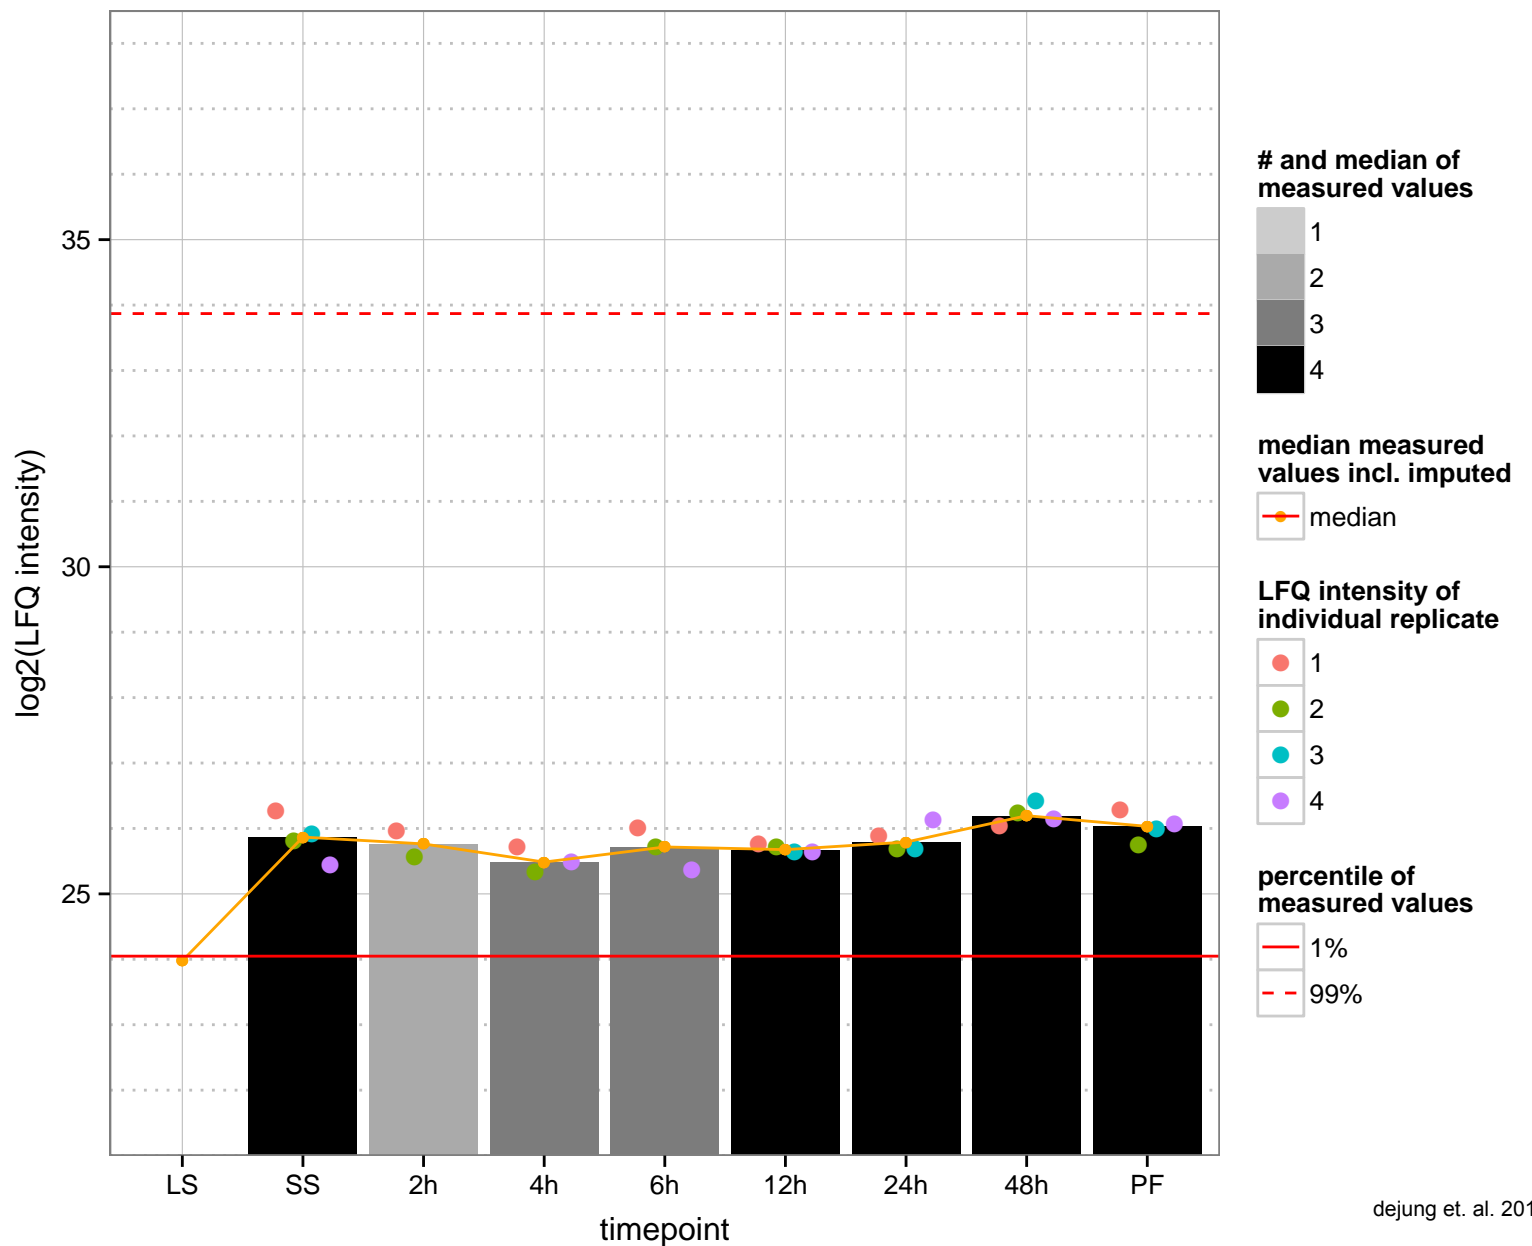

nucleoplasmin-like protein (NLP) (nlp)

Tb927.10.5450

AGOF: DNA binding

AGOC: nucleus

AGOP: chromatin remodeling, negative regulation of transcription, DNA-dependent, positive regulation of transcription, regula

PGOF: binding

PGOC: null

PGOP: null

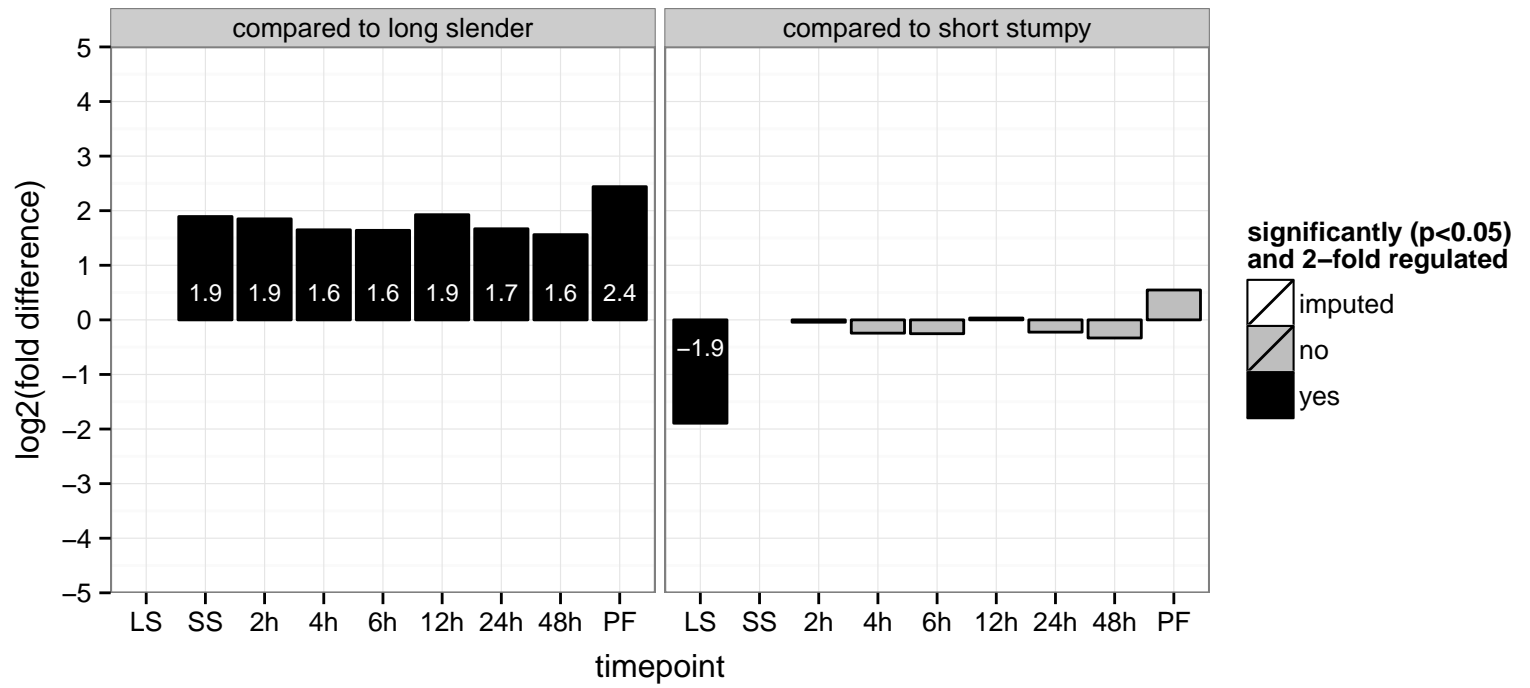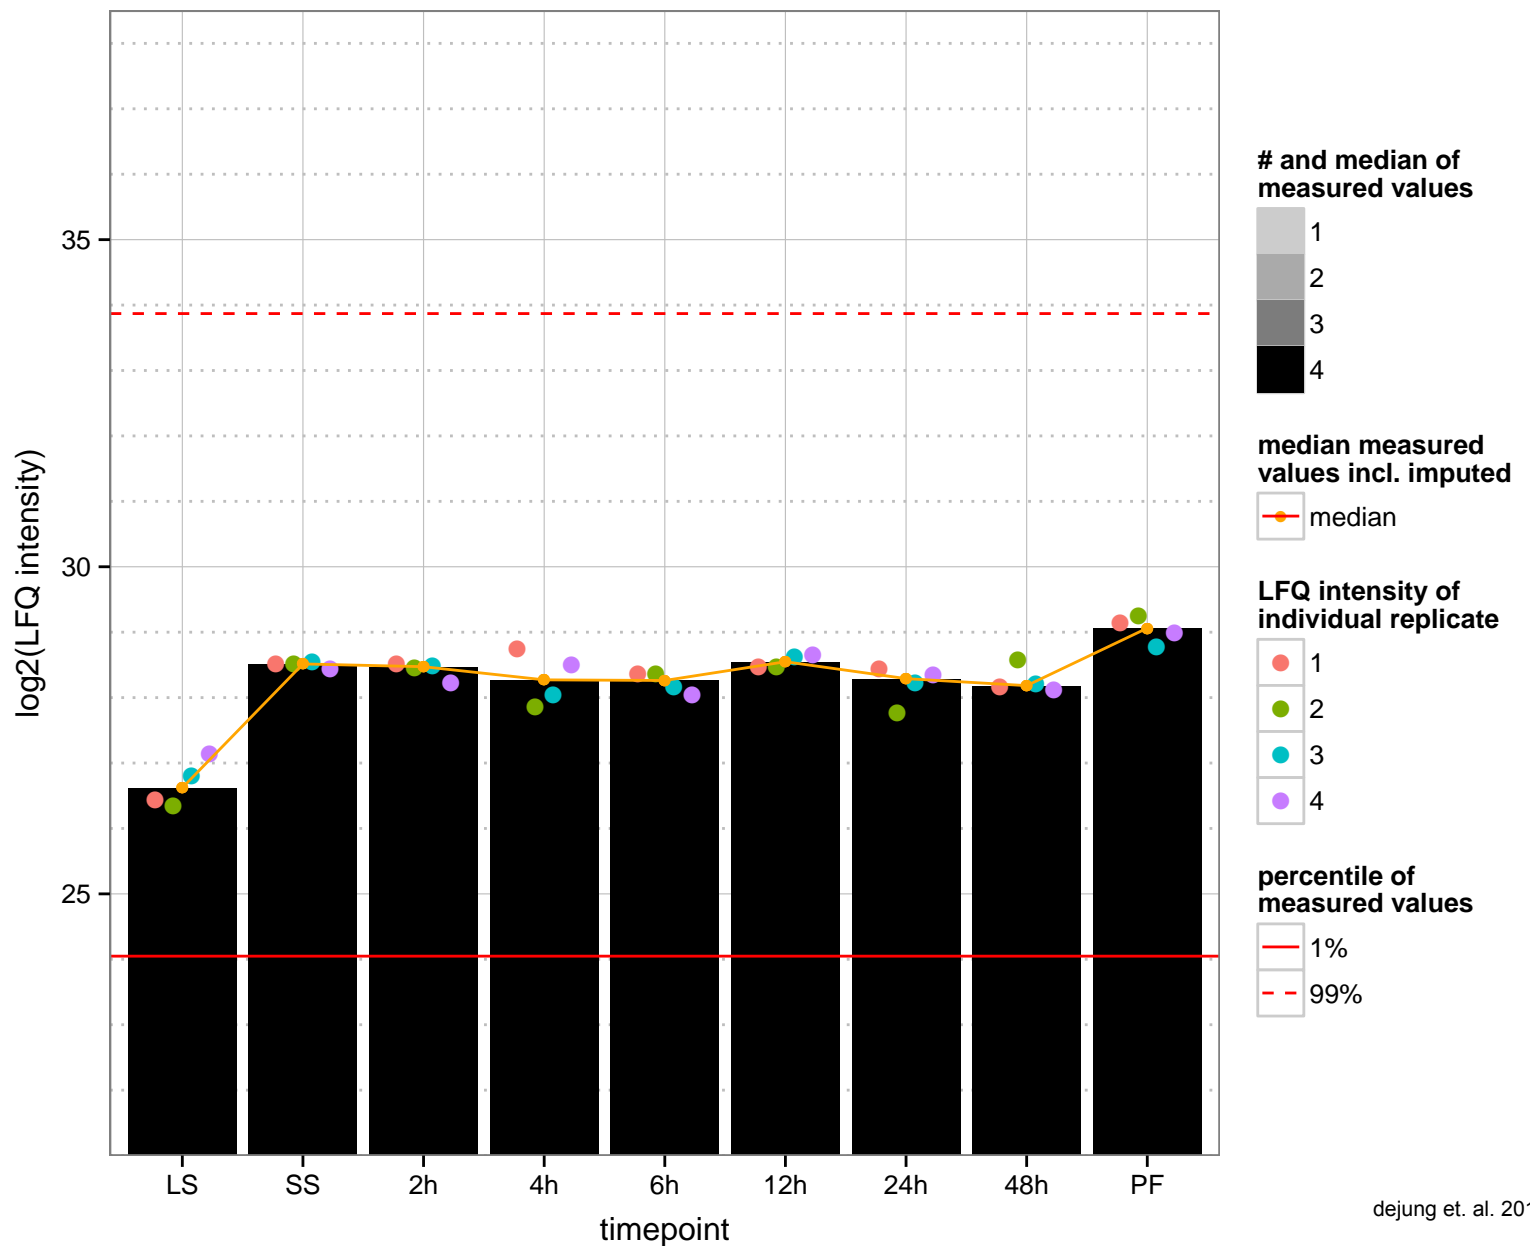



hypothetical protein, conserved  
 Tb927.10.5520  
 AGOF: null  
 AGOC: null  
 AGOP: null  
 PGO: null  
 PGOC: null  
 PGOP: null

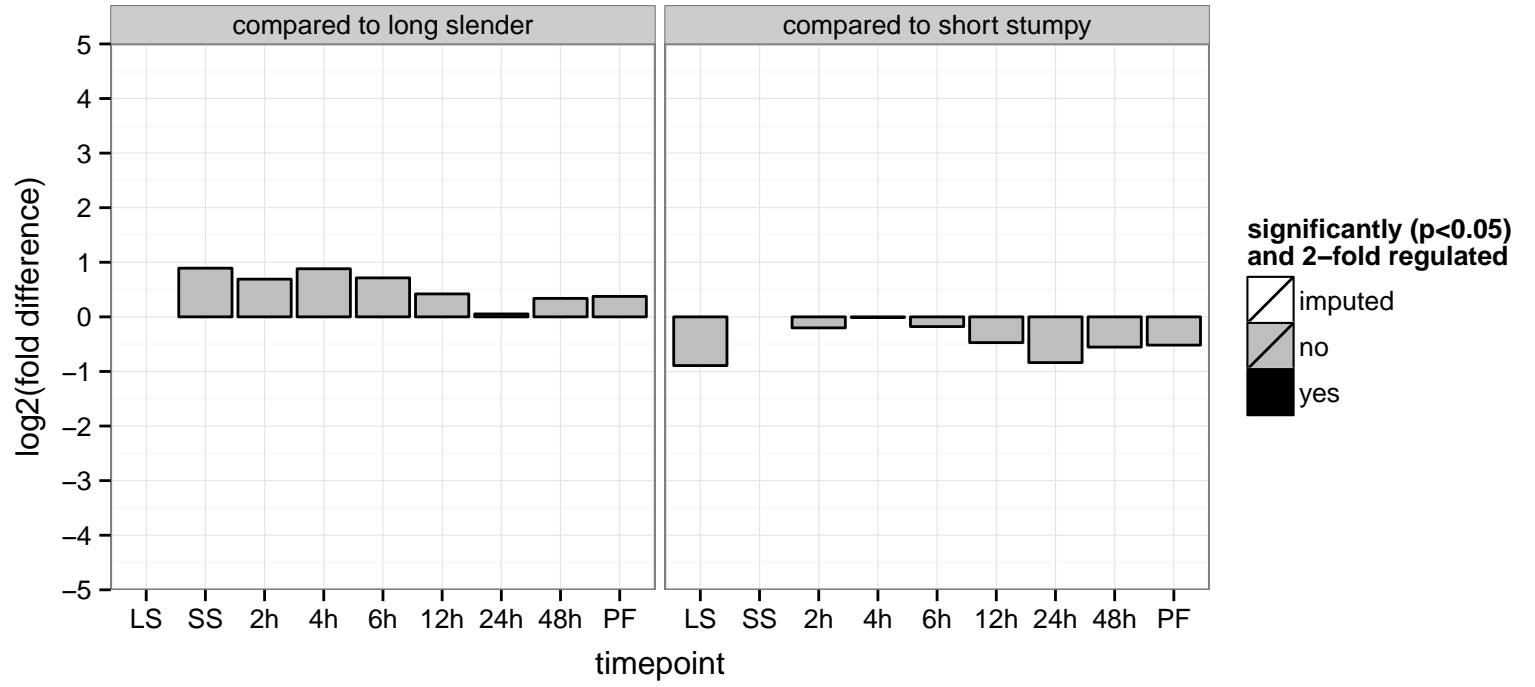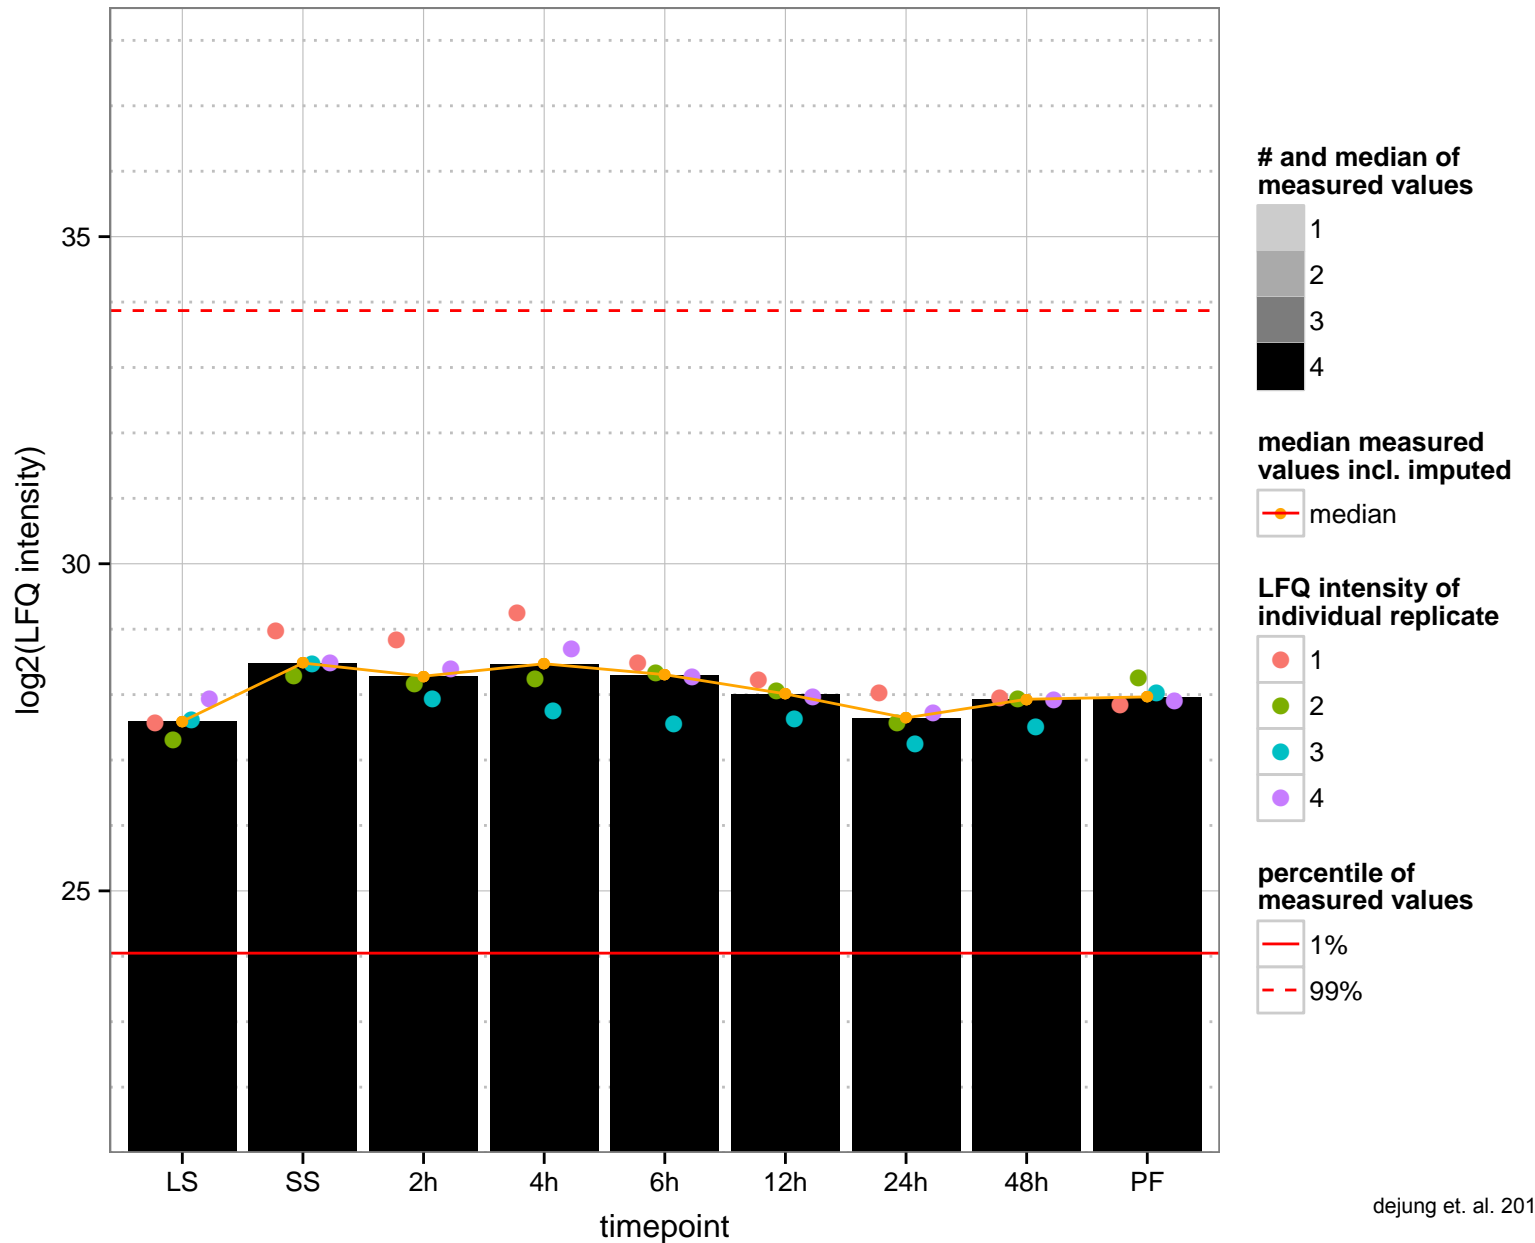

hypothetical protein, conserved  
 Tb927.10.5540  
 AGOF: null  
 AGOC: mitochondrion  
 AGOP: null  
 PGO: null  
 PGO: null  
 PGO: null

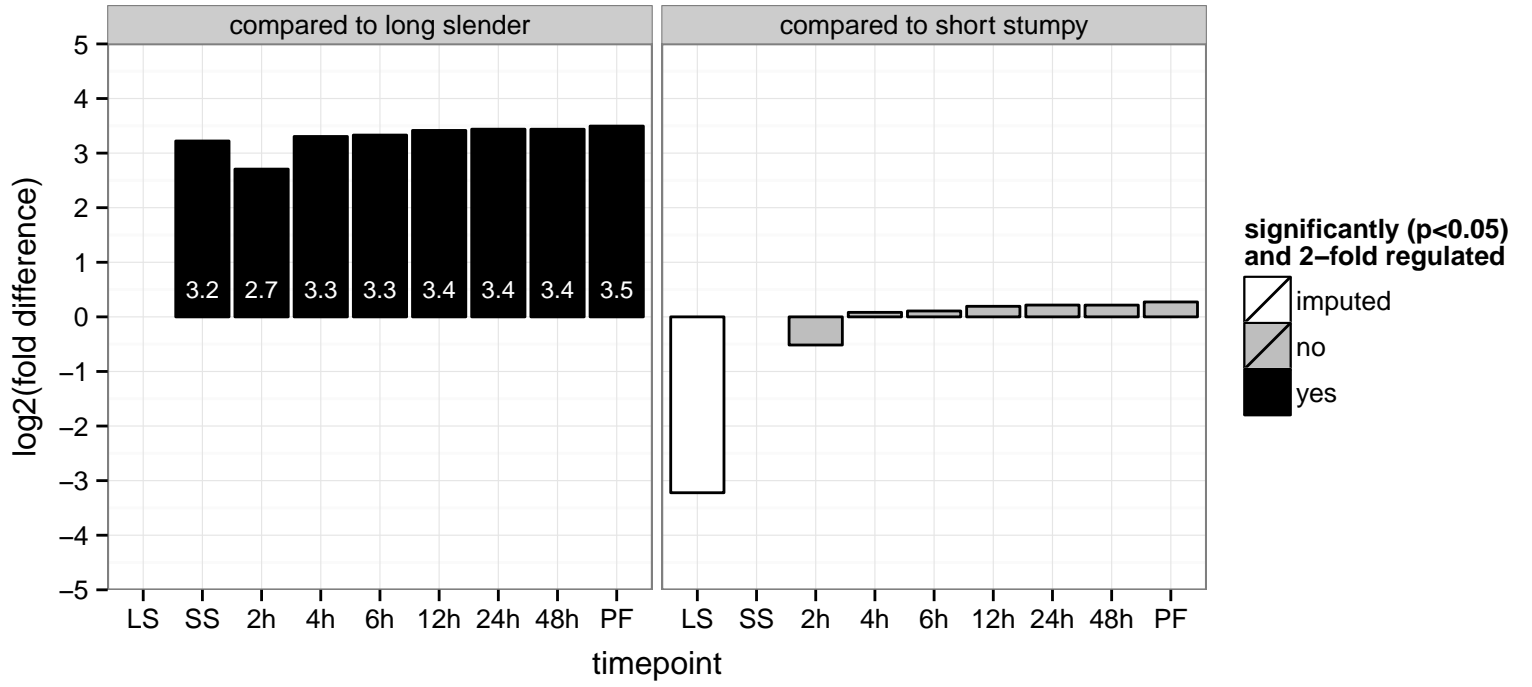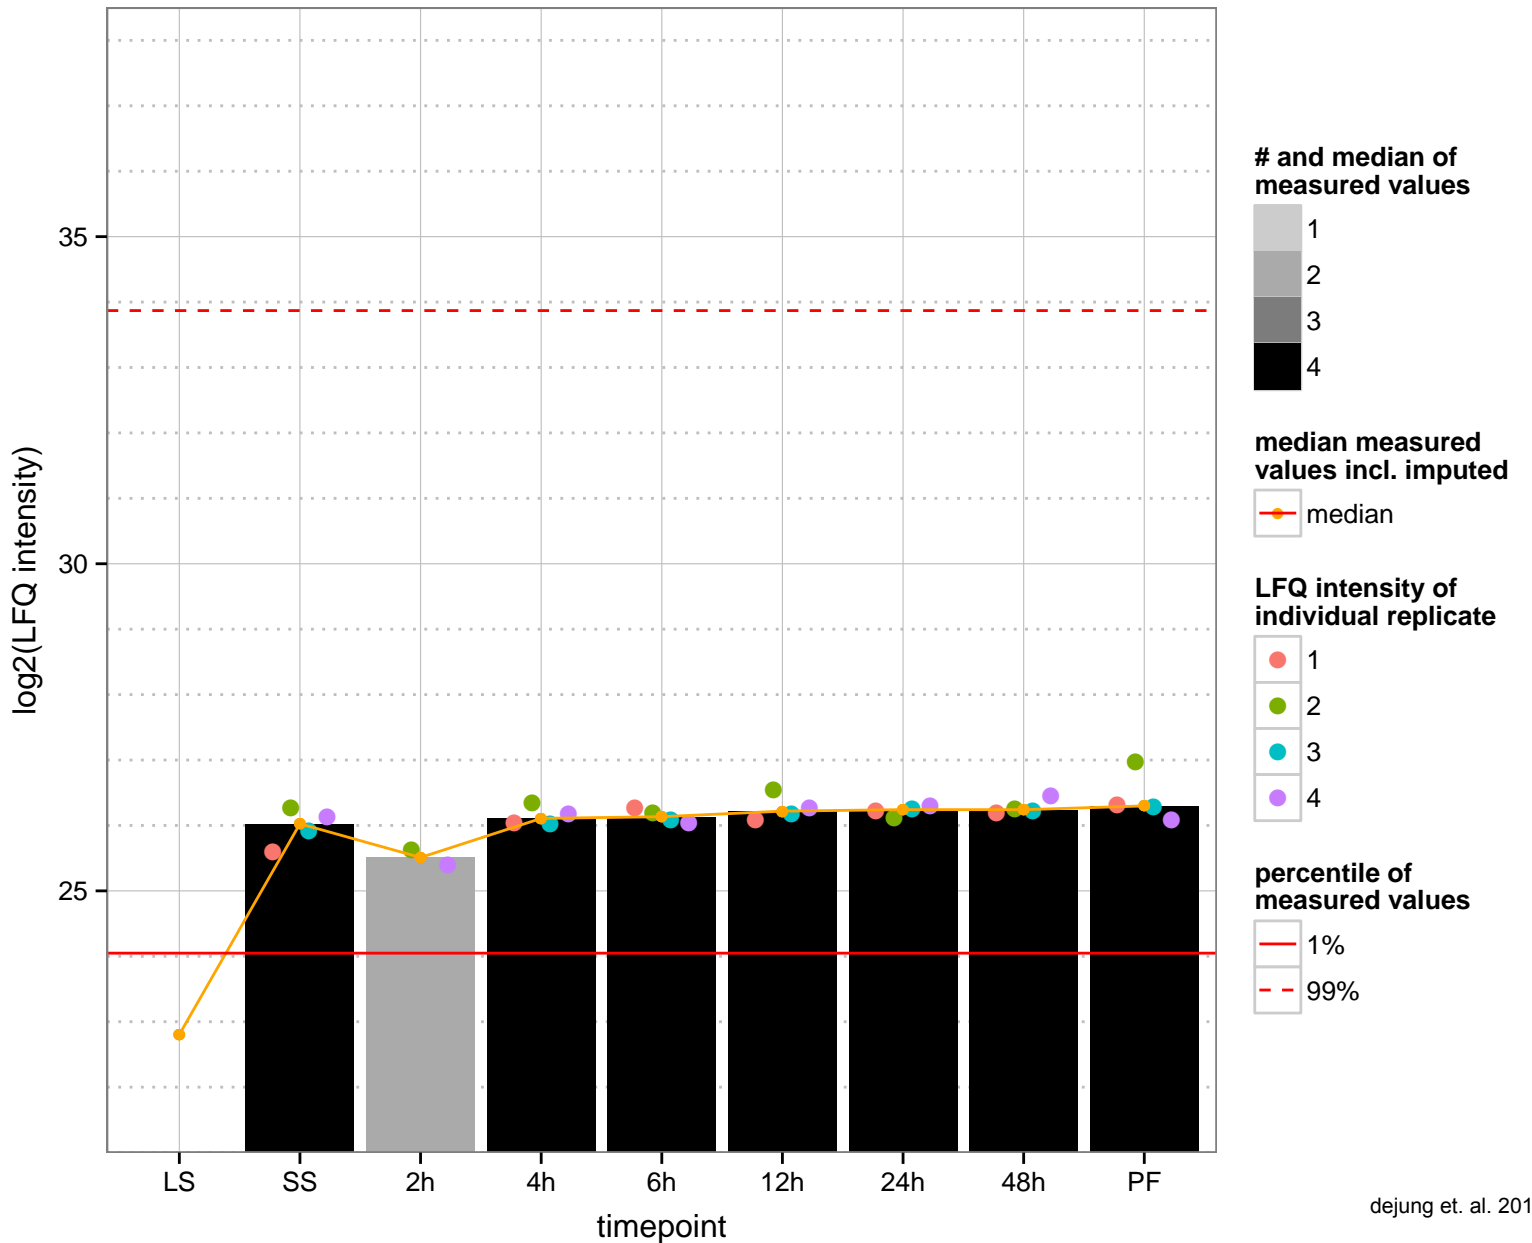

hypothetical protein, conserved  
 Tb927.10.5630  
 AGOF: null  
 AGOC: null  
 AGOP: null  
 PGOF: null  
 PGOE: null  
 PGOP: null

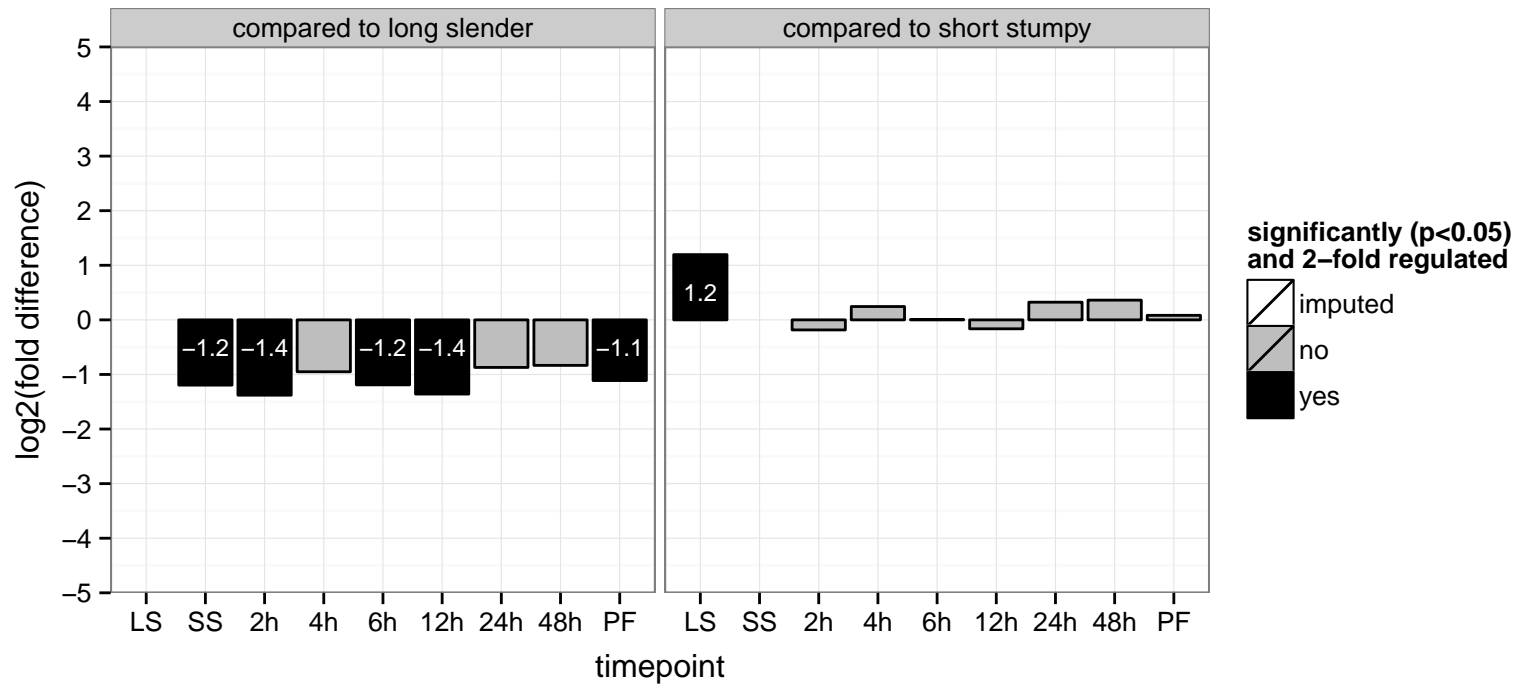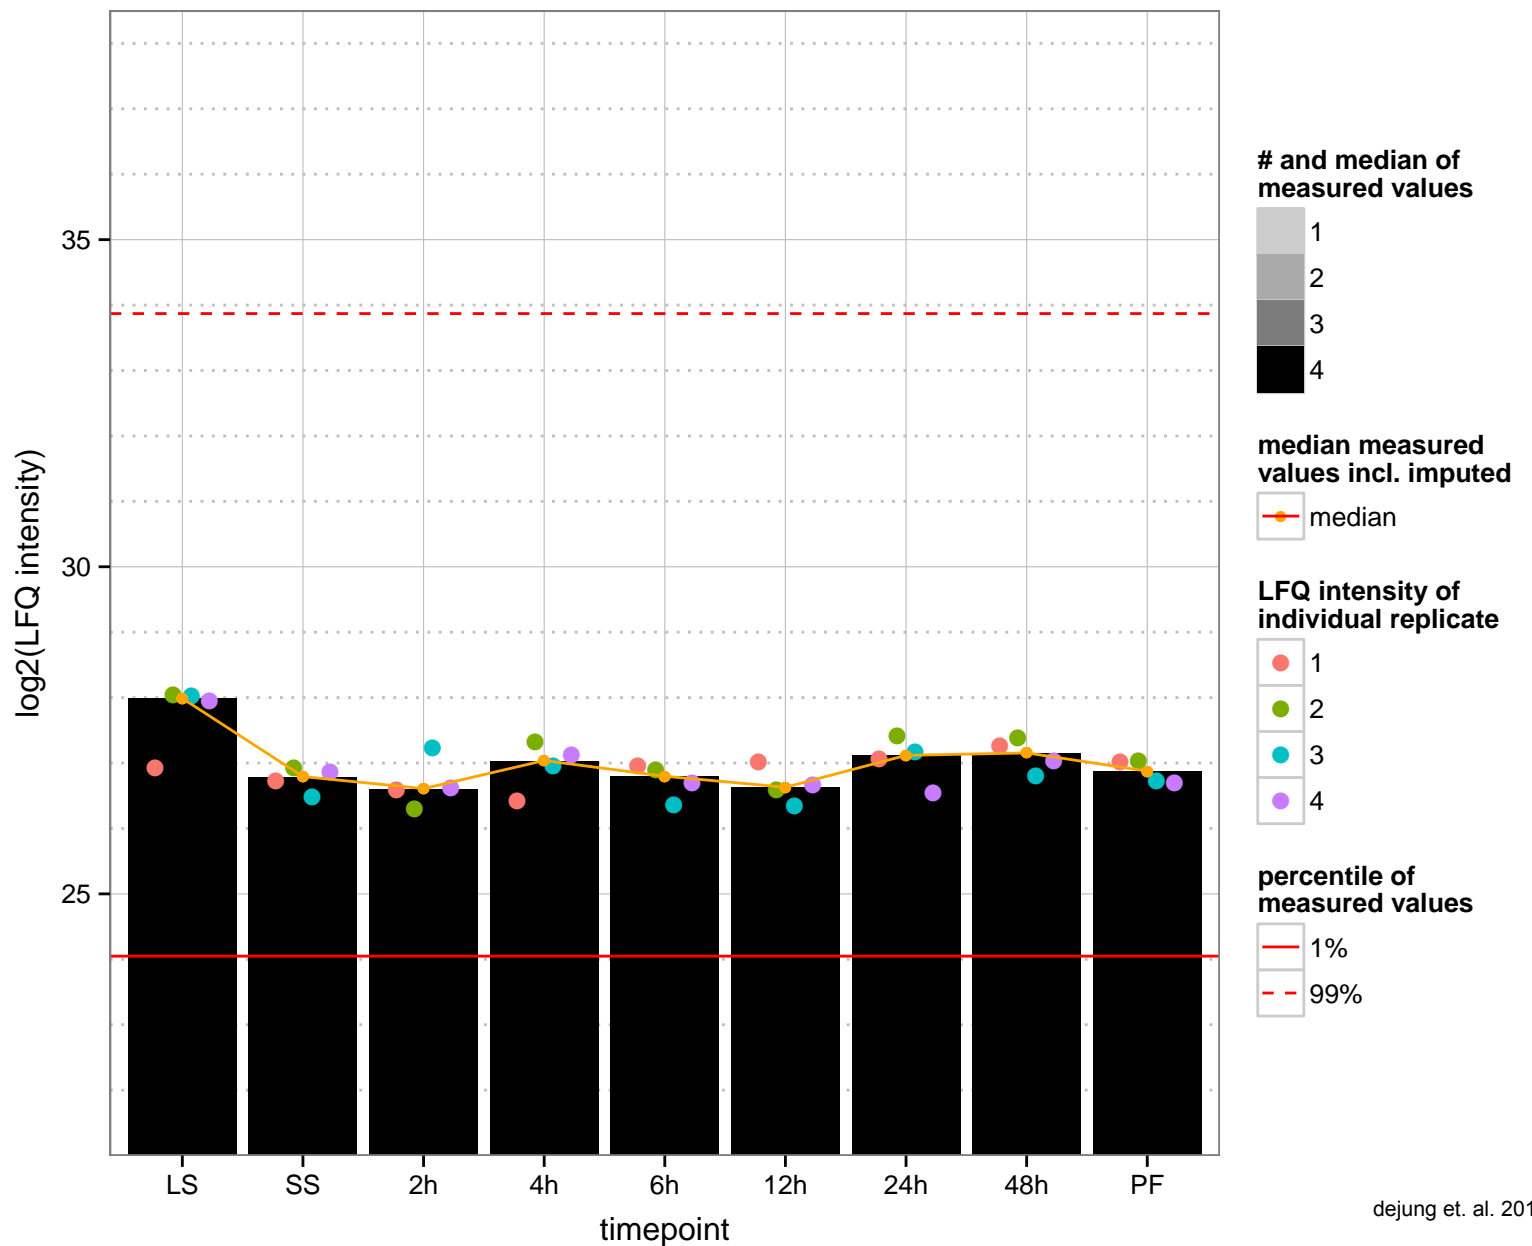

hypothetical protein, conserved  
 Tb927.10.5640  
 AGOF: null  
 AGOC: null  
 AGOP: null  
 PGO: null  
 PGOC: null  
 PGOP: null

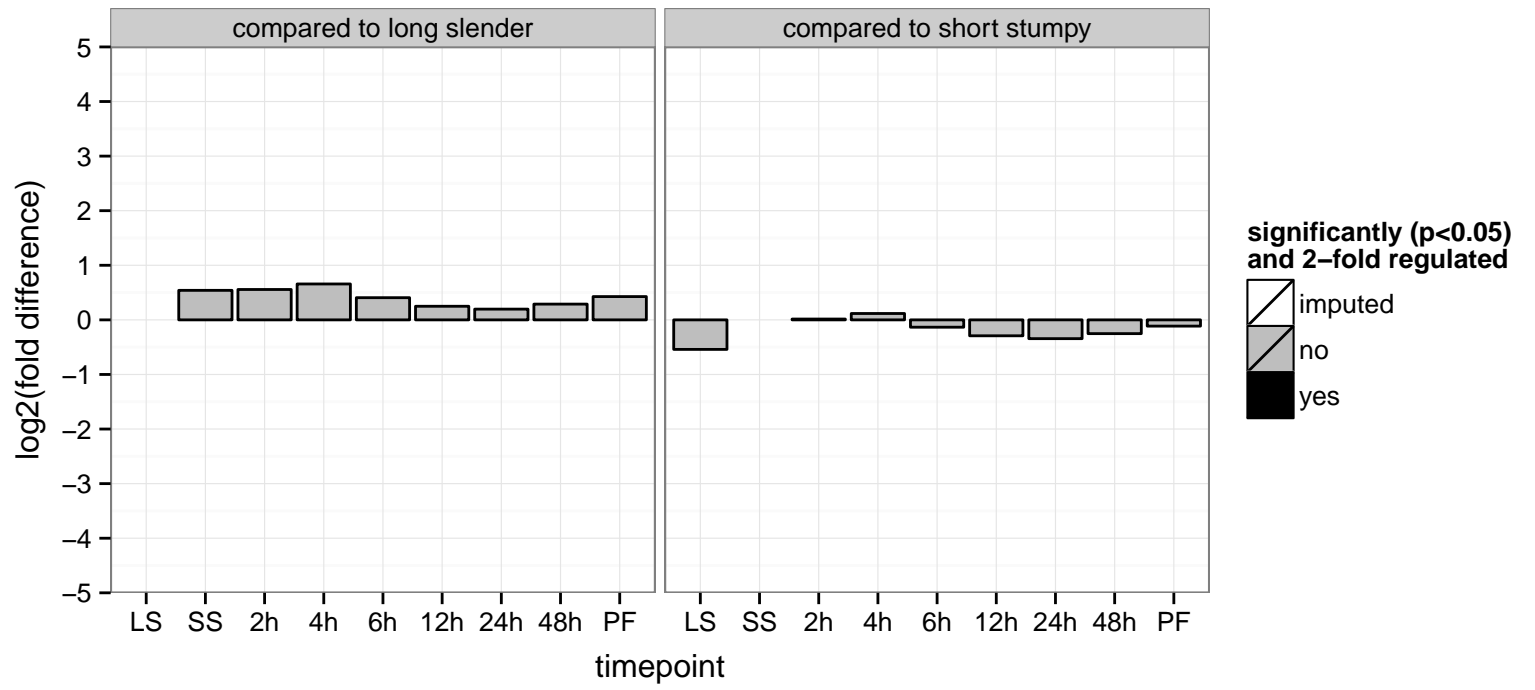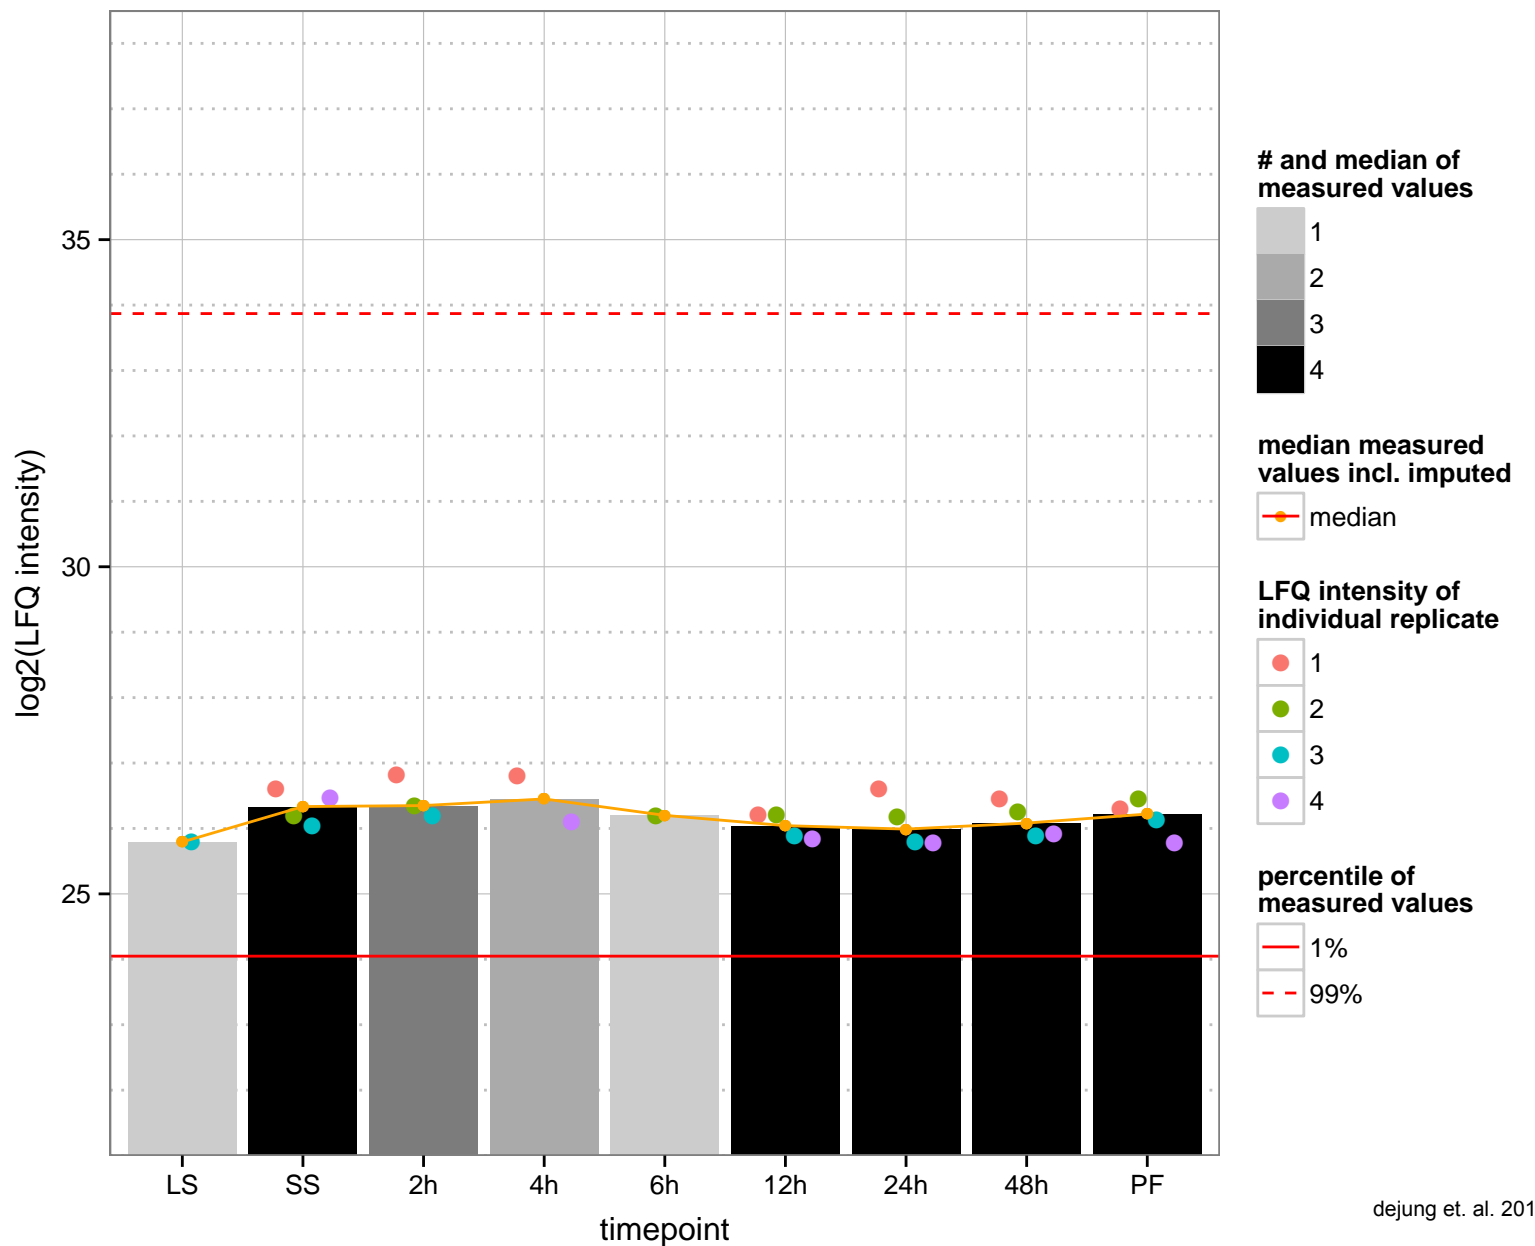

procyclin-associated gene 1 (PAG1) protein, putative  
 Tb927.10.5680  
 AGOF: null  
 AGOC: null  
 AGOP: evasion or tolerance of host immune response  
 PGO: null  
 PGO: null  
 PGO: null  
 PGO: evasion or tolerance of host immune response

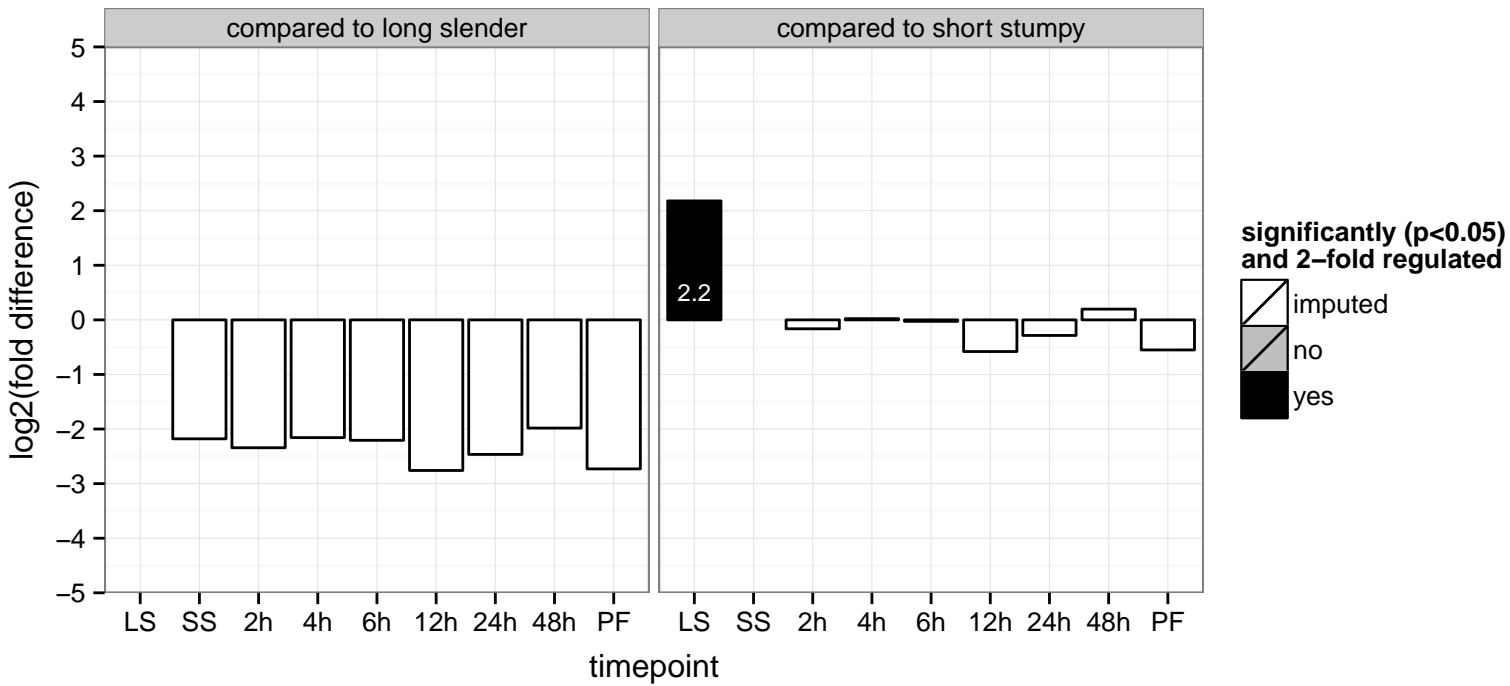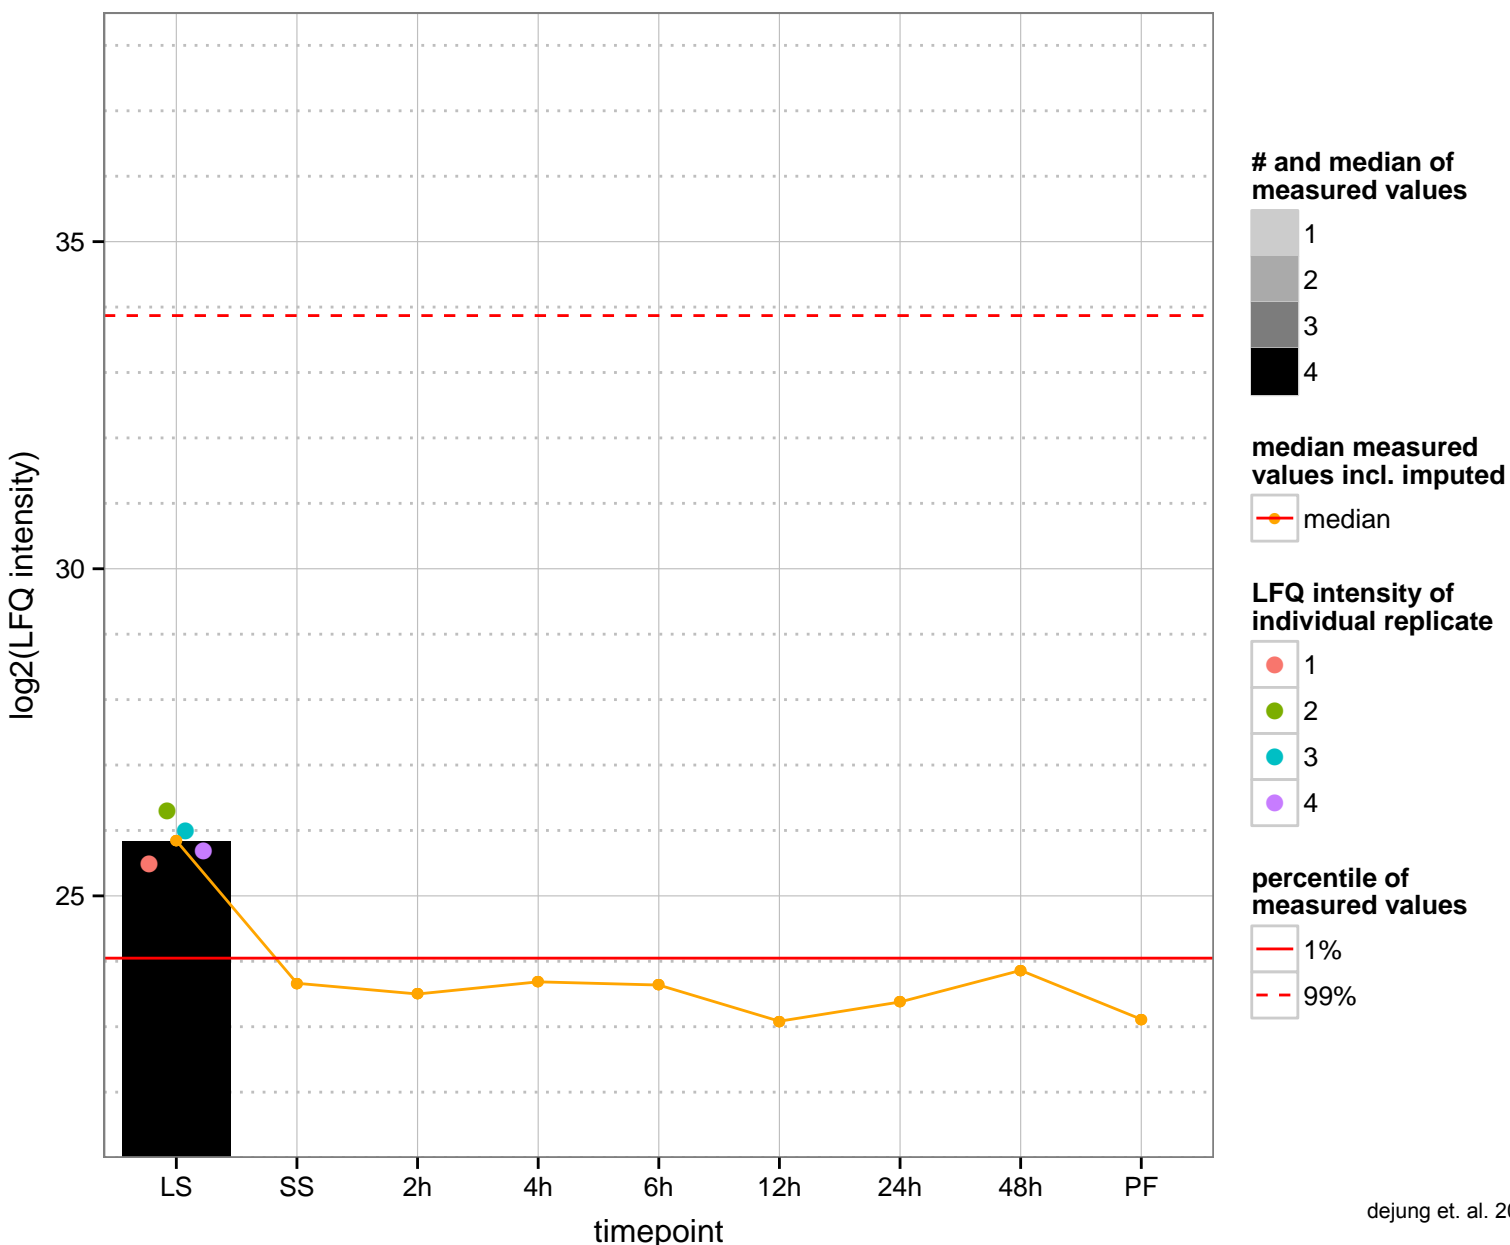

valosin-containing protein homolog, Transitional endoplasmic reticulum ATPase, putative (VCP)  
 Tb927.10.5770  
 AGOF: ATP binding, ATPase activity  
 AGOC: cytoplasm, membrane  
 AGOP: biological\_process  
 PGOF: ATP binding, hydrolase activity, nucleoside-triphosphatase activity, nucleotide binding  
 PGOC: null  
 PGOP: null

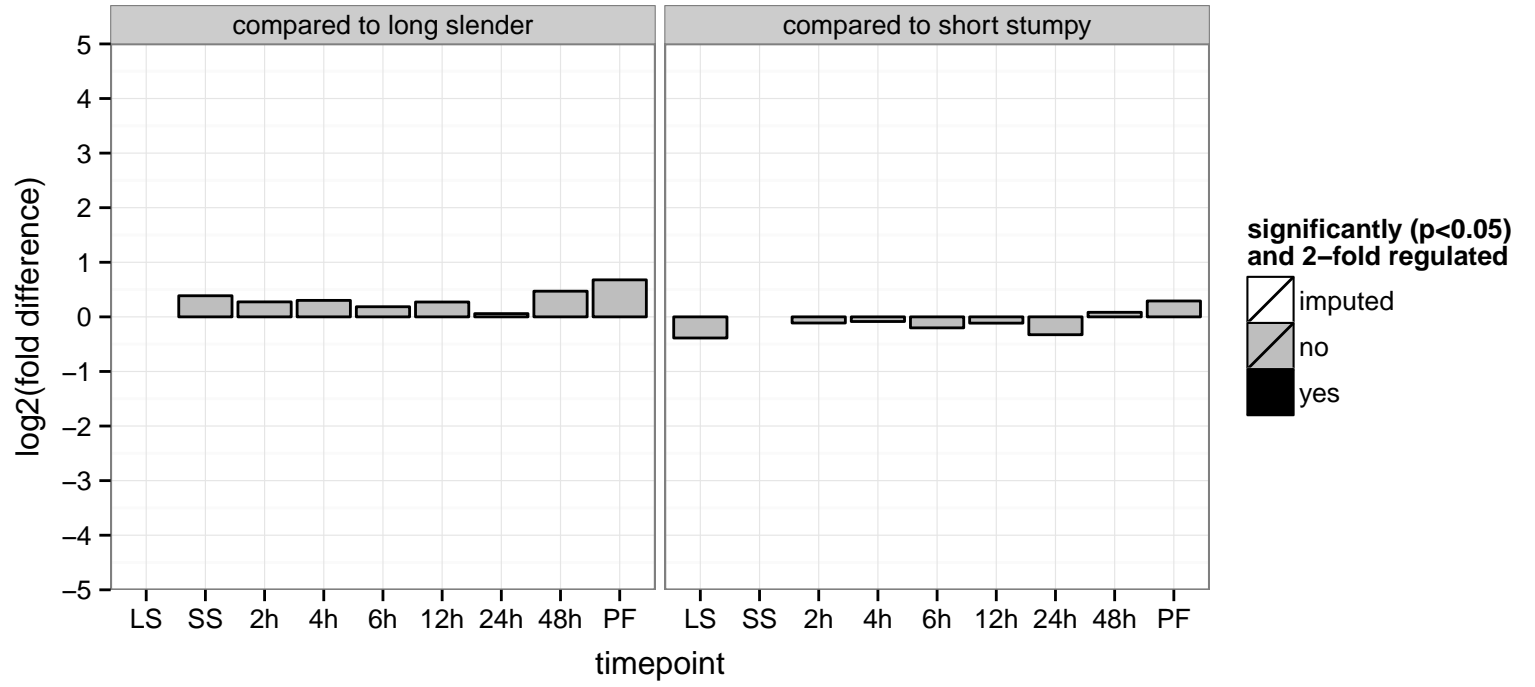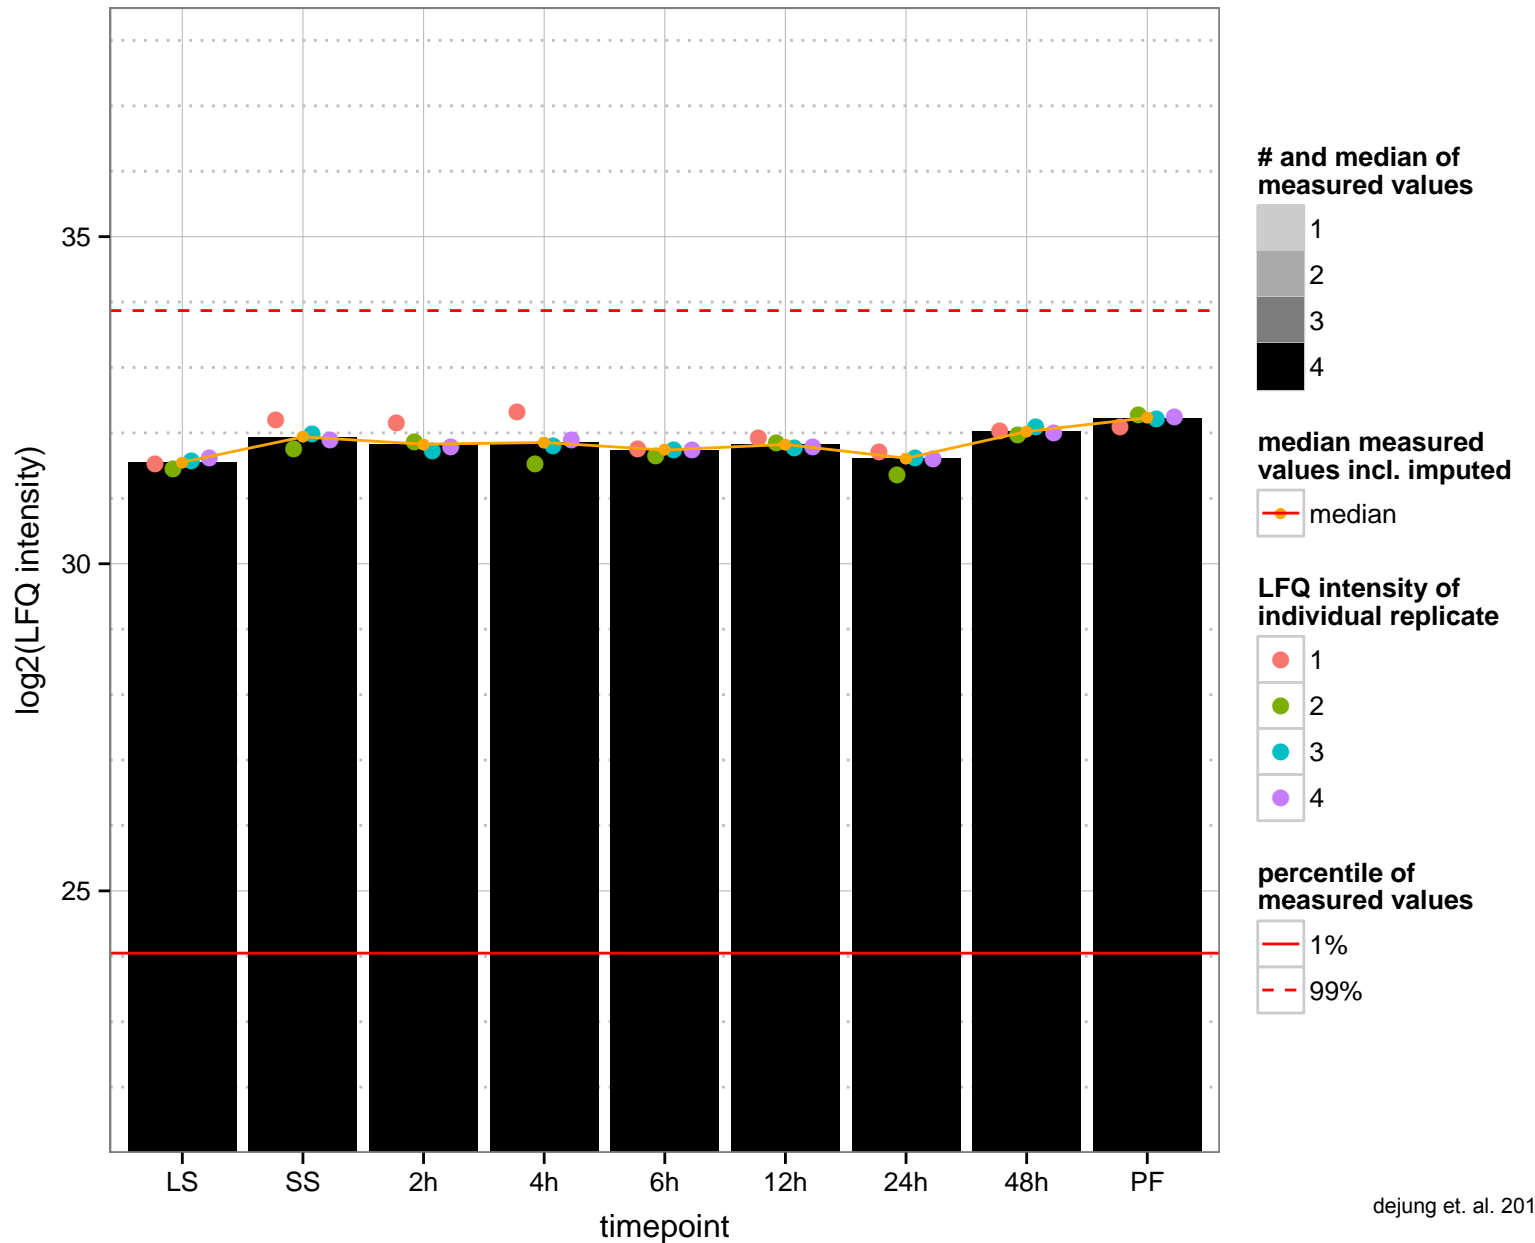

hypothetical protein, conserved  
 Tb927.10.5790  
 AGOF: catalytic activity  
 AGOC: null  
 AGOP: null  
 PGOF: binding, catalytic activity, protein binding  
 PGOC: null  
 PGOP: null

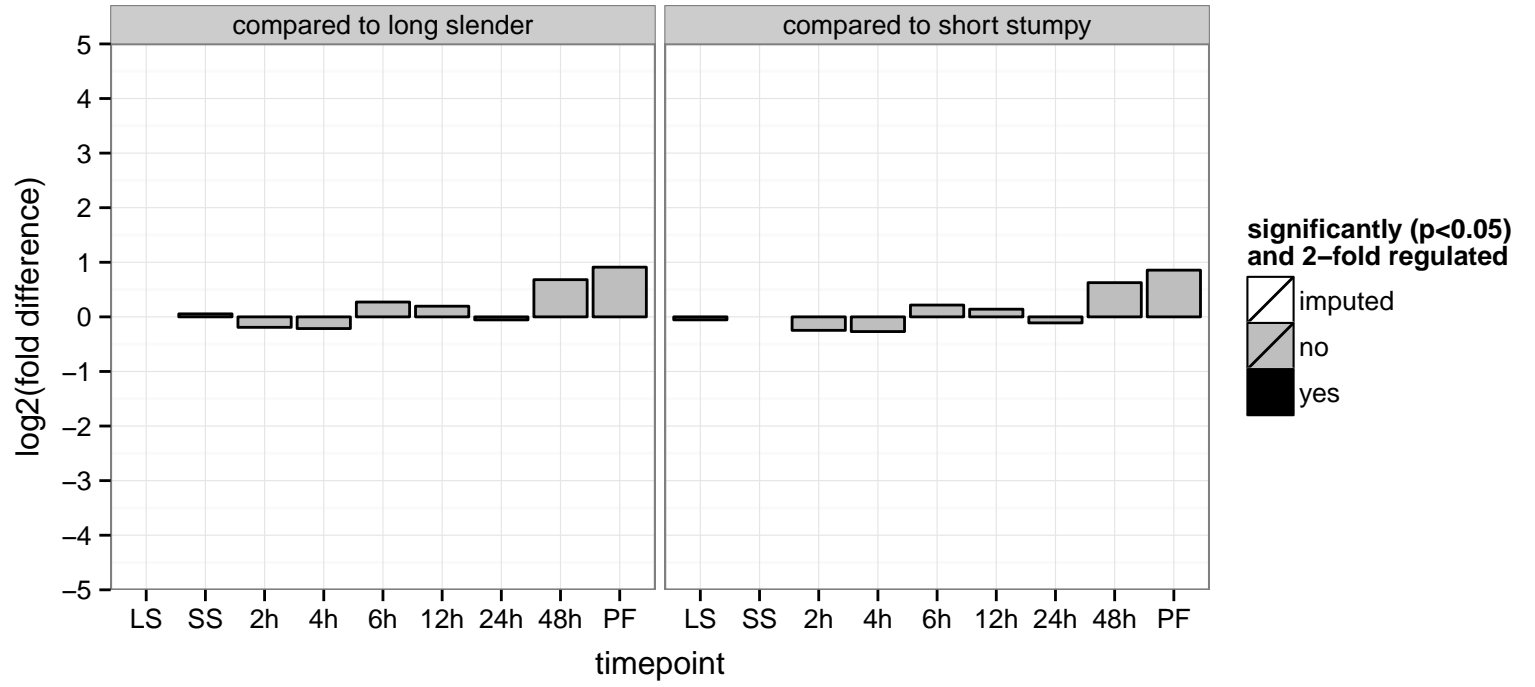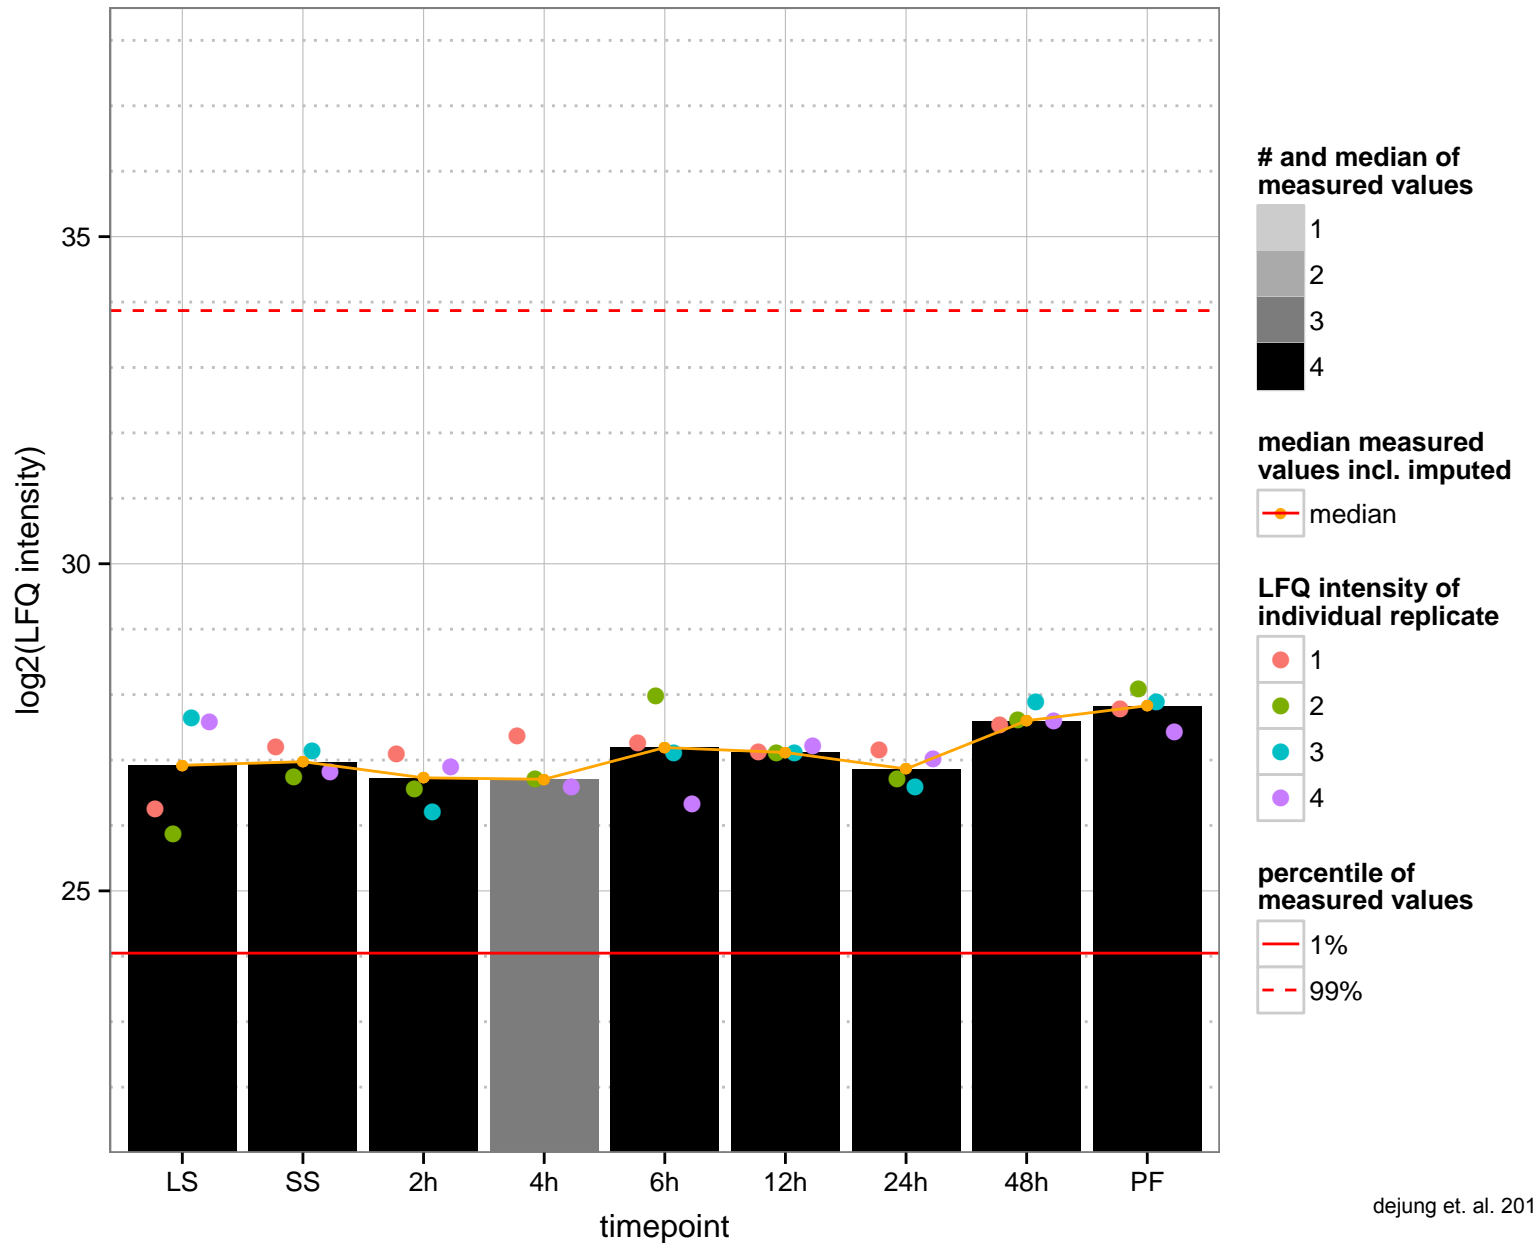

hypothetical protein, conserved  
 Tb927.10.5830  
 AGOF: zinc ion binding  
 AGOC: intracellular  
 AGOP: null  
 PGOF: zinc ion binding  
 PGOC: intracellular  
 PGOP: null

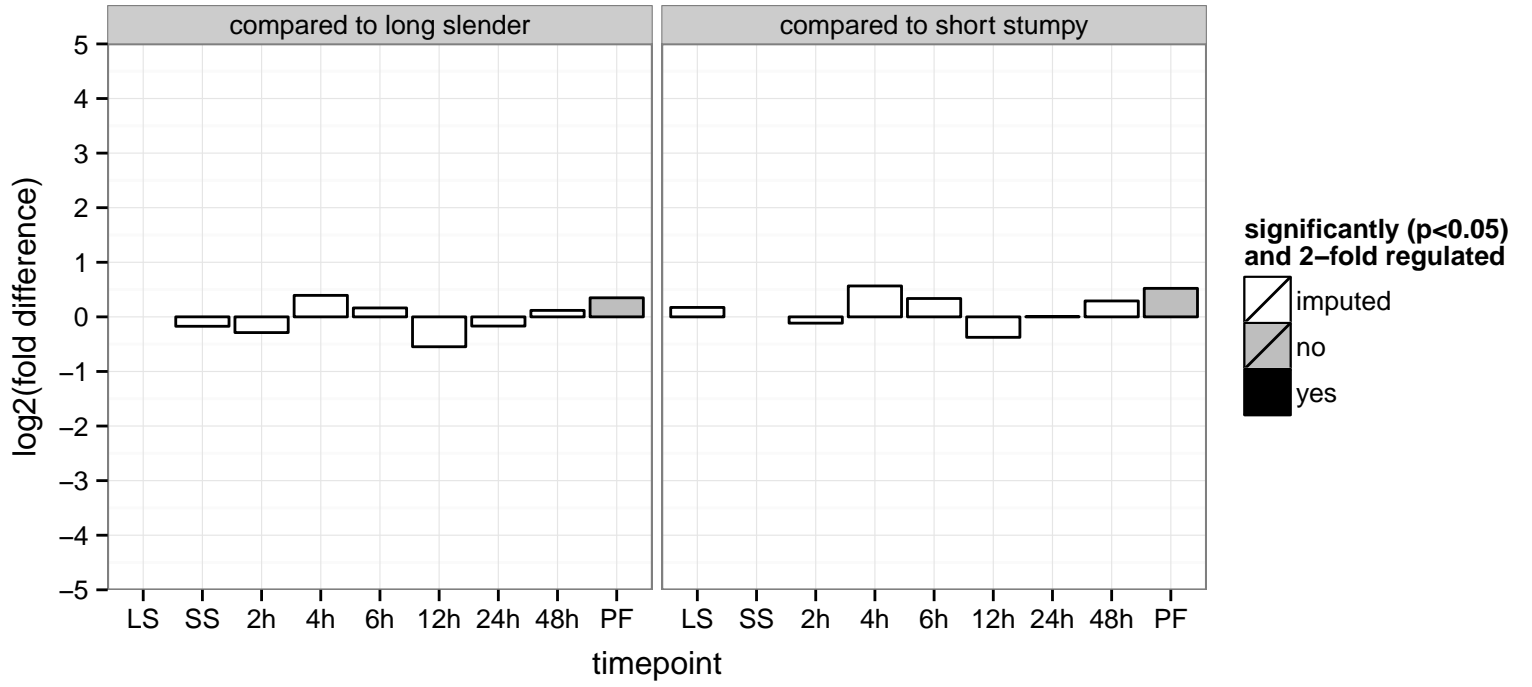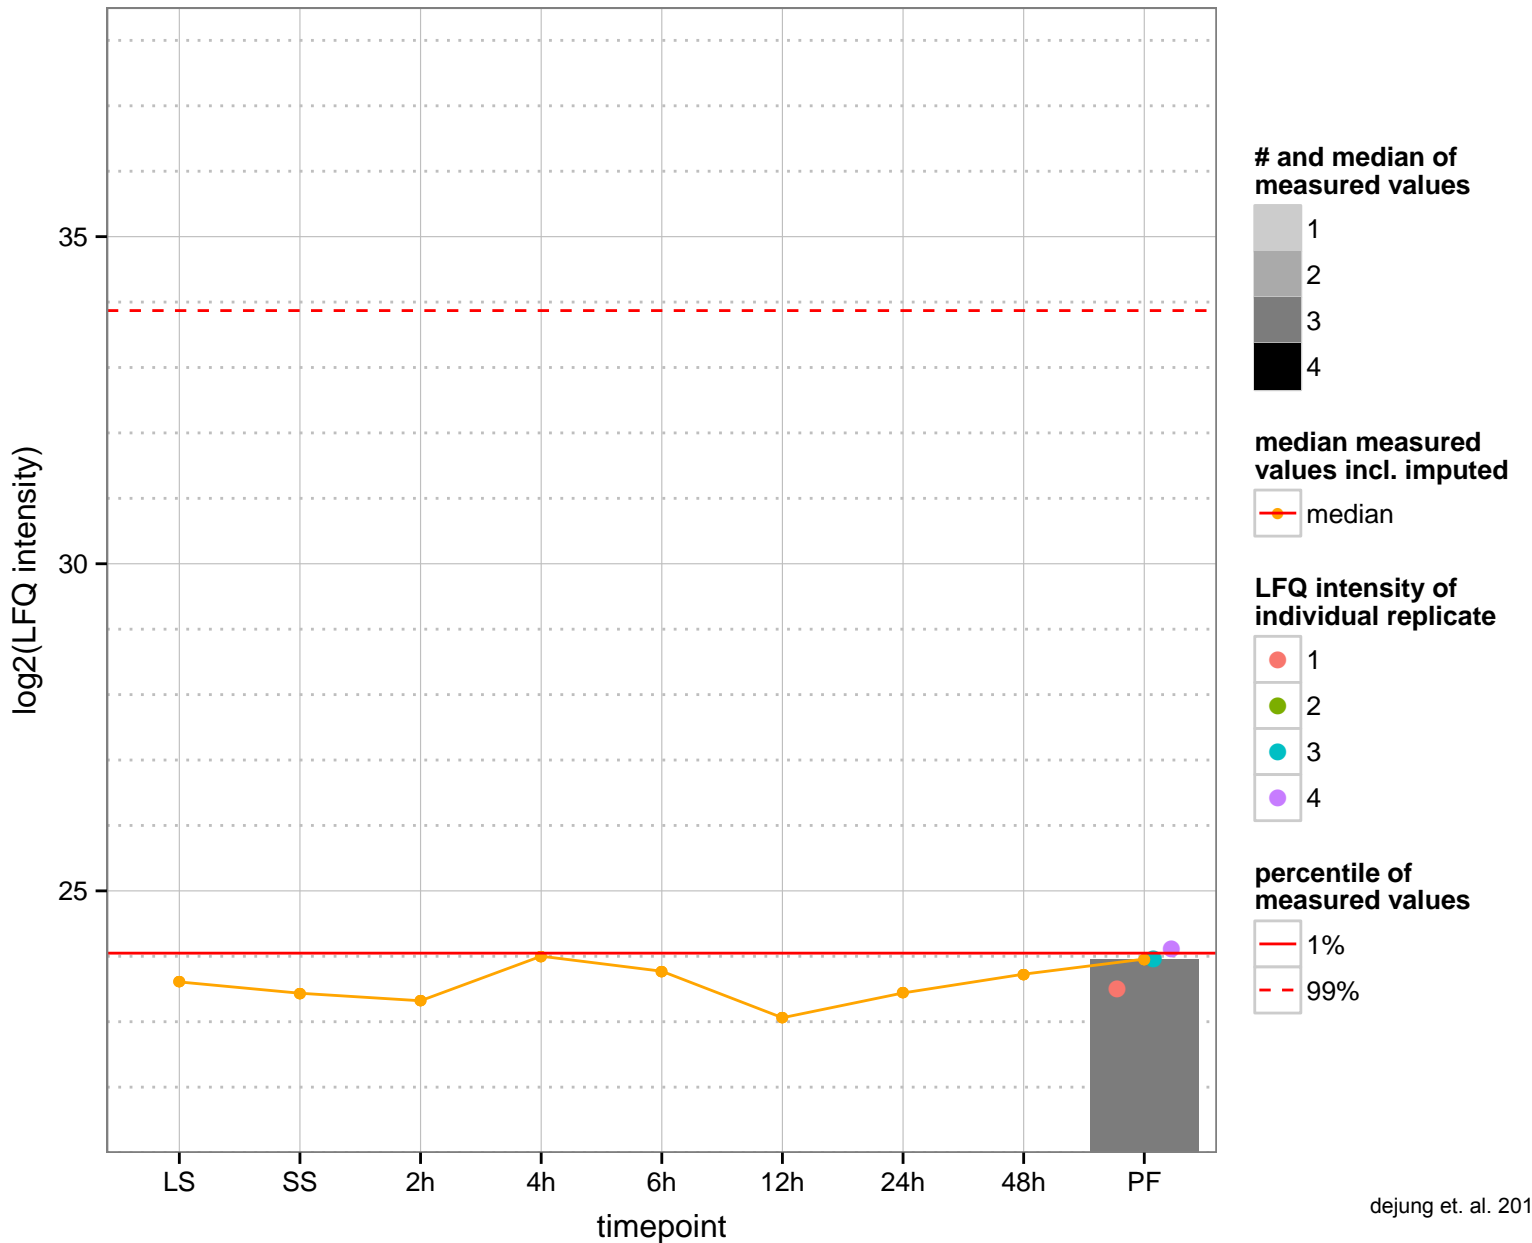



hypothetical protein, conserved  
 Tb927.10.5900  
 AGOF: null  
 AGOC: mitochondrion  
 AGOP: null  
 PGO: null  
 PGO: null  
 PGO: null

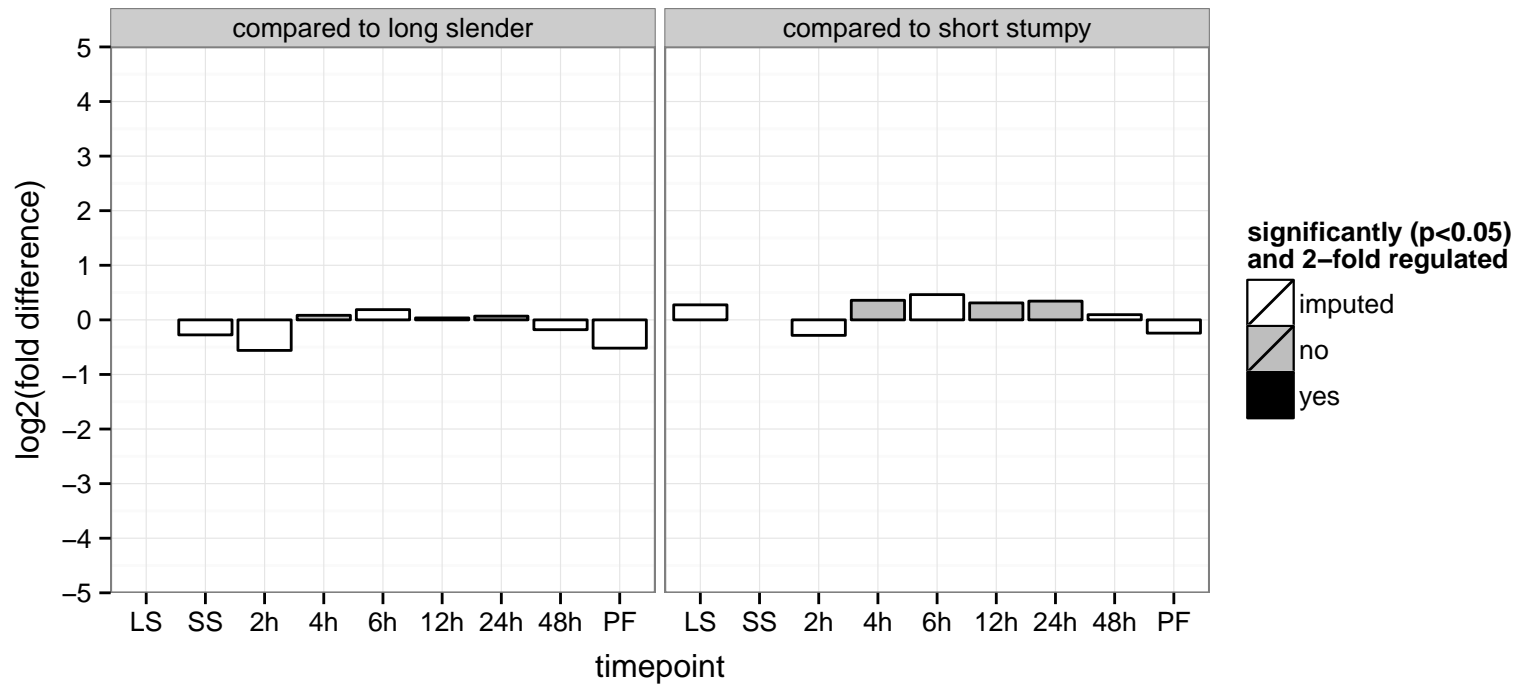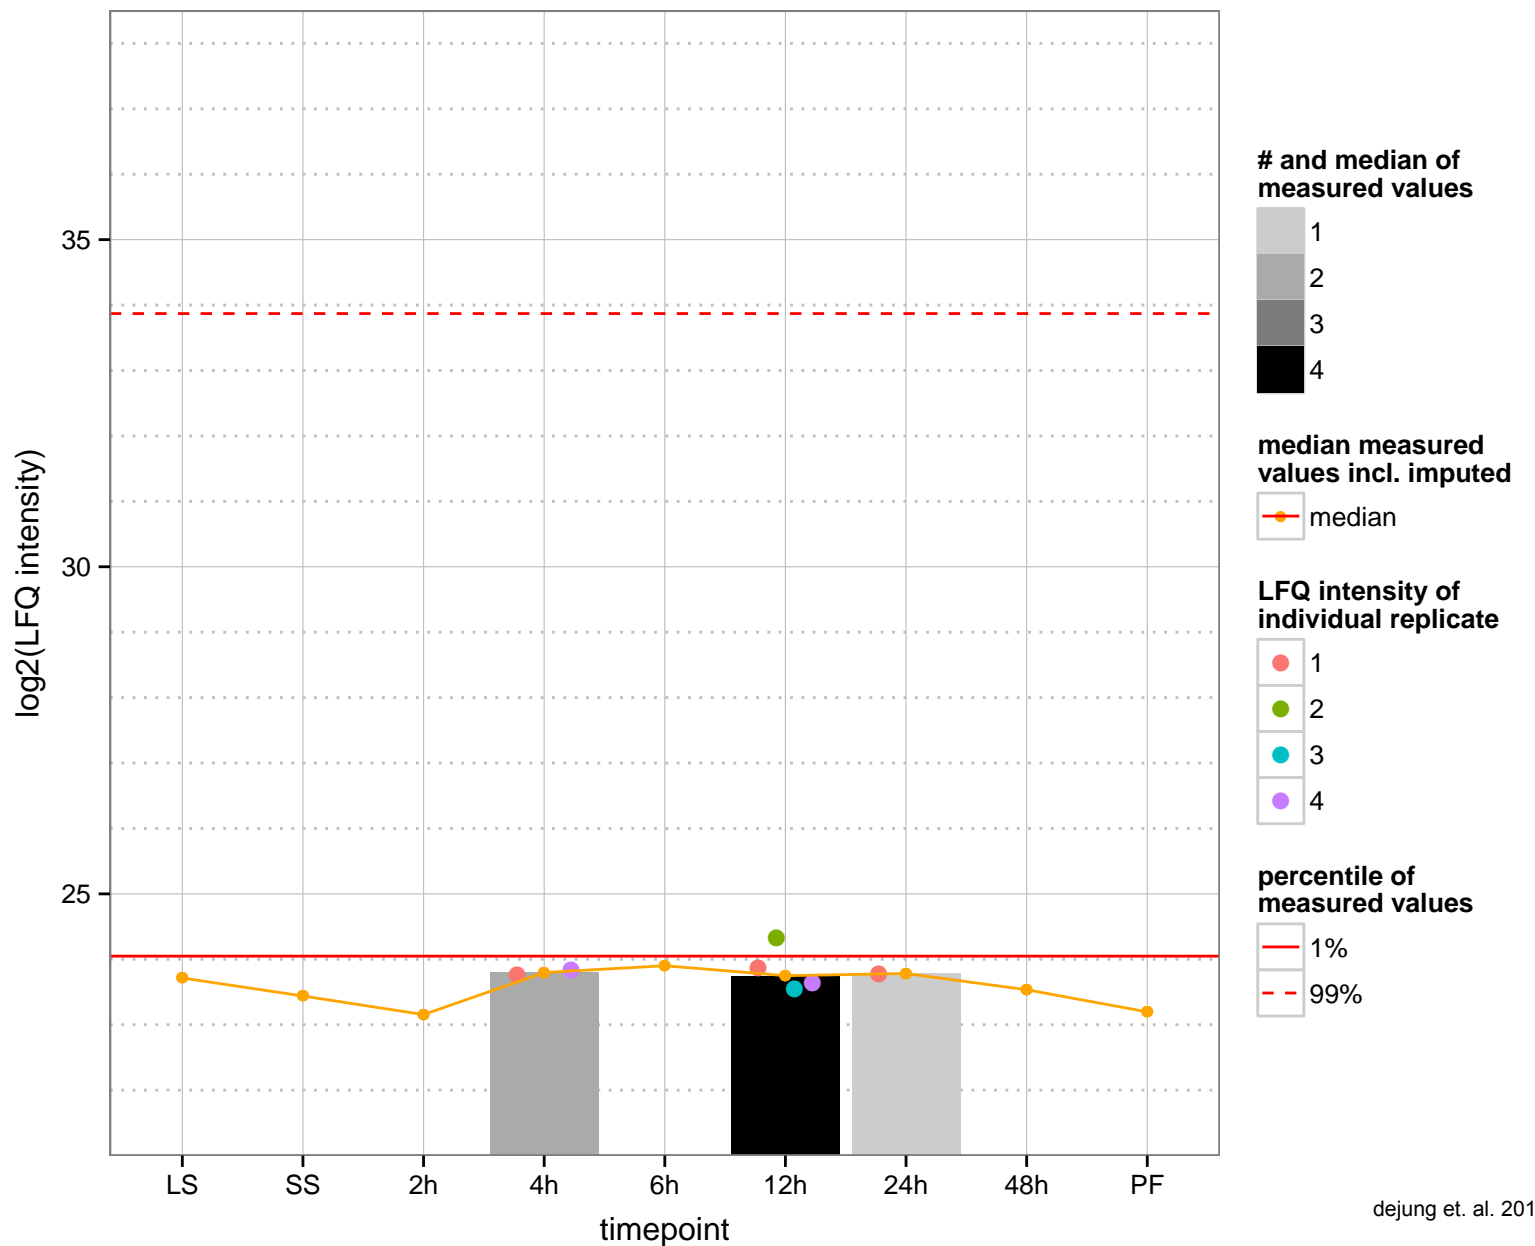

leucine-rich repeat protein (LRRP), putative  
 Tb927.10.5980  
 AGOF: null  
 AGOC: null  
 AGOP: null  
 PGO: protein binding  
 PGOC: null  
 PGOP: null

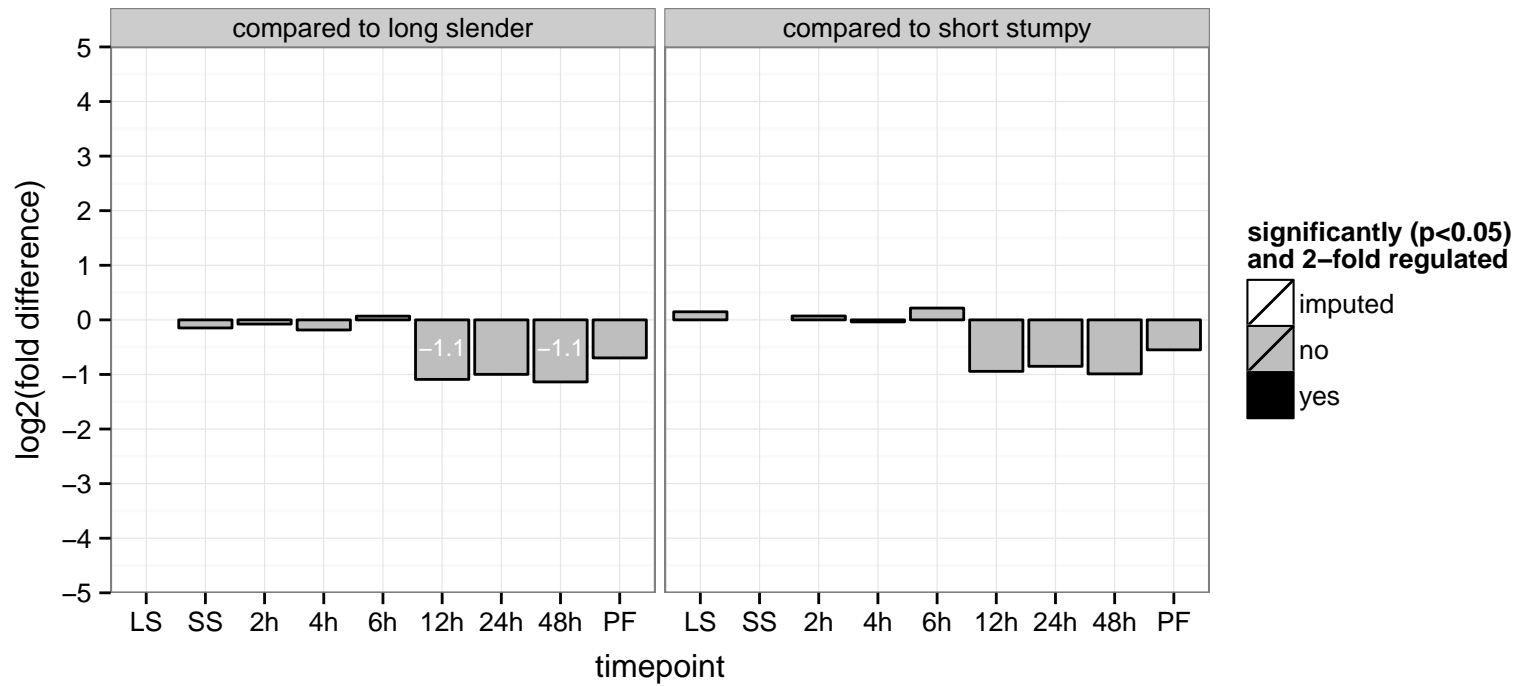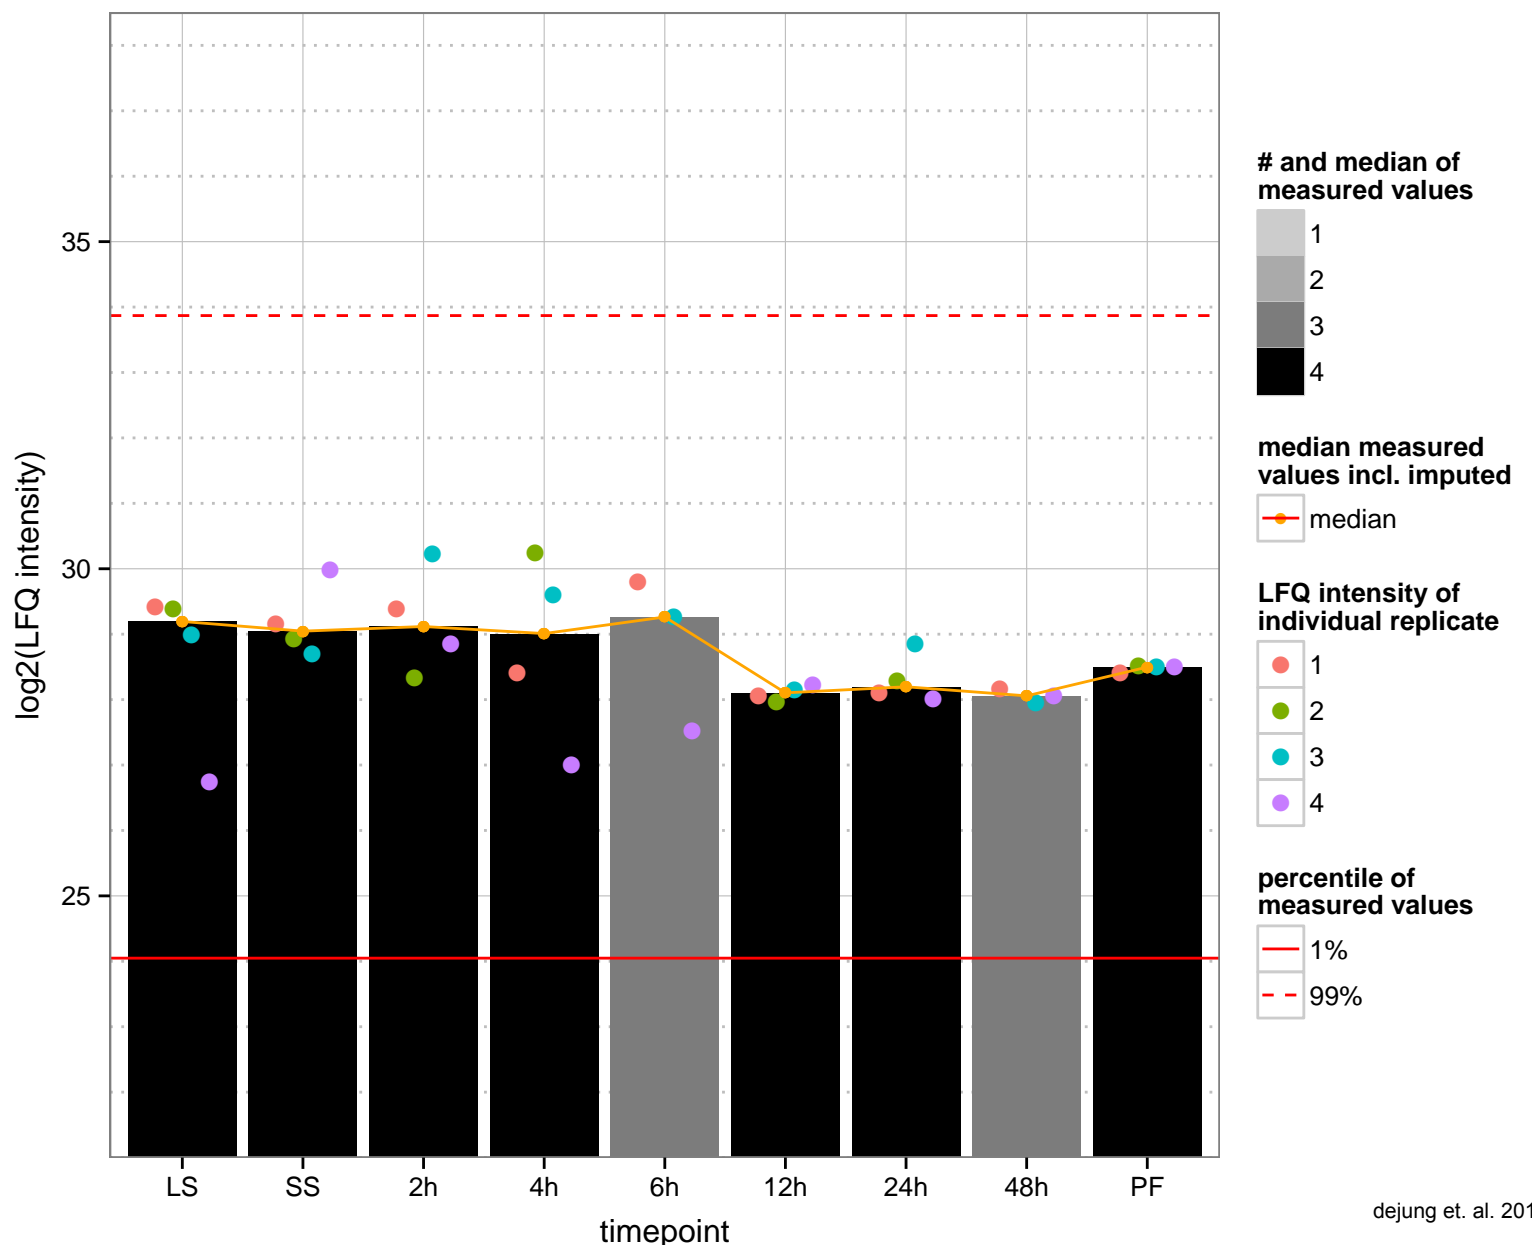

hypothetical protein, conserved  
 Tb927.10.6010  
 AGOF: null  
 AGOC: null  
 AGOP: null  
 PGOF: binding  
 PGO: null  
 PGOP: null

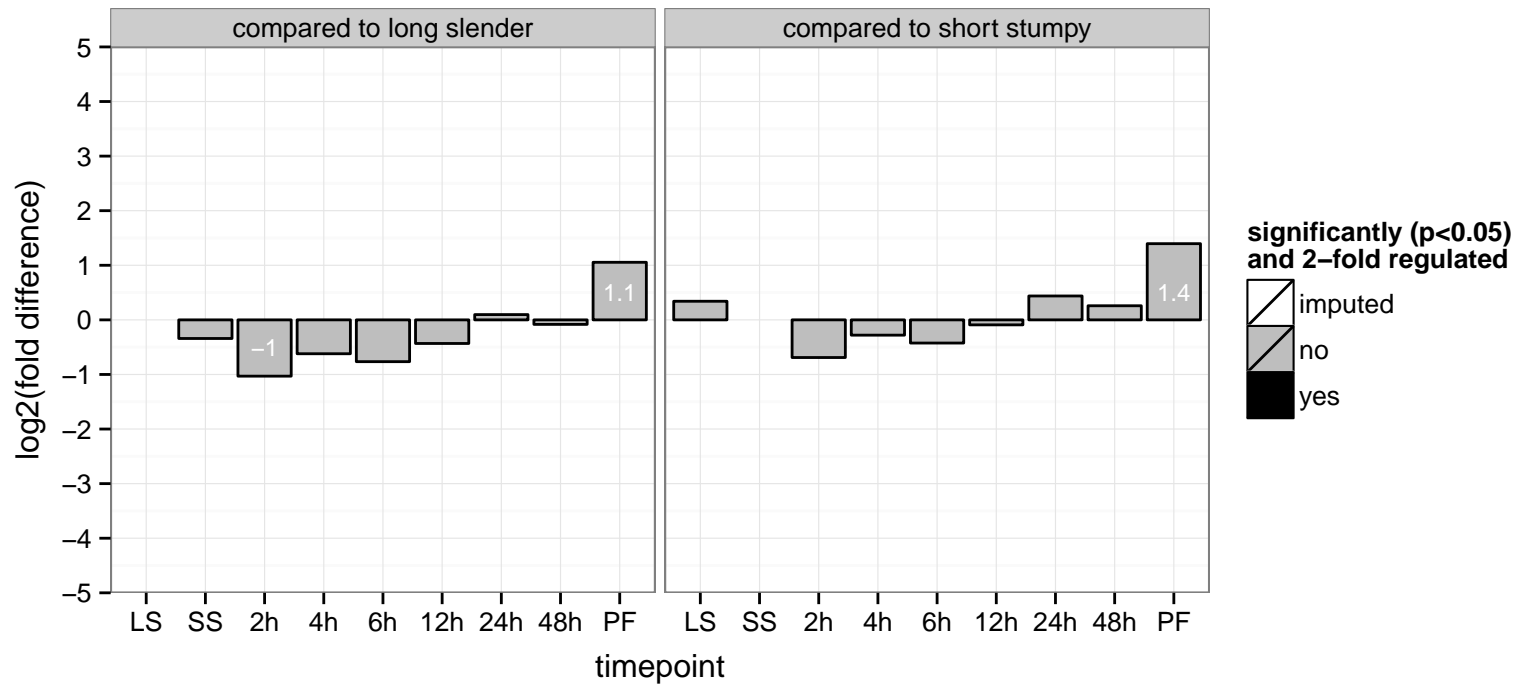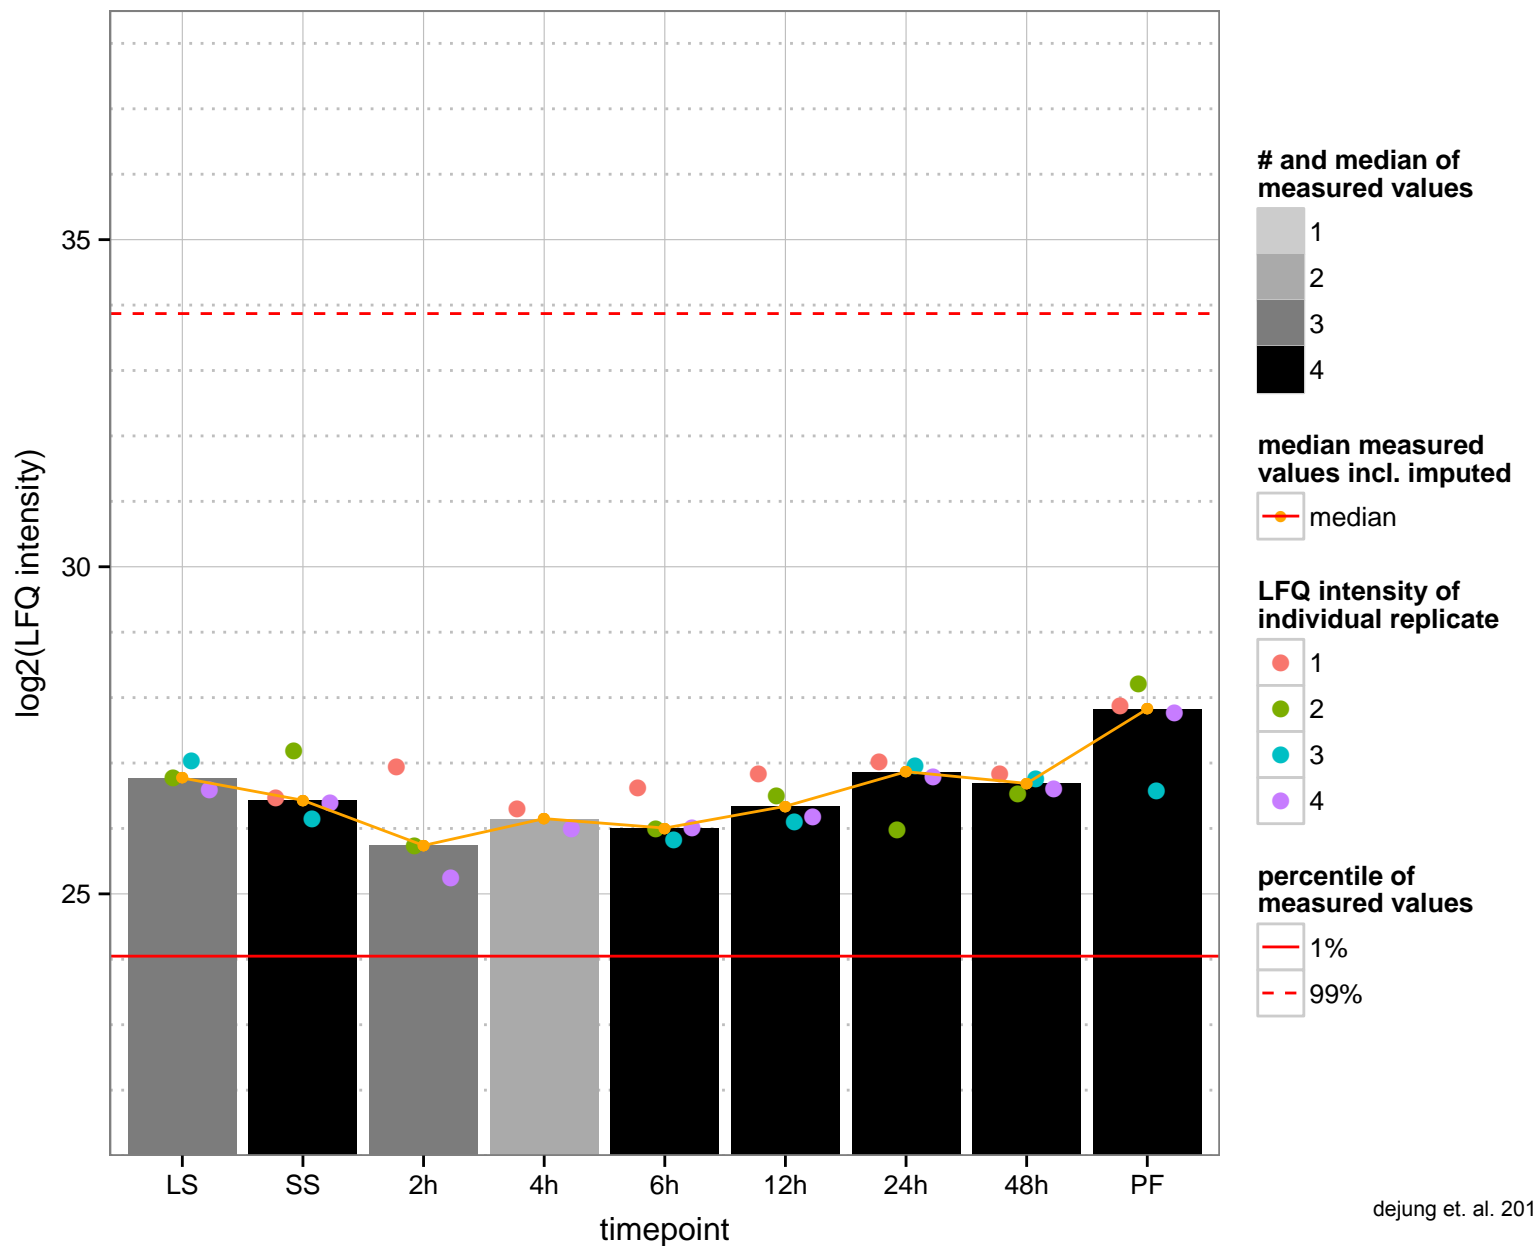

hypothetical protein, conserved  
 Tb927.10.6160  
 AGOF: null  
 AGOC: cis-Golgi network, membrane  
 AGOP: intracellular protein transport  
 PGO: null  
 PGOC: cis-Golgi network, membrane  
 PGOP: intracellular protein transport

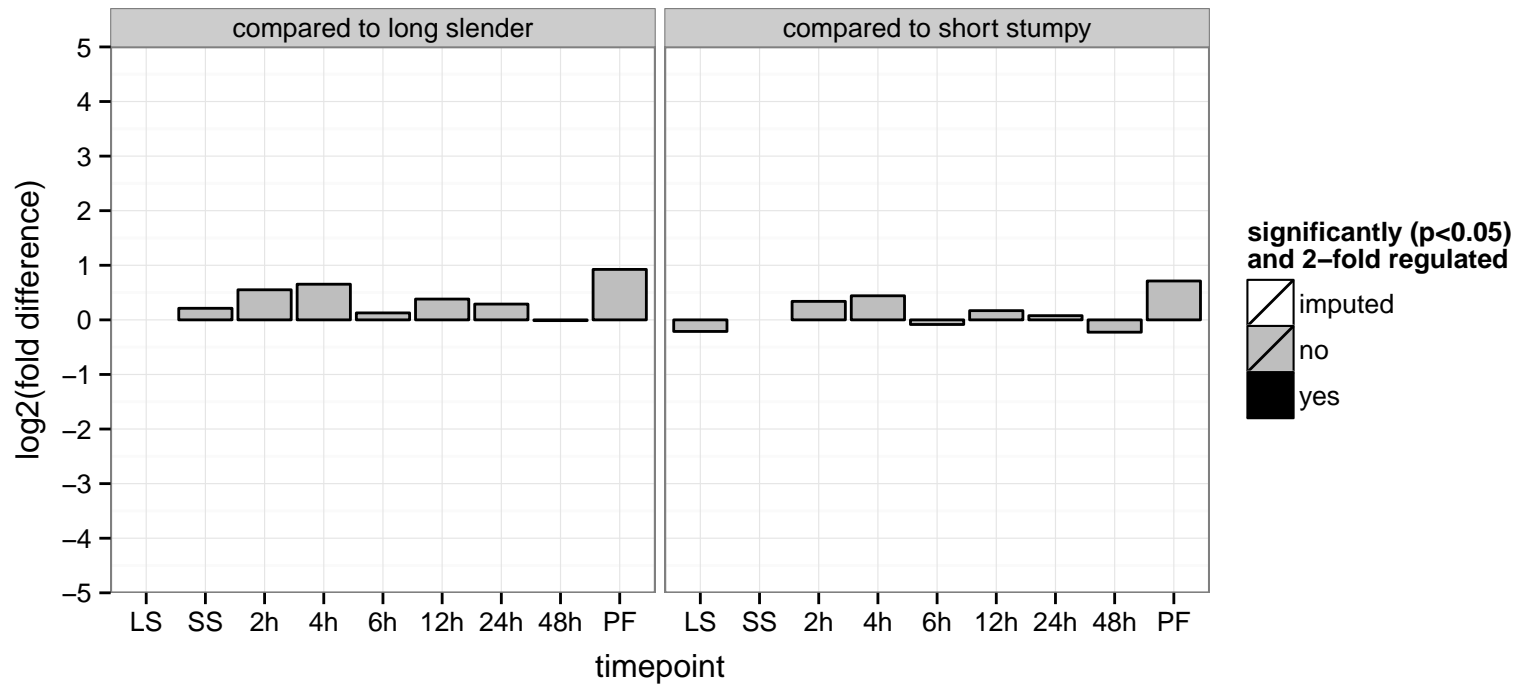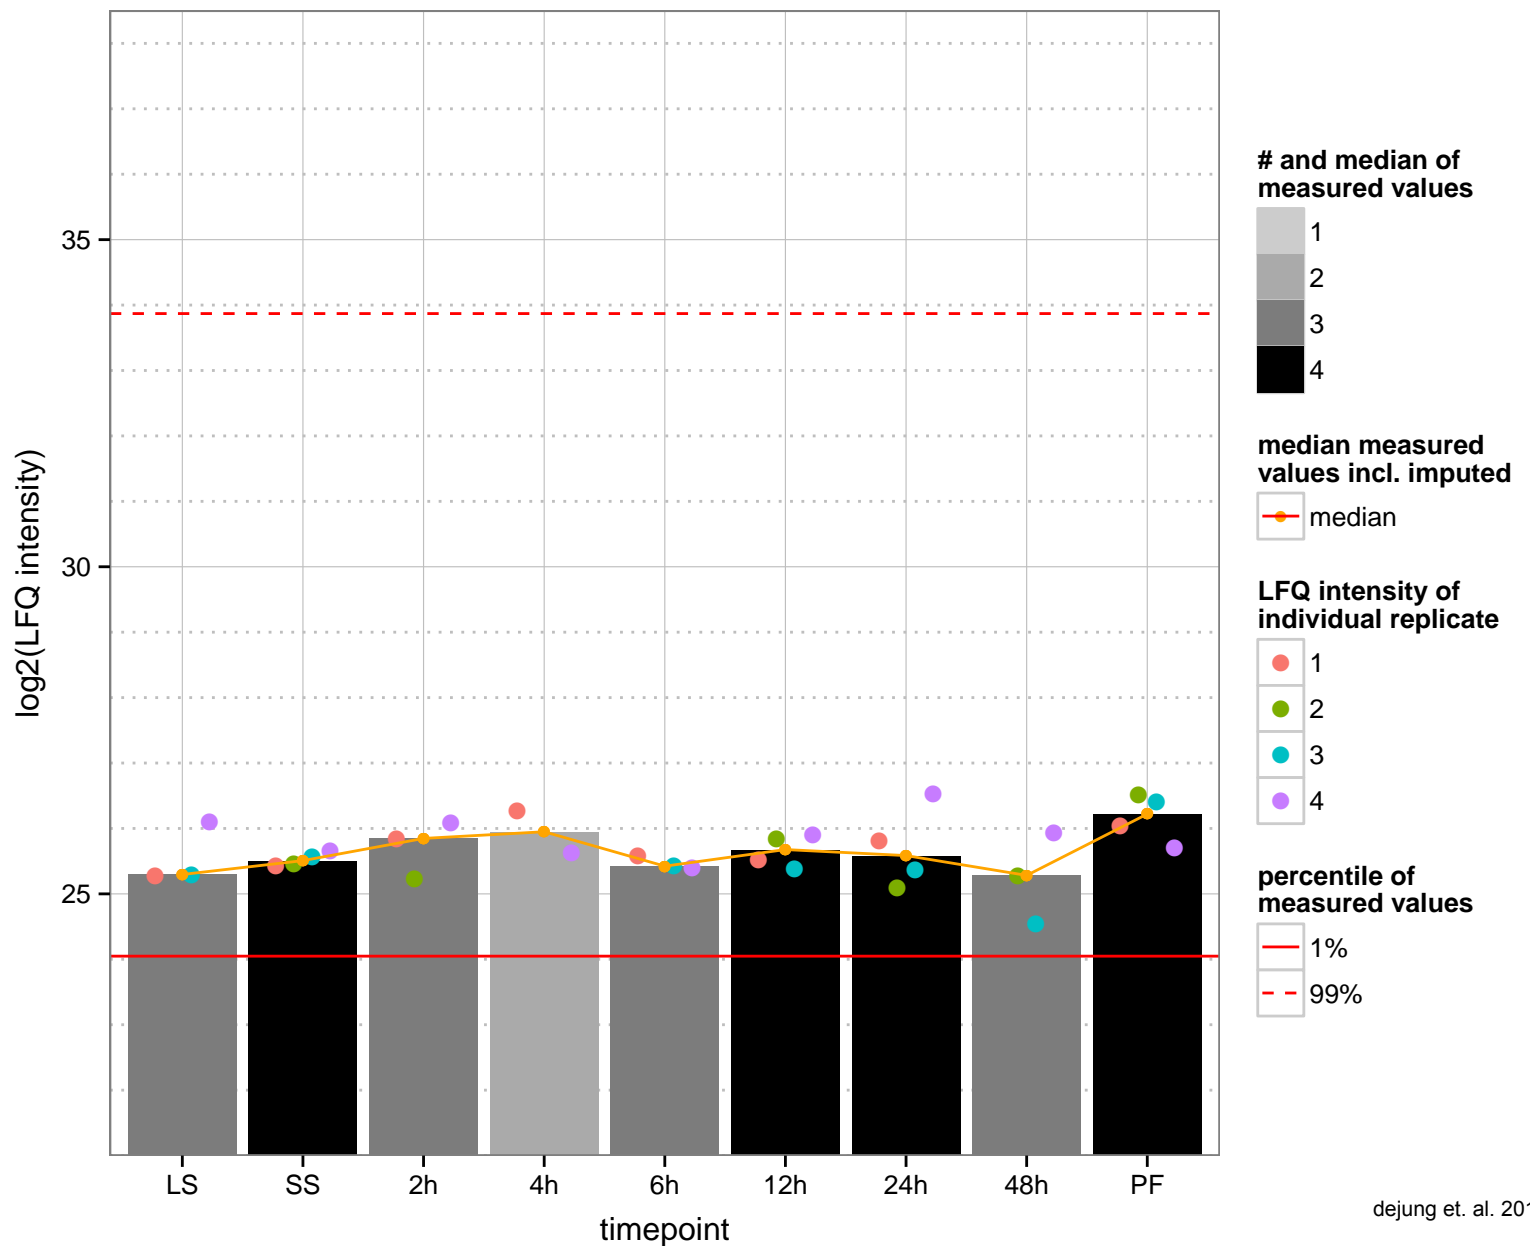

hypothetical protein, conserved  
 Tb927.10.6170  
 AGOF: null  
 AGOC: mitochondrion  
 AGOP: null  
 PGO: binding  
 PGOC: null  
 PGOP: null

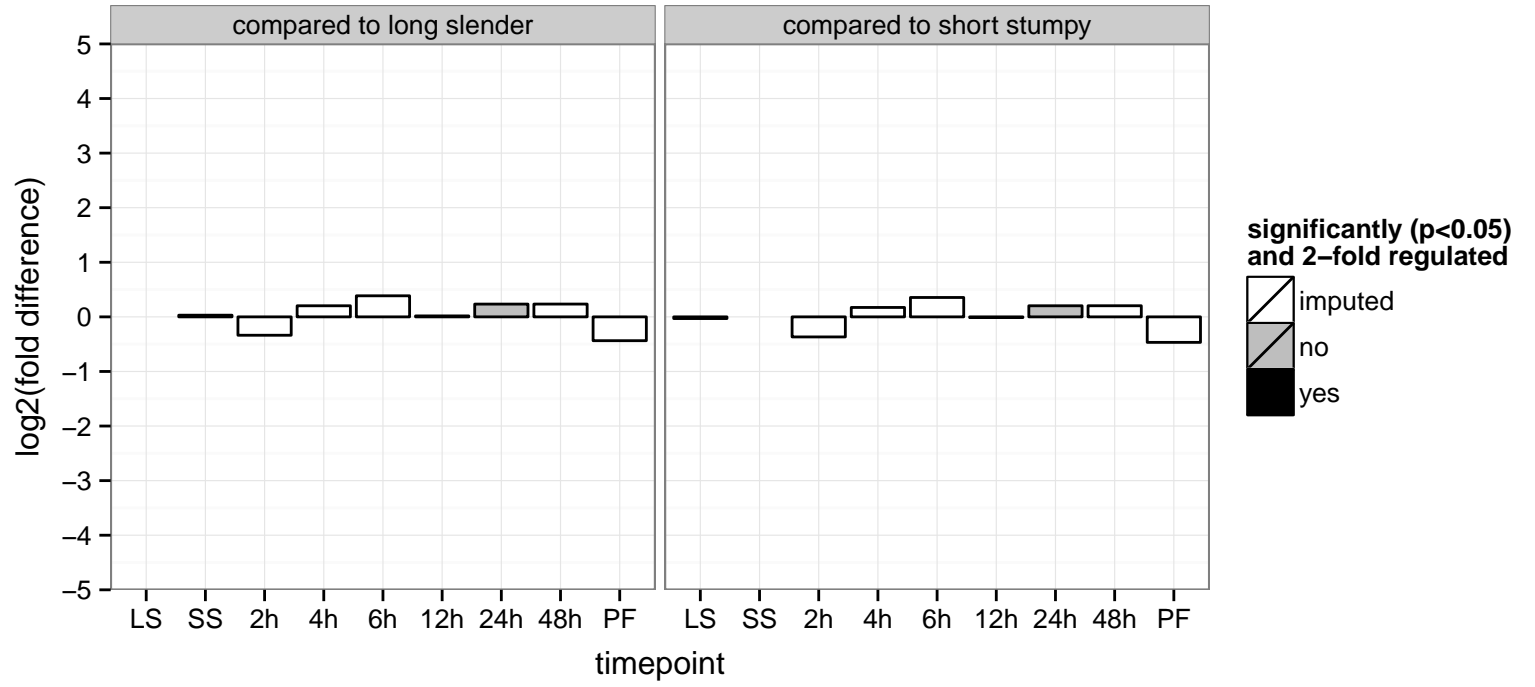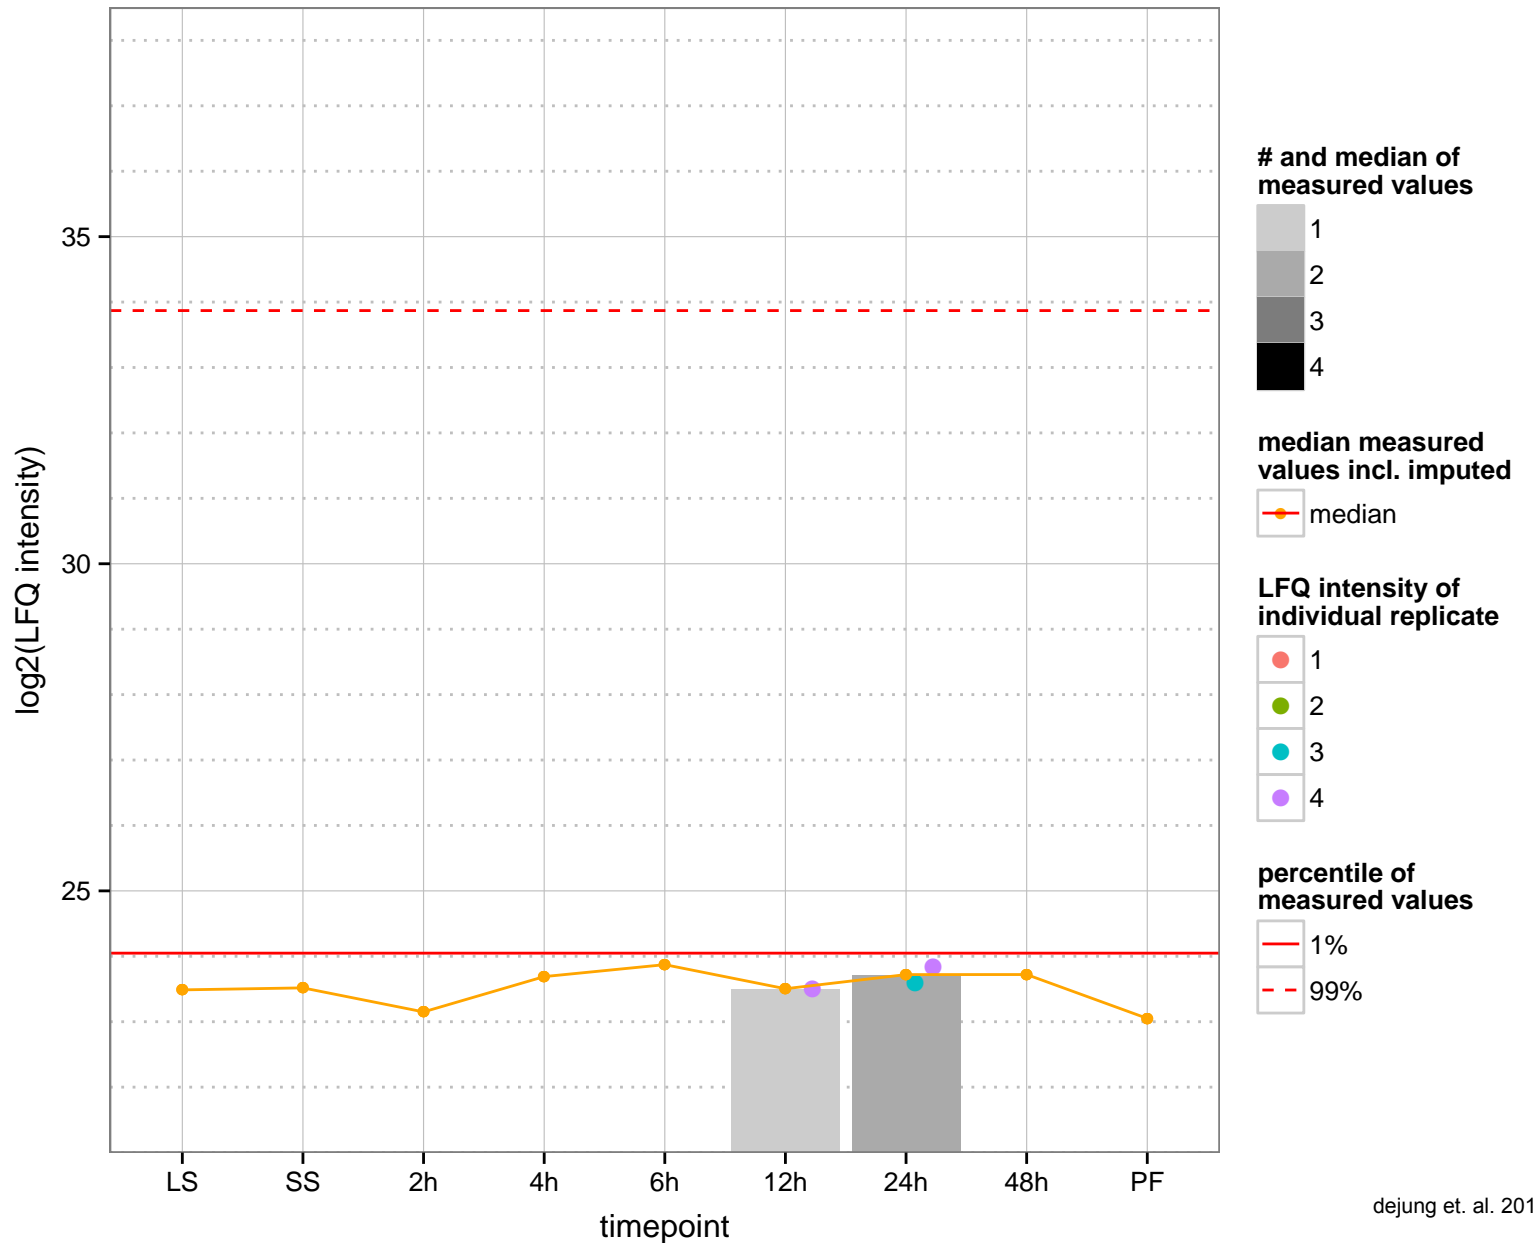

5'-3' exoribonuclease 2, putative (XRND)  
 Tb927.10.6220  
 AGOF: exonuclease activity, nucleic acid binding  
 AGOC: intracellular, nucleus  
 AGOP: RNA processing  
 PGOF: exonuclease activity, nucleic acid binding  
 PGO: intracellular  
 PGOP: null

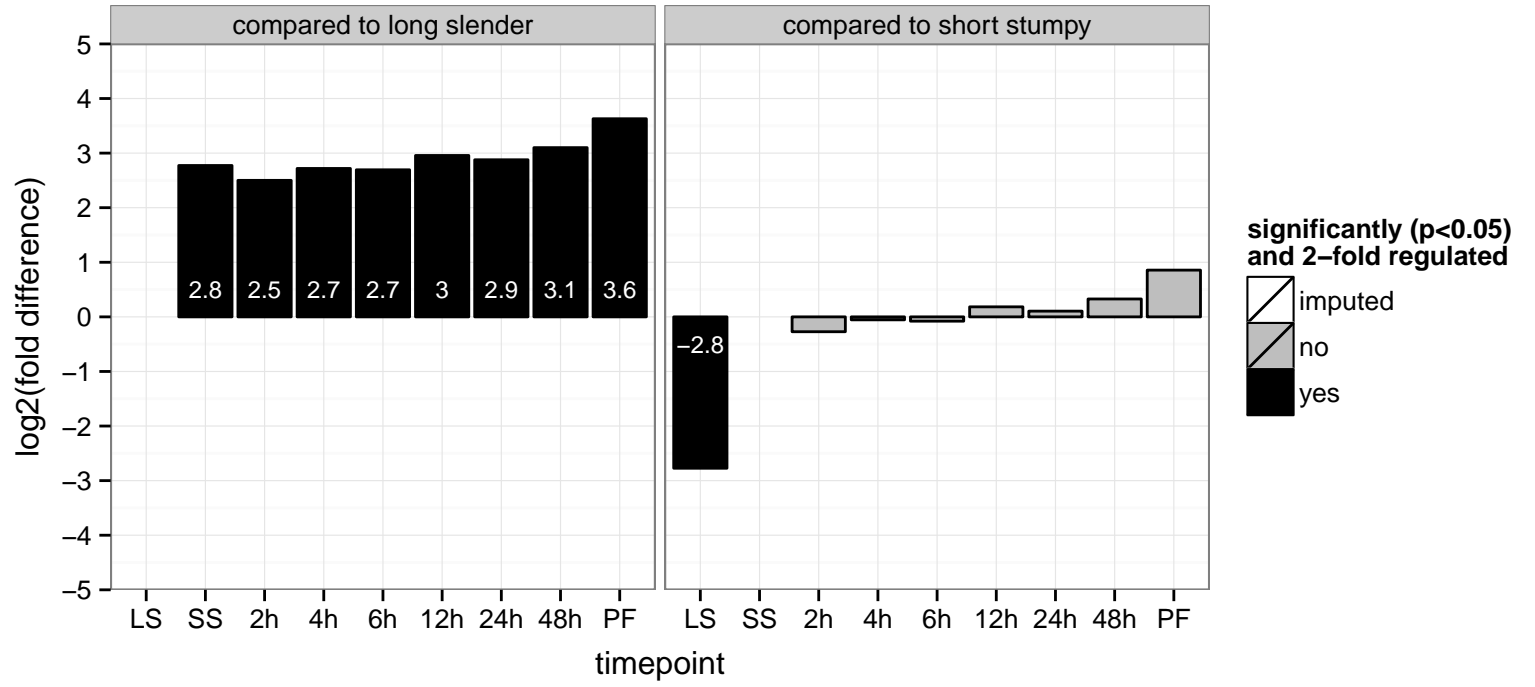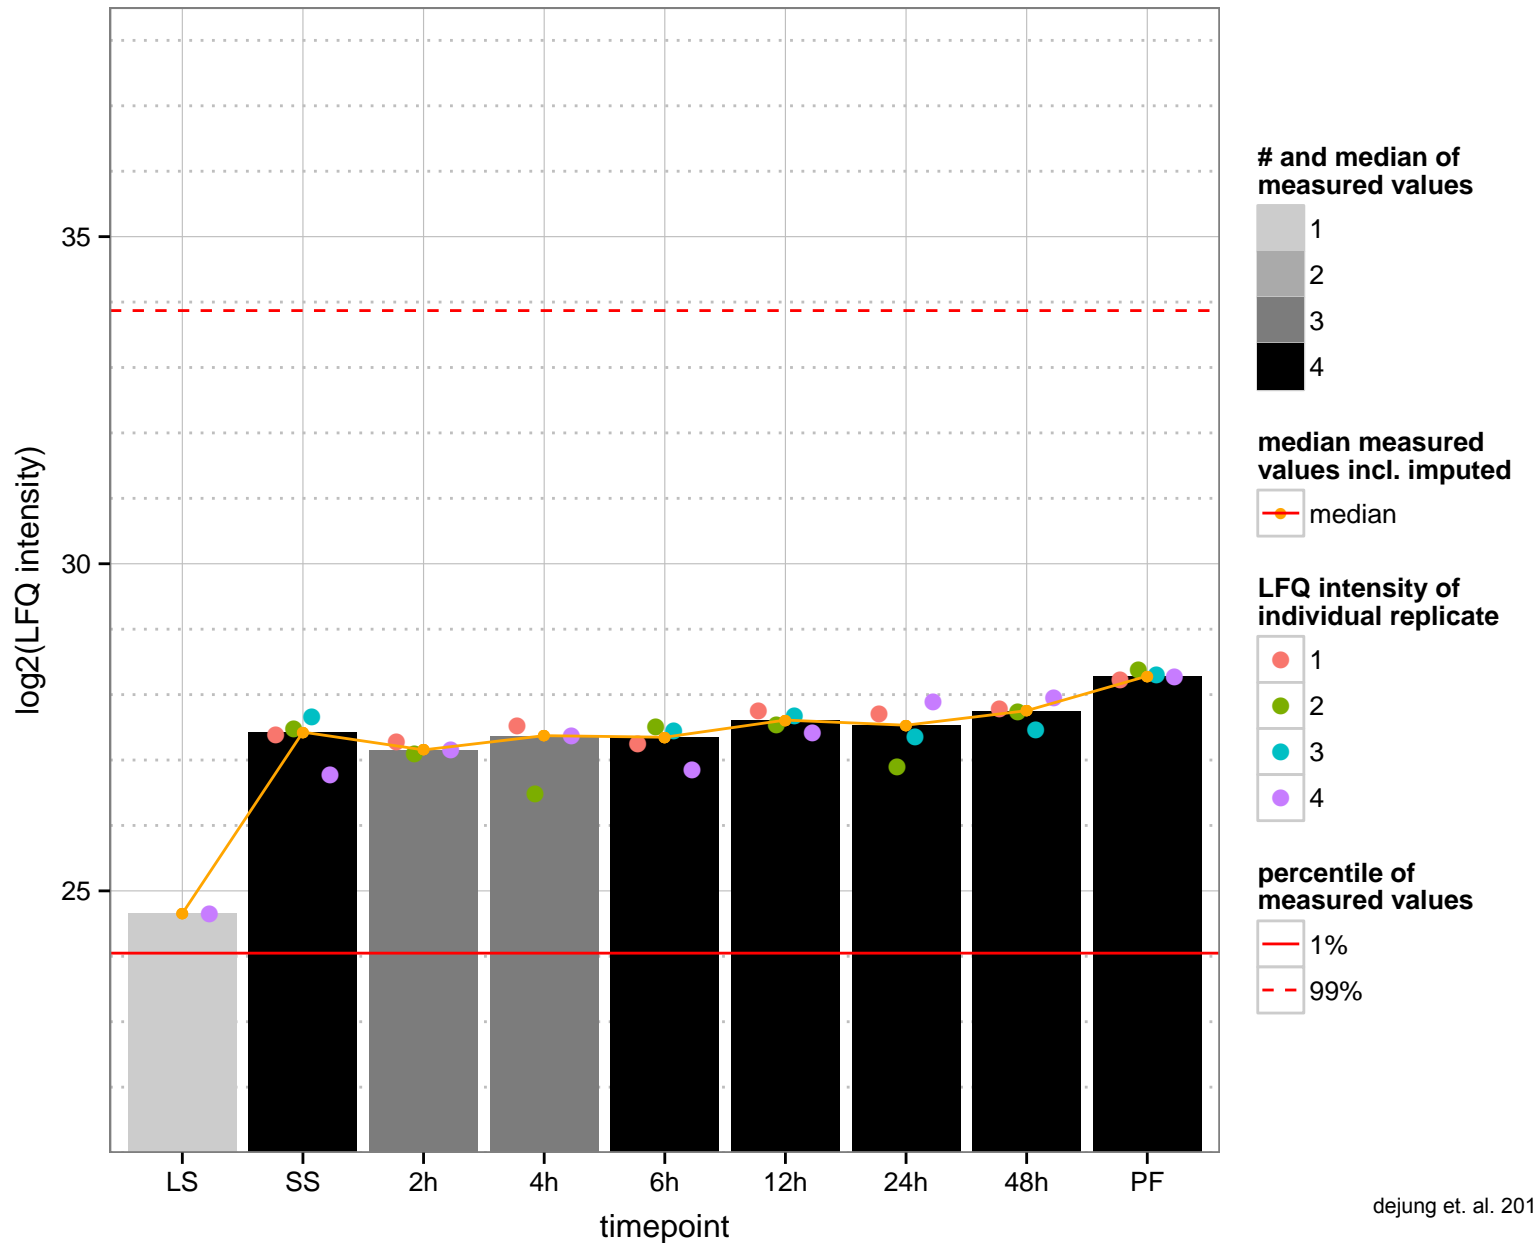

ATP-dependent DEAD/H RNA helicase, putative

Tb927.10.6260;Tb11.v5.0279

AGOF: null, ATP binding, ATP-dependent helicase activity, helicase activity, nucleic acid binding

AGOC: null

AGOP: null, nucleobase-containing compound metabolic process

PGOF: ATP binding, ATP-dependent helicase activity, helicase activity, nucleic acid binding

PGOC: null

PGOP: null

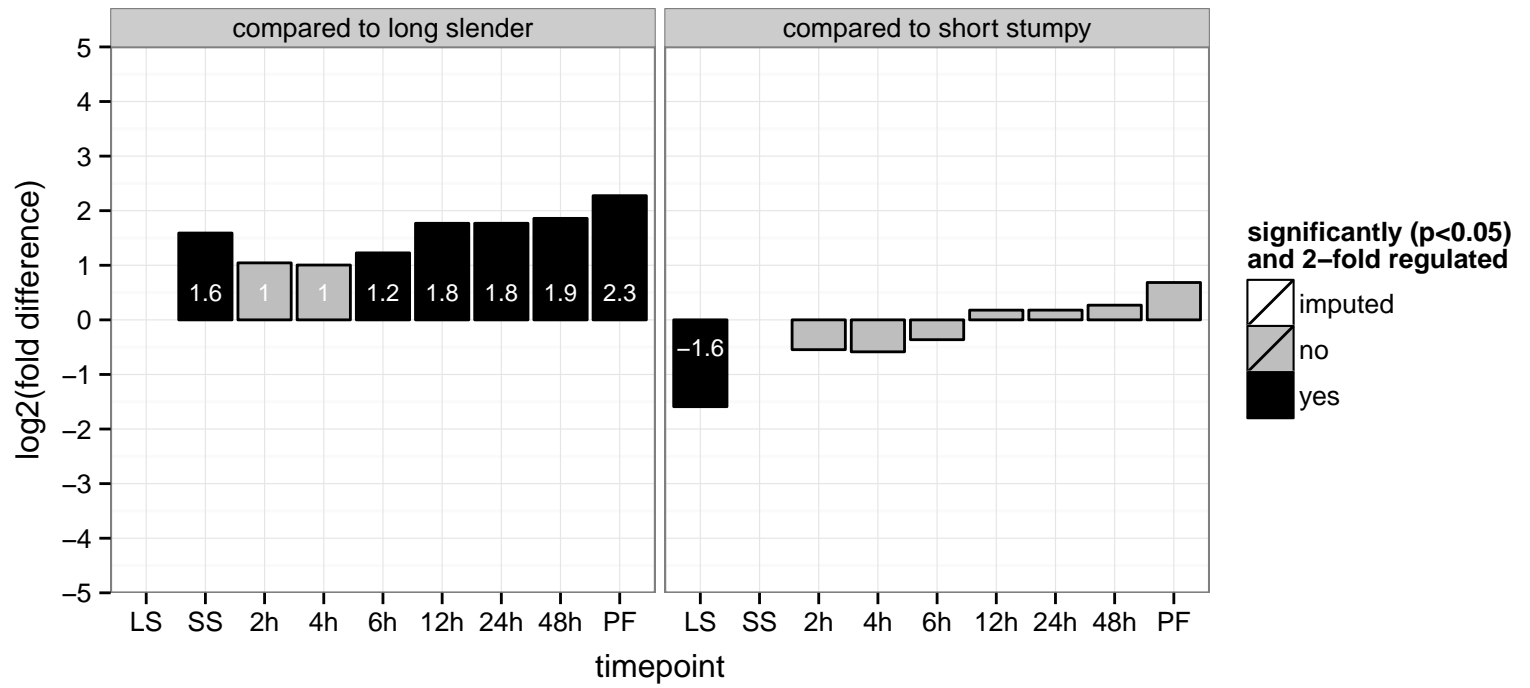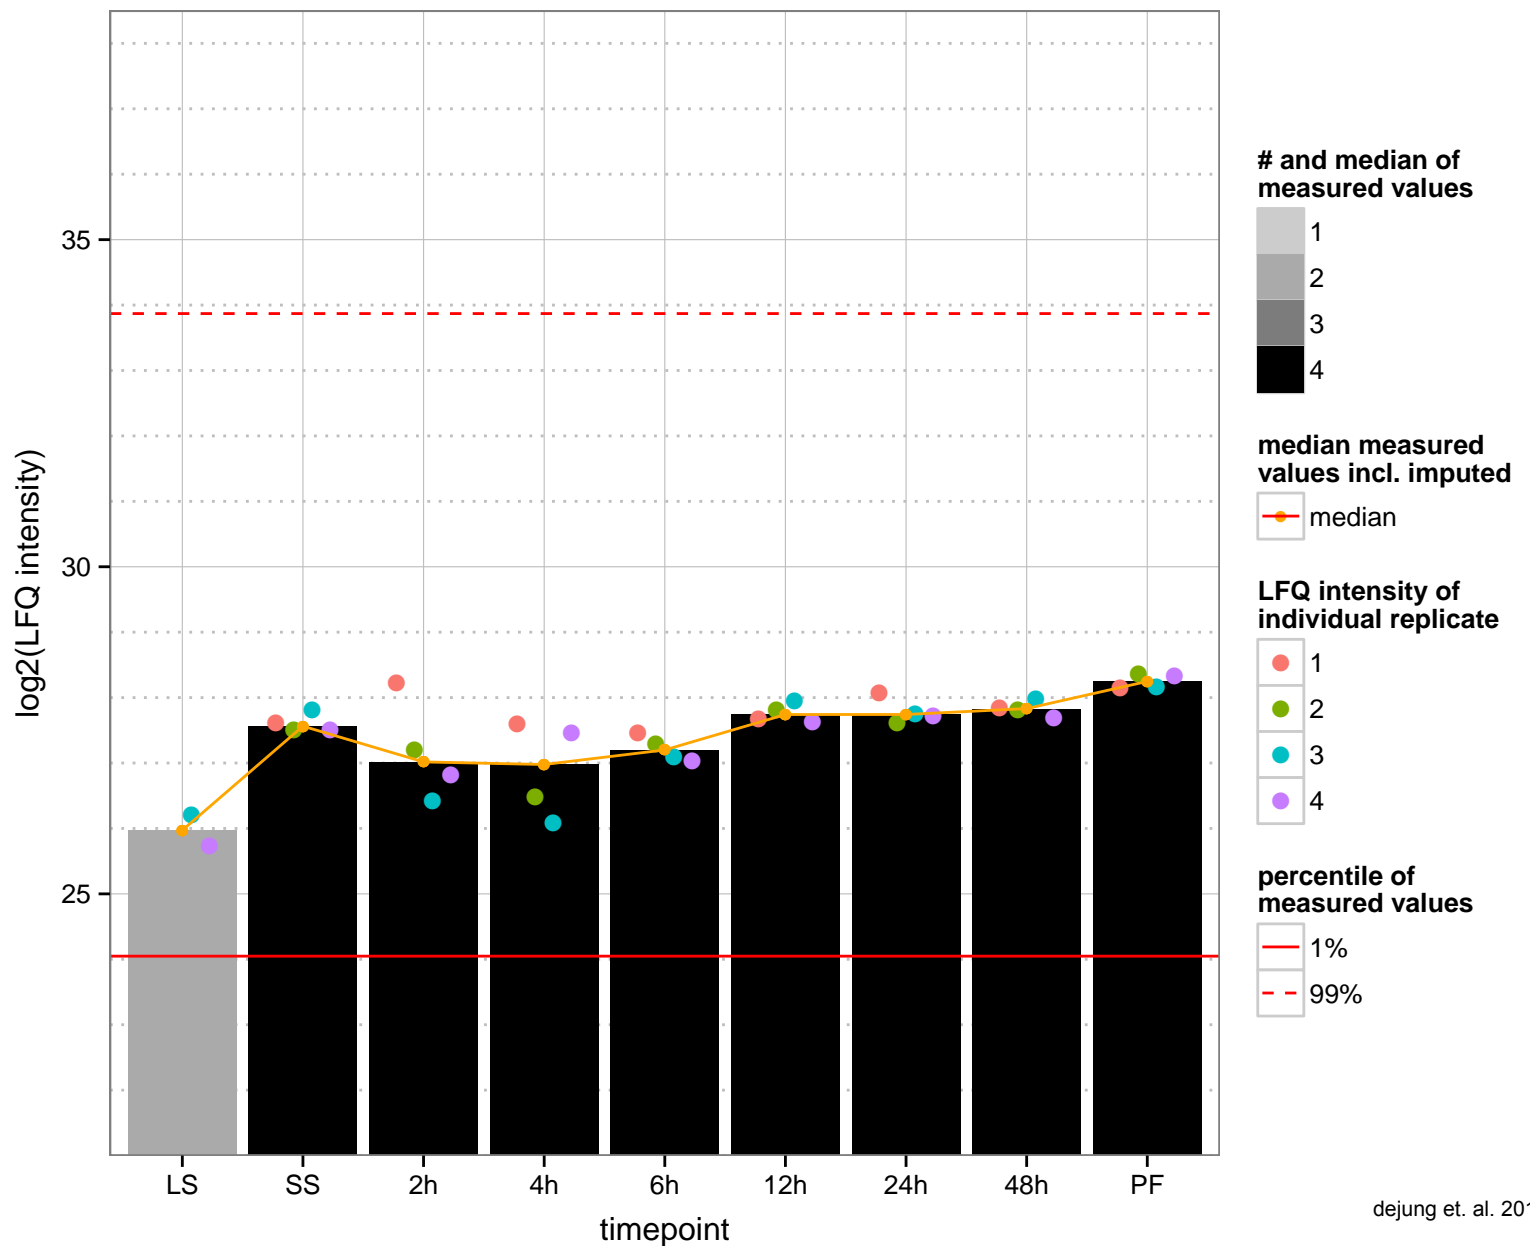

chaperonin HSP60, mitochondrial precursor (HSP60)

Tb927.10.6510;Tb927.10.6400

AGOF: ATP binding, unfolded protein binding

AGOC: mitochondrion

AGOP: protein complex assembly, protein folding, protein import into mitochondrial matrix

PGOF: ATP binding

PGOC: cytoplasm

PGOP: cellular protein metabolic process, protein refolding

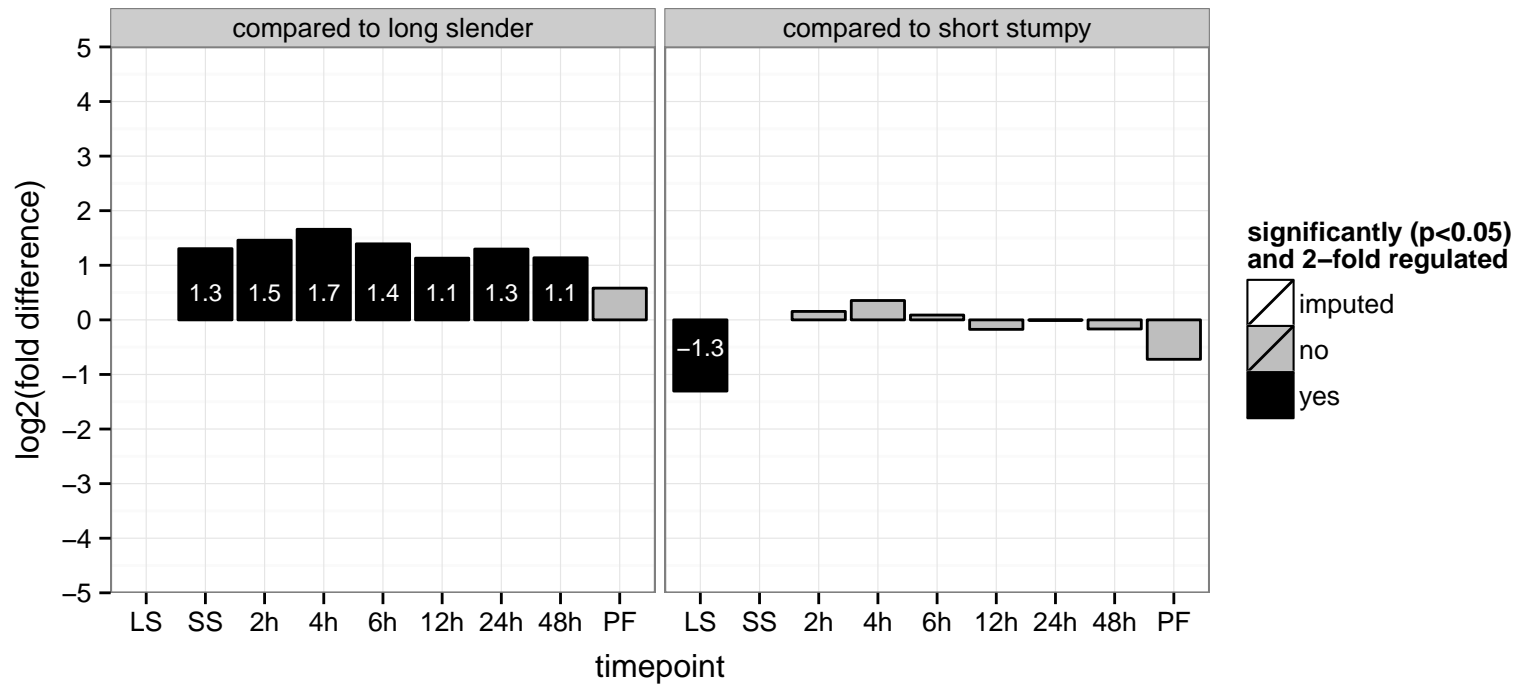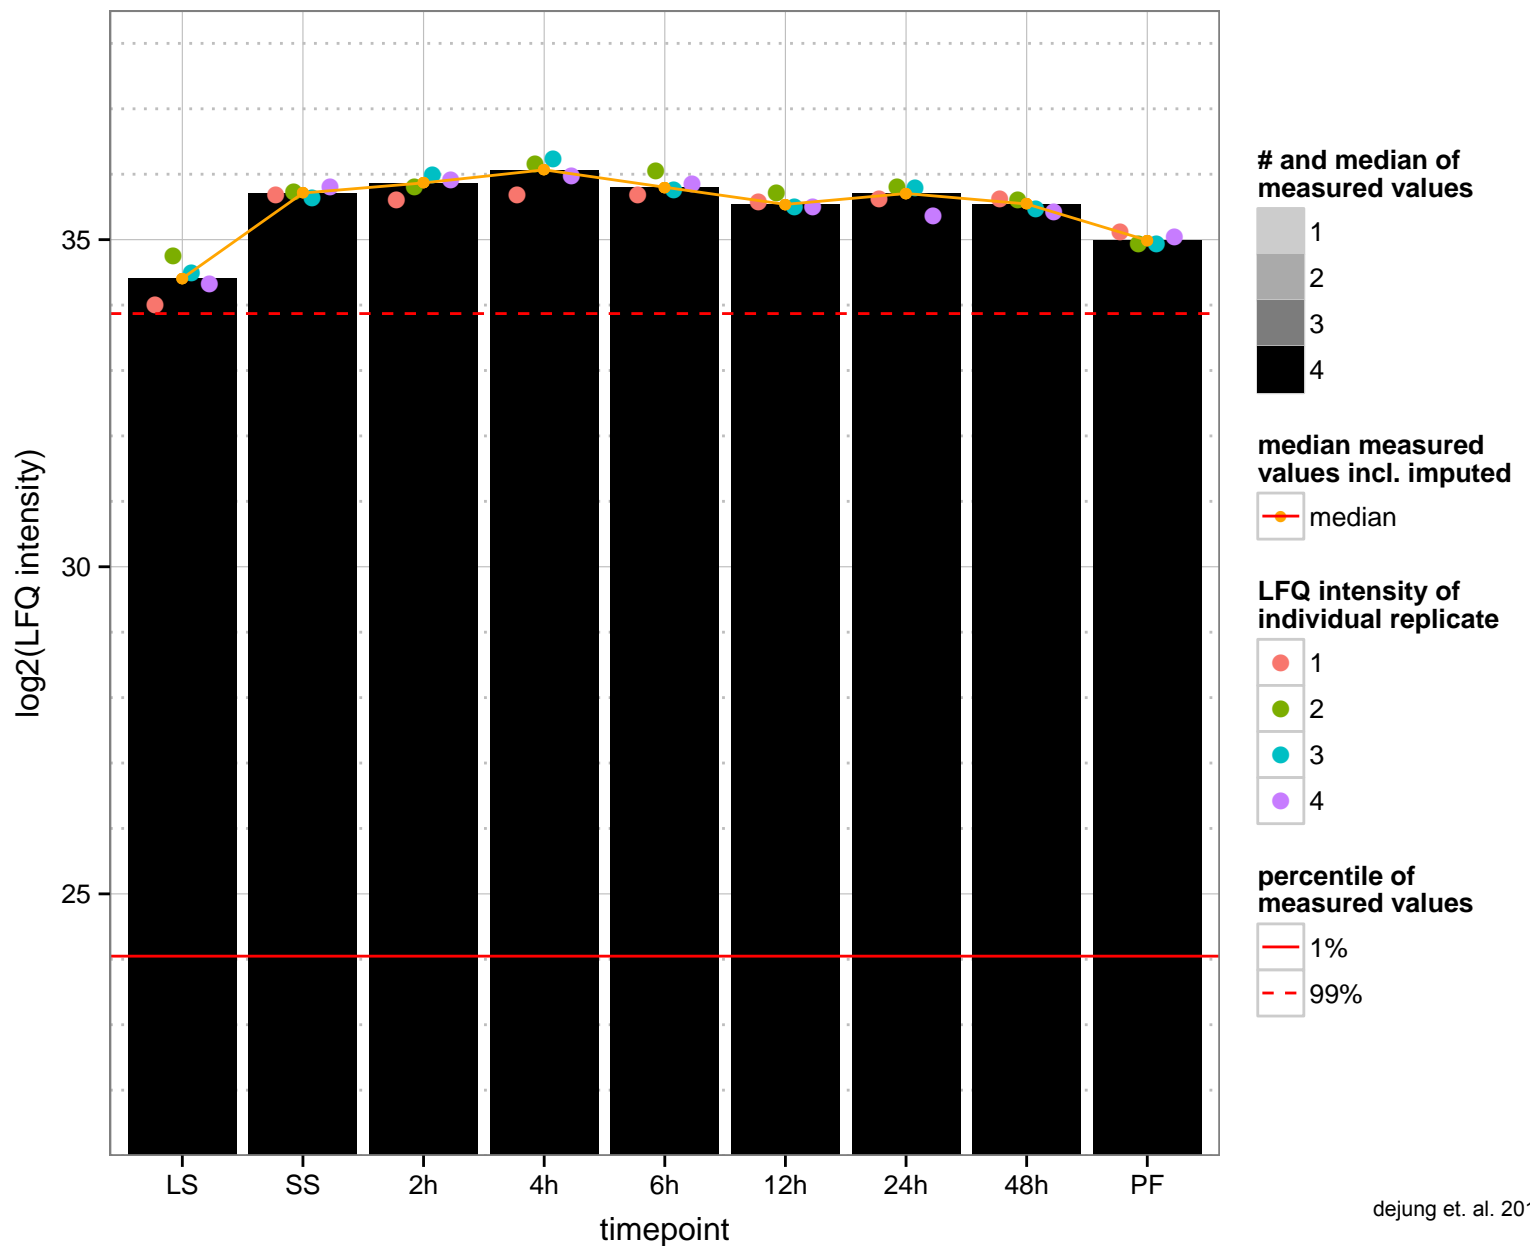



phosphomannomutase, putative  
 Tb927.10.6440  
 AGOF: phosphomannomutase activity  
 AGOC: cytoplasm  
 AGOP: mannose biosynthetic process  
 PGOF: catalytic activity, phosphomannomutase activity  
 PGO: cytoplasm  
 PGO: mannose biosynthetic process, metabolic process

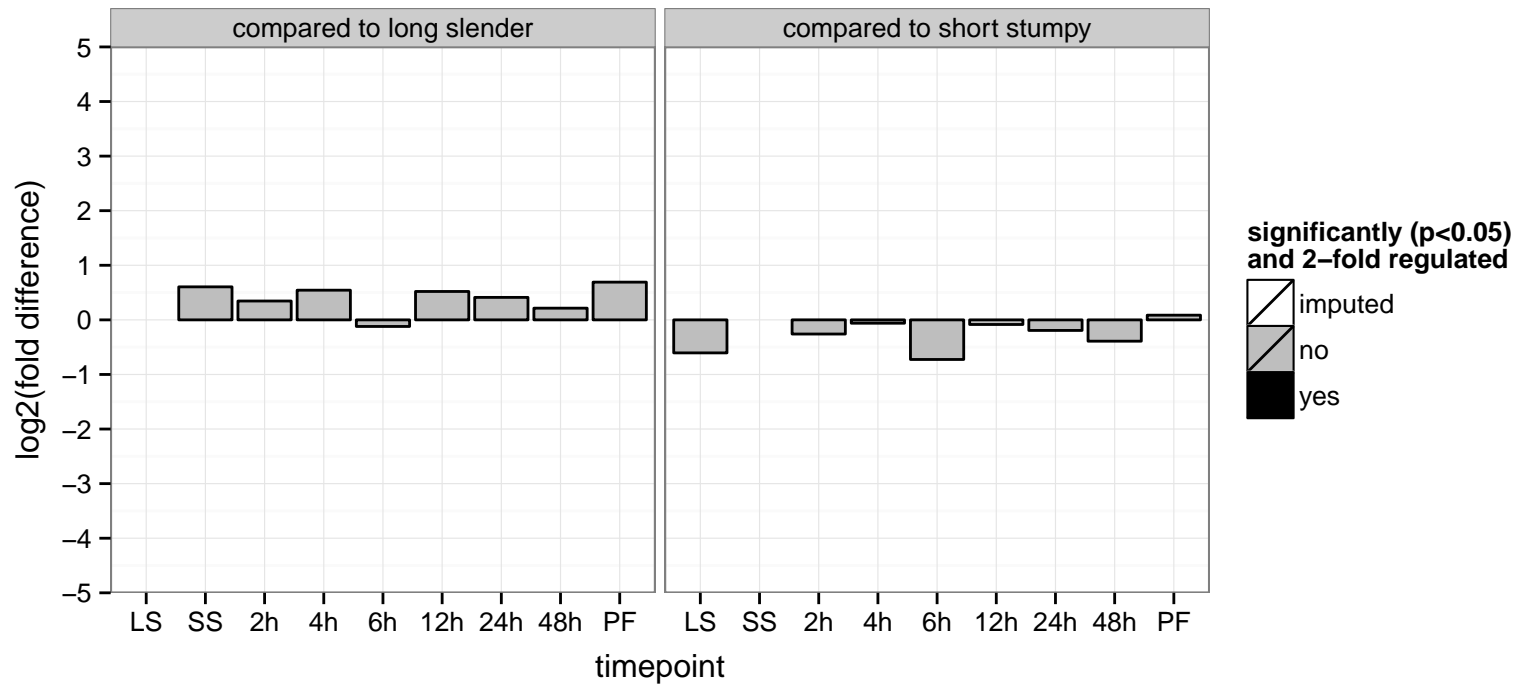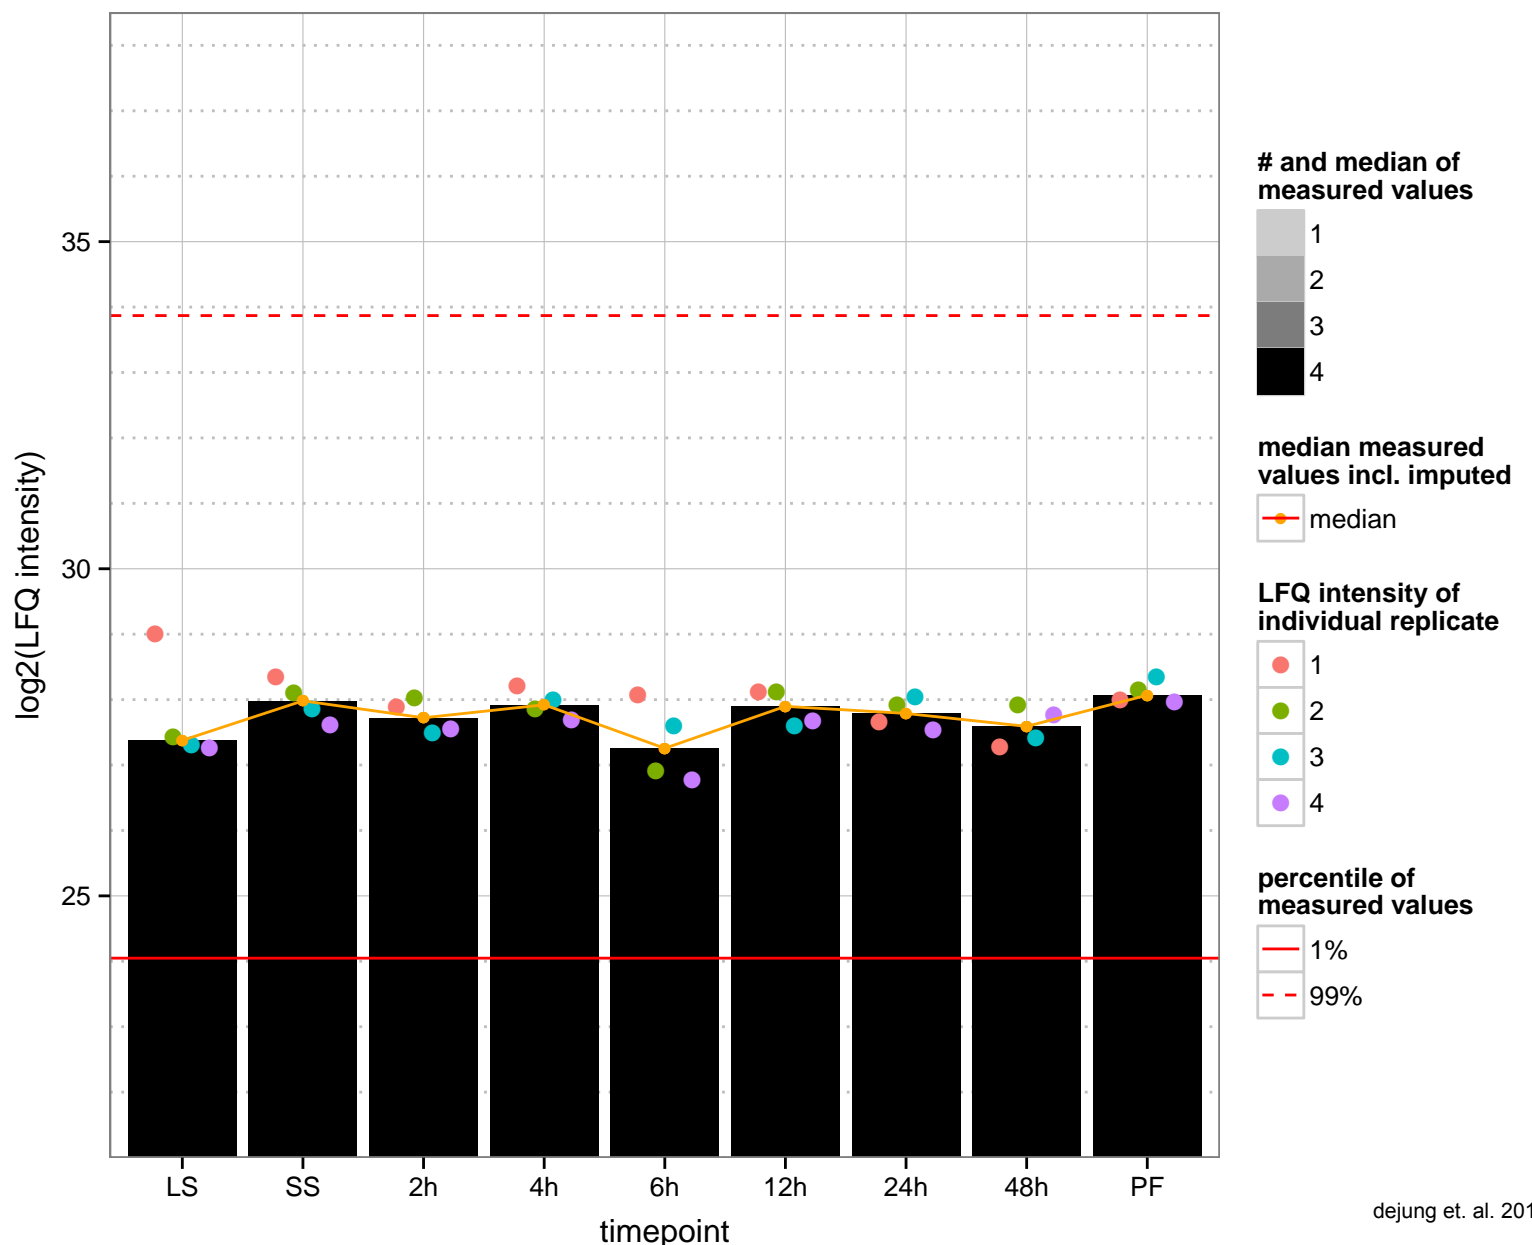

hypothetical protein, conserved  
 Tb927.10.6490  
 AGOF: null  
 AGOC: null  
 AGOP: null  
 PGO: null  
 PGOC: null  
 PGOP: null

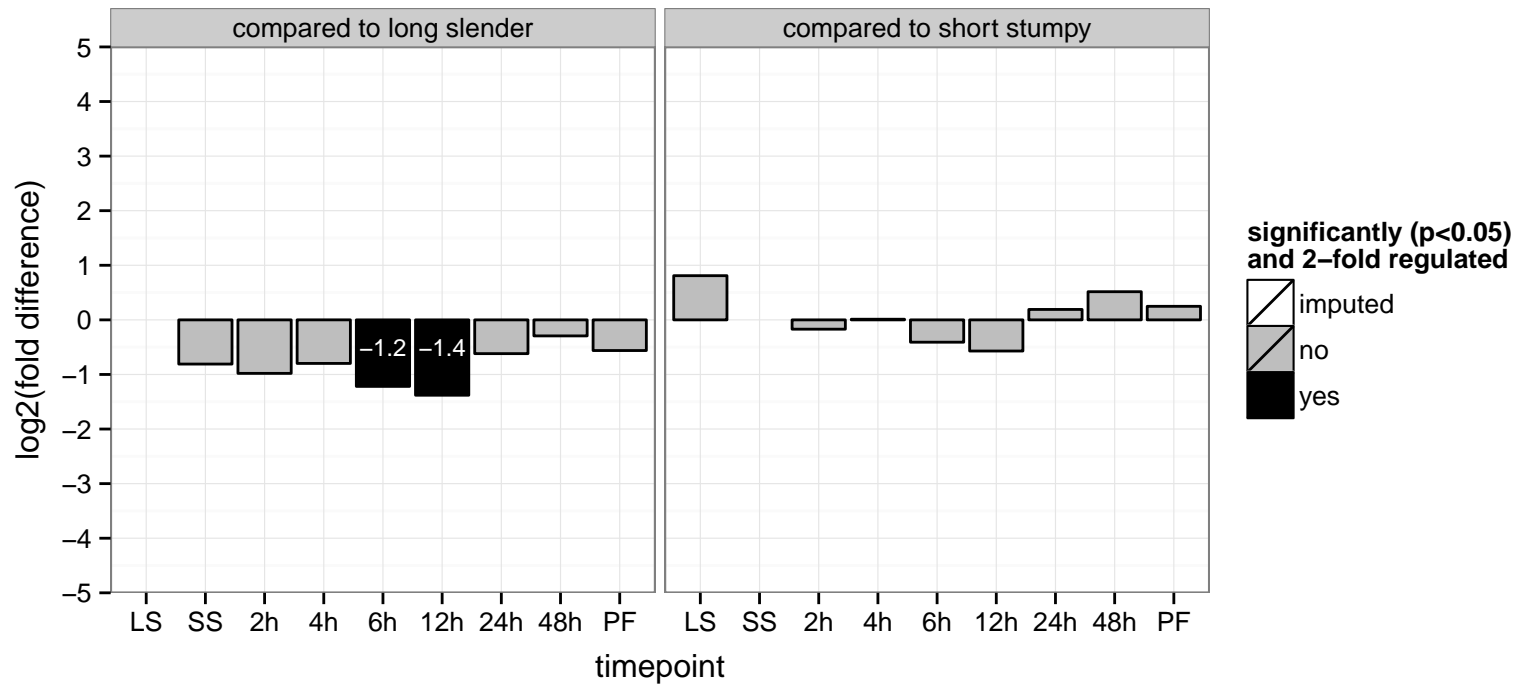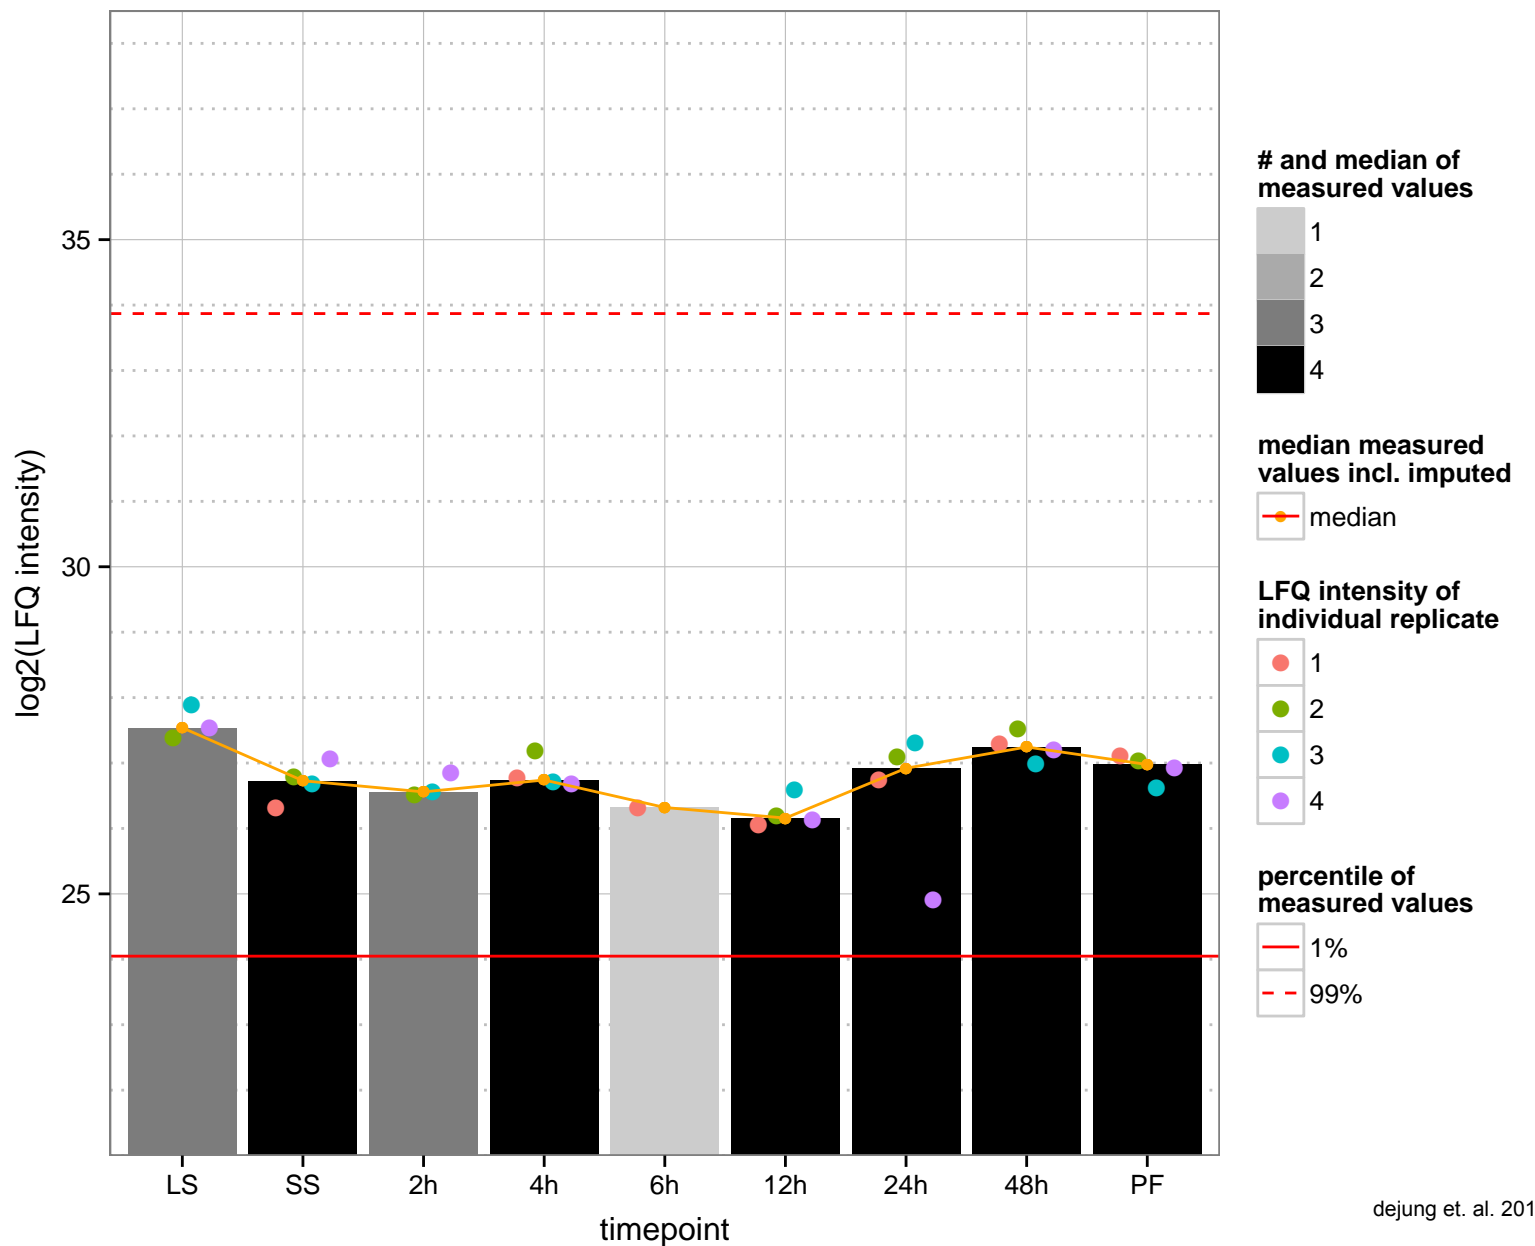

TAX-2  
 Tb927.10.650  
 AGOF: heme binding  
 AGOC: cilium part  
 AGOP: ciliary or flagellar motility  
 PGOF: heme binding  
 PGOC: null  
 PGOP: null

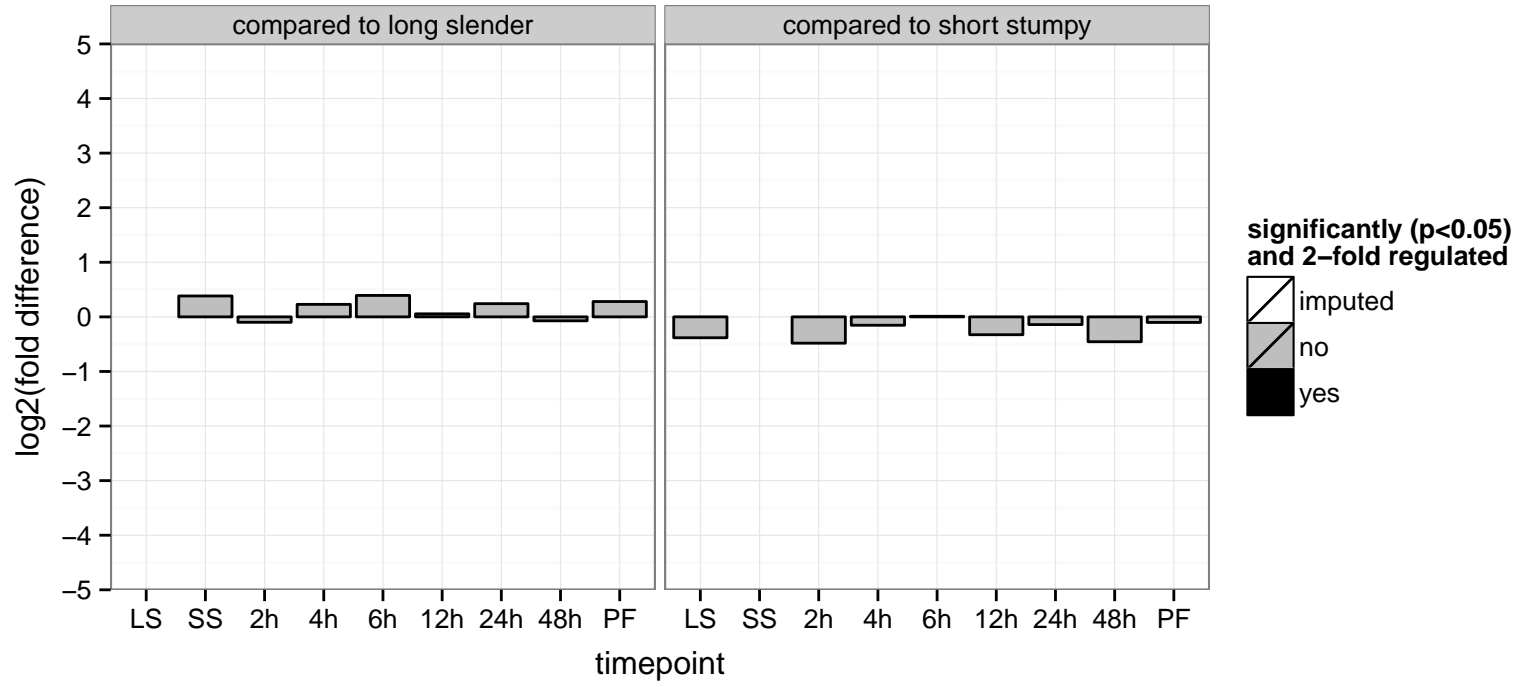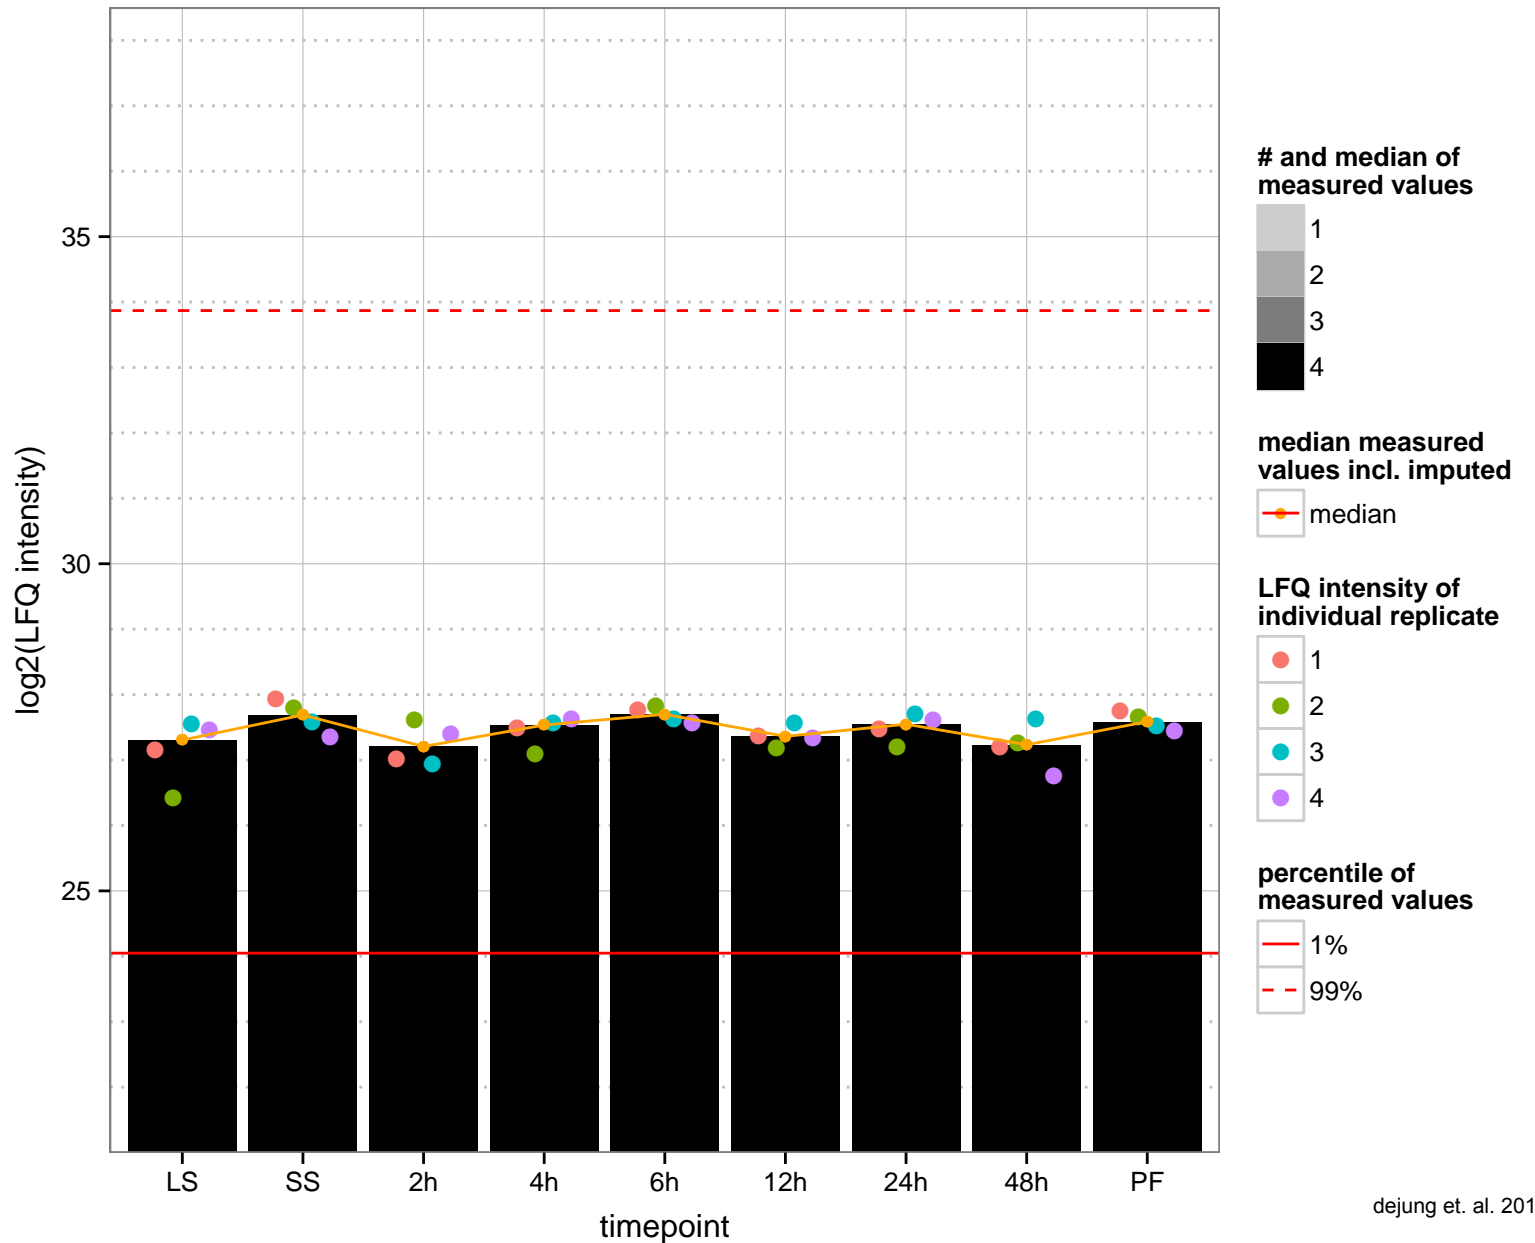

chaperone protein DNAj, putative  
 Tb927.10.6610  
 AGOF: heat shock protein binding, unfolded protein binding  
 AGOC: null  
 AGOP: protein folding  
 PGOF: heat shock protein binding  
 PGOC: null  
 PGOP: null

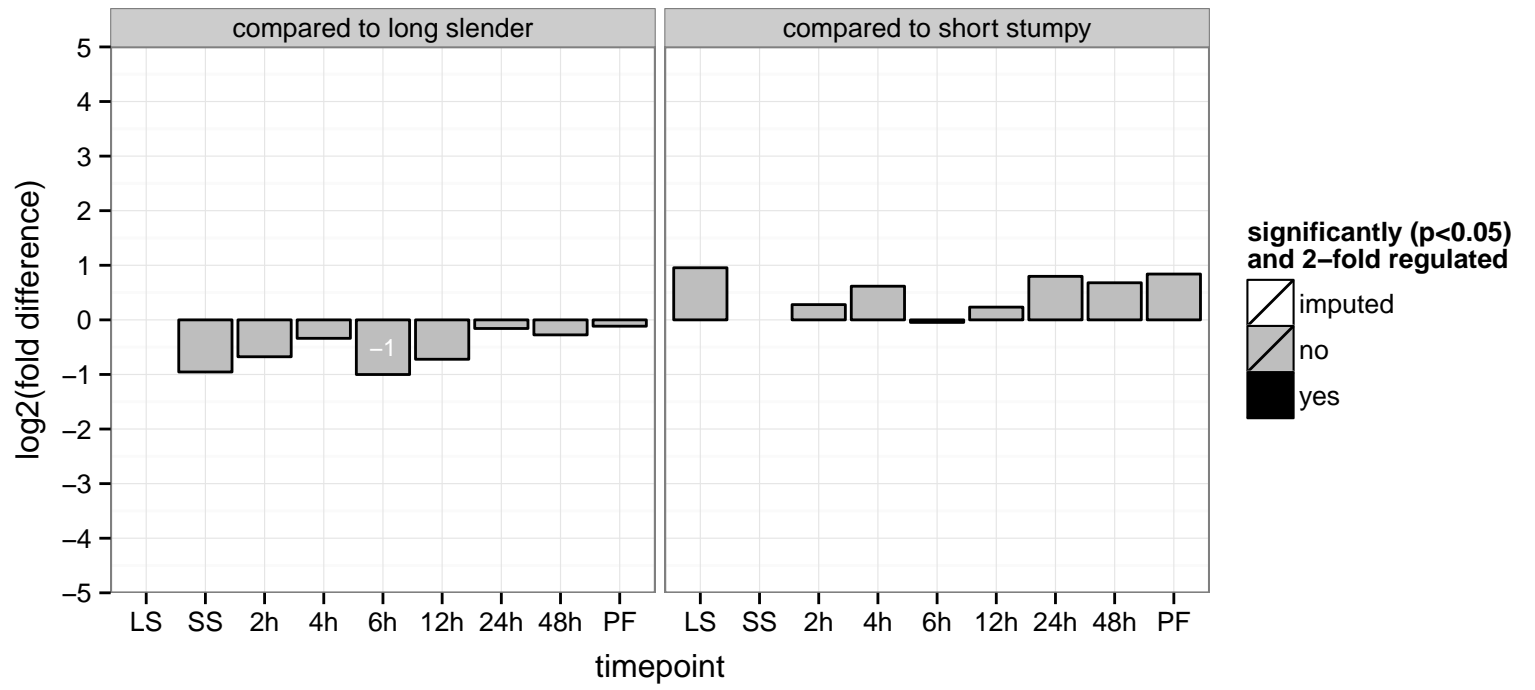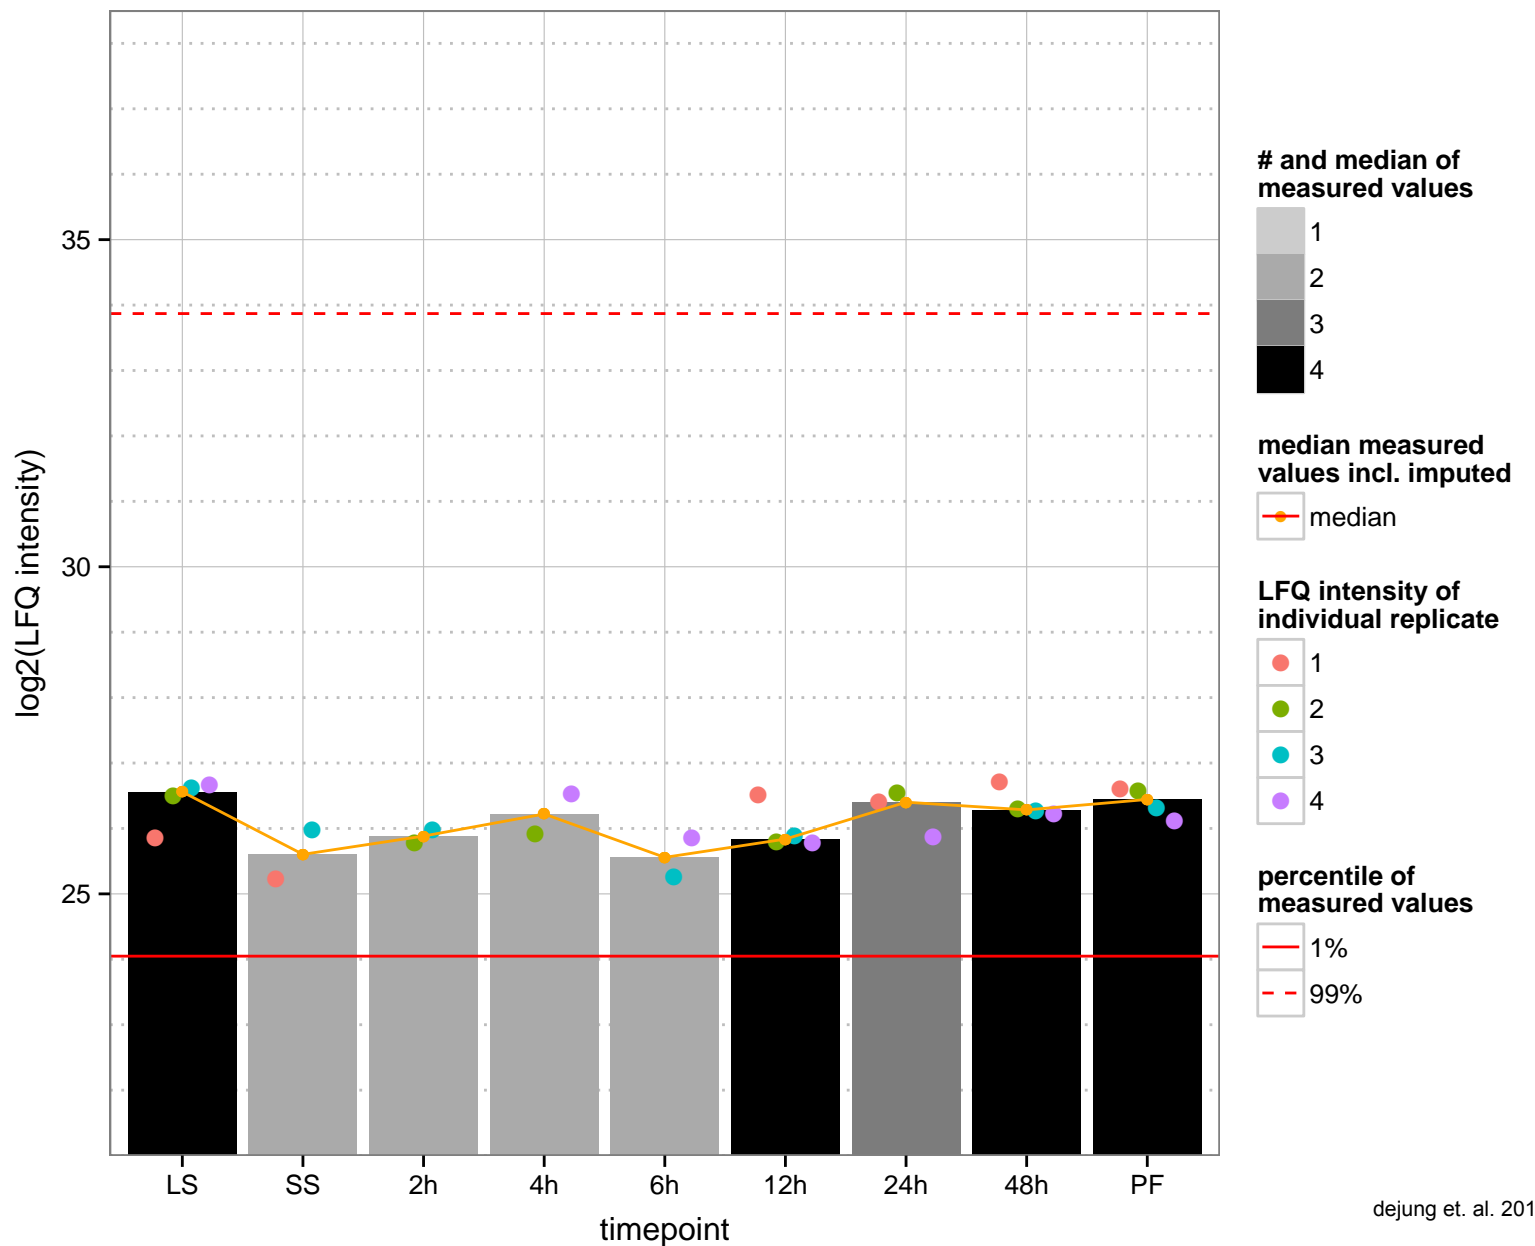

COP-coated vesicle membrane protein erv25 precursor, putative, ER--golgi transport protein erv25 precursor  
 Tb927.10.6640  
 AGOF: null  
 AGOC: integral to membrane  
 AGOP: transport  
 PGOF: null  
 PGO: integral to membrane  
 PGOP: transport

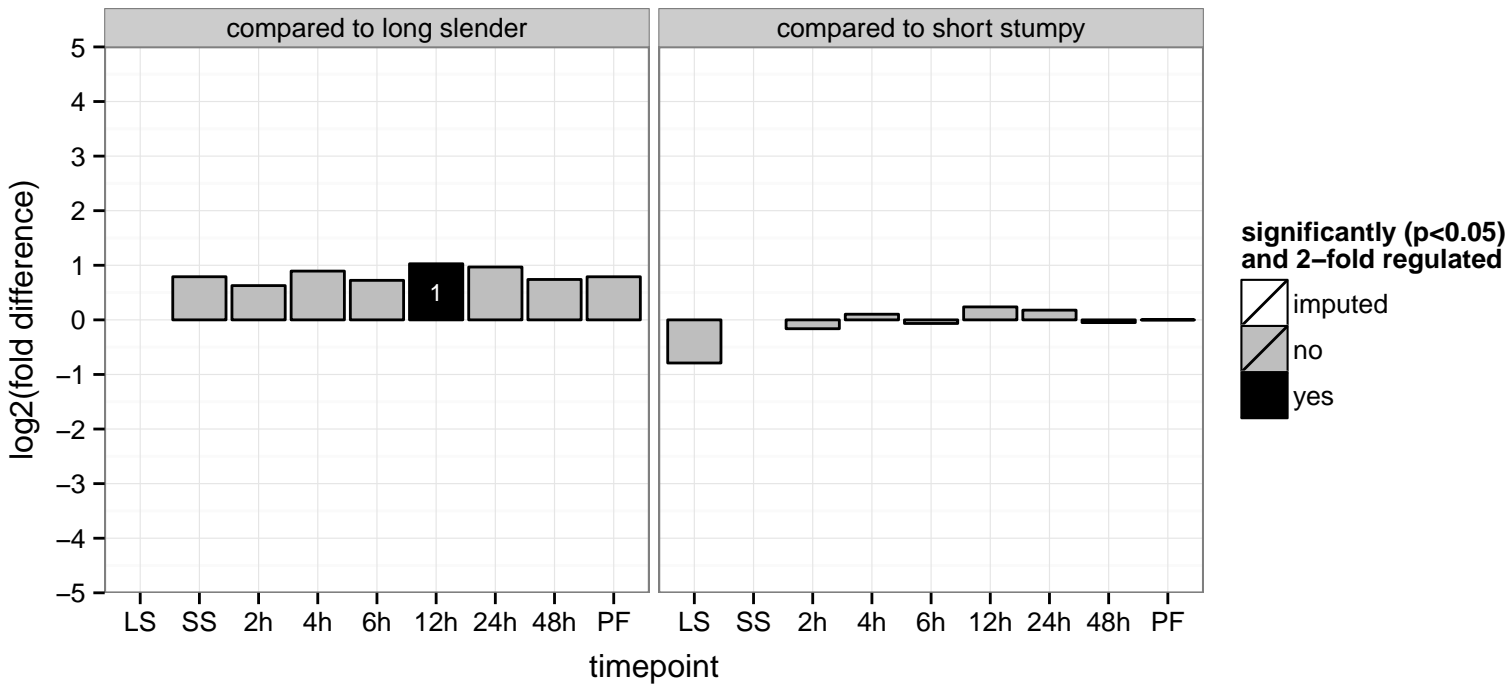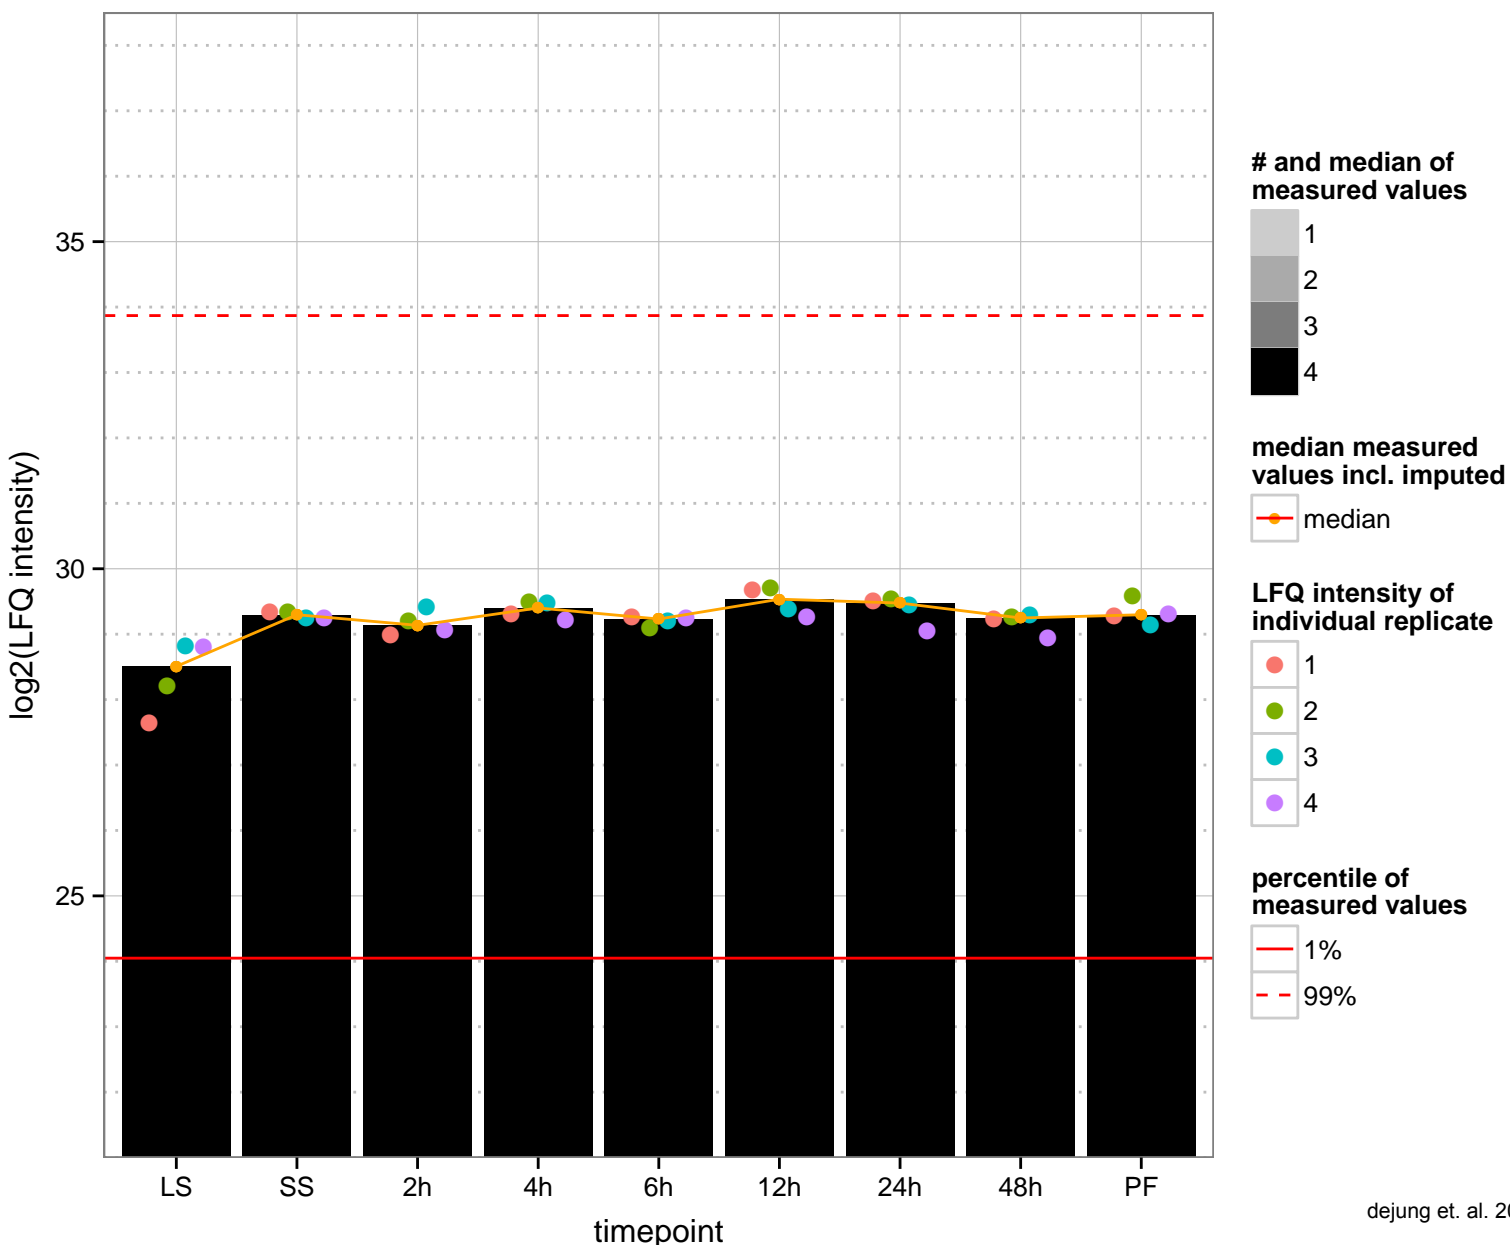

dynein light chain, putative  
 Tb927.10.6670  
 AGOF: microtubule motor activity  
 AGOC: microtubule associated complex  
 AGOP: microtubule-based process  
 PGO: null  
 PGO: microtubule associated complex  
 PGO: microtubule-based process

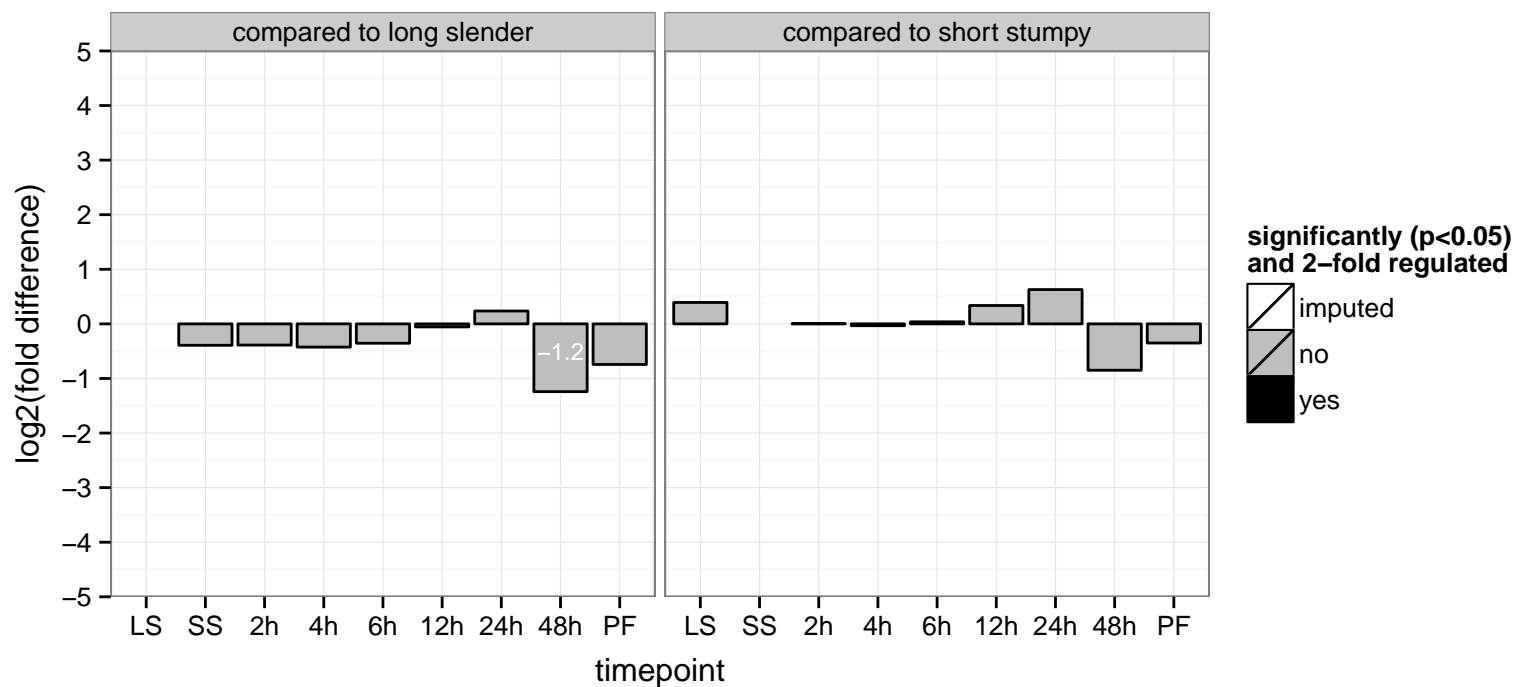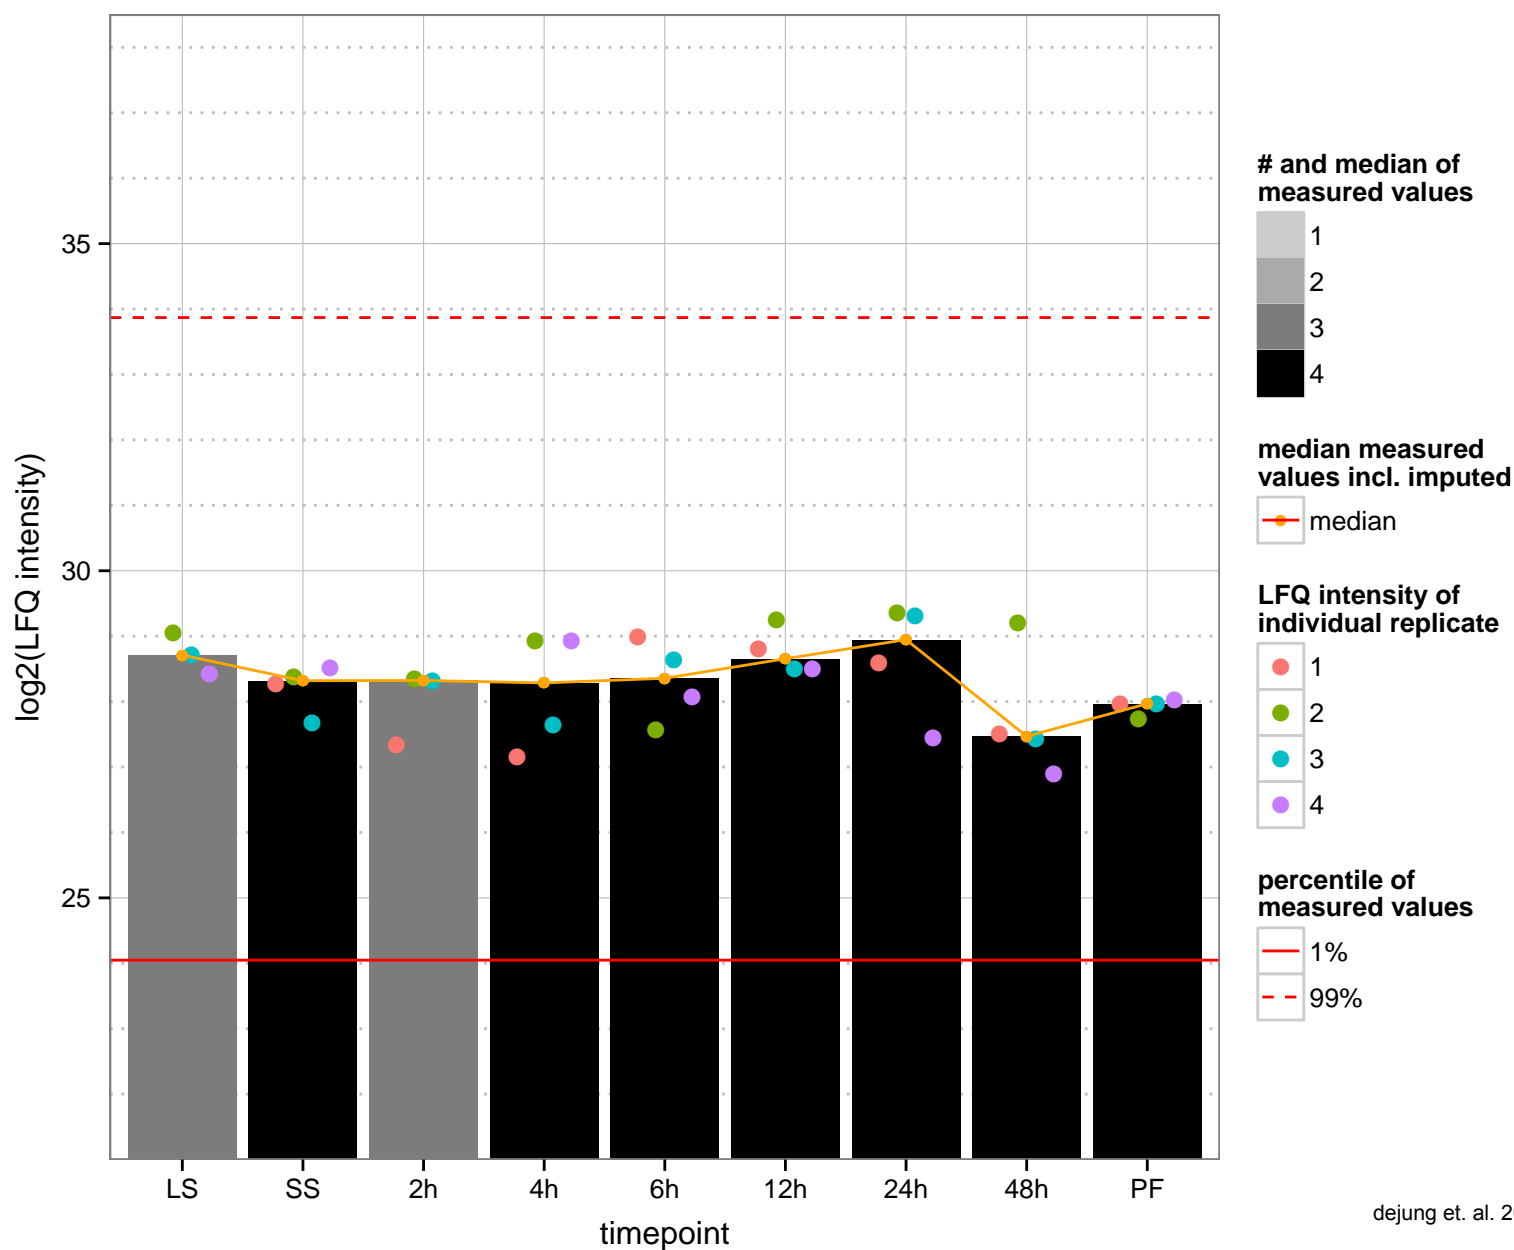

developmentally regulated GTP-binding protein, putative  
 Tb927.10.6800  
 AGOF: GTP binding  
 AGOC: cytoplasm, intracellular  
 AGOP: cellular process  
 PGO: GTP binding  
 PGOC: null  
 PGOP: null

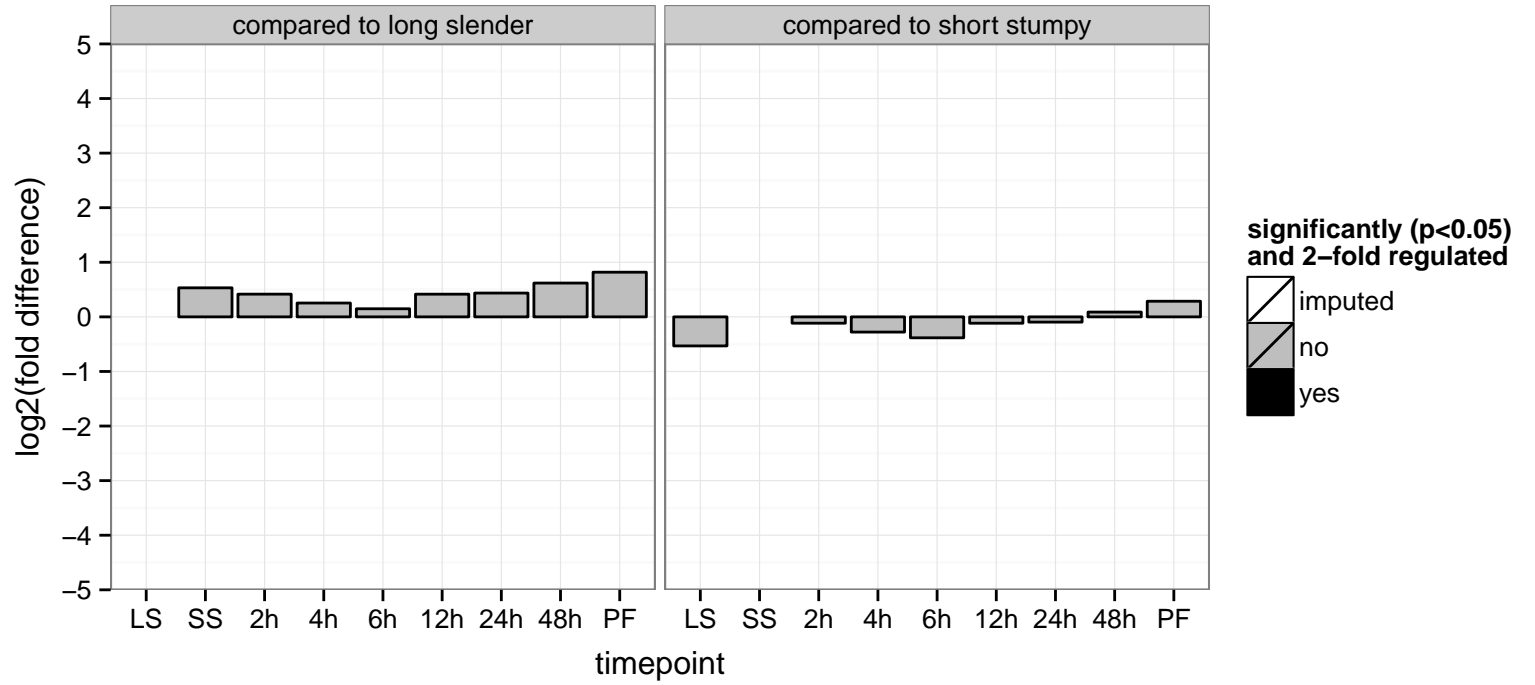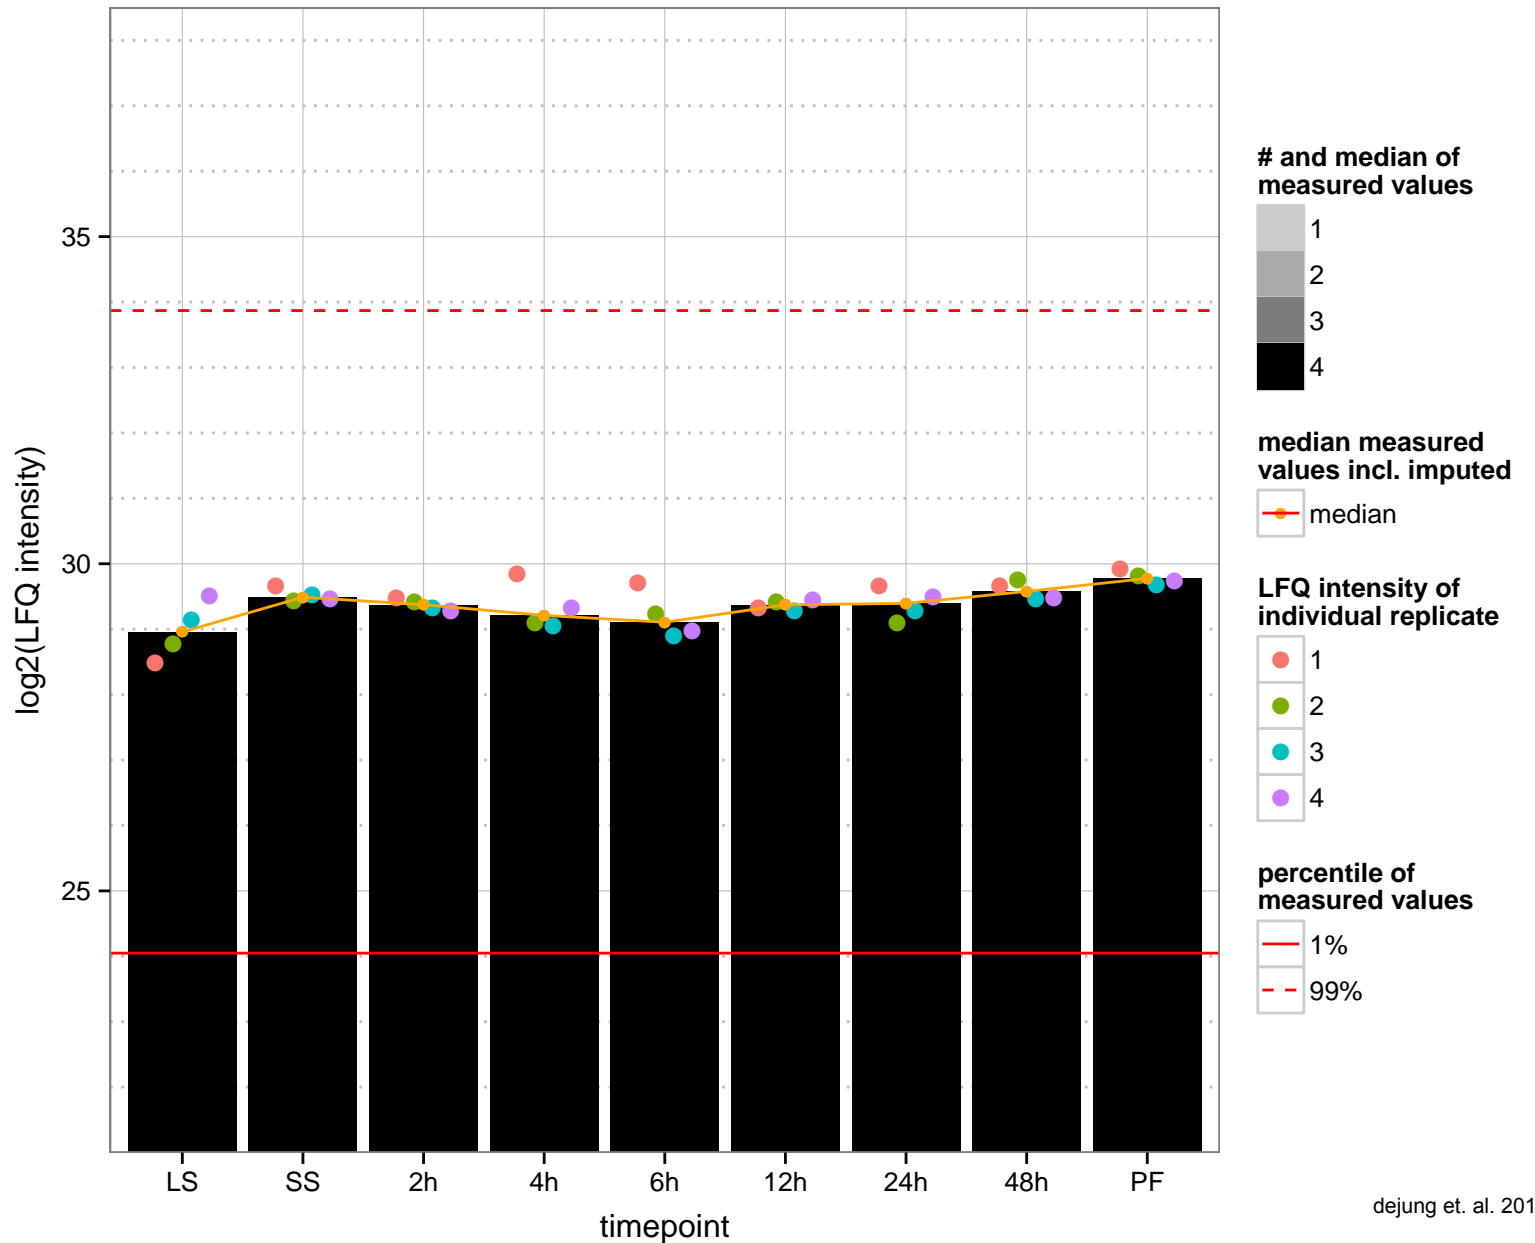

guanylate kinase, putative  
 Tb927.10.6810  
 AGOF: null  
 AGOC: null  
 AGOP: nucleobase-containing small molecule interconversion  
 PGO: protein binding  
 PGOC: null  
 PGOP: null

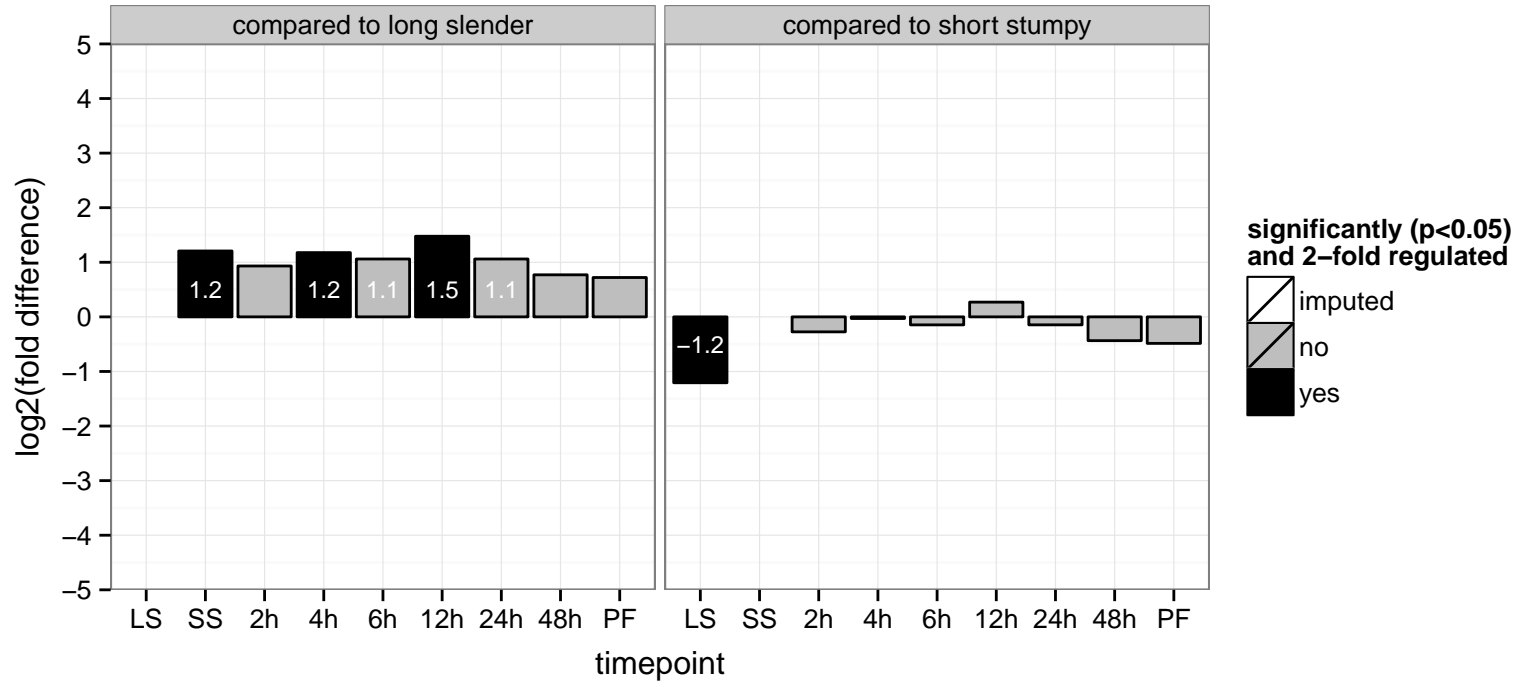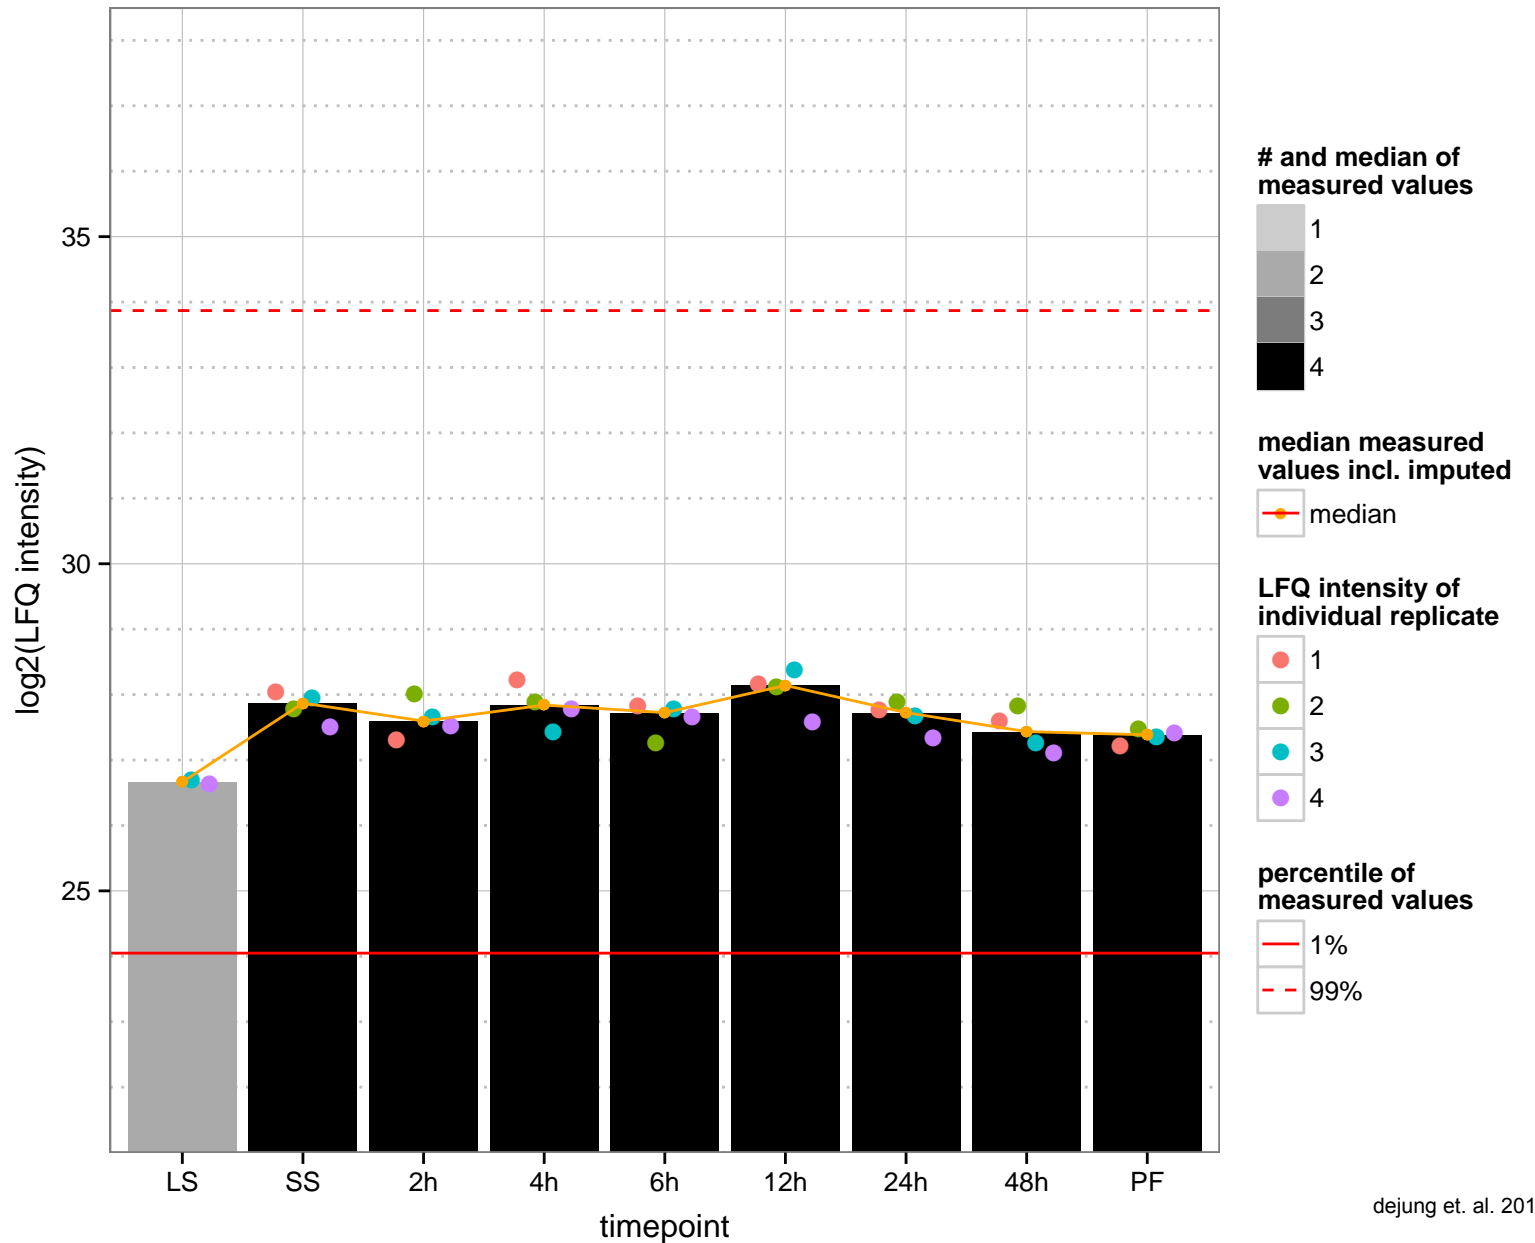



hypothetical protein, conserved  
 Tb927.10.6820  
 AGOF: null  
 AGOC: null  
 AGOP: null  
 PGO: null  
 PGOC: null  
 PGOP: null

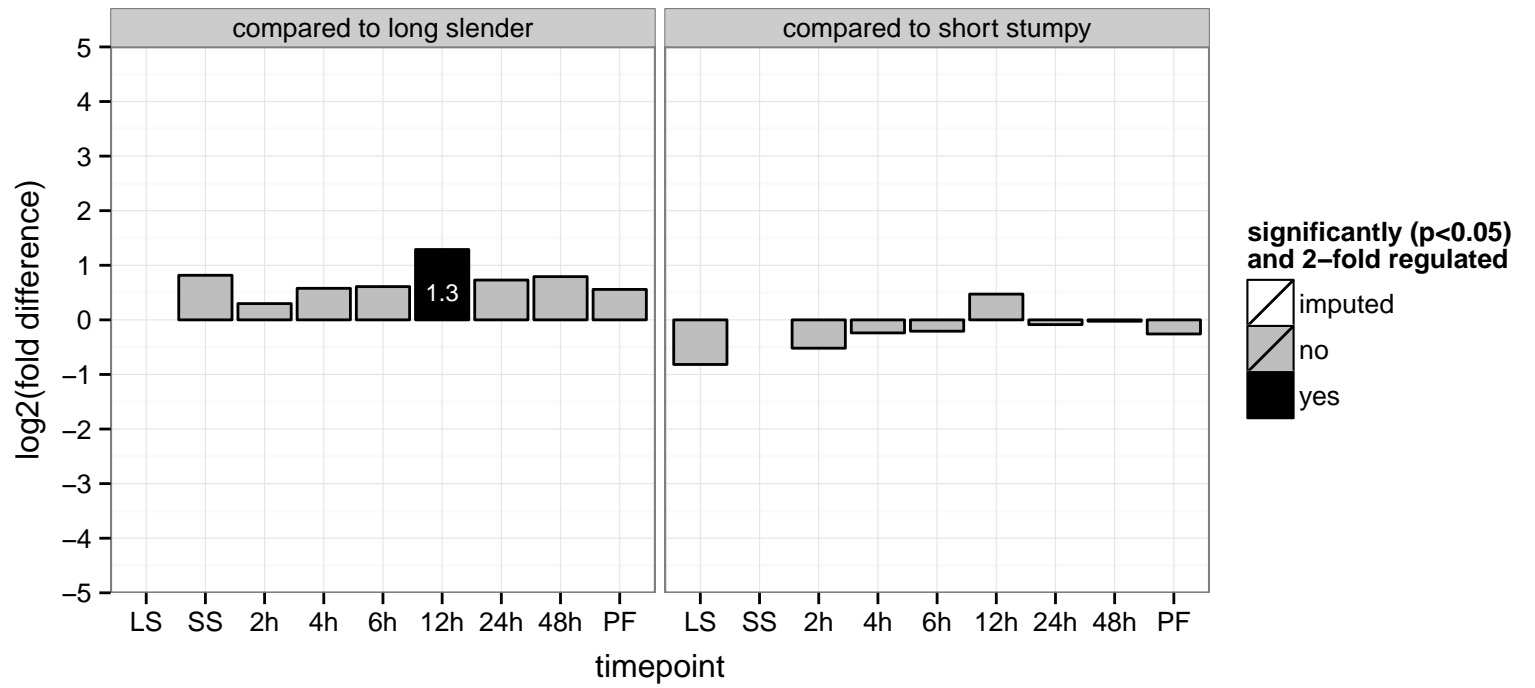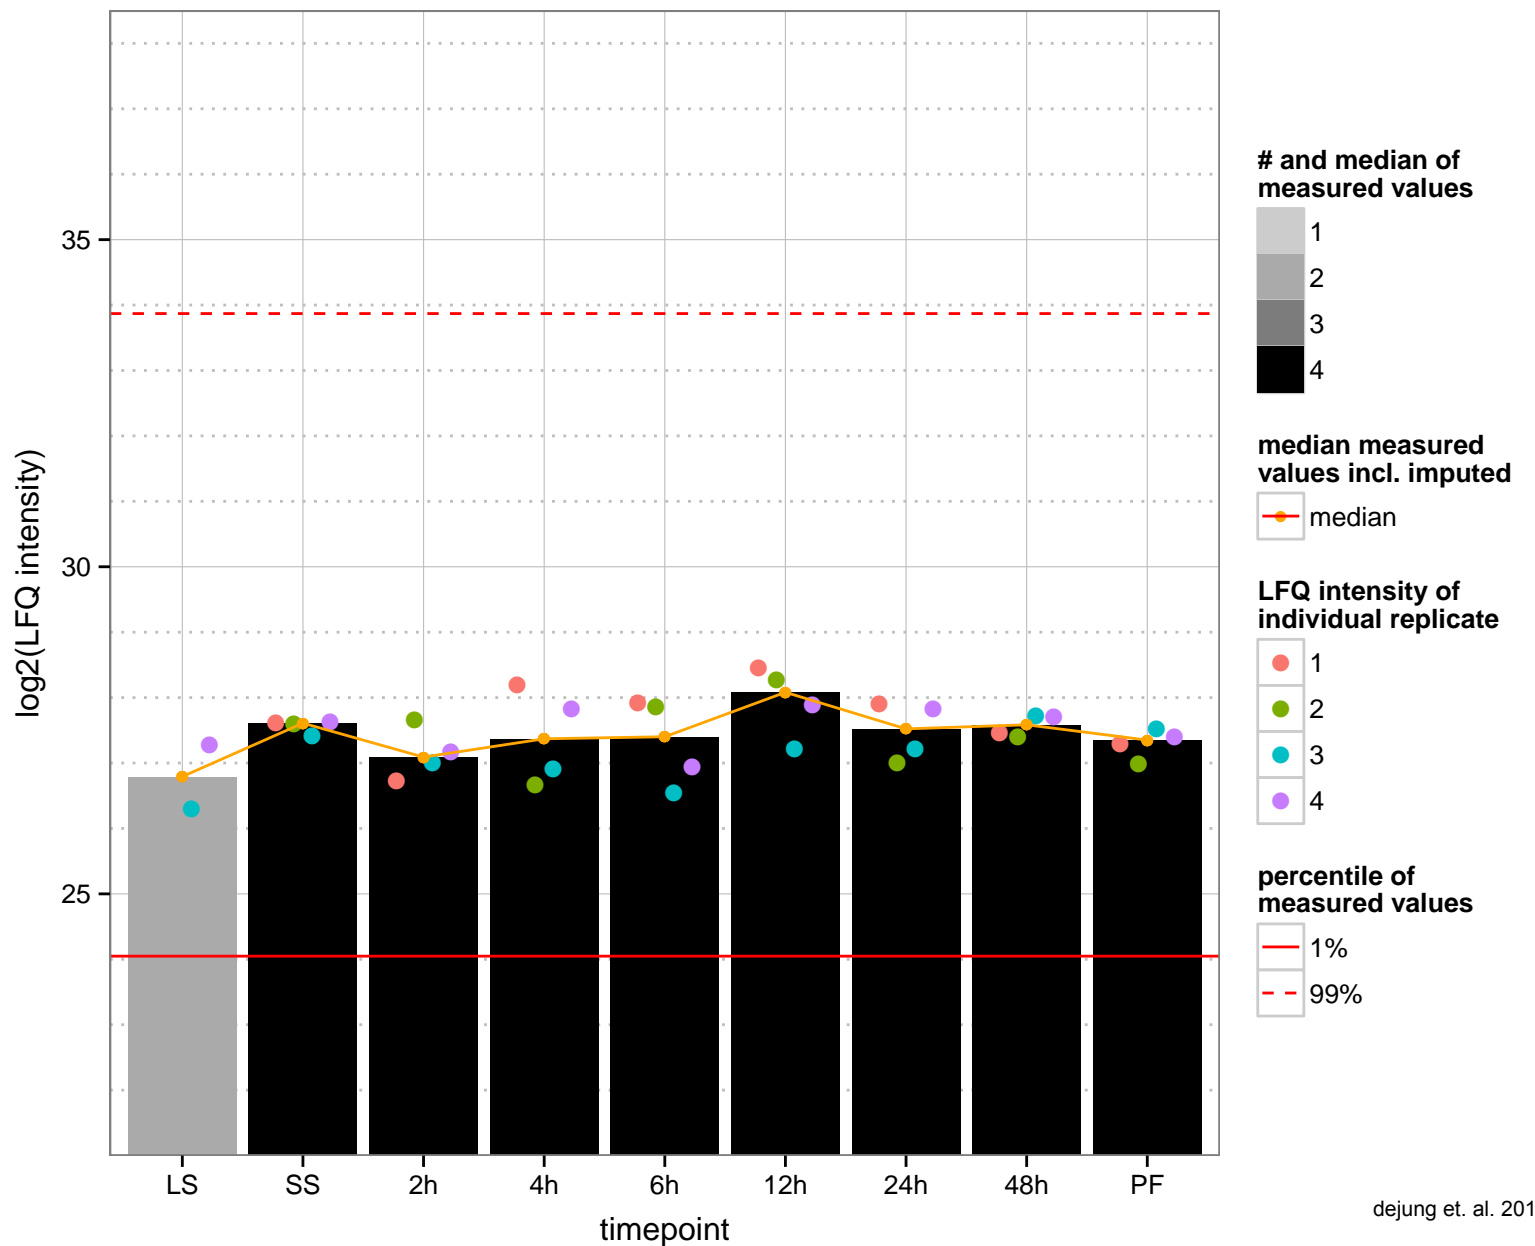

hypothetical protein, conserved  
 Tb927.10.6840  
 AGOF: null  
 AGOC: null  
 AGOP: null  
 PGOF: null  
 PGO: null  
 PGOP: null

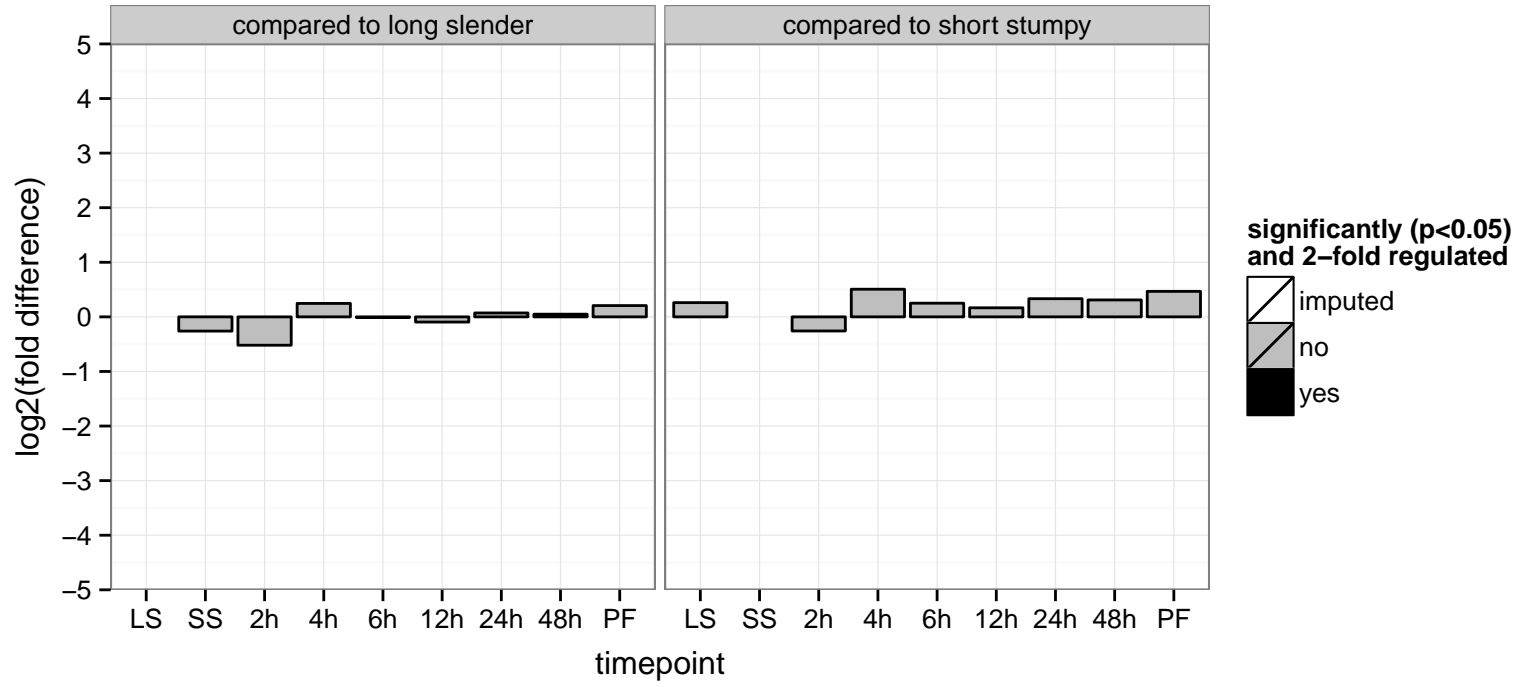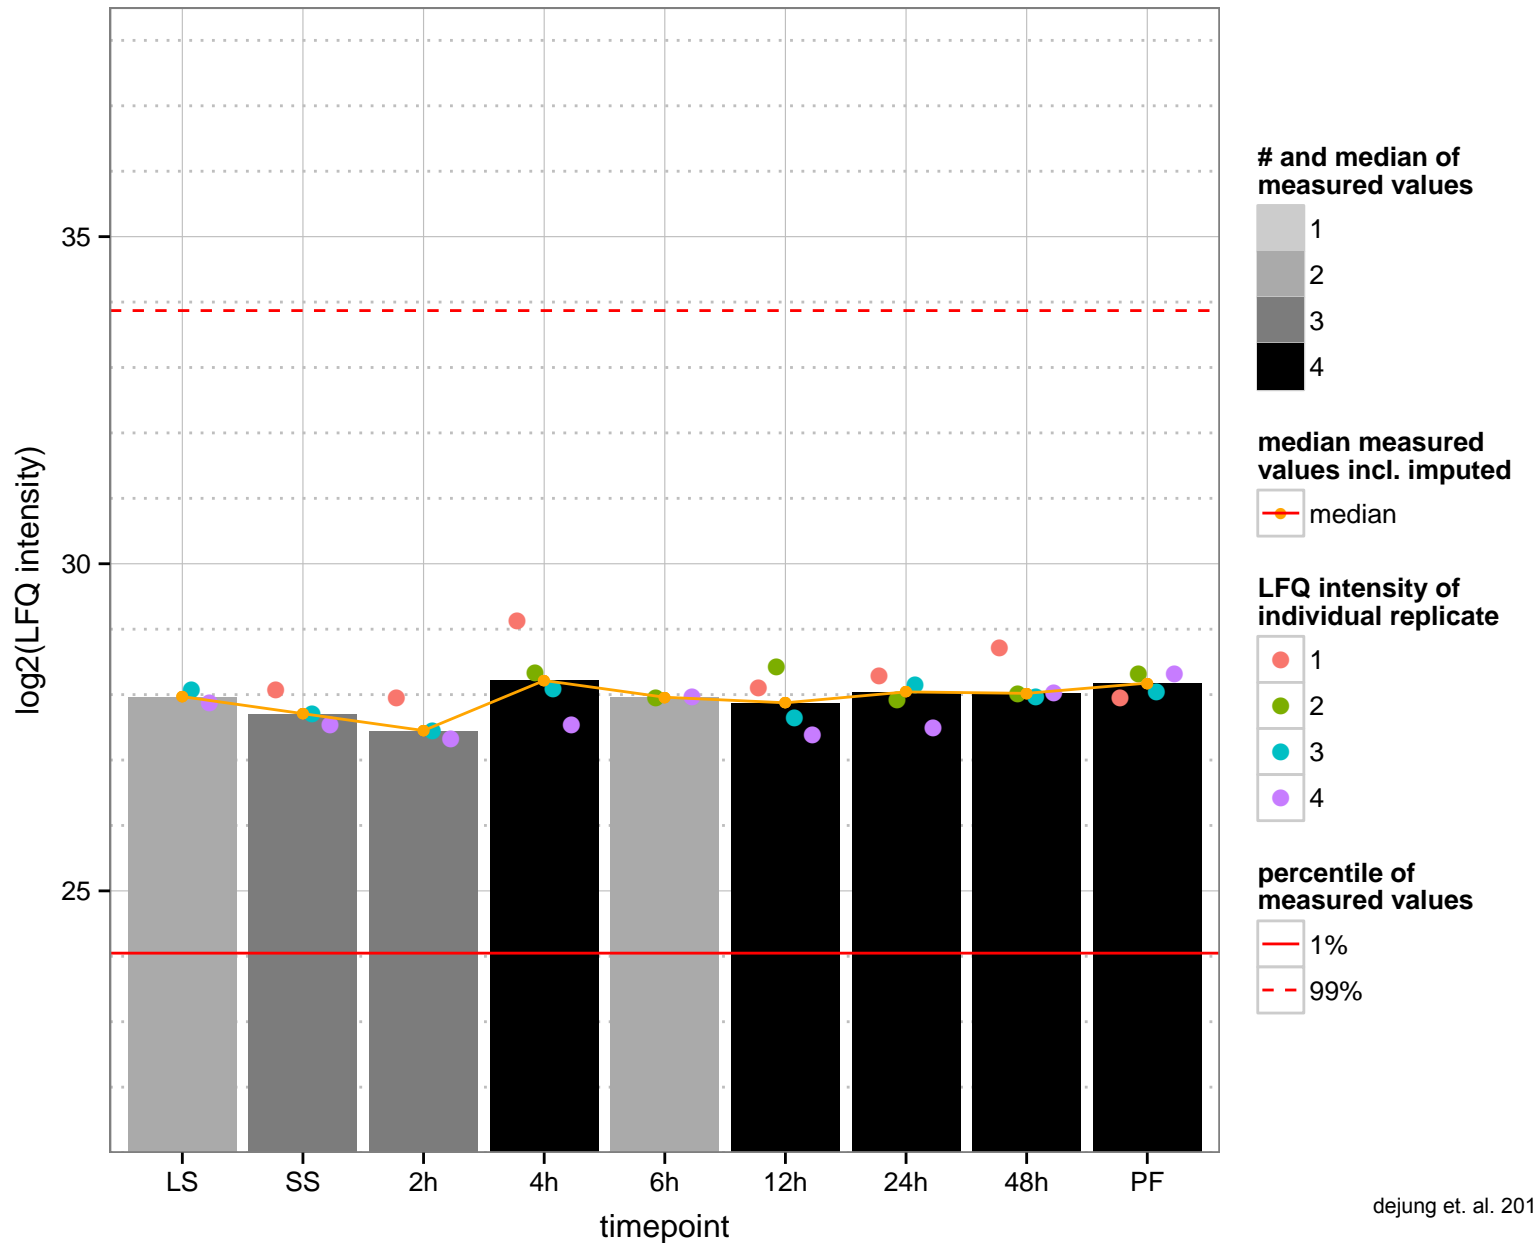

Dipeptidyl-peptidase 8-like, putative, dipeptidyl-peptidase 8-like serine peptidase, serine peptidase, Clan SC, Family S9B  
 Tb927.10.6970;Tb927.10.6940  
 AGOF: serine-type peptidase activity  
 AGOC: membrane  
 AGOP: proteolysis  
 PGOF: serine-type peptidase activity  
 PGO: membrane  
 PGOP: proteolysis

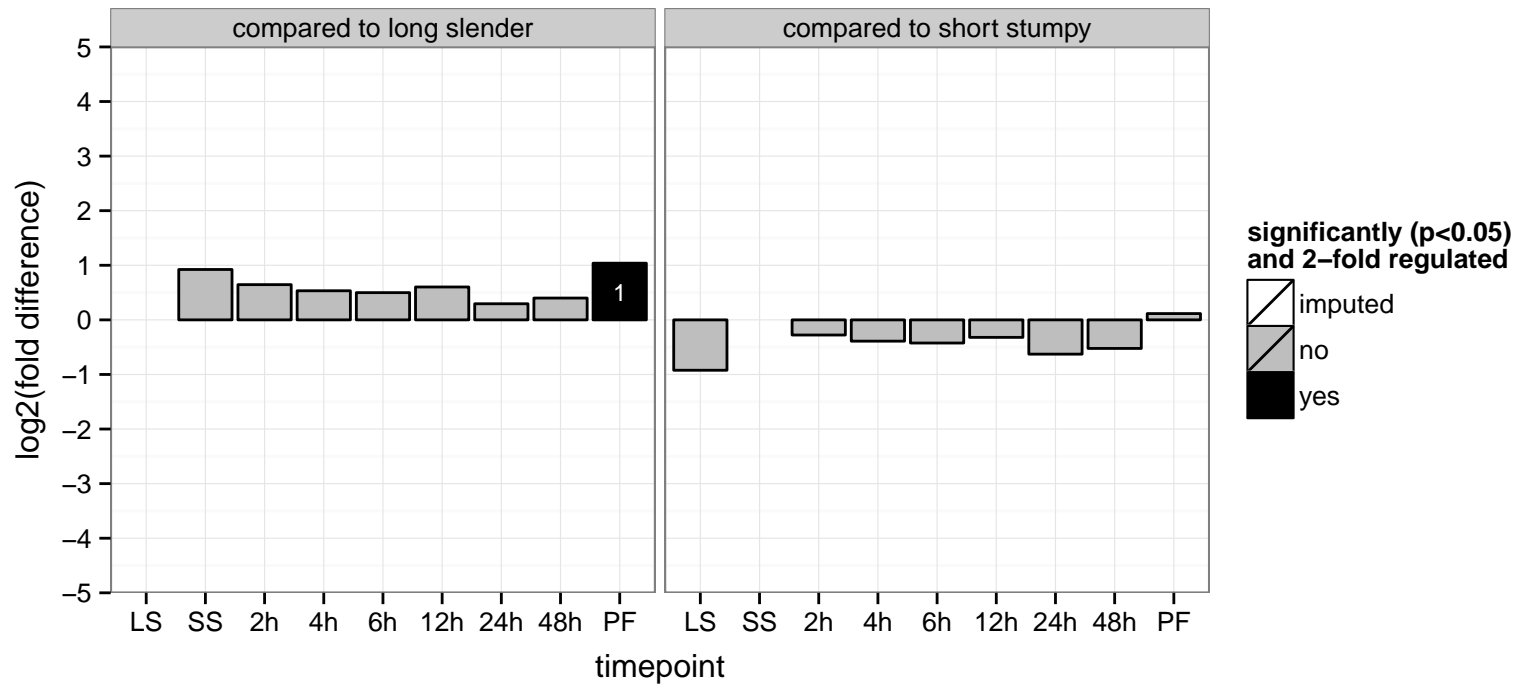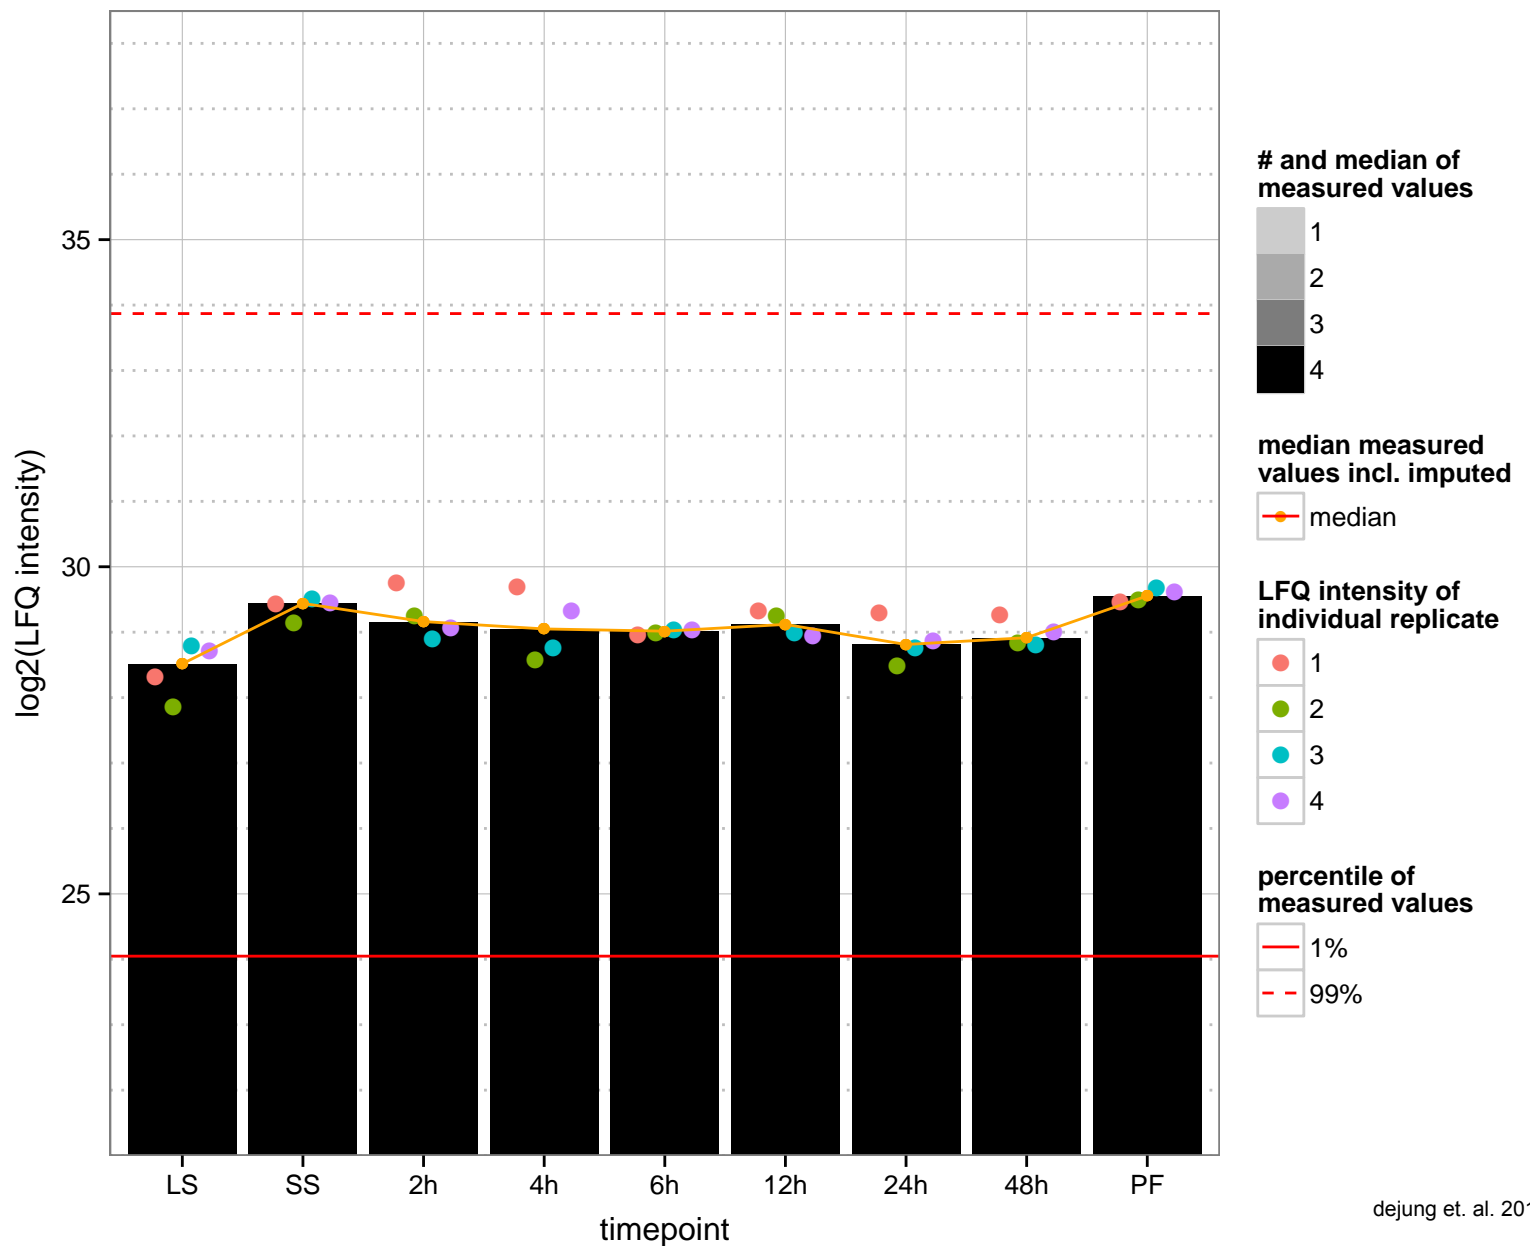

hypothetical protein, conserved  
 Tb927.10.6960  
 AGOF: null  
 AGOC: null  
 AGOP: null  
 PGO: null  
 PGOC: null  
 PGOP: null

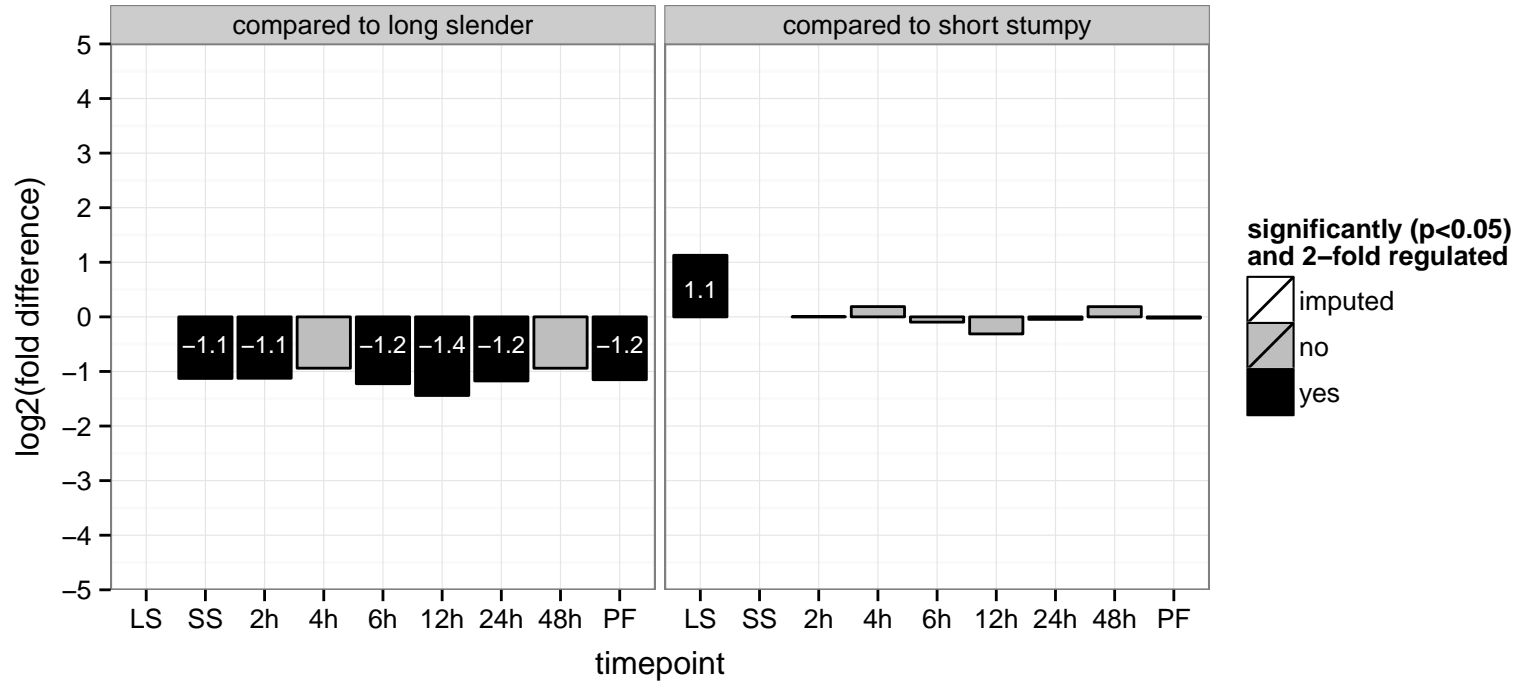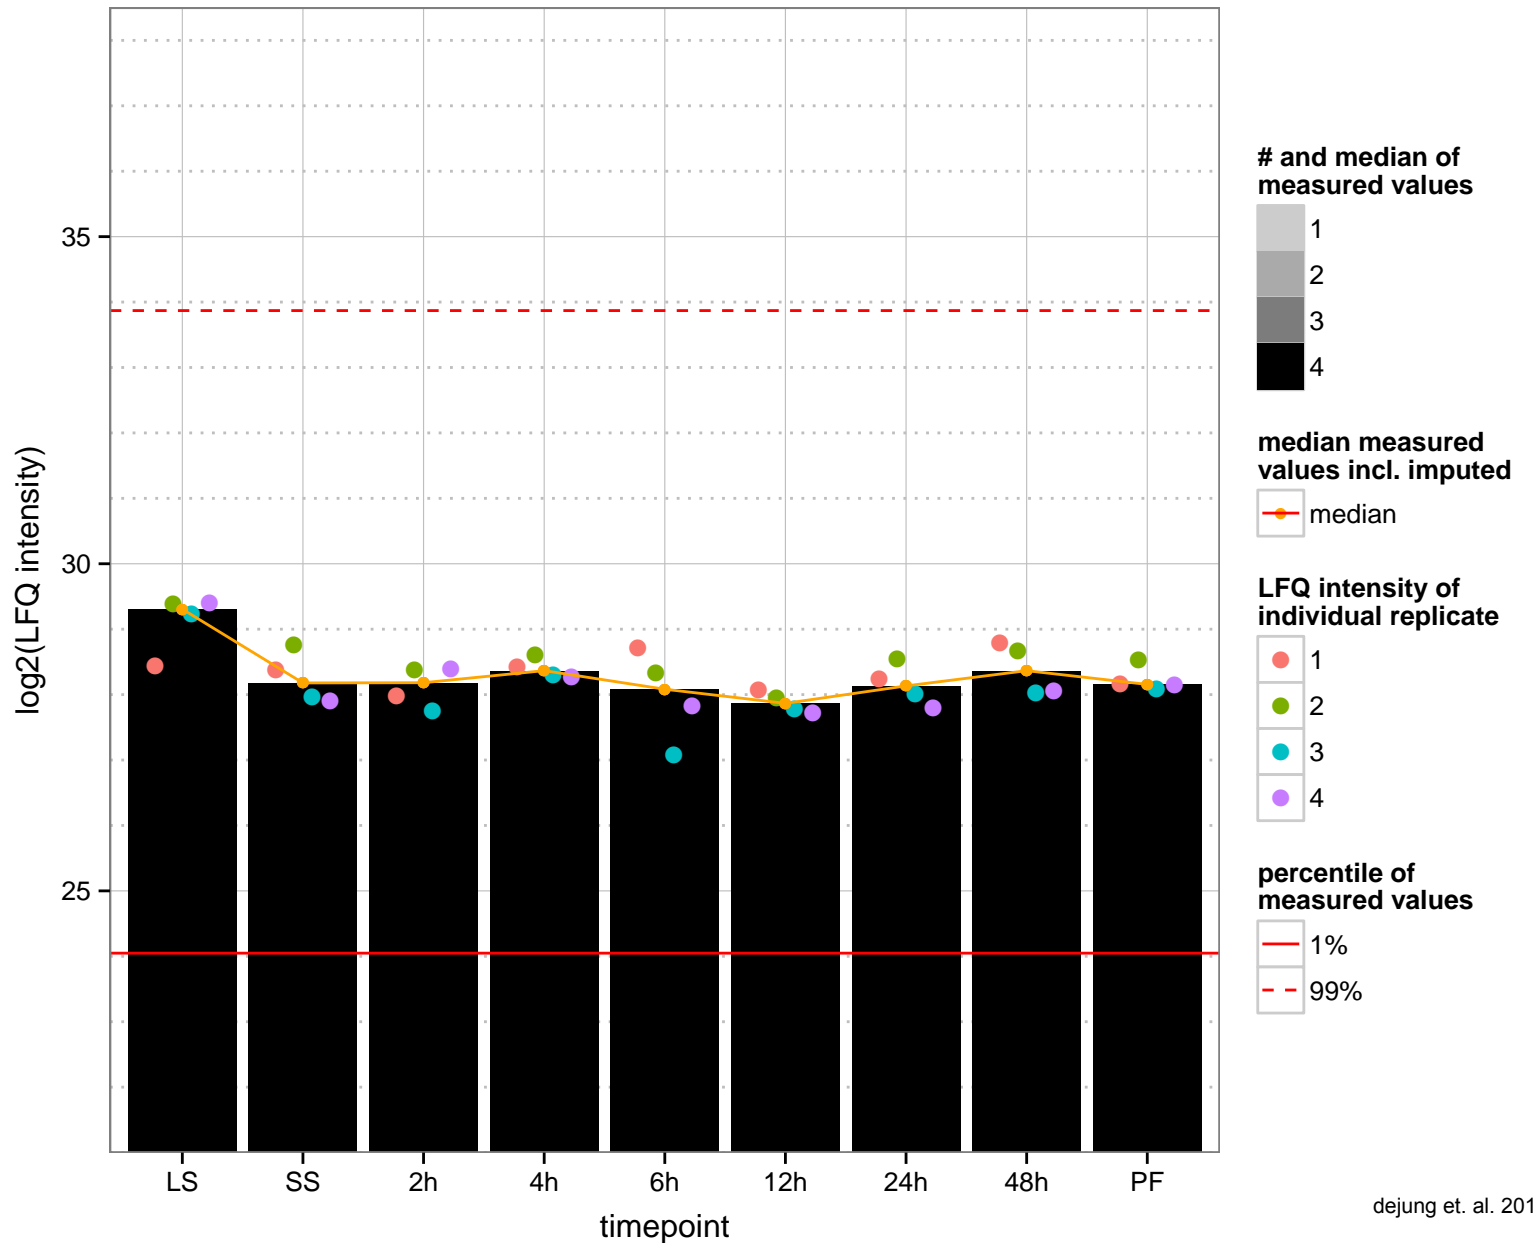

hypothetical protein, conserved  
 Tb927.10.700  
 AGOF: null  
 AGOC: null  
 AGOP: null  
 PGOF: null  
 PGOC: null  
 PGOP: null

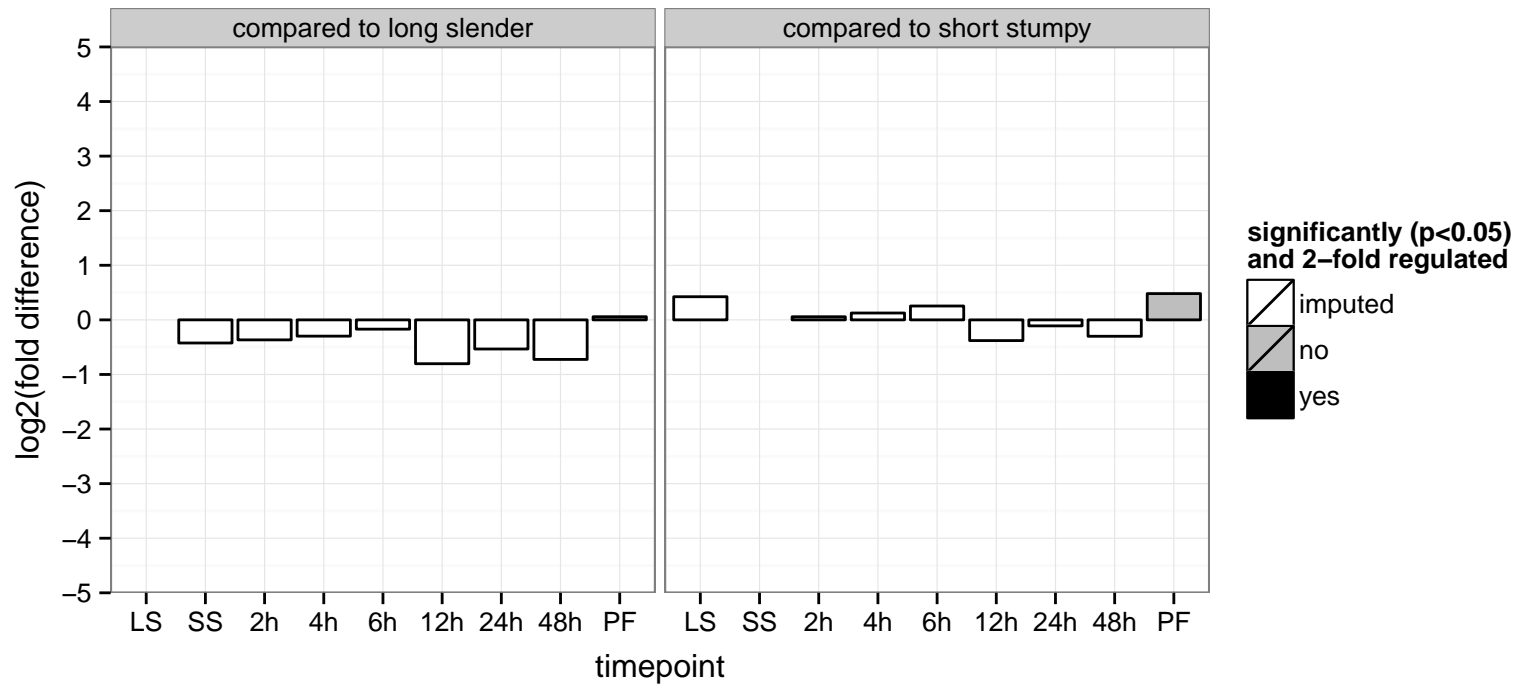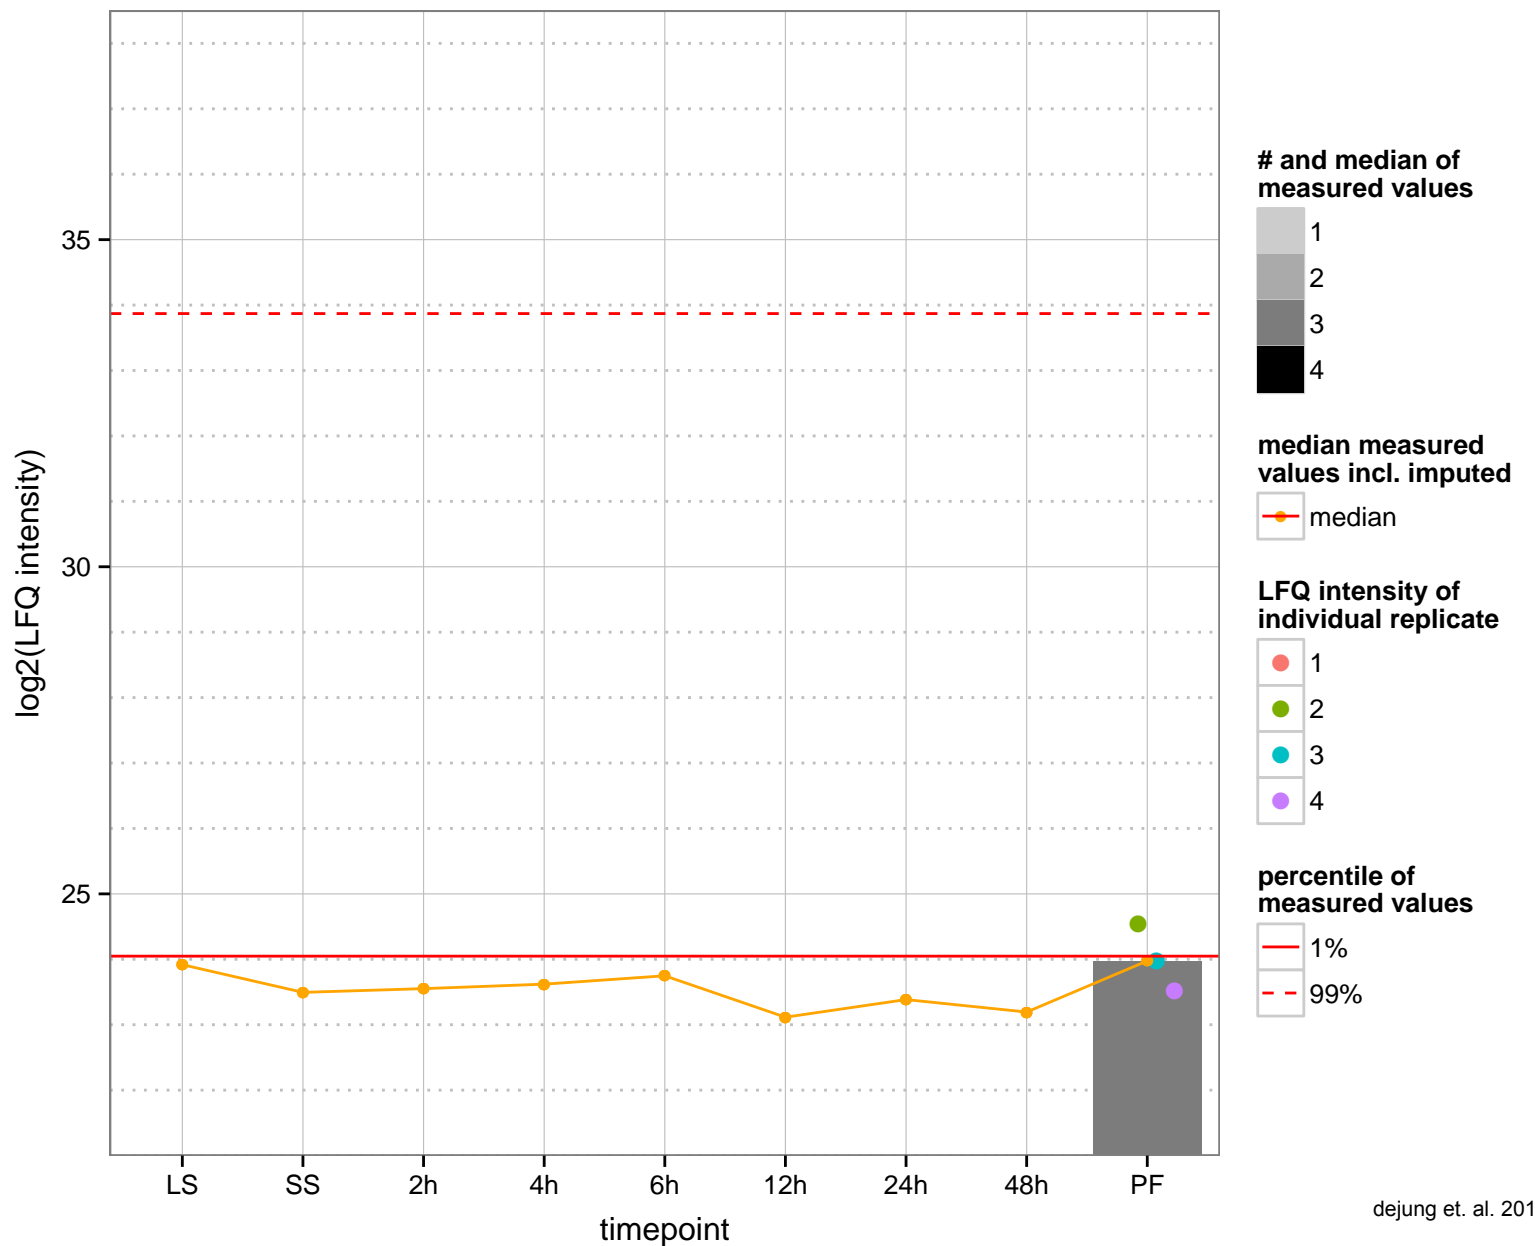

acid phosphatase, putative  
 Tb927.10.7020  
 AGOF: acid phosphatase activity  
 AGOC: null  
 AGOP: null  
 PGO: acid phosphatase activity  
 PGOC: null  
 PGOP: null

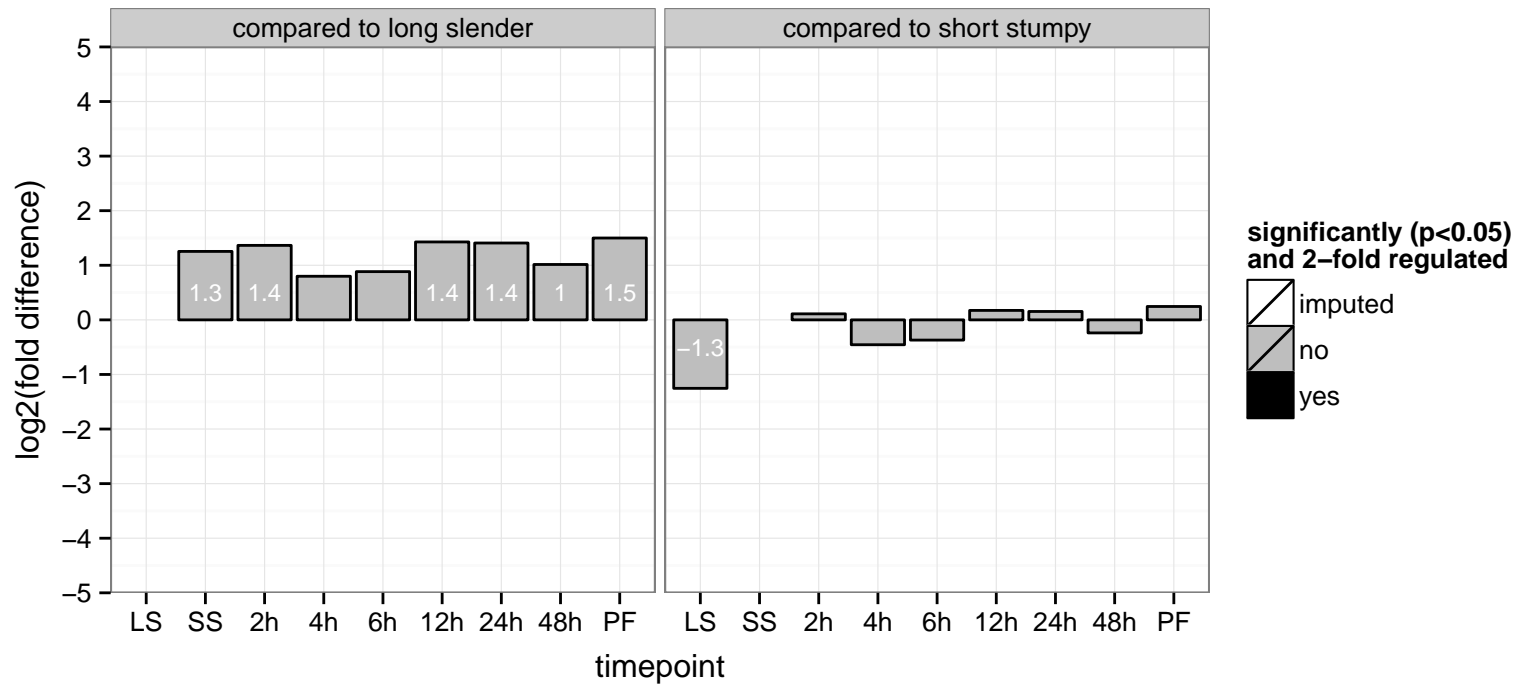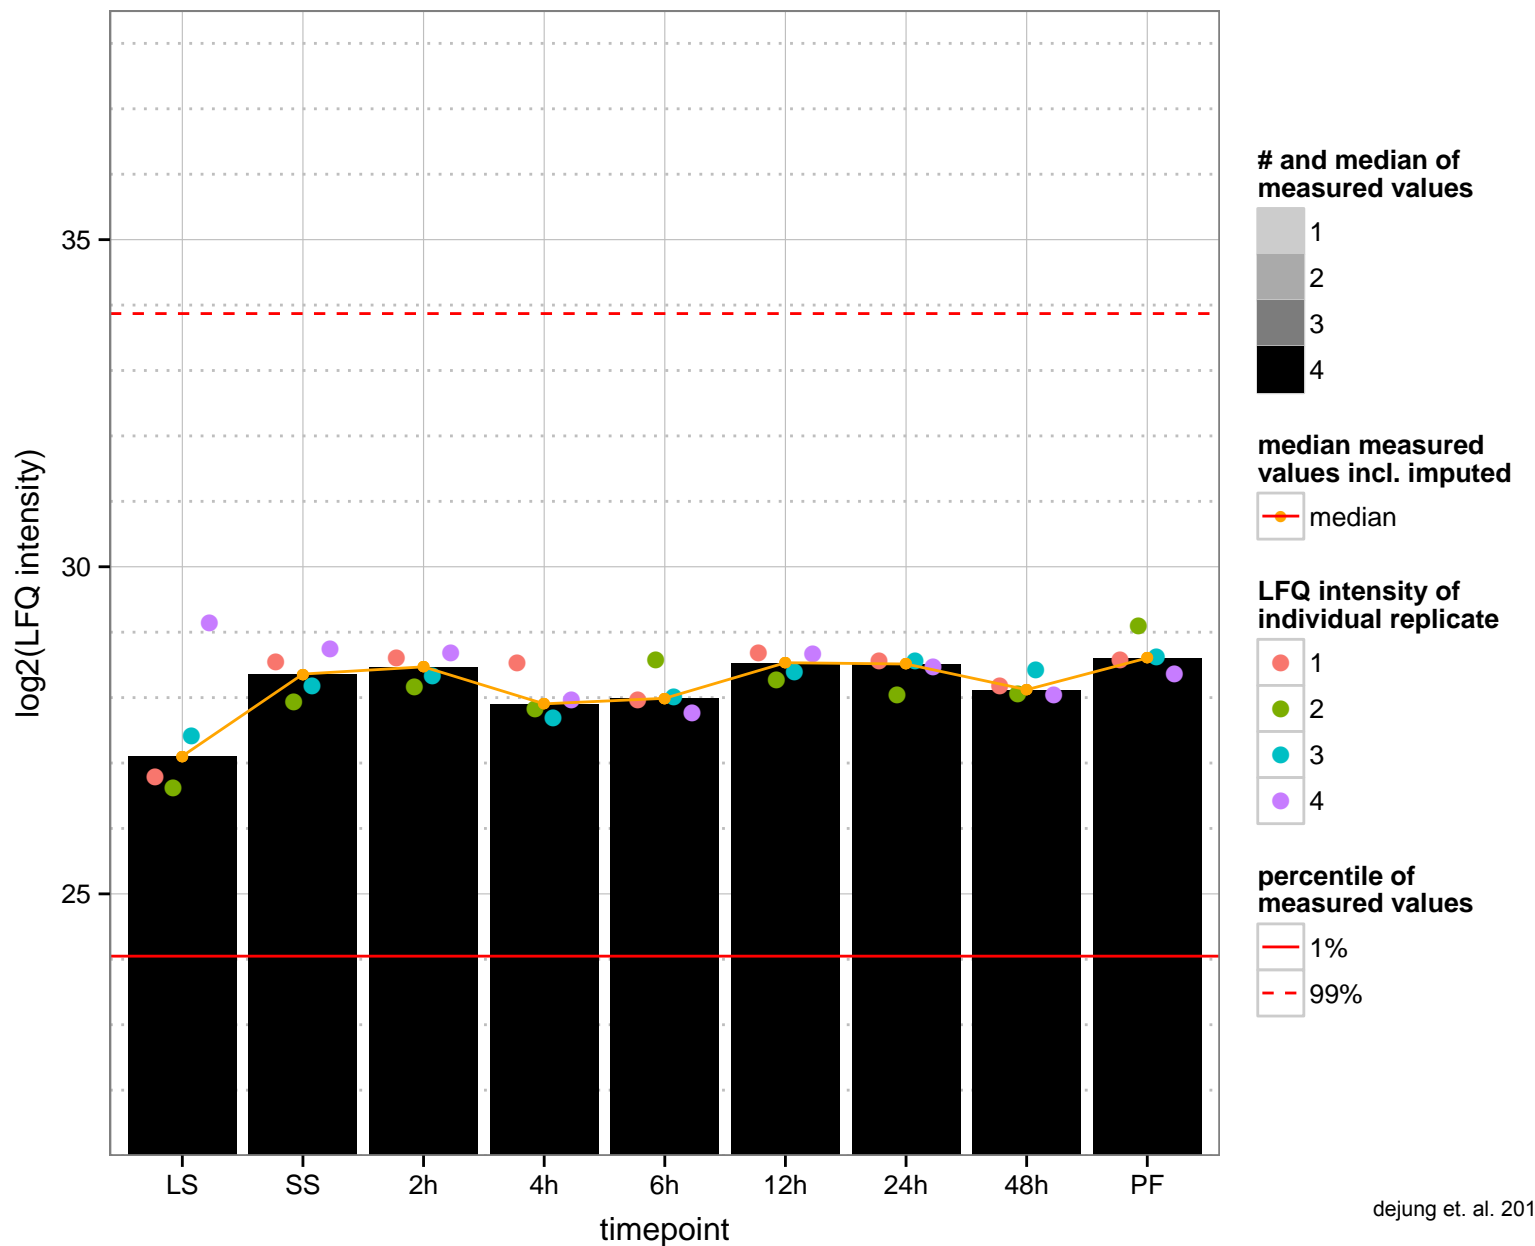

nucleoporin interacting component (NUP93), putative  
 Tb927.10.7060  
 AGOF: null  
 AGOC: nuclear pore  
 AGOP: transport  
 PGOF: null  
 PGO: nuclear pore  
 PGOP: transport

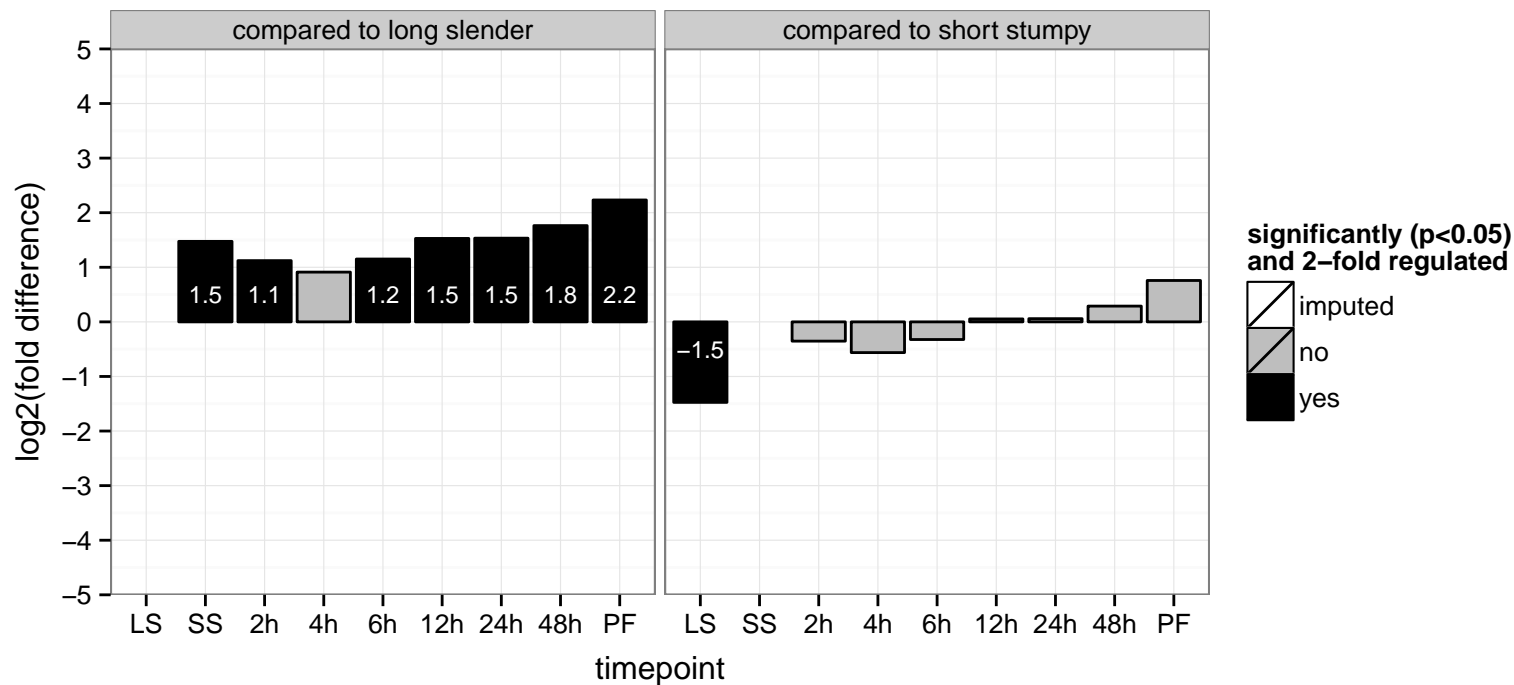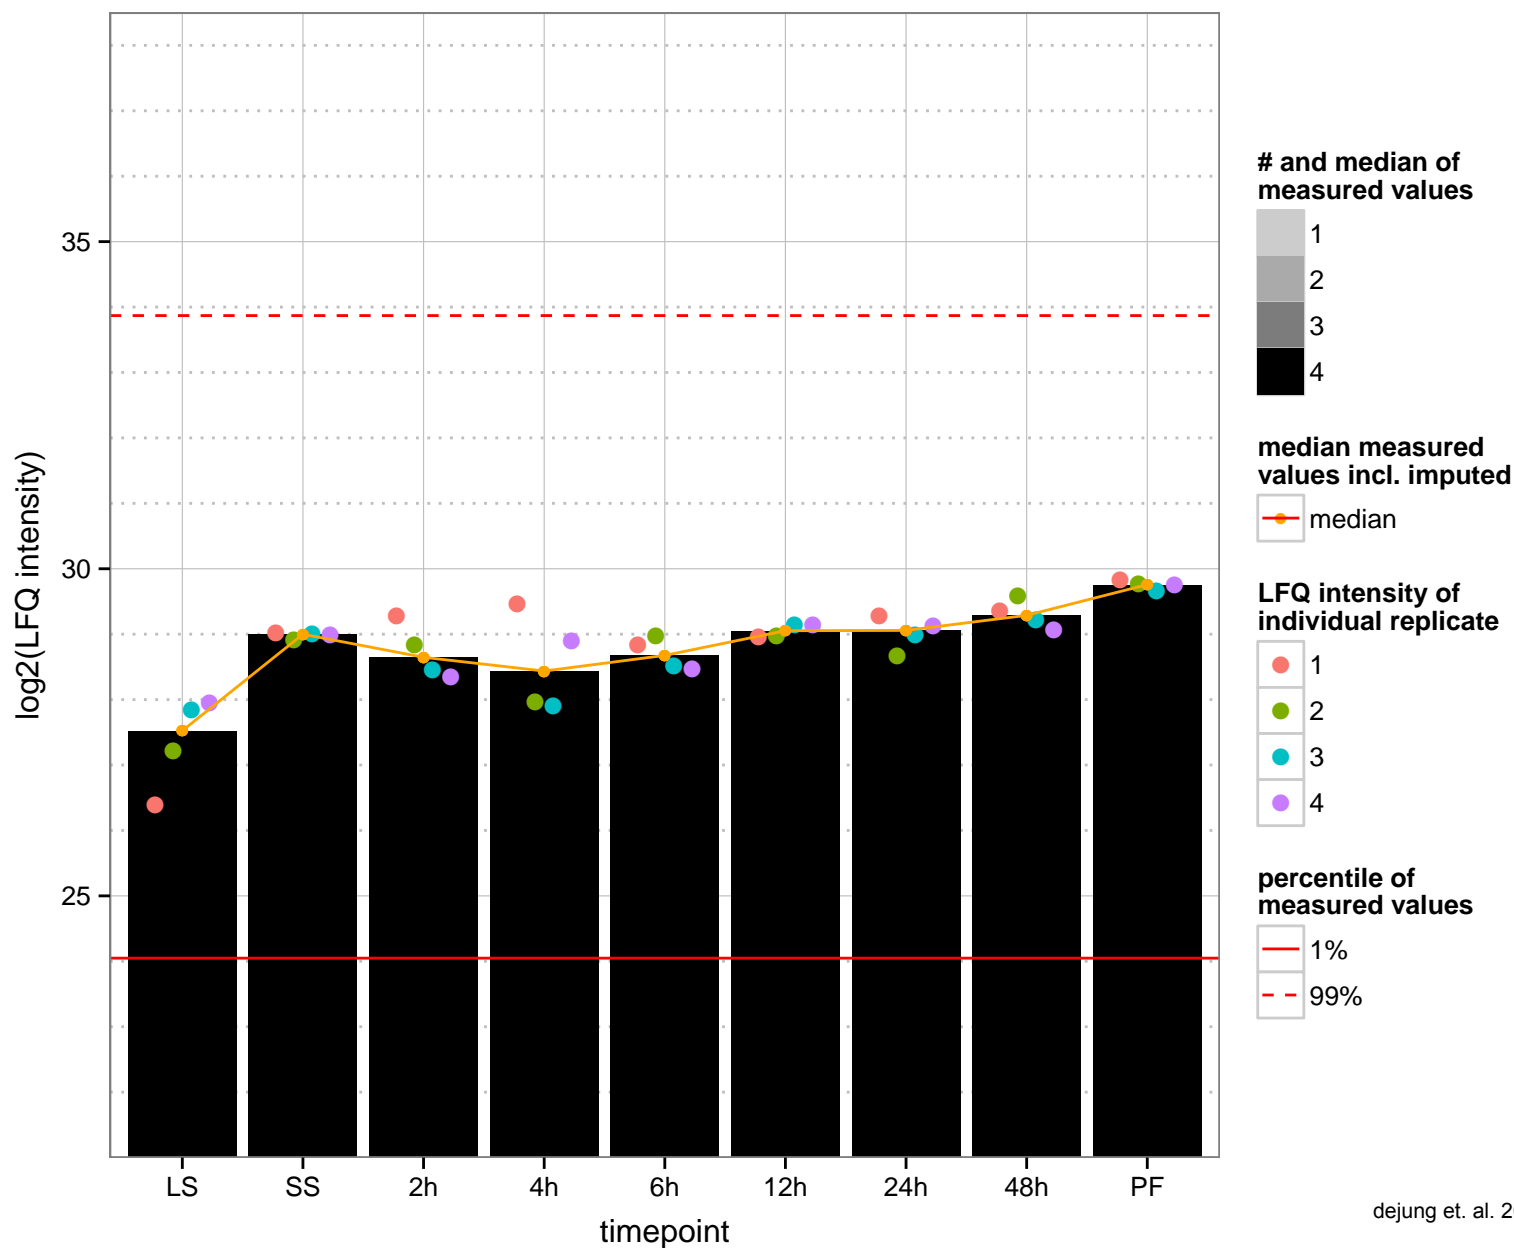

ATP-dependent DEAD/H RNA helicase, putative, RNA helicase

Tb927.10.7080

AGOF: ATP binding, ATP-dependent helicase activity, helicase activity, nucleic acid binding

AGOC: null

AGOP: nucleobase-containing compound metabolic process

PGOF: ATP binding, ATP-dependent helicase activity, helicase activity, nucleic acid binding

PGOC: null

PGOP: null

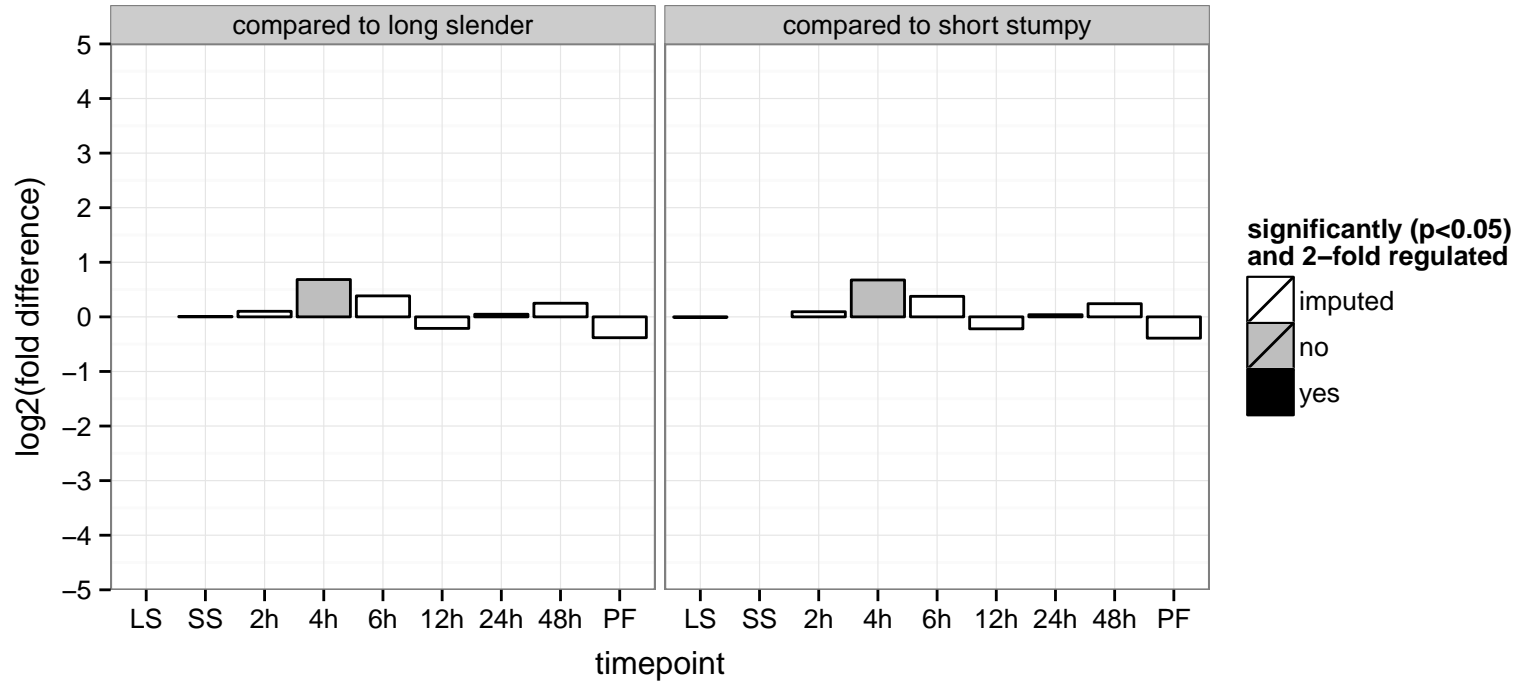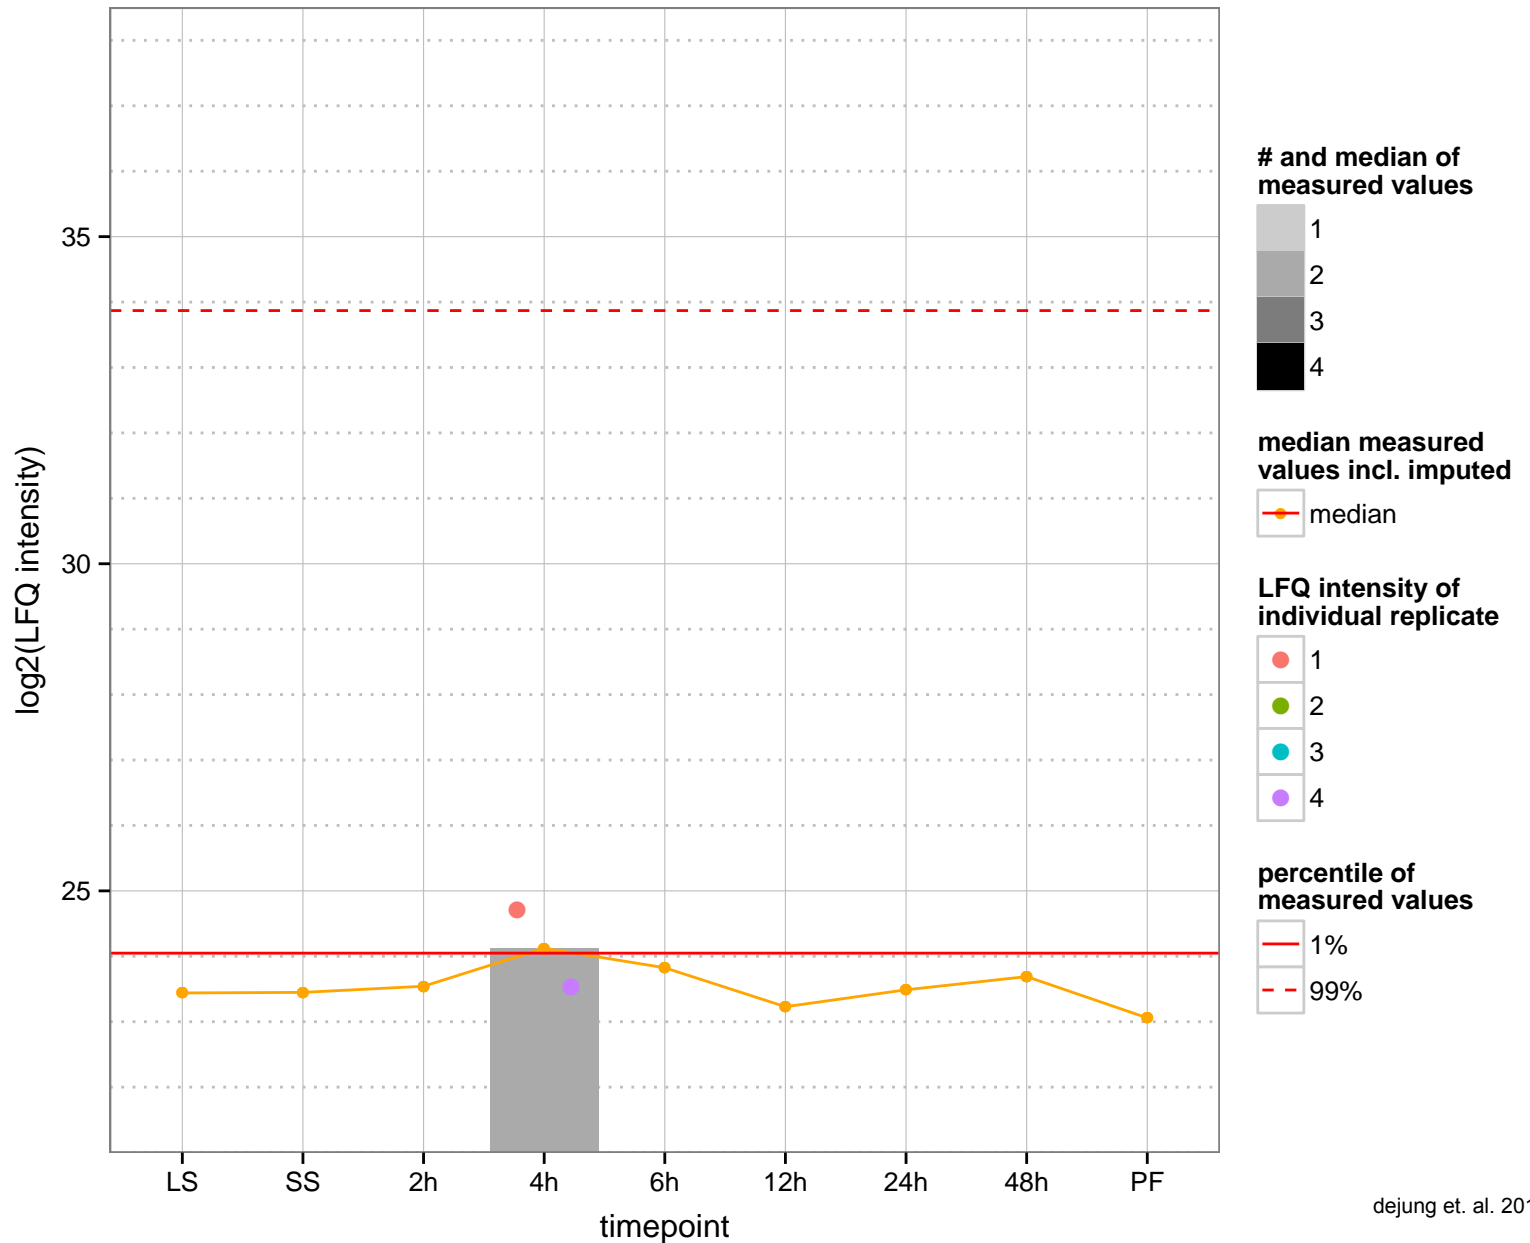



hypothetical protein, conserved  
 Tb927.10.7120  
 AGOF: null  
 AGOC: null  
 AGOP: null  
 PGOF: null  
 PGOC: null  
 PGOP: null

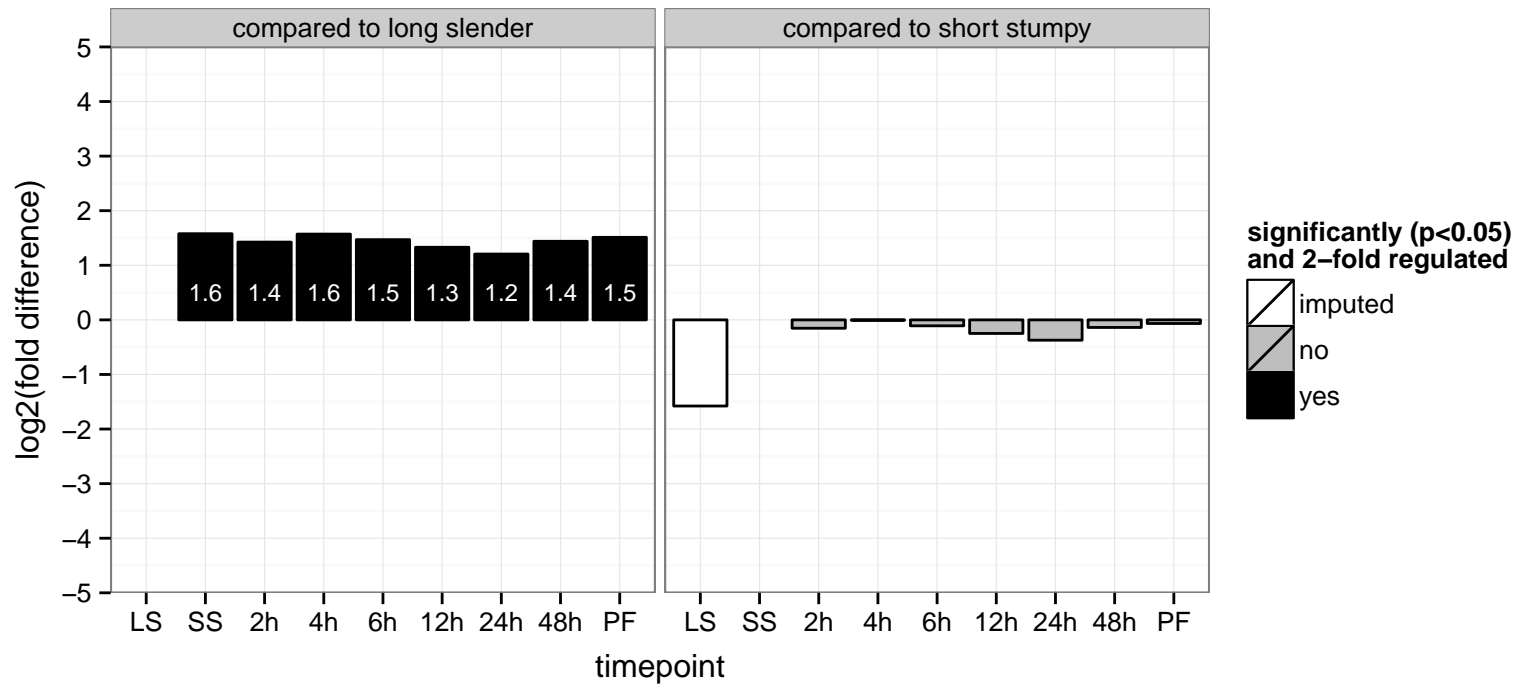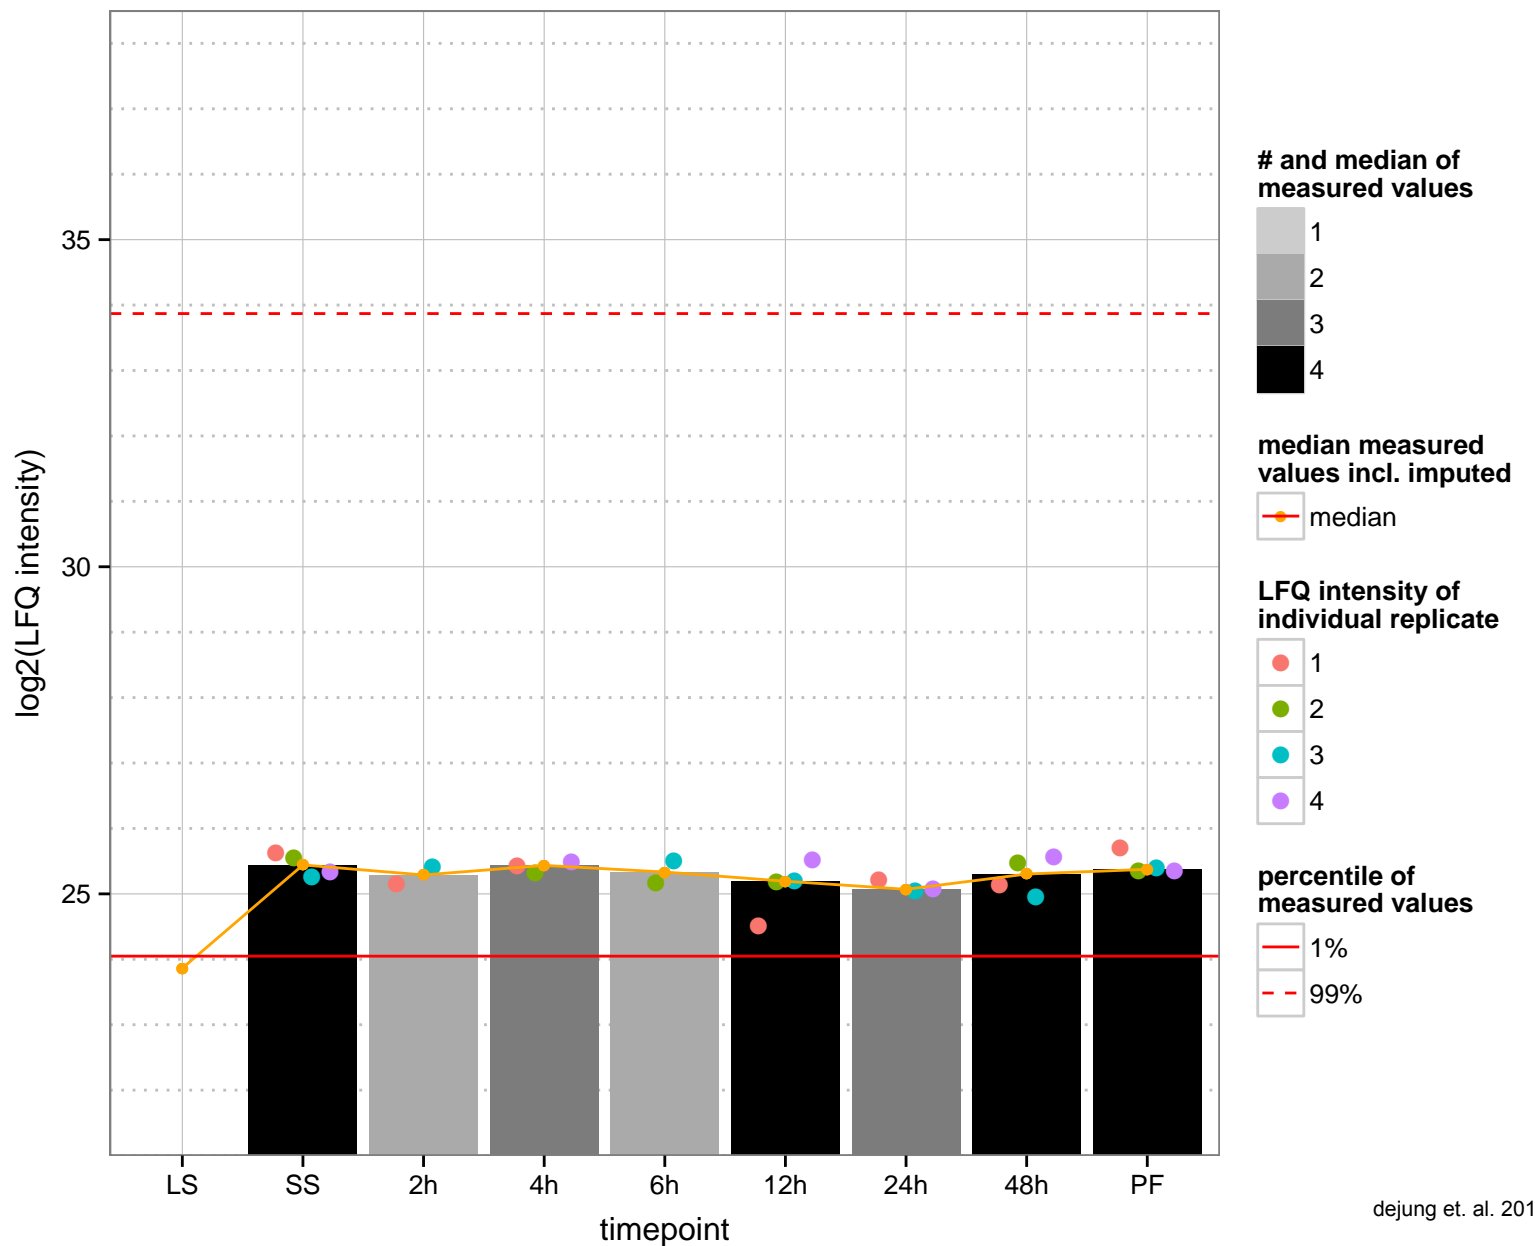

hypothetical protein, conserved  
 Tb927.10.7130  
 AGOF: null  
 AGOC: null  
 AGOP: null  
 PGO: binding  
 PGOC: null  
 PGOP: null

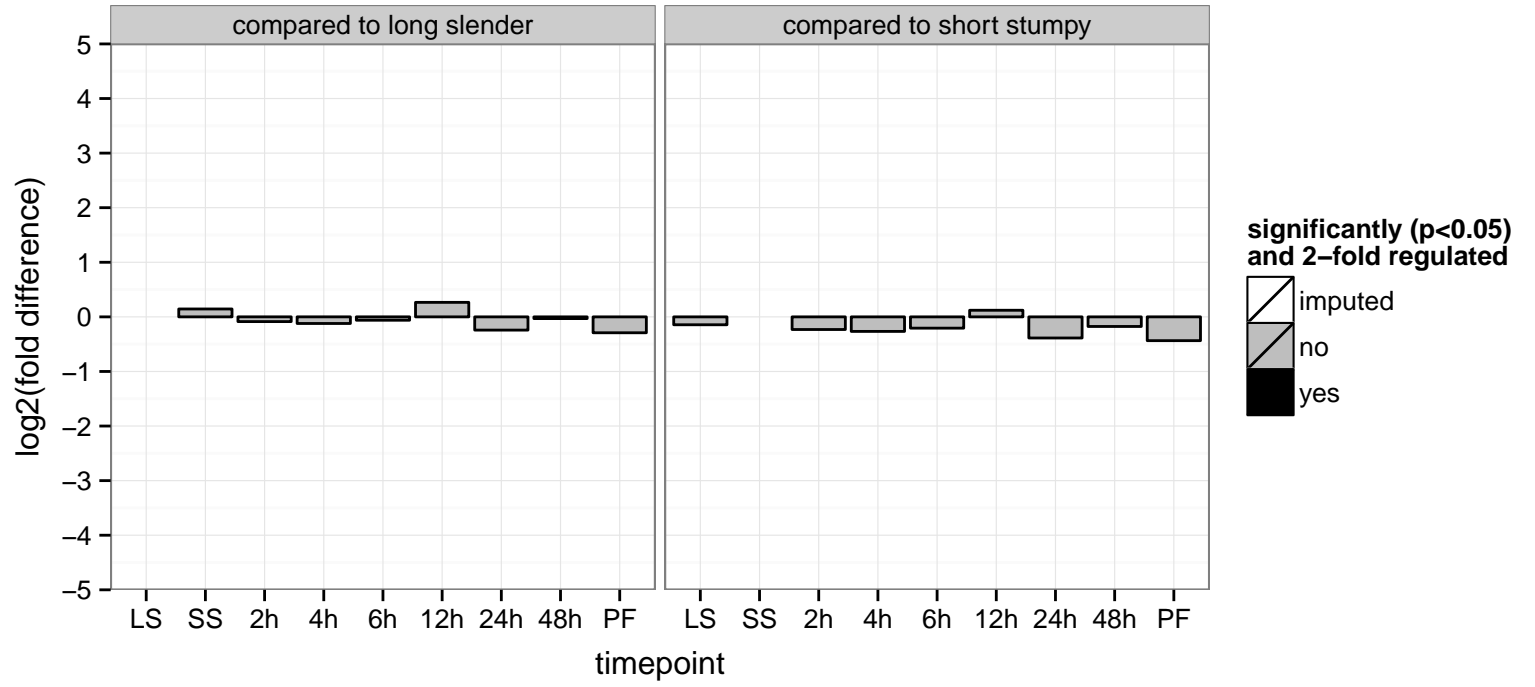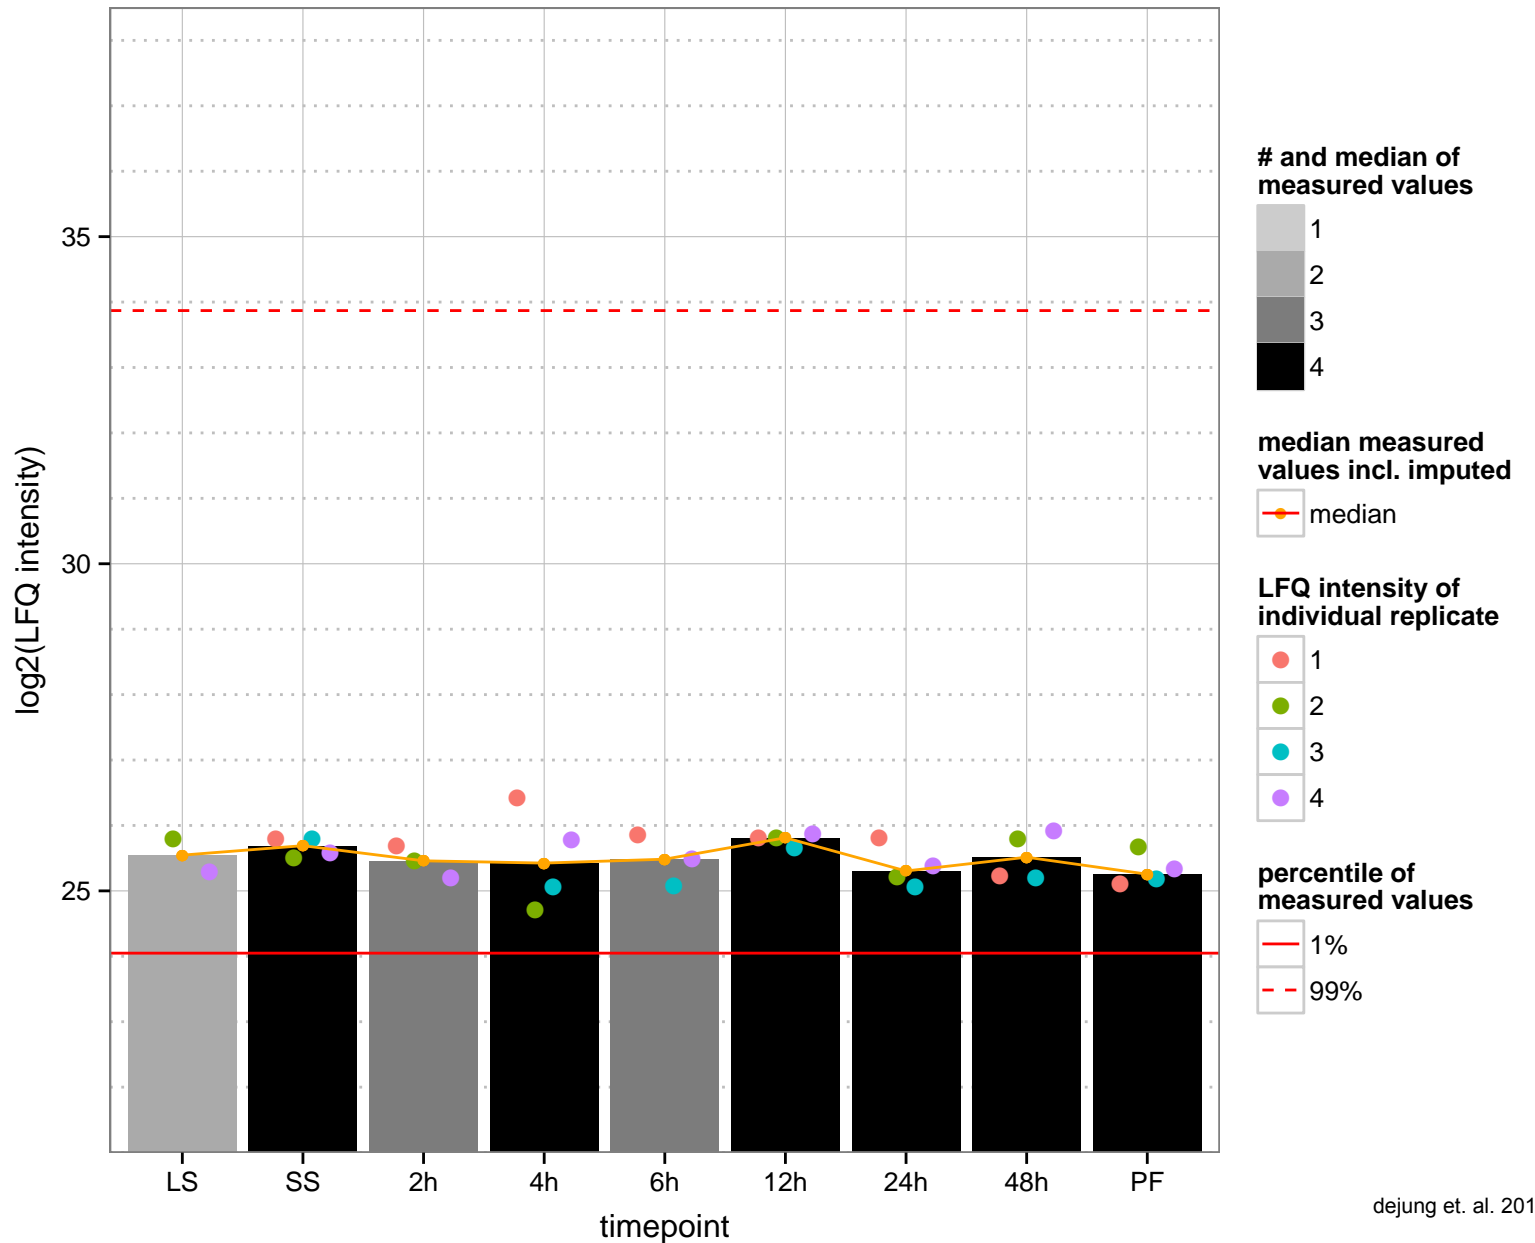

hypothetical protein, conserved  
 Tb927.10.7200  
 AGOF: null  
 AGOC: null  
 AGOP: null  
 PGO: protein binding  
 PGOC: null  
 PGOP: null

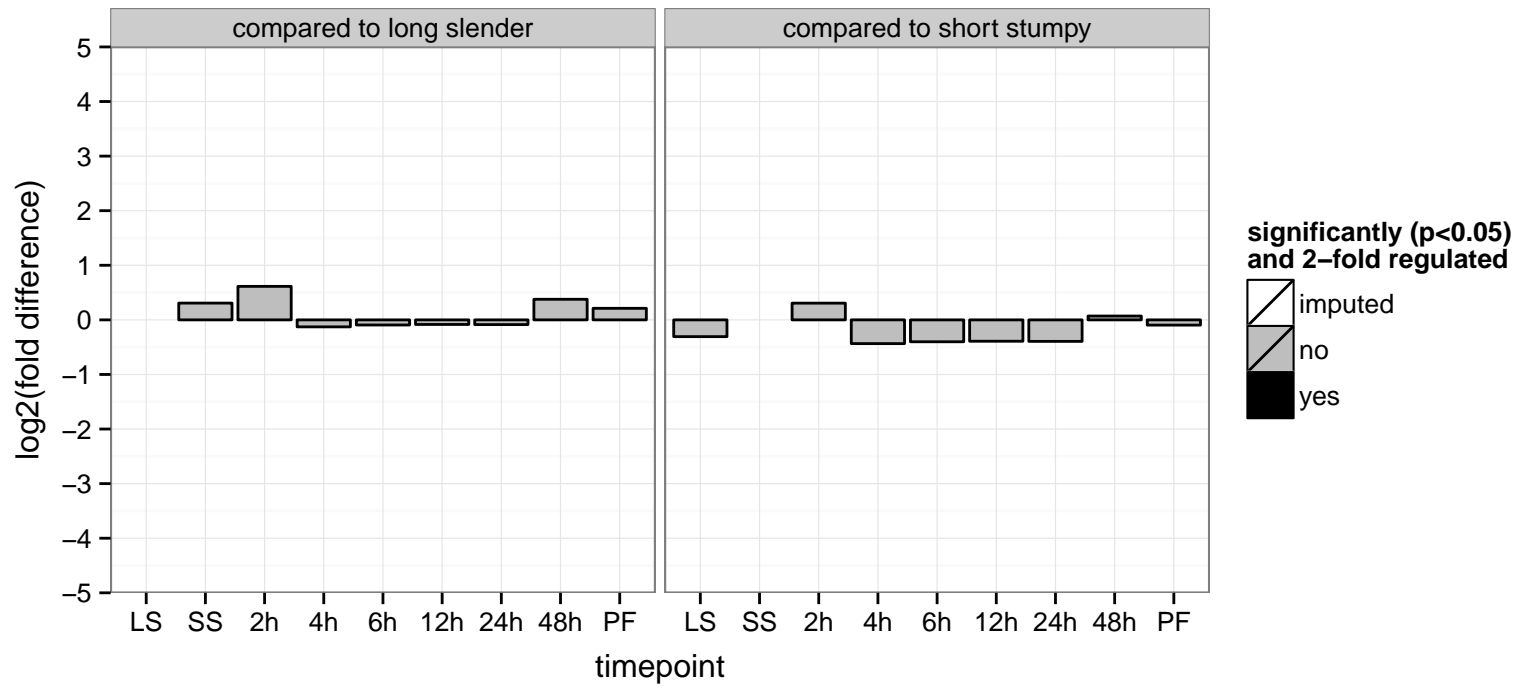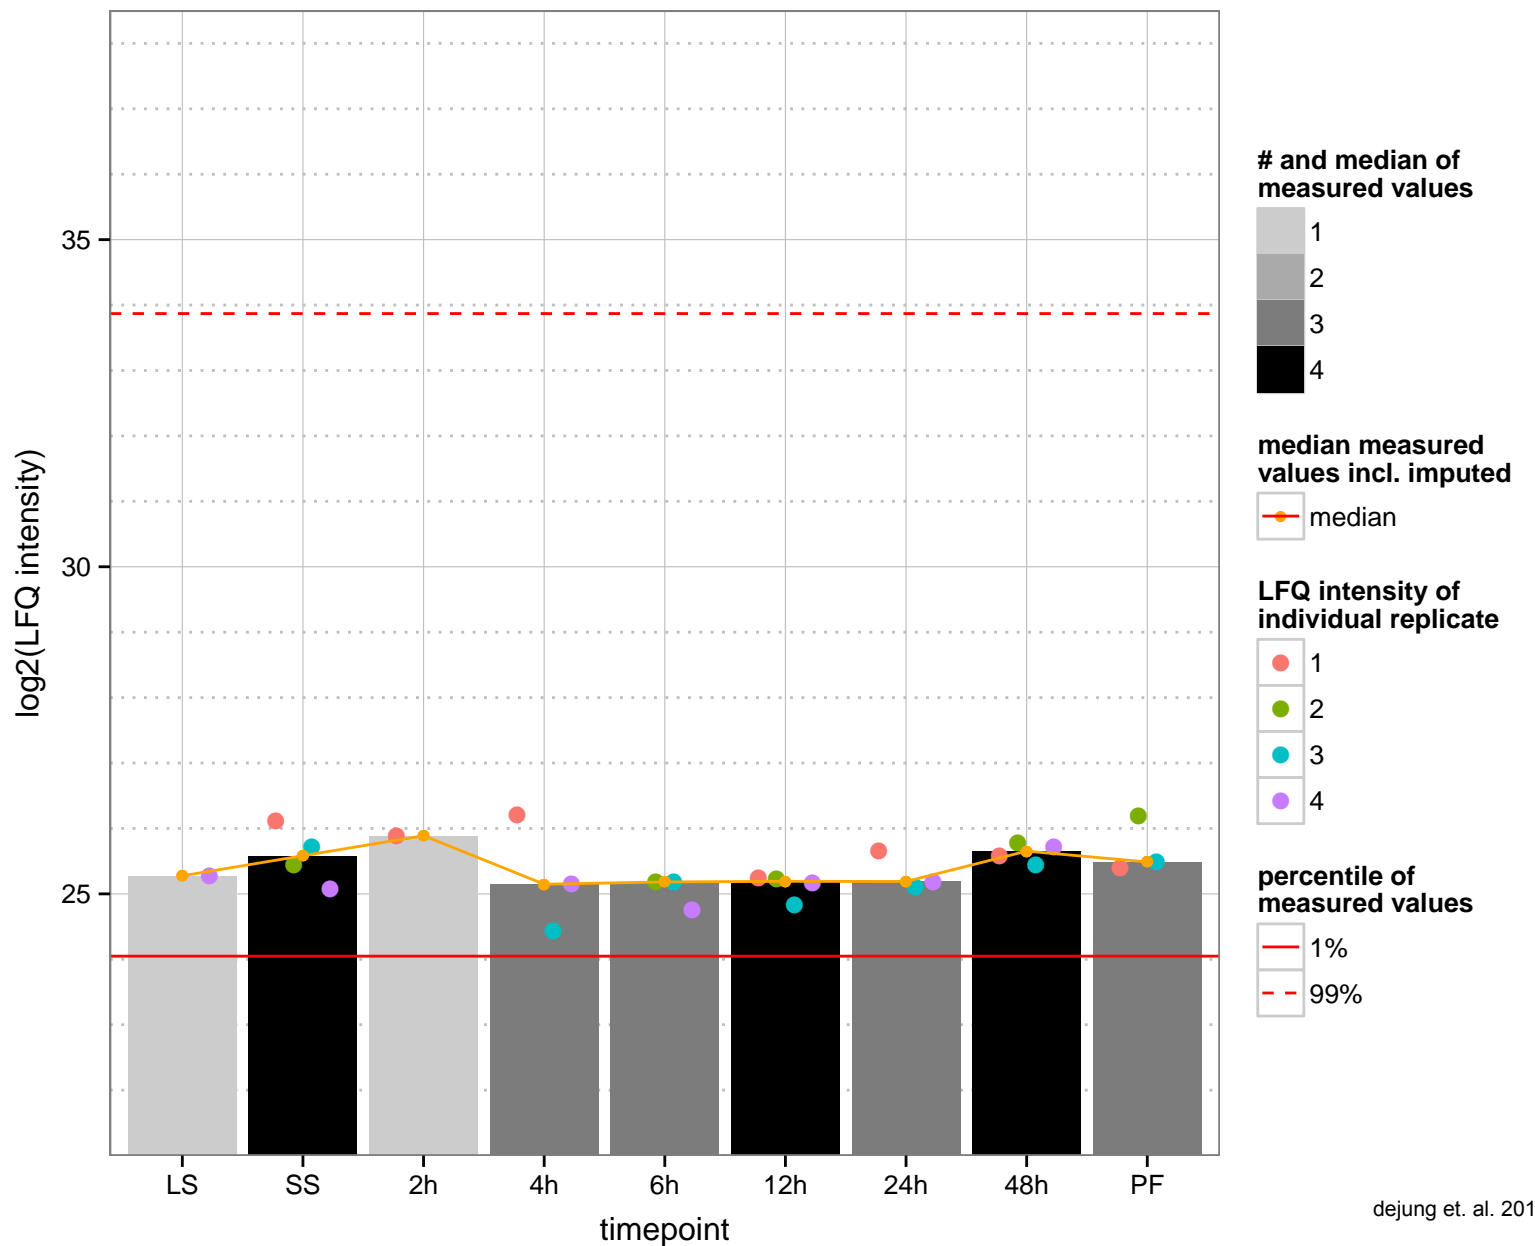

hypothetical protein, conserved

Tb927.10.7230

AGOF: null, ATP binding, nucleoside diphosphate kinase activity

AGOC: null

AGOP: null, CTP biosynthetic process, GTP biosynthetic process, UTP biosynthetic process, oxidation–reduction process

PGOF: ATP binding, nucleoside diphosphate kinase activity

PGOC: null

PGOP: CTP biosynthetic process, GTP biosynthetic process, UTP biosynthetic process, nucleoside diphosphate phosphoryla

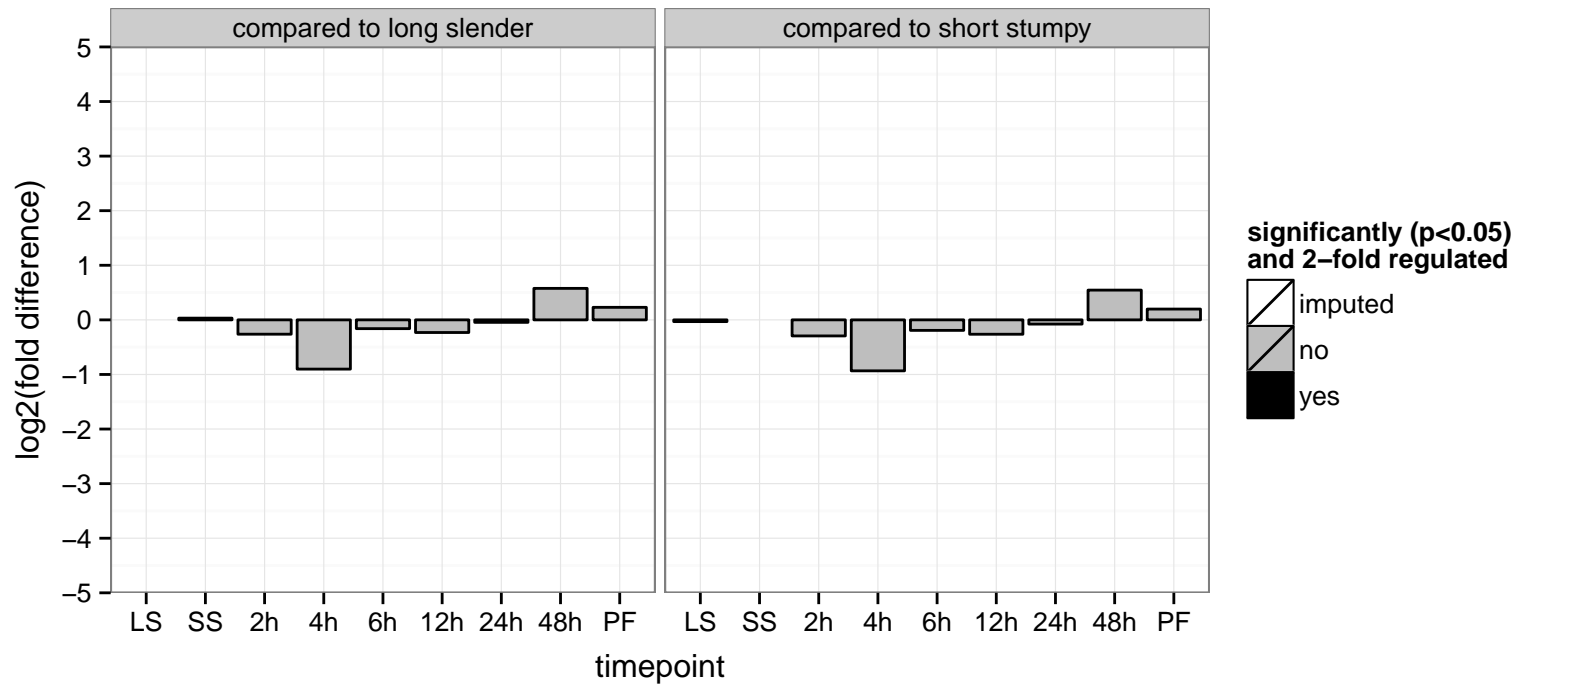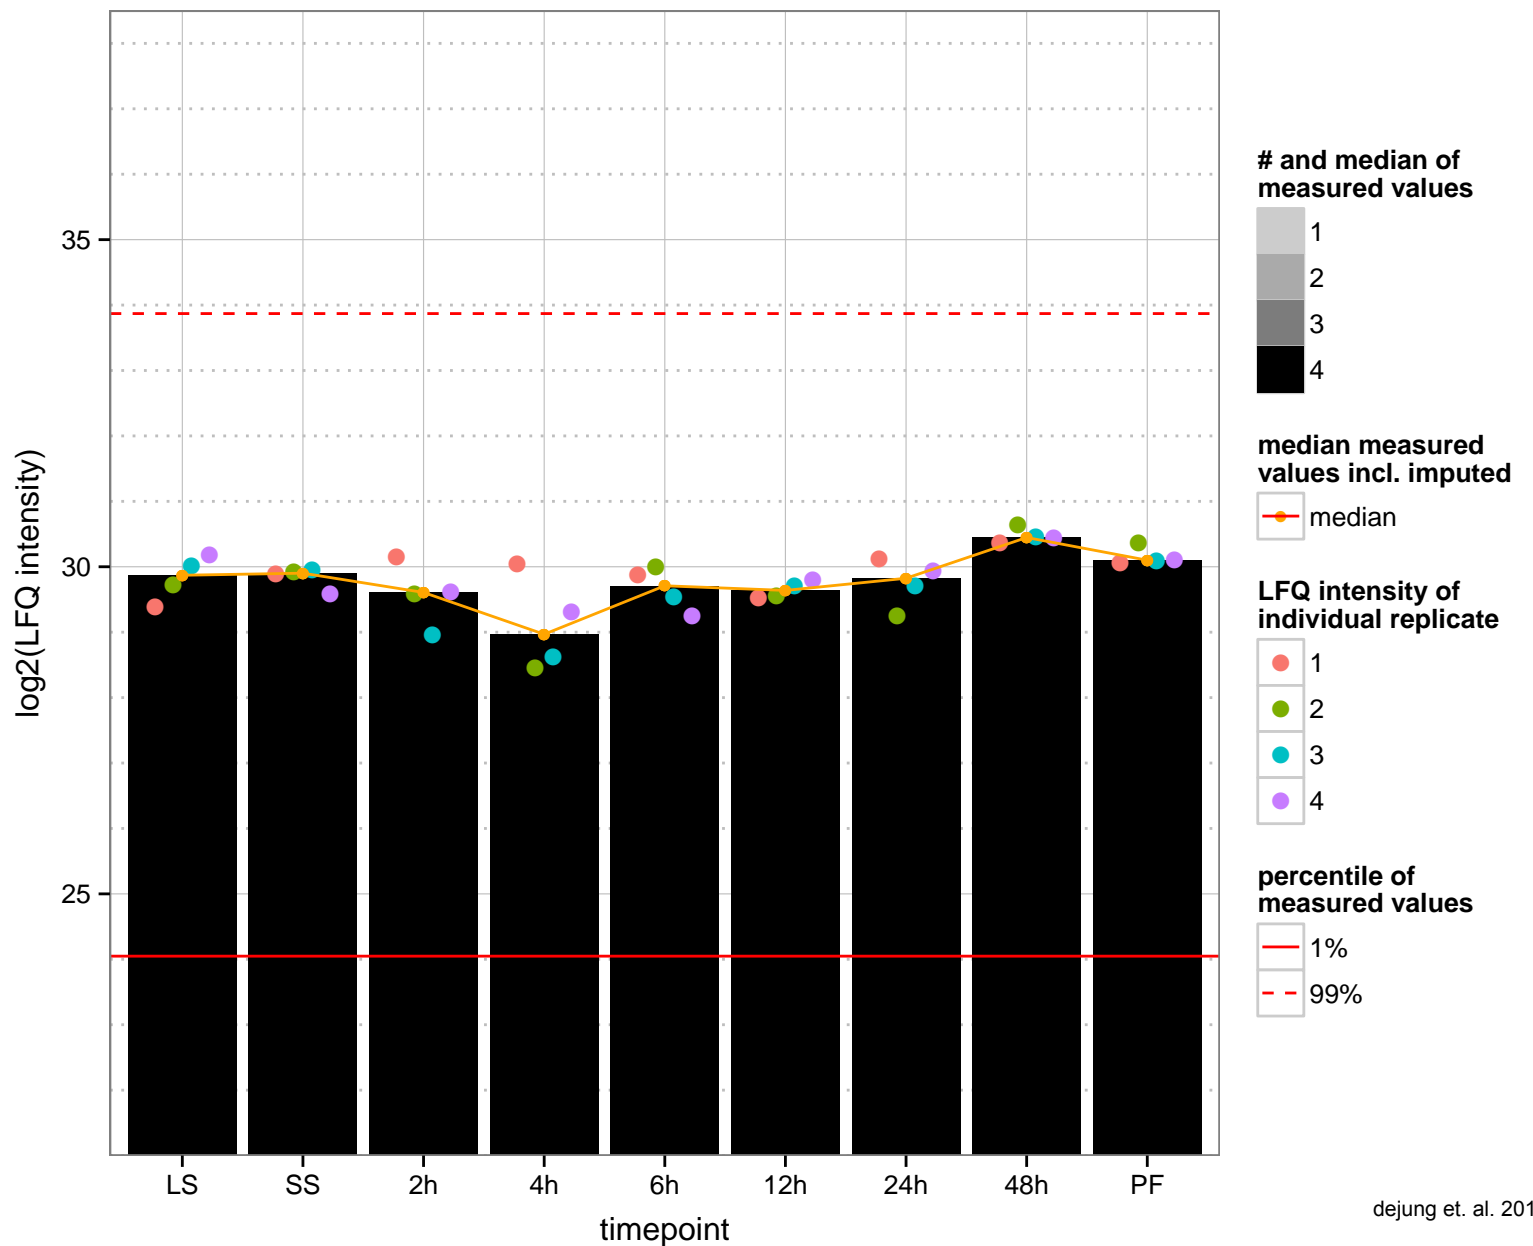

pre-mRNA splicing factor ATP-dependent RNA helicase, putative, RNA helicase  
 Tb927.10.7280  
 AGOF: ATP binding, ATP-dependent RNA helicase activity, nucleic acid binding  
 AGOC: spliceosomal complex  
 AGOP: RNA splicing, RNA splicing, via transesterification reactions  
 PGO: ATP binding, ATP-dependent helicase activity, helicase activity, nucleic acid binding  
 PGOC: null  
 PGOP: null

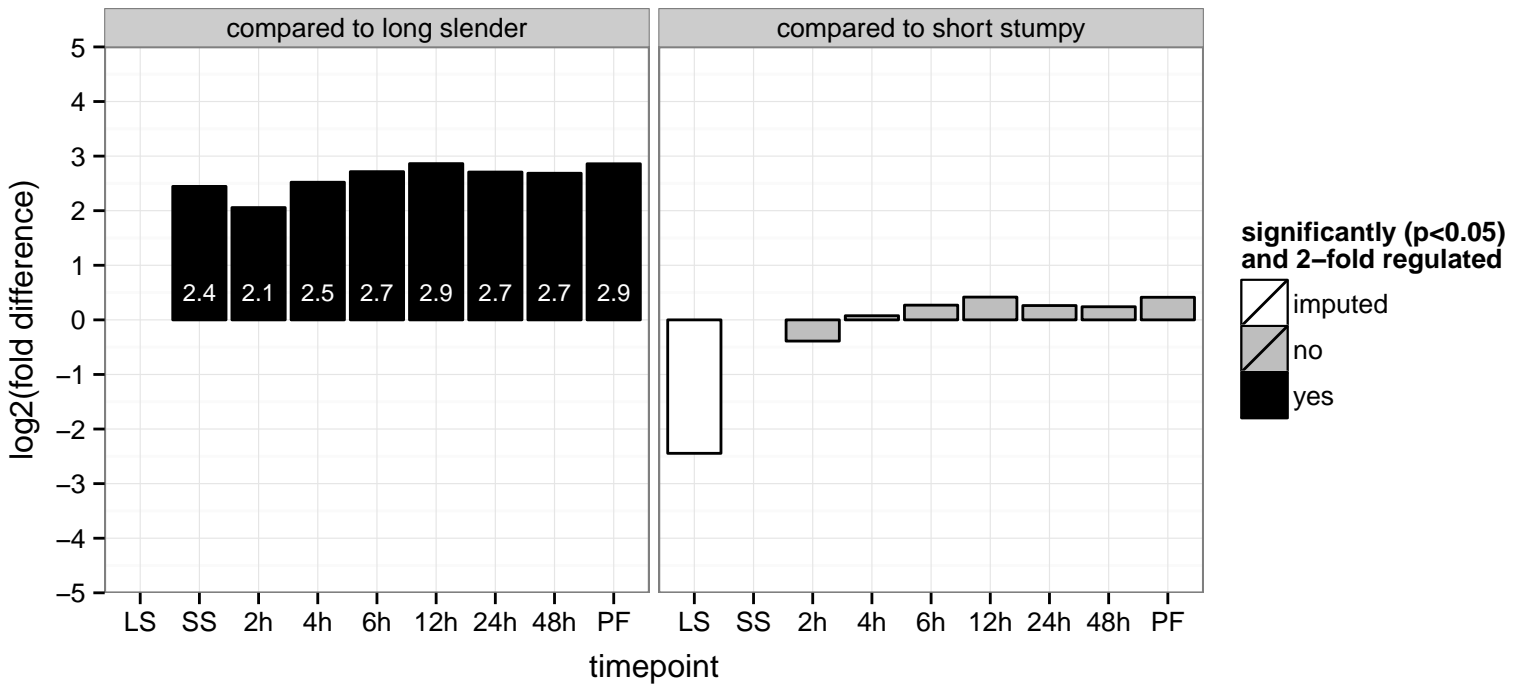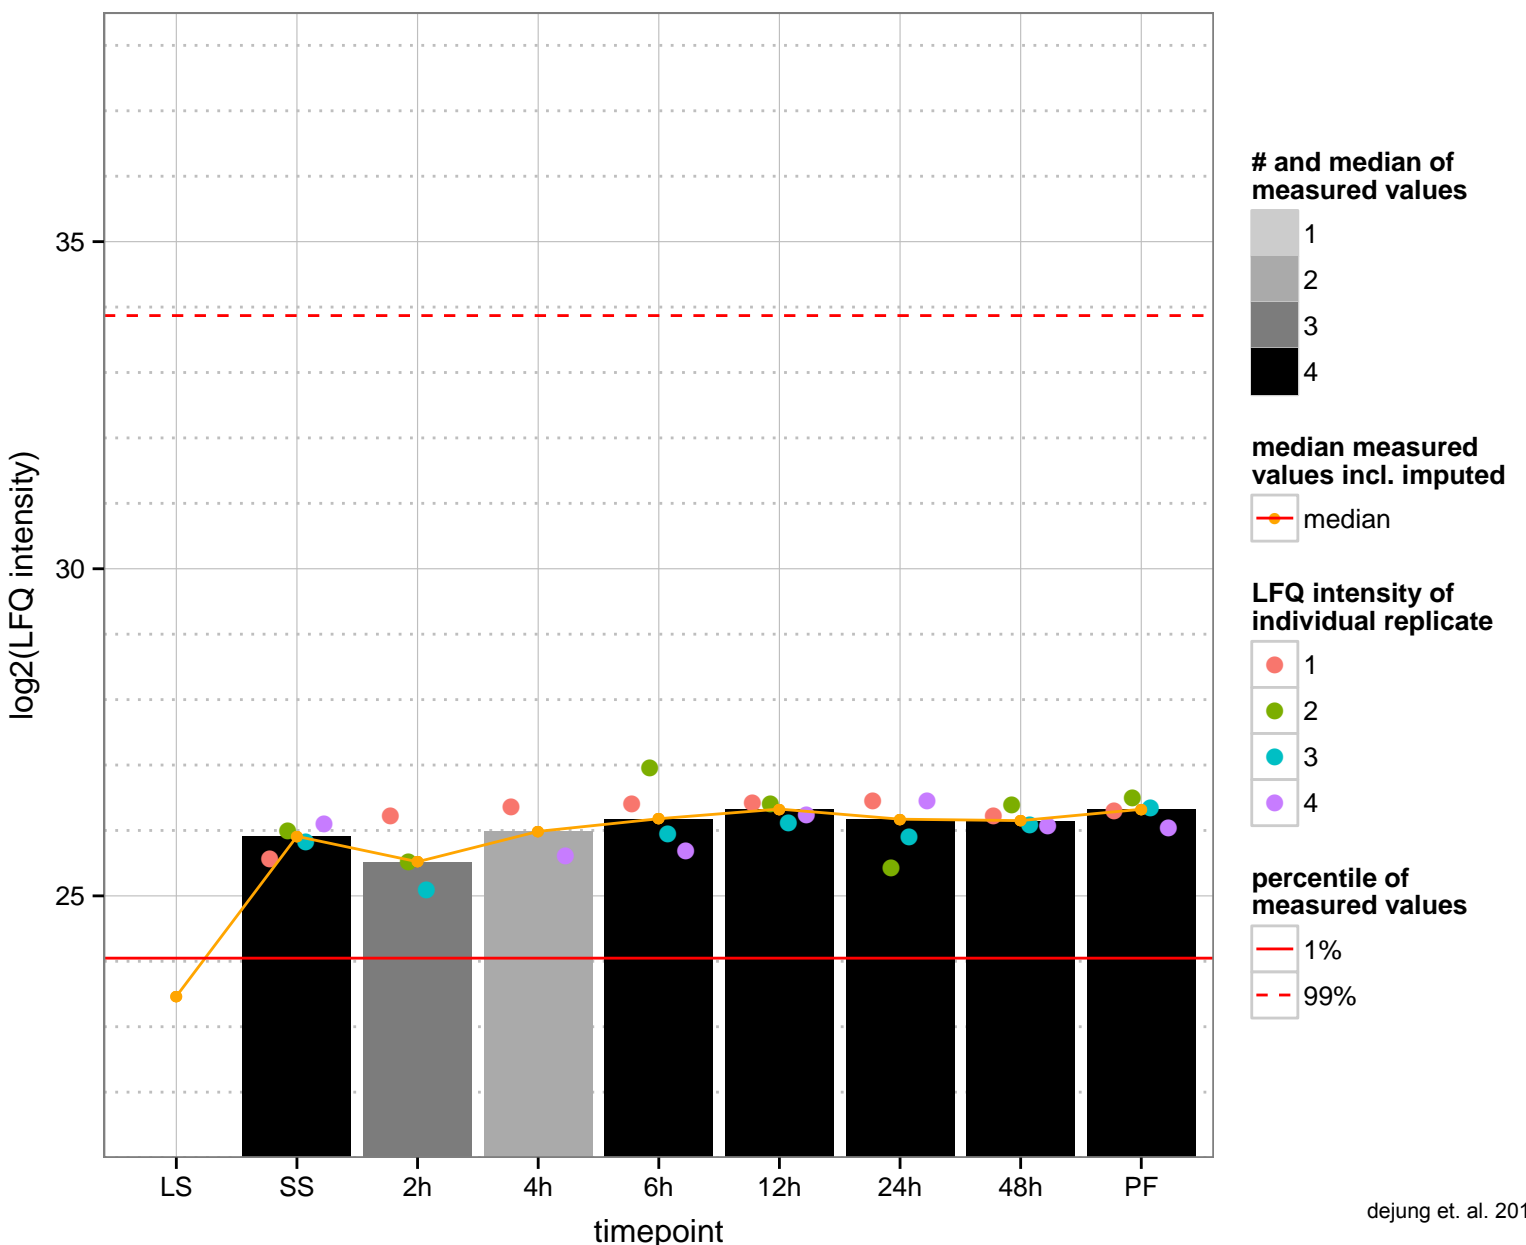

hypothetical protein, conserved  
 Tb927.10.7350  
 AGOF: null  
 AGOC: null  
 AGOP: null  
 PGO: null  
 PGOC: null  
 PGOP: null

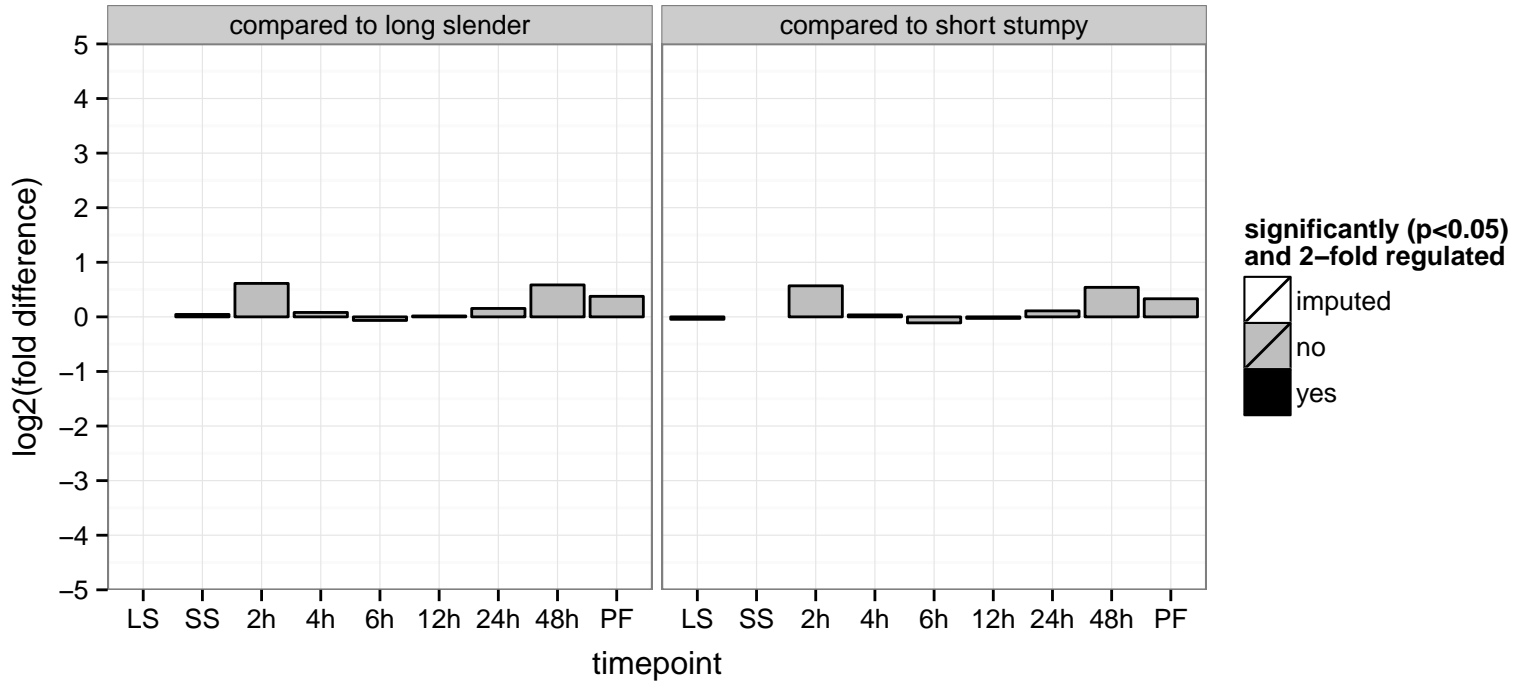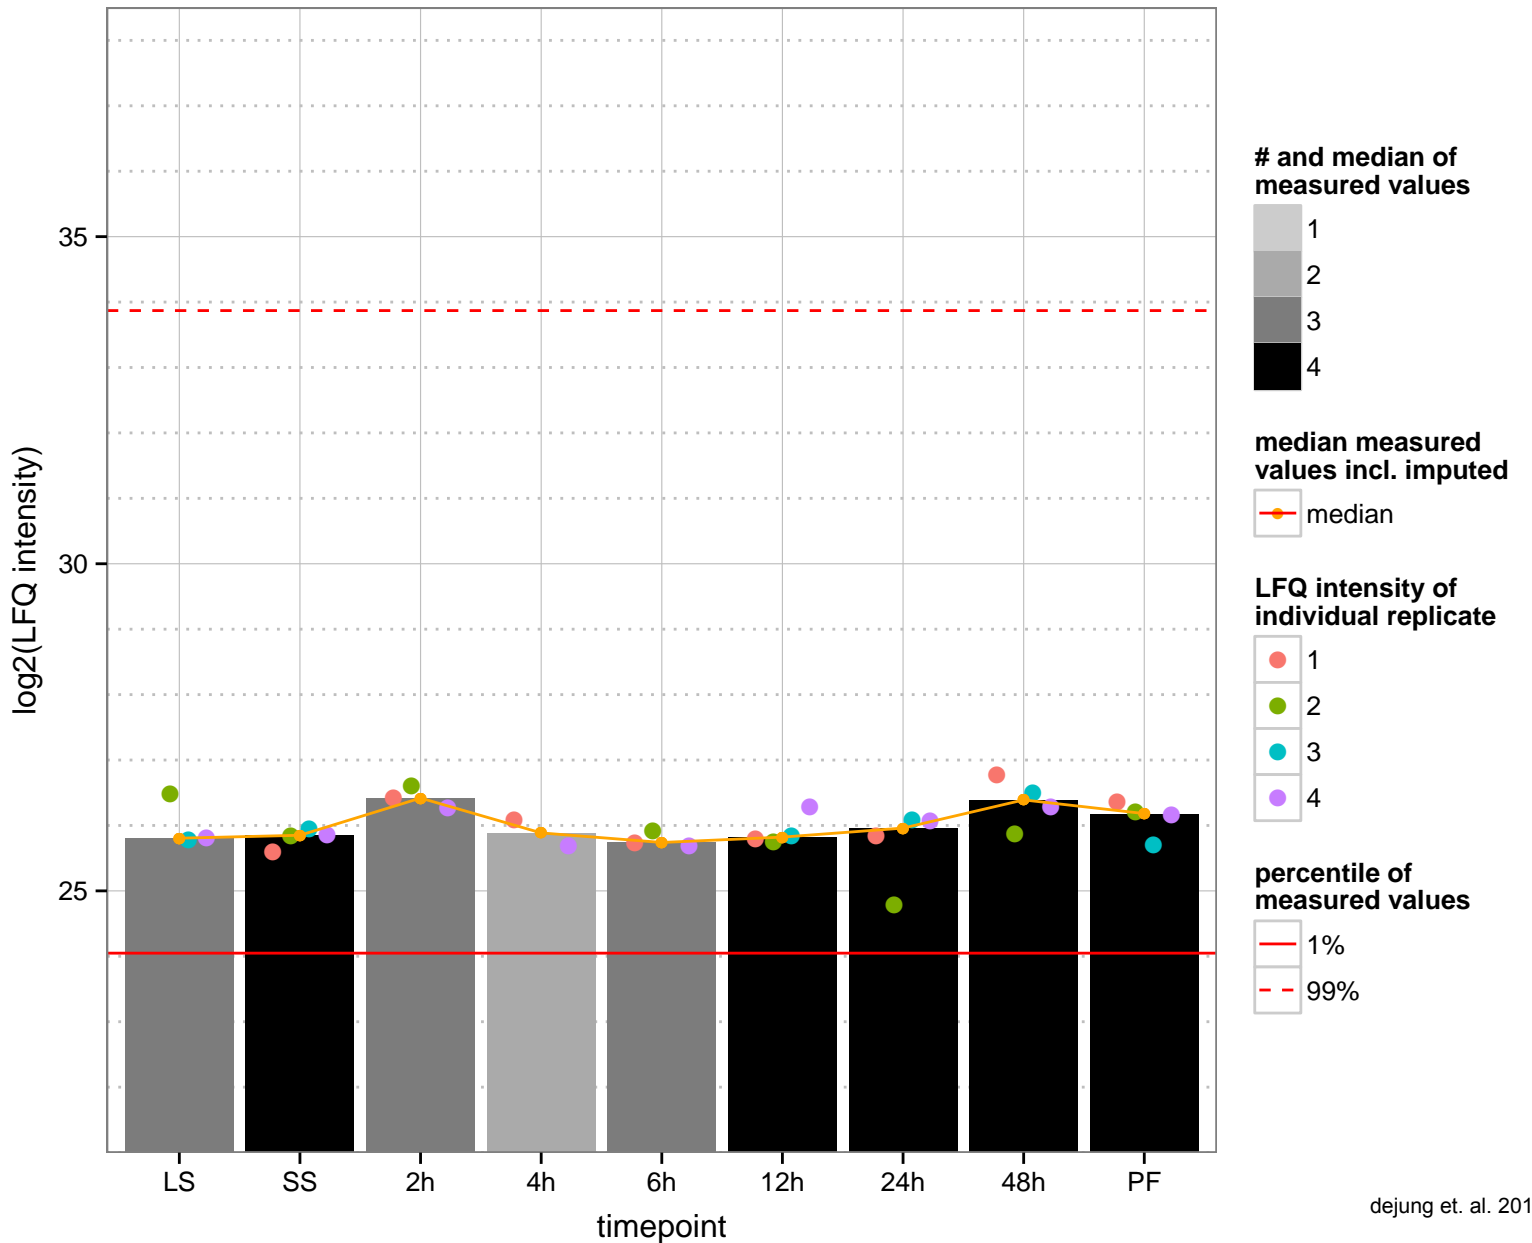

succinyl-CoA ligase [GDP-forming] beta-chain, putative  
 Tb927.10.7410  
 AGOF: catalytic activity  
 AGOC: mitochondrion  
 AGOP: metabolic process  
 PGO: catalytic activity  
 PGO: null  
 PGO: metabolic process

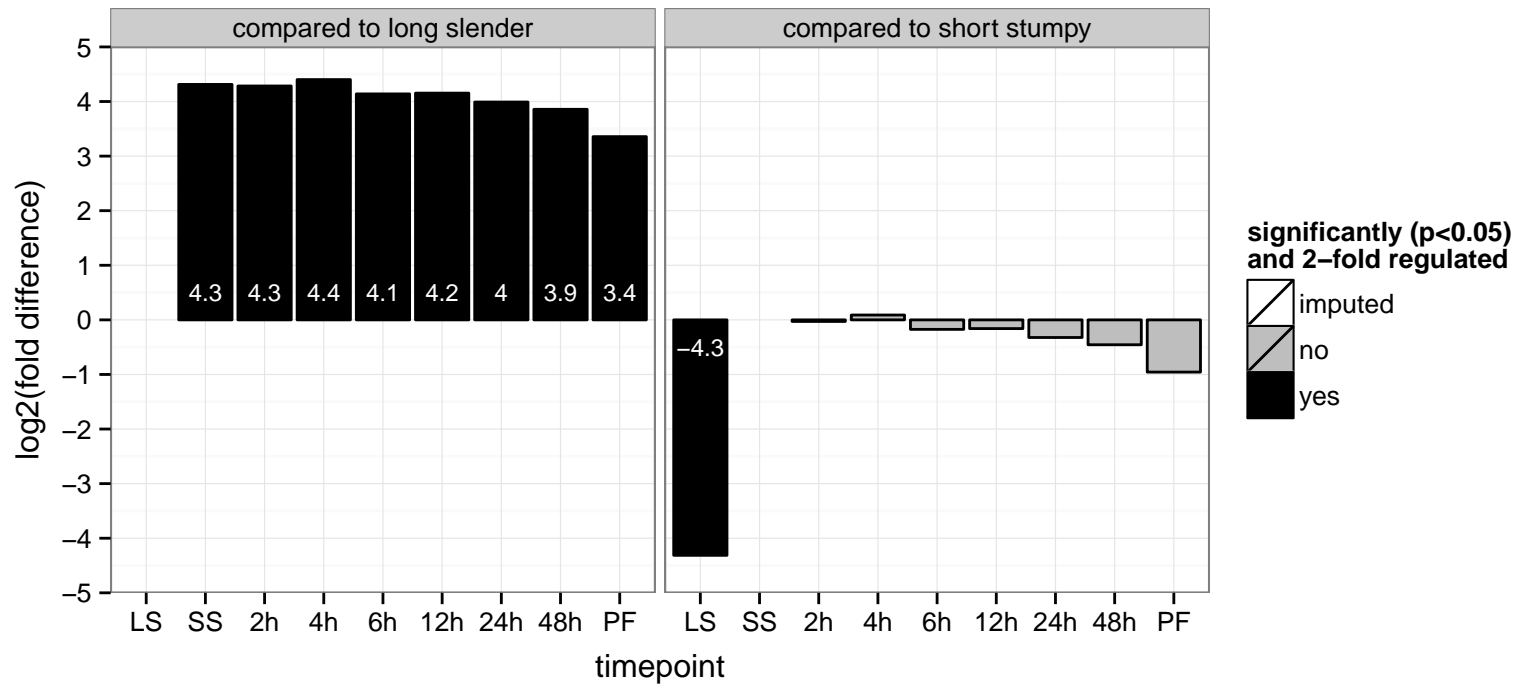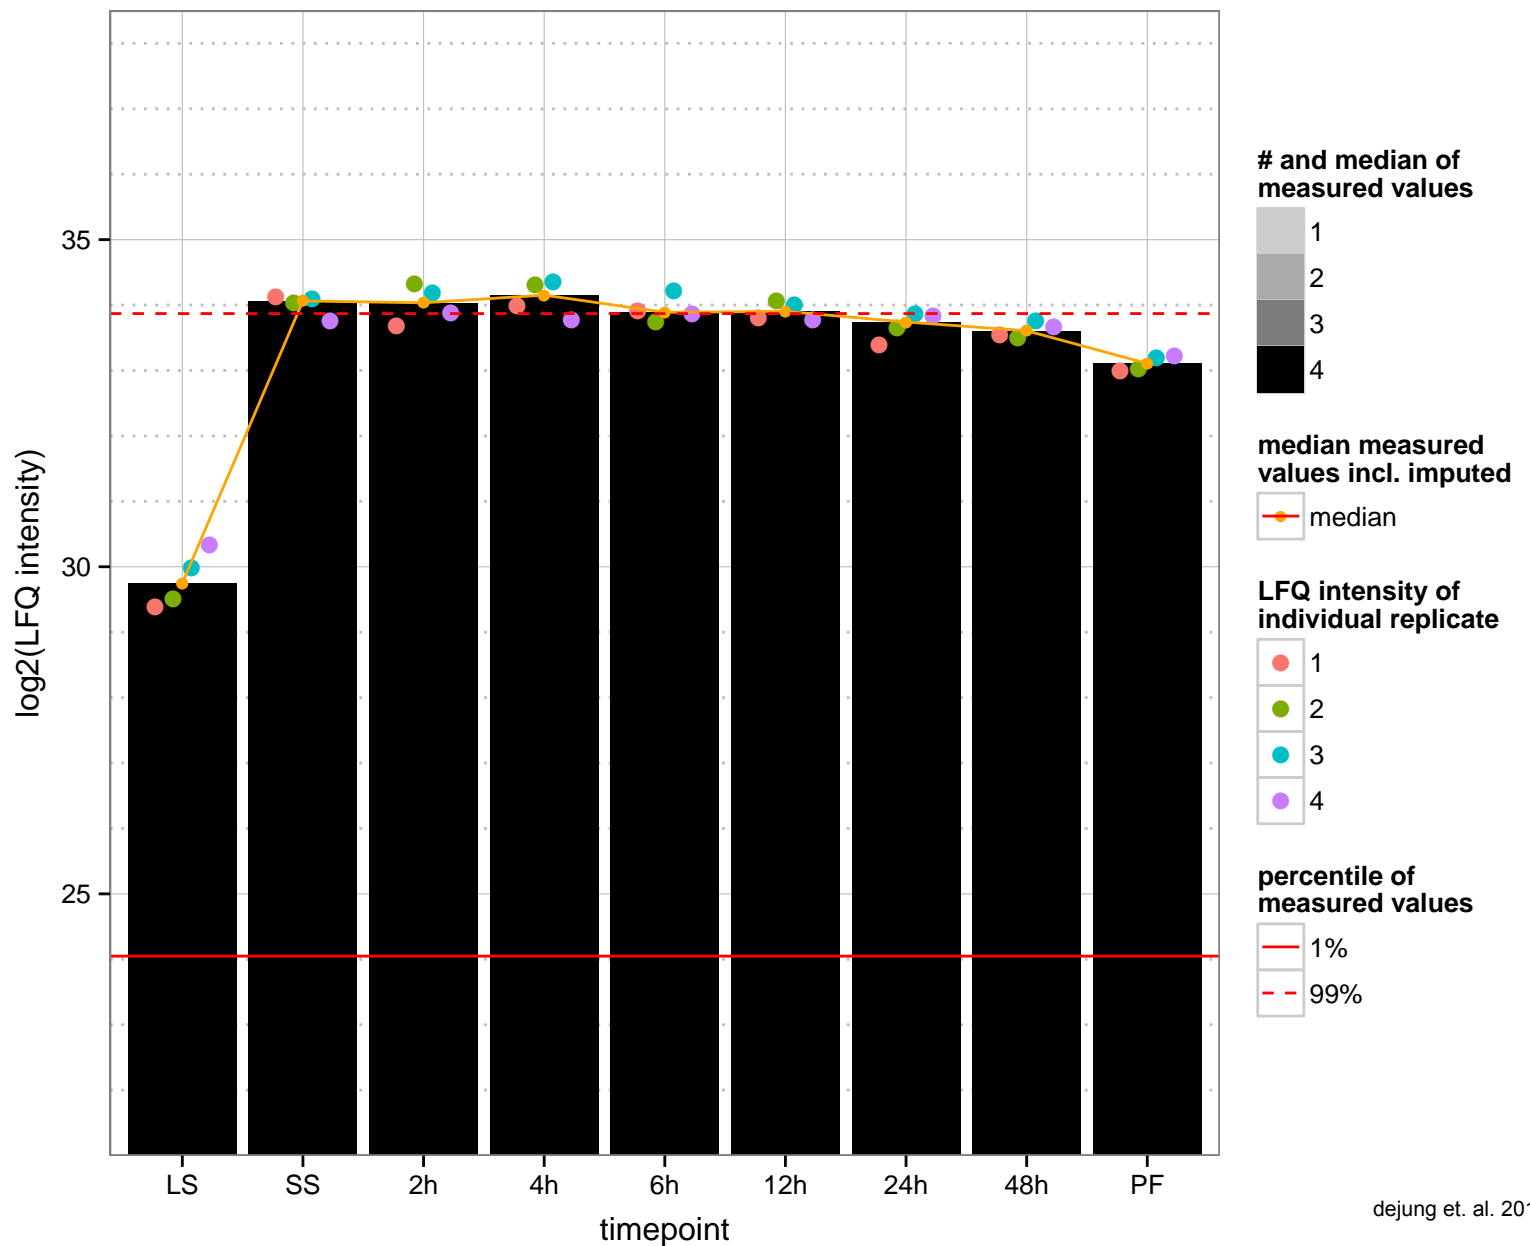

bromodomain factor 2 protein, putative  
 Tb927.10.7420  
 AGOF: histone binding  
 AGOC: nucleus  
 AGOP: chromatin remodeling, histone modification  
 PGO: protein binding  
 PGOC: null  
 PGOP: null

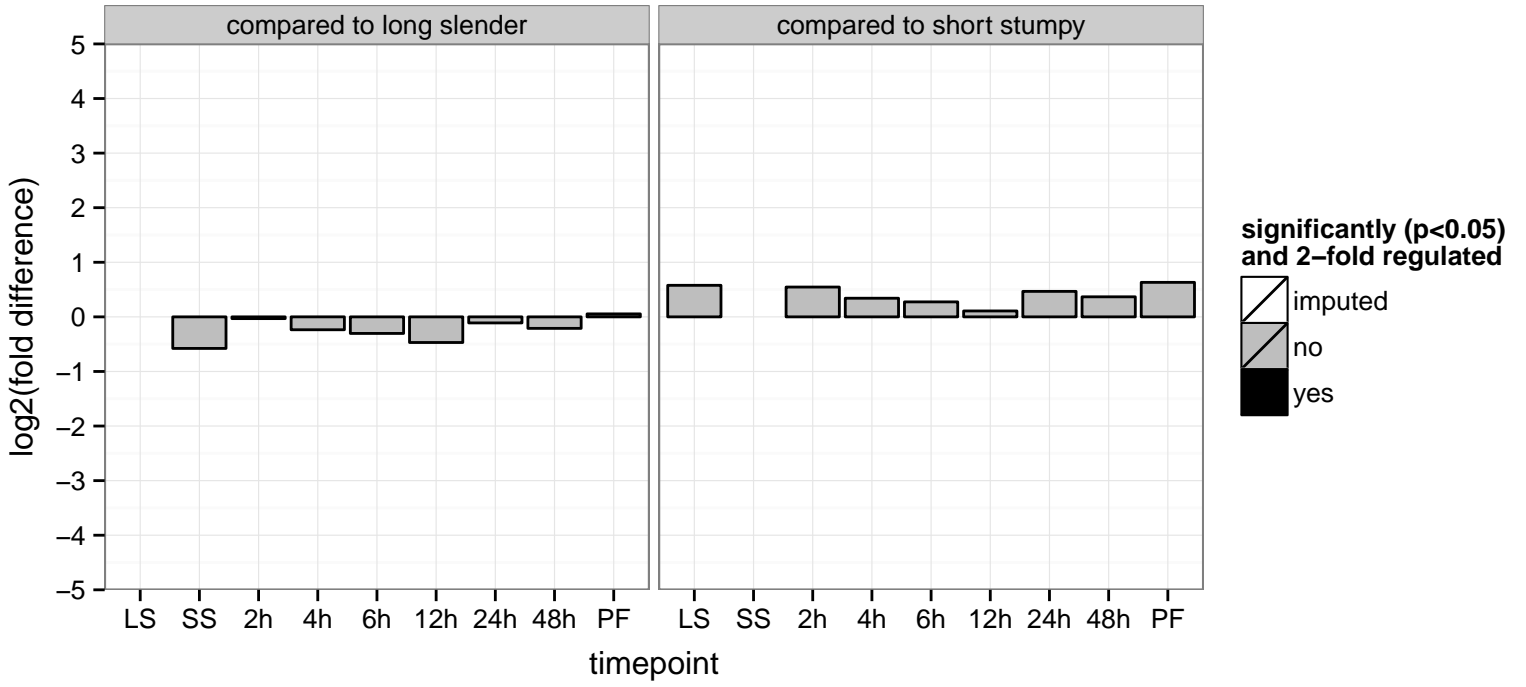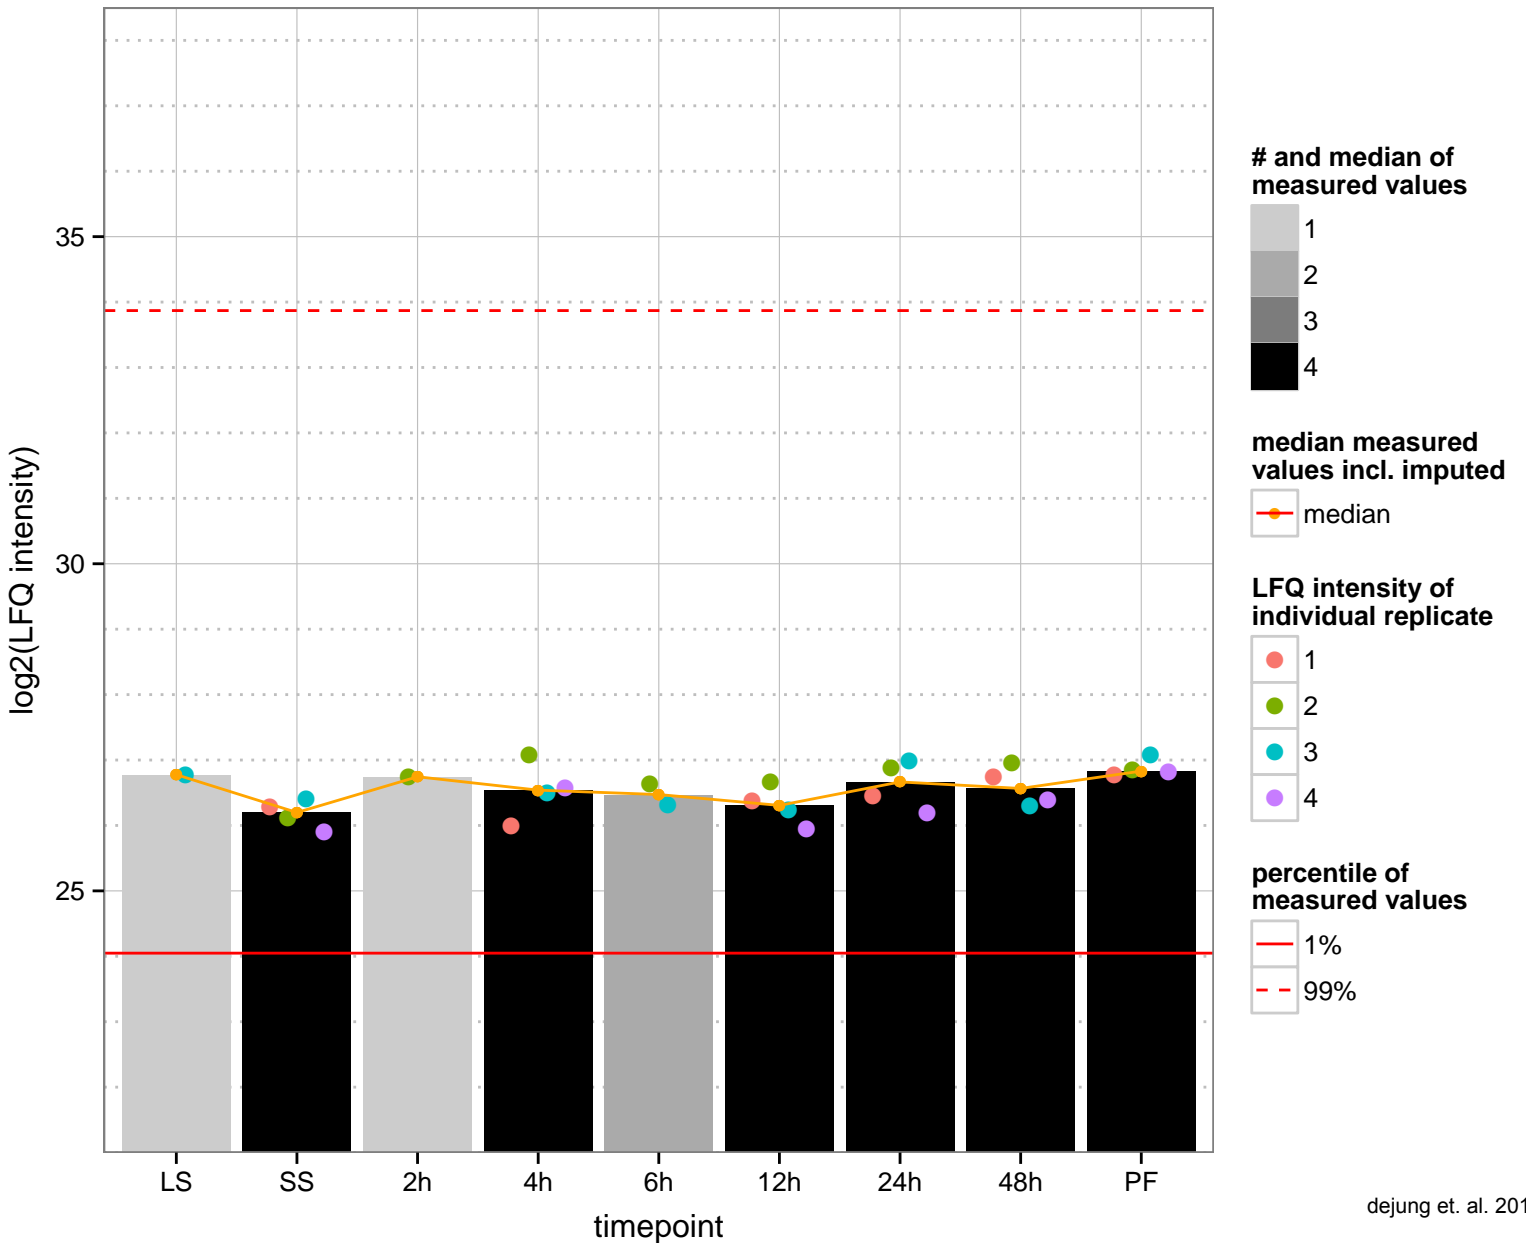



MTR4, ATP-dependent DEAD/H RNA helicase (MTR4)

Tb927.10.7440

AGOF: ATP binding, ATP-dependent helicase activity, helicase activity, nucleic acid binding

AGOC: nucleus

AGOP: rRNA processing

PGOF: ATP binding, ATP-dependent helicase activity, helicase activity, hydrolase activity, acting on acid anhydrides, in phospho

PGOC: null

PGOP: null

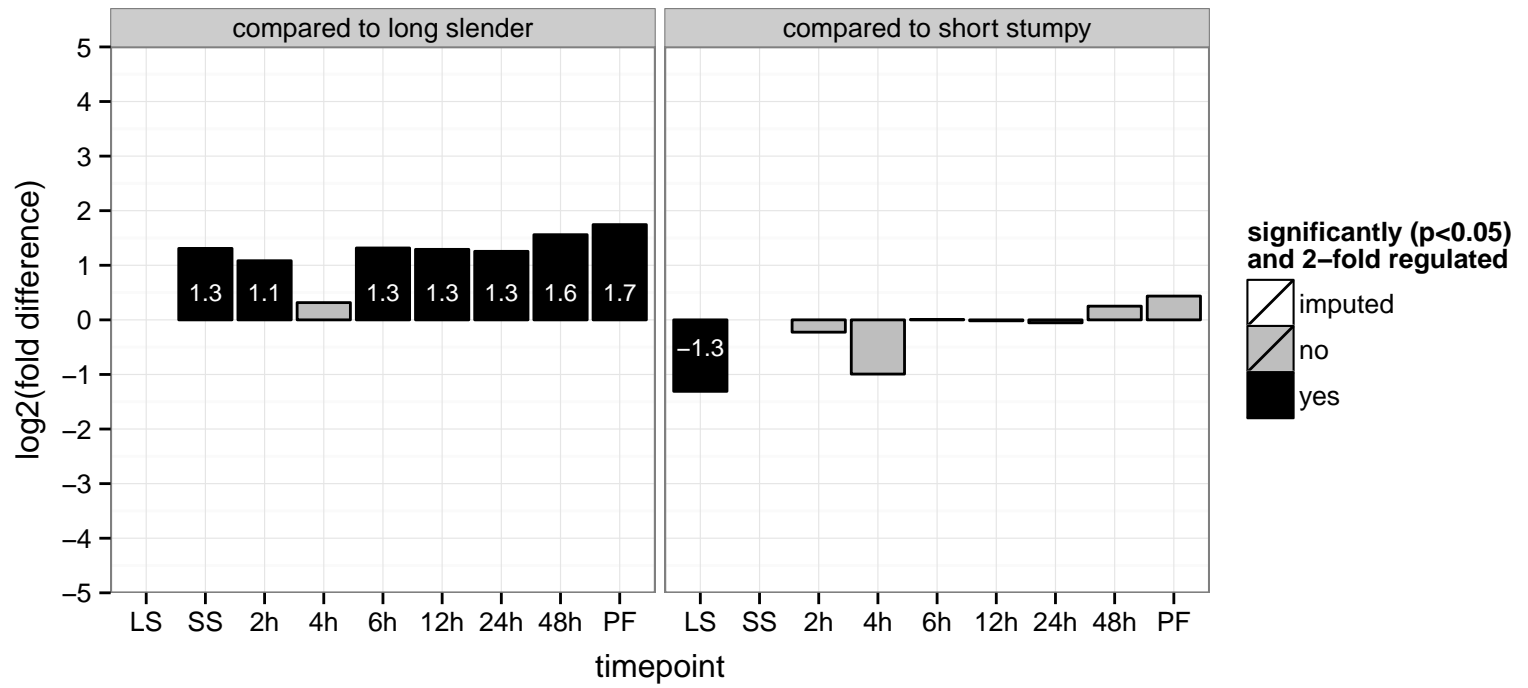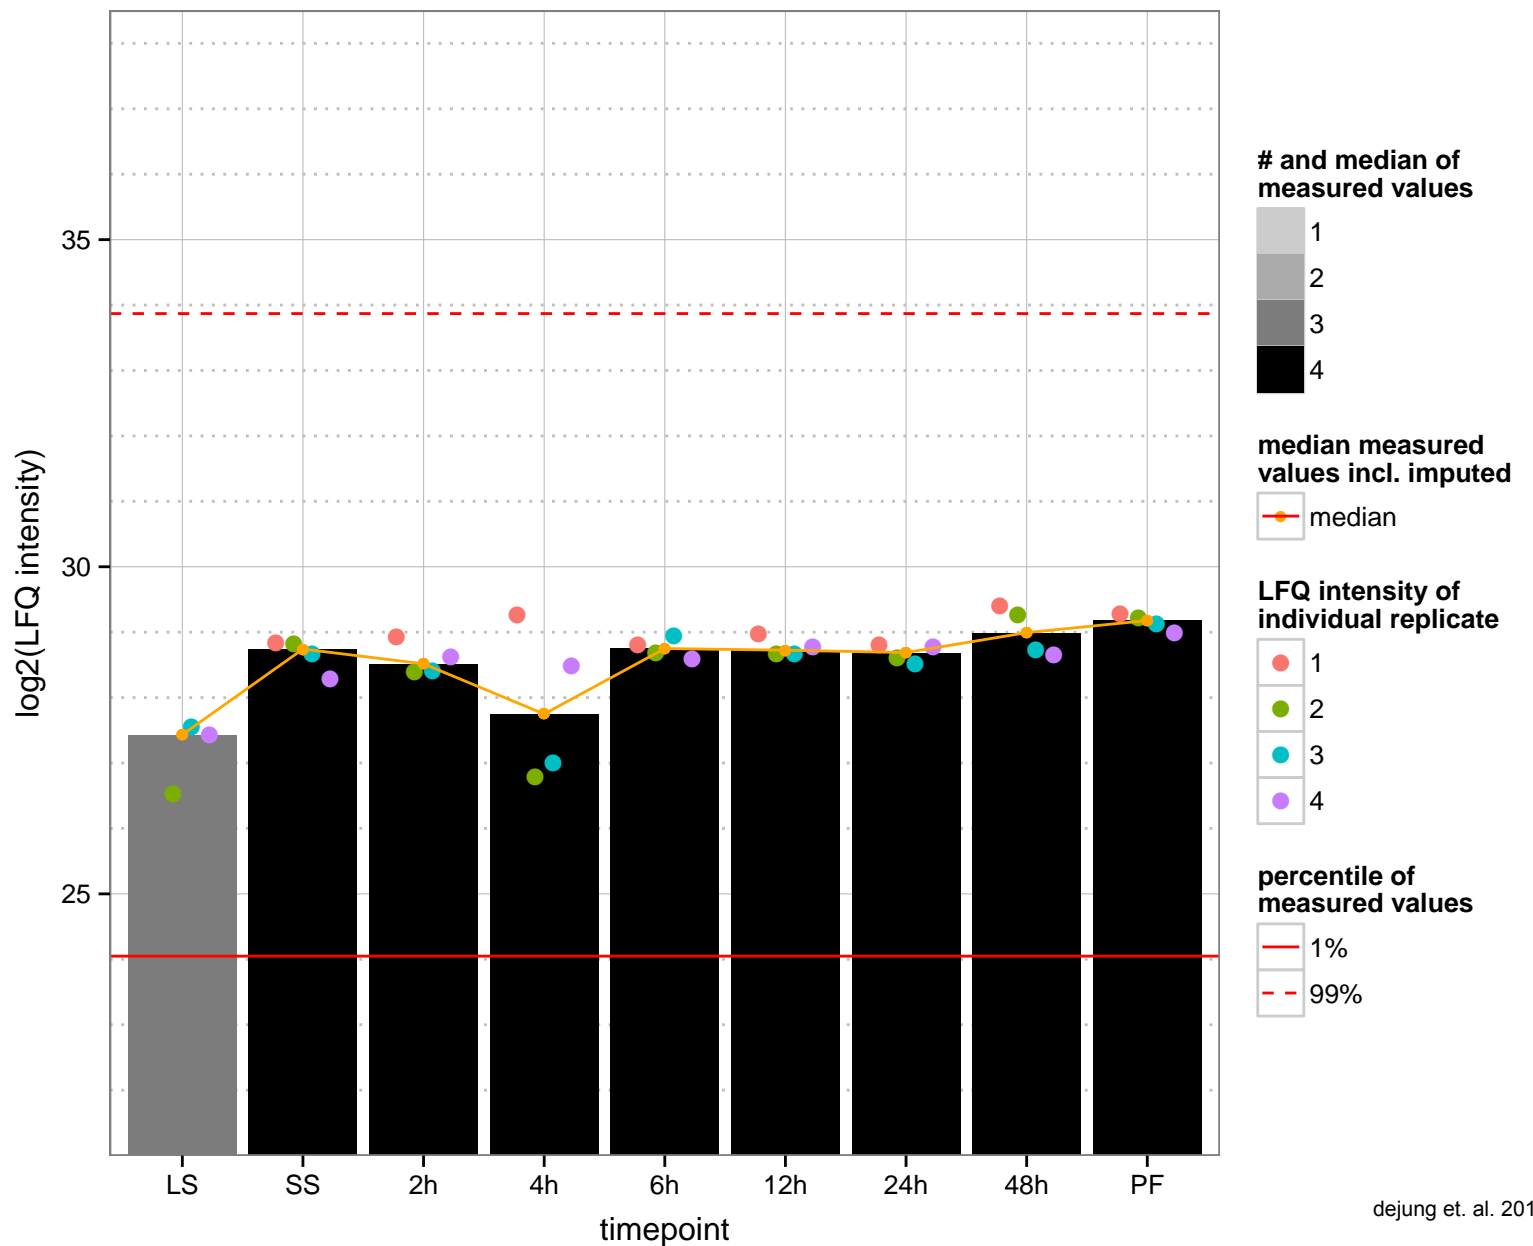

exosome complex exonuclease RRP41A, Rrp41p homologue (RRP41A)

Tb927.10.7450

AGOF: 3'-5'-exoribonuclease activity, RNA binding

AGOC: null

AGOP: RNA processing, rRNA processing

PGOF: null

PGOC: null

PGOP: null

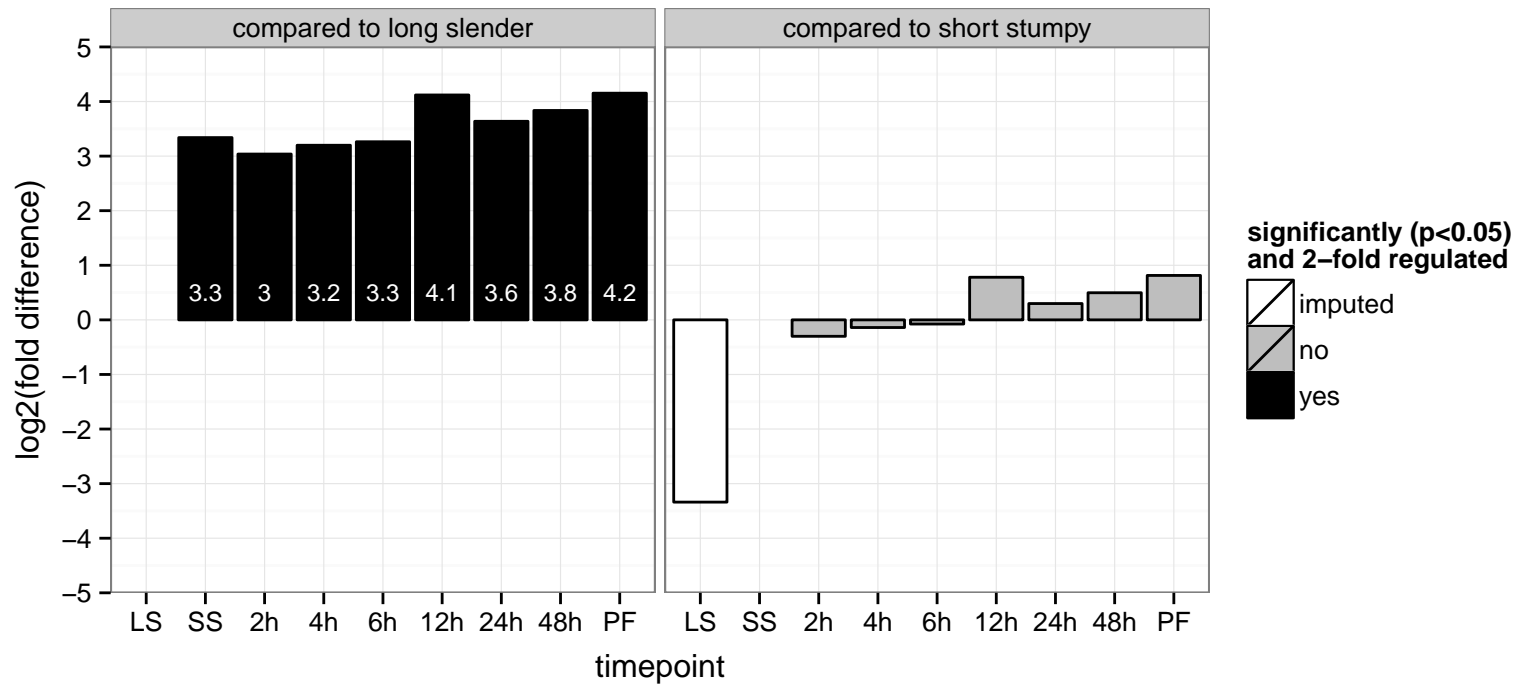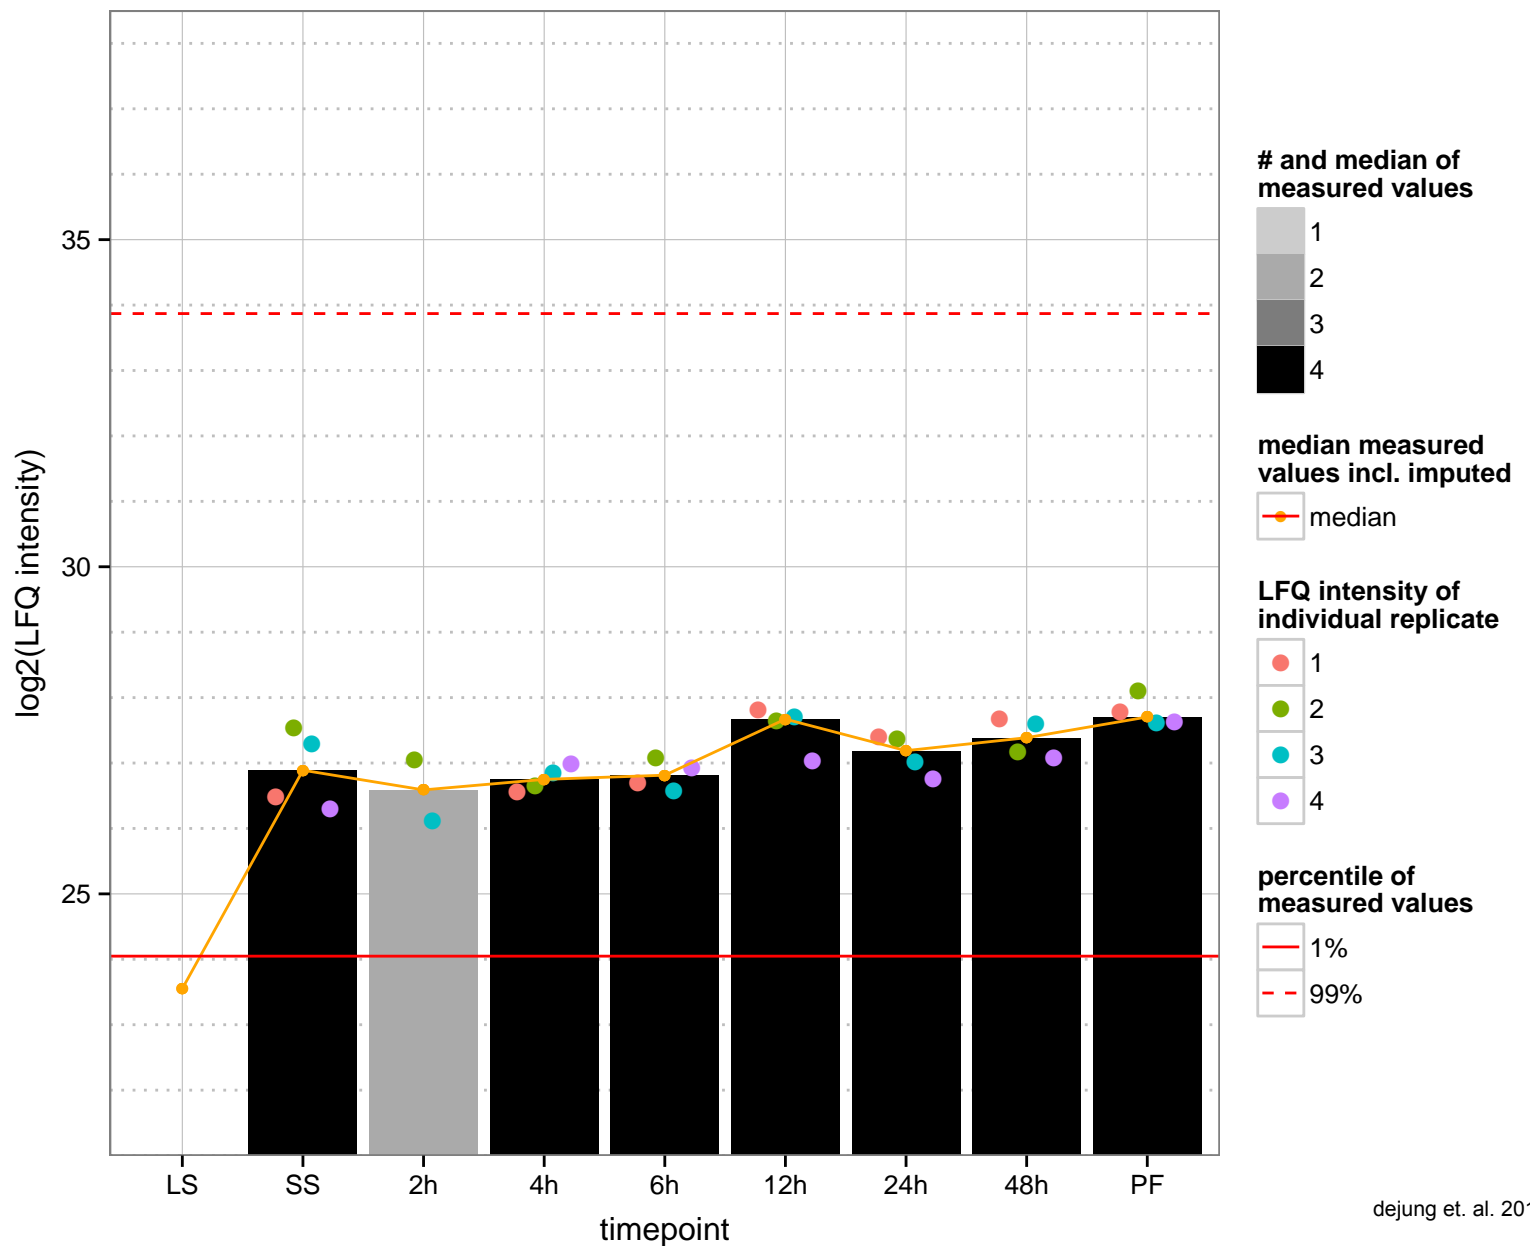

fibrillarlin (NOP1)  
 Tb927.10.7500  
 AGOF: RNA binding, rRNA 2'-O-ribose methylation guide activity  
 AGOC: box C/D snoRNP complex, nucleus  
 AGOP: rRNA processing  
 PGOF: RNA binding, methyltransferase activity  
 PGO: null  
 PGOP: rRNA processing, tRNA processing

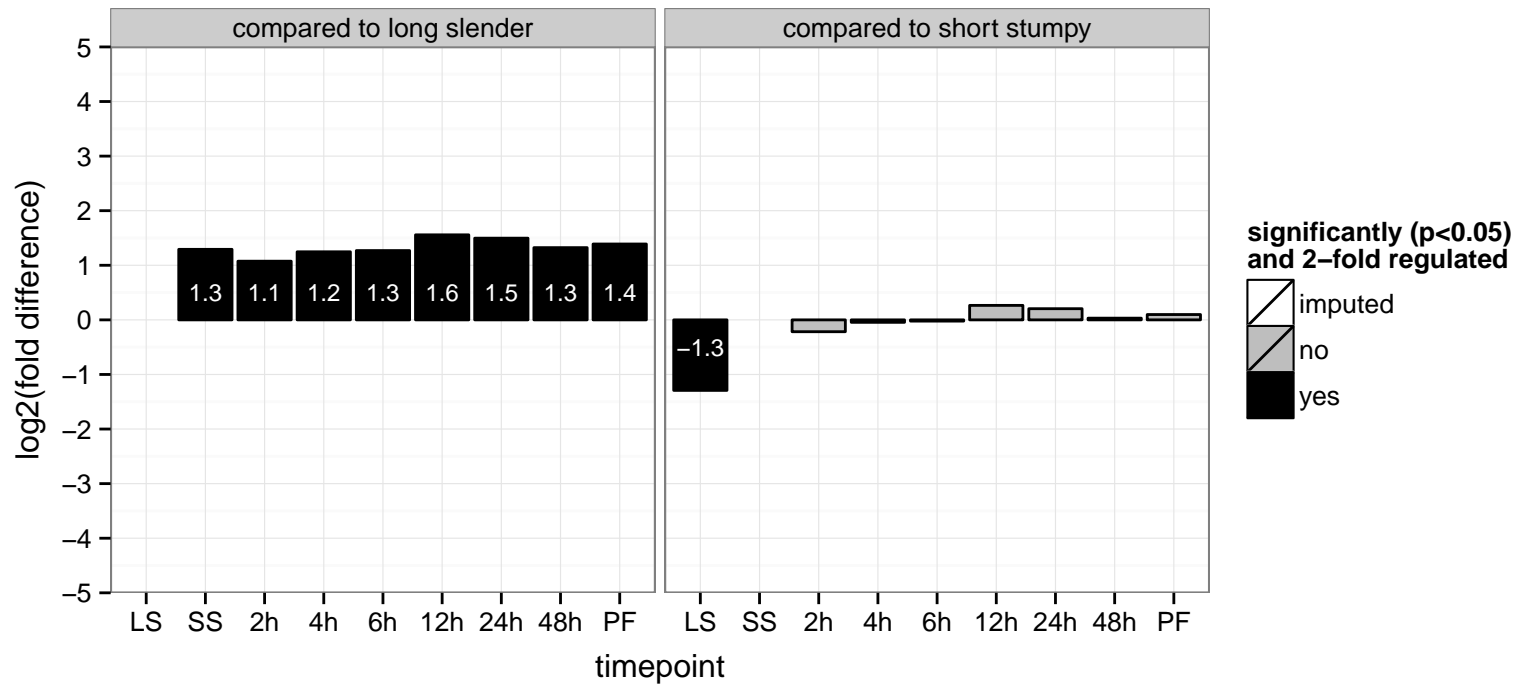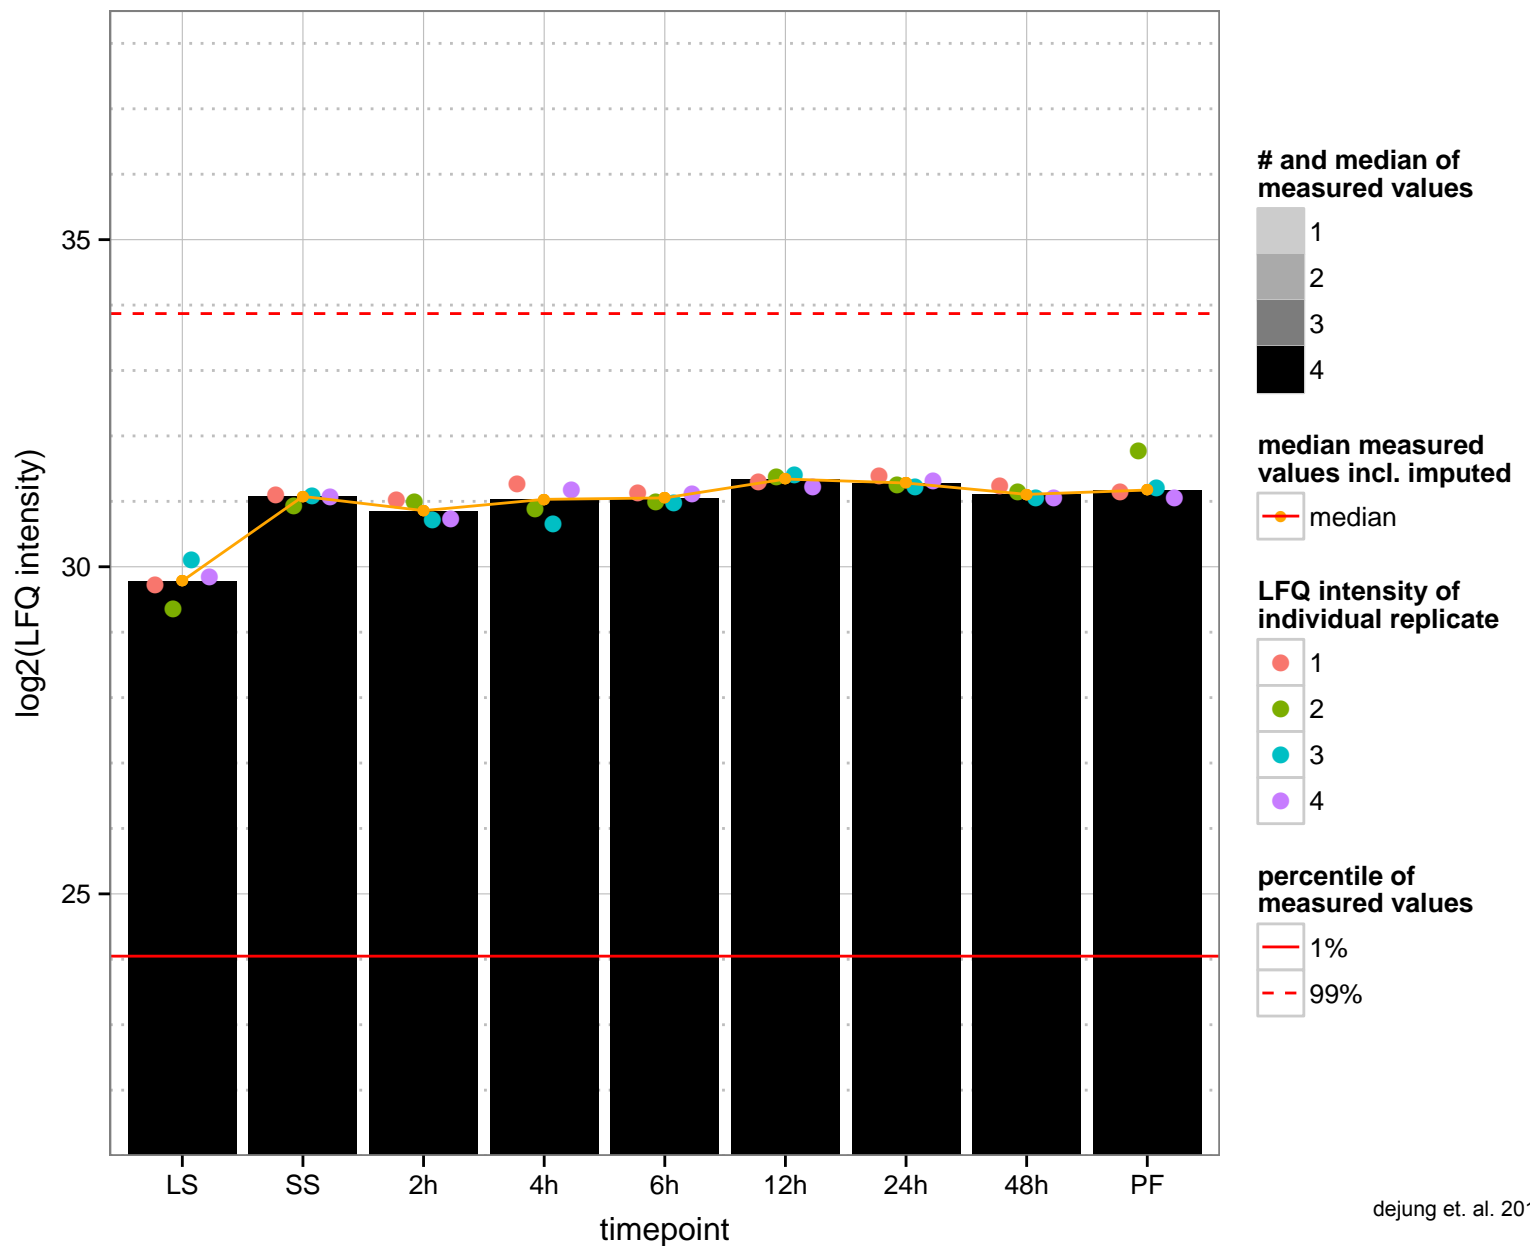

chromatin binding protein, putative  
 Tb927.10.7510  
 AGOF: Ran GTPase binding, chromatin binding  
 AGOC: null  
 AGOP: chromosome organization  
 PGO: null  
 PGOC: null  
 PGOP: null

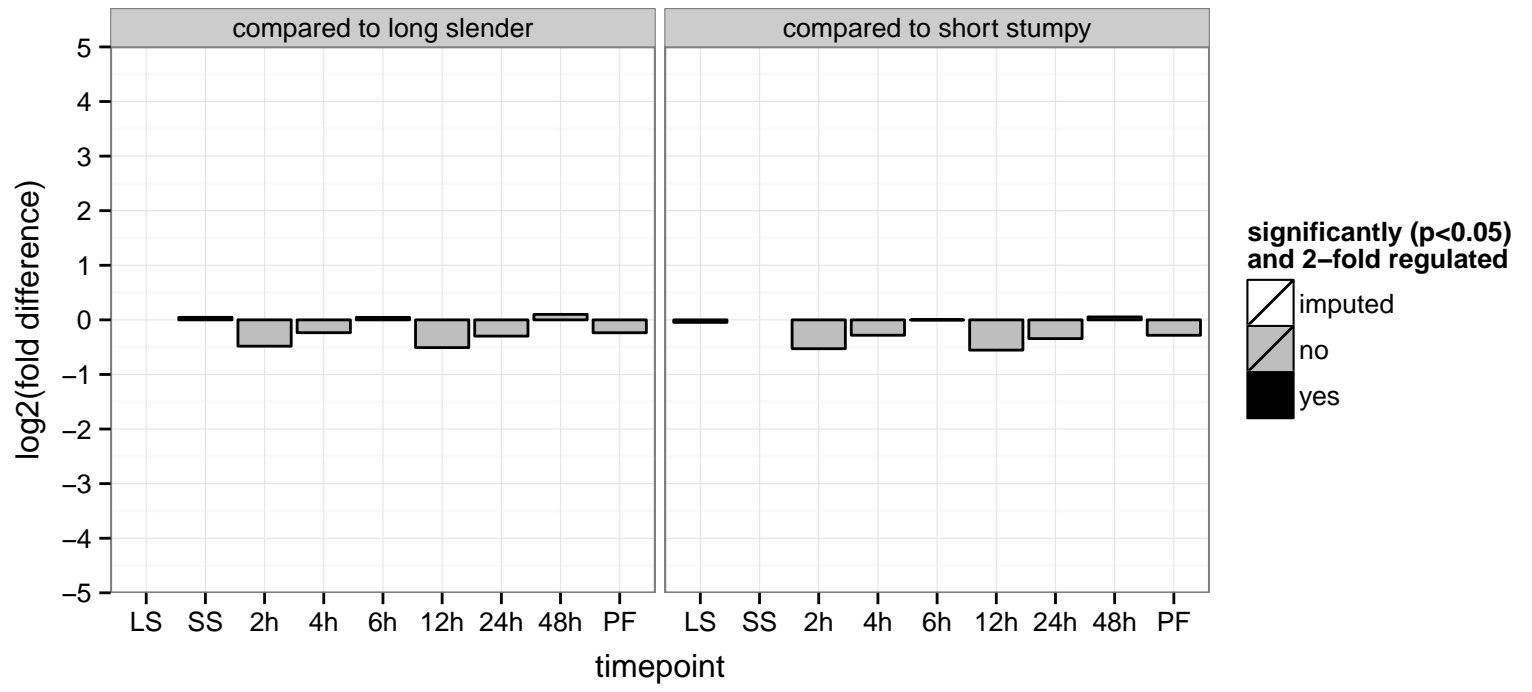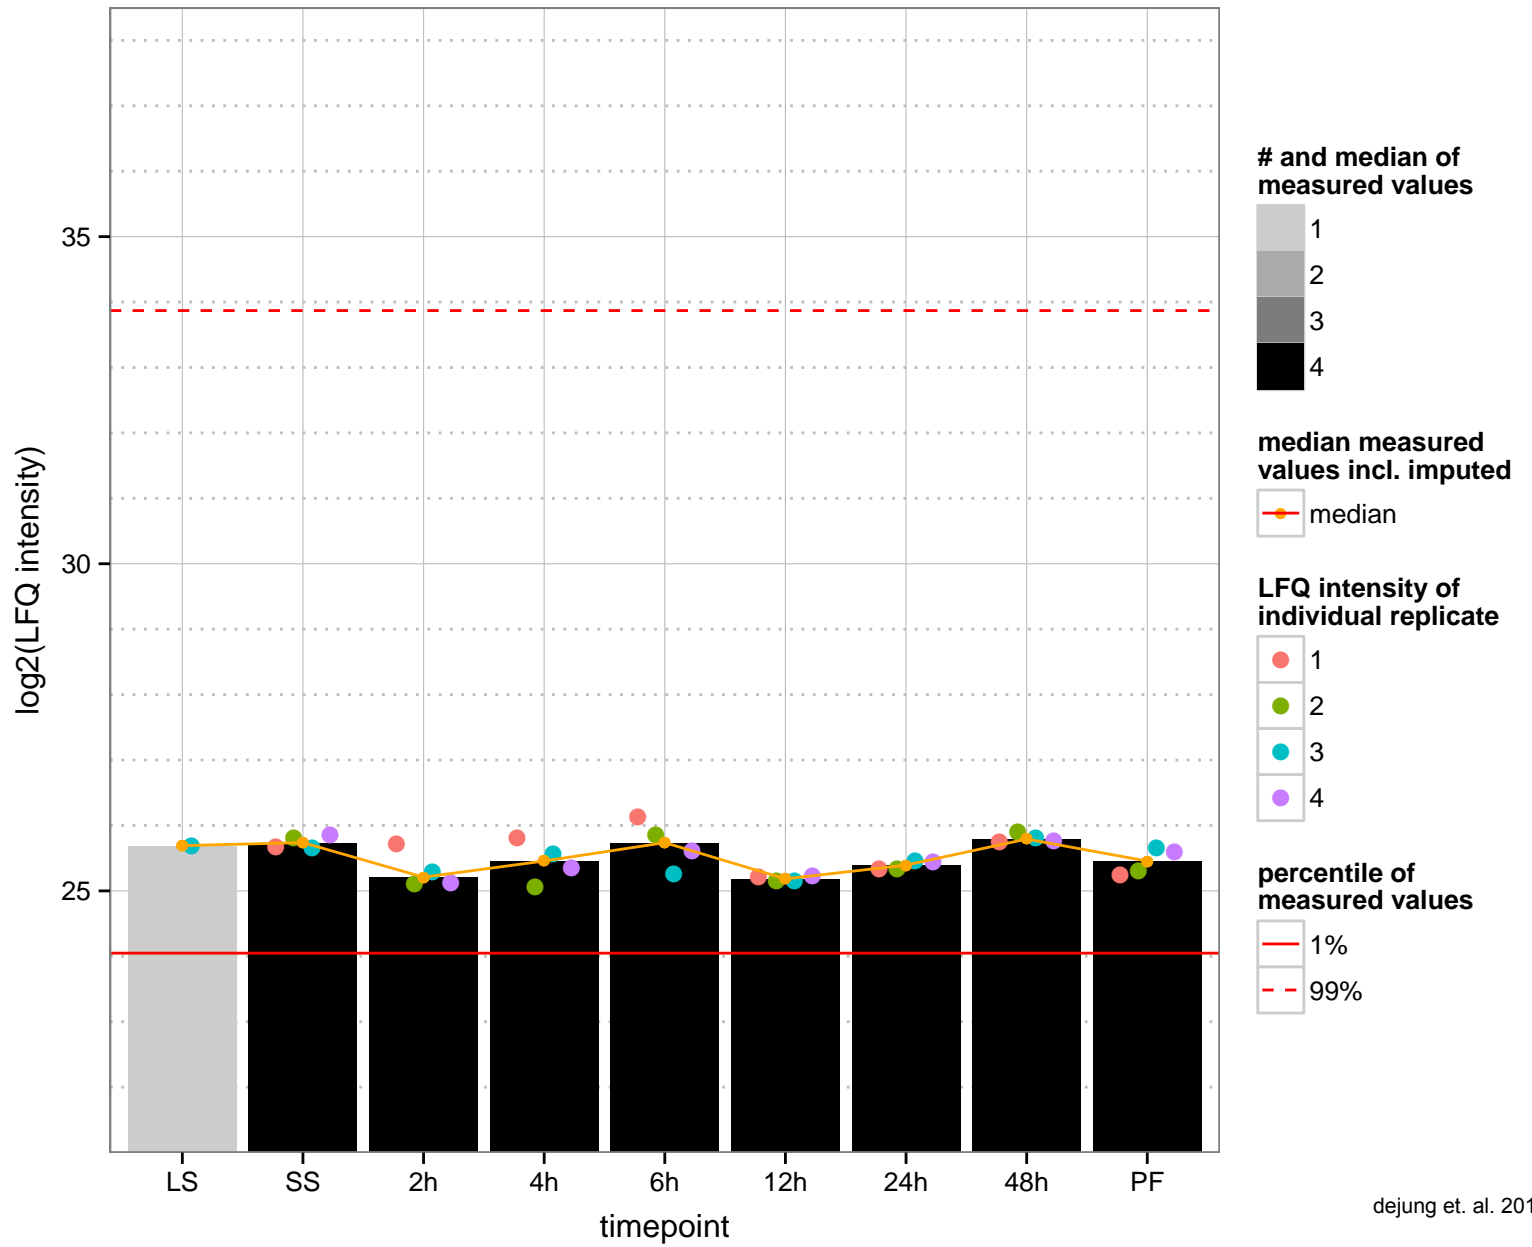

hypothetical protein, conserved  
 Tb927.10.7550  
 AGOF: null  
 AGOC: null  
 AGOP: null  
 PGO: null  
 PGOC: null  
 PGOP: null

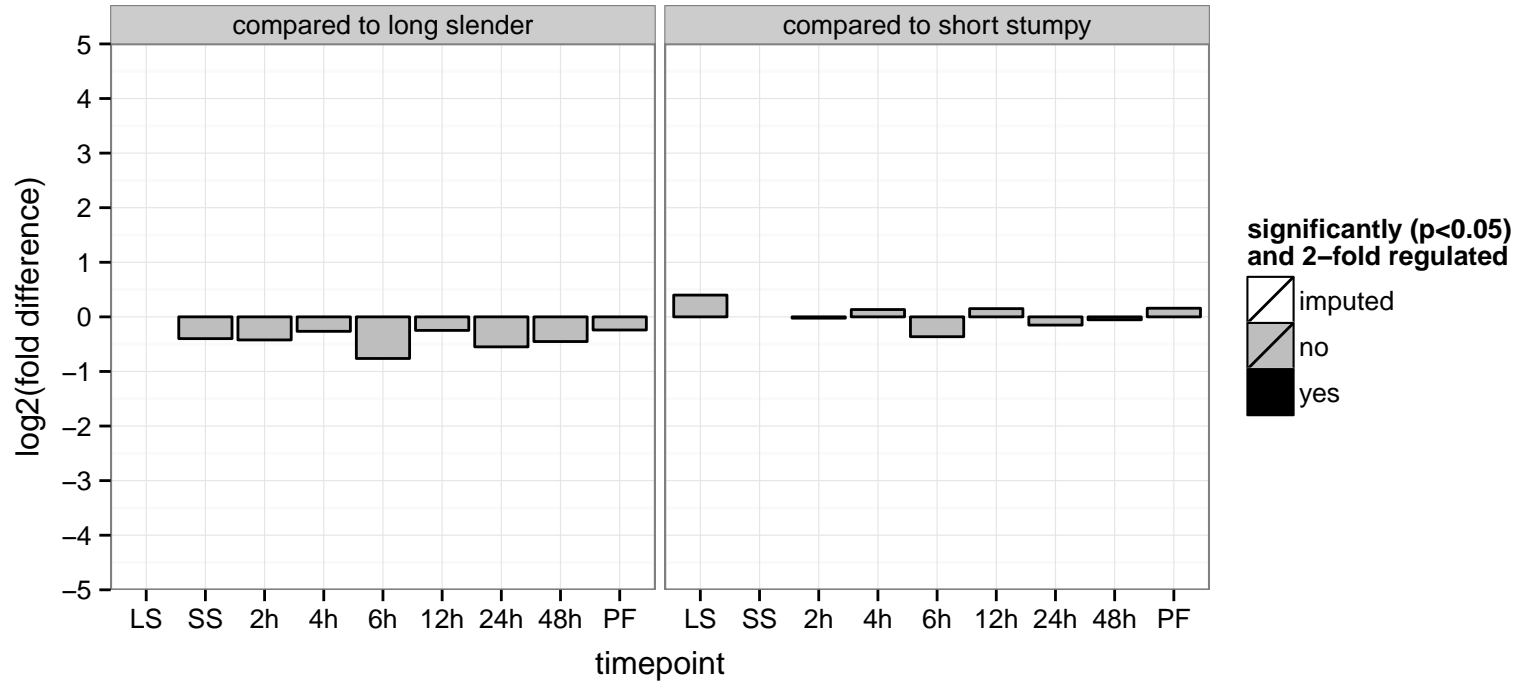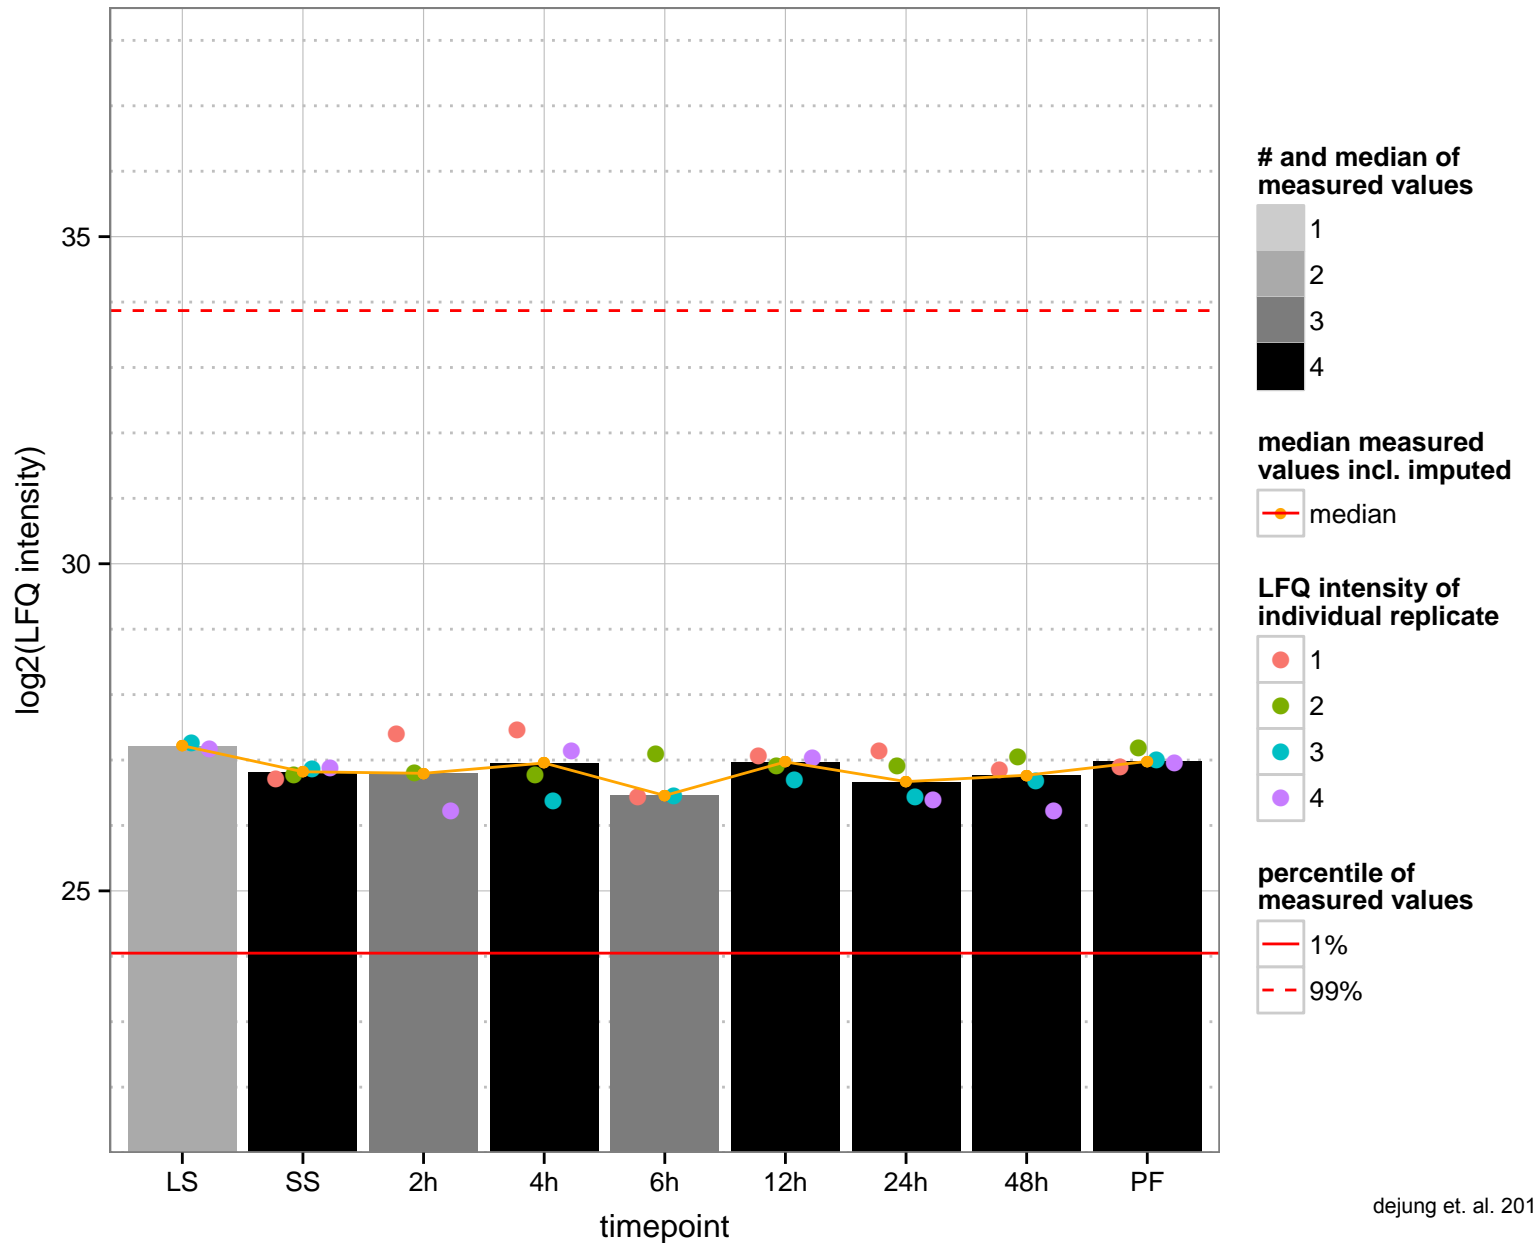

dihydrolipoamide acetyltransferase precursor, putative, dihydrolipoamide acetyltransferase E2 subunit  
 Tb927.10.7570  
 AGOF: null, dihydrolipoamide acetyltransferase activity, pyruvate dehydrogenase activity  
 AGOC: null, mitochondrial pyruvate dehydrogenase complex, mitochondrion  
 AGOP: null, acetyl-CoA biosynthetic process from pyruvate  
 PGO: transferase activity, transferring acyl groups  
 PGO: null  
 PGO: null  
 PGO: metabolic process

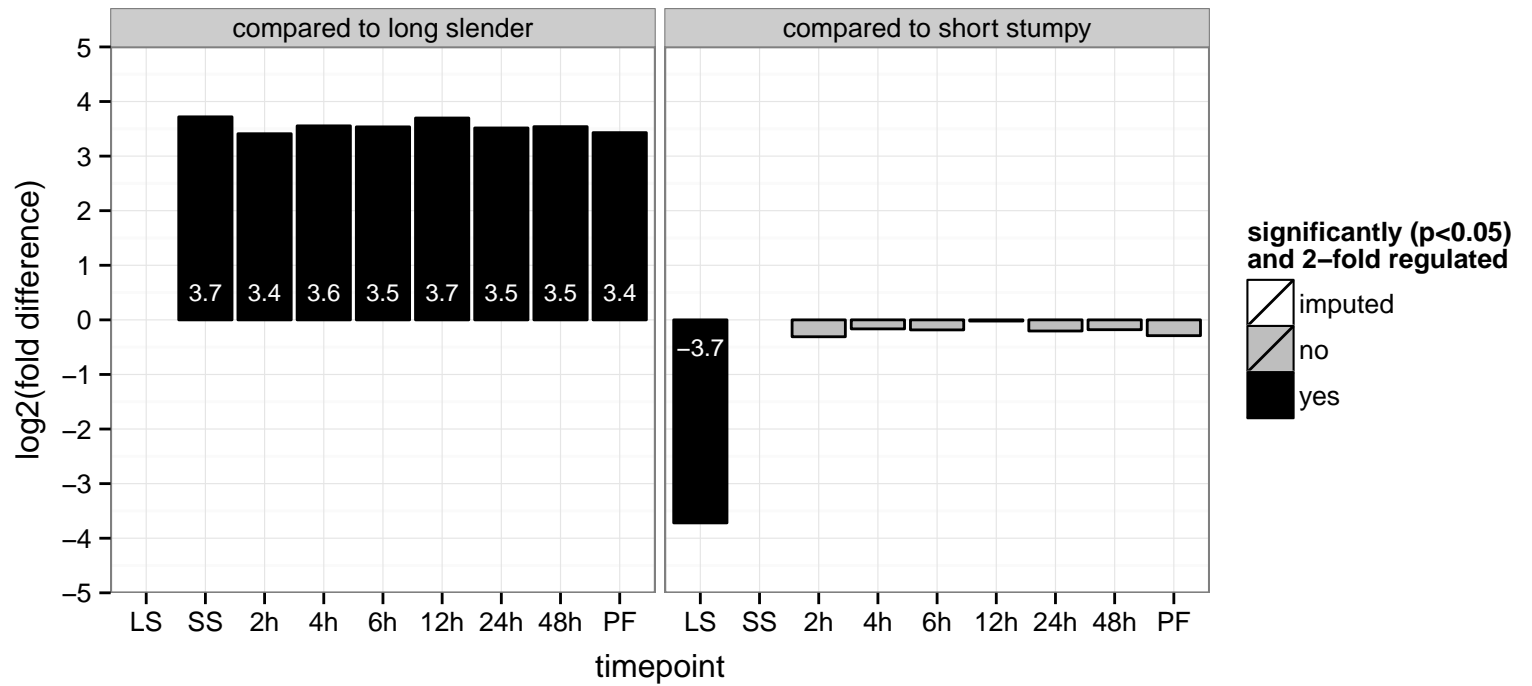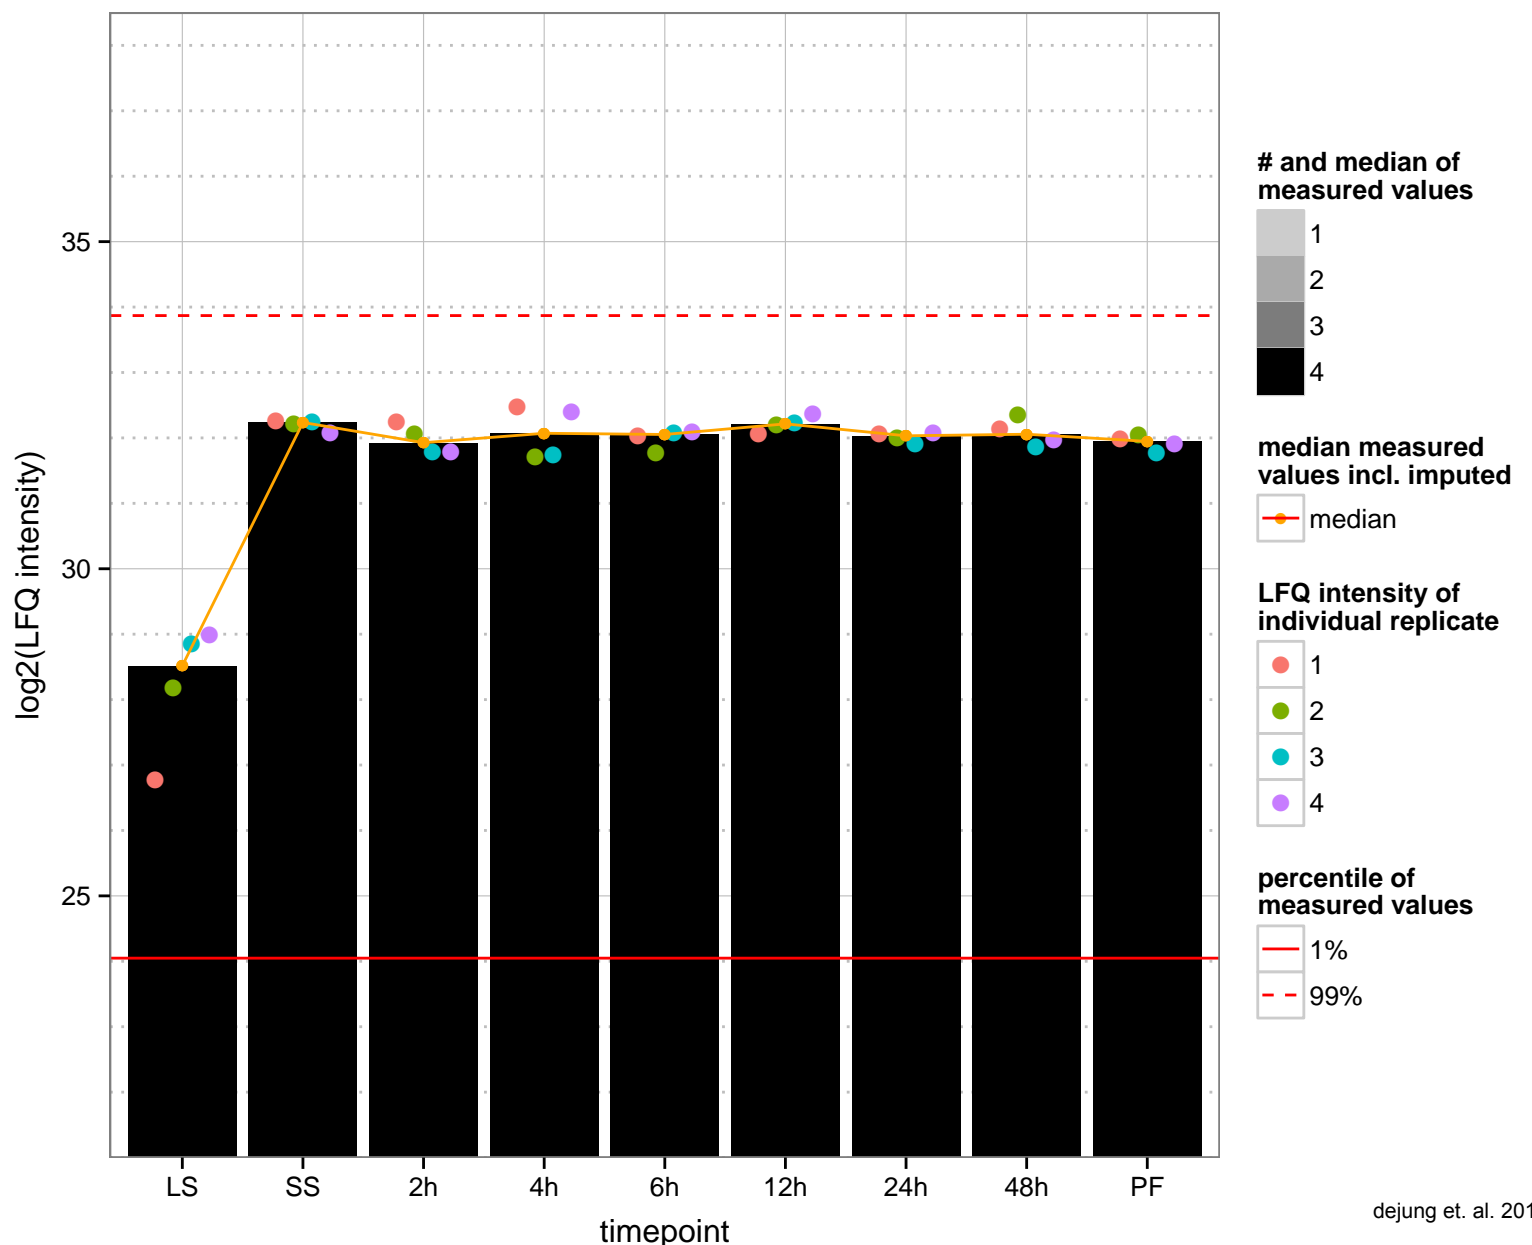

hypothetical protein, conserved  
 Tb927.10.7580  
 AGOF: null  
 AGOC: null  
 AGOP: null  
 PGO: binding  
 PGO: null  
 PGO: null

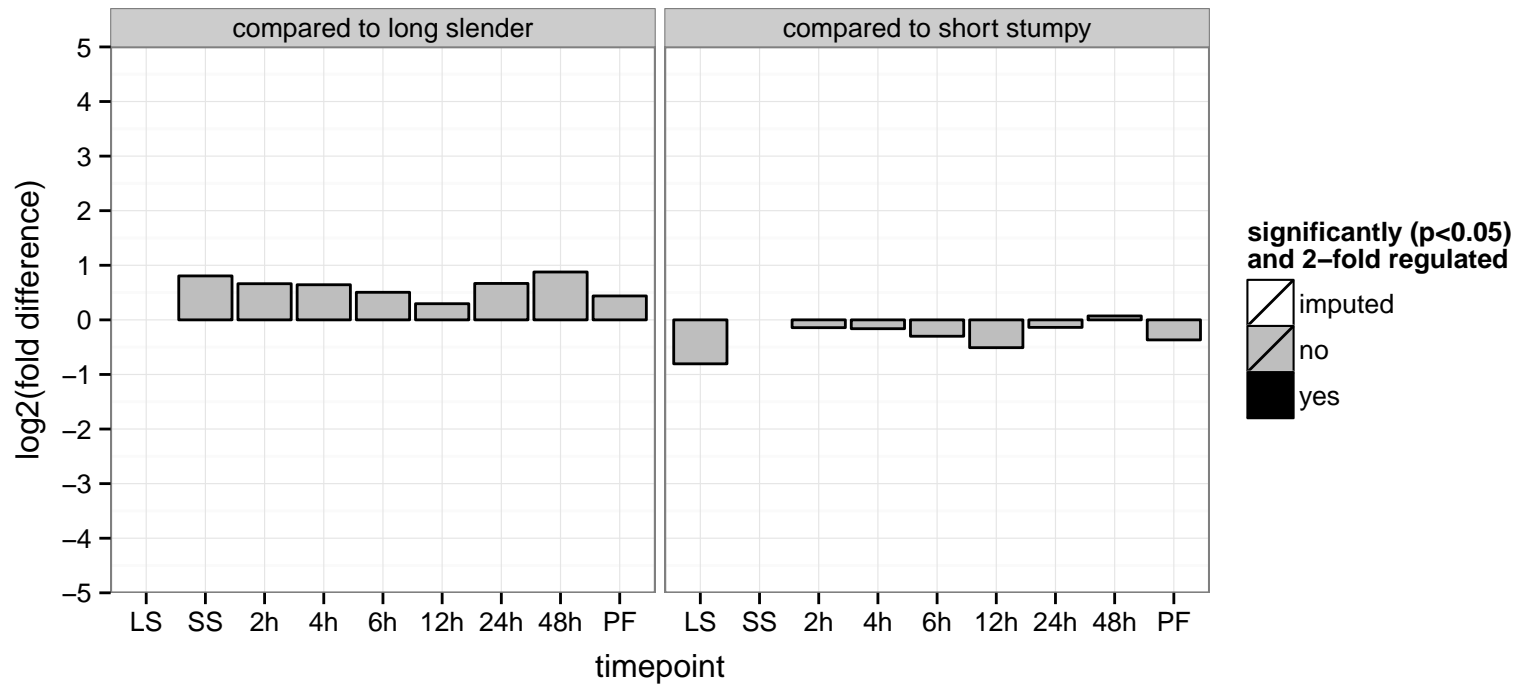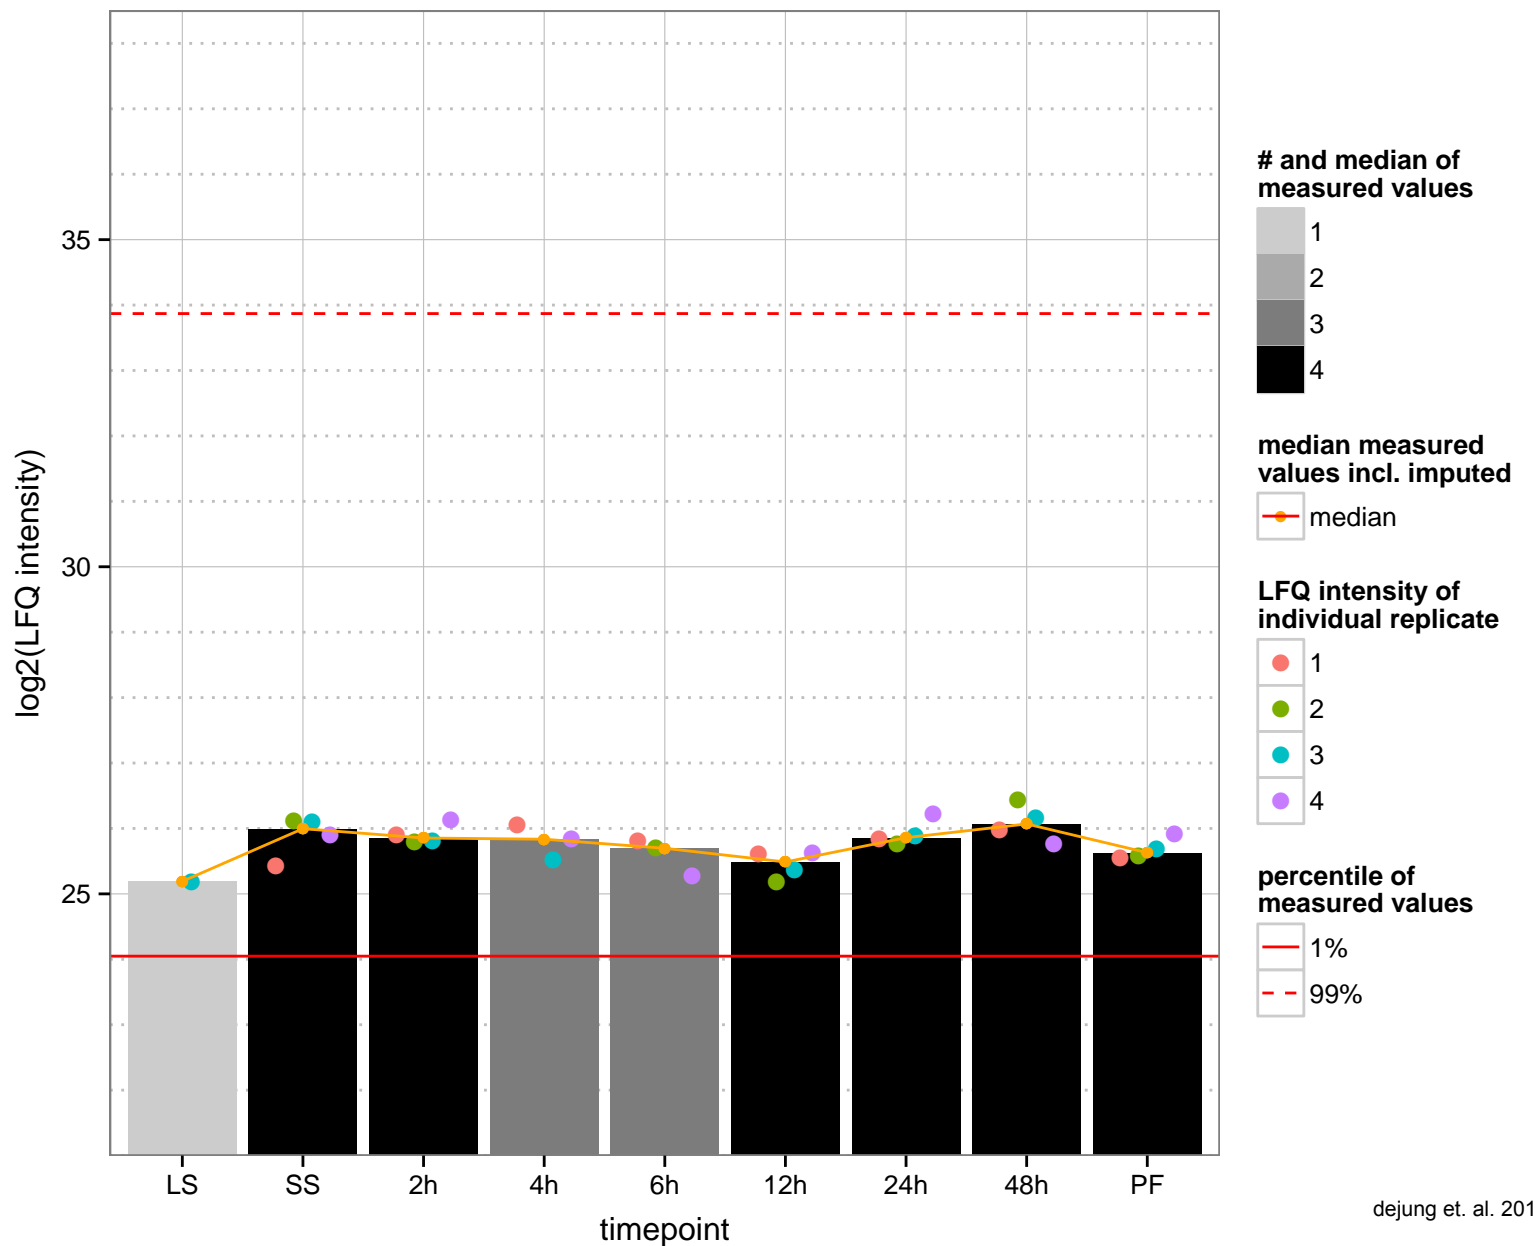

hypothetical protein, conserved  
 Tb927.10.7610  
 AGOF: null  
 AGOC: mitochondrion  
 AGOP: null  
 PGO: null  
 PGOC: null  
 PGOP: null

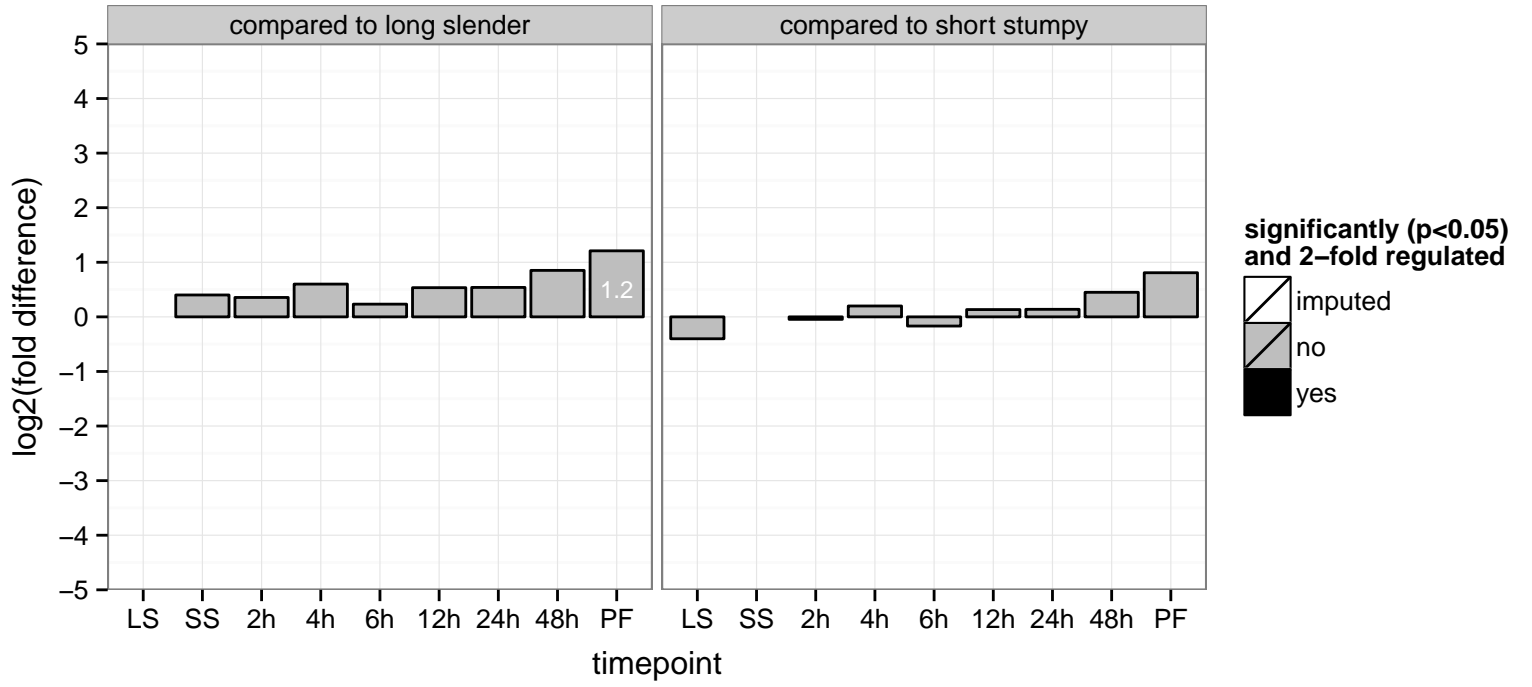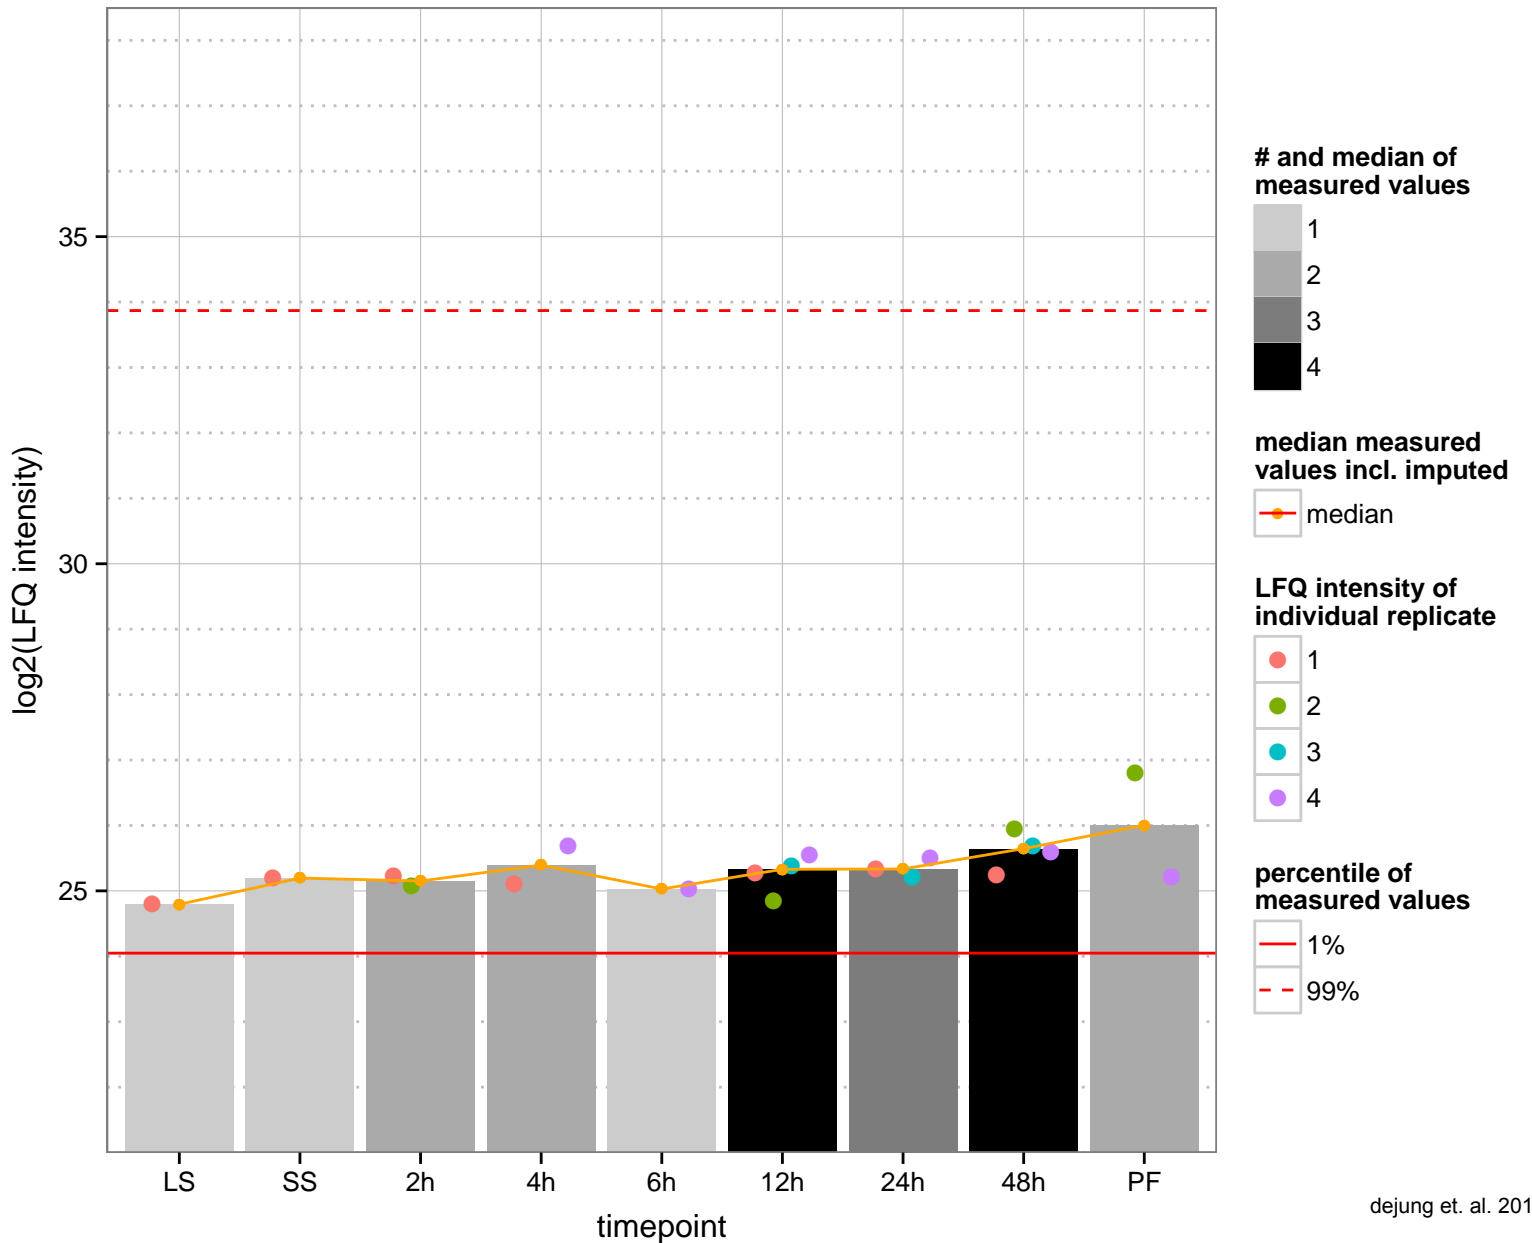



transportin2- like protein  
 Tb927.10.7630  
 AGOF: null  
 AGOC: null  
 AGOP: null  
 PGOF: binding  
 PGO: null  
 PGOP: null

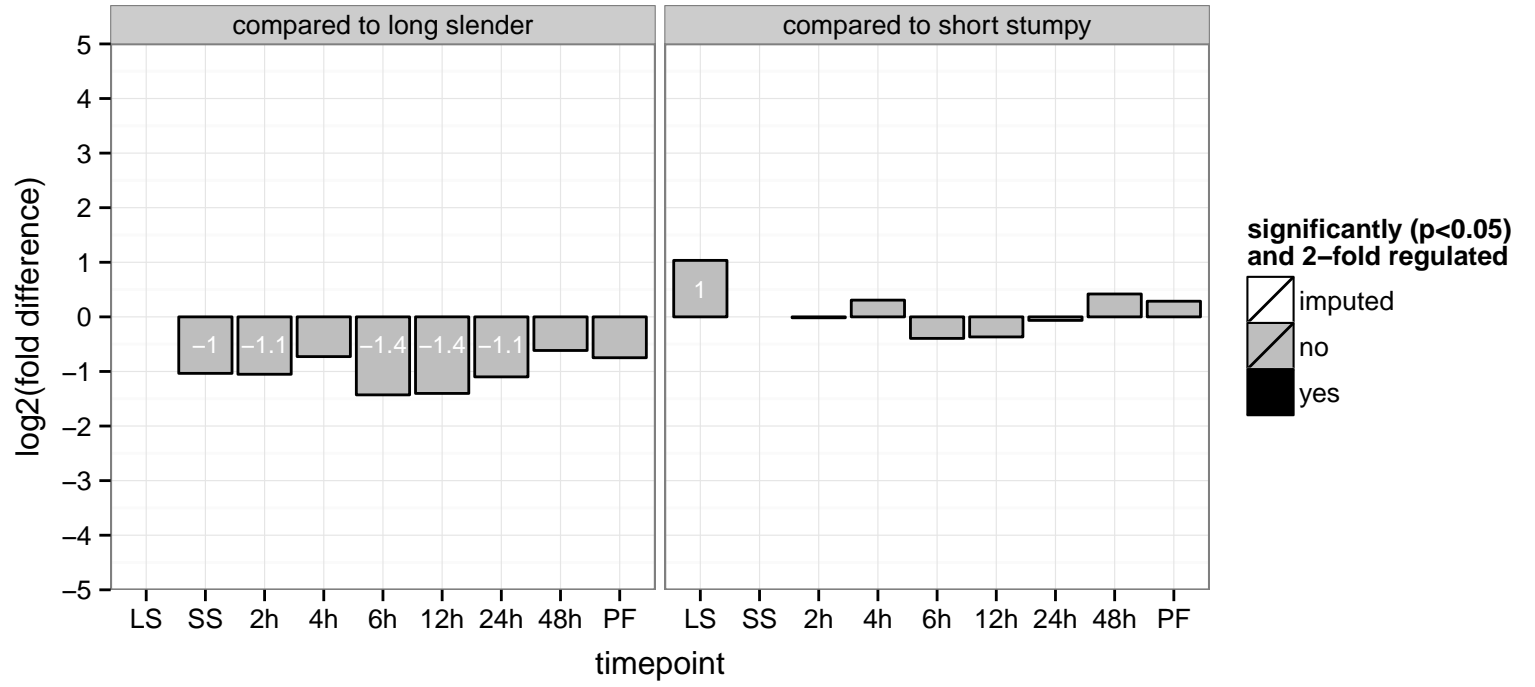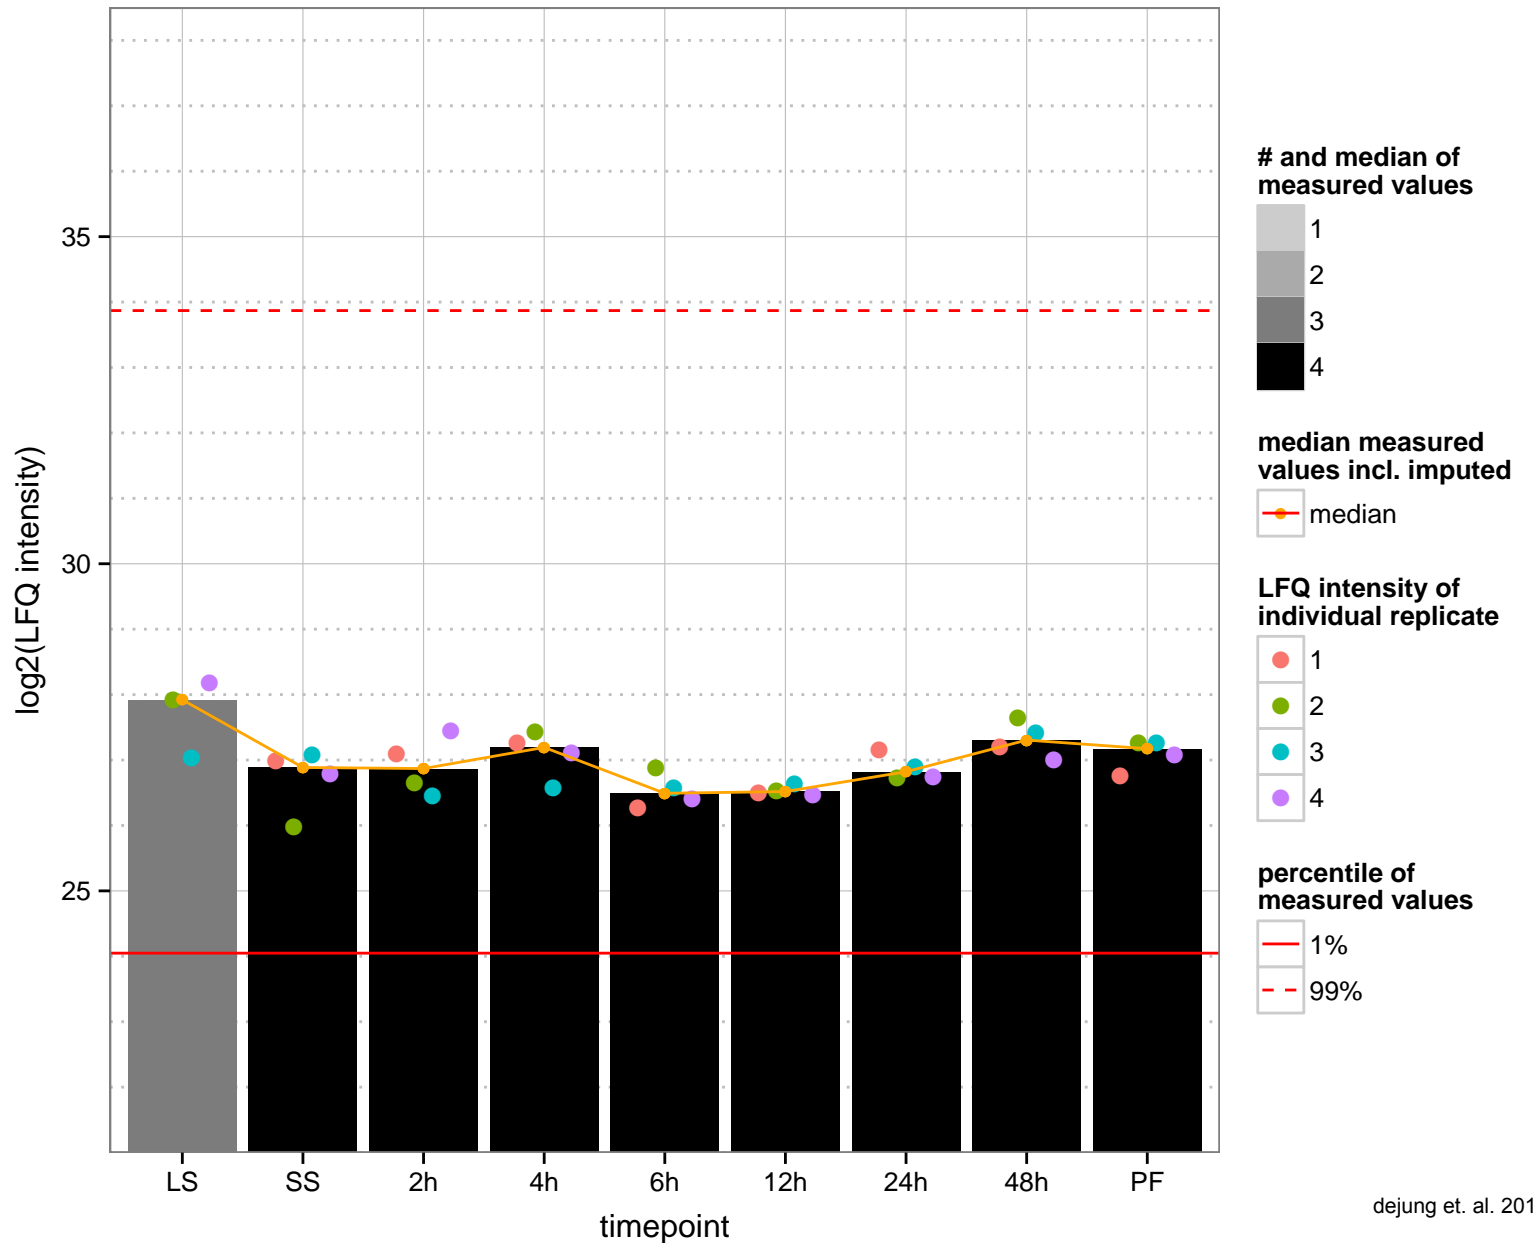

rib72 protein- like protein  
 Tb927.10.7690  
 AGOF: null  
 AGOC: null  
 AGOP: ciliary or flagellar motility  
 PGO: null  
 PGOC: null  
 PGOP: null

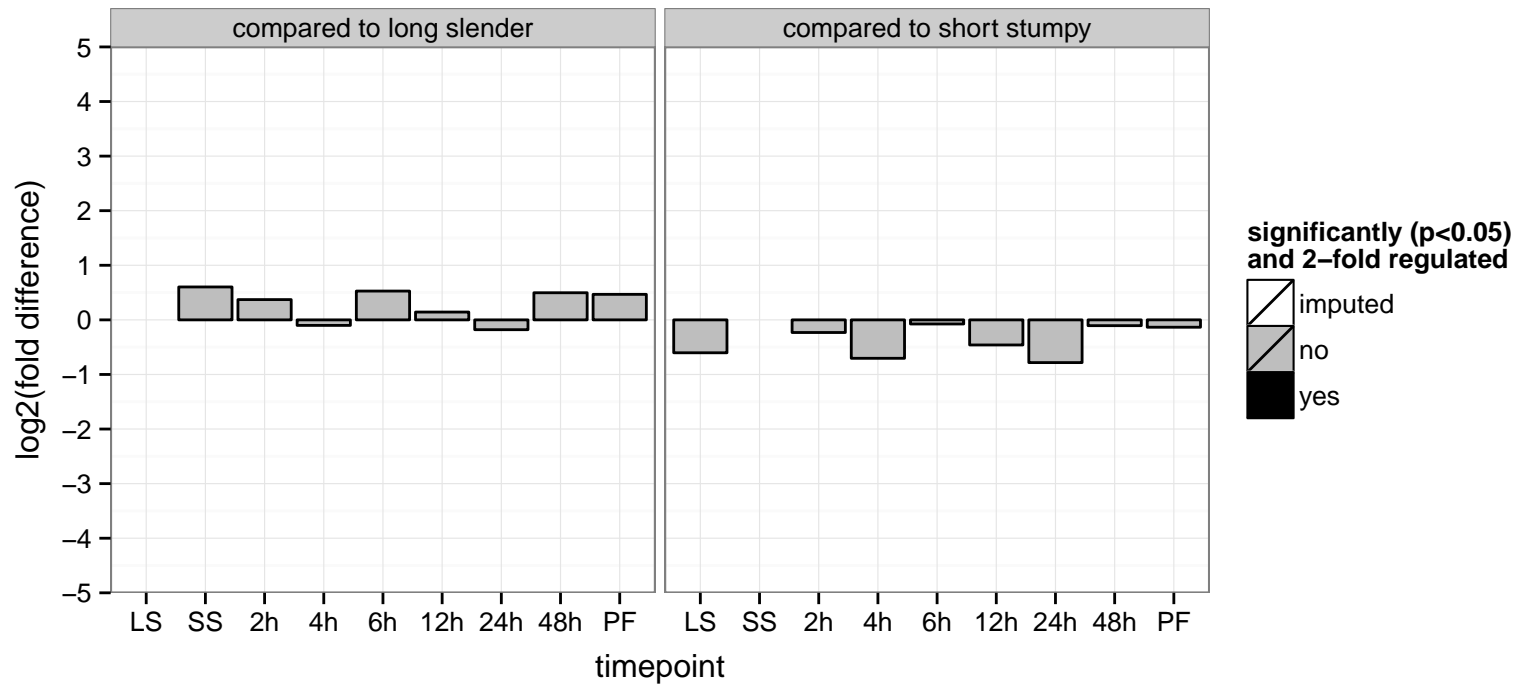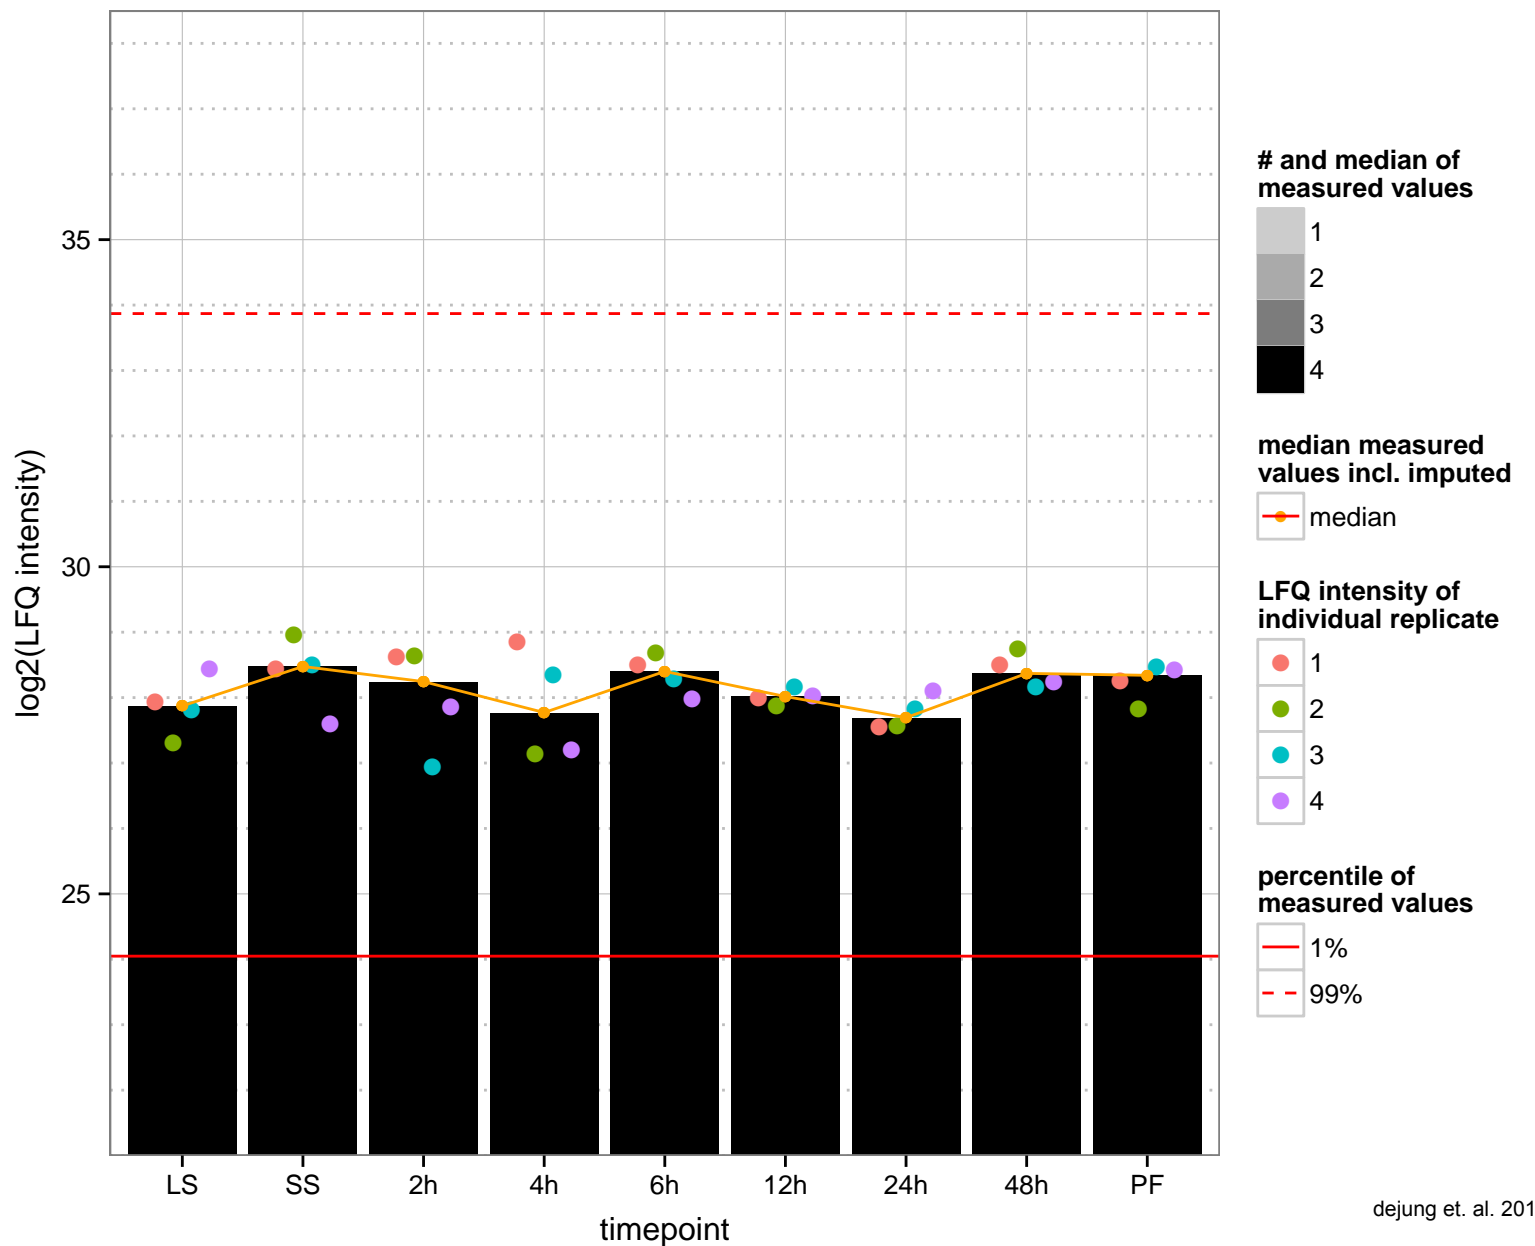

protein transport protein SEC23 (SEC23.2)

Tb927.10.7740

AGOF: protein binding, zinc ion binding

AGOC: COPII vesicle coat

AGOP: ER to Golgi vesicle-mediated transport, intracellular protein transport

PGOF: zinc ion binding

PGOC: COPII vesicle coat

PGOP: ER to Golgi vesicle-mediated transport, intracellular protein transport

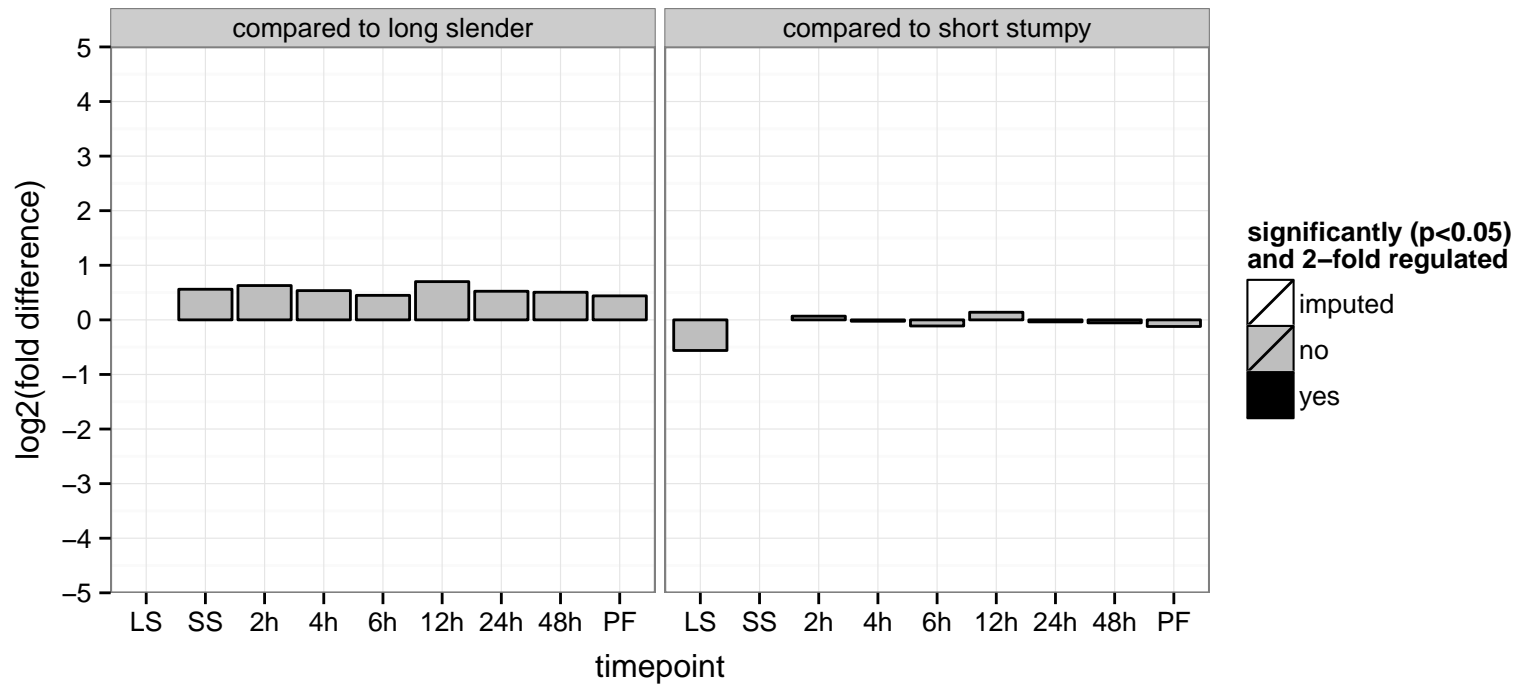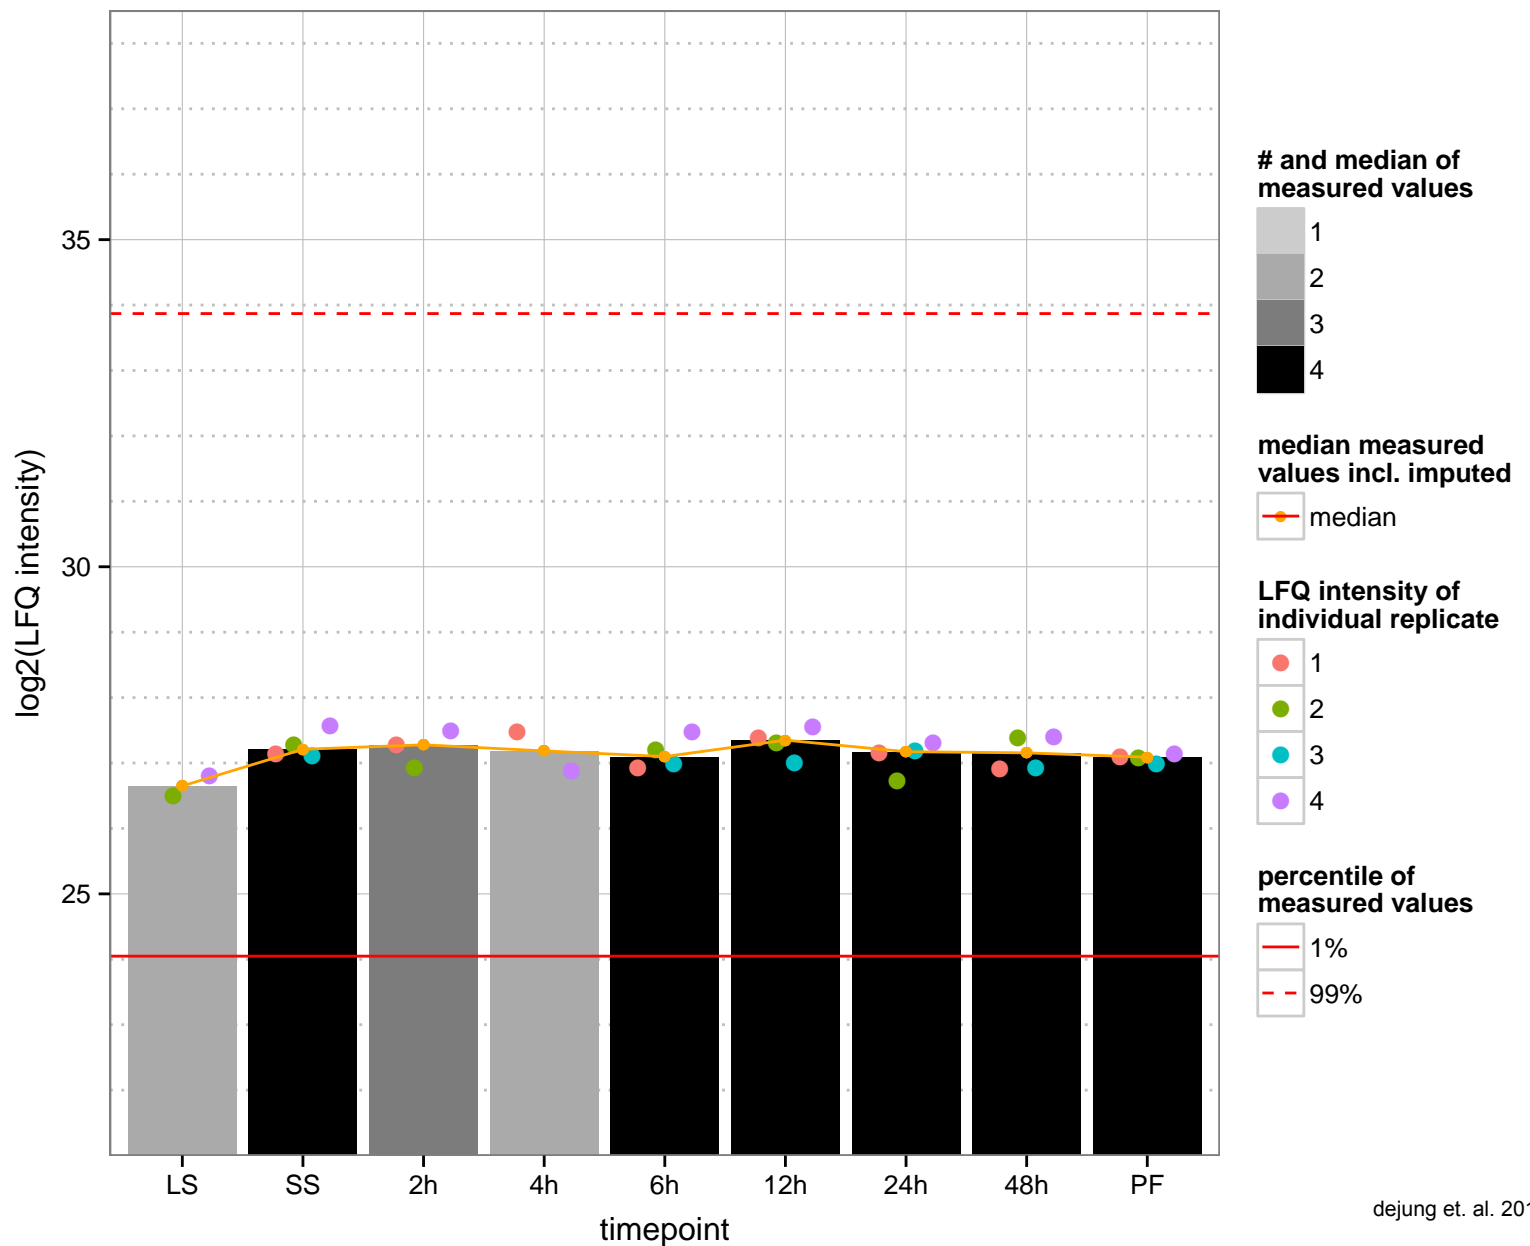

ubiquitin fusion degradation protein, putative  
 Tb927.10.7790  
 AGOF: null  
 AGOC: null  
 AGOP: ubiquitin-dependent protein catabolic process  
 PGO: null  
 PGO: null  
 PGO: null  
 PGO: null

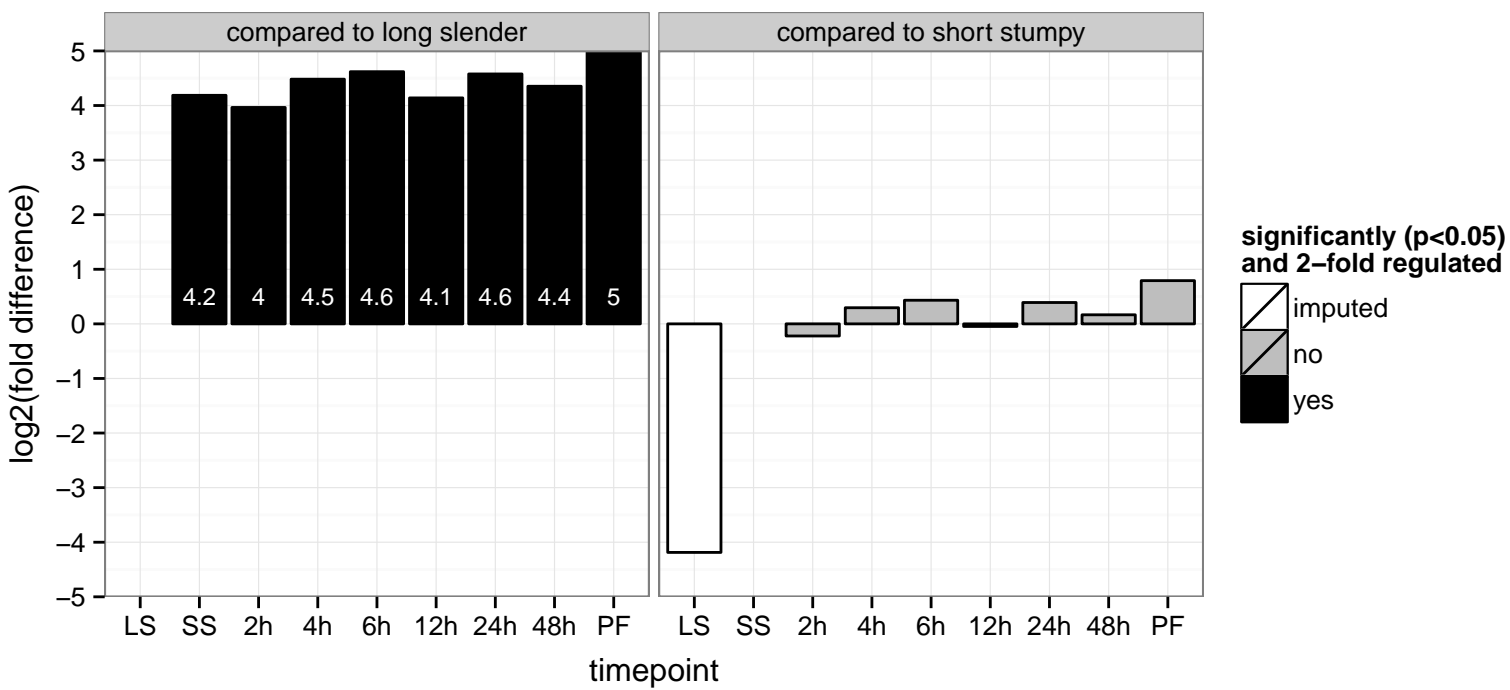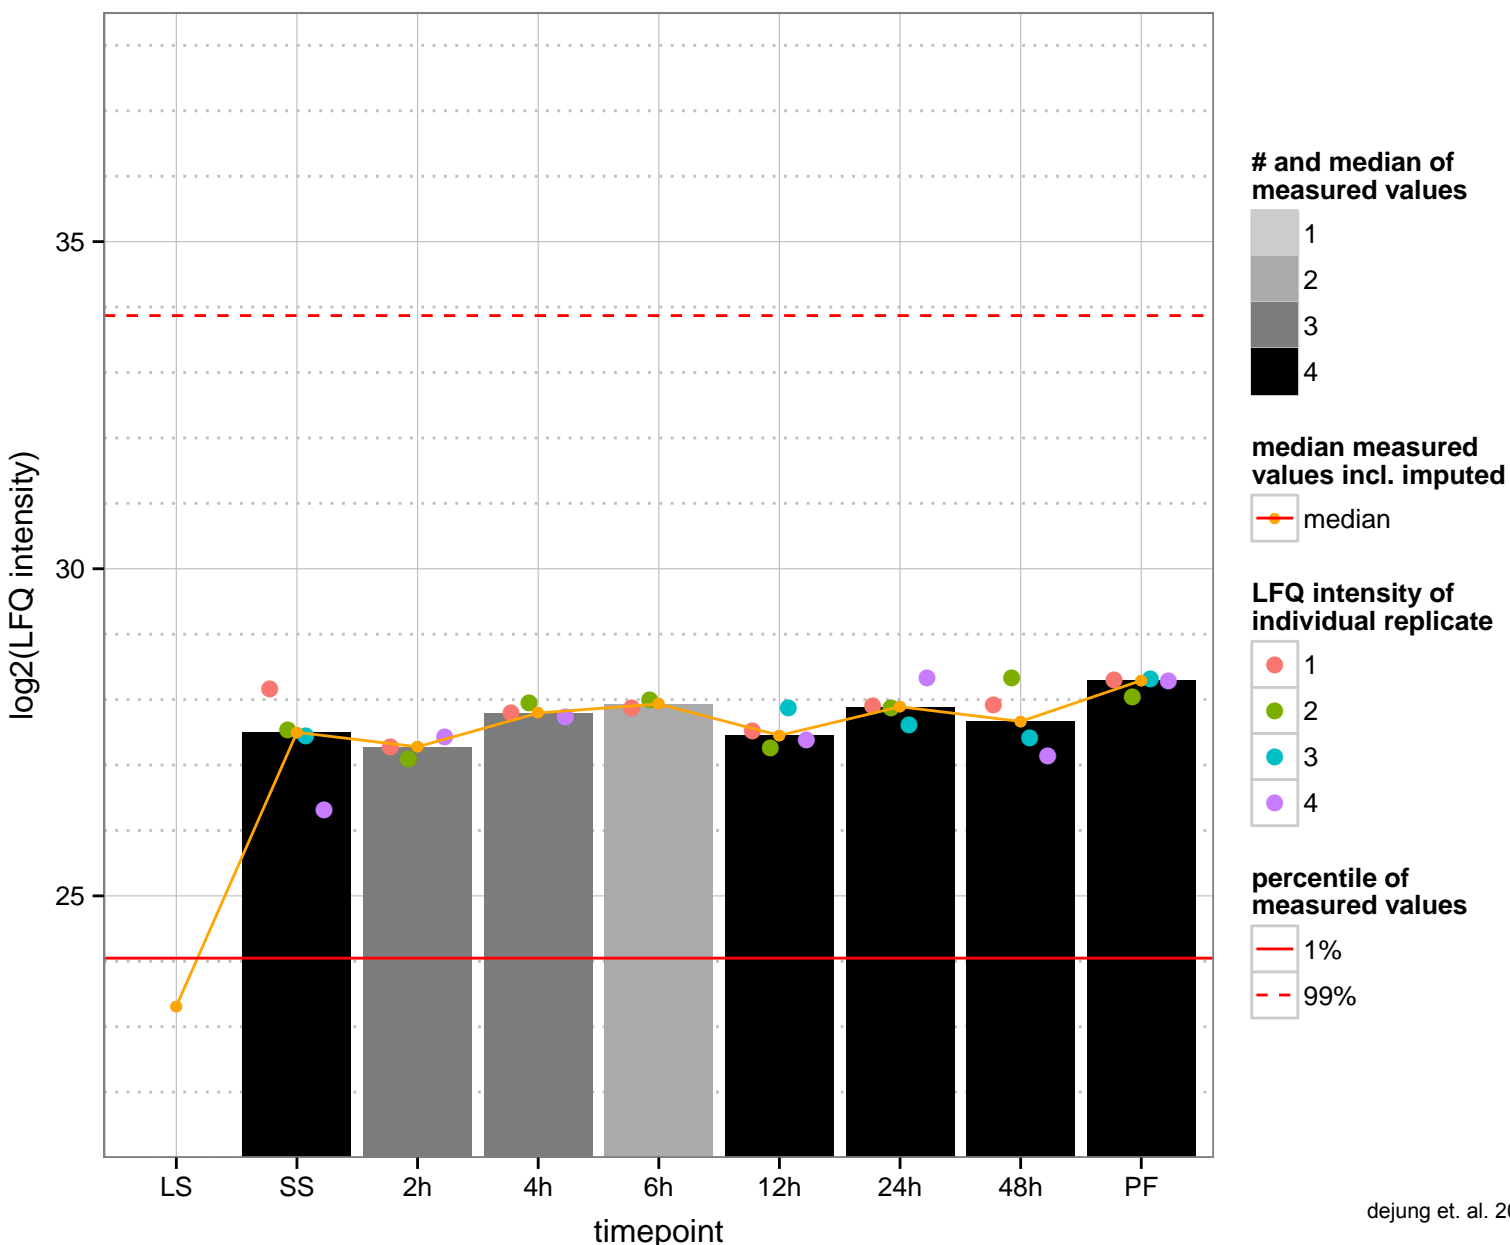

hypothetical protein, conserved  
 Tb927.10.7810  
 AGOF: null  
 AGOC: null  
 AGOP: null  
 PGO: null  
 PGOC: null  
 PGOP: null

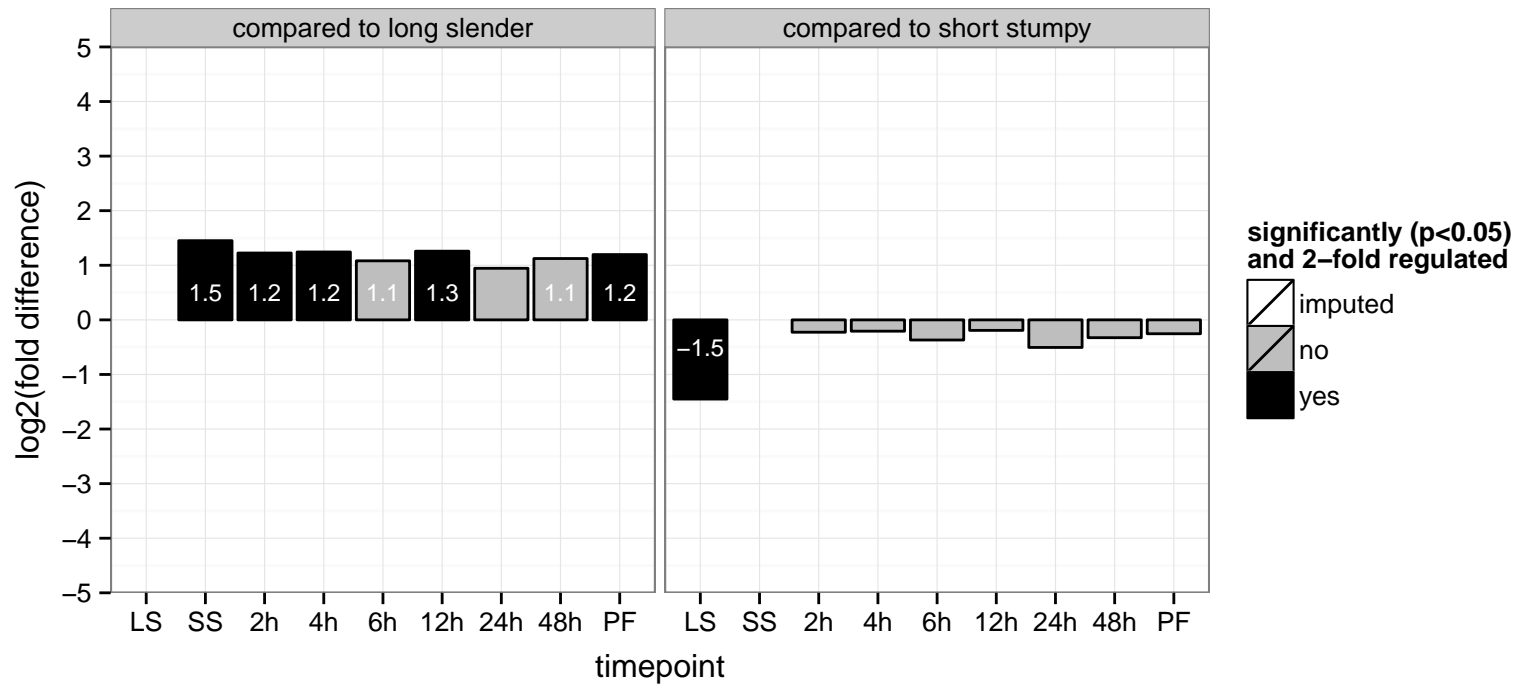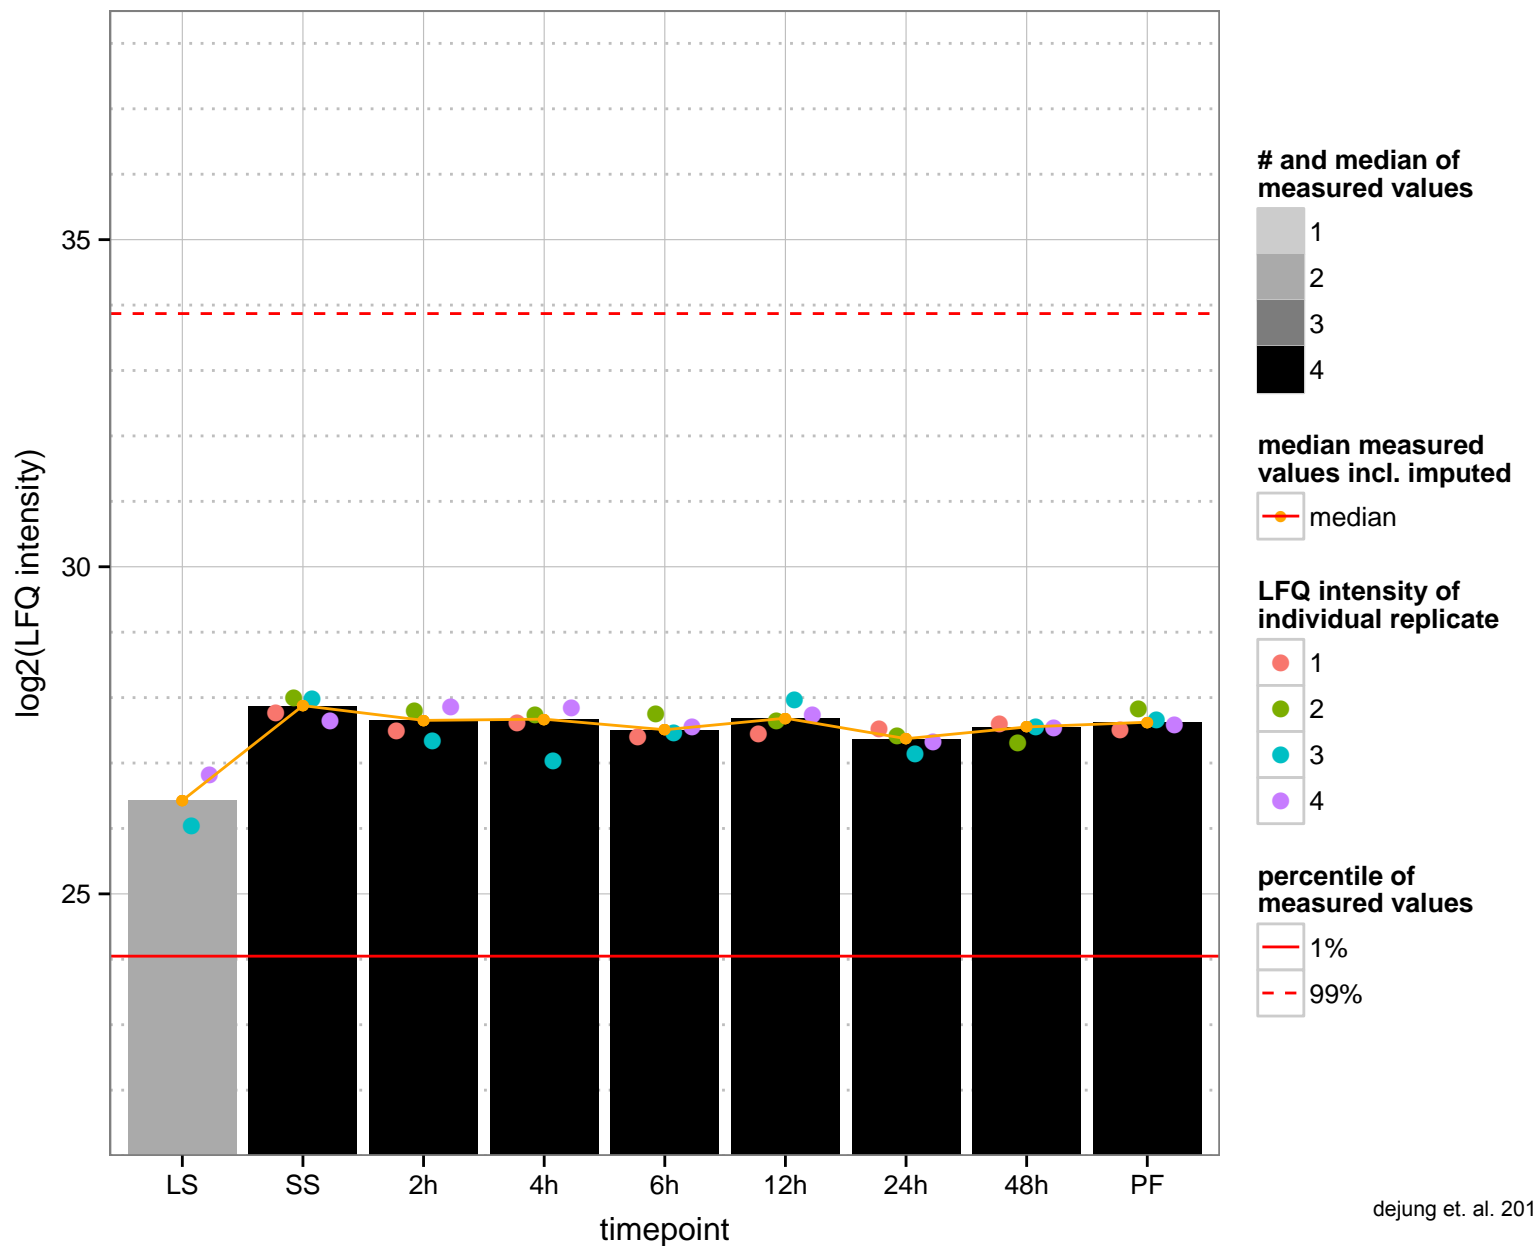

hypothetical protein, conserved  
 Tb927.10.7870  
 AGOF: null  
 AGOC: null  
 AGOP: null  
 PGO: null  
 PGOC: null  
 PGOP: null

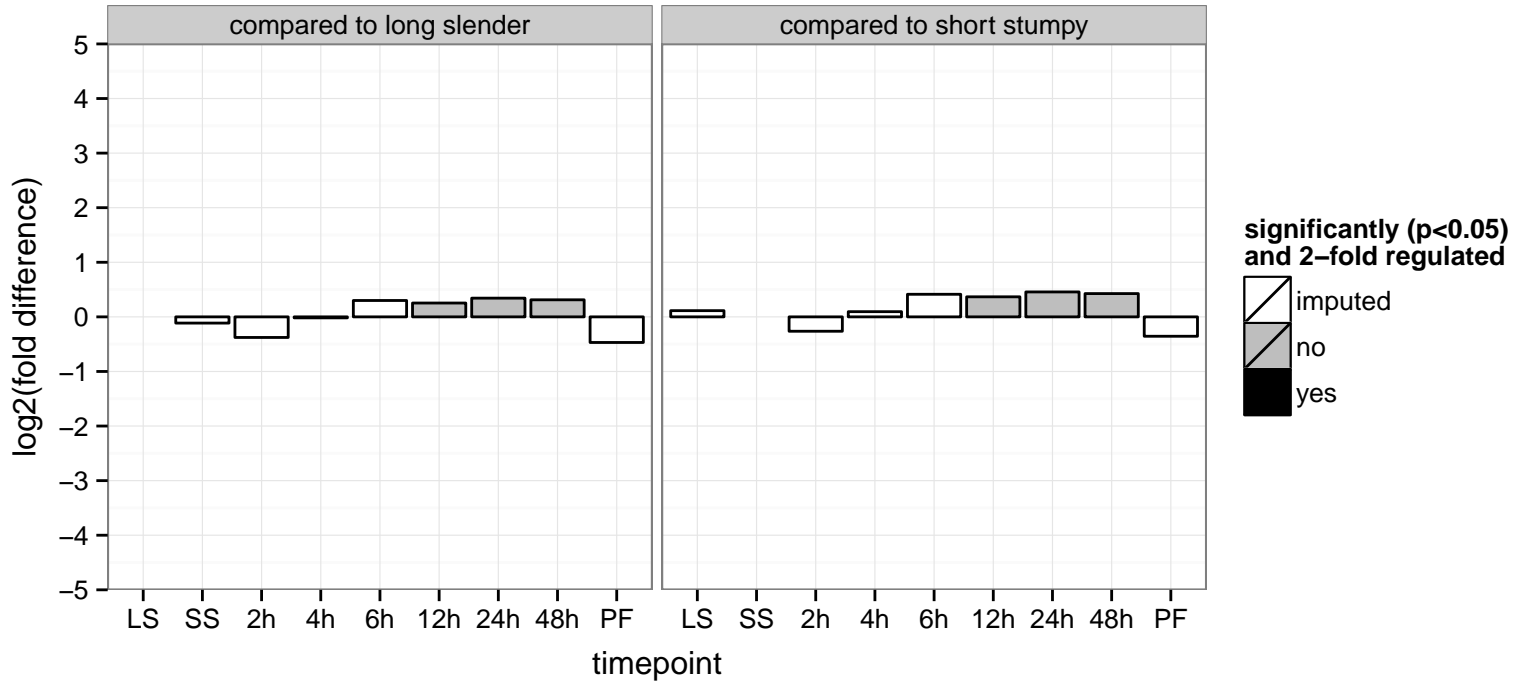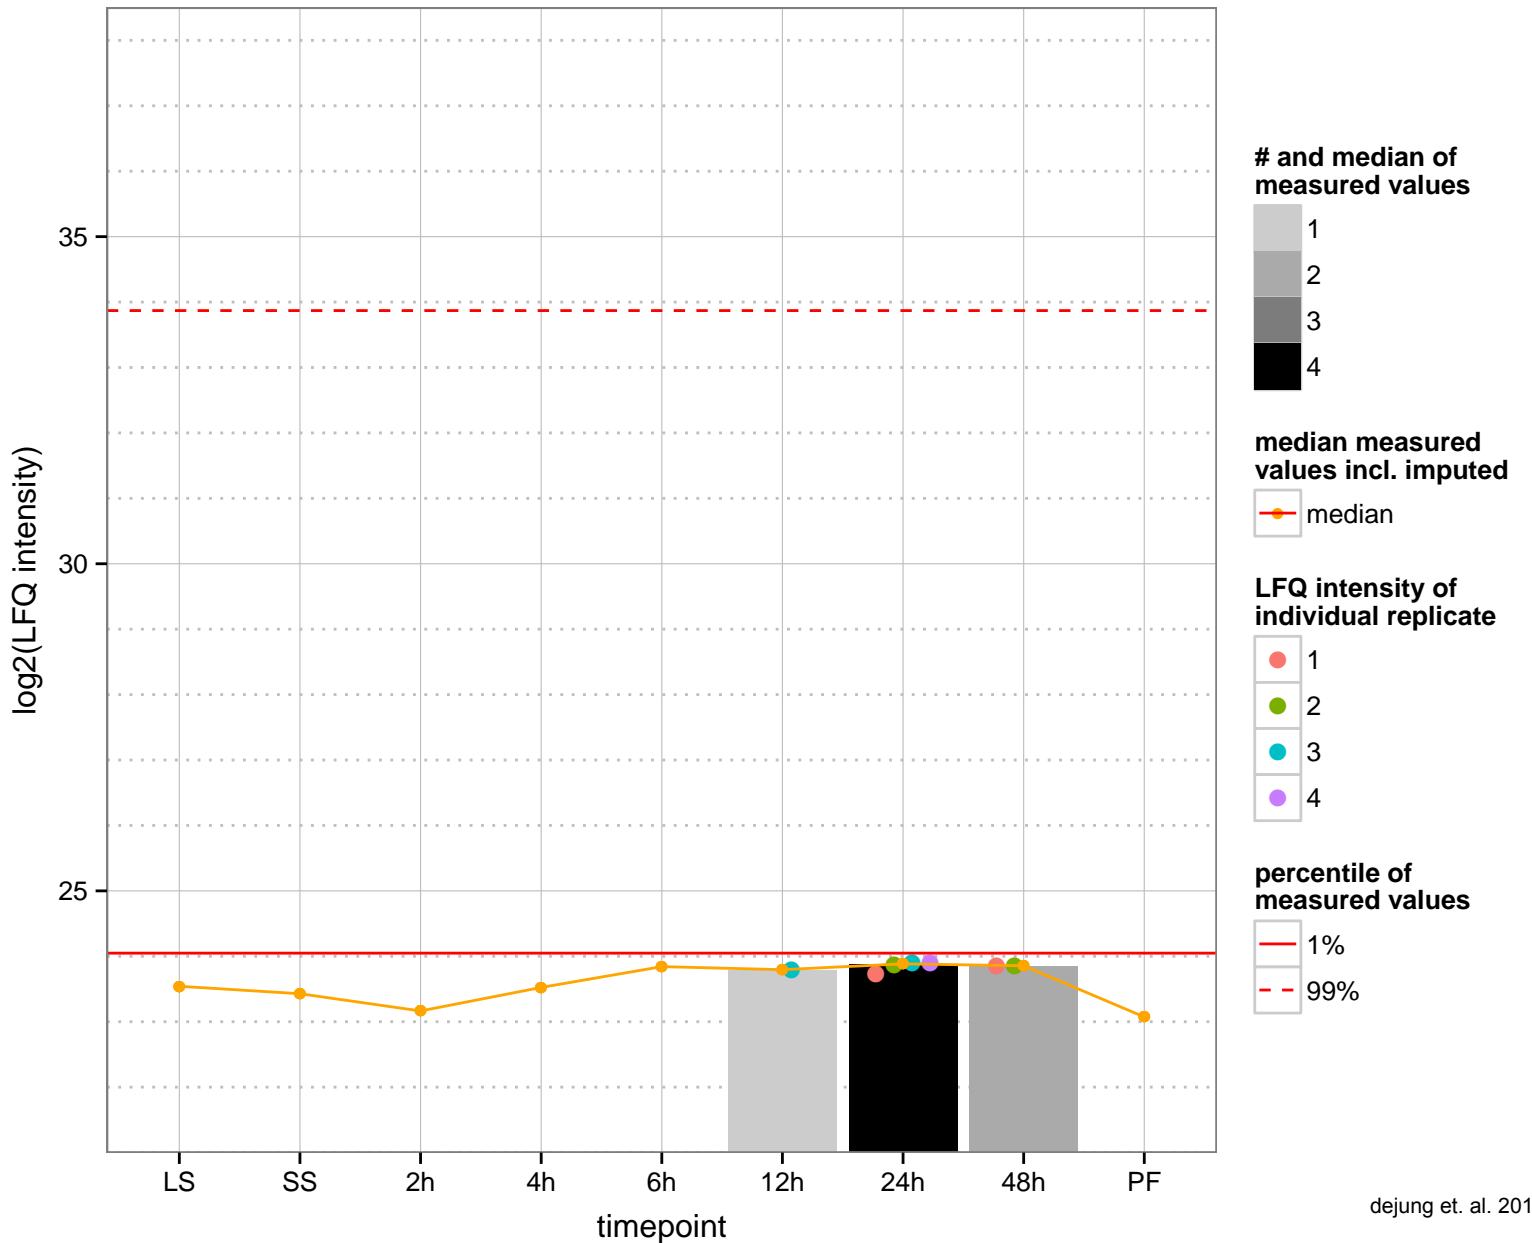

hypothetical protein, conserved  
 Tb927.10.7880  
 AGOF: null  
 AGOC: null  
 AGOP: null  
 PGOF: null  
 PGO C: null  
 PGOP: null

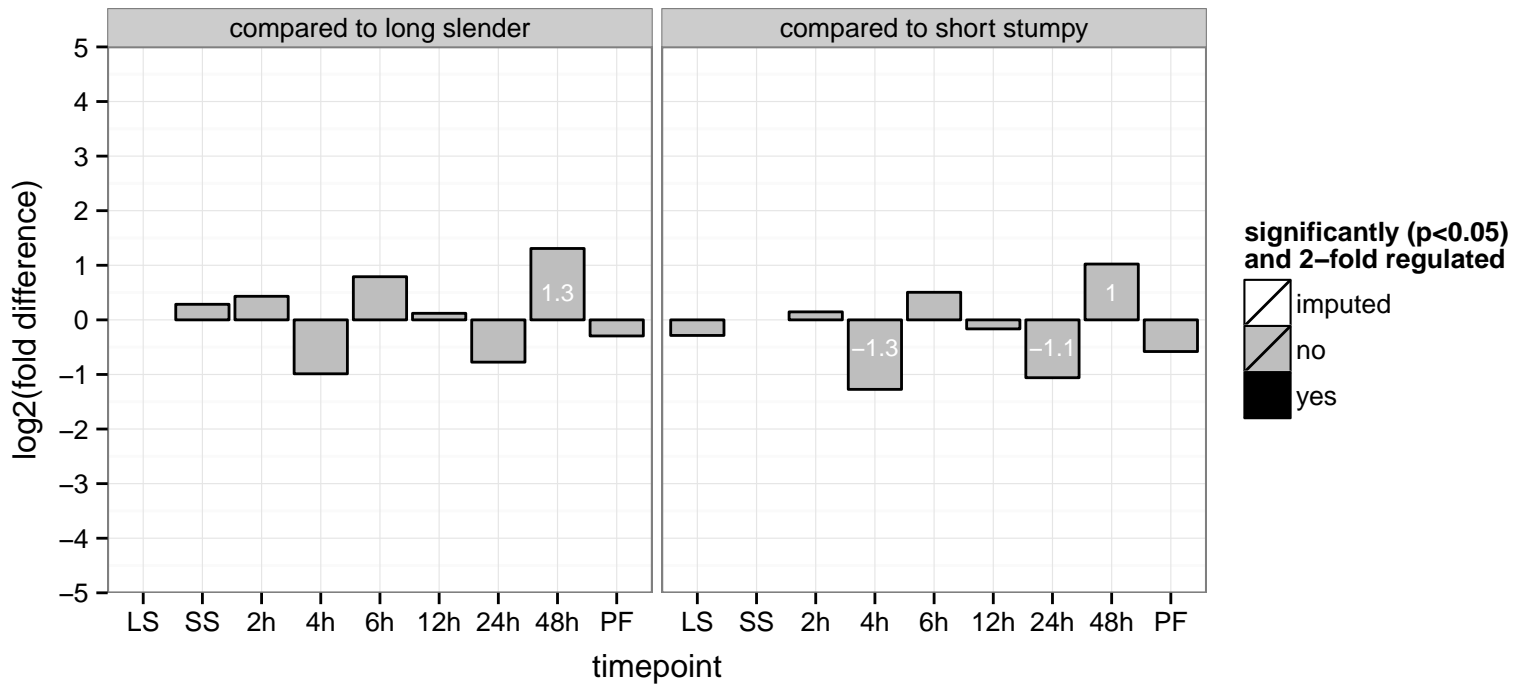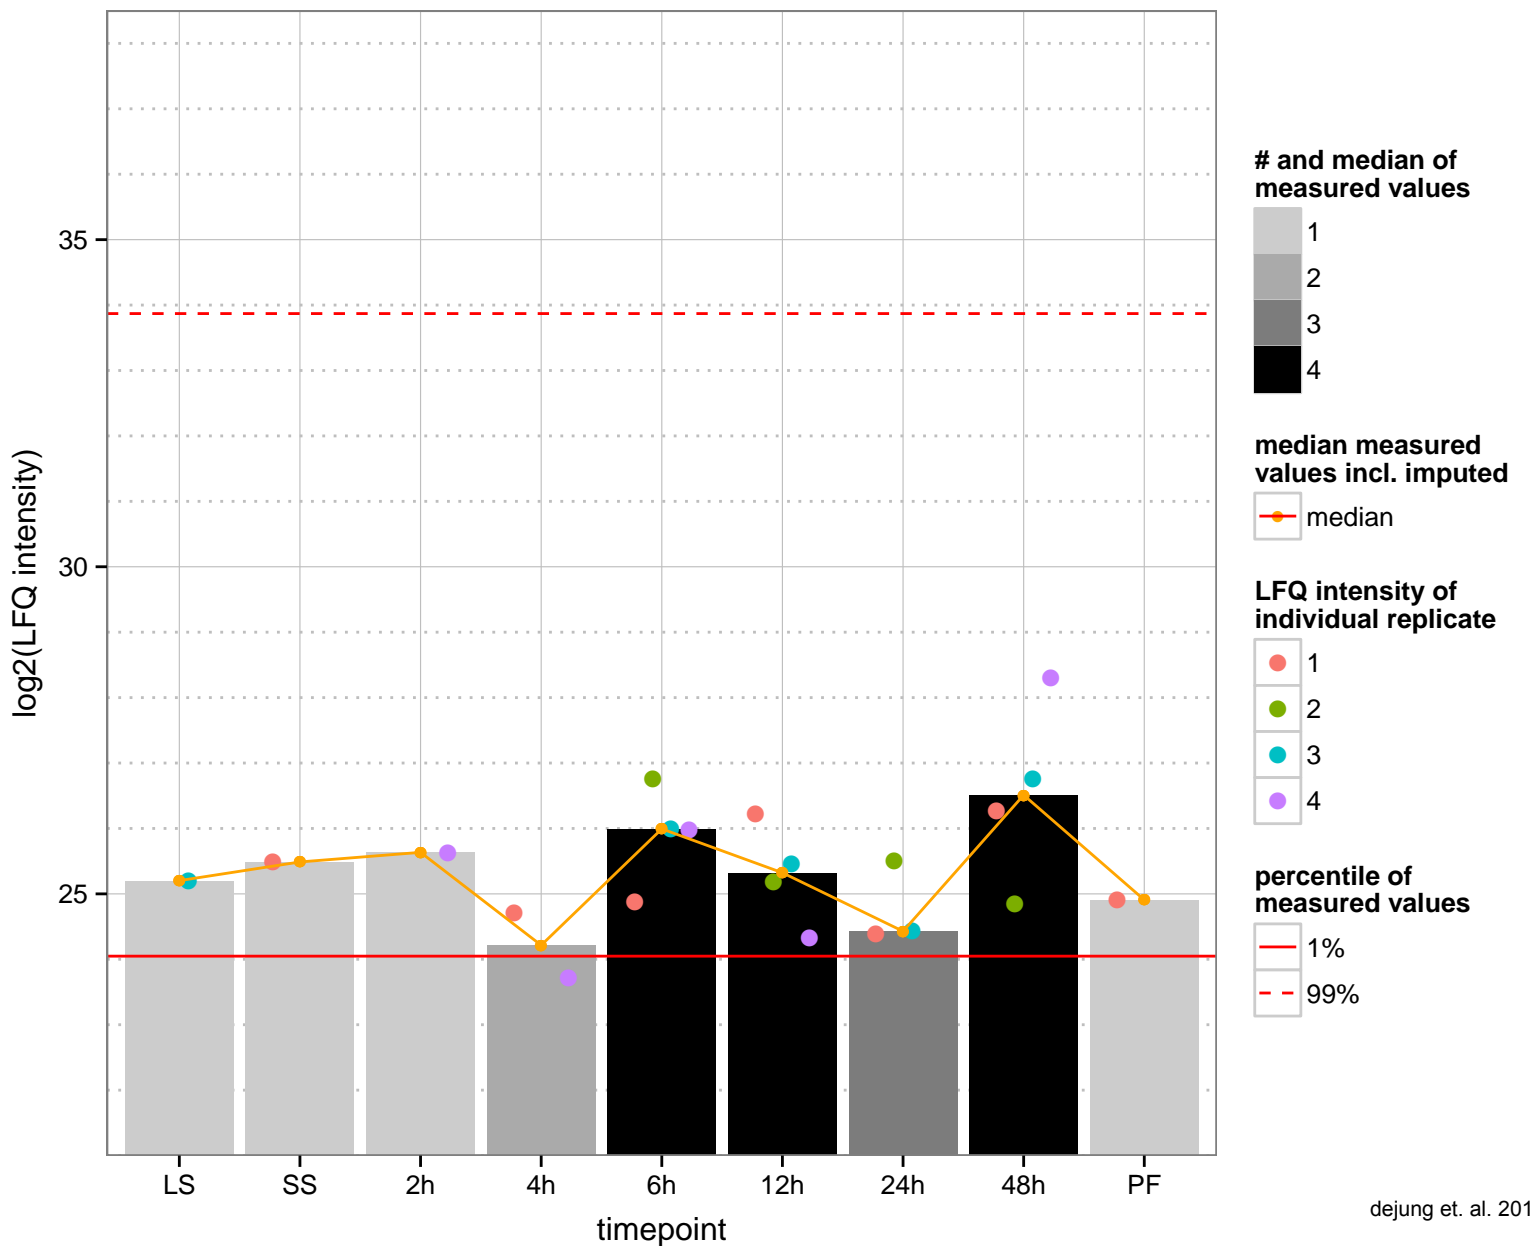

hypothetical protein, conserved  
 Tb927.10.7920  
 AGOF: null  
 AGOC: null  
 AGOP: null  
 PGO: null  
 PGOC: null  
 PGOP: null

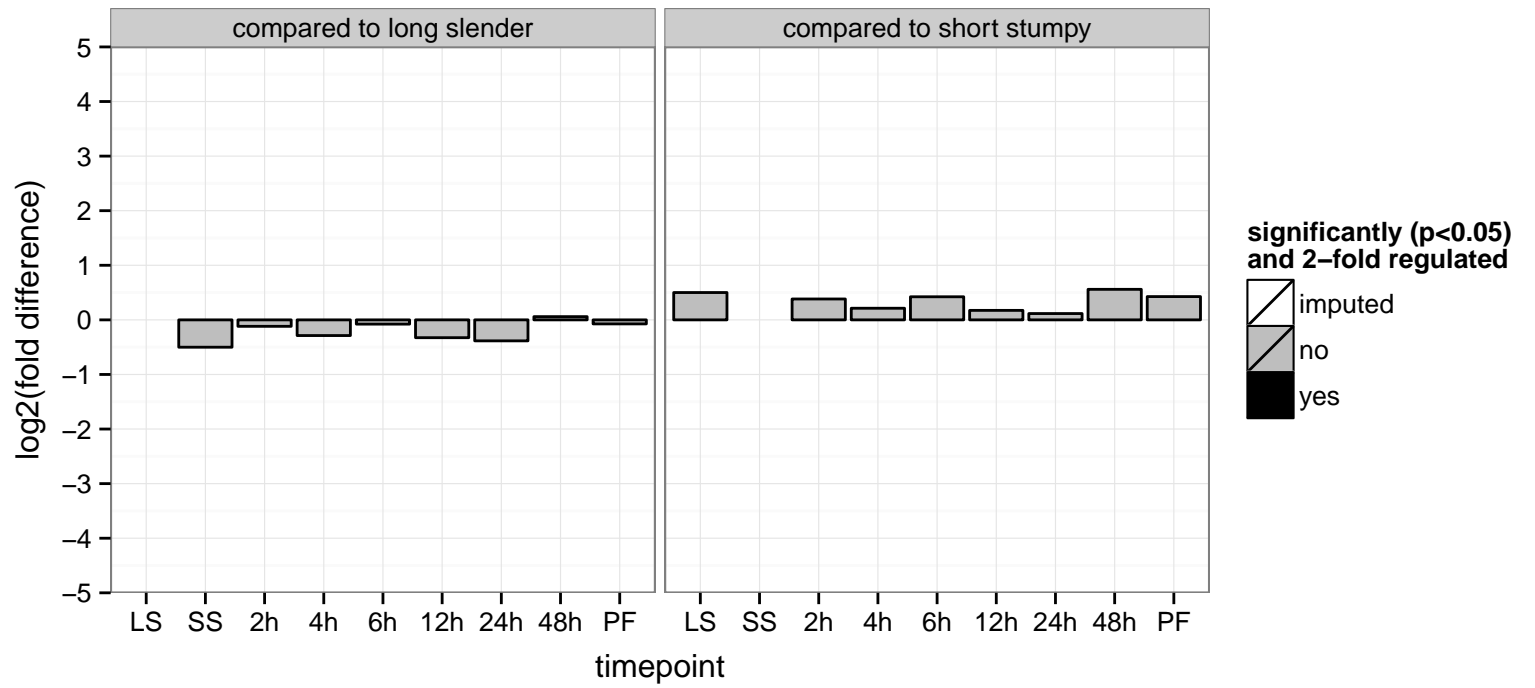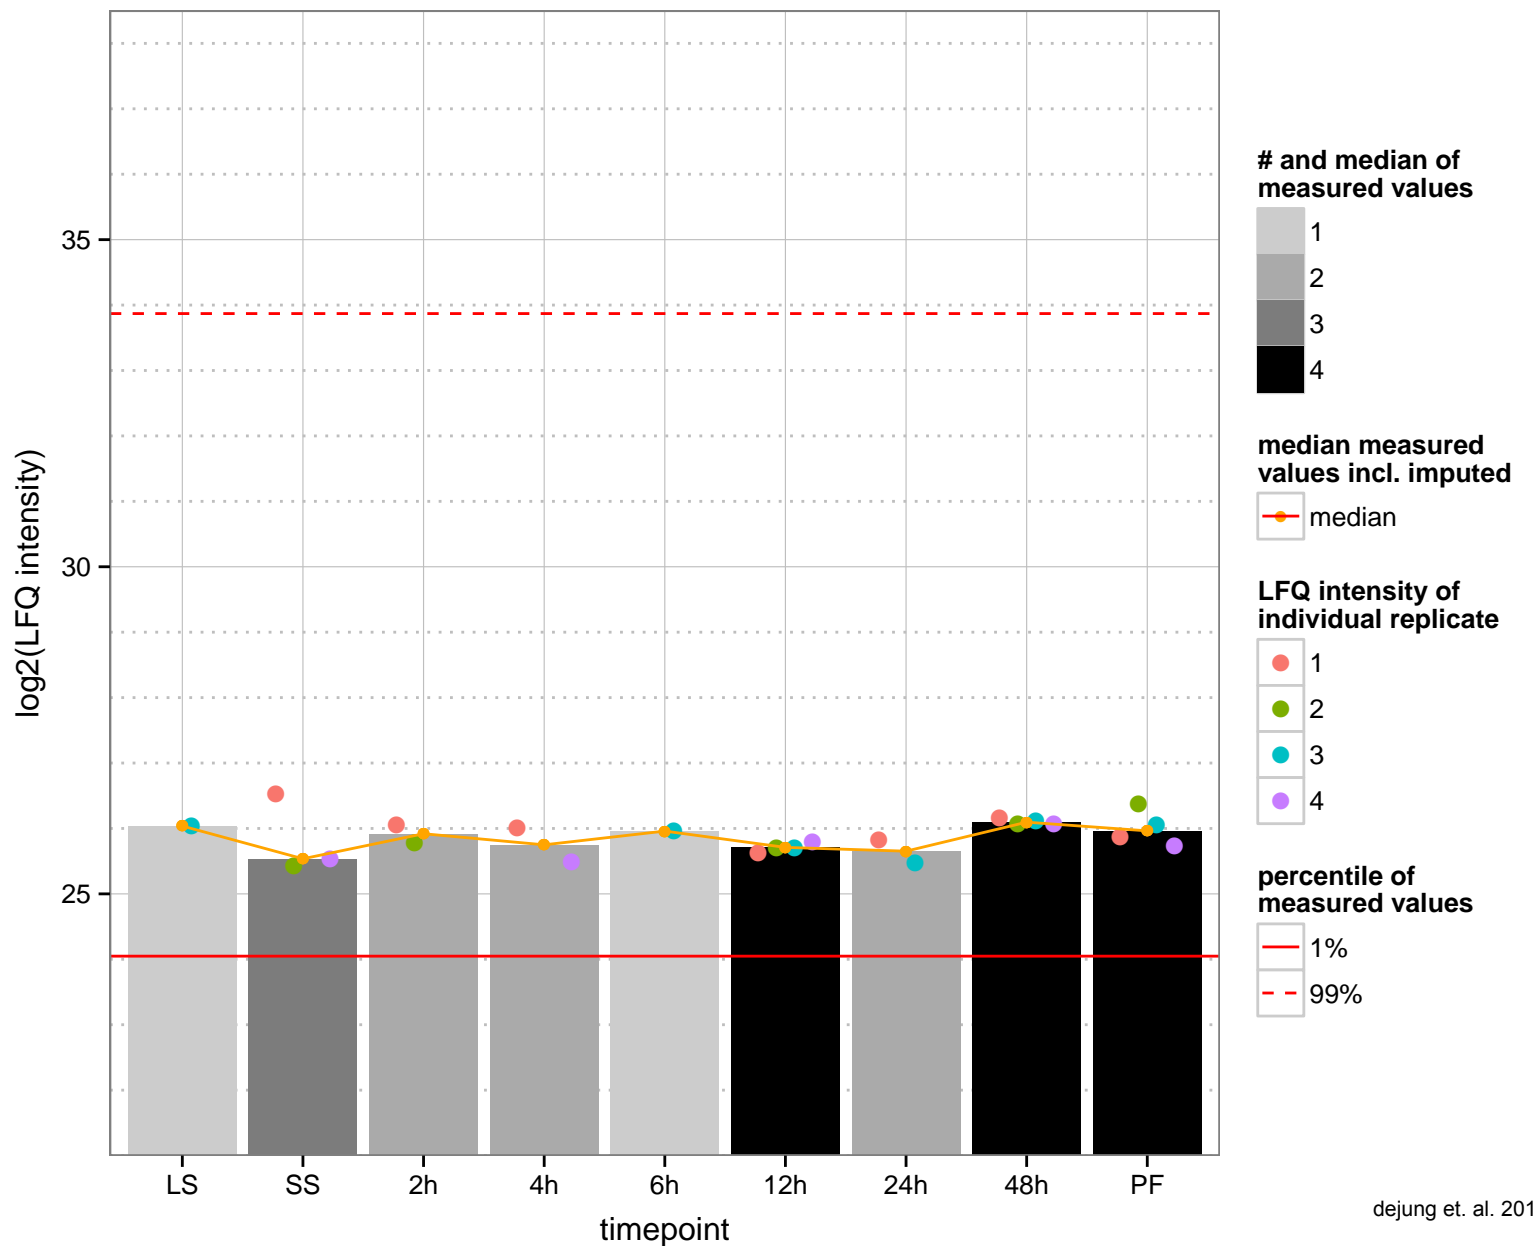



2, 3-bisphosphoglycerate-independent phosphoglycerate mutase (PGAM)

Tb927.10.7930

AGOF: 2, 3-bisphosphoglycerate-independent phosphoglycerate mutase activity, manganese ion binding

AGOC: cytoplasm, cytosol

AGOP: gluconeogenesis, glycolysis

PGOF: catalytic activity, manganese ion binding, metal ion binding, phosphoglycerate mutase activity

PGOC: cytoplasm

PGOP: glucose catabolic process, metabolic process

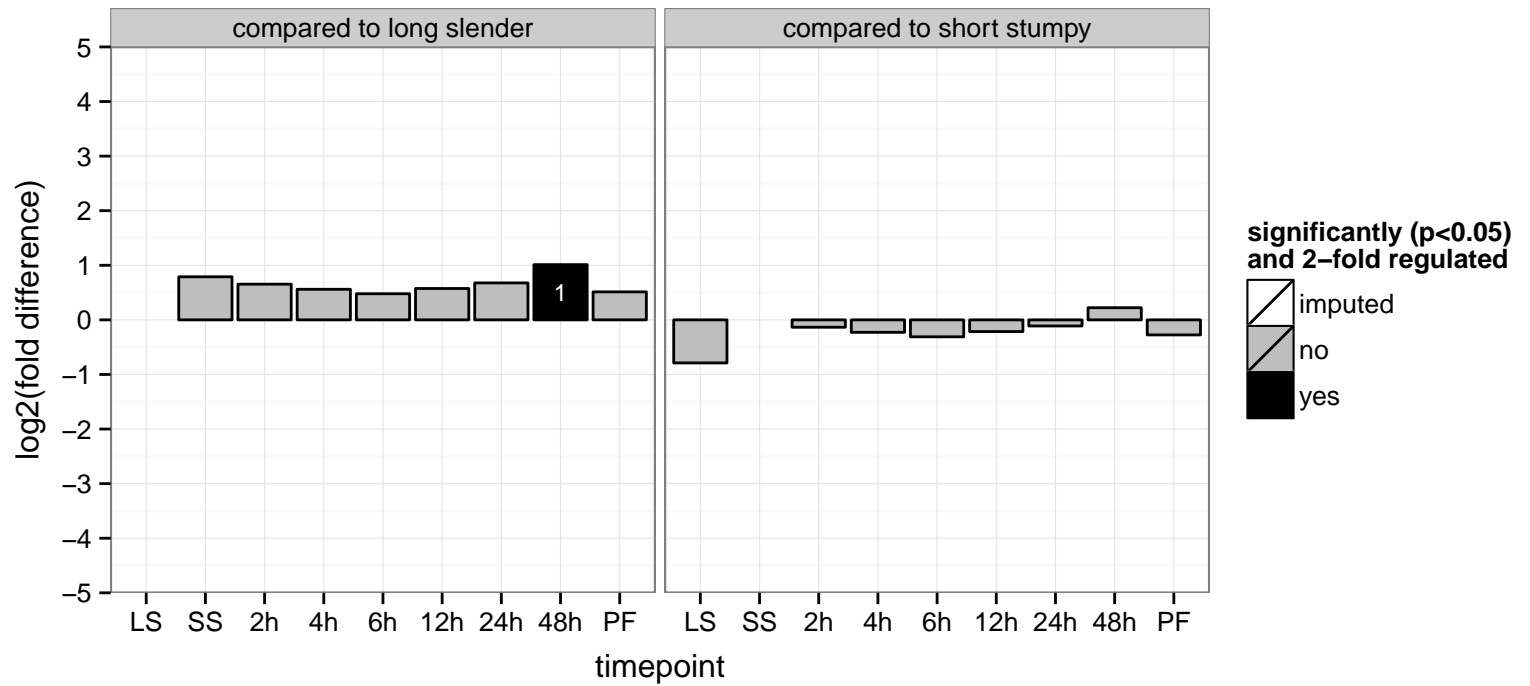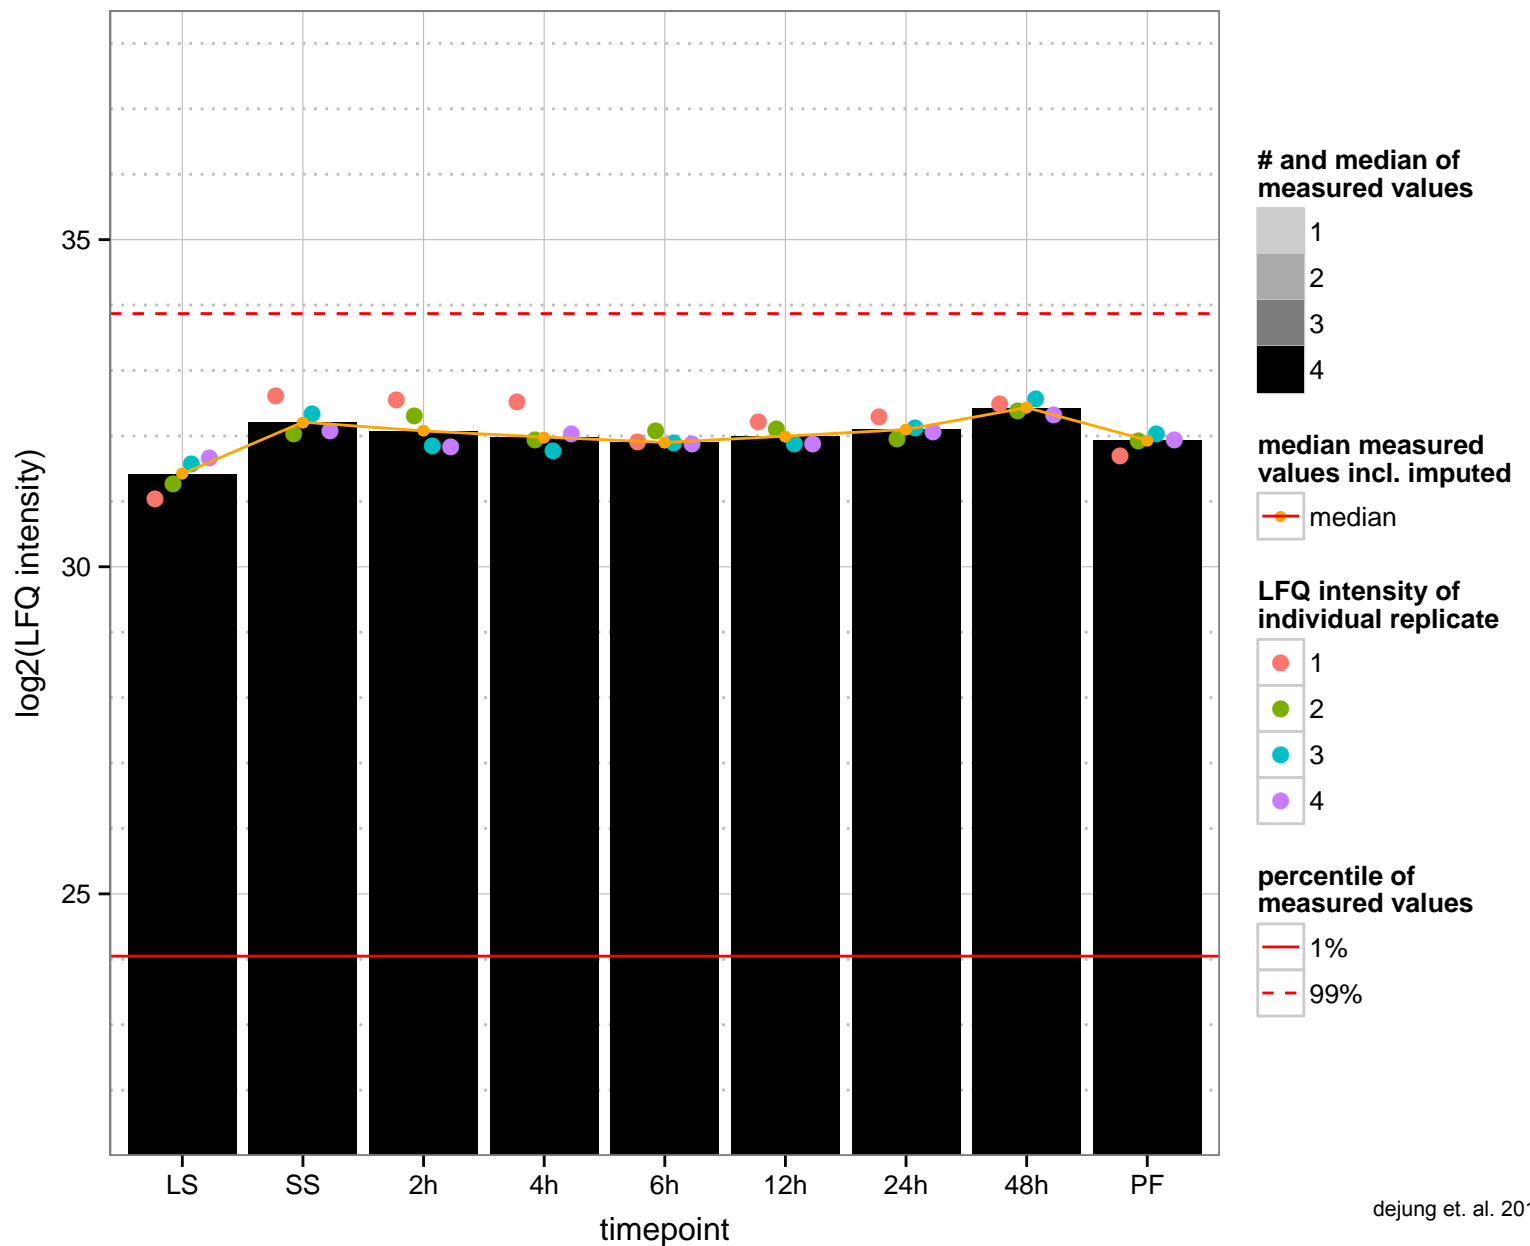

methyltransferase, putative  
 Tb927.10.7940  
 AGOF: nucleic acid binding, rRNA methyltransferase activity  
 AGOC: null  
 AGOP: RNA methylation  
 PGO: methyltransferase activity, nucleic acid binding  
 PGO: null  
 PGO: methylation

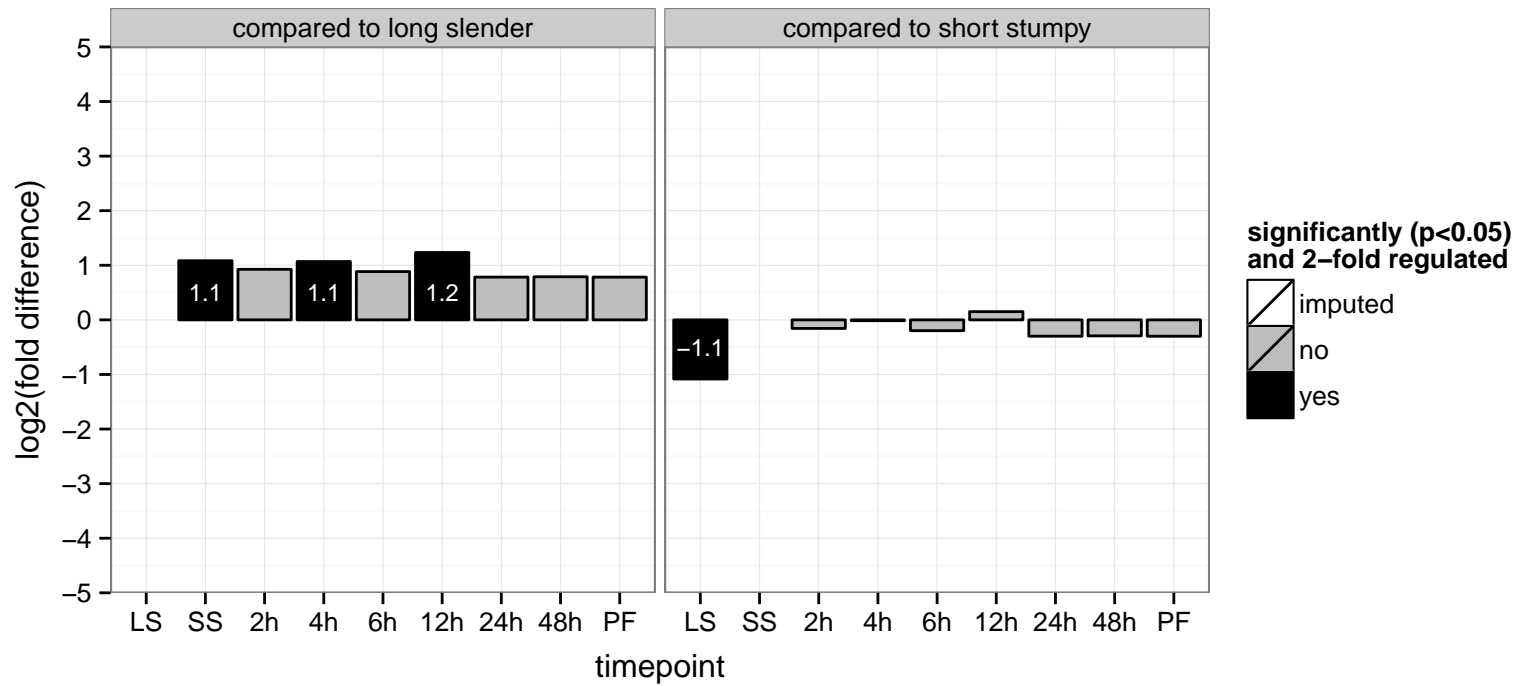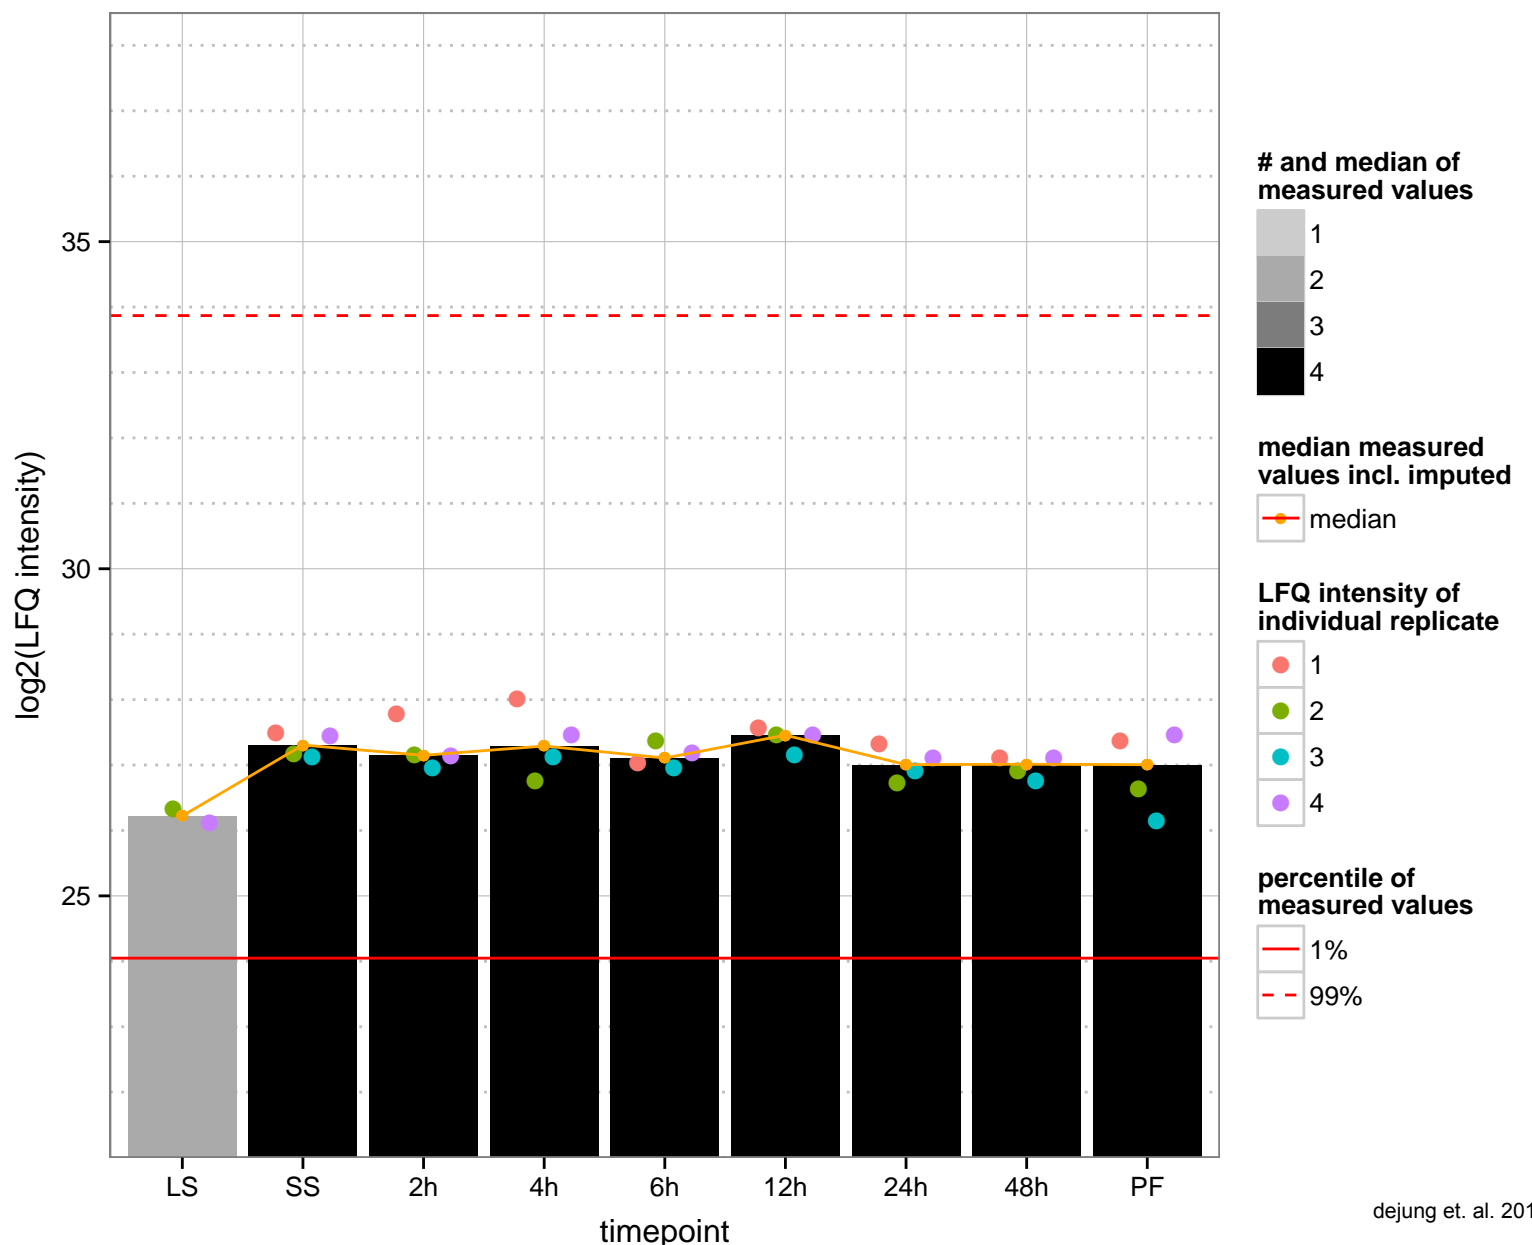

replication factor C, subunit 5, putative, ATPase  
 Tb927.10.7990  
 AGOF: DNA binding, nucleoside-triphosphatase activity, nucleotide binding  
 AGOC: nucleus  
 AGOP: DNA replication  
 PGOF: DNA binding, nucleoside-triphosphatase activity, nucleotide binding  
 PGOC: null  
 PGO: DNA replication

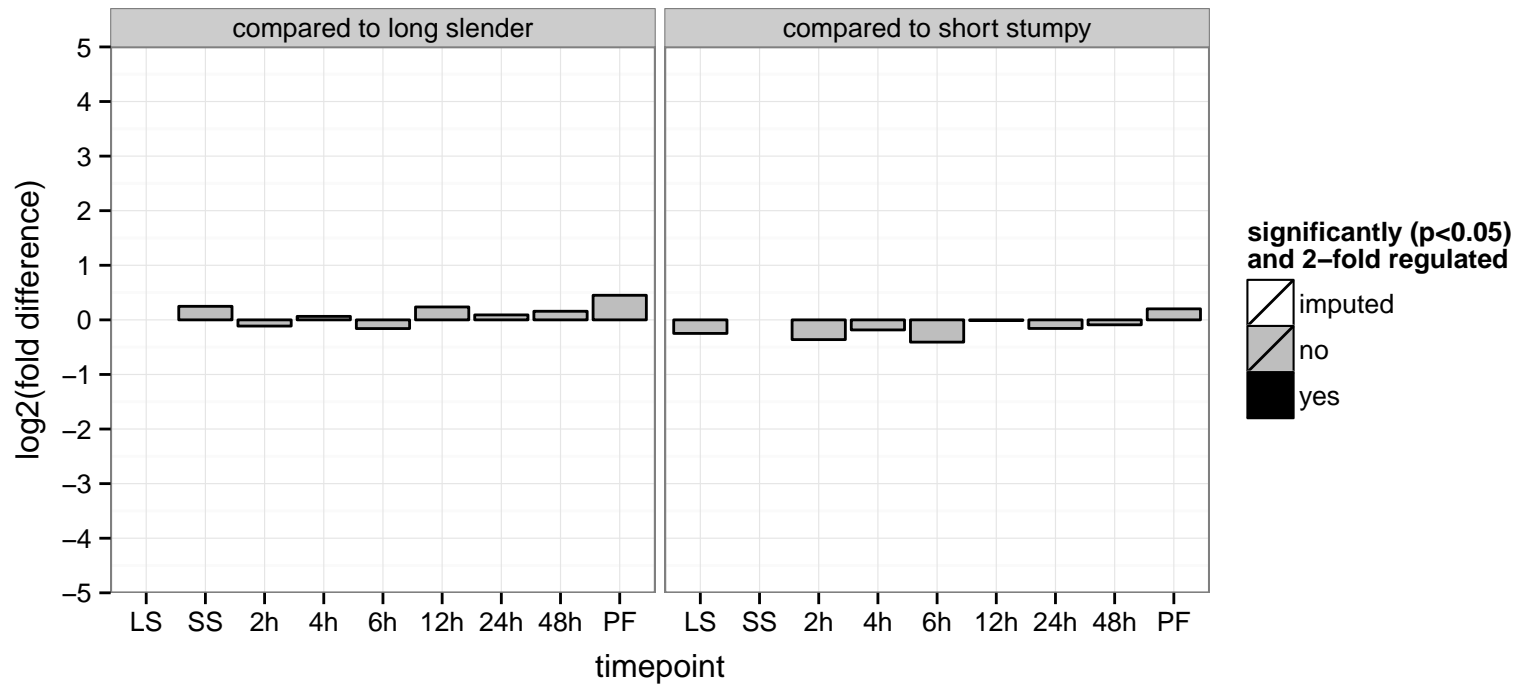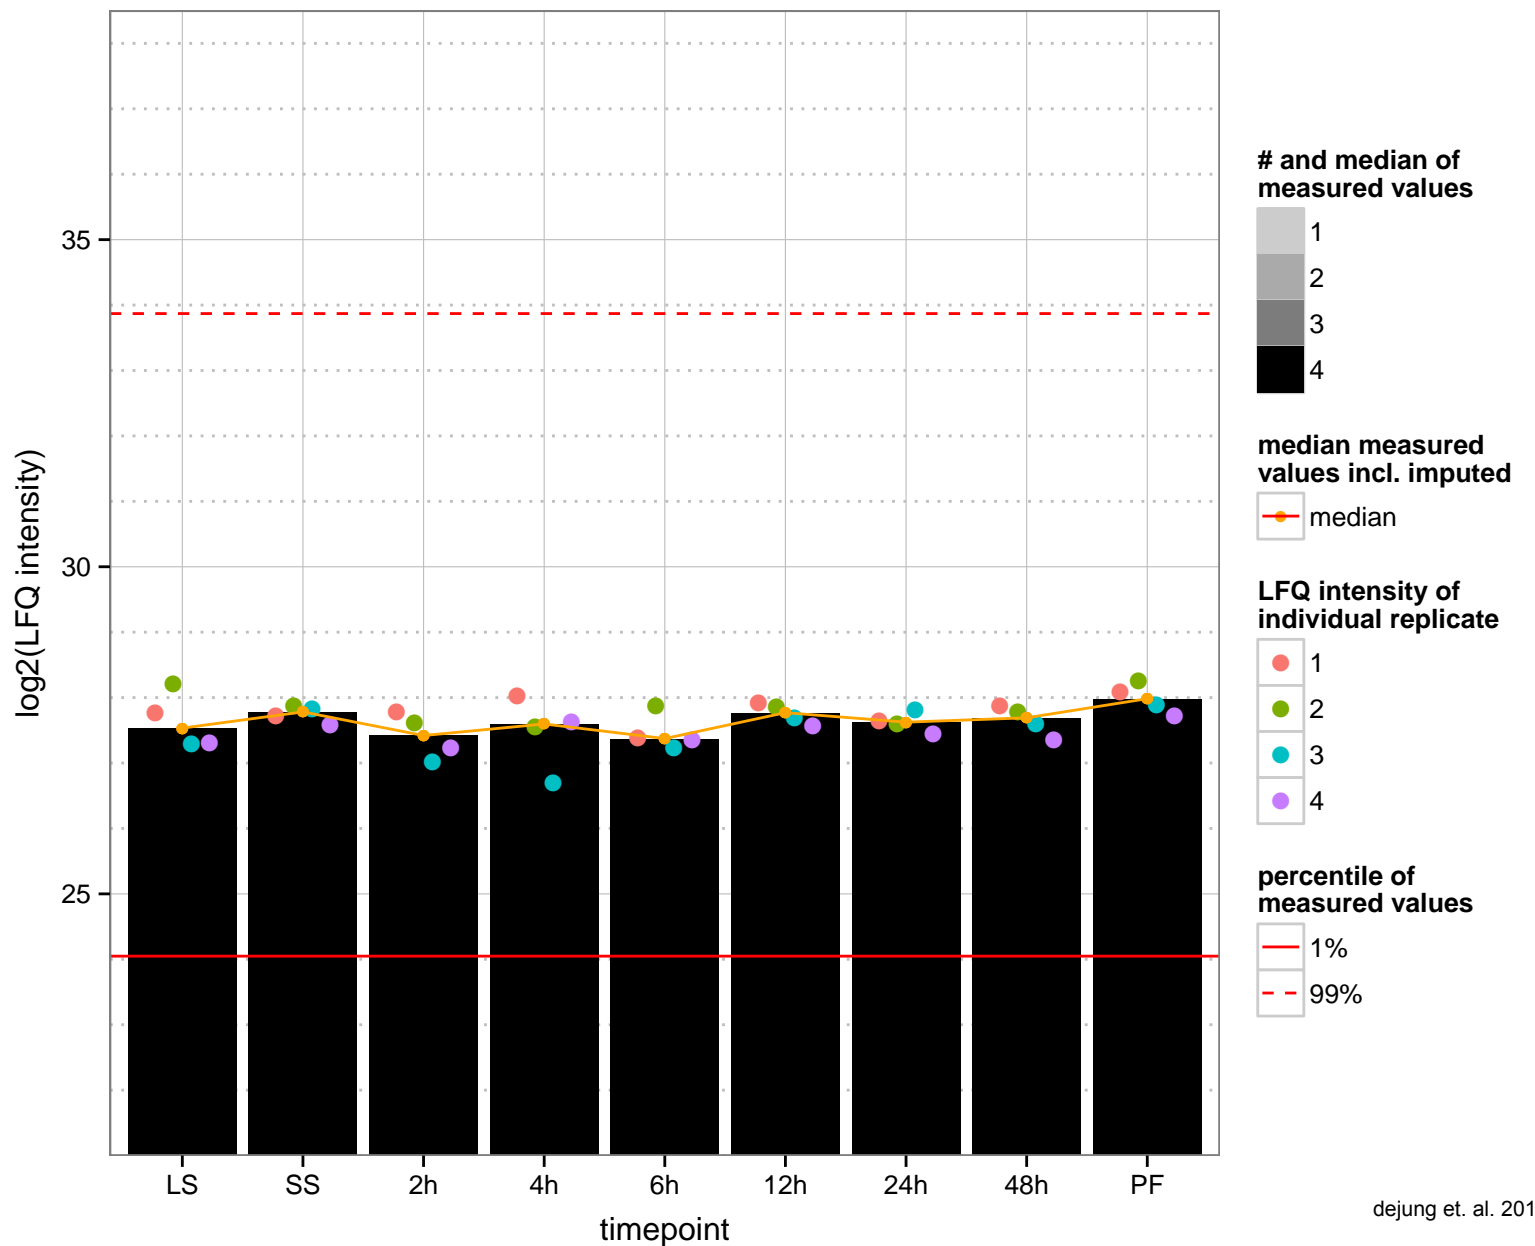

hypothetical protein, conserved  
 Tb927.10.8000  
 AGOF: null  
 AGOC: null  
 AGOP: null  
 PGO: adenylate kinase activity  
 PGOC: null  
 PGOP: null

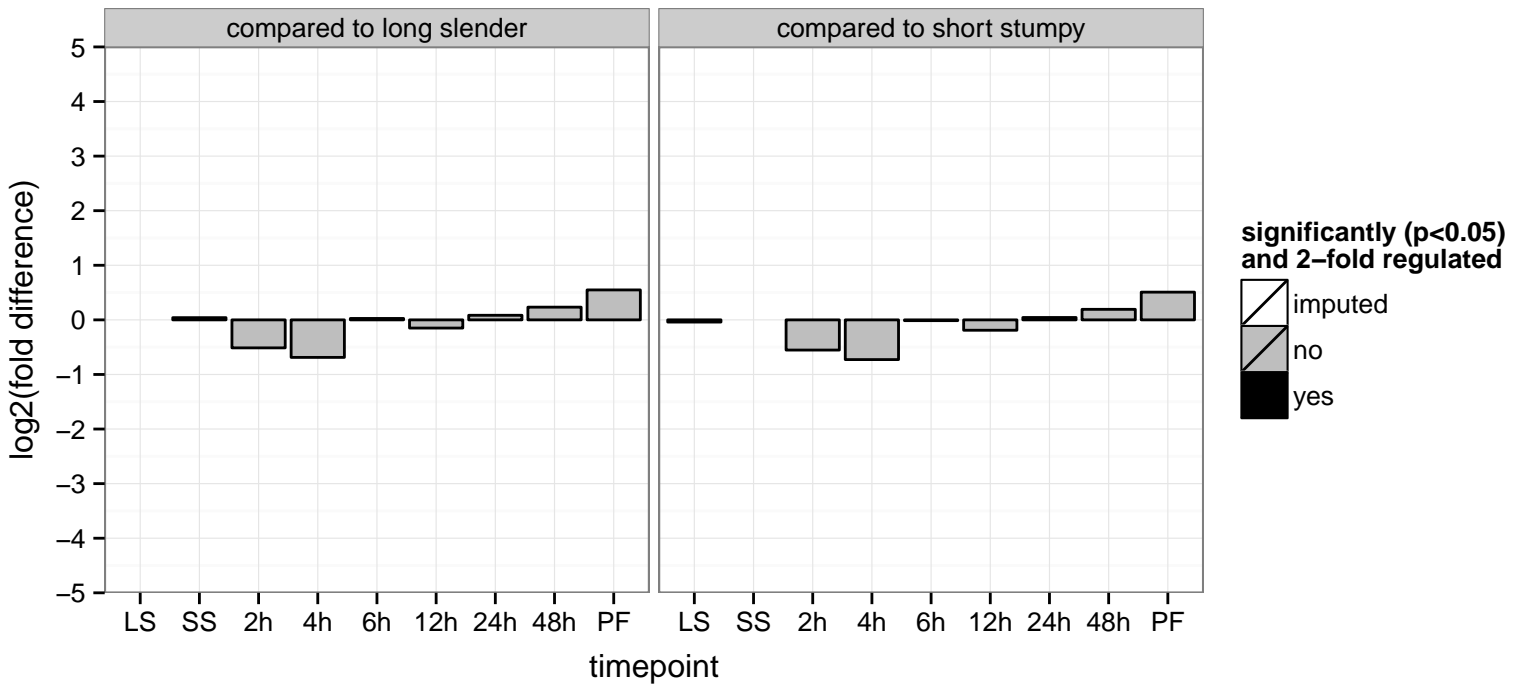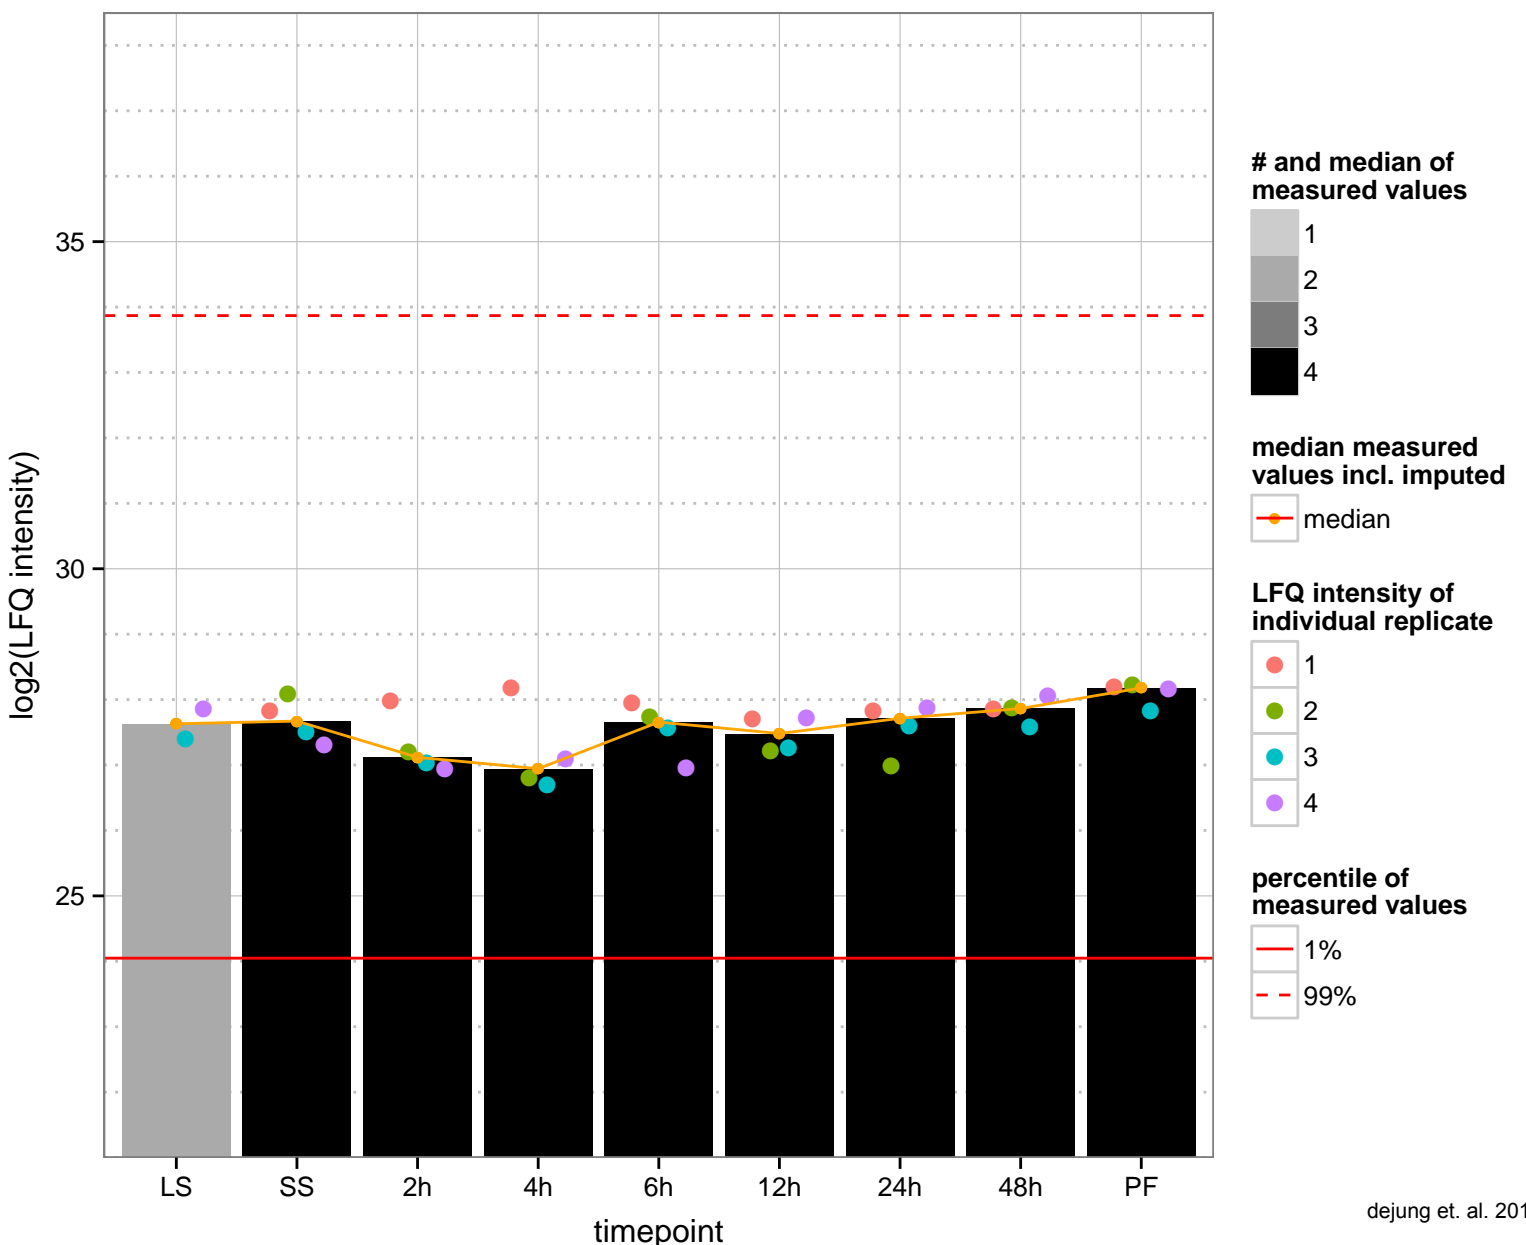

hypothetical protein, conserved  
 Tb927.10.8010  
 AGOF: null  
 AGOC: mitochondrion  
 AGOP: null  
 PGO: null  
 PGOC: null  
 PGOP: null

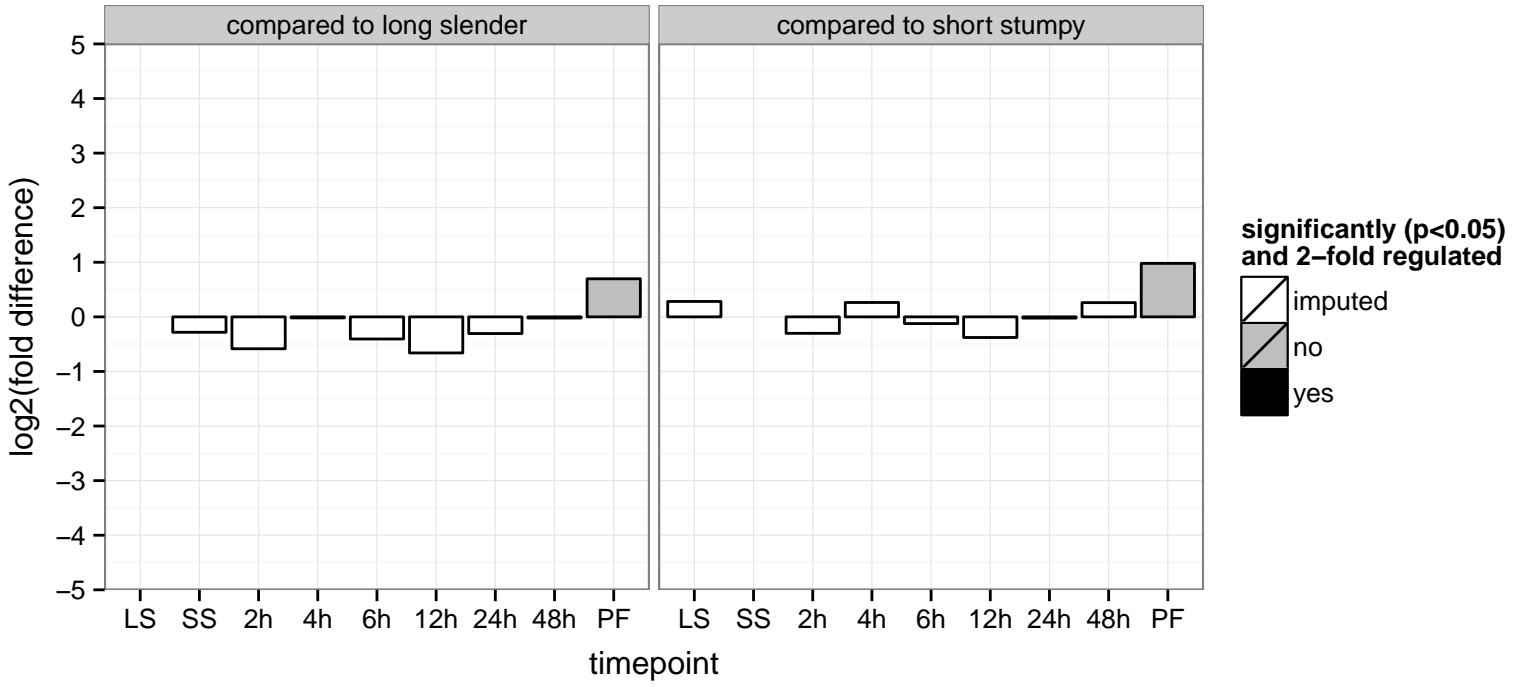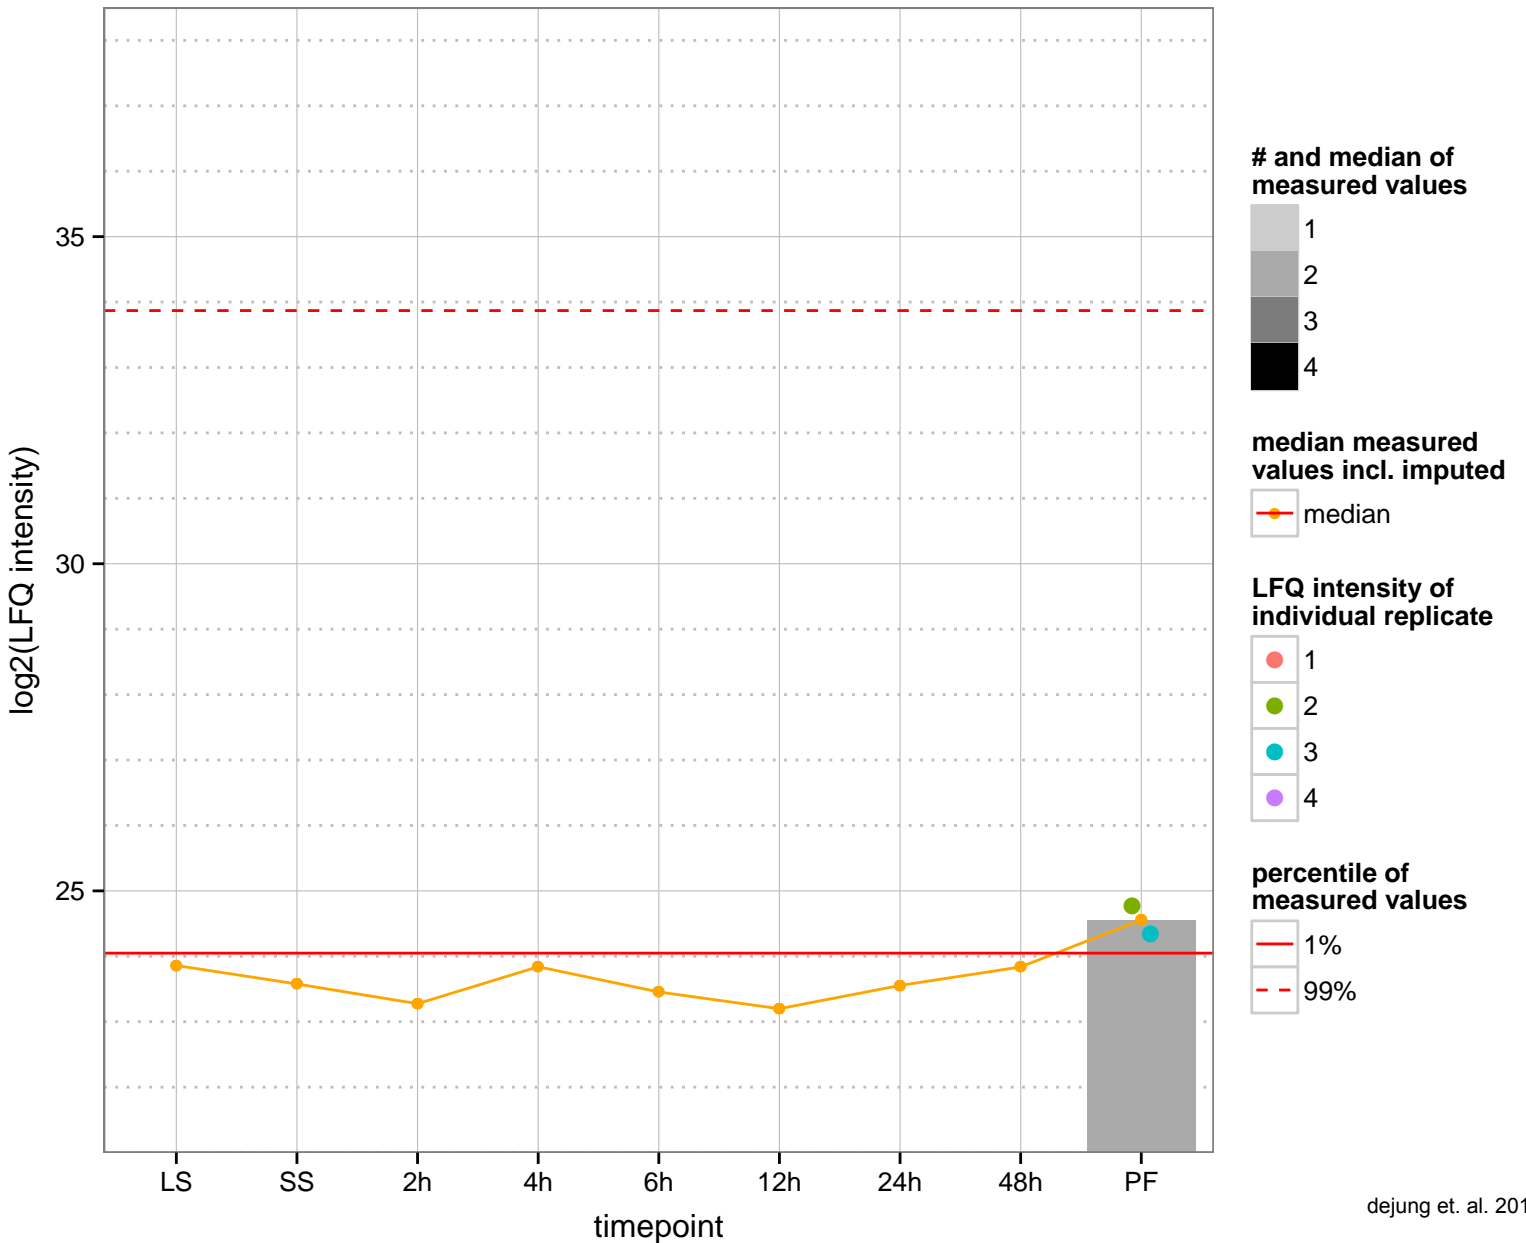

adaptin complex 1 subunit, putative, beta-adaptin, fragment (BAD1)

Tb927.10.8040

AGOF: protein transporter activity

AGOC: Golgi apparatus, clathrin coat of trans-Golgi network vesicle, coated pit, trans-Golgi network

AGOP: intracellular protein transport, vesicle-mediated transport

PGOF: binding, protein transporter activity

PGOC: membrane coat

PGOP: intracellular protein transport, protein transport, vesicle-mediated transport

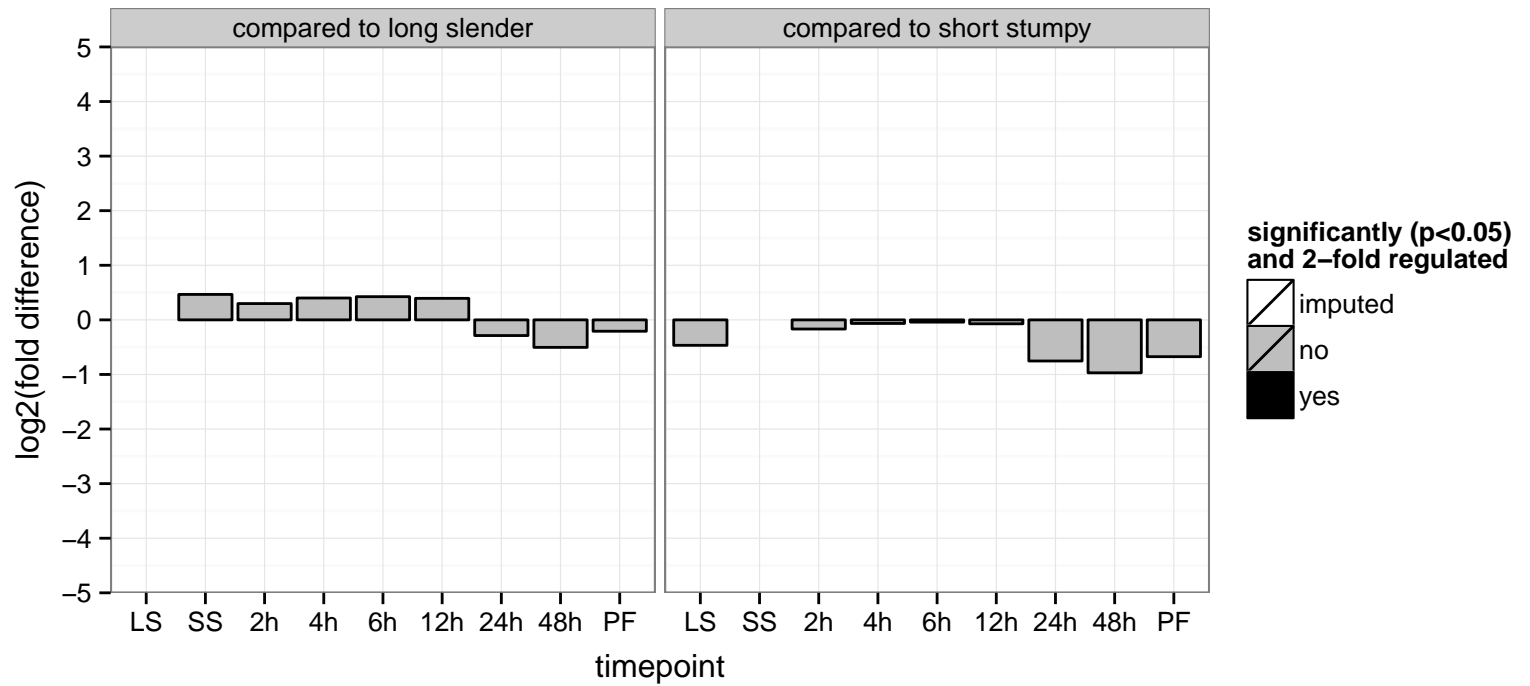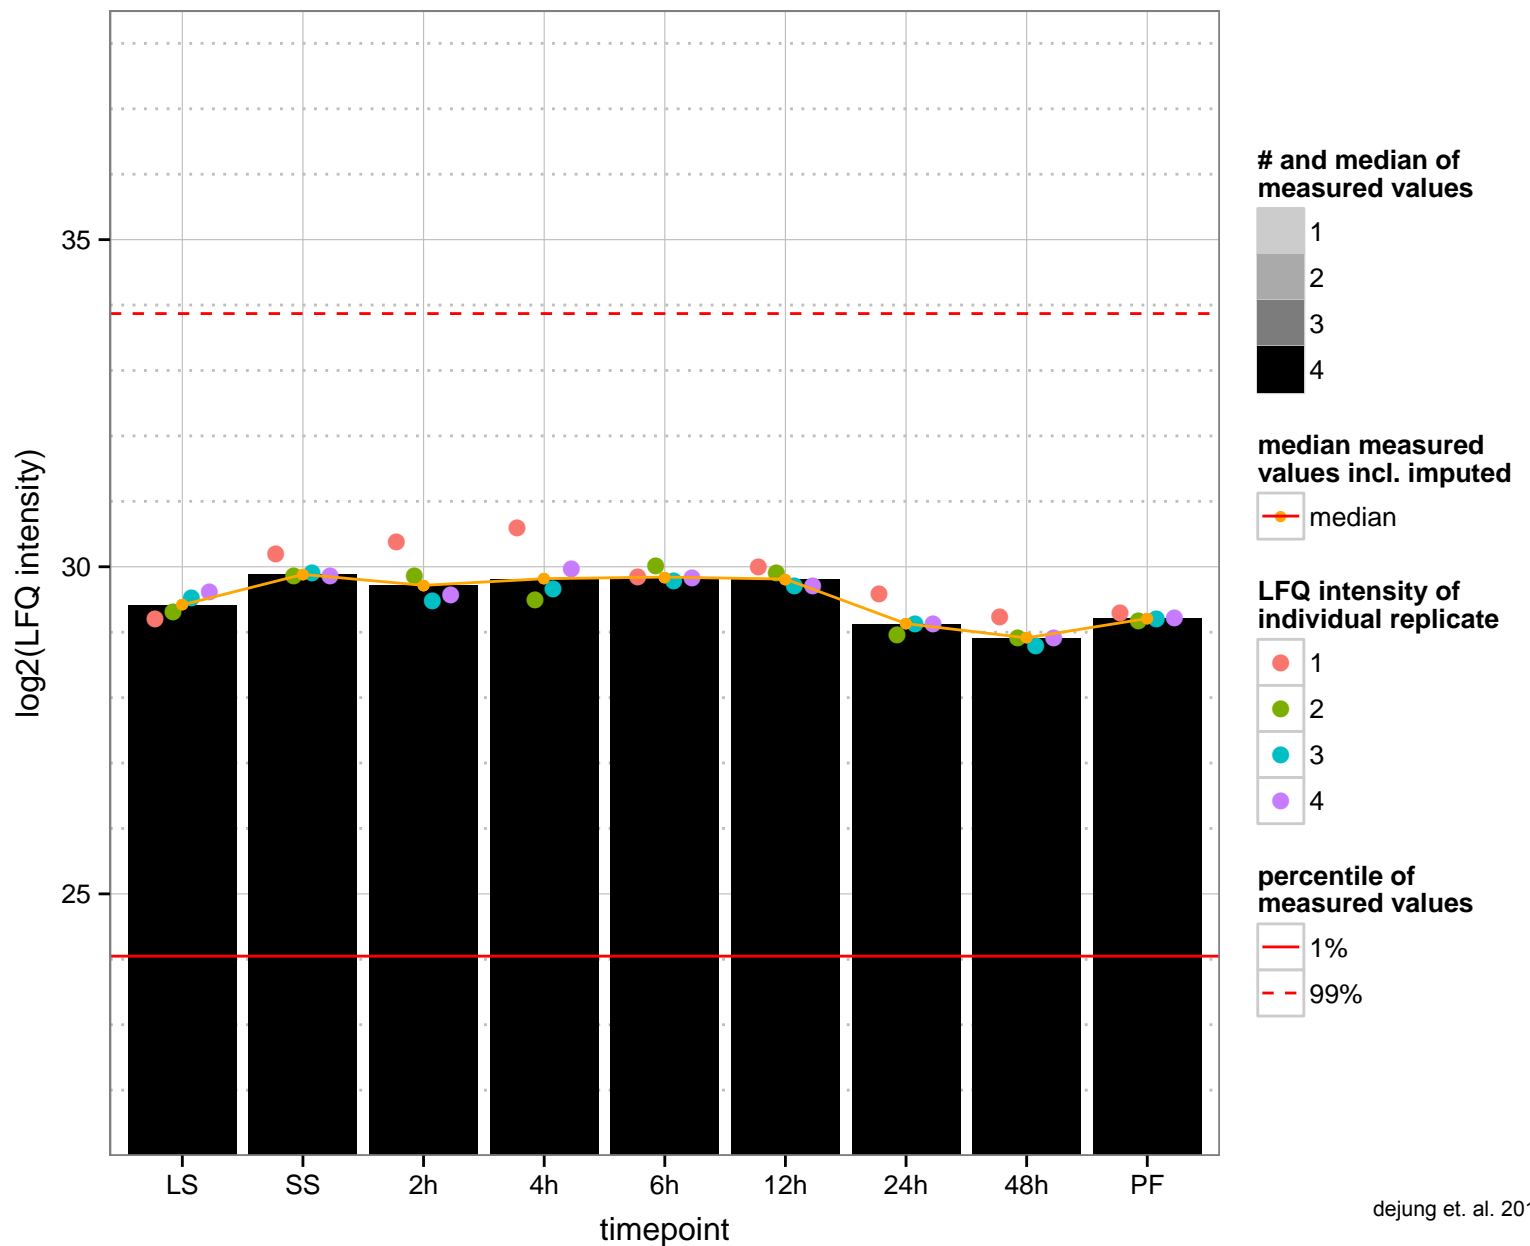

hypothetical protein, conserved  
 Tb927.10.8060  
 AGOF: null  
 AGOC: null  
 AGOP: null  
 PGOF: protein binding  
 PGOC: null  
 PGOP: null

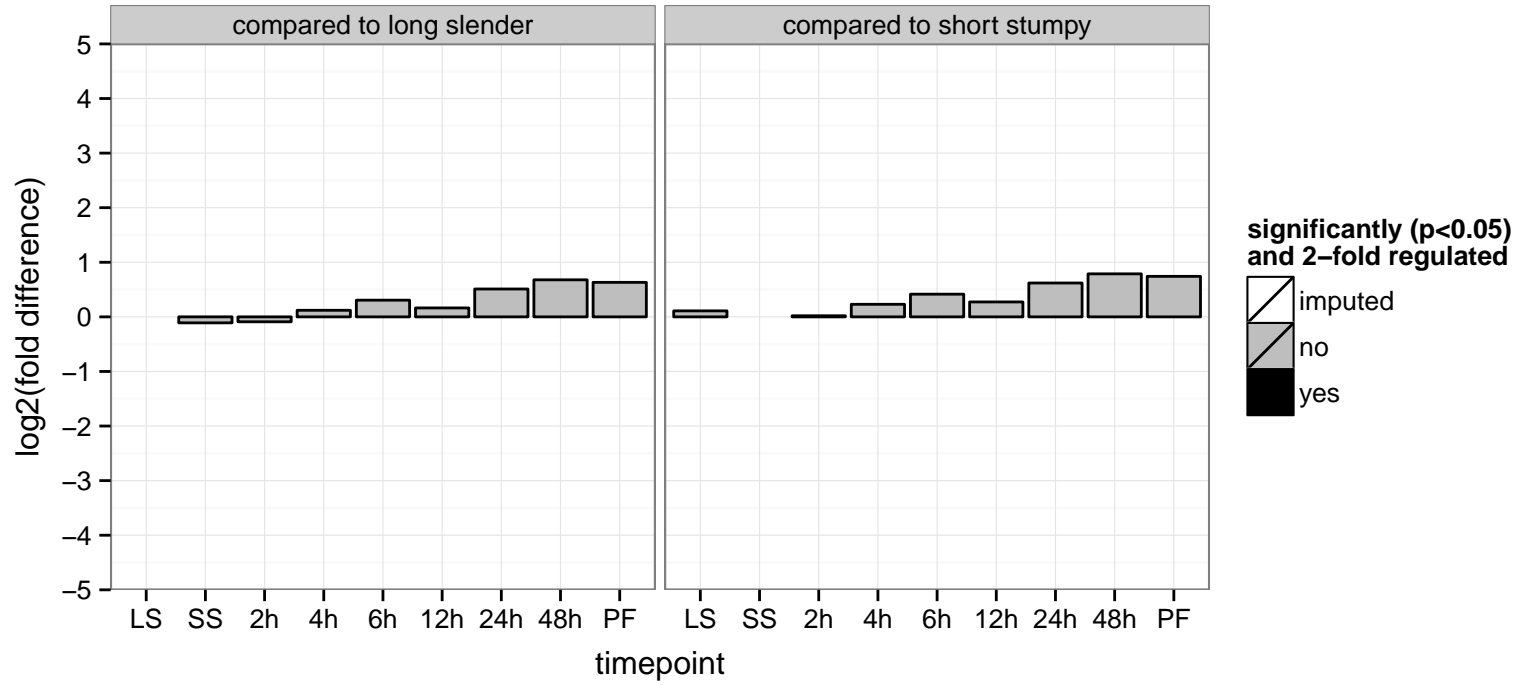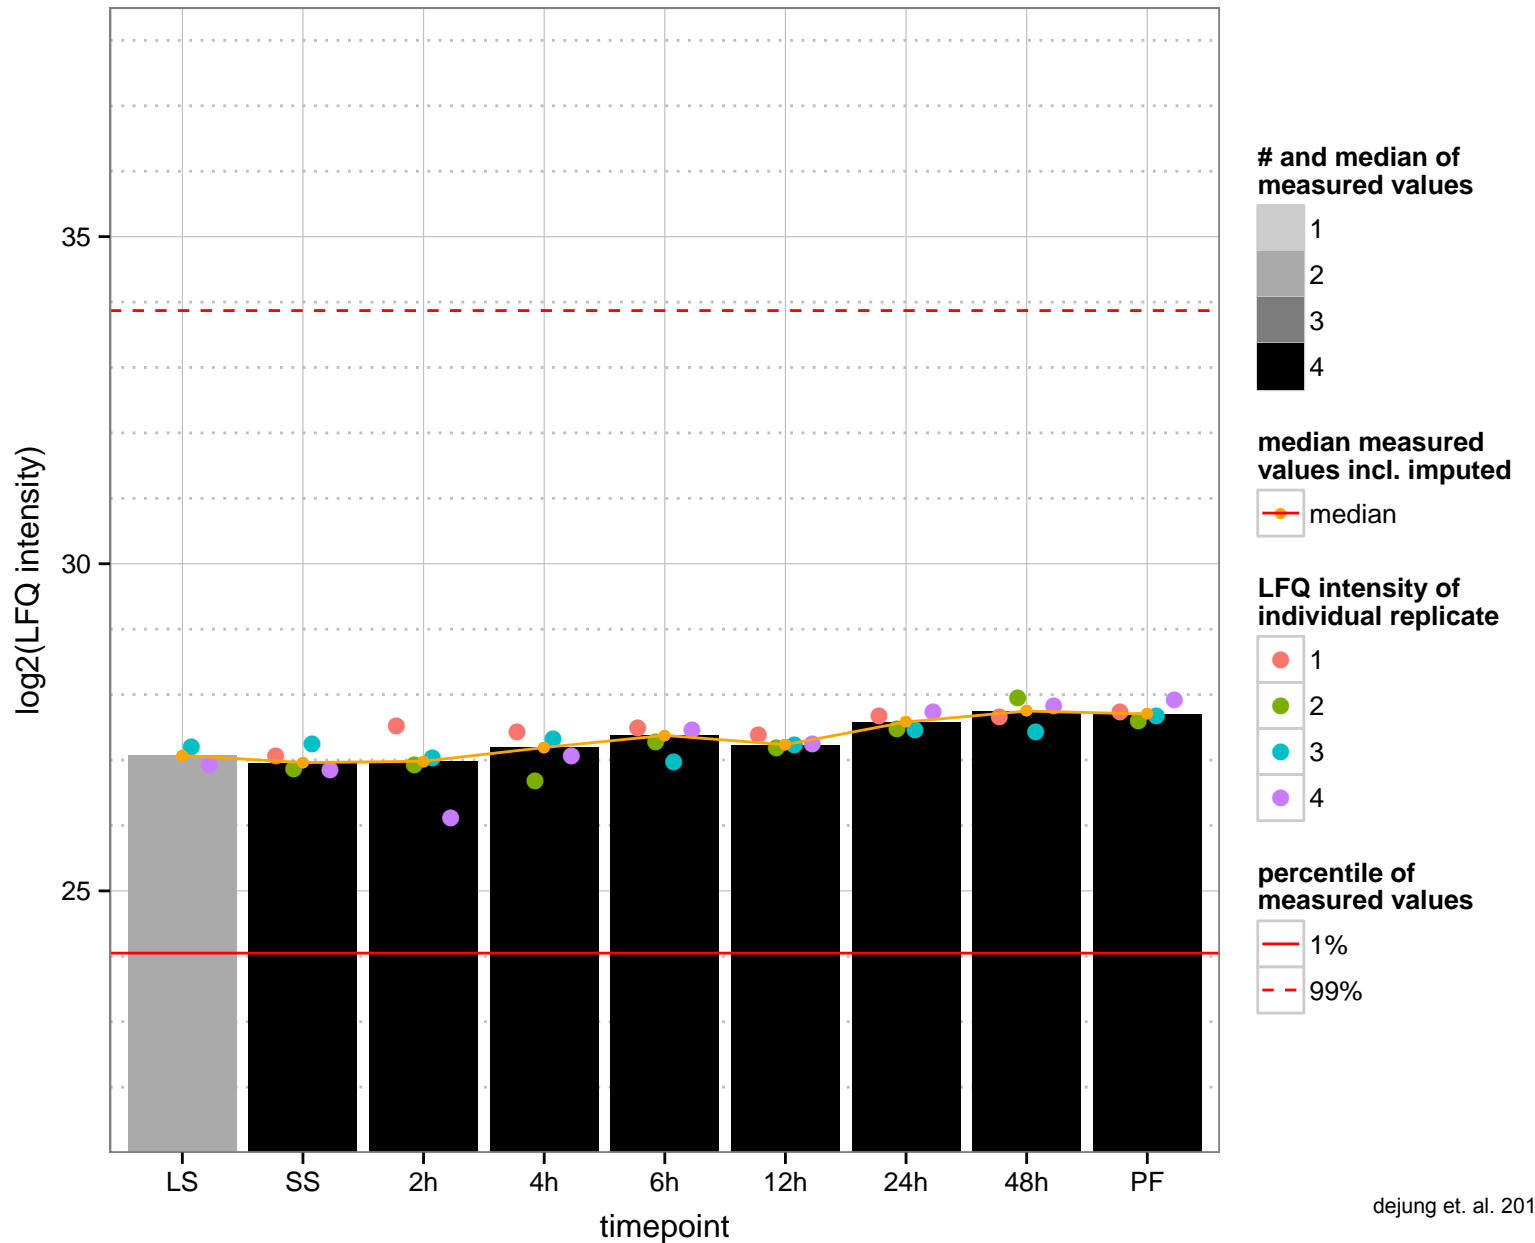

hypothetical protein, conserved  
 Tb927.10.8080  
 AGOF: null  
 AGOC: null  
 AGOP: null  
 PGO: null  
 PGOC: null  
 PGOP: null

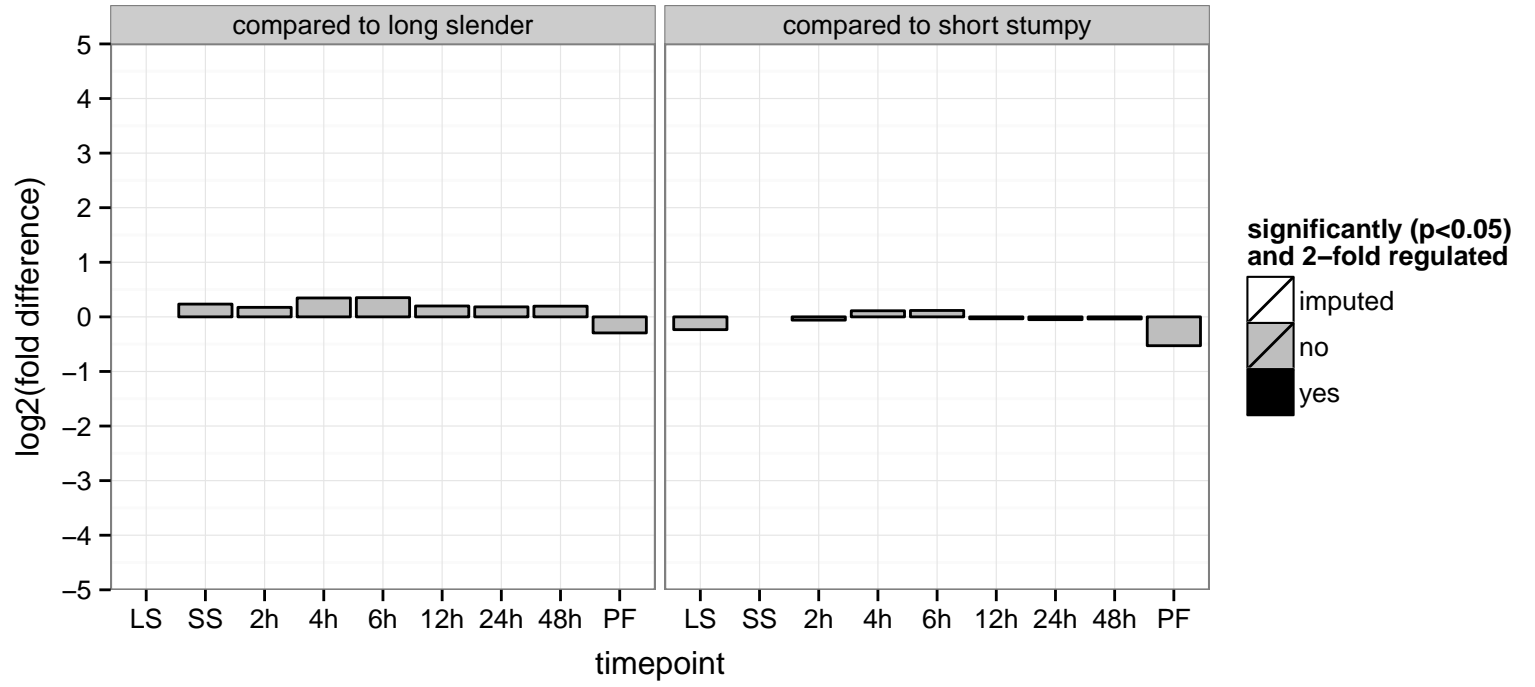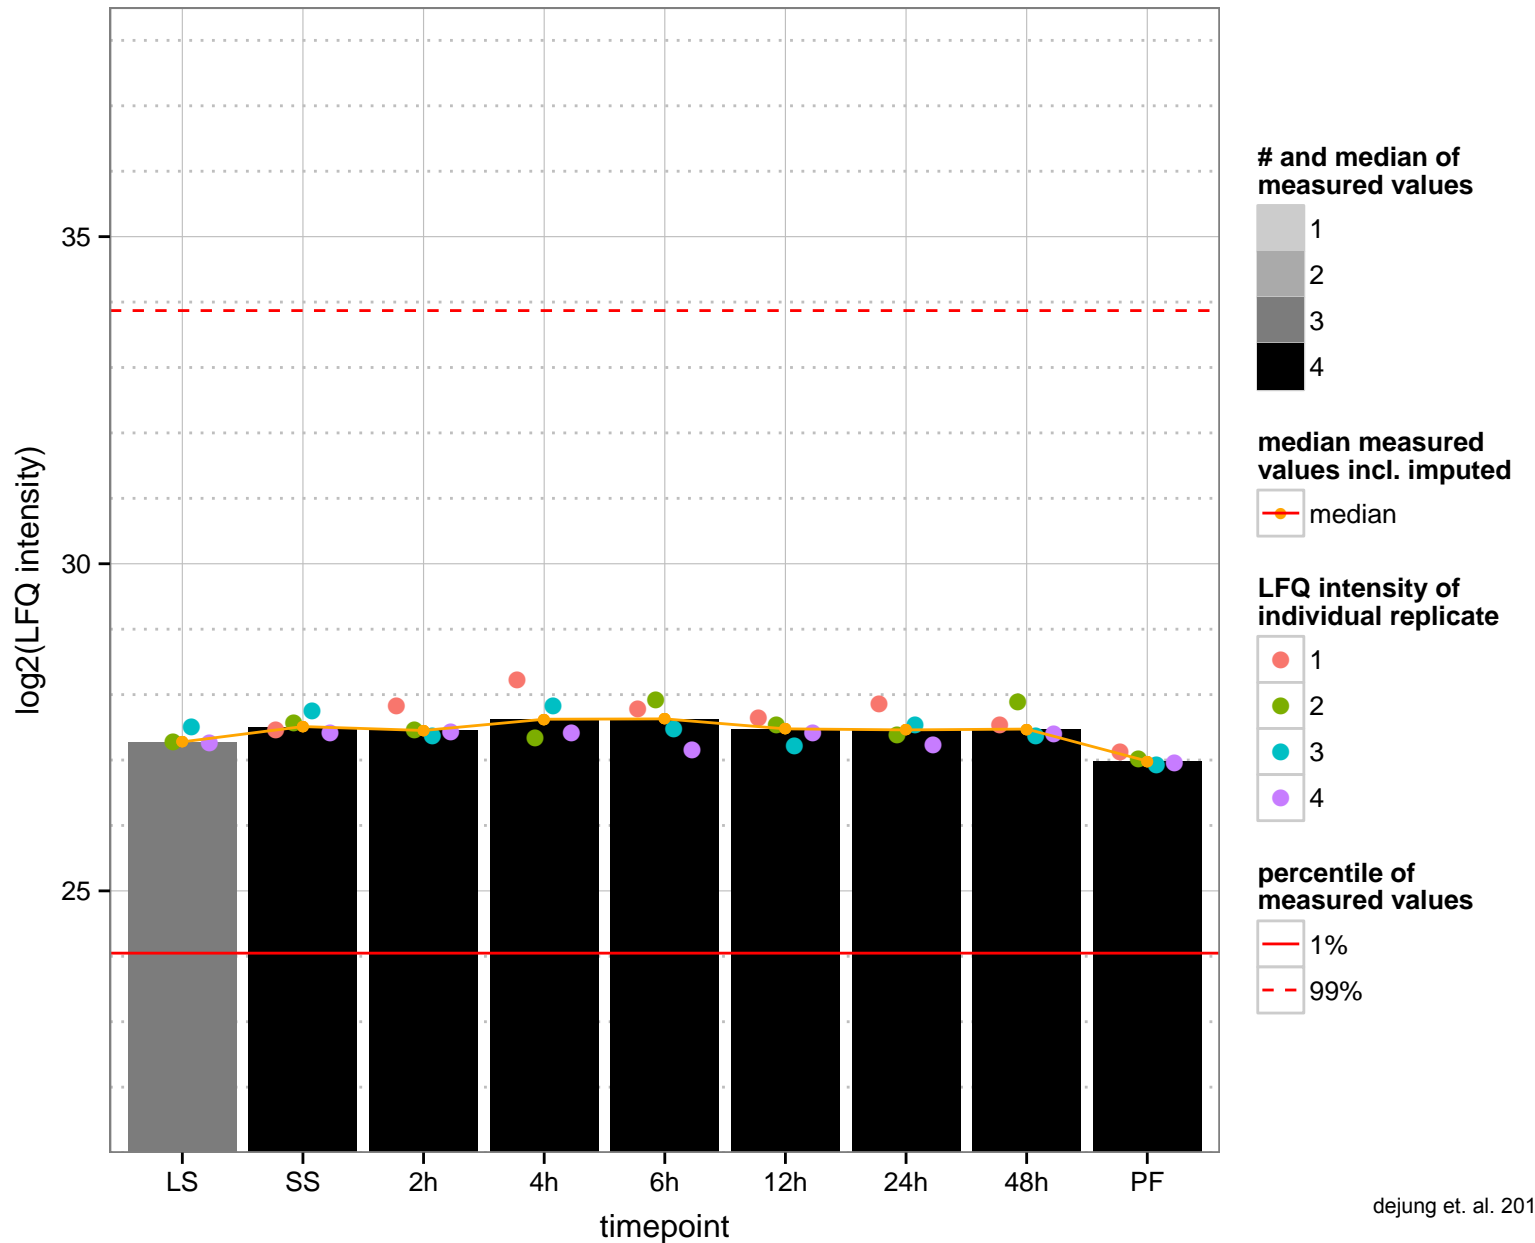



hypothetical protein, conserved  
 Tb927.10.8090  
 AGOF: null  
 AGOC: null  
 AGOP: null  
 PGO: null  
 PGOC: null  
 PGOP: null

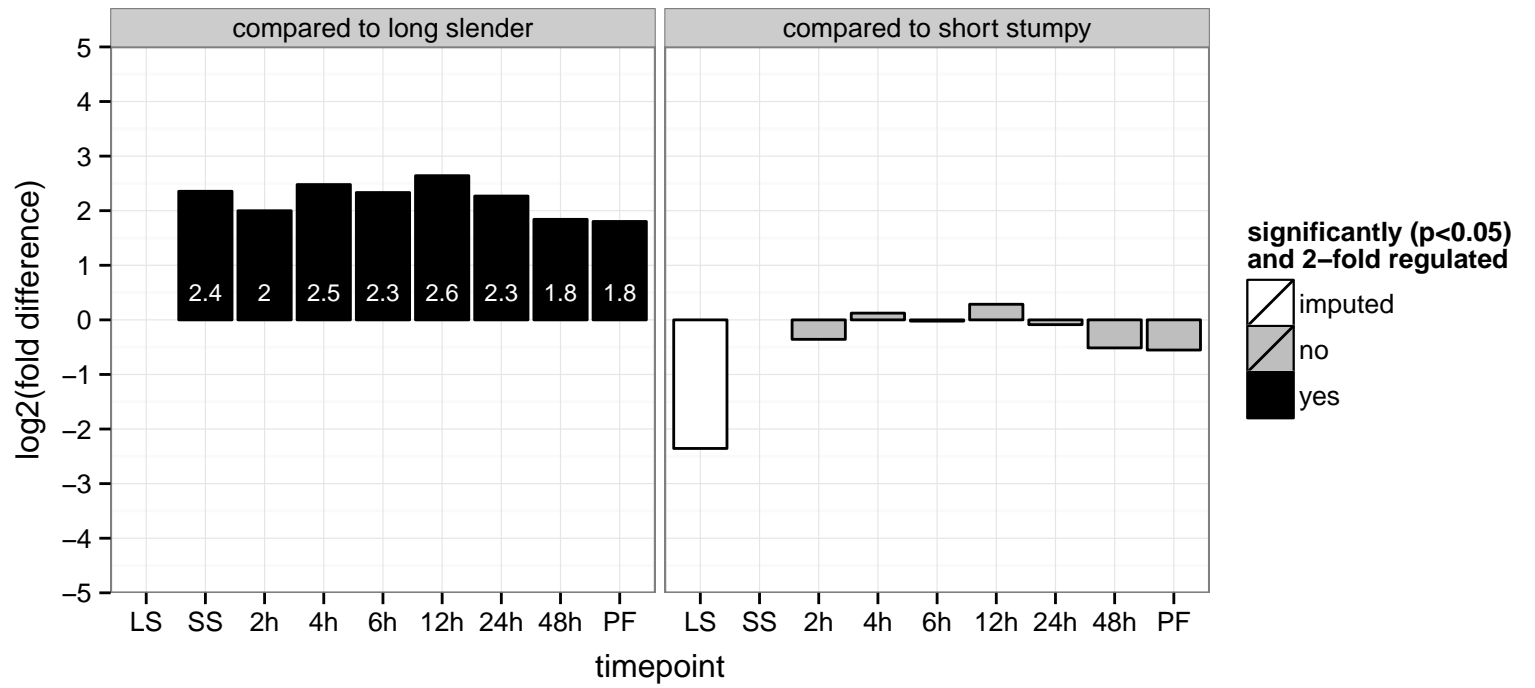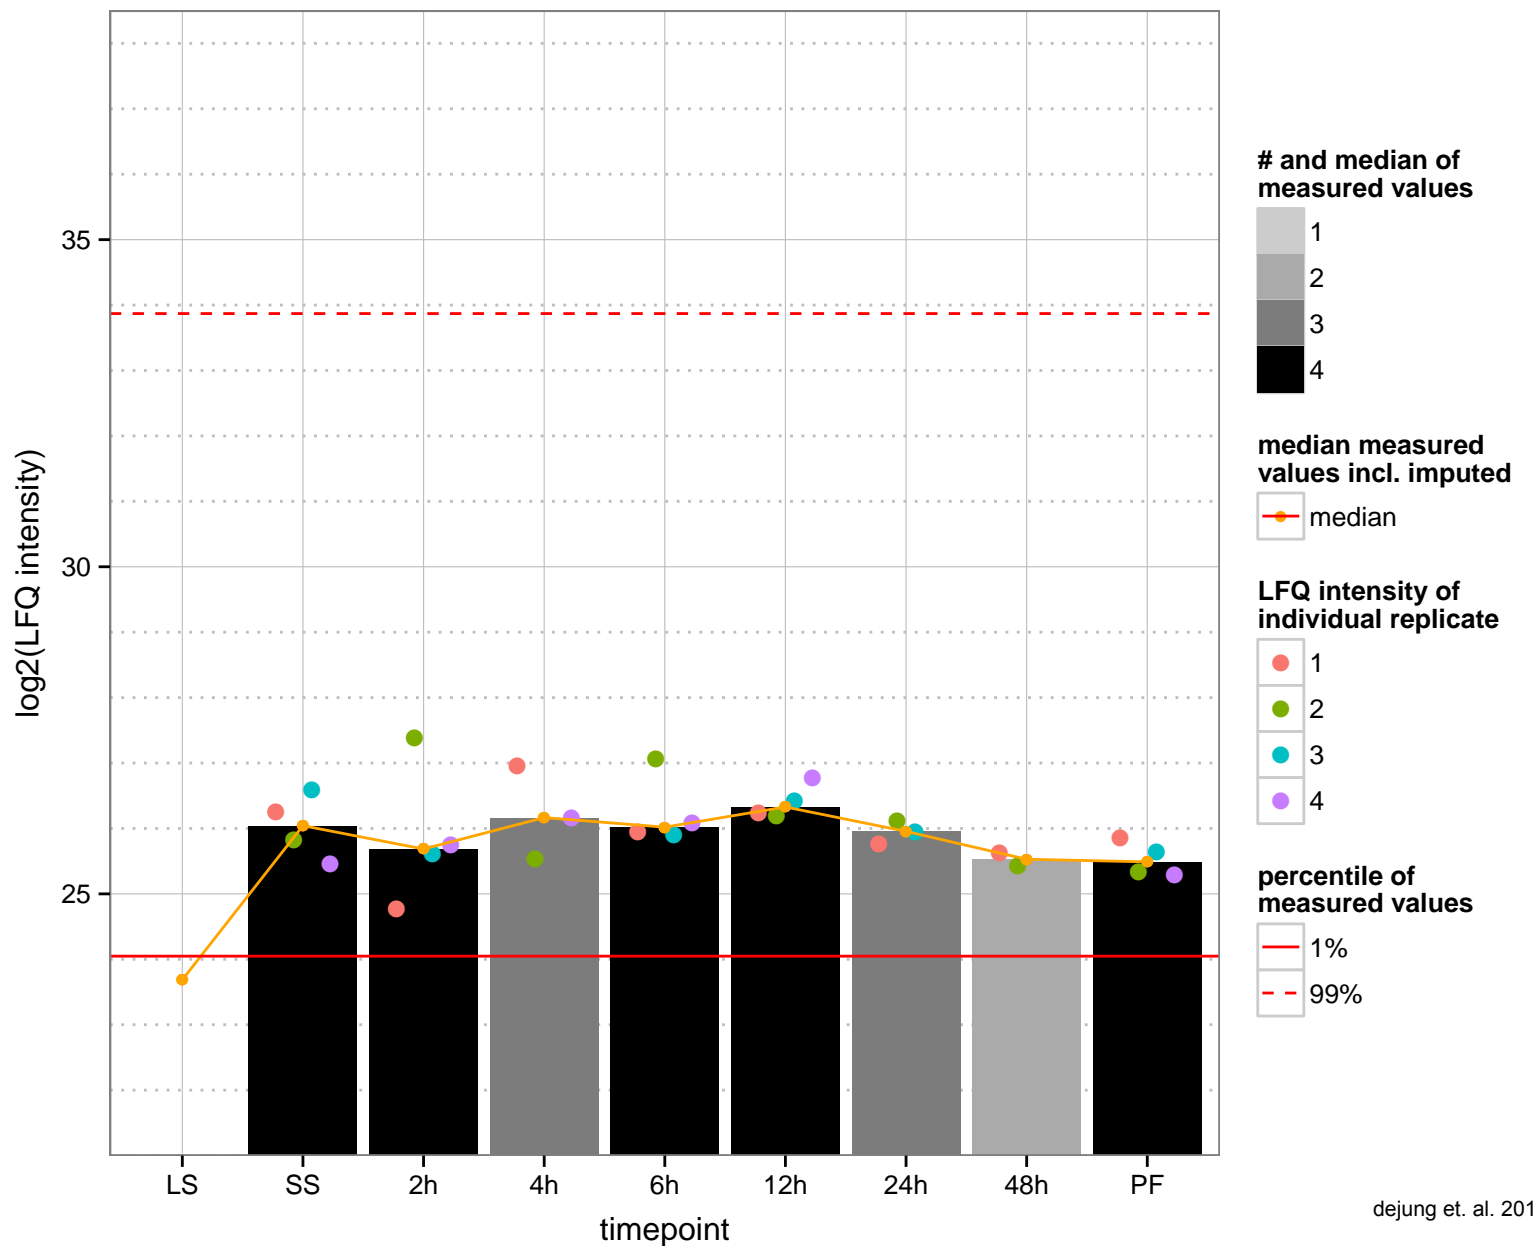

hypothetical protein, conserved  
 Tb927.10.810  
 AGOF: null  
 AGOC: null  
 AGOP: null  
 PGO: null  
 PGOC: null  
 PGOP: null

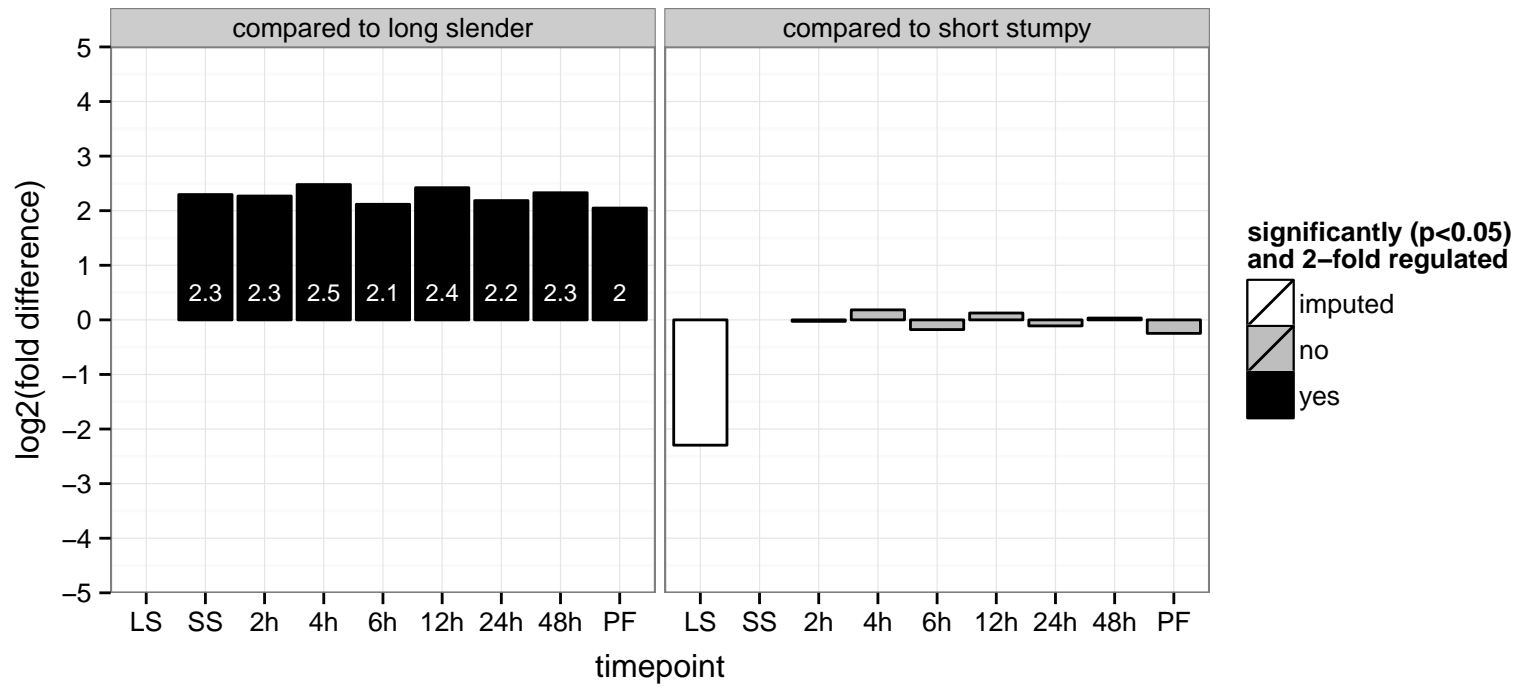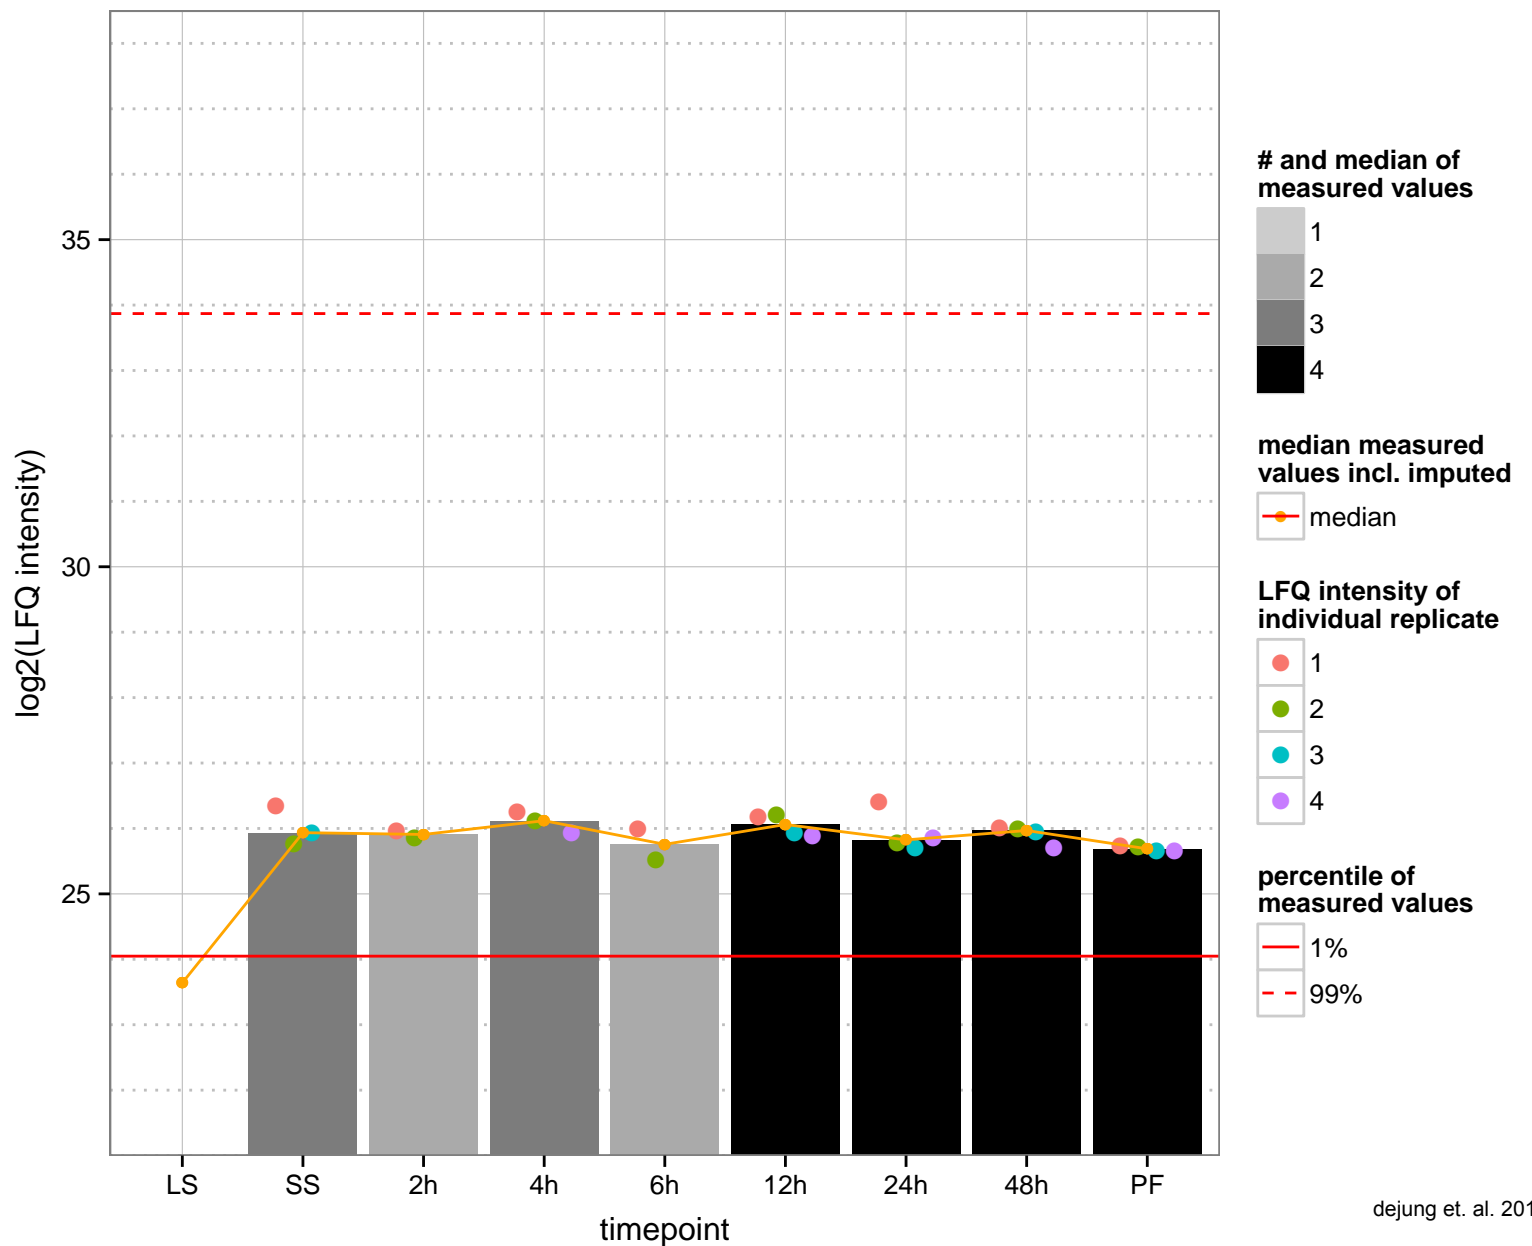

hypothetical protein, conserved  
 Tb927.10.8110  
 AGOF: null  
 AGOC: mitochondrion  
 AGOP: null  
 PGO: null  
 PGO: null  
 PGO: null

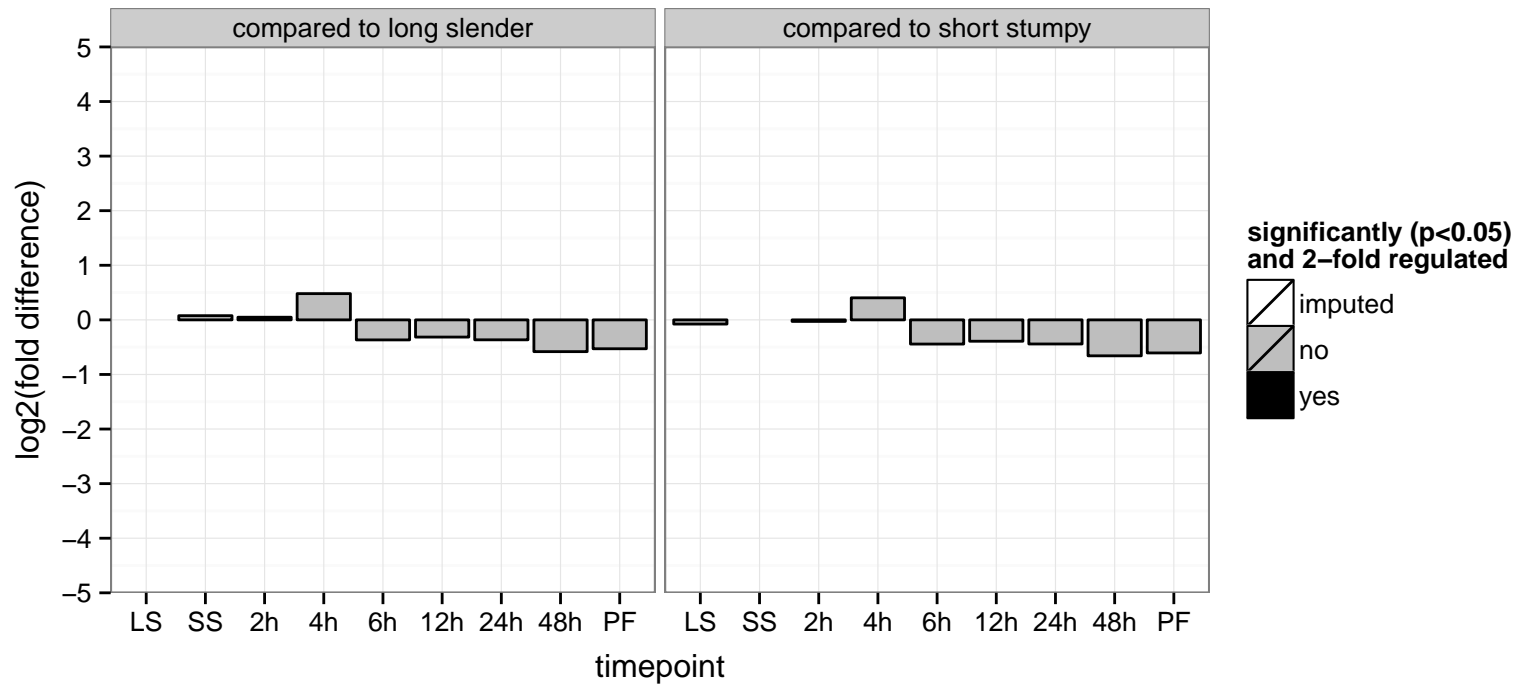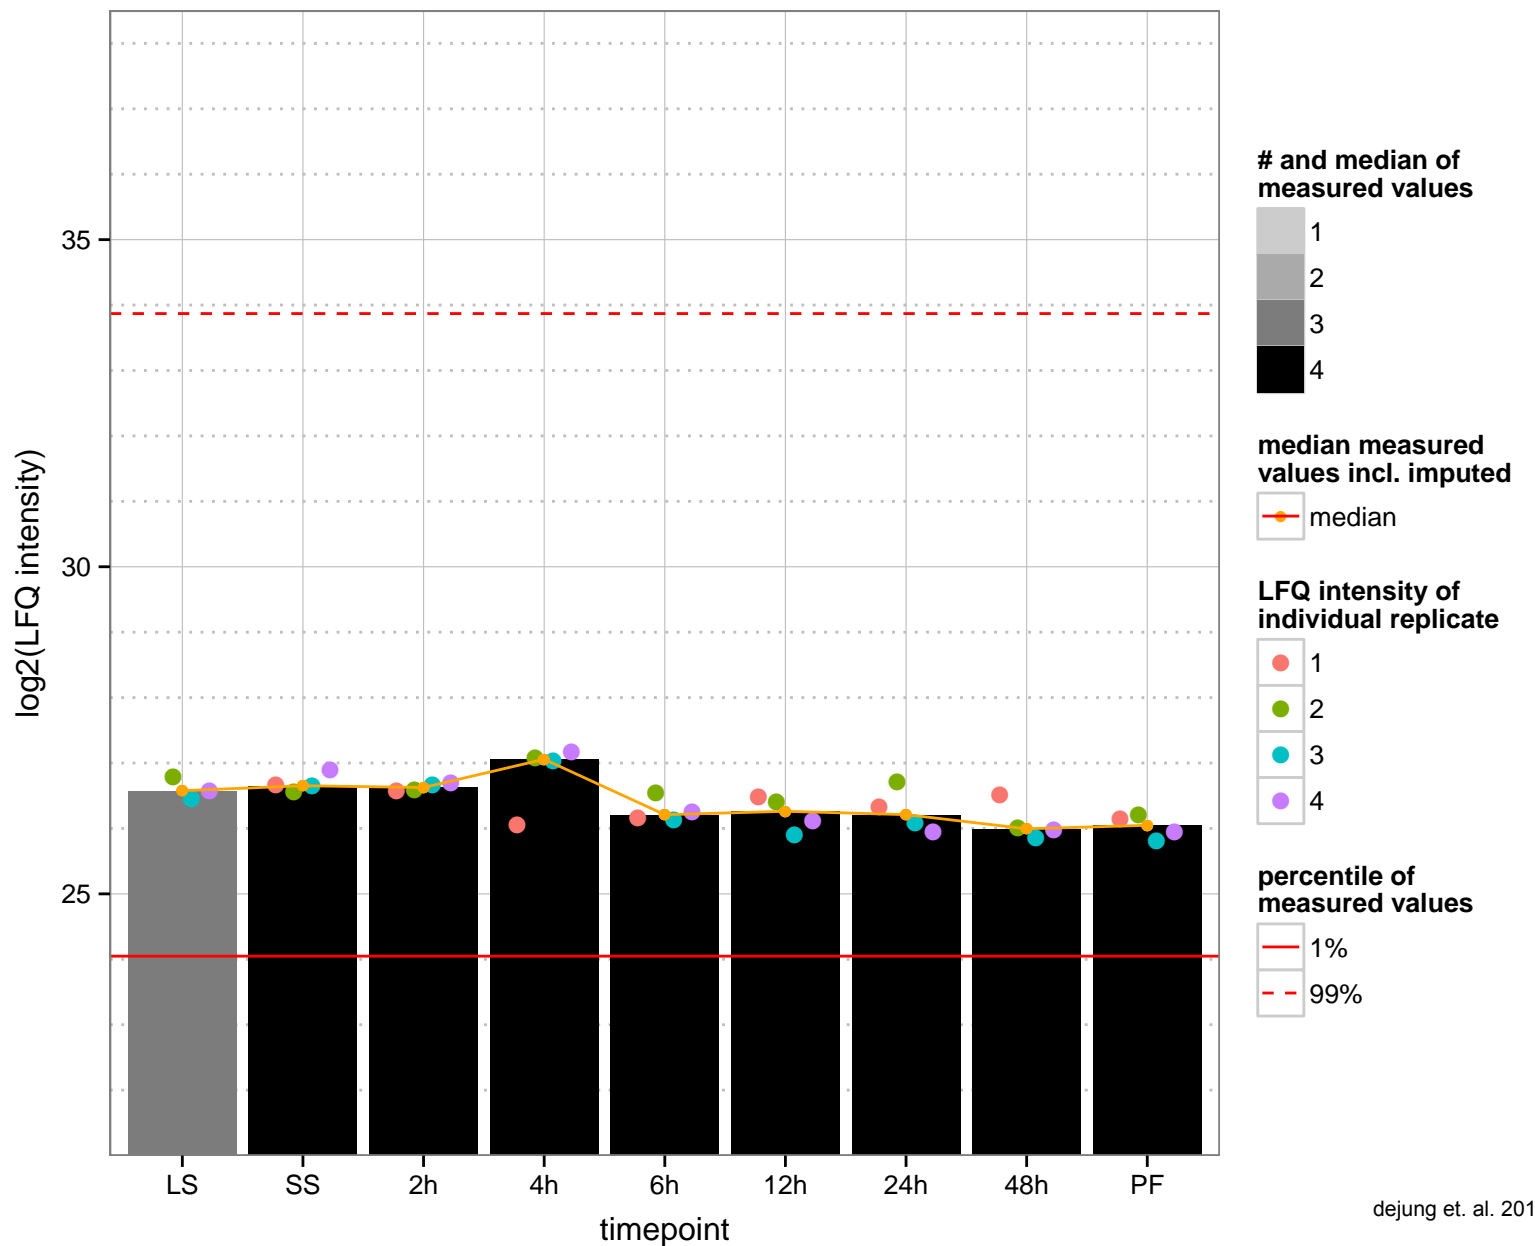

nuclear pore complex protein (NUP155), putative, nucleoporin  
 Tb927.10.8170  
 AGOF: structural constituent of nuclear pore  
 AGOC: nuclear pore  
 AGOP: nucleocytoplasmic transport  
 PGO: null  
 PGOC: null  
 PGOP: null

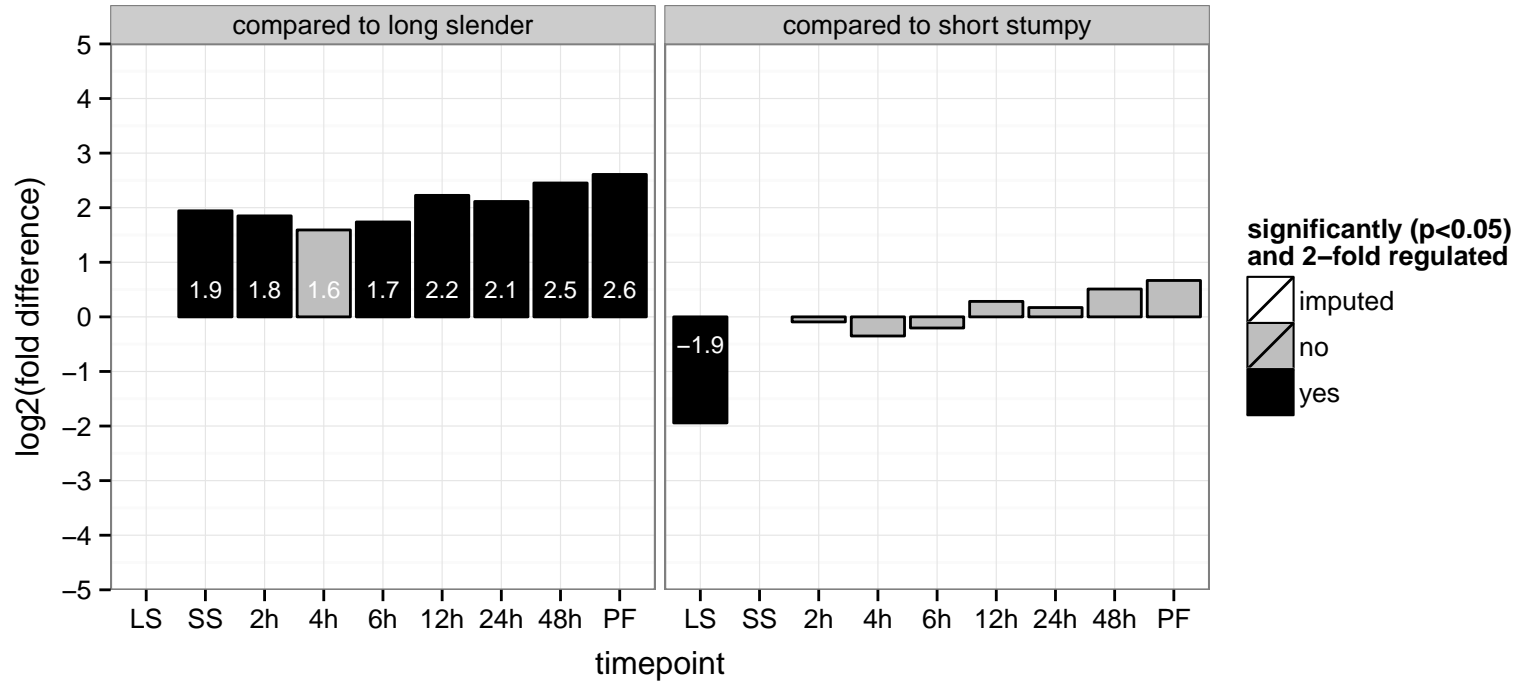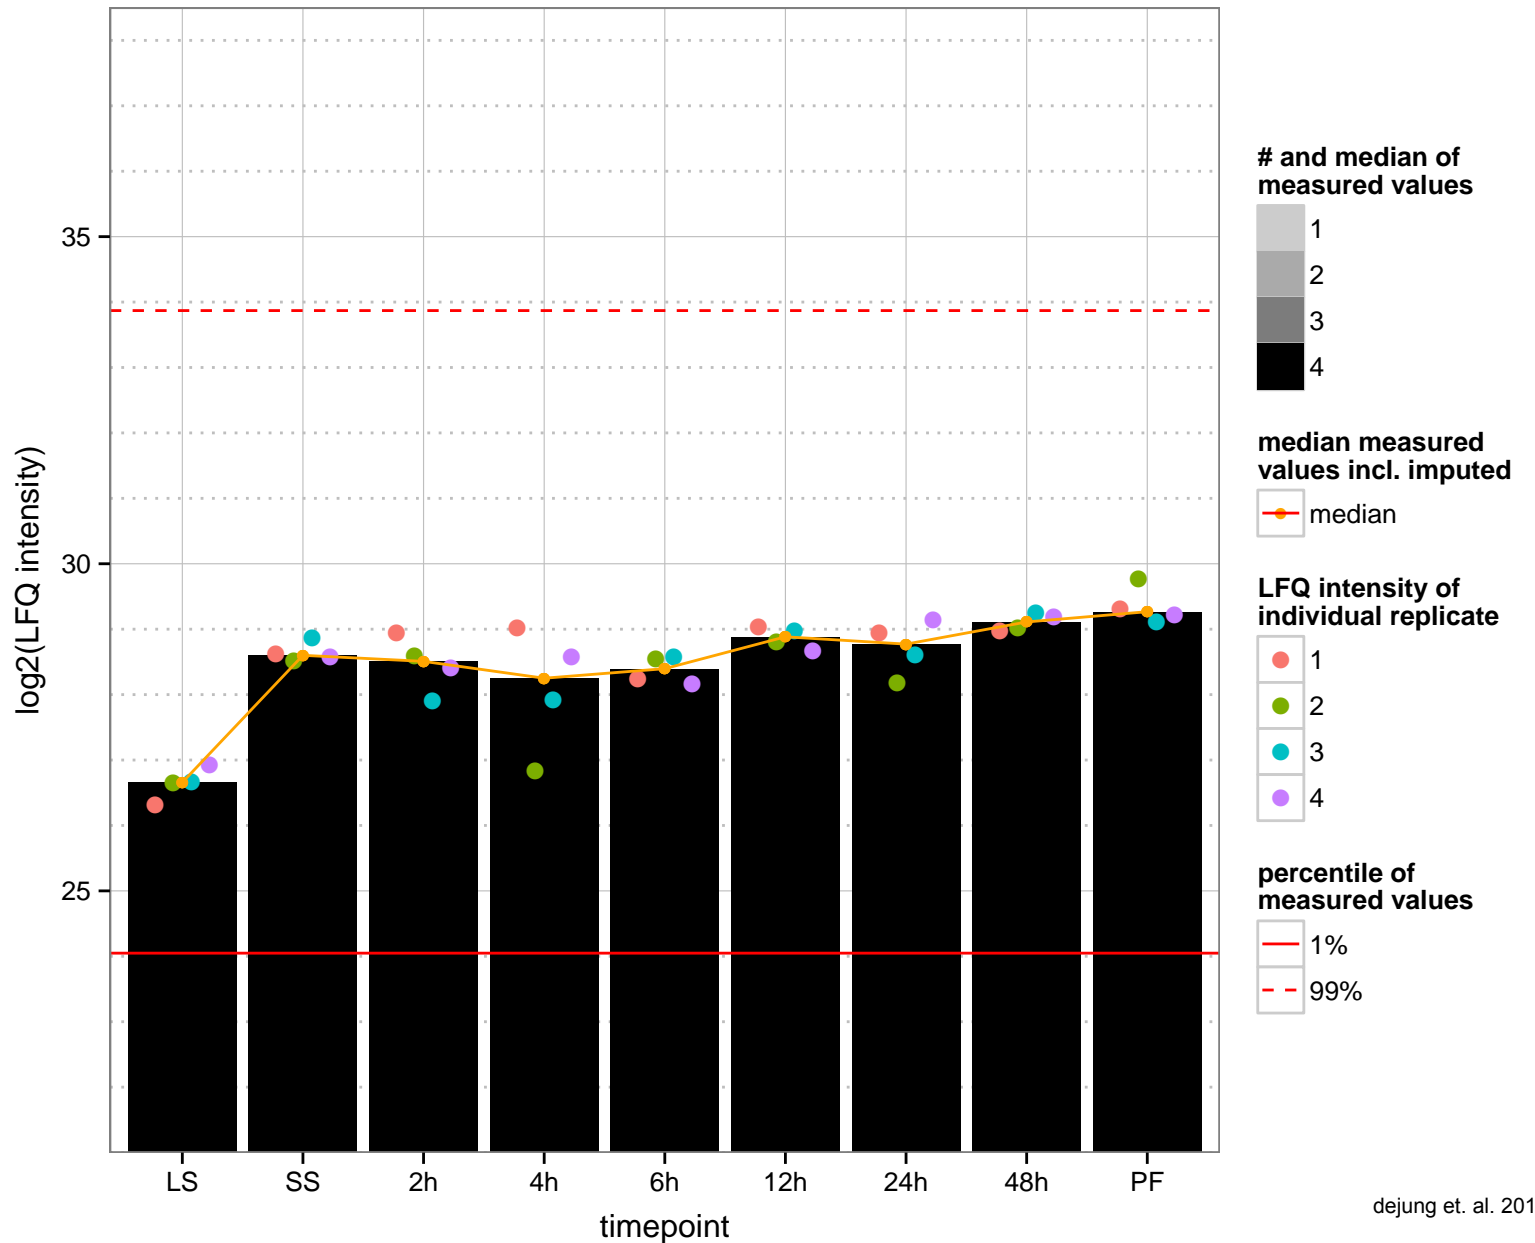

KREPA2, RNA-editing complex protein (KREPA2)

Tb927.10.8210

AGOF: zinc ion binding

AGOC: intracellular, mRNA editing complex, mitochondrial mRNA editing complex, mitochondrion

AGOP: mRNA modification

PGOF: zinc ion binding

PGOC: intracellular

PGOP: null

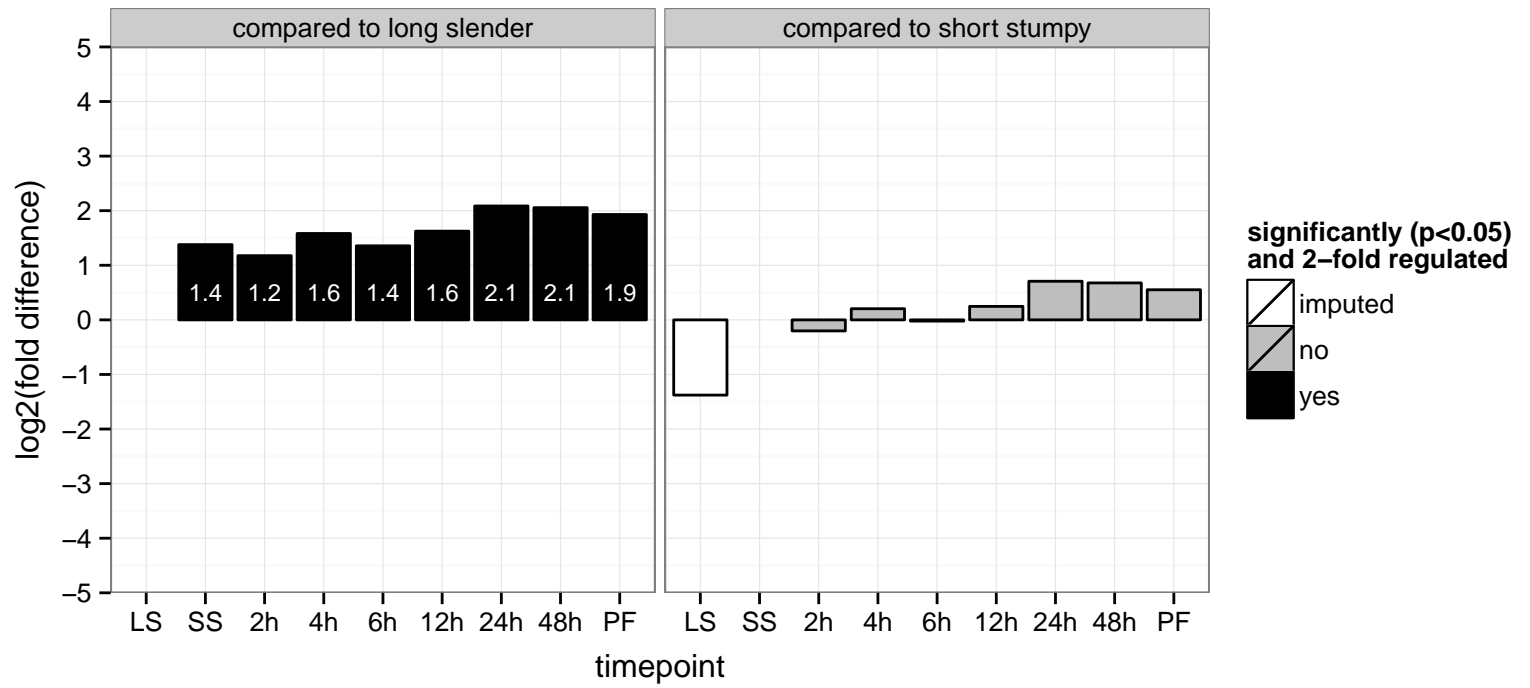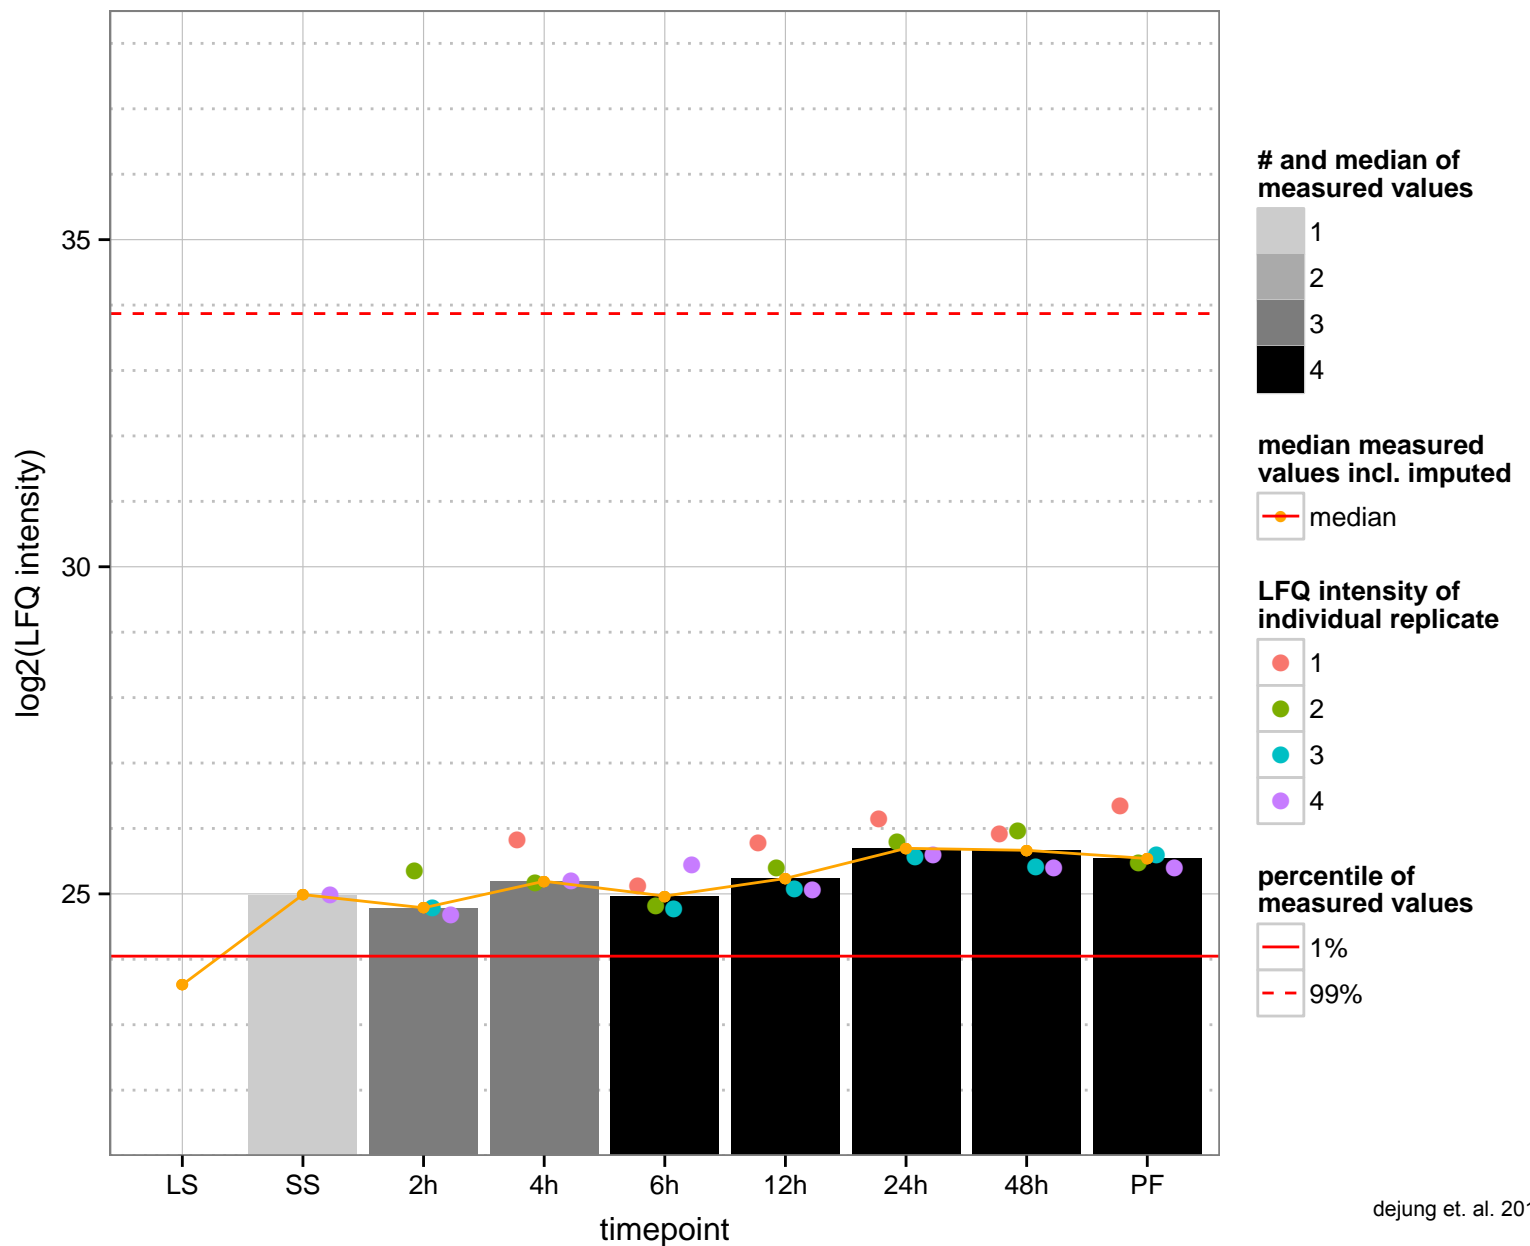

eukaryotic translation initiation factor 3 subunit 8, putative  
 Tb927.10.8290;Tb927.10.8270;Tb11.v5.0877  
 AGOF: null, ribosomal small subunit binding, translation initiation factor activity  
 AGOC: null, eukaryotic translation initiation factor 3 complex  
 AGOP: null, translational initiation  
 PGO: translation initiation factor activity  
 PGO: eukaryotic translation initiation factor 3 complex  
 PGO: translational initiation

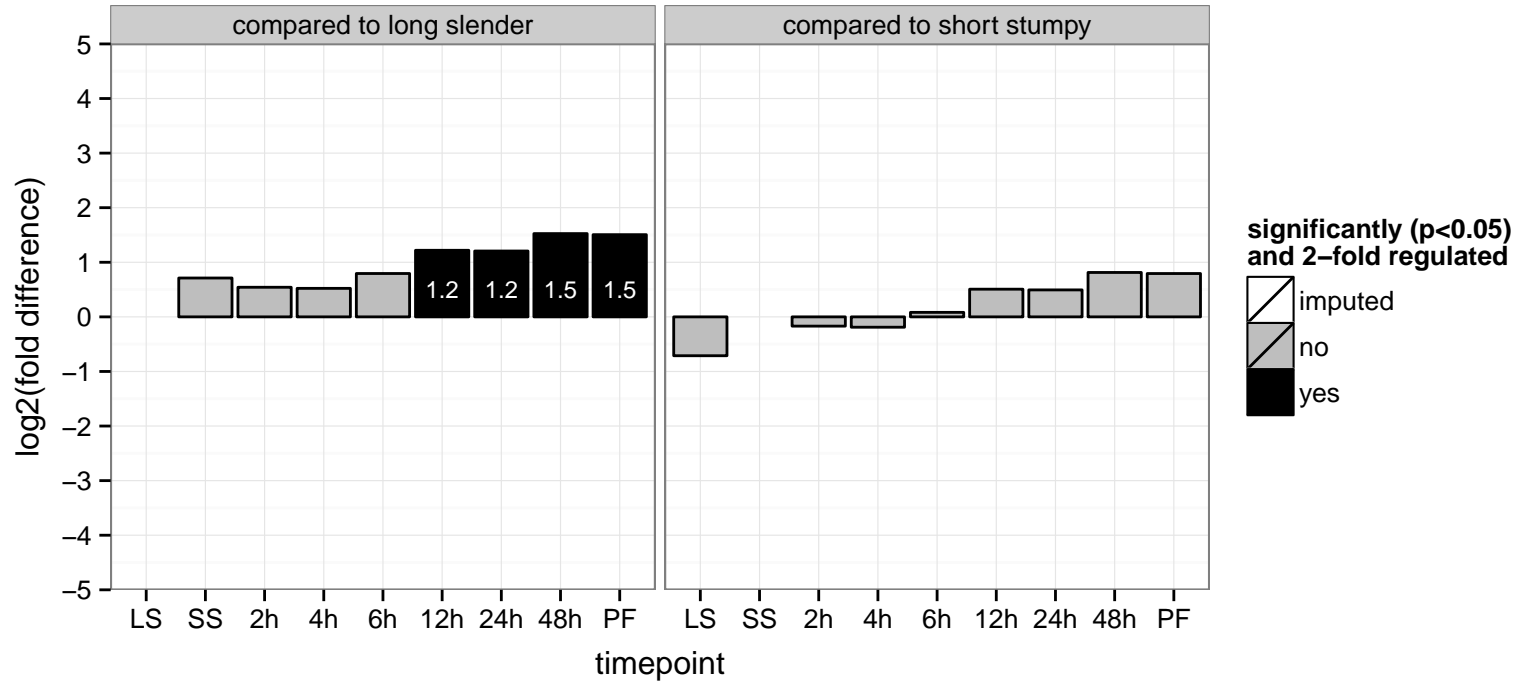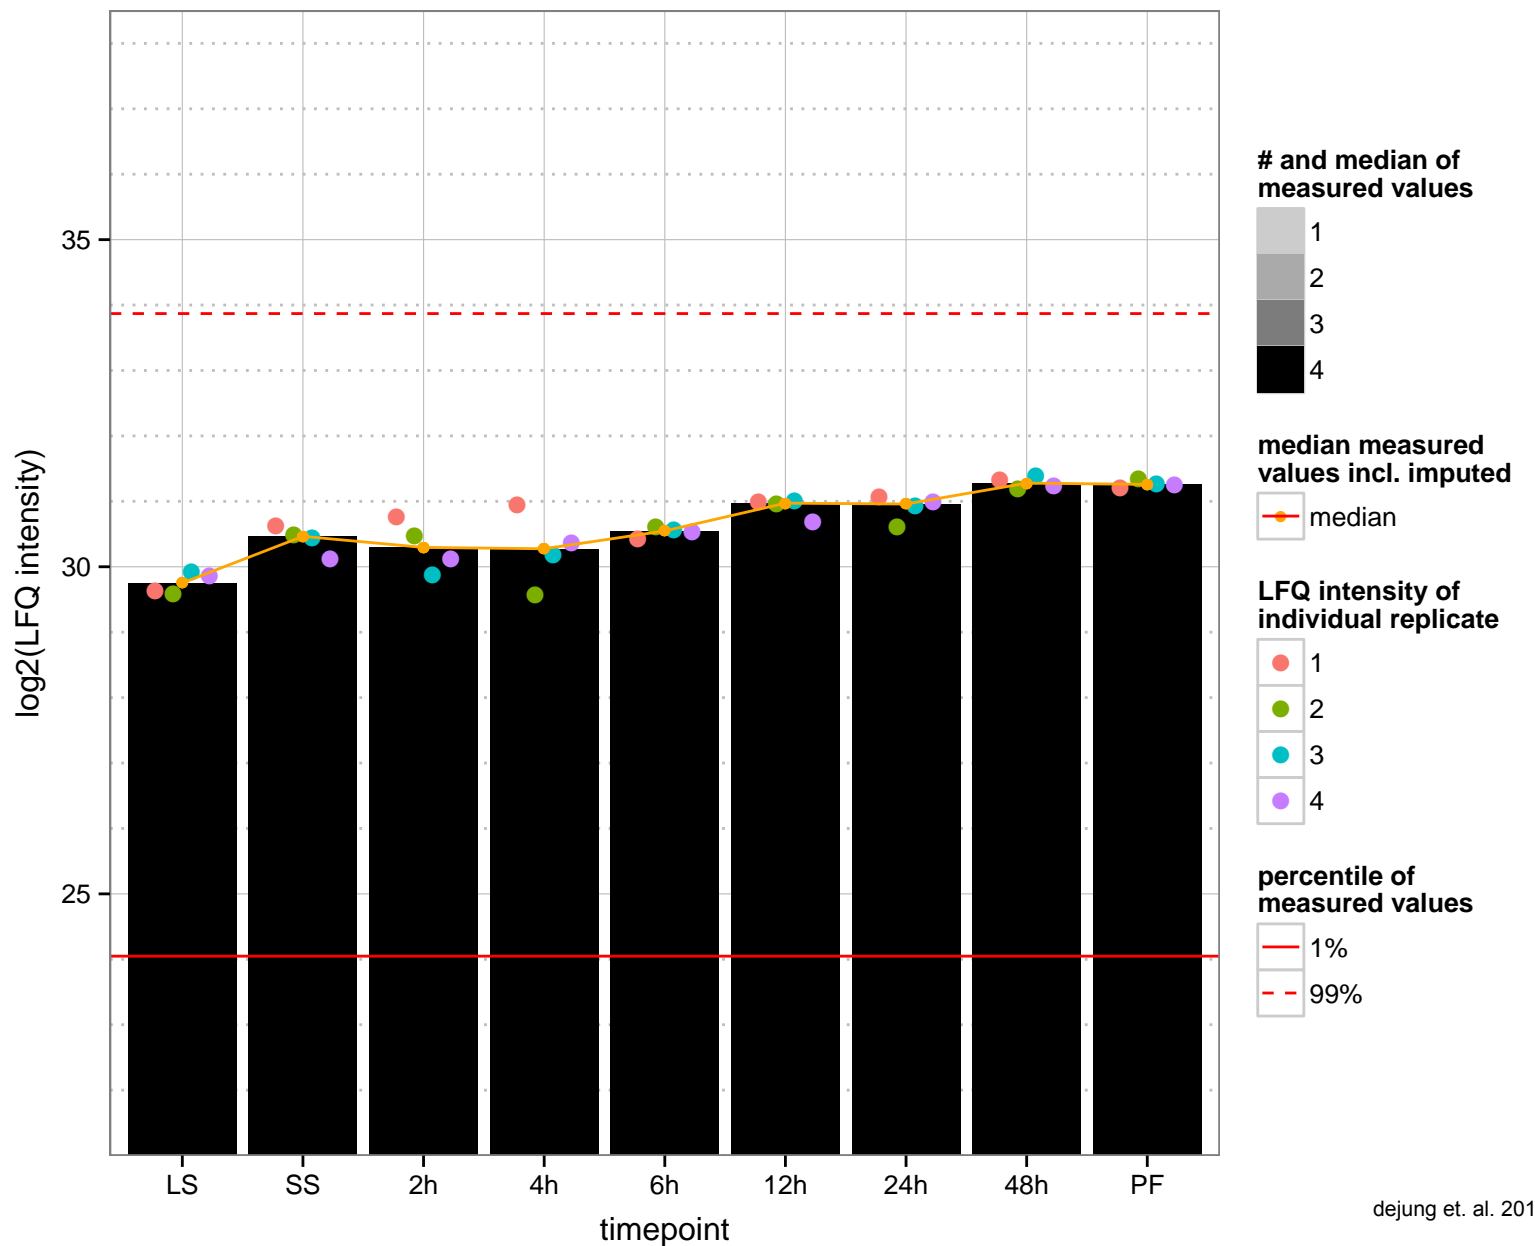

adenylate kinase, putative

Tb927.10.830

AGOF: ATP binding, adenylate kinase activity

AGOC: cytosol, glycosome

AGOP: nucleobase-containing compound metabolic process

PGOF: ATP binding, adenylate kinase activity, cAMP-dependent protein kinase regulator activity, nucleobase-containing compound metabolic process

PGOC: null

PGOP: nucleobase-containing compound metabolic process, nucleotide phosphorylation, signal transduction

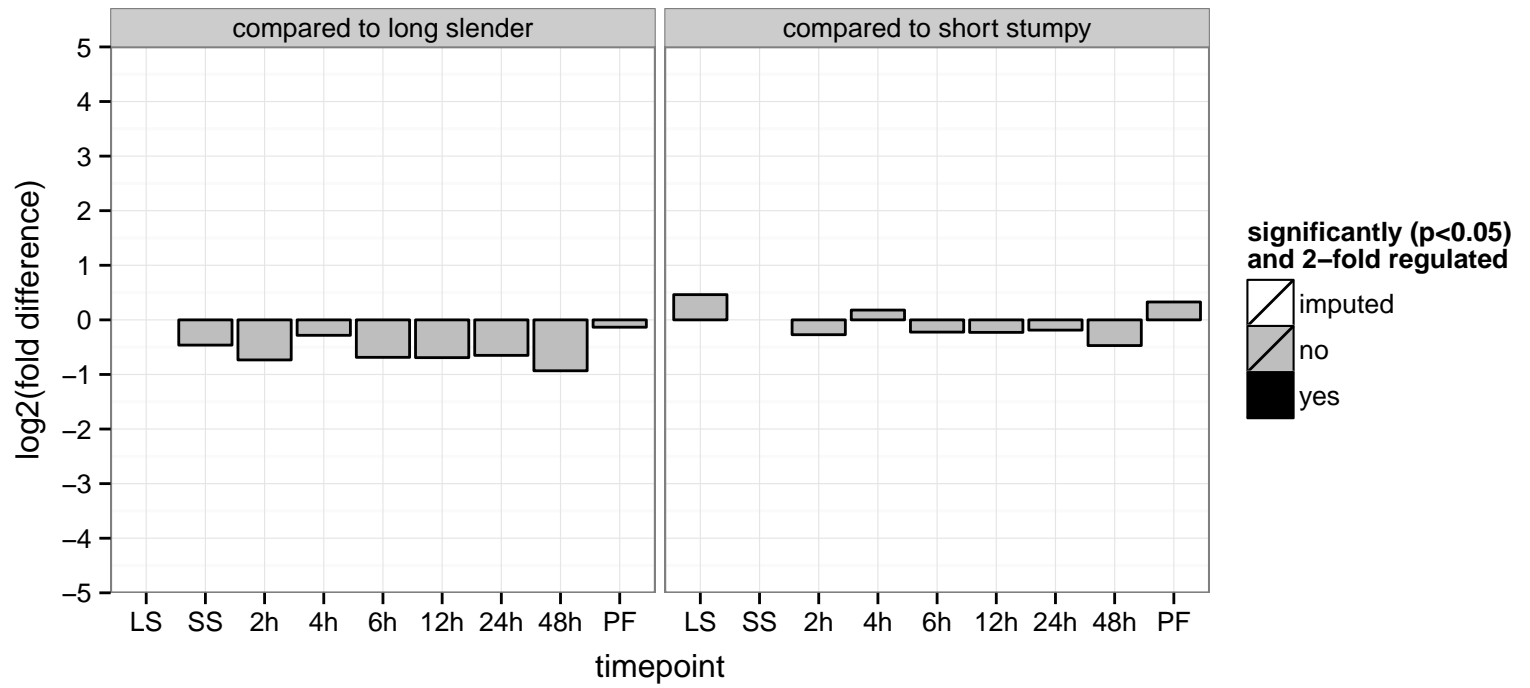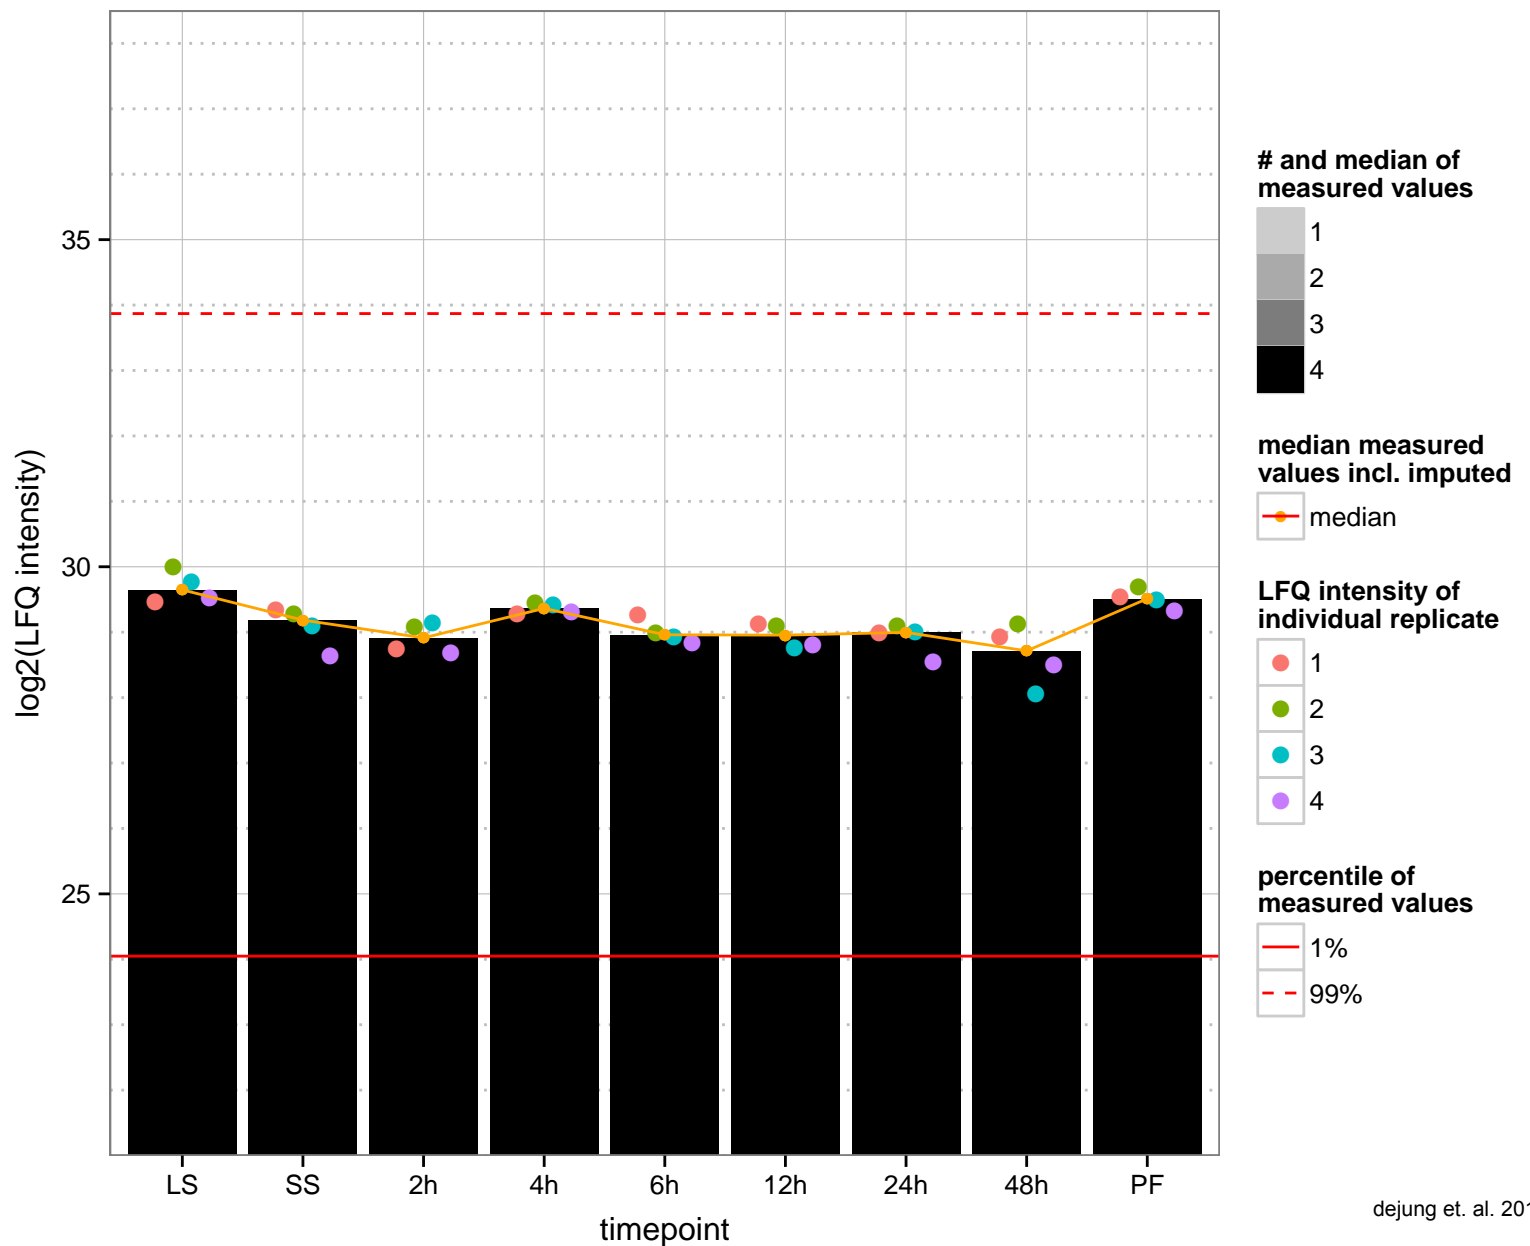

hypothetical protein, conserved  
 Tb927.10.8410  
 AGOF: null  
 AGOC: null  
 AGOP: null  
 PGOF: null  
 PGOE: null  
 PGOP: null

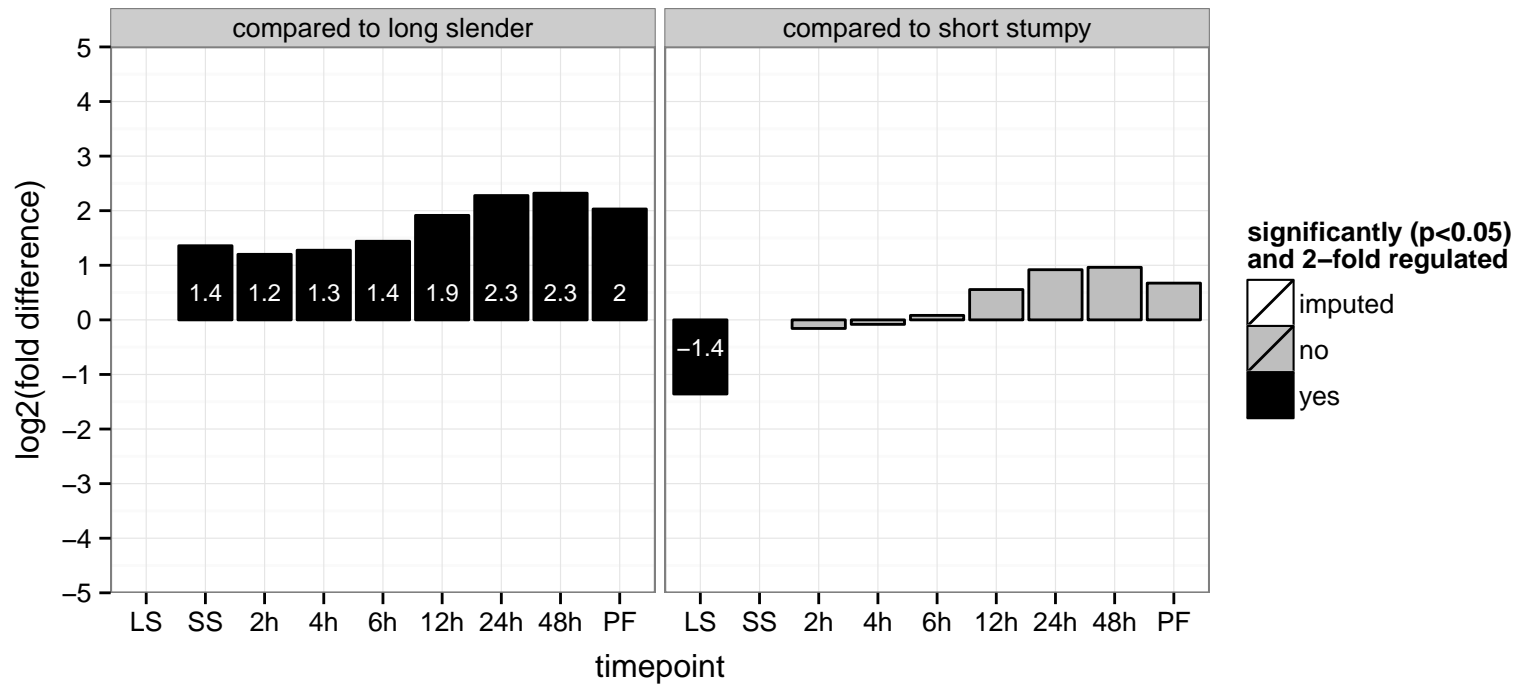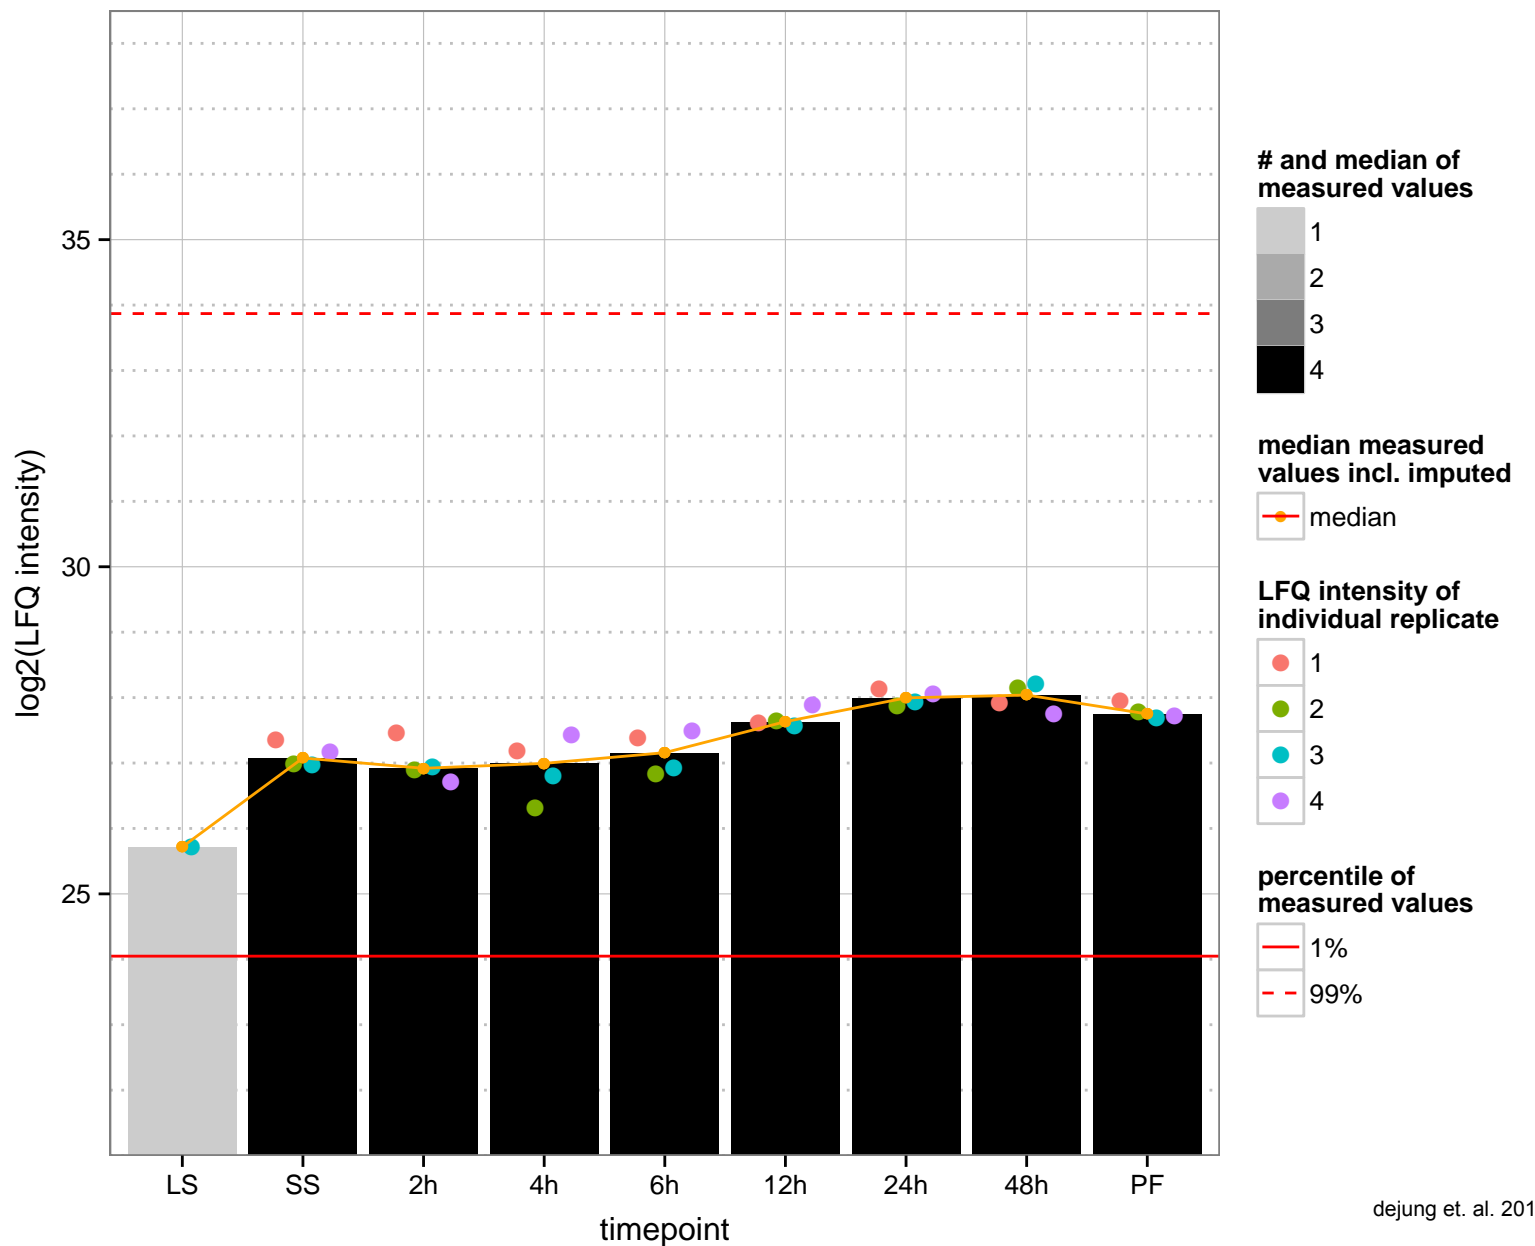



target of rapamycin (TOR) kinase 1 (TOR1)

Tb927.10.8420

AGOF: phosphotransferase activity, alcohol group as acceptor

AGOC: null

AGOP: growth, intracellular signal transduction

PGOF: binding, phosphotransferase activity, alcohol group as acceptor, protein binding, transferase activity, transferring phospho

PGOC: null

PGOP: null

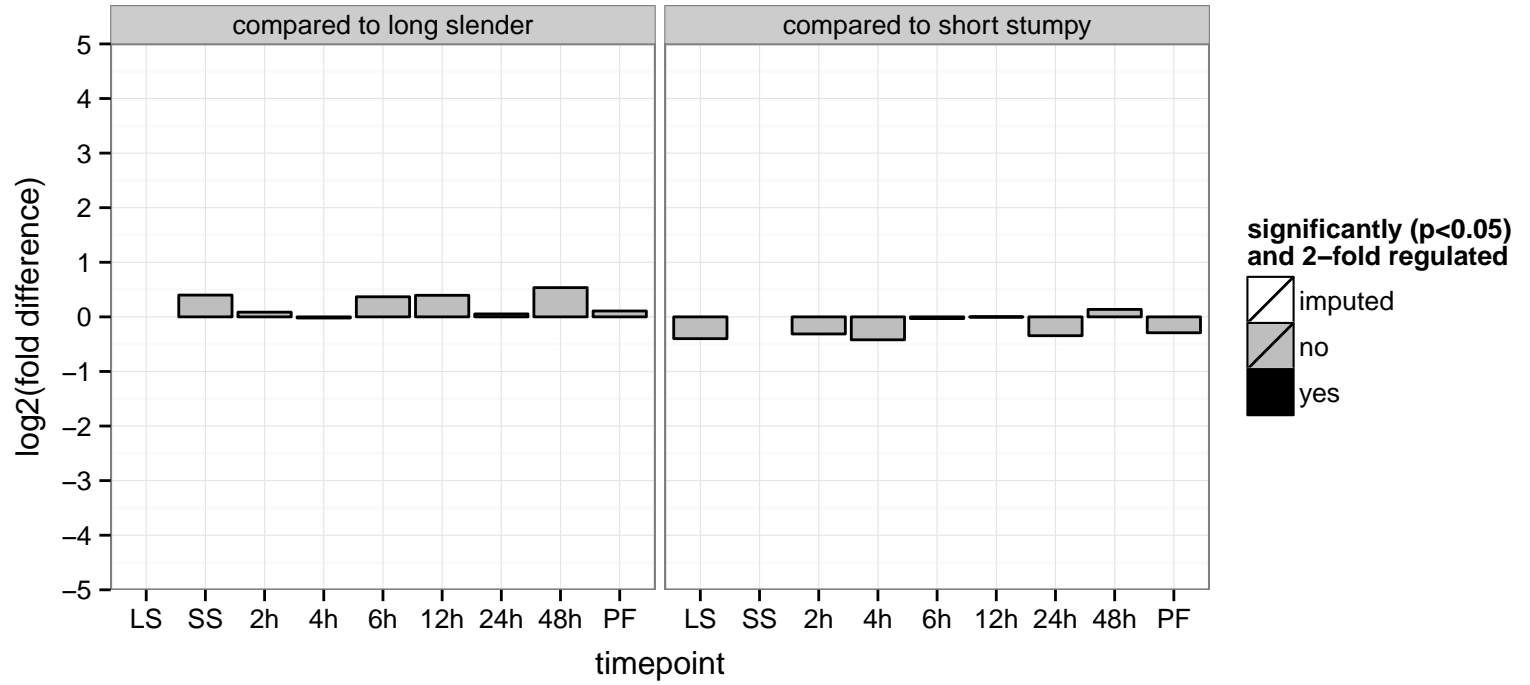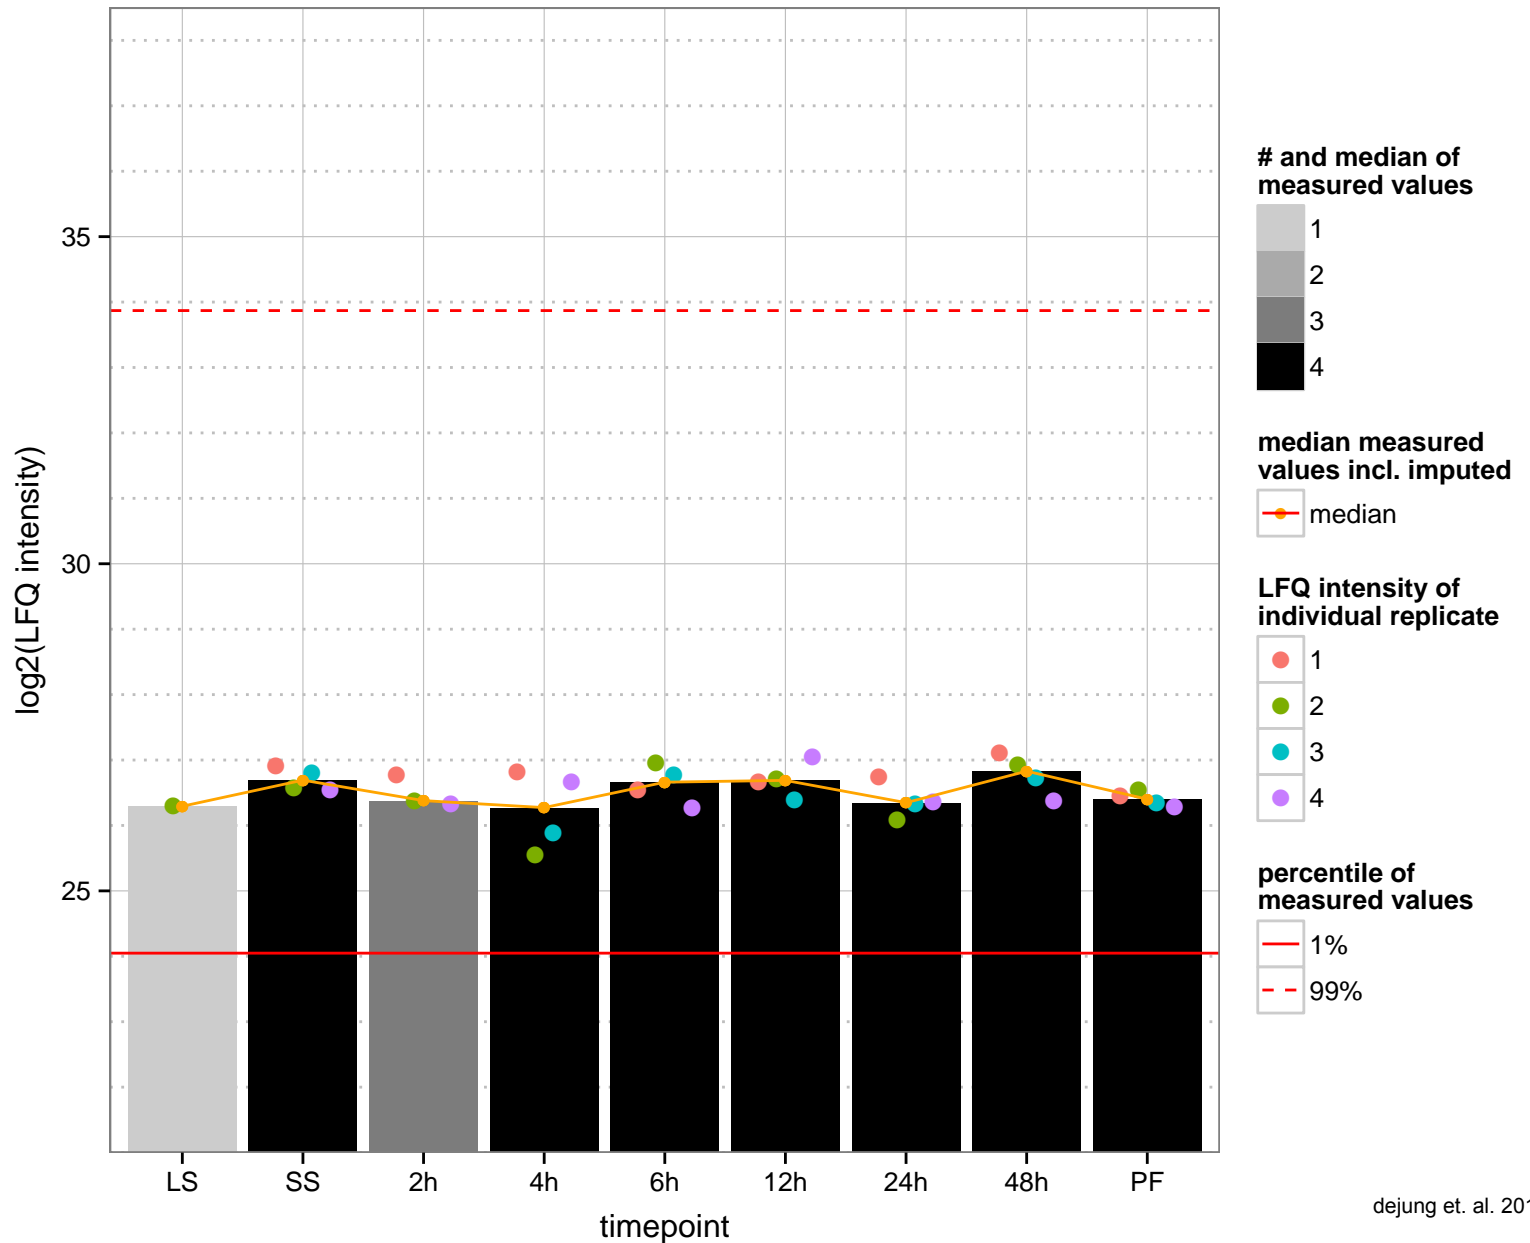

hypothetical protein, conserved  
 Tb927.10.850  
 AGOF: null  
 AGOC: null  
 AGOP: null  
 PGO: protein binding  
 PGOC: null  
 PGOP: null

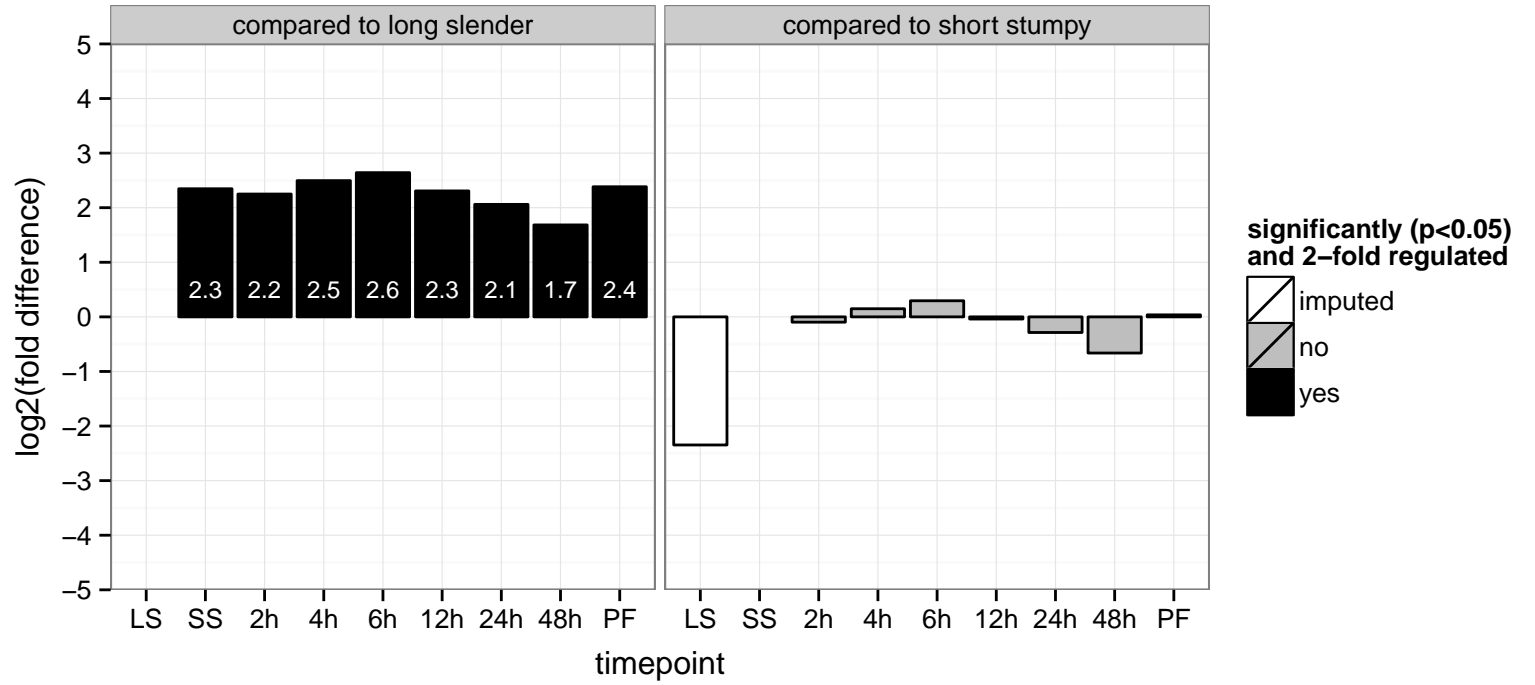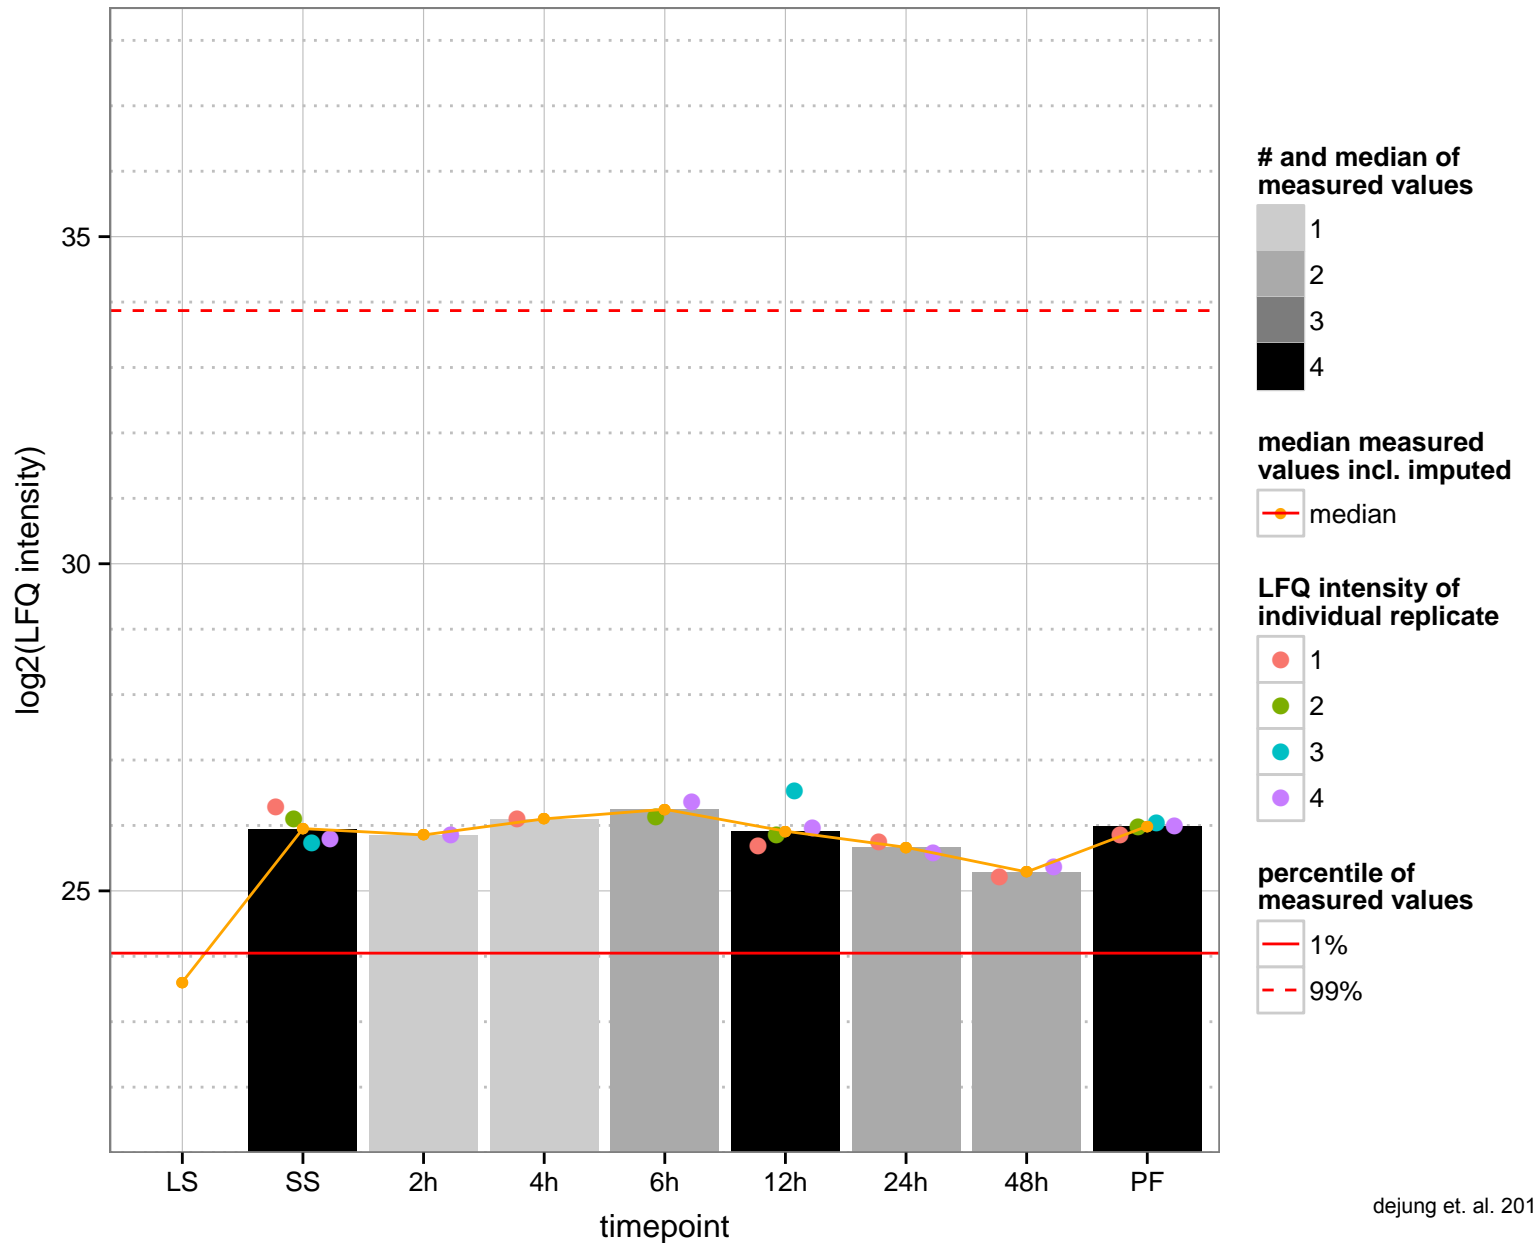

flagellum transition zone component, putative, flagellum transition zone component (FTZC)  
 Tb927.10.8590  
 AGOF: null  
 AGOC: null, axoneme  
 AGOP: null  
 PGO: null  
 PGO: null  
 PGO: null

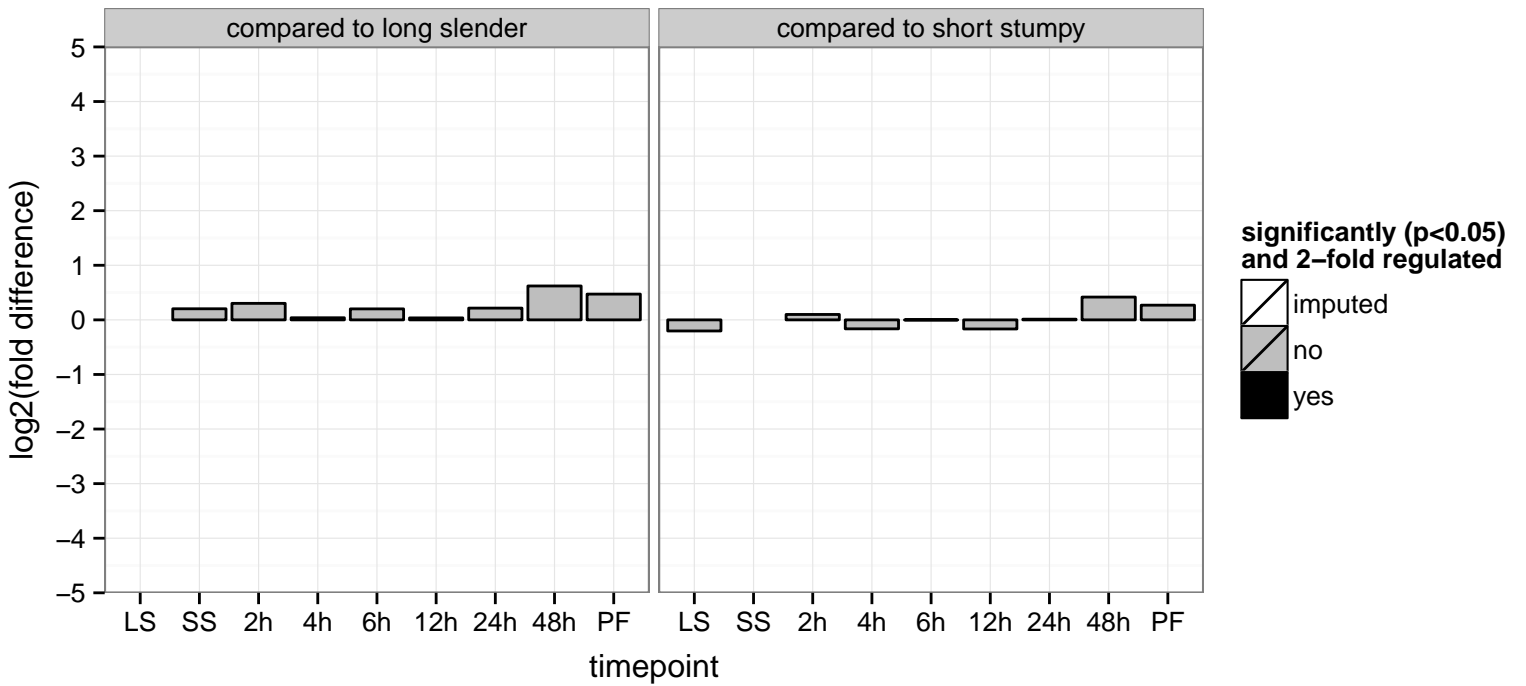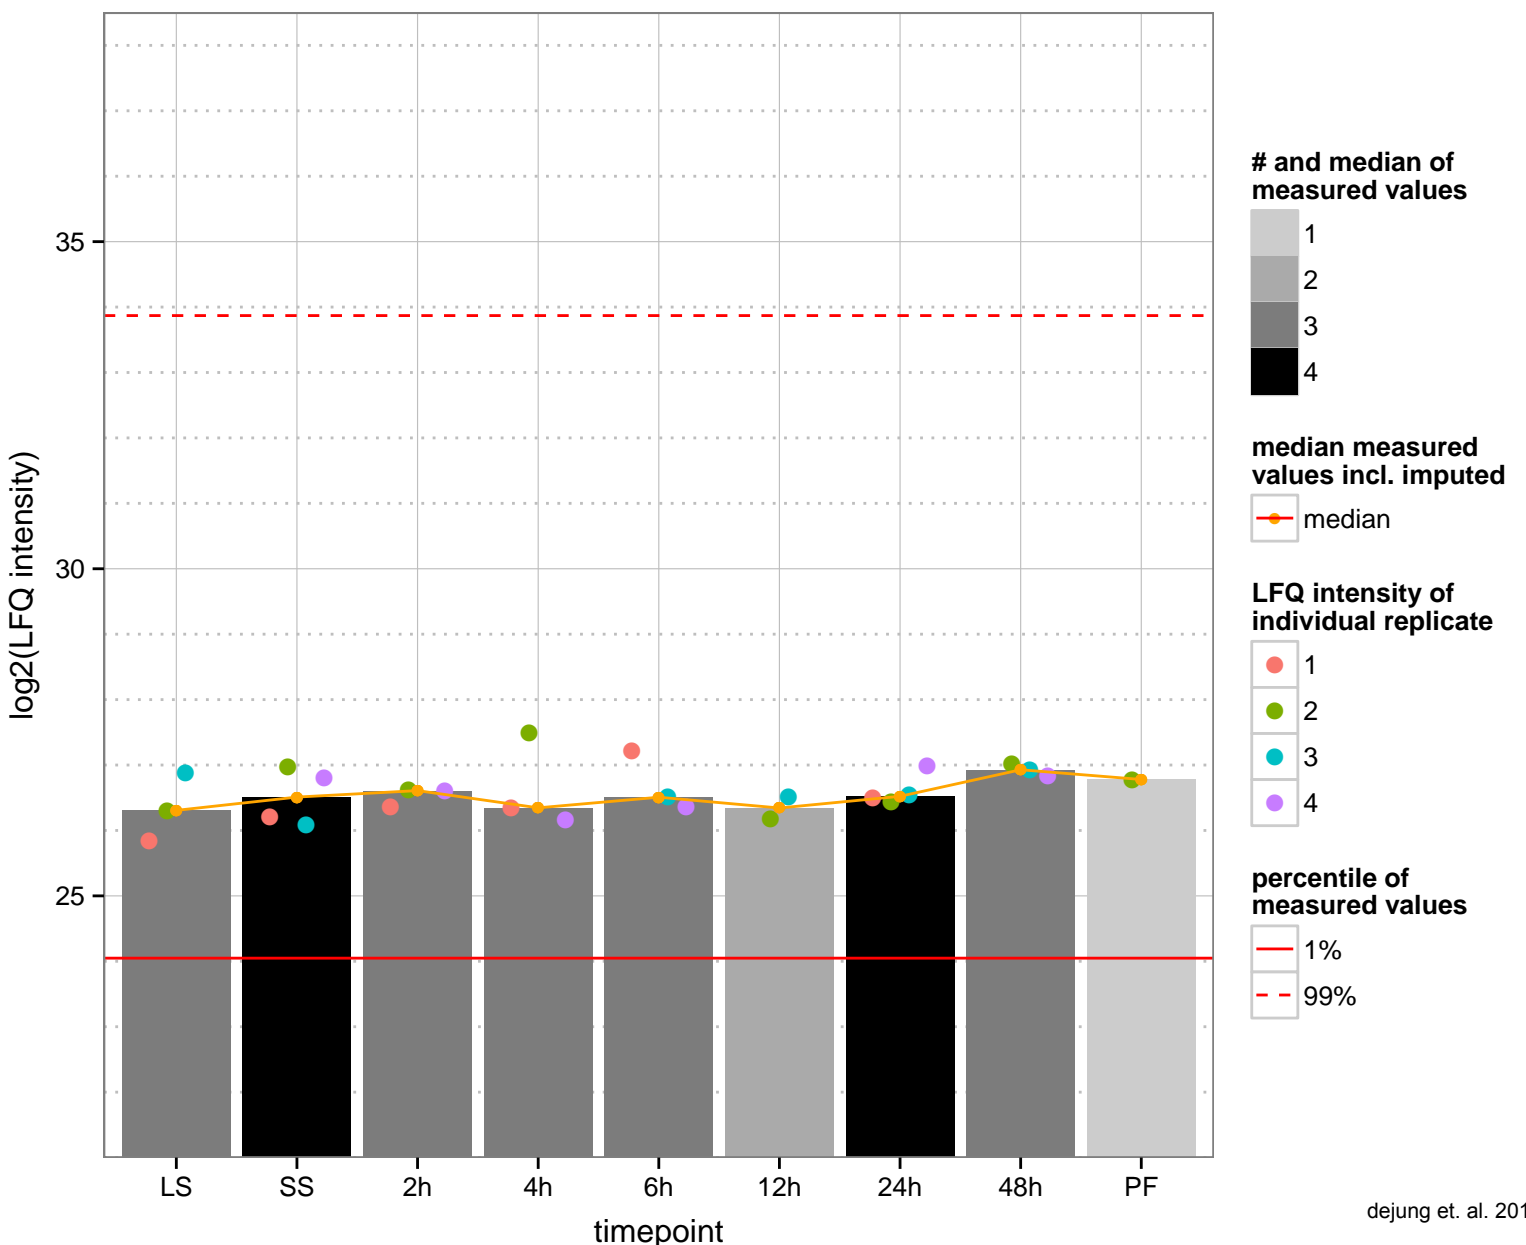

hypothetical protein, conserved  
 Tb927.10.8640  
 AGOF: null  
 AGOC: null  
 AGOP: null  
 PGO: null  
 PGOC: null  
 PGOP: null

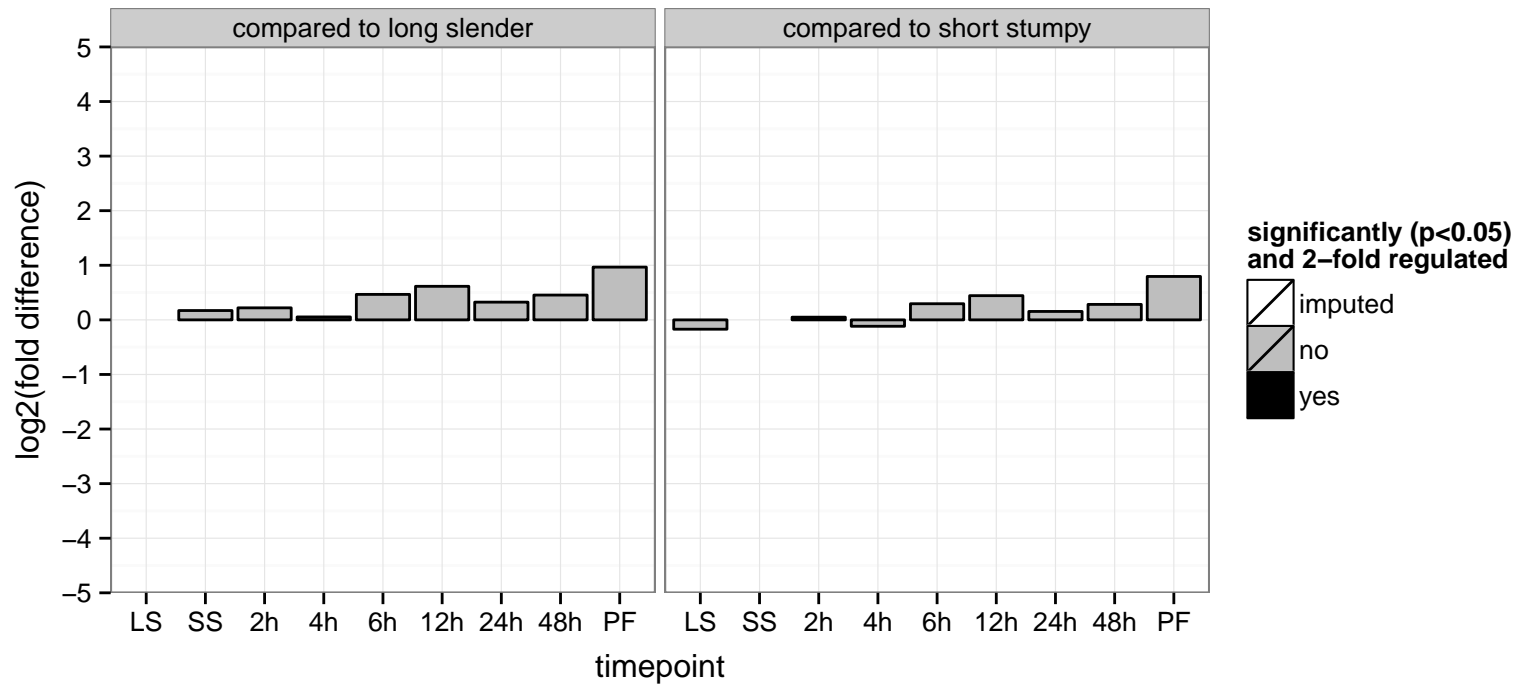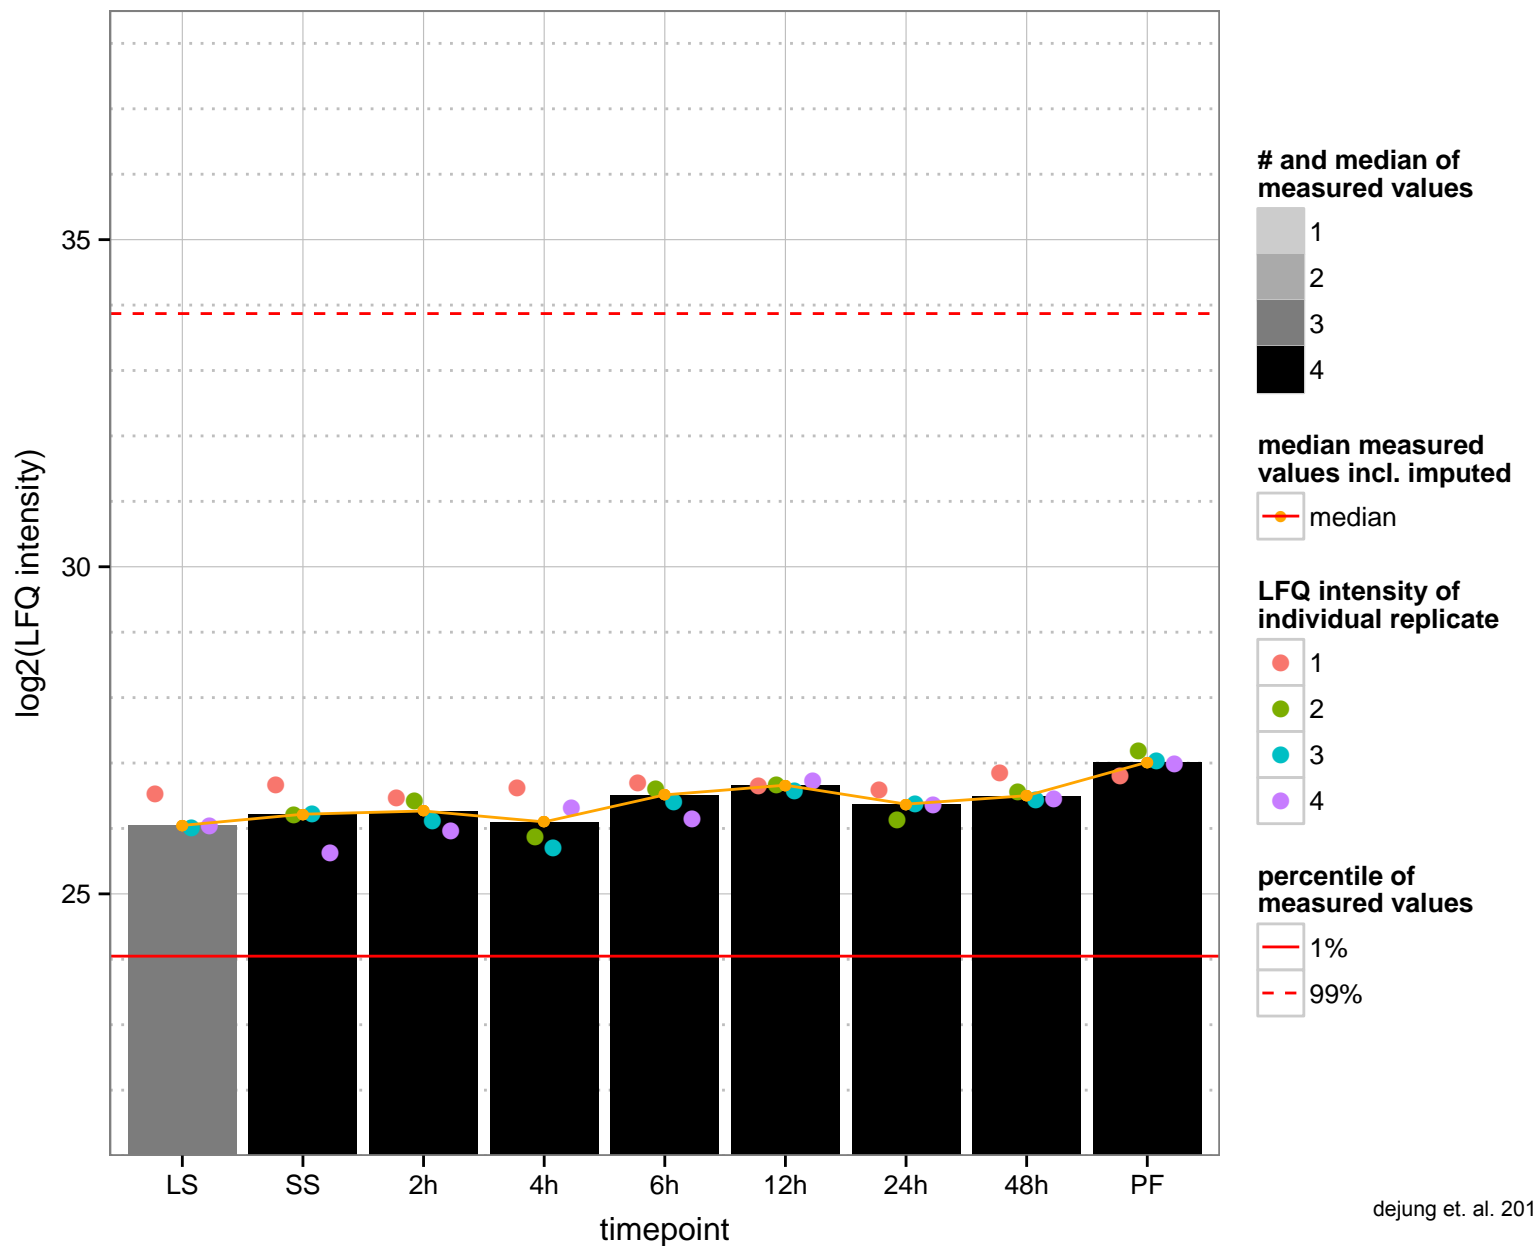

hypothetical protein, conserved  
 Tb927.10.8660  
 AGOF: null  
 AGOC: null  
 AGOP: null  
 PGO: protein binding  
 PGOC: null  
 PGOP: null

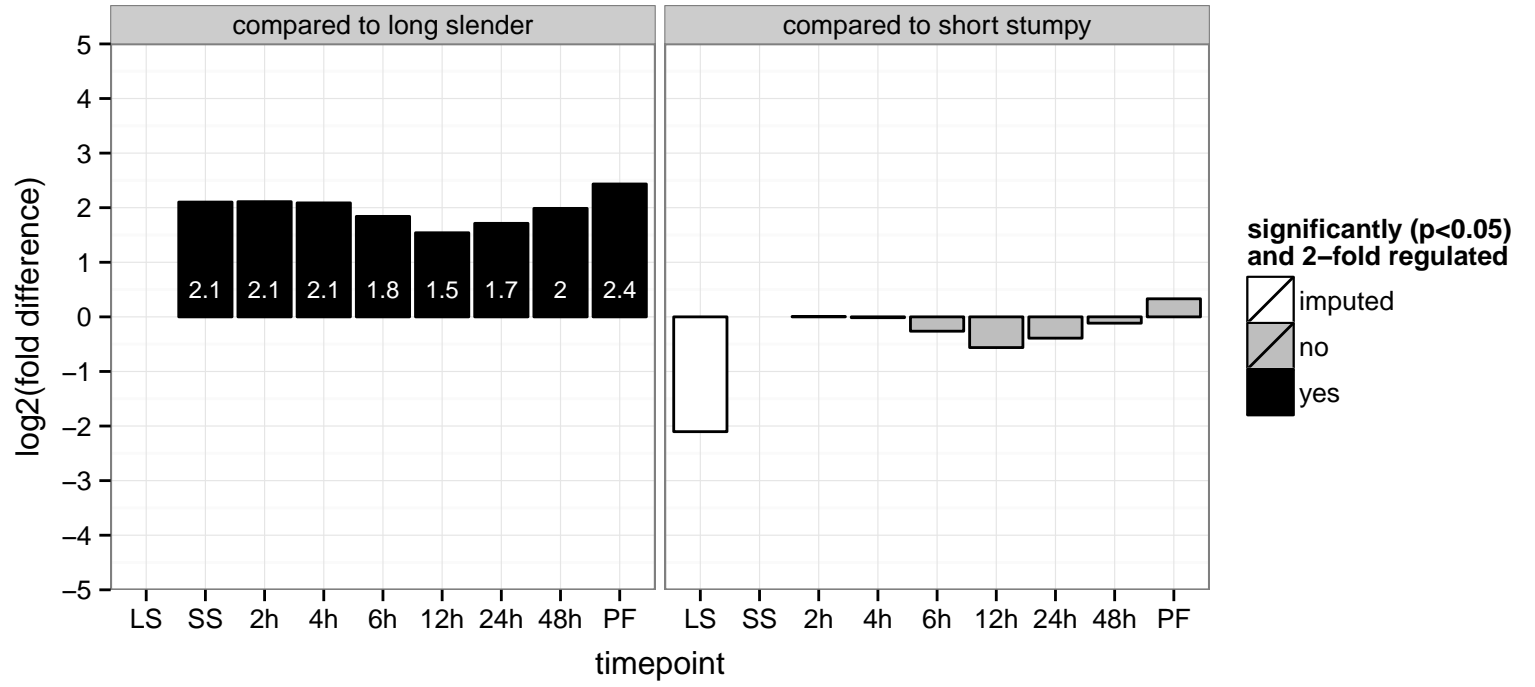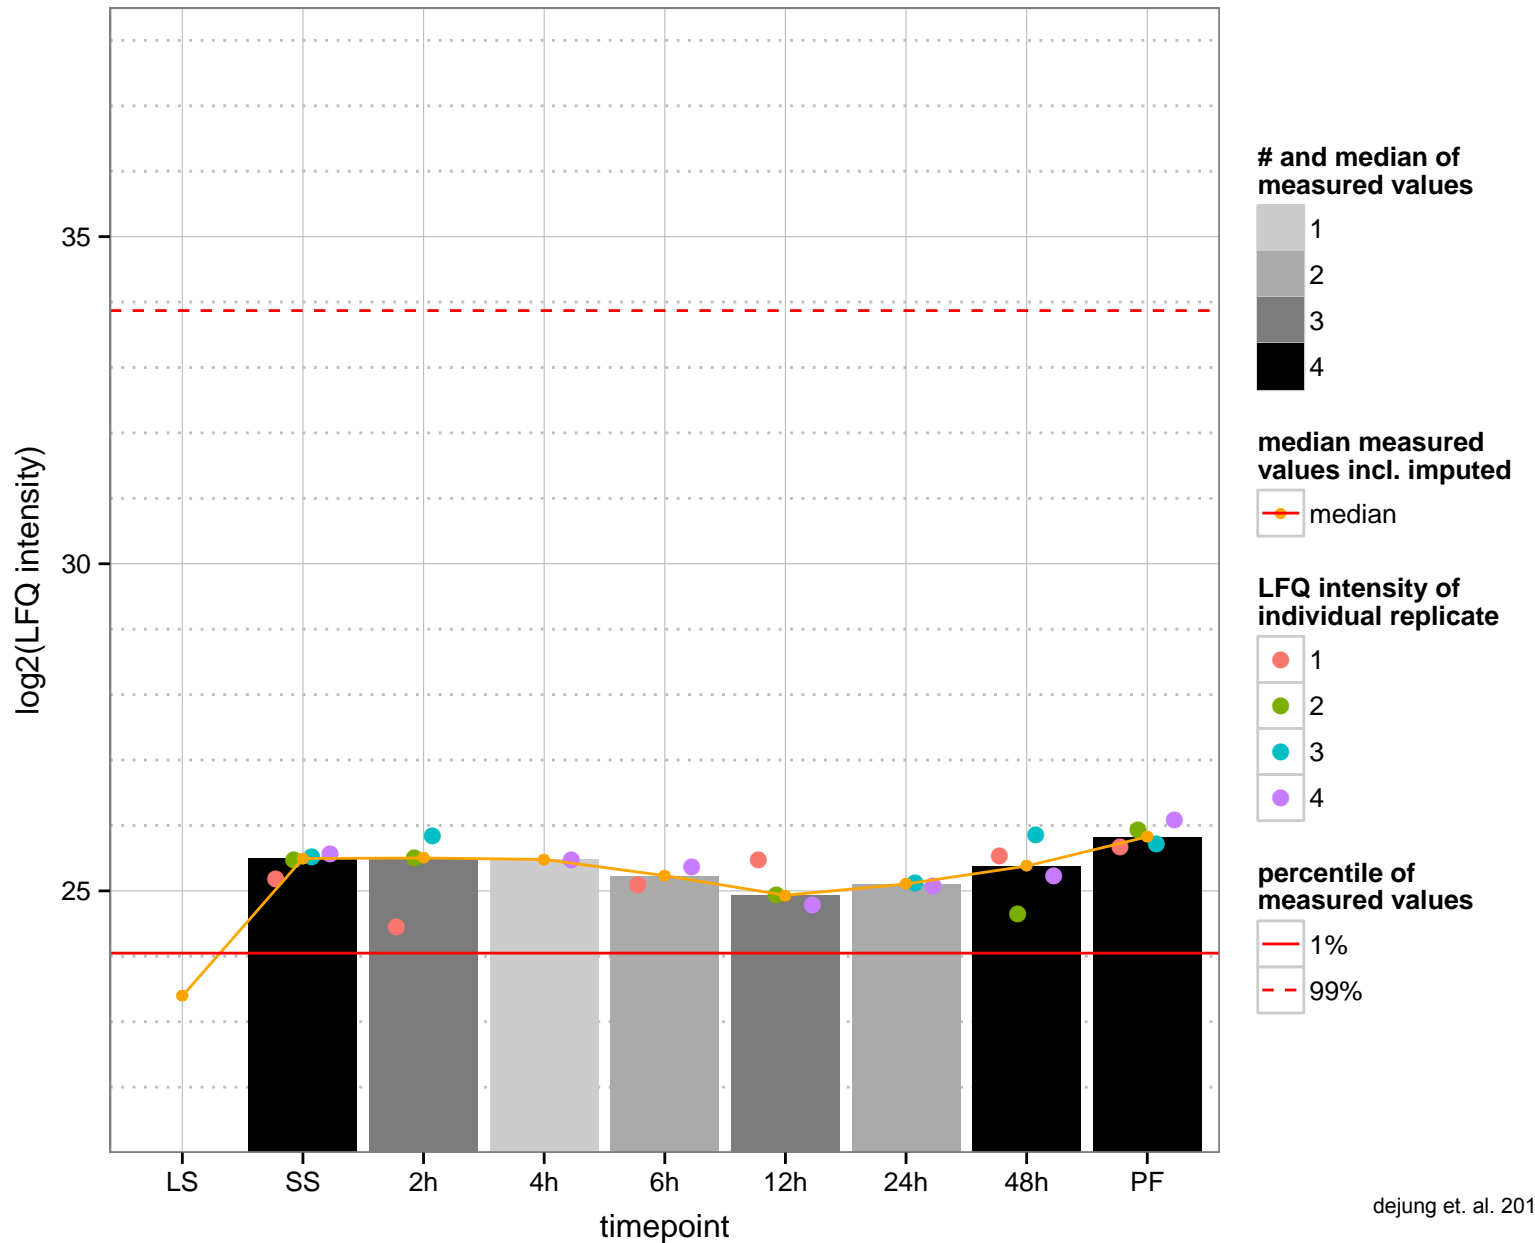

CCR4–NOT transcription complex subunit 10, putative  
 Tb927.10.8720  
 AGOF: null  
 AGOC: cytoplasm  
 AGOP: null  
 PGO: null  
 PGOC: null  
 PGOP: null

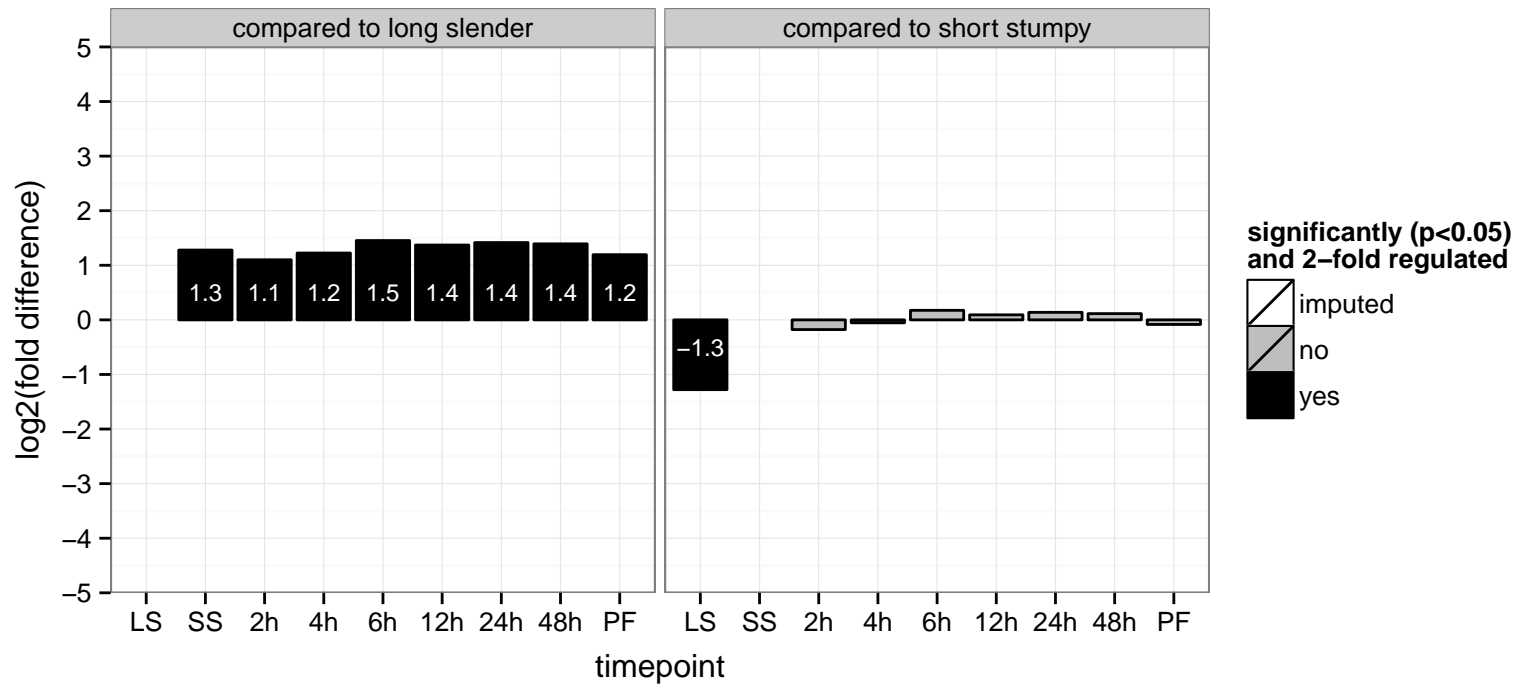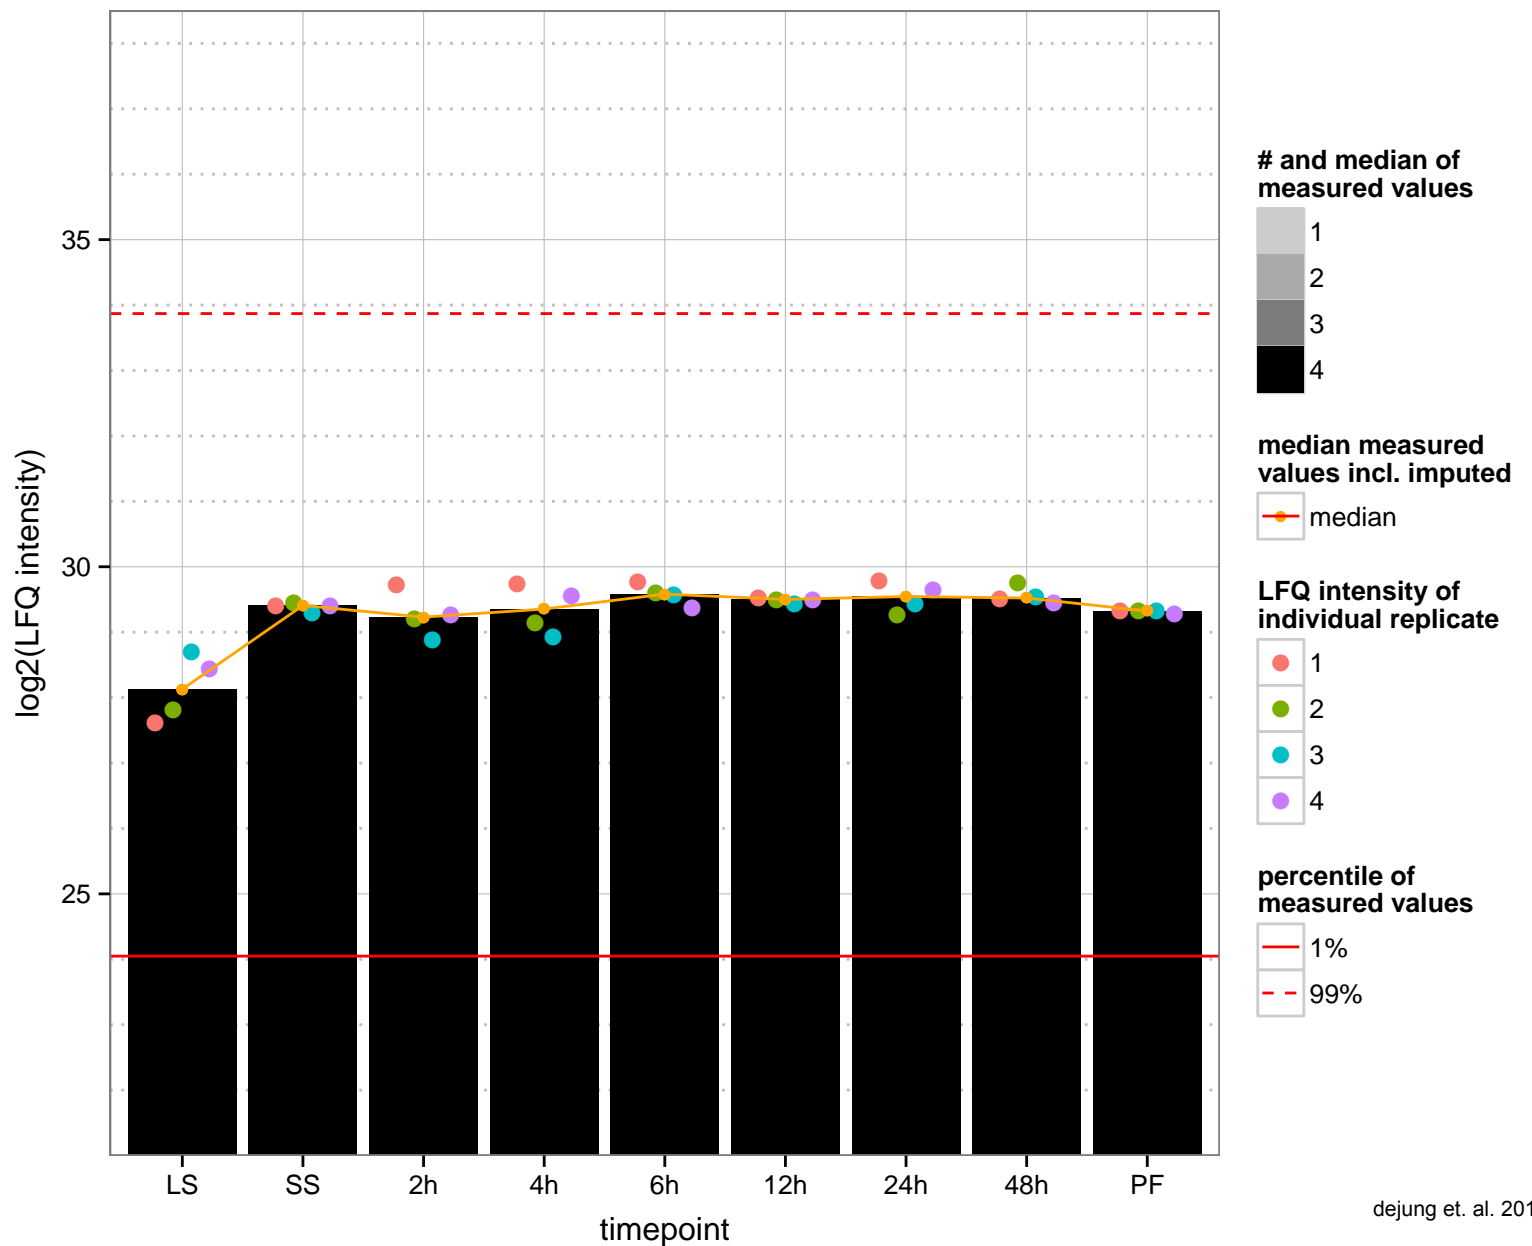

hypothetical protein, conserved  
 Tb927.10.8780  
 AGOF: ATP binding, nucleobase-containing compound kinase activity  
 AGOC: null  
 AGOP: nucleobase-containing compound metabolic process  
 PGO: null  
 PGO: null  
 PGO: null

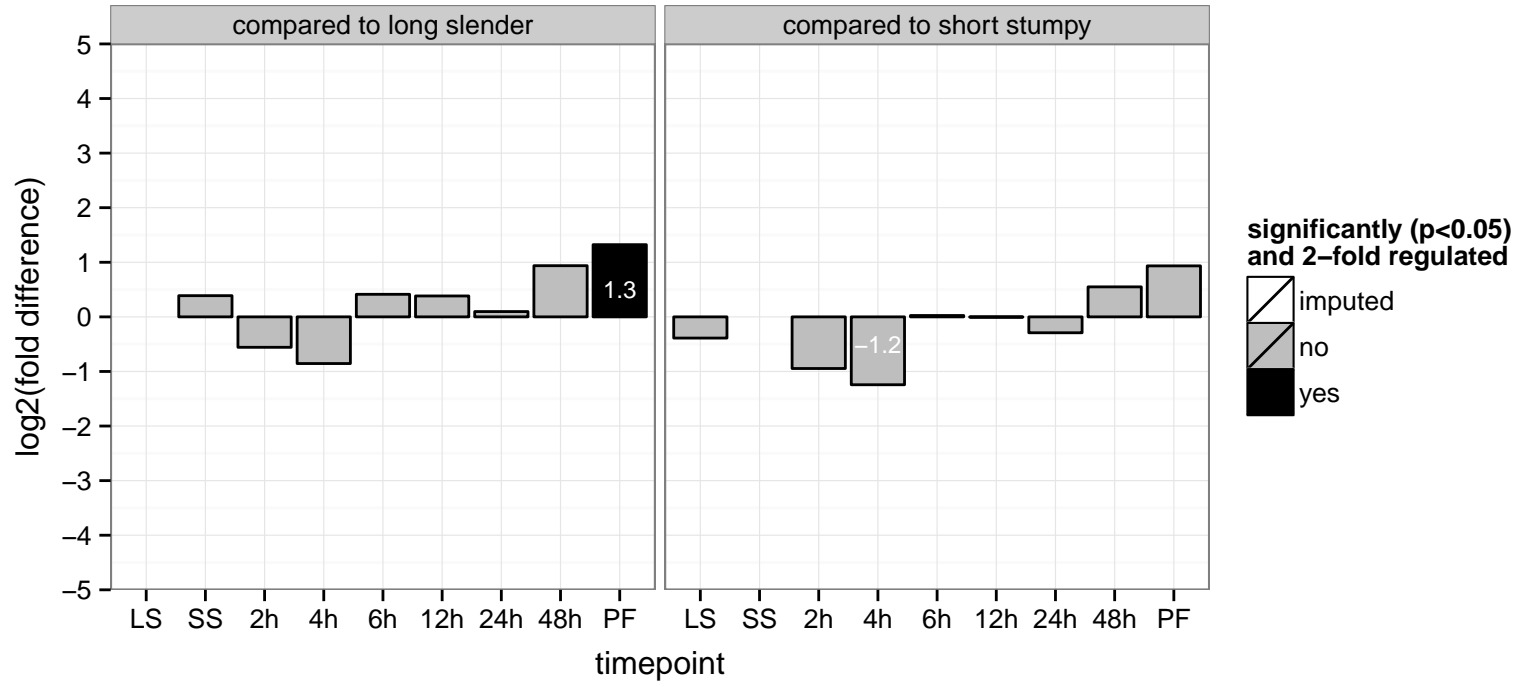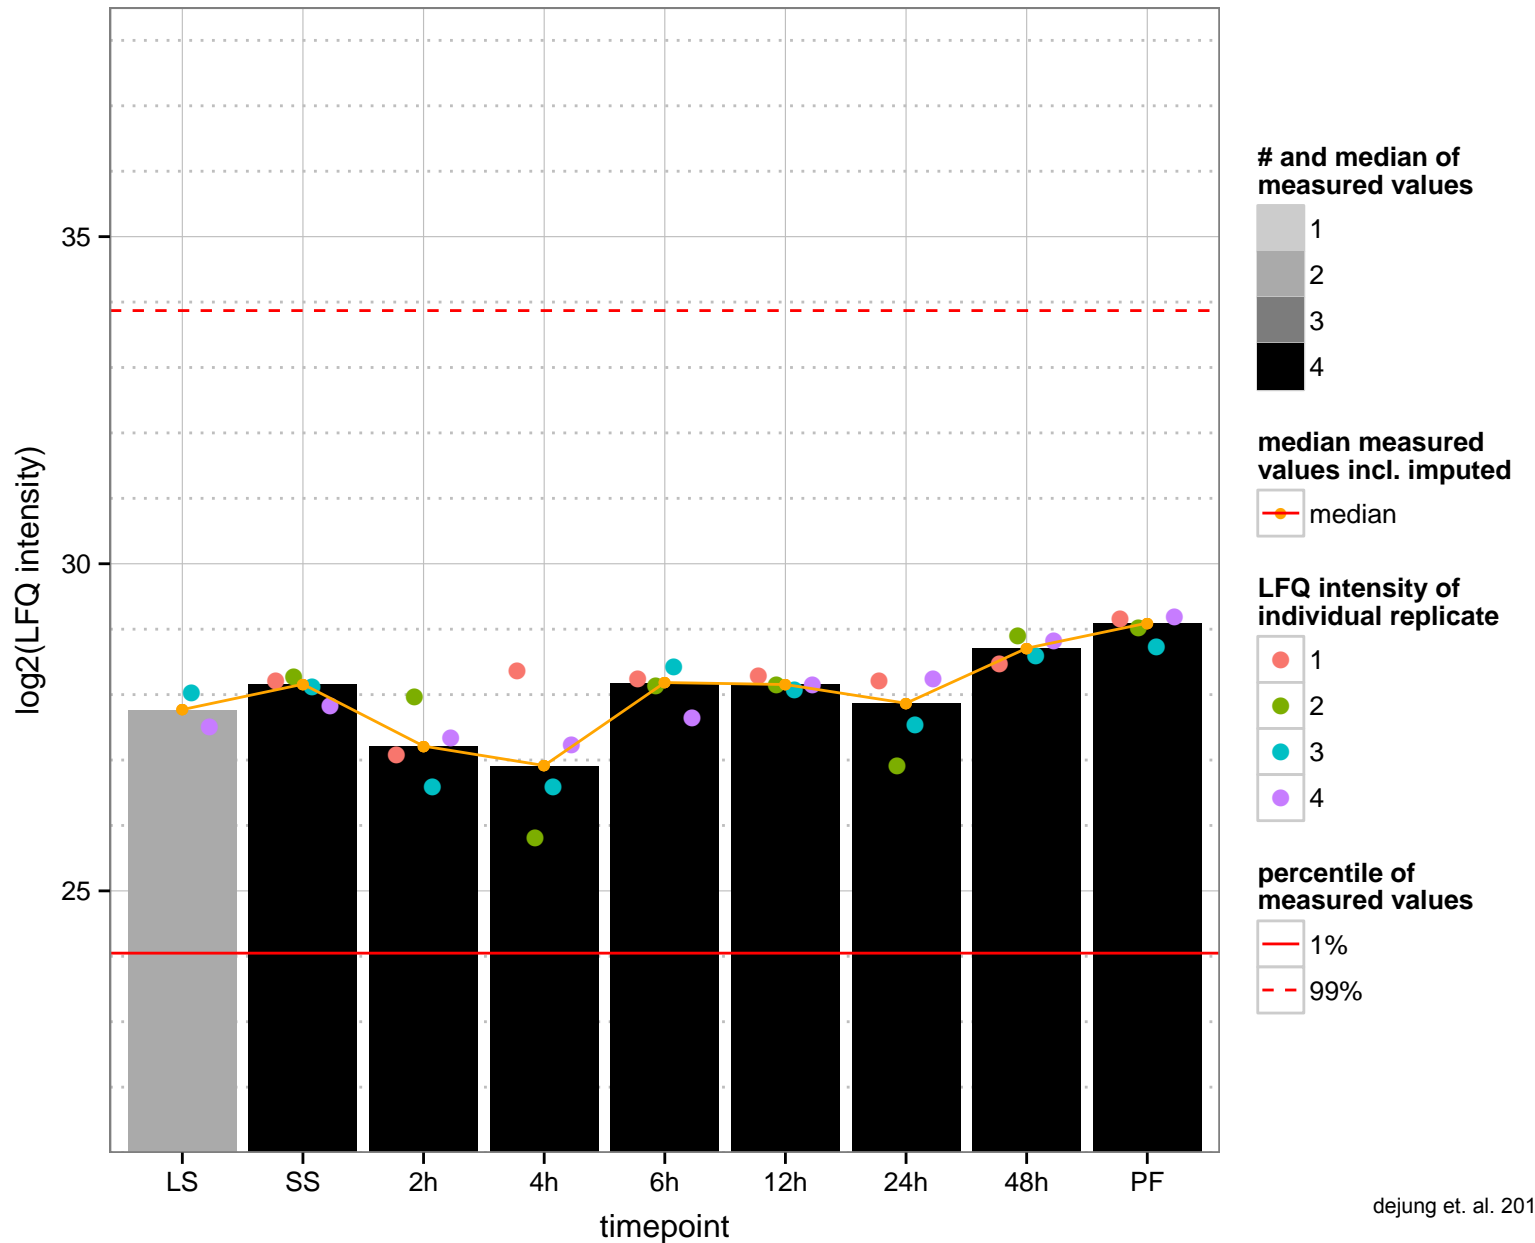

hypothetical protein, conserved  
 Tb927.10.8790  
 AGOF: null  
 AGOC: null  
 AGOP: null  
 PGO: null  
 PGOC: null  
 PGOP: null

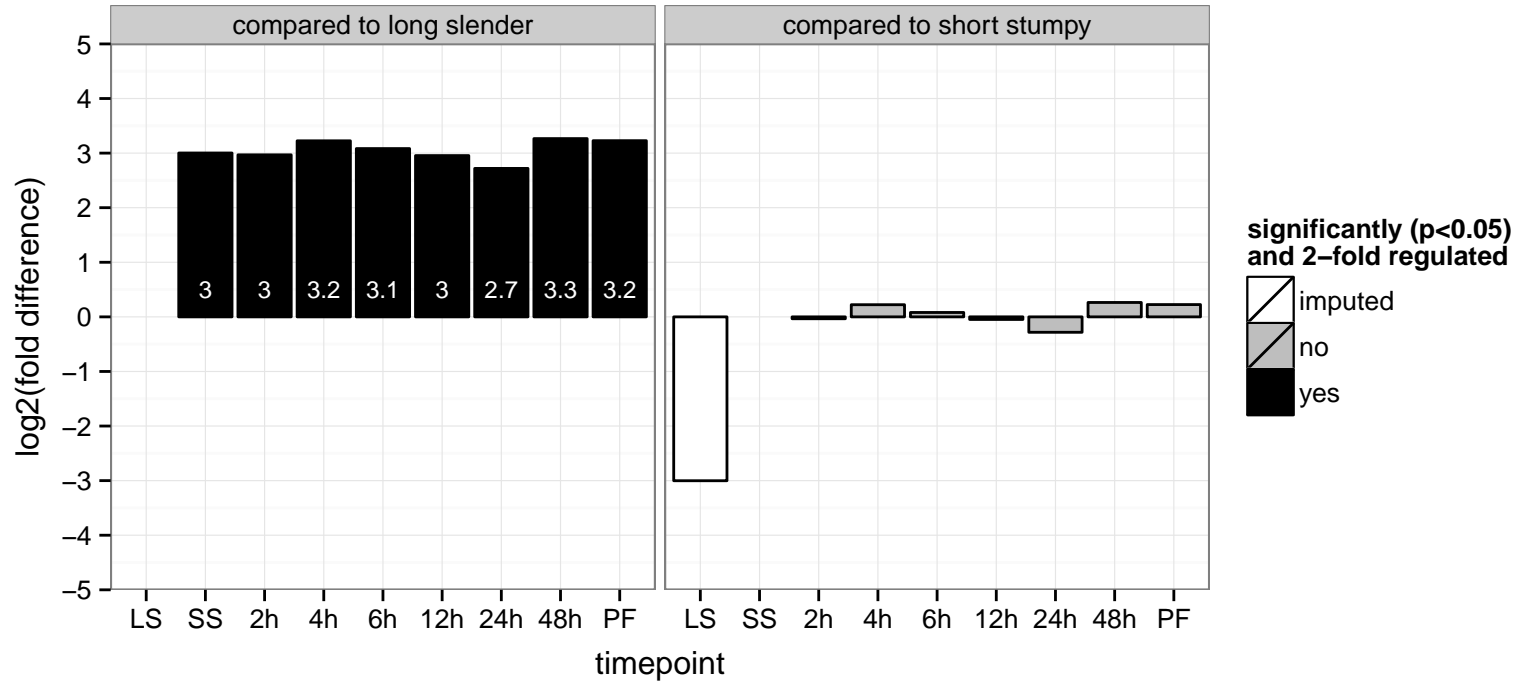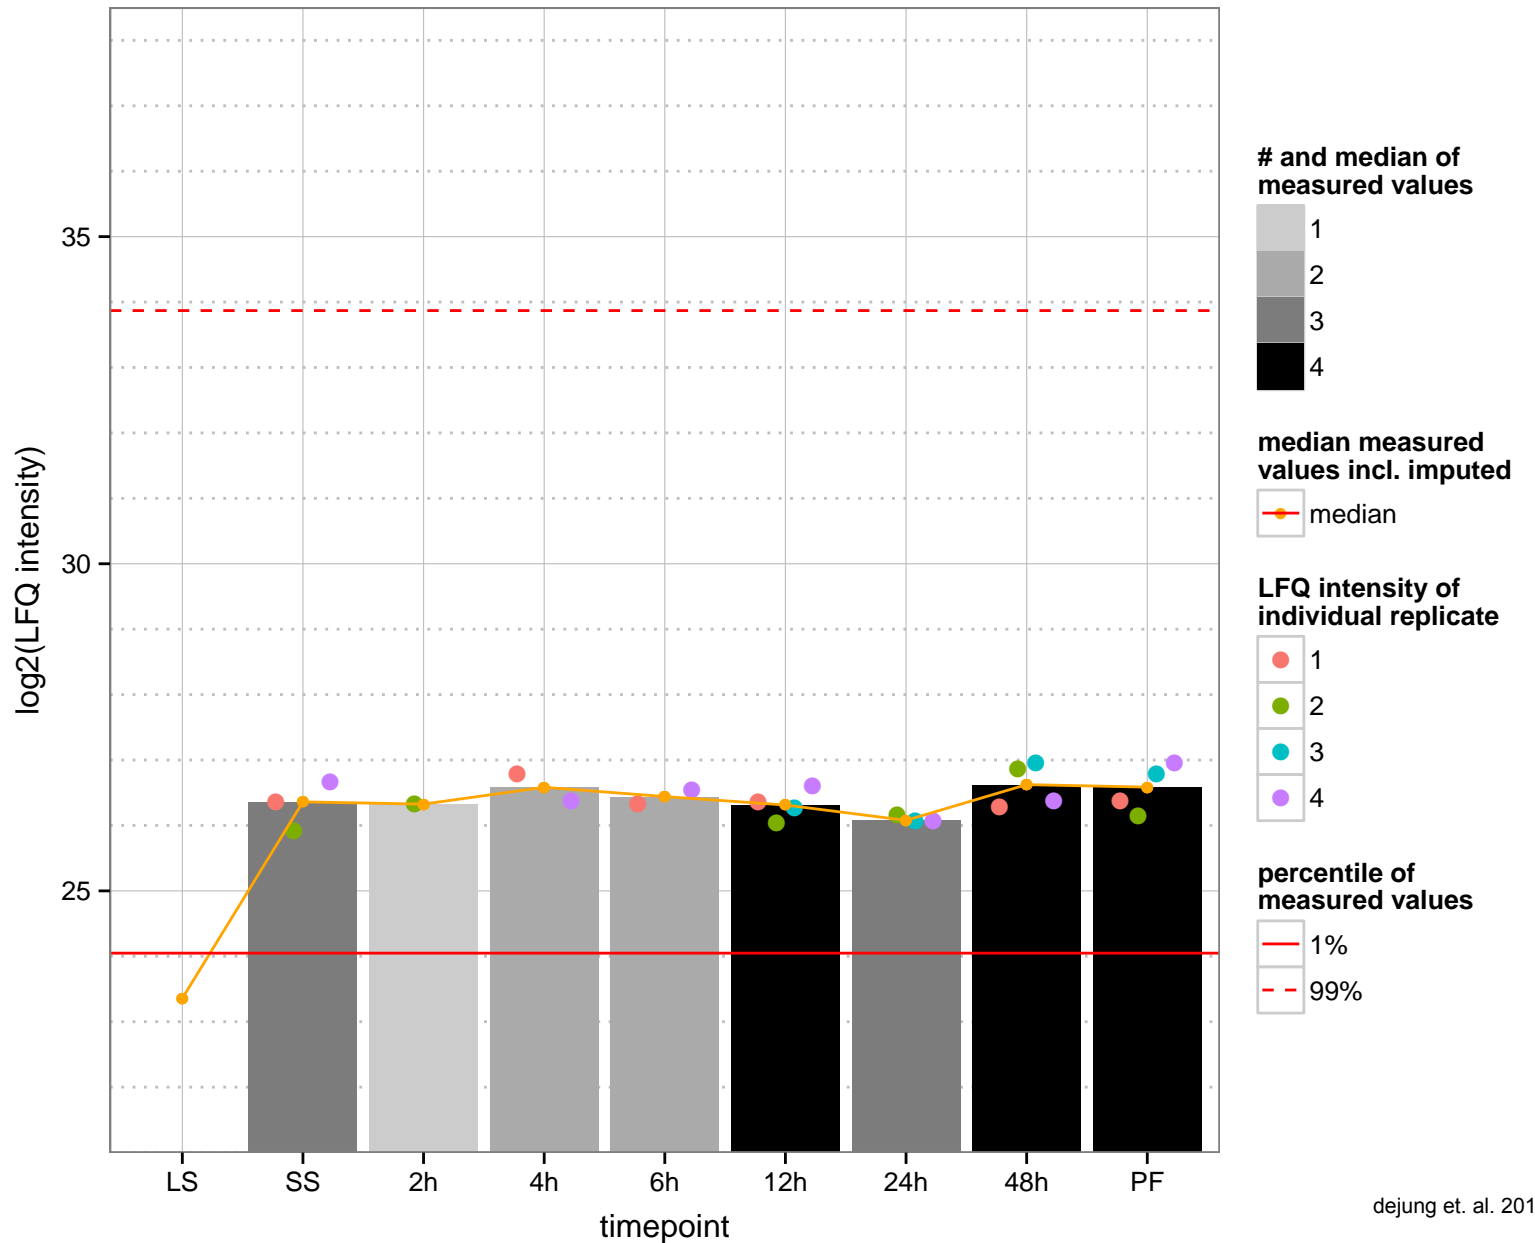



hypothetical protein, conserved  
 Tb927.10.8820  
 AGOF: null  
 AGOC: null  
 AGOP: null  
 PGO: null  
 PGOC: null  
 PGOP: null

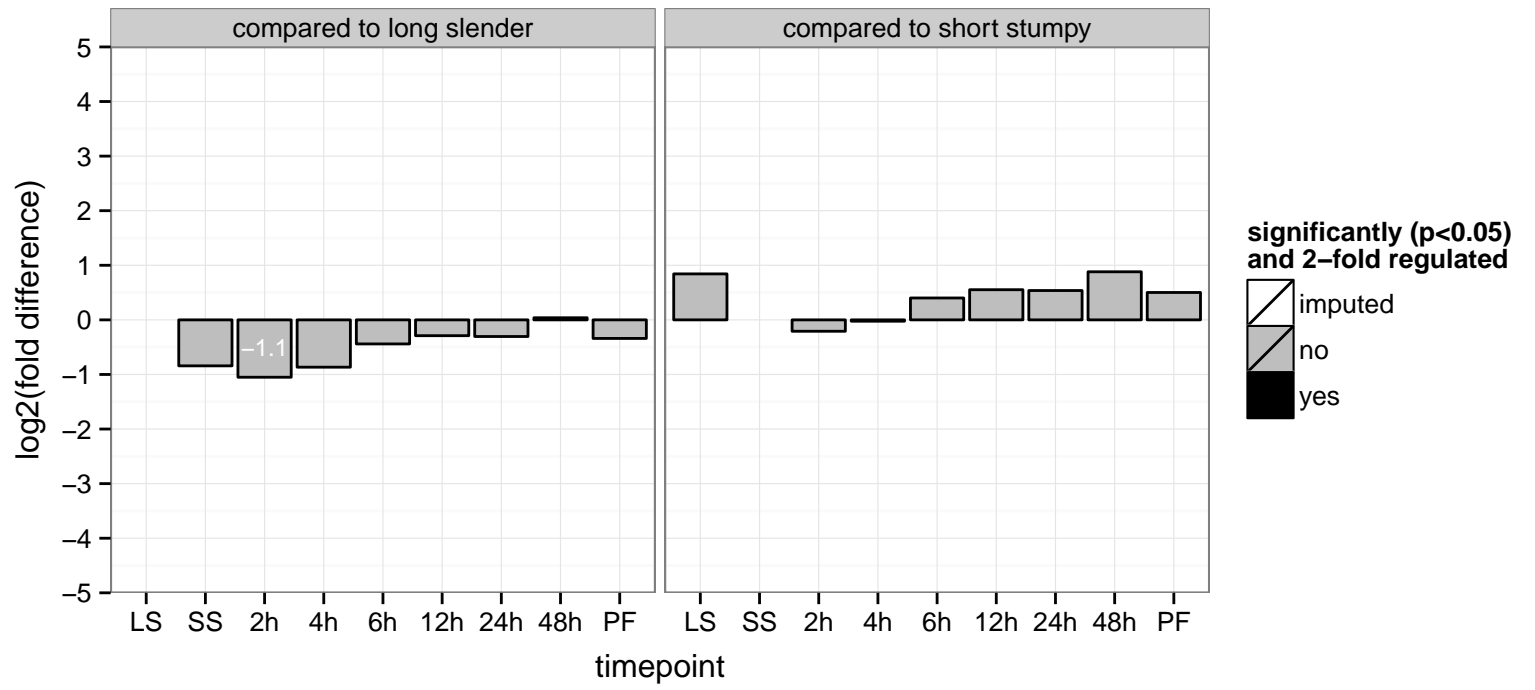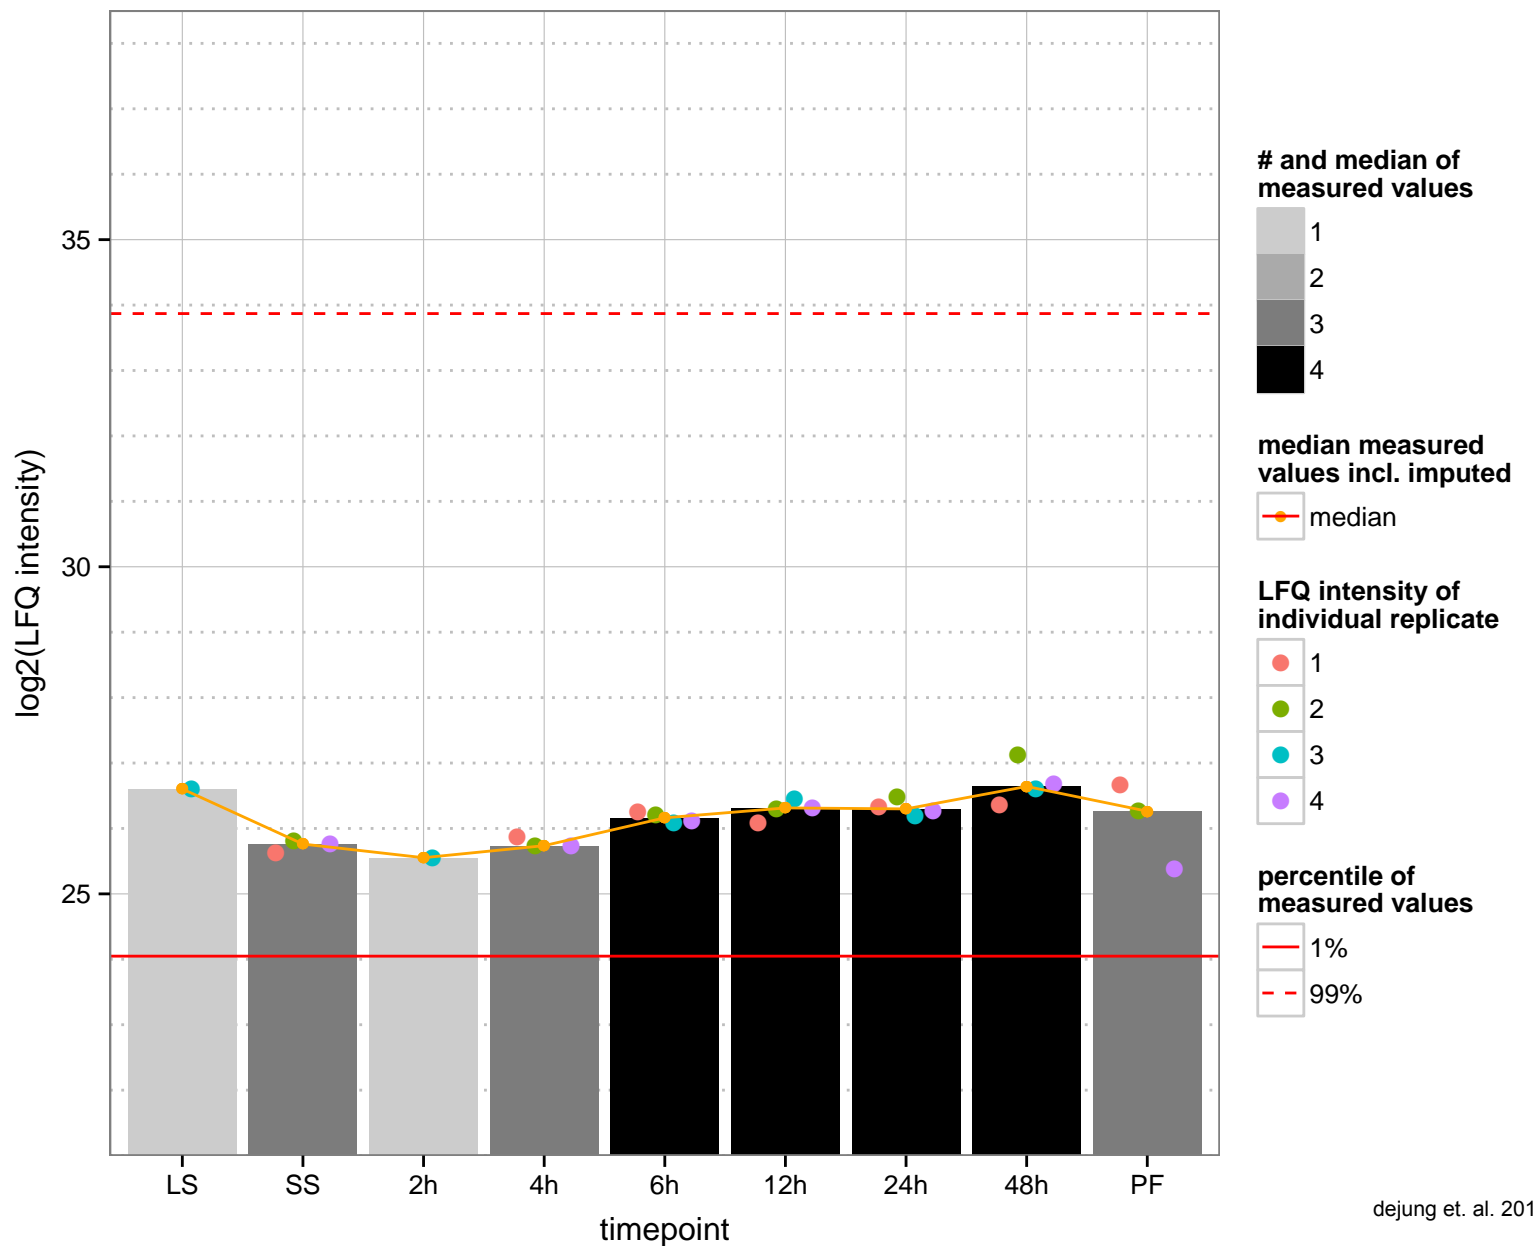

hypothetical protein, conserved  
 Tb927.10.8830  
 AGOF: heat shock protein binding  
 AGOC: null  
 AGOP: null  
 PGOF: heat shock protein binding  
 PGOC: null  
 PGOP: null

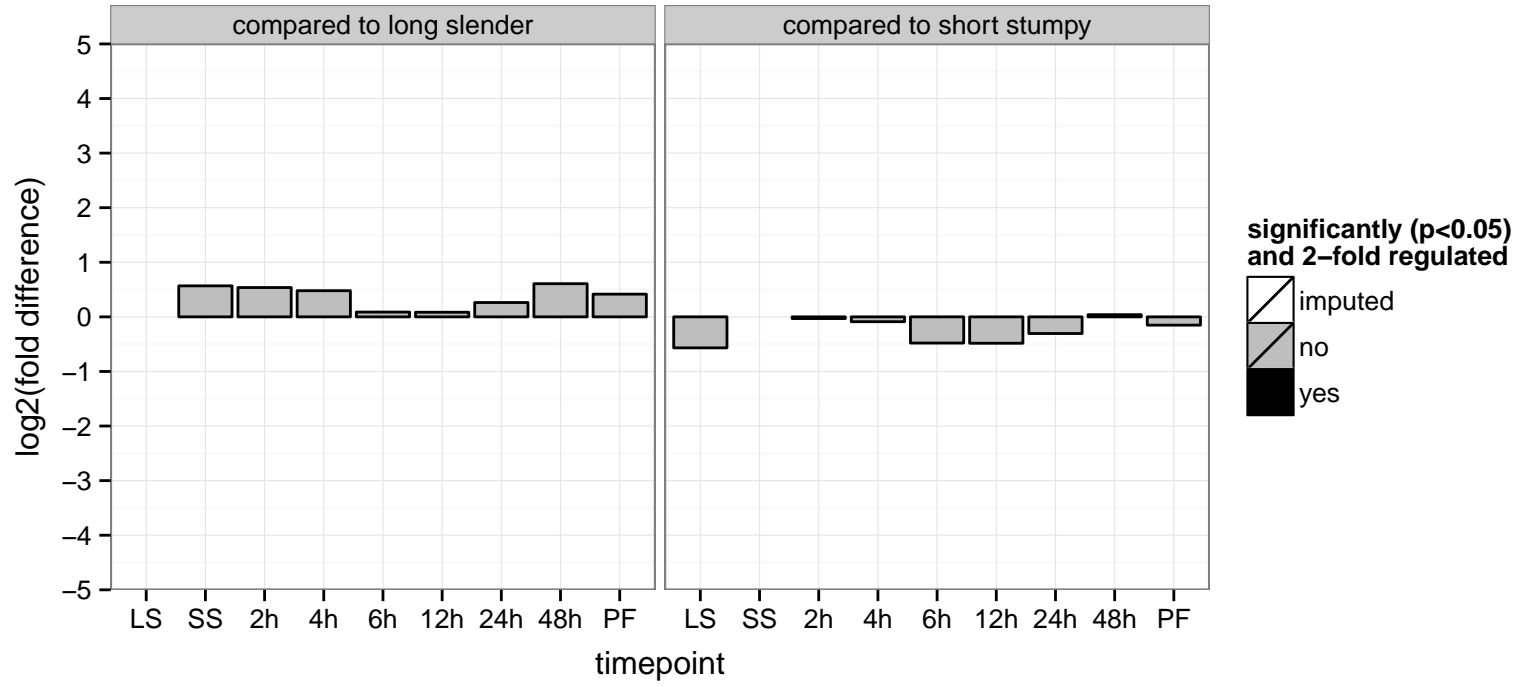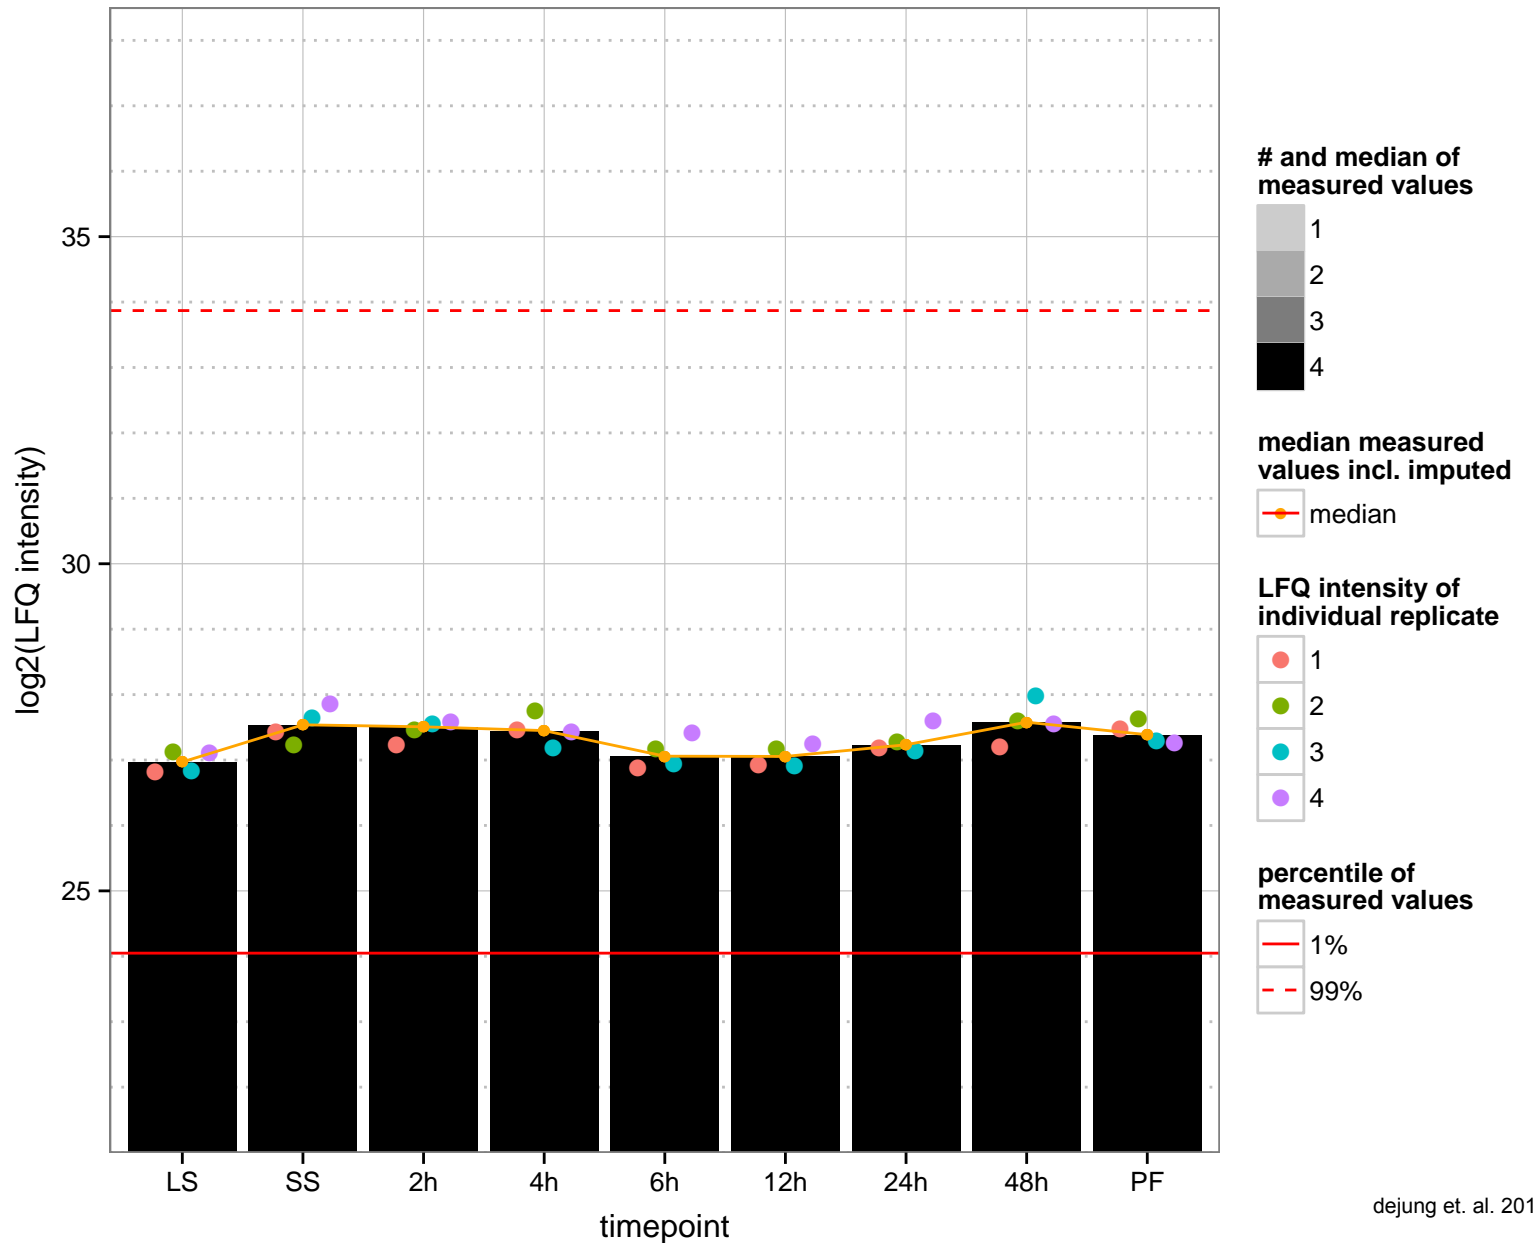

kinetoplast DNA-associated protein, putative  
 Tb927.10.8890  
 AGOF: DNA binding  
 AGOC: kinetoplast, mitochondrion  
 AGOP: DNA packaging  
 PGO: protein binding  
 PGO: null  
 PGO: null

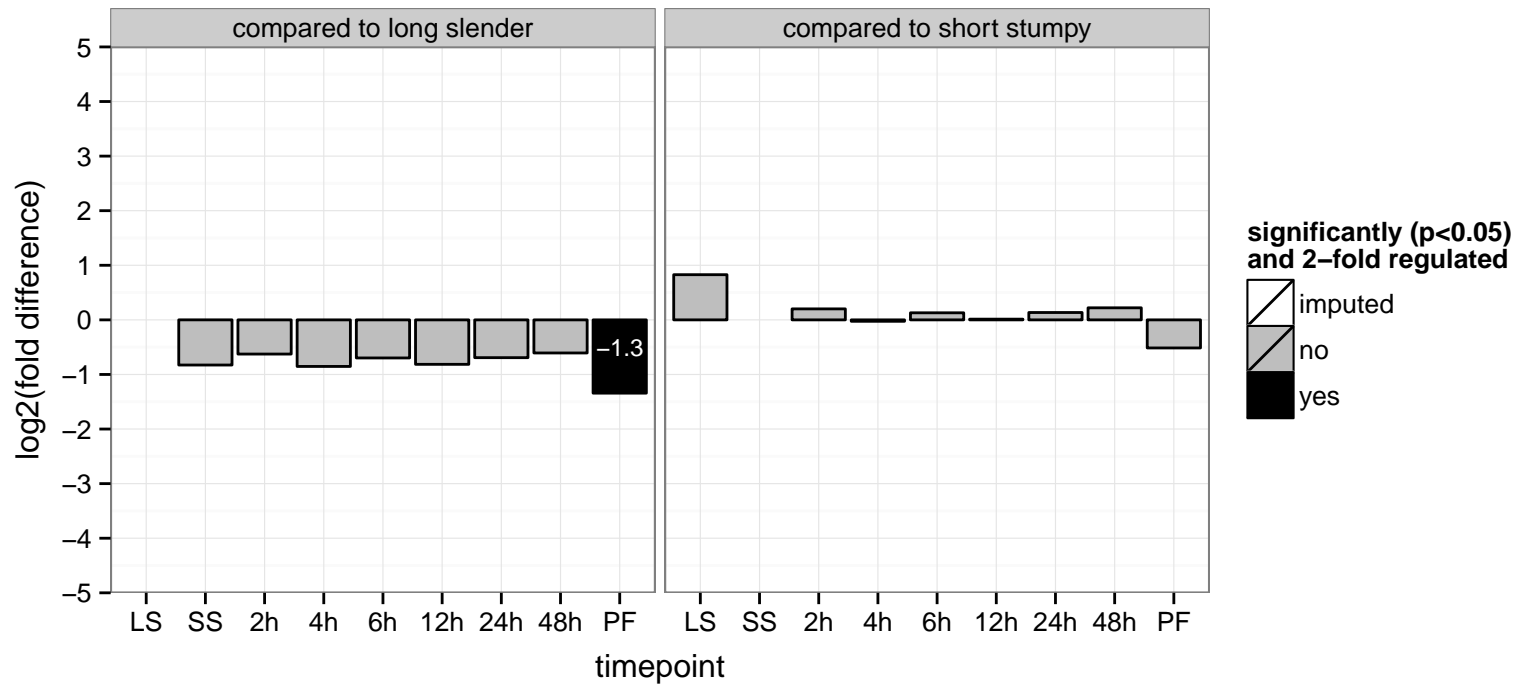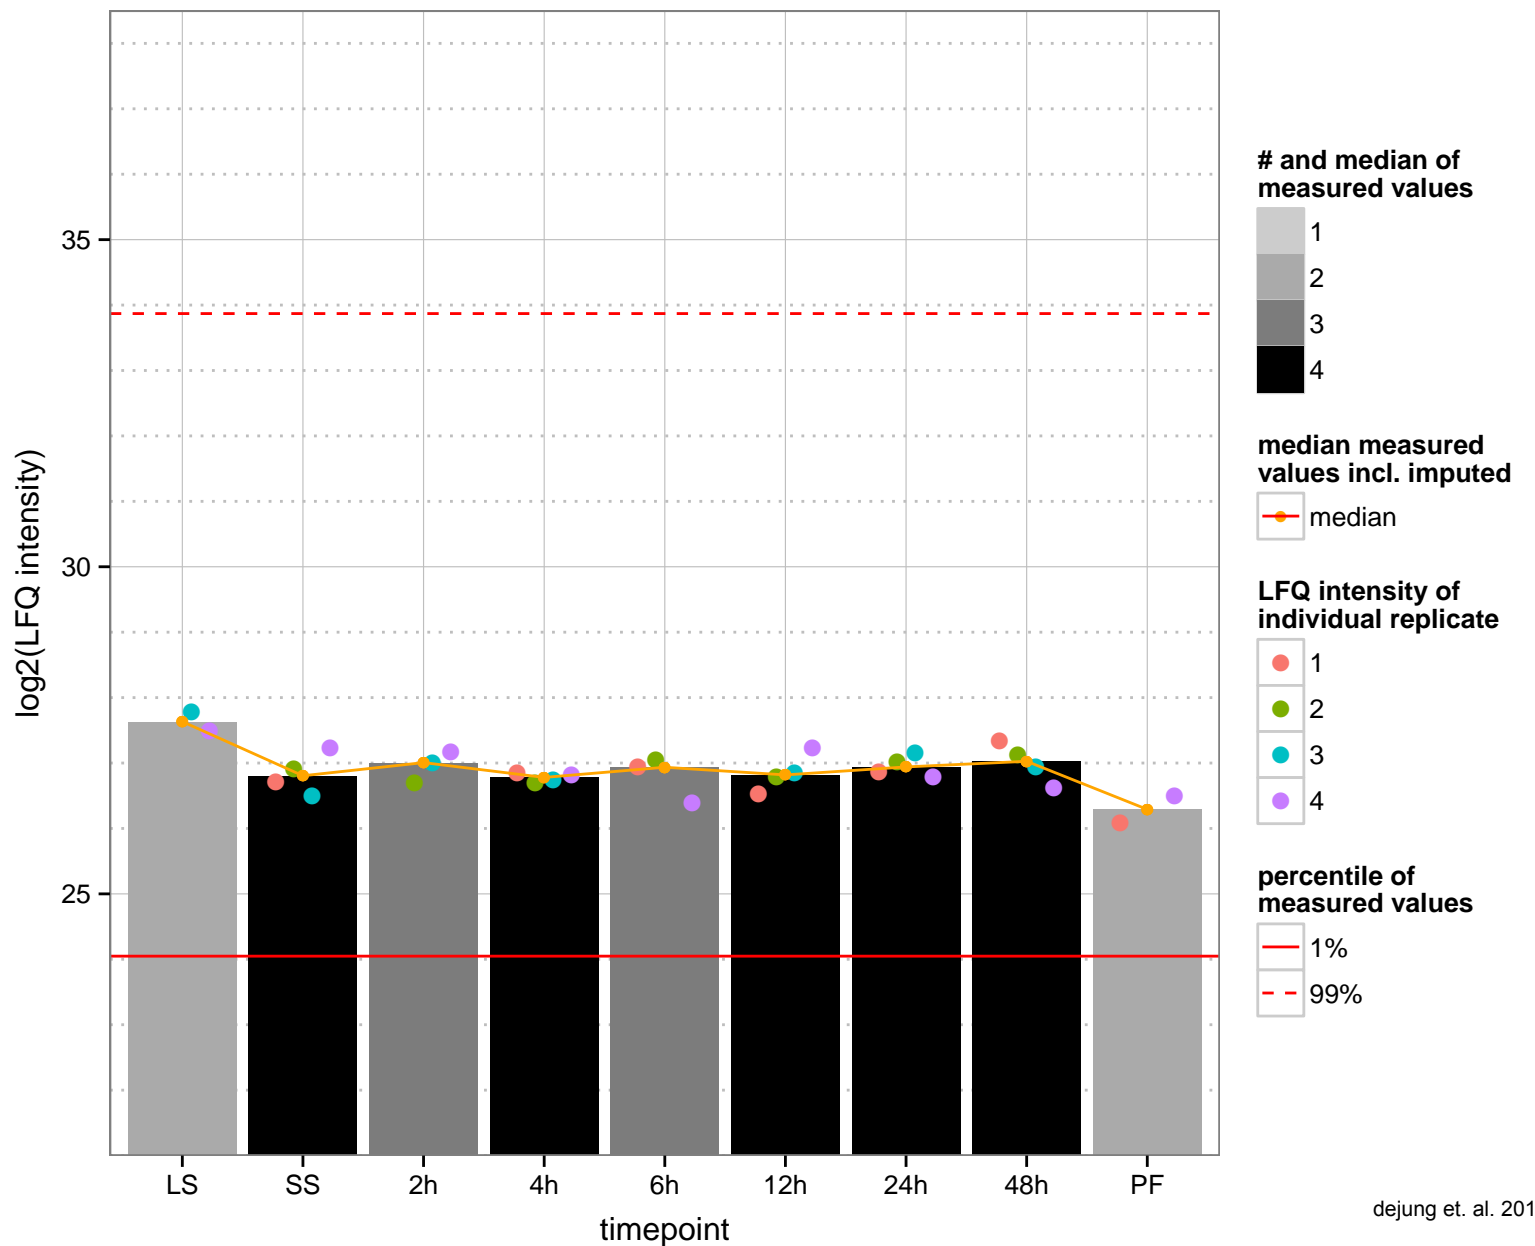

paraflagellar rod component, putative (PFC18)  
 Tb927.10.8930  
 AGOF: null  
 AGOC: null  
 AGOP: null  
 PGOF: null  
 PGO: null  
 PGOP: null

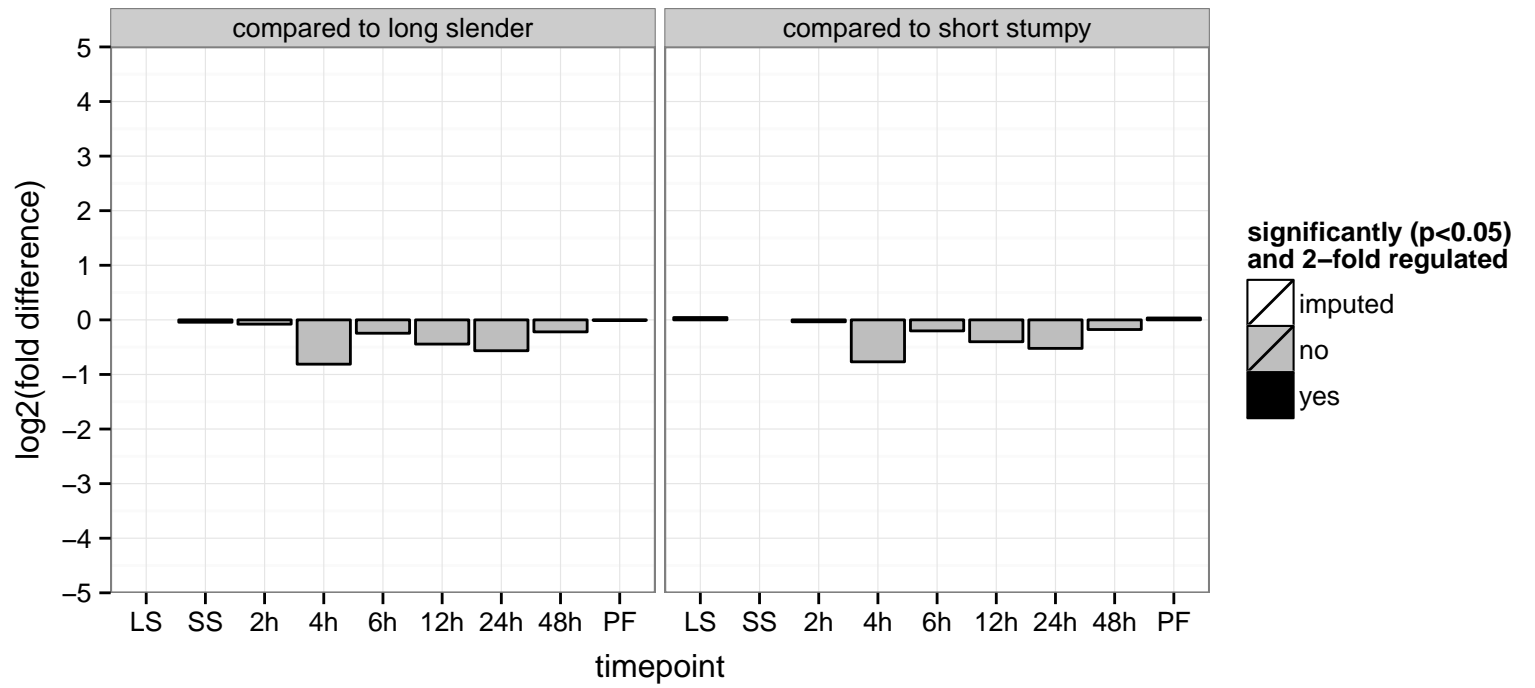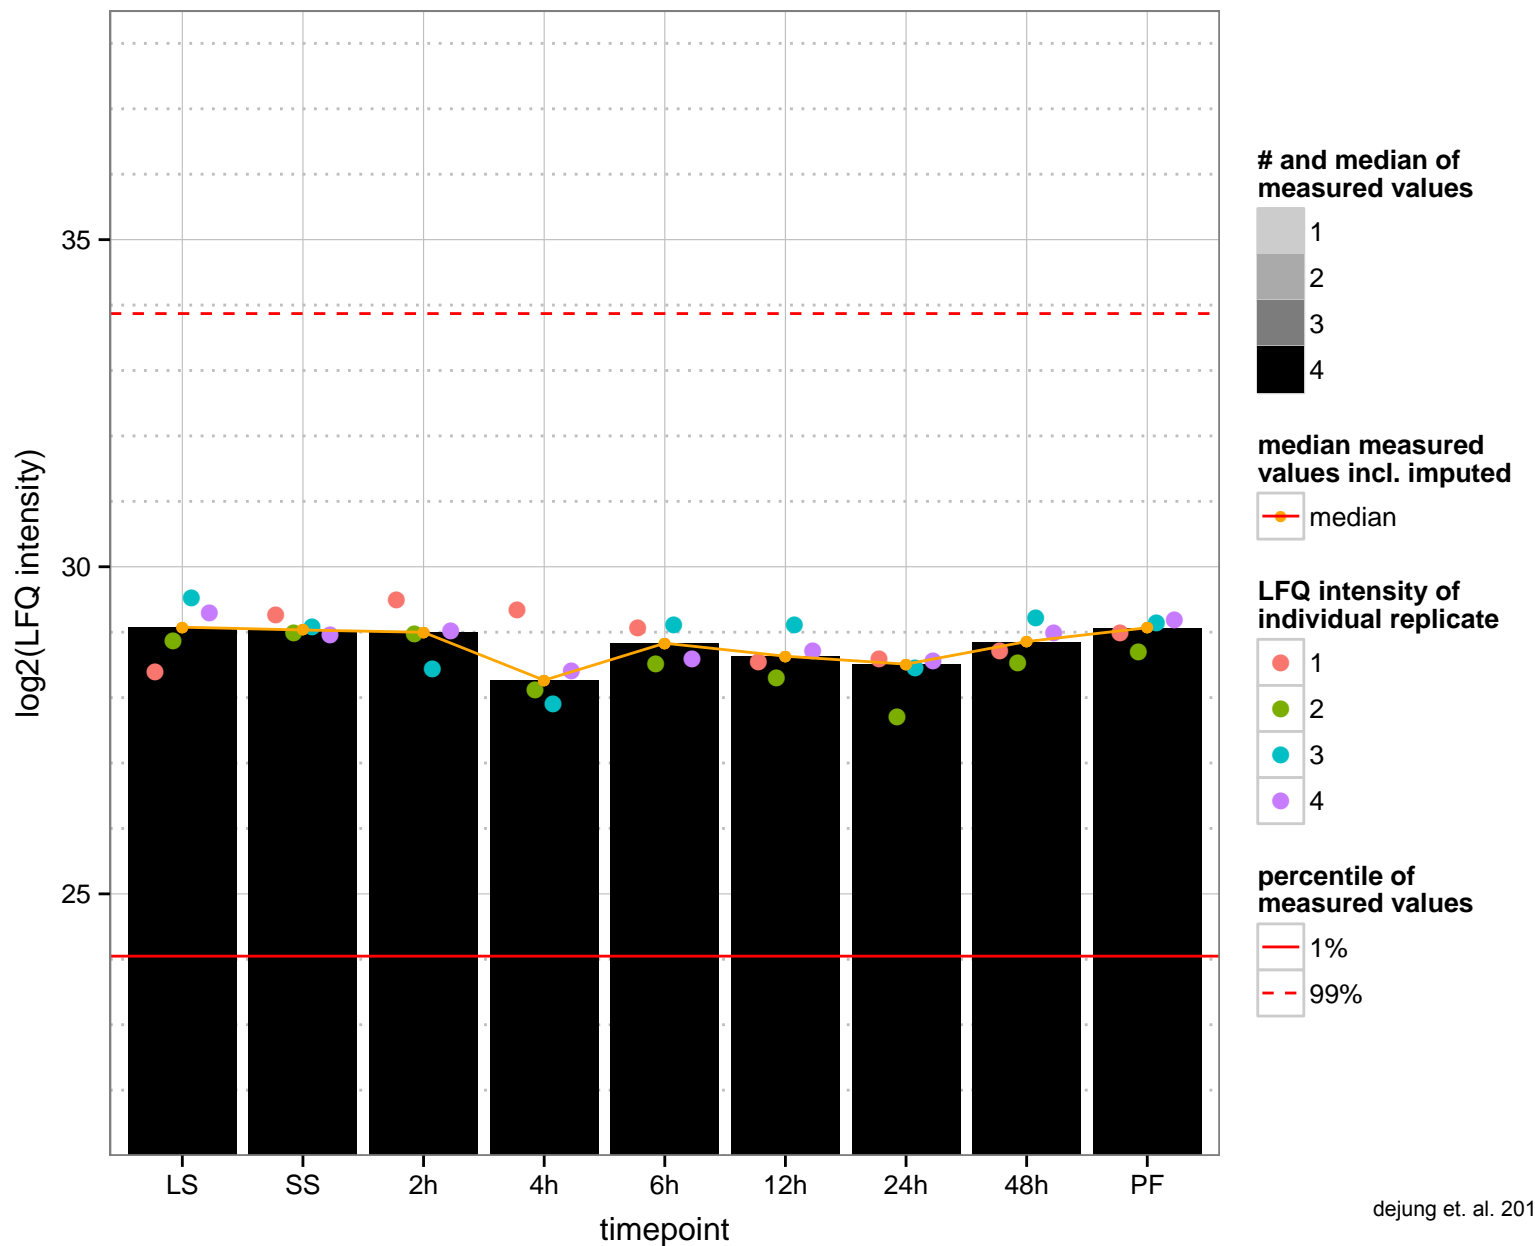

flagellum targeting protein kharon1, putative (KH1)  
 Tb927.10.8940  
 AGOF: null  
 AGOC: flagellar pocket  
 AGOP: pathogenesis, protein targeting  
 PGO: null  
 PGOC: null  
 PGOP: null

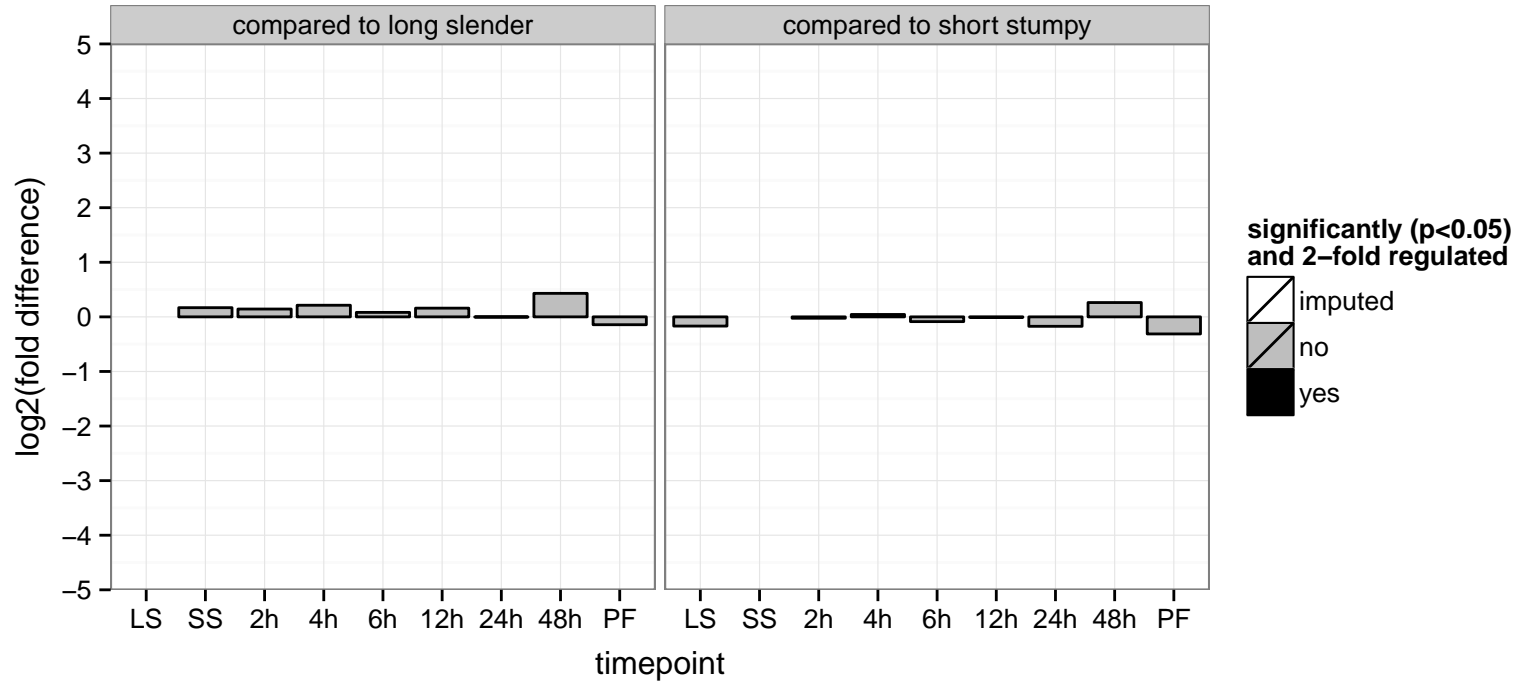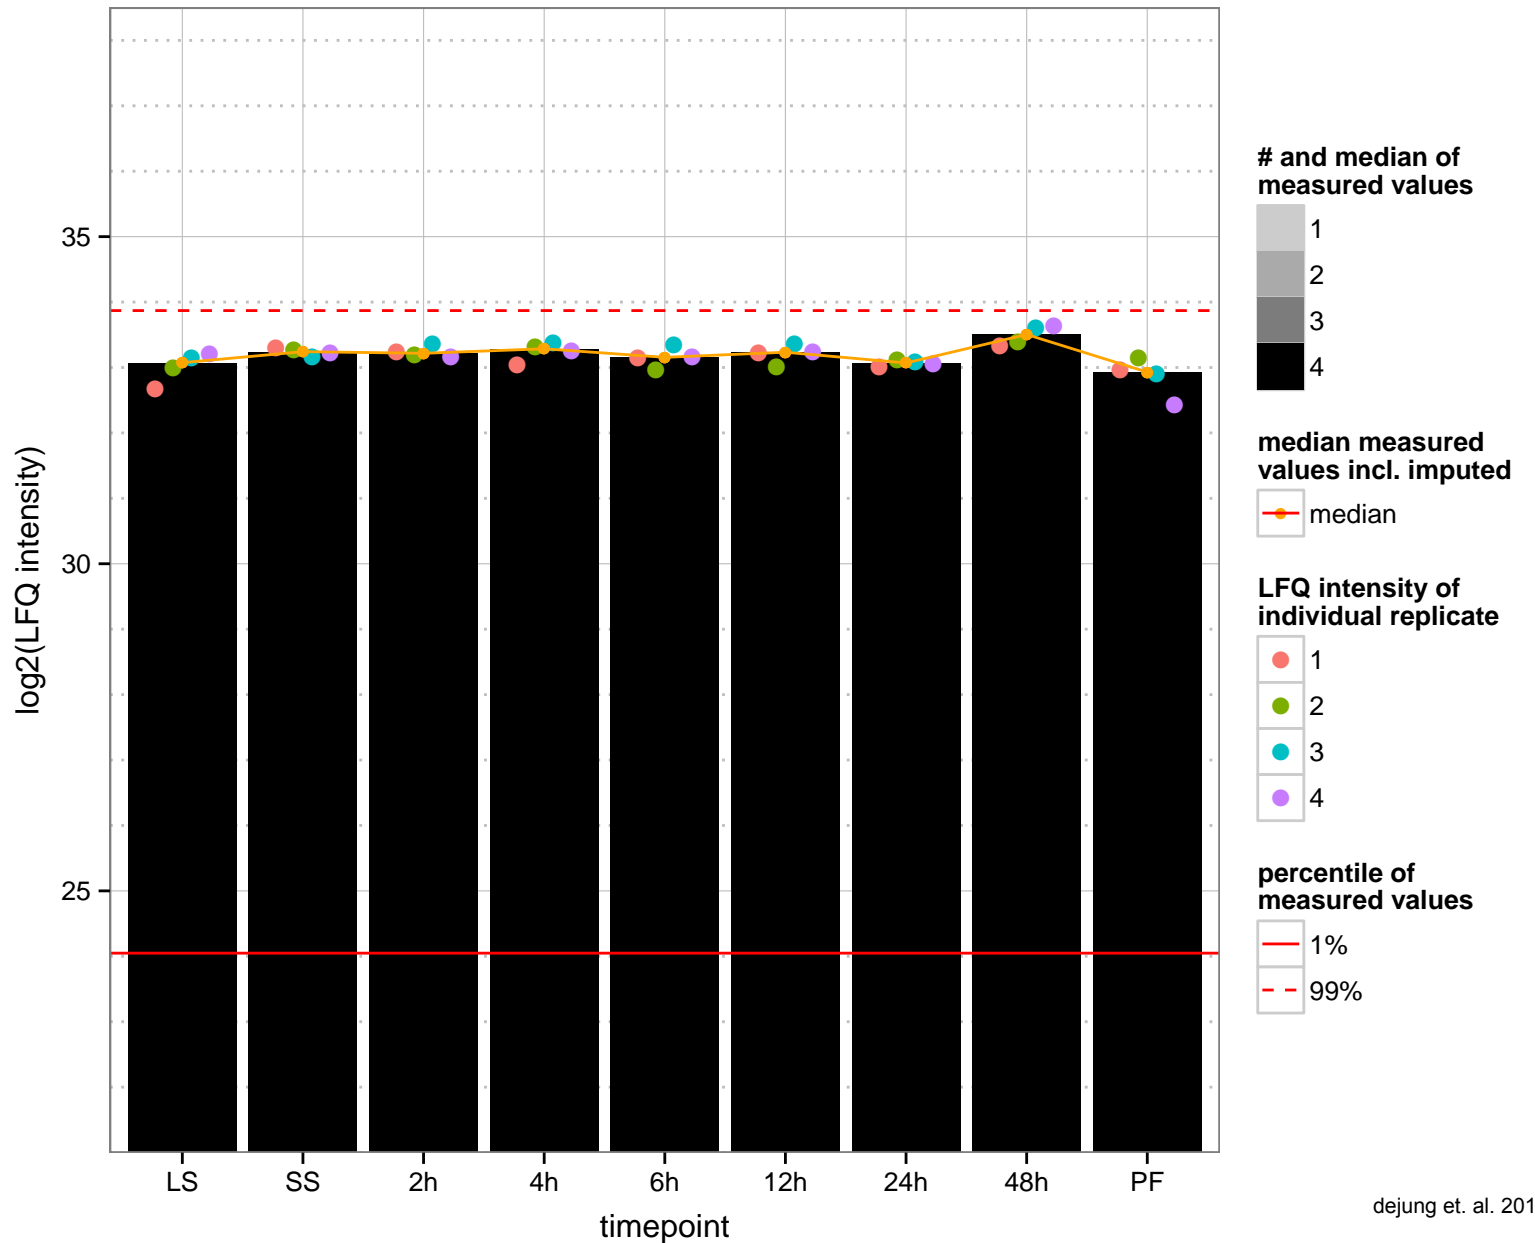

kinetoplast DNA-associated protein, putative  
 Tb927.10.8950;Tb927.10.8970  
 AGOF: DNA binding  
 AGOC: kinetoplast, mitochondrion  
 AGOP: DNA packaging  
 PGO: null  
 PGOC: null  
 PGOP: null

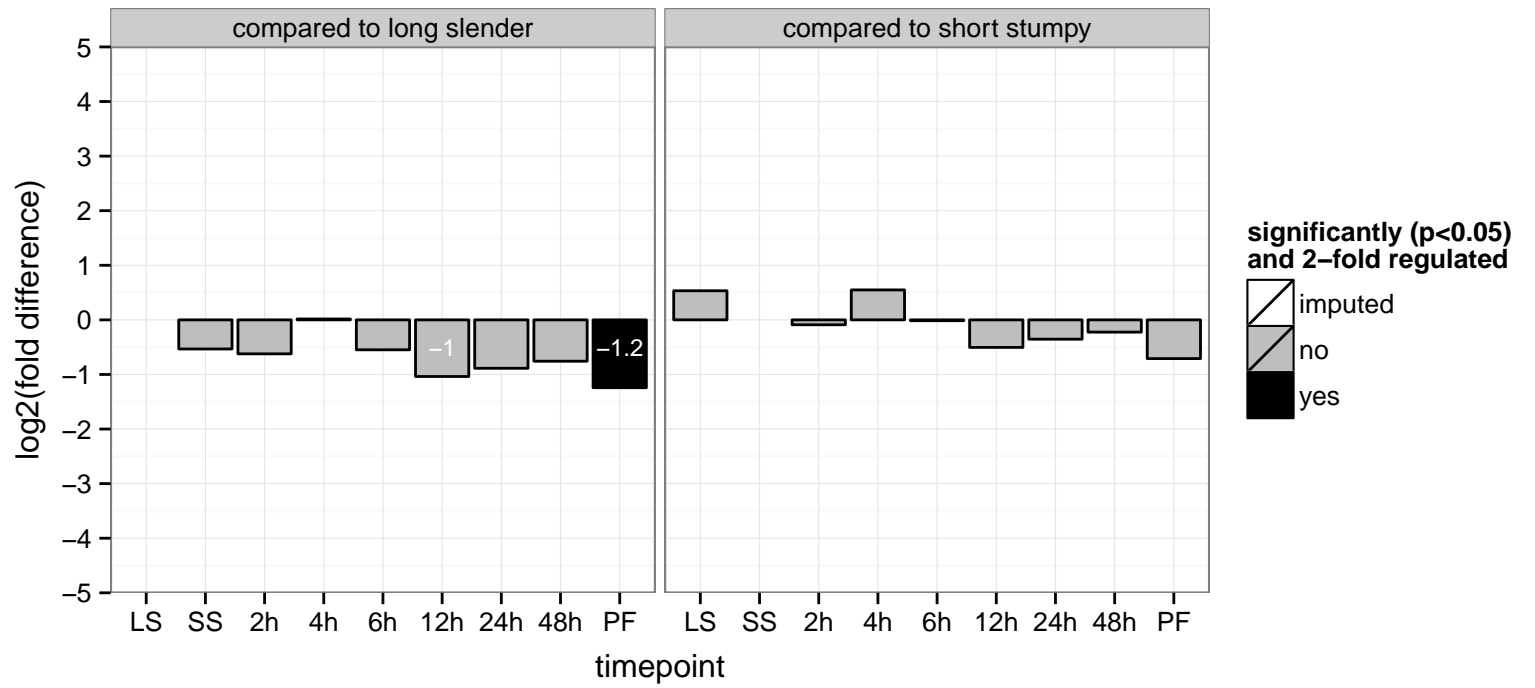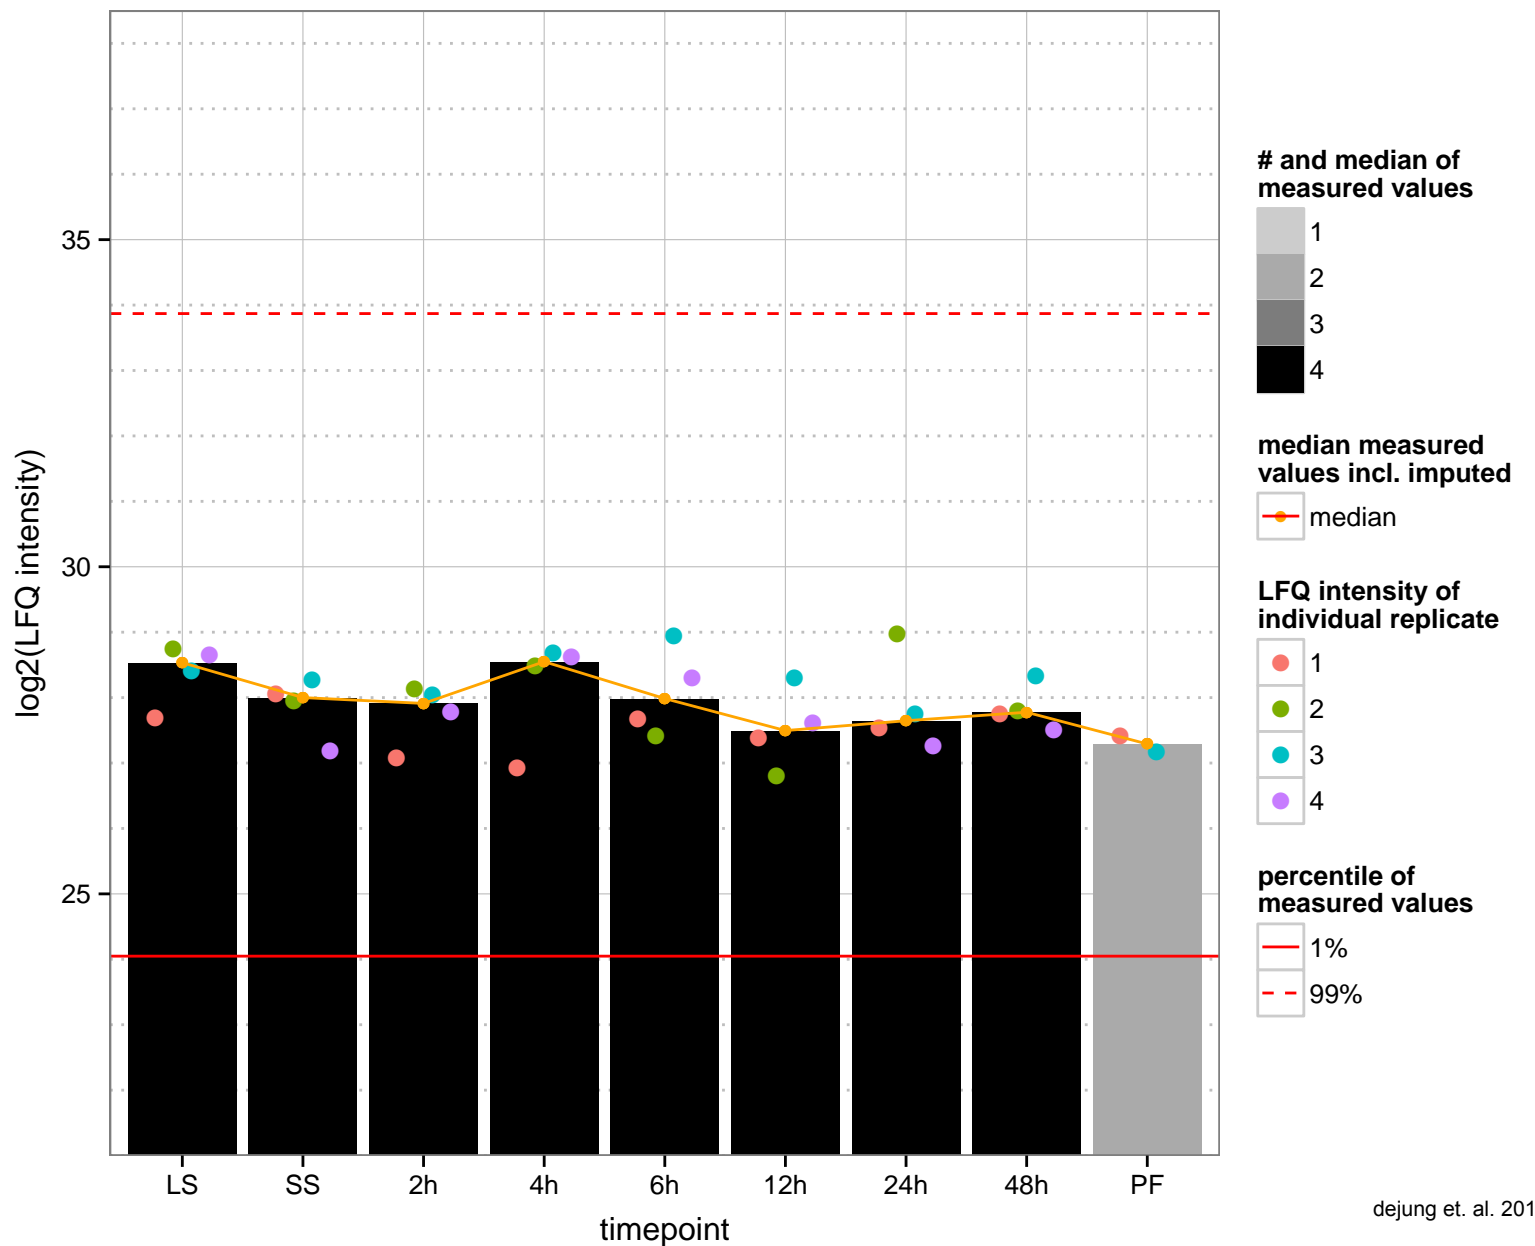

hypothetical protein, conserved  
 Tb927.10.8960  
 AGOF: null  
 AGOC: null  
 AGOP: null  
 PGO: protein binding  
 PGOC: null  
 PGOP: null

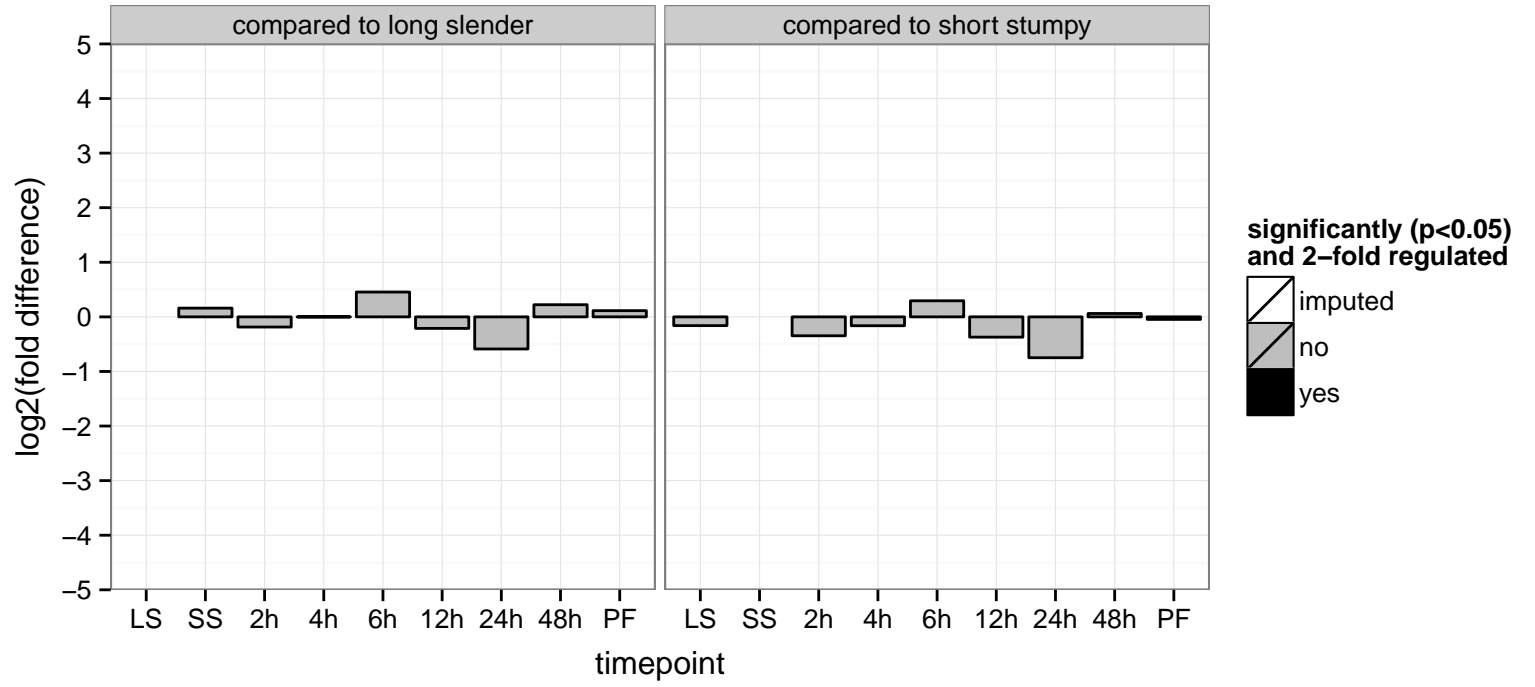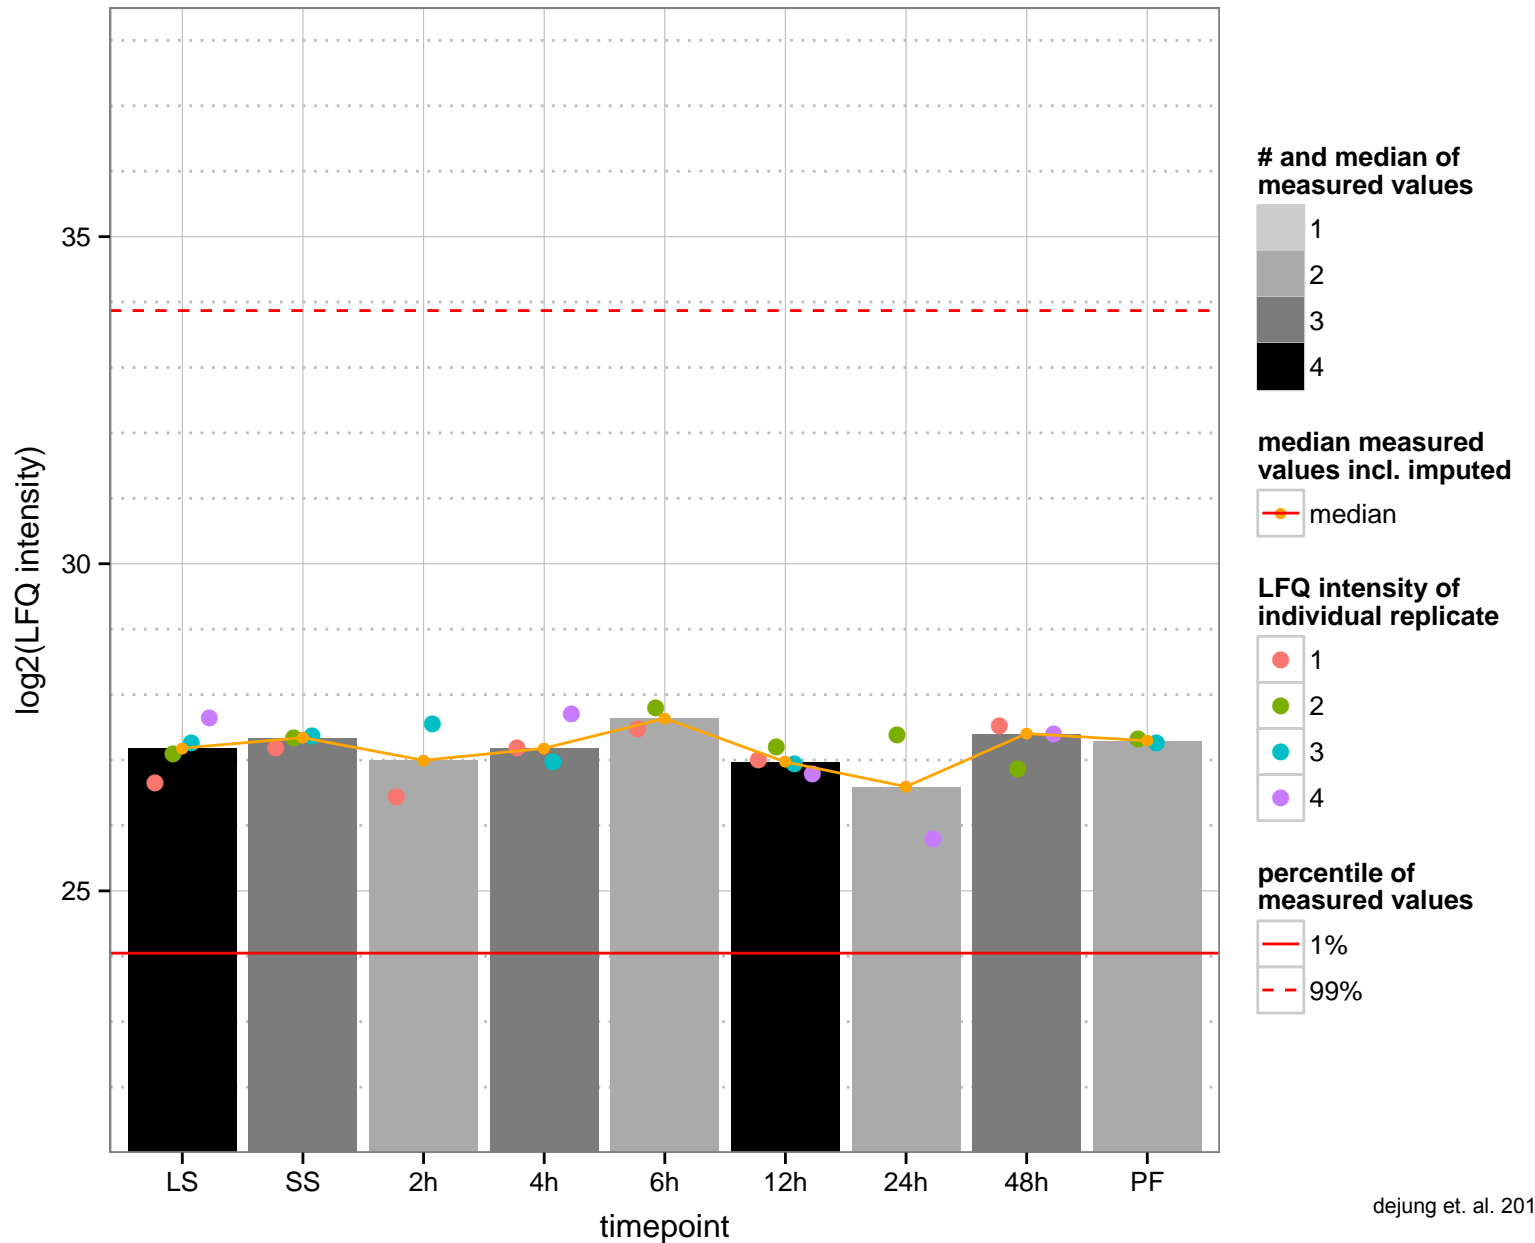

hypothetical protein, conserved  
 Tb927.10.9020  
 AGOF: null, translation initiation factor activity  
 AGOC: null  
 AGOP: null, regulation of translational initiation, translational initiation  
 PGOF: null, translation initiation factor activity  
 PGO: null  
 PGOP: null, regulation of translational initiation, translational initiation

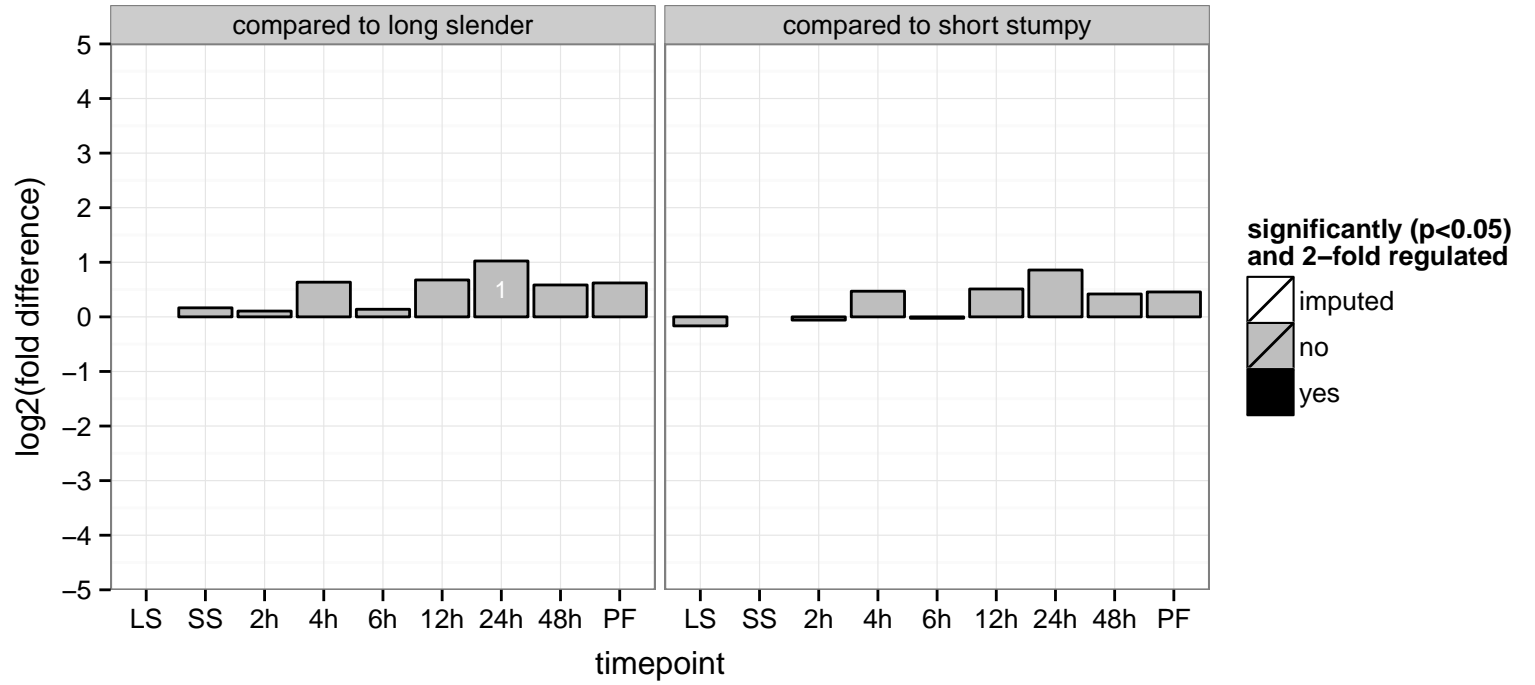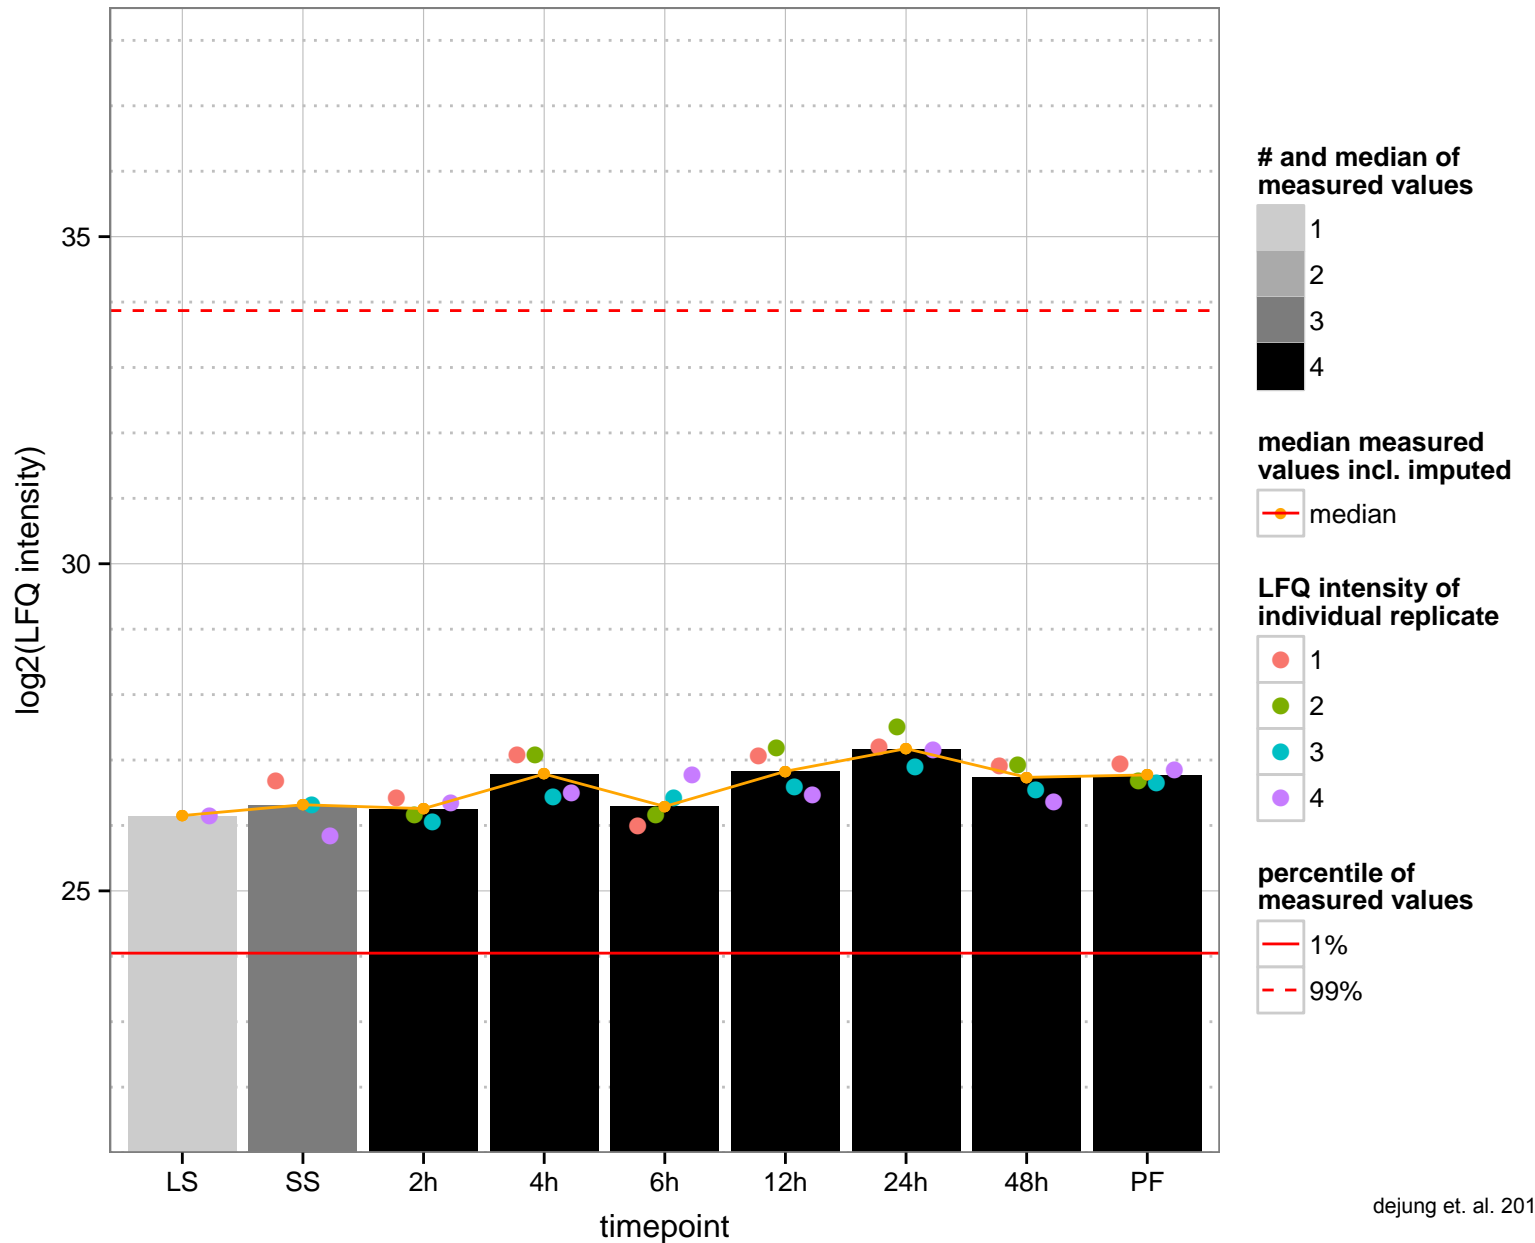



hypothetical protein, conserved  
 Tb927.10.9040  
 AGOF: null  
 AGOC: null  
 AGOP: null  
 PGOF: null  
 PGO C: null  
 PGOP: null

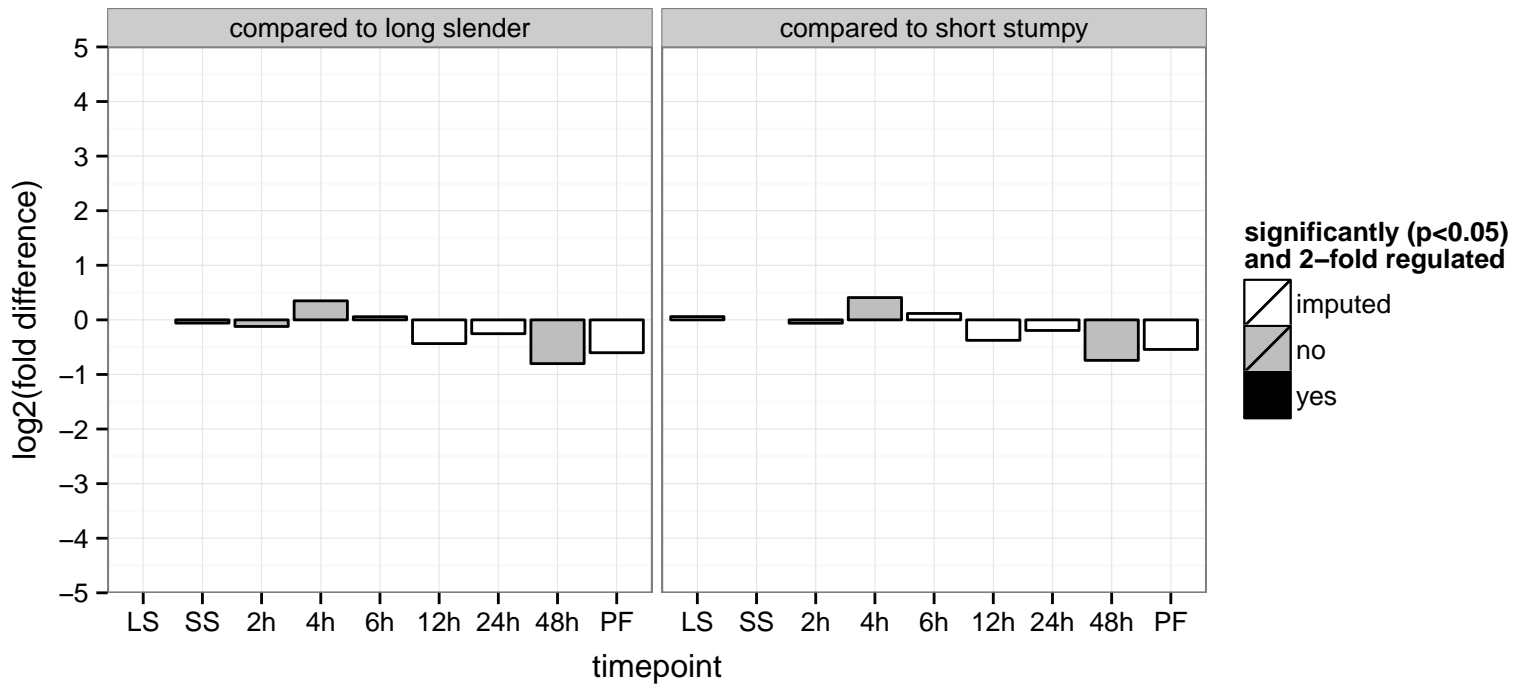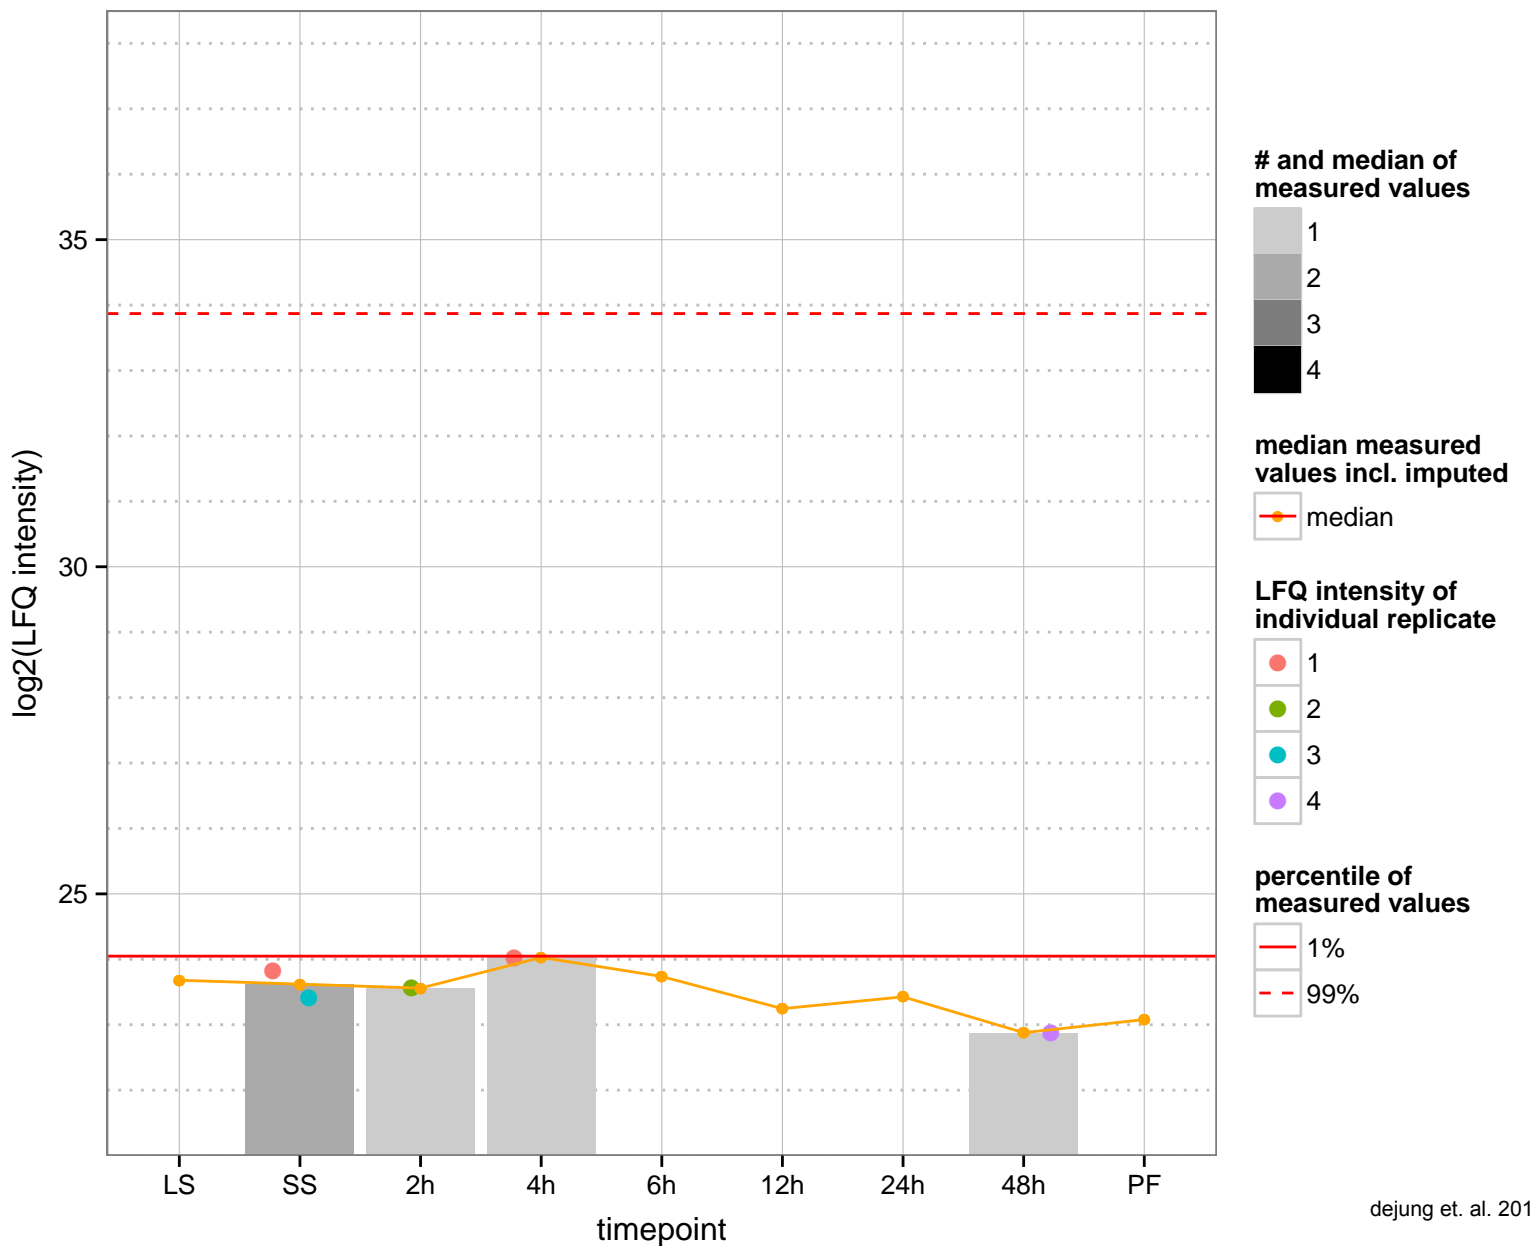

hypothetical protein, conserved  
 Tb927.10.9090  
 AGOF: null  
 AGOC: null  
 AGOP: null  
 PGOF: null  
 PGOC: null  
 PGOP: null

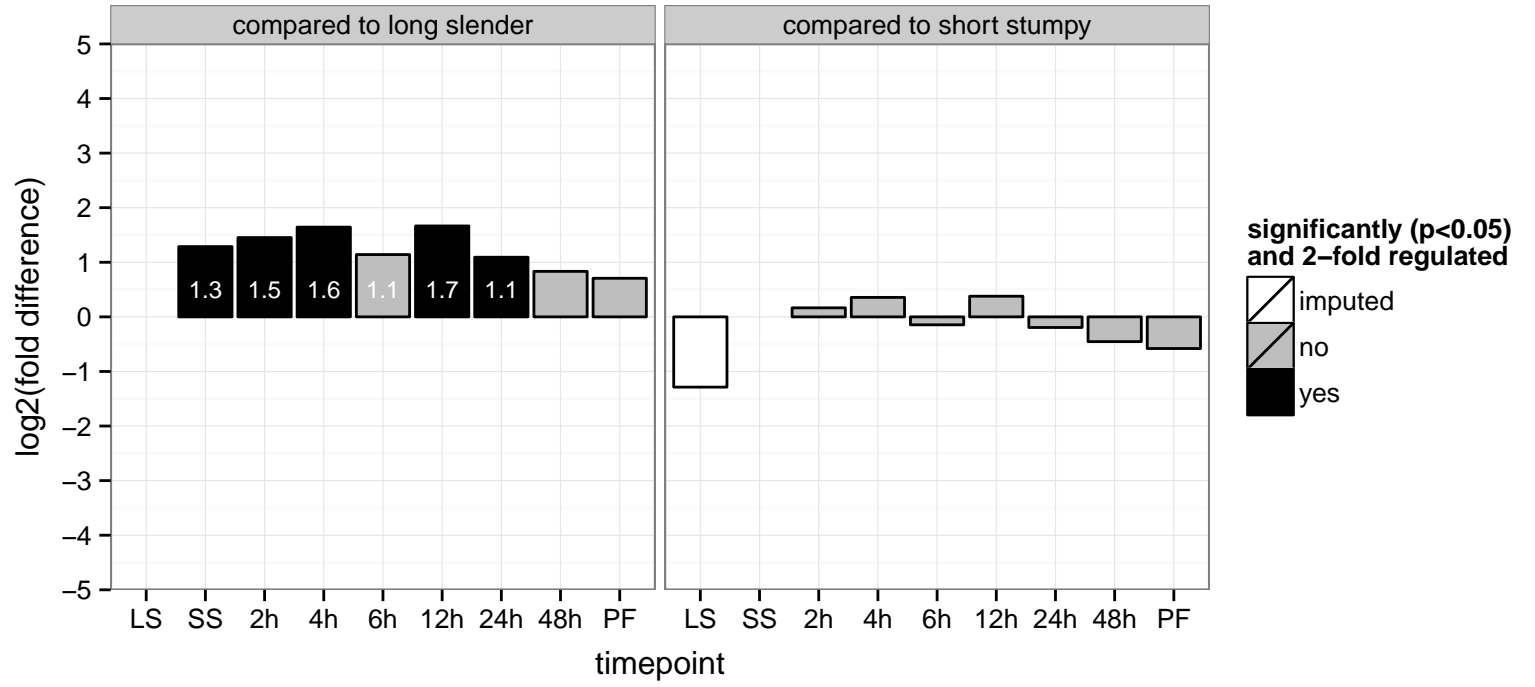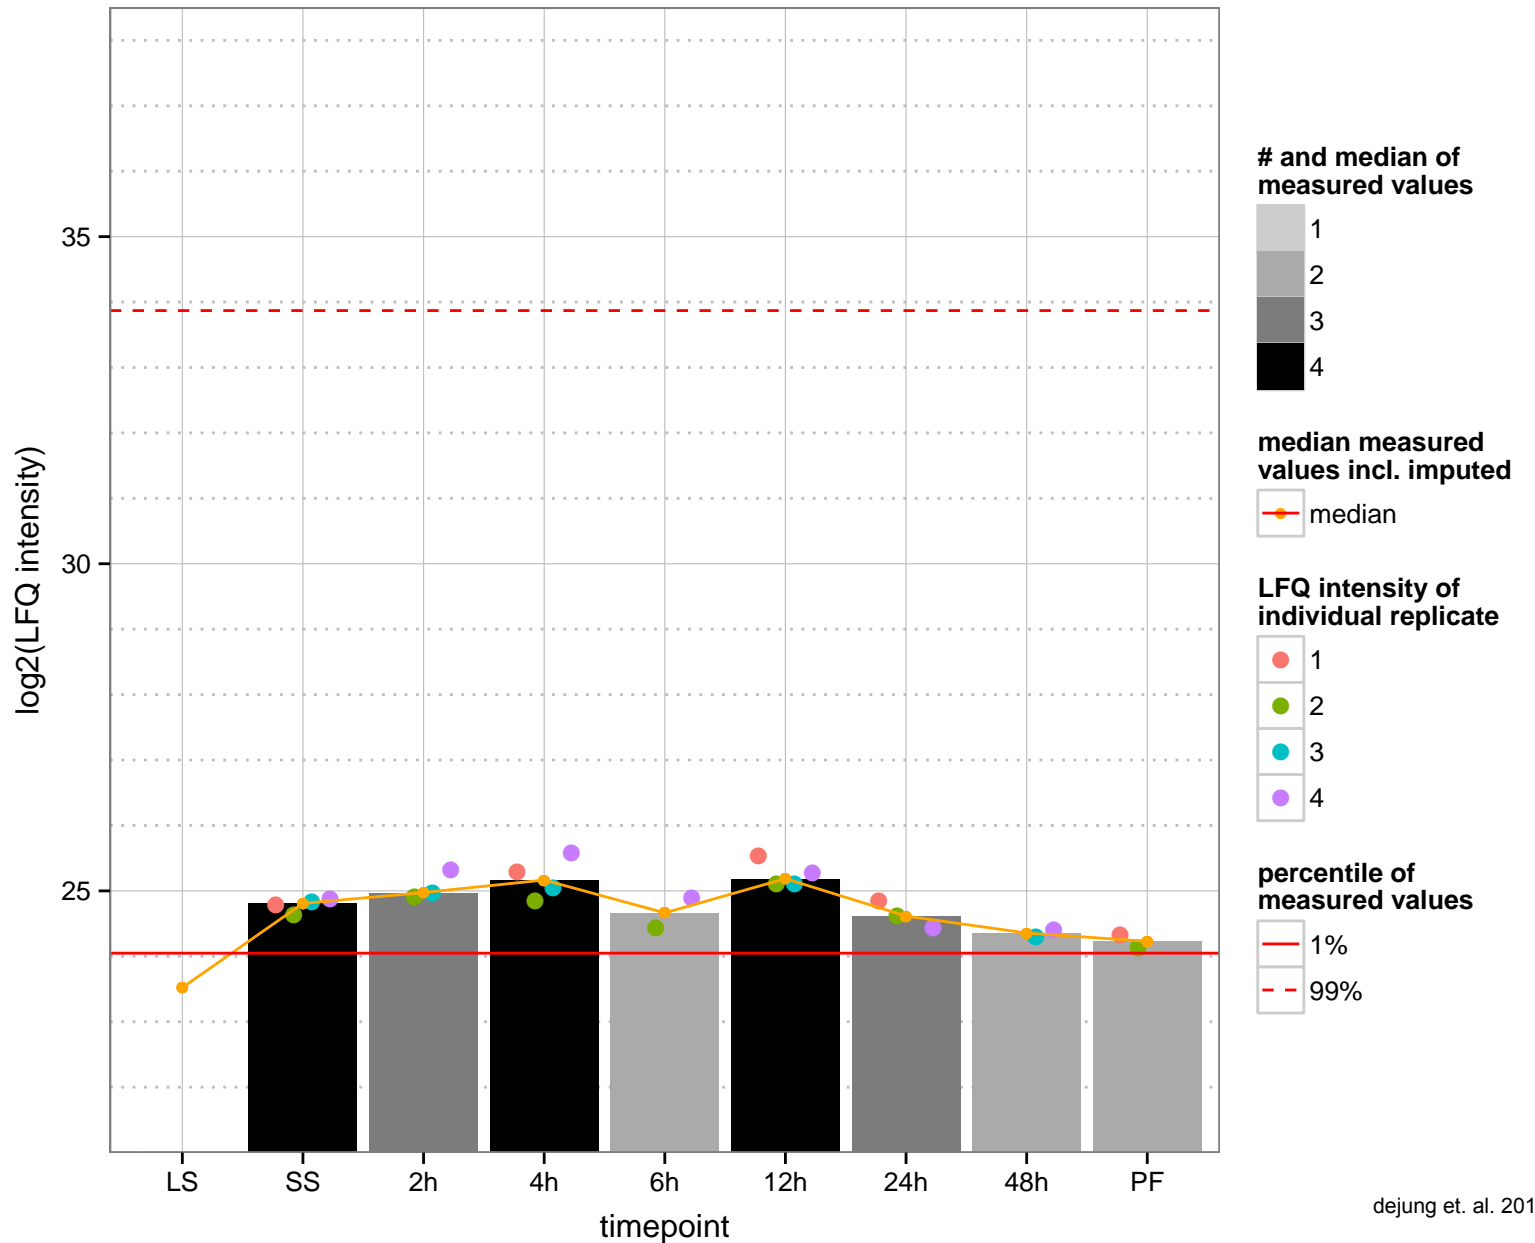

pre-mRNA splicing factor ATP-dependent RNA helicase, putative

Tb927.10.9130

AGOF: ATP binding, ATP-dependent RNA helicase activity, nucleic acid binding

AGOC: spliceosomal complex

AGOP: RNA splicing, RNA splicing, via transesterification reactions

PGOF: ATP binding, ATP-dependent helicase activity, helicase activity, nucleic acid binding

PGOC: null

PGOP: null

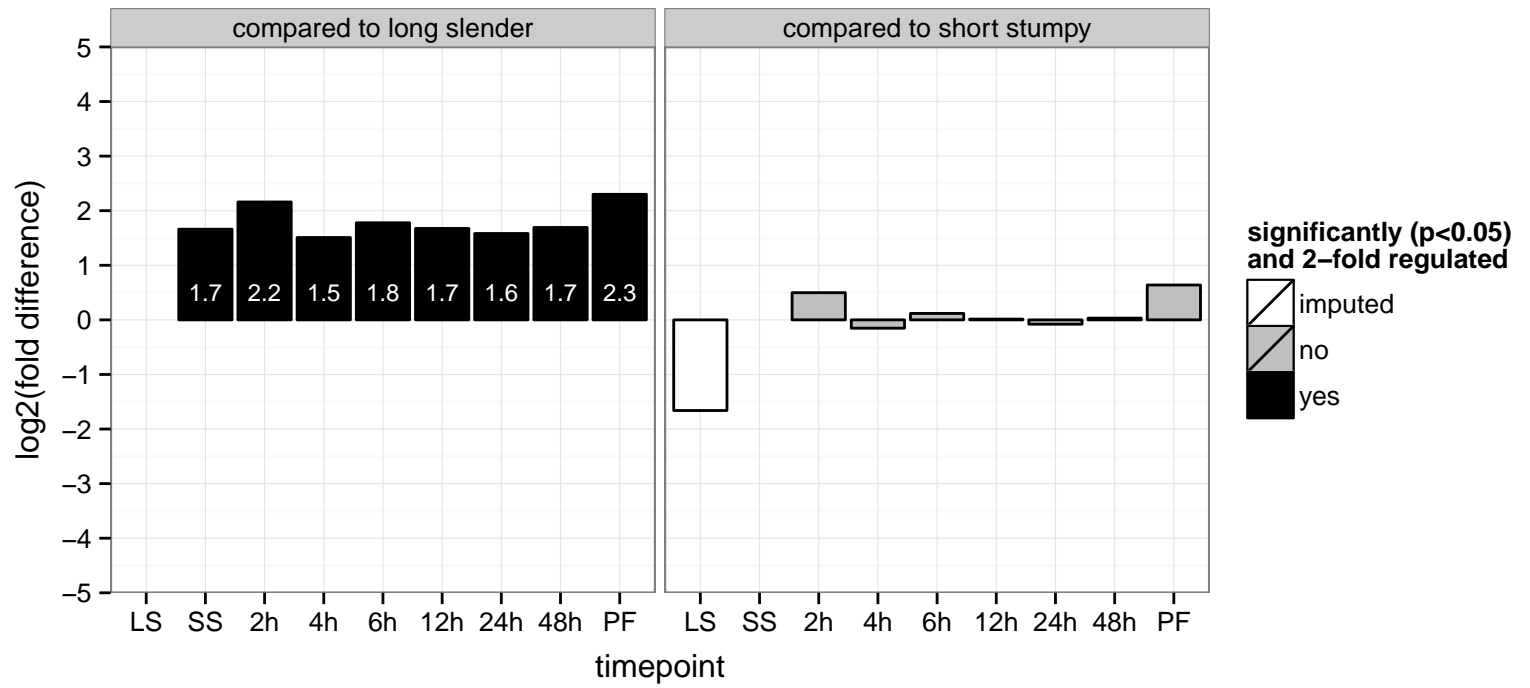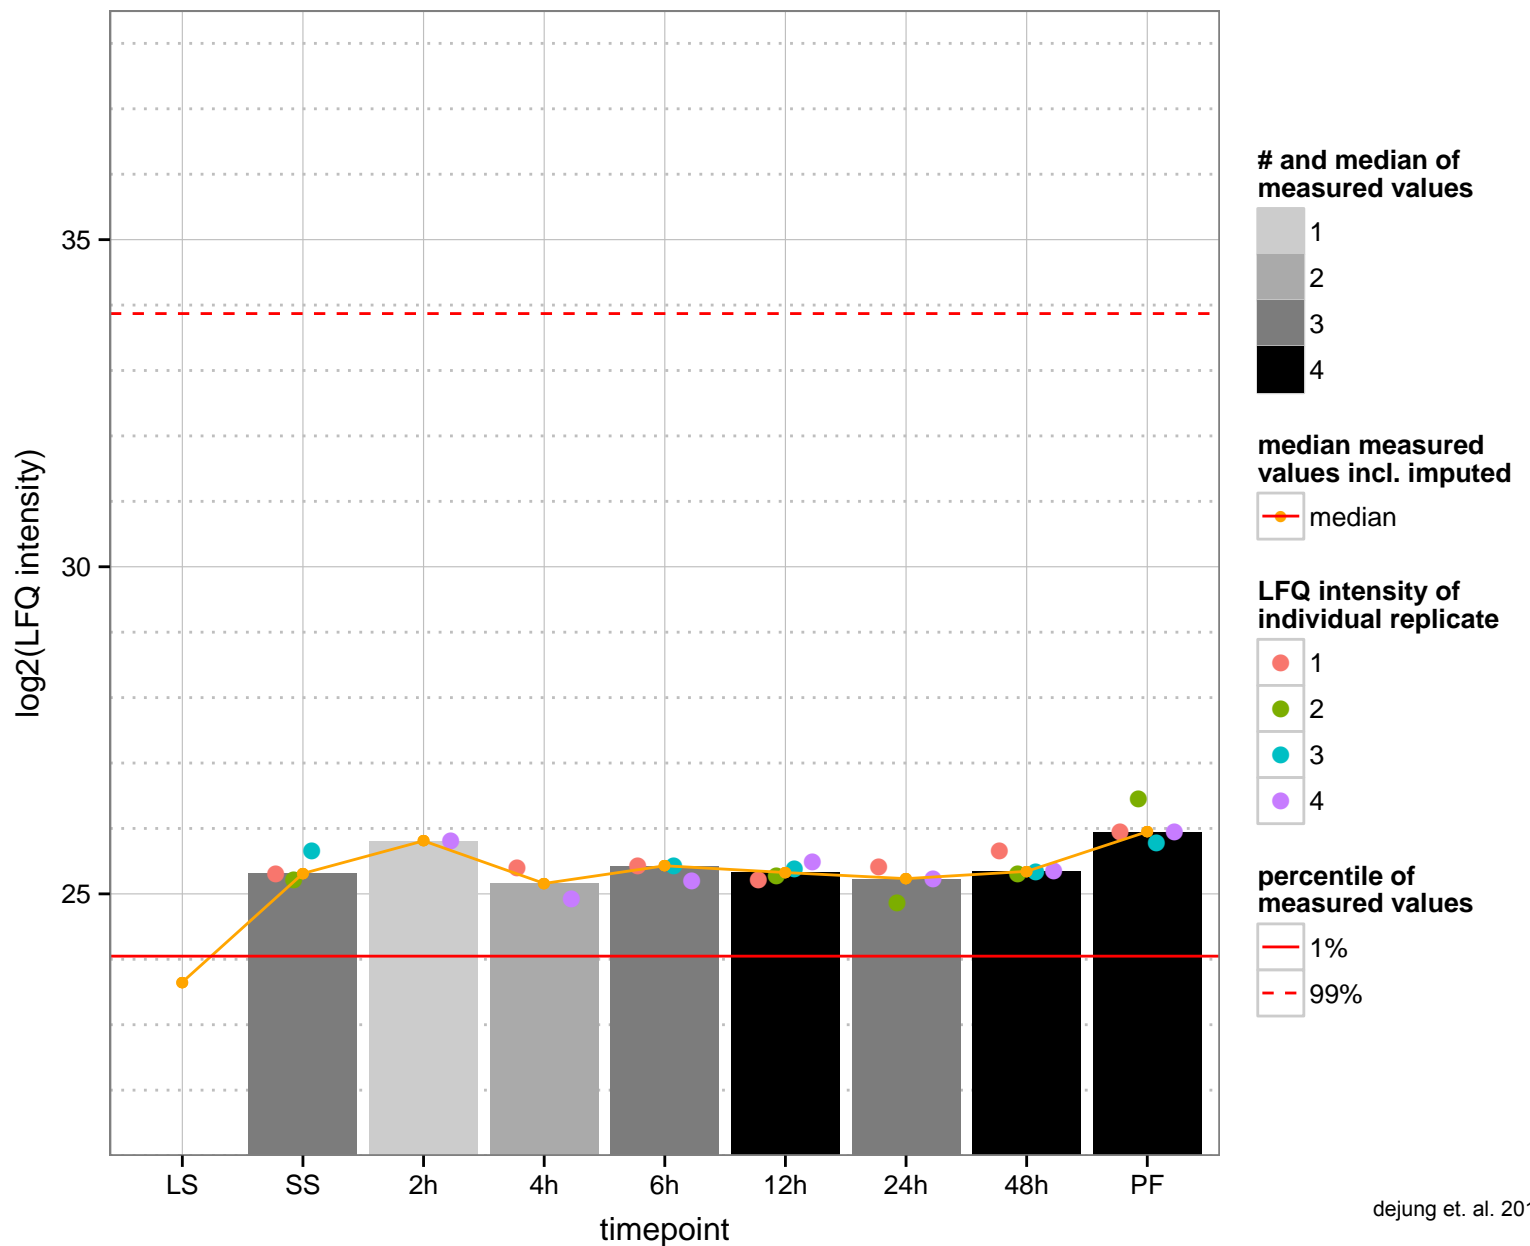

hypothetical protein, conserved  
 Tb927.10.9140  
 AGOF: oxidoreductase activity  
 AGOC: mitochondrion  
 AGOP: null  
 PGOF: oxidoreductase activity  
 PGOC: null  
 PGOP: oxidation–reduction process

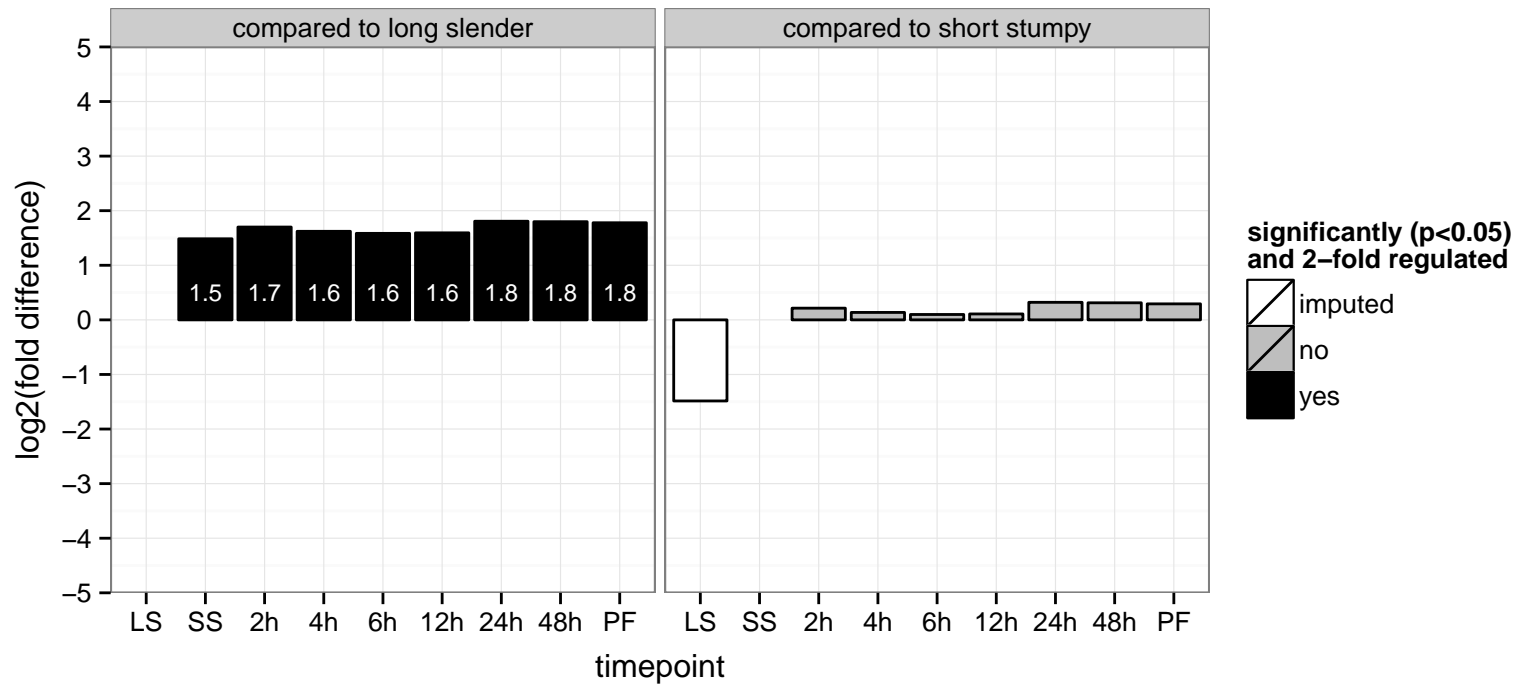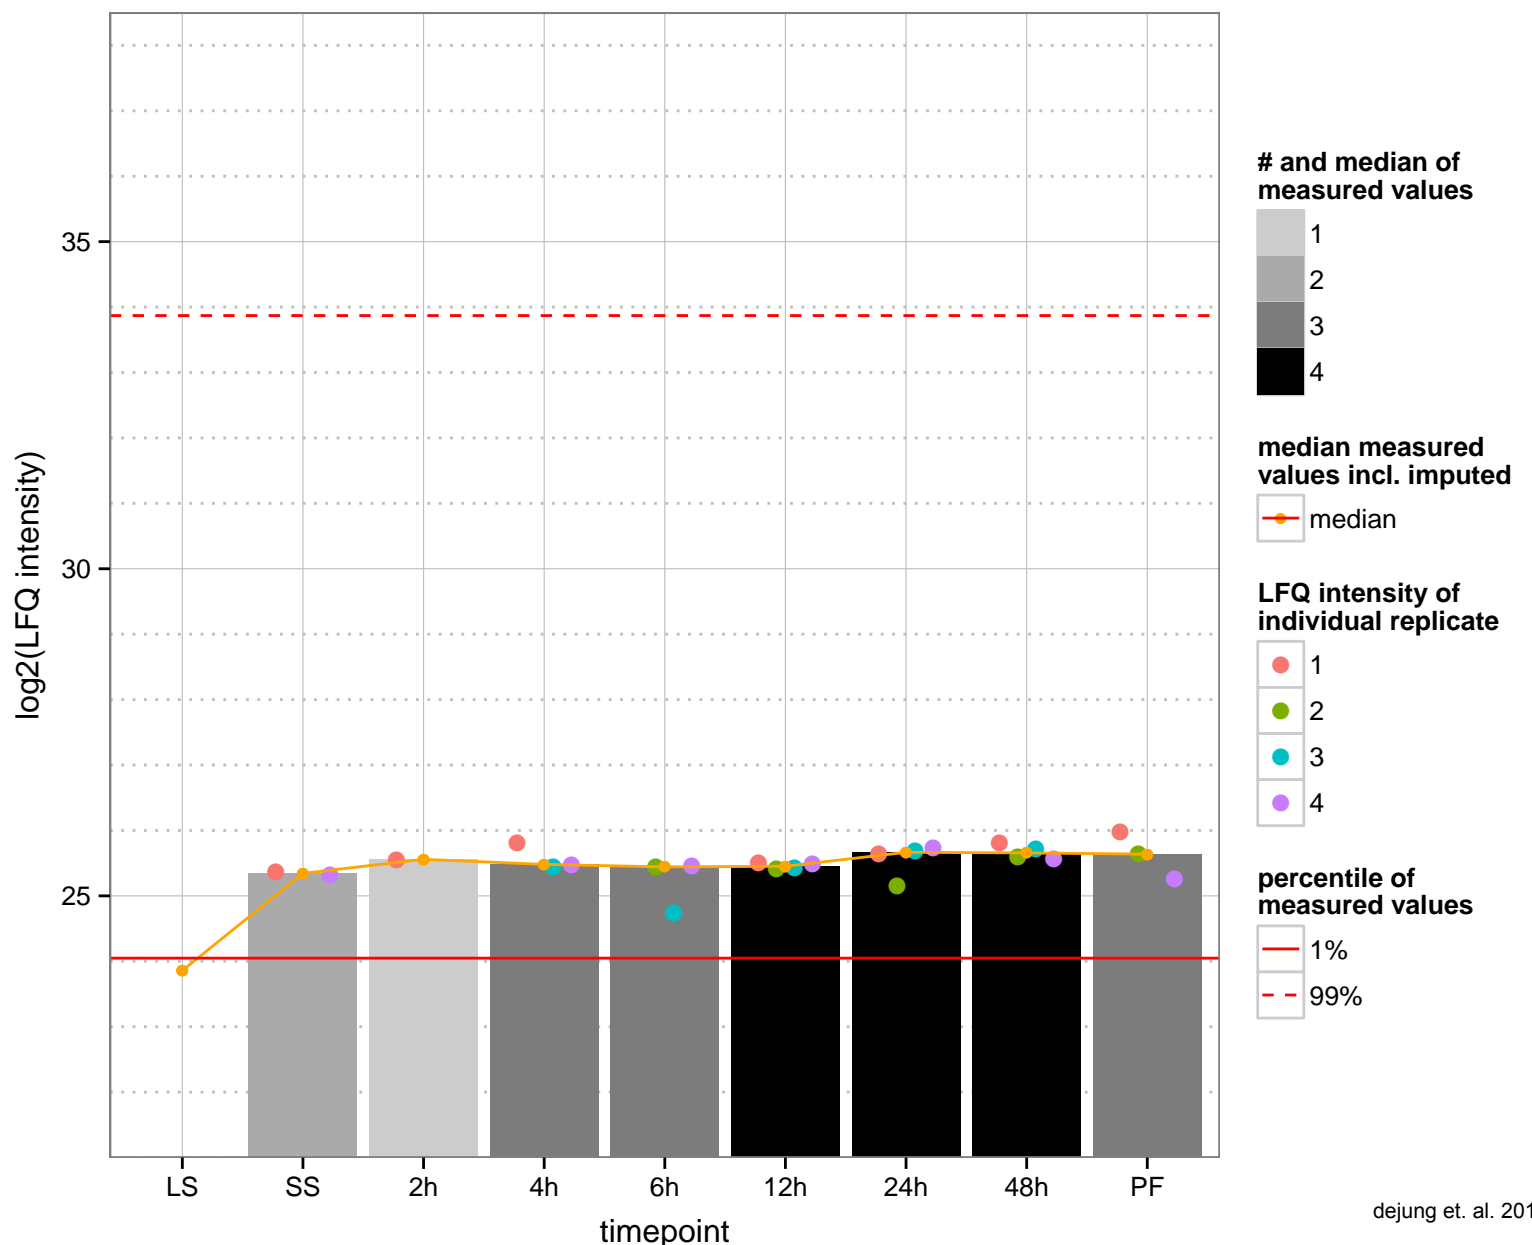

isoleucyl-tRNA synthetase, putative (IleRS)

Tb927.10.9190

AGOF: ATP binding, isoleucine-tRNA ligase activity, zinc ion binding

AGOC: cytoplasm, mitochondrion

AGOP: isoleucyl-tRNA aminoacylation, translation

PGOF: ATP binding, aminoacyl-tRNA editing activity, aminoacyl-tRNA ligase activity, isoleucine-tRNA ligase activity, nucleotidyl transferase activity

PGOC: cytoplasm

PGOP: isoleucyl-tRNA aminoacylation, tRNA aminoacylation for protein translation

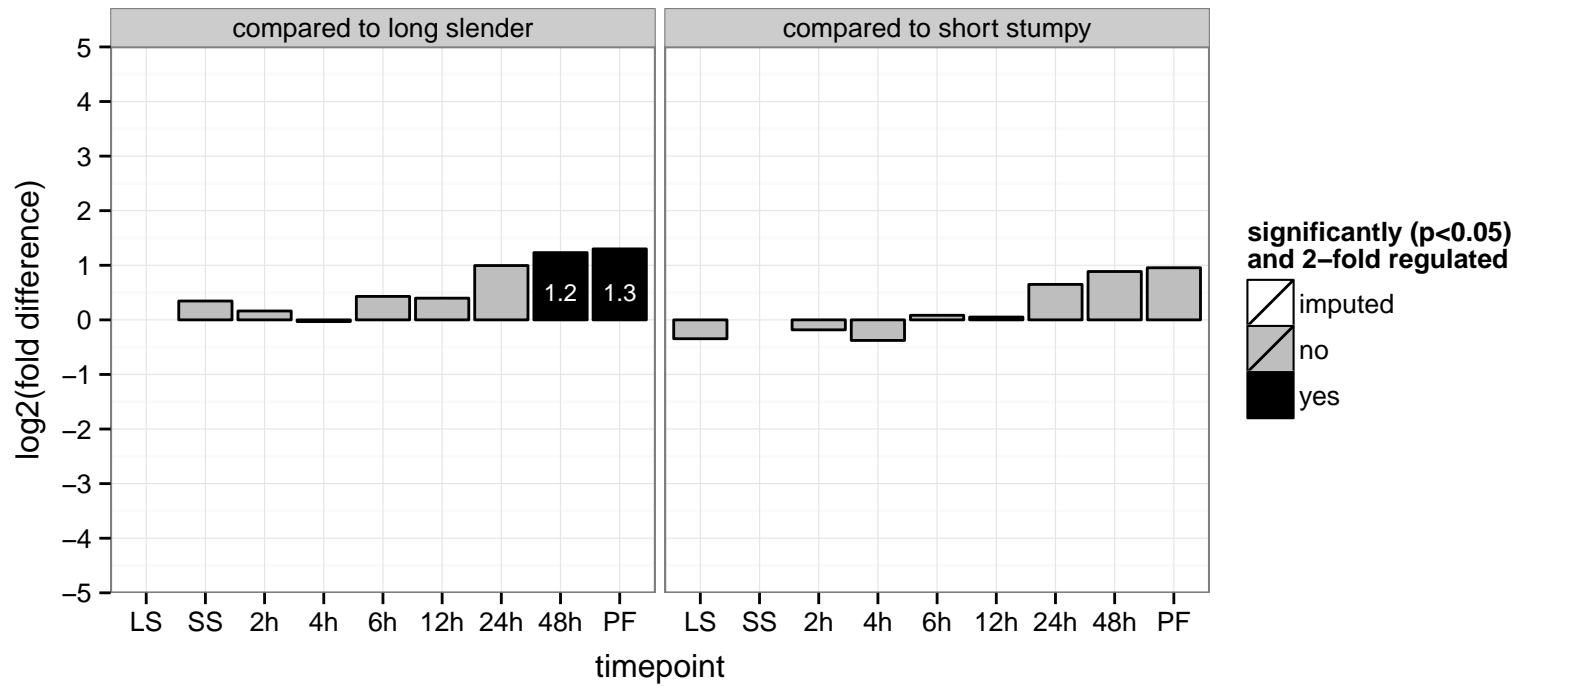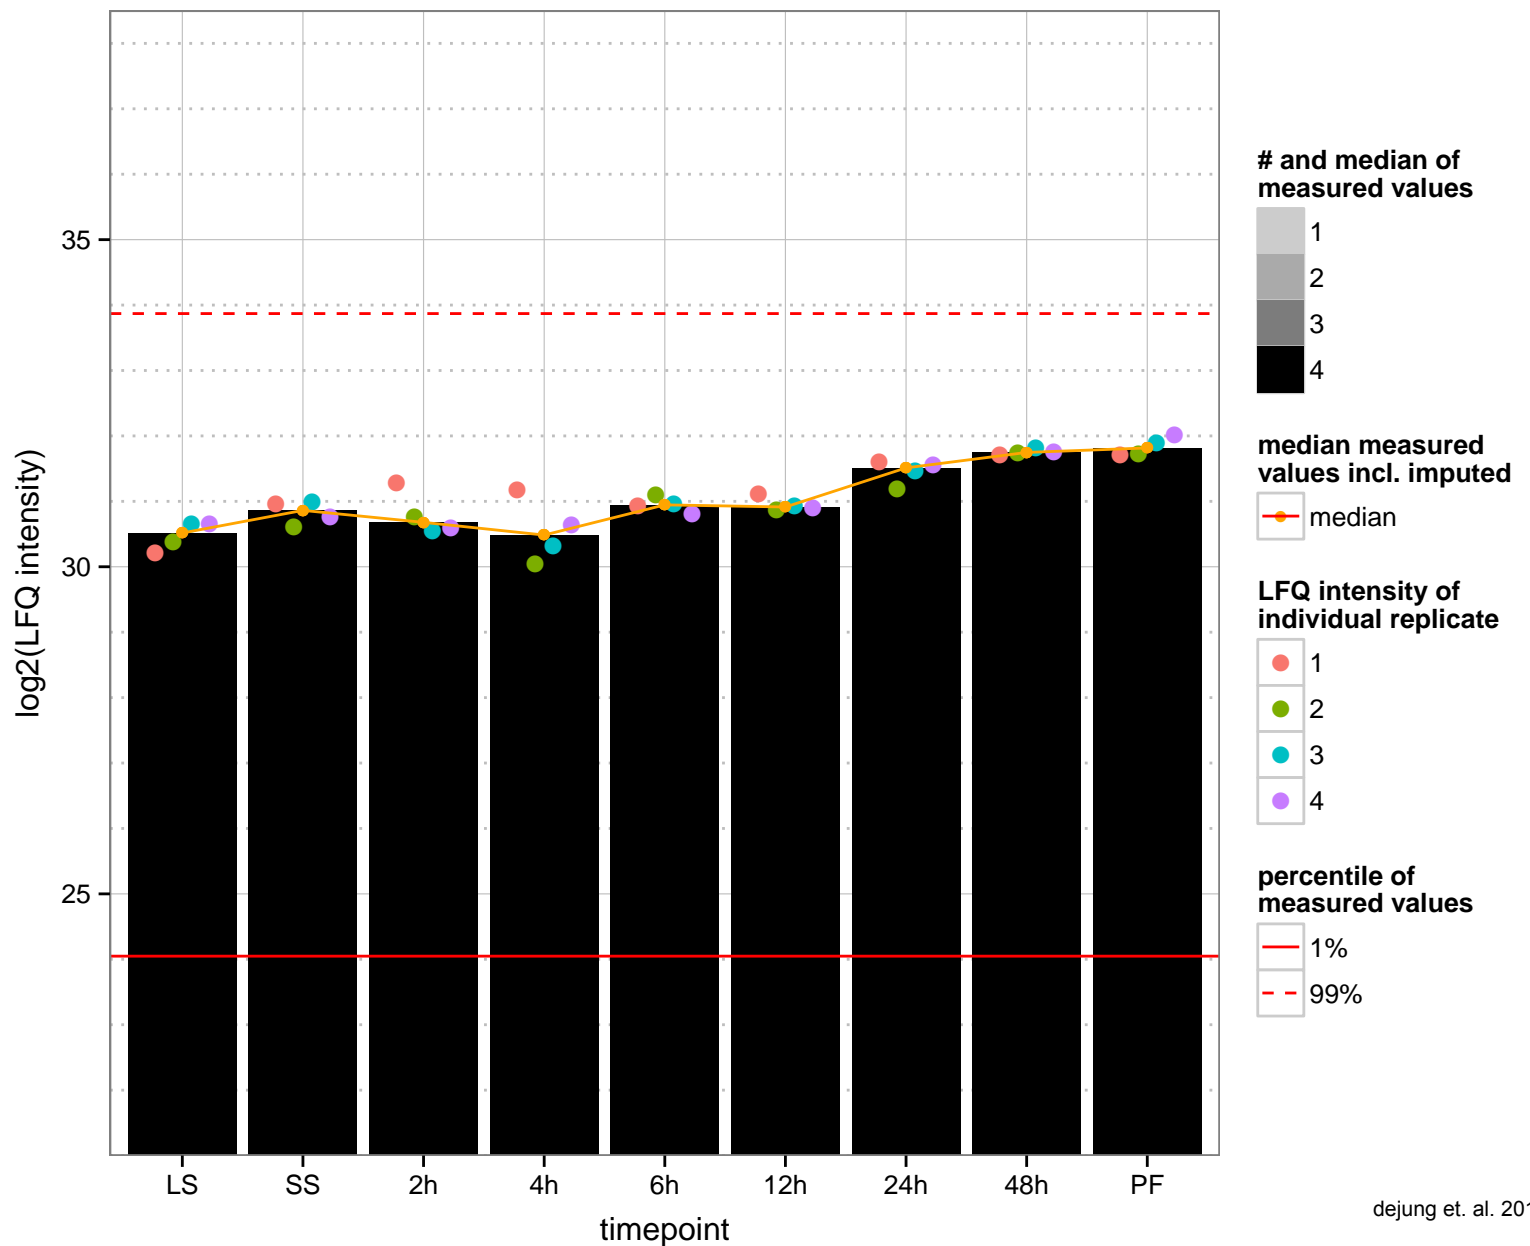

hypothetical protein, conserved  
 Tb927.10.9240  
 AGOF: null  
 AGOC: cytoplasm  
 AGOP: pathogenesis, regulation of protein secretion  
 PGO: null  
 PGOC: cytoplasm  
 PGOP: pathogenesis, regulation of protein secretion

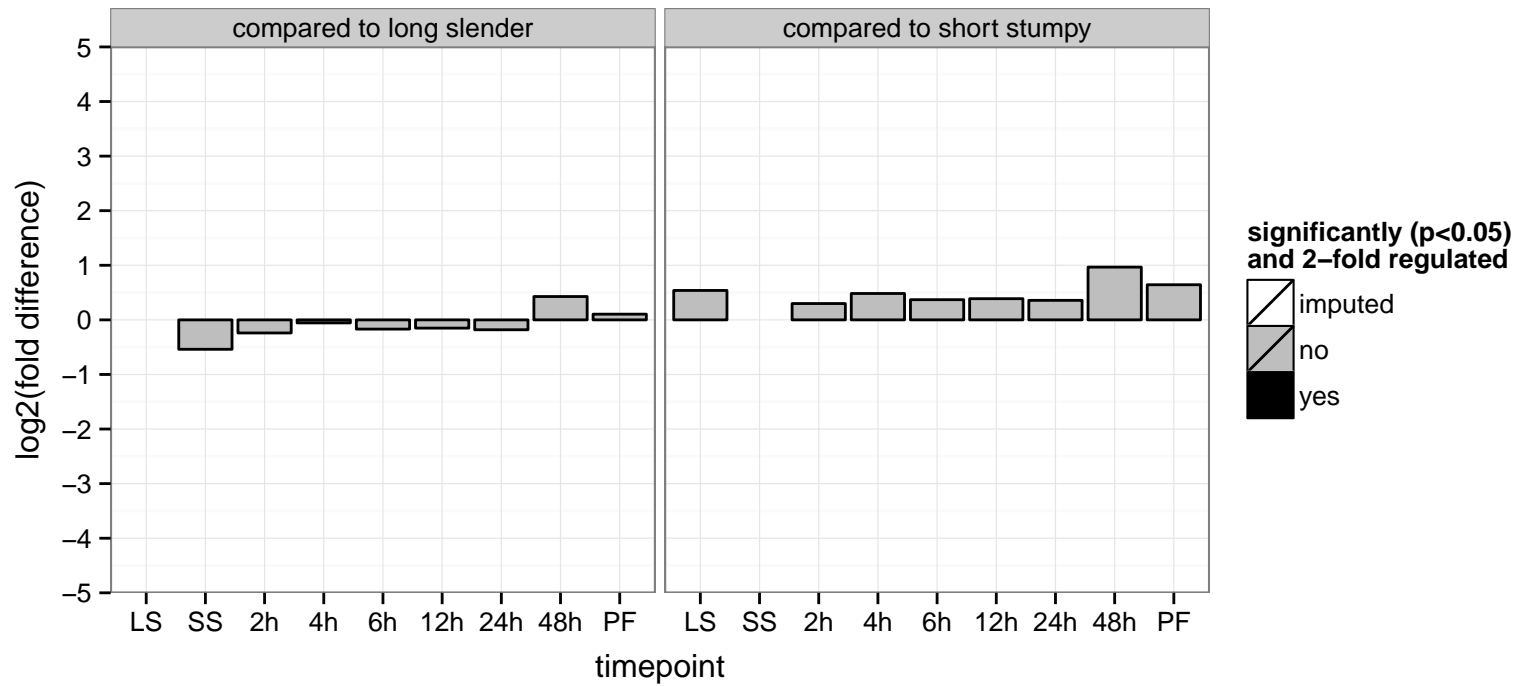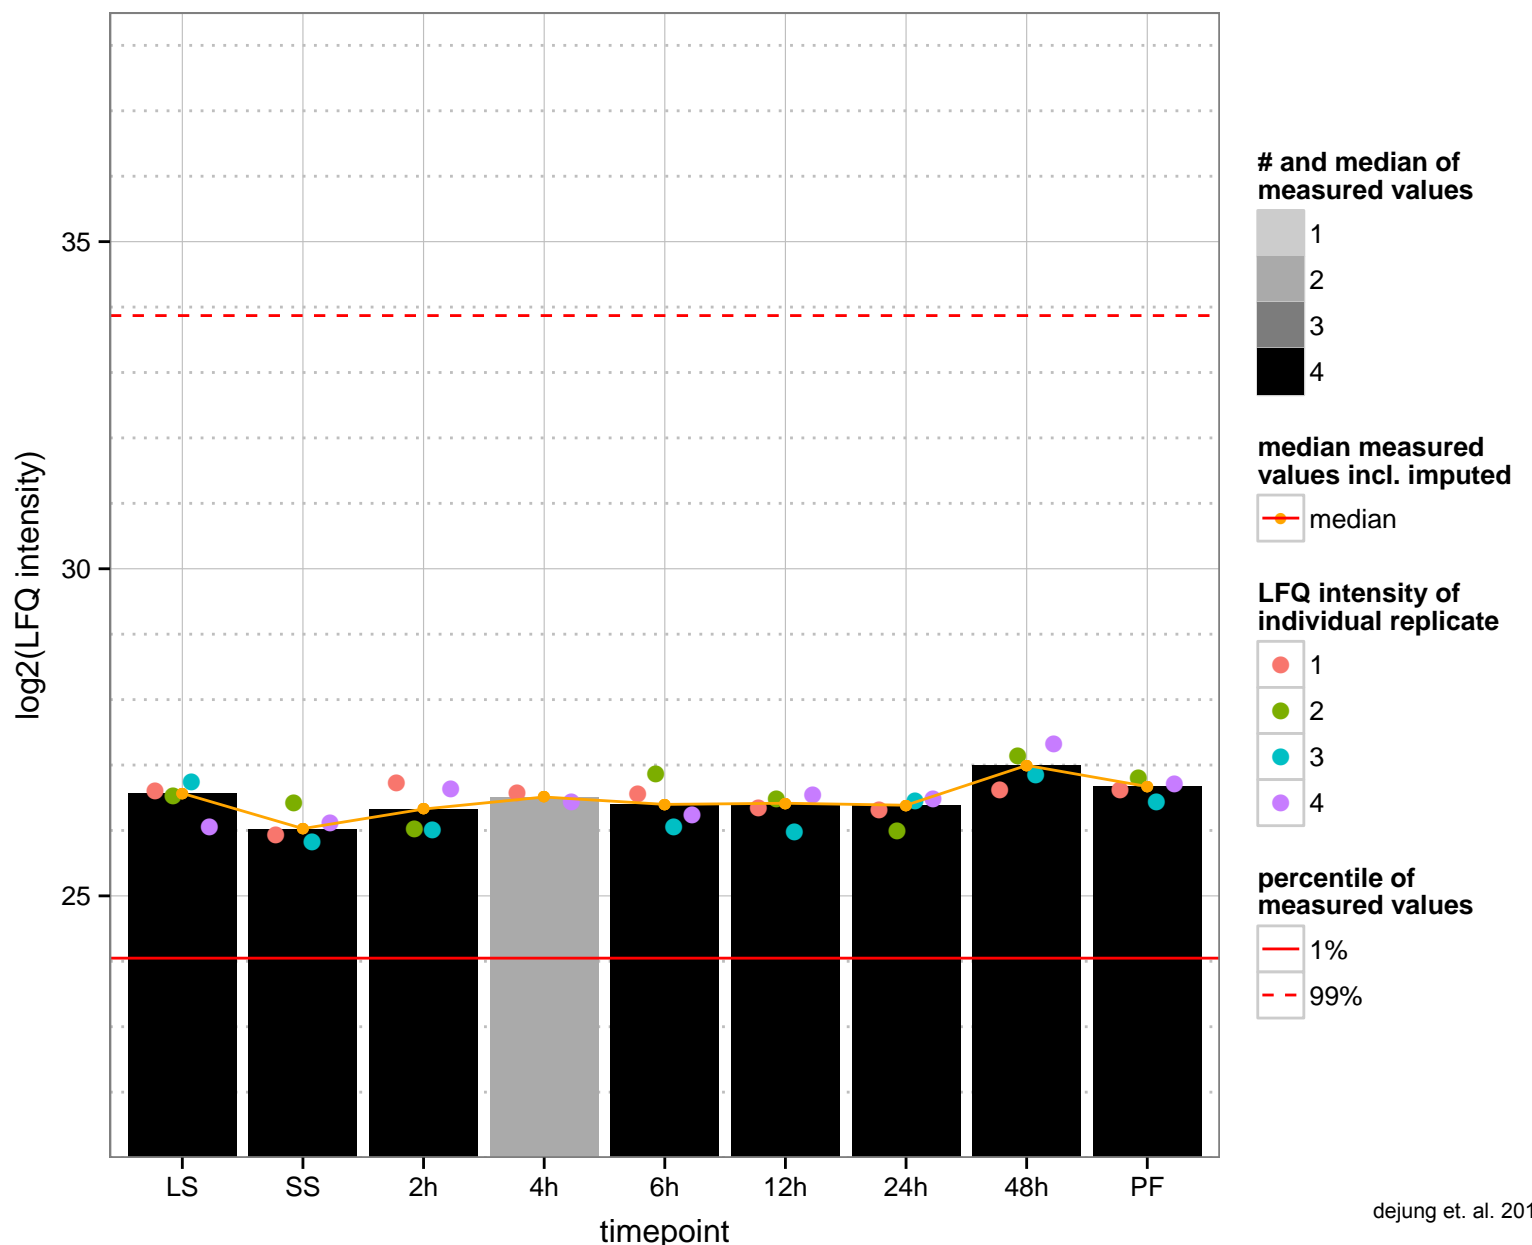

G-actin binding protein, putative, CAP/Srv2p  
 Tb927.10.9250  
 AGOF: actin binding  
 AGOC: null  
 AGOP: activation of adenylate cyclase activity, cytoskeleton organization  
 PGO: actin binding  
 PGO: null  
 PGO: cytoskeleton organization

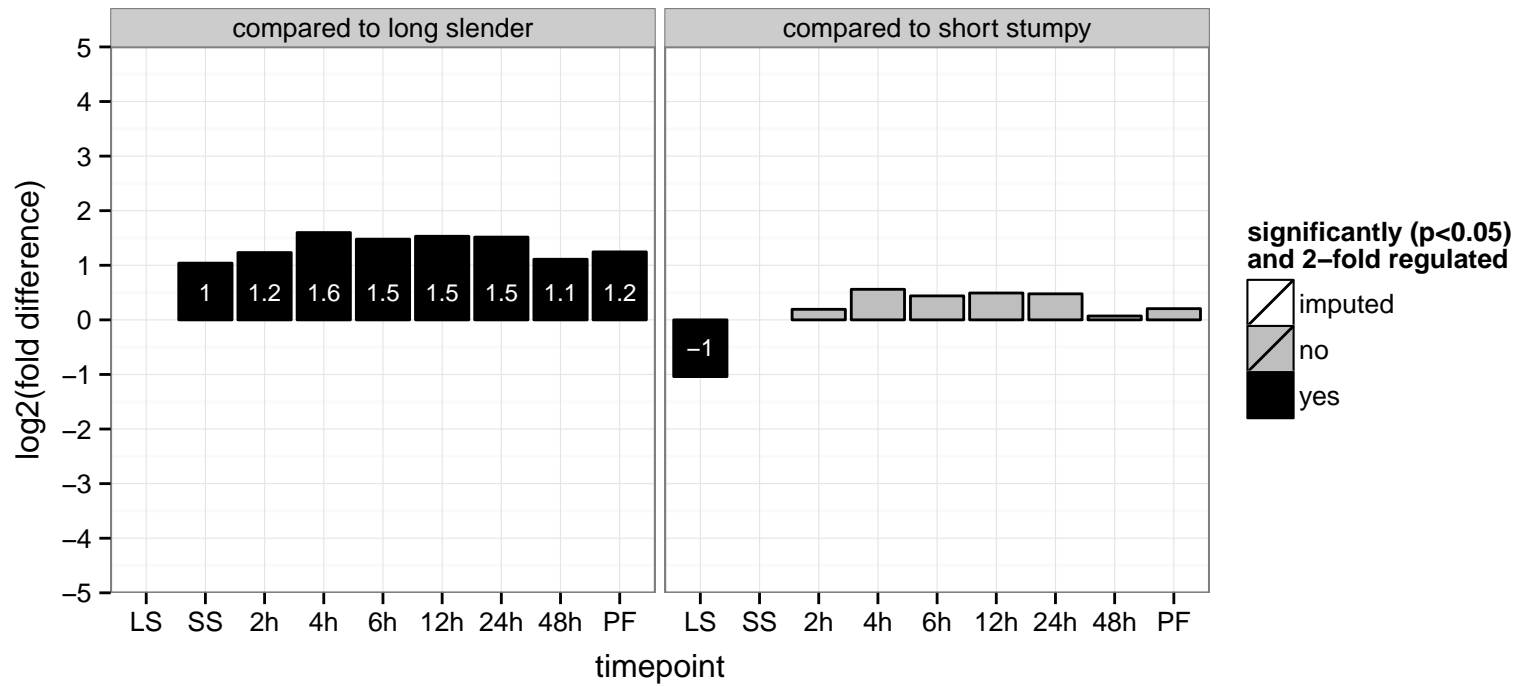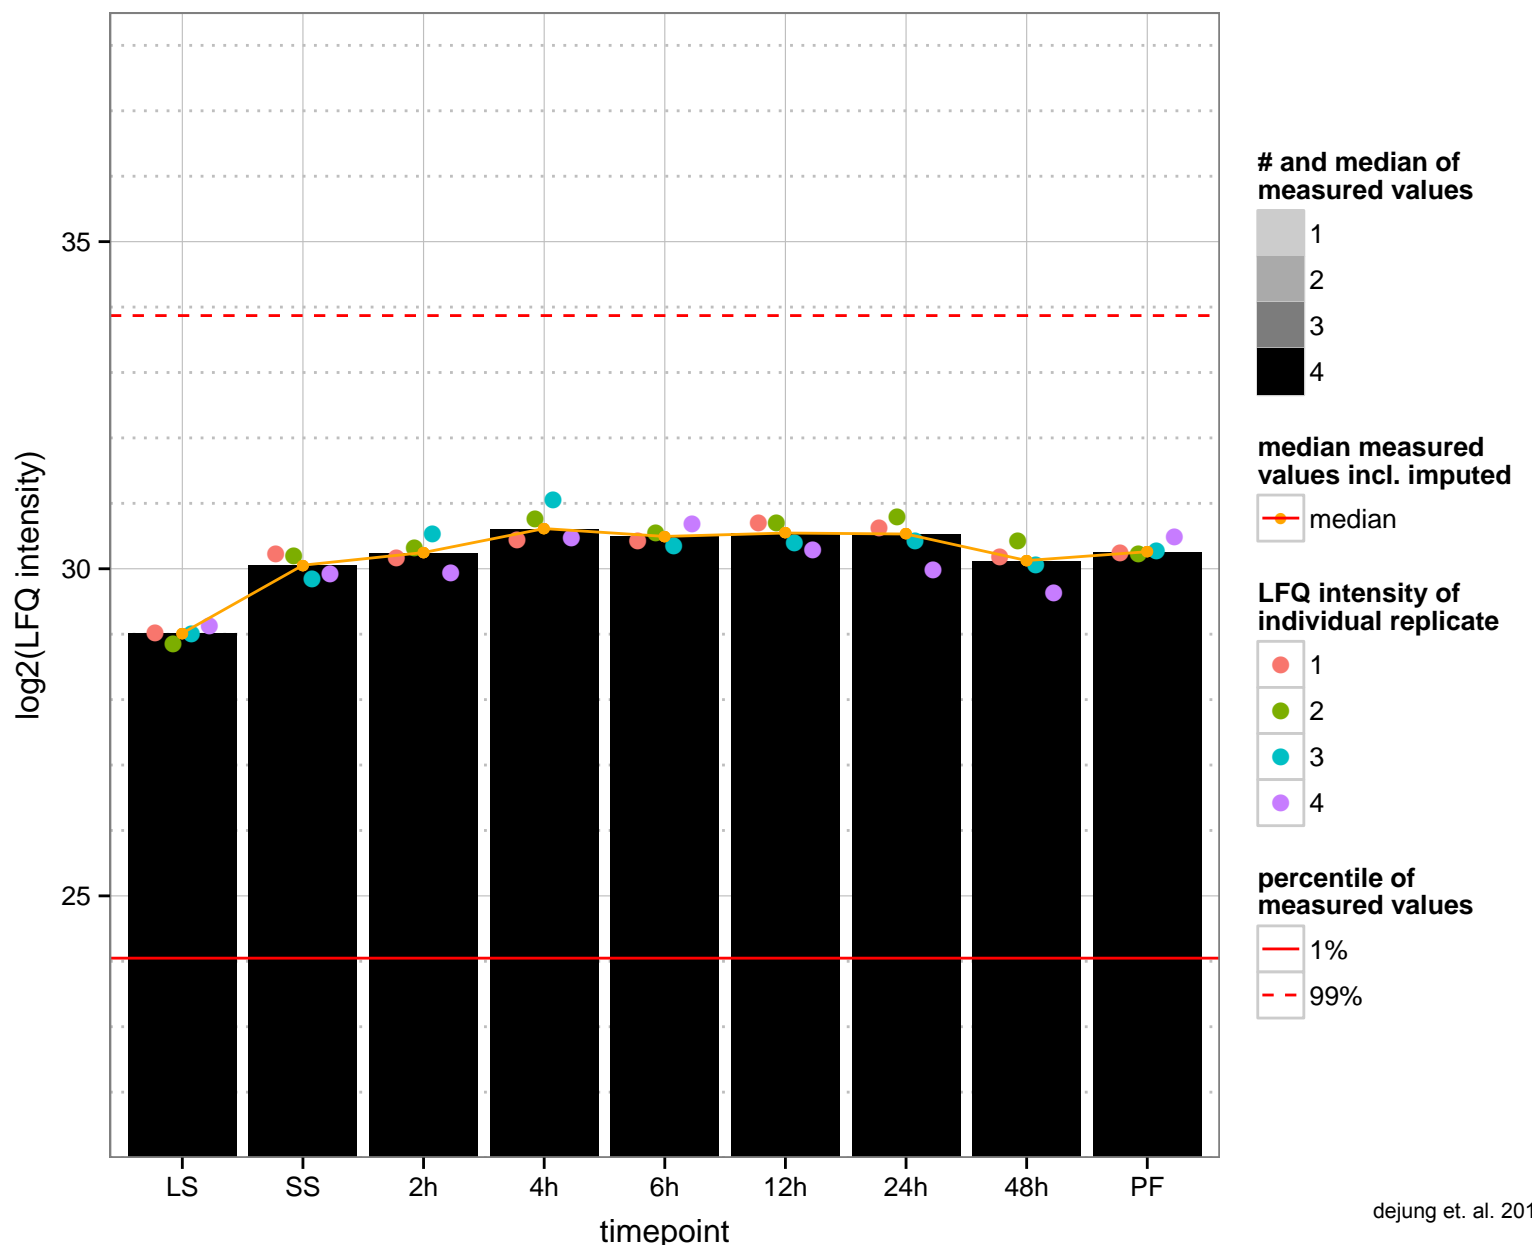

hypothetical protein, conserved  
 Tb927.10.9260  
 AGOF: null  
 AGOC: null  
 AGOP: null  
 PGO: binding  
 PGOC: null  
 PGOP: null

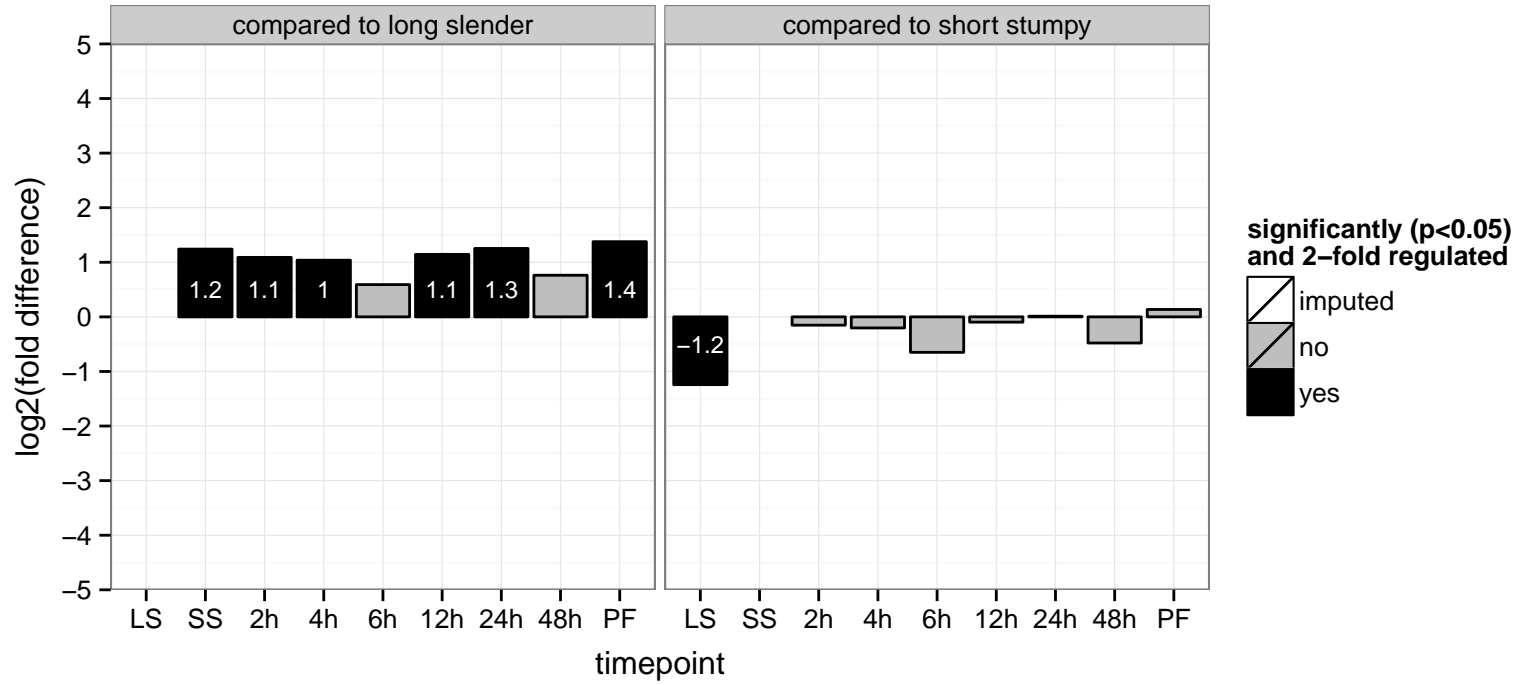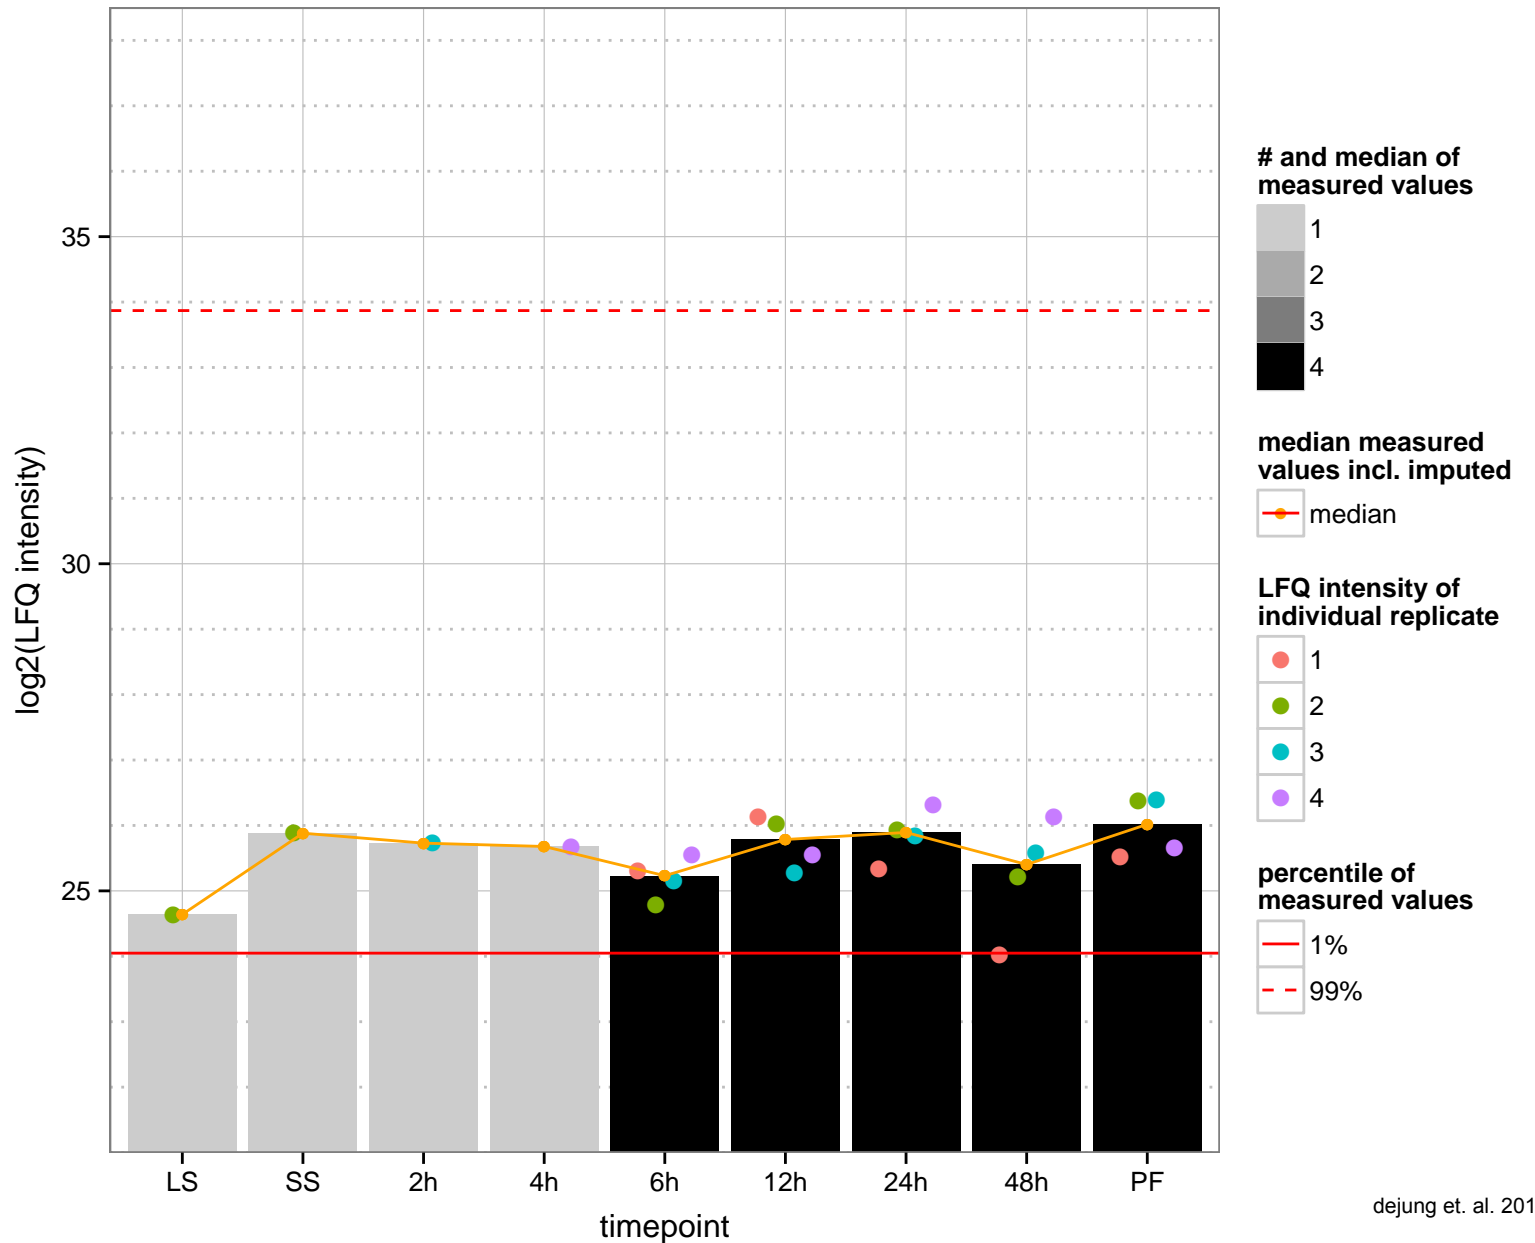



hypothetical protein, conserved  
 Tb927.10.9390  
 AGOF: null  
 AGOC: null  
 AGOP: null  
 PGOF: null  
 PGO C: null  
 PGOP: null

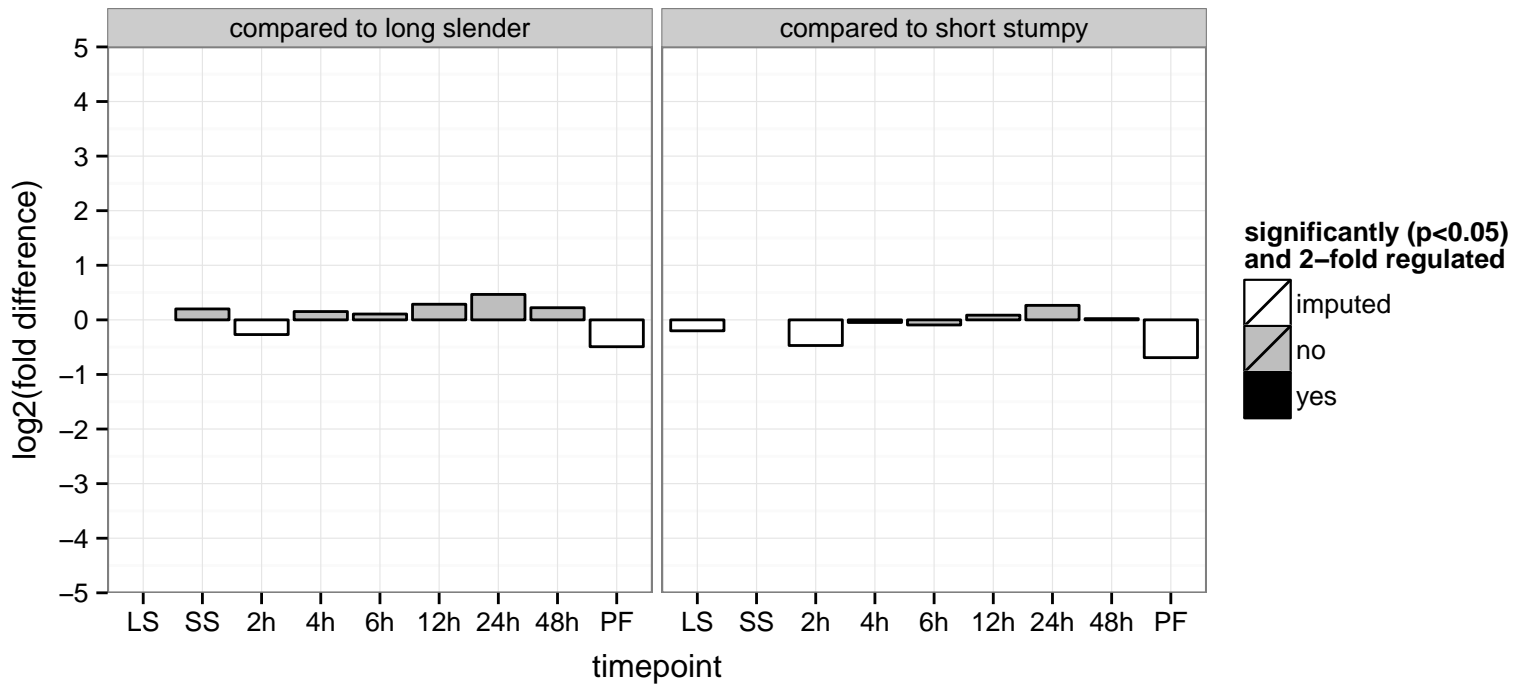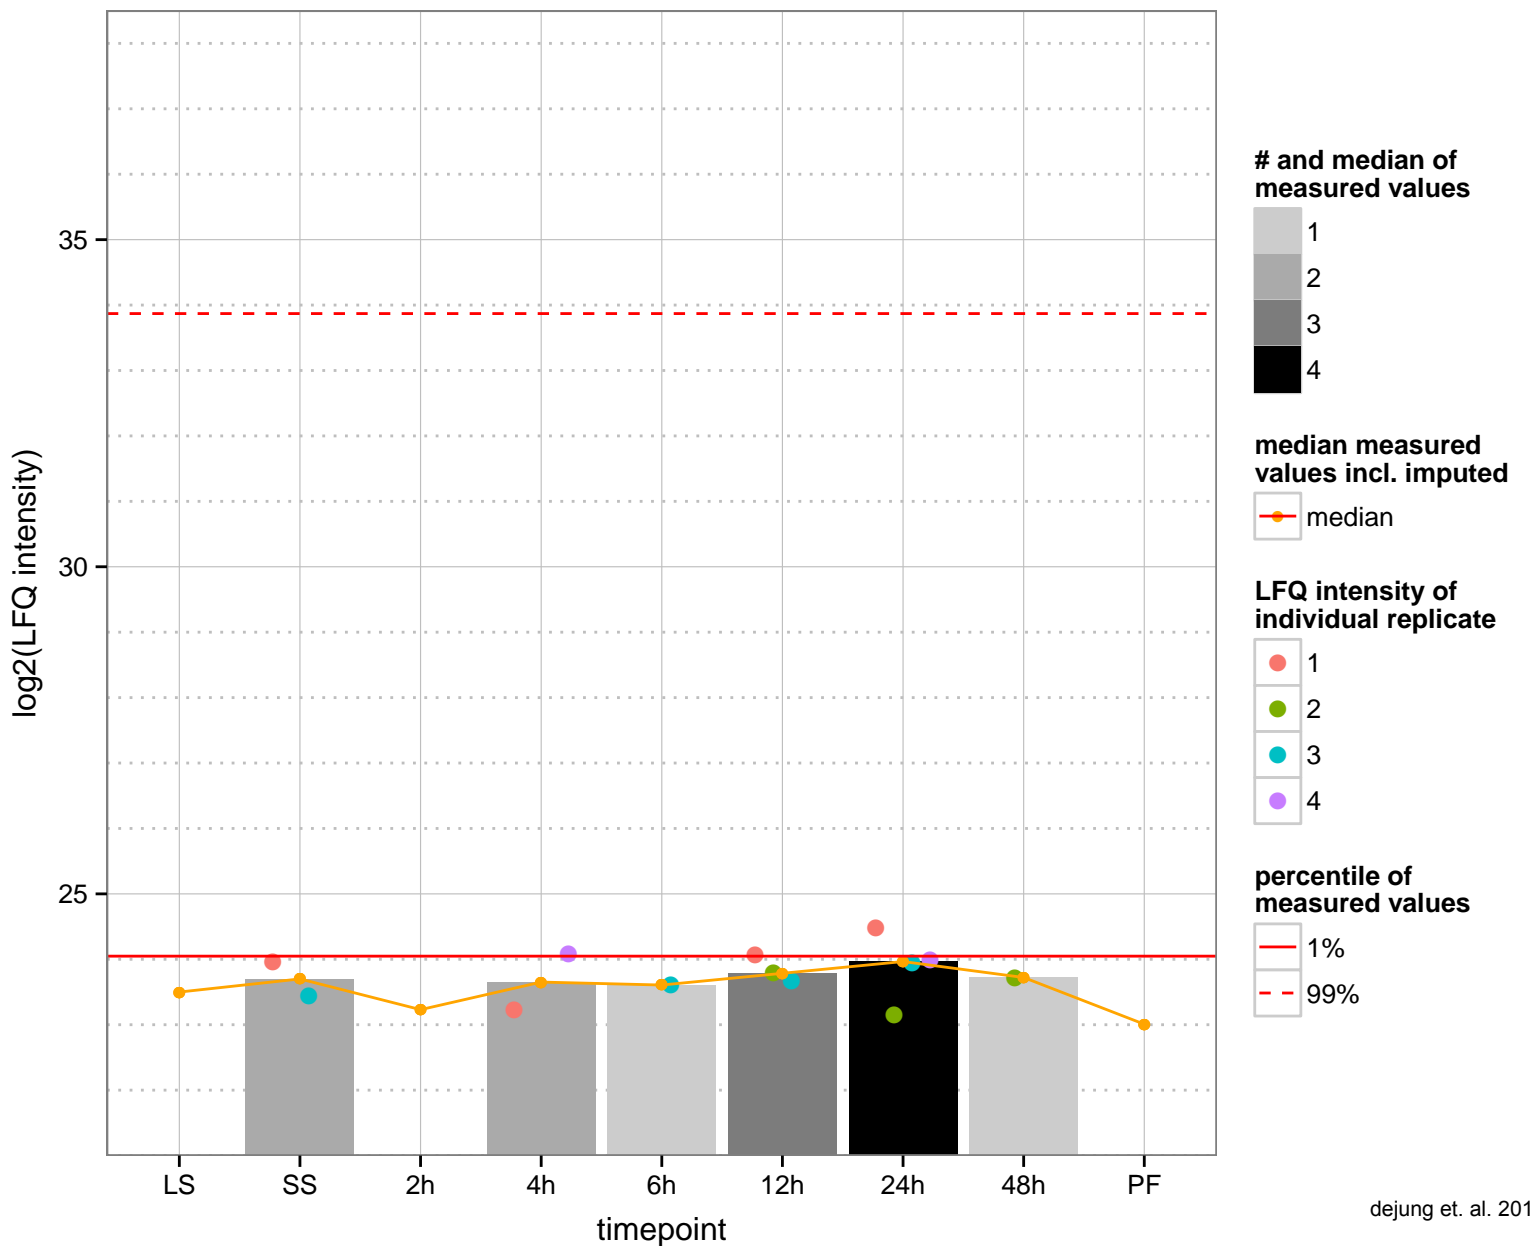

branch point binding protein, putative  
 Tb927.10.9400  
 AGOF: transcription corepressor activity  
 AGOC: nucleus  
 AGOP: spliceosomal complex assembly  
 PGO: null  
 PGO: null  
 PGO: null

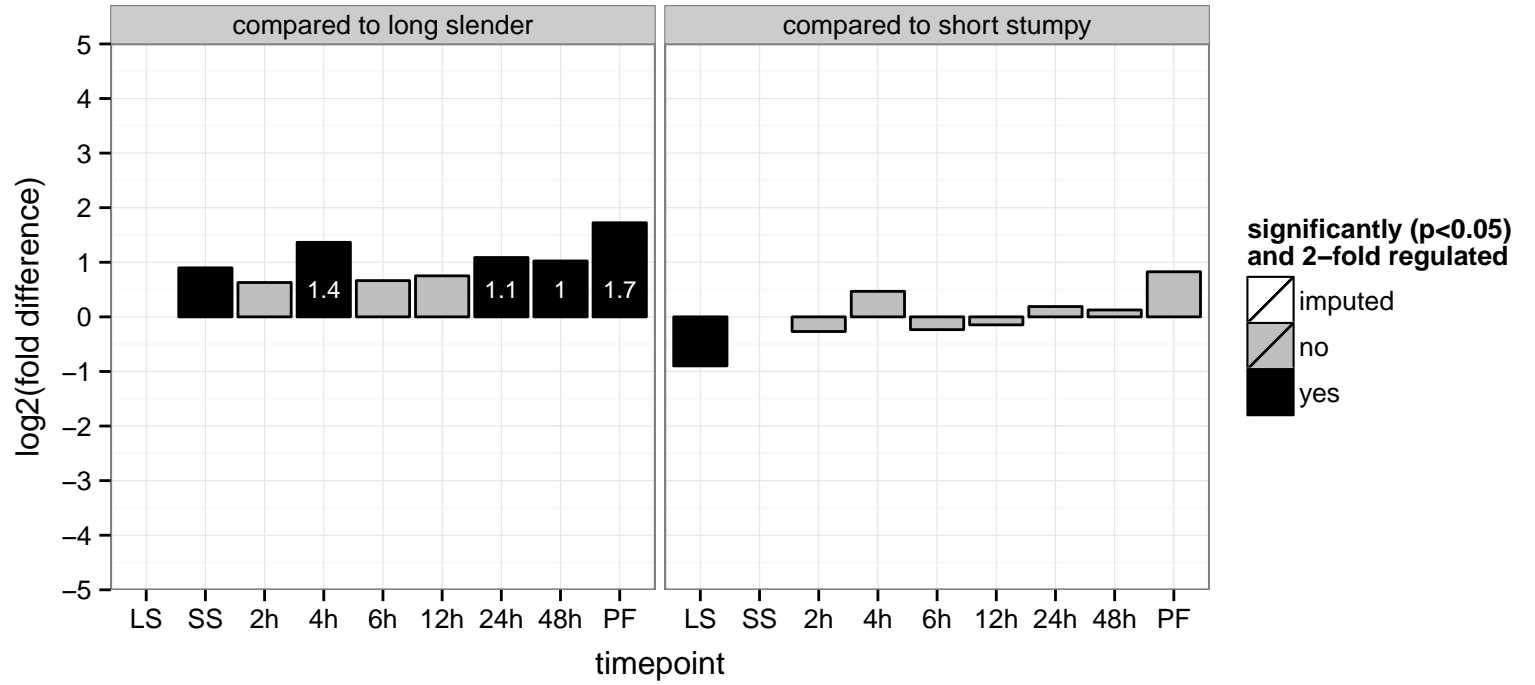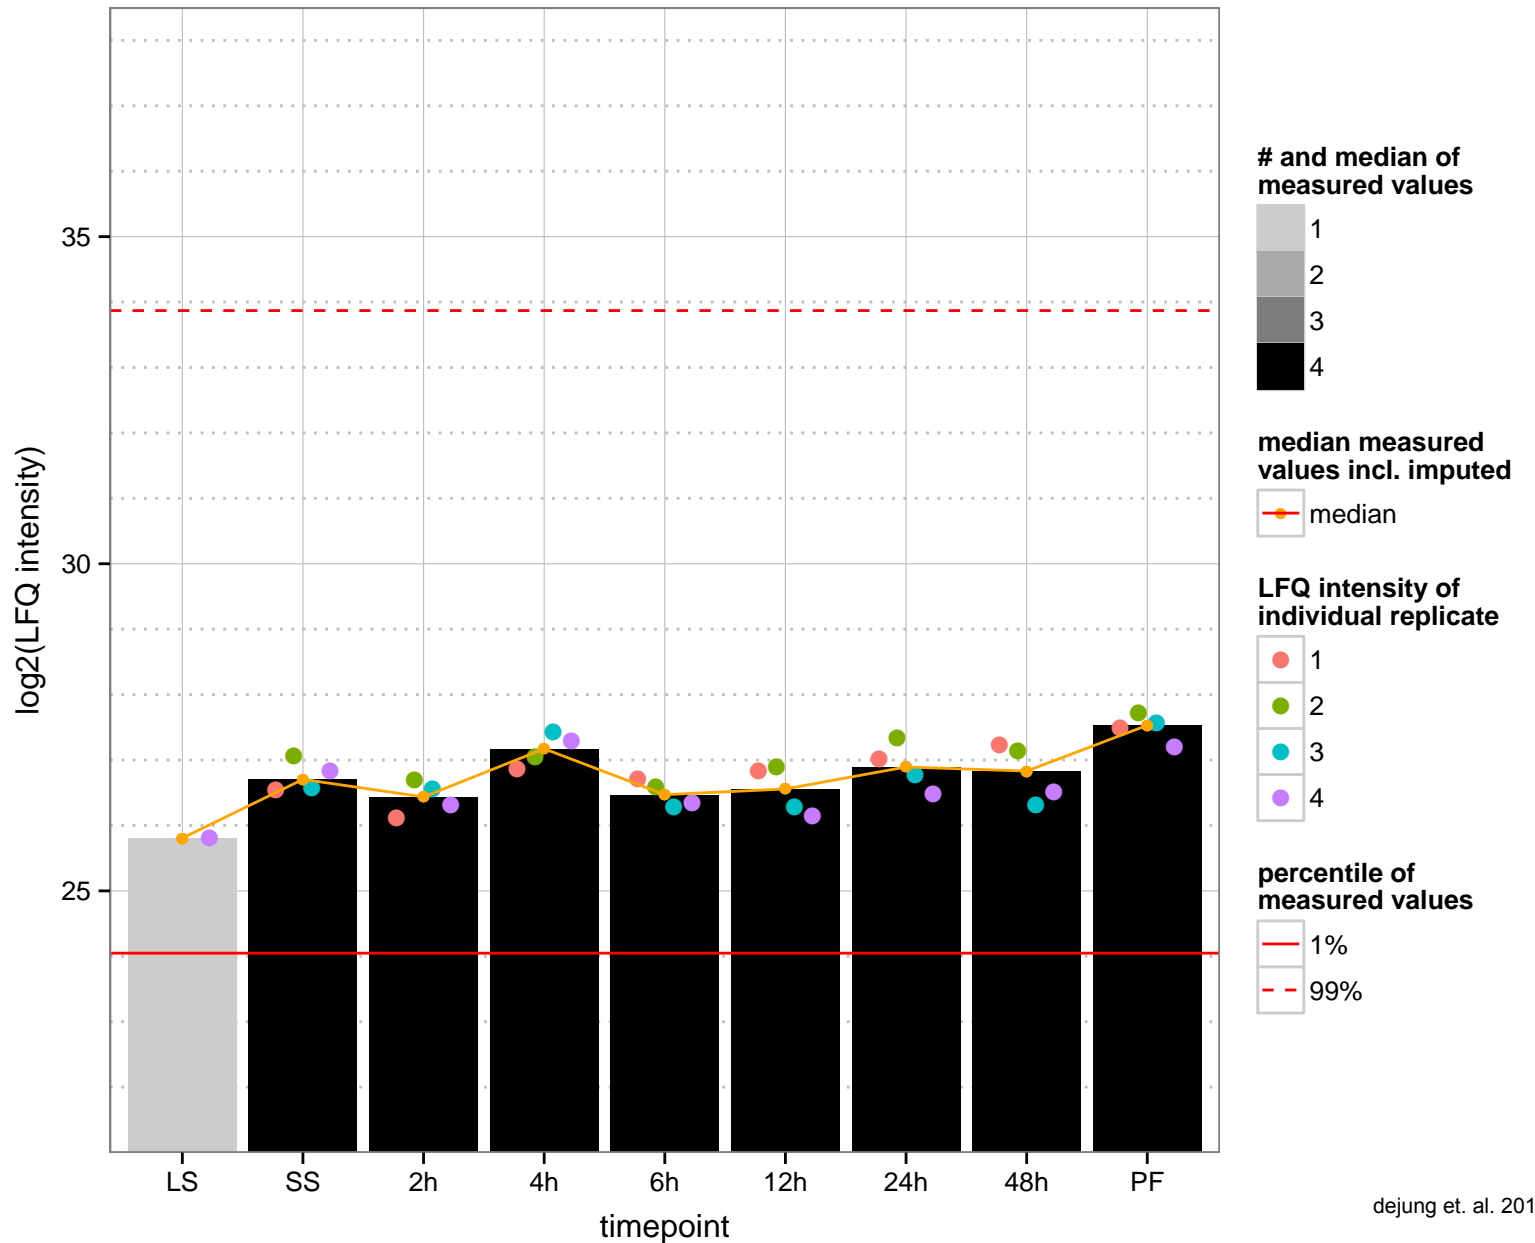

selenophosphate synthetase, putative (SPS2)

Tb927.10.9410

AGOF: ATP binding, selenide, water dikinase activity

AGOC: null

AGOP: tRNA aminoacylation for protein translation

PGOF: ATP binding, catalytic activity, selenide, water dikinase activity

PGOC: null

PGOP: null

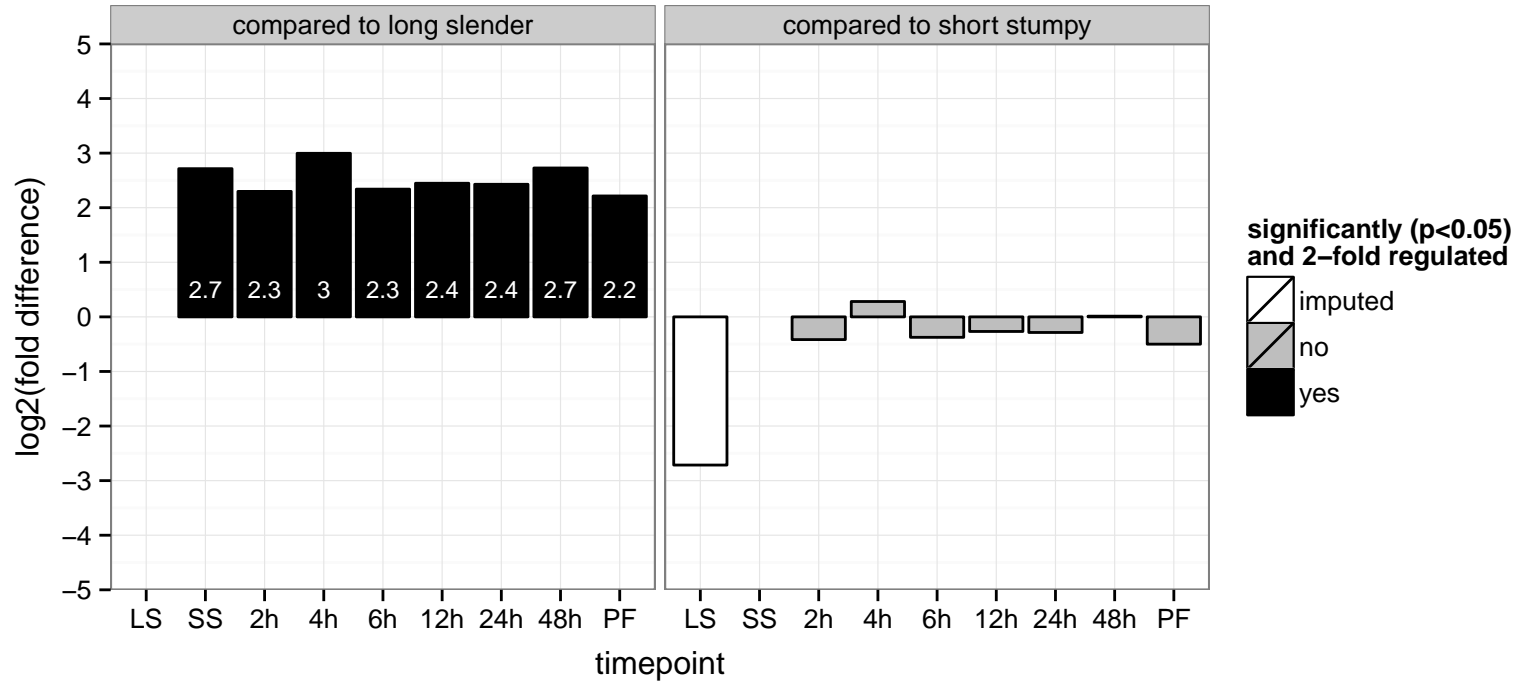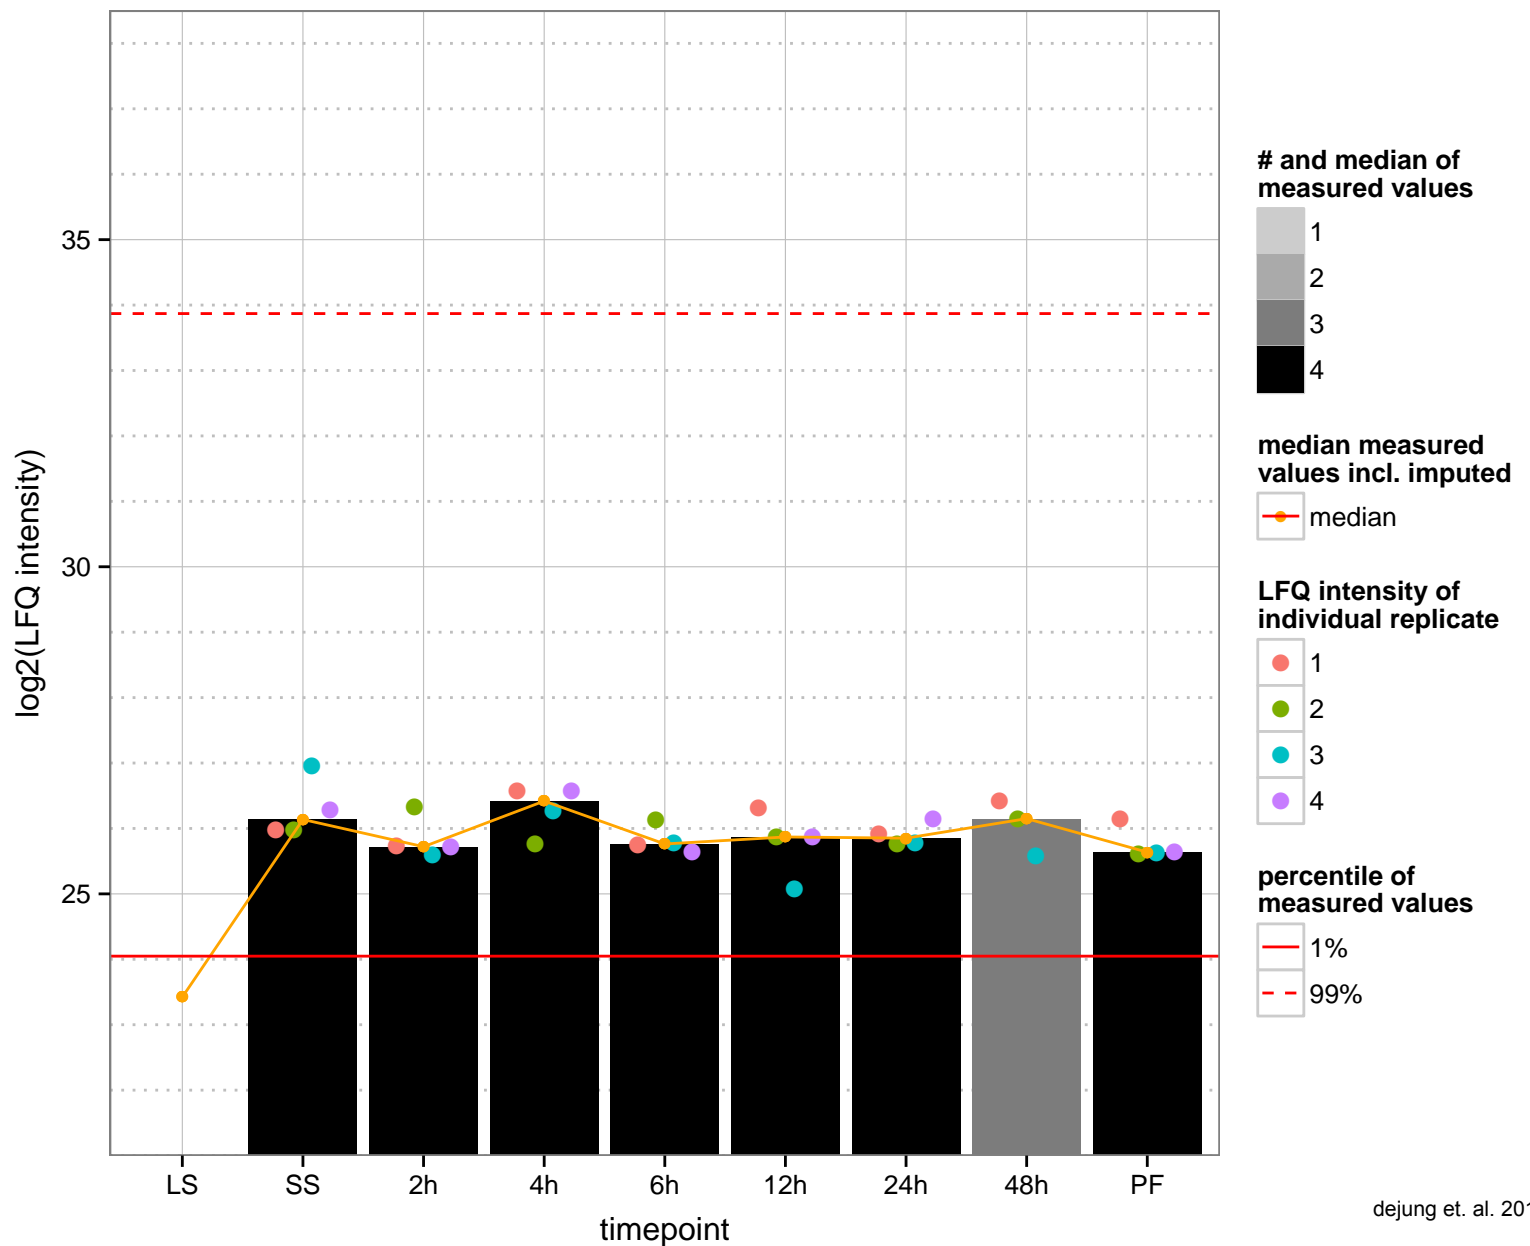

phosphoribosylpyrophosphate synthetase, putative (PRS)

Tb927.10.9430

AGOF: ATP binding, magnesium ion binding, ribose phosphate diphosphokinase activity

AGOC: null

AGOP: nucleoside metabolic process, purine ribonucleotide biosynthetic process

PGOF: magnesium ion binding, ribose phosphate diphosphokinase activity

PGOC: null

PGOP: nucleoside metabolic process, nucleotide biosynthetic process

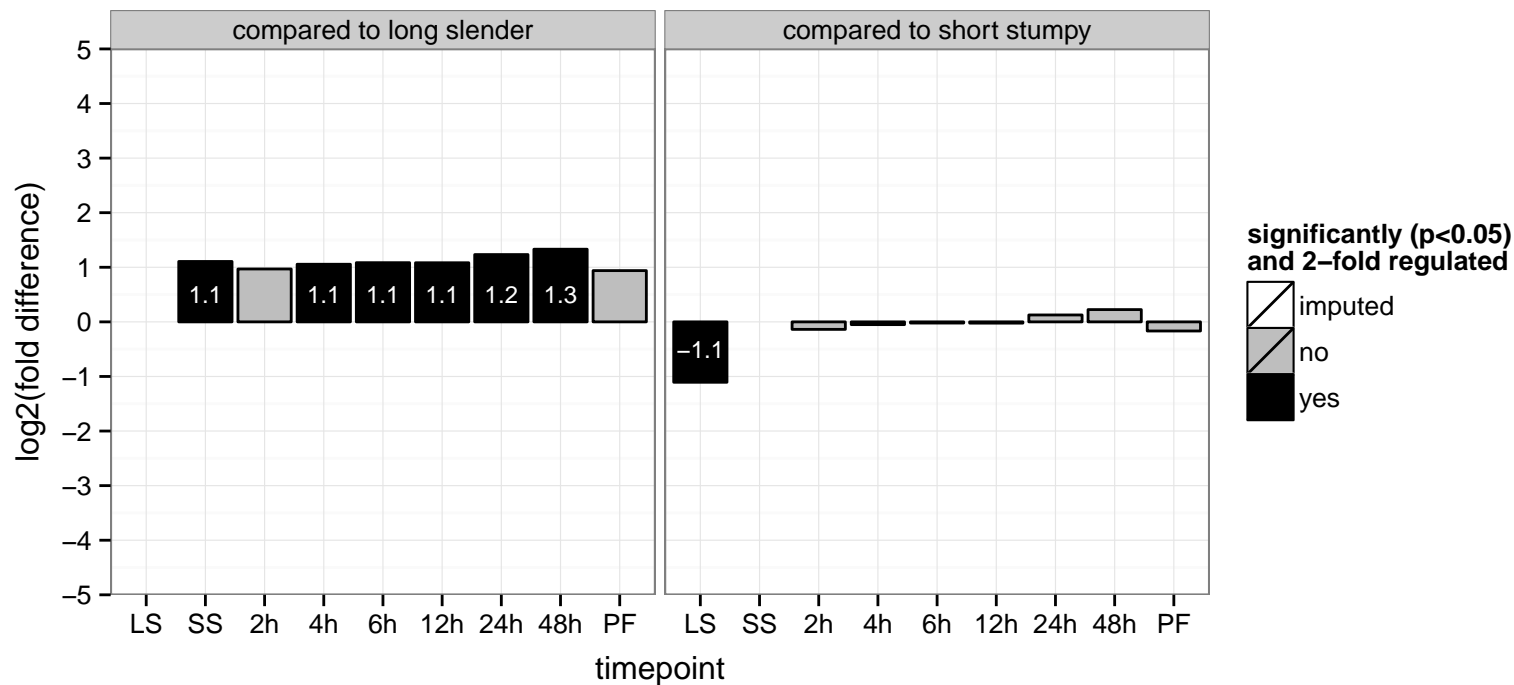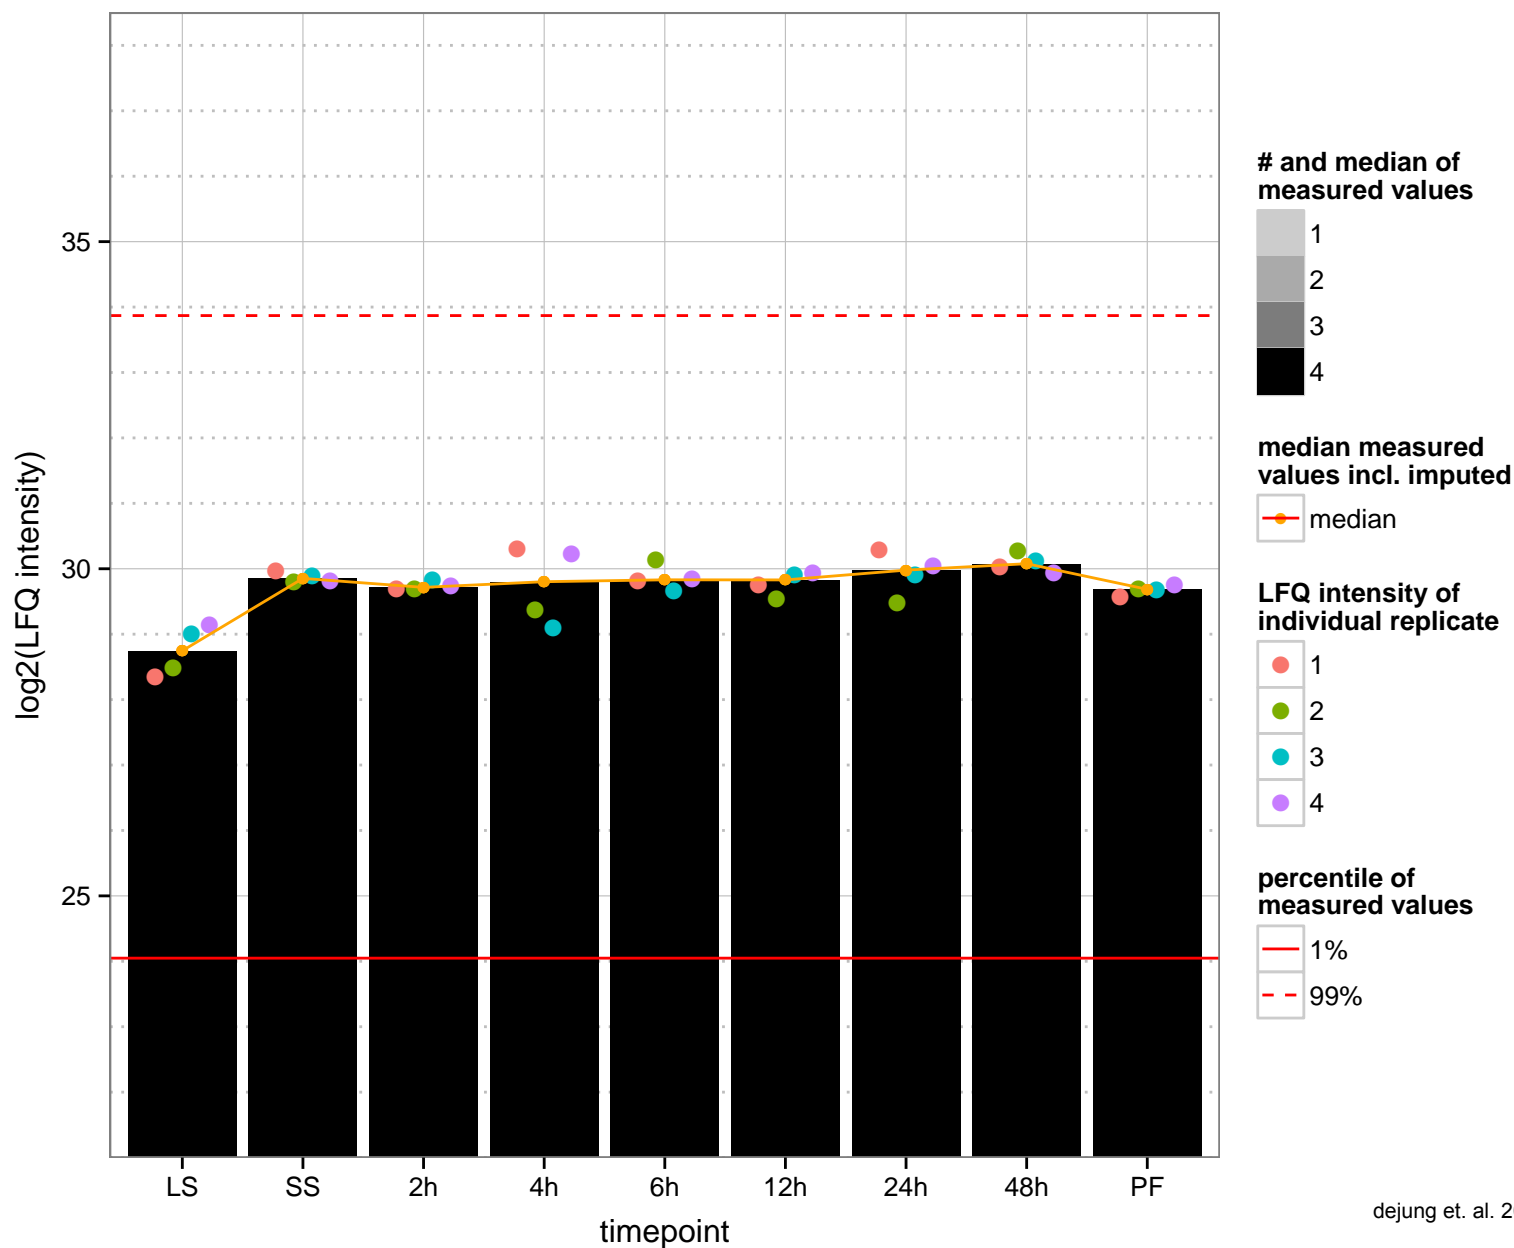

NADH dehydrogenase (54 NDH2)  
 Tb927.10.9440  
 AGOF: NADH dehydrogenase (ubiquinone) activity  
 AGOC: mitochondrion  
 AGOP: mitochondrial electron transport, NADH to ubiquinone  
 PGO: flavin adenine dinucleotide binding, oxidoreductase activity  
 PGO: null  
 PGO: oxidation-reduction process

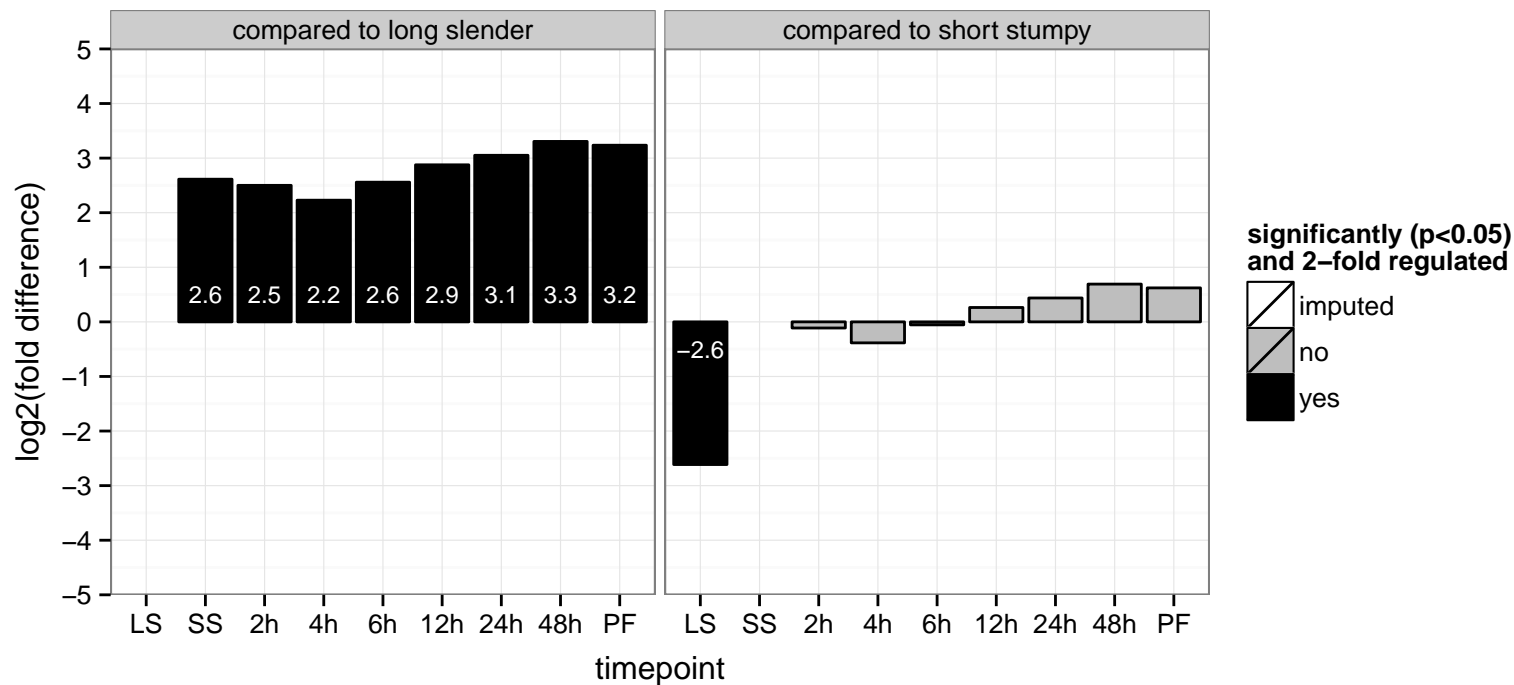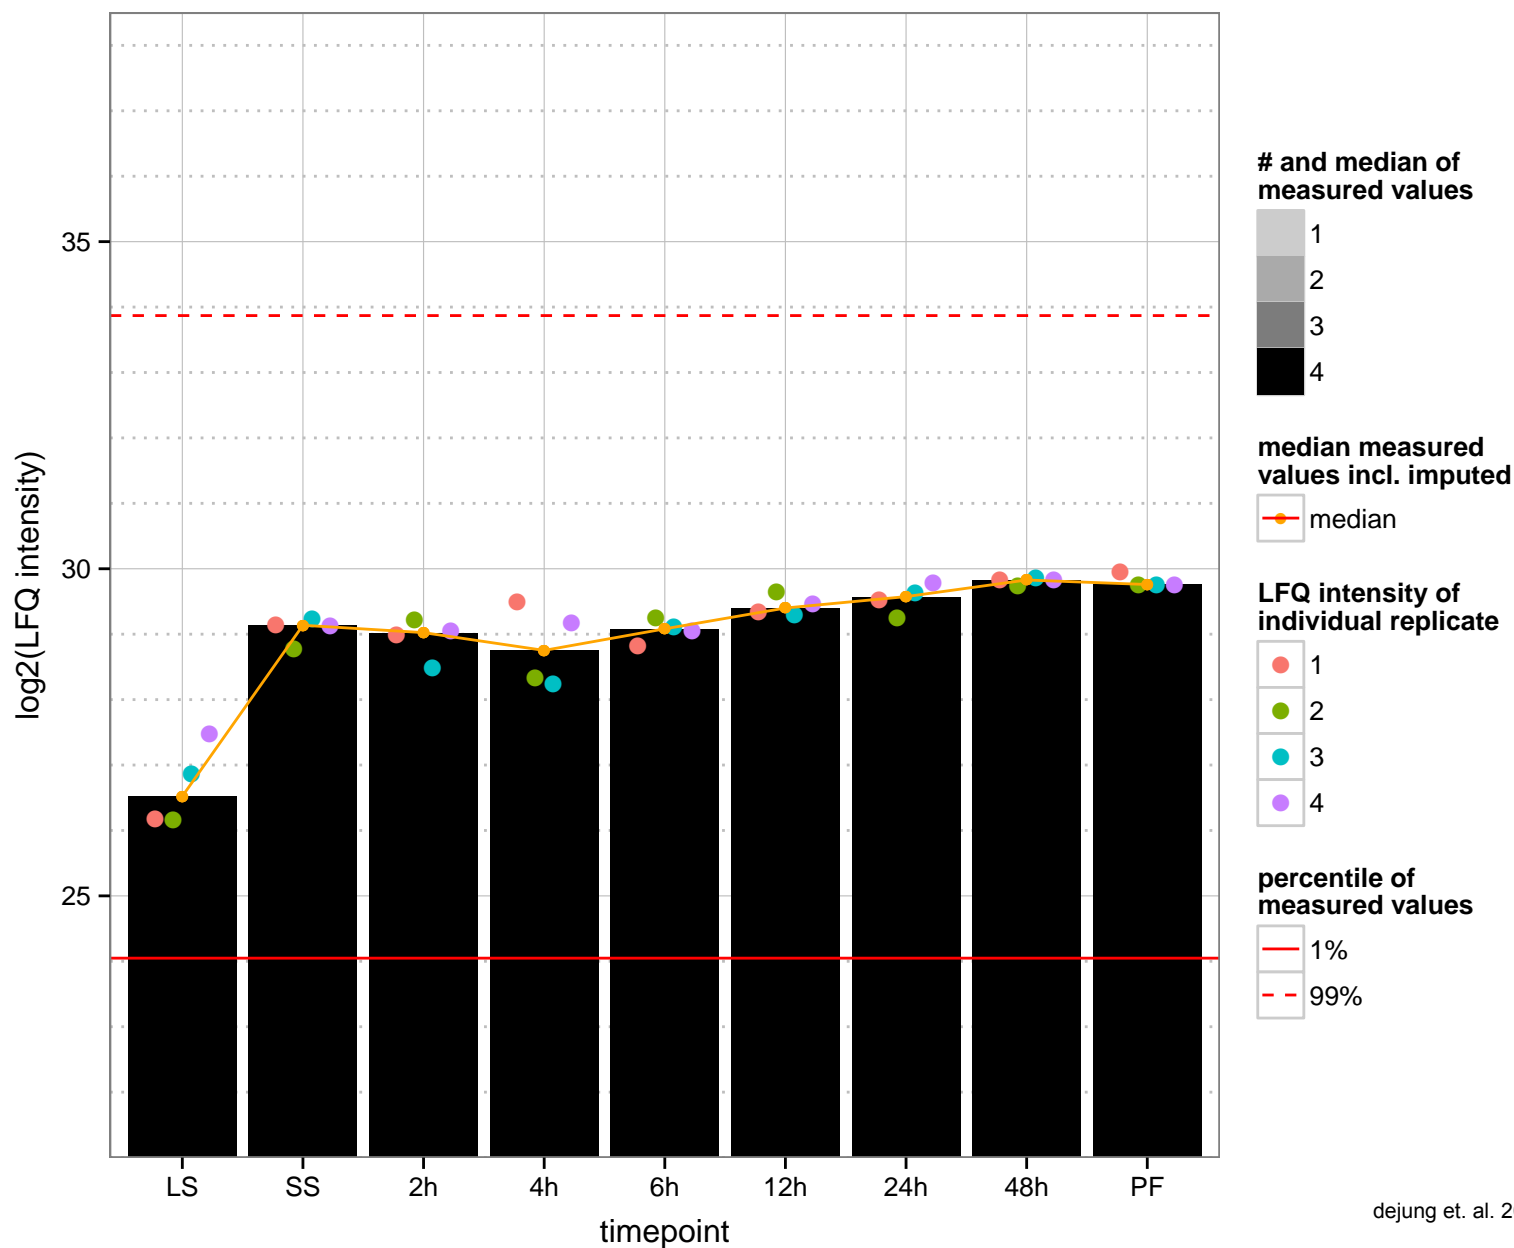

oxidoreductase, putative

Tb927.10.9560

AGOF: alcohol dehydrogenase activity, zinc-dependent, oxidoreductase activity, zinc ion binding

AGOC: null

AGOP: metabolic process, oxidation-reduction process

PGOF: oxidoreductase activity, transferase activity, transferring acyl groups other than amino-acyl groups, zinc ion binding

PGOC: null

PGOP: oxidation-reduction process

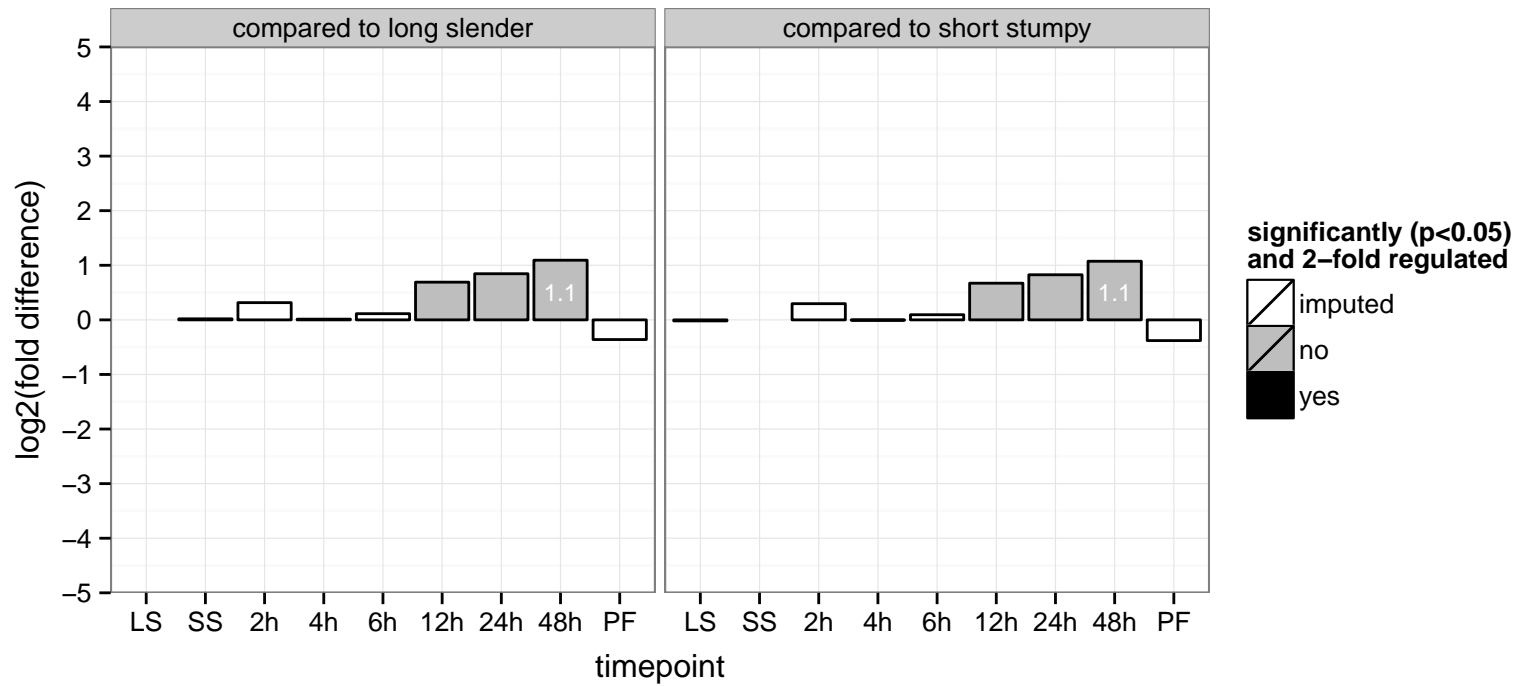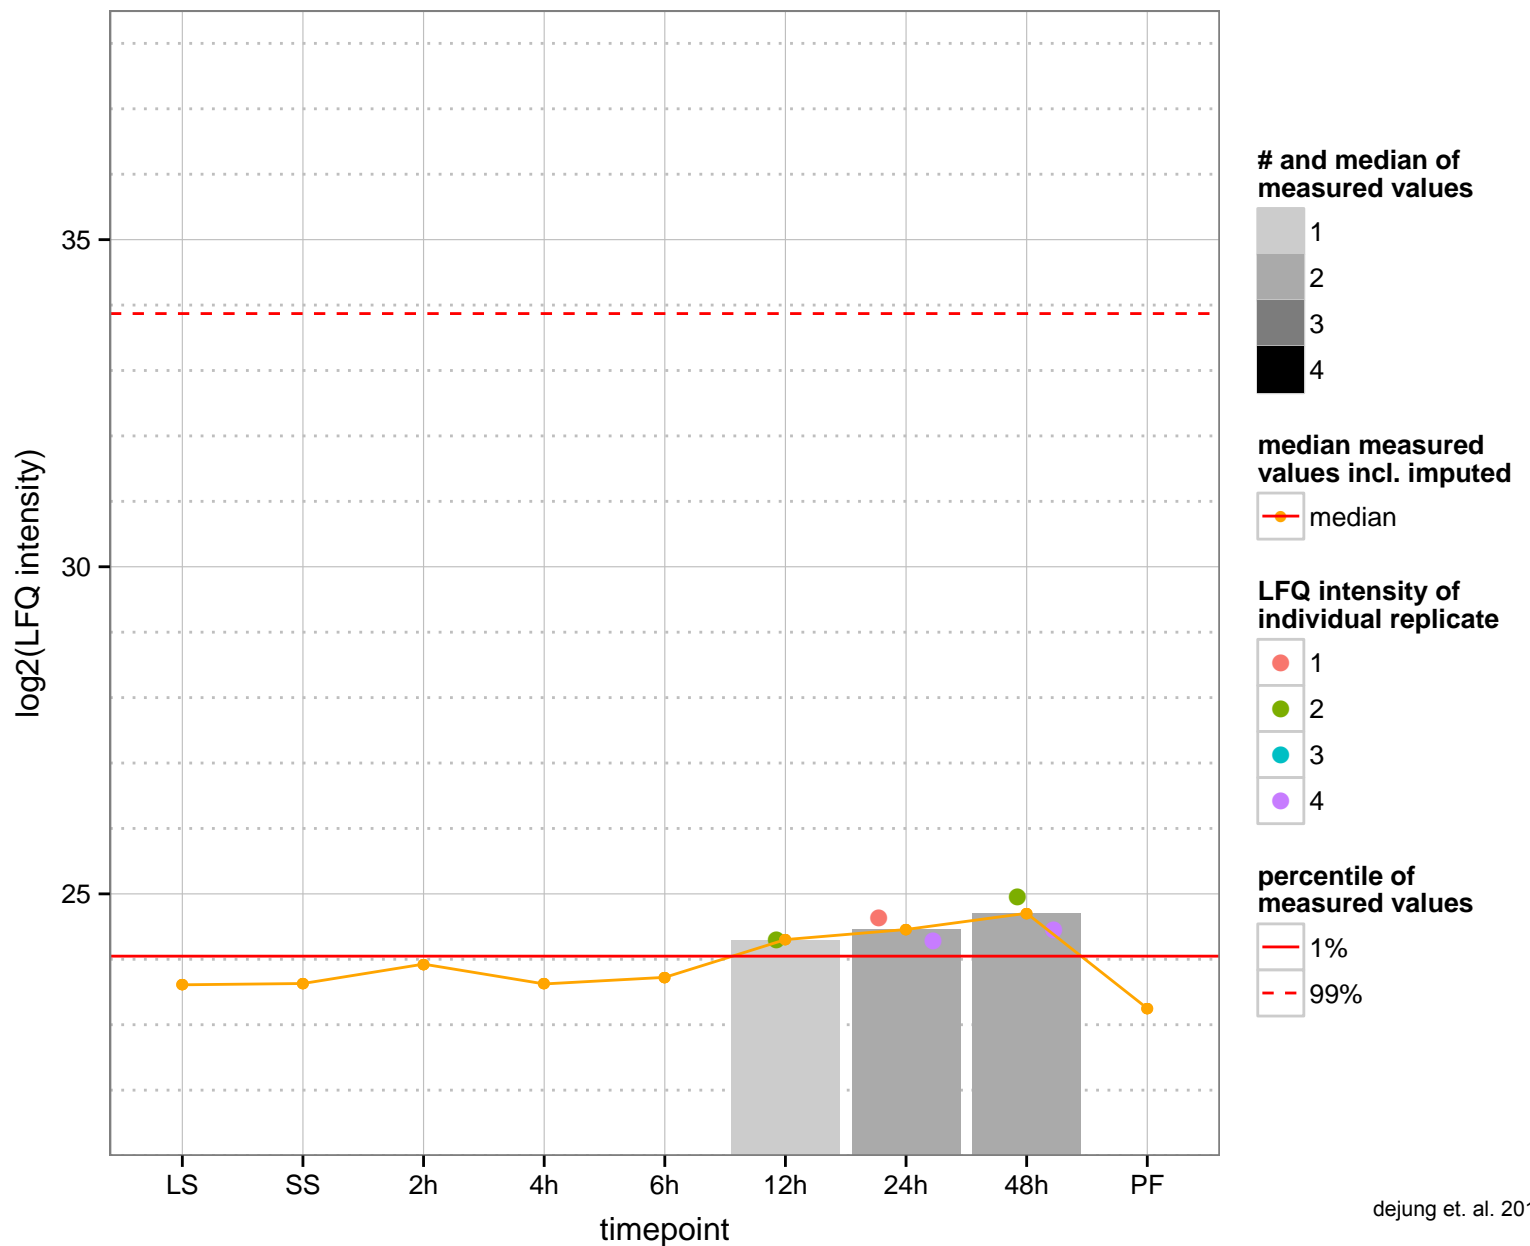

hypothetical protein, conserved, paraflagellar rod component, putative (PFC14)

Tb927.10.9570

AGOF: null

AGOC: null

AGOP: null

PGOF: null, protein binding

PGOC: null

PGOP: null

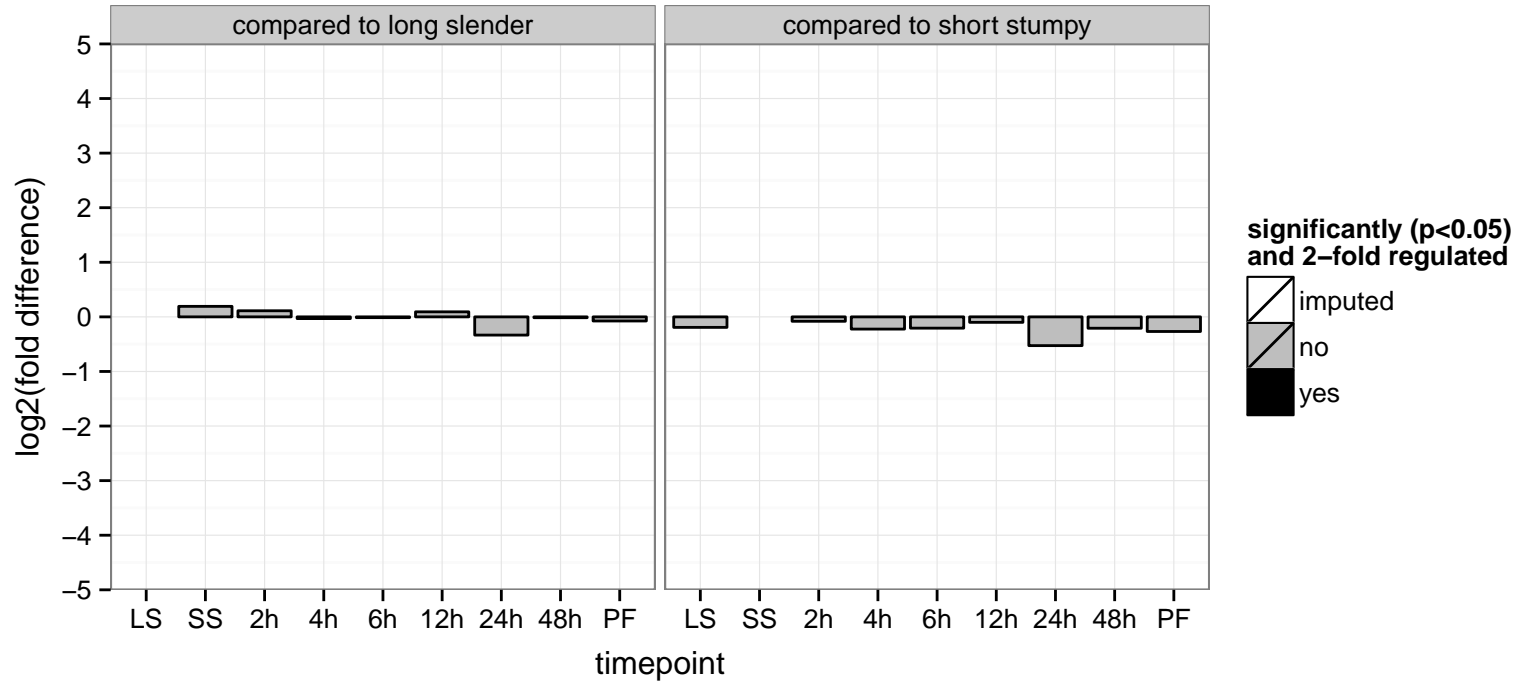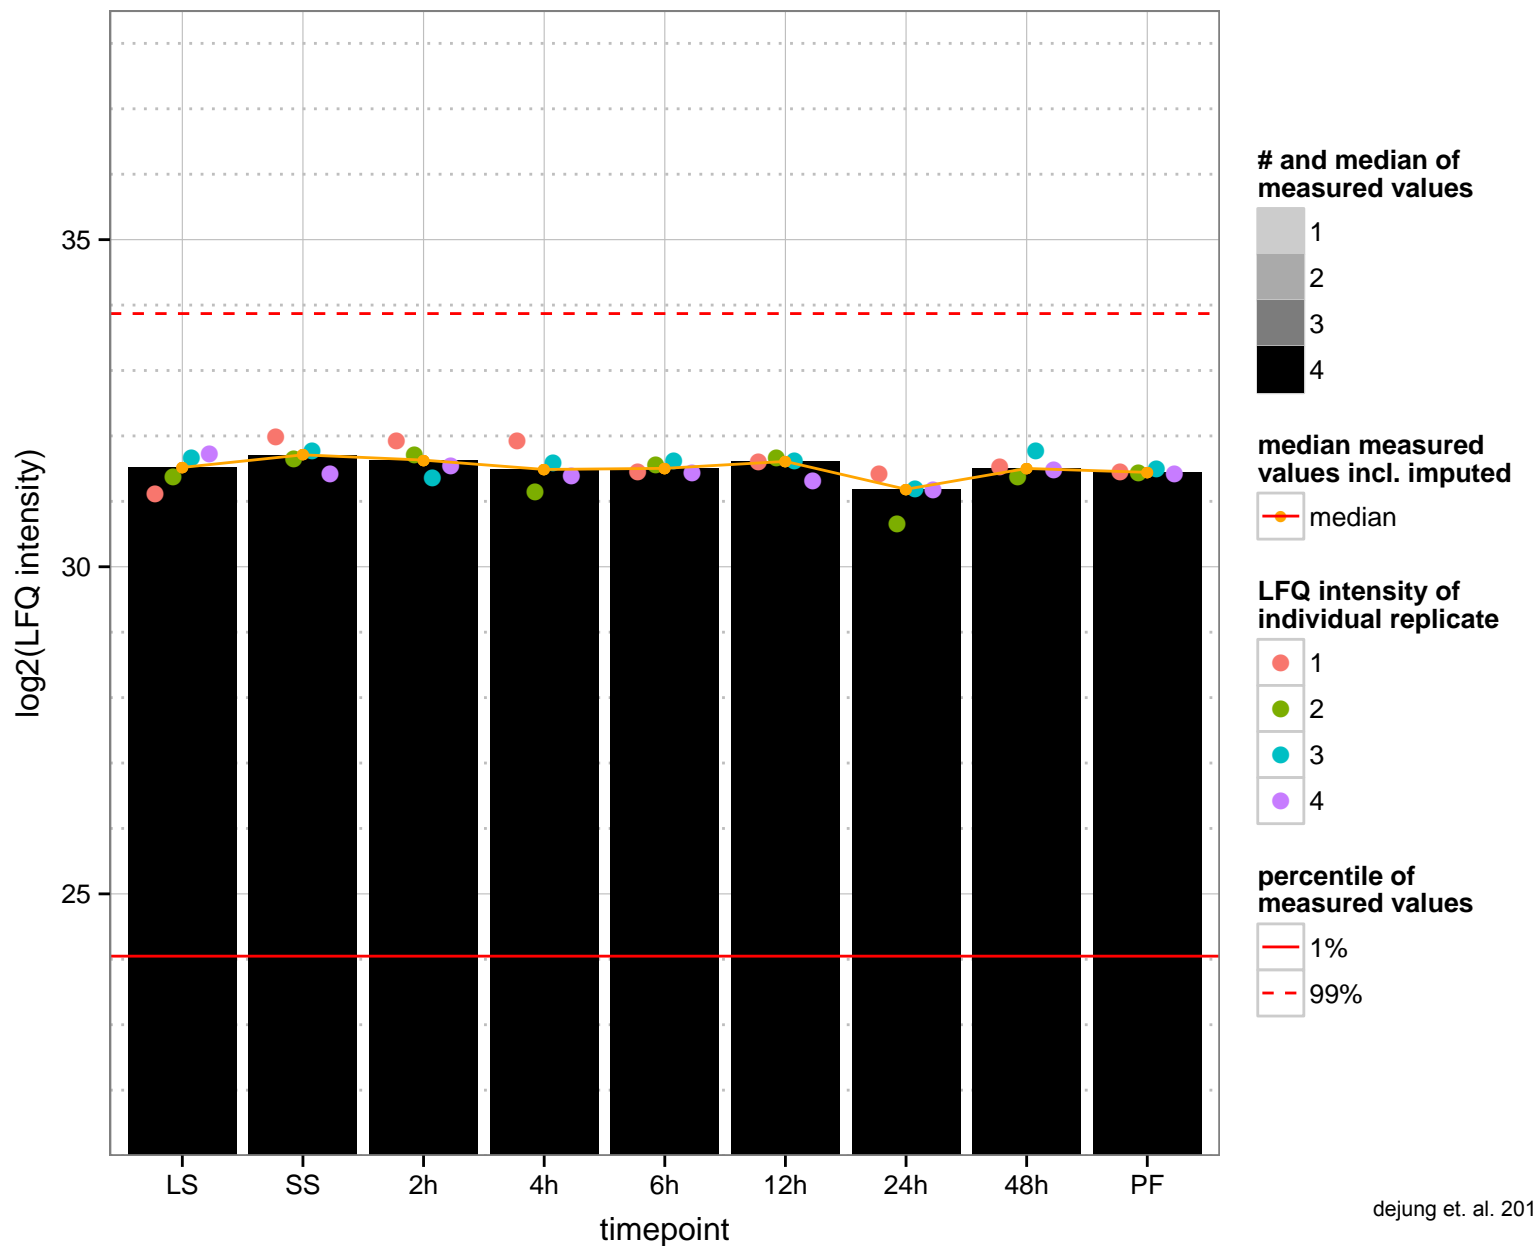

hypothetical protein, conserved  
 Tb927.10.9640  
 AGOF: null  
 AGOC: null  
 AGOP: null  
 PGO: null  
 PGOC: null  
 PGOP: null

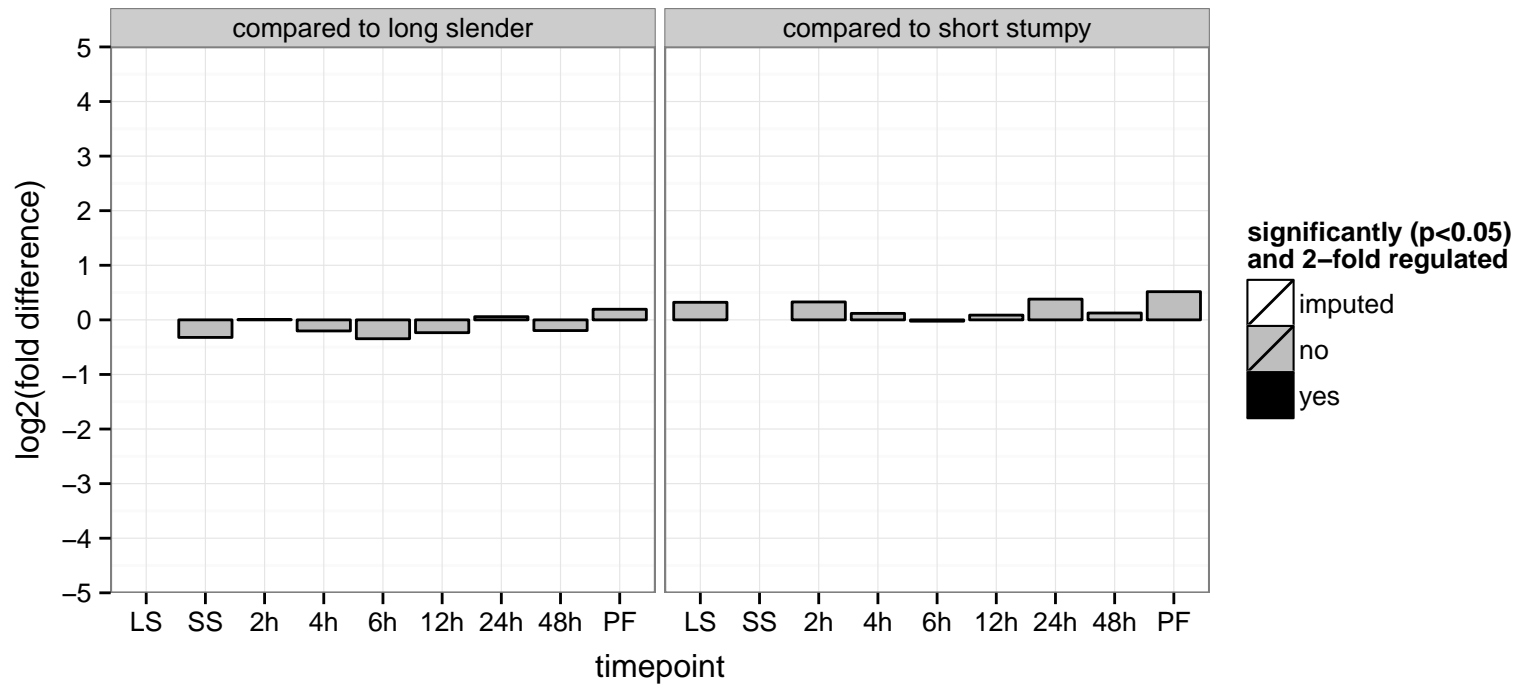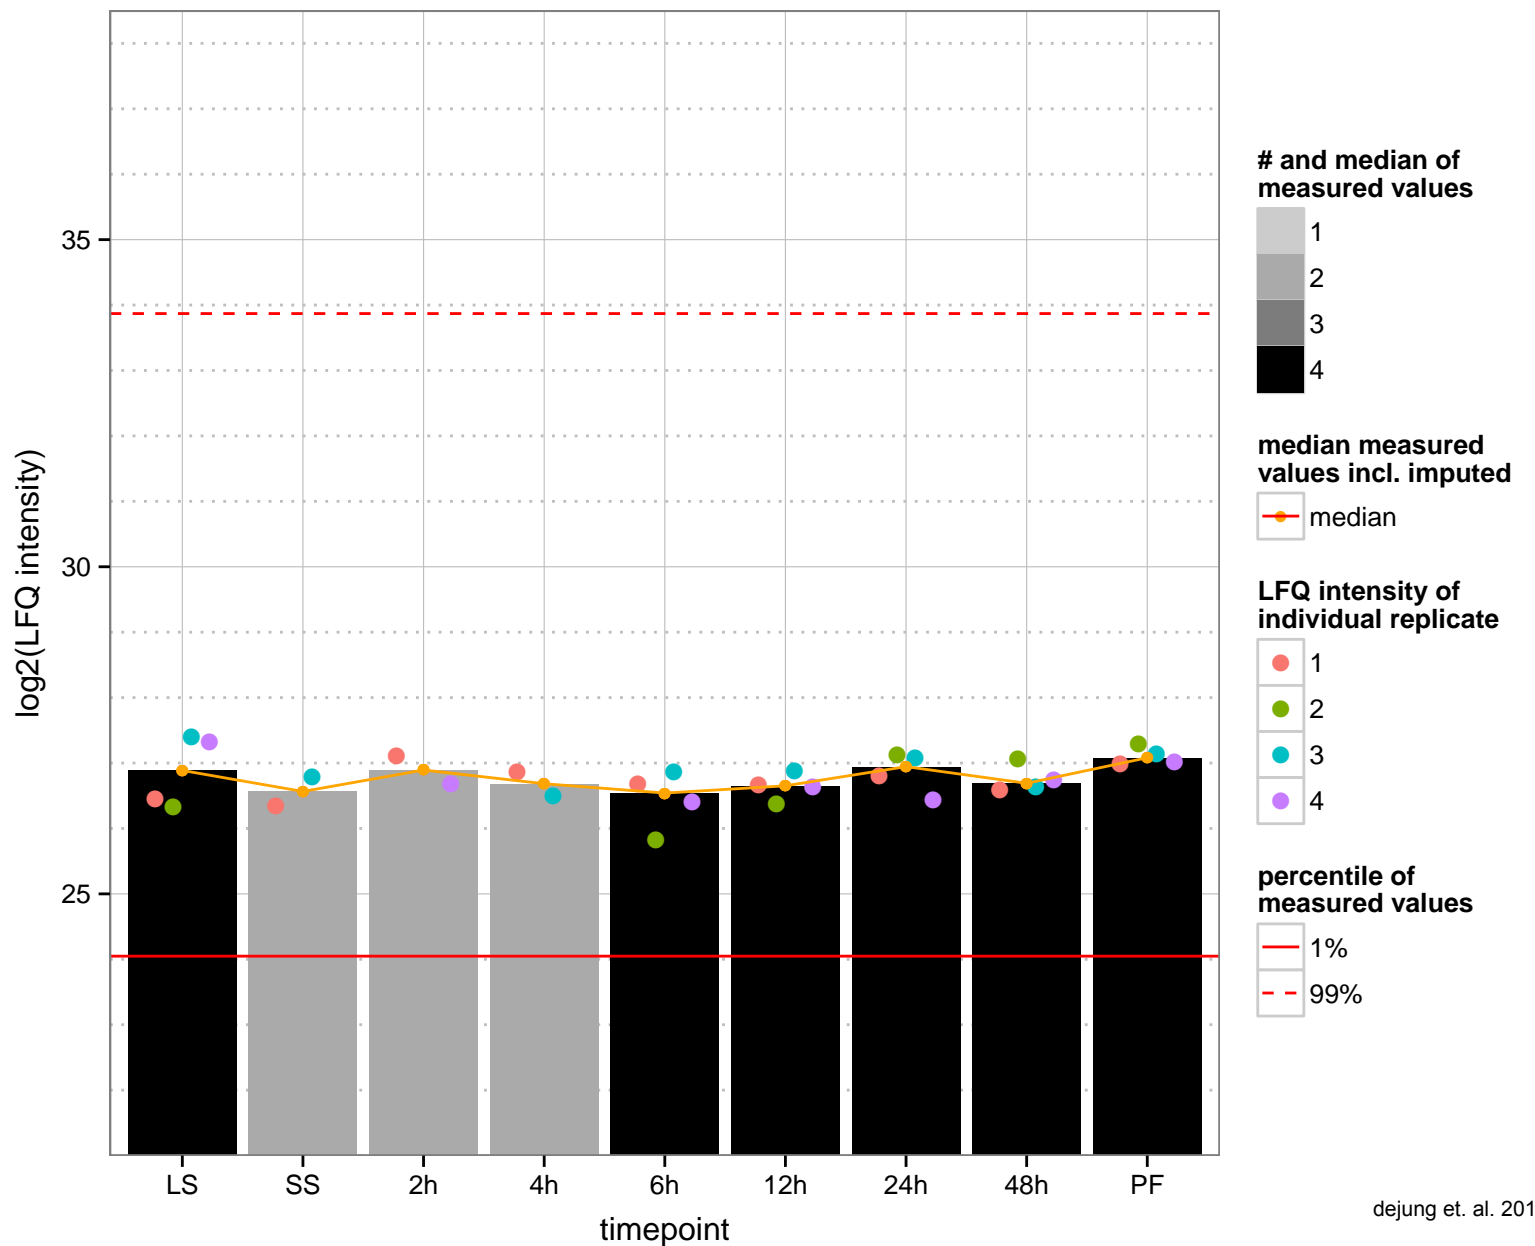



hypothetical protein, conserved  
 Tb927.10.9650;Tb11.v5.0399  
 AGOF: null  
 AGOC: null  
 AGOP: null  
 PGO: null  
 PGOC: null  
 PGOP: null

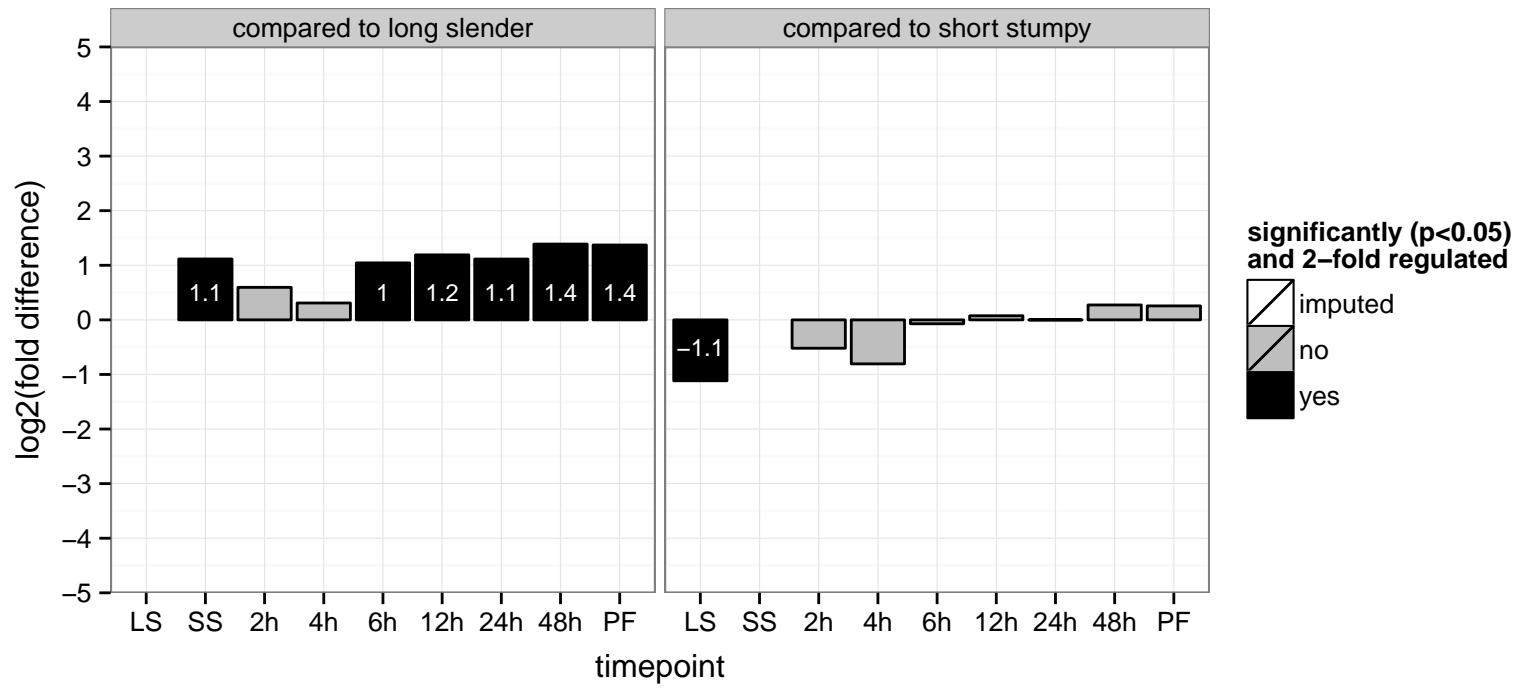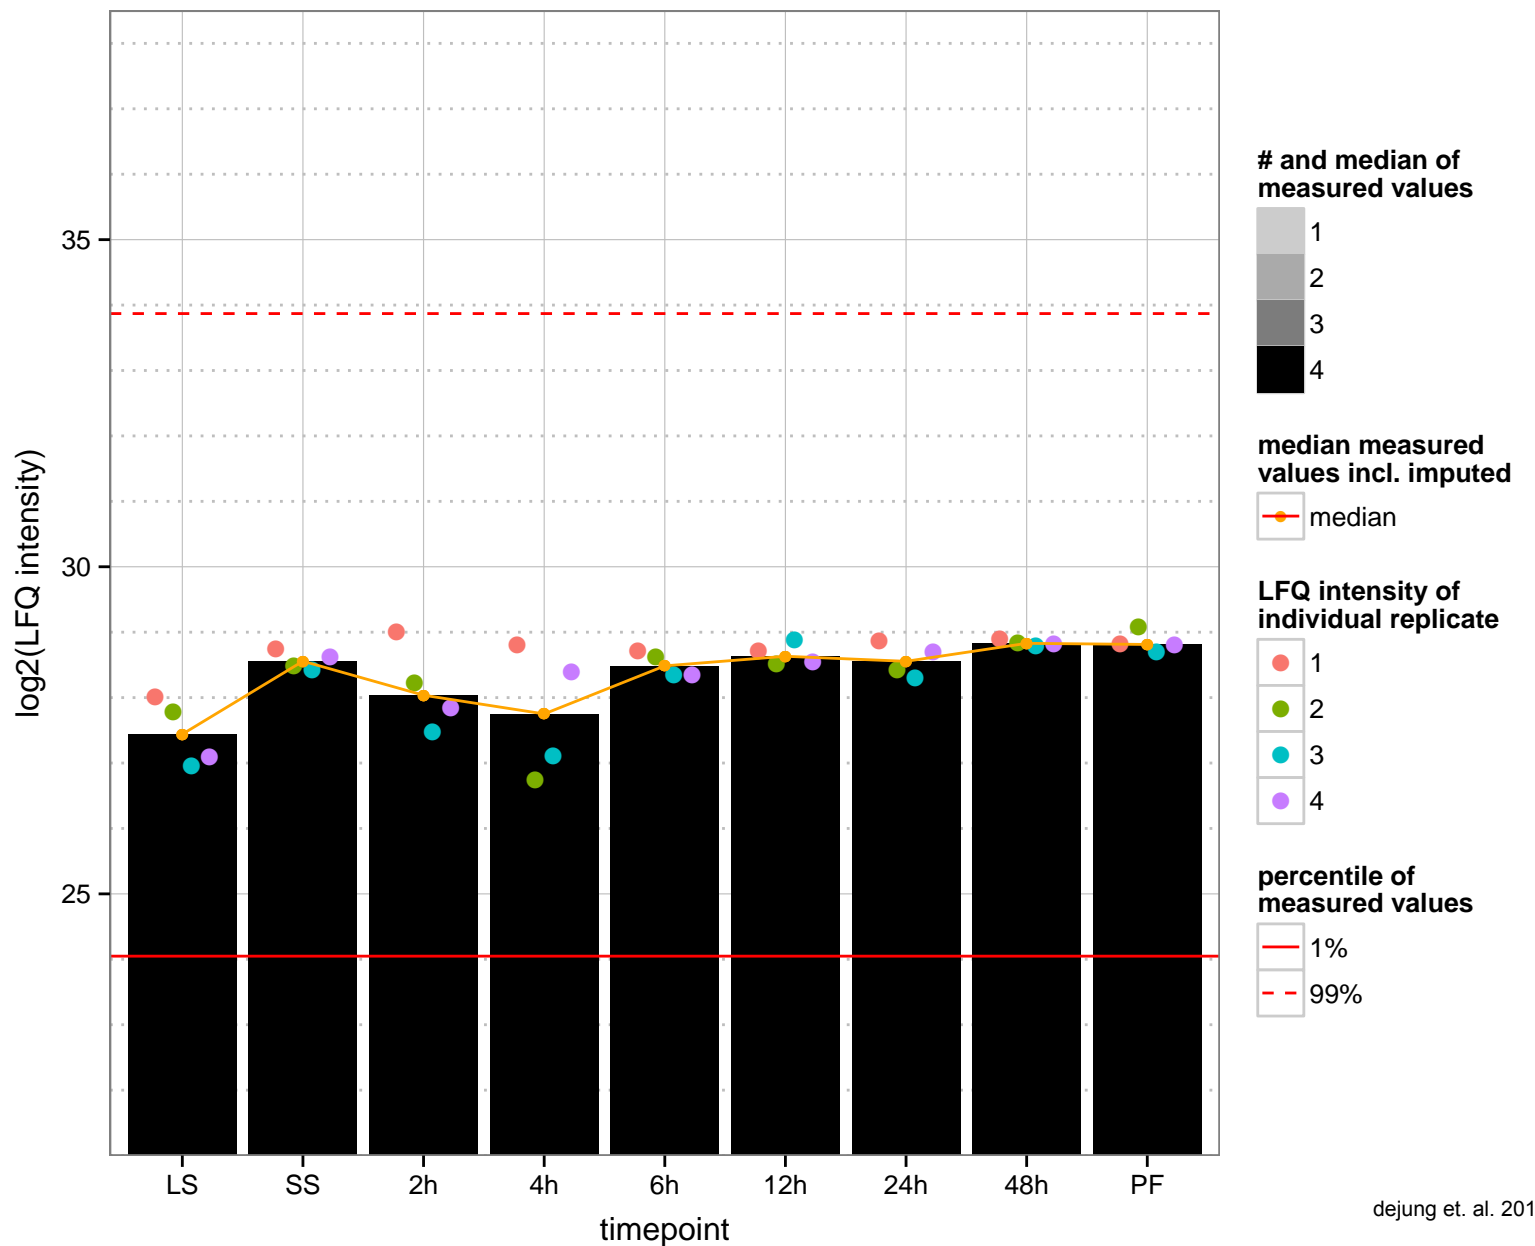

hypothetical protein, conserved  
Tb927.10.9660;Tb11.v5.0735  
AGOF: null  
AGOC: null, intracellular  
AGOP: null, RNA processing  
PGOF: null  
PGOC: intracellular  
PGOP: RNA processing

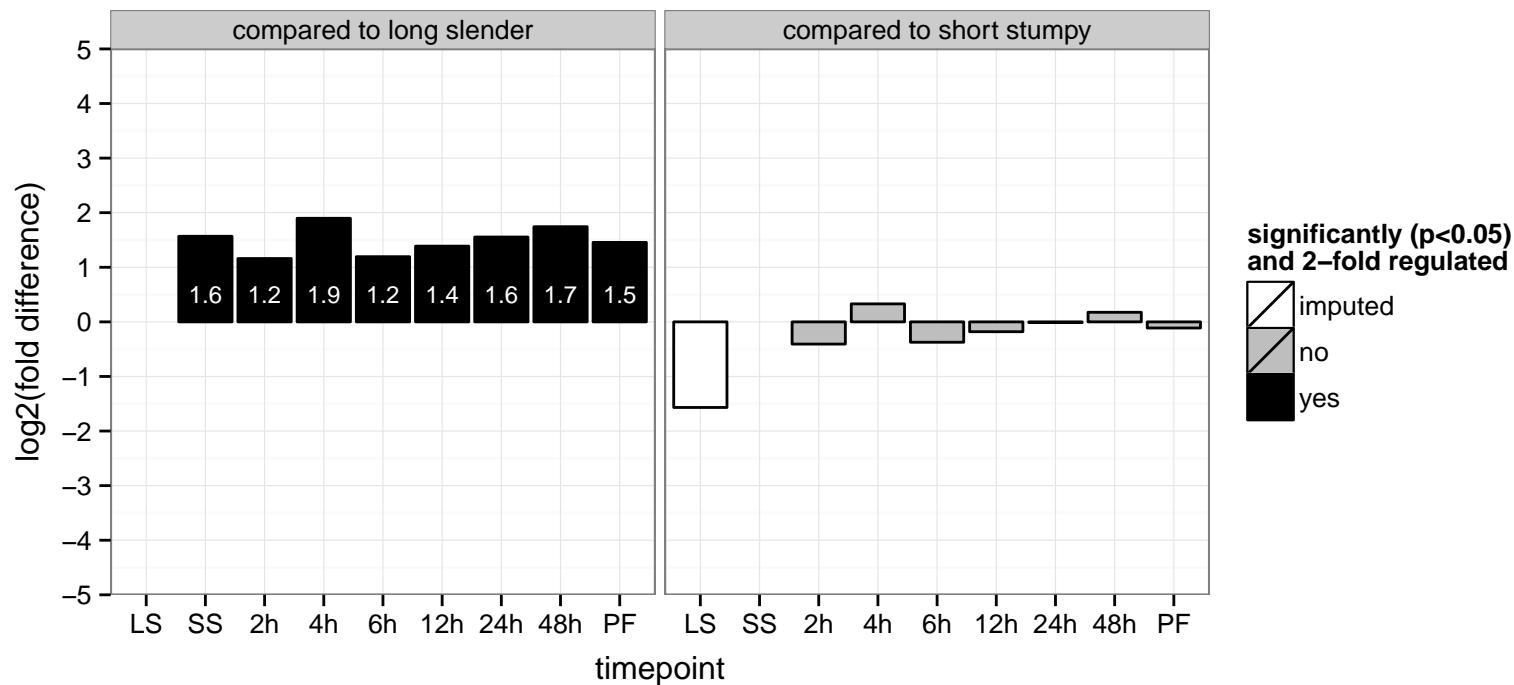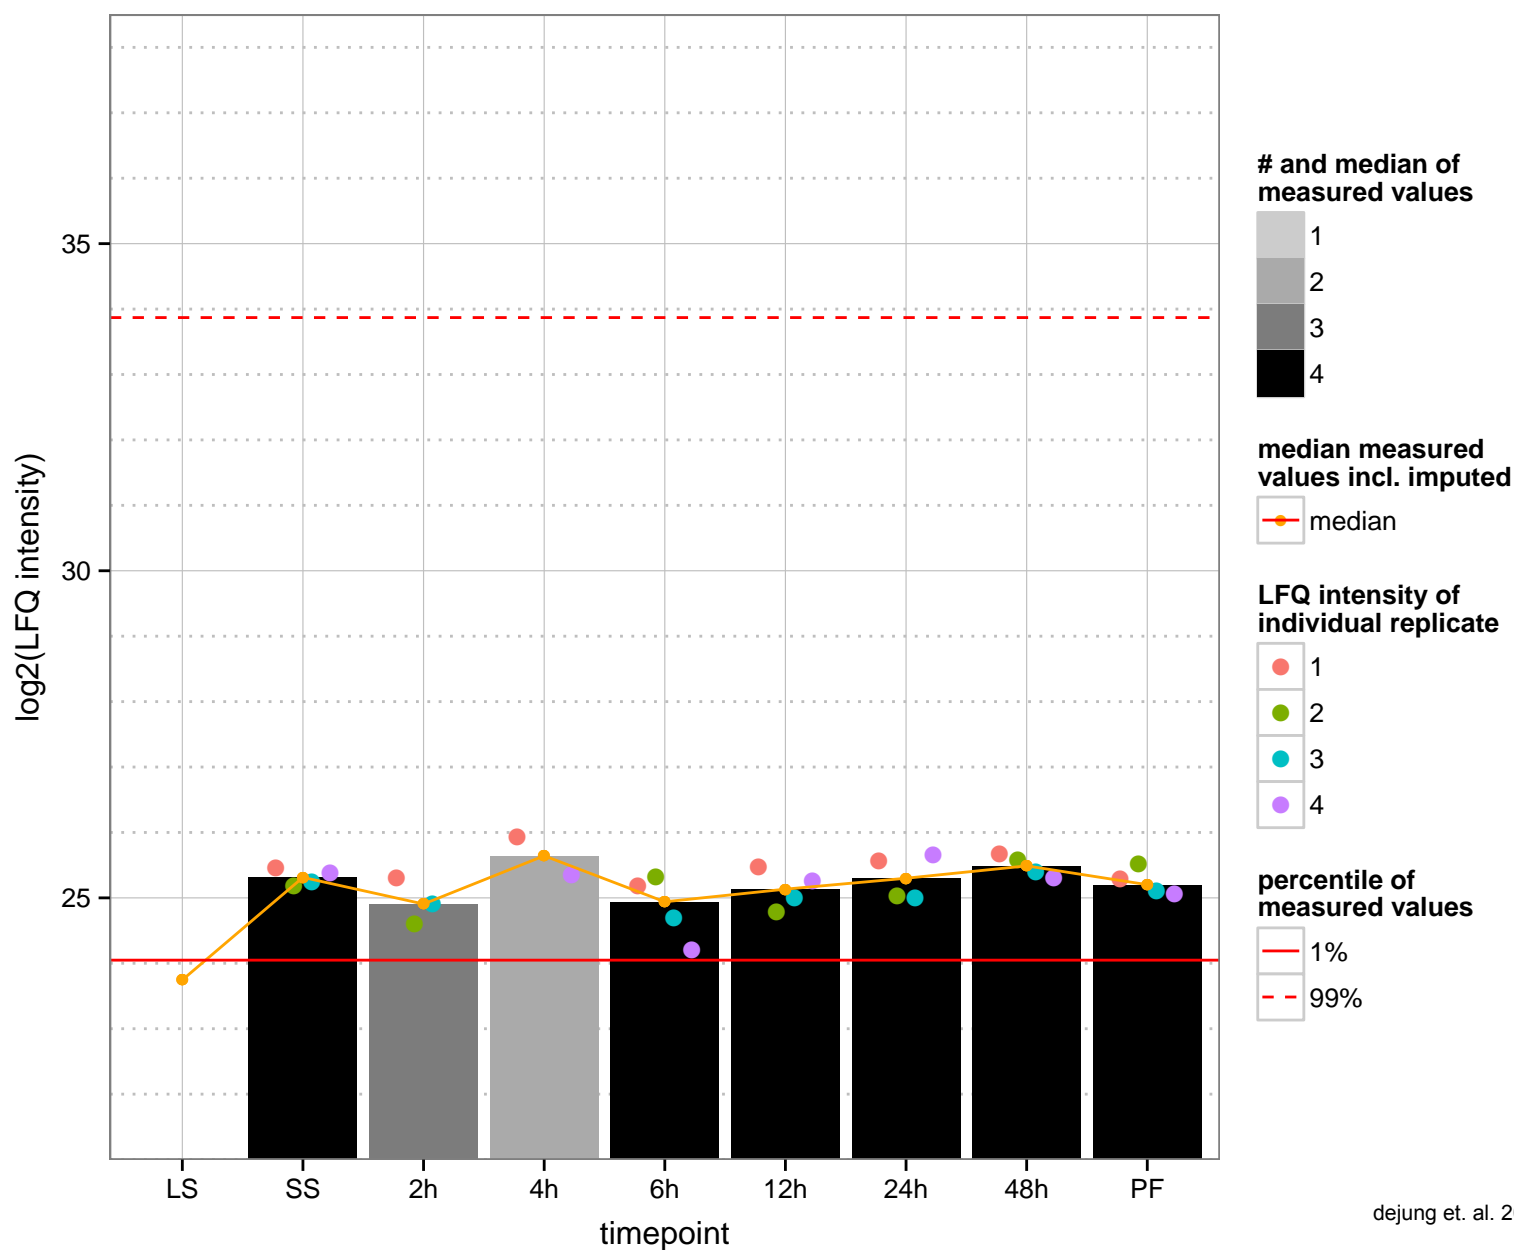

hypothetical protein, conserved  
 Tb927.10.9680  
 AGOF: null  
 AGOC: null  
 AGOP: null  
 PGO: protein binding  
 PGOC: null  
 PGOP: null

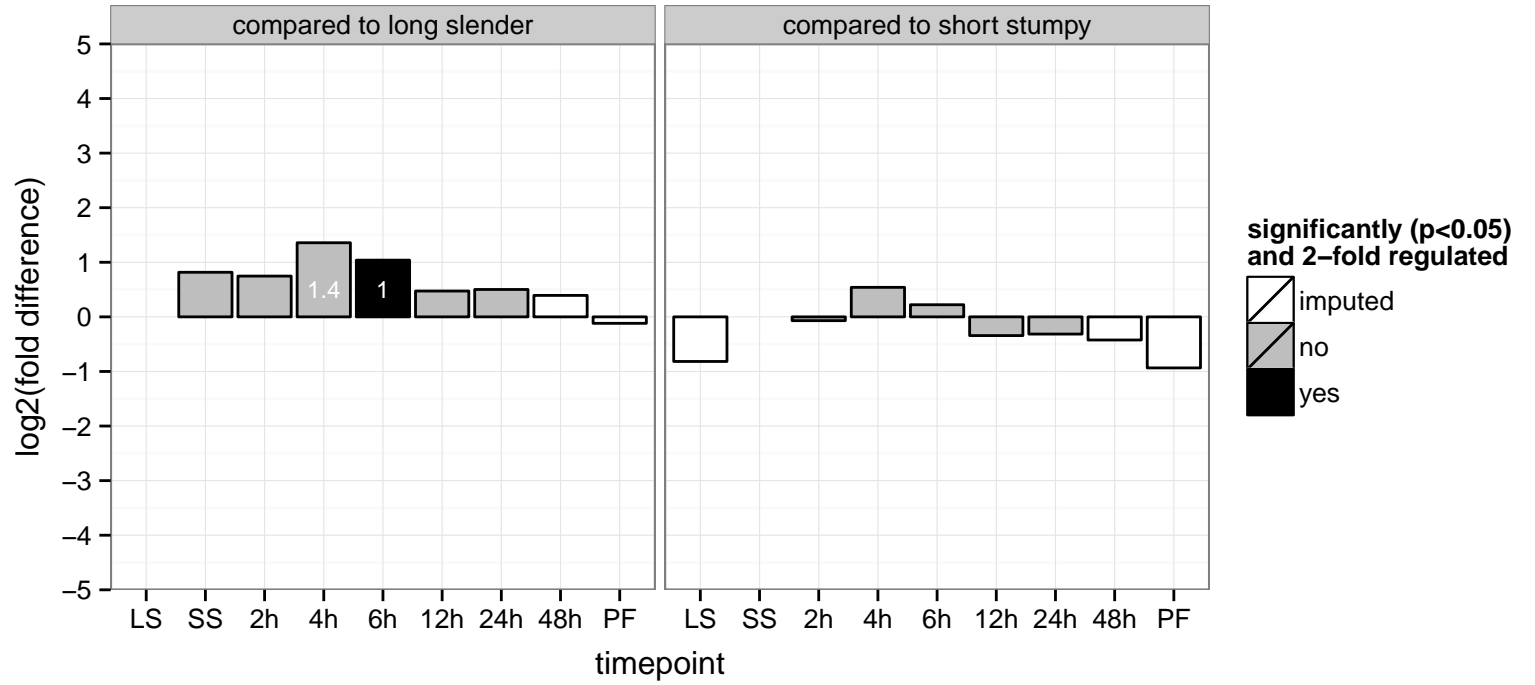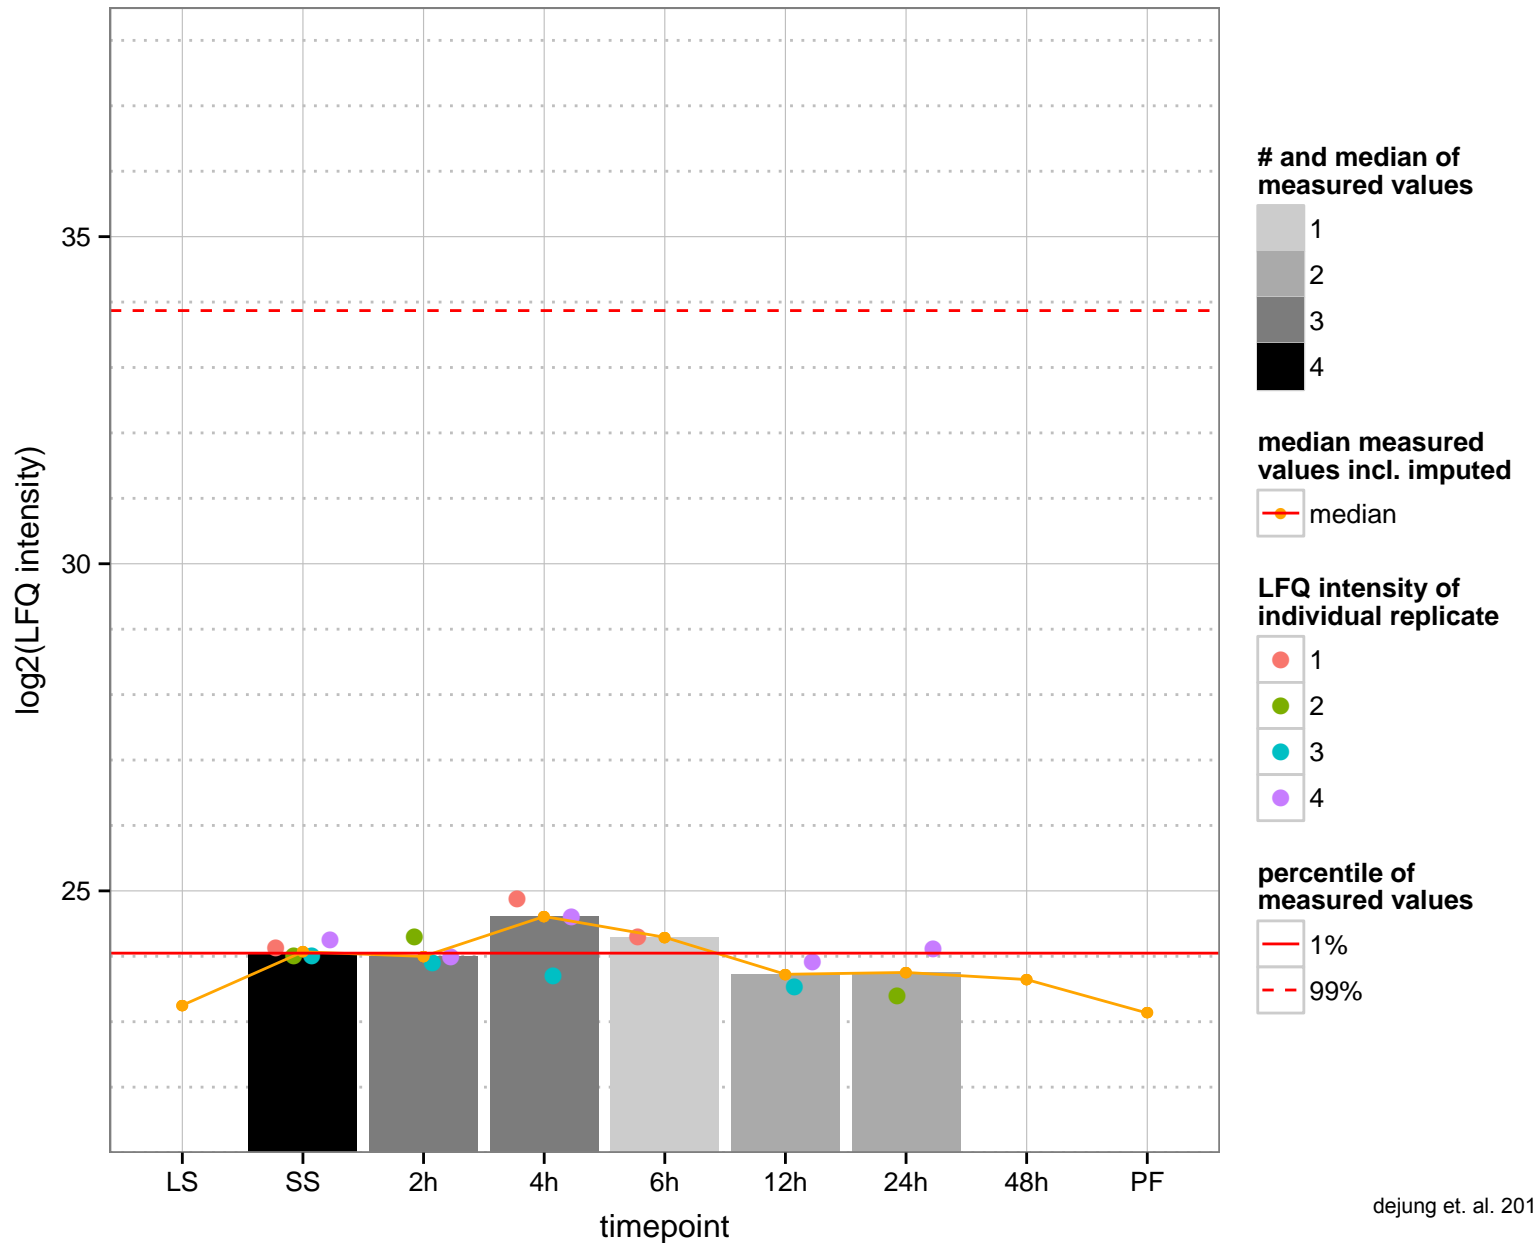

hypothetical protein, conserved, predicted C2 domain protein  
 Tb927.10.9700  
 AGOF: null  
 AGOC: null  
 AGOP: null  
 PGOF: null, protein binding  
 PGO: null  
 PGOP: null

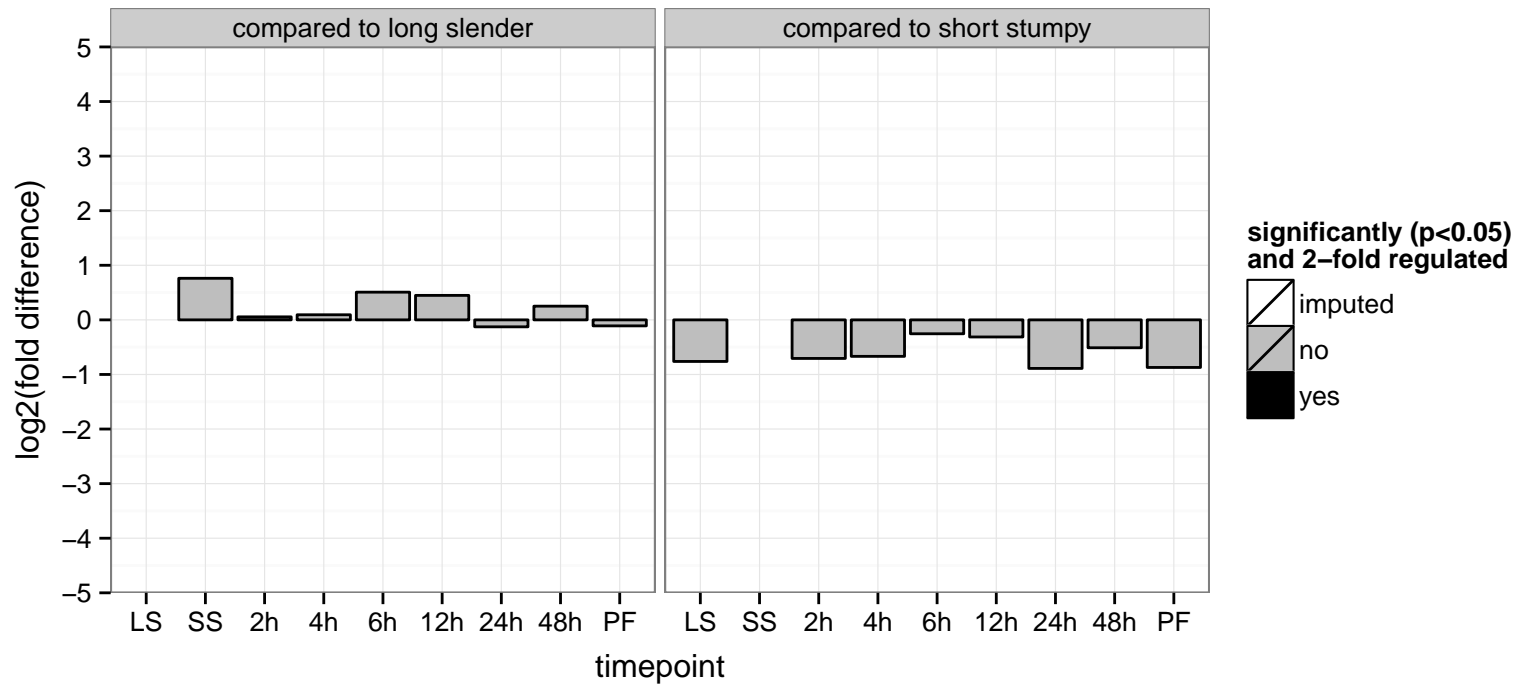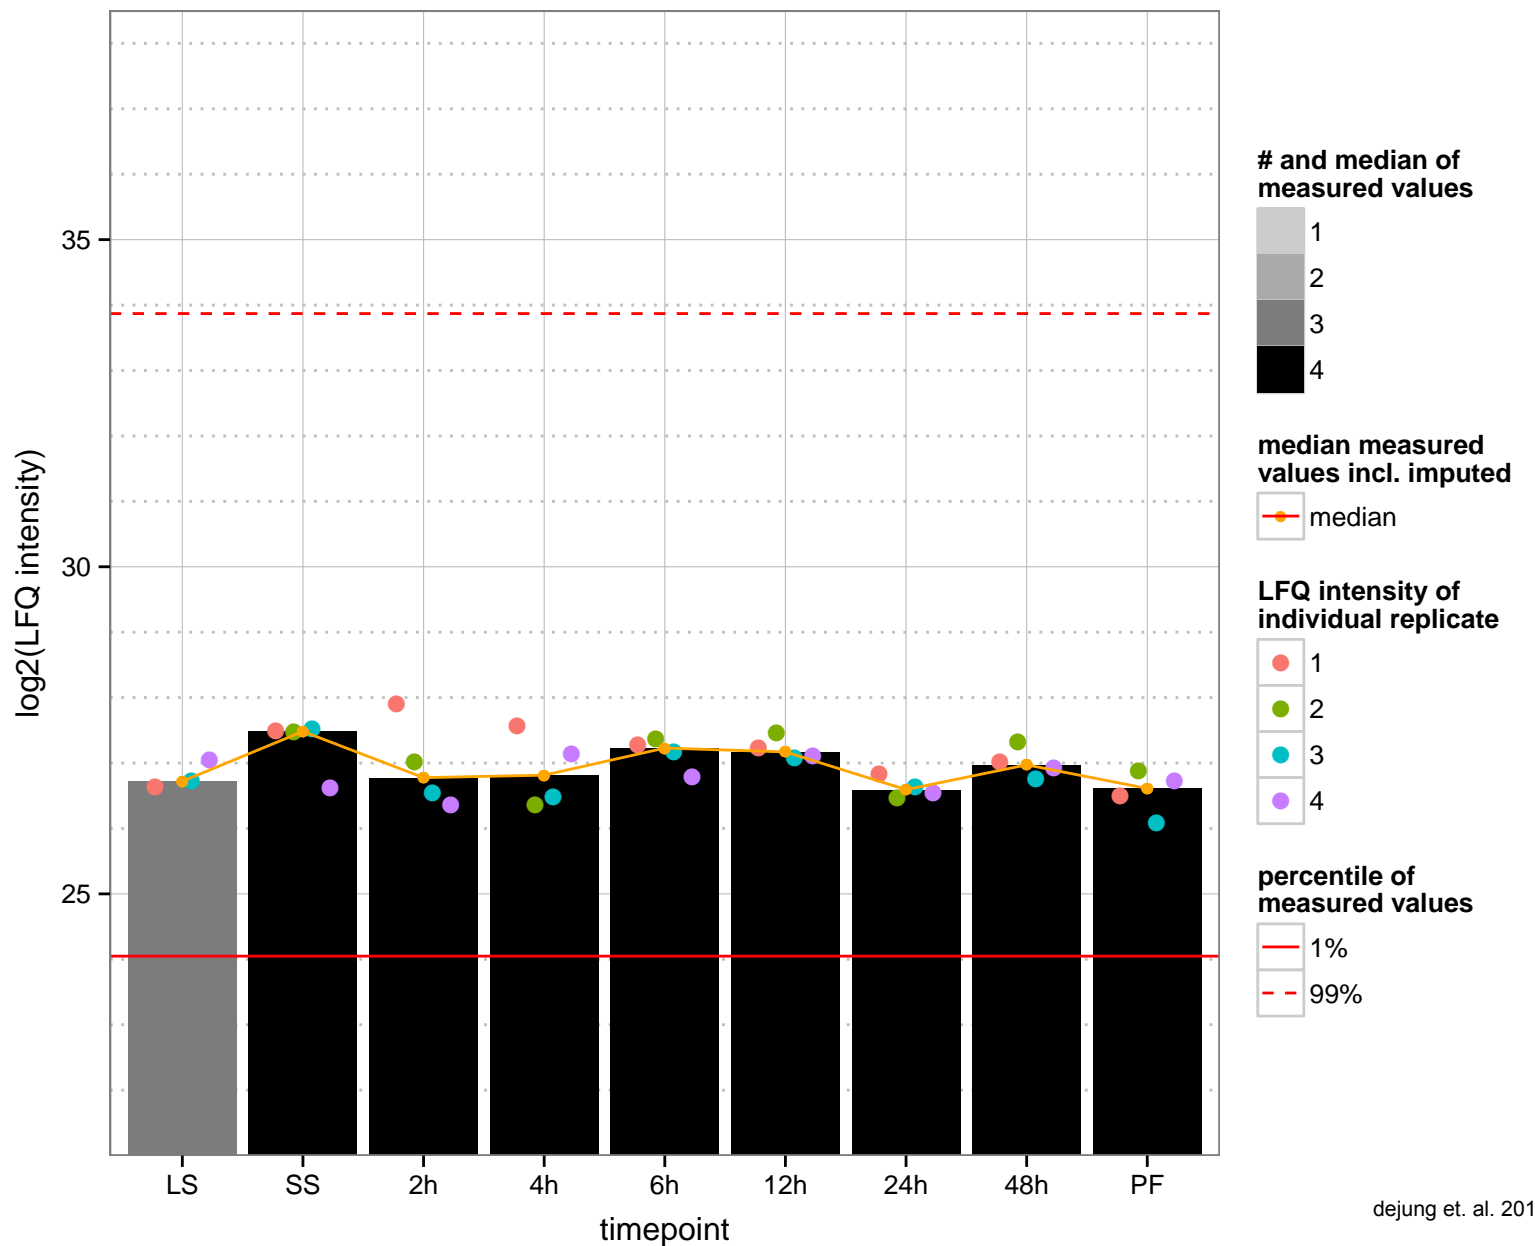

proteasome regulatory ATPase subunit 6, 19S proteasome regulatory subunit (RPT6)

Tb927.10.9740

AGOF: ATP binding, nucleoside-triphosphatase activity

AGOC: cytoplasm, nucleus, proteasome regulatory particle

AGOP: ubiquitin-dependent protein catabolic process

PGOF: ATP binding, hydrolase activity, nucleoside-triphosphatase activity, nucleotide binding

PGOC: cytoplasm

PGOP: protein catabolic process

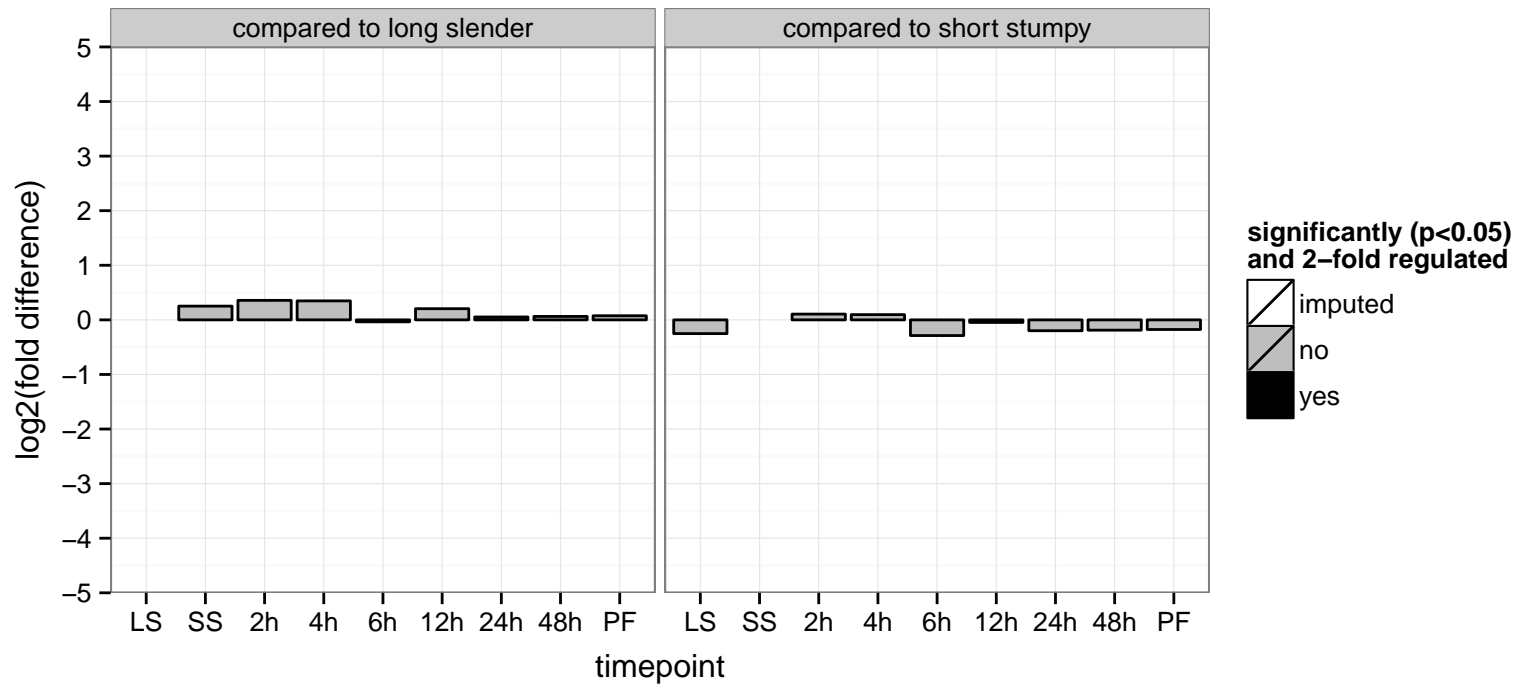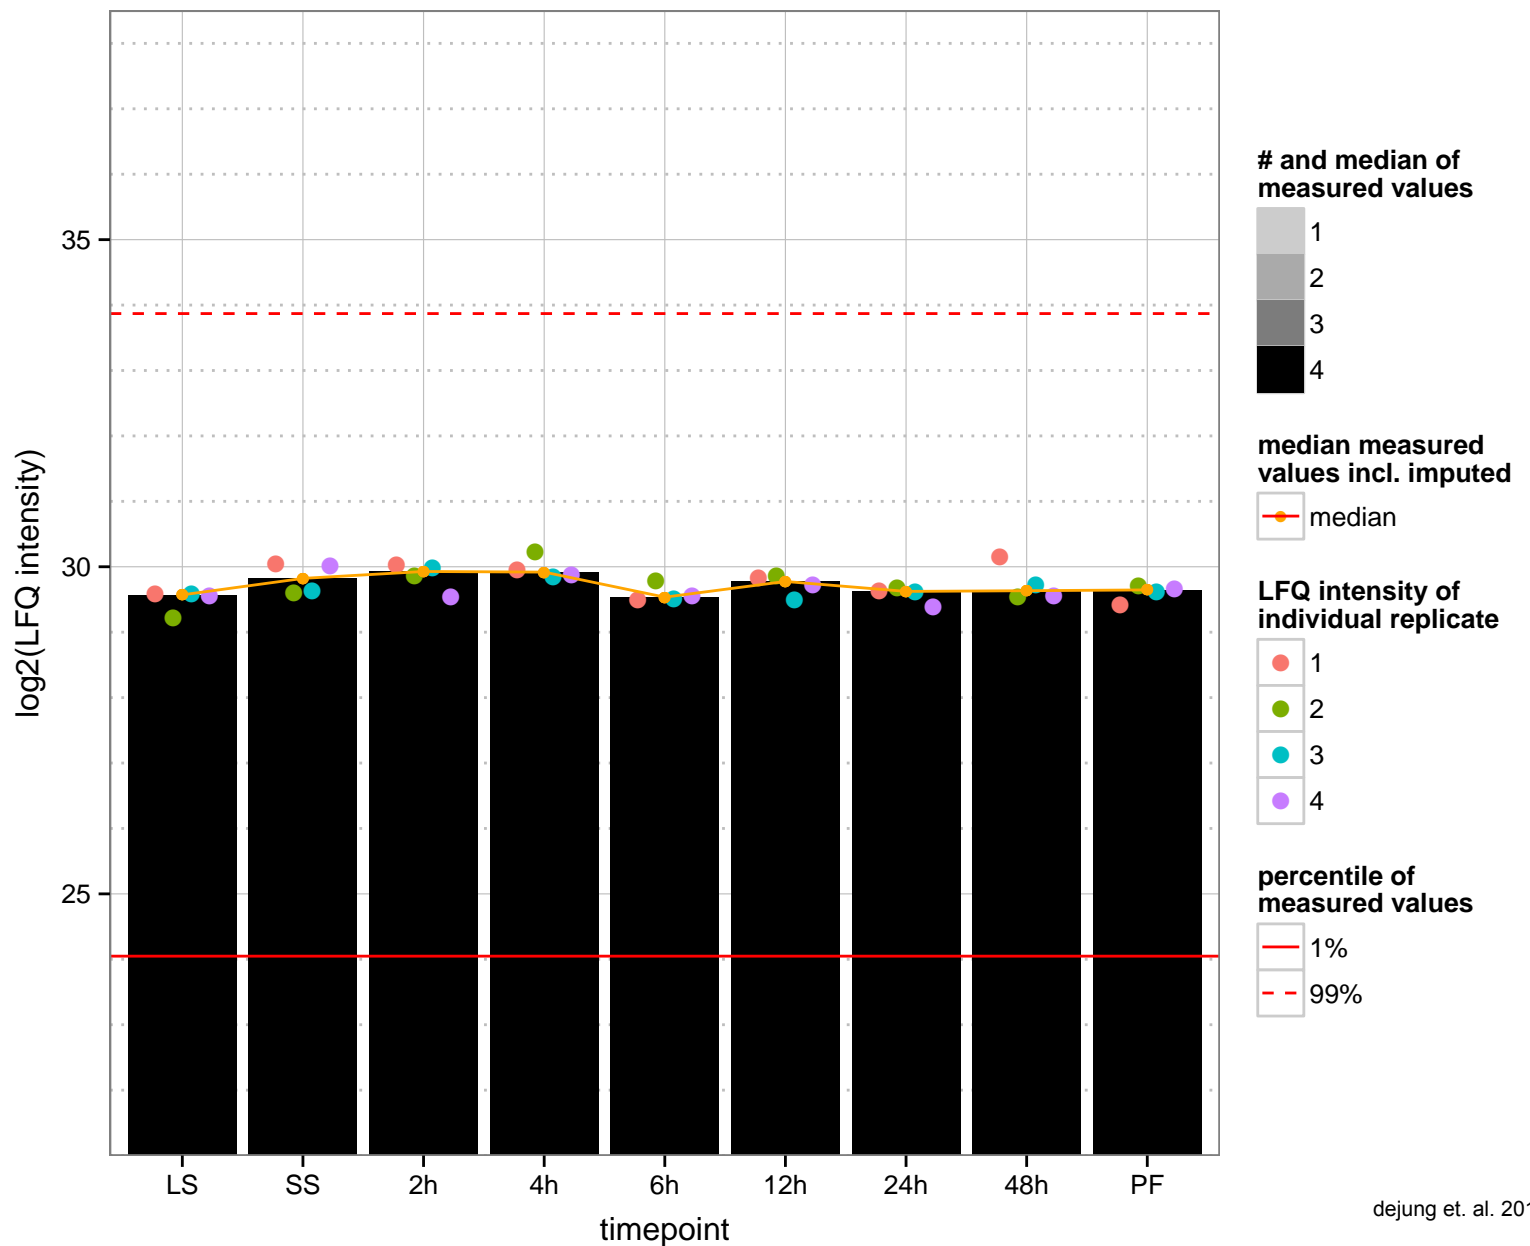

alternative oxidase  
 Tb927.10.9760  
 AGOF: null  
 AGOC: mitochondrial envelope, mitochondrion  
 AGOP: respiratory gaseous exchange  
 PGO: null  
 PGO: mitochondrial envelope  
 PGO: oxidation–reduction process, respiratory gaseous exchange

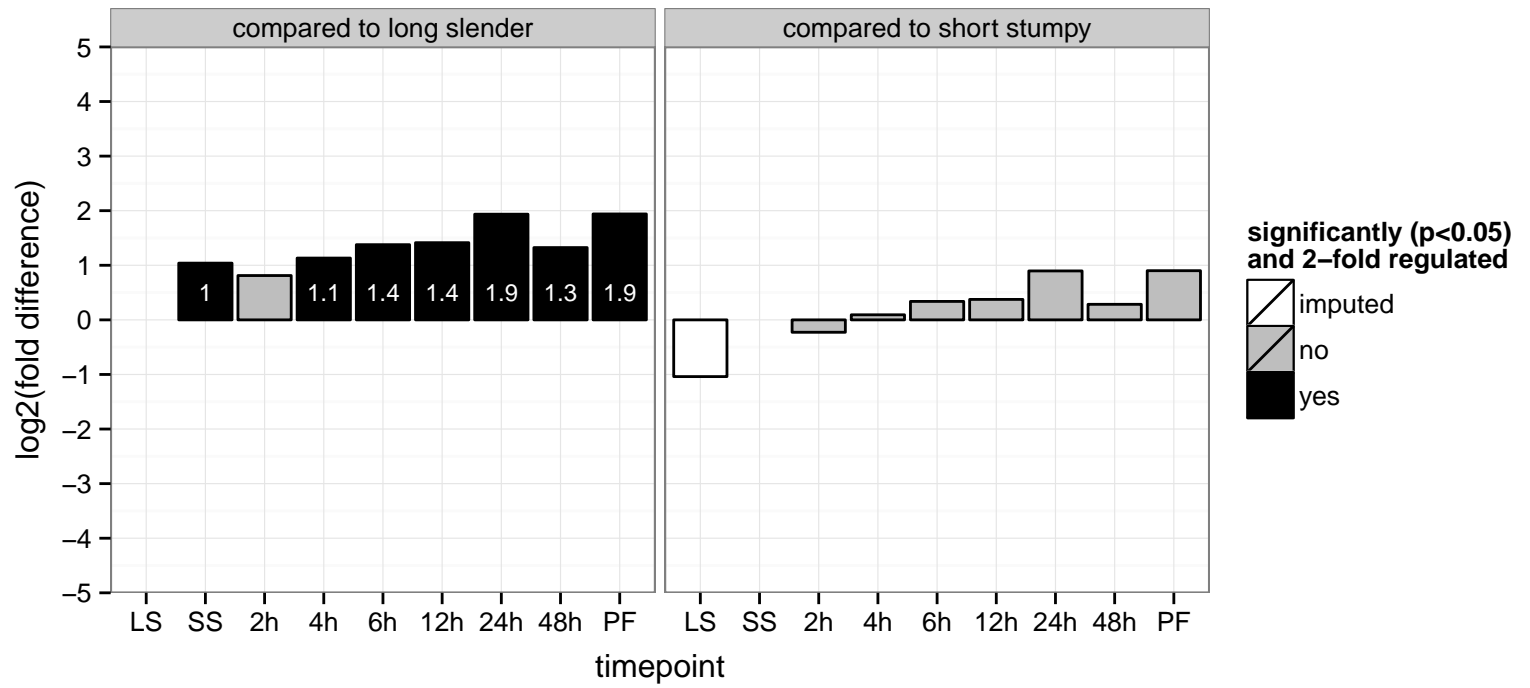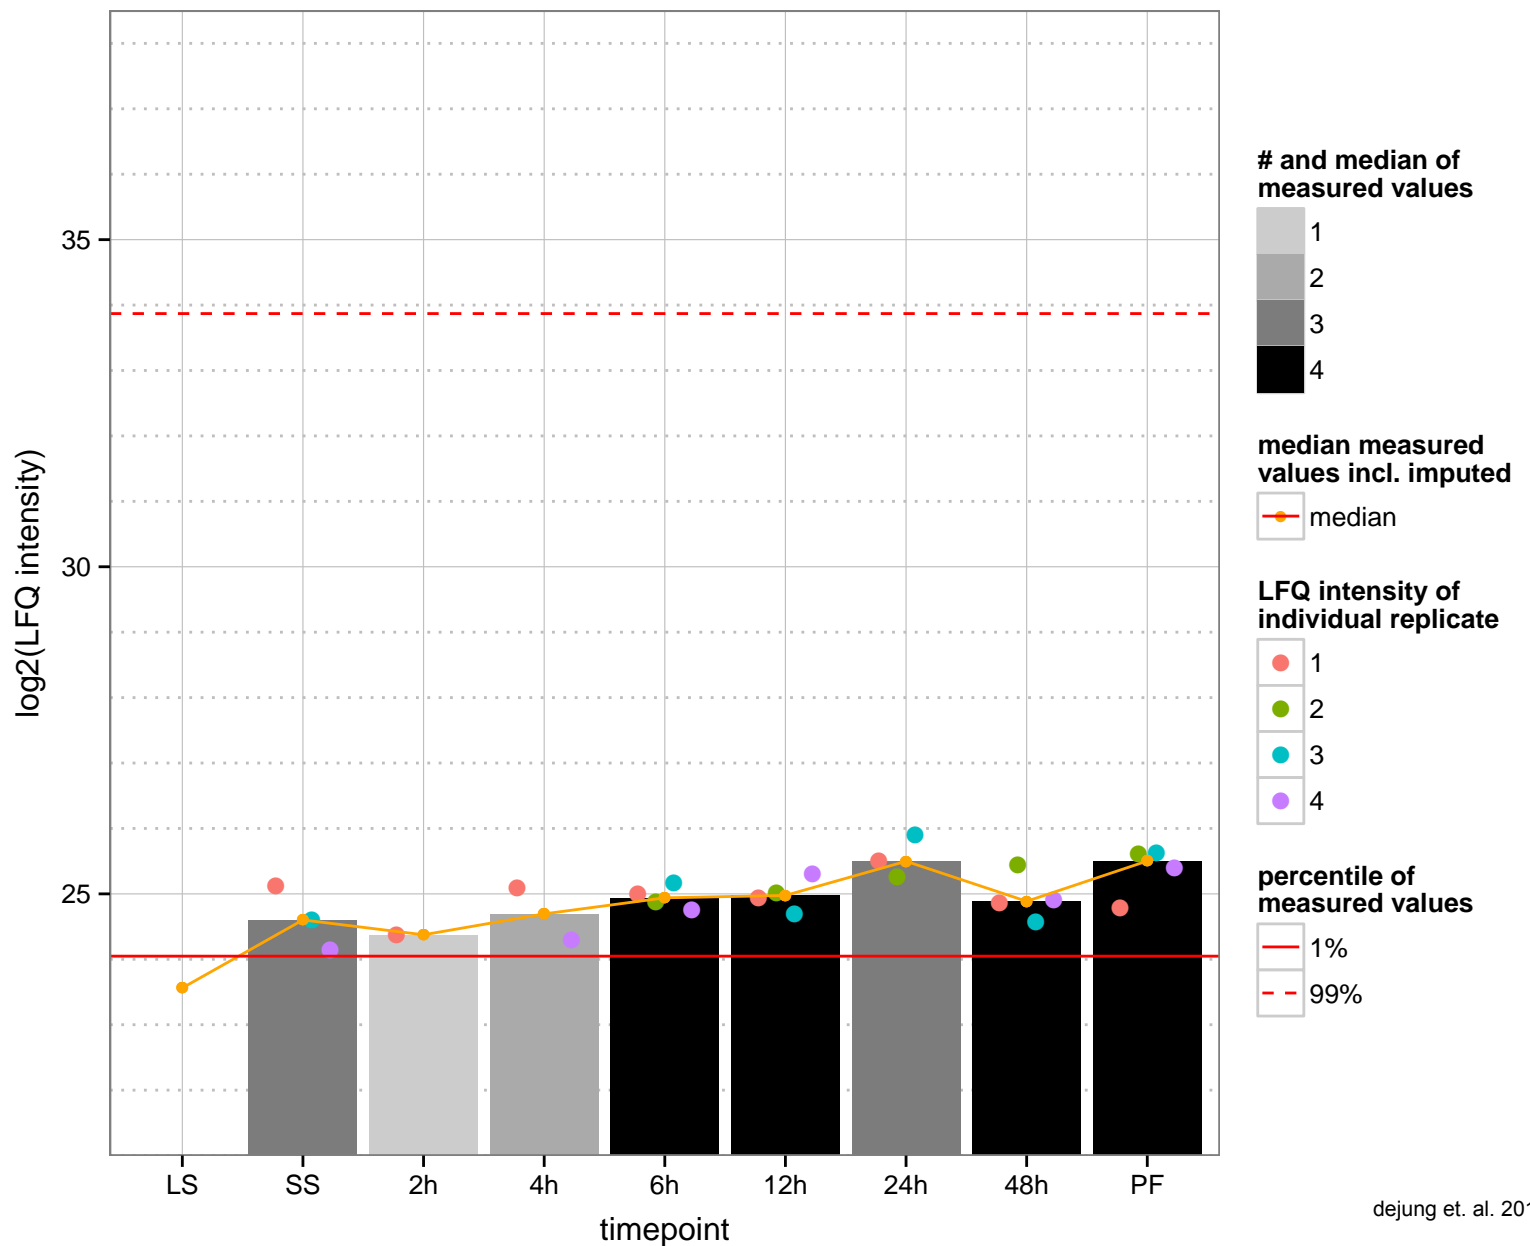

60S ribosomal protein L22  
 Tb927.10.9800  
 AGOF: structural constituent of ribosome  
 AGOC: intracellular, ribosome  
 AGOP: translation  
 PGOF: structural constituent of ribosome  
 PGOC: intracellular, ribosome  
 PGOP: translation

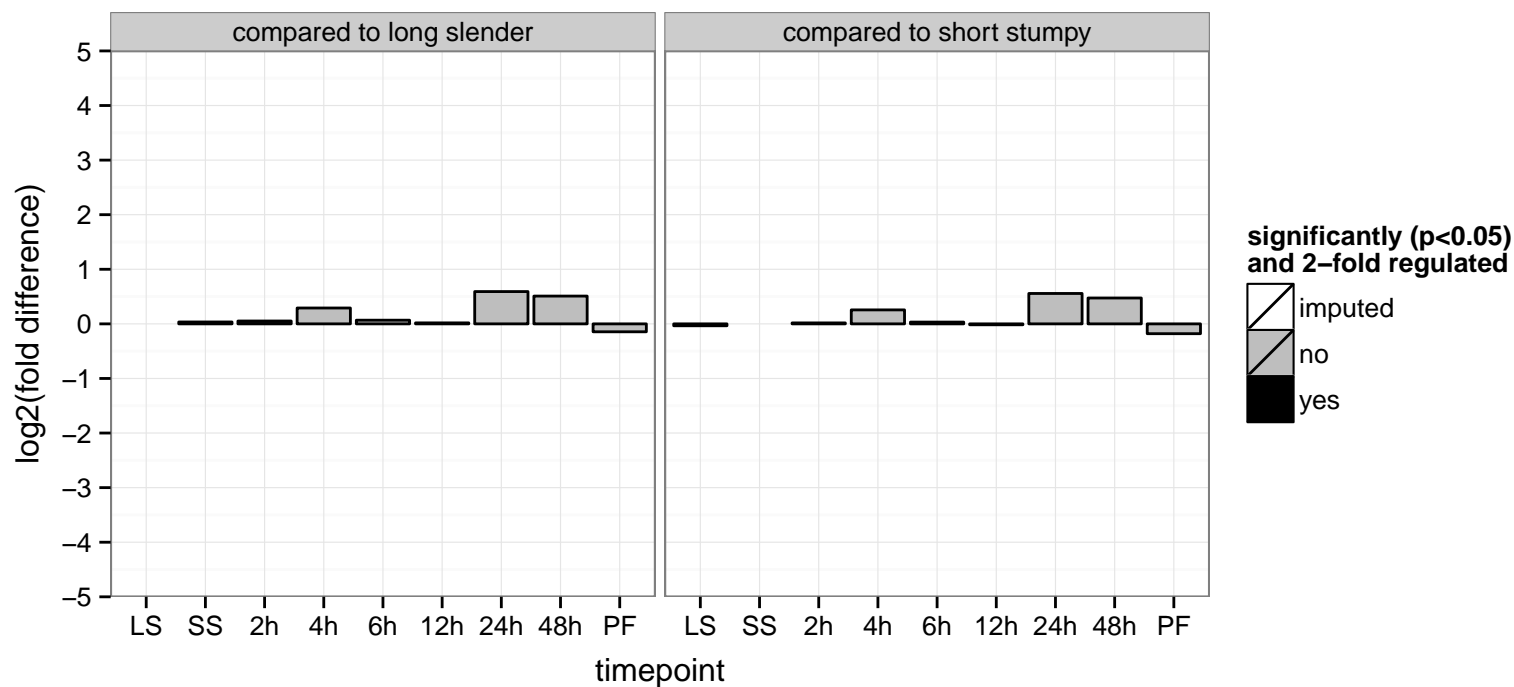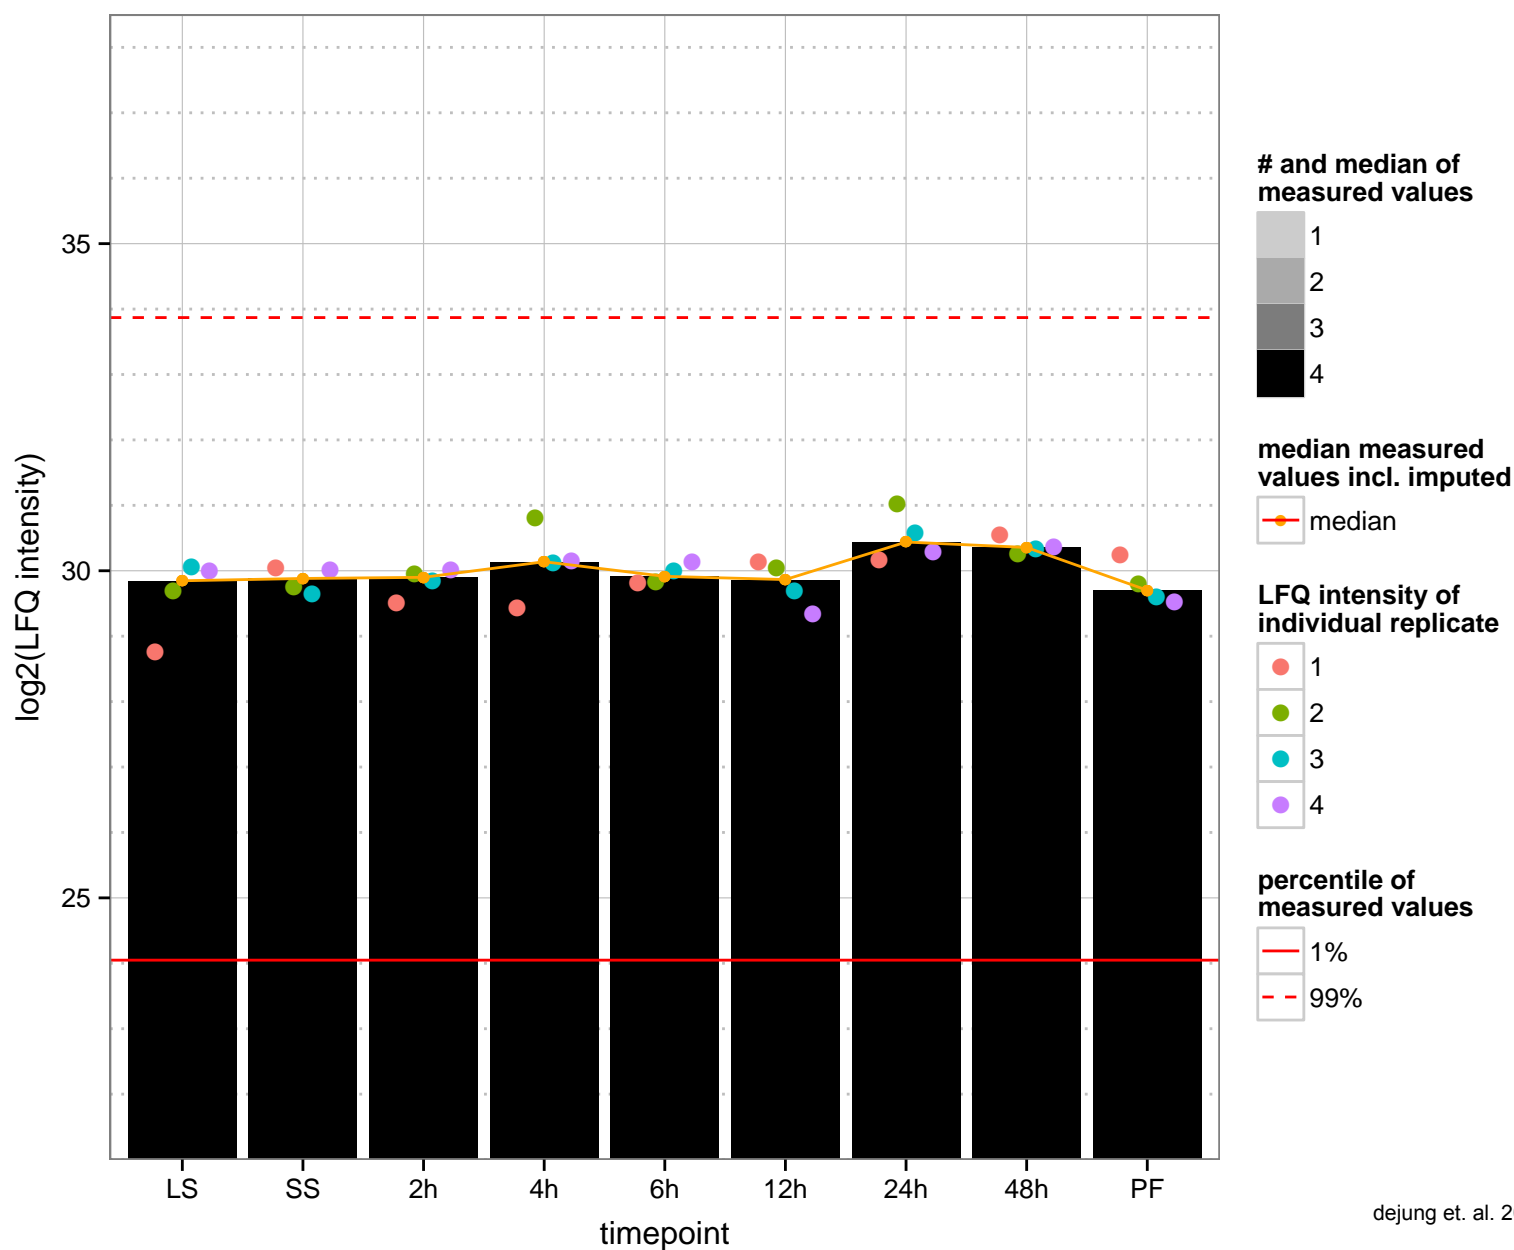

chaperone protein DNAj, putative  
 Tb927.10.9840  
 AGOF: heat shock protein binding, unfolded protein binding  
 AGOC: null  
 AGOP: protein folding  
 PGOF: heat shock protein binding  
 PGO: null  
 PGOP: null

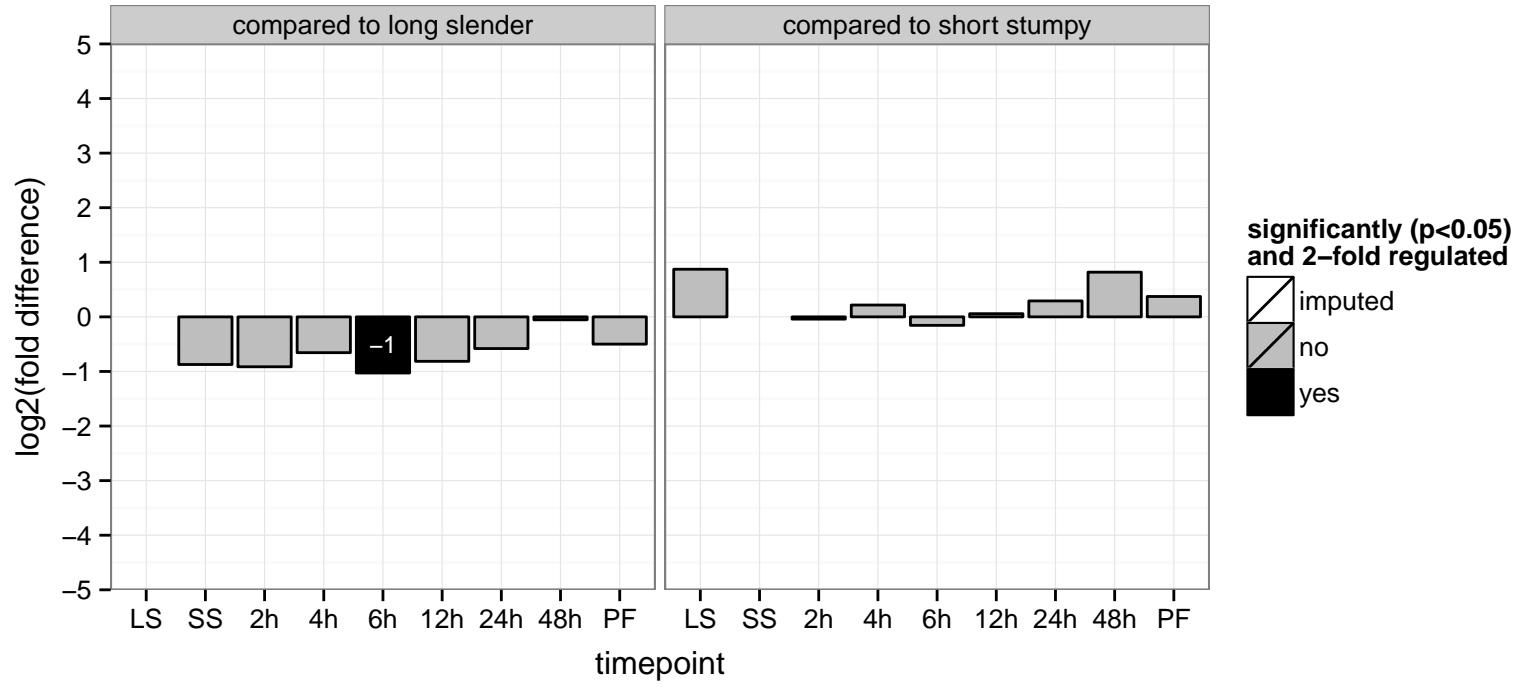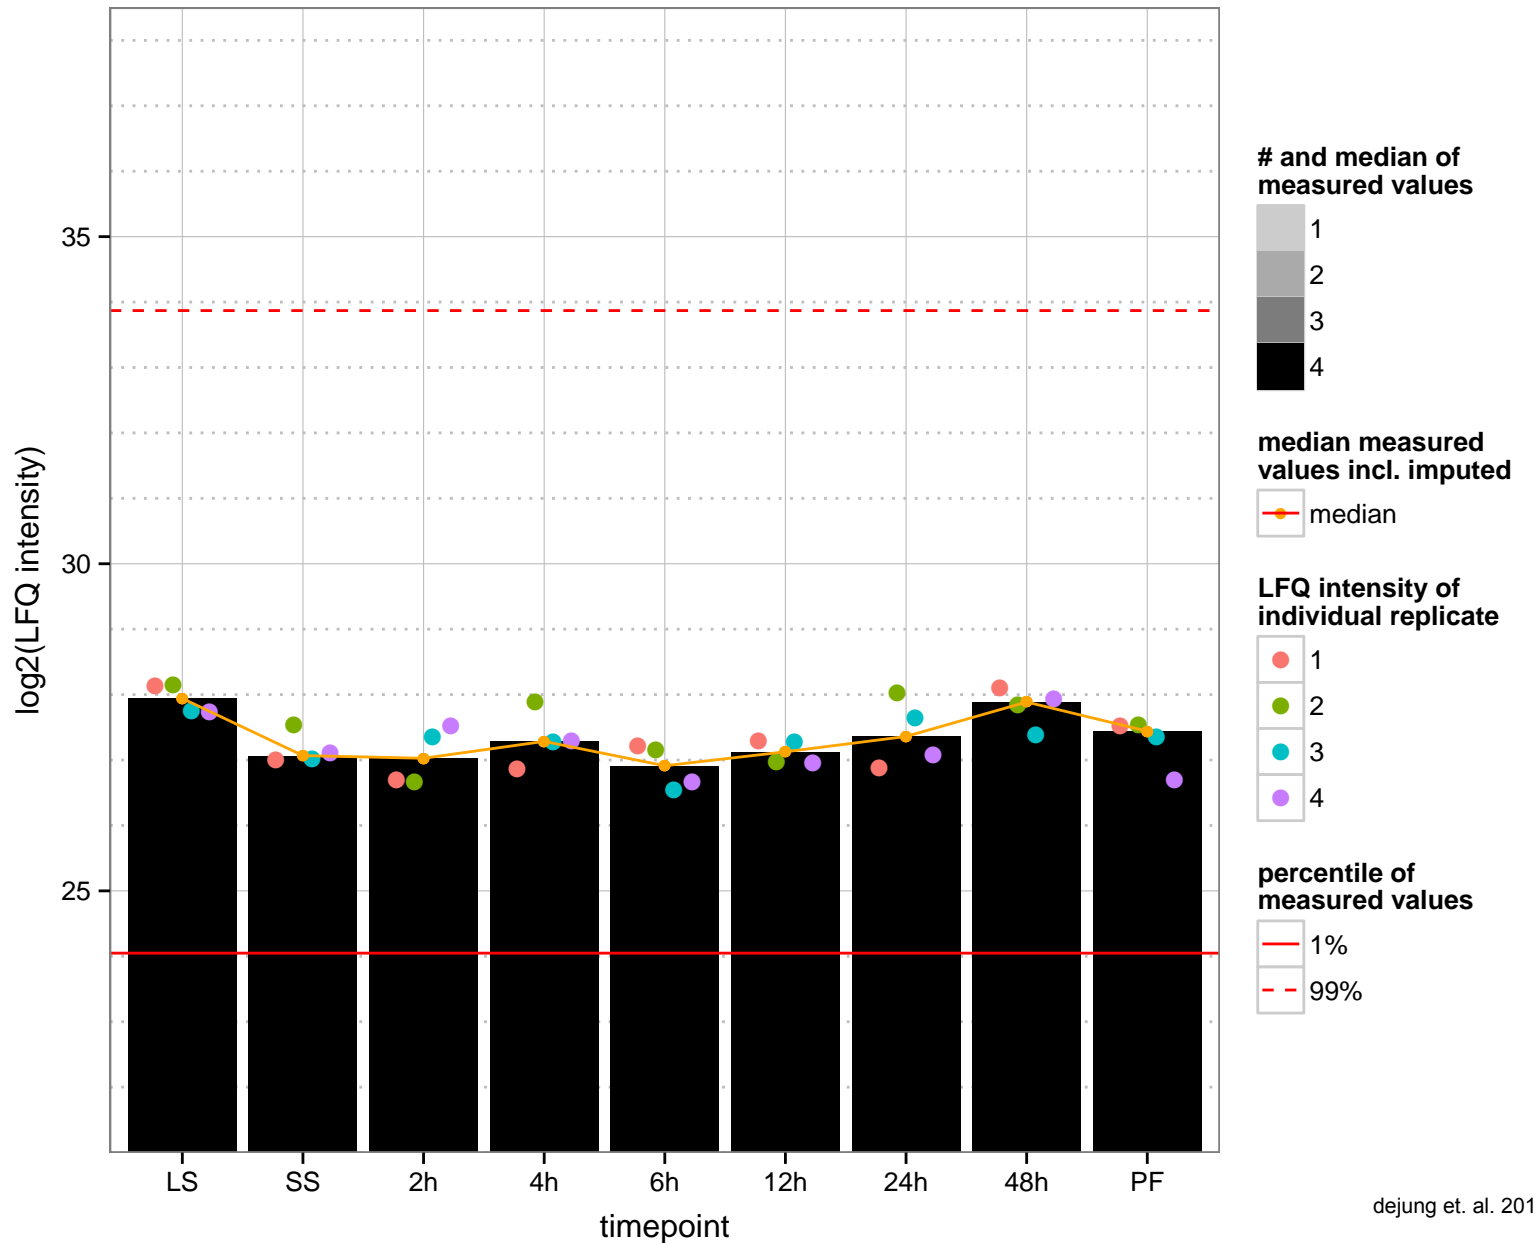



Mitochondrial N(5)-glutamine methyltransferase MTQ1, putative

Tb927.10.9860

AGOF: S-adenosylmethionine-dependent methyltransferase activity, protein methyltransferase activity

AGOC: mitochondrion

AGOP: protein methylation, translational readthrough

PGOF: protein methyltransferase activity

PGOC: null

PGOP: protein methylation

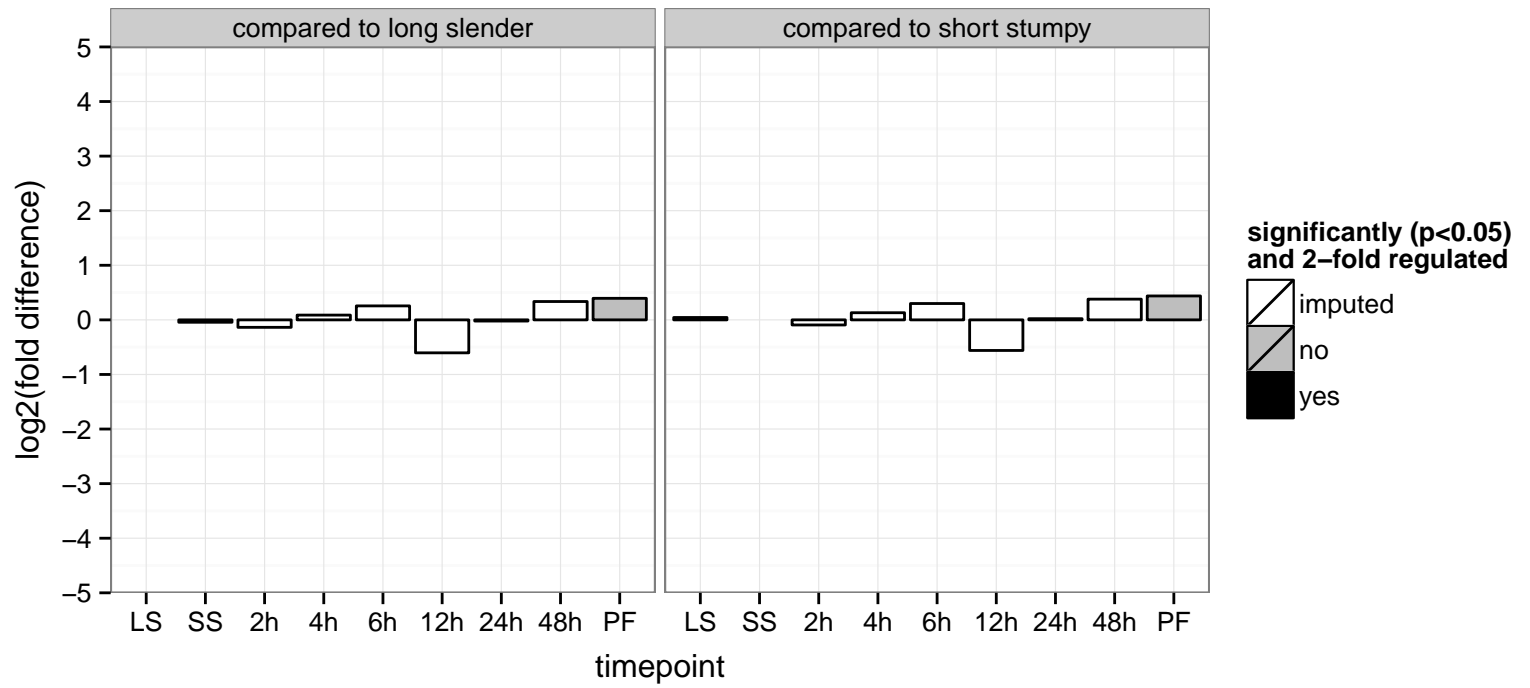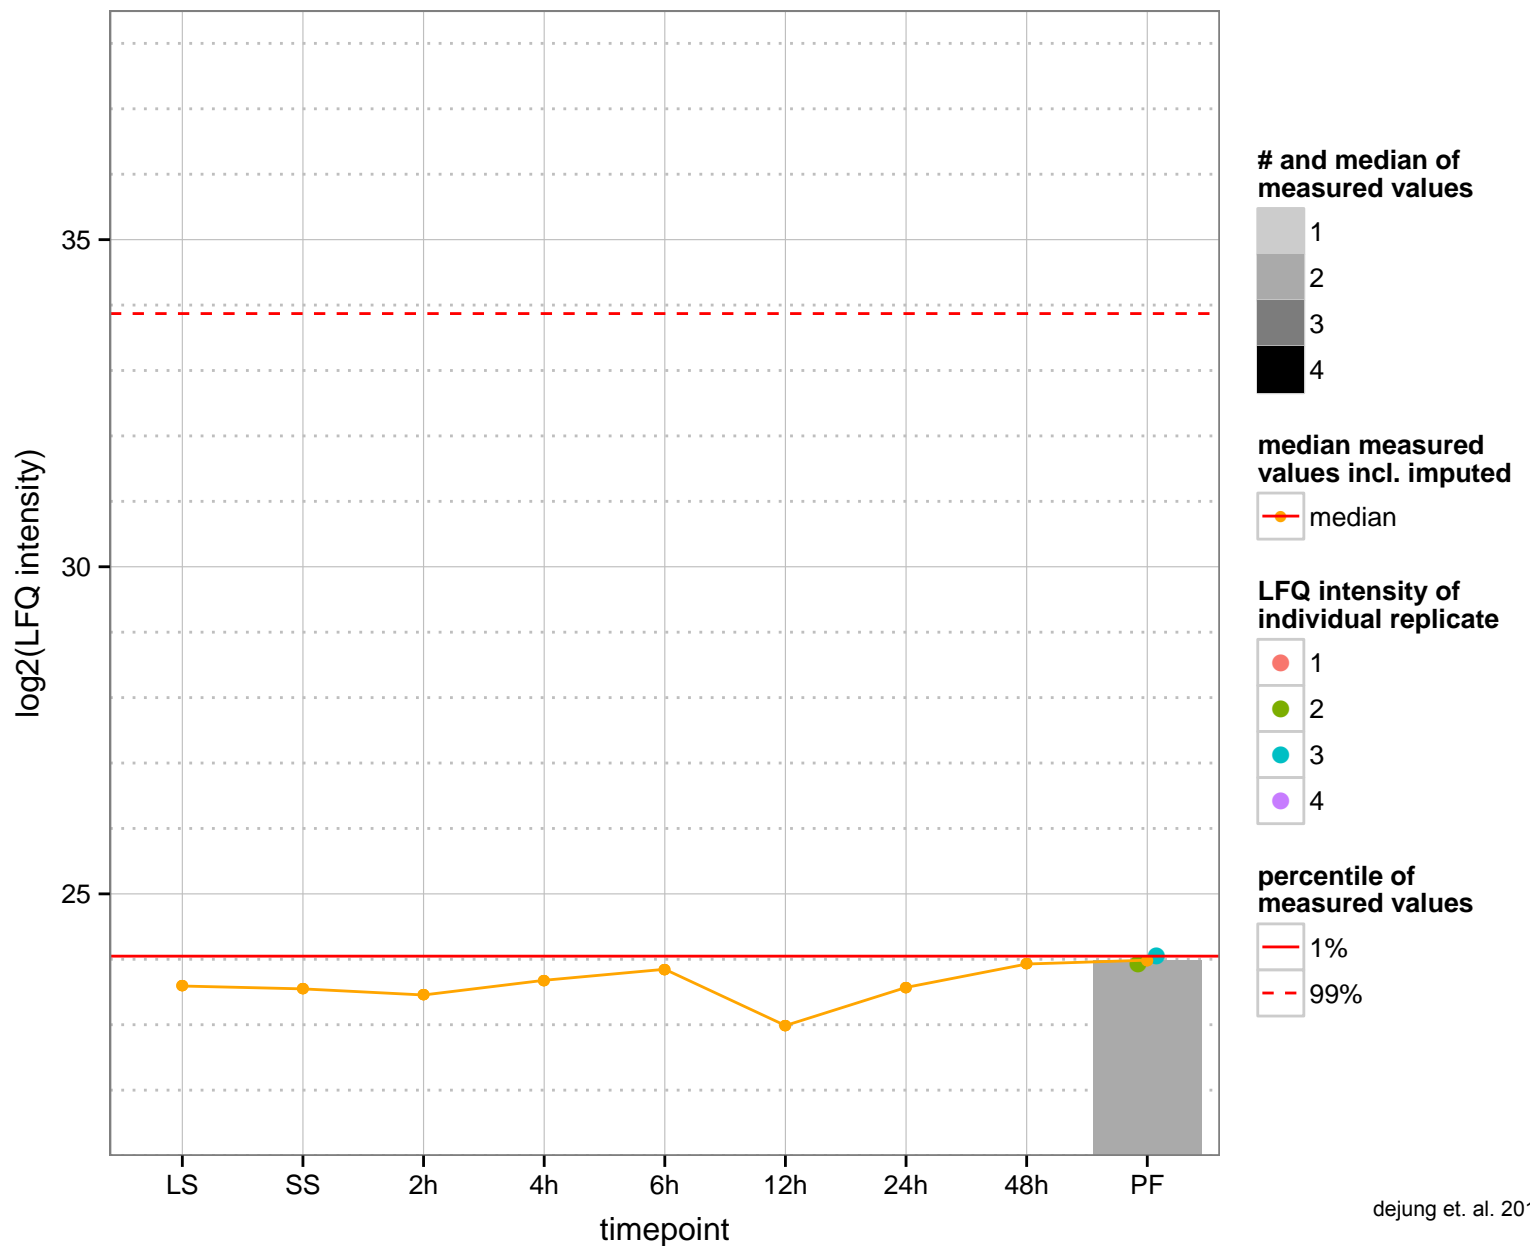

hypothetical protein, conserved  
 Tb927.10.9890  
 AGOF: null  
 AGOC: null  
 AGOP: null  
 PGO: null  
 PGOC: null  
 PGOP: null

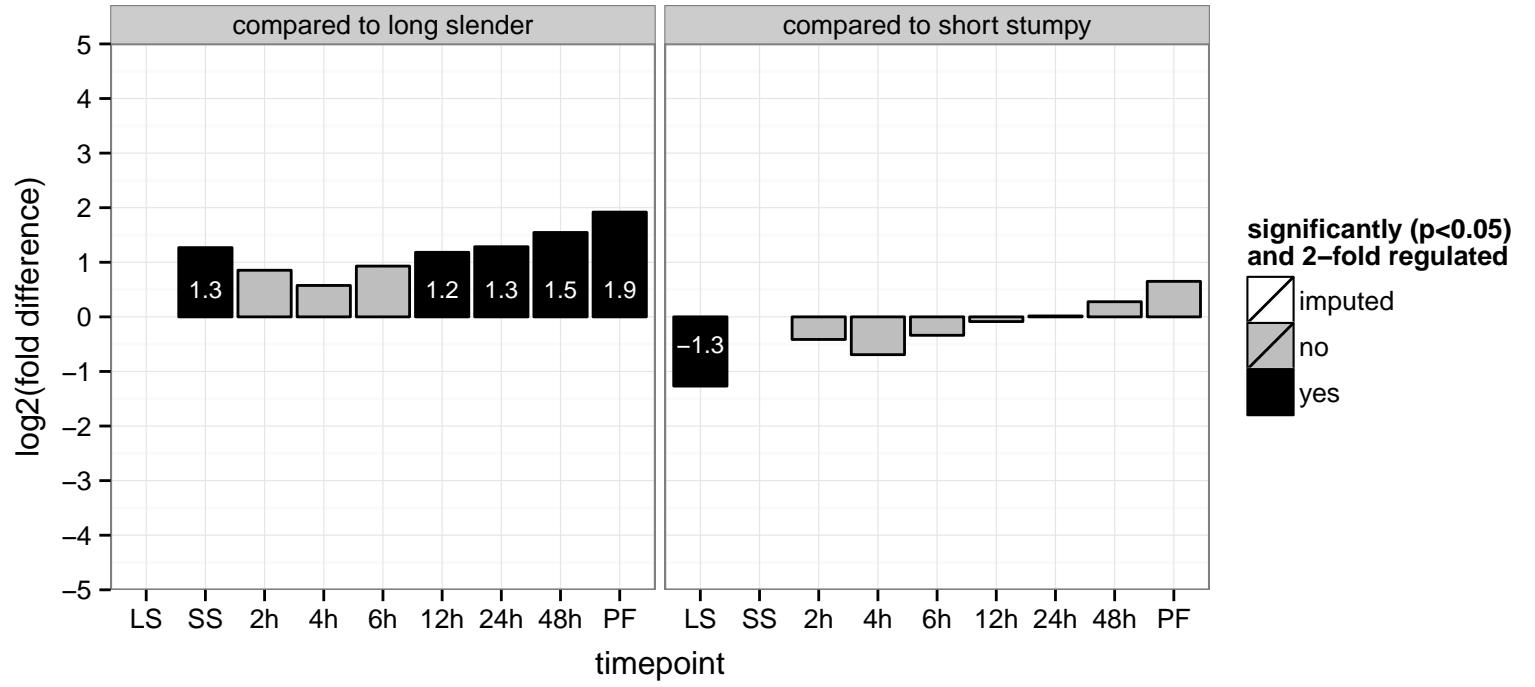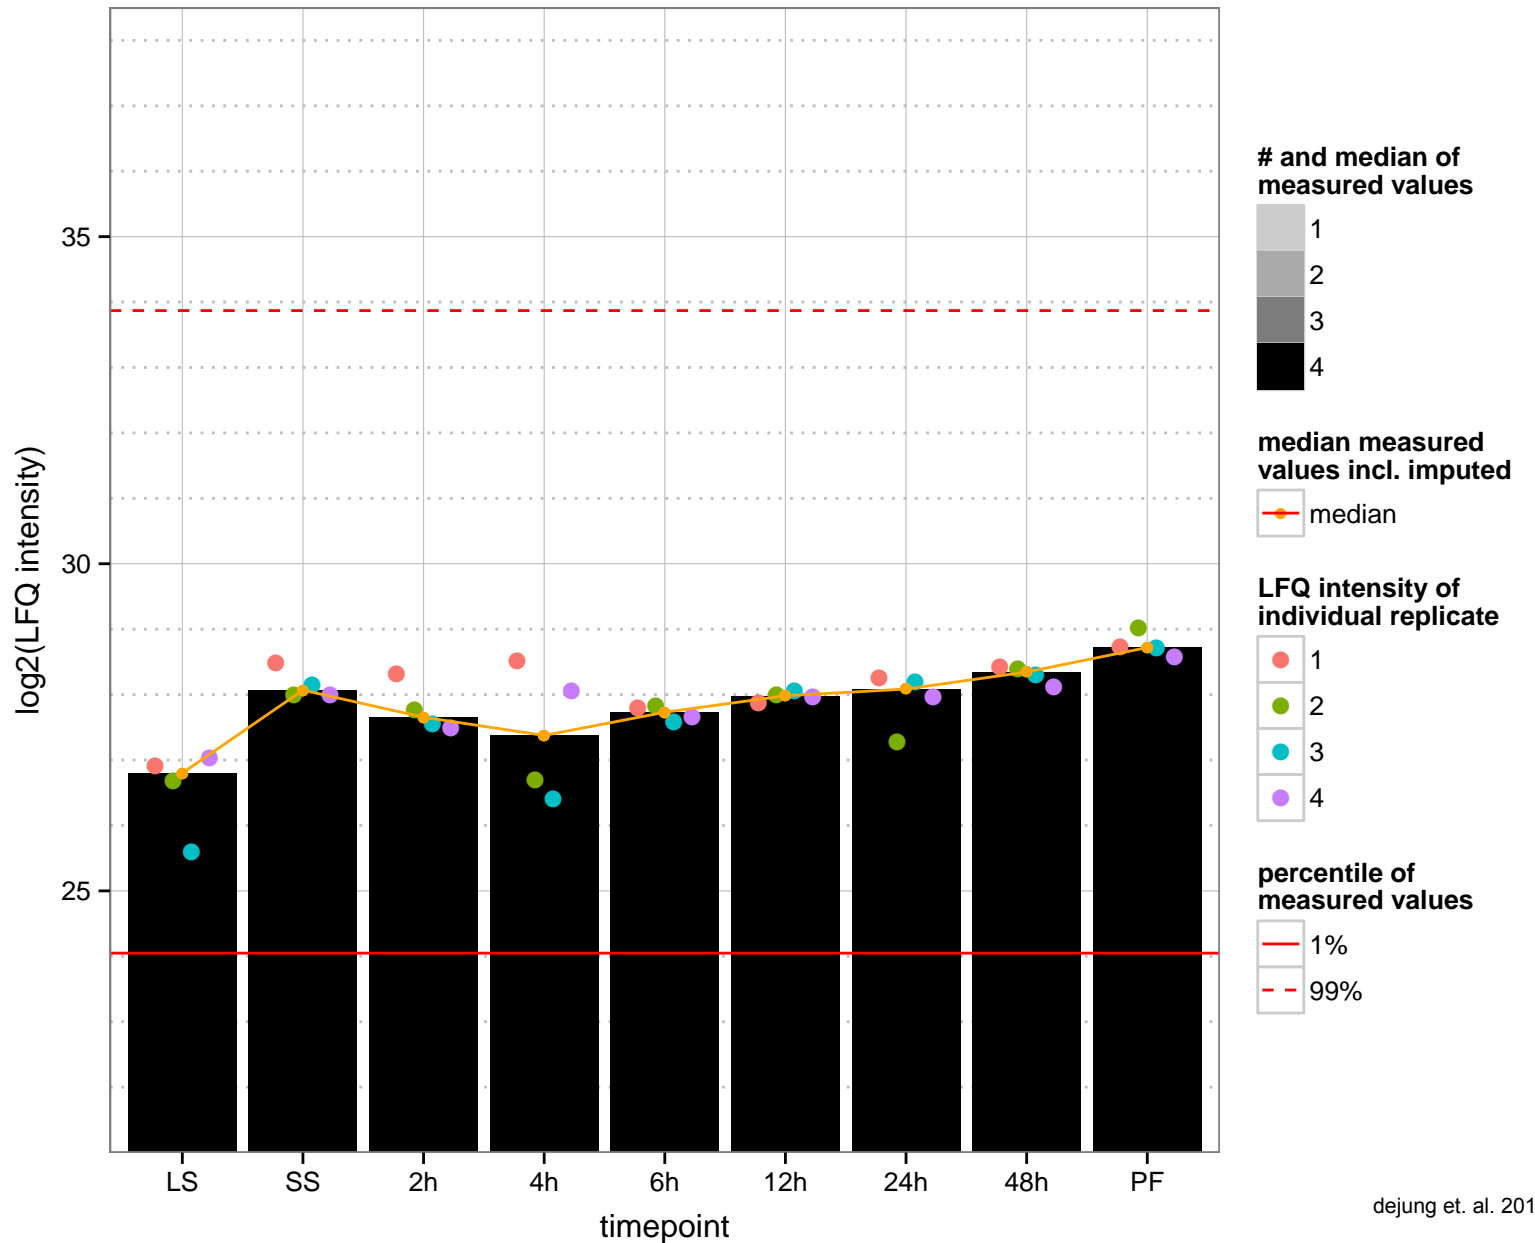

ABC1 protein, putative  
 Tb927.10.9900  
 AGOF: protein kinase activity  
 AGOC: null  
 AGOP: null  
 PGO: transferase activity, transferring phosphorus-containing groups  
 PGOC: null  
 PGOP: null

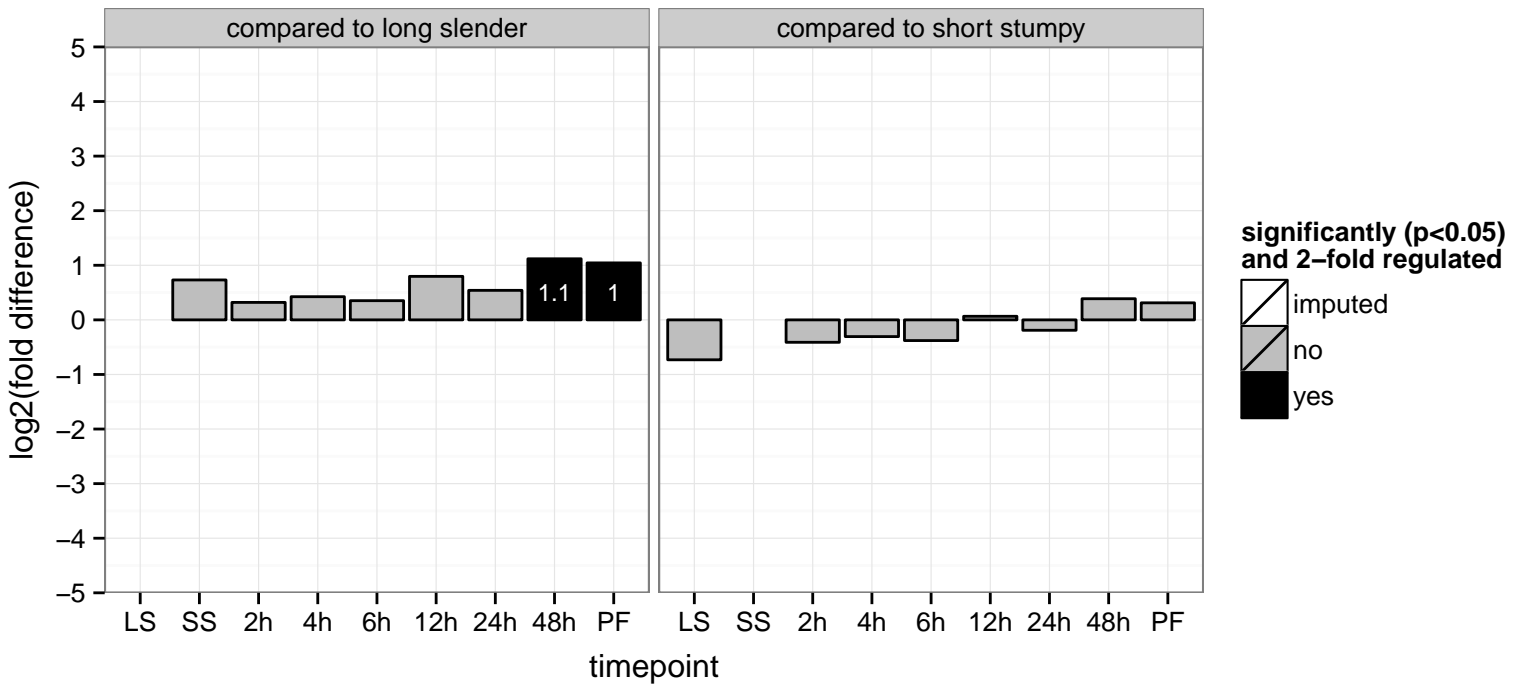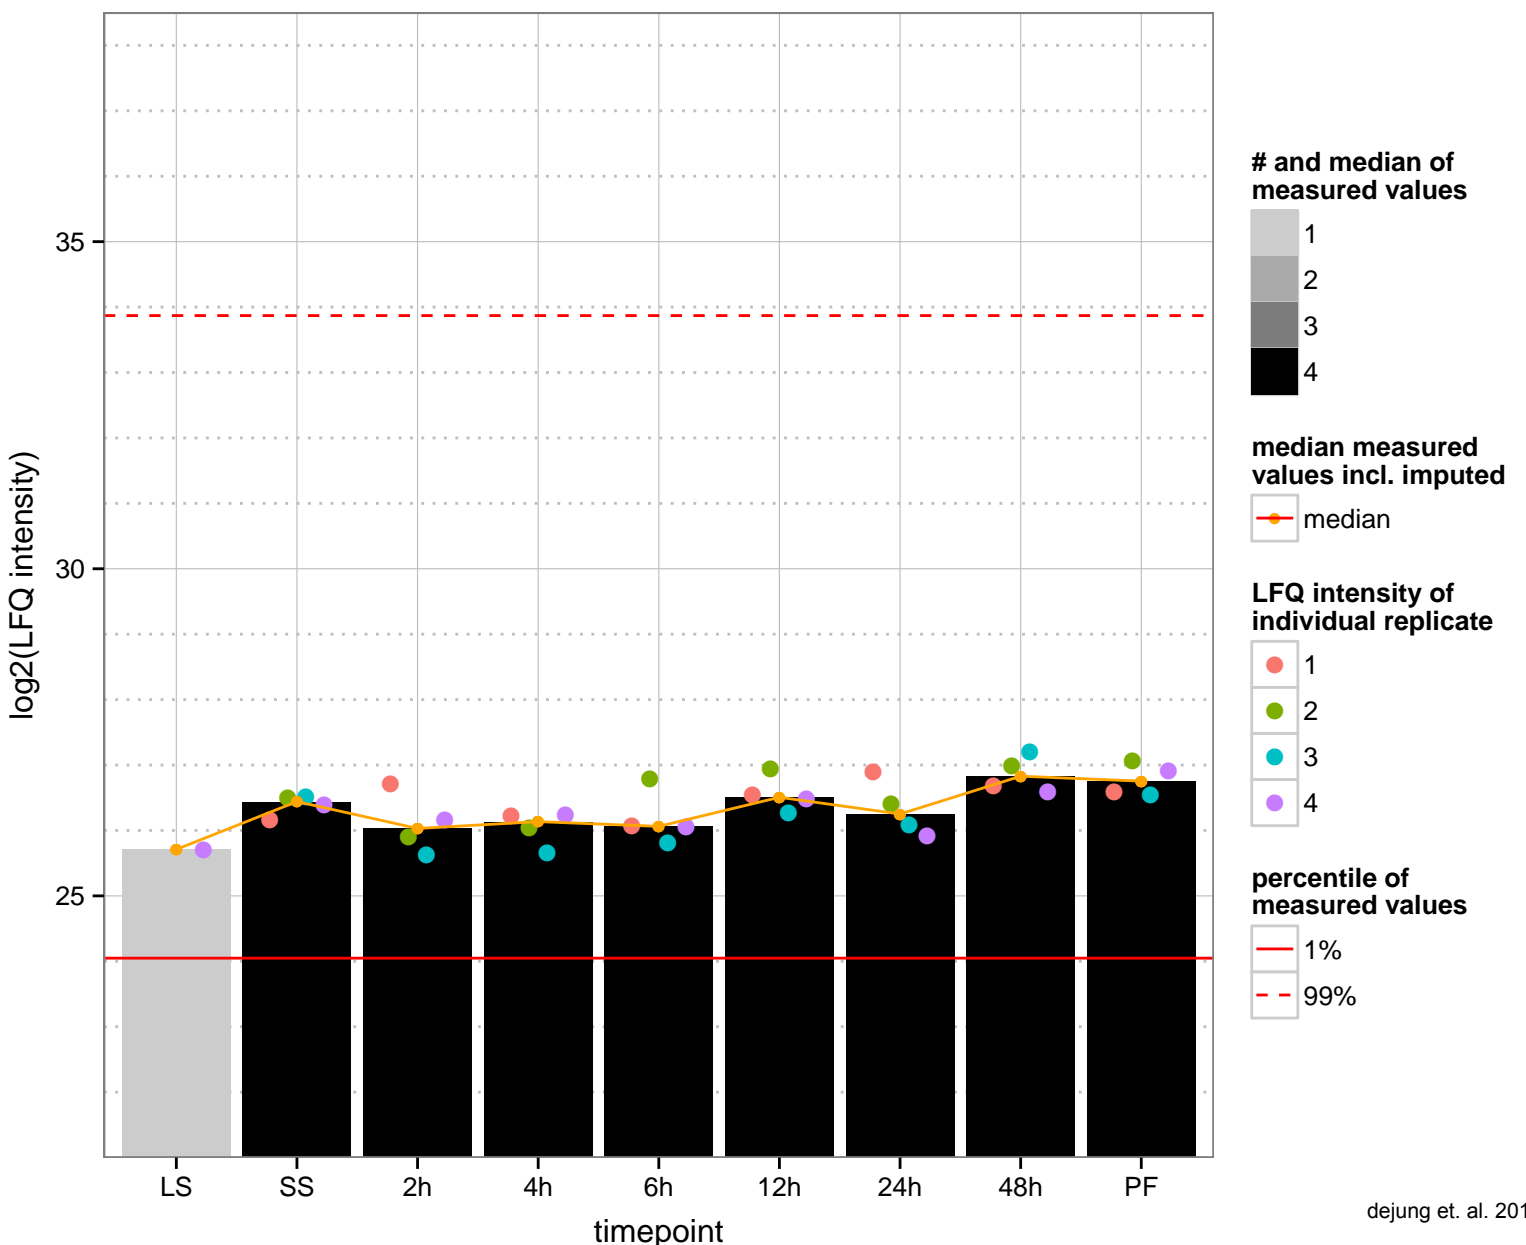

hypothetical protein, conserved  
 Tb927.10.9910  
 AGOF: null  
 AGOC: null  
 AGOP: null  
 PGO: null  
 PGOC: null  
 PGOP: null

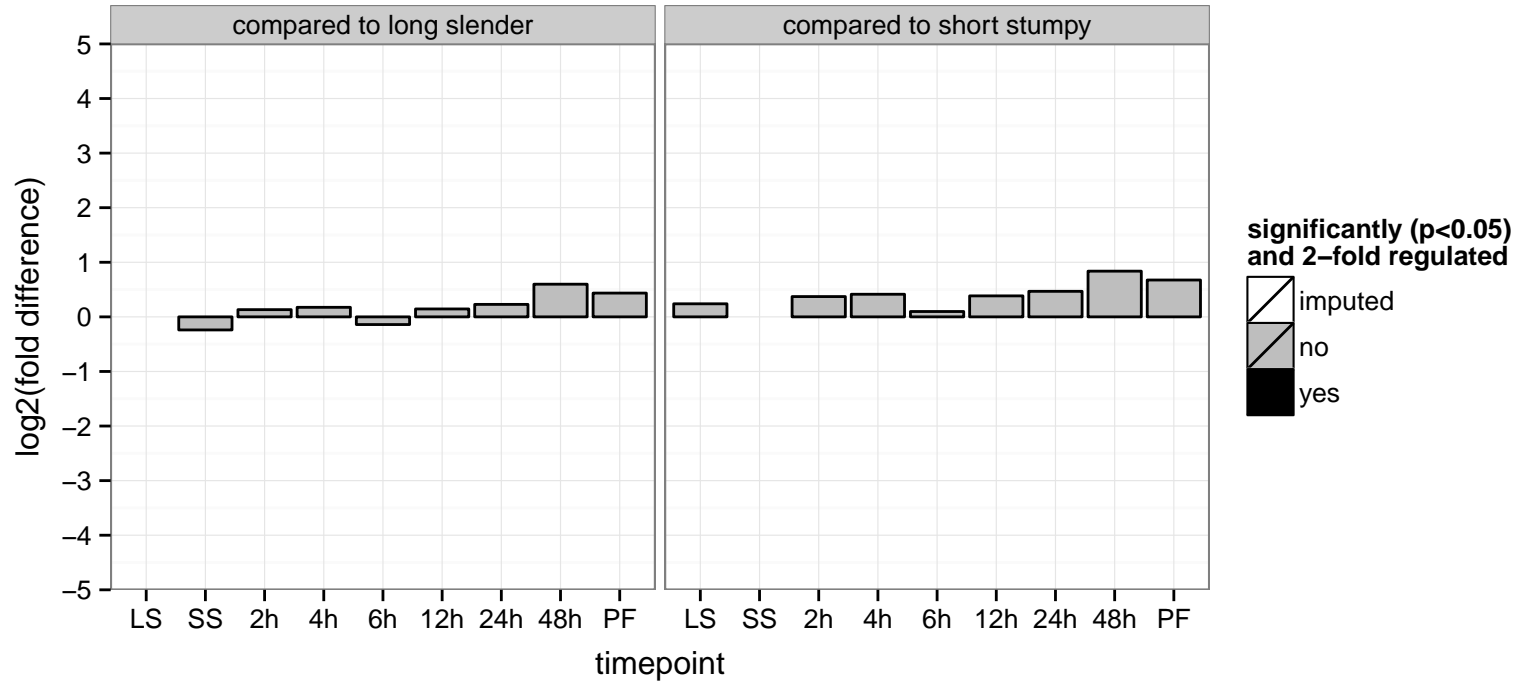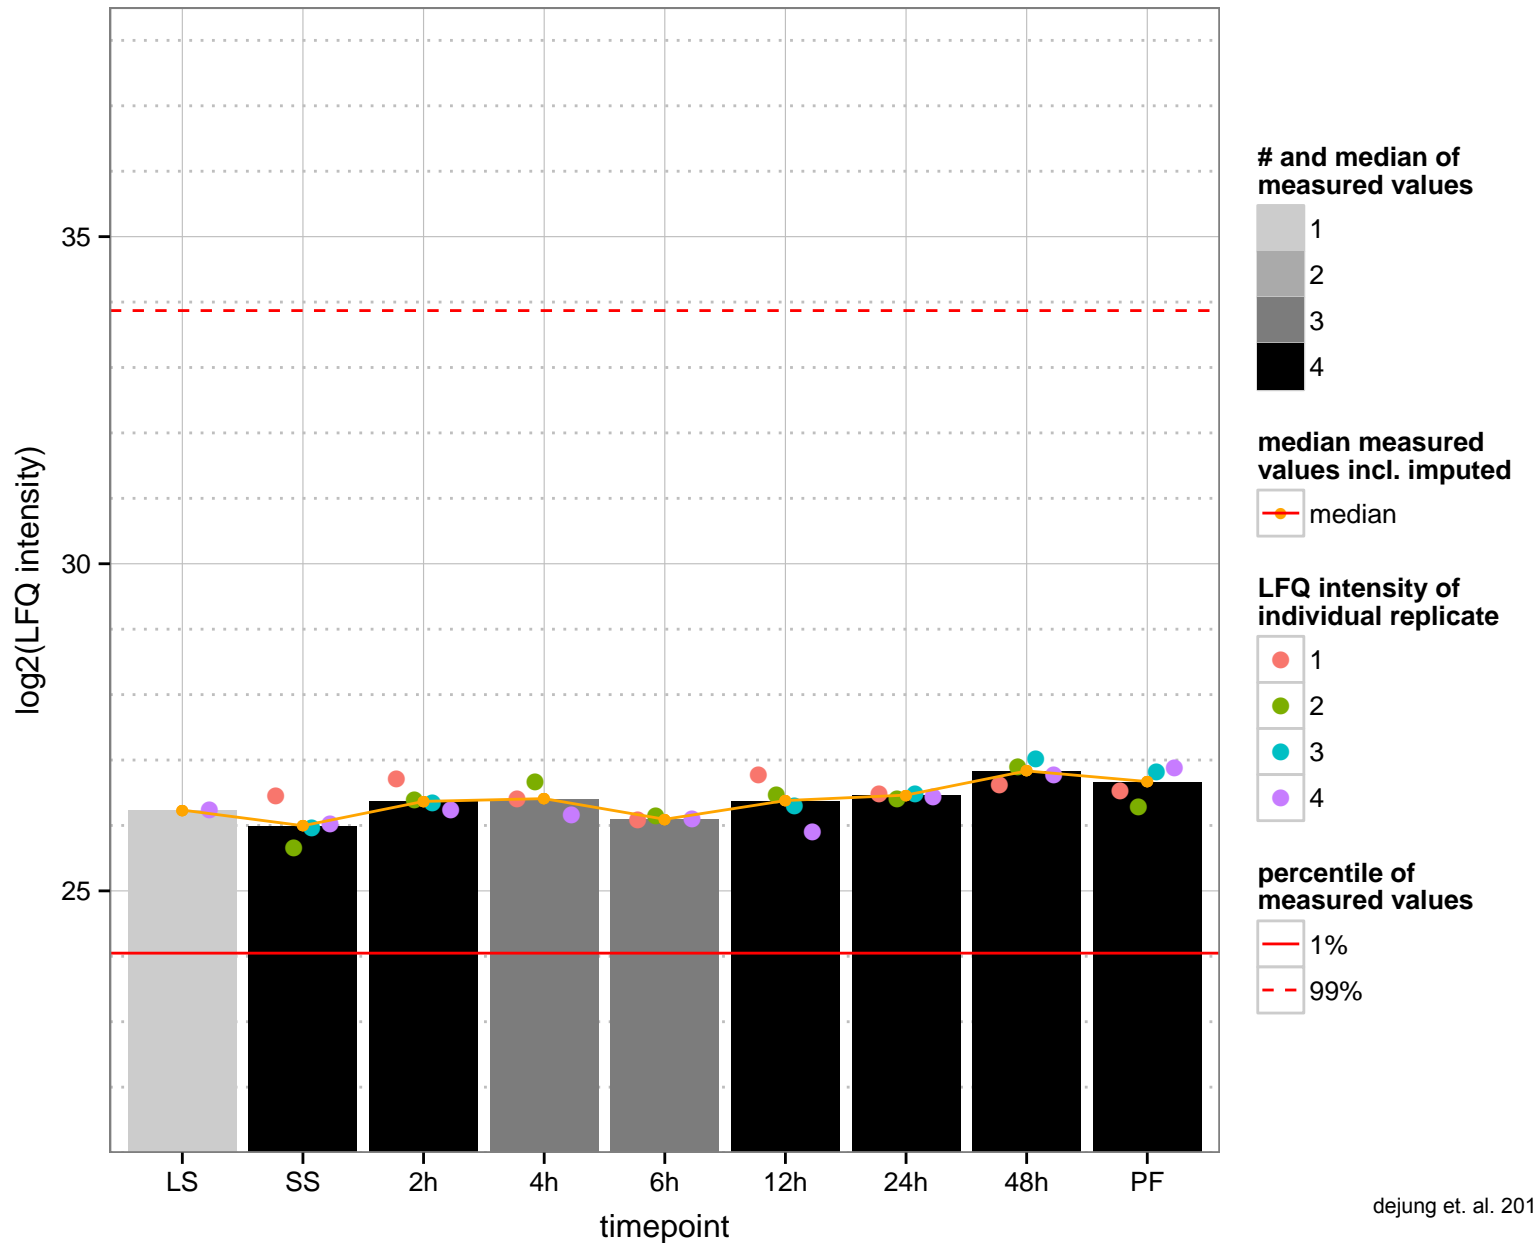

hypothetical protein, conserved  
 Tb927.10.9970  
 AGOF: null  
 AGOC: mitochondrion  
 AGOP: null  
 PGO: null  
 PGOC: null  
 PGOP: null

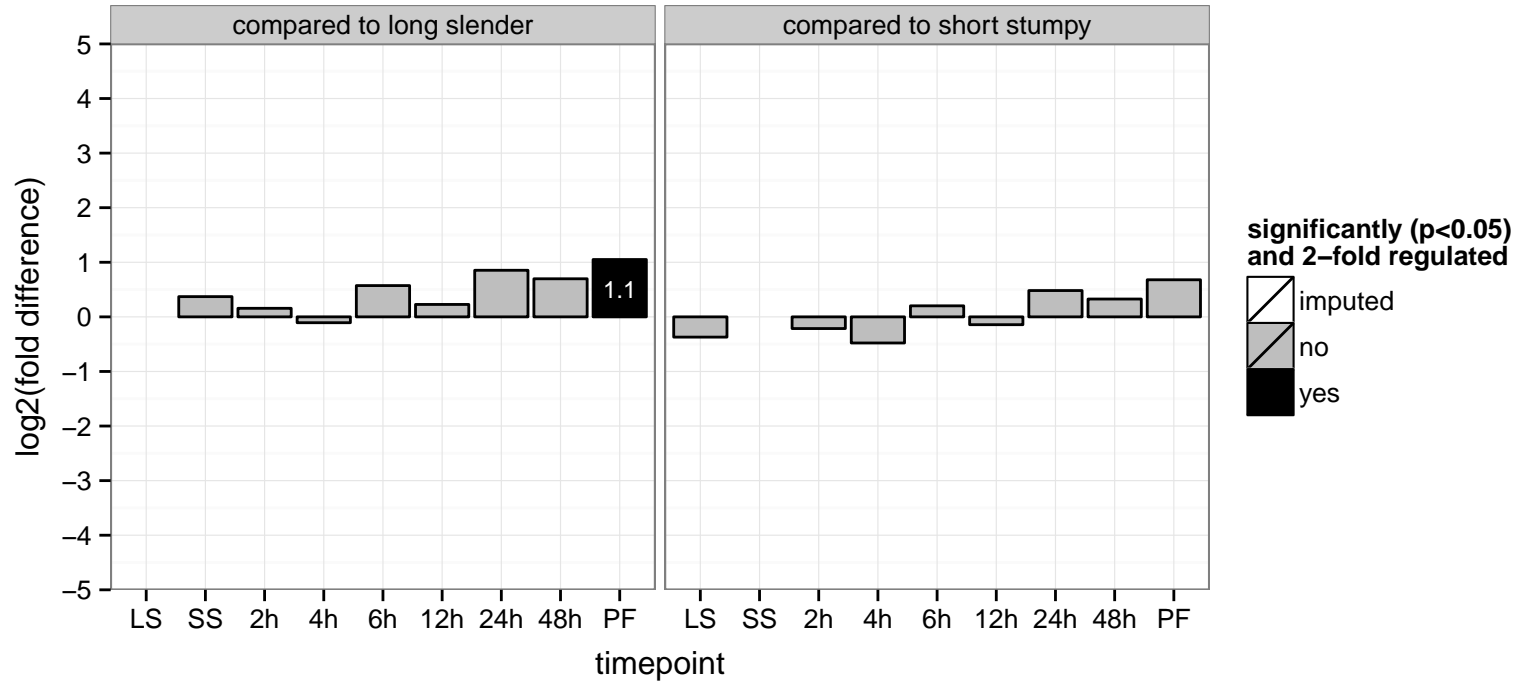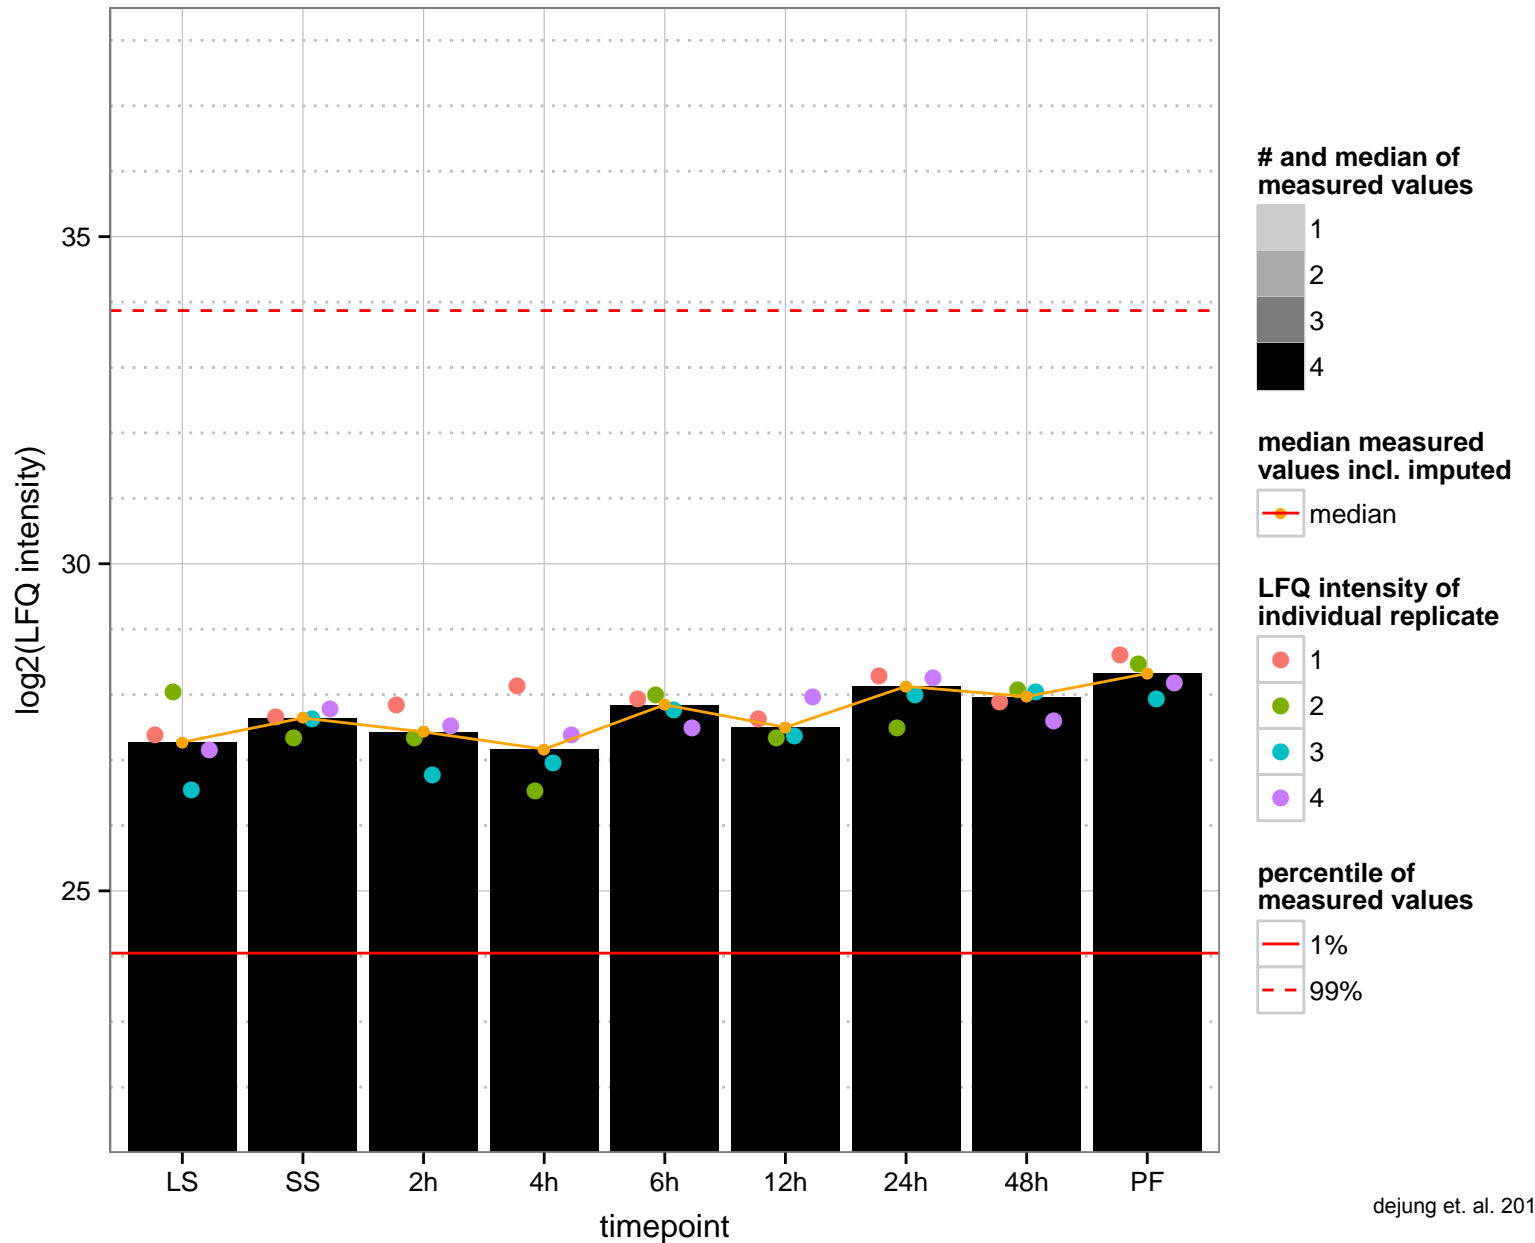

short-chain dehydrogenase, putative  
 Tb927.11.10020  
 AGOF: oxidoreductase activity  
 AGOC: integral to membrane  
 AGOP: metabolic process  
 PGOF: oxidoreductase activity  
 PGOC: null  
 PGO: metabolic process

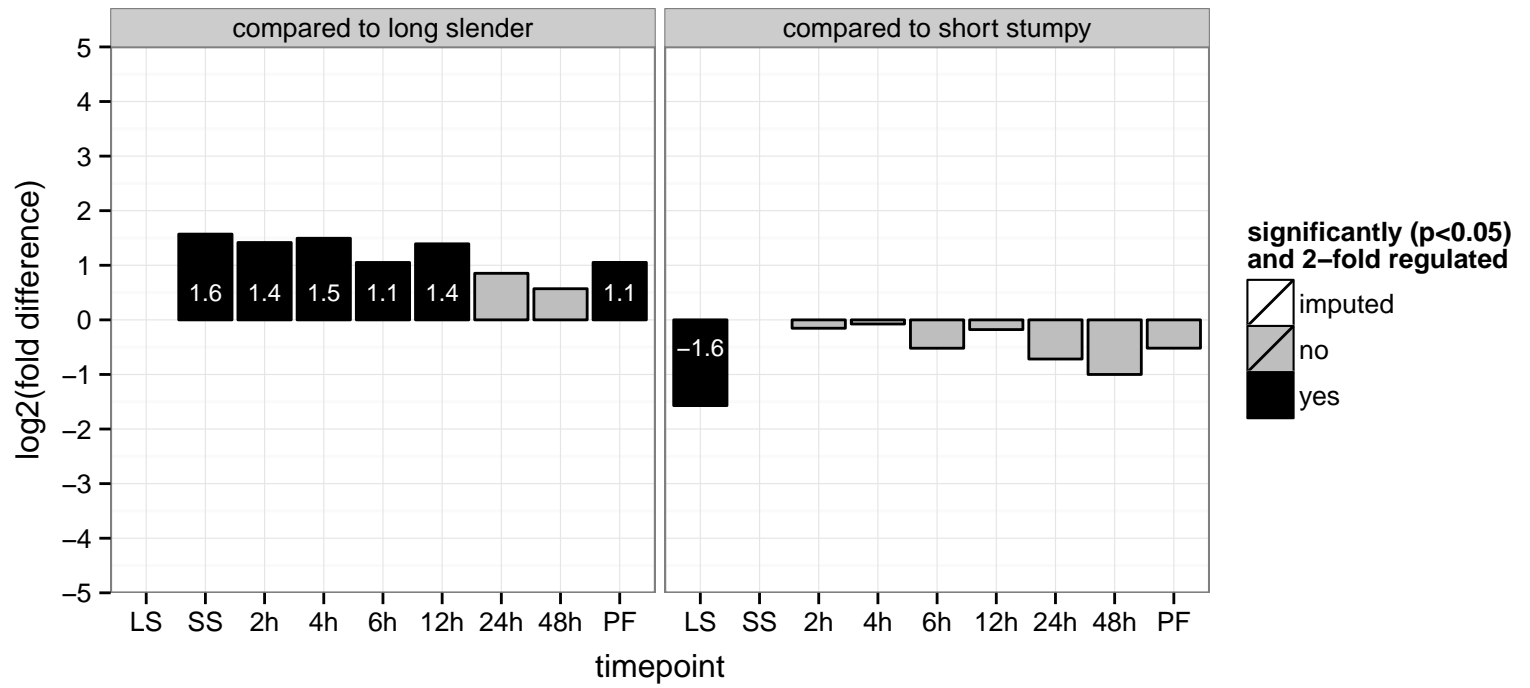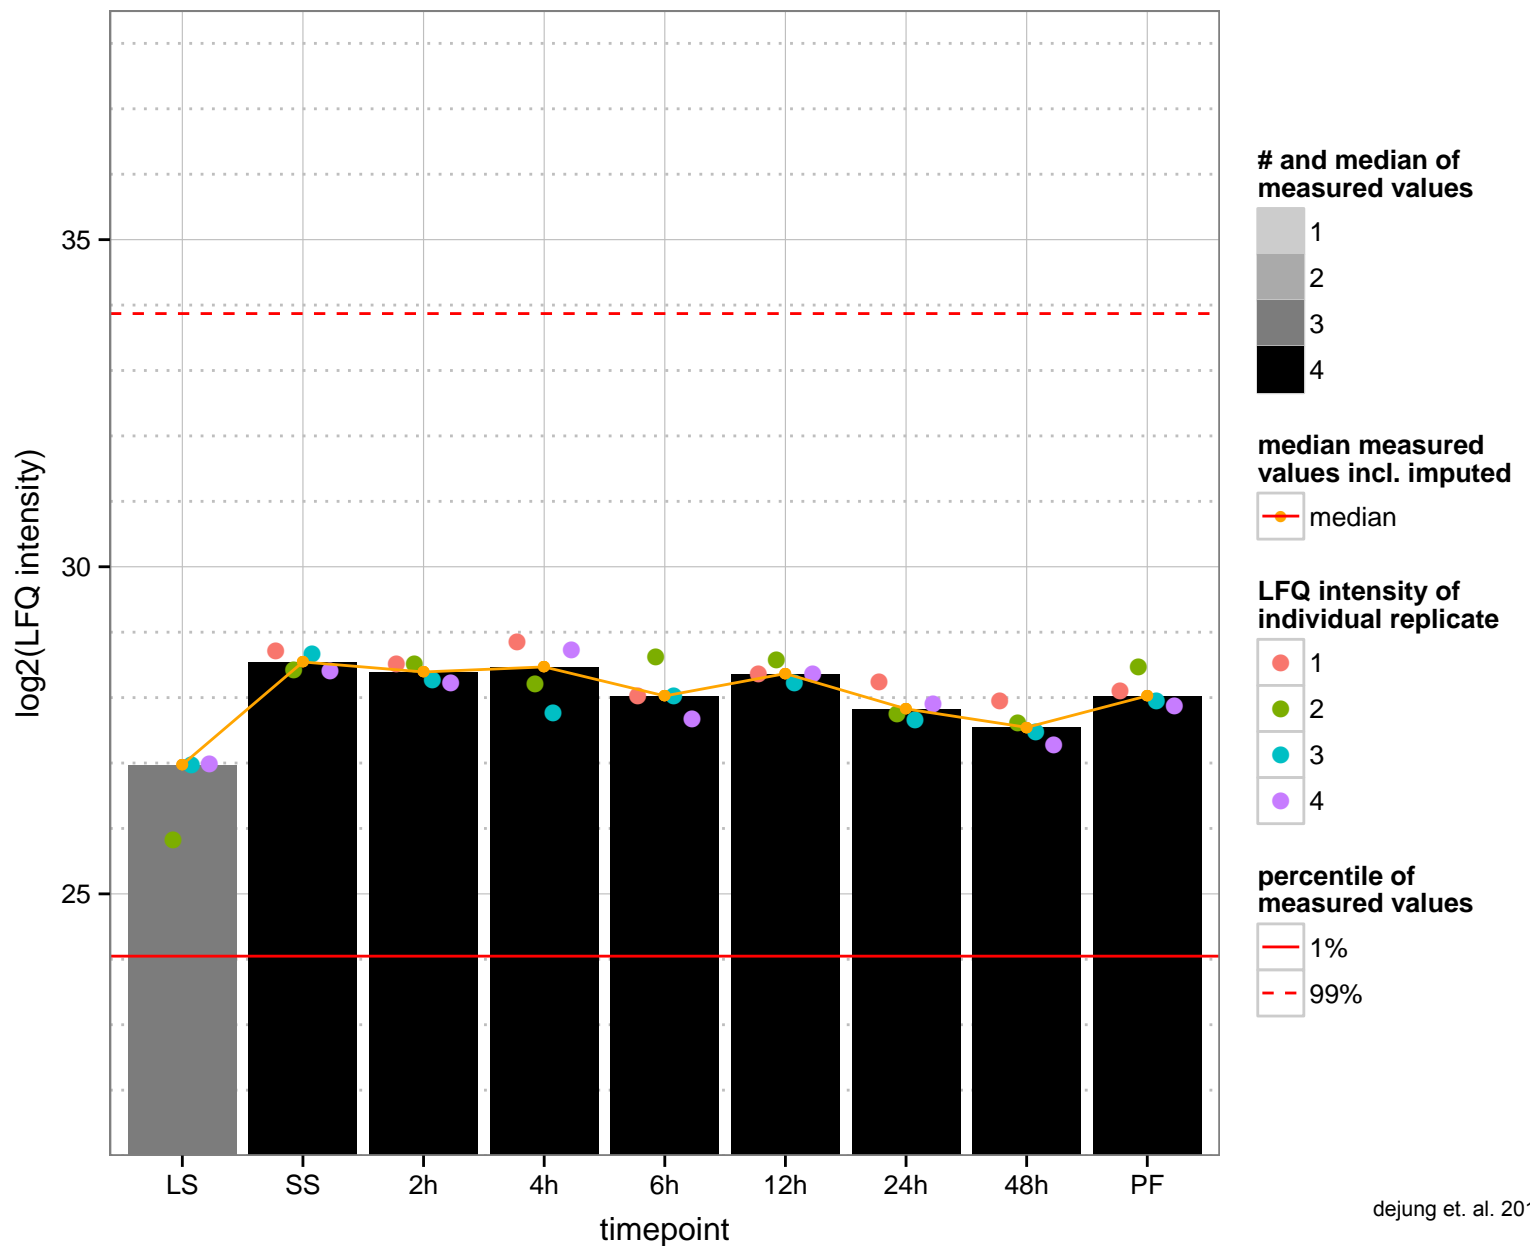

Biotin--acetyl-CoA-carboxylase ligase, putative, biotin--protein ligase  
 Tb927.11.10060  
 AGOF: biotin-[acetyl-CoA-carboxylase] ligase activity  
 AGOC: null  
 AGOP: biotin biosynthetic process, cellular protein modification process  
 PGOF: biotin-[acetyl-CoA-carboxylase] ligase activity, catalytic activity  
 PGOC: null  
 PGOP: cellular protein modification process

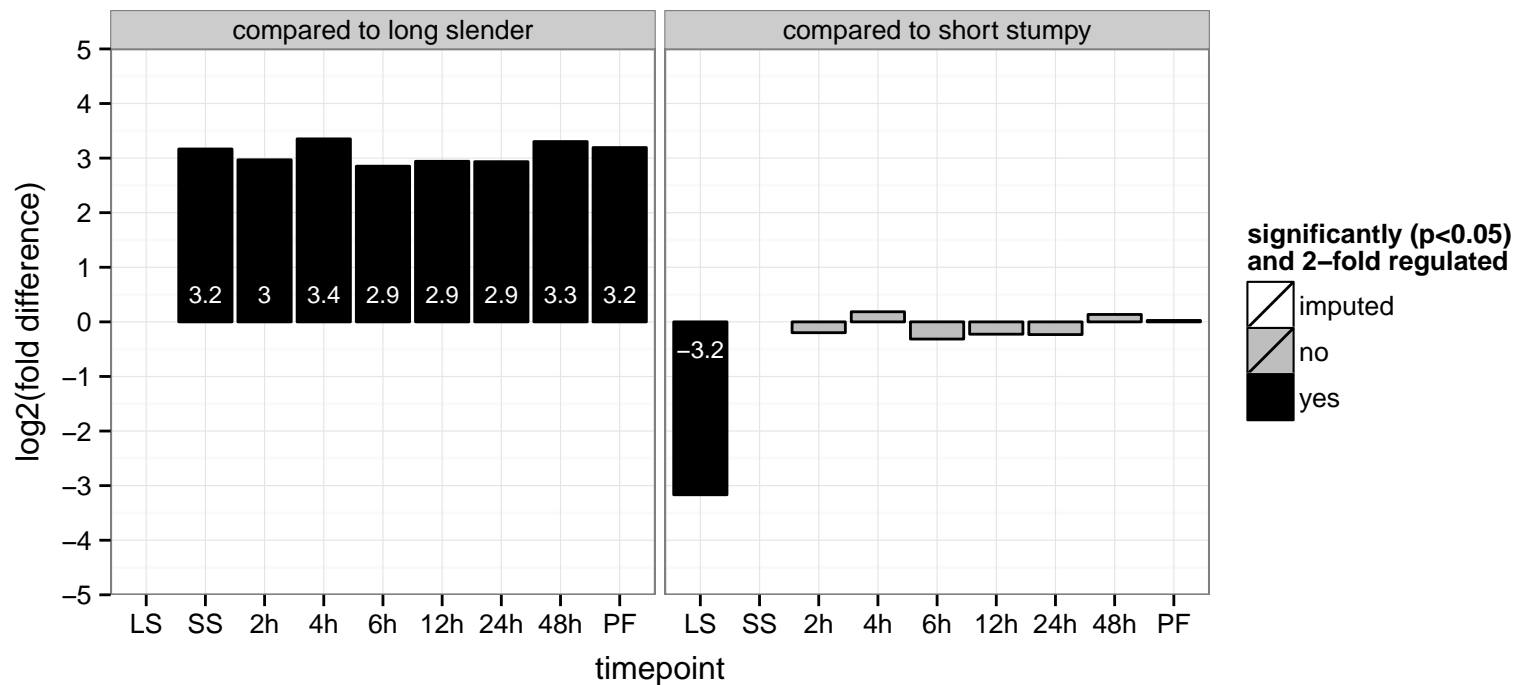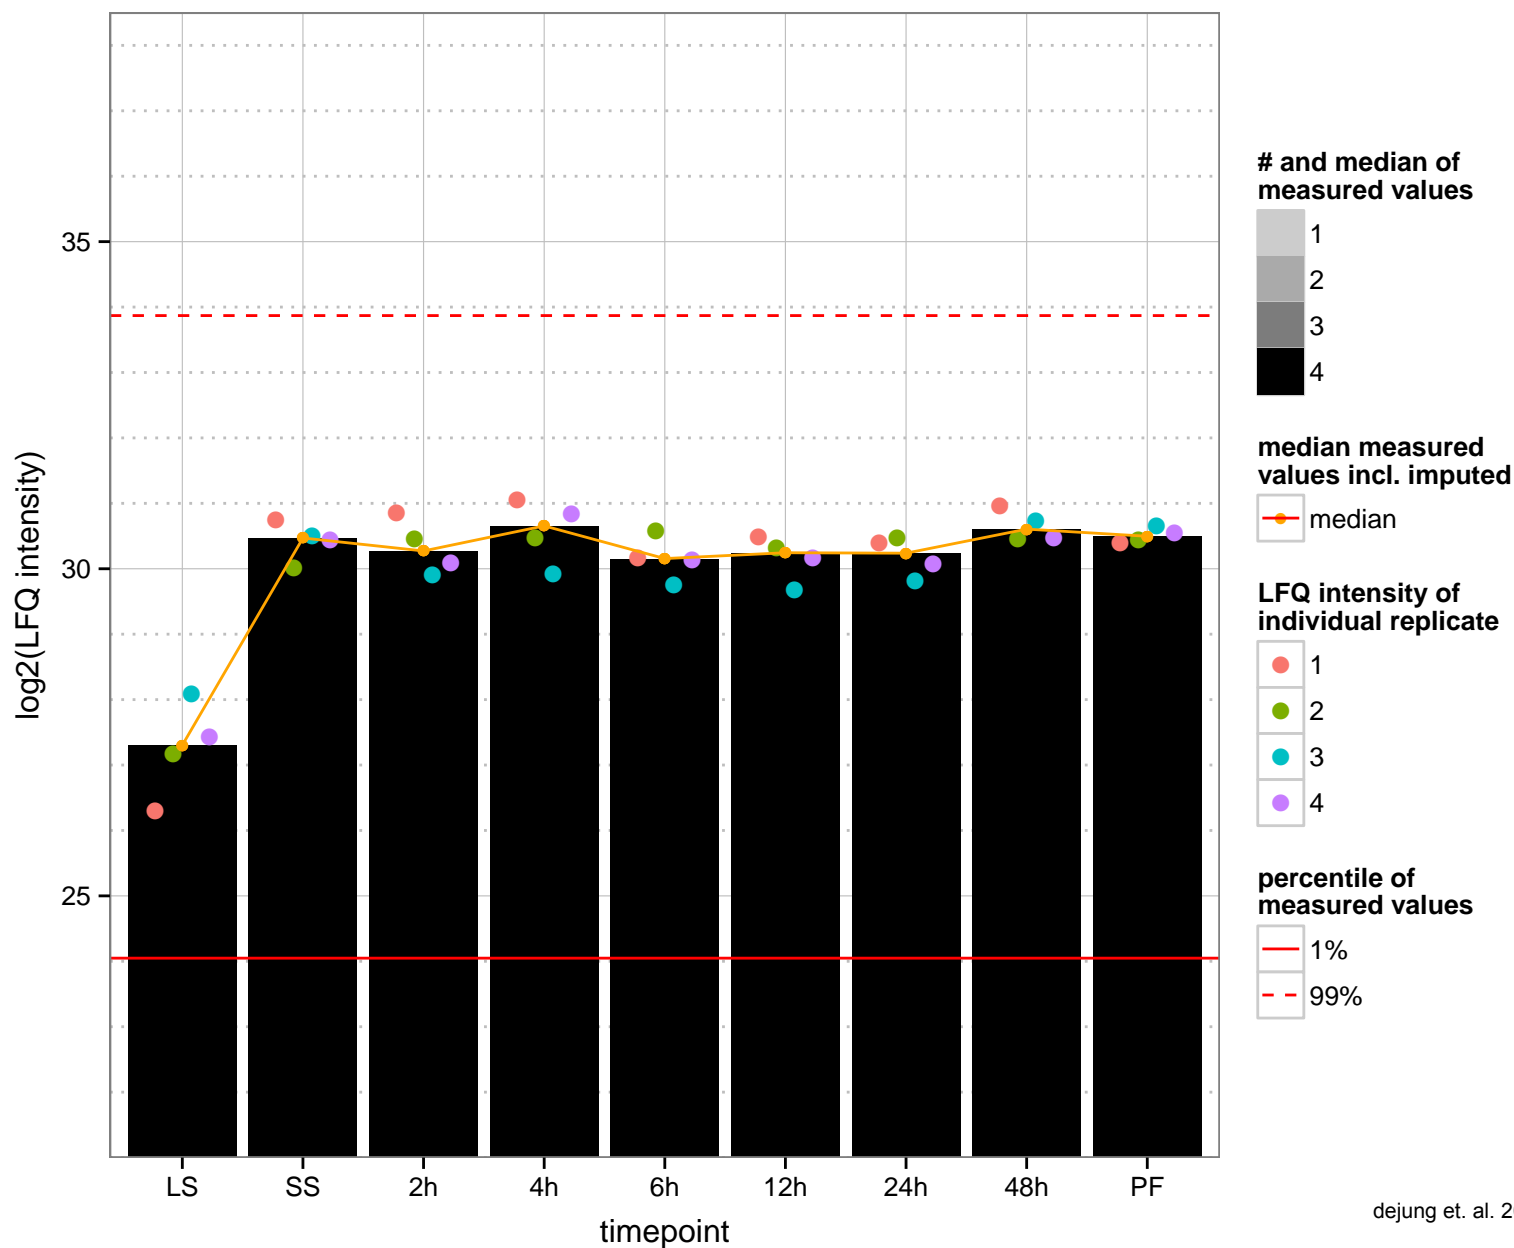

hypothetical protein, conserved  
 Tb927.11.10070  
 AGOF: null  
 AGOC: null  
 AGOP: null  
 PGO: protein binding  
 PGOC: null  
 PGOP: null

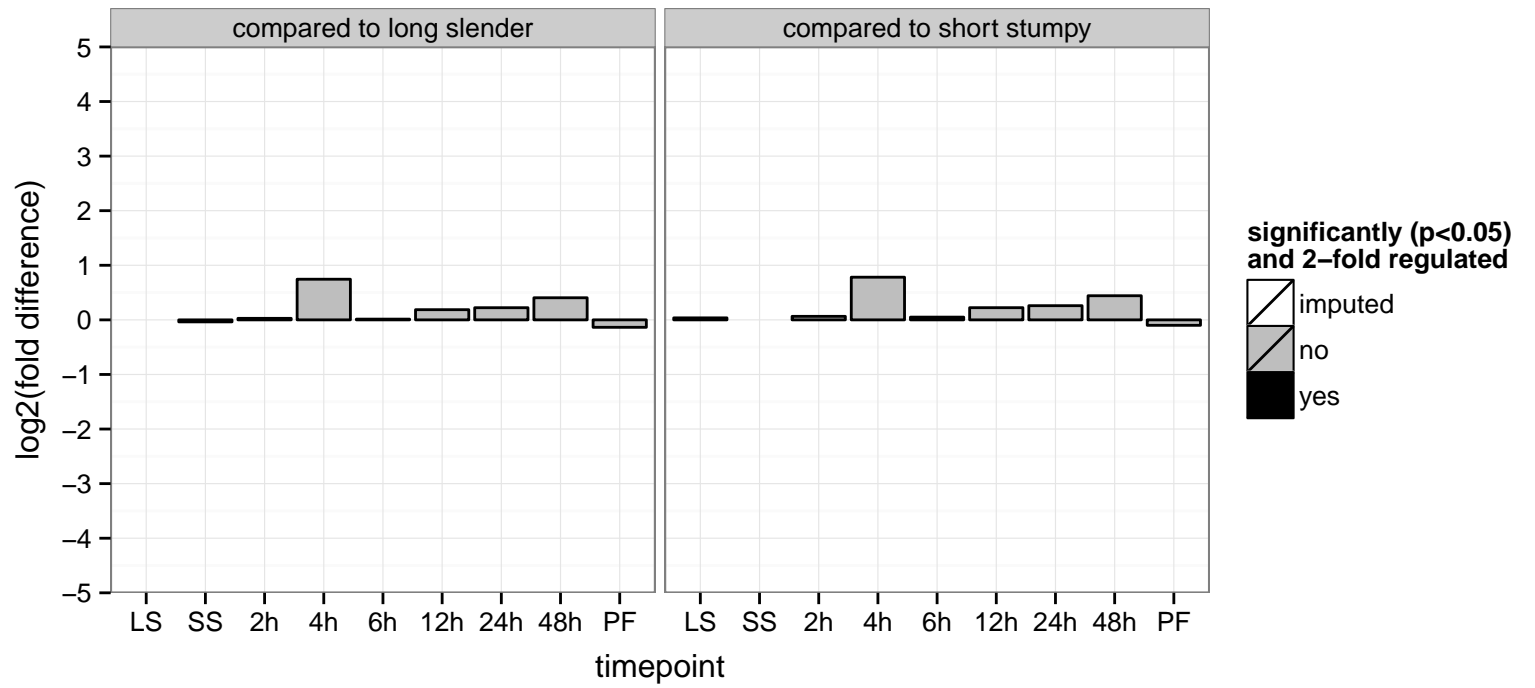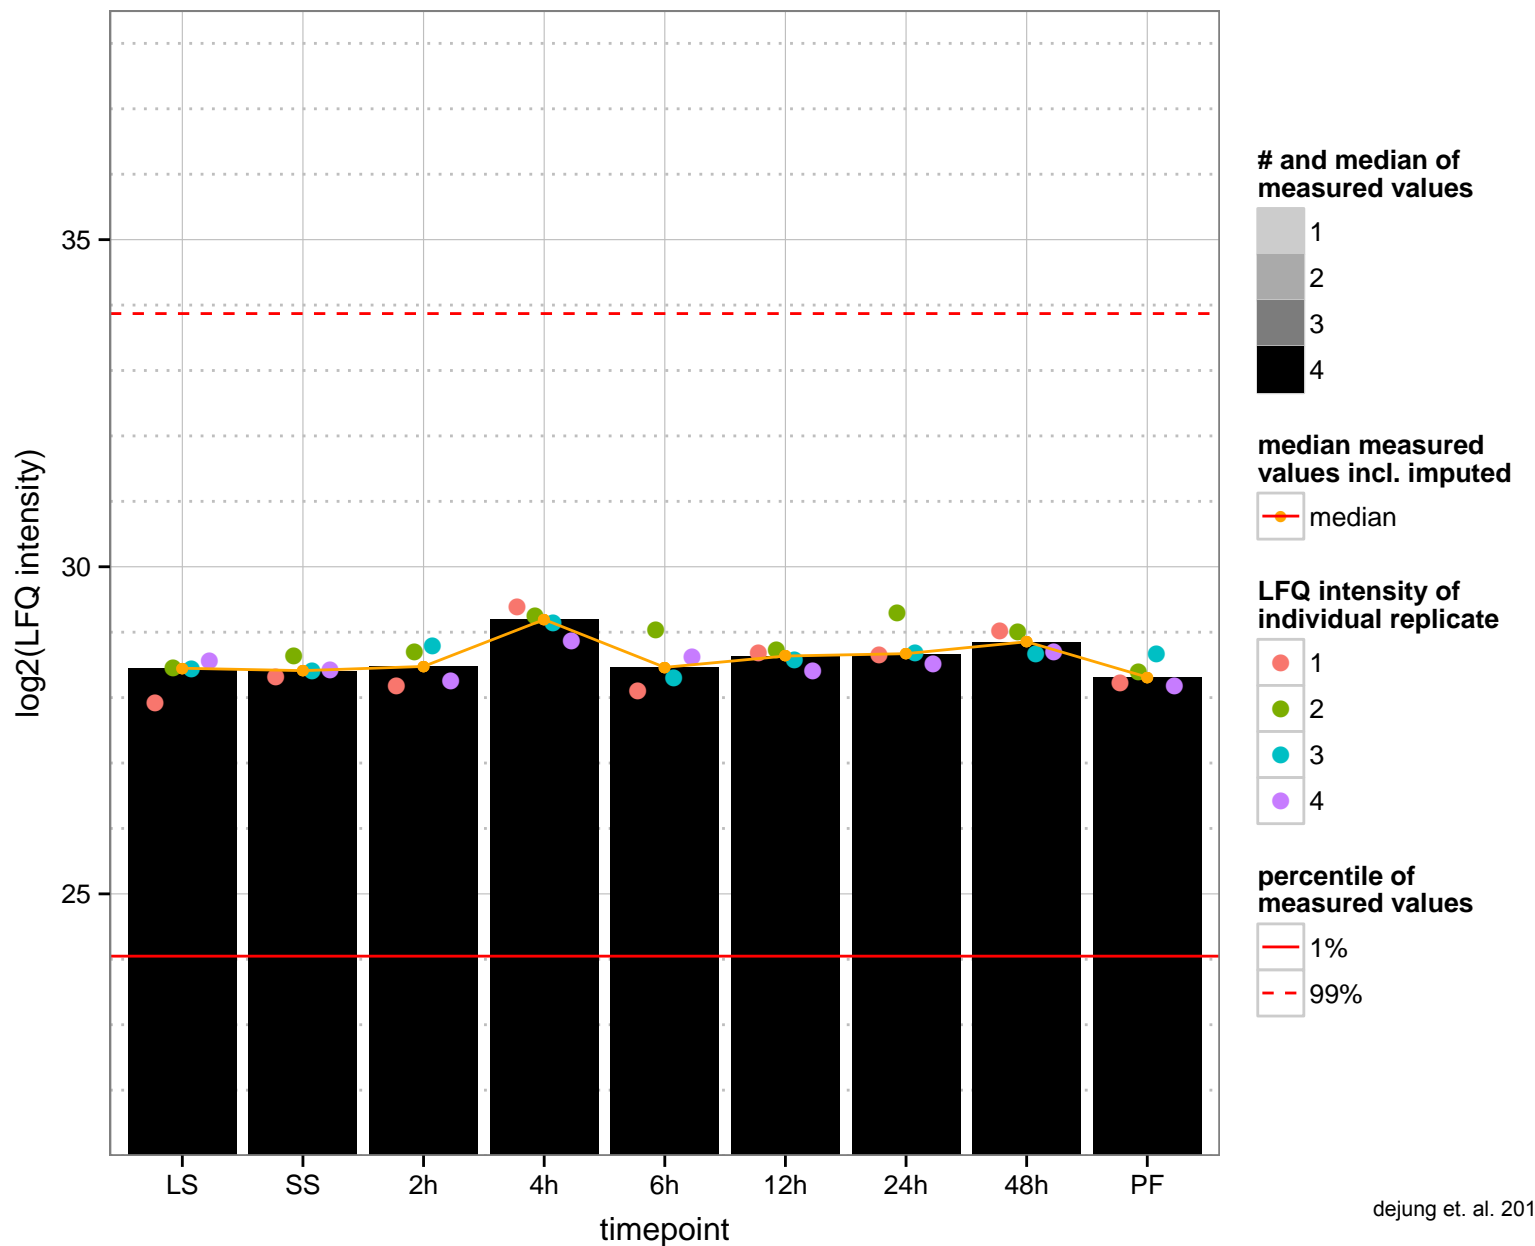



hypothetical protein, conserved  
 Tb927.11.10090  
 AGOF: null  
 AGOC: null  
 AGOP: null  
 PGO: null  
 PGO: null  
 PGO: null

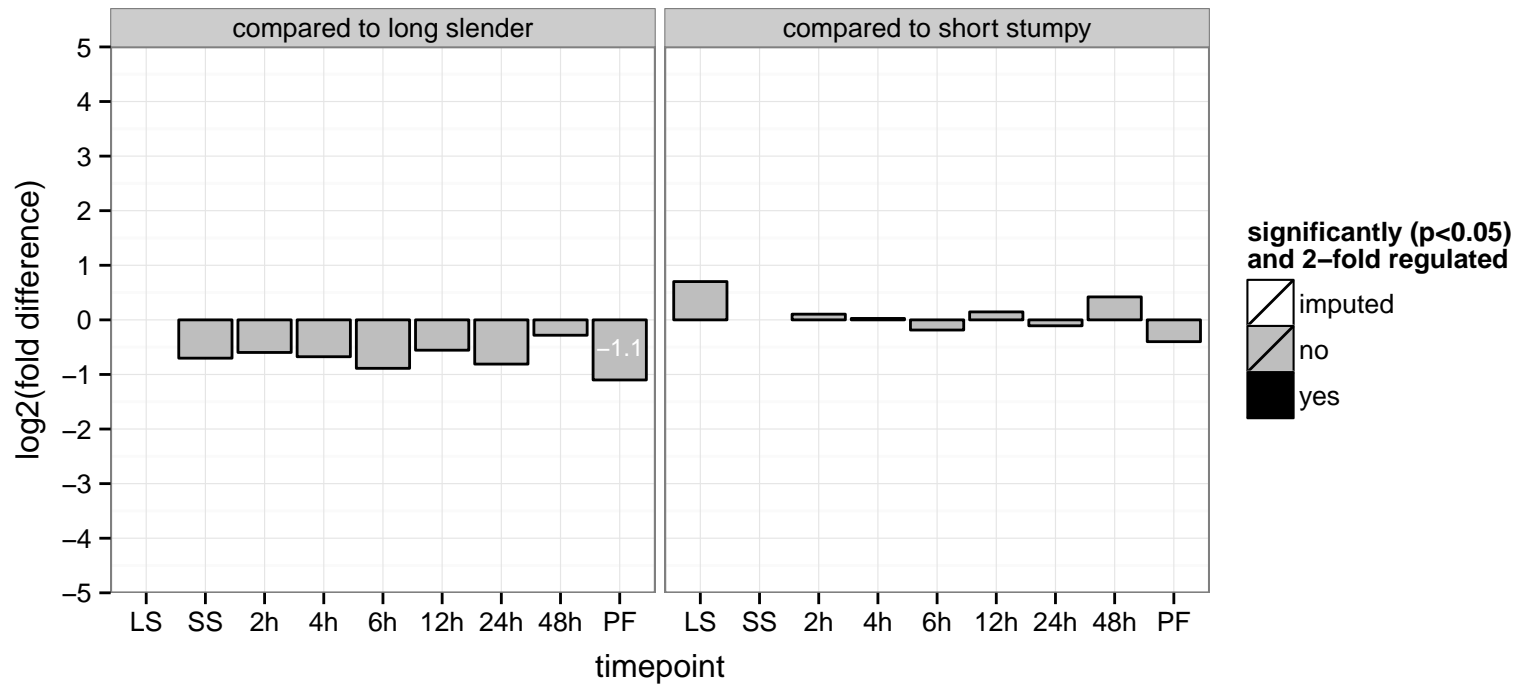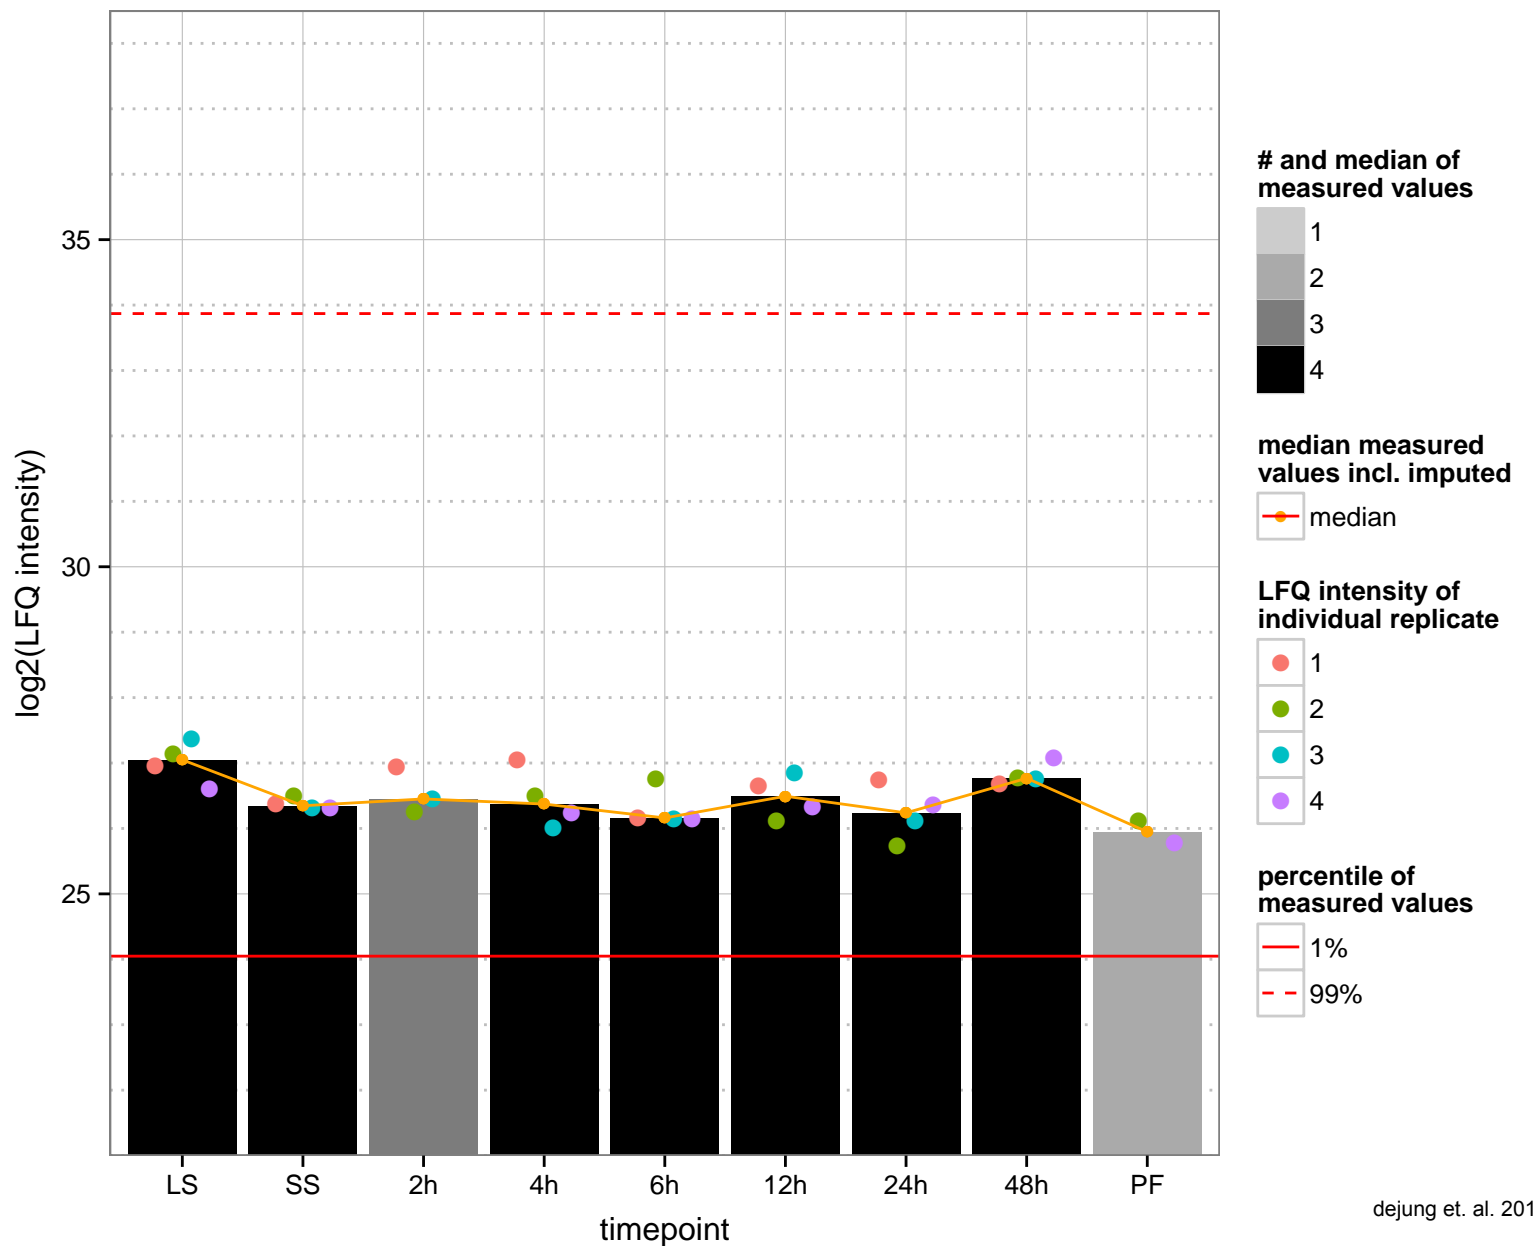

chaperone protein DNAj, putative  
 Tb927.11.1010  
 AGOF: heat shock protein binding, unfolded protein binding  
 AGOC: integral to membrane, mitochondrial inner membrane, mitochondrion  
 AGOP: protein folding  
 PGO: heat shock protein binding  
 PGOC: null  
 PGOP: null

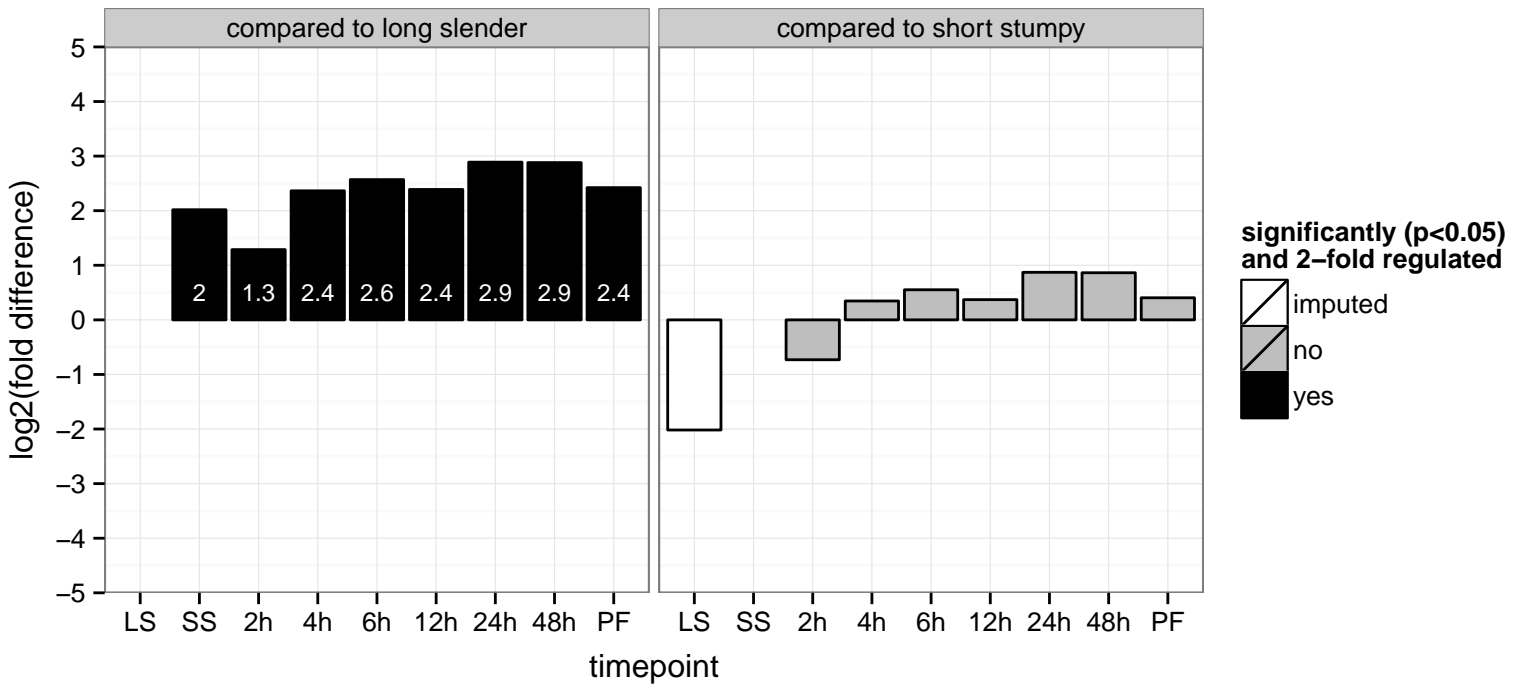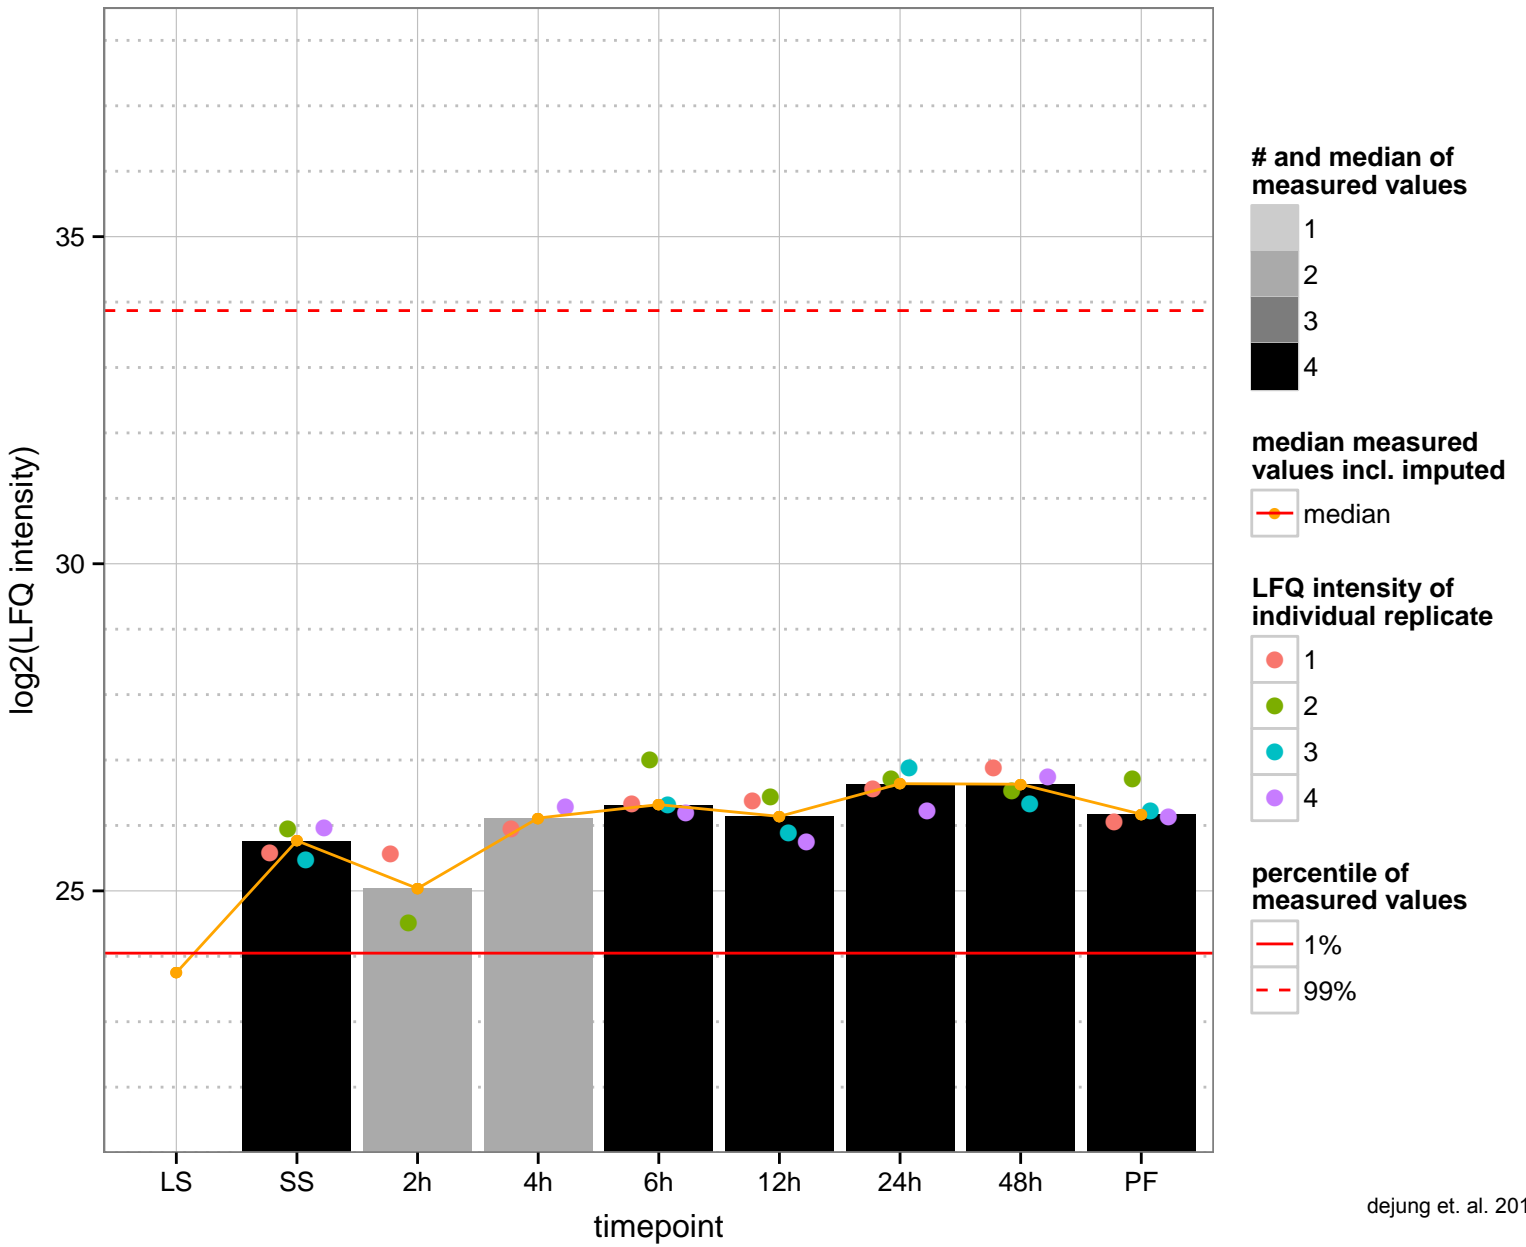

hypothetical protein, conserved  
 Tb927.11.10130  
 AGOF: null  
 AGOC: null  
 AGOP: null  
 PGOF: null  
 PGO C: null  
 PGOP: null

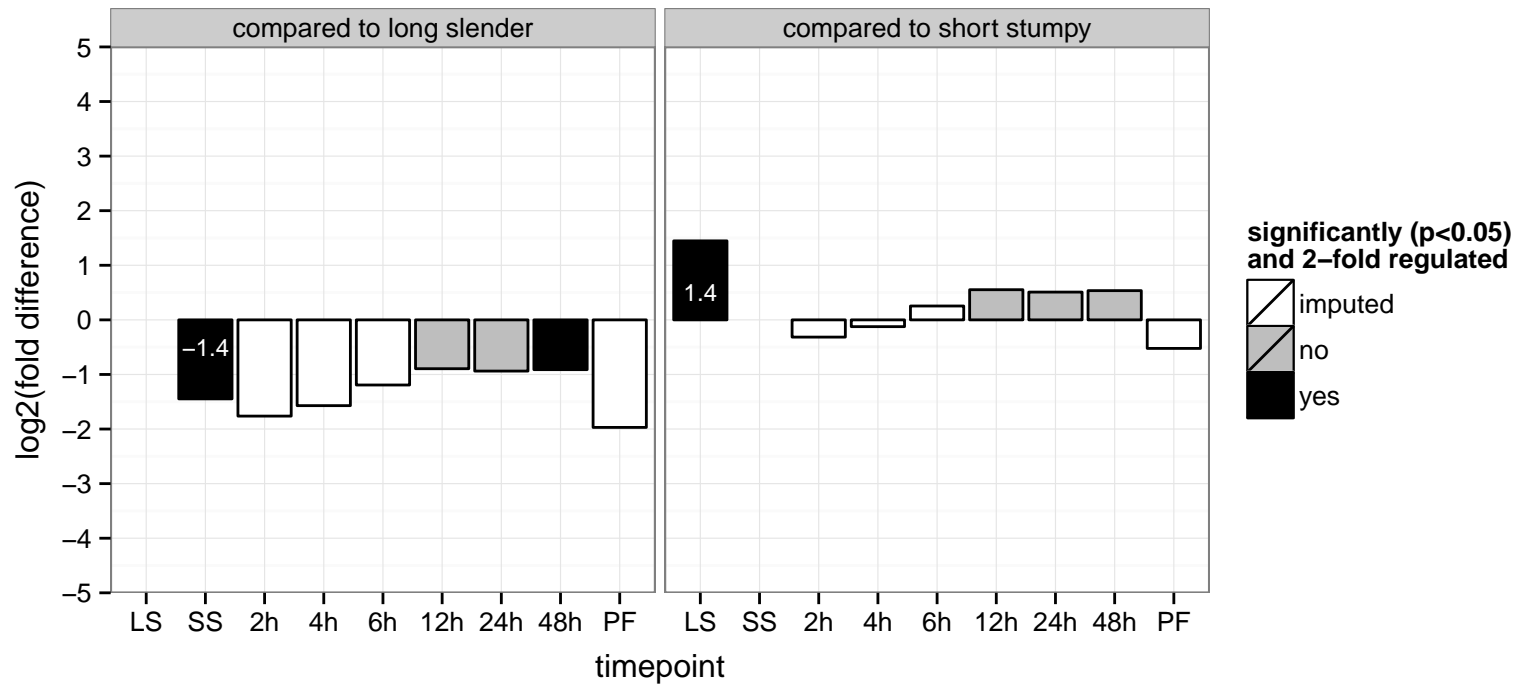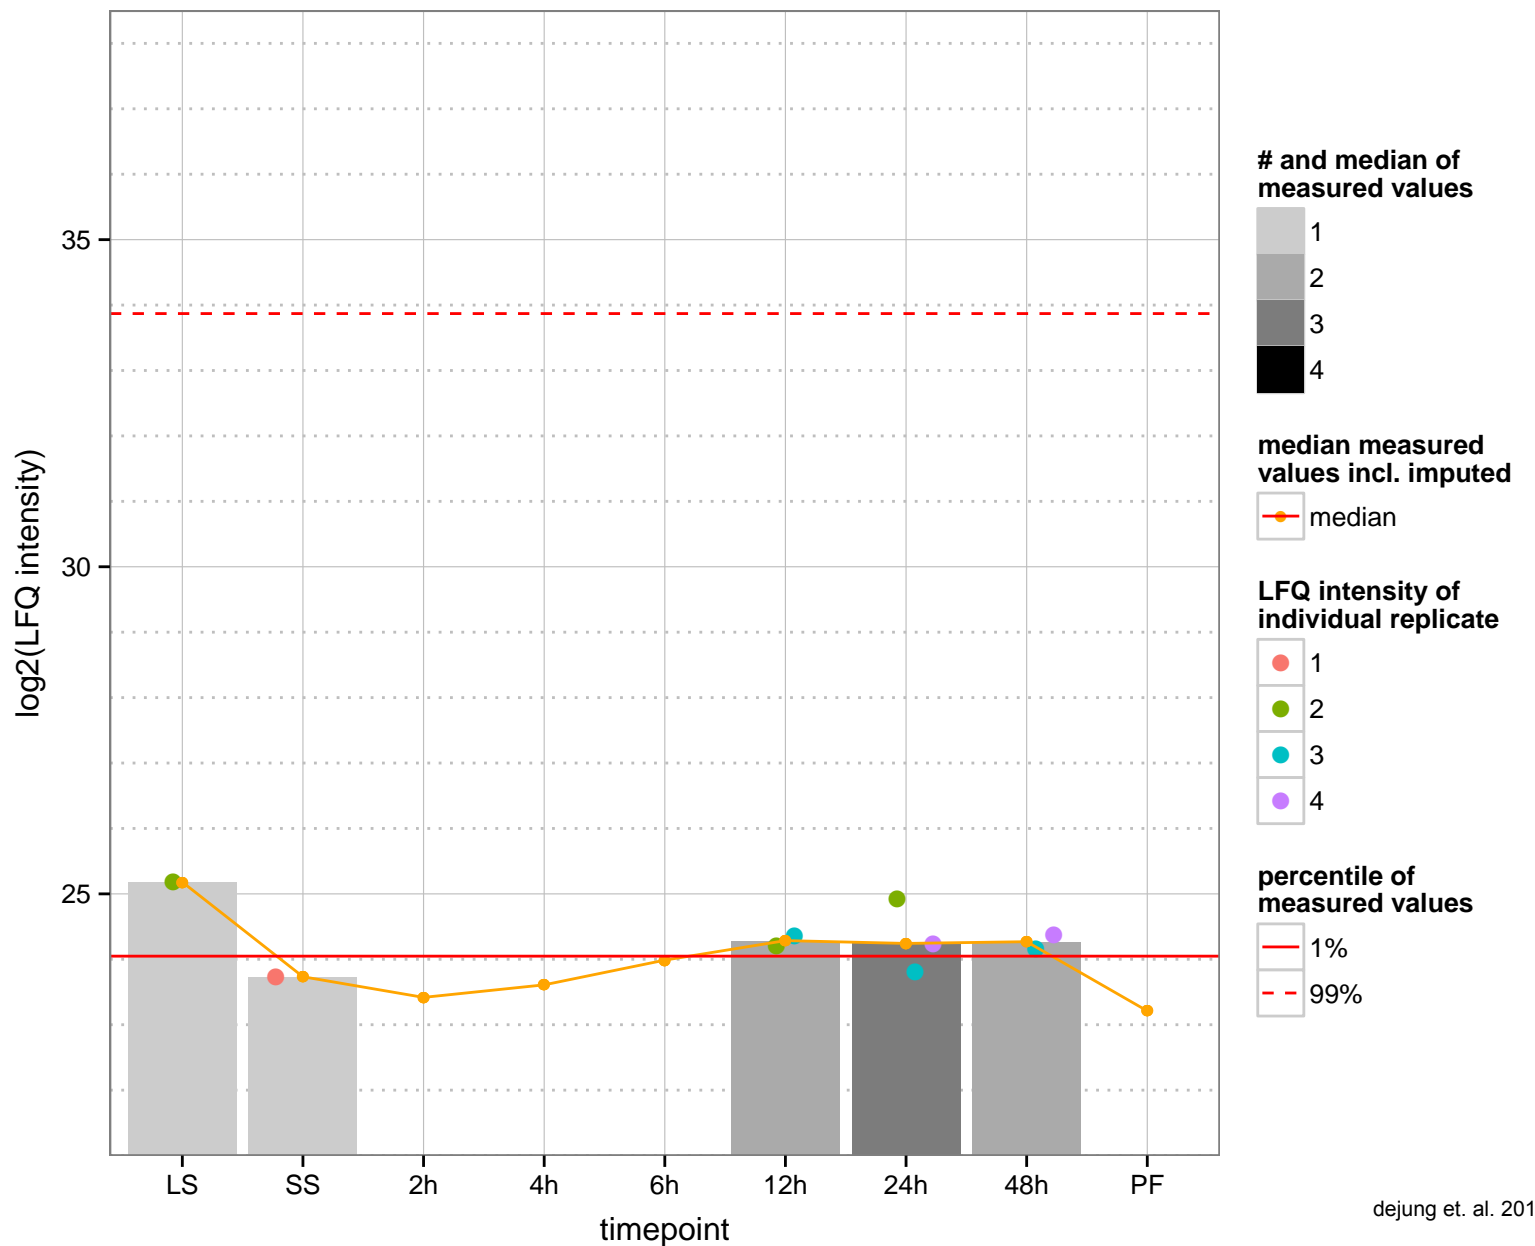

ribokinase, putative  
 Tb927.11.1020  
 AGOF: ribokinase activity  
 AGOC: null  
 AGOP: D-ribose metabolic process  
 PGOF: null  
 PGO: null  
 PGOP: null

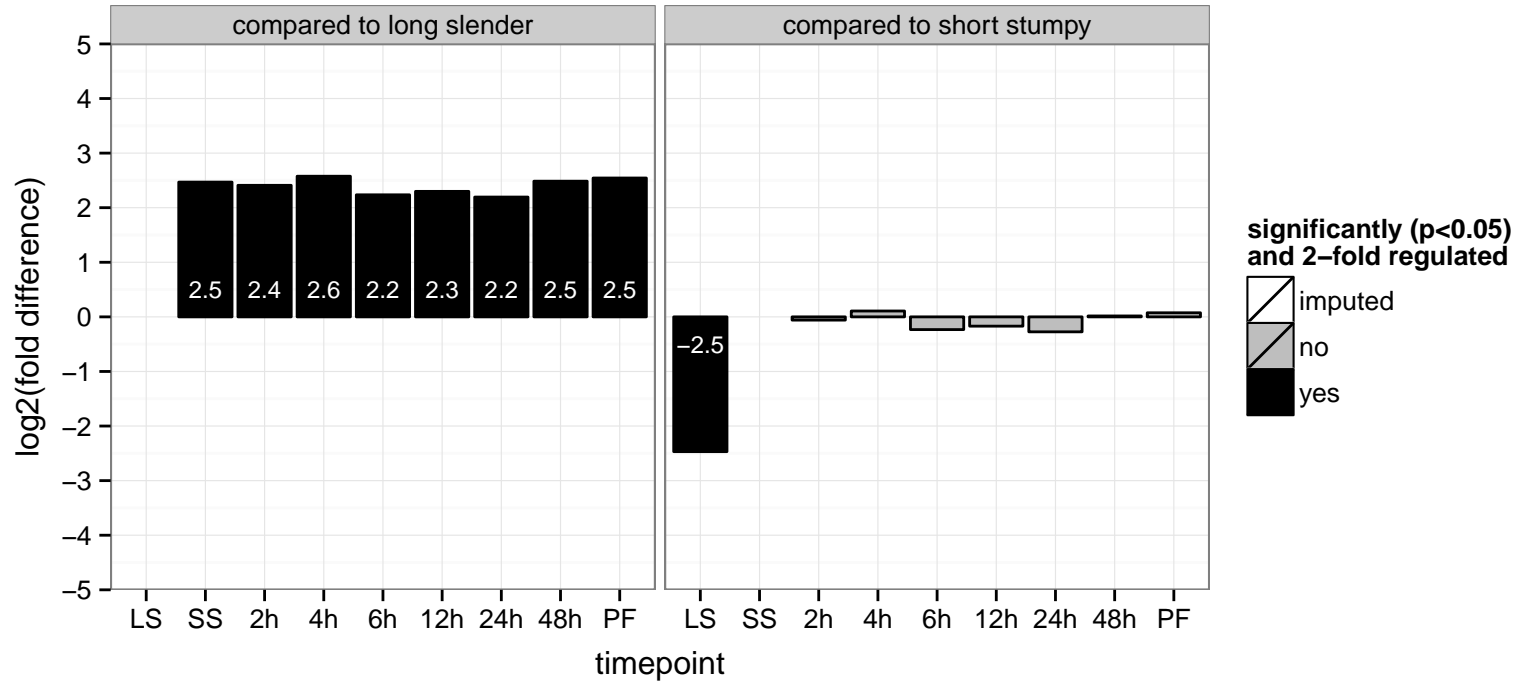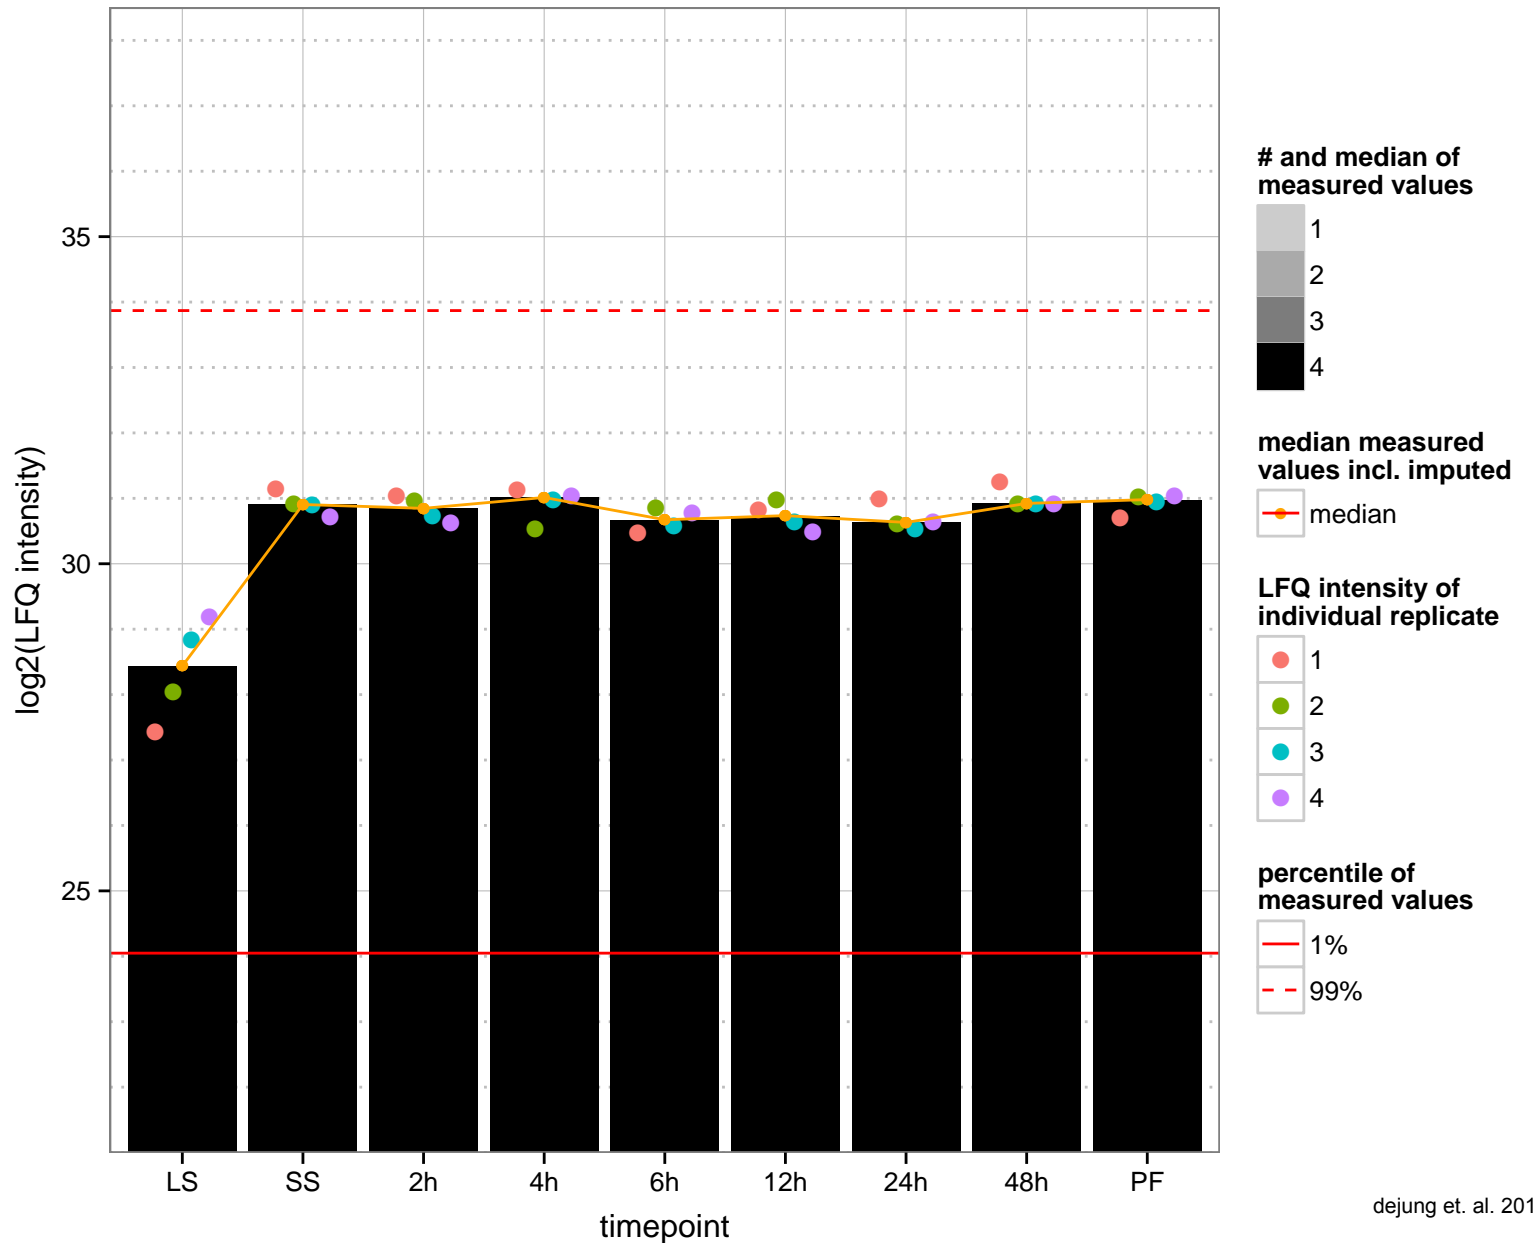

hypothetical protein, conserved  
 Tb927.11.10200  
 AGOF: null  
 AGOC: null  
 AGOP: null  
 PGOF: null  
 PGO: null  
 PGOP: null

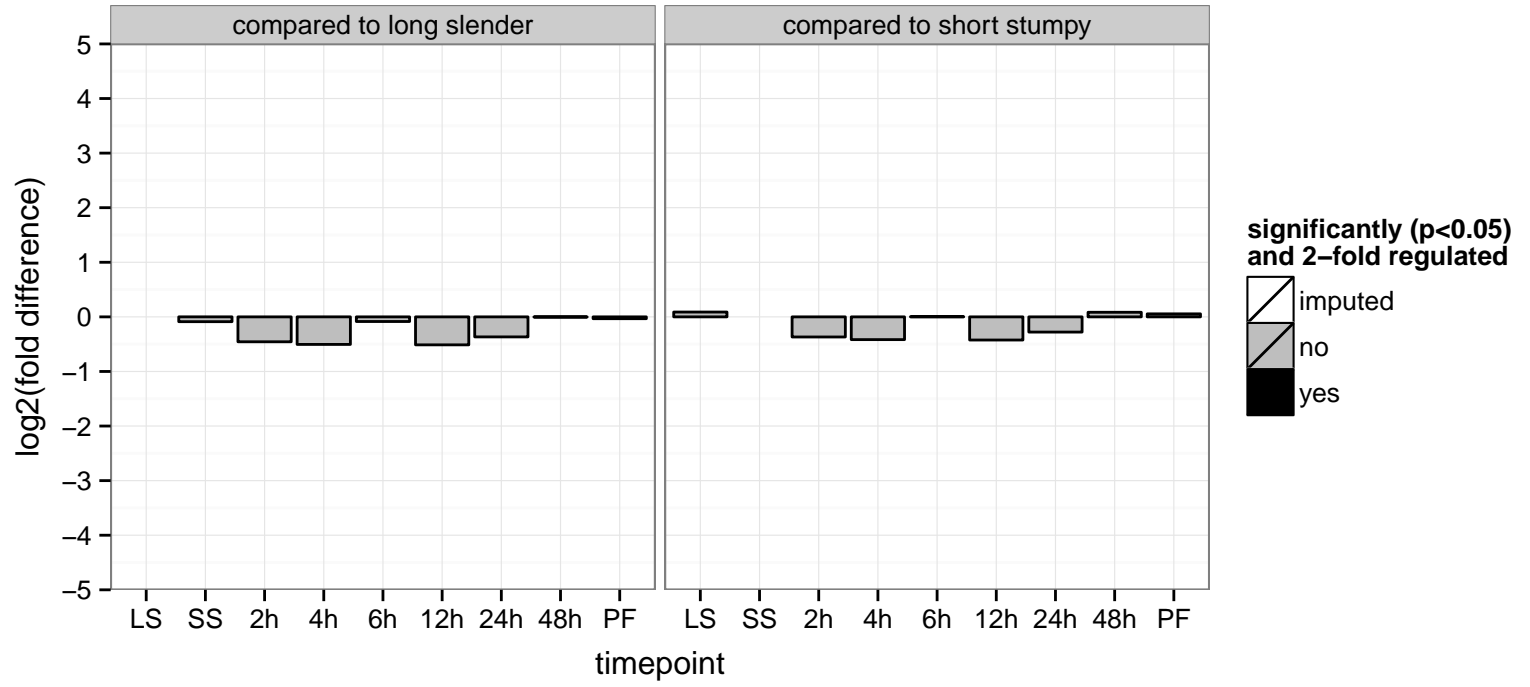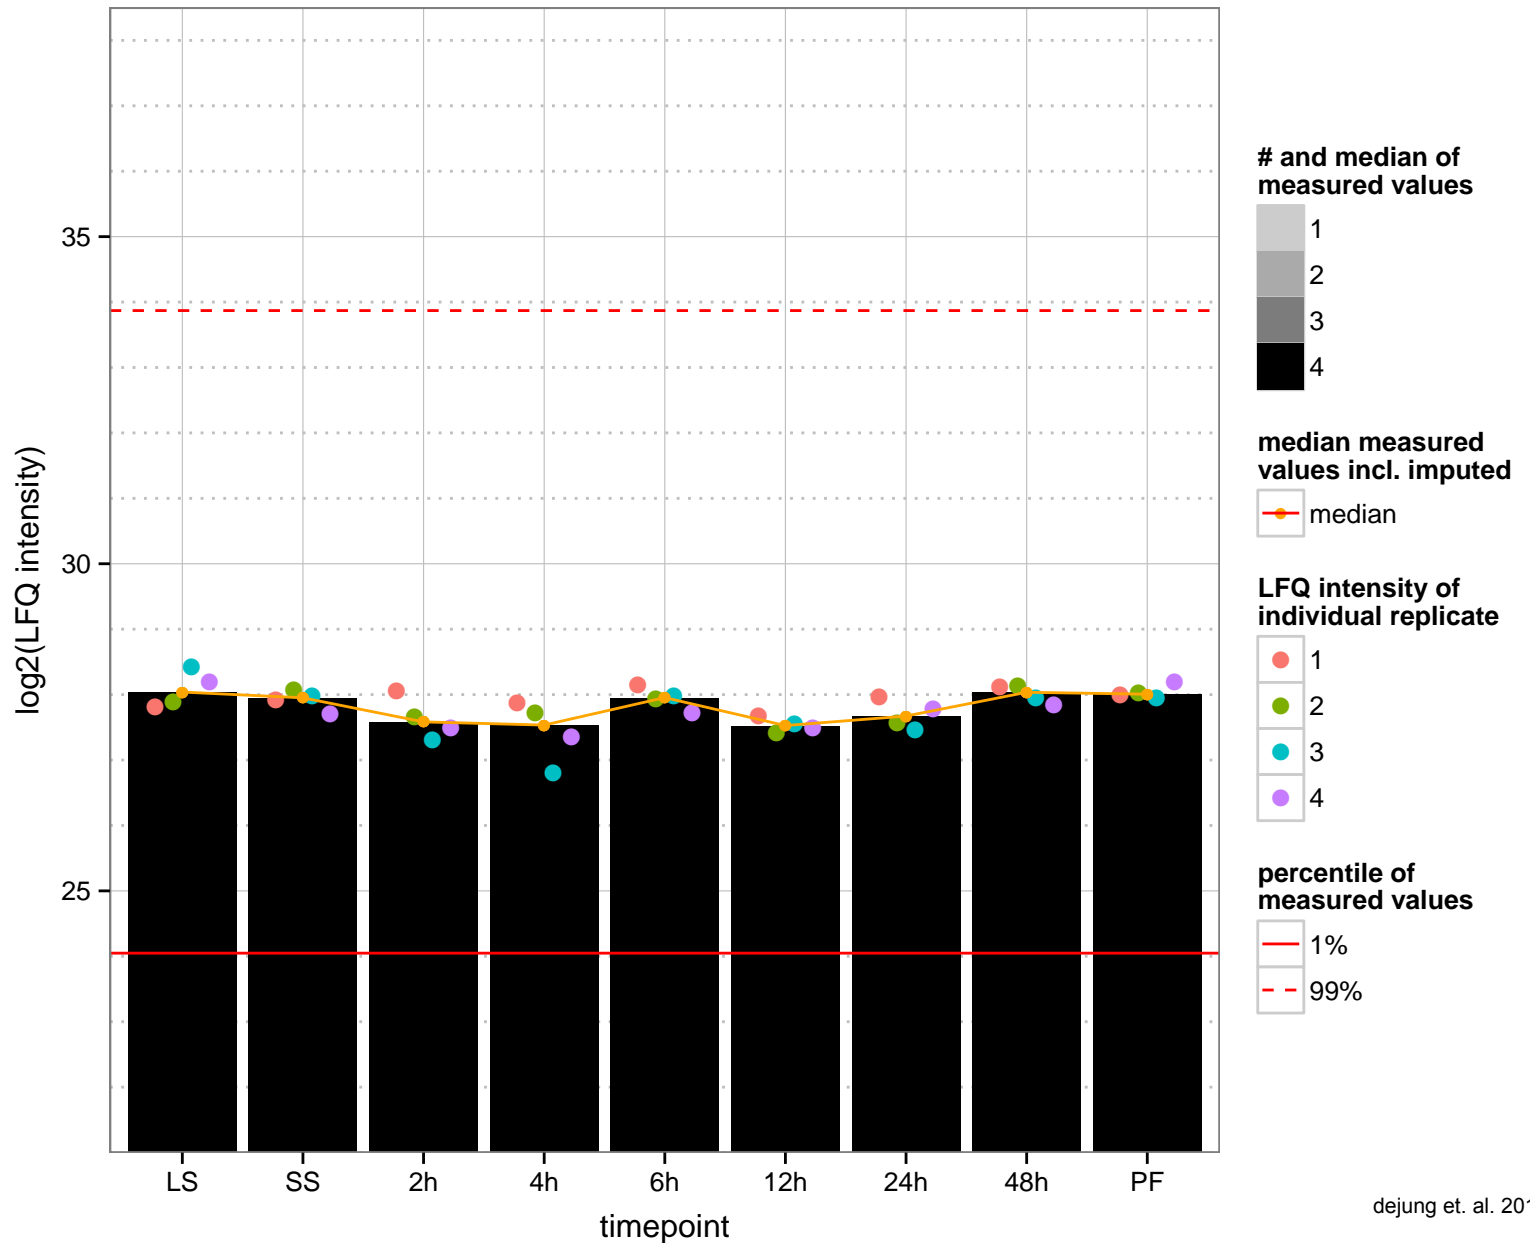

kinetoplastid kinetochore protein 7 (kkt7)  
 Tb927.11.1030  
 AGOF: null  
 AGOC: kinetochore  
 AGOP: chromosome segregation  
 PGO: null  
 PGOC: null  
 PGOP: null

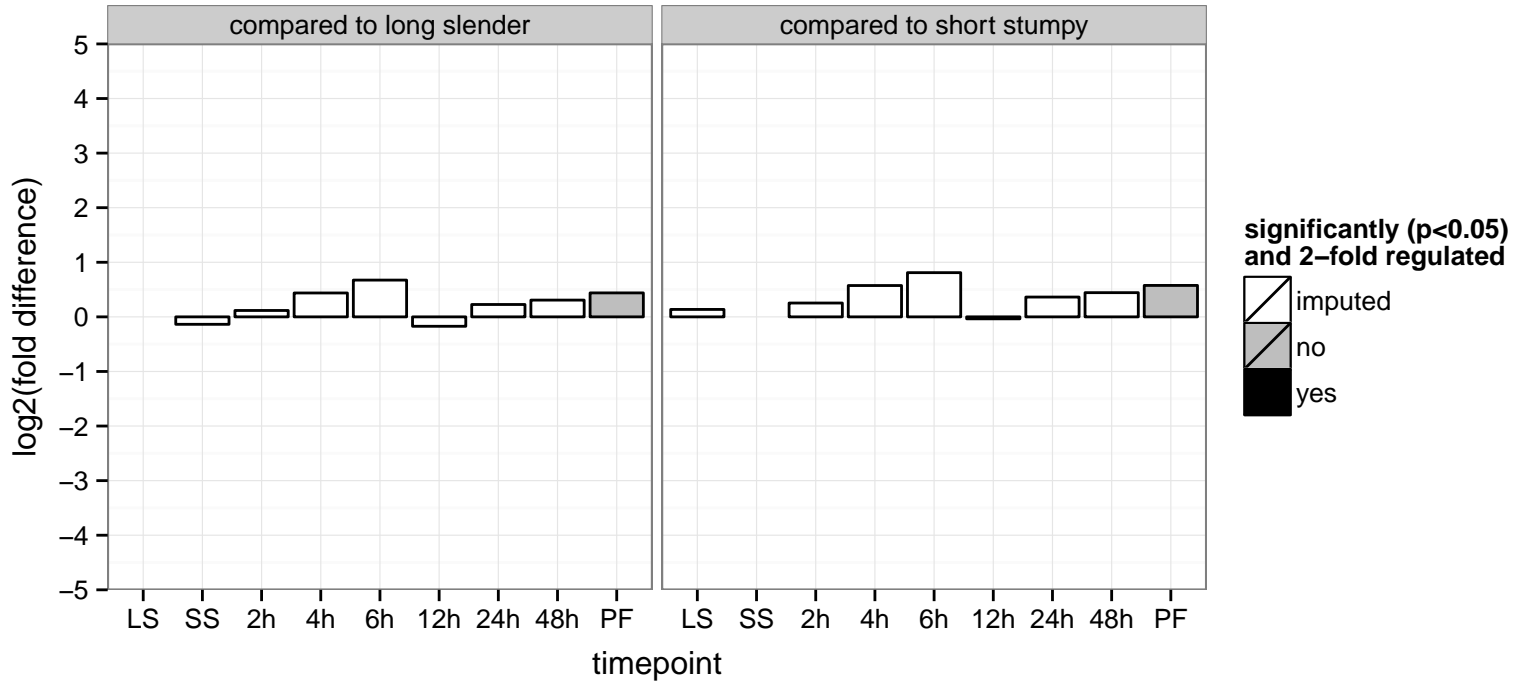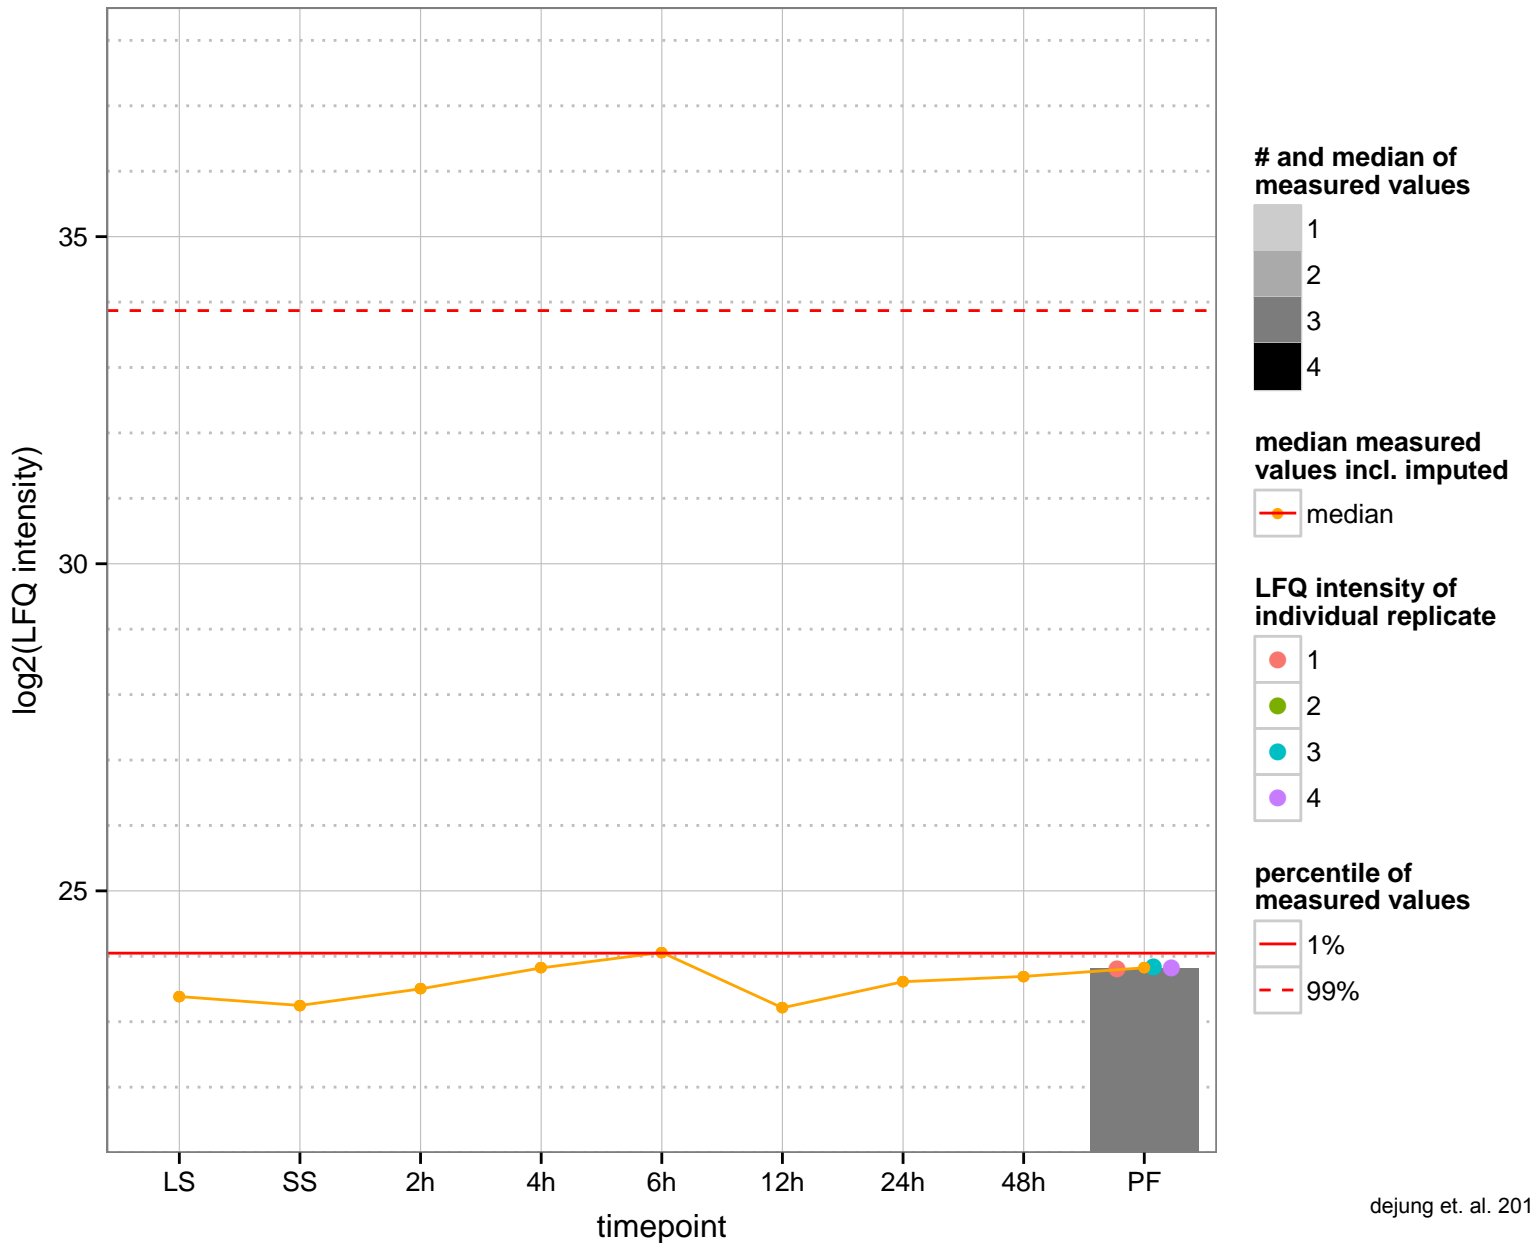

hypothetical protein, conserved  
 Tb927.11.10330  
 AGOF: null  
 AGOC: null  
 AGOP: null  
 PGO: null  
 PGOC: null  
 PGOP: null

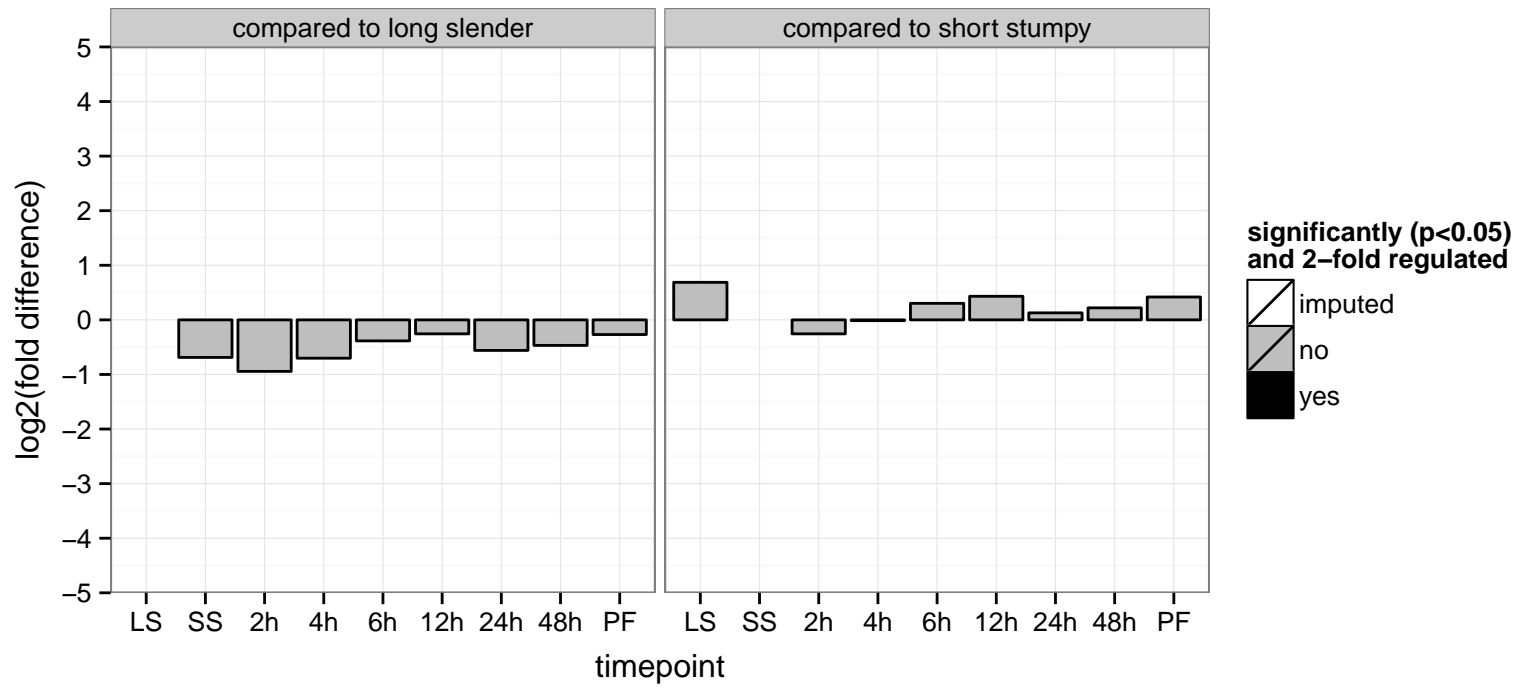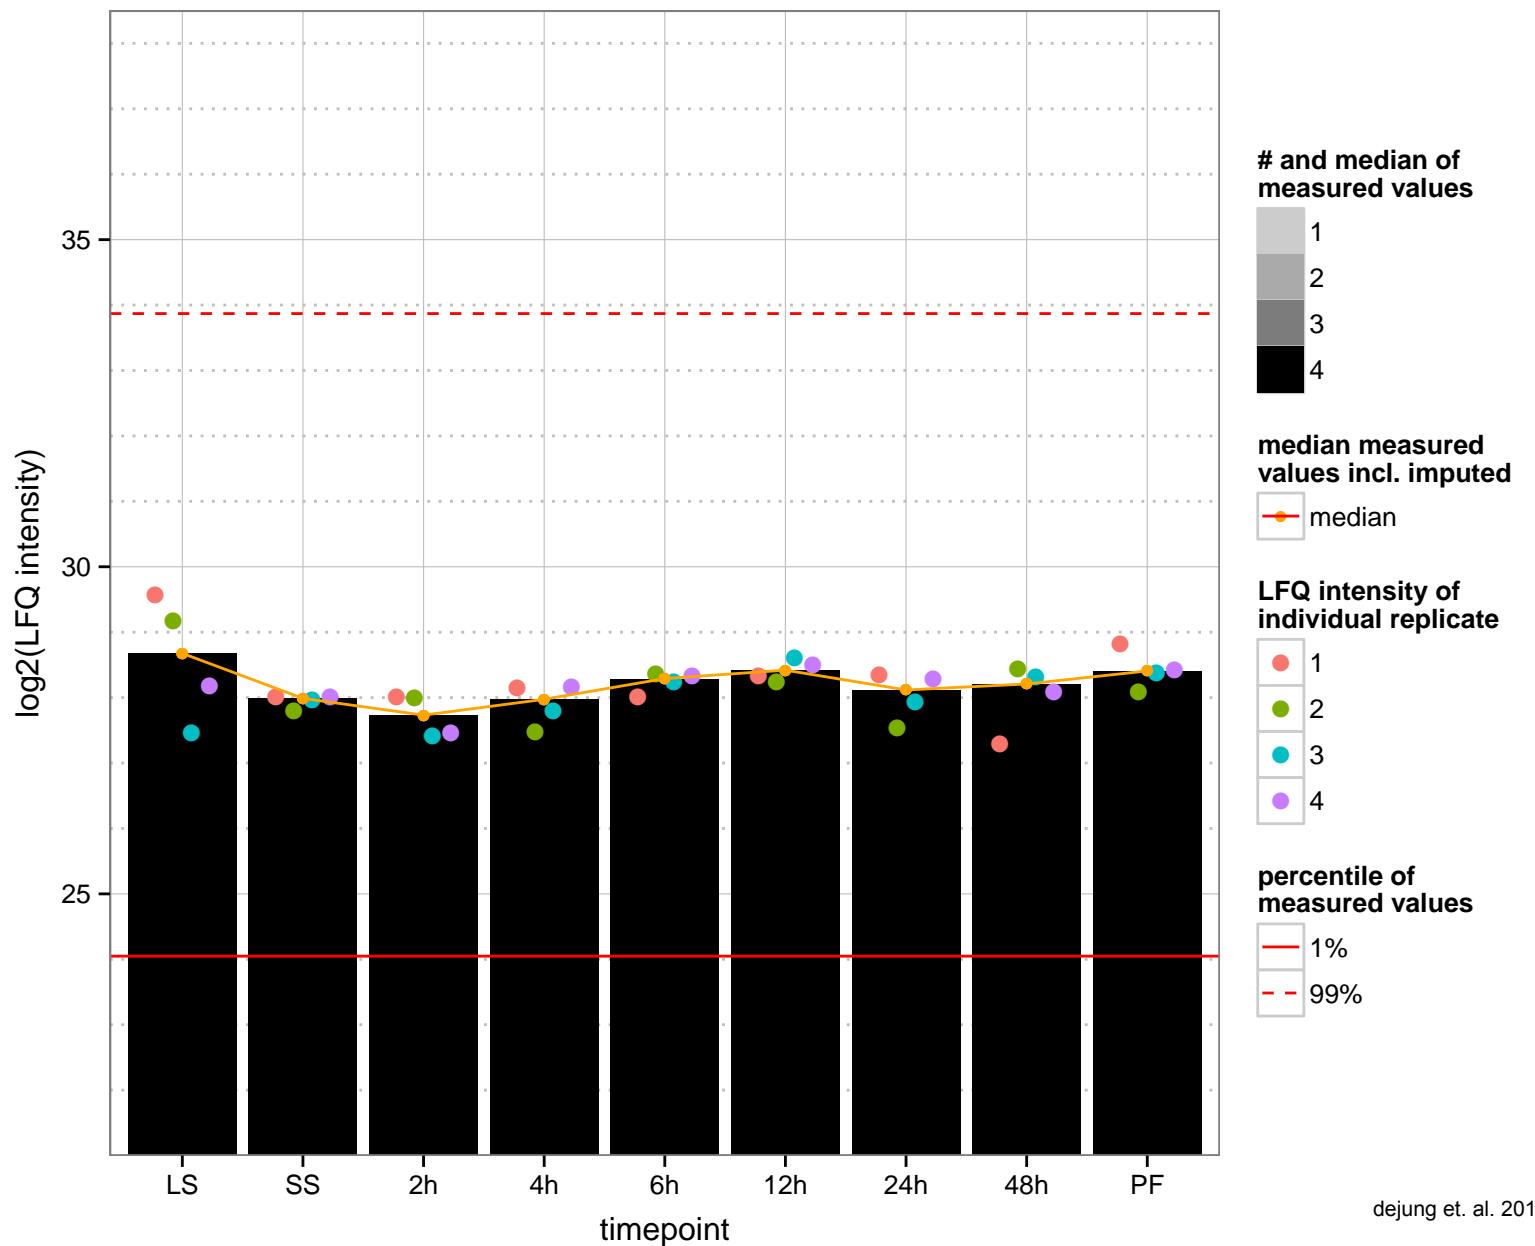

Serine/threonine-protein phosphatase PGAM5, mitochondrial, putative, phosphoglycerate mutase family member 5, putative  
 Tb927.11.10340  
 AGOF: phosphoprotein phosphatase activity, protein serine/threonine kinase activator activity  
 AGOC: null  
 AGOP: regulation of mitochondrion organization  
 PGO: null  
 PGO: null  
 PGO: null

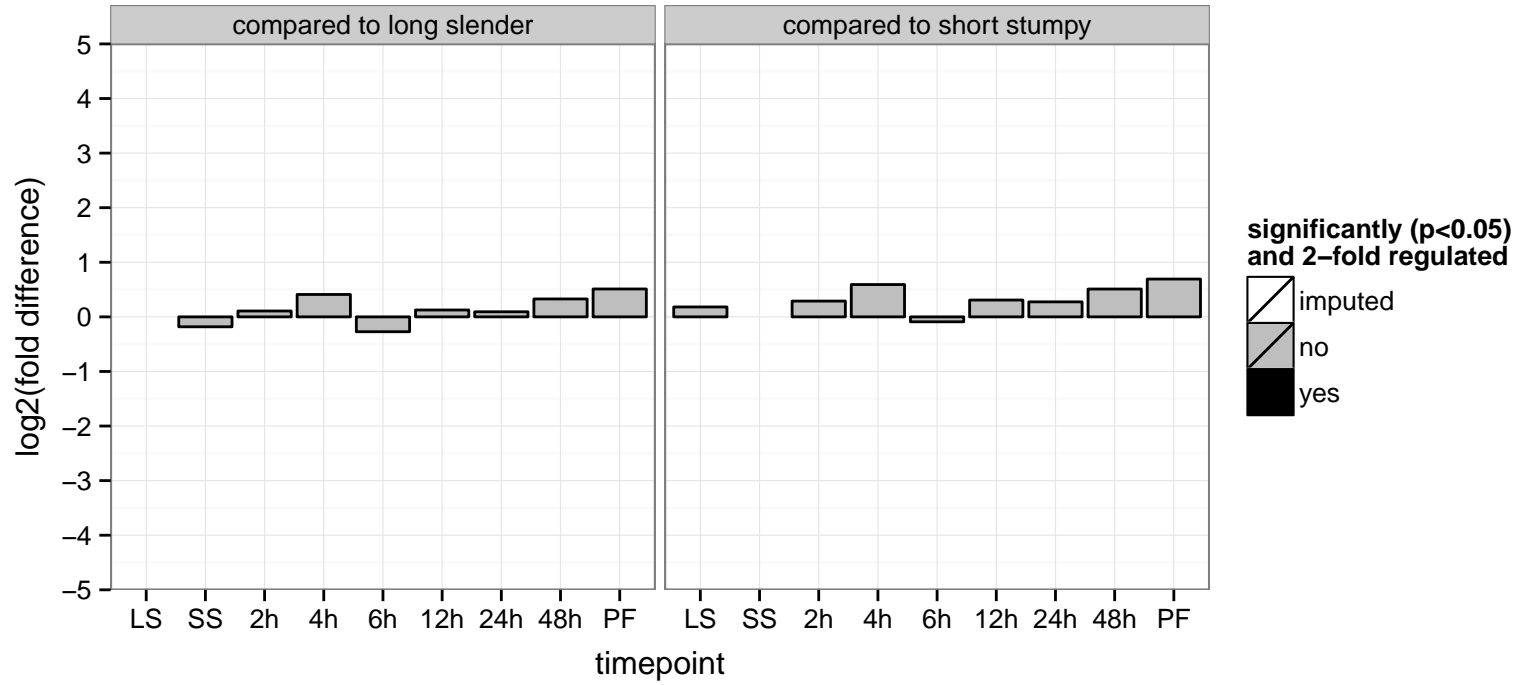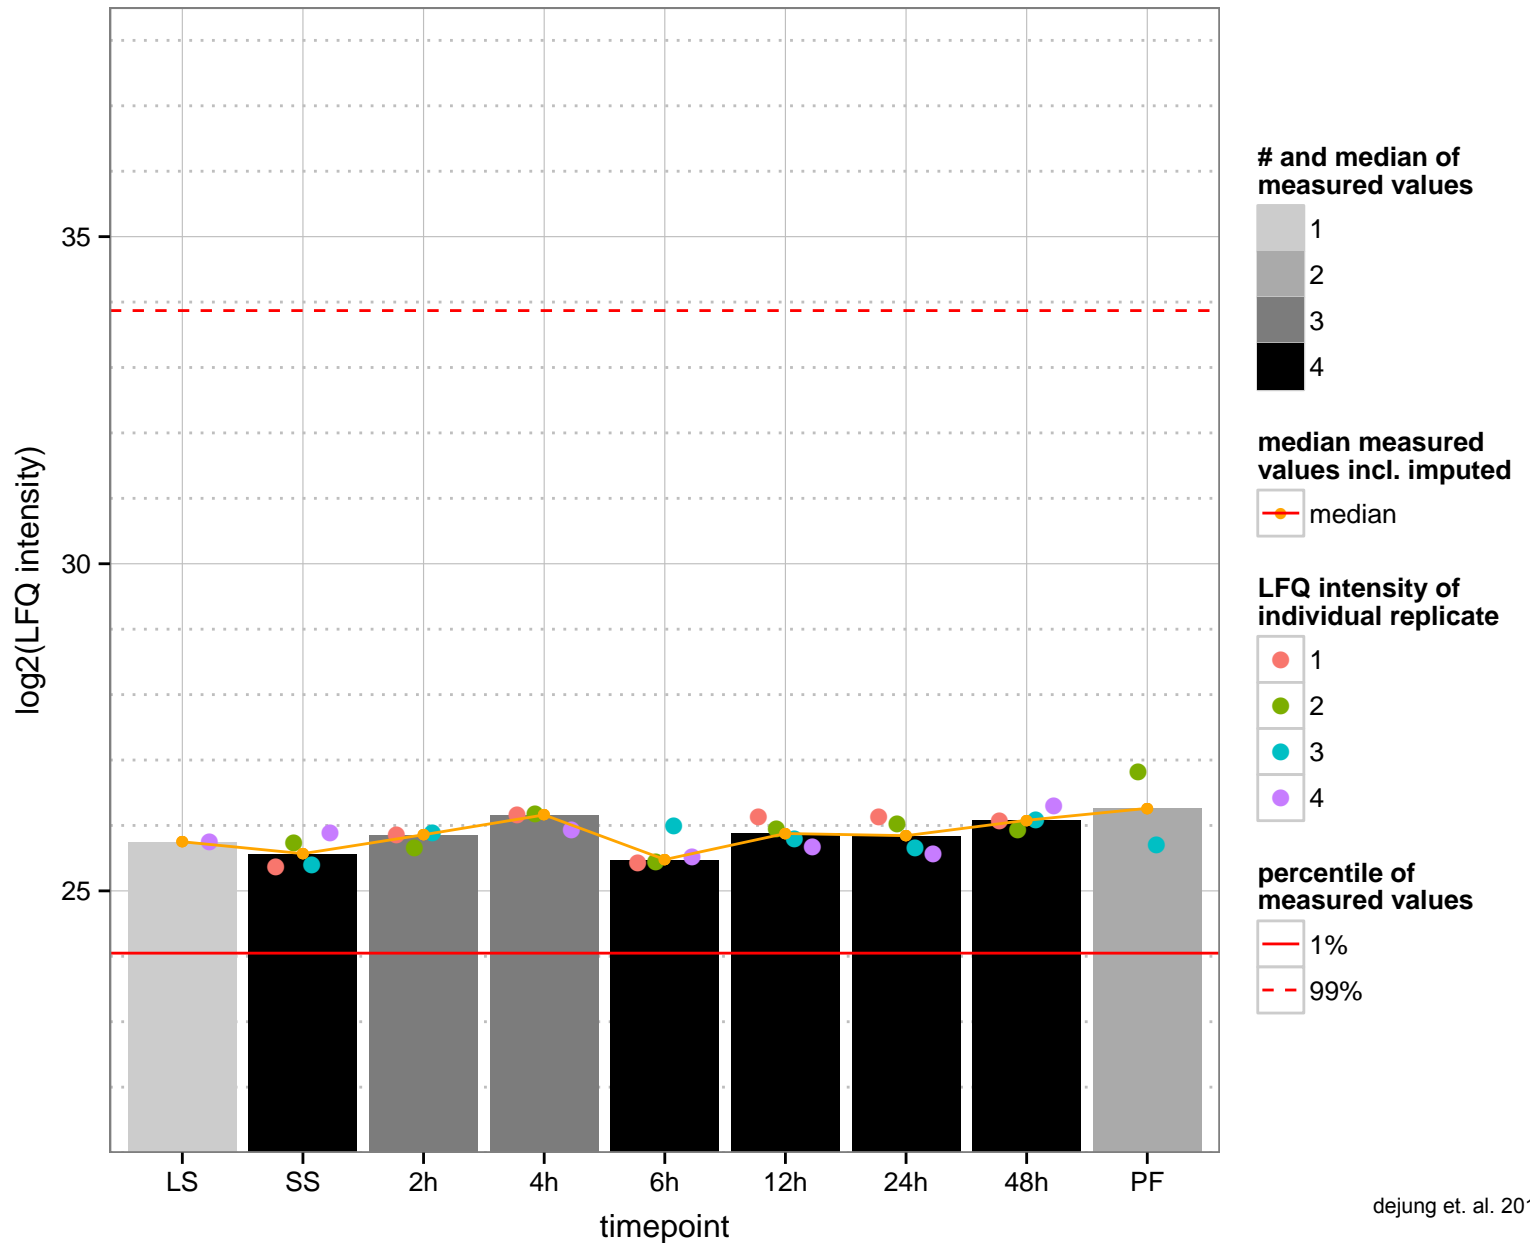



hypothetical protein, conserved  
 Tb927.11.10380  
 AGOF: null  
 AGOC: null  
 AGOP: null  
 PGOF: null  
 PGO: null  
 PGOP: null

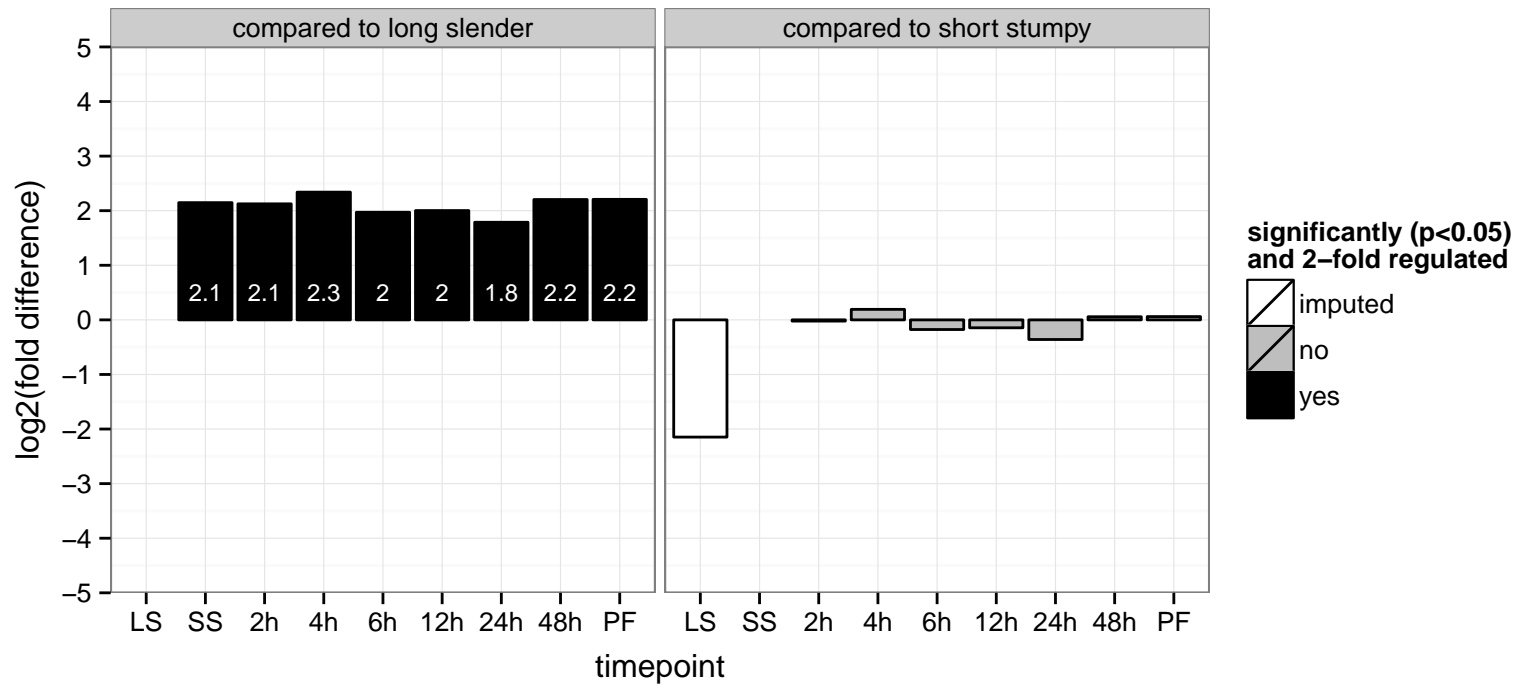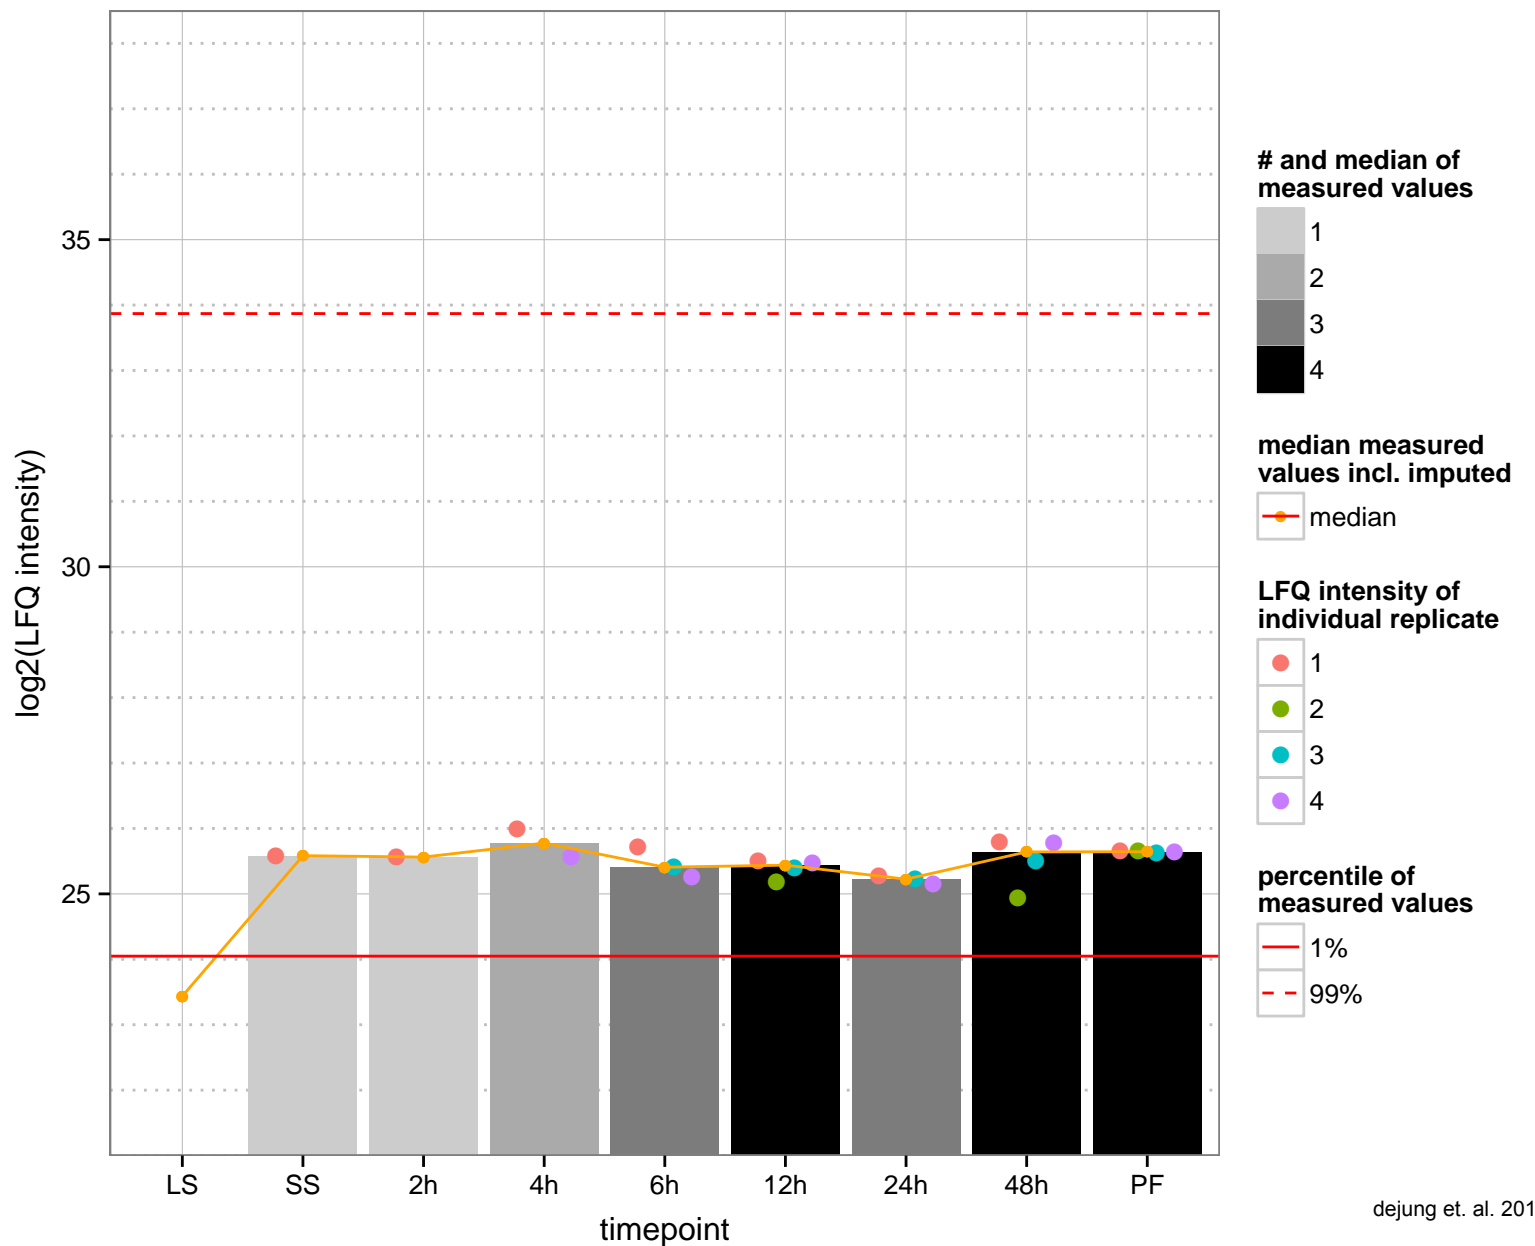

hypothetical protein, conserved  
 Tb927.11.10430  
 AGOF: null  
 AGOC: null  
 AGOP: null  
 PGOF: protein binding  
 PGO: null  
 PGOP: null

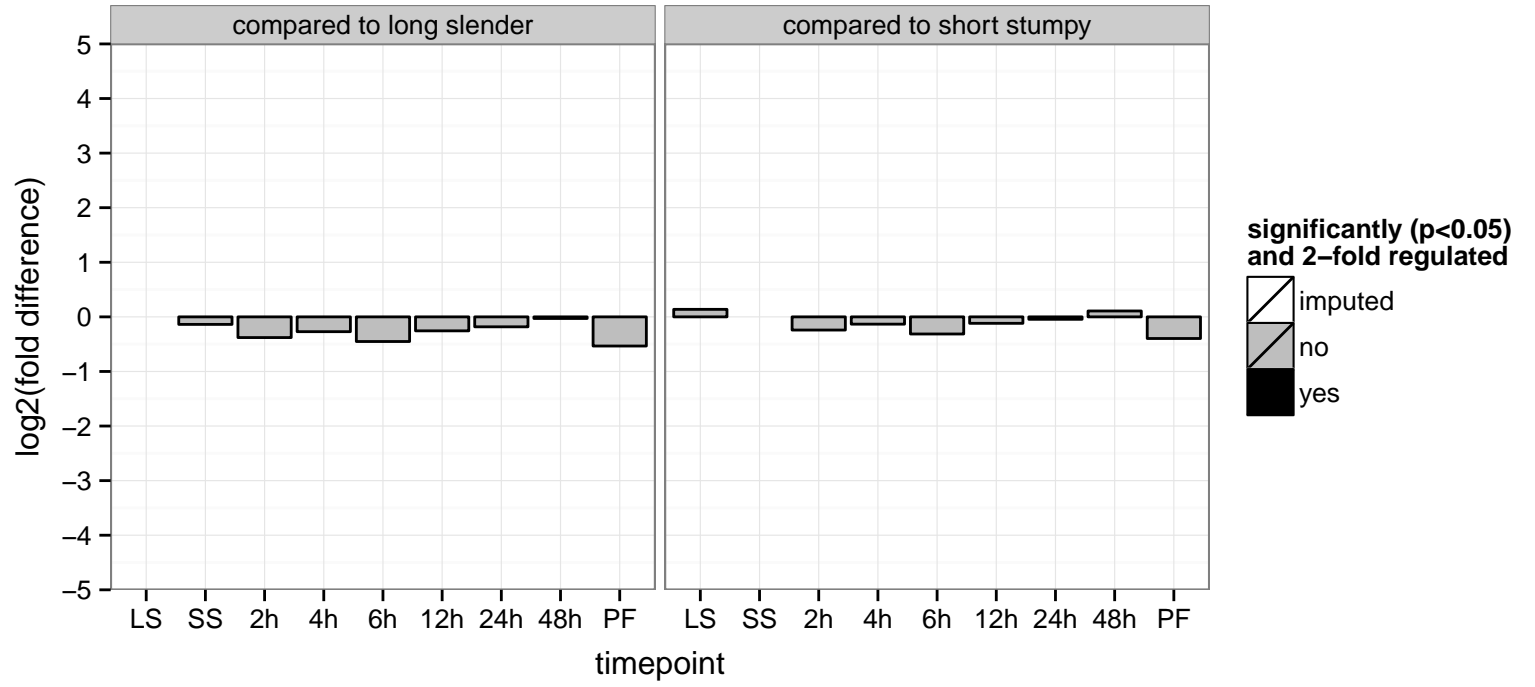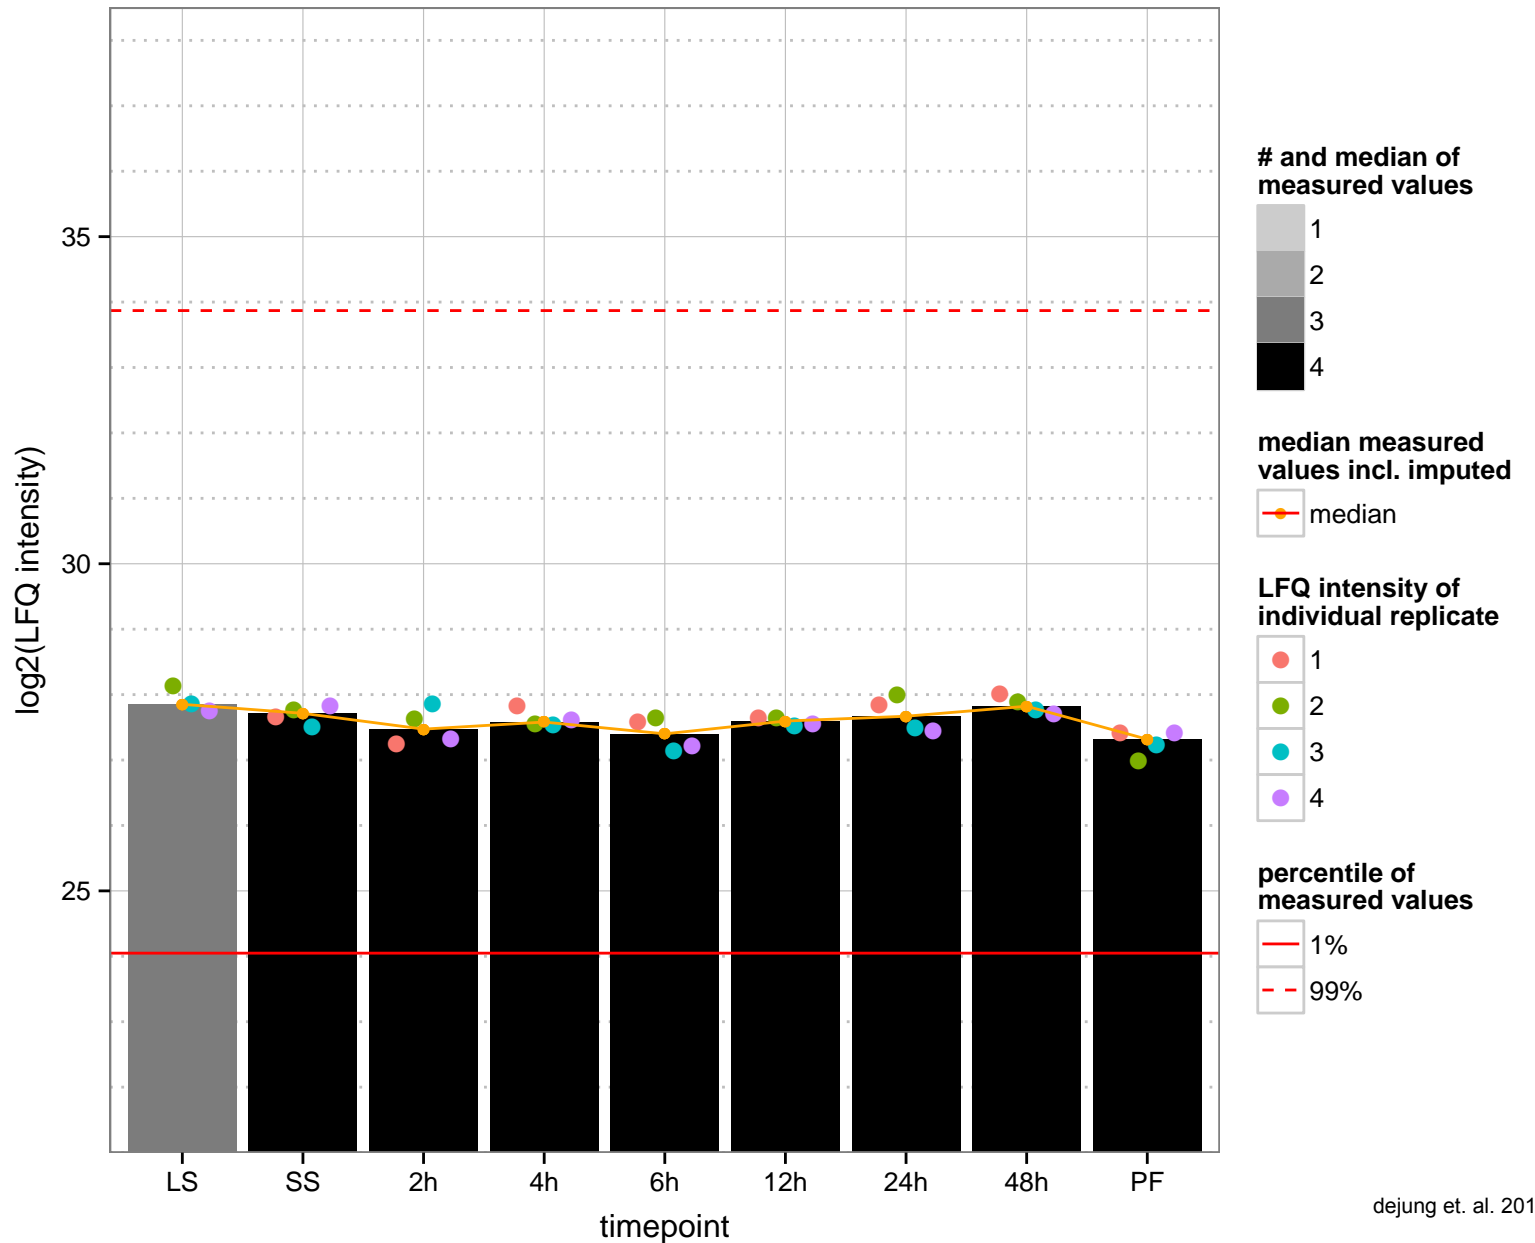

UDP-N-acetylglucosamine-dolichyl-phosphate N-acetylglucosaminephosphotransferase, putative

Tb927.11.10450

AGOF: UDP-N-acetylglucosamine-dolichyl-phosphate N-acetylglucosaminephosphotransferase activity

AGOC: integral to membrane

AGOP: dolichol-linked oligosaccharide biosynthetic process

PGOF: phospho-N-acetylmuramoyl-pentapeptide-transferase activity

PGOC: integral to membrane

PGOP: null

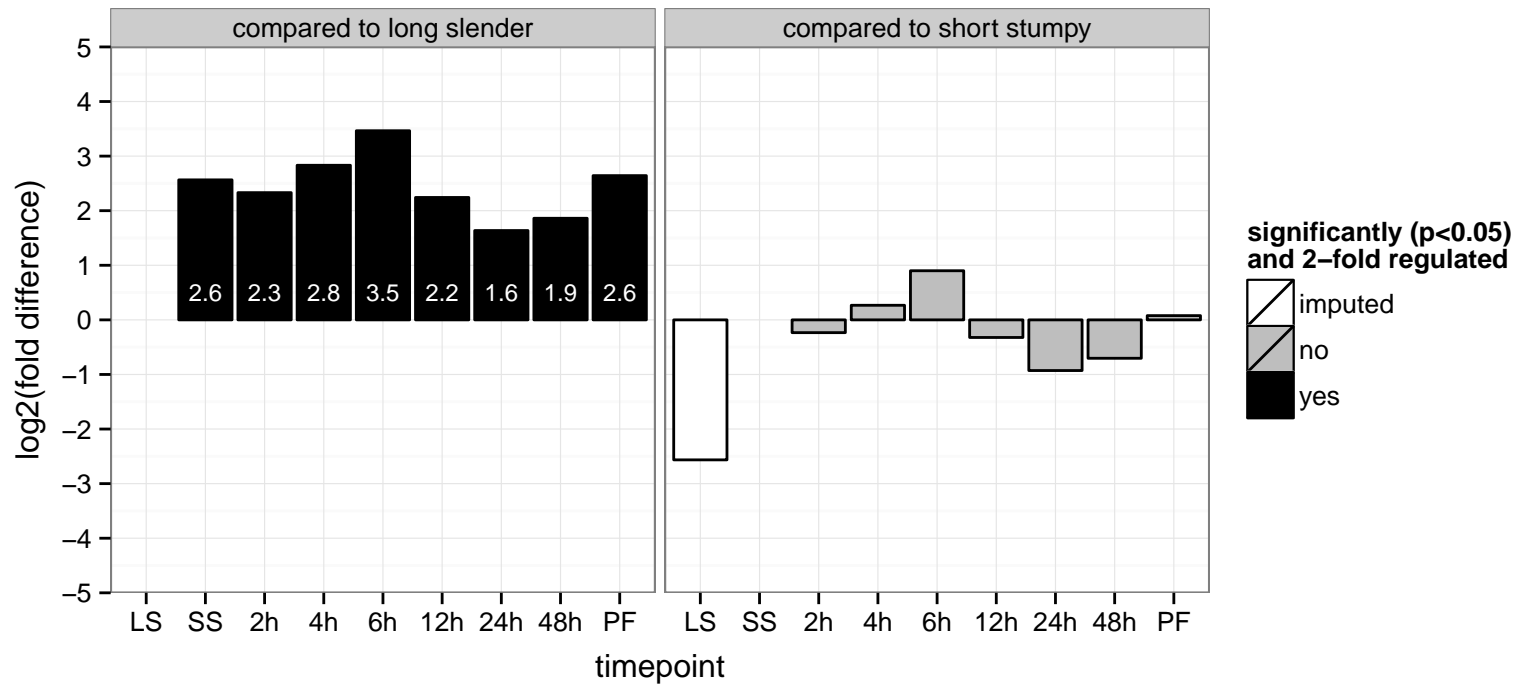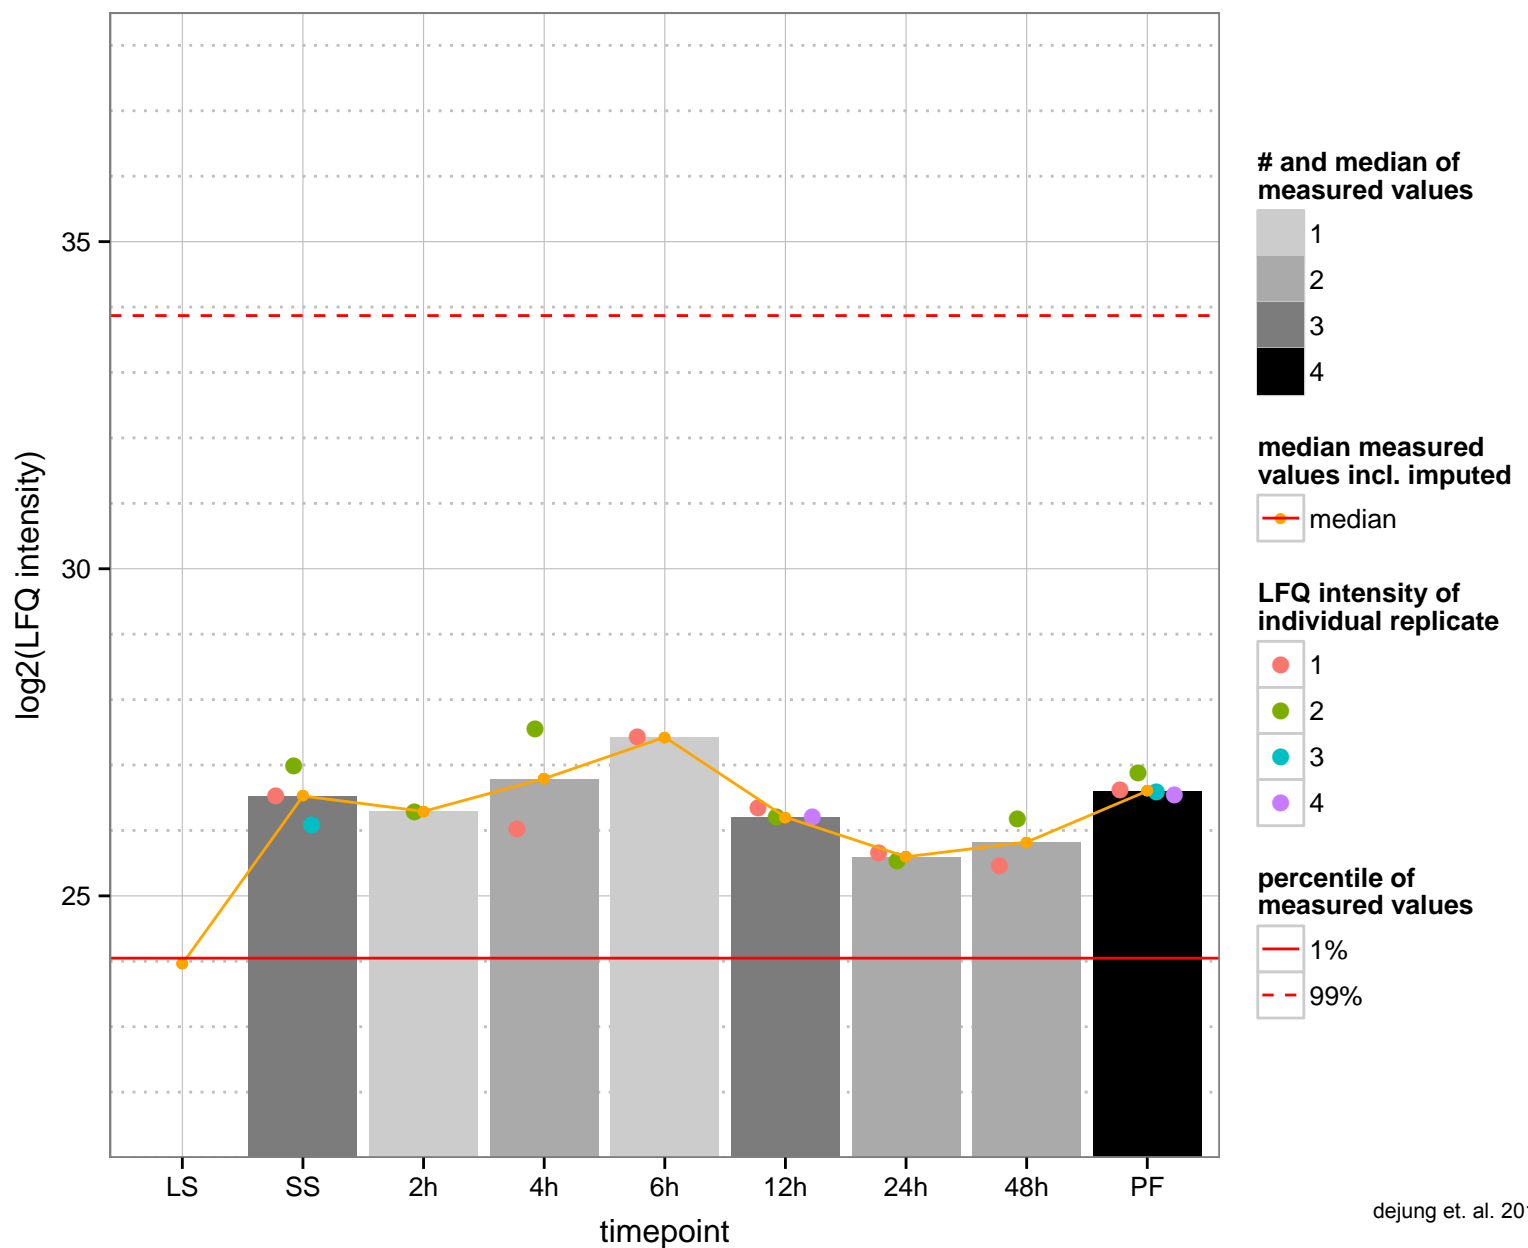

hypothetical protein, conserved  
 Tb927.11.10480  
 AGOF: null  
 AGOC: null  
 AGOP: null  
 PGO: protein binding  
 PGO: small-subunit processome  
 PGO: rRNA processing

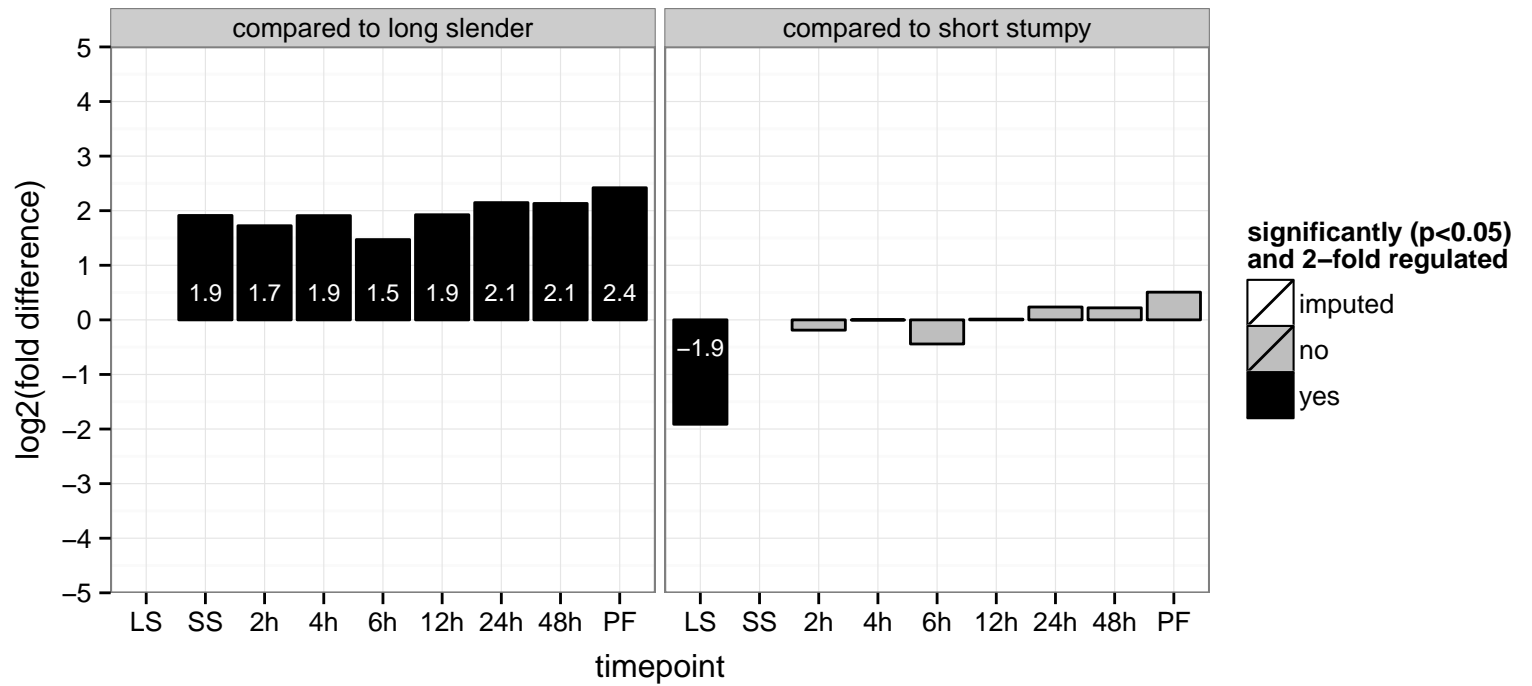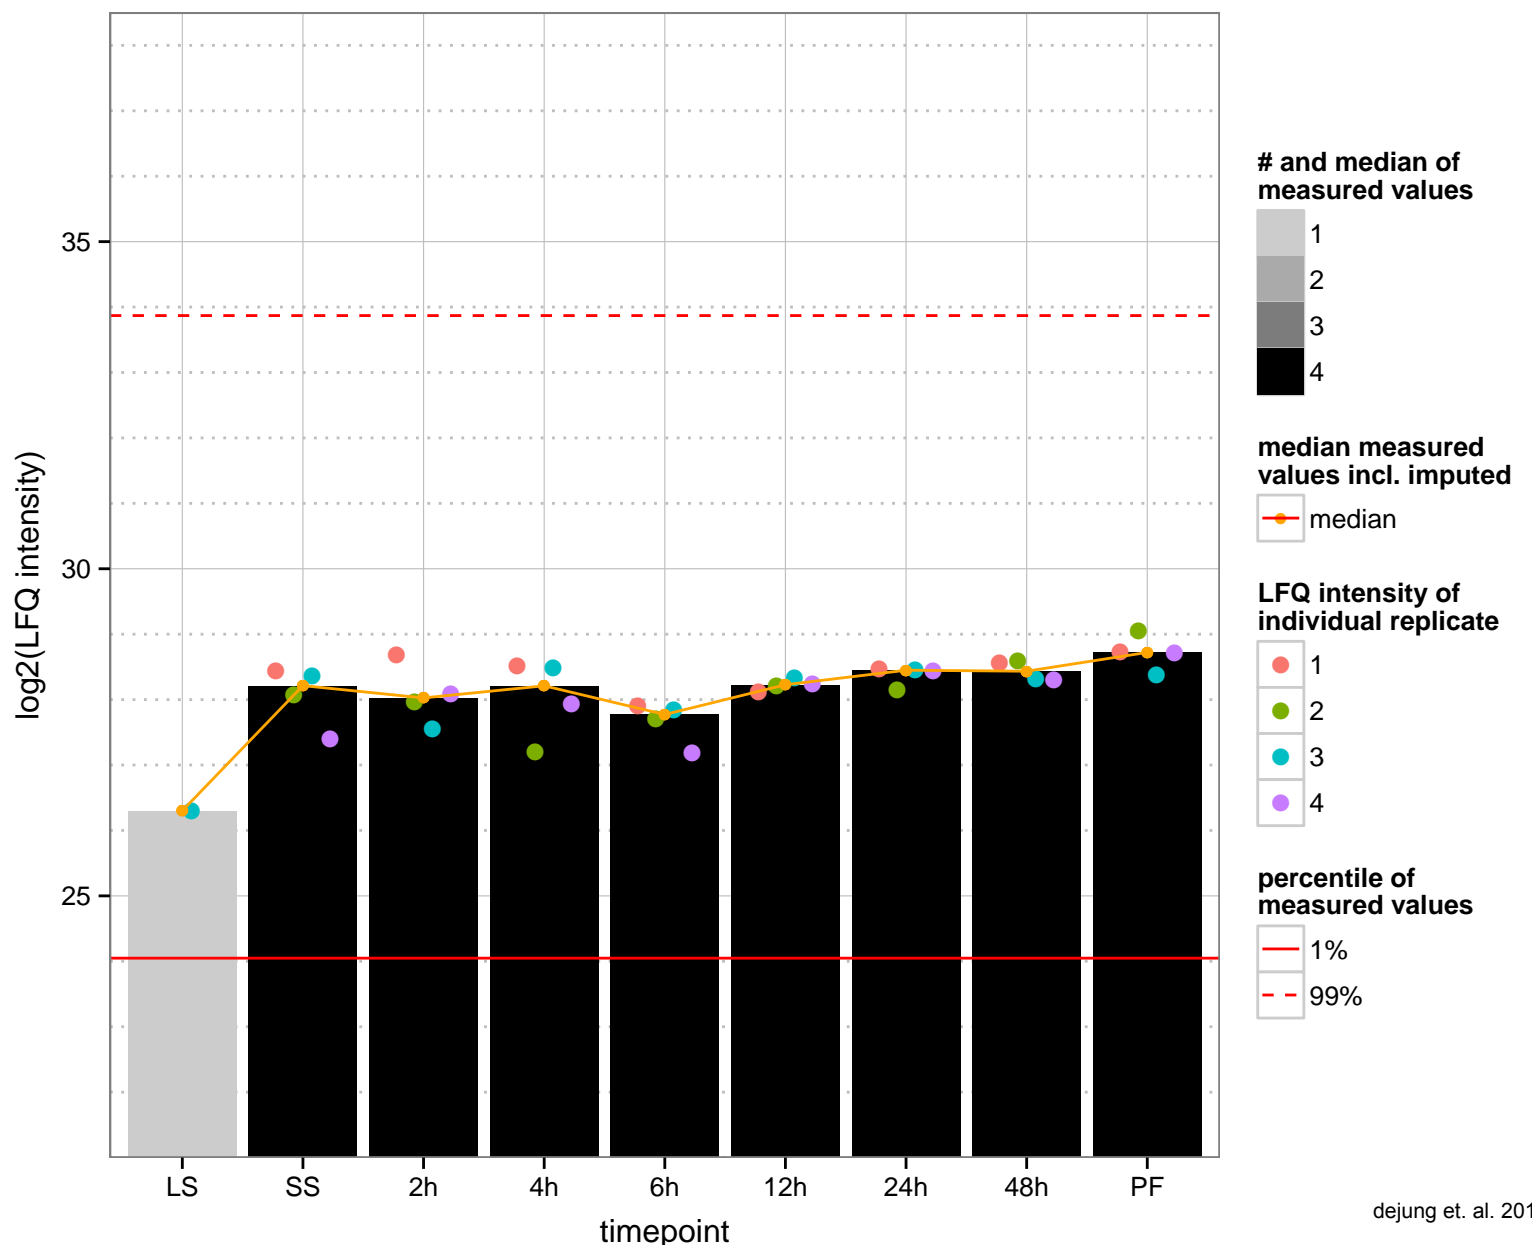

ubiquinone biosynthesis methyltransferase, putative  
 Tb927.11.10510  
 AGOF: 2-polyprenyl-6-methoxy-1, 4-benzoquinone methyltransferase activity  
 AGOC: mitochondrion  
 AGOP: coenzyme biosynthetic process, ubiquinone metabolic process  
 PGO: methyltransferase activity  
 PGOC: null  
 PGOP: null

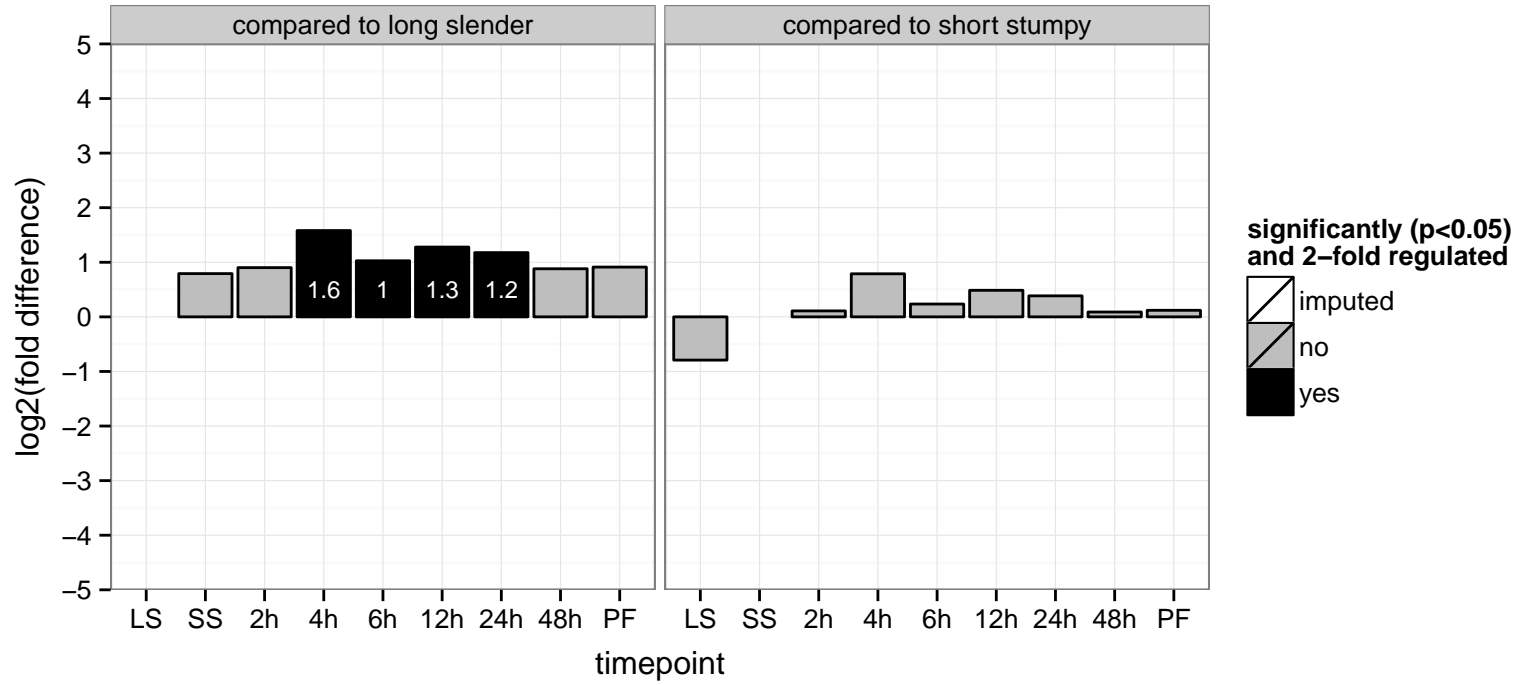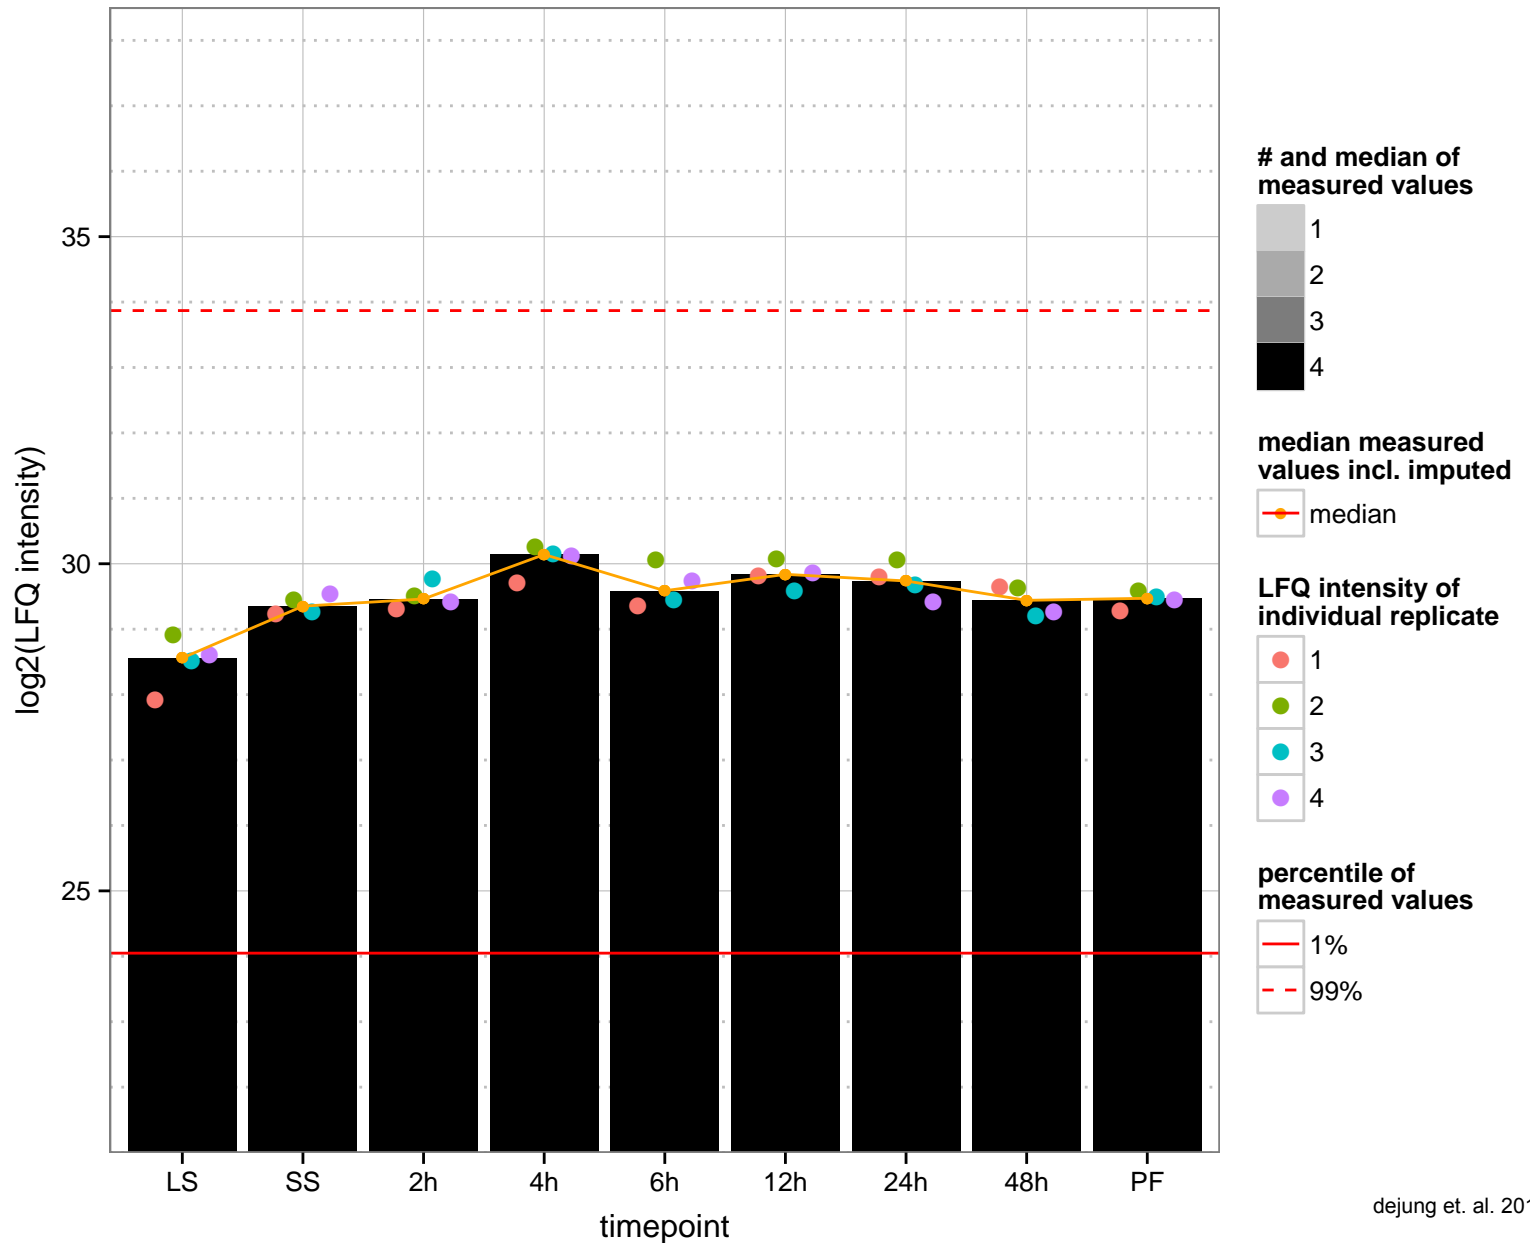

hypothetical protein, conserved  
 Tb927.11.10540  
 AGOF: null  
 AGOC: null  
 AGOP: null  
 PGO: null  
 PGOC: null  
 PGOP: null

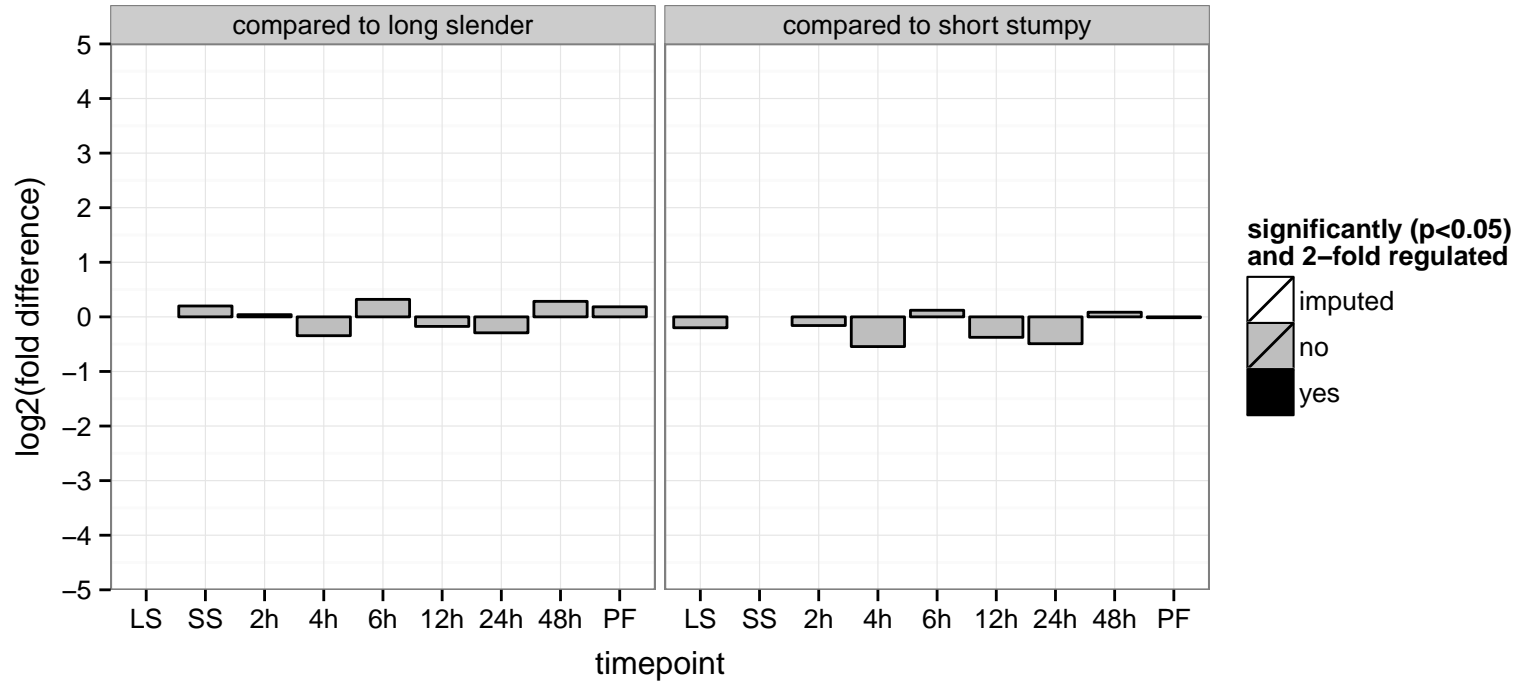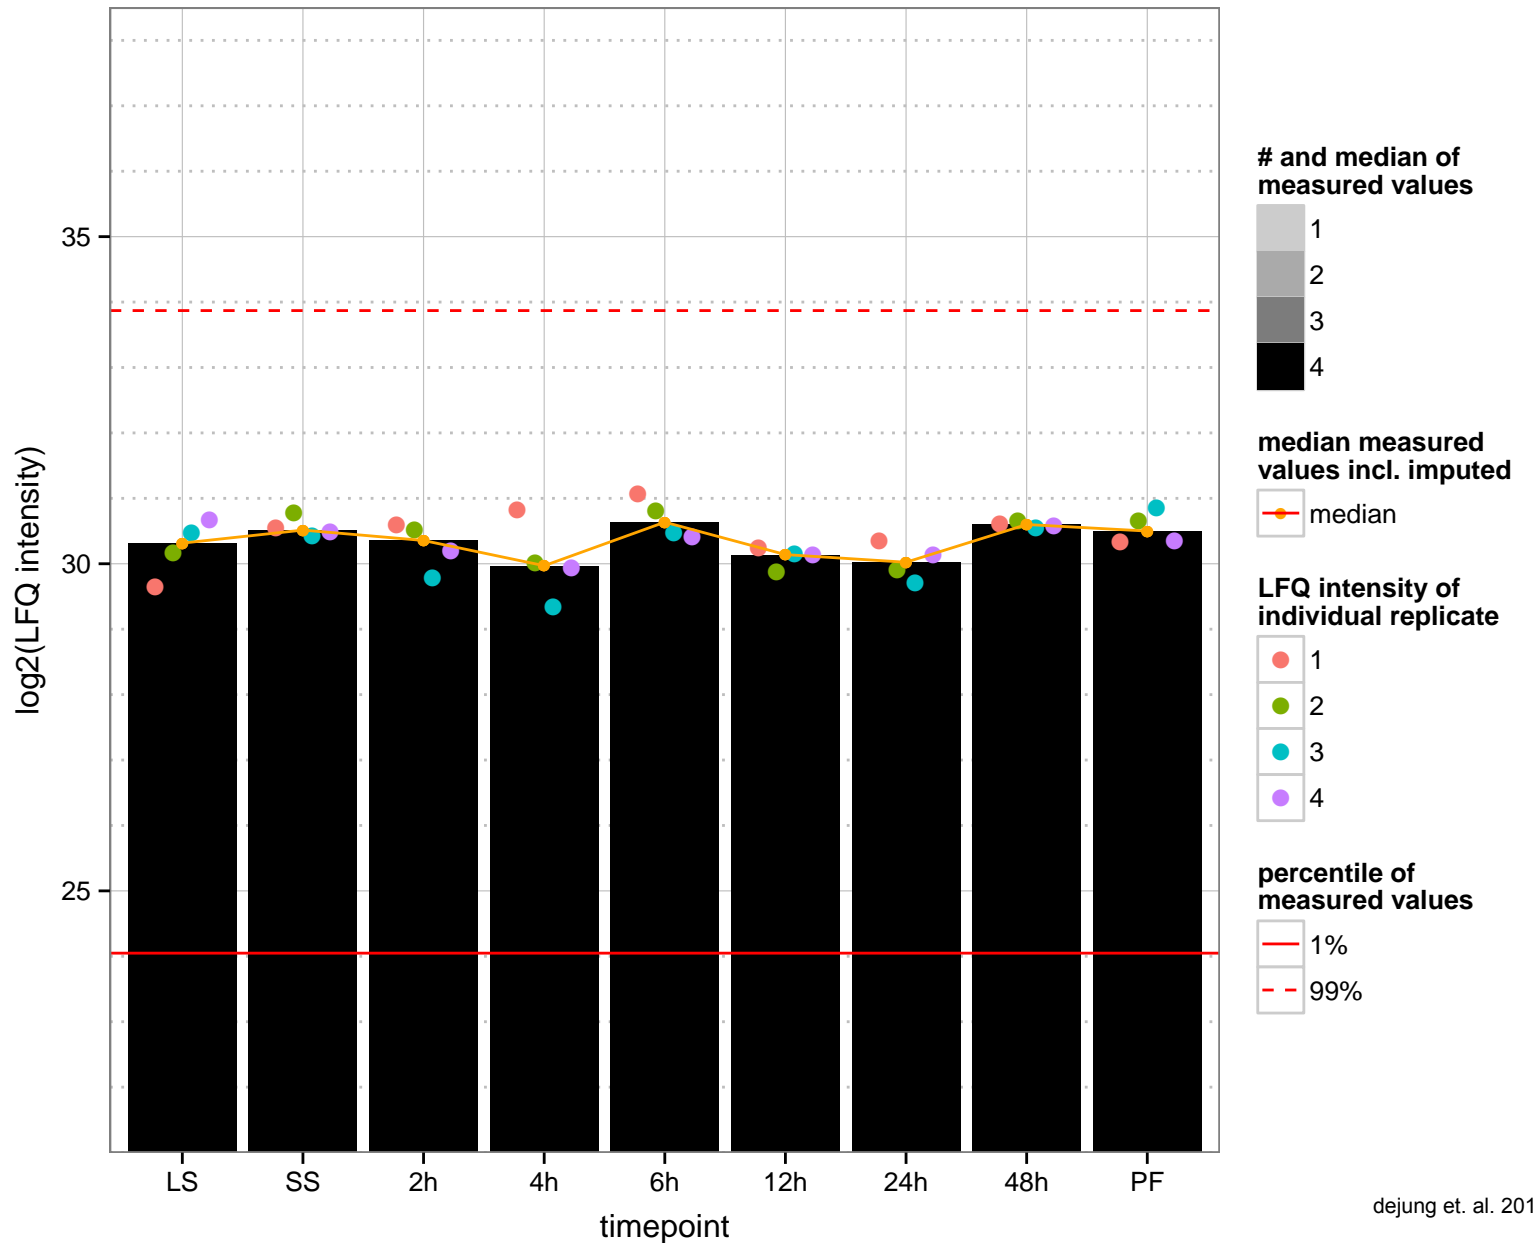

hypothetical protein, conserved  
 Tb927.11.10580  
 AGOF: null  
 AGOC: membrane  
 AGOP: Golgi organization, protein transport  
 PGO: null  
 PGOC: null  
 PGOP: null

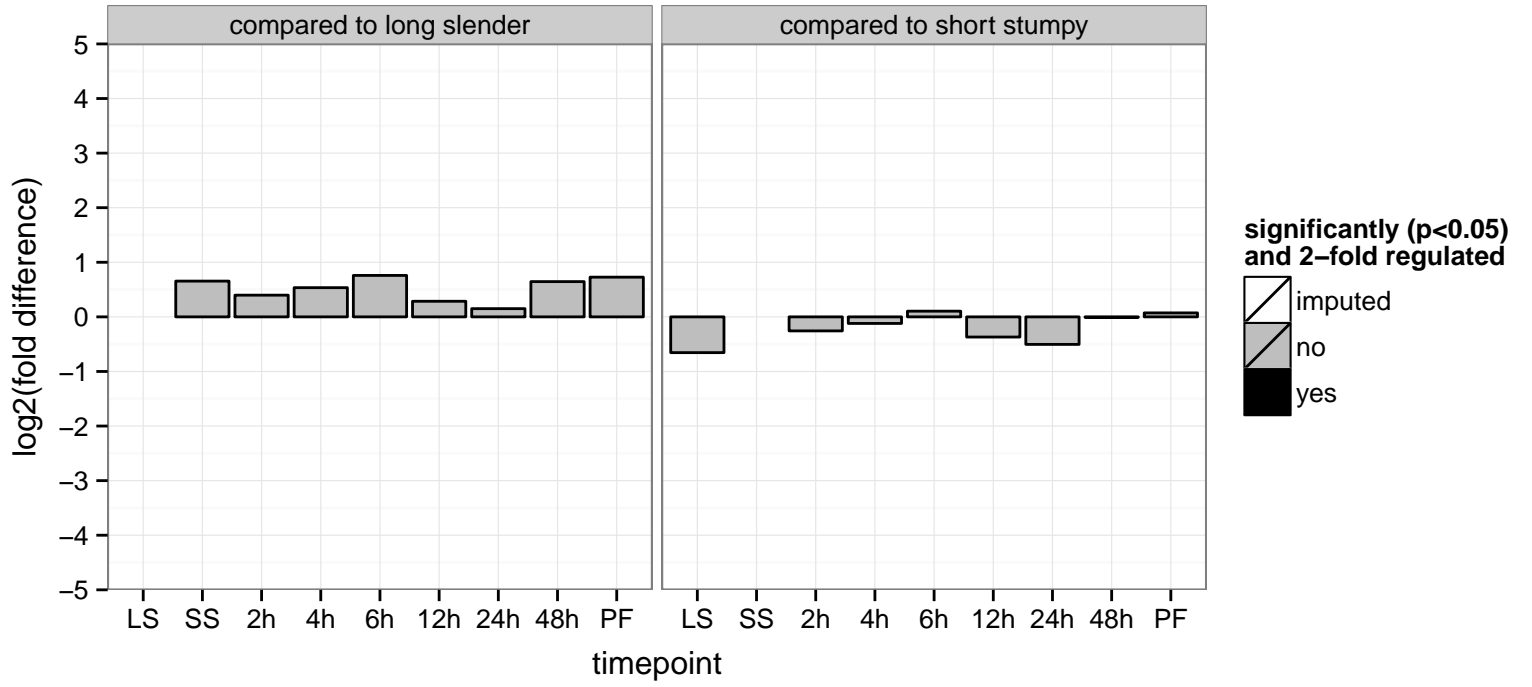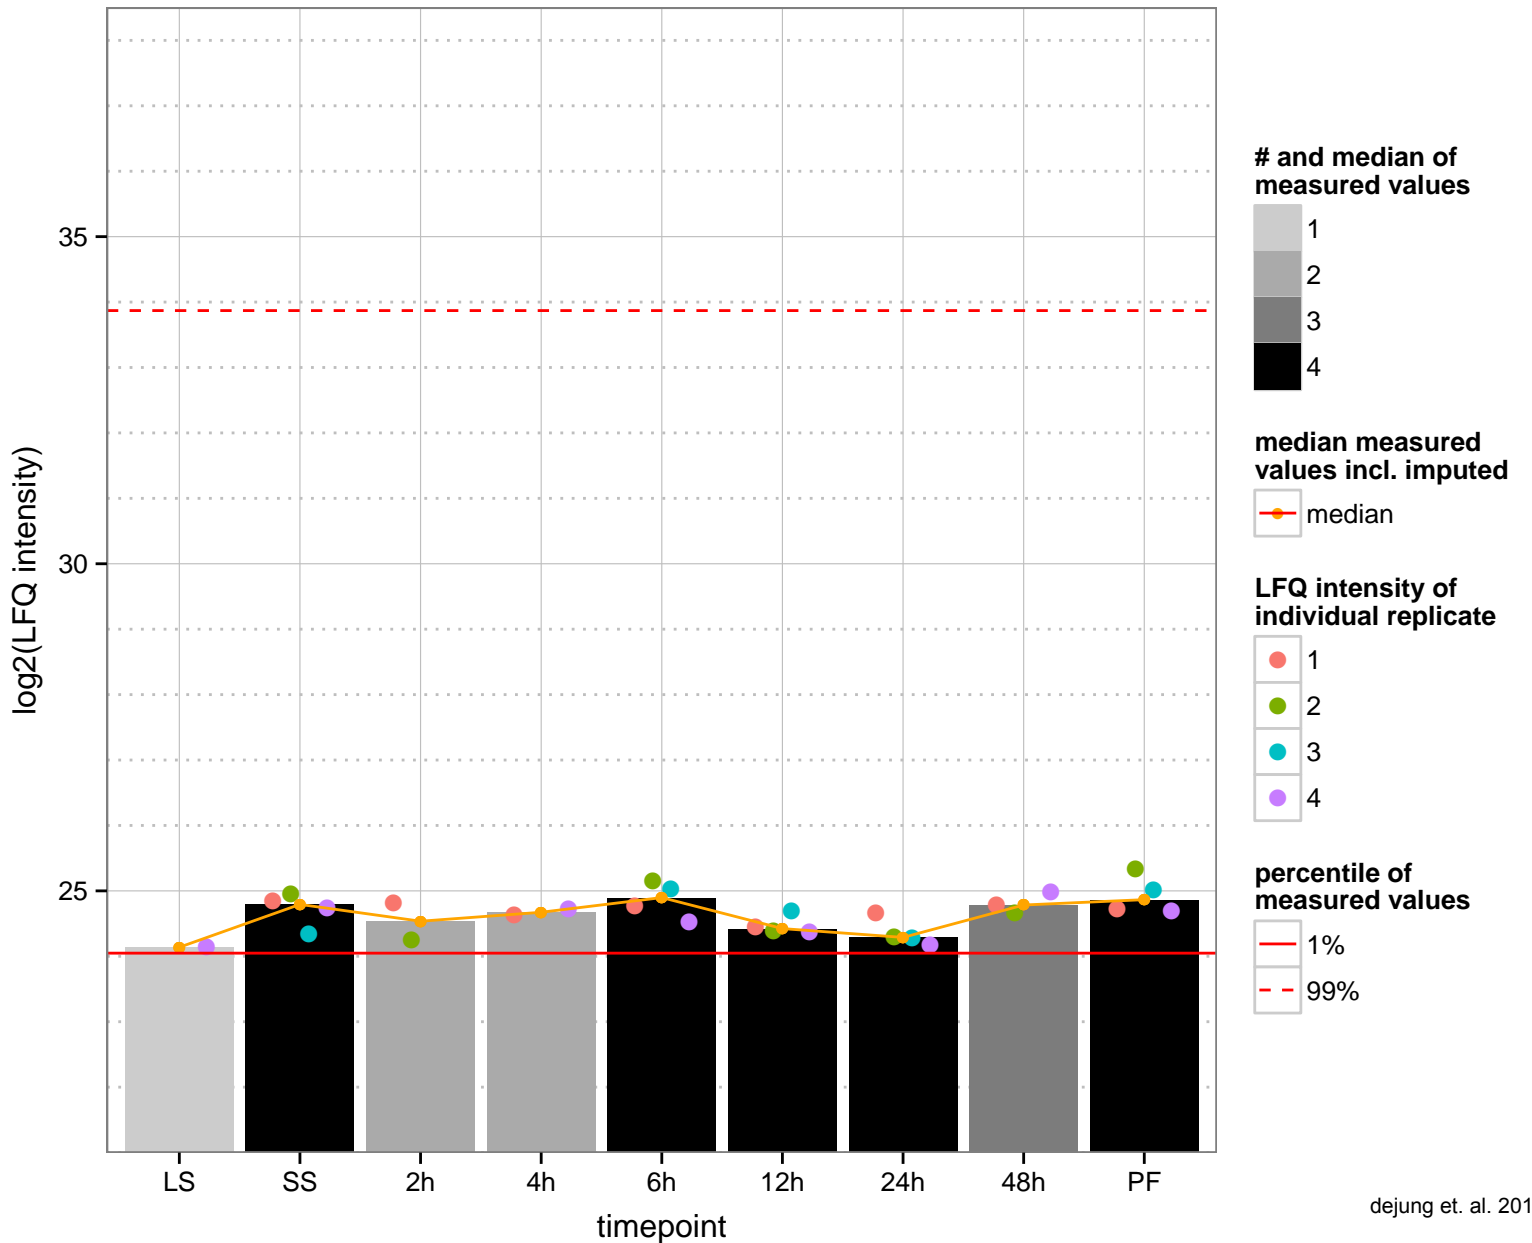

hypothetical protein, conserved  
 Tb927.11.10720  
 AGOF: null  
 AGOC: mitochondrion  
 AGOP: null  
 PGO: null  
 PGOC: null  
 PGOP: null

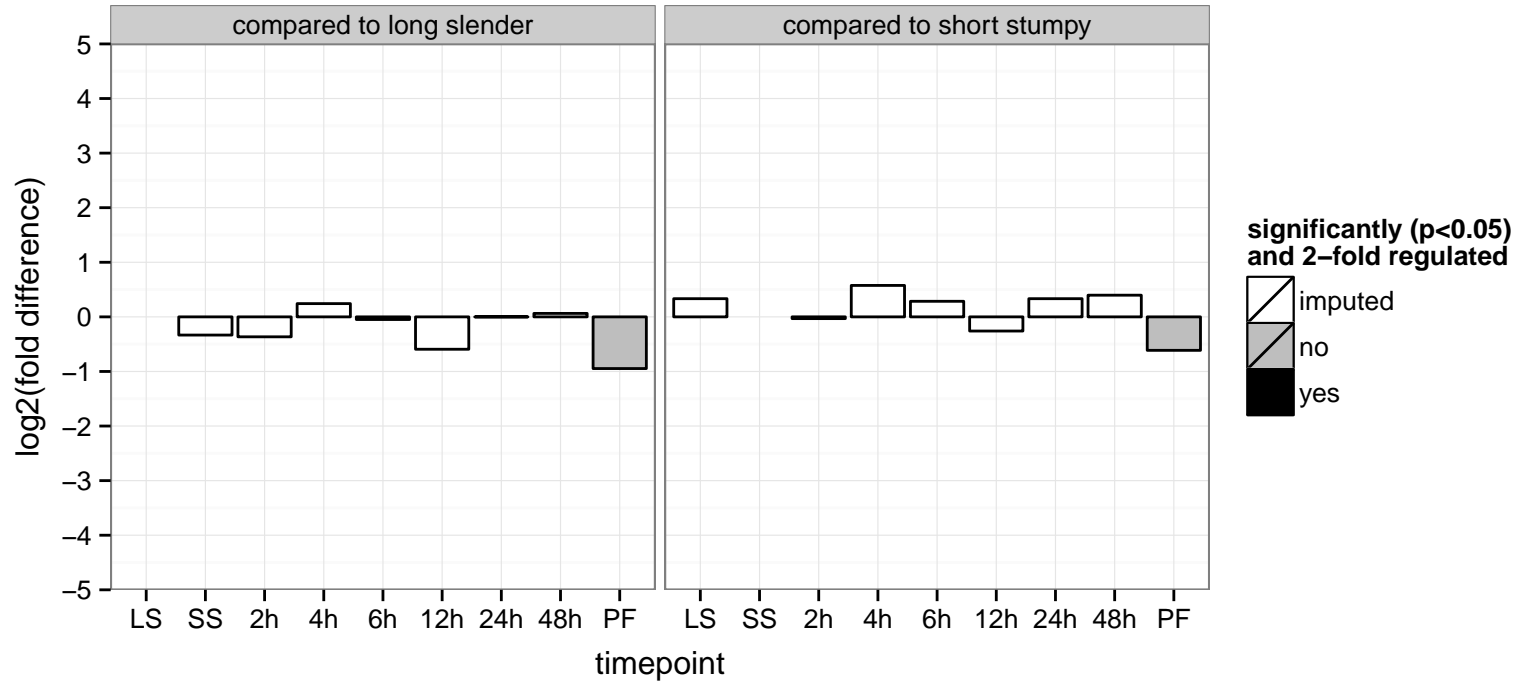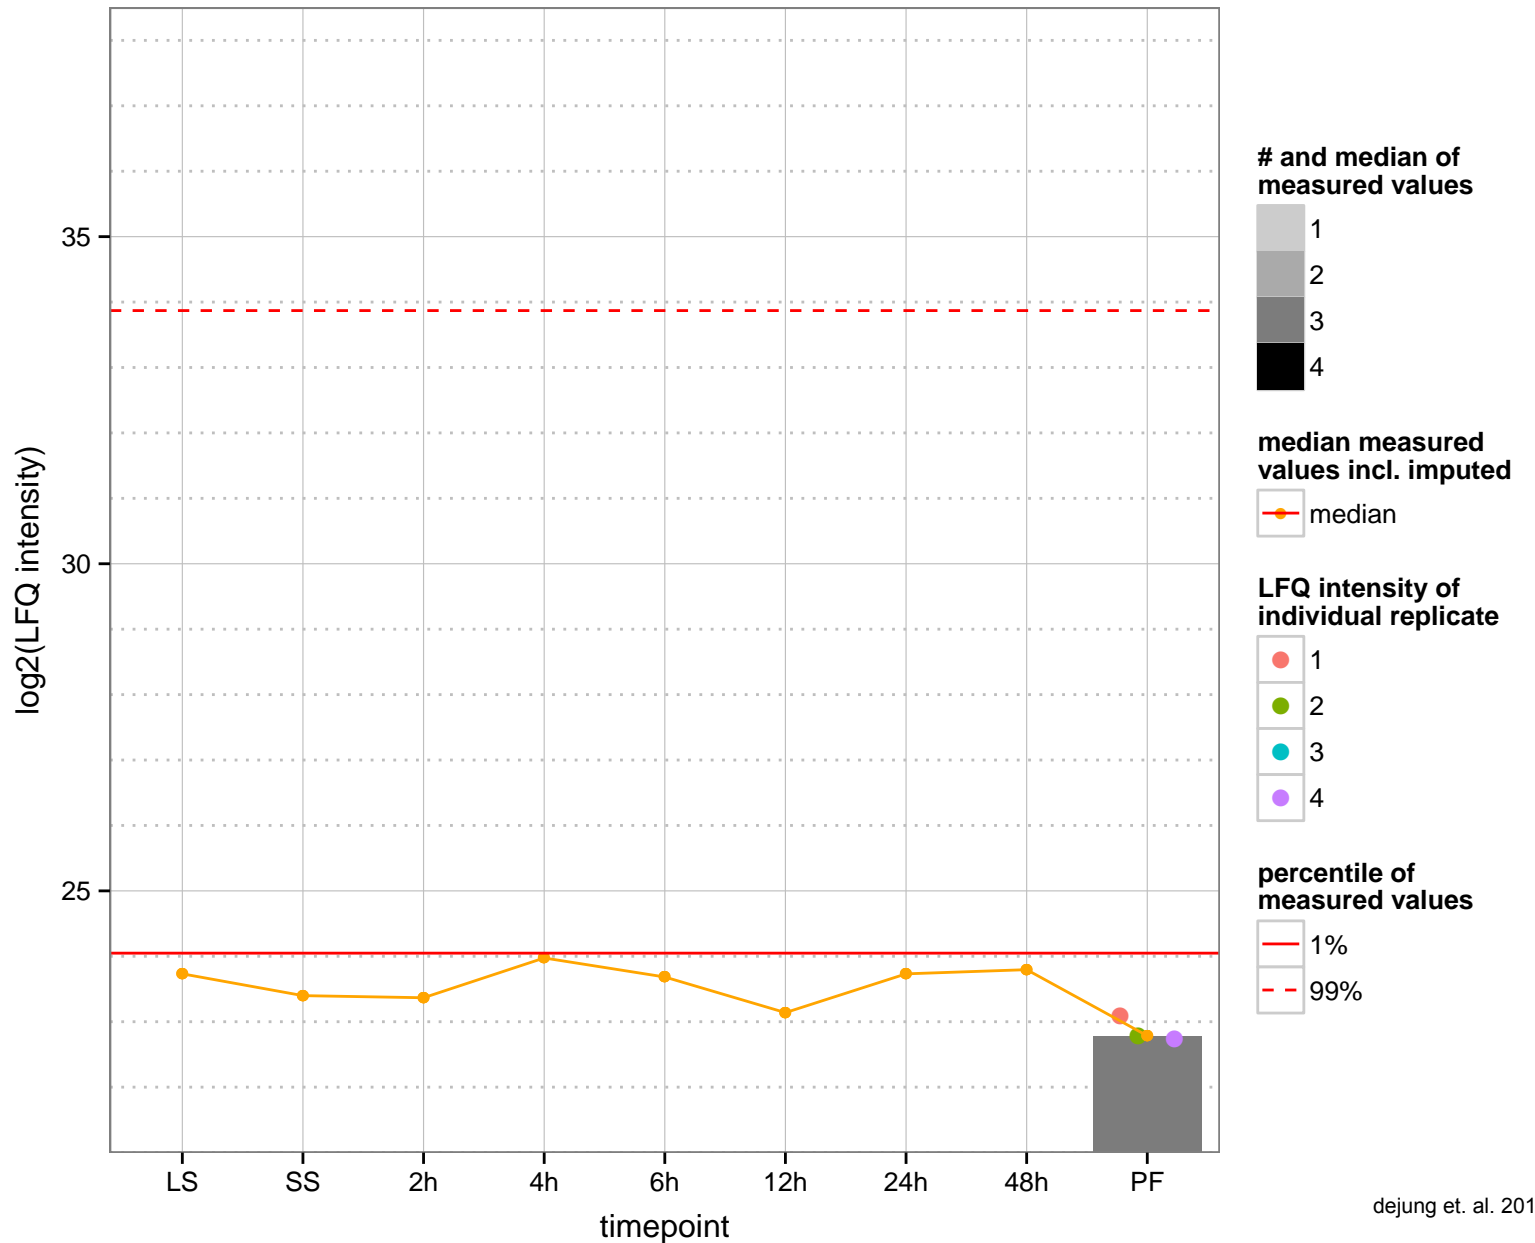



vacuolar sorting–associated protein–like, putative  
 Tb927.11.10740  
 AGOF: null  
 AGOC: endosome  
 AGOP: protein targeting to vacuole  
 PGO: null  
 PGO: null  
 PGO: null

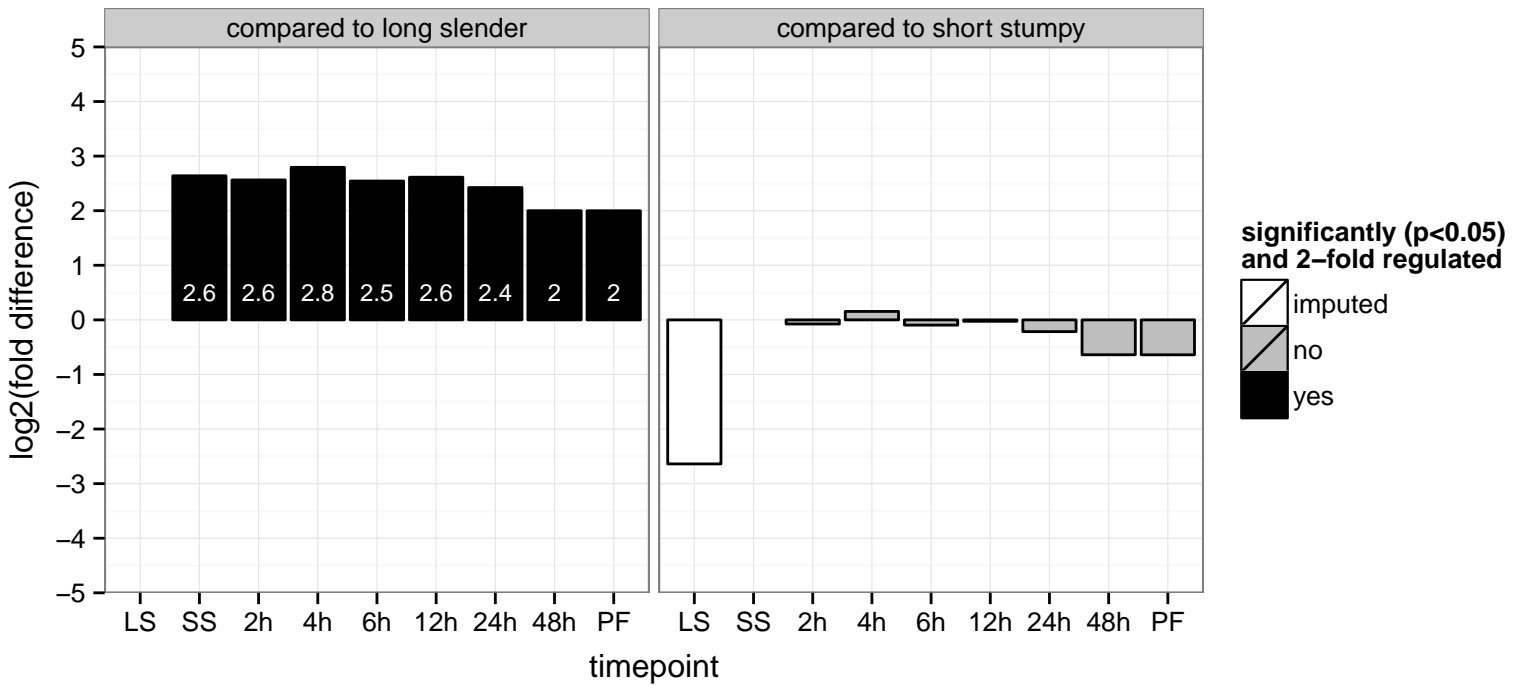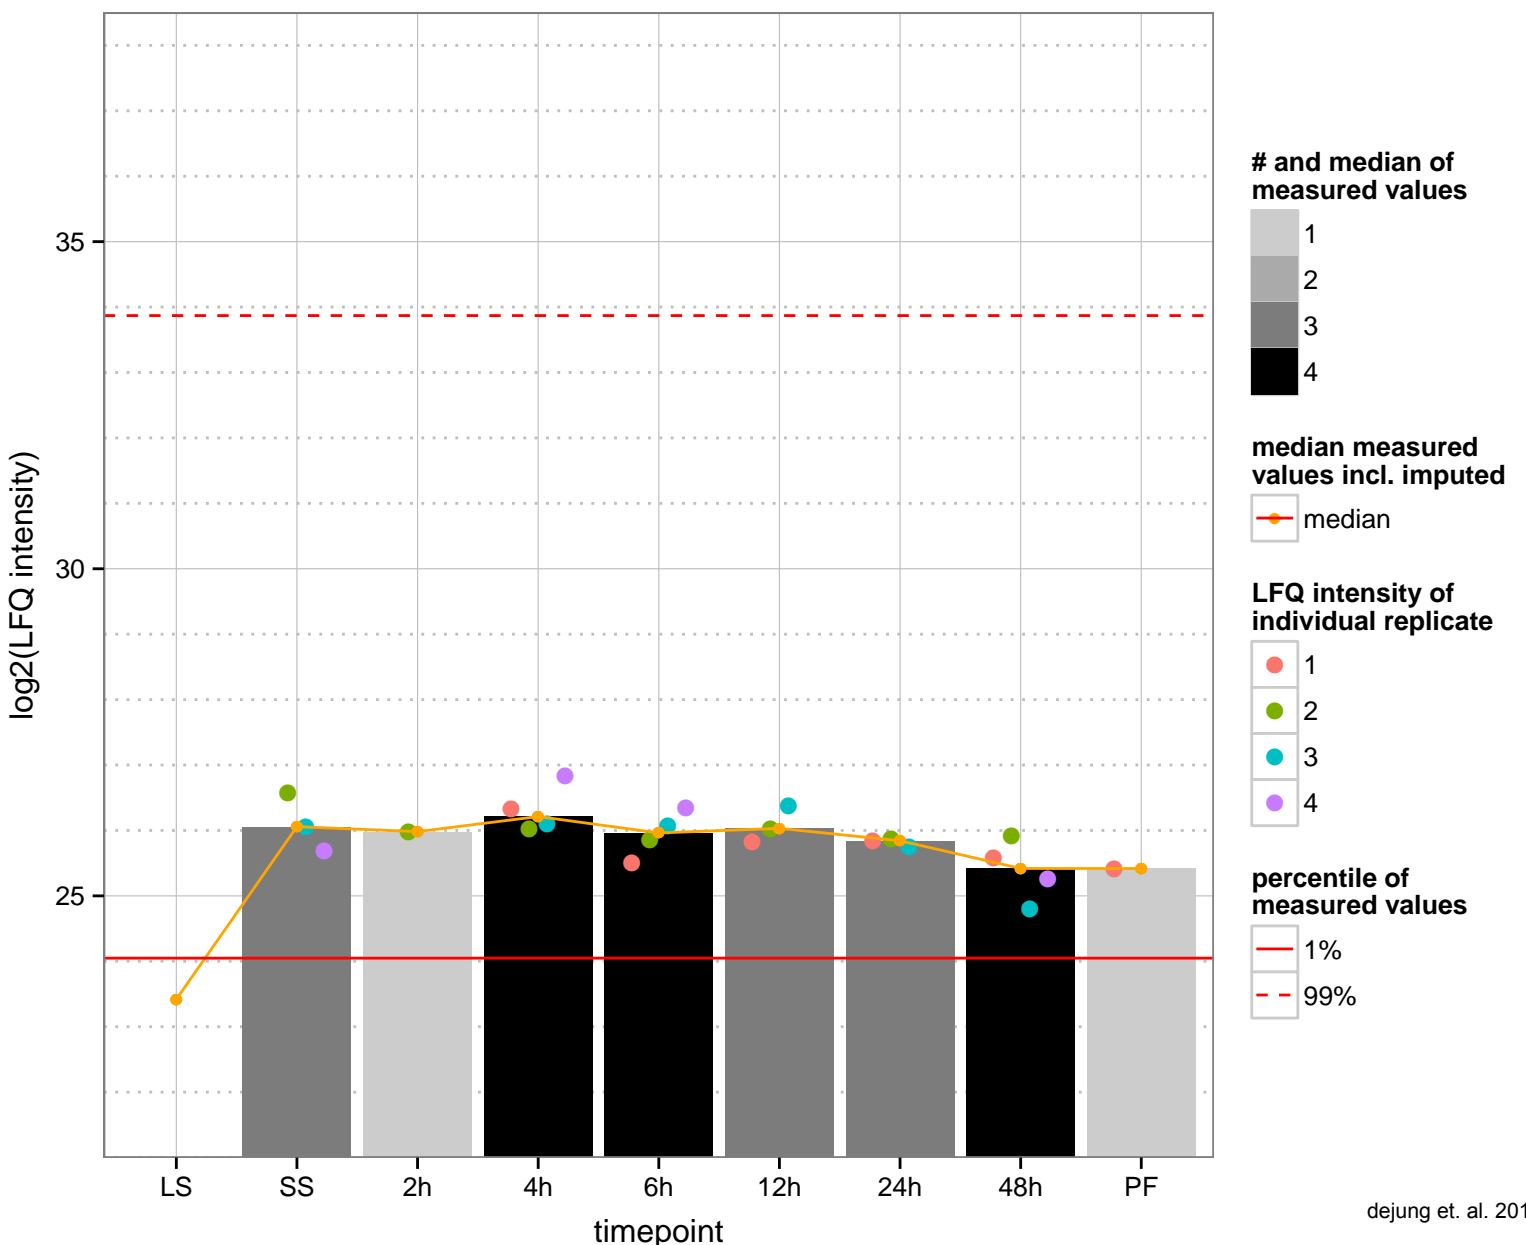

hypothetical protein, conserved  
 Tb927.11.10780  
 AGOF: null  
 AGOC: null  
 AGOP: null  
 PGOF: null  
 PGO: null  
 PGOP: null

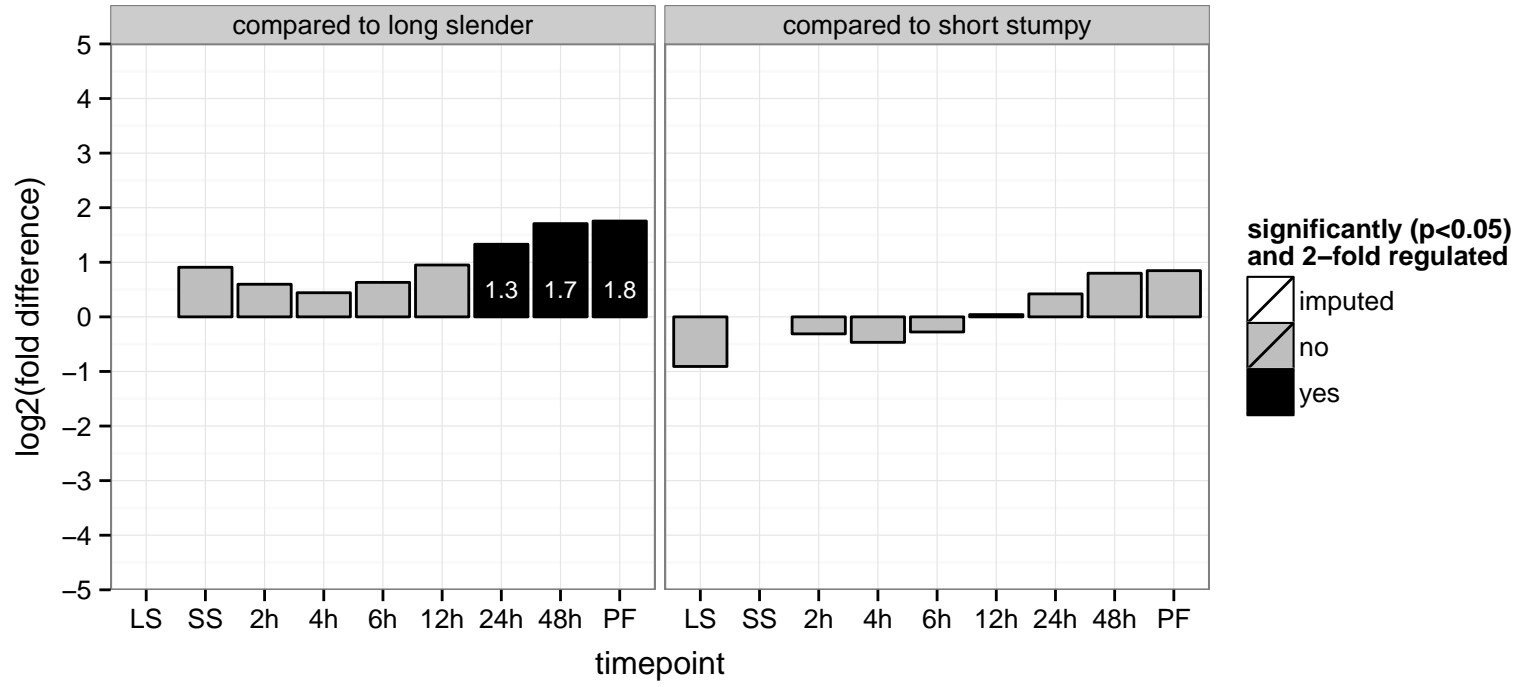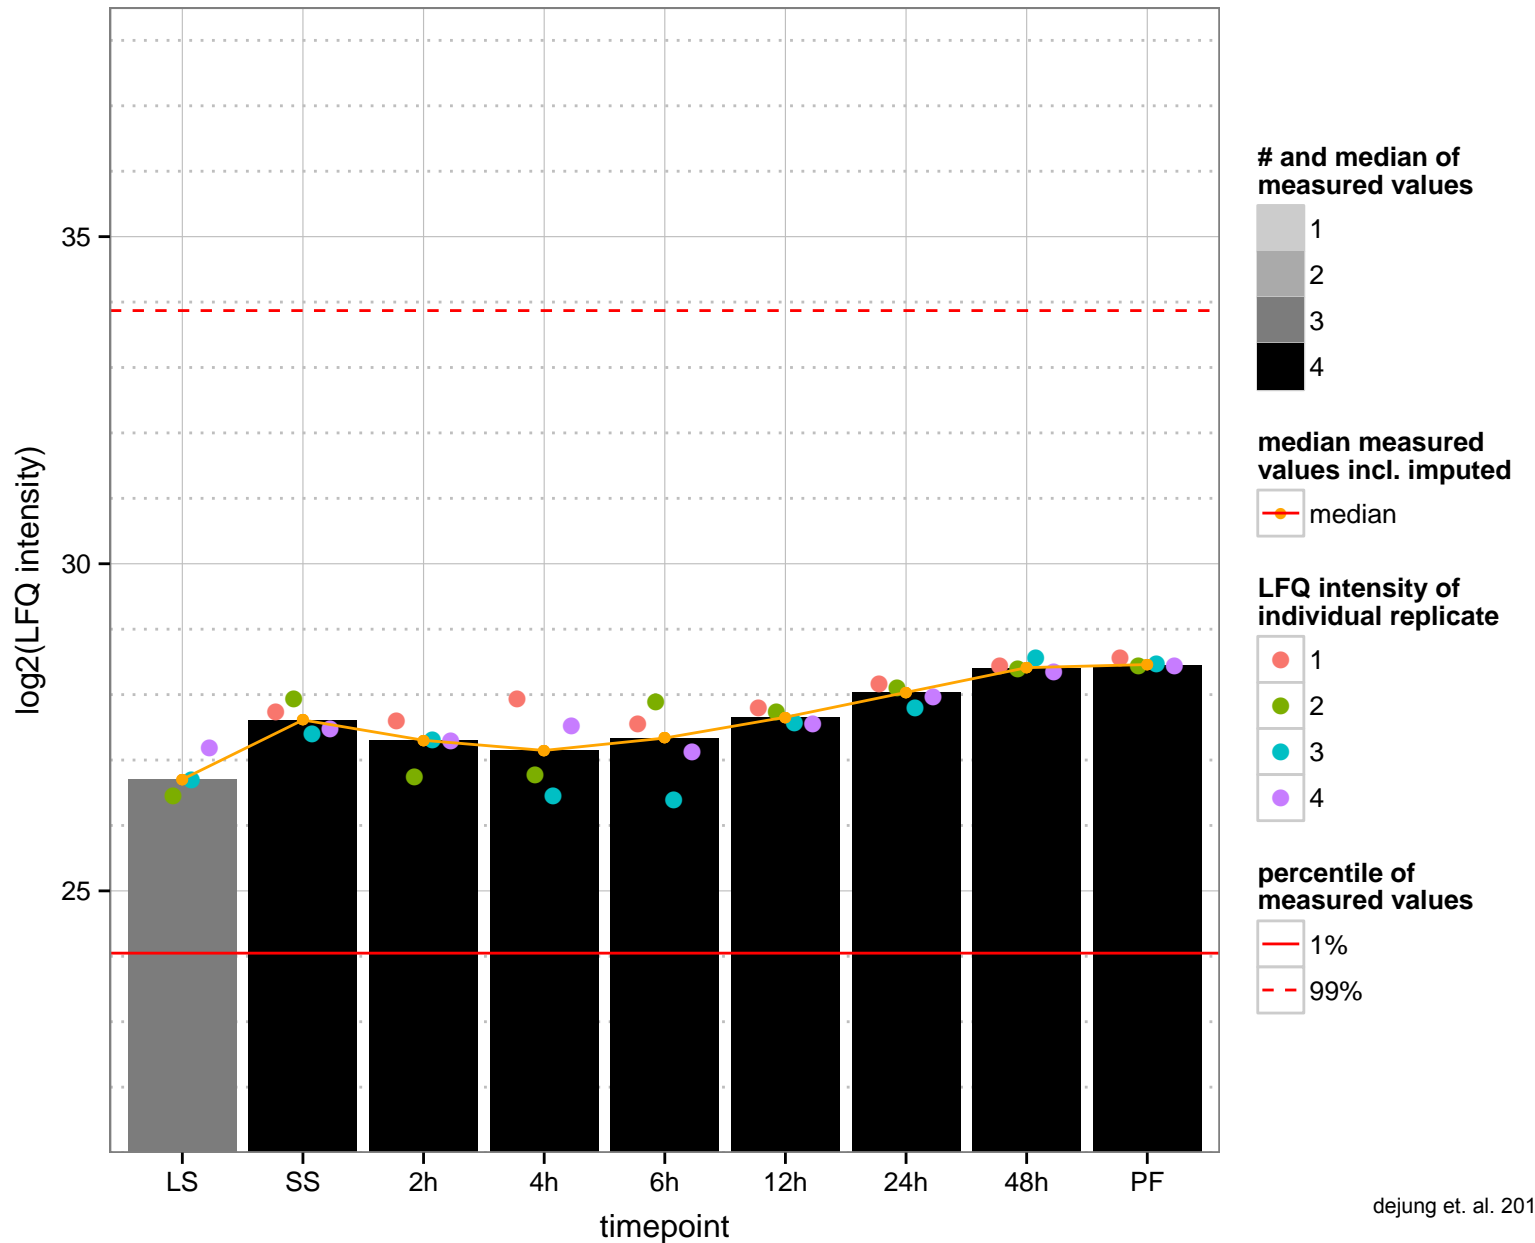

40S ribosomal protein SA, putative  
 Tb927.11.10910;Tb927.11.10790  
 AGOF: structural constituent of ribosome  
 AGOC: intracellular, organellar small ribosomal subunit, ribosome  
 AGOP: translation  
 PGO: structural constituent of ribosome  
 PGO: intracellular, ribosome, small ribosomal subunit  
 PGO: translation

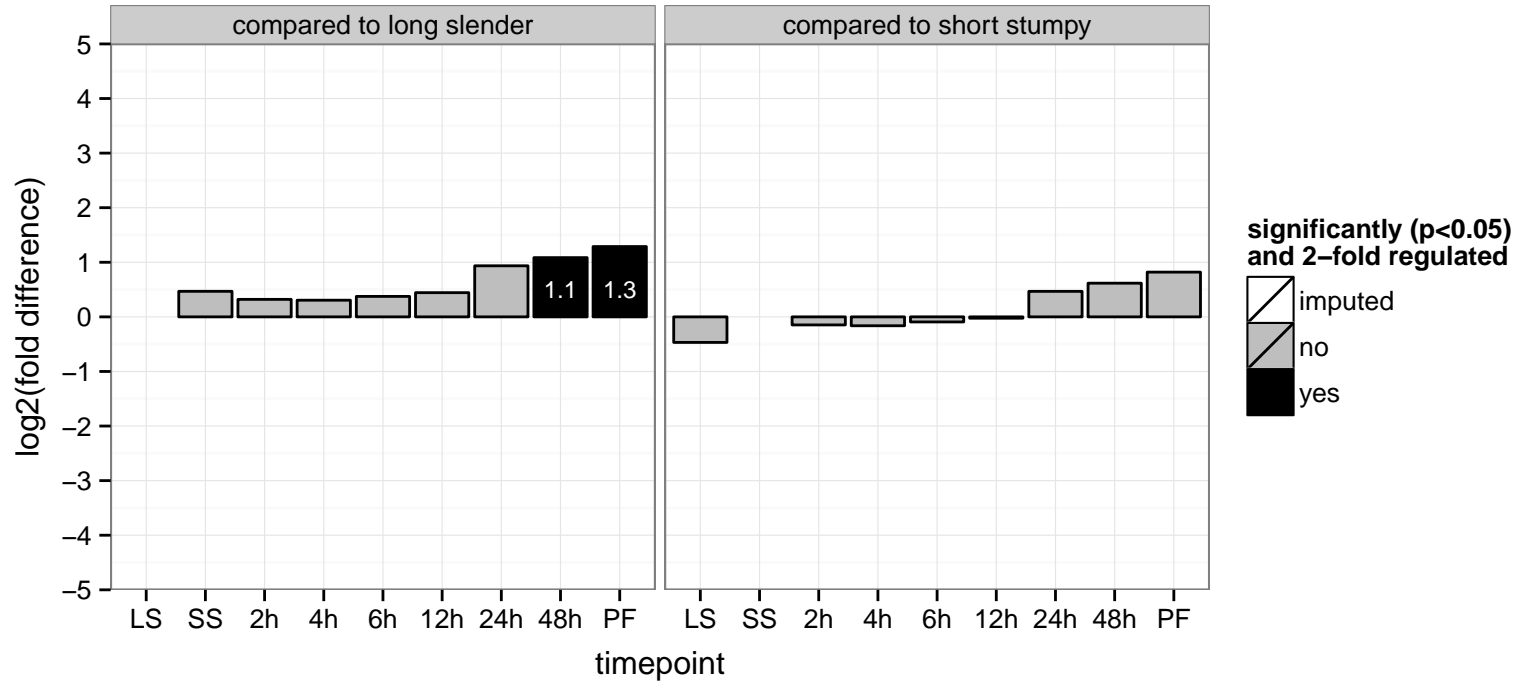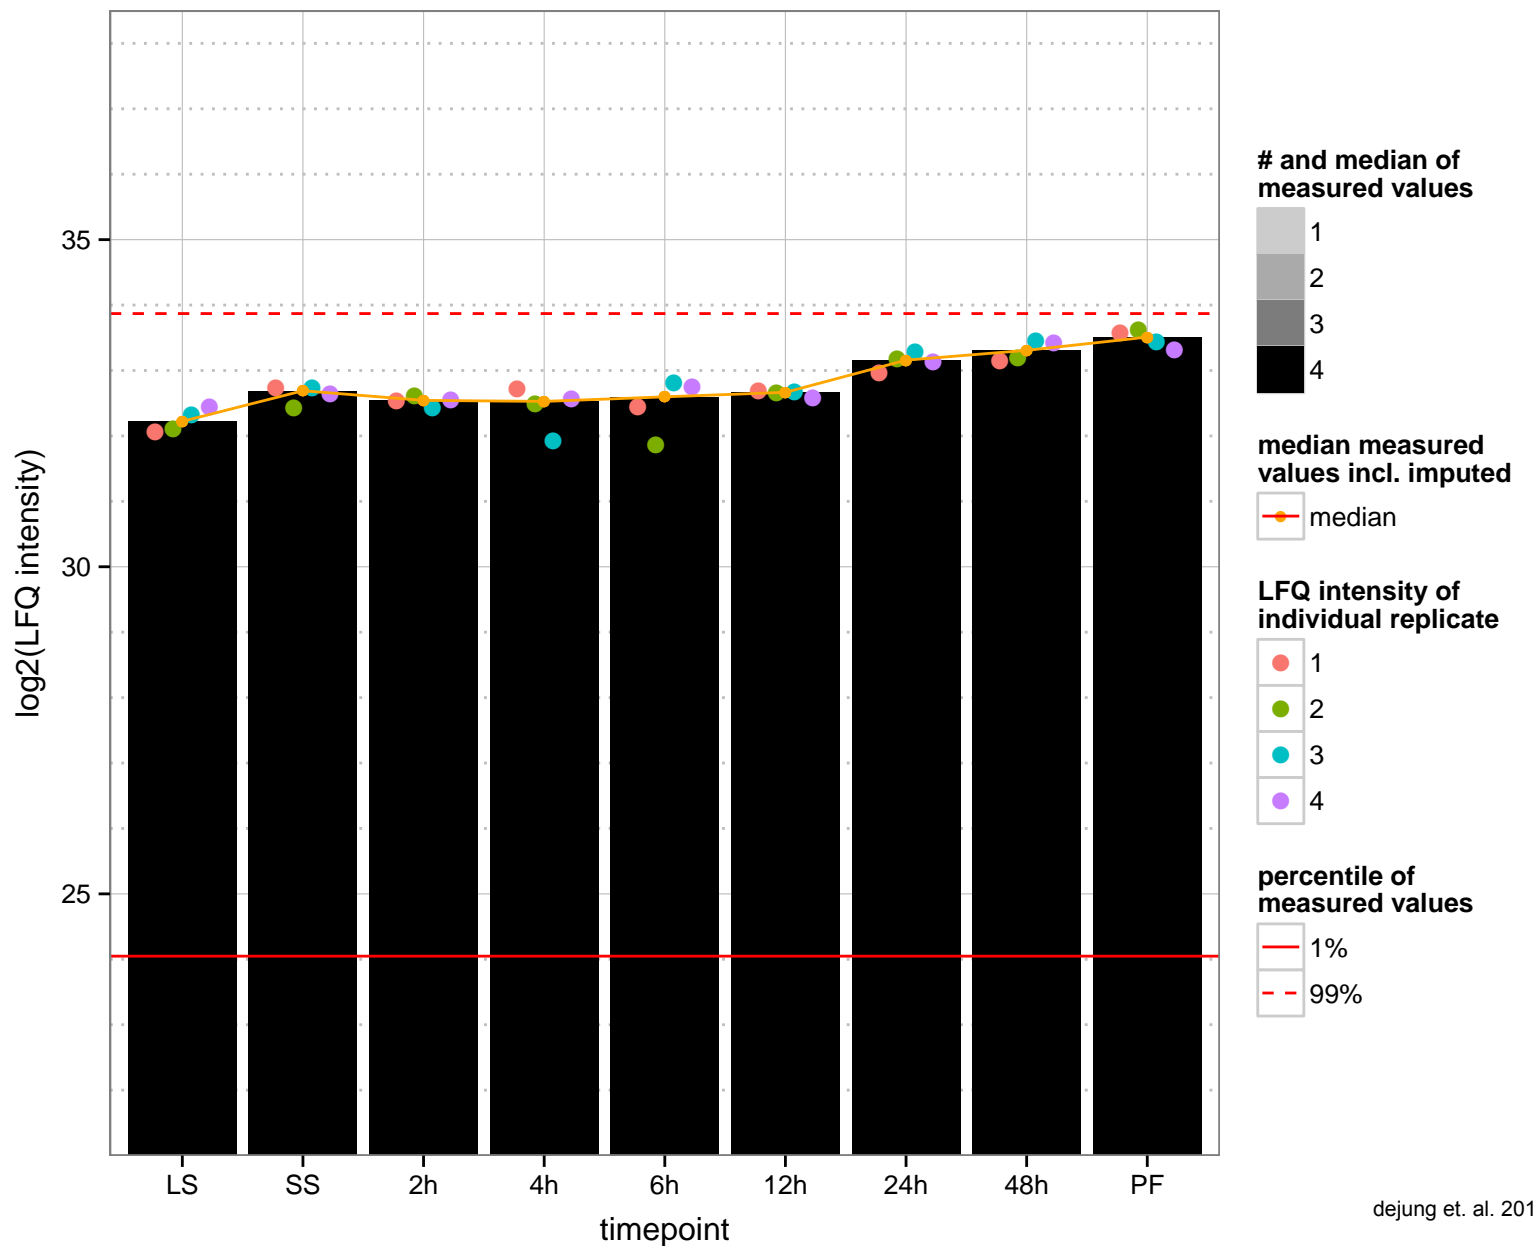

hypothetical protein, conserved  
 Tb927.11.1080  
 AGOF: null  
 AGOC: null  
 AGOP: null  
 PGO: null  
 PGOC: null  
 PGOP: null

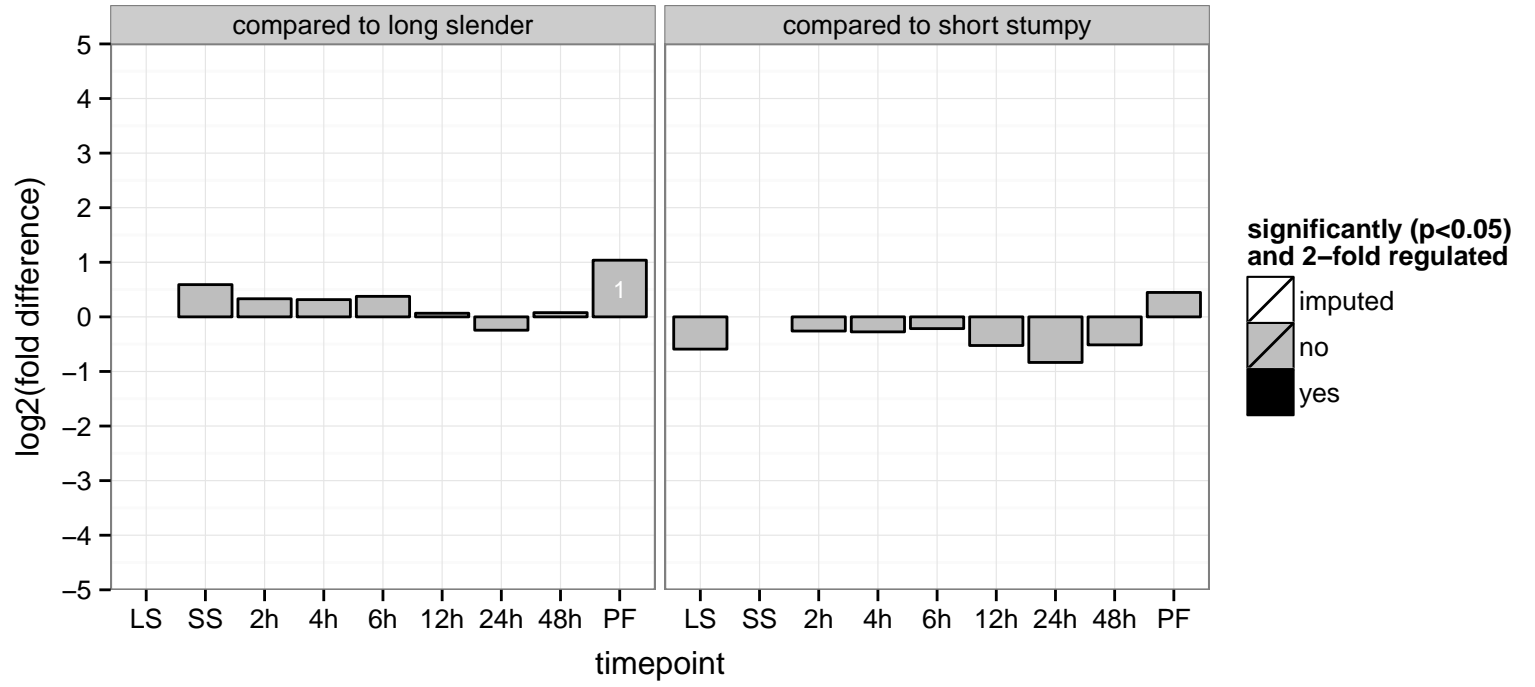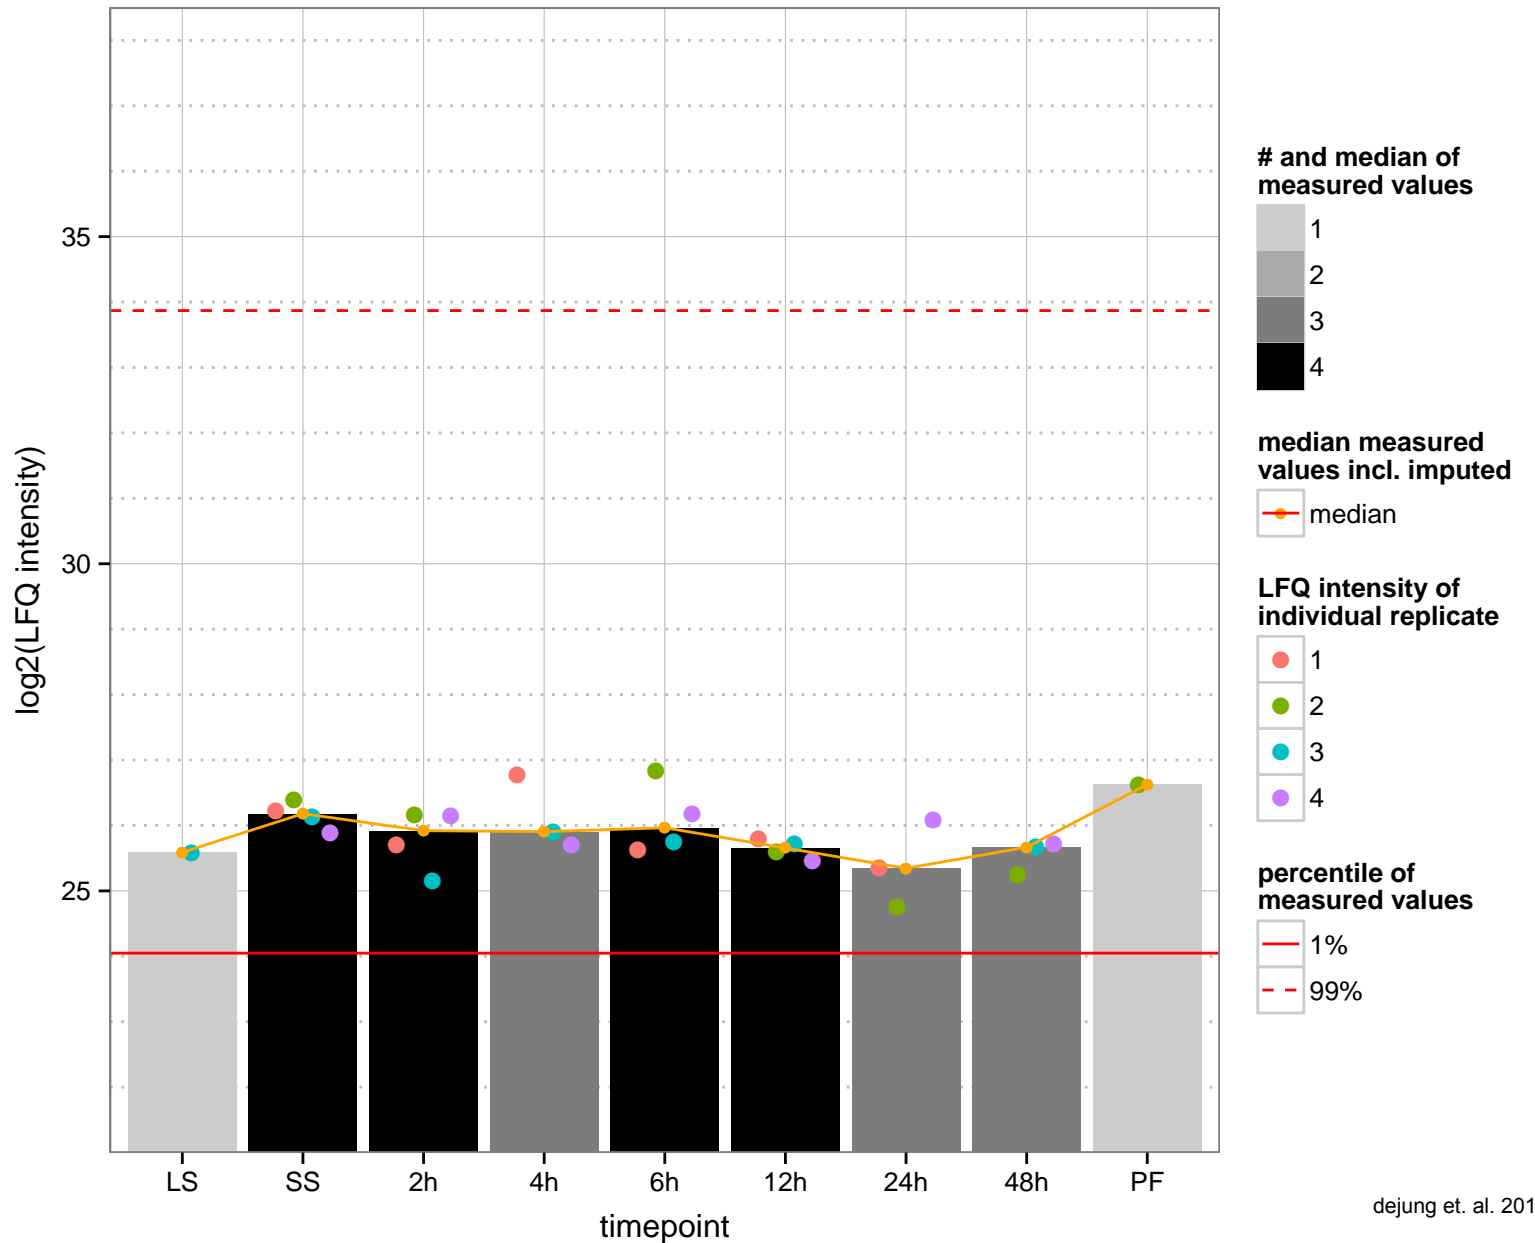

hypothetical protein, conserved  
 Tb927.11.10800  
 AGOF: null  
 AGOC: null  
 AGOP: null  
 PGO: null  
 PGOC: null  
 PGOP: null

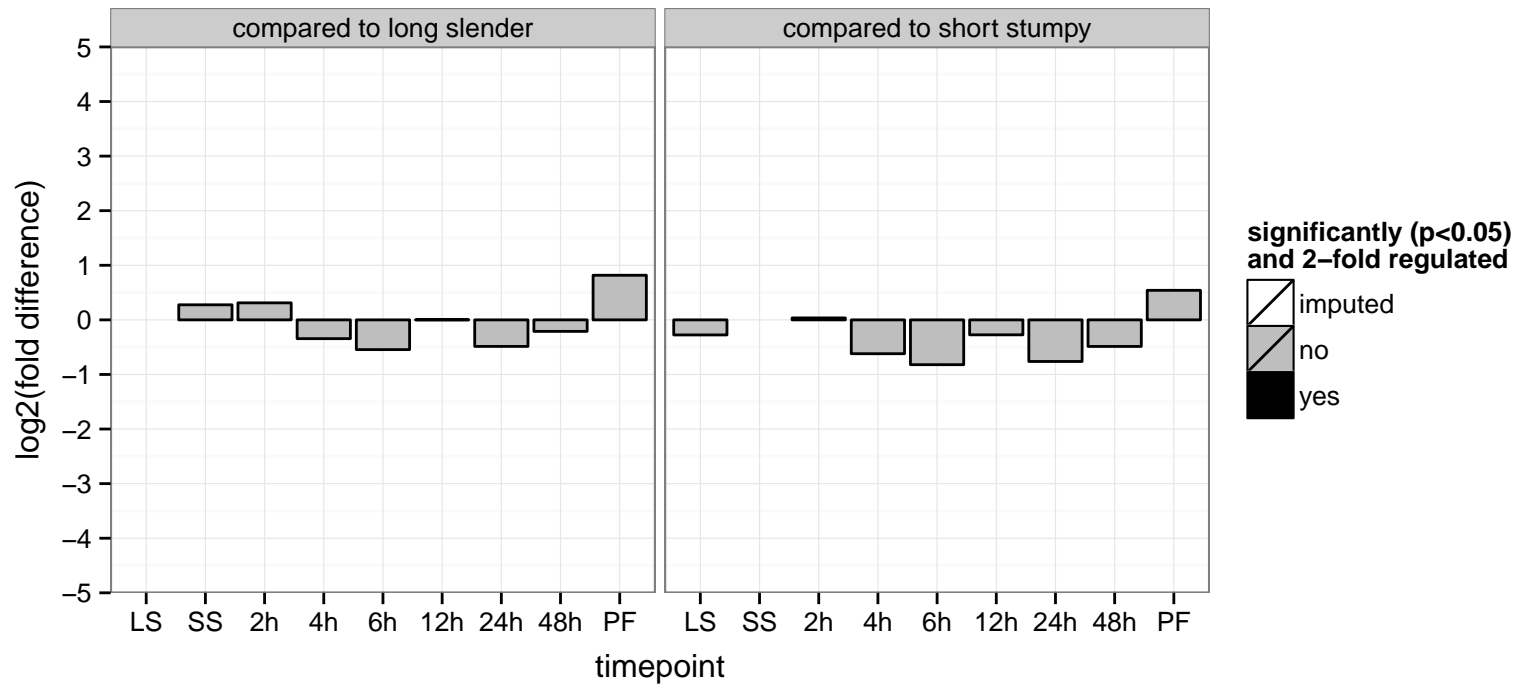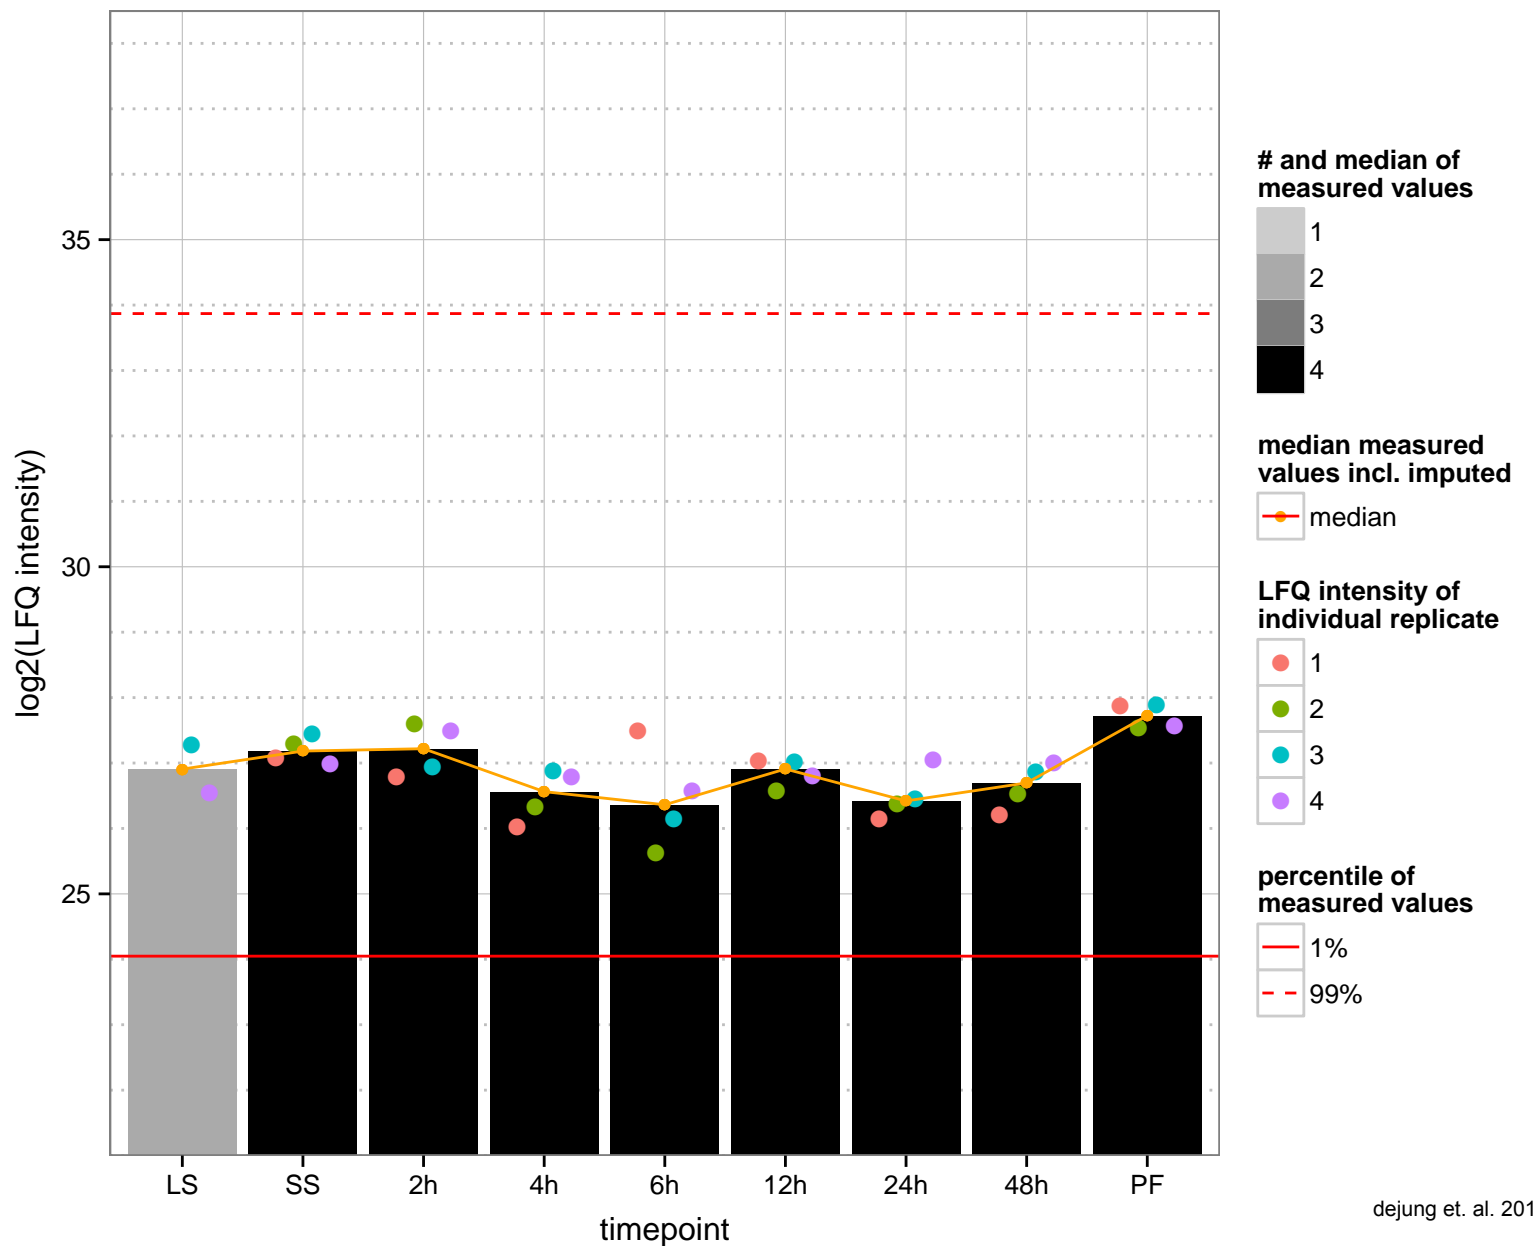

protein kinase ck2 regulatory subunit, putative, casein kinase II beta chain  
 Tb927.11.10820  
 AGOF: protein kinase regulator activity  
 AGOC: protein kinase CK2 complex  
 AGOP: null  
 PGOF: protein kinase regulator activity  
 PGOC: protein kinase CK2 complex  
 PGOP: null

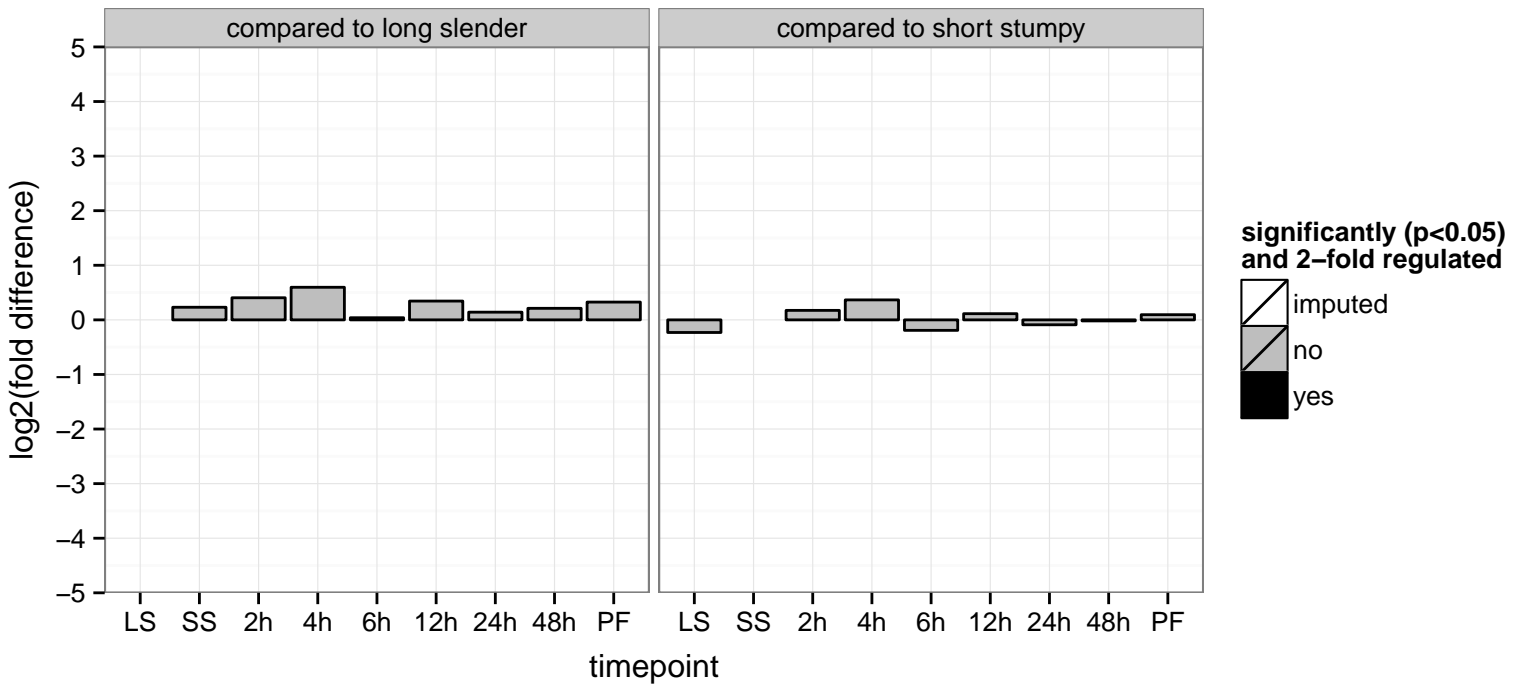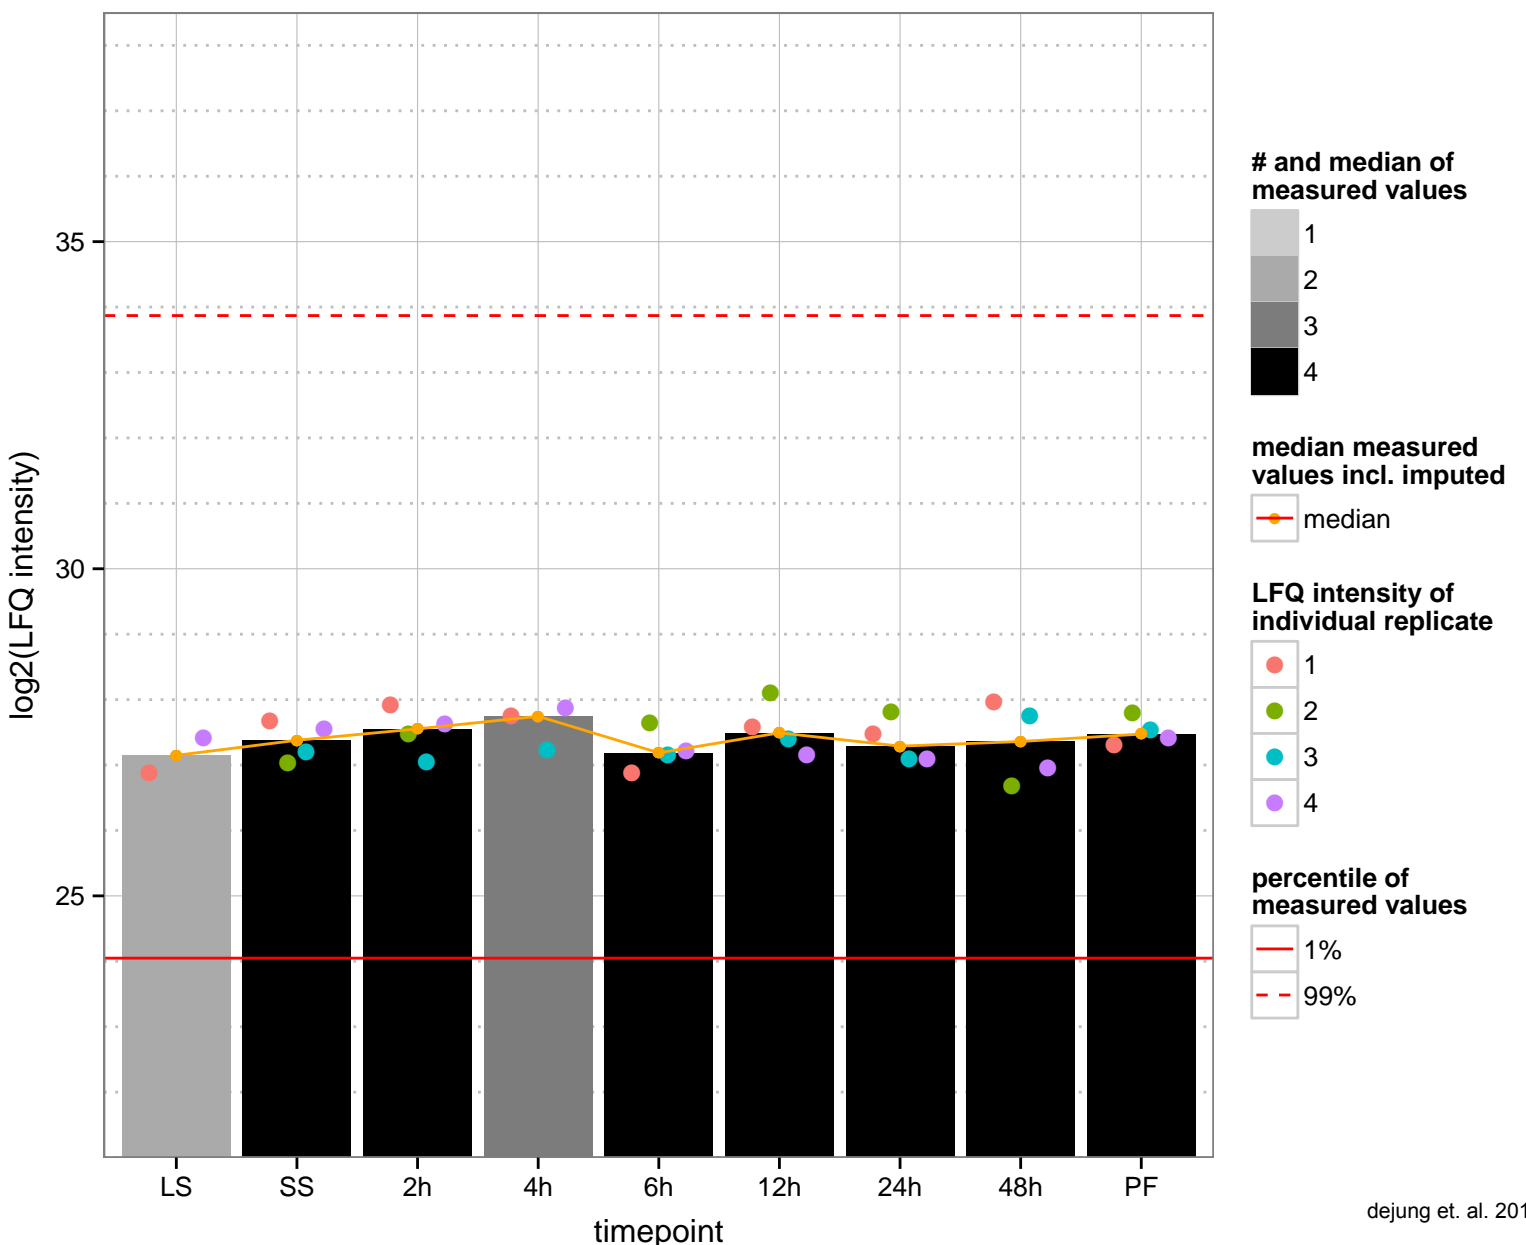

hypothetical protein, conserved  
 Tb927.11.10840  
 AGOF: null  
 AGOC: null  
 AGOP: null  
 PGOF: null  
 PGOE: null  
 PGOP: null

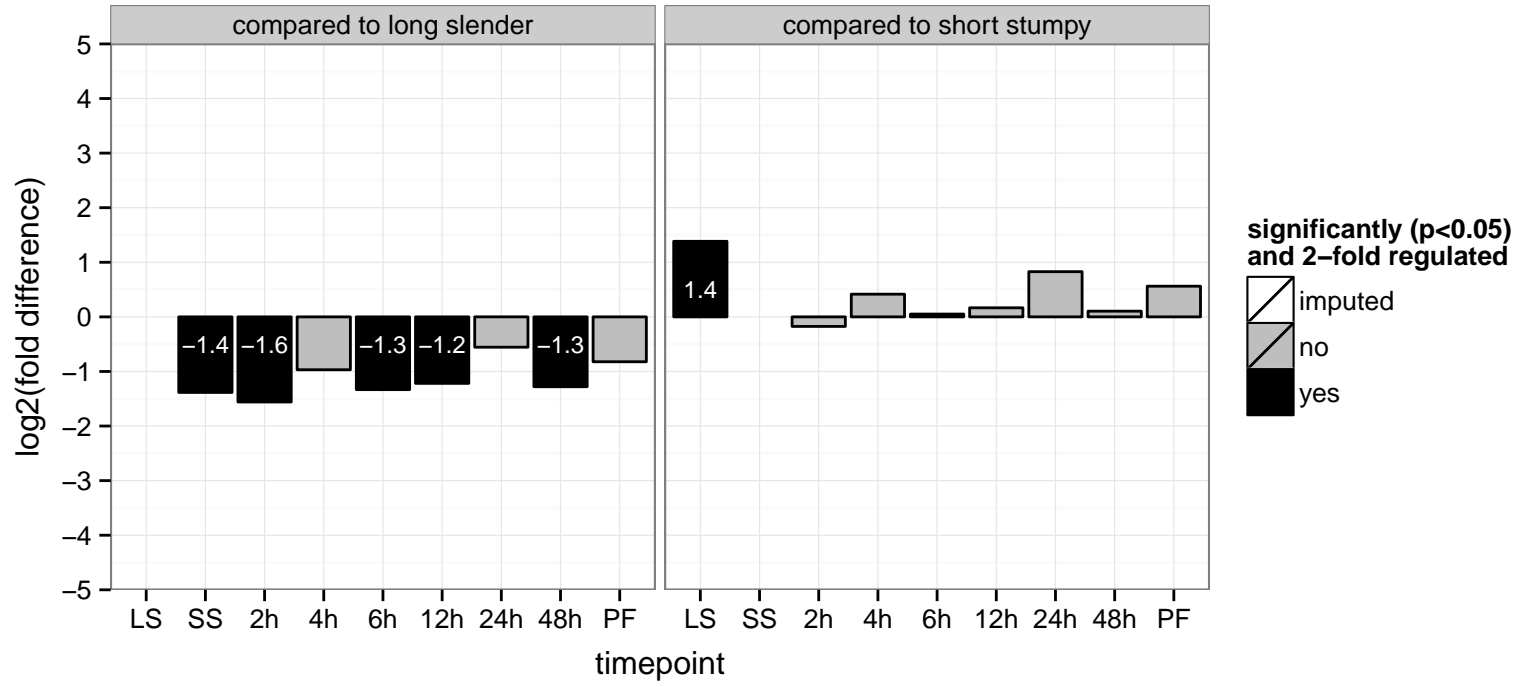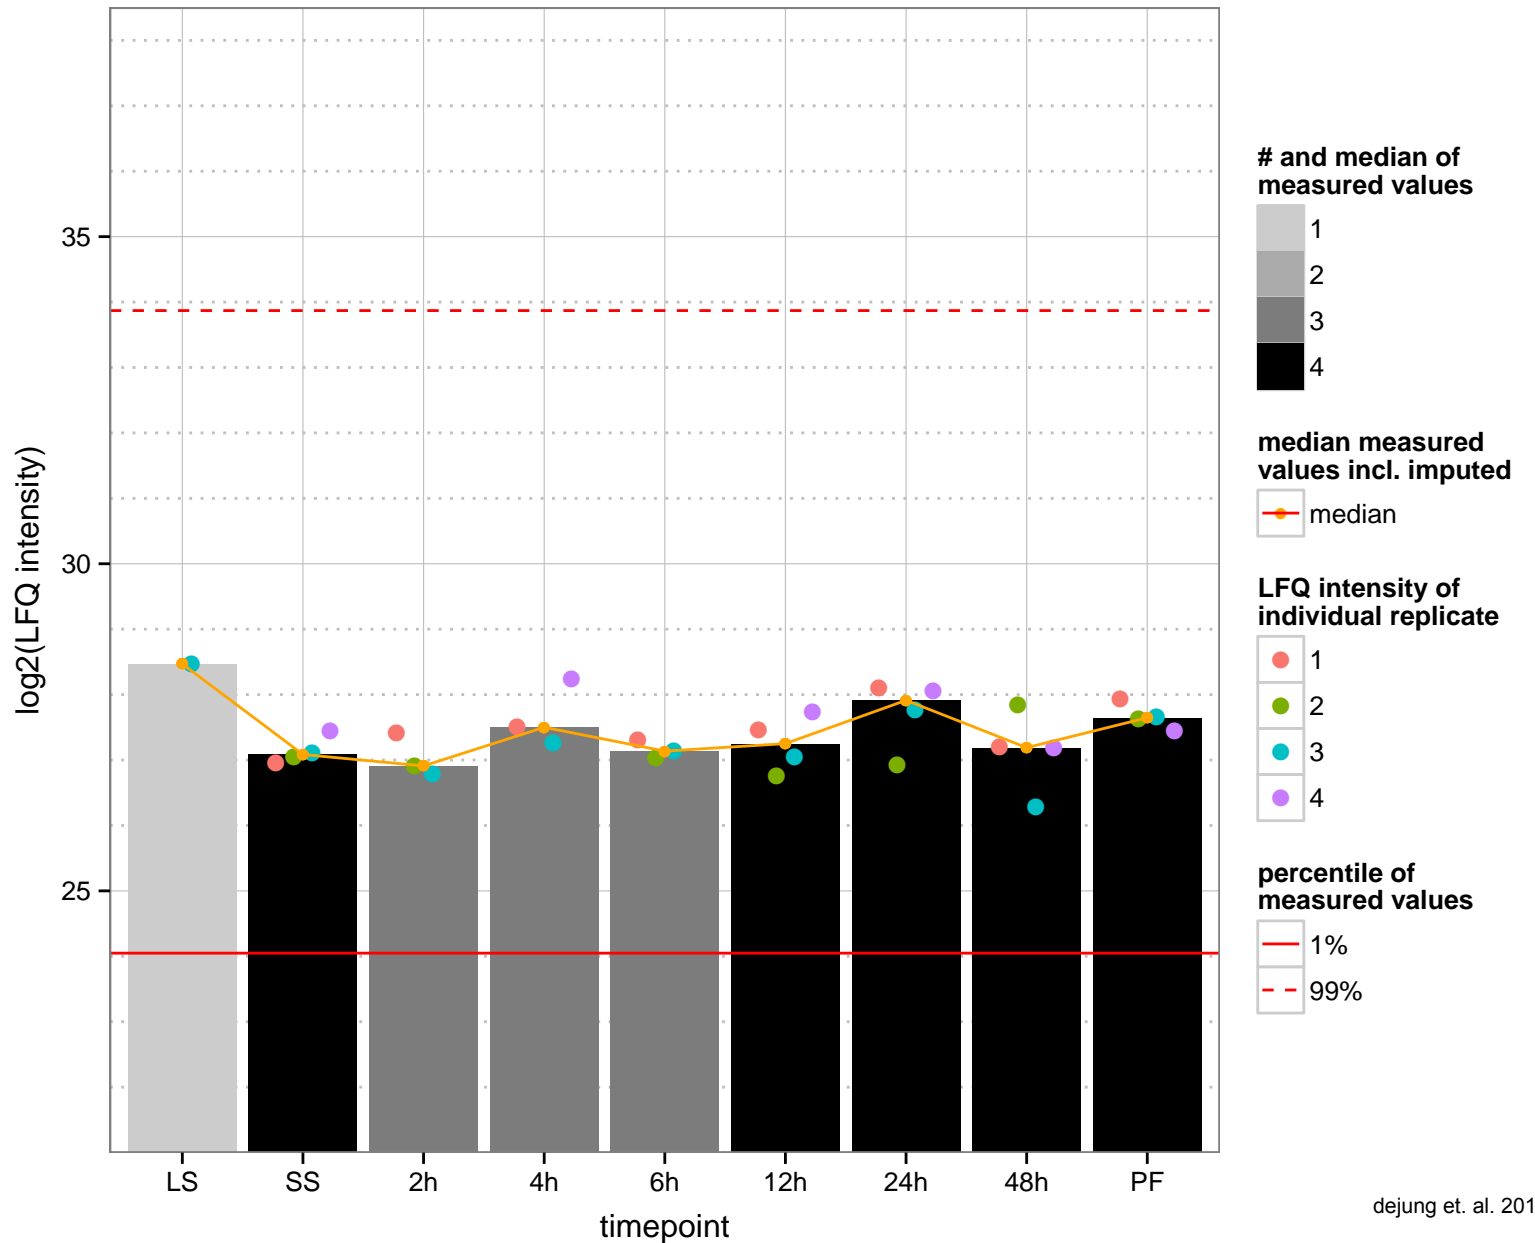

32 kDa ER-associated protein (ERAP32)  
 Tb927.11.10870  
 AGOF: null  
 AGOC: endoplasmic reticulum  
 AGOP: null  
 PGO: null  
 PGOC: null  
 PGOP: null

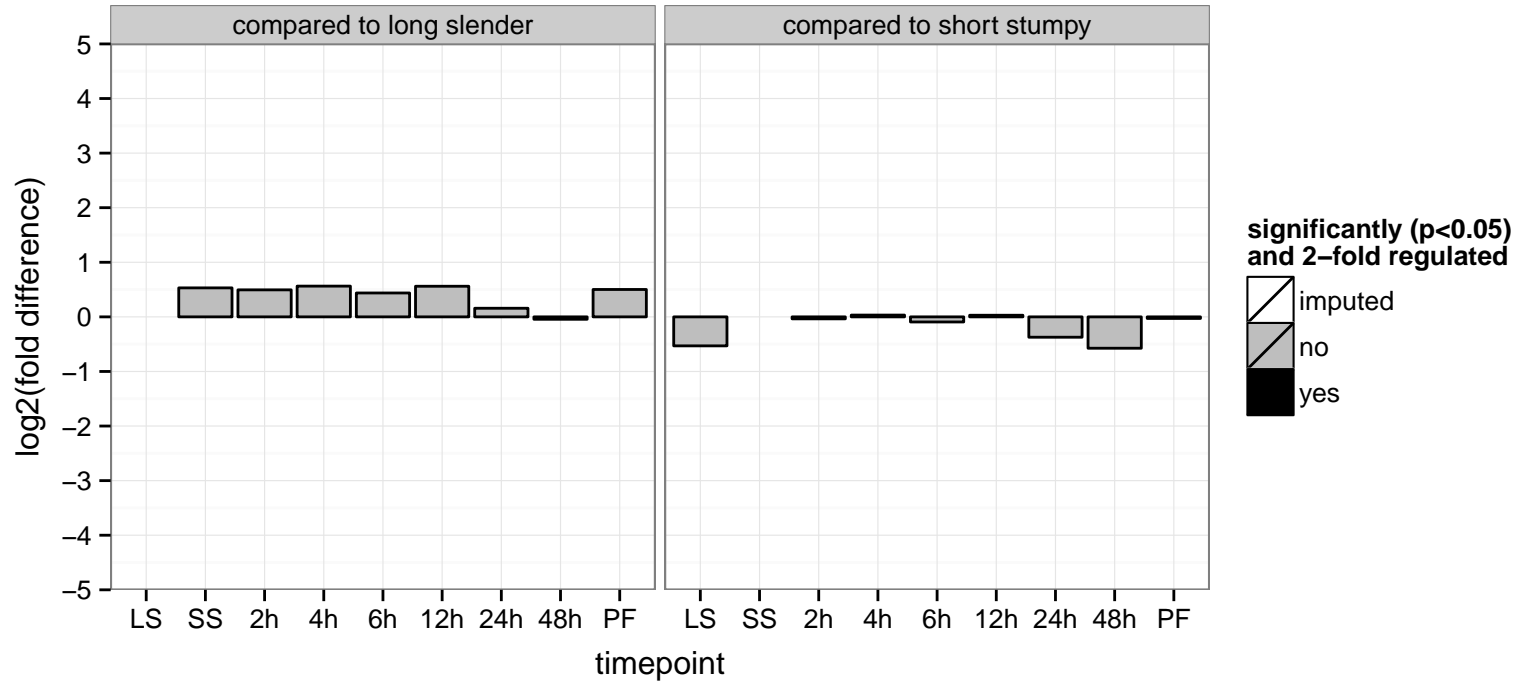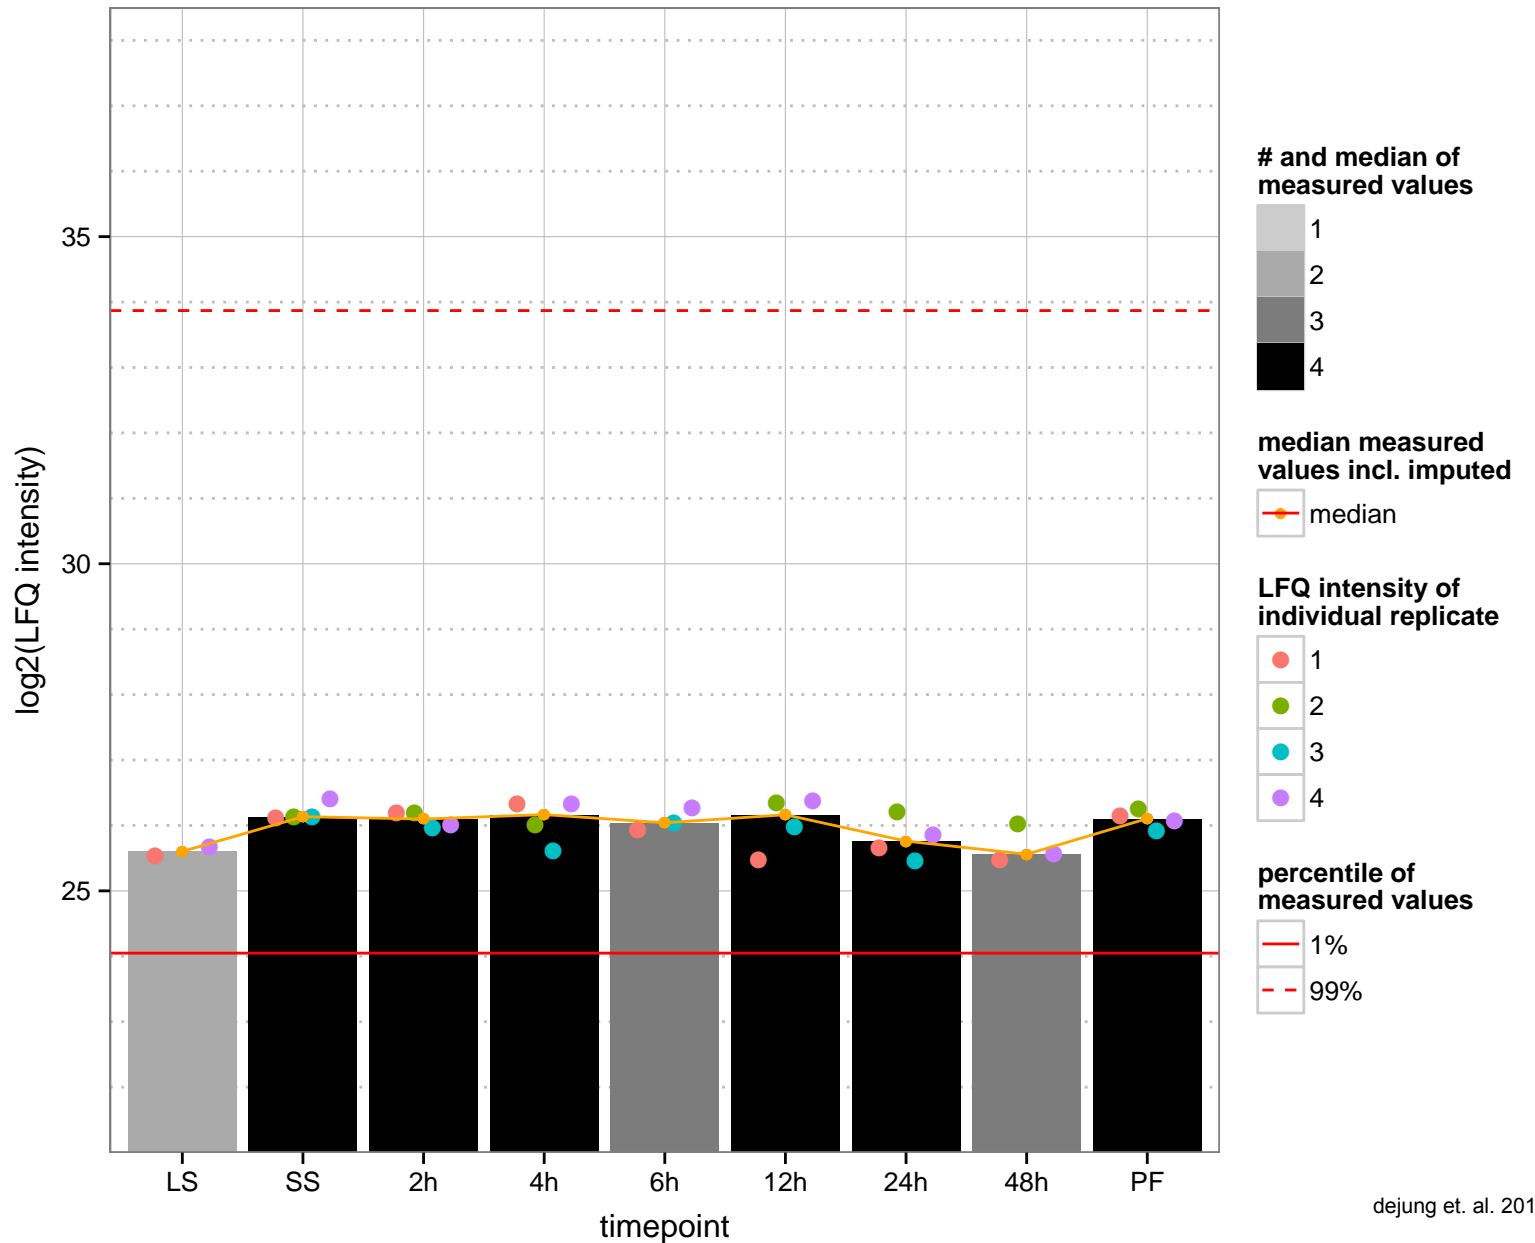



calpain-like protein, putative, cytoskeleton associated protein, calpain, cysteine peptidase, Clan CA, family C2  
 Tb927.11.1090  
 AGOF: calcium-dependent cysteine-type endopeptidase activity  
 AGOC: intracellular, cytoplasm  
 AGOP: proteolysis  
 PGOF: calcium-dependent cysteine-type endopeptidase activity, null  
 PGO: intracellular, null  
 PGOP: proteolysis, null

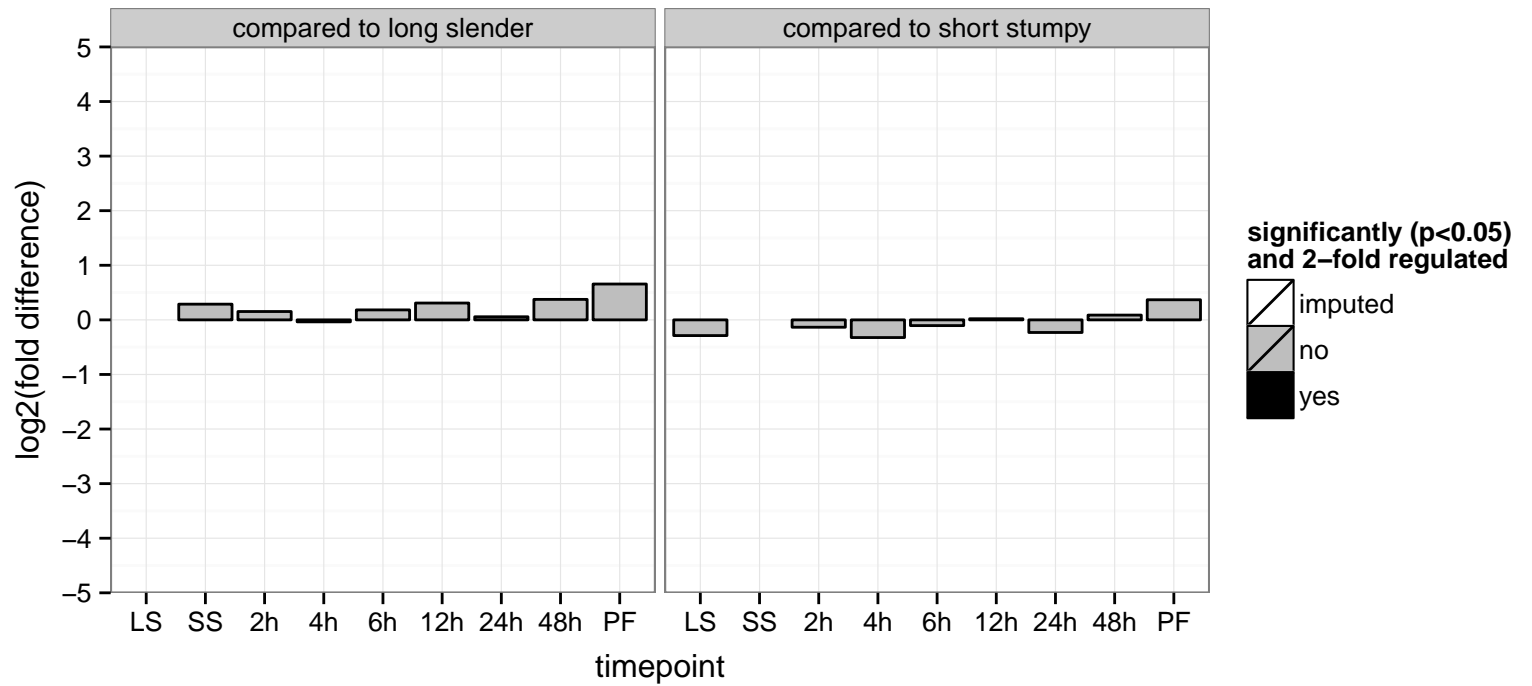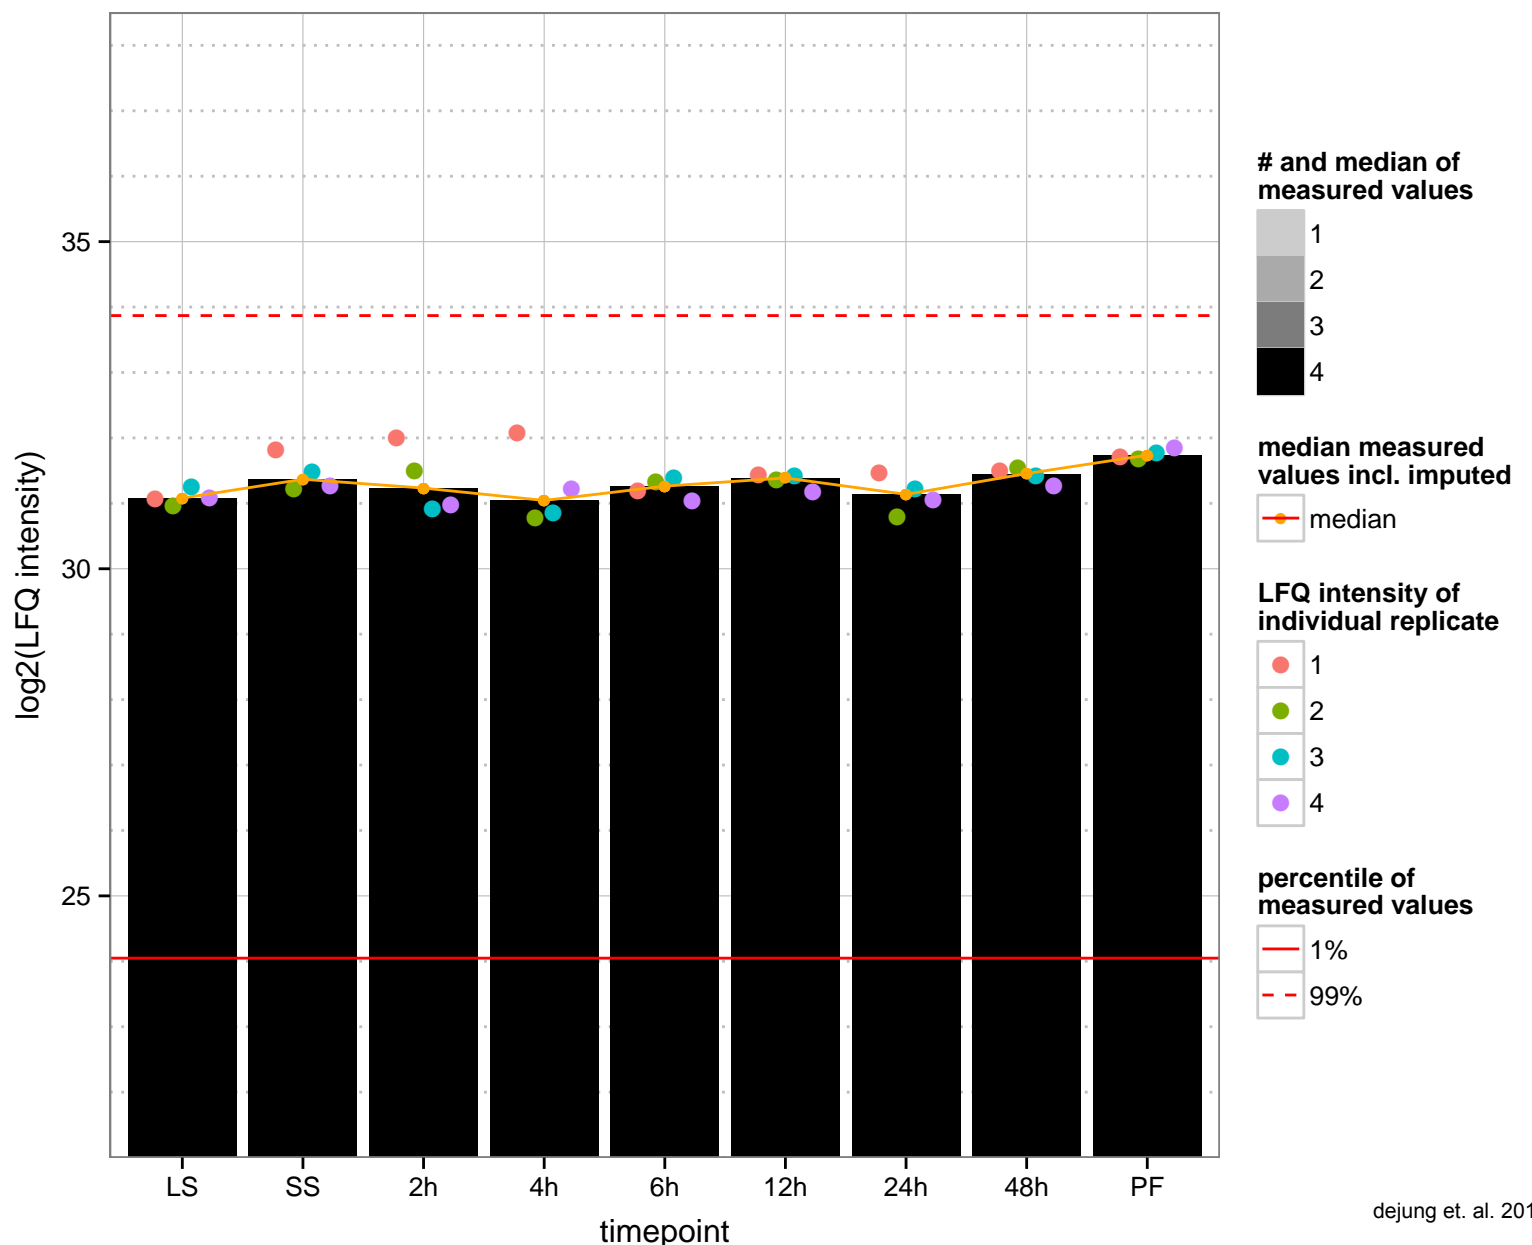

delta tubulin, tubulin delta chain (TUBD1)

Tb927.11.10930

AGOF: GTP binding, structural molecule activity

AGOC: microtubule, protein complex

AGOP: cell growth, microtubule-based movement, protein polymerization

PGOF: null

PGOC: protein complex

PGOP: protein polymerization

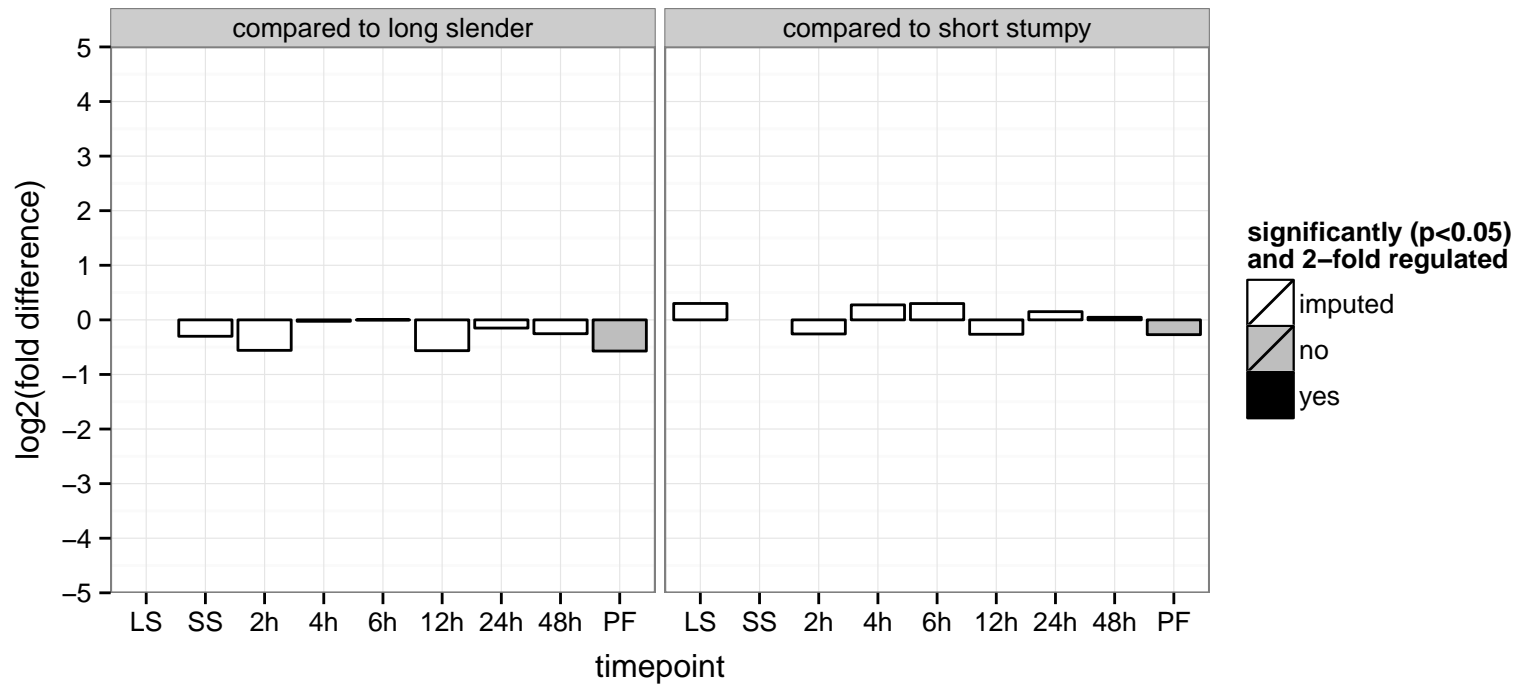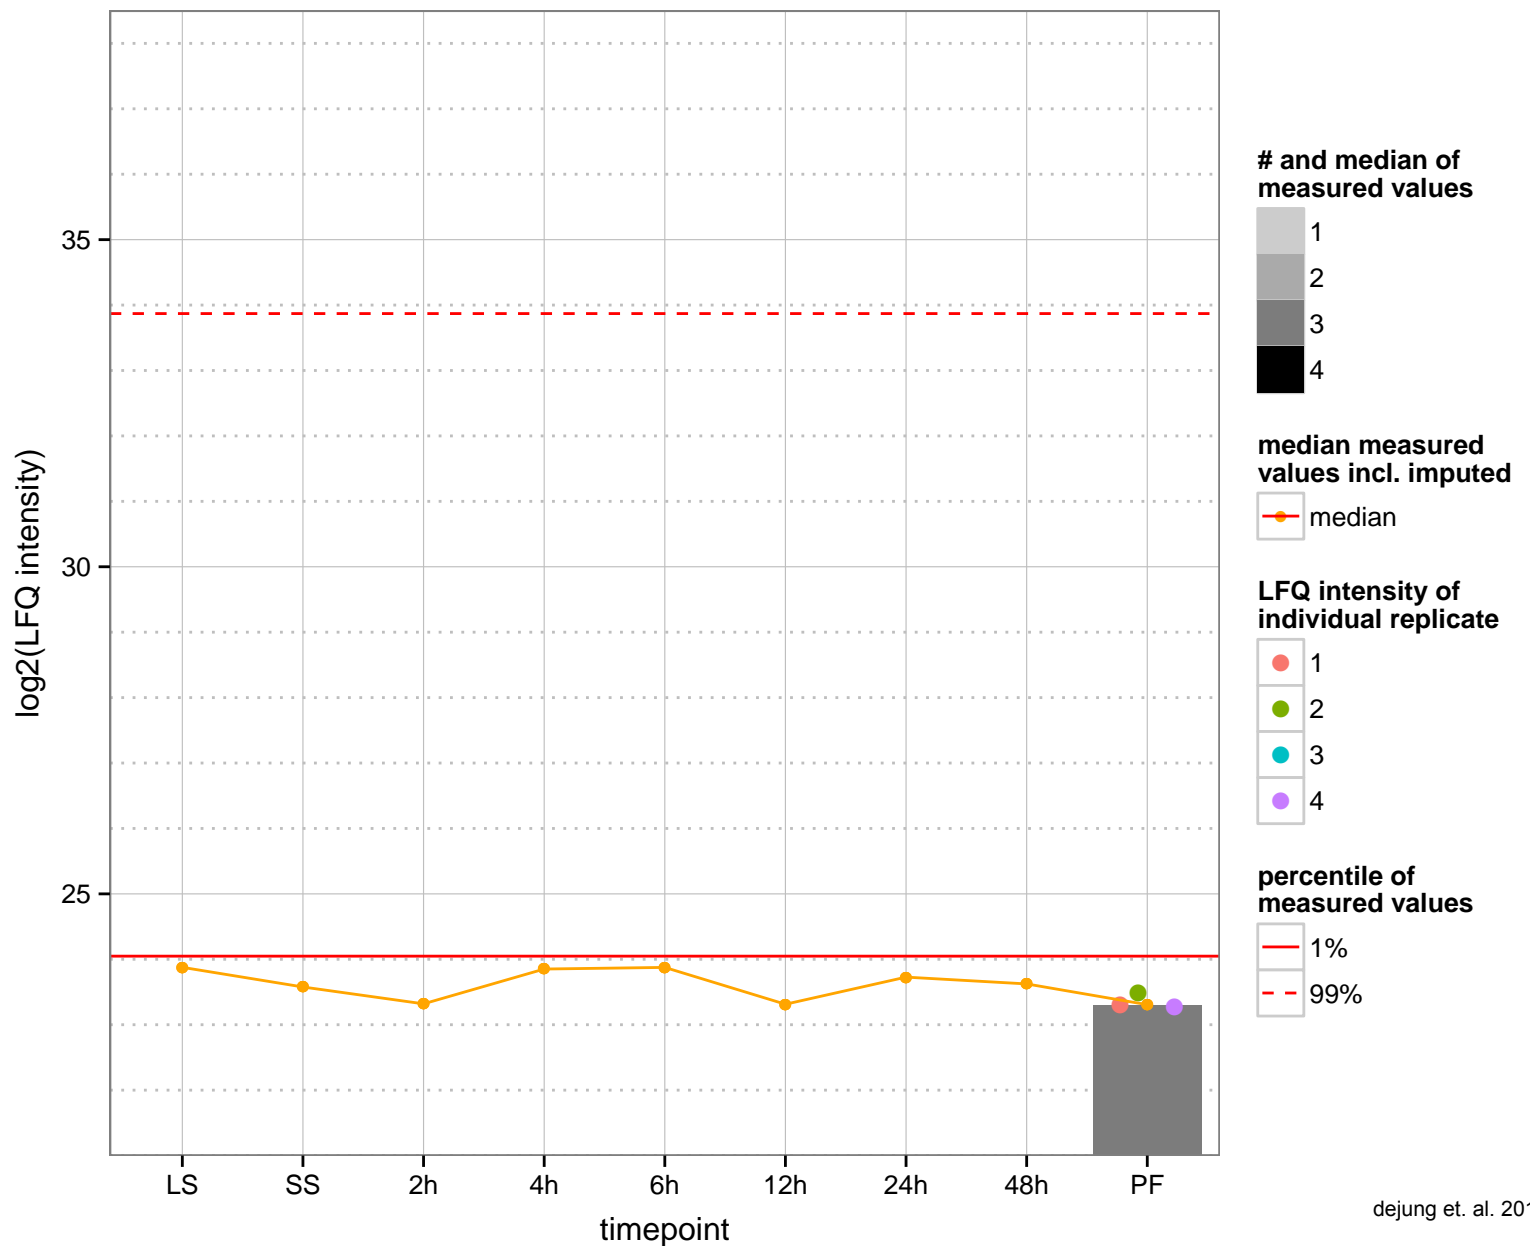

translation initiation factor 2 subunit, putative  
 Tb927.11.10990  
 AGOF: GTP binding, translation initiation factor activity  
 AGOC: eukaryotic translation initiation factor 2B complex  
 AGOP: cellular biosynthetic process, translational initiation  
 PGO: null  
 PGOC: null  
 PGOP: cellular biosynthetic process, cellular metabolic process

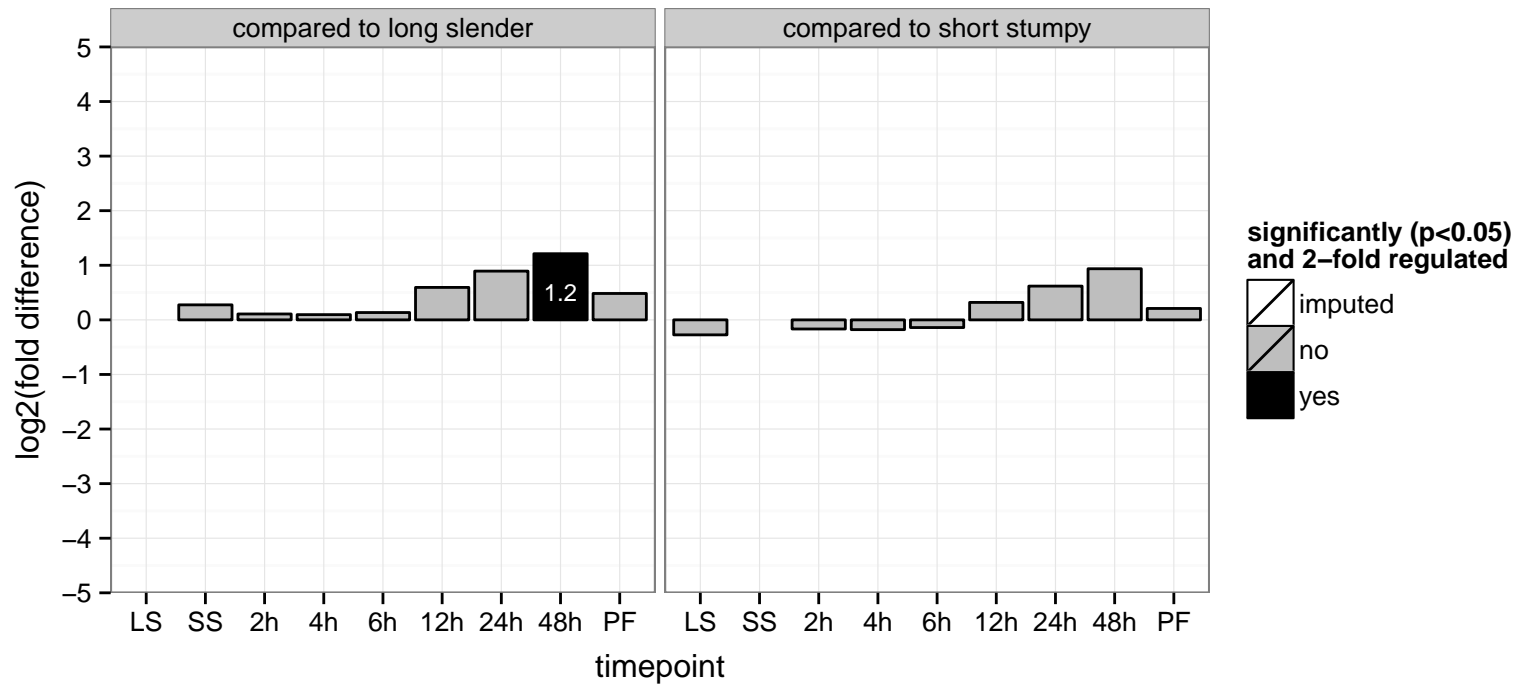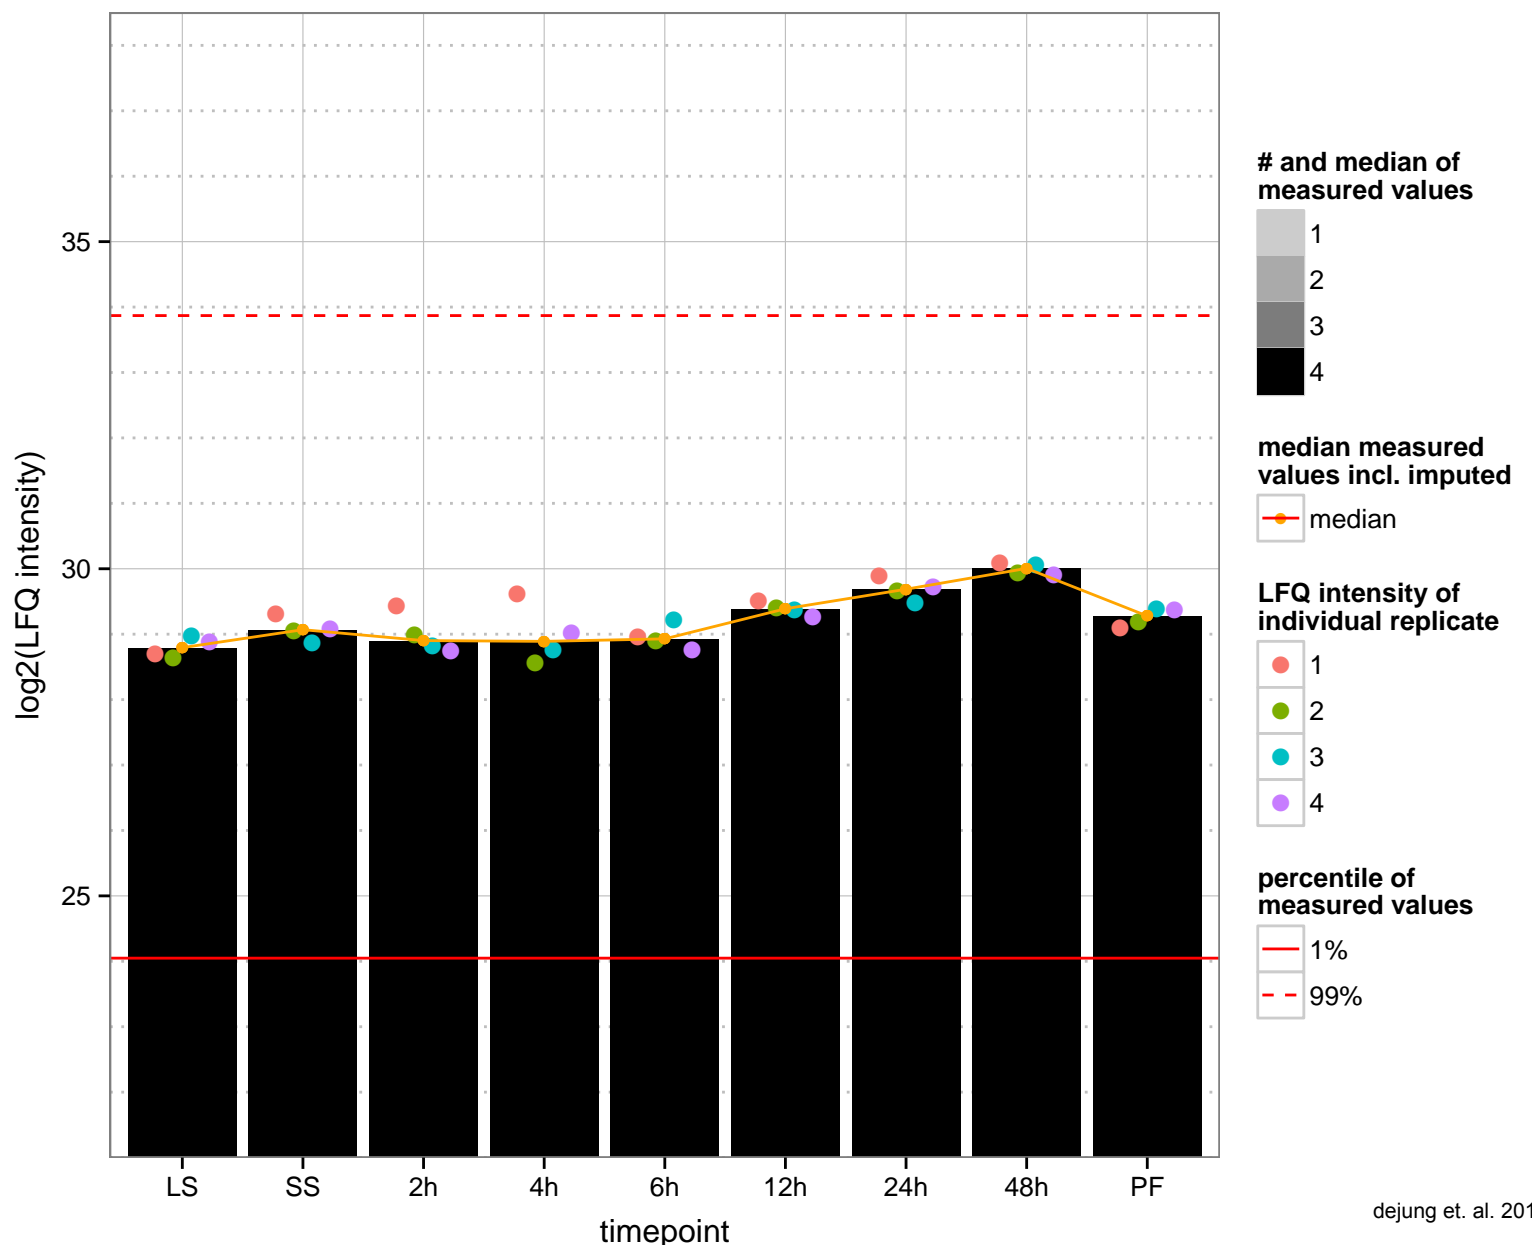

hypothetical protein, conserved  
 Tb927.11.11000  
 AGOF: null  
 AGOC: null  
 AGOP: null  
 PGO: protein binding  
 PGO: null  
 PGO: null

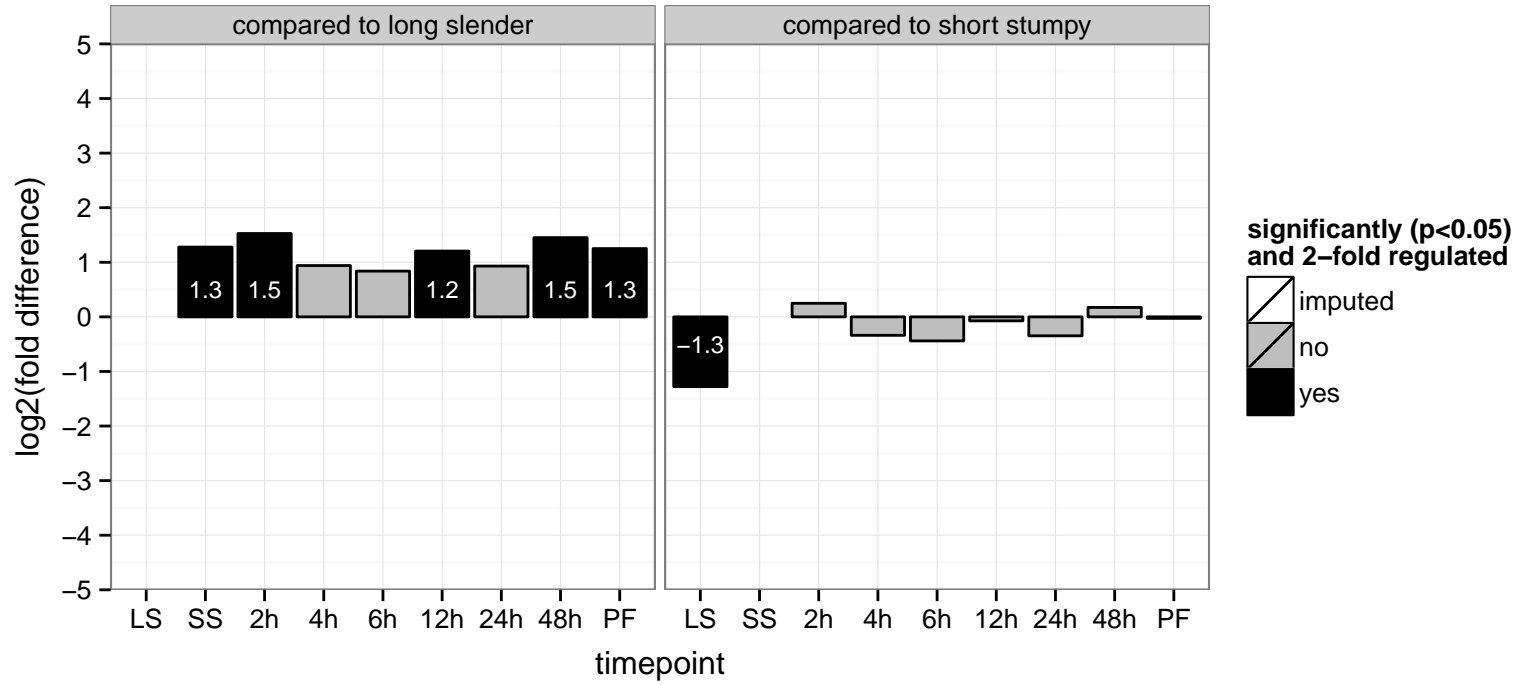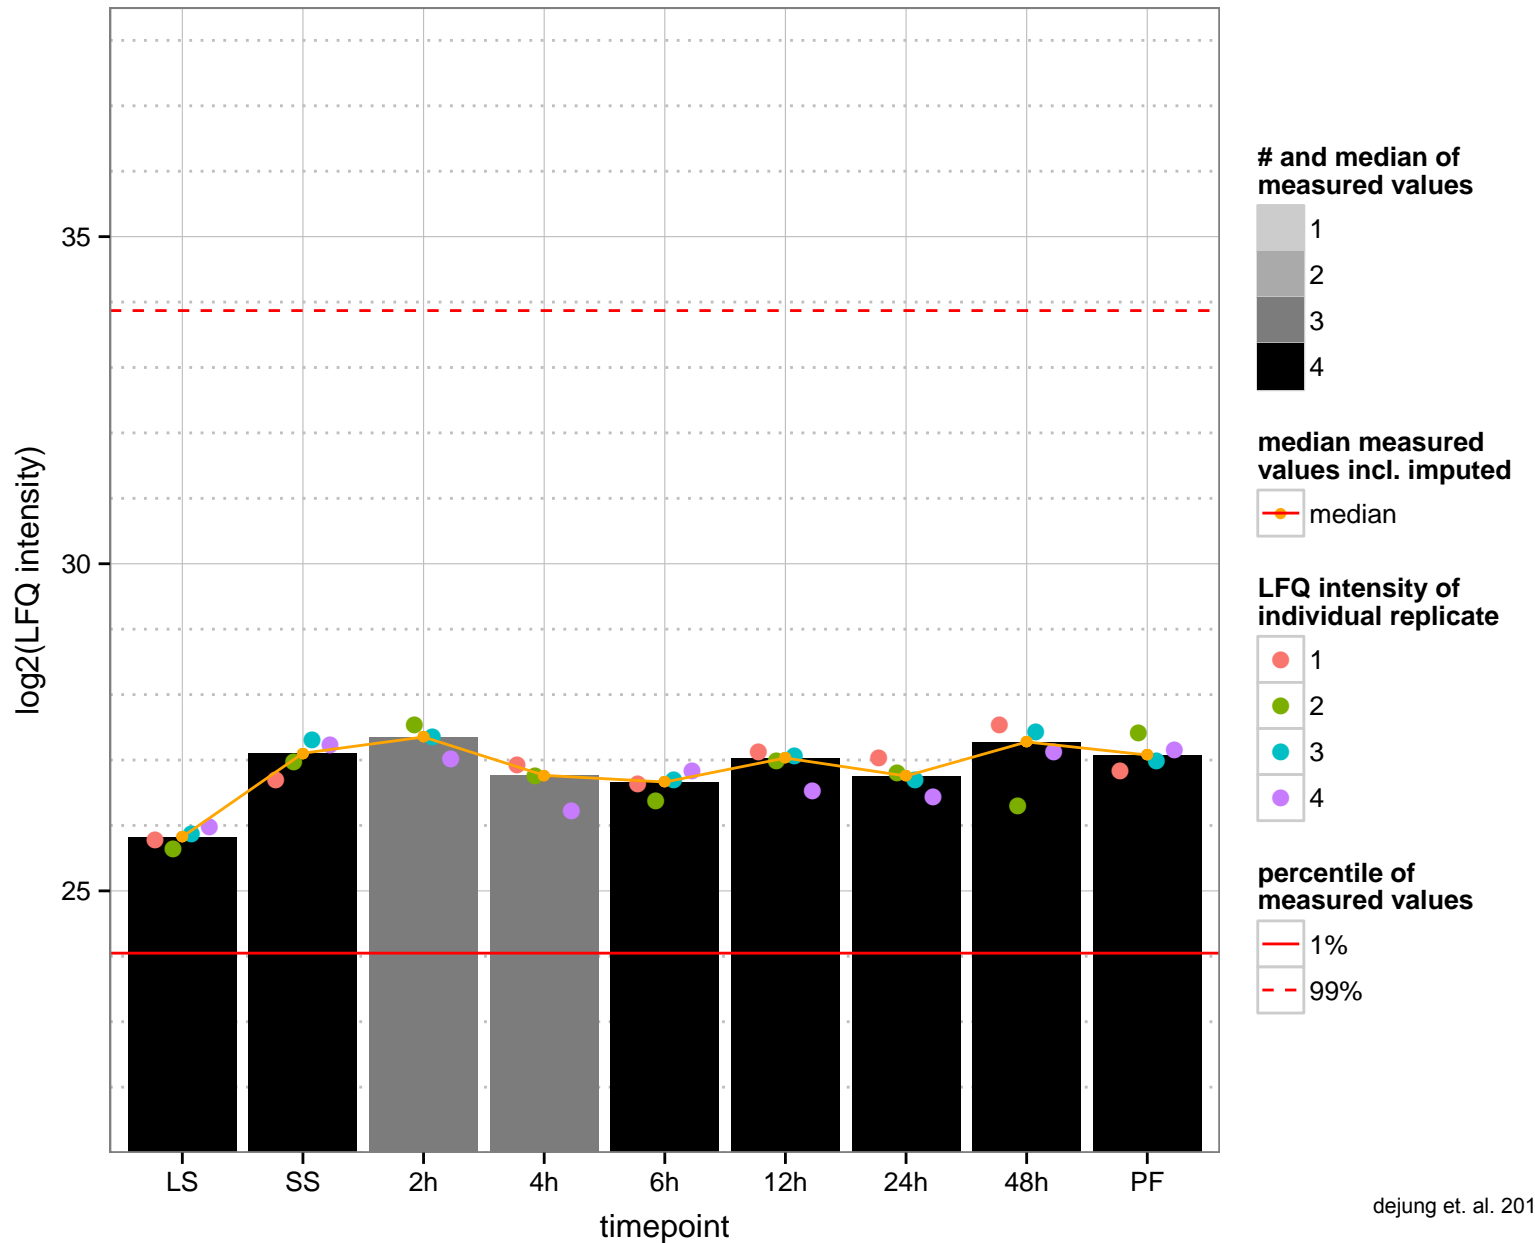

hypothetical protein, conserved  
 Tb927.11.11010  
 AGOF: null  
 AGOC: null  
 AGOP: null  
 PGO: null  
 PGOC: null  
 PGOP: null

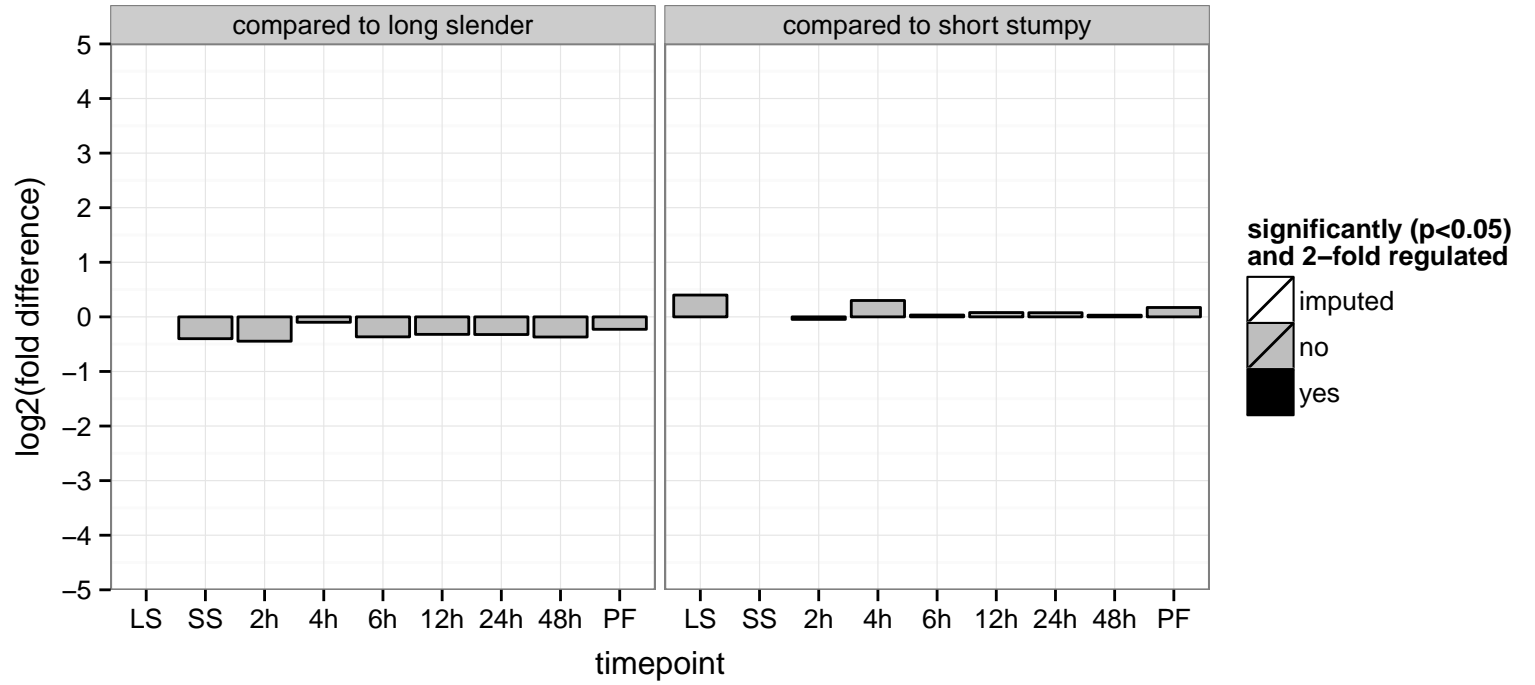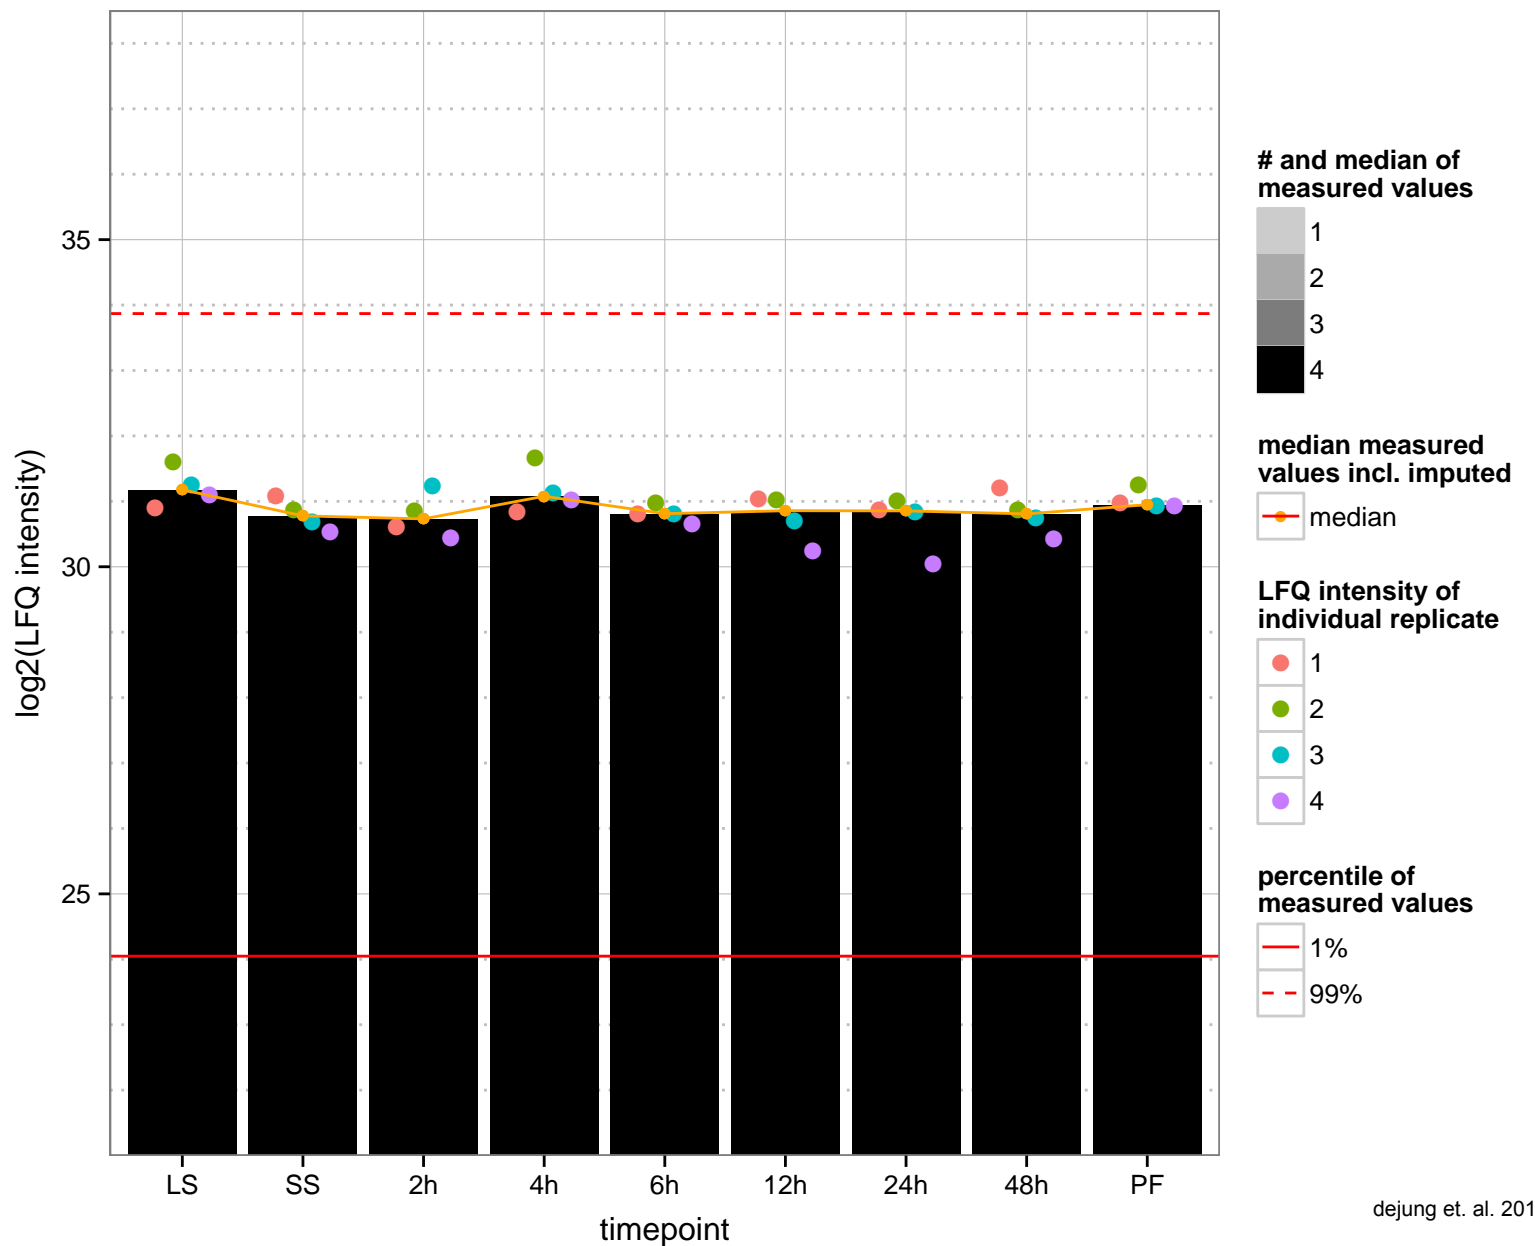

Nucleoporin (TbNup140)  
 Tb927.11.11090  
 AGOF: null  
 AGOC: nuclear pore  
 AGOP: null  
 PGOF: protein binding  
 PGO: null  
 PGOP: null

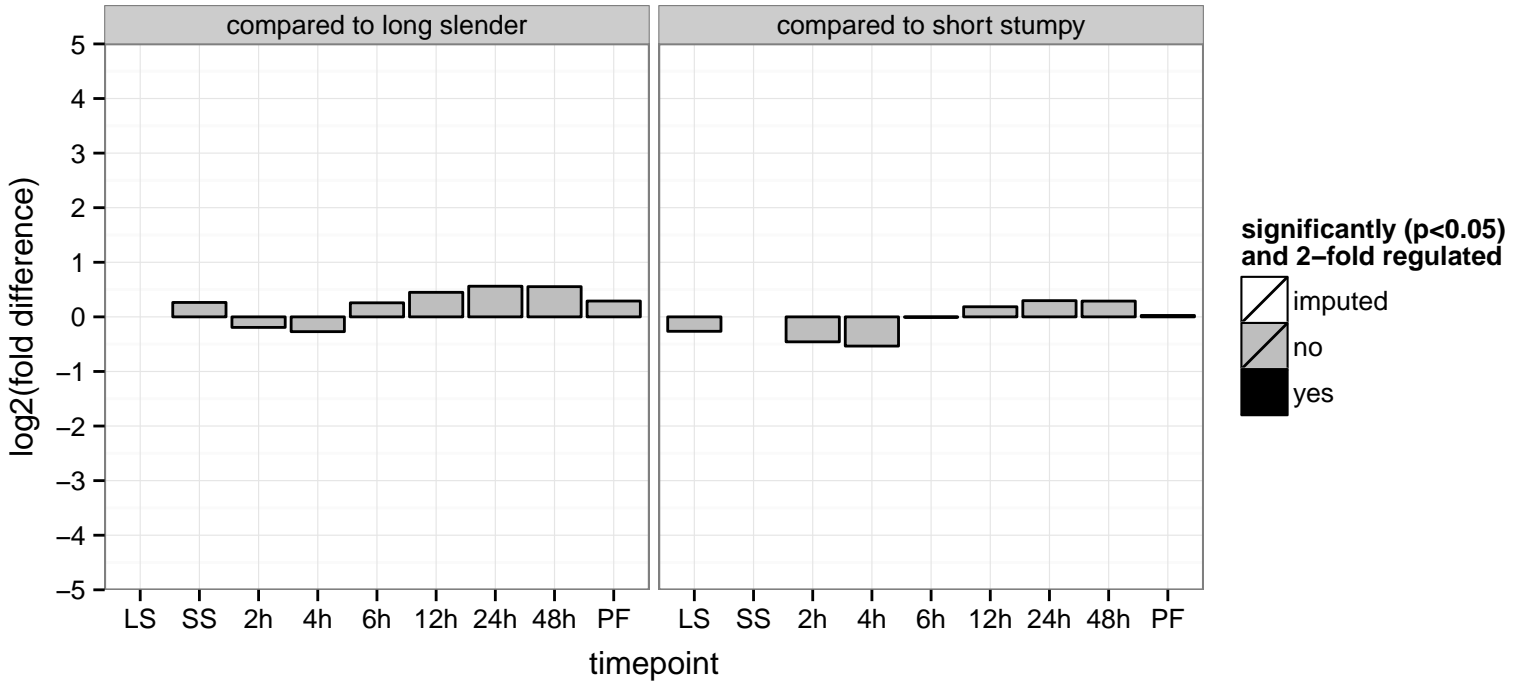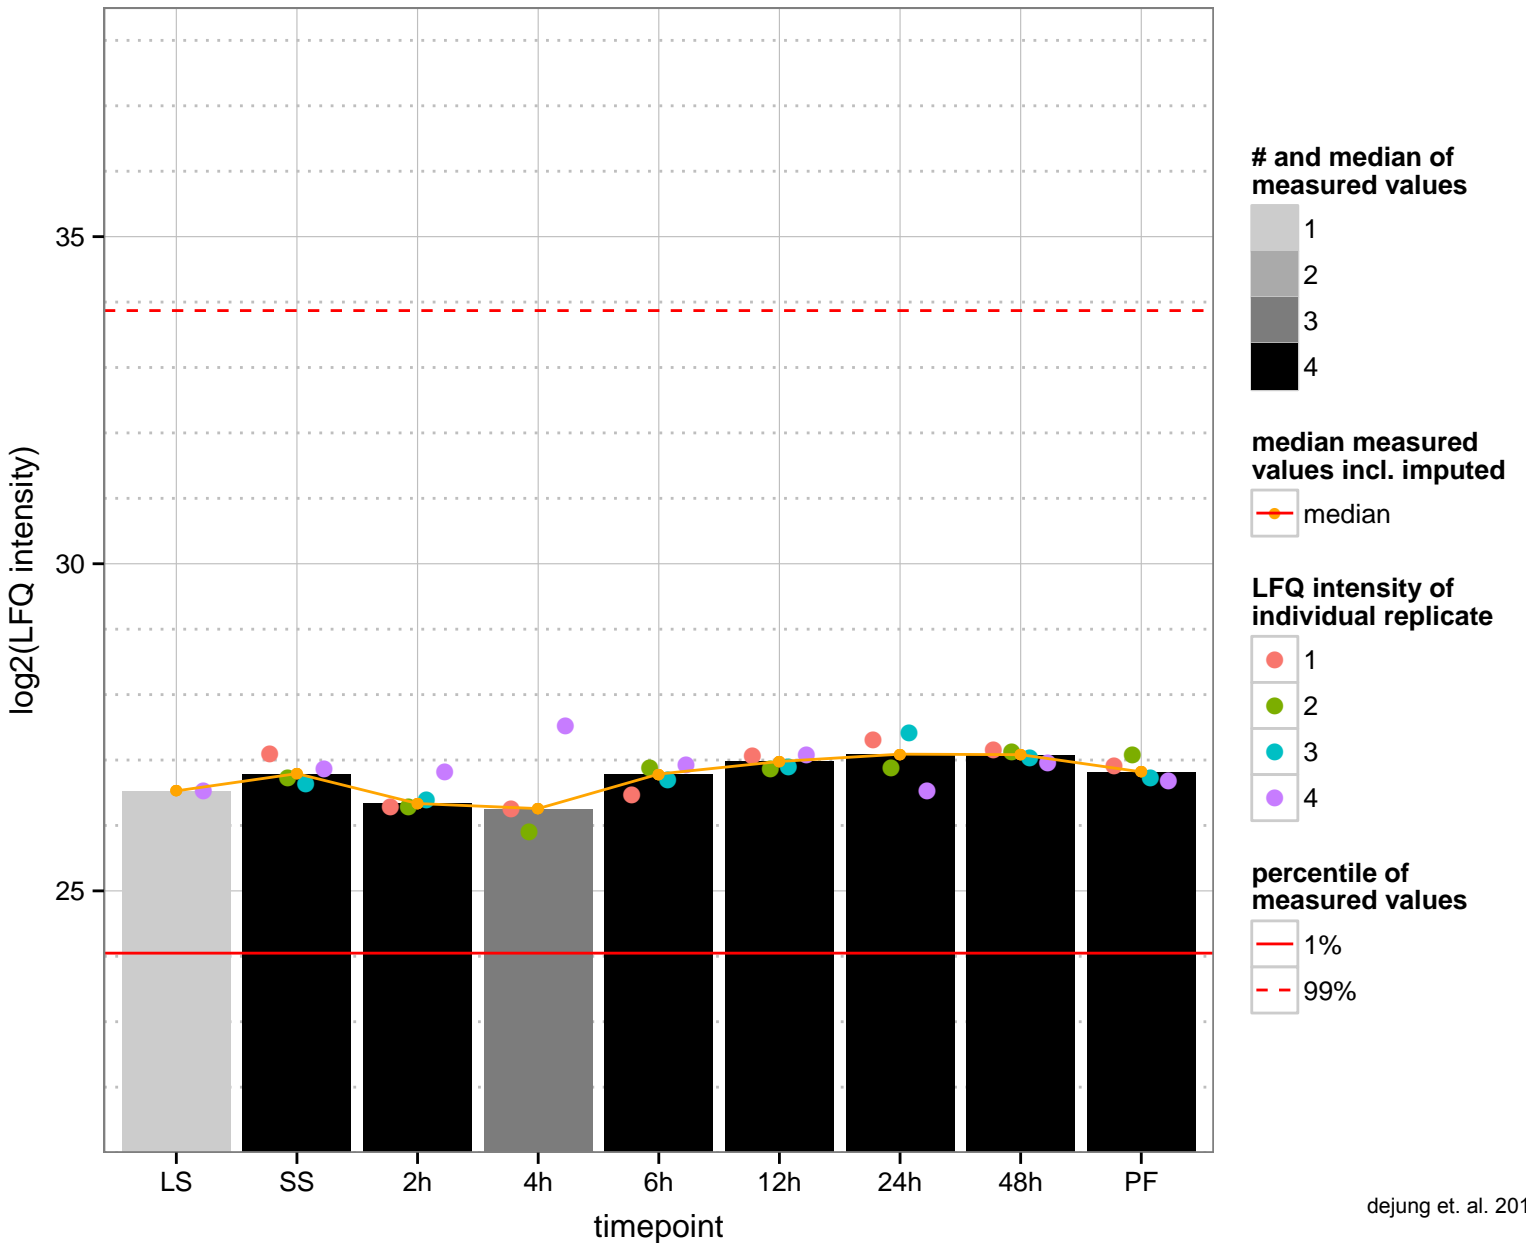

calpain-like cysteine peptidase, putative, calpain  
 Tb927.11.1110  
 AGOF: null, calcium-dependent cysteine-type endopeptidase activity  
 AGOC: null, intracellular  
 AGOP: null, proteolysis  
 PGOF: null, calcium-dependent cysteine-type endopeptidase activity  
 PGOC: null, intracellular  
 PGOP: null, proteolysis

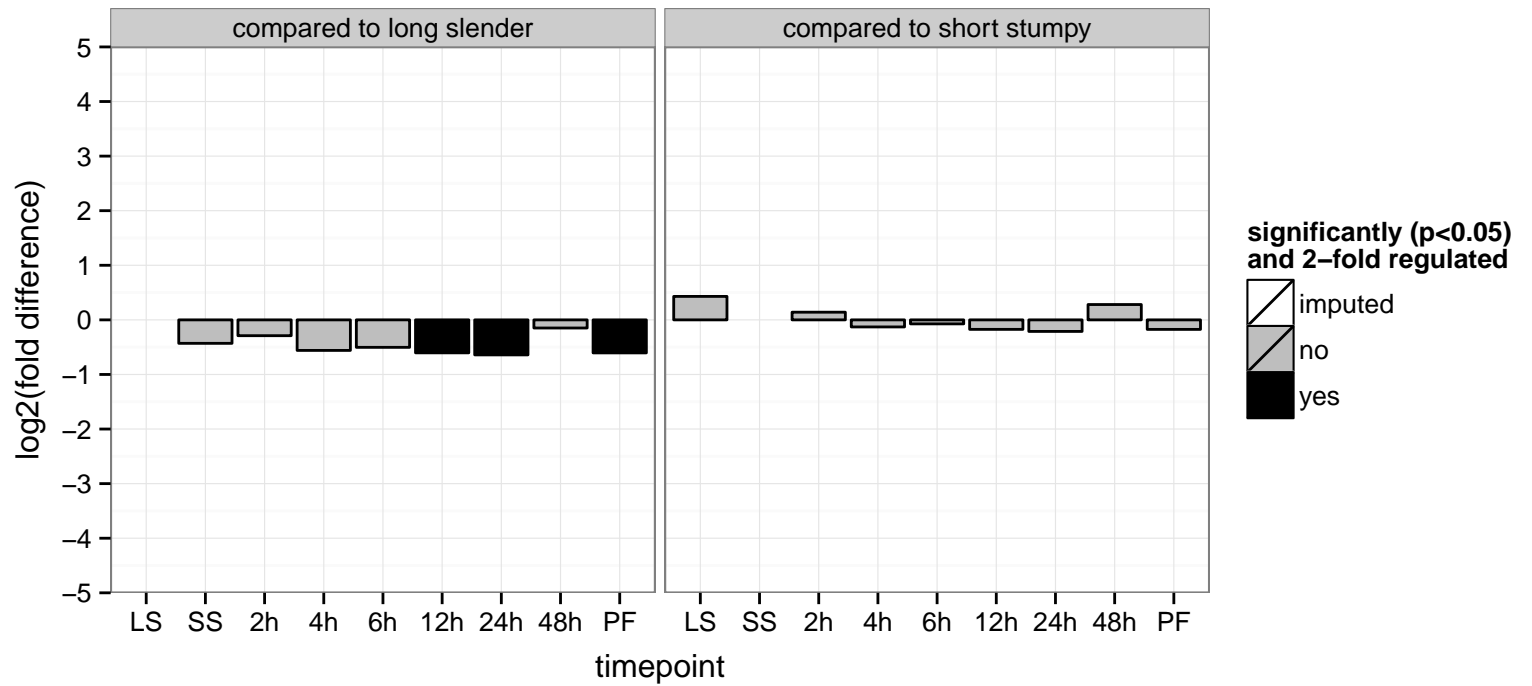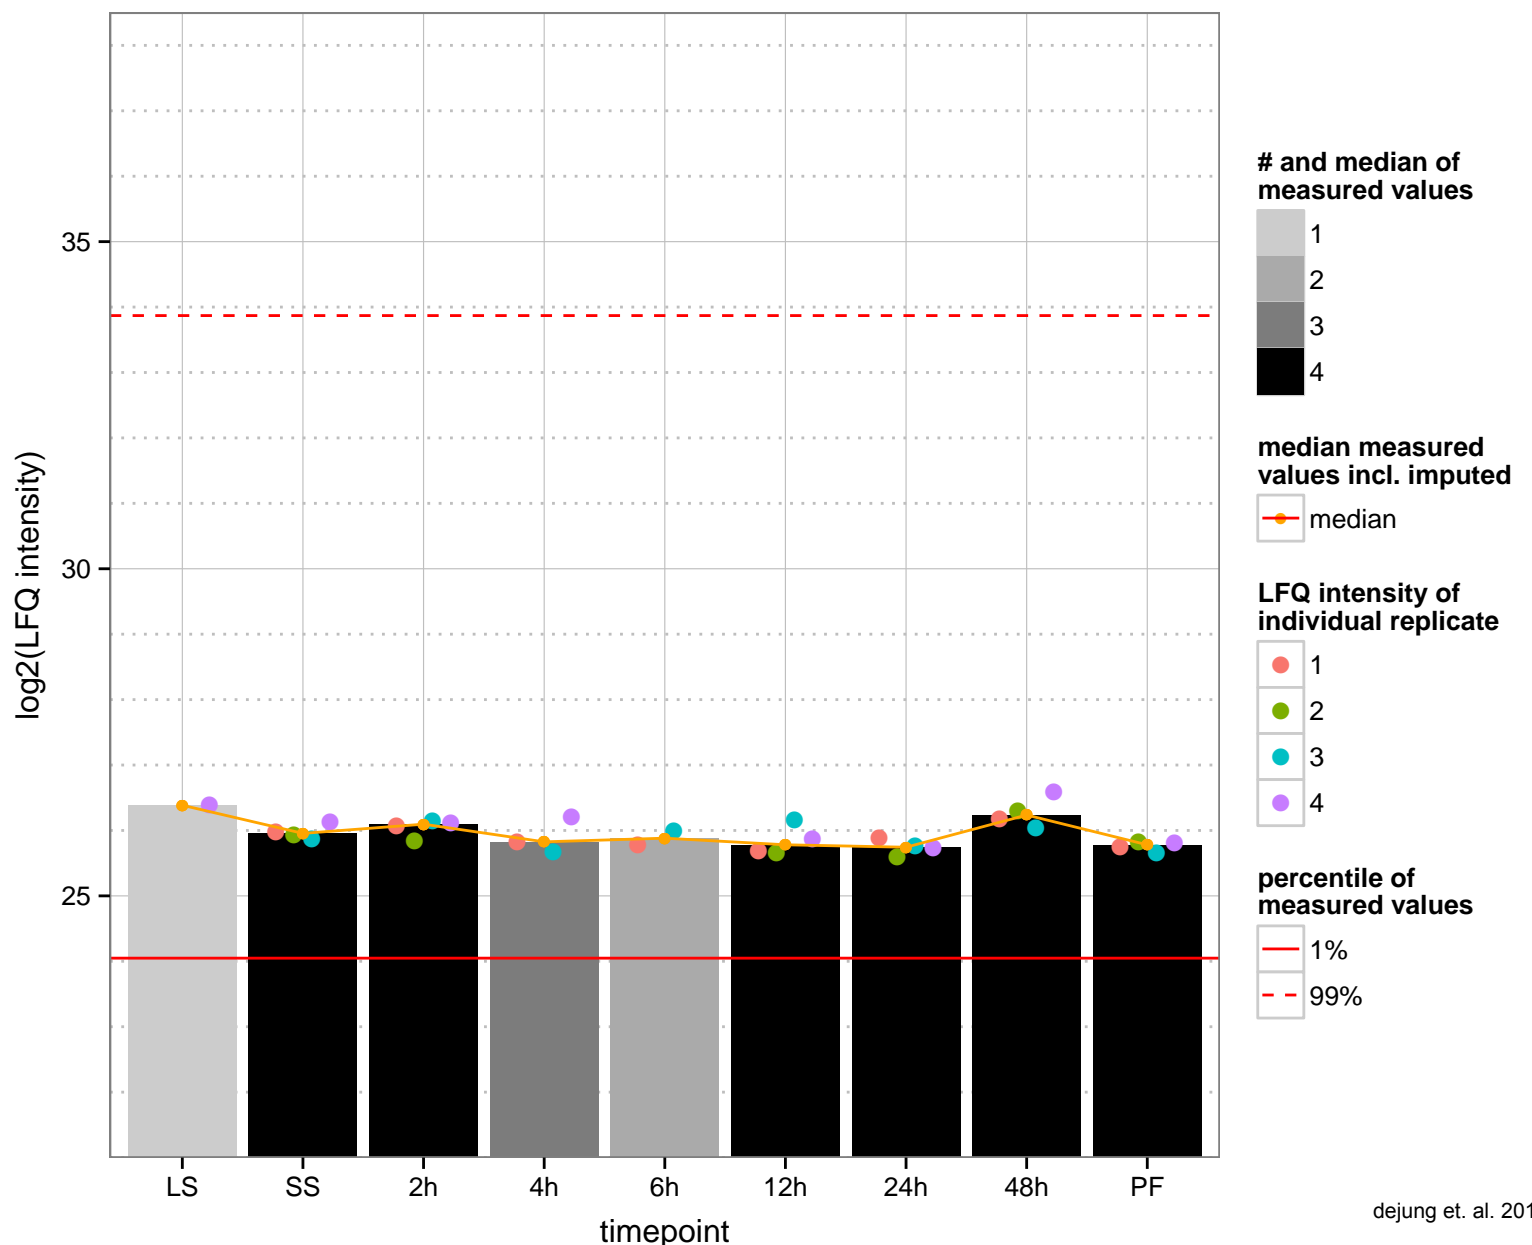

U5 snRNP-specific 40 kDa protein  
 Tb927.11.11150  
 AGOF: pre-mRNA 5'-splice site binding  
 AGOC: cytosol, nucleus  
 AGOP: RNA splicing  
 PGO: protein binding  
 PGO: null  
 PGO: null

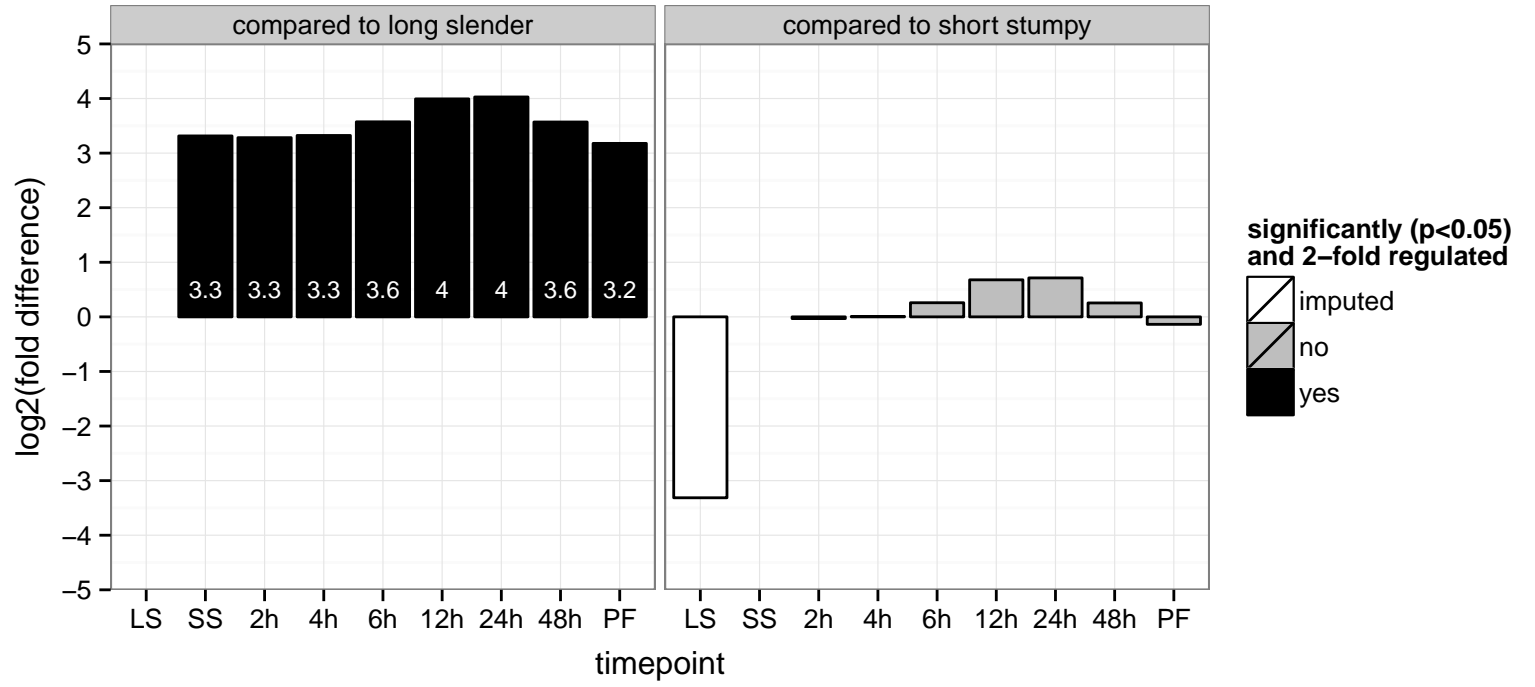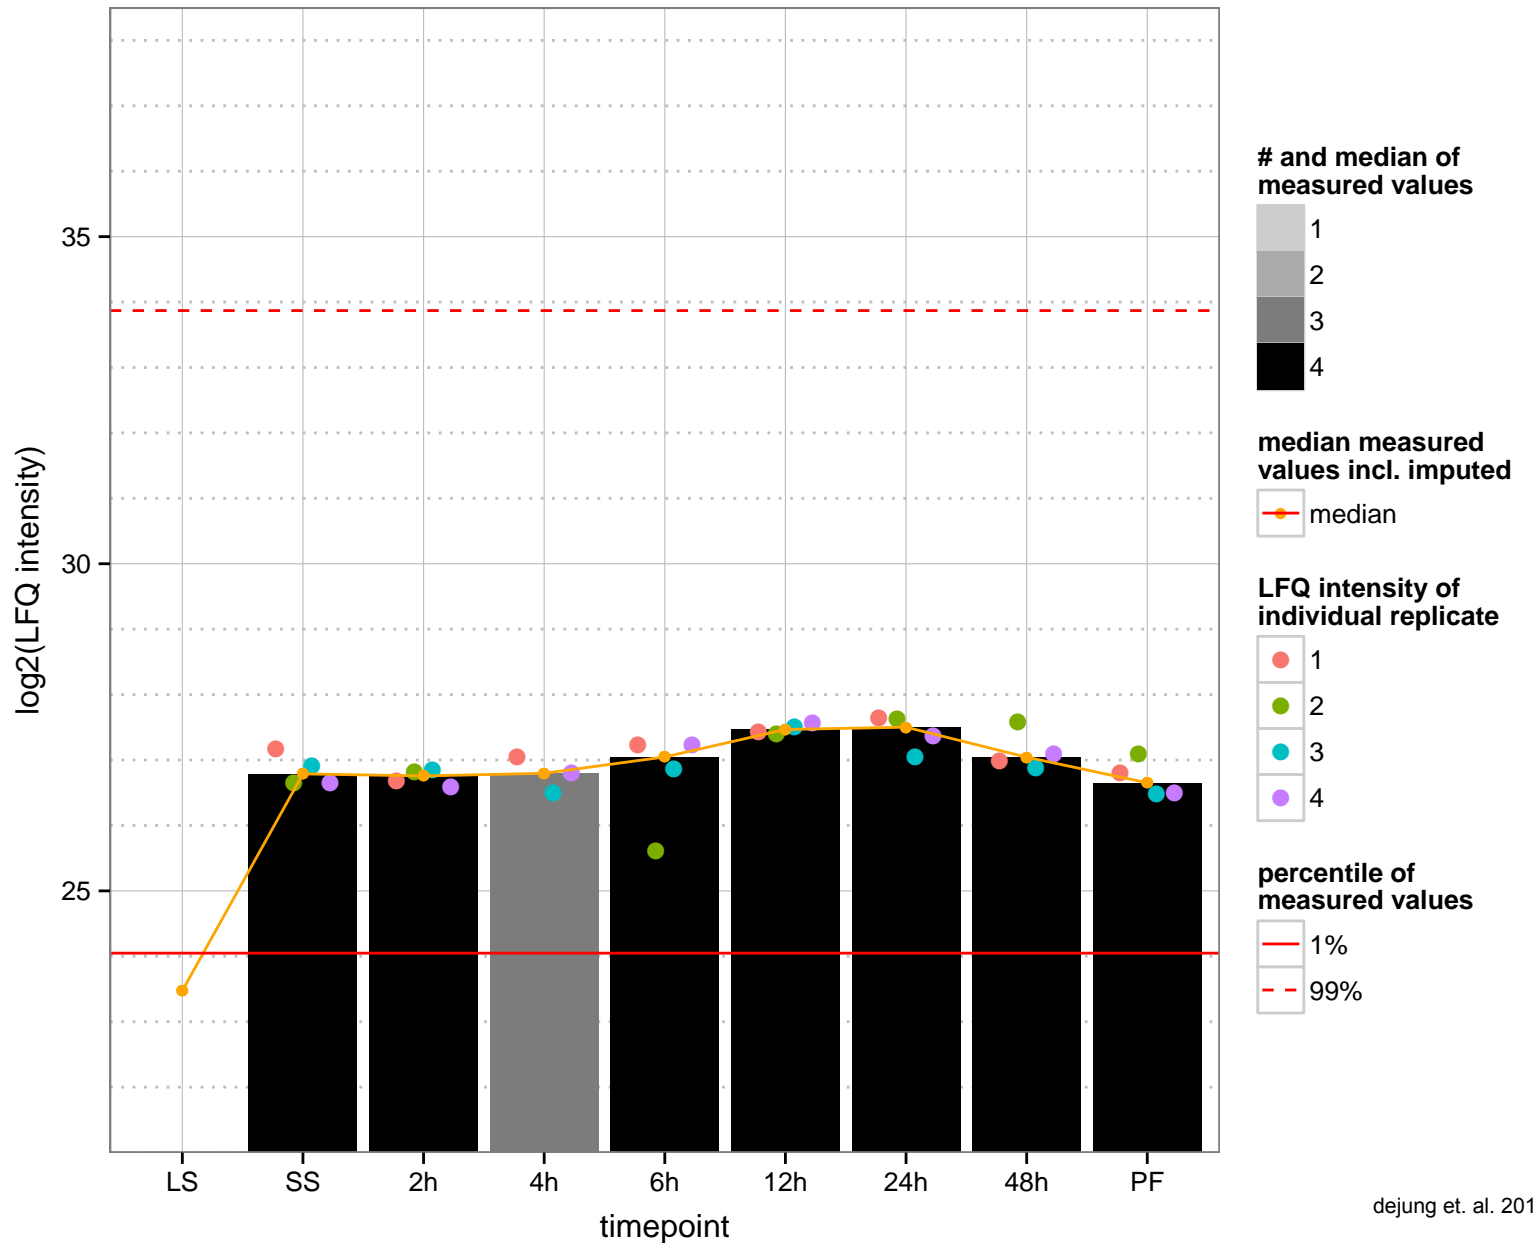



phosphate transporter, putative  
 Tb927.11.11160  
 AGOF: citrate transmembrane transporter activity  
 AGOC: contractile vacuole, integral to membrane  
 AGOP: citrate transport  
 PGO: transporter activity  
 PGOC: membrane  
 PGOP: sodium ion transport, transmembrane transport

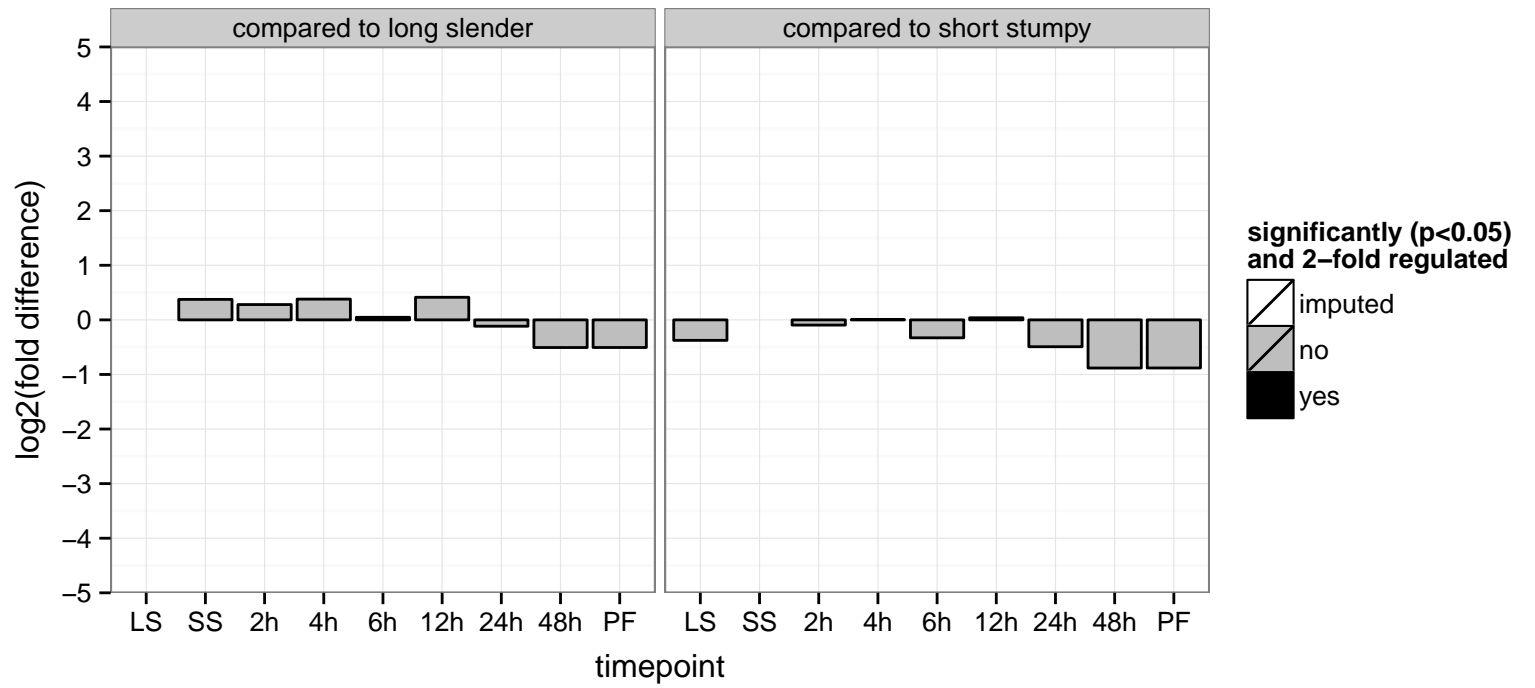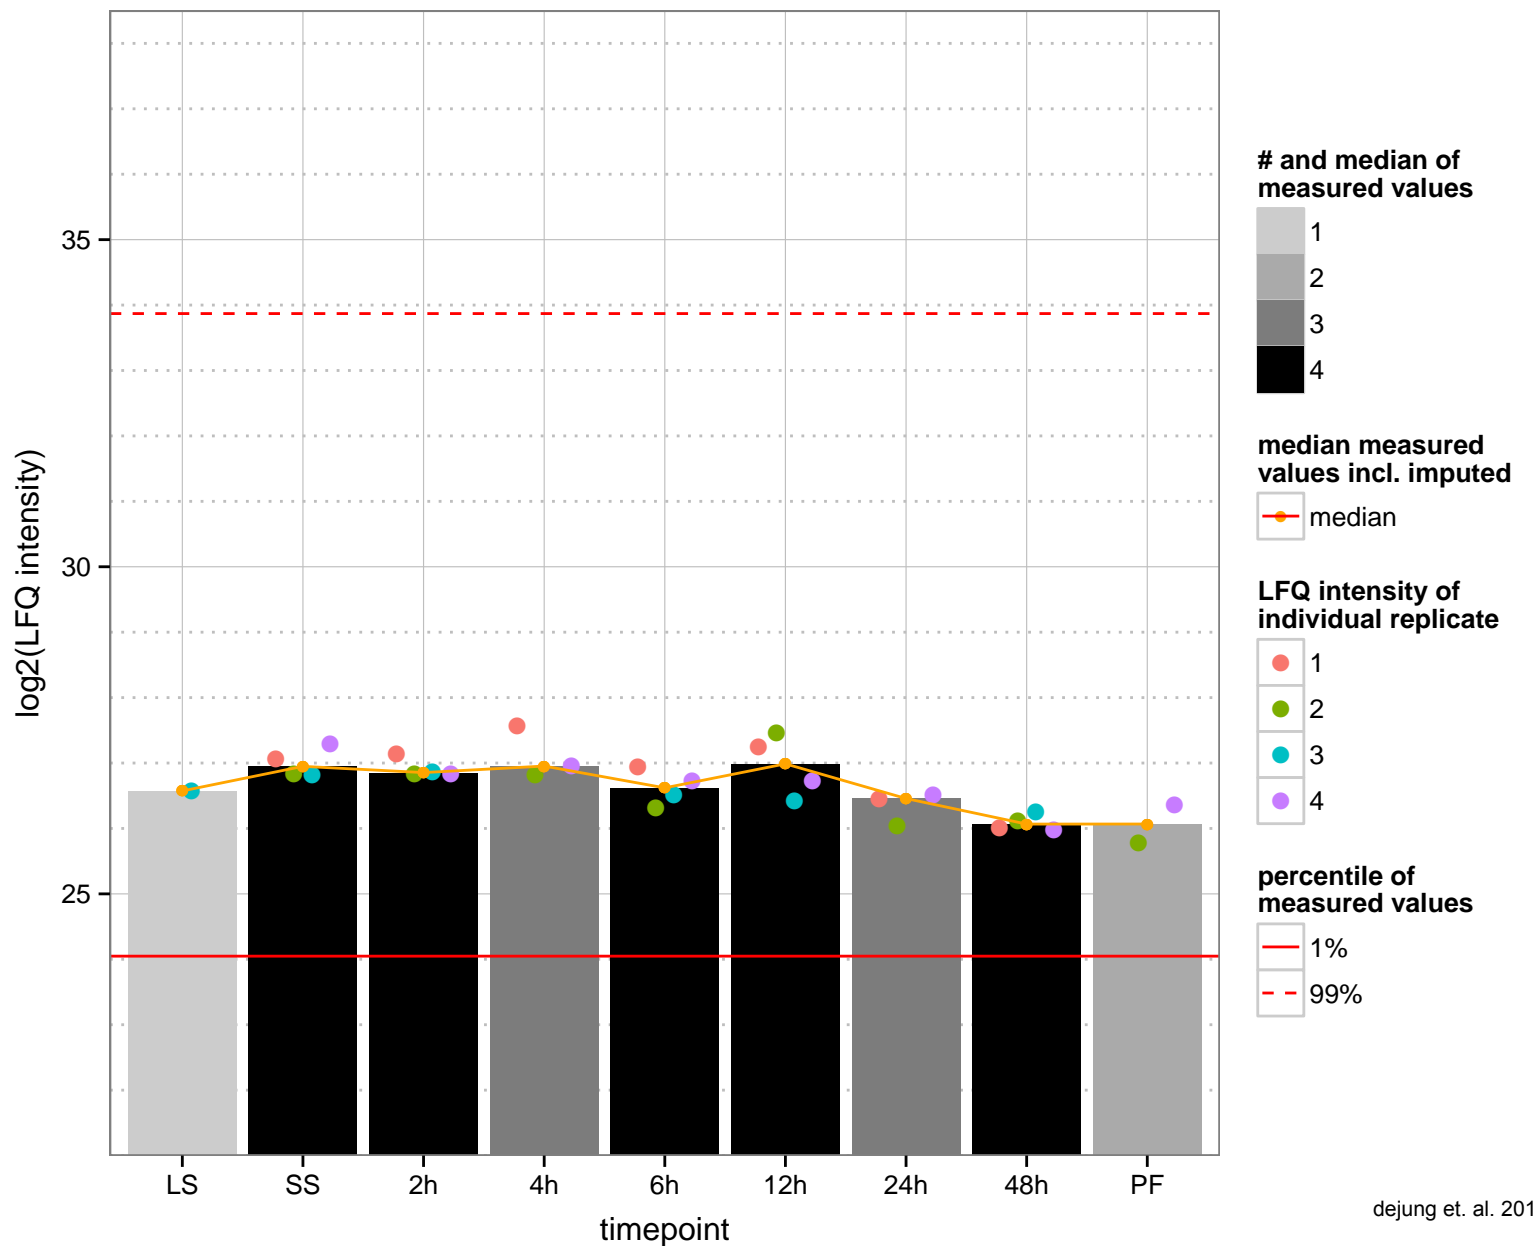

dynein heavy chain, putative

Tb927.11.11220

AGOF: ATP binding, ATPase activity, microtubule motor activity

AGOC: dynein complex

AGOP: microtubule-based movement

PGOF: ATP binding, ATPase activity, microtubule motor activity, nucleoside-triphosphatase activity, nucleotide binding

PGOC: dynein complex

PGOP: microtubule-based movement

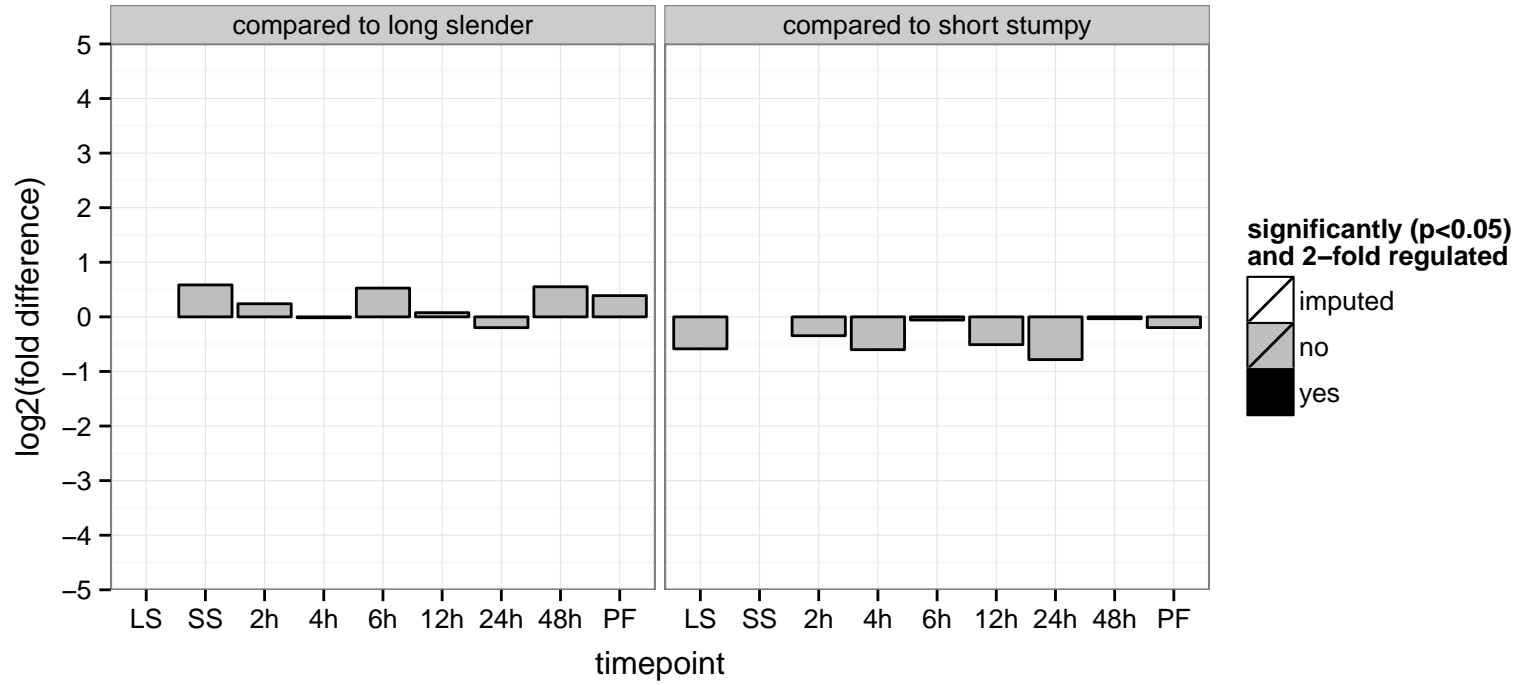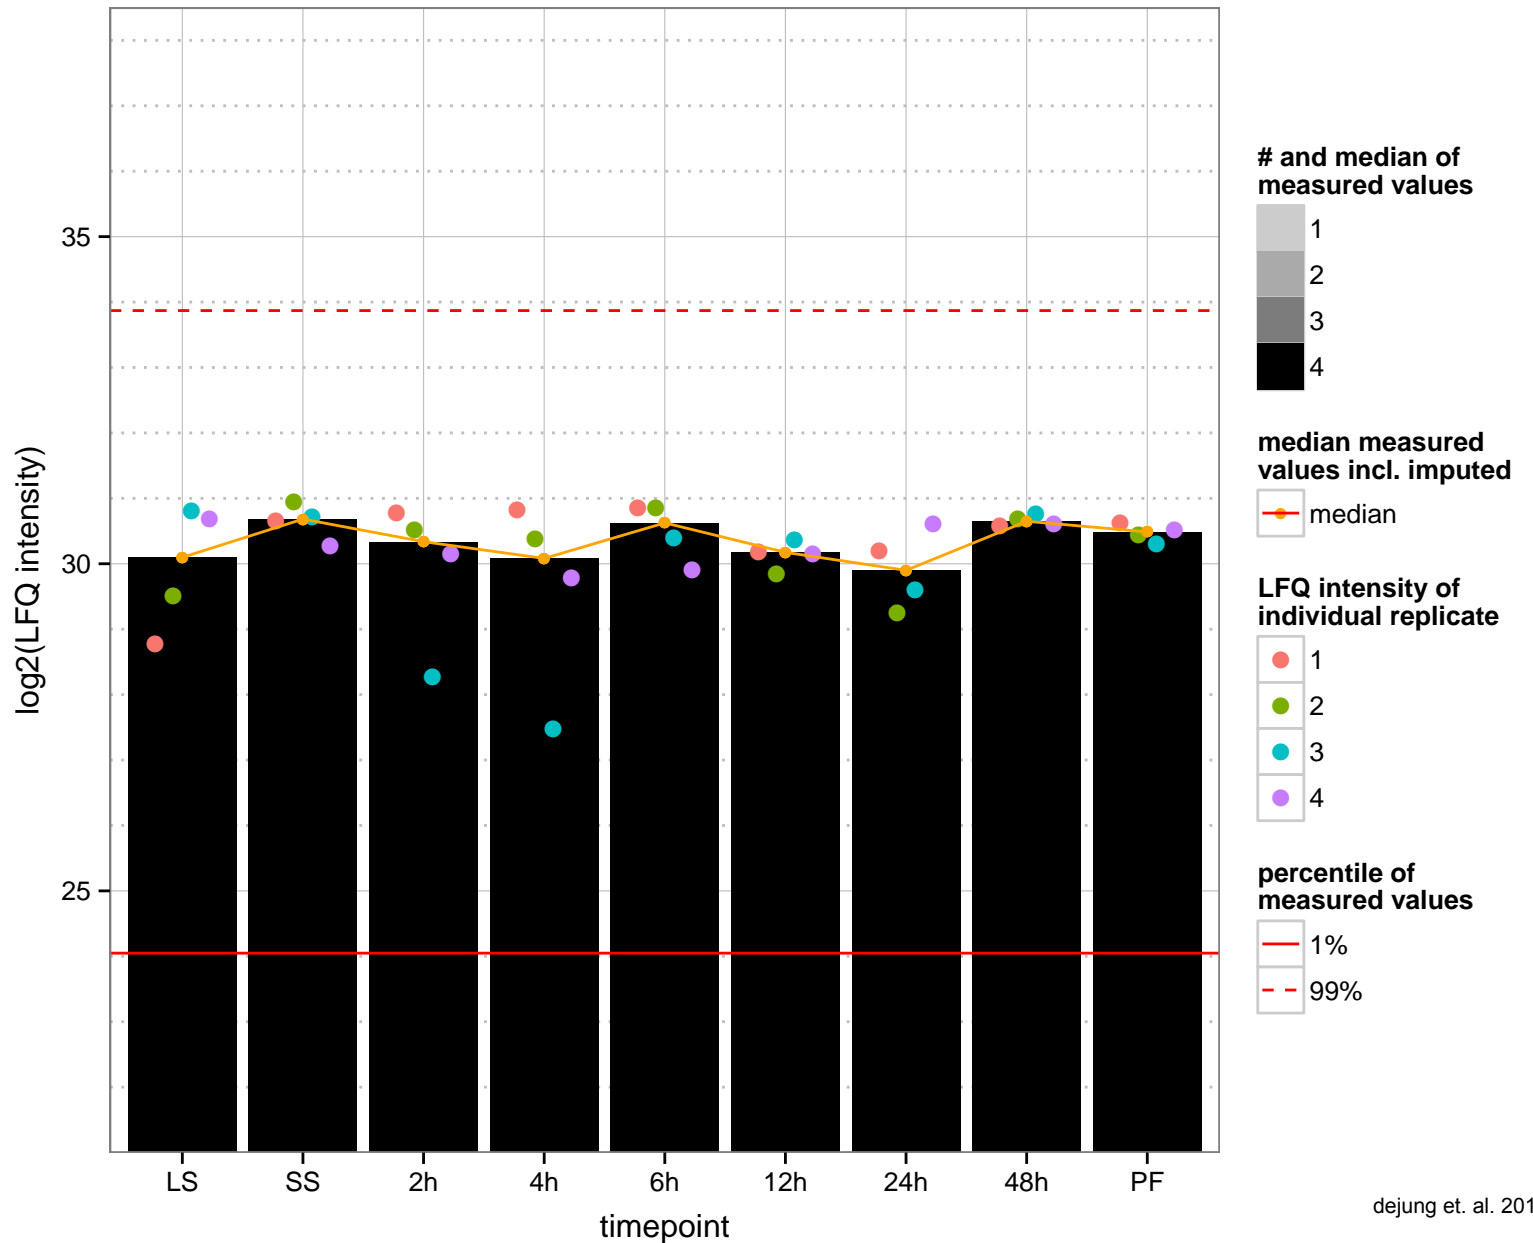

cytosolic malate dehydrogenase (cMDH)

Tb927.11.11250

AGOF: L-malate dehydrogenase activity, malate dehydrogenase activity

AGOC: cytoplasm

AGOP: glycolysis, malate metabolic process, oxidation-reduction process

PGOF: L-malate dehydrogenase activity, catalytic activity, malate dehydrogenase activity, oxidoreductase activity, acting on the

PGOC: null

PGOP: carbohydrate metabolic process, cellular carbohydrate metabolic process, malate metabolic process, oxidation-reduction process

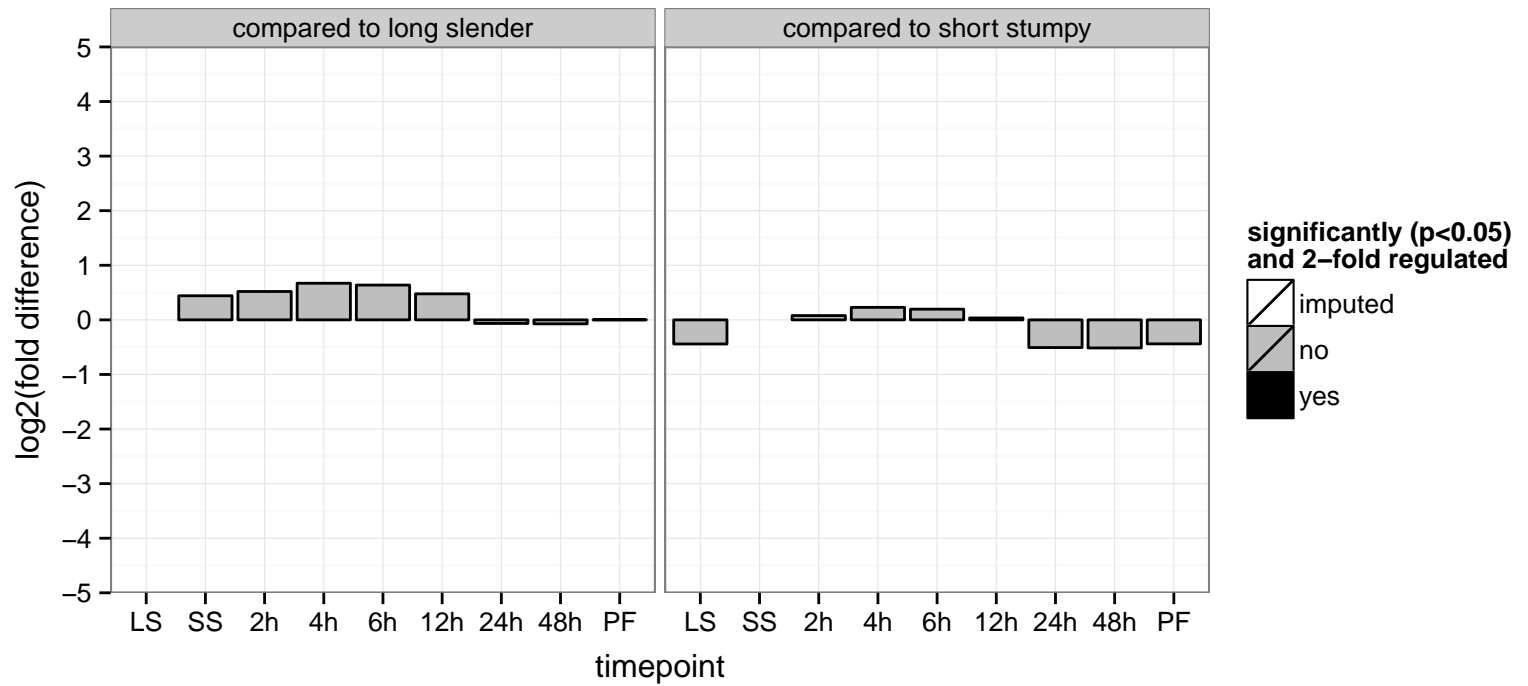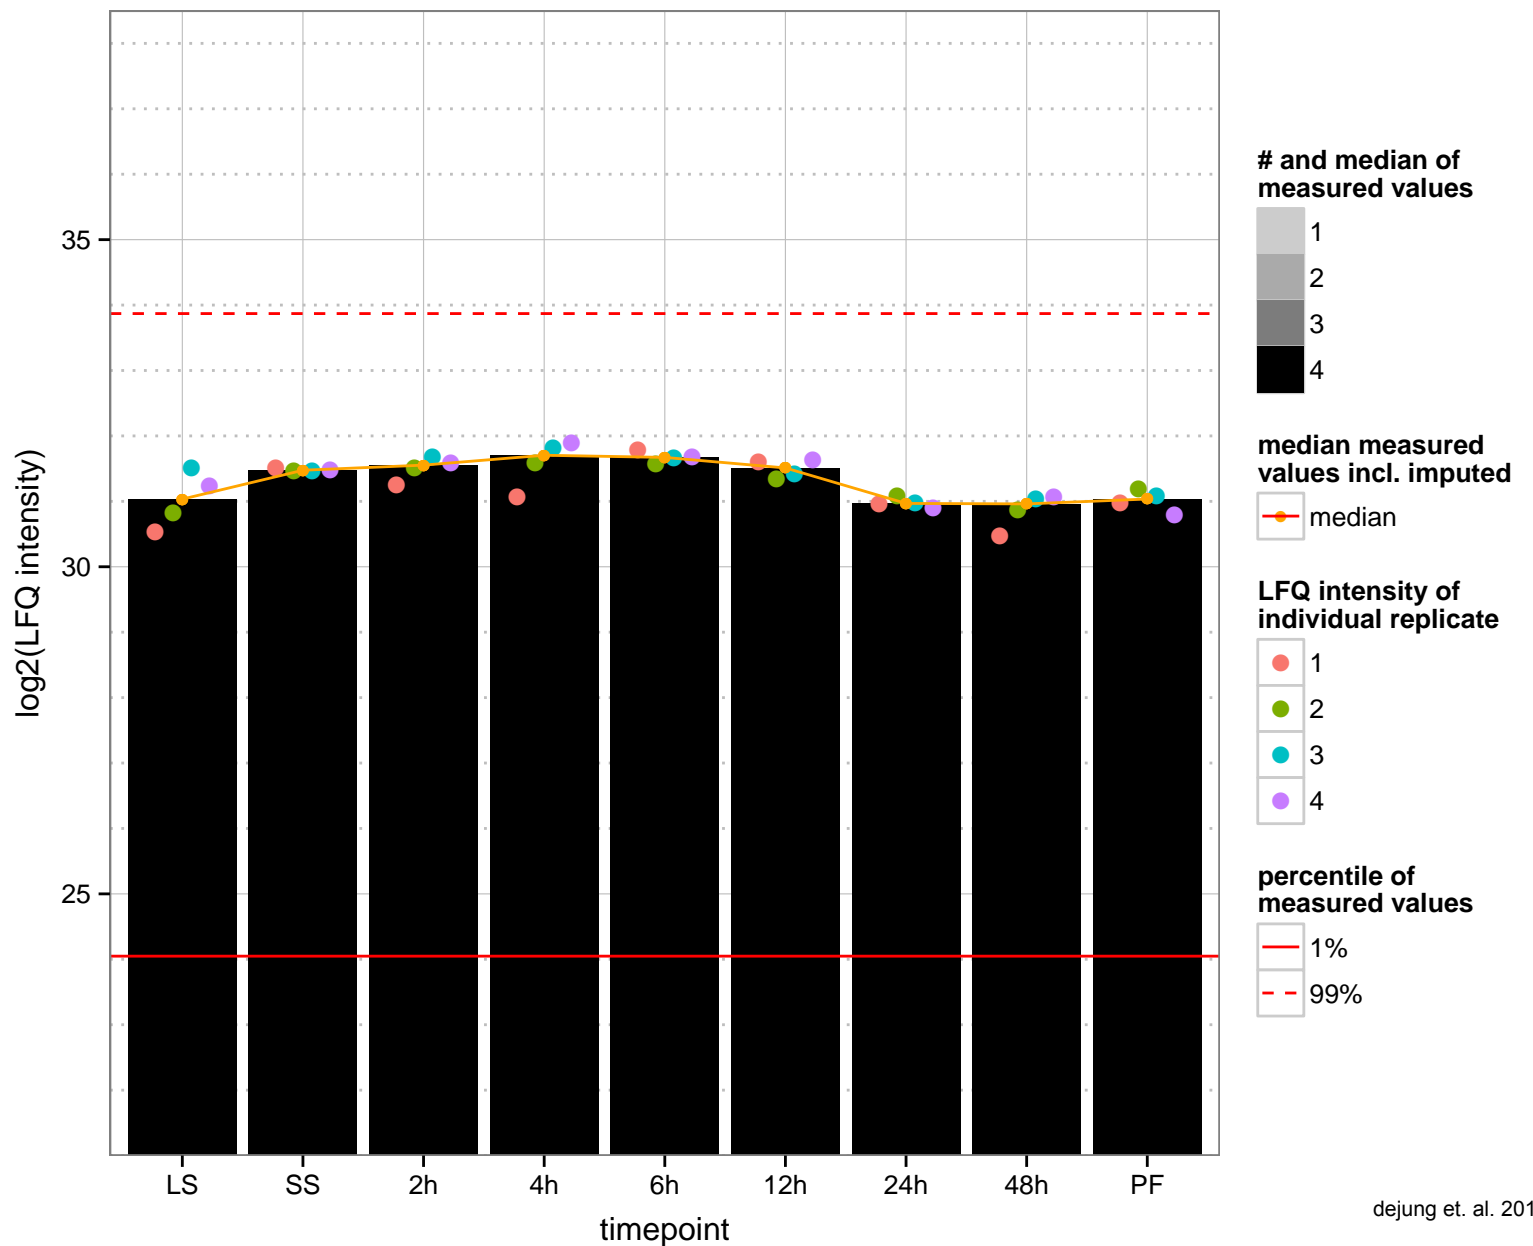

hypothetical protein, conserved  
 Tb927.11.11280  
 AGOF: null  
 AGOC: null, mitochondrion  
 AGOP: null  
 PGO: null  
 PGO: null  
 PGO: null

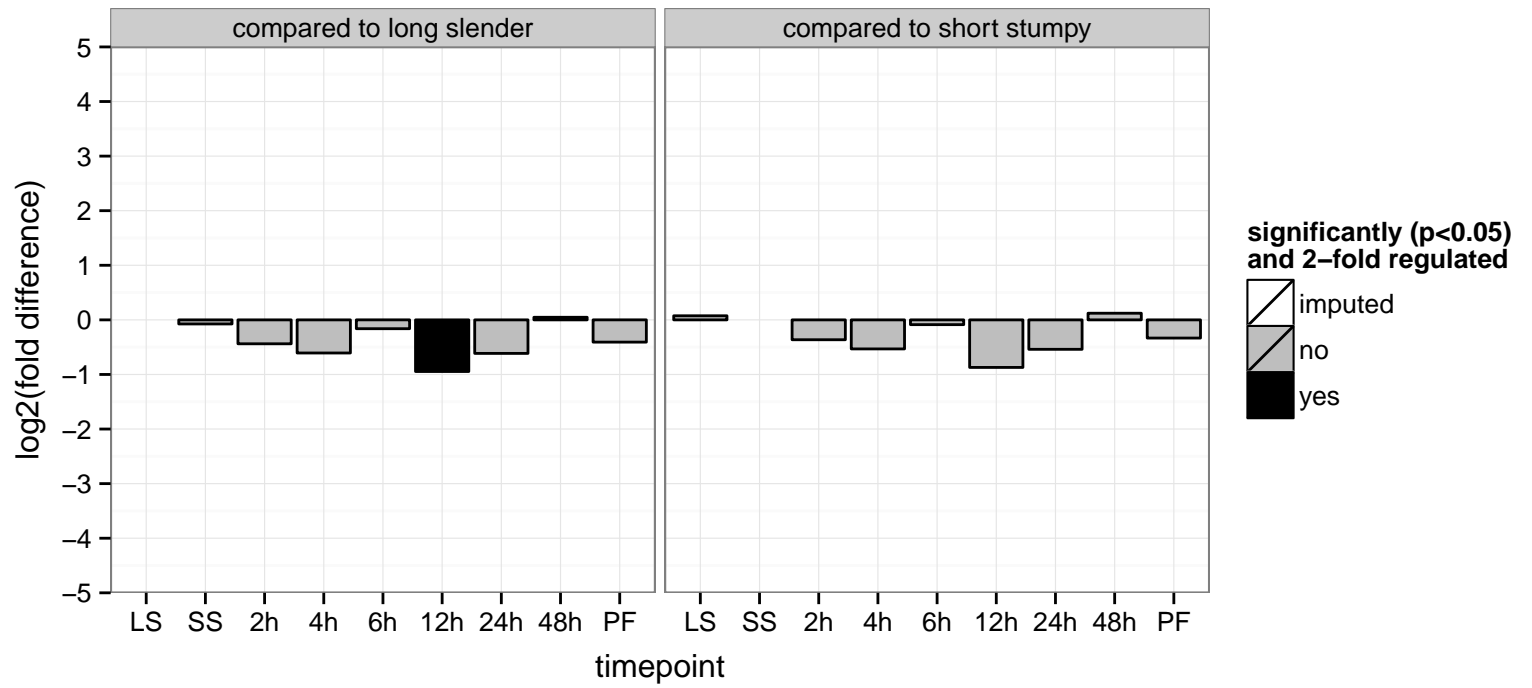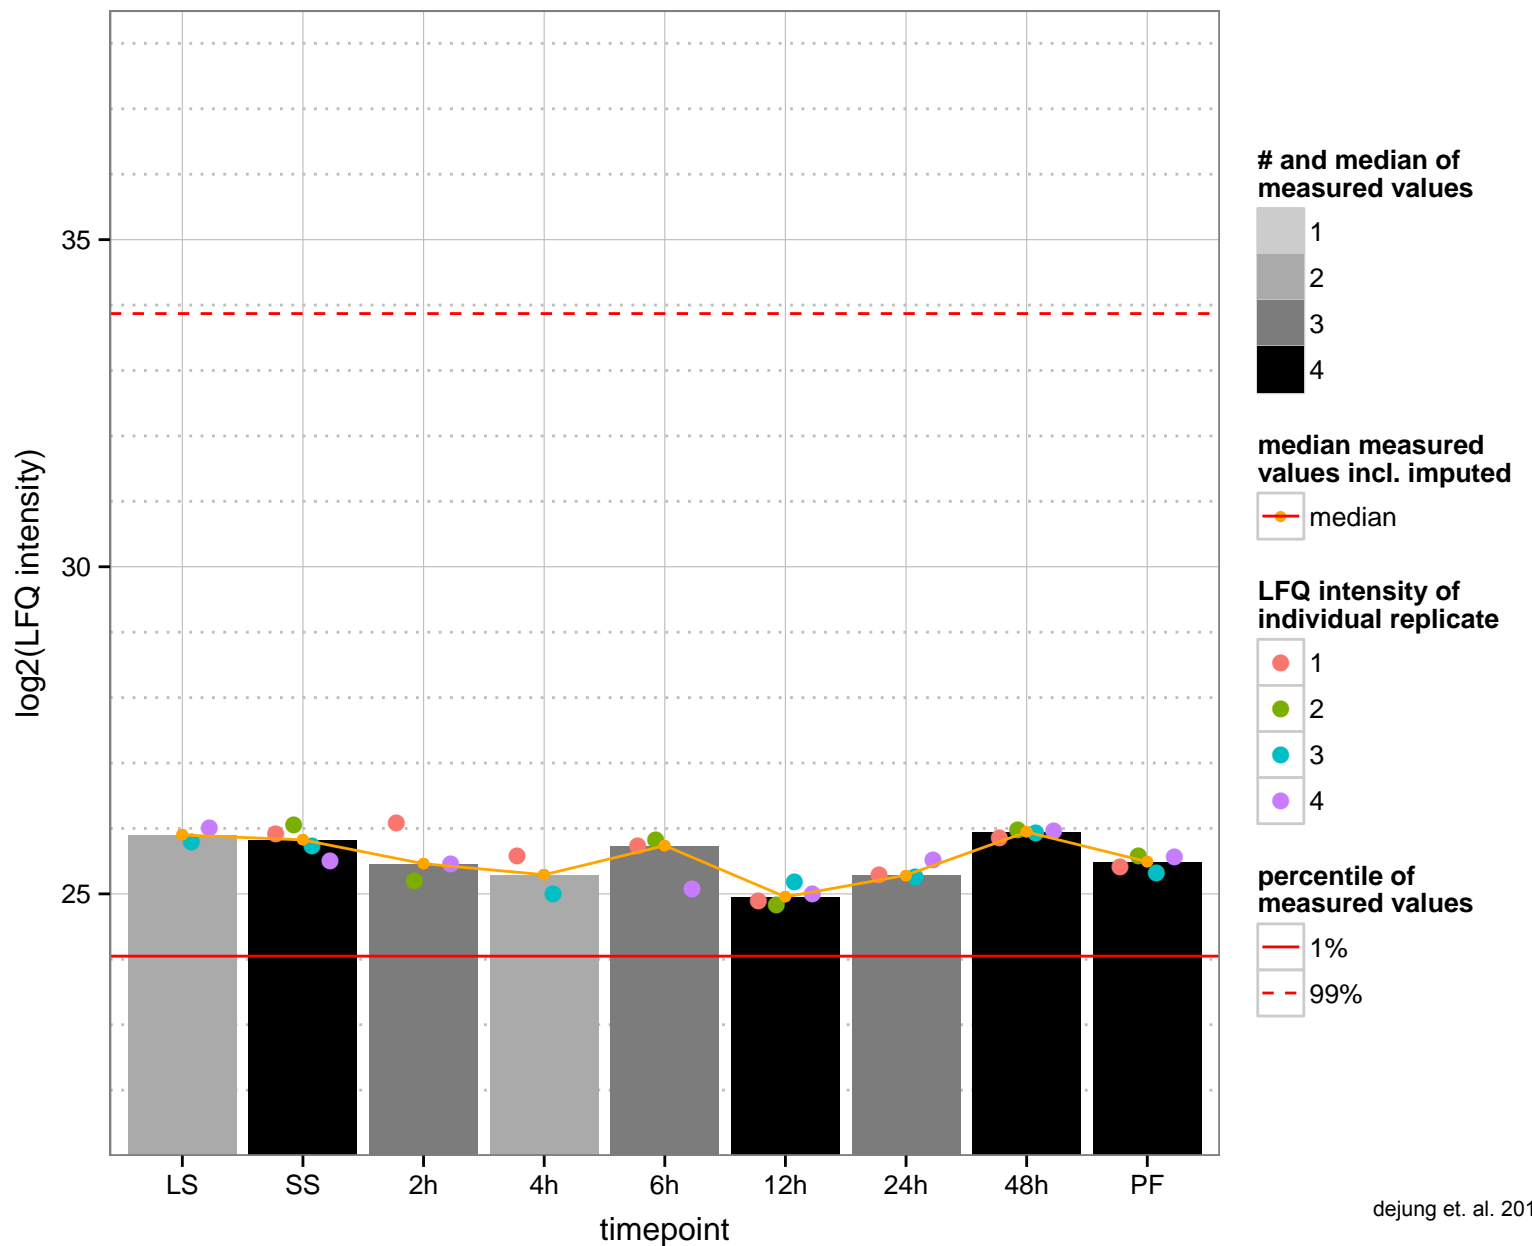

heat shock protein 70, putative  
 Tb927.11.11290  
 AGOF: ATP binding  
 AGOC: null  
 AGOP: protein folding  
 PGOF: null  
 PGOC: null  
 PGOP: null

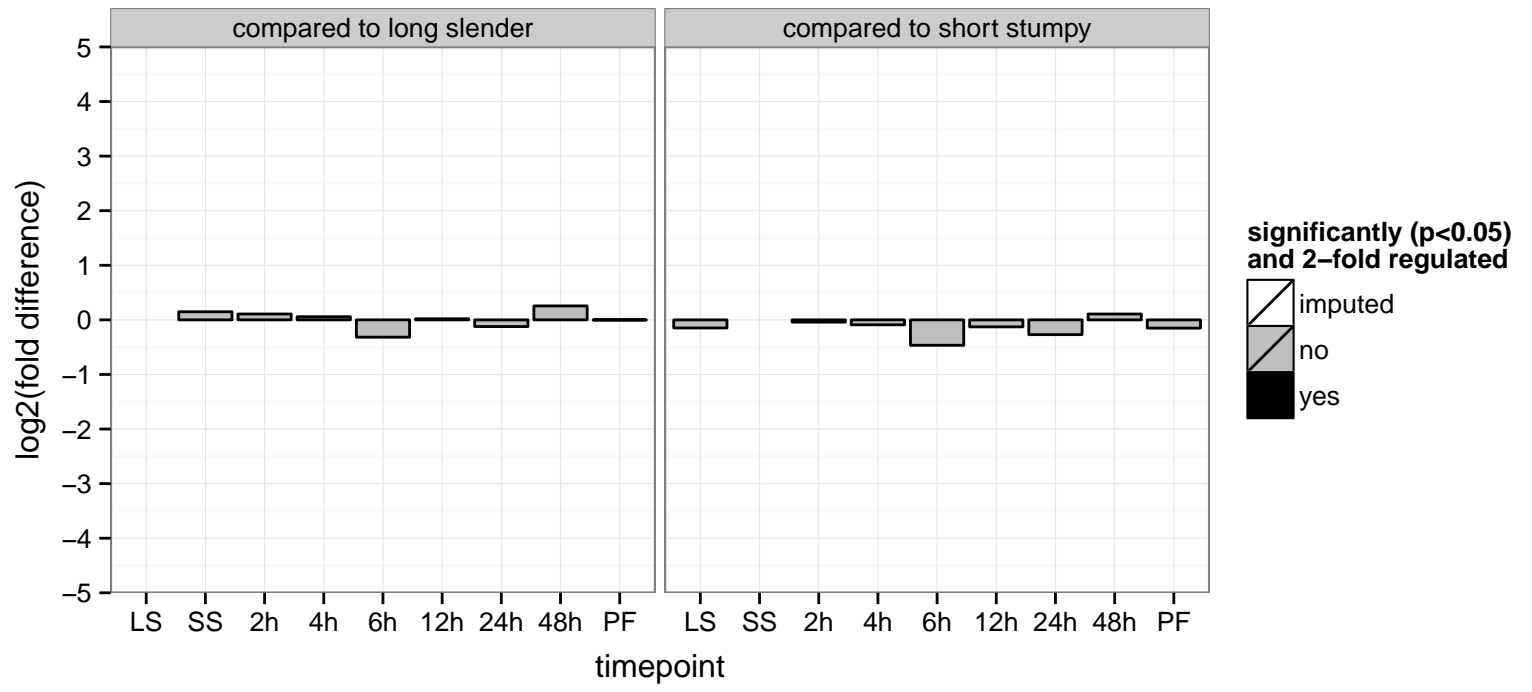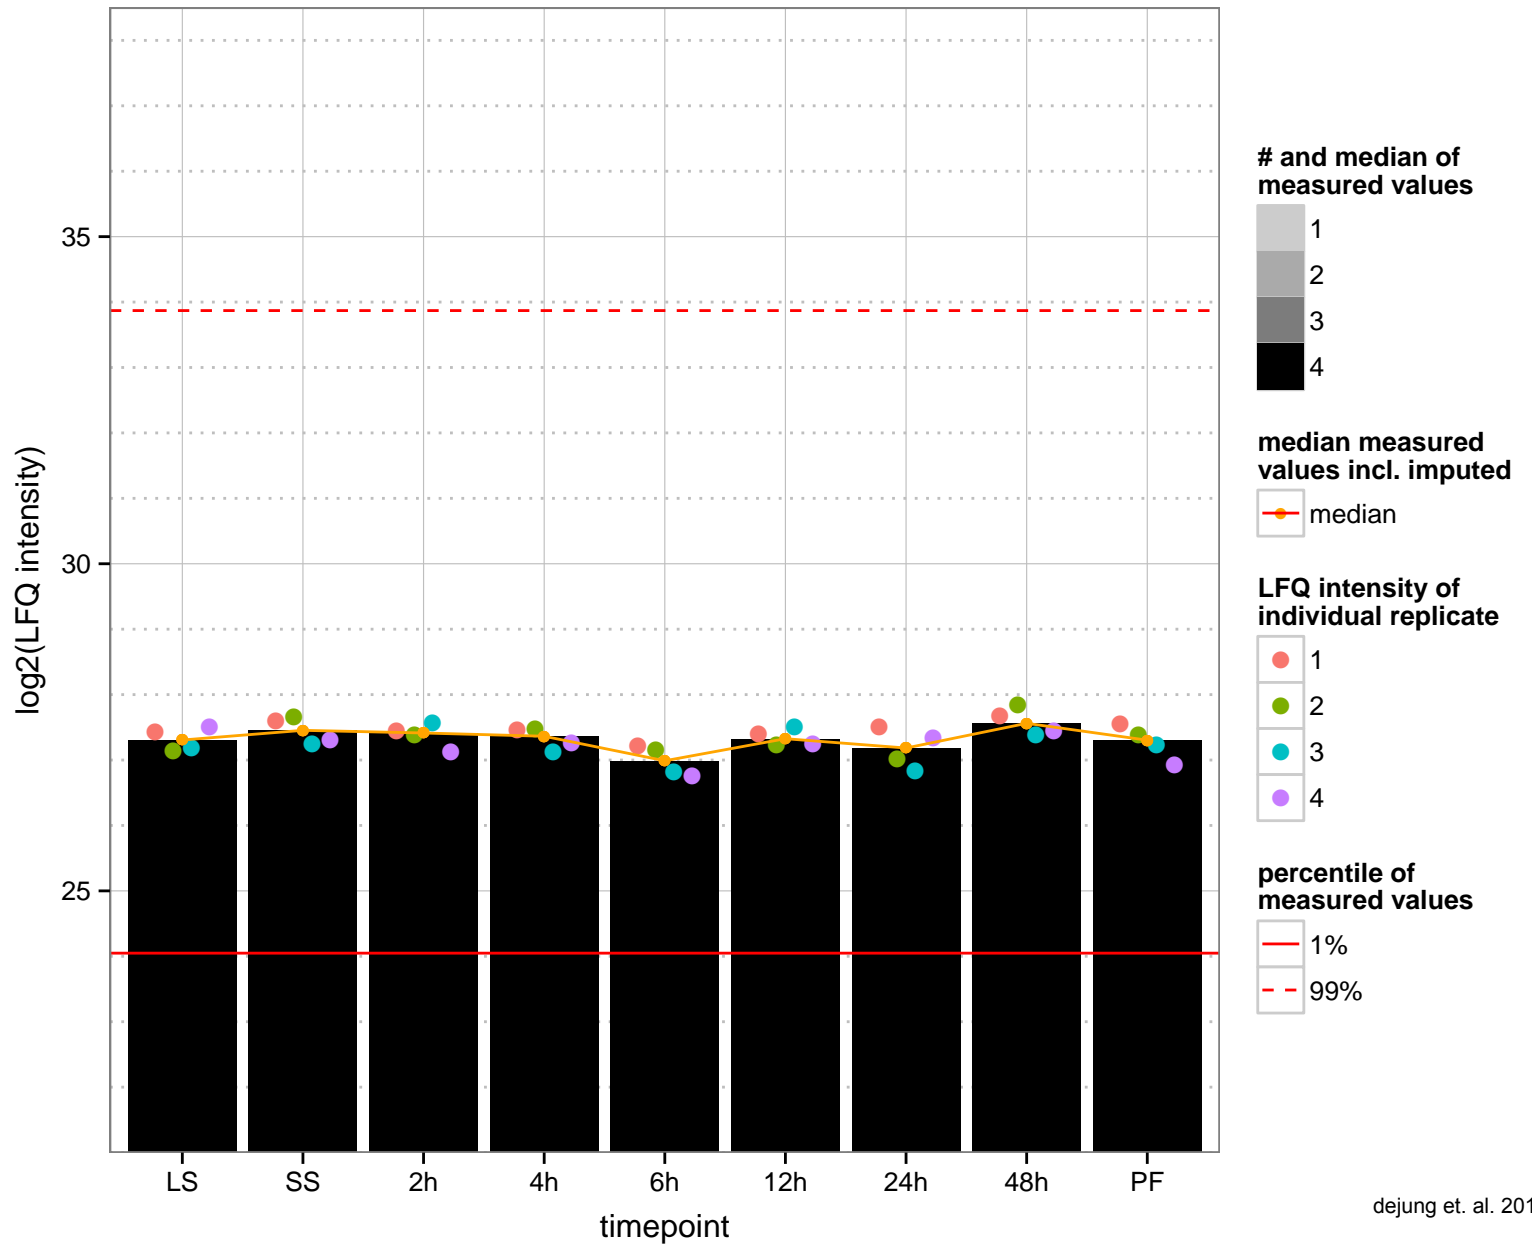

heat shock protein 70 (hsp70), putative, heat shock protein 70  
 Tb927.11.11330;Tb11.v5.1035  
 AGOF: null, ATP binding  
 AGOC: null  
 AGOP: null, protein folding  
 PGO: null  
 PGO: null  
 PGO: null

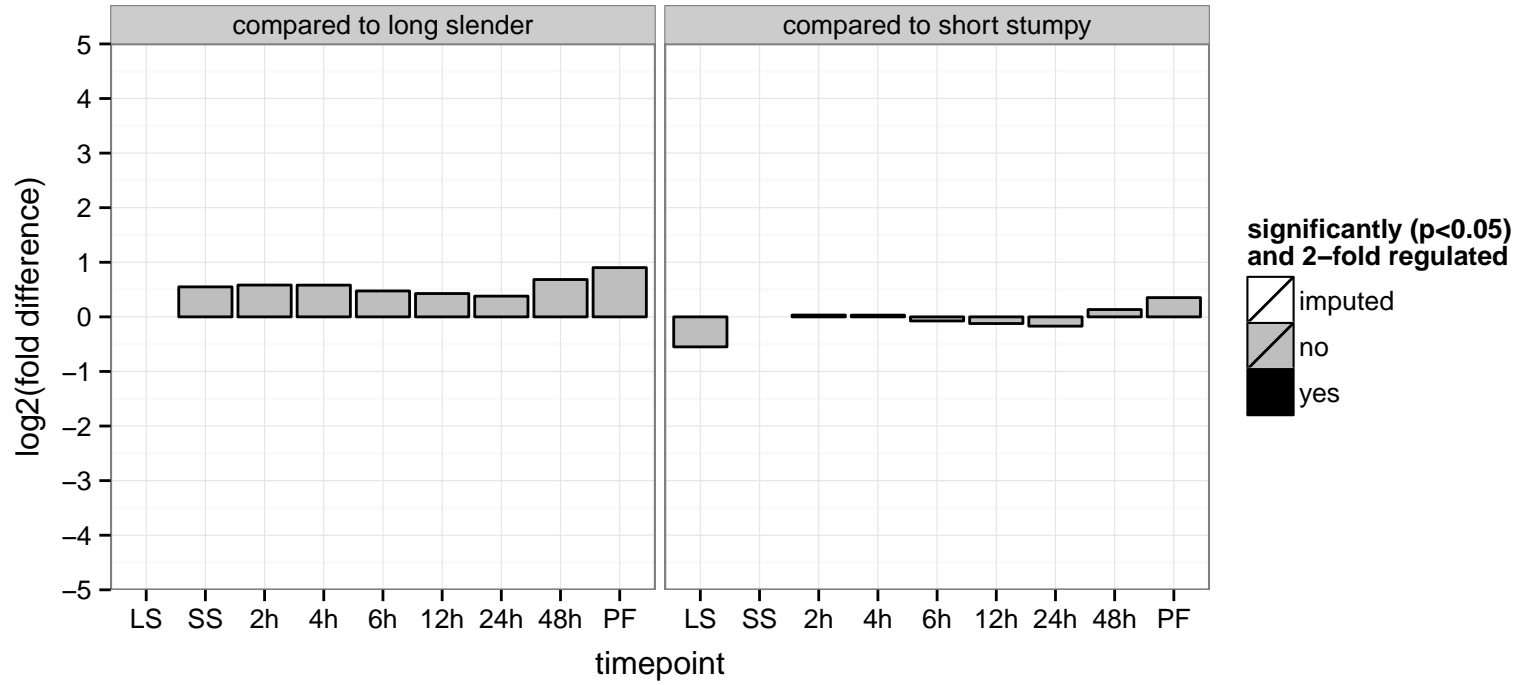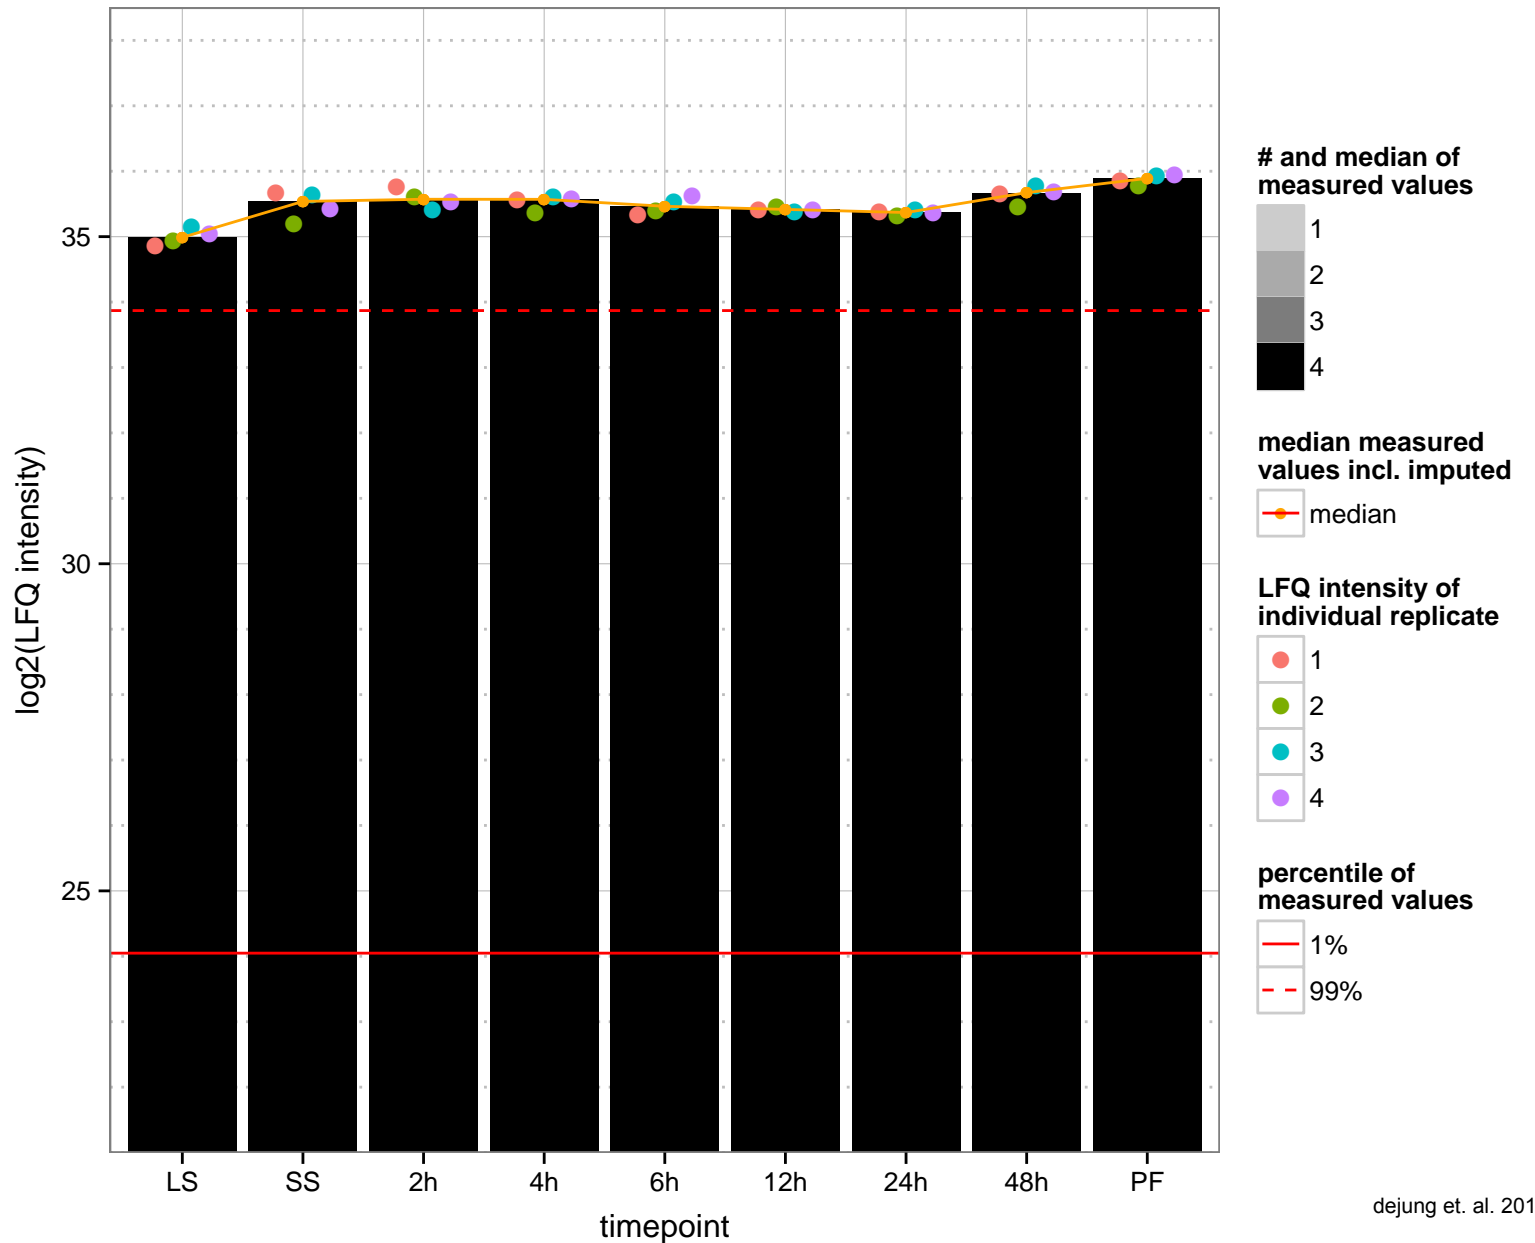

gamma-tubulin complex subunit, putative, spindle pole body component alp6  
 Tb927.11.11340  
 AGOF: null  
 AGOC: null, integral to membrane, microtubule organizing center, spindle pole  
 AGOP: null, microtubule cytoskeleton organization  
 PGOF: null  
 PGOC: microtubule organizing center, spindle pole  
 PGOP: microtubule cytoskeleton organization

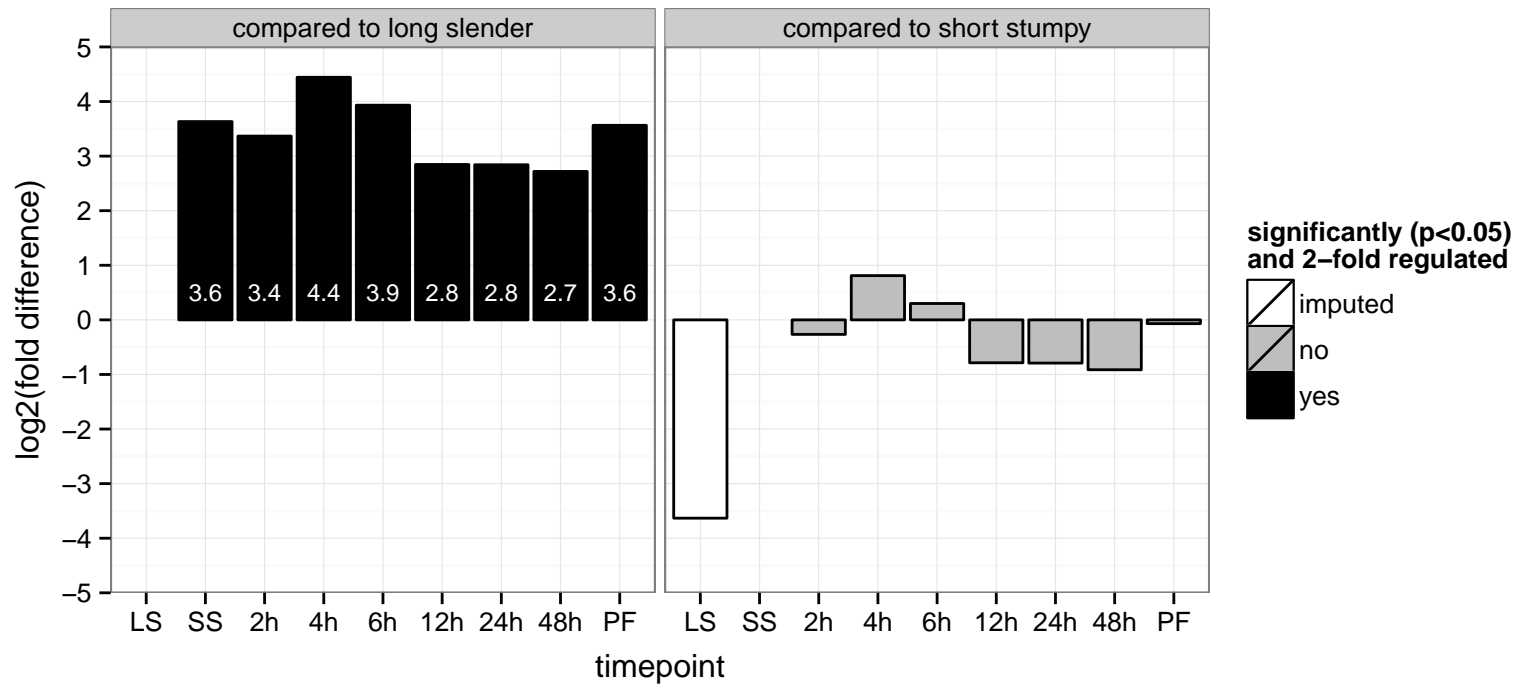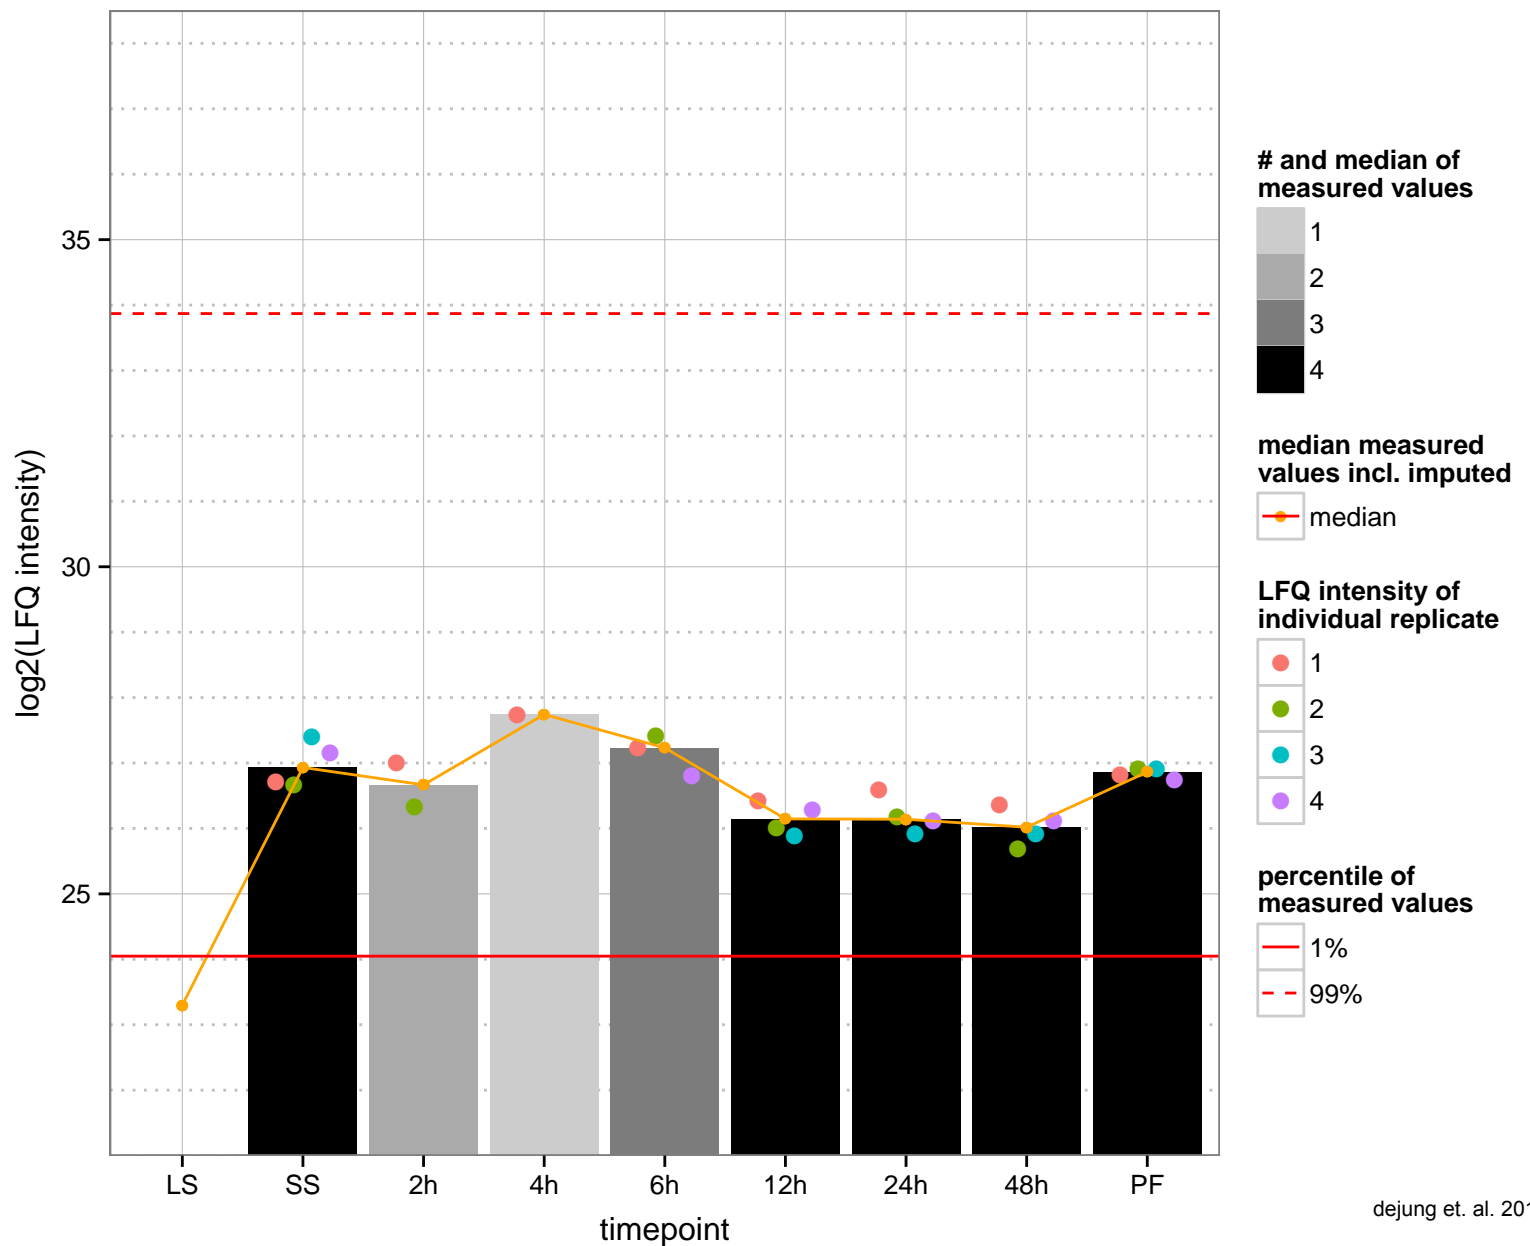

hypothetical protein, conserved  
 Tb927.11.11380  
 AGOF: null  
 AGOC: mitochondrion  
 AGOP: null  
 PGO: null  
 PGO: null  
 PGO: null

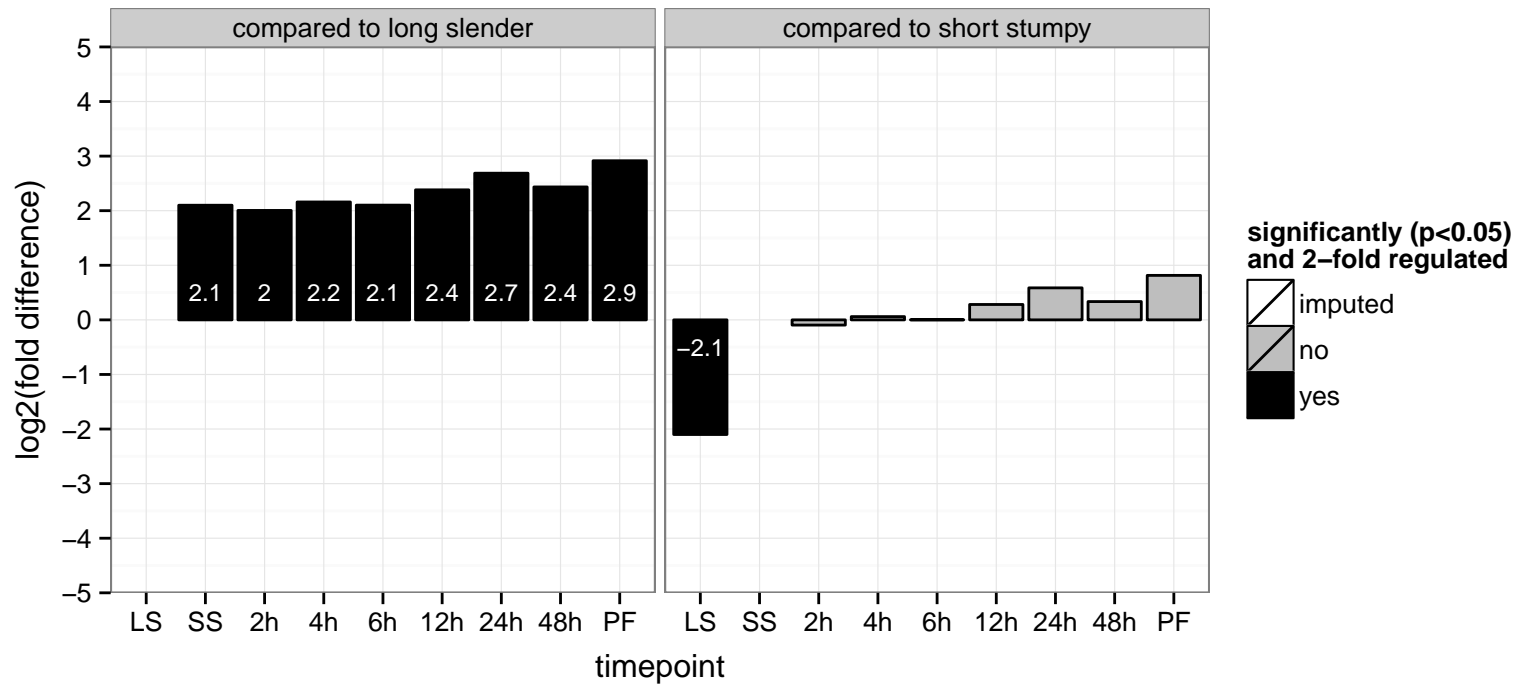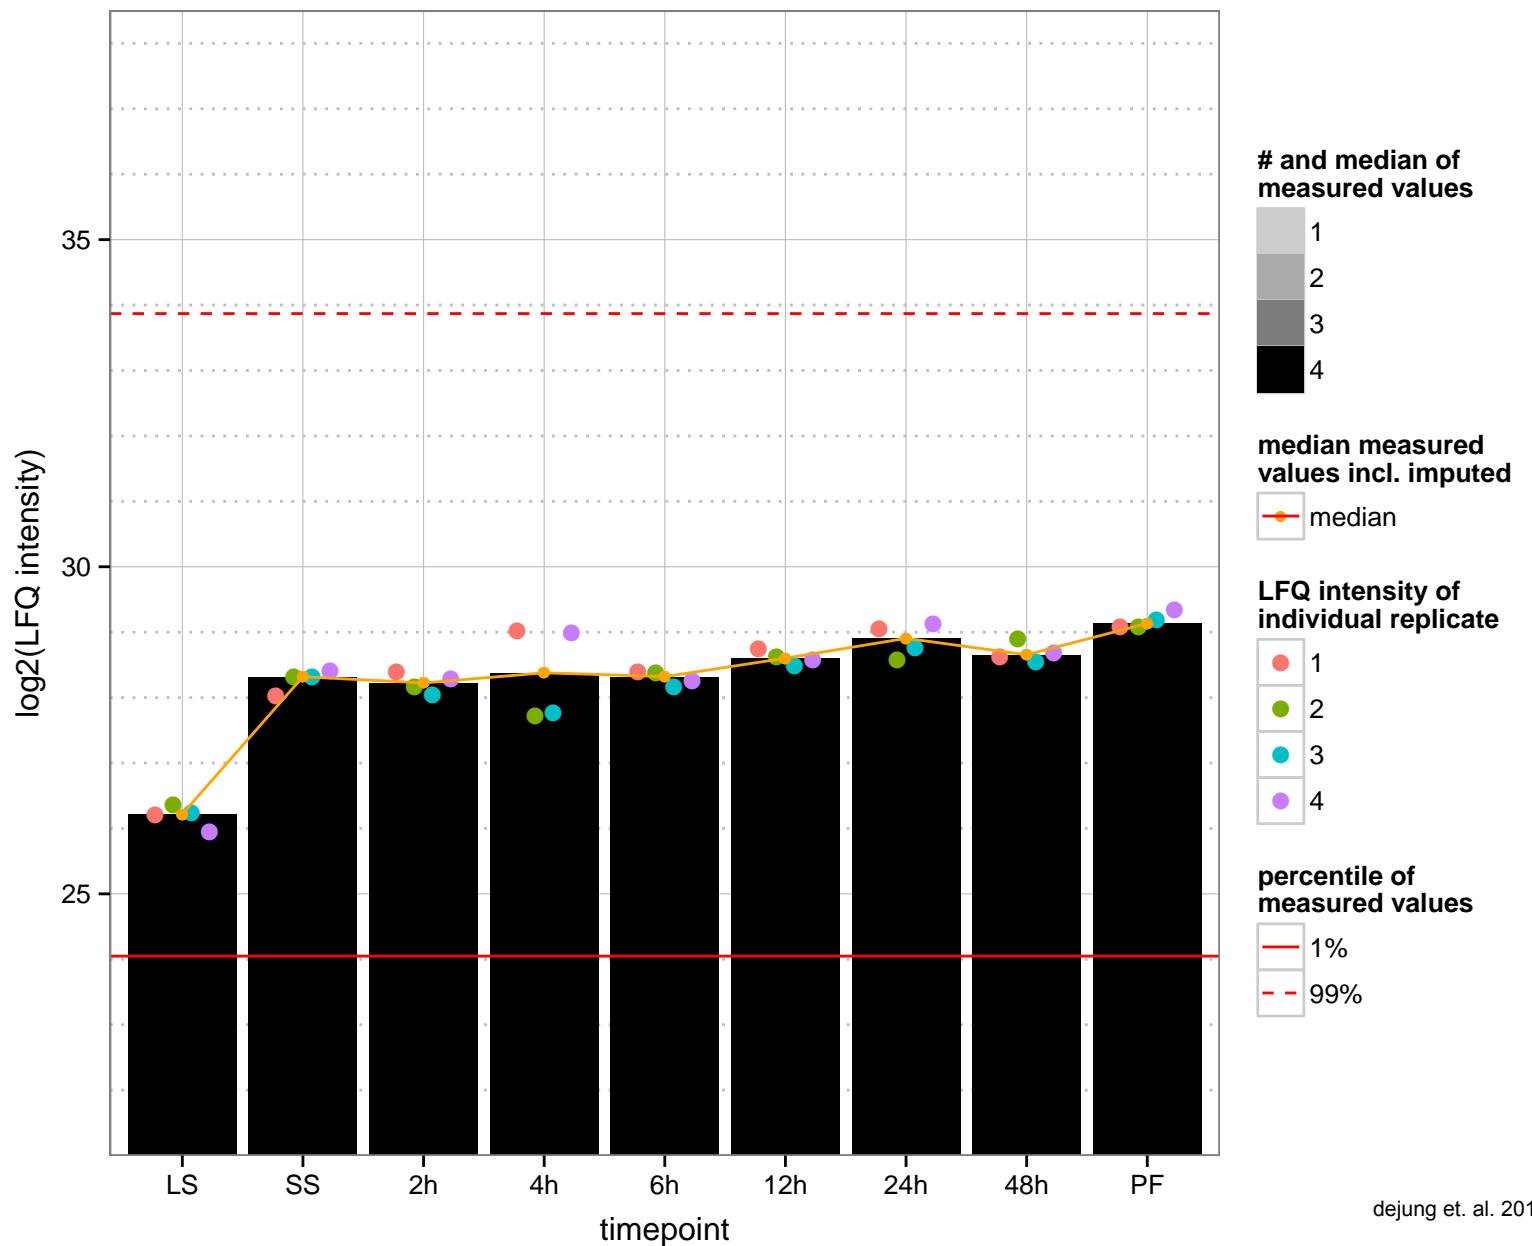



cullin 1, putative  
 Tb927.11.11430  
 AGOF: ubiquitin protein ligase binding  
 AGOC: cullin-RING ubiquitin ligase complex  
 AGOP: cell proliferation, ubiquitin-dependent protein catabolic process  
 PGO: ubiquitin protein ligase binding  
 PGOC: cullin-RING ubiquitin ligase complex  
 PGOP: ubiquitin-dependent protein catabolic process

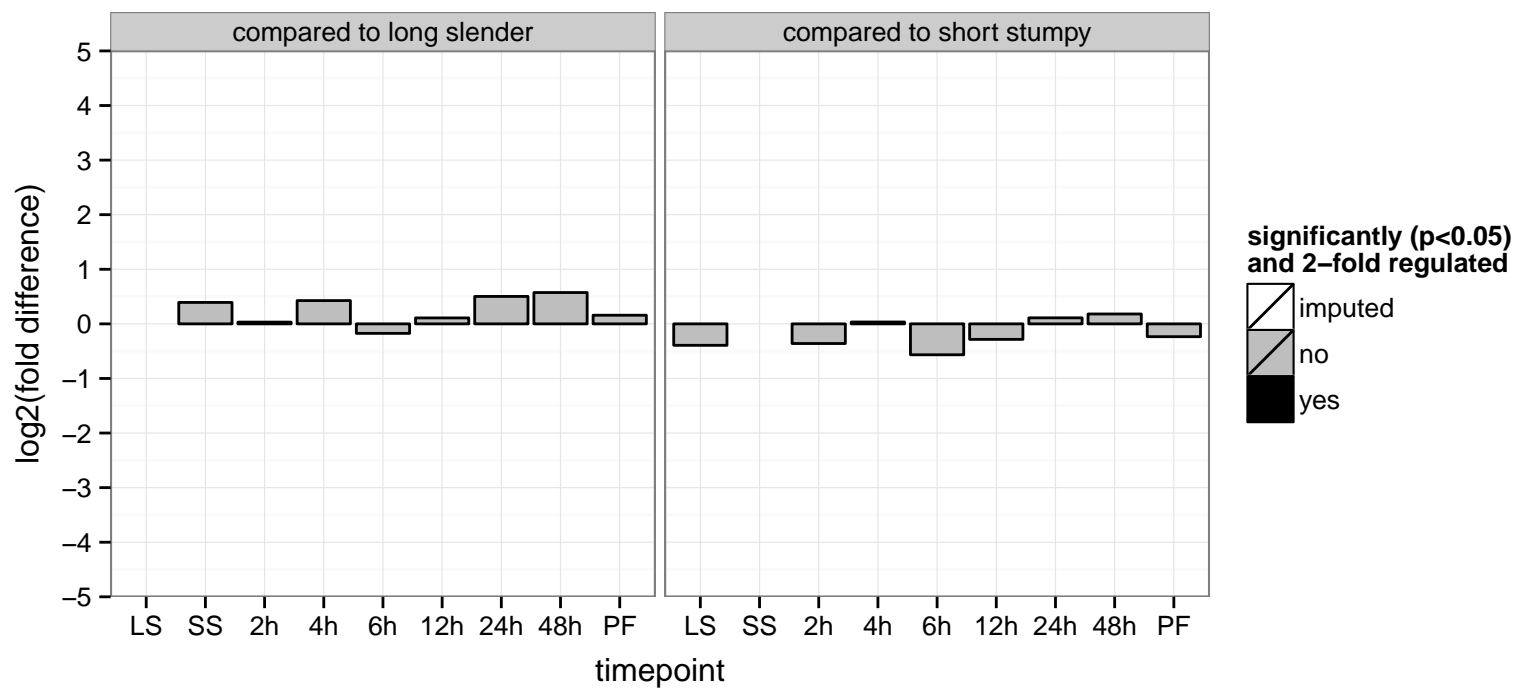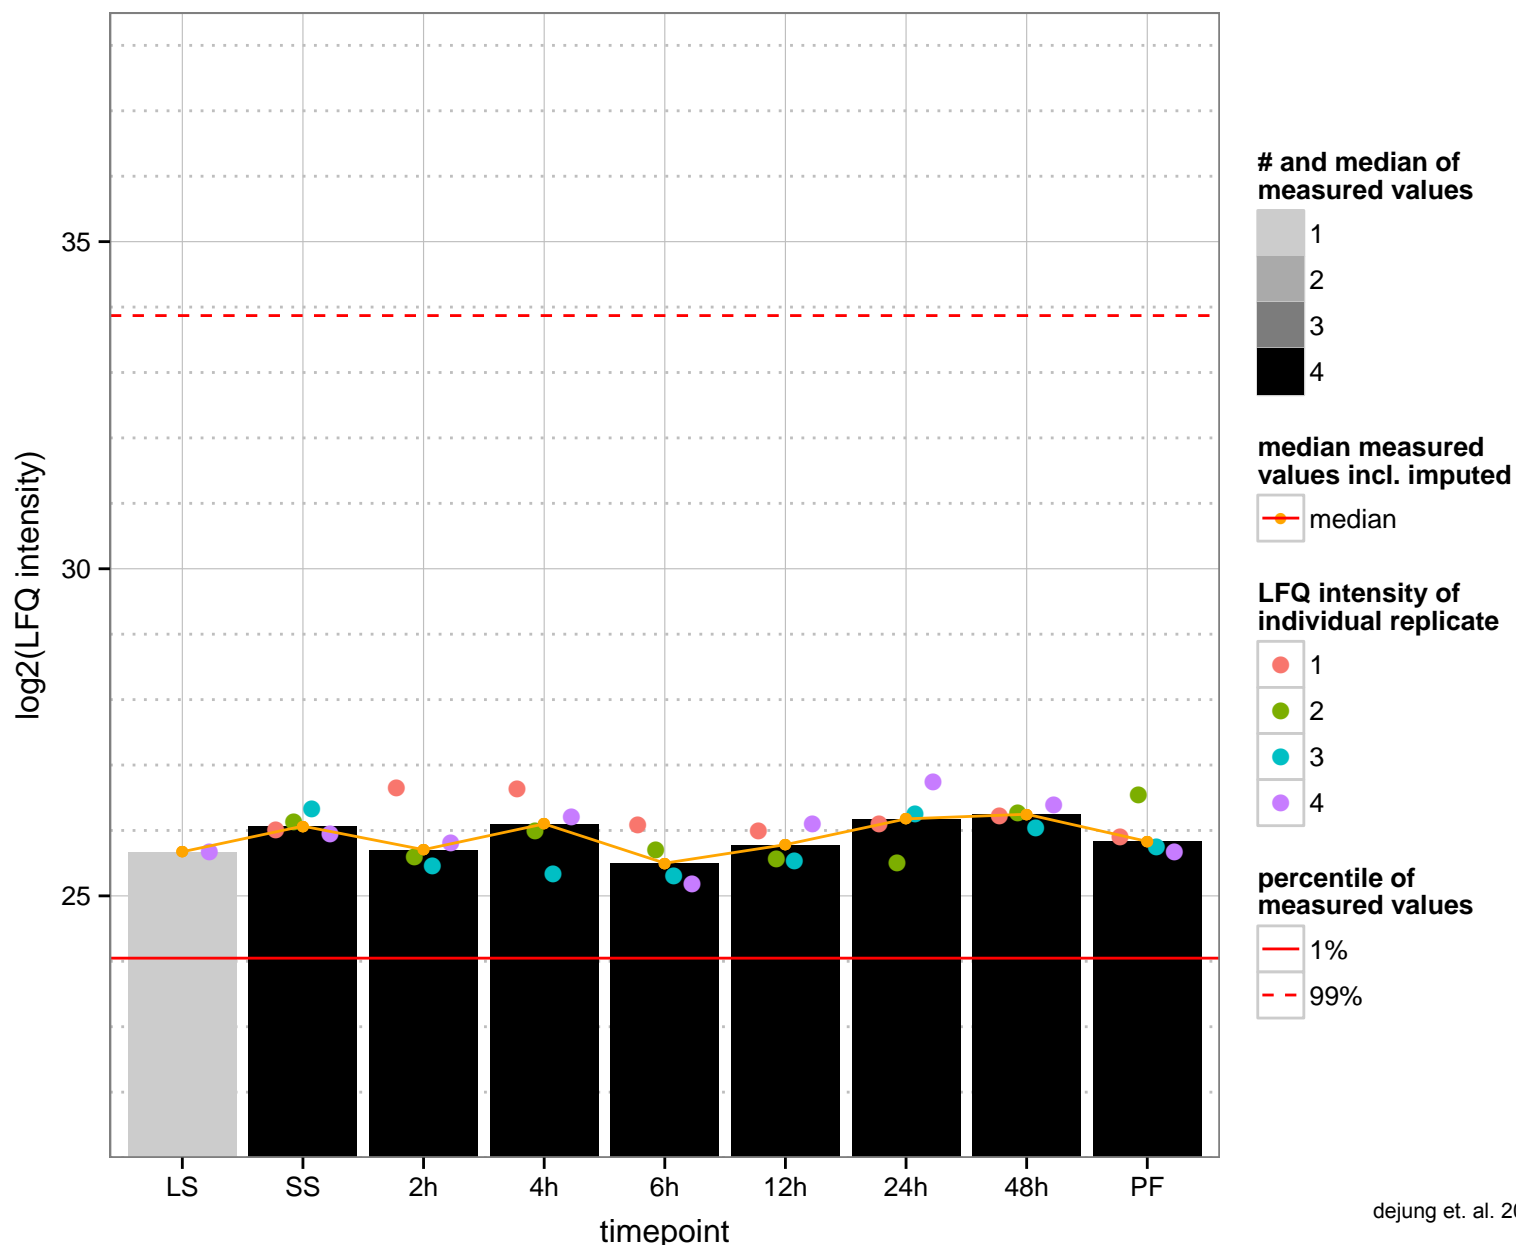

radial spoke protein RSP3, putative  
 Tb927.11.1150  
 AGOF: null  
 AGOC: radial spoke  
 AGOP: ciliary or flagellar motility  
 PGO: null  
 PGOC: null  
 PGOP: null

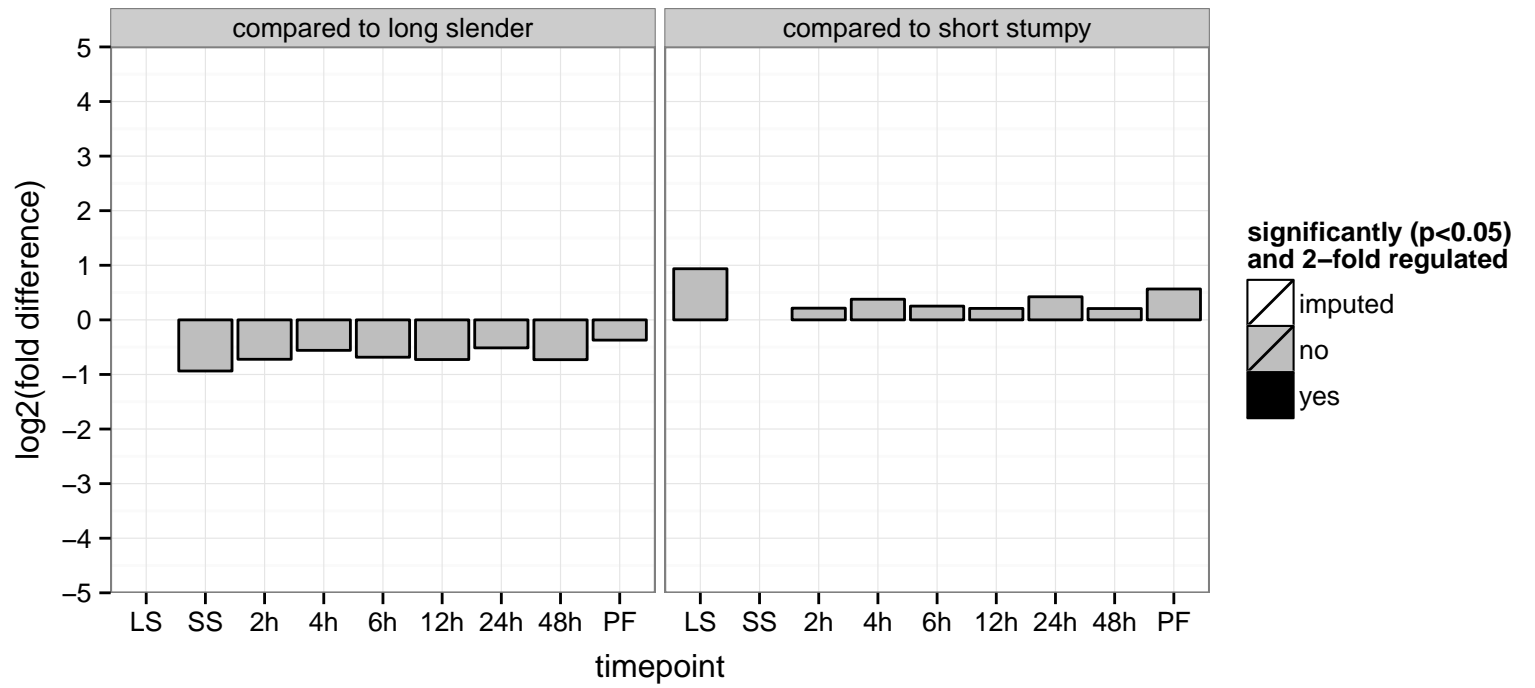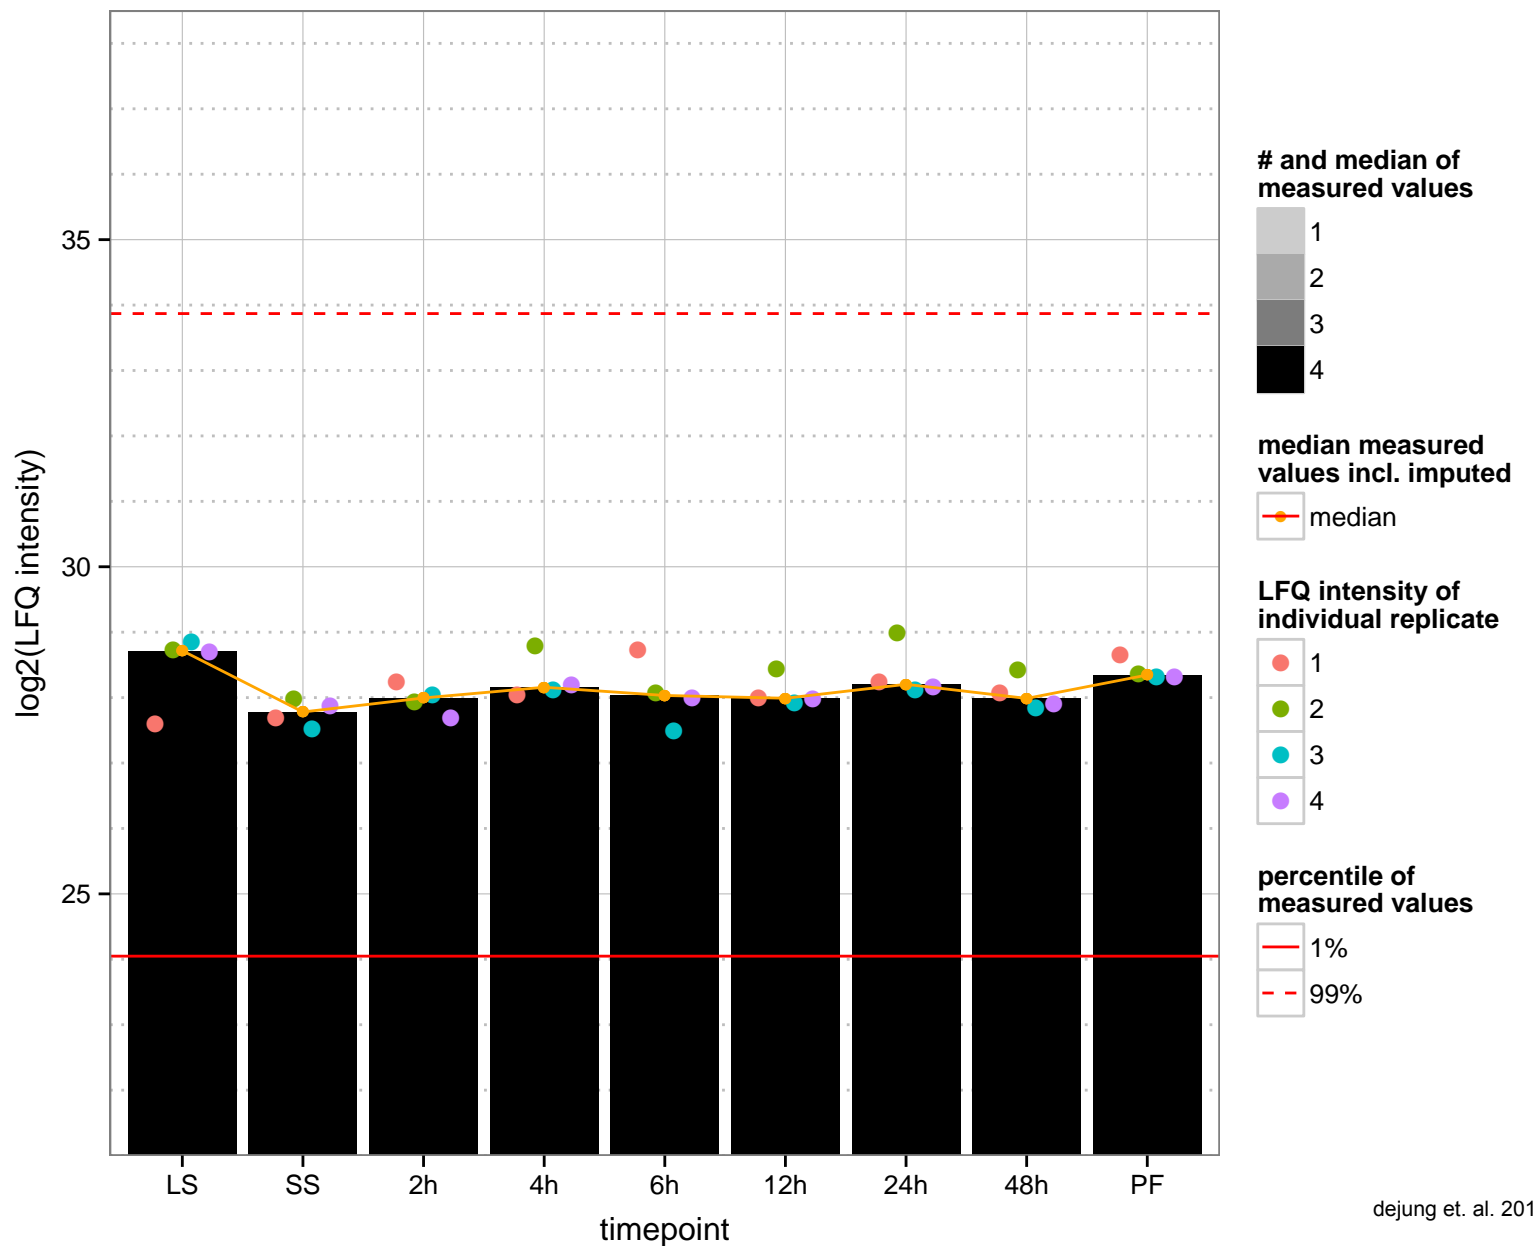

glycosomal membrane protein (PEX11)  
 Tb927.11.11520  
 AGOF: null  
 AGOC: endoplasmic reticulum, glycosome membrane  
 AGOP: peroxisome fission  
 PGO: null  
 PGOC: integral to peroxisomal membrane  
 PGOP: peroxisome fission

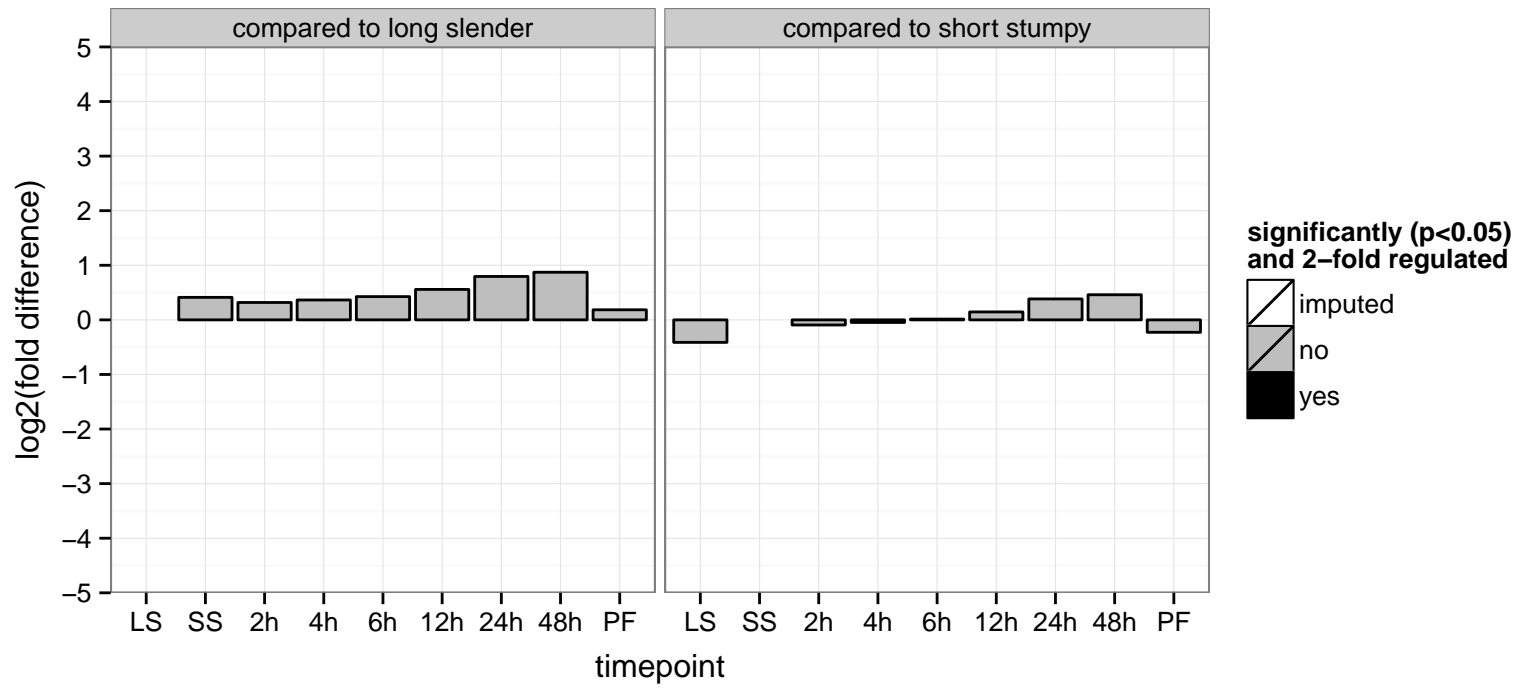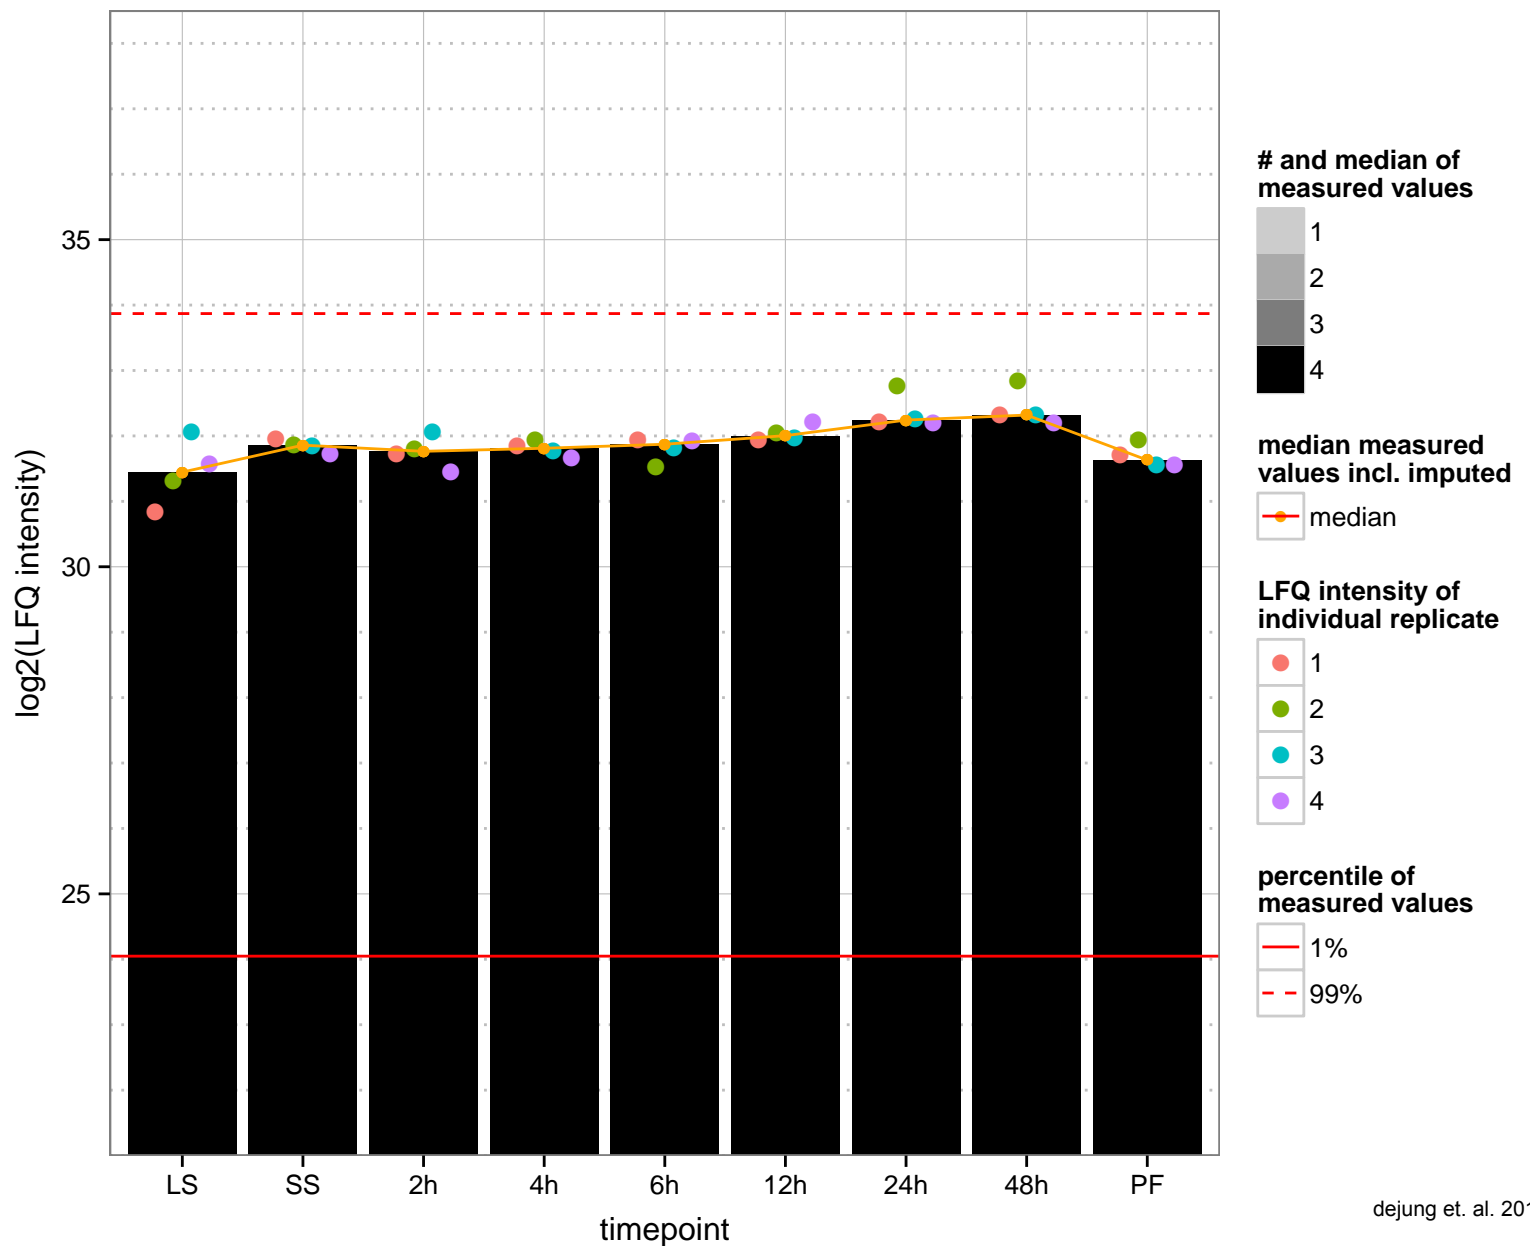

unspecified product, DNA topoisomerase II, putative  
 Tb927.11.11550;Tb927.11.11540  
 AGOF: null, ATP binding, DNA topoisomerase (ATP-hydrolyzing) activity  
 AGOC: null, chromosome  
 AGOP: null, DNA topological change  
 PGOF: ATP binding, DNA binding, DNA topoisomerase (ATP-hydrolyzing) activity  
 PGO: chromosome  
 PGOP: DNA topological change

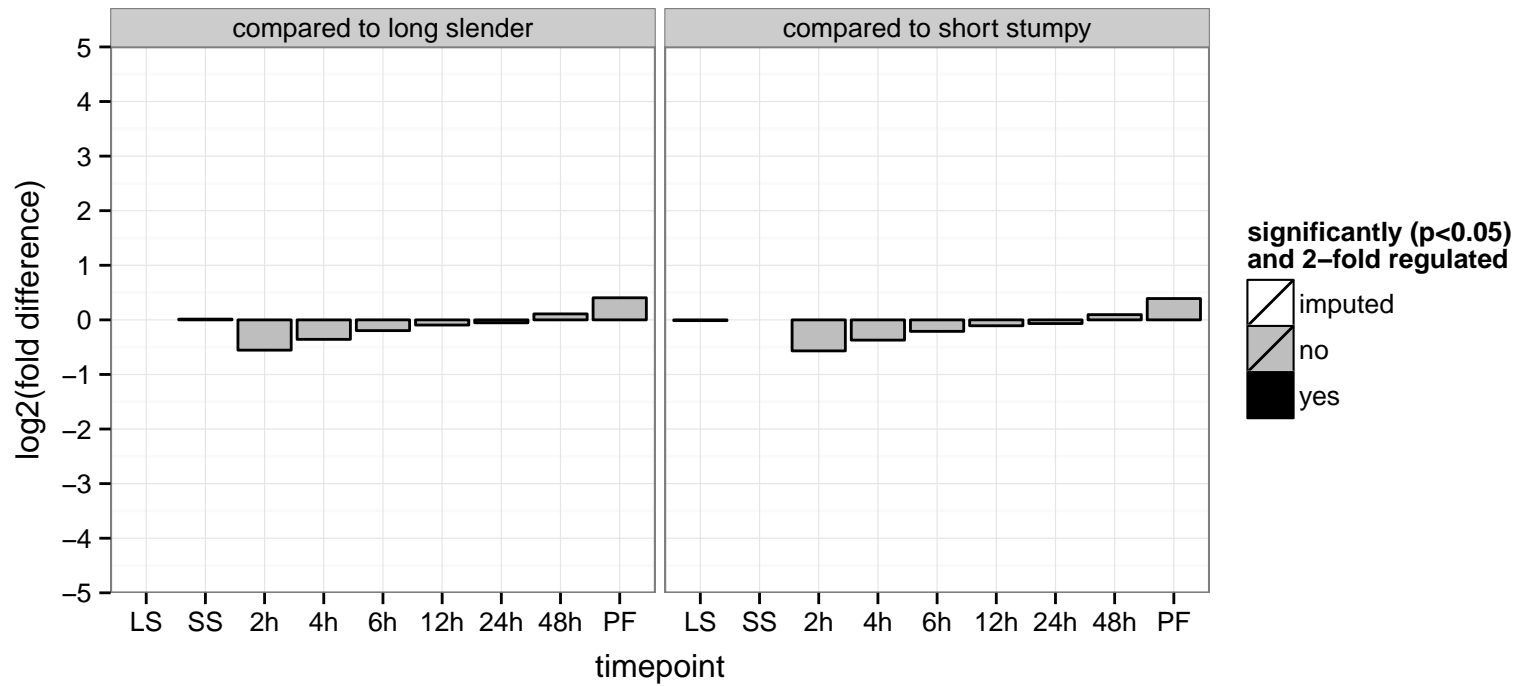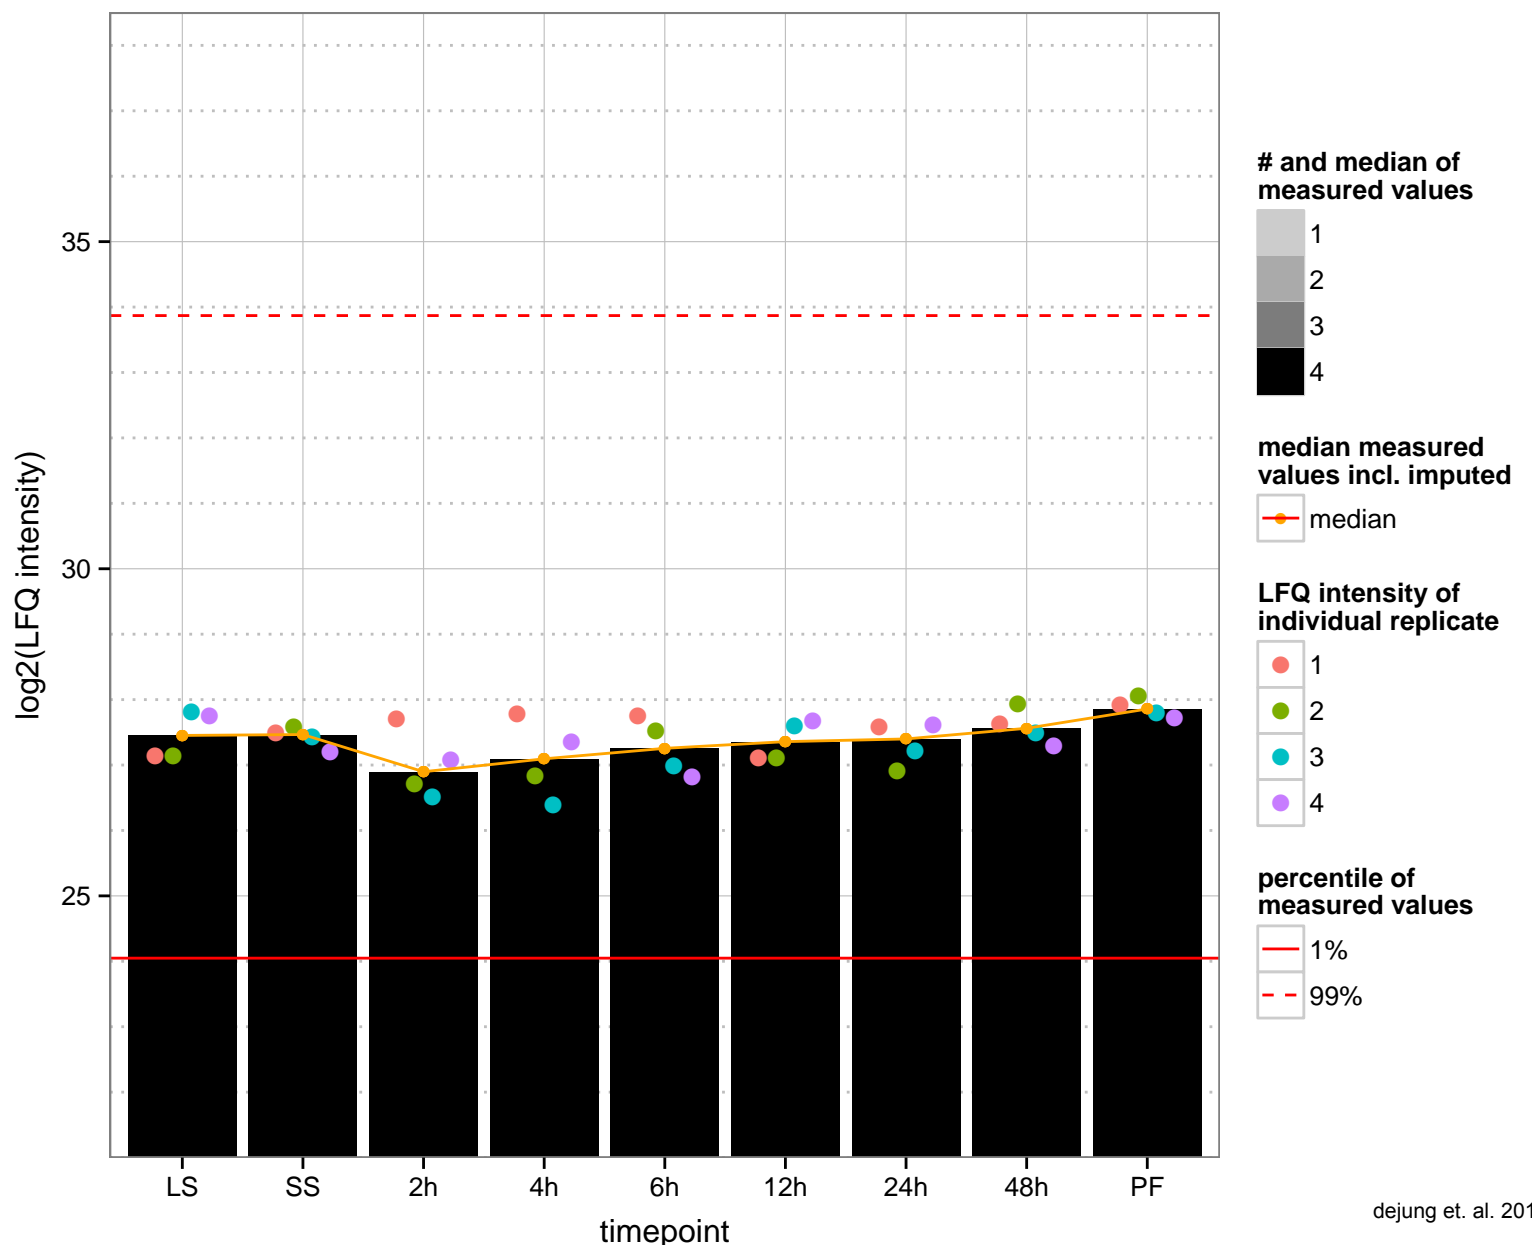

Translation initiation factor eIF-2B subunit epsilon, putative, eIF-2B GDP-GTP exchange factor subunit epsilon (EIF2BE)  
 Tb927.11.11570  
 AGOF: null  
 AGOC: null  
 AGOP: null  
 PGO: transferase activity  
 PGOC: null  
 PGOP: null

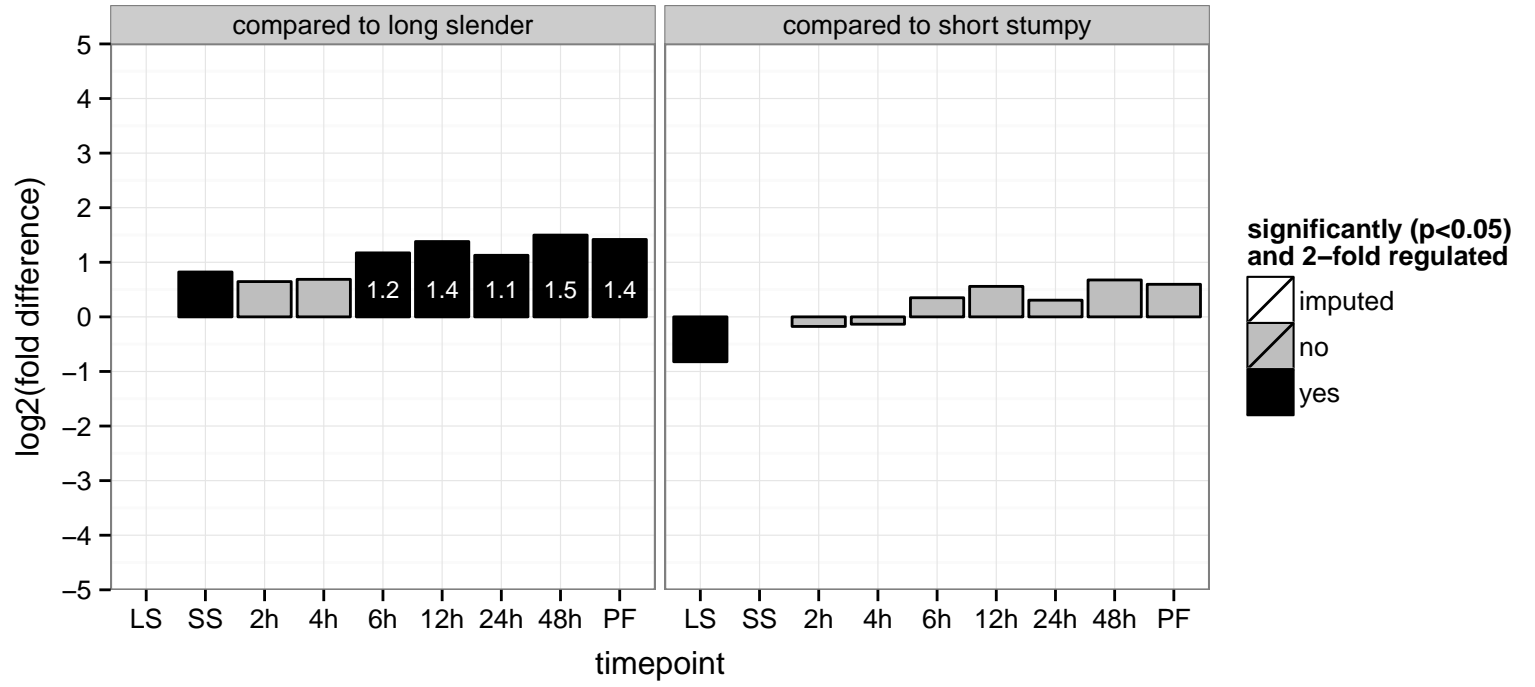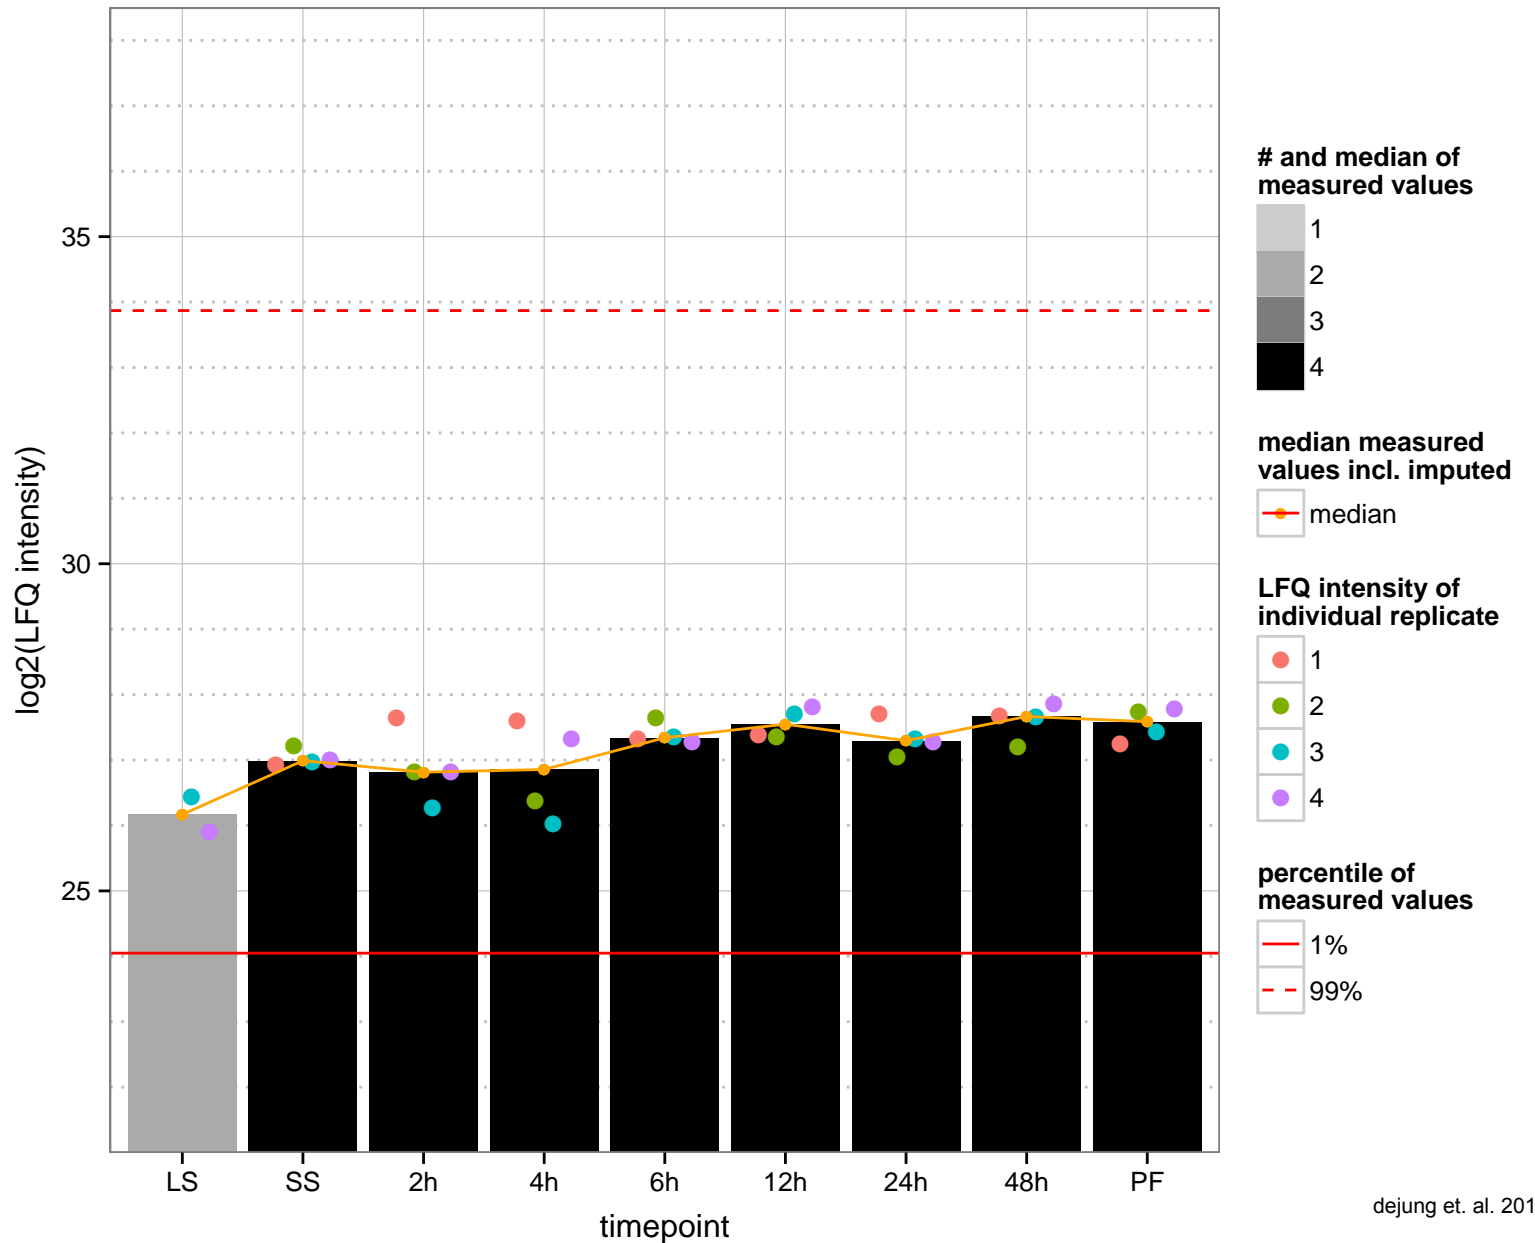

eukaryotic translation initiation factor, putative  
 Tb927.11.11590  
 AGOF: translation initiation factor activity  
 AGOC: eukaryotic translation initiation factor 3 complex  
 AGOP: translational initiation  
 PGO: protein binding  
 PGOC: null  
 PGOP: null

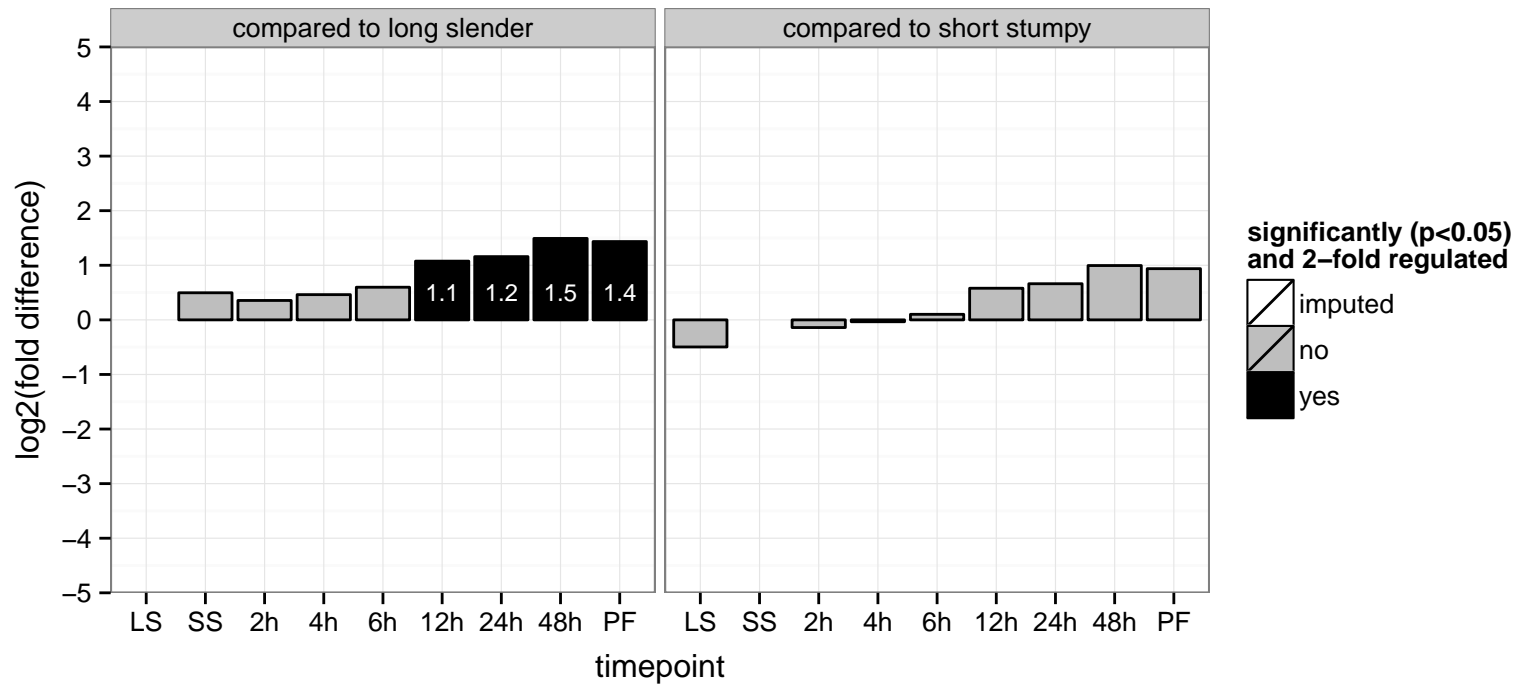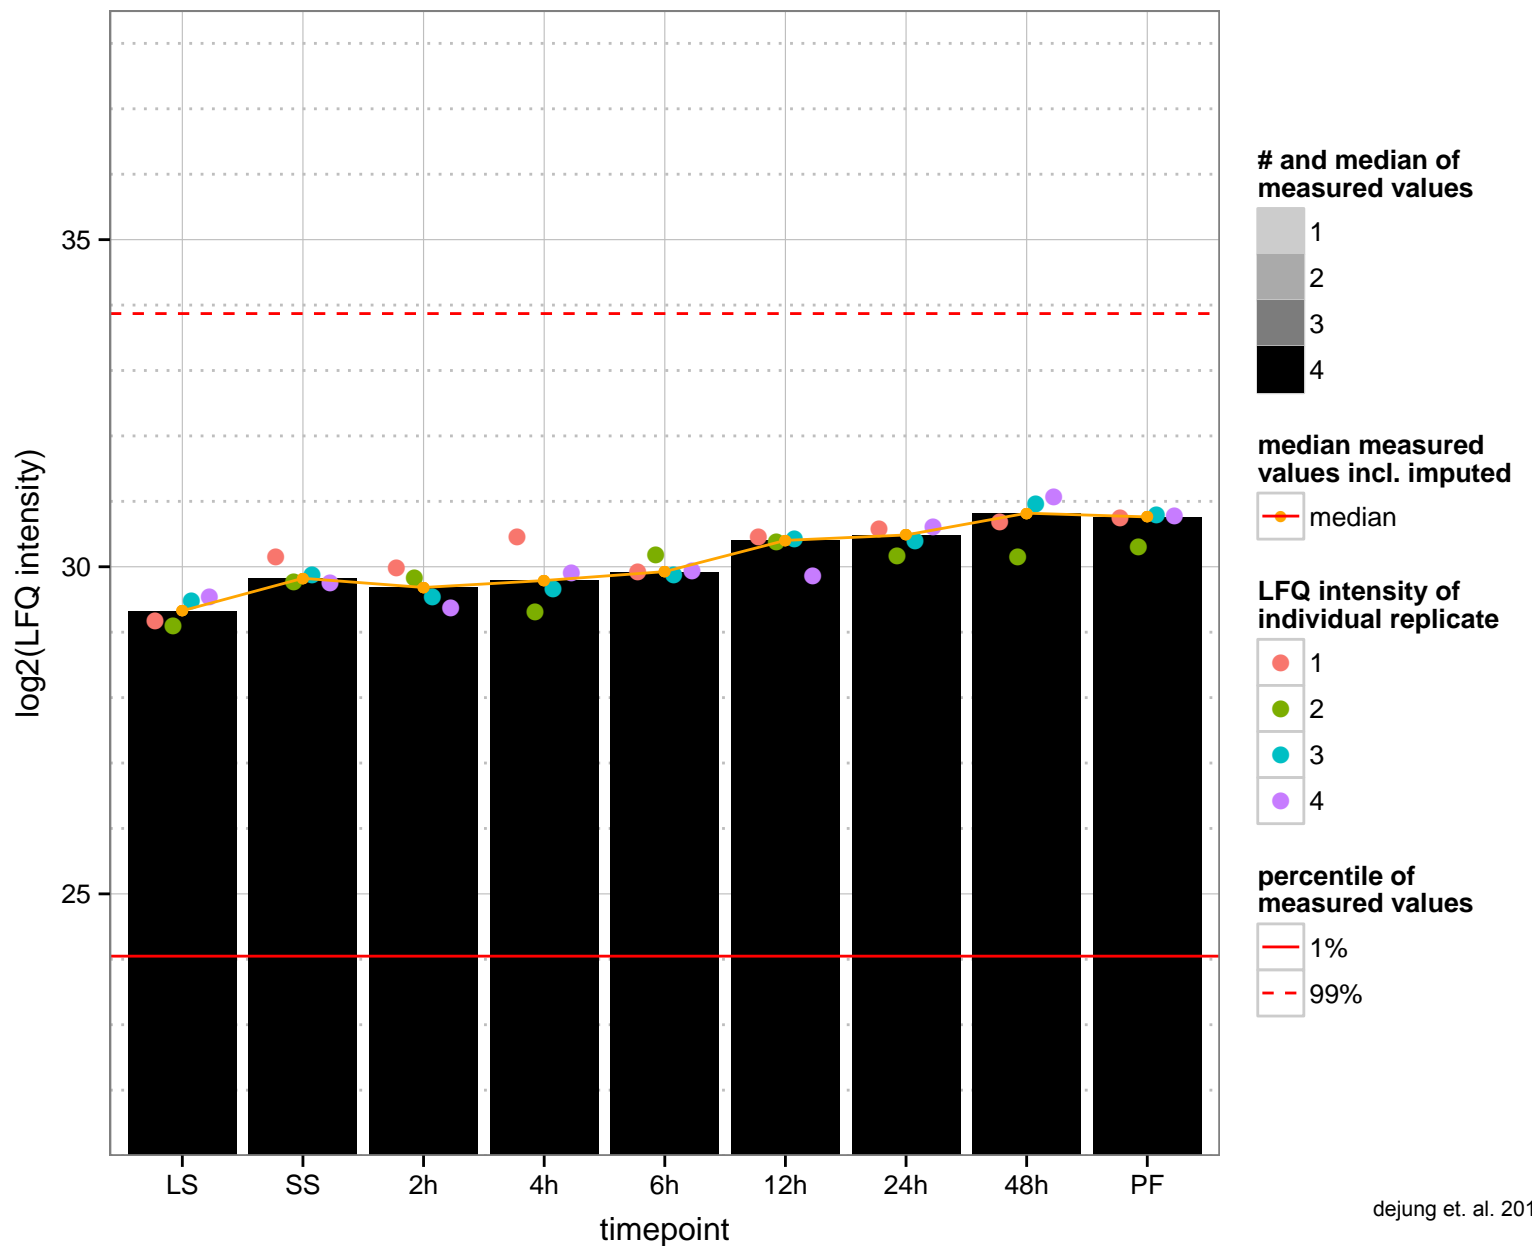

hypothetical protein, conserved  
 Tb927.11.1160  
 AGOF: null  
 AGOC: null  
 AGOP: null  
 PGO: null  
 PGO: null  
 PGO: null

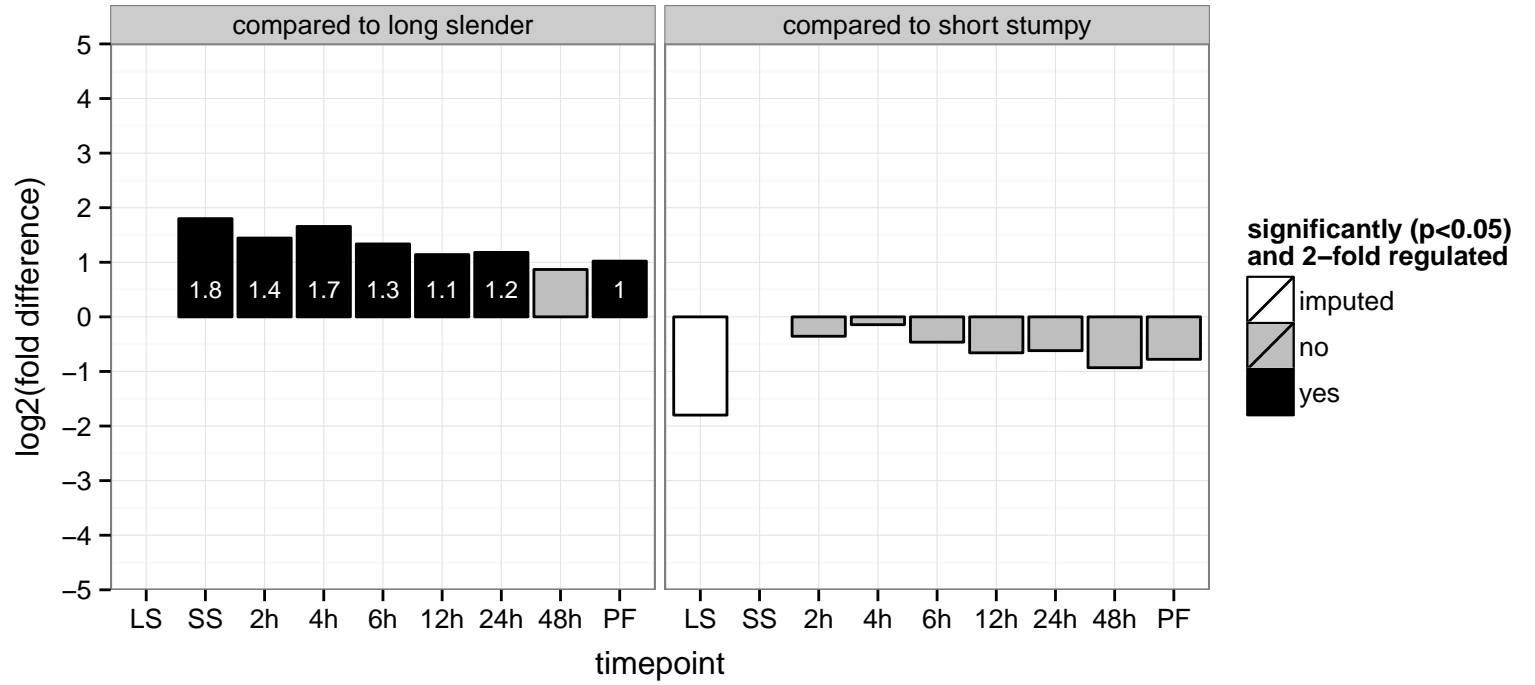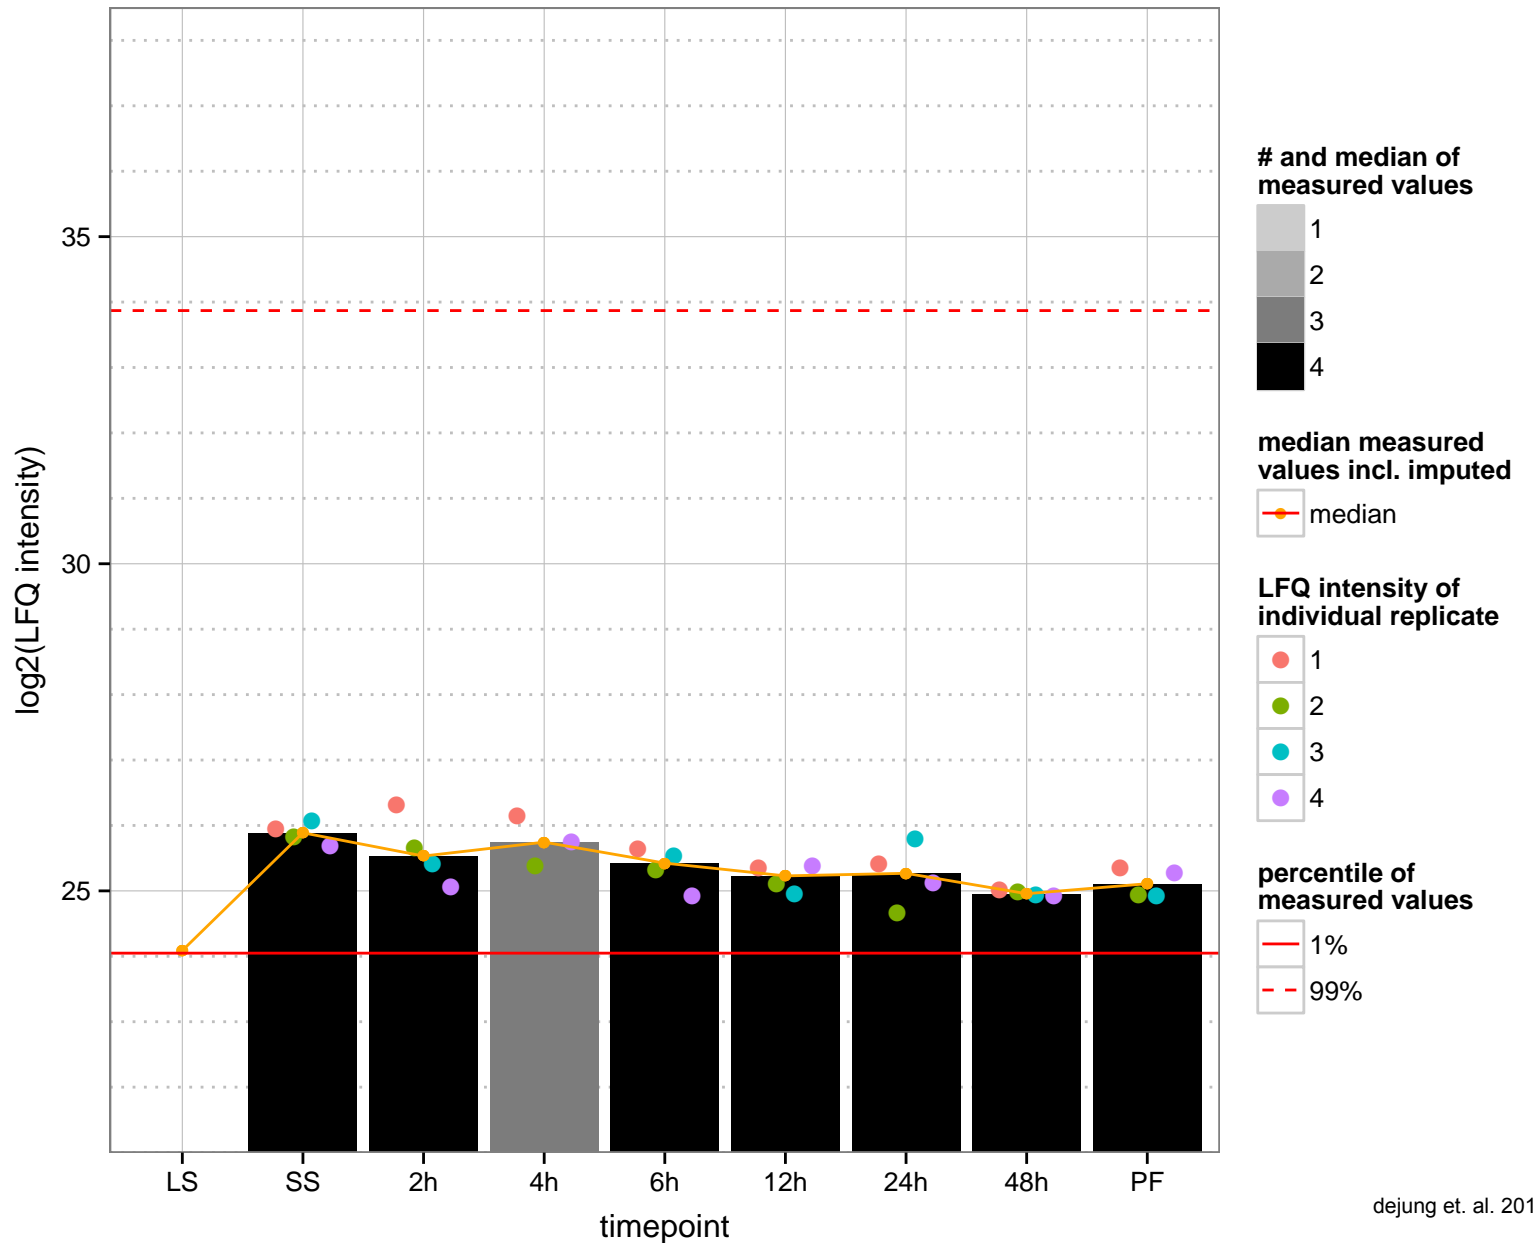

conserved protein  
 Tb927.11.11660  
 AGOF: tRNA (adenine-N1-)-methyltransferase activity  
 AGOC: null  
 AGOP: tRNA methylation  
 PGOF: tRNA (adenine-N1-)-methyltransferase activity  
 PGOC: tRNA (m1A) methyltransferase complex  
 PGOP: tRNA methylation

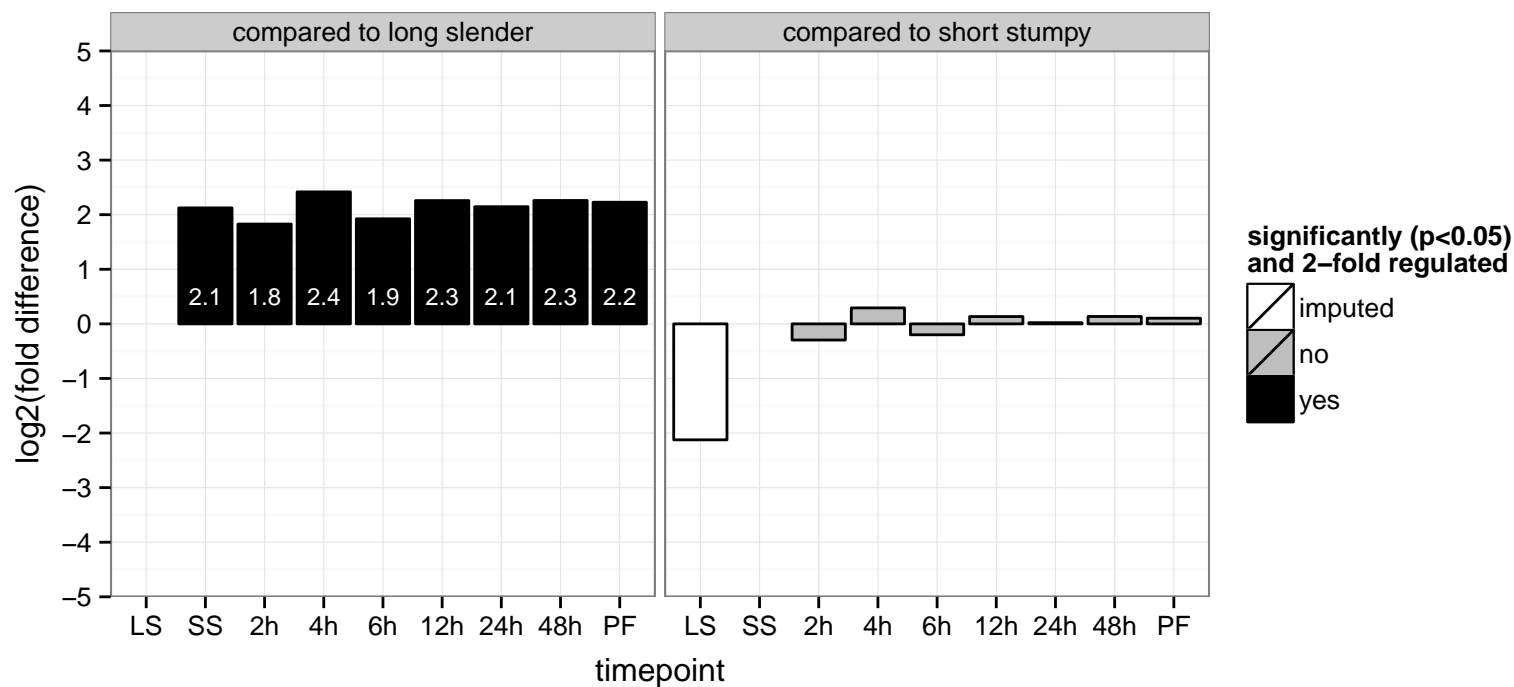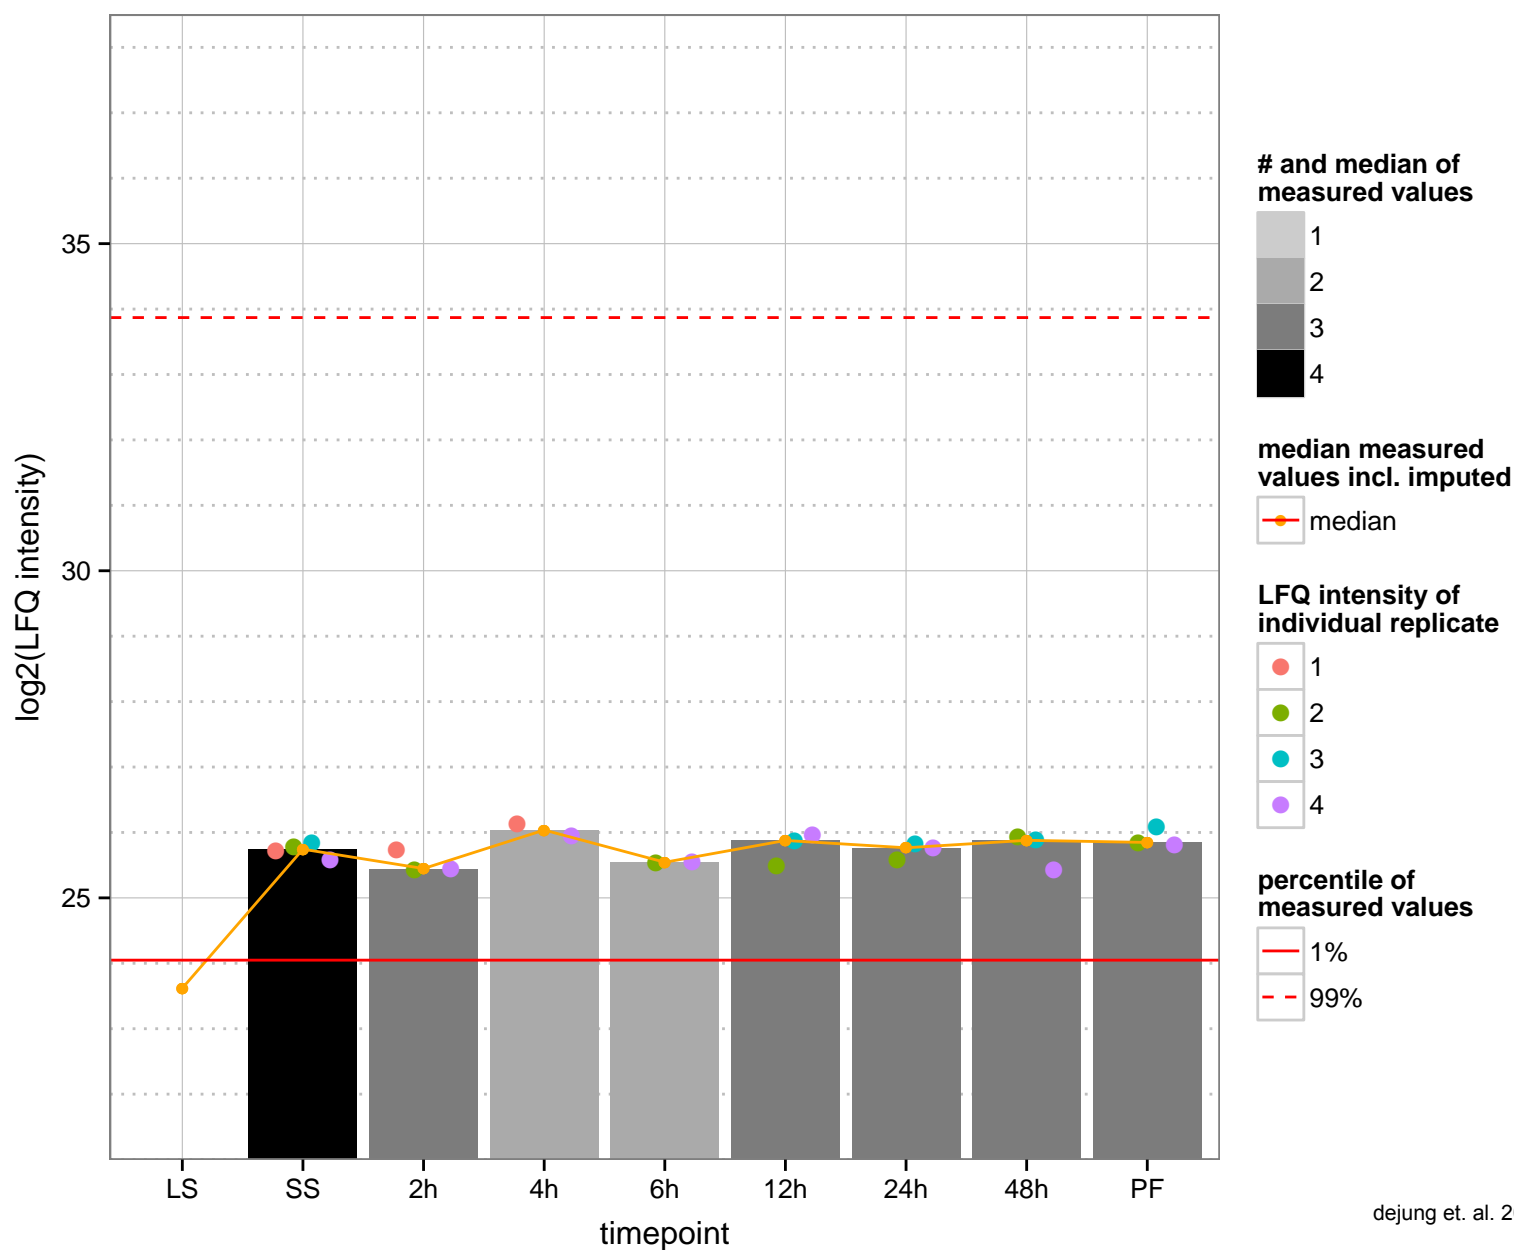



2-oxoglutarate dehydrogenase E2 component, putative  
 Tb927.11.11680  
 AGOF: dihydrolipoyllysine-residue succinyltransferase activity  
 AGOC: mitochondrion, oxoglutarate dehydrogenase complex  
 AGOP: tricarboxylic acid cycle  
 PGO: transferase activity, transferring acyl groups  
 PGO: null  
 PGOP: metabolic process

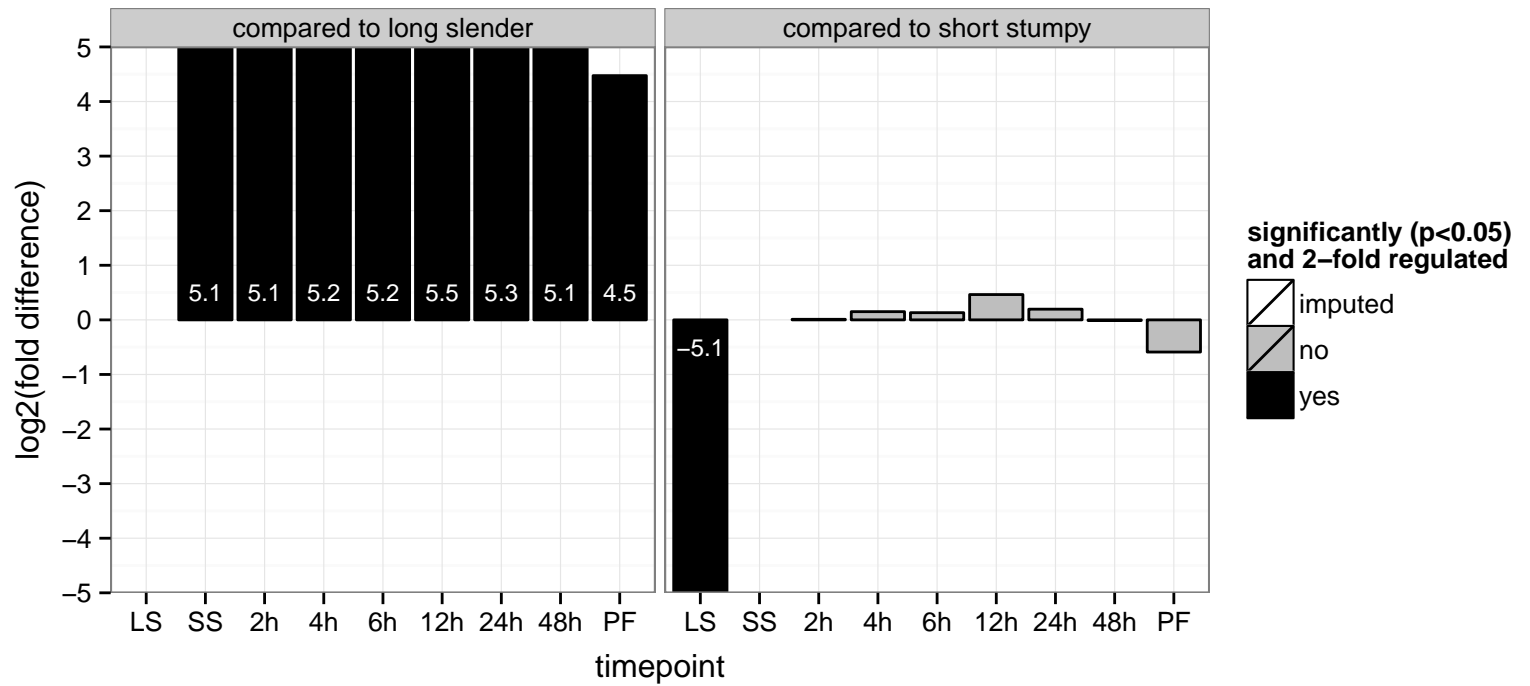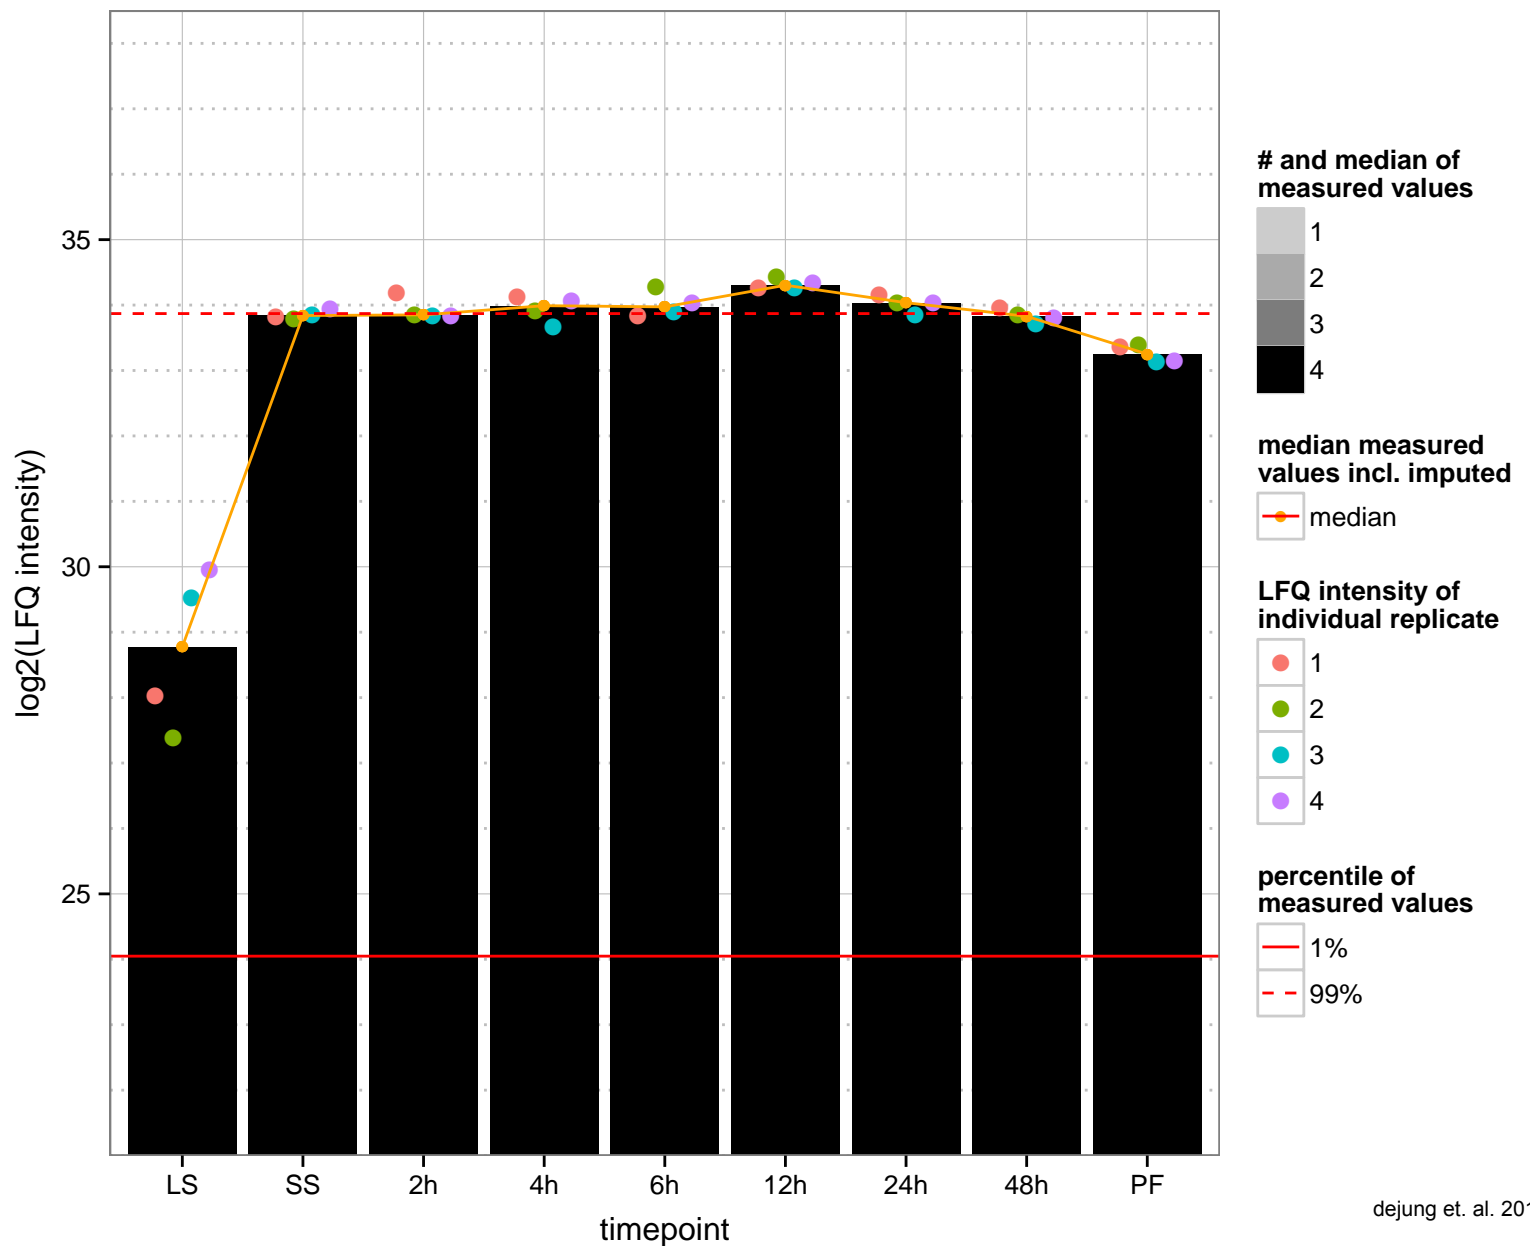

hypothetical protein, conserved  
 Tb927.11.1170  
 AGOF: null  
 AGOC: null  
 AGOP: null  
 PGO: null  
 PGOC: null  
 PGOP: null

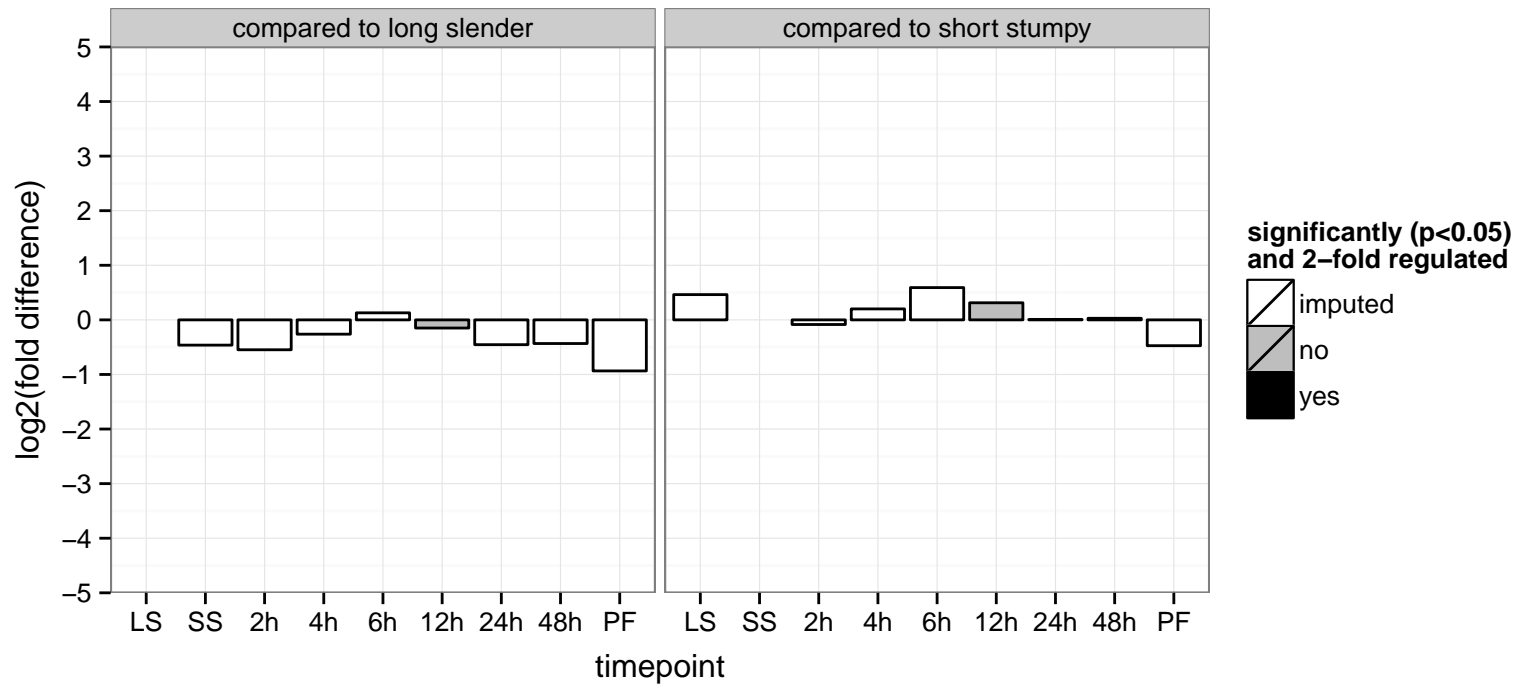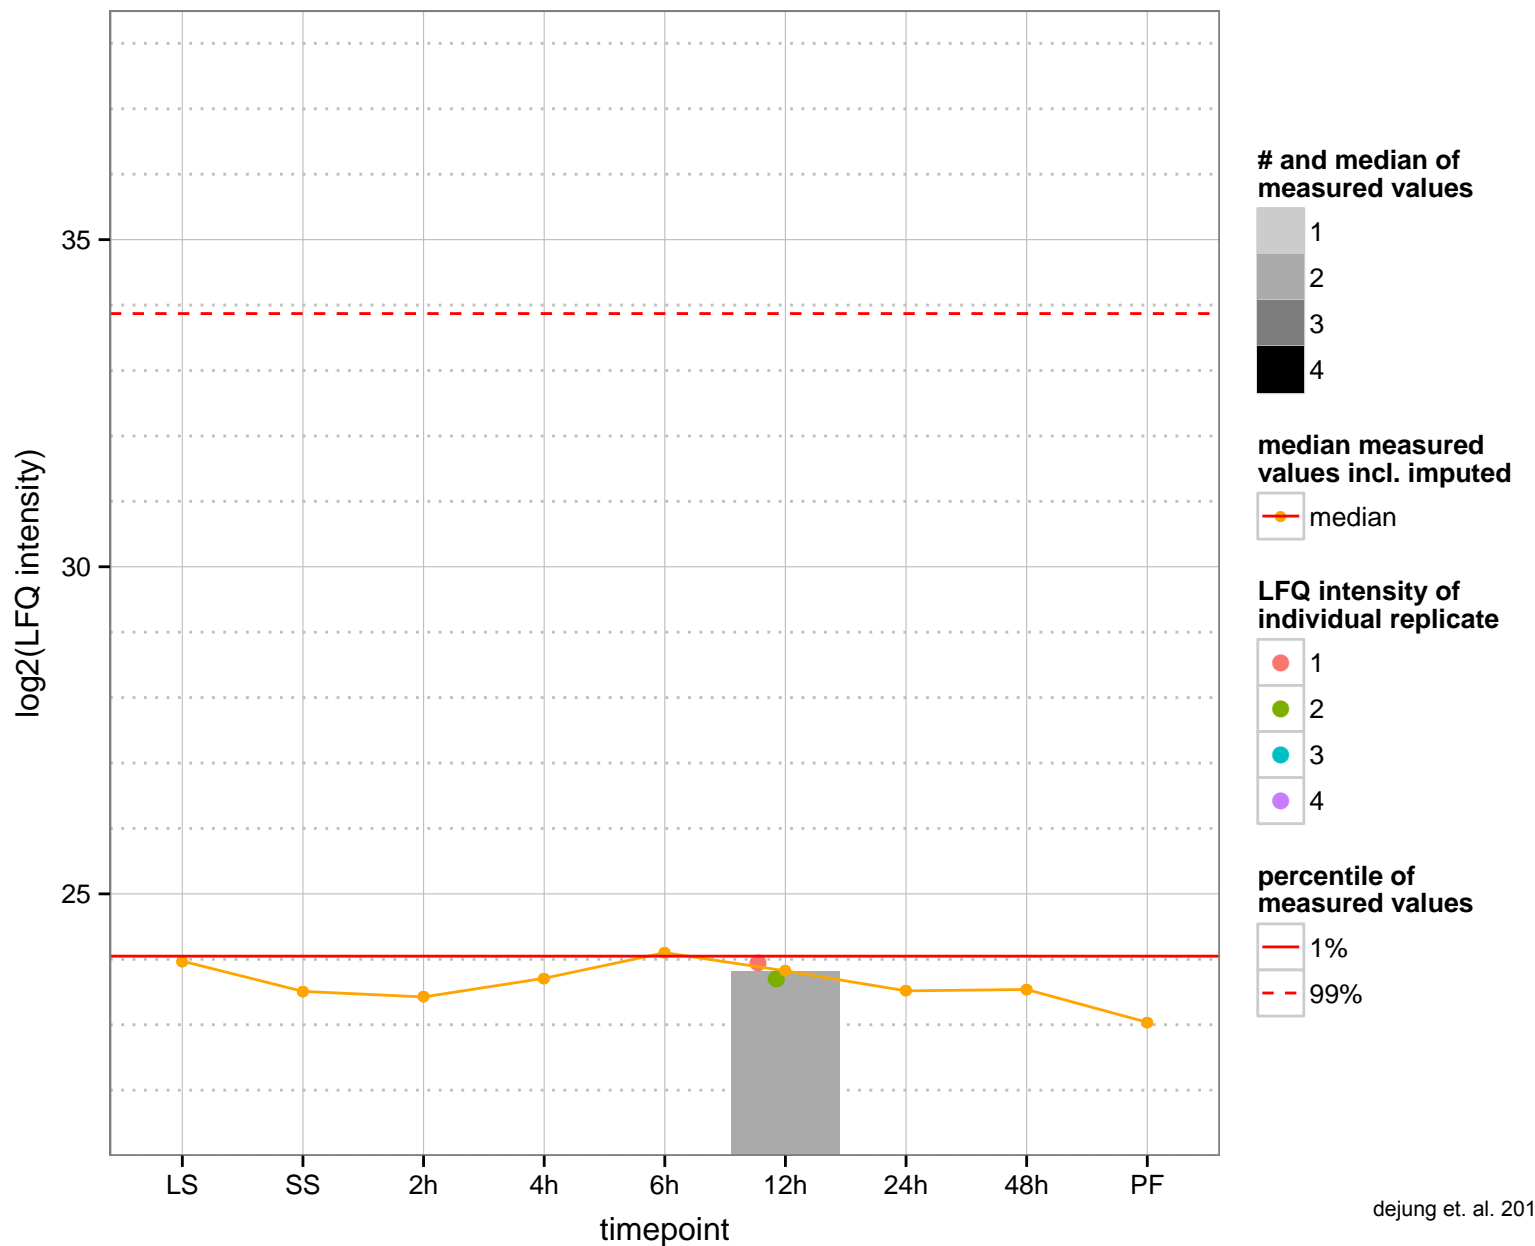

hypothetical protein, conserved  
 Tb927.11.11700  
 AGOF: transferase activity  
 AGOC: null  
 AGOP: null  
 PGOF: nucleotidyltransferase activity, transferase activity  
 PGOC: null  
 PGOP: biosynthetic process

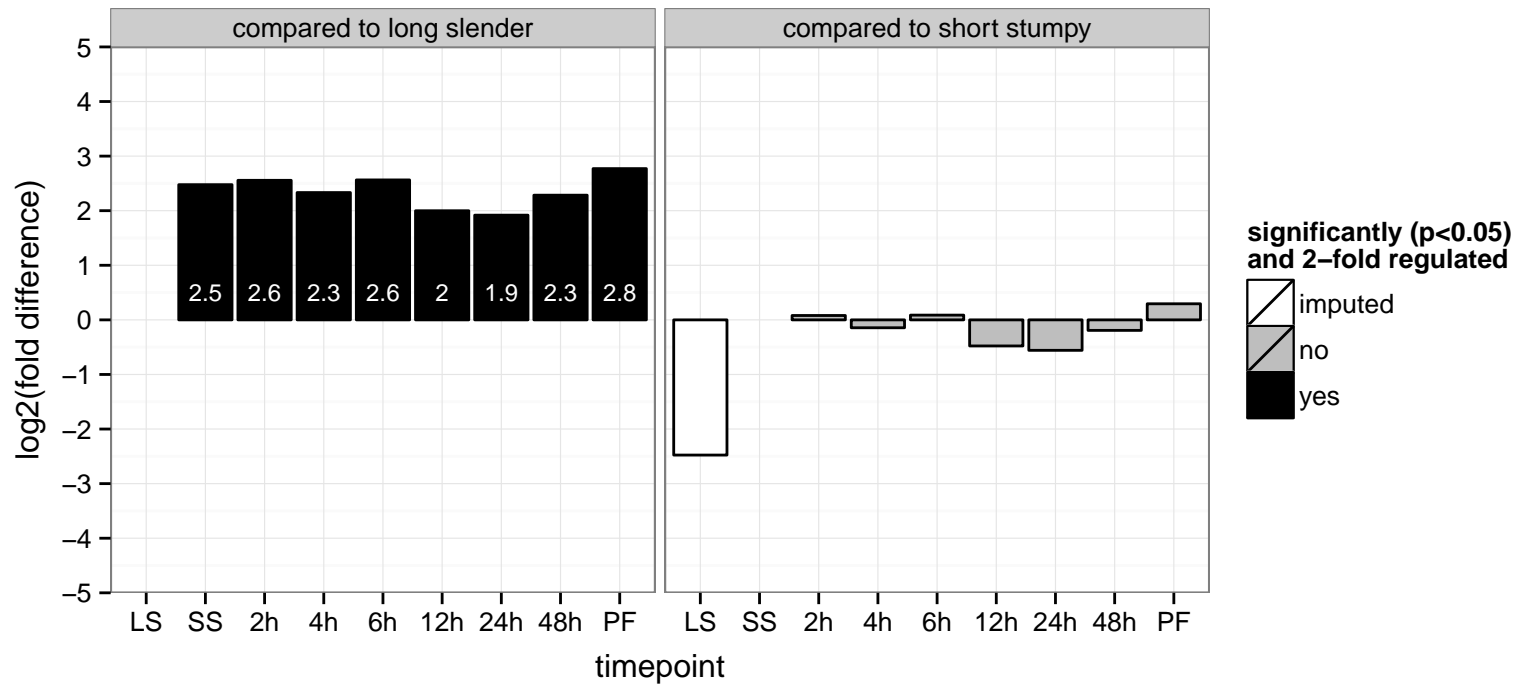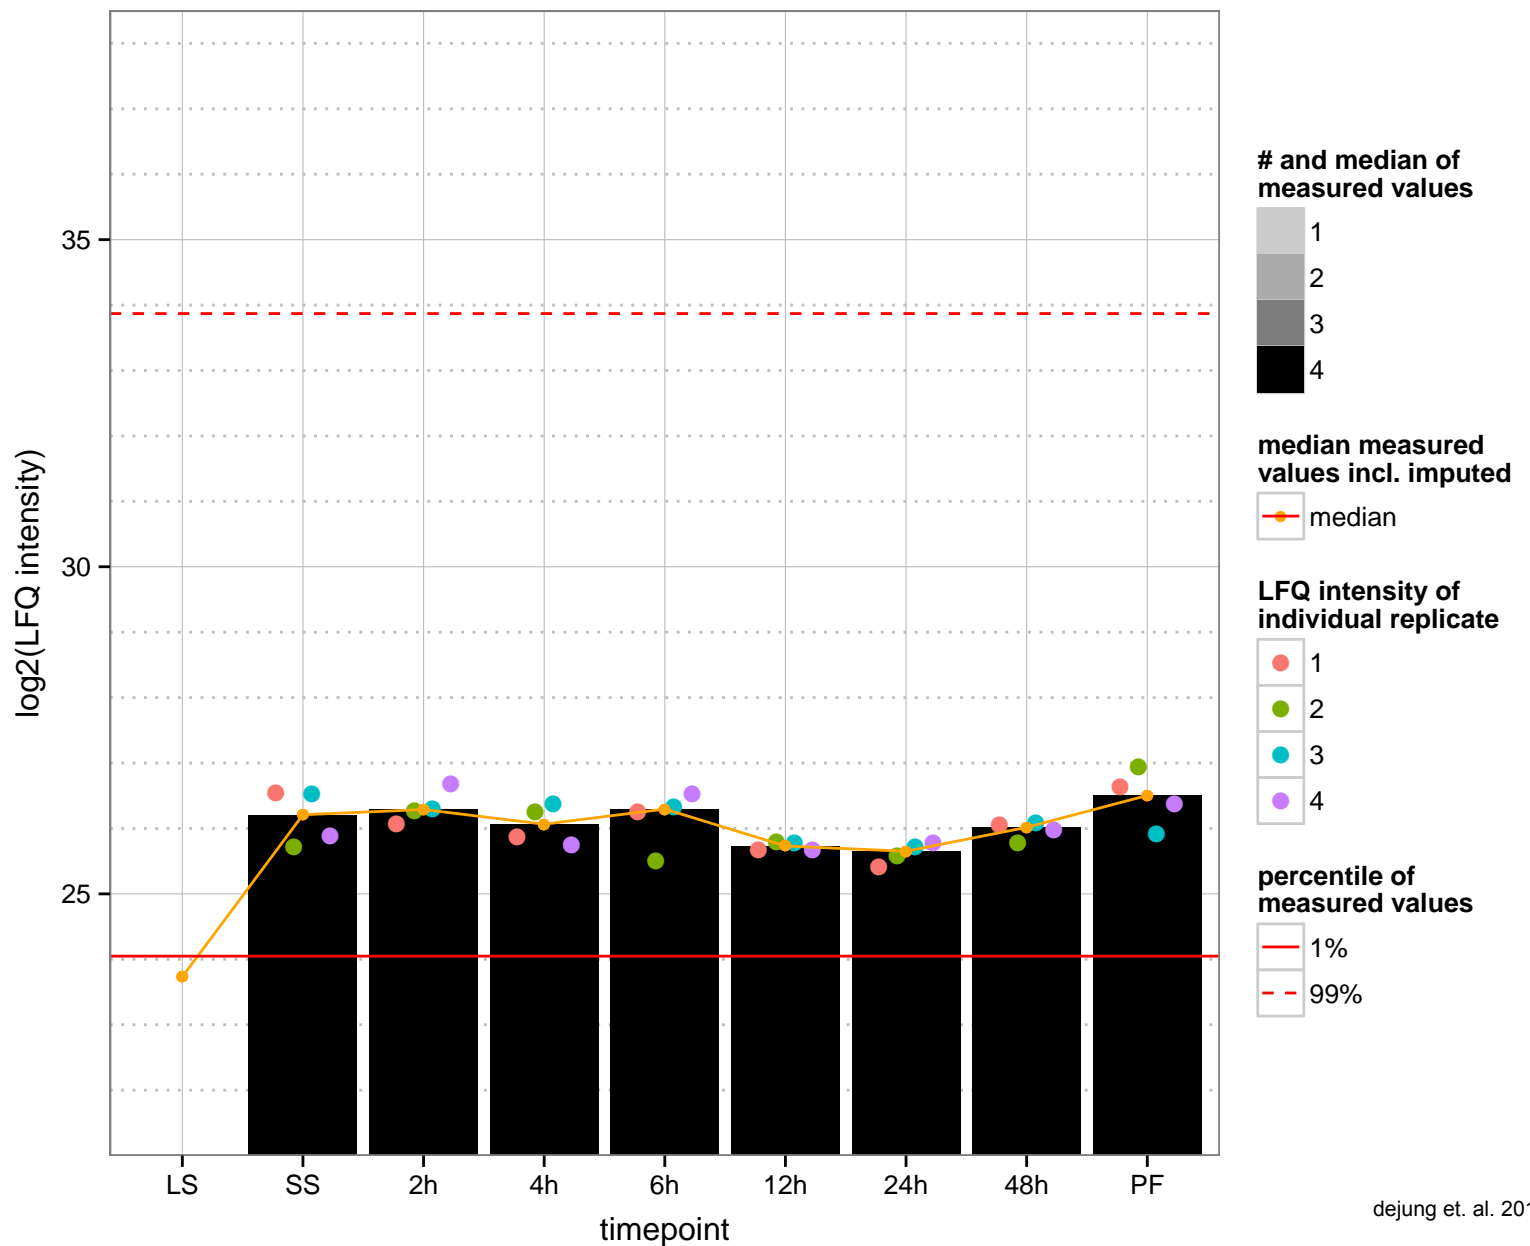

FG-GAP repeat protein, putative, integrin alpha chain protein  
 Tb927.11.11720  
 AGOF: null  
 AGOC: integral to membrane, integrin complex  
 AGOP: cell-matrix adhesion  
 PGOF: null  
 PGOC: null  
 PGOP: null

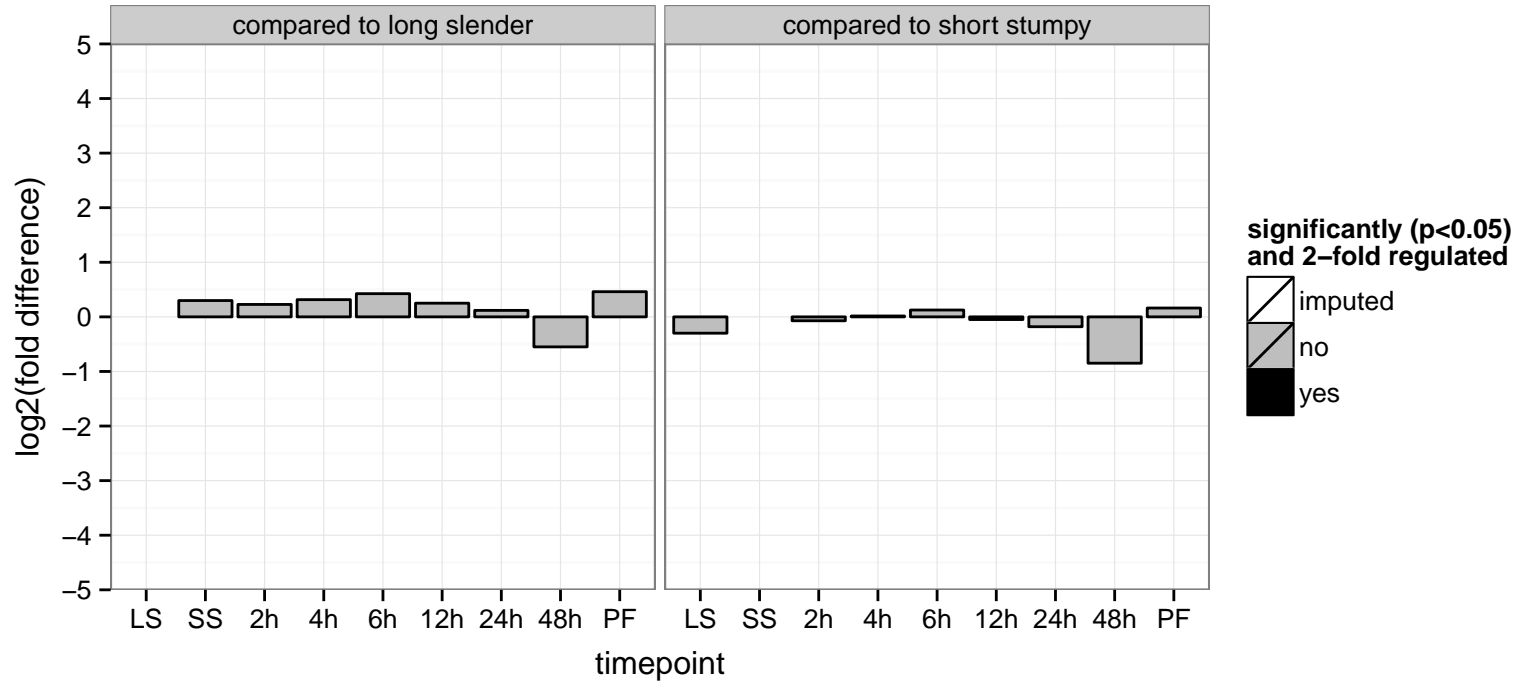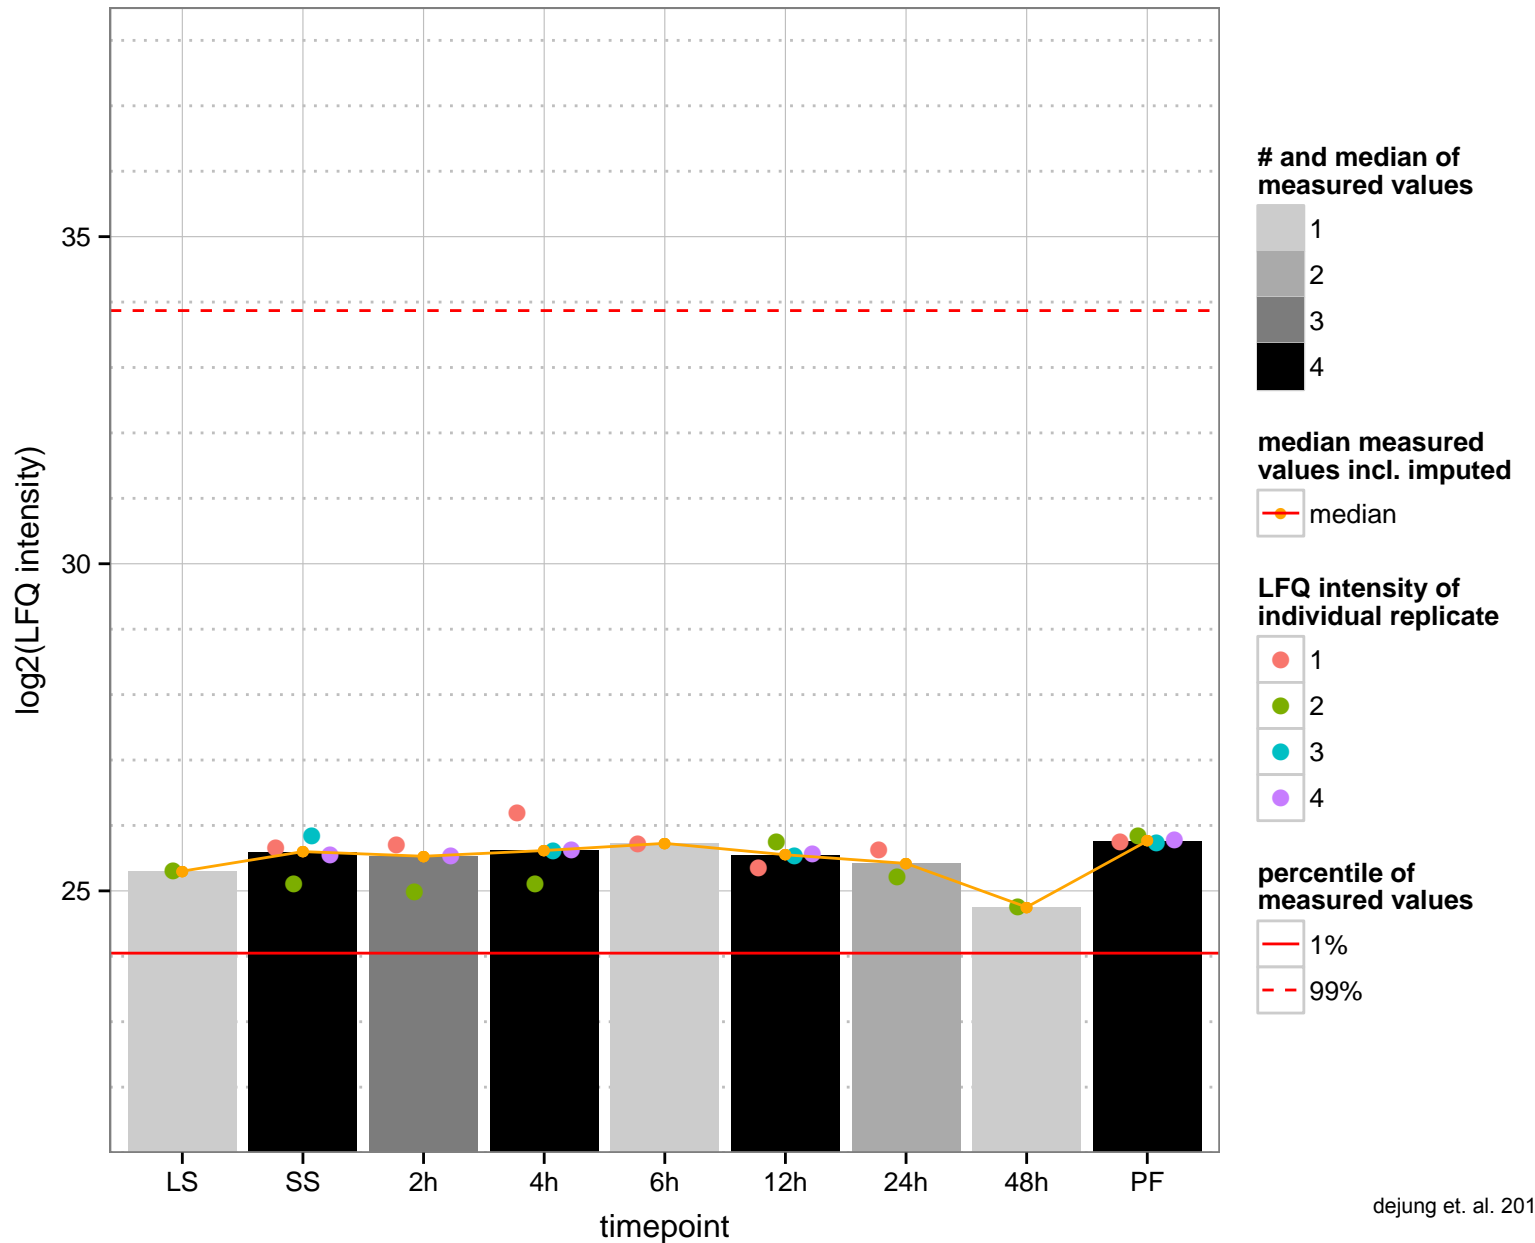

MRP protein, putative  
 Tb927.11.11730  
 AGOF: nucleotide binding  
 AGOC: null  
 AGOP: null  
 PGO: null  
 PGOC: null  
 PGOP: null

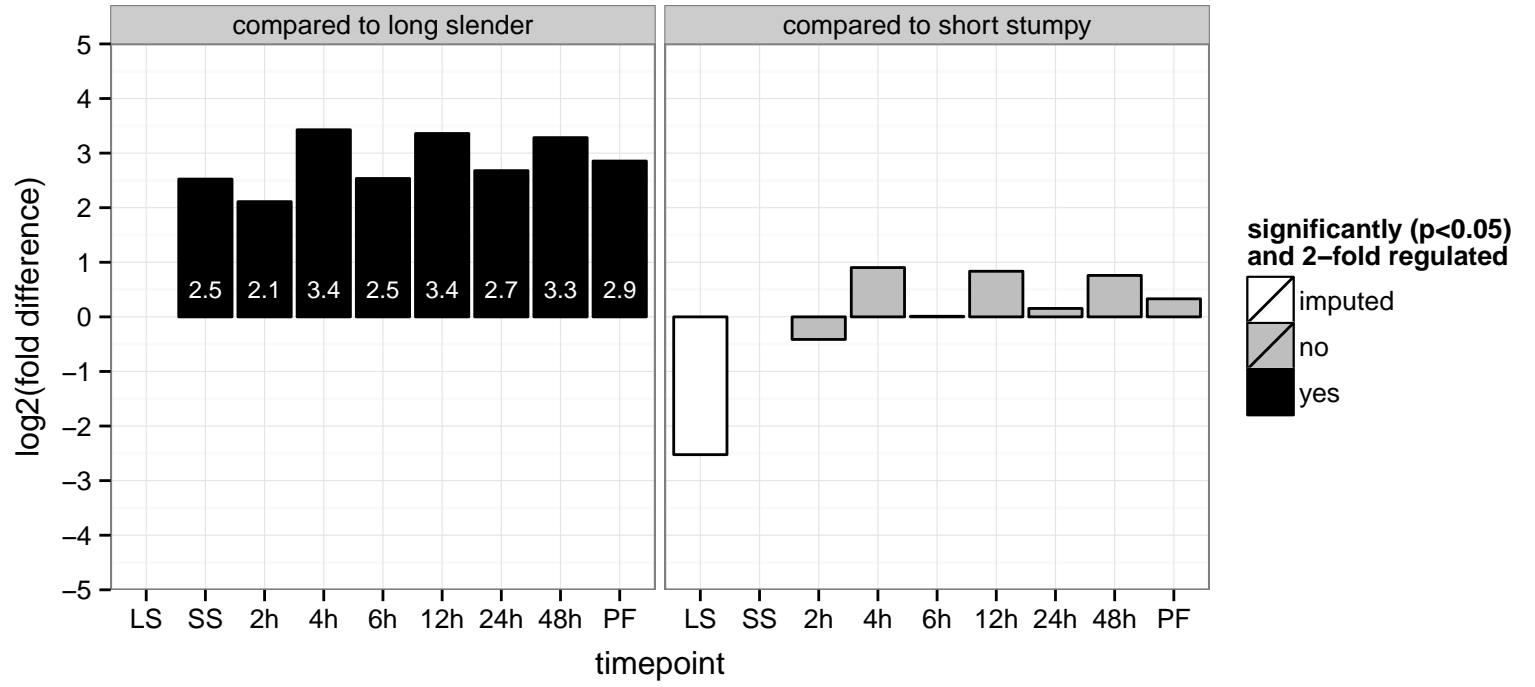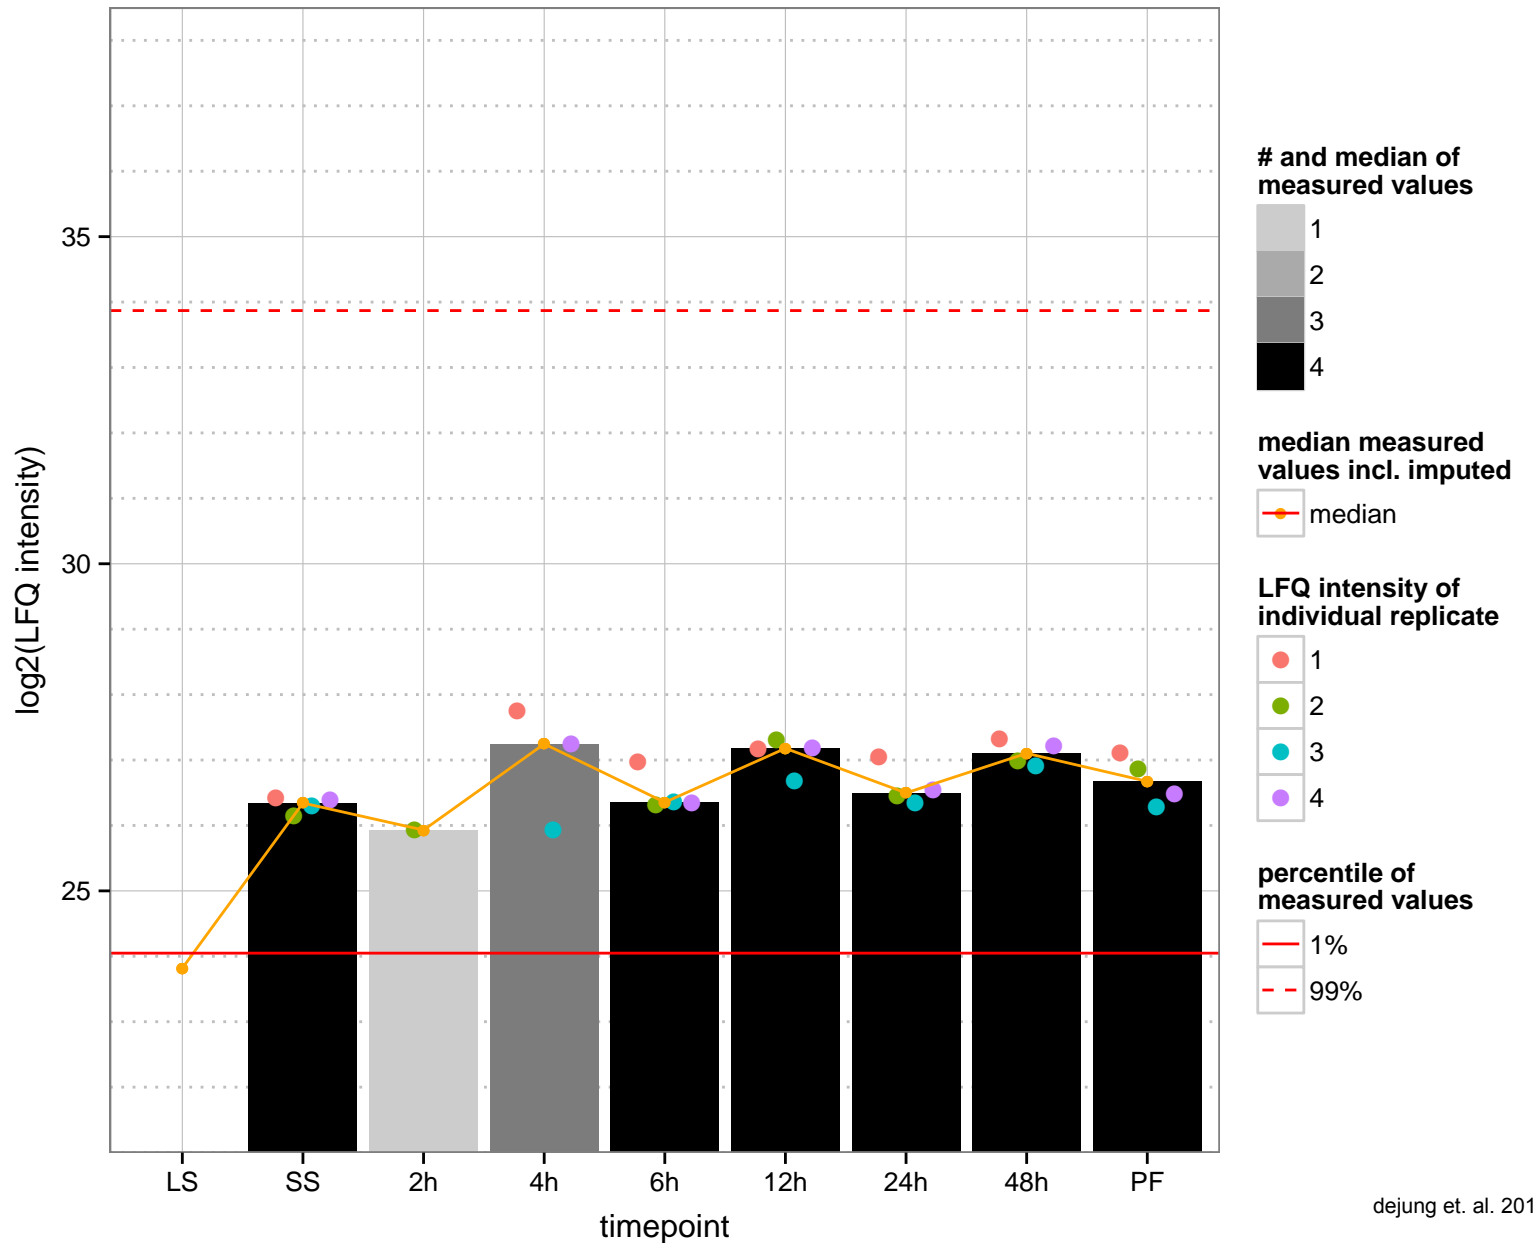

NA, splicing factor 3B subunit 1, putative  
 Tb927.11.11850  
 AGOF: NA, null  
 AGOC: NA, null  
 AGOP: NA, null  
 PGO: NA, binding, protein binding  
 PGO: NA, null  
 PGO: NA, null

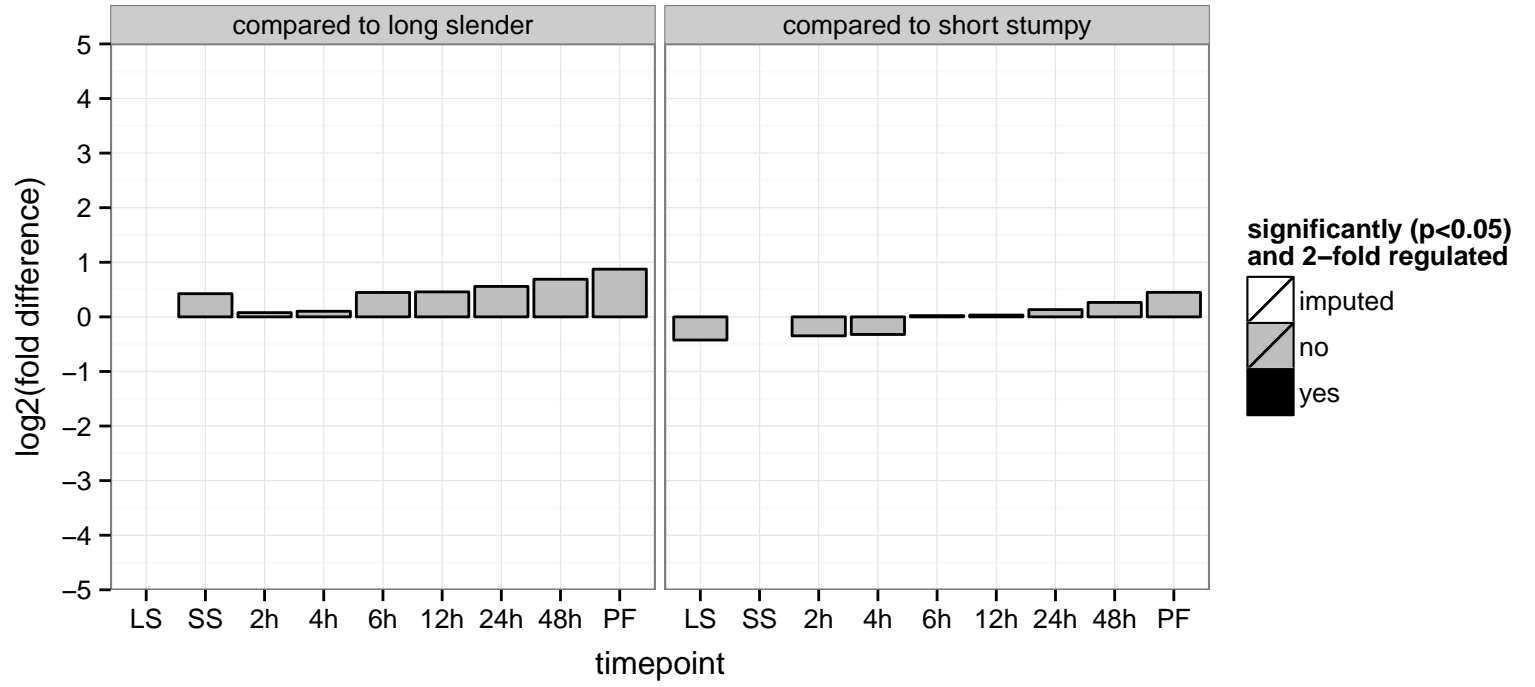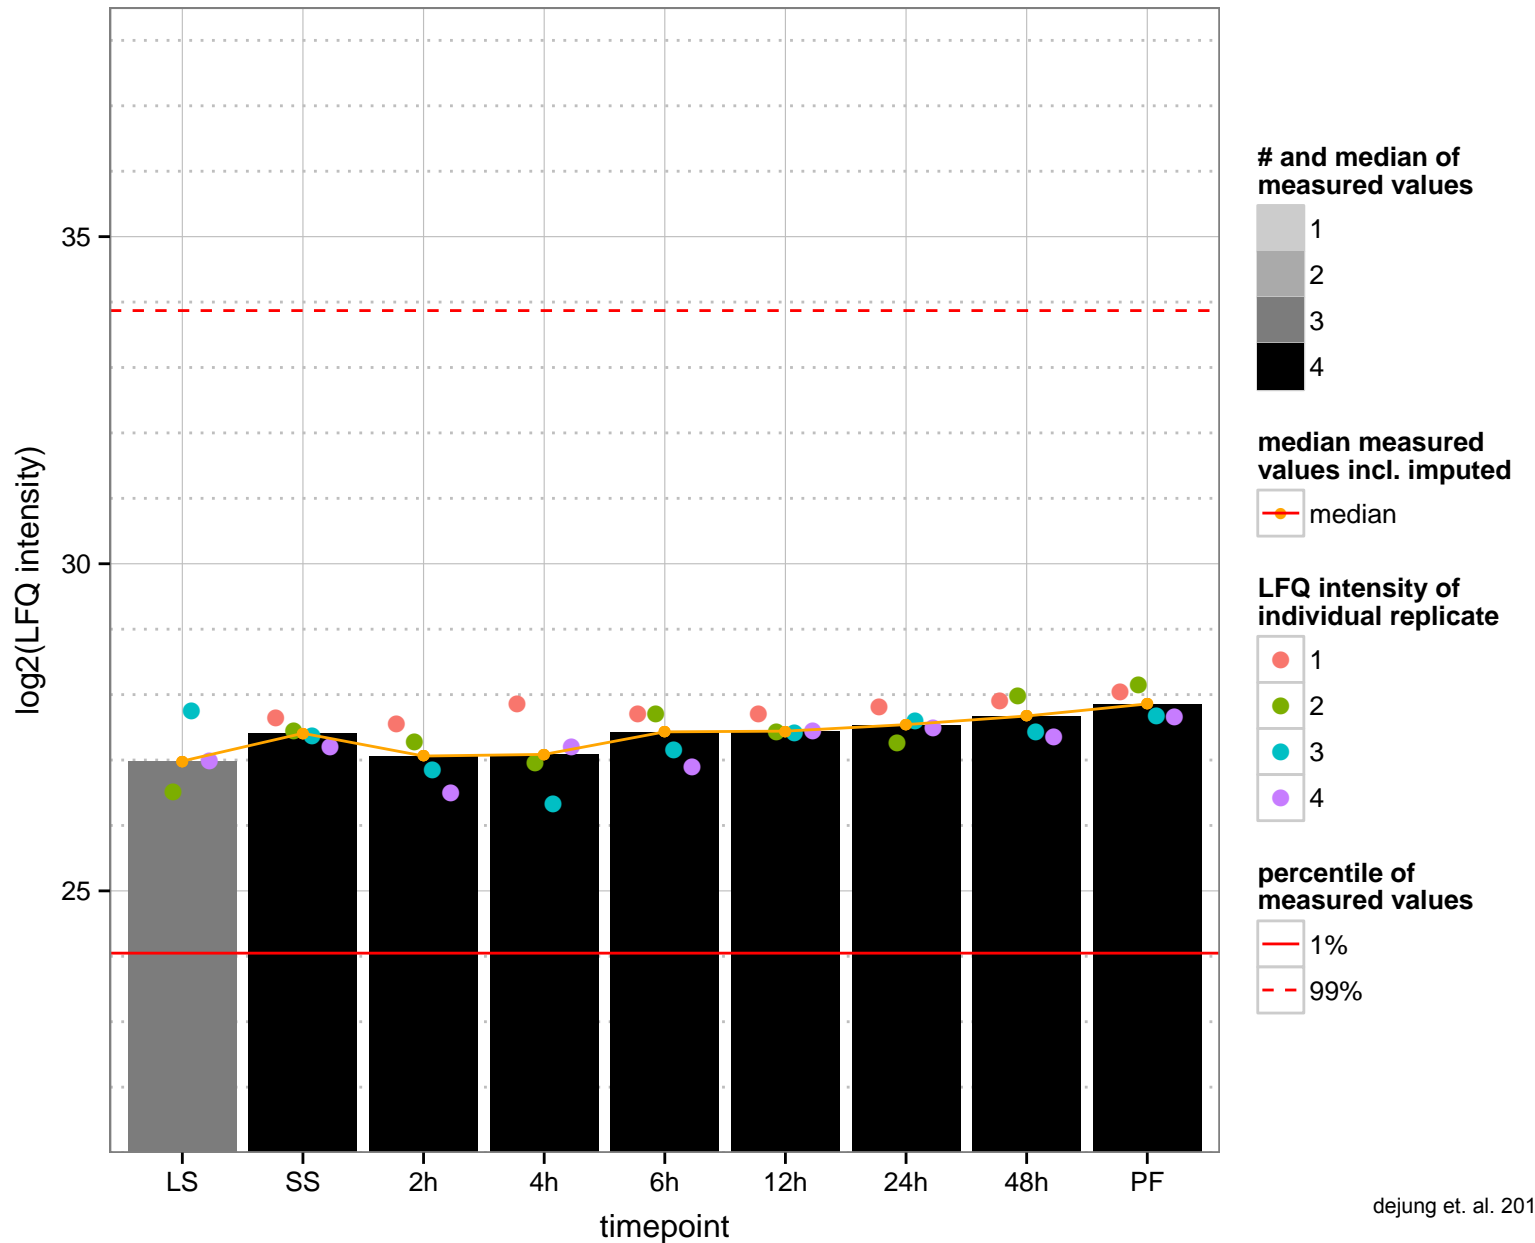

hypothetical protein, conserved  
 Tb927.11.11870  
 AGOF: null  
 AGOC: mitochondrion  
 AGOP: null  
 PGO: null  
 PGOC: null  
 PGOP: null

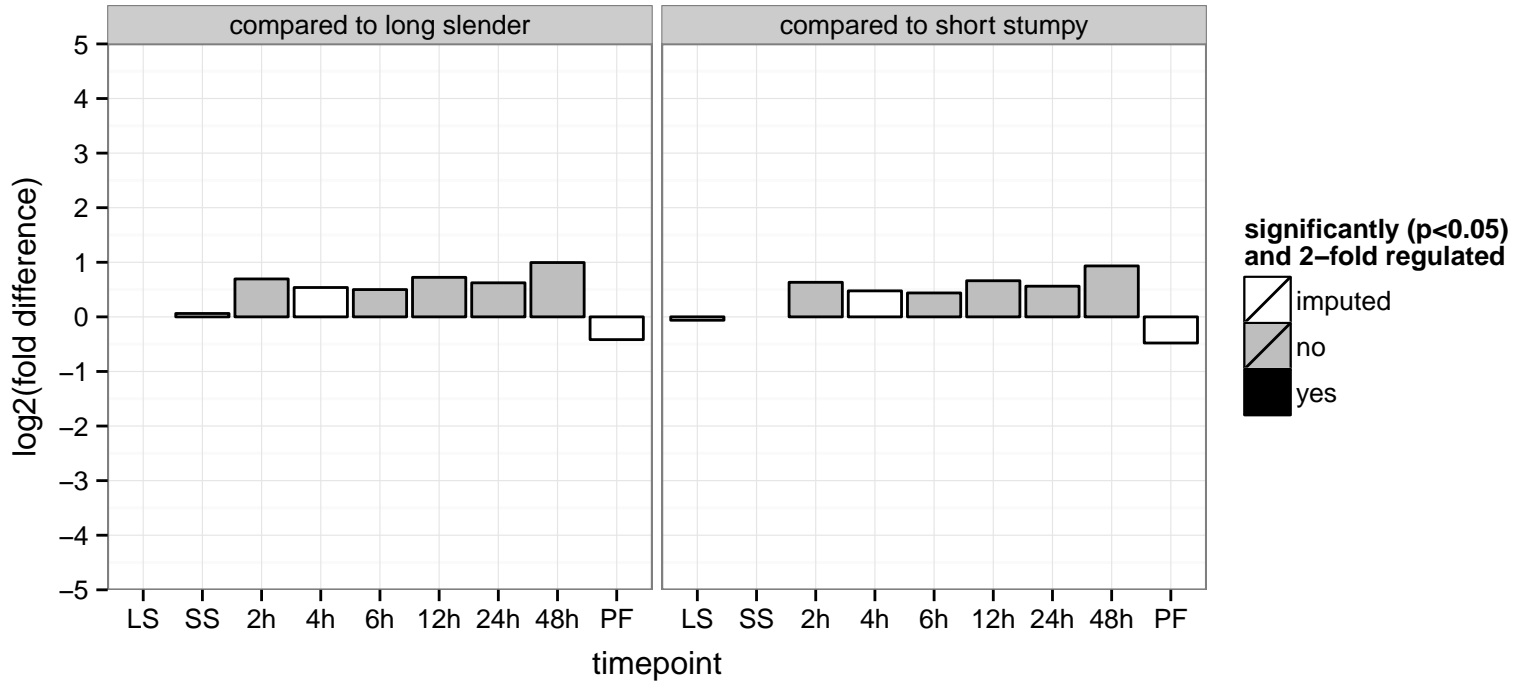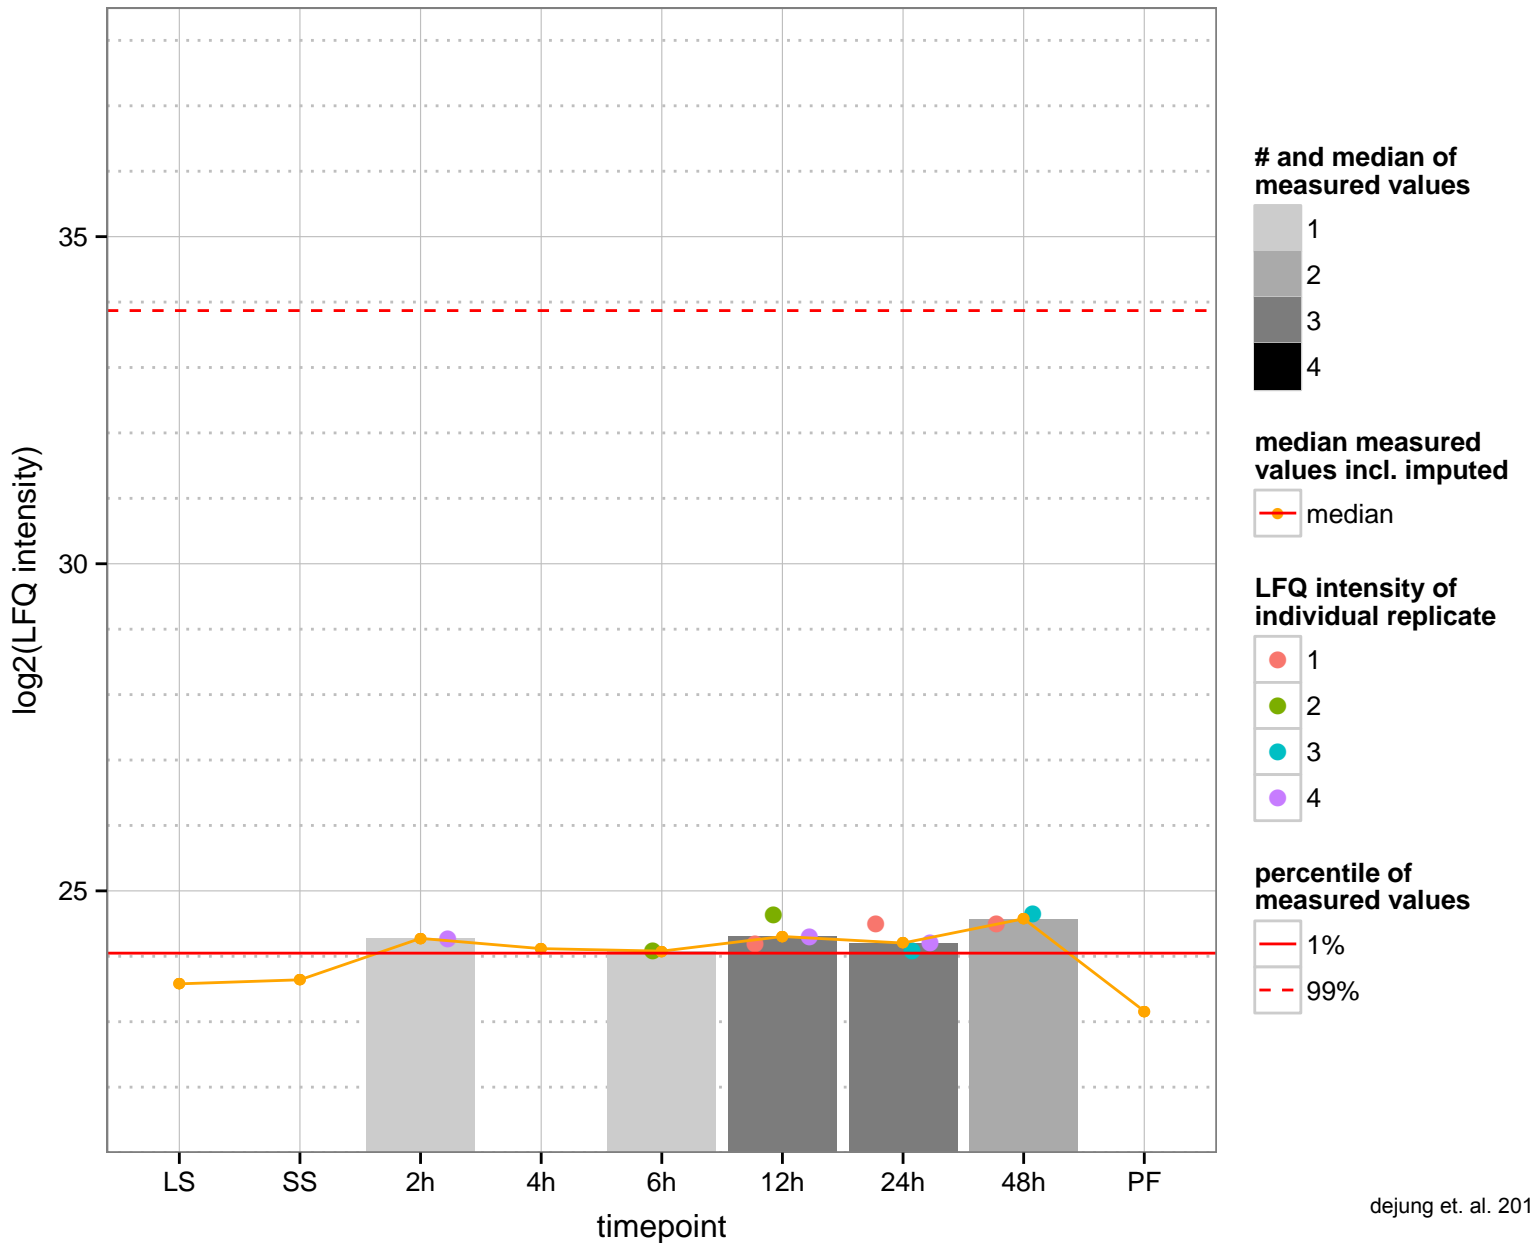

conserved protein  
 Tb927.11.11880  
 AGOF: null  
 AGOC: null  
 AGOP: null  
 PGO: protein binding  
 PGOC: null  
 PGOP: null

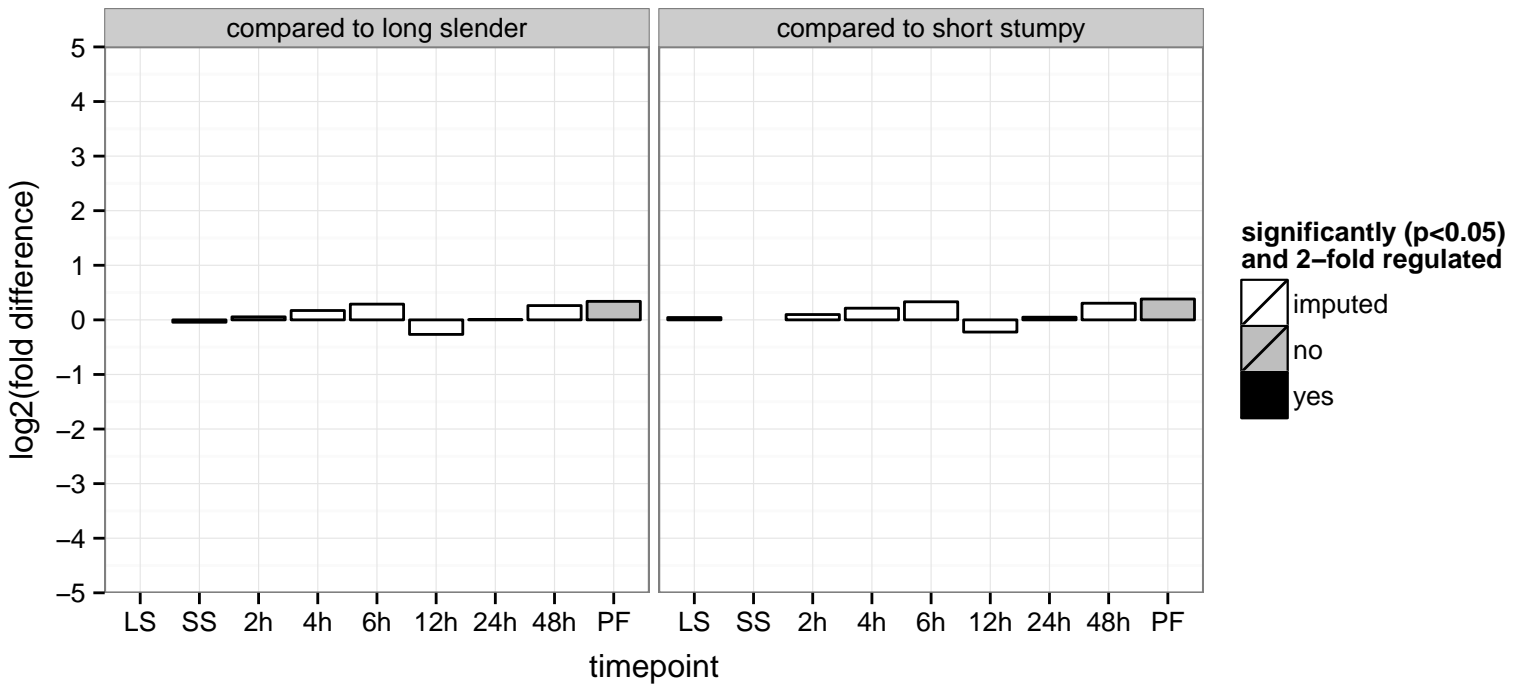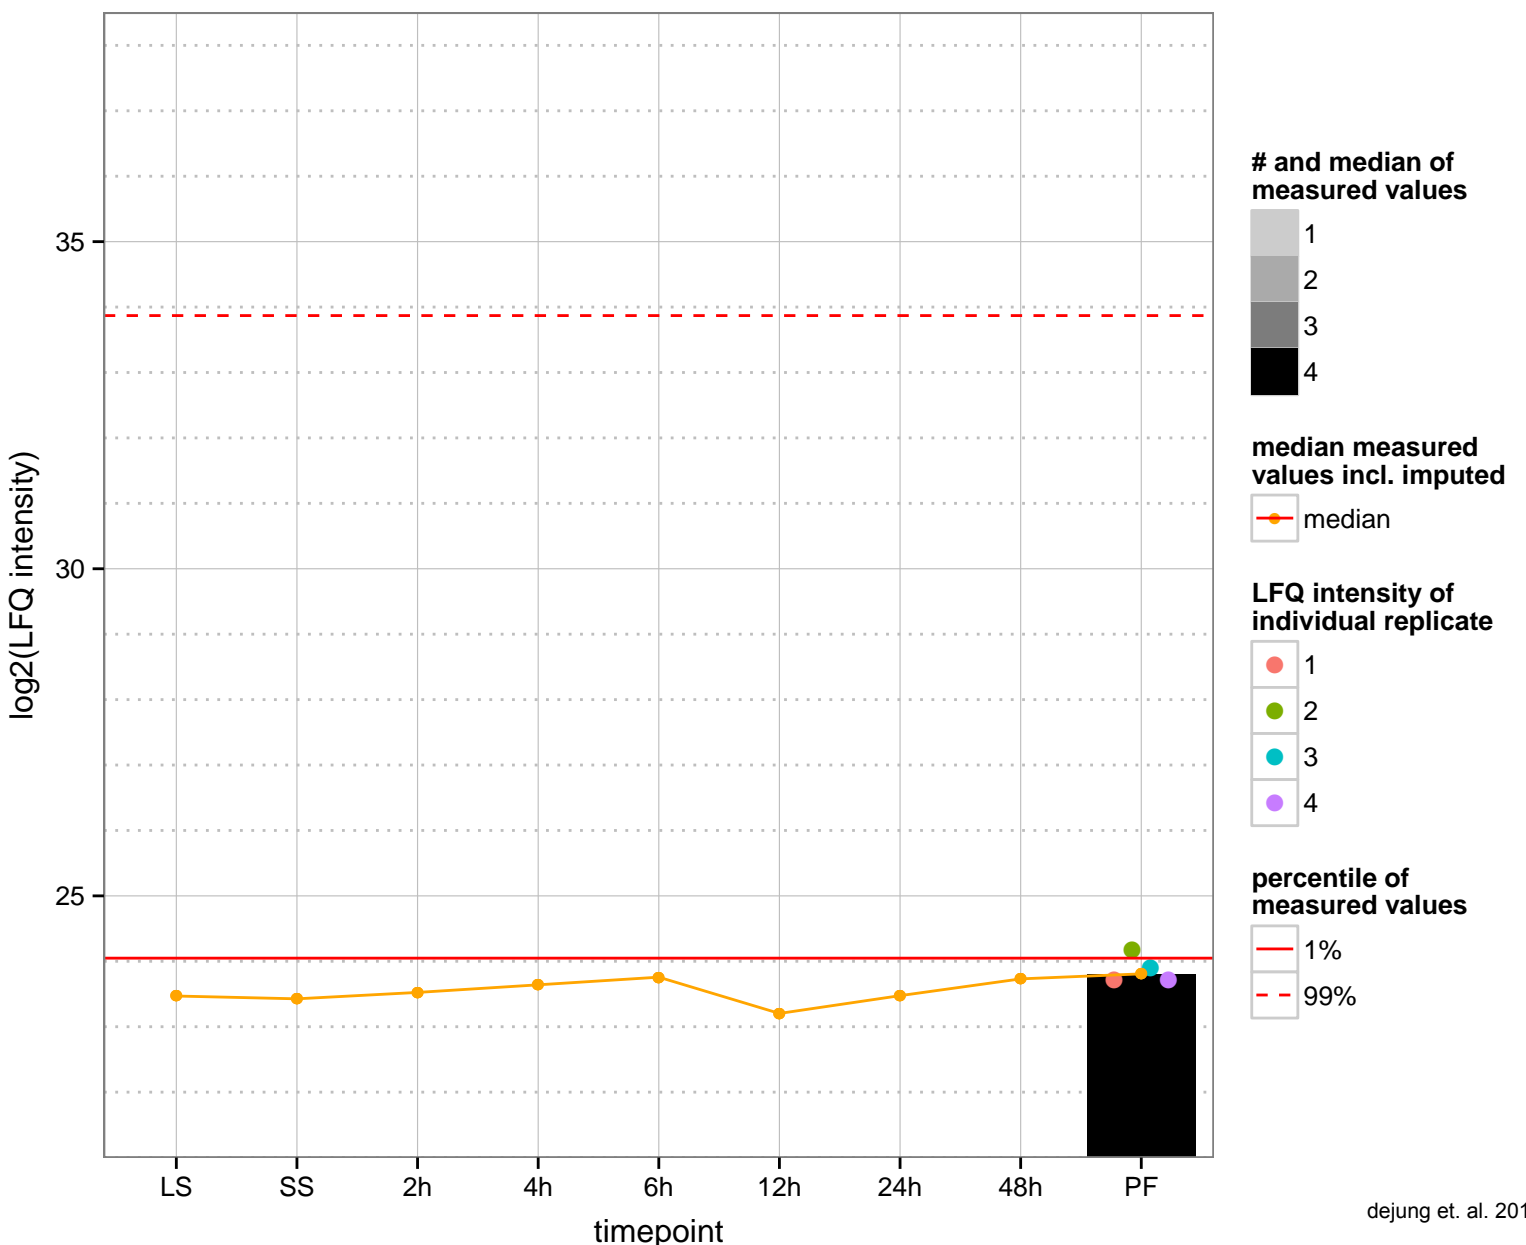



coatomer gamma subunit, putative, cytosolic coat protein, putative (TbCoatomerGamma)  
 Tb927.11.11900  
 AGOF: structural molecule activity  
 AGOC: COPI vesicle coat, Golgi-associated vesicle  
 AGOP: intracellular protein transport, retrograde vesicle-mediated transport, Golgi to ER  
 PGO: binding, structural molecule activity  
 PGO: Golgi-associated vesicle, membrane coat  
 PGO: intracellular protein transport, vesicle-mediated transport

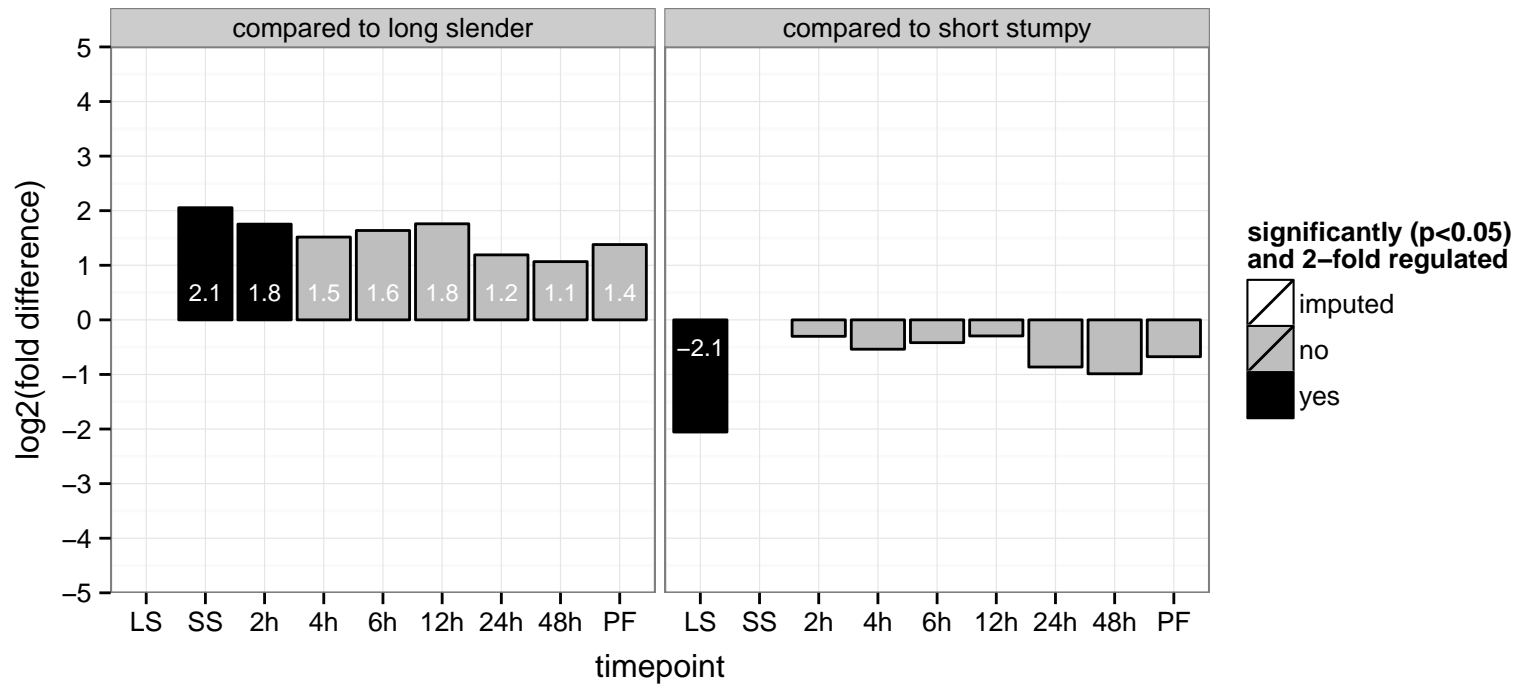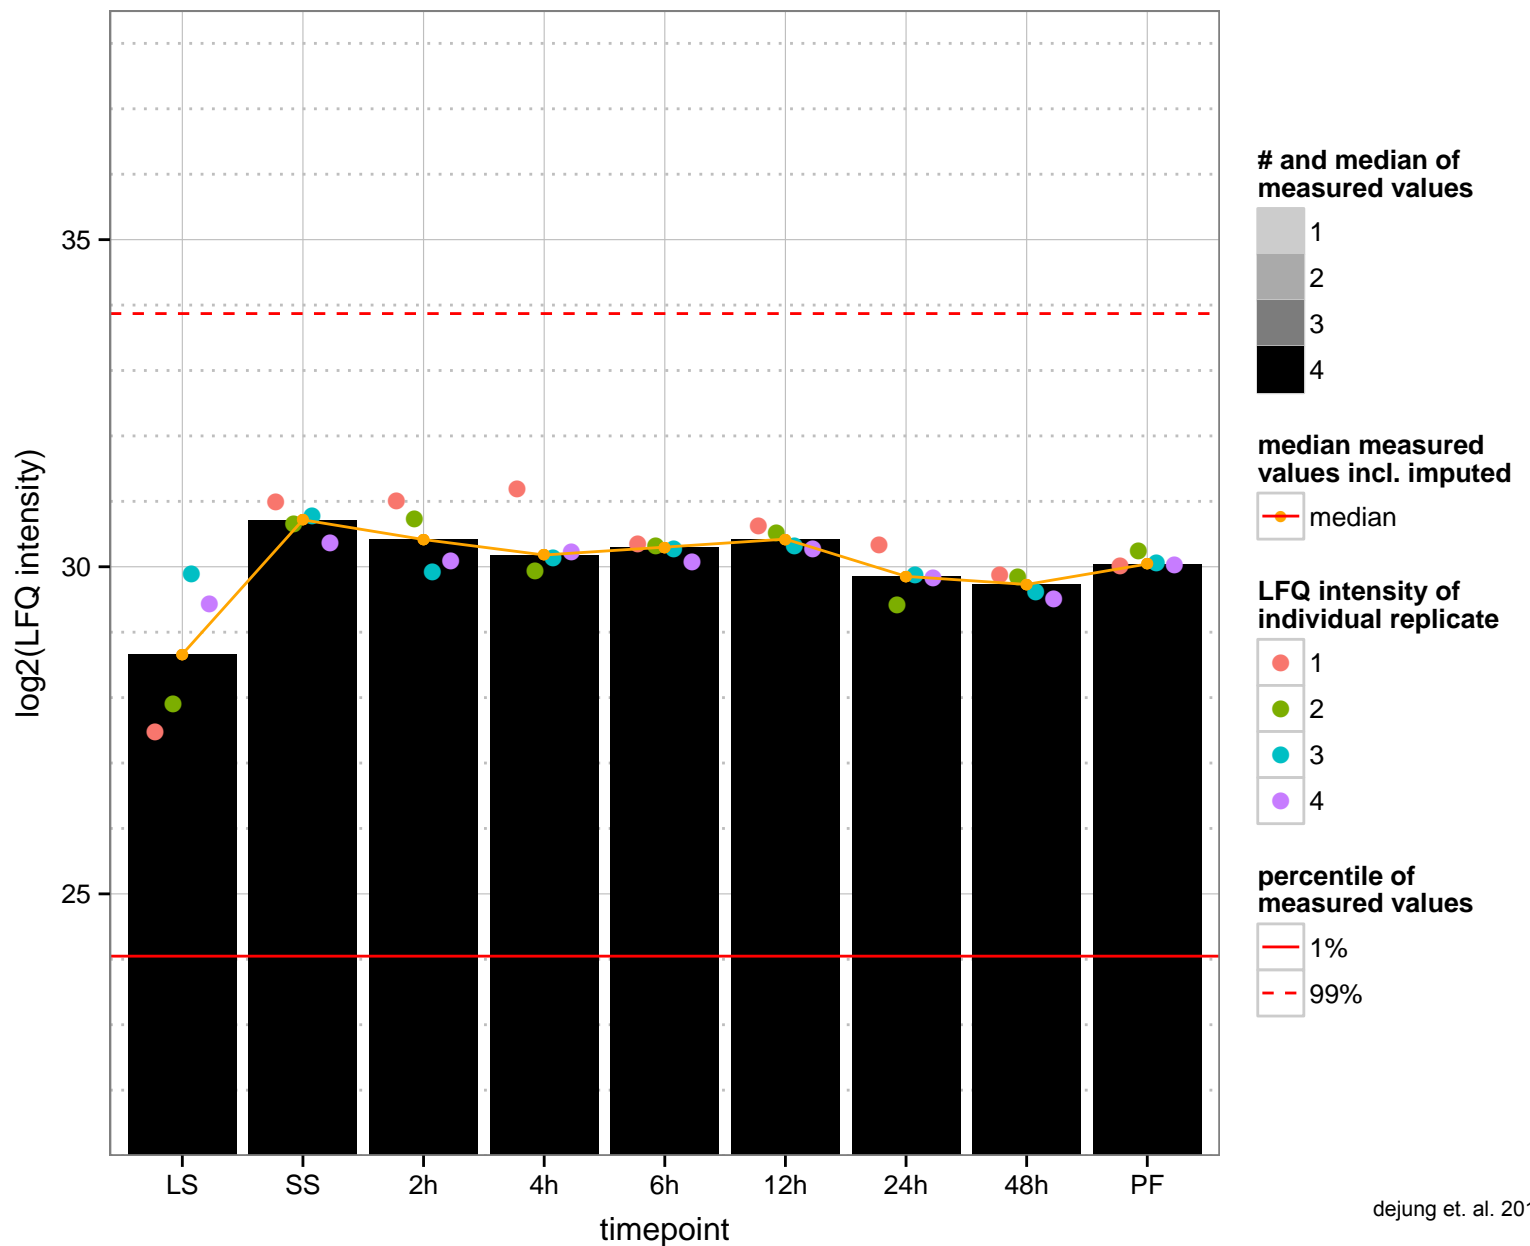

hypothetical protein, conserved  
 Tb927.11.1210  
 AGOF: null  
 AGOC: null  
 AGOP: null  
 PGO: null  
 PGOC: null  
 PGOP: null

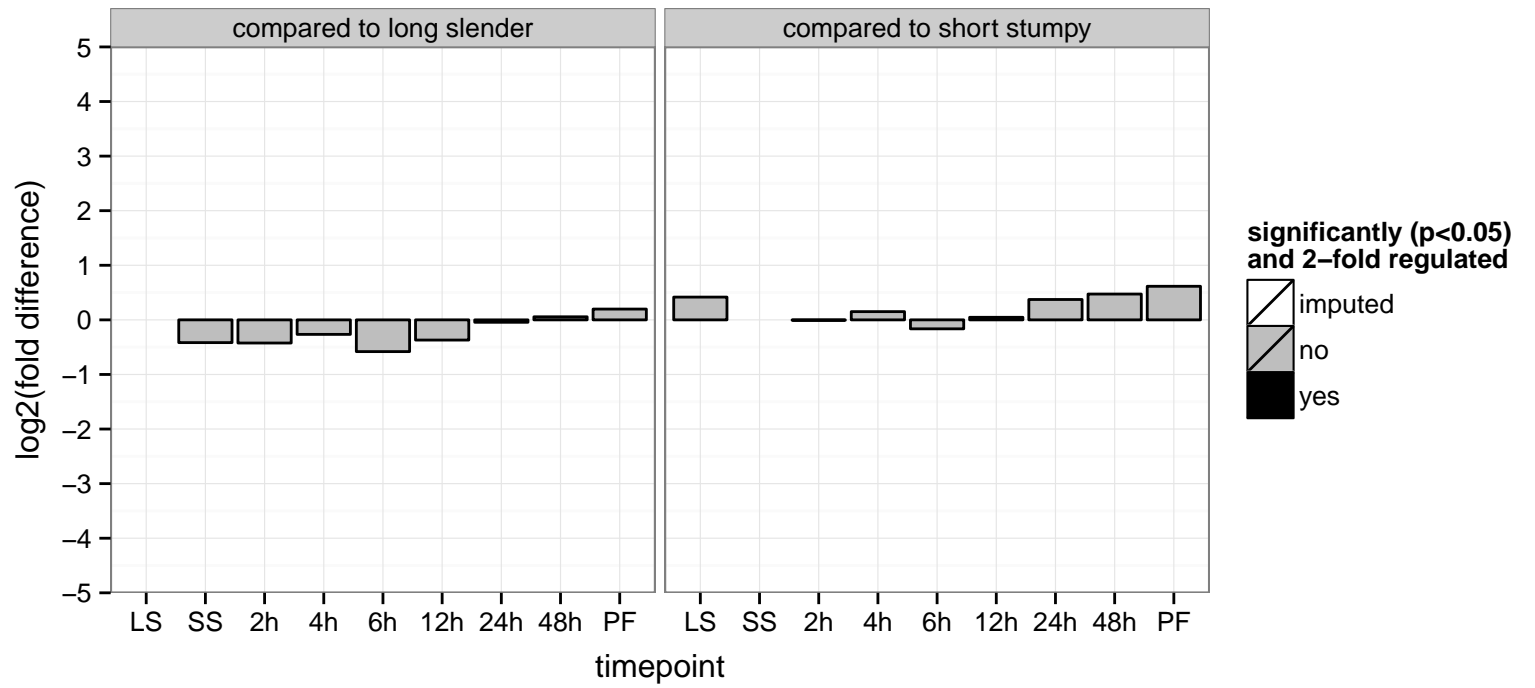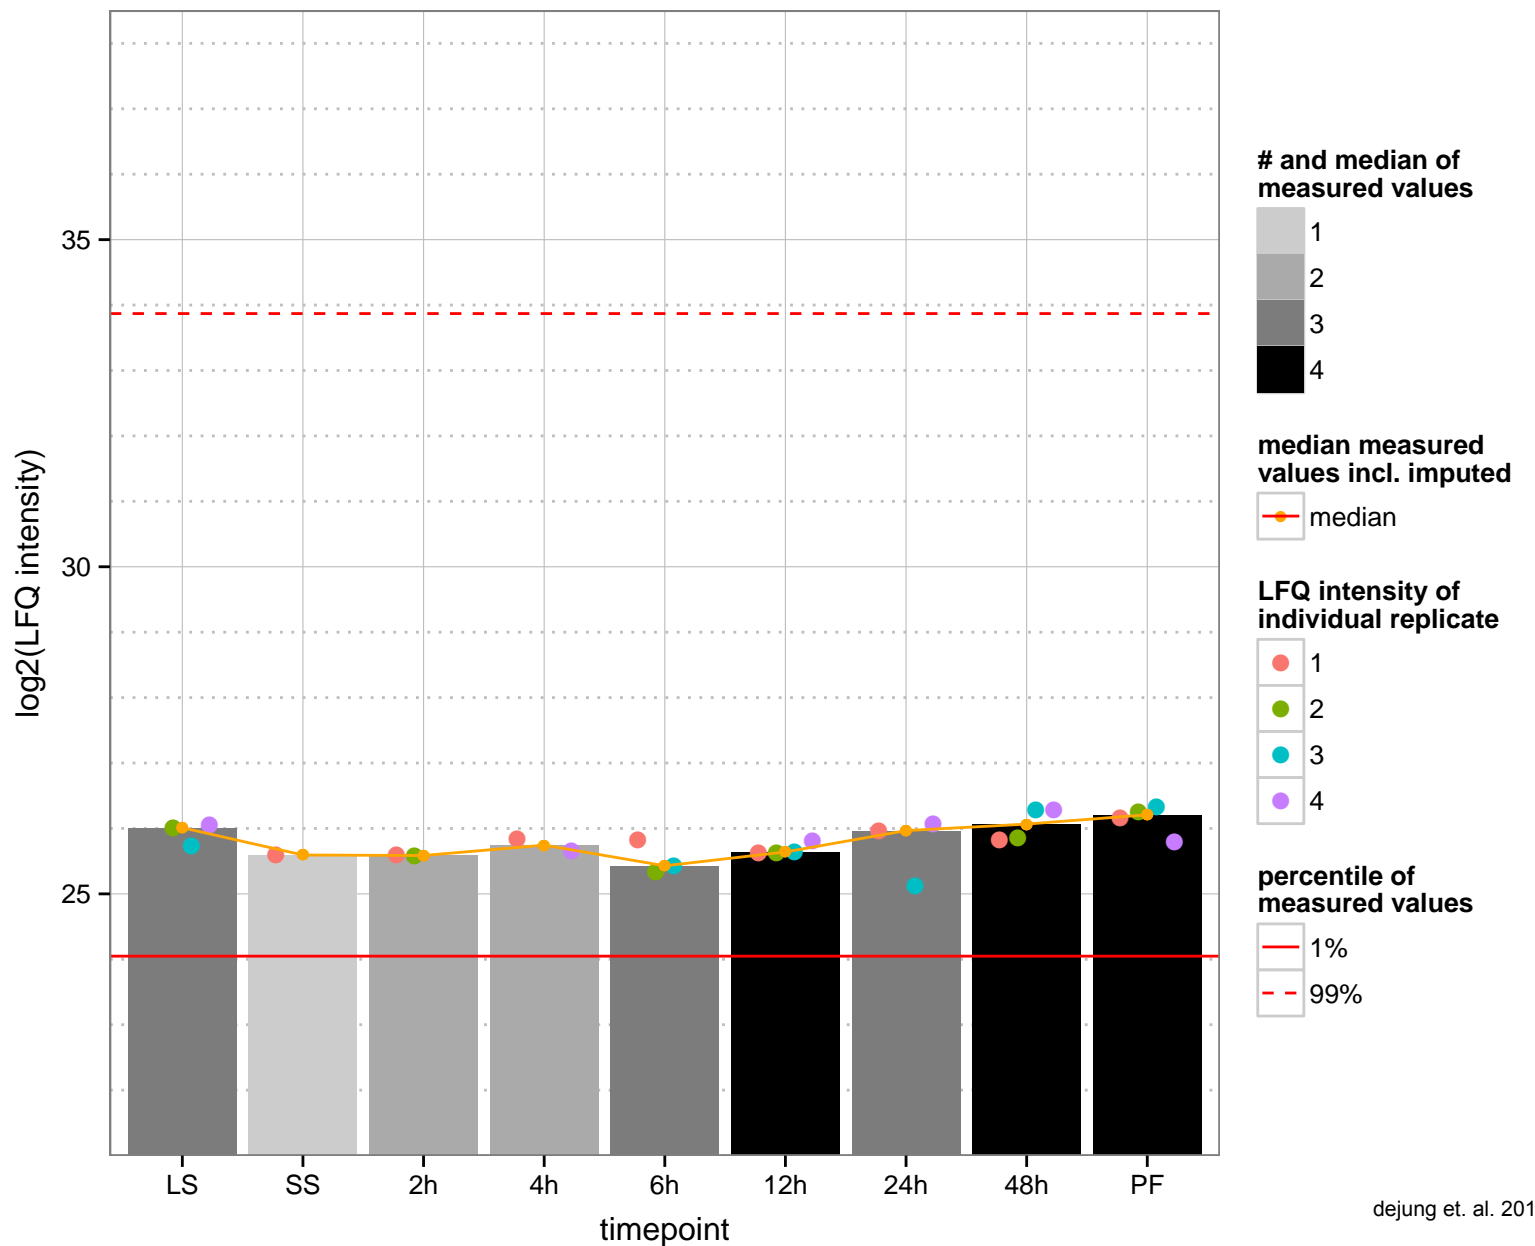

hypothetical protein, conserved  
 Tb927.11.12210  
 AGOF: null  
 AGOC: null  
 AGOP: null  
 PGO: null  
 PGOC: null  
 PGOP: null

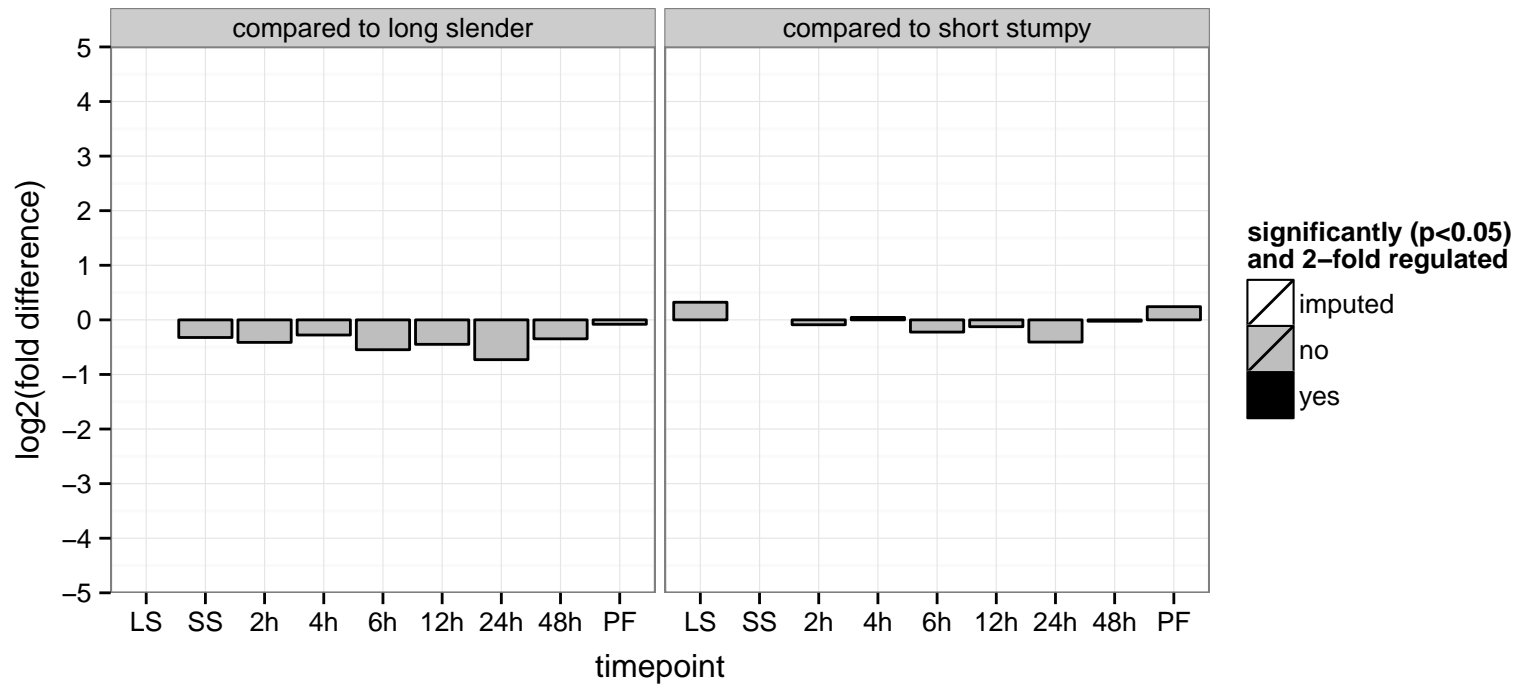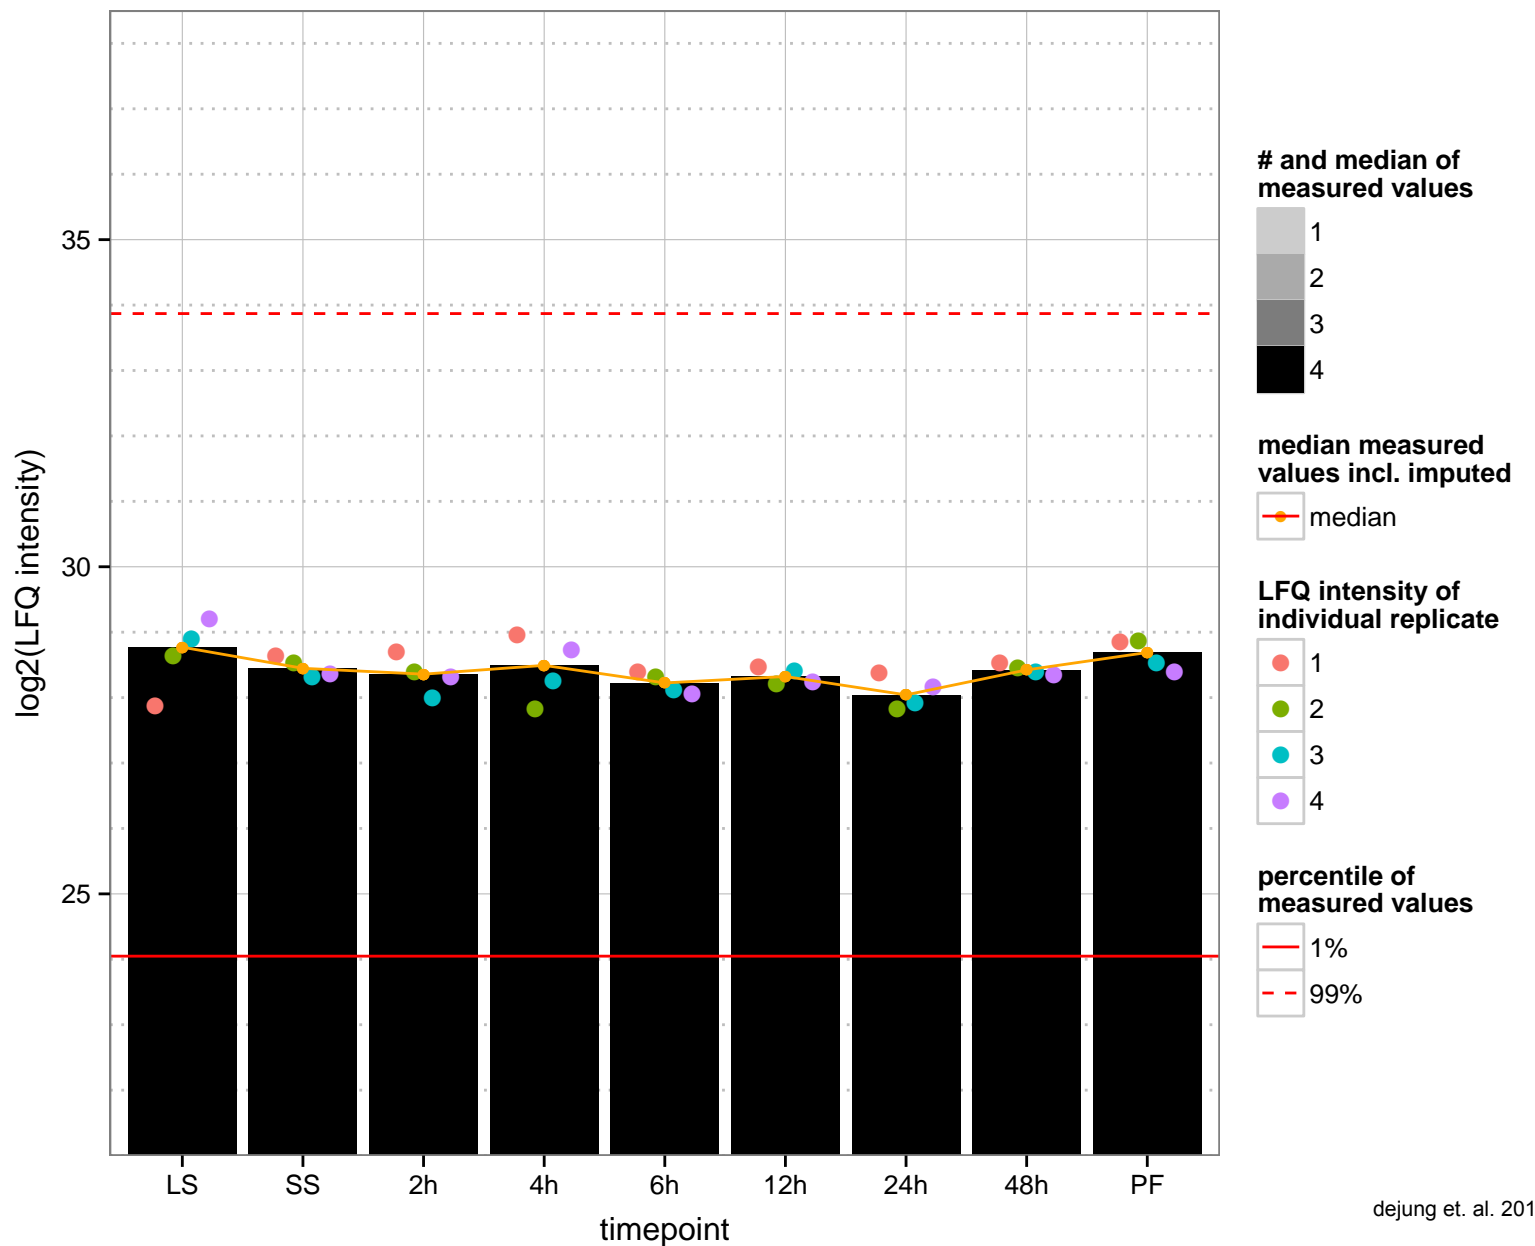

catalytic subunit of the vacuolar transporter chaperone 4  
 Tb927.11.12220  
 AGOF: metal ion binding  
 AGOC: vacuolar transporter chaperone complex  
 AGOP: polyphosphate biosynthetic process  
 PGO: null  
 PGOC: null  
 PGOP: null

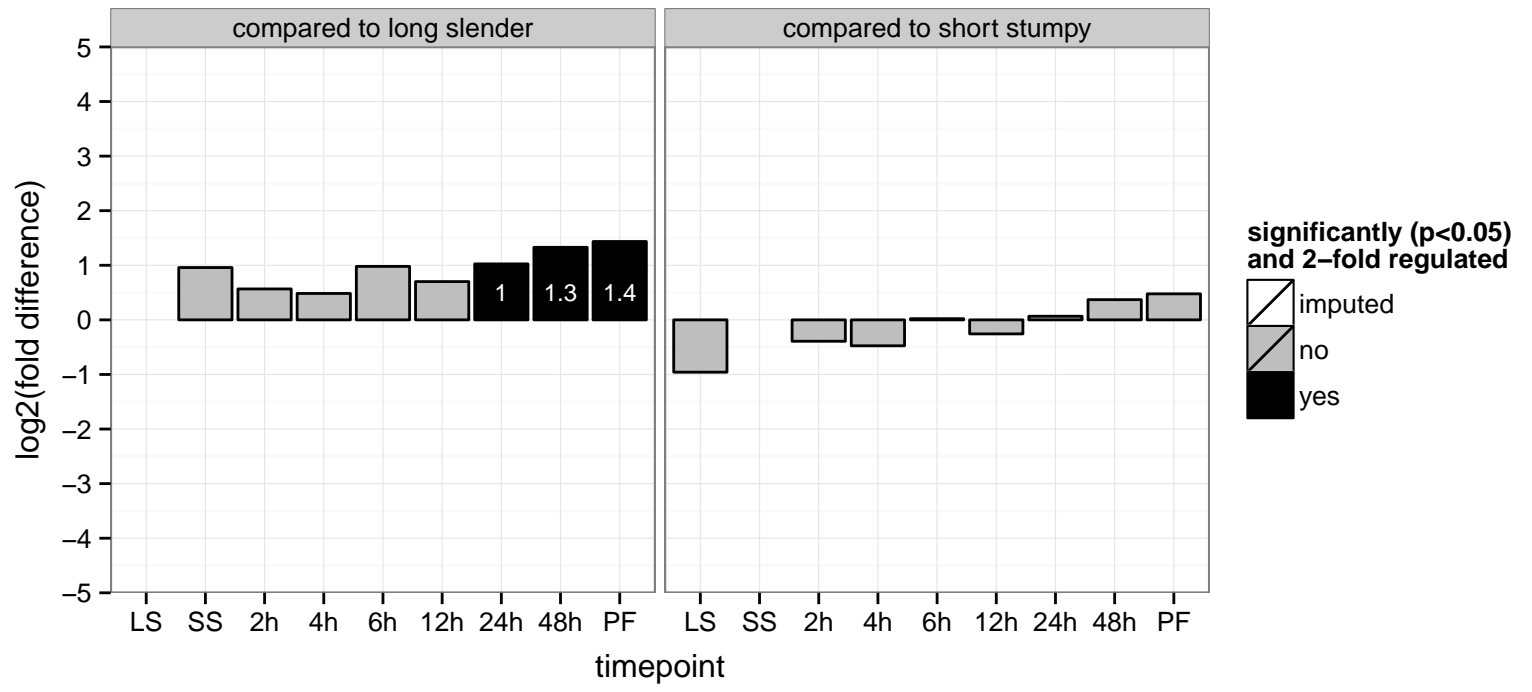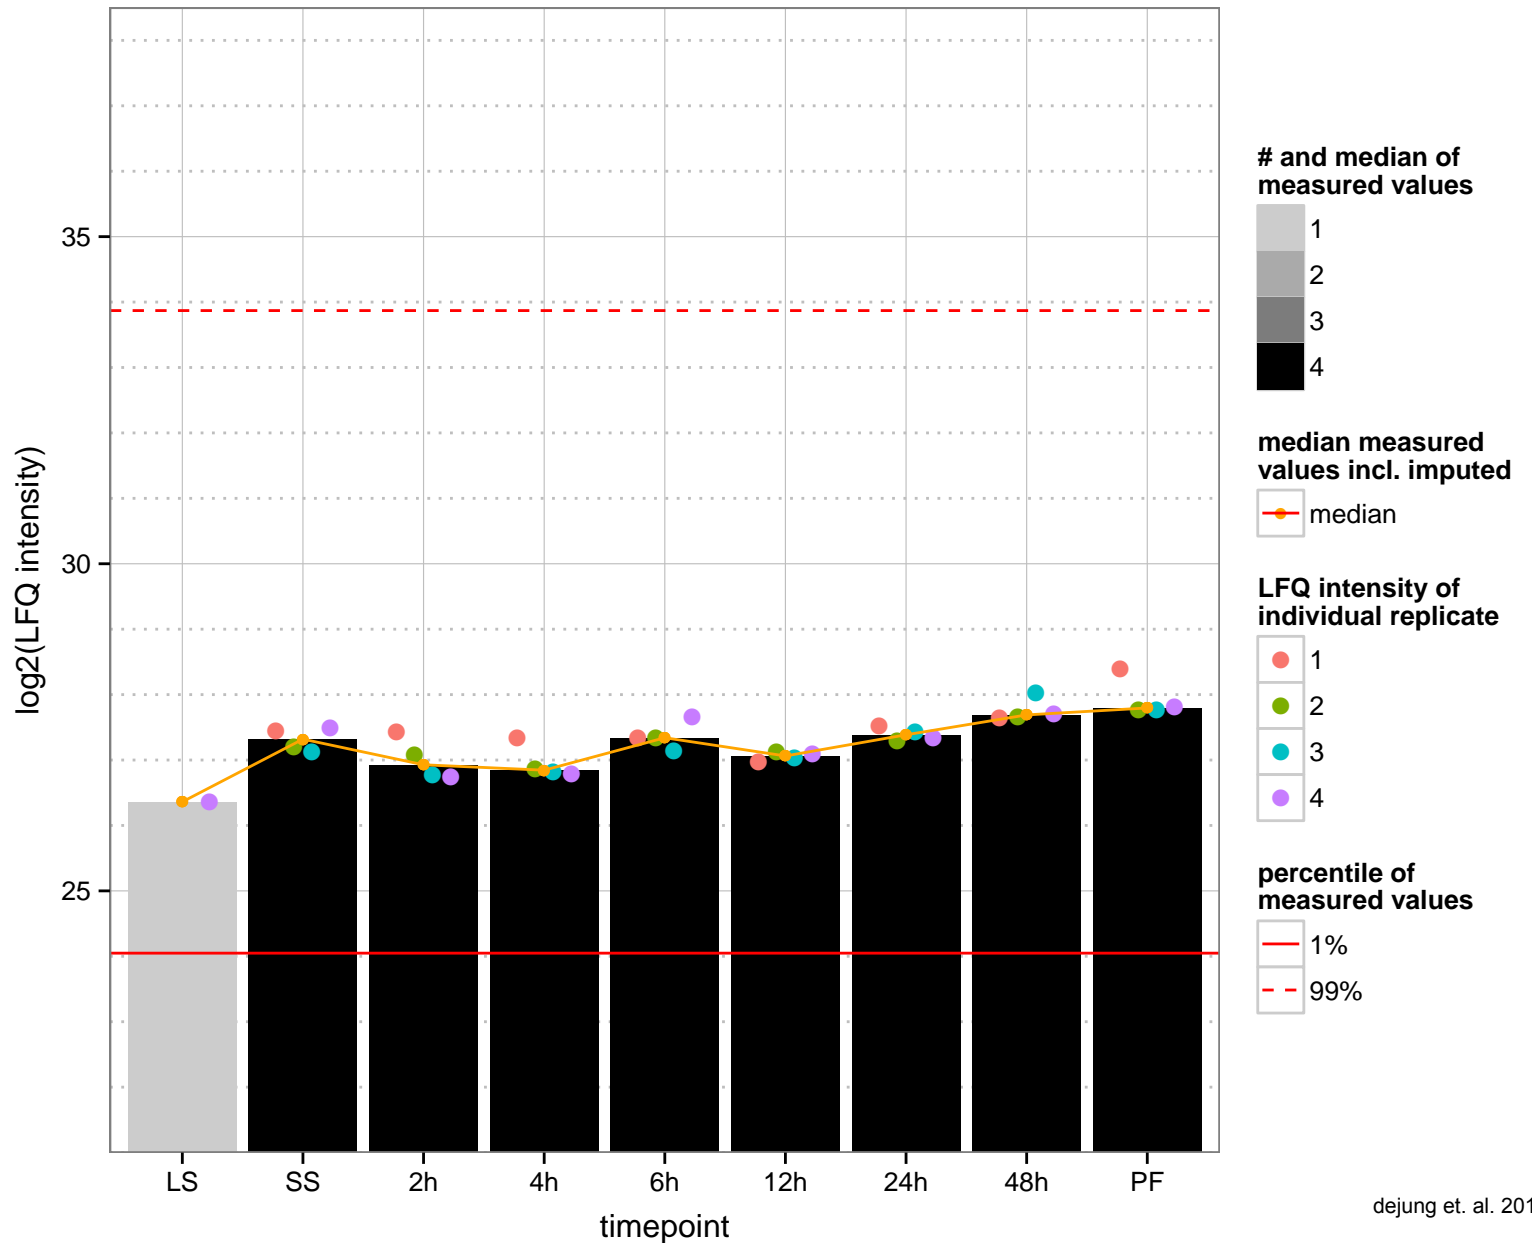

hypothetical protein, conserved  
 Tb927.11.12260  
 AGOF: null  
 AGOC: null  
 AGOP: null  
 PGOF: null  
 PGOC: null  
 PGOP: null

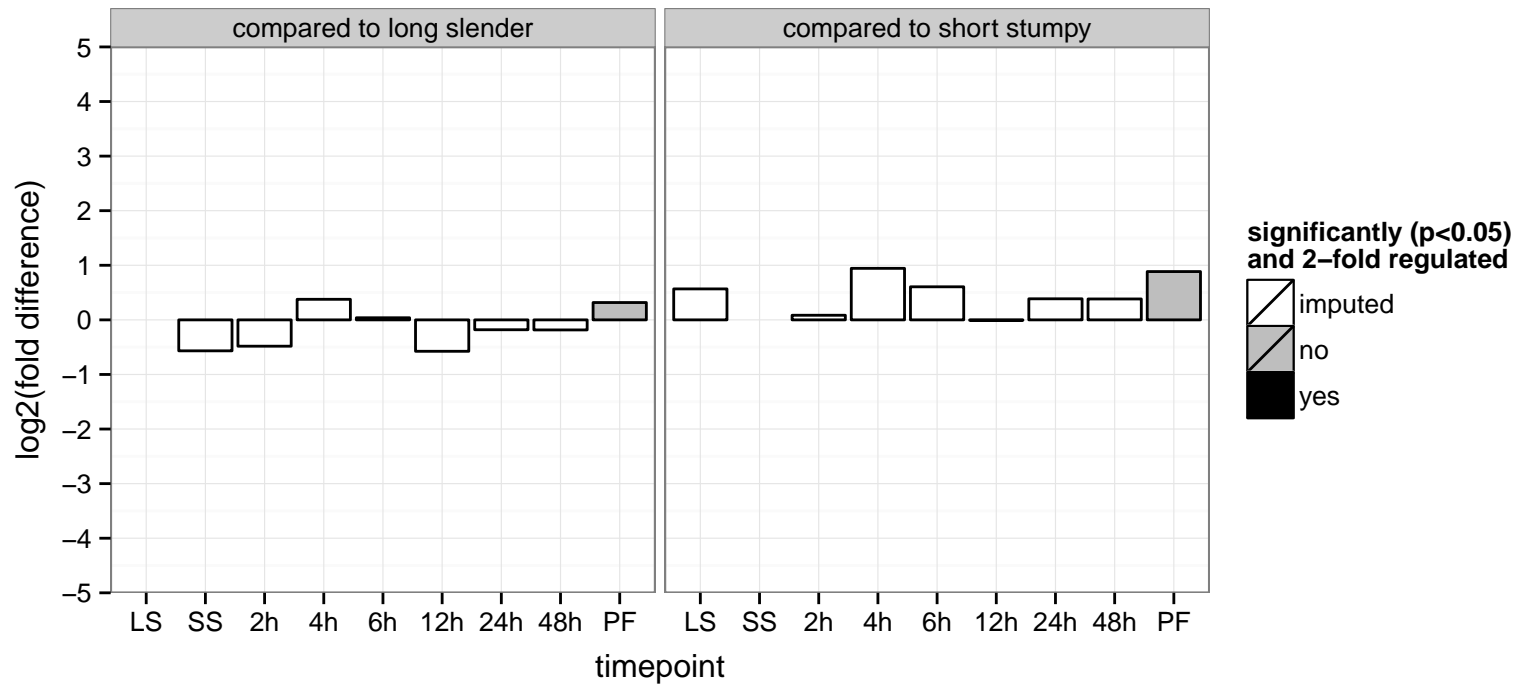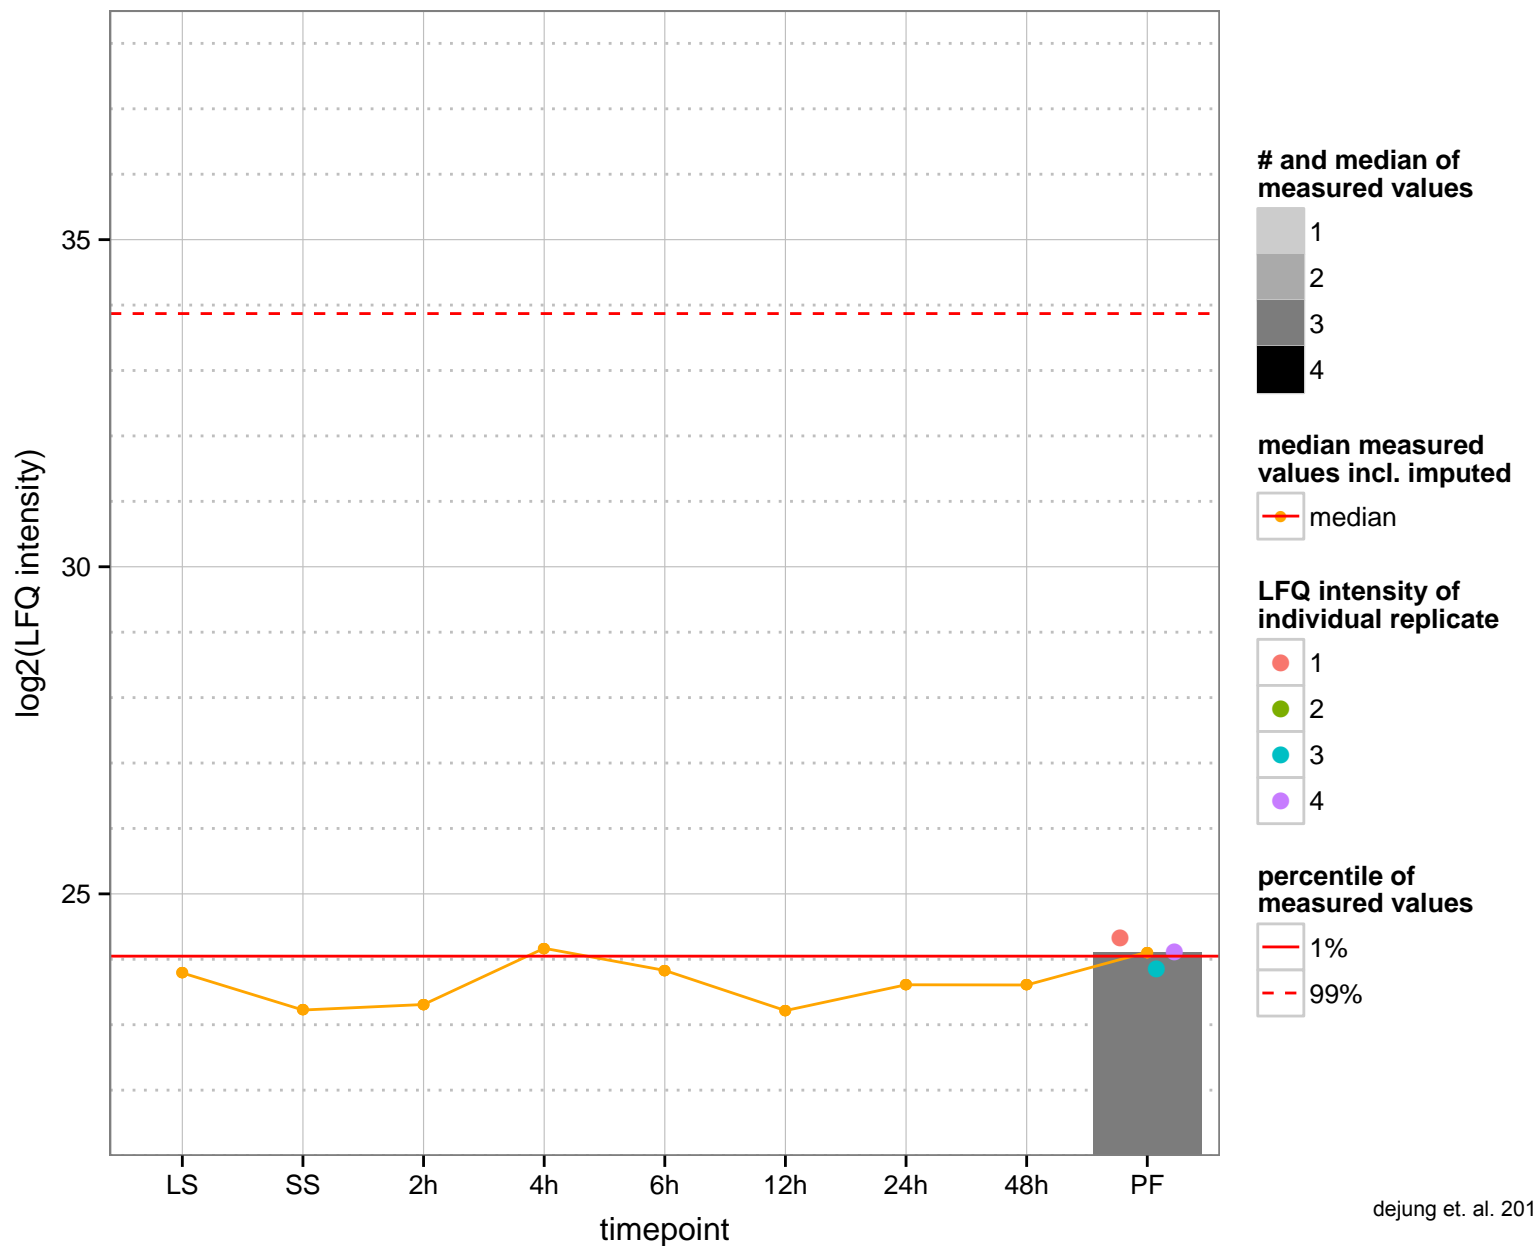

hypothetical protein, conserved  
 Tb927.11.12380  
 AGOF: null  
 AGOC: null  
 AGOP: null  
 PGO: null  
 PGOC: null  
 PGOP: null

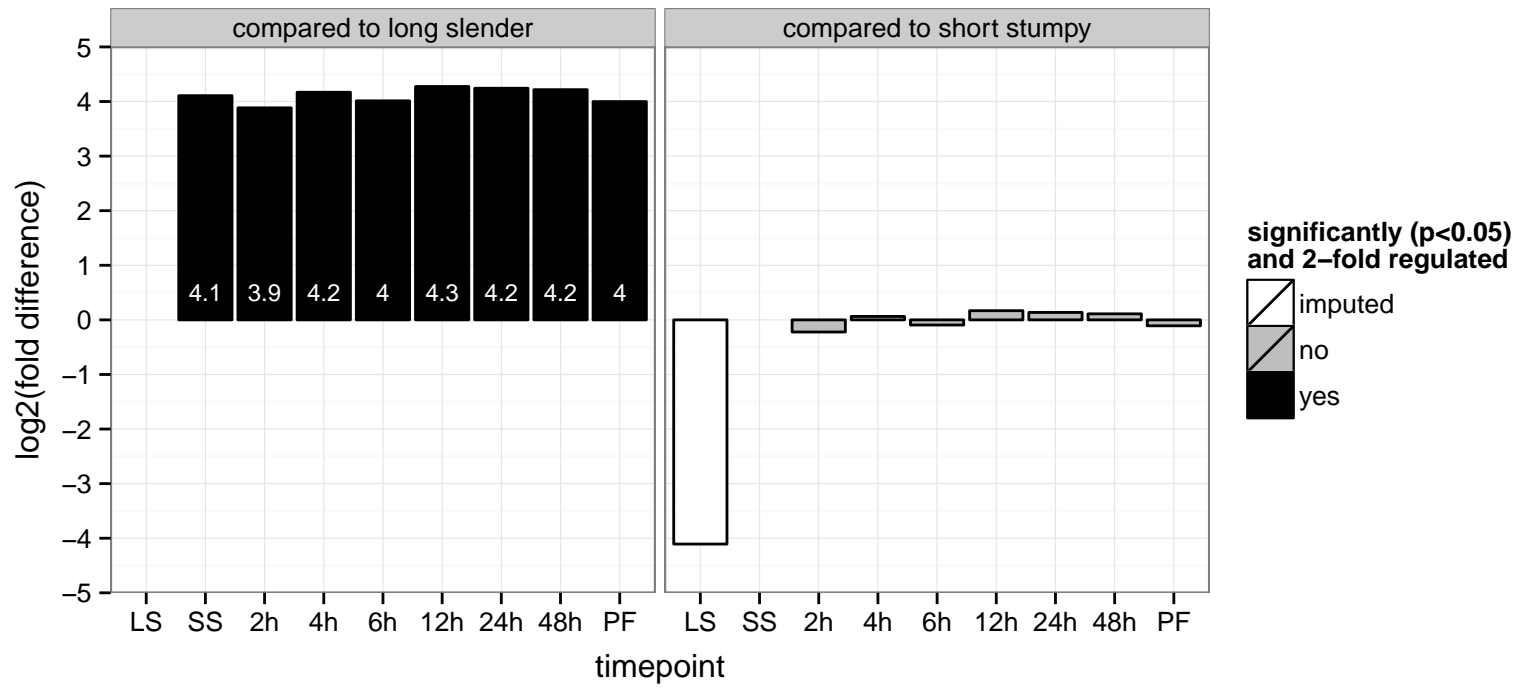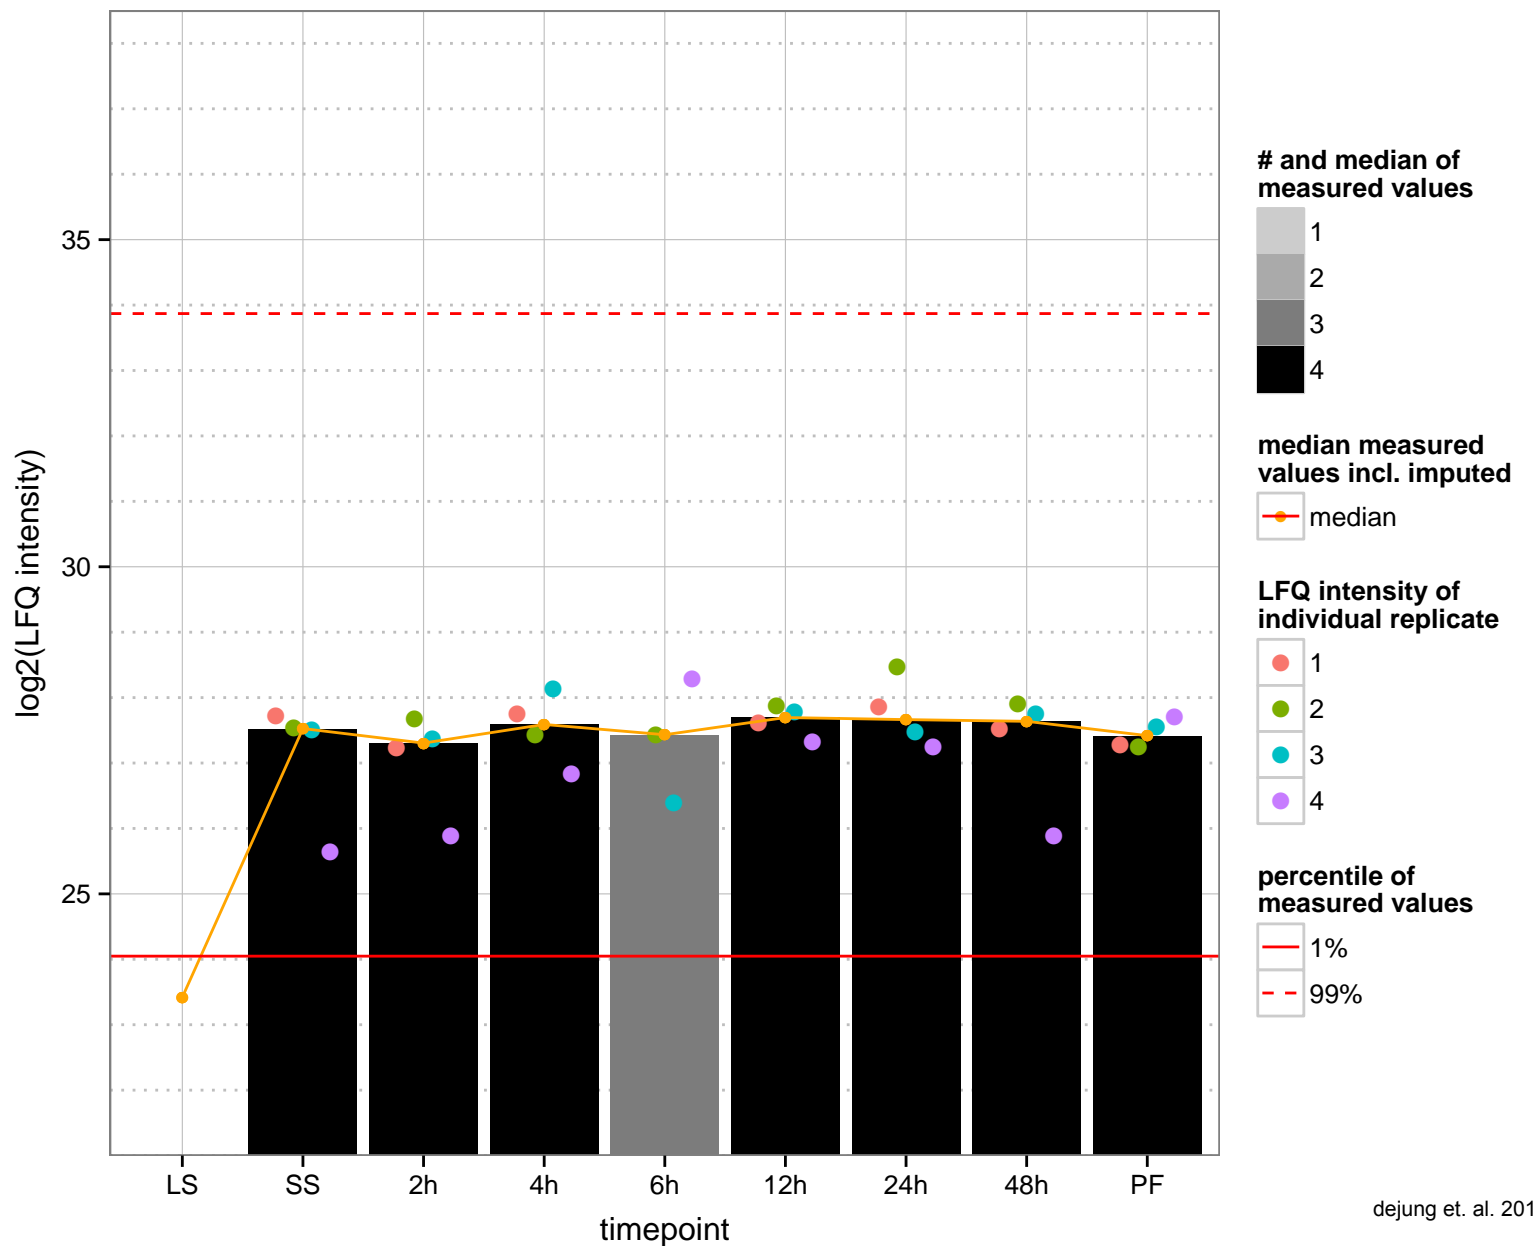

hypothetical protein, conserved  
 Tb927.11.12470  
 AGOF: null  
 AGOC: null  
 AGOP: null  
 PGO: null  
 PGOC: null  
 PGOP: null

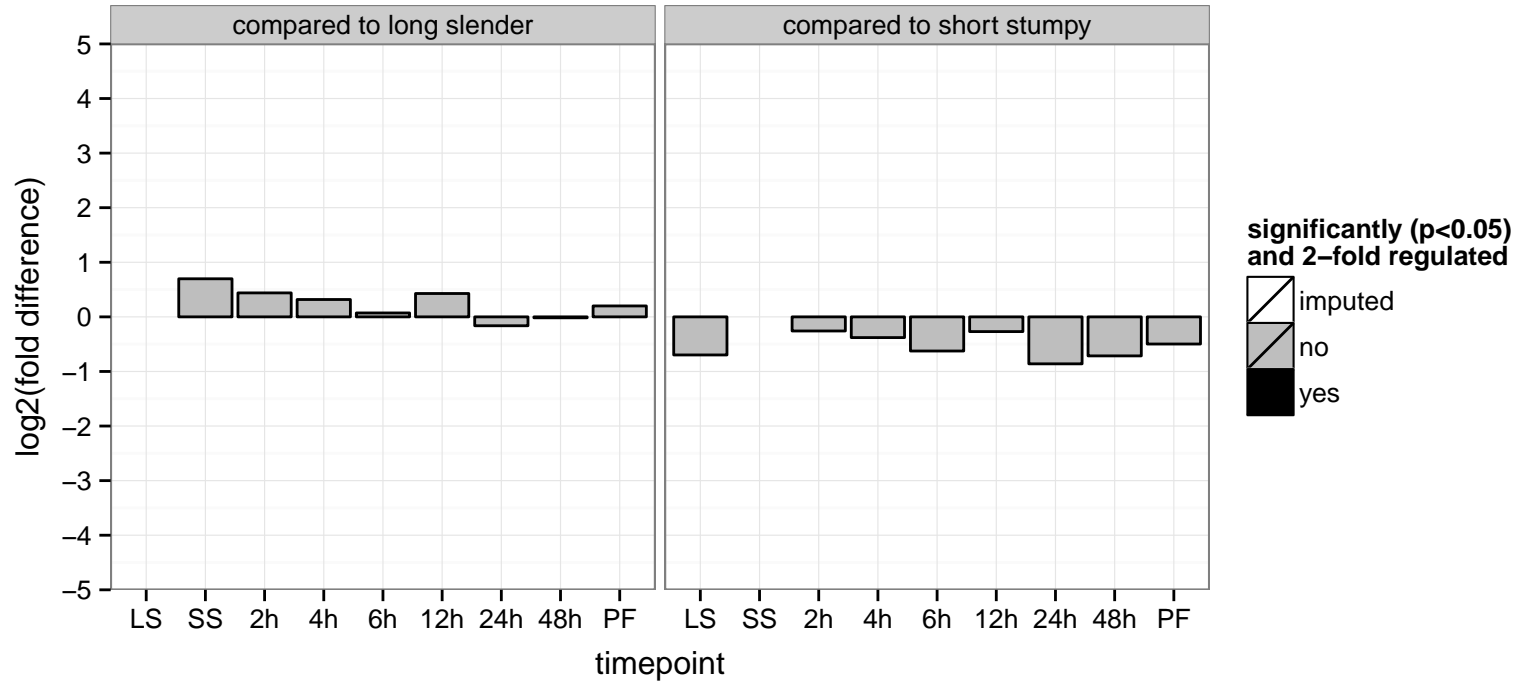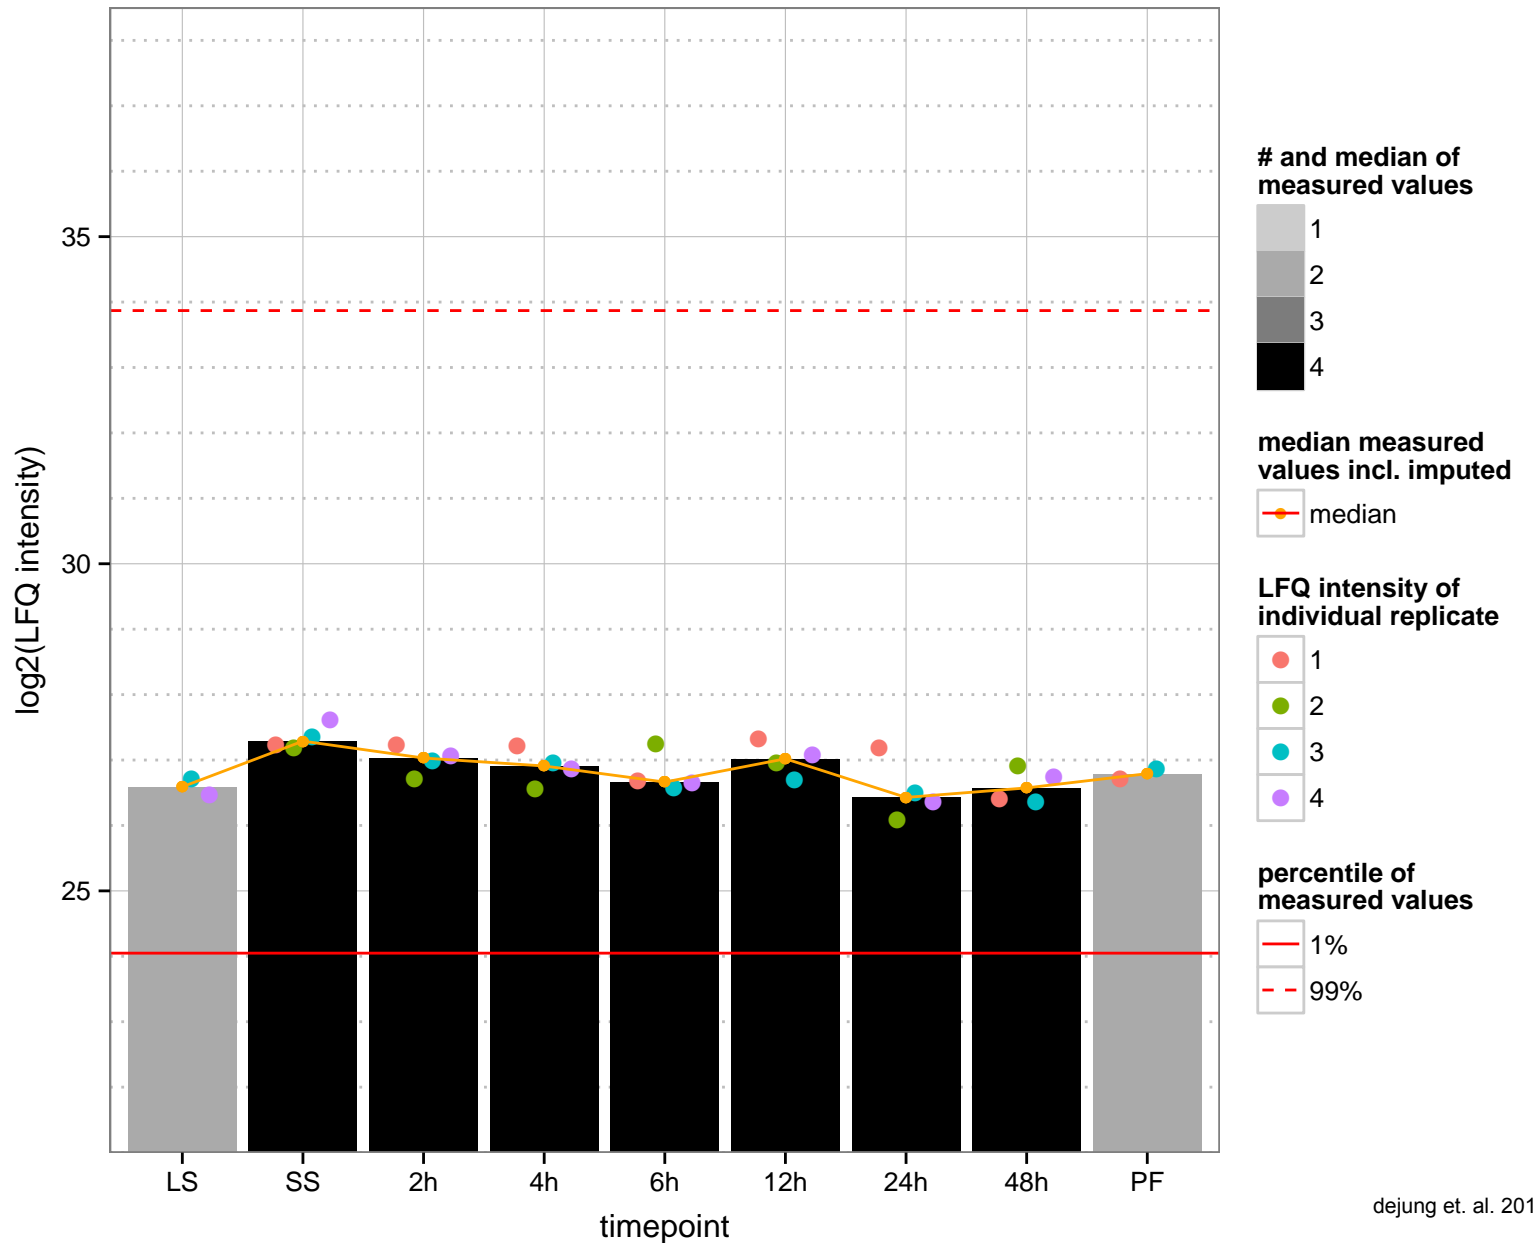

kinetoplastid-specific phospho-protein phosphatase, putative  
 Tb927.11.12480  
 AGOF: hydrolase activity, protein serine/threonine phosphatase activity  
 AGOC: null  
 AGOP: protein dephosphorylation  
 PGOF: hydrolase activity  
 PGOC: null  
 PGOP: null

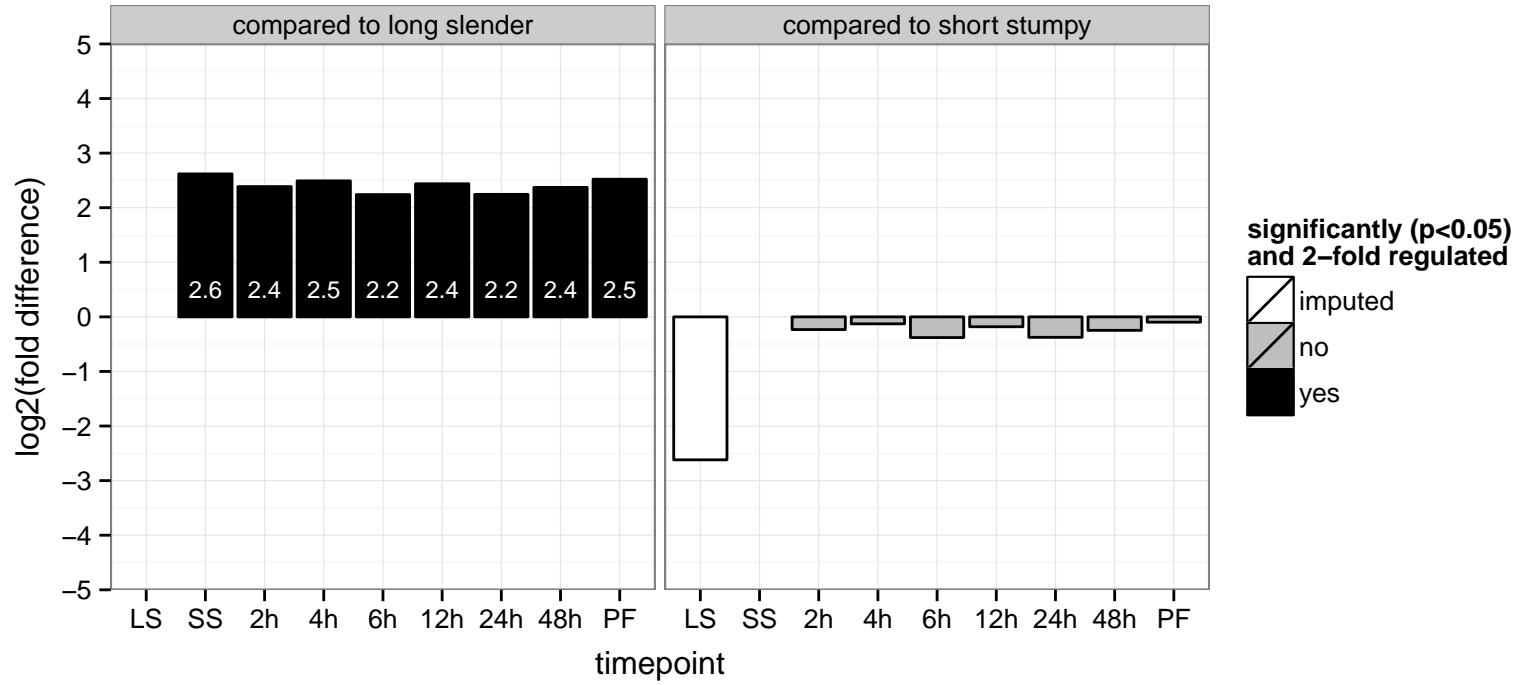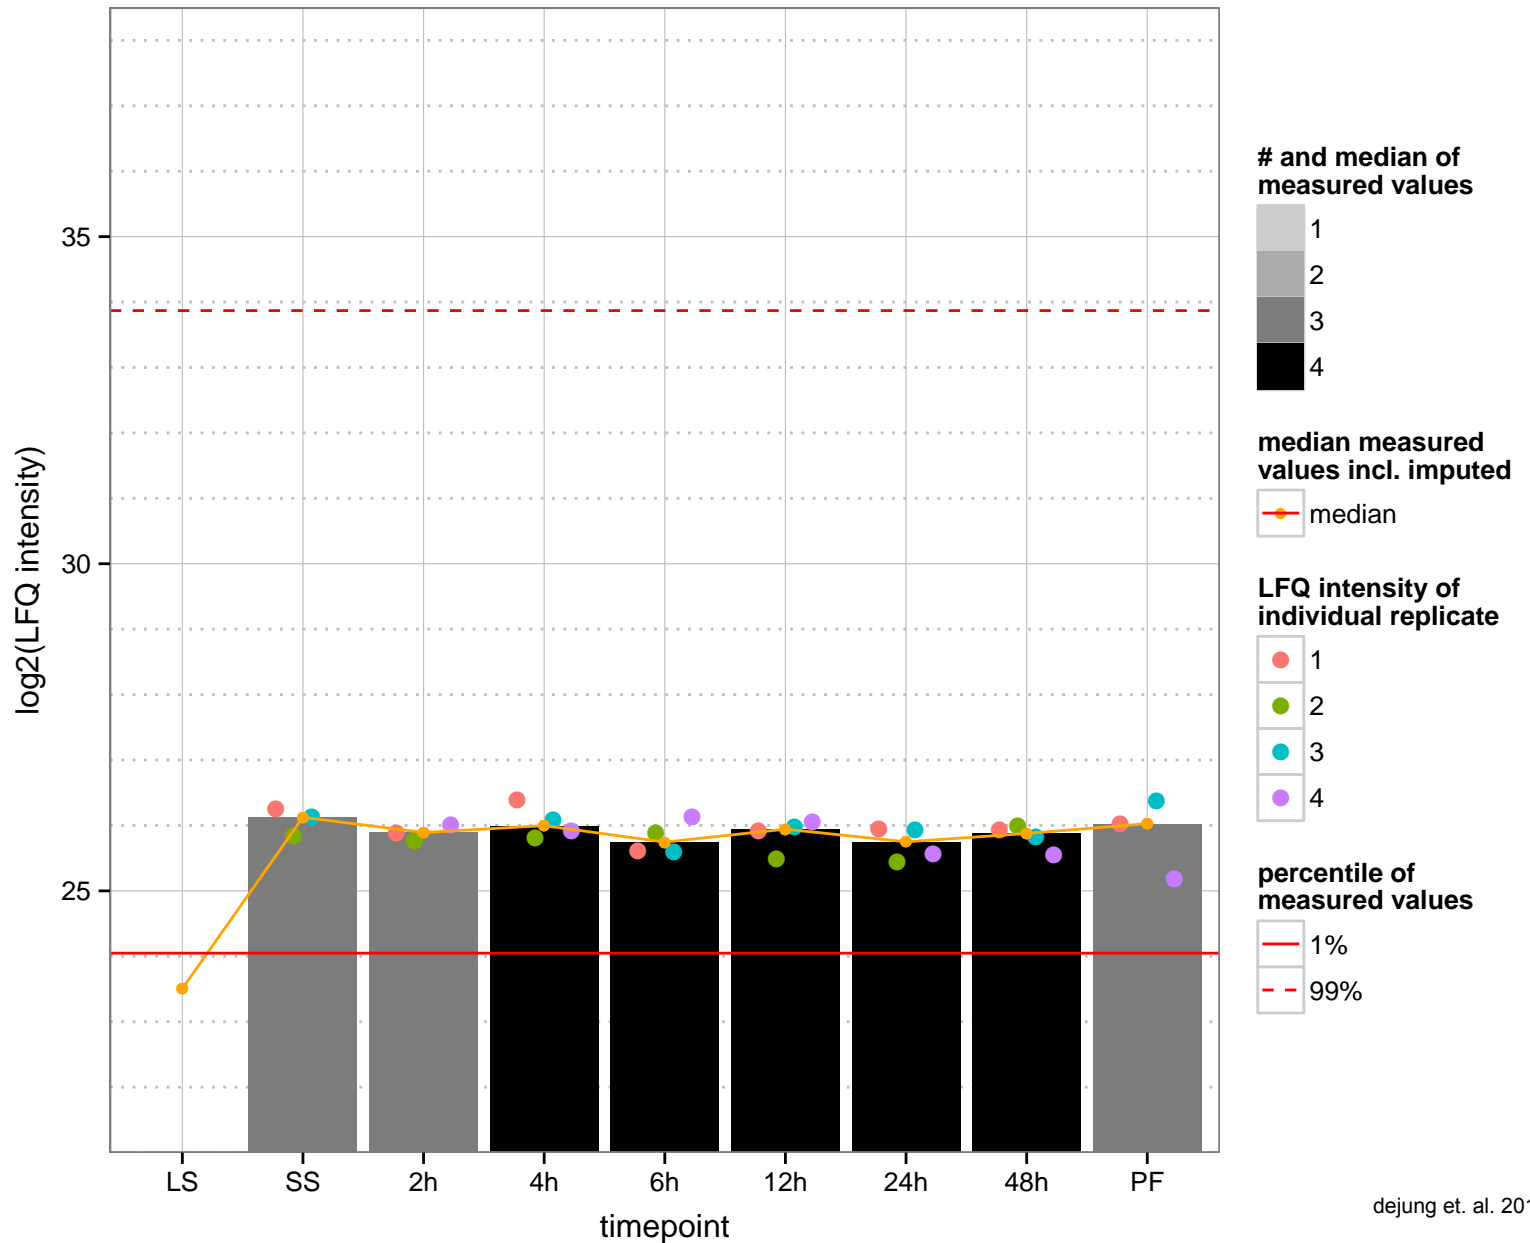



hypothetical protein, conserved  
 Tb927.11.12490  
 AGOF: null  
 AGOC: null  
 AGOP: null  
 PGOF: null  
 PGOC: null  
 PGOP: null

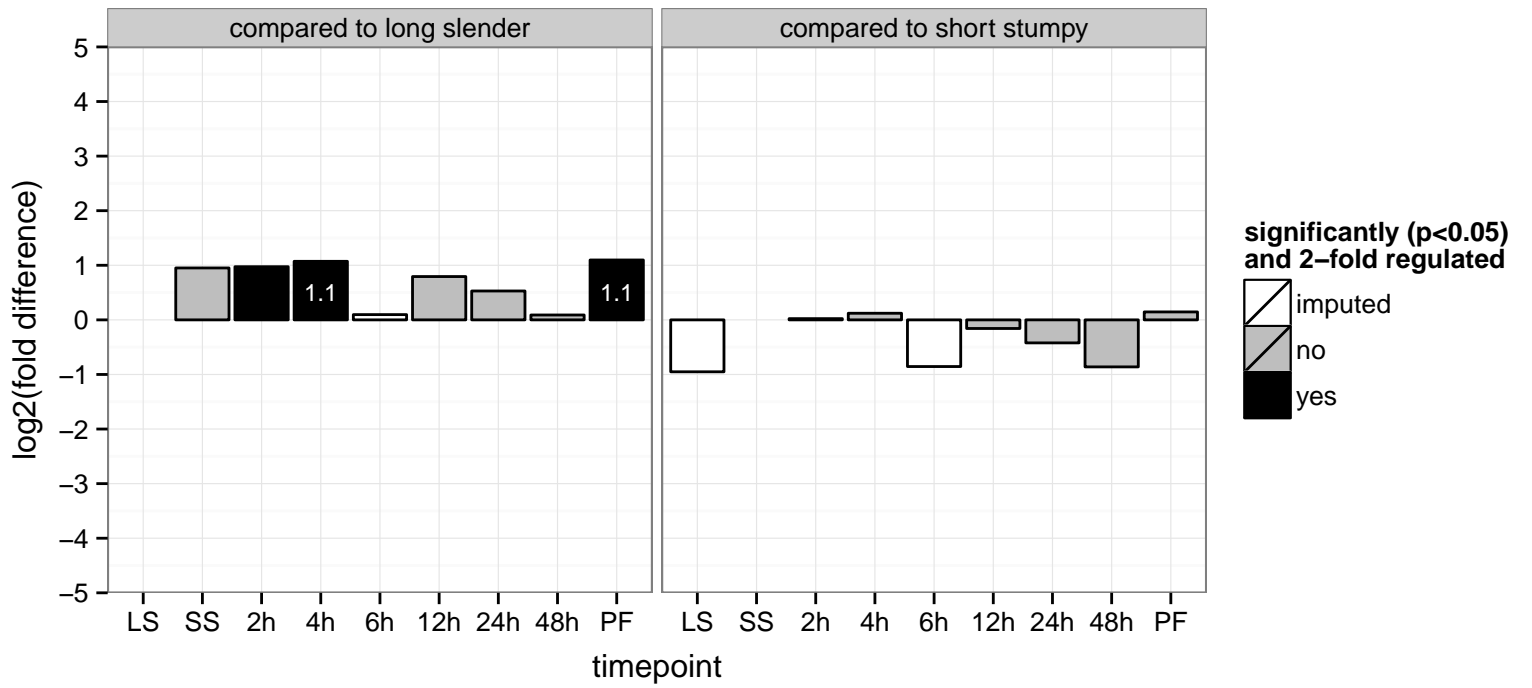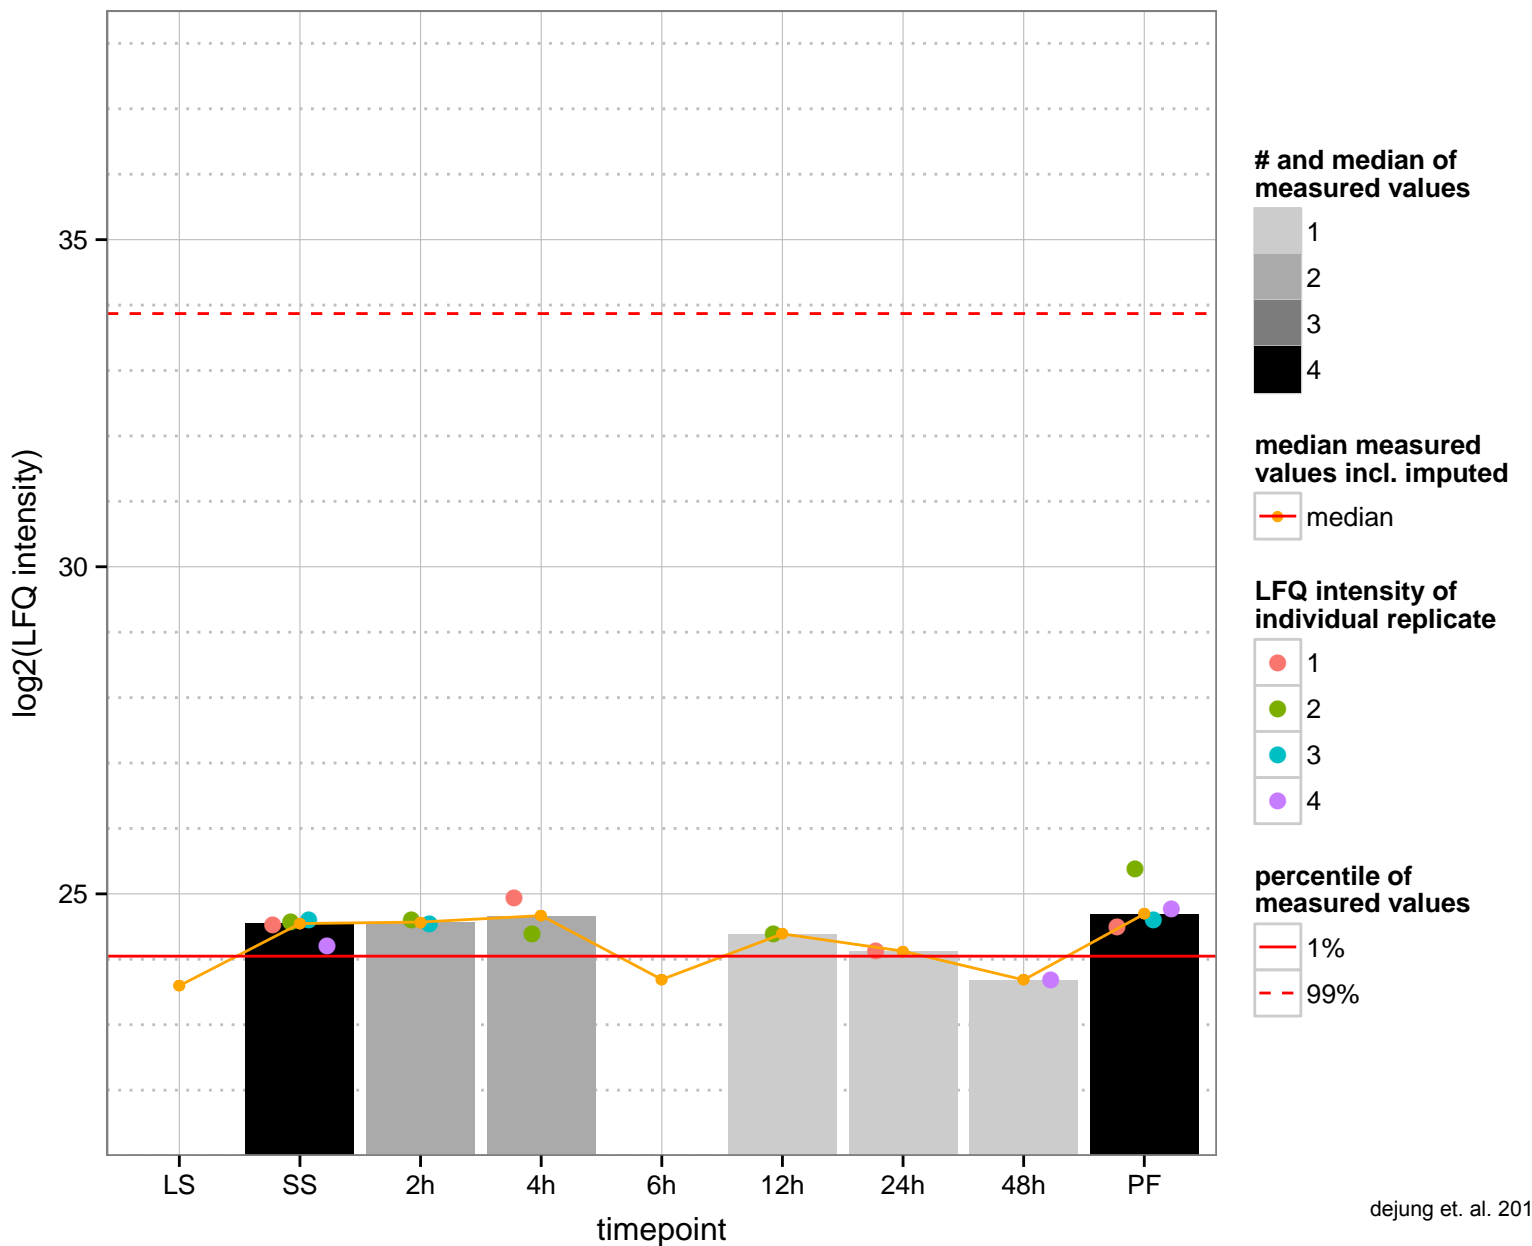

hypothetical protein, conserved  
 Tb927.11.12530  
 AGOF: null  
 AGOC: null  
 AGOP: null  
 PGOF: null  
 PGO: null  
 PGOP: null

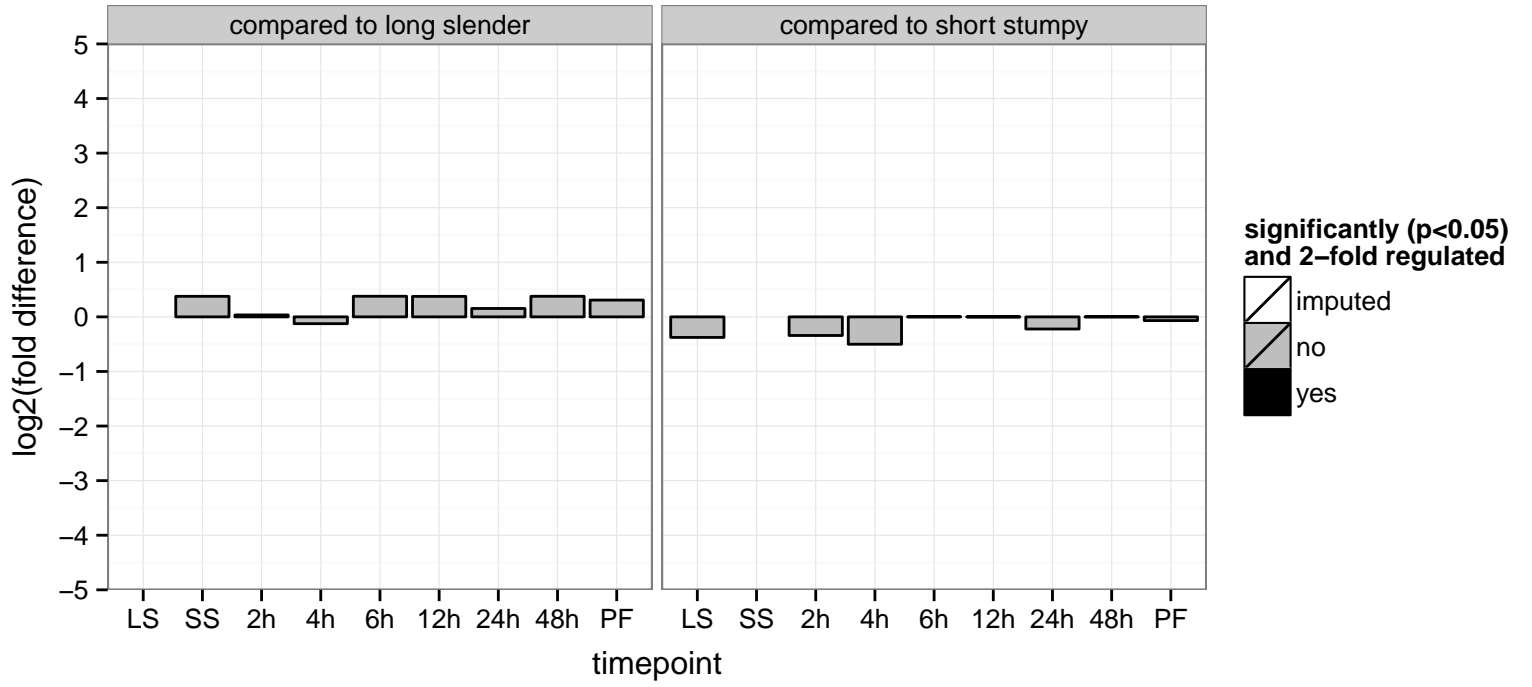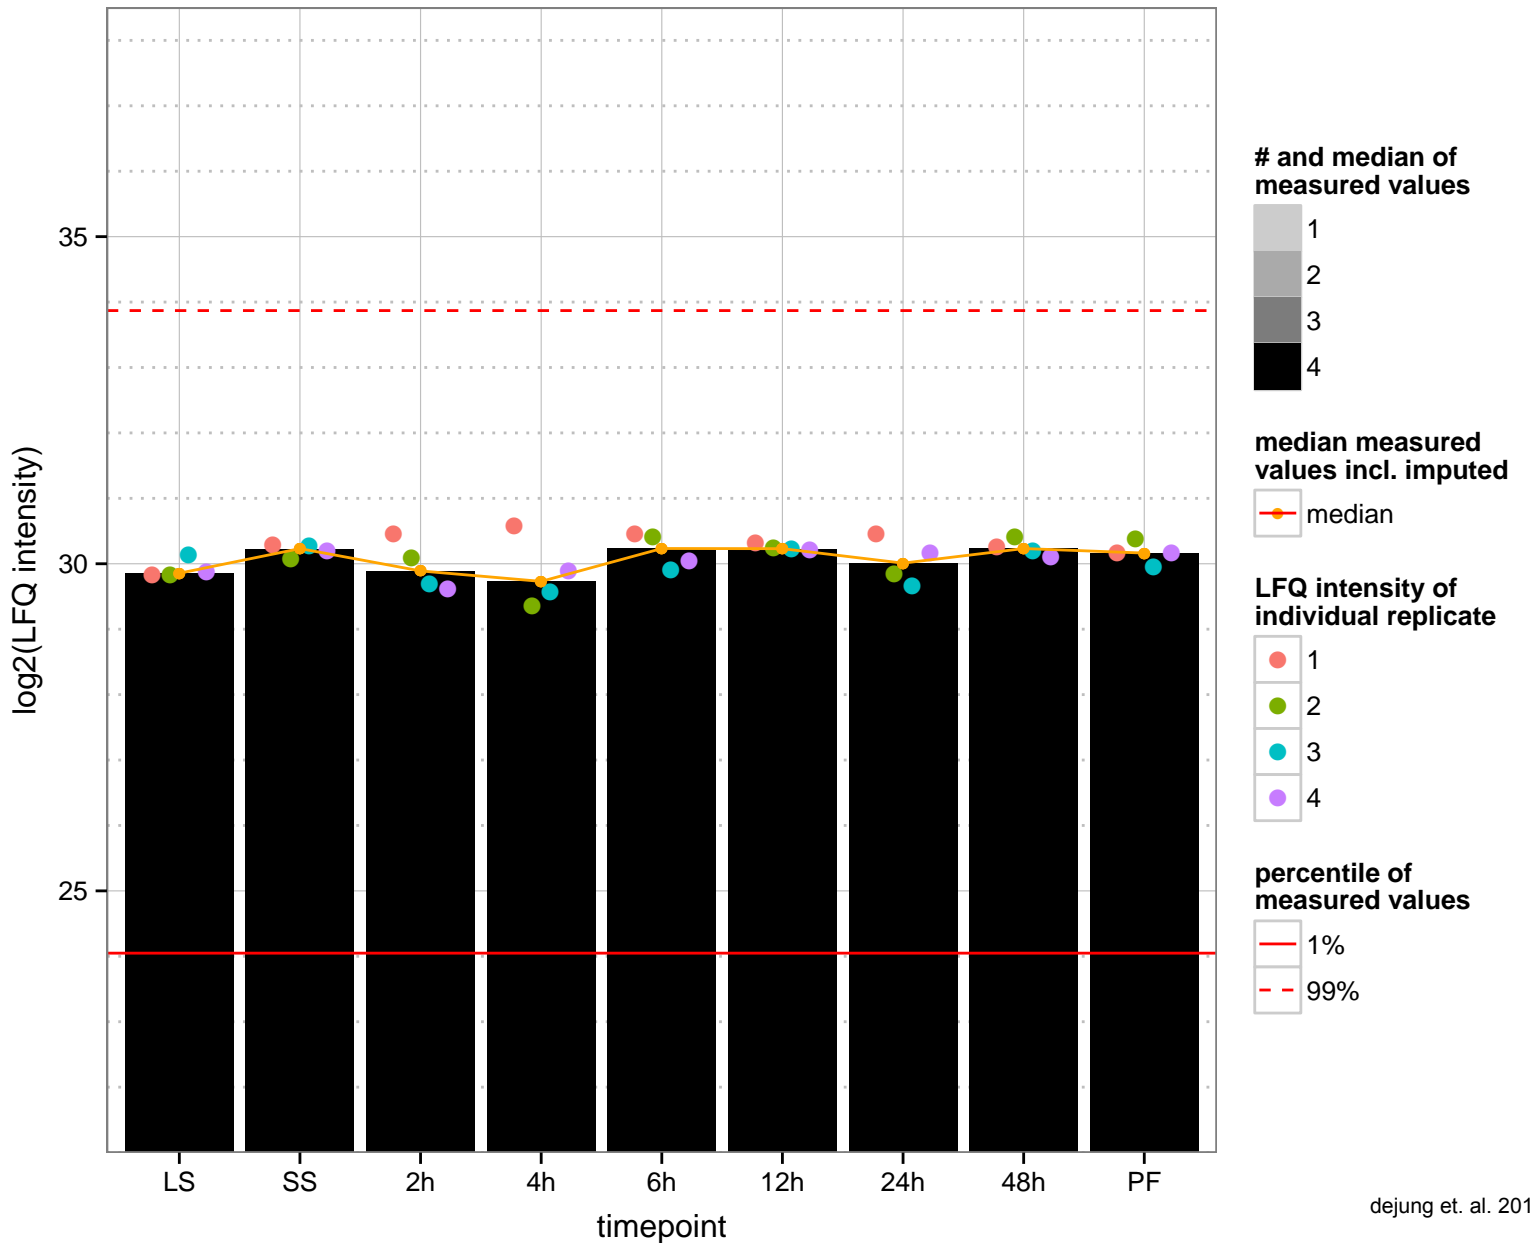

leucine-rich repeat protein (LRRP), putative  
 Tb927.11.12540  
 AGOF: null  
 AGOC: null  
 AGOP: null  
 PGOF: null  
 PGO: null  
 PGOP: null

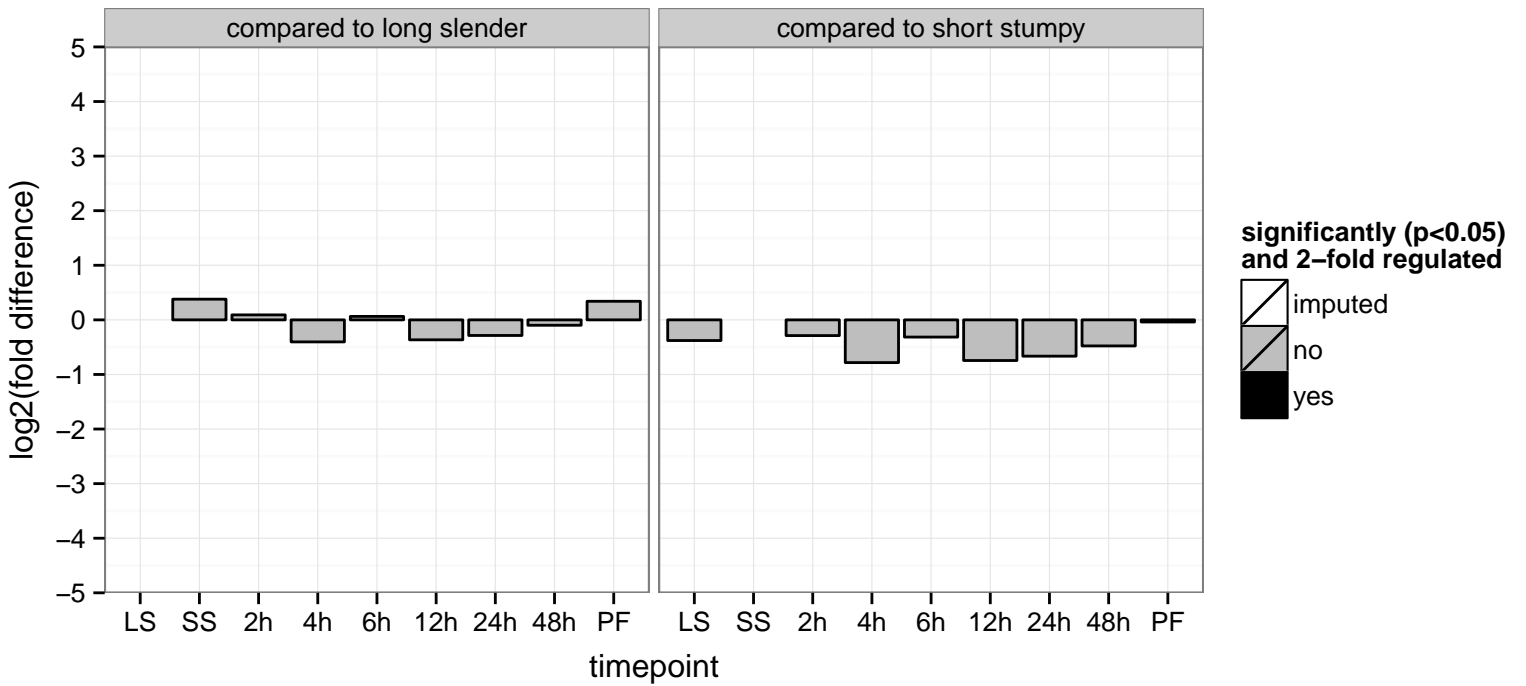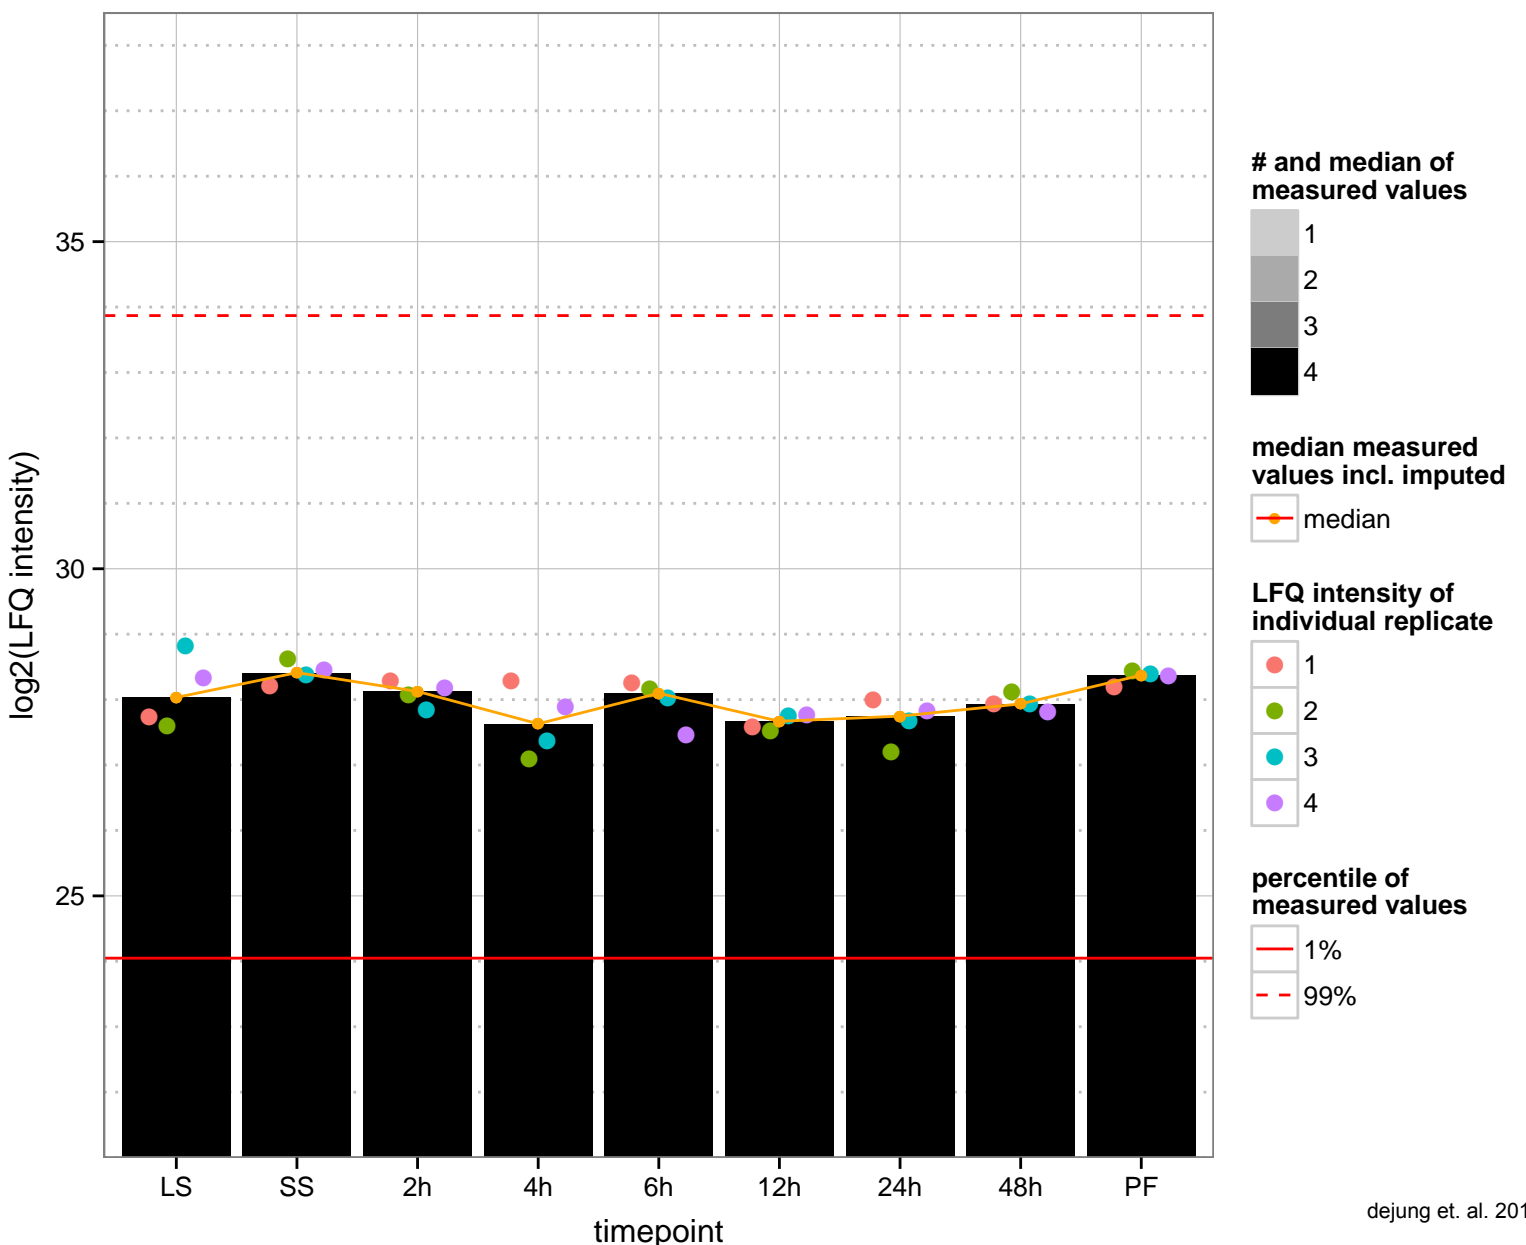

hypothetical protein, conserved  
 Tb927.11.12590  
 AGOF: null  
 AGOC: null  
 AGOP: null  
 PGOF: null  
 PGOC: null  
 PGOP: null

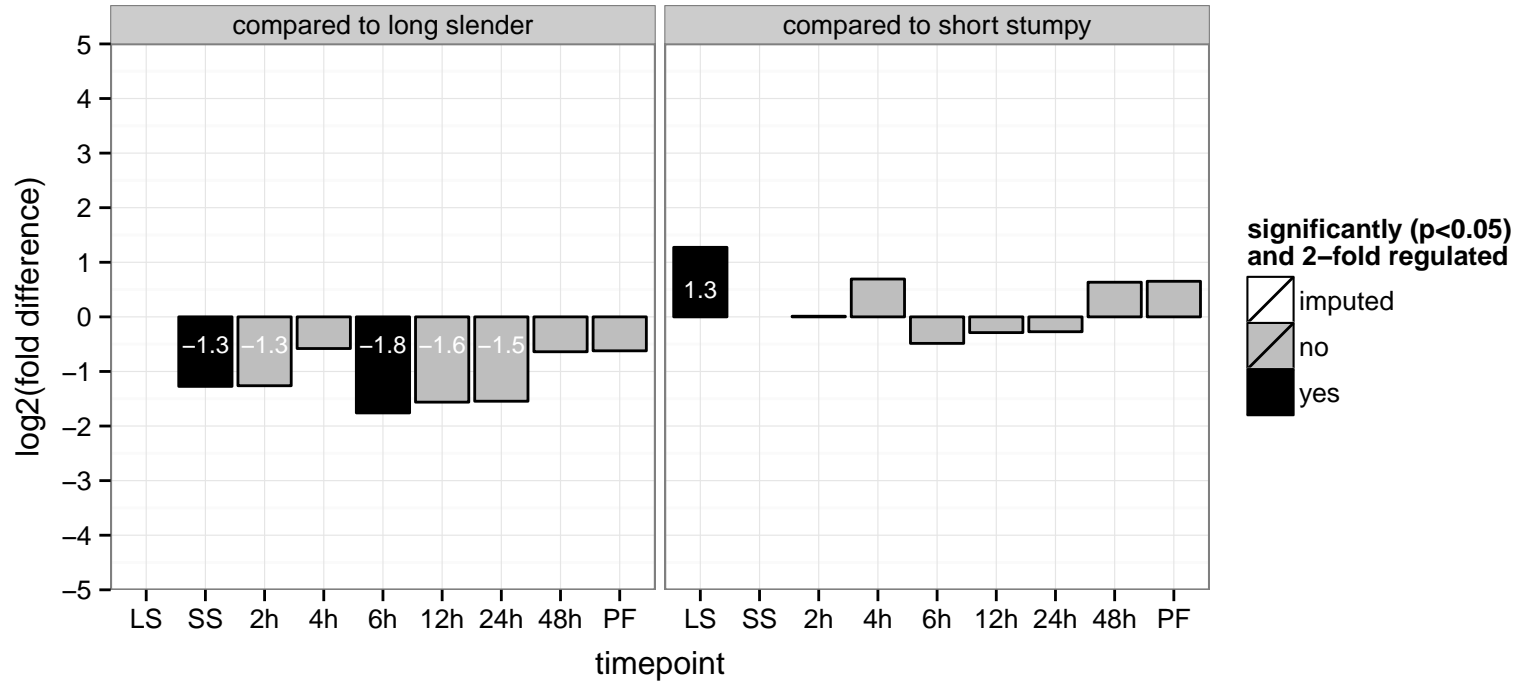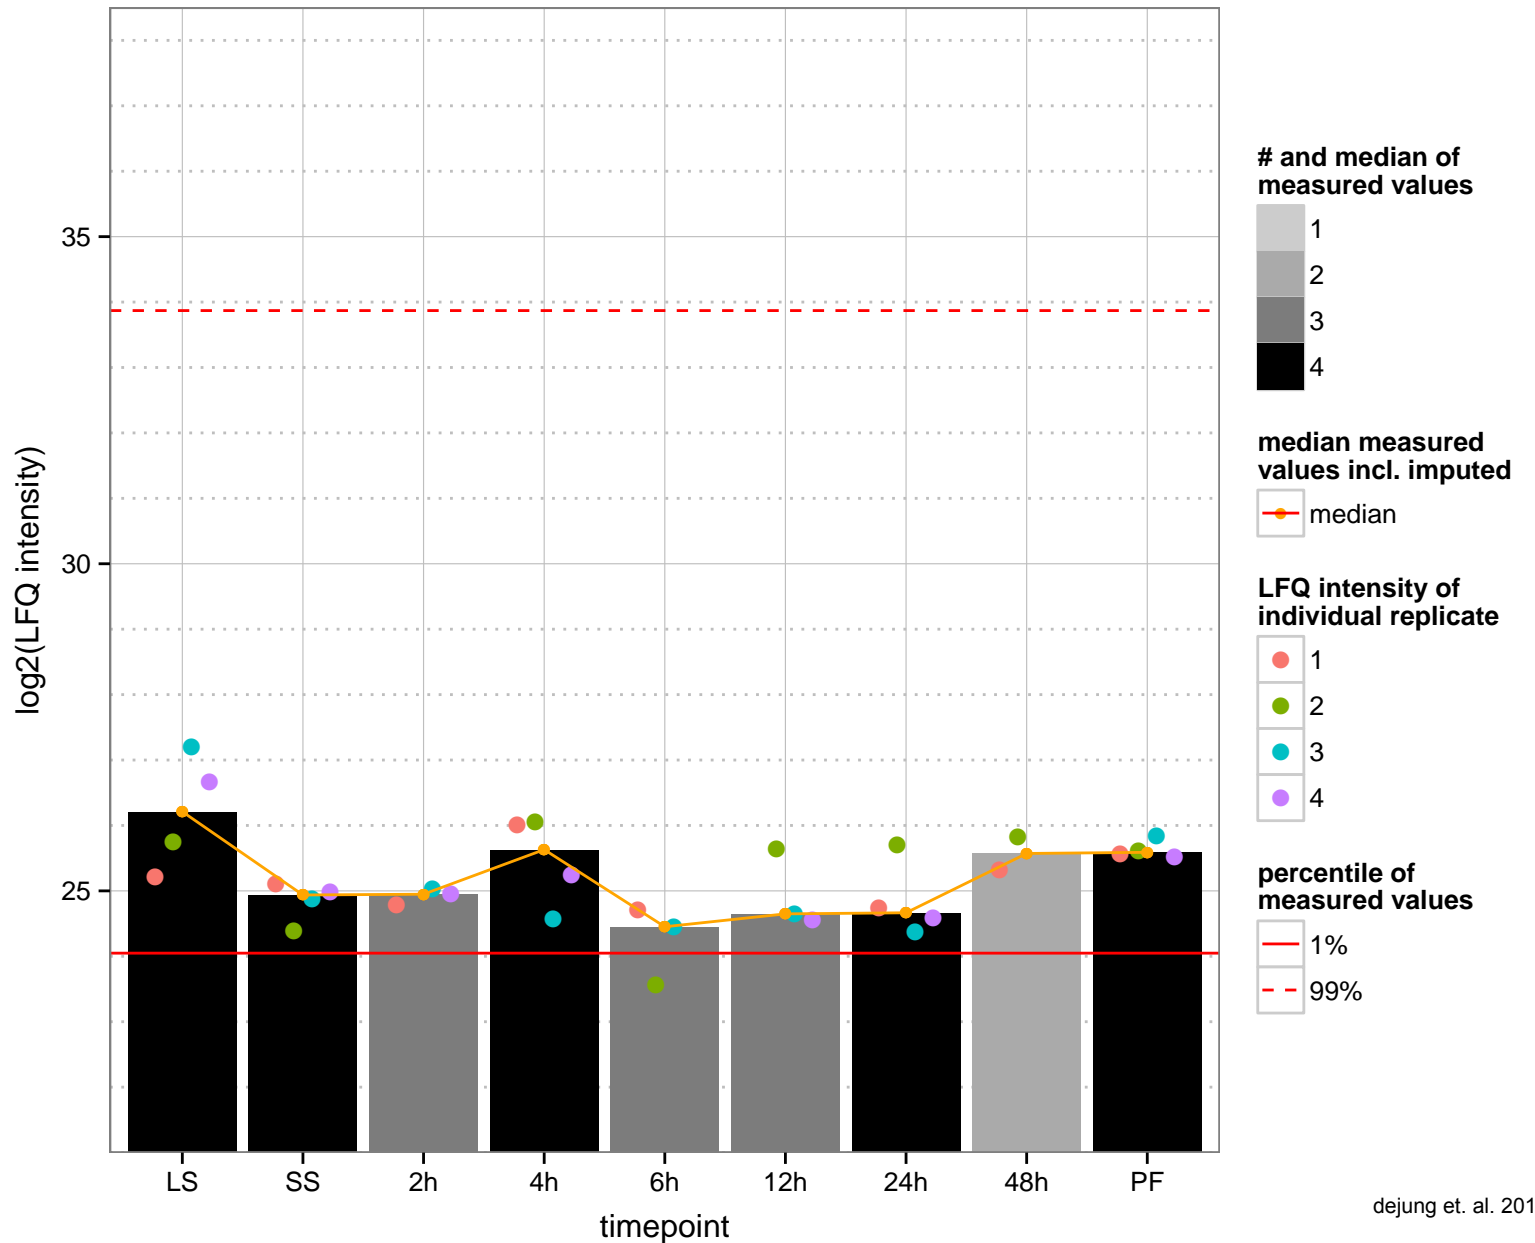

hypothetical protein, conserved  
 Tb927.11.12630  
 AGOF: null  
 AGOC: null  
 AGOP: null  
 PGOF: null  
 PGOC: null  
 PGOP: null

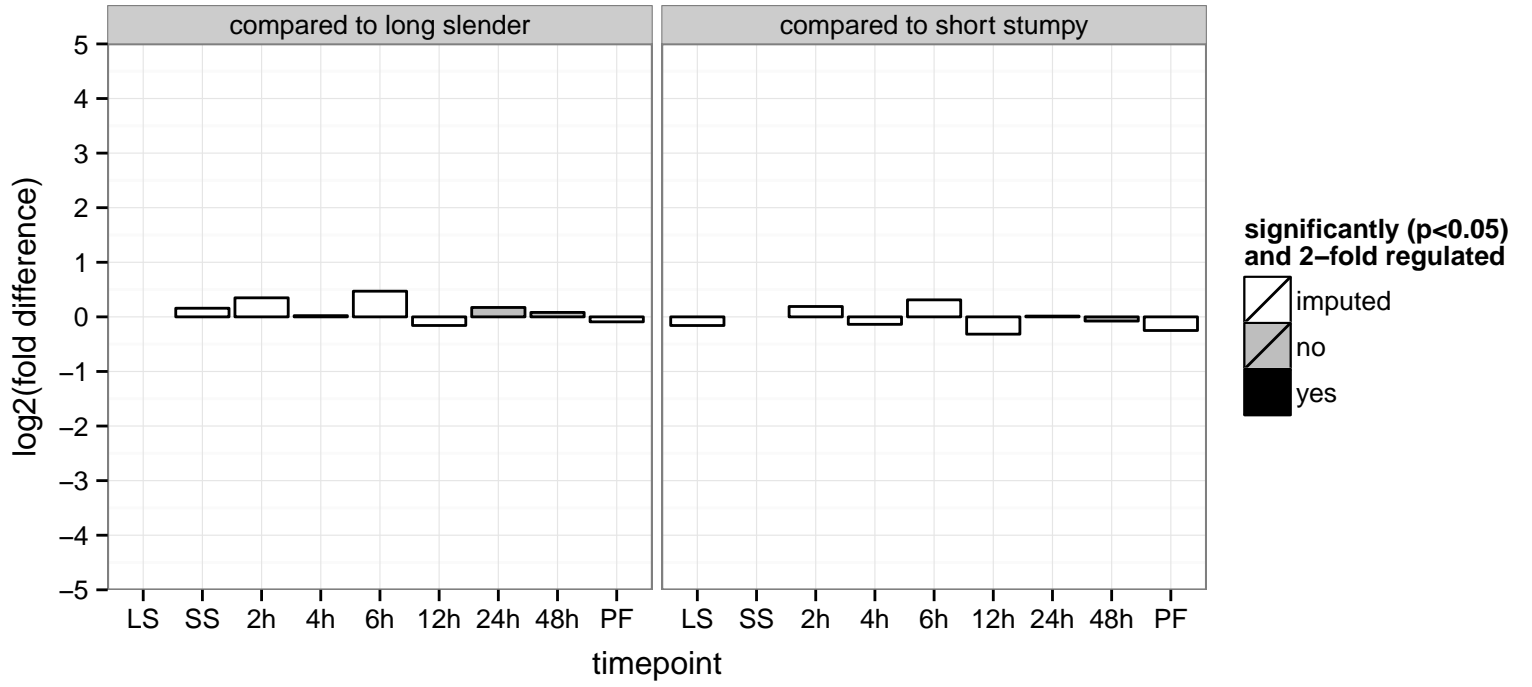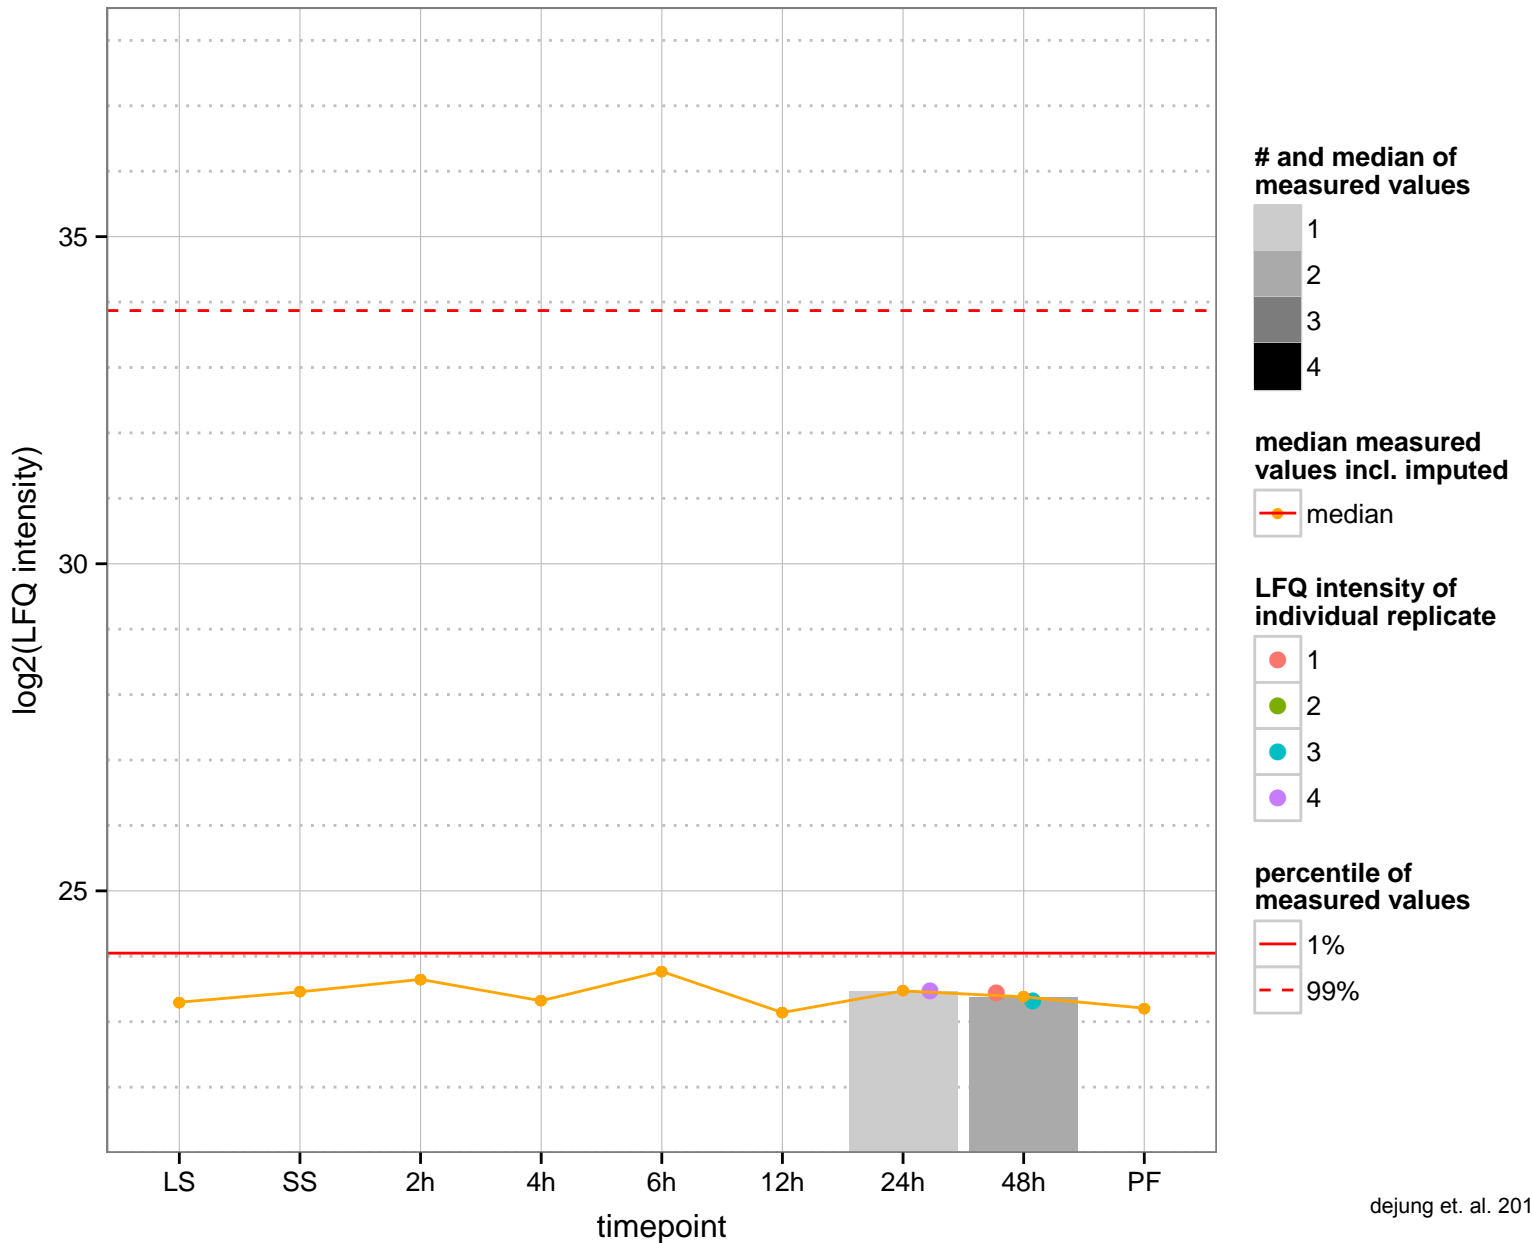

hypothetical protein, conserved

Tb927.11.12640

AGOF: null

AGOC: null

AGOP: null

PGOF: Rho guanyl-nucleotide exchange factor activity, phospholipid binding, protein binding

PGOC: intracellular

PGOP: regulation of Rho protein signal transduction

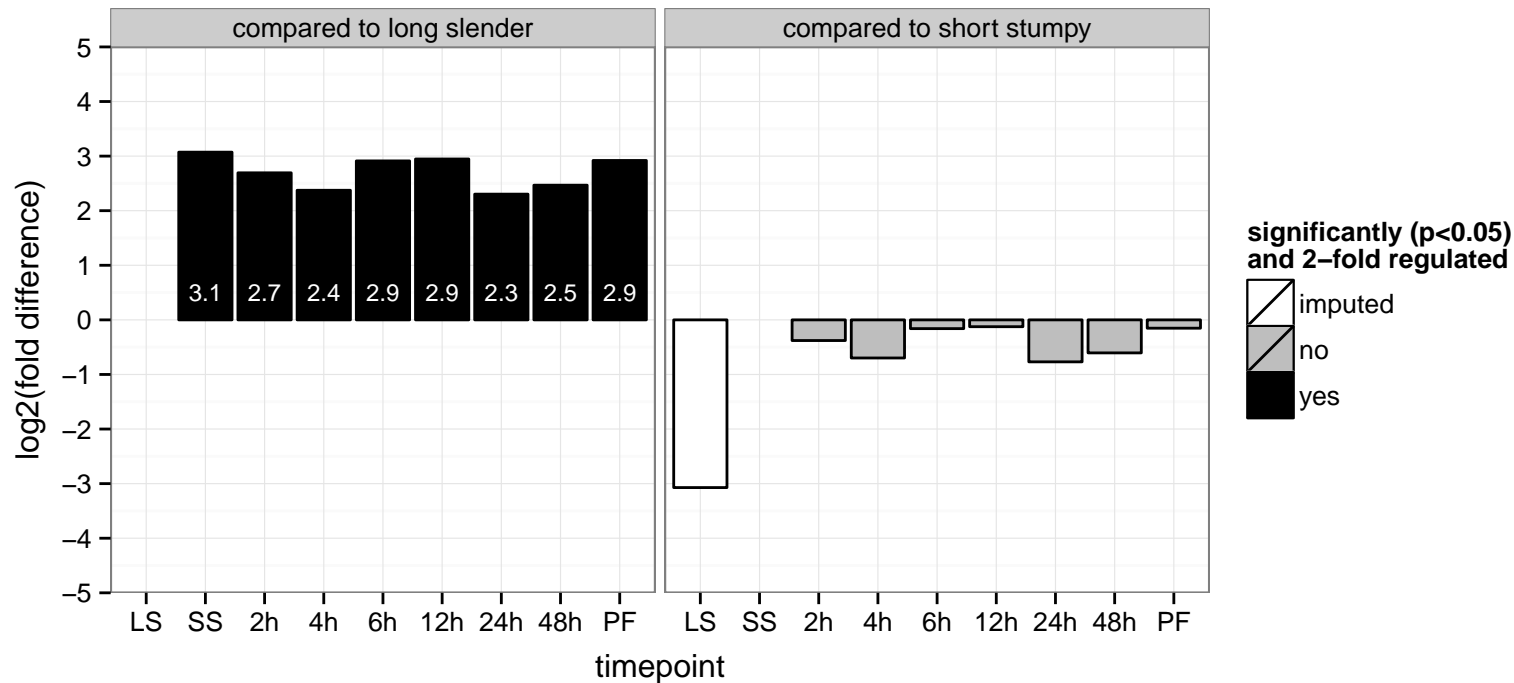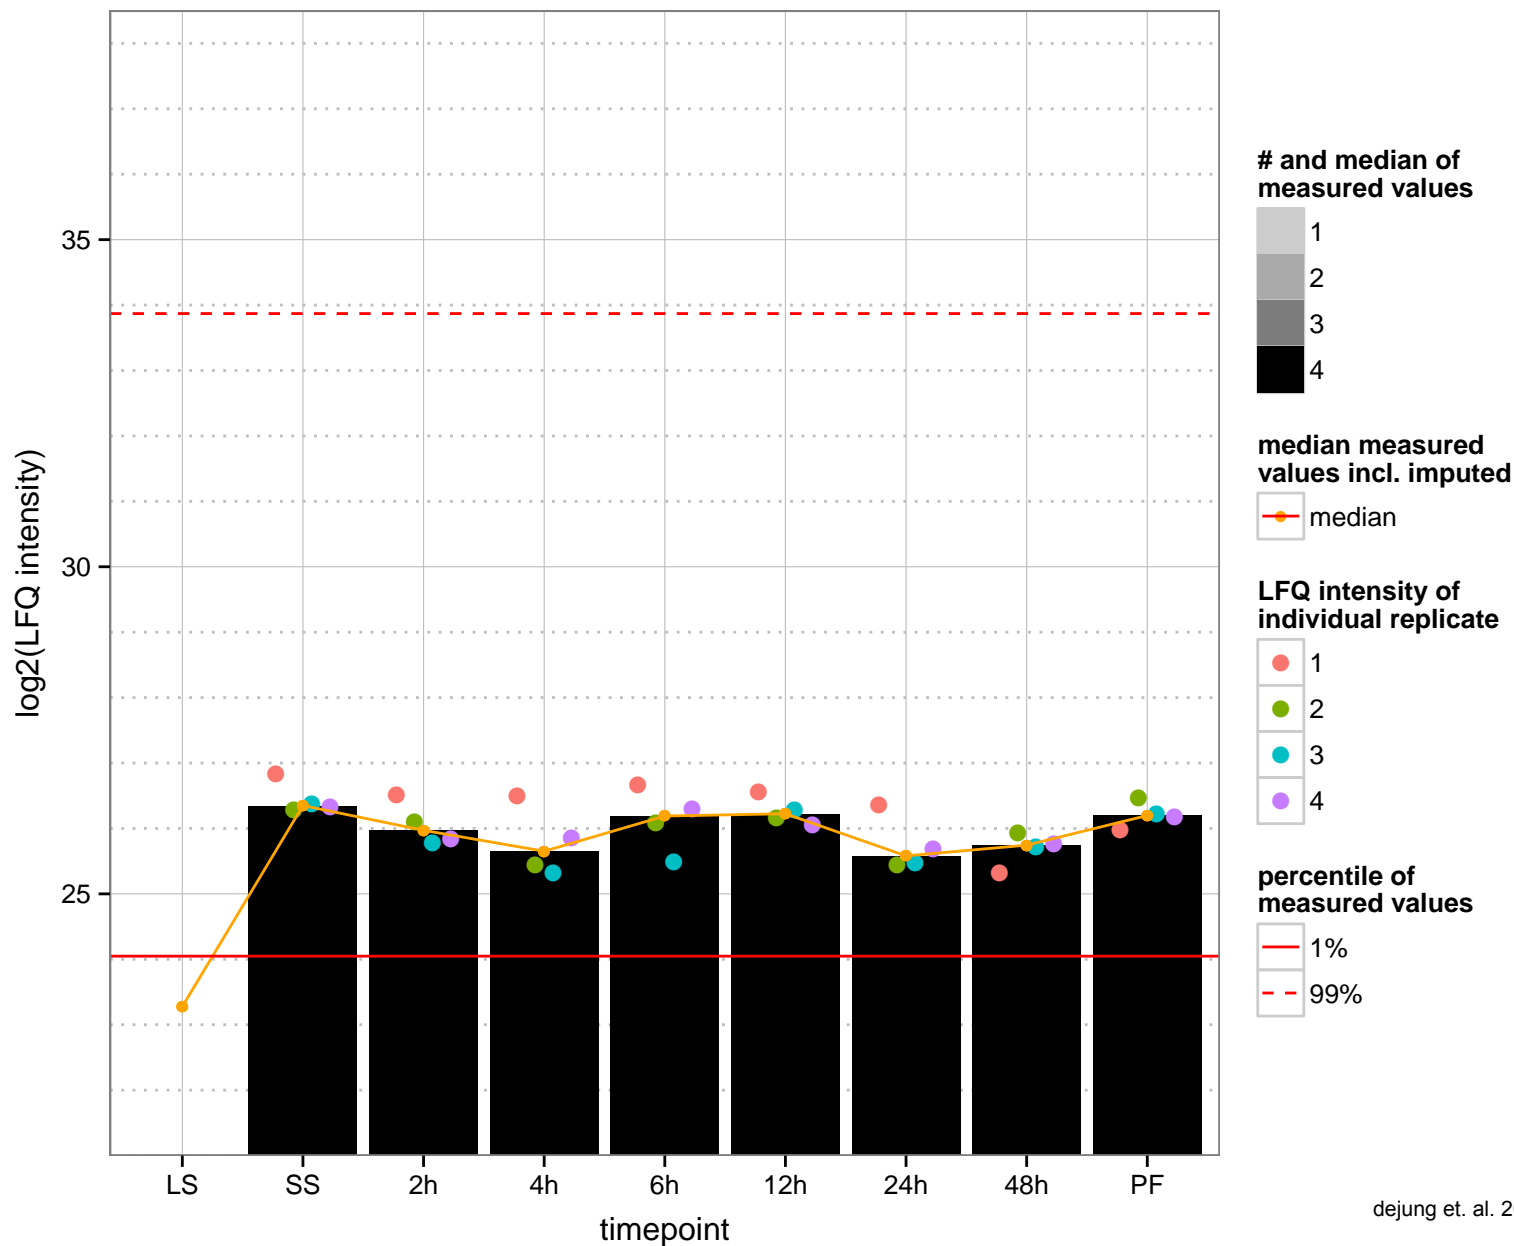

hypothetical protein, conserved  
 Tb927.11.12910  
 AGOF: null  
 AGOC: null  
 AGOP: null  
 PGO: unfolded protein binding  
 PGOC: prefoldin complex  
 PGOP: protein folding

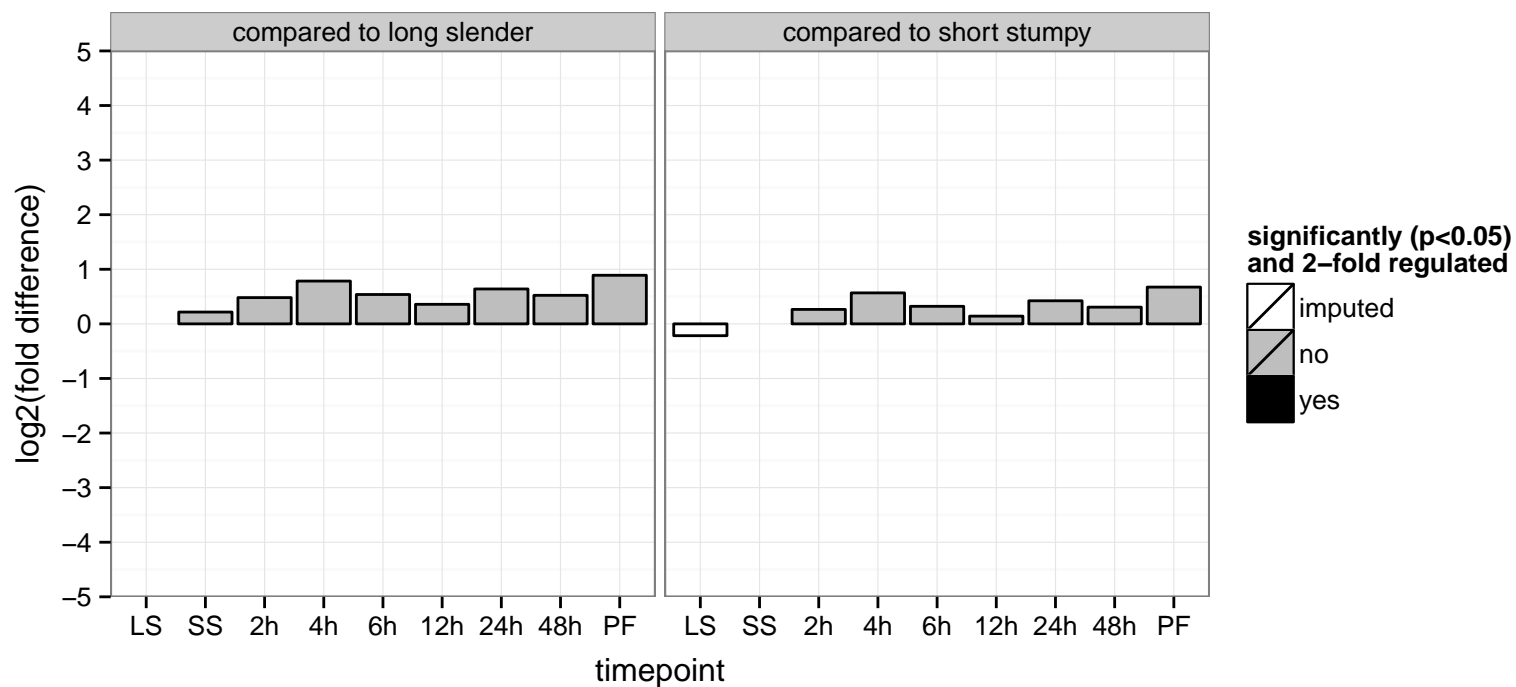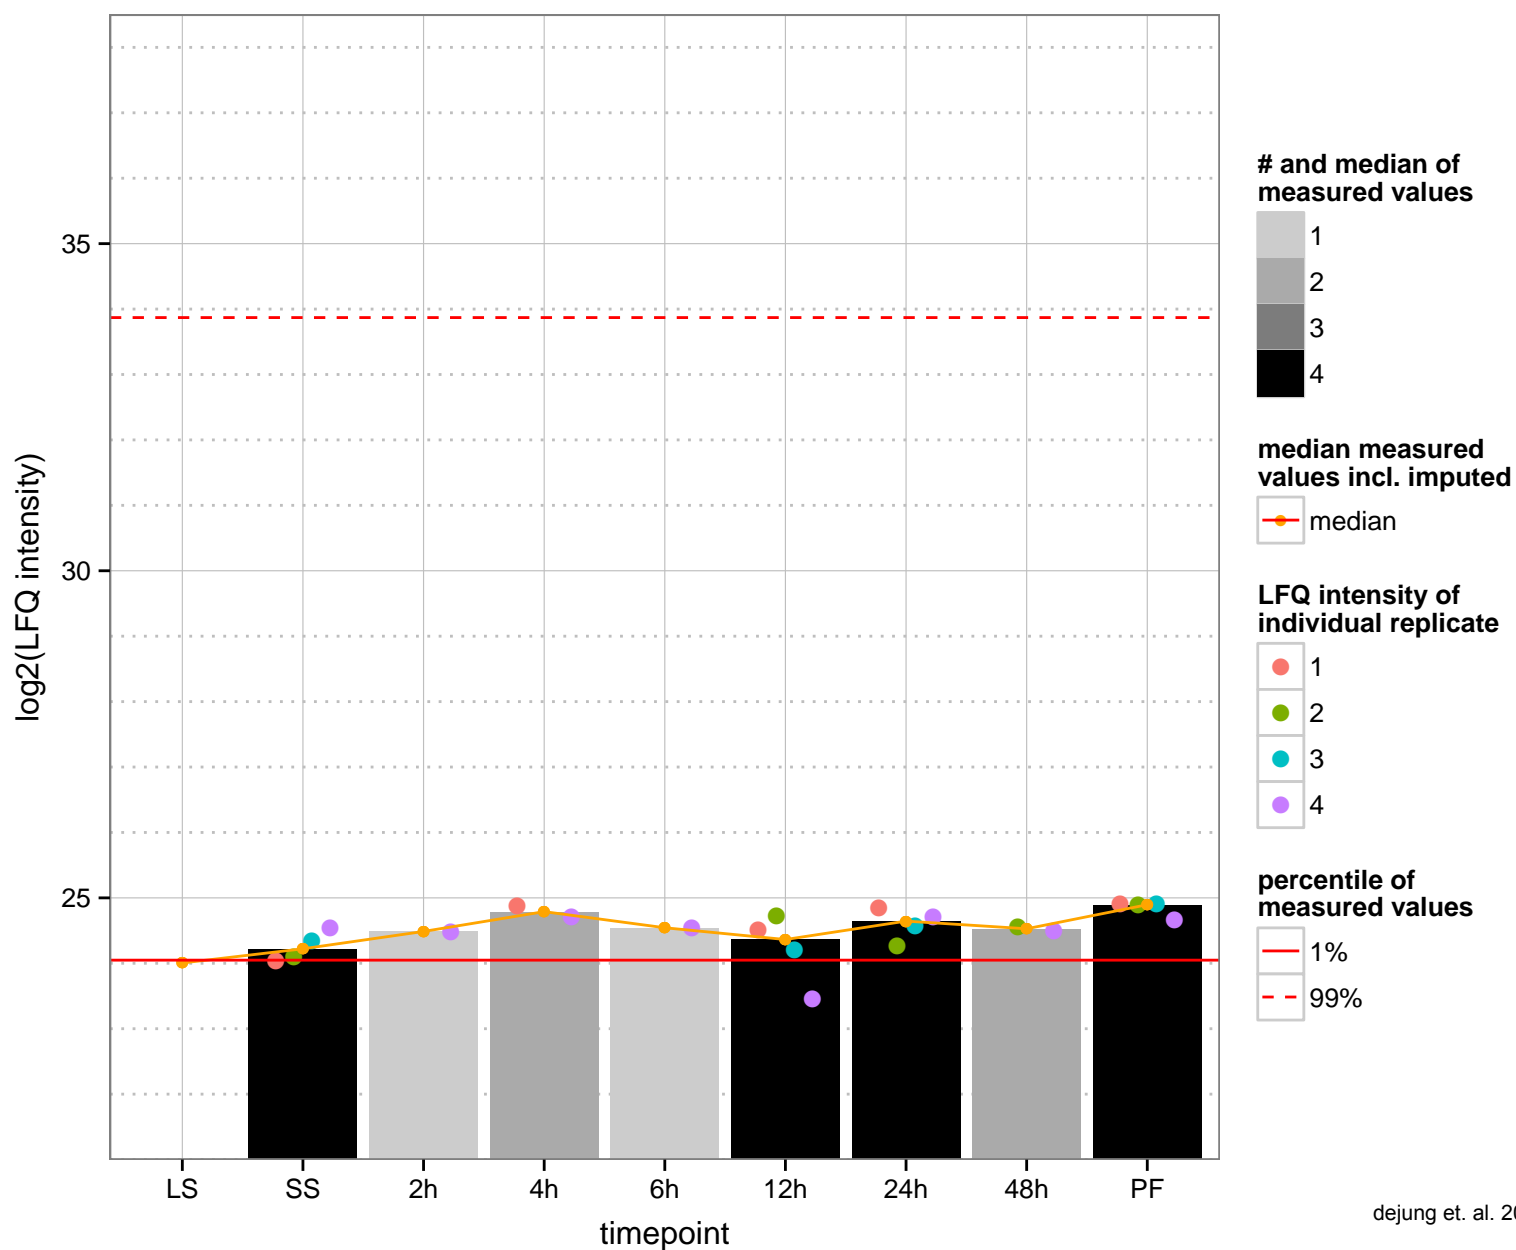

hypothetical protein, conserved  
 Tb927.11.12920  
 AGOF: ATP binding, nucleoside-triphosphatase activity  
 AGOC: null  
 AGOP: null  
 PGO: nucleoside-triphosphatase activity, nucleotide binding  
 PGOC: null  
 PGOP: null

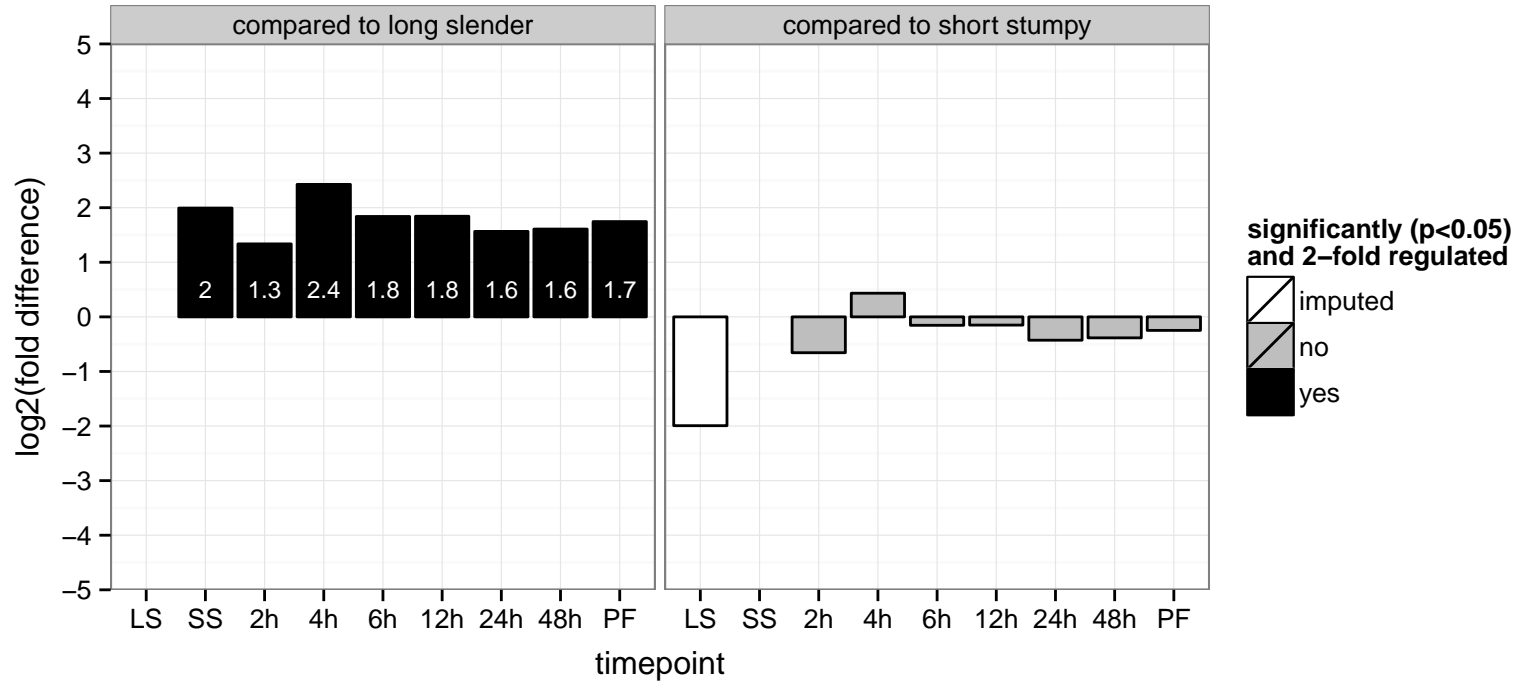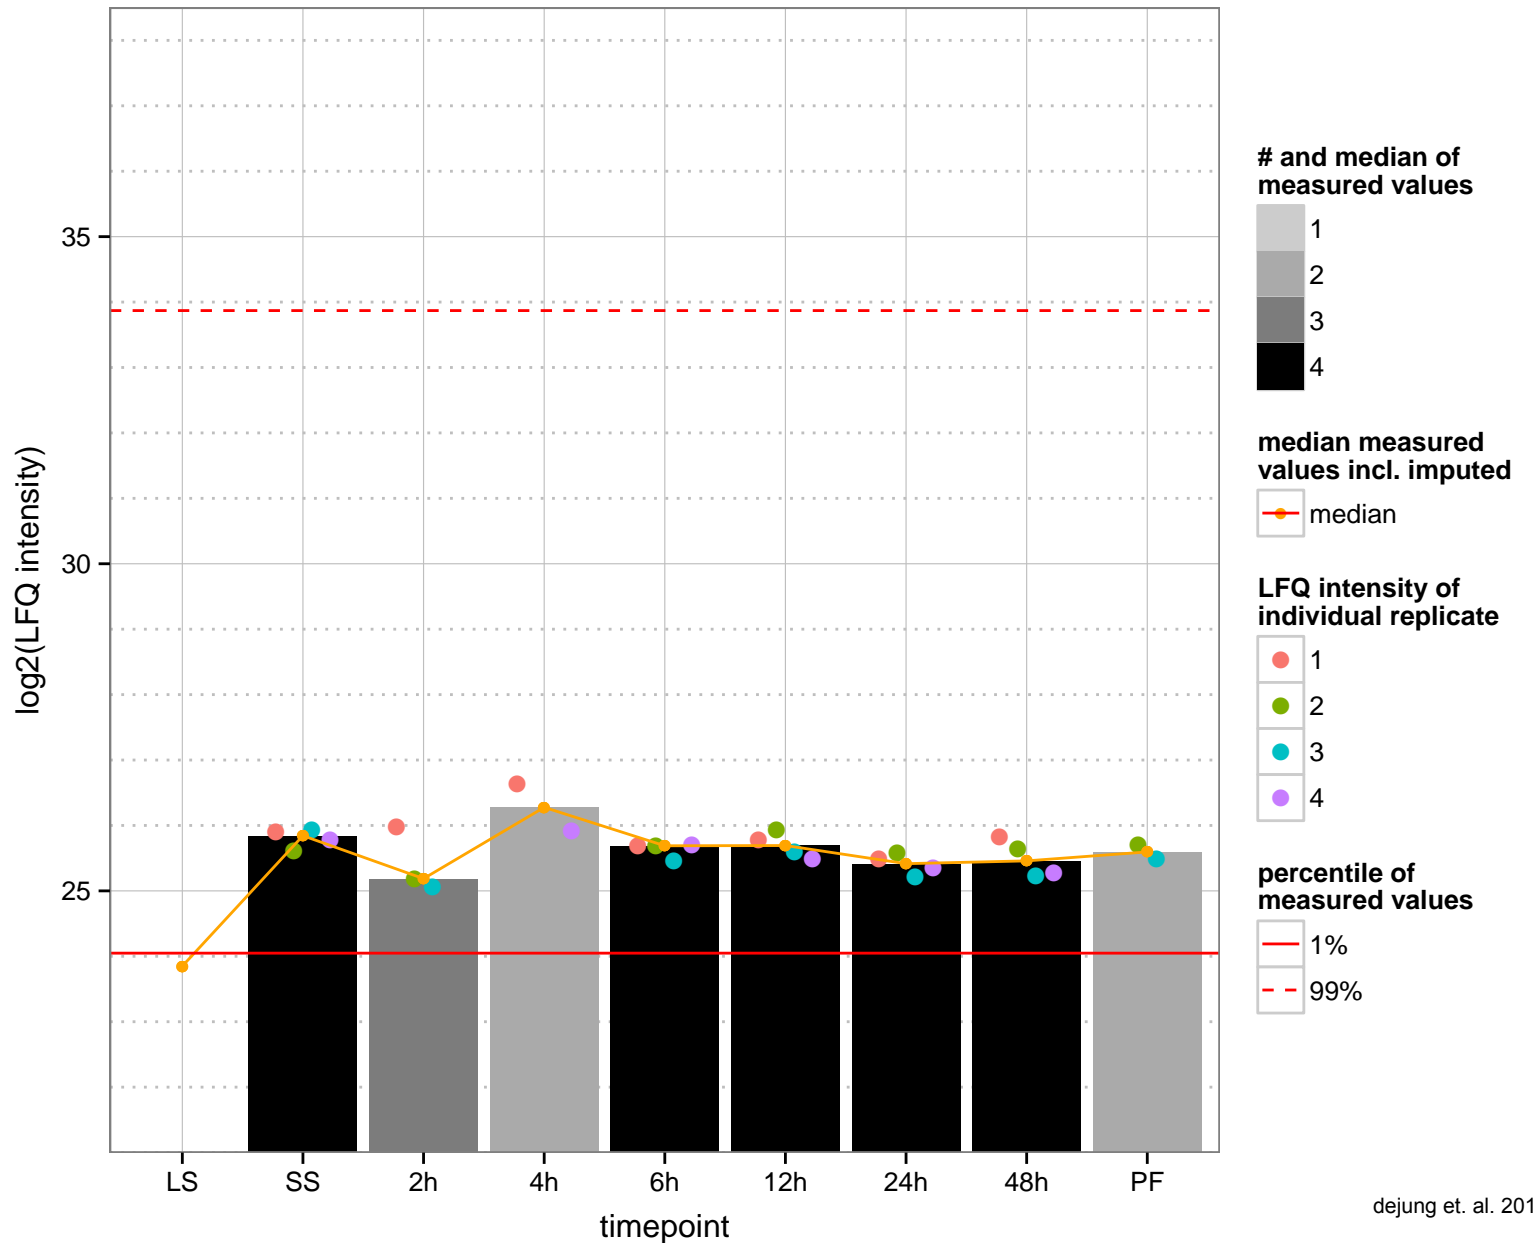



hypothetical protein, conserved  
 Tb927.11.12940  
 AGOF: null  
 AGOC: null  
 AGOP: null  
 PGOF: null  
 PGO: null  
 PGOP: null

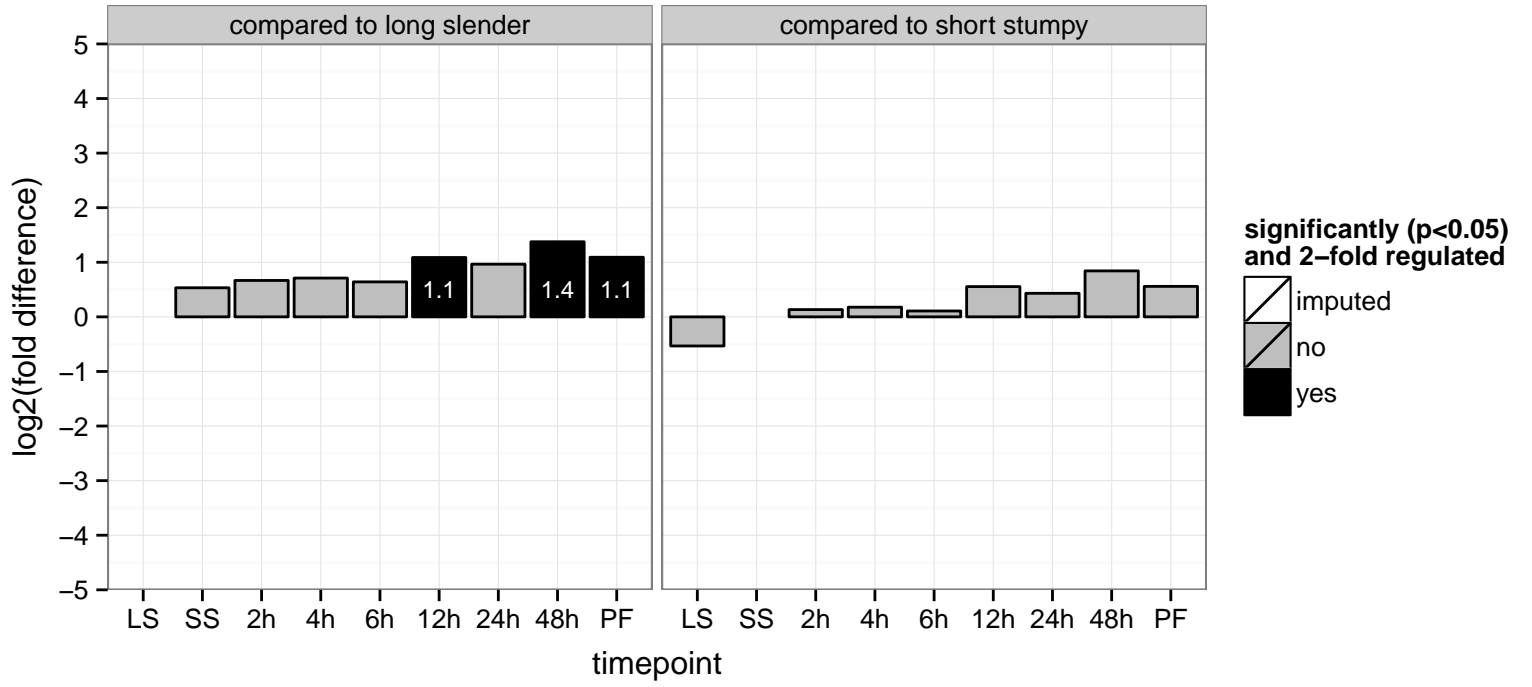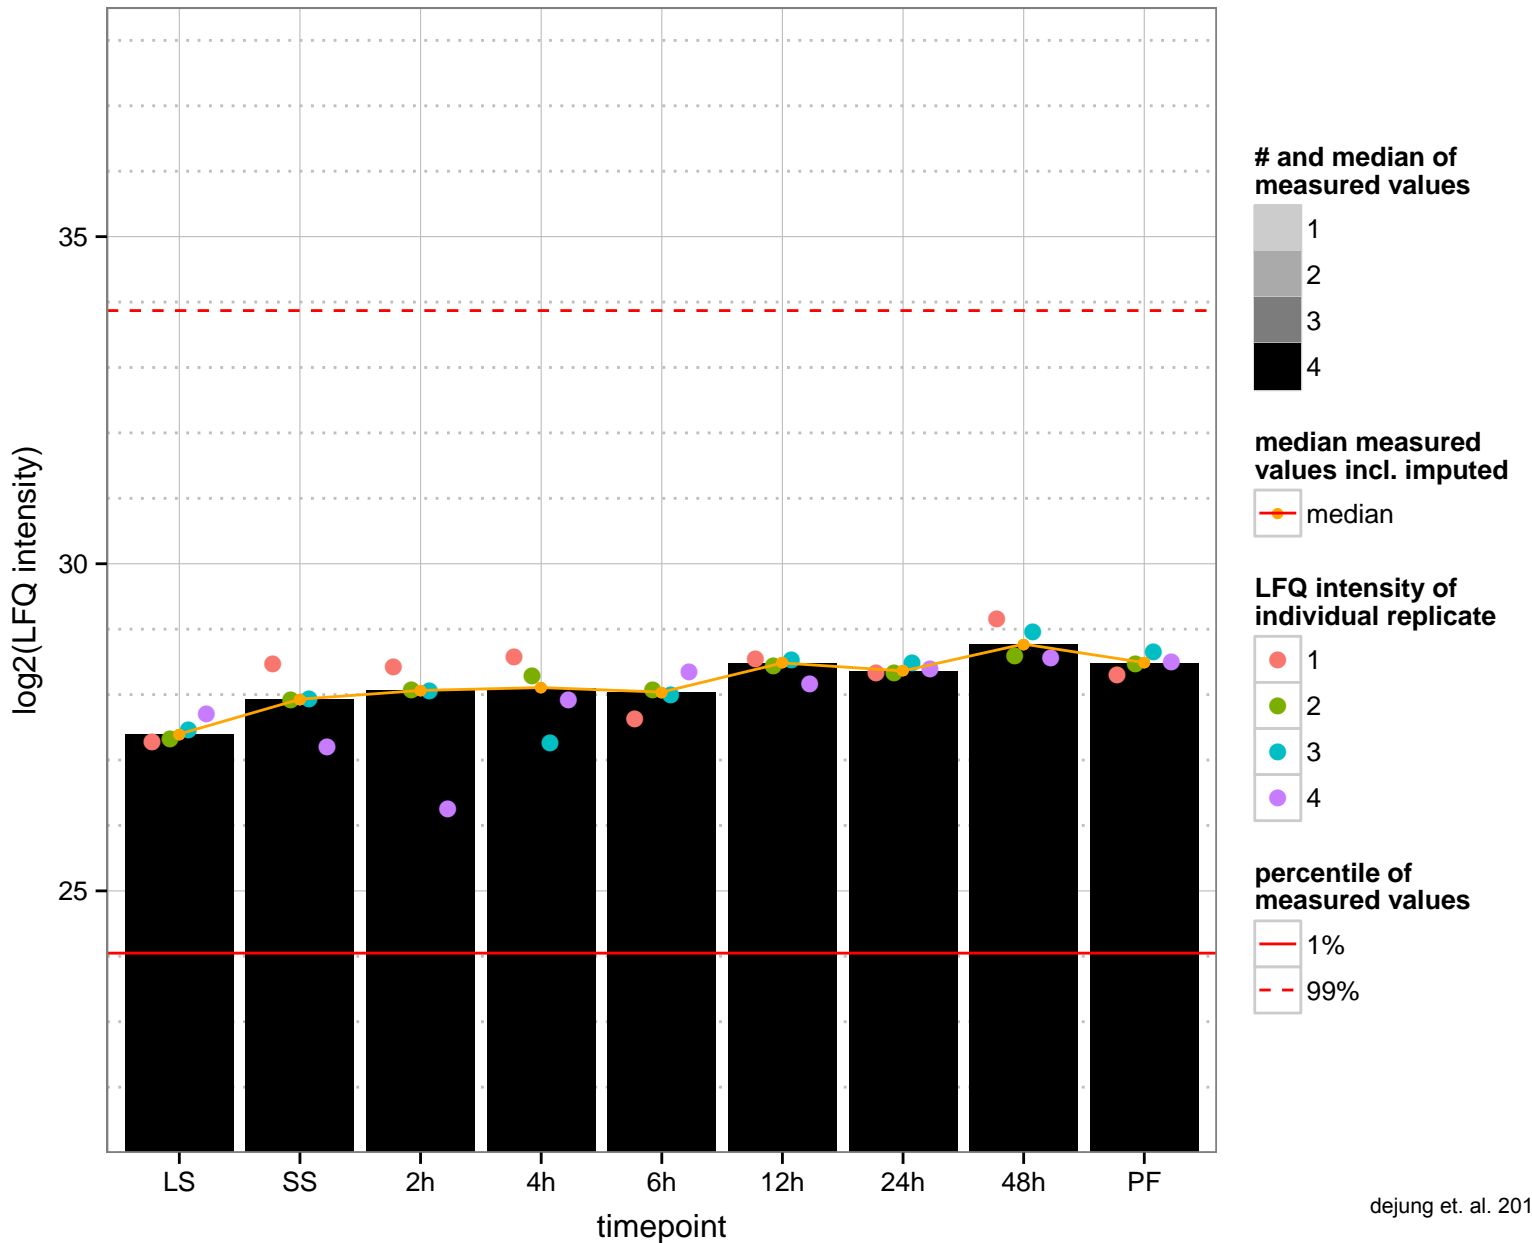

hypothetical protein  
 Tb927.11.13010  
 AGOF: null  
 AGOC: null  
 AGOP: null  
 PGO: null  
 PGOC: null  
 PGOP: null

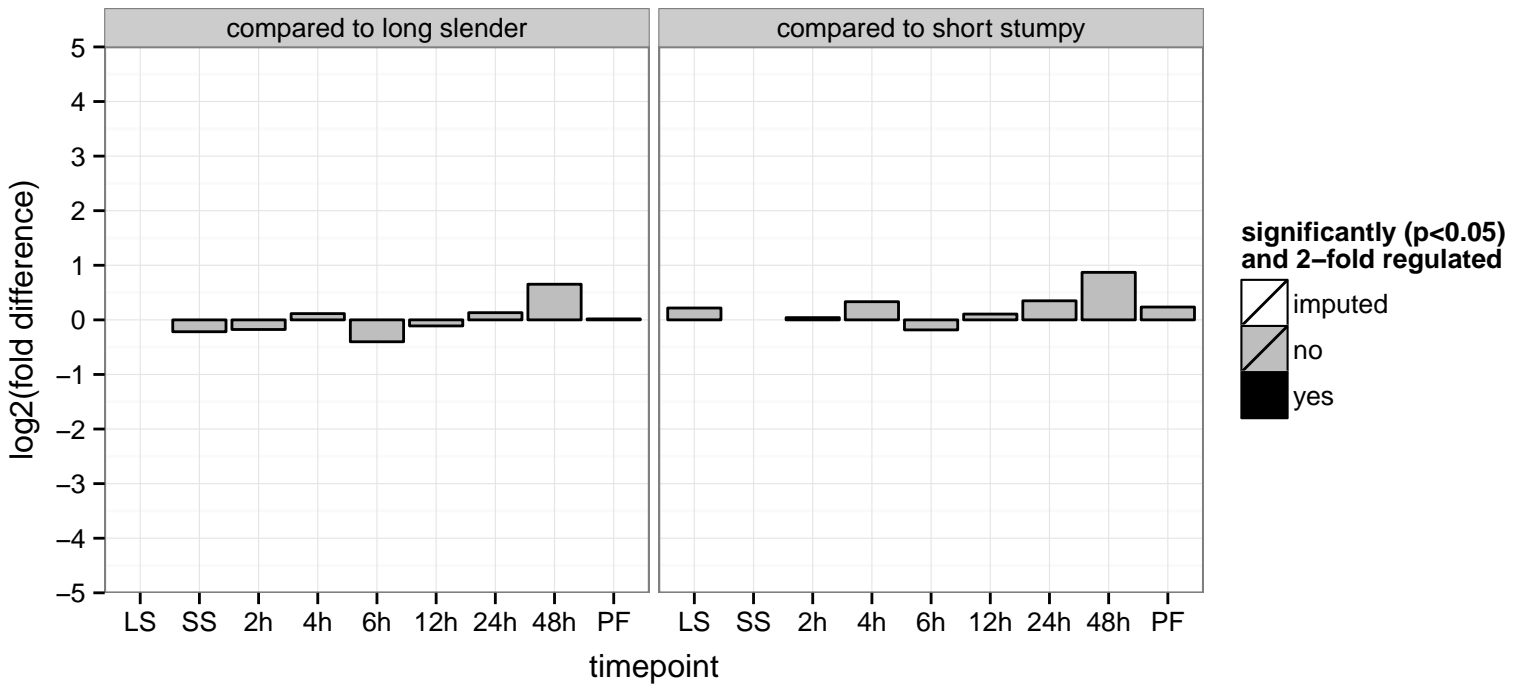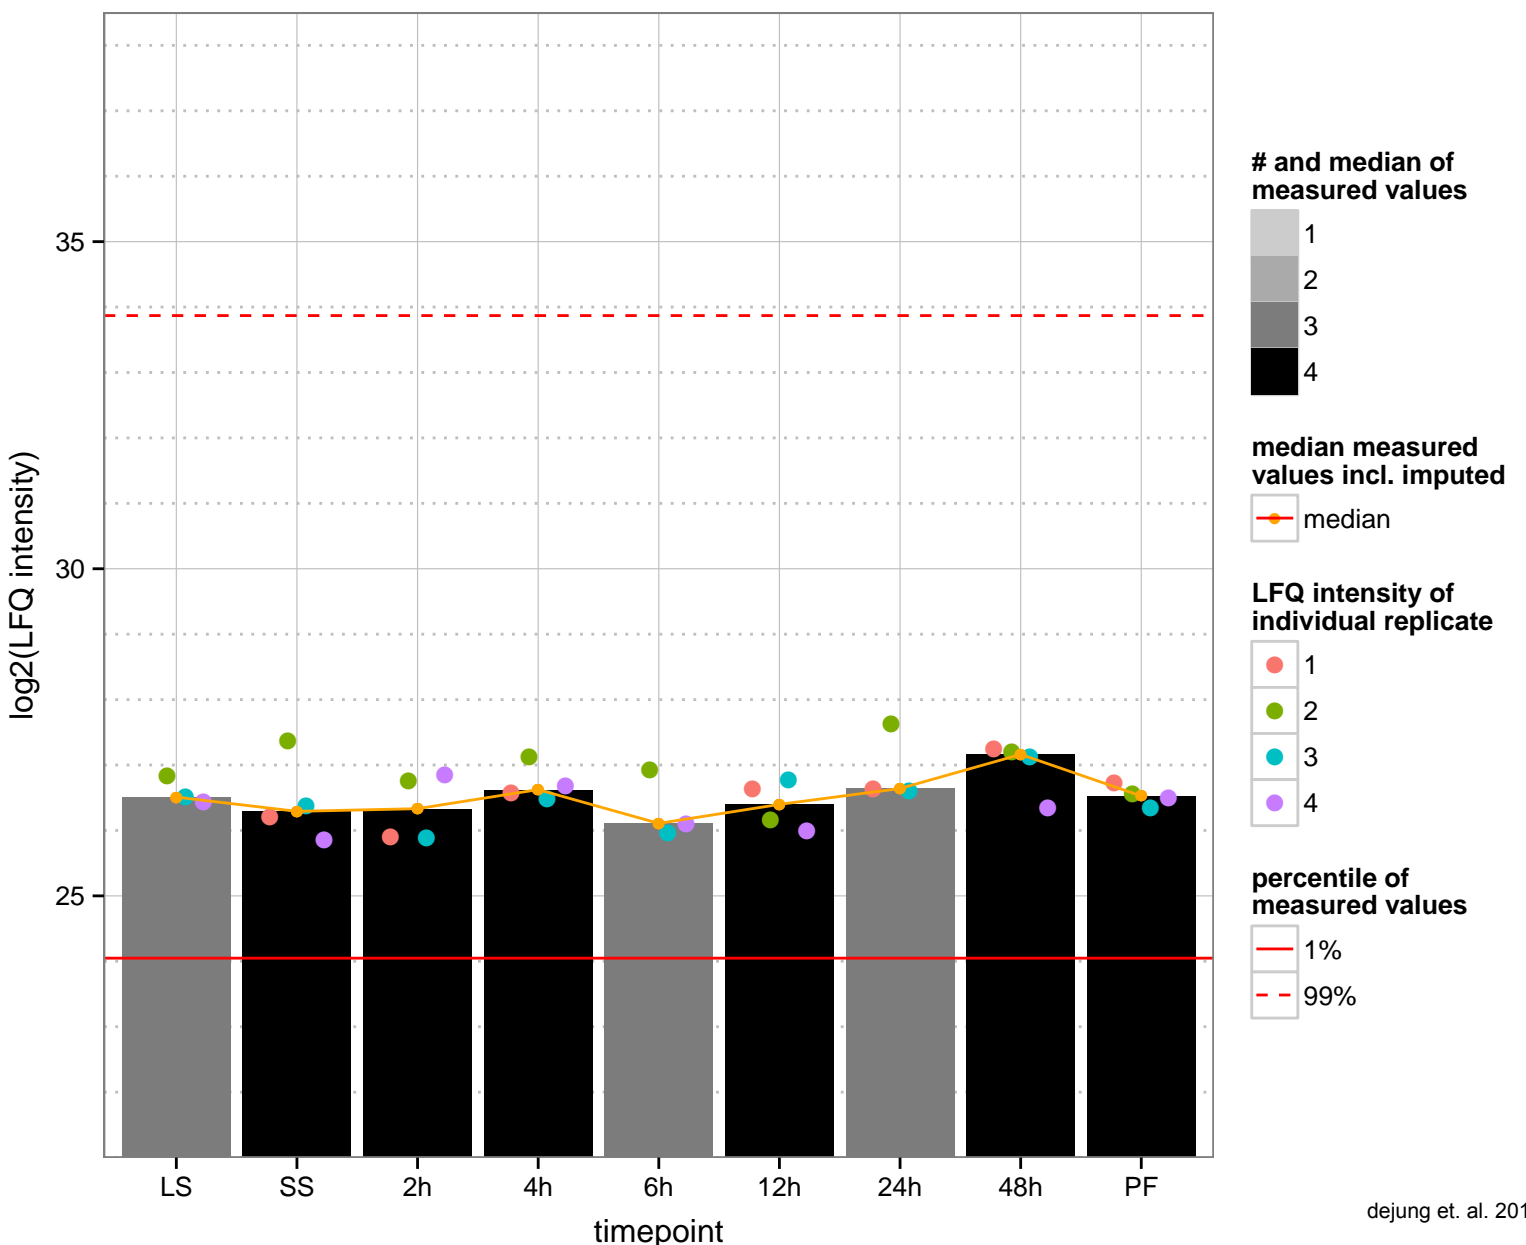

calmodulin  
 Tb927.11.13050;Tb927.11.13040;Tb927.11.13030;Tb927.11.13020  
 AGOF: calcium ion binding  
 AGOC: cilium, contractile vacuole, cytosol  
 AGOP: null  
 PGOF: null, calcium ion binding  
 PGOC: null  
 PGOP: null

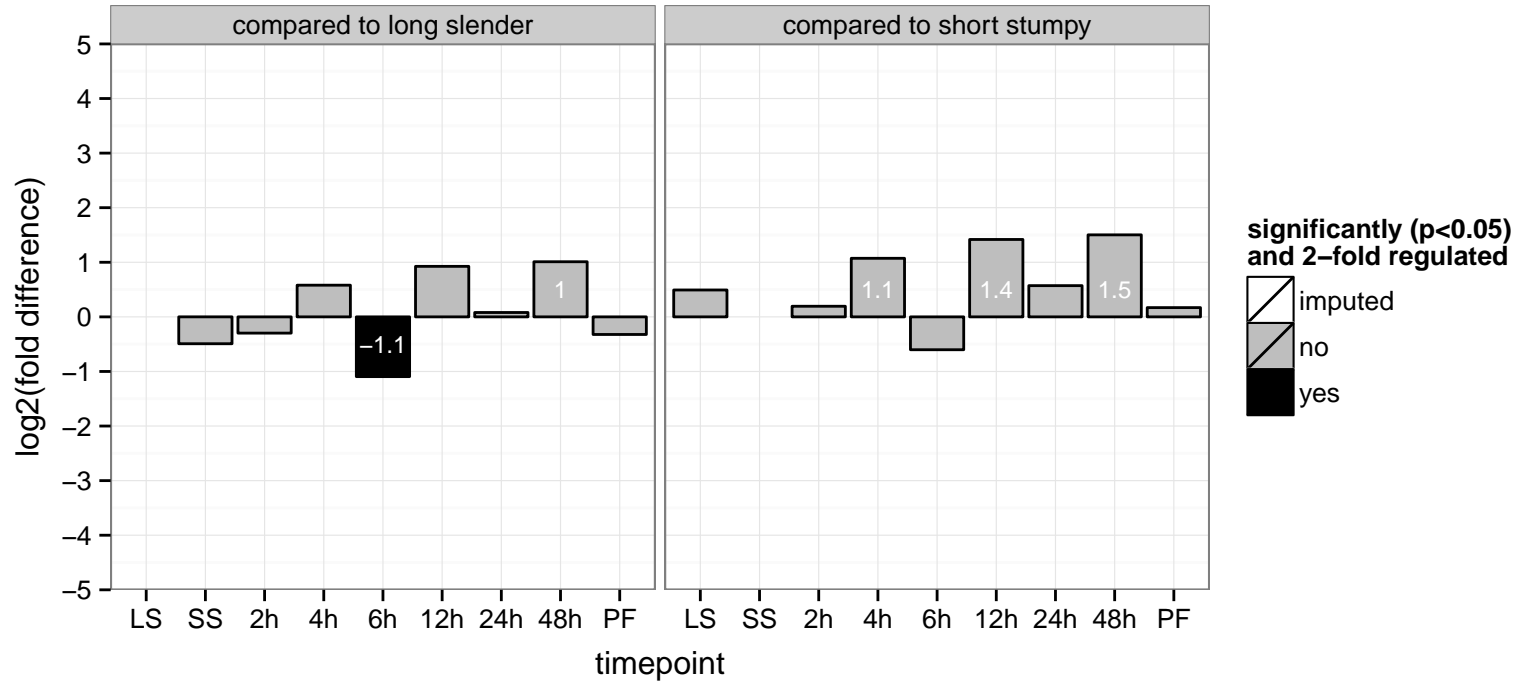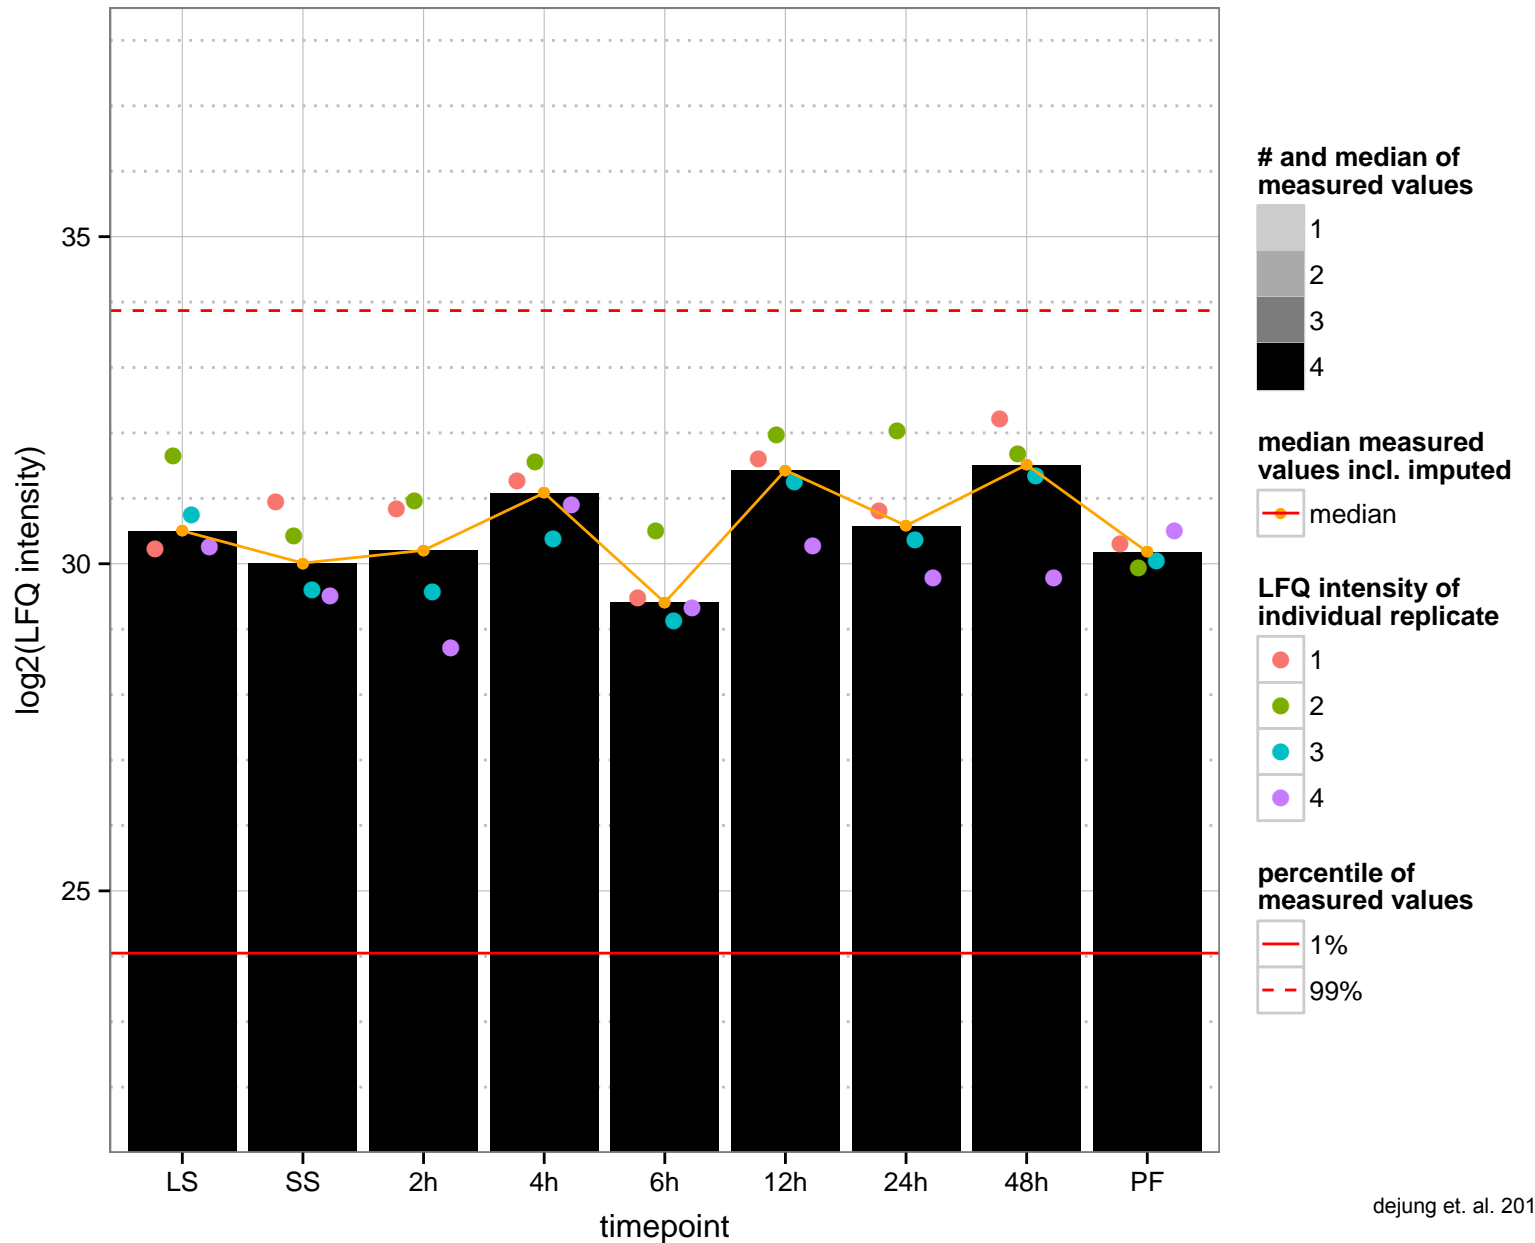

hypothetical protein, conserved

Tb927.11.13070

AGOF: null

AGOC: null

AGOP: null

PGOF: transferase activity, transferase activity, transferring selenium-containing groups

PGOC: null

PGOP: null

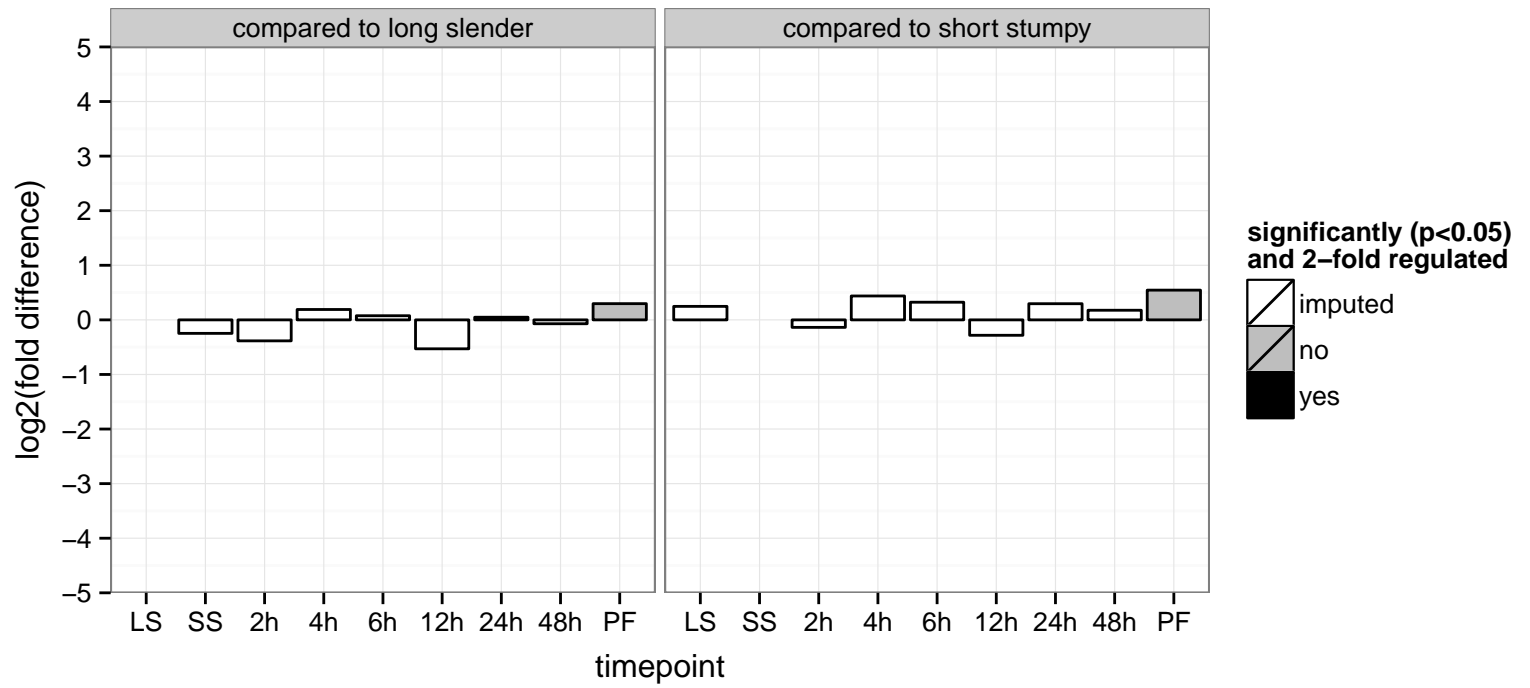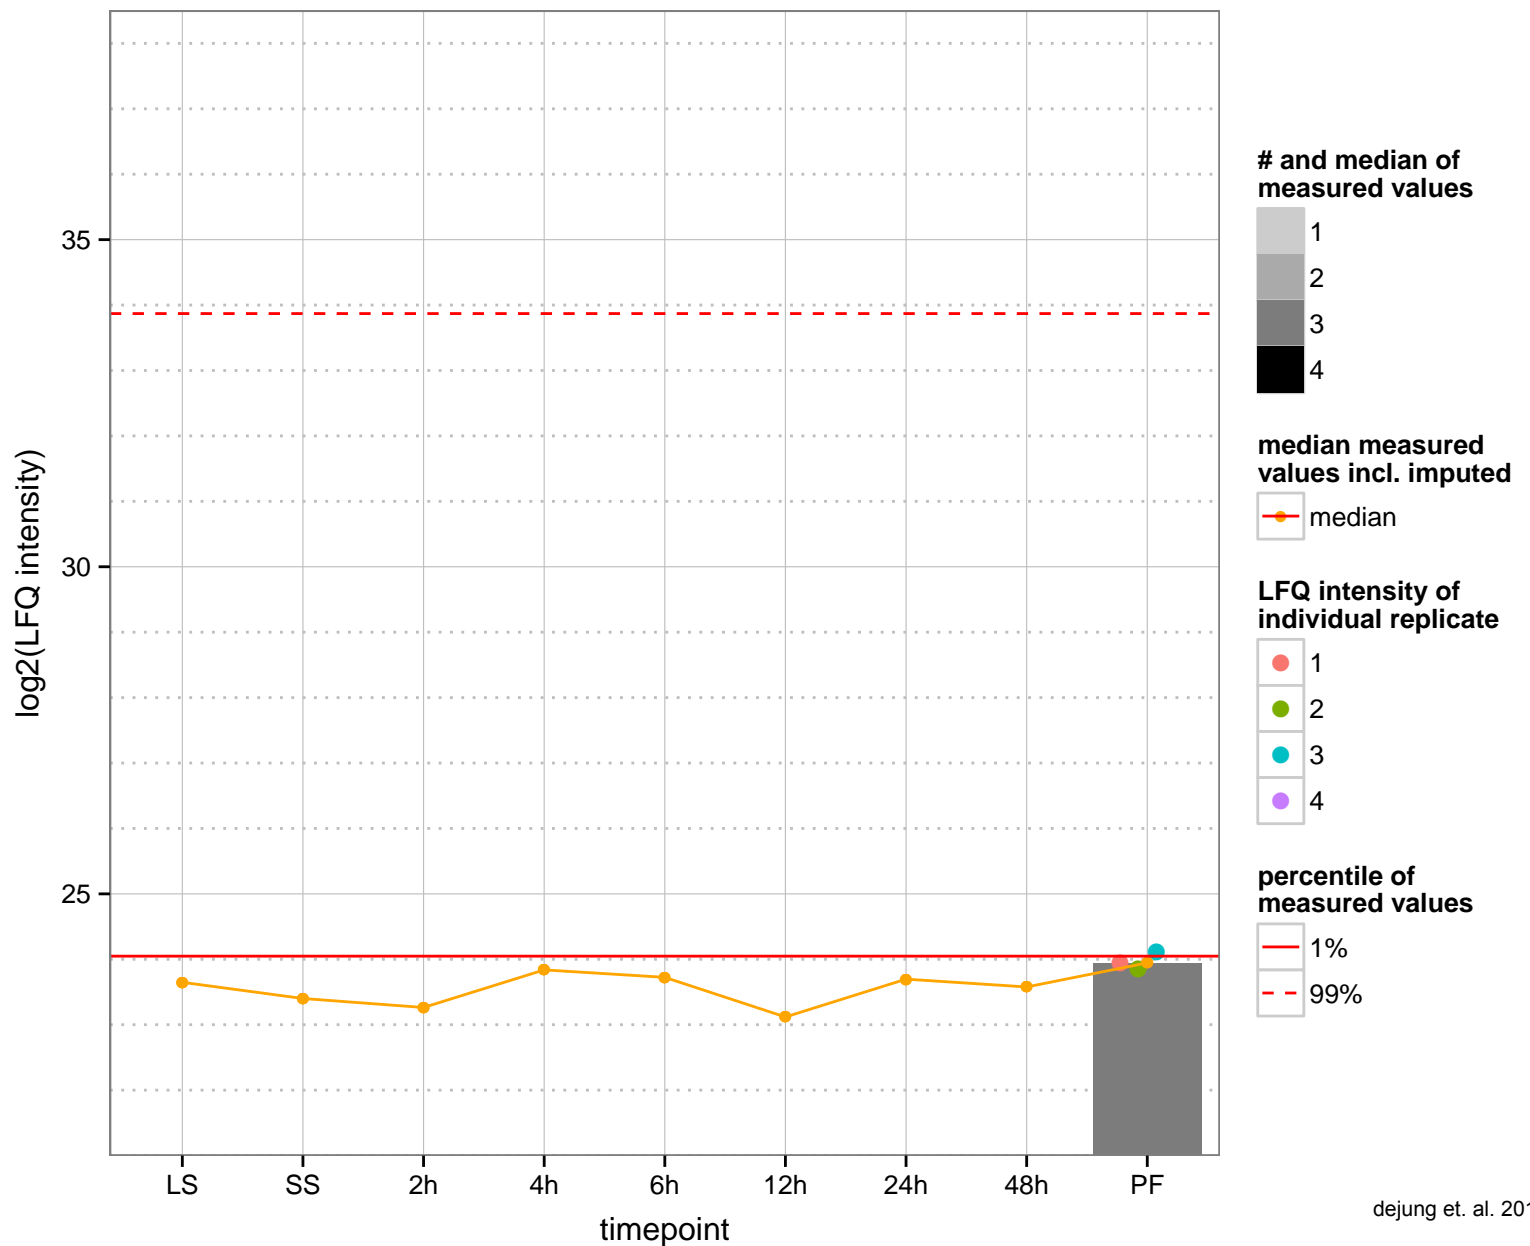

hypothetical protein, conserved  
 Tb927.11.13080  
 AGOF: null  
 AGOC: null  
 AGOP: null  
 PGO: null  
 PGOC: null  
 PGOP: null

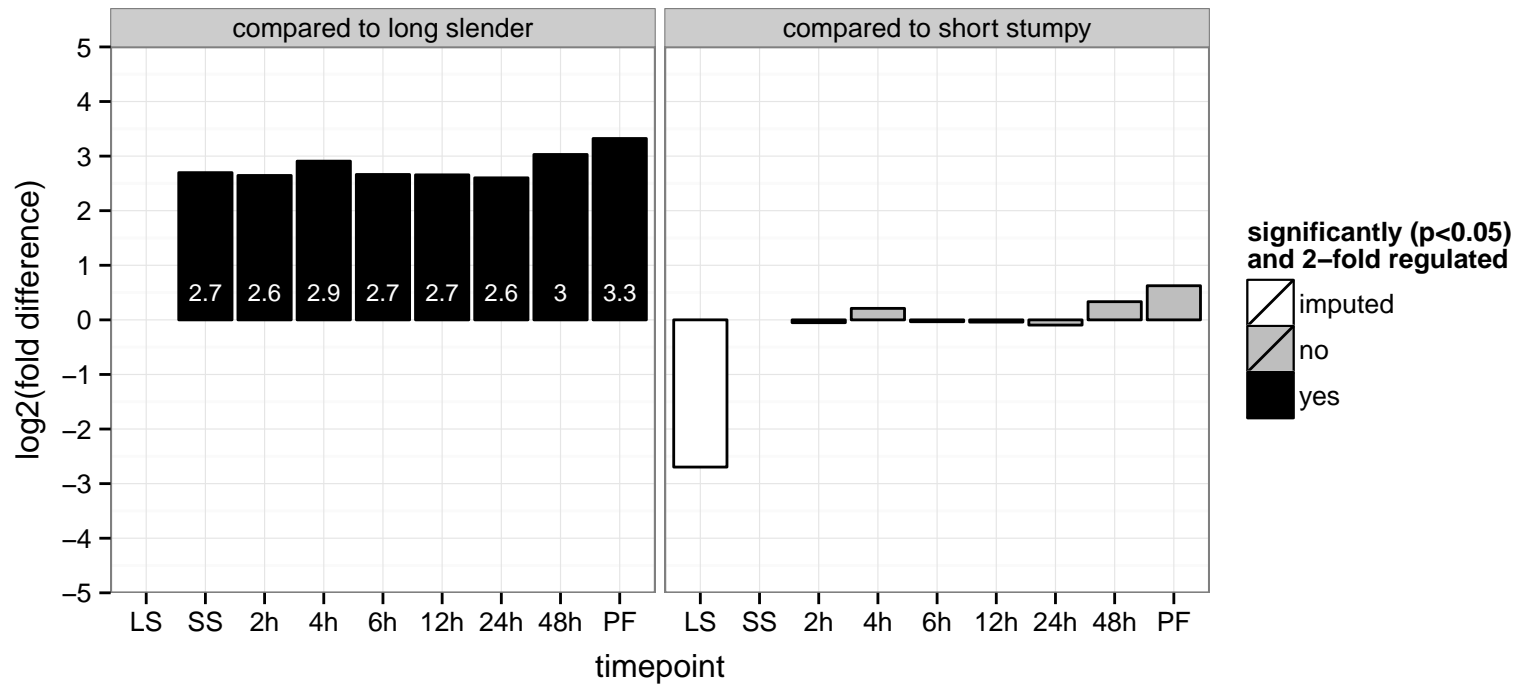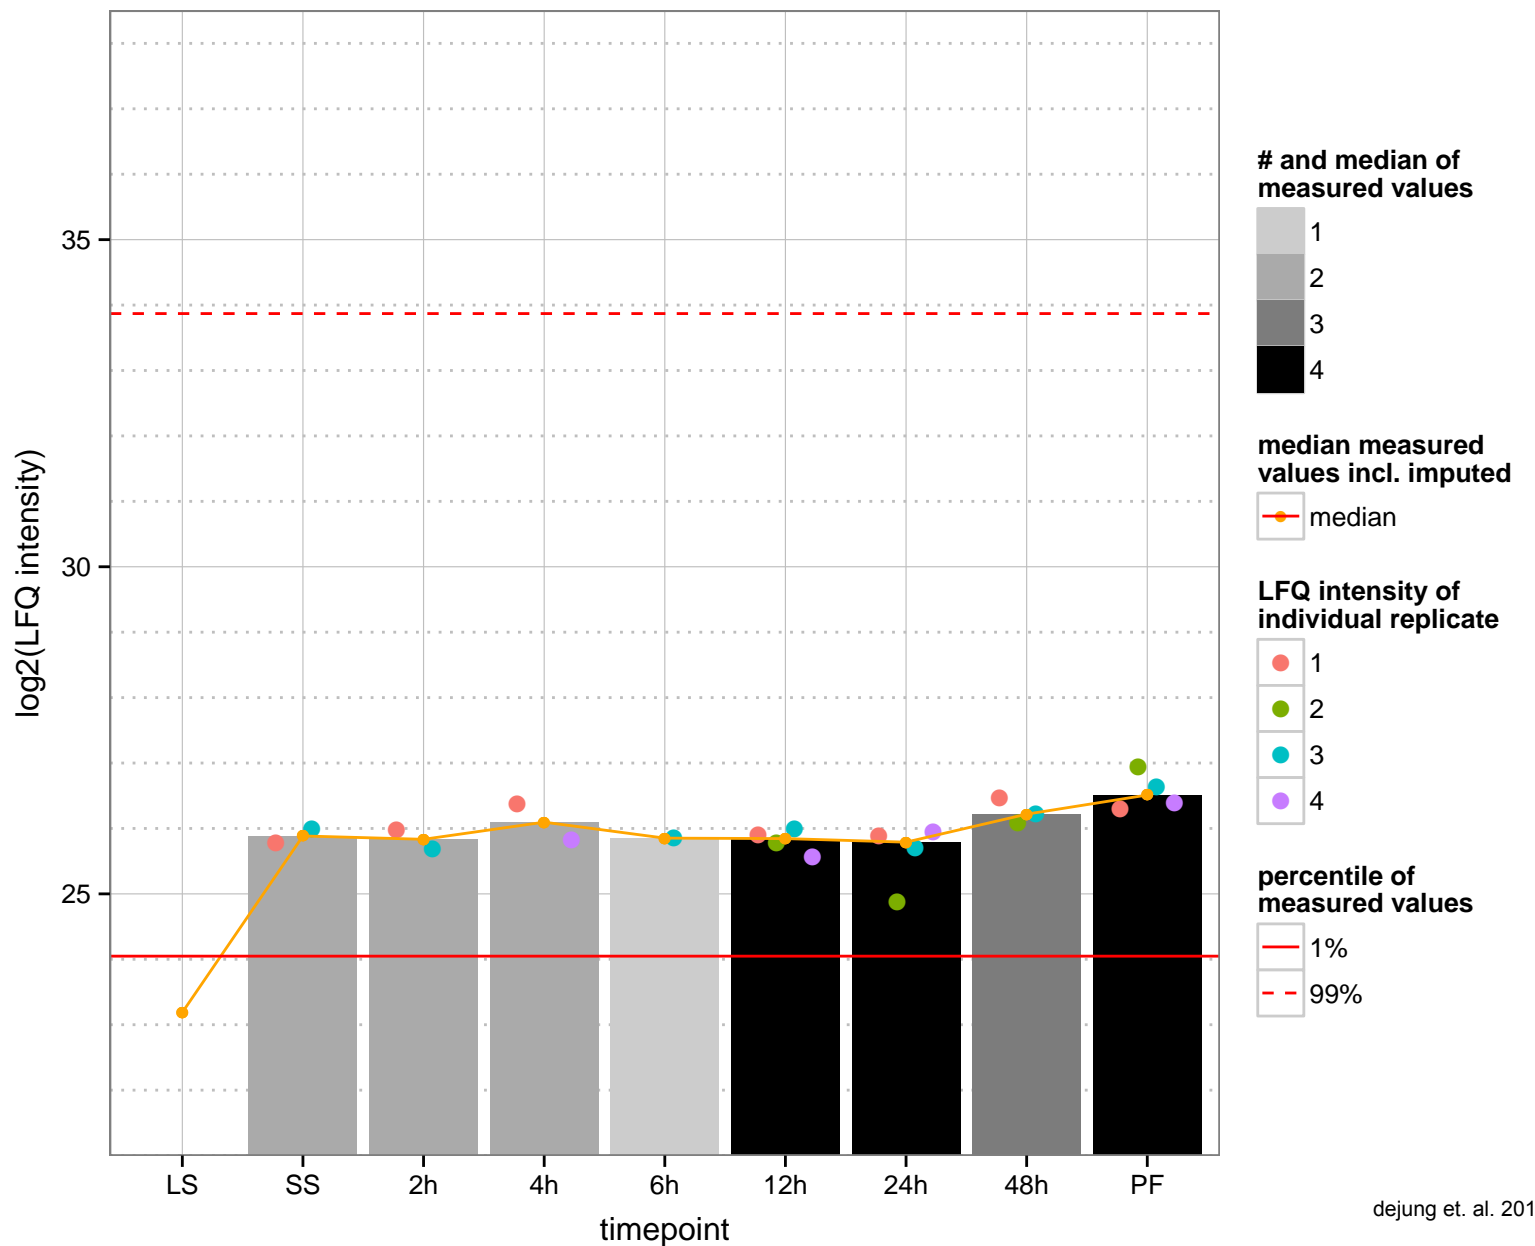

elongation factor 1 gamma, putative  
 Tb927.11.13190;Tb927.11.13090  
 AGOF: translation elongation factor activity  
 AGOC: eukaryotic translation elongation factor 1 complex  
 AGOP: translational elongation  
 PGOF: protein binding, translation elongation factor activity  
 PGOC: eukaryotic translation elongation factor 1 complex  
 PGOP: translational elongation

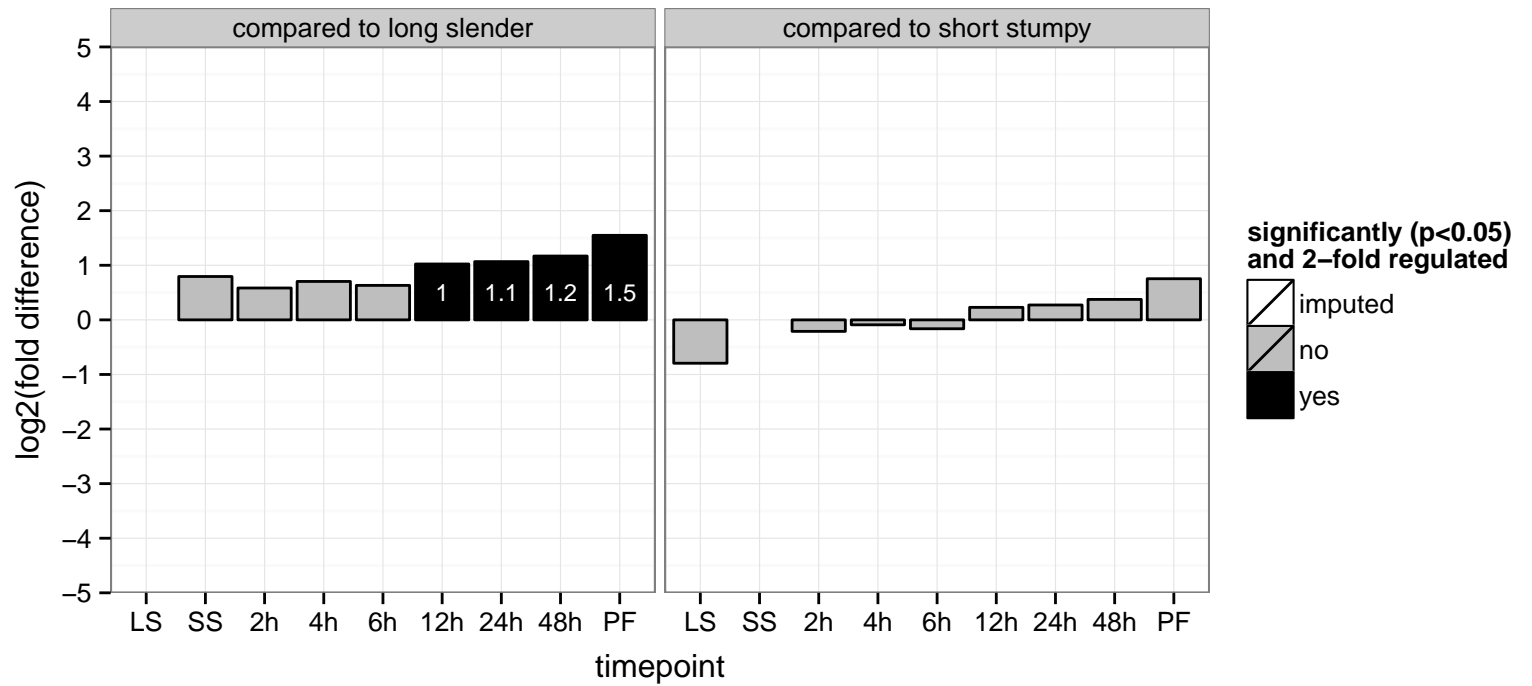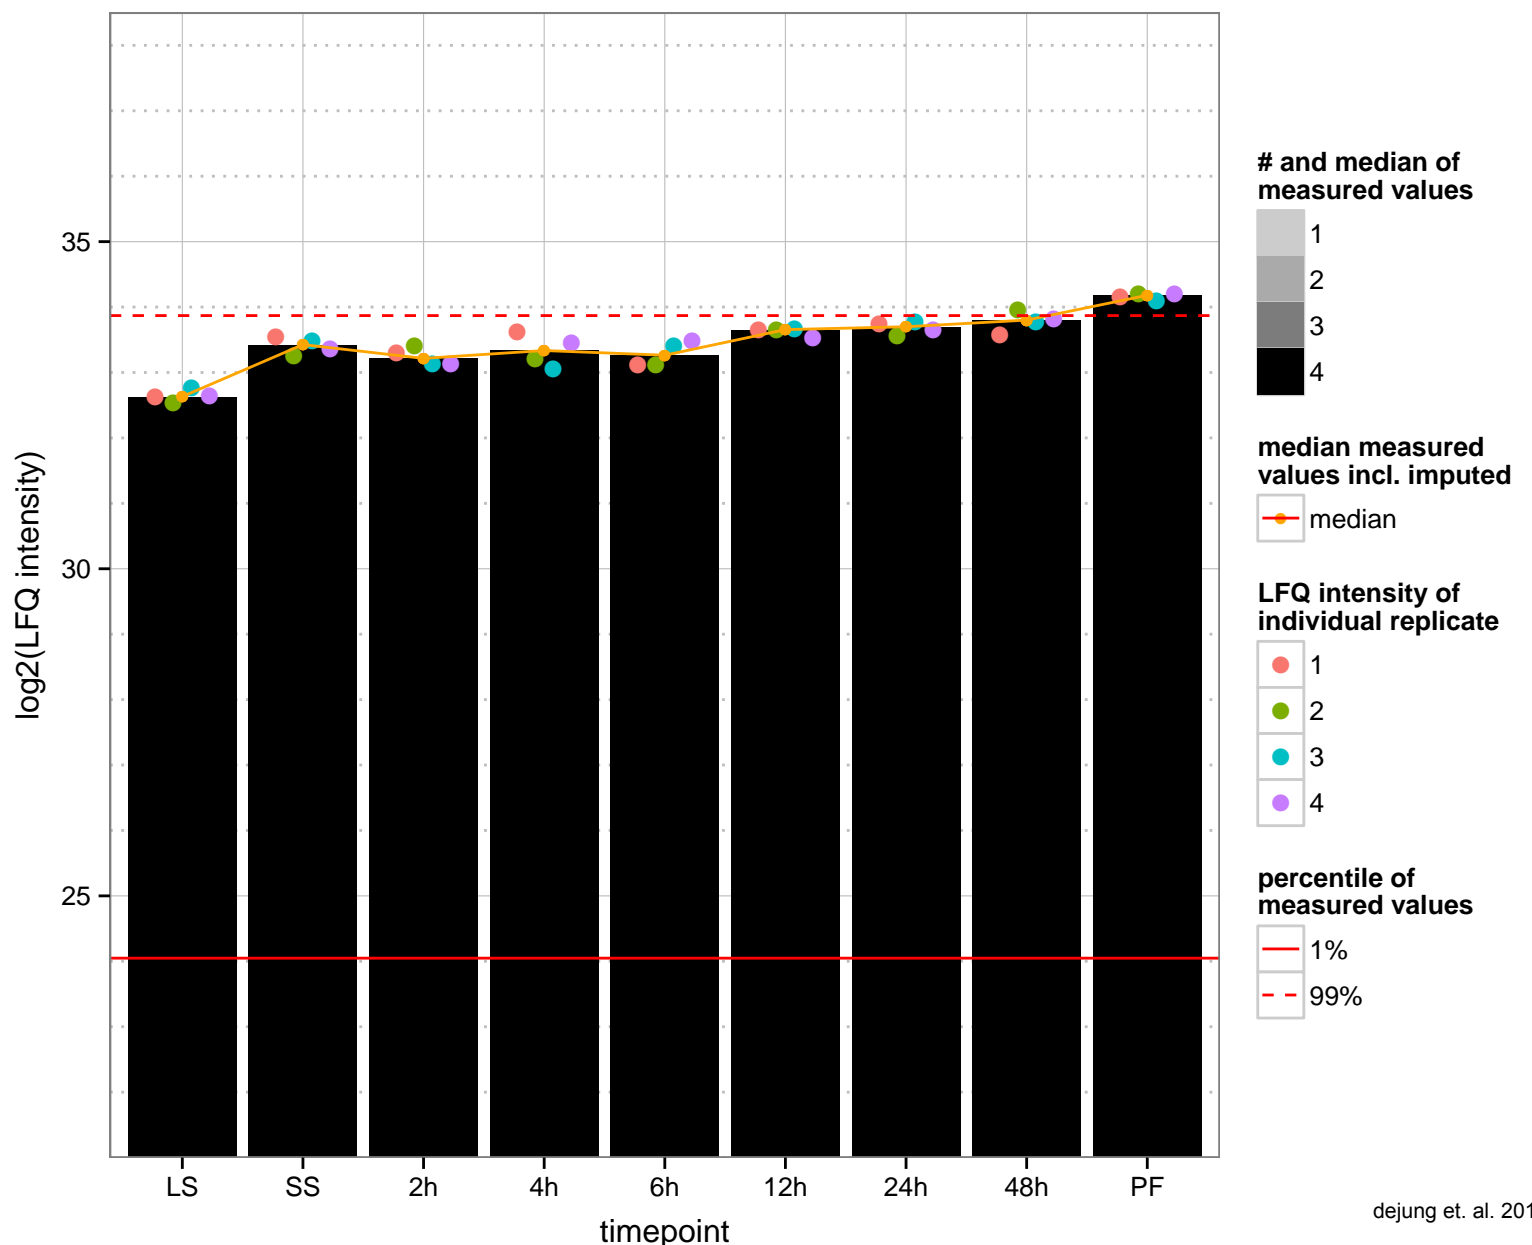

hypothetical protein, conserved  
 Tb927.11.13270  
 AGOF: null  
 AGOC: null  
 AGOP: null  
 PGO: null  
 PGO: null  
 PGO: null

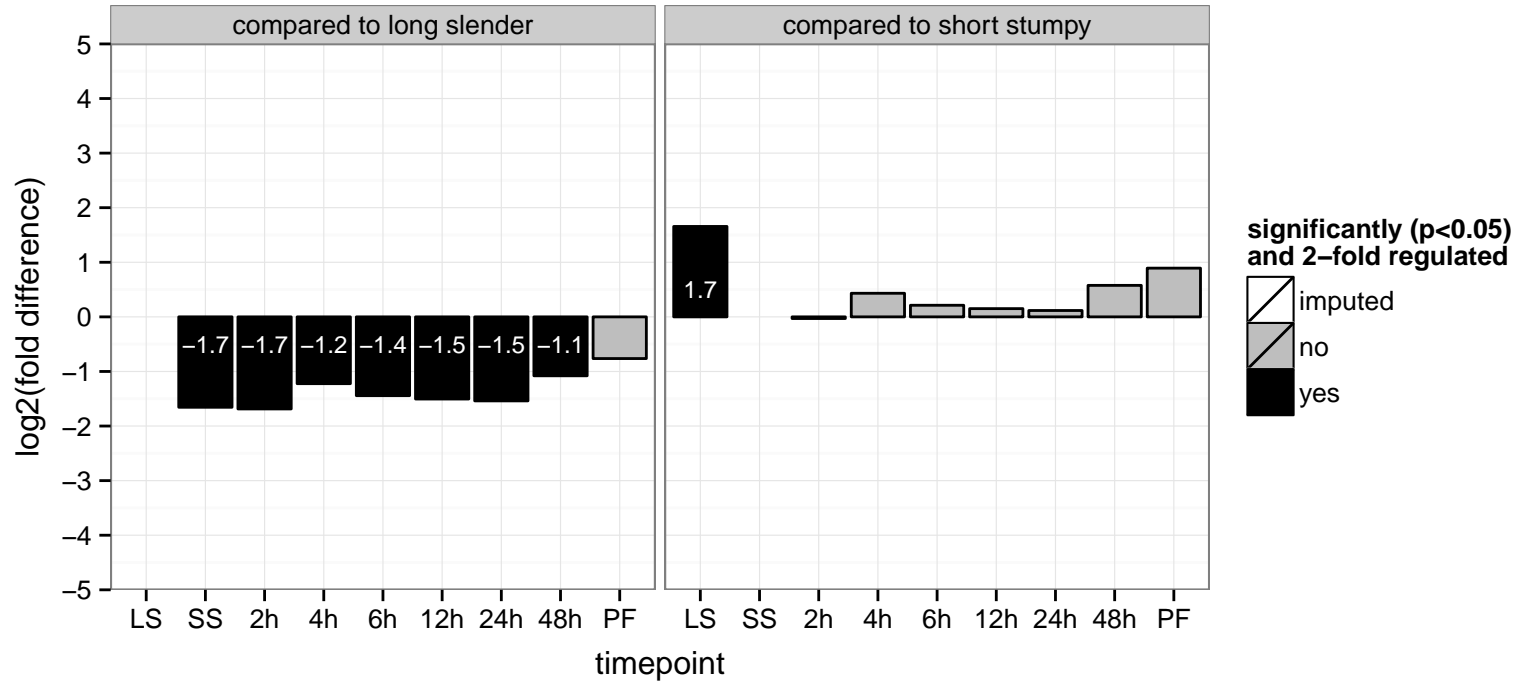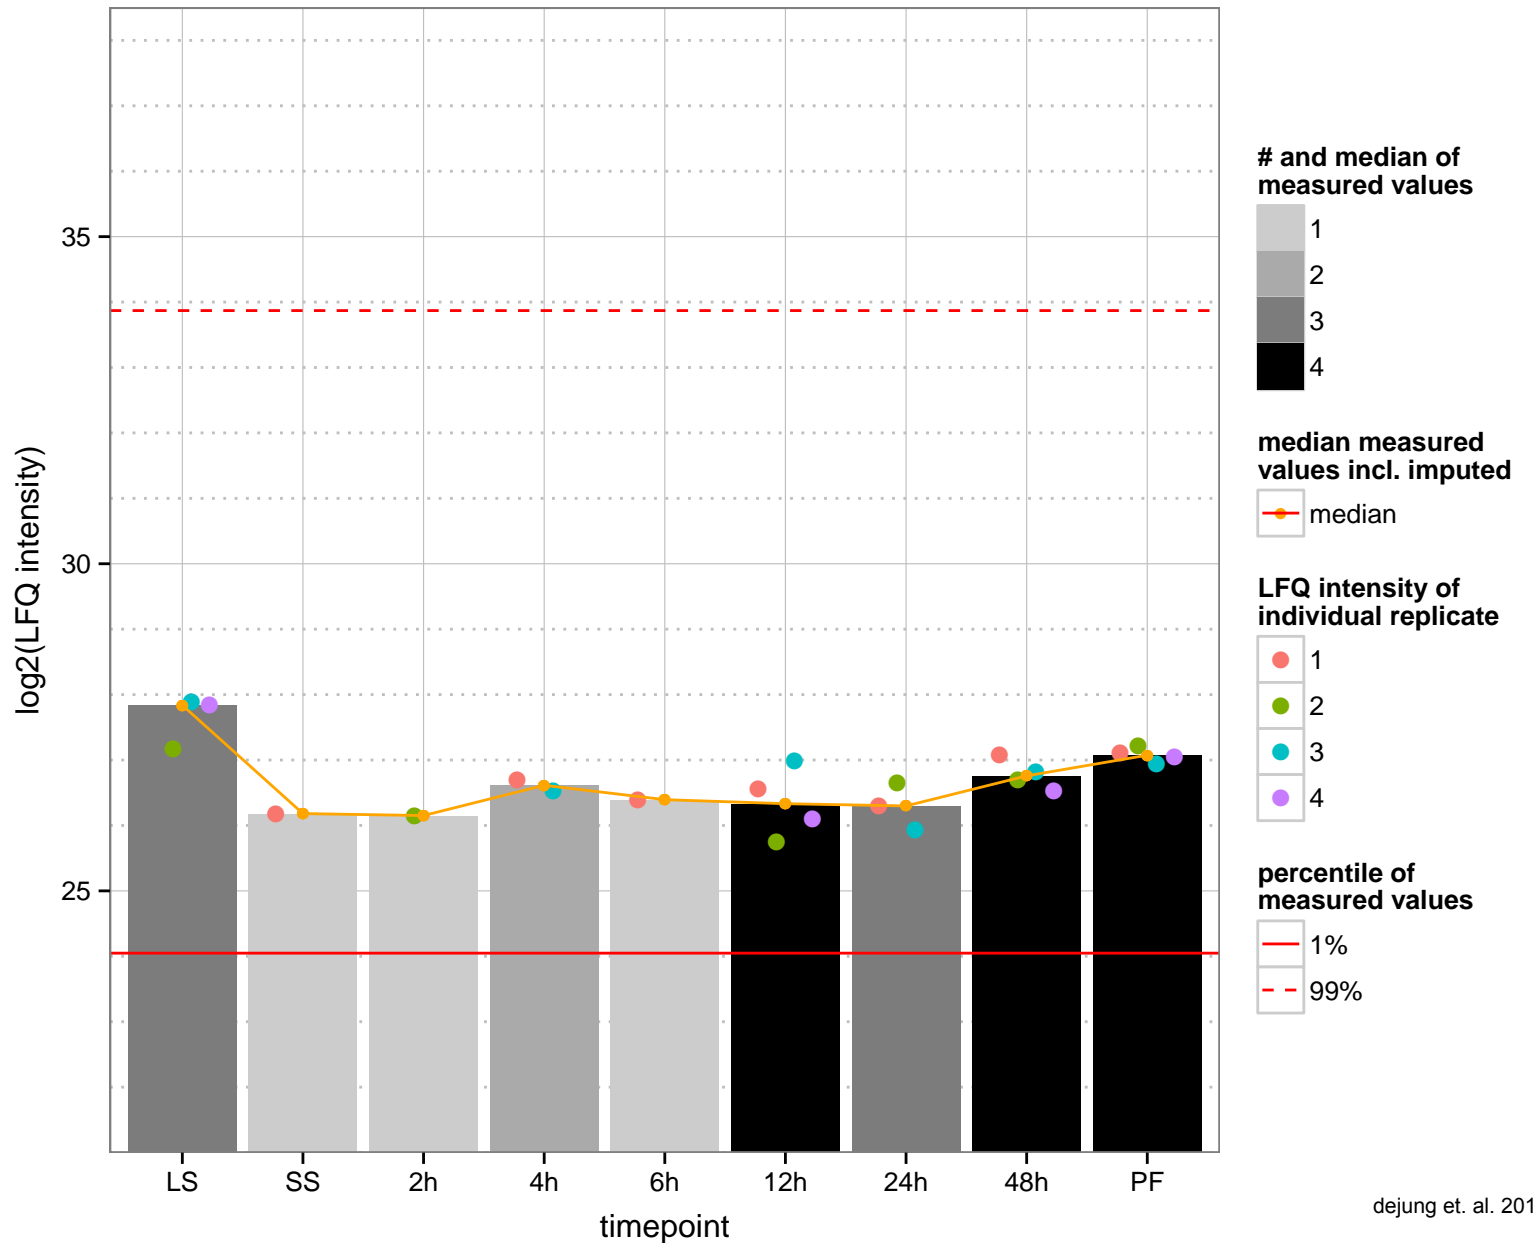

mitochondrial RNA binding protein 2 (GBP25)  
 Tb927.11.13280  
 AGOF: RNA binding  
 AGOC: mitochondrion  
 AGOP: RNA modification  
 PGO: DNA binding  
 PGO: null  
 PGO: regulation of transcription, DNA-dependent

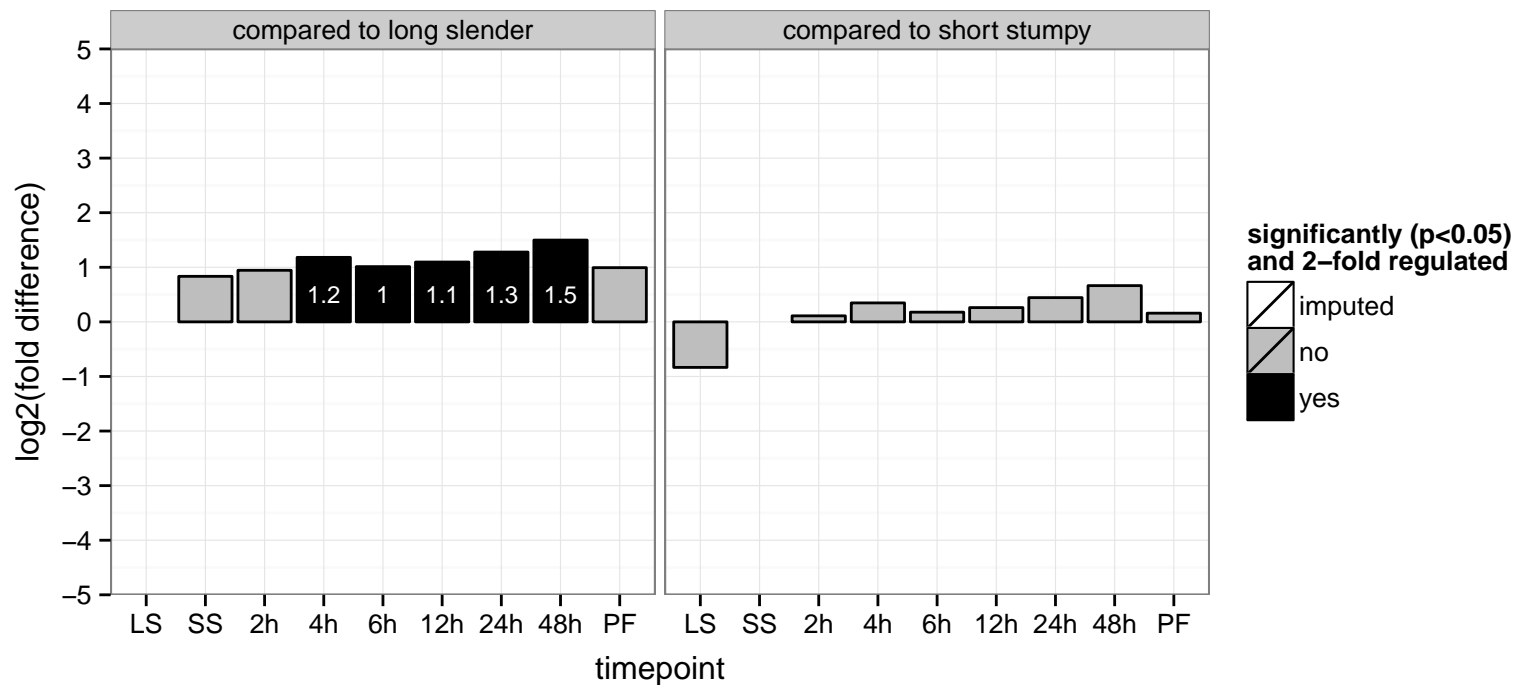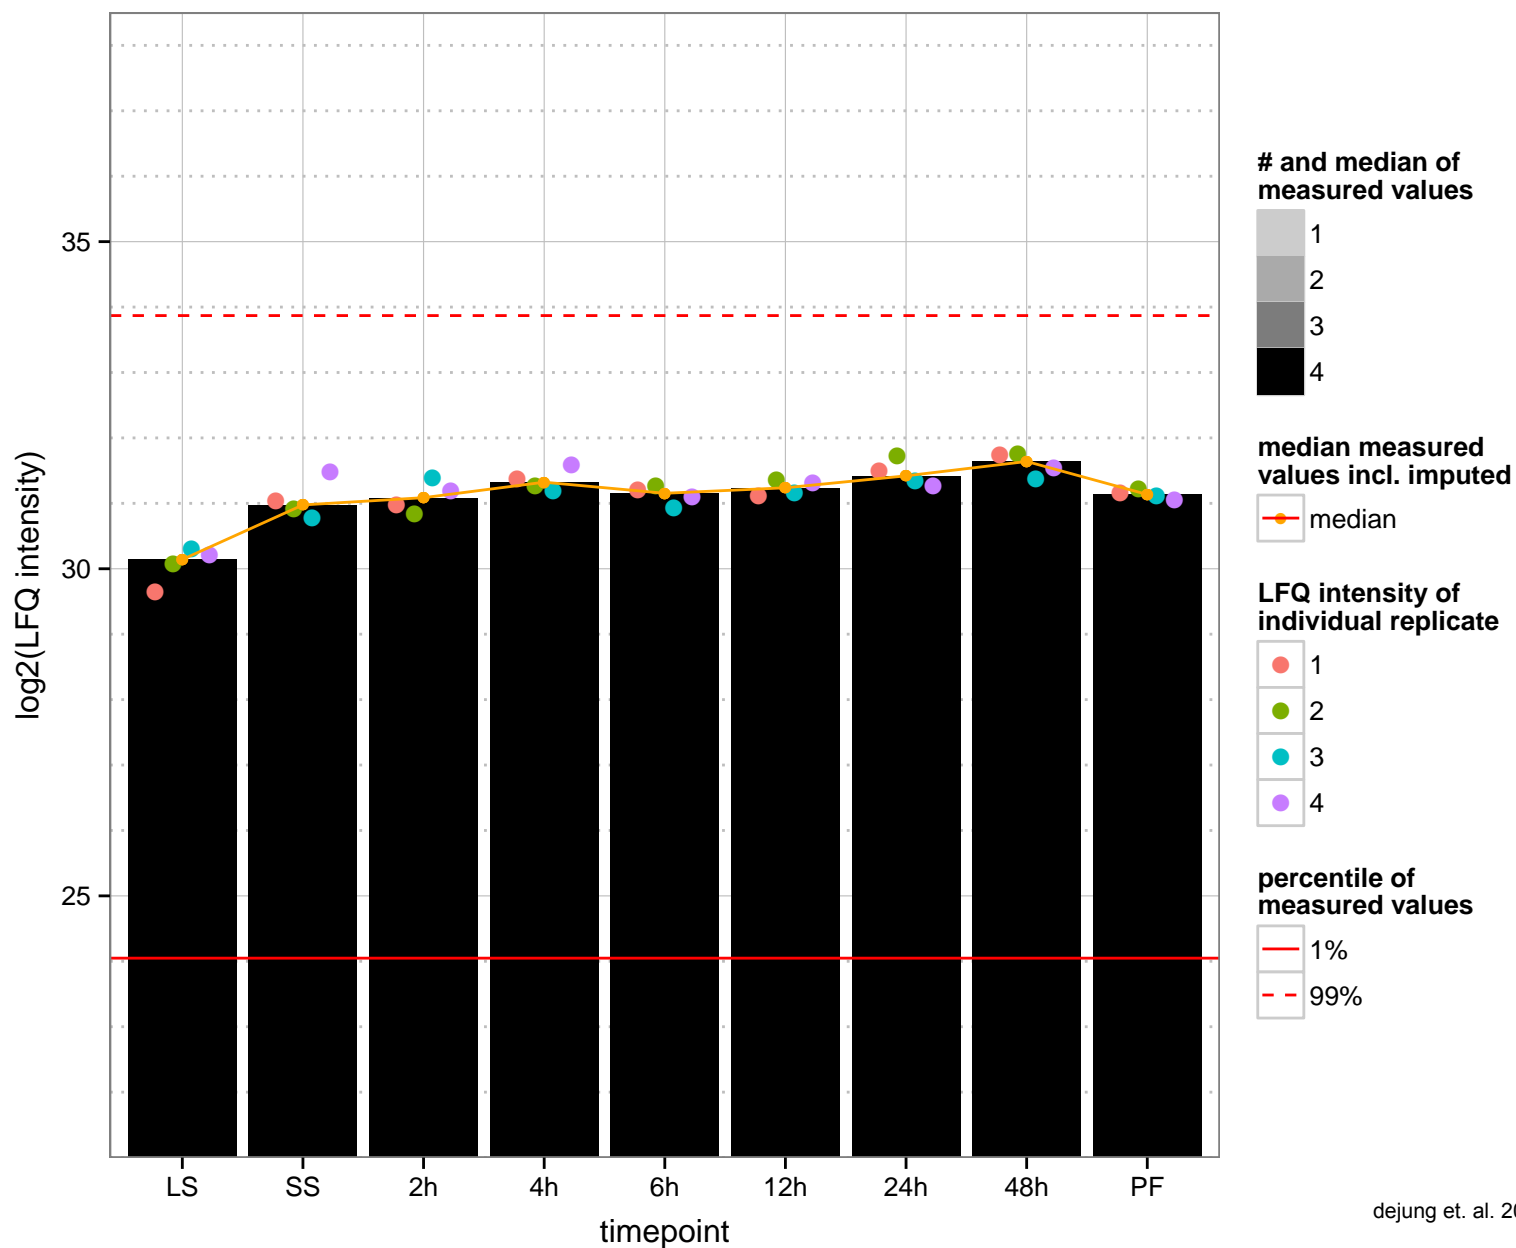



hypothetical protein, conserved  
 Tb927.11.1330  
 AGOF: null  
 AGOC: null  
 AGOP: null  
 PGO: null  
 PGOC: null  
 PGOP: null

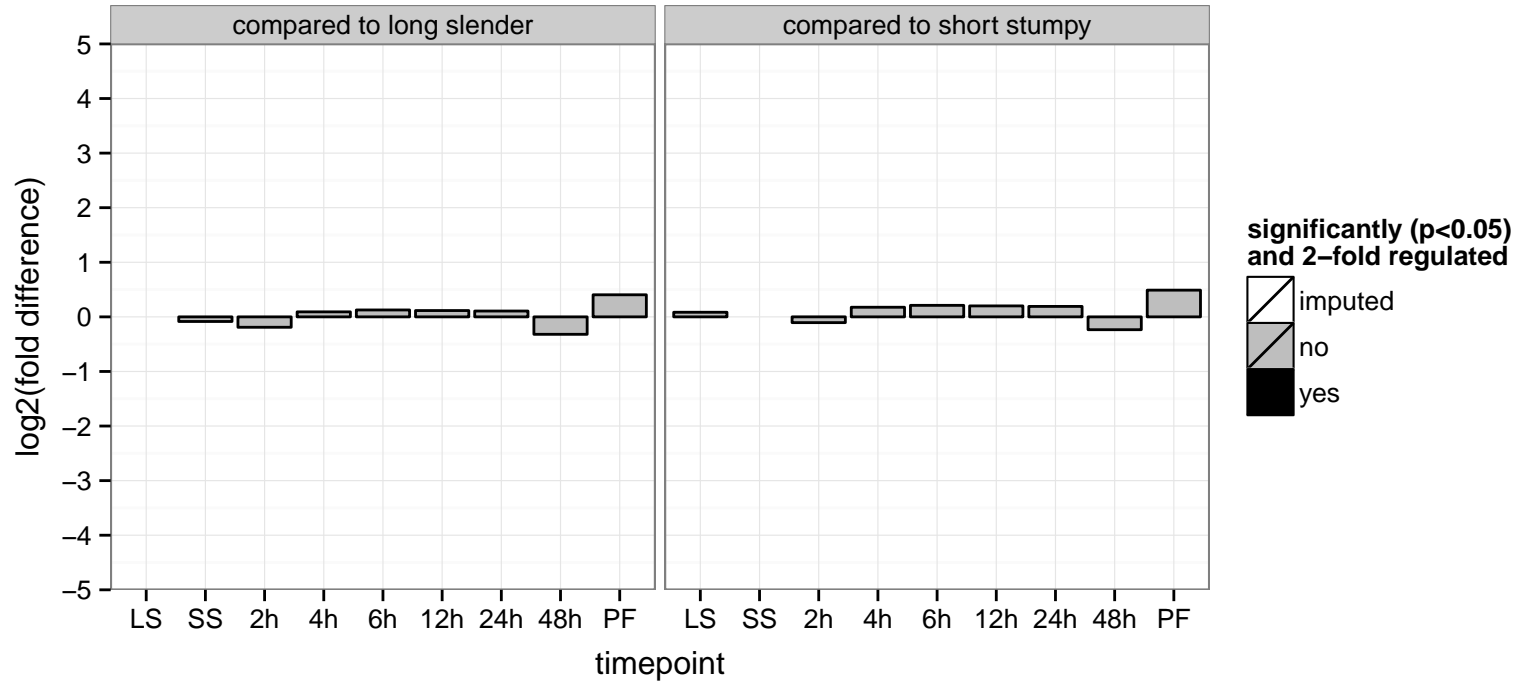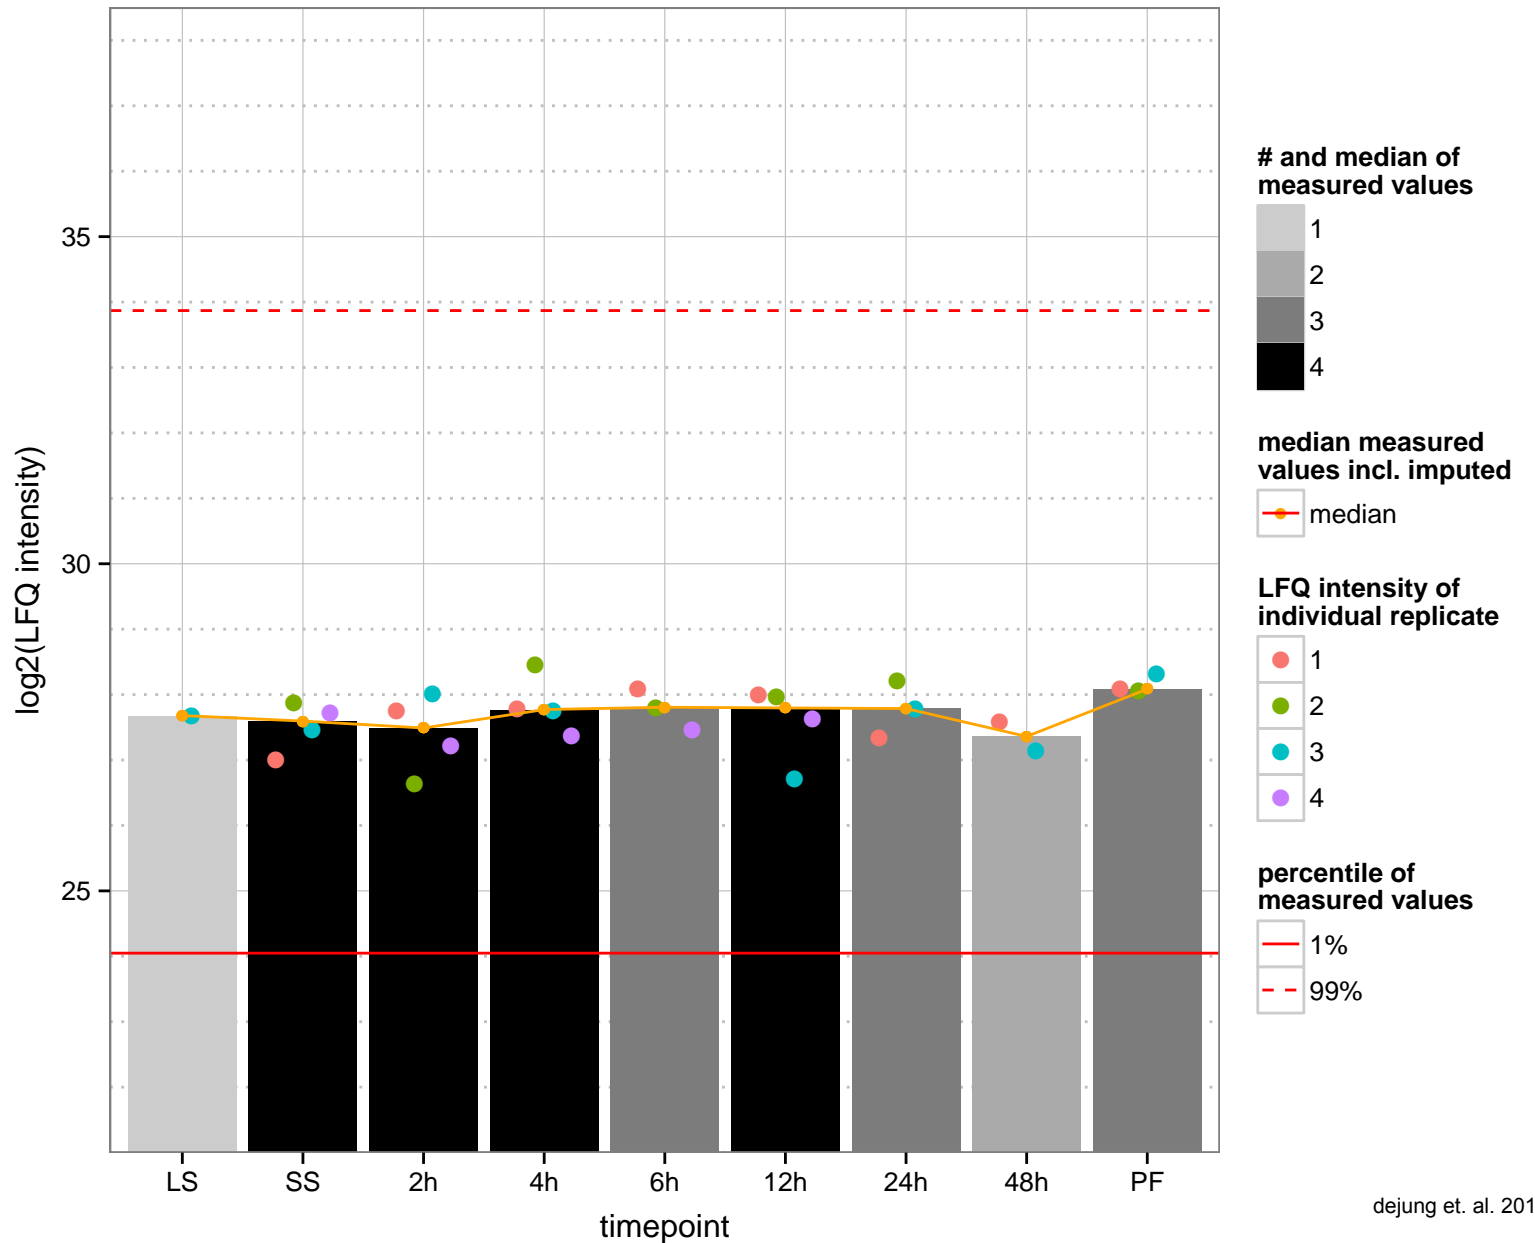

hypothetical protein, conserved  
 Tb927.11.13300  
 AGOF: null  
 AGOC: null  
 AGOP: null  
 PGO: null  
 PGOC: null  
 PGOP: null

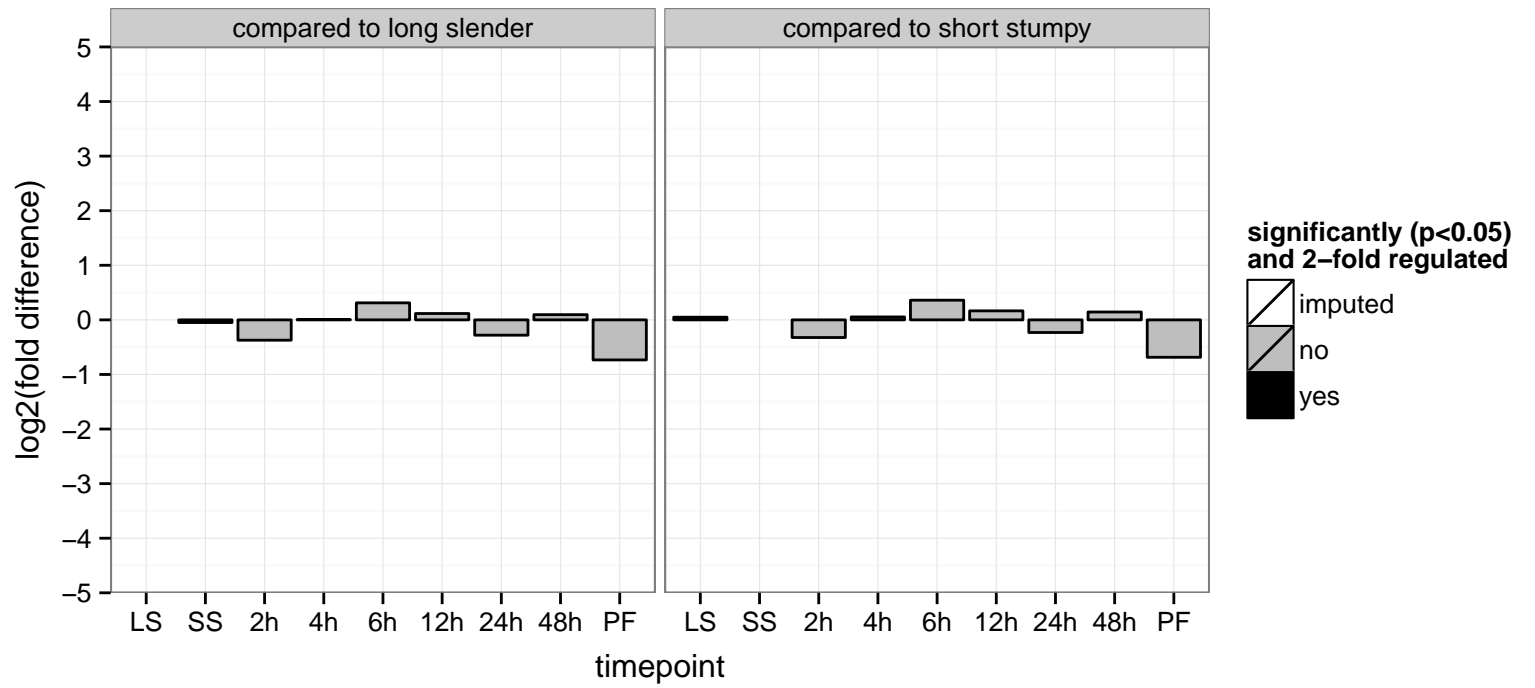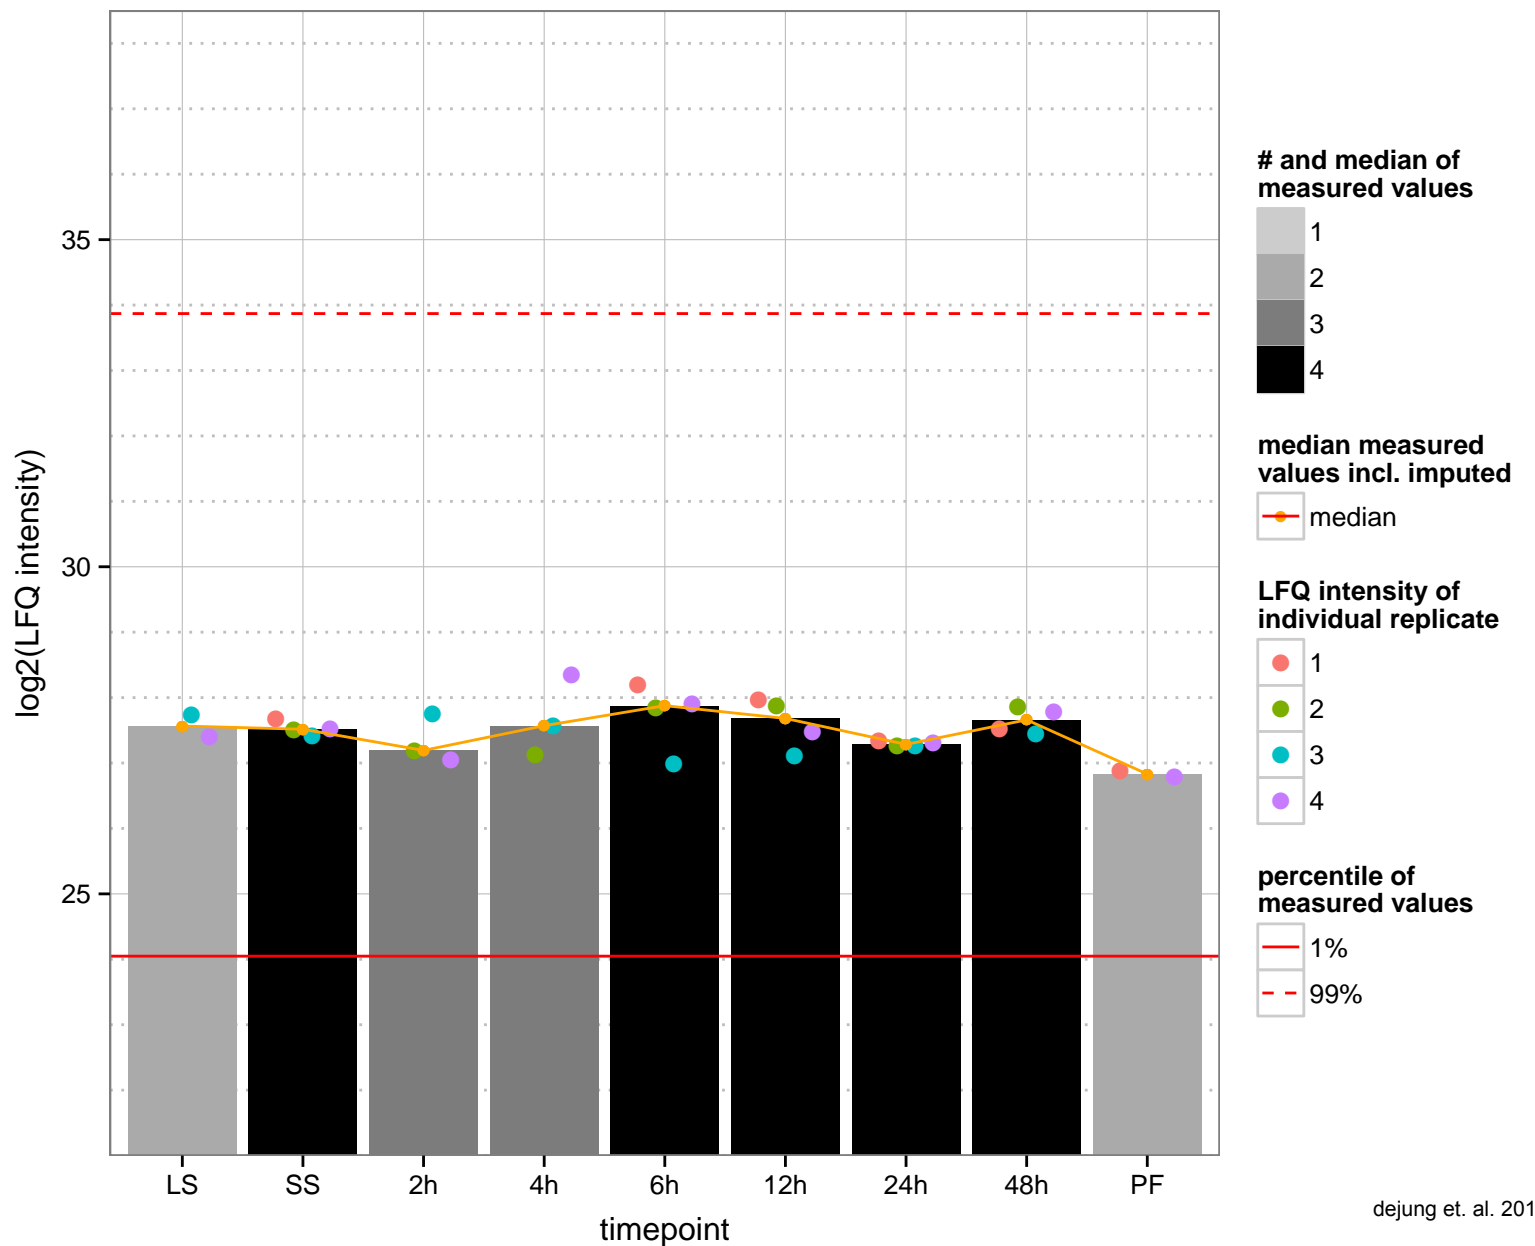

AAA ATPase, putative  
 Tb927.11.13360  
 AGOF: ATP binding, ATPase activity  
 AGOC: null  
 AGOP: protein metabolic process  
 PGOF: ATP binding, nucleoside-triphosphatase activity, nucleotide binding  
 PGOC: null  
 PGOP: null

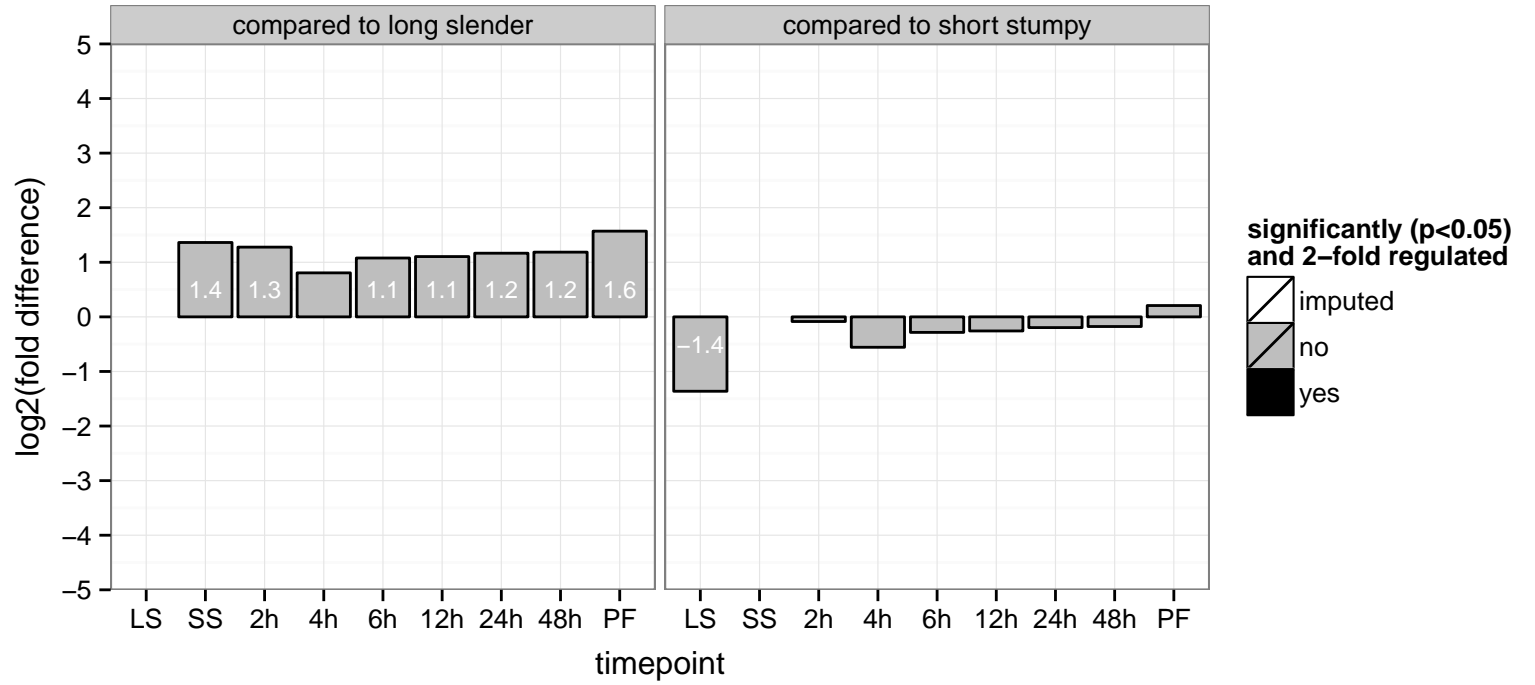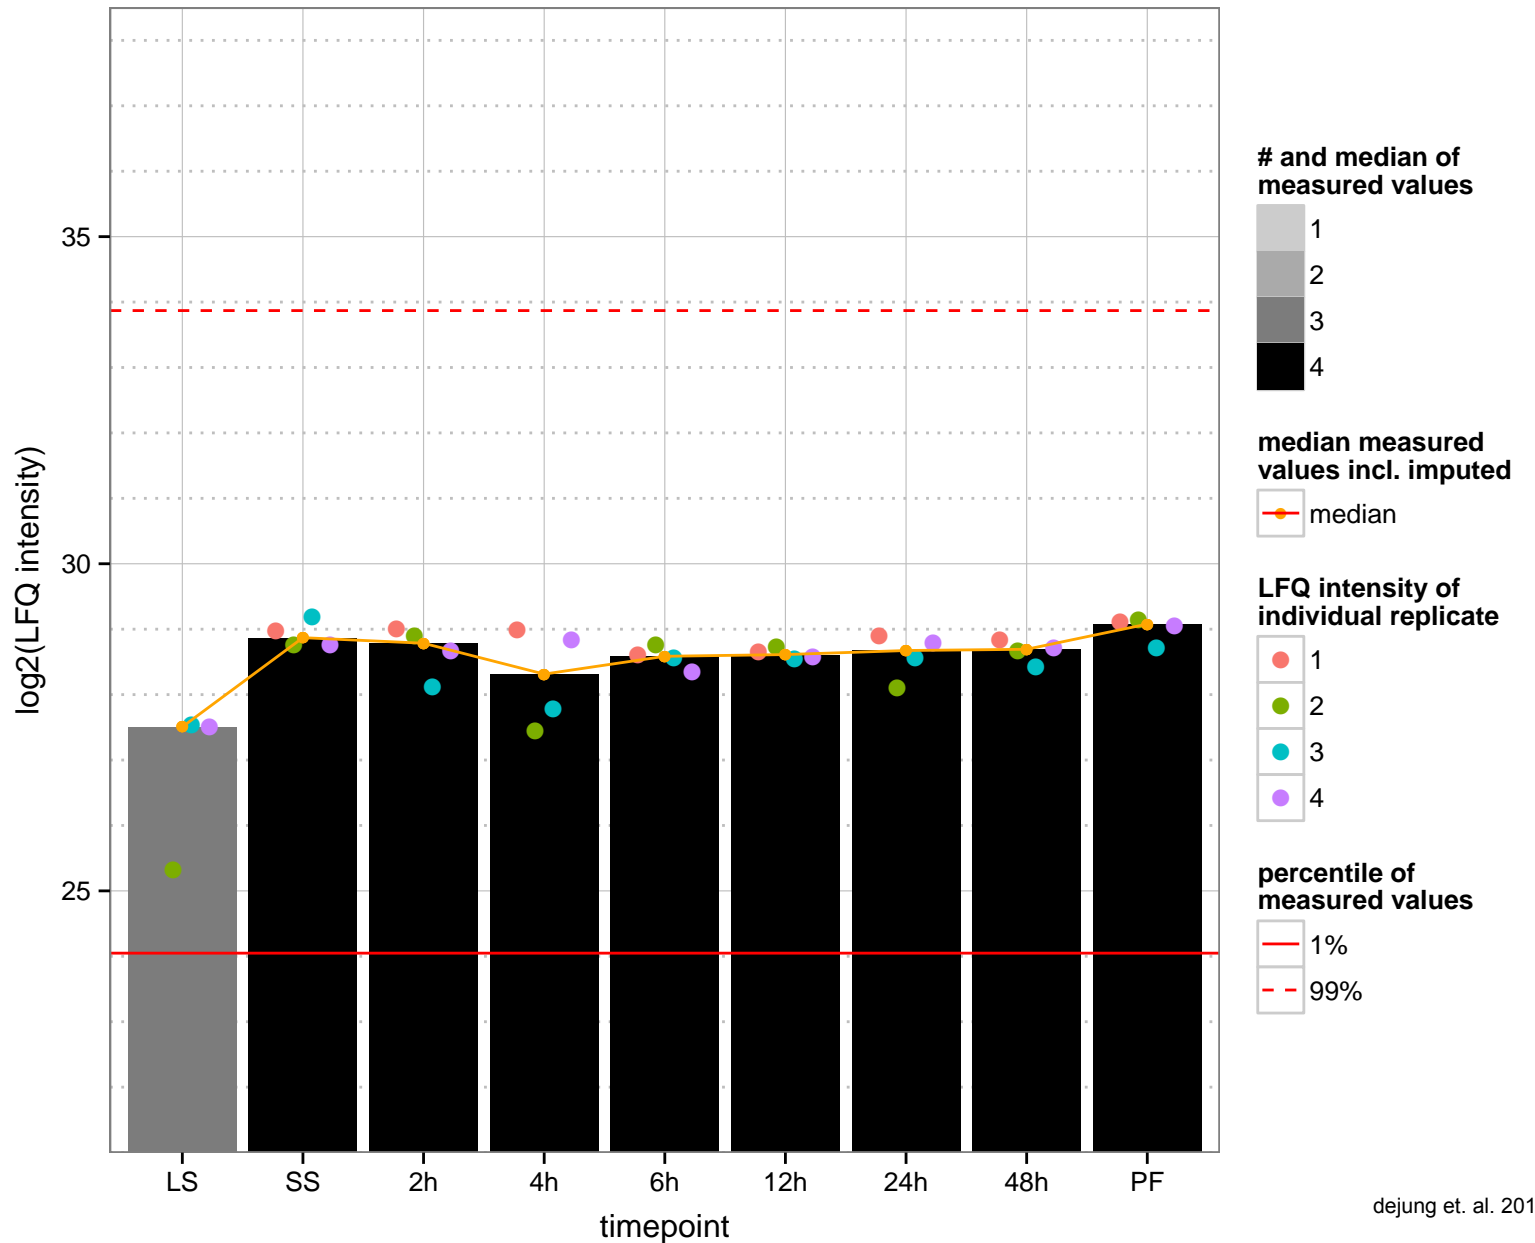

hypothetical protein, conserved  
 Tb927.11.13400  
 AGOF: null  
 AGOC: null  
 AGOP: null  
 PGOF: protein binding  
 PGOC: null  
 PGOP: null

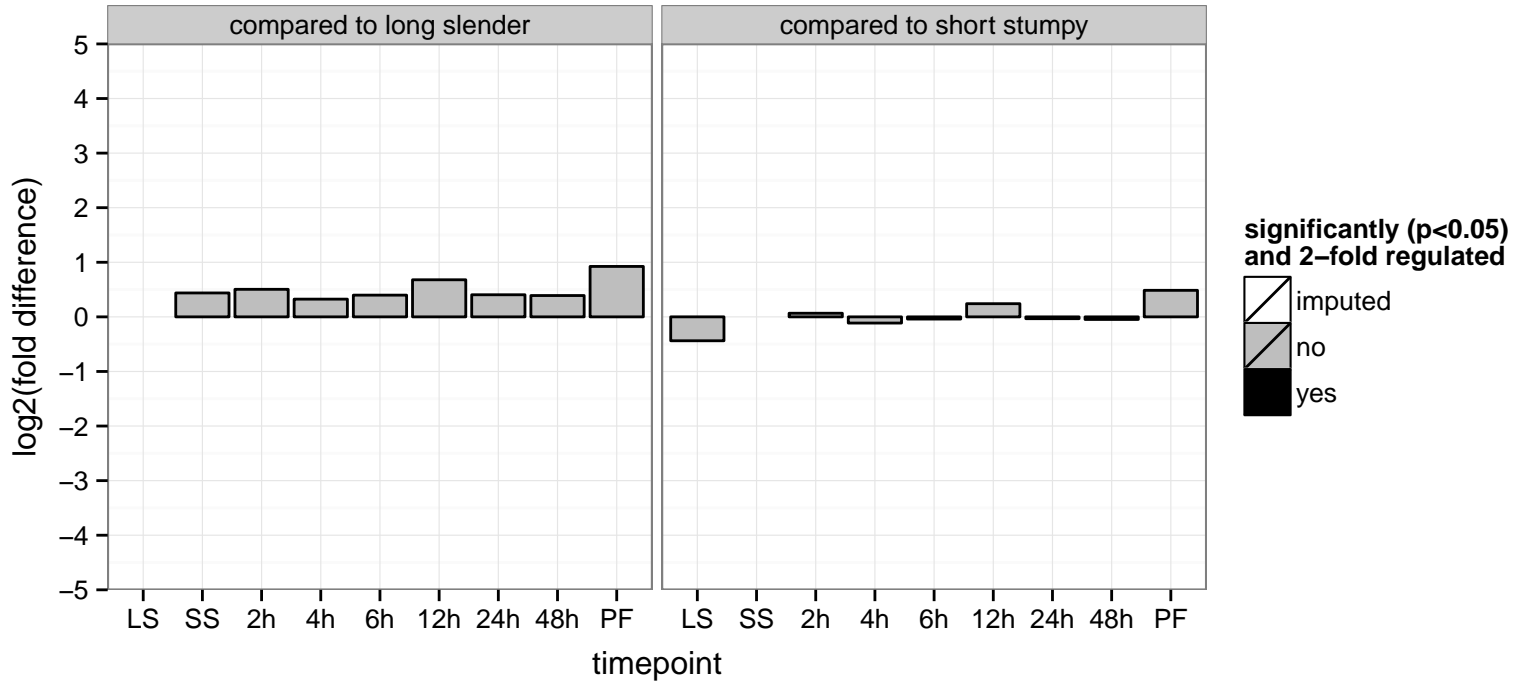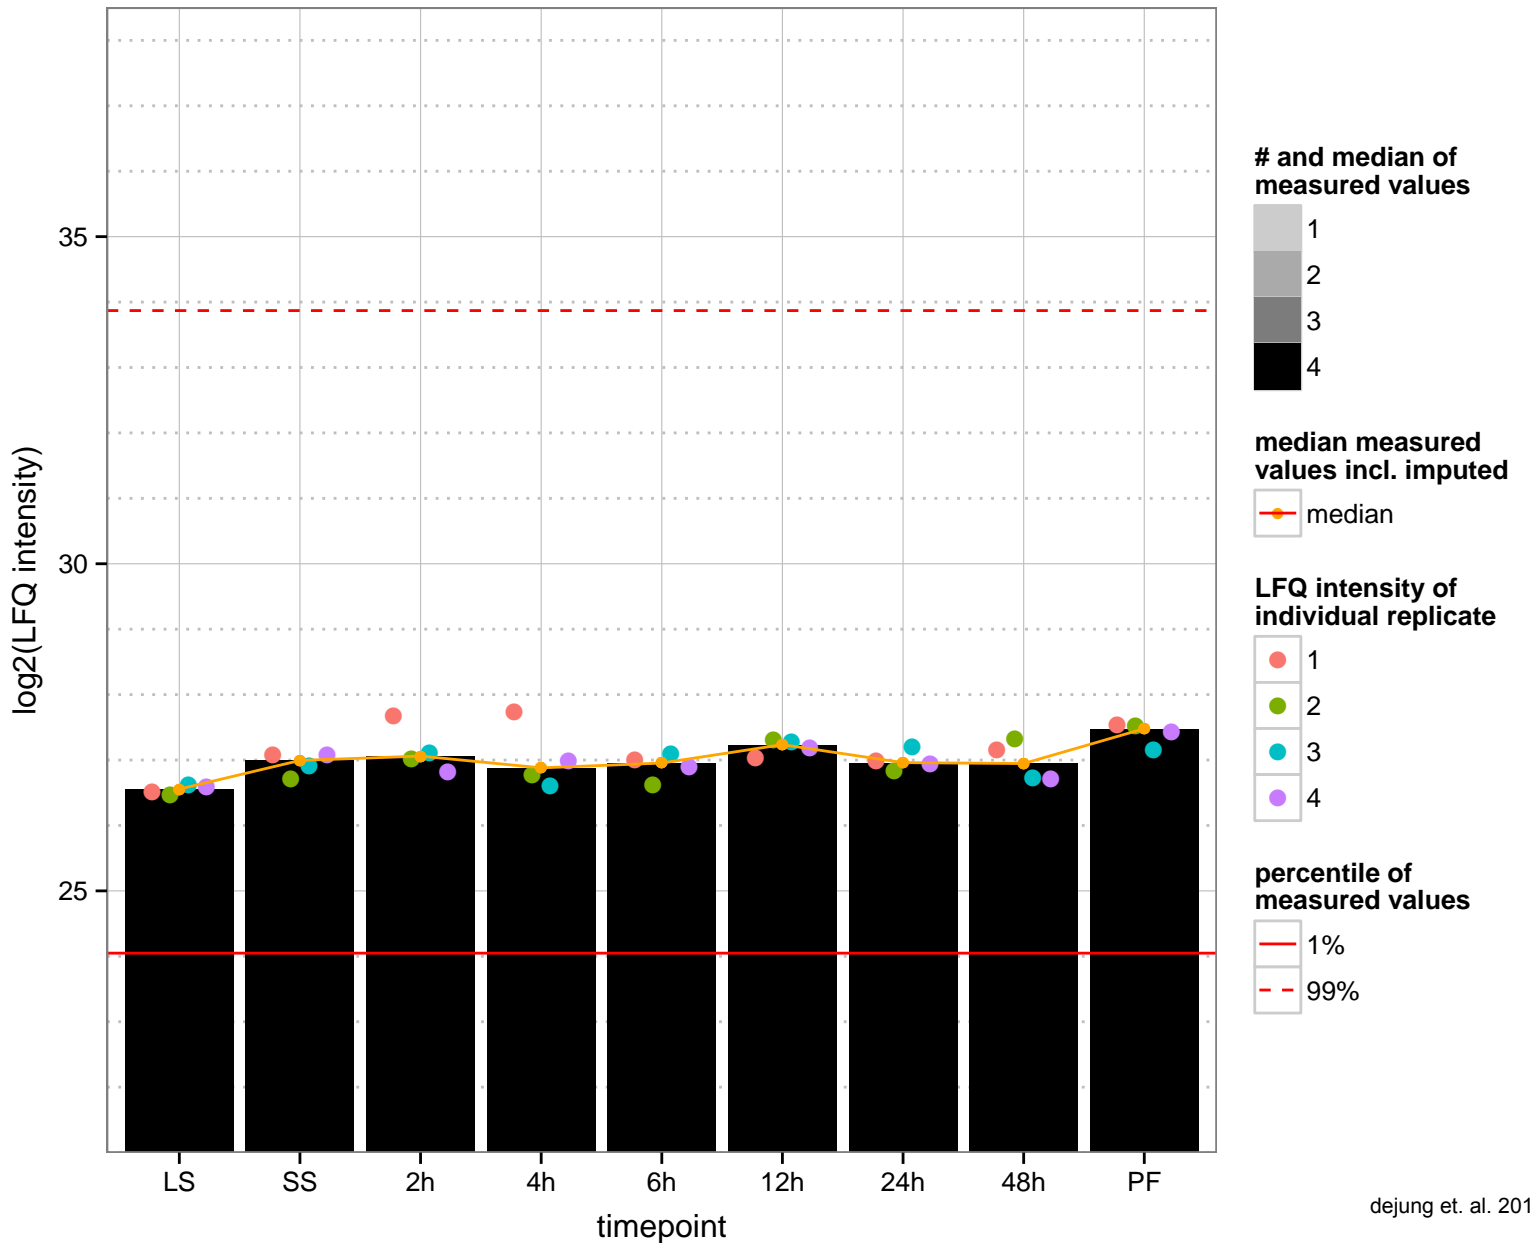

hypothetical protein, conserved  
 Tb927.11.13470  
 AGOF: null  
 AGOC: null  
 AGOP: null  
 PGO: null  
 PGOC: null  
 PGOP: null

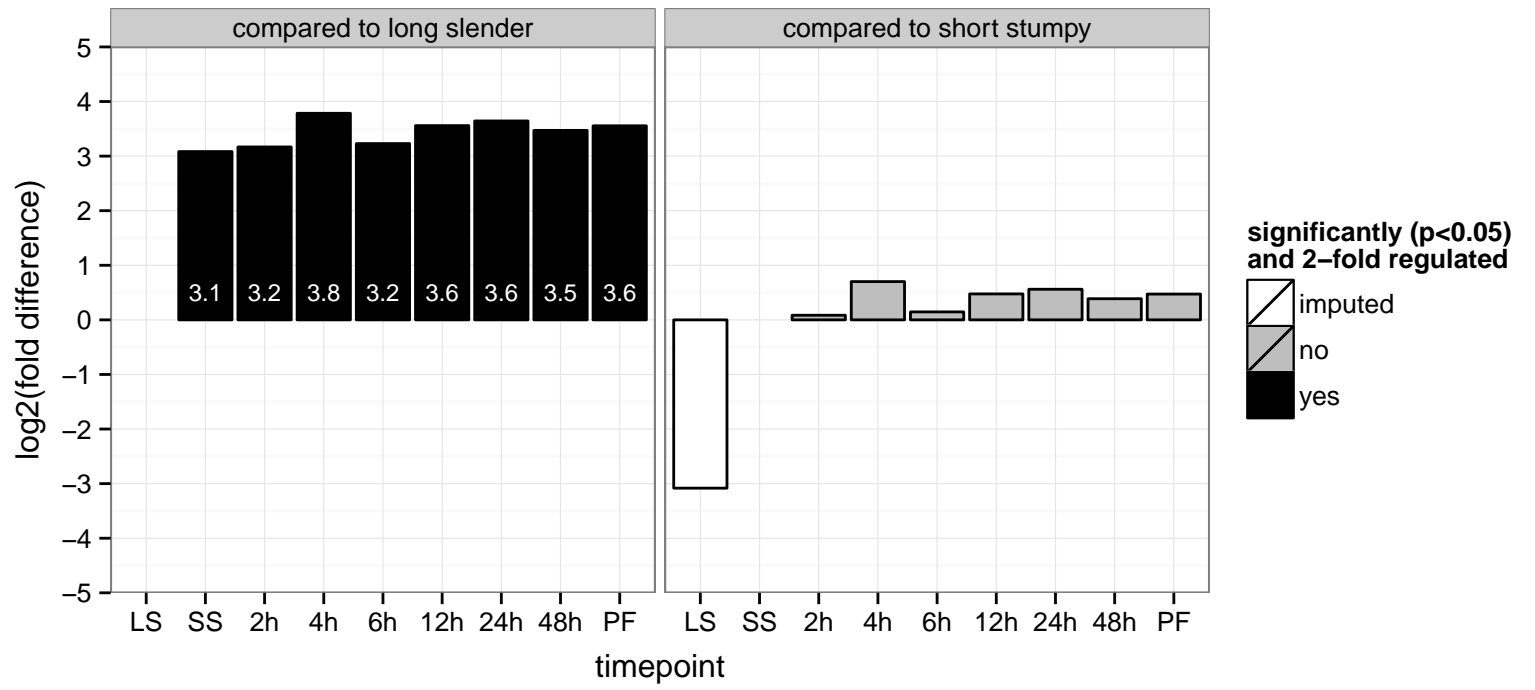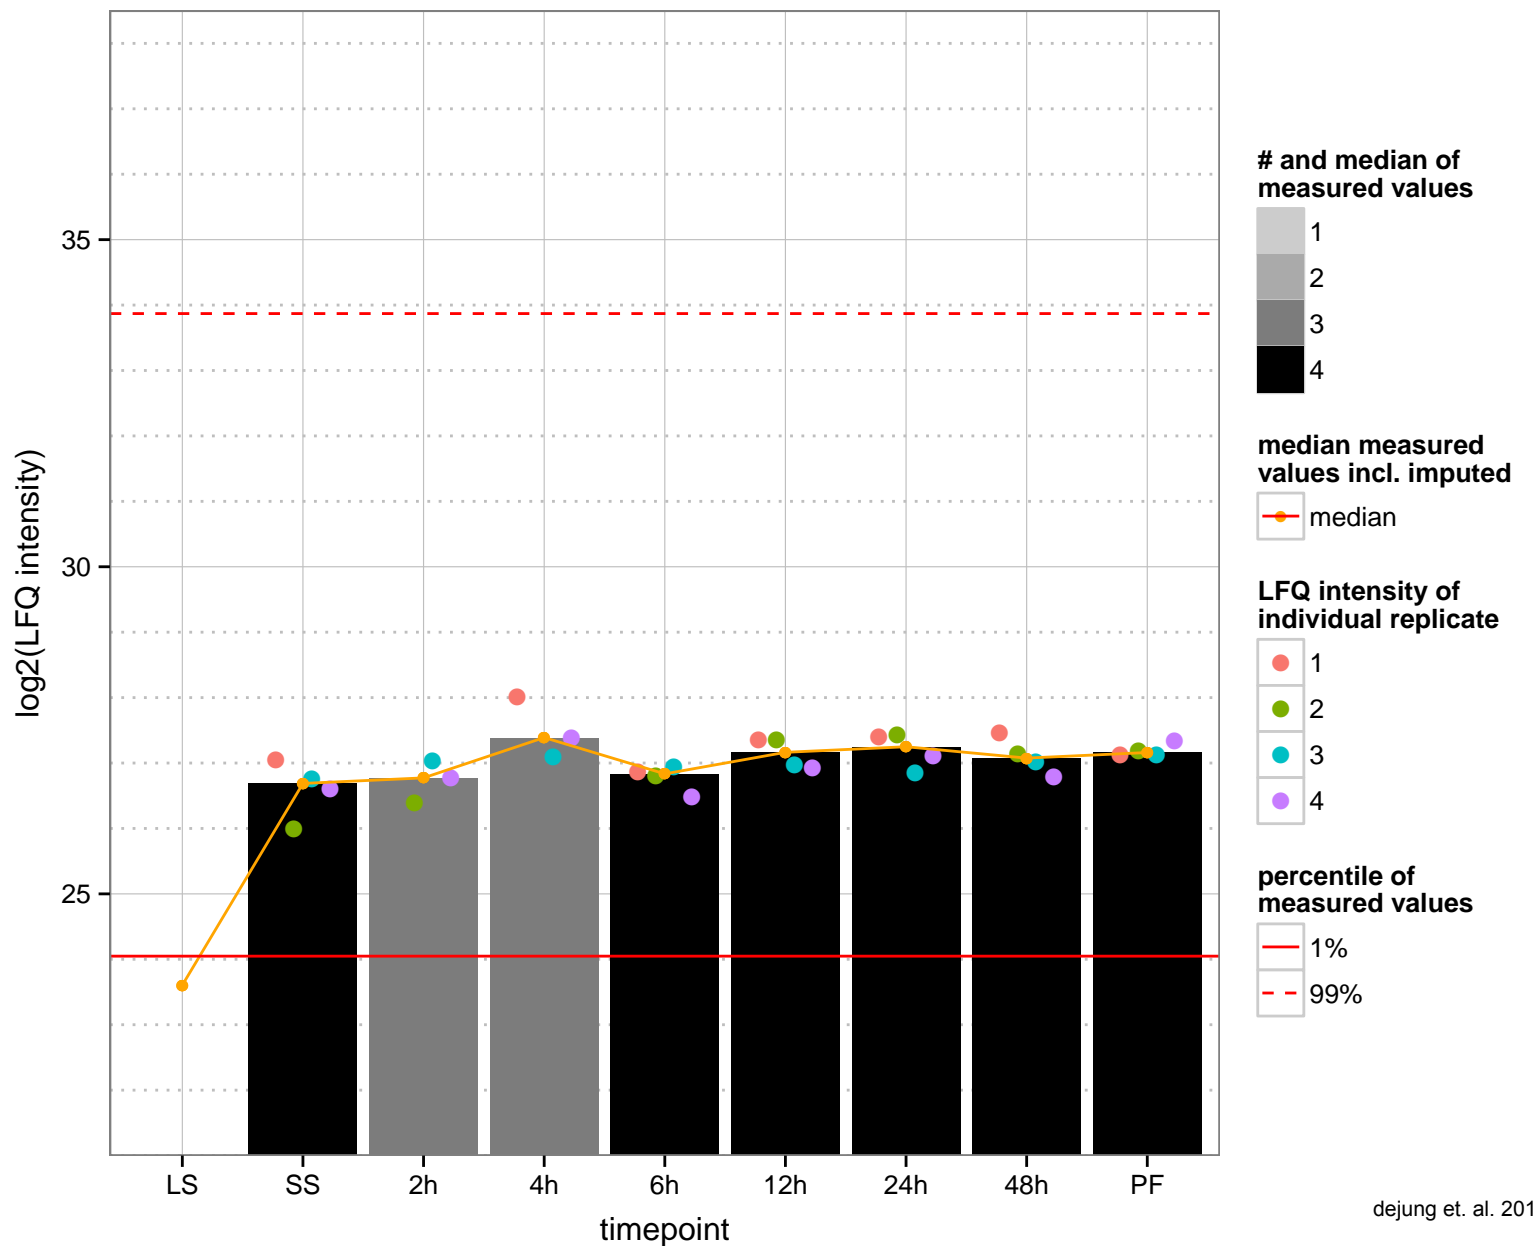

par1  
 Tb927.11.13500  
 AGOF: calmodulin binding  
 AGOC: motile cilium  
 AGOP: null  
 PGOF: calmodulin binding  
 PGO: microtubule-based flagellum  
 PGOP: null

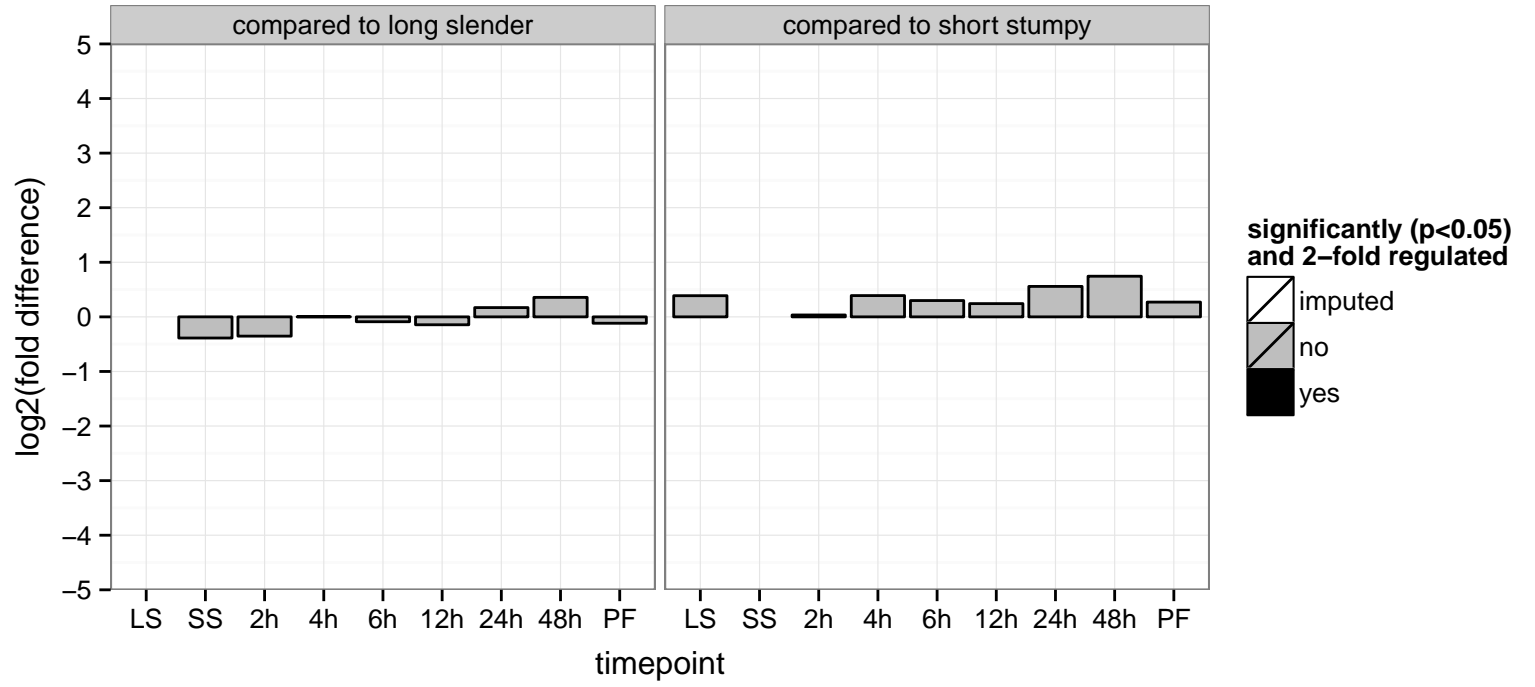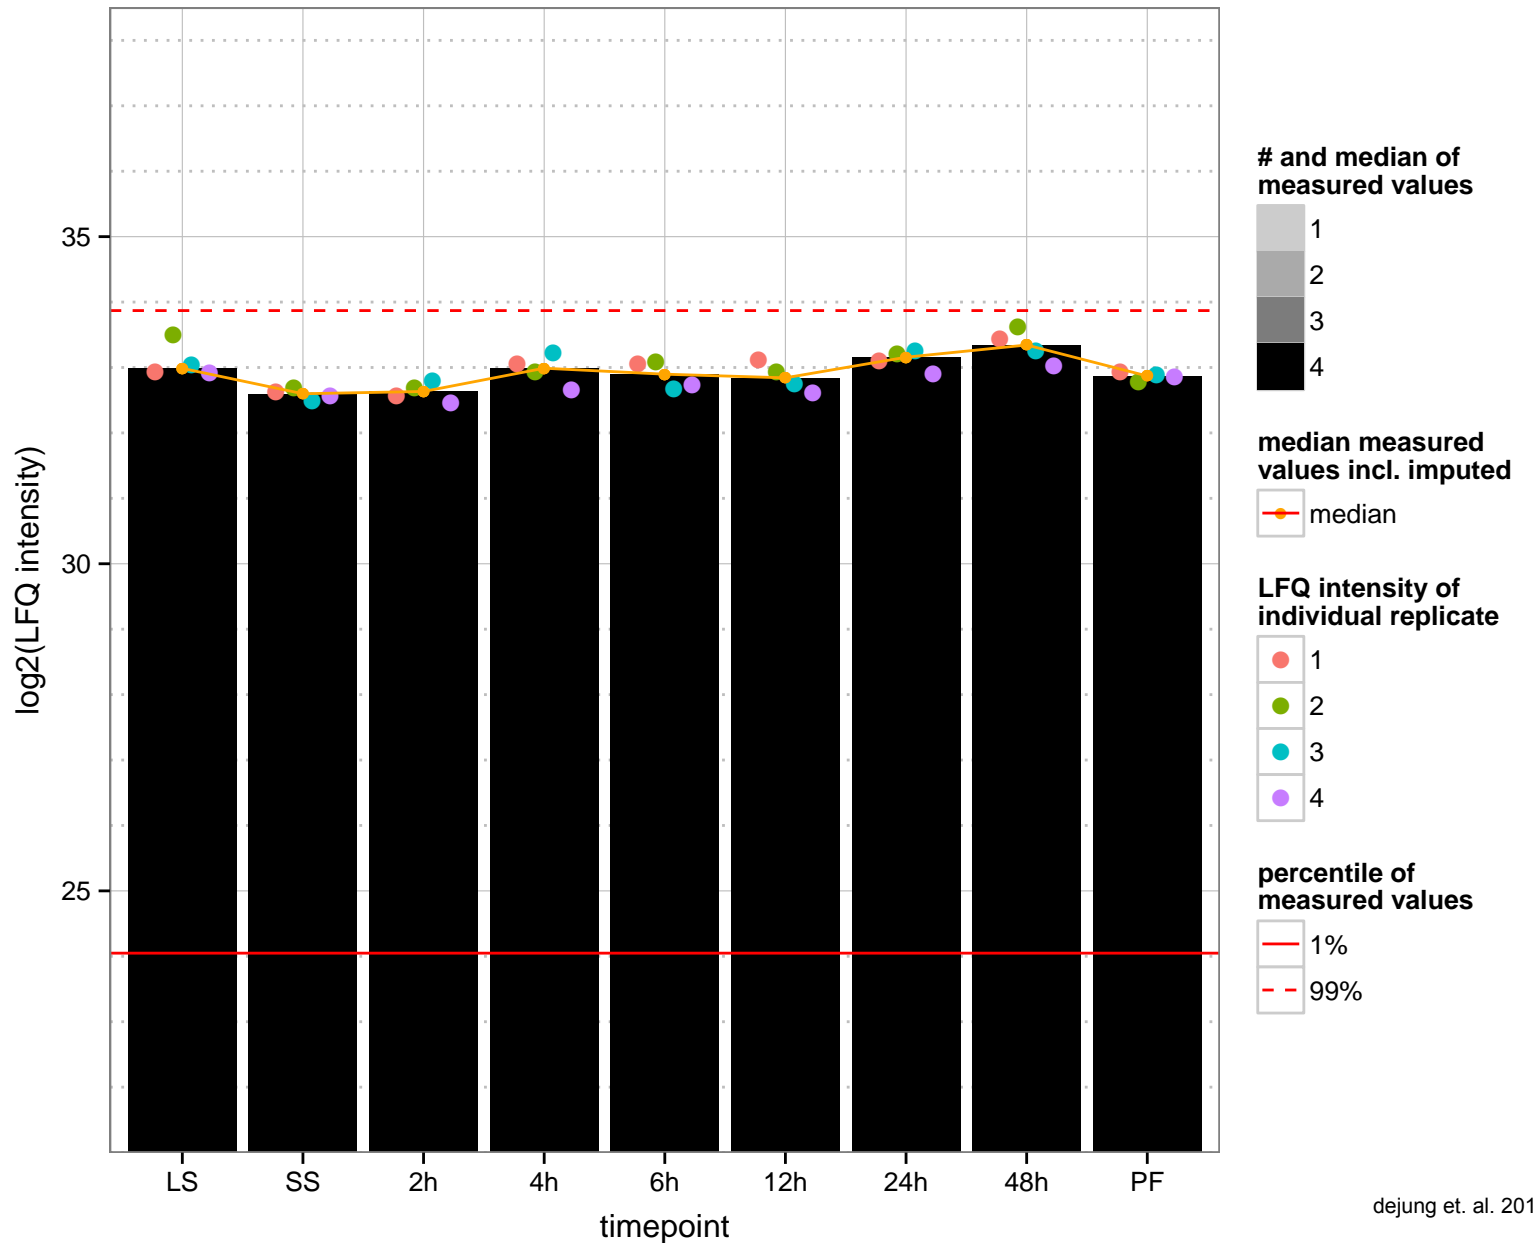

hypothetical protein, conserved  
 Tb927.11.13540  
 AGOF: null  
 AGOC: null  
 AGOP: null  
 PGOF: null  
 PGOC: null  
 PGOP: null

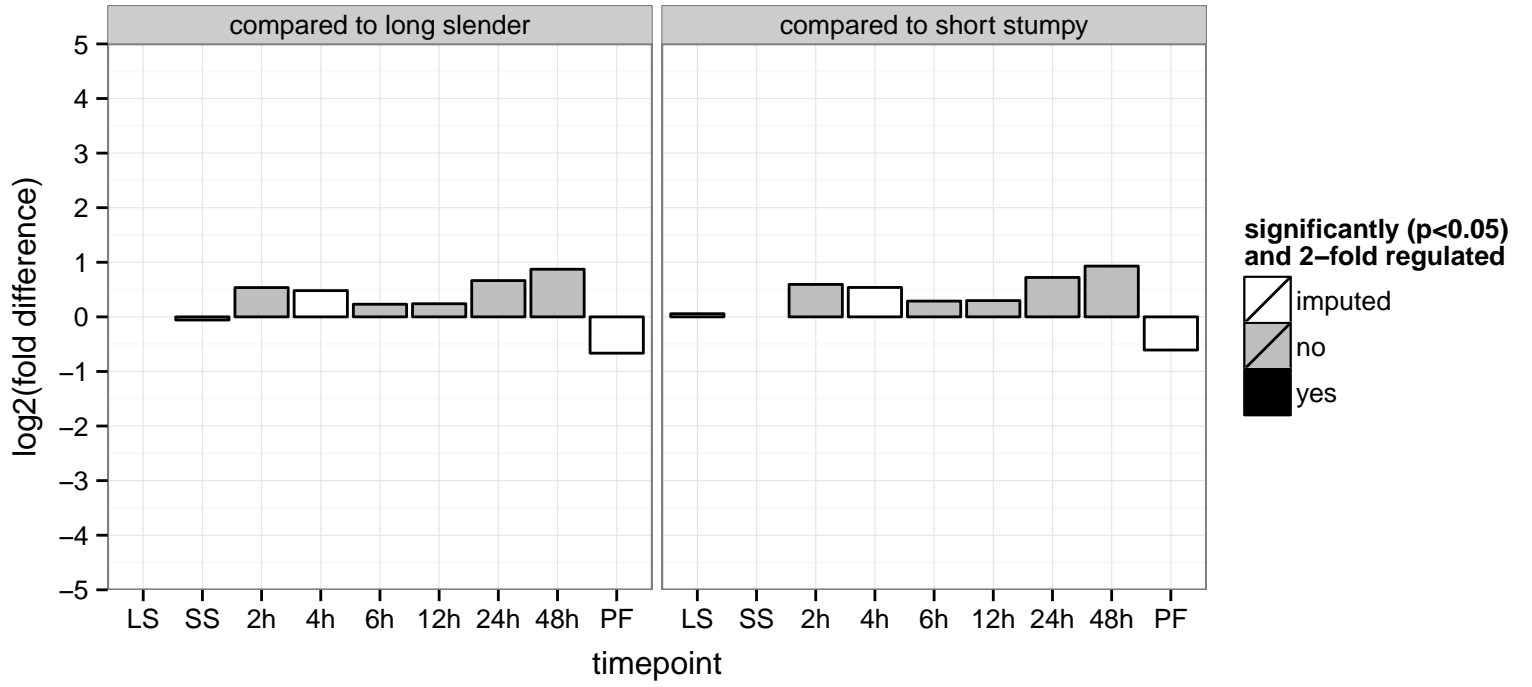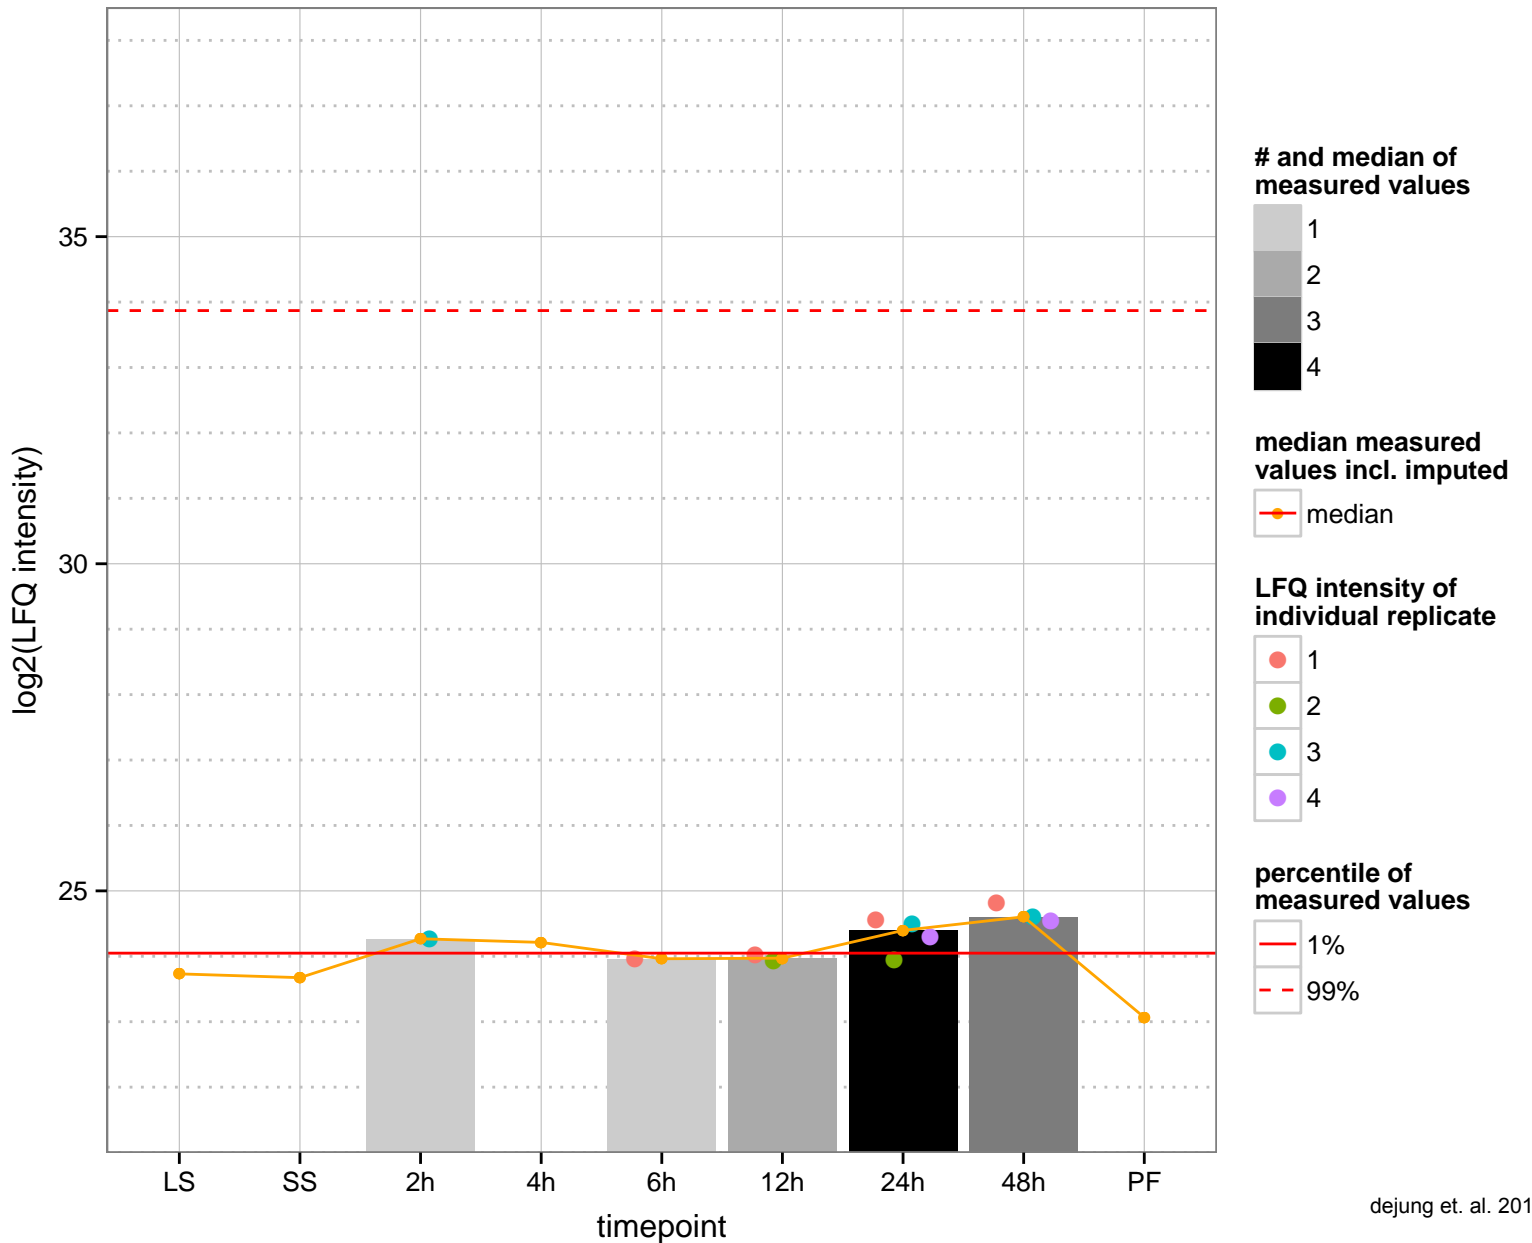

ubiquinone biosynthesis protein-like protein  
 Tb927.11.13580  
 AGOF: null  
 AGOC: integral to membrane, mitochondrion  
 AGOP: ubiquinone biosynthetic process  
 PGO: null  
 PGOC: null  
 PGOP: ubiquinone biosynthetic process

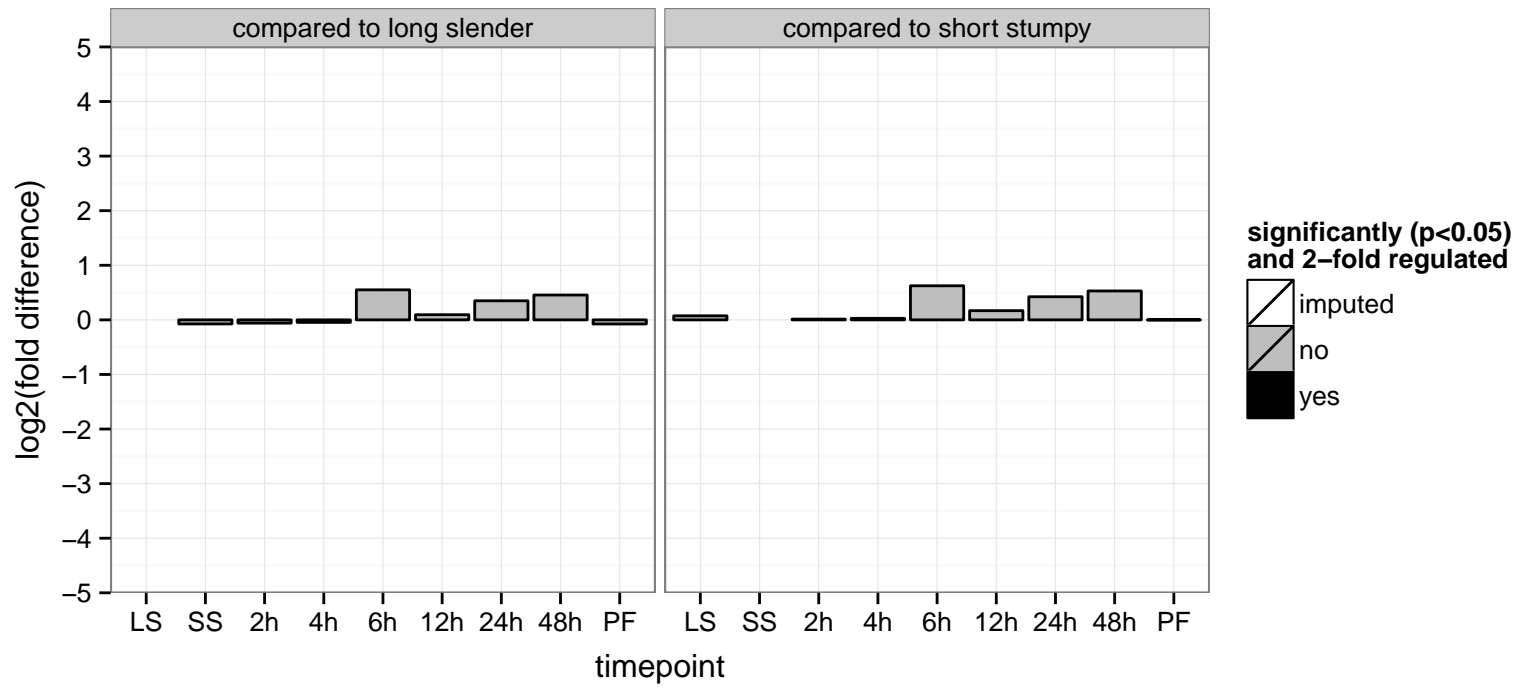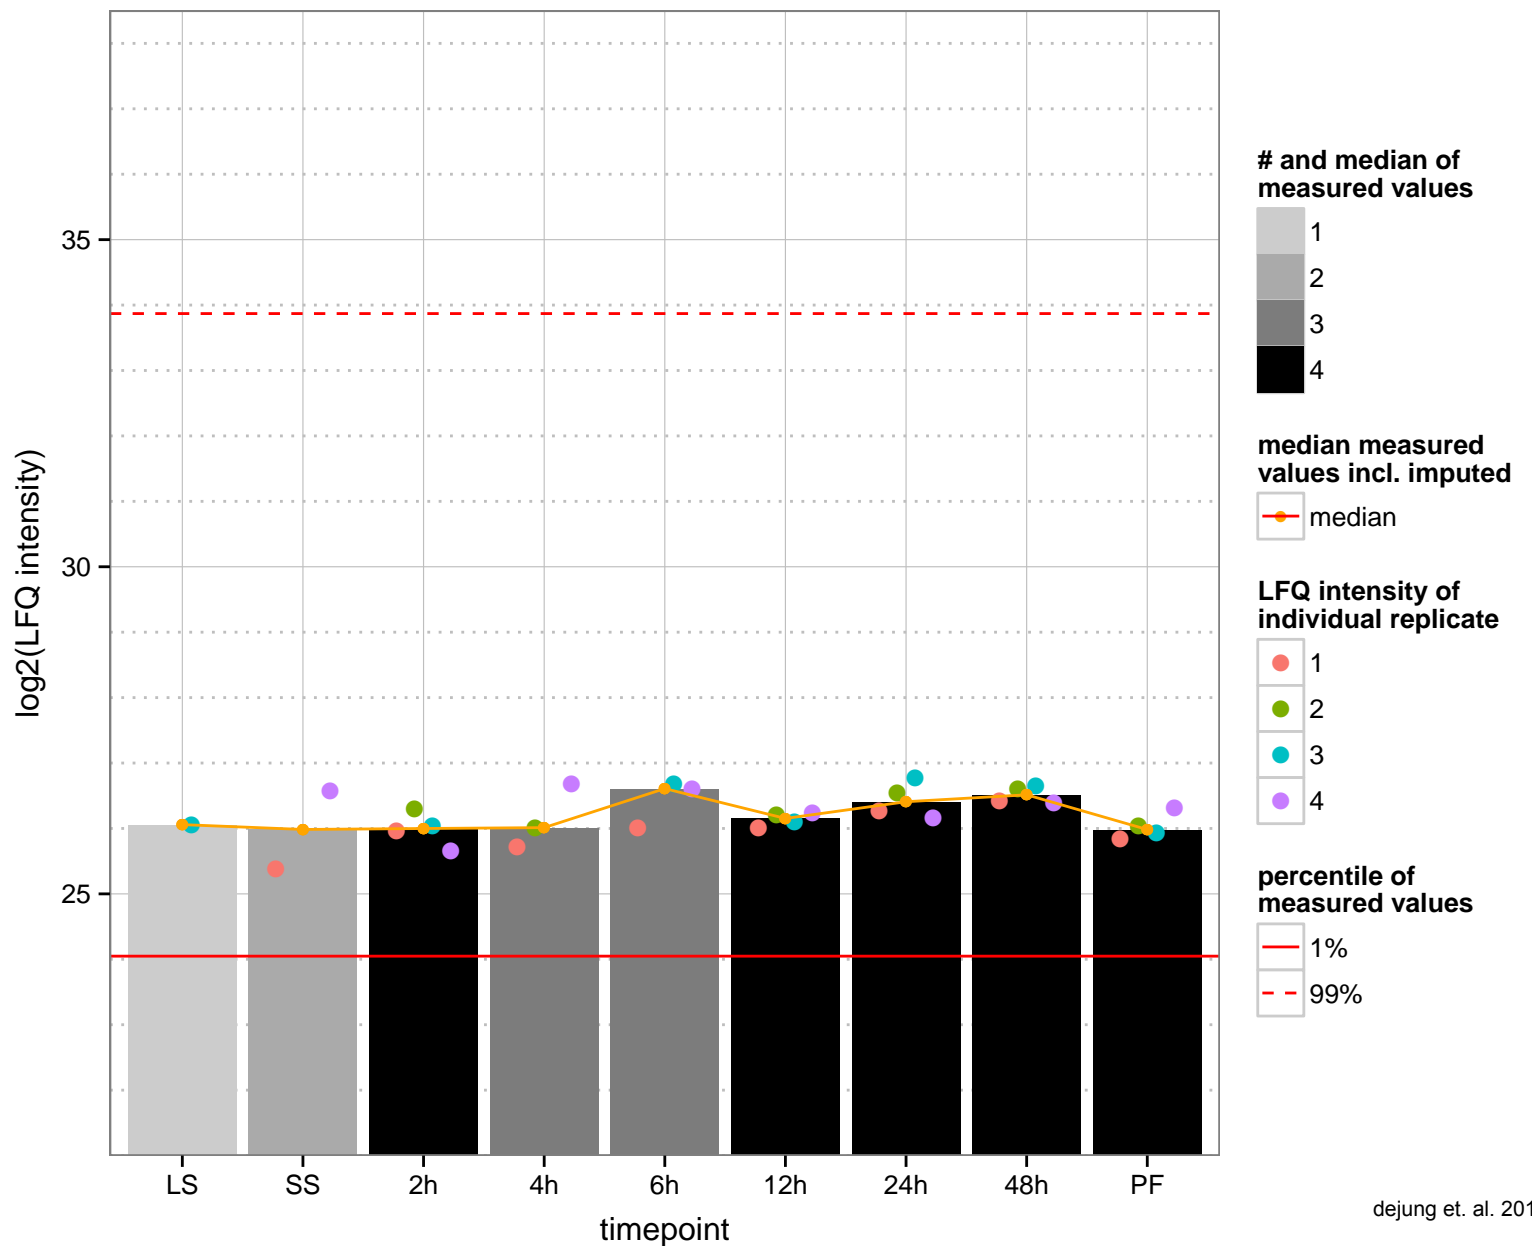



hypothetical protein, conserved  
 Tb927.11.13670  
 AGOF: null  
 AGOC: null  
 AGOP: null  
 PGO: null  
 PGOC: null  
 PGOP: null

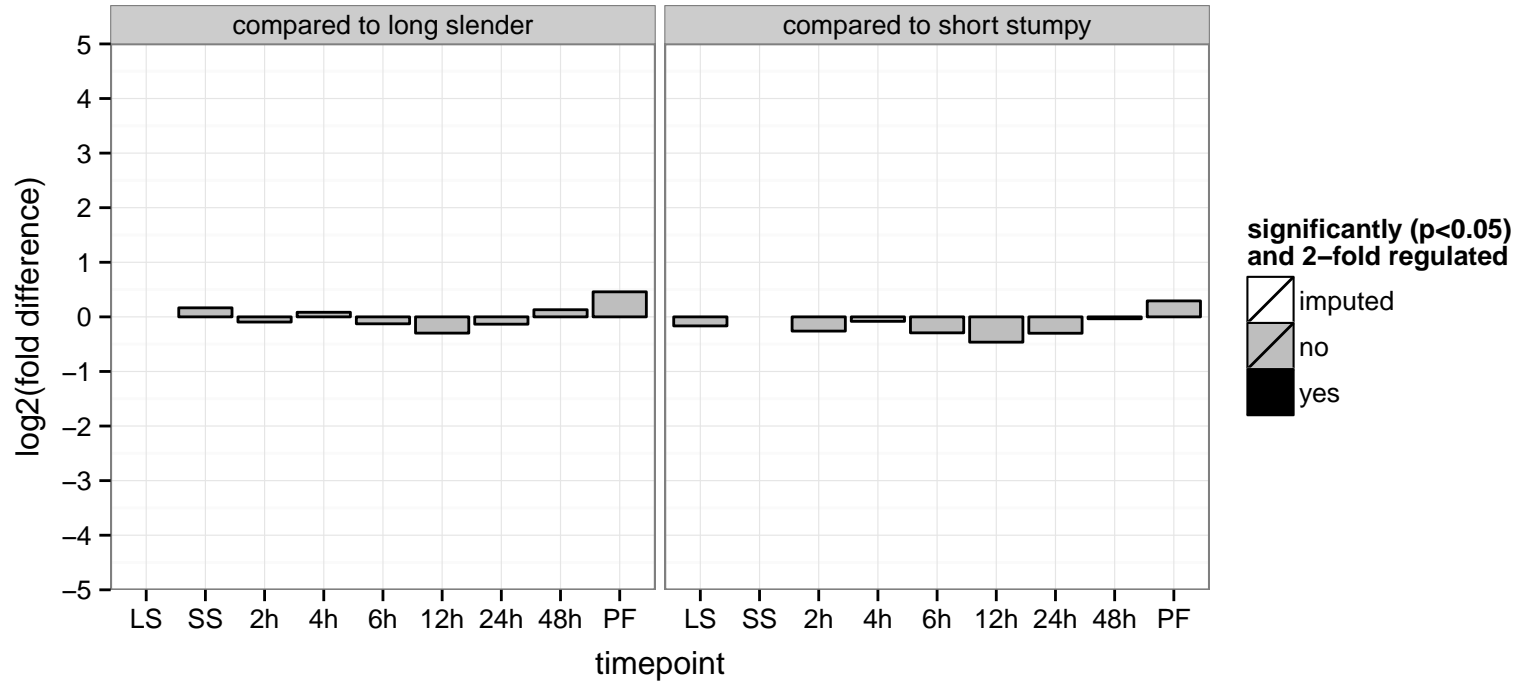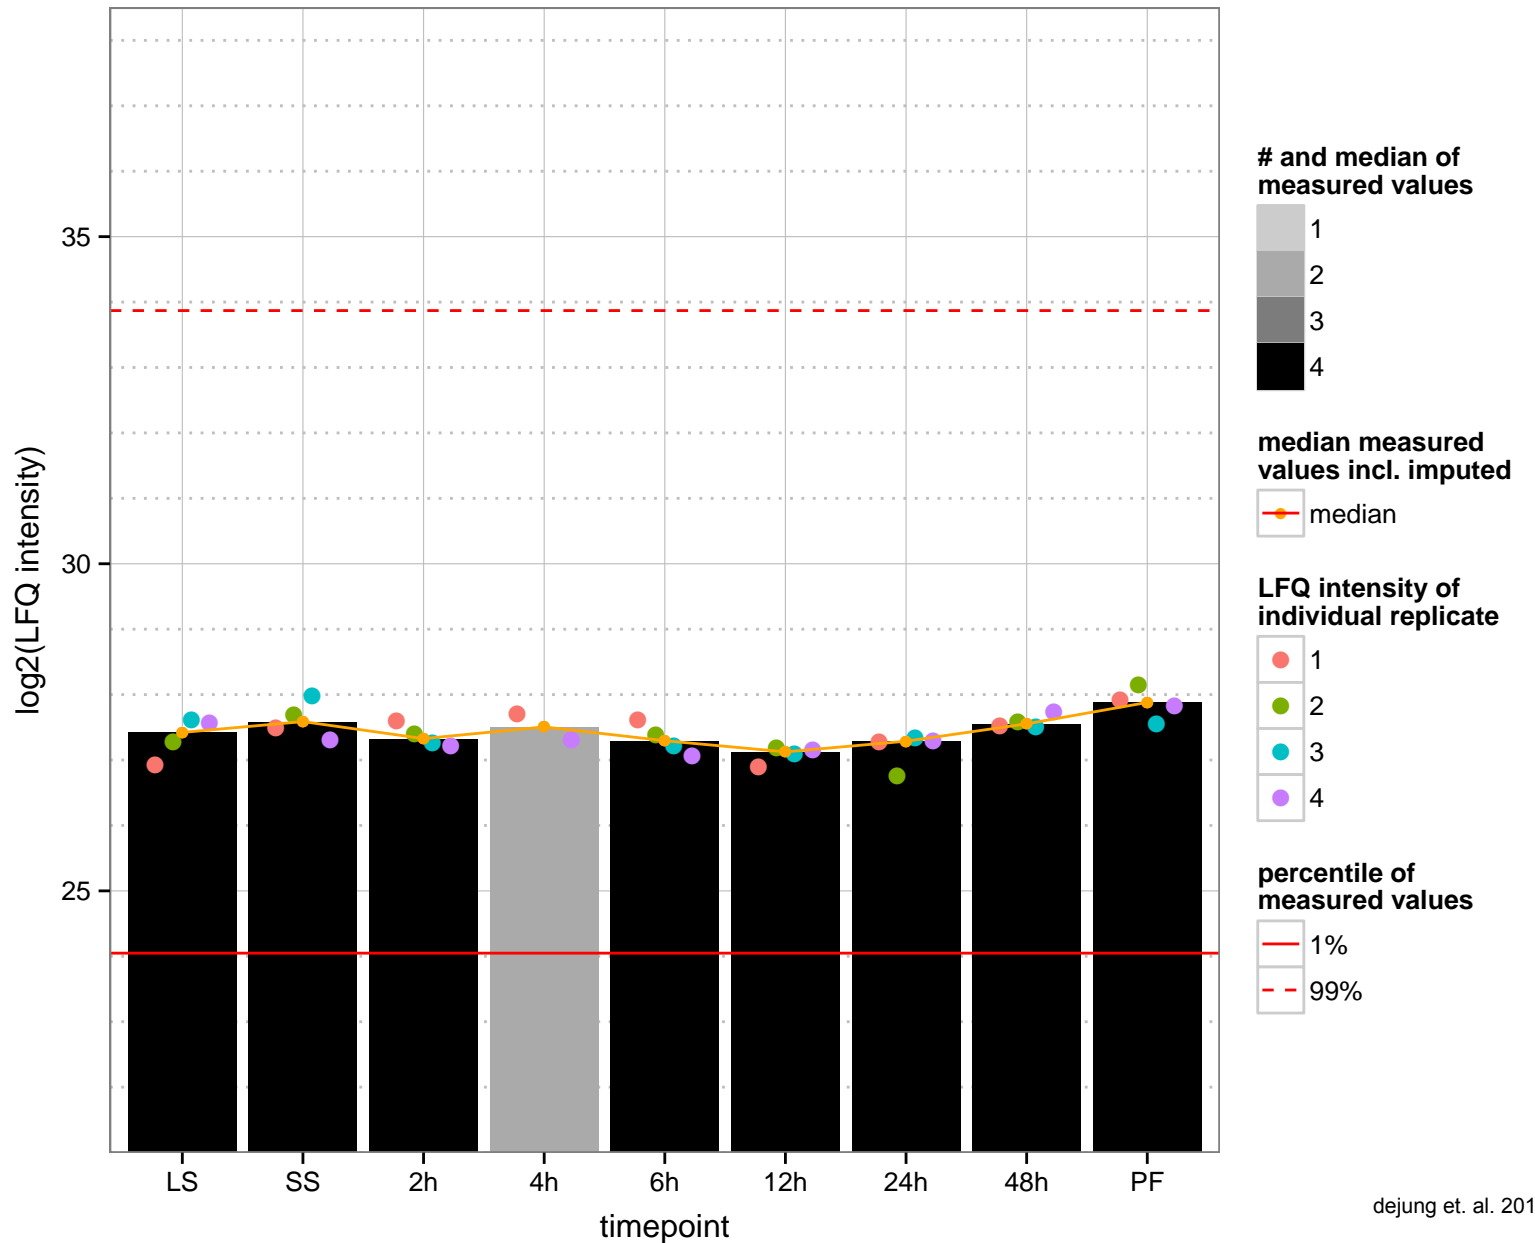

Ras-related protein Rab4 (RAB4)

Tb927.11.13750

AGOF: GTP binding, GTPase activity

AGOC: intracellular

AGOP: intracellular protein transport, nucleocytoplasmic transport, small GTPase mediated signal transduction

PGOF: GTP binding, GTPase activity

PGOC: intracellular, membrane

PGOP: GTP catabolic process, intracellular protein transport, nucleocytoplasmic transport, protein transport, signal transduction

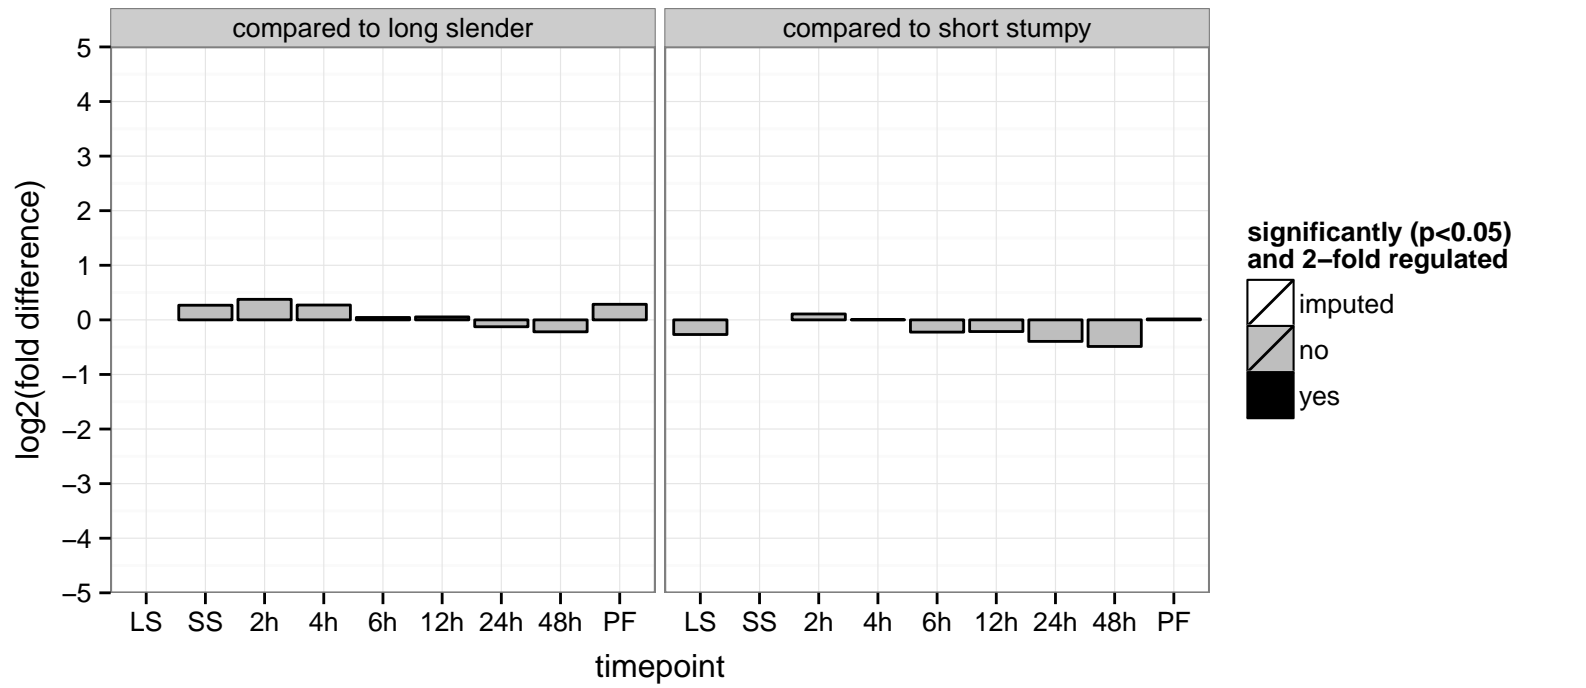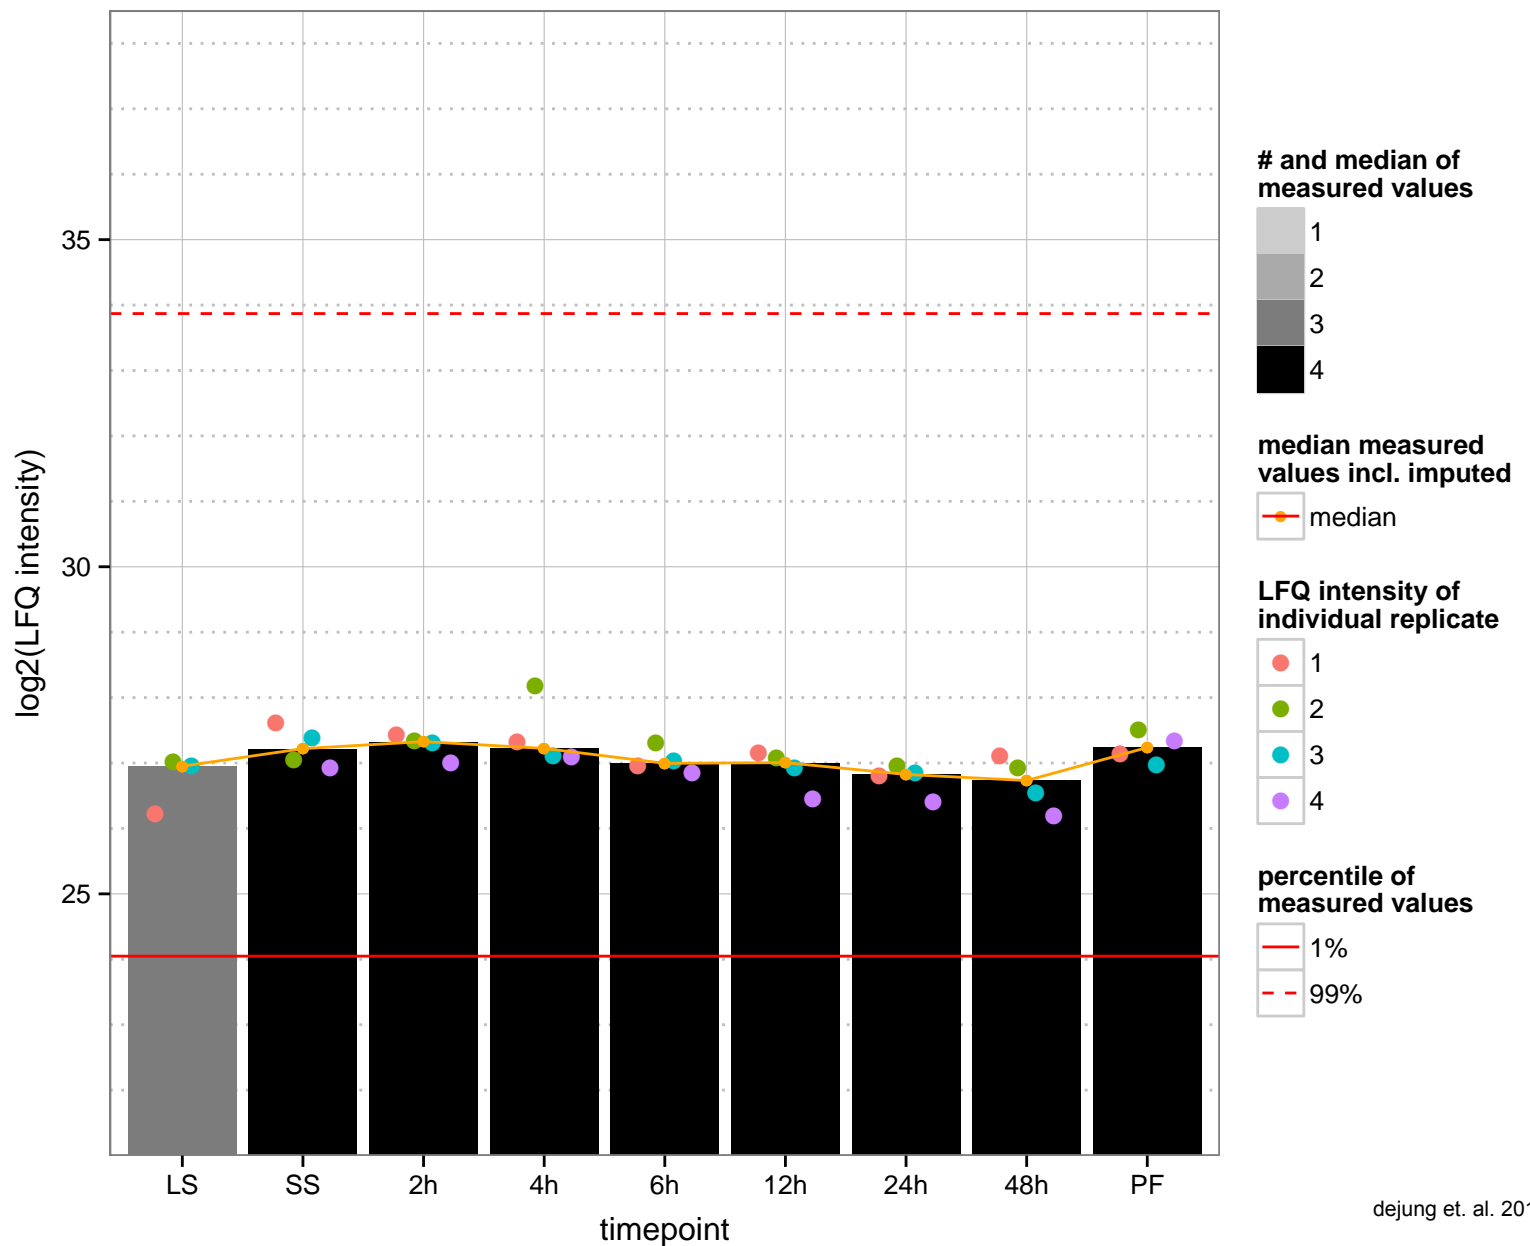

hypothetical protein, conserved  
 Tb927.11.13770  
 AGOF: null  
 AGOC: membrane  
 AGOP: null  
 PGO: null  
 PGO: null  
 PGO: membrane  
 PGO: null

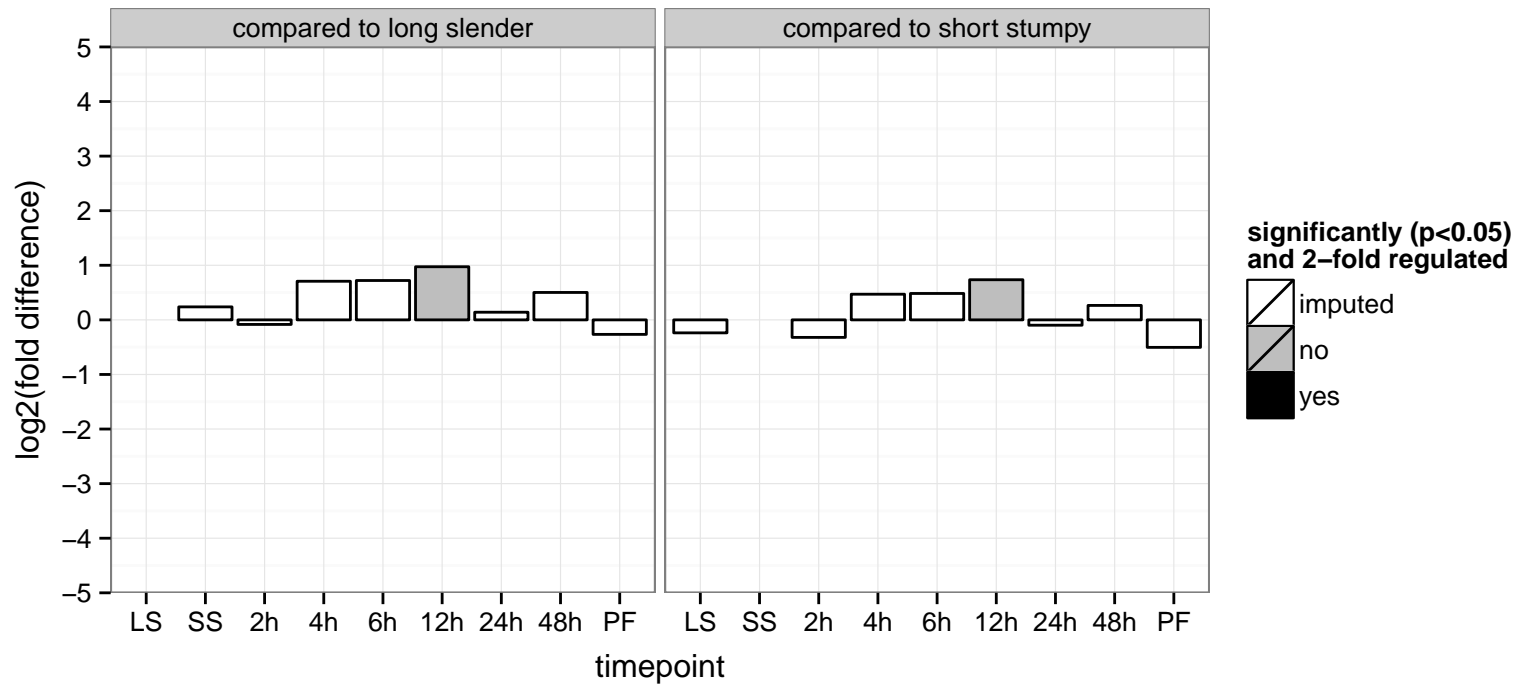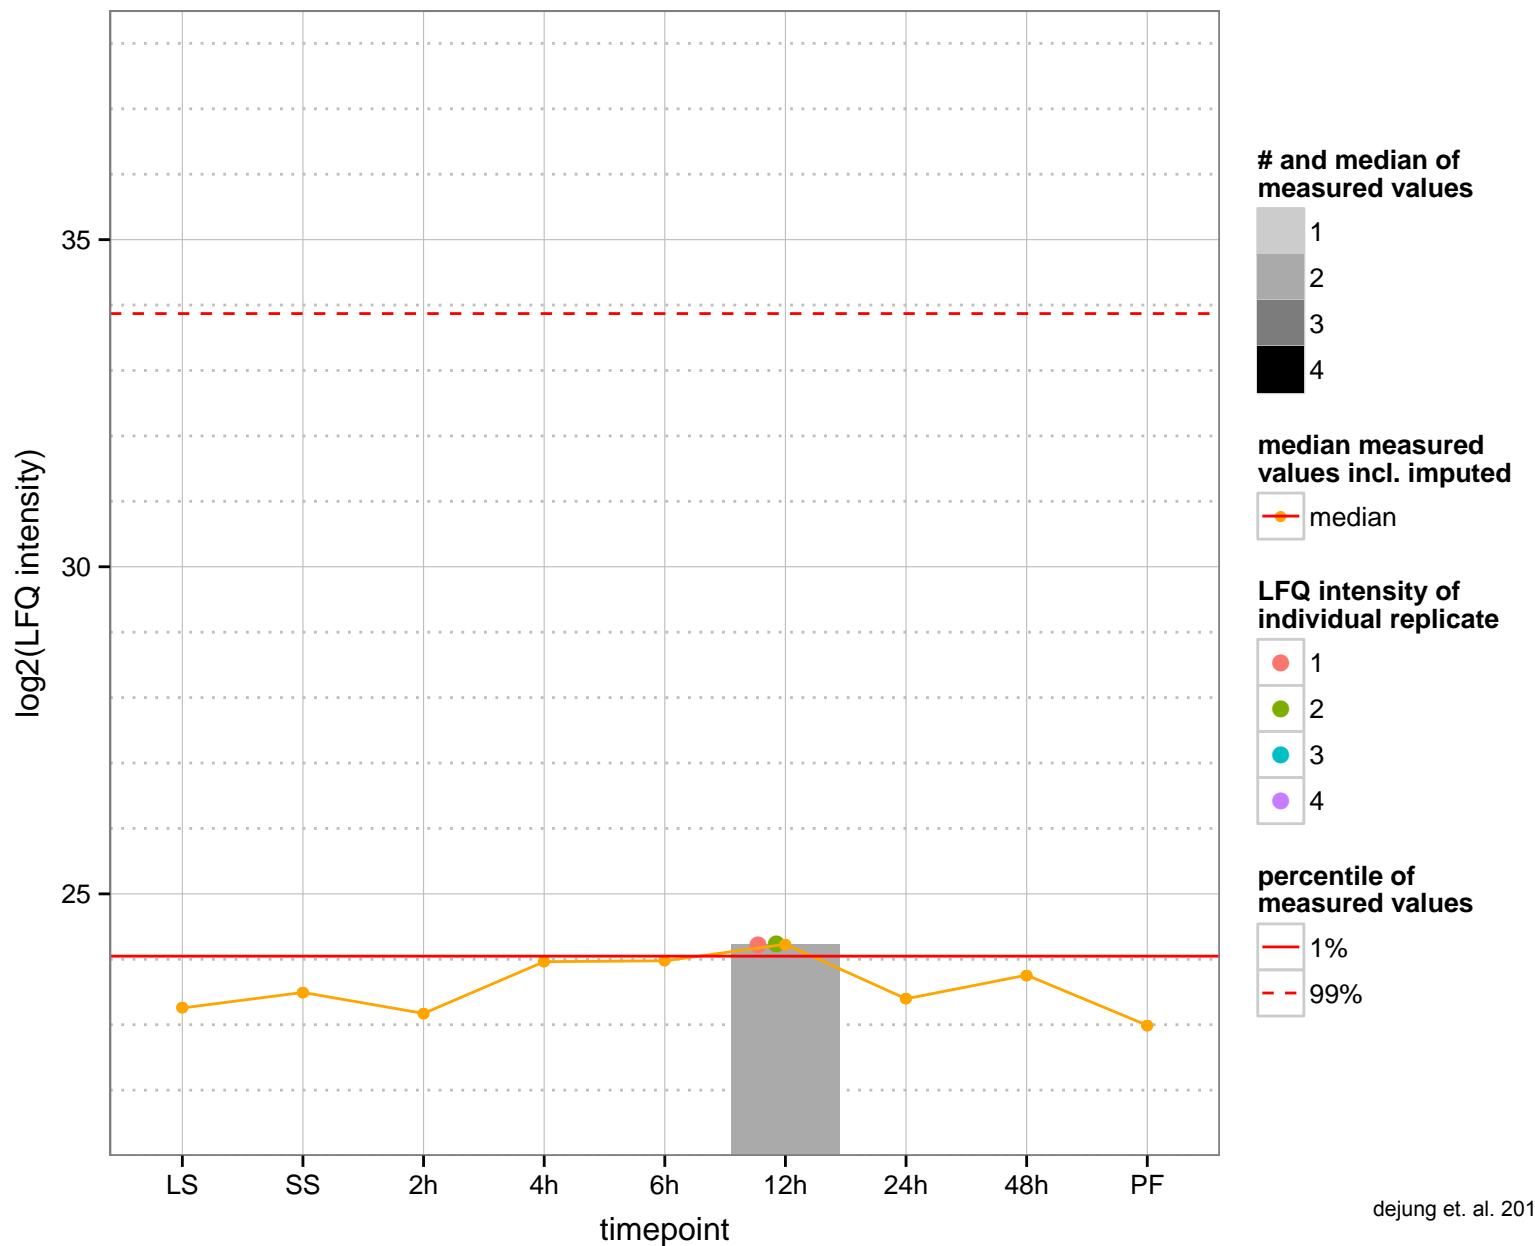

profilin  
 Tb927.11.13780  
 AGOF: actin binding  
 AGOC: null  
 AGOP: actin cytoskeleton organization, cytoskeleton organization  
 PGOF: actin binding  
 PGO: actin cytoskeleton  
 PGO: cytoskeleton organization

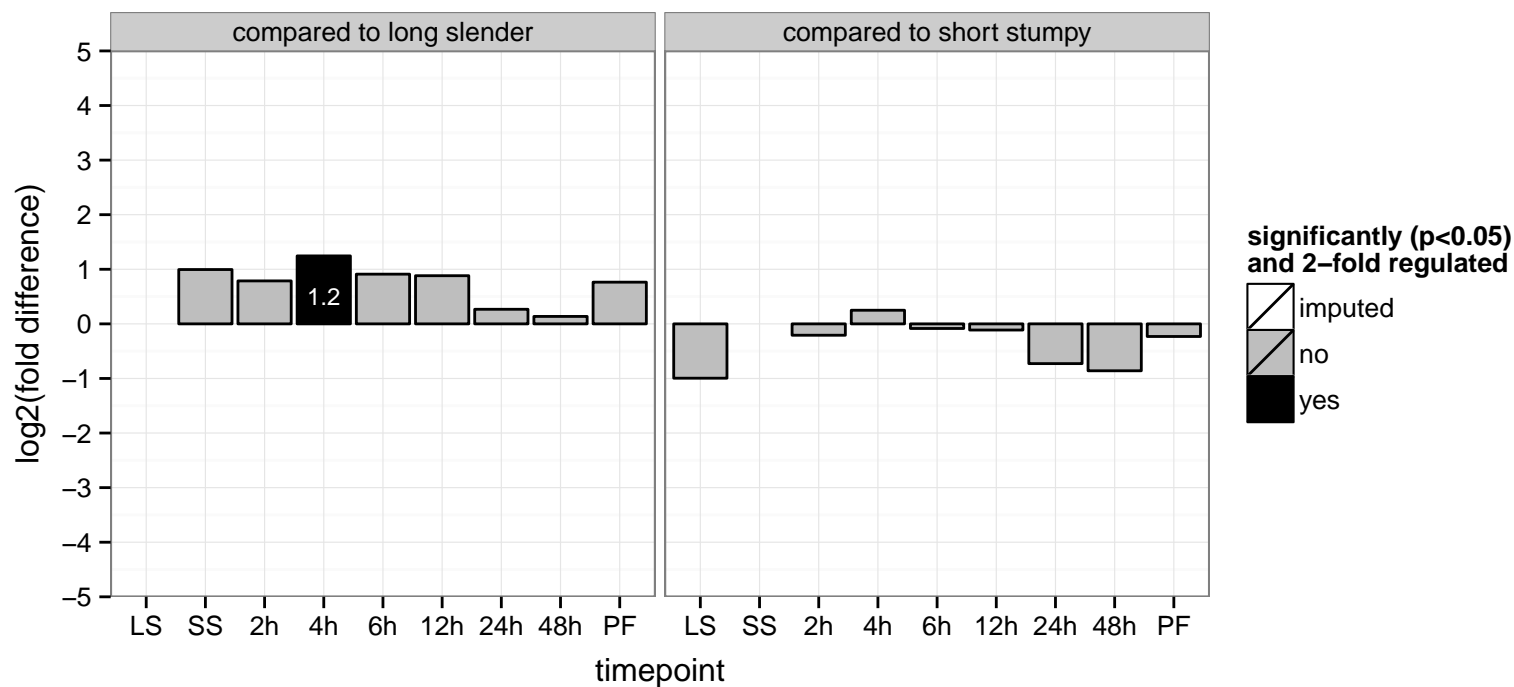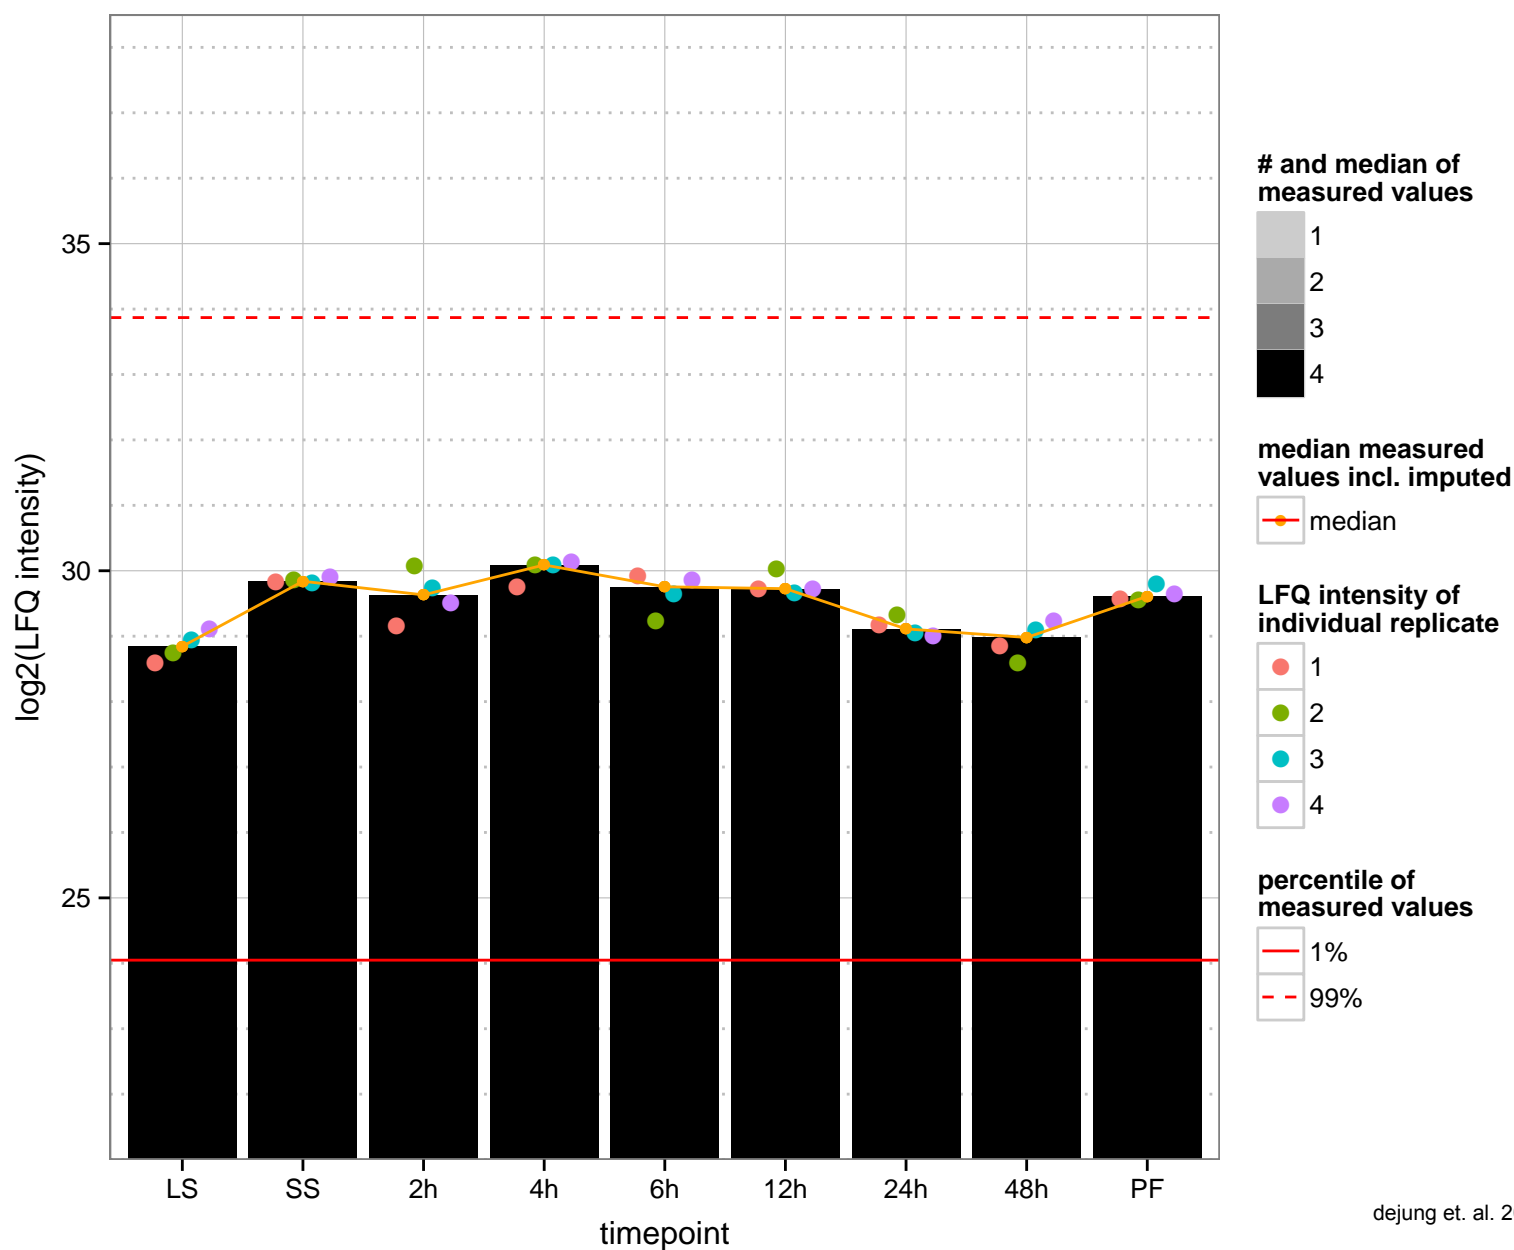

ATP-dependent DEAD/H RNA helicase, putative, ATP-dependent RNA helicase  
 Tb927.11.13810  
 AGOF: ATP binding, ATP-dependent helicase activity, helicase activity, nucleic acid binding  
 AGOC: null  
 AGOP: nucleobase-containing compound metabolic process  
 PGOF: ATP binding, ATP-dependent helicase activity, helicase activity, nucleic acid binding  
 PGOC: null  
 PGOP: null

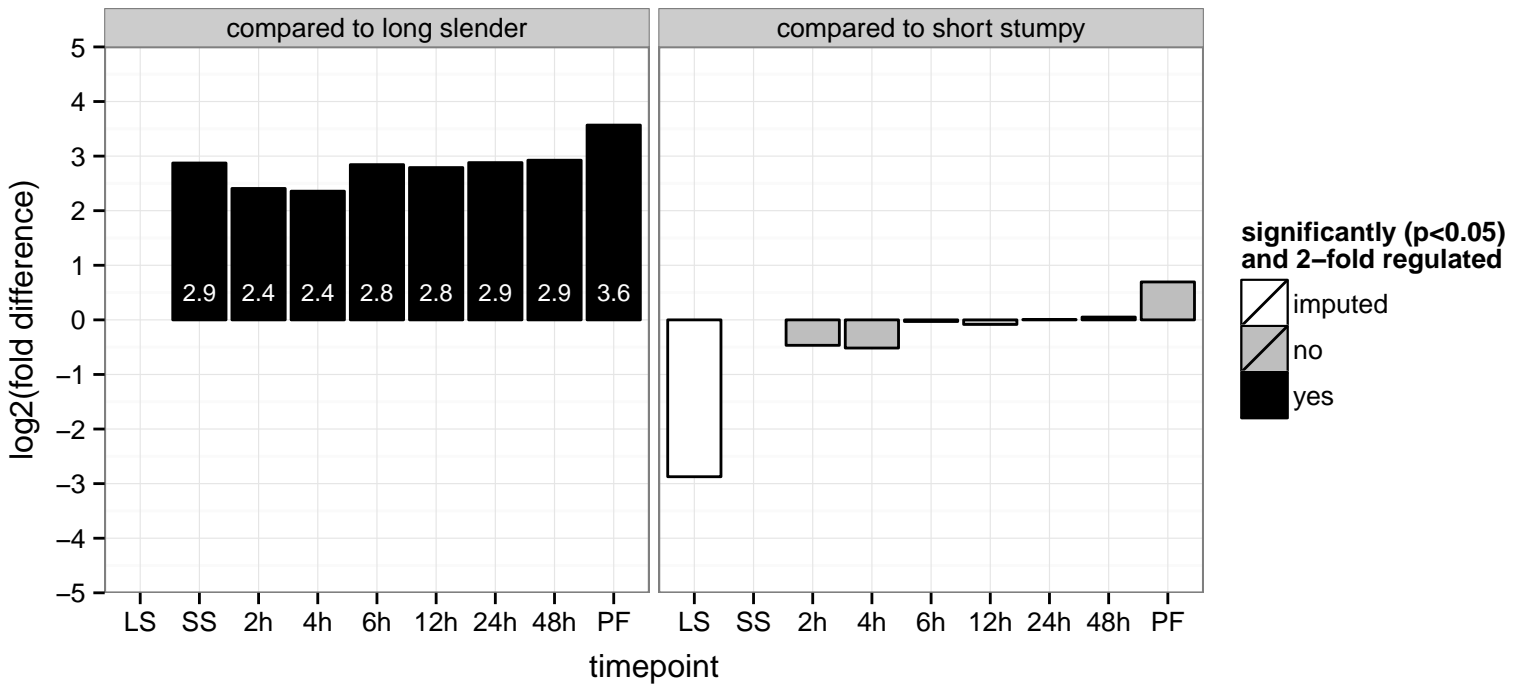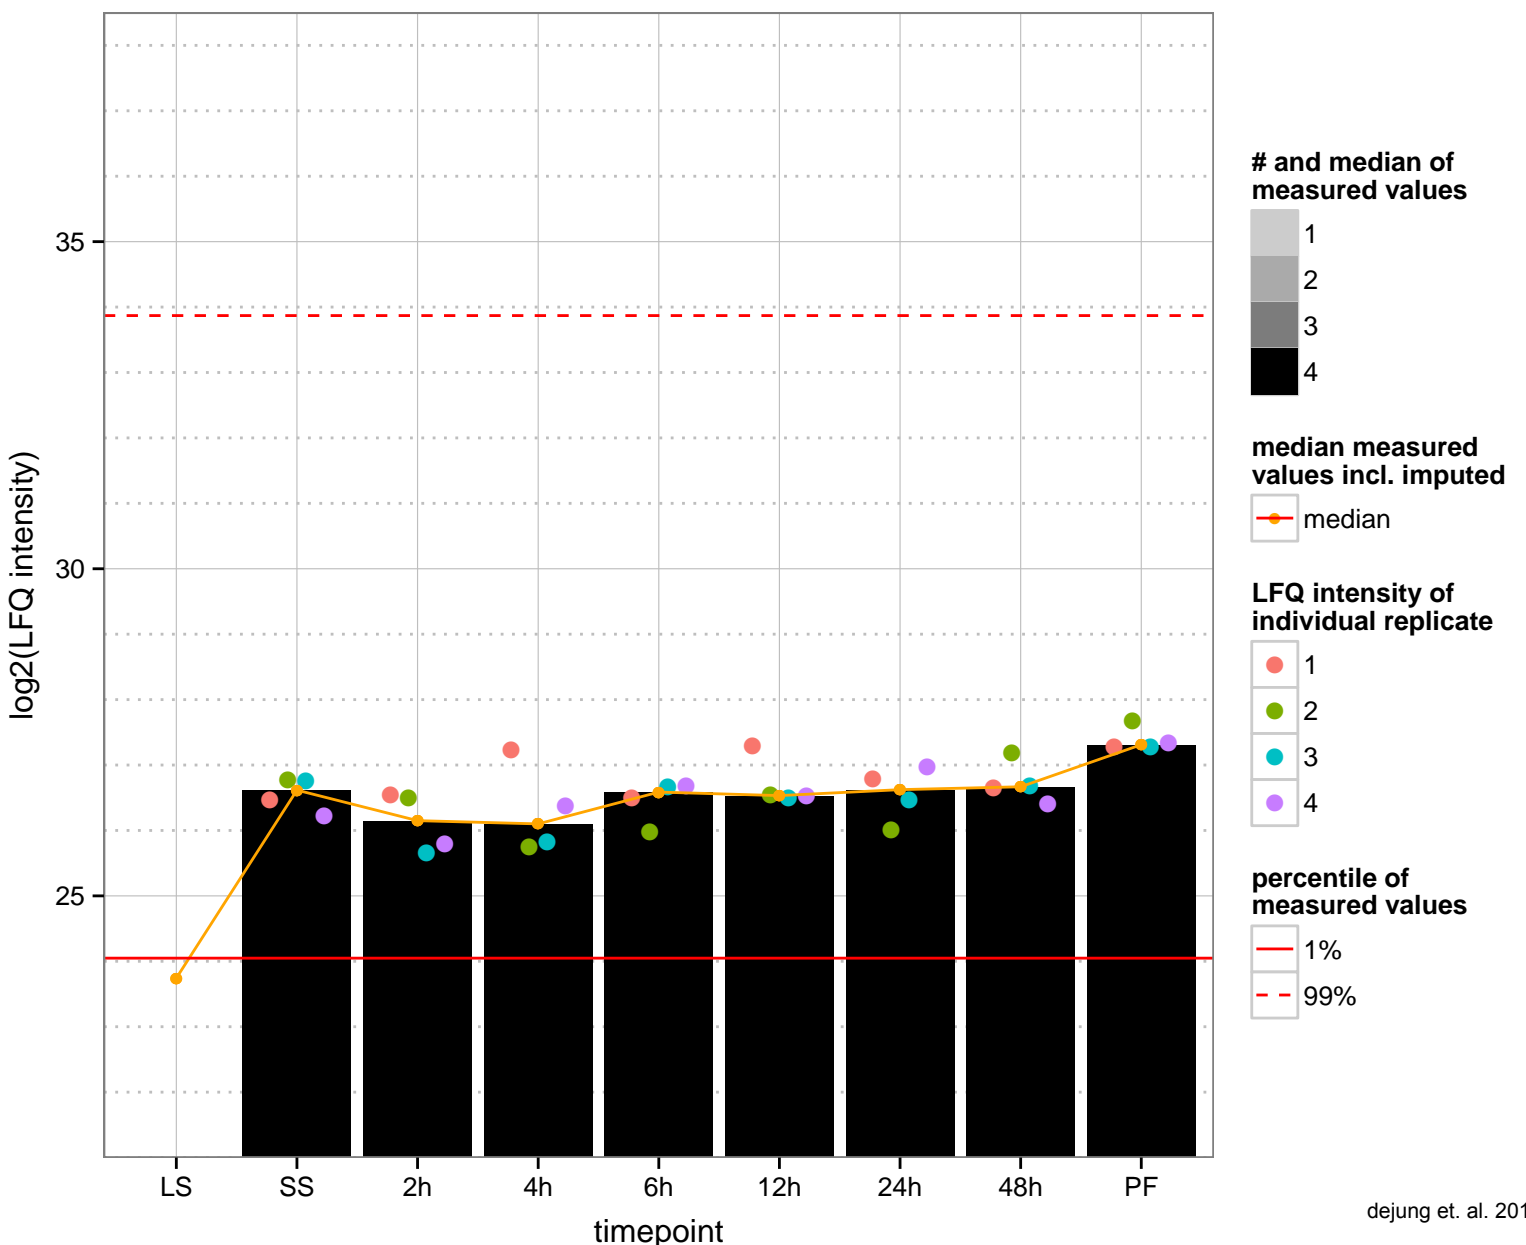

hypothetical protein, conserved  
 Tb927.11.13820  
 AGOF: null  
 AGOC: null  
 AGOP: null  
 PGOF: null  
 PGO: null  
 PGOP: null

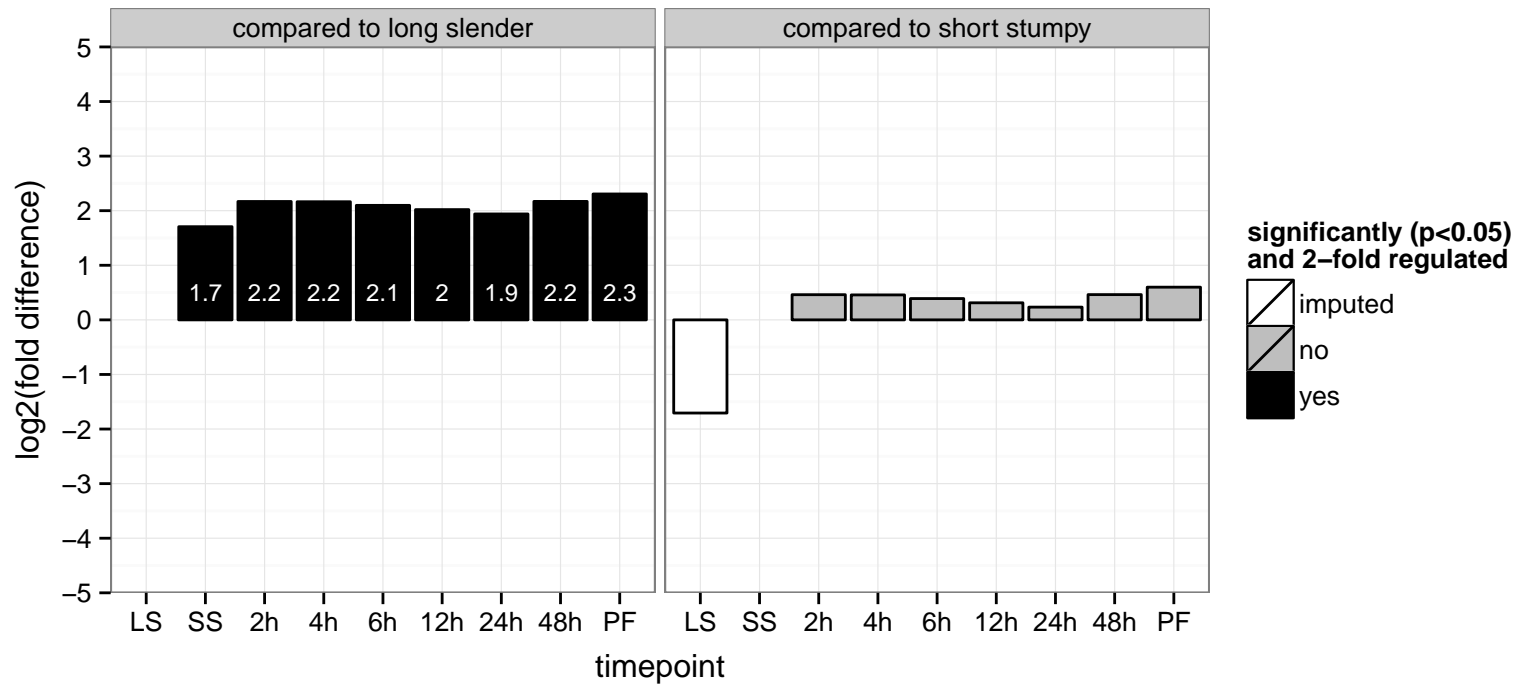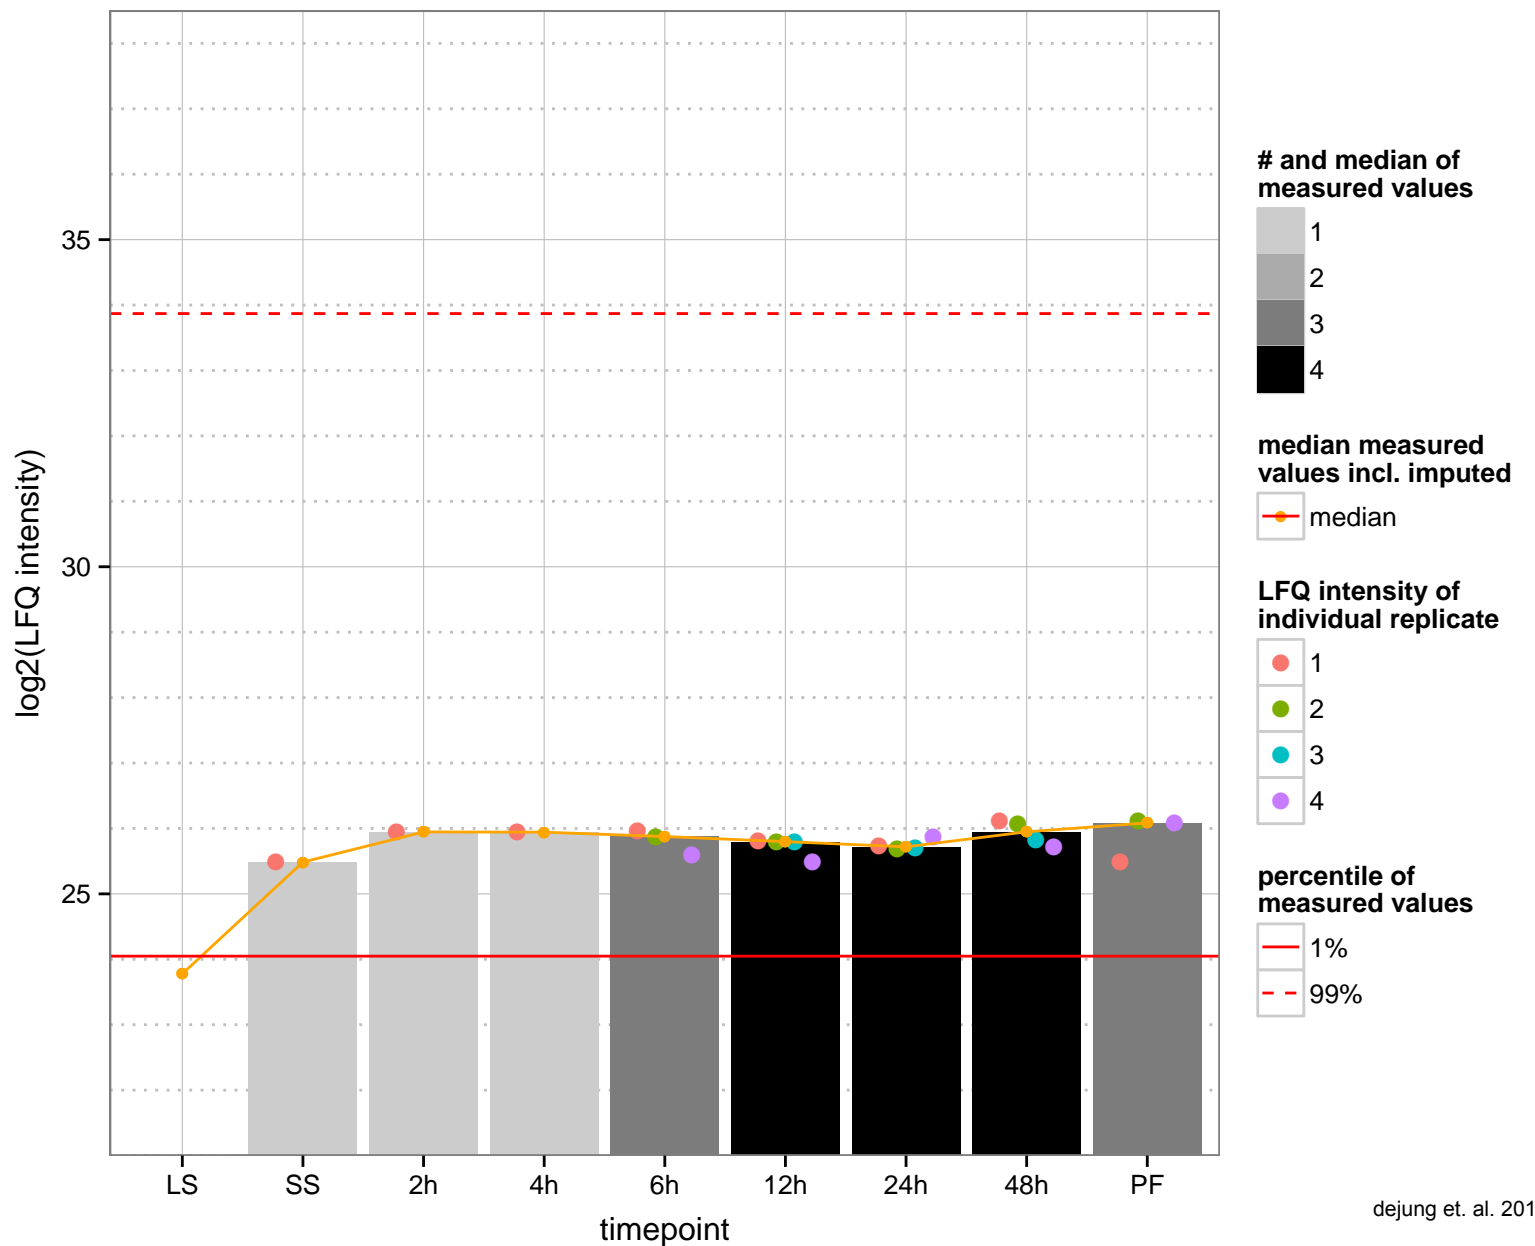

hypothetical protein, conserved  
 Tb927.11.13860  
 AGOF: null  
 AGOC: null  
 AGOP: null  
 PGO: null  
 PGOC: null  
 PGOP: null

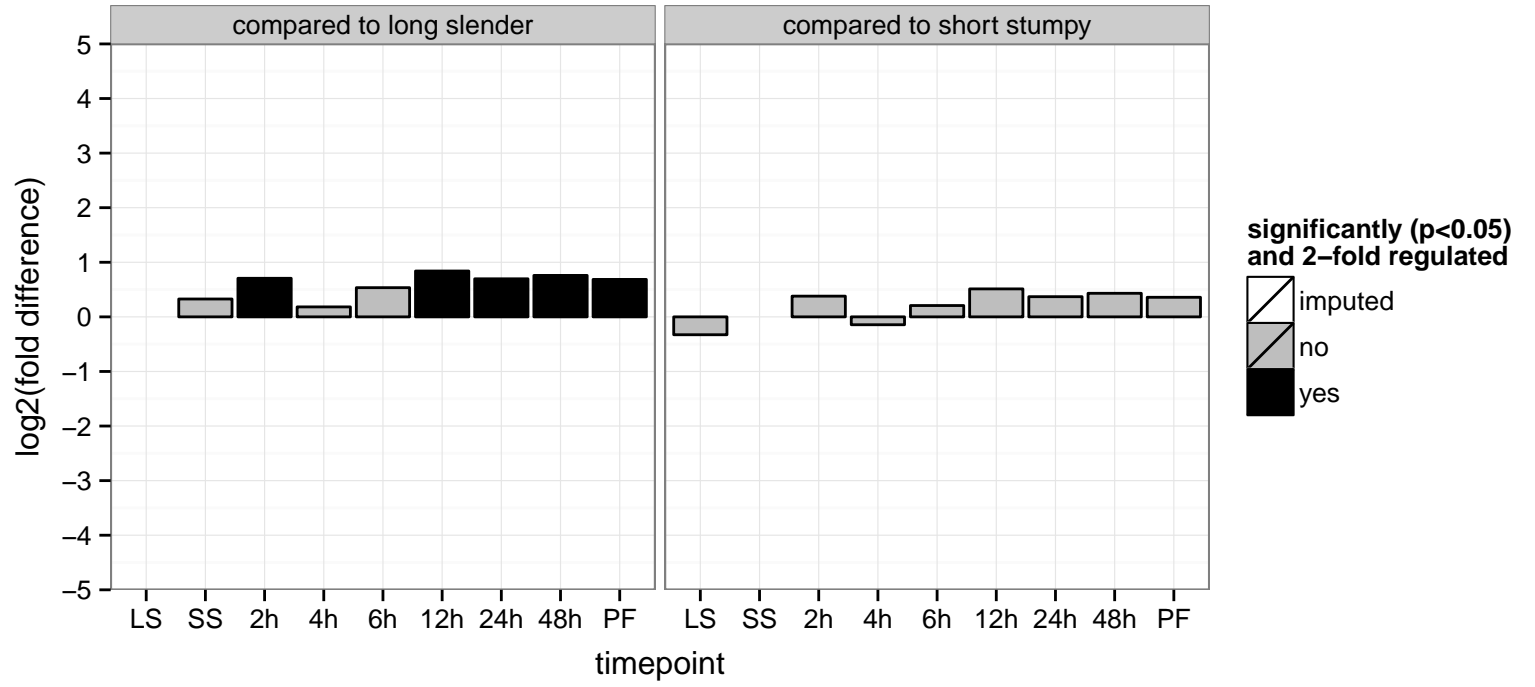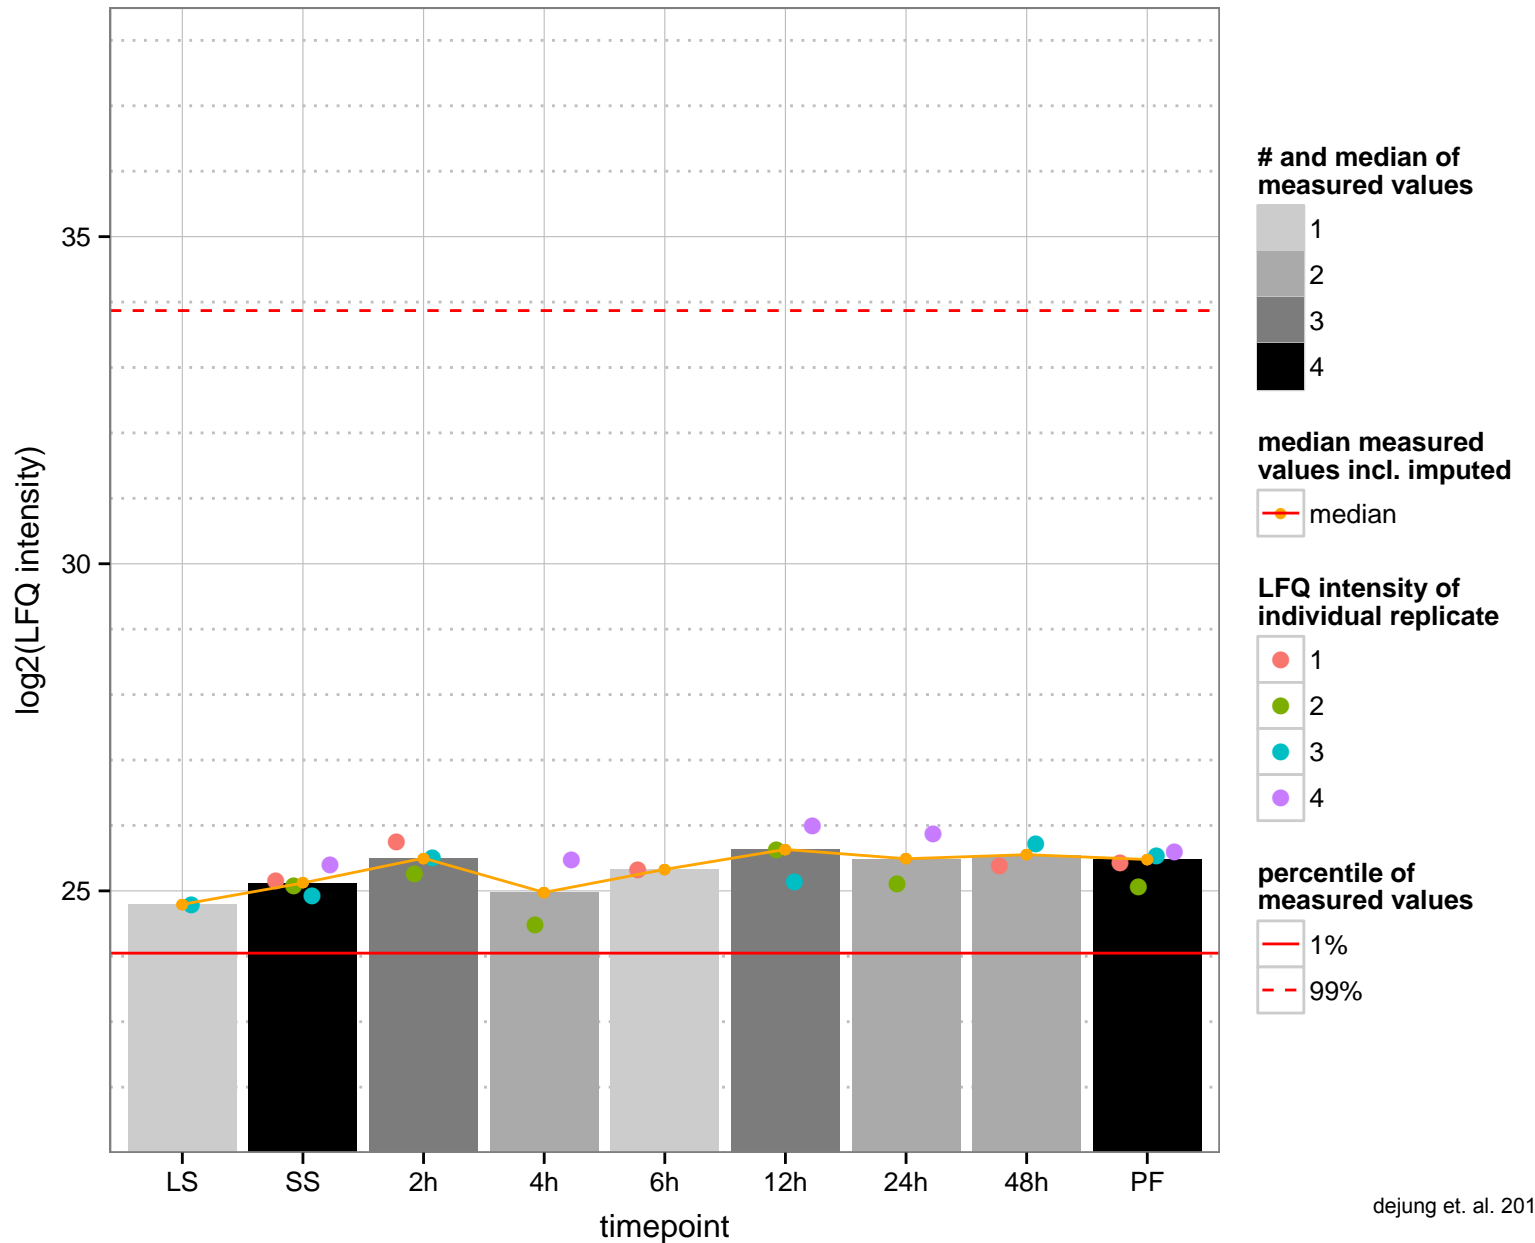

class I transcription factor A, subunit 1 (CITFA-1)  
 Tb927.11.1390  
 AGOF: null  
 AGOC: null  
 AGOP: null  
 PGO: null  
 PGOC: null  
 PGOP: null

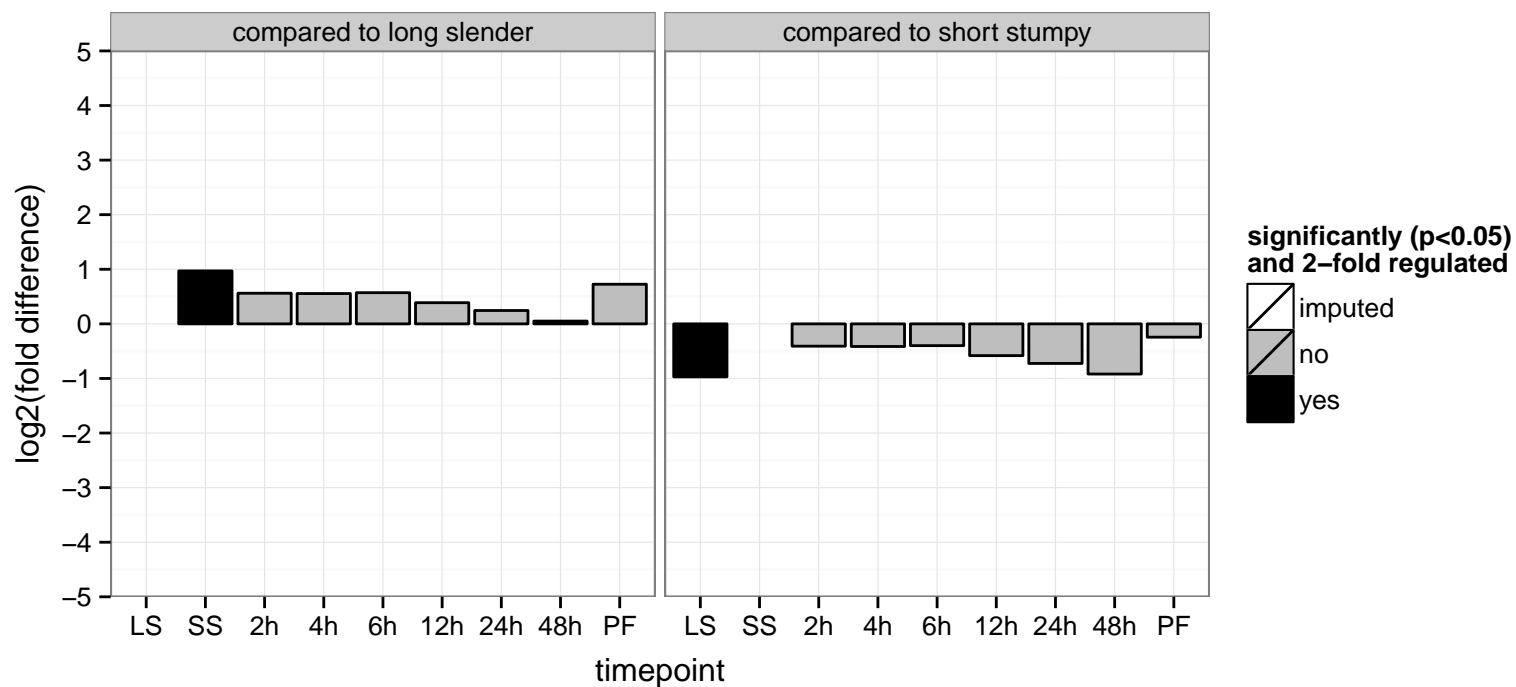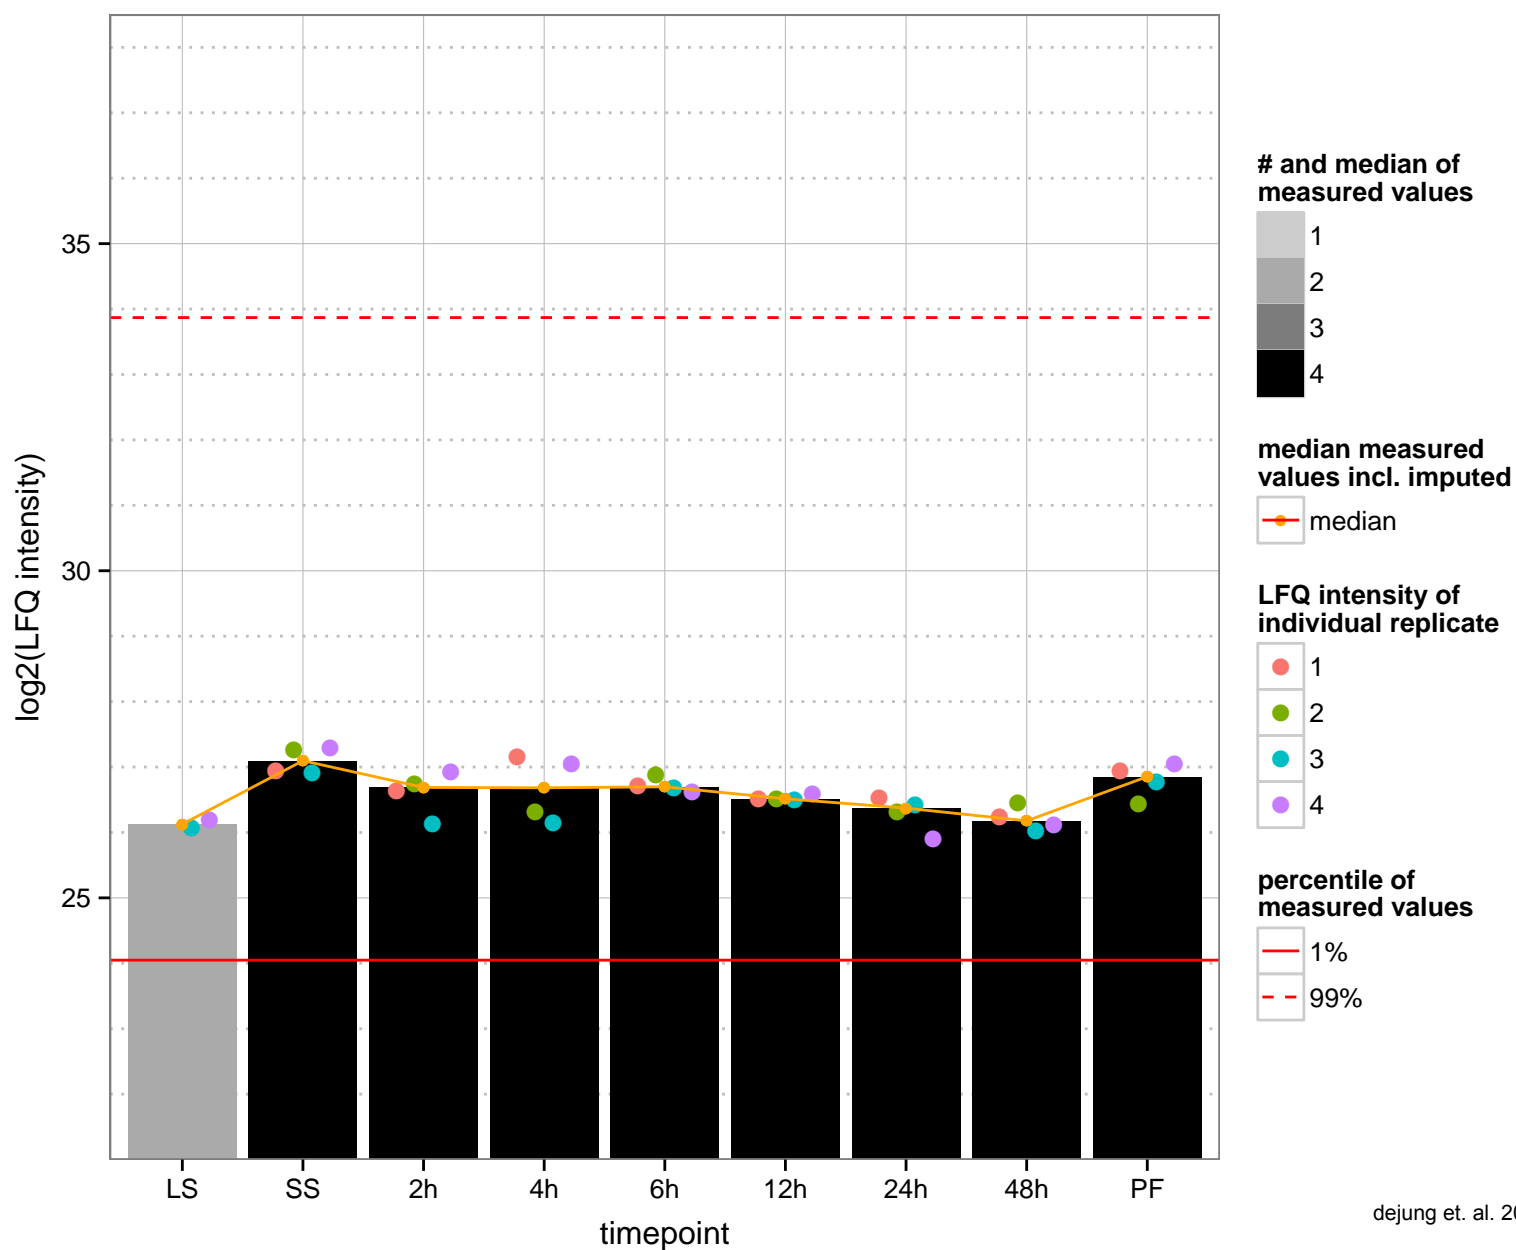



centrin, putative  
 Tb927.11.13900  
 AGOF: calcium ion binding  
 AGOC: cilium basal body  
 AGOP: null  
 PGOF: calcium ion binding  
 PGOC: null  
 PGOP: null

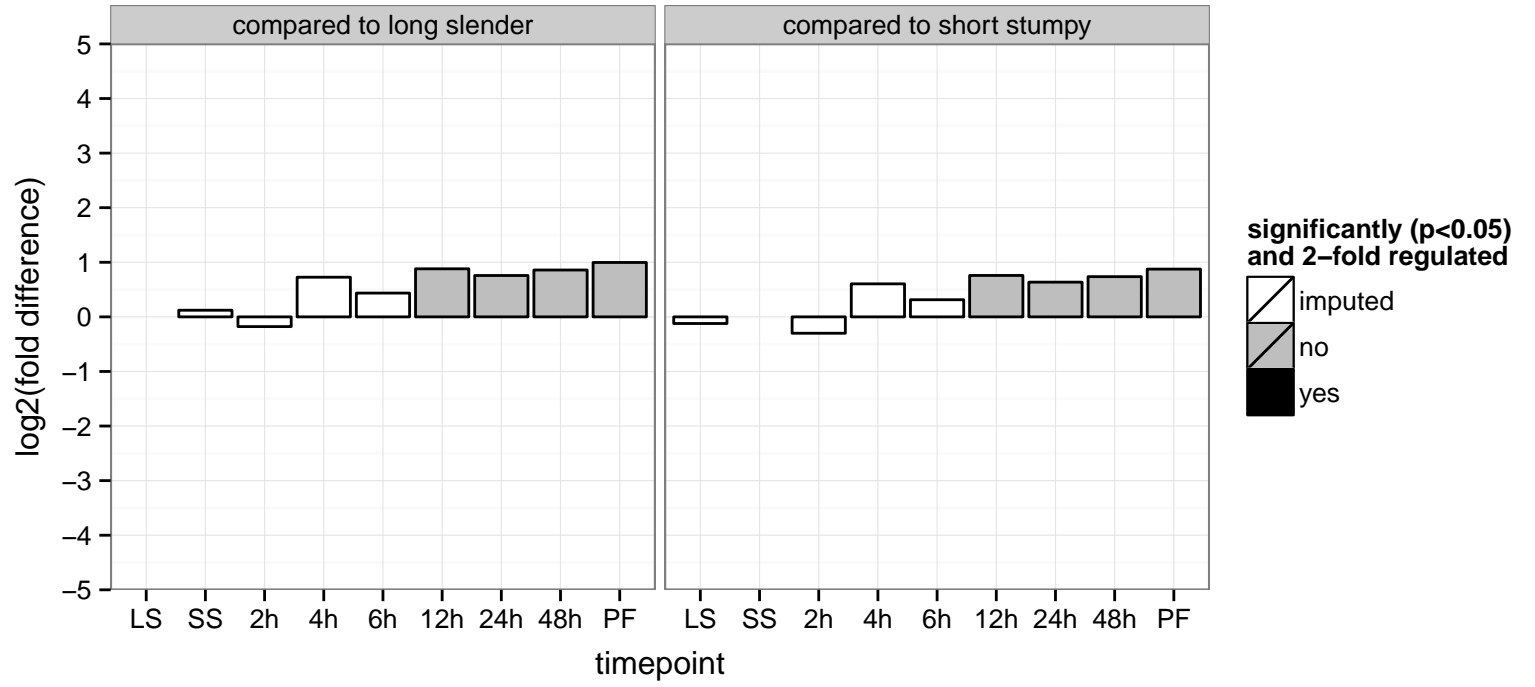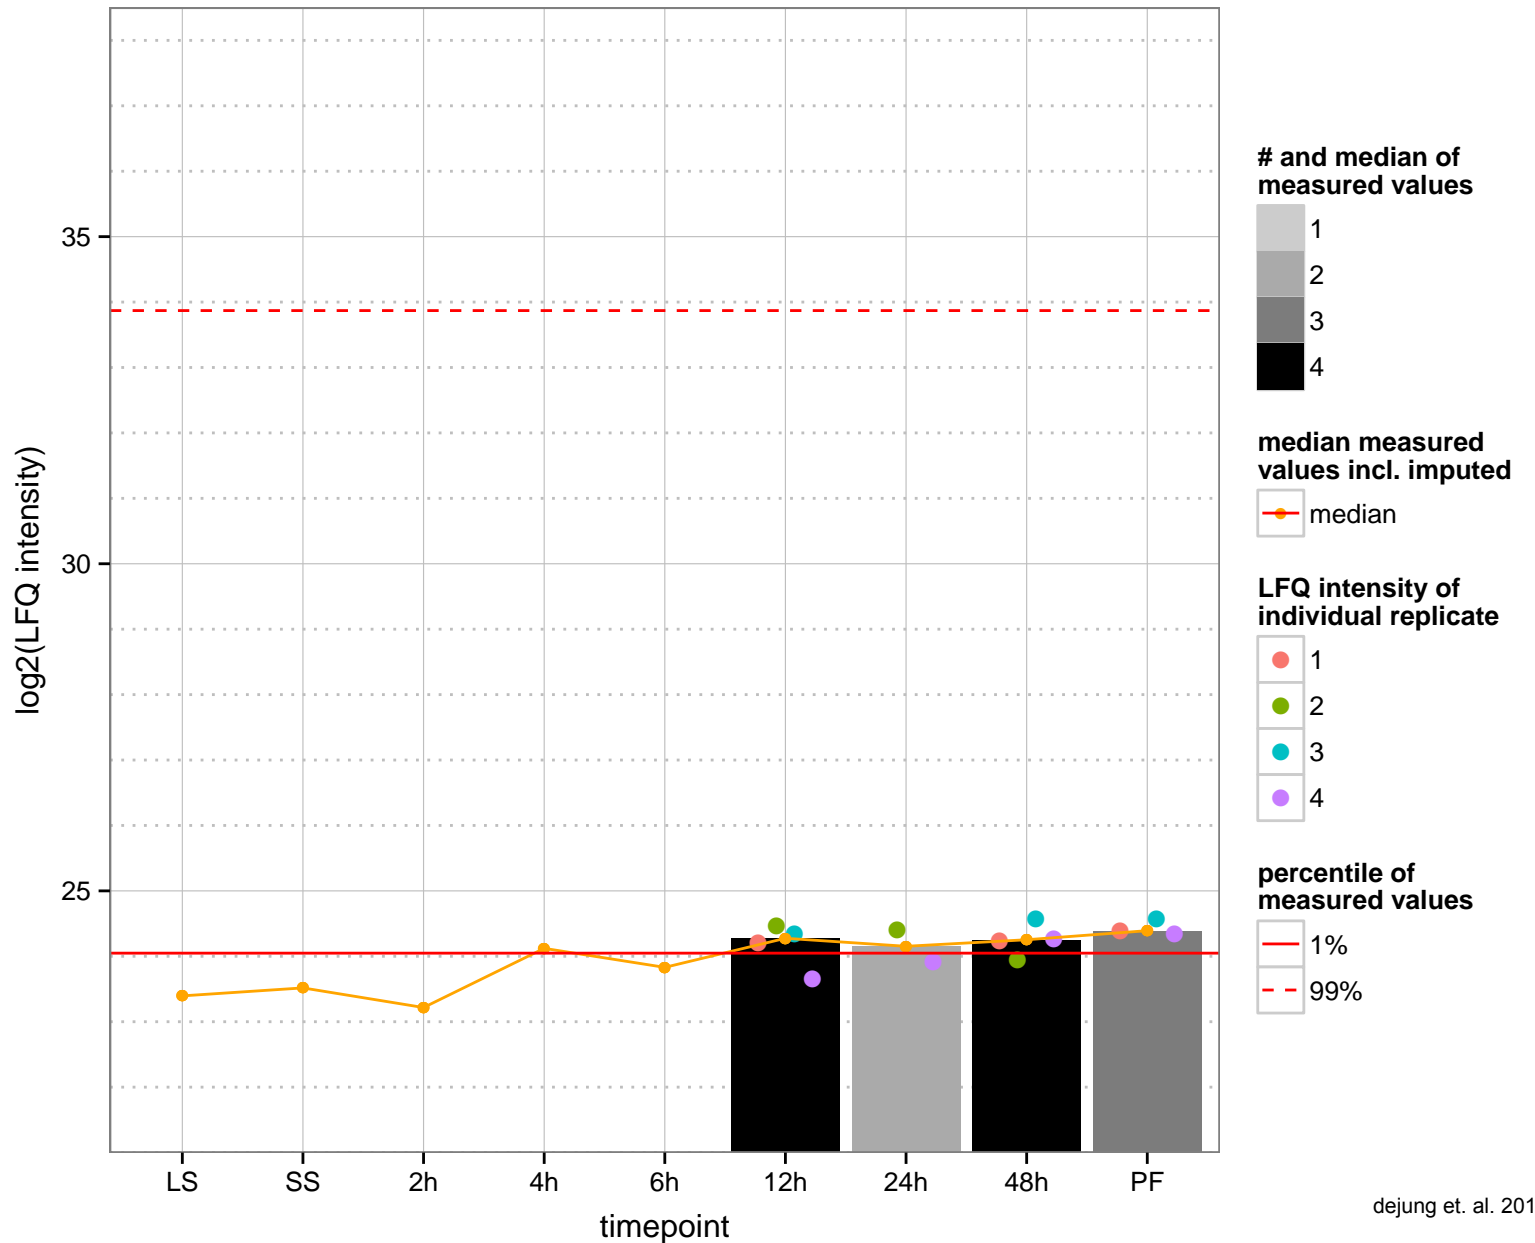

hypothetical protein, conserved  
 Tb927.11.1400  
 AGOF: null  
 AGOC: mitochondrion  
 AGOP: null  
 PGO: null  
 PGO: null  
 PGO: null

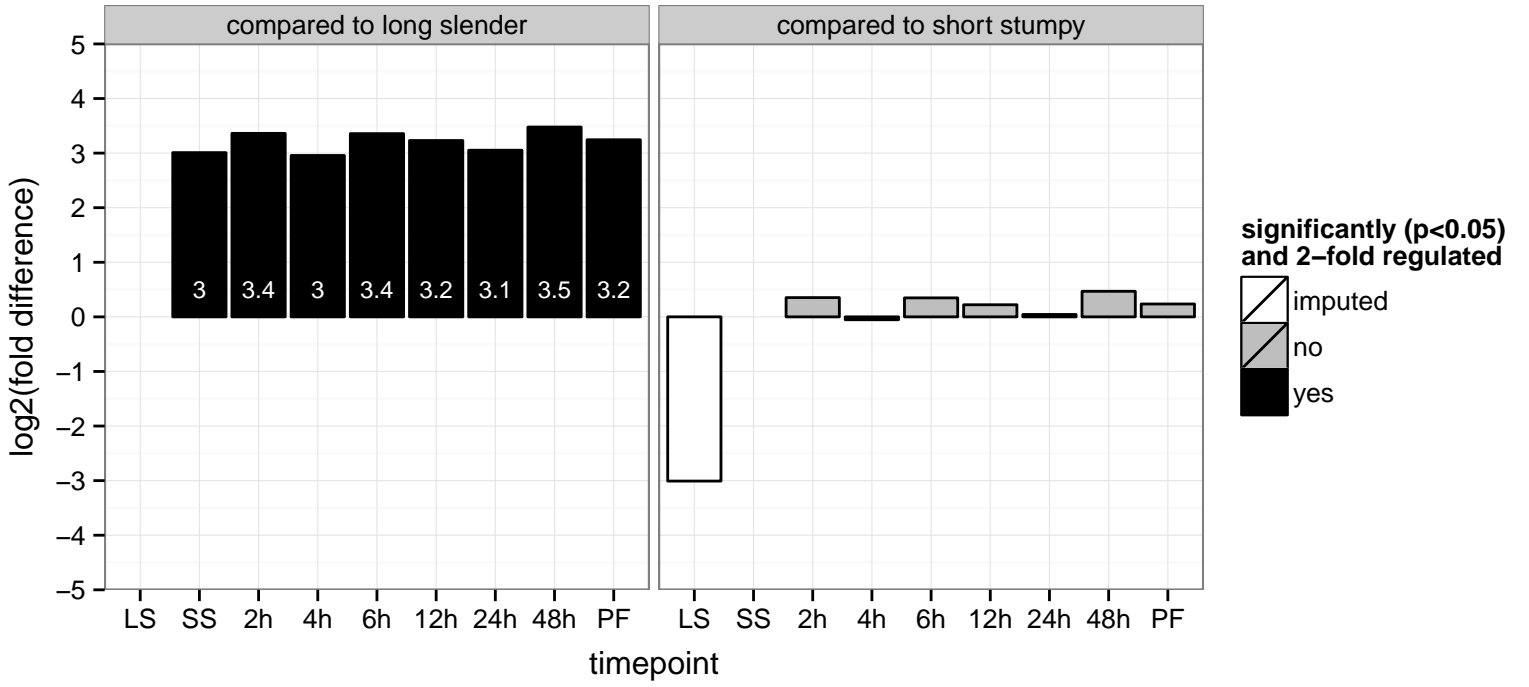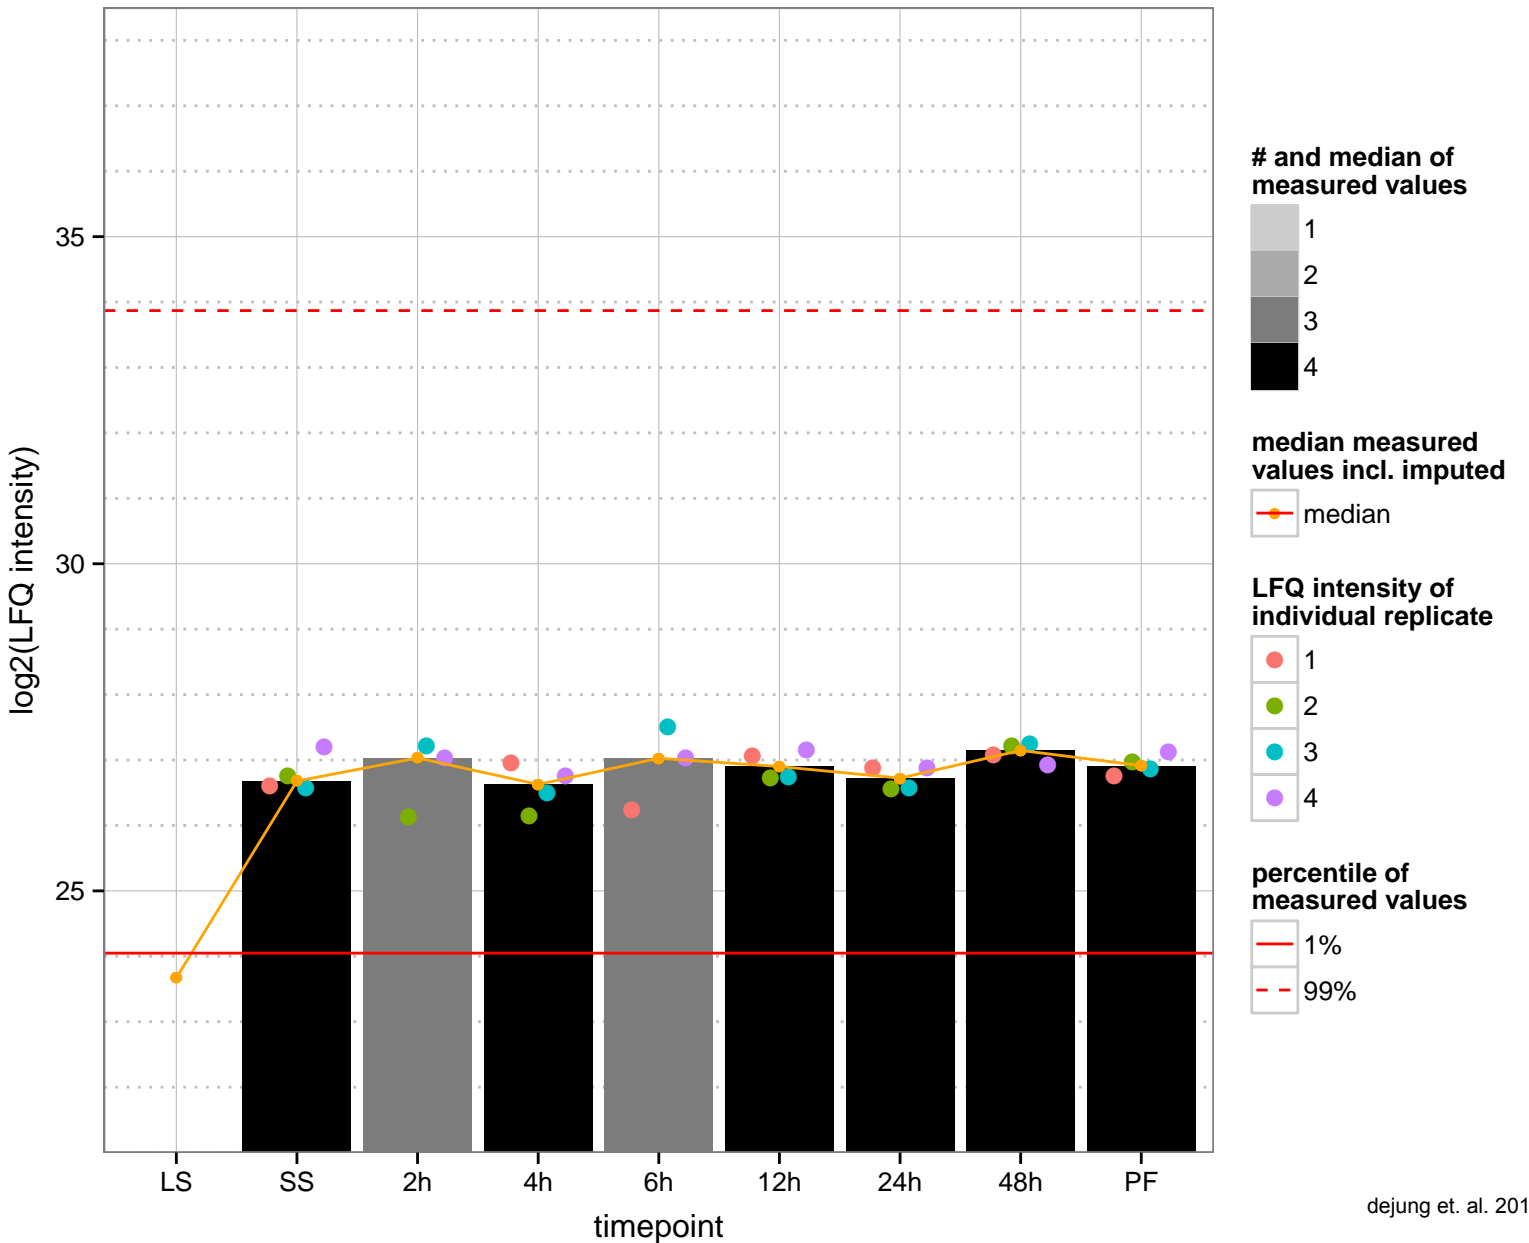

NRBD1, p34 (NRBD1), RNA-binding protein (NRBD2)  
 Tb927.11.14020;Tb927.11.14000  
 AGOF: RNA binding, protein binding  
 AGOC: nucleus  
 AGOP: RNA processing  
 PGO: nucleic acid binding  
 PGO: null  
 PGO: null

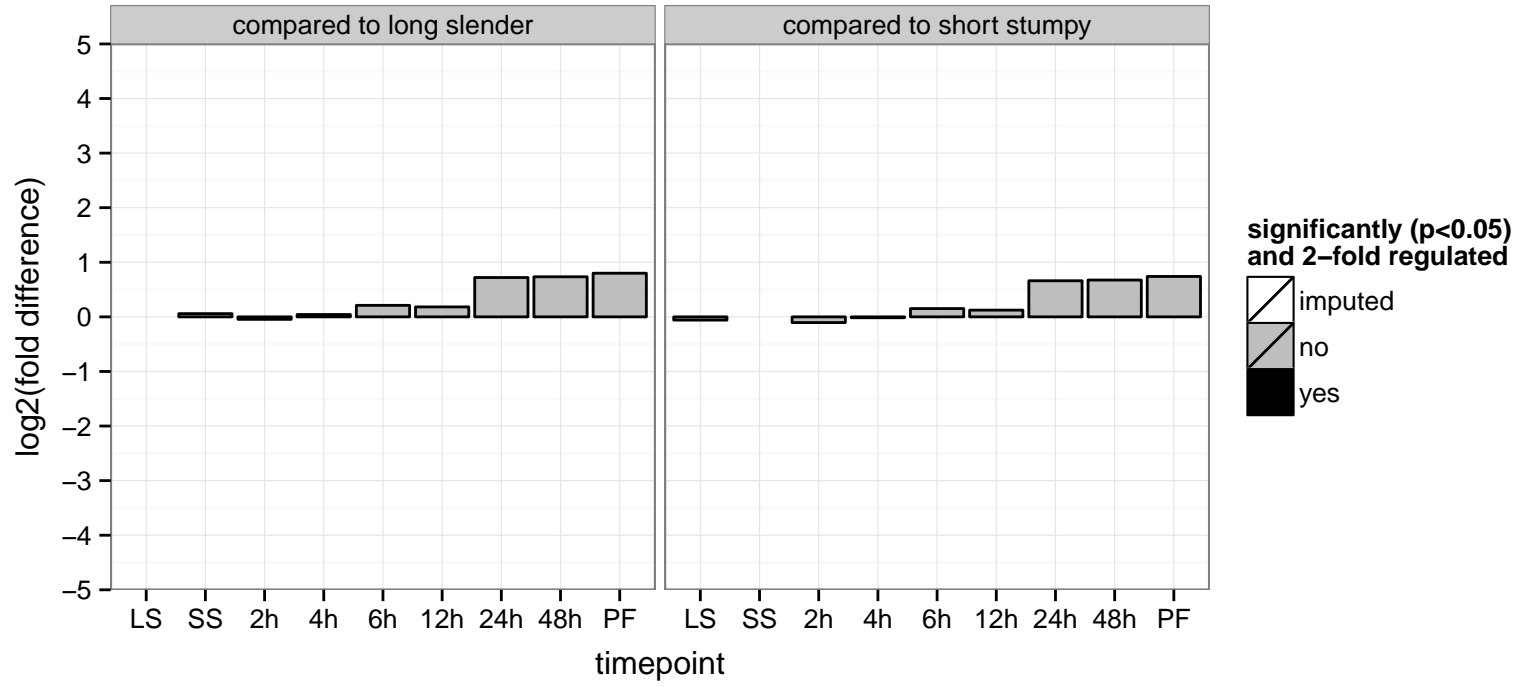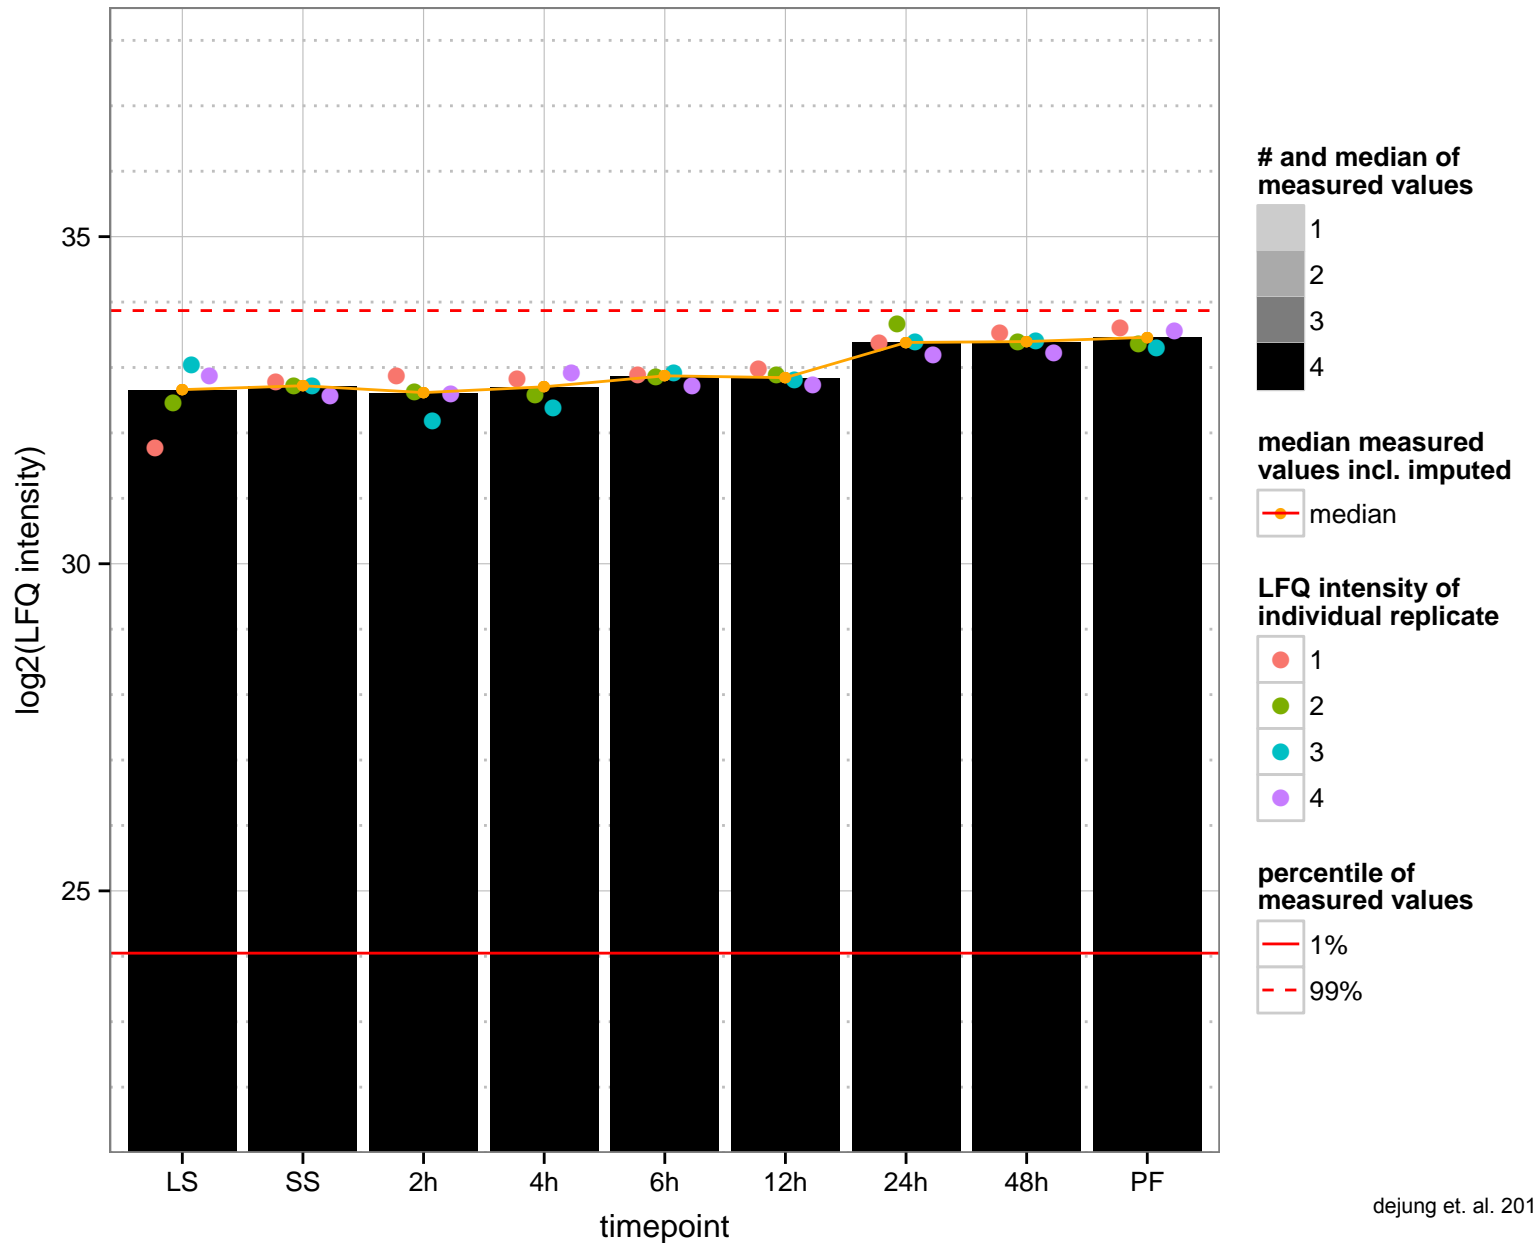

cyclin 2, G1 cyclin (CYC2)

Tb927.11.14080

AGOF: cyclin binding, cyclin-dependent protein kinase regulator activity, protein binding

AGOC: cyclin-dependent protein kinase holoenzyme complex

AGOP: cell cycle

PGOF: protein kinase binding

PGOC: null

PGOP: regulation of cyclin-dependent protein kinase activity

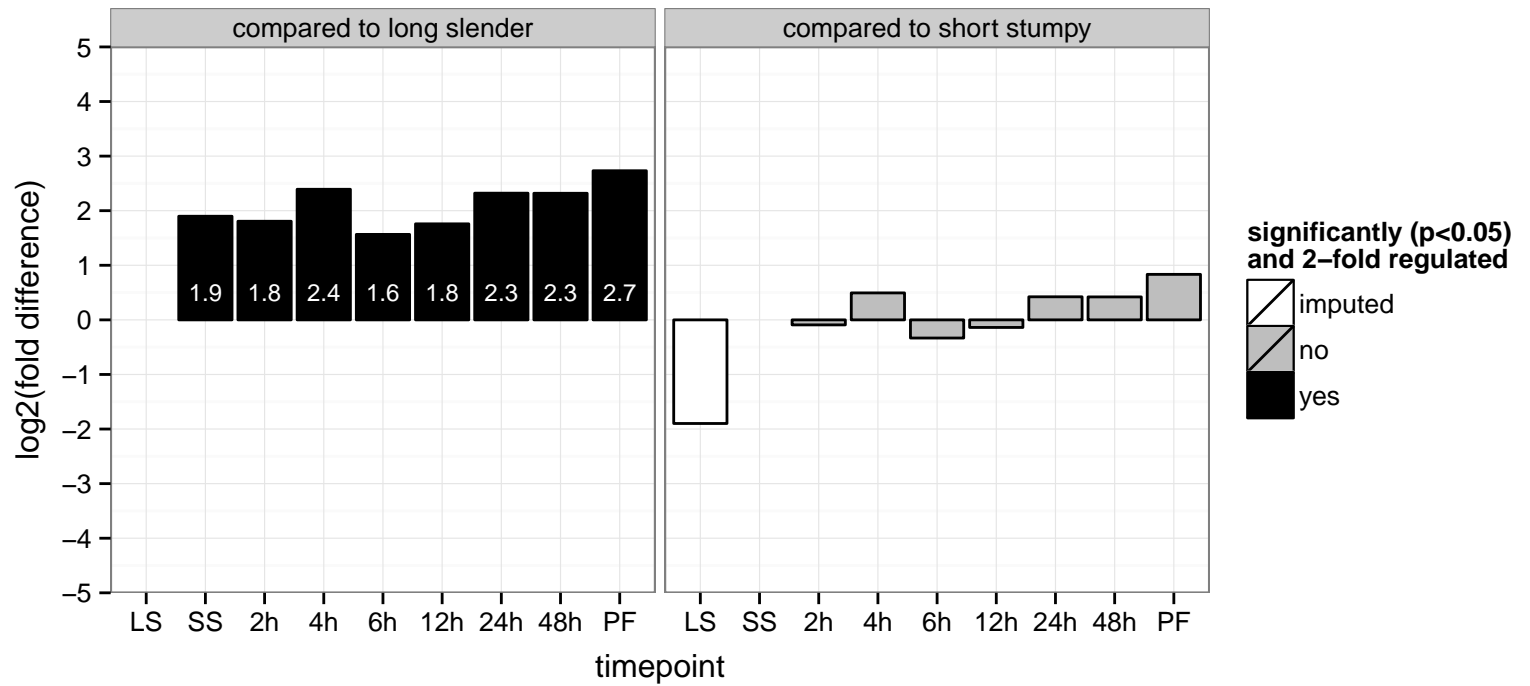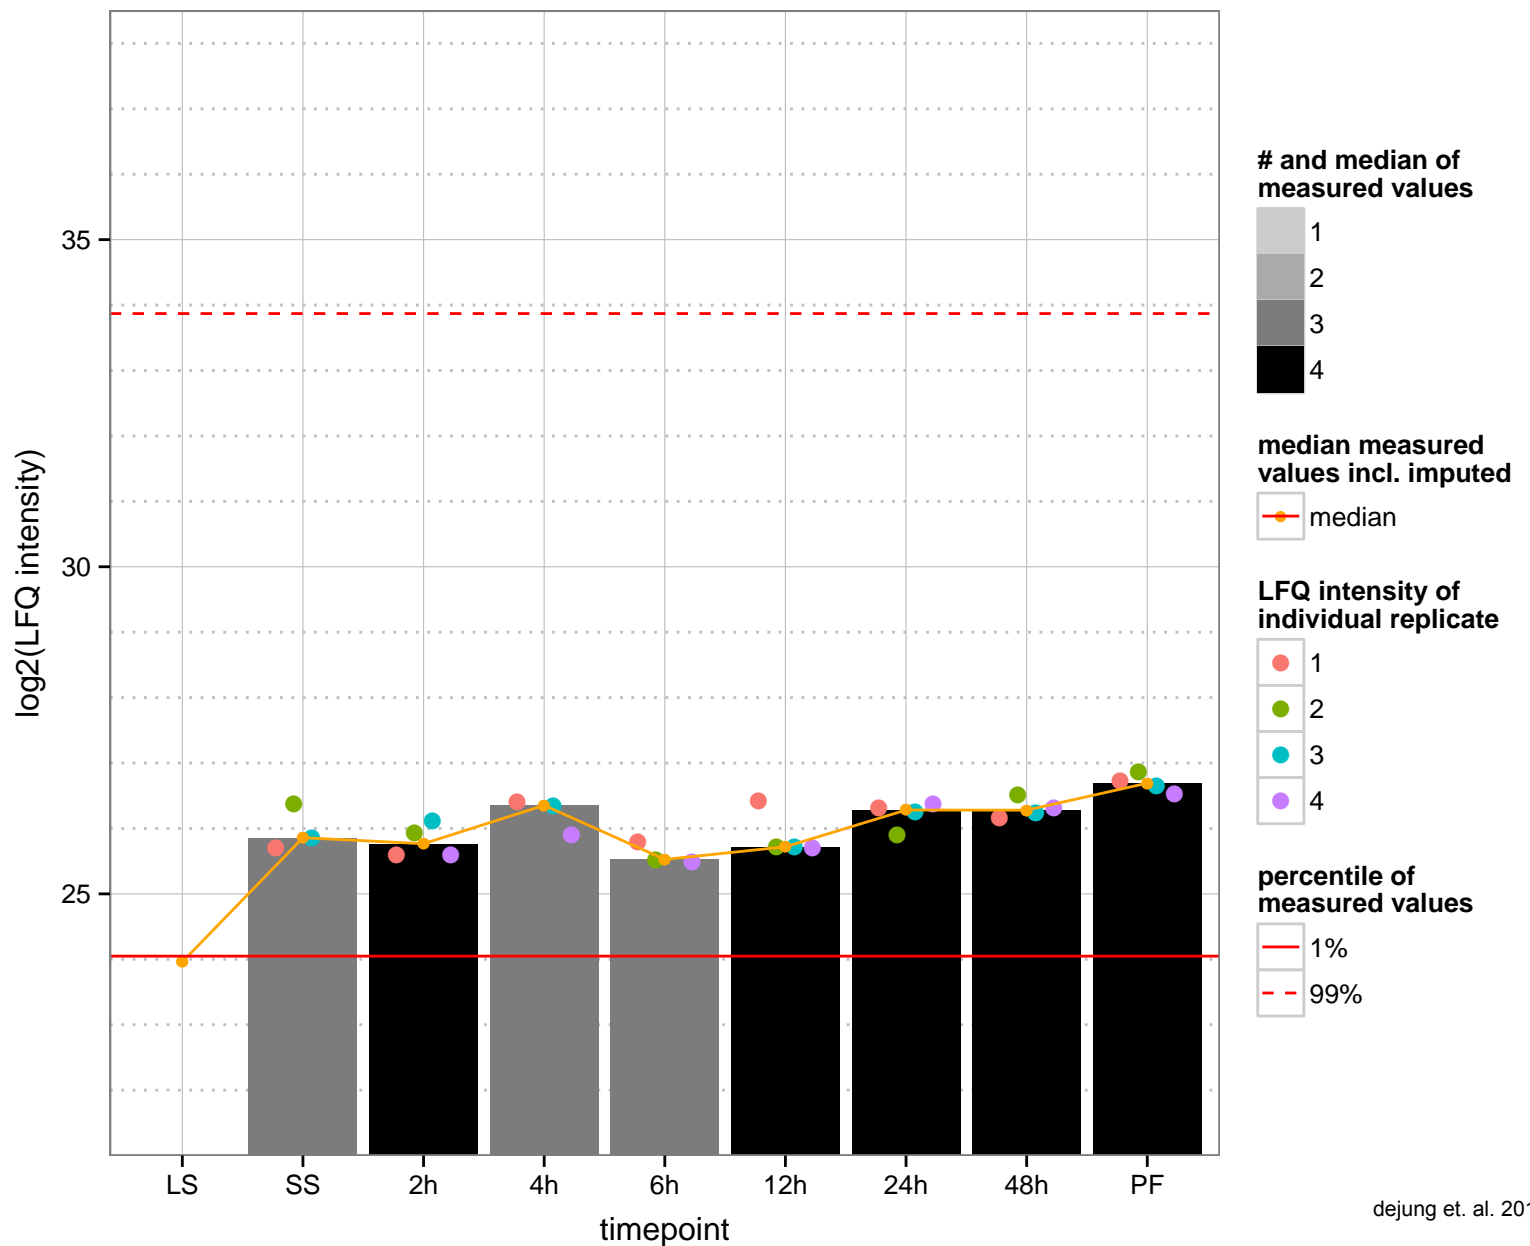

hypothetical protein, conserved  
 Tb927.11.14090  
 AGOF: null  
 AGOC: null  
 AGOP: null  
 PGO: null  
 PGO: null  
 PGO: null

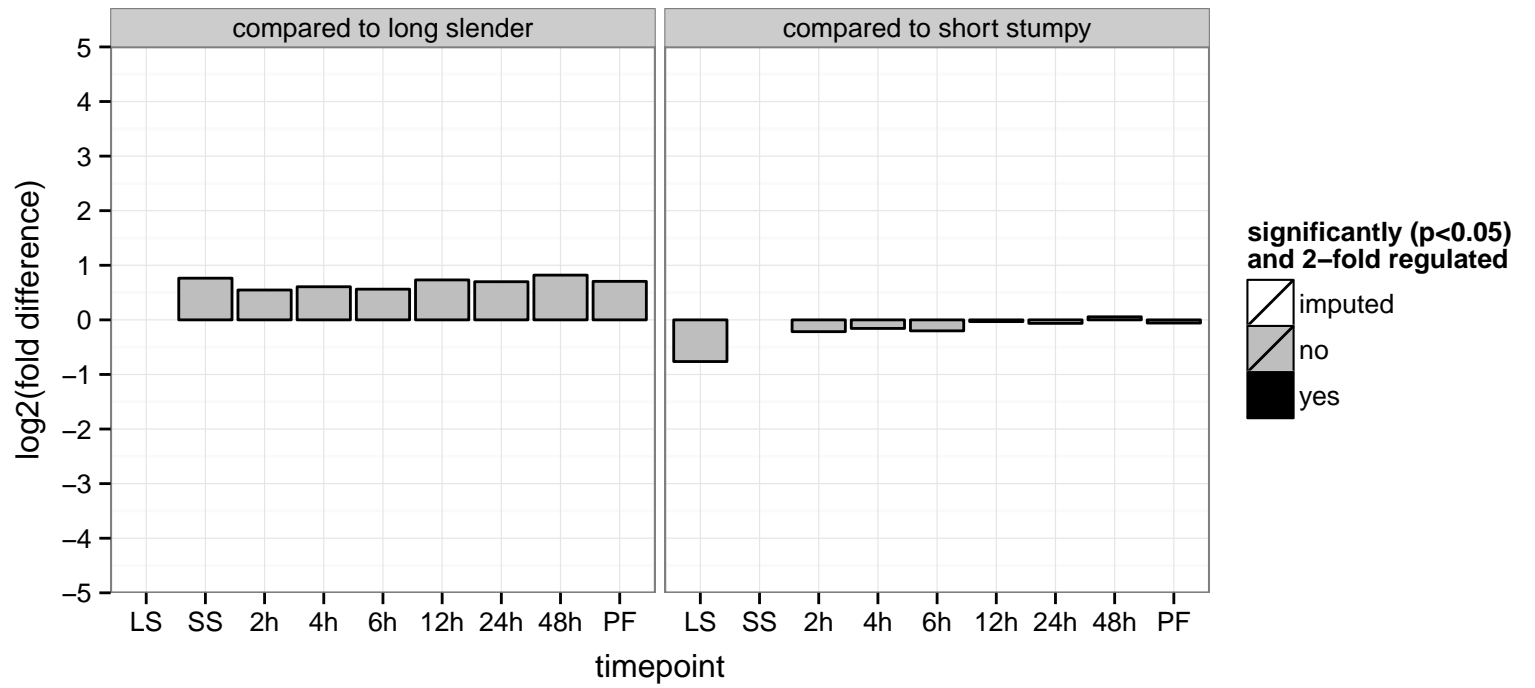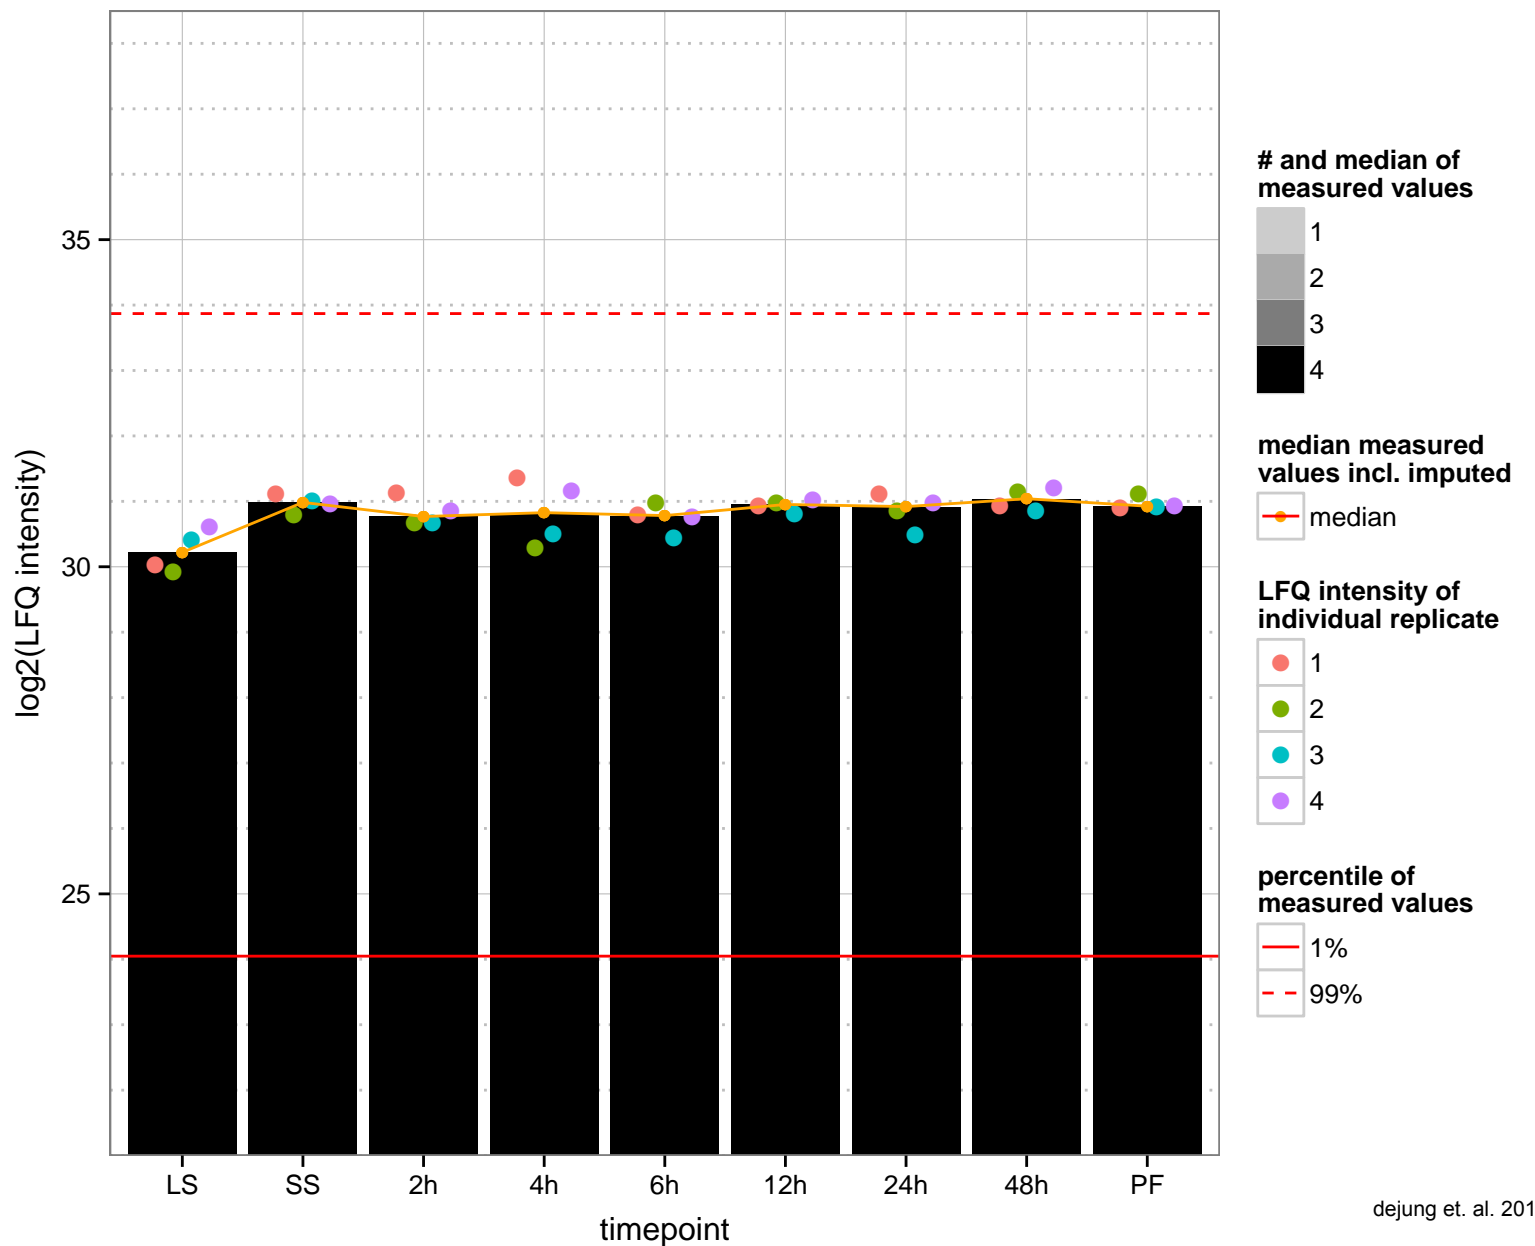

class I transcription factor A, subunit 3 (CITFA-3)  
 Tb927.11.1410  
 AGOF: null  
 AGOC: null  
 AGOP: null  
 PGO: null  
 PGO: null  
 PGO: null

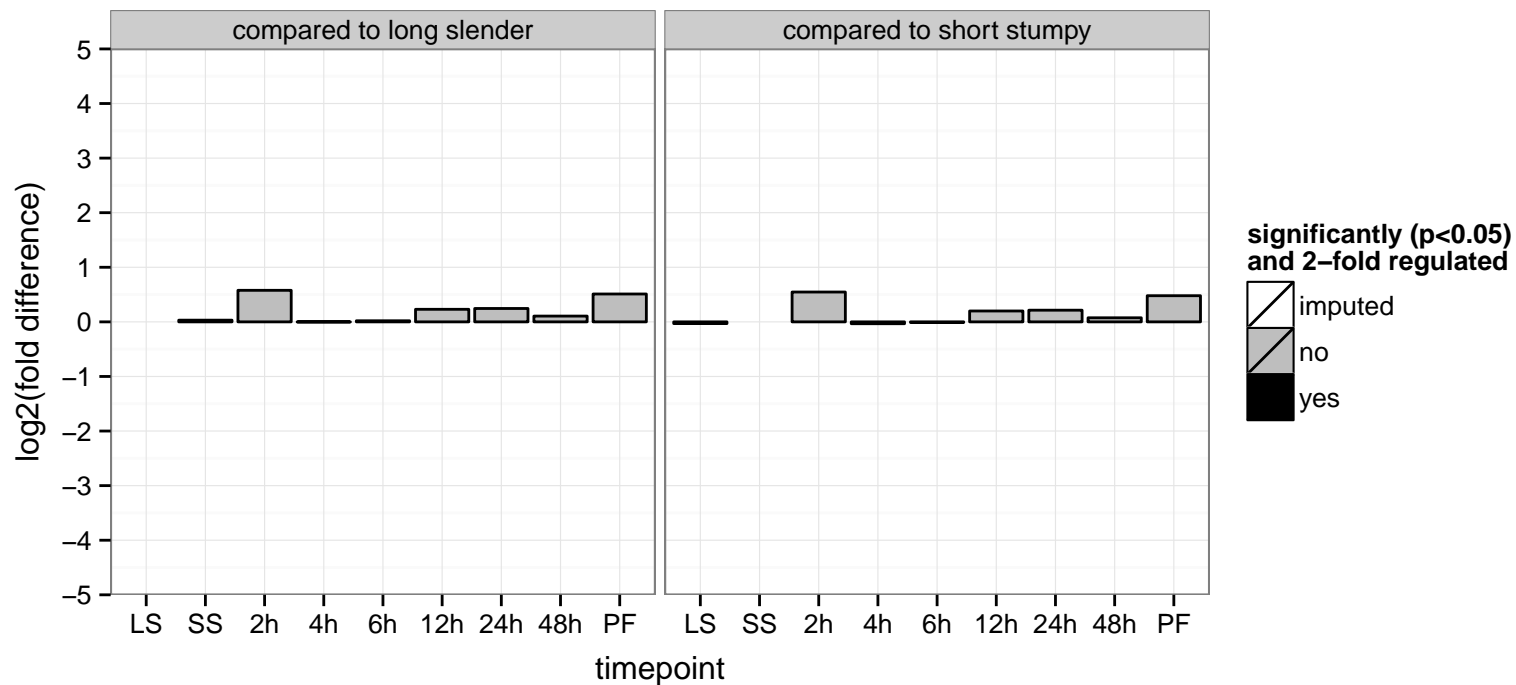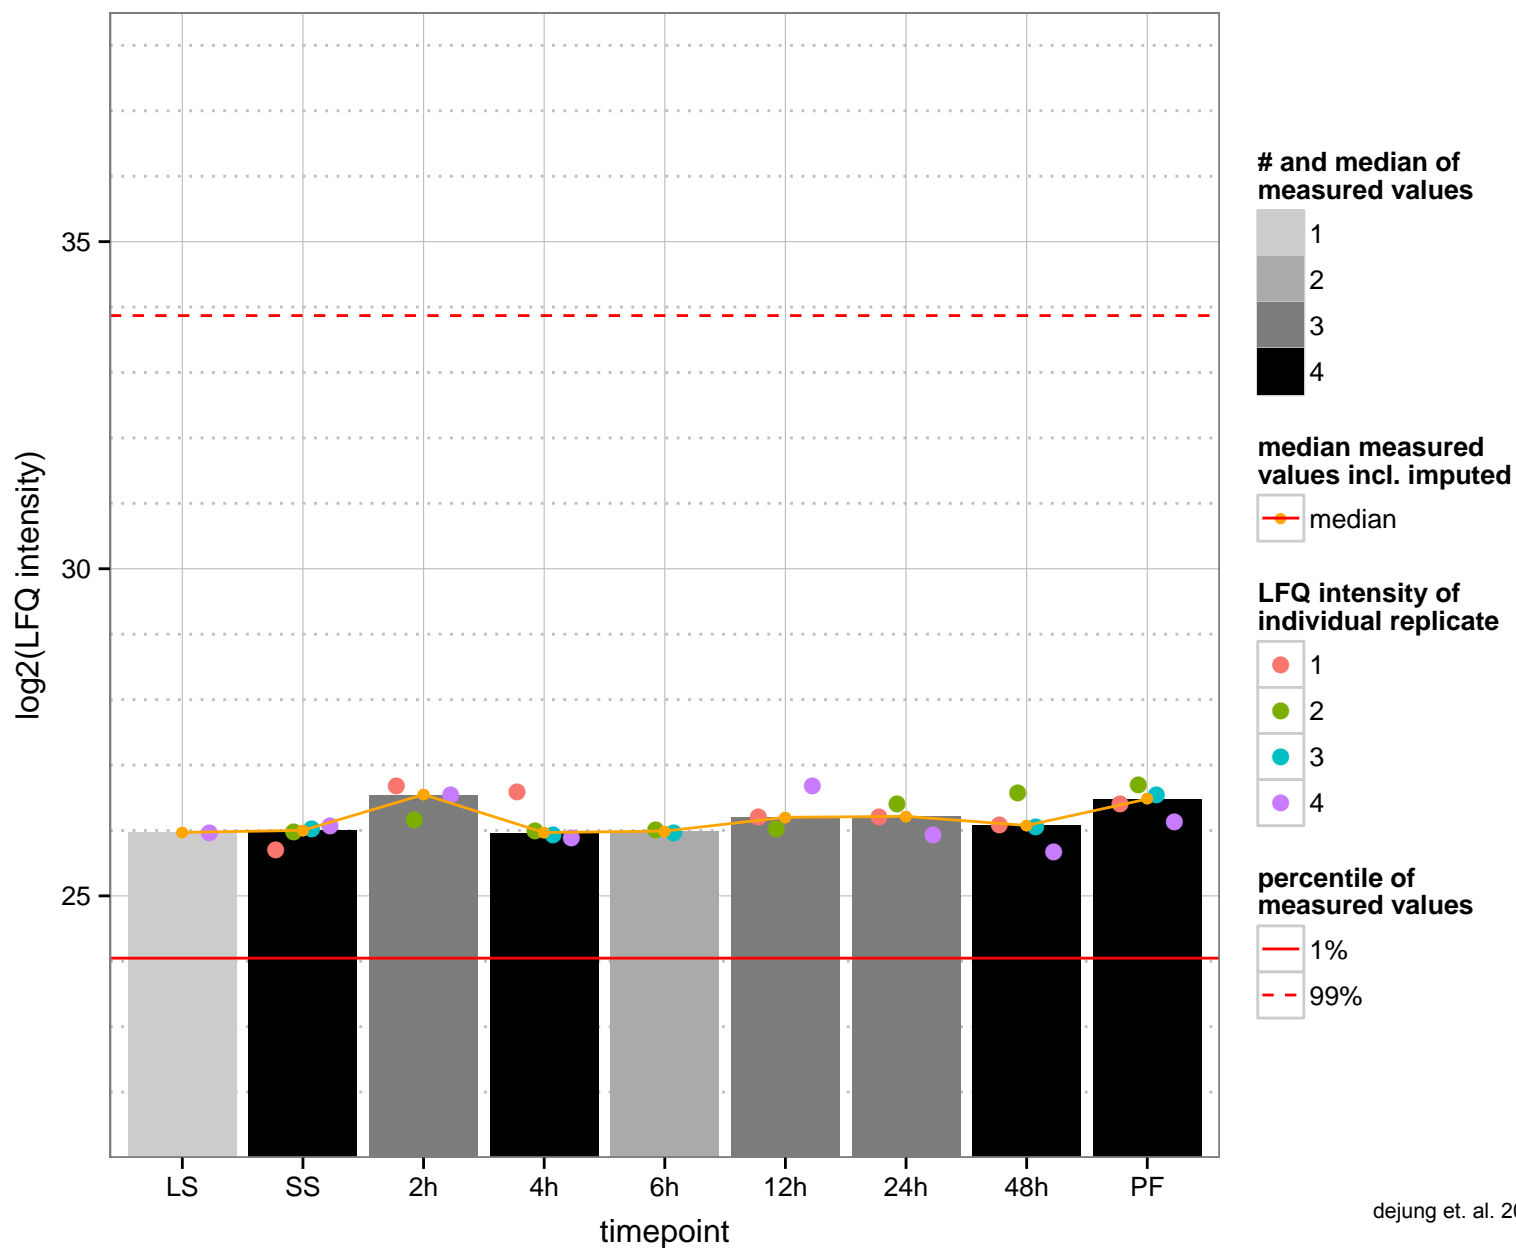

DRBD4 (DRBD4)  
 Tb927.11.14100  
 AGOF: RNA binding  
 AGOC: null  
 AGOP: RNA processing  
 PGO: nucleic acid binding  
 PGO: null  
 PGOP: null

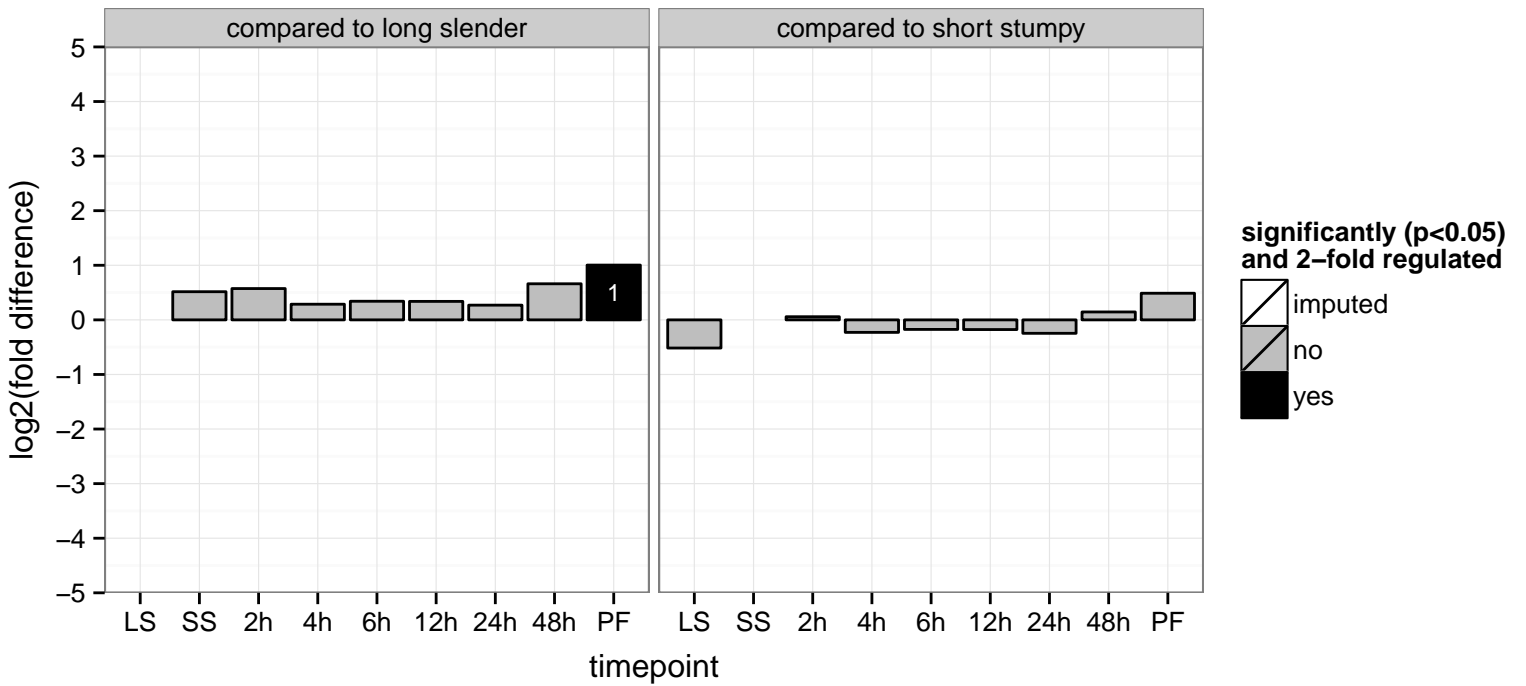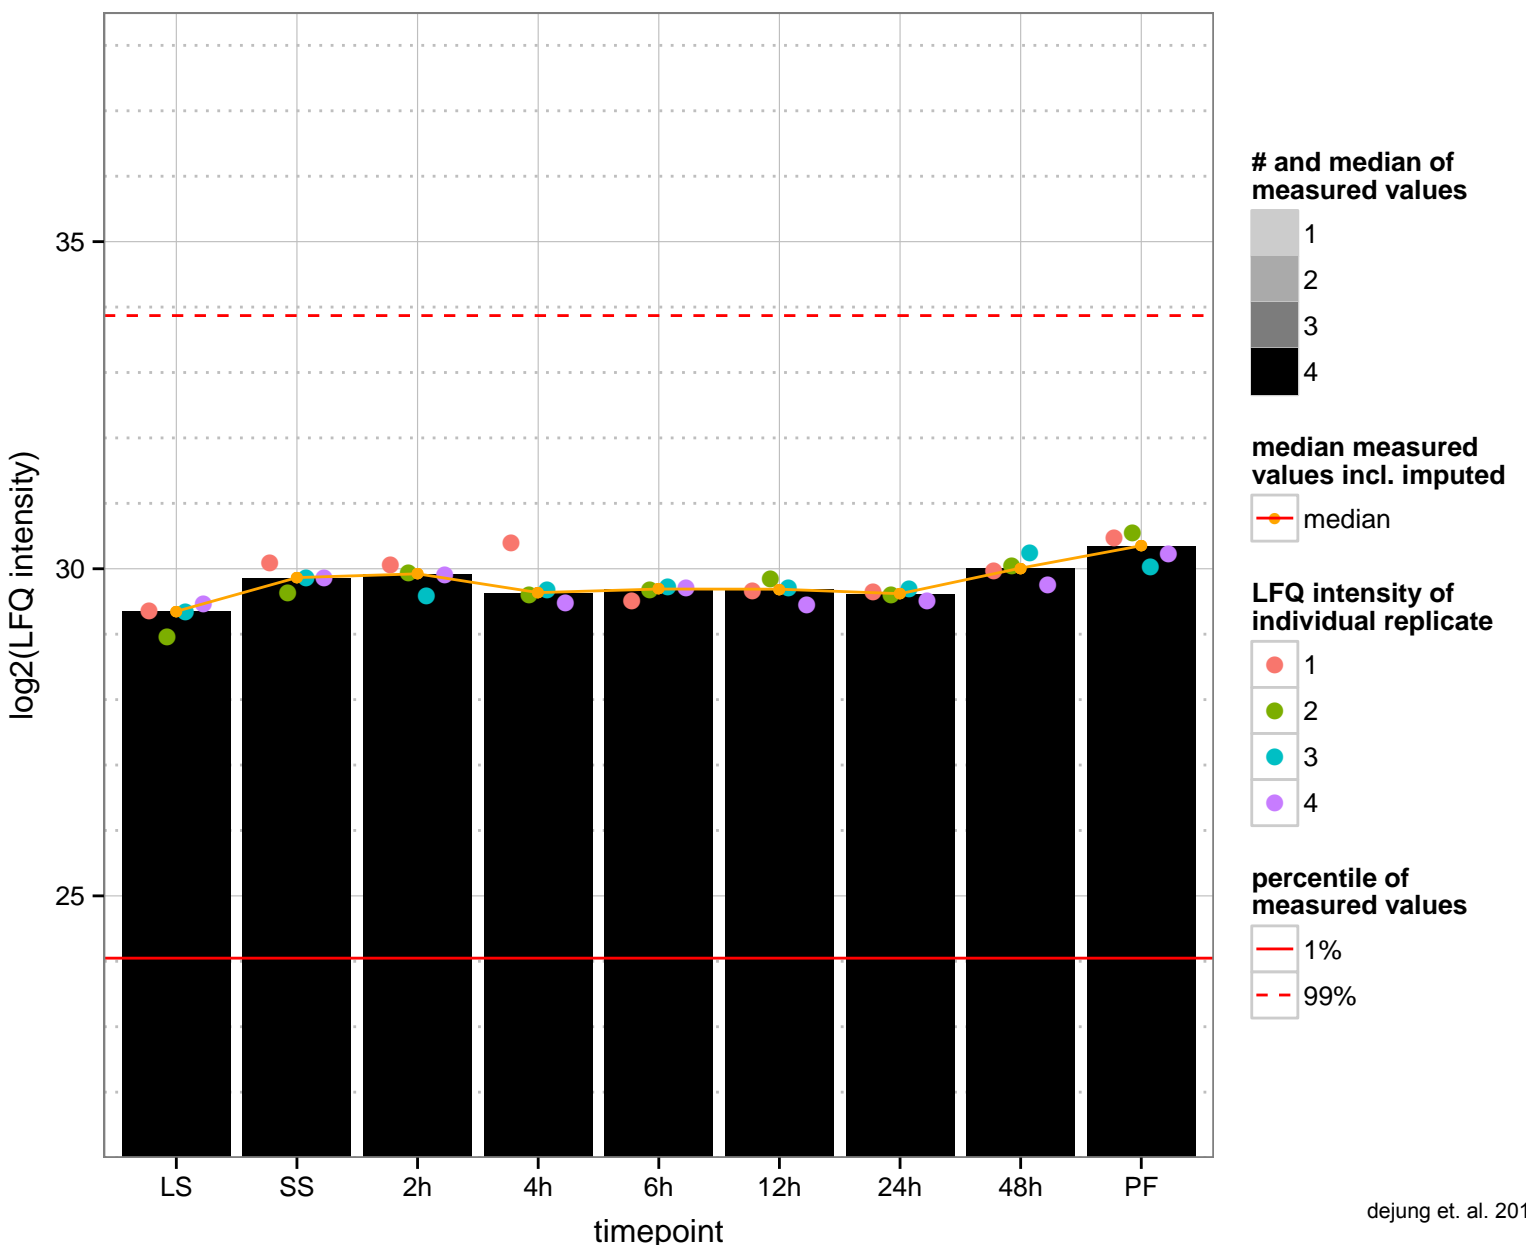

phenylalanyl-tRNA synthetase alpha chain, putative

Tb927.11.14120

AGOF: ATP binding, phenylalanine-tRNA ligase activity, tRNA binding

AGOC: cytoplasm

AGOP: phenylalanyl-tRNA aminoacylation, translation

PGOF: ATP binding, aminoacyl-tRNA ligase activity, nucleotide binding, phenylalanine-tRNA ligase activity, tRNA binding

PGOC: cytoplasm

PGOP: phenylalanyl-tRNA aminoacylation, tRNA aminoacylation, tRNA aminoacylation for protein translation

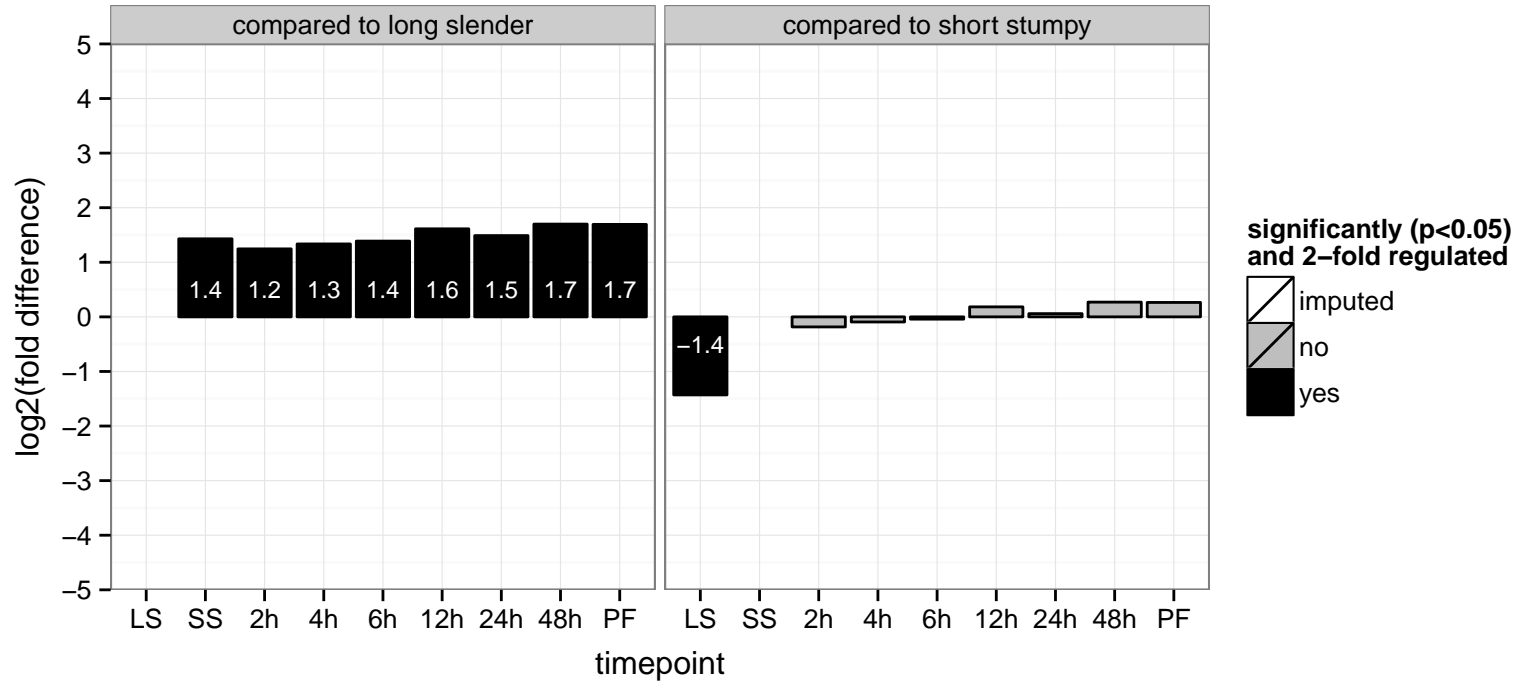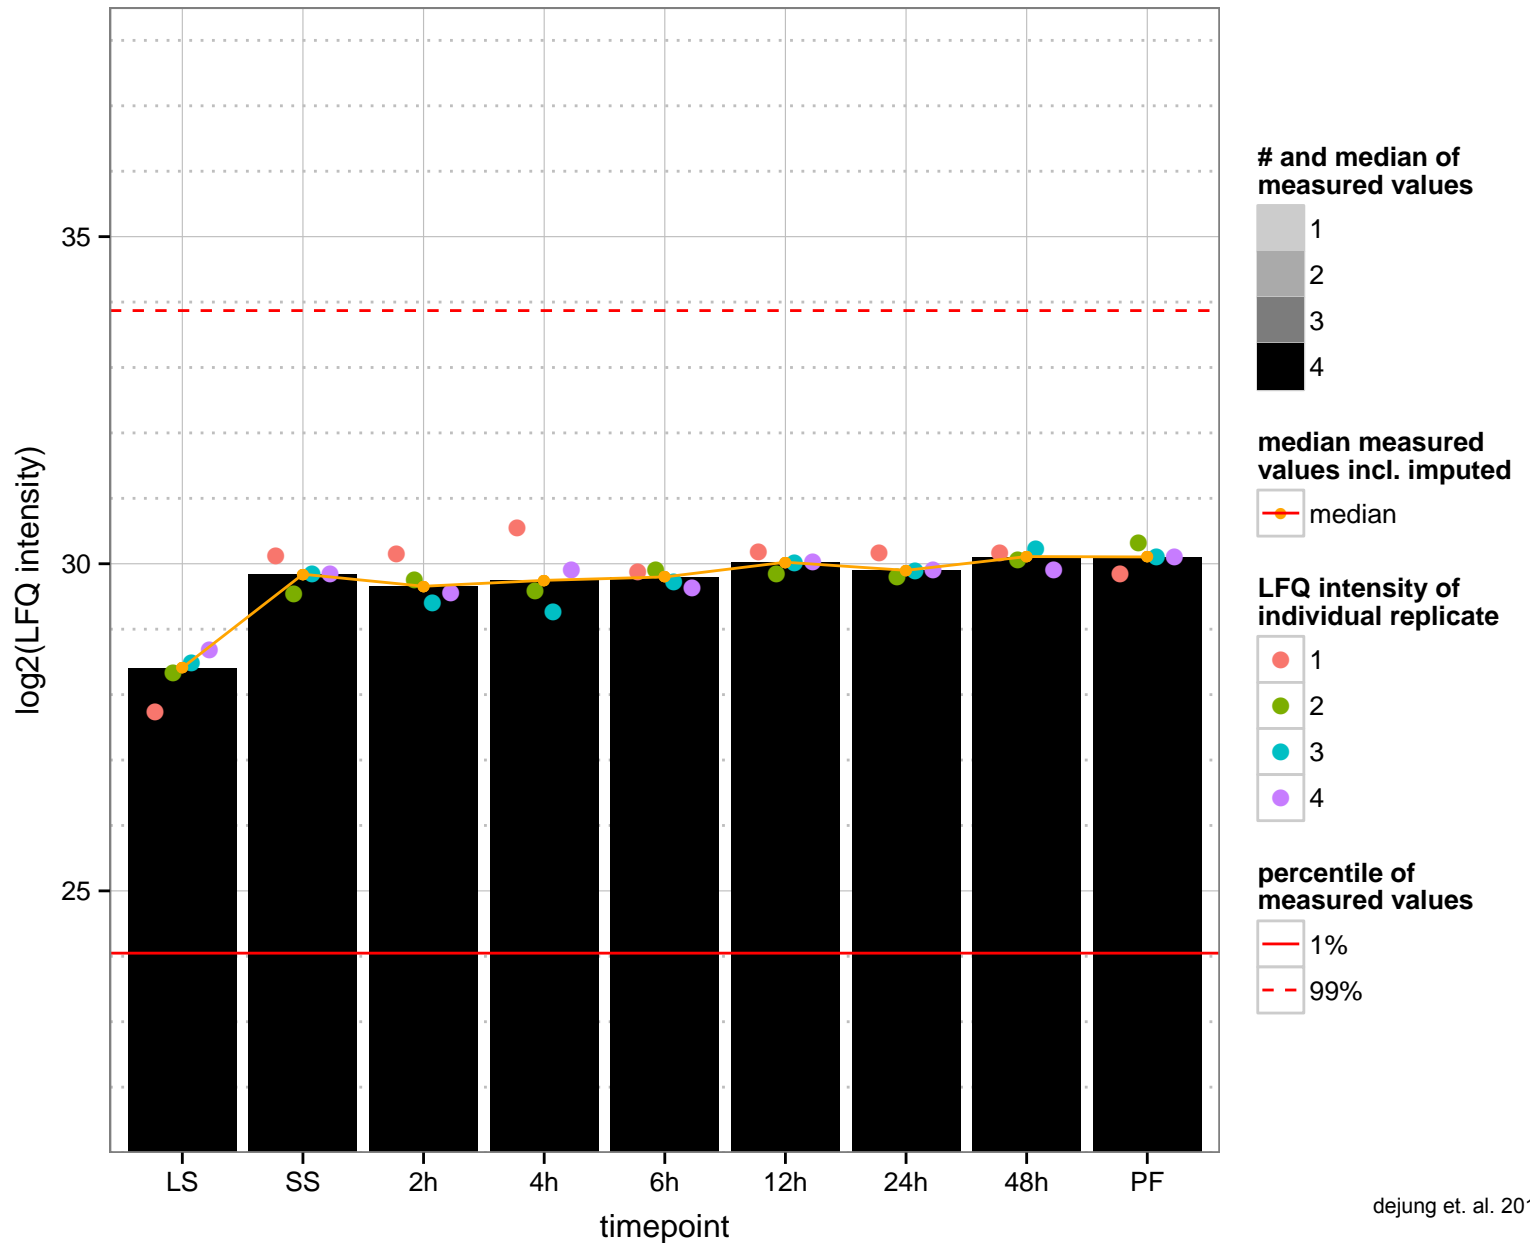



ethanolamine-phosphate cytidyltransferase (TbECT)

Tb927.11.14140

AGOF: ethanolamine-phosphate cytidyltransferase activity, nucleotidyltransferase activity

AGOC: cytosol

AGOP: ethanolamine biosynthetic process, phosphatidylethanolamine biosynthetic process, phospholipid biosynthetic process

PGOF: catalytic activity, nucleotidyltransferase activity

PGOC: null

PGOP: biosynthetic process

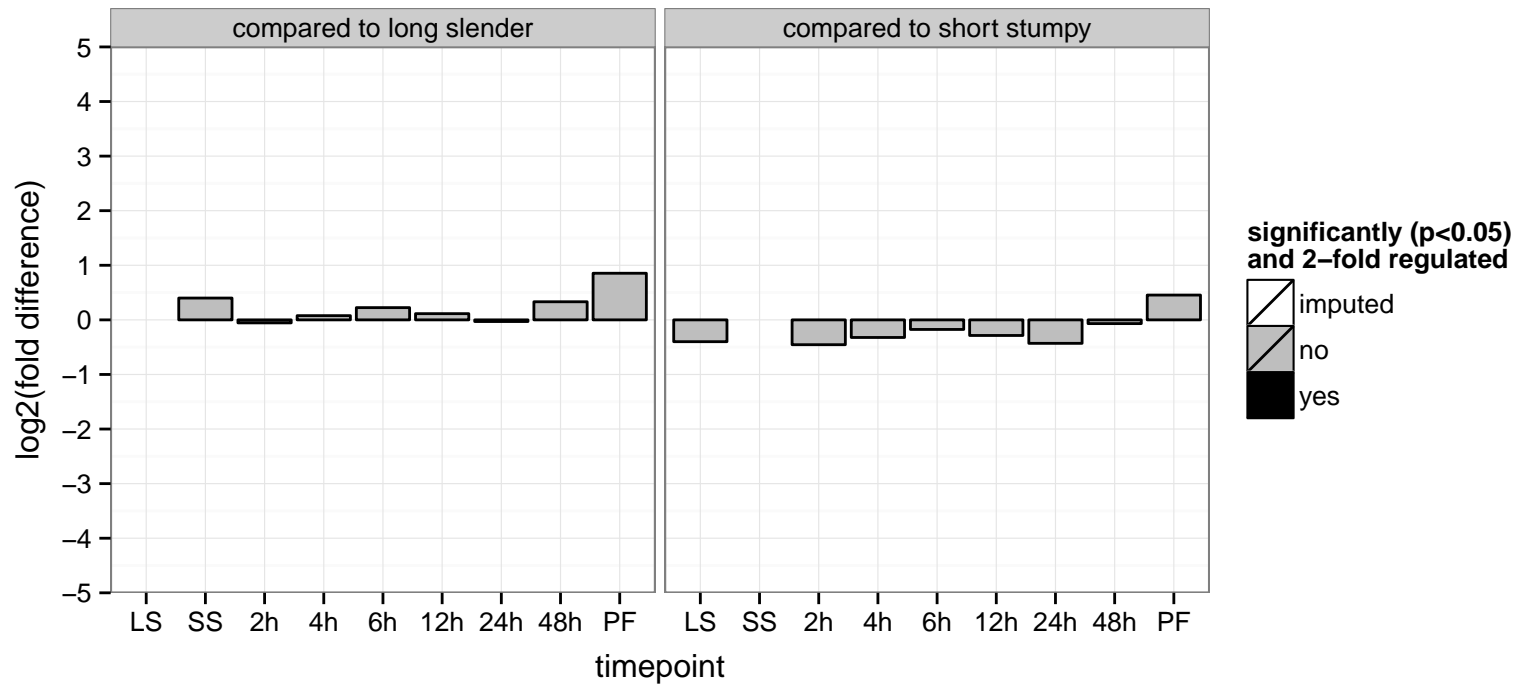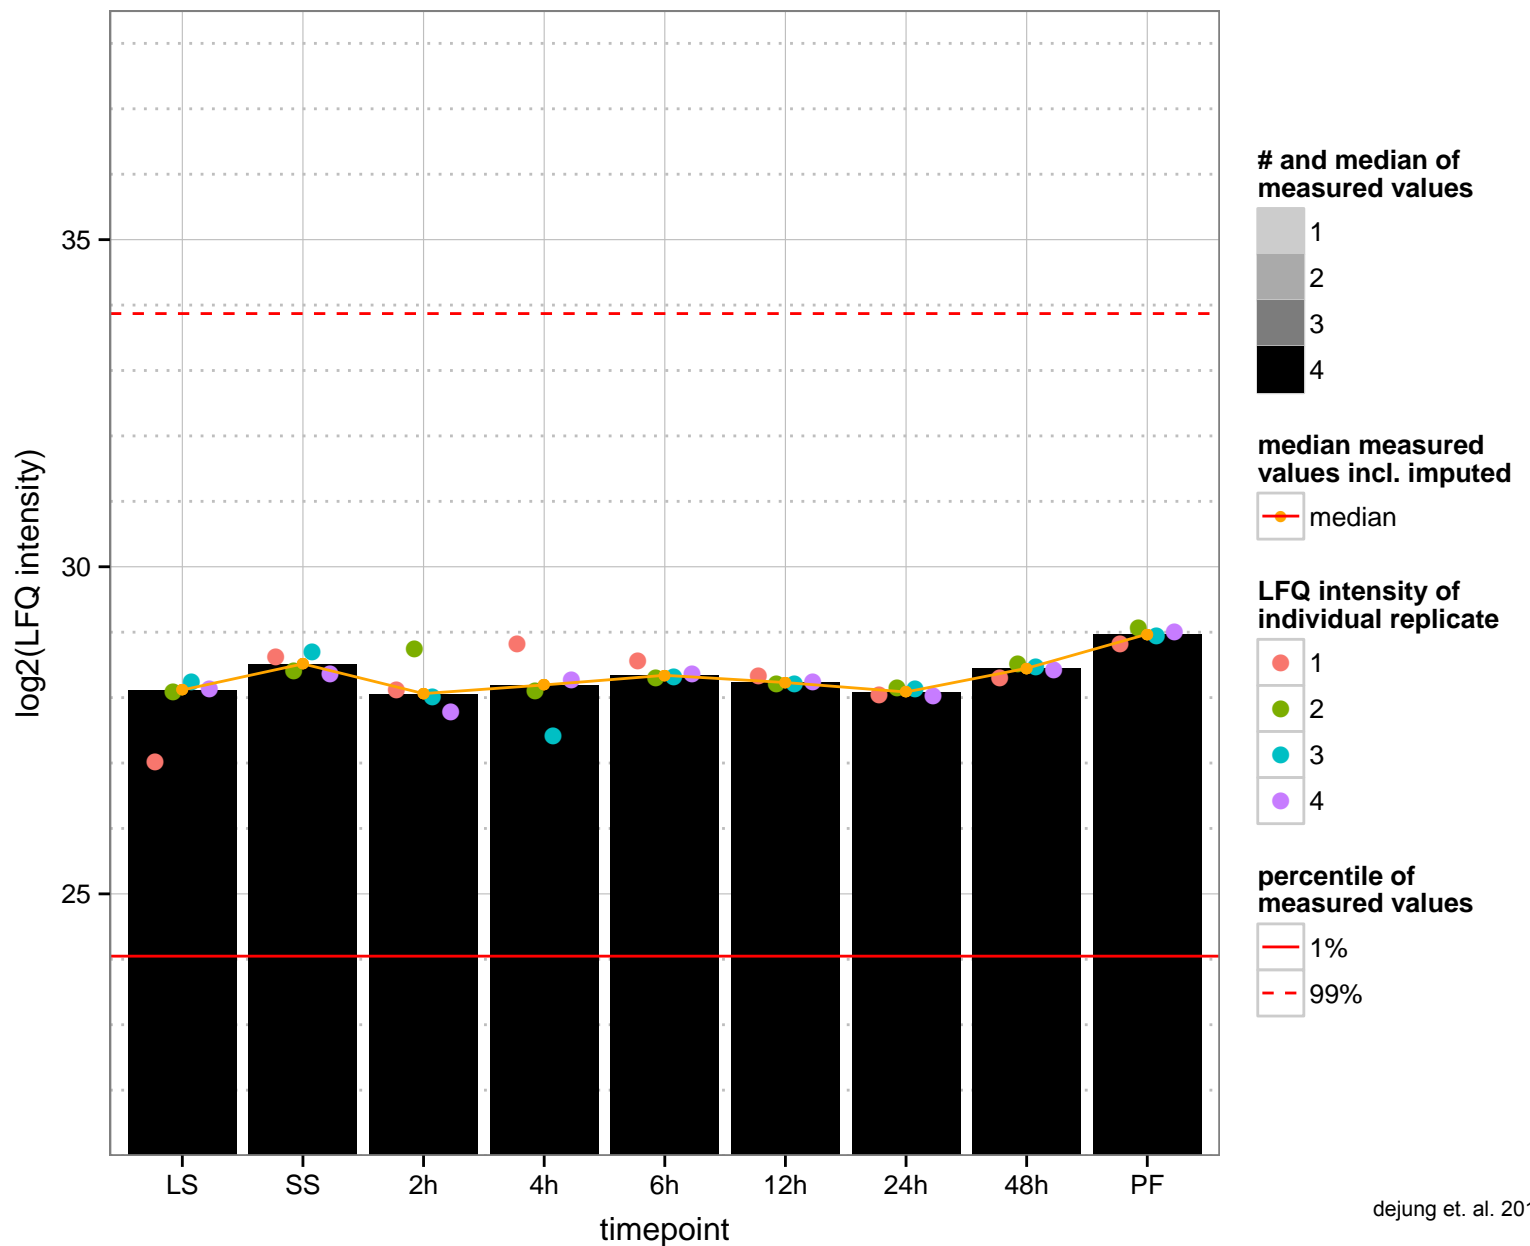

hypothetical protein, conserved  
 Tb927.11.14190  
 AGOF: hydrolase activity, acting on ester bonds, nucleic acid binding  
 AGOC: RNA-induced silencing complex  
 AGOP: RNA interference  
 PGOF: hydrolase activity, acting on ester bonds, nucleic acid binding  
 PGO: RNA-induced silencing complex  
 PGO: gene silencing by RNA

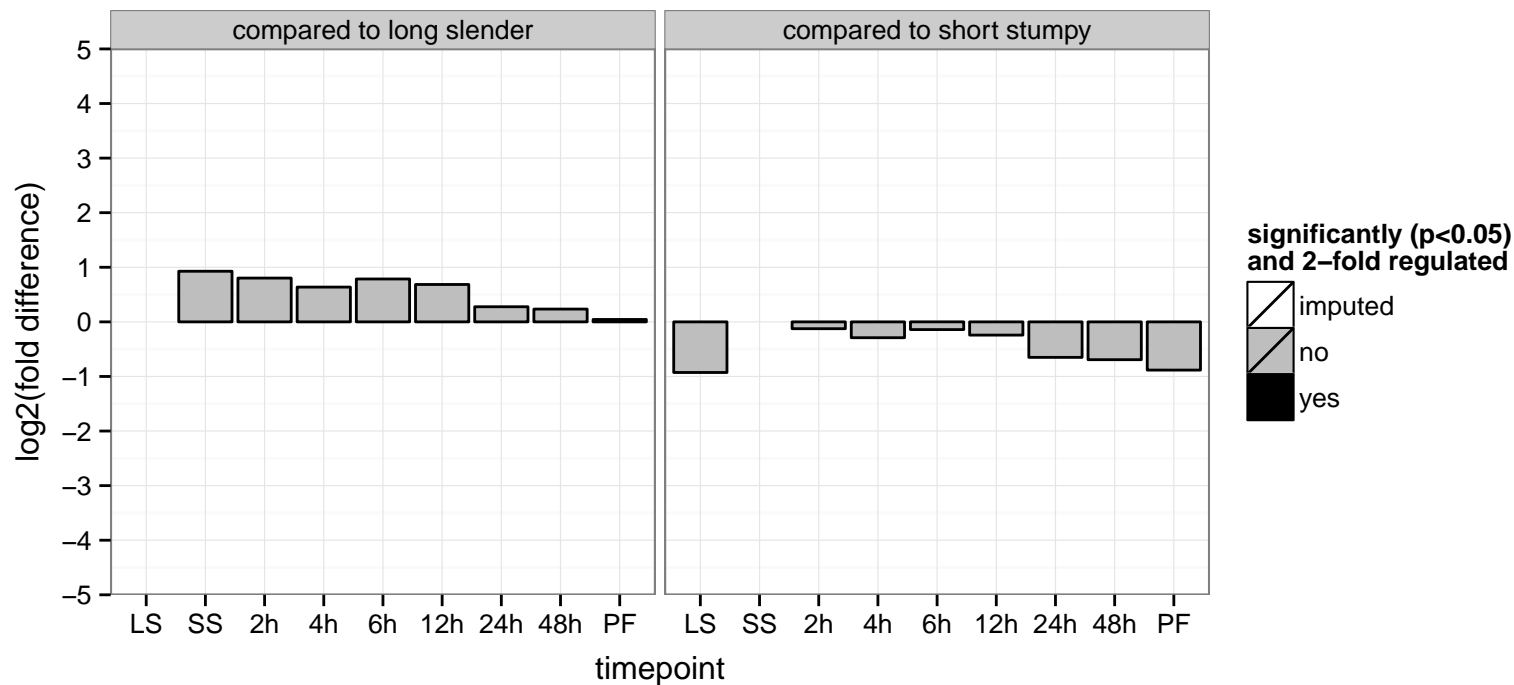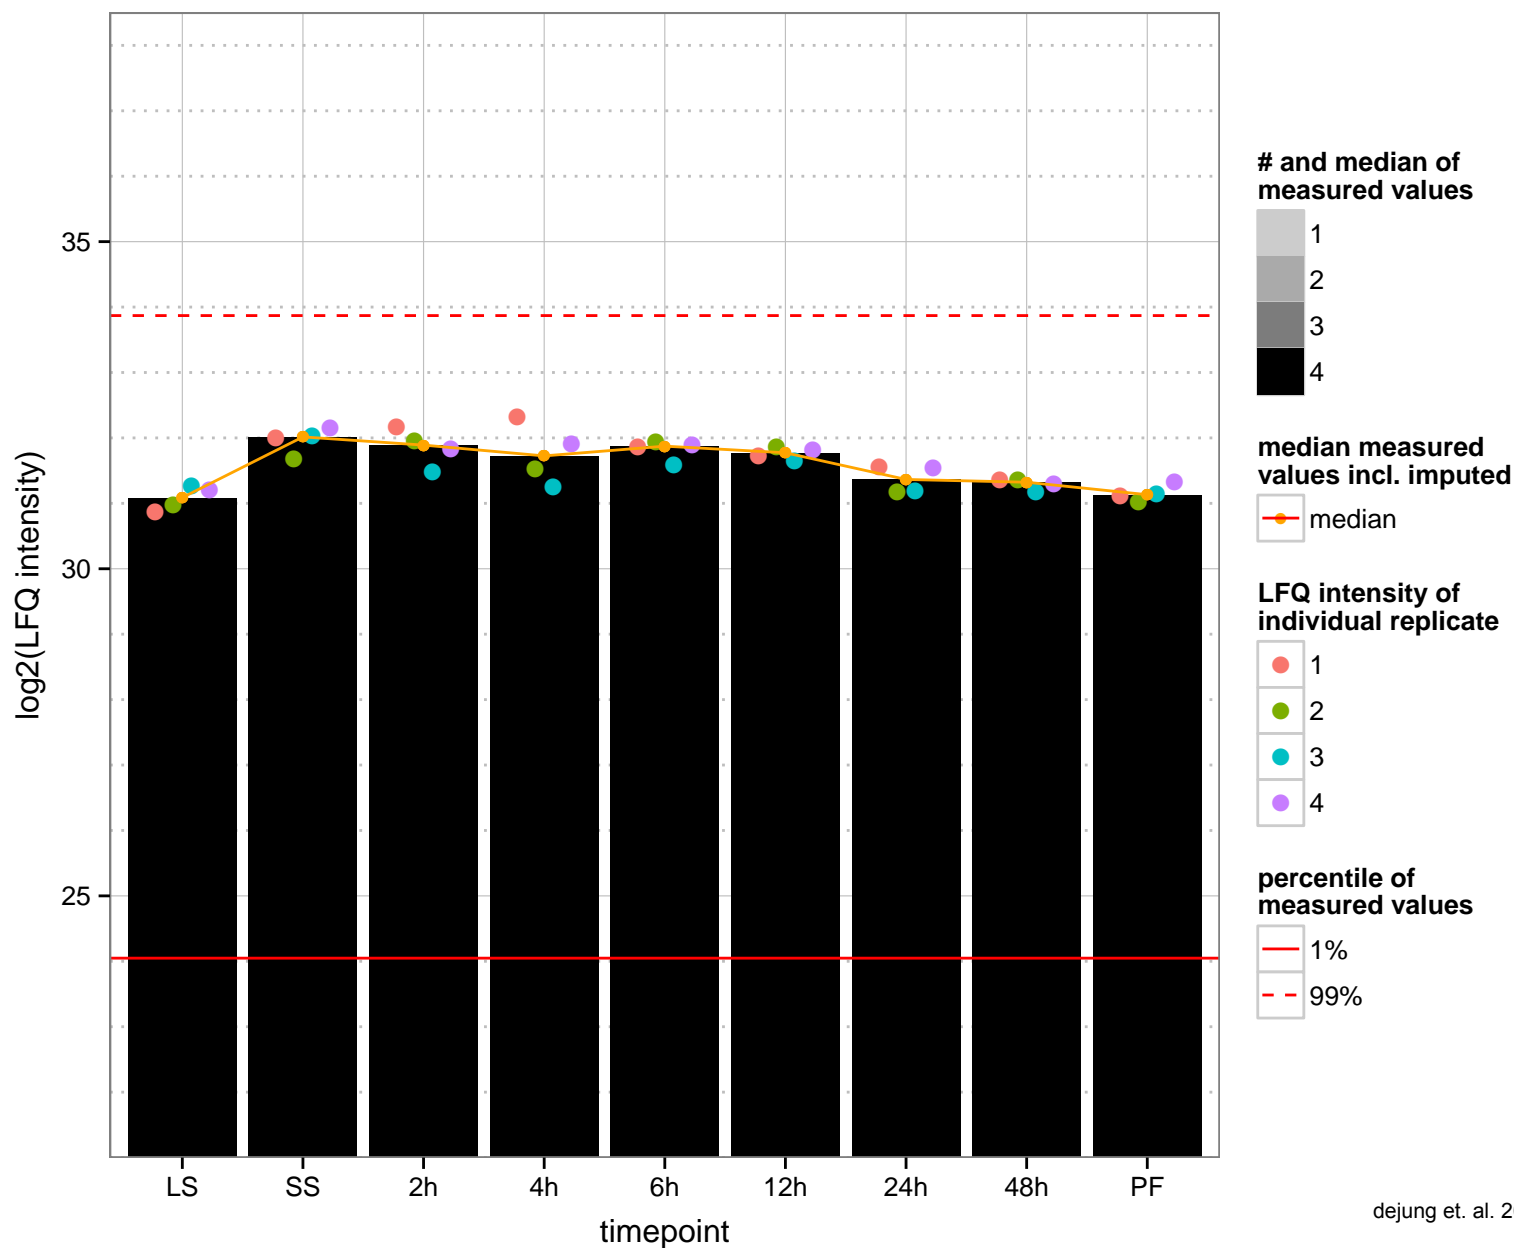

hypothetical protein, conserved  
 Tb927.11.1420  
 AGOF: null  
 AGOC: null  
 AGOP: null  
 PGOF: protein binding  
 PGO: null  
 PGOP: null

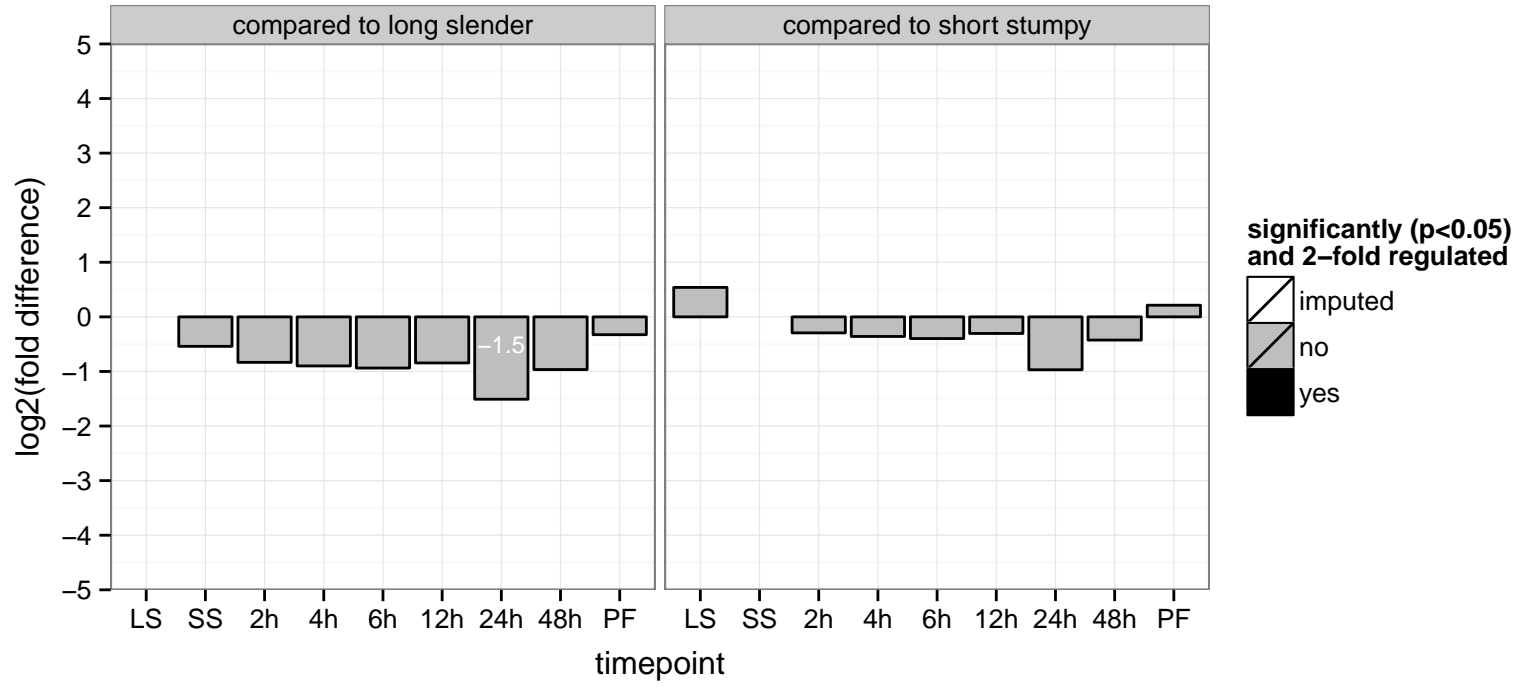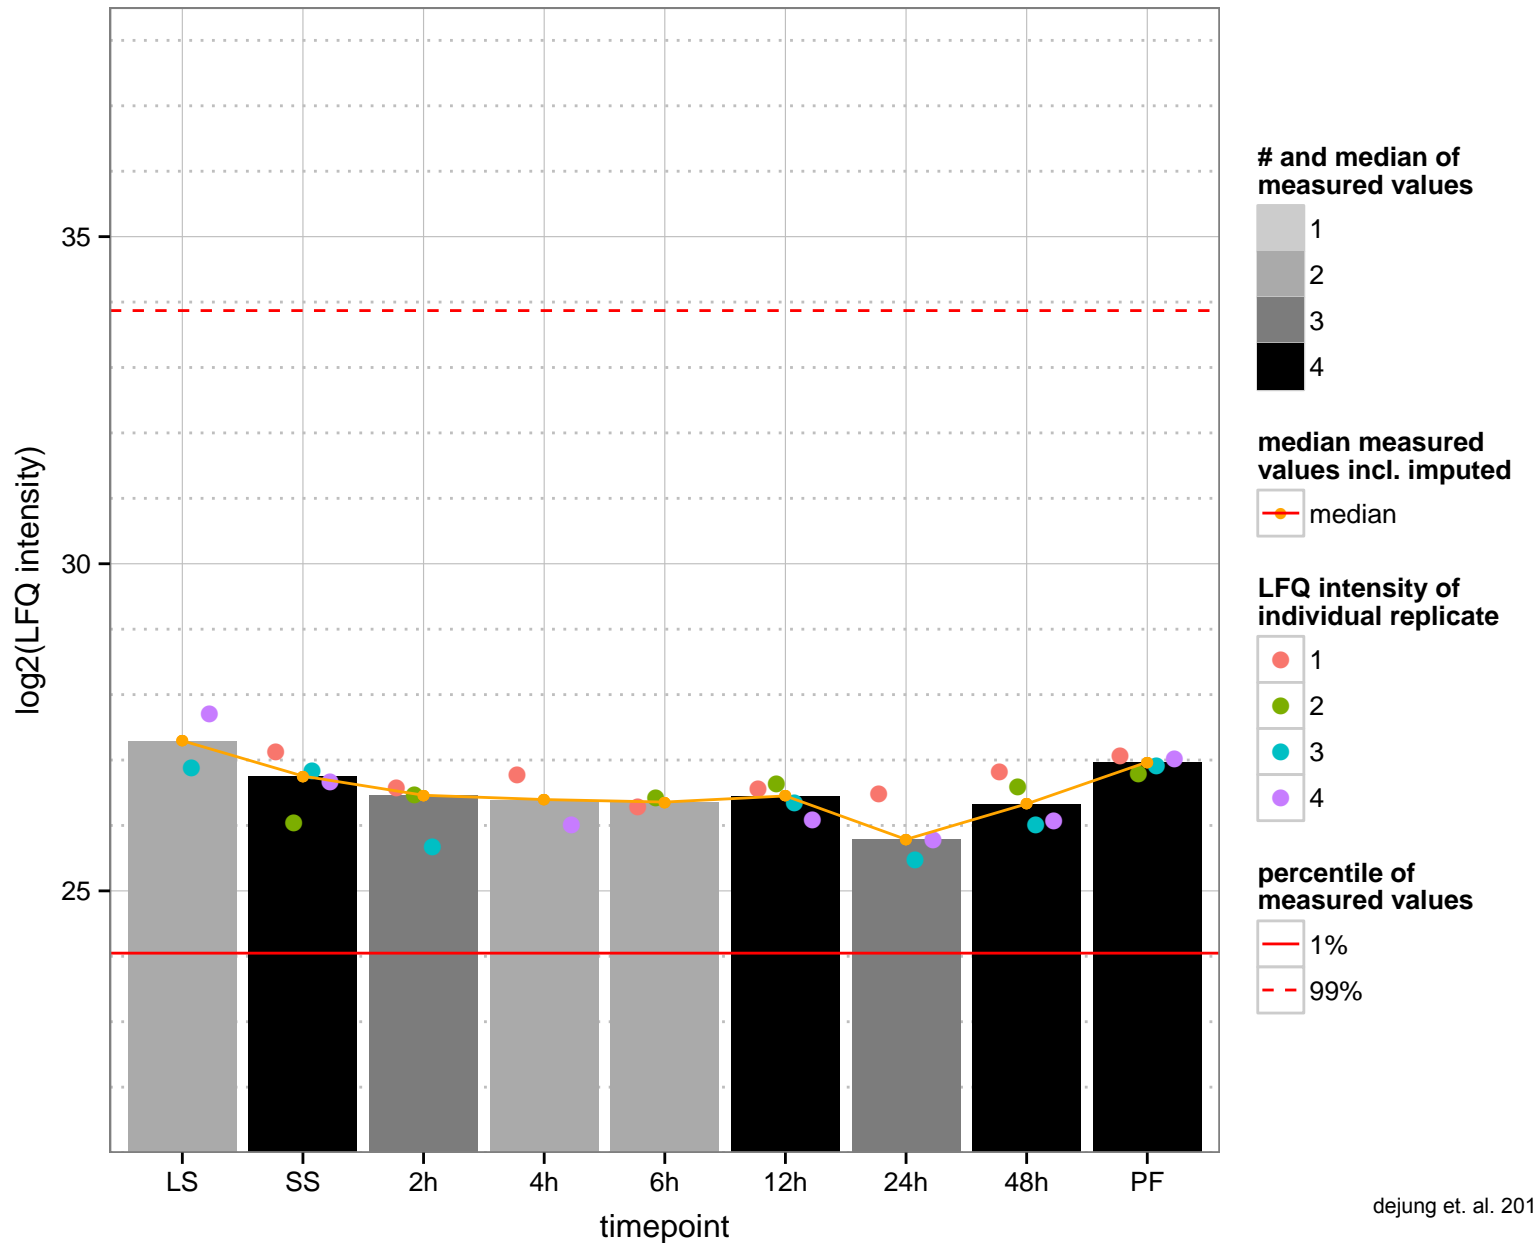

T-complex protein 1, epsilon subunit, putative (TCP-1-epsilon)  
 Tb927.11.14250  
 AGOF: ATP binding, unfolded protein binding  
 AGOC: chaperonin-containing T-complex  
 AGOP: cellular protein metabolic process, regulation of cell cycle  
 PGO: ATP binding, unfolded protein binding  
 PGO: null  
 PGO: cellular protein metabolic process, protein folding

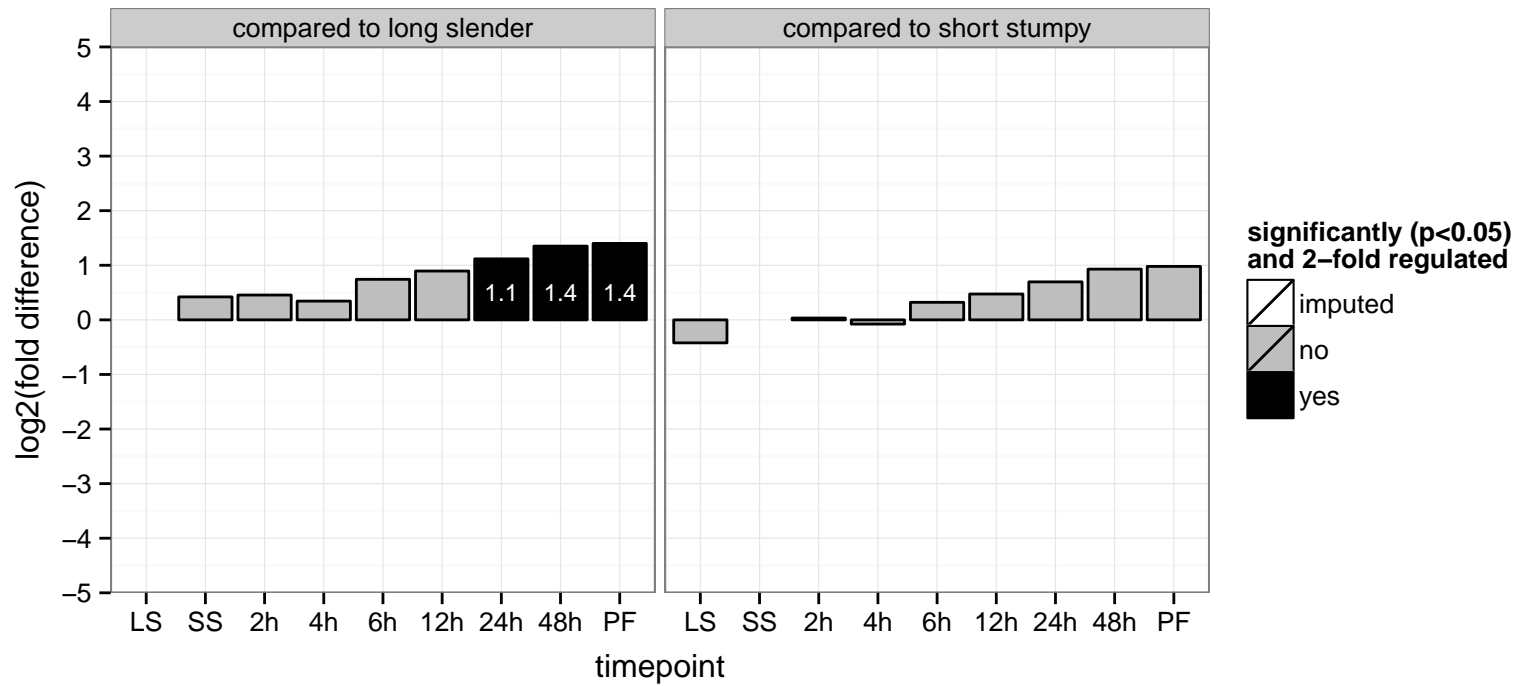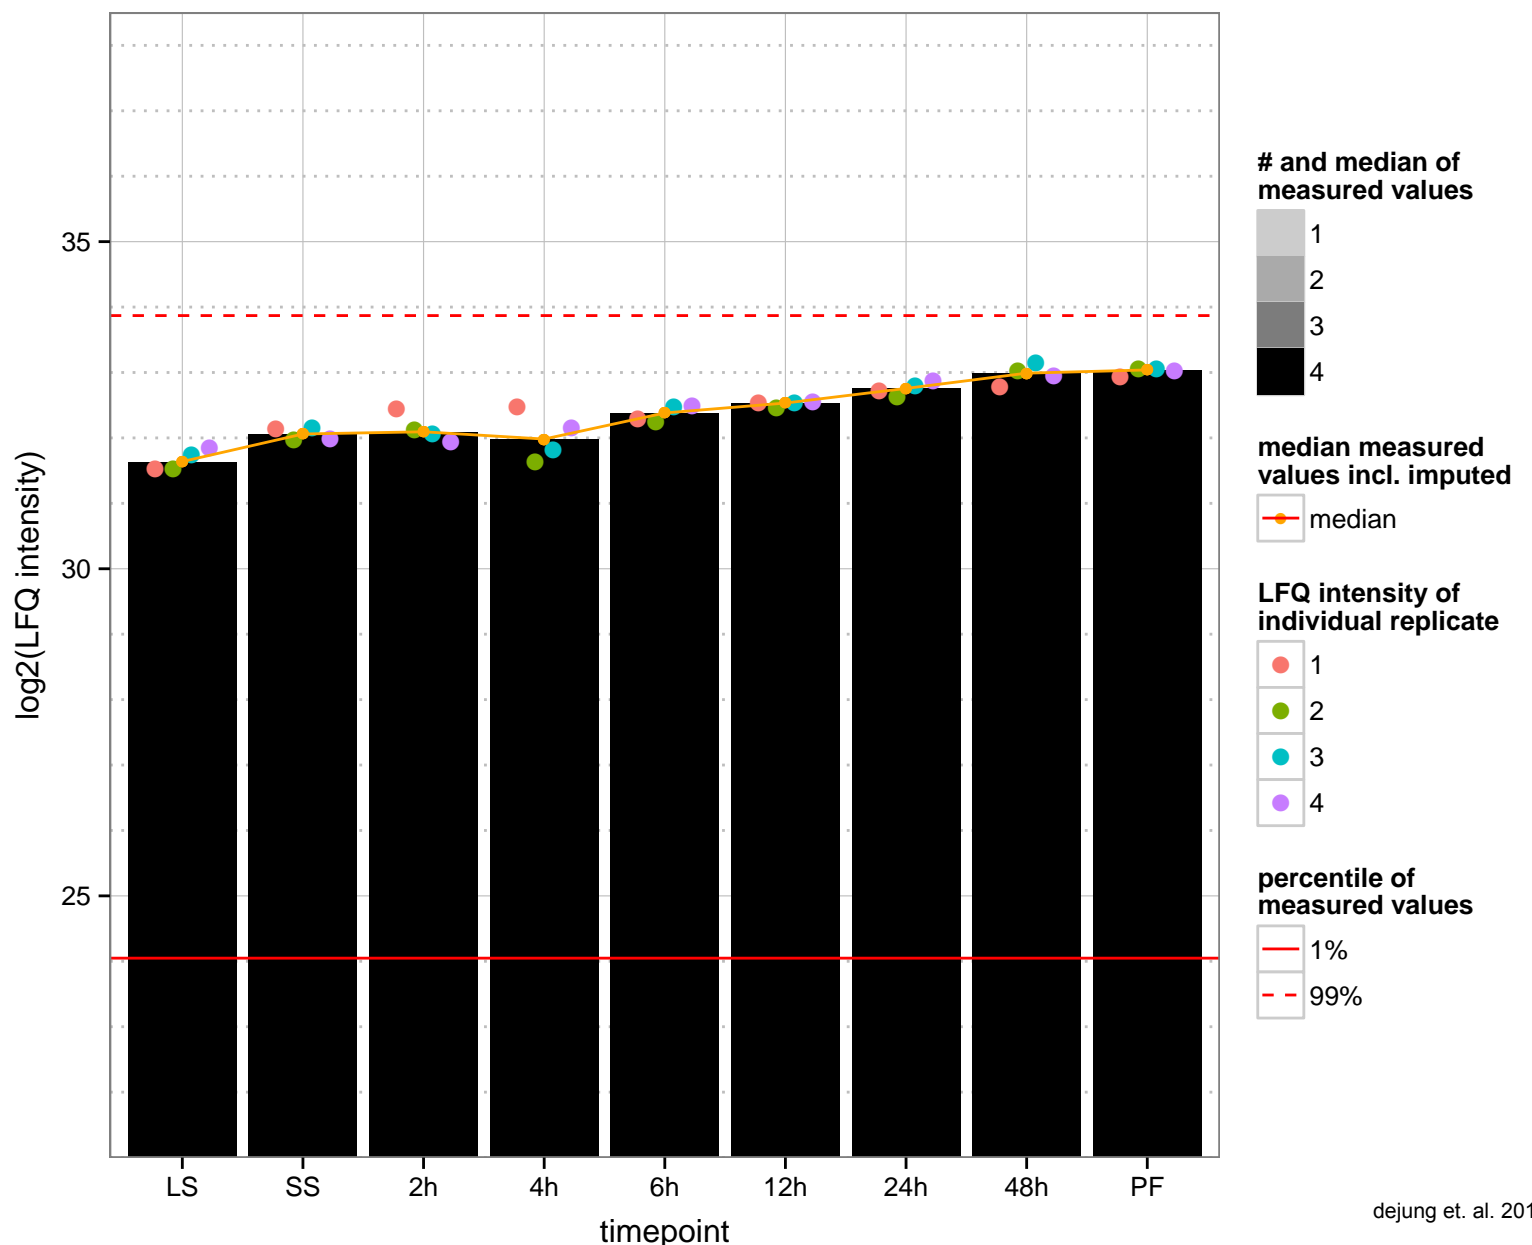

septum formation protein MAF homologue, putative  
 Tb927.11.14280  
 AGOF: null  
 AGOC: cytoplasm  
 AGOP: barrier septum assembly  
 PGO: null  
 PGOC: cytoplasm  
 PGOP: null

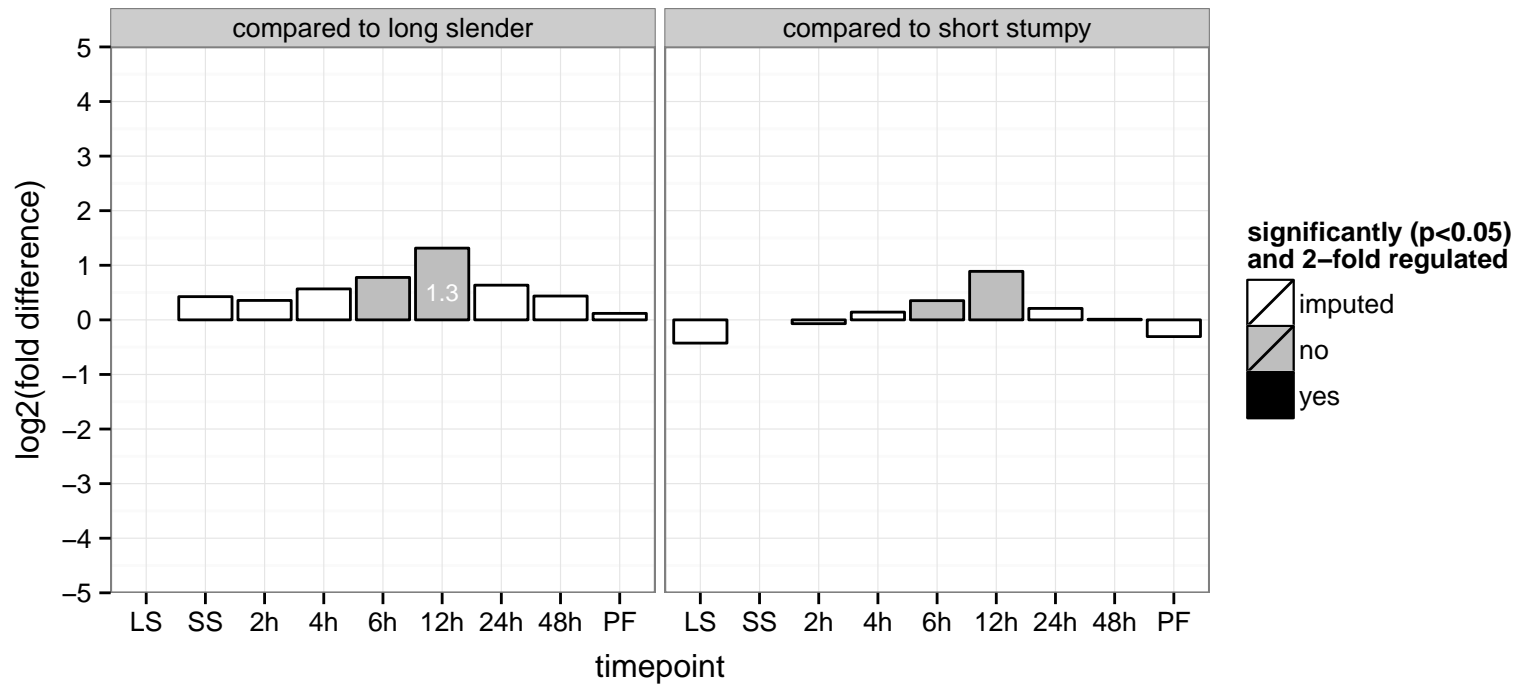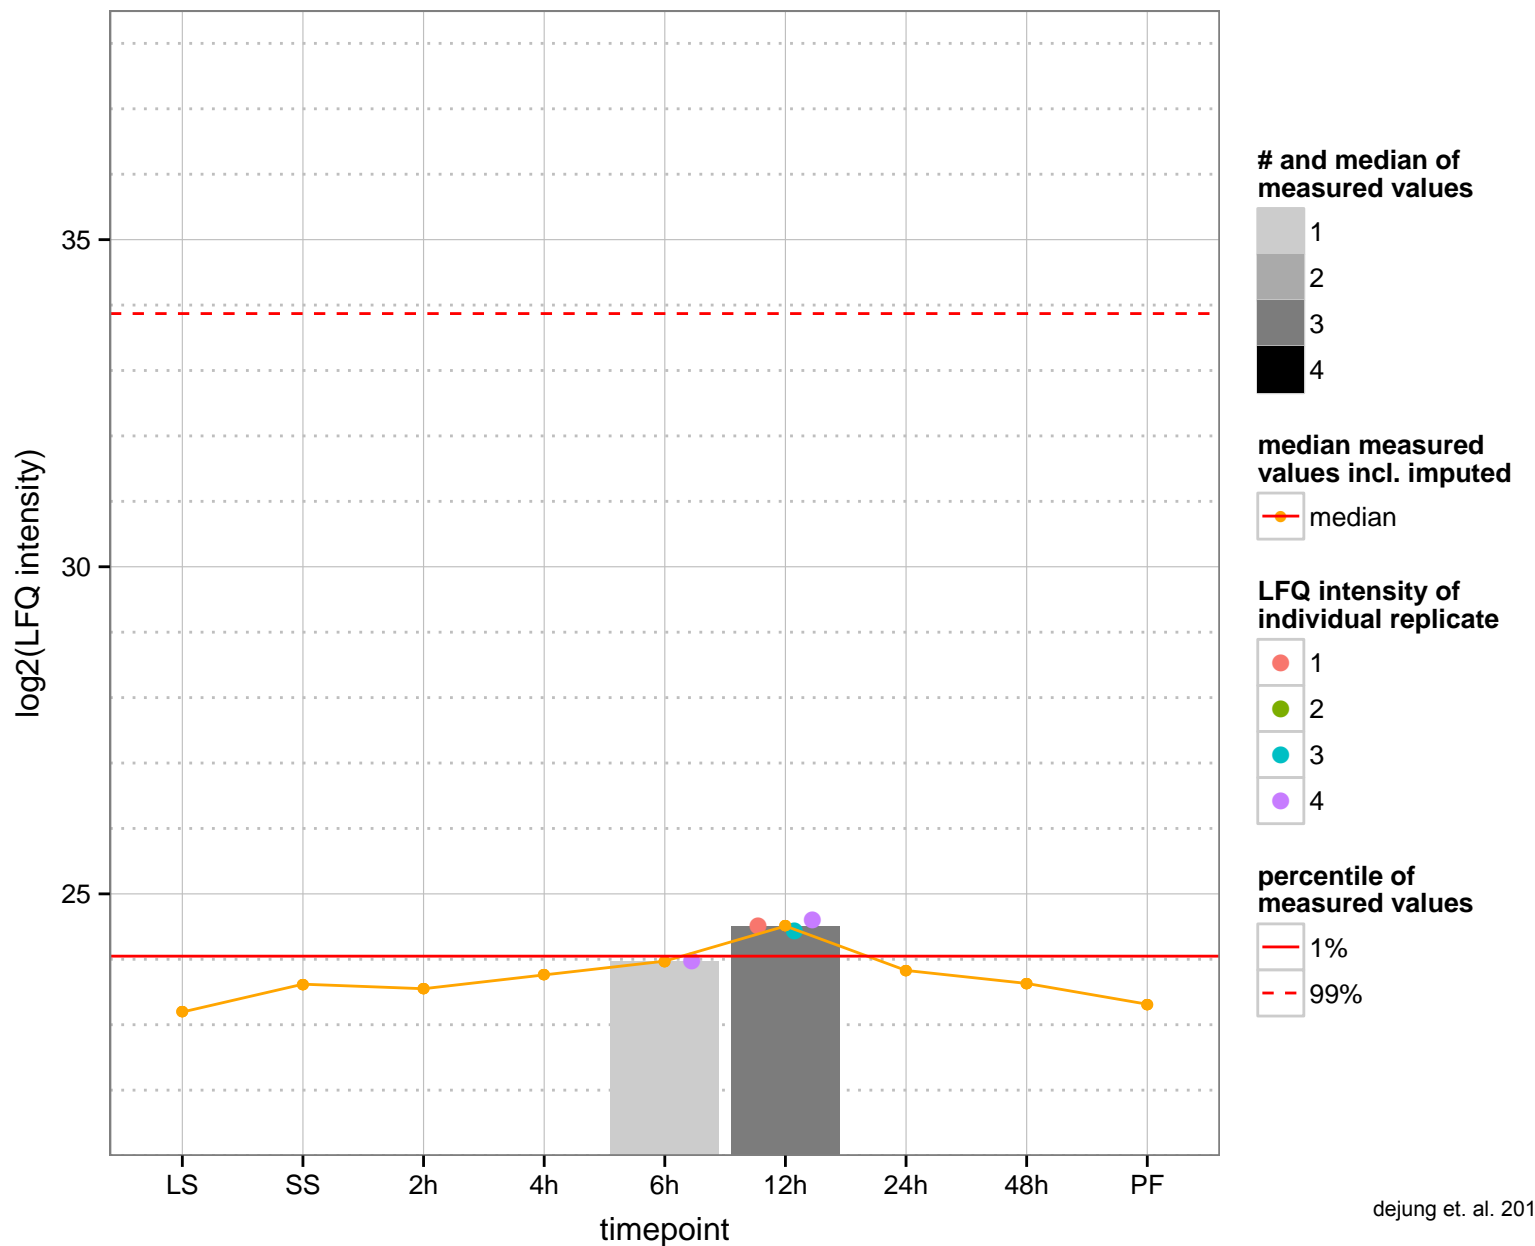

hypothetical protein, conserved  
 Tb927.11.1430  
 AGOF: null  
 AGOC: null  
 AGOP: ciliary or flagellar motility  
 PGO: null  
 PGOC: null  
 PGOP: null

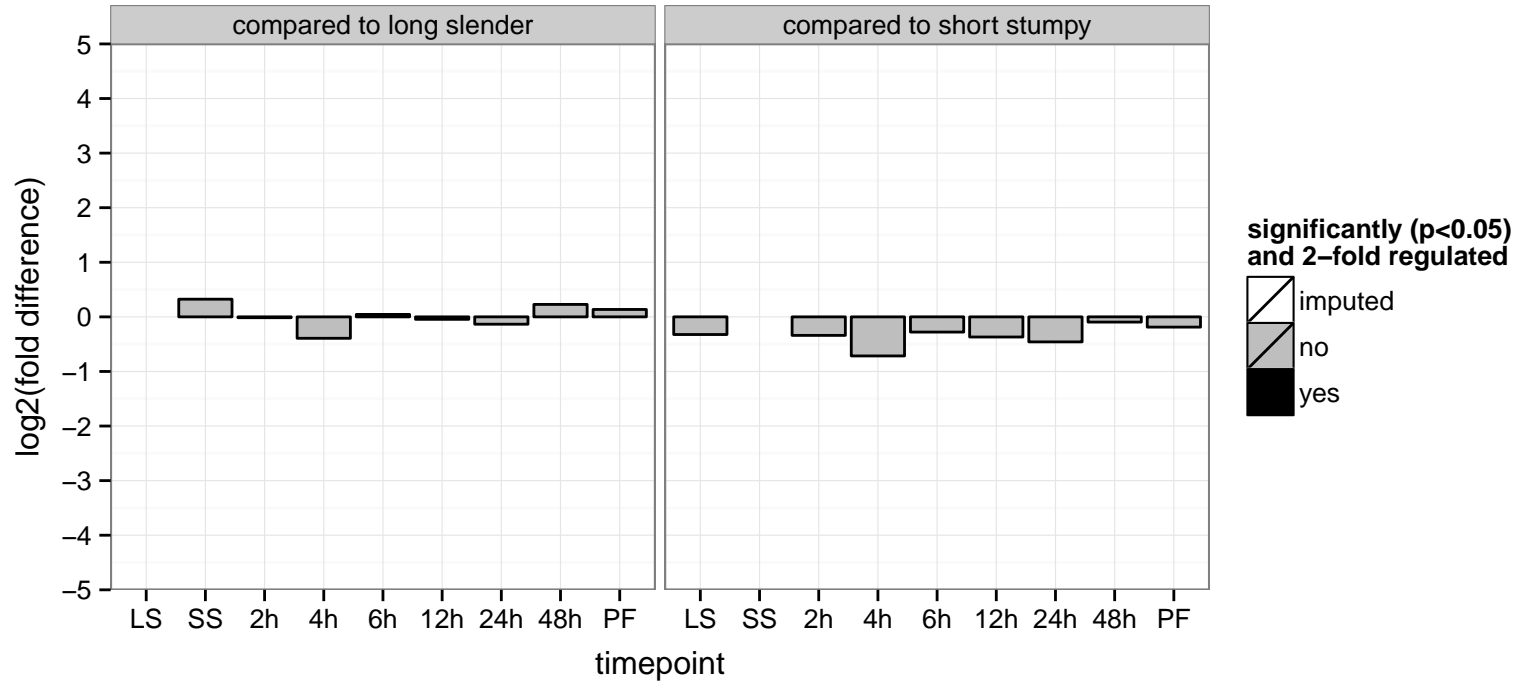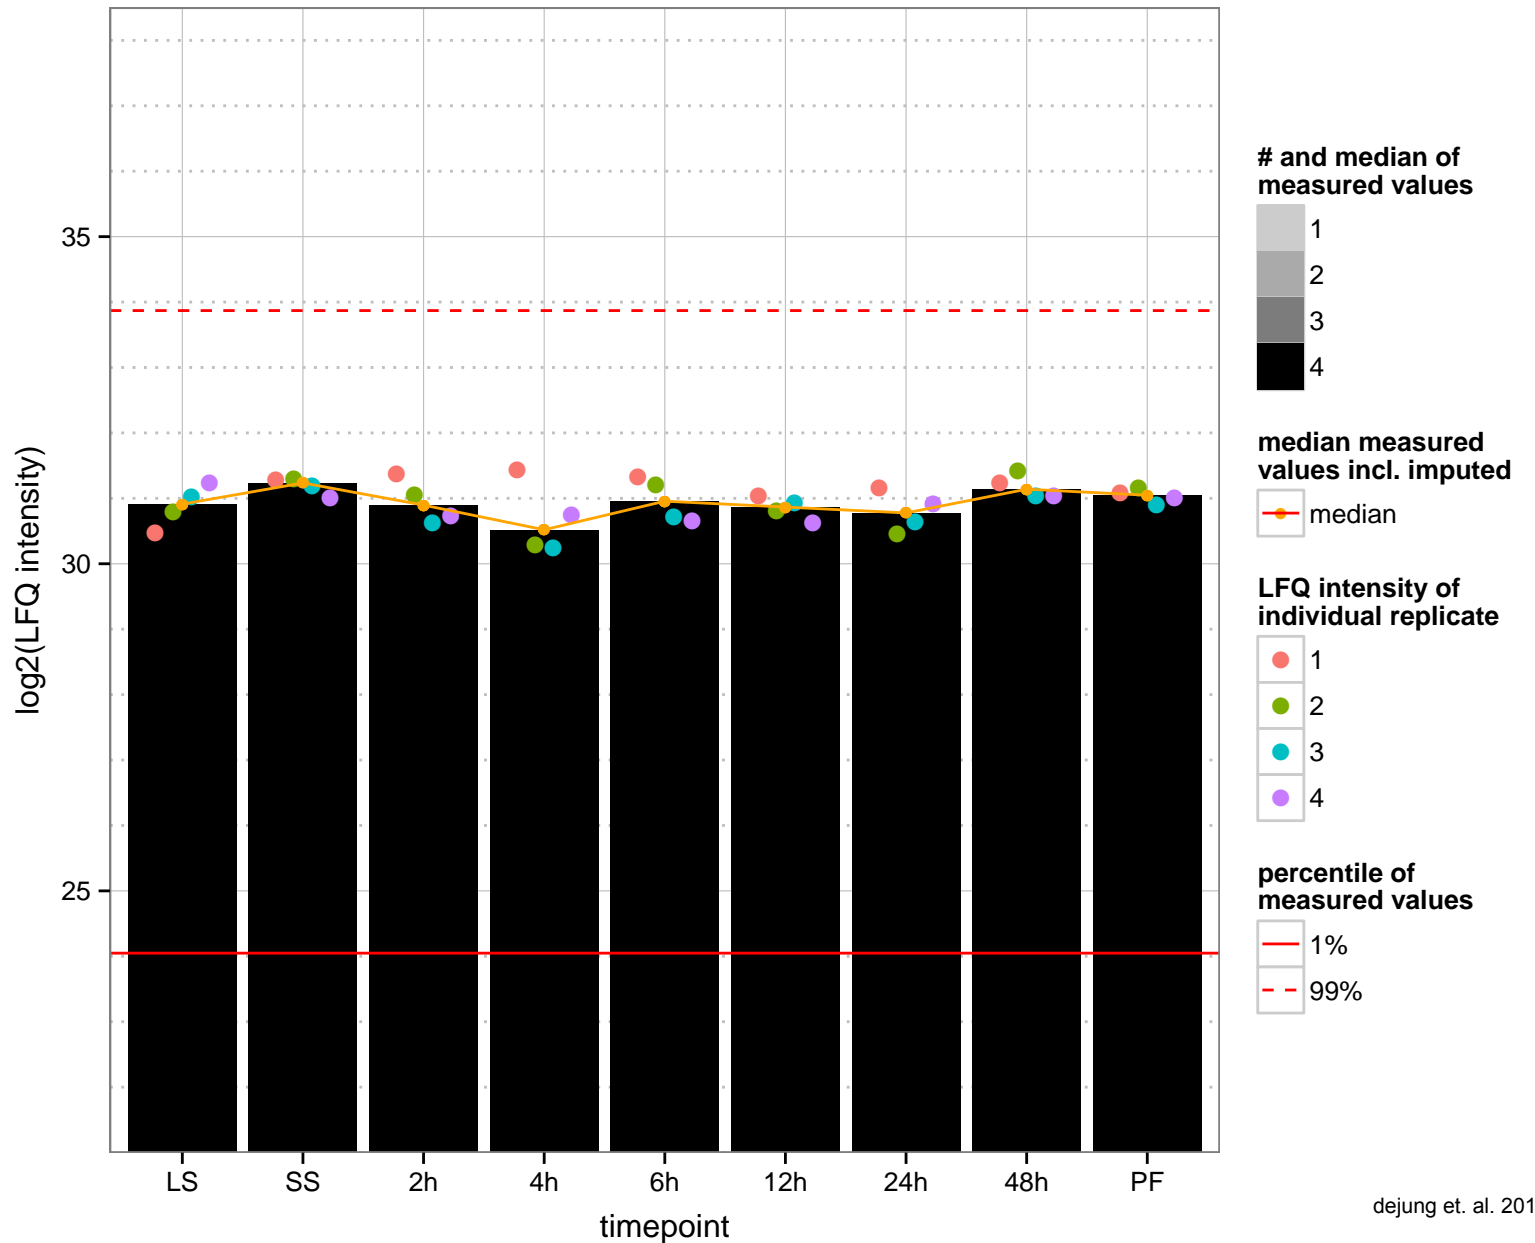

dynein intermediate chain IC70, putative  
 Tb927.11.14300  
 AGOF: microtubule motor activity, motor activity  
 AGOC: dynein complex  
 AGOP: null  
 PGOF: protein binding  
 PGOC: null  
 PGOP: null

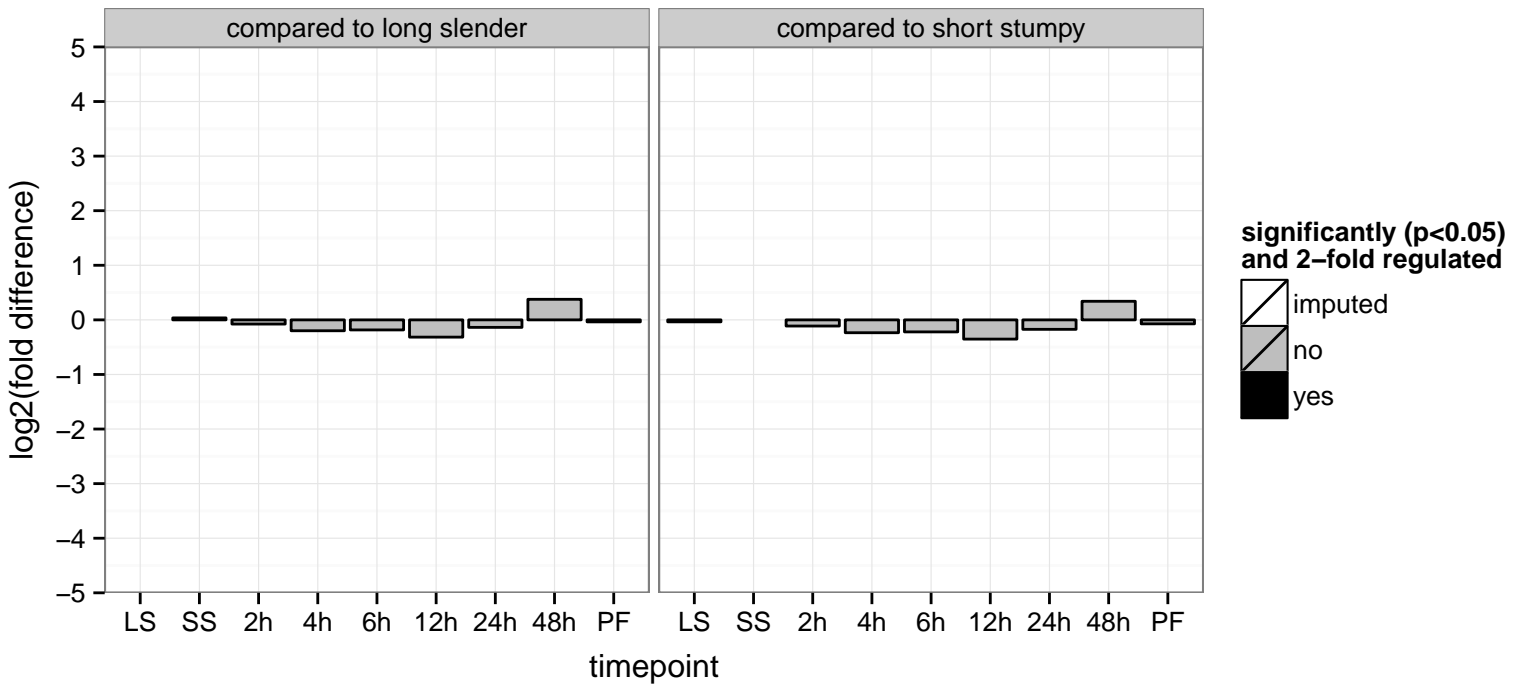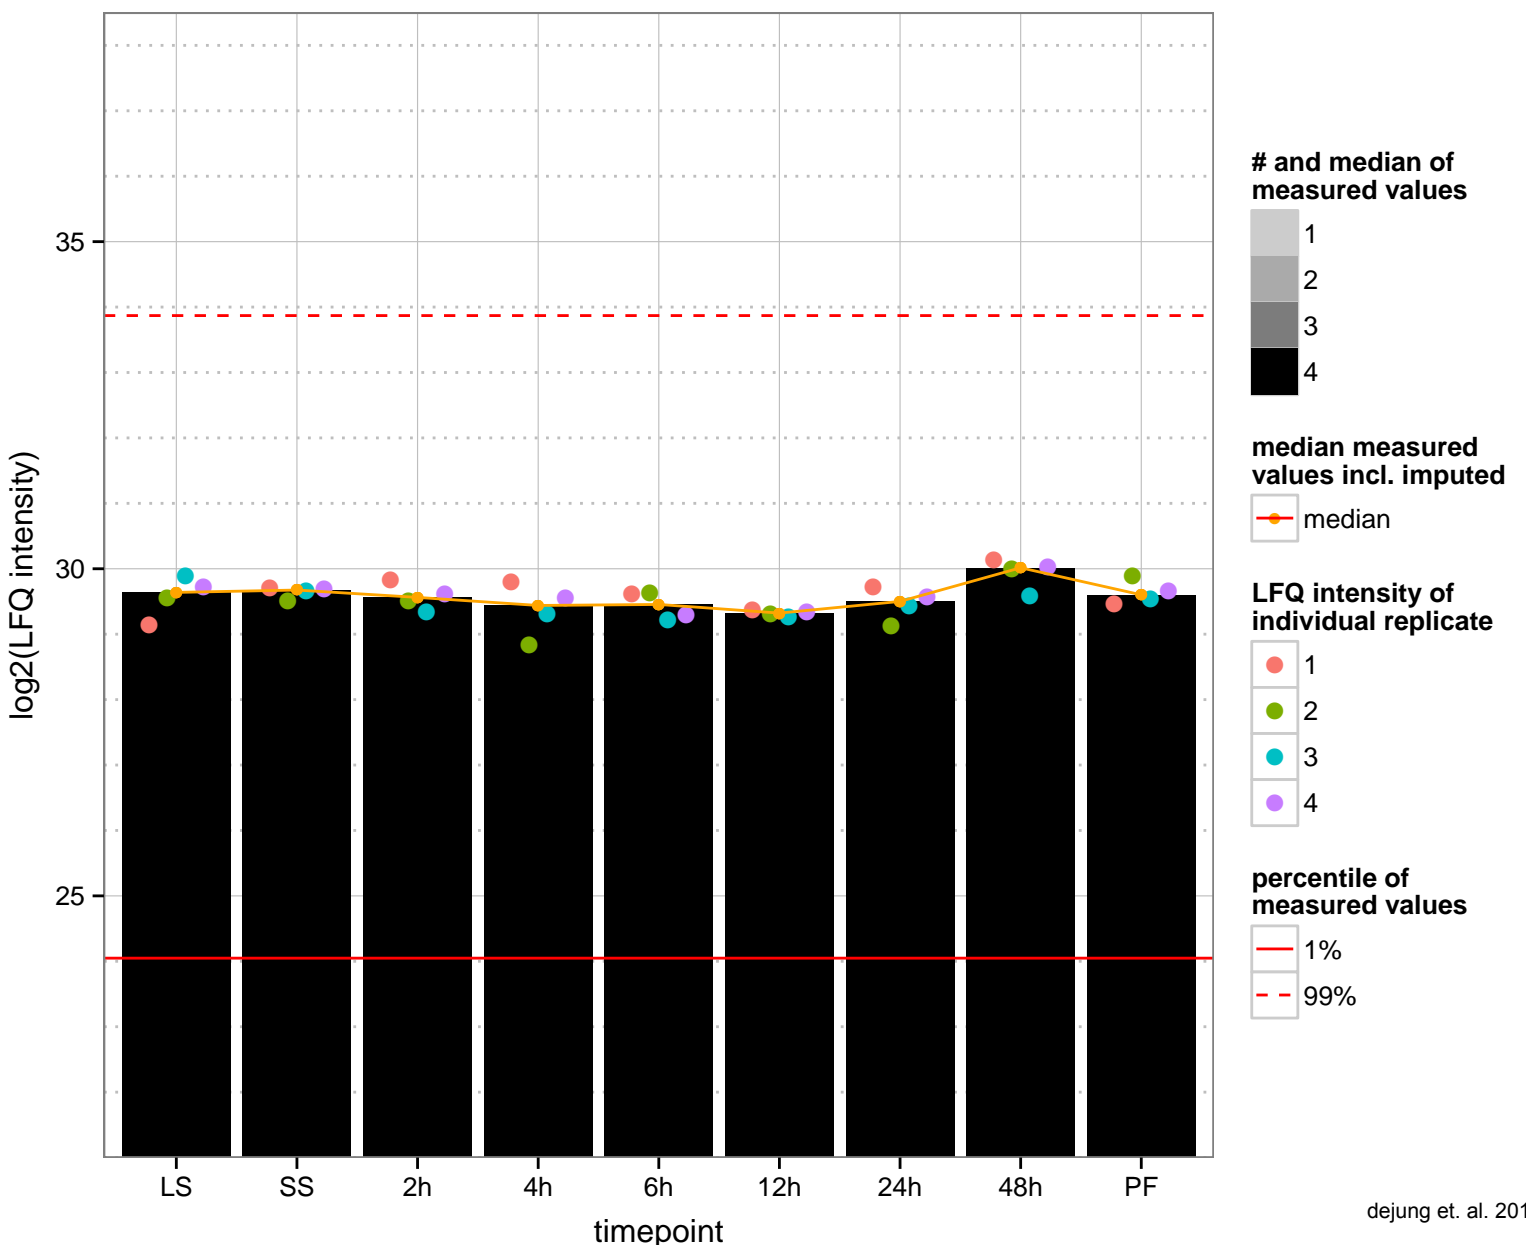

small nuclear ribonucleoprotein Sm-G (Sm-G)

Tb927.11.14310

AGOF: null

AGOC: nucleus, small nucleolar ribonucleoprotein complex

AGOP: RNA splicing, RNA splicing, via transesterification reactions, nuclear mRNA trans splicing, SL addition

PGOF: null

PGOC: null

PGOP: null

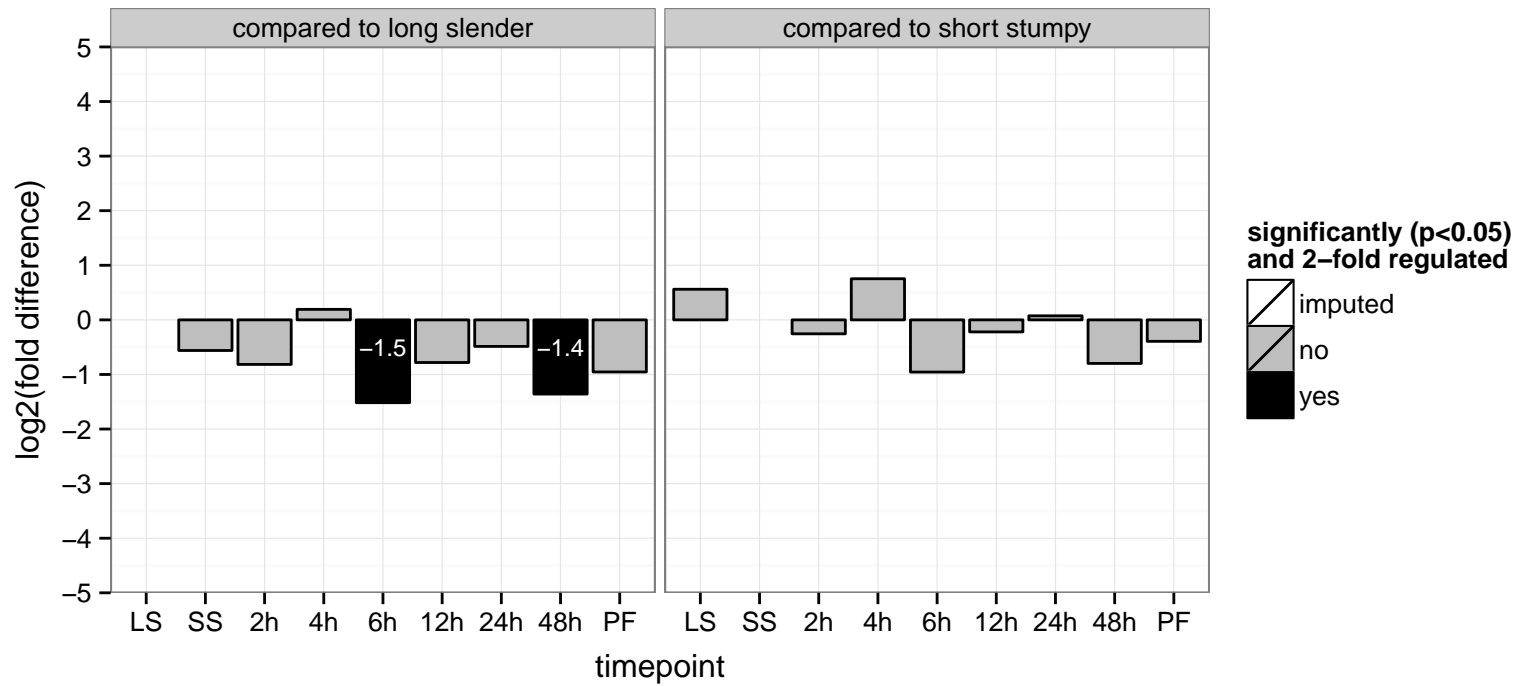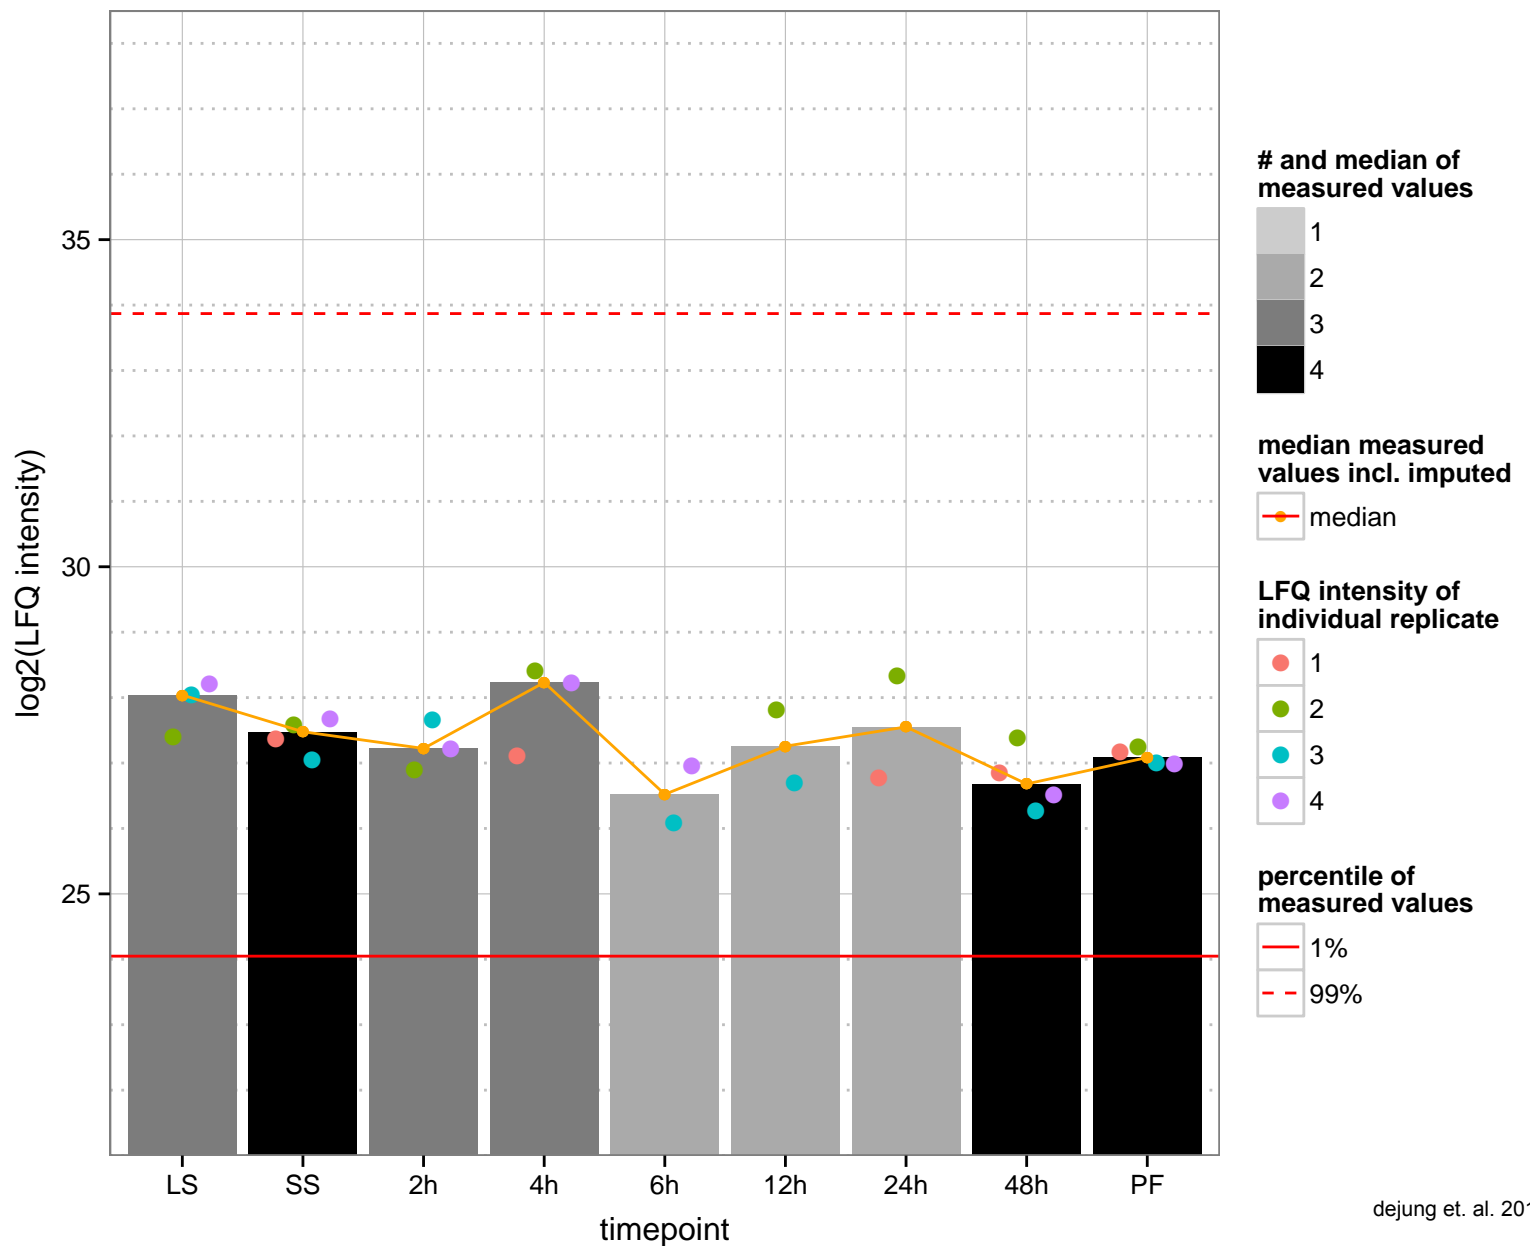



hypothetical protein, conserved  
 Tb927.11.14330  
 AGOF: acid-amino acid ligase activity, zinc ion binding  
 AGOC: intracellular  
 AGOP: cellular protein modification process  
 PGO: acid-amino acid ligase activity, binding, zinc ion binding  
 PGOC: intracellular  
 PGOP: cellular protein modification process

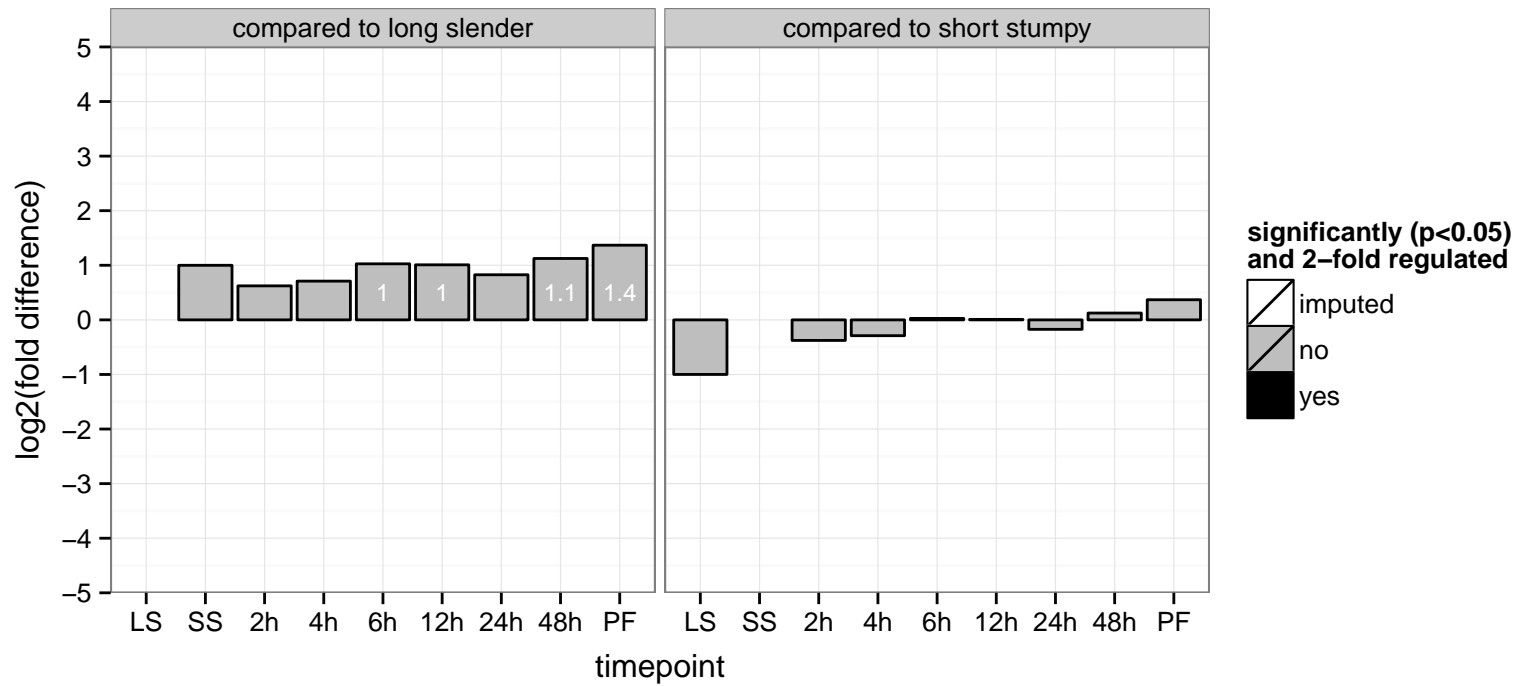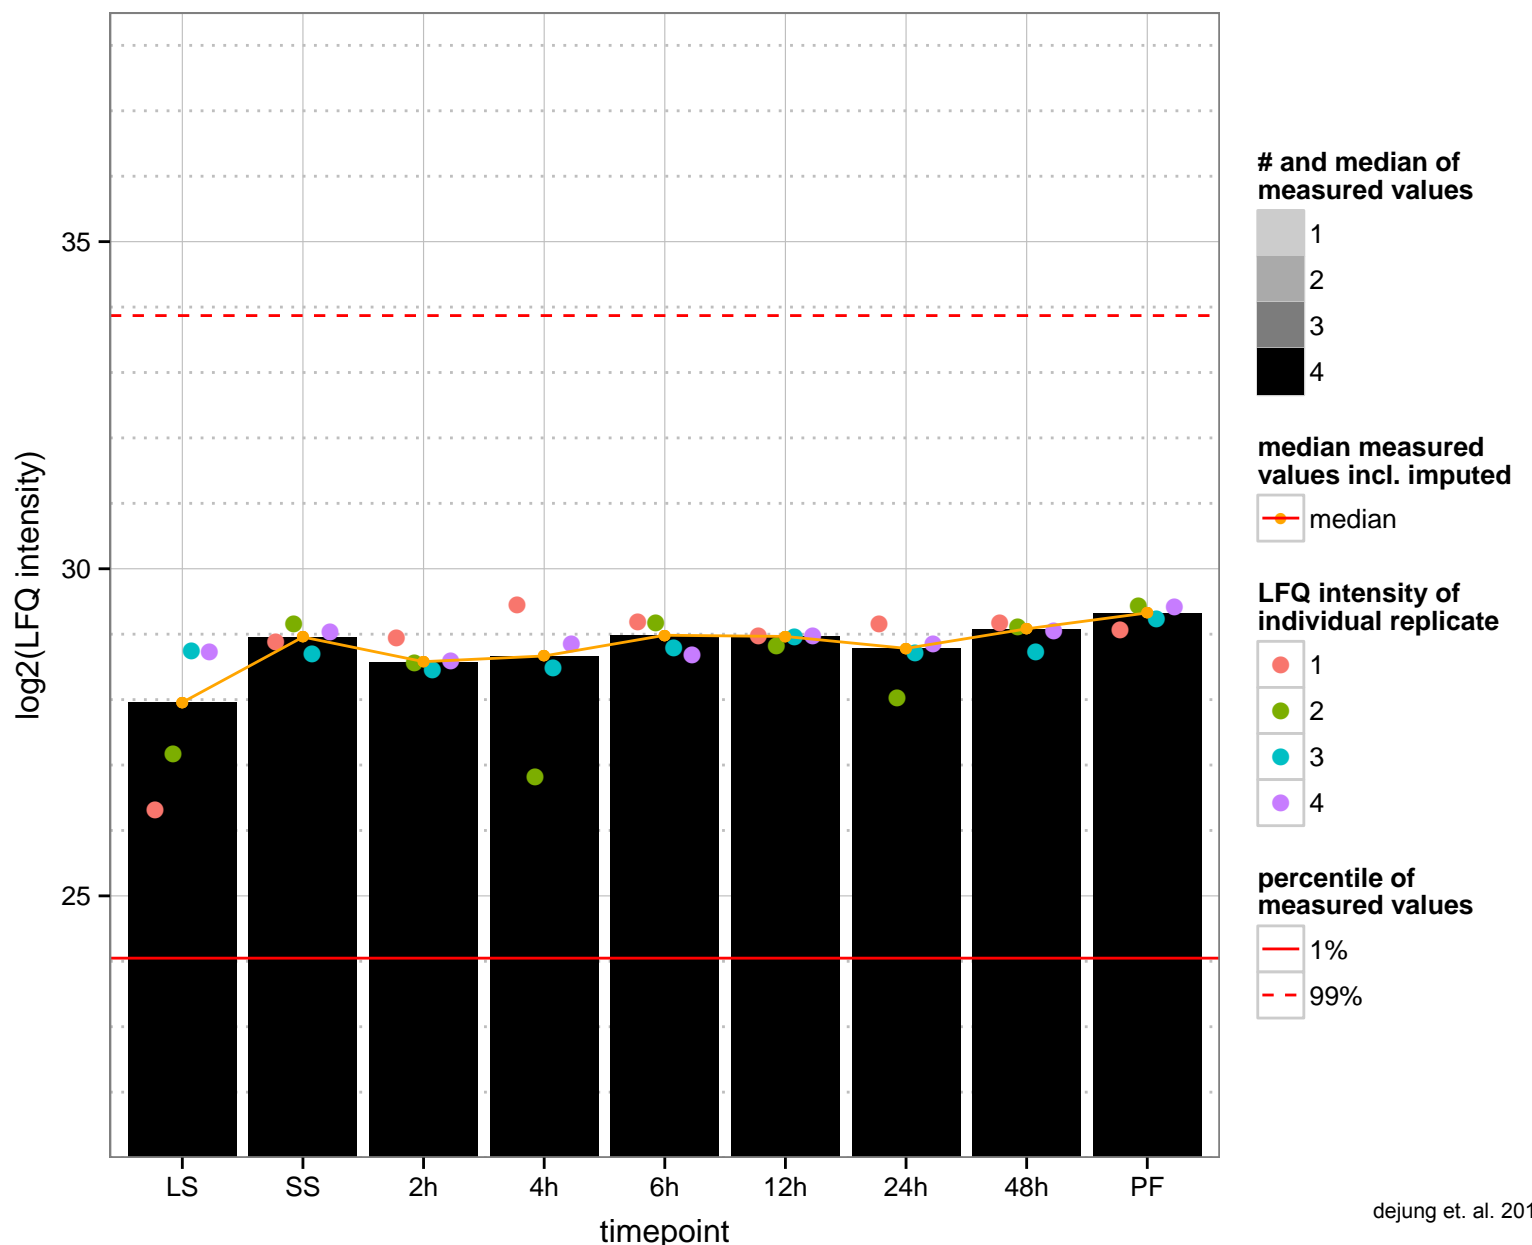

exportin 1 (XPO1)  
 Tb927.11.14340  
 AGOF: protein transporter activity  
 AGOC: cytoplasm, nuclear pore, nucleus  
 AGOP: intracellular protein transport, nuclear export, protein import into nucleus, docking  
 PGO: binding, protein transporter activity  
 PGO: null  
 PGO: intracellular protein transport

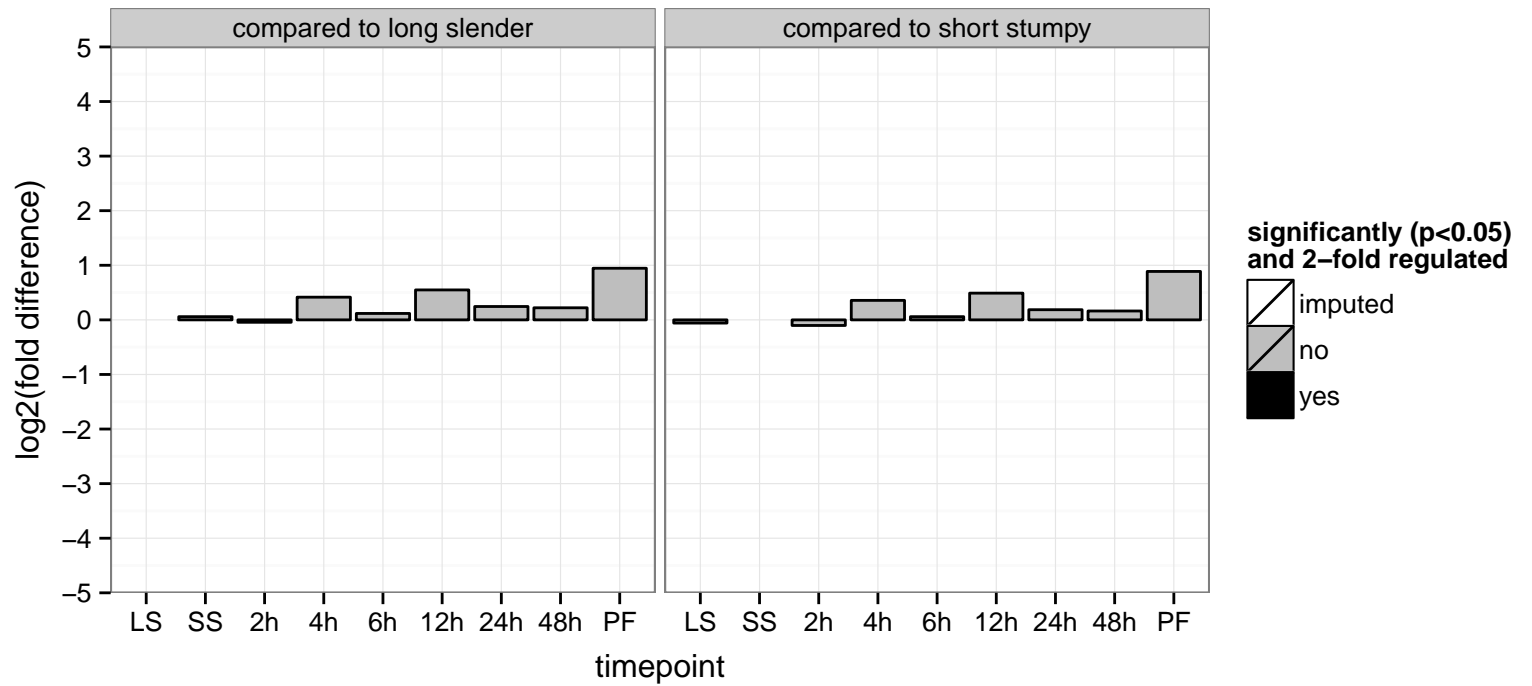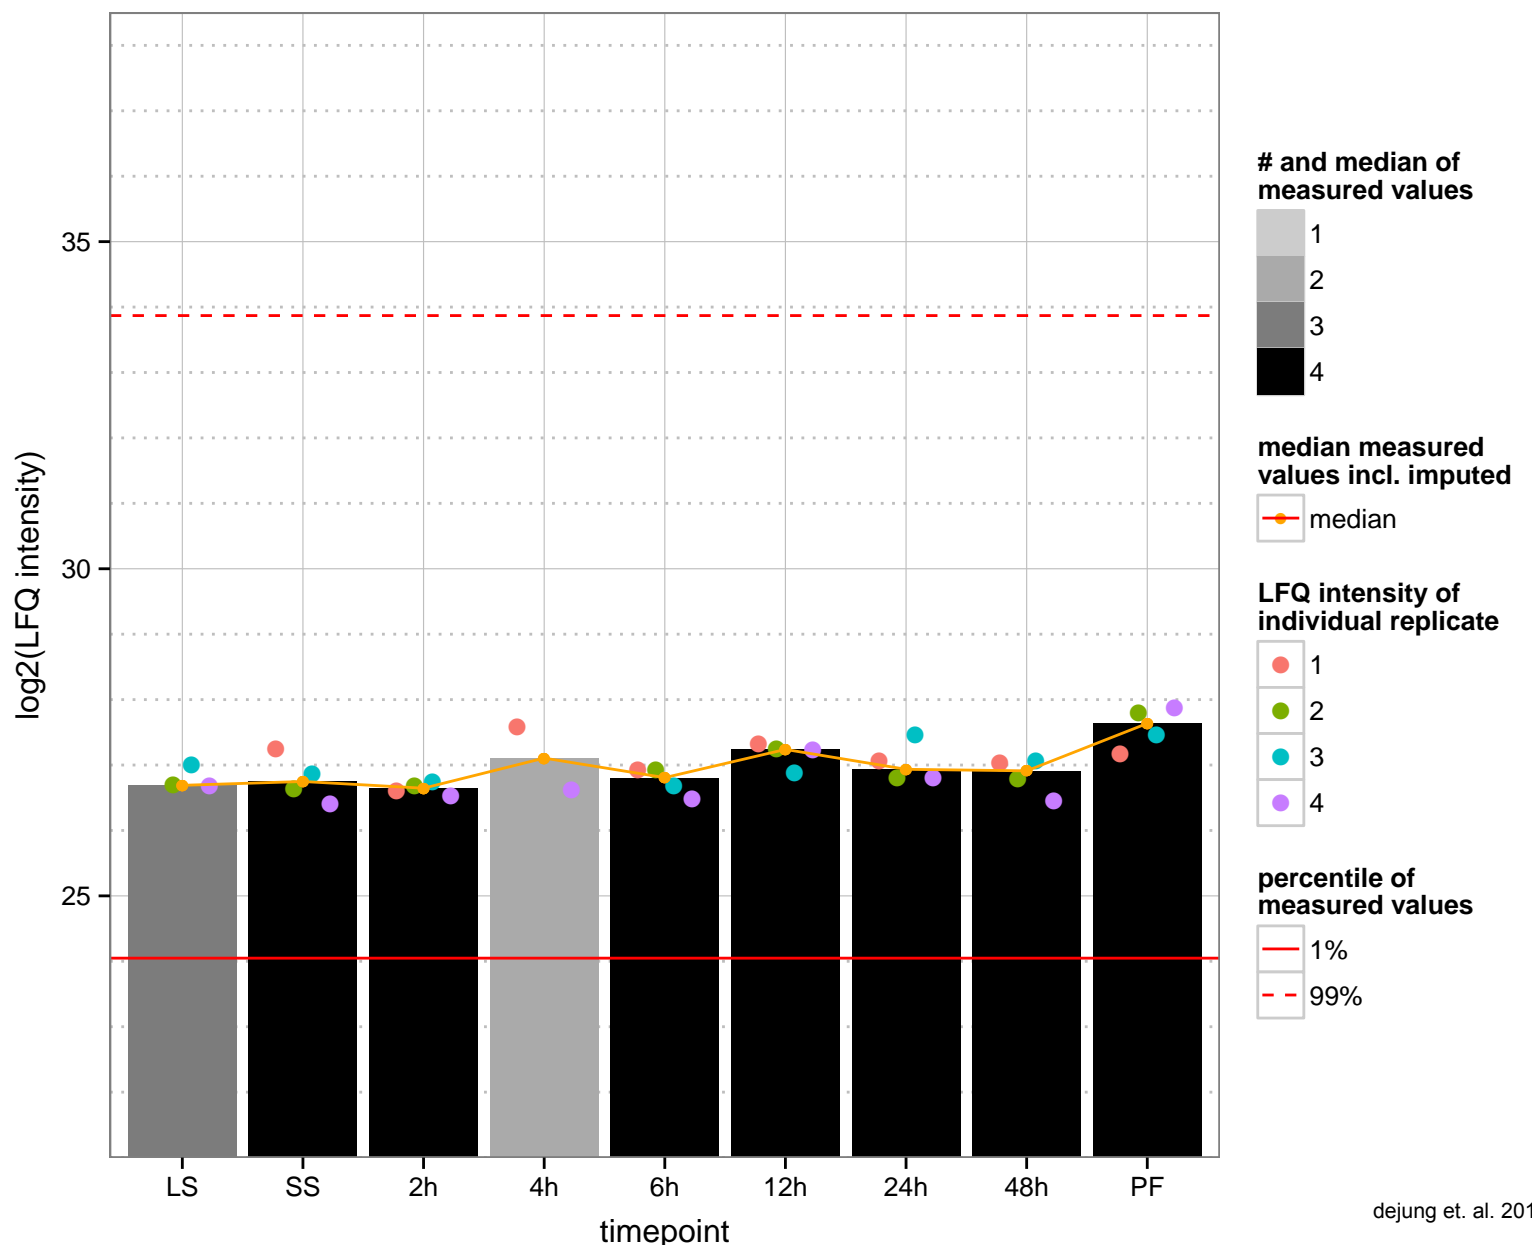

proteasome regulatory non-ATP-ase subunit  
 Tb927.11.14430  
 AGOF: endopeptidase activity  
 AGOC: proteasome regulatory particle  
 AGOP: proteolysis  
 PGOF: null  
 PGO: null  
 PGOP: null

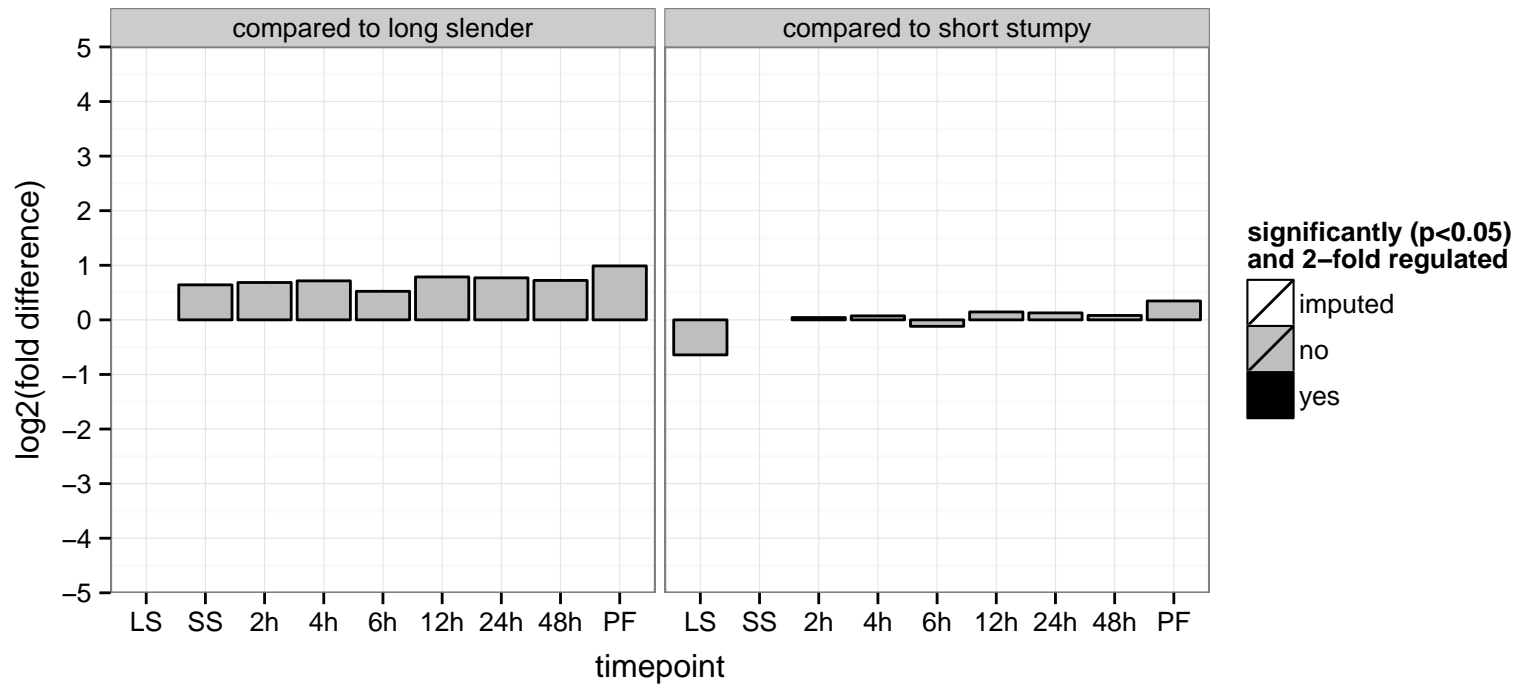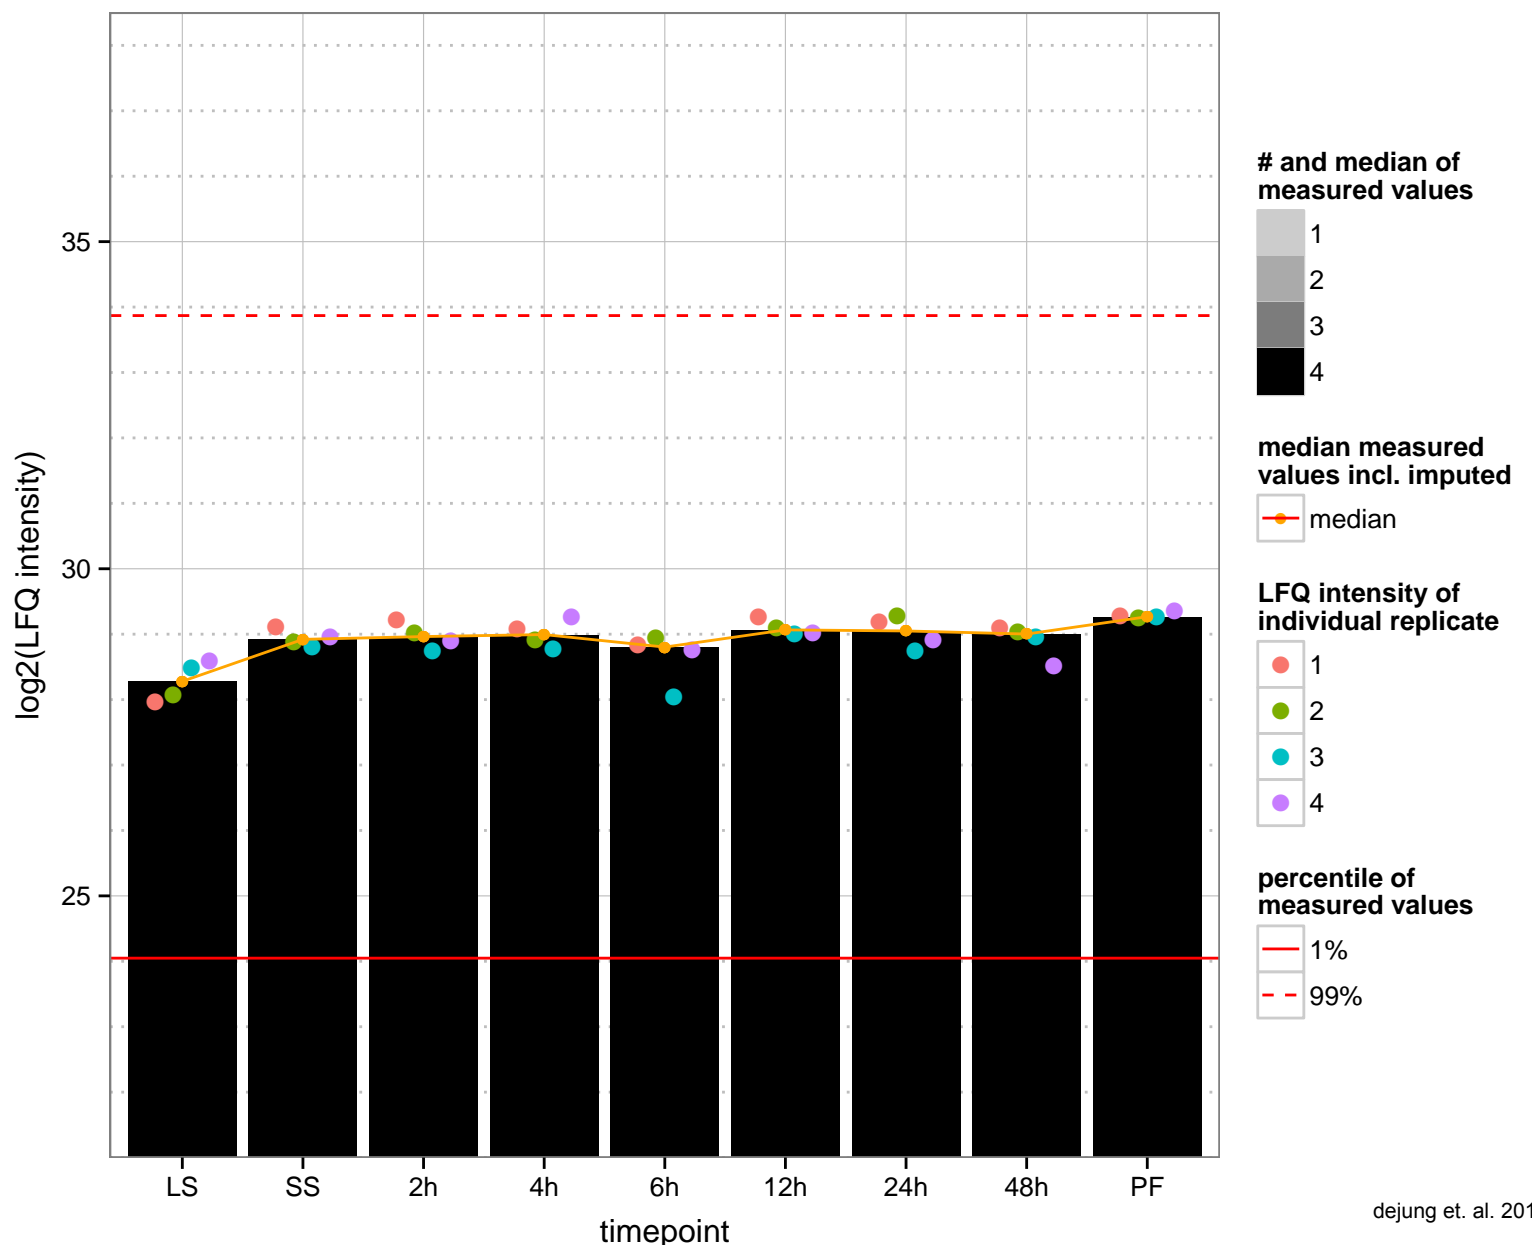

ADP-ribosylation factor GTPase activating protein 1, putative  
 Tb927.11.14460  
 AGOF: ARF GTPase activator activity, DNA binding, zinc ion binding  
 AGOC: nucleus  
 AGOP: regulation of ARF GTPase activity  
 PGOF: ARF GTPase activator activity, zinc ion binding  
 PGO: null  
 PGOP: regulation of ARF GTPase activity

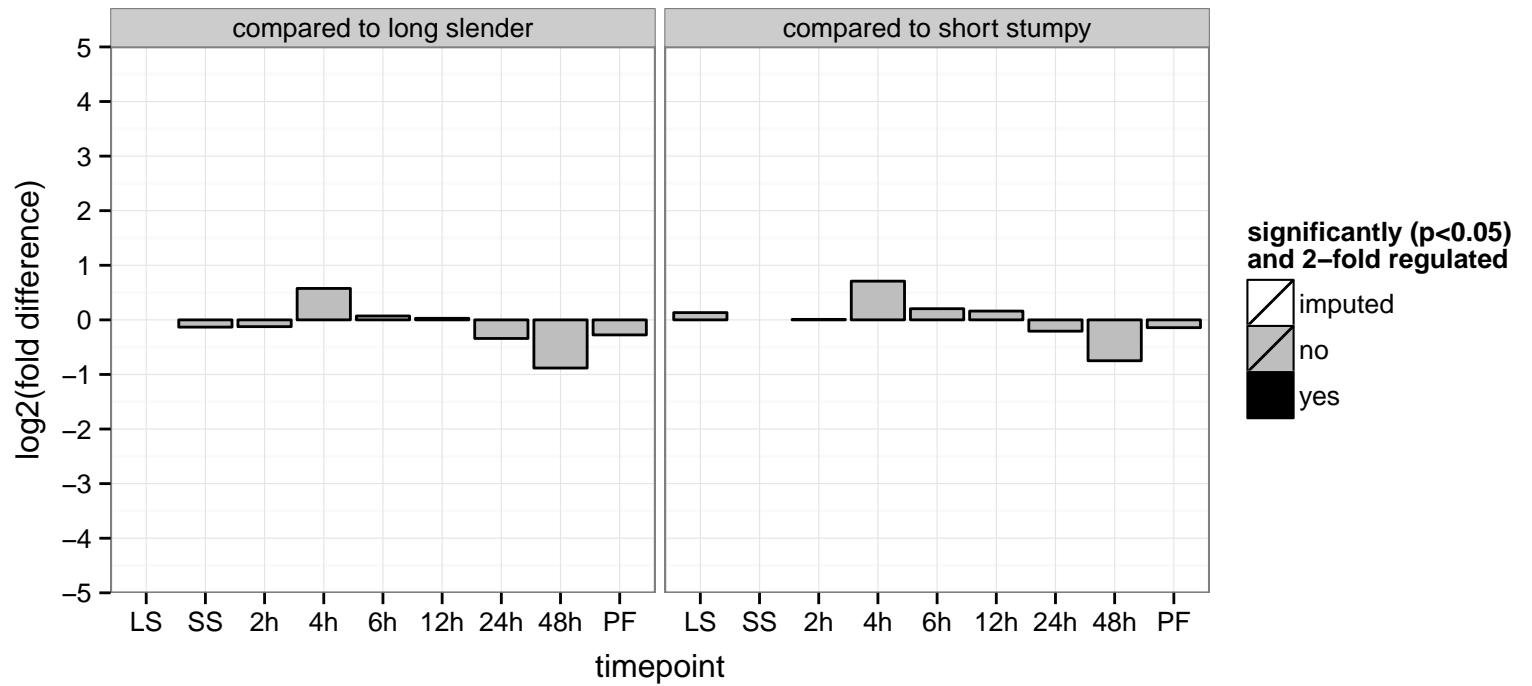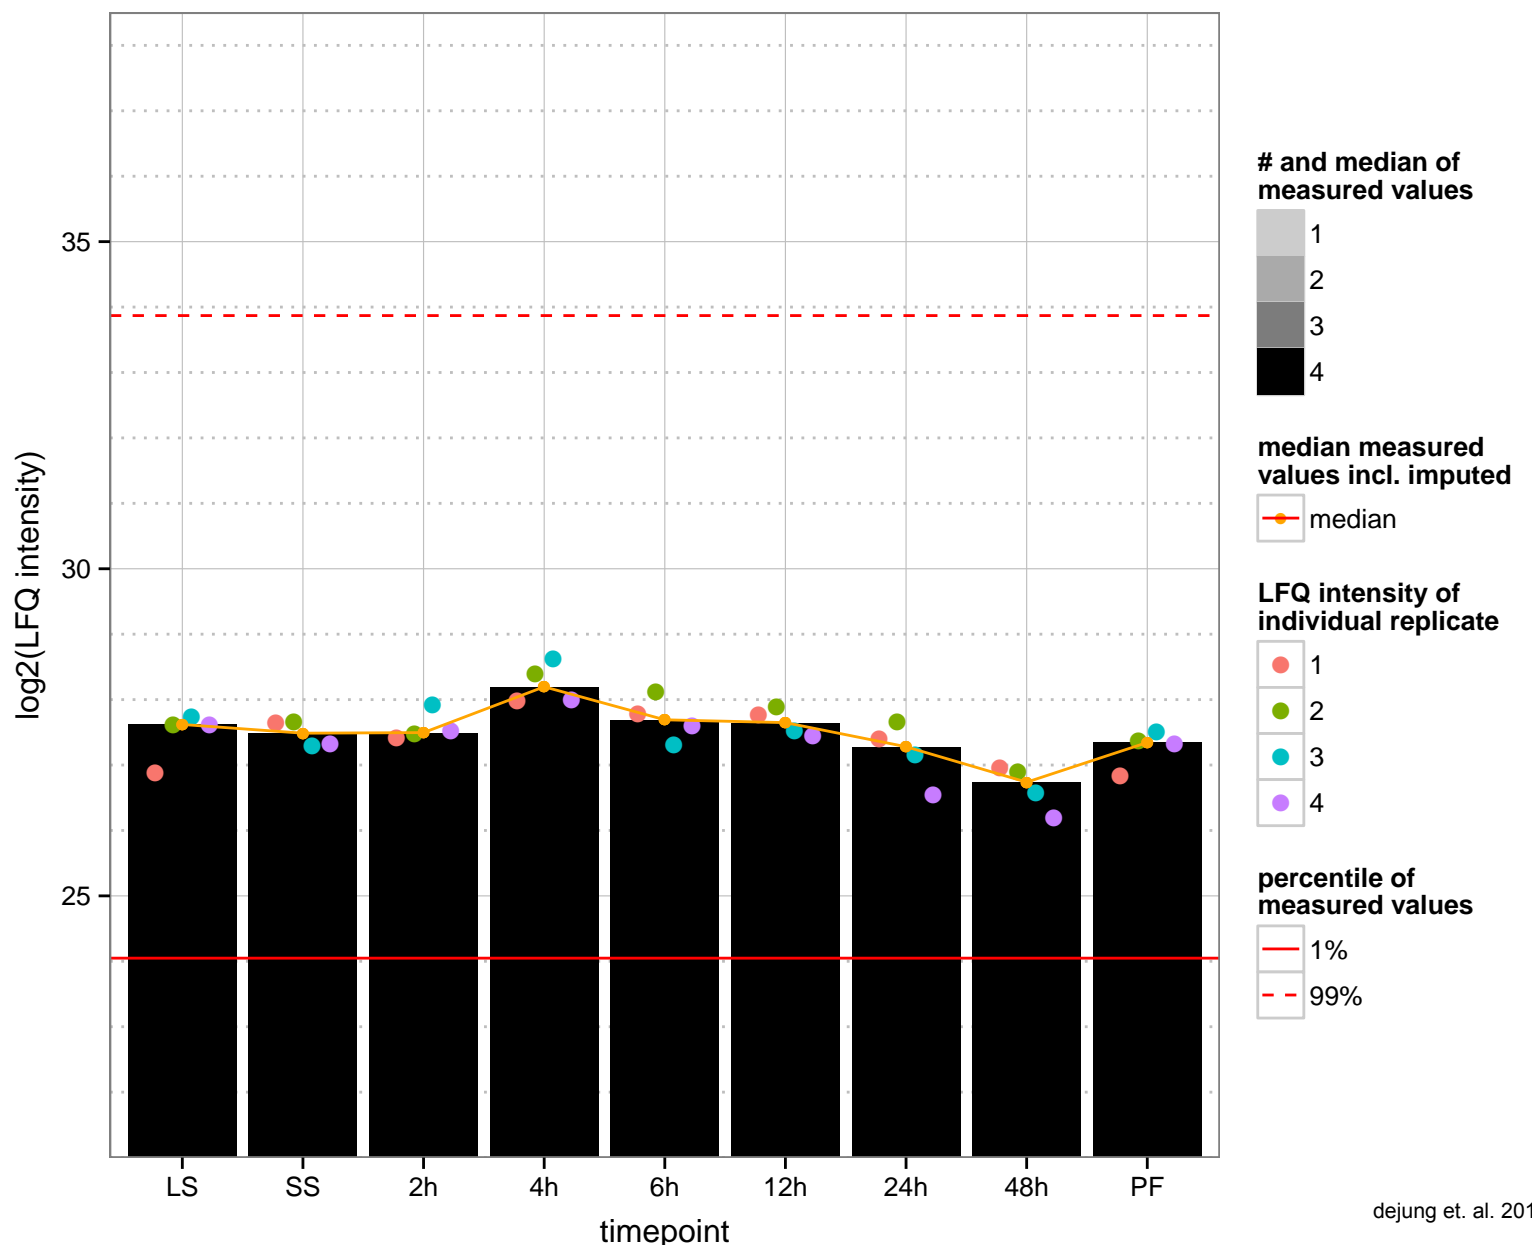

RNA polymerase subunit, putative (RPB7)  
 Tb927.11.14490  
 AGOF: DNA-directed RNA polymerase activity  
 AGOC: null  
 AGOP: transcription, DNA-dependent  
 PGOF: DNA-directed RNA polymerase activity  
 PGO: null  
 PGO: transcription, DNA-dependent

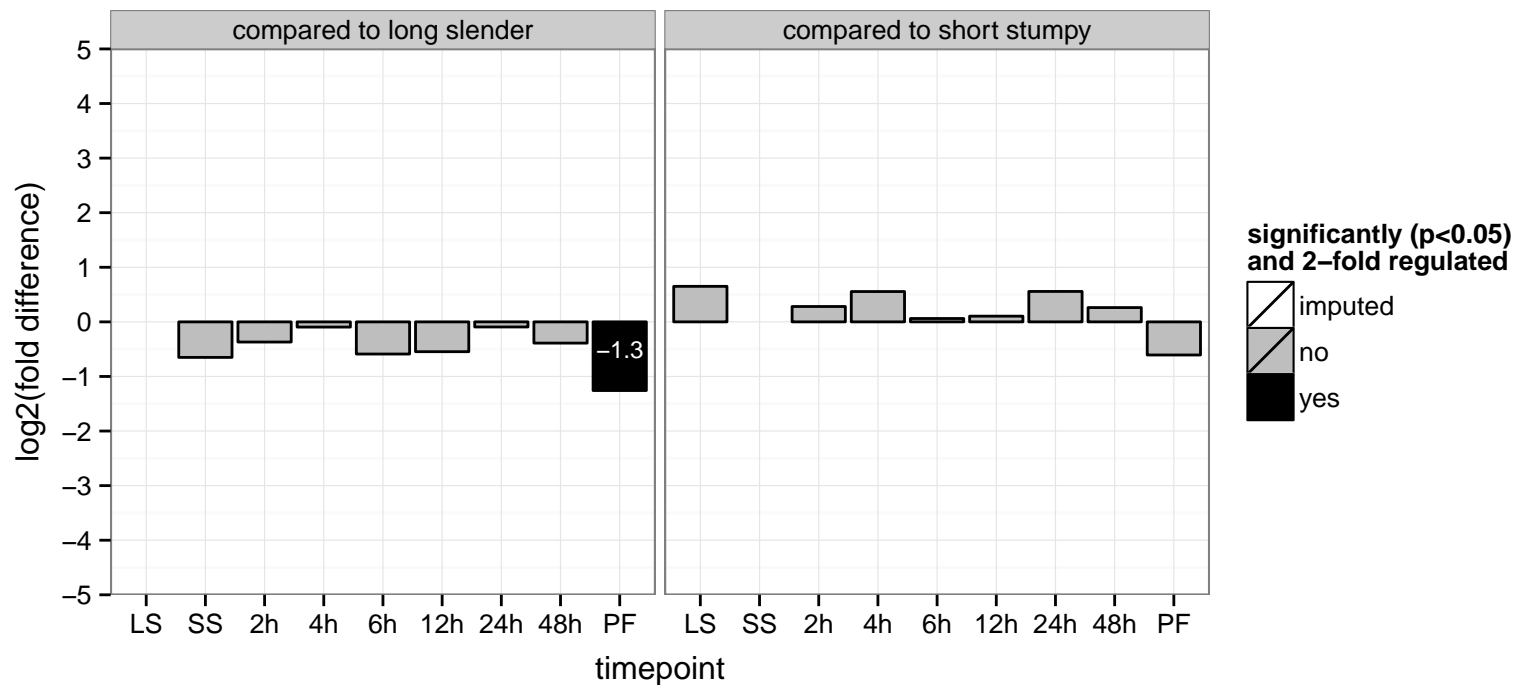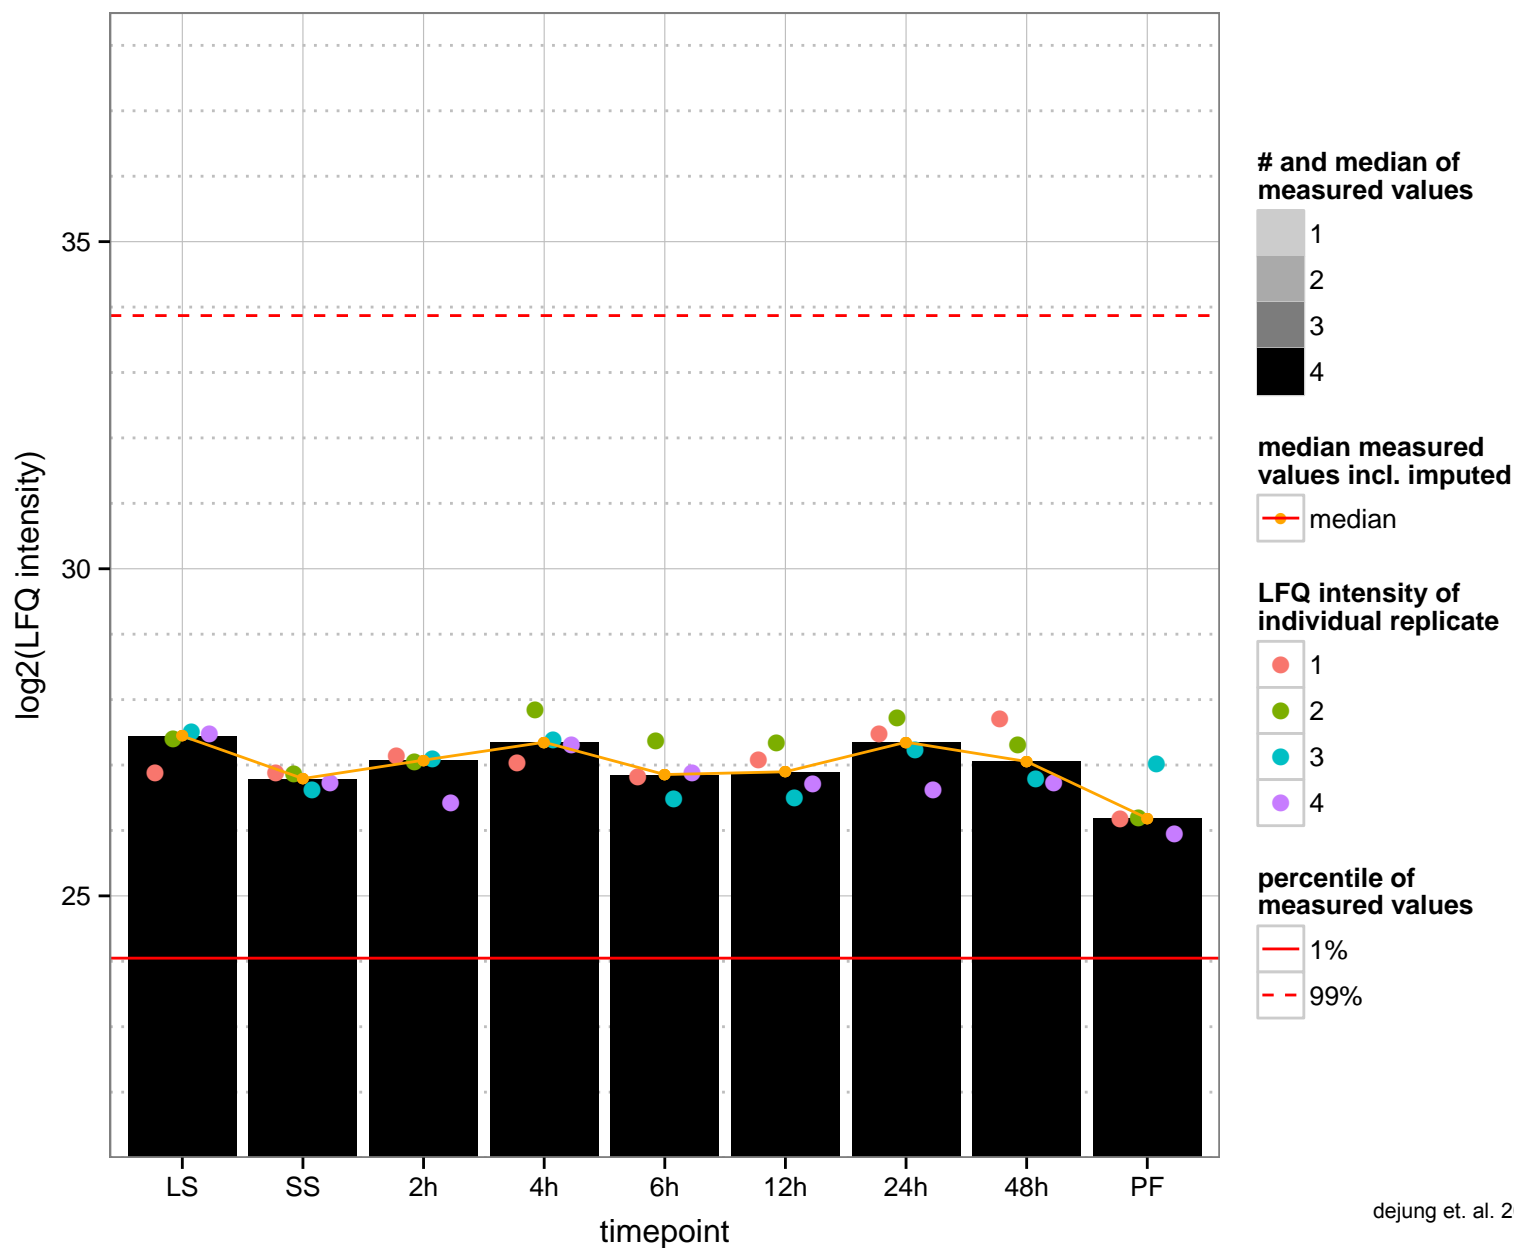

2-oxoglutarate dehydrogenase E1 component, putative

Tb927.11.1450

AGOF: oxoglutarate dehydrogenase (succinyl-transferring) activity, thiamine pyrophosphate binding

AGOC: mitochondrion, oxoglutarate dehydrogenase complex

AGOP: glycolysis, lysine catabolic process, tricarboxylic acid cycle, tryptophan metabolic process

PGOF: oxidoreductase activity, acting on the aldehyde or oxo group of donors, disulfide as acceptor, oxoglutarate dehydrogenase

PGOC: null

PGOP: metabolic process, oxidation-reduction process, tricarboxylic acid cycle

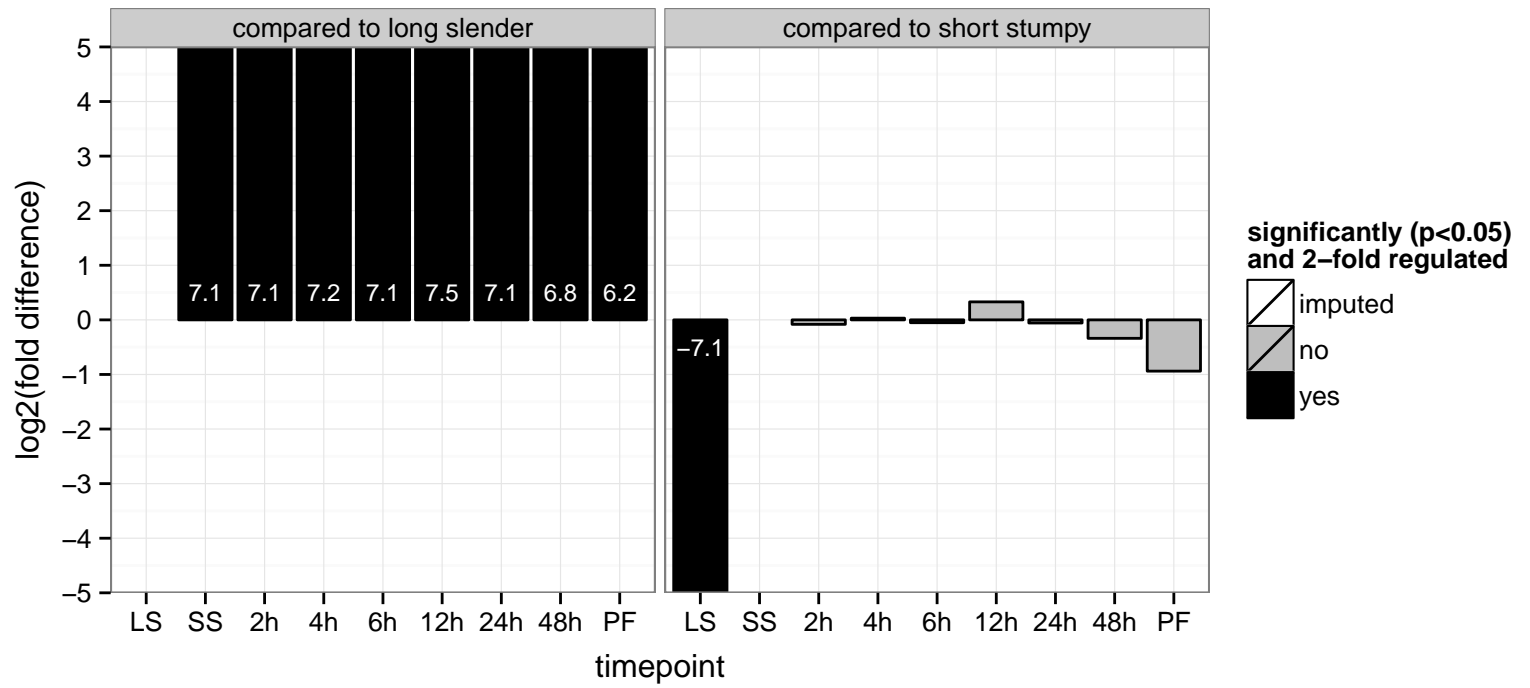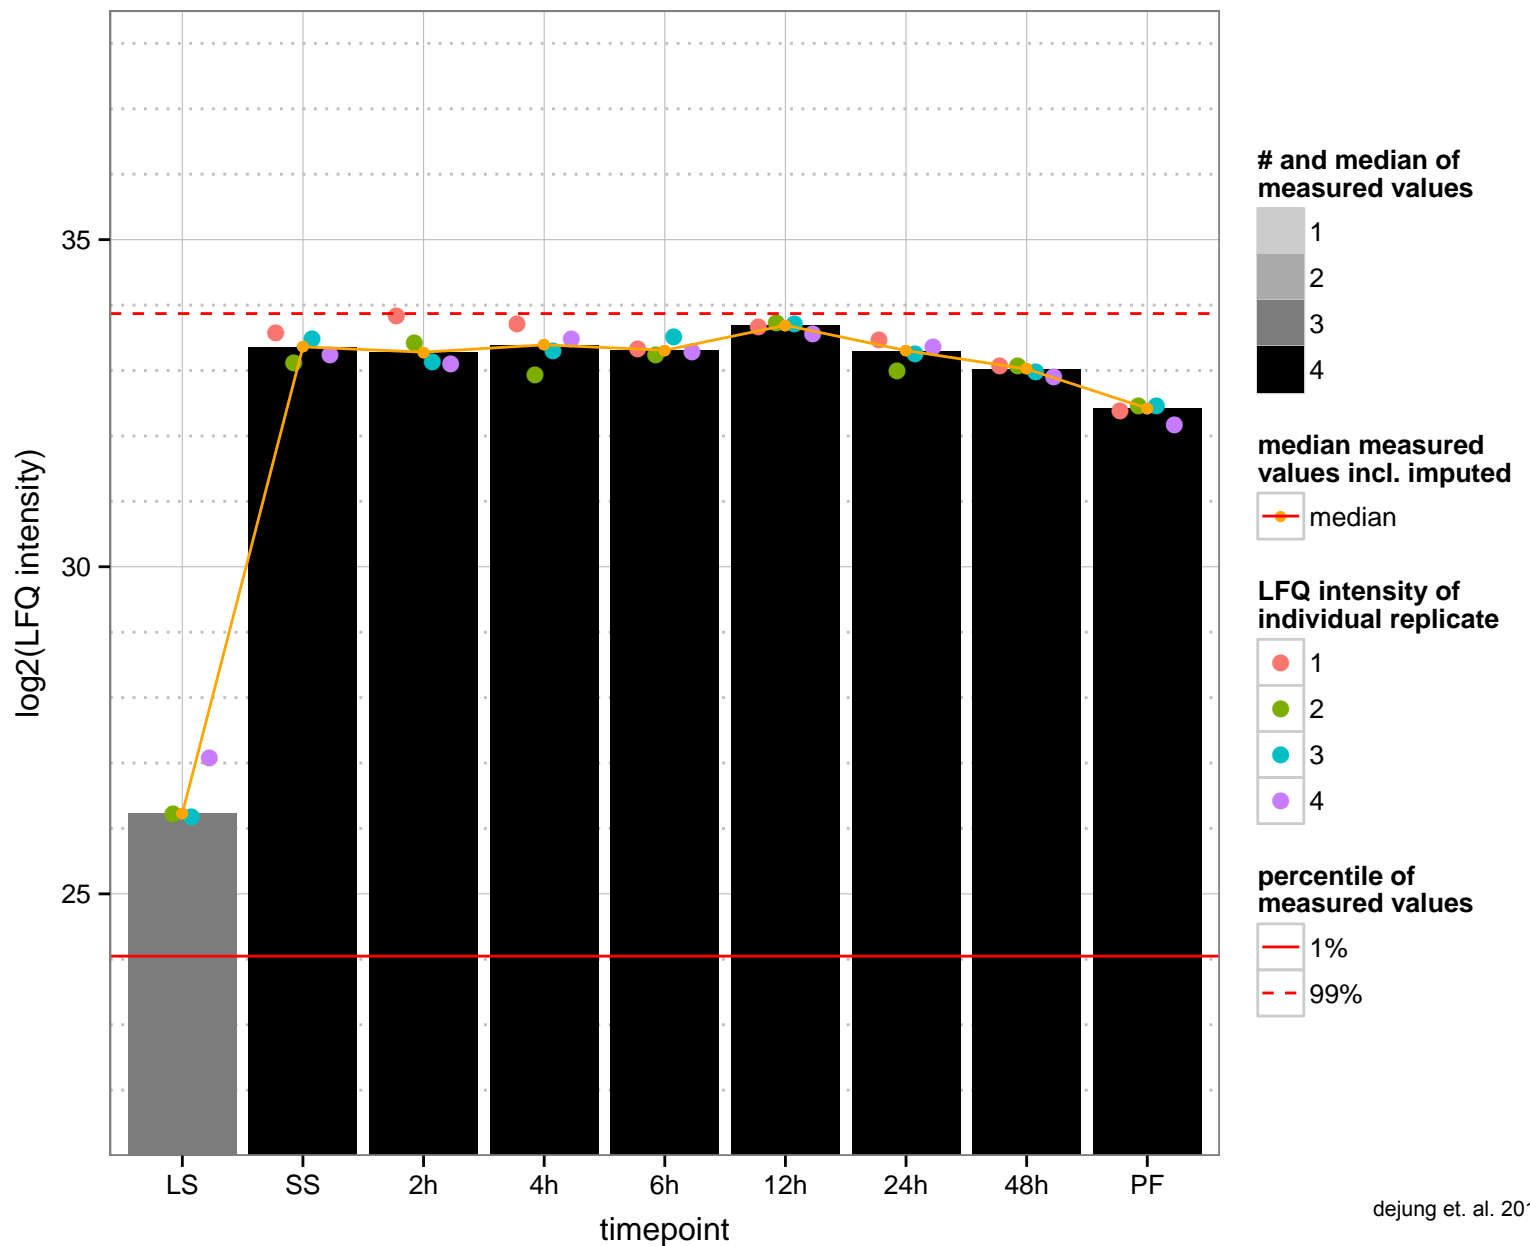

cleavage and polyadenylation specificity factor-like protein, putative  
 Tb927.11.14560  
 AGOF: nucleic acid binding  
 AGOC: nucleus  
 AGOP: mRNA cleavage, mRNA polyadenylation  
 PGO: nucleic acid binding  
 PGO: nucleus  
 PGO: null

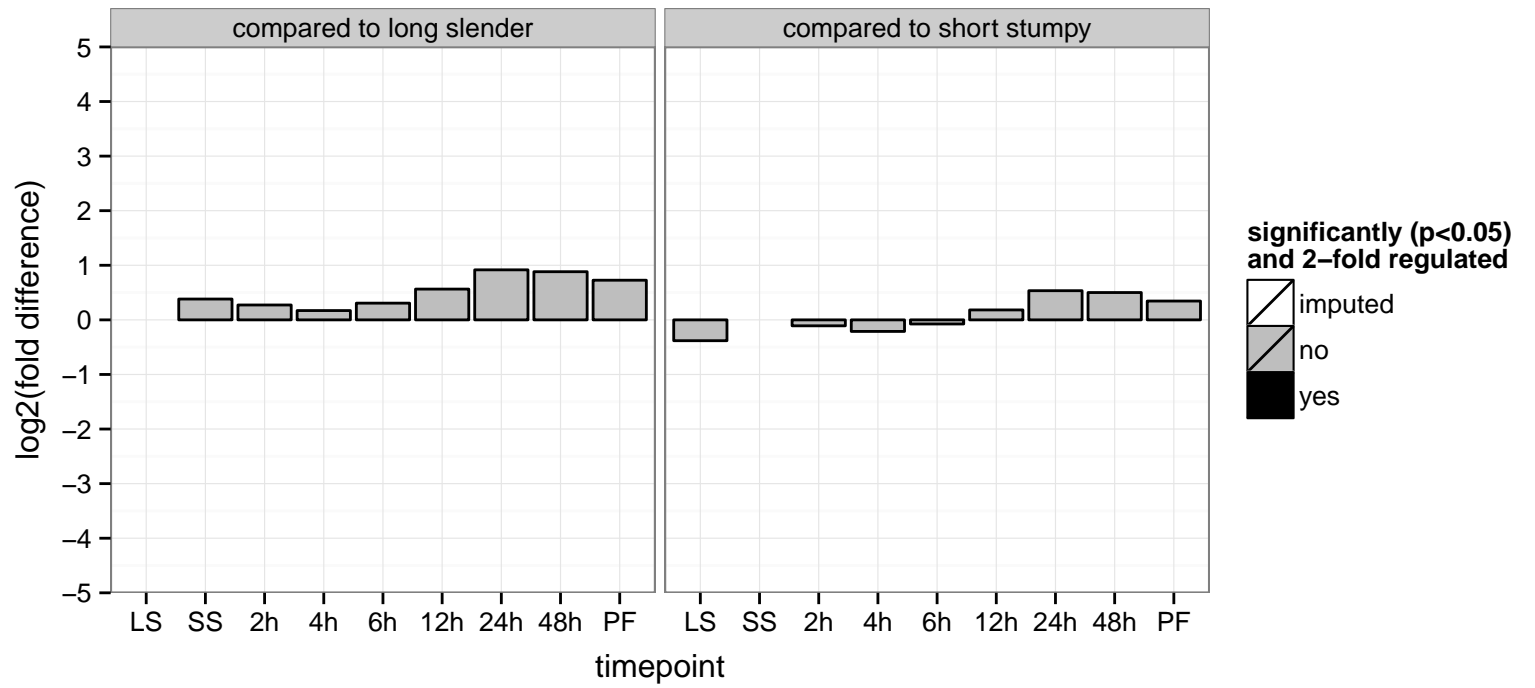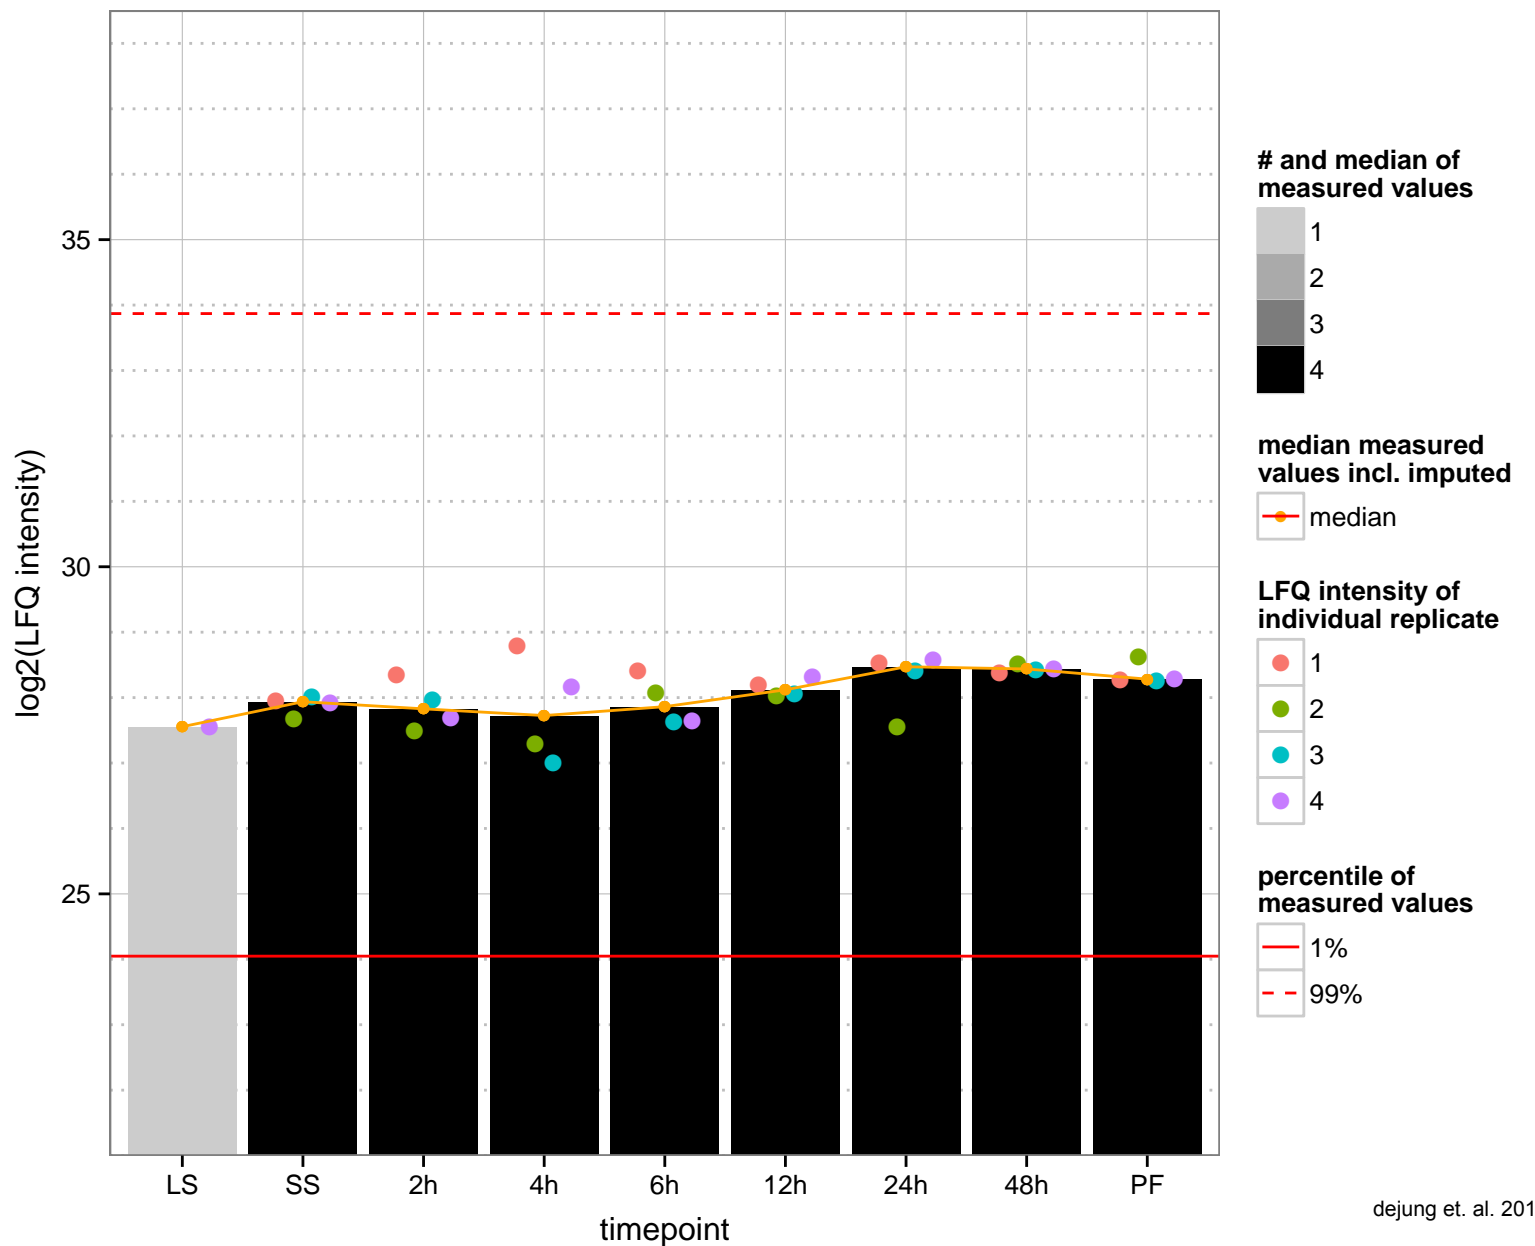

NAD+ synthase, putative  
 Tb927.11.14870  
 AGOF: ATP binding, NAD+ synthase (glutamine-hydrolyzing) activity  
 AGOC: null  
 AGOP: NAD biosynthetic process  
 PGOF: ATP binding, NAD+ synthase (glutamine-hydrolyzing) activity  
 PGOC: null  
 PGOP: NAD biosynthetic process

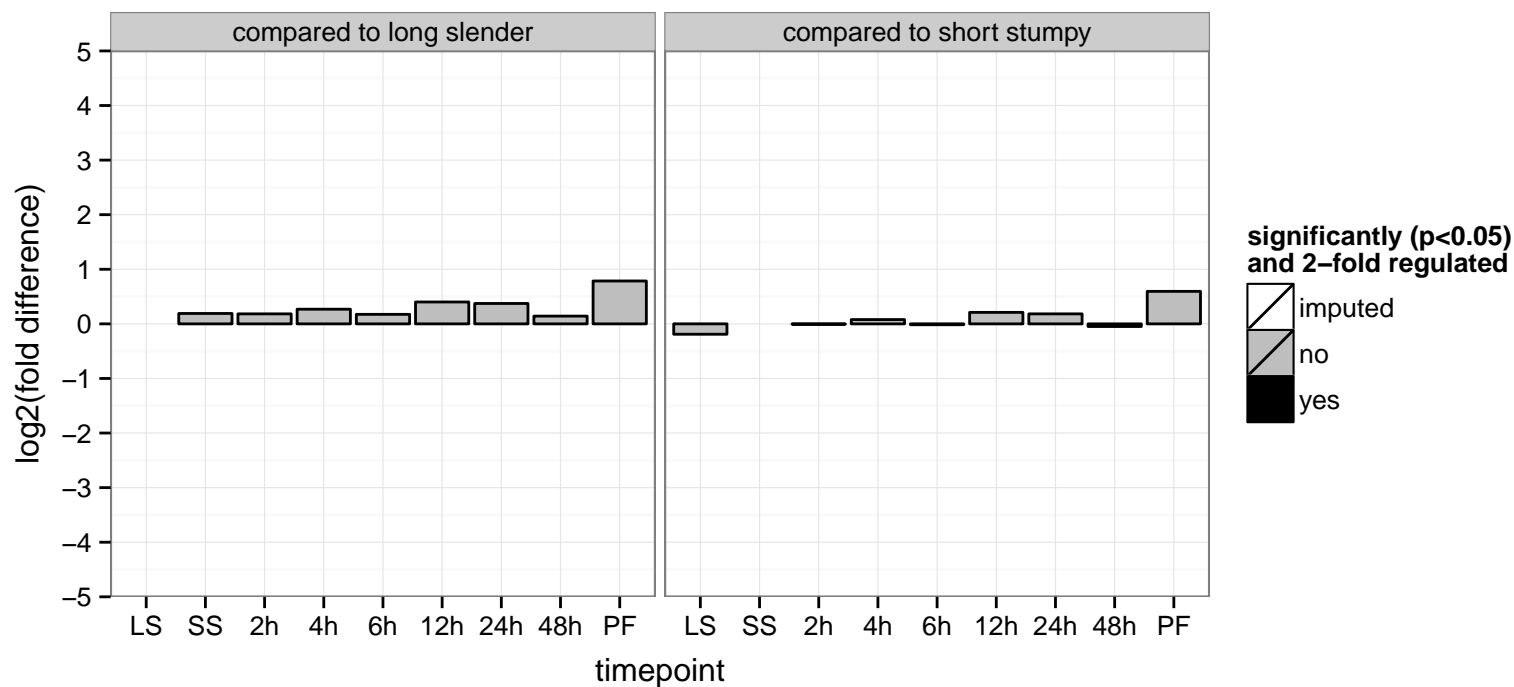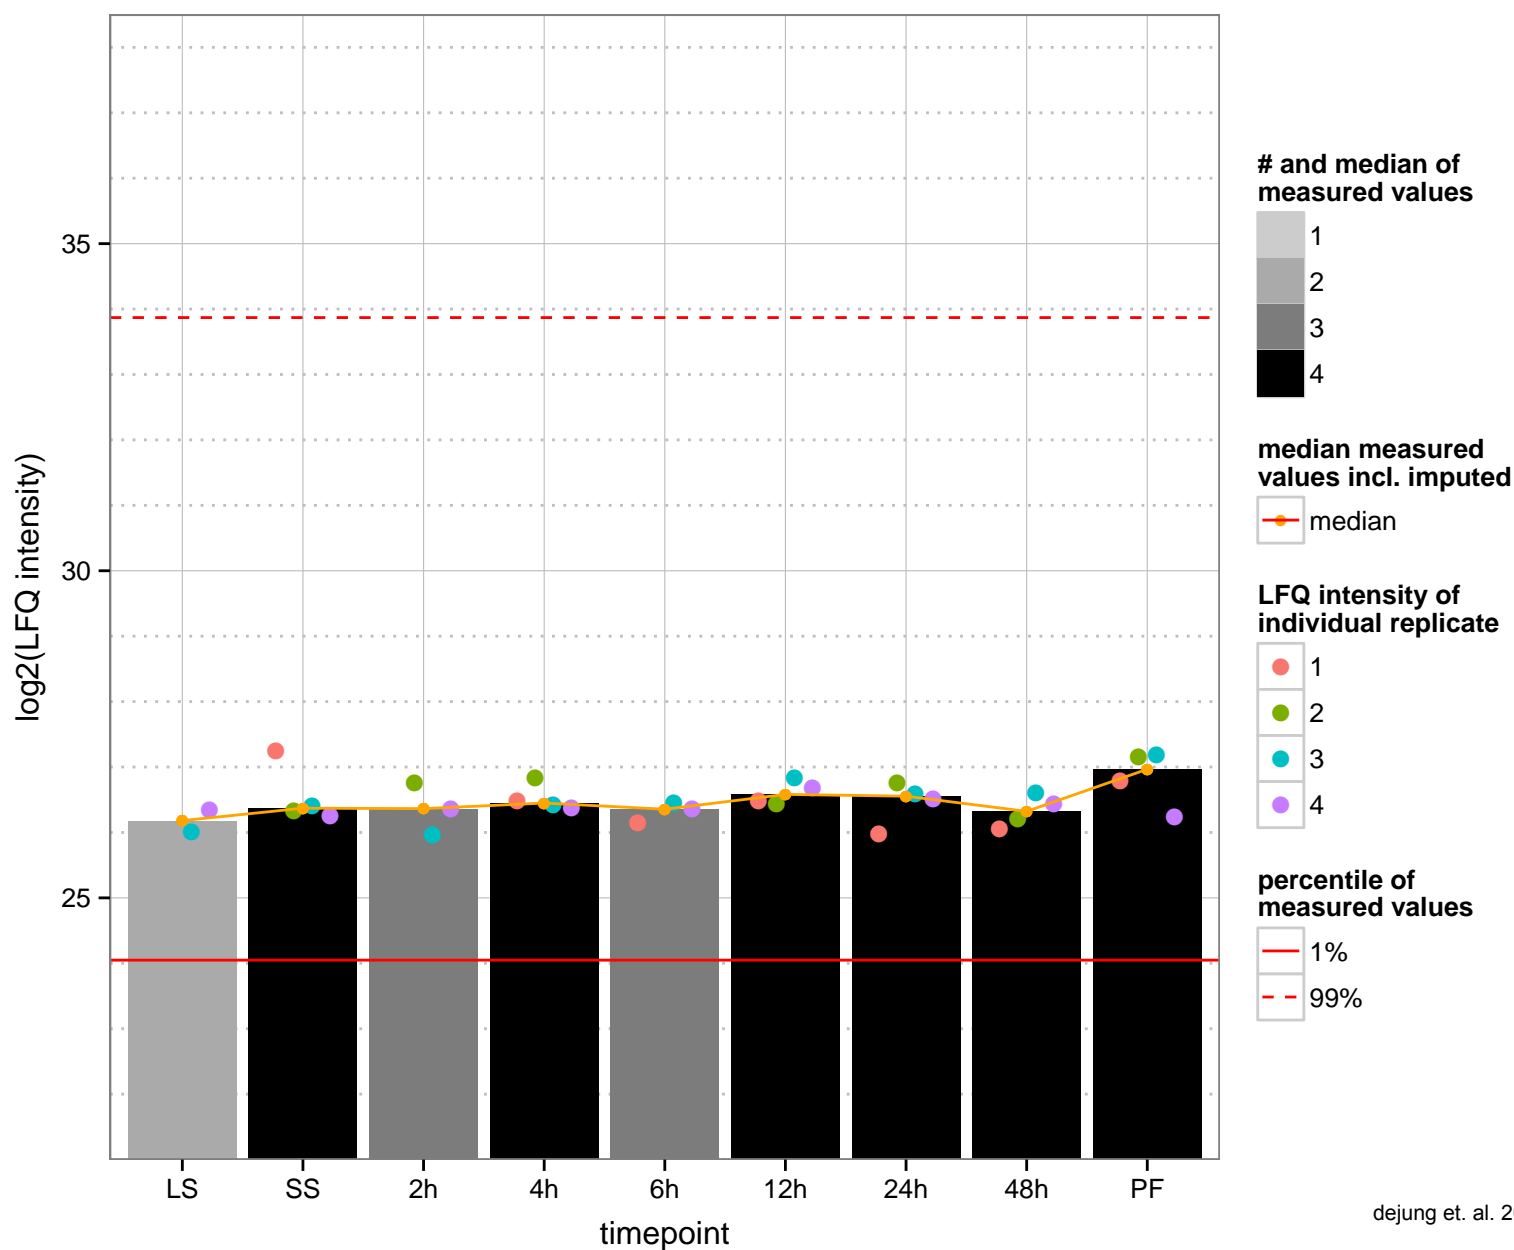



hypothetical protein, conserved  
 Tb927.11.14890  
 AGOF: DNA binding, DNA-directed DNA polymerase activity  
 AGOC: nucleus  
 AGOP: DNA replication  
 PGOF: DNA binding, DNA-directed DNA polymerase activity  
 PGO: null  
 PGOP: DNA replication

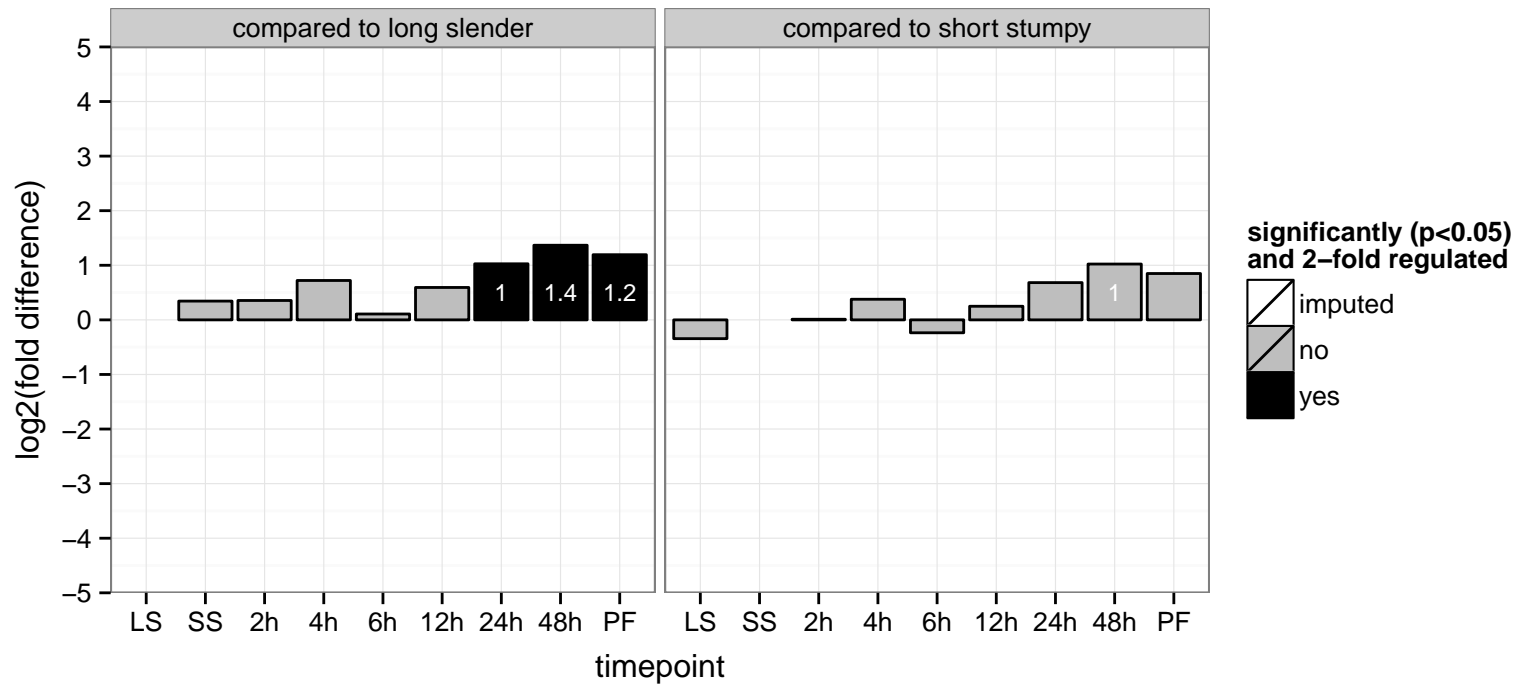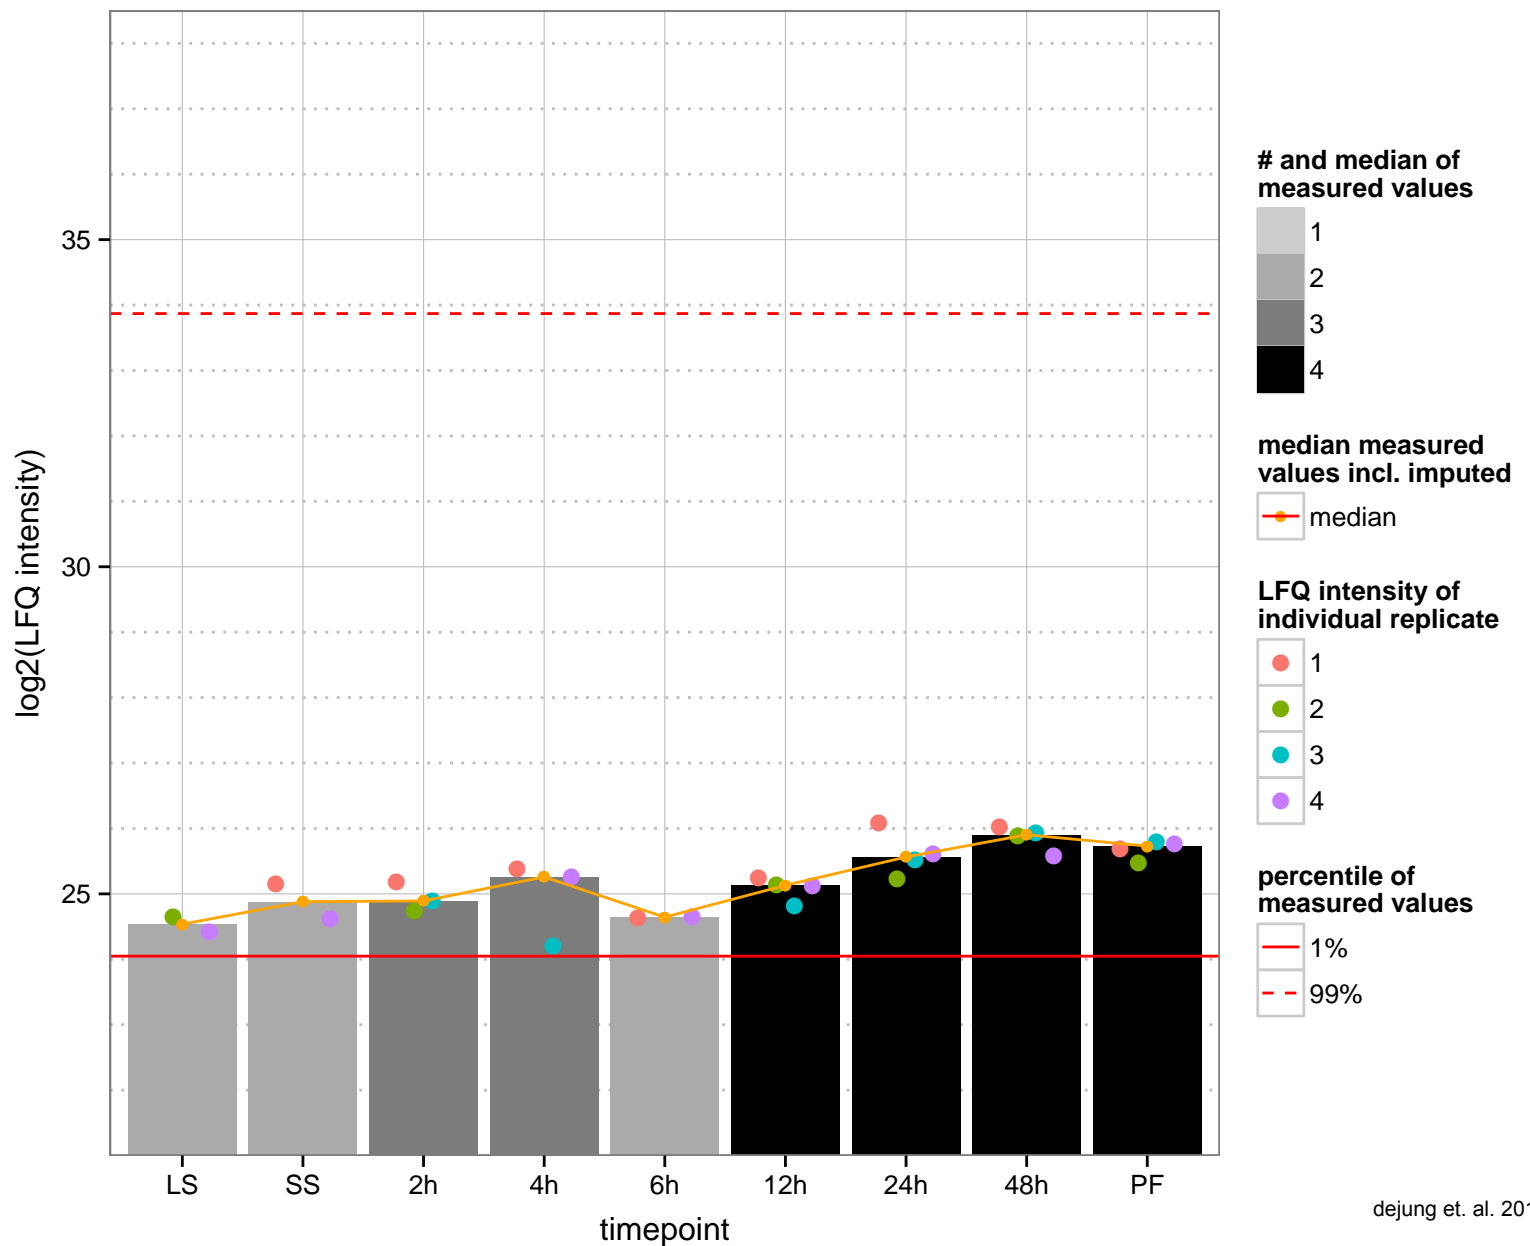

coatamer epsilon subunit, putative, cytosolic coat protein

Tb927.11.14900

AGOF: protein transporter activity, structural molecule activity

AGOC: COPI vesicle coat, cytoplasm, membrane

AGOP: intracellular protein transport, retrograde vesicle-mediated transport, Golgi to ER

PGOF: structural molecule activity

PGOC: COPI vesicle coat

PGOP: retrograde vesicle-mediated transport, Golgi to ER

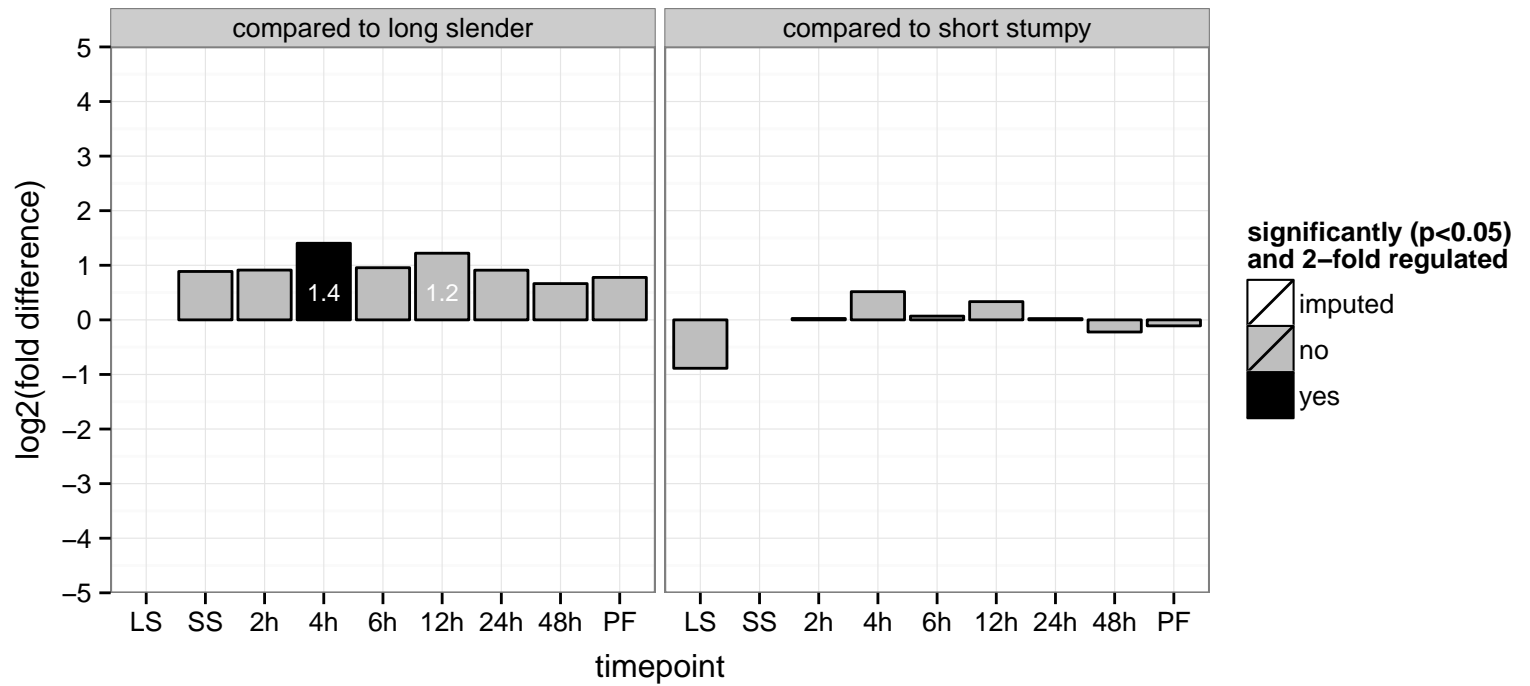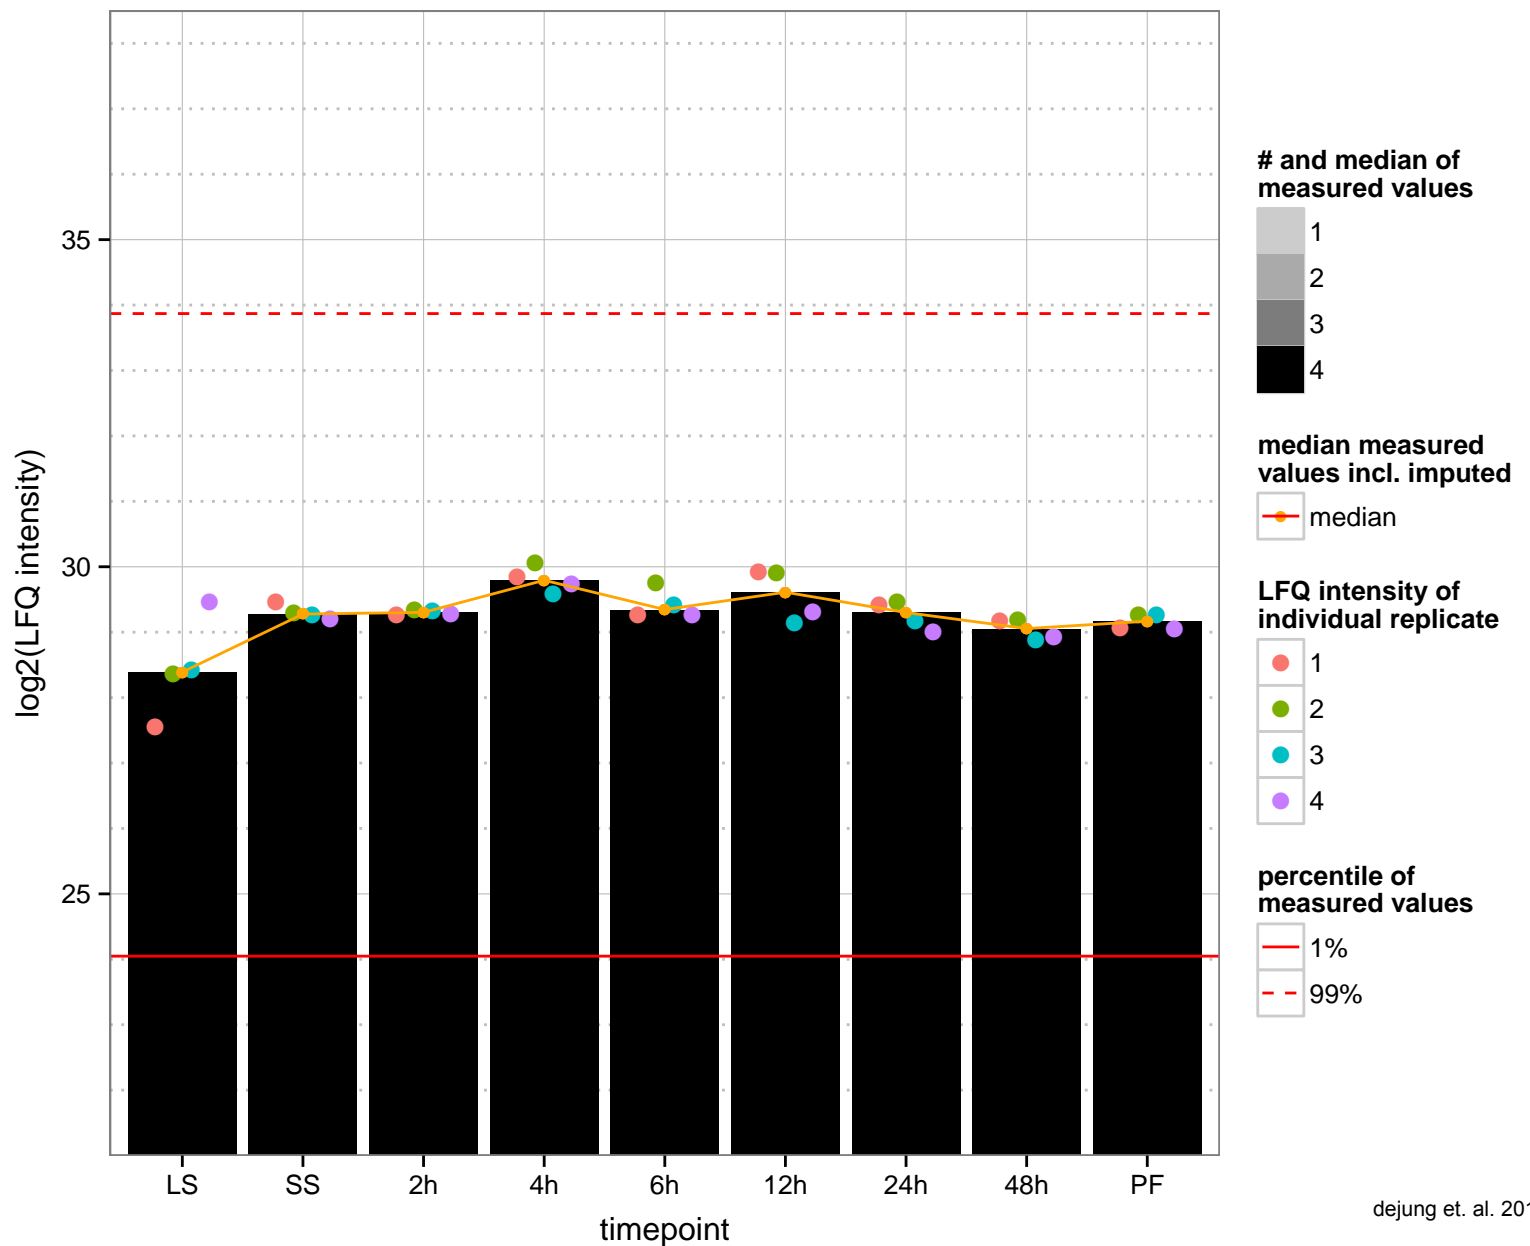

protein phosphatase 2C, putative  
 Tb927.11.14910  
 AGOF: phosphatase activity  
 AGOC: integral to membrane  
 AGOP: dephosphorylation  
 PGO: catalytic activity  
 PGOC: null  
 PGOP: null

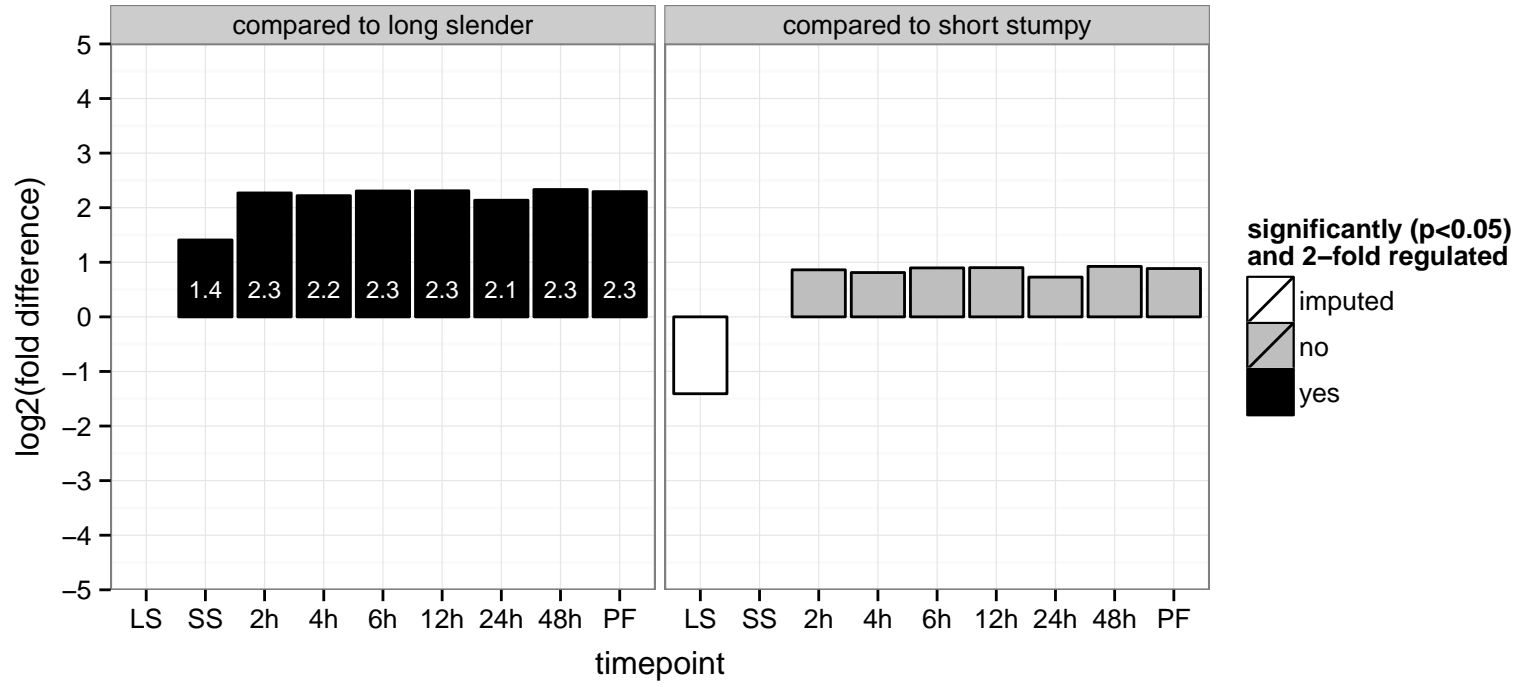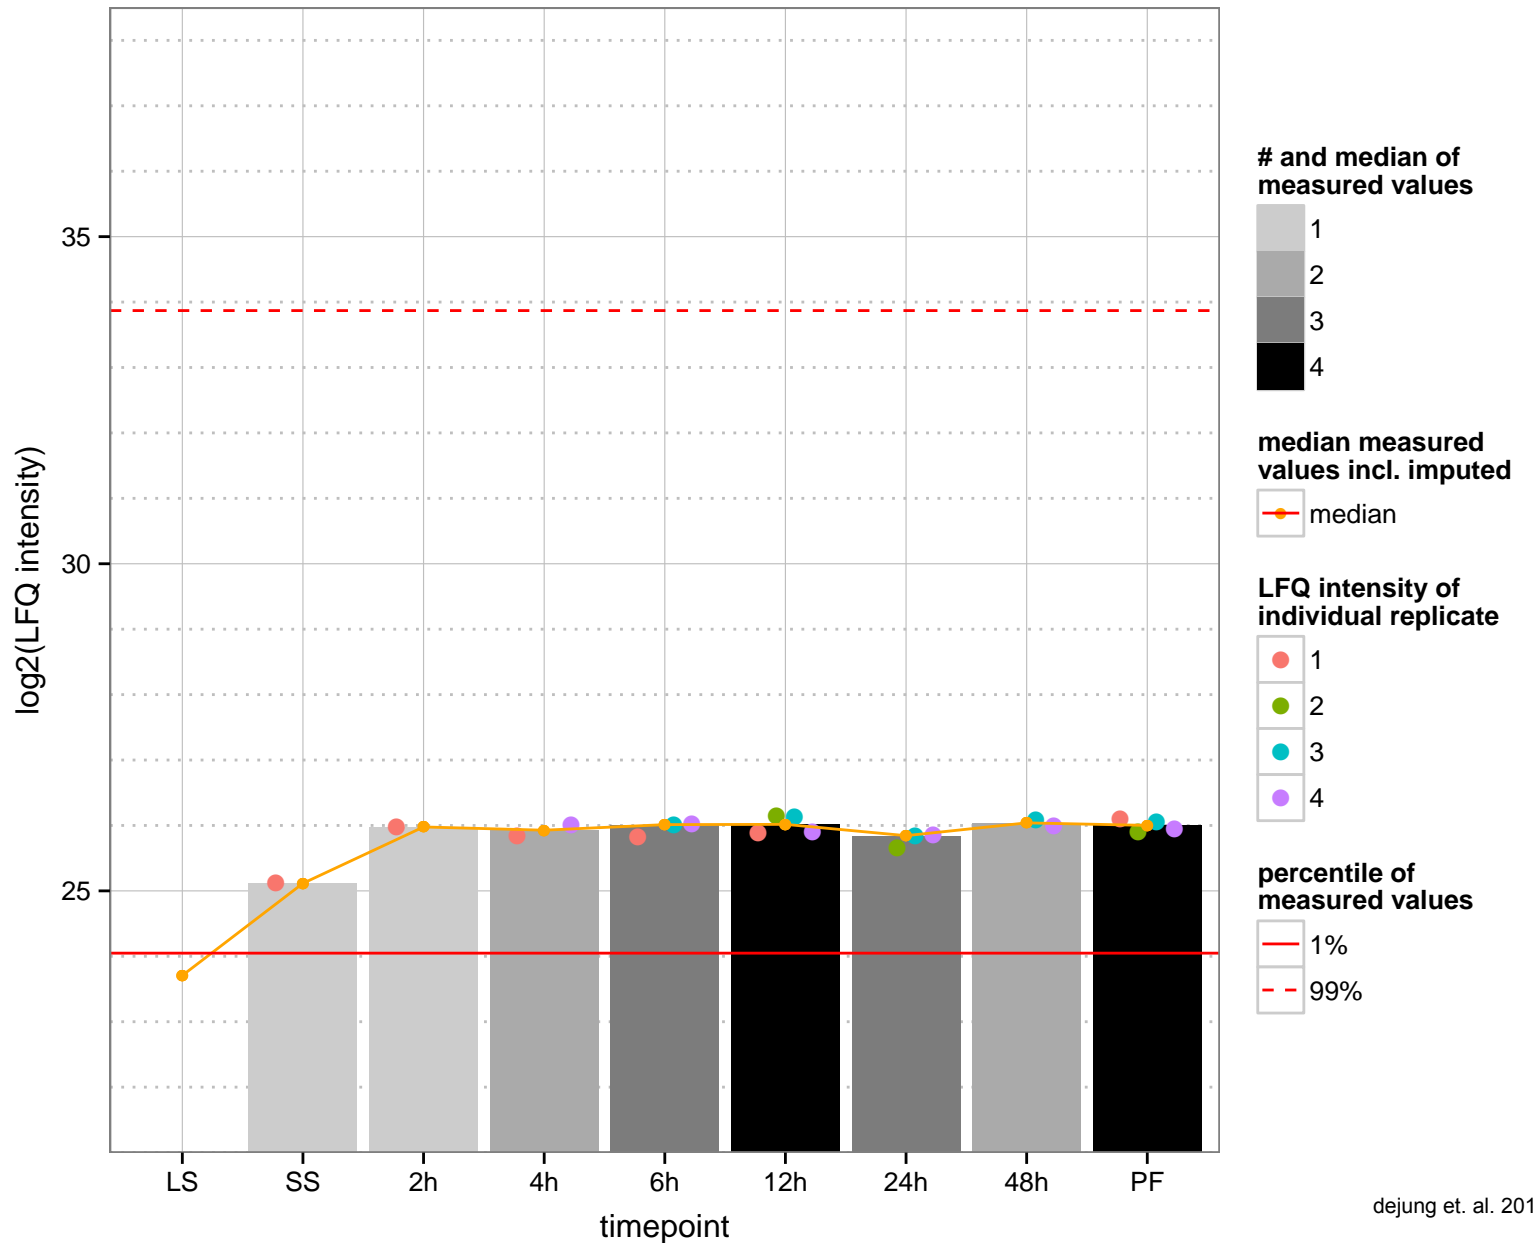

hypothetical protein, conserved  
 Tb927.11.14970  
 AGOF: null  
 AGOC: null  
 AGOP: null  
 PGO: null  
 PGOC: null  
 PGOP: null

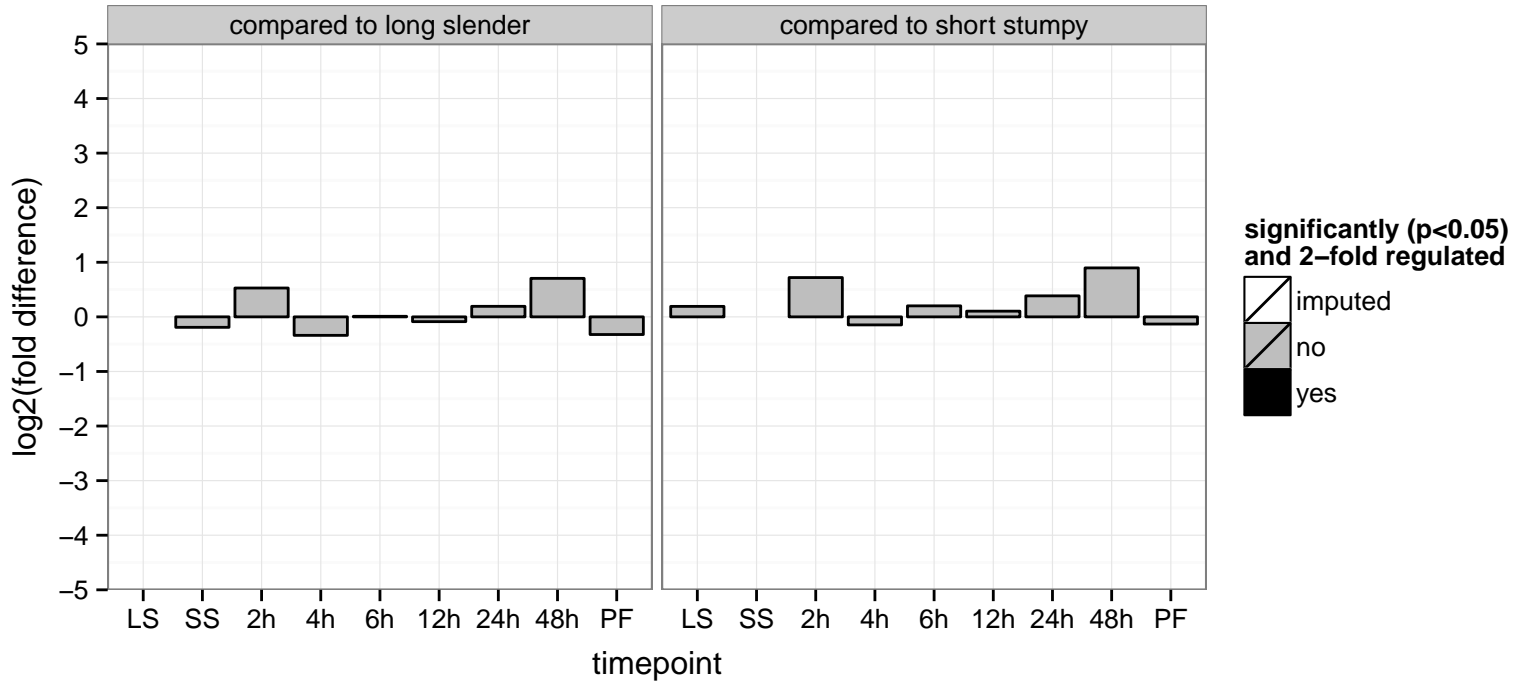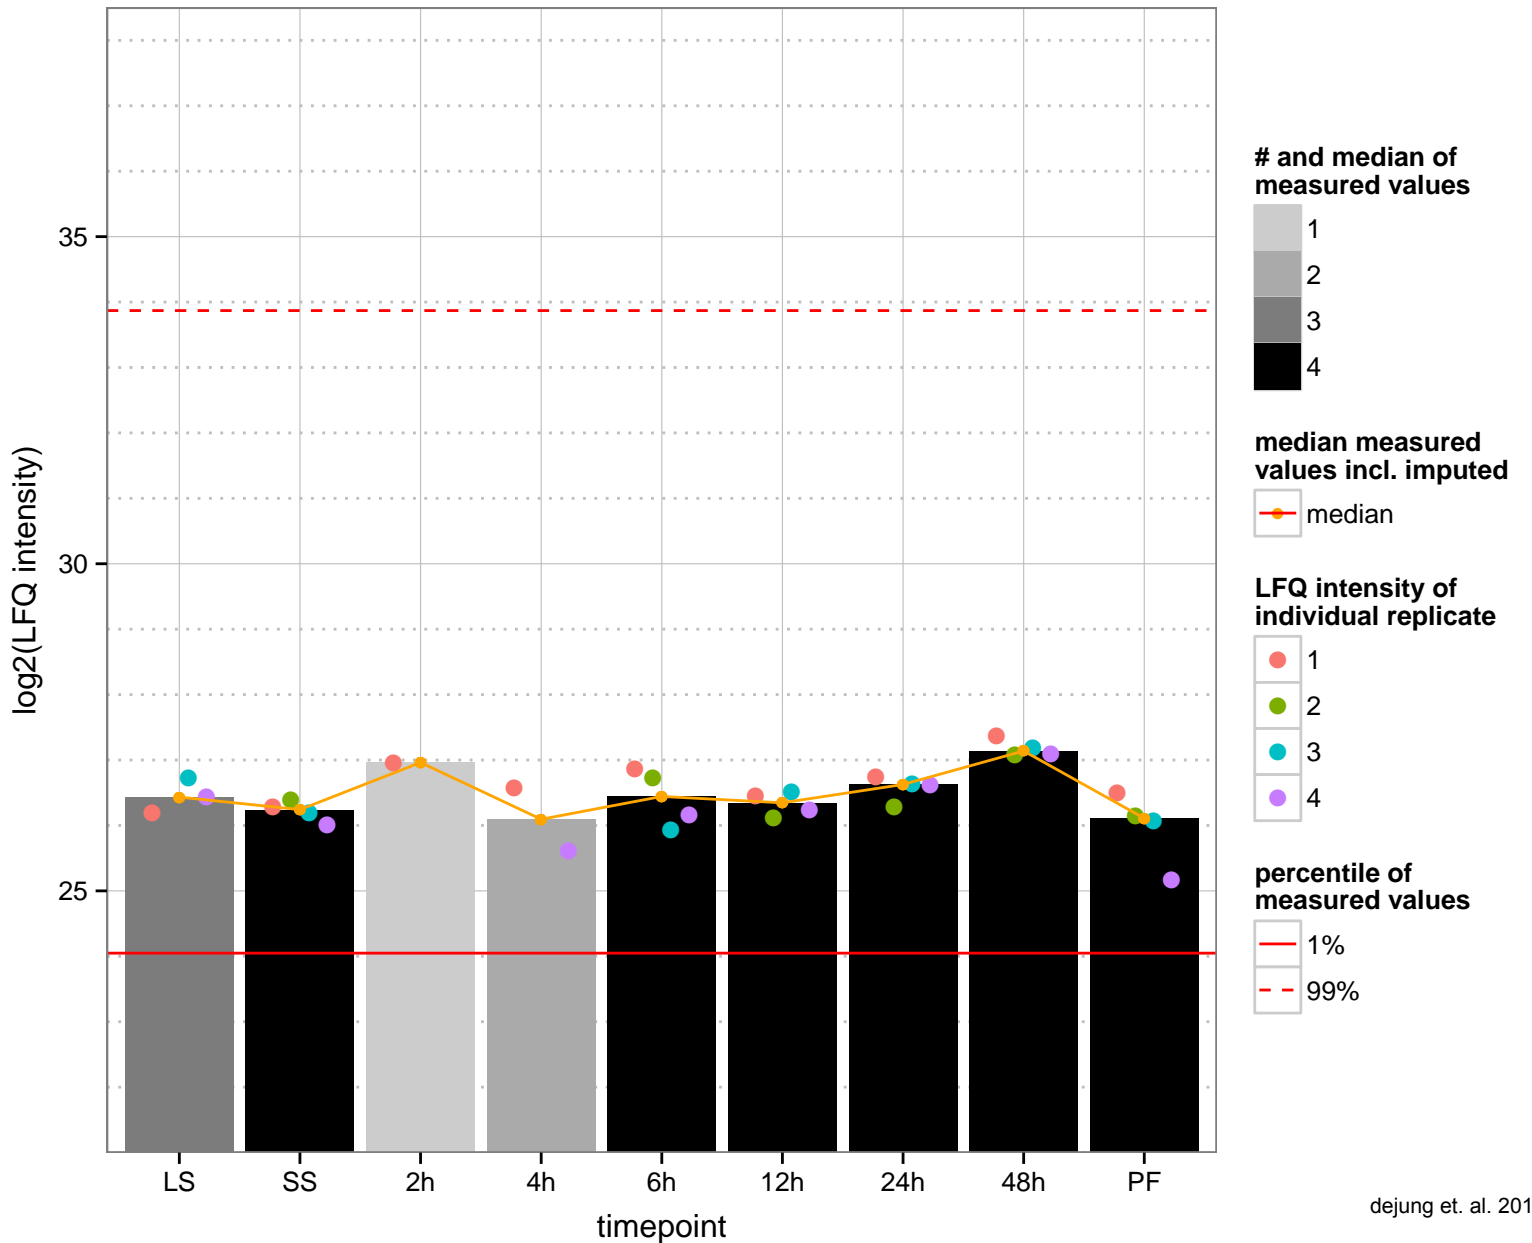

chaperonin HSP60, mitochondrial precursor, putative, heat shock protein 60 (Cpn60)  
 Tb927.11.15040  
 AGOF: ATP binding, unfolded protein binding  
 AGOC: mitochondrion  
 AGOP: protein complex assembly, protein folding  
 PGO: ATP binding  
 PGO: cytoplasm  
 PGO: cellular protein metabolic process, protein refolding

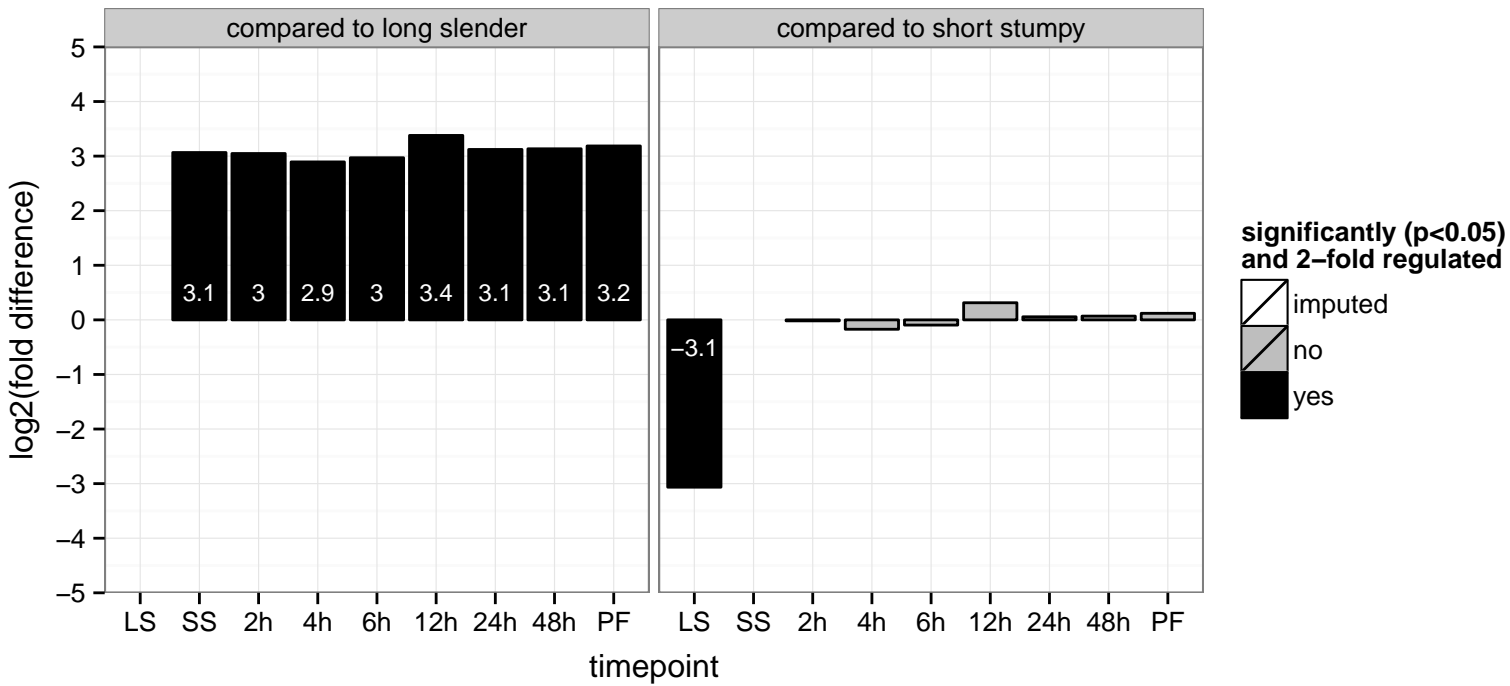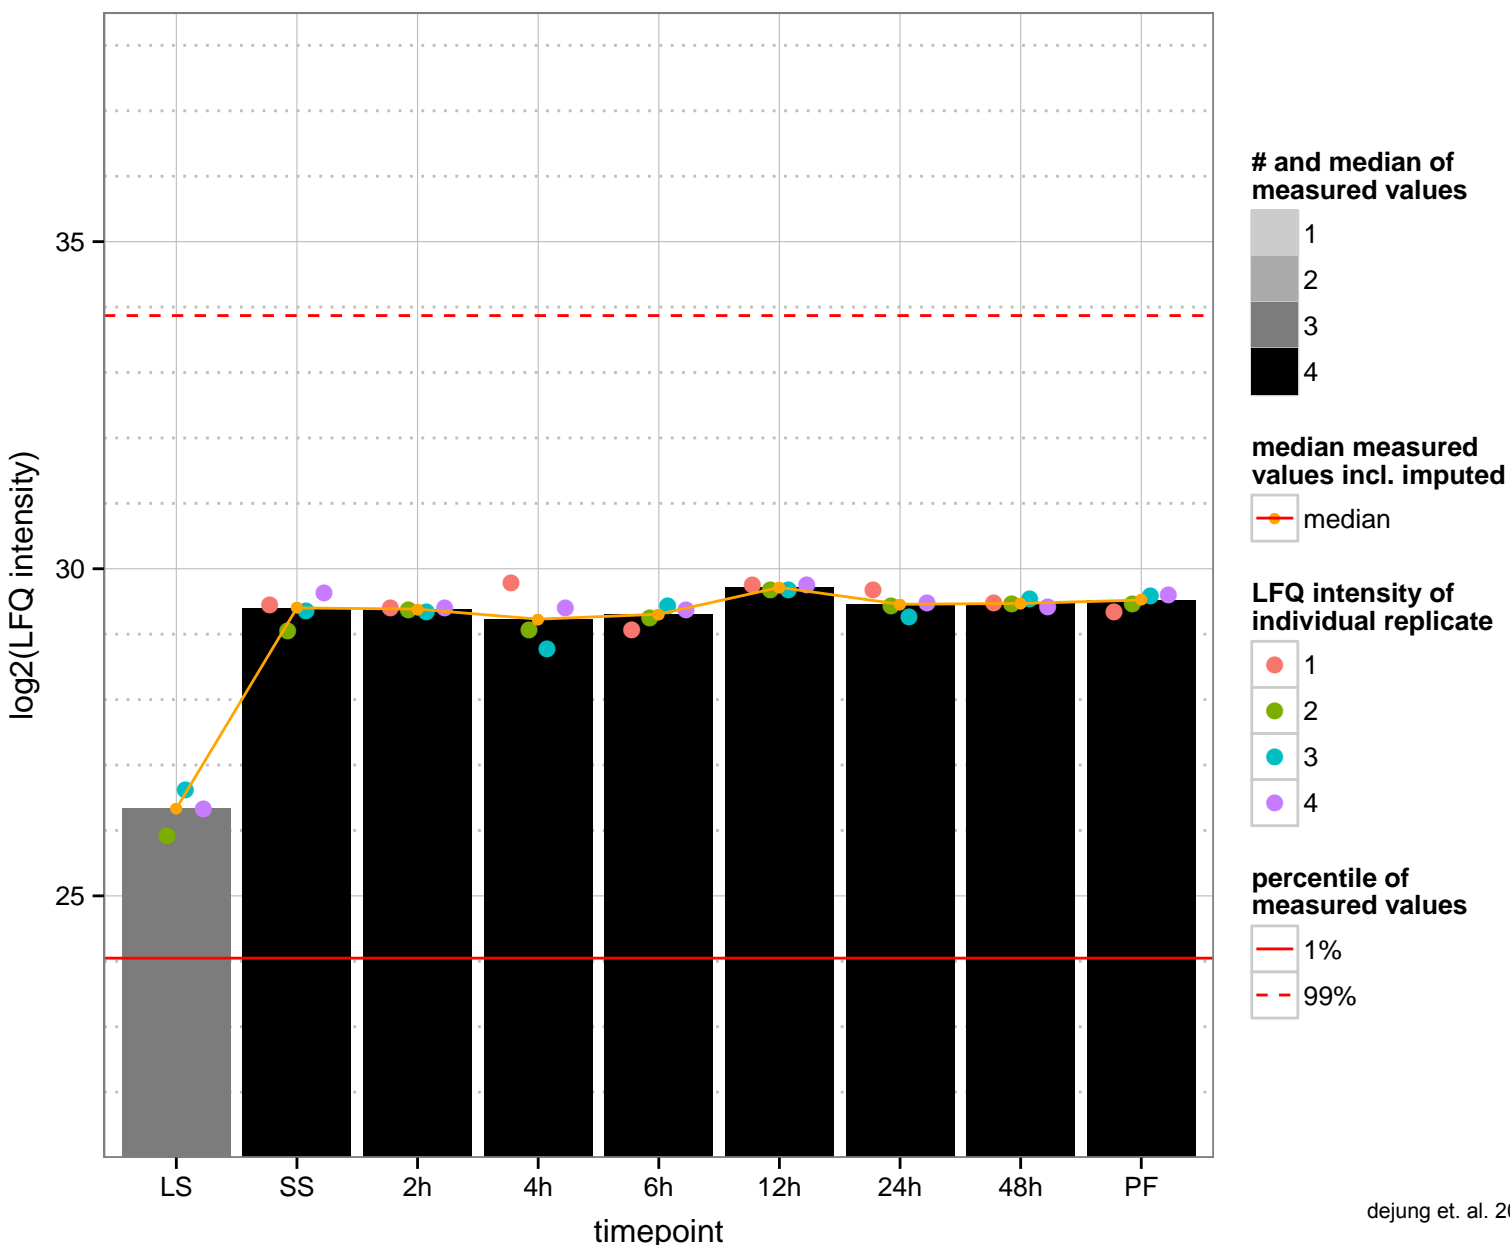

hypothetical protein, conserved  
 Tb927.11.15070  
 AGOF: null  
 AGOC: mitochondrion  
 AGOP: null  
 PGO: null  
 PGOC: null  
 PGOP: null

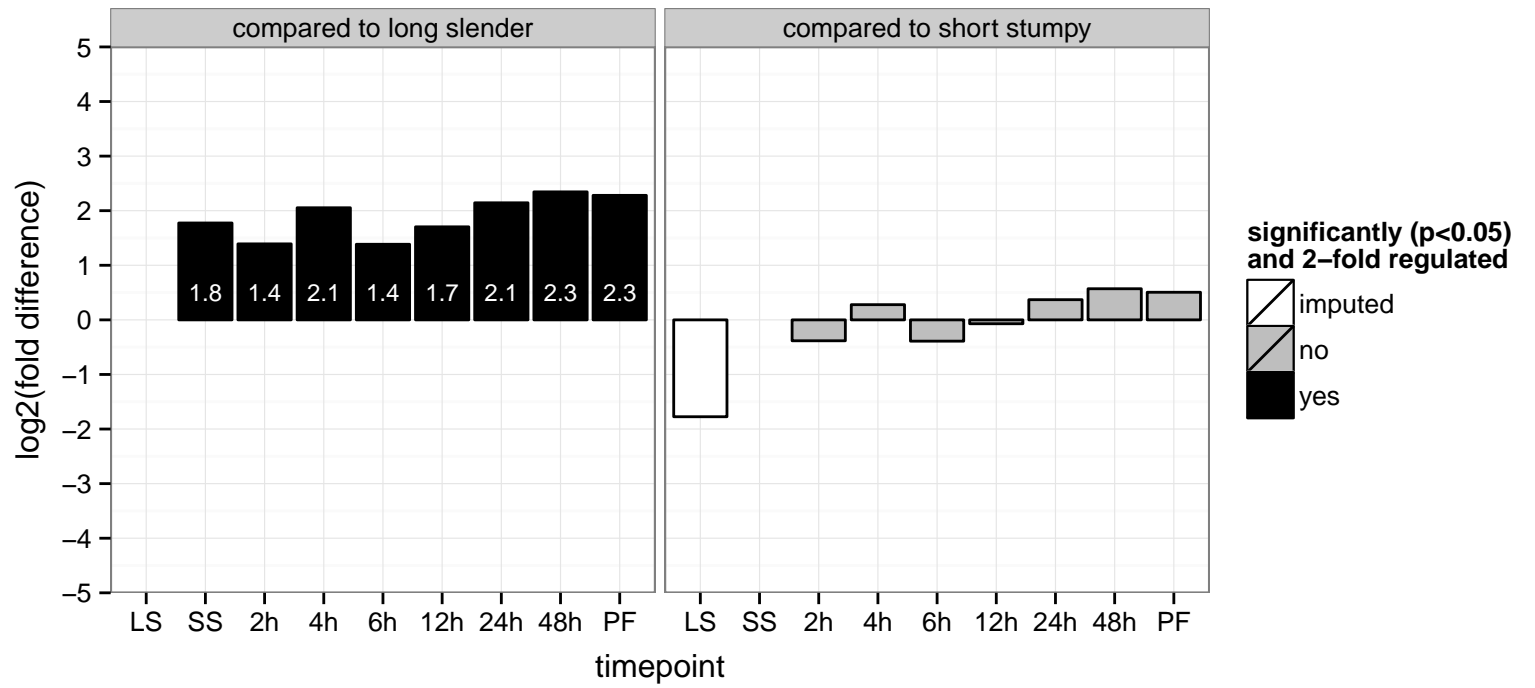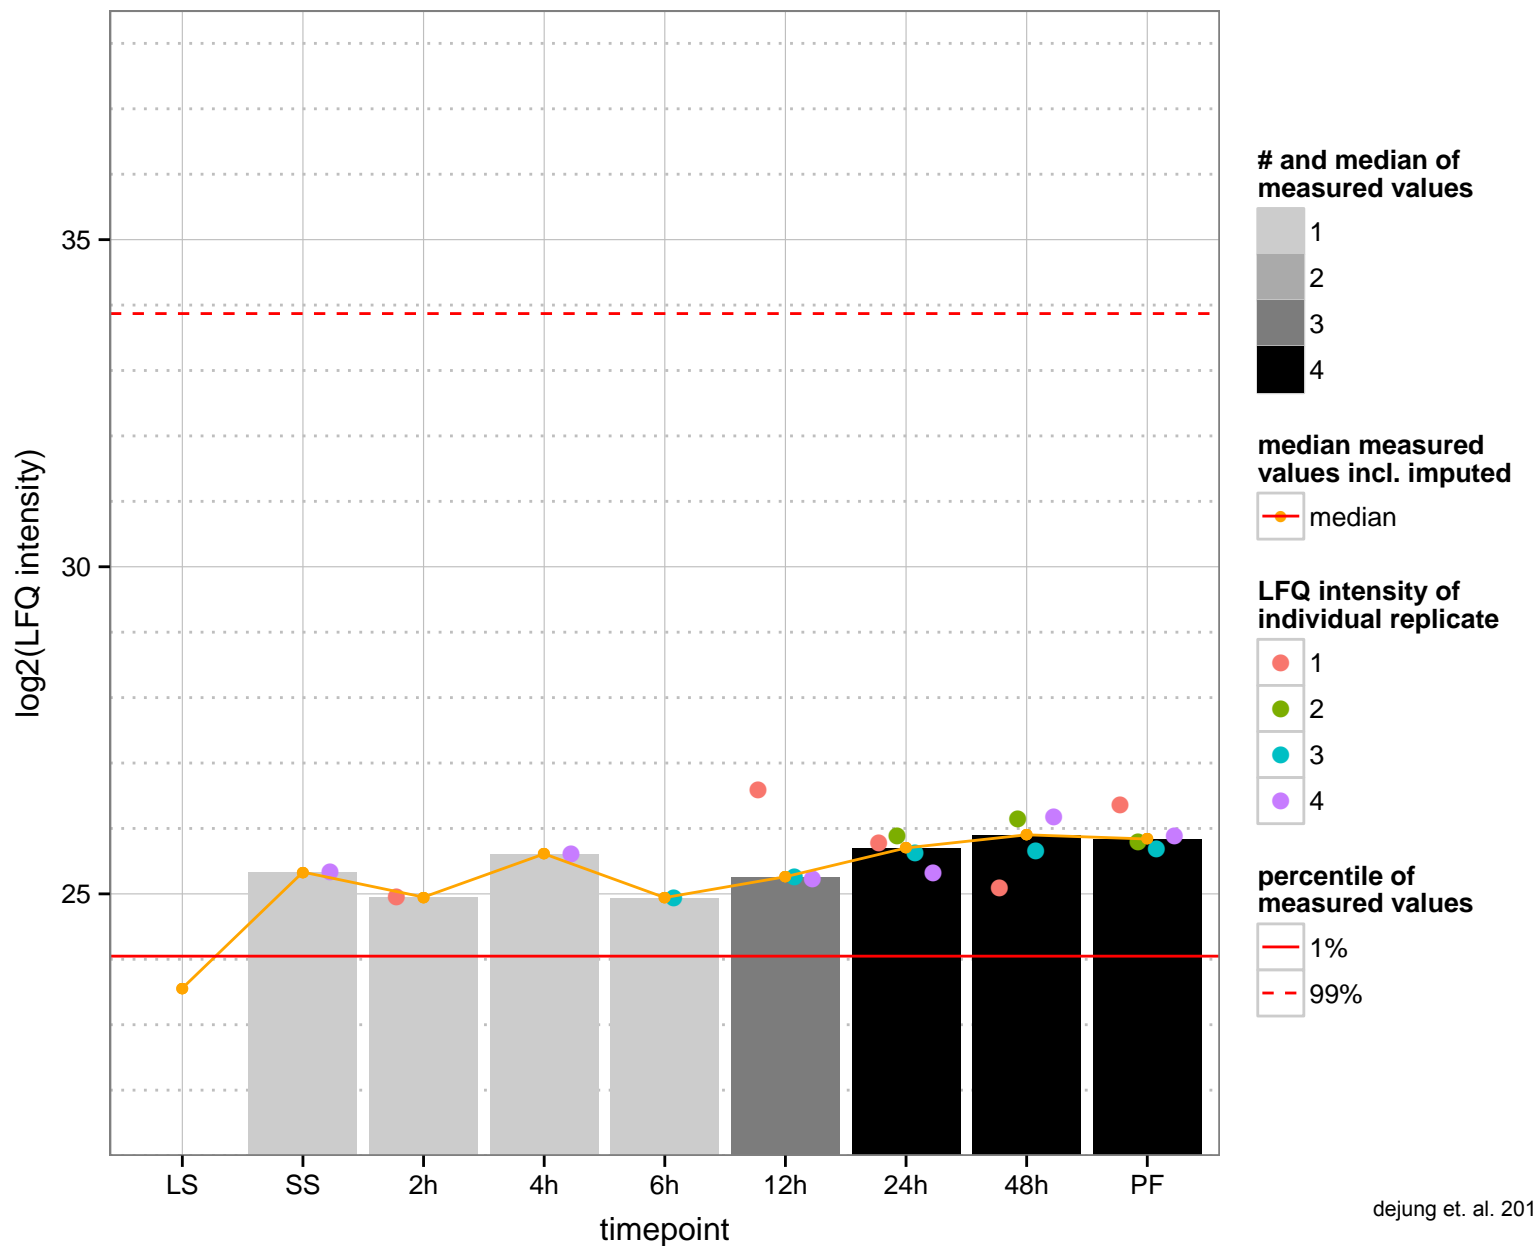

Tb5.20  
 Tb927.11.15100  
 AGOF: null  
 AGOC: null  
 AGOP: null  
 PGO: null  
 PGOC: null  
 PGOP: null

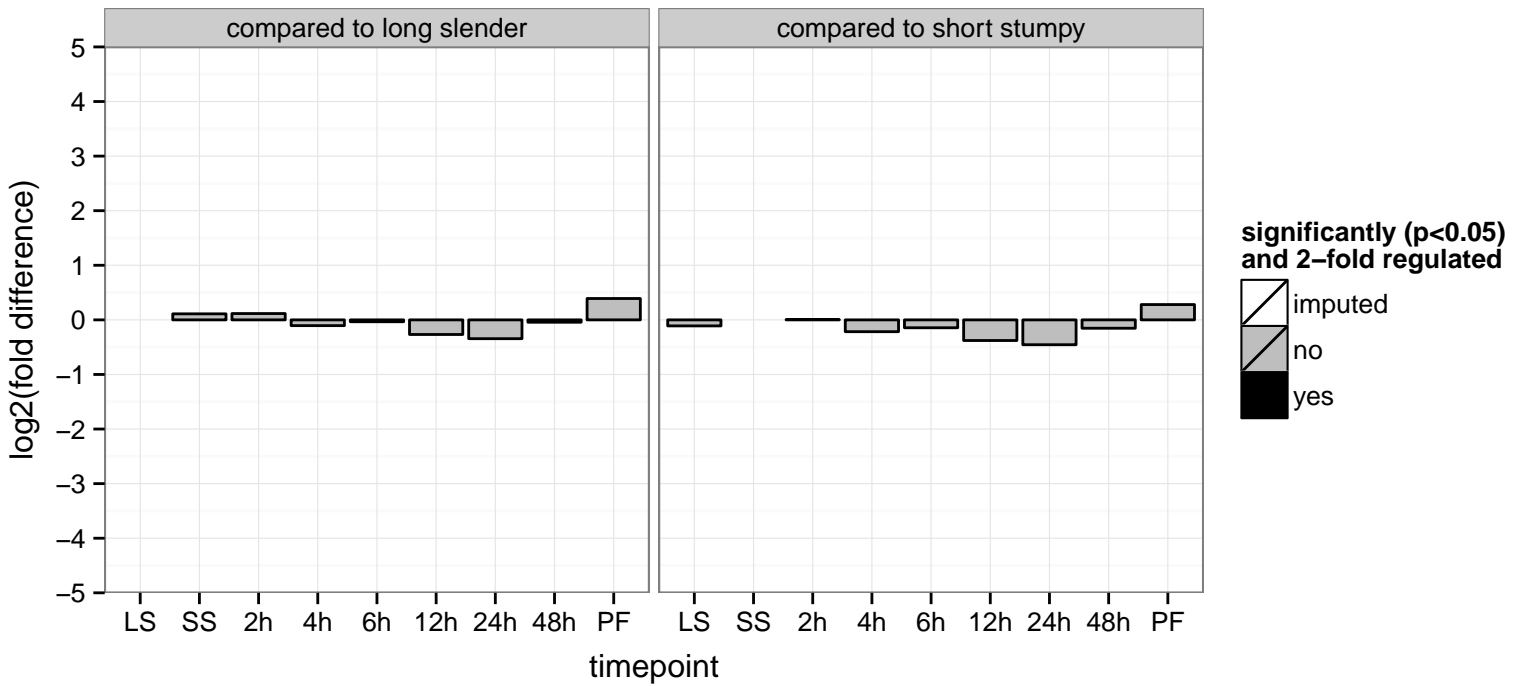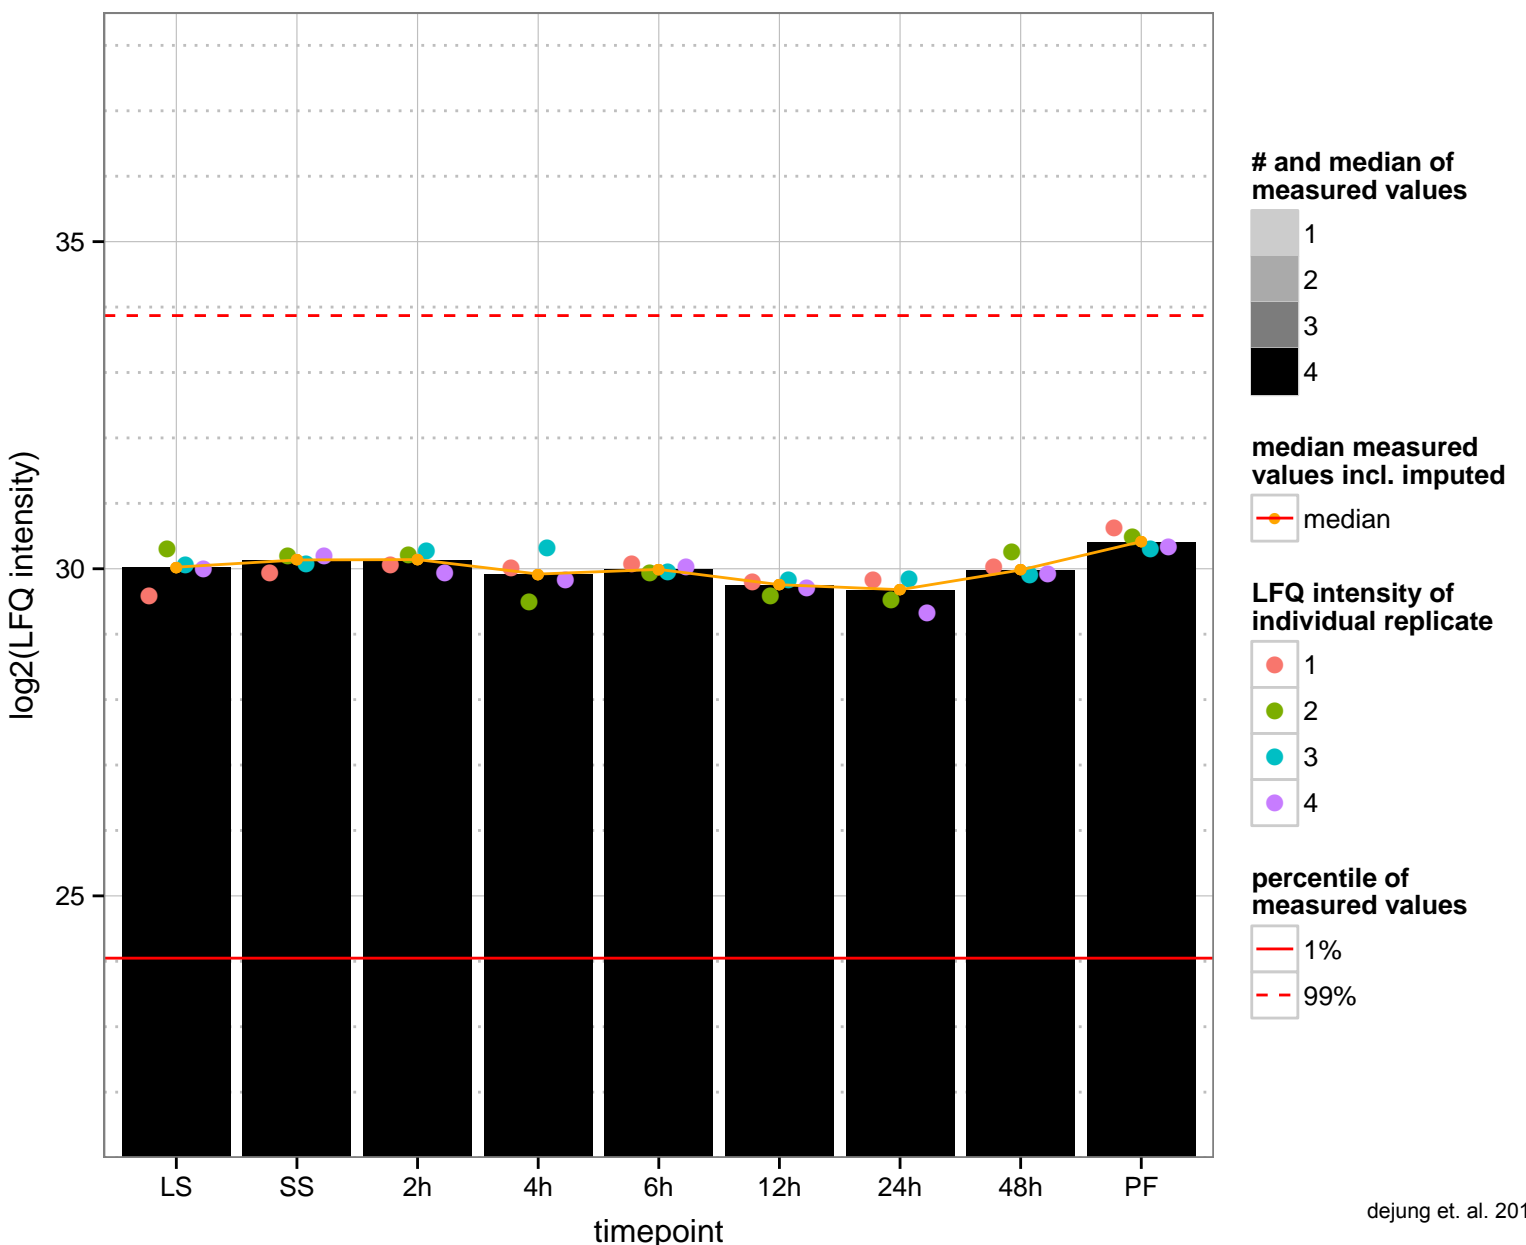

chaperone protein DNAj, putative, heat shock protein-like protein  
 Tb927.11.15130  
 AGOF: heat shock protein binding, unfolded protein binding  
 AGOC: null  
 AGOP: protein folding  
 PGOF: heat shock protein binding, unfolded protein binding  
 PGO: null  
 PGOP: protein folding

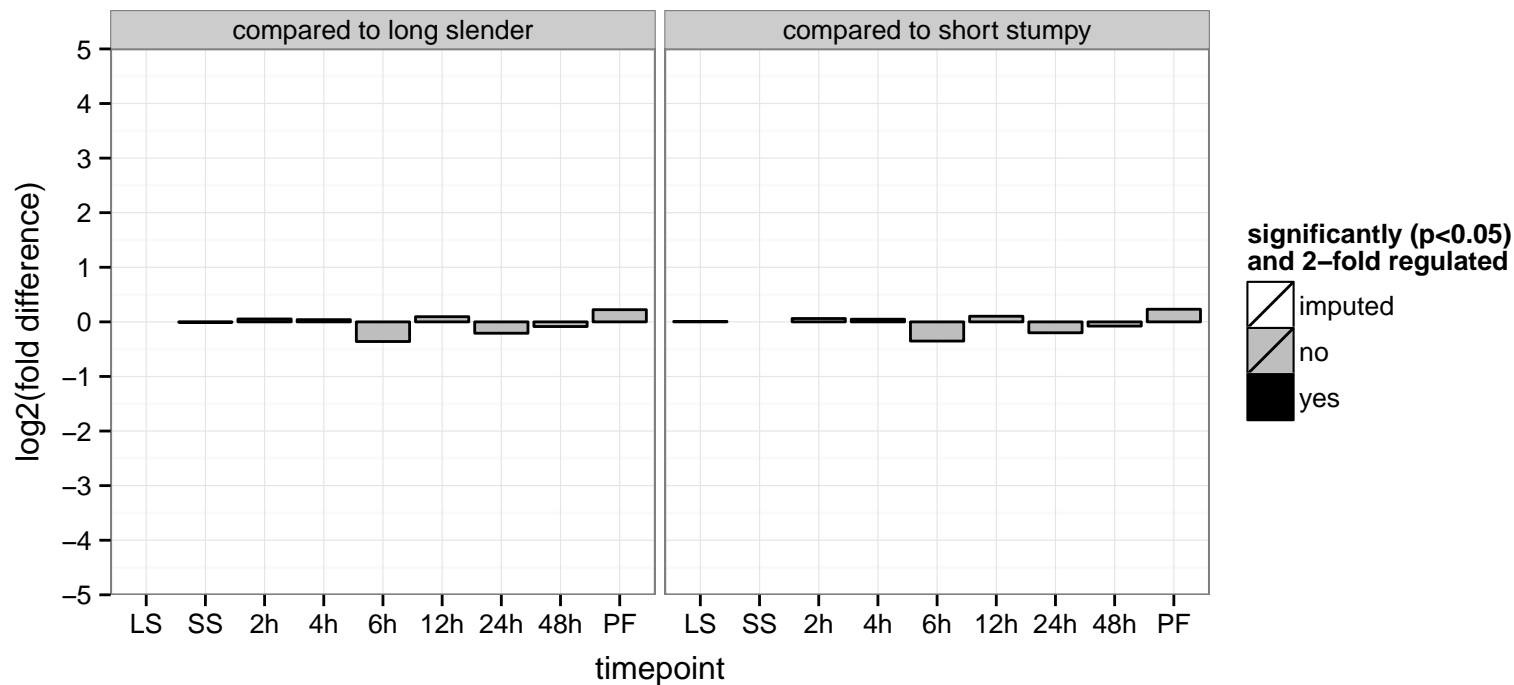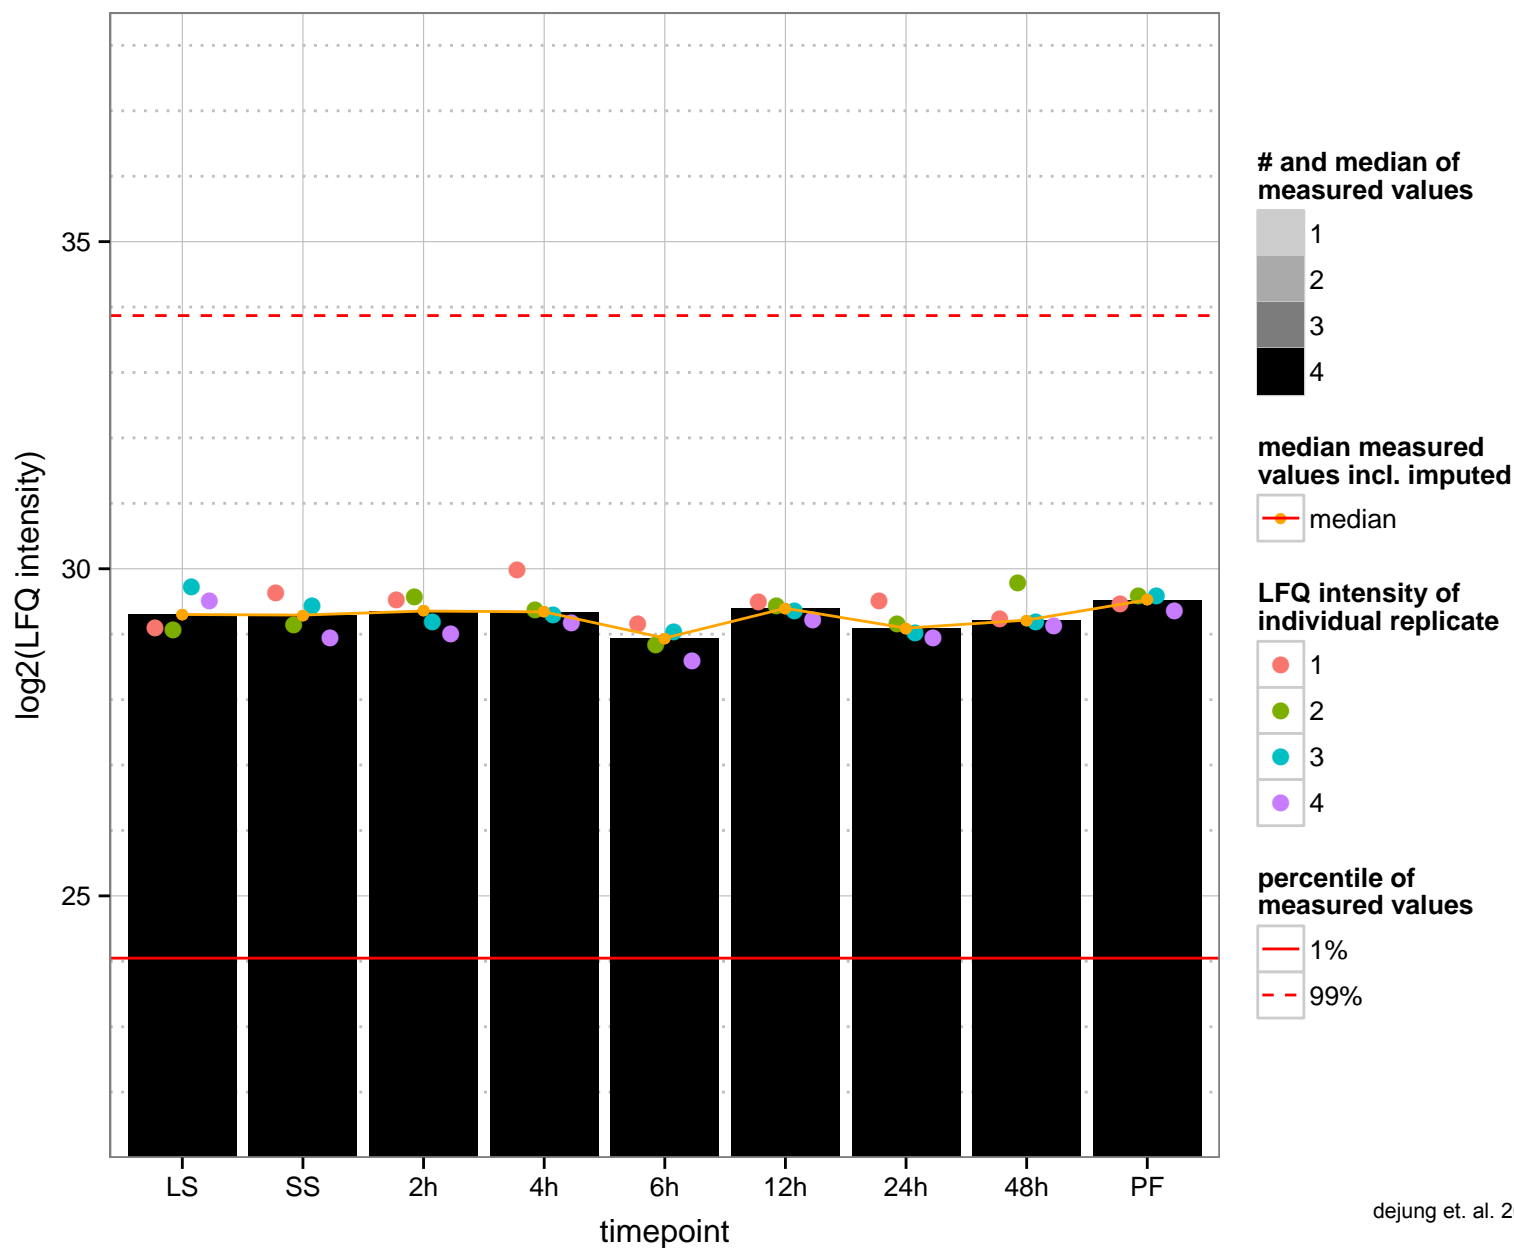



1-acyl-sn-glycerol-3-phosphate acyltransferase, putative  
 Tb927.11.15150  
 AGOF: 1-acylglycerol-3-phosphate O-acyltransferase activity  
 AGOC: integral to membrane  
 AGOP: metabolic process  
 PGOF: transferase activity, transferring acyl groups  
 PGO: null  
 PGOP: metabolic process

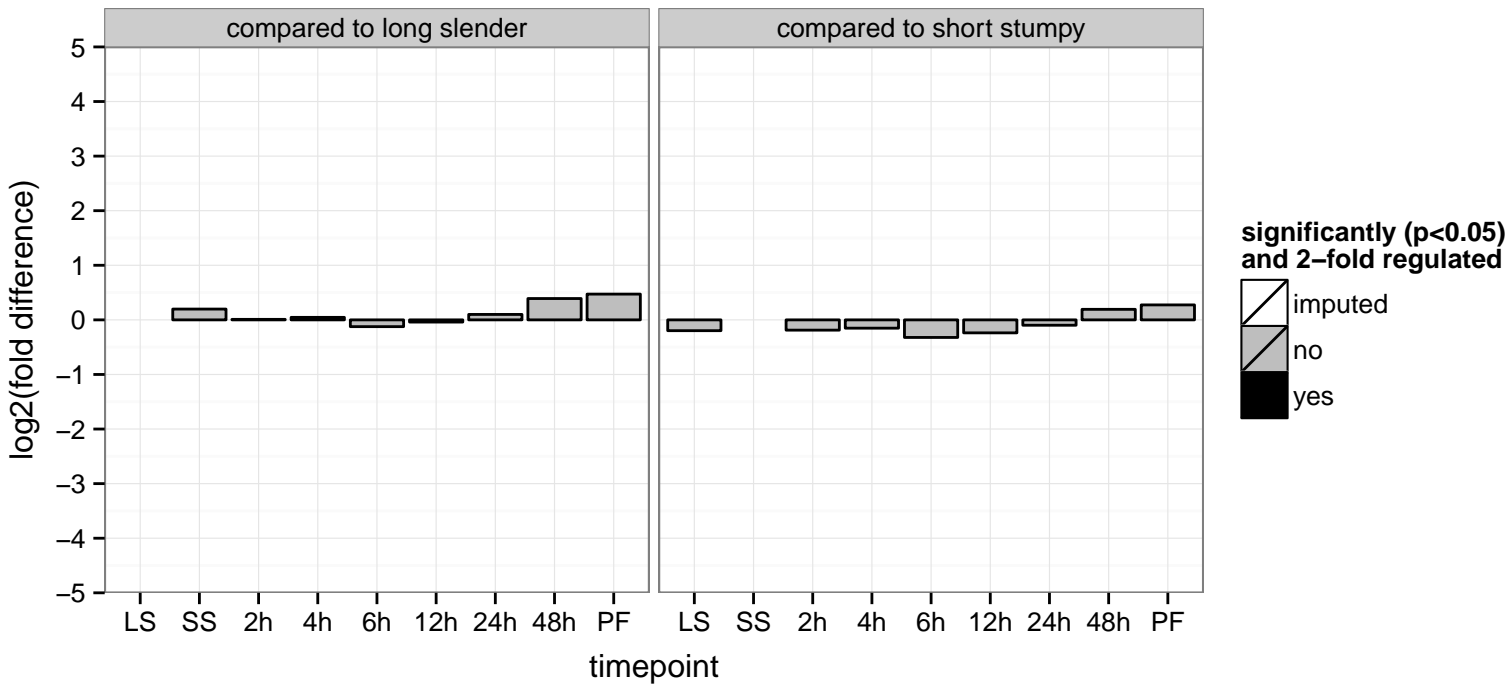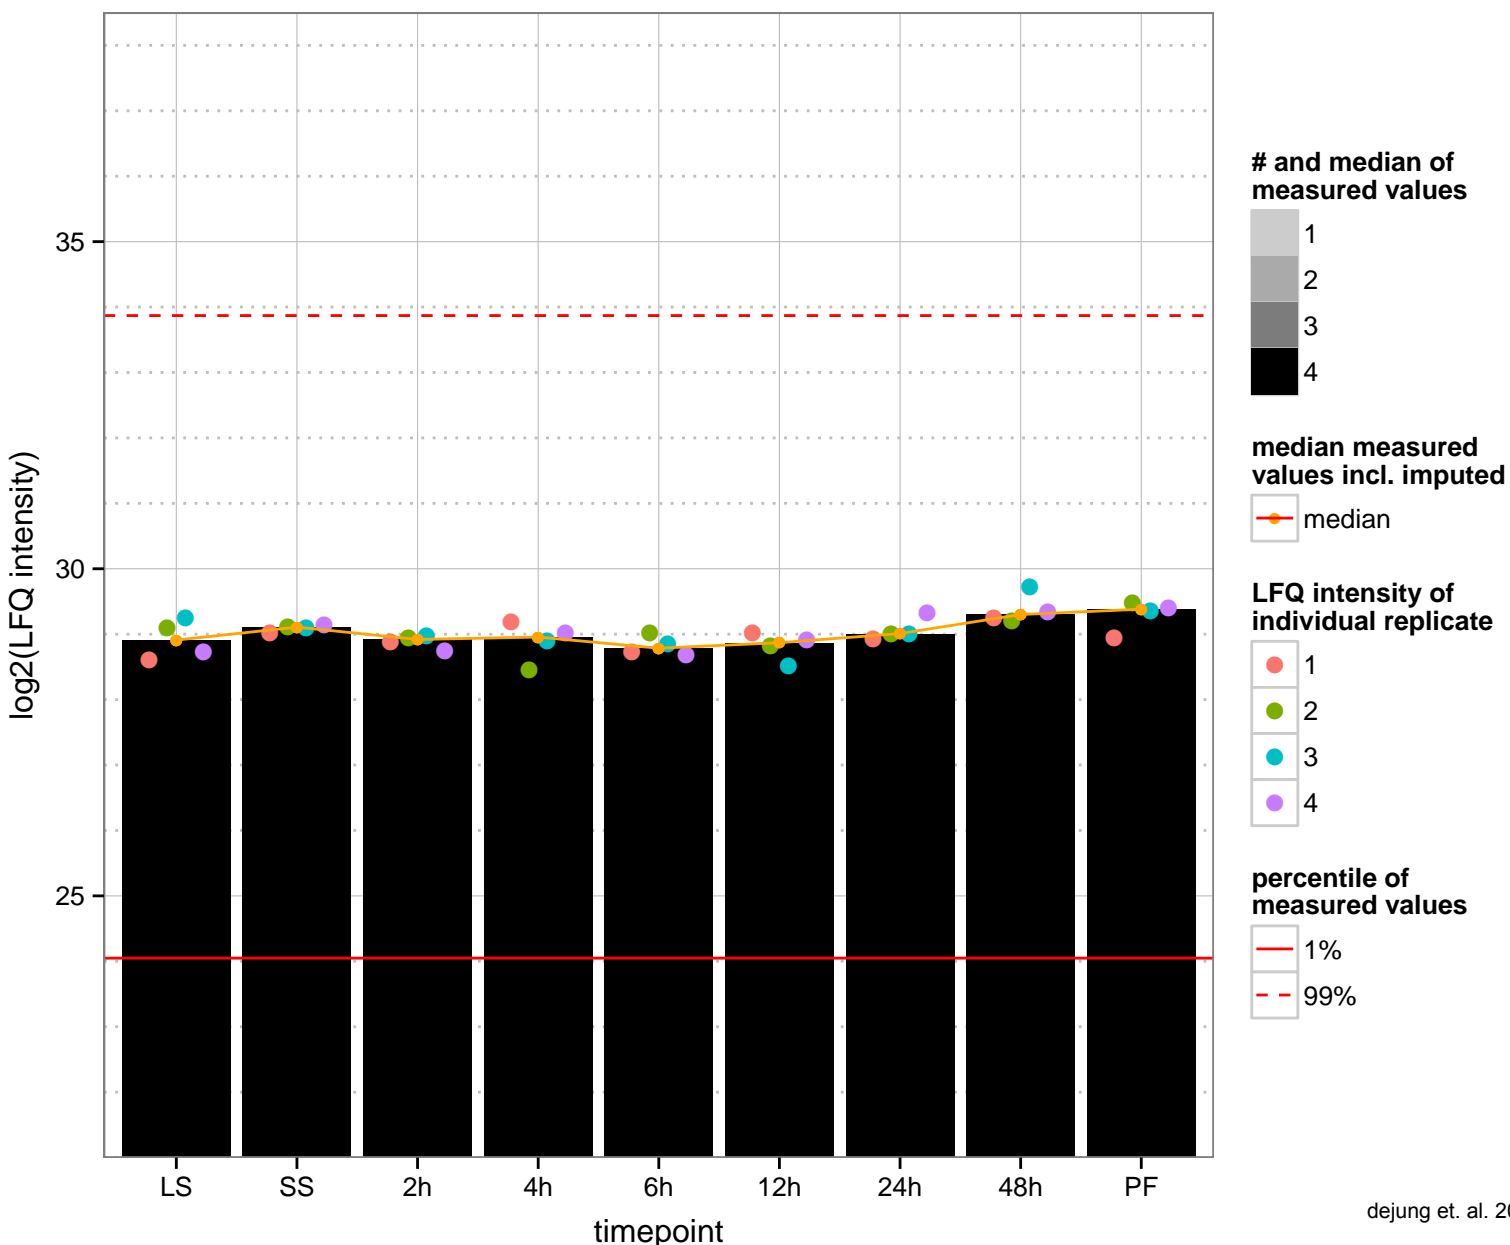

hypothetical protein, conserved  
 Tb927.11.15180  
 AGOF: null  
 AGOC: null  
 AGOP: null  
 PGO: null  
 PGOC: null  
 PGOP: null

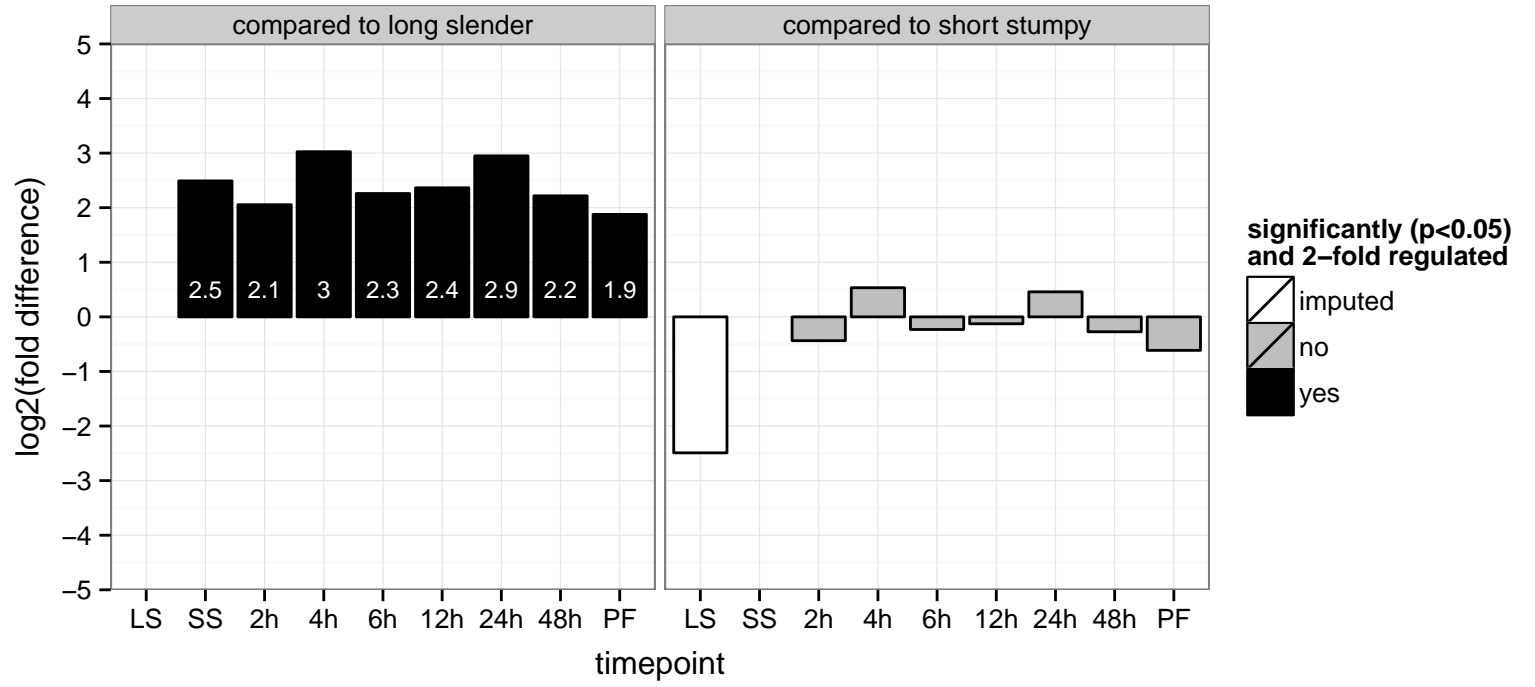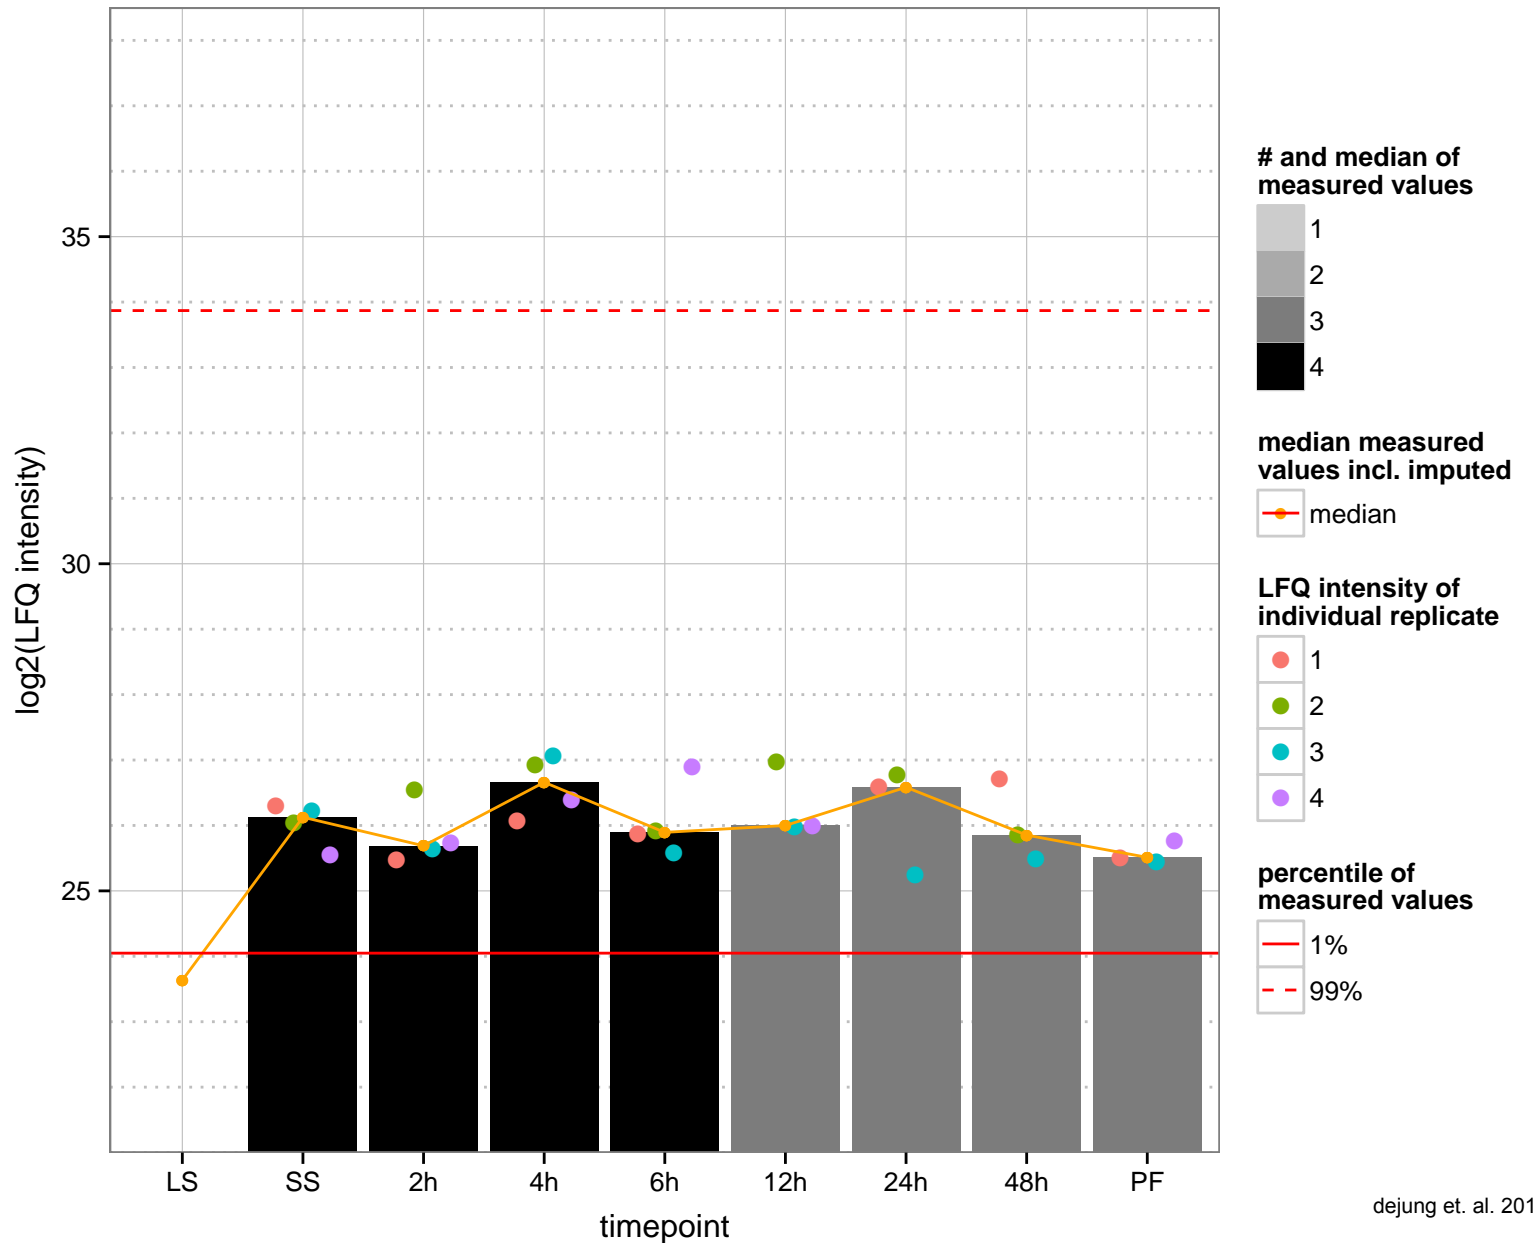

hypothetical protein, conserved  
 Tb927.11.15190  
 AGOF: null  
 AGOC: null  
 AGOP: null  
 PGO: null  
 PGOC: null  
 PGOP: null

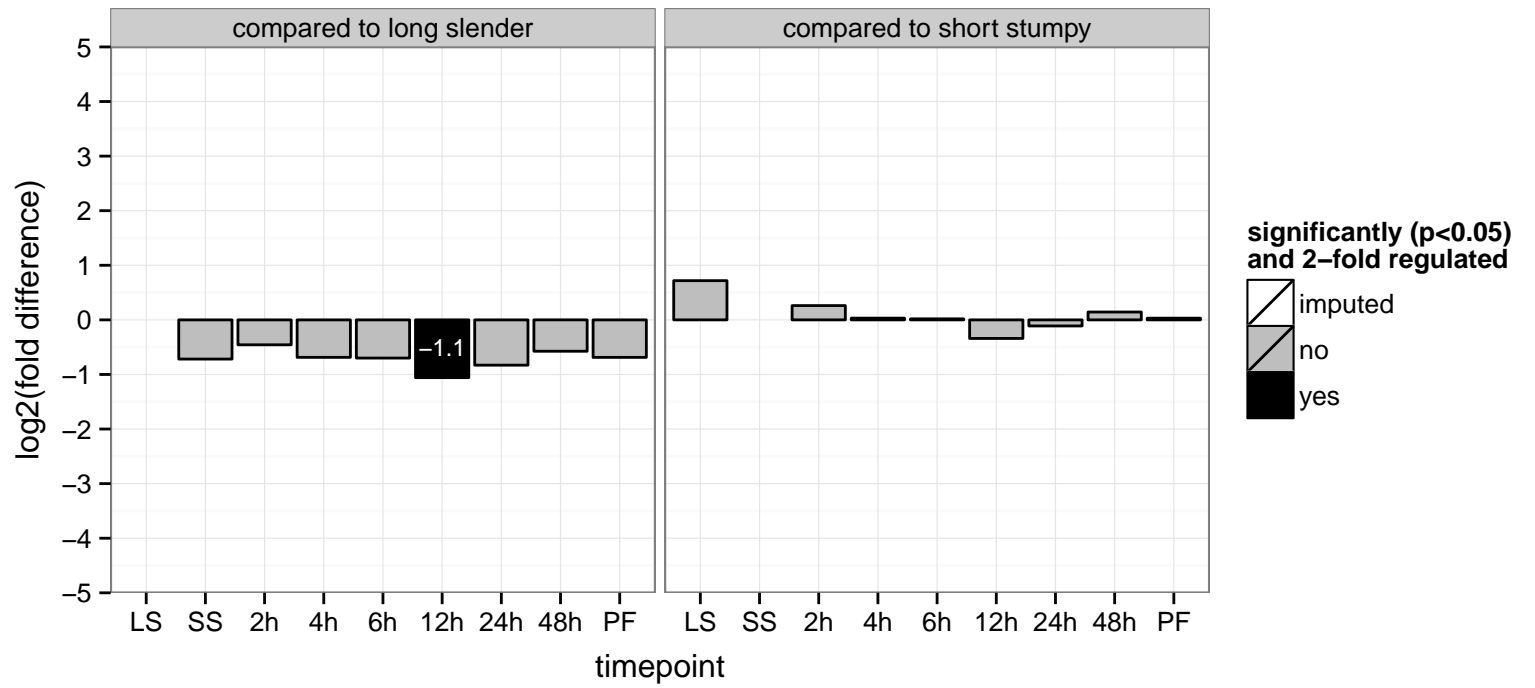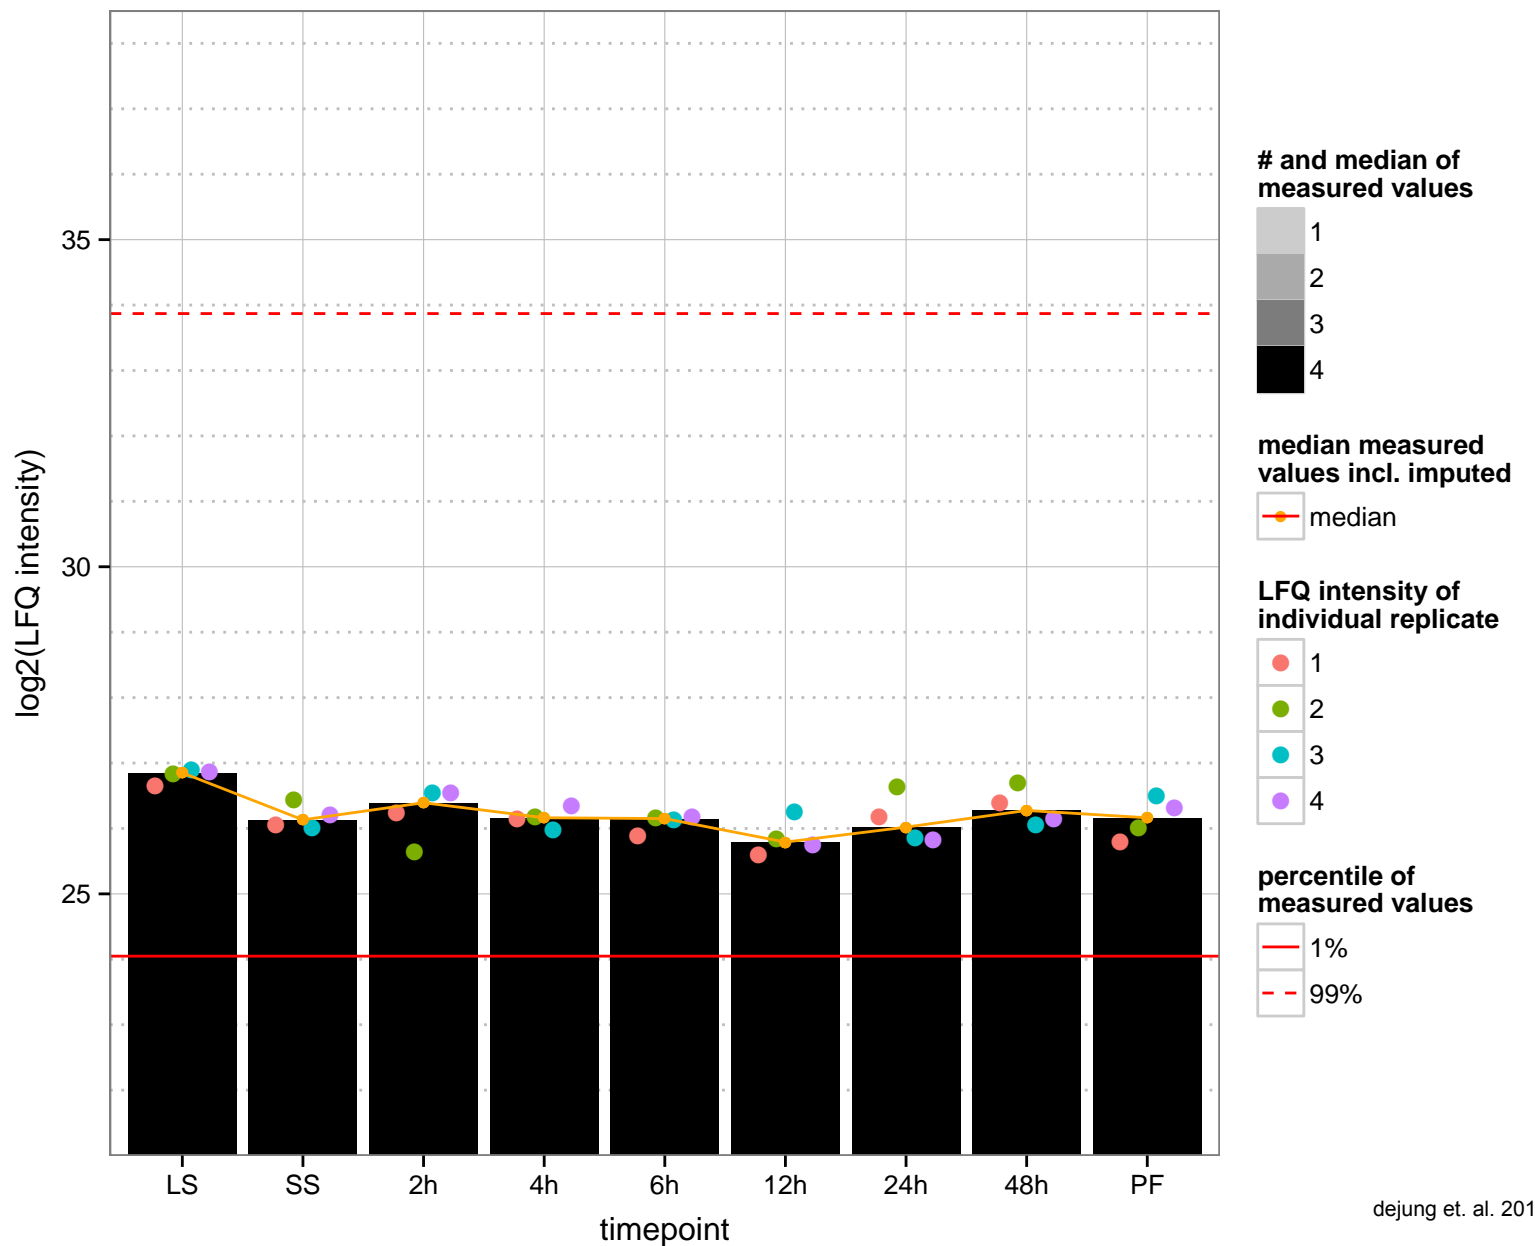

cytosolic coat protein, putative  
 Tb927.11.15230  
 AGOF: protein transmembrane transporter activity  
 AGOC: ER to Golgi transport vesicle membrane, integral to membrane  
 AGOP: ER to Golgi vesicle-mediated transport  
 PGO: null  
 PGOC: integral to membrane  
 PGOP: transport

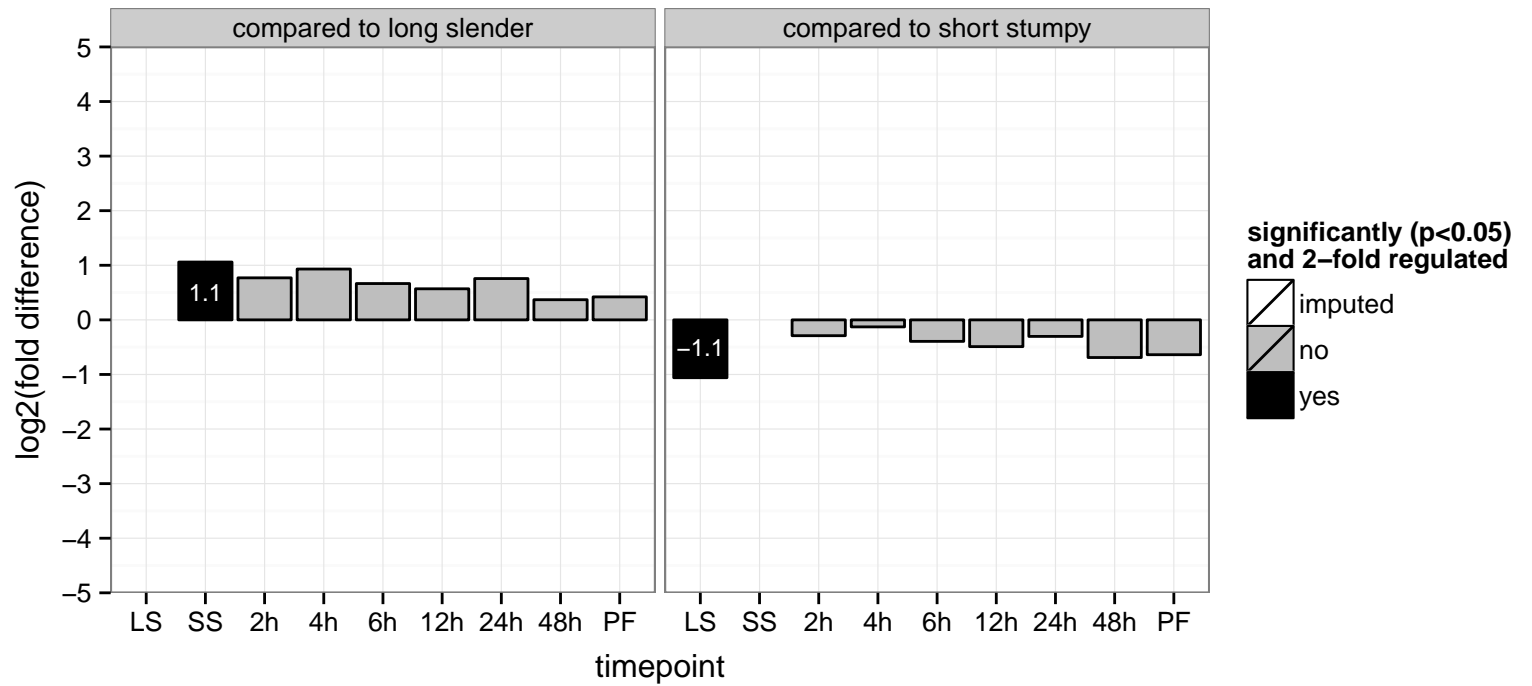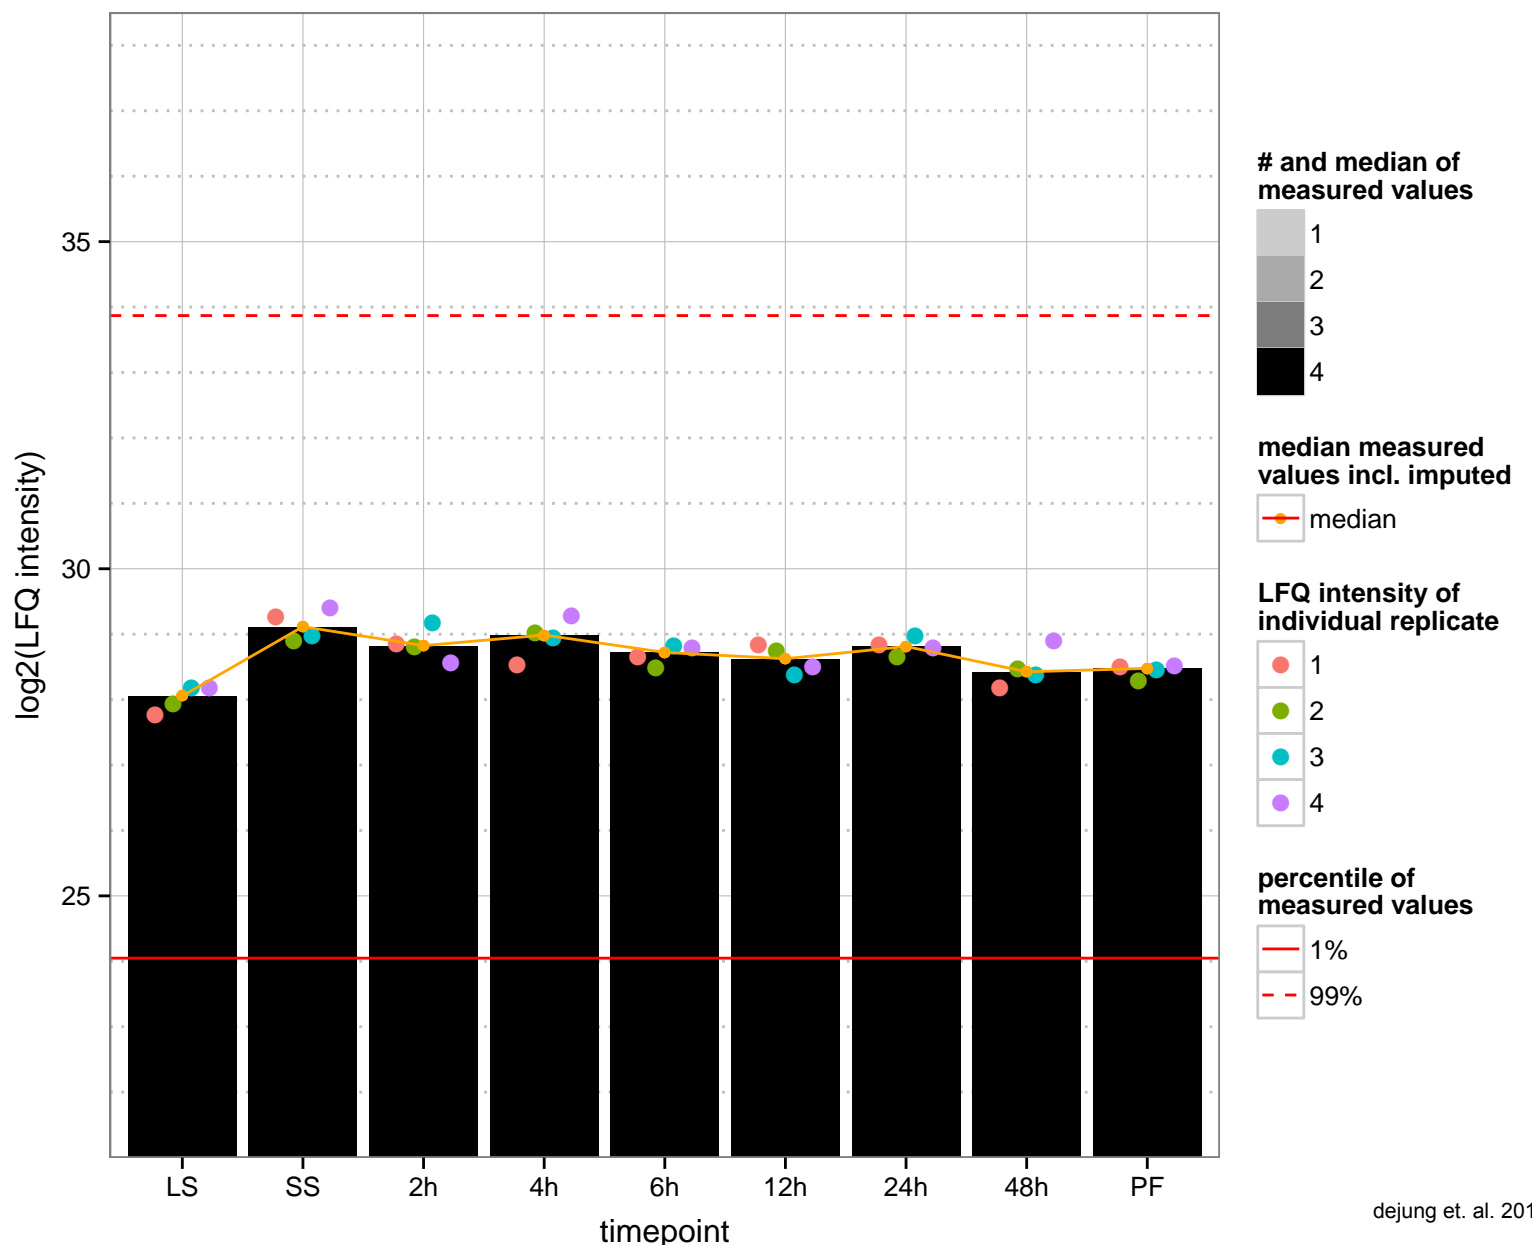

hypothetical protein, conserved  
 Tb927.11.15270  
 AGOF: nucleotidyltransferase activity  
 AGOC: null  
 AGOP: biosynthetic process  
 PGOF: nucleotidyltransferase activity  
 PGOC: null  
 PGOP: biosynthetic process

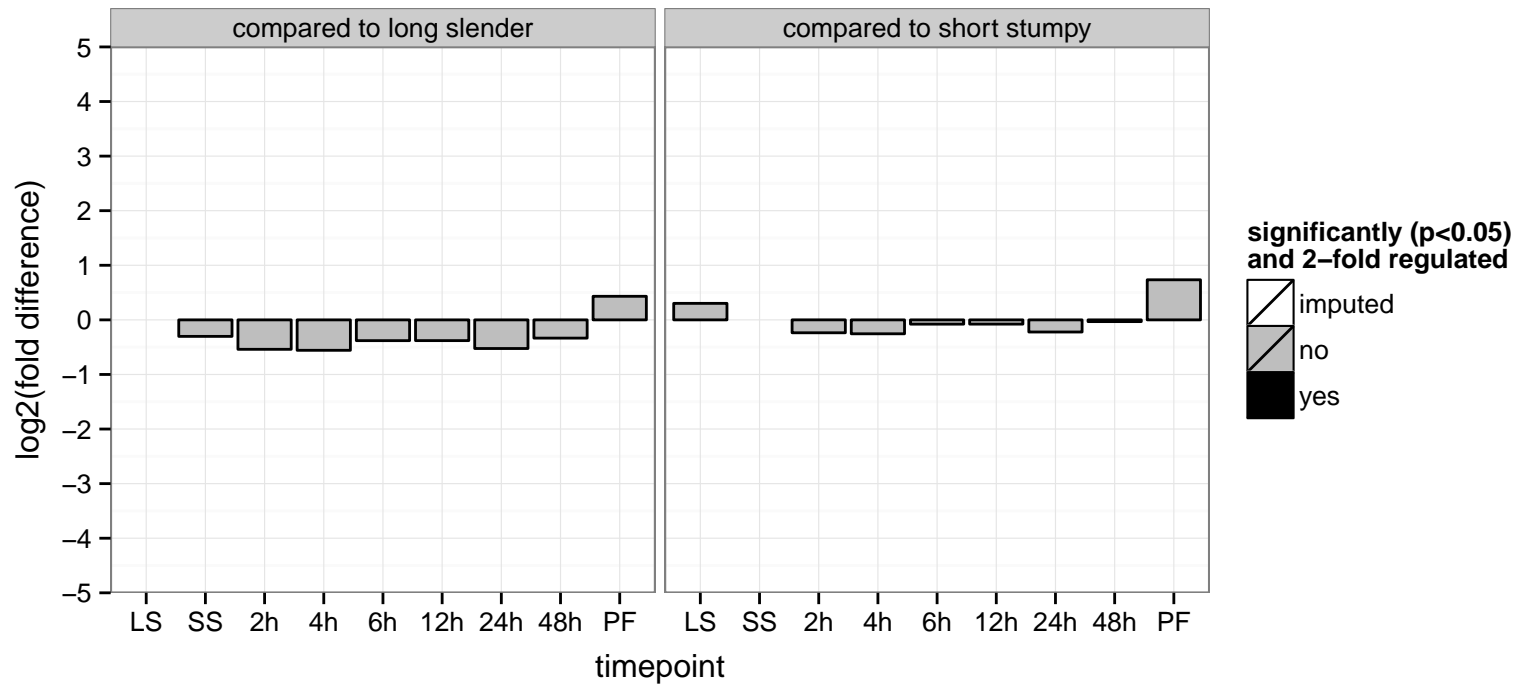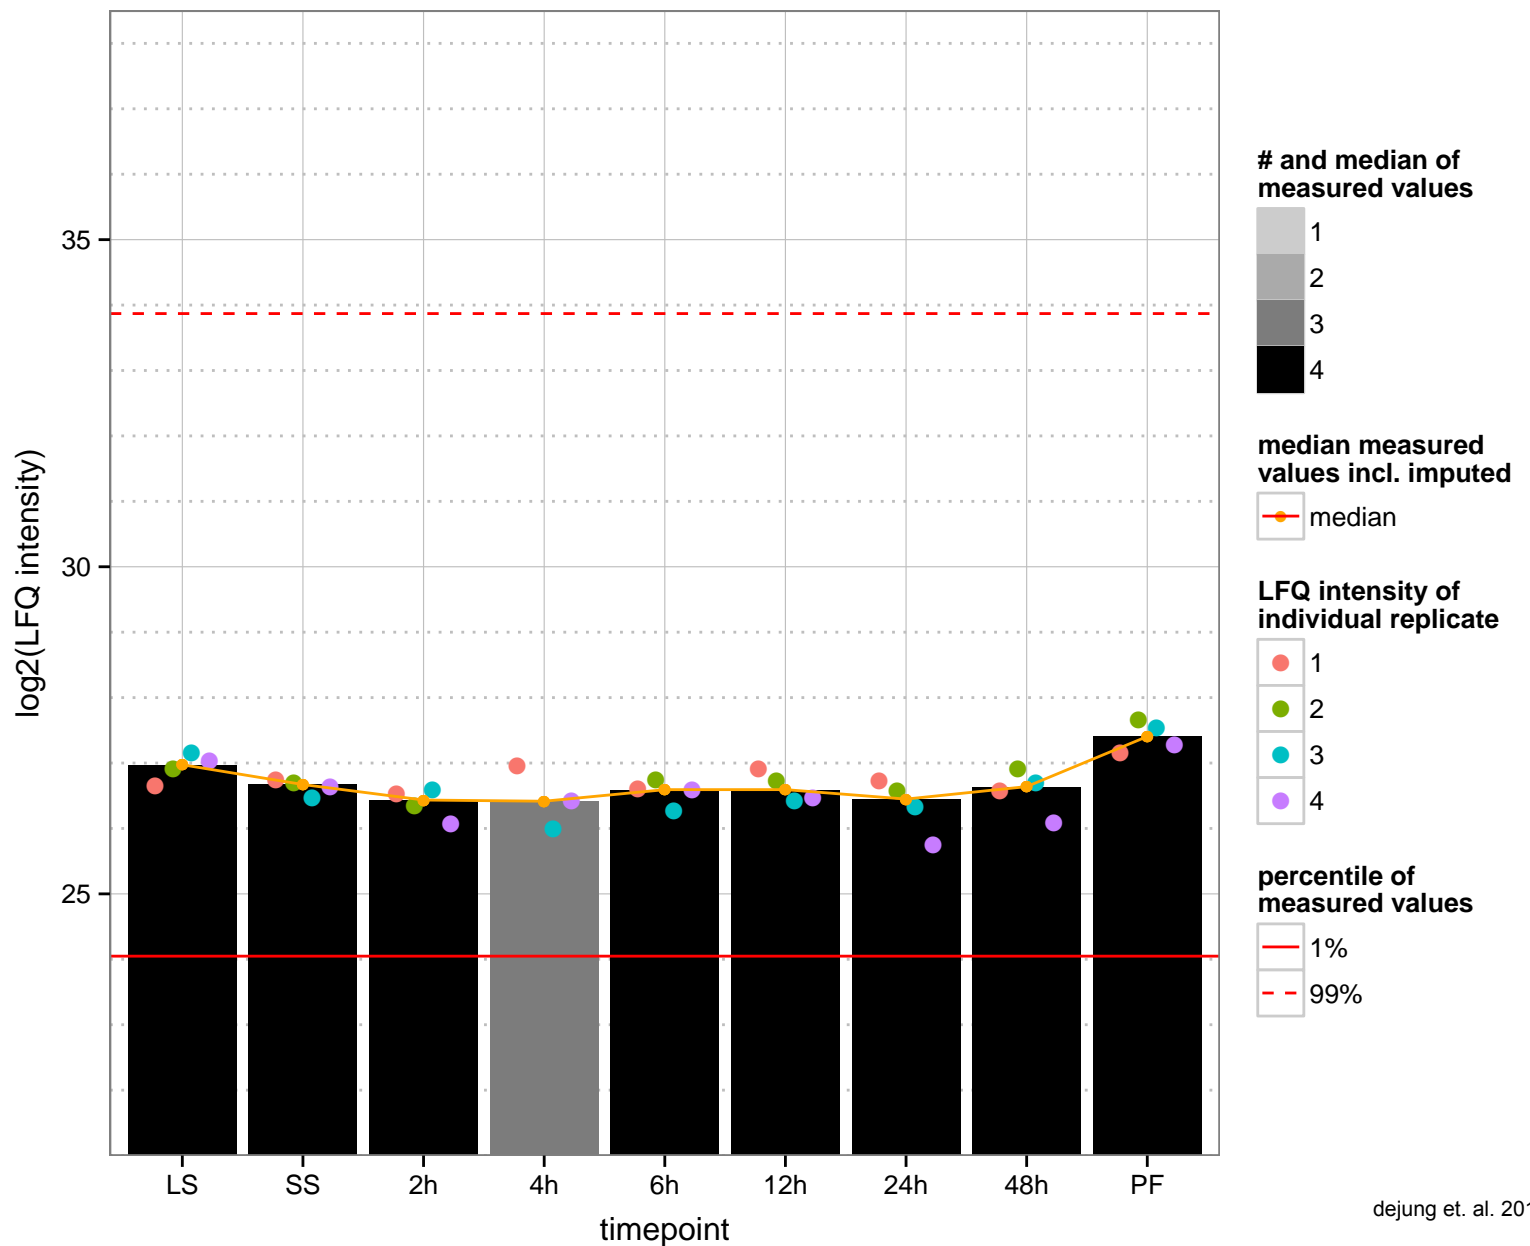

isovaleryl-coA dehydrogenase, putative  
 Tb927.11.1540  
 AGOF: acyl-CoA dehydrogenase activity, oxidoreductase activity  
 AGOC: mitochondrion  
 AGOP: metabolic process  
 PGOF: acyl-CoA dehydrogenase activity, oxidoreductase activity, acting on the CH-CH group of donors  
 PGOC: null  
 PGOP: metabolic process, oxidation-reduction process

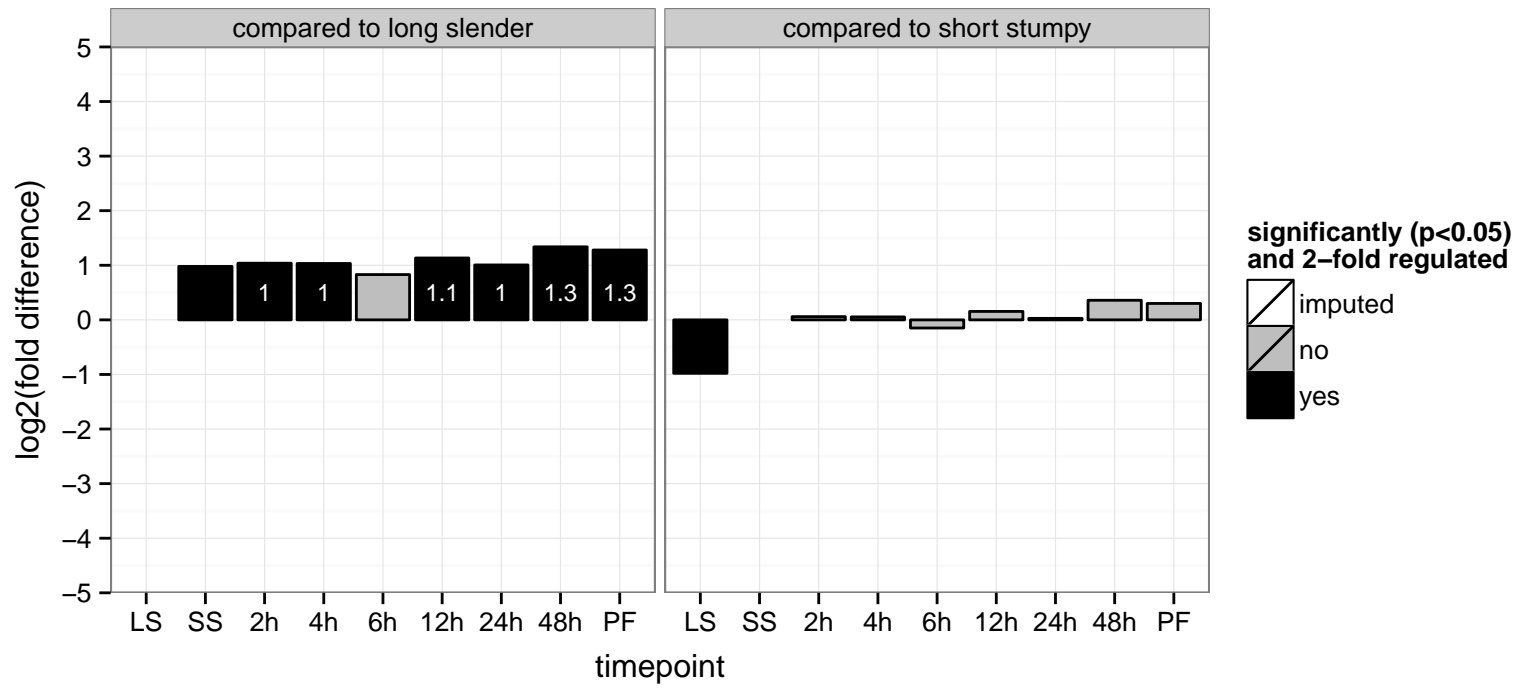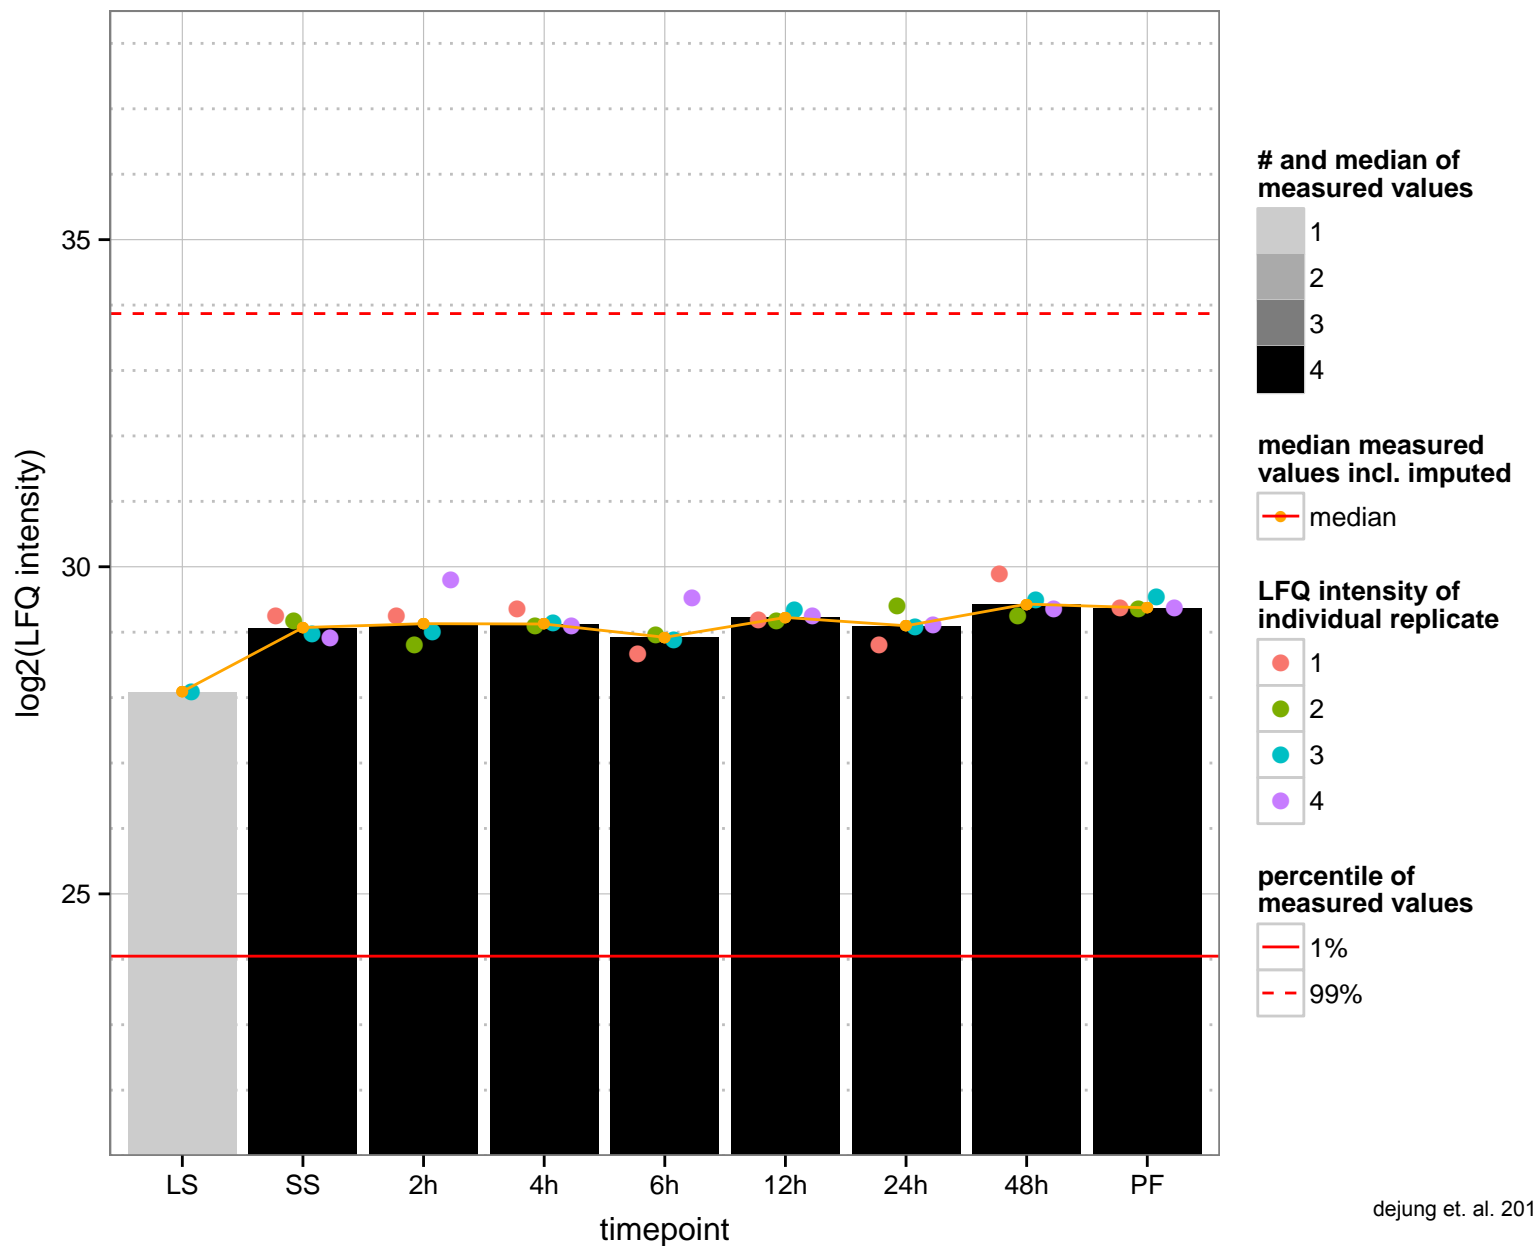

hypothetical protein, conserved  
 Tb927.11.15420  
 AGOF: translation initiation factor activity  
 AGOC: nucleus  
 AGOP: translational initiation  
 PGO: binding  
 PGOC: null  
 PGOP: null

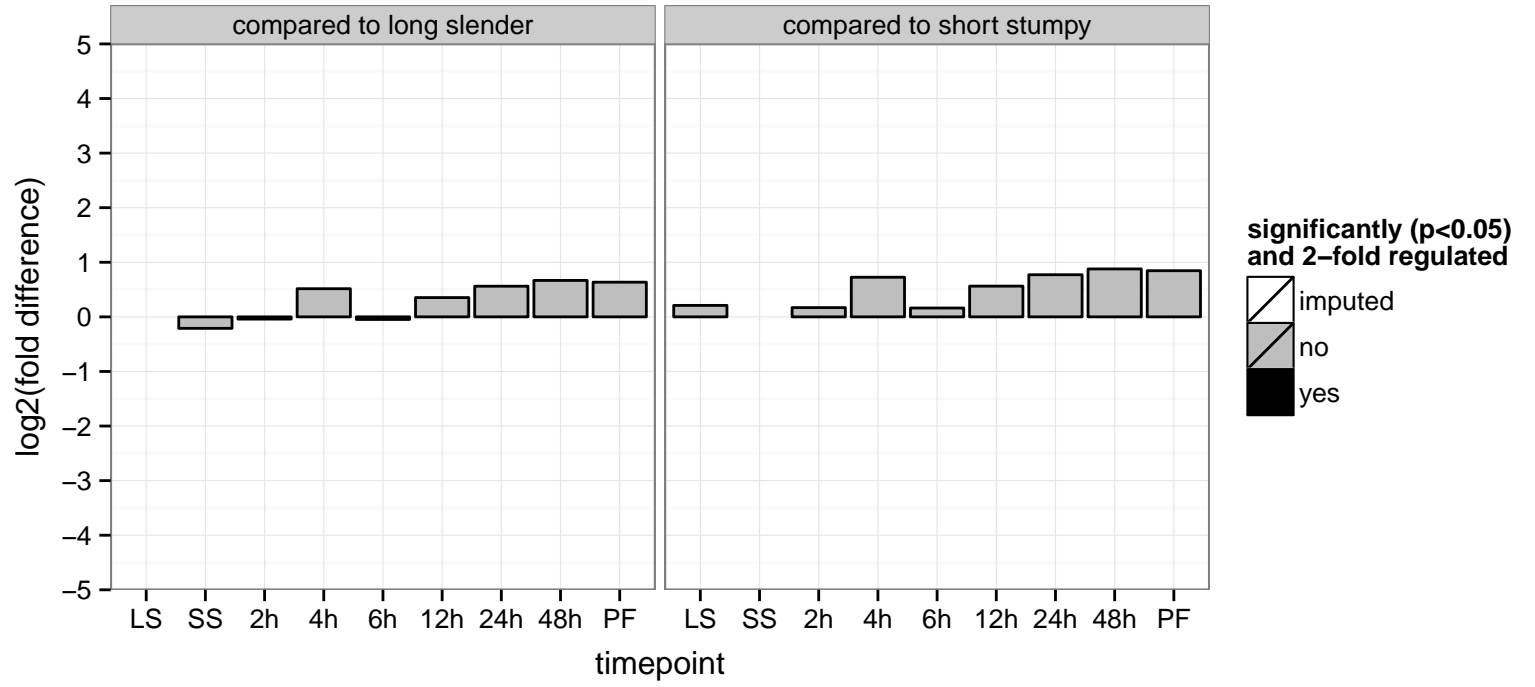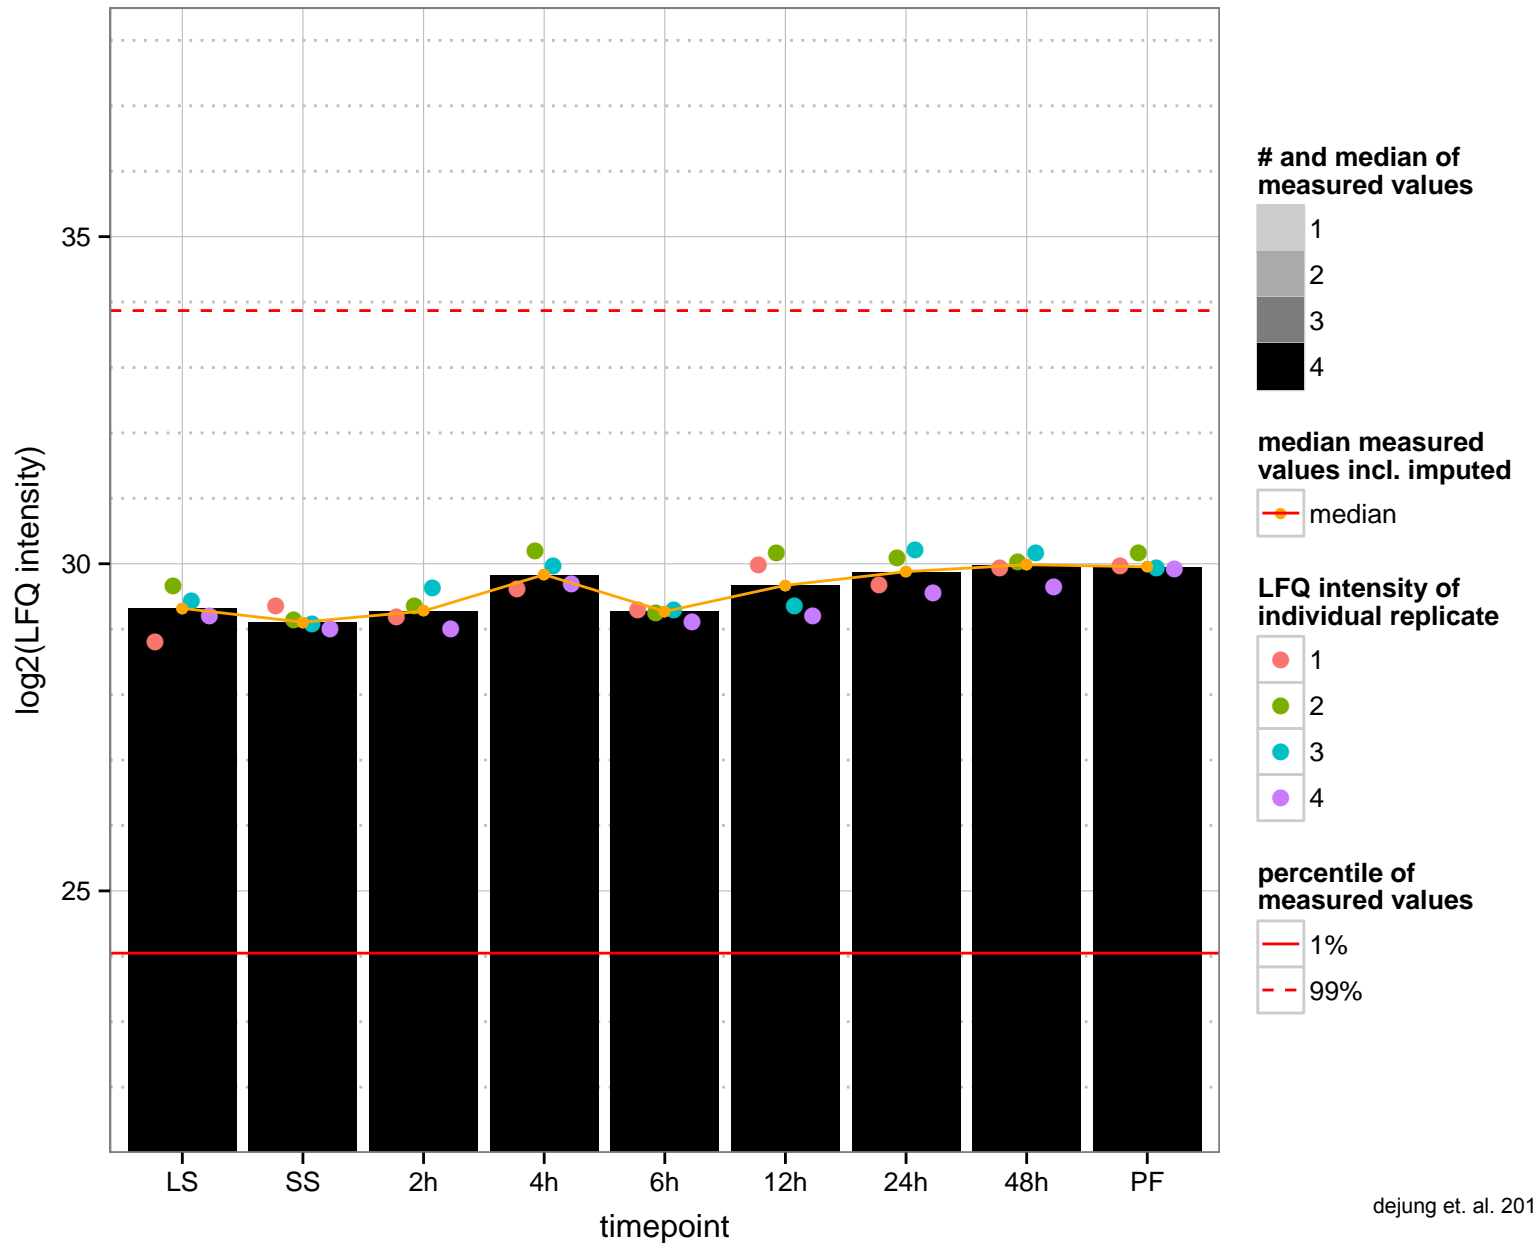

U5 small nuclear ribonucleoprotein component, putative, U5 snrnp-specific protein  
 Tb927.11.15430  
 AGOF: GTP binding, GTPase activity  
 AGOC: nucleus  
 AGOP: translation  
 PGOF: GTP binding, GTPase activity  
 PGO: null  
 PGOP: null

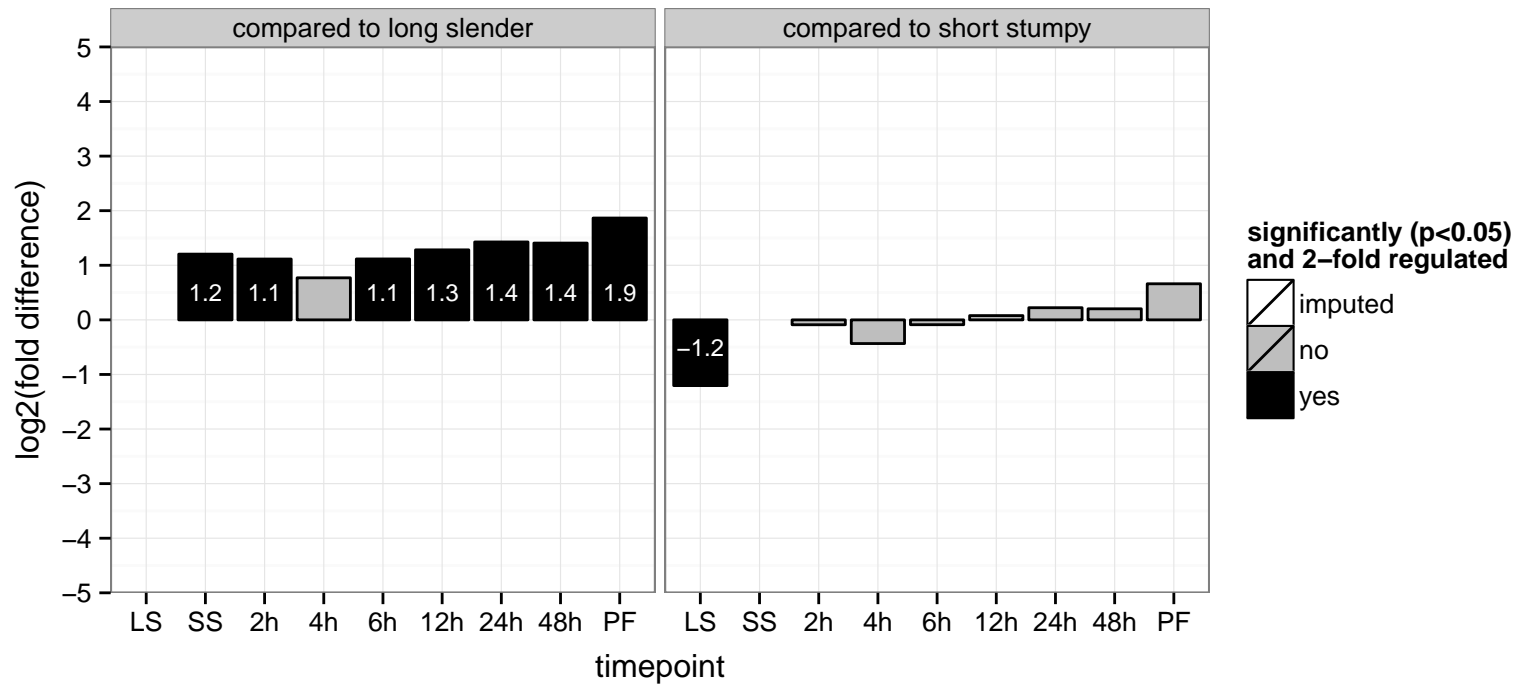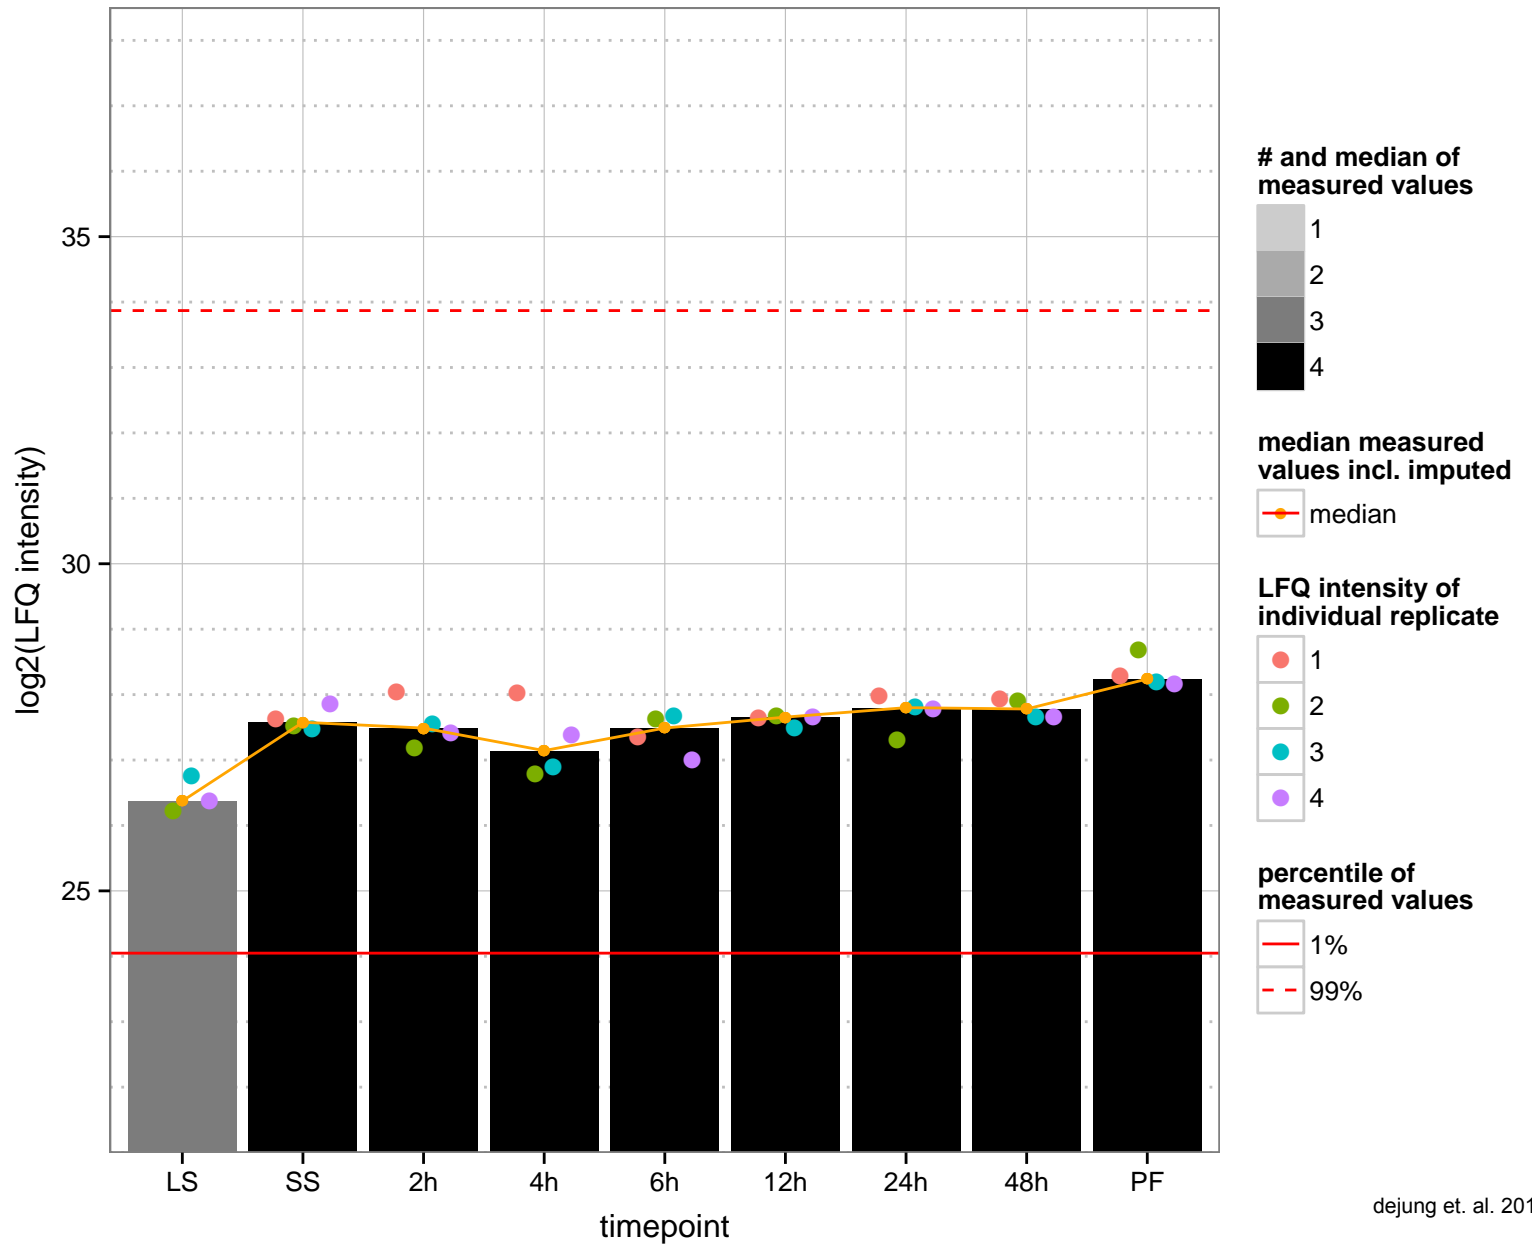



heat shock protein Hsp20, putative  
 Tb927.11.15480  
 AGOF: null  
 AGOC: null  
 AGOP: null  
 PGOF: null  
 PGO C: null  
 PGOP: null

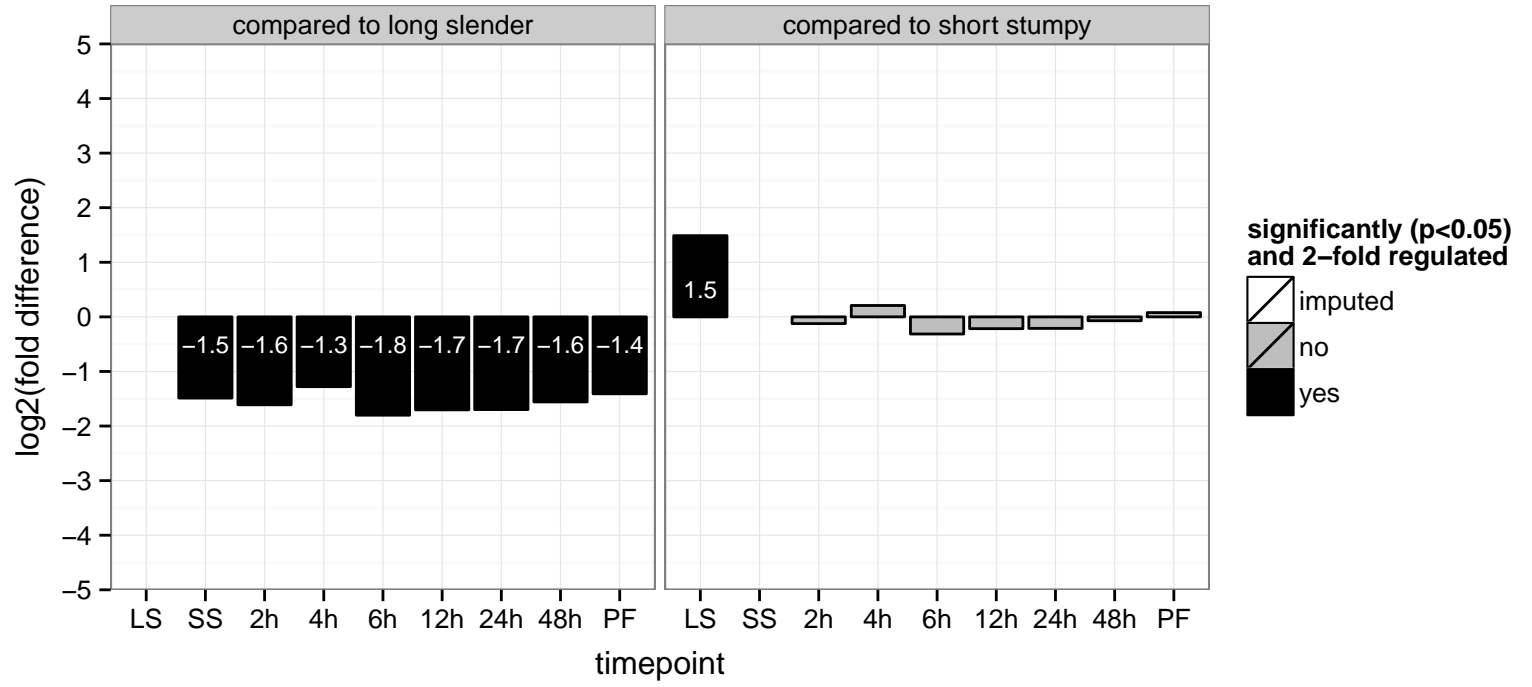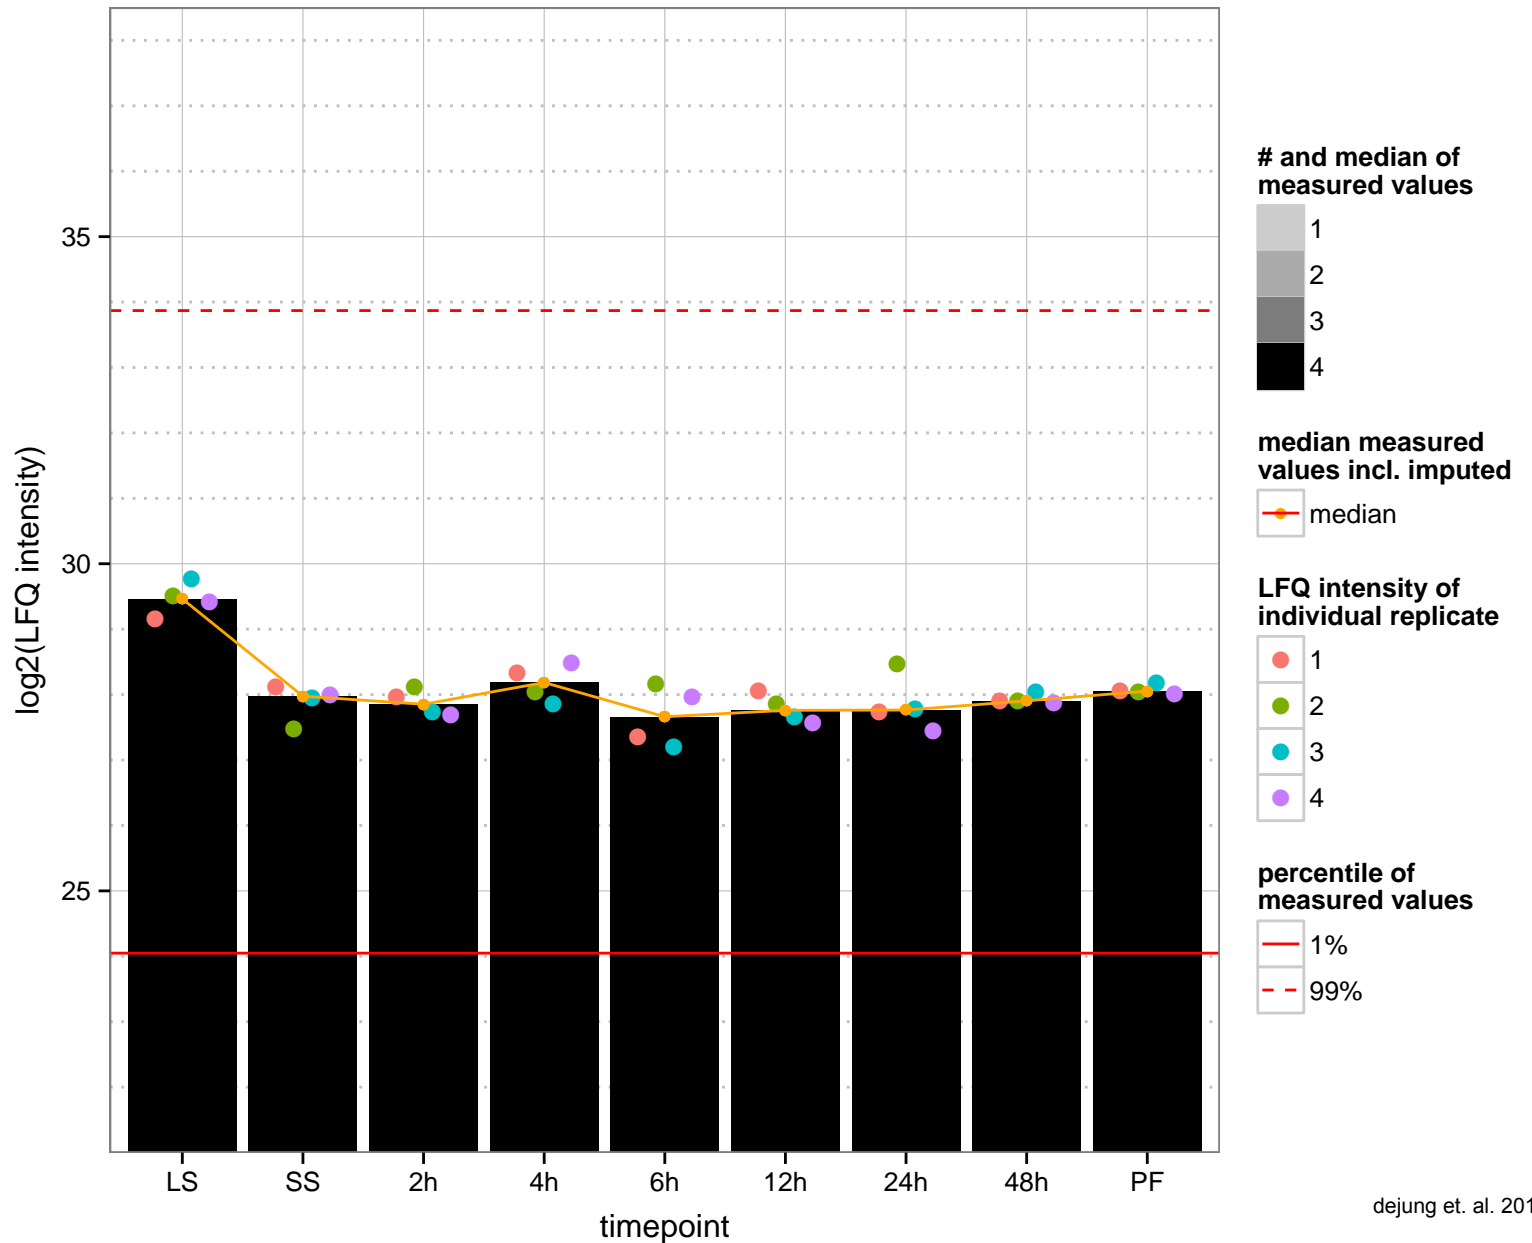

Nucleoporin (TbNup53a)  
 Tb927.11.15560  
 AGOF: structural constituent of nuclear pore  
 AGOC: nuclear pore  
 AGOP: null  
 PGOF: structural constituent of nuclear pore  
 PGOC: nuclear pore  
 PGOP: null

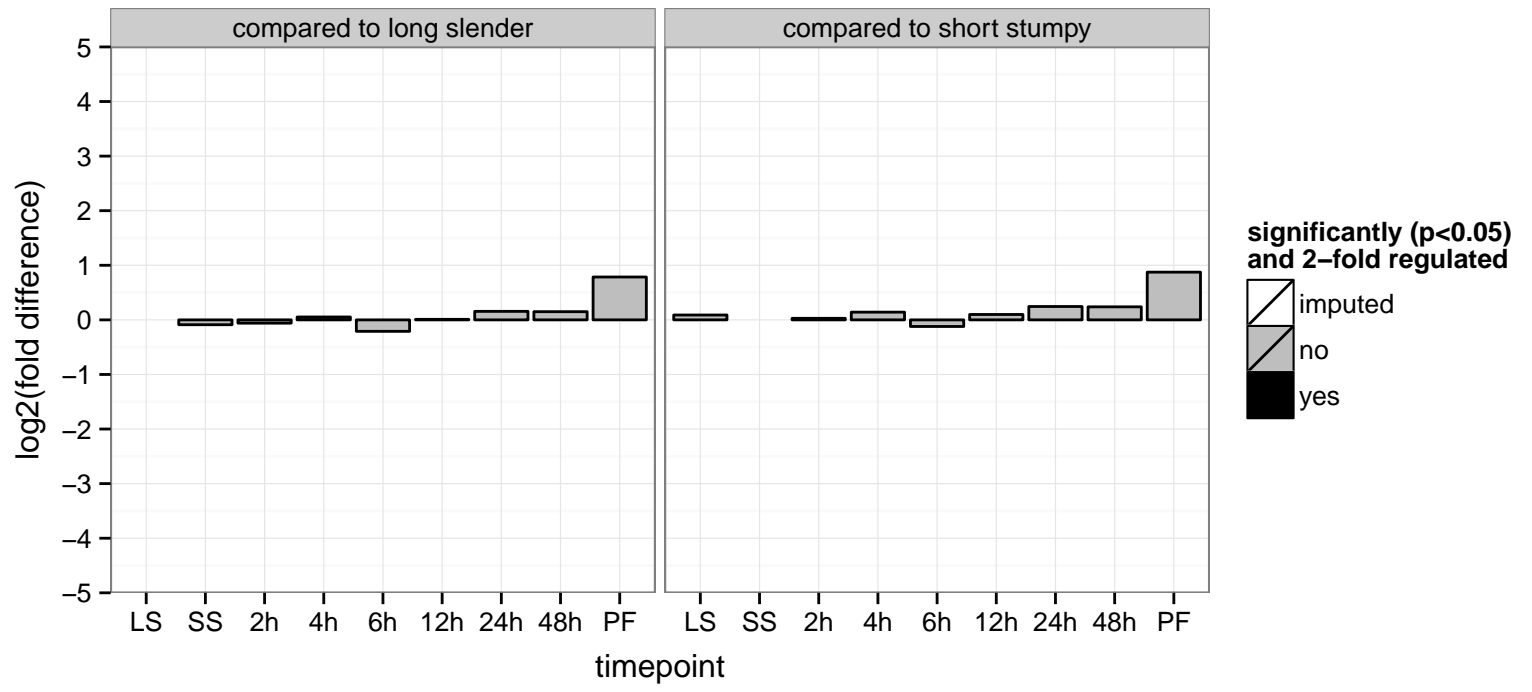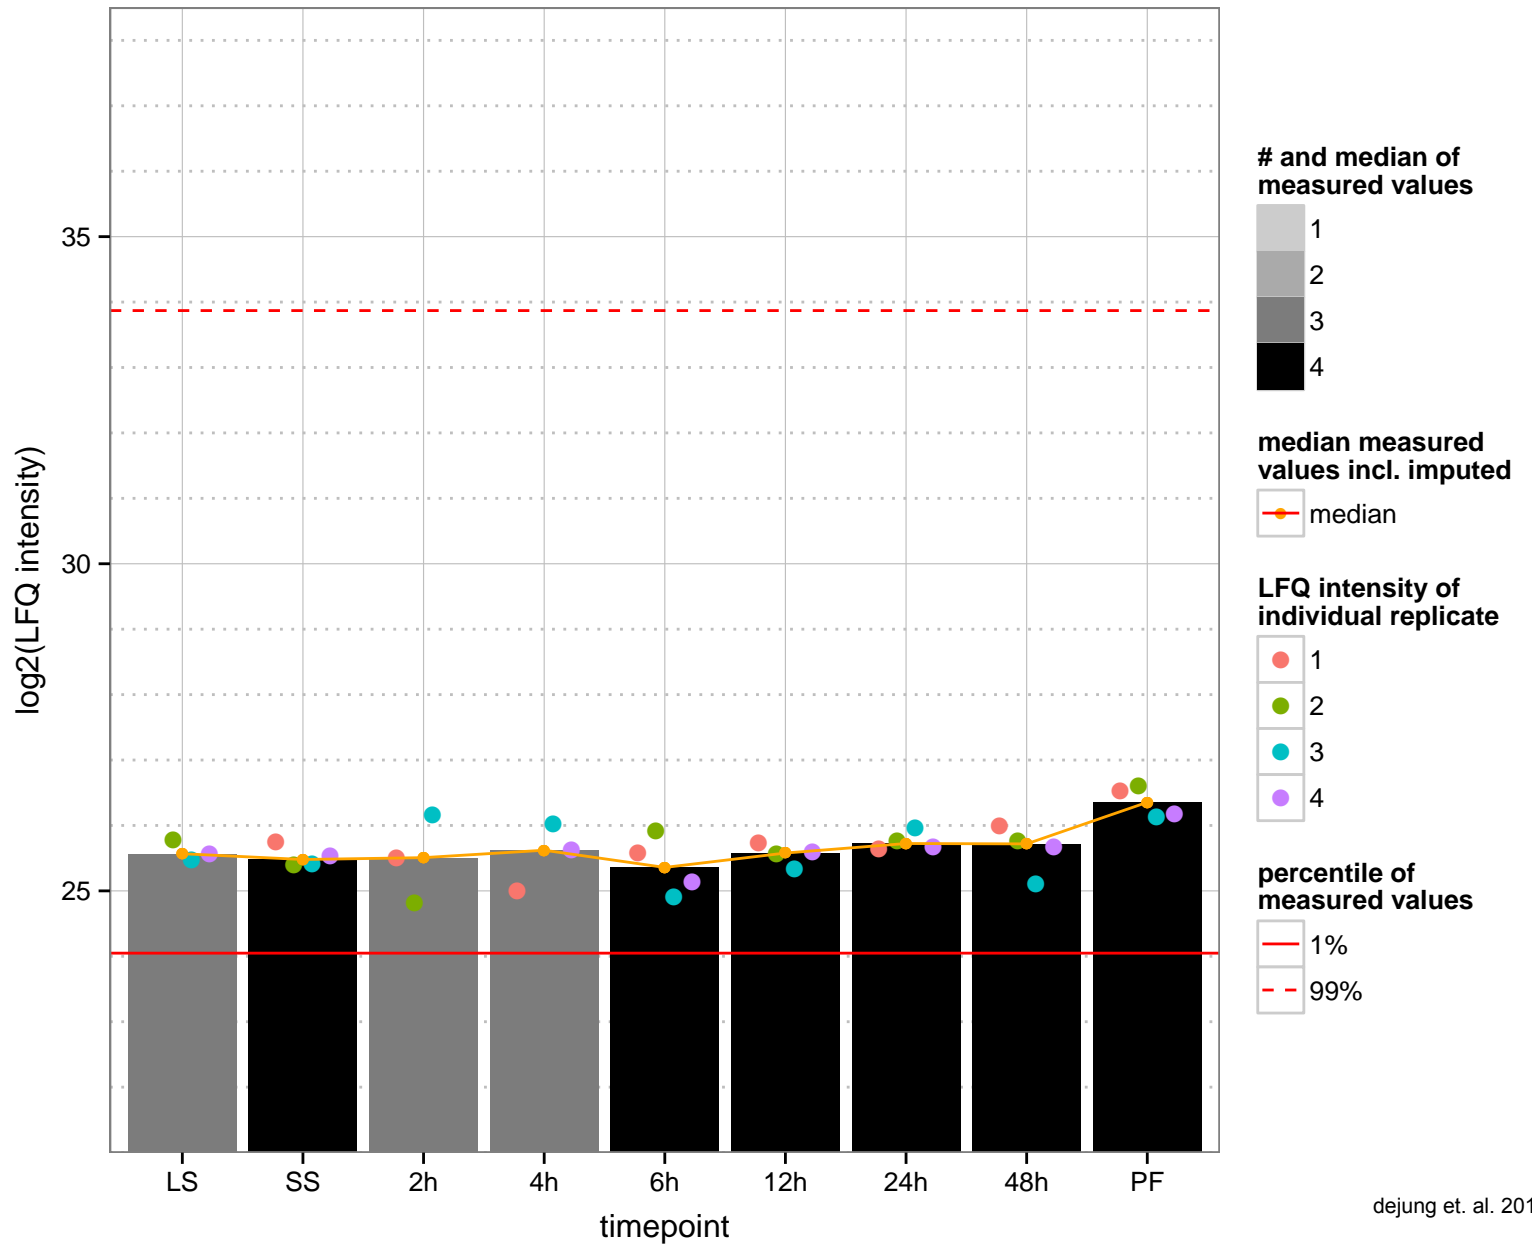

1, 2-Dihydroxy-3-keto-5-methylthiopentene dioxygenase, putative  
 Tb927.11.1560  
 AGOF: dioxygenase activity, metal ion binding  
 AGOC: cytosol  
 AGOP: L-methionine salvage from methylthioadenosine  
 PGO: acireductone dioxygenase [iron(II)-requiring] activity  
 PGO: null  
 PGO: oxidation-reduction process

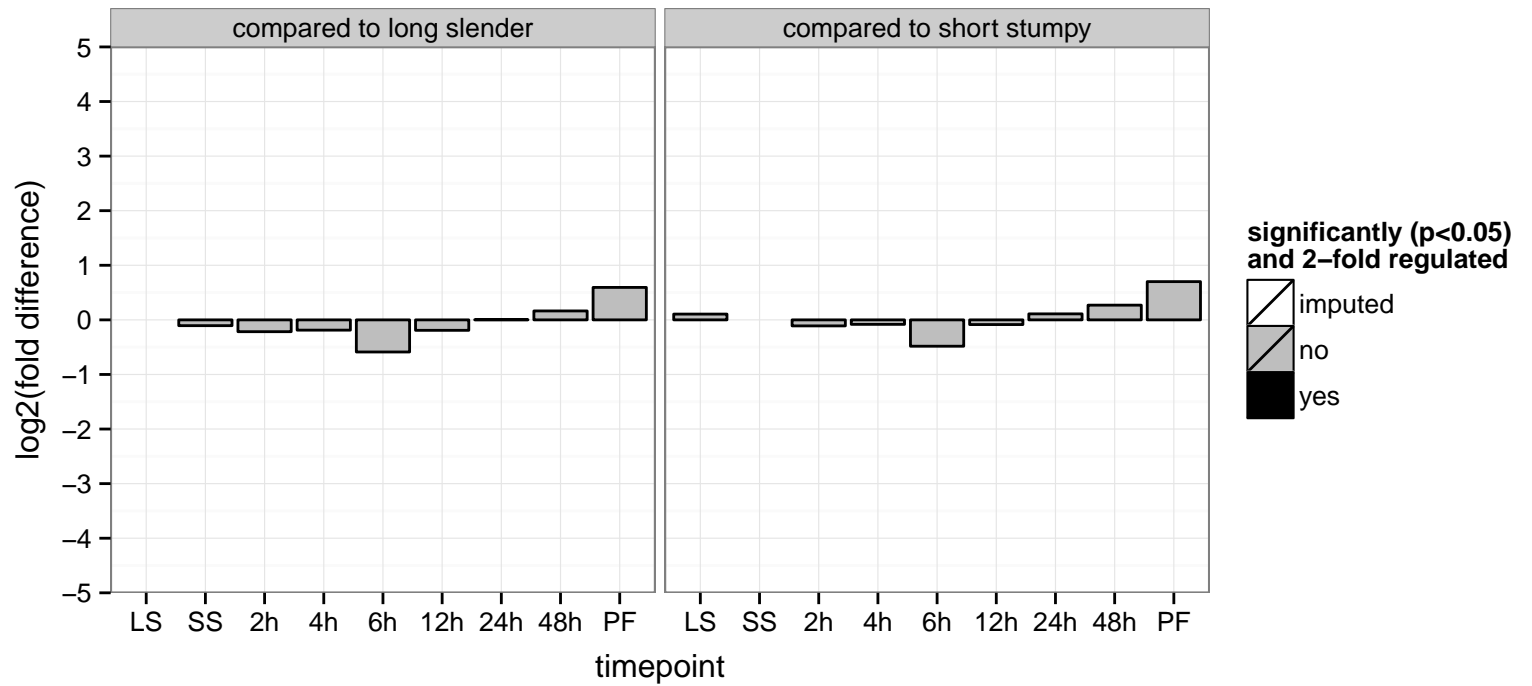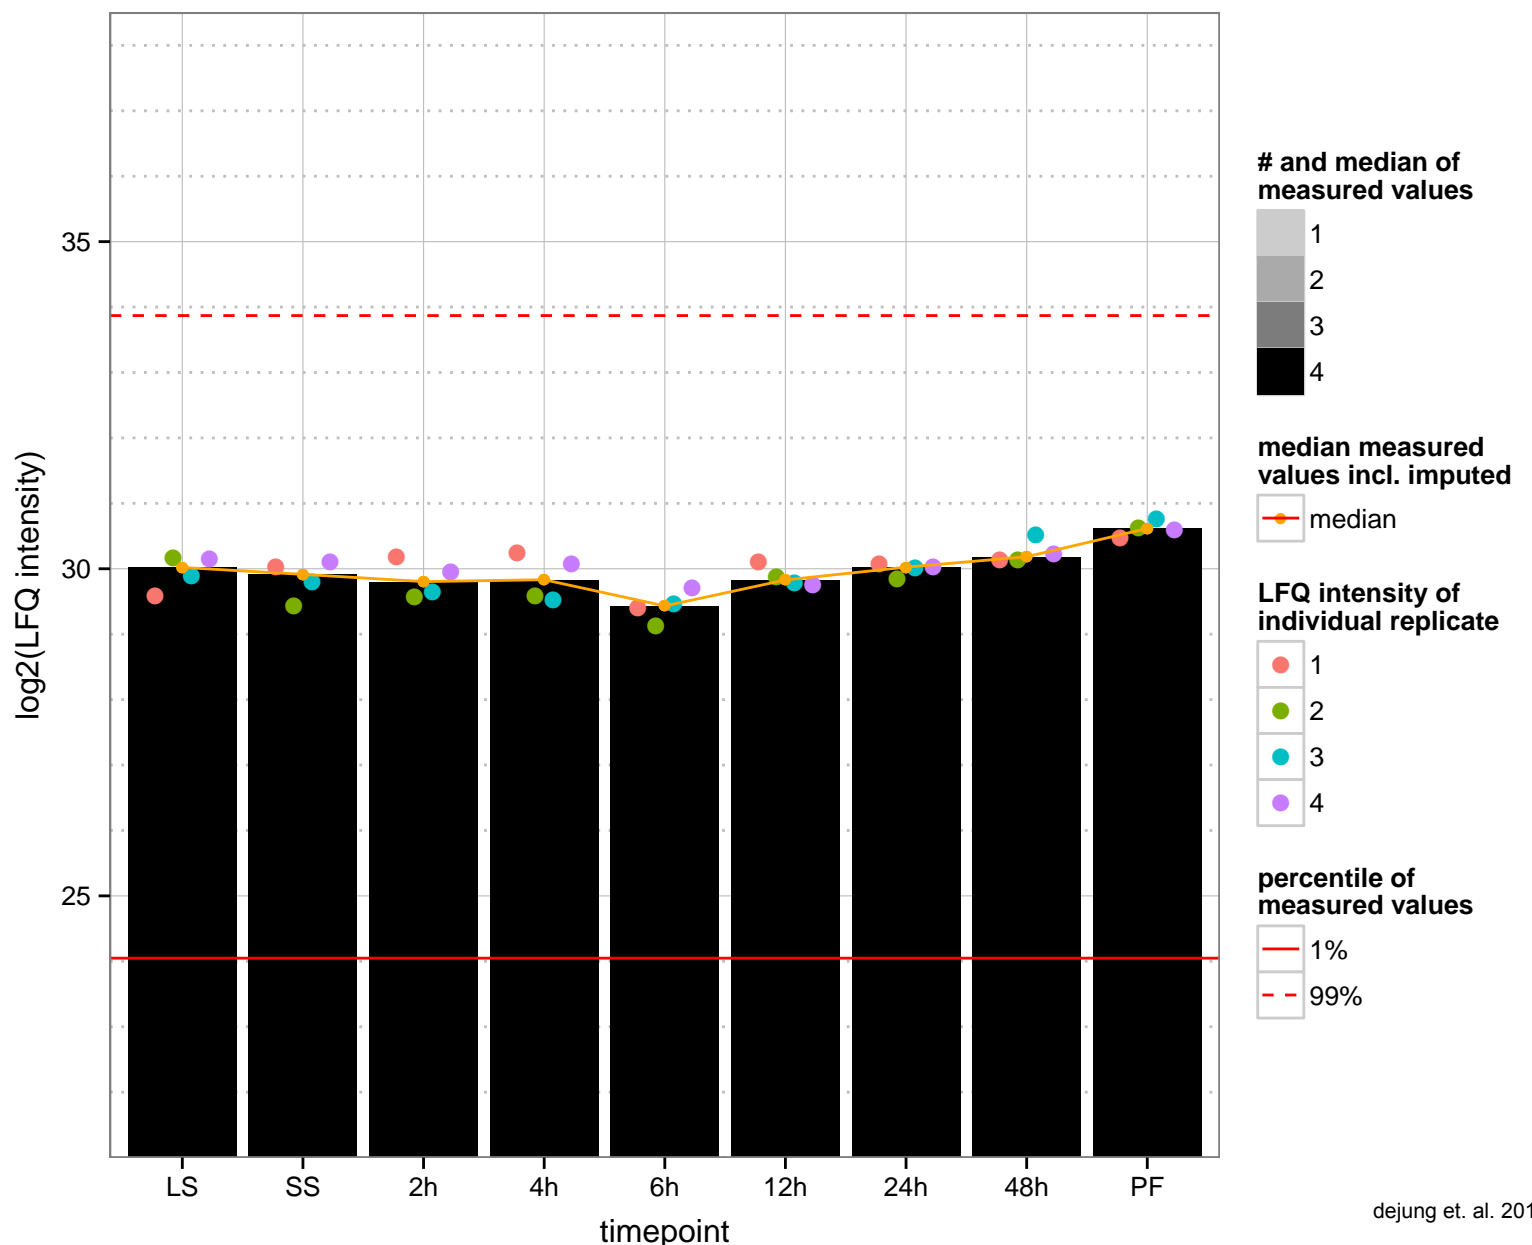

mitochondrial RNA binding complex 1 subunit, NUDIX hydrolase, putative (MERS1)  
 Tb927.11.15640  
 AGOF: RNA binding, hydrolase activity  
 AGOC: mitochondrion  
 AGOP: cytidine to uridine editing, mRNA stabilization  
 PGO: hydrolase activity  
 PGOC: null  
 PGOP: null

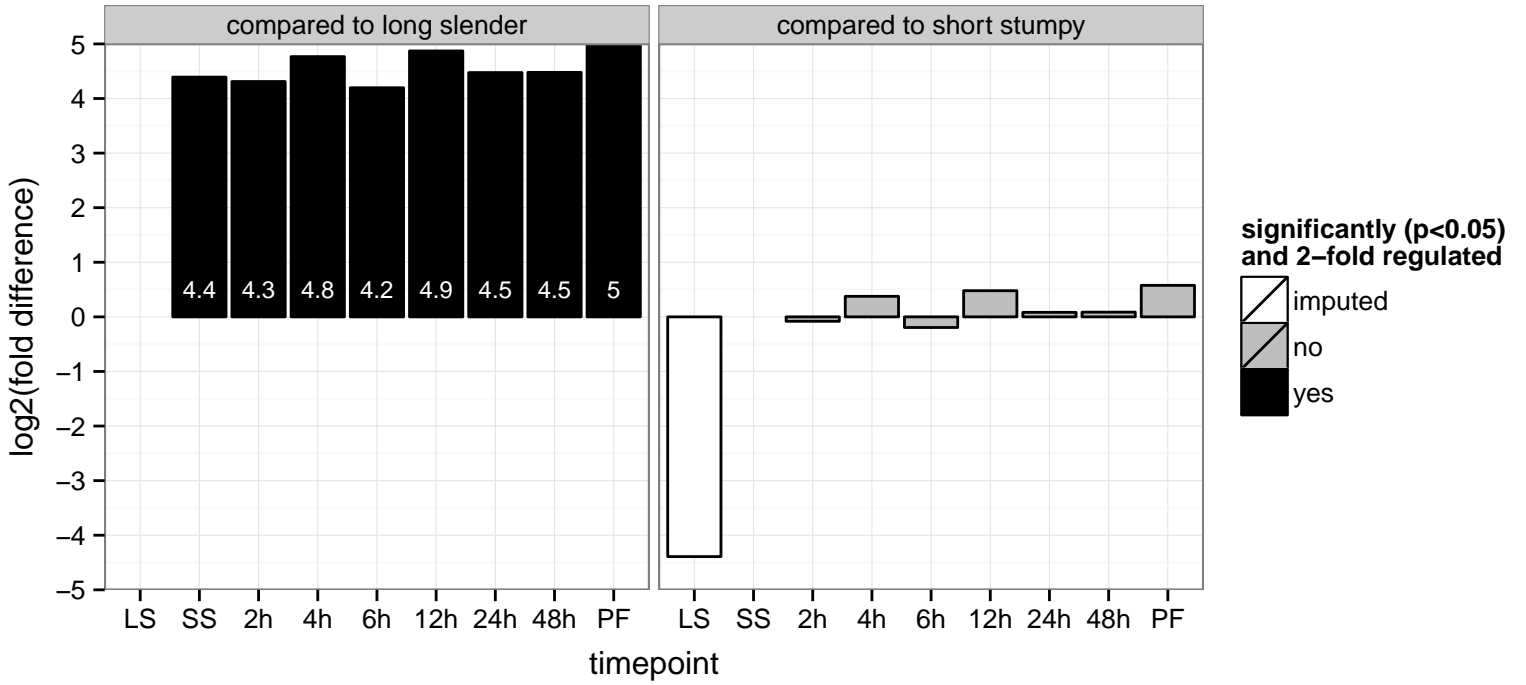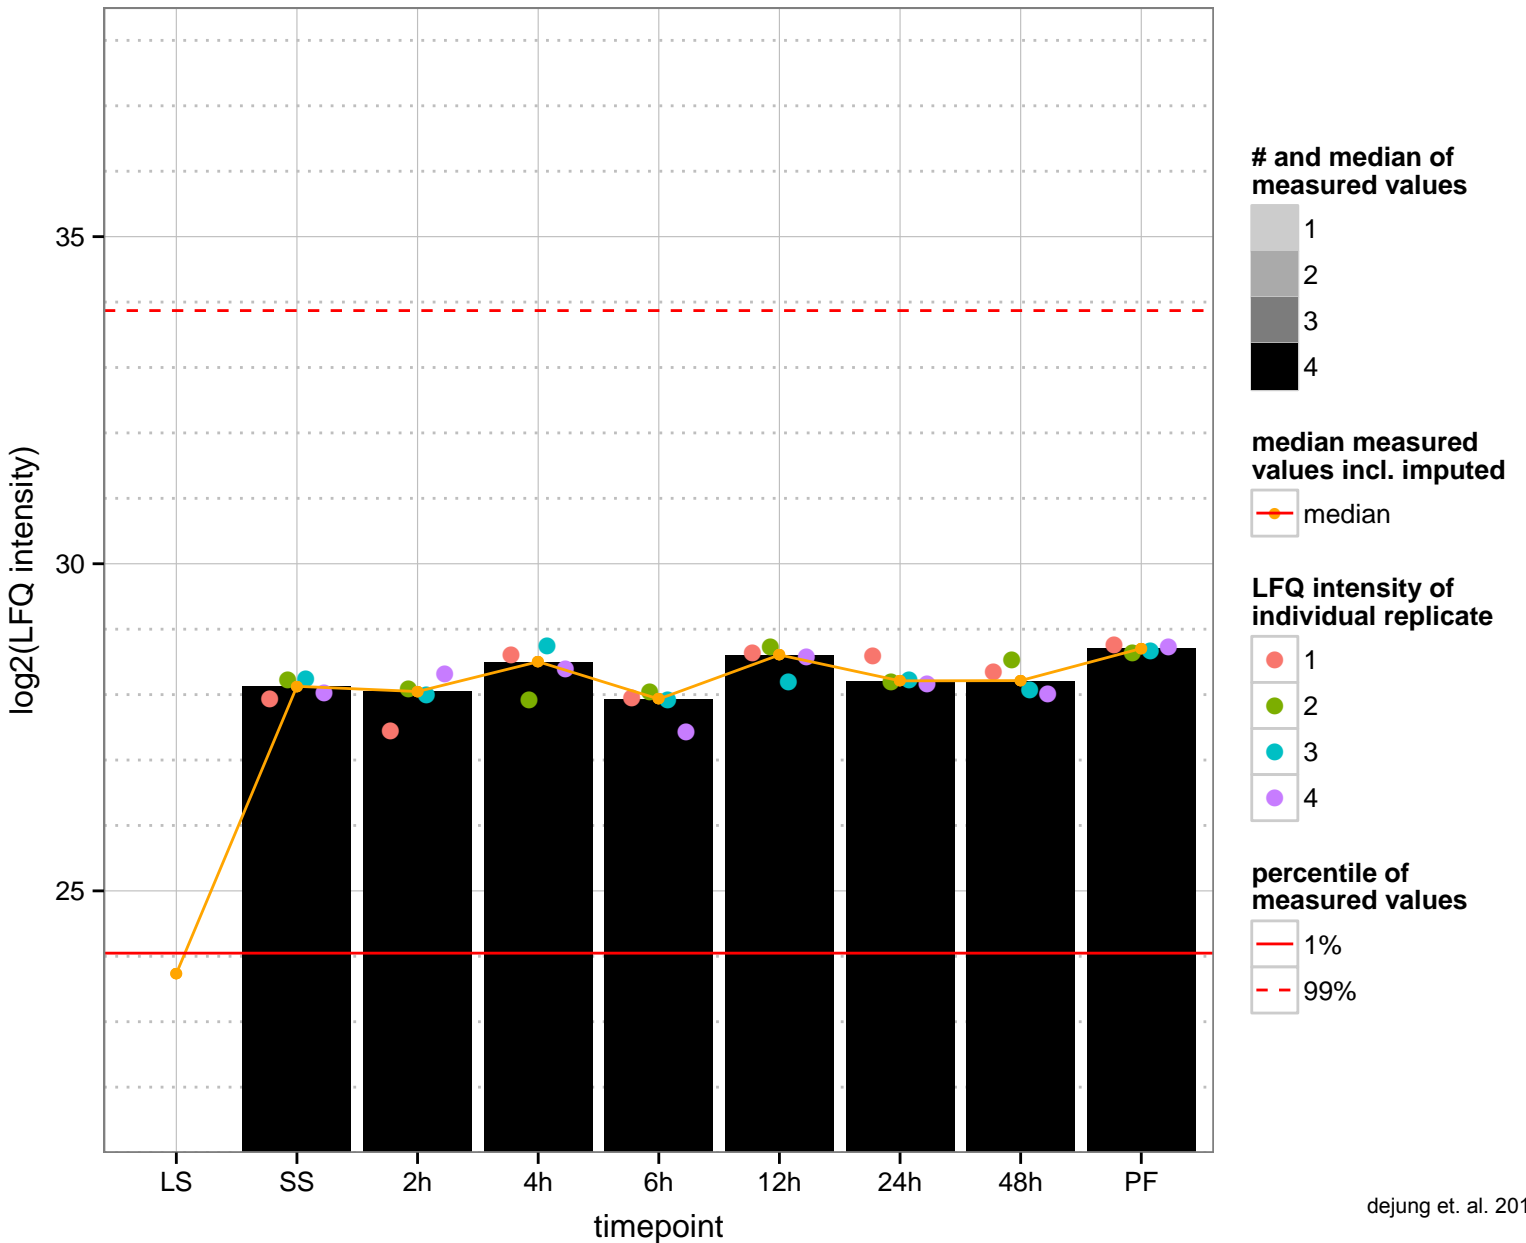

hypothetical protein, conserved  
 Tb927.11.15680  
 AGOF: null  
 AGOC: null  
 AGOP: null  
 PGOF: null  
 PGO: null  
 PGOP: null

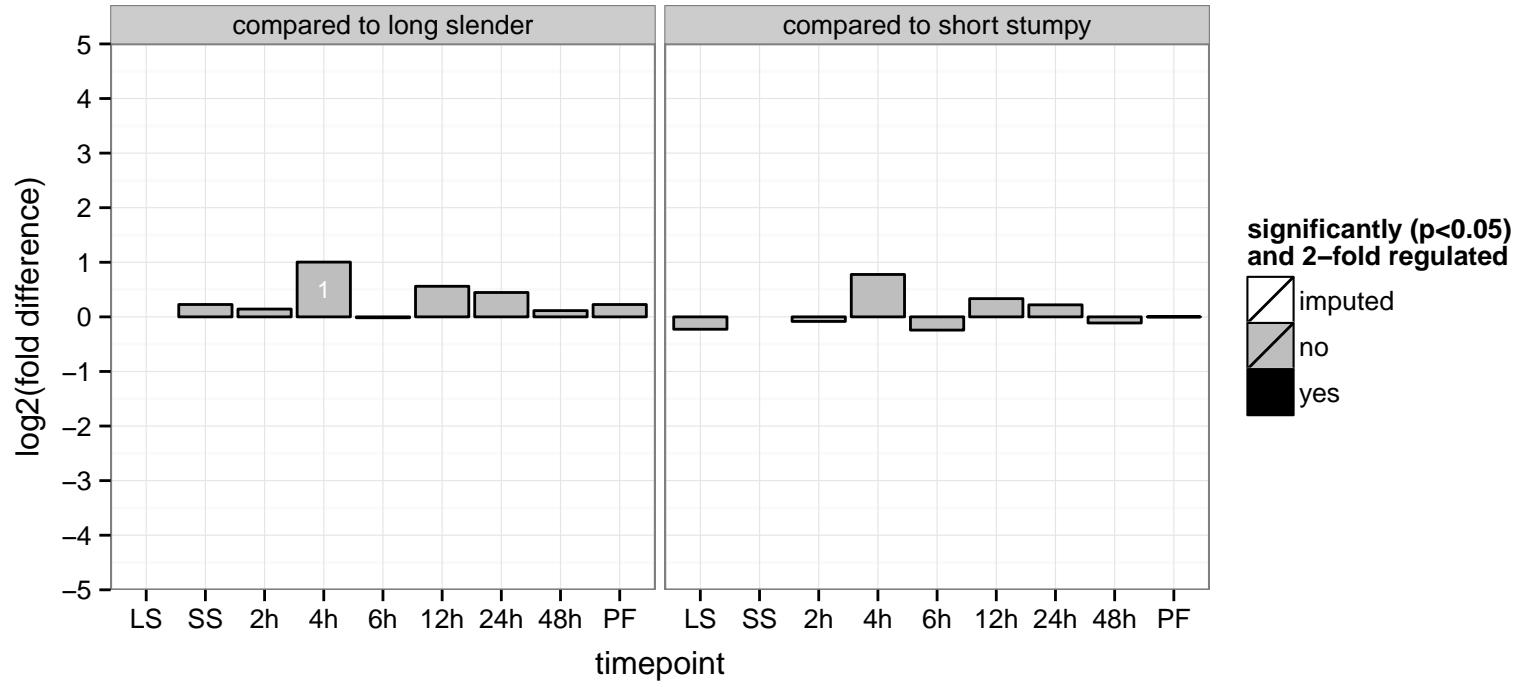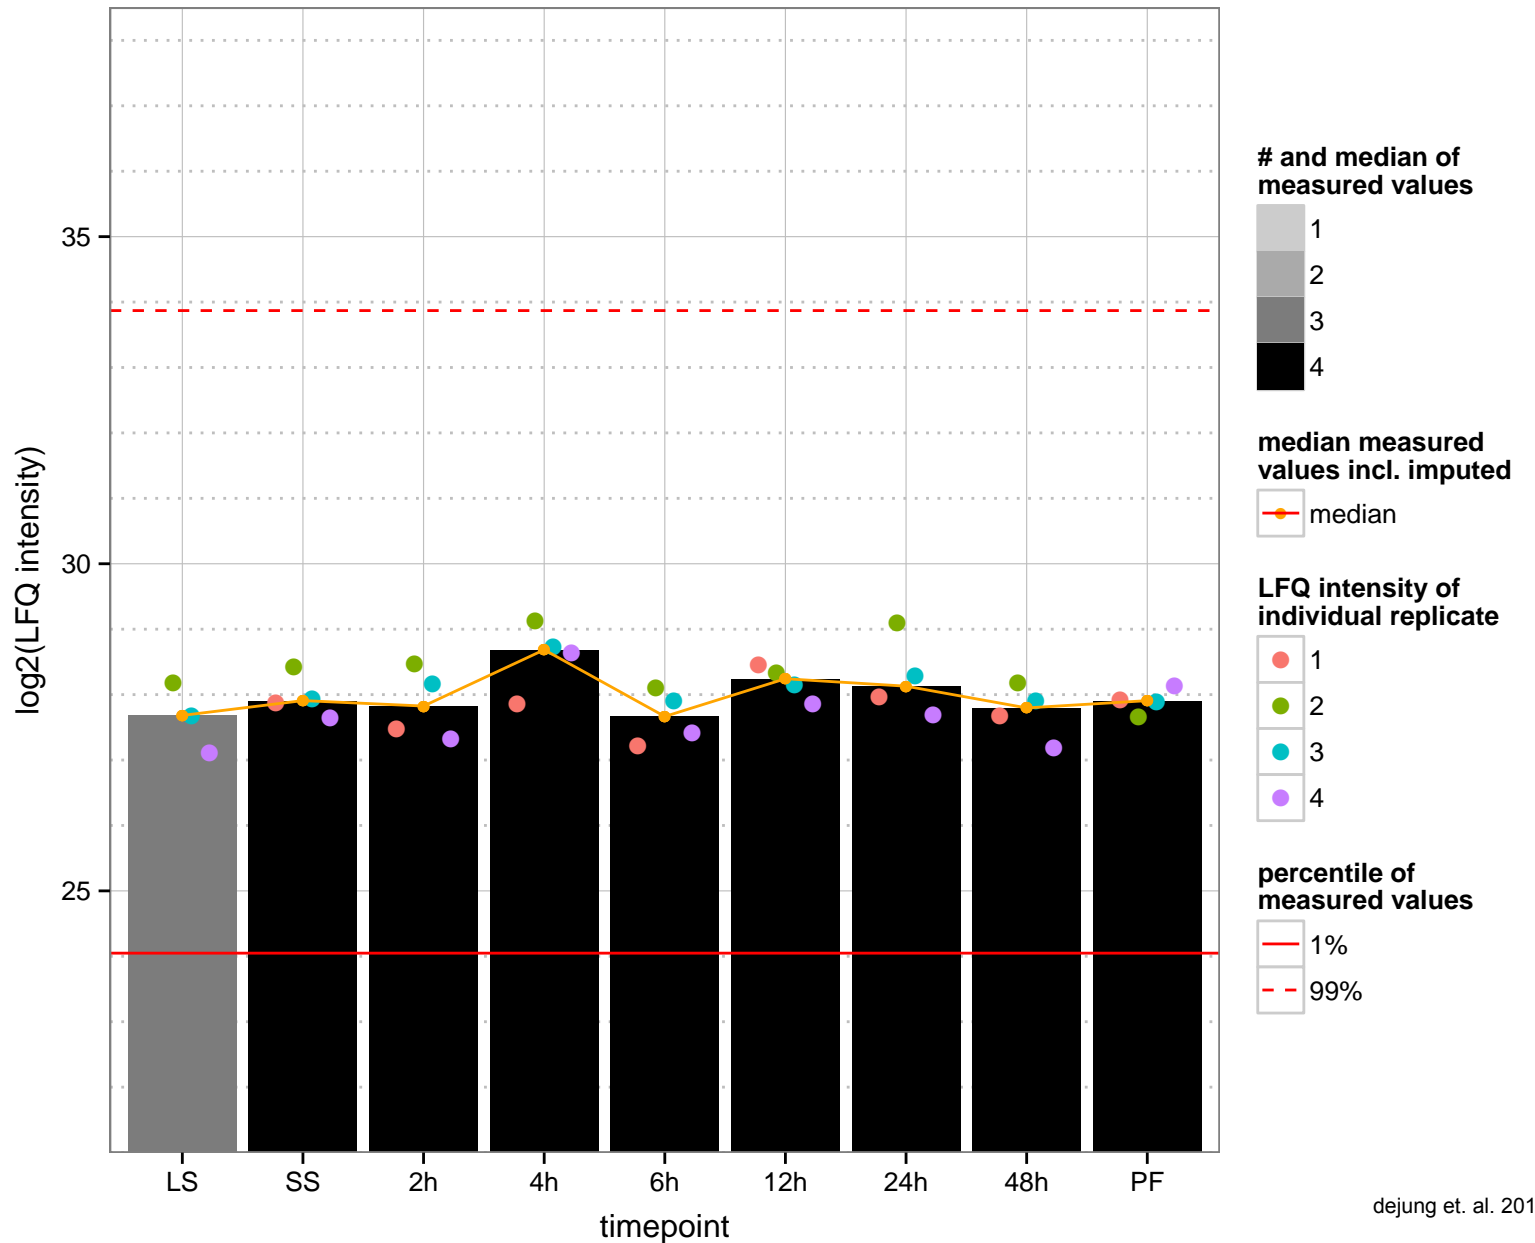

U5 snRNP-associated 102 kDa protein, putative  
 Tb927.11.15690  
 AGOF: null  
 AGOC: null  
 AGOP: null  
 PGO: null  
 PGO: null  
 PGO: null

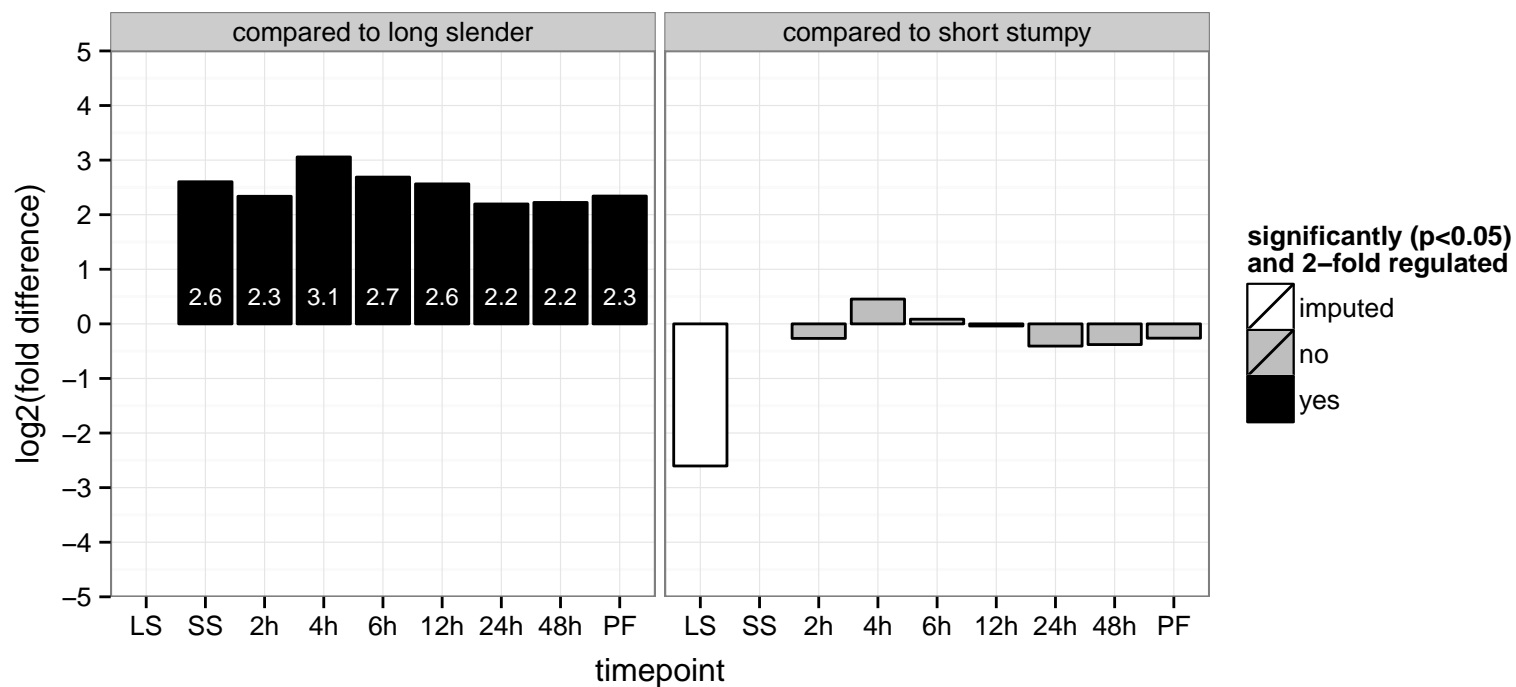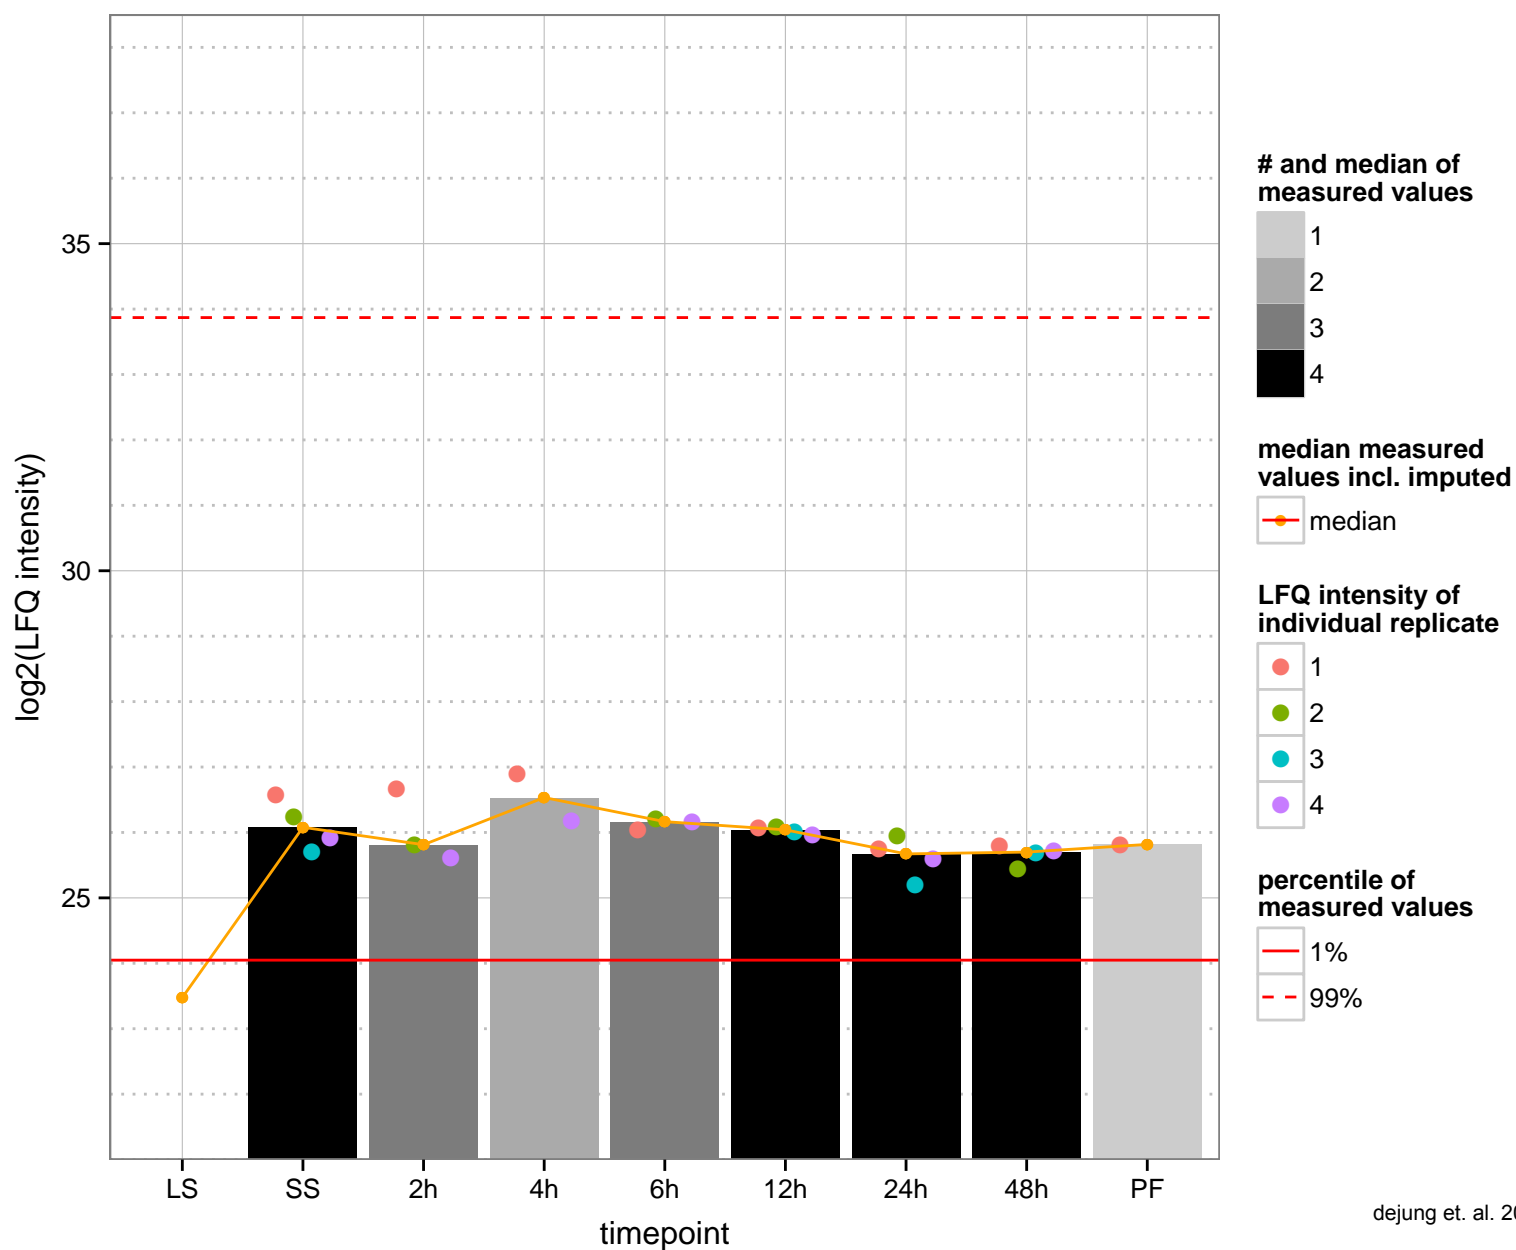

hypothetical protein, conserved  
 Tb927.11.15730  
 AGOF: null  
 AGOC: mitochondrion  
 AGOP: null  
 PGO: null  
 PGO: null  
 PGO: null

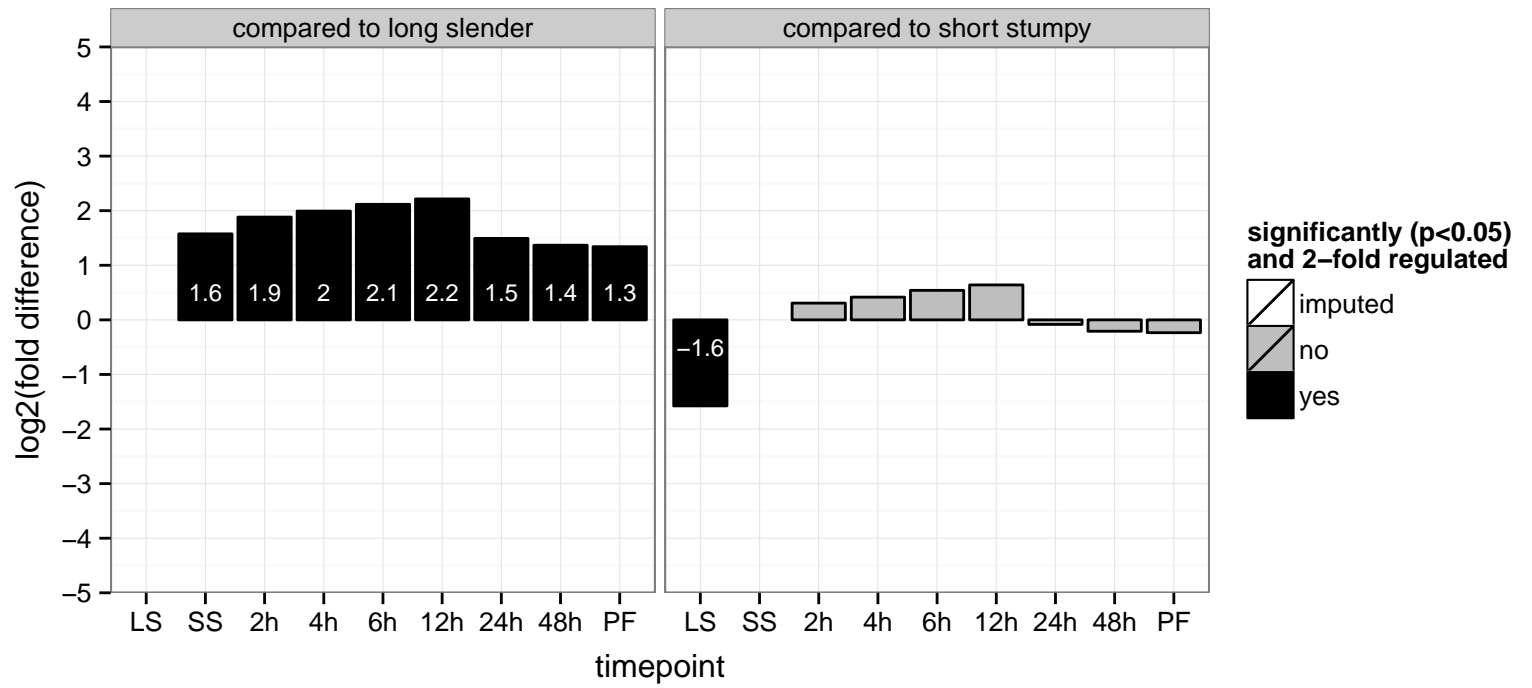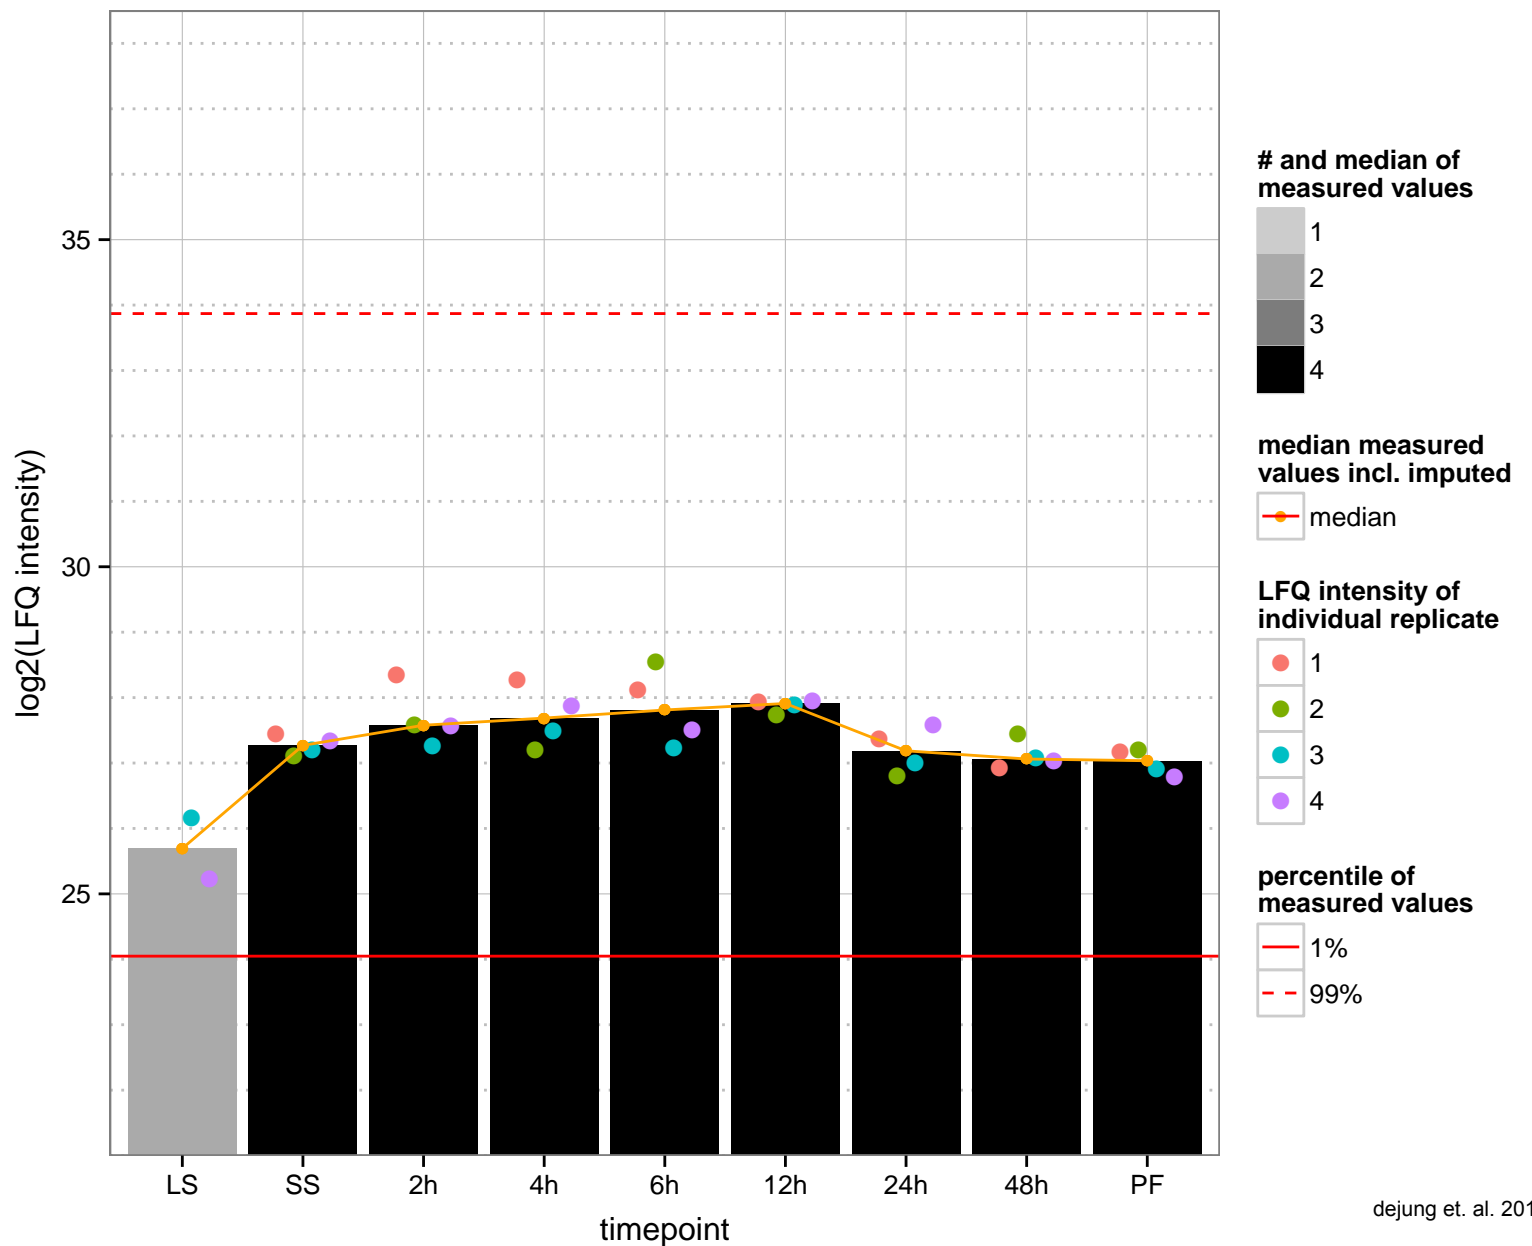

AMP deaminase, putative  
 Tb927.11.15750  
 AGOF: AMP deaminase activity  
 AGOC: null  
 AGOP: generation of precursor metabolites and energy, purine ribonucleoside monophosphate biosynthetic process  
 PGOF: deaminase activity  
 PGO: null  
 PGOP: purine ribonucleoside monophosphate biosynthetic process

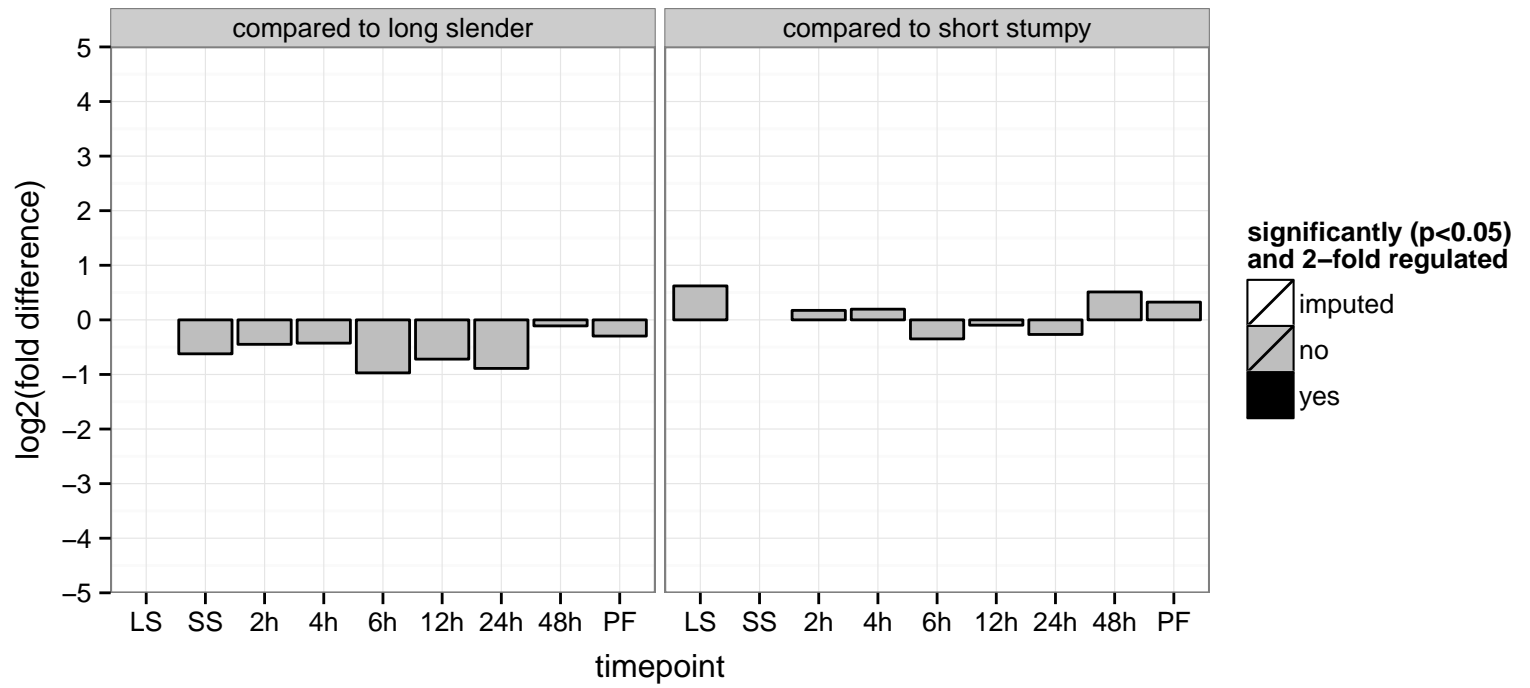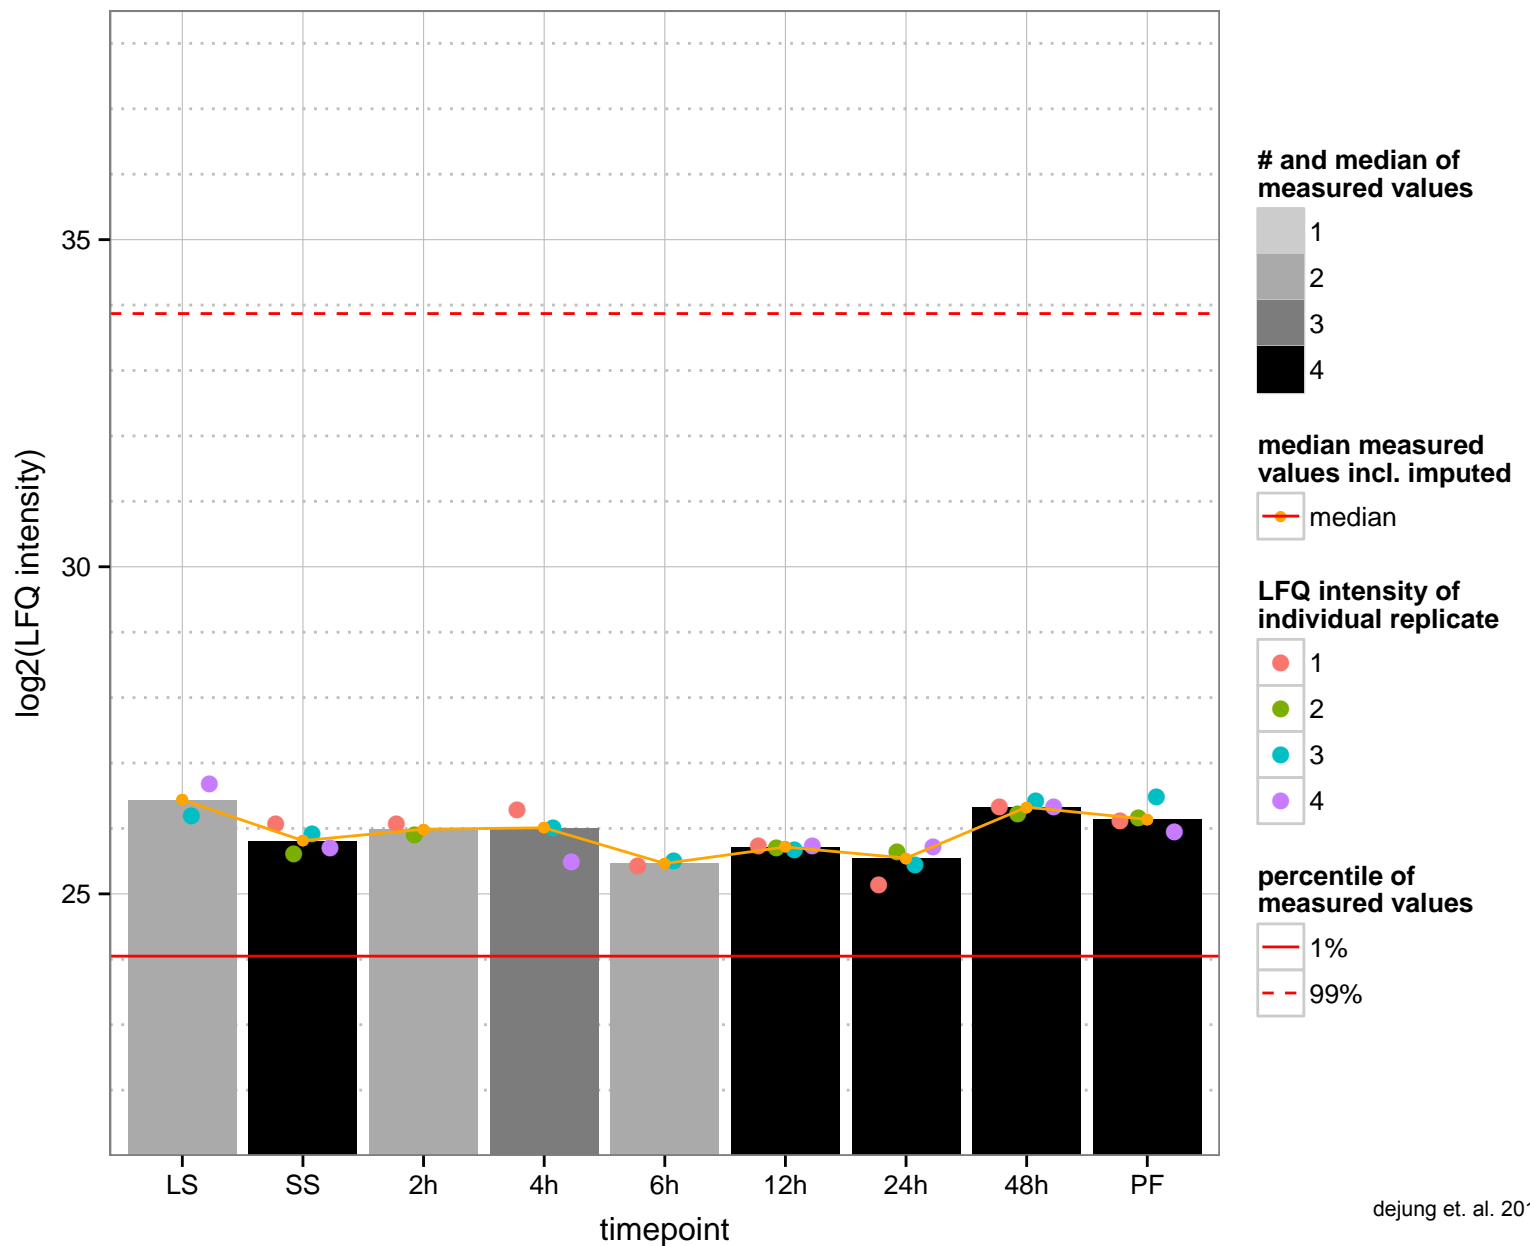



variant surface glycoprotein (VSG), putative, RNA methyltransferase  
 Tb927.11.15830;Tb11.v5.0683  
 AGOF: null, RNA binding, RNA methyltransferase activity  
 AGOC: null  
 AGOP: null, RNA processing, tRNA methylation  
 PGO: RNA binding, RNA methyltransferase activity  
 PGOC: null  
 PGOP: RNA processing

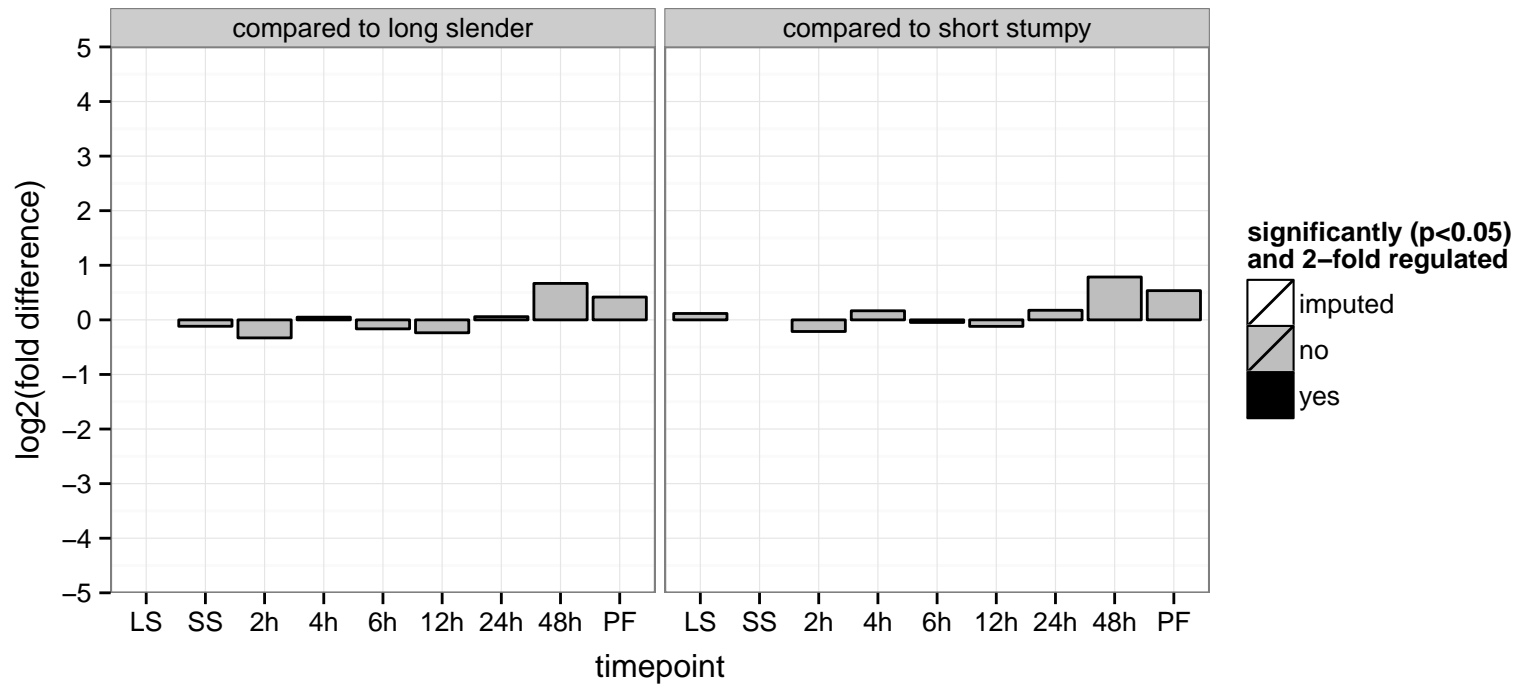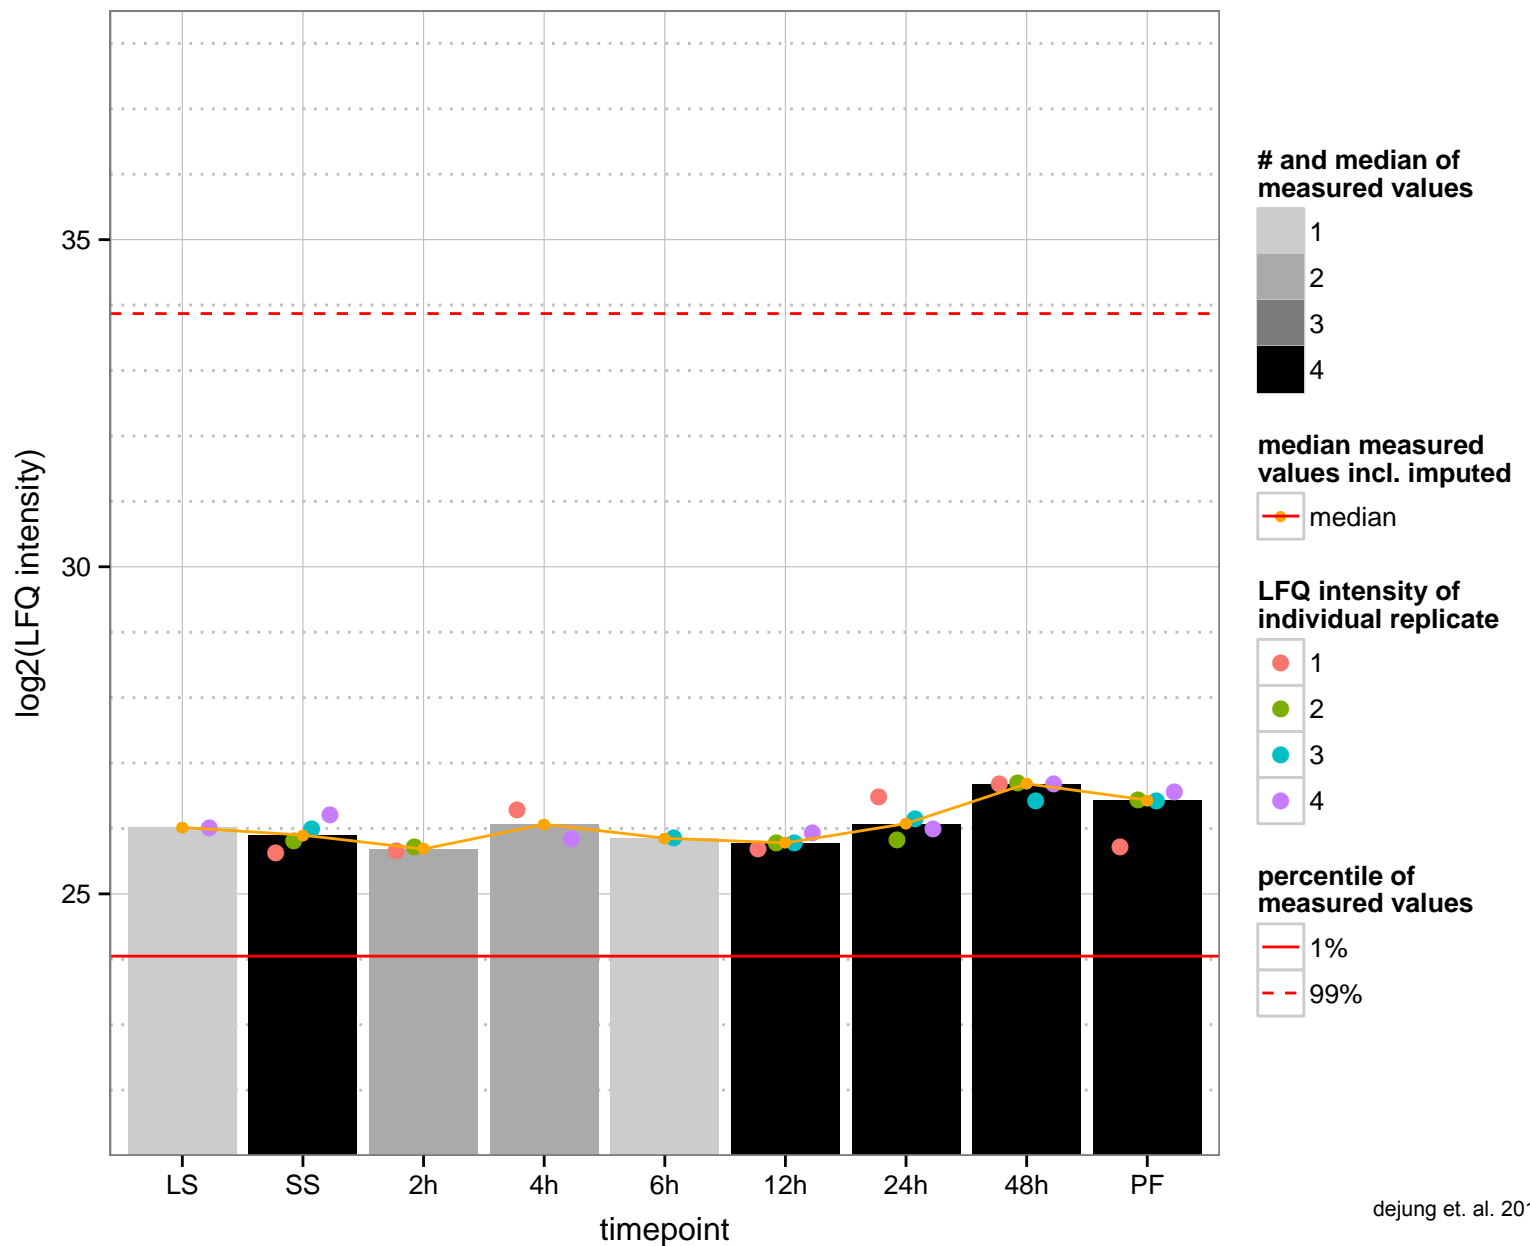

60S ribosomal protein L27, putative  
 Tb927.11.15900;Tb927.11.15880  
 AGOF: structural constituent of ribosome  
 AGOC: intracellular, ribosome  
 AGOP: translation  
 PGOF: structural constituent of ribosome, null  
 PGOC: intracellular, ribosome, null  
 PGOP: translation, null

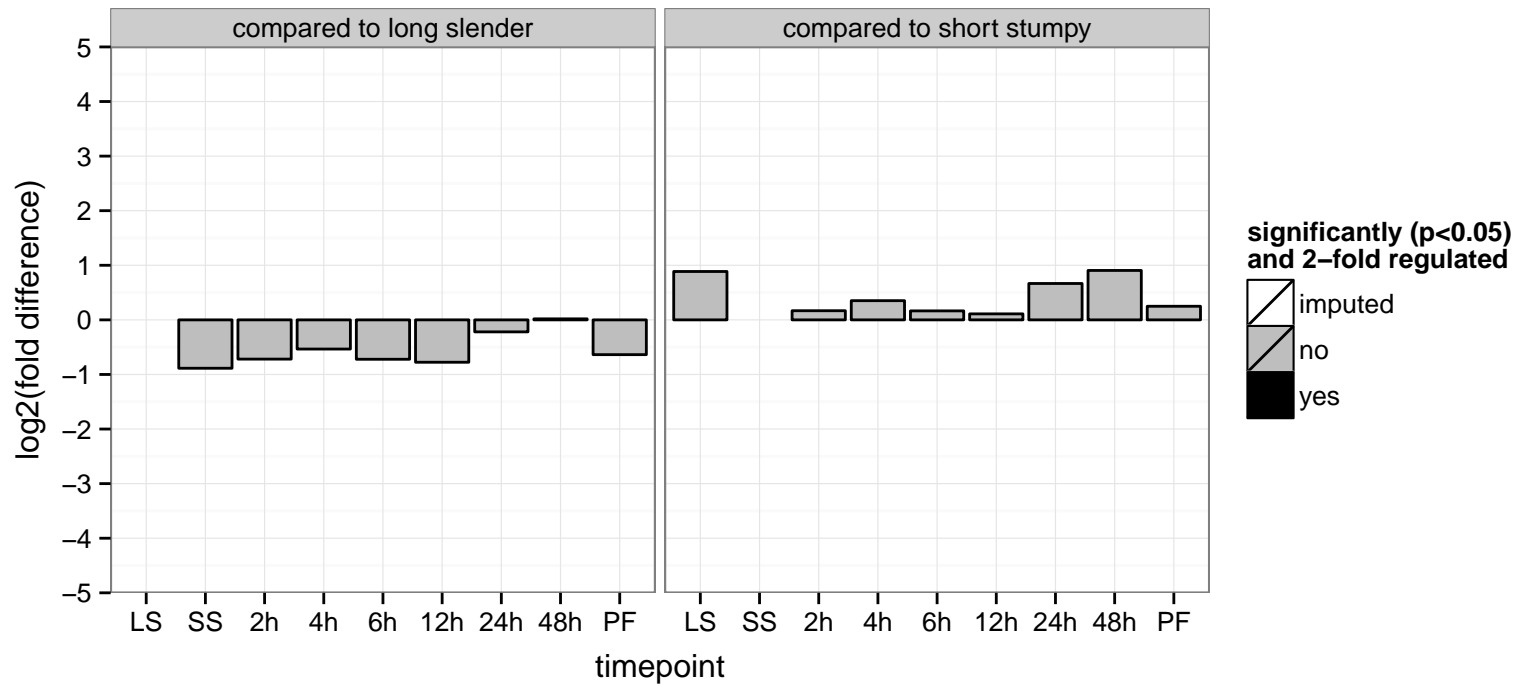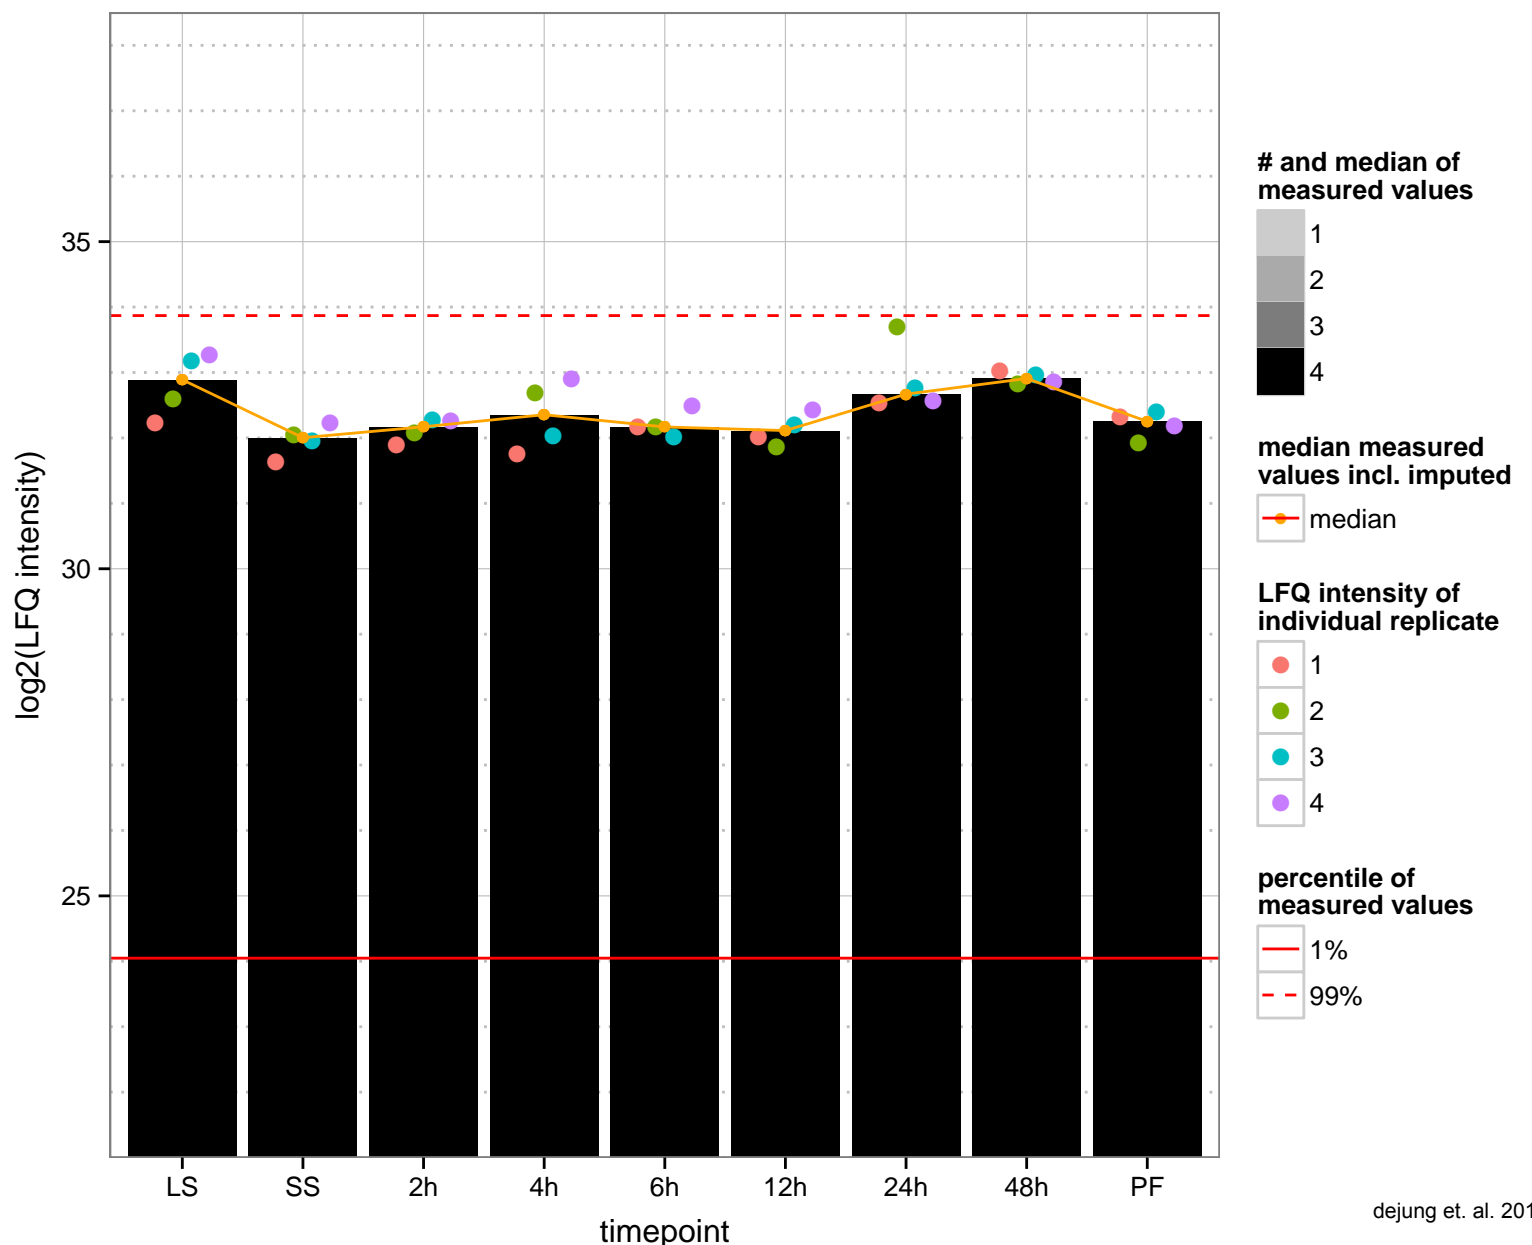

hypothetical protein, conserved  
 Tb927.11.15930  
 AGOF: null  
 AGOC: cis-Golgi network  
 AGOP: ER to Golgi vesicle-mediated transport  
 PGO: null  
 PGOC: cis-Golgi network  
 PGOP: ER to Golgi vesicle-mediated transport, transport

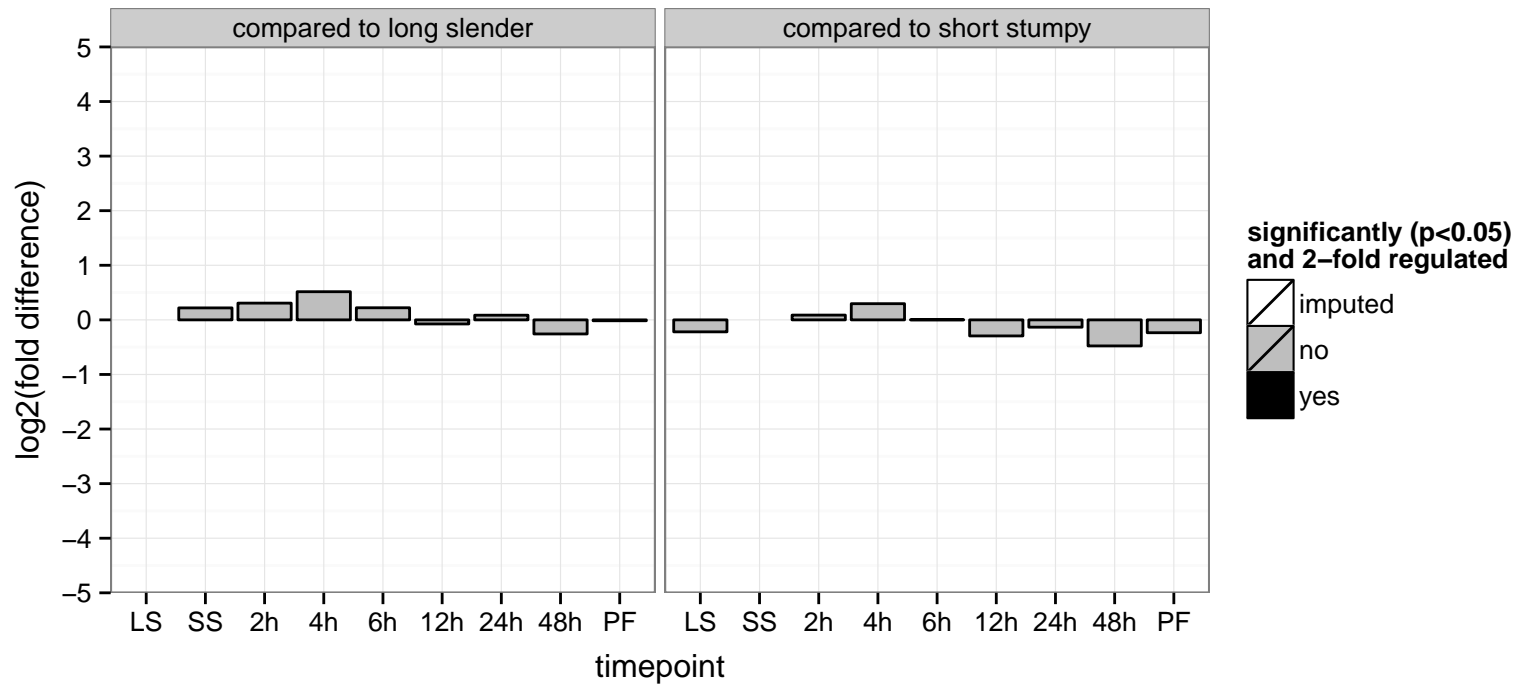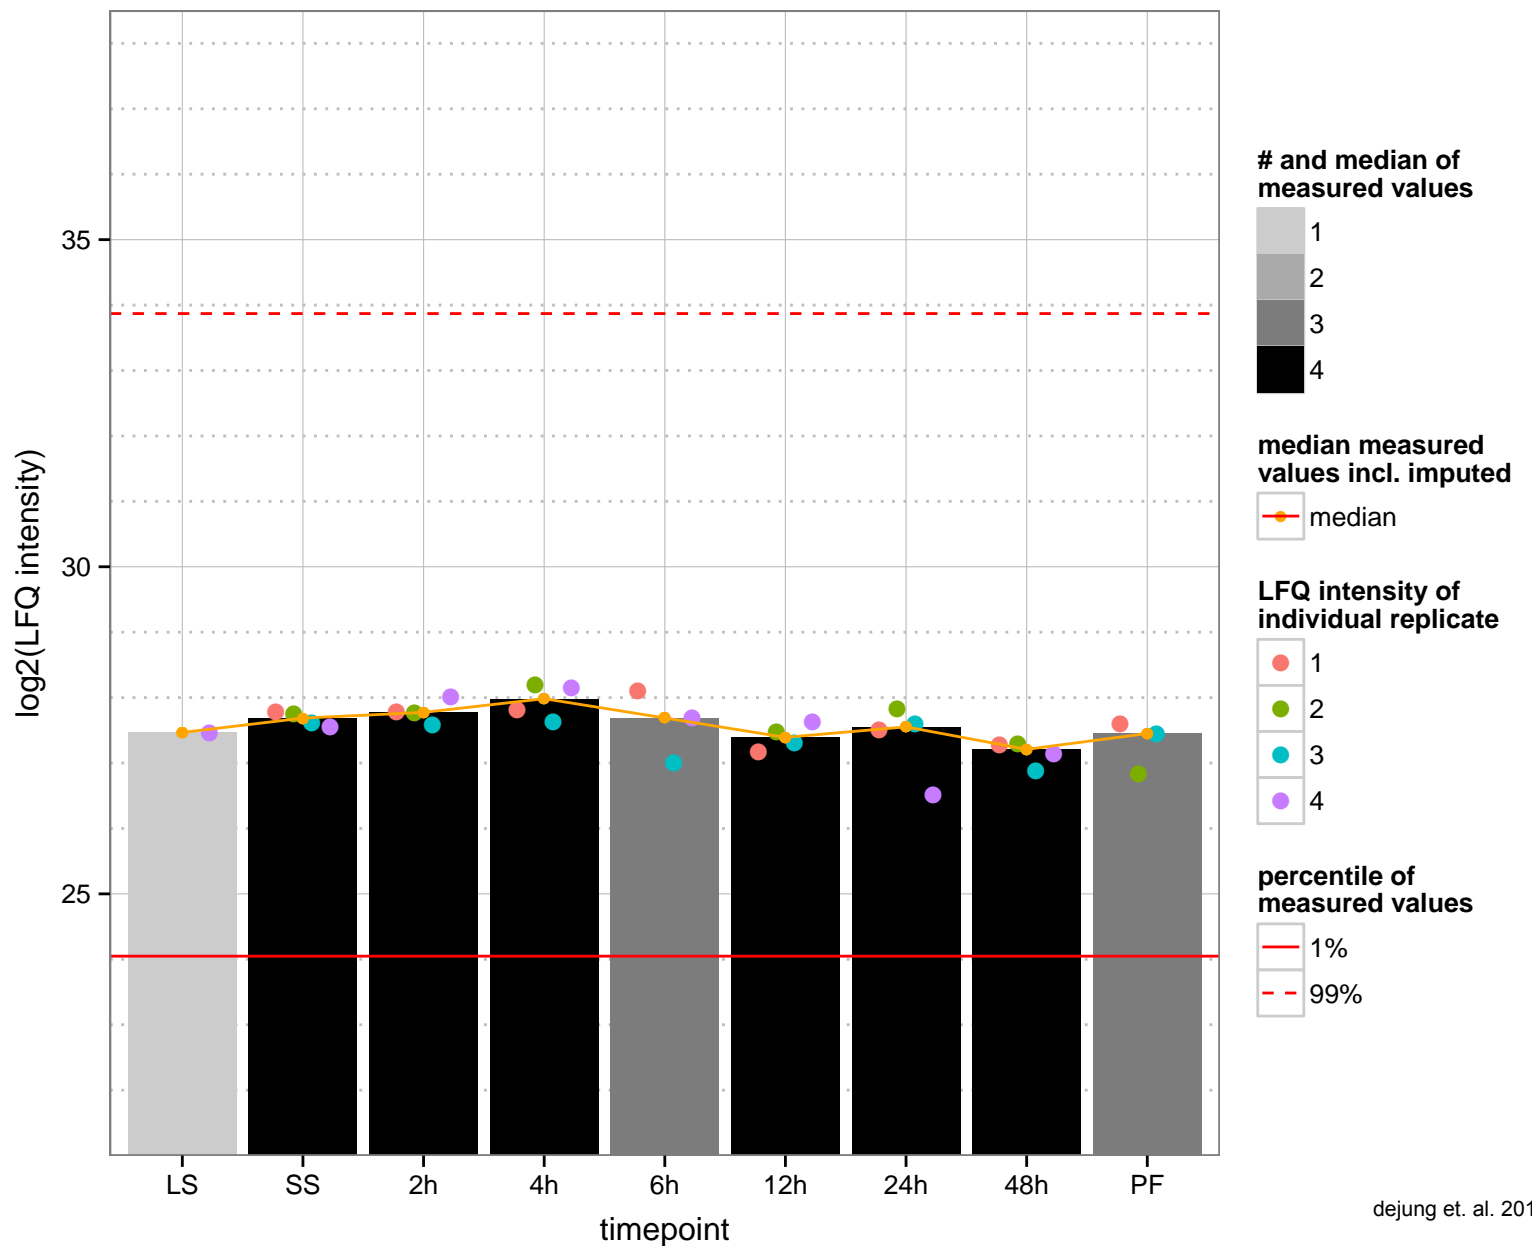

nucleoporin Nup109 (TbNup109)  
 Tb927.11.15990  
 AGOF: null  
 AGOC: nuclear pore  
 AGOP: null  
 PGO: null  
 PGOC: null  
 PGOP: null

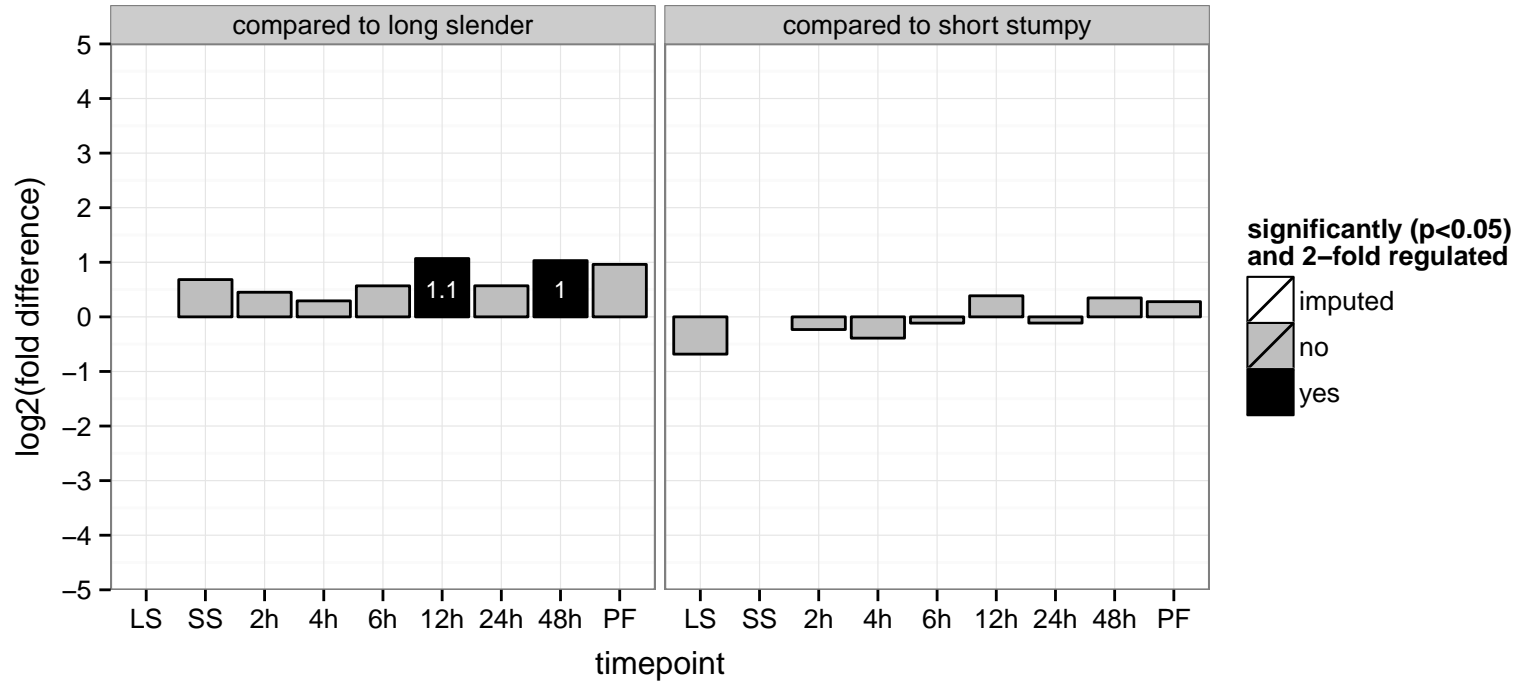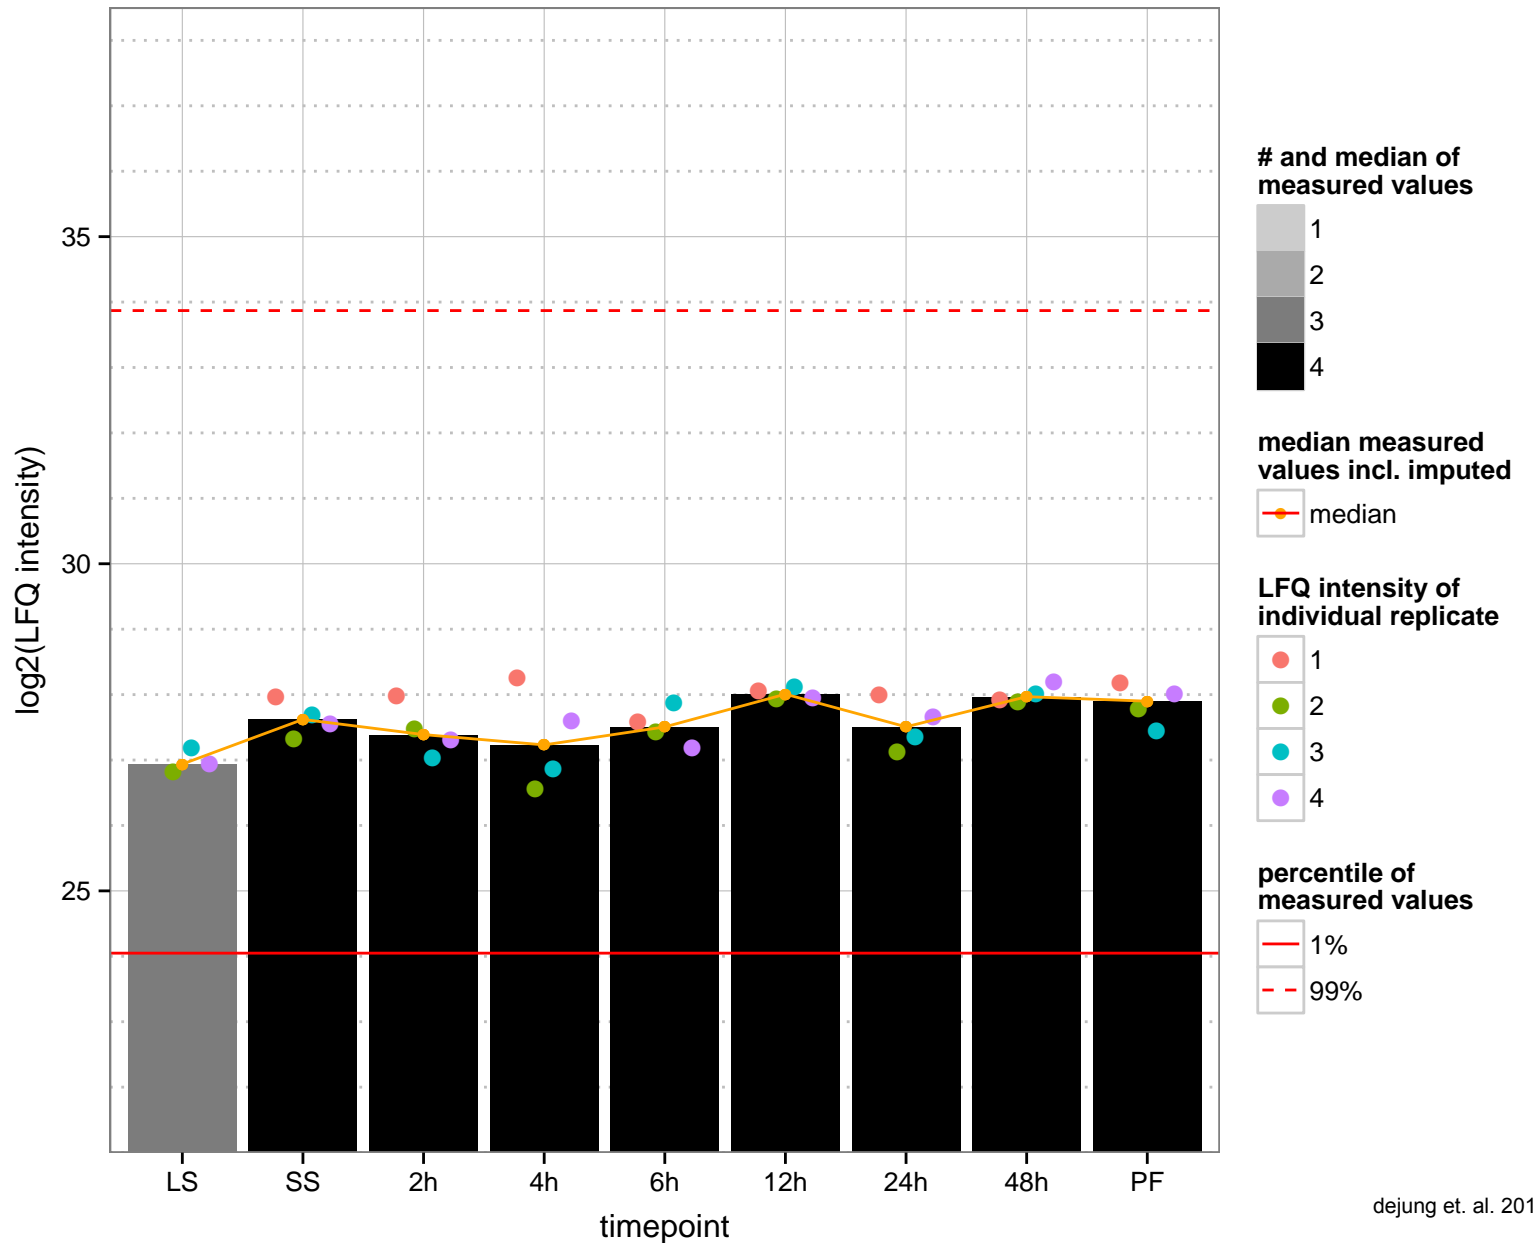

proteasome regulatory non-ATP-ase subunit 7 (RPN7)  
 Tb927.11.16030  
 AGOF: endopeptidase activity  
 AGOC: proteasome regulatory particle  
 AGOP: ubiquitin-dependent protein catabolic process  
 PGO: protein binding  
 PGOC: null  
 PGOP: null

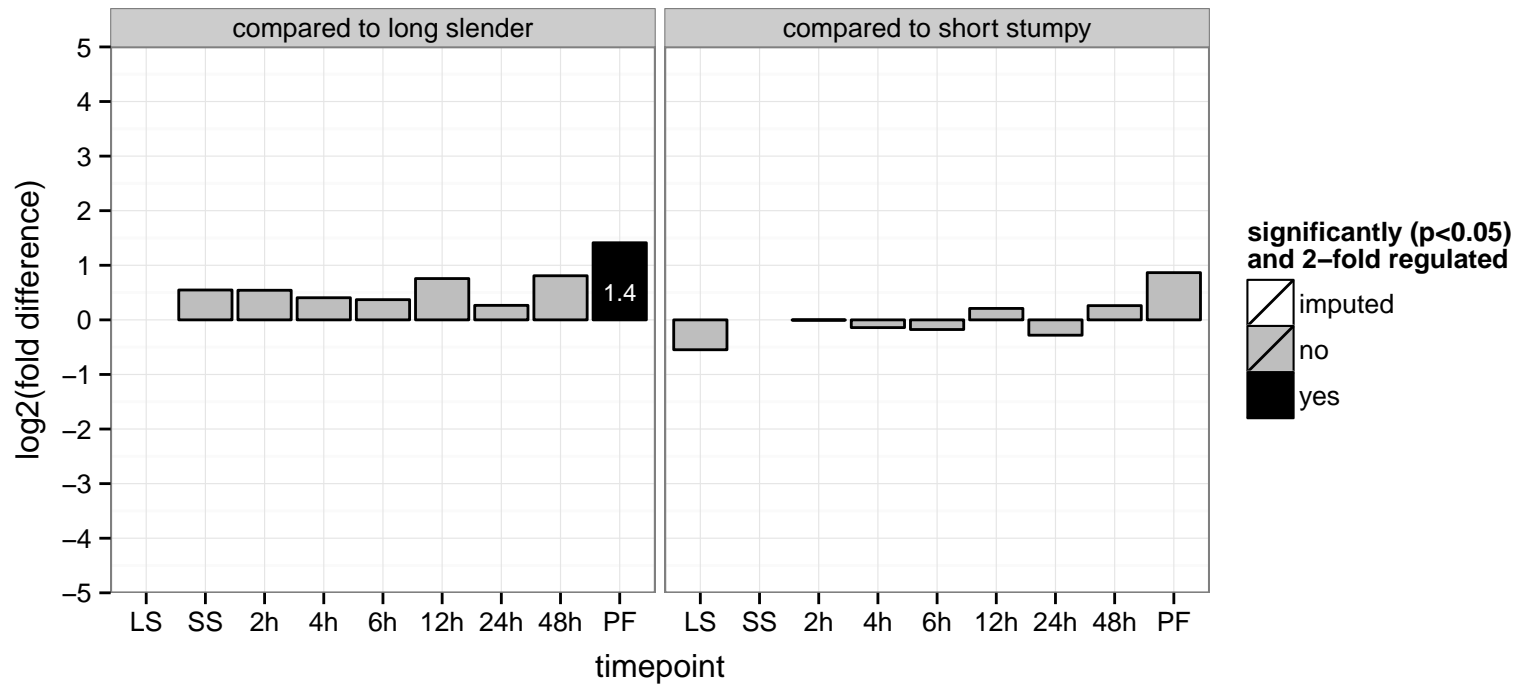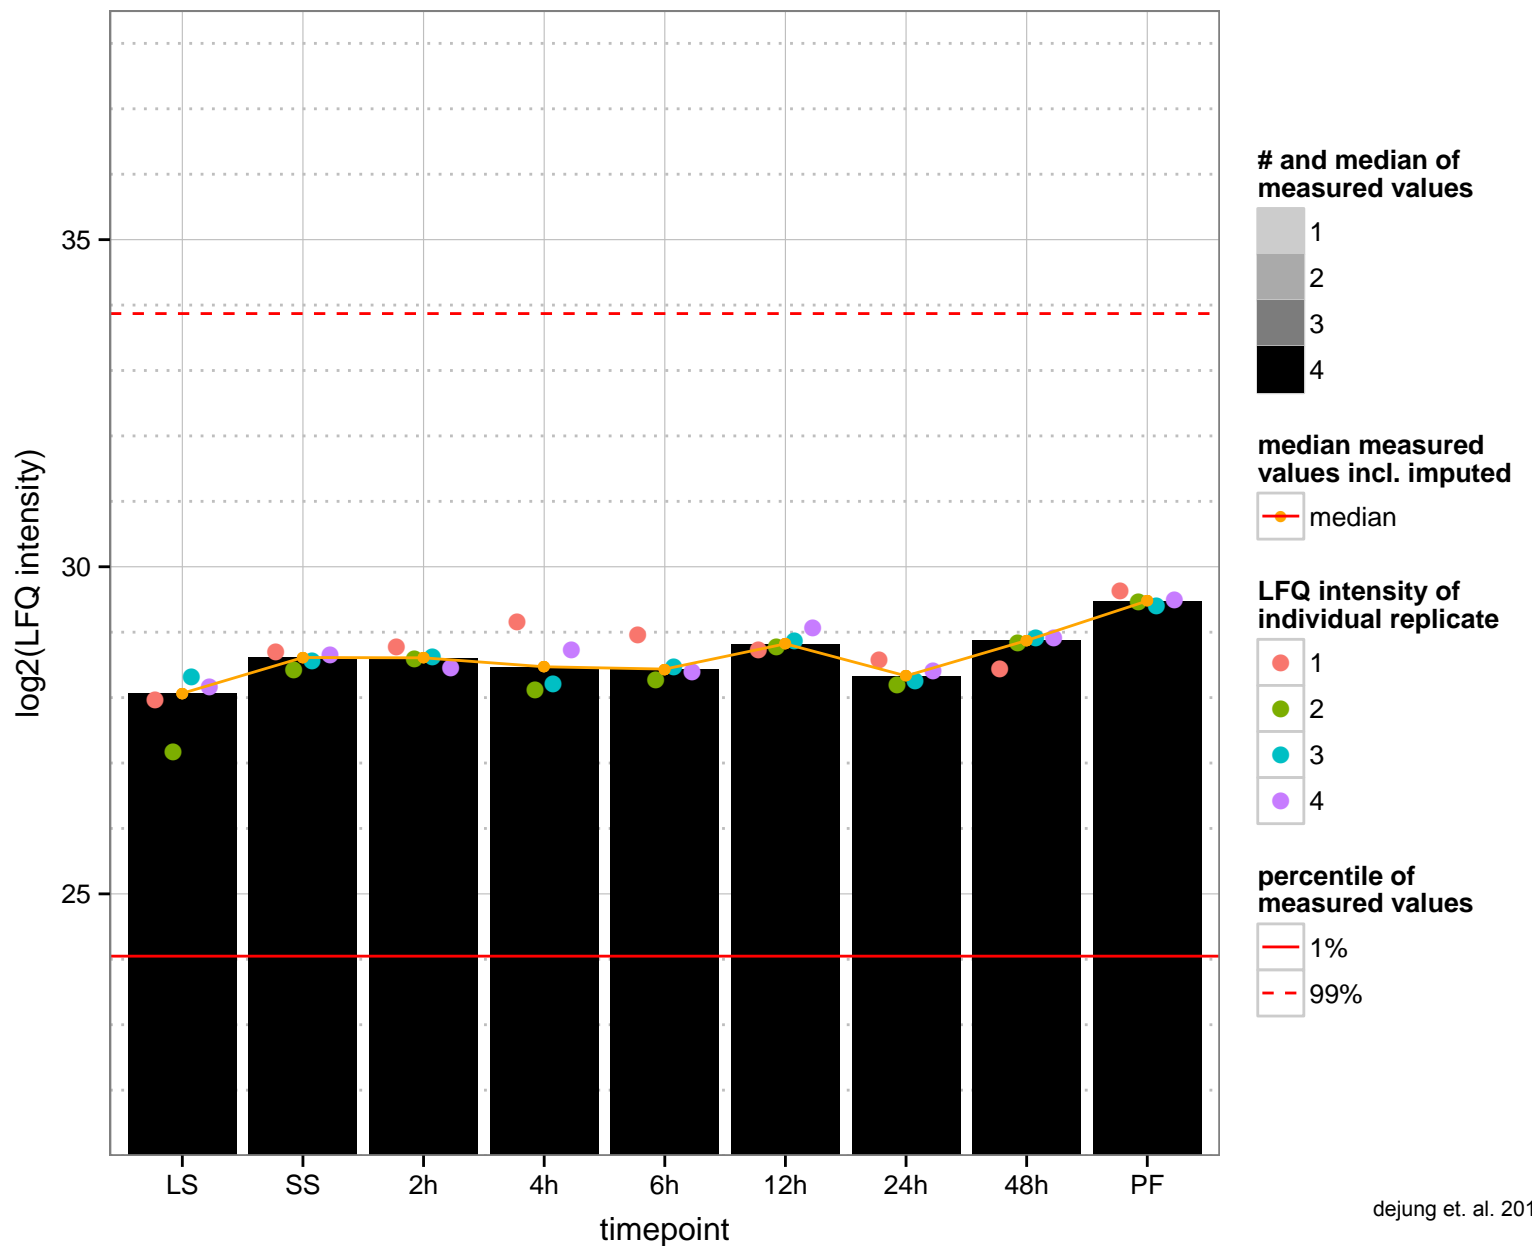

outer dynein arm docking complex, putative (DC2)  
 Tb927.11.16090  
 AGOF: null  
 AGOC: axonemal dynein complex  
 AGOP: axonemal dynein complex assembly  
 PGOF: null  
 PGO: null  
 PGOP: null

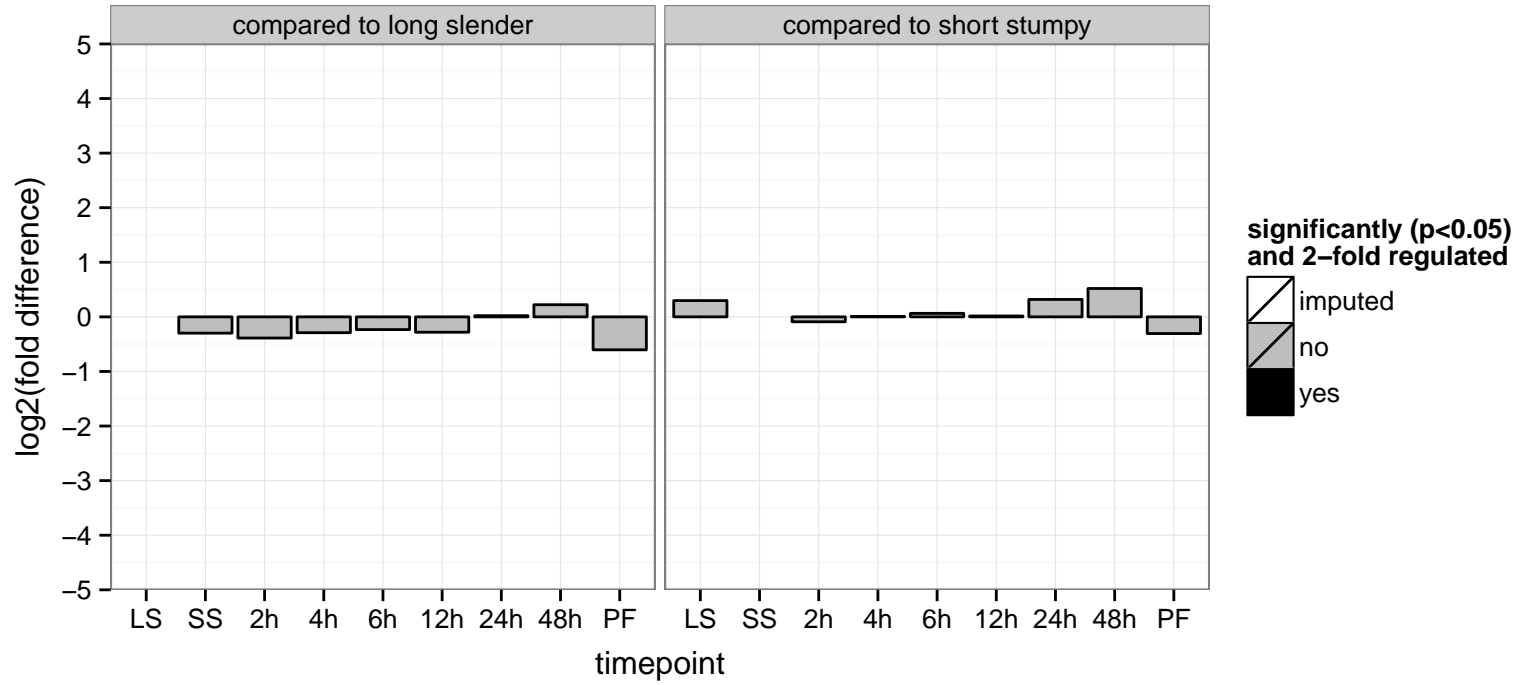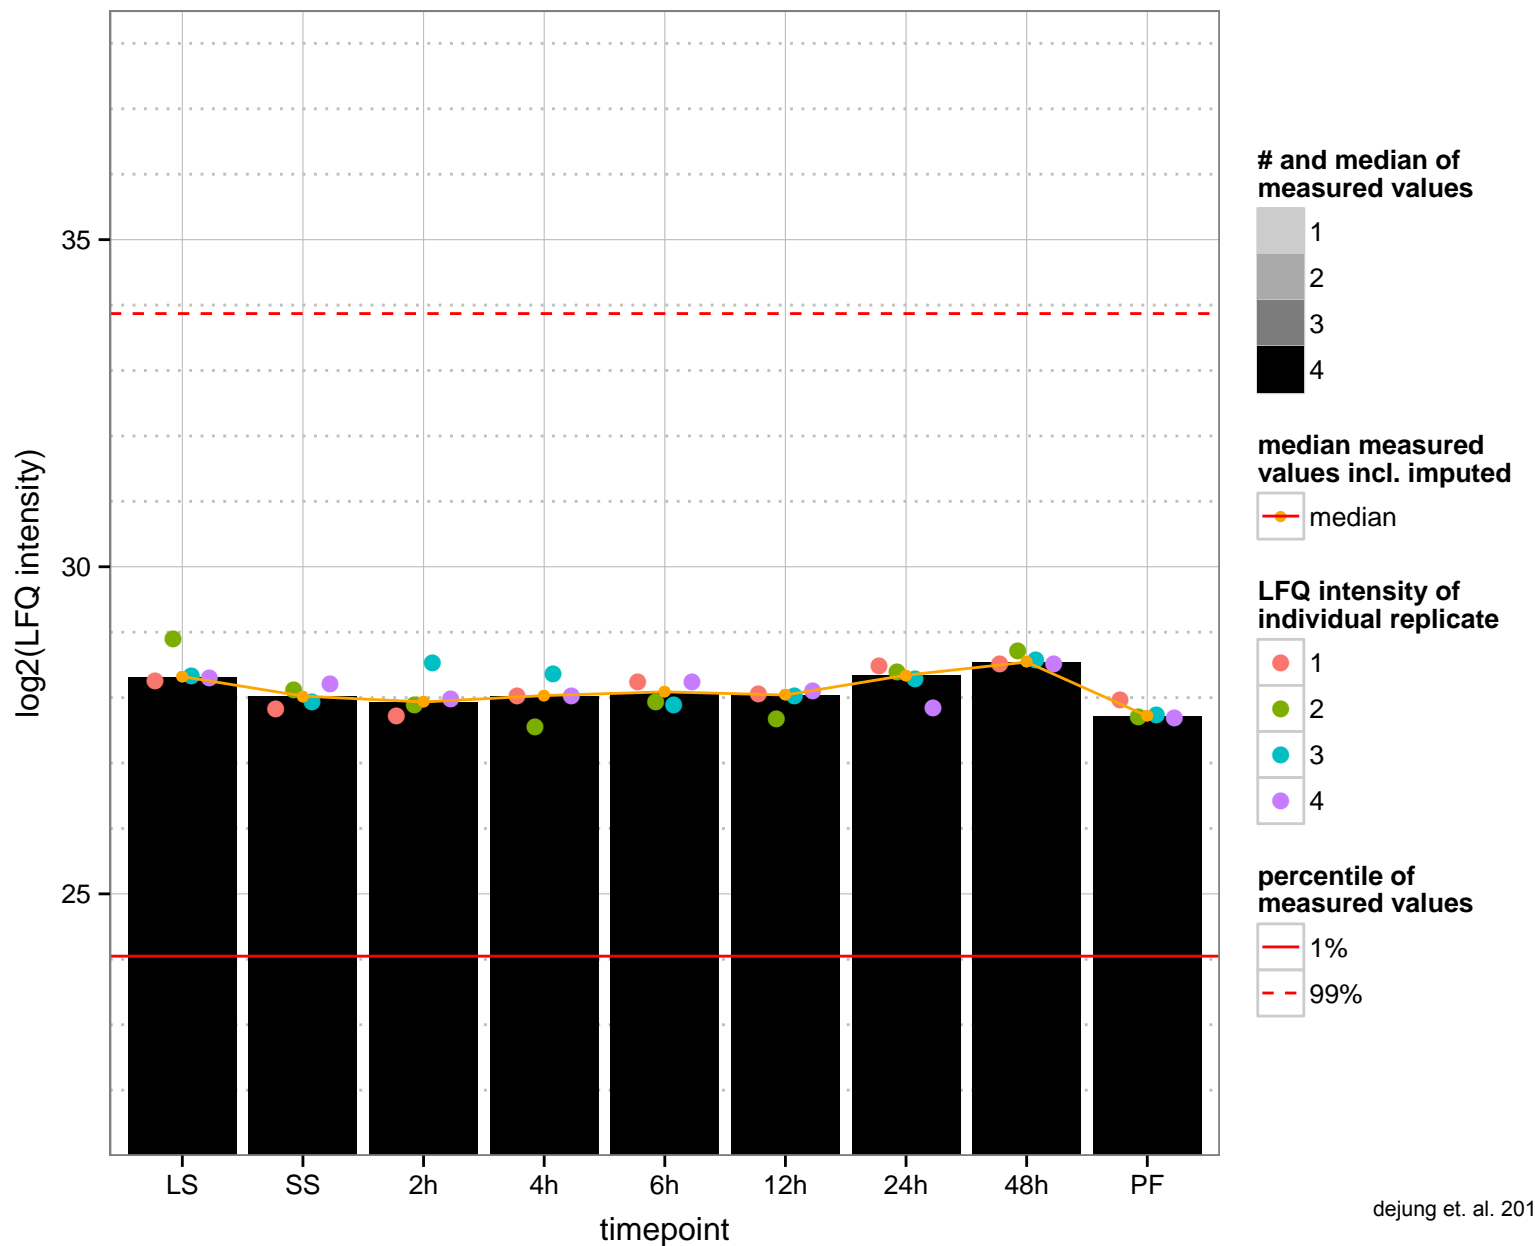

ubiquitin carboxyl-terminal hydrolase, putative  
 Tb927.11.16100  
 AGOF: cysteine-type endopeptidase activity, ubiquitin thiolesterase activity  
 AGOC: null  
 AGOP: ubiquitin-dependent protein catabolic process  
 PGO: ubiquitin thiolesterase activity  
 PGO: null  
 PGOP: ubiquitin-dependent protein catabolic process

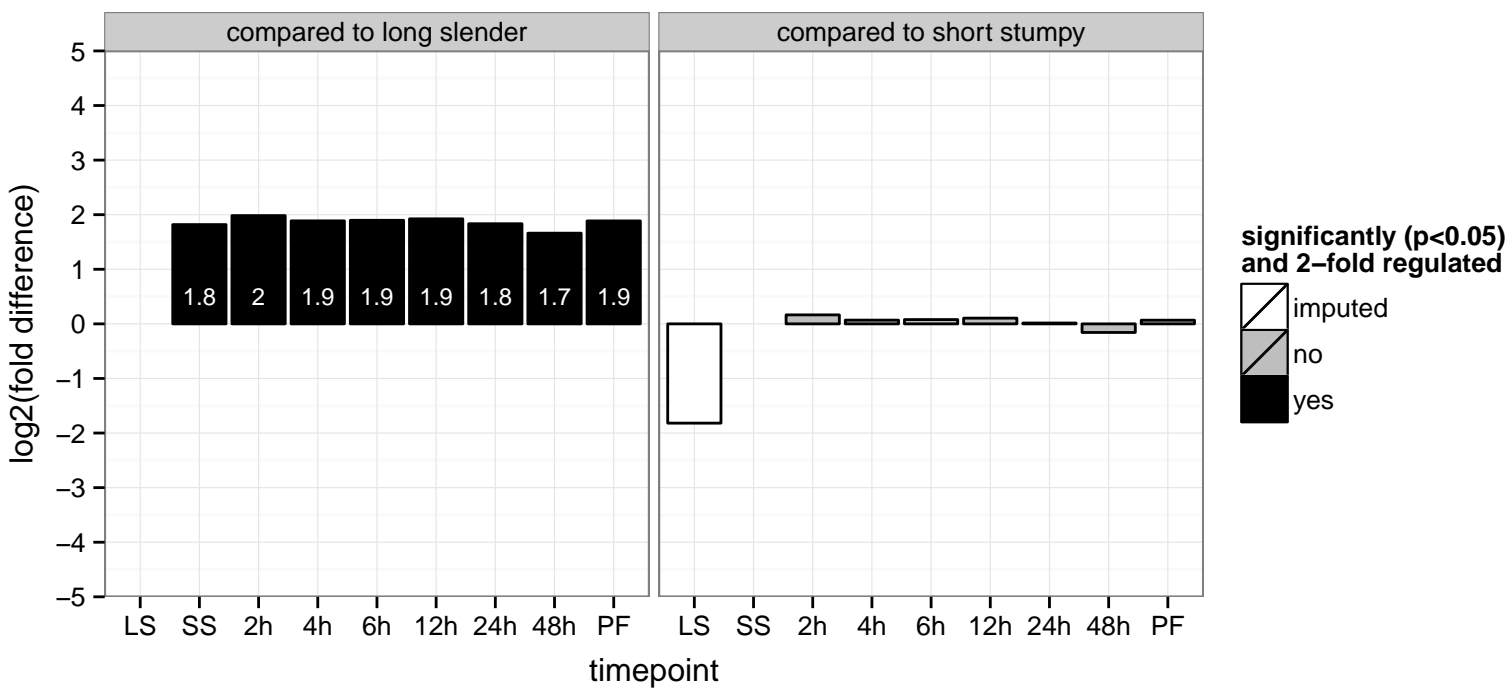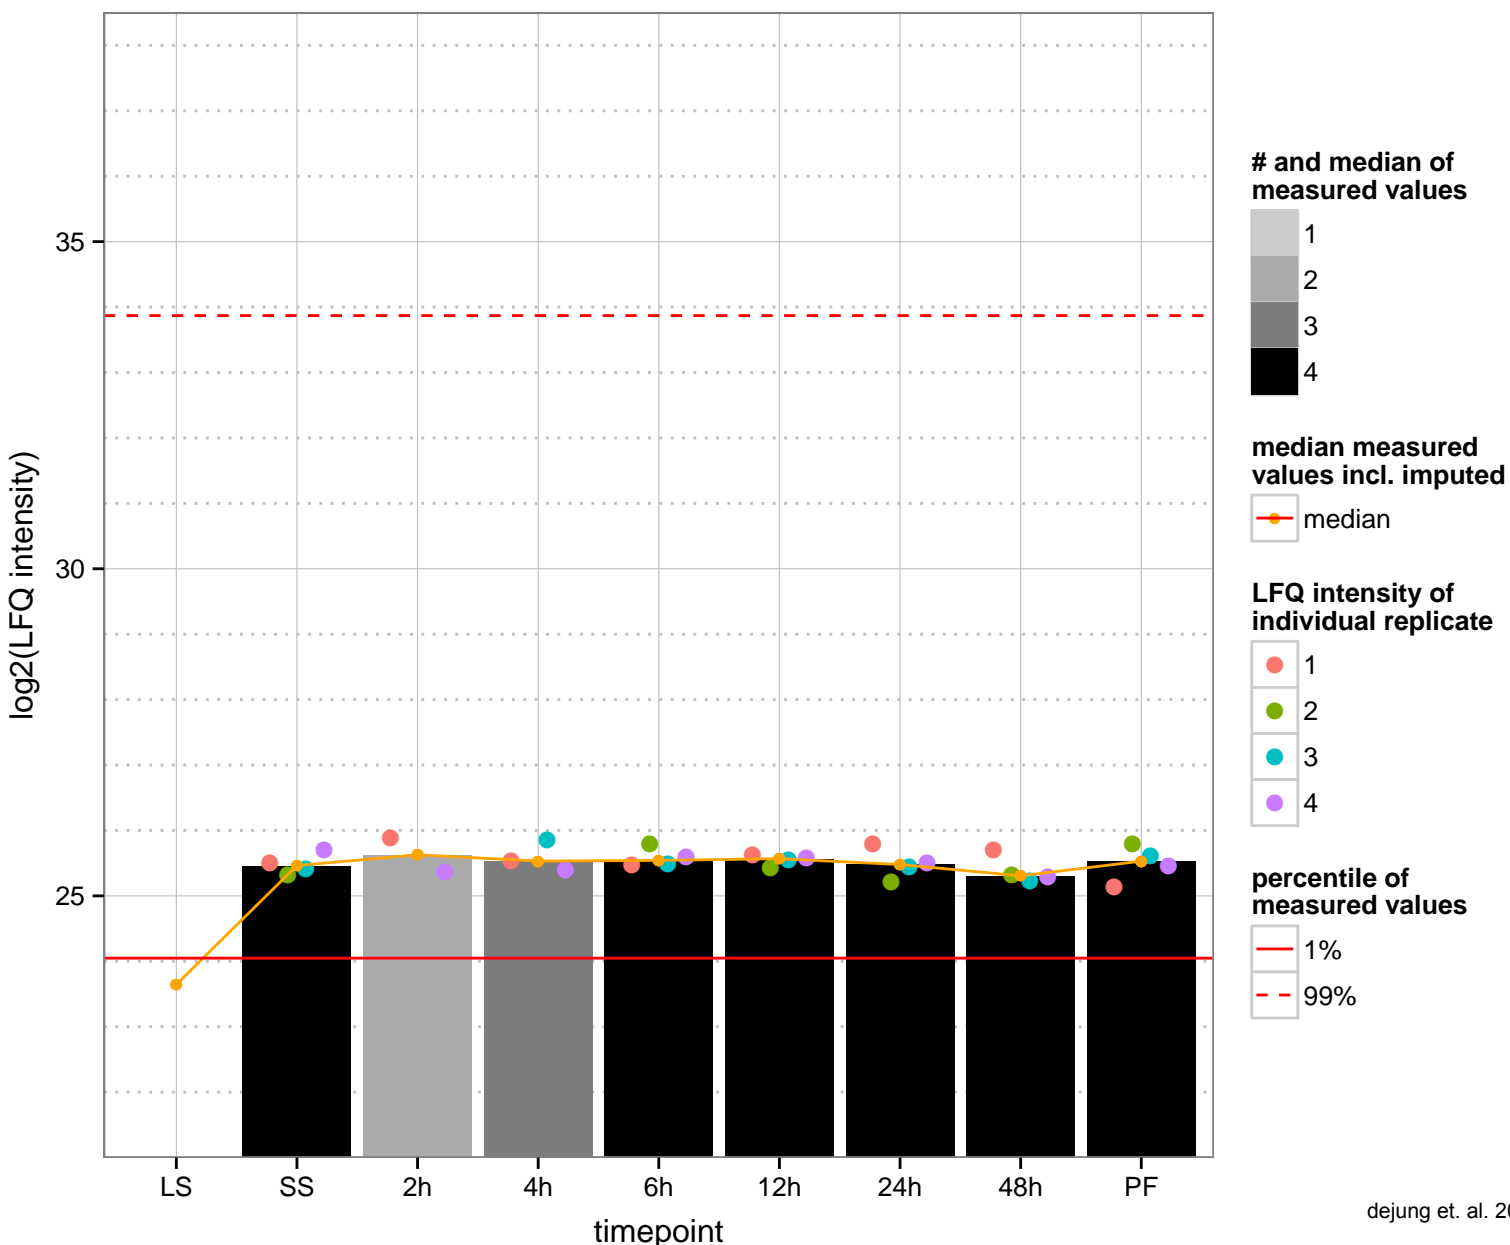

integrin alpha chain protein, putative, FG-GAP repeat protein  
 Tb927.11.16110  
 AGOF: null  
 AGOC: integral to membrane, integrin complex  
 AGOP: cell-matrix adhesion  
 PGO: null  
 PGOC: null  
 PGOP: null

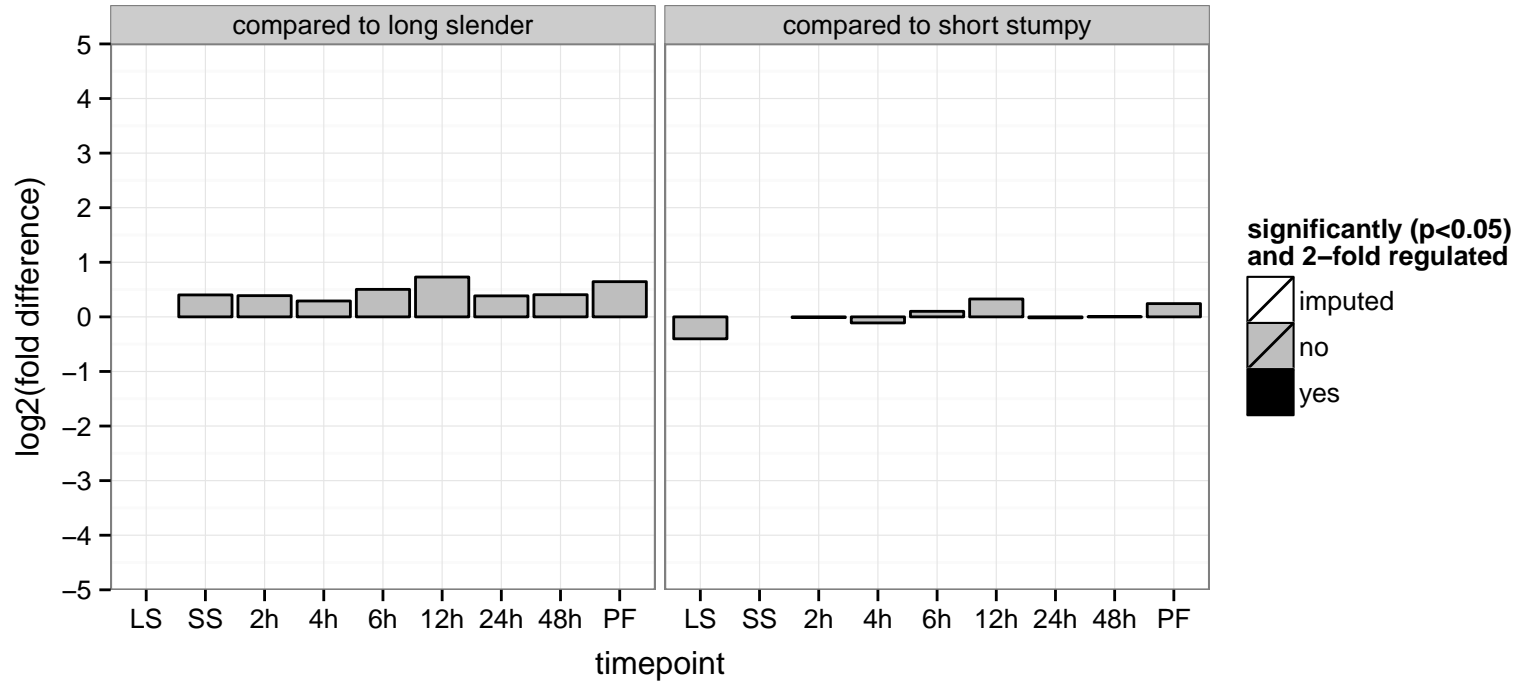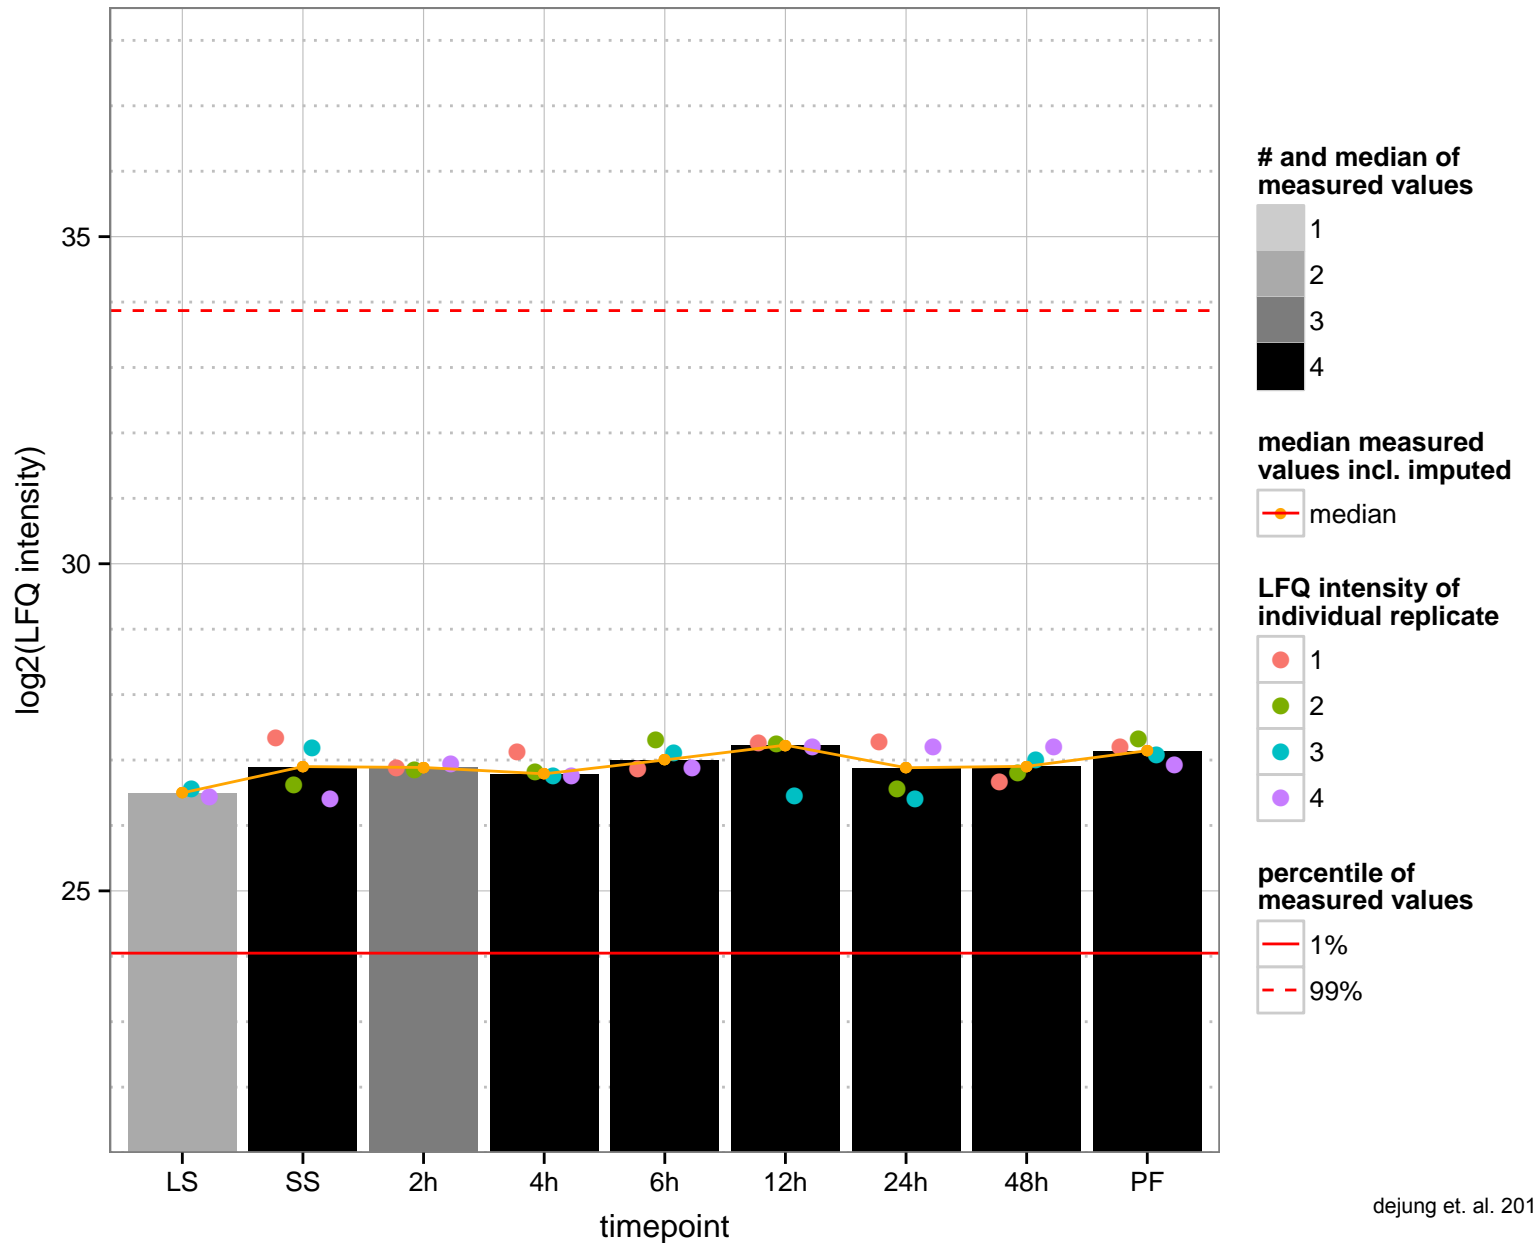



nucleoside diphosphate kinase (NDPK)

Tb927.11.16130

AGOF: ATP binding, nucleoside diphosphate kinase activity

AGOC: nucleus

AGOP: CTP biosynthetic process, GTP biosynthetic process, UTP biosynthetic process

PGOF: ATP binding, nucleoside diphosphate kinase activity

PGOC: null

PGOP: CTP biosynthetic process, GTP biosynthetic process, UTP biosynthetic process, nucleoside diphosphate phosphoryla

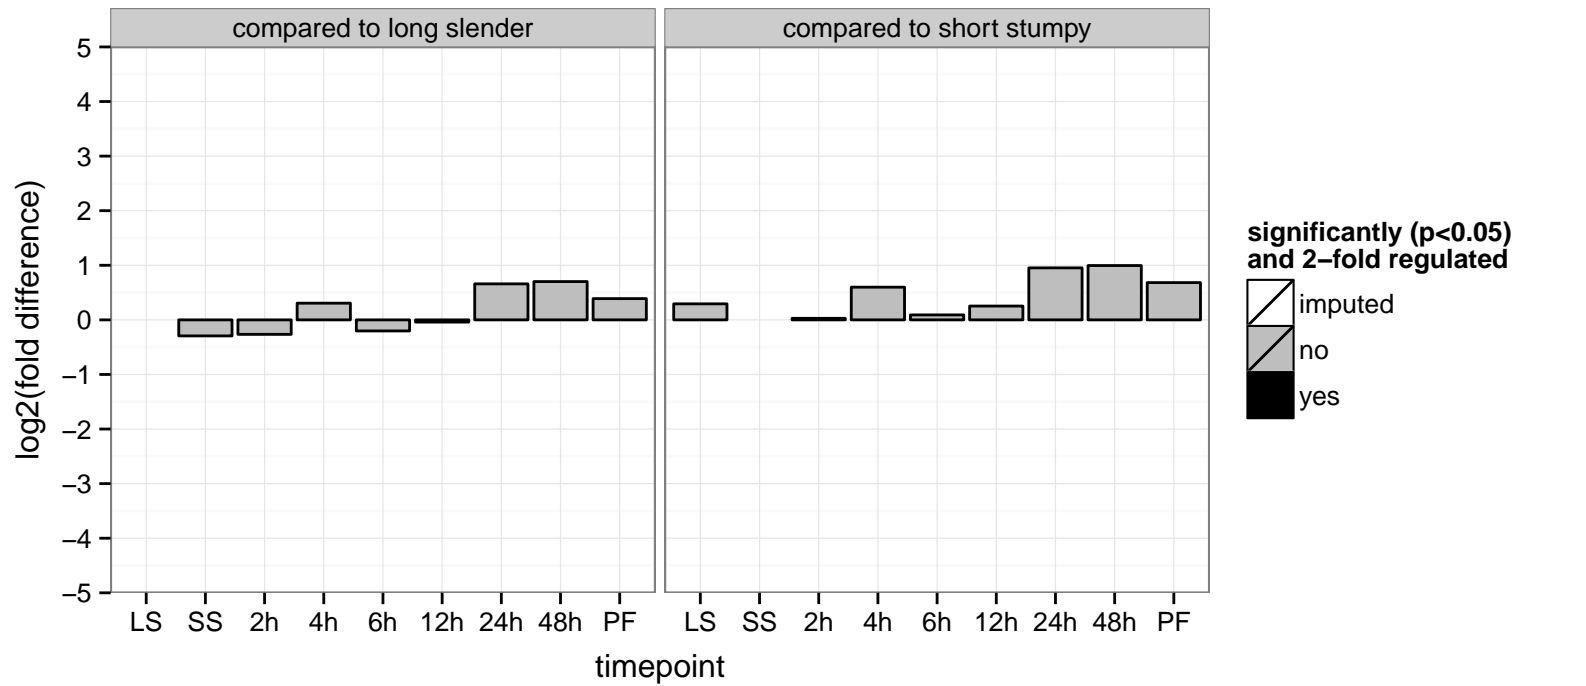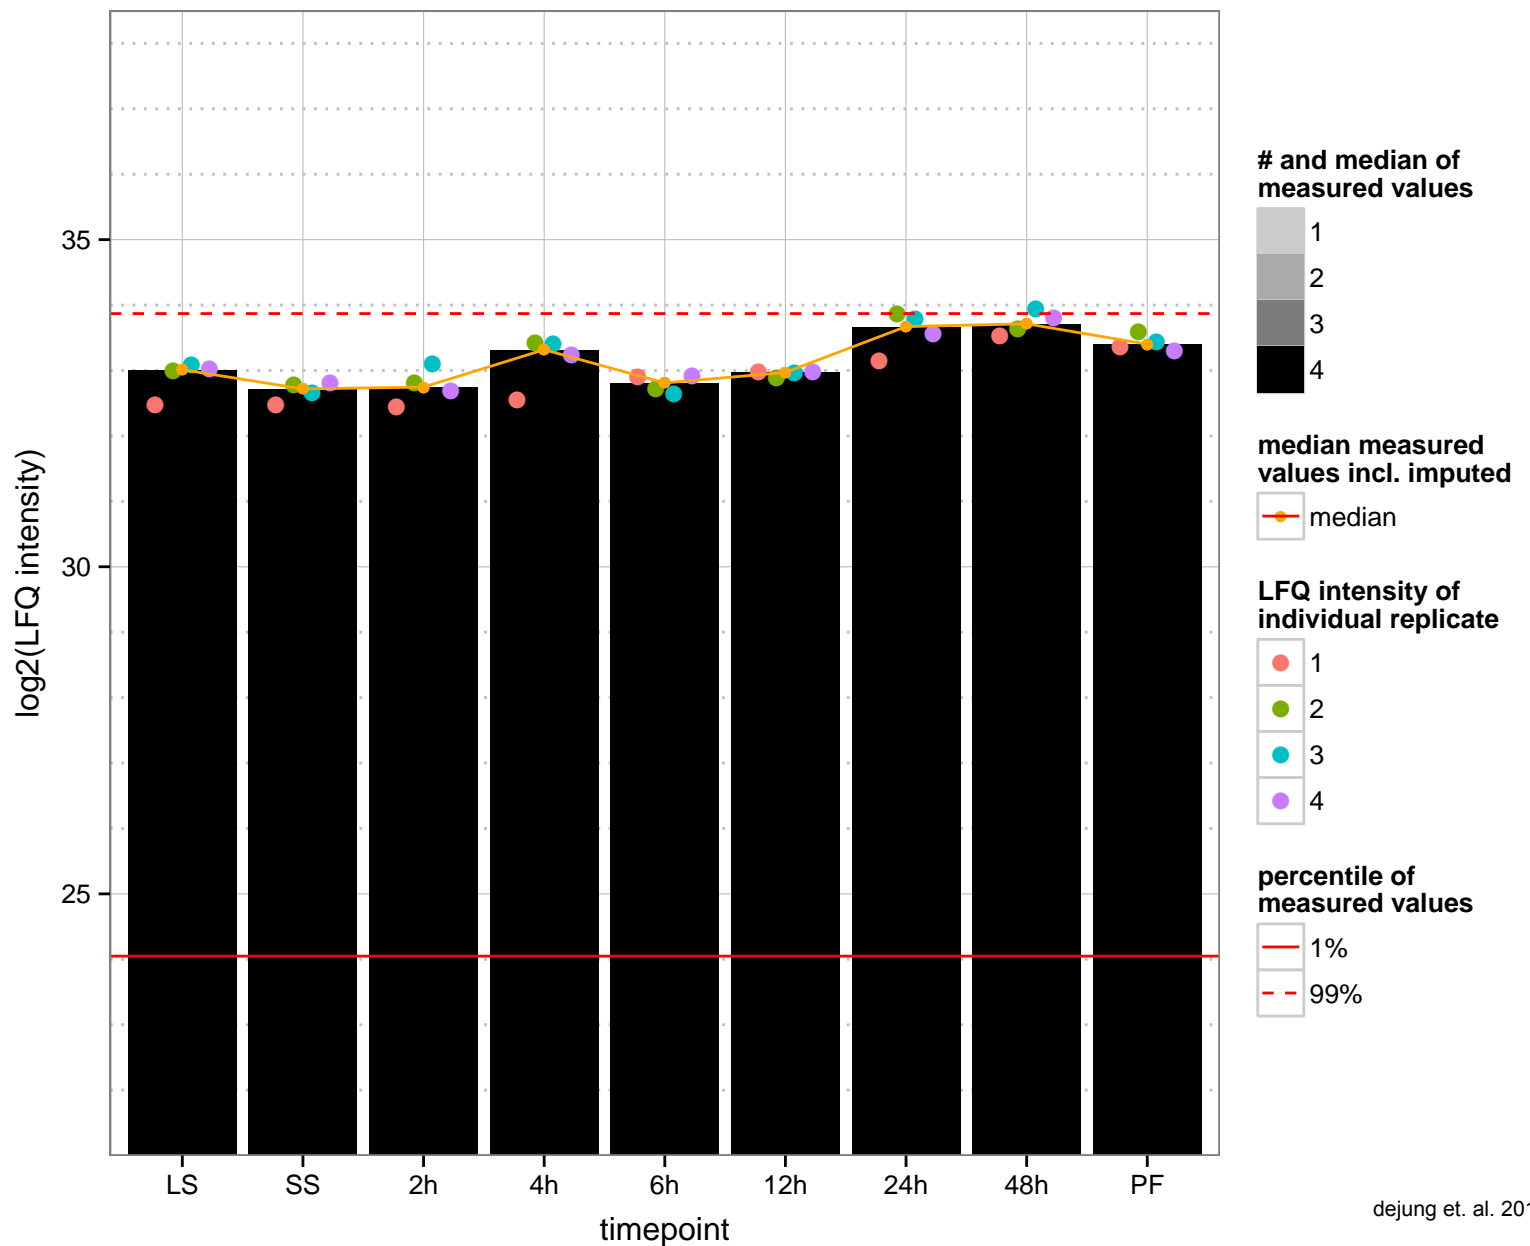

hypothetical protein, conserved  
 Tb927.11.1620  
 AGOF: null  
 AGOC: mitochondrion  
 AGOP: null  
 PGO: null  
 PGO: null  
 PGO: null

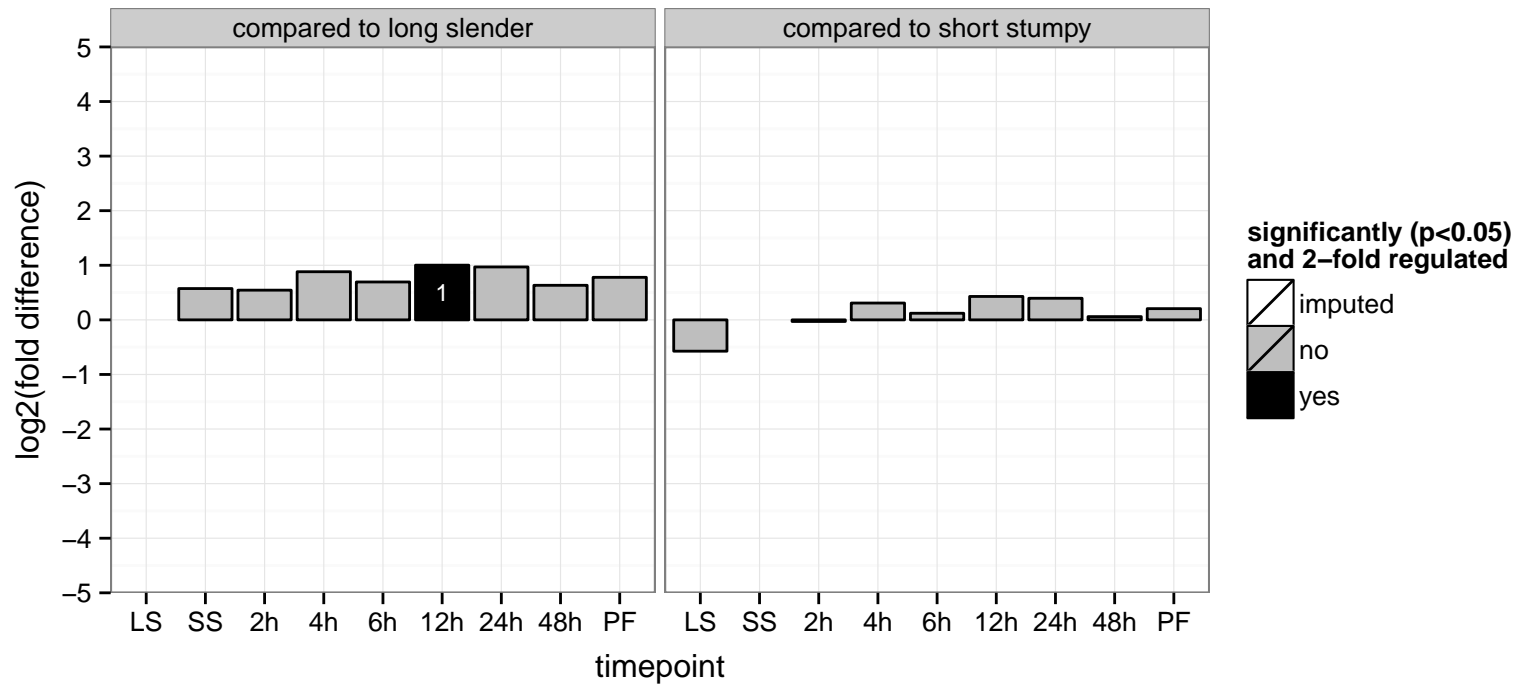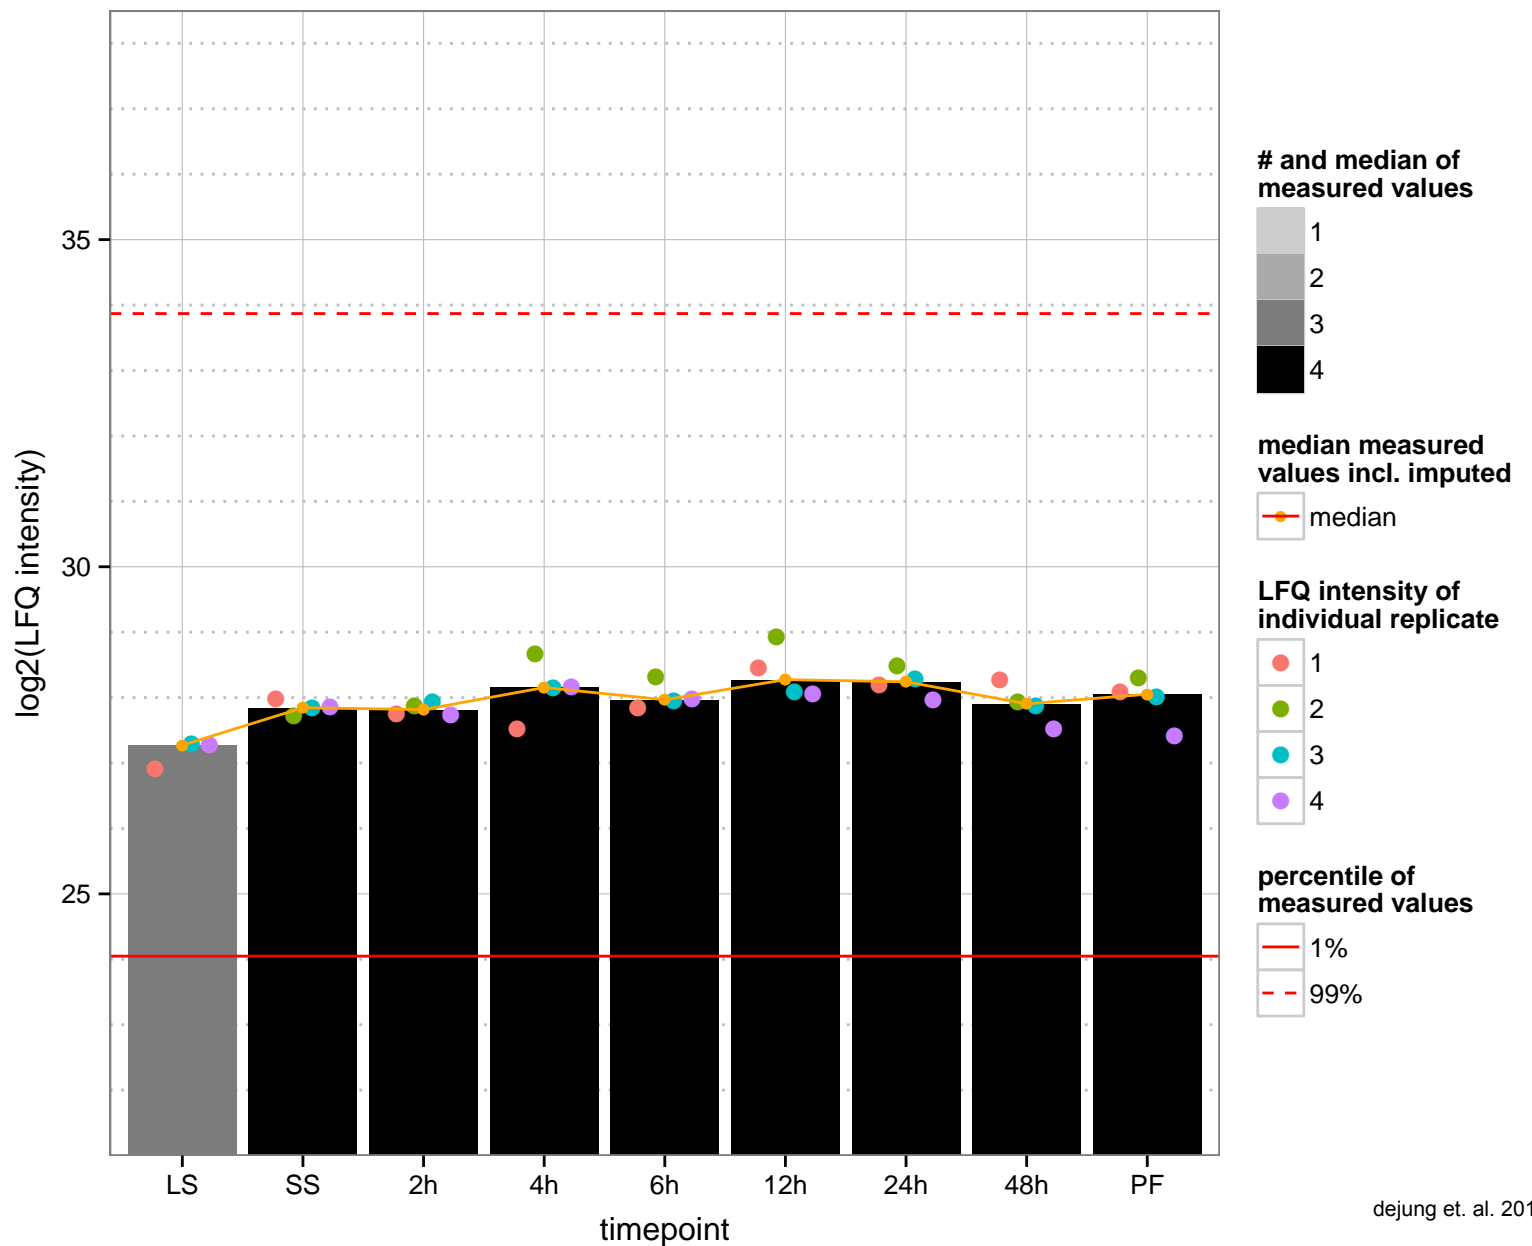

hypothetical protein, conserved  
 Tb927.11.16350  
 AGOF: null  
 AGOC: null  
 AGOP: null  
 PGO: null  
 PGOC: membrane  
 PGO: intracellular signal transduction

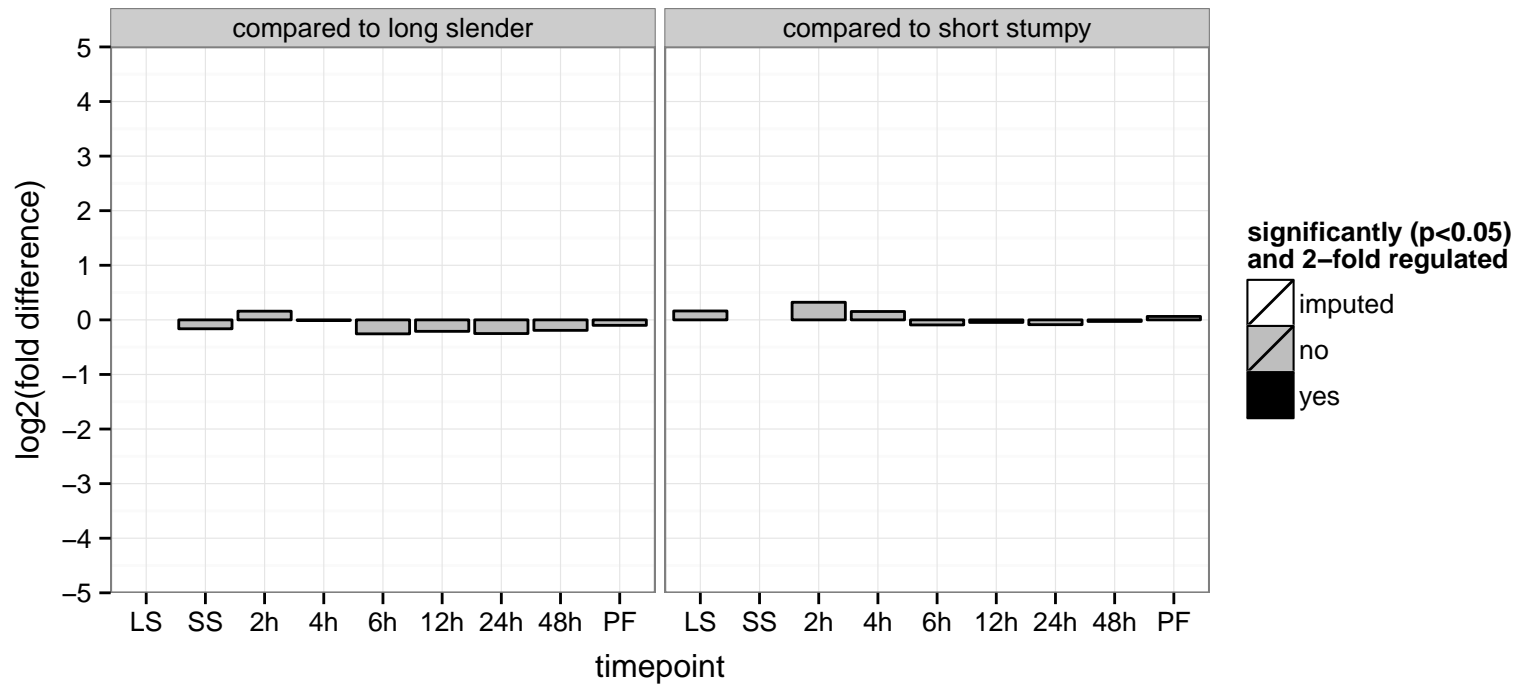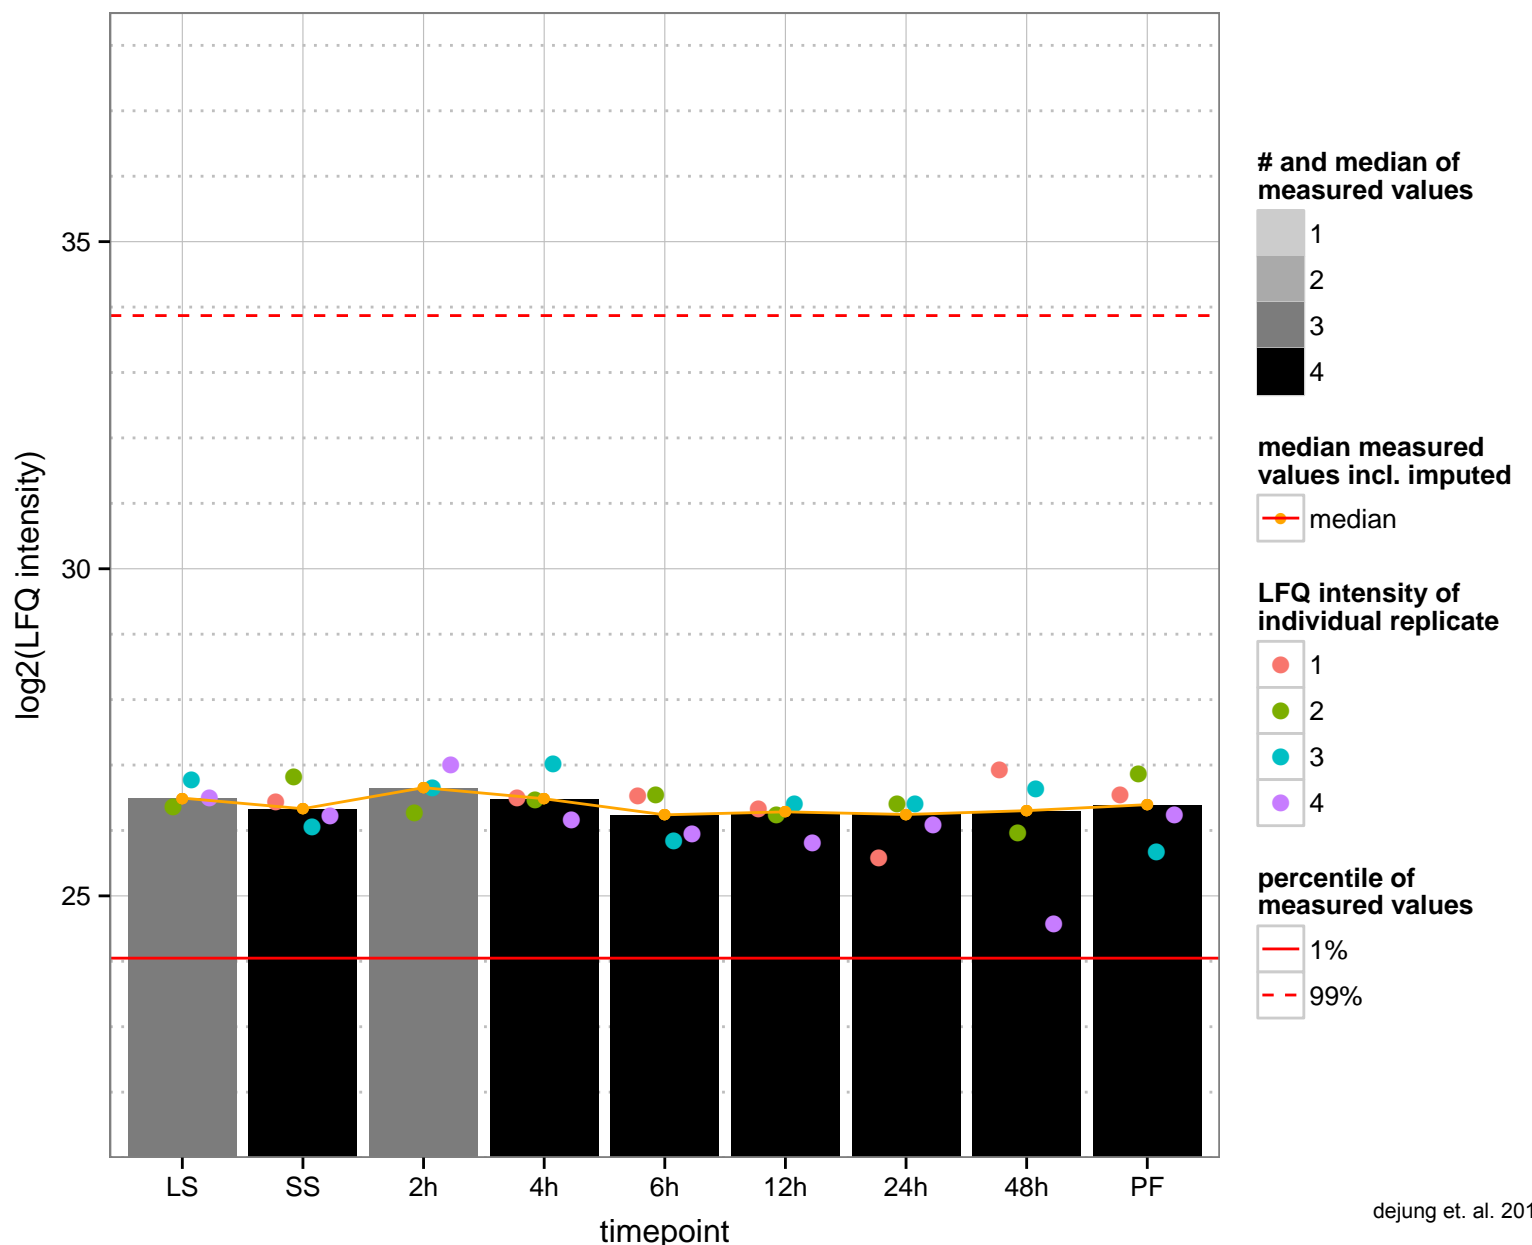

hypothetical protein, conserved  
 Tb927.11.16370  
 AGOF: null  
 AGOC: null  
 AGOP: null  
 PGOF: null  
 PGOE: null  
 PGOP: null

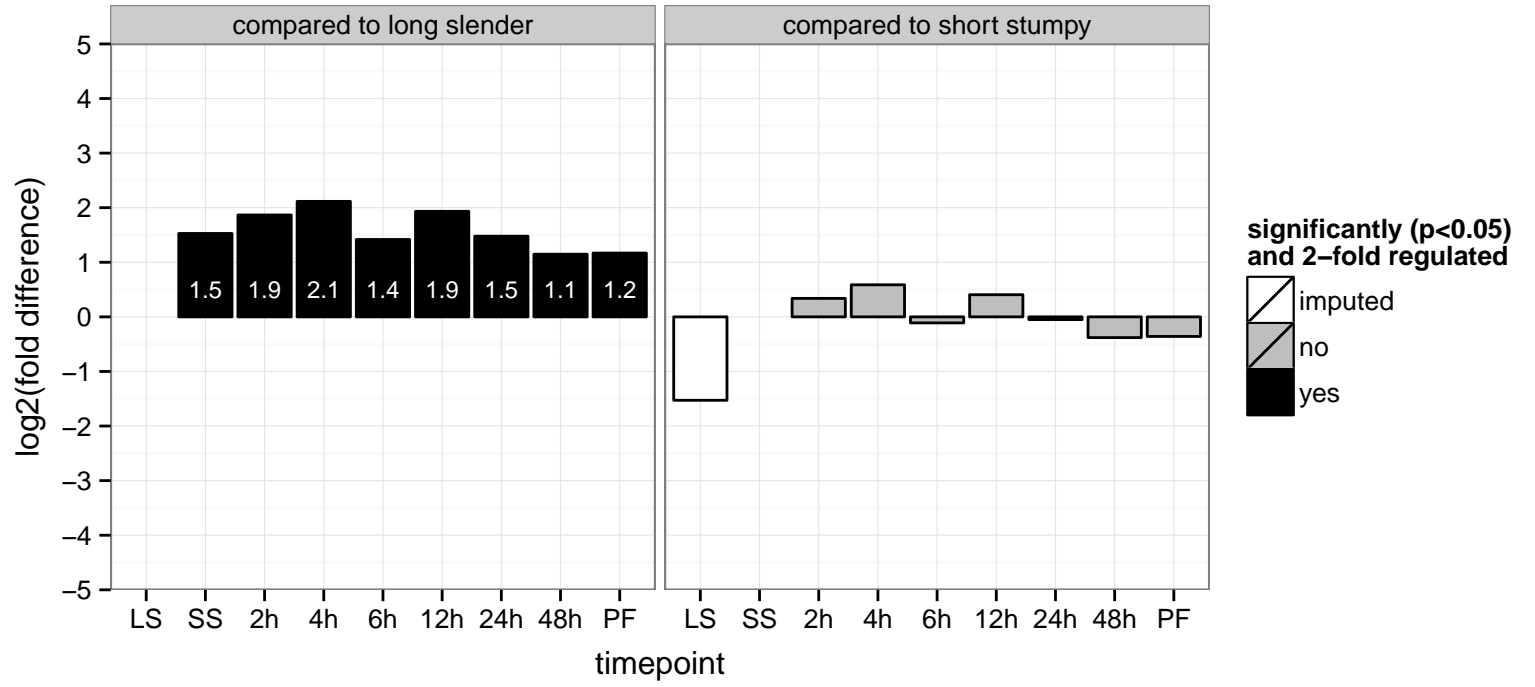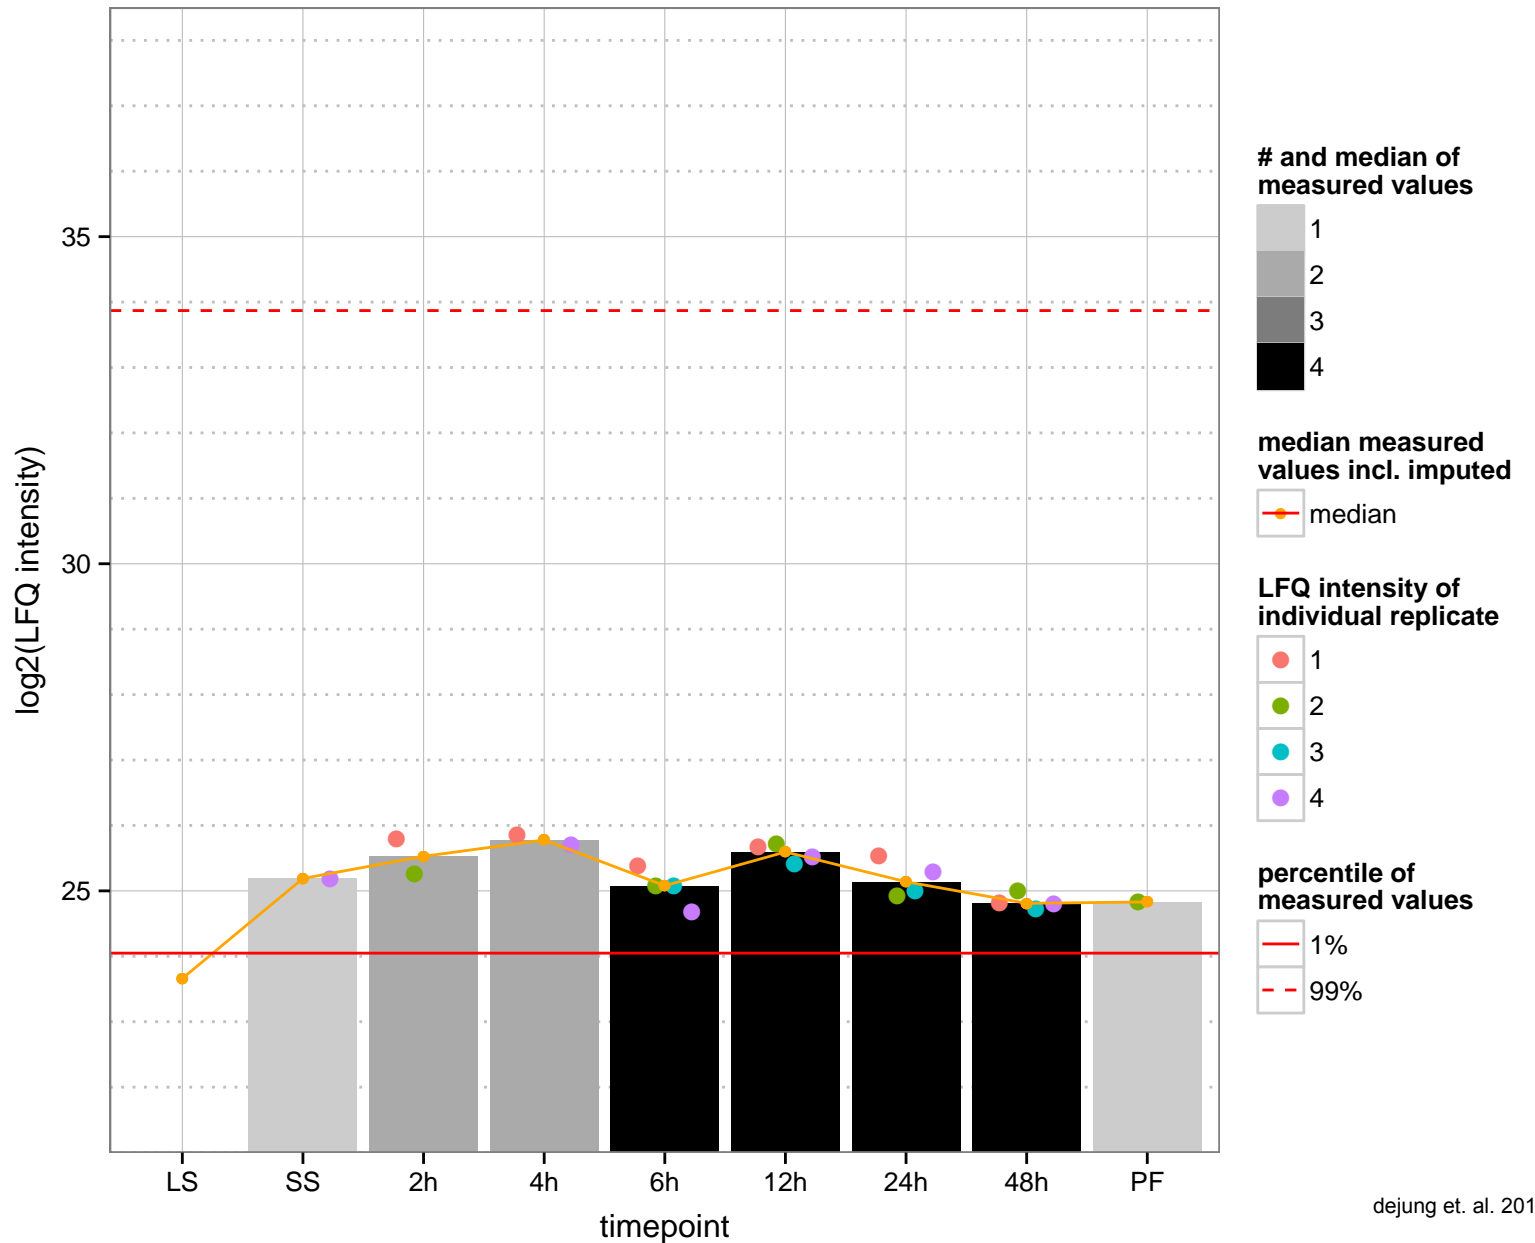

hypothetical protein, conserved  
 Tb927.11.16380  
 AGOF: null  
 AGOC: mitochondrion  
 AGOP: protein folding  
 PGO: protein binding  
 PGOC: null  
 PGOP: null

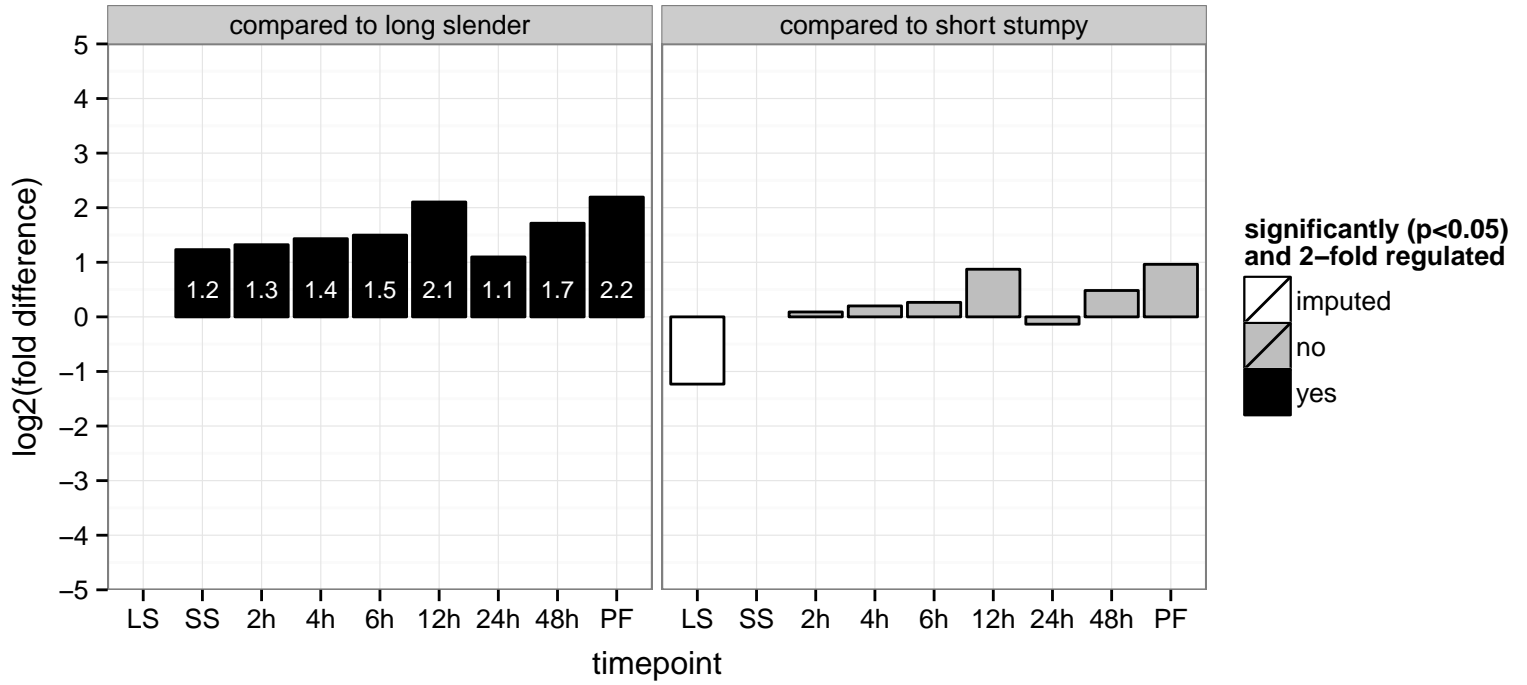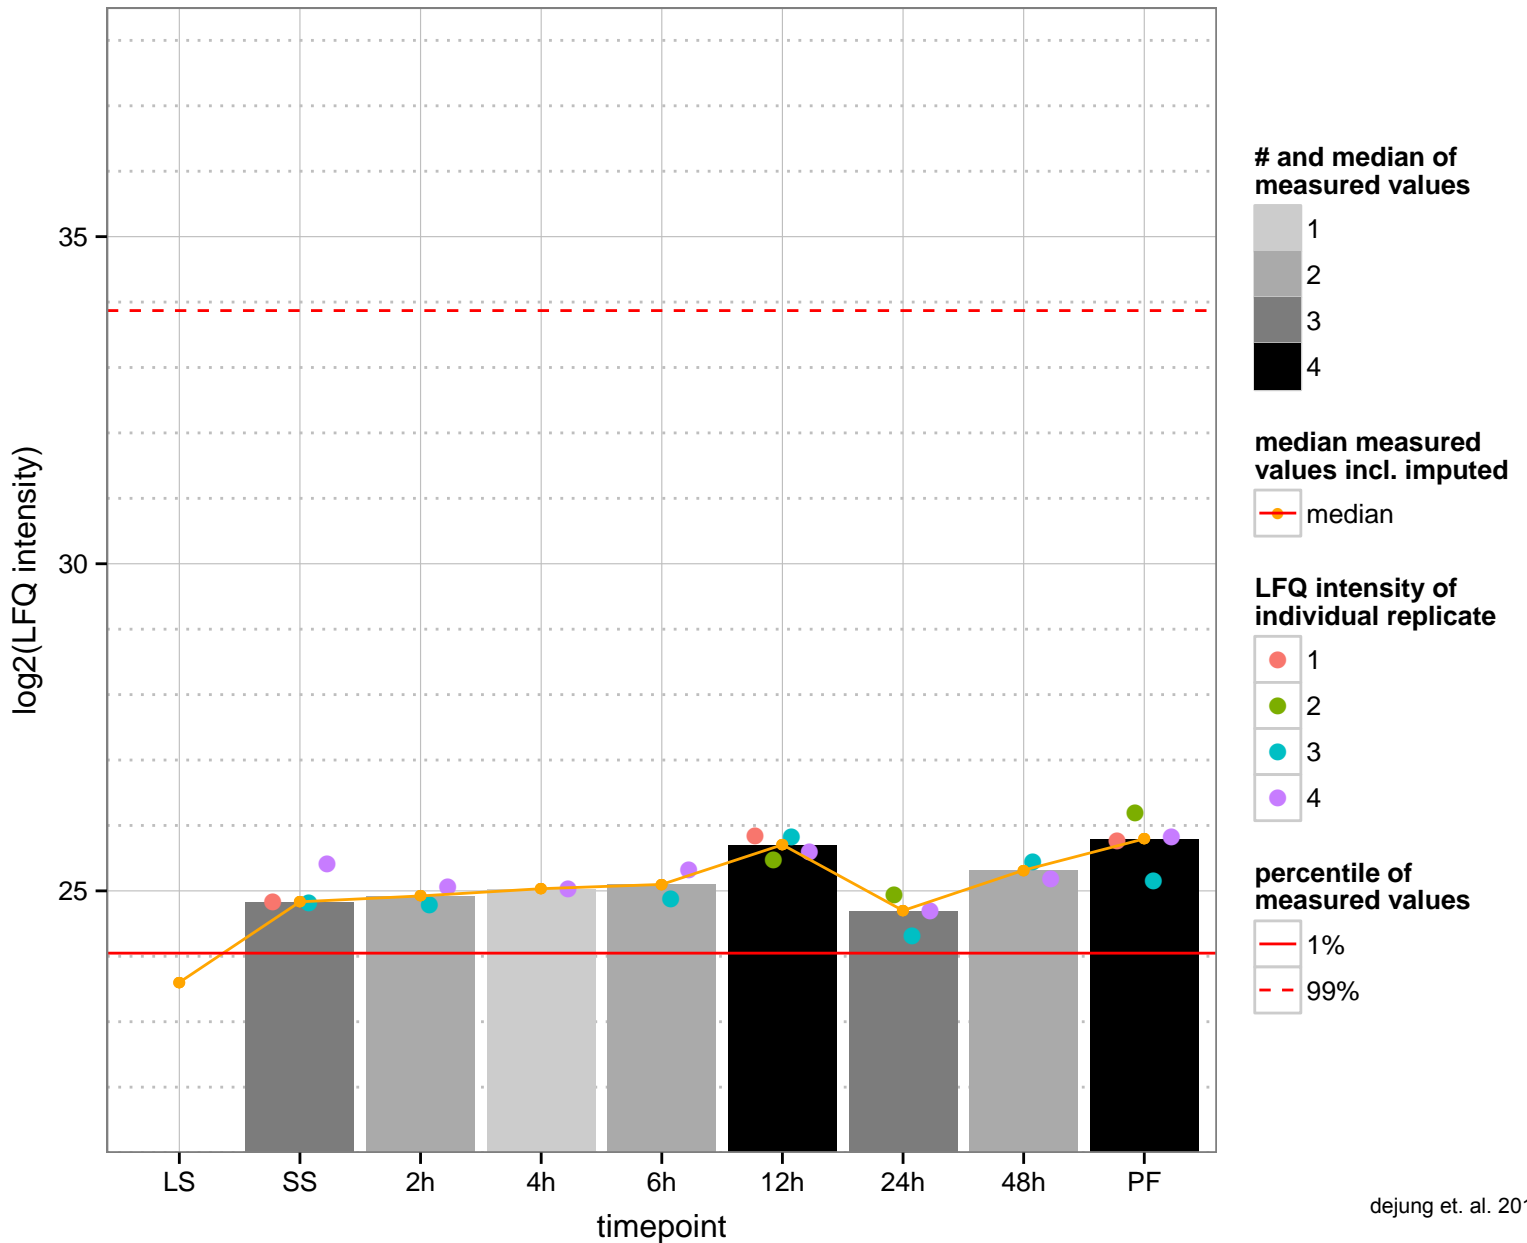

kinetoplast-associated protein 3, putative (KAP3)  
 Tb927.11.16400  
 AGOF: DNA binding  
 AGOC: kinetoplast, mitochondrial matrix, mitochondrion  
 AGOP: DNA metabolic process, DNA packaging  
 PGO: null  
 PGOC: null  
 PGOP: null

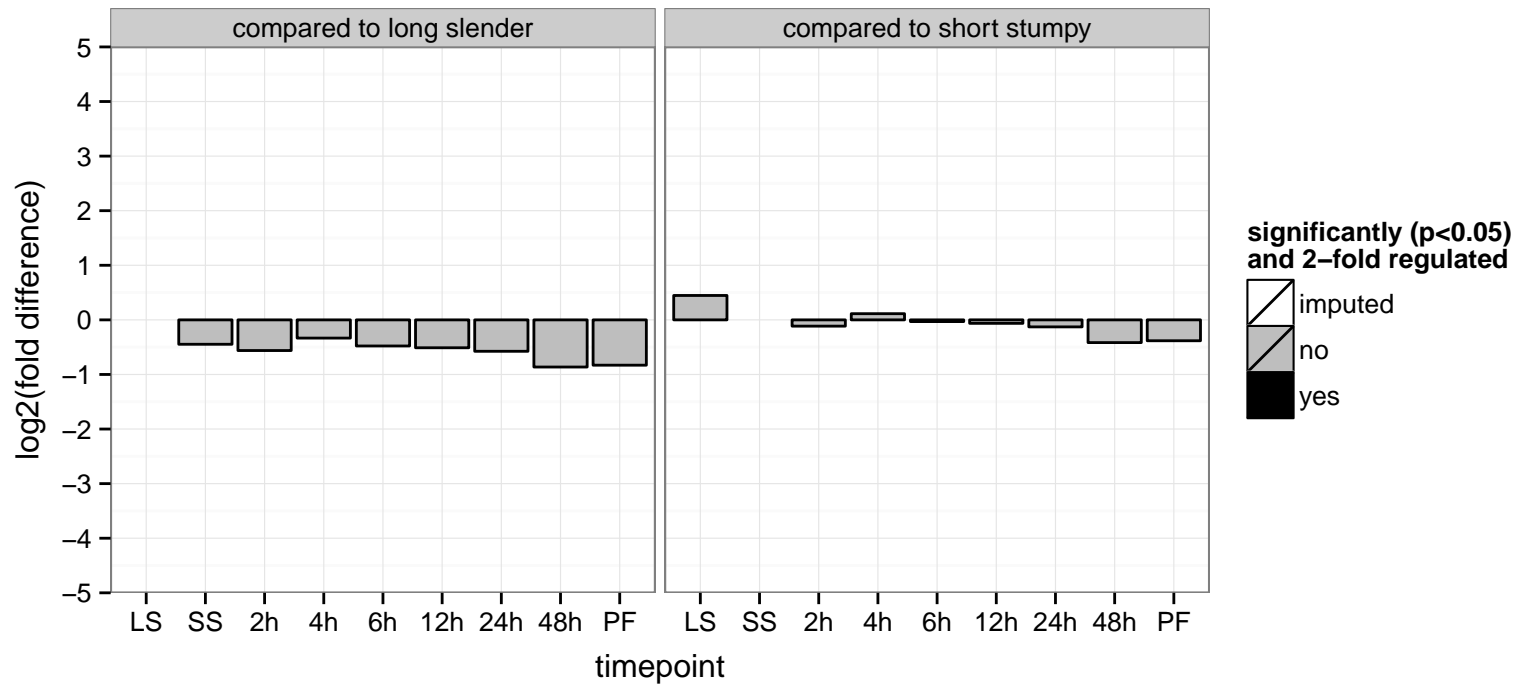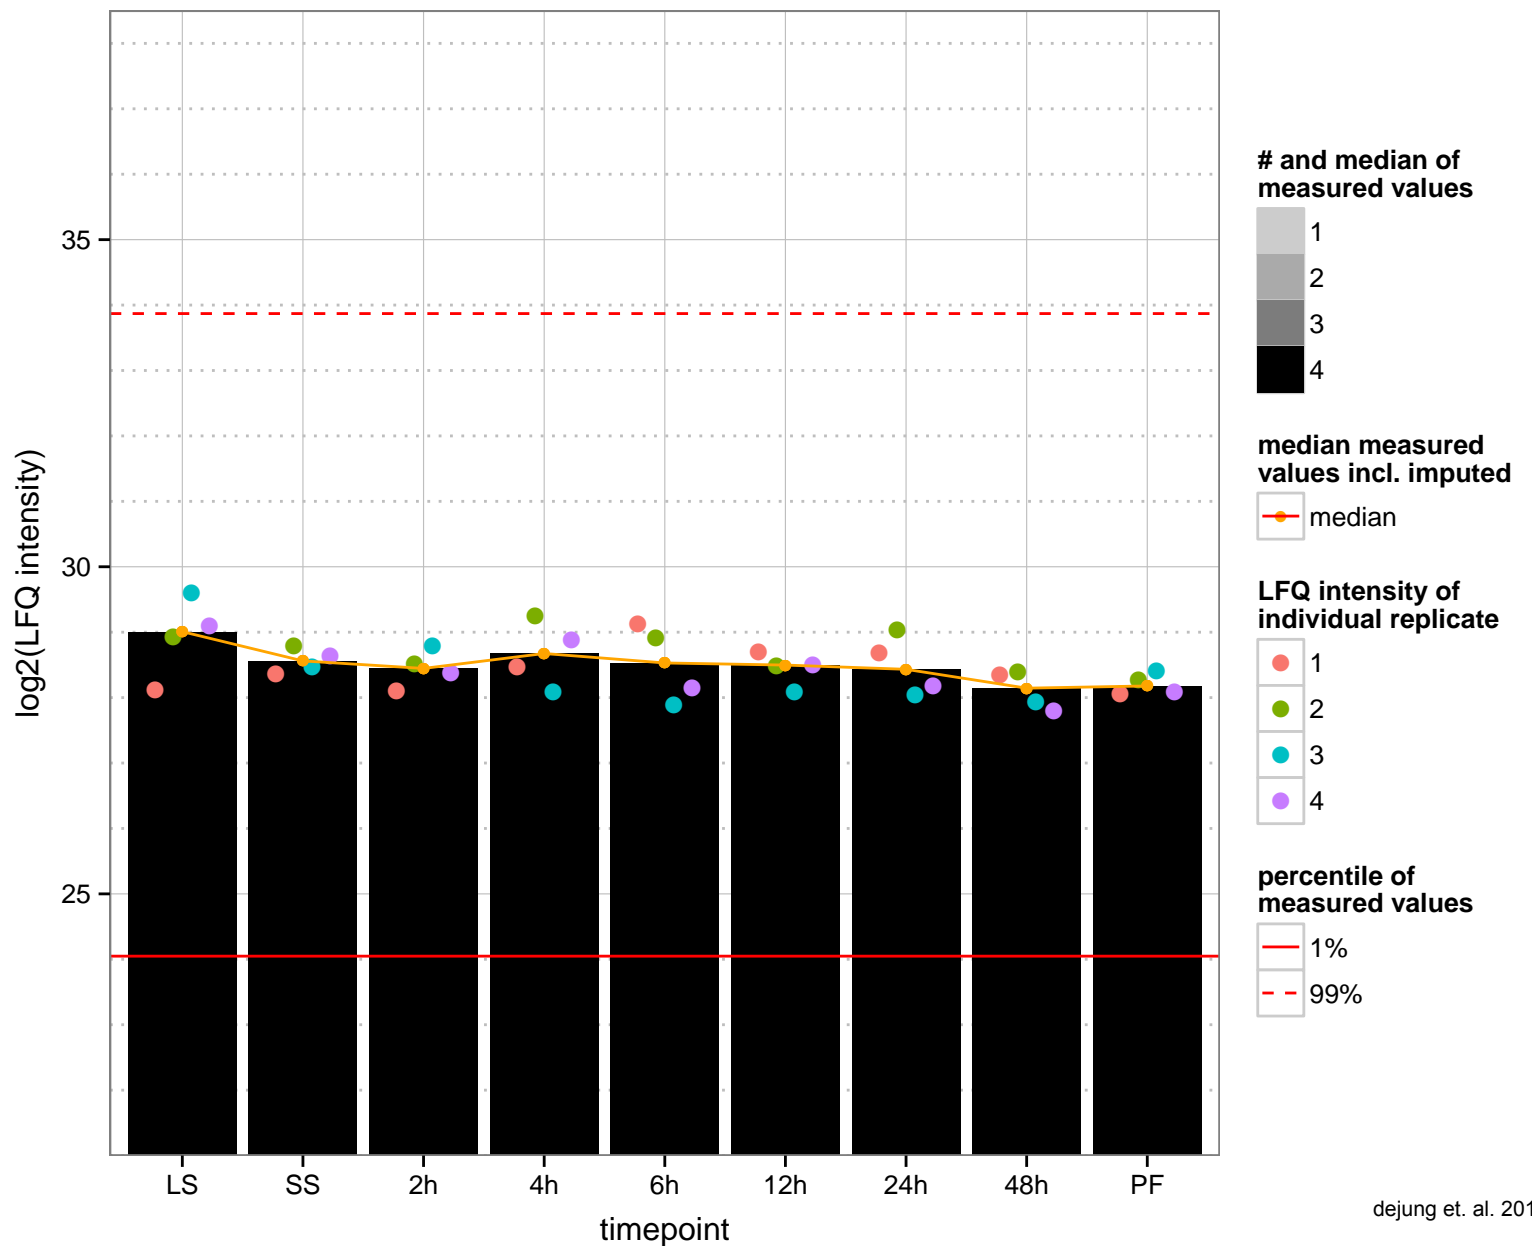

hypothetical protein, conserved  
 Tb927.11.16460  
 AGOF: null  
 AGOC: null  
 AGOP: null  
 PGO: null  
 PGOC: null  
 PGOP: null

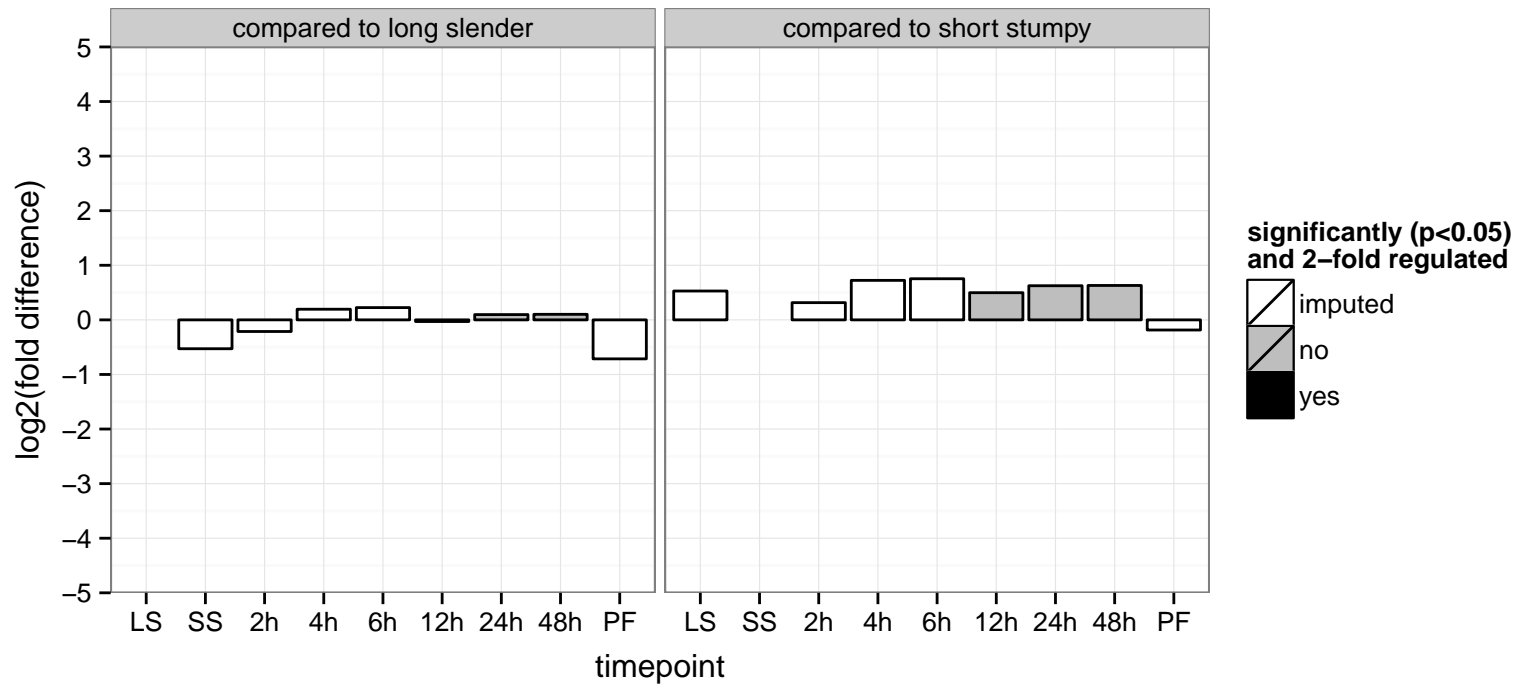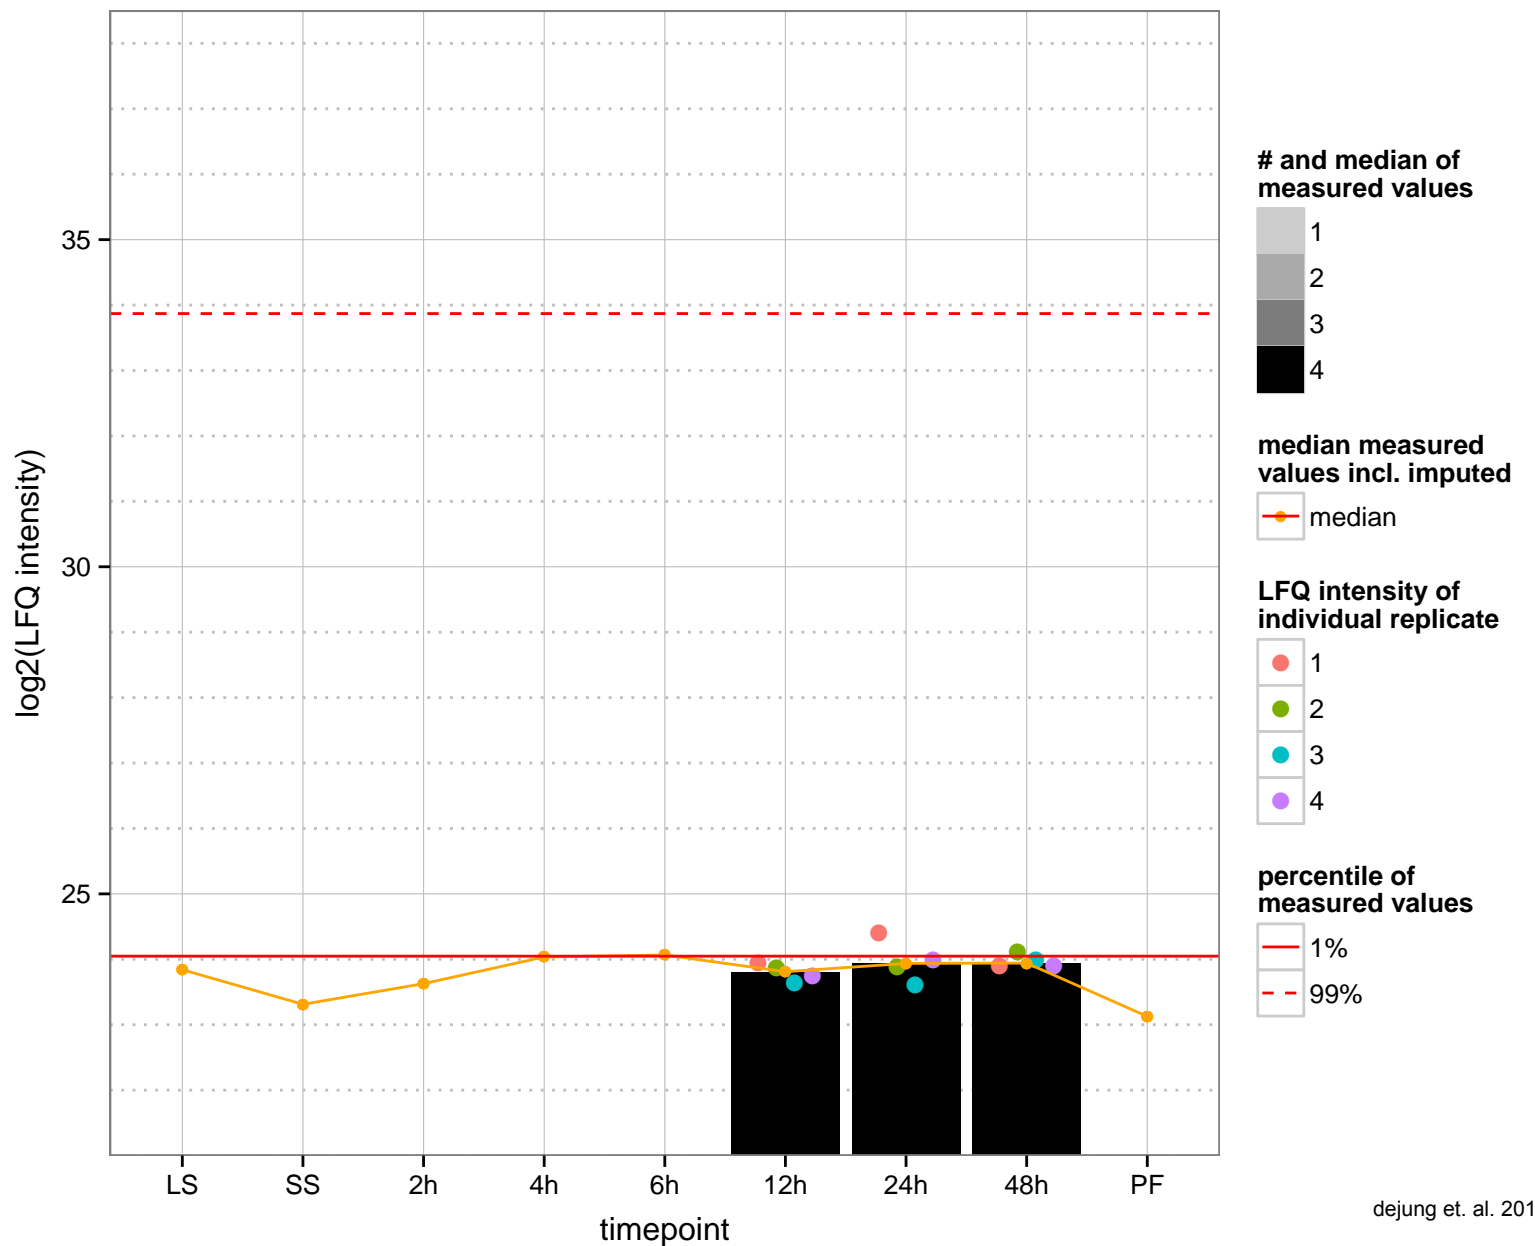

hypothetical protein, conserved  
 Tb927.11.16470  
 AGOF: null  
 AGOC: null  
 AGOP: null  
 PGO: null  
 PGOC: null  
 PGOP: null

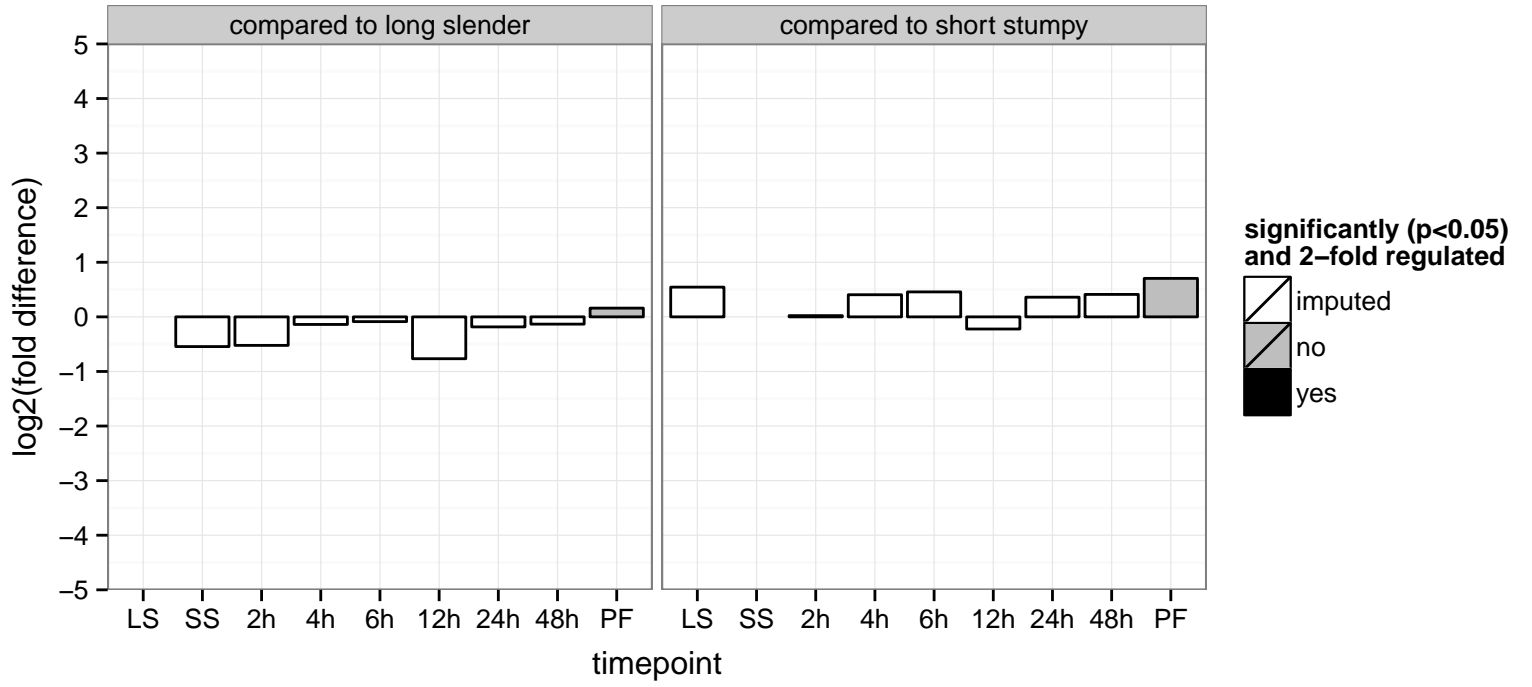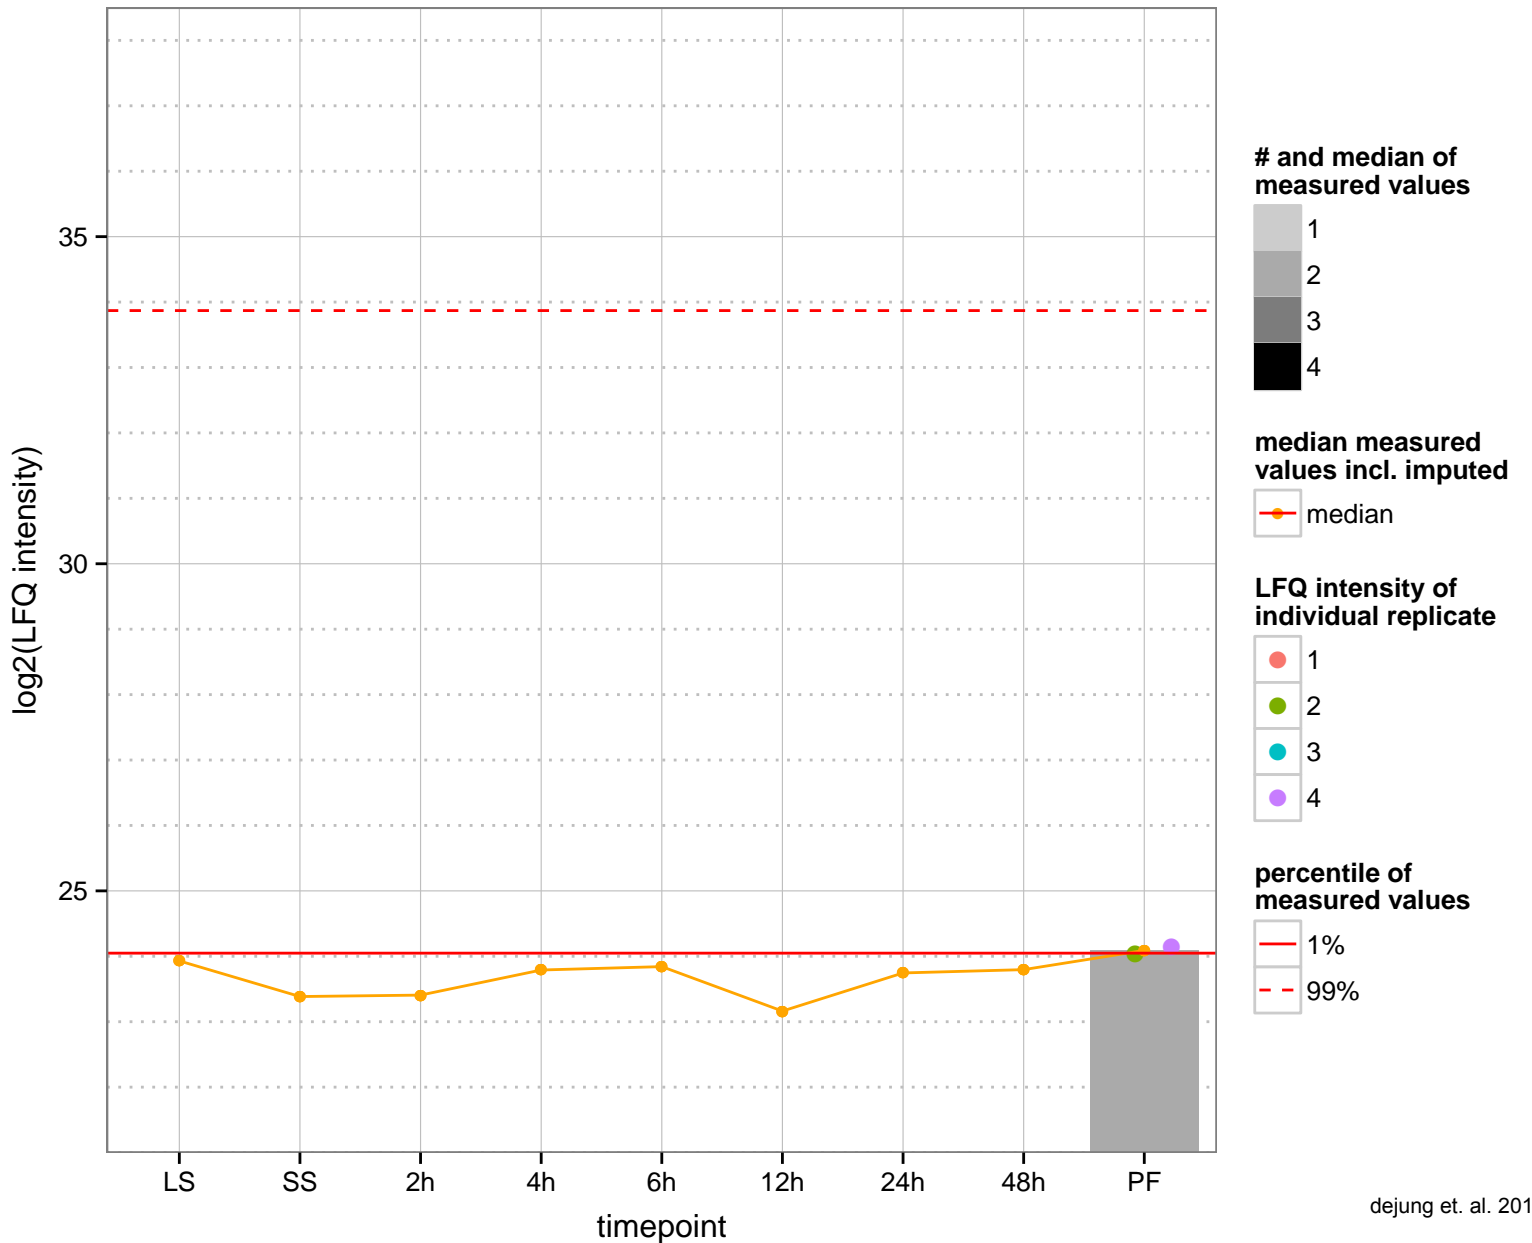



vesicular transport protein (CDC48 homologue), putative

Tb927.11.1660

AGOF: ATP binding, ATPase activity

AGOC: null

AGOP: regulation of transcription, DNA-dependent, two-component signal transduction system (phosphorelay)

PGOF: ATP binding, nucleoside-triphosphatase activity, nucleotide binding

PGOC: null

PGOP: null

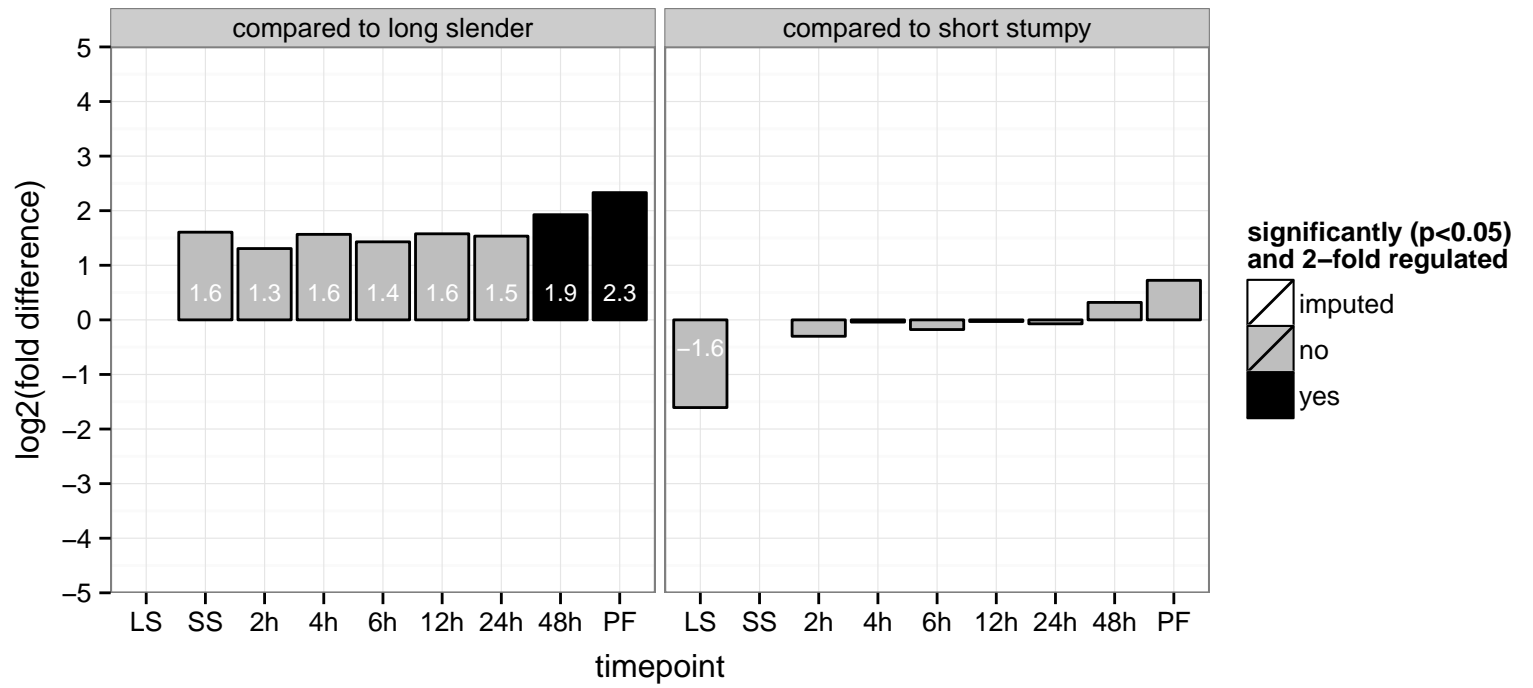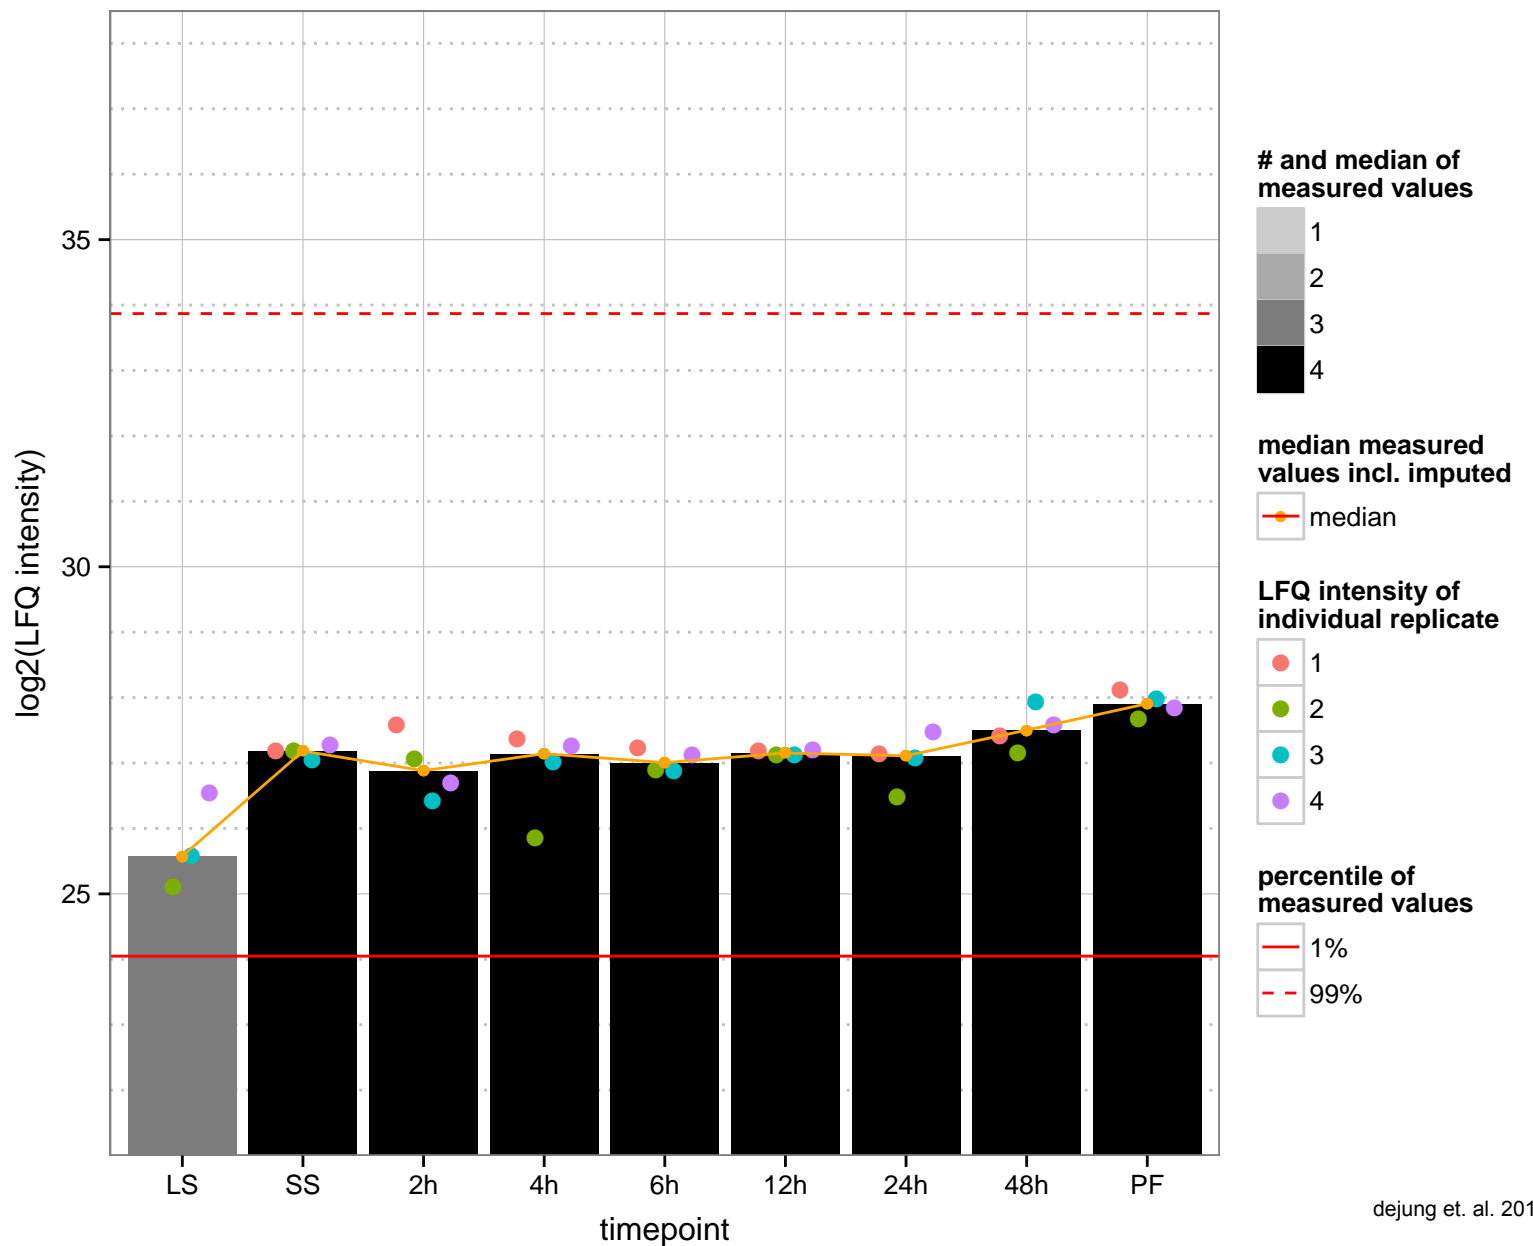

exosome-associated protein 2 (EAP2)

Tb927.11.16600

AGOF: 3'-5'-exoribonuclease activity, RNA binding

AGOC: cytoplasmic exosome (RNase complex), nuclear exosome (RNase complex)

AGOP: RNA processing, rRNA processing

PGOF: null

PGOC: null

PGOP: null

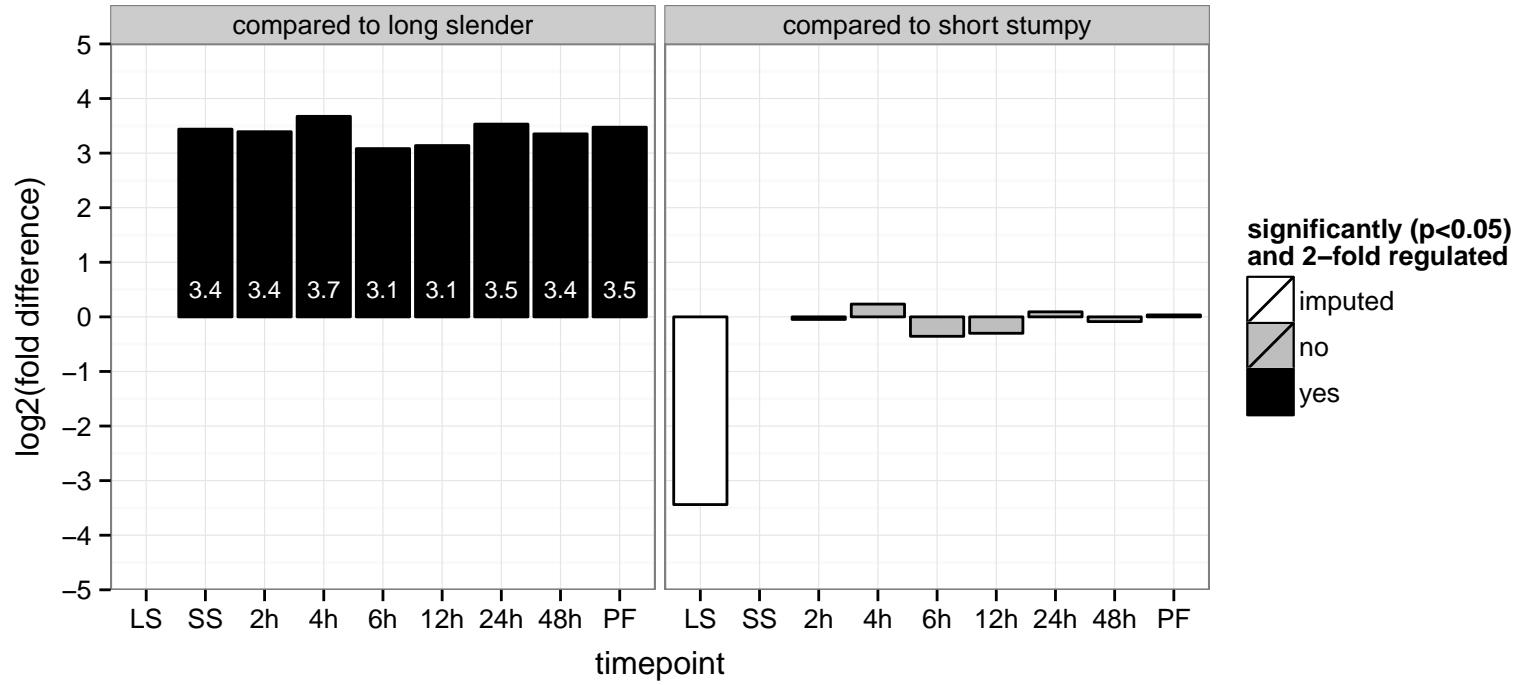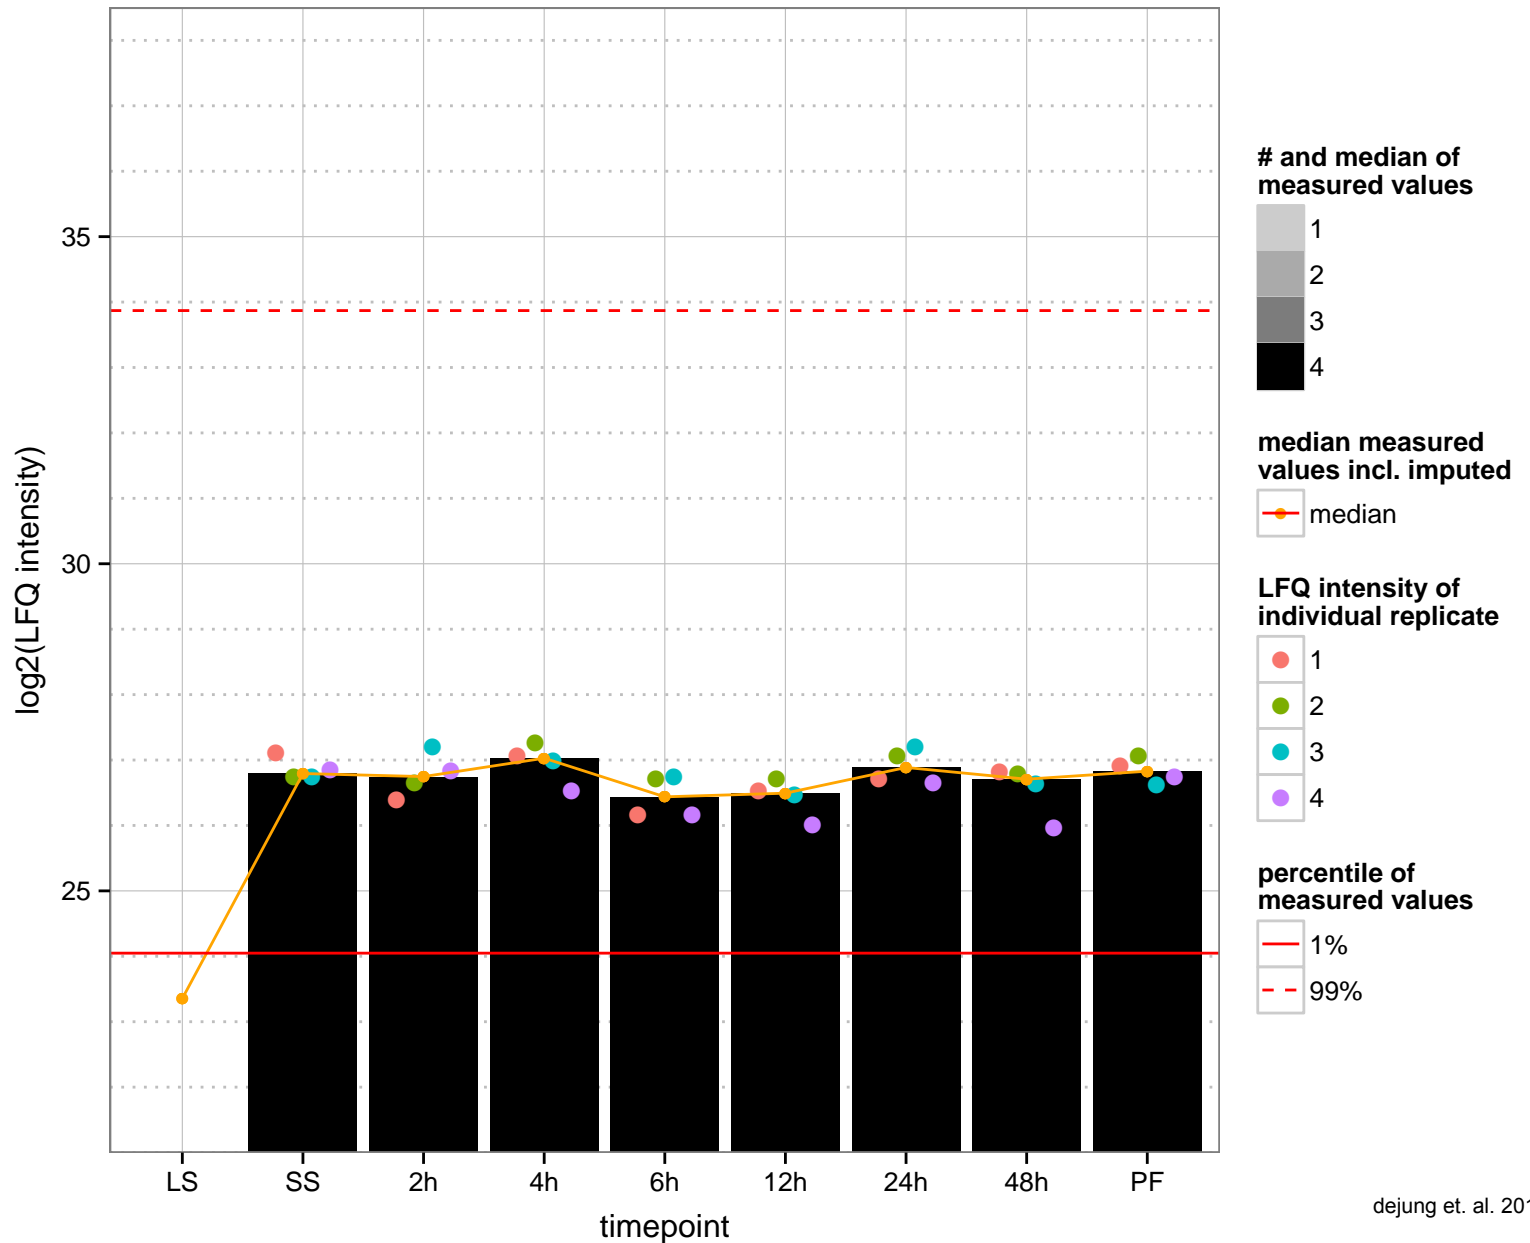

hypothetical protein, conserved  
 Tb927.11.16630  
 AGOF: null  
 AGOC: integral to membrane  
 AGOP: null  
 PGO: null  
 PGO: integral to membrane  
 PGO: transmembrane transport

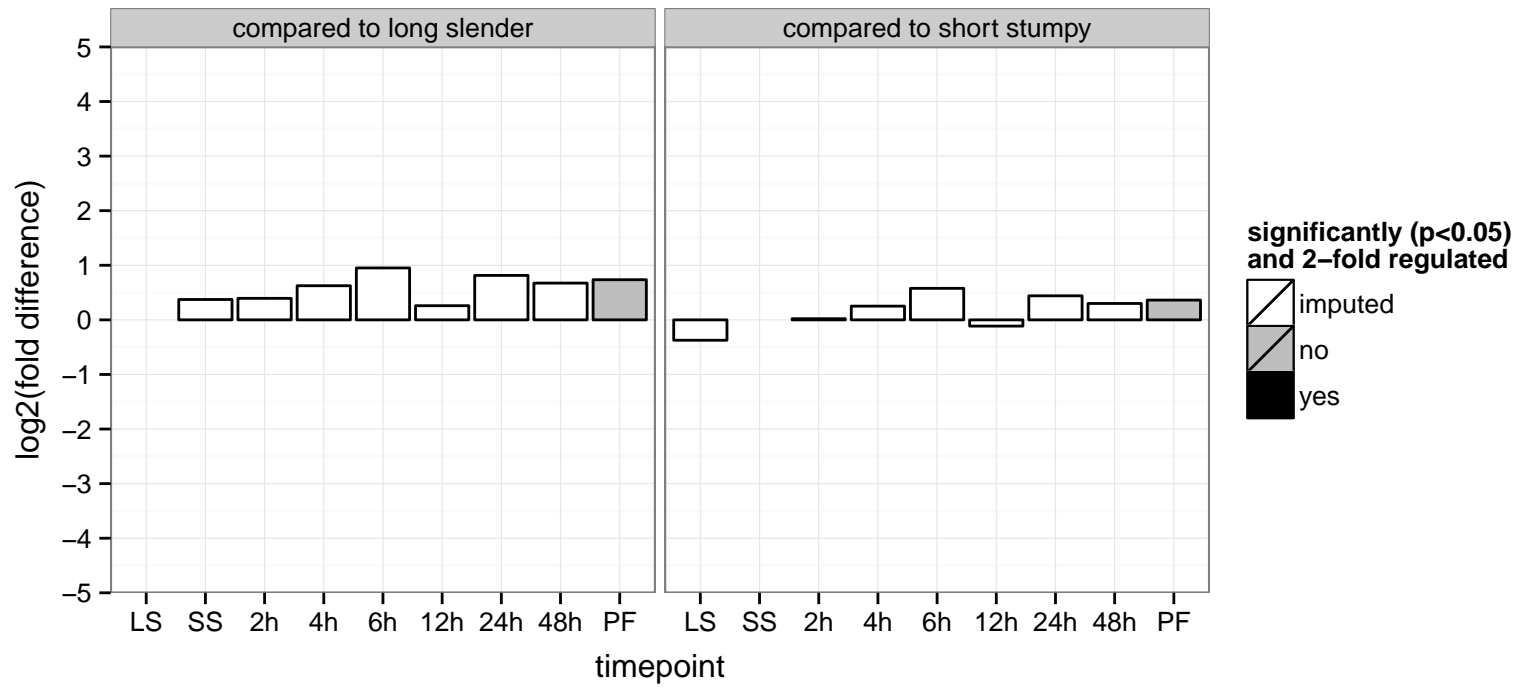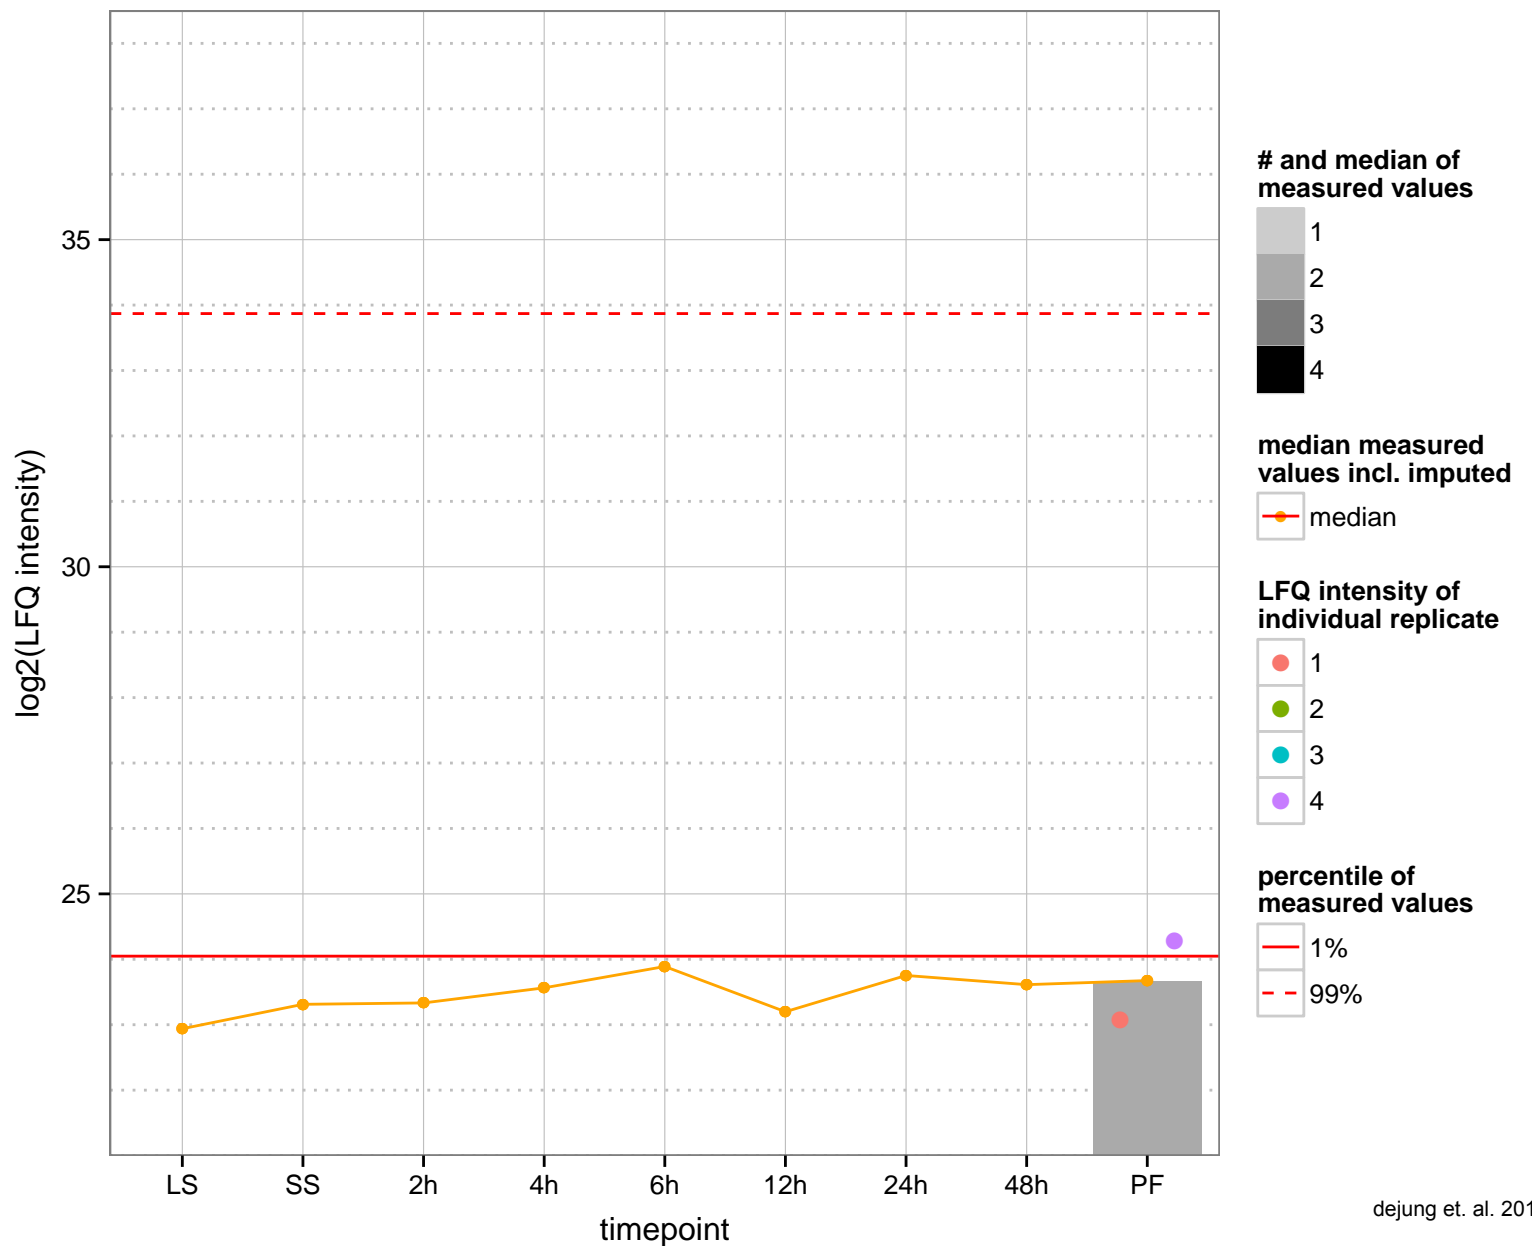

hypothetical protein, conserved  
 Tb927.11.16660  
 AGOF: null  
 AGOC: null  
 AGOP: null  
 PGOF: binding  
 PGO: null  
 PGOP: null

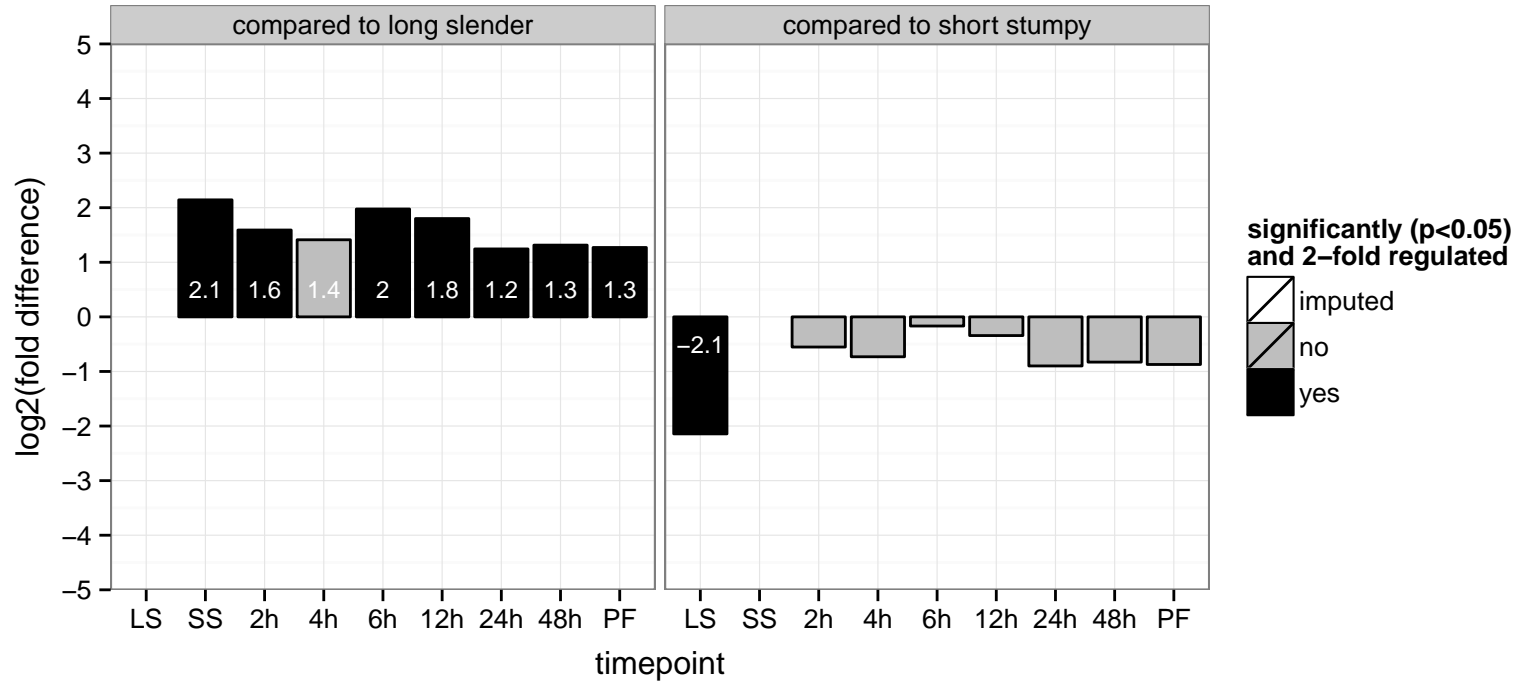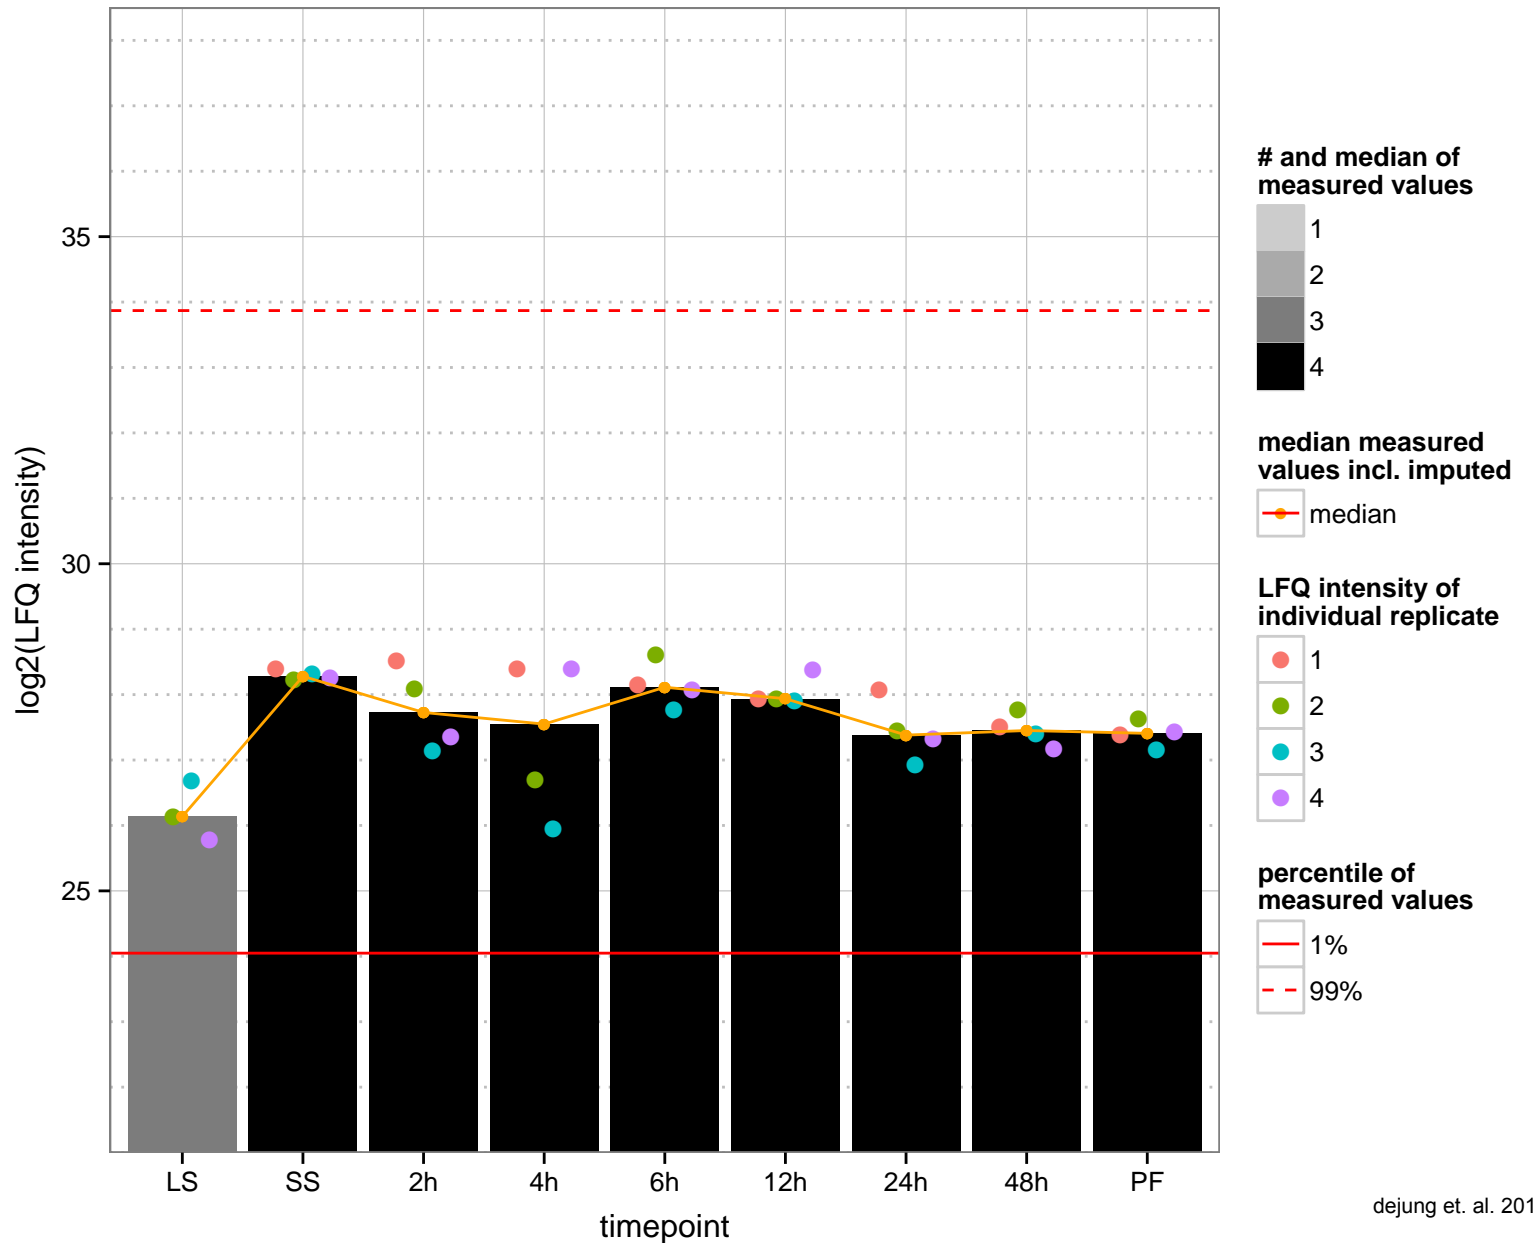

cysteine desulfurase

Tb927.11.1670

AGOF: cysteine desulfurase activity, transaminase activity

AGOC: mitochondrion

AGOP: iron-sulfur cluster assembly, protein complex assembly, sulfur amino acid metabolic process, tRNA wobble position ur

PGOF: null

PGOC: null

PGOP: metabolic process

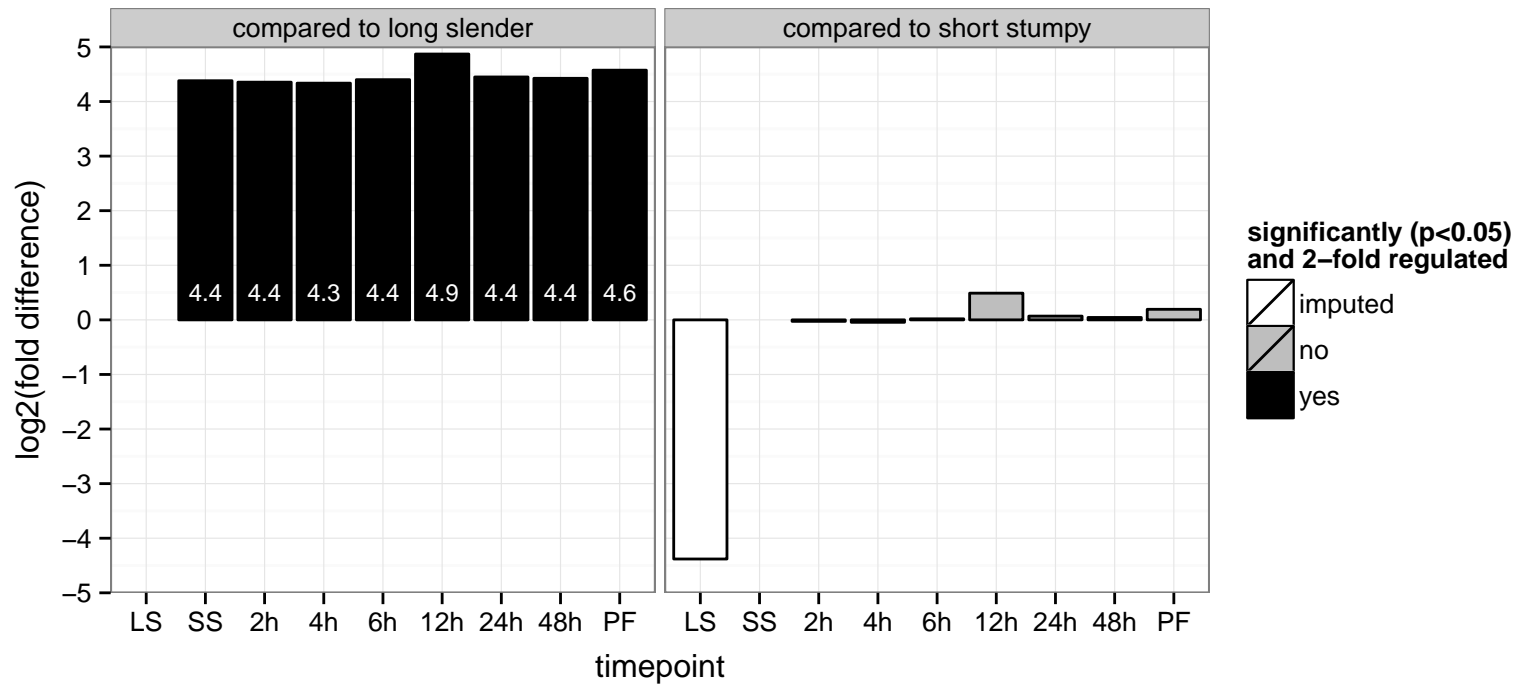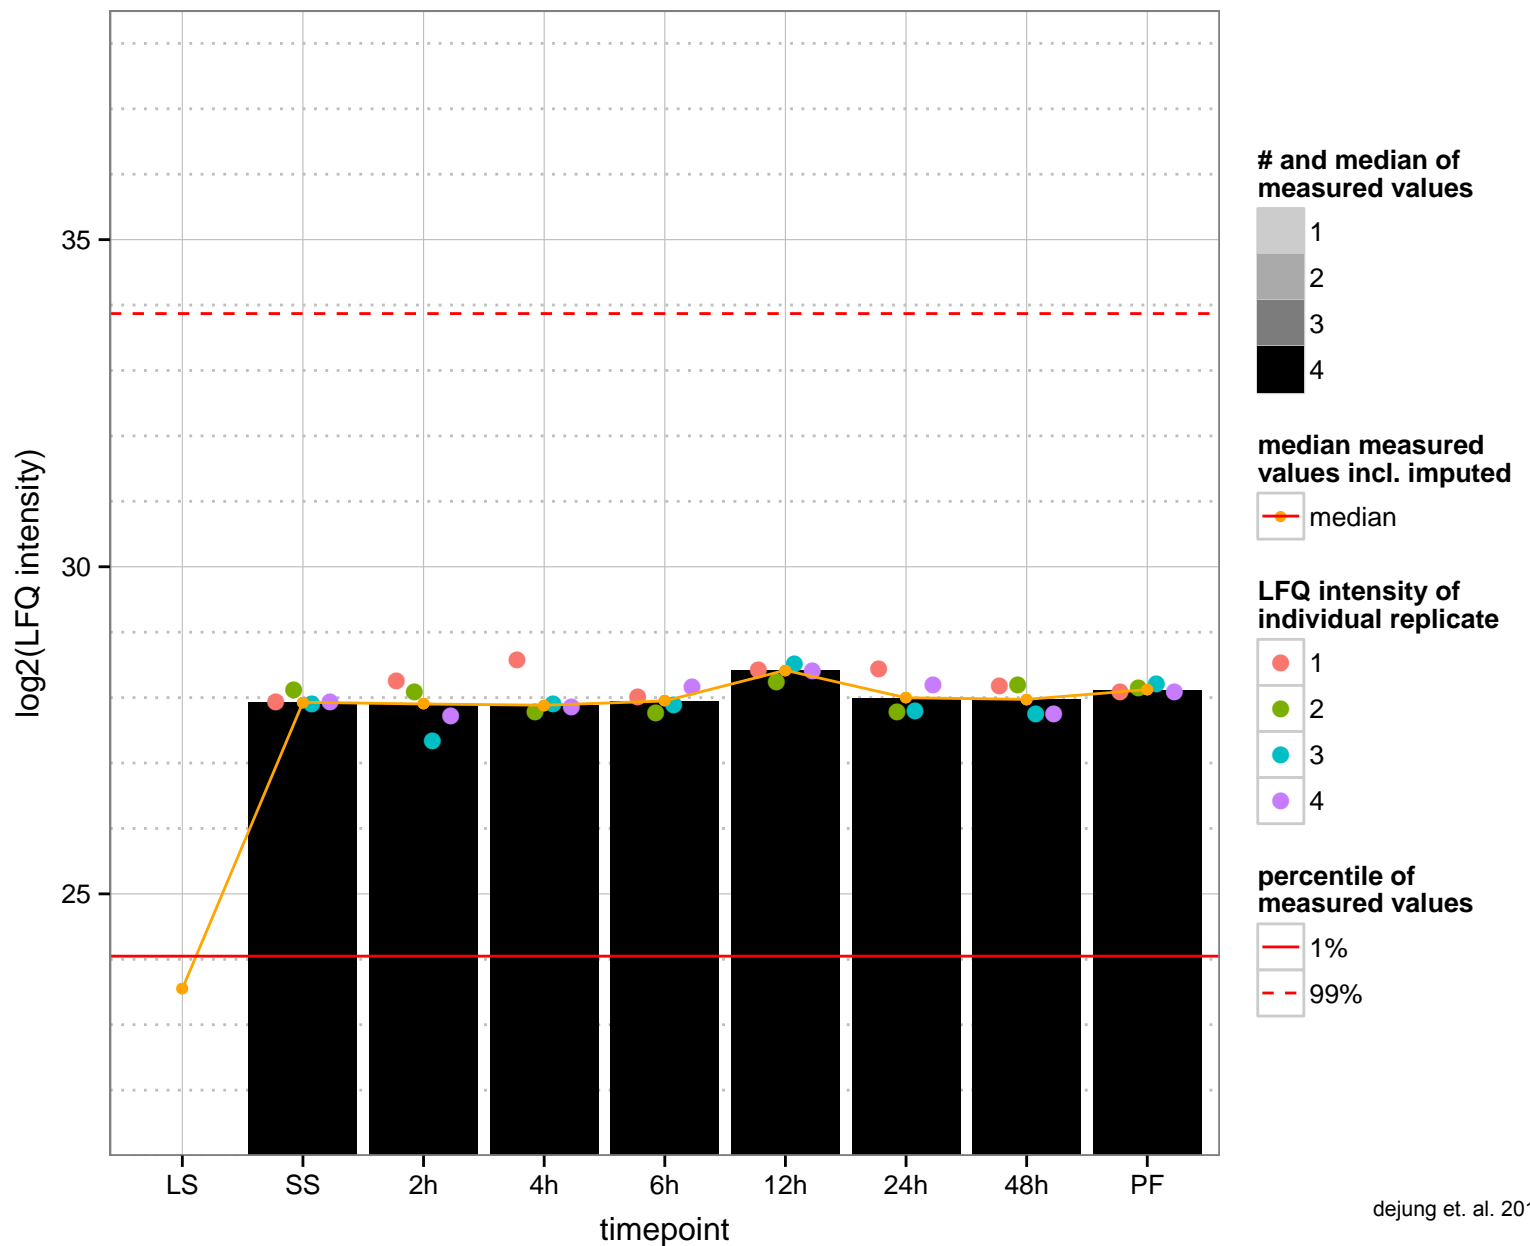

hypothetical protein, conserved  
 Tb927.11.16700  
 AGOF: null  
 AGOC: null  
 AGOP: null  
 PGOF: null  
 PGO C: null  
 PGOP: null

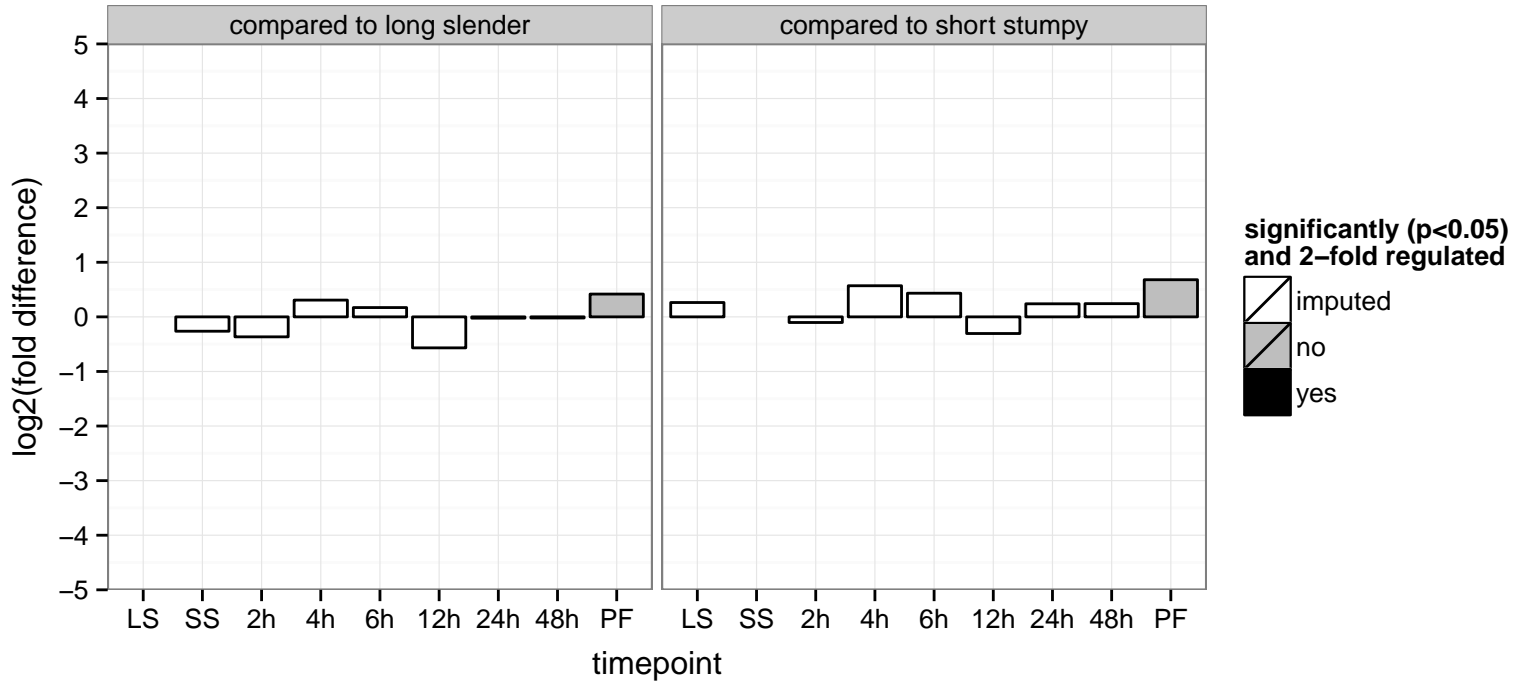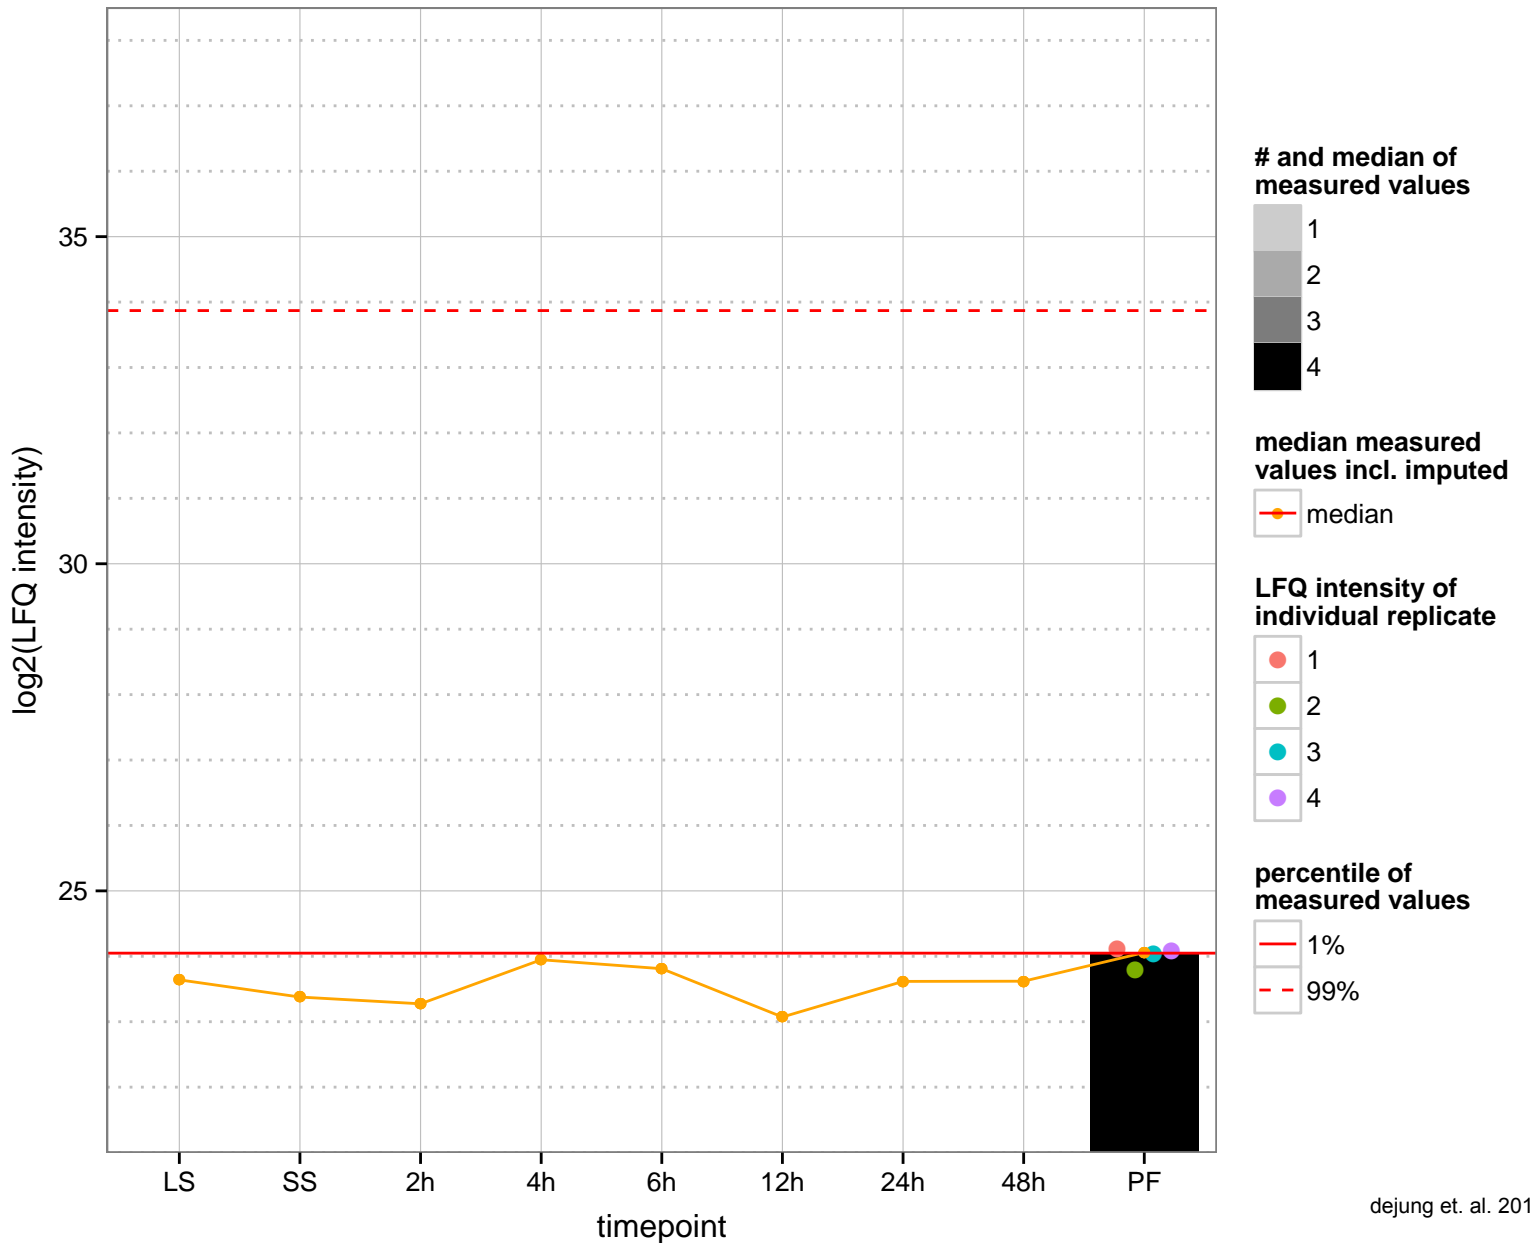

dihydrolipoyl dehydrogenase (GCVL-2)

Tb927.11.16730

AGOF: dihydrolipoyl dehydrogenase activity, disulfide oxidoreductase activity, flavin adenine dinucleotide binding

AGOC: cytoplasm, mitochondrial inner membrane, mitochondrion

AGOP: cell redox homeostasis, oxidation-reduction process

PGOF: dihydrolipoyl dehydrogenase activity, flavin adenine dinucleotide binding, oxidoreductase activity

PGOC: cytoplasm

PGOP: cell redox homeostasis, oxidation-reduction process

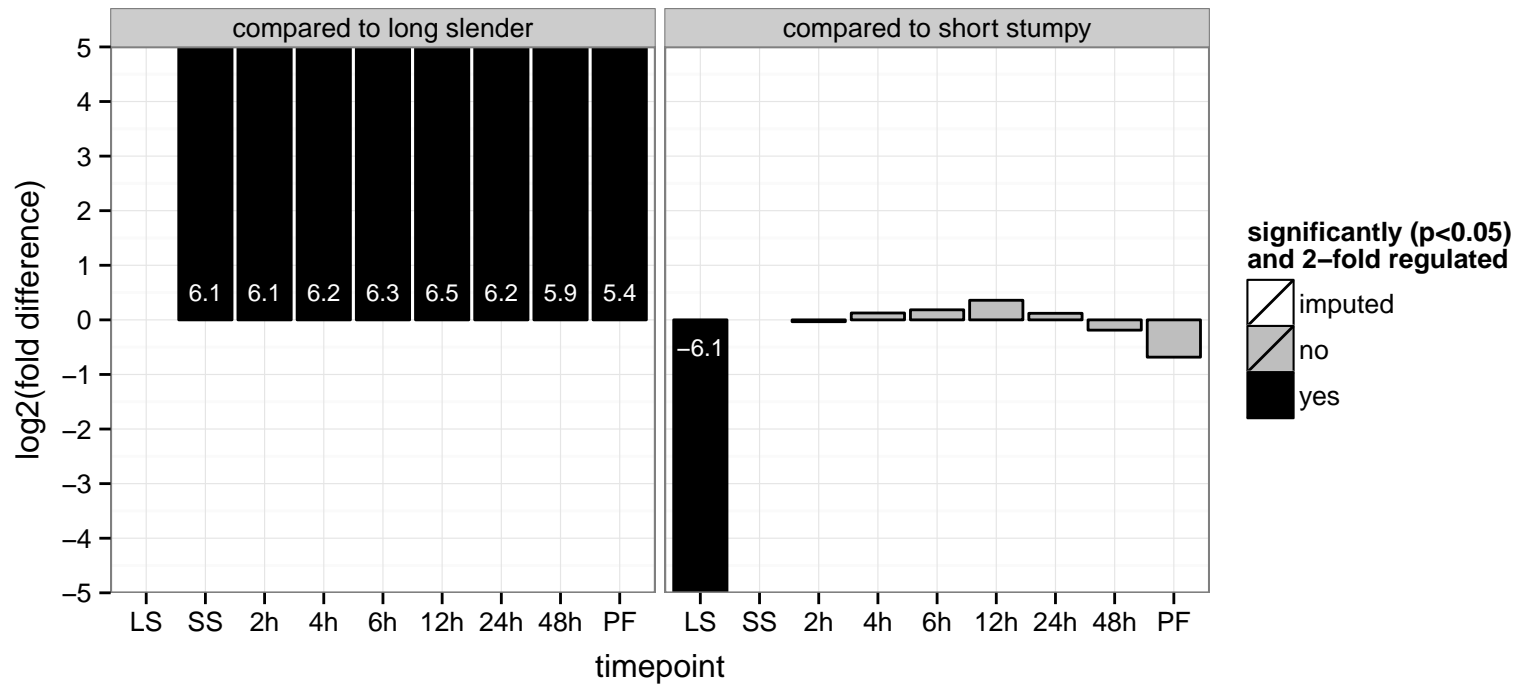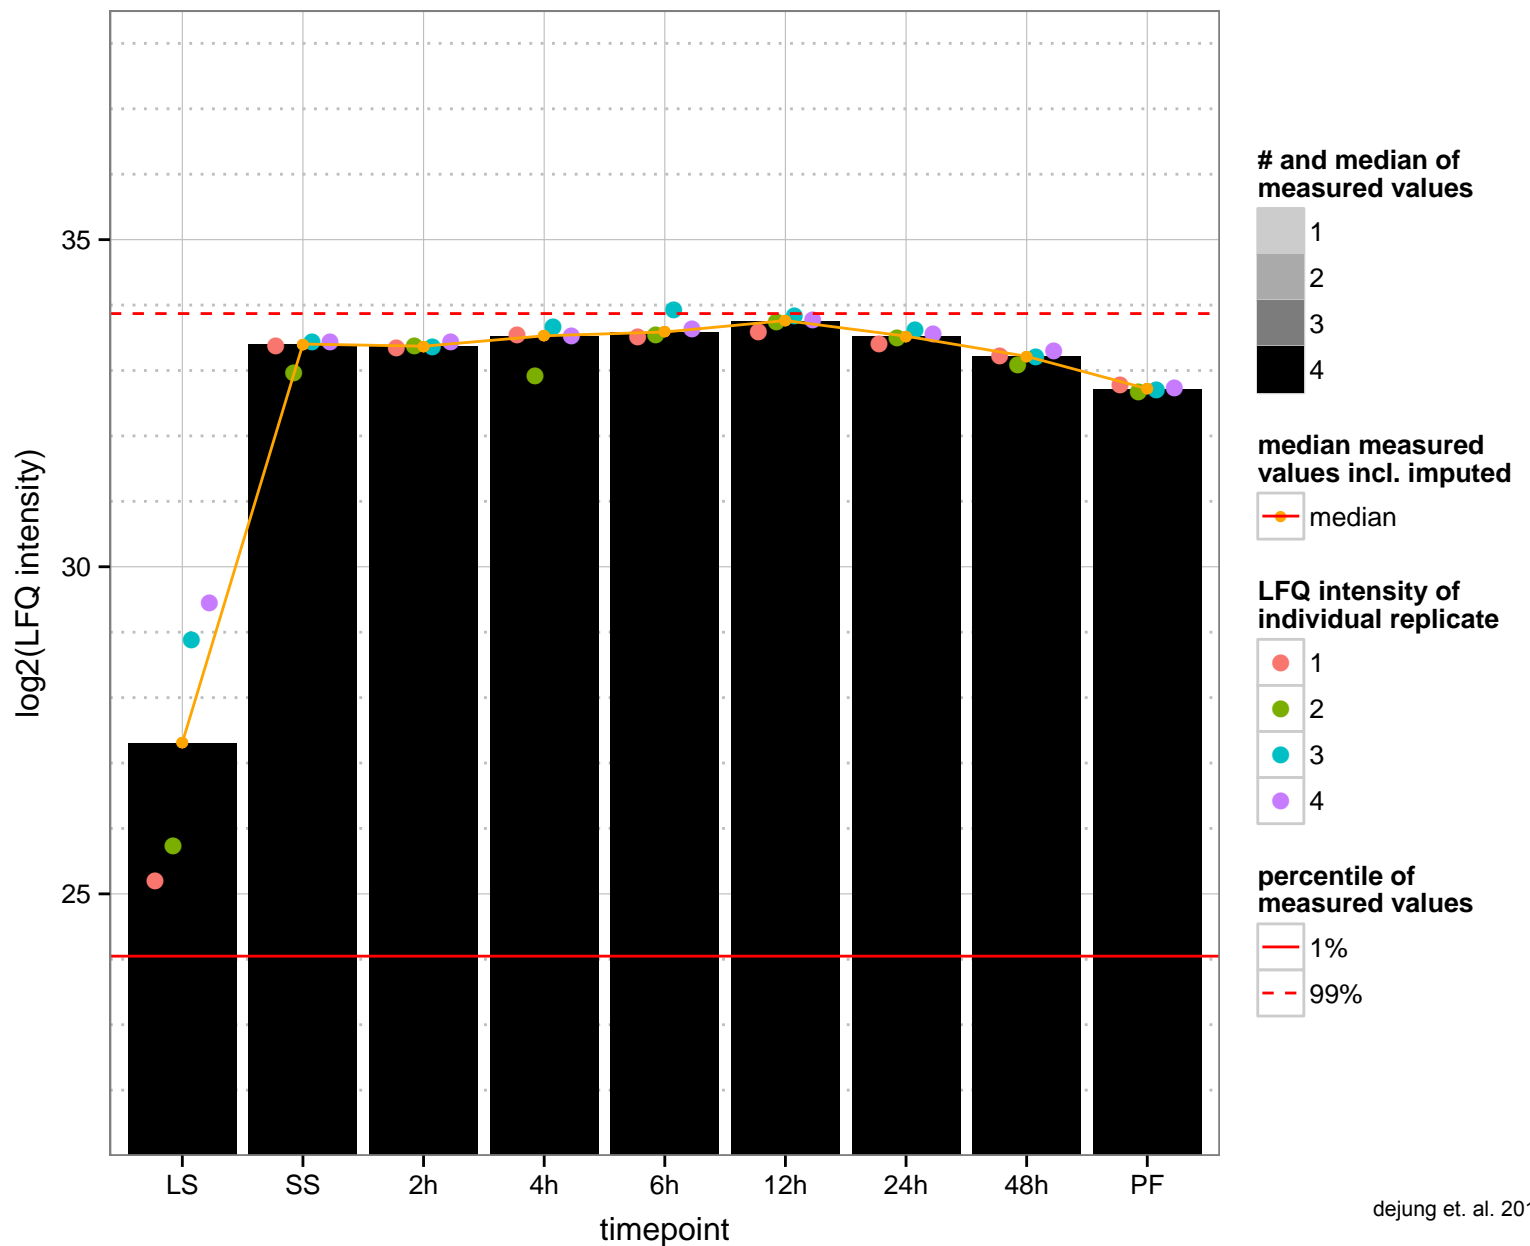

chaperone protein DNAj, putative

Tb927.11.16740

AGOF: chaperone binding, heat shock protein binding, unfolded protein binding

AGOC: null

AGOP: protein folding

PGOF: heat shock protein binding, unfolded protein binding

PGOC: null

PGOP: protein folding

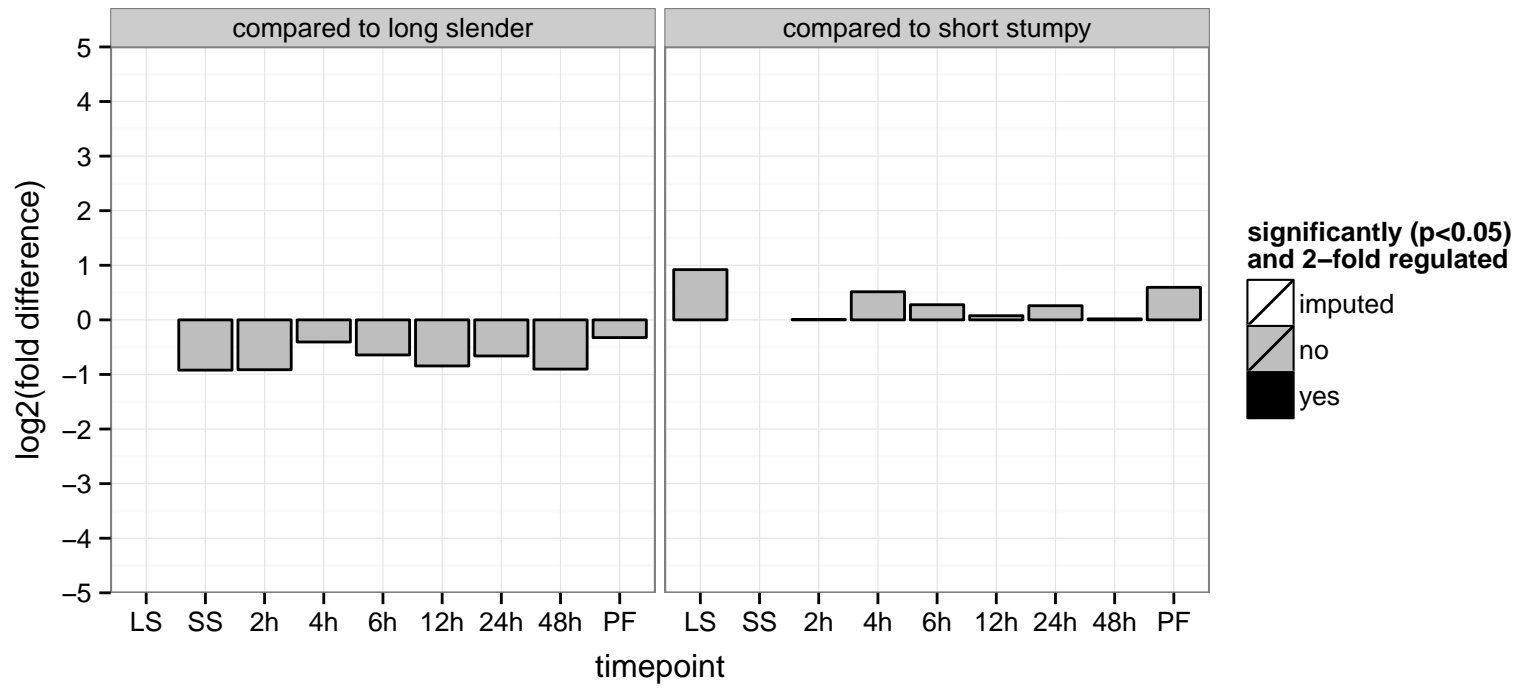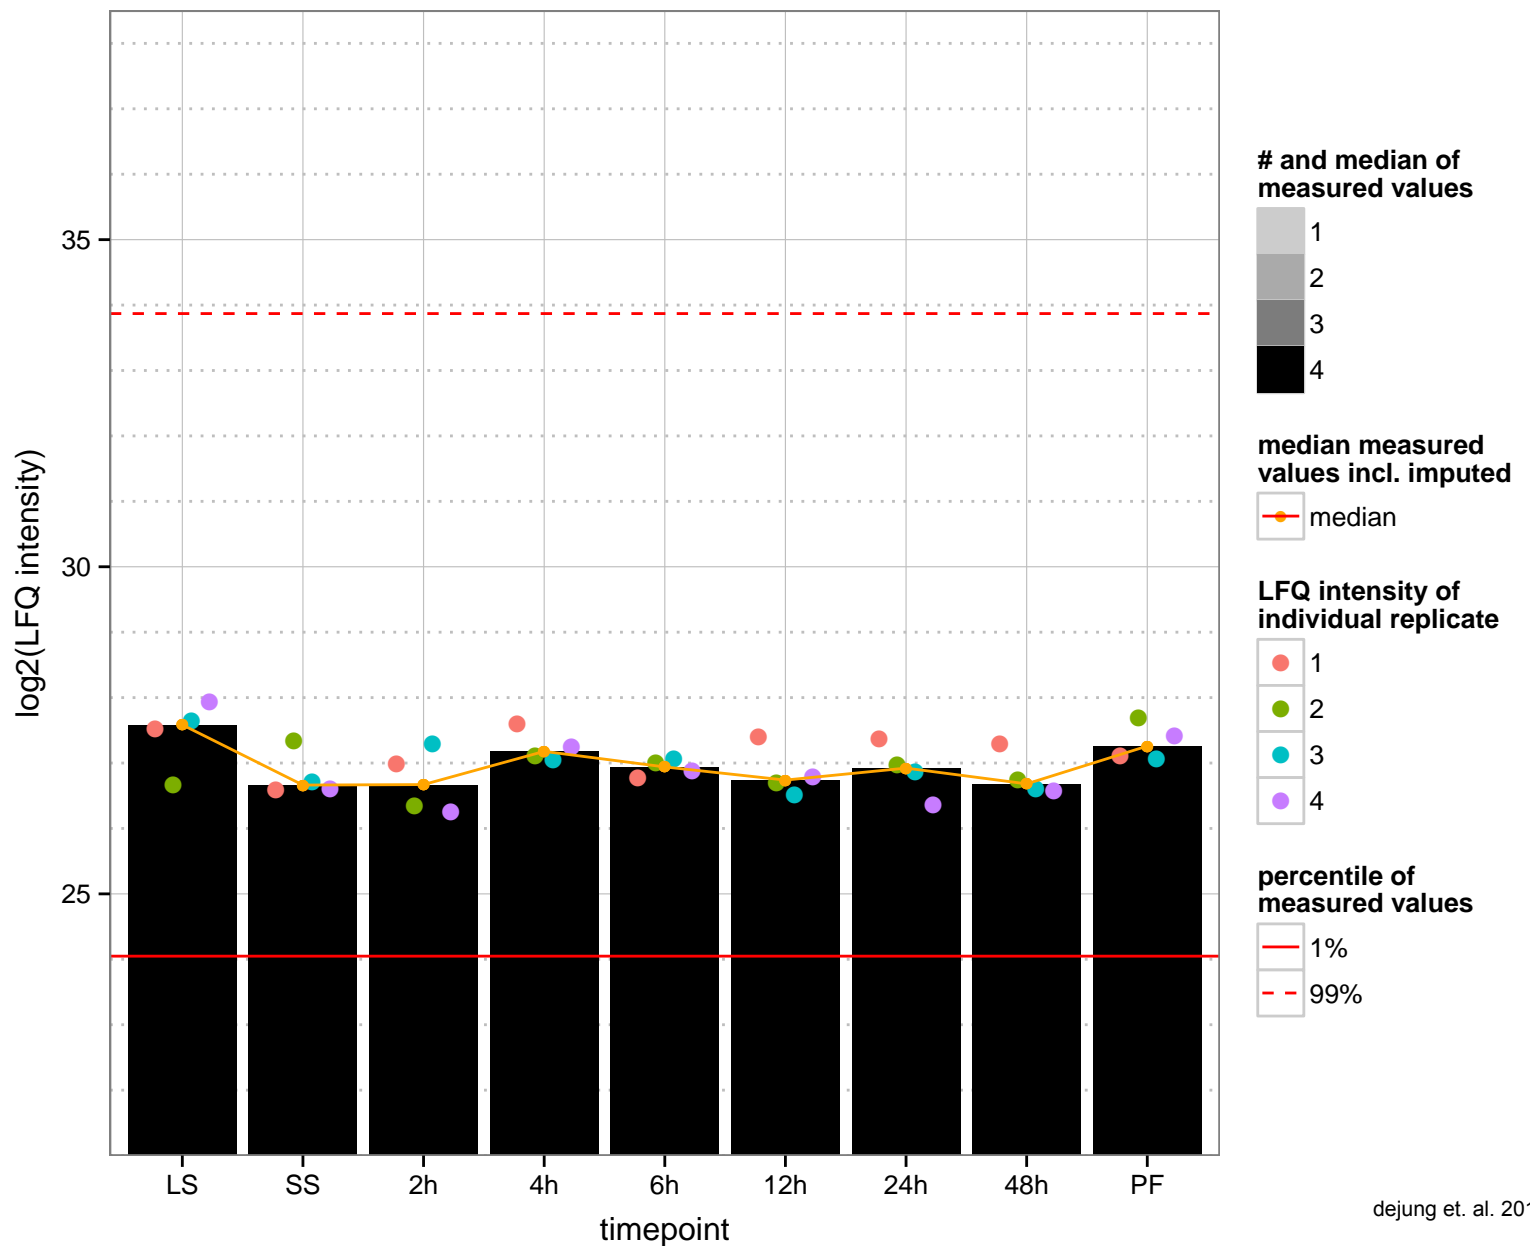



T-complex protein 1, alpha subunit, putative (TCP-1-alpha)  
 Tb927.11.16760  
 AGOF: ATP binding, unfolded protein binding  
 AGOC: chaperonin-containing T-complex  
 AGOP: protein folding, regulation of cell cycle  
 PGO: ATP binding  
 PGO: null  
 PGO: cellular protein metabolic process

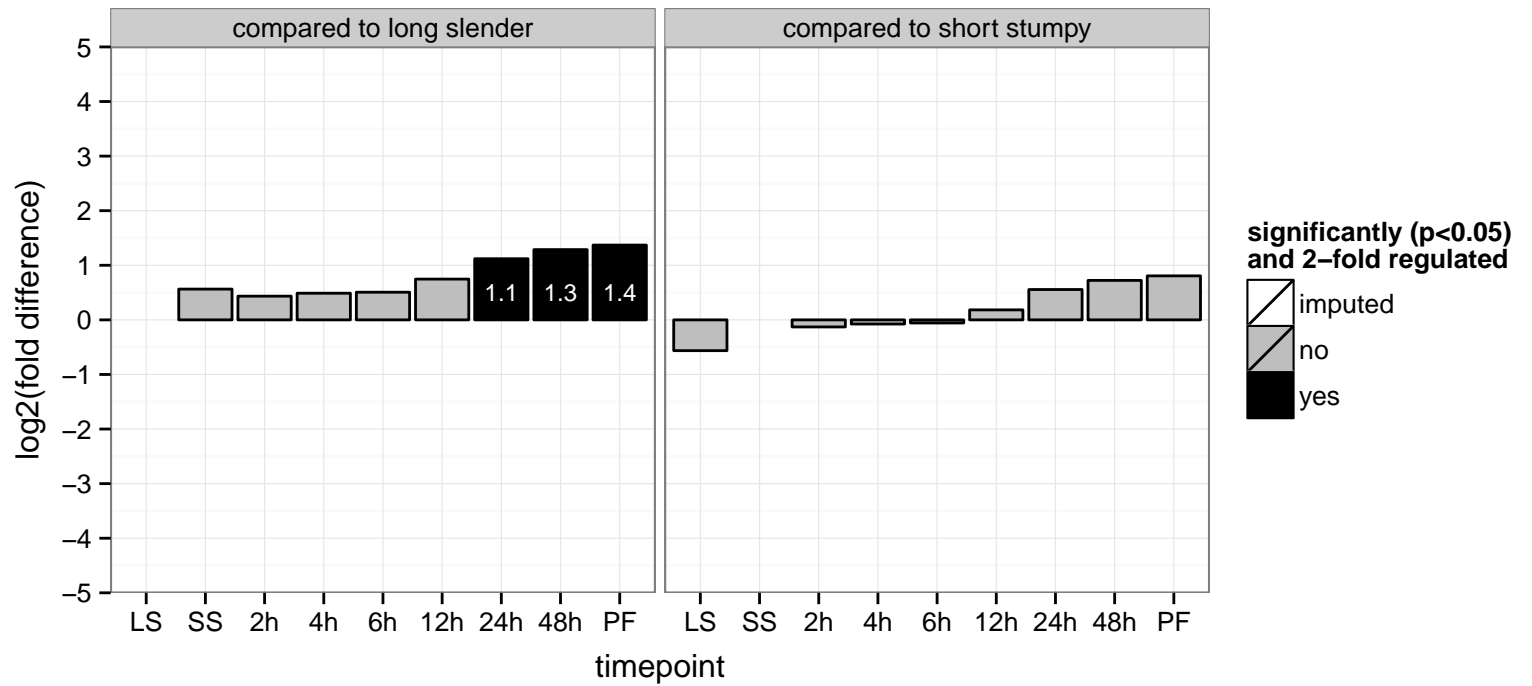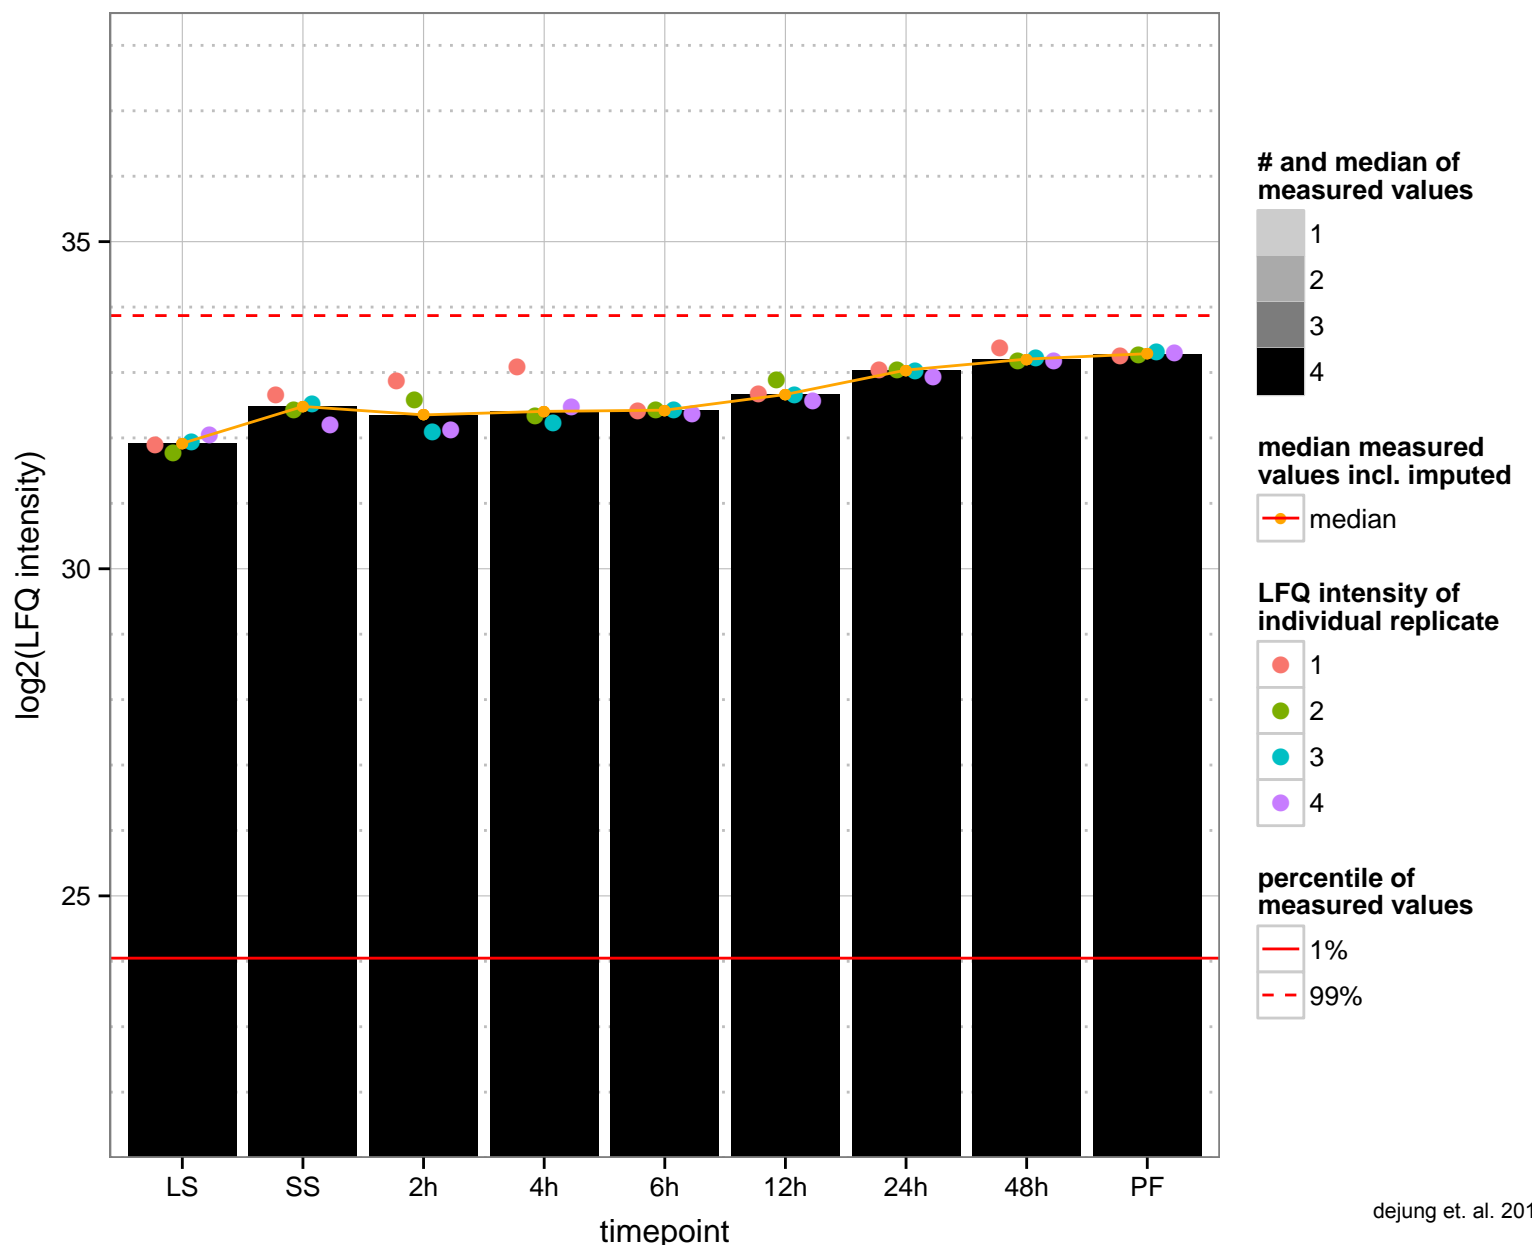

glucosamine-6-phosphate isomerase, putative  
 Tb927.11.16770  
 AGOF: glucosamine-6-phosphate deaminase activity  
 AGOC: null  
 AGOP: N-acetylglucosamine catabolic process, carbohydrate metabolic process  
 PGO: glucosamine-6-phosphate deaminase activity  
 PGOC: null  
 PGOP: N-acetylglucosamine metabolic process, carbohydrate metabolic process

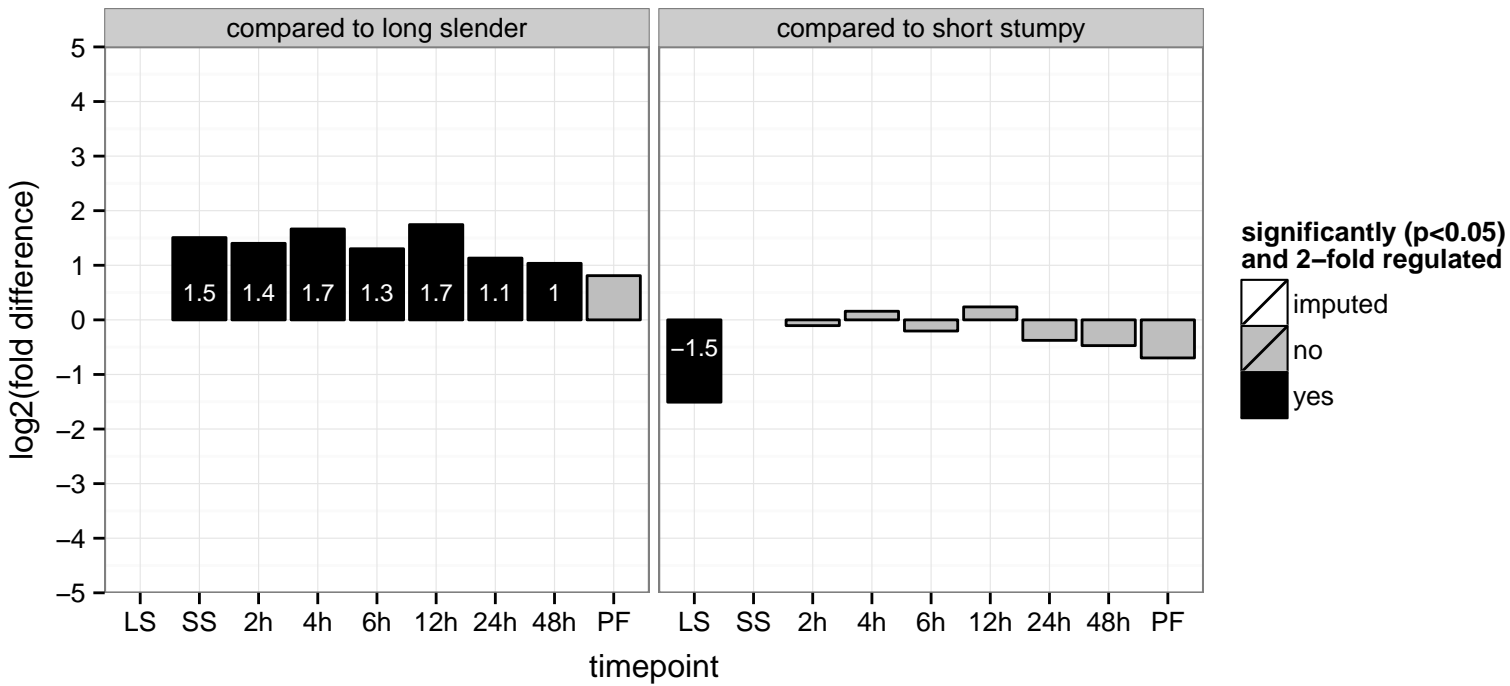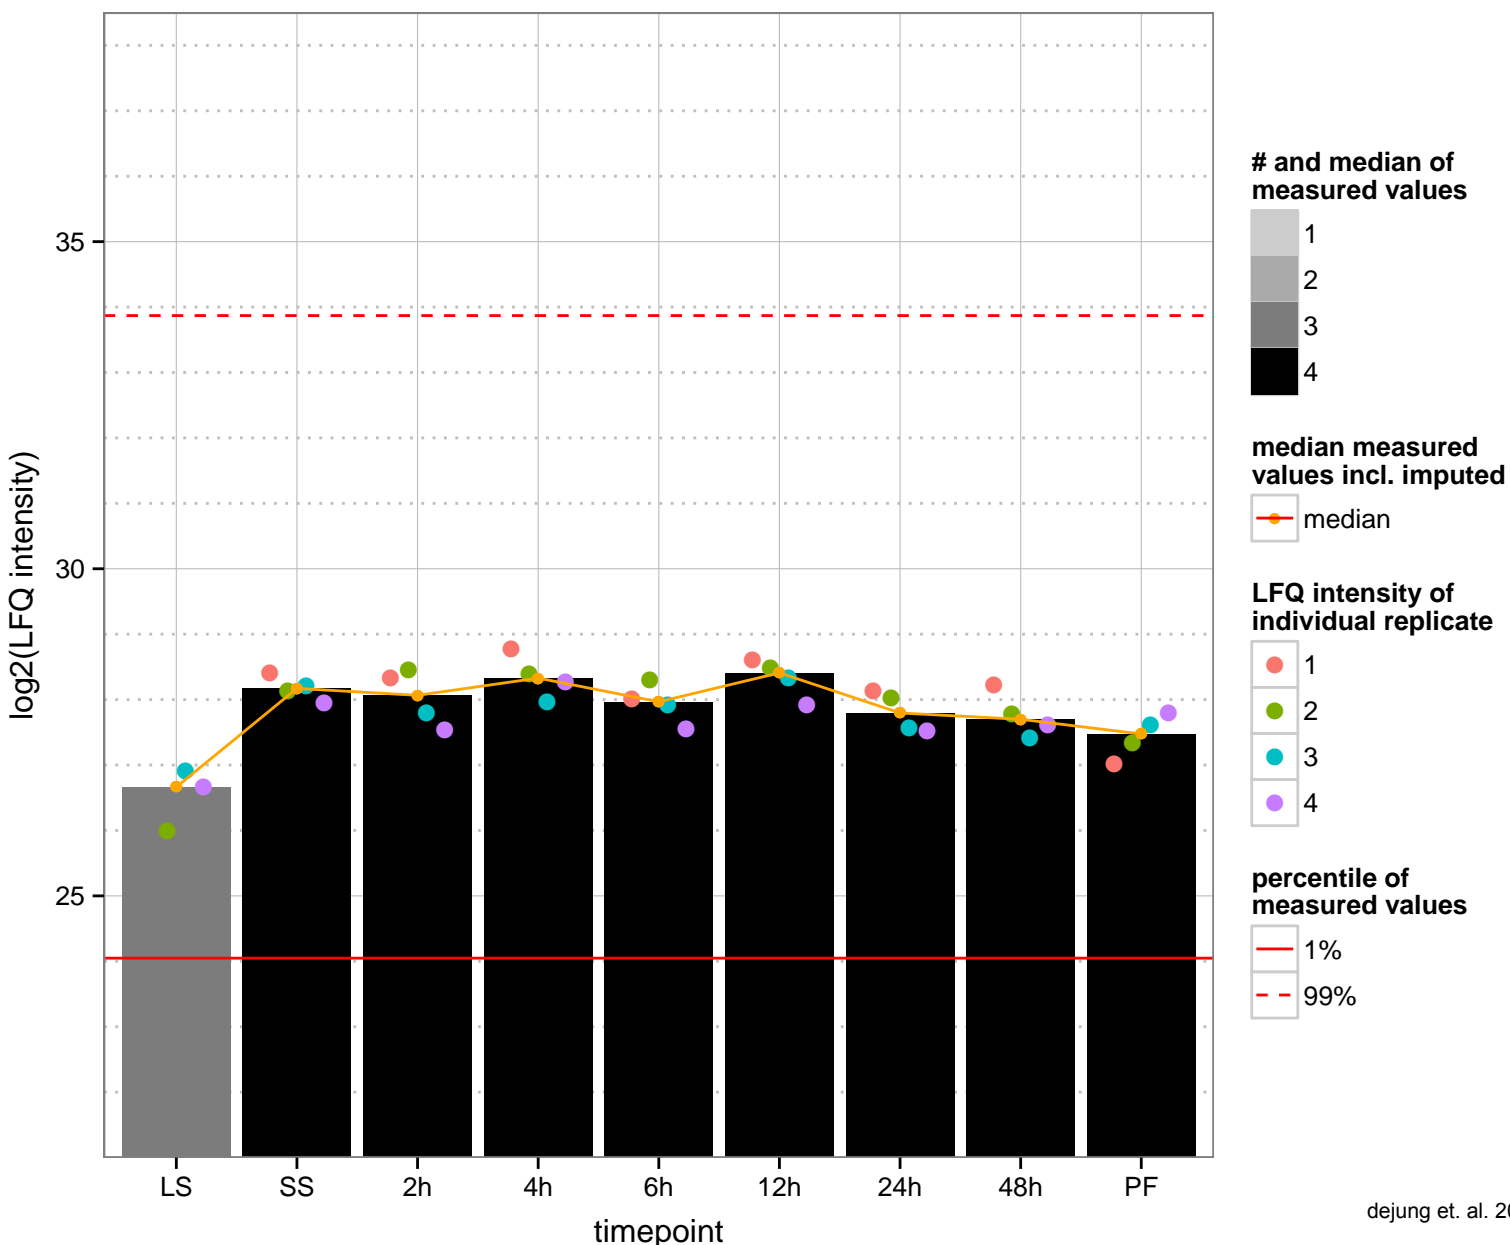

mitogen-activated protein kinase (ECK1)

Tb927.11.16790

AGOF: ATP binding, protein kinase activity, protein serine/threonine kinase activity, protein tyrosine kinase activity

AGOC: null

AGOP: protein phosphorylation

PGOF: ATP binding, protein kinase activity, transferase activity, transferring phosphorus-containing groups

PGOC: null

PGOP: protein phosphorylation

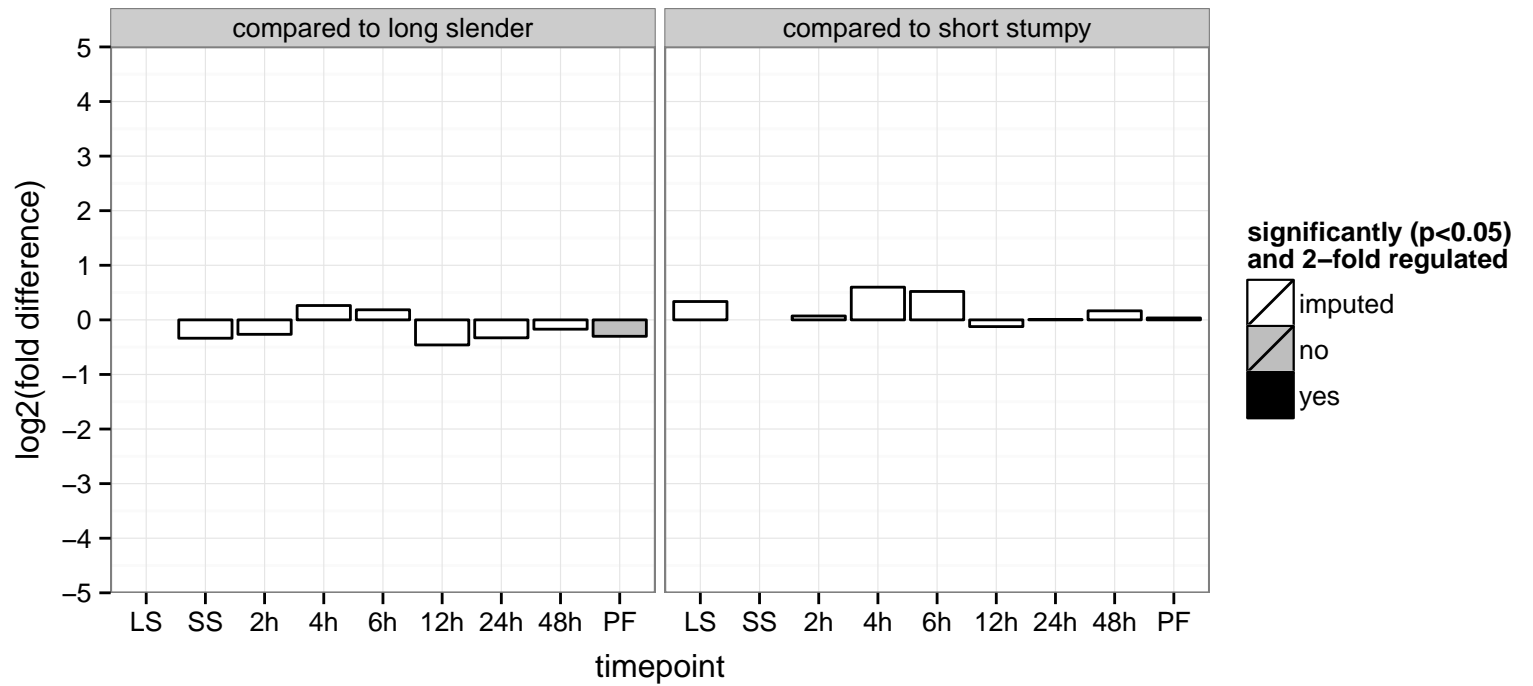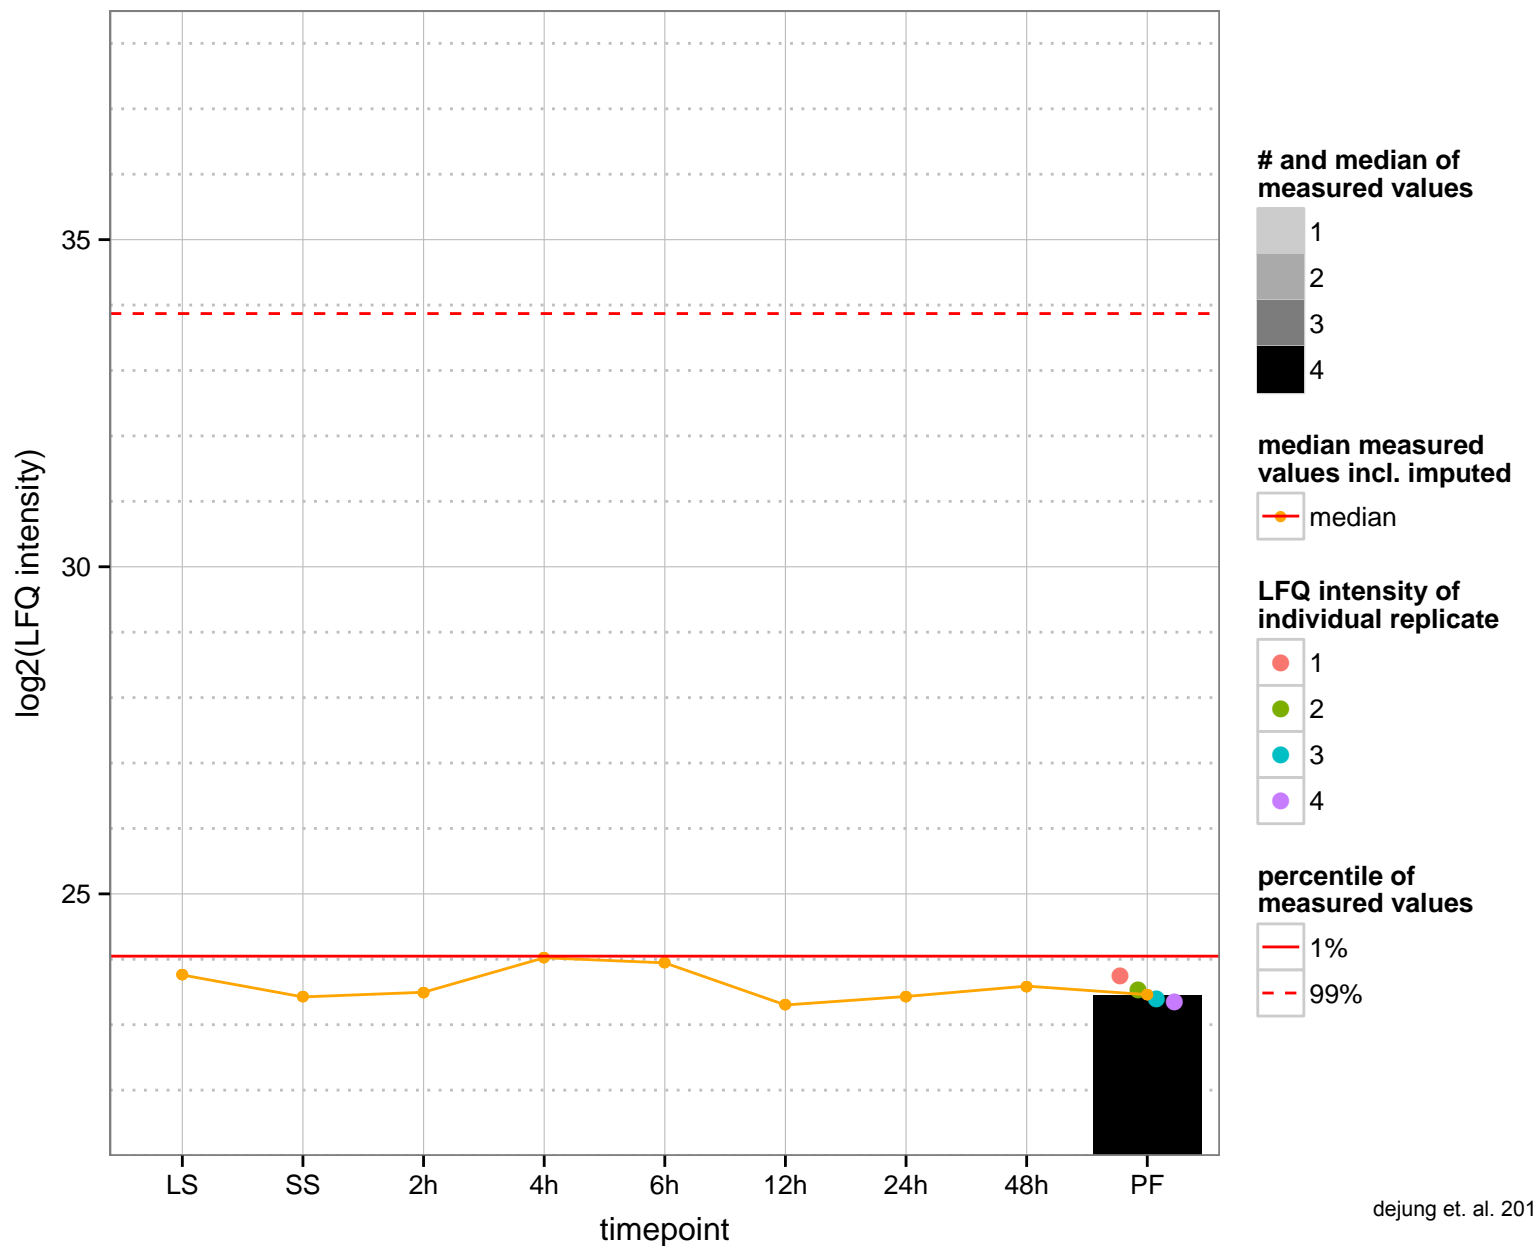

vesicular-fusion protein SEC18, putative

Tb927.11.1680

AGOF: ATP binding, nucleoside-triphosphatase activity

AGOC: null

AGOP: ER to Golgi vesicle-mediated transport, Golgi vesicle transport, vesicle-mediated transport

PGOF: ATP binding, nucleoside-triphosphatase activity, nucleotide binding

PGOC: null

PGOP: null

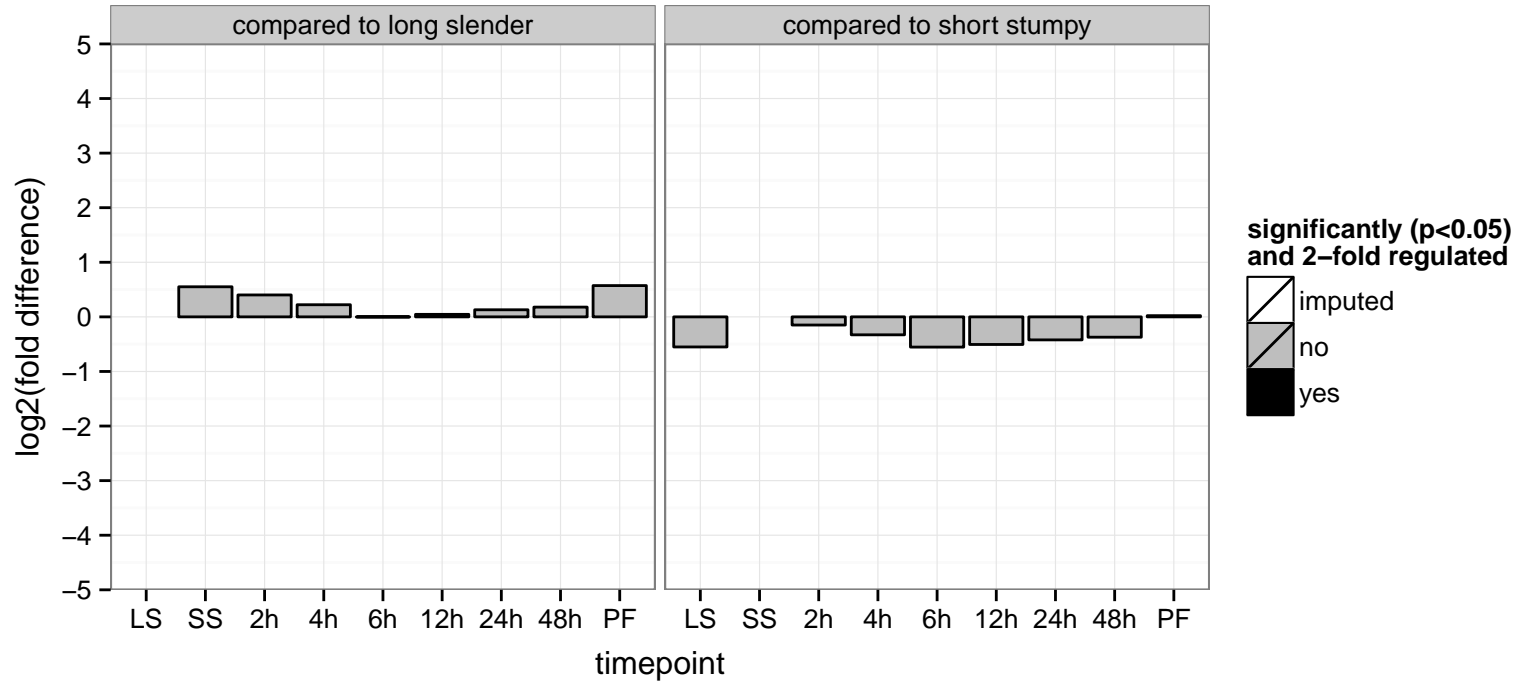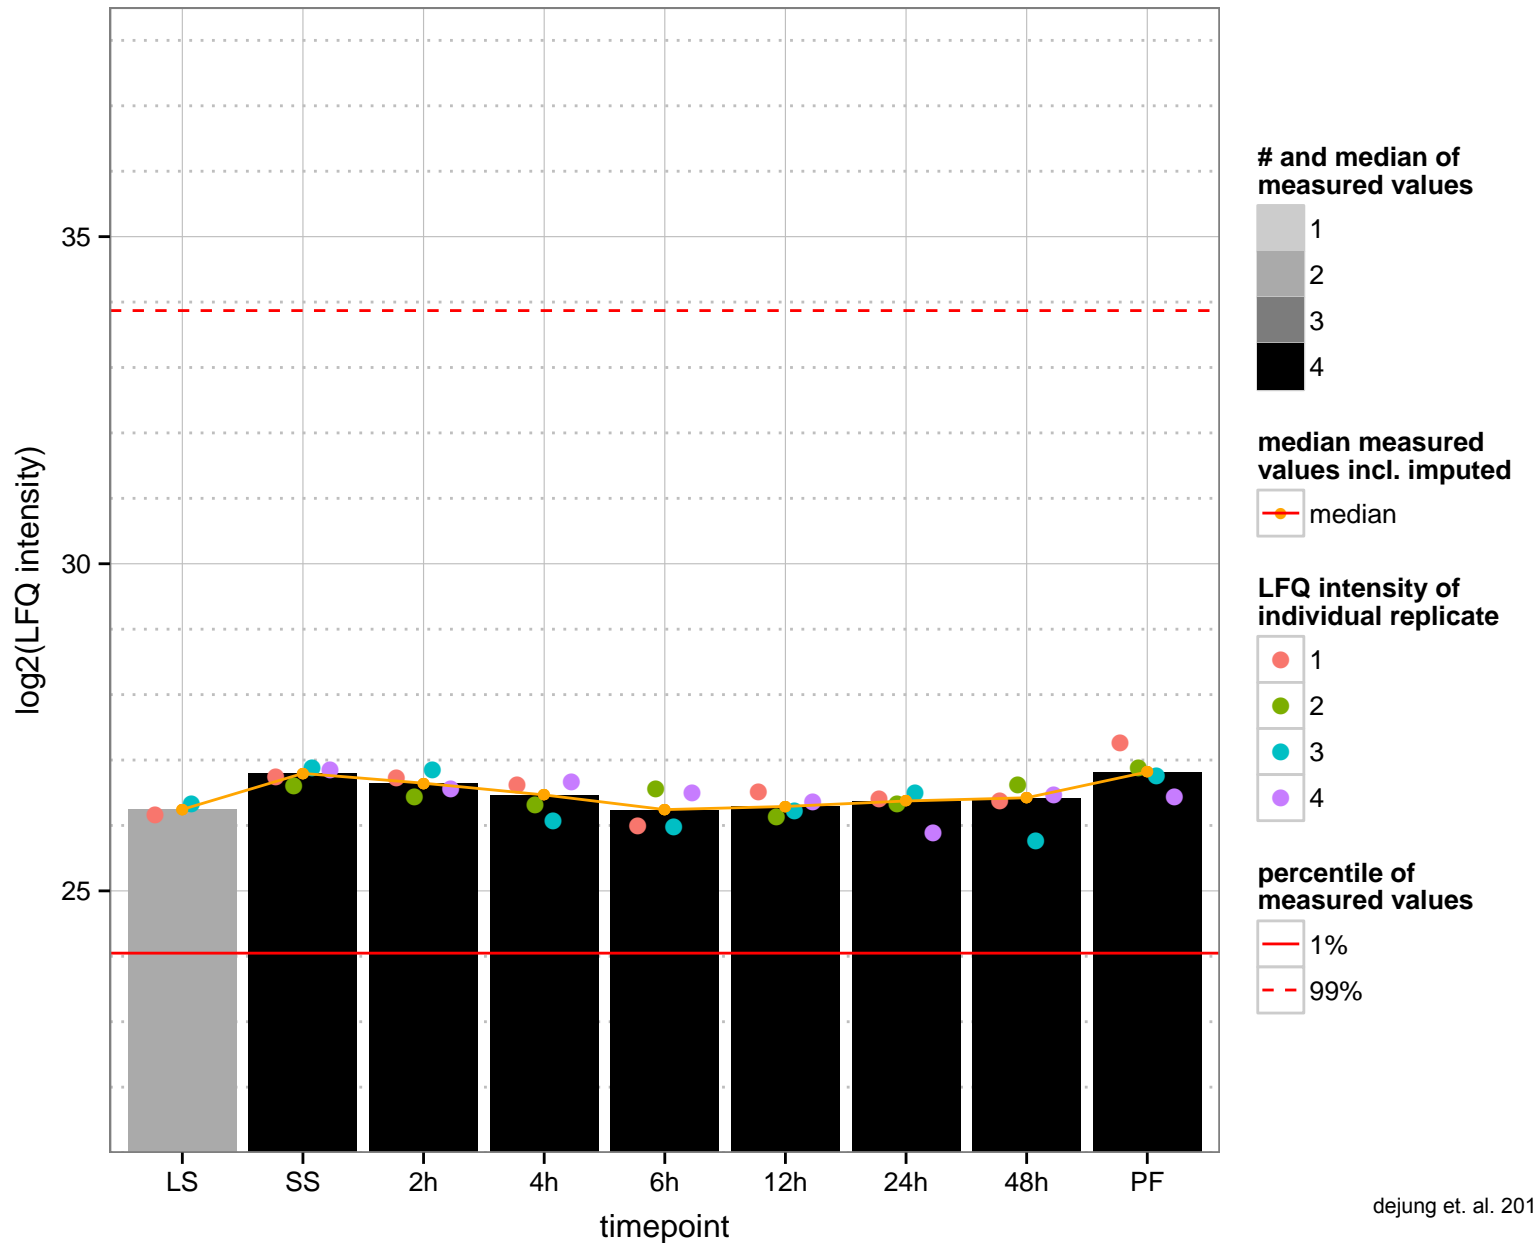

dynein light intermediate chain D1bLIC, putative  
 Tb927.11.16810  
 AGOF: null  
 AGOC: null  
 AGOP: null  
 PGOF: GTP binding  
 PGO: intracellular  
 PGO: small GTPase mediated signal transduction

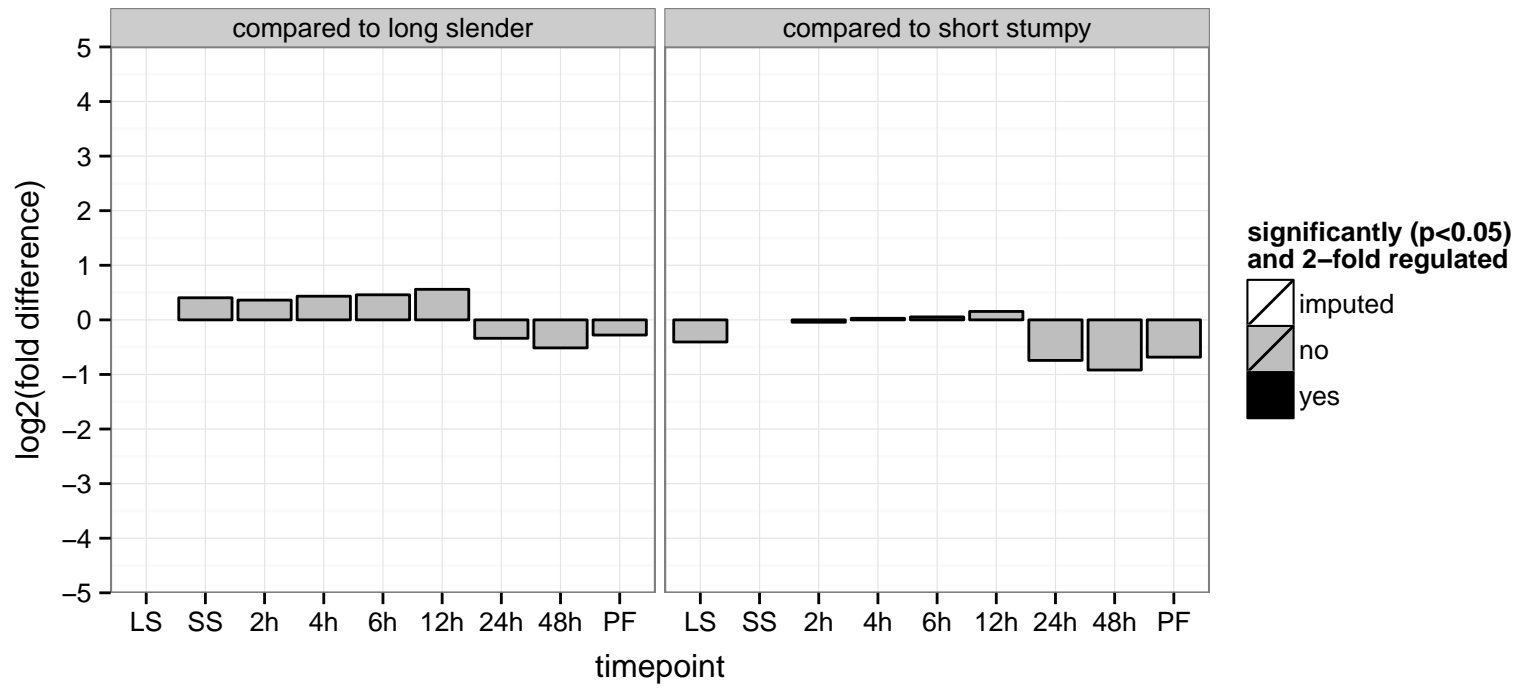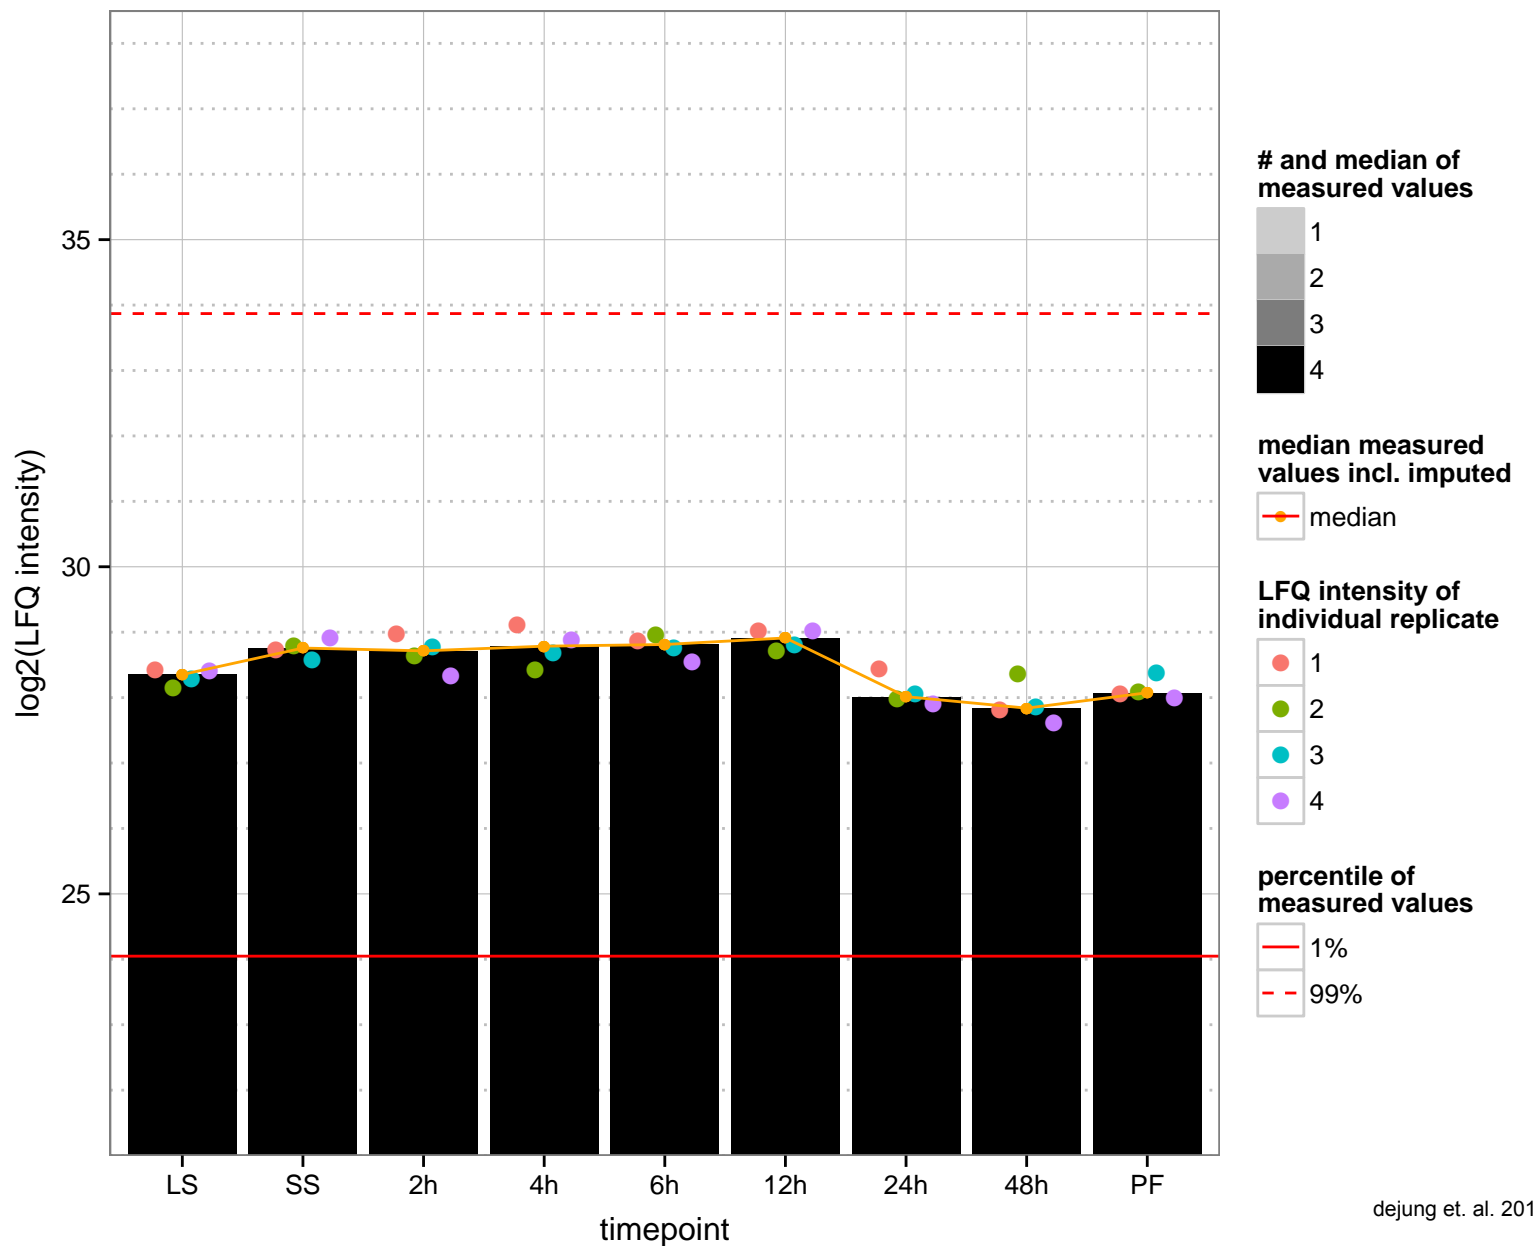

Rab-like 5, small G protein (RABL5)  
 Tb927.11.16830  
 AGOF: GTP binding  
 AGOC: null  
 AGOP: cilium assembly  
 PGO: GTP binding  
 PGO: intracellular  
 PGO: small GTPase mediated signal transduction

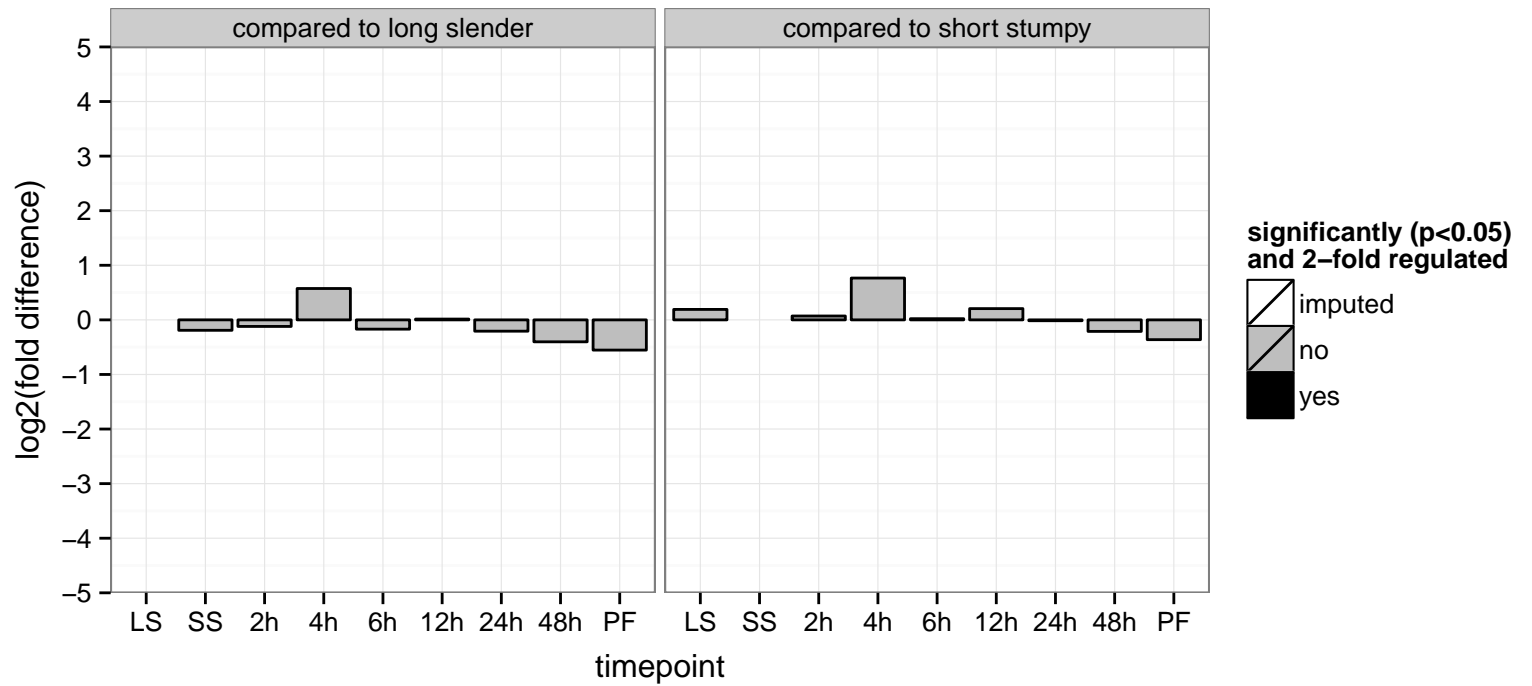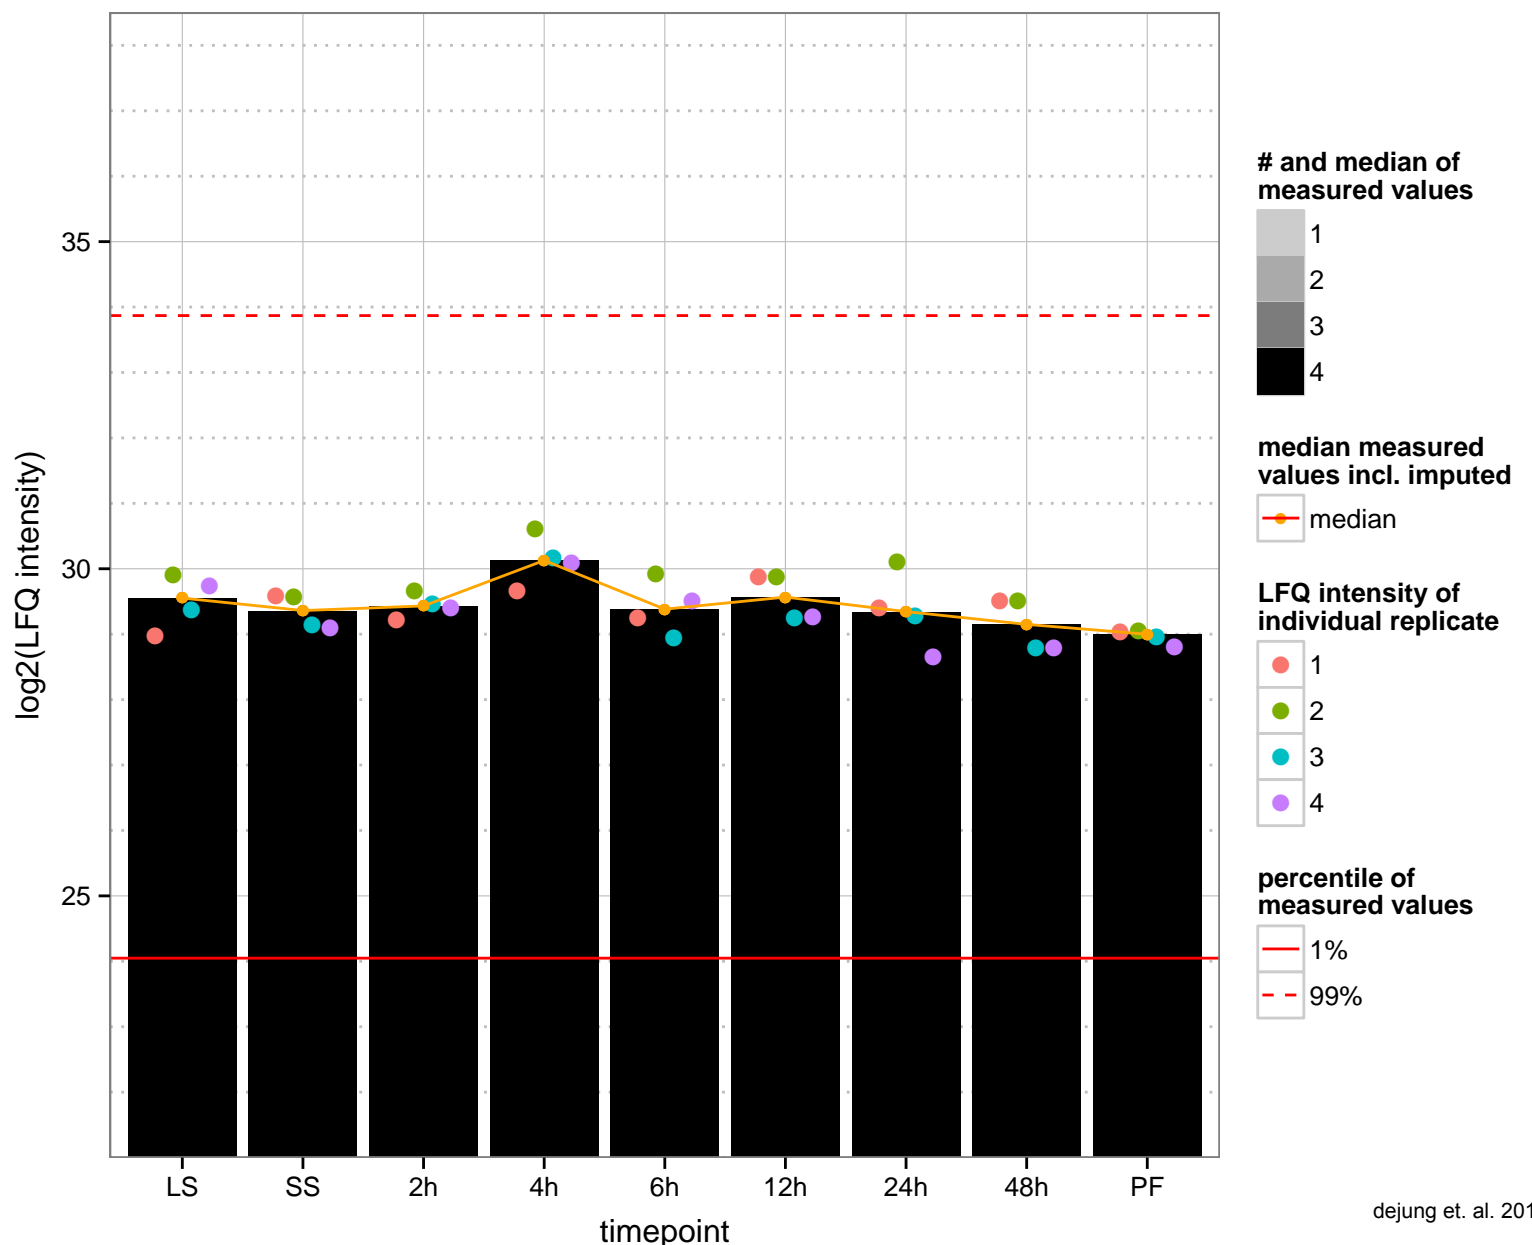

hypothetical protein, conserved  
 Tb927.11.16850  
 AGOF: null  
 AGOC: null  
 AGOP: null  
 PGO: null  
 PGOC: null  
 PGOP: null

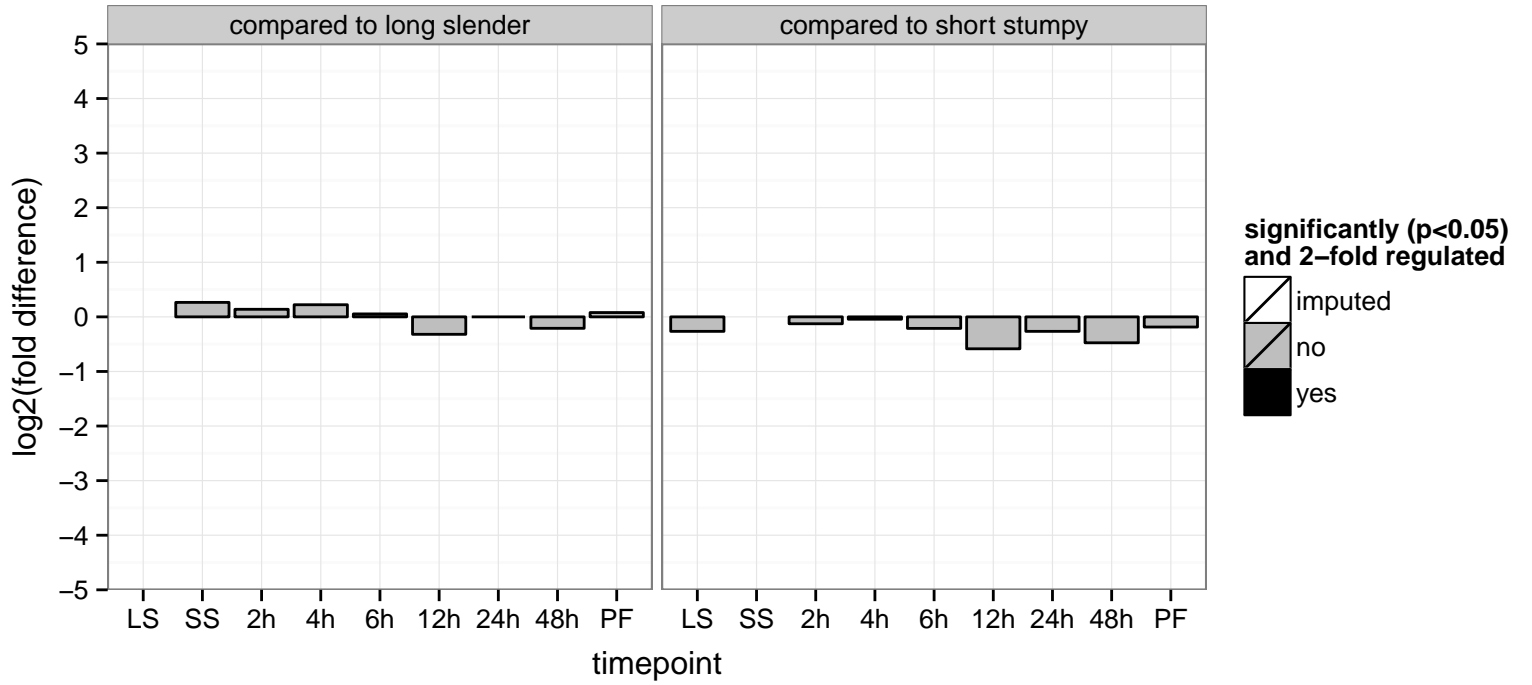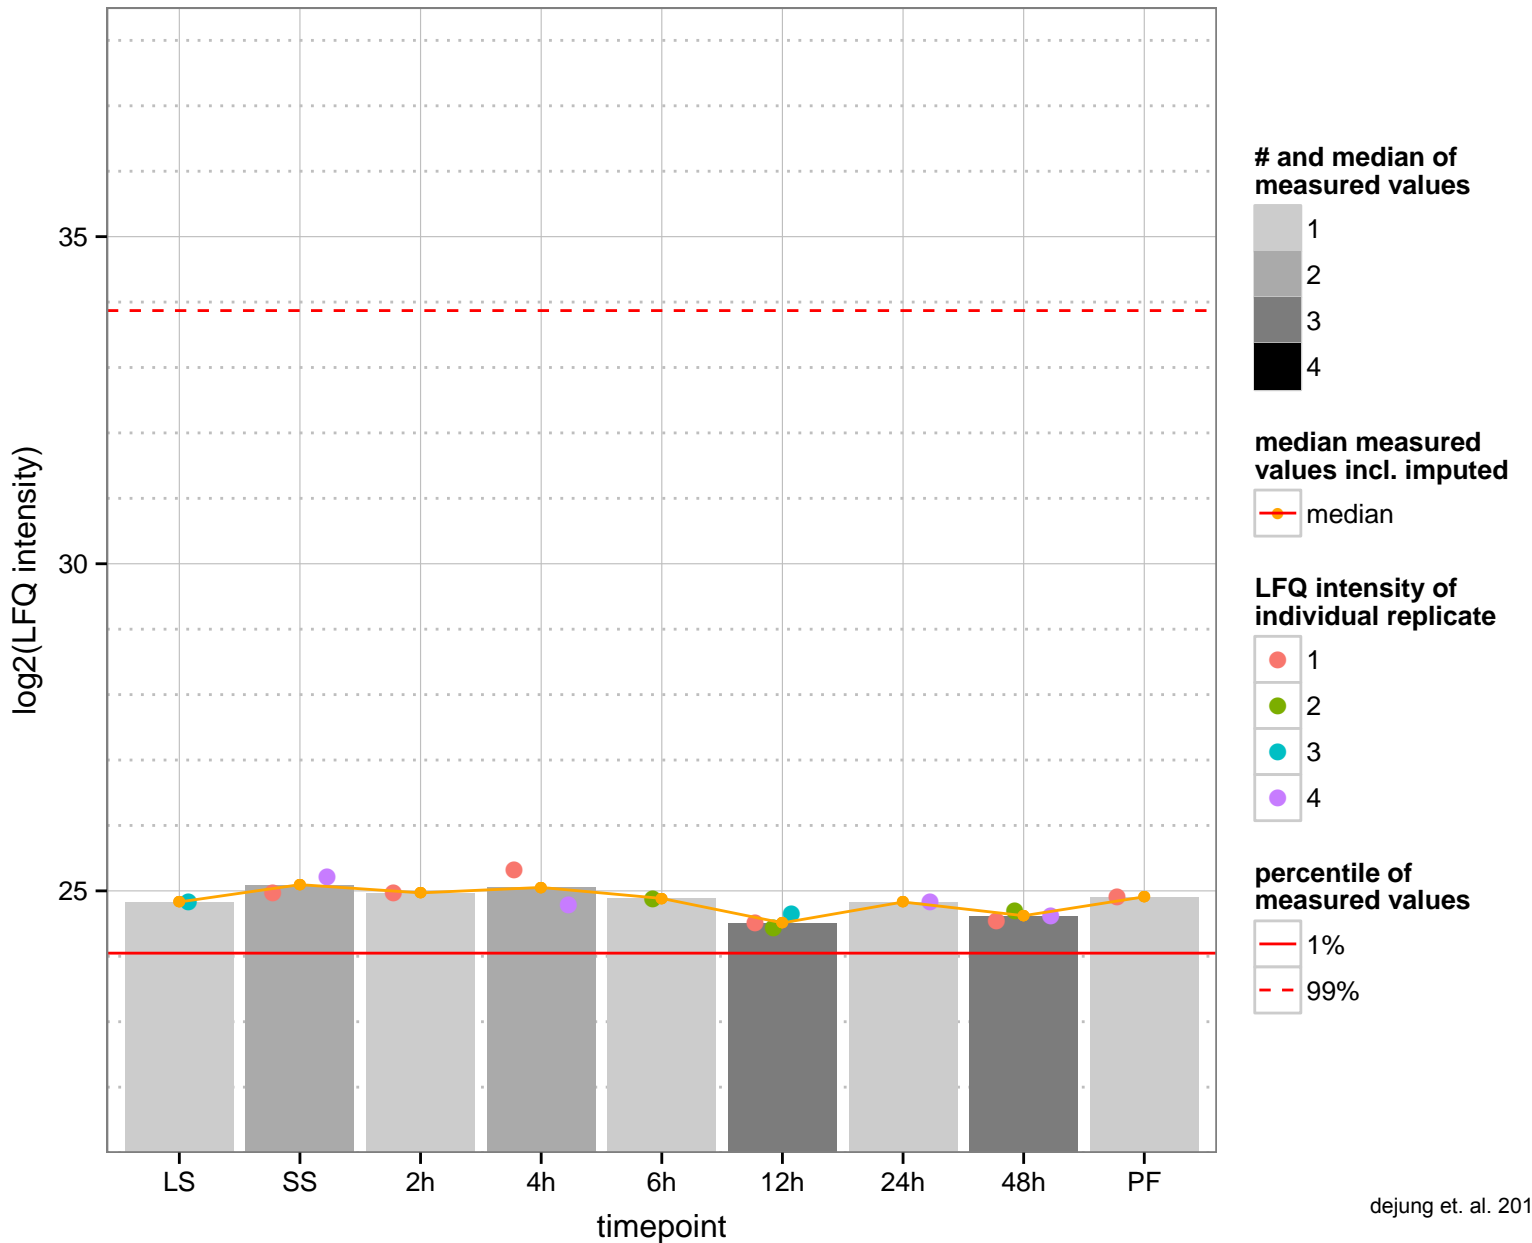

mitochondrial RNA binding protein (MRB8620)  
 Tb927.11.16860  
 AGOF: RNA binding  
 AGOC: mitochondrion  
 AGOP: RNA metabolic process  
 PGO: null  
 PGOC: null  
 PGOP: null

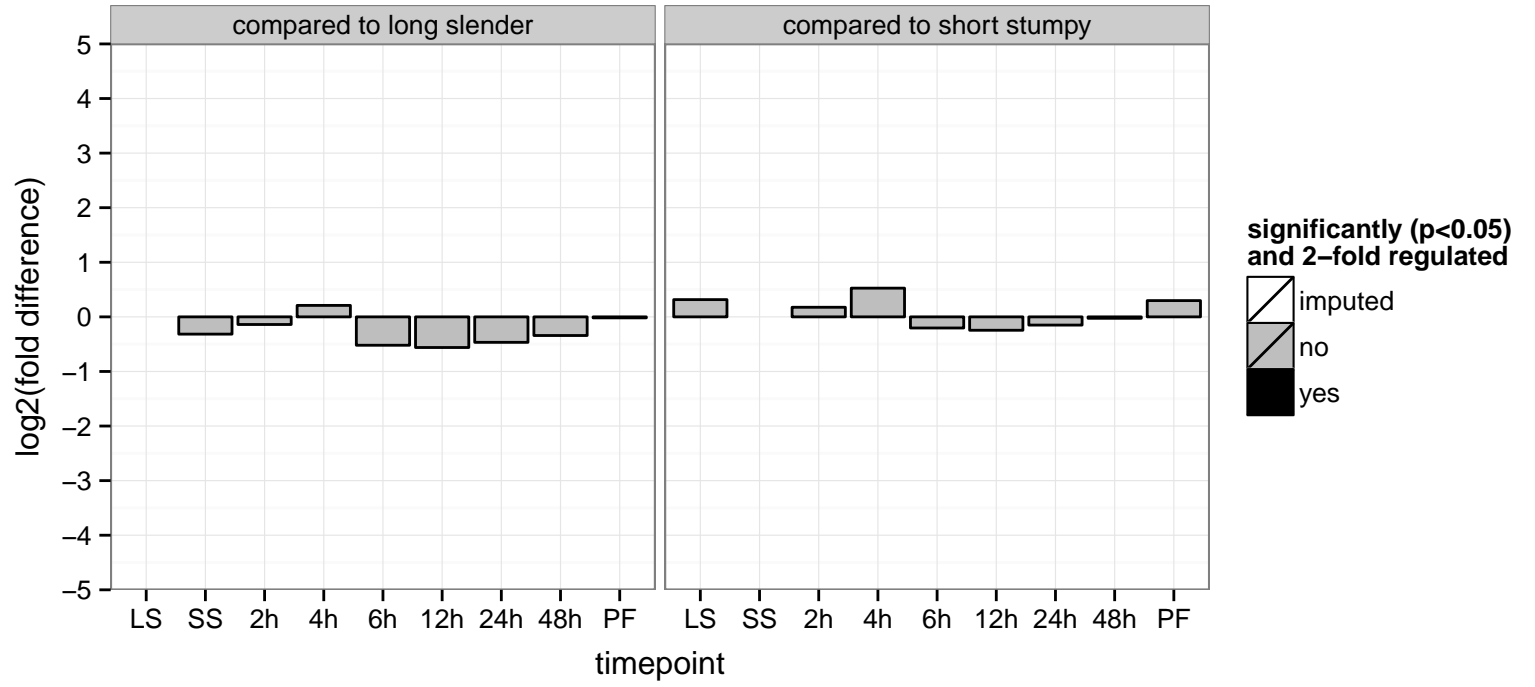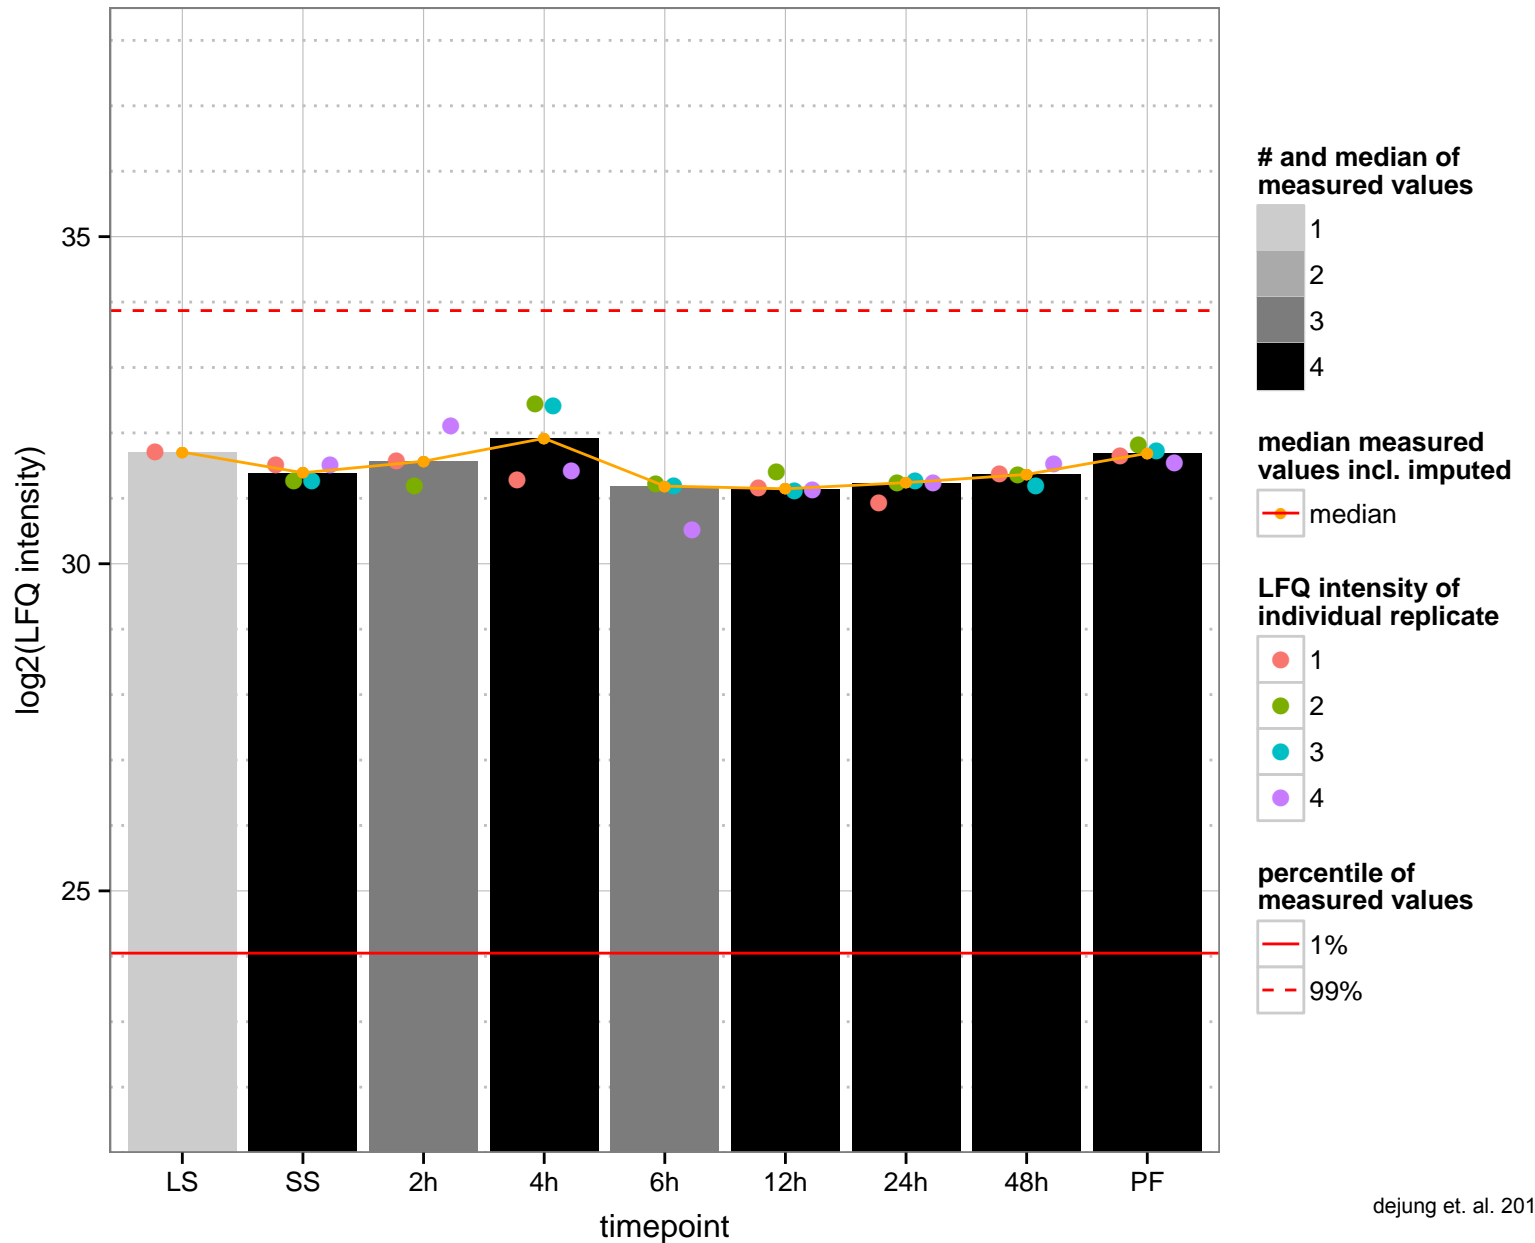



leucine-rich repeat protein (LRRP), putative  
 Tb927.11.16880  
 AGOF: null  
 AGOC: null  
 AGOP: null  
 PGO: null  
 PGOC: null  
 PGOP: null

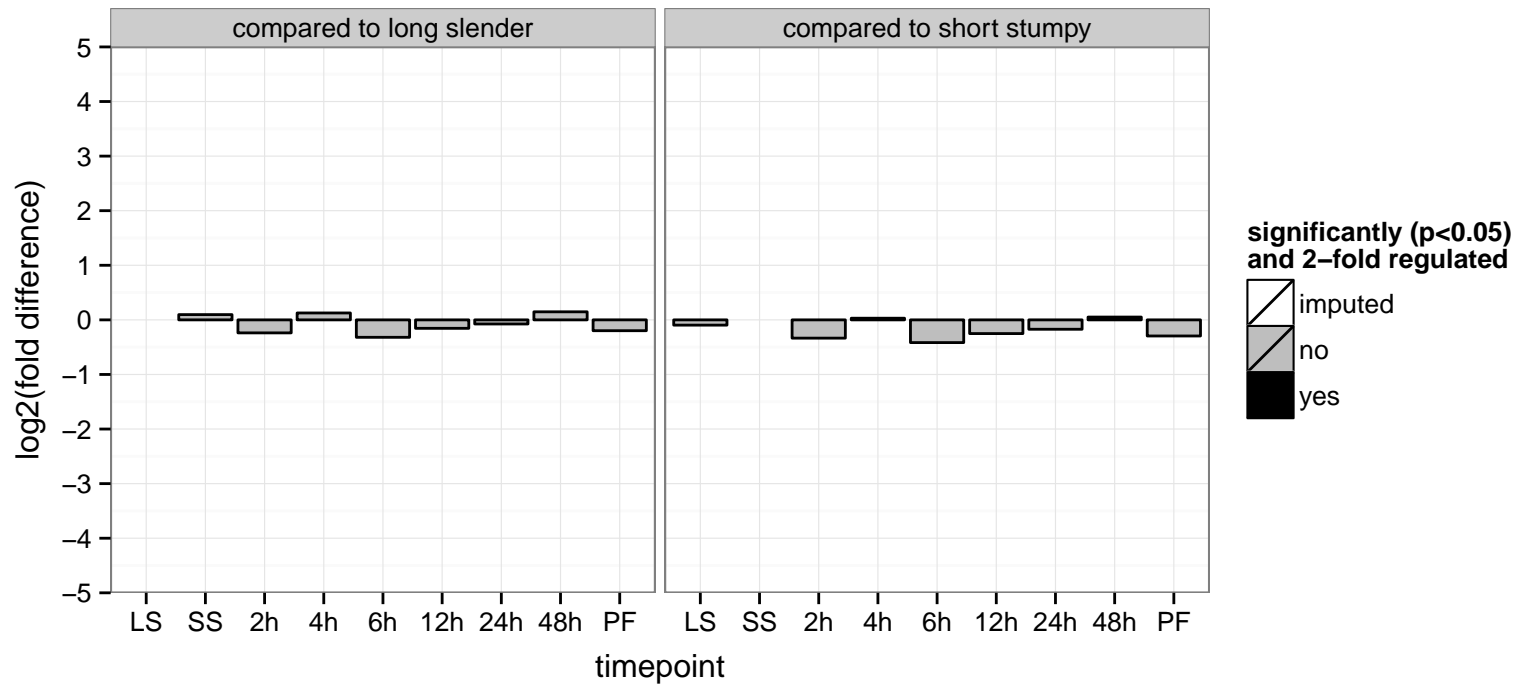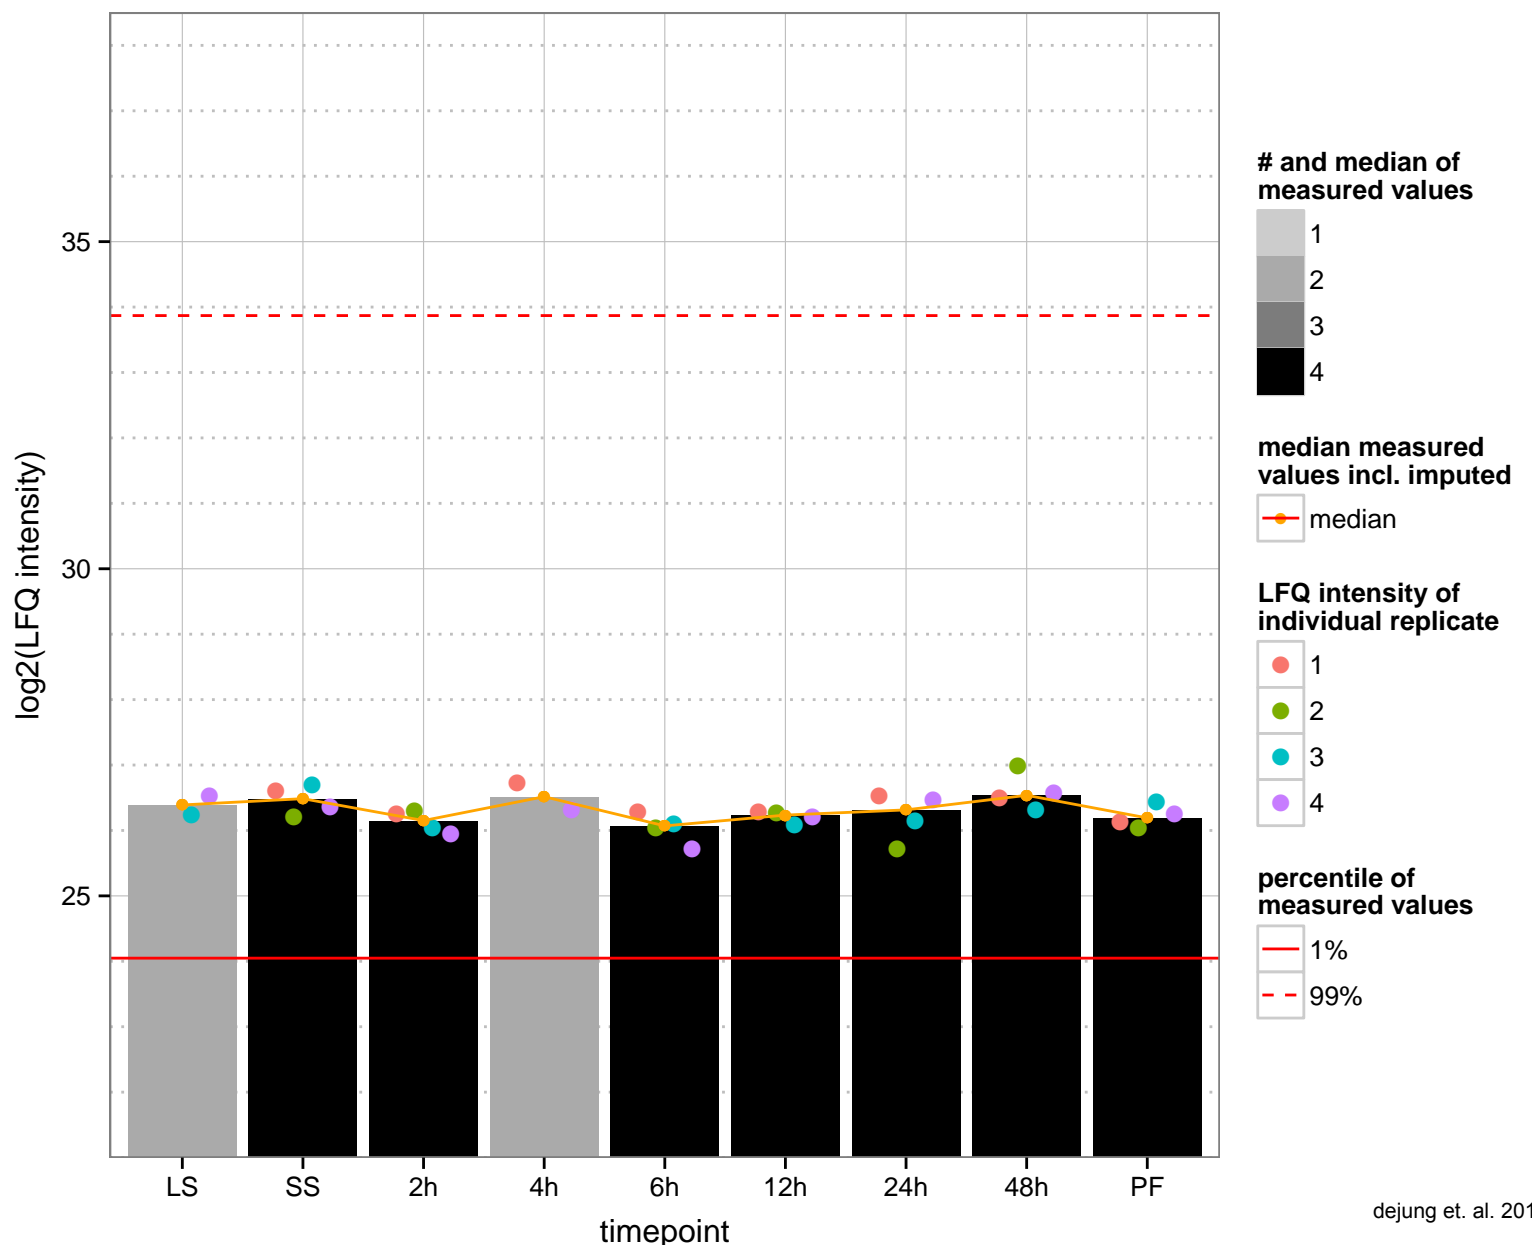

hypothetical protein, conserved  
 Tb927.11.16890  
 AGOF: null  
 AGOC: null  
 AGOP: null  
 PGOF: protein binding  
 PGO: null  
 PGOP: null

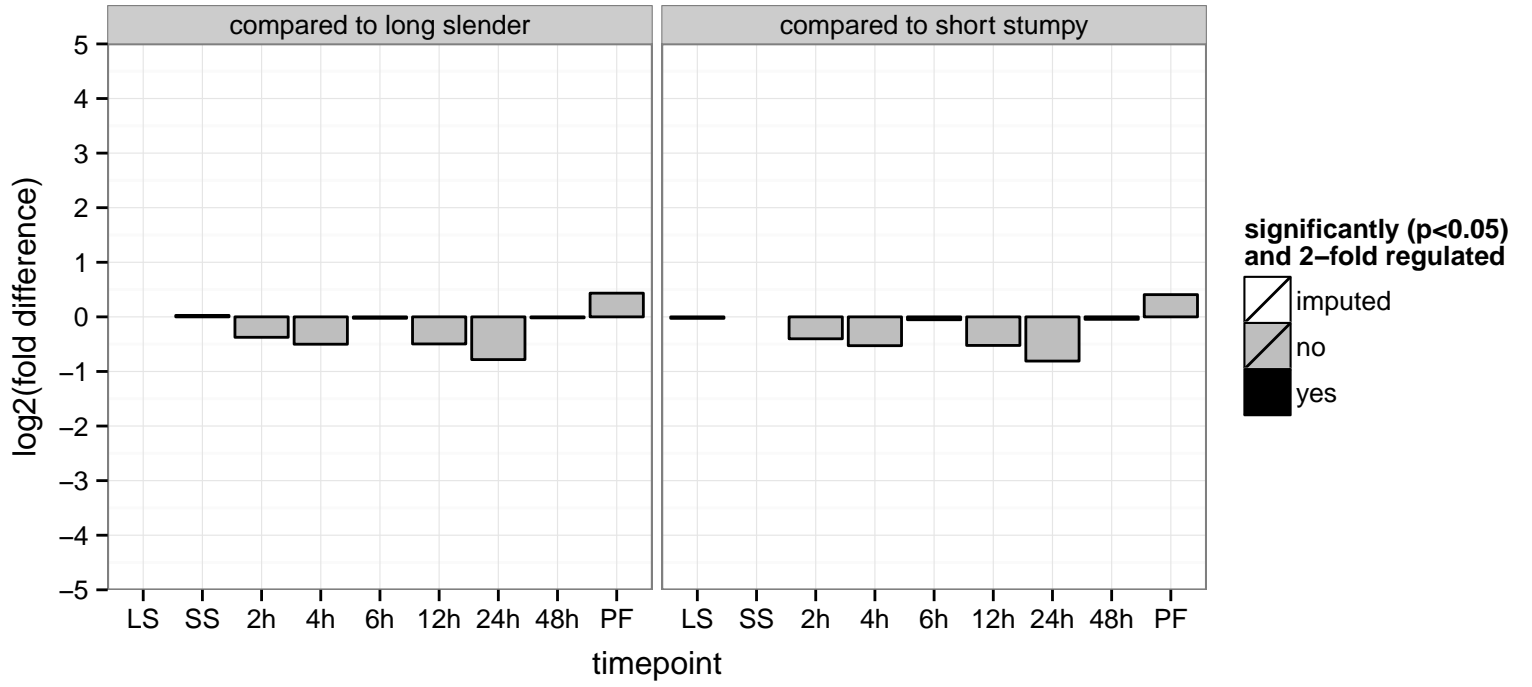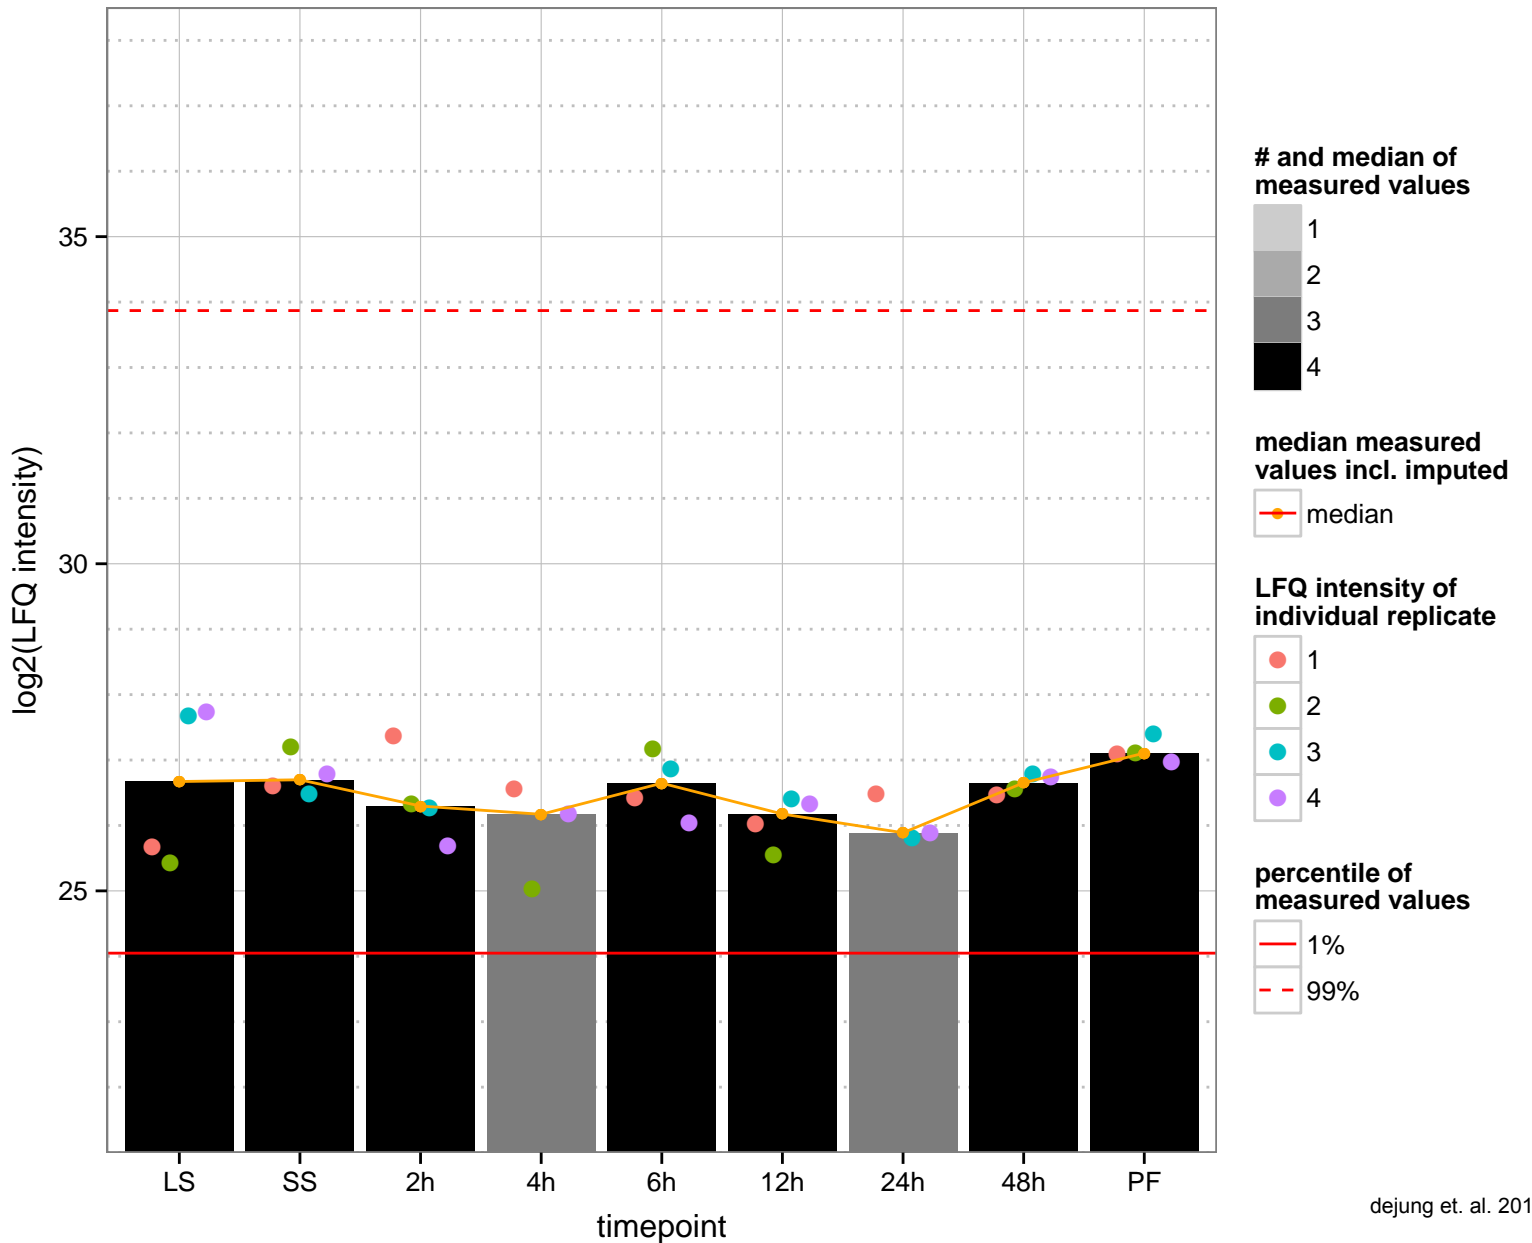

protein phosphatase 4, putative

Tb927.11.16970

AGOF: phosphoric ester hydrolase activity, protein serine/threonine phosphatase activity

AGOC: protein phosphatase type 2A complex

AGOP: phosphate-containing compound metabolic process

PGOF: hydrolase activity

PGOC: null

PGOP: null

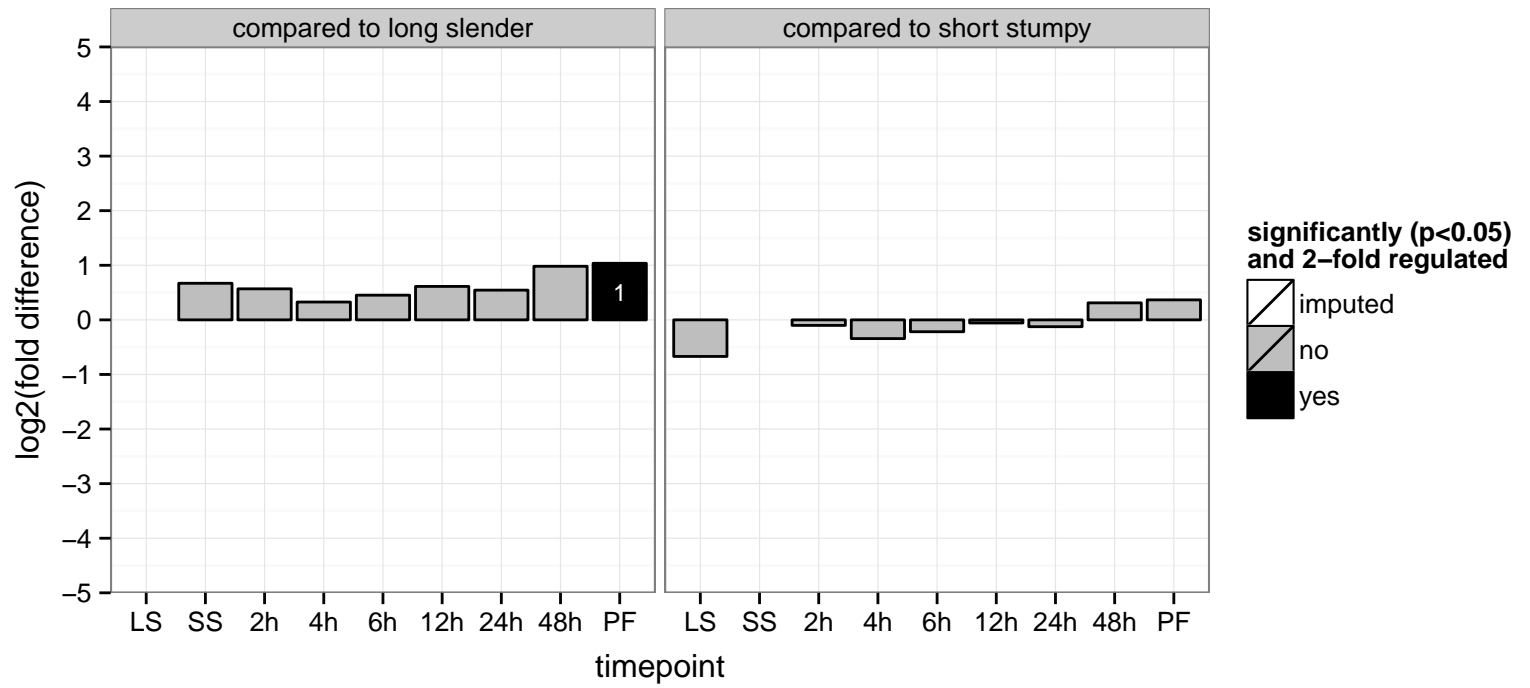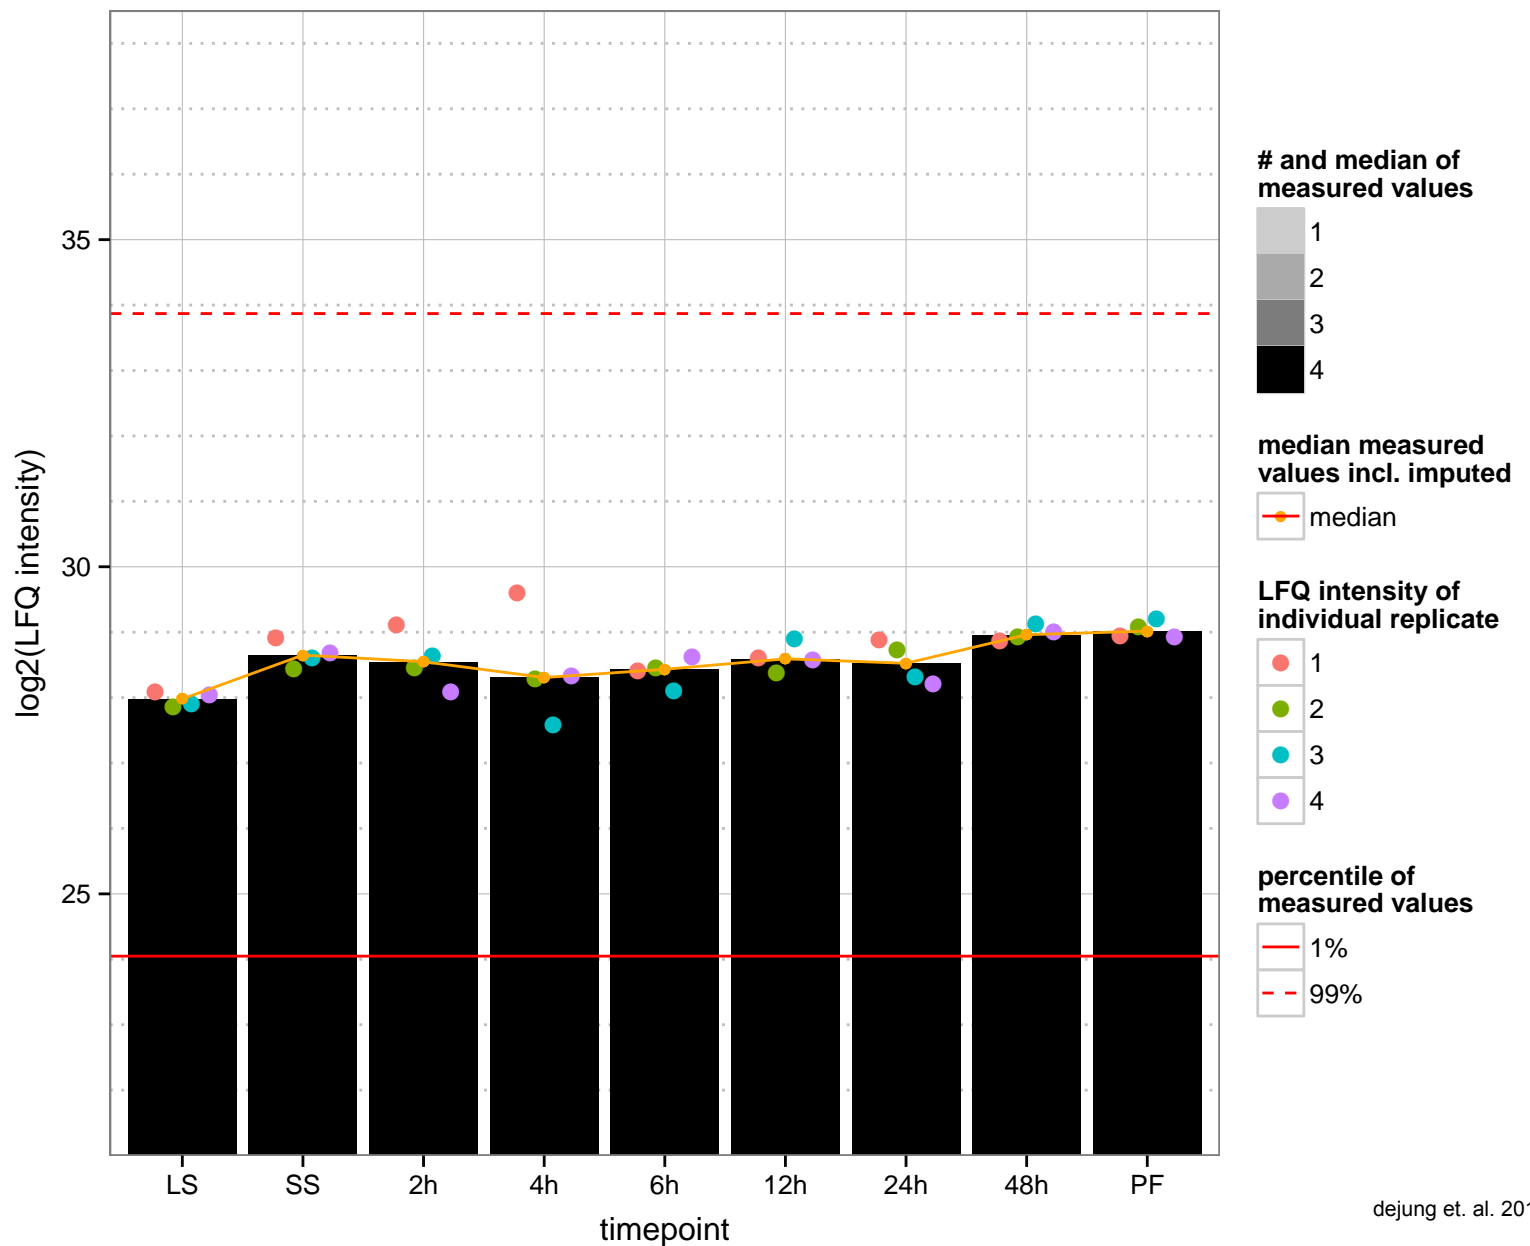

hypothetical protein, conserved  
 Tb927.11.1700  
 AGOF: null  
 AGOC: mitochondrion  
 AGOP: null  
 PGO: null  
 PGOC: null  
 PGOP: null

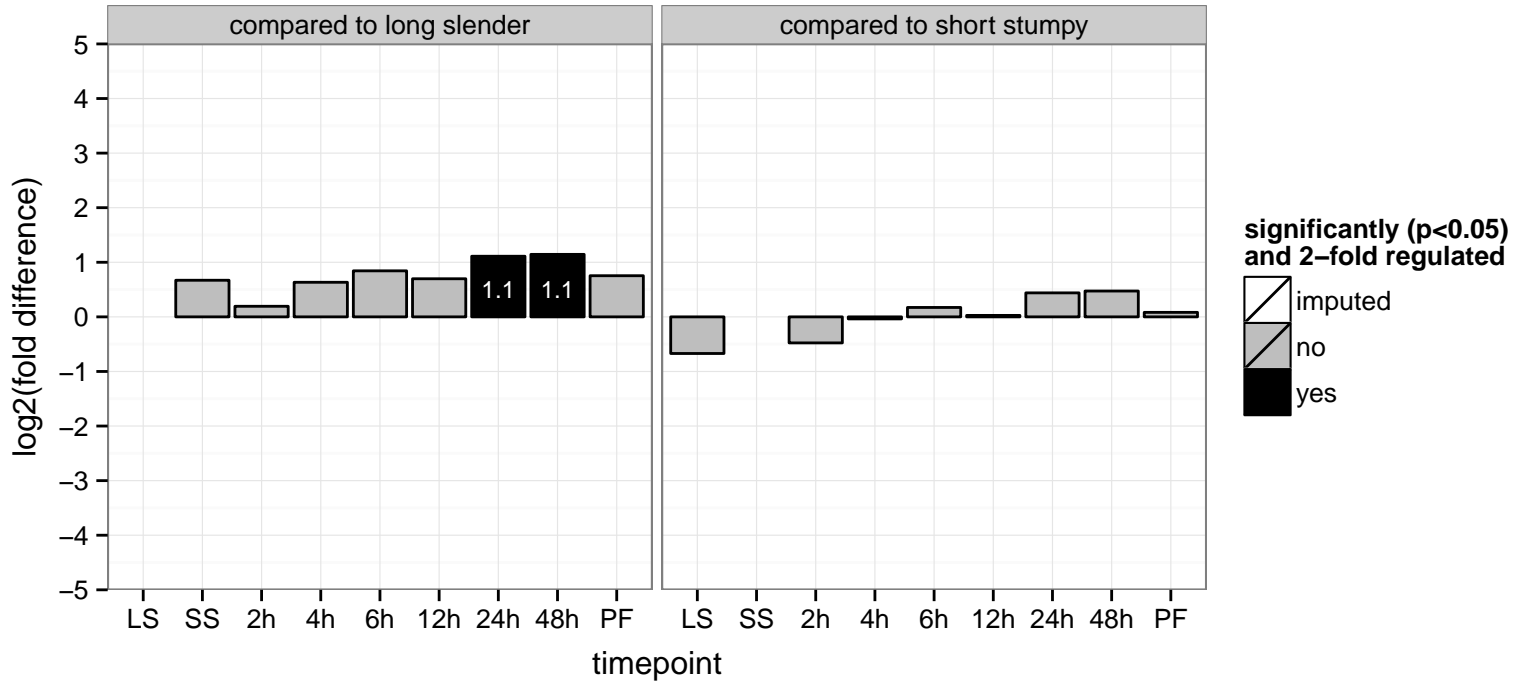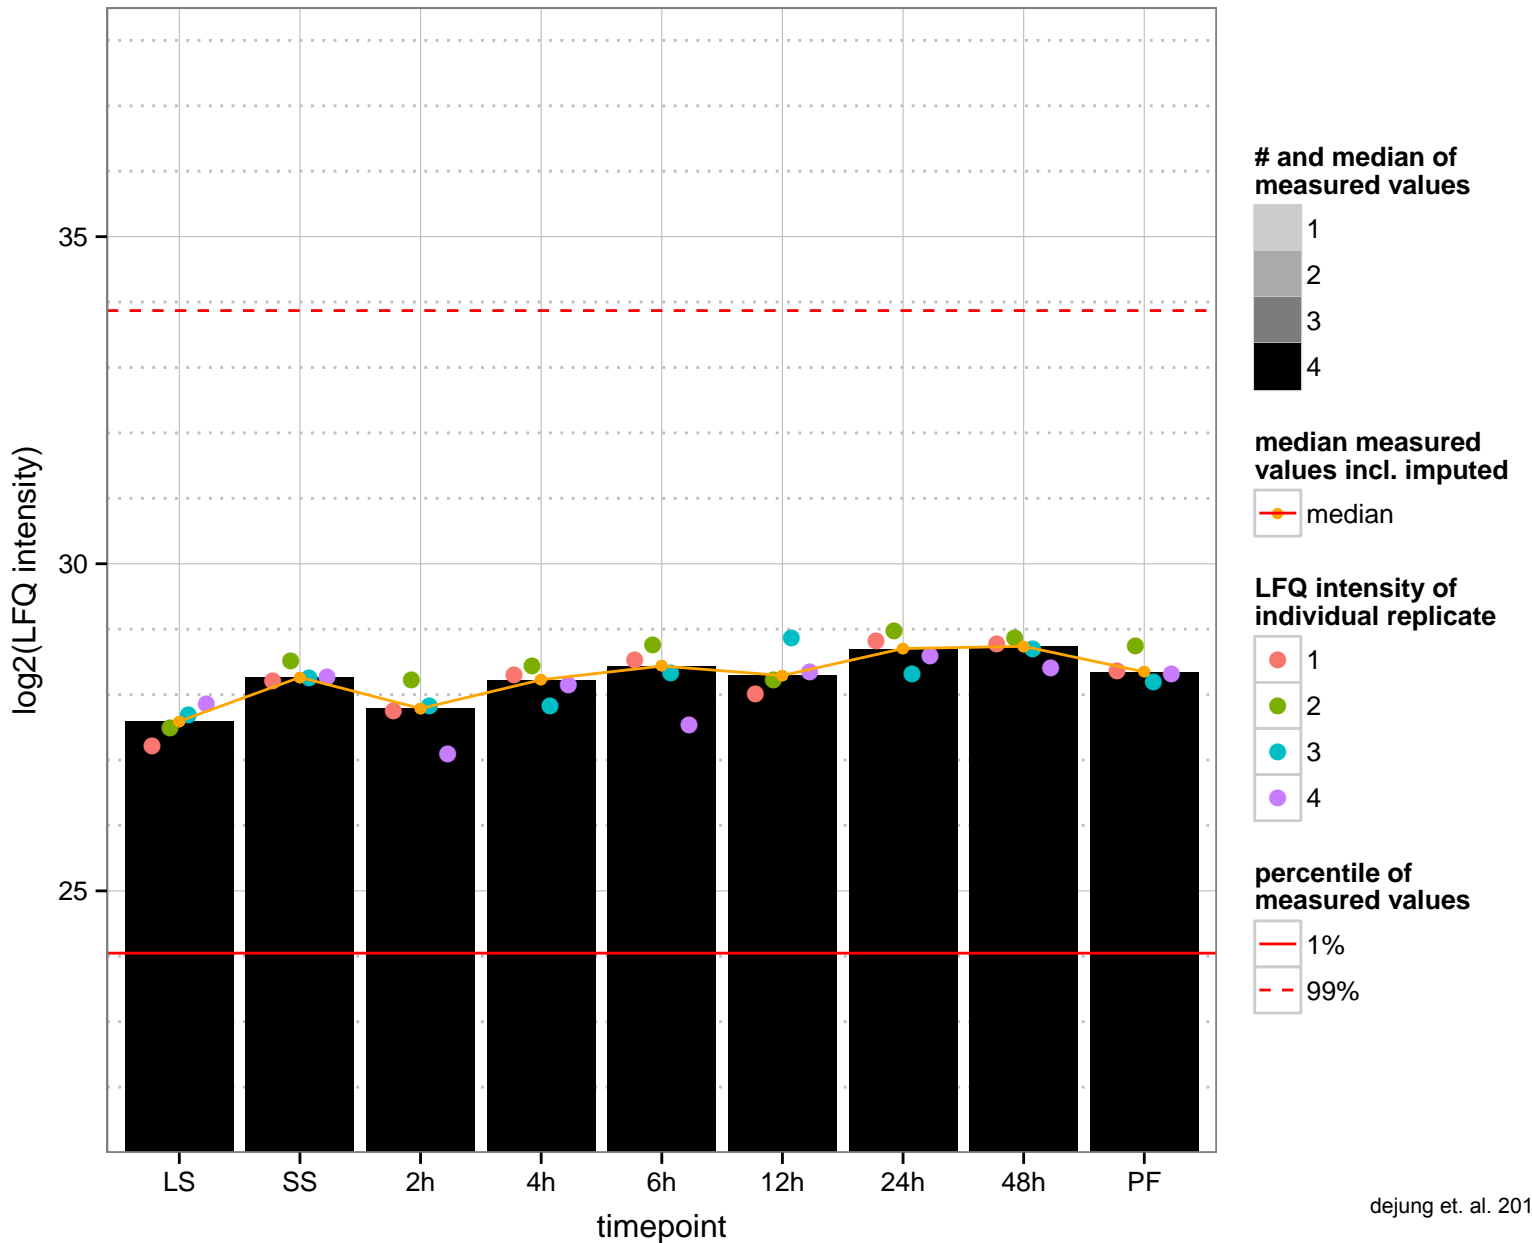

hypothetical protein, conserved, leucine-rich repeat protein (LRRP), putative  
 Tb927.11.17000;Tb11.v5.0404  
 AGOF: null  
 AGOC: null  
 AGOP: null  
 PGO: null, protein binding  
 PGOC: null  
 PGOP: null

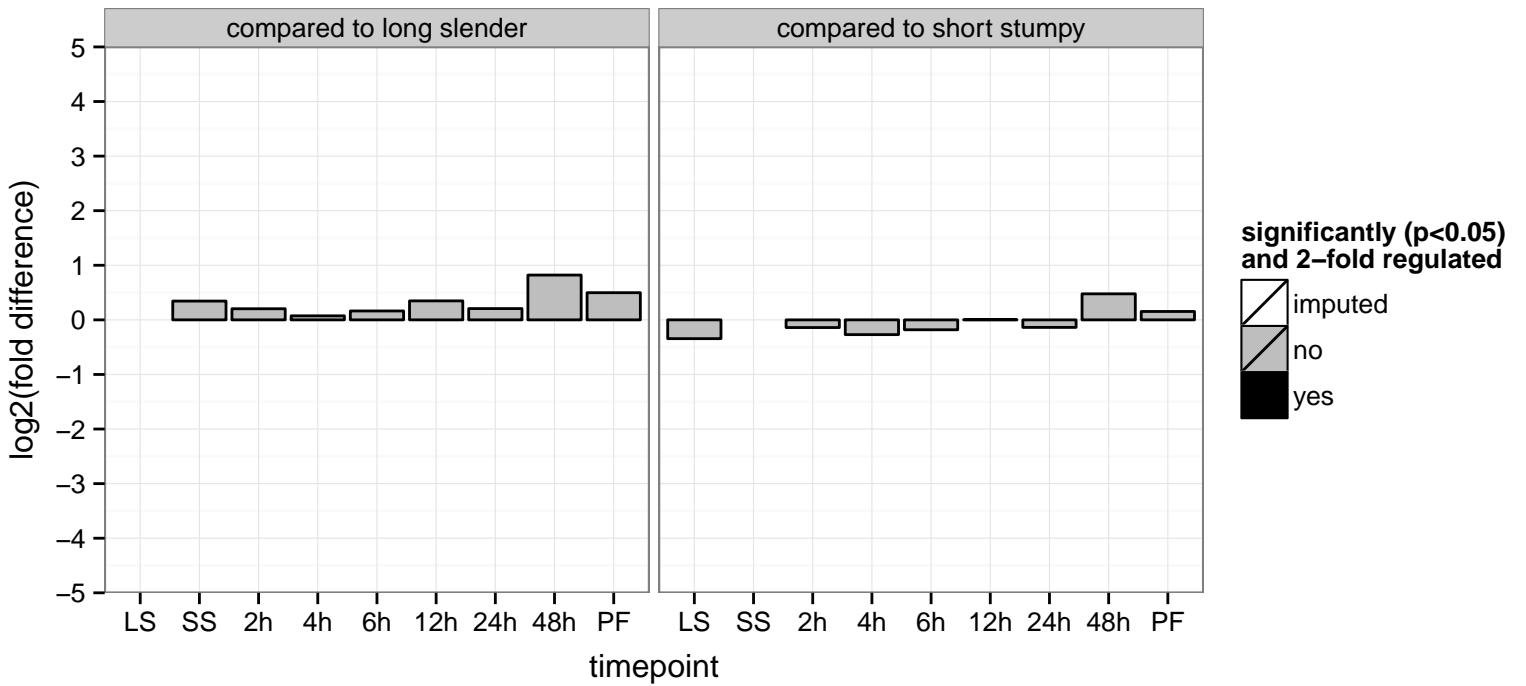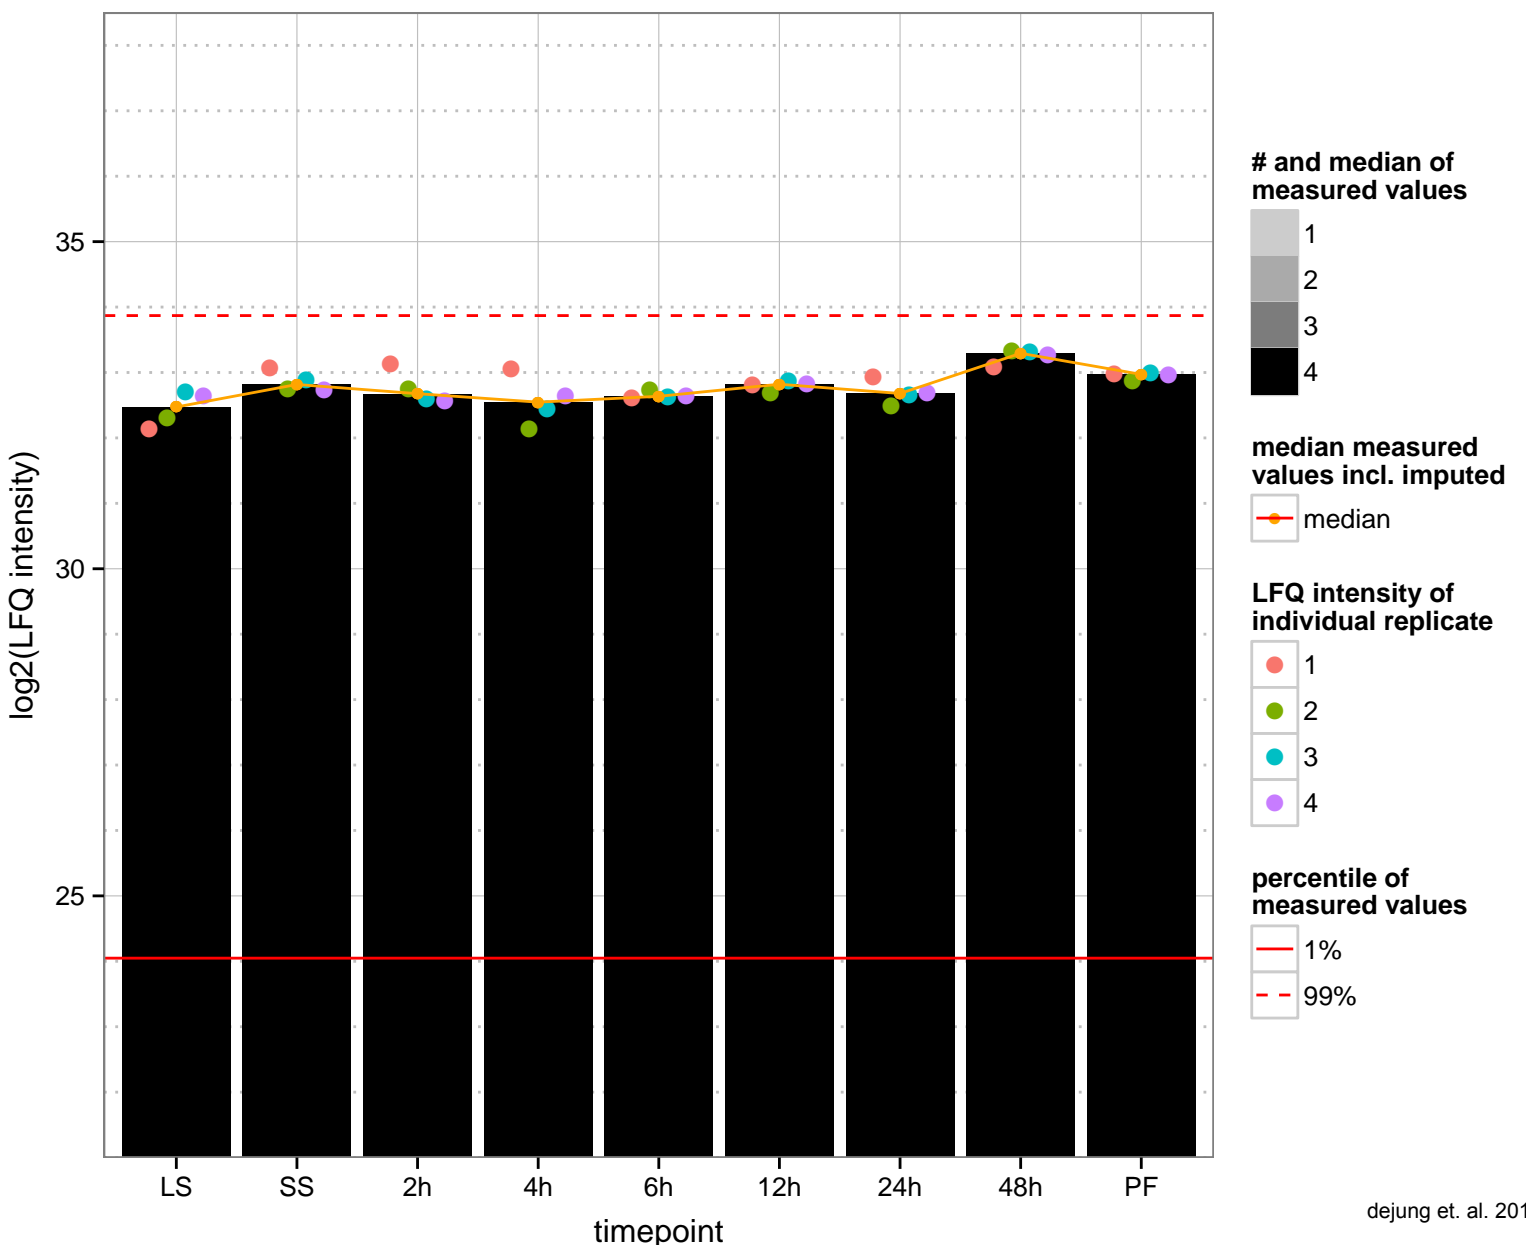

mitochondrial RNA binding protein 1, gBP21, MRP1 (GBP21)  
 Tb927.11.1710  
 AGOF: RNA binding  
 AGOC: mitochondrion  
 AGOP: mRNA modification  
 PGO: DNA binding  
 PGO: null  
 PGO: regulation of transcription, DNA-dependent

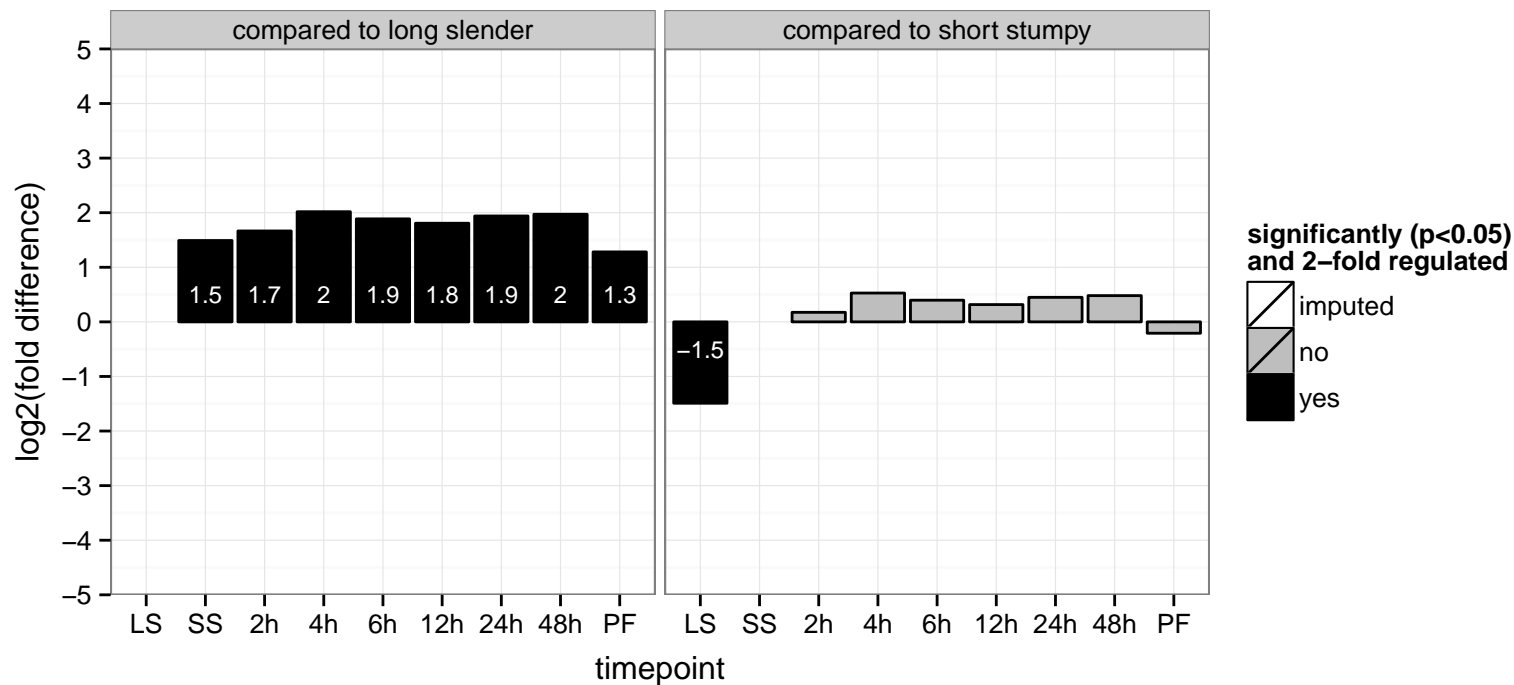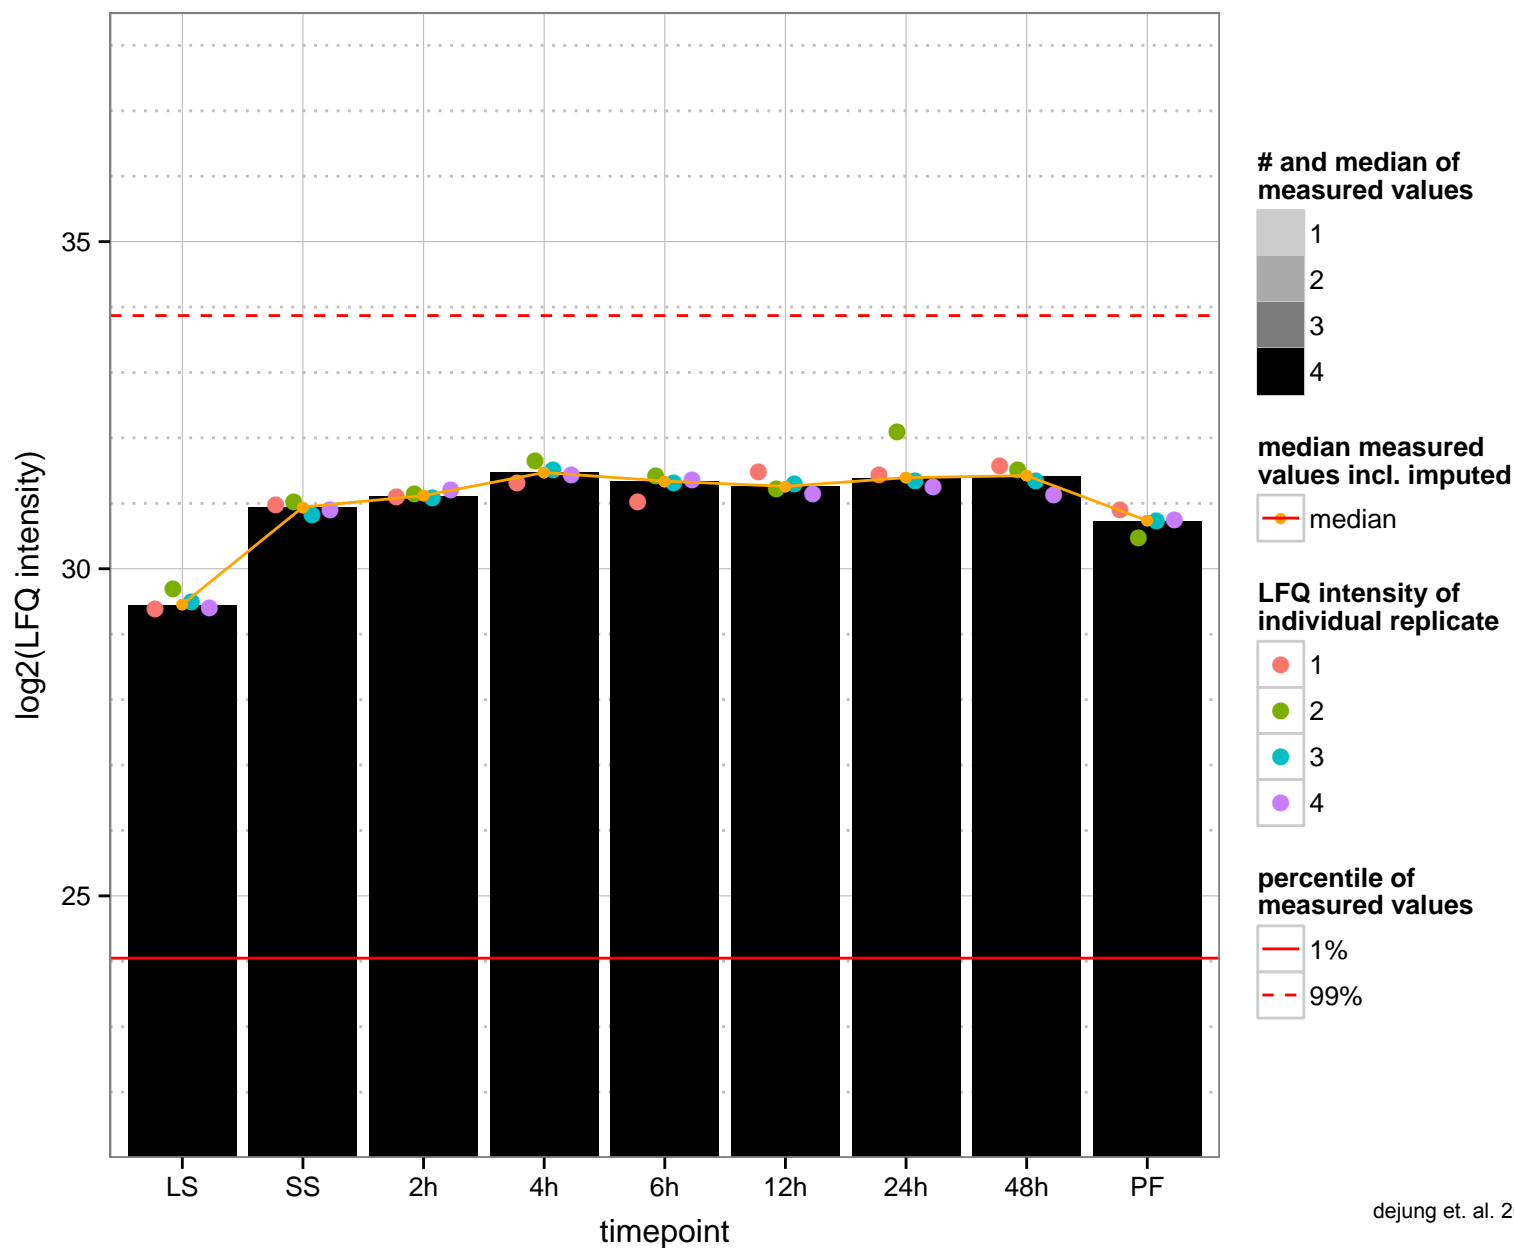

intraflagellar transport protein IFT88 (IFT88)  
 Tb927.11.1740  
 AGOF: null  
 AGOC: motile cilium  
 AGOP: cilium assembly, establishment of cell polarity, regulation of cell size  
 PGO: protein binding  
 PGO: null  
 PGO: null

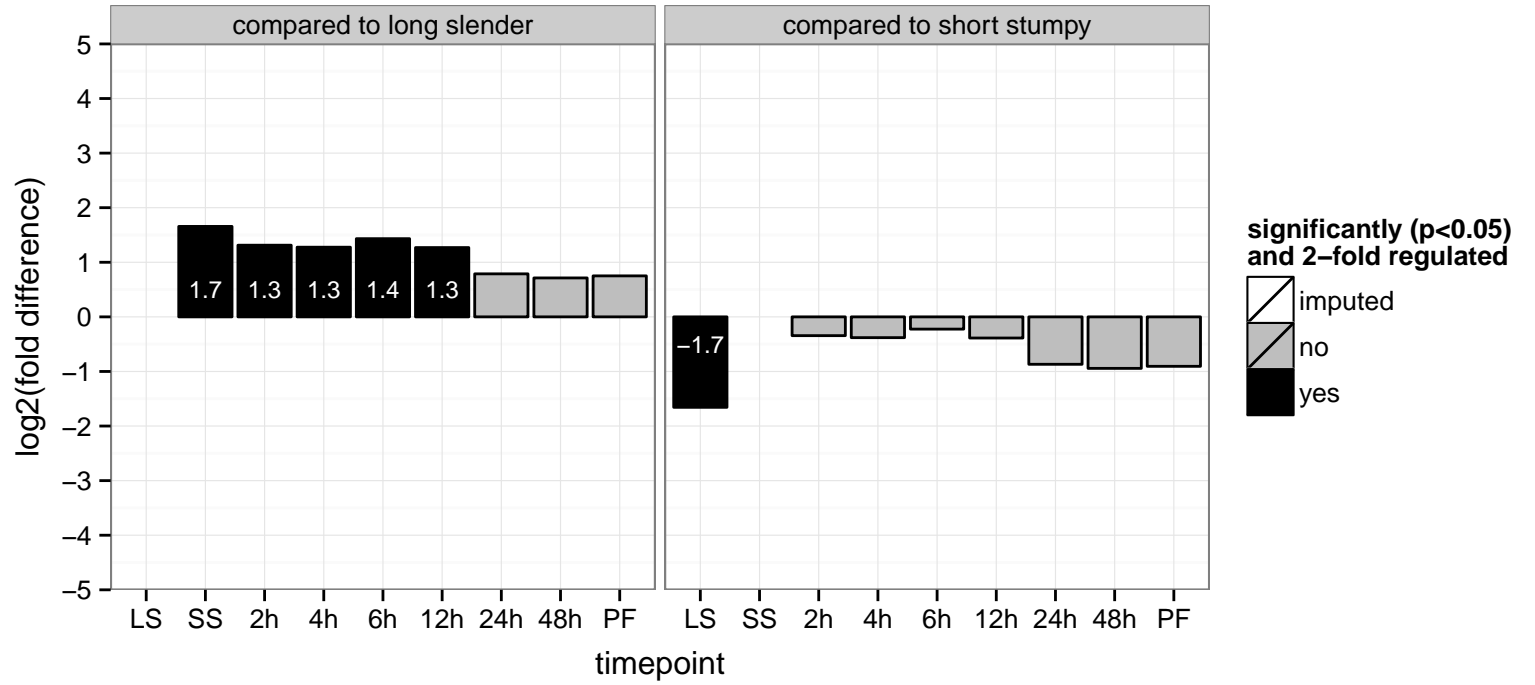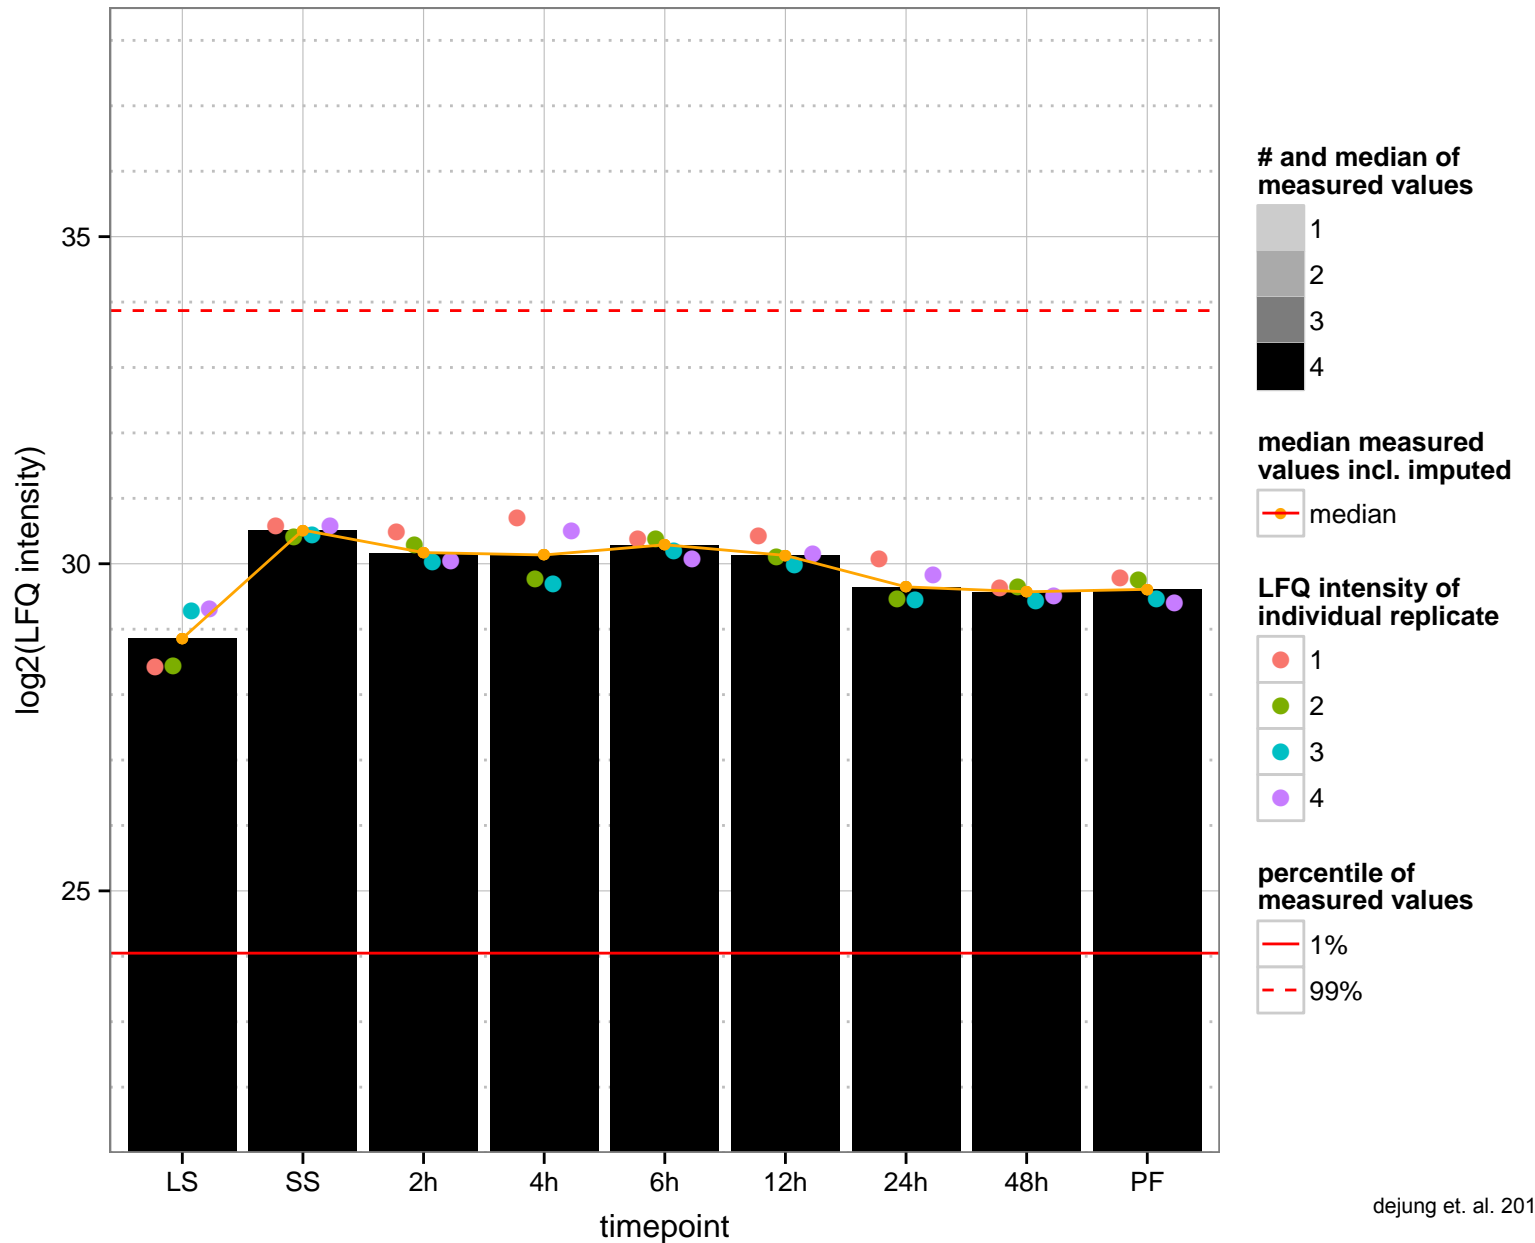

hypothetical protein, conserved (pseudogene), translation initiation factor eIF2B delta subunit, putative, eIF-2B GDP-GTP ex  
Tb927.11.1820;Tb11.1400  
AGOF: null, GTP binding, translation initiation factor activity  
AGOC: null, eukaryotic translation initiation factor 2B complex  
AGOP: cellular metabolic process, regulation of translation, translational initiation  
PGOF: null  
PGOC: null  
PGOP: cellular metabolic process

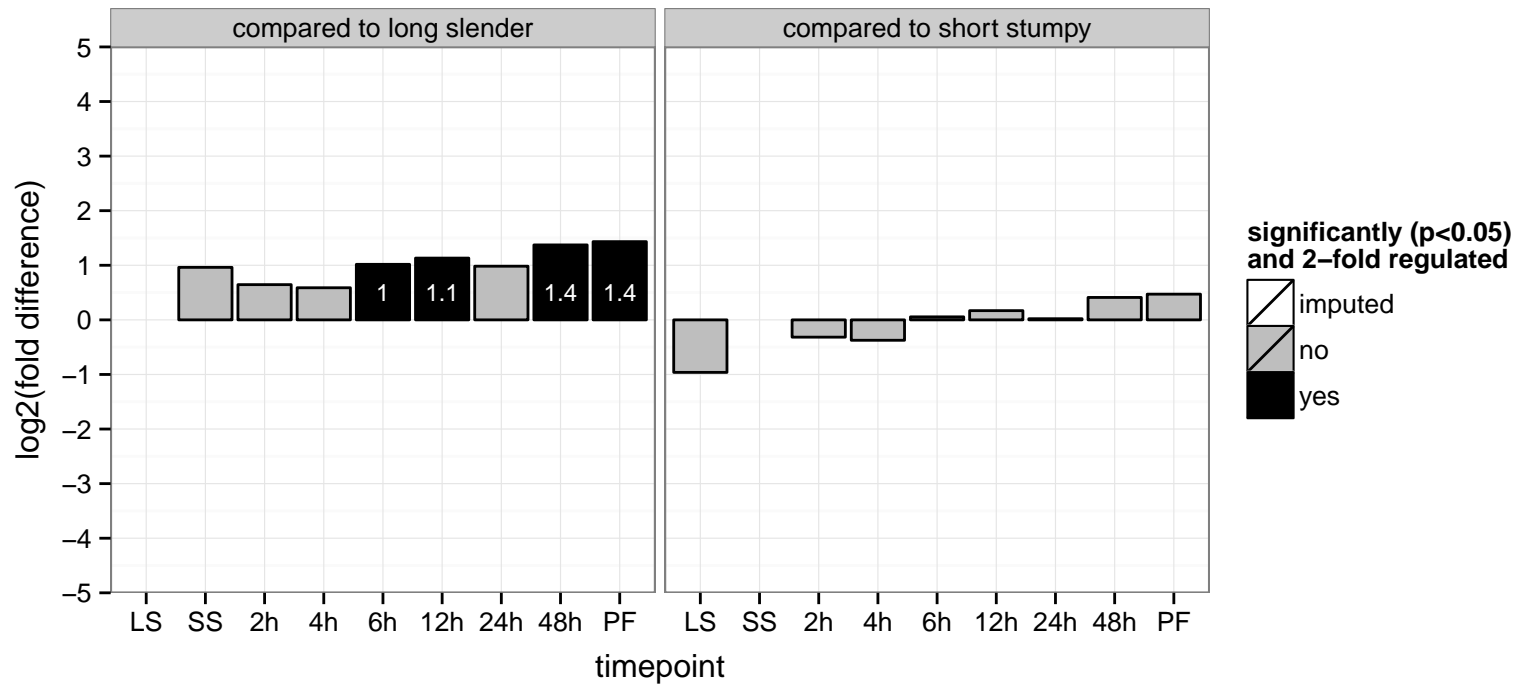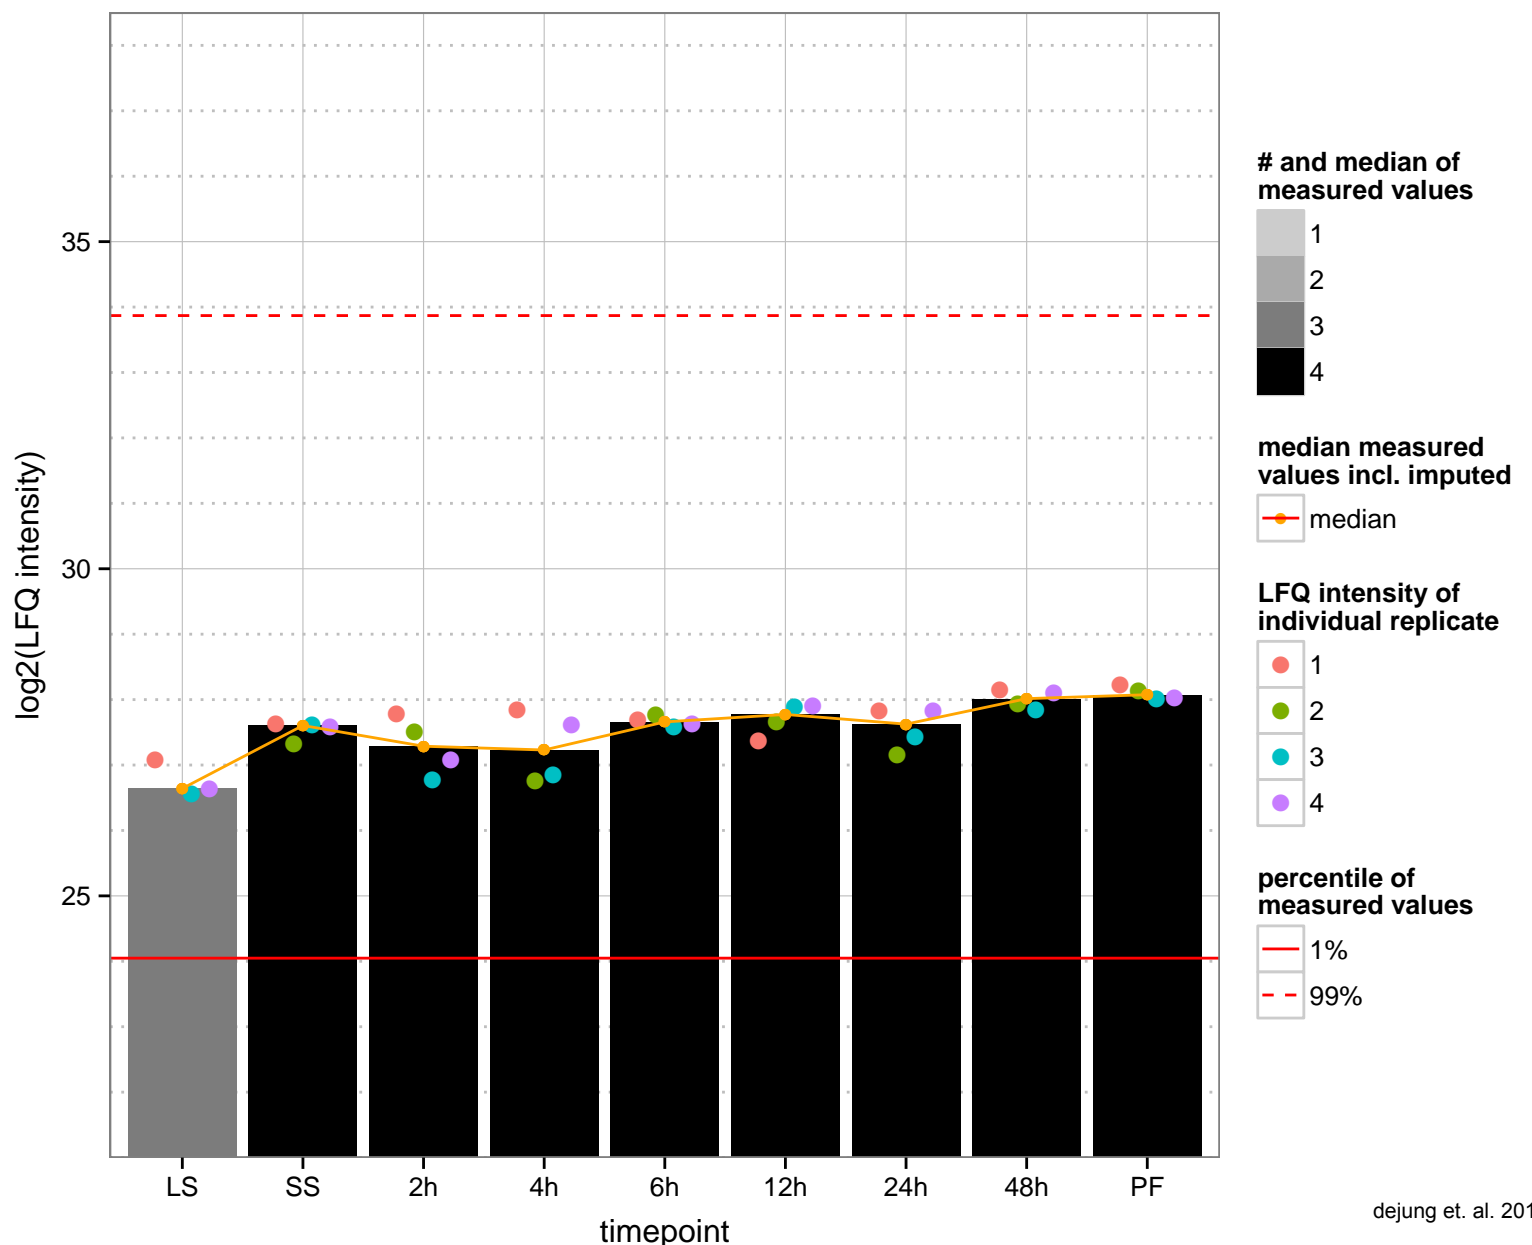



hypothetical protein, conserved  
 Tb927.11.1890  
 AGOF: null  
 AGOC: null  
 AGOP: null  
 PGO: protein binding  
 PGOC: null  
 PGOP: null

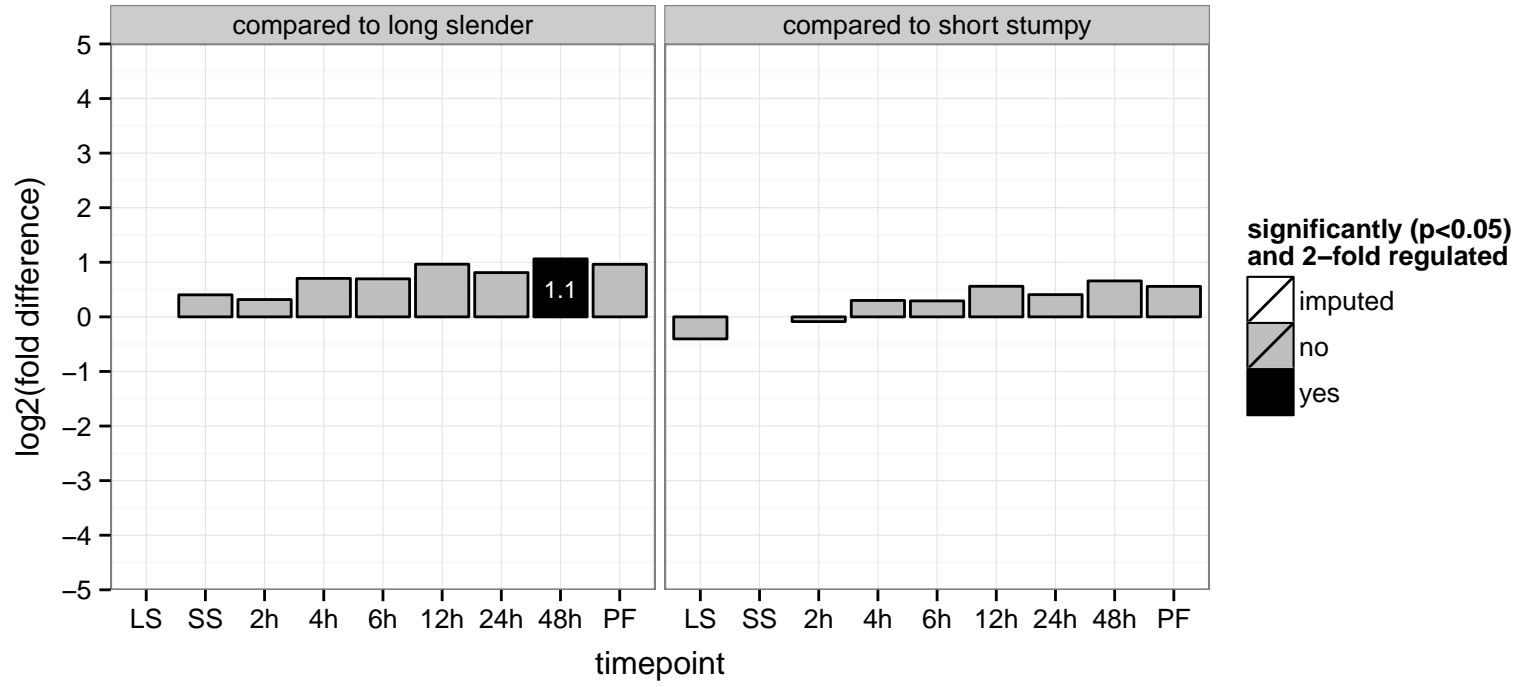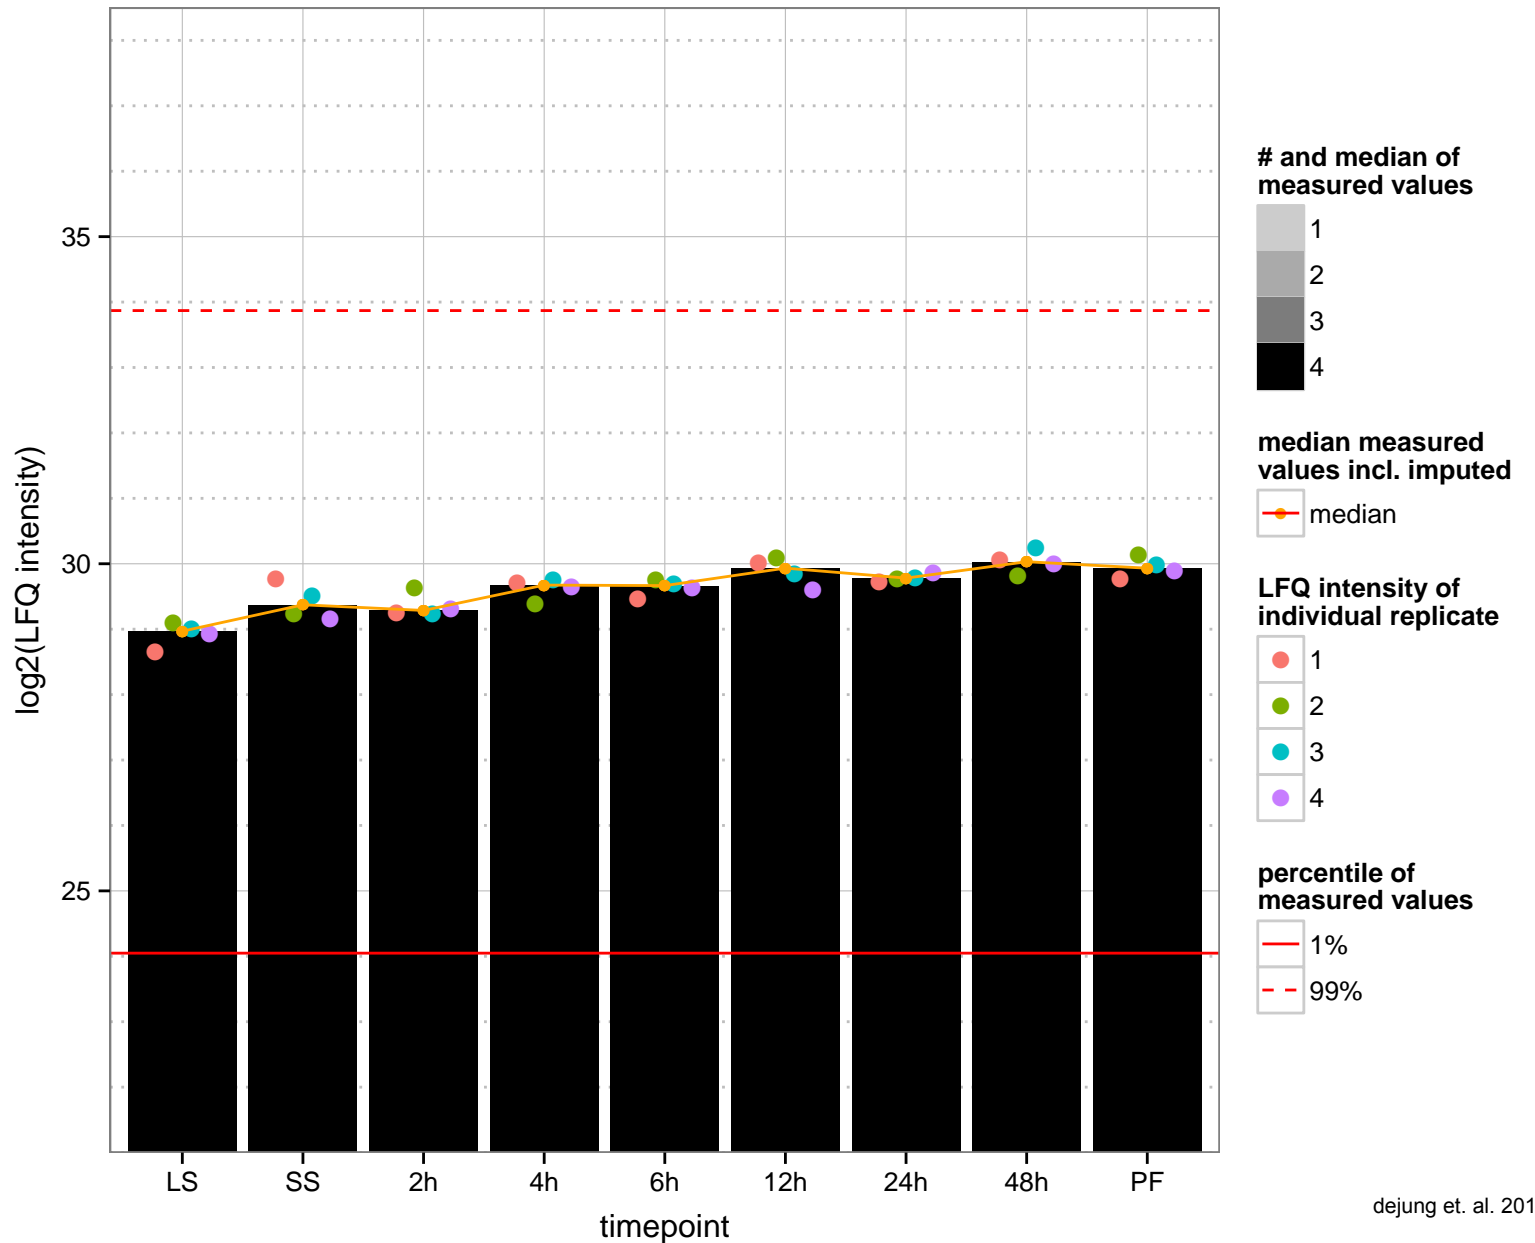

T-complex protein 1, beta subunit, putative  
 Tb927.11.1900  
 AGOF: ATP binding, unfolded protein binding  
 AGOC: chaperonin-containing T-complex  
 AGOP: protein folding, regulation of cell cycle  
 PGO: ATP binding, unfolded protein binding  
 PGO: null  
 PGO: cellular protein metabolic process, protein folding

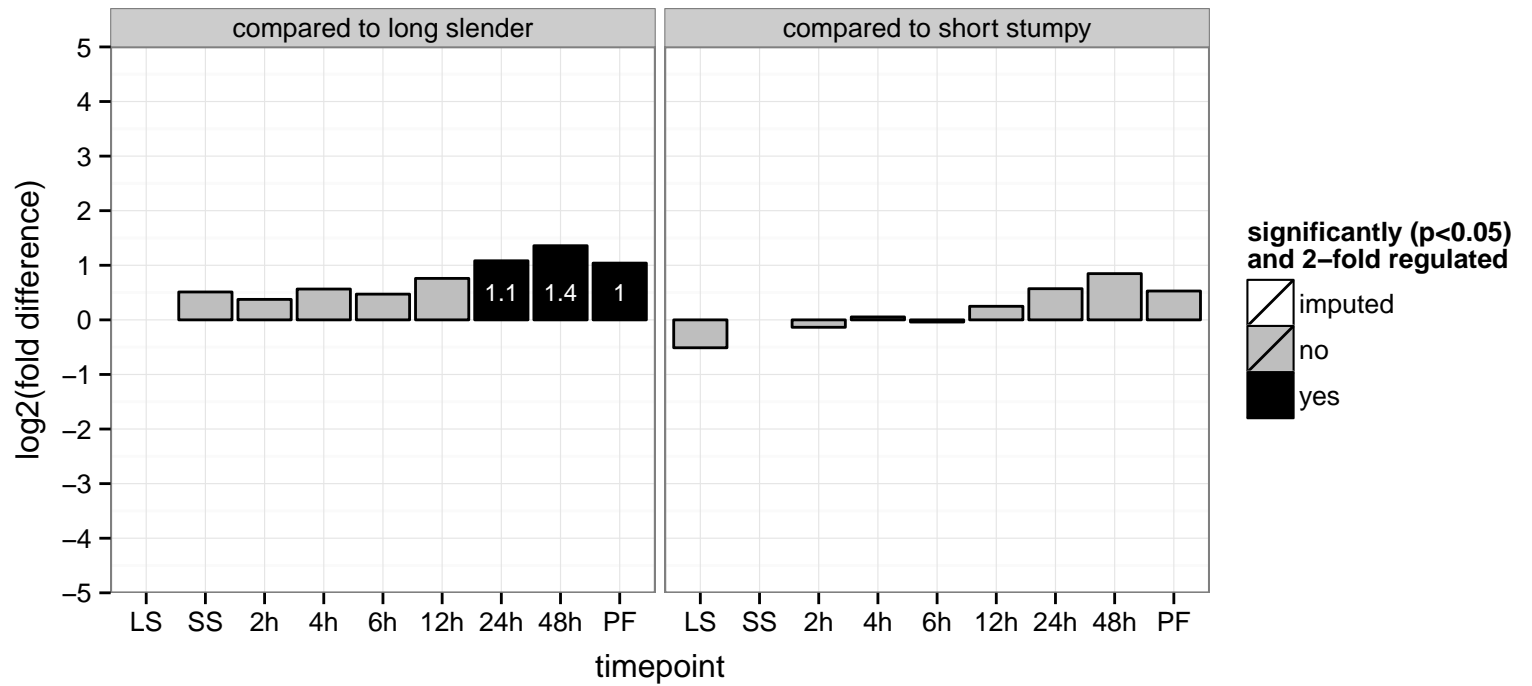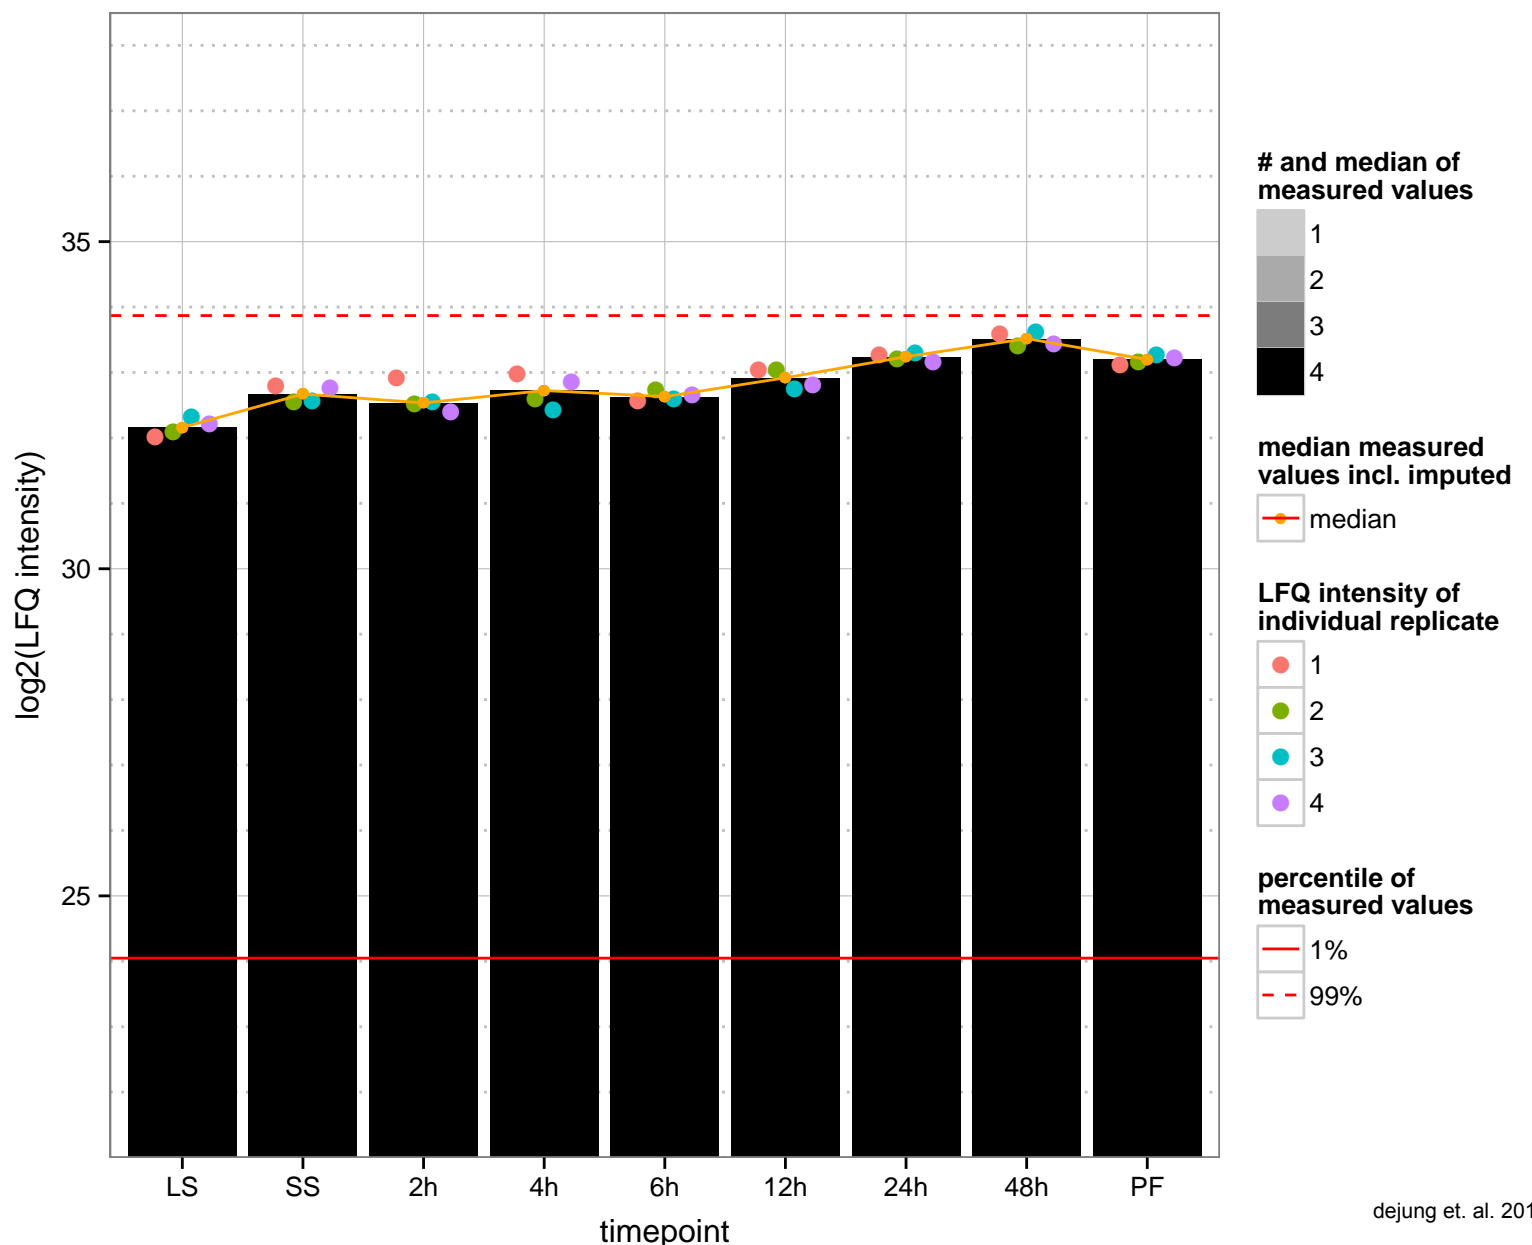

ubiquitin carboxyl-terminal hydrolase, putative, cysteine peptidase, Clan CA, family C19  
 Tb927.11.1930  
 AGOF: cysteine-type endopeptidase activity, ubiquitin thiolesterase activity  
 AGOC: null  
 AGOP: ubiquitin-dependent protein catabolic process  
 PGO: ubiquitin thiolesterase activity  
 PGO: null  
 PGO: ubiquitin-dependent protein catabolic process

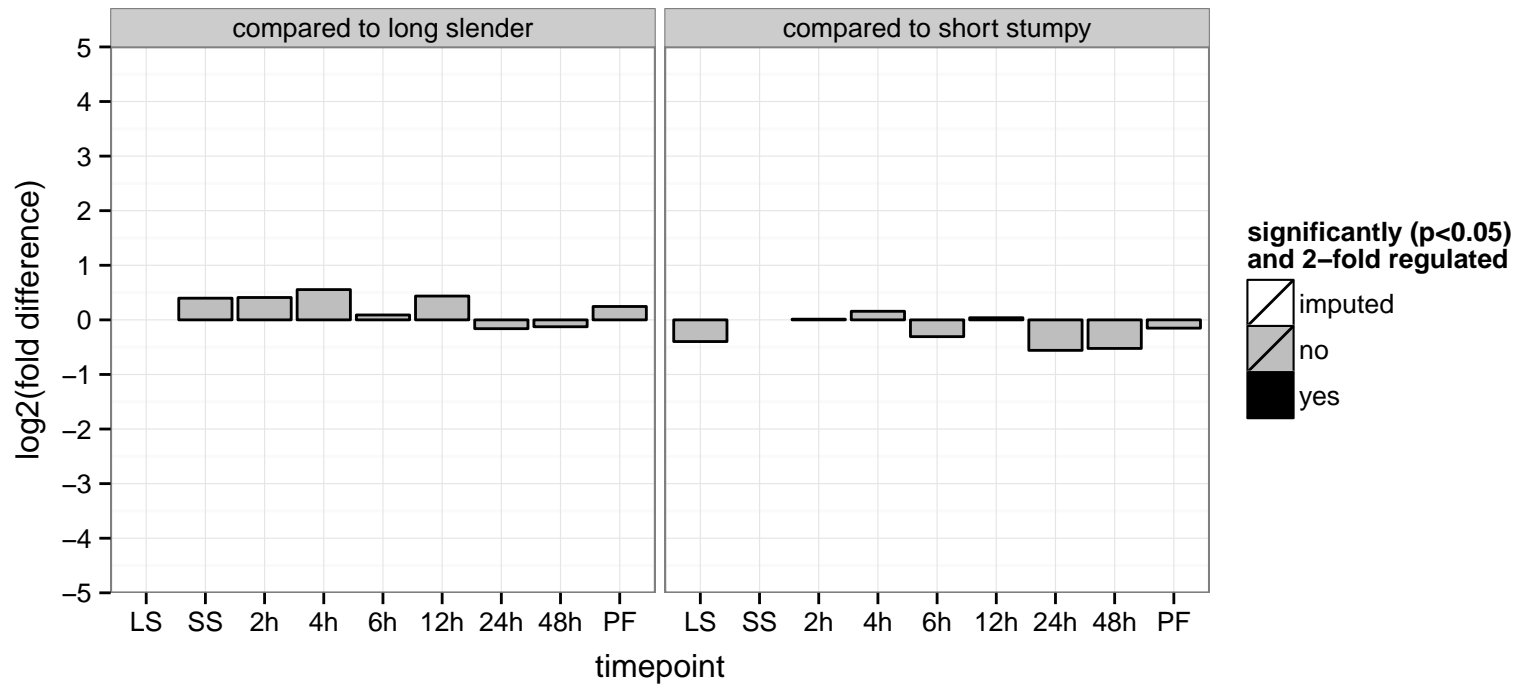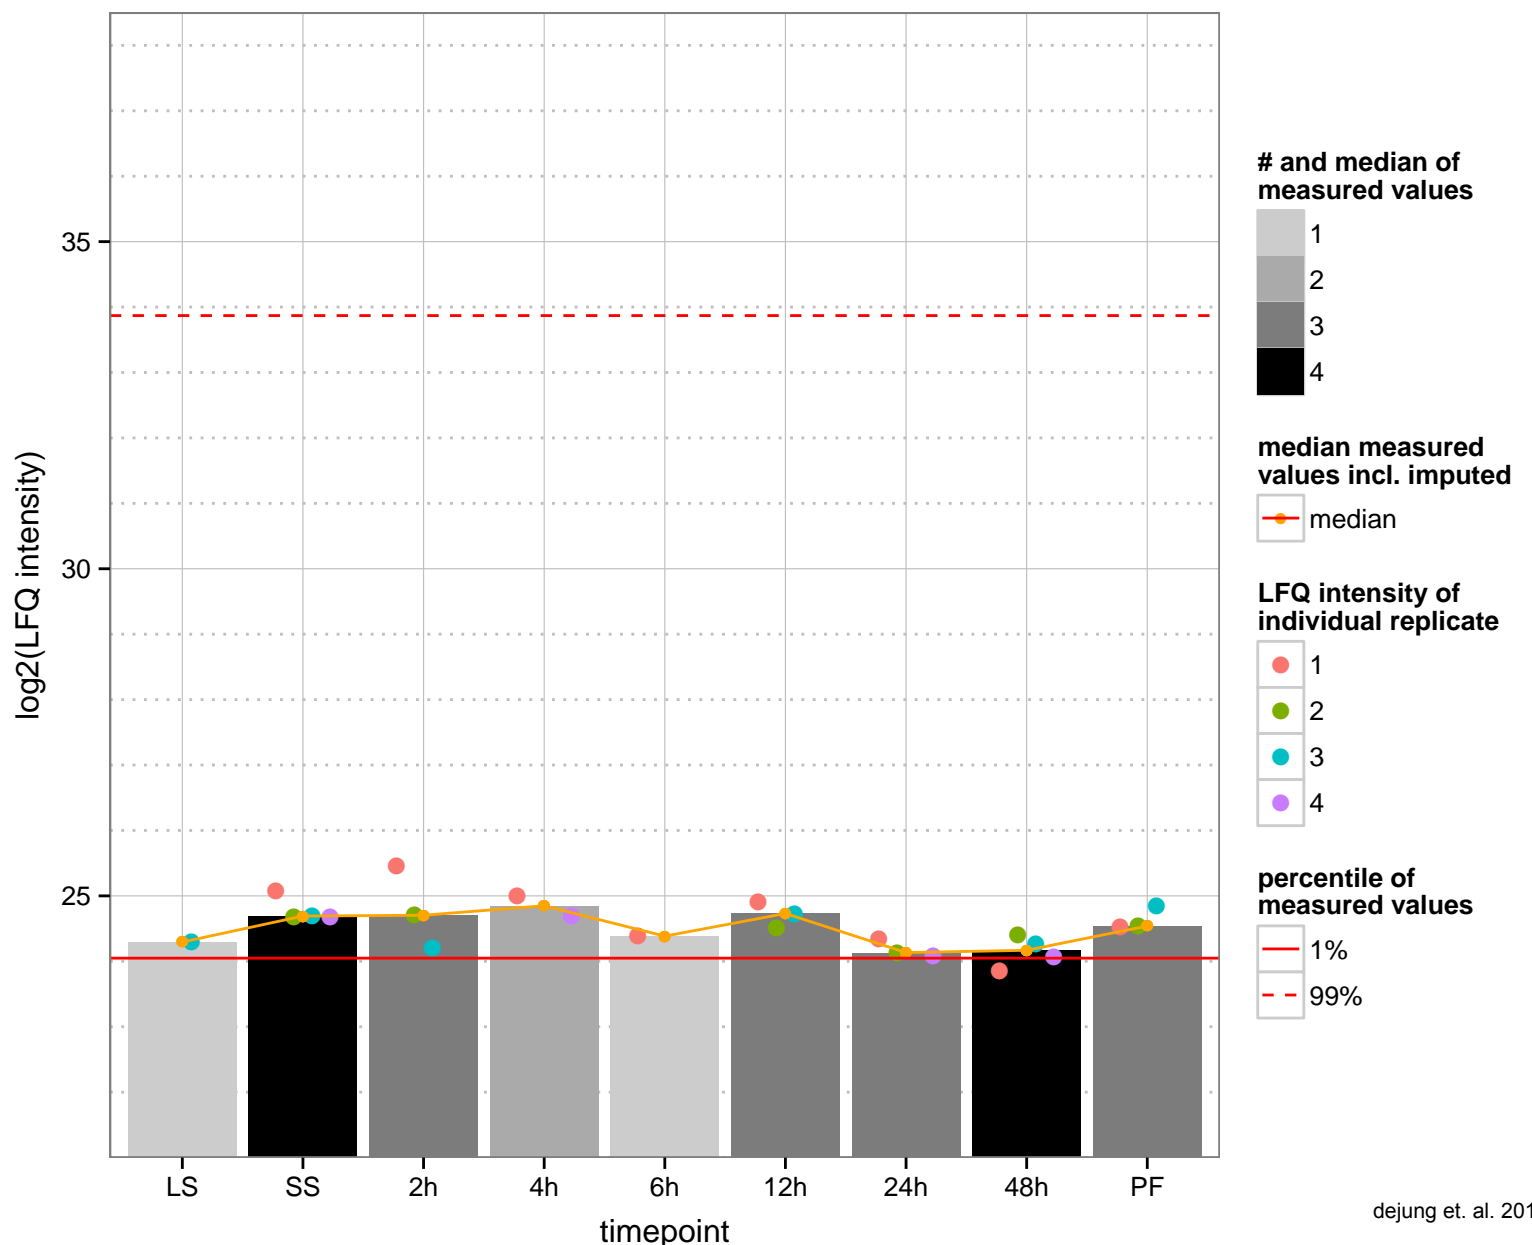

leucine-rich repeat protein (LRRP), putative  
 Tb927.11.1960  
 AGOF: null  
 AGOC: null  
 AGOP: null  
 PGOF: protein binding  
 PGO: null  
 PGOP: null

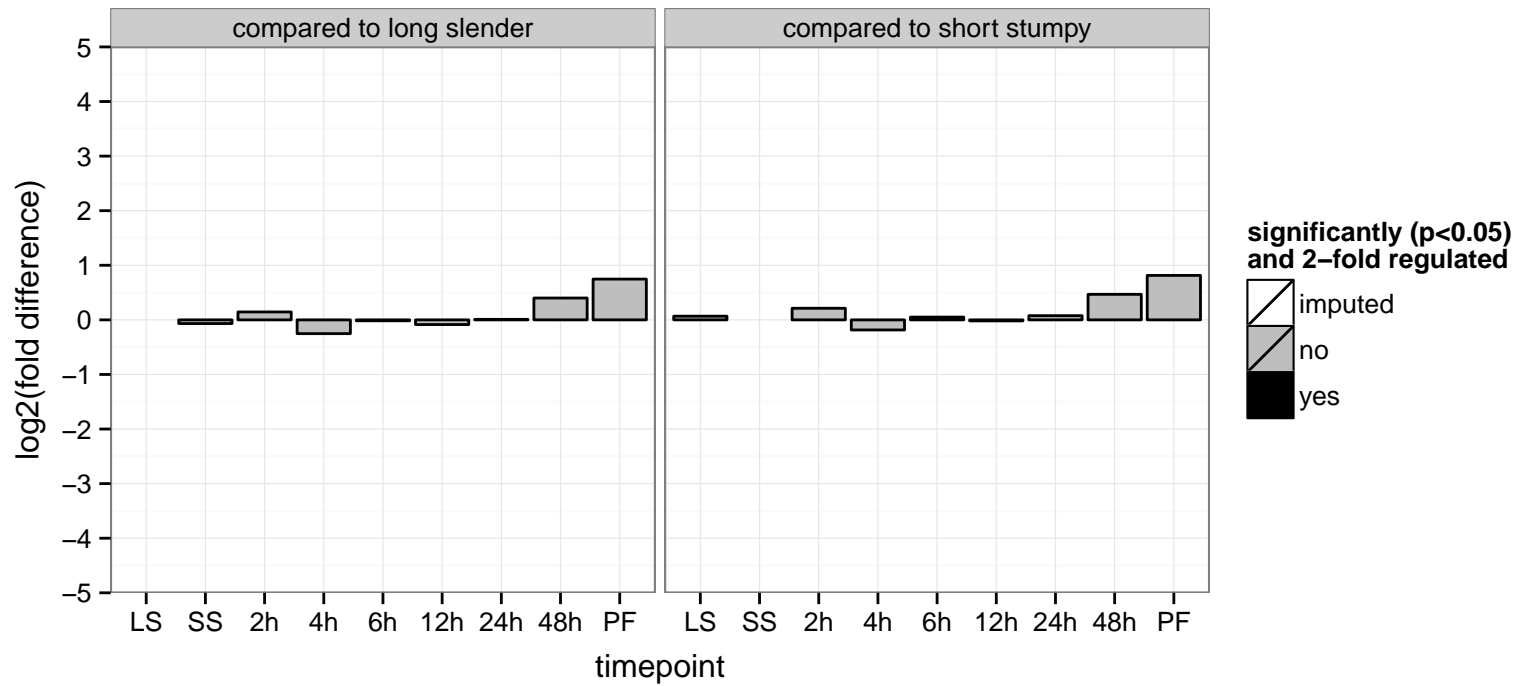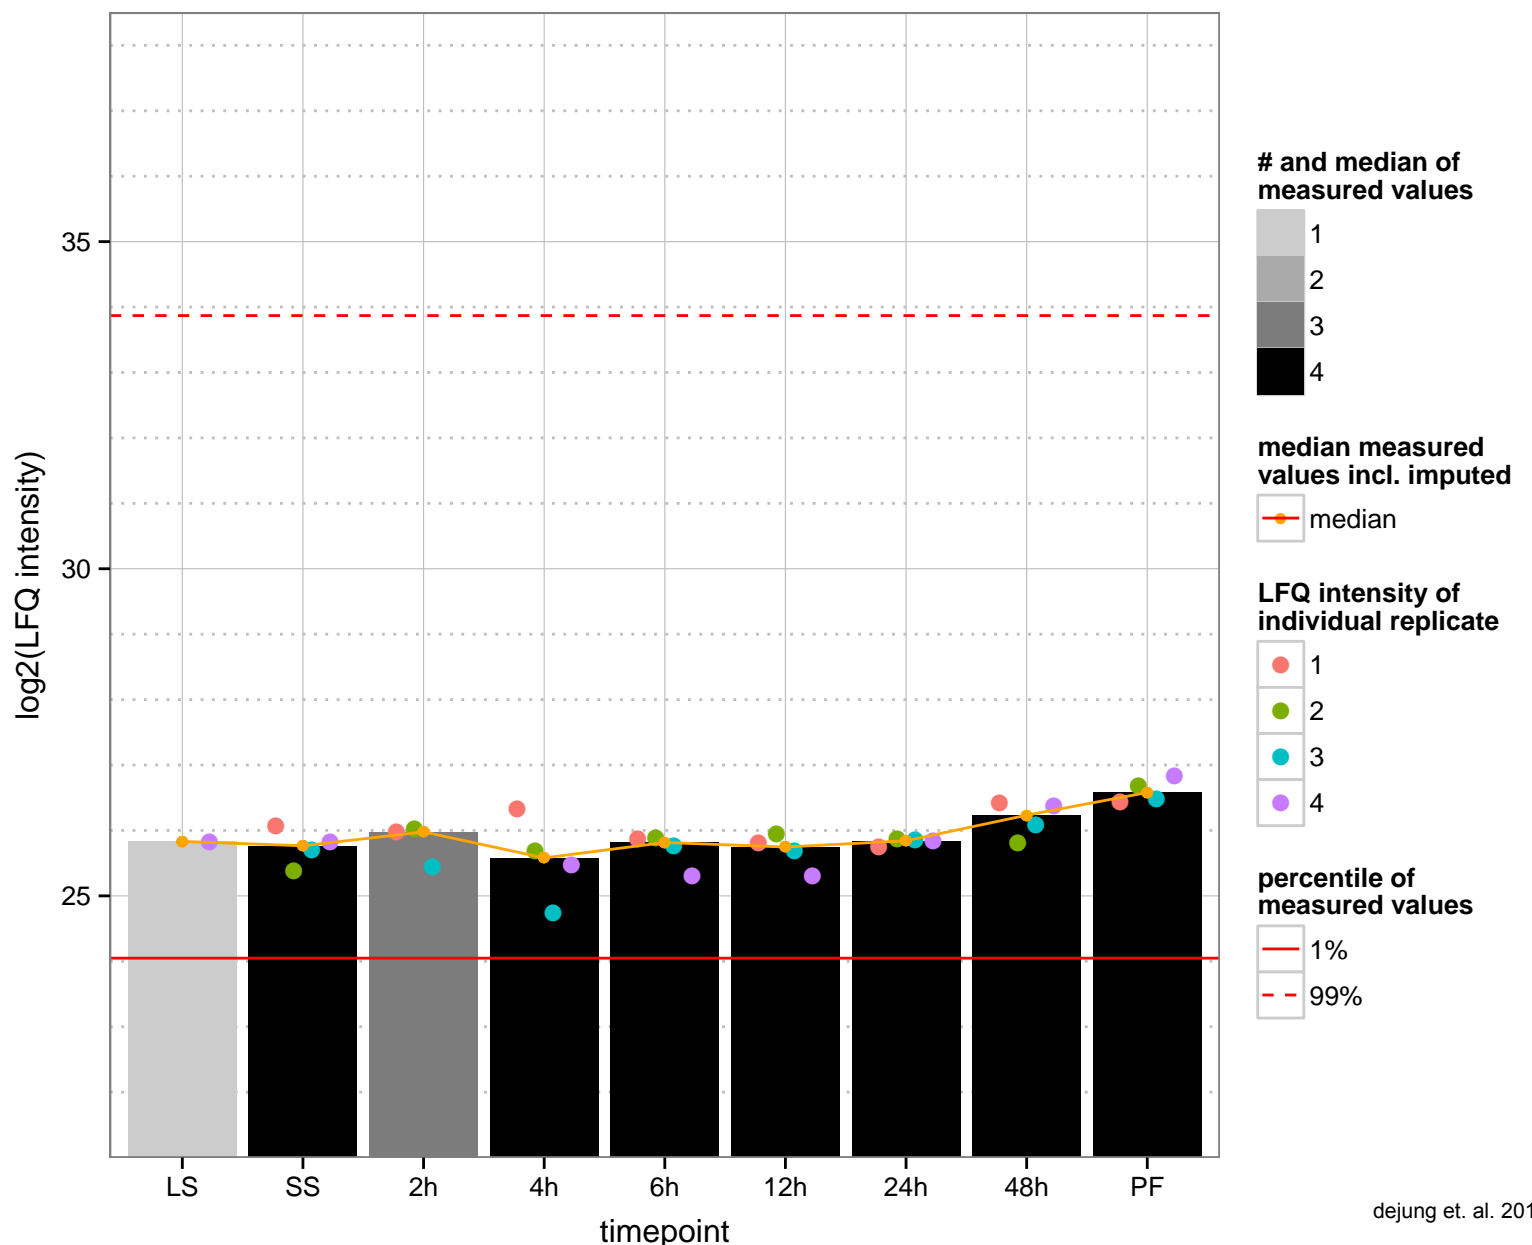

hypothetical protein, conserved  
 Tb927.11.2030  
 AGOF: null  
 AGOC: null  
 AGOP: null  
 PGO: null  
 PGOC: null  
 PGOP: null

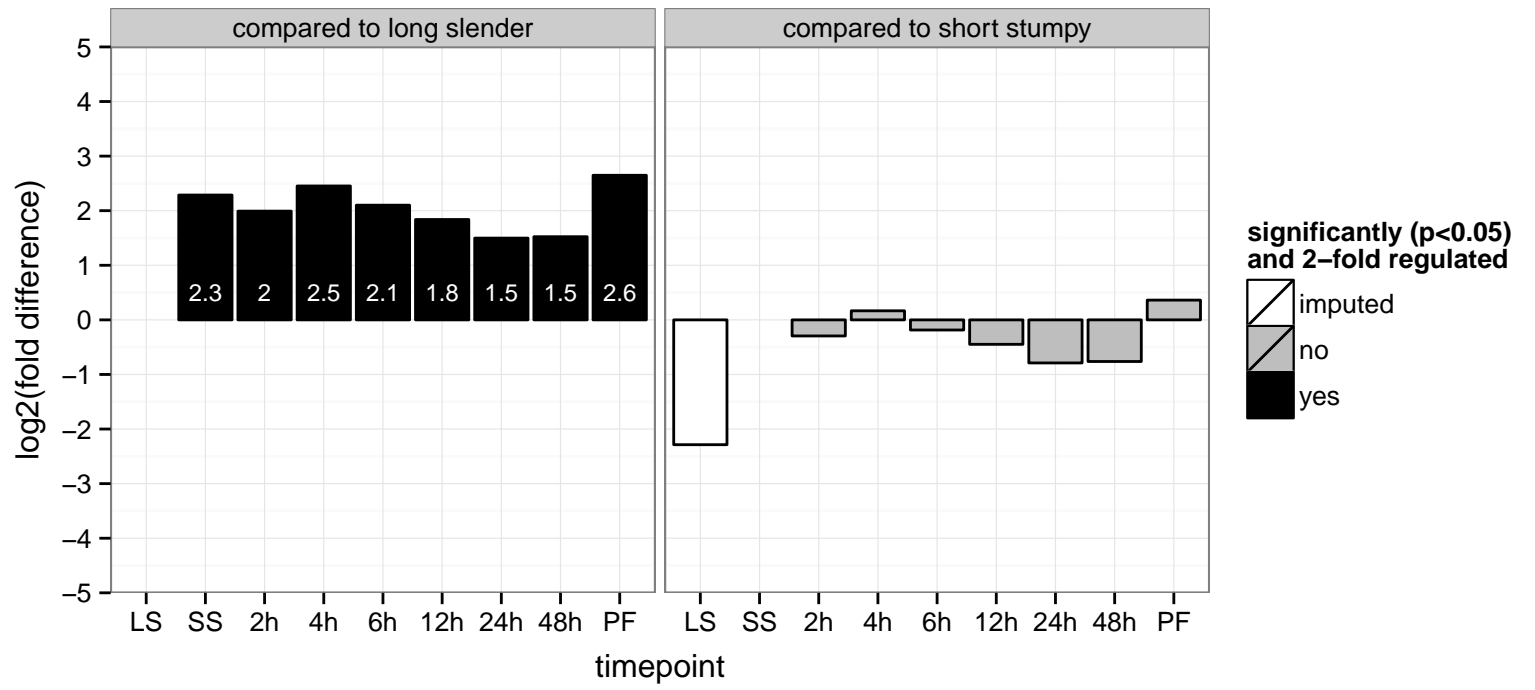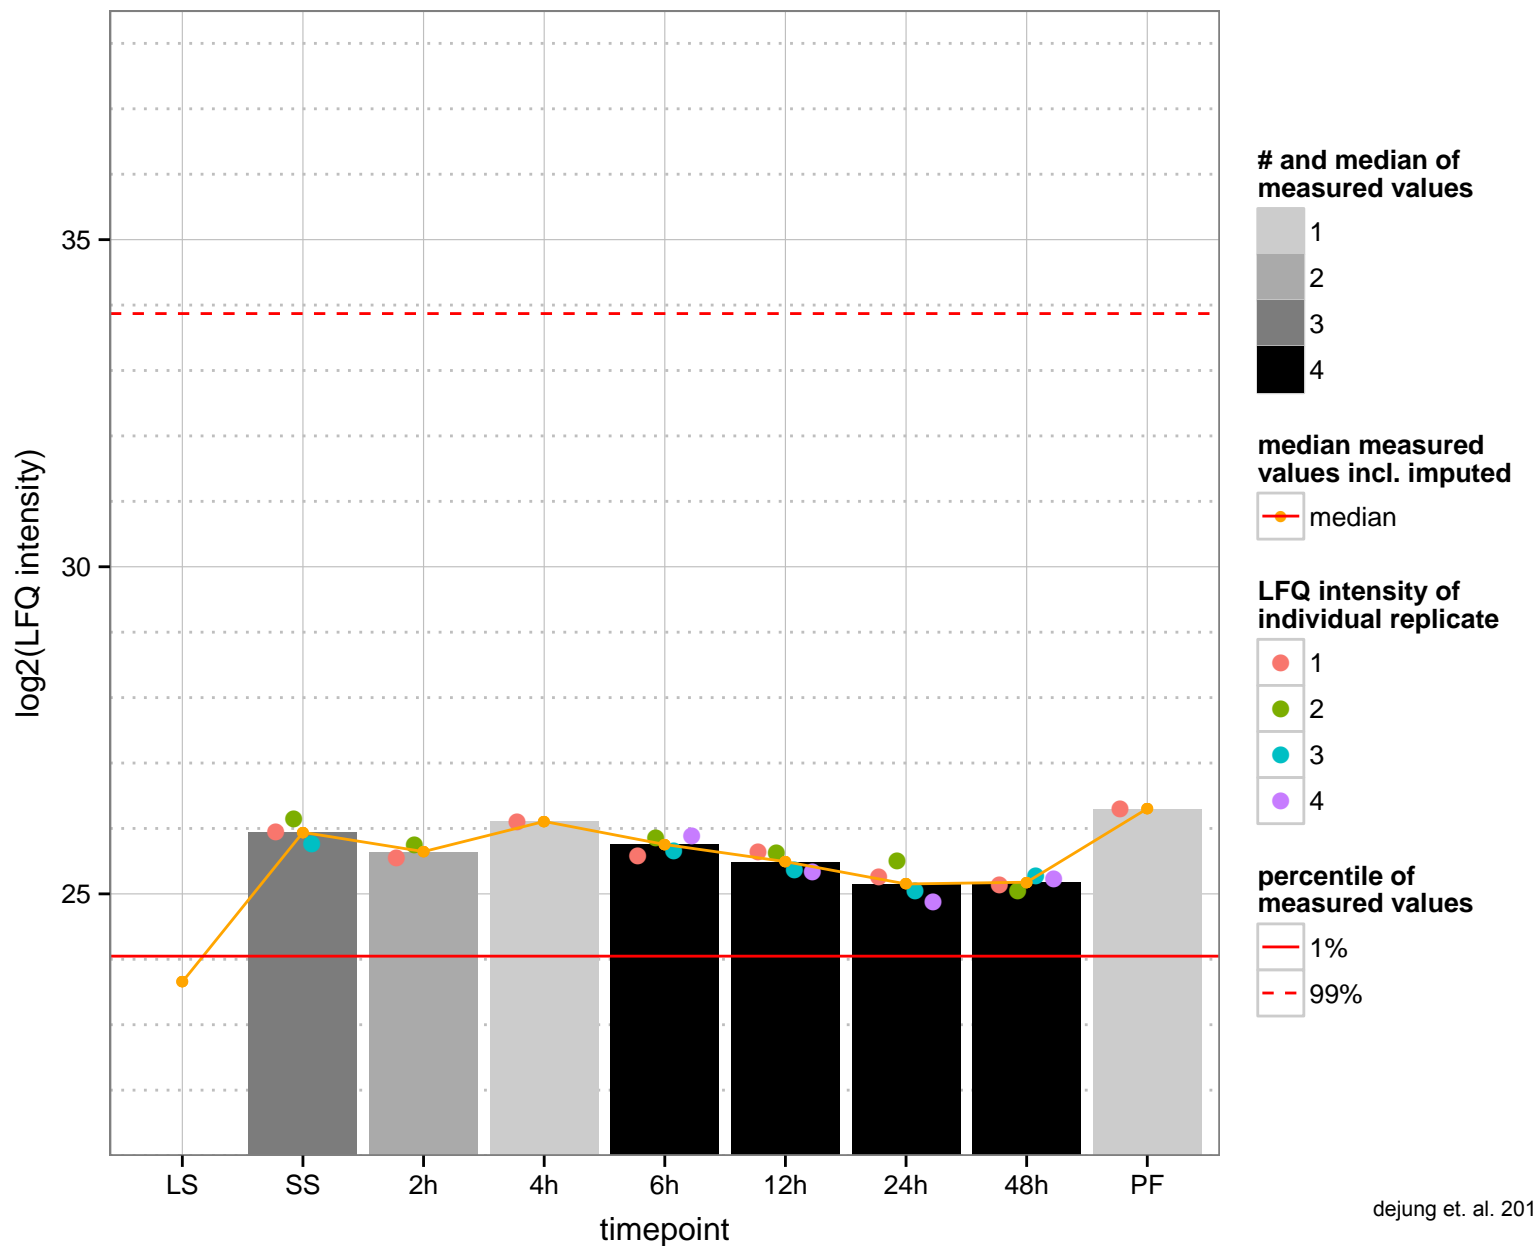

60S acidic ribosomal subunit protein, putative  
 Tb927.11.2060;Tb927.11.2050  
 AGOF: structural constituent of ribosome  
 AGOC: intracellular, large ribosomal subunit, ribosome  
 AGOP: ribosome biogenesis, translation, translational elongation  
 PGO: null, structural constituent of ribosome  
 PGO: null, intracellular, ribosome  
 PGO: null, ribosome biogenesis, translational elongation

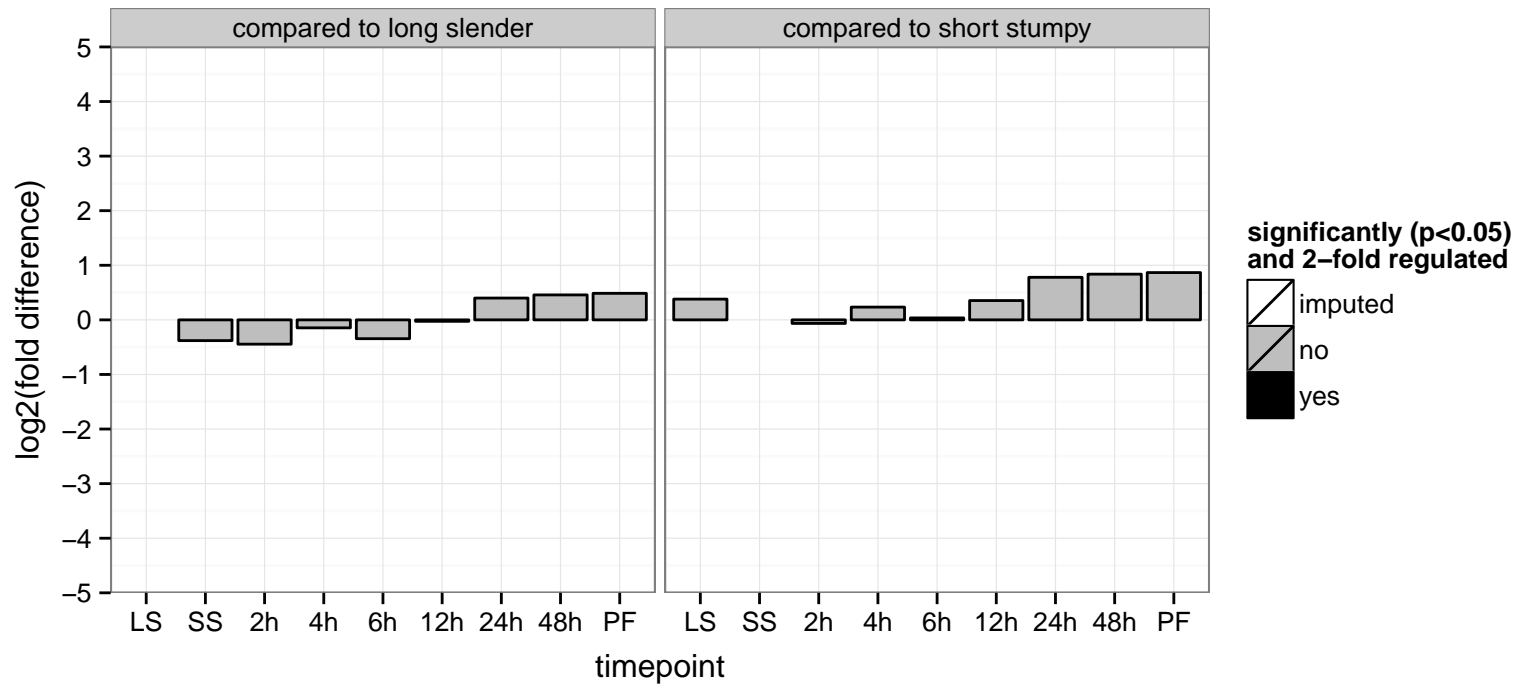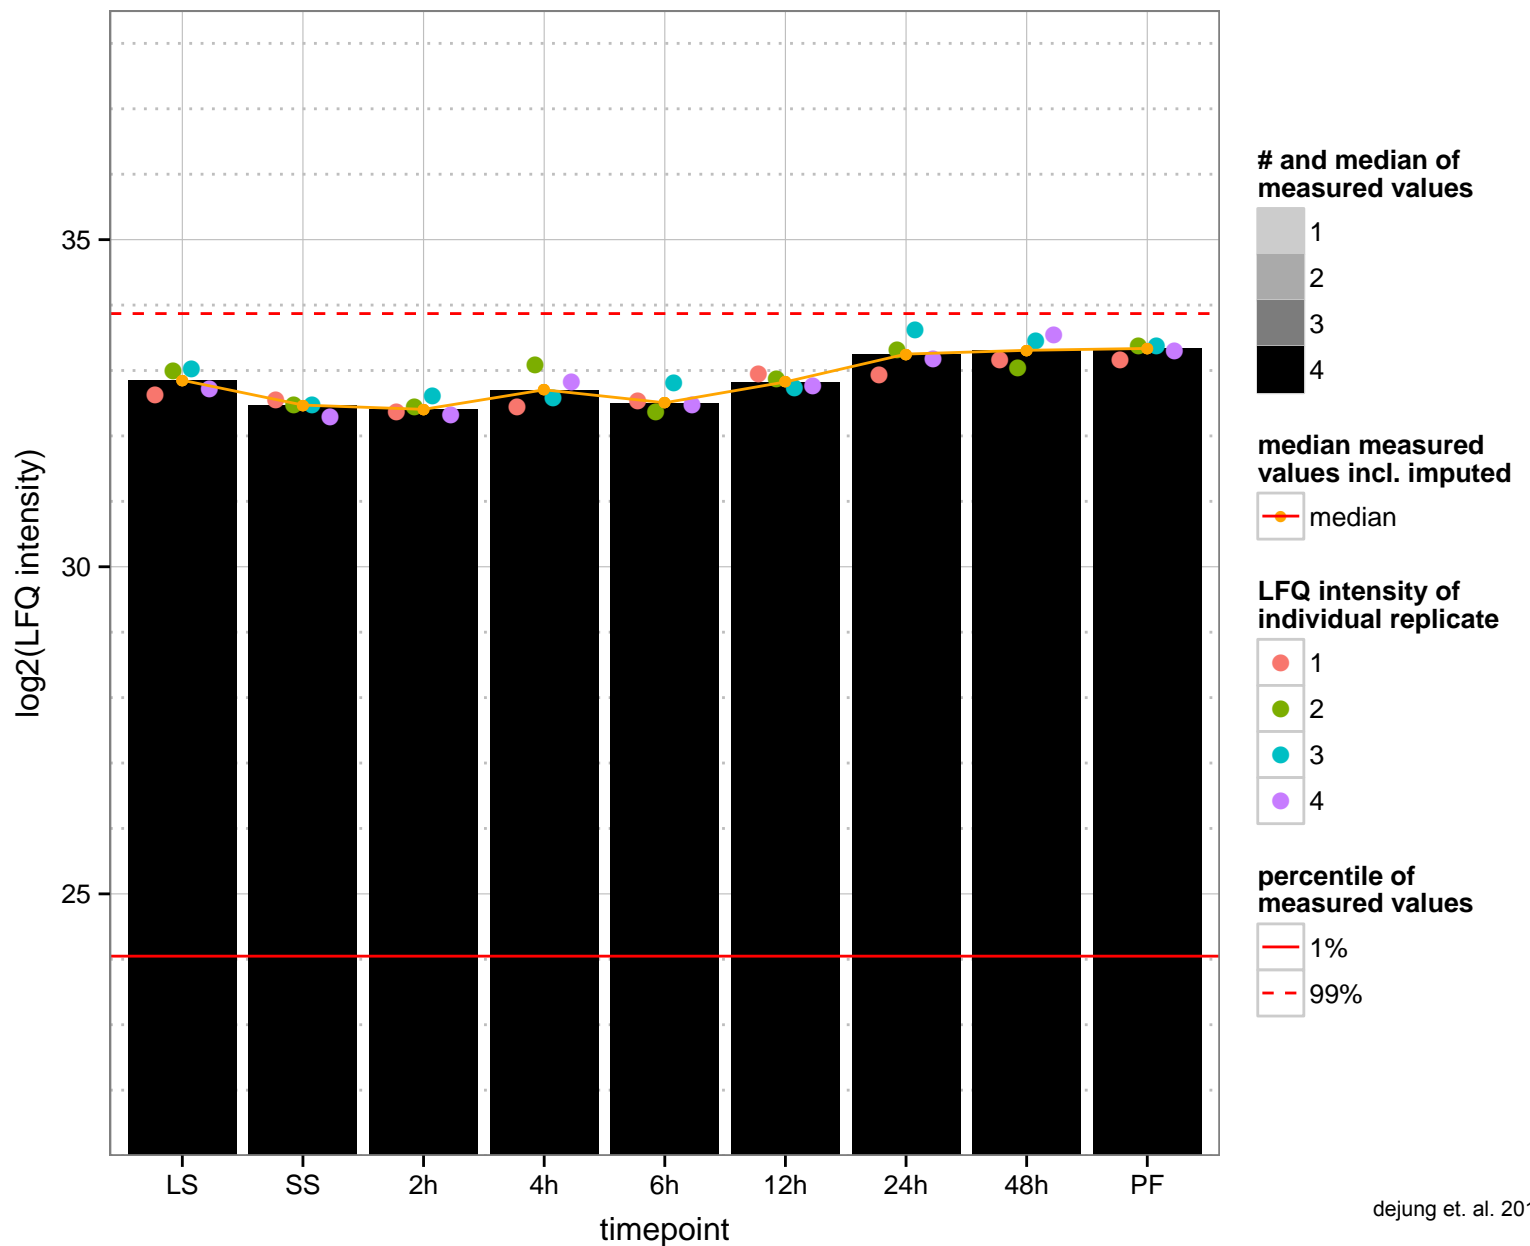

hypothetical protein, conserved  
 Tb927.11.2080  
 AGOF: null  
 AGOC: null  
 AGOP: null  
 PGOF: null  
 PGO C: null  
 PGO P: null

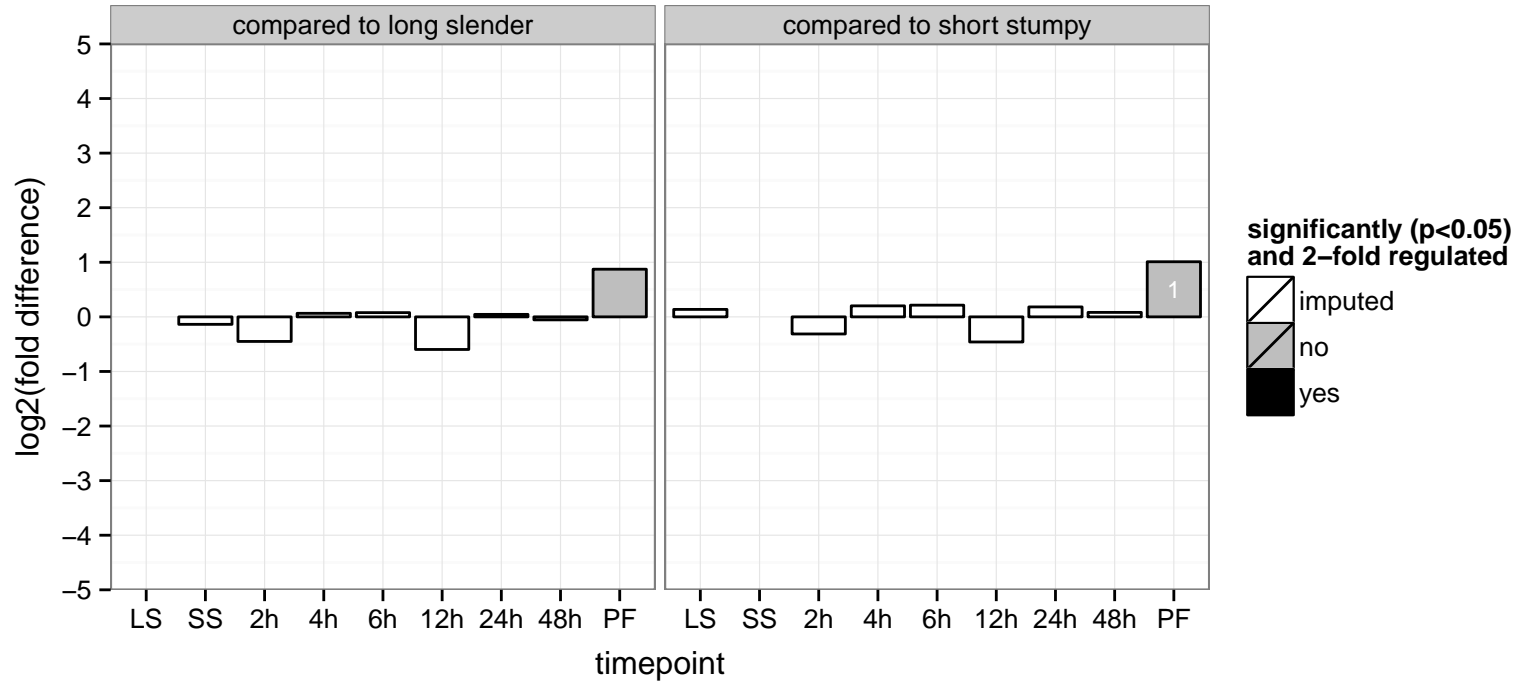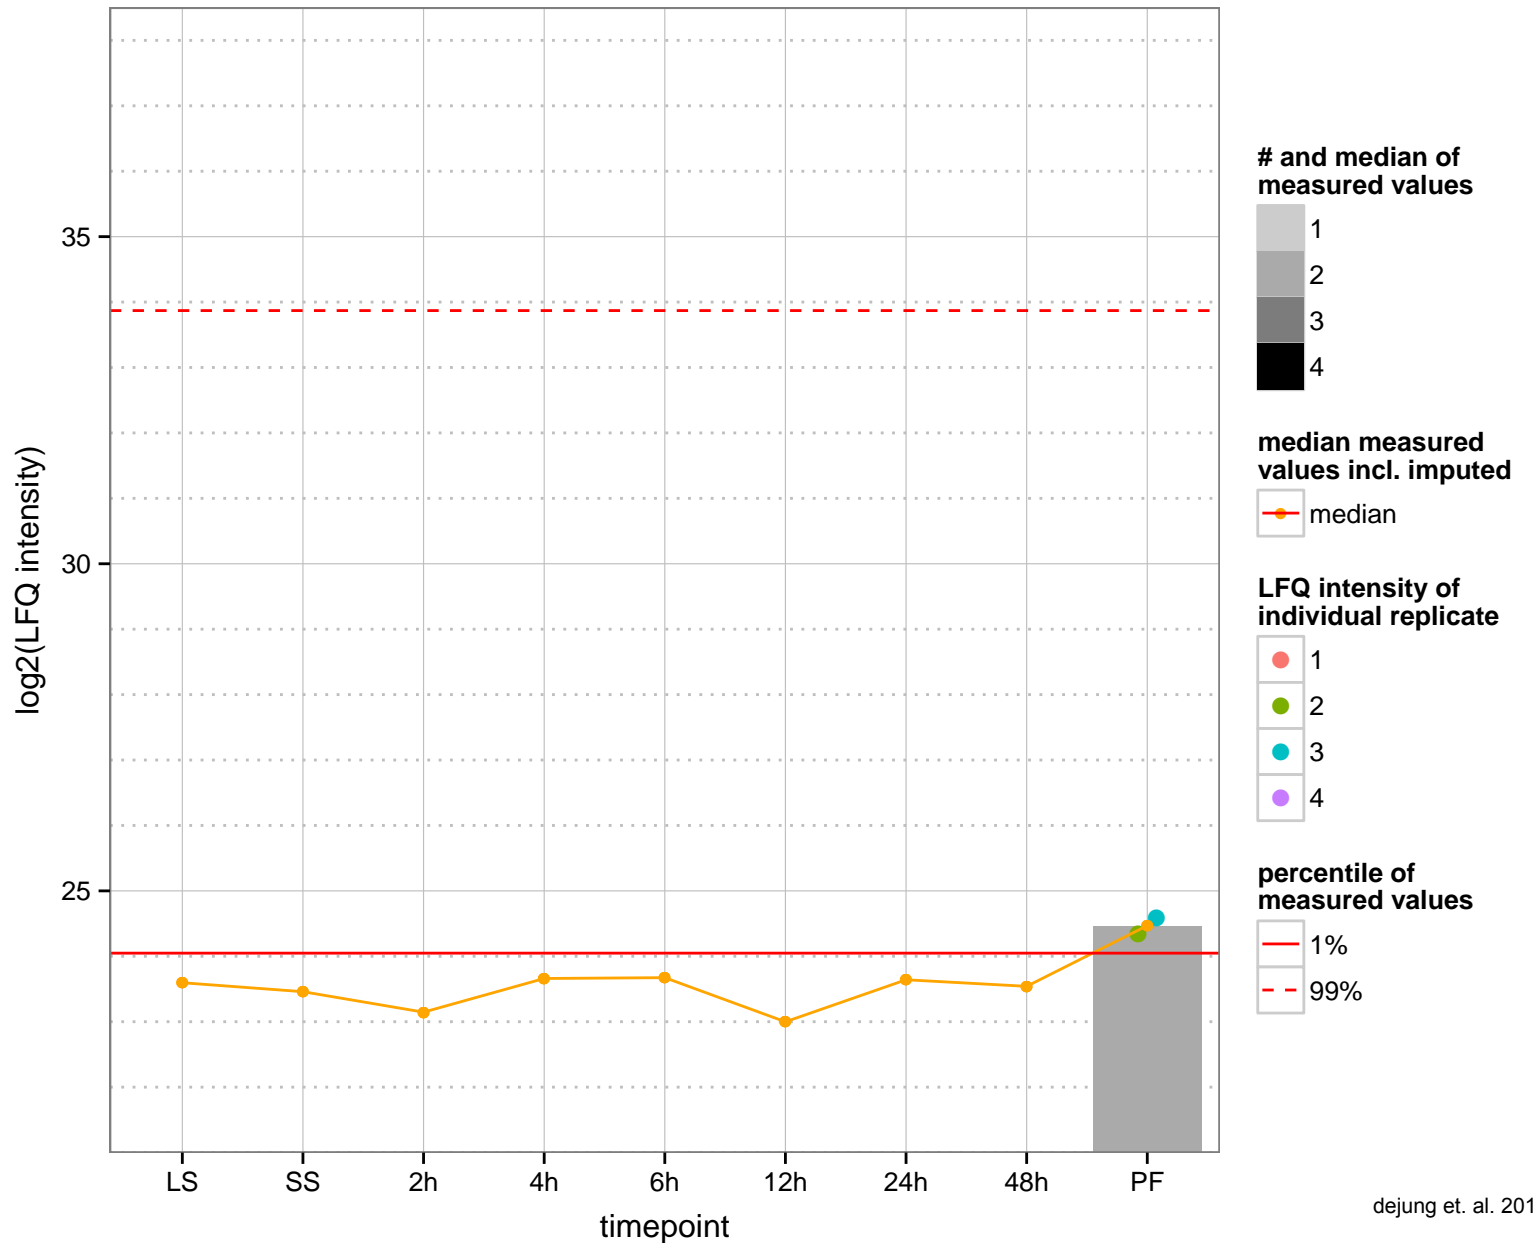

choline kinase (EK1)

Tb927.11.2090

AGOF: ethanolamine kinase activity

AGOC: cytosol

AGOP: phosphatidylethanolamine biosynthetic process

PGOF: phosphotransferase activity, alcohol group as acceptor, transferase activity, transferring phosphorus-containing groups

PGOC: null

PGOP: null

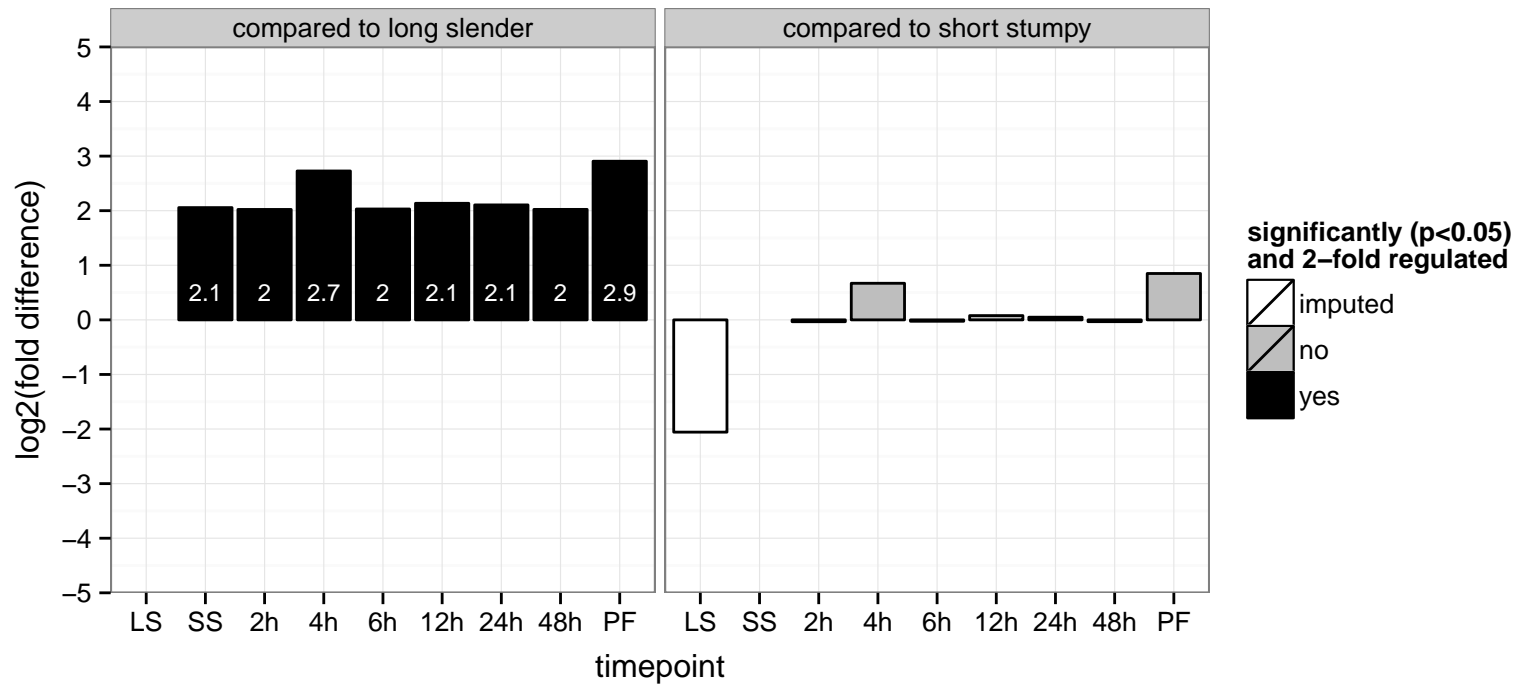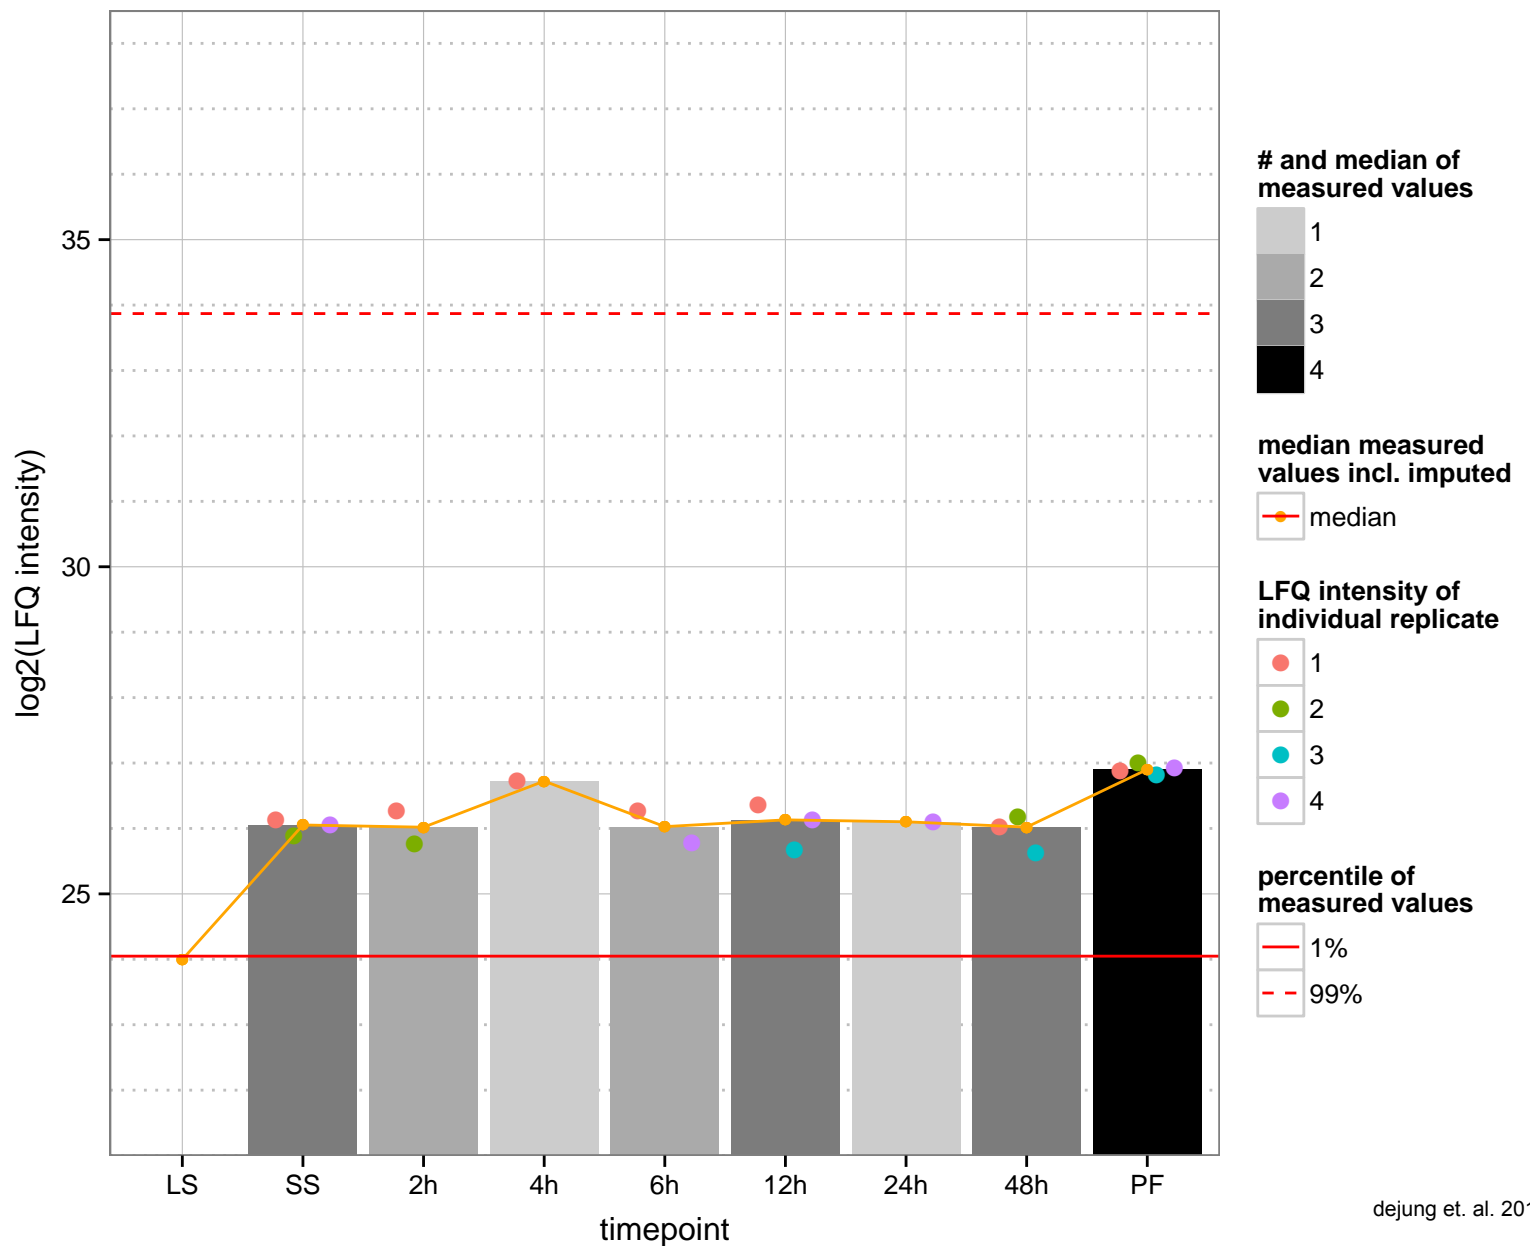



hypothetical protein, conserved  
 Tb927.11.210  
 AGOF: null  
 AGOC: null  
 AGOP: null  
 PGO: null  
 PGOC: null  
 PGOP: null

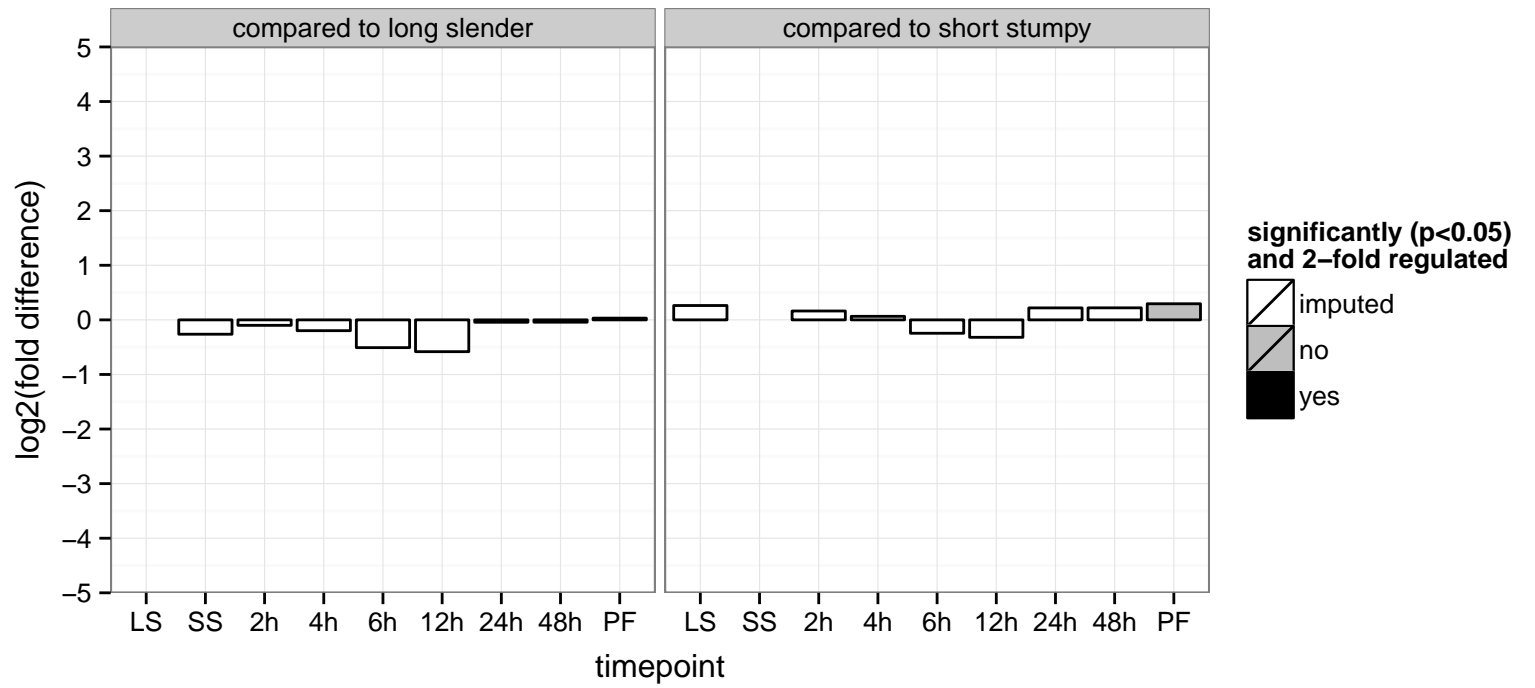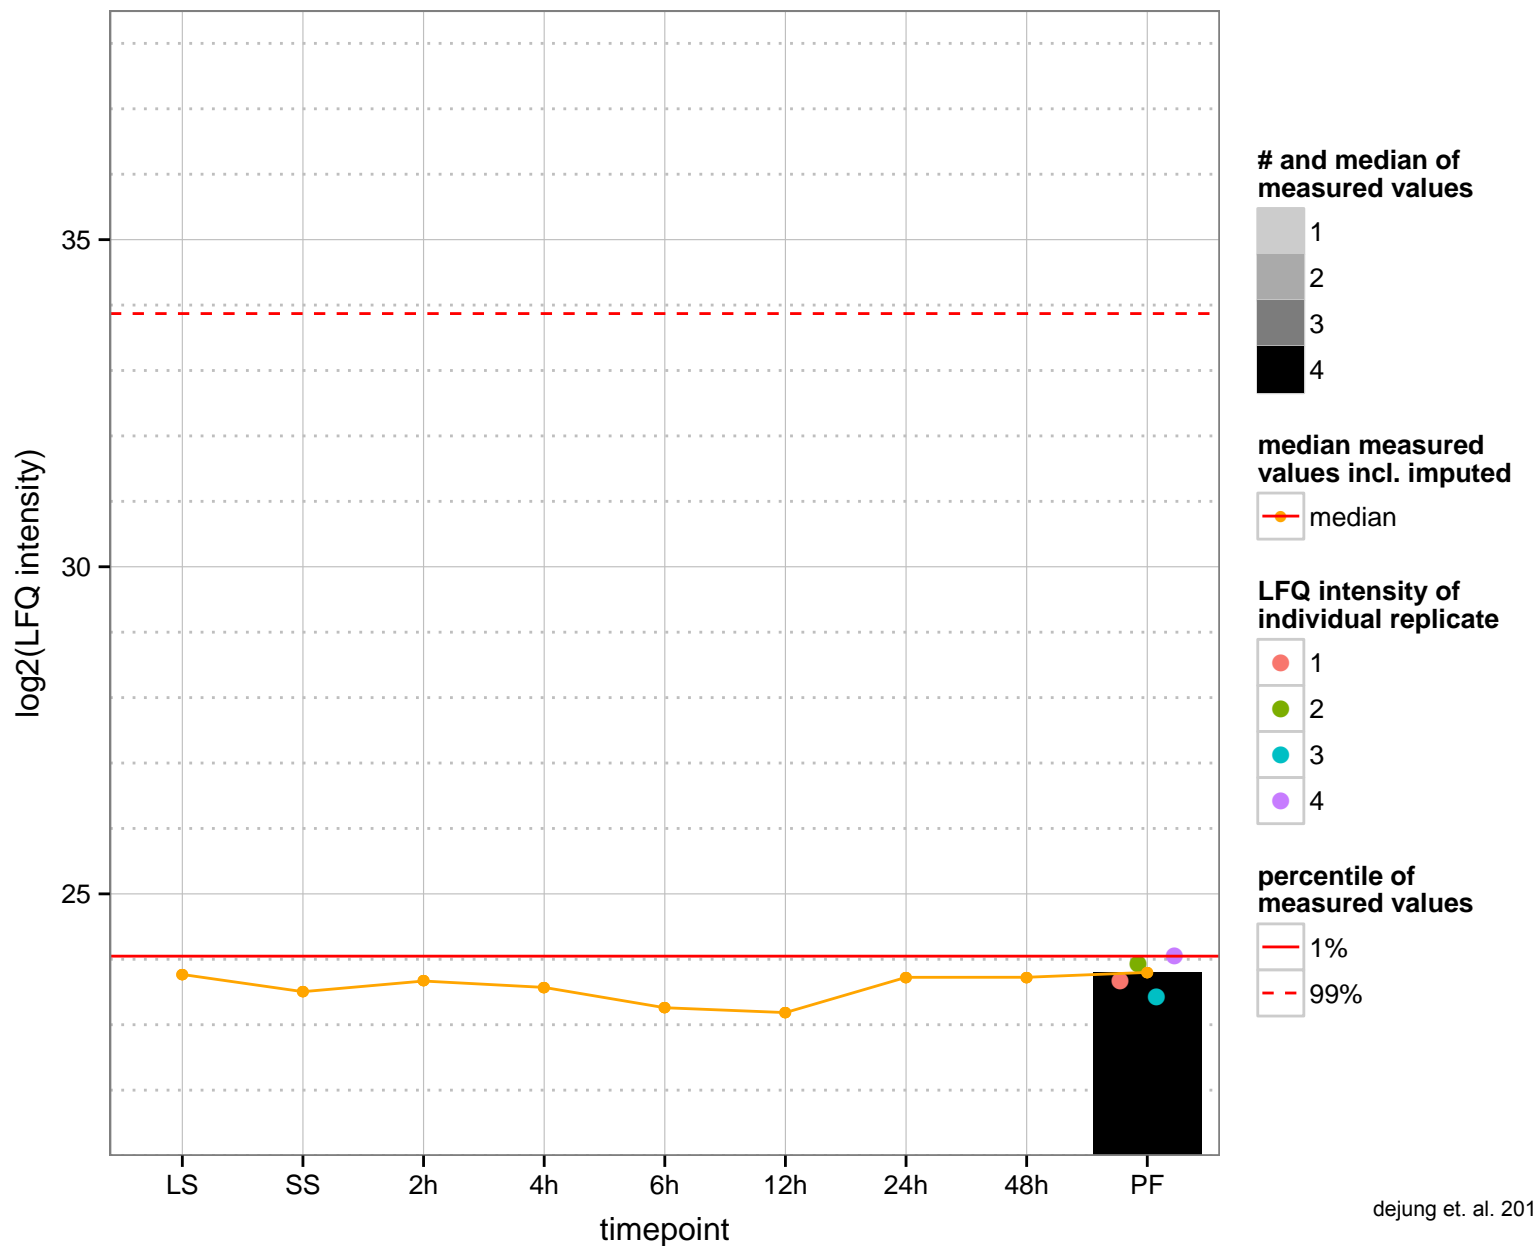

hypothetical protein, conserved  
 Tb927.11.2110  
 AGOF: null  
 AGOC: null  
 AGOP: protein transport  
 PGO: null  
 PGOC: null  
 PGOP: protein transport

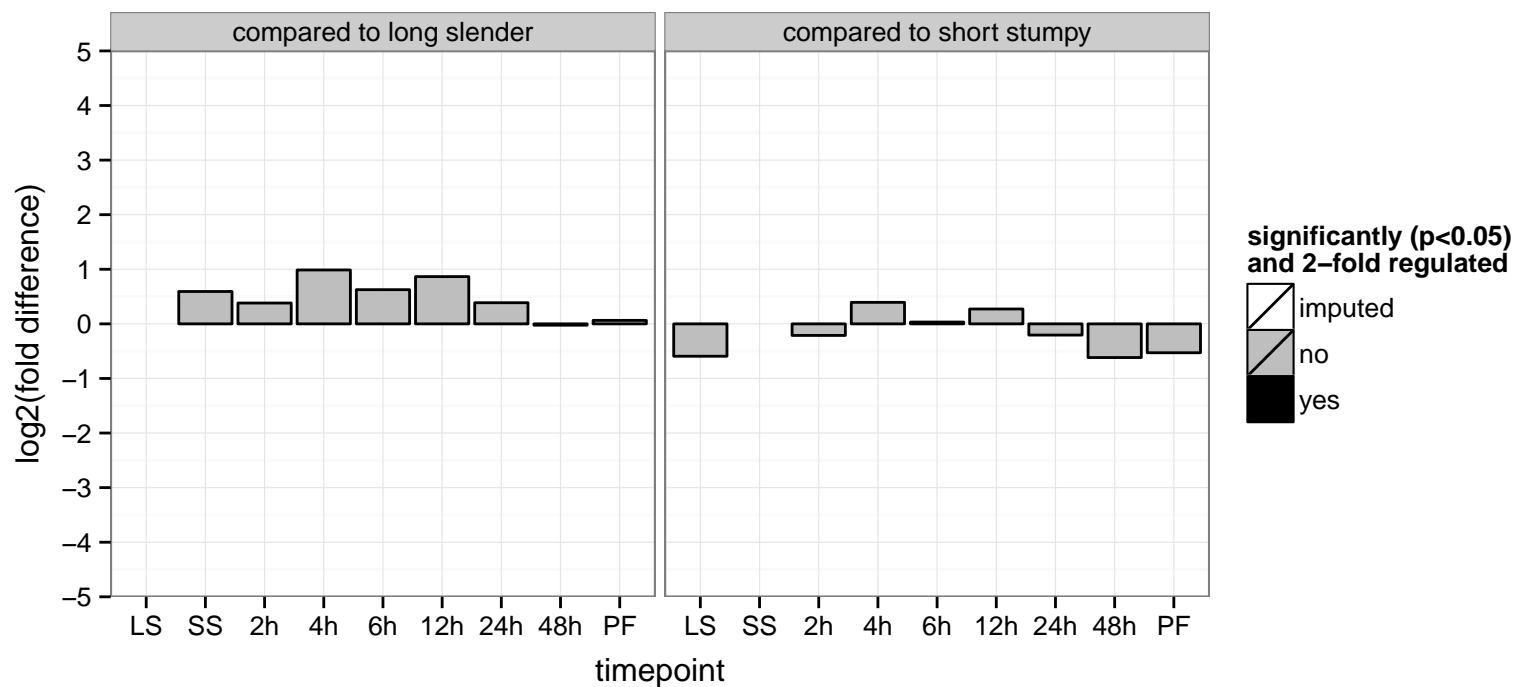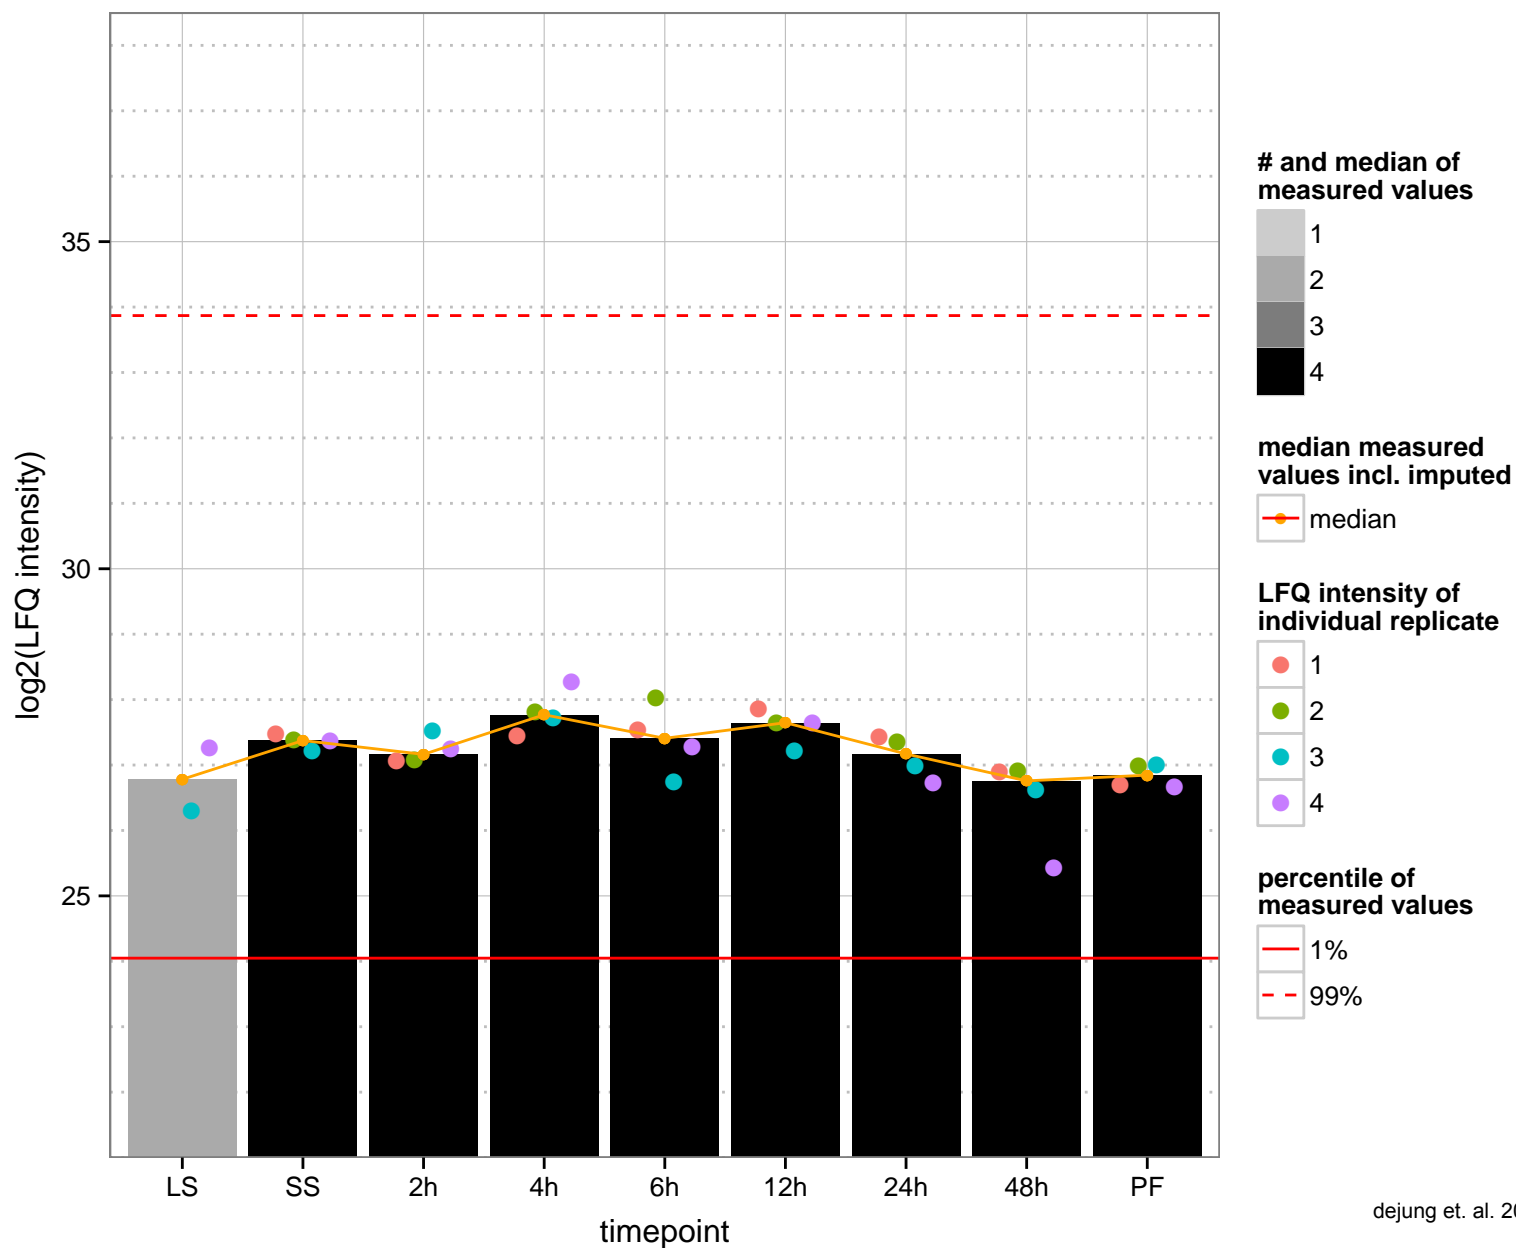

proteasome regulatory non-ATP-ase subunit 3 (RPN3)

Tb927.11.2130

AGOF: endopeptidase activity, enzyme regulator activity

AGOC: proteasome complex, proteasome regulatory particle

AGOP: regulation of protein catabolic process, ubiquitin-dependent protein catabolic process

PGOF: enzyme regulator activity, protein binding

PGOC: proteasome complex

PGOP: regulation of protein catabolic process

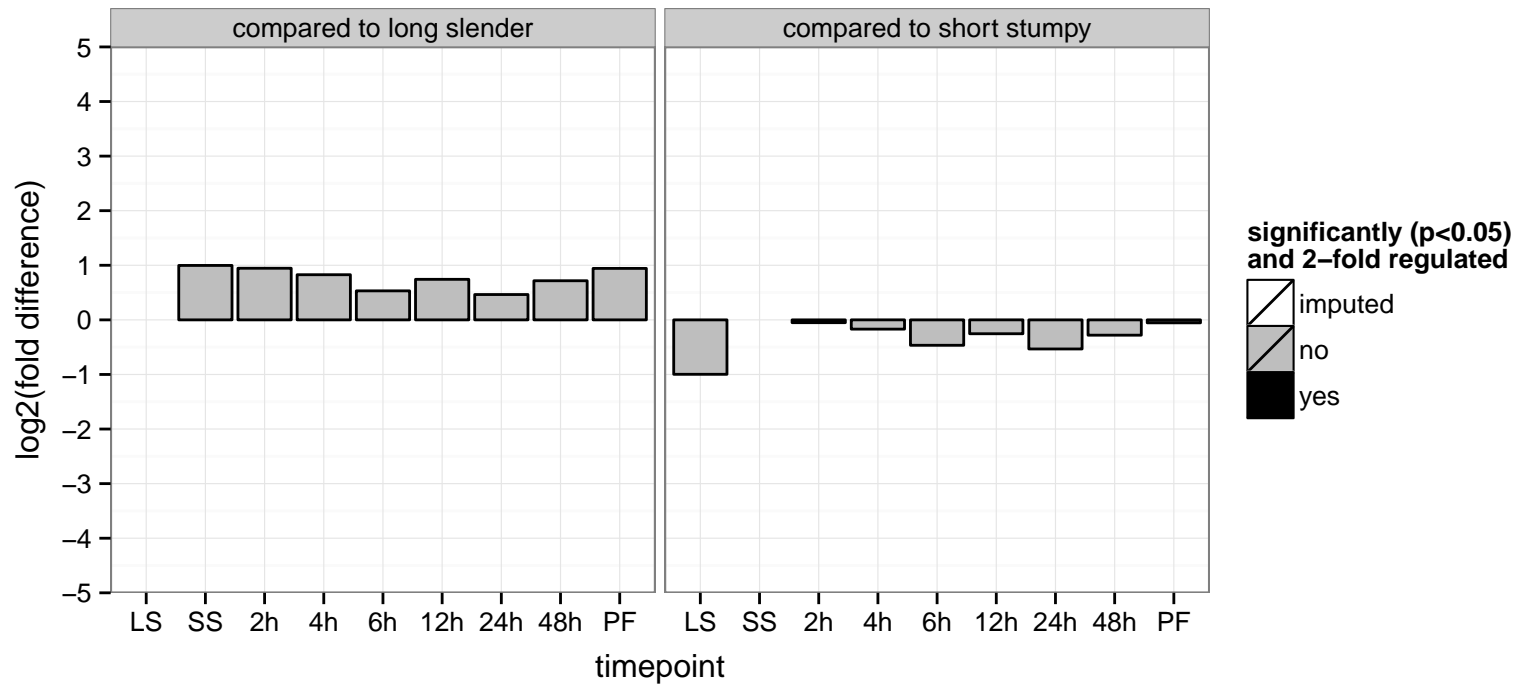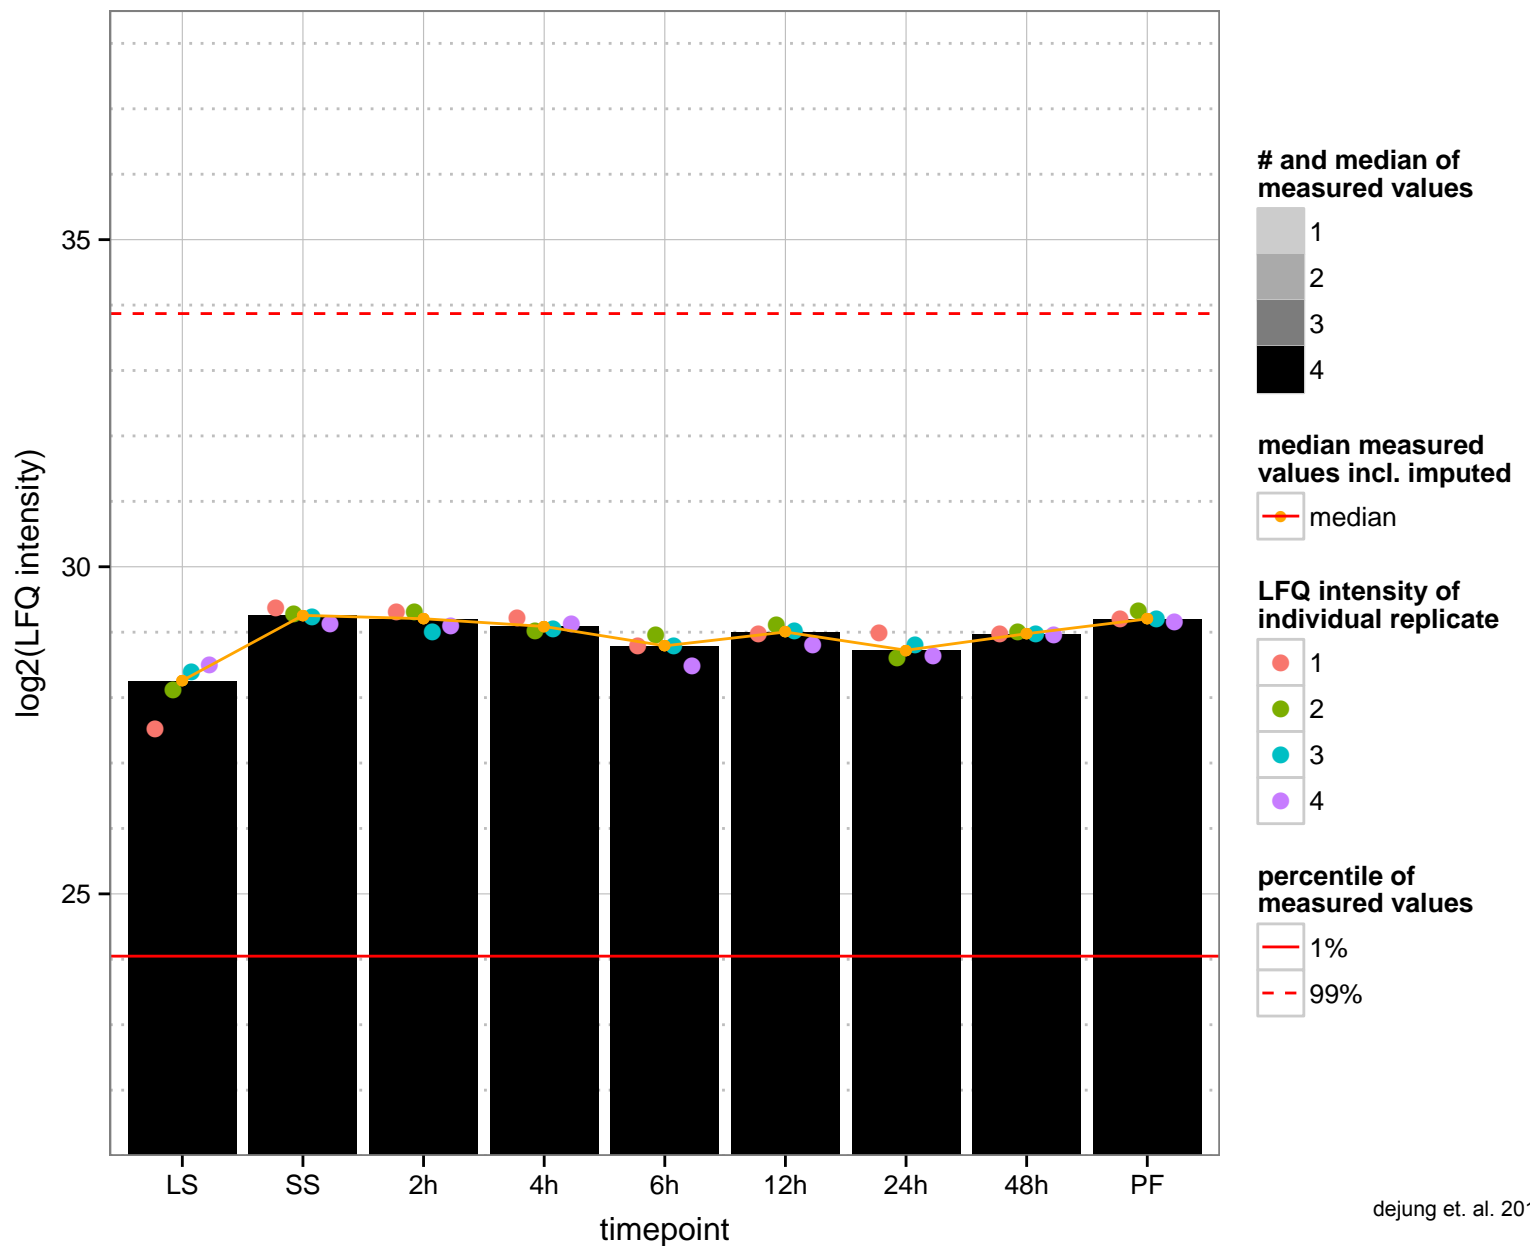

hypothetical protein, conserved  
 Tb927.11.2140  
 AGOF: null  
 AGOC: null  
 AGOP: null  
 PGO: null  
 PGOC: null  
 PGOP: null

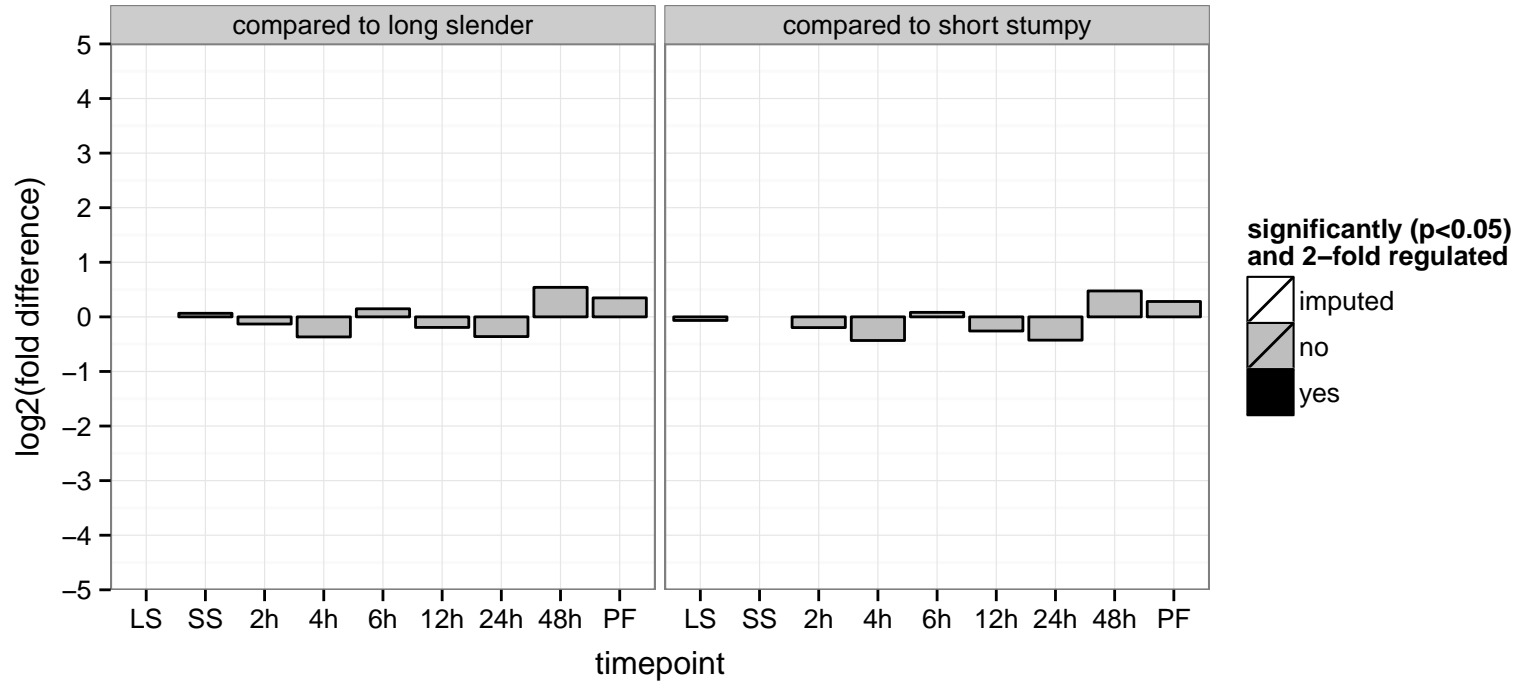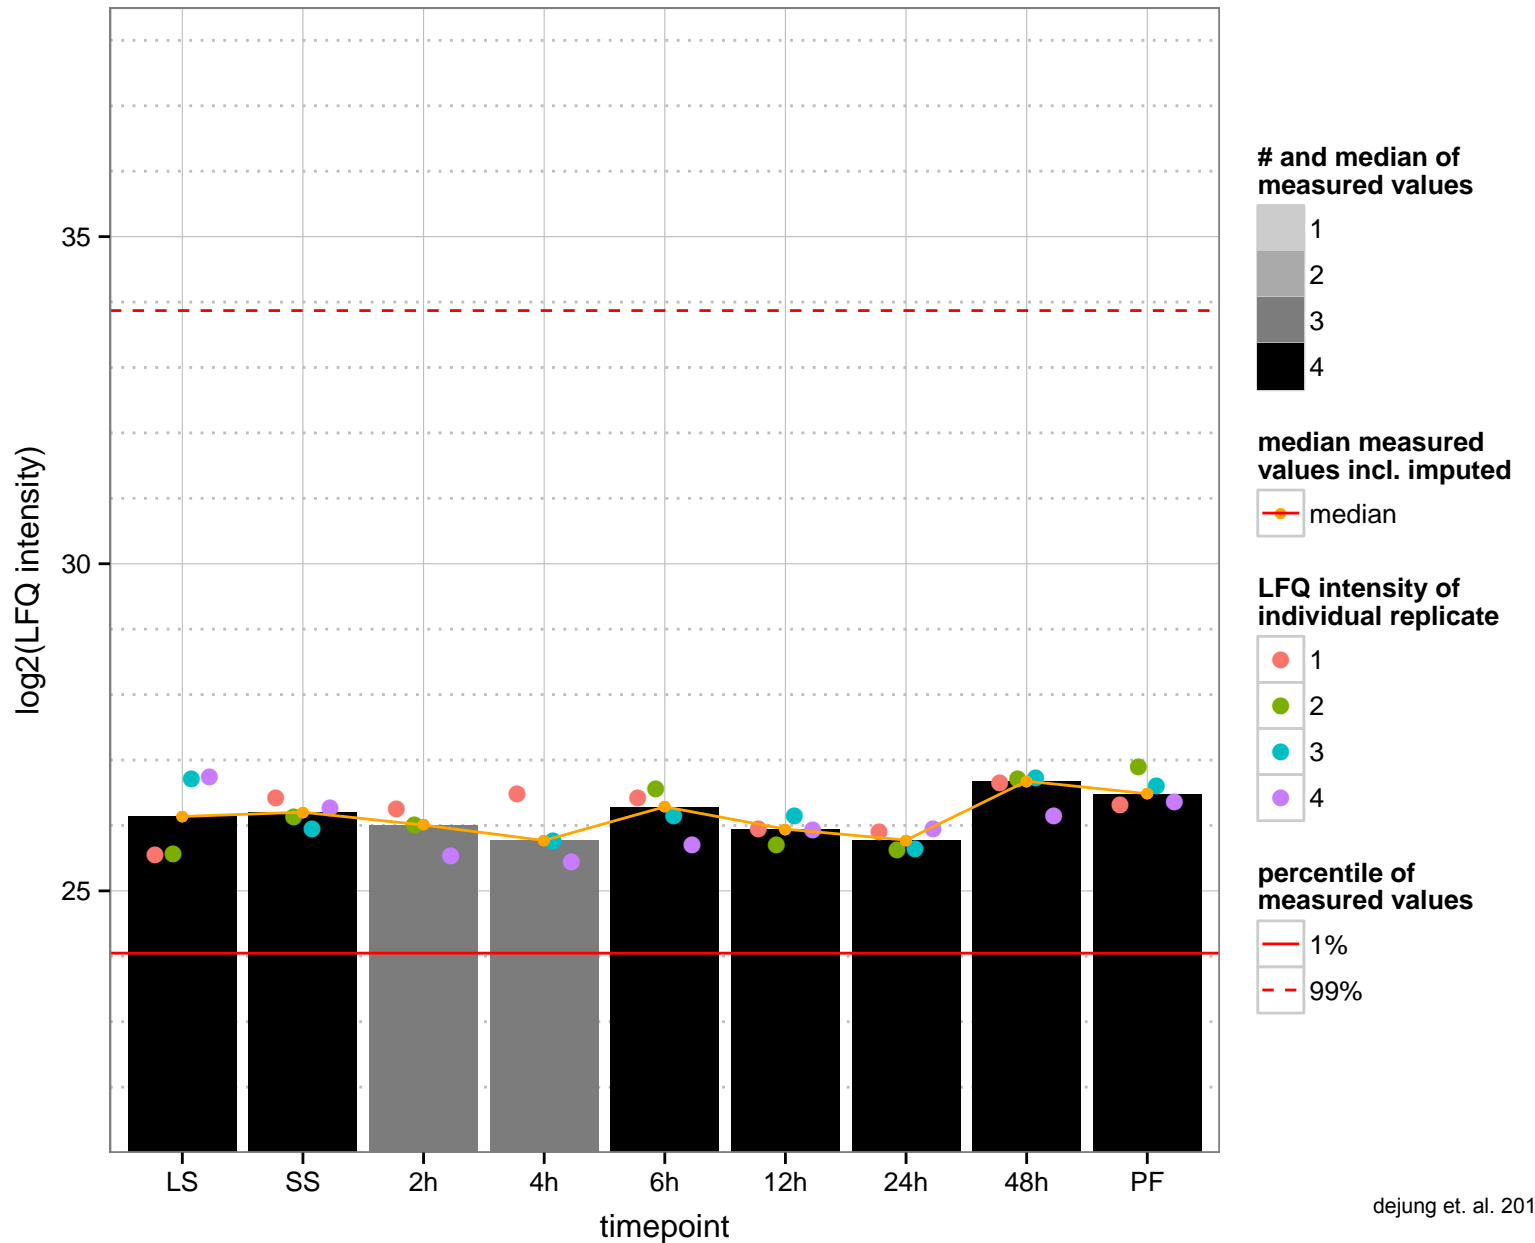

hypothetical protein, conserved  
 Tb927.11.2190  
 AGOF: null  
 AGOC: null  
 AGOP: null  
 PGO: null  
 PGOC: null  
 PGOP: null

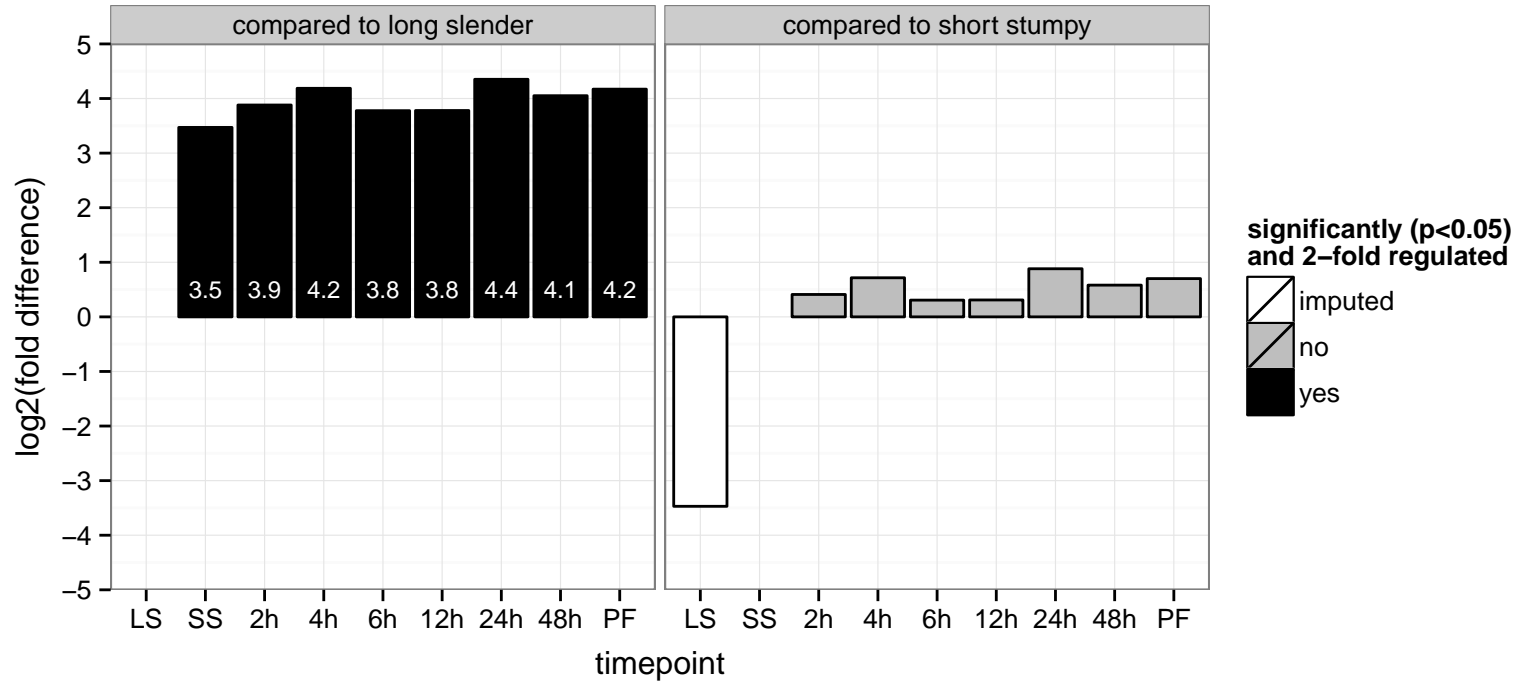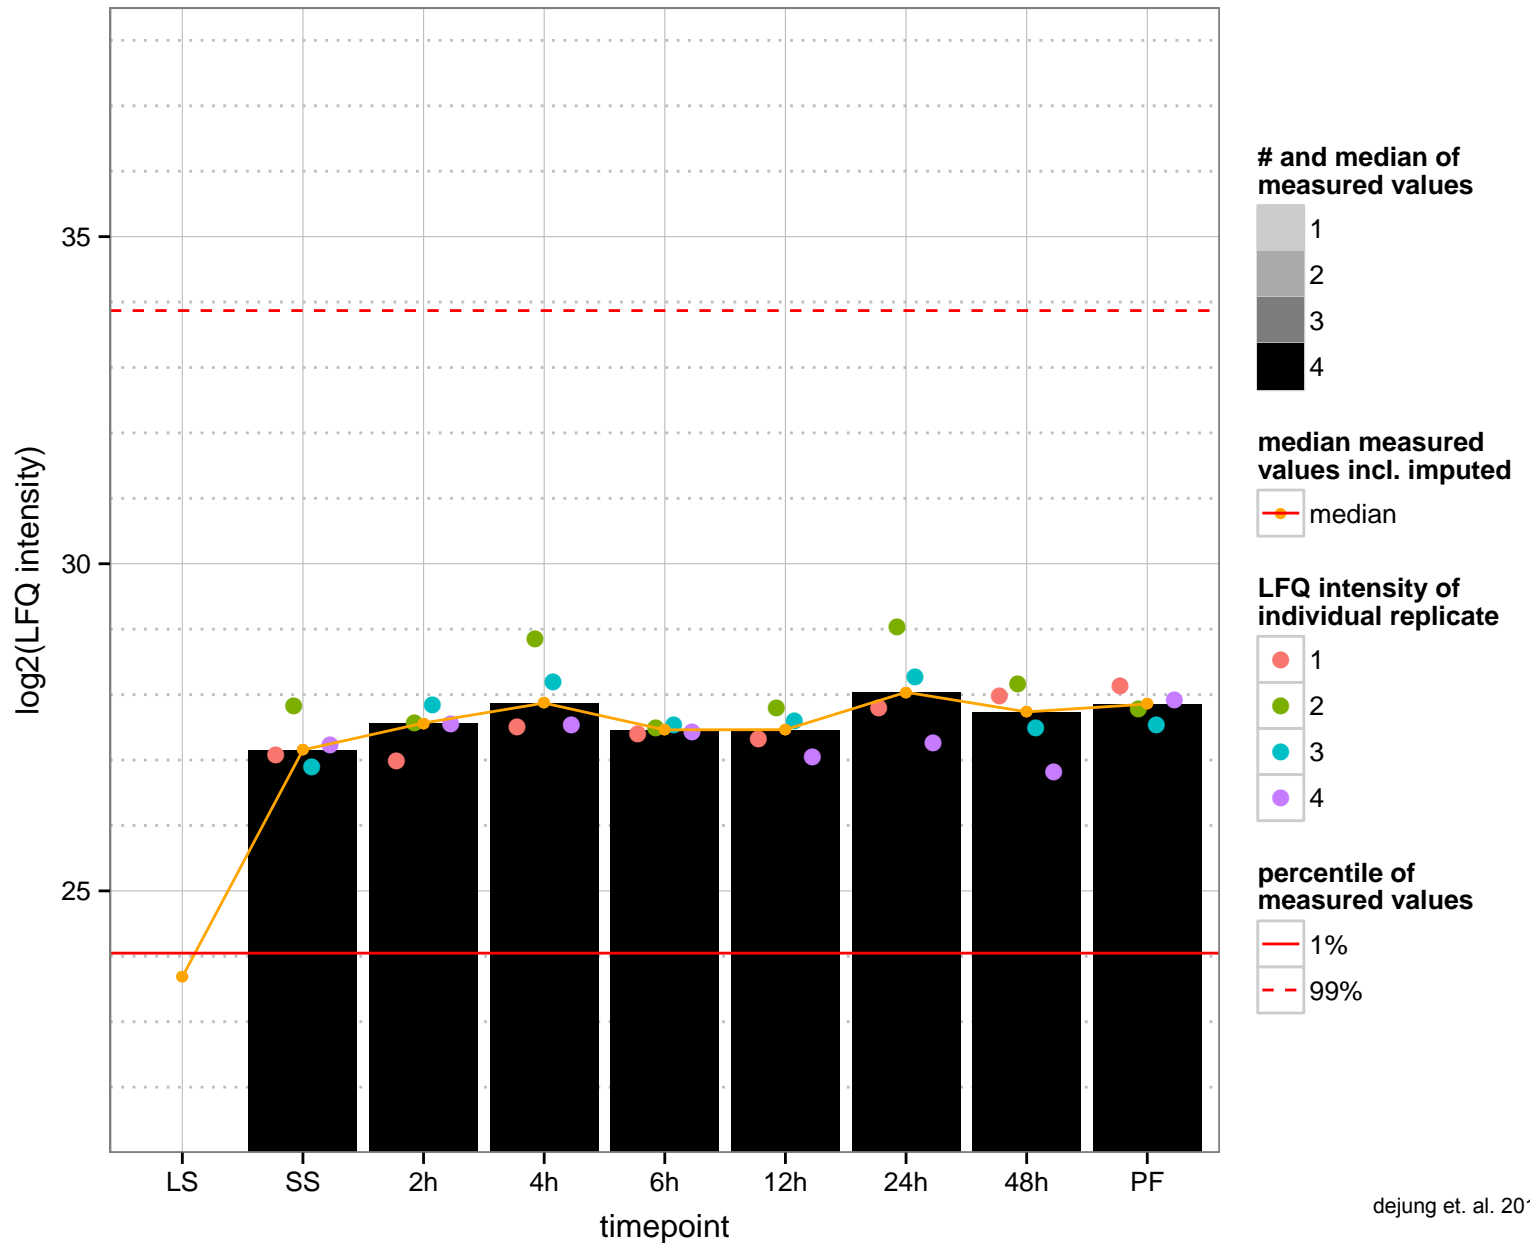

eukaryotic translation initiation factor 4e, putative (eIF4E)  
 Tb927.11.2260  
 AGOF: RNA binding, translation initiation factor activity  
 AGOC: cytoplasm  
 AGOP: translational initiation  
 PGOF: RNA binding, translation initiation factor activity  
 PGO: cytoplasm  
 PGOP: translational initiation

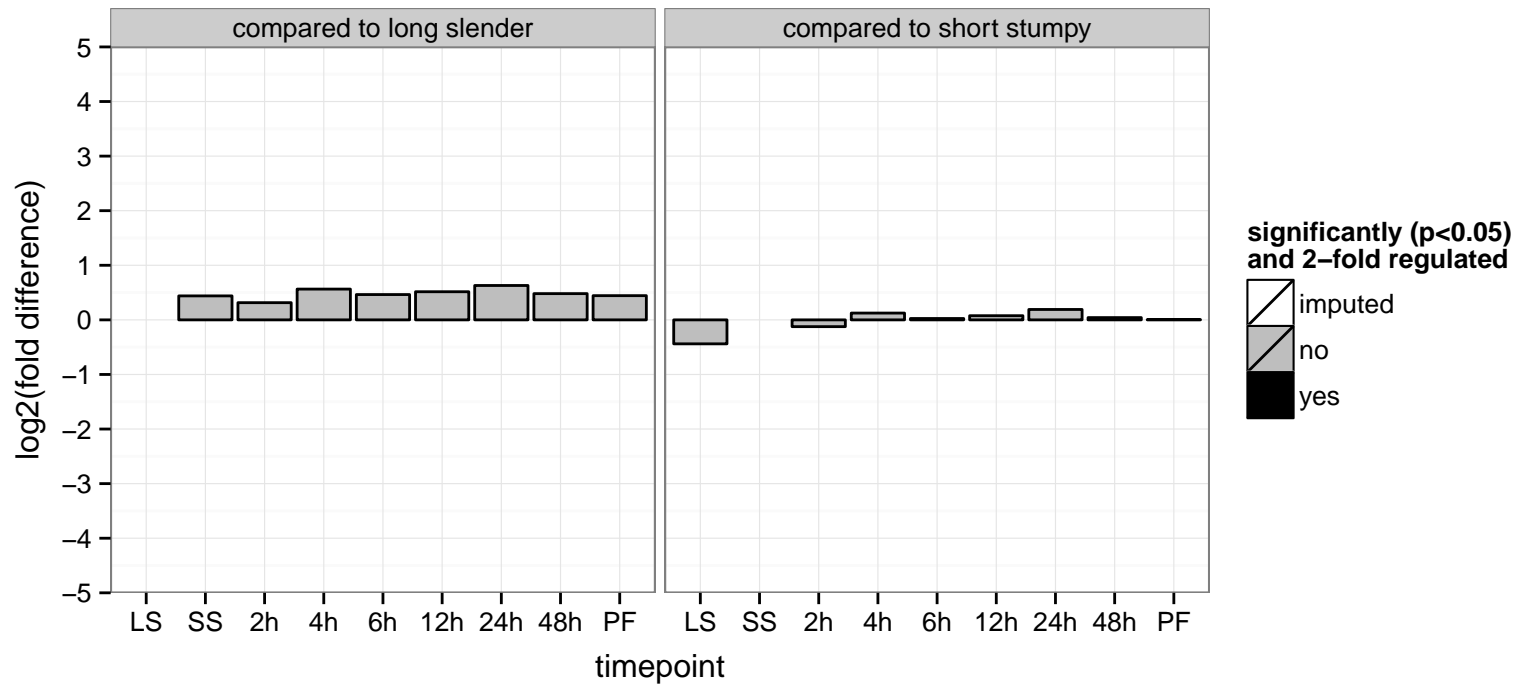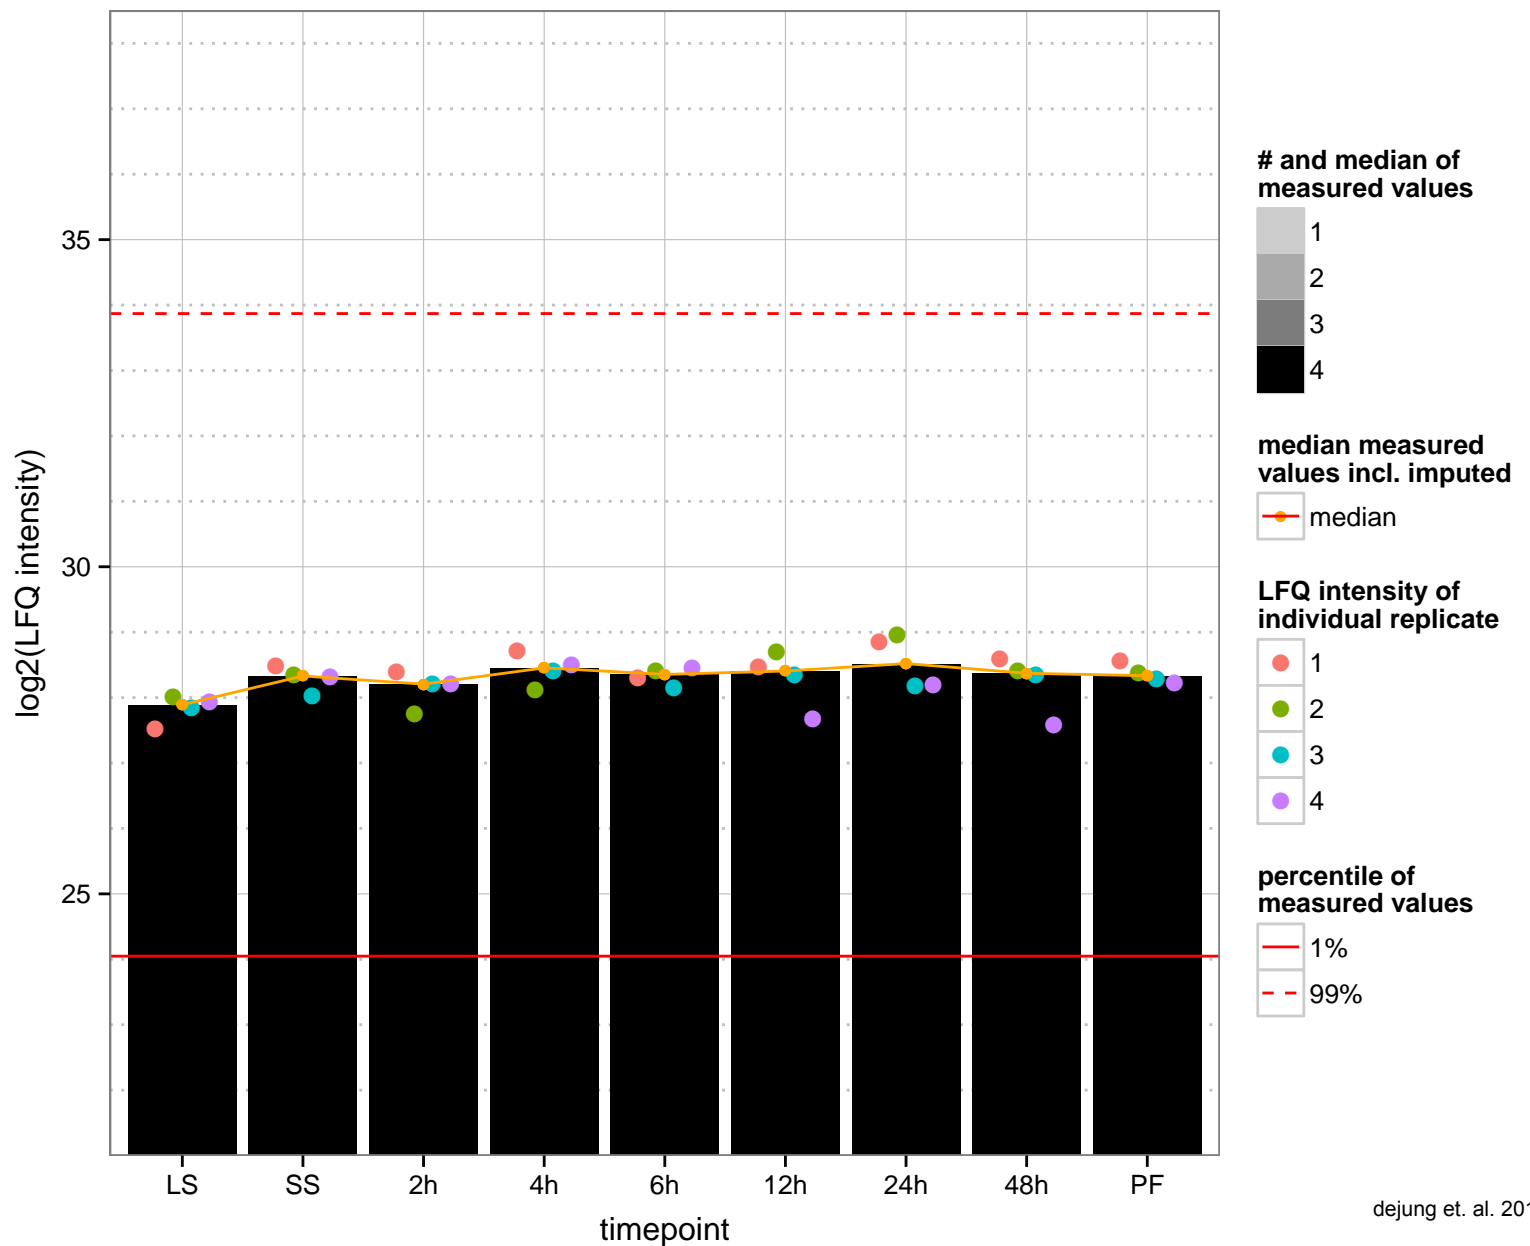

dynein intermediate chain IC140 (IDA7), putative  
 Tb927.11.2270  
 AGOF: null  
 AGOC: null  
 AGOP: ciliary or flagellar motility  
 PGO: protein binding  
 PGO: null  
 PGO: null

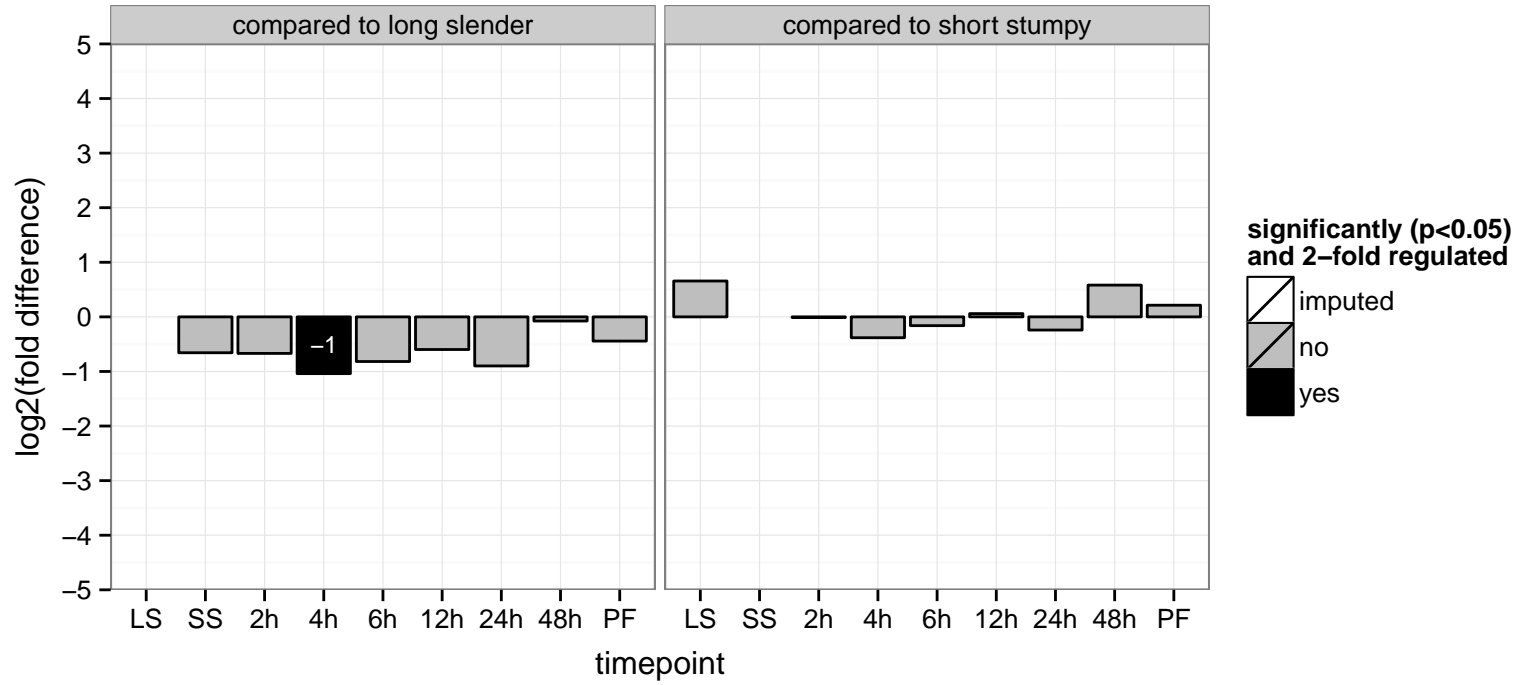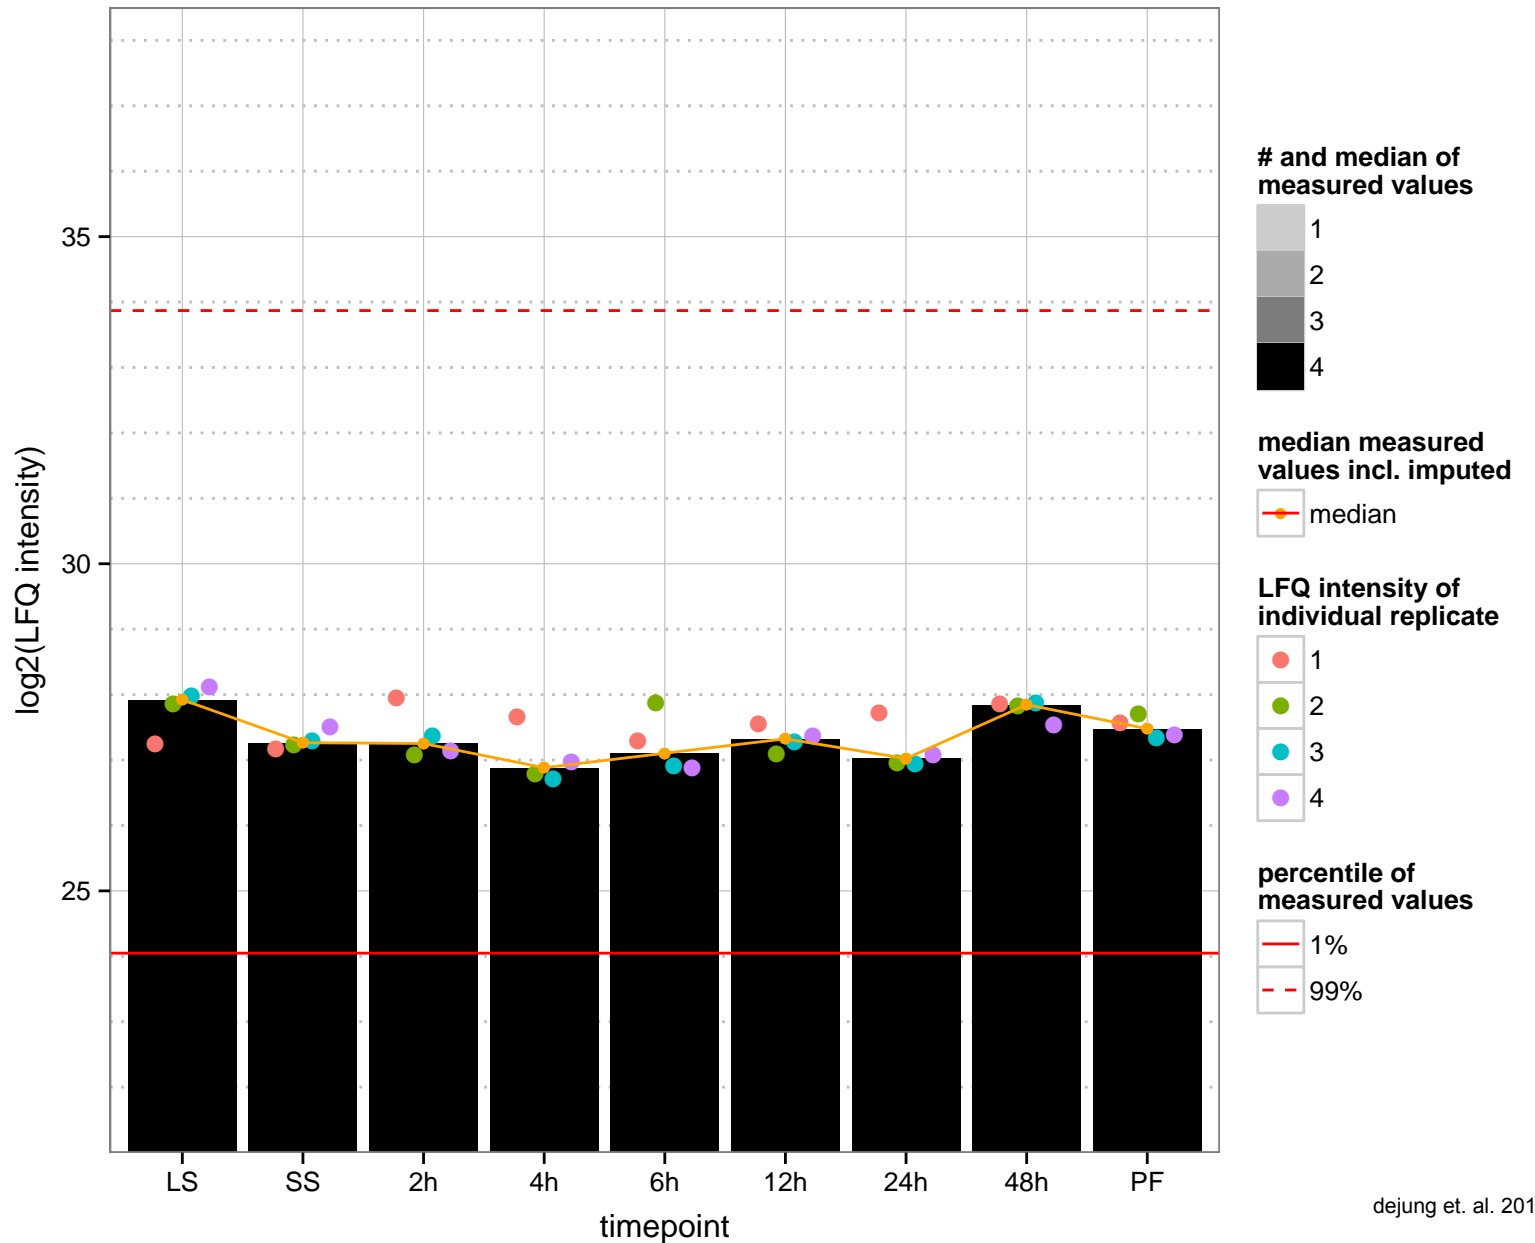

hypothetical protein, conserved  
 Tb927.11.2280  
 AGOF: null  
 AGOC: null  
 AGOP: null  
 PGO: protein binding  
 PGOC: null  
 PGOP: null

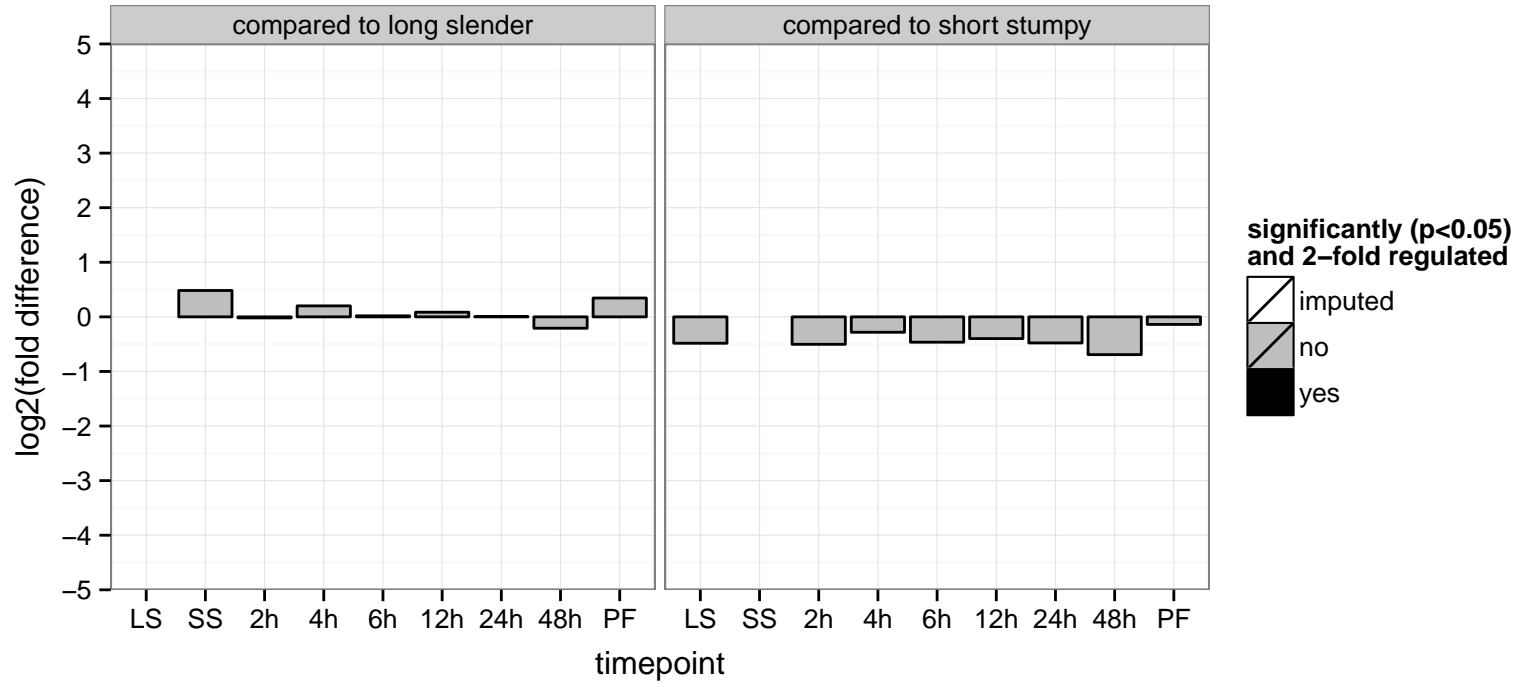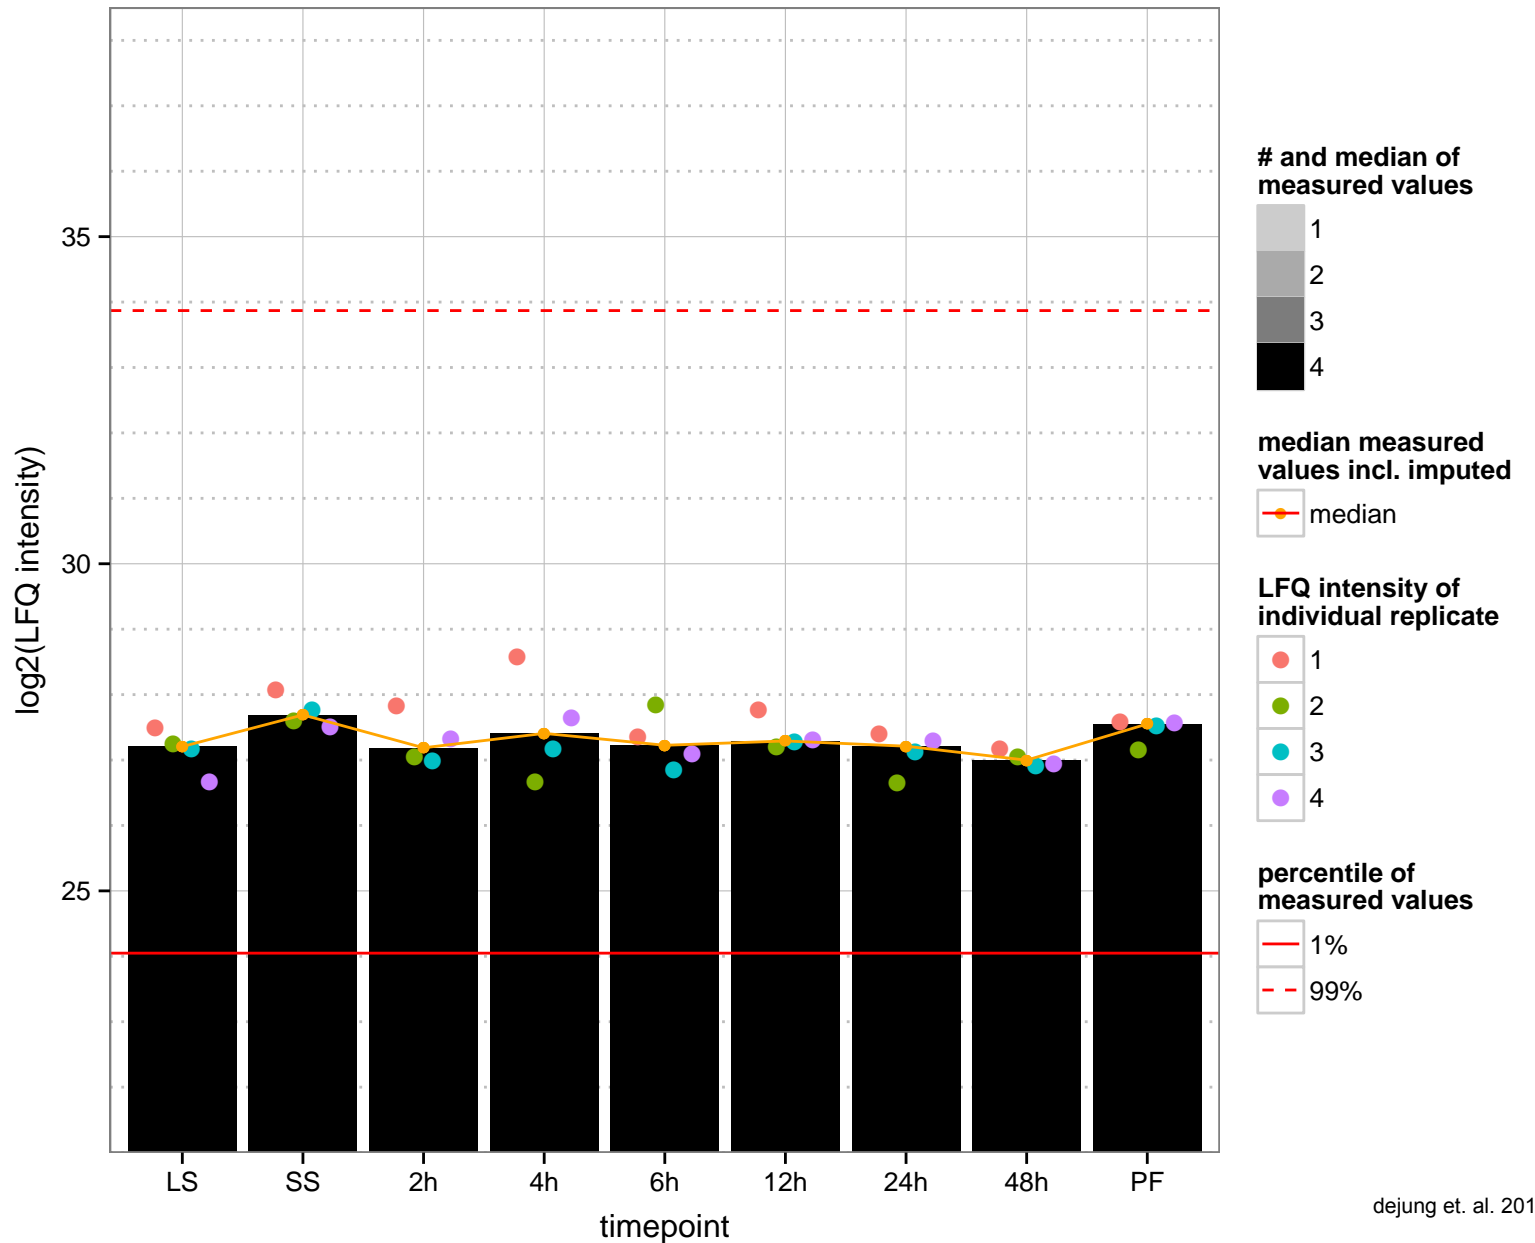



cleavage and polyadenylation specificity factor, putative  
 Tb927.11.230  
 AGOF: mRNA 3'-UTR binding  
 AGOC: mRNA cleavage and polyadenylation specificity factor complex  
 AGOP: mRNA cleavage, mRNA polyadenylation  
 PGO: null  
 PGOC: null  
 PGOP: null

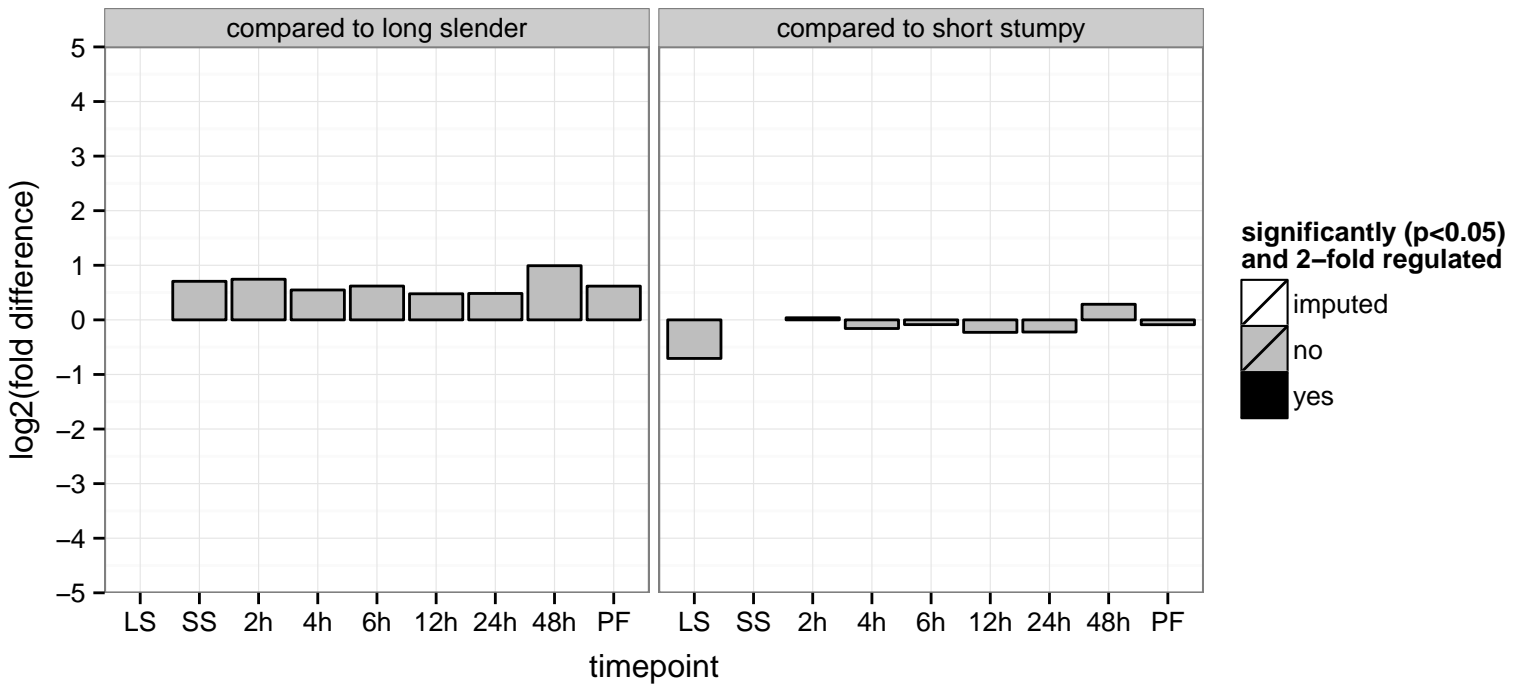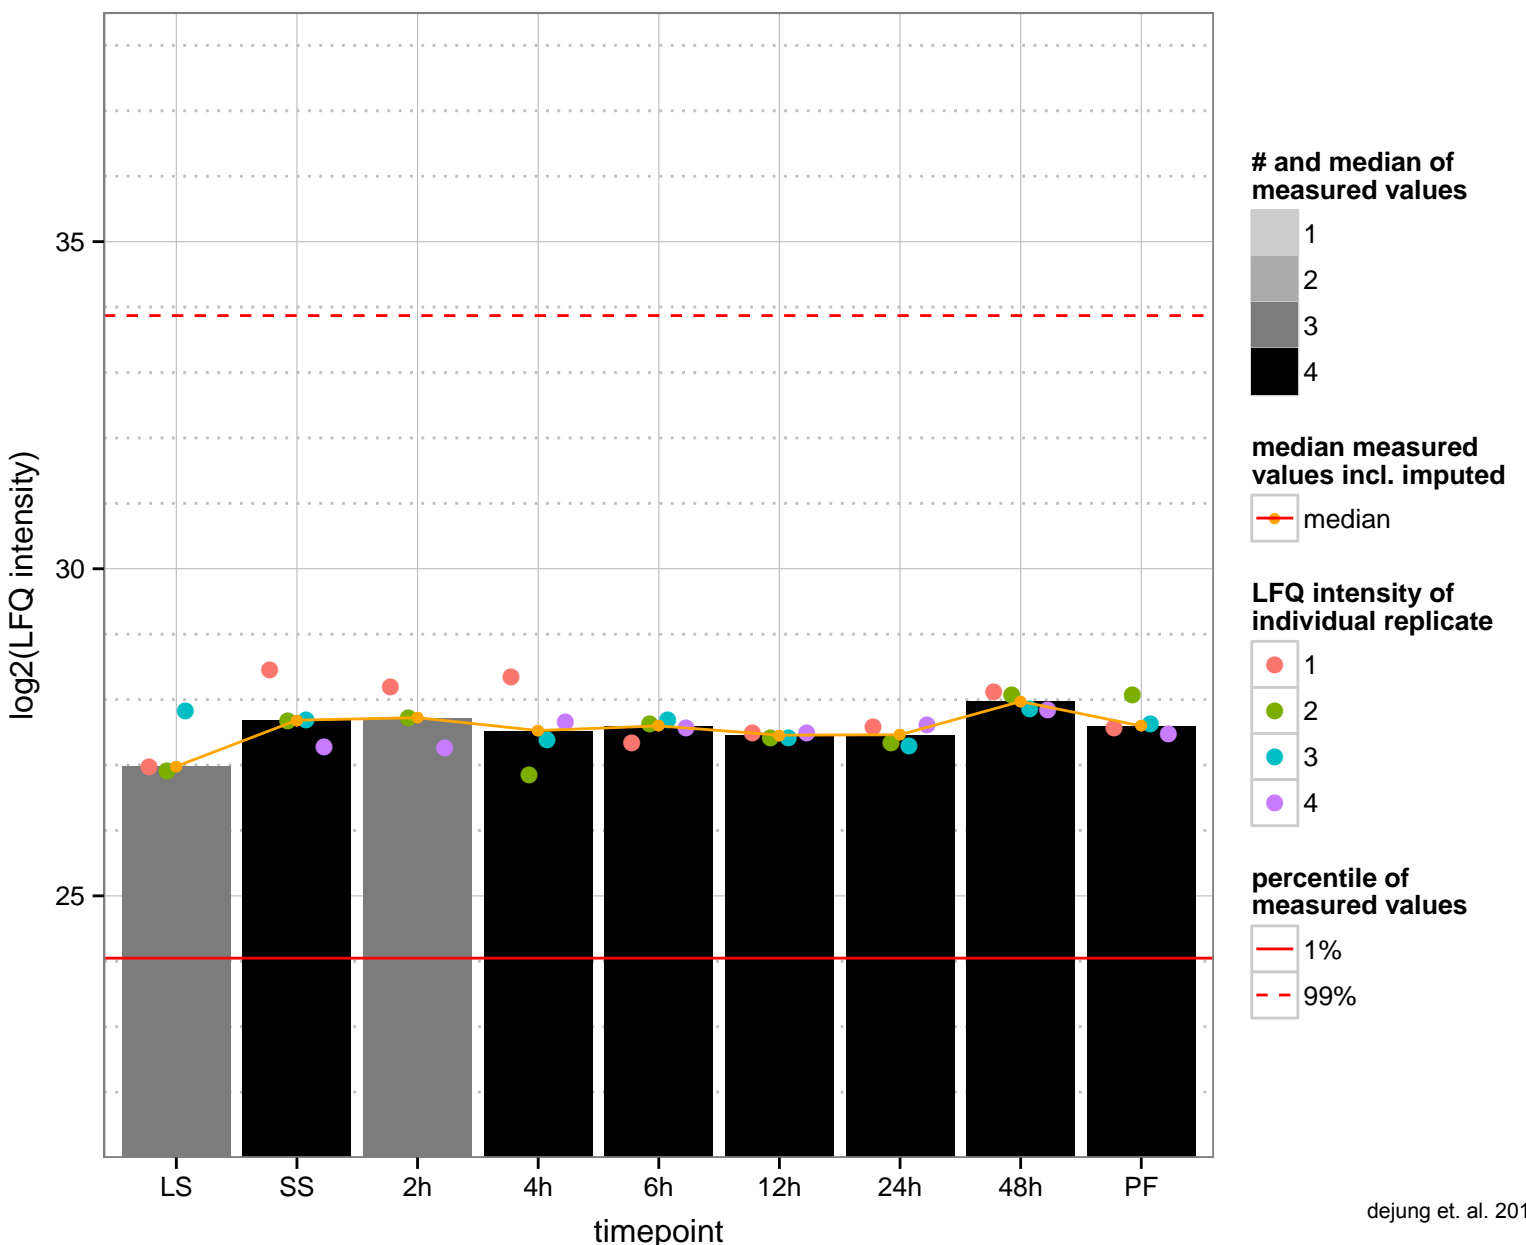

eukaryotic peptide chain release factor subunit 1, putative (ERF1)

Tb927.11.2300

AGOF: translation release factor activity, translation release factor activity, codon specific

AGOC: null

AGOP: translation, translational termination

PGOF: translation release factor activity, codon specific

PGOC: cytoplasm

PGOP: translational termination

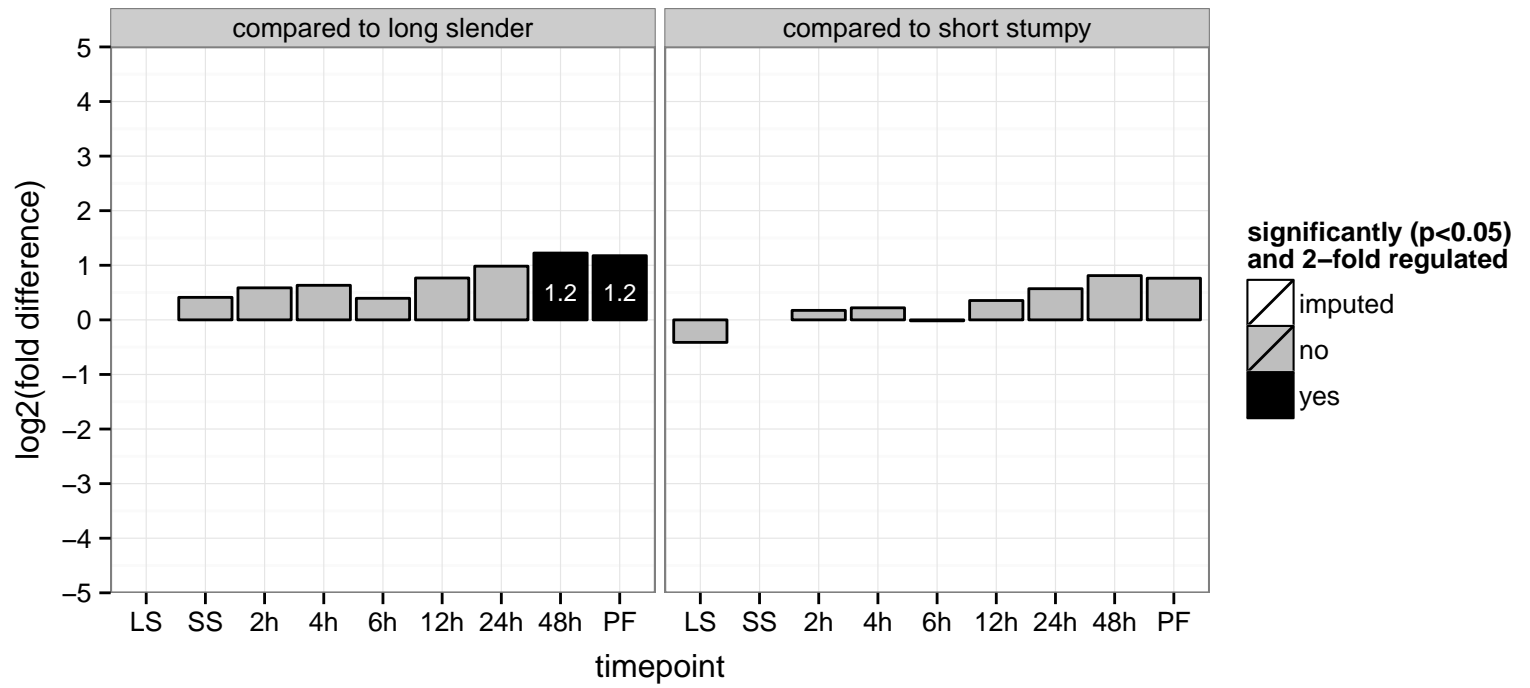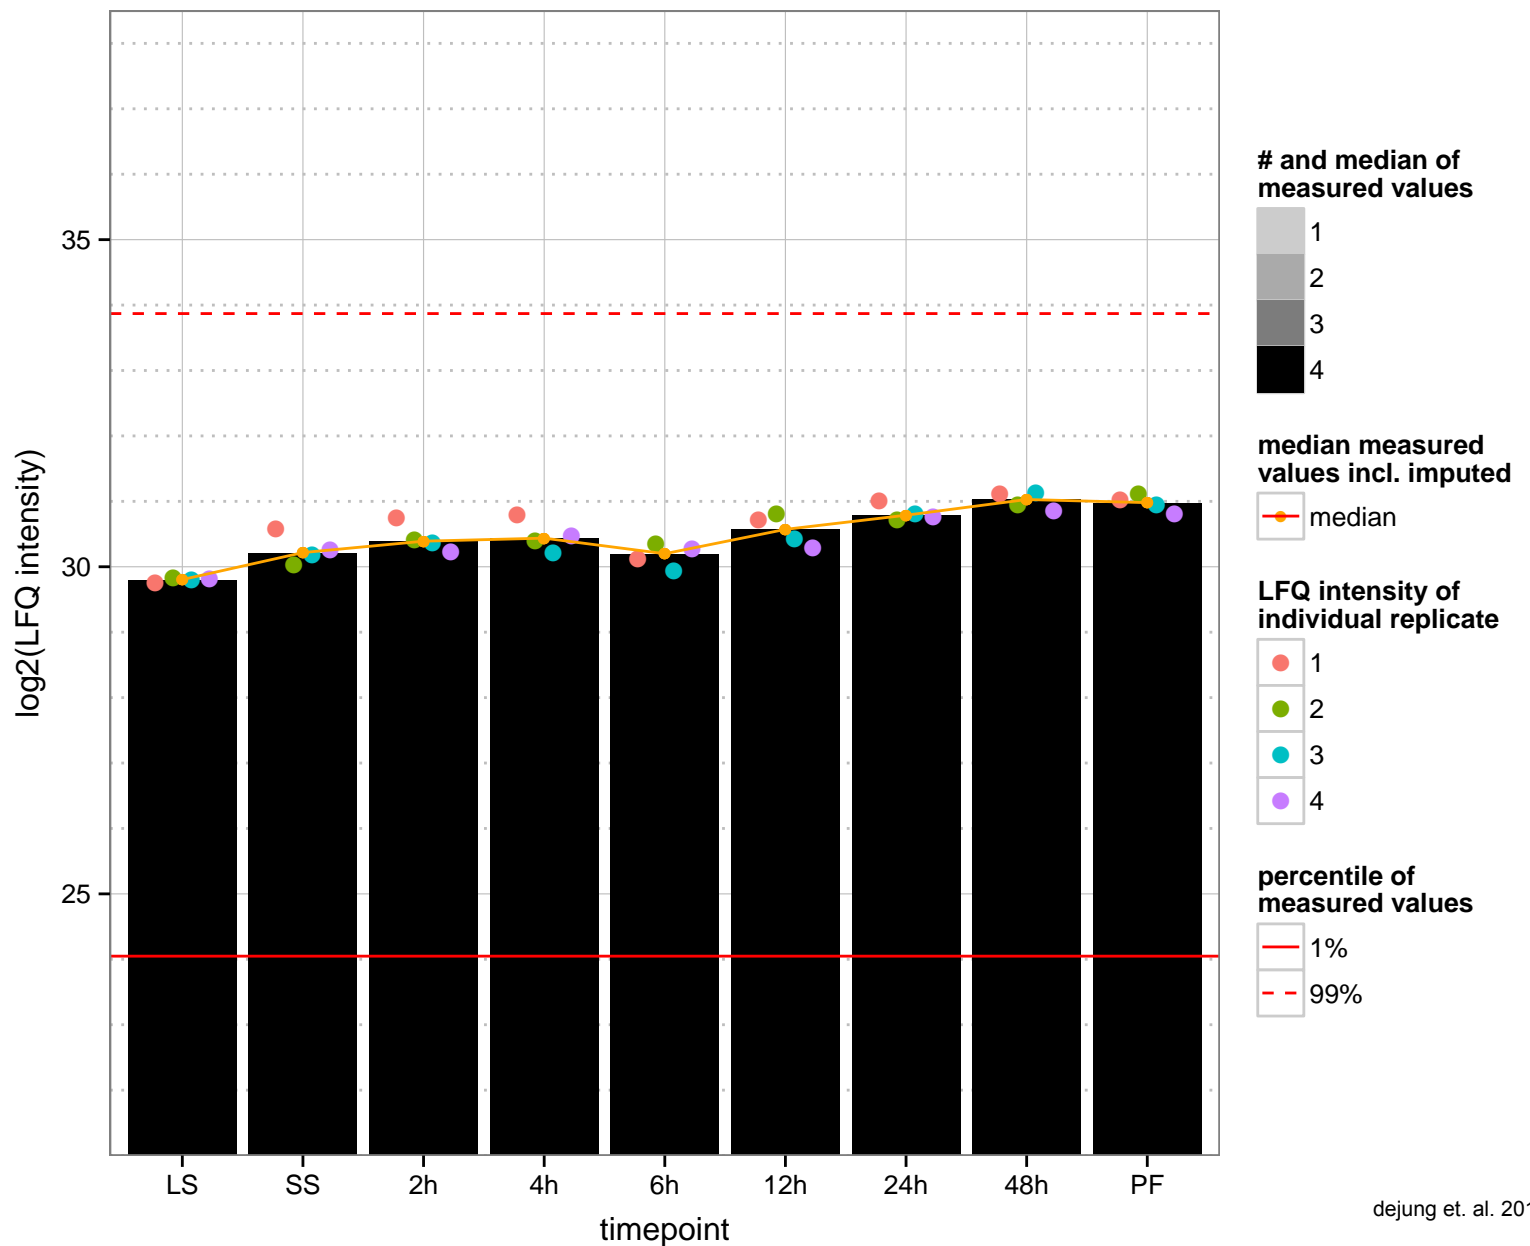

hypothetical protein, conserved  
 Tb927.11.2340  
 AGOF: null  
 AGOC: null  
 AGOP: null  
 PGO: null  
 PGOC: null  
 PGOP: null

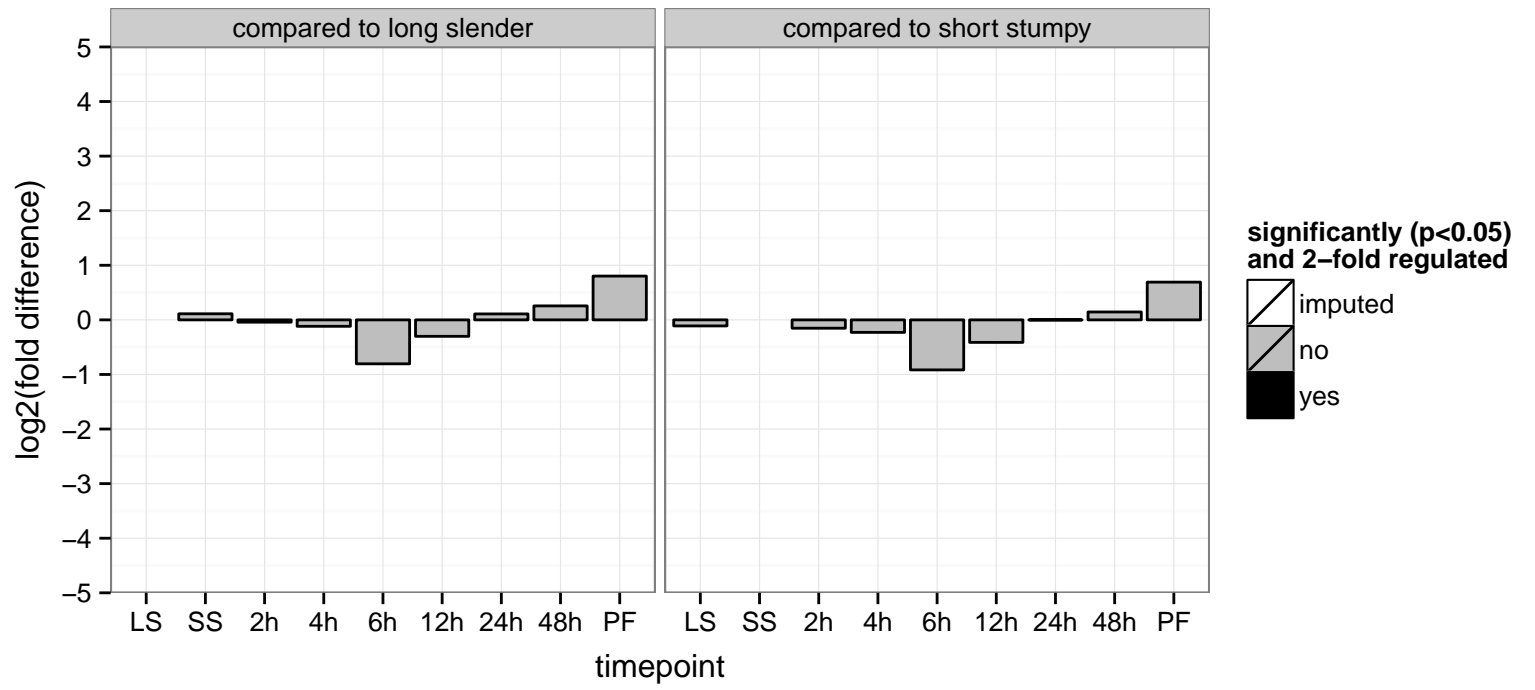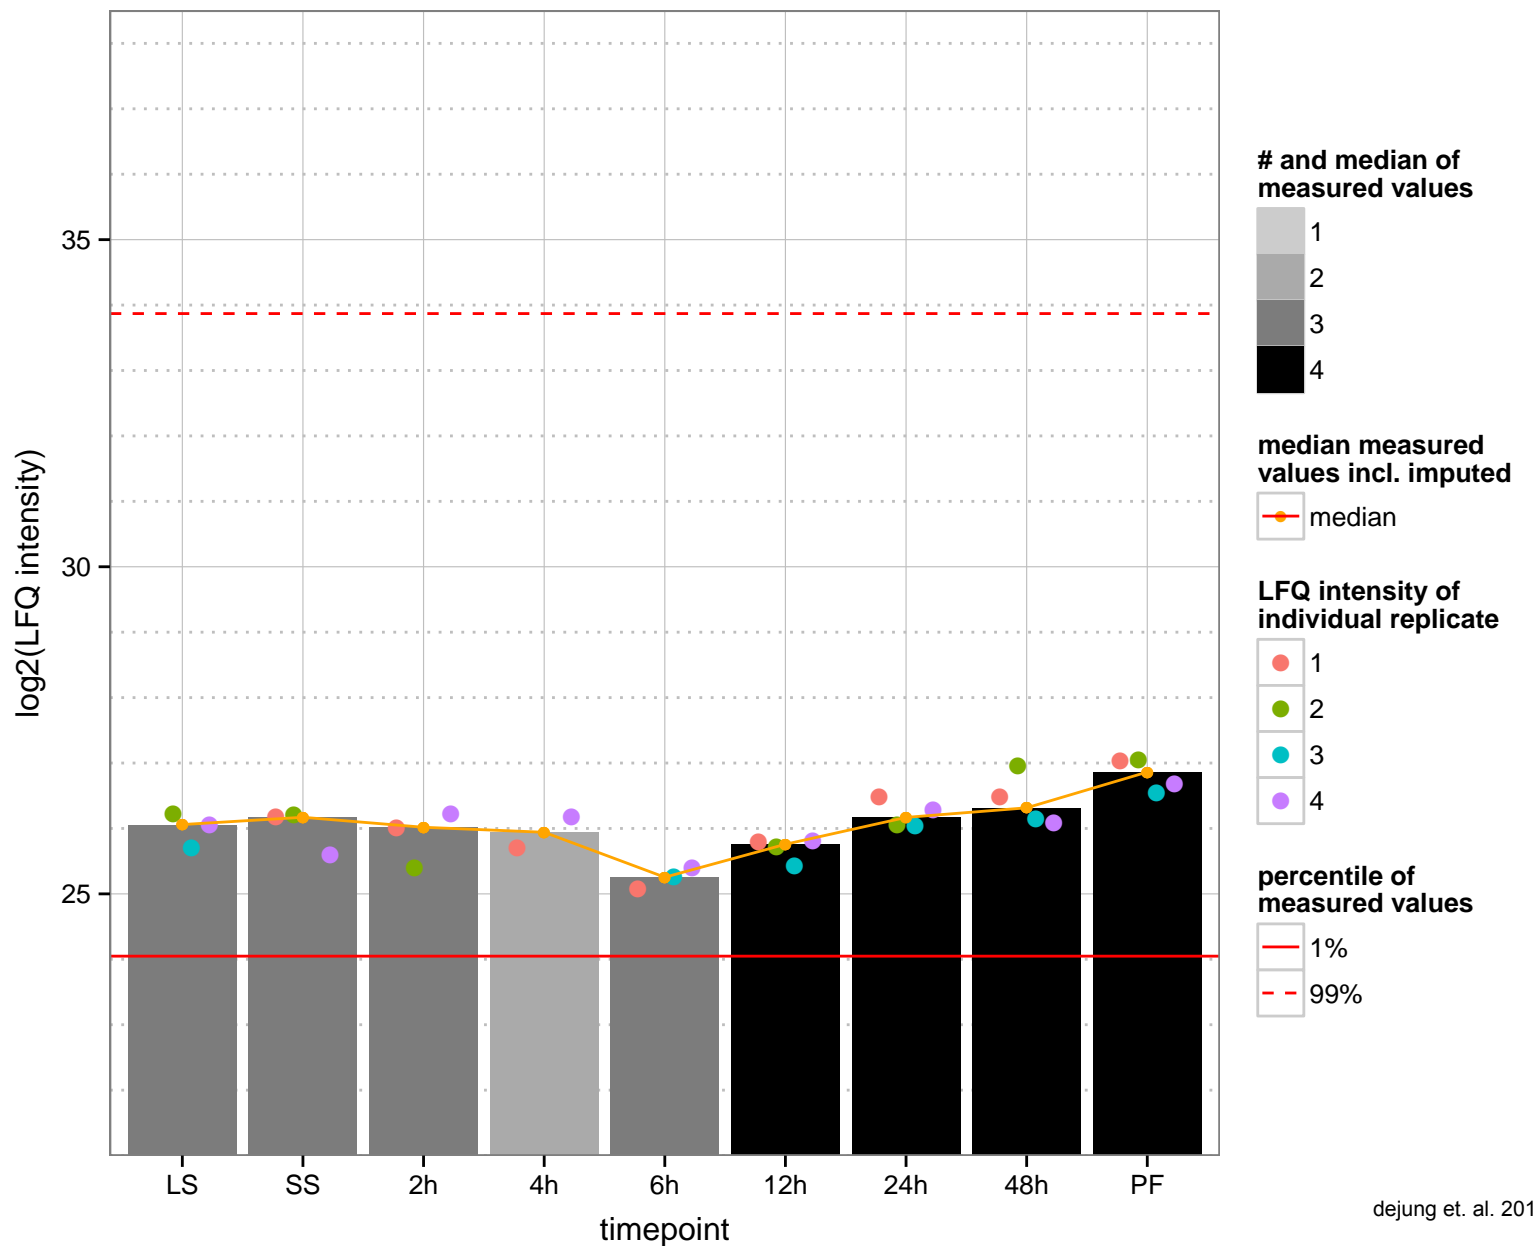

phenylalanyl-tRNA synthetase (beta subunit), putative

Tb927.11.2360

AGOF: ATP binding, RNA binding, magnesium ion binding, phenylalanine-tRNA ligase activity

AGOC: cytoplasm, phenylalanine-tRNA ligase complex

AGOP: phenylalanyl-tRNA aminoacylation, translation

PGOF: ATP binding, RNA binding, magnesium ion binding, nucleotide binding, phenylalanine-tRNA ligase activity

PGOC: cytoplasm

PGOP: phenylalanyl-tRNA aminoacylation

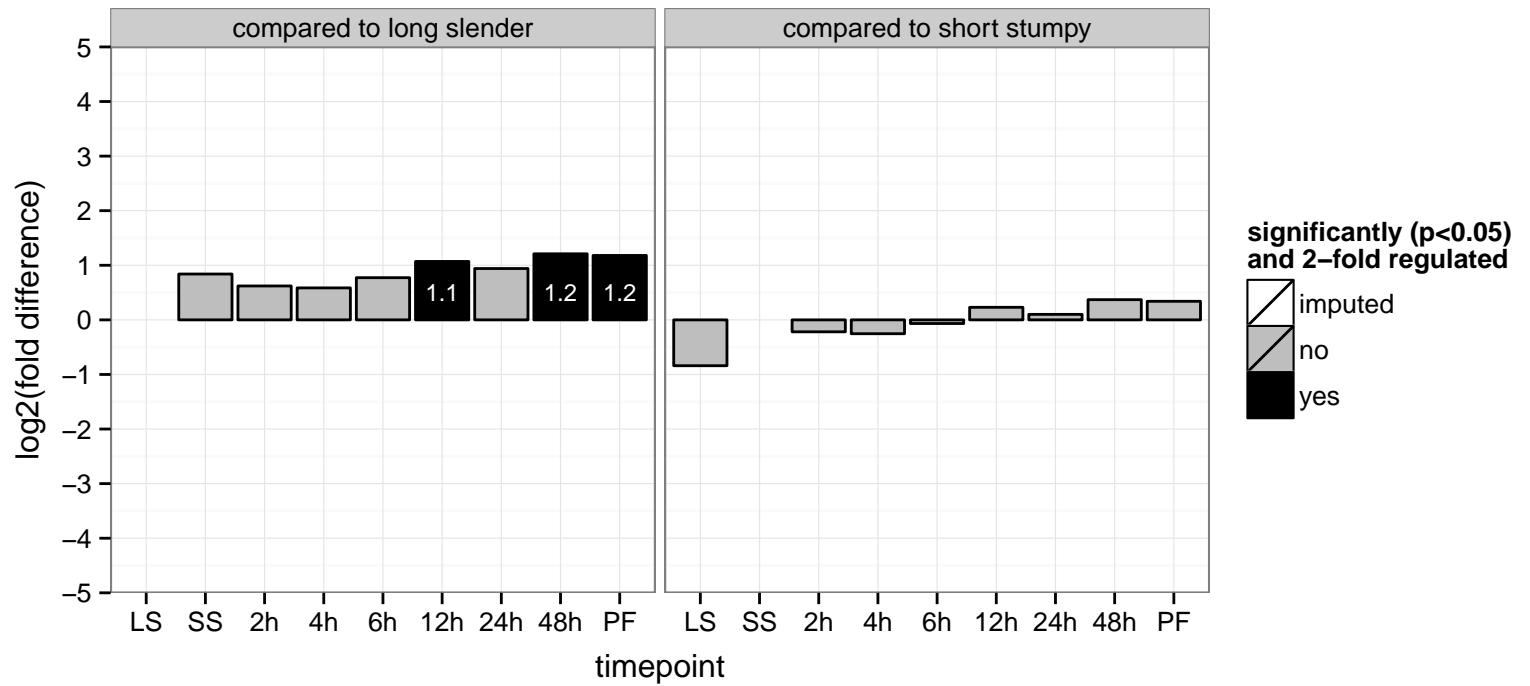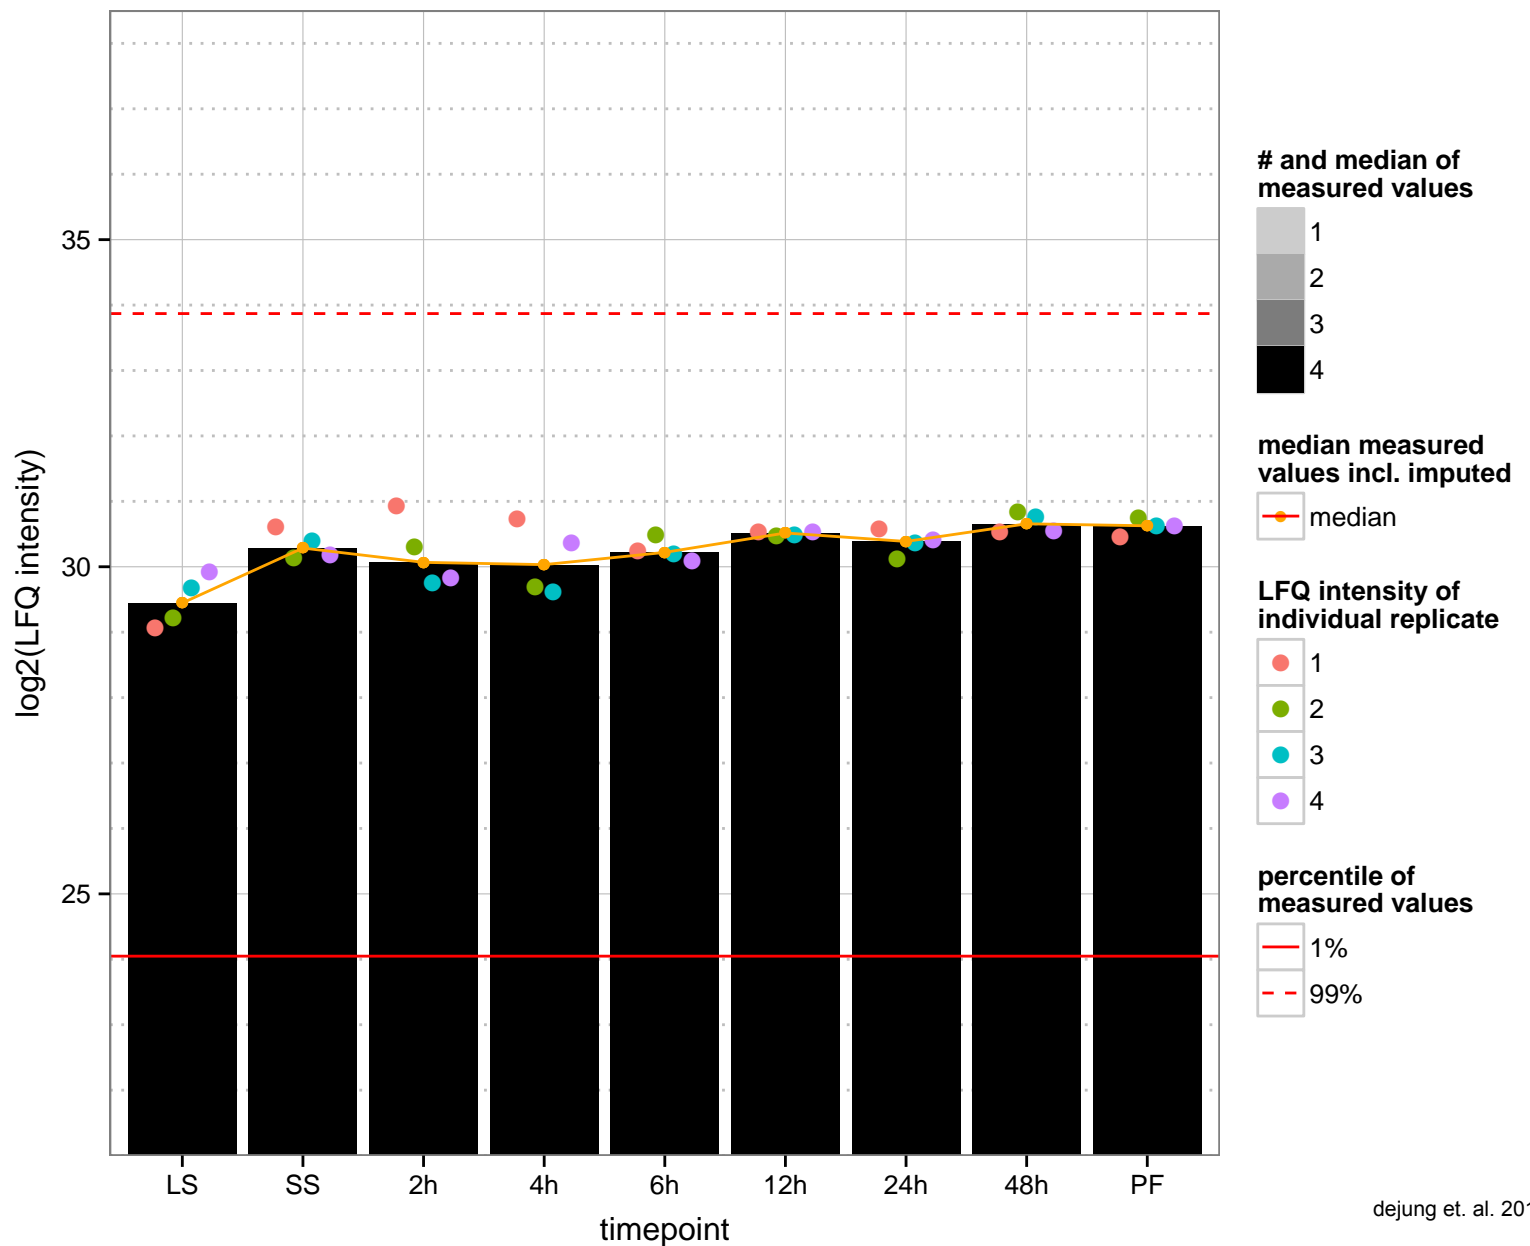

hypothetical protein, conserved  
 Tb927.11.2370  
 AGOF: RNA binding, zinc ion binding  
 AGOC: null  
 AGOP: null  
 PGOF: nucleic acid binding, protein binding, zinc ion binding  
 PGOC: null  
 PGOP: null

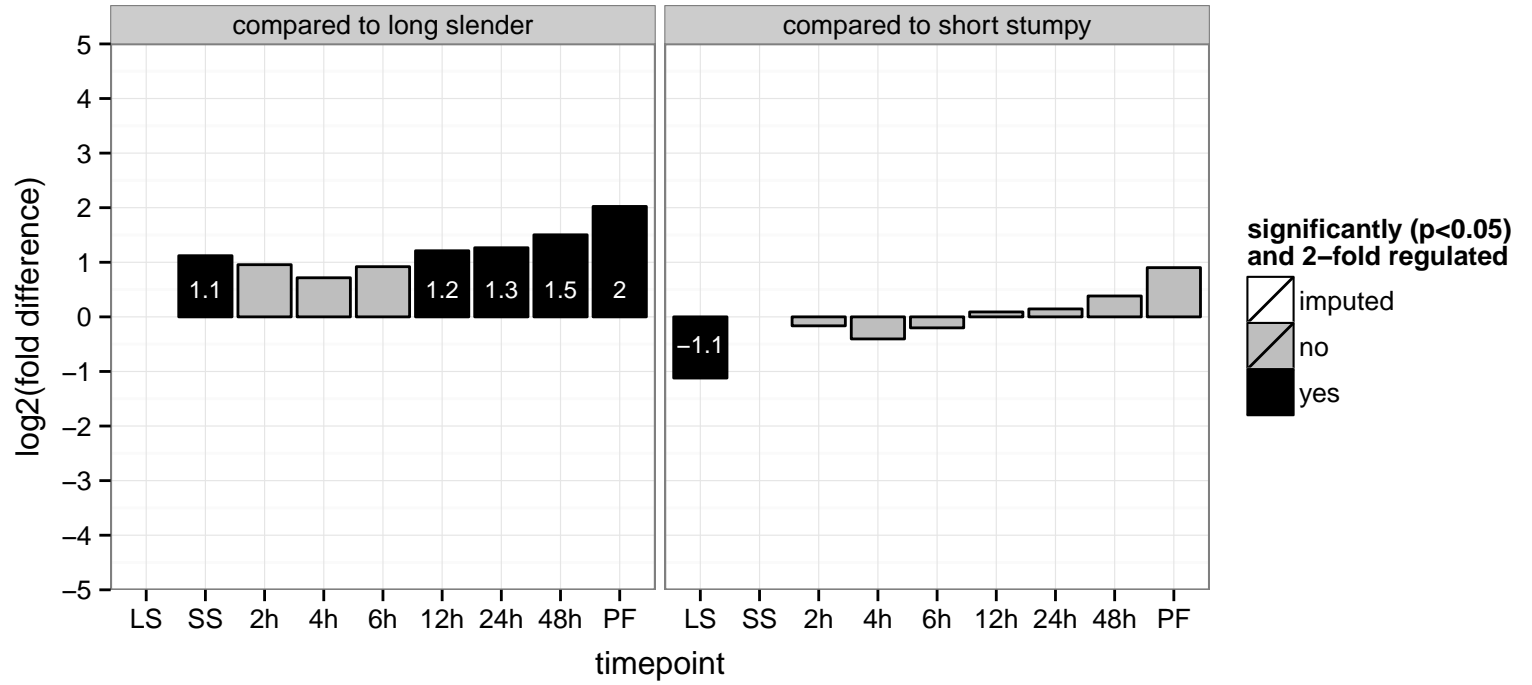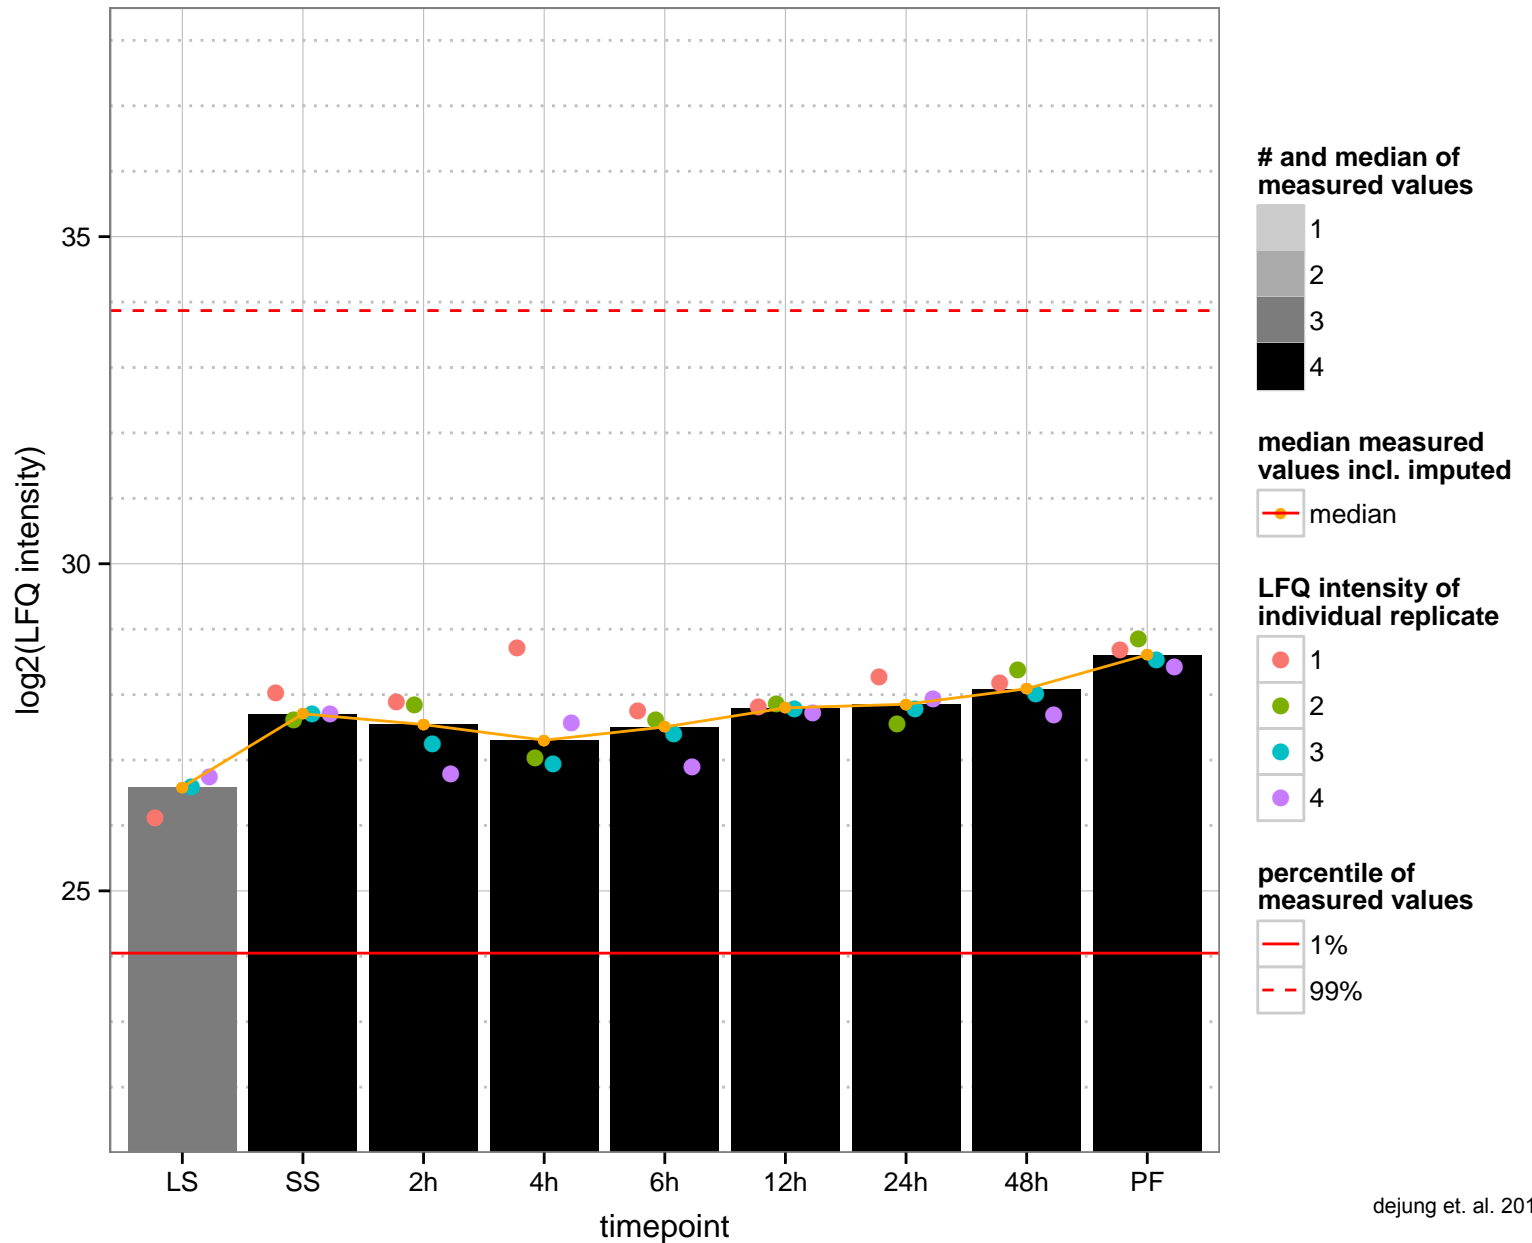

phosphoglycerate kinase, putative  
 Tb927.11.2380  
 AGOF: phosphoglycerate kinase activity  
 AGOC: integral to membrane  
 AGOP: glycolysis  
 PGOF: phosphoglycerate kinase activity  
 PGOC: null  
 PGOP: glycolysis

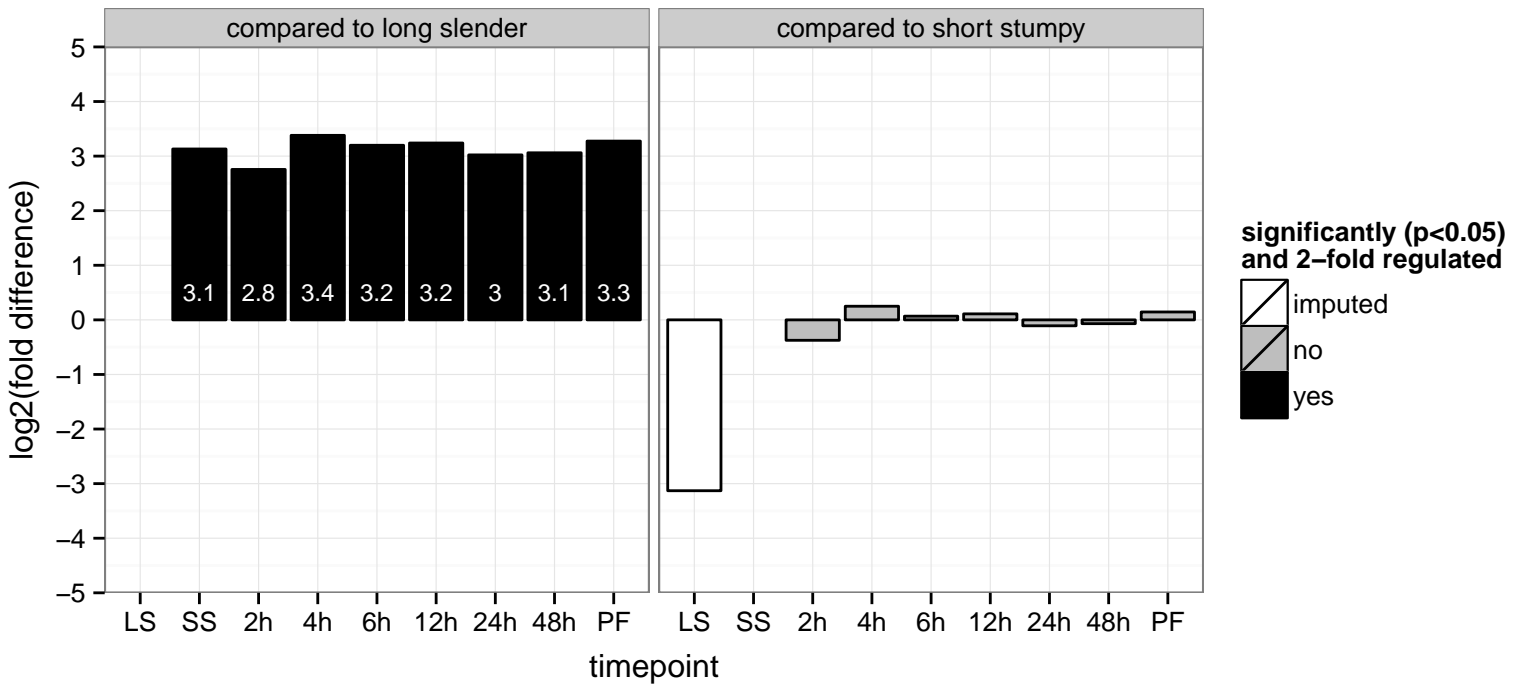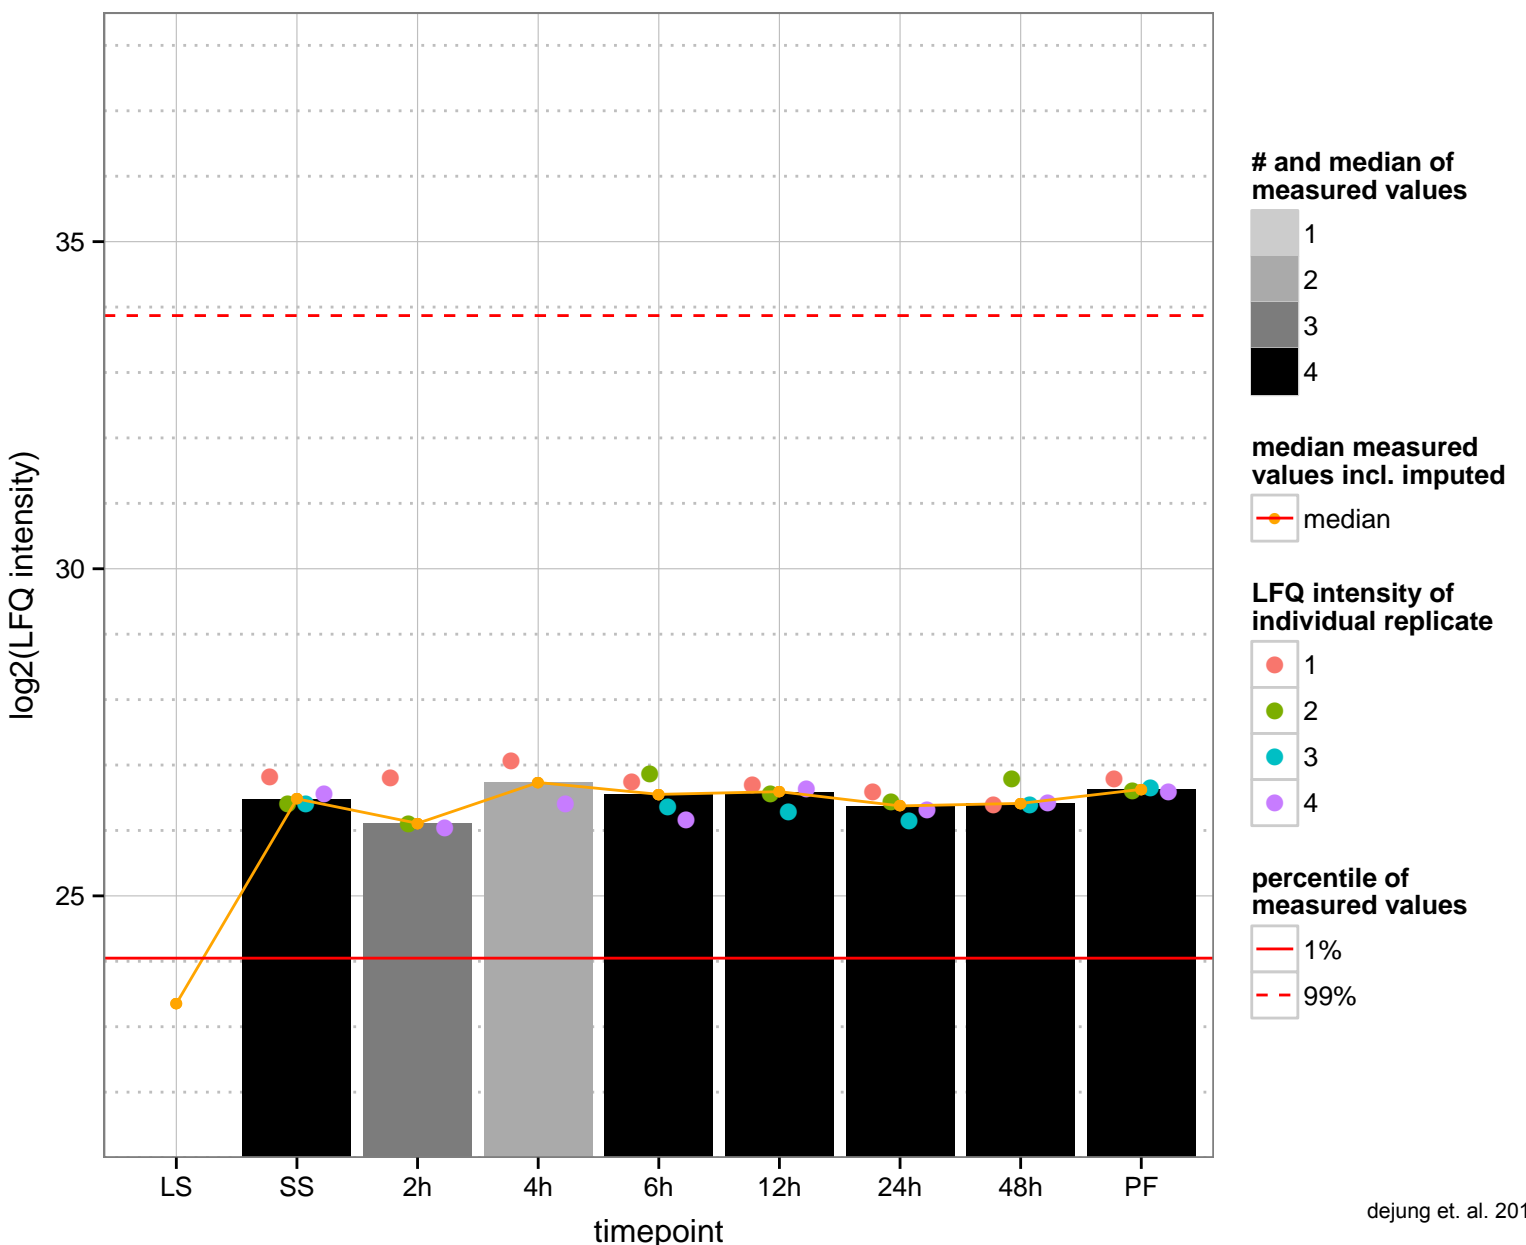

UDP-N-acetylglucosamine pyrophosphorylase, putative  
 Tb927.11.2520  
 AGOF: nucleotidyltransferase activity  
 AGOC: null  
 AGOP: UDP-glucose metabolic process  
 PGO: nucleotidyltransferase activity  
 PGO: null  
 PGOP: metabolic process

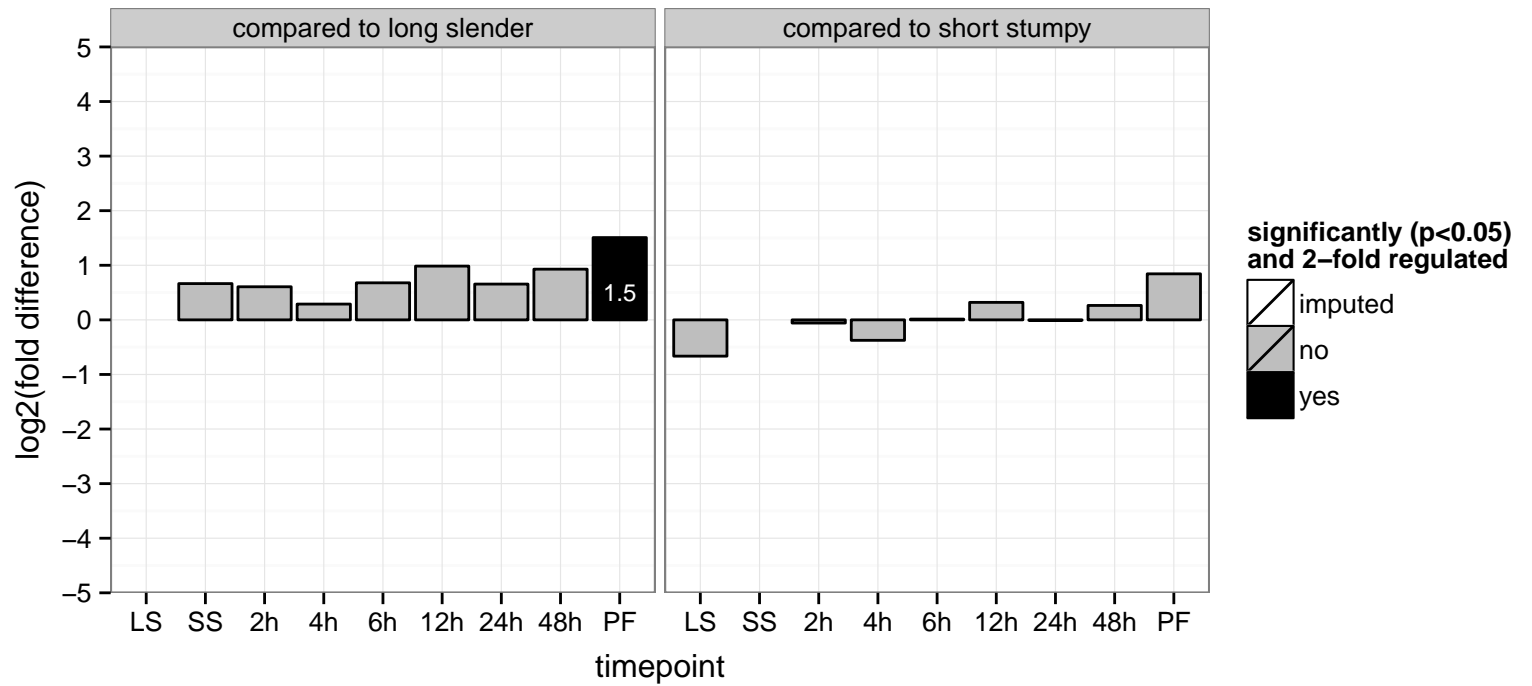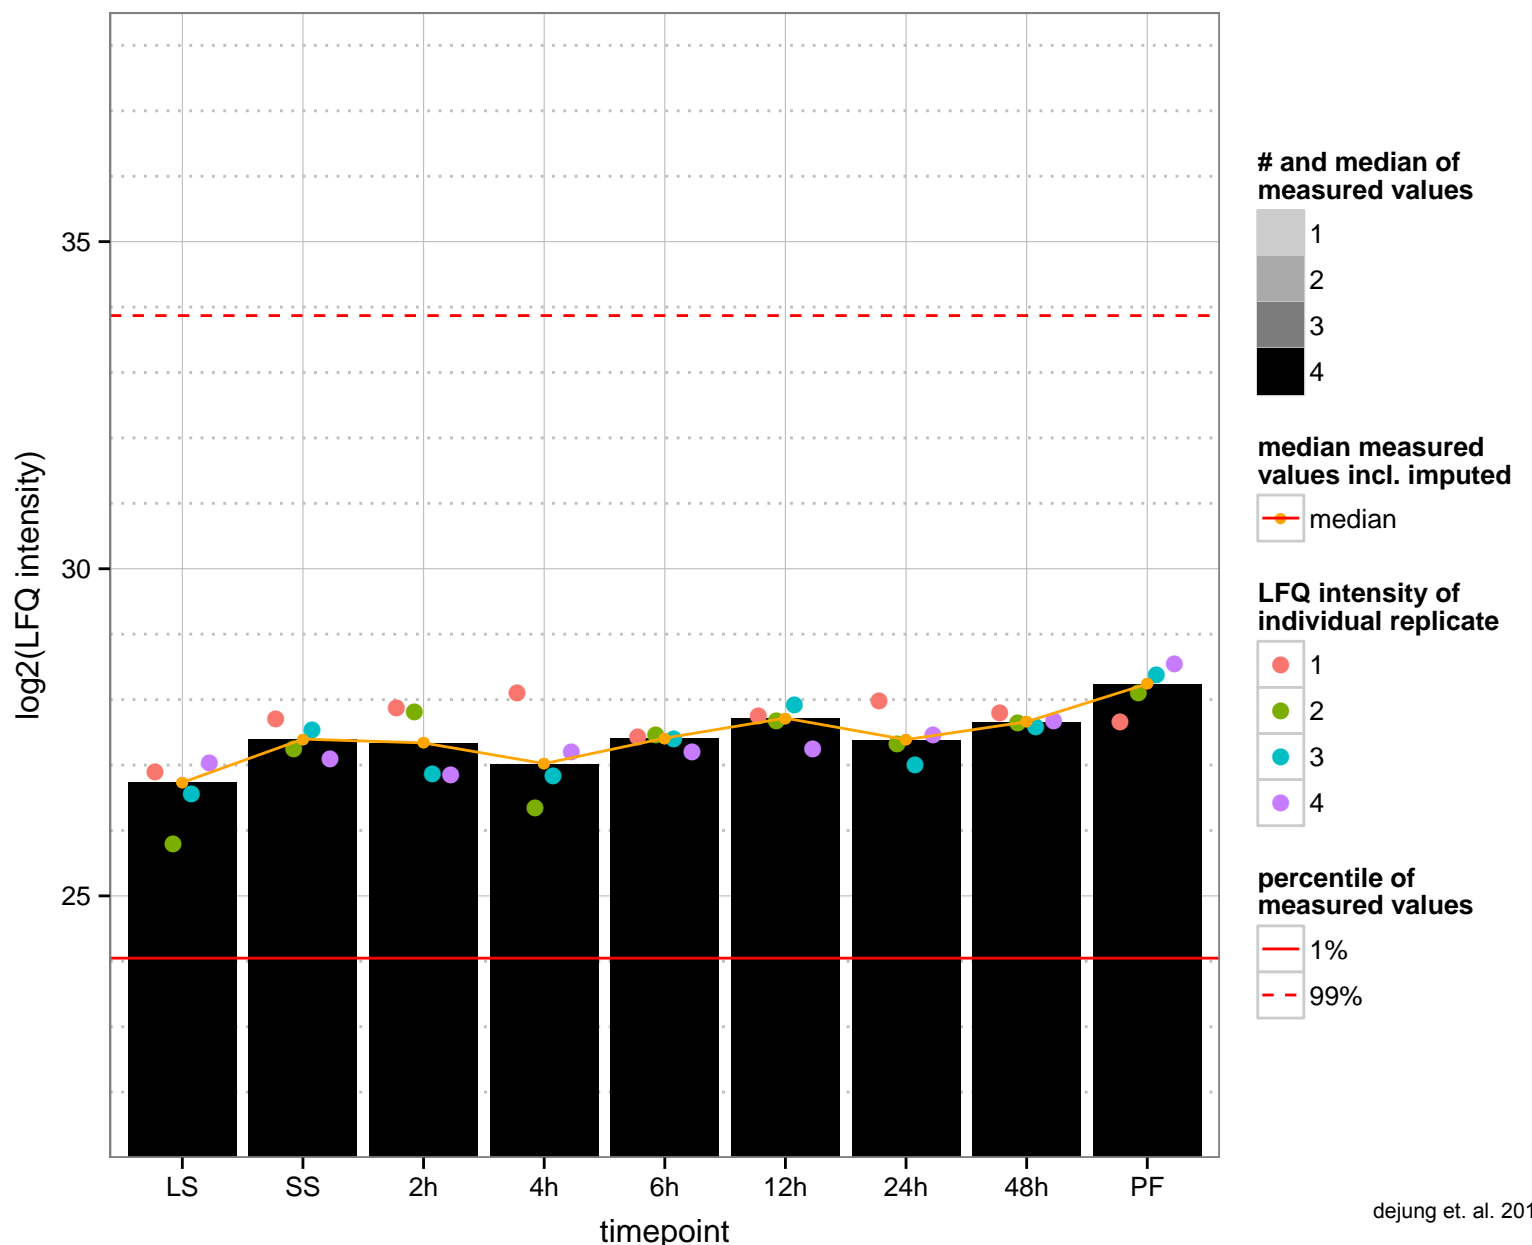

hypothetical protein, conserved  
 Tb927.11.2540  
 AGOF: null  
 AGOC: null  
 AGOP: null  
 PGOF: null  
 PGOE: null  
 PGOP: null

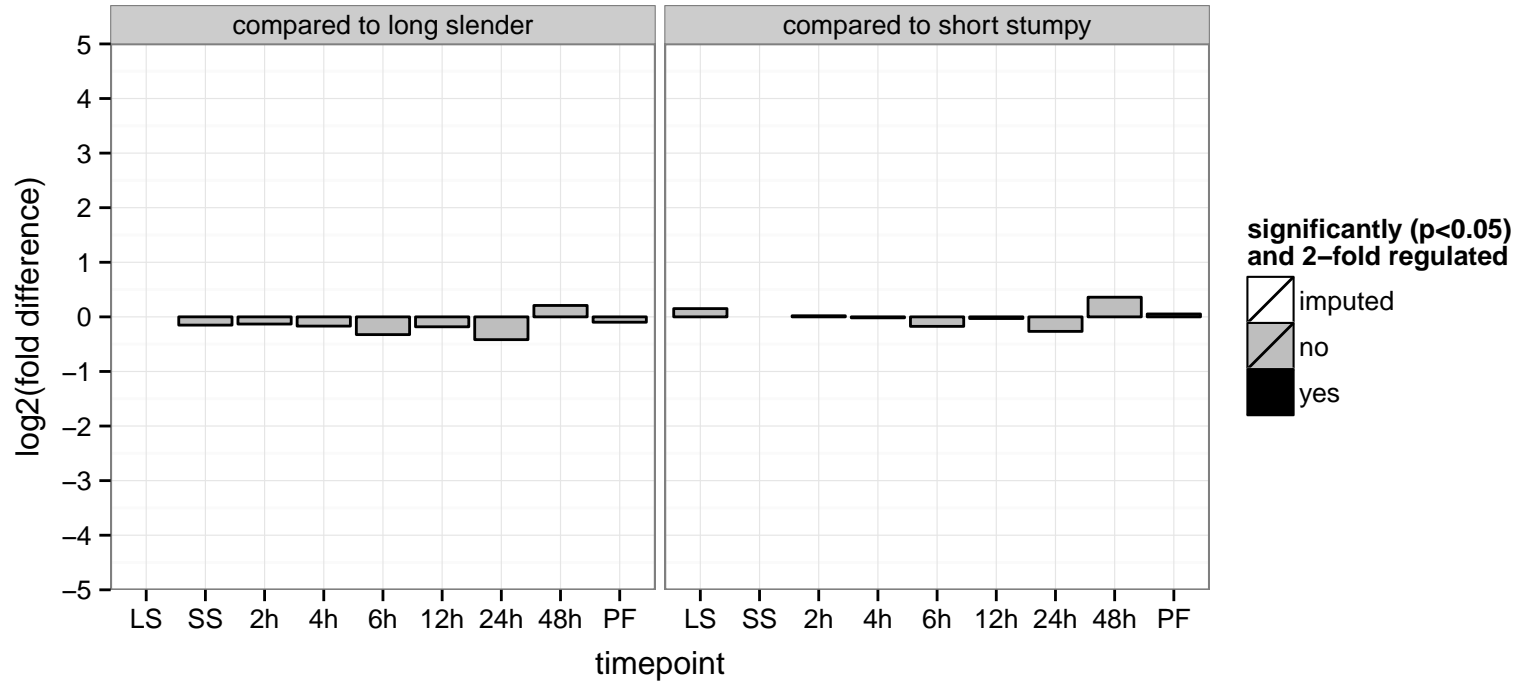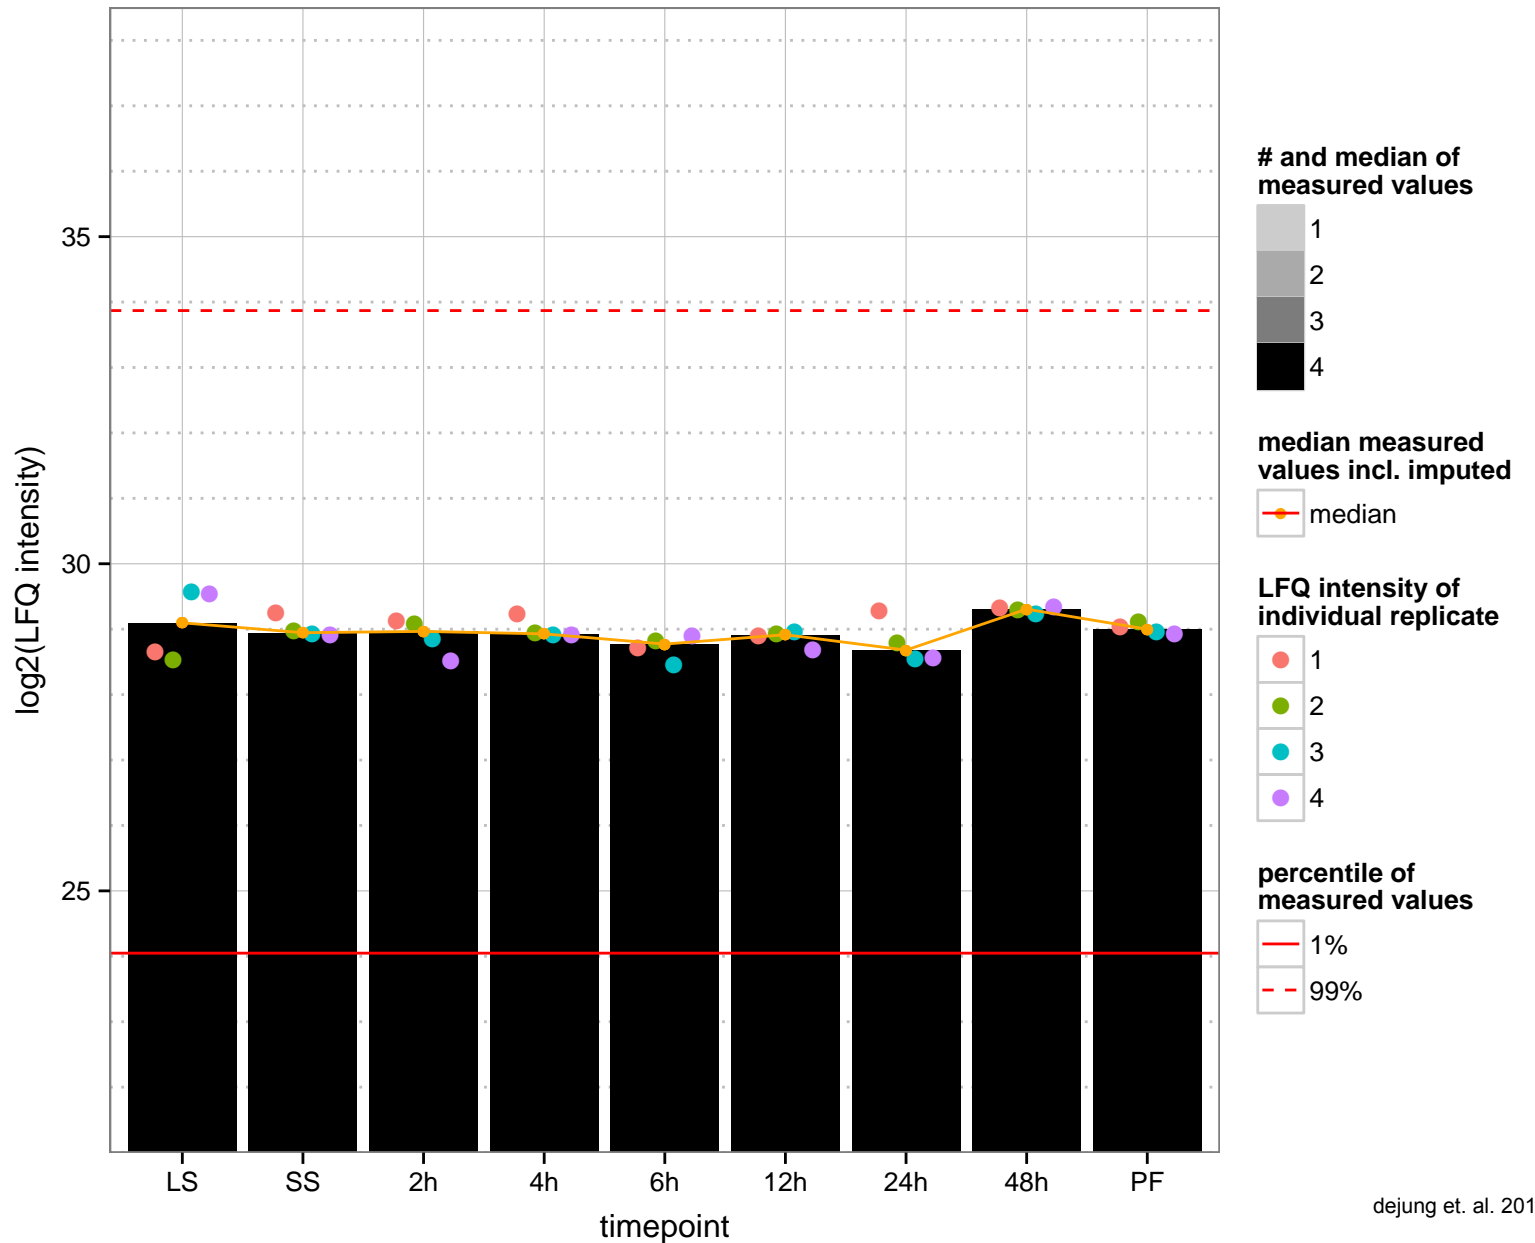



hypothetical protein, conserved  
 Tb927.11.2570  
 AGOF: null  
 AGOC: null  
 AGOP: null  
 PGO: null  
 PGOC: null  
 PGOP: null

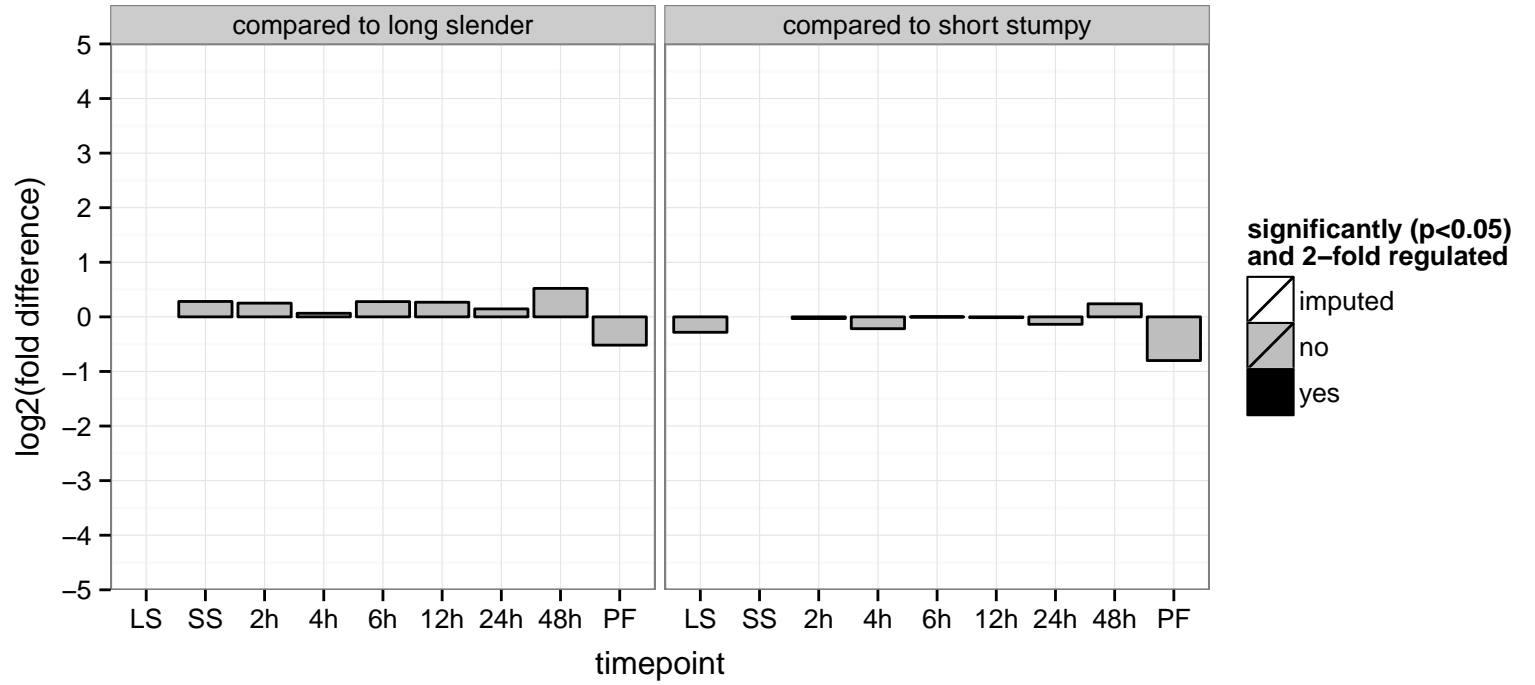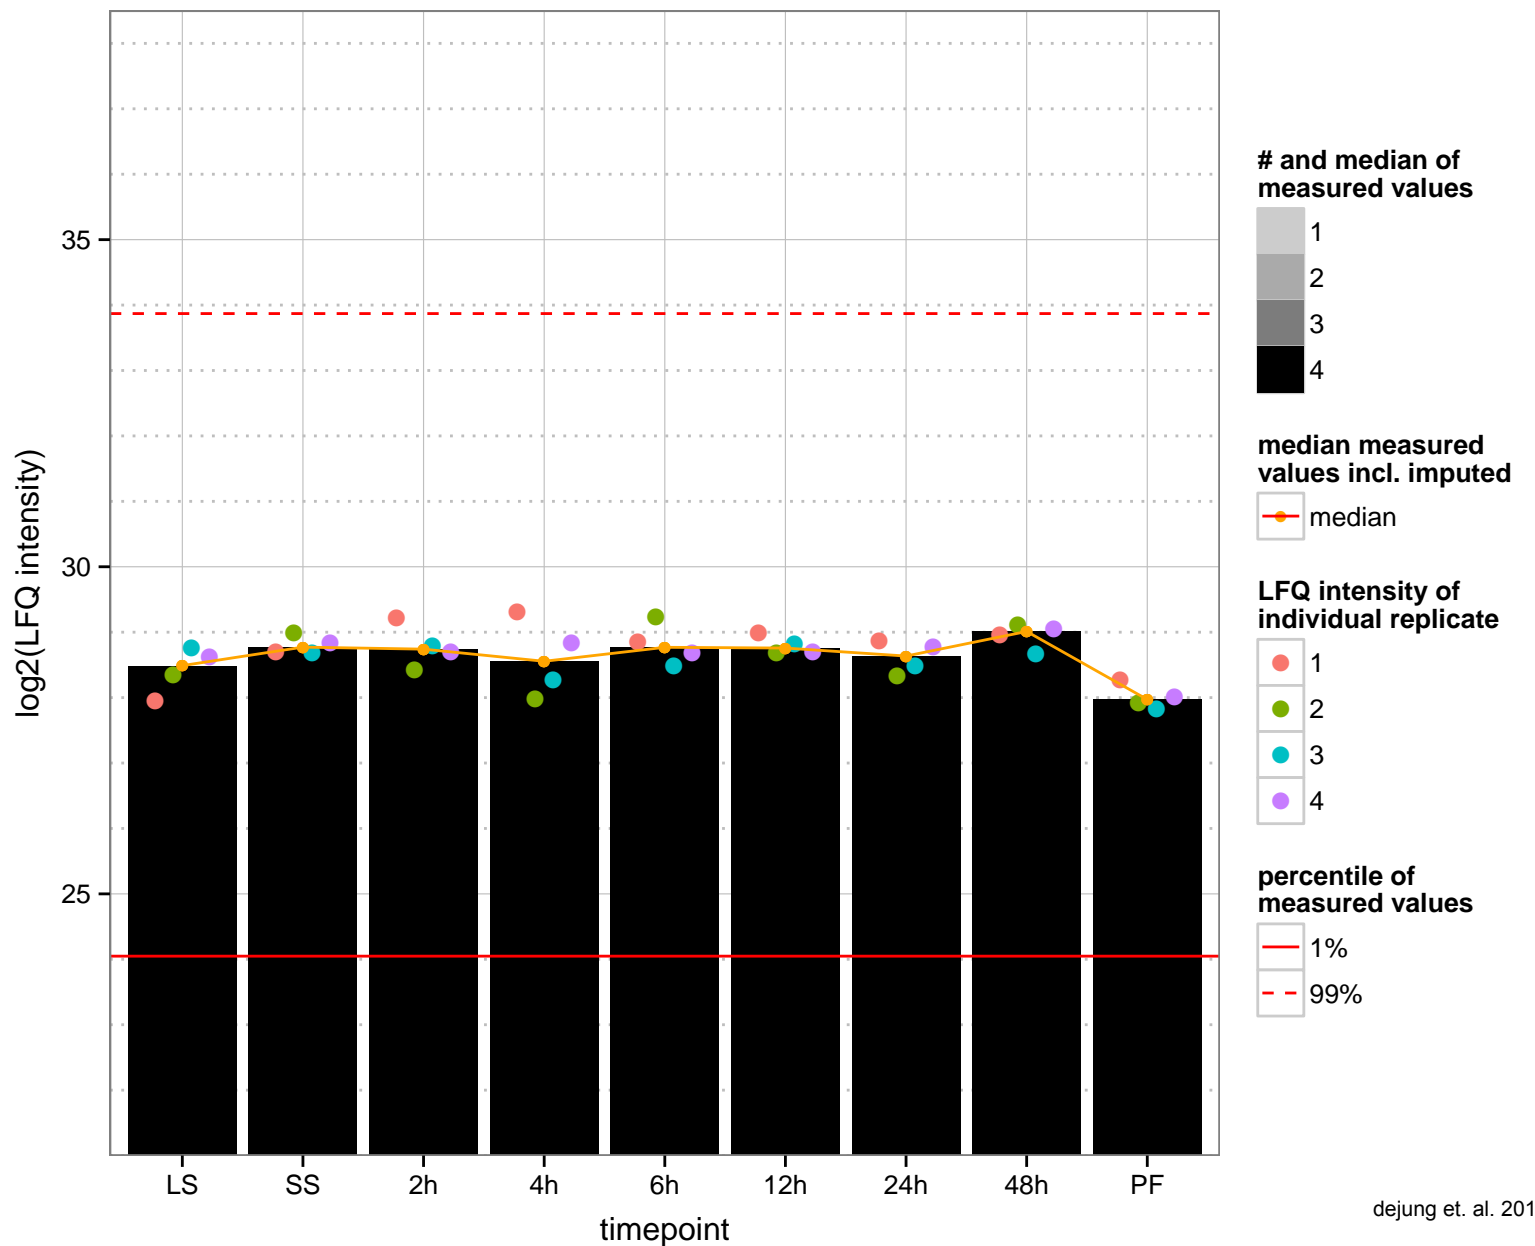

predicted WD40 repeat protein (PIFTF6)  
 Tb927.11.260  
 AGOF: null  
 AGOC: null  
 AGOP: null  
 PGOF: protein binding  
 PGO: null  
 PGO: null

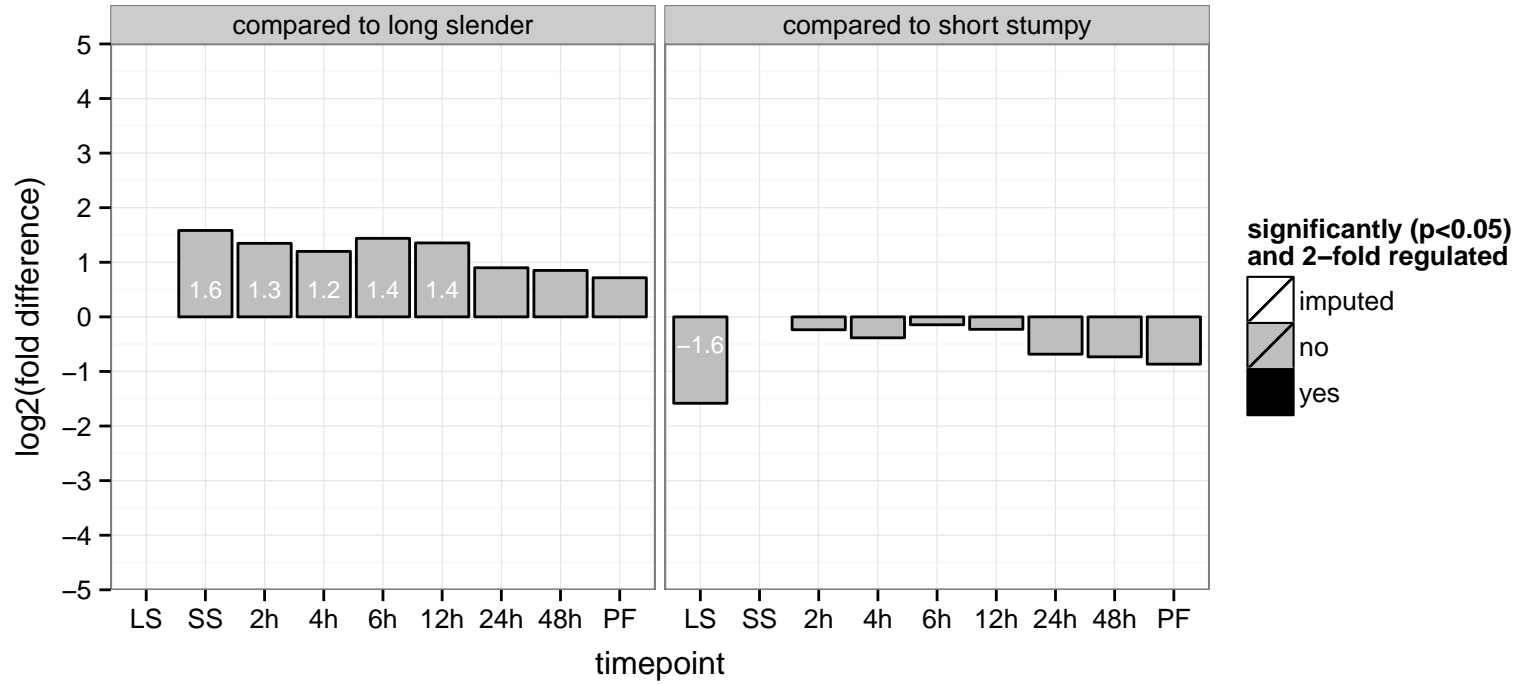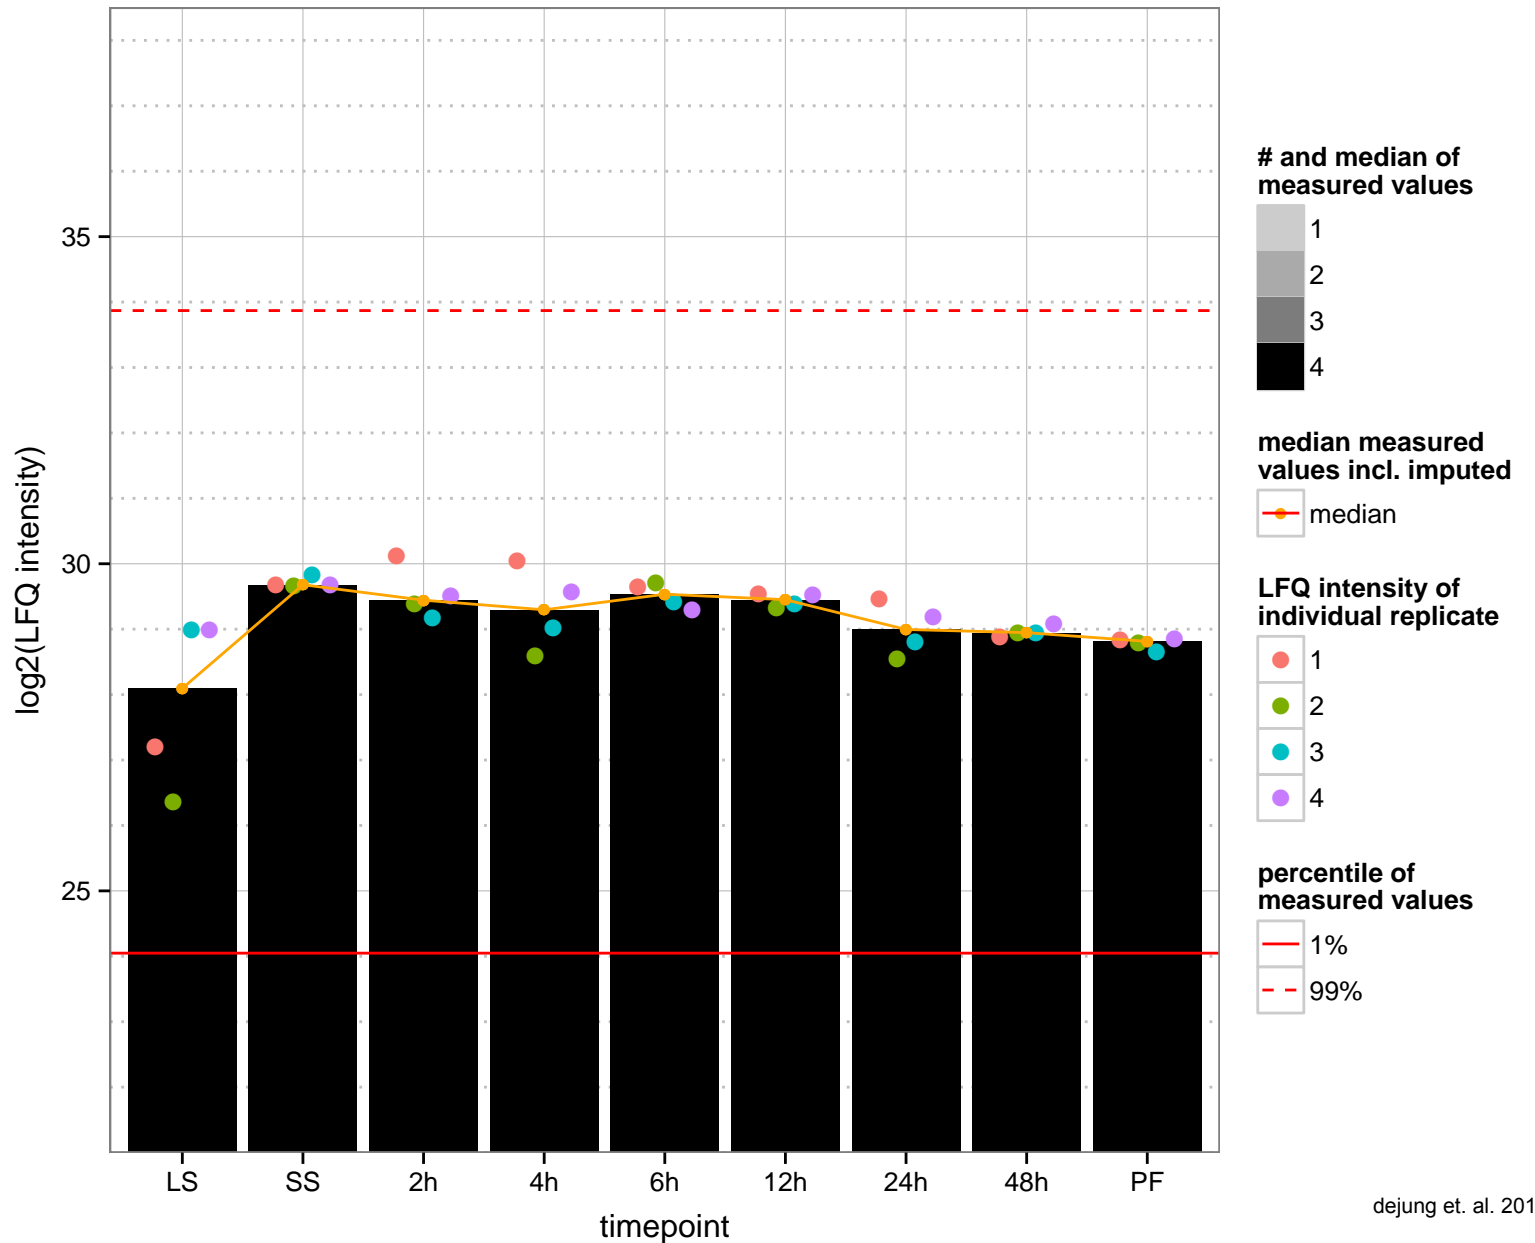

hypothetical protein, conserved  
 Tb927.11.2600  
 AGOF: null  
 AGOC: null  
 AGOP: null  
 PGOF: null  
 PGO C: null  
 PGOP: null

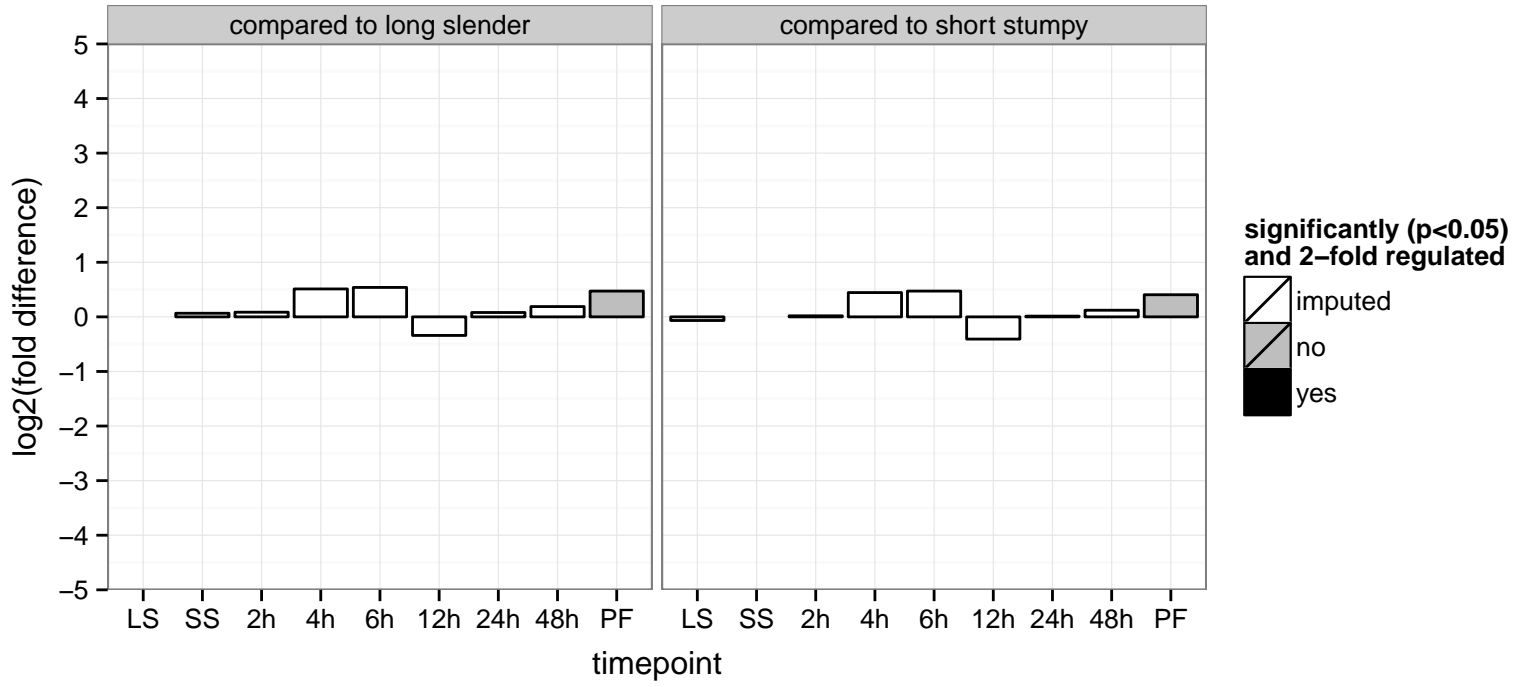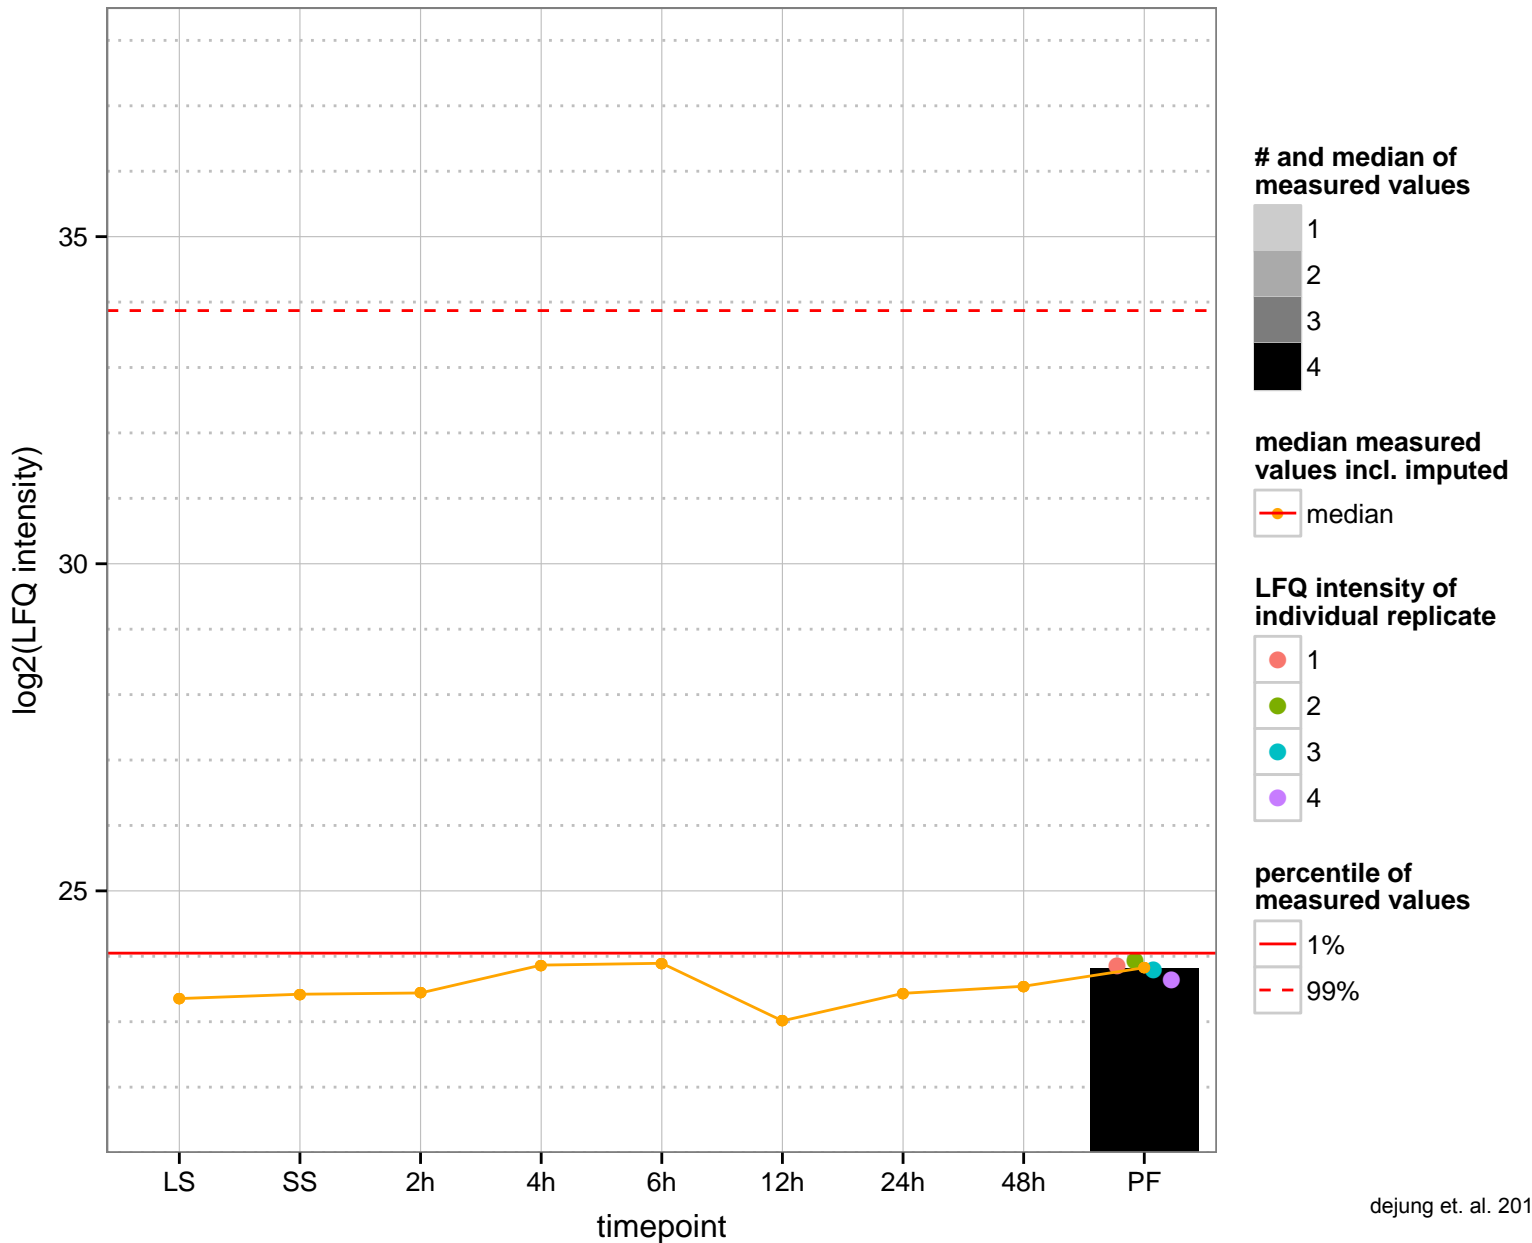

hypothetical protein, conserved  
 Tb927.11.2610  
 AGOF: null  
 AGOC: null  
 AGOP: null  
 PGO: null  
 PGOC: null  
 PGOP: null

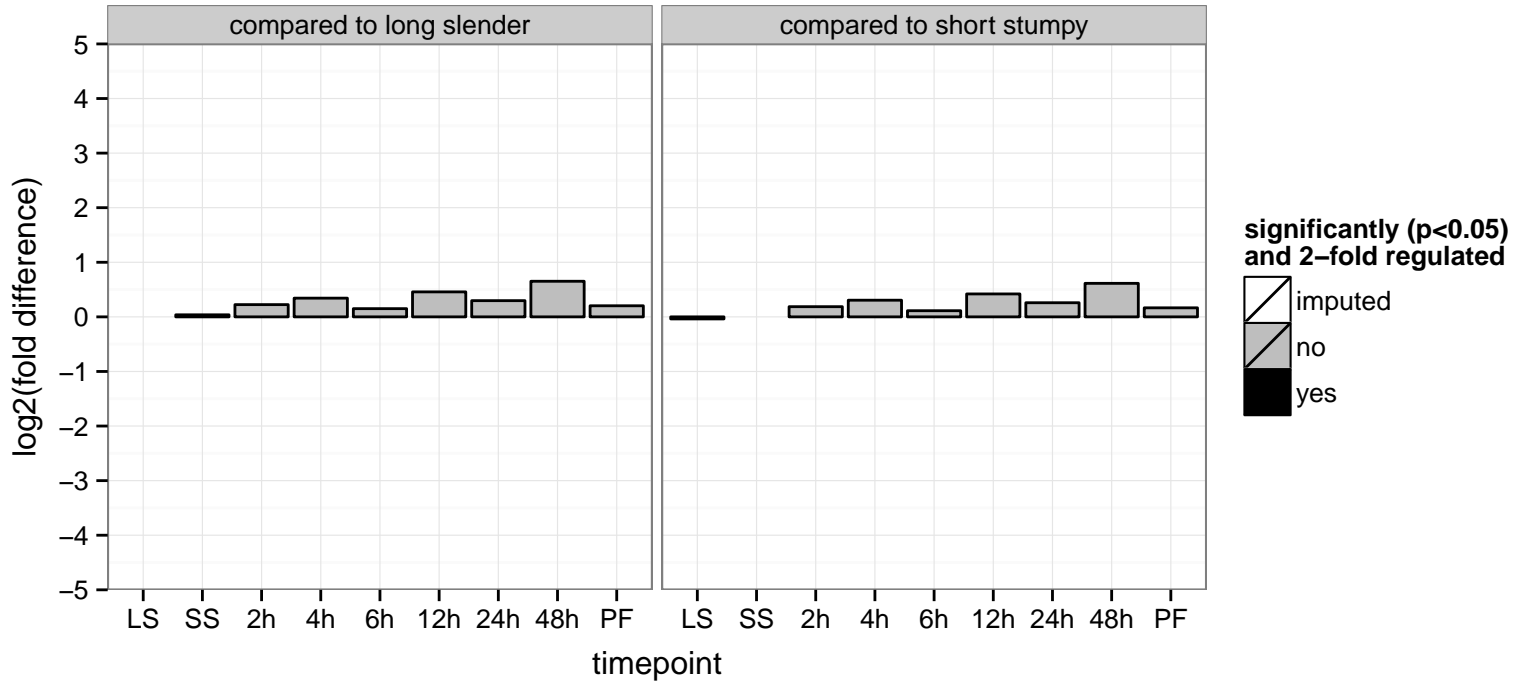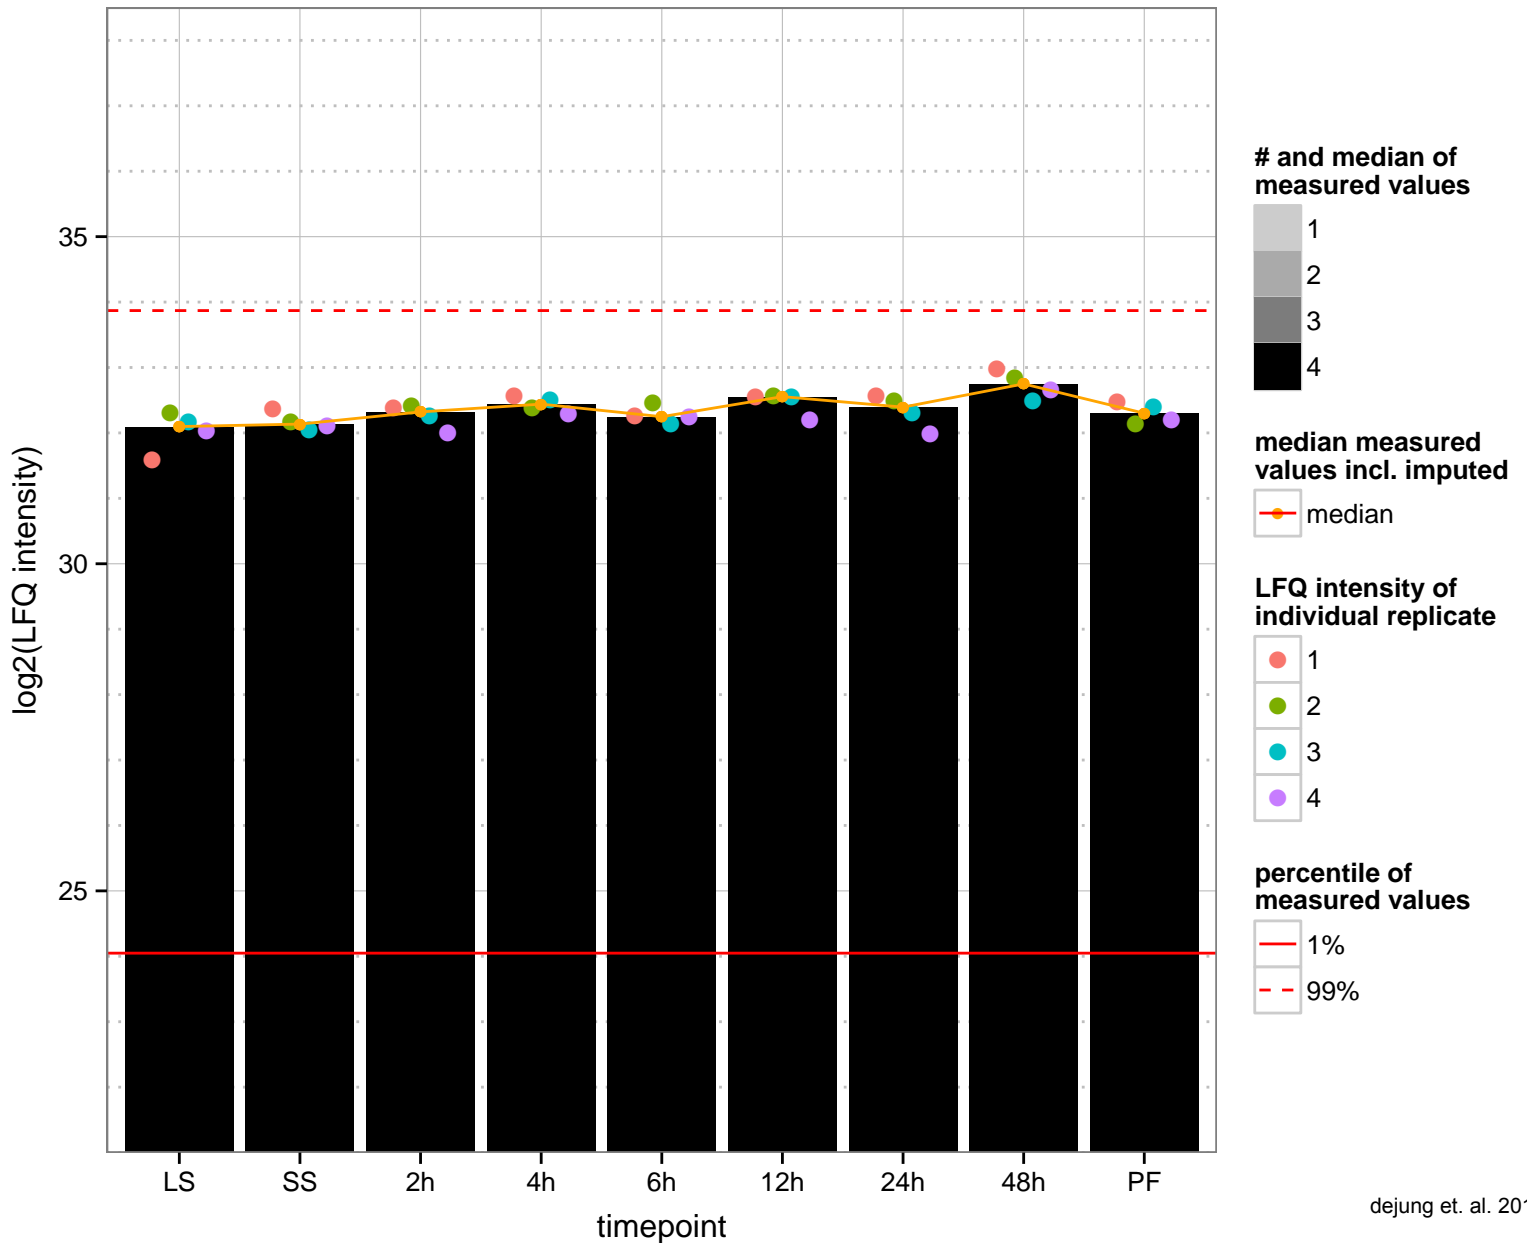

hypothetical protein, conserved  
 Tb927.11.2620  
 AGOF: null  
 AGOC: null  
 AGOP: null  
 PGO: null  
 PGOC: null  
 PGOP: null

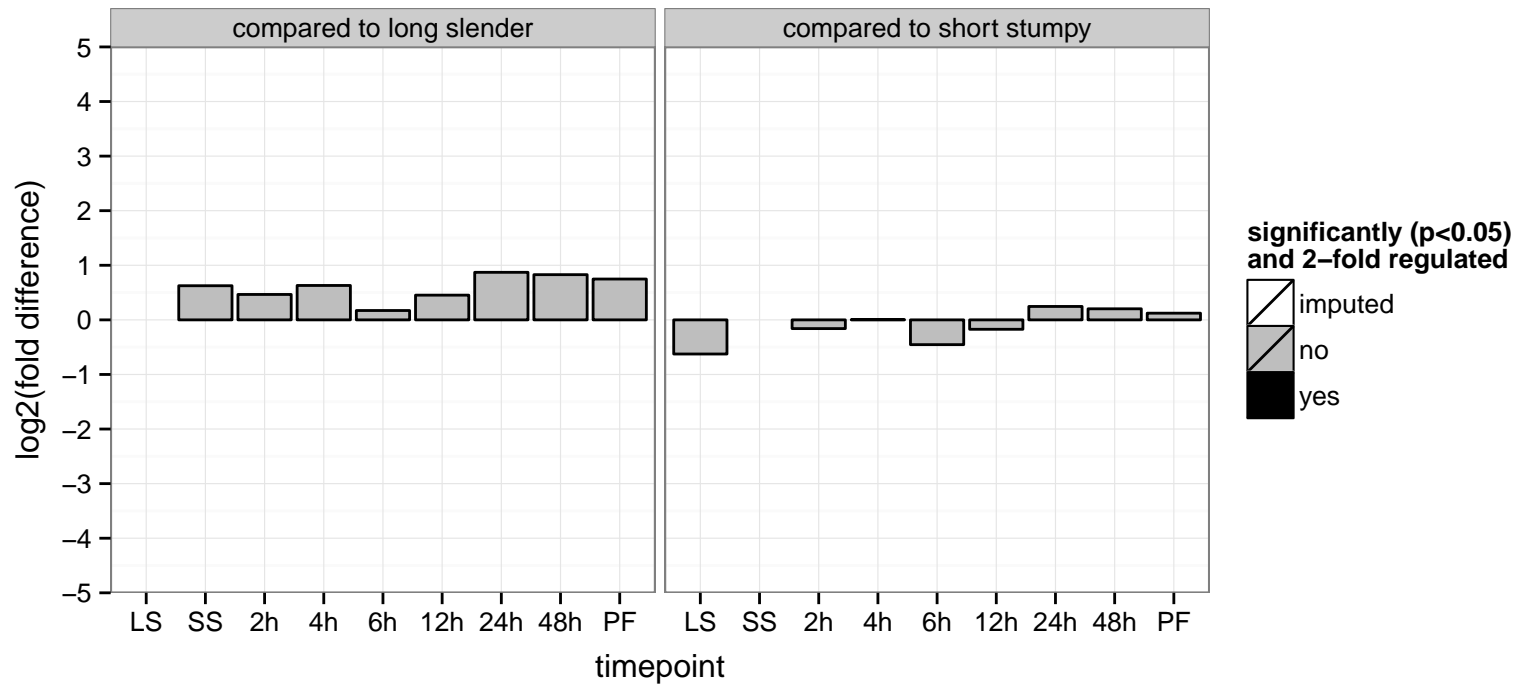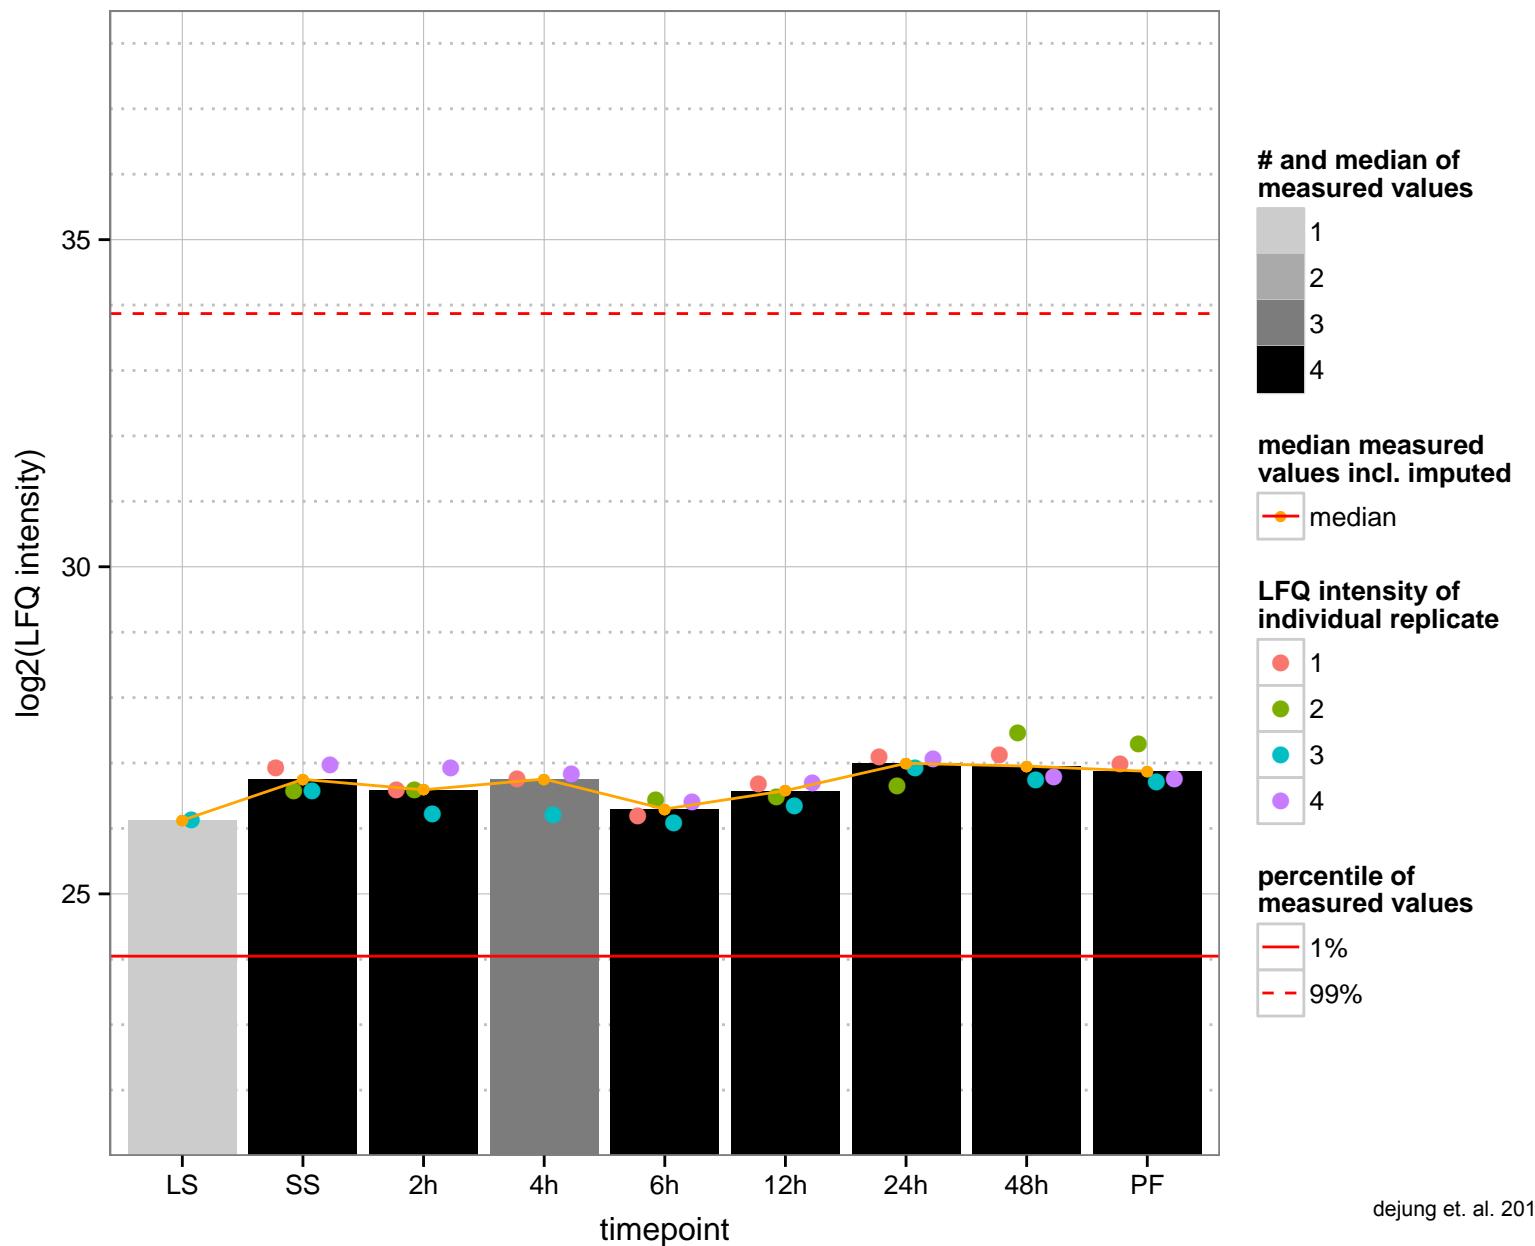

ras-like small GTPase, putative (TbNST)  
 Tb927.11.2640  
 AGOF: GTP binding, GTPase activity  
 AGOC: intracellular  
 AGOP: null  
 PGO: GTP binding  
 PGOC: null  
 PGOP: null

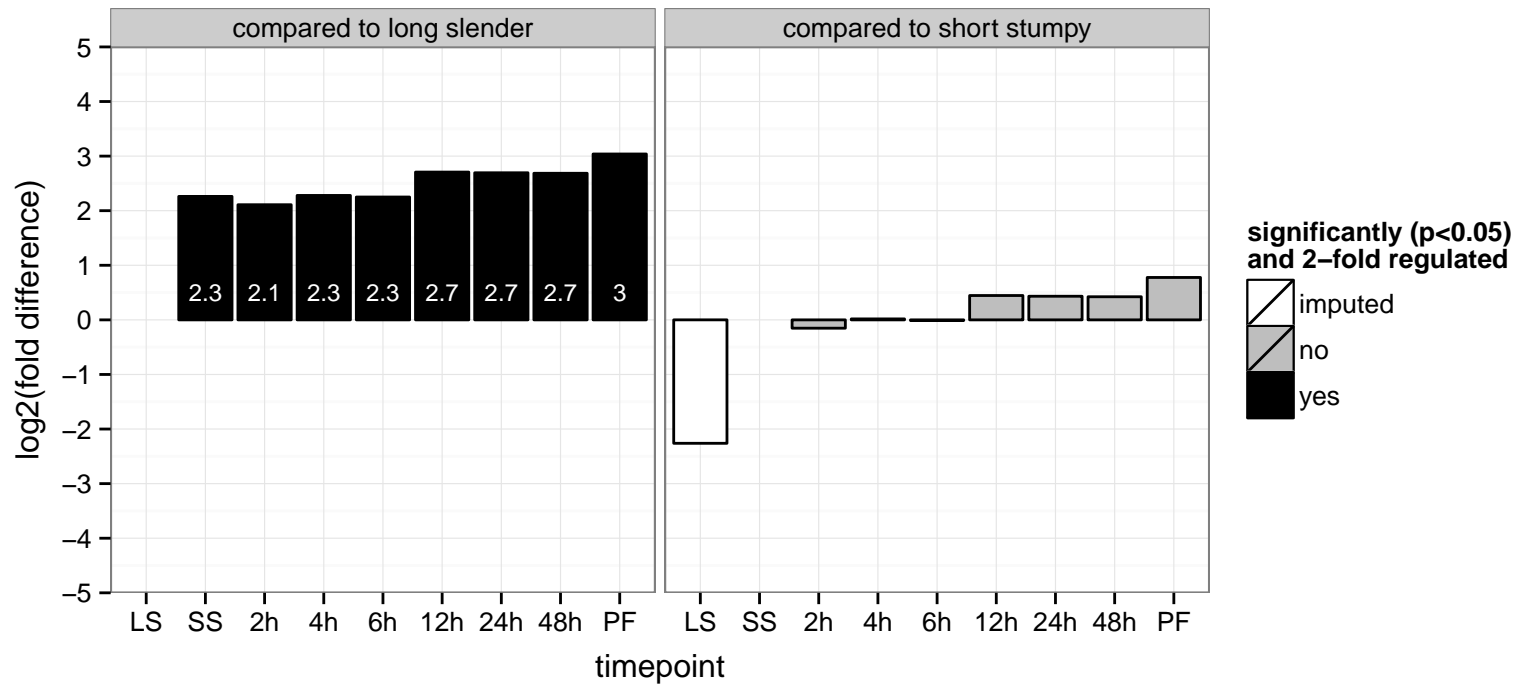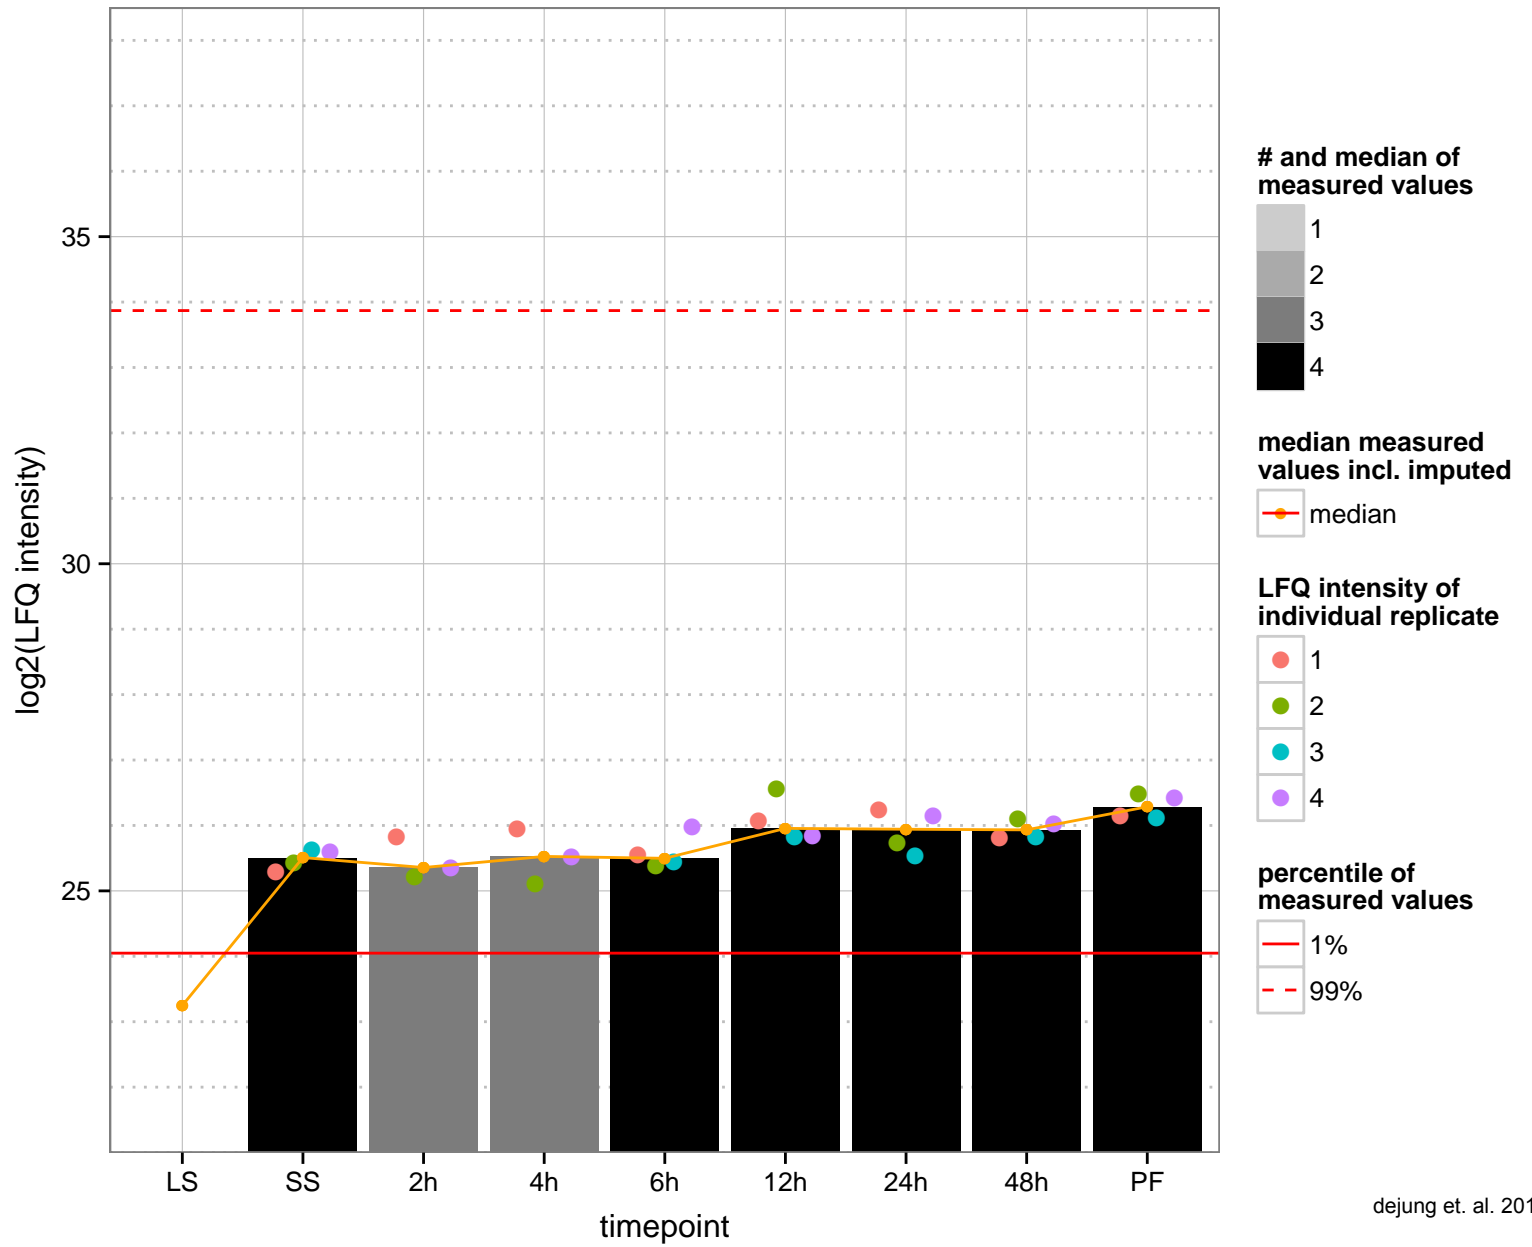

heat shock protein 84, putative  
 Tb927.11.2650  
 AGOF: ATP binding, ATPase activity, coupled, unfolded protein binding  
 AGOC: mitochondrion  
 AGOP: protein folding, response to stress  
 PGOF: ATP binding, unfolded protein binding  
 PGO: null  
 PGOP: protein folding, response to stress

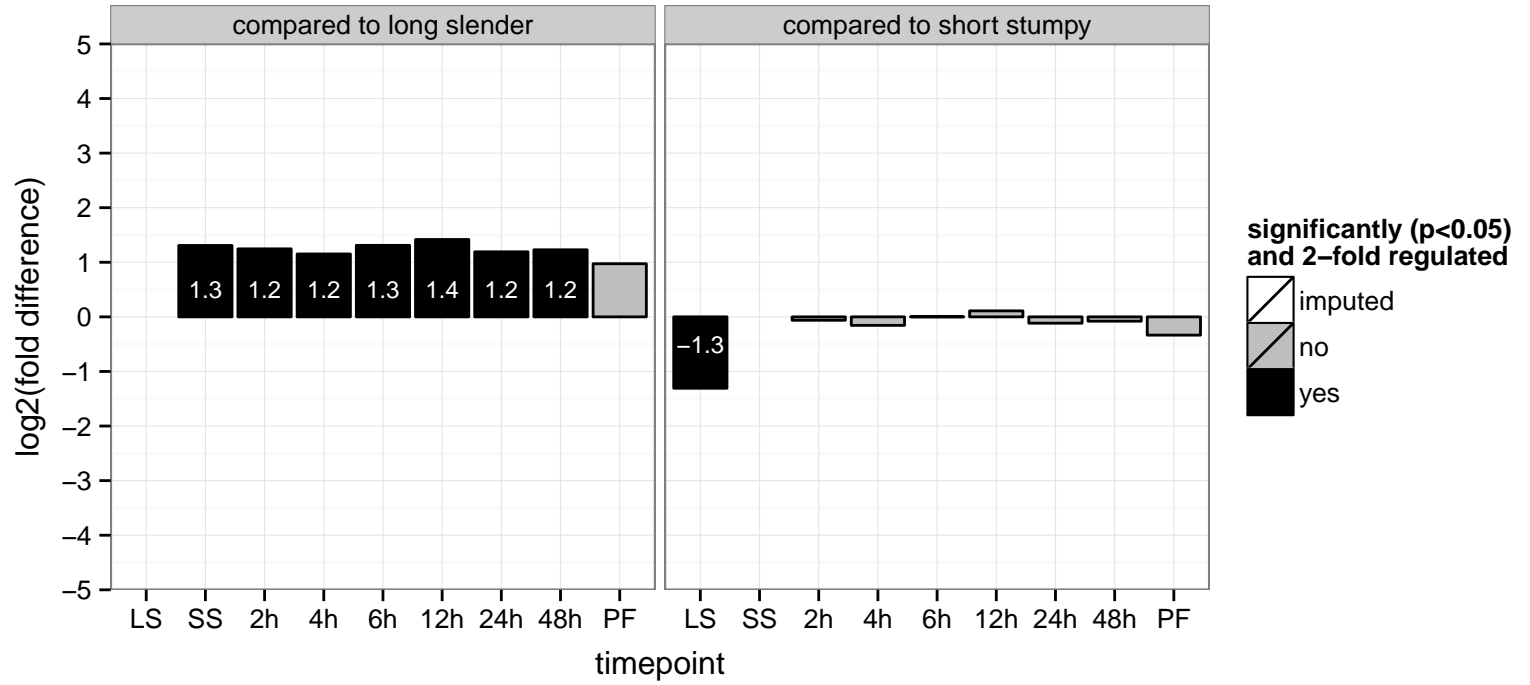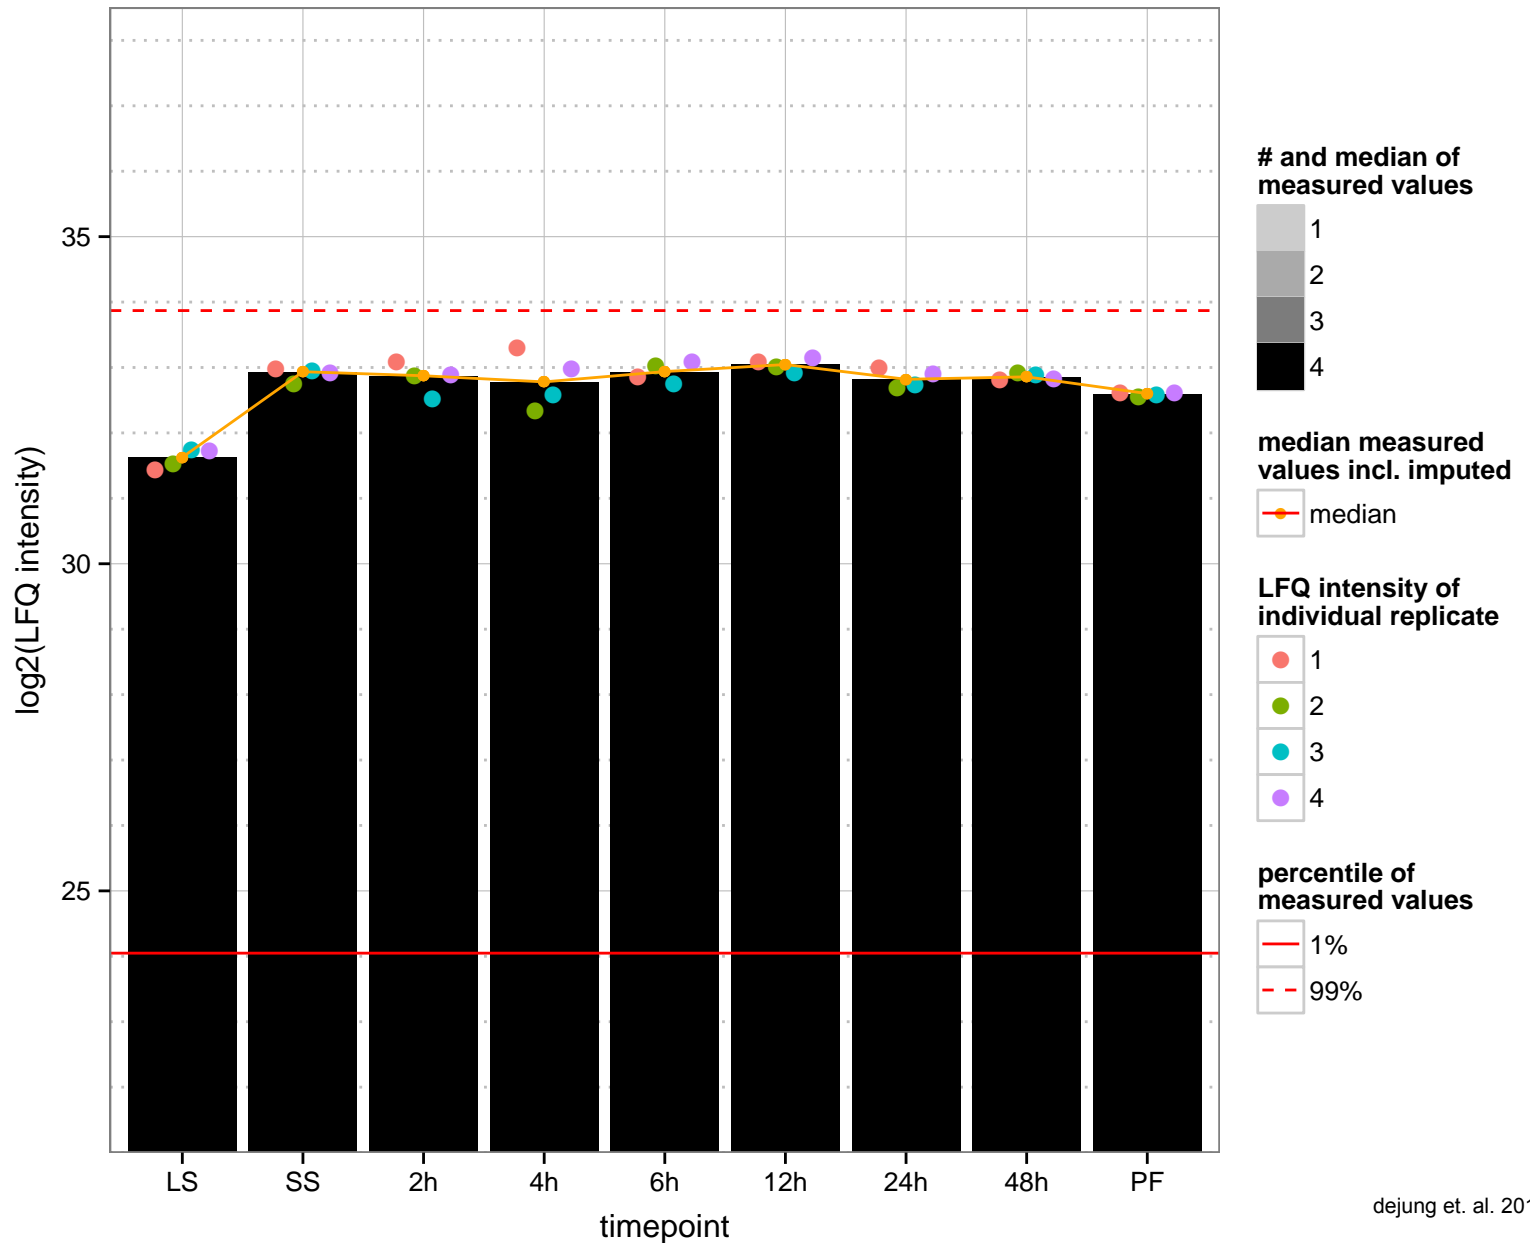

Nucleoporin (TbNup59)  
 Tb927.11.2670  
 AGOF: null  
 AGOC: null  
 AGOP: null  
 PGO: null  
 PGOC: null  
 PGOP: null

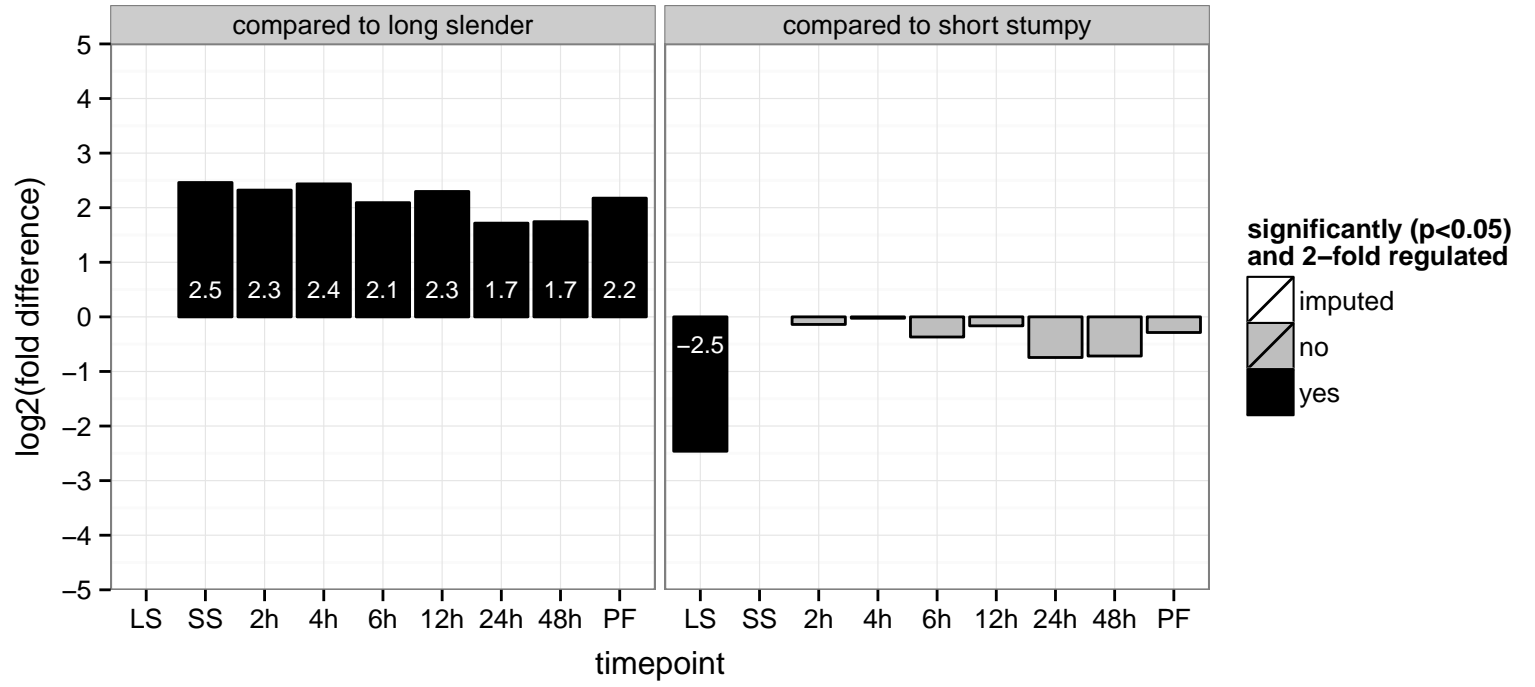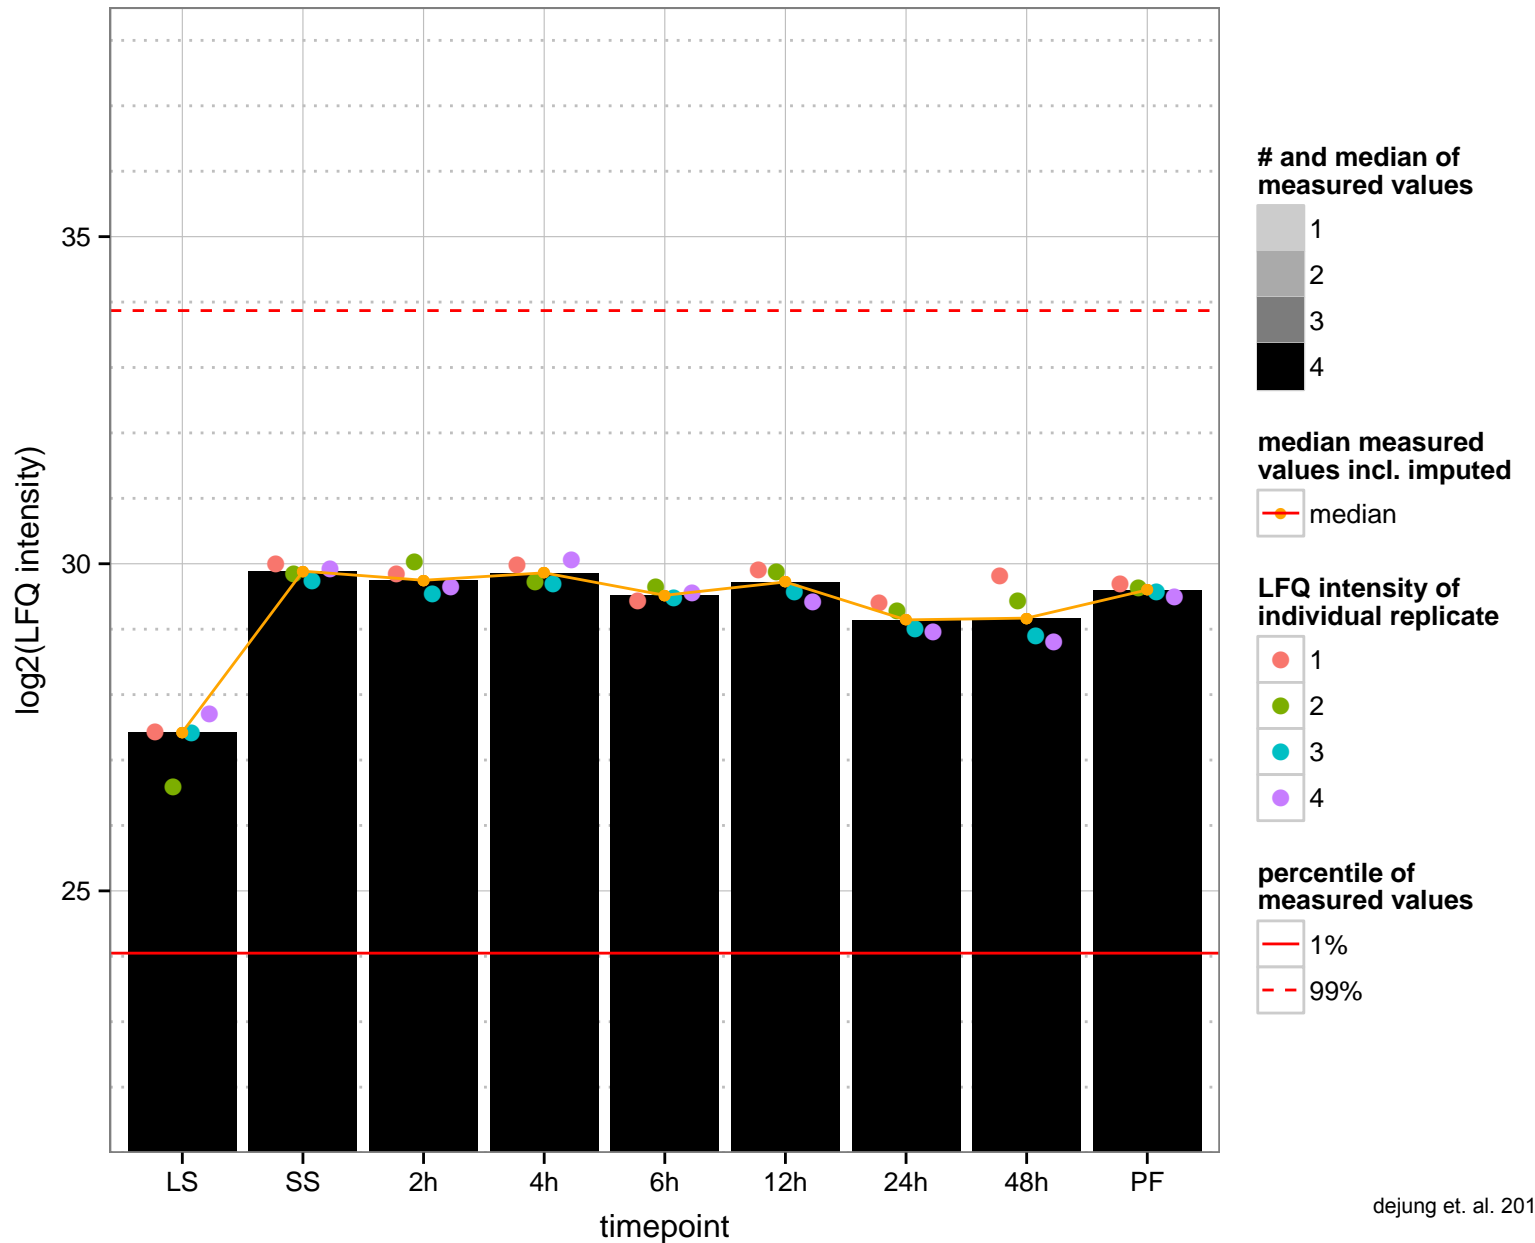



hypothetical protein, conserved  
 Tb927.11.2740  
 AGOF: zinc ion binding  
 AGOC: null  
 AGOP: null  
 PGOF: zinc ion binding  
 PGOC: null  
 PGOP: null

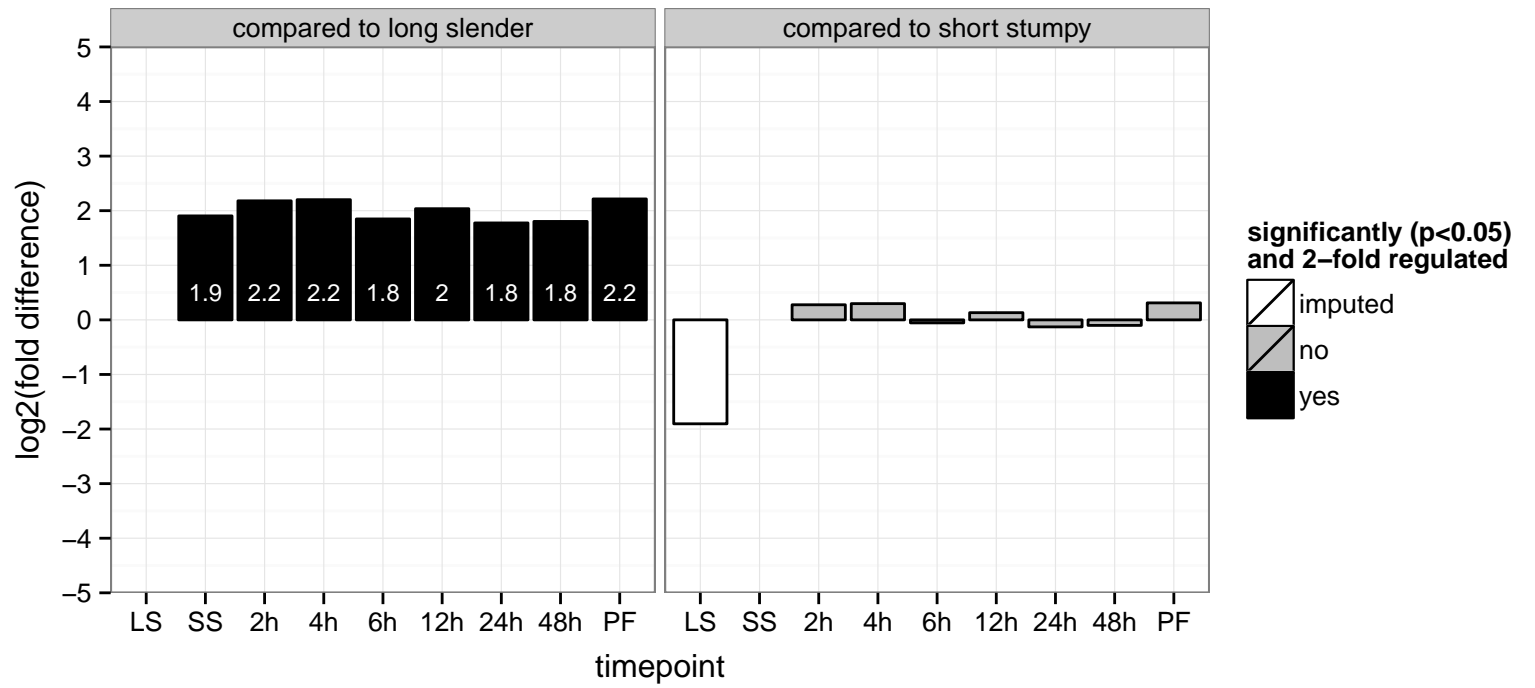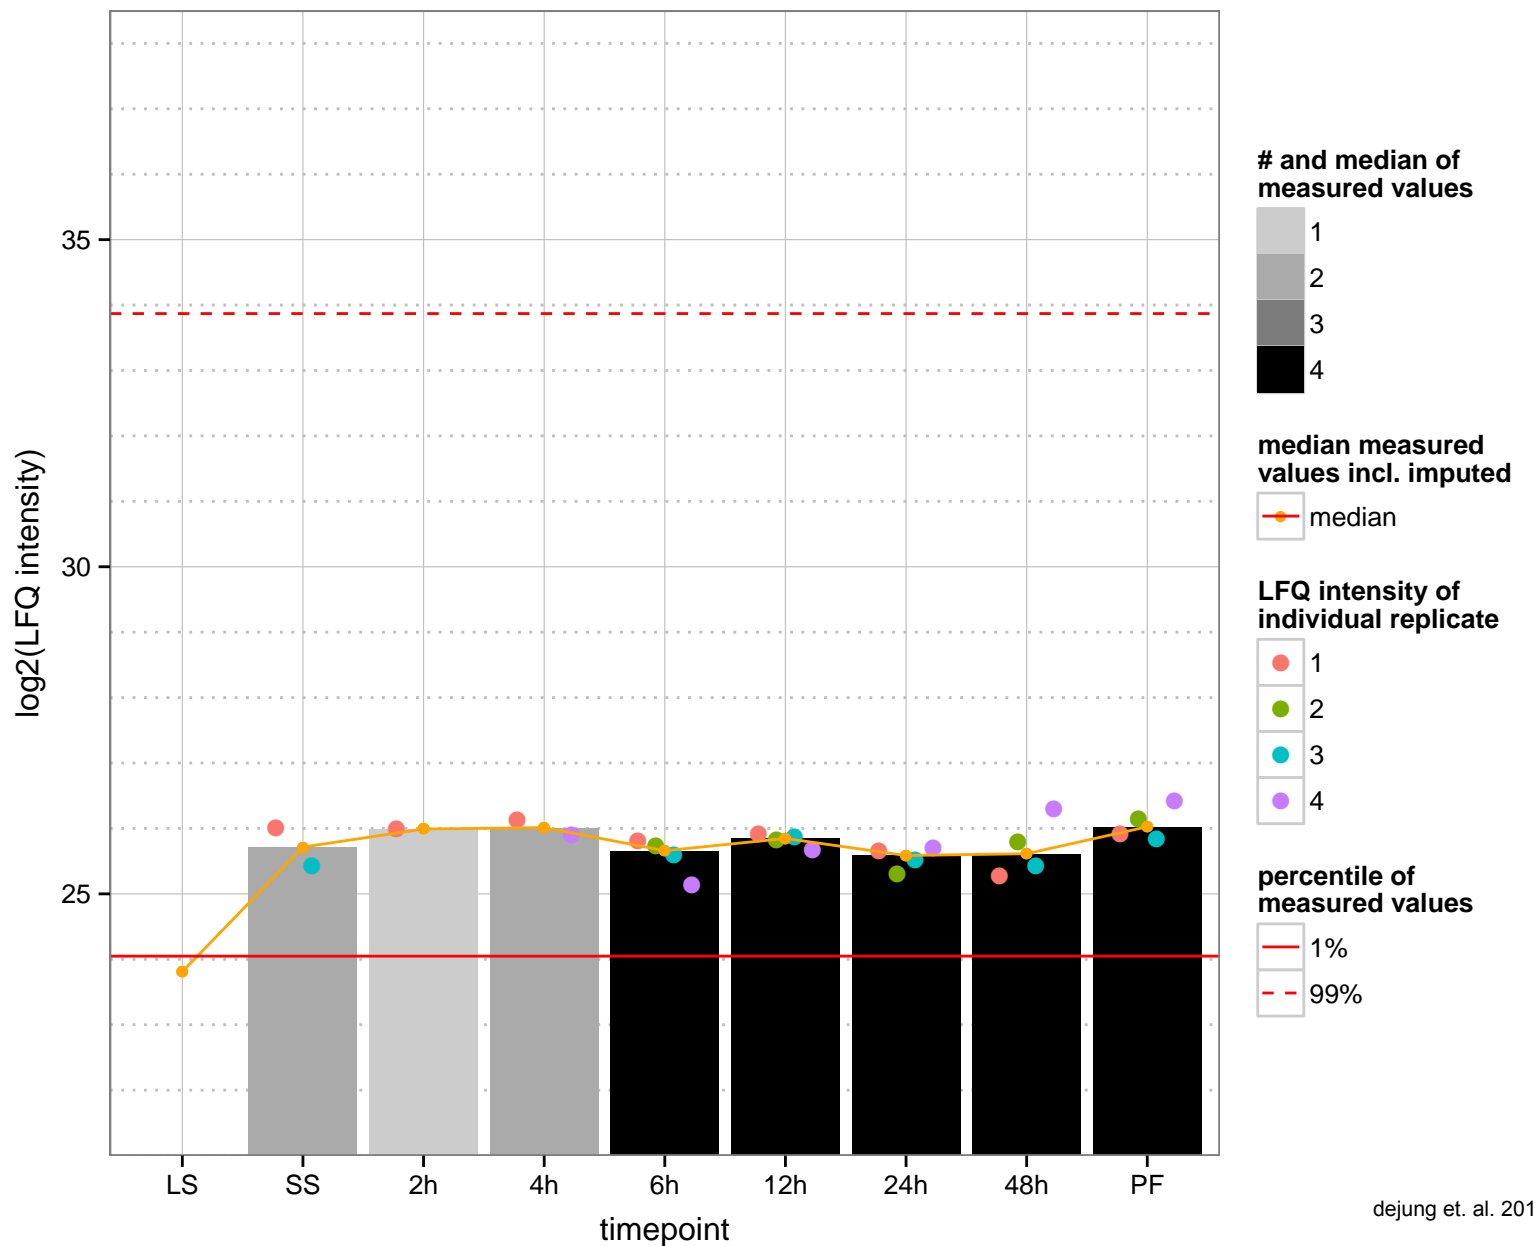

hypothetical protein, conserved  
 Tb927.11.2760  
 AGOF: null  
 AGOC: null  
 AGOP: null  
 PGO: null  
 PGOC: null  
 PGOP: null

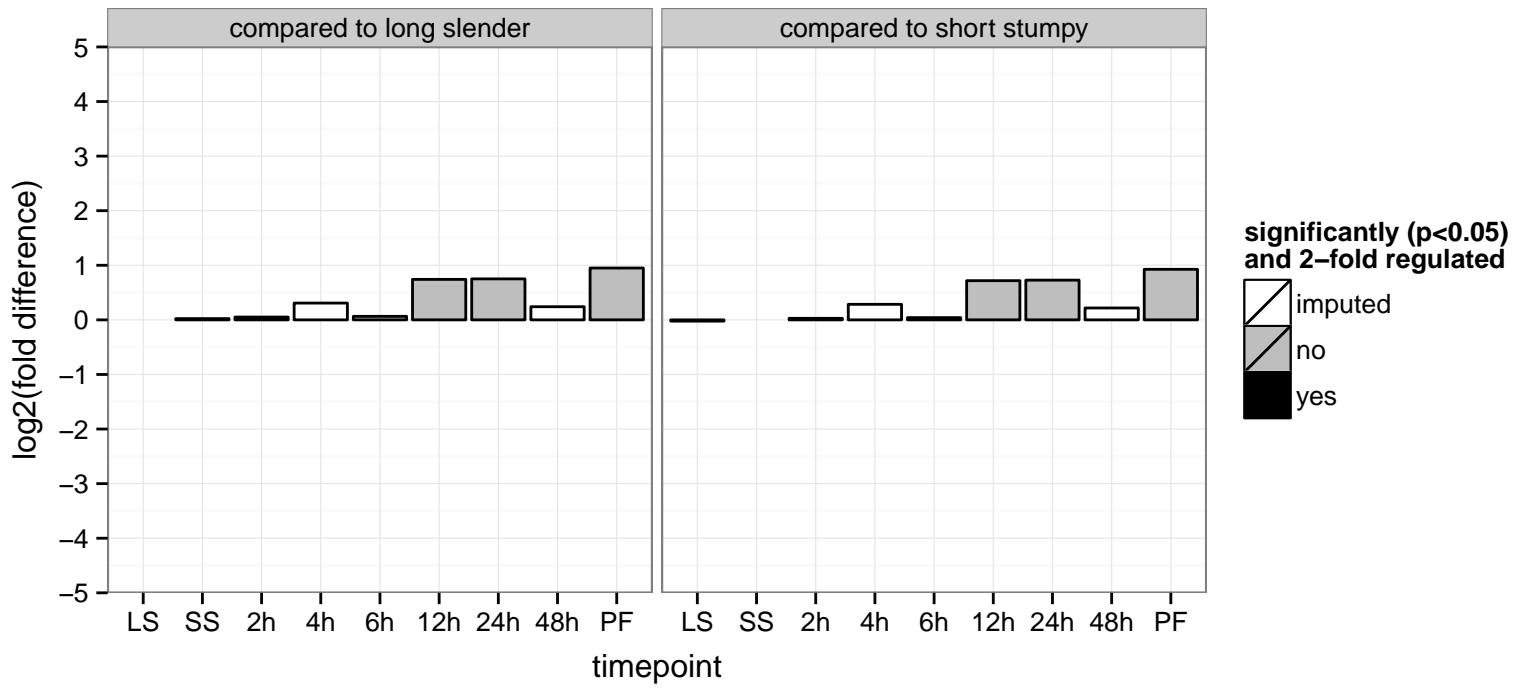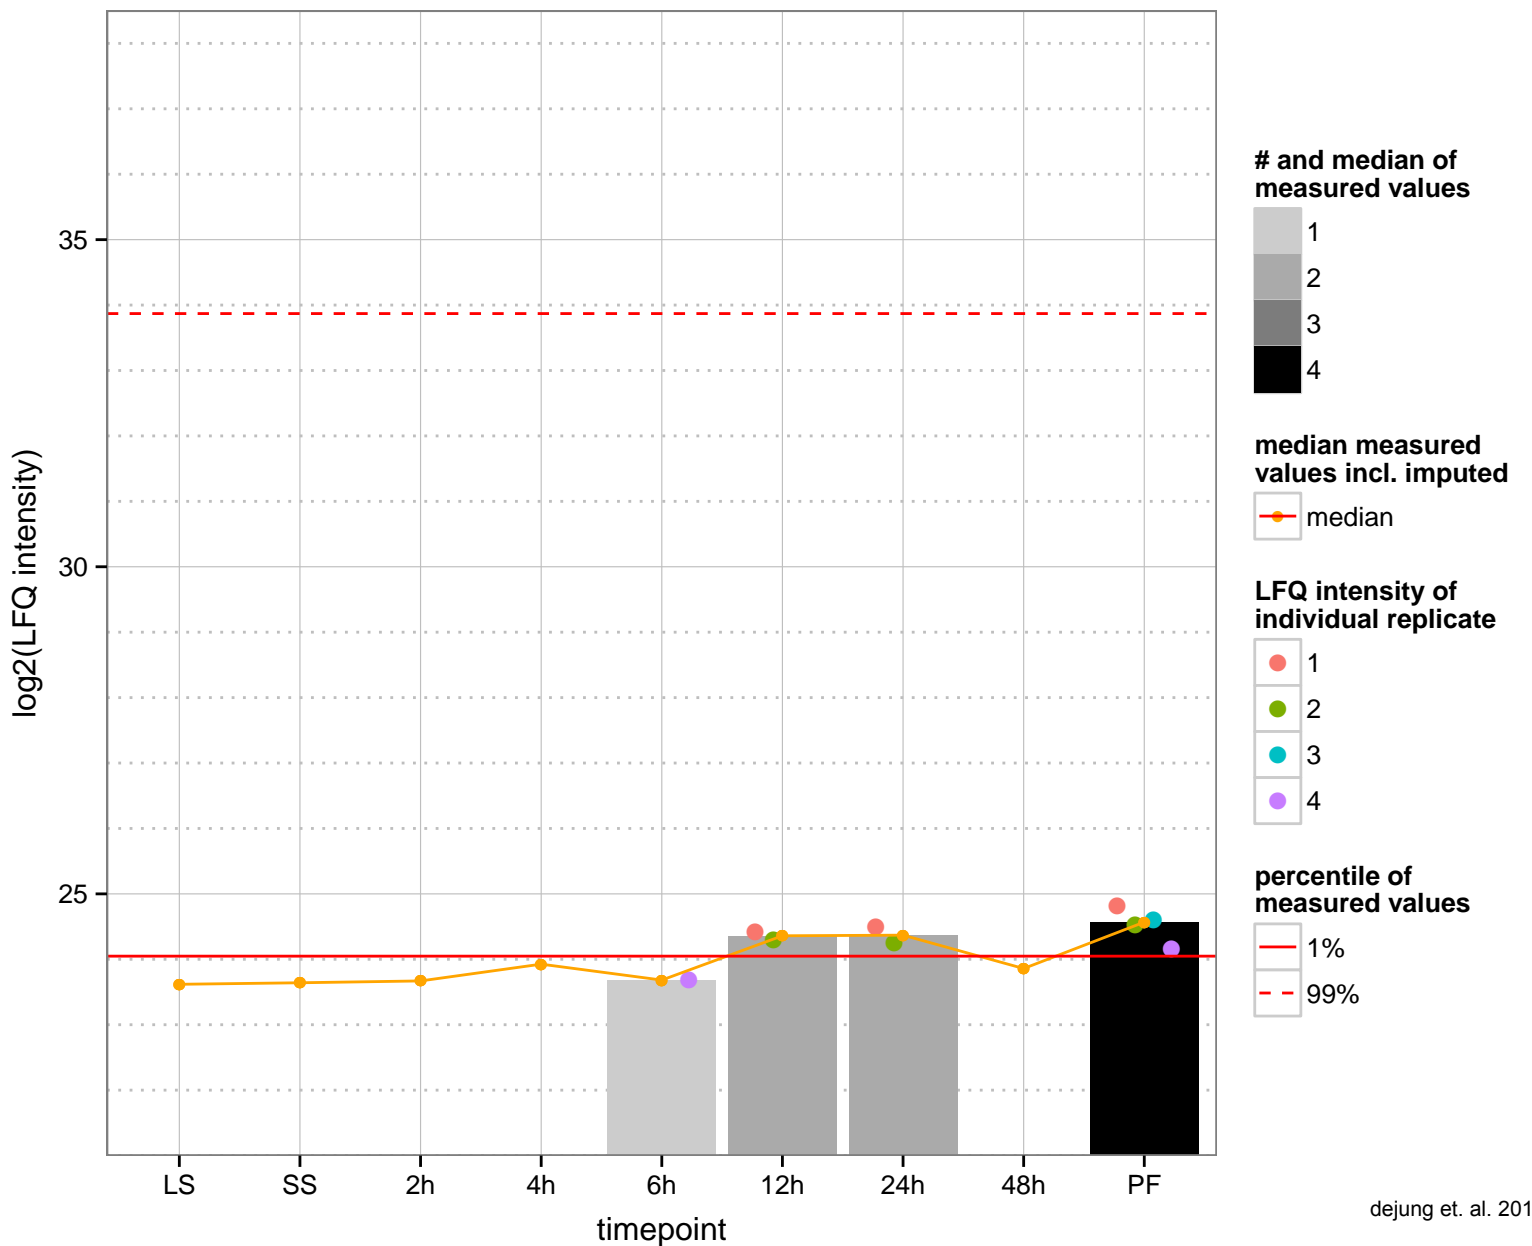

hypothetical protein, conserved  
 Tb927.11.2770  
 AGOF: null  
 AGOC: null  
 AGOP: null  
 PGO: null  
 PGOC: null  
 PGOP: null

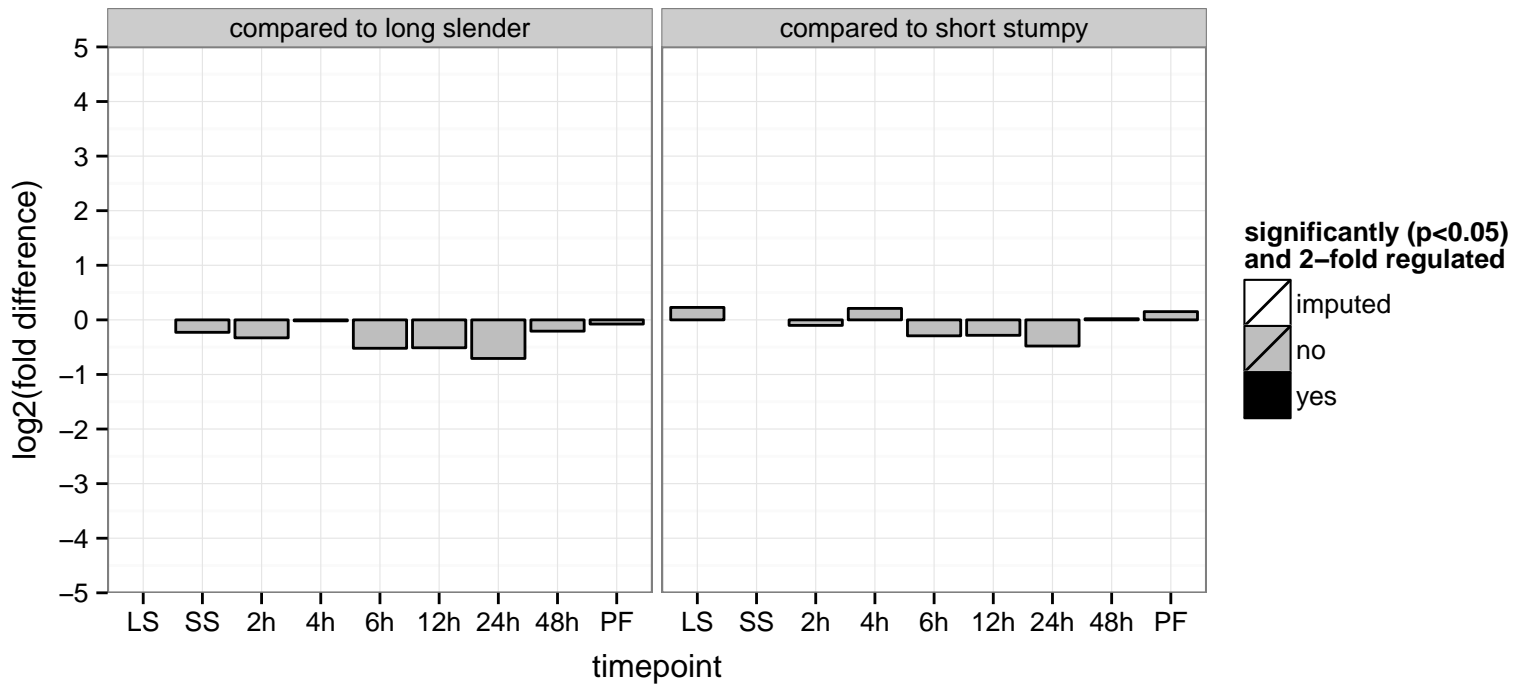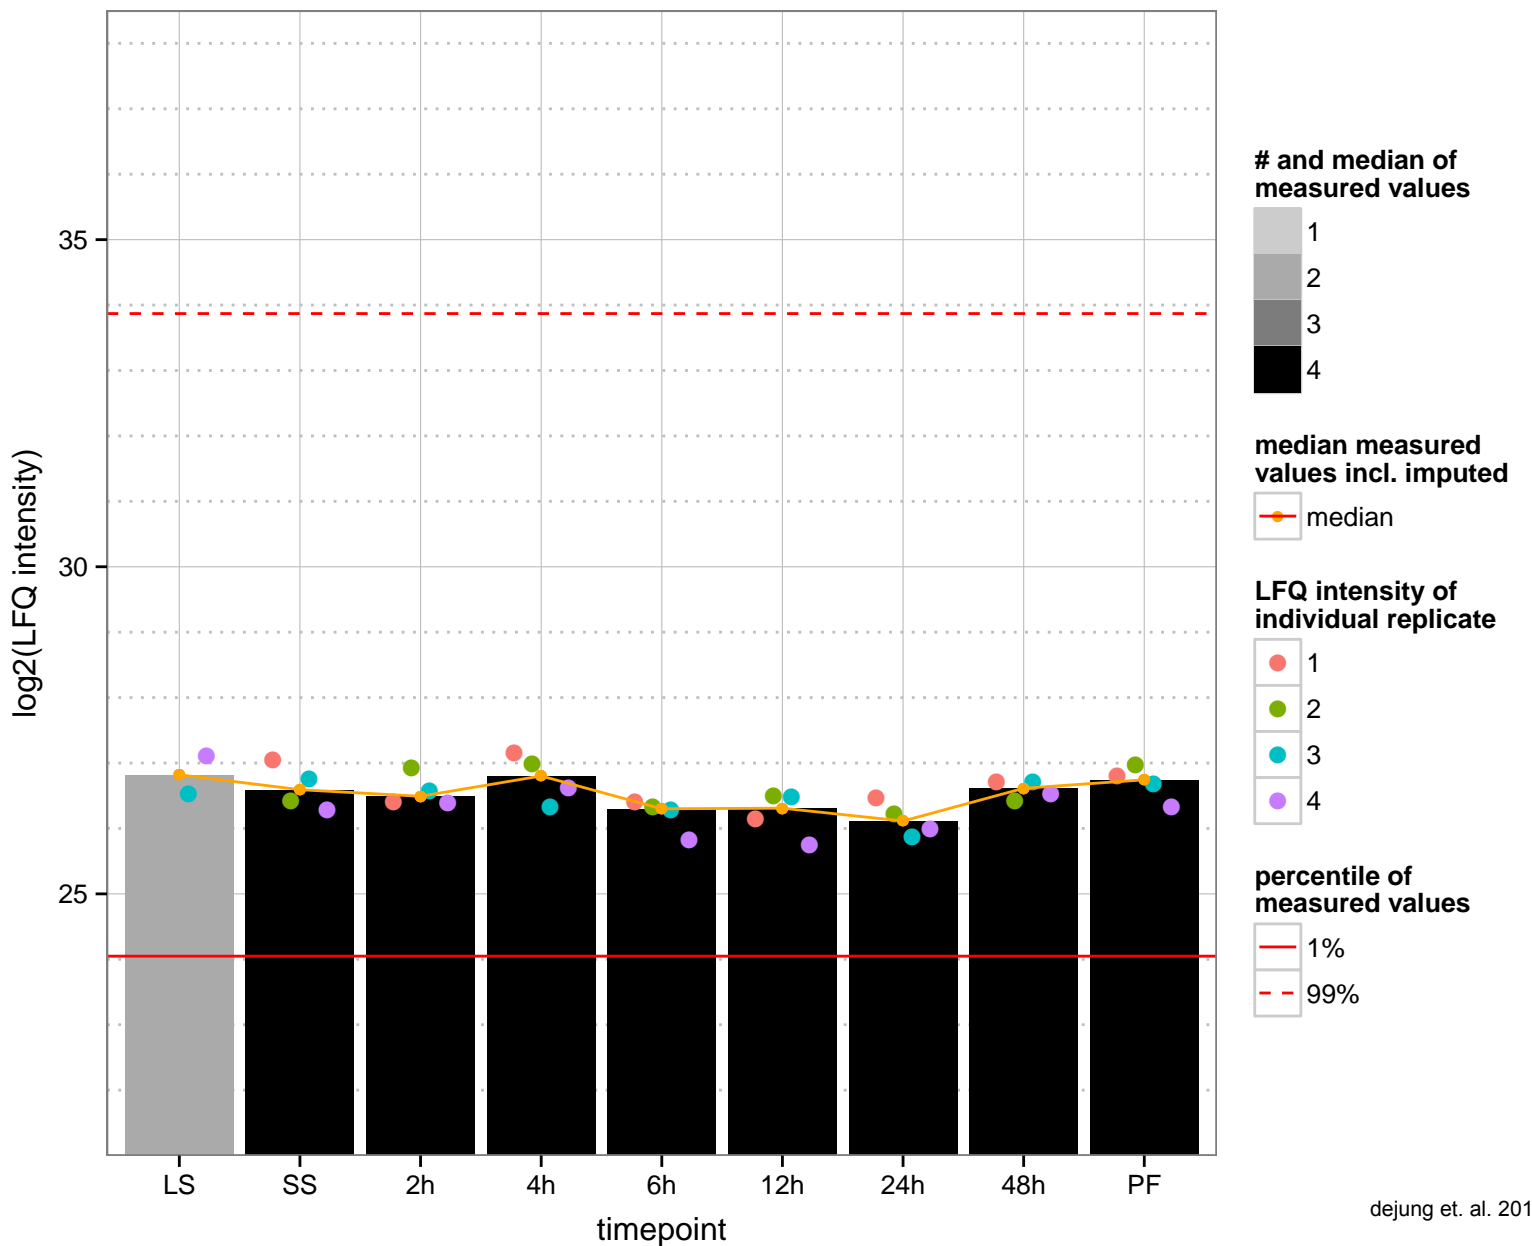

hypothetical protein, conserved  
 Tb927.11.2790  
 AGOF: null  
 AGOC: null  
 AGOP: null  
 PGO: null  
 PGOC: null  
 PGOP: null

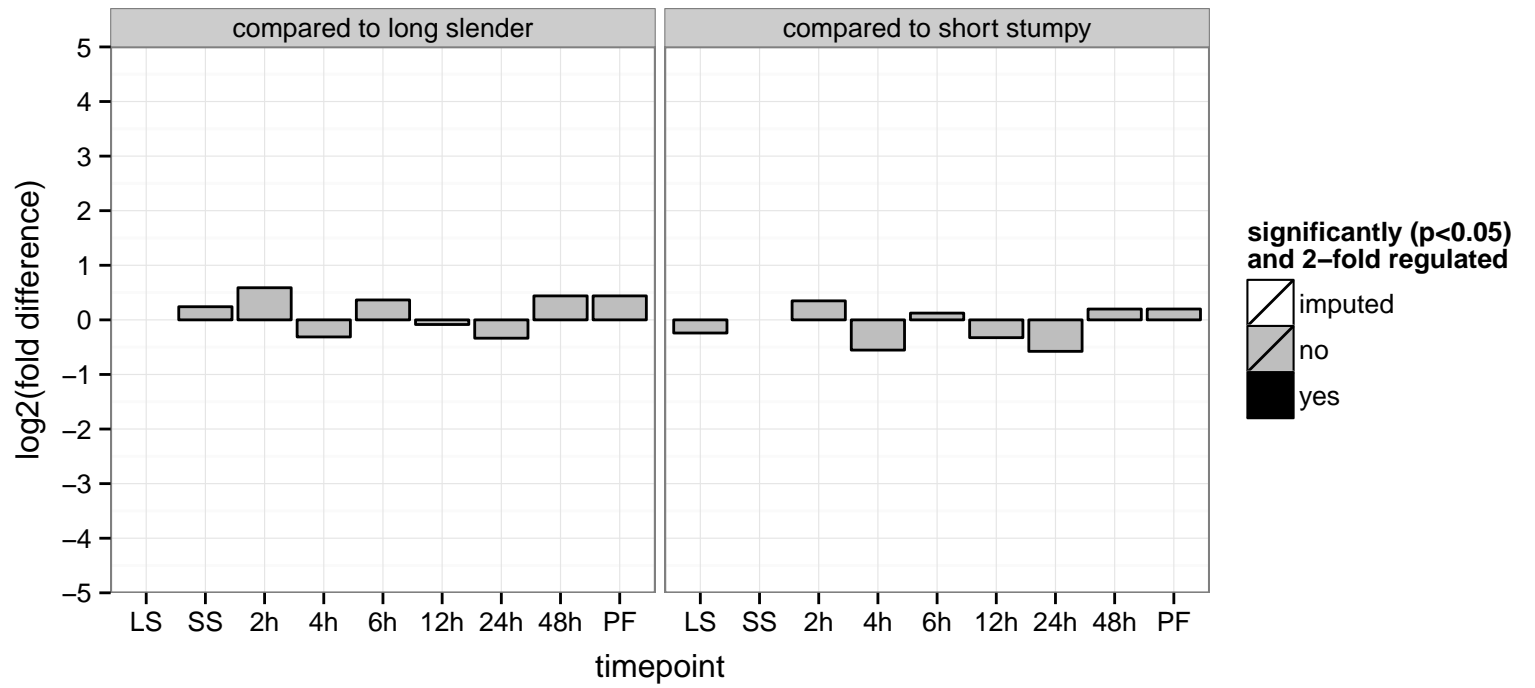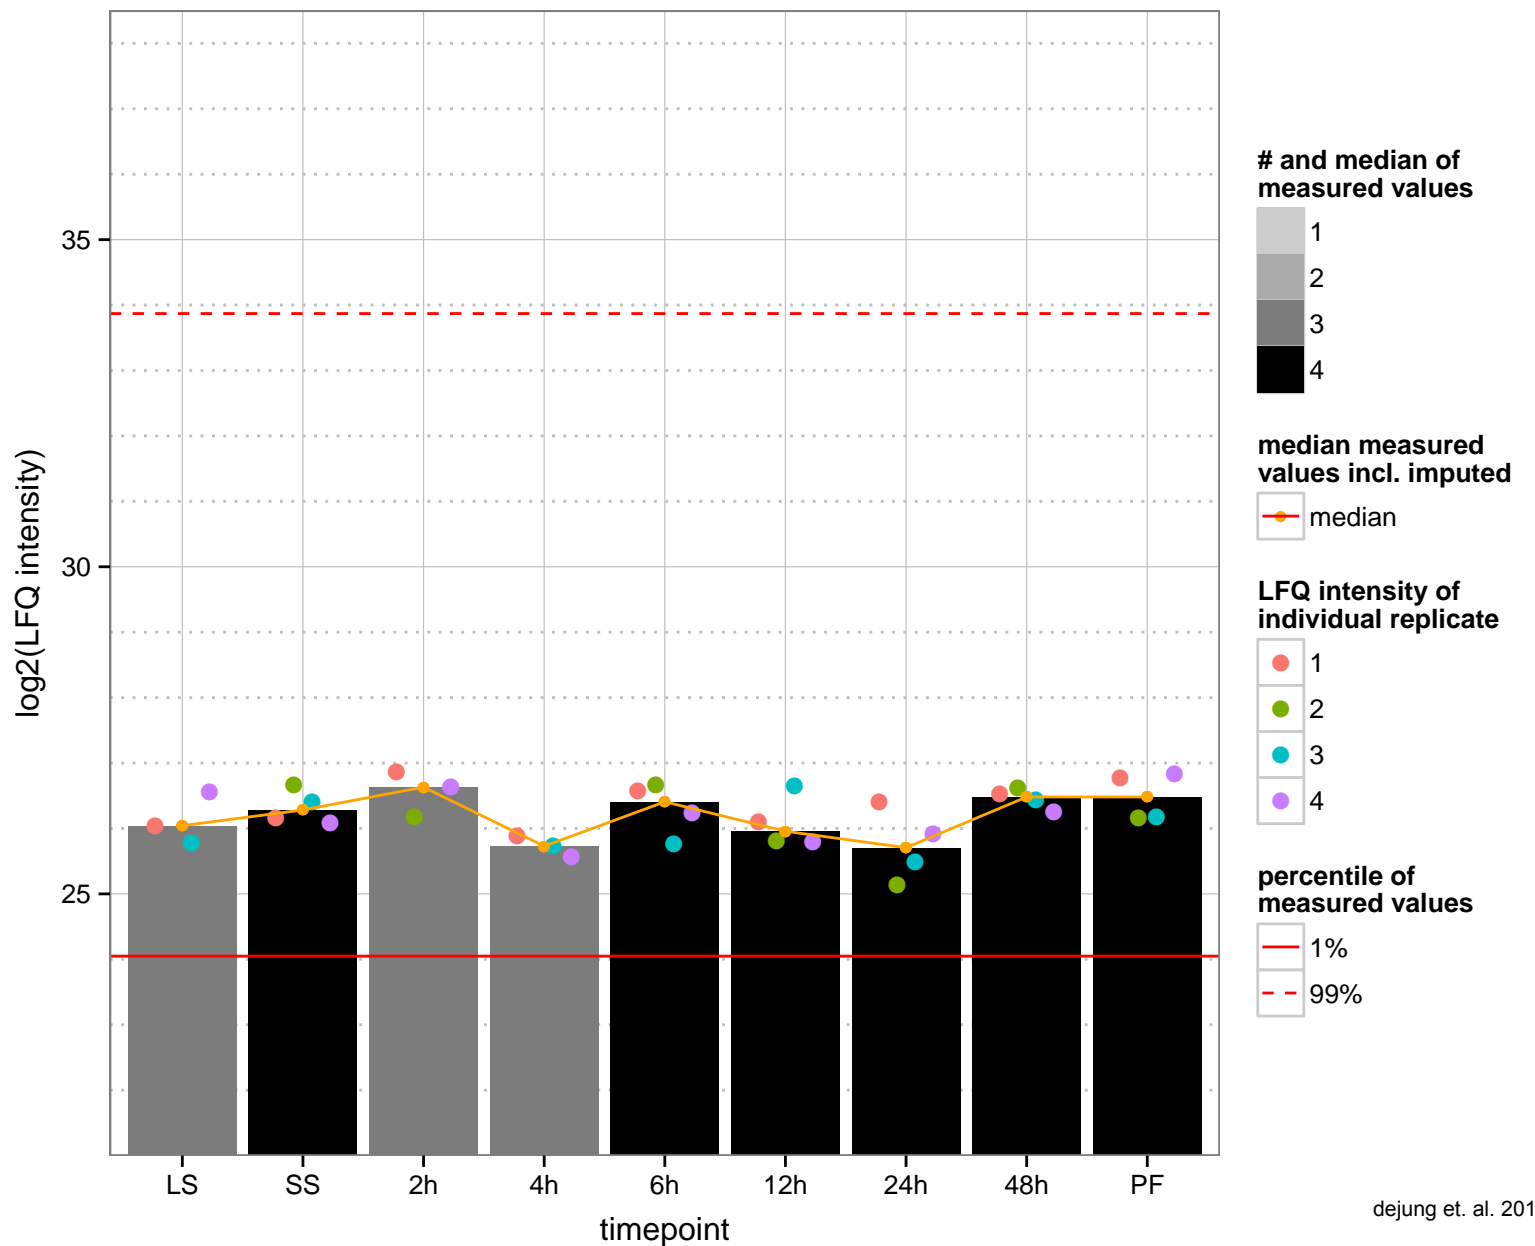

hypothetical protein, conserved  
 Tb927.11.280  
 AGOF: null  
 AGOC: null  
 AGOP: null  
 PGO: null  
 PGOC: null  
 PGOP: null

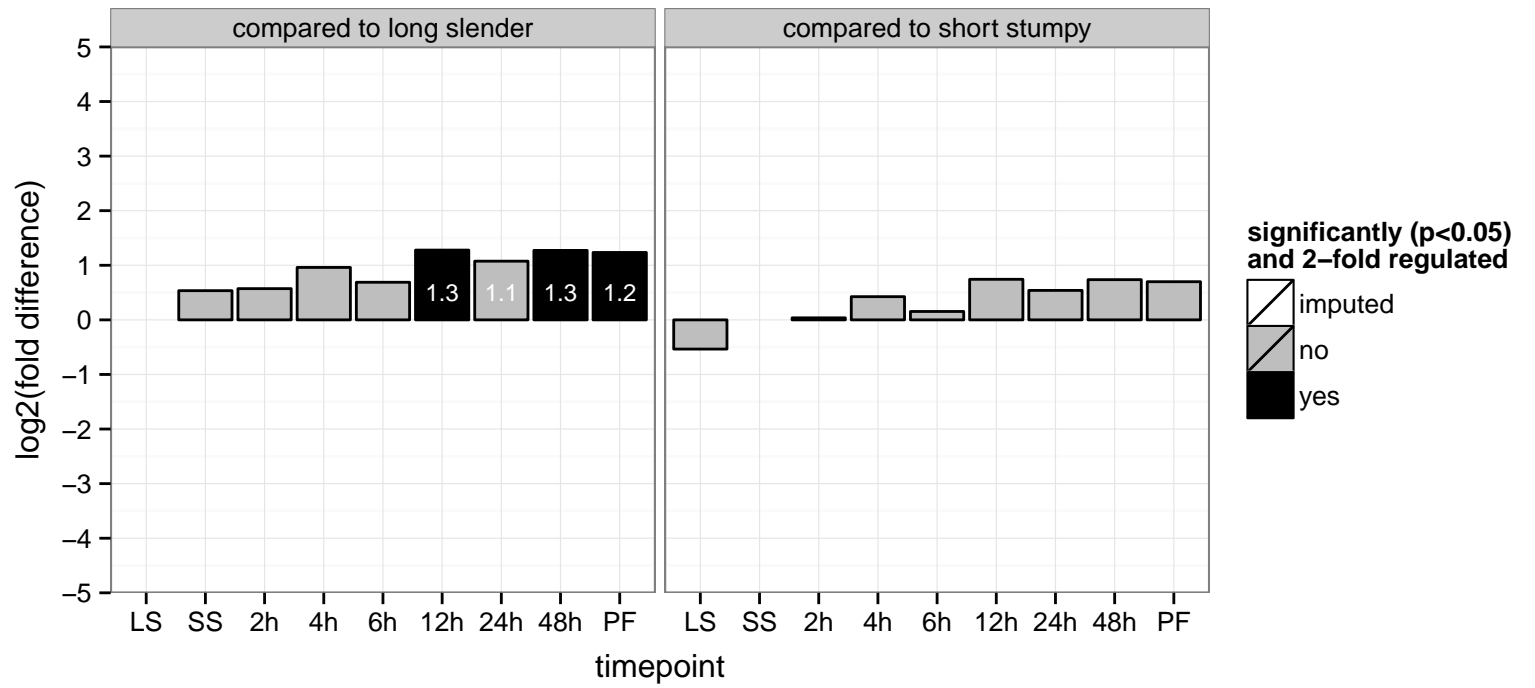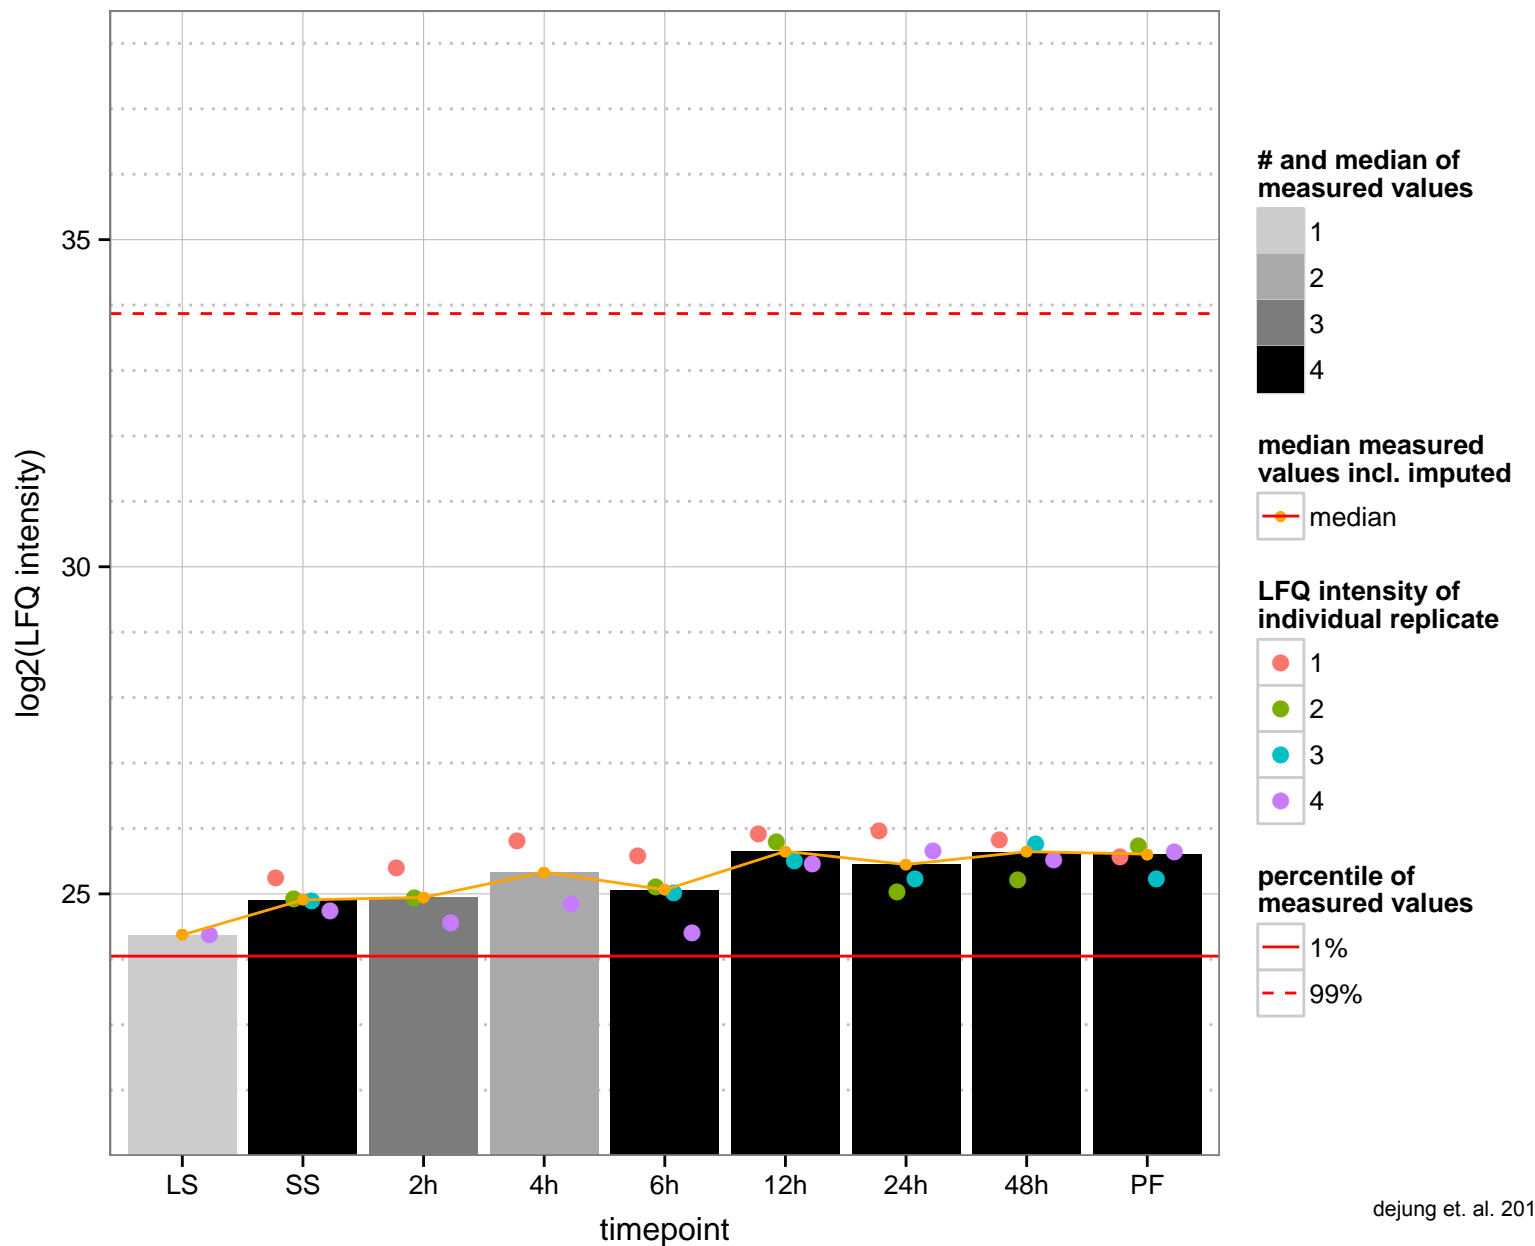

kinesin, putative (KIN-A)

Tb927.11.2880

AGOF: ATP binding, microtubule motor activity, motor activity, protein binding

AGOC: chromosome passenger complex, kinesin complex, microtubule associated complex, nucleus, spindle midzone

AGOP: chromosome segregation, cytokinesis, microtubule-based movement, spindle assembly

PGOF: ATP binding, microtubule motor activity

PGOC: null

PGOP: microtubule-based movement

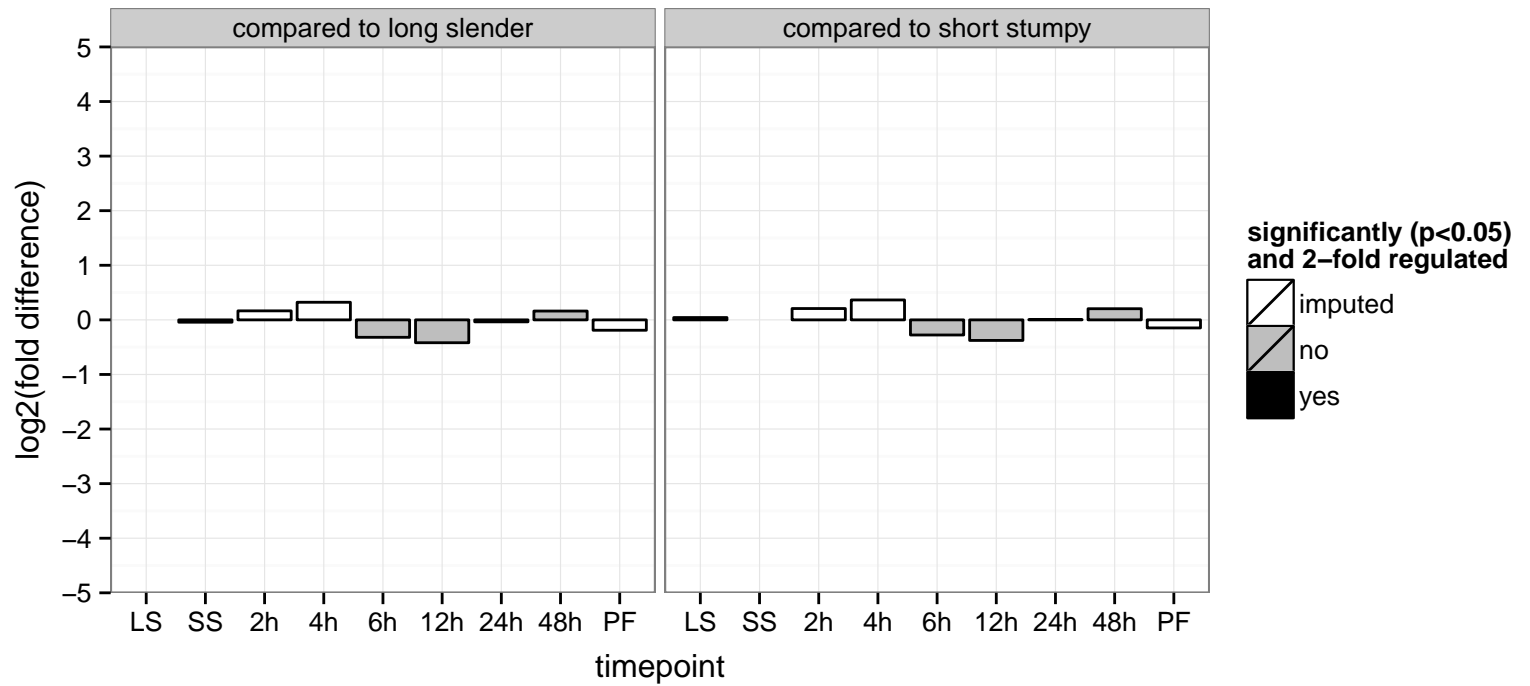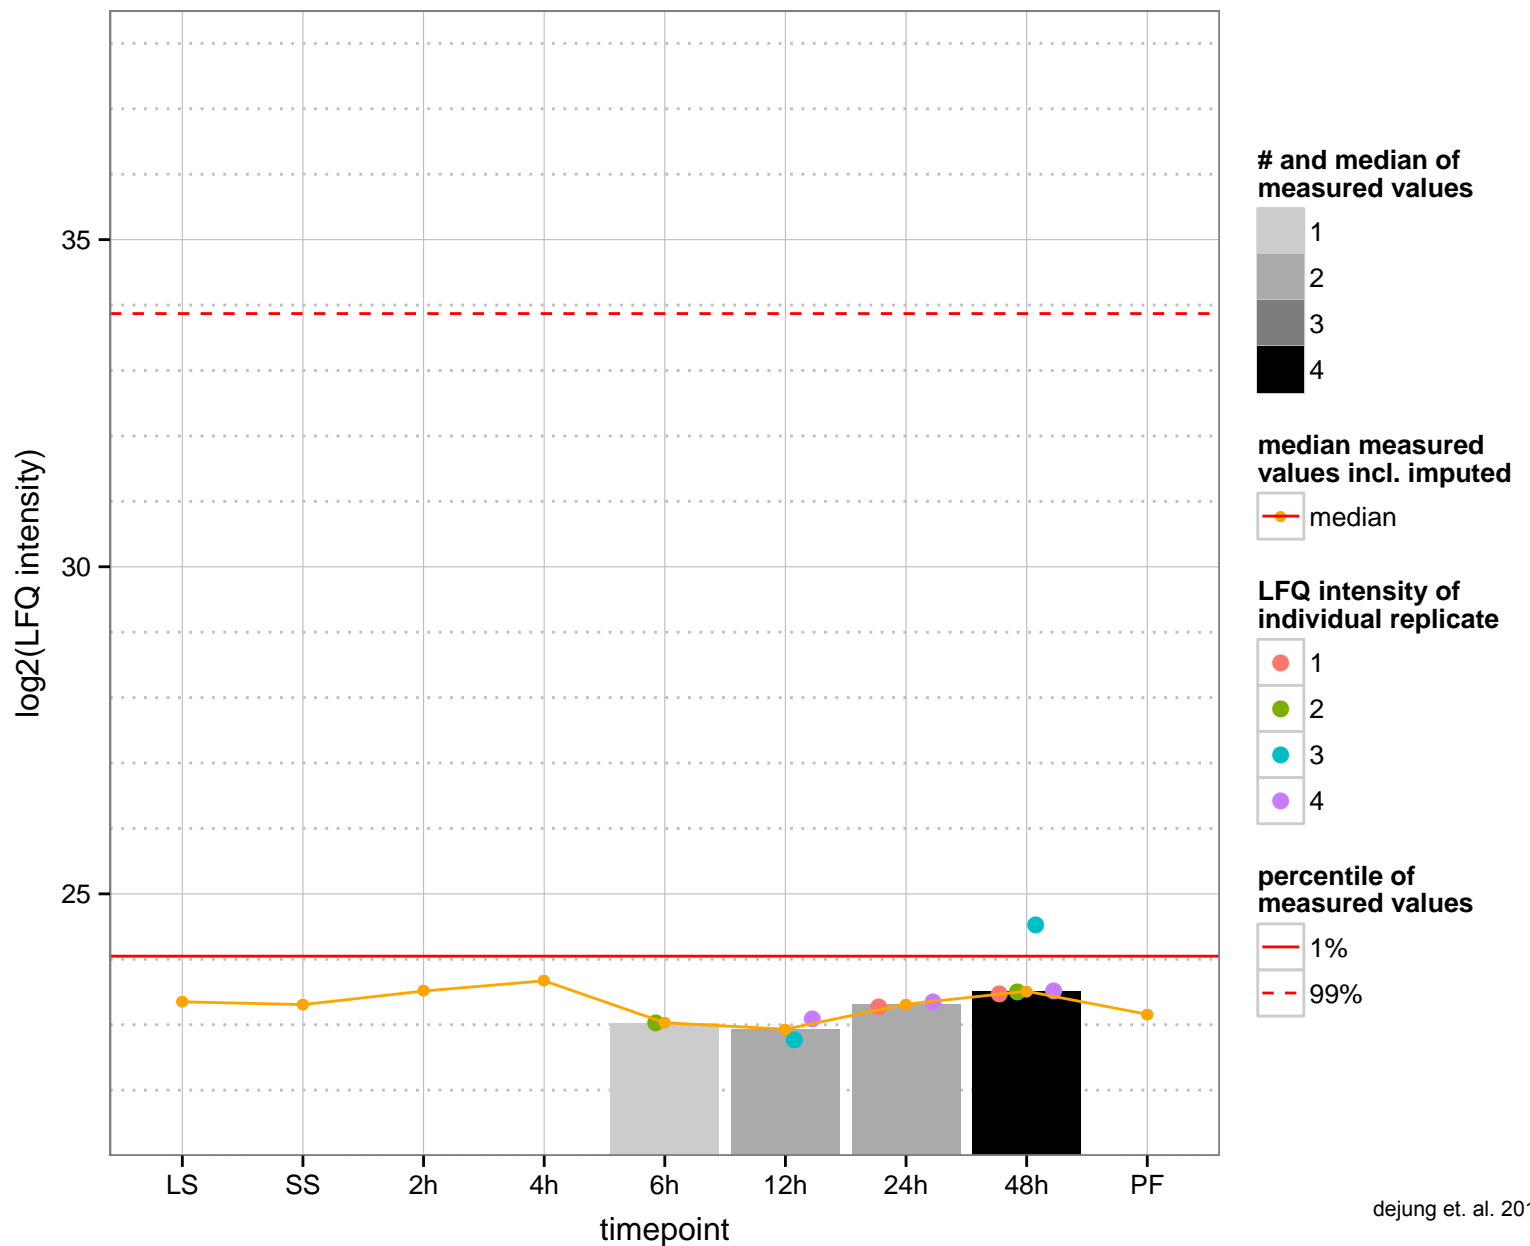

phosphoglycerate mutase, putative (iPGAM)  
 Tb927.11.2910  
 AGOF: cobalt ion binding, phosphoglycerate mutase activity  
 AGOC: mitochondrion  
 AGOP: glycolysis  
 PGO: null  
 PGO: null  
 PGO: null

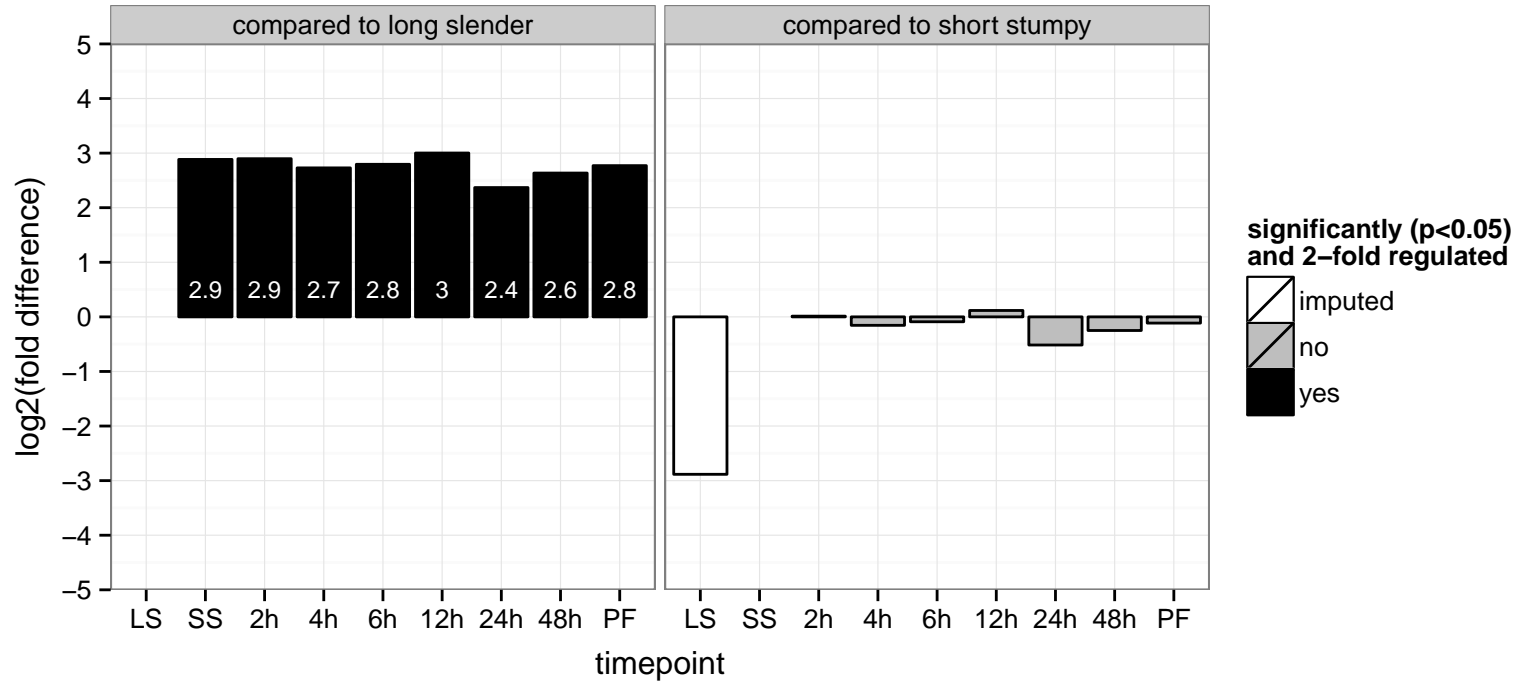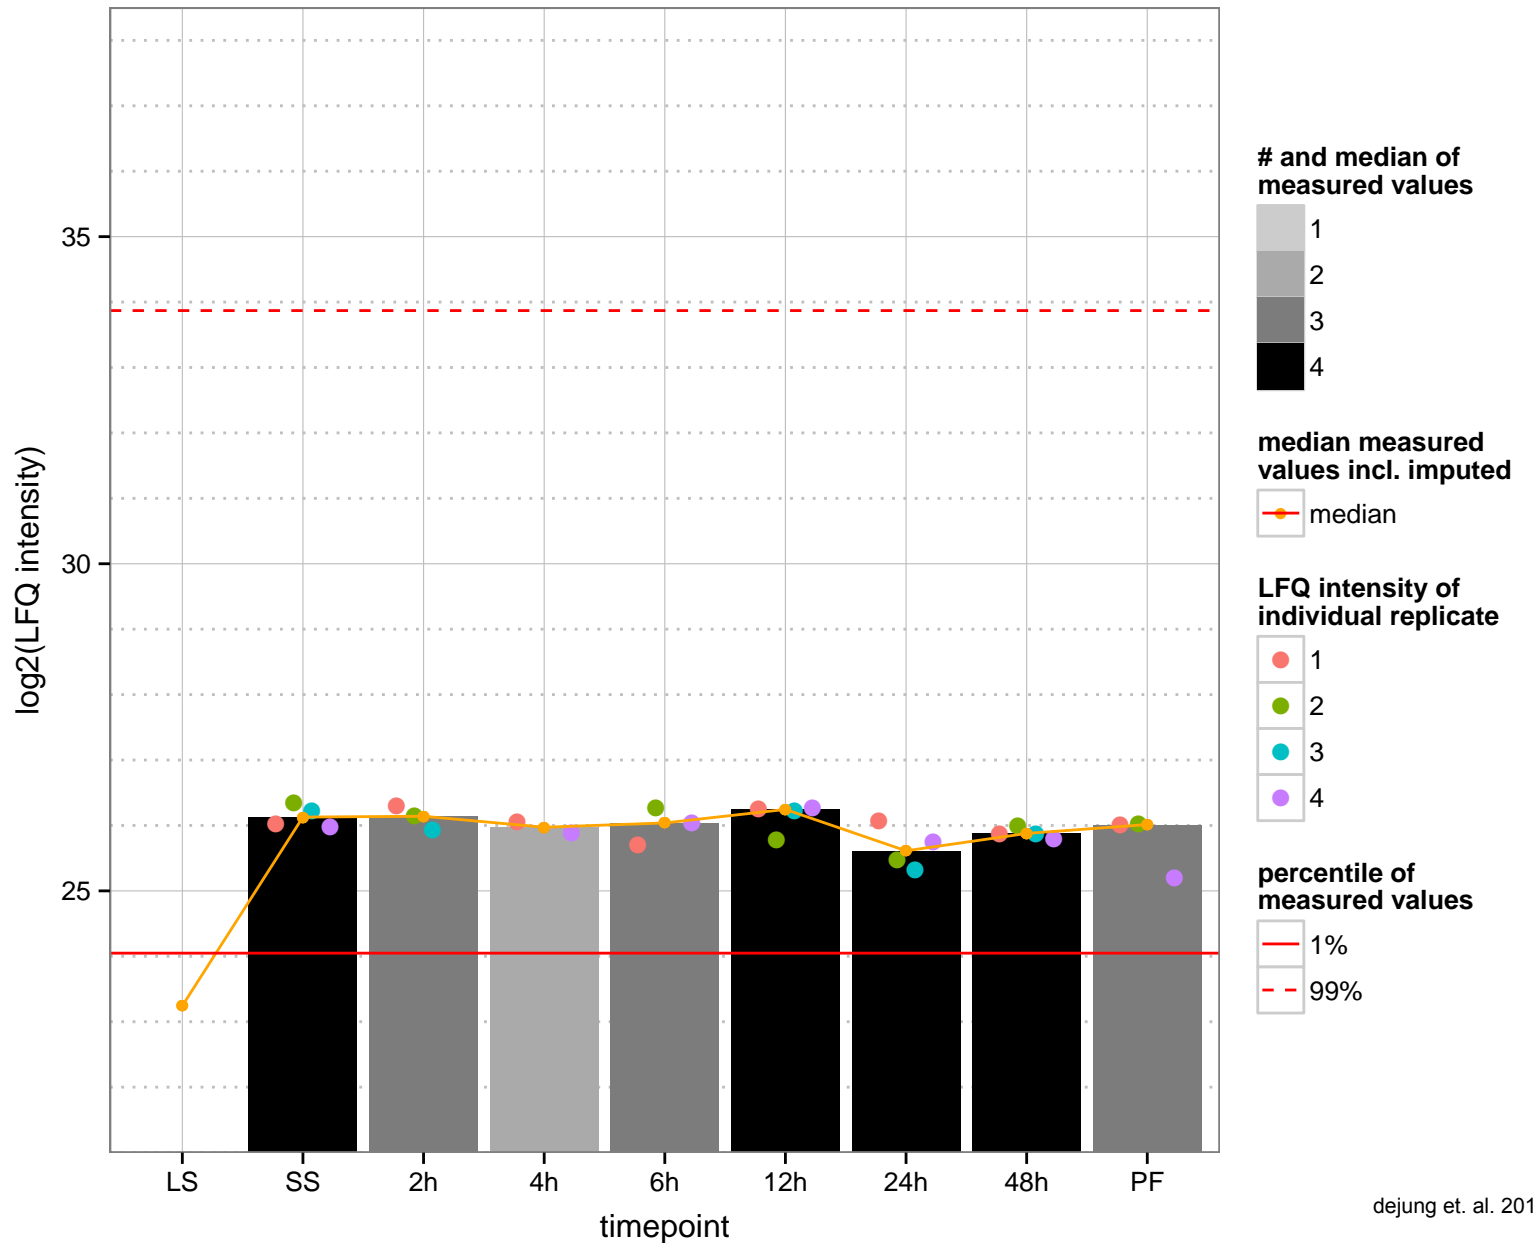

Nucleoporin (TbNup89)  
 Tb927.11.2950  
 AGOF: null  
 AGOC: nuclear pore  
 AGOP: null  
 PGO: null  
 PGO: null  
 PGO: null

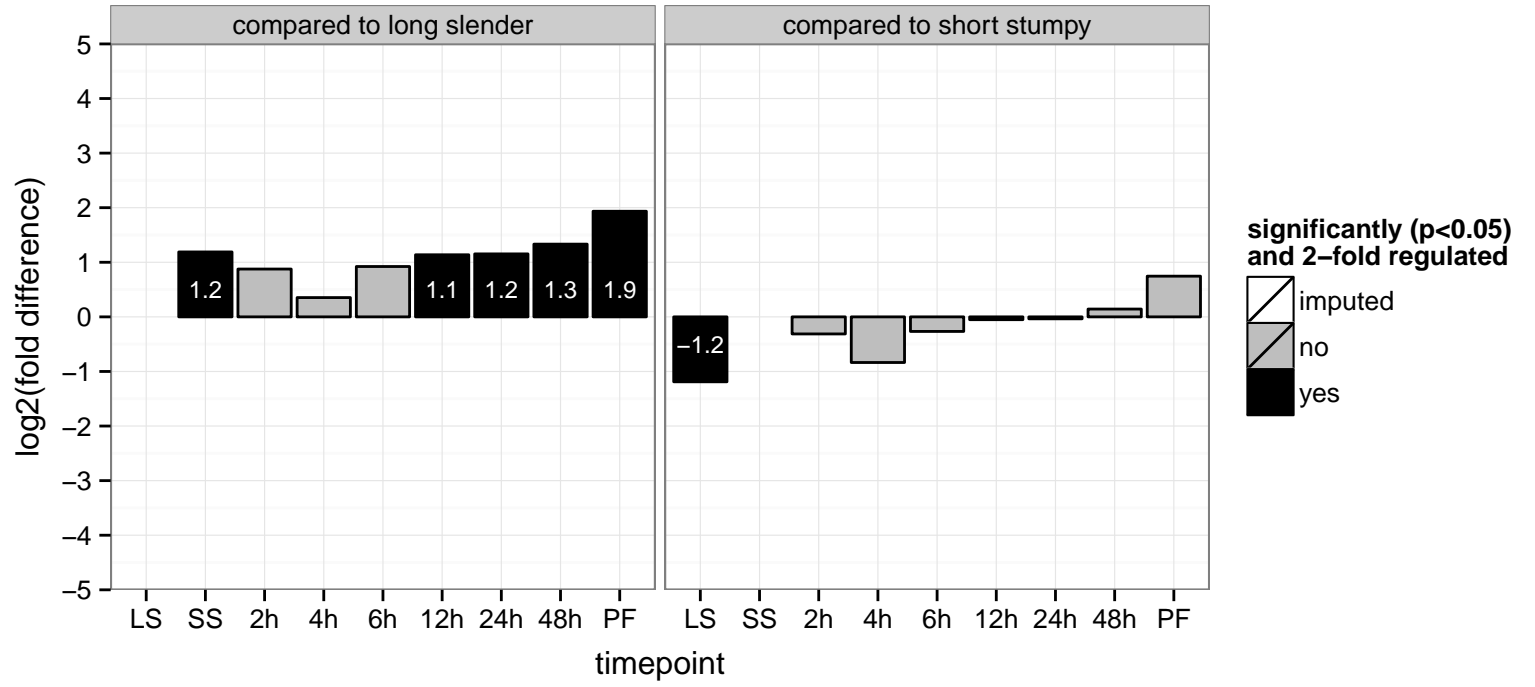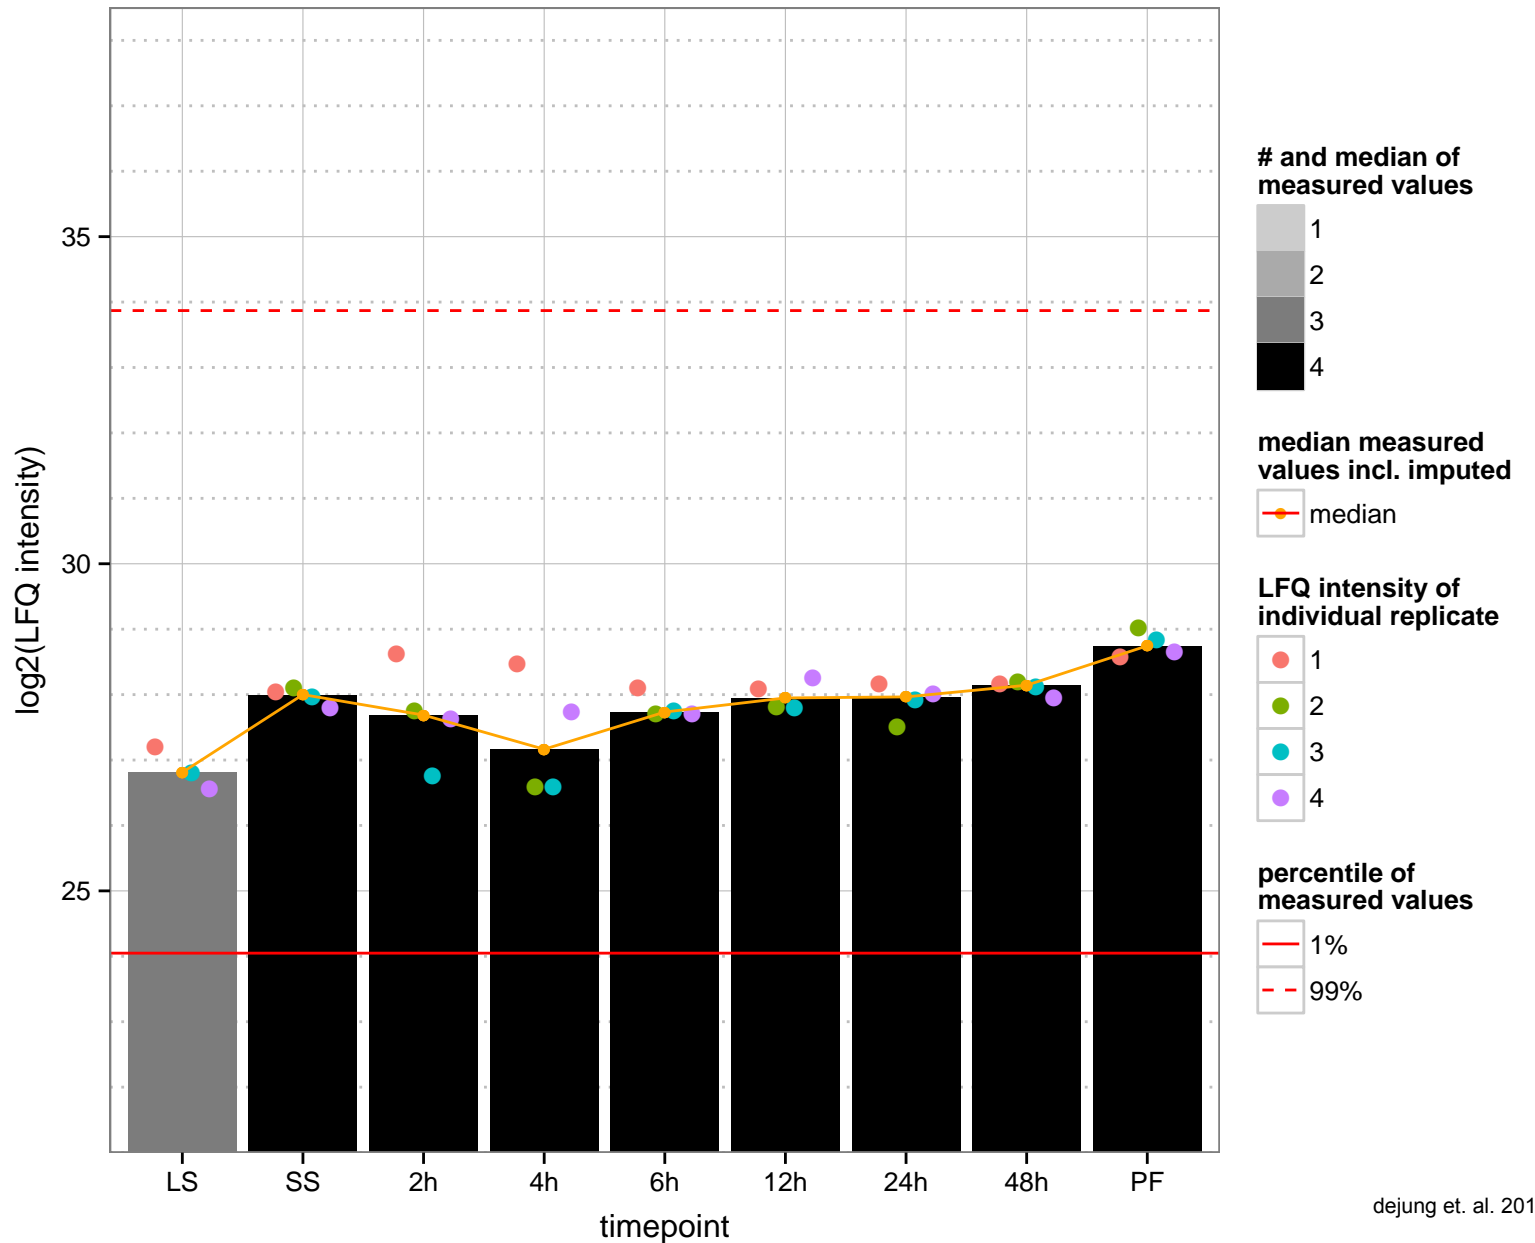



hypothetical protein, conserved  
 Tb927.11.2970  
 AGOF: null  
 AGOC: null  
 AGOP: null  
 PGOF: binding  
 PGO: null  
 PGOP: null

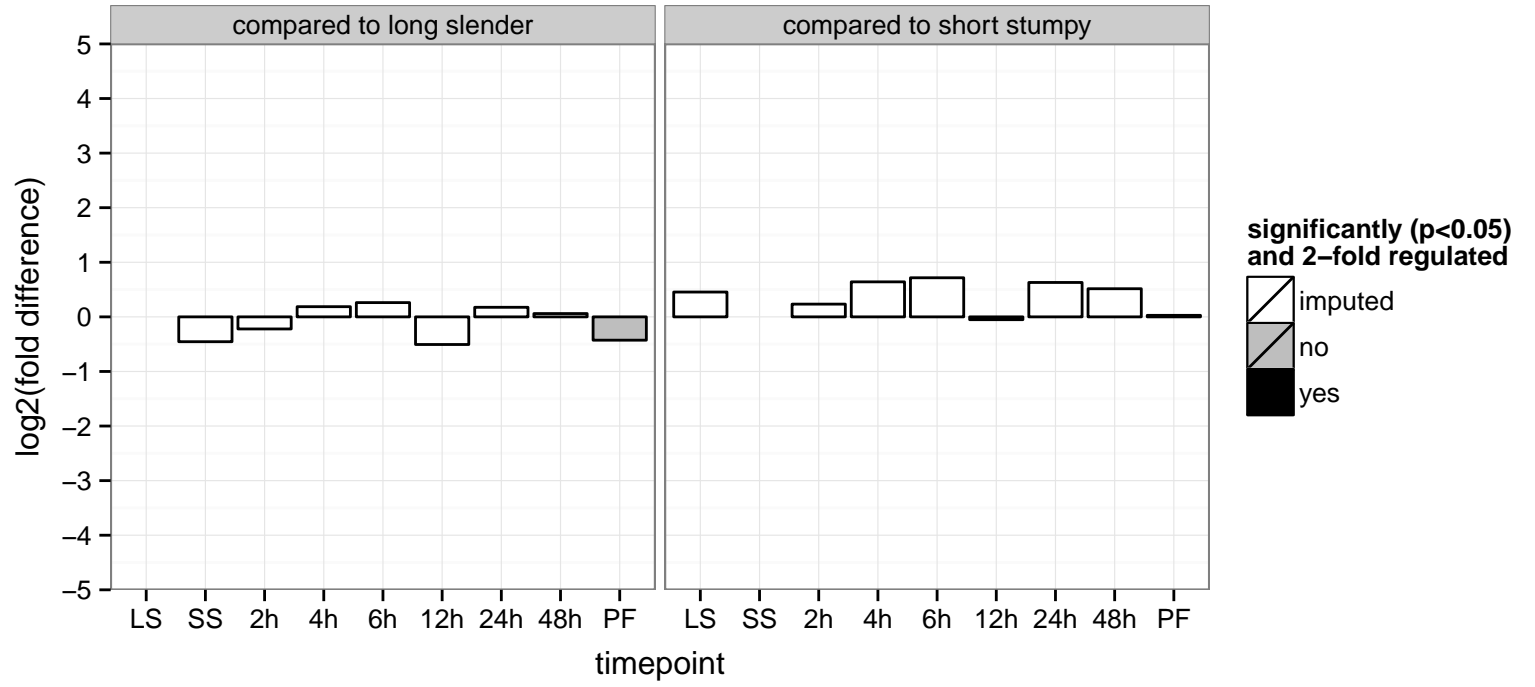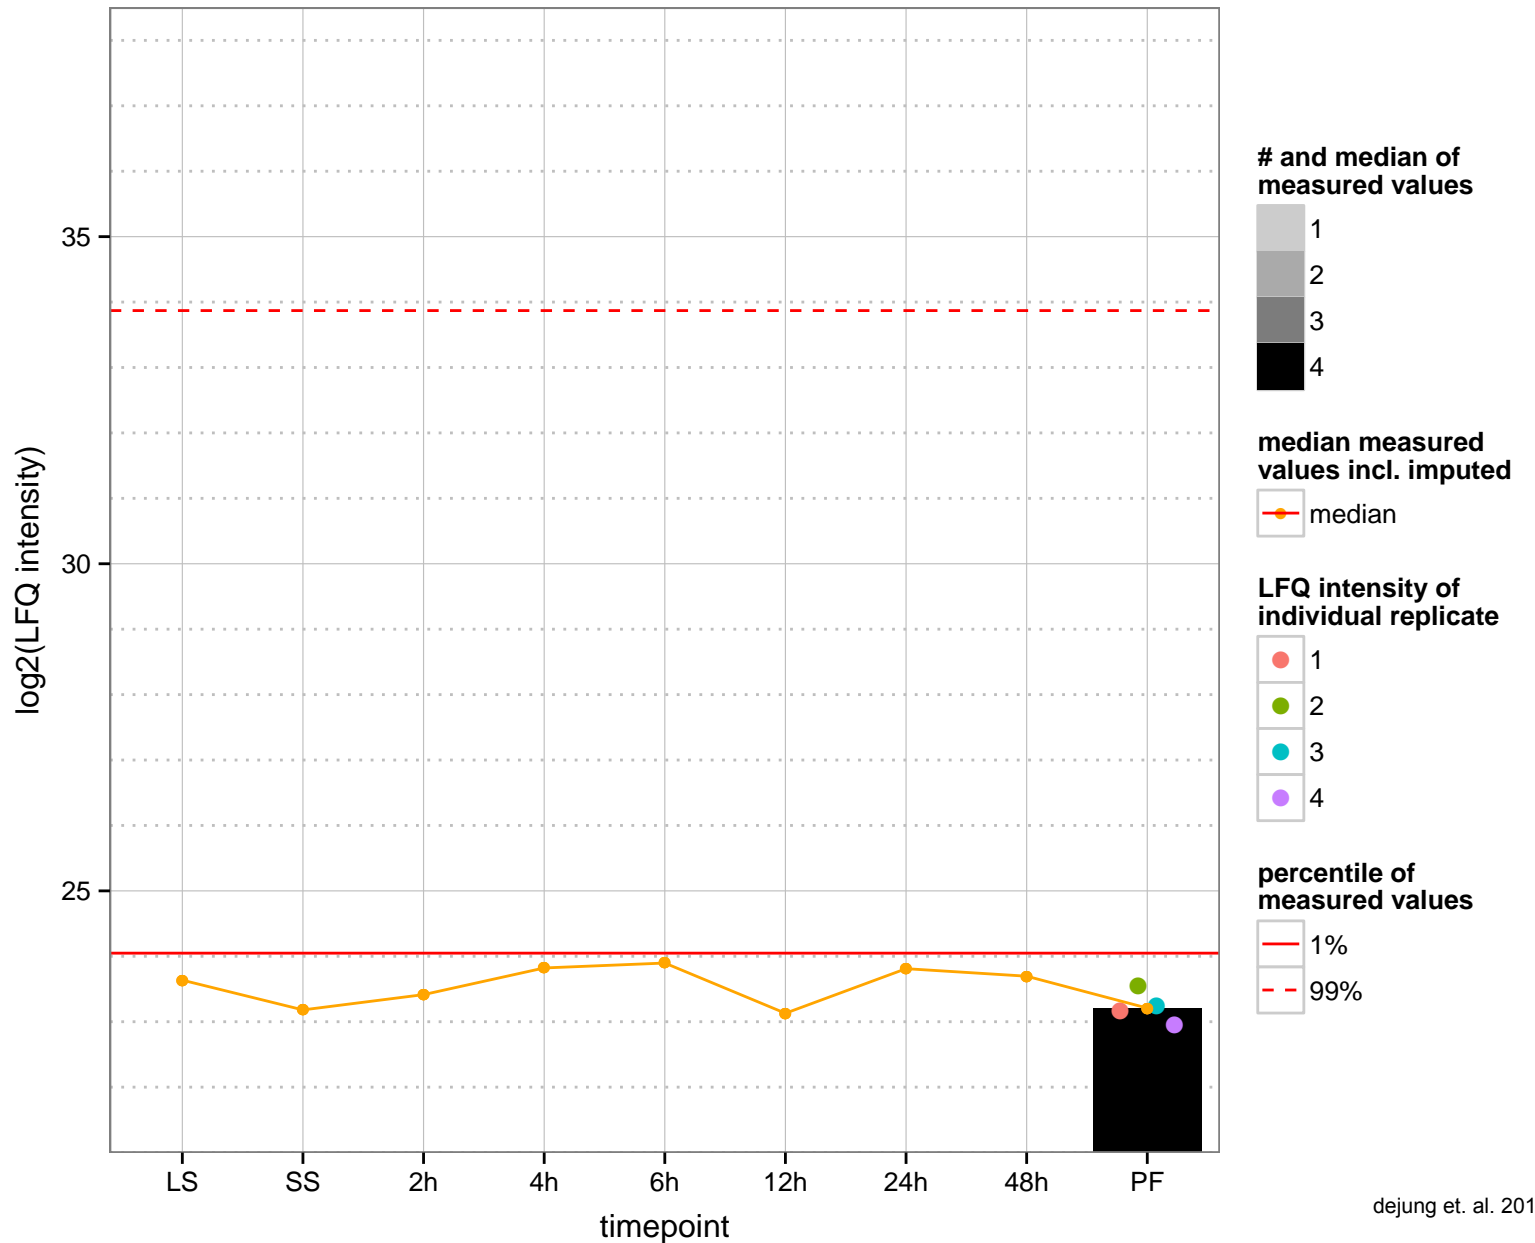

phosphoribosylpyrophosphate synthetase, putative (PRS)

Tb927.11.3030

AGOF: ATP binding, magnesium ion binding, ribose phosphate diphosphokinase activity

AGOC: integral to membrane

AGOP: nucleoside metabolic process, purine ribonucleotide biosynthetic process

PGOF: magnesium ion binding, ribose phosphate diphosphokinase activity

PGOC: null

PGOP: nucleoside metabolic process, nucleotide biosynthetic process

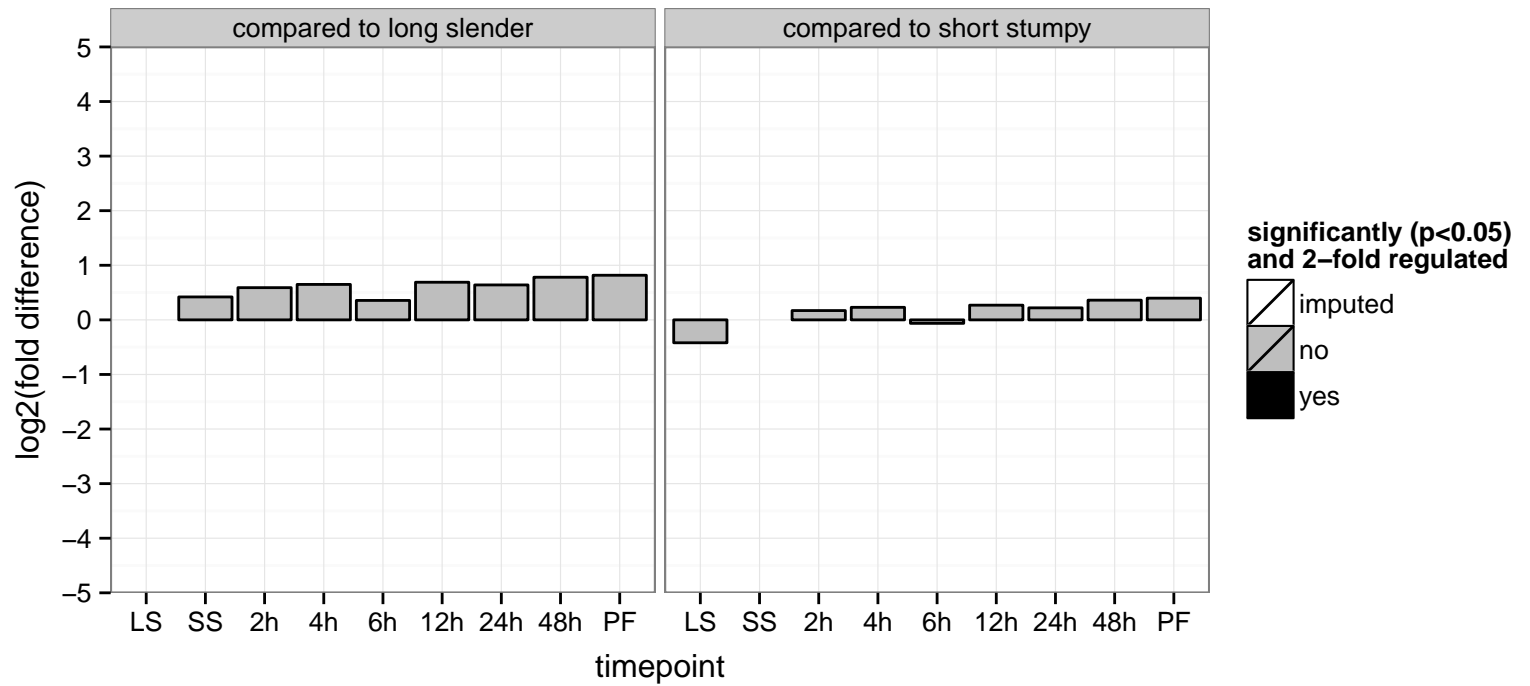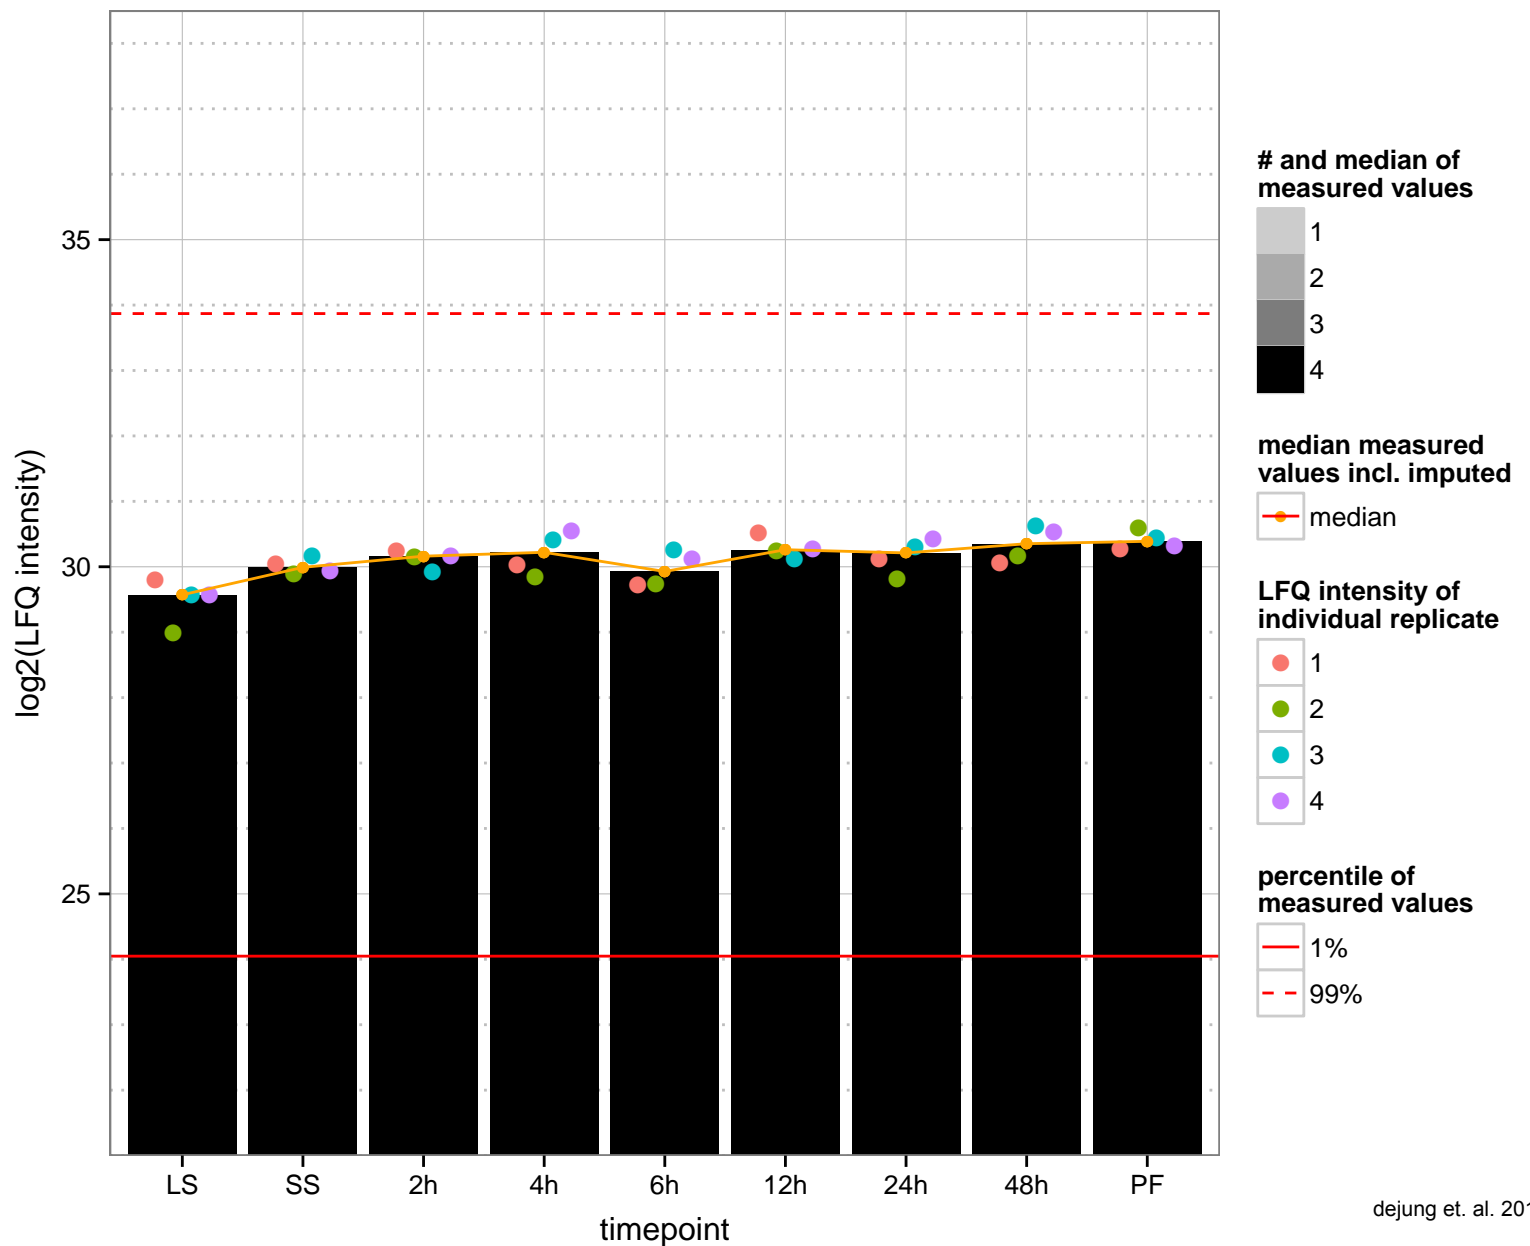

hypothetical protein, conserved  
 Tb927.11.3160  
 AGOF: null  
 AGOC: null  
 AGOP: null  
 PGO: null  
 PGOC: null  
 PGOP: null

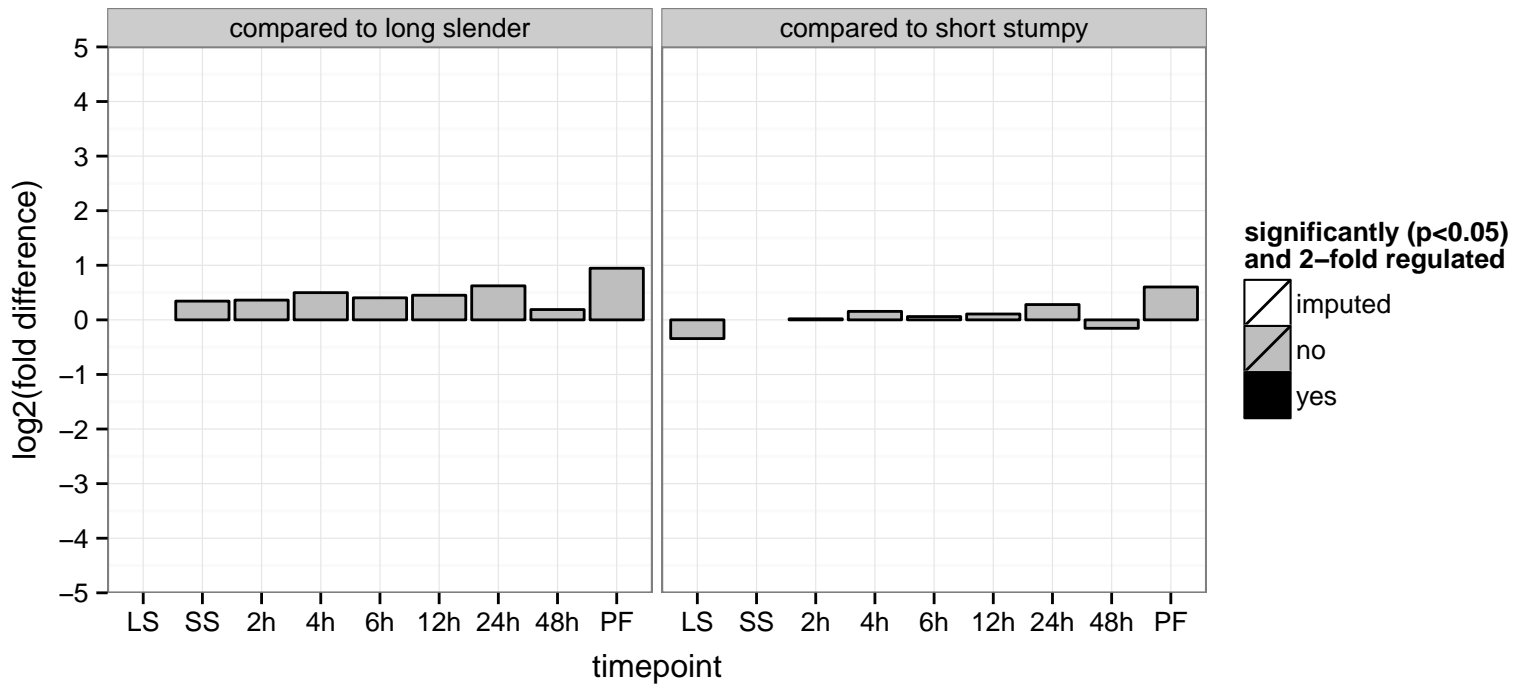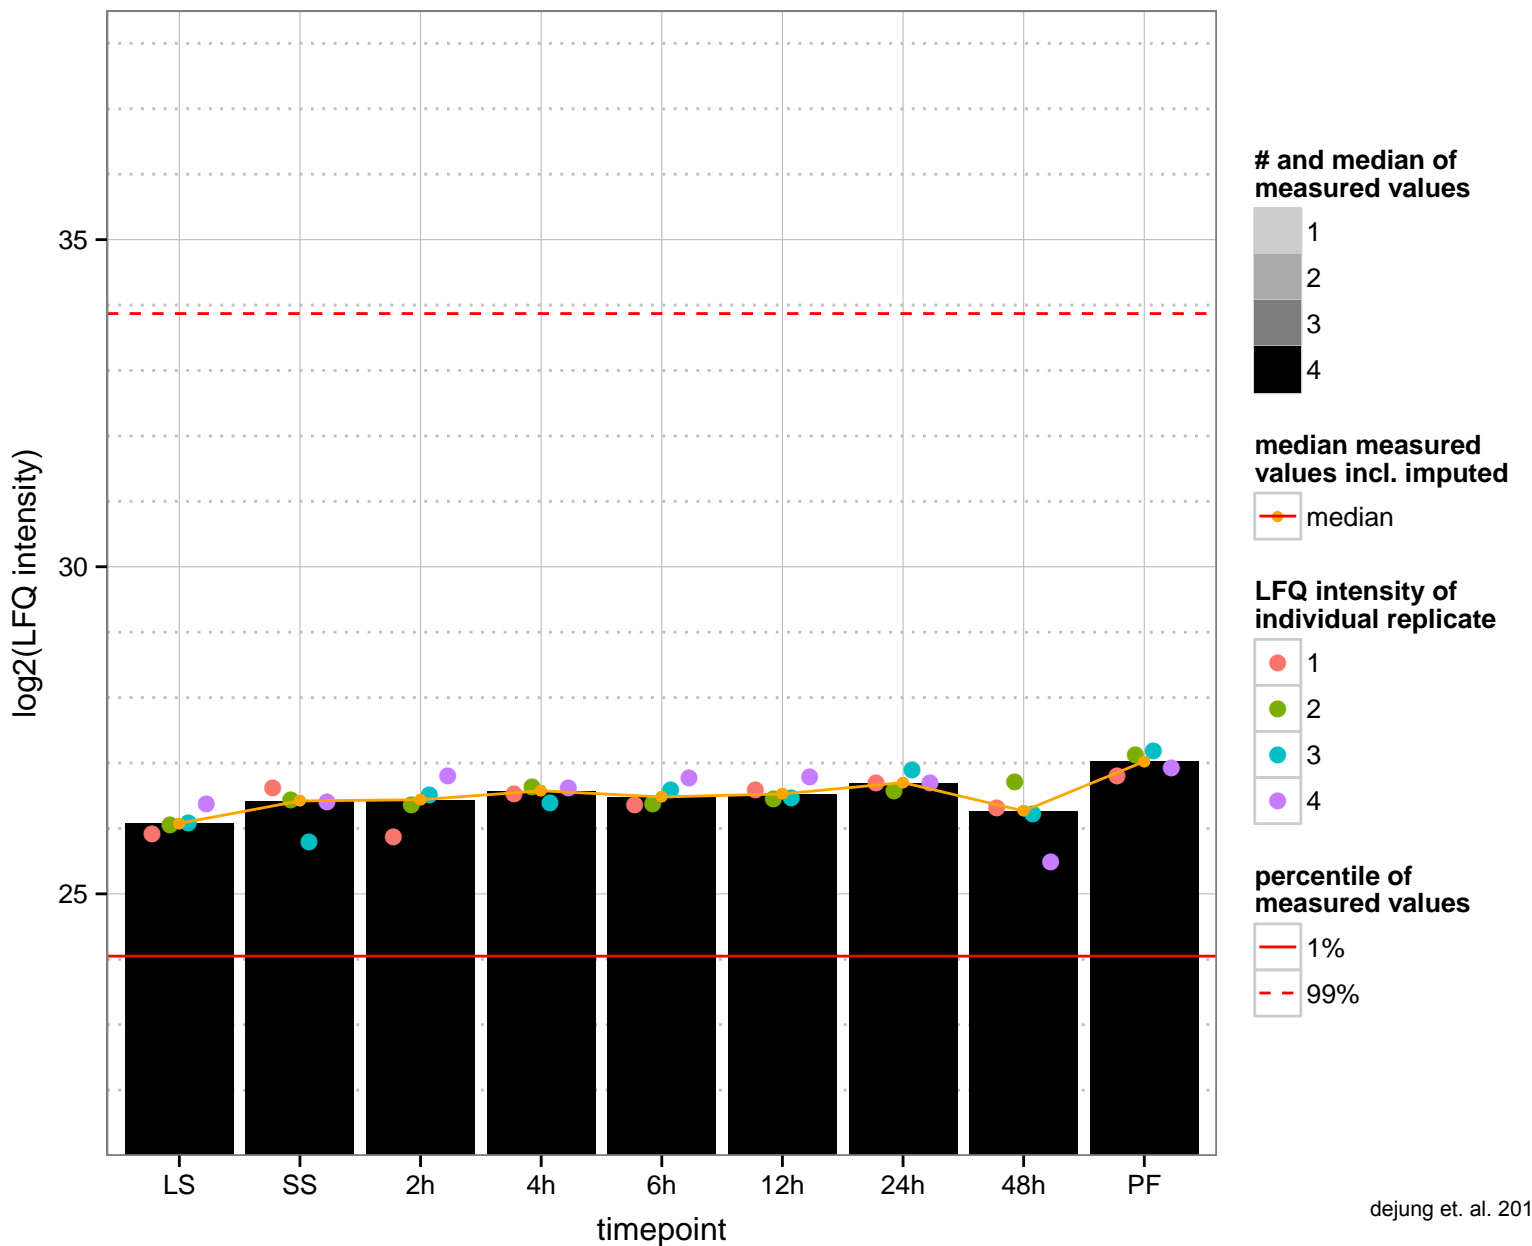

hypothetical protein, conserved  
 Tb927.11.3190  
 AGOF: null  
 AGOC: null  
 AGOP: null  
 PGO: binding, protein binding  
 PGOC: null  
 PGOP: null

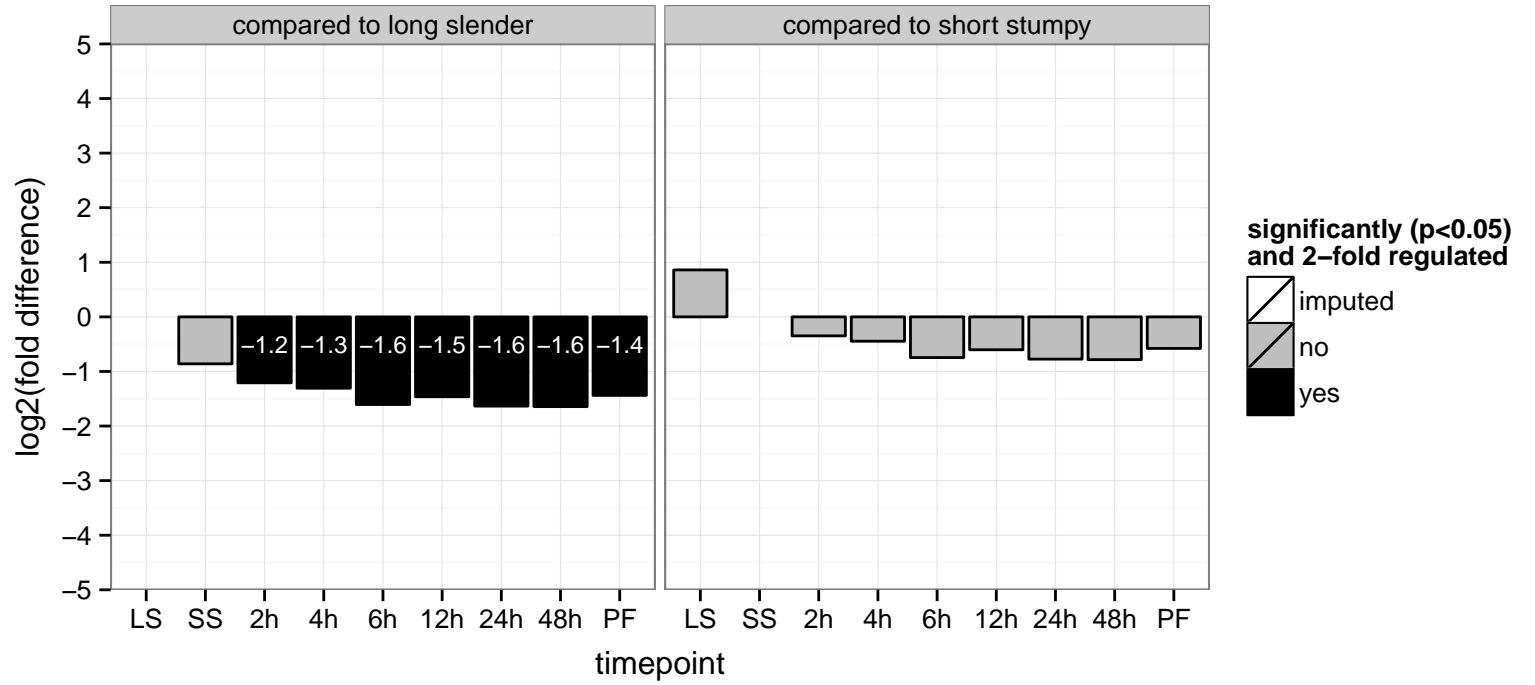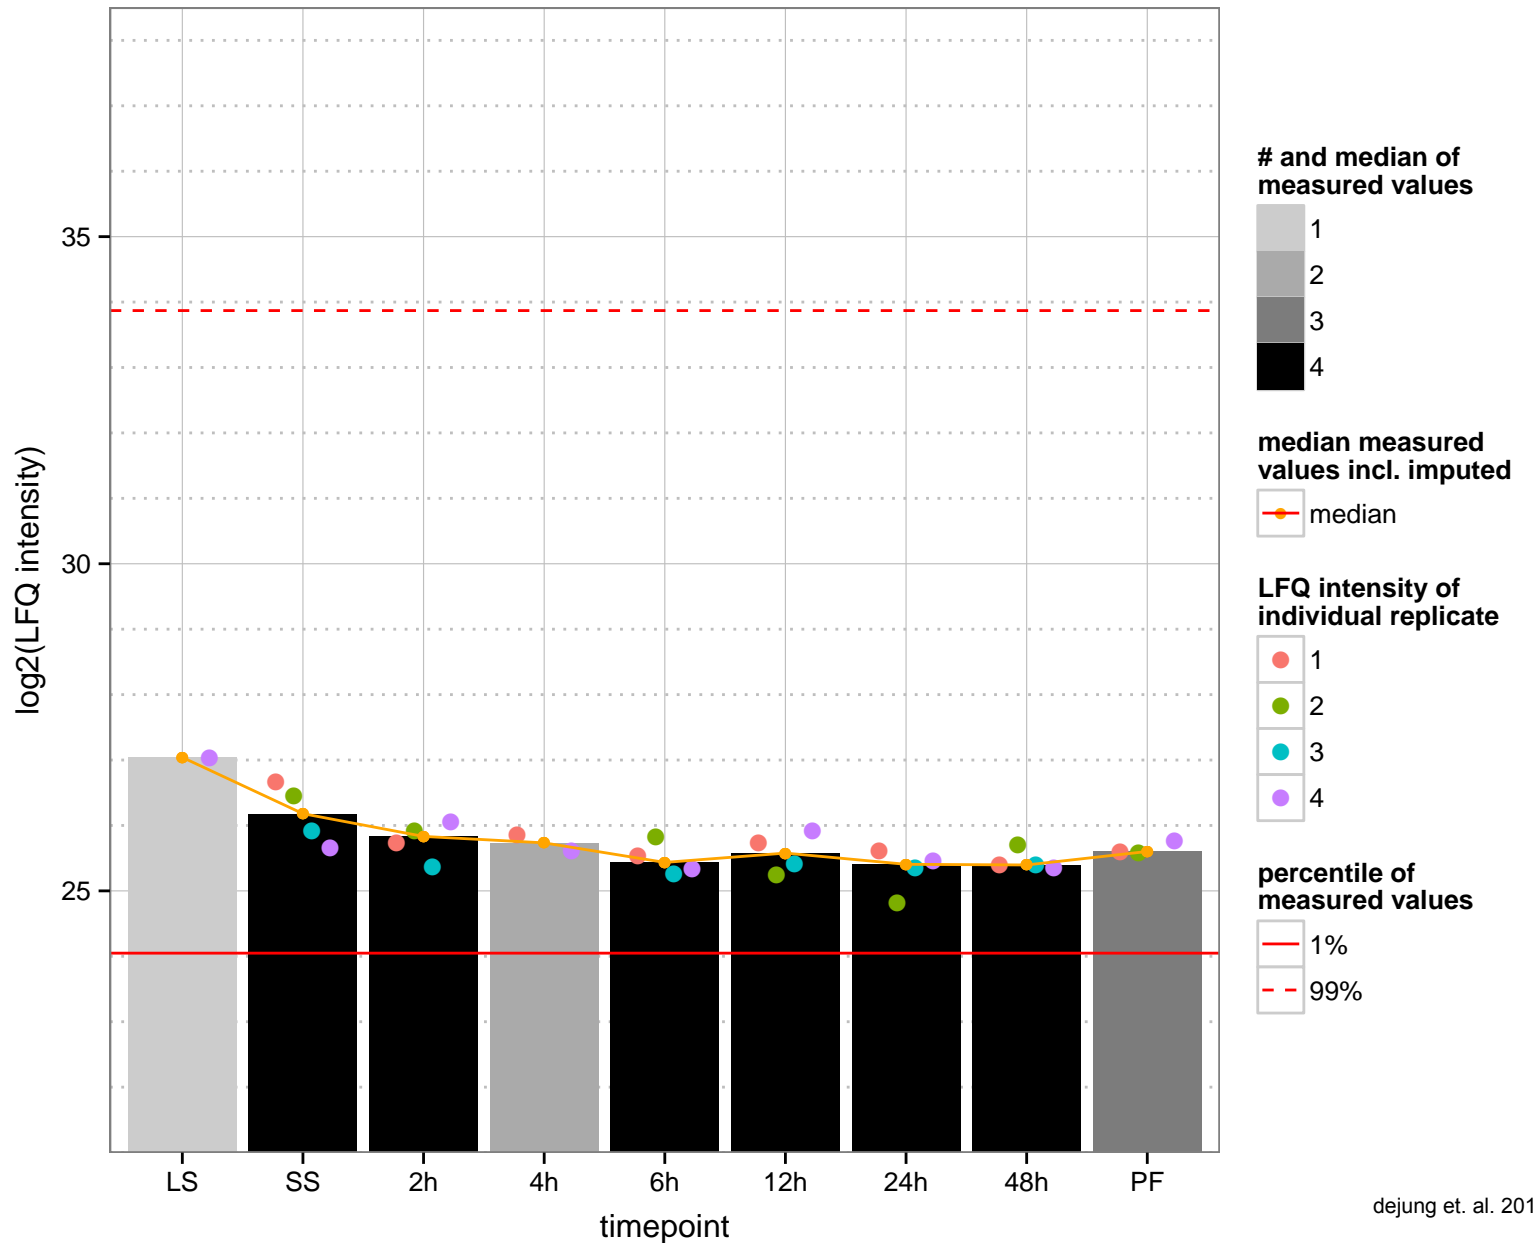

dynein light chain 1, putative  
 Tb927.11.320  
 AGOF: microtubule motor activity  
 AGOC: microtubule associated complex  
 AGOP: microtubule-based process  
 PGO: null  
 PGOC: microtubule associated complex  
 PGOP: microtubule-based process

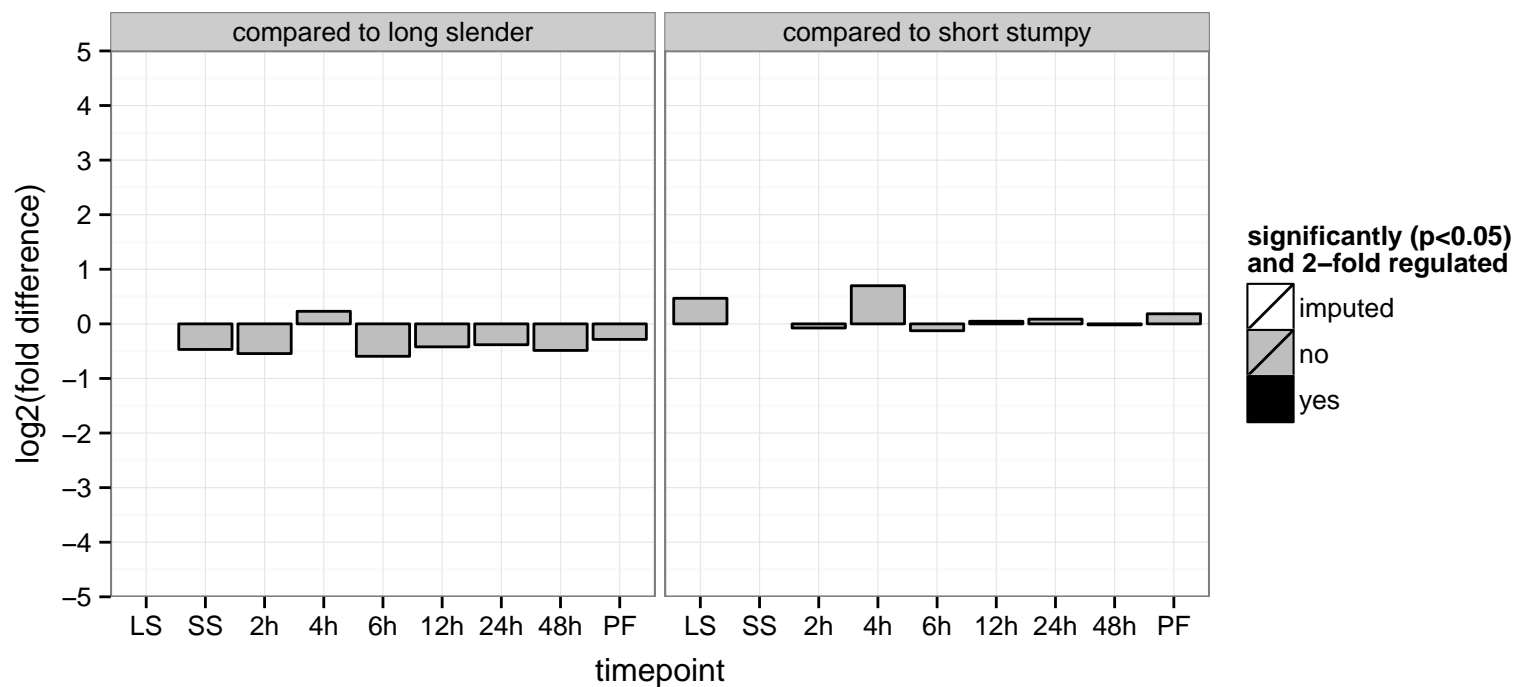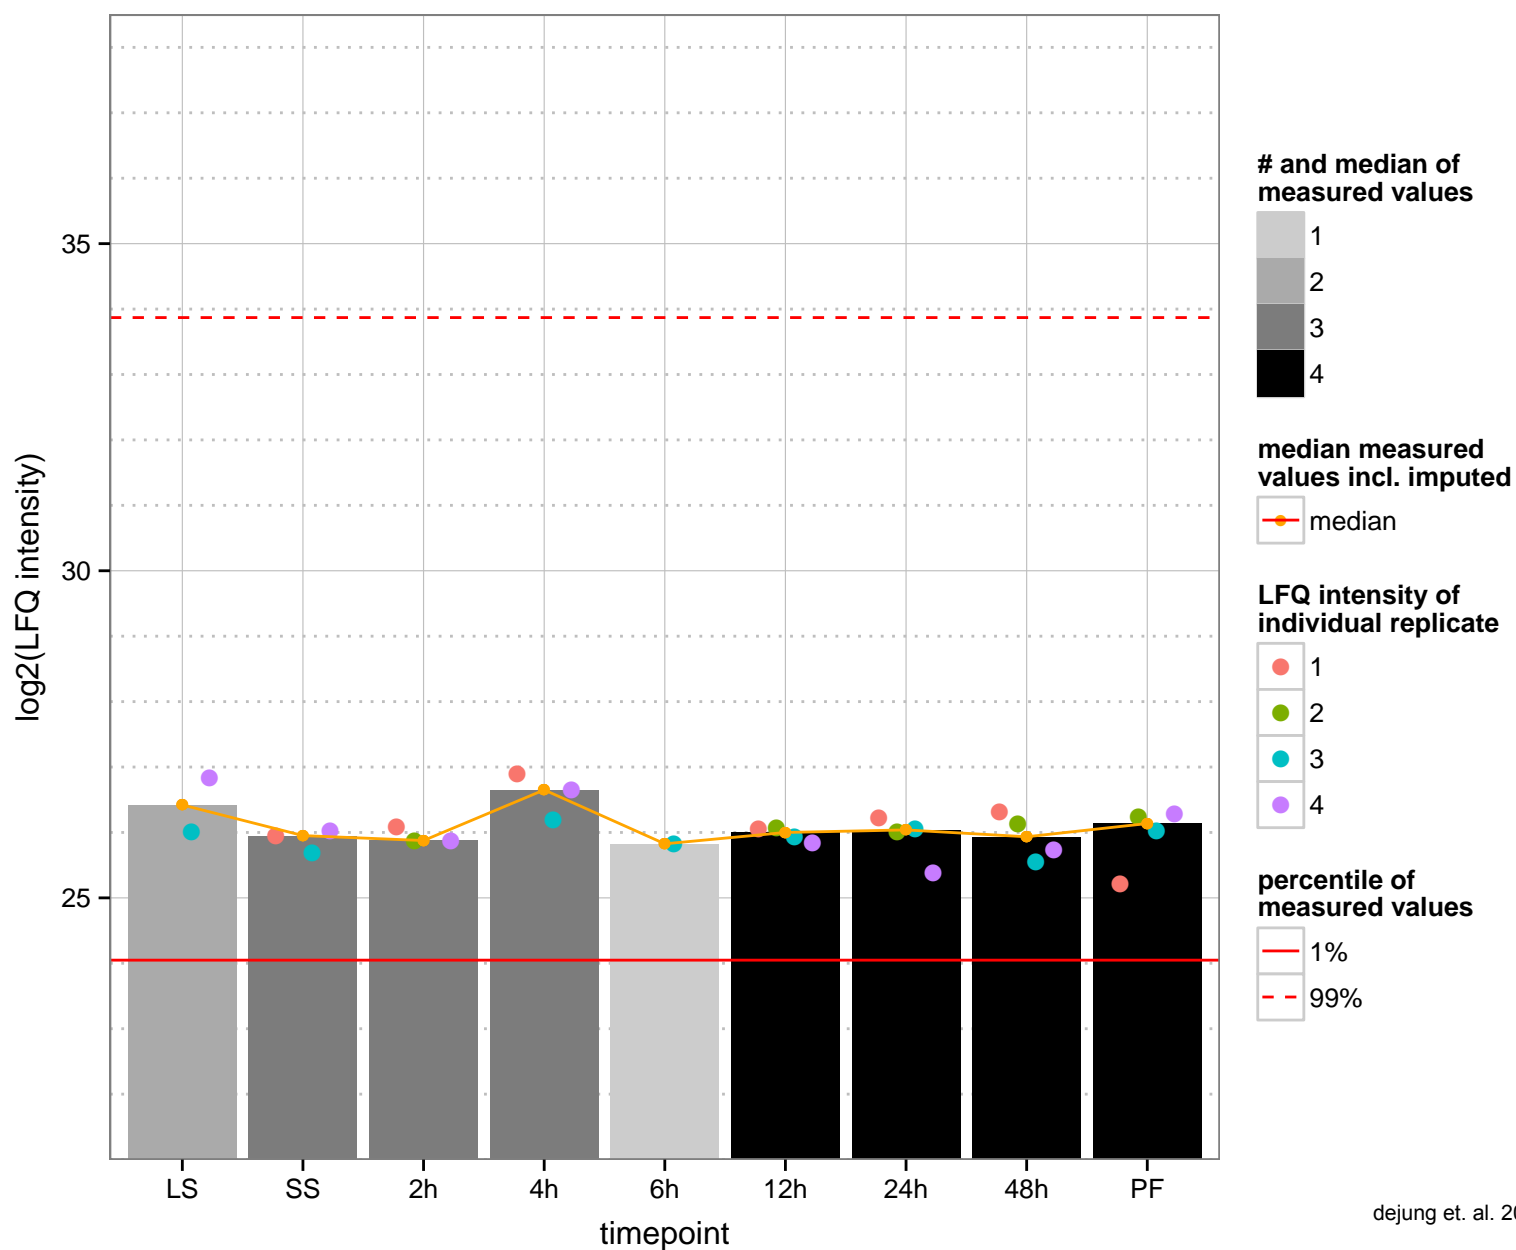

T-complex protein 1, zeta subunit, putative (TCP-1-zeta)  
 Tb927.11.3240  
 AGOF: ATP binding, unfolded protein binding  
 AGOC: chaperonin-containing T-complex  
 AGOP: protein folding, regulation of cell cycle  
 PGO: ATP binding, unfolded protein binding  
 PGO: null  
 PGO: cellular protein metabolic process, protein folding

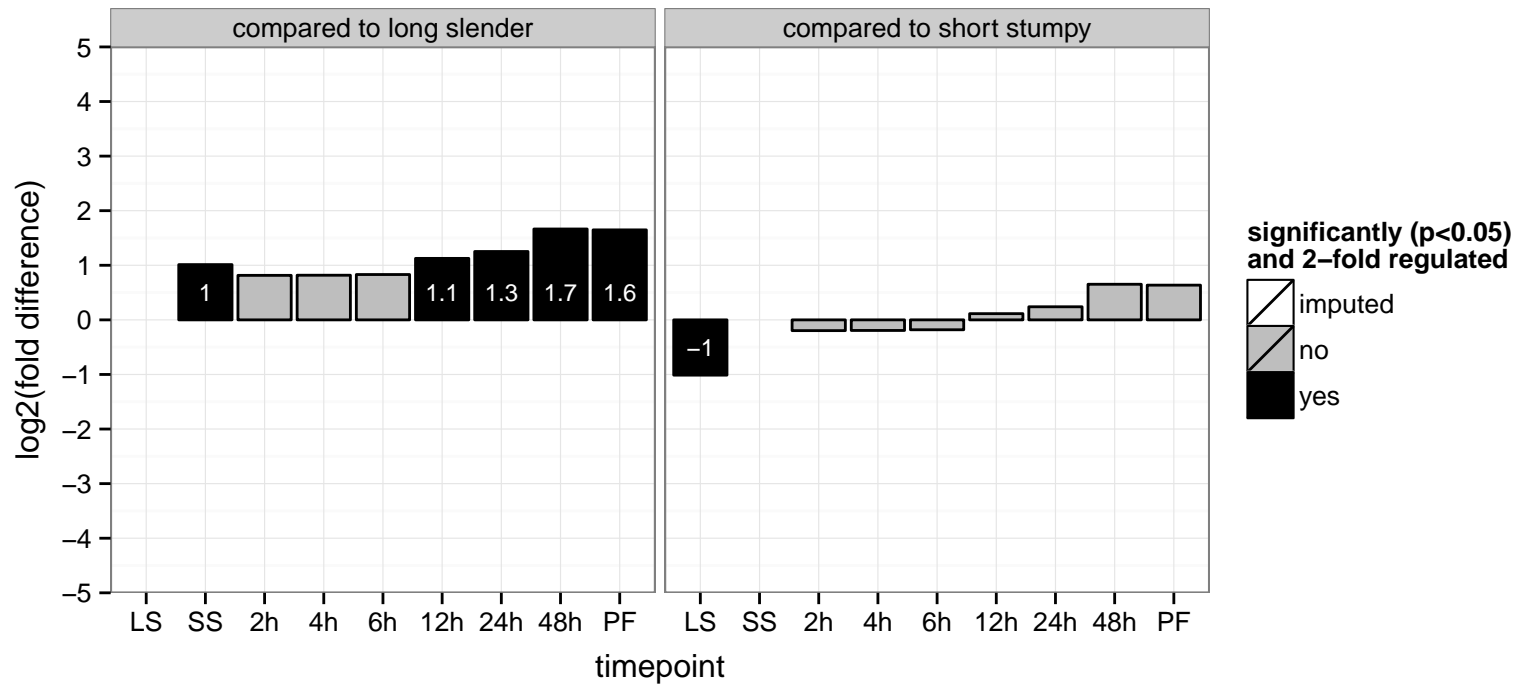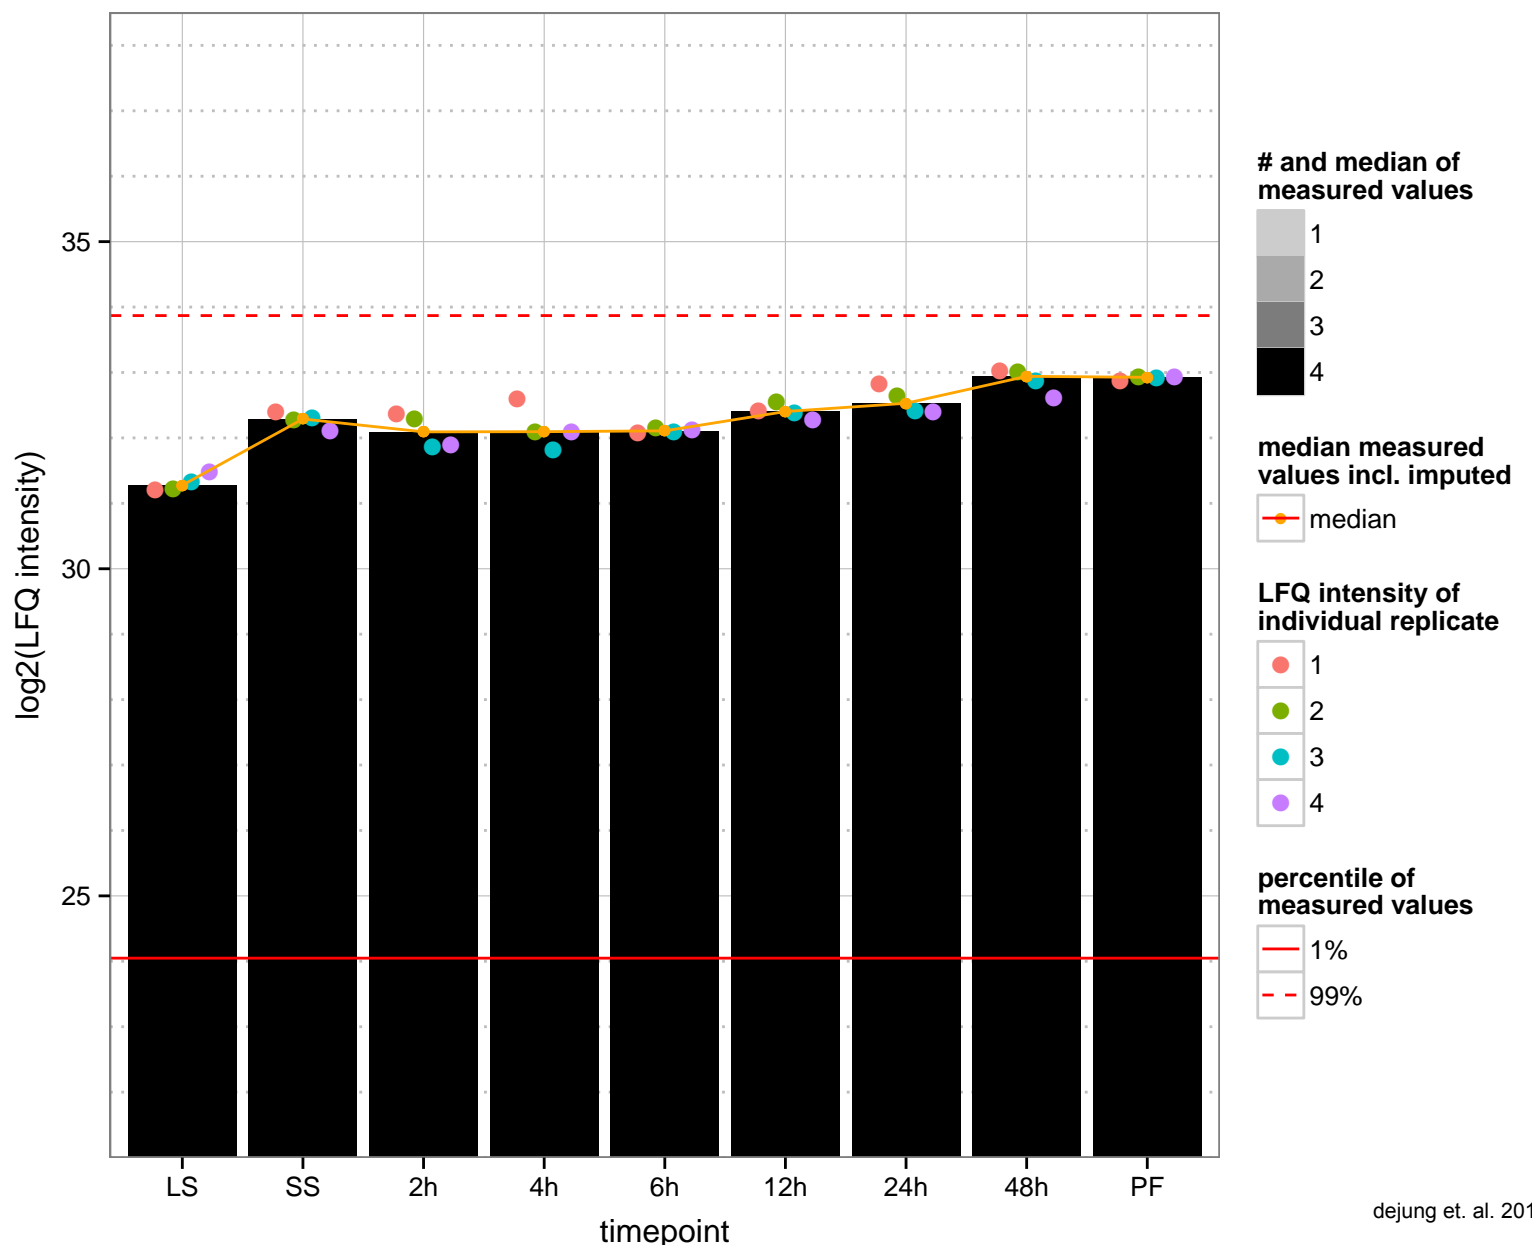

dynein heavy chain, putative

Tb927.11.3250

AGOF: ATP binding, ATPase activity, microtubule motor activity

AGOC: dynein complex

AGOP: microtubule-based movement

PGOF: ATP binding, ATPase activity, microtubule motor activity, nucleoside-triphosphatase activity, nucleotide binding

PGOC: dynein complex

PGOP: microtubule-based movement

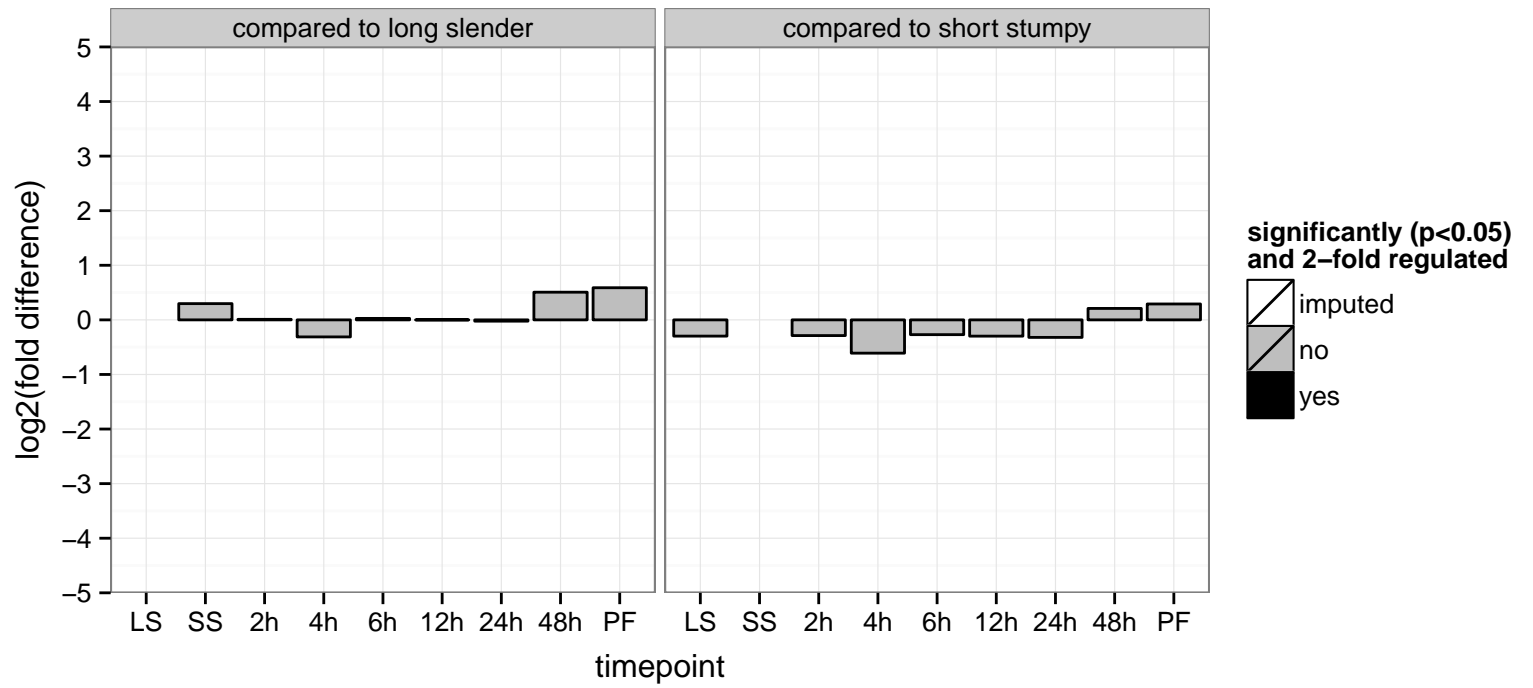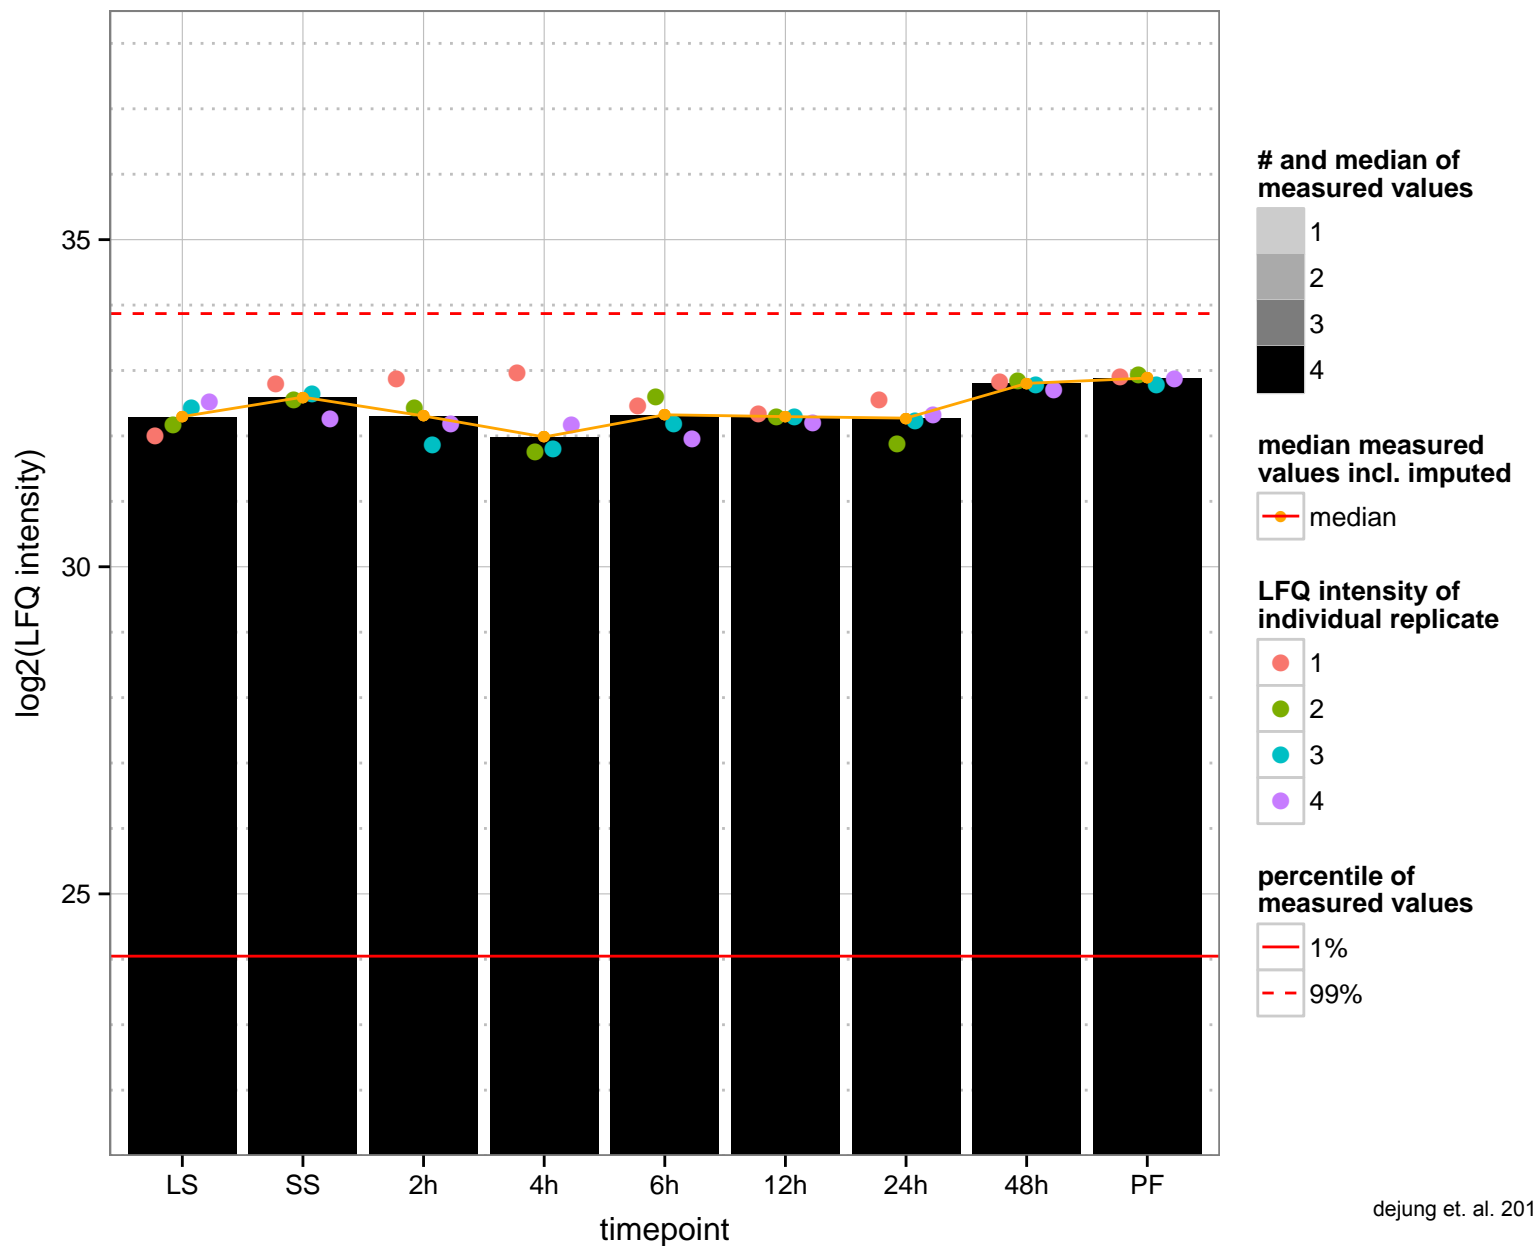

hypothetical protein, conserved  
 Tb927.11.3300  
 AGOF: null  
 AGOC: mitochondrial membrane  
 AGOP: null  
 PGO: null  
 PGO: null  
 PGO: null

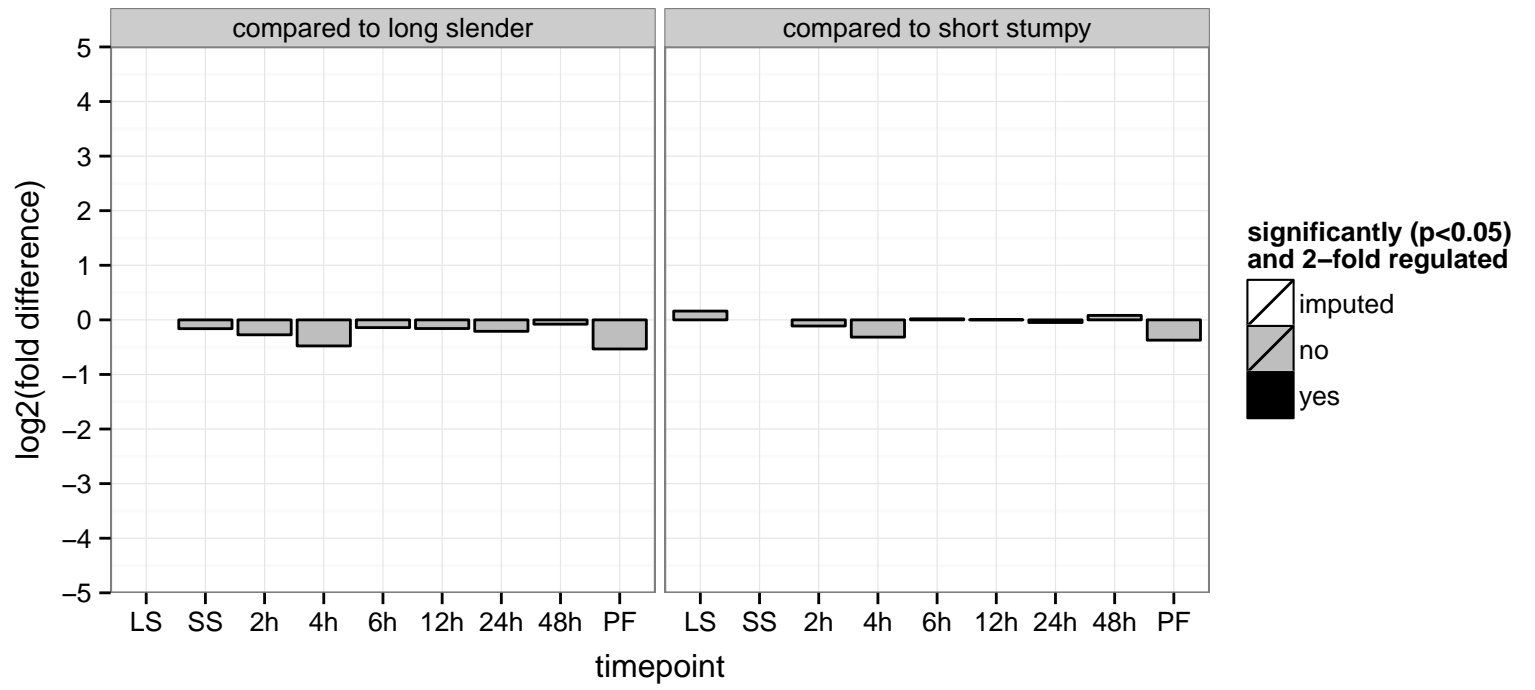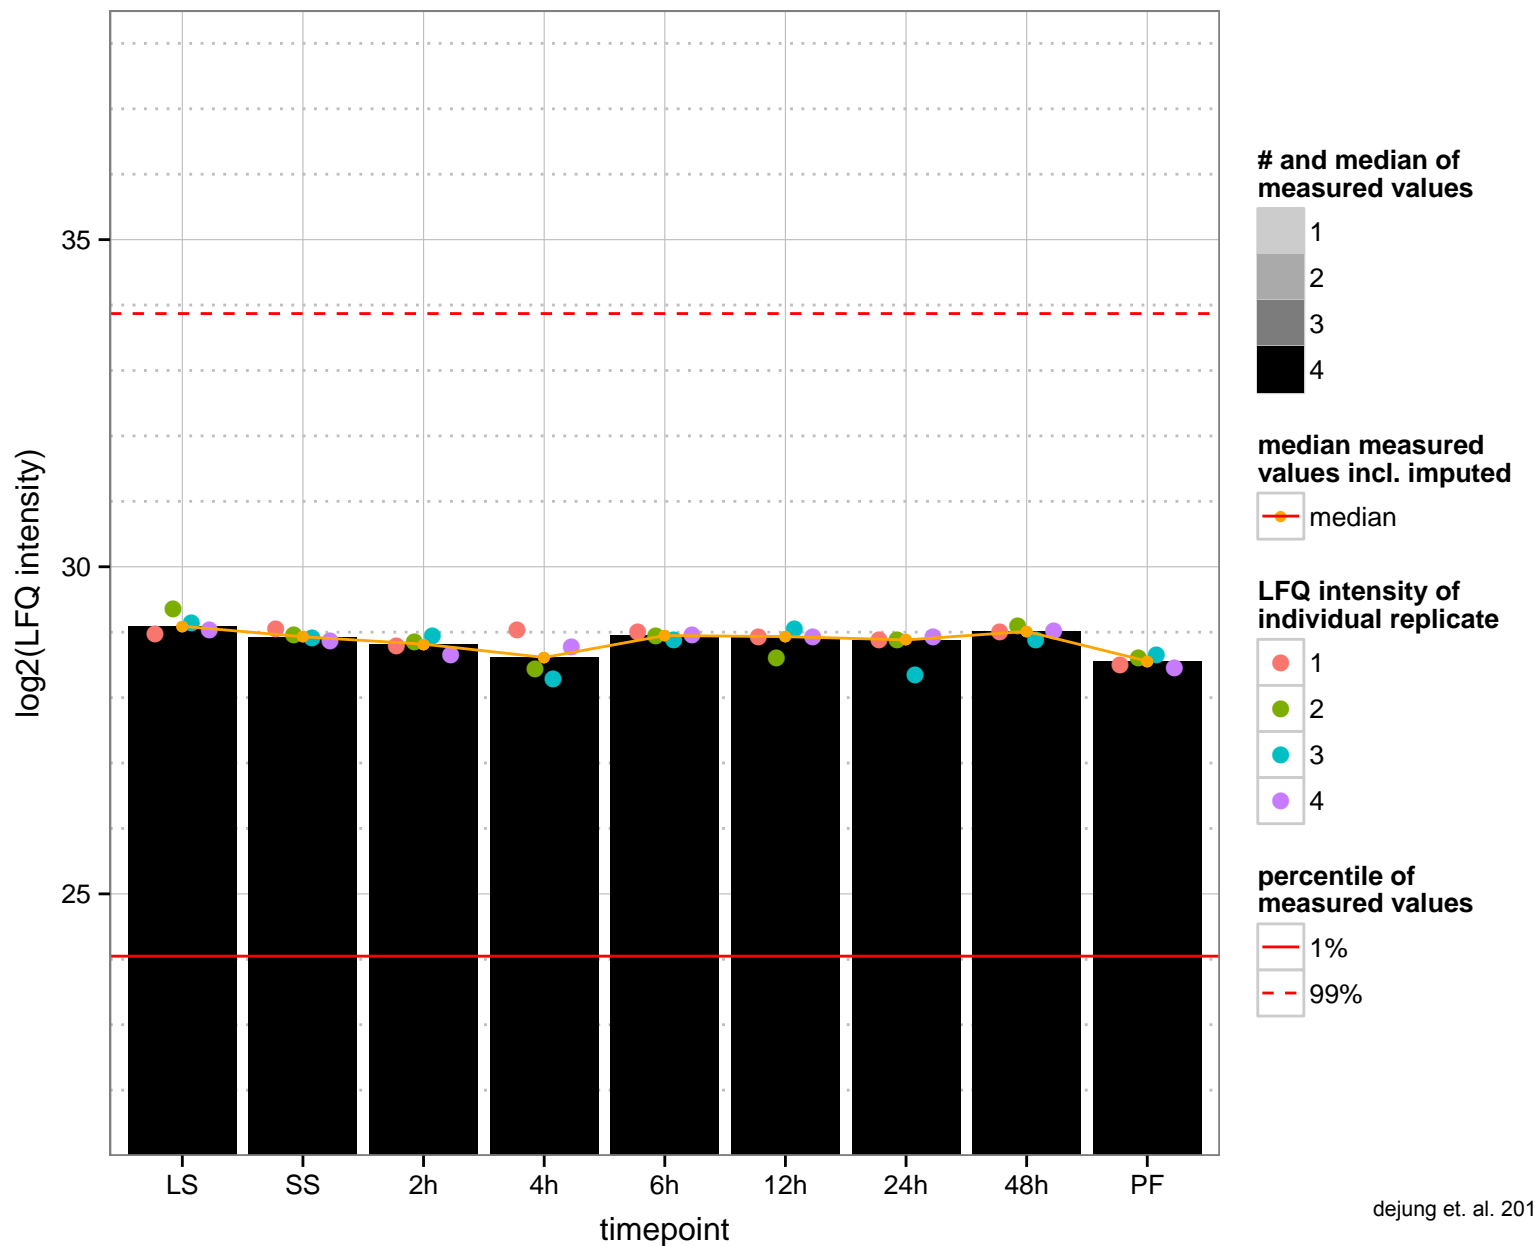



hypothetical protein, conserved  
 Tb927.11.3360  
 AGOF: ATP binding  
 AGOC: null  
 AGOP: ciliary or flagellar motility  
 PGO: ATP binding, protein binding  
 PGO: null  
 PGOP: null

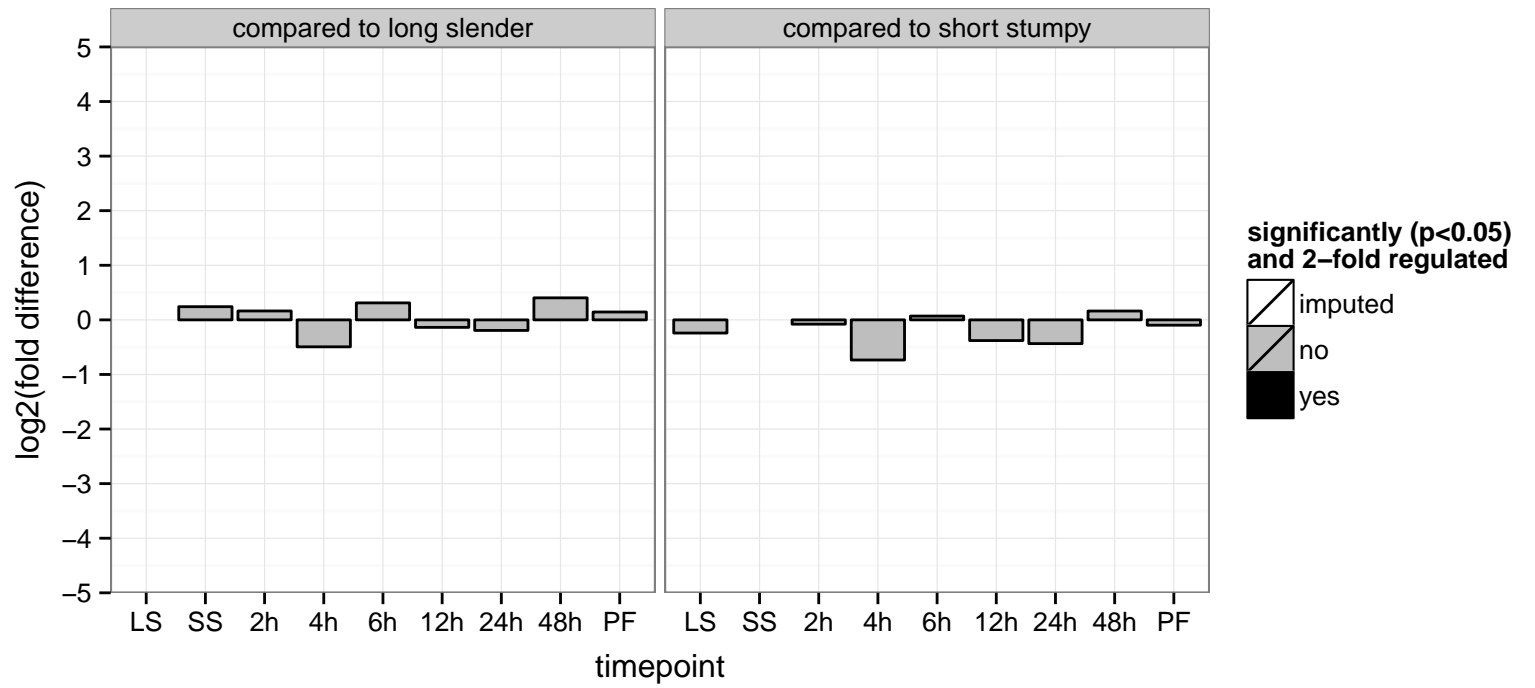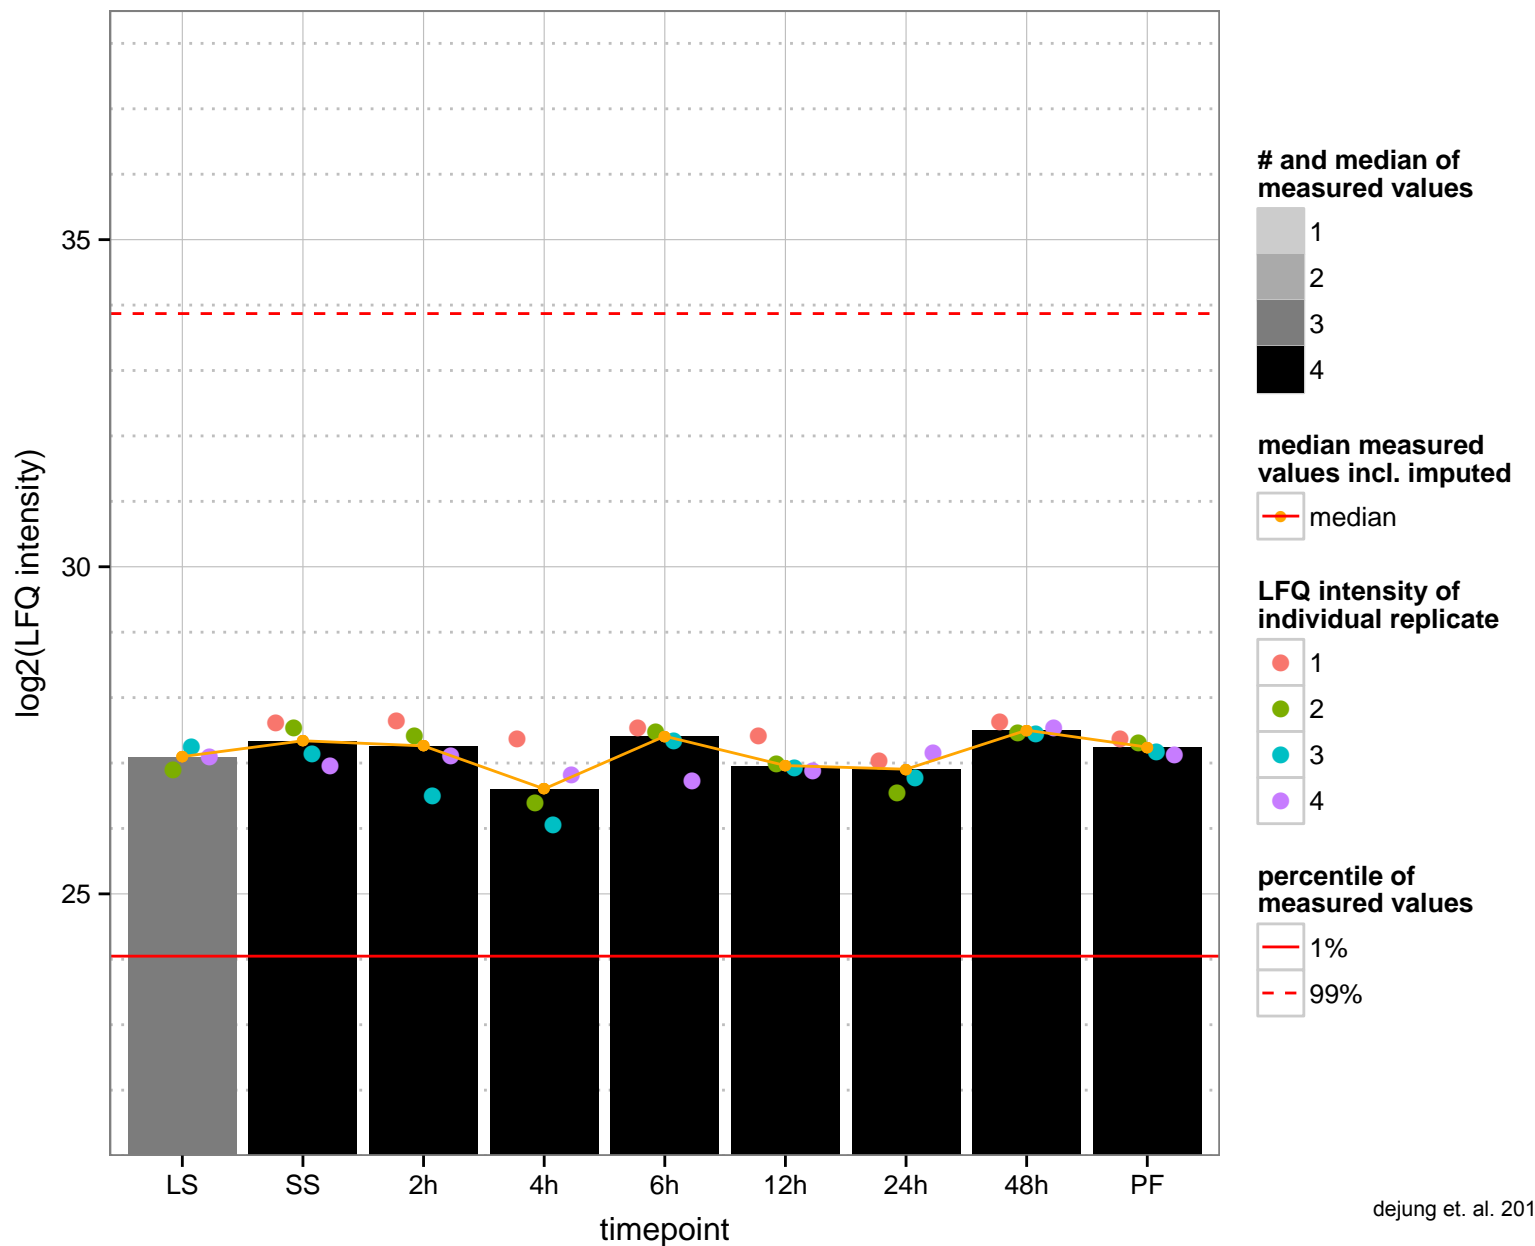

Ran-binding protein 1, putative  
 Tb927.11.3380  
 AGOF: GDP-dissociation inhibitor activity  
 AGOC: cytoplasm, nucleus  
 AGOP: nuclear transport  
 PGO: null  
 PGO: null  
 PGO: null

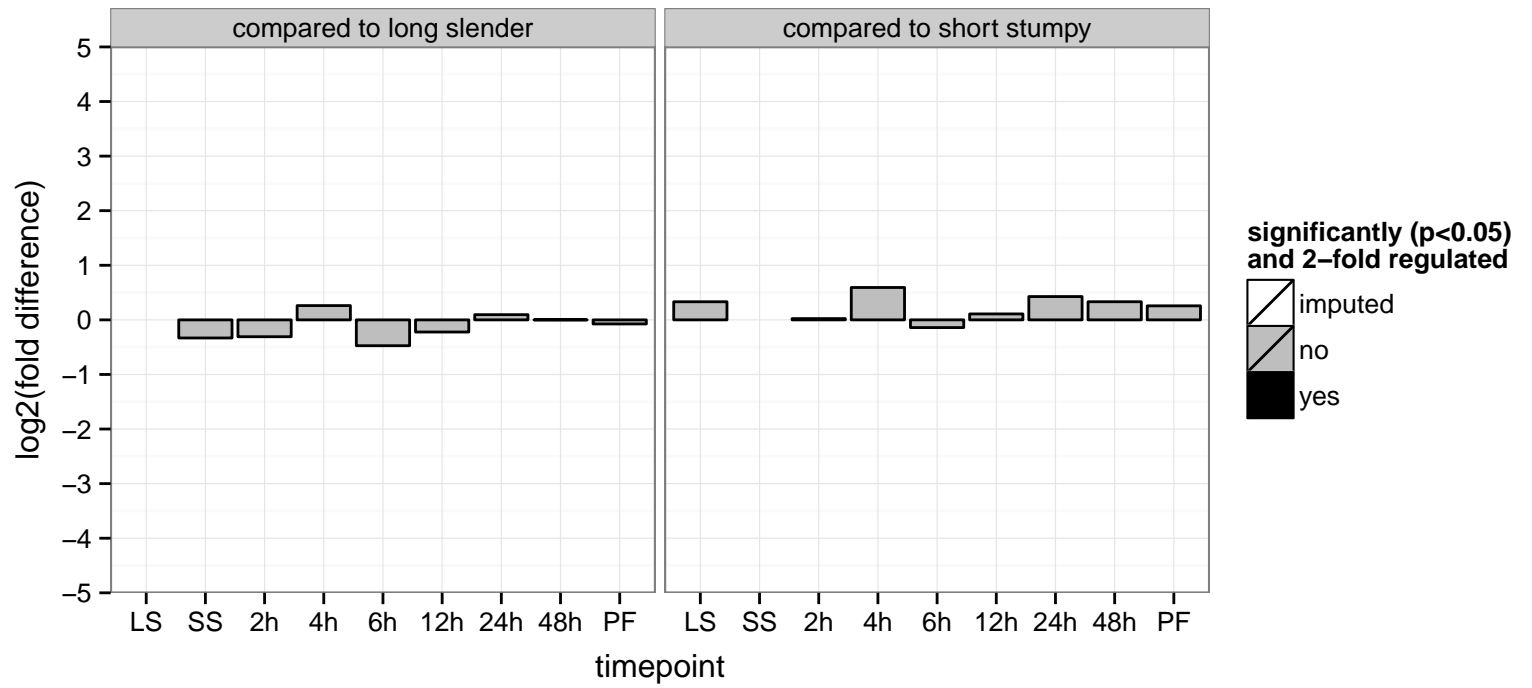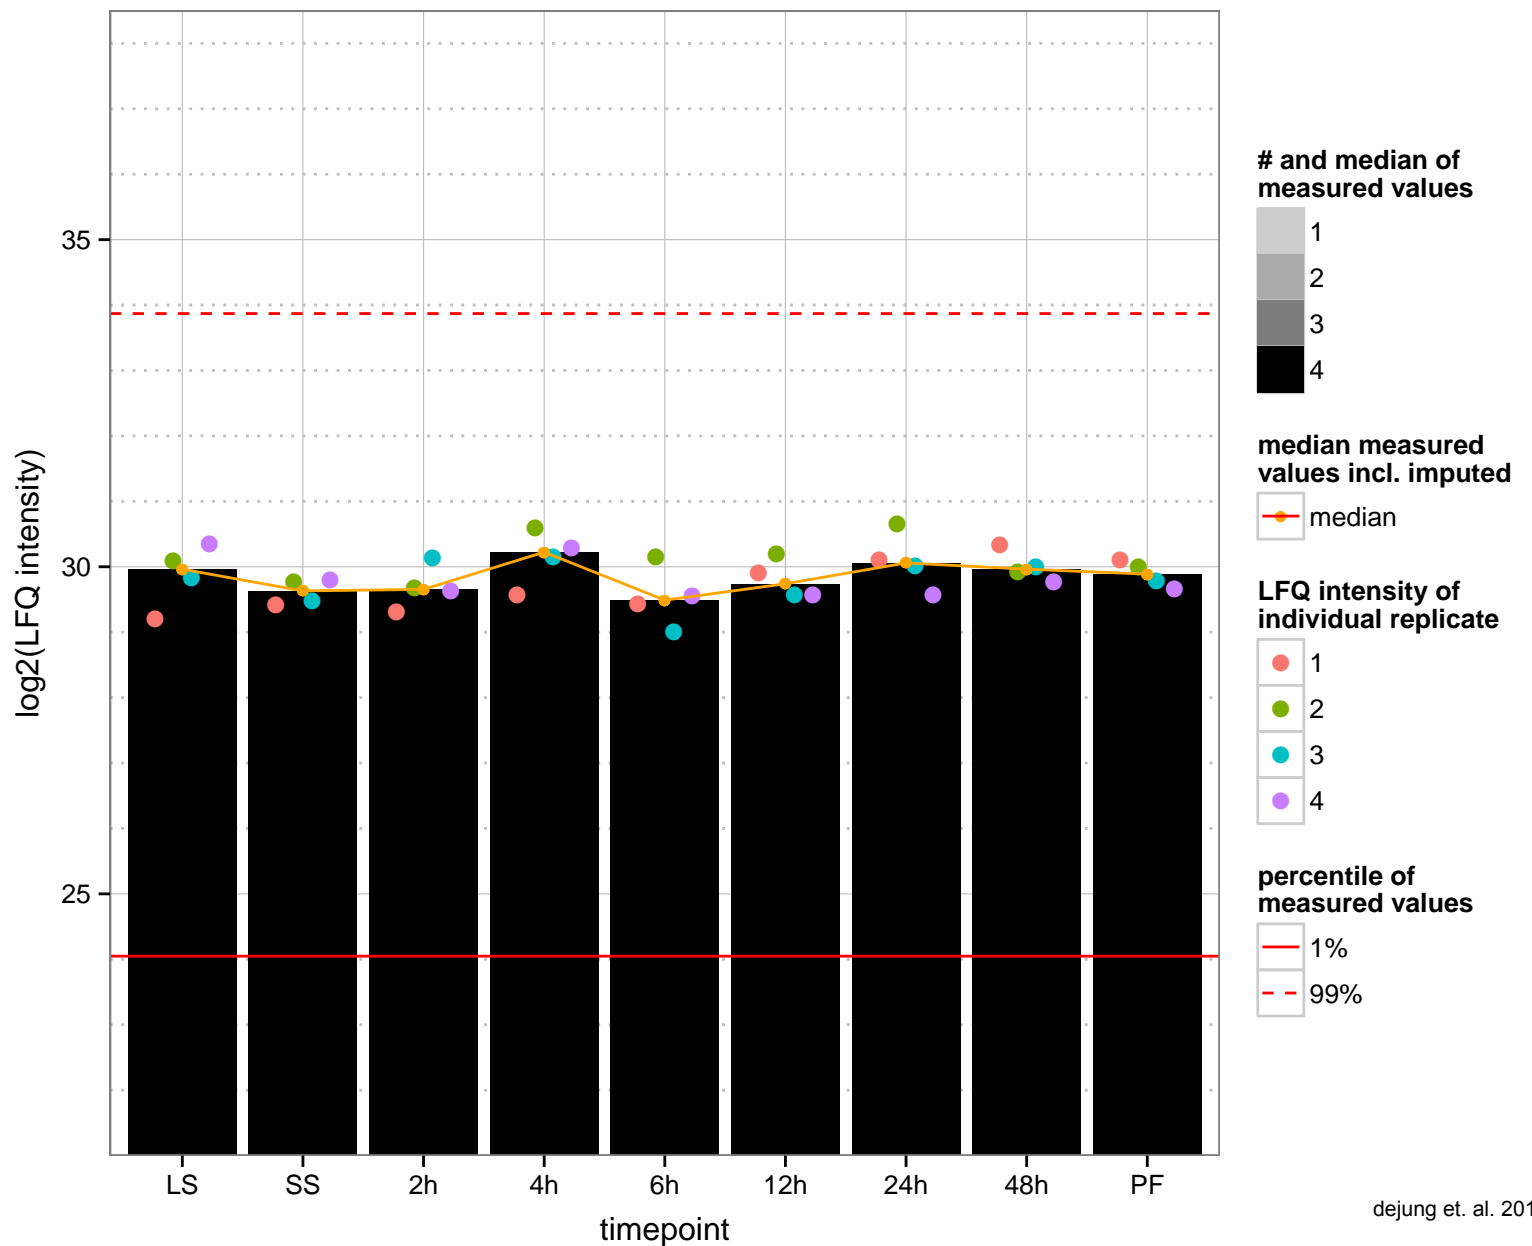

hypothetical protein, conserved  
 Tb927.11.3390  
 AGOF: acid-amino acid ligase activity  
 AGOC: intracellular  
 AGOP: cellular protein modification process  
 PGOF: acid-amino acid ligase activity, protein binding  
 PGO: intracellular  
 PGOP: cellular protein modification process

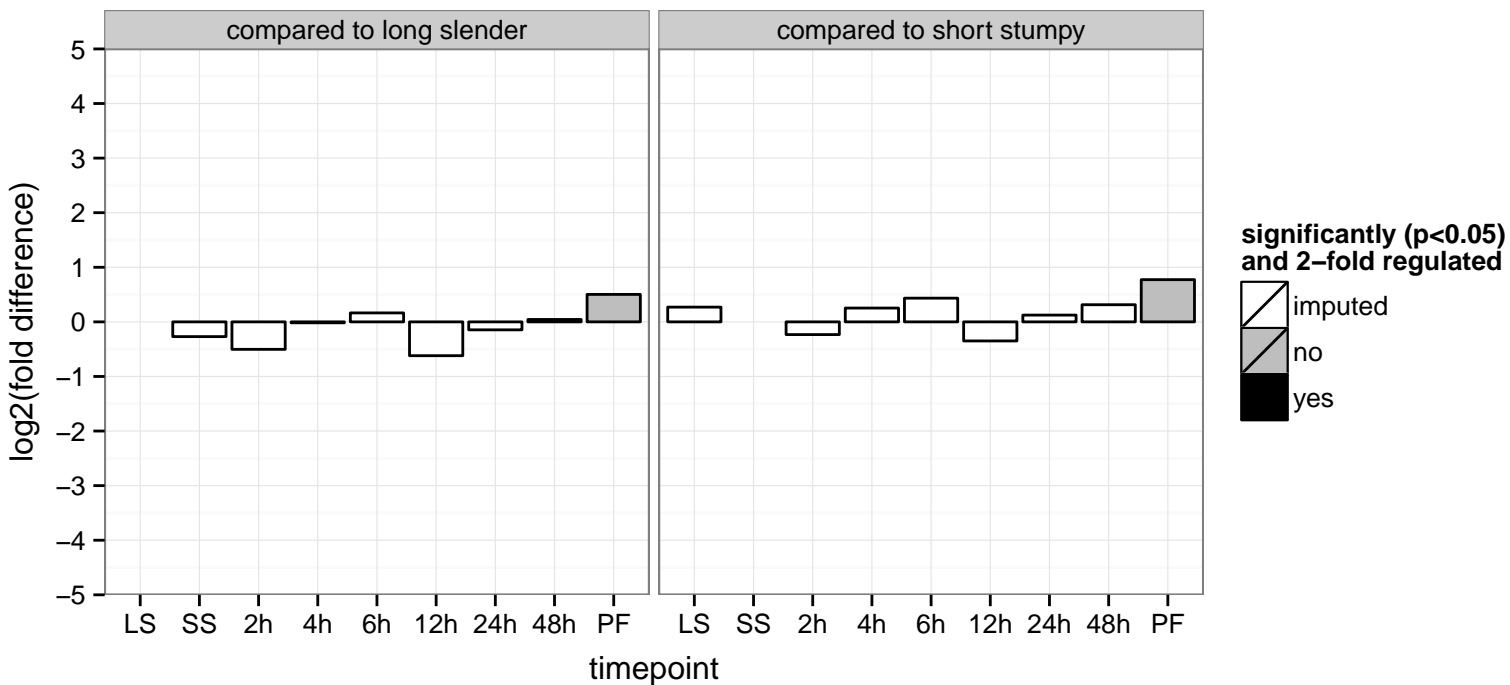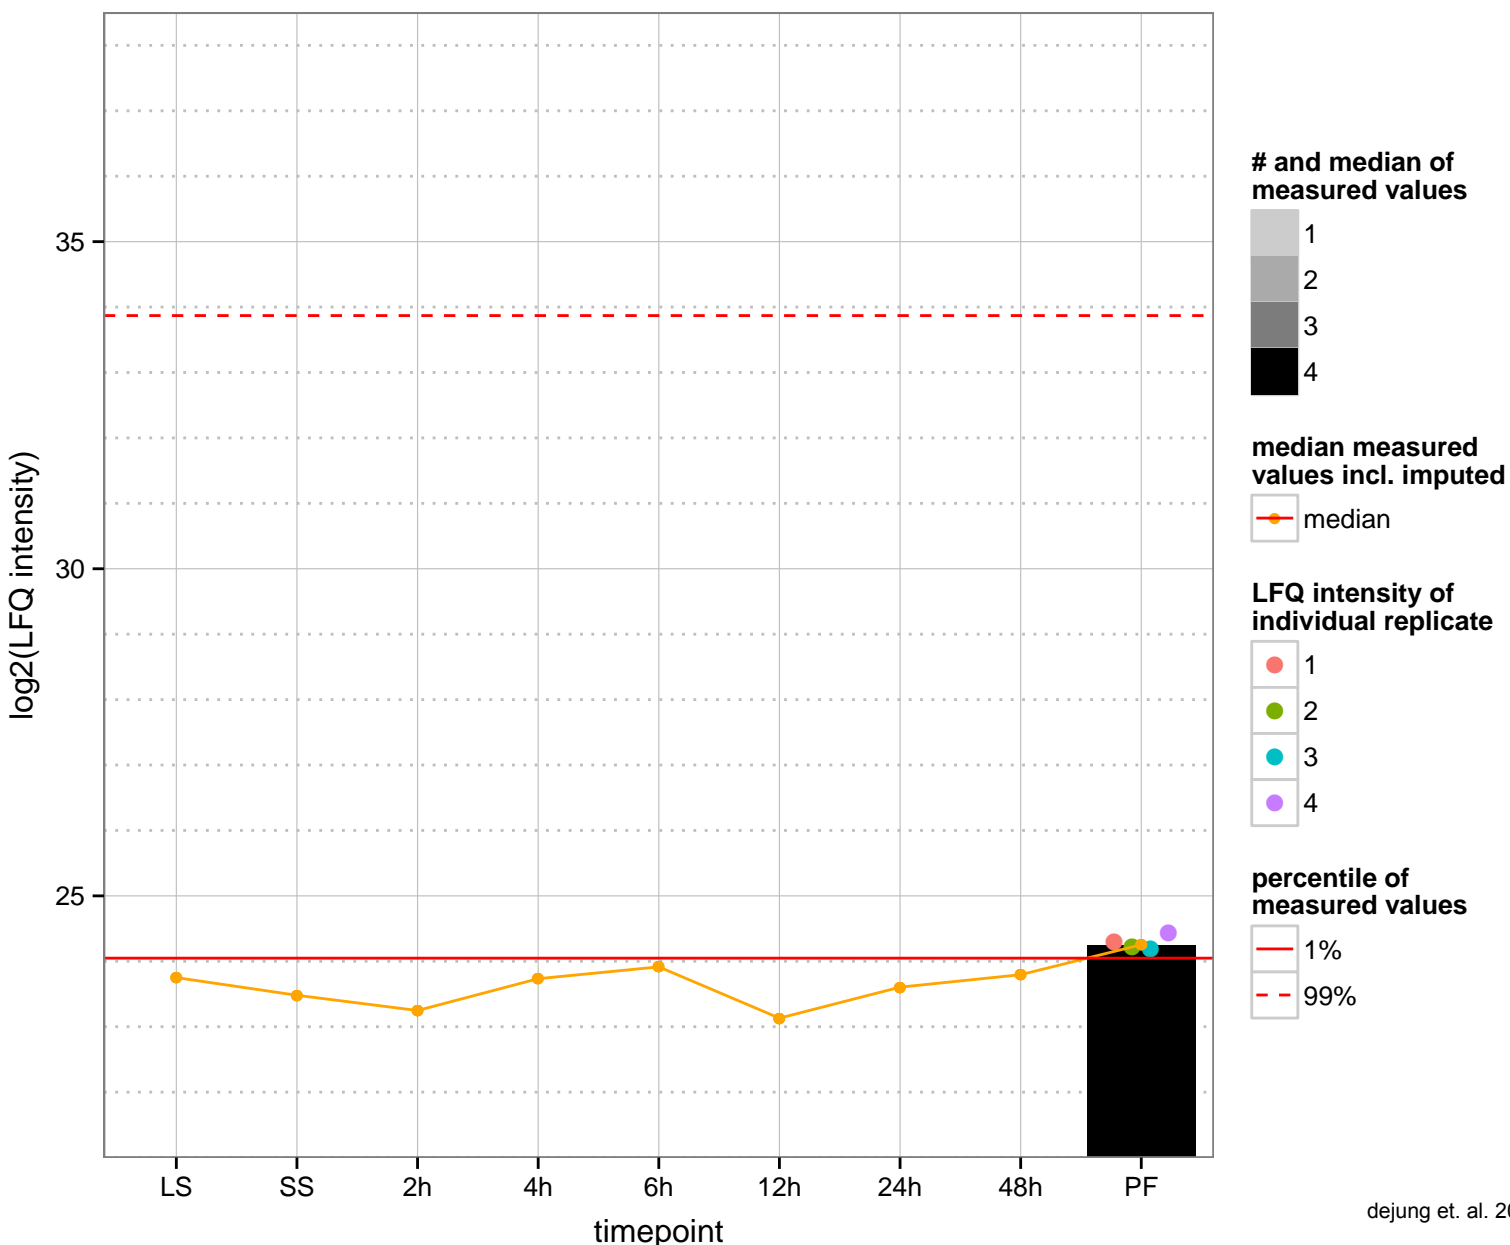

hypothetical protein, conserved  
 Tb927.11.3480  
 AGOF: null  
 AGOC: null  
 AGOP: null  
 PGOF: DNA-directed RNA polymerase activity  
 PGO: nucleus  
 PGO: transcription, DNA-dependent

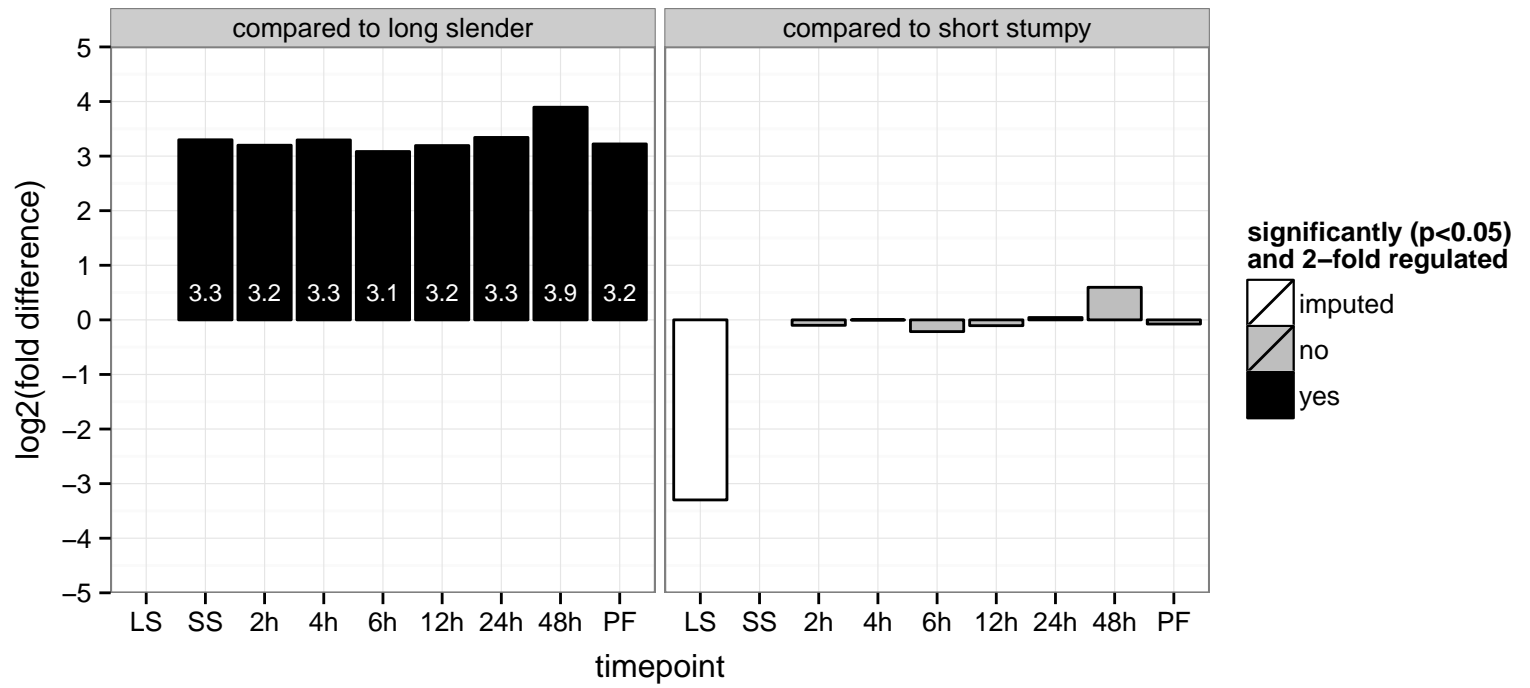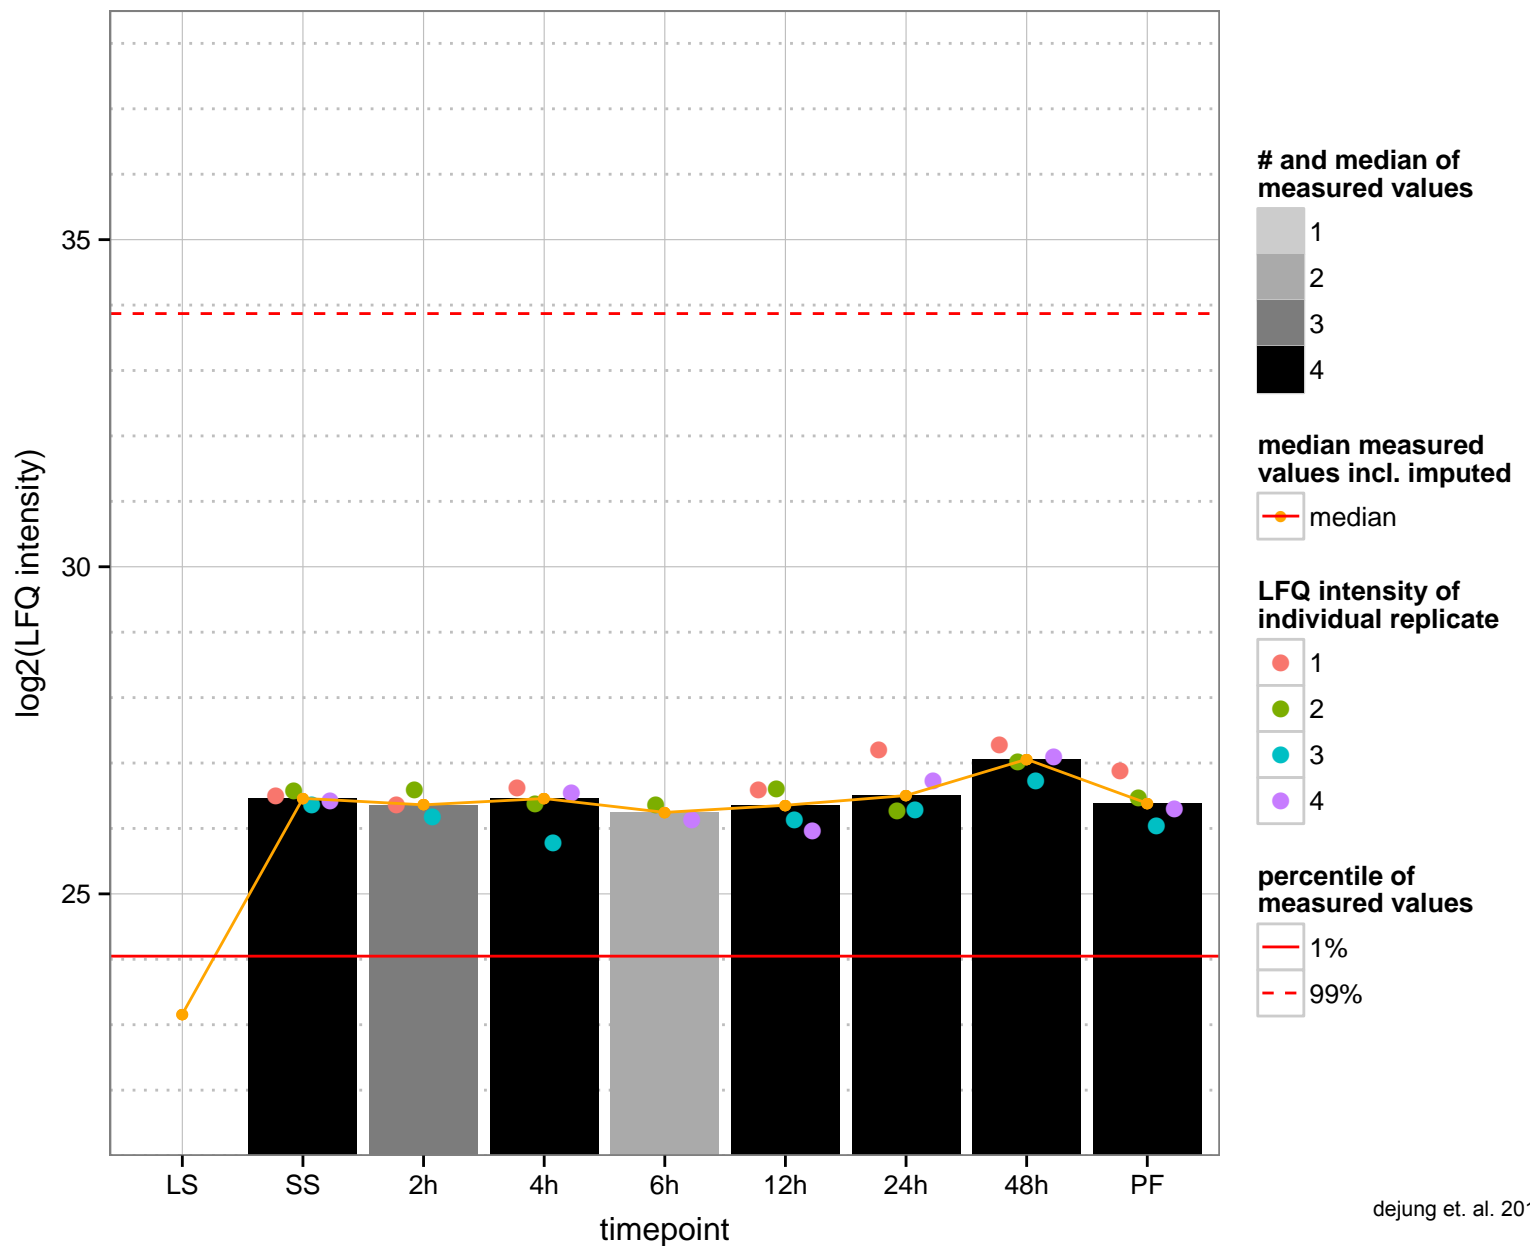

hypothetical protein, conserved  
 Tb927.11.3490  
 AGOF: null  
 AGOC: null  
 AGOP: null  
 PGO: null  
 PGOC: null  
 PGOP: null

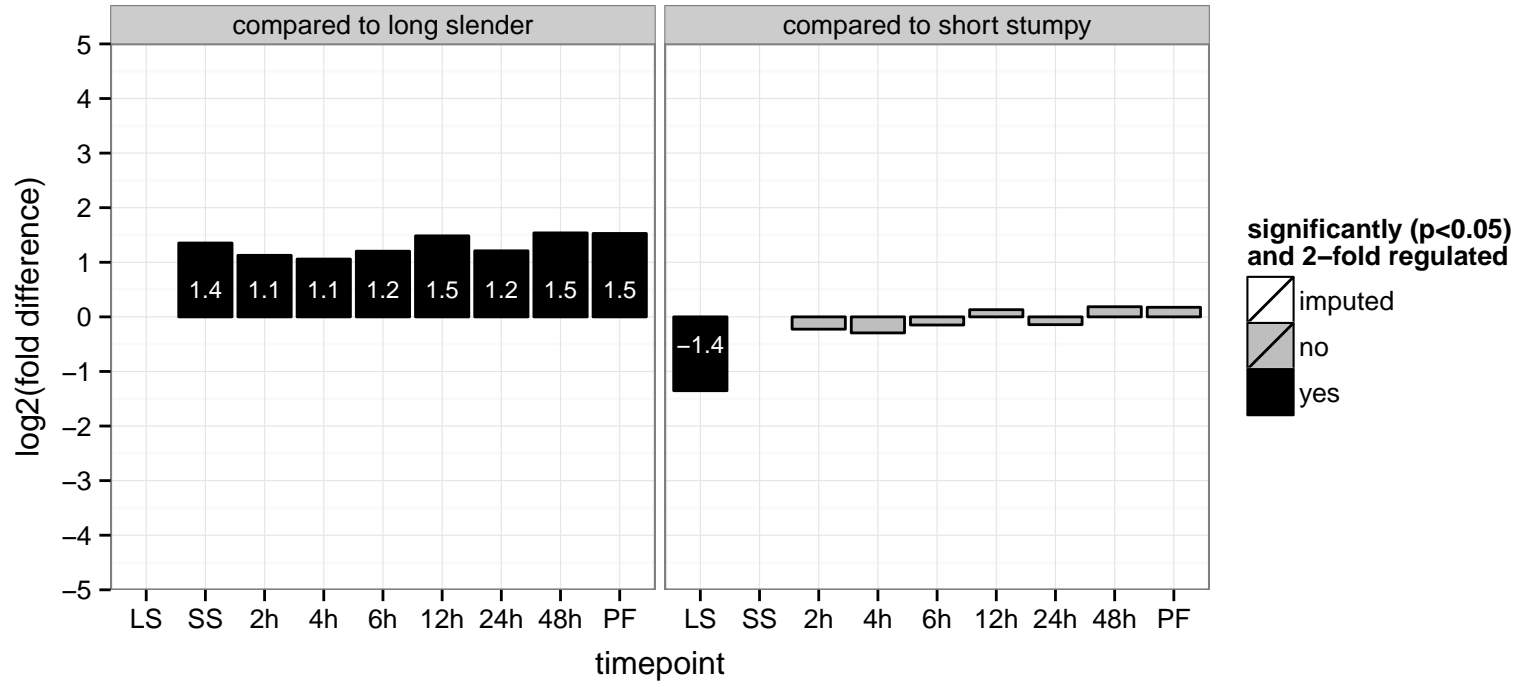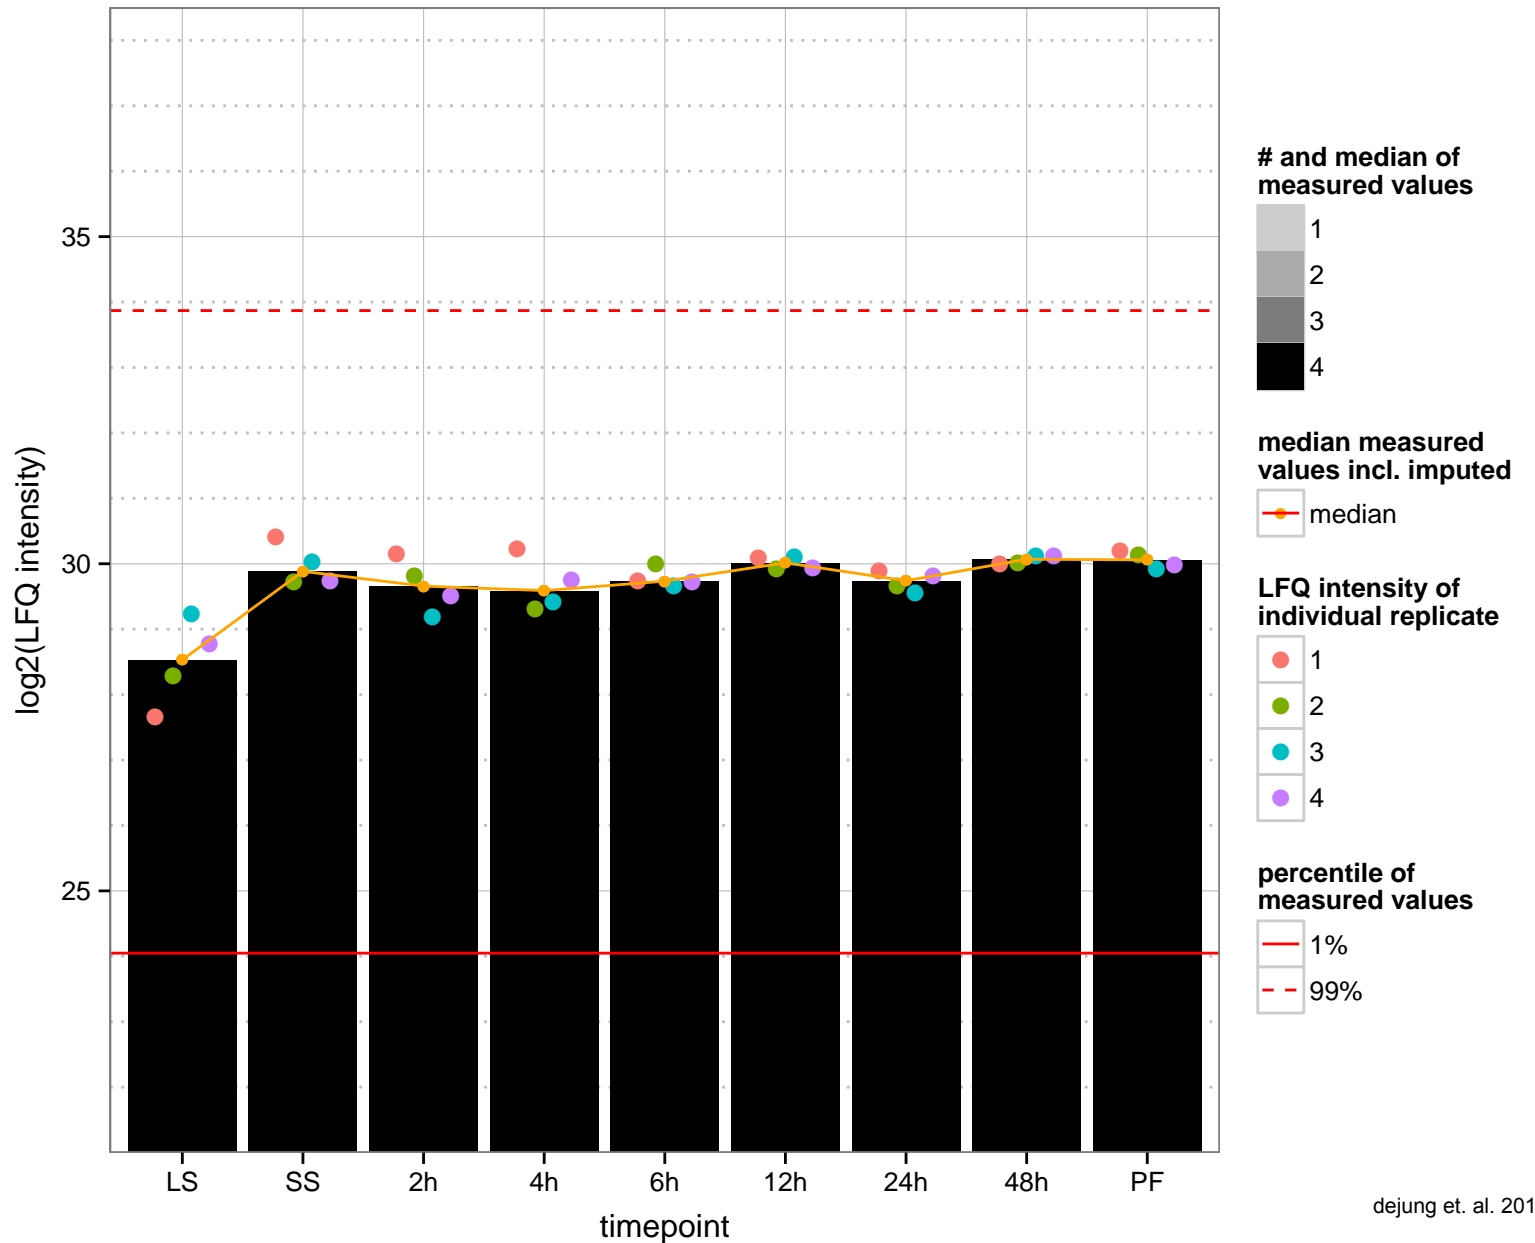

hypothetical protein, conserved  
 Tb927.11.3500  
 AGOF: catalytic activity  
 AGOC: null  
 AGOP: metabolic process  
 PGO: null  
 PGOC: null  
 PGOP: null

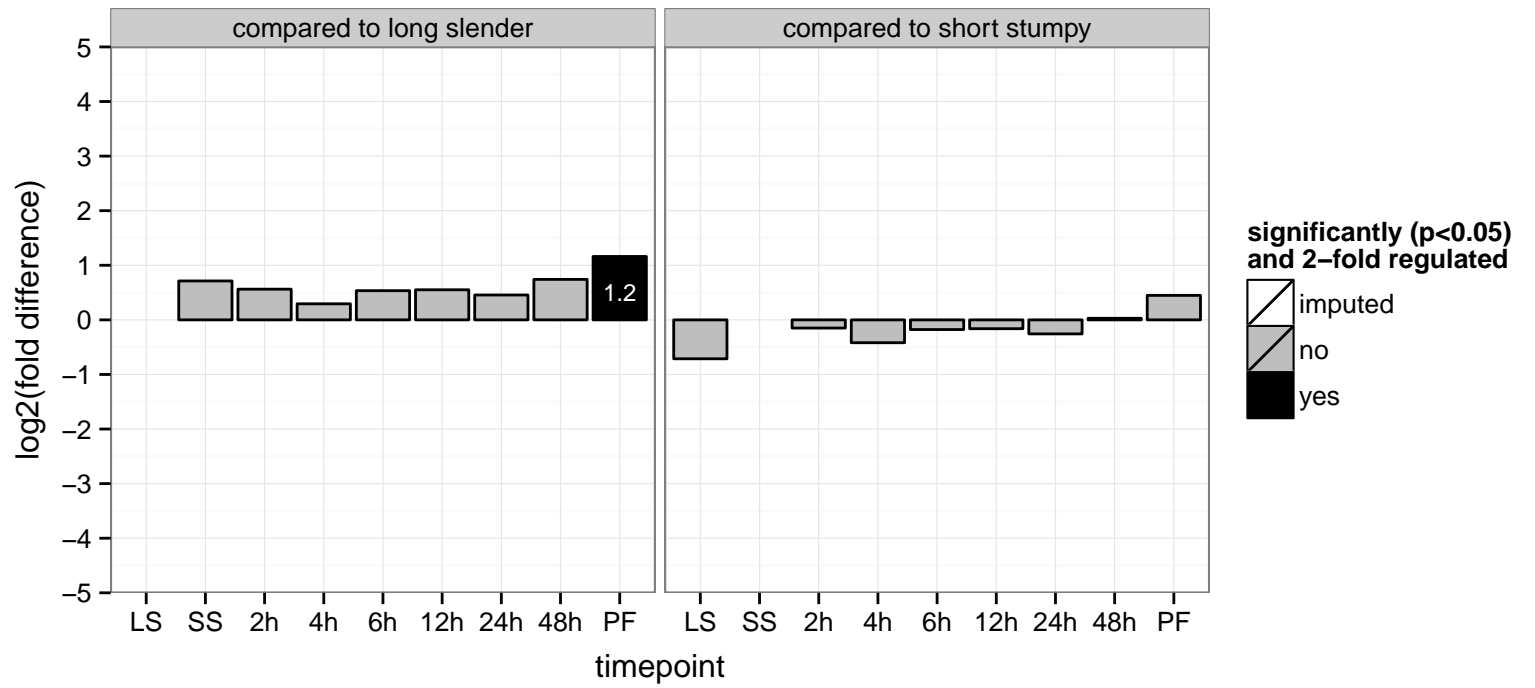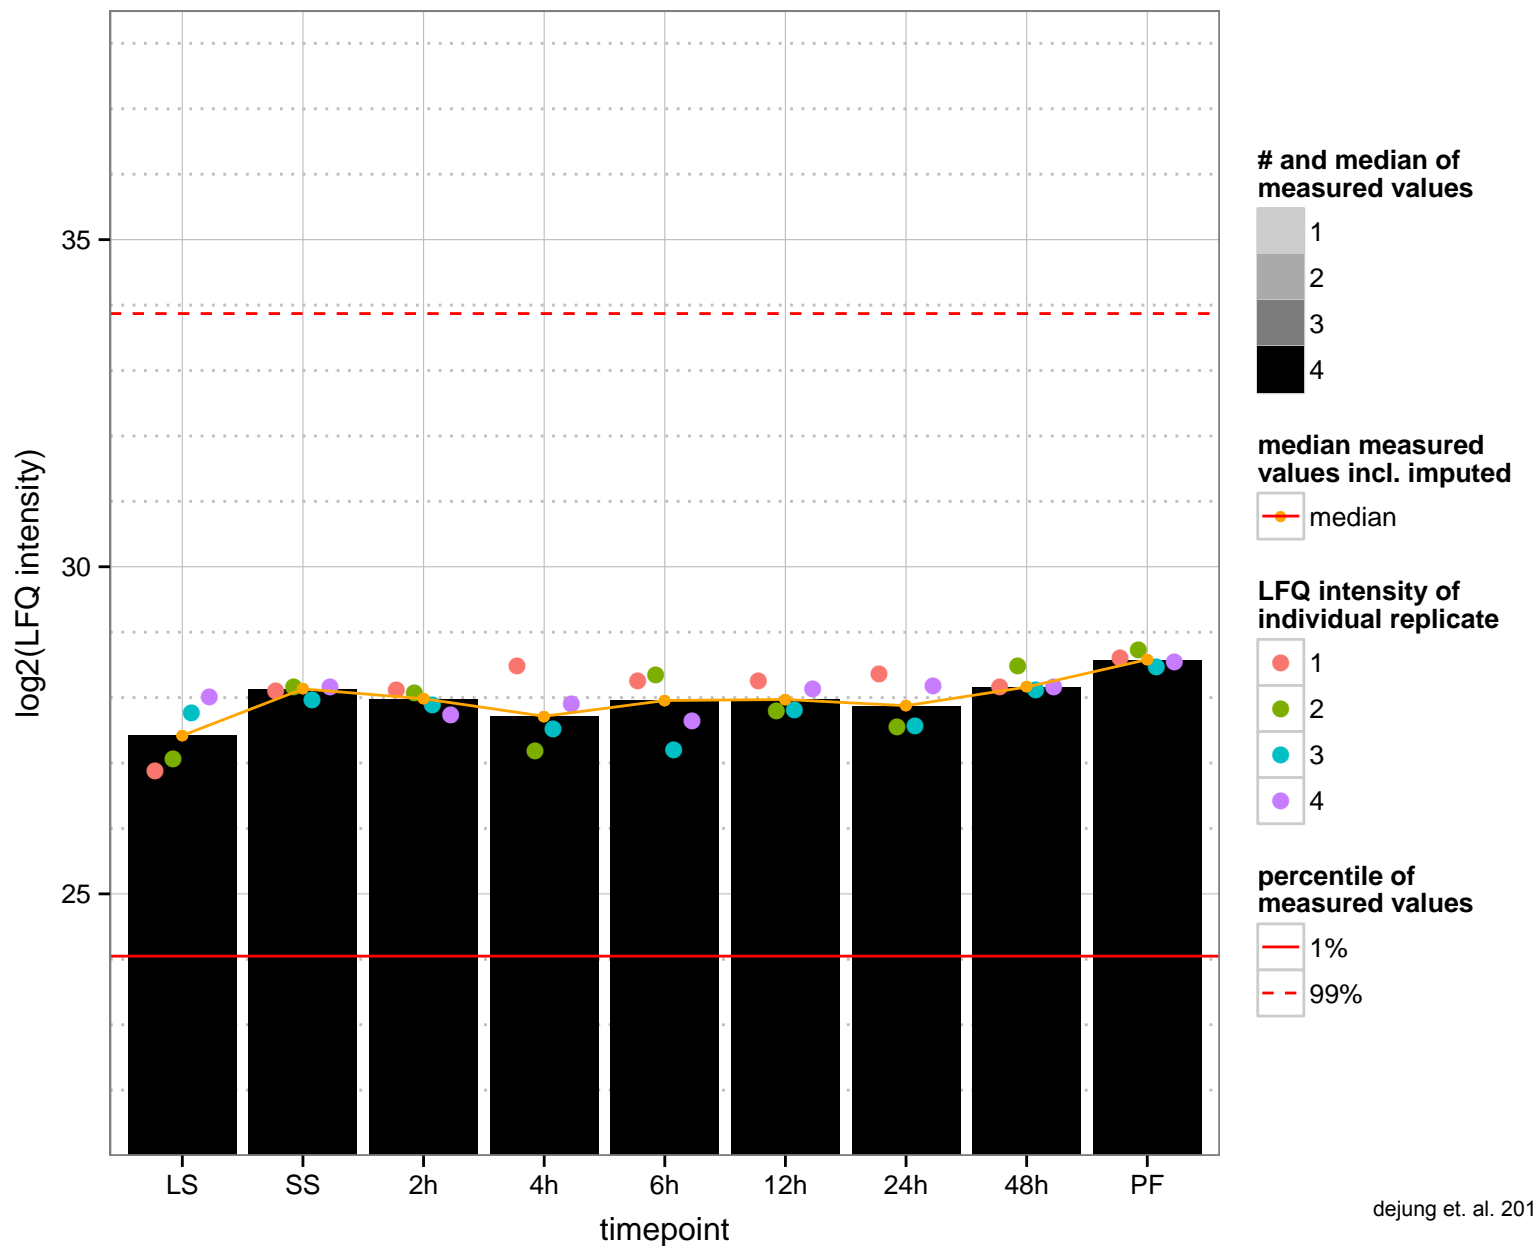

hypothetical protein, conserved  
 Tb927.11.3510  
 AGOF: null  
 AGOC: null  
 AGOP: protein folding  
 PGO: null  
 PGOC: null  
 PGOP: protein folding

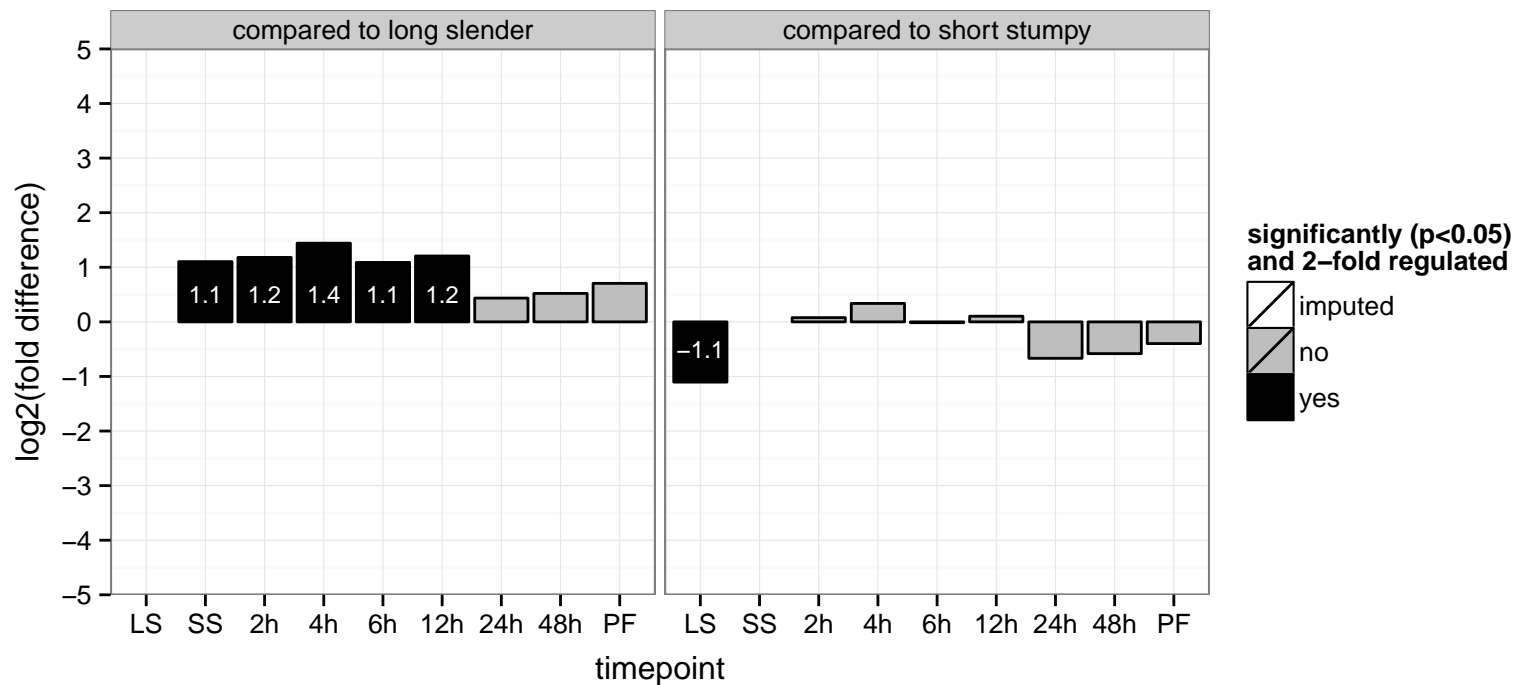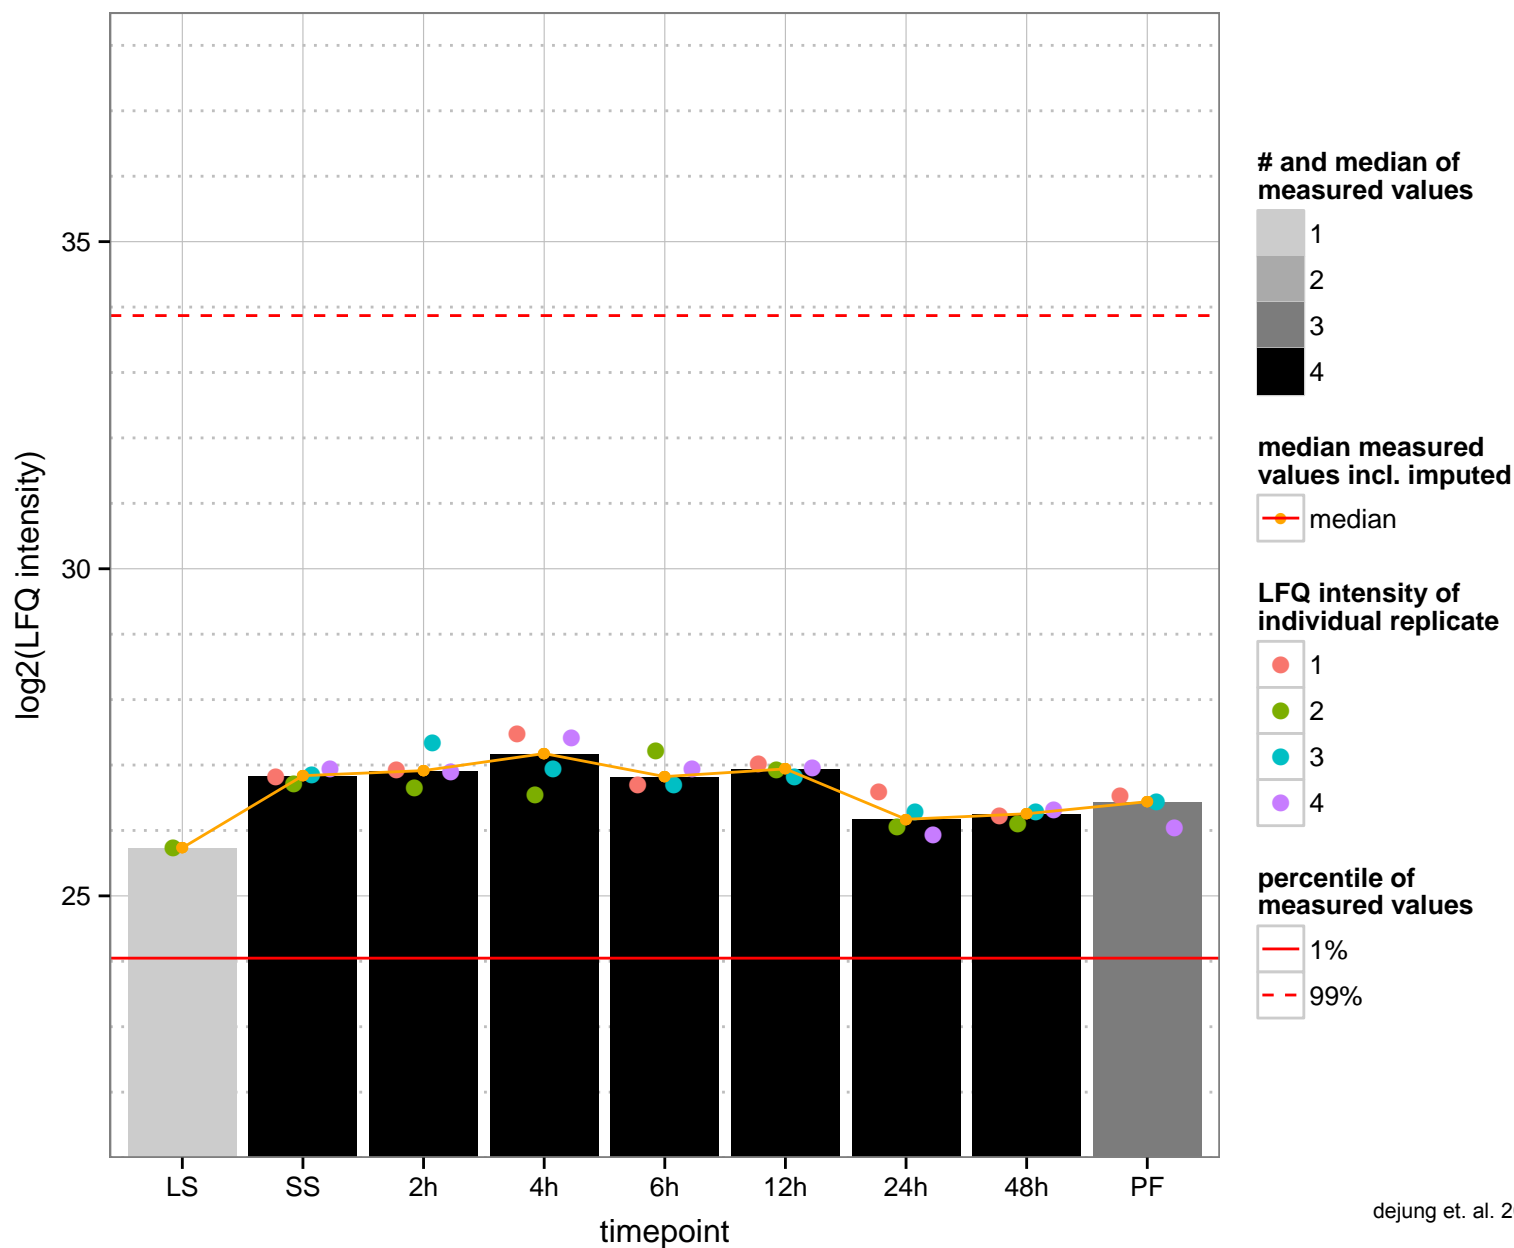

hypothetical protein, conserved  
 Tb927.11.3540  
 AGOF: null  
 AGOC: null  
 AGOP: null  
 PGO: null  
 PGO: null  
 PGO: null

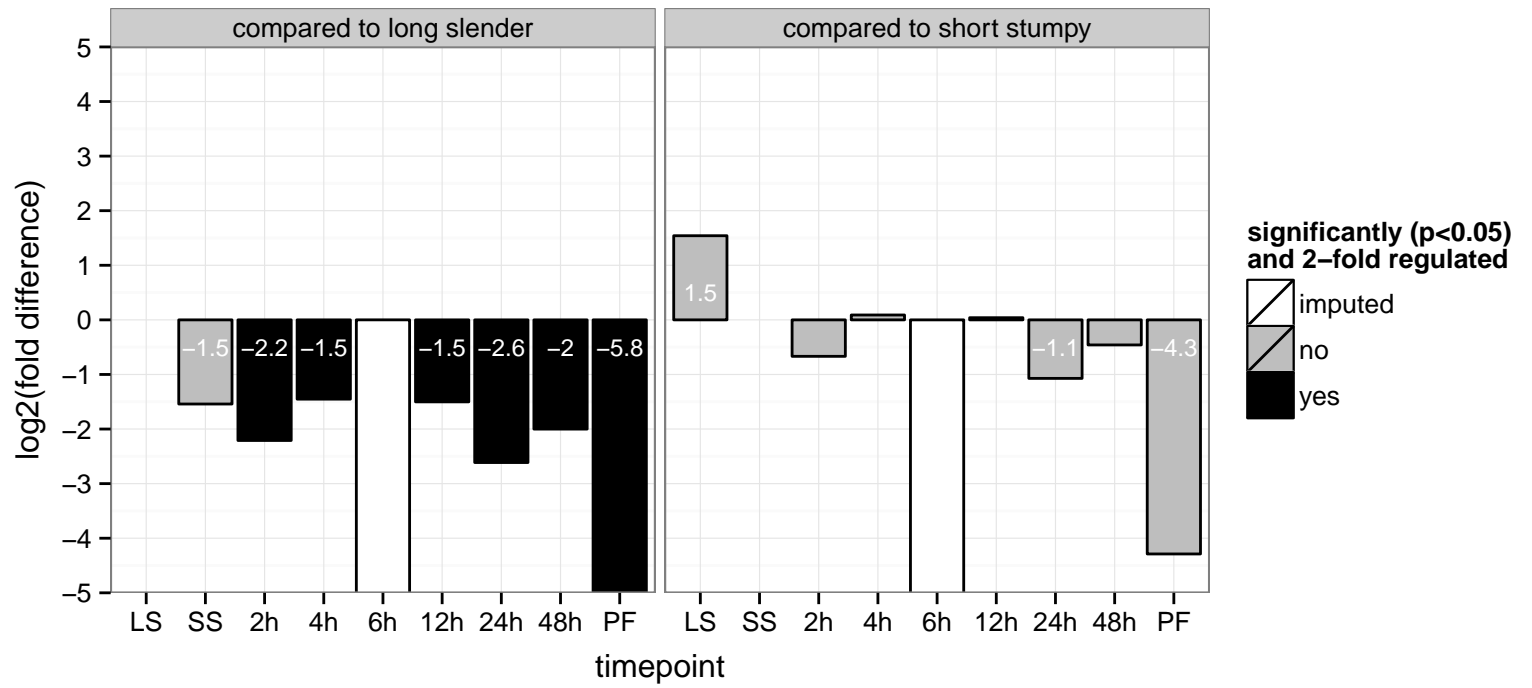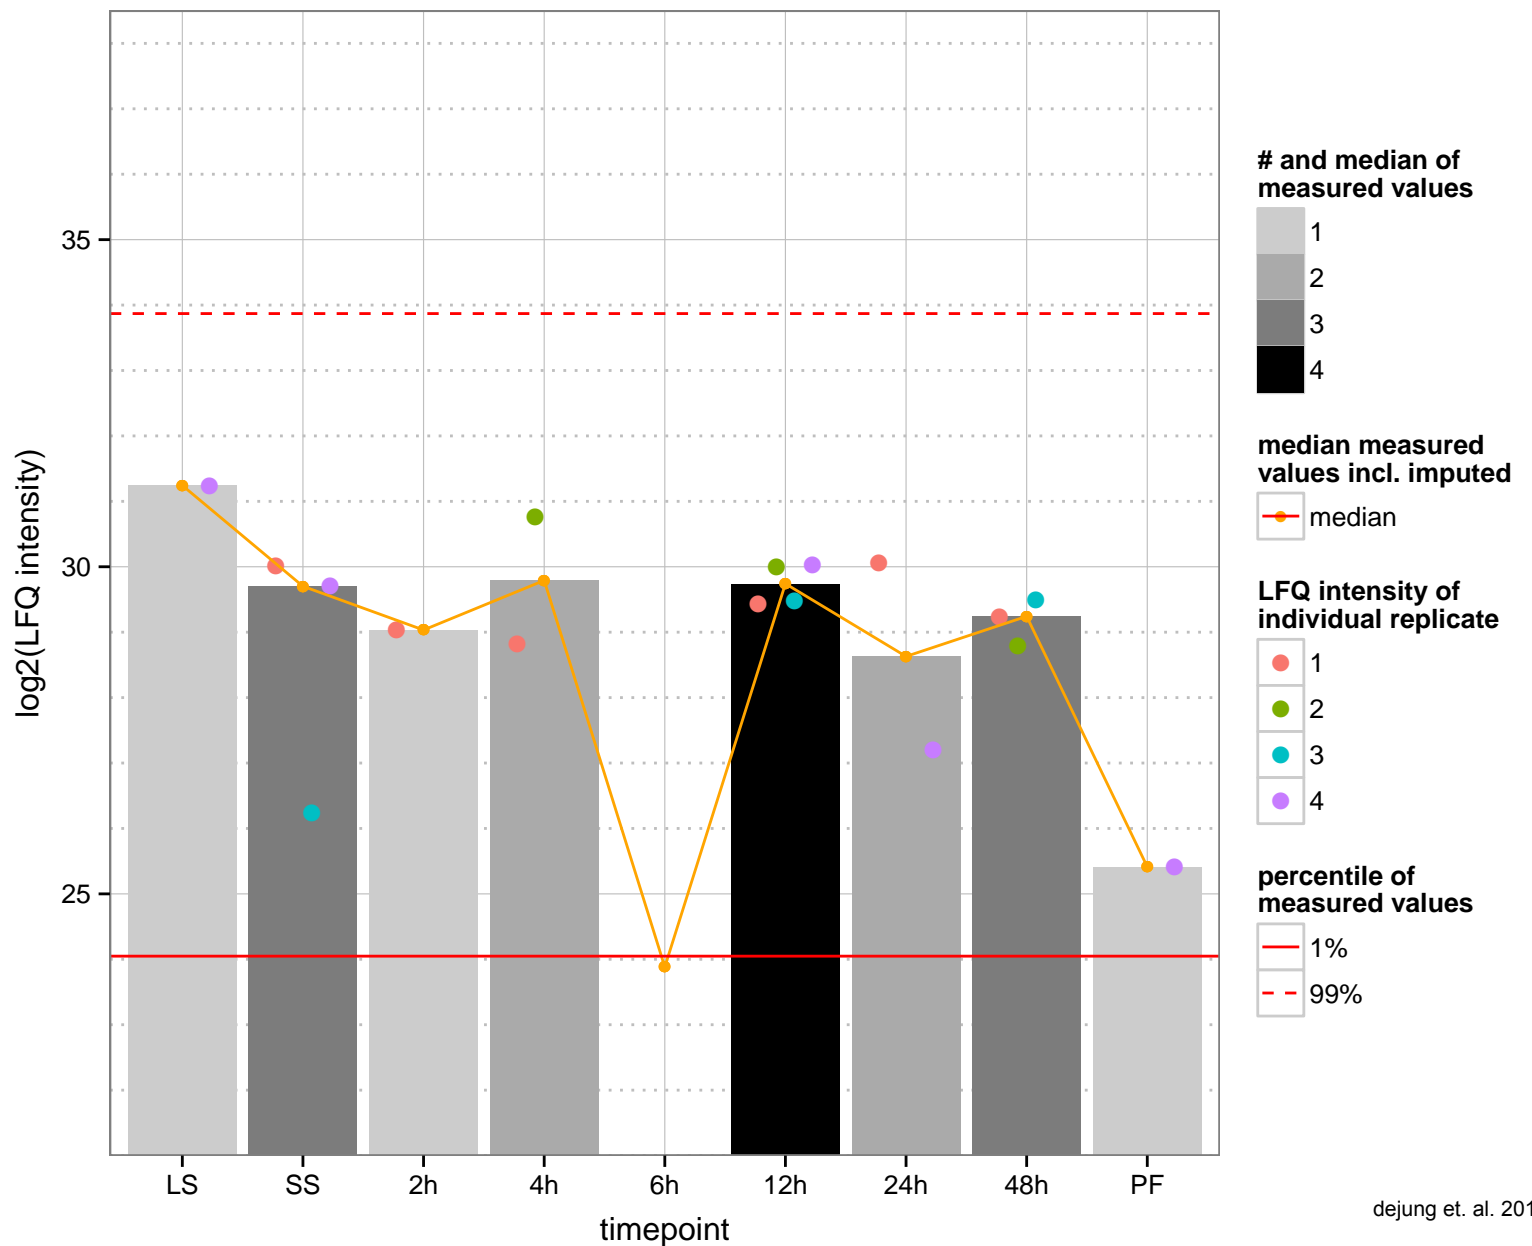



XPA-interacting protein, putative  
 Tb927.11.3550  
 AGOF: GTP binding, nucleoside-triphosphatase activity  
 AGOC: null  
 AGOP: small GTPase mediated signal transduction  
 PGO: nucleoside-triphosphatase activity, nucleotide binding  
 PGO: null  
 PGOP: null

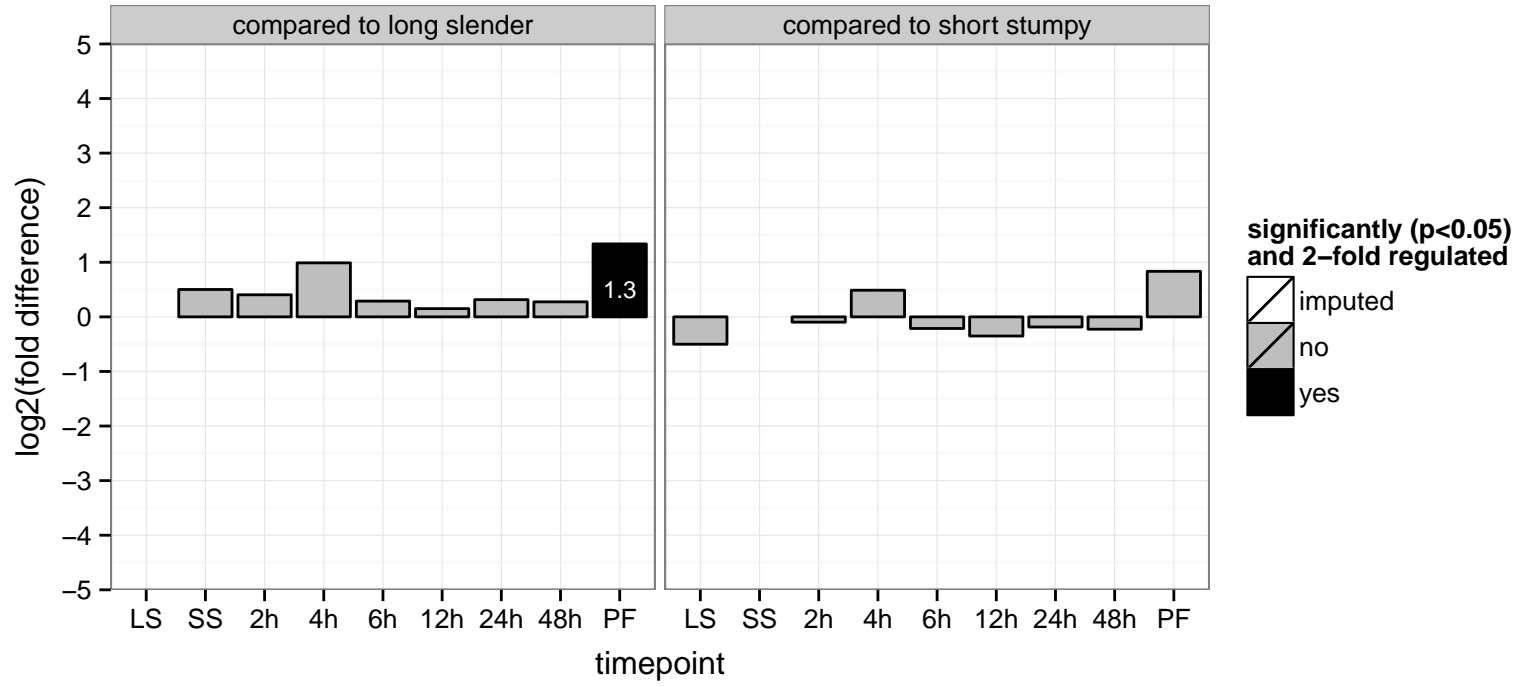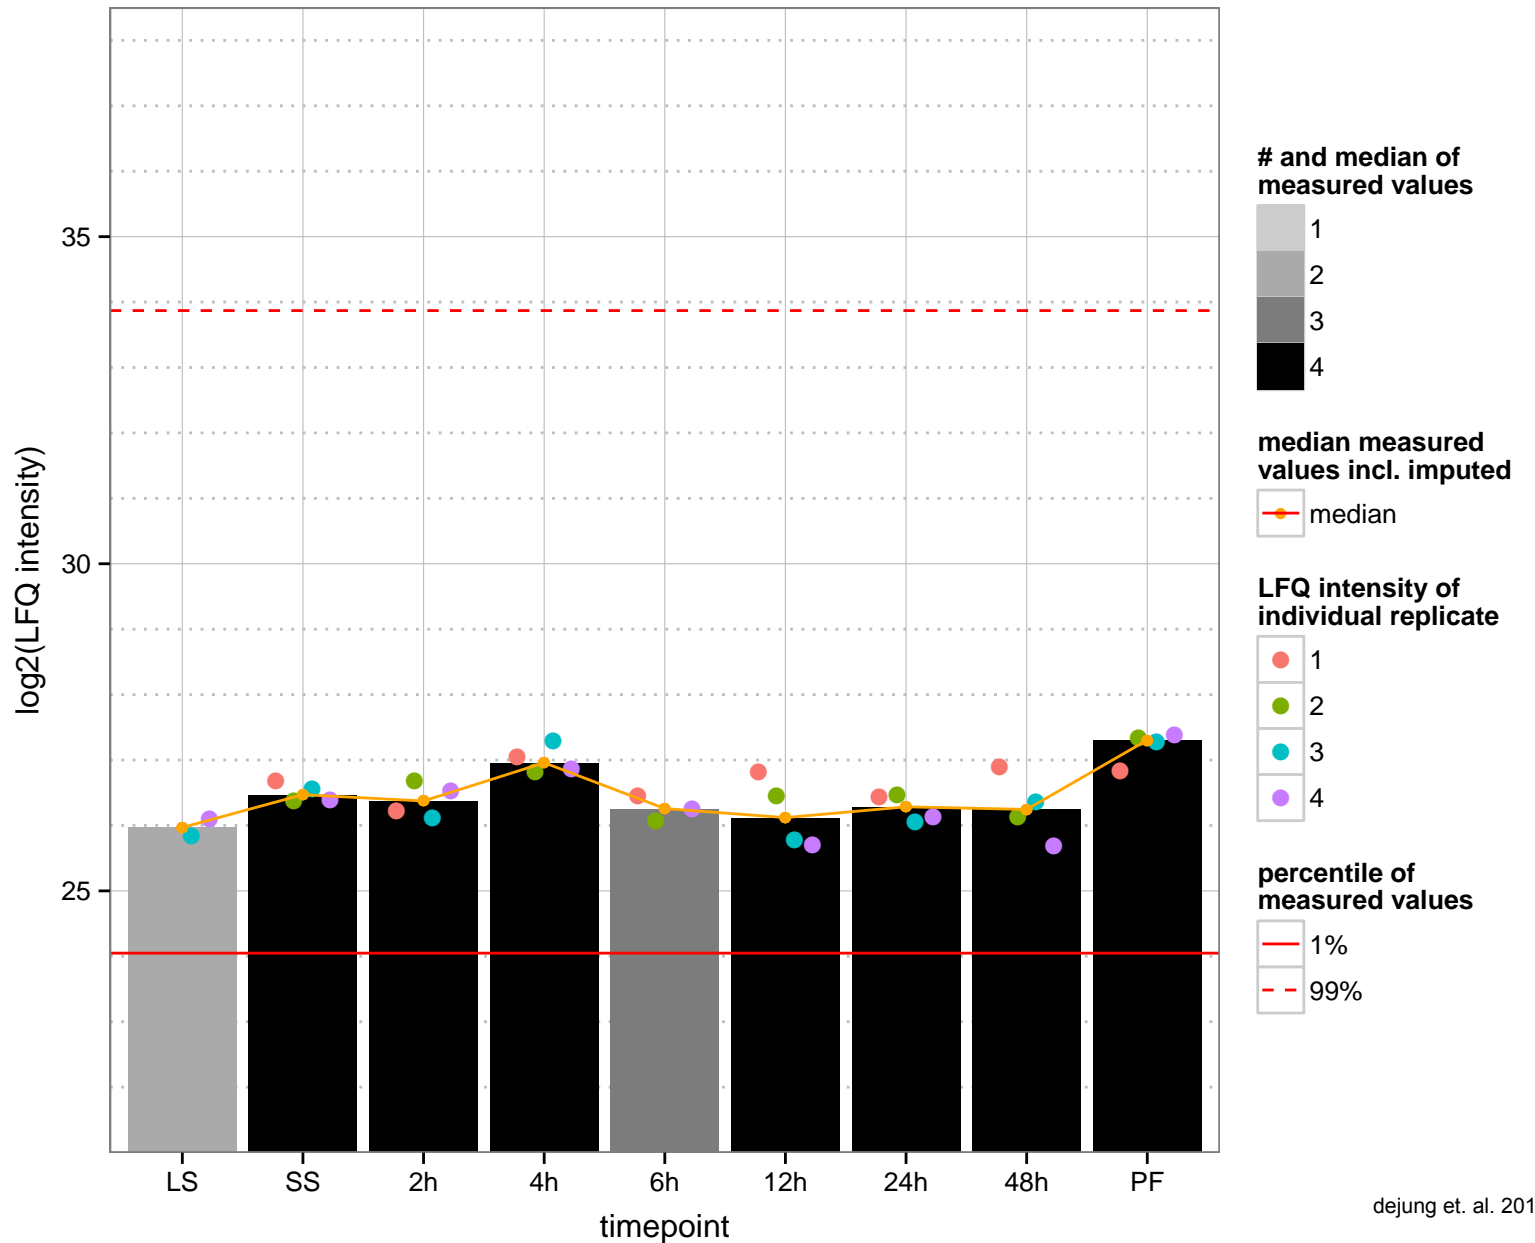

aminopeptidase, putative, metallo-peptidase, Clan MA(E) Family M1  
 Tb927.11.3570  
 AGOF: metalloexopeptidase activity, metallopeptidase activity, zinc ion binding  
 AGOC: null  
 AGOP: proteolysis  
 PGOF: metallopeptidase activity, zinc ion binding  
 PGO: null  
 PGOP: null

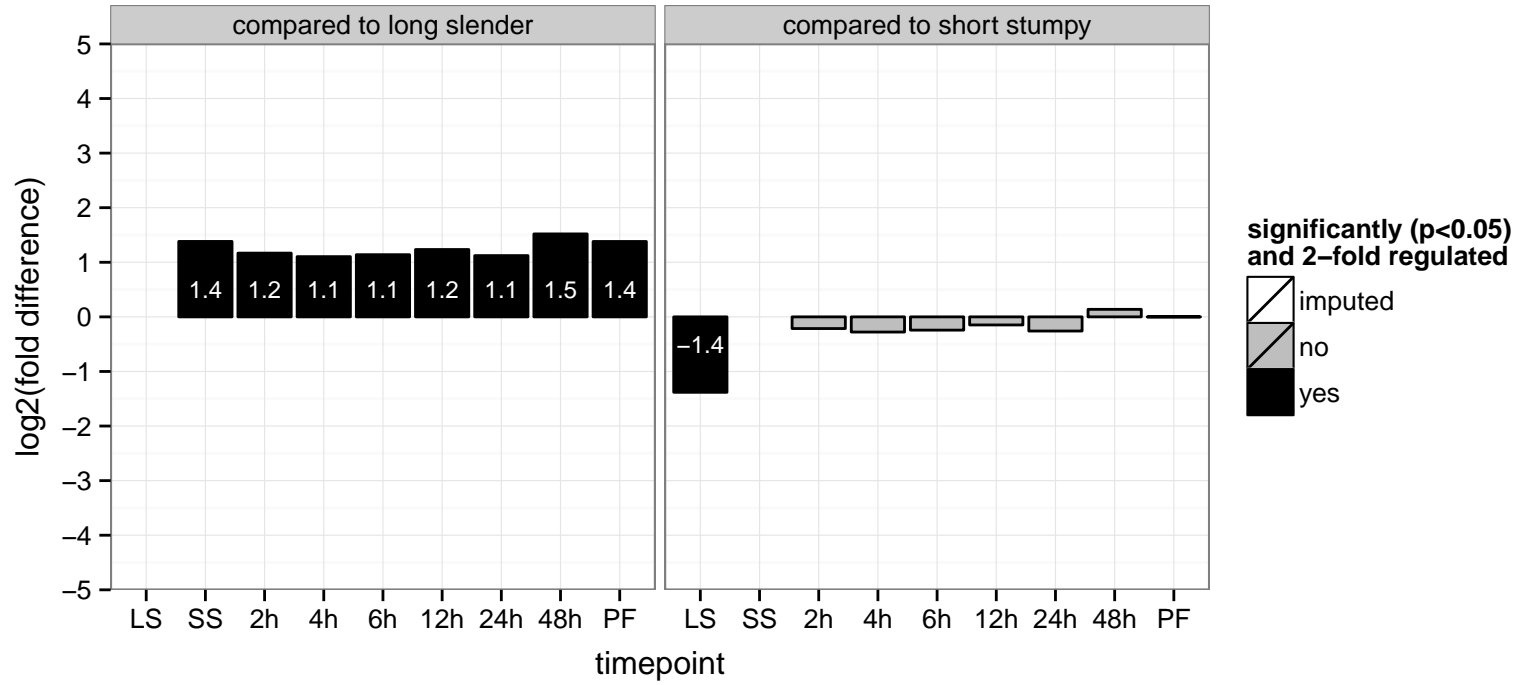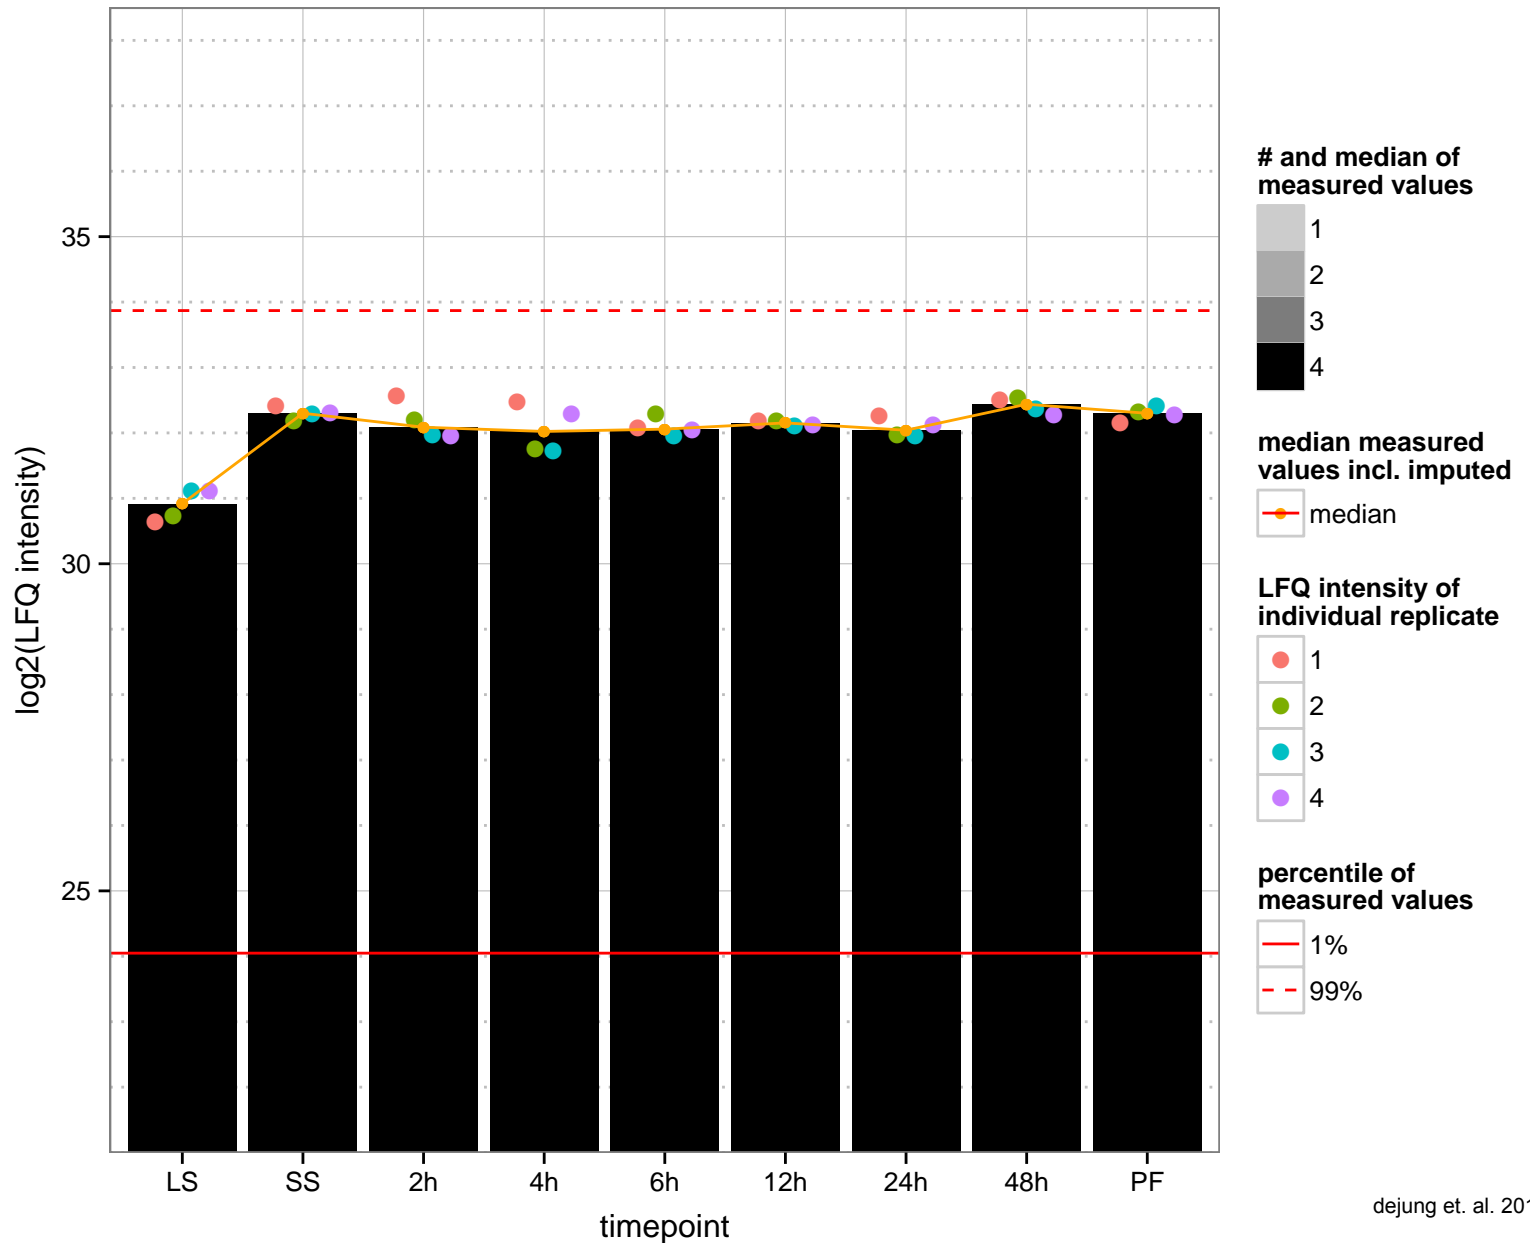

hypothetical protein, conserved  
Tb927.11.3580  
AGOF: ATP binding, thiamine diphosphokinase activity  
AGOC: null  
AGOP: thiamine diphosphate biosynthetic process  
PGOF: ATP binding, thiamine diphosphokinase activity  
PGOC: null  
PGOP: thiamine diphosphate biosynthetic process

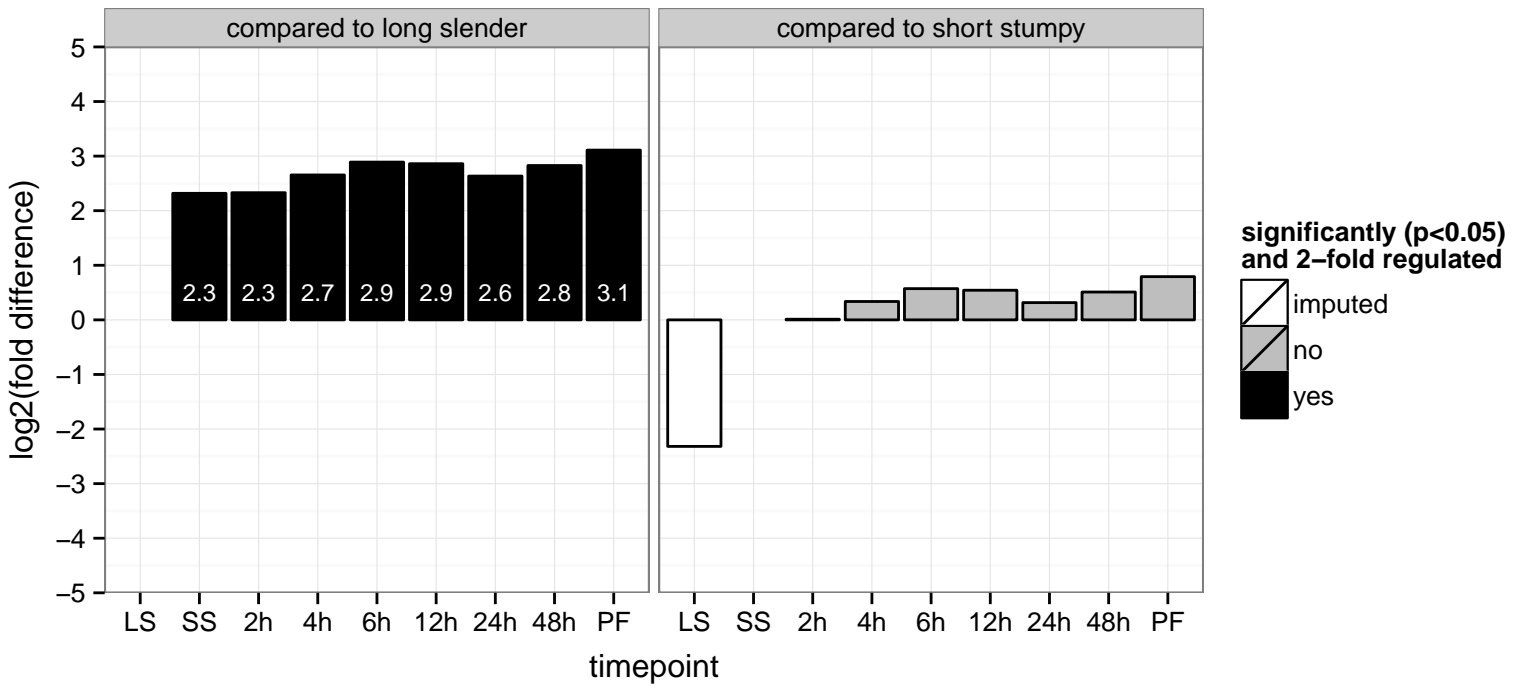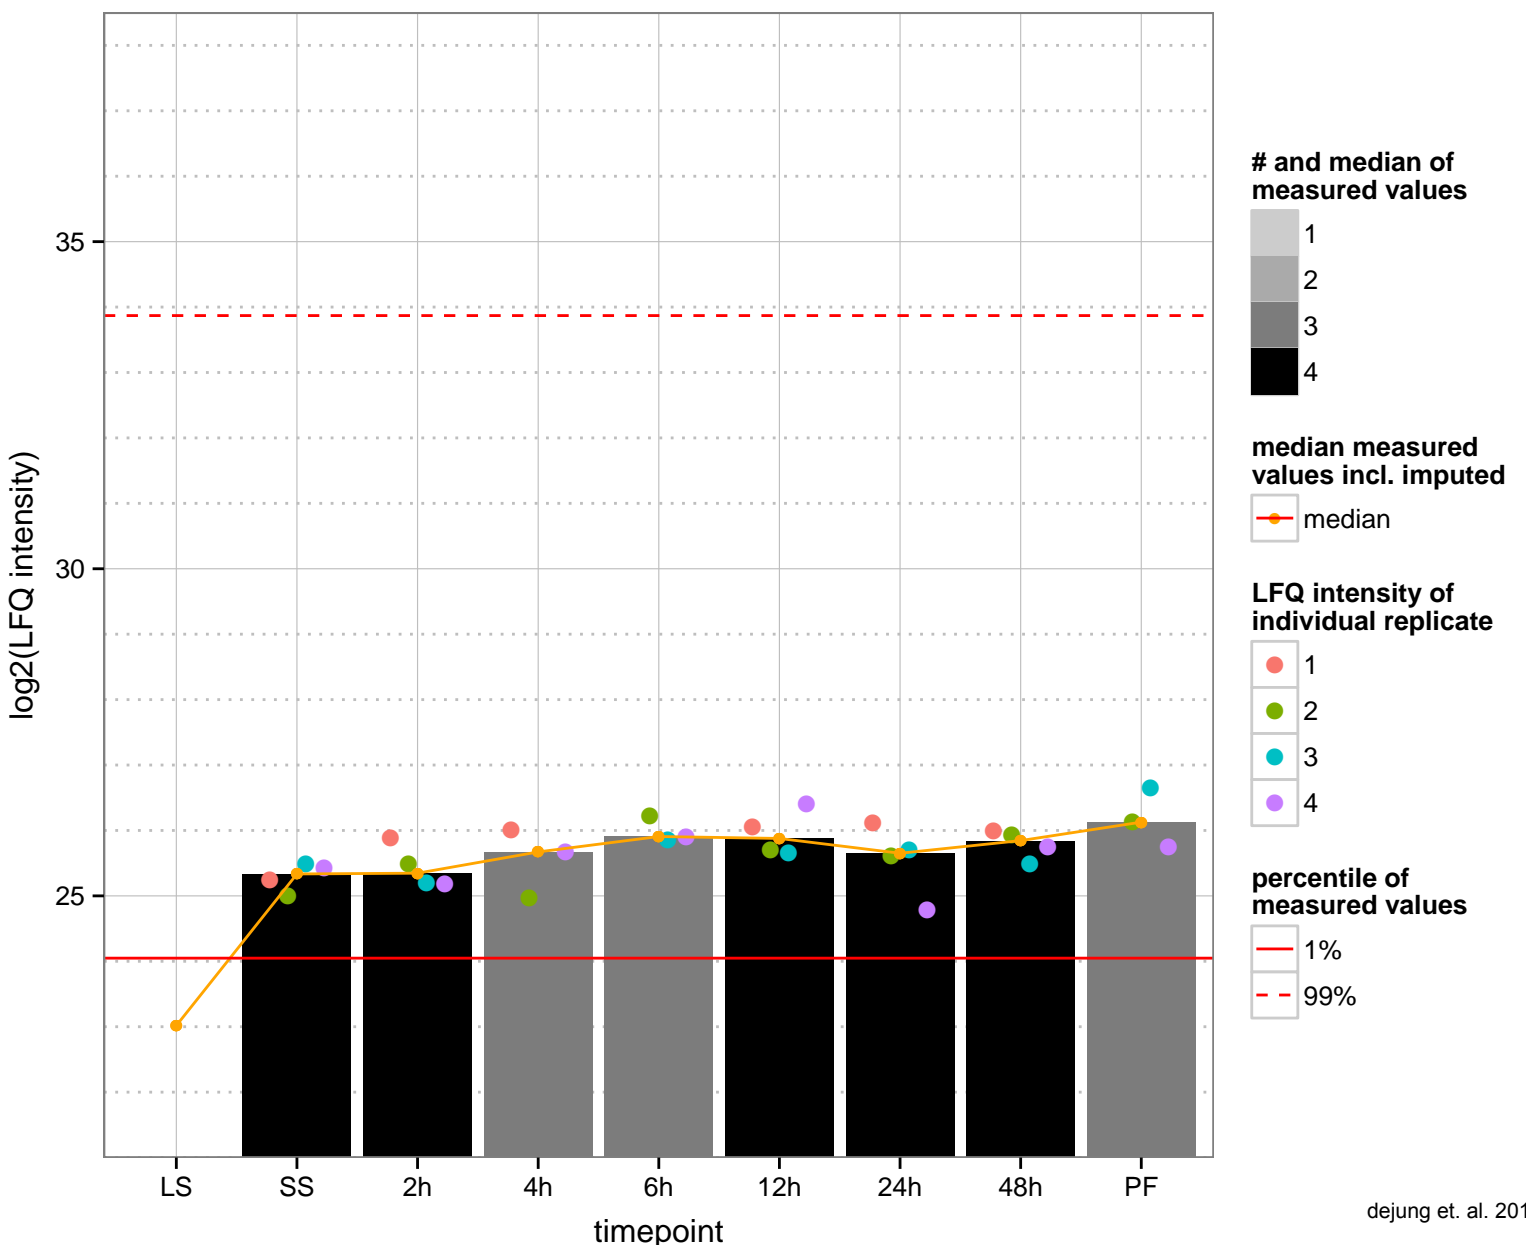

Dynein light chain Tctex-type, putative  
 Tb927.11.3660  
 AGOF: microtubule motor activity  
 AGOC: microtubule associated complex  
 AGOP: microtubule-based process  
 PGO: null  
 PGOC: null  
 PGOP: null

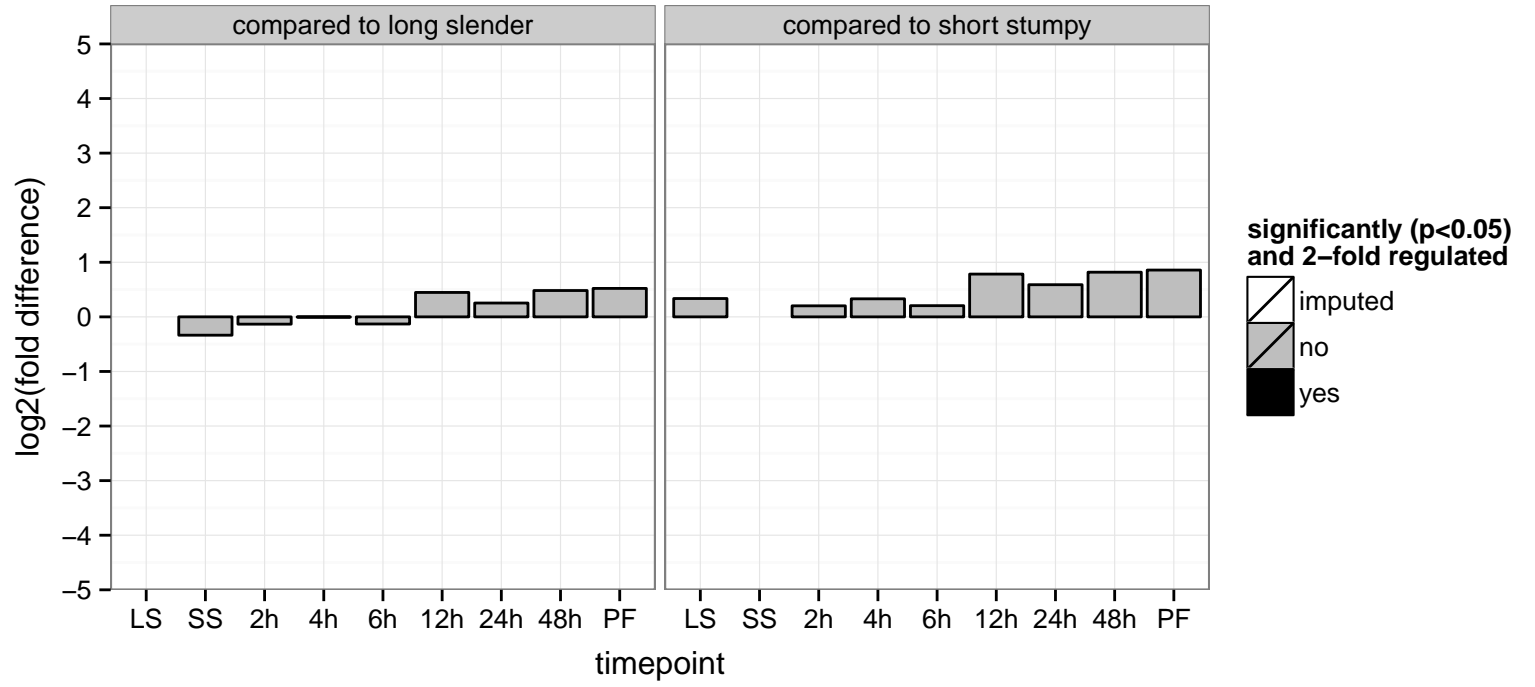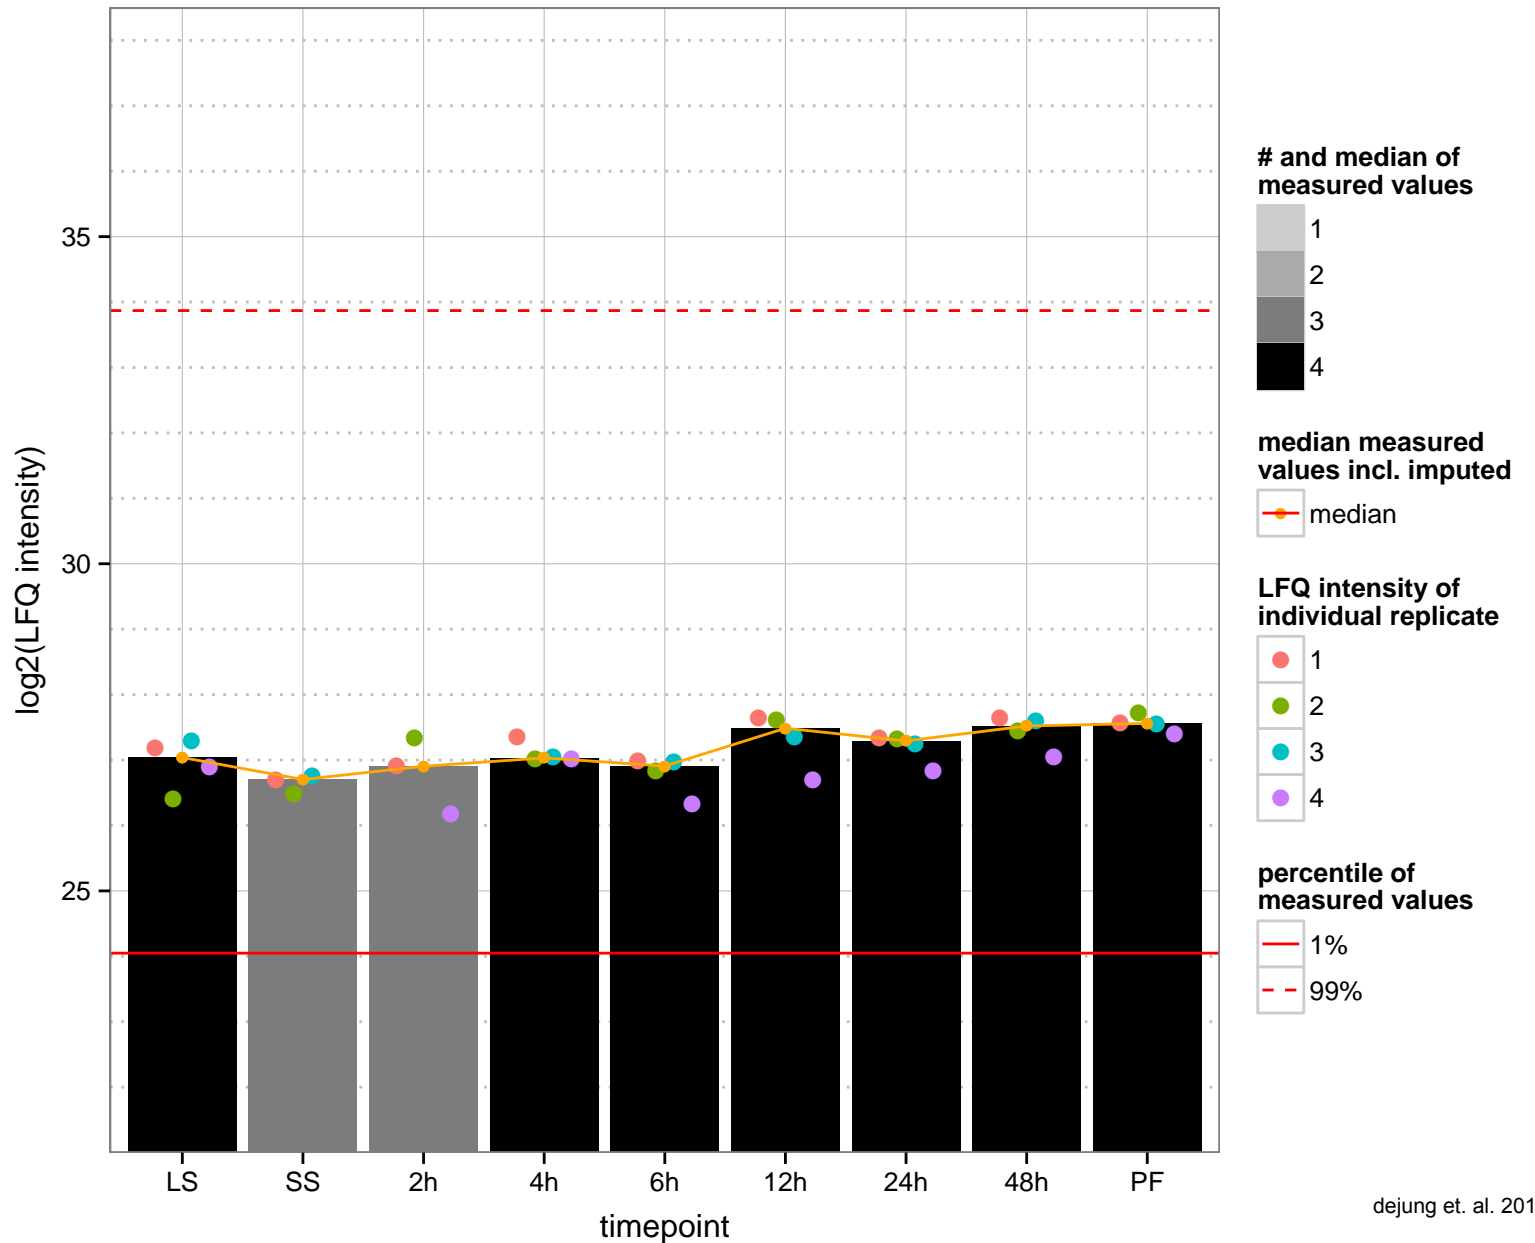

repressor activator protein 1 (RAP1)  
 Tb927.11.370  
 AGOF: null  
 AGOC: nuclear chromosome, telomeric region, nucleus  
 AGOP: null  
 PGO: null  
 PGOC: null  
 PGOP: null

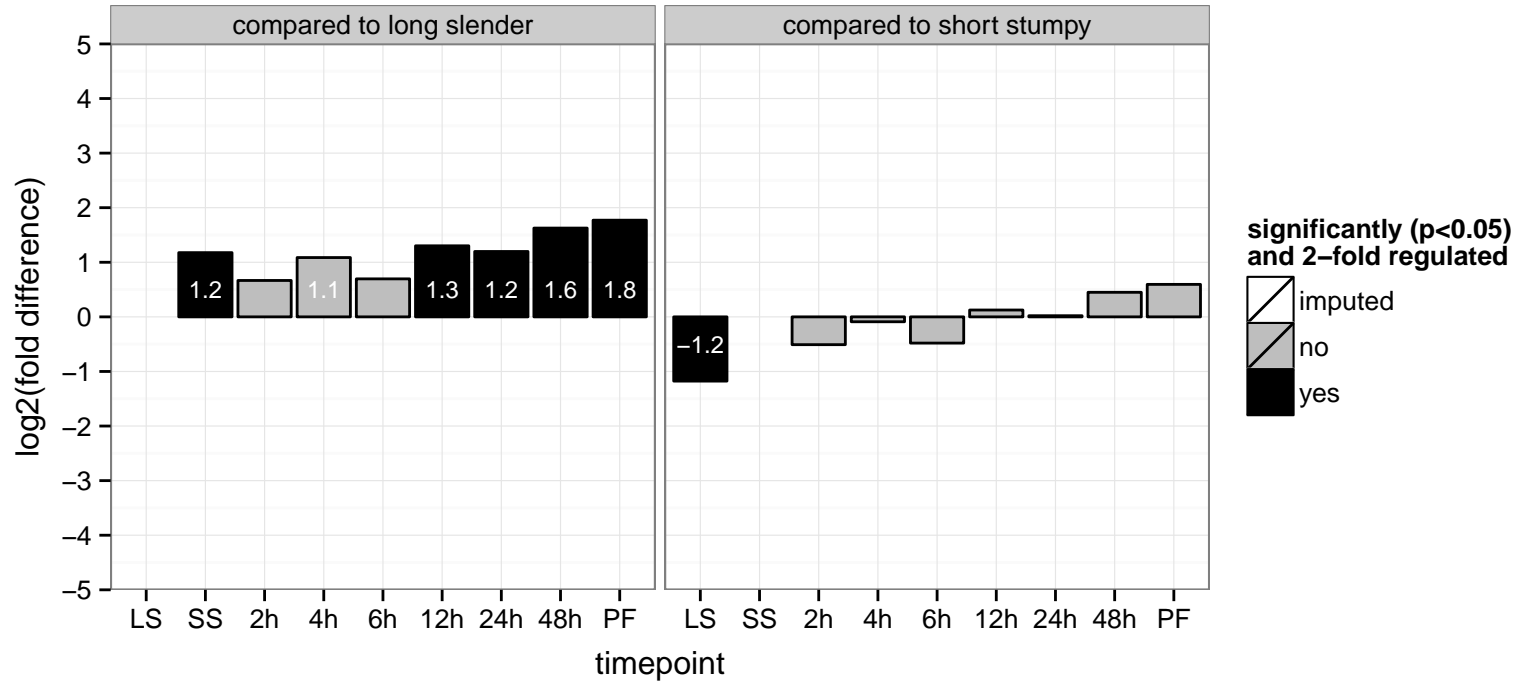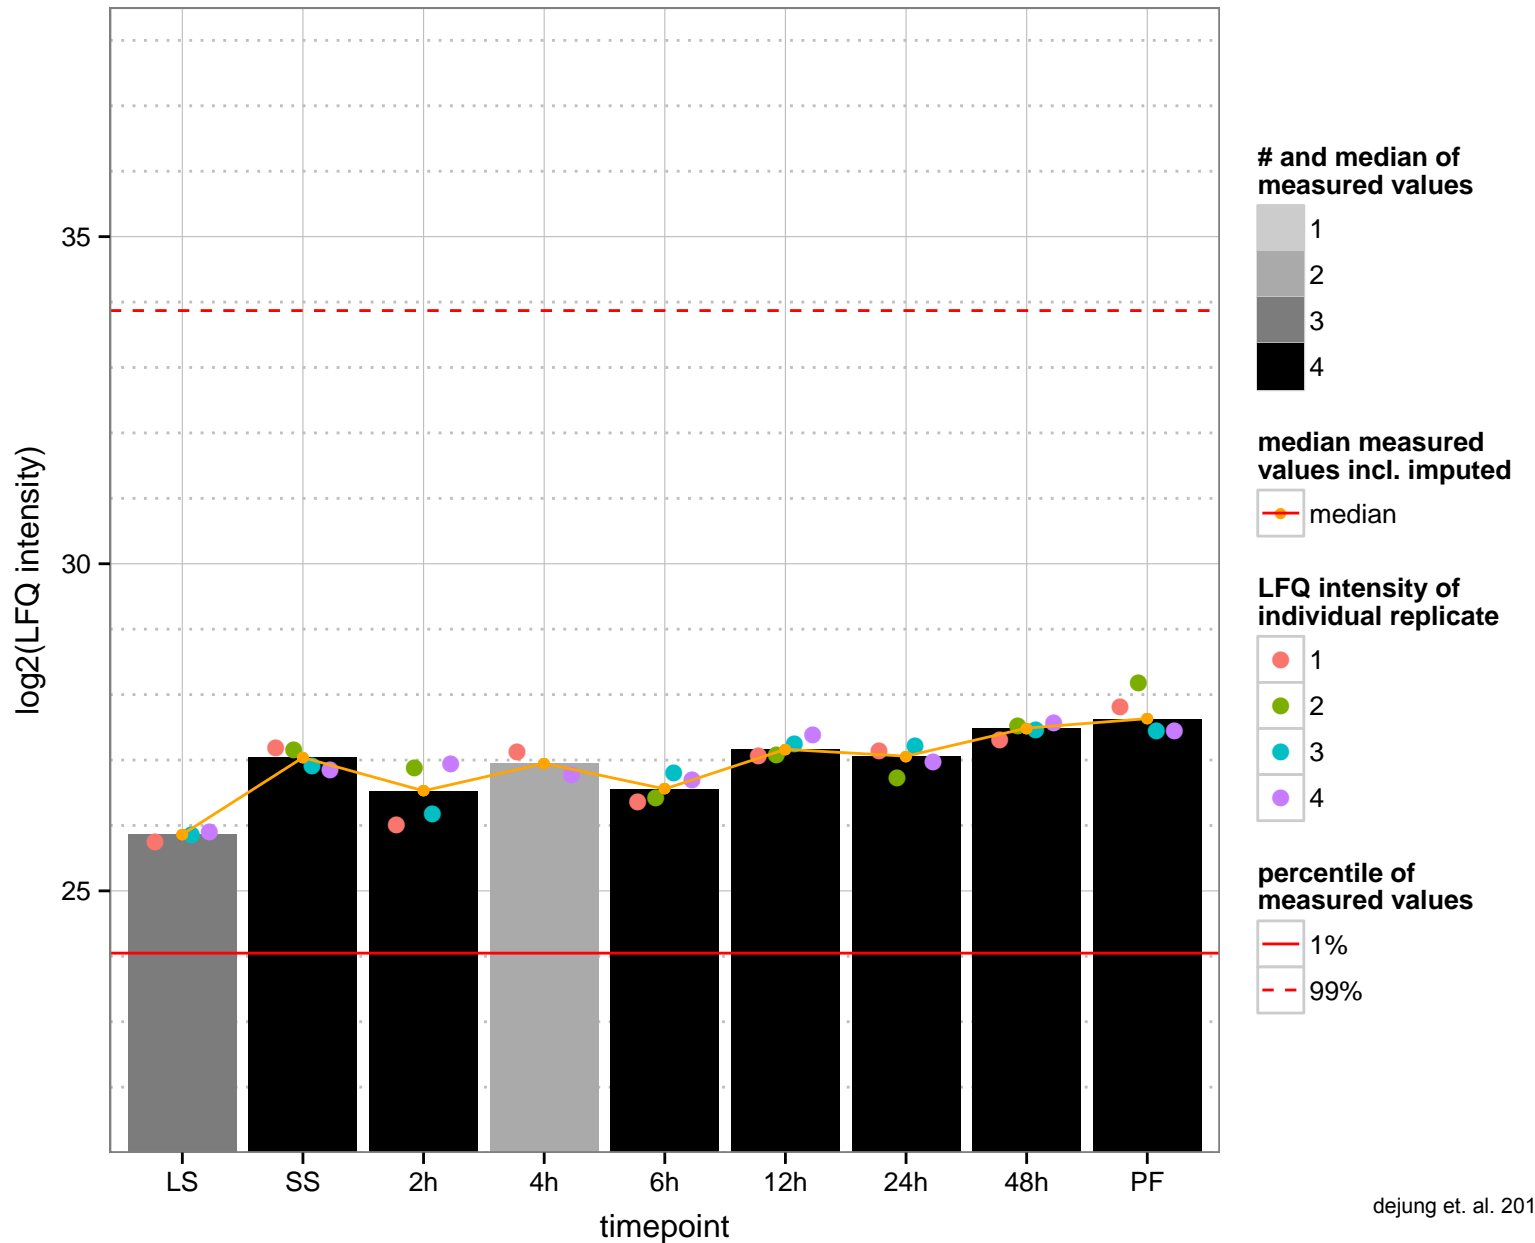

hypothetical protein, conserved  
 Tb927.11.3700  
 AGOF: null  
 AGOC: mitochondrion  
 AGOP: null  
 PGO: null  
 PGO: null  
 PGO: null

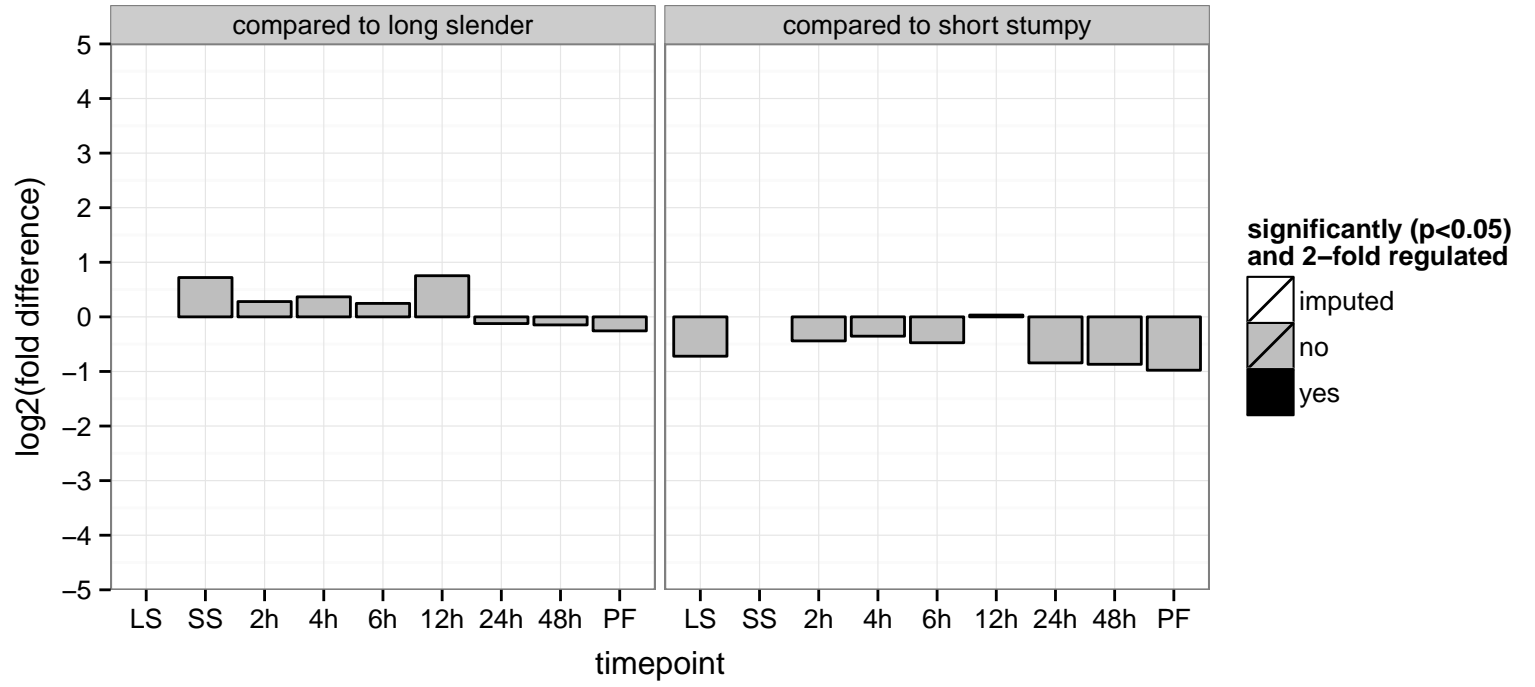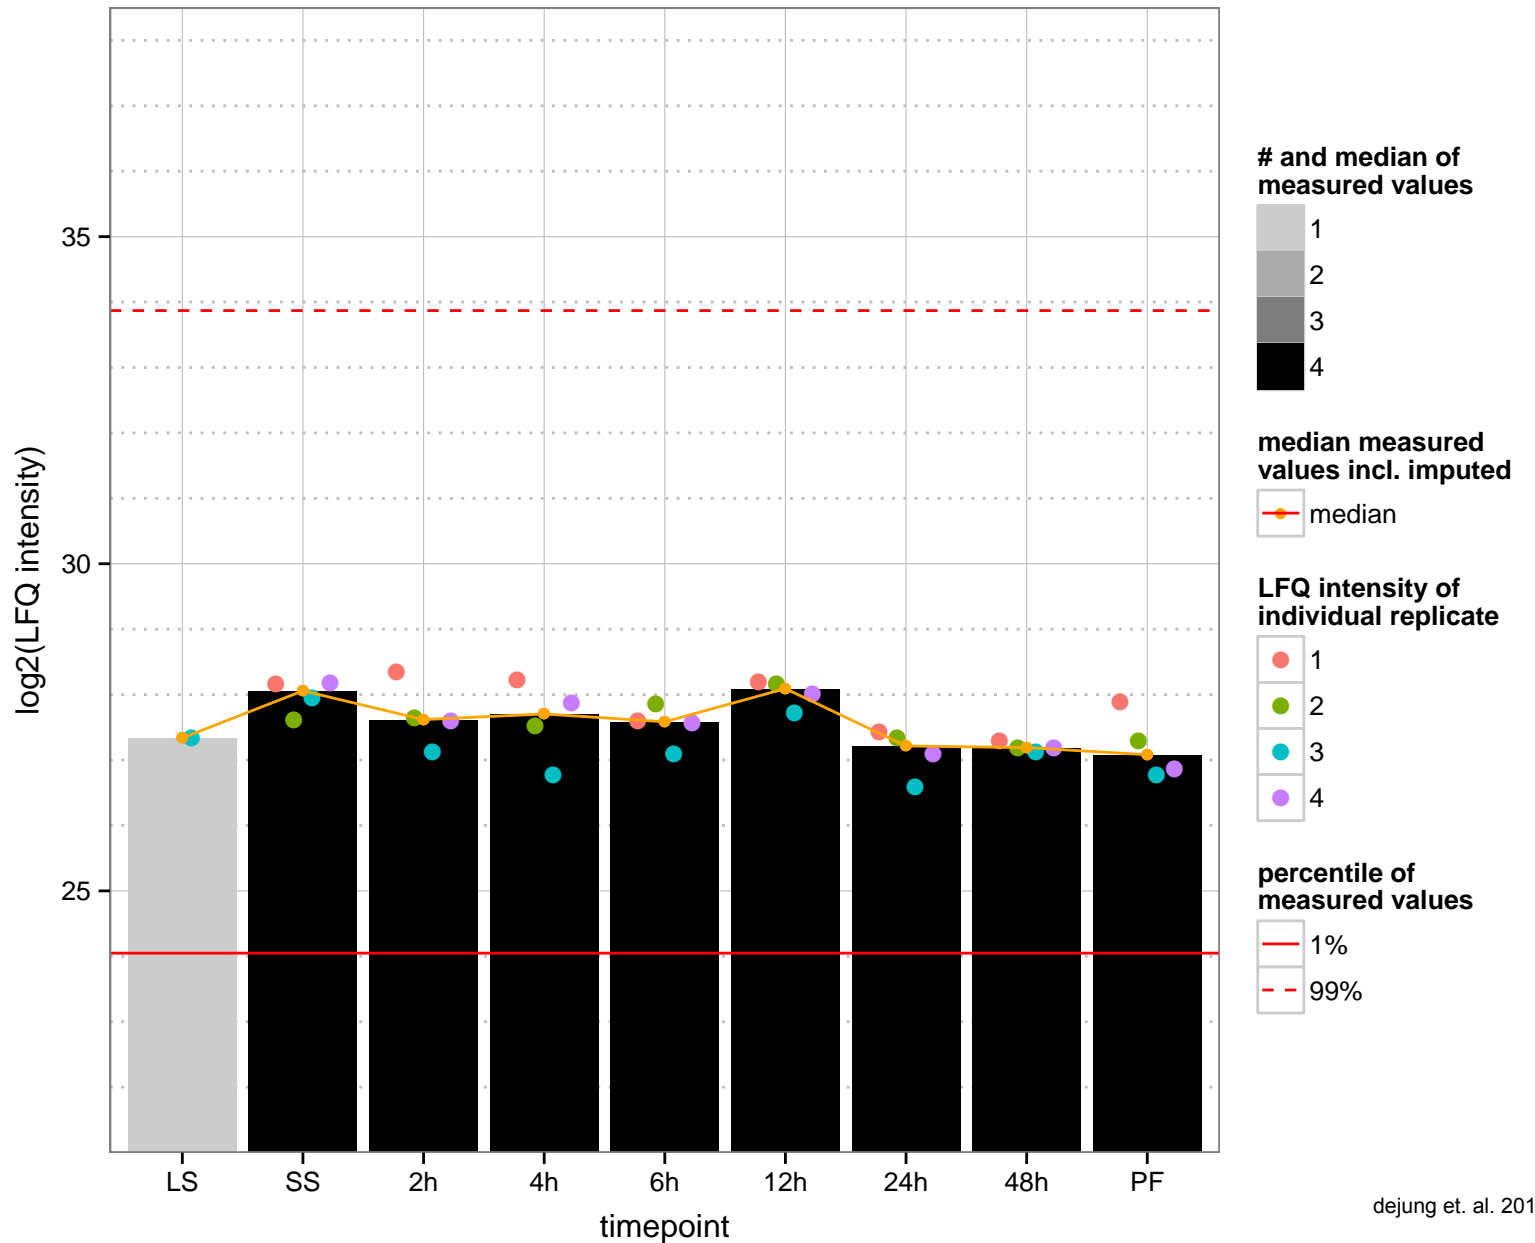

hypothetical protein, conserved  
 Tb927.11.3710  
 AGOF: null  
 AGOC: null  
 AGOP: null  
 PGO: null  
 PGO: null  
 PGO: null

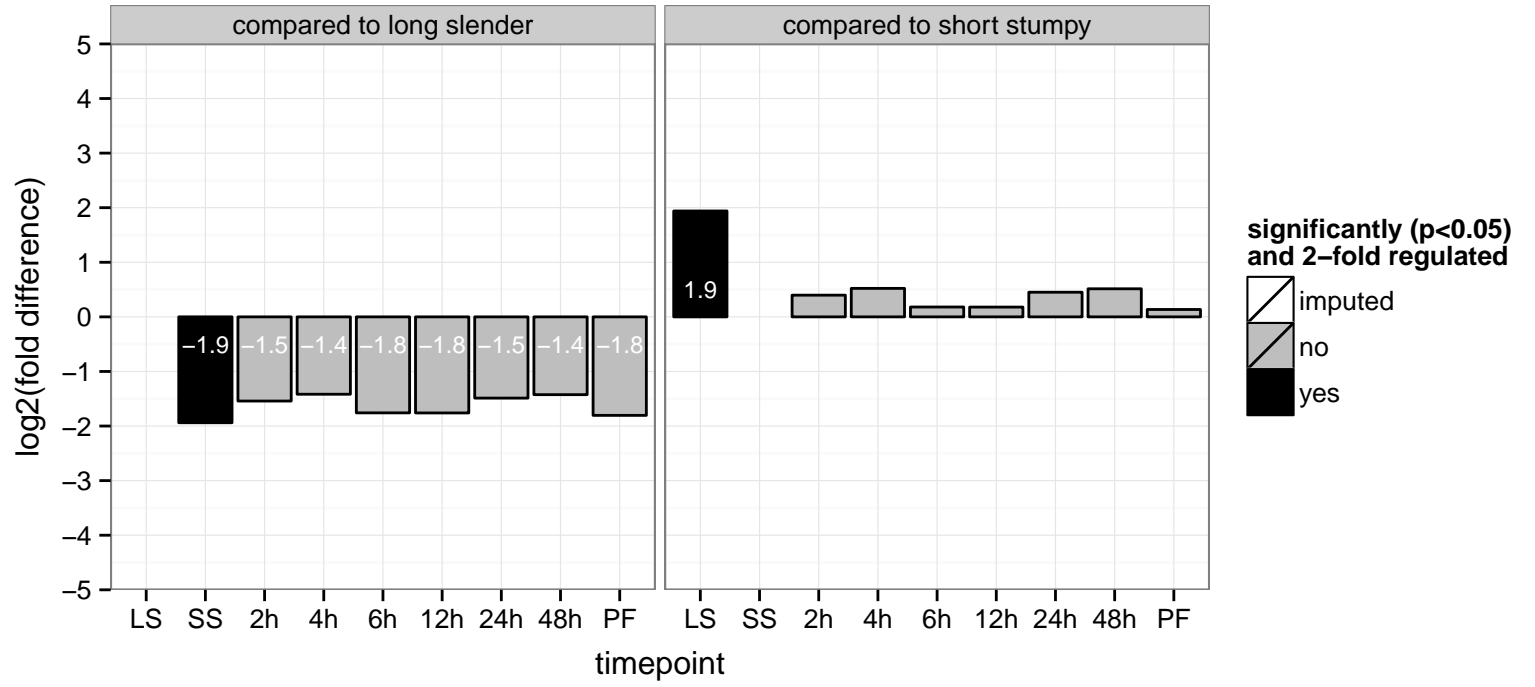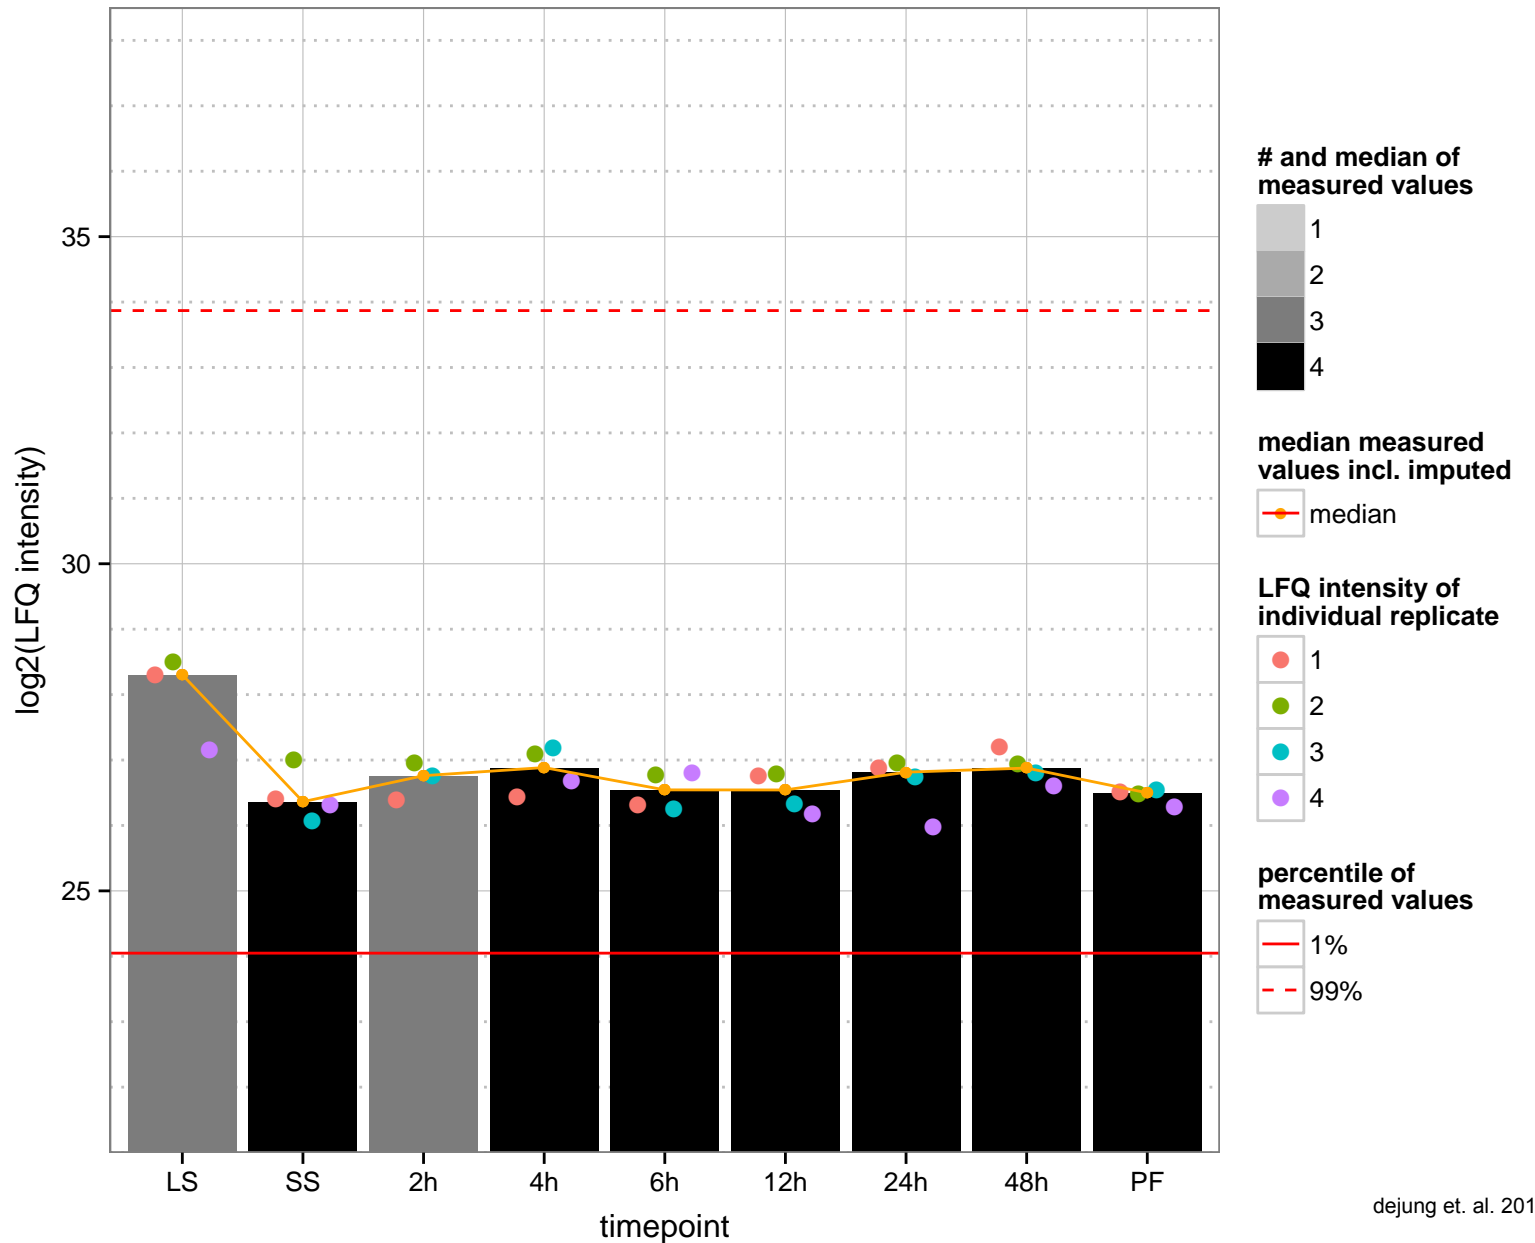

leucyl-tRNA synthetase, putative (LeuRS)

Tb927.11.3730

AGOF: ATP binding, leucine-tRNA ligase activity

AGOC: cytoplasm

AGOP: leucyl-tRNA aminoacylation, translation

PGOF: ATP binding, aminoacyl-tRNA editing activity, aminoacyl-tRNA ligase activity, leucine-tRNA ligase activity, nucleotide

PGOC: cytoplasm

PGOP: leucyl-tRNA aminoacylation, tRNA aminoacylation for protein translation

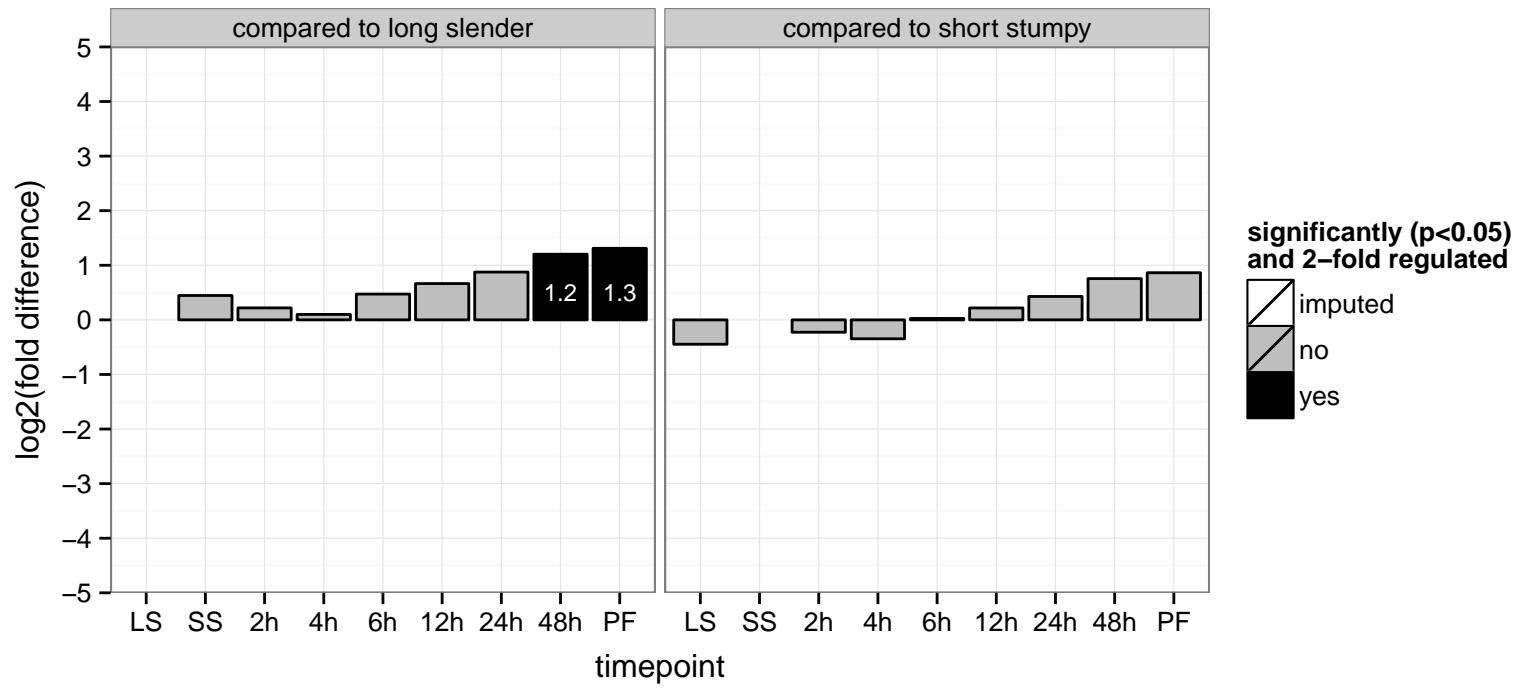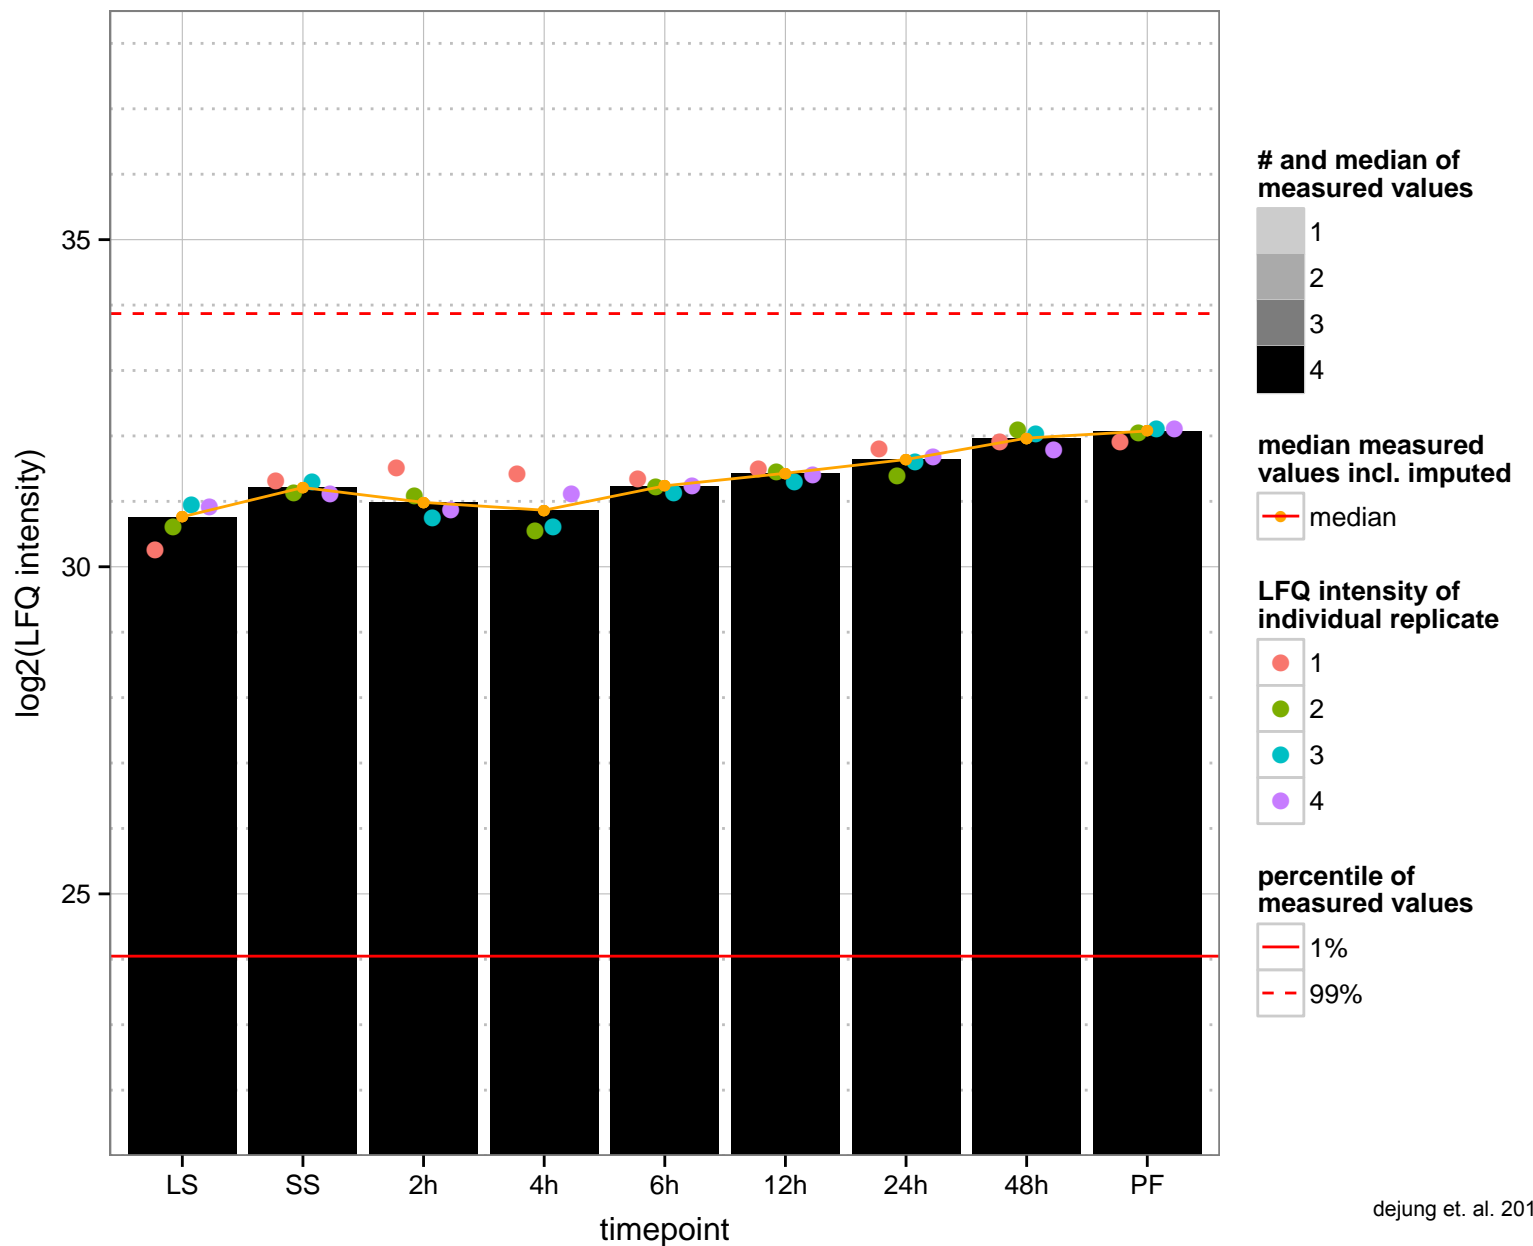



proteasome regulatory ATPase subunit 2 (RPT2)

Tb927.11.3740

AGOF: ATP binding, ATPase activity

AGOC: cytoplasm, nucleus, proteasome regulatory particle

AGOP: ubiquitin-dependent protein catabolic process

PGOF: ATP binding, hydrolase activity, nucleoside-triphosphatase activity, nucleotide binding

PGOC: cytoplasm

PGOP: protein catabolic process

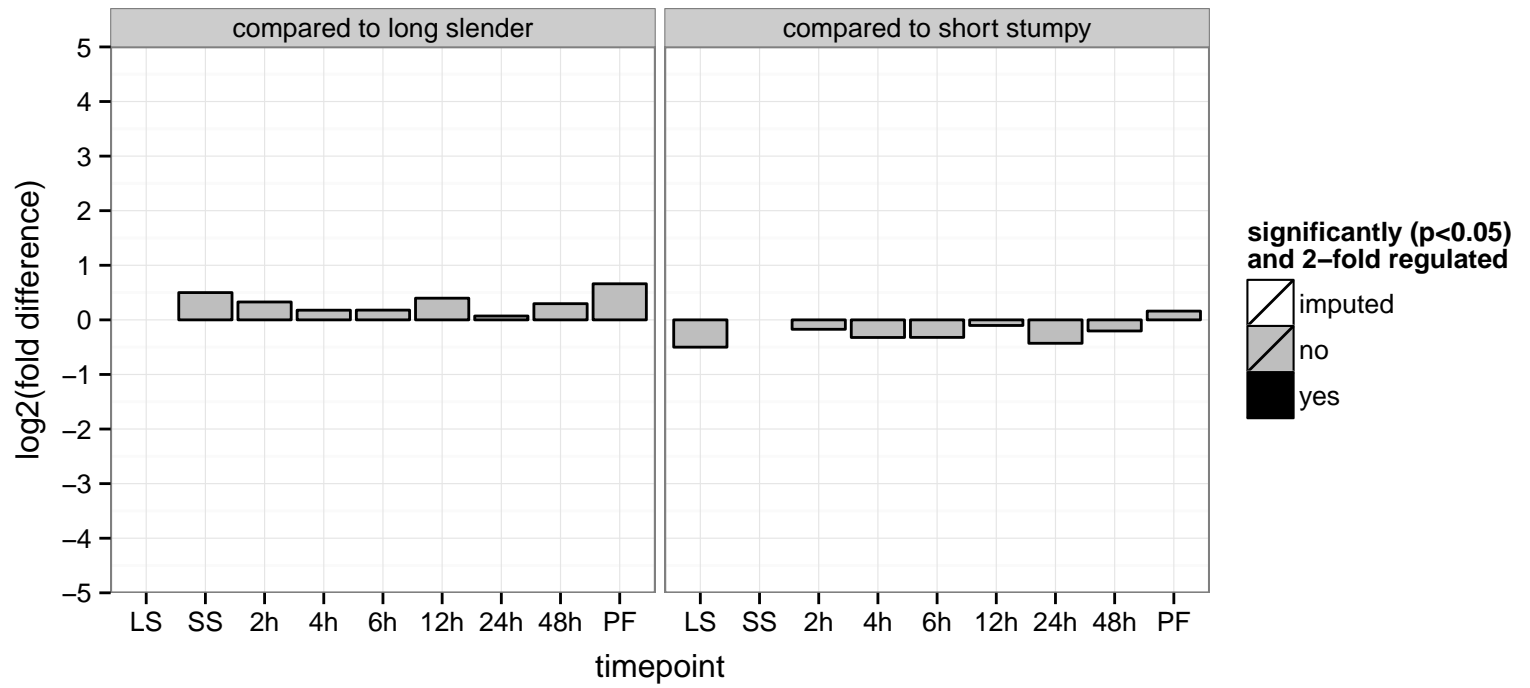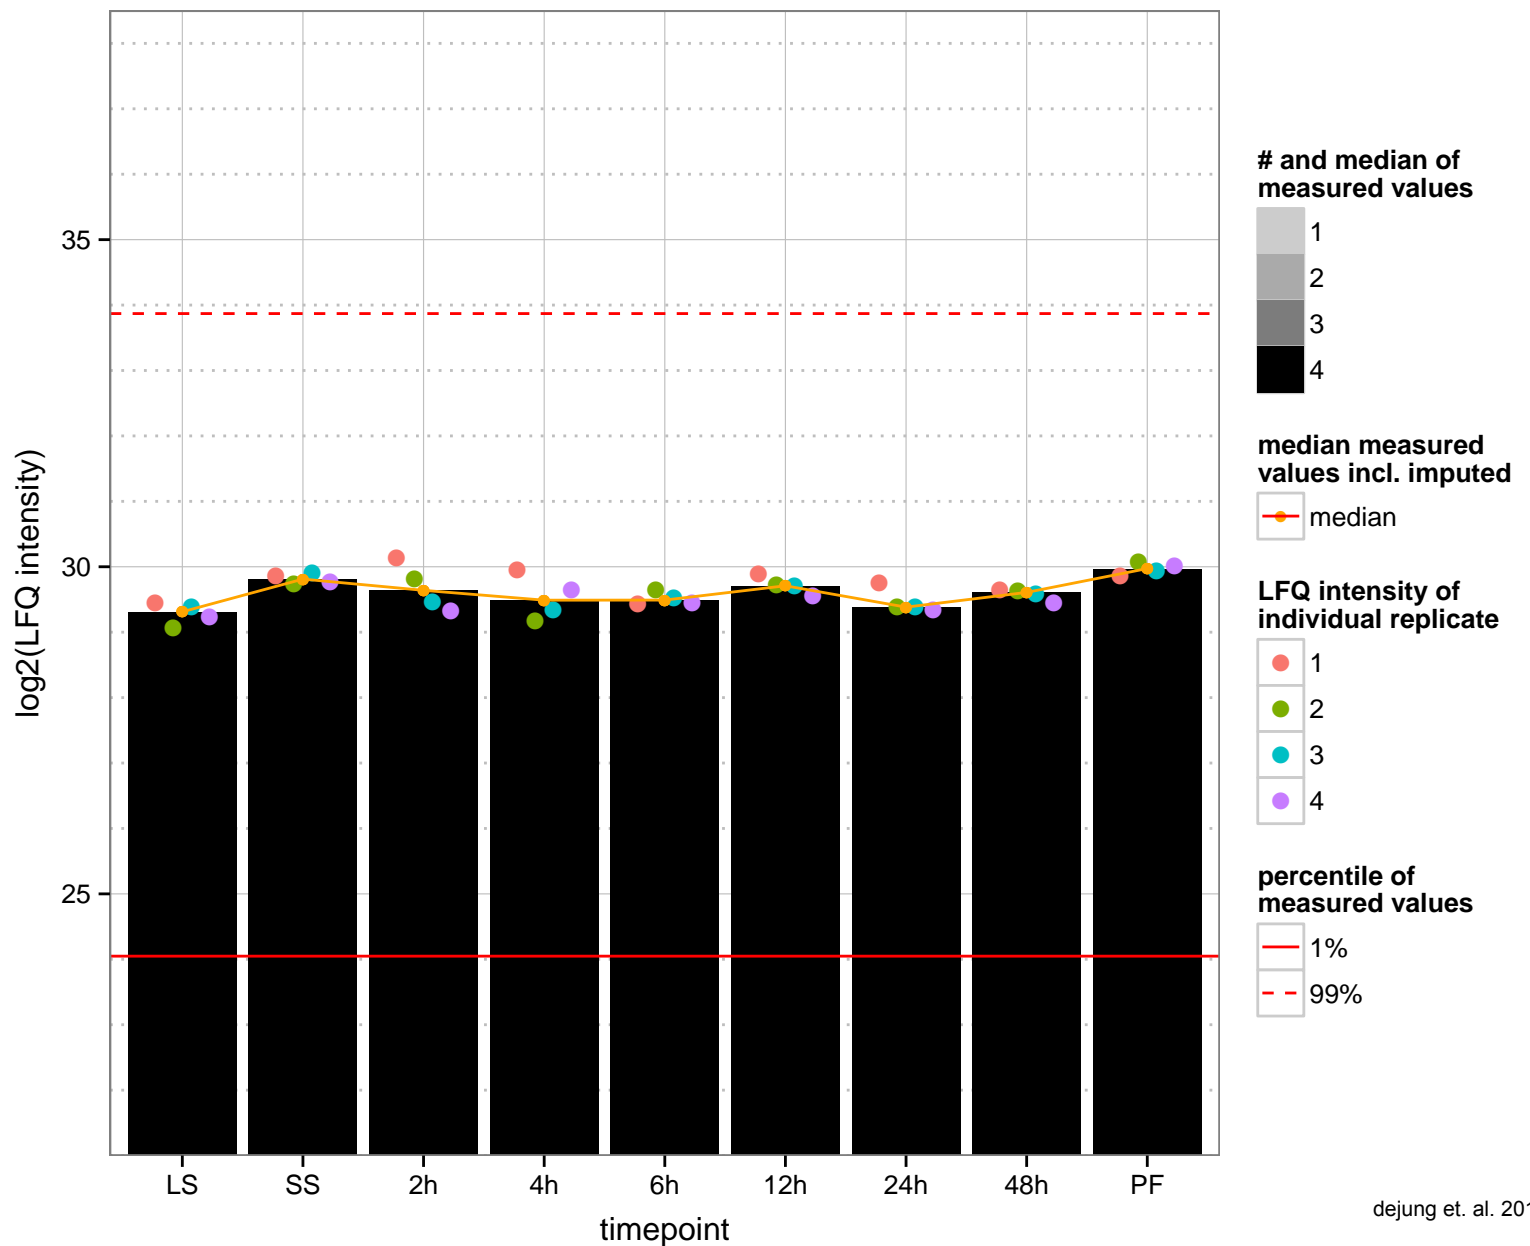

hypothetical protein, conserved  
 Tb927.11.3770  
 AGOF: null  
 AGOC: null  
 AGOP: null  
 PGOF: null  
 PGOE: null  
 PGOP: null

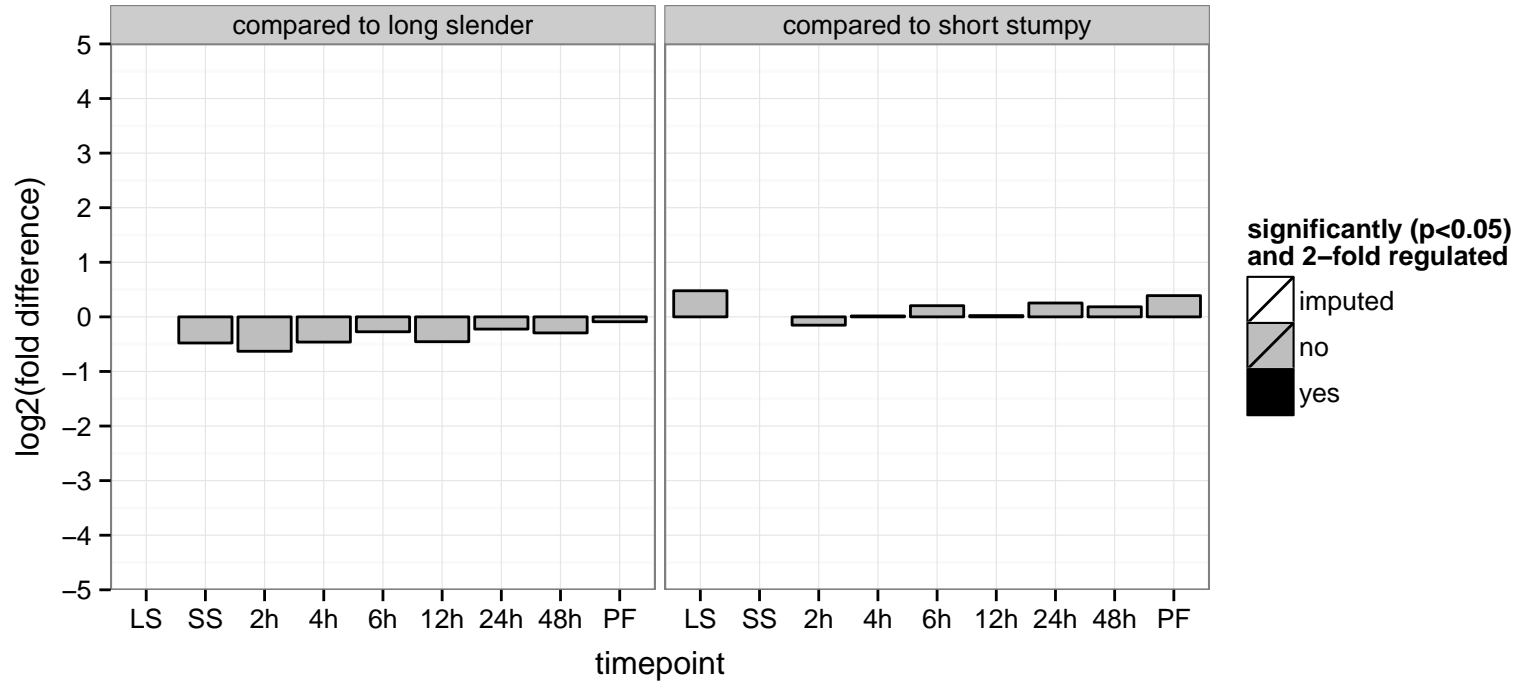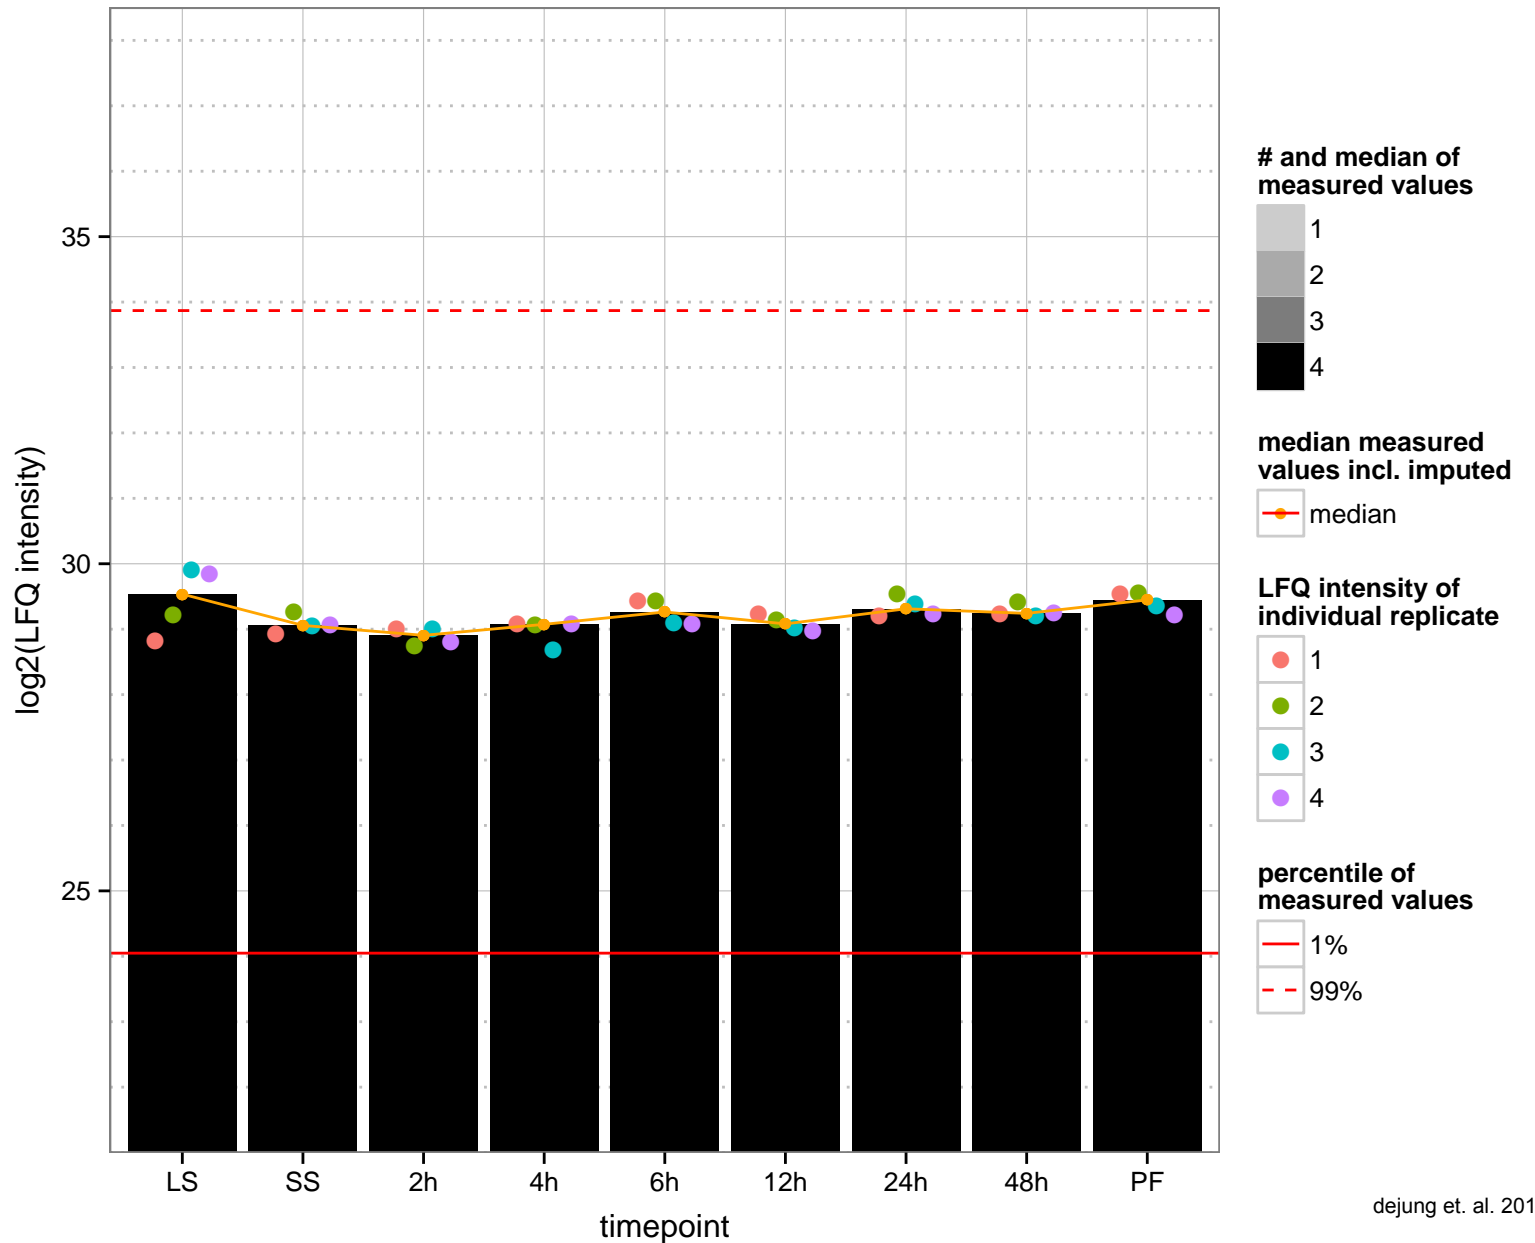

hypothetical protein, conserved  
 Tb927.11.3790  
 AGOF: null  
 AGOC: null  
 AGOP: null  
 PGO: null  
 PGOC: null  
 PGOP: null

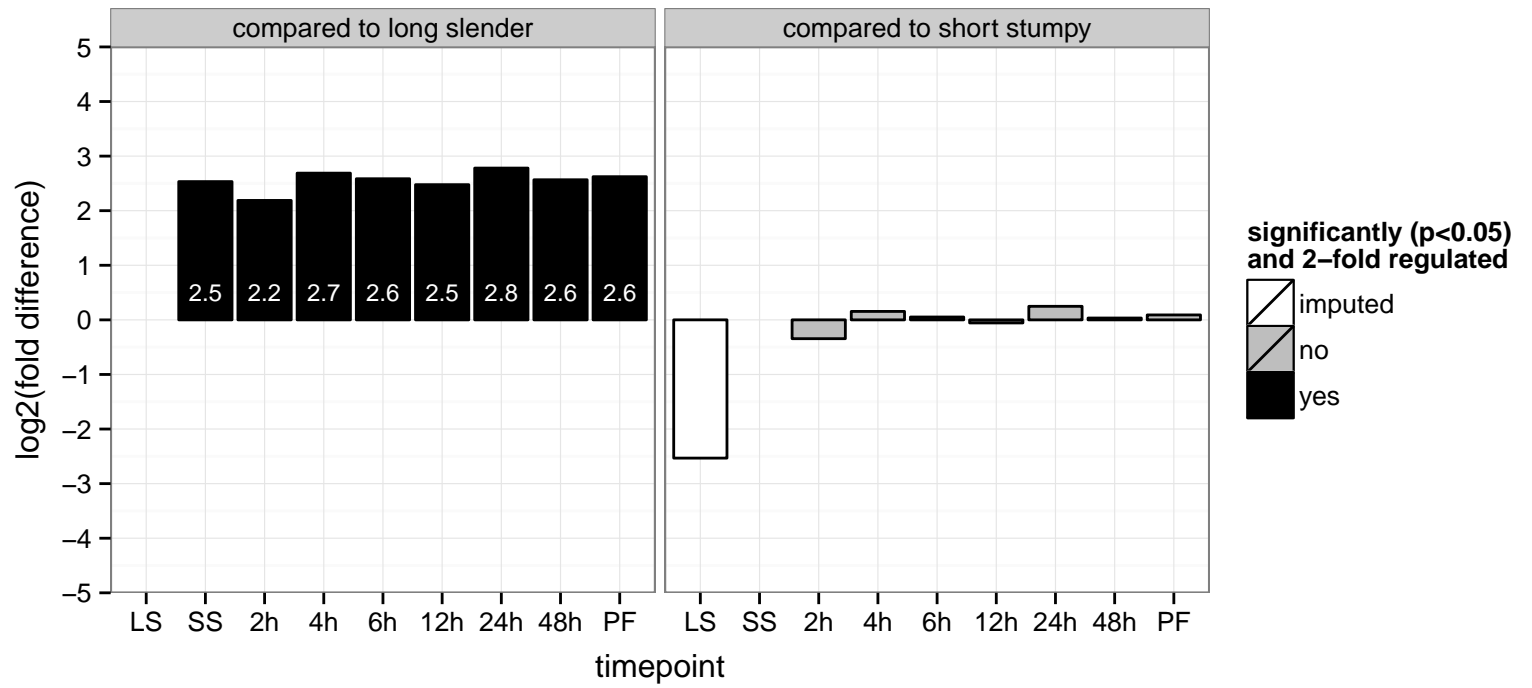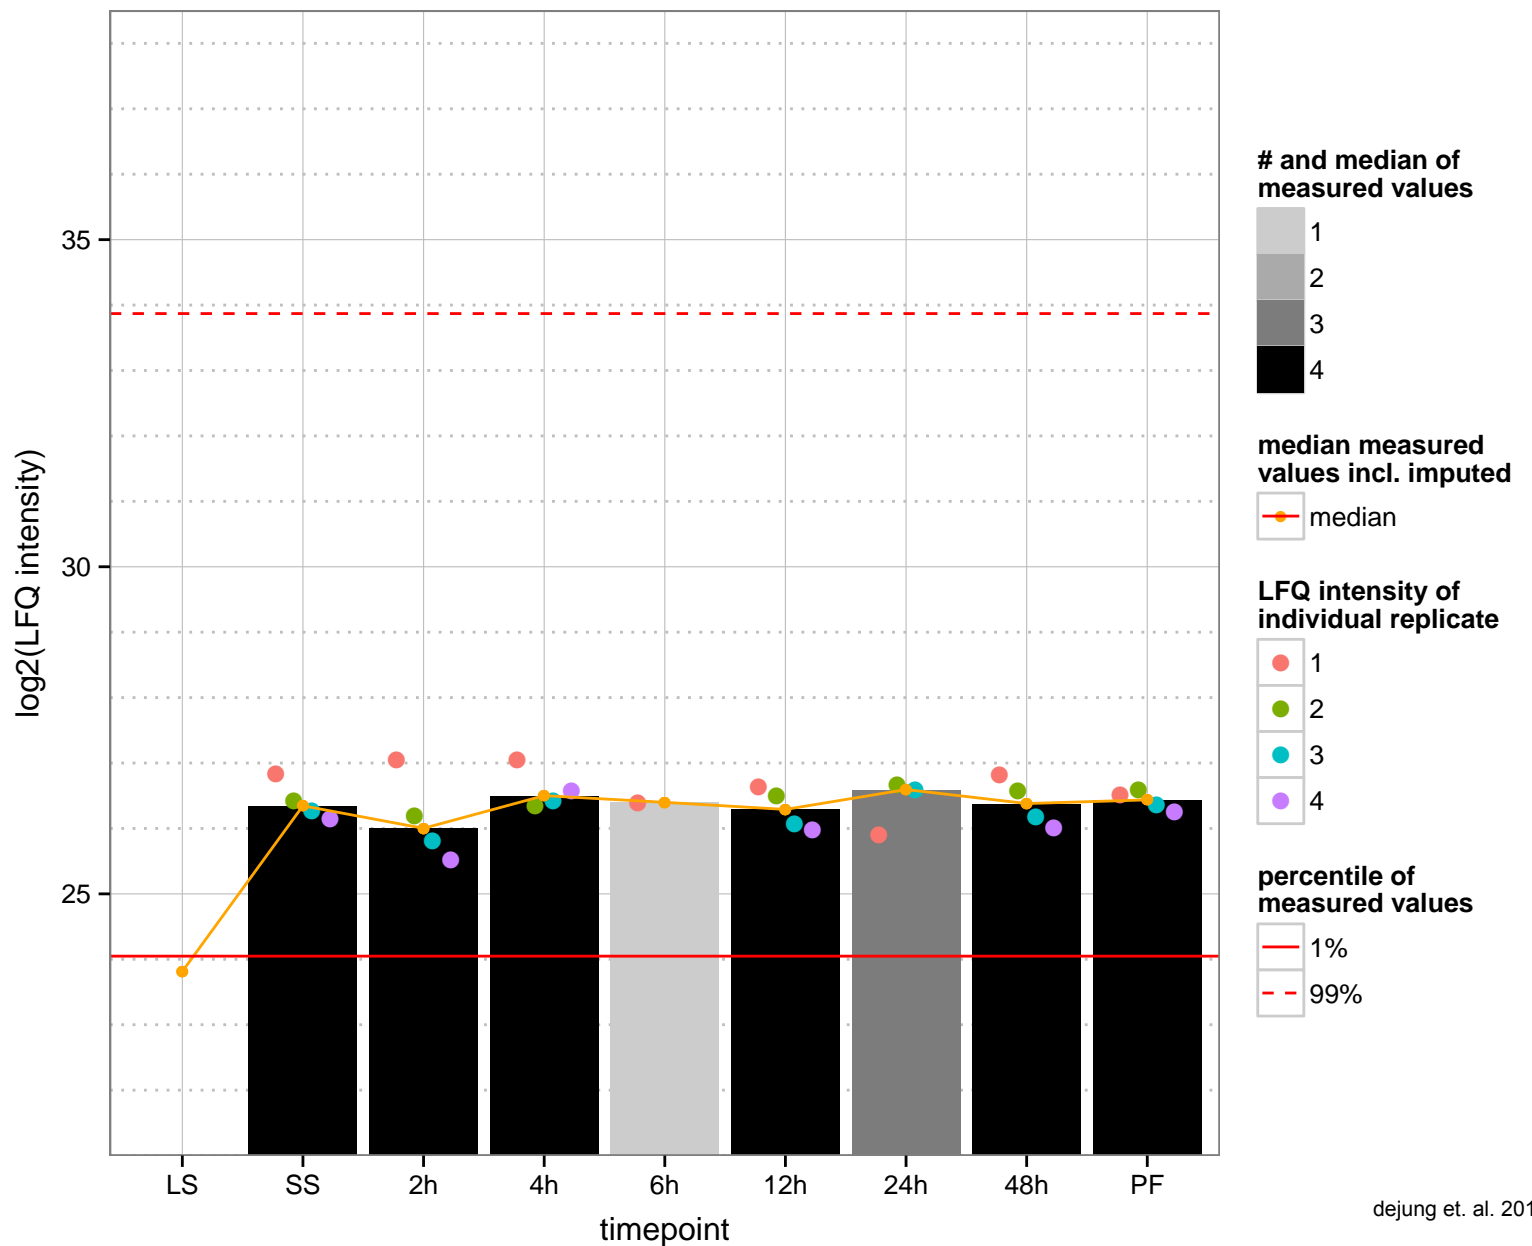

hypothetical protein, conserved  
 Tb927.11.3830  
 AGOF: null  
 AGOC: null  
 AGOP: null  
 PGOF: null  
 PGOC: null  
 PGOP: null

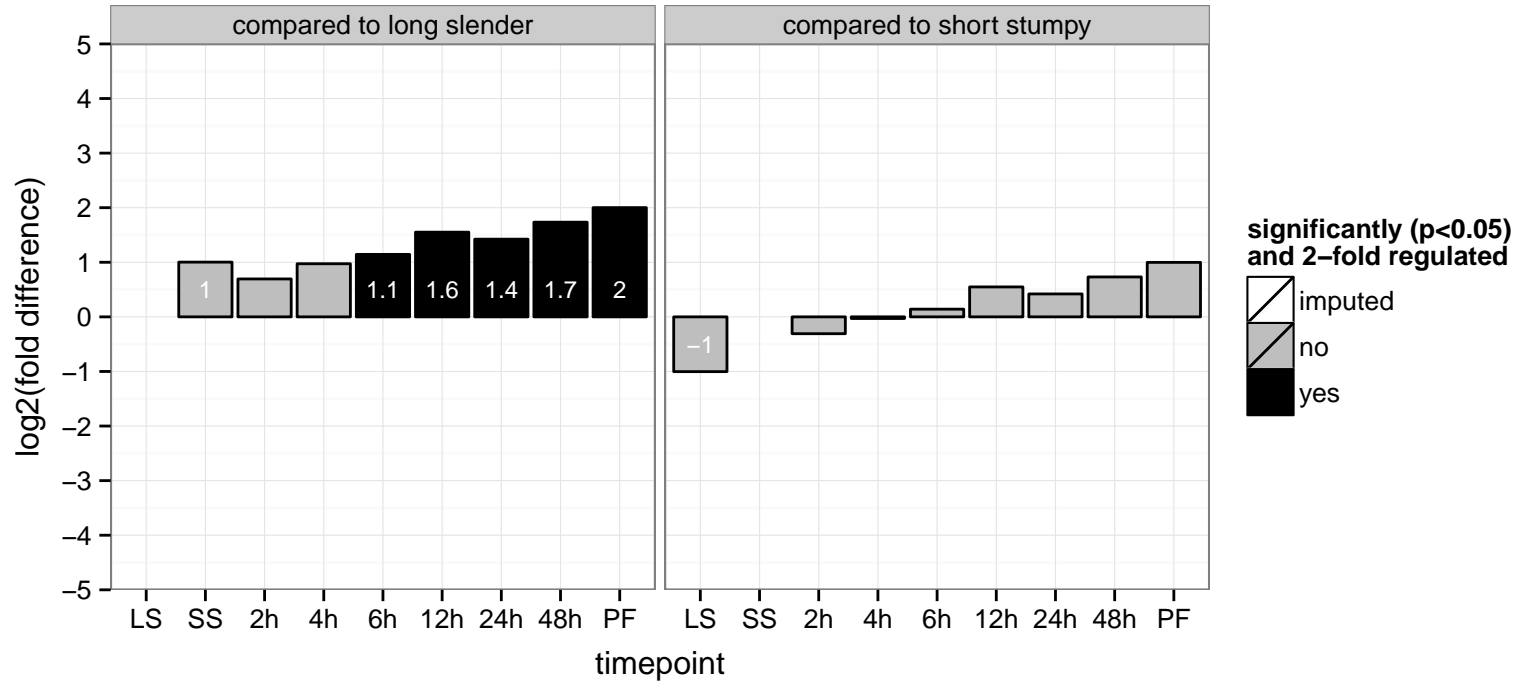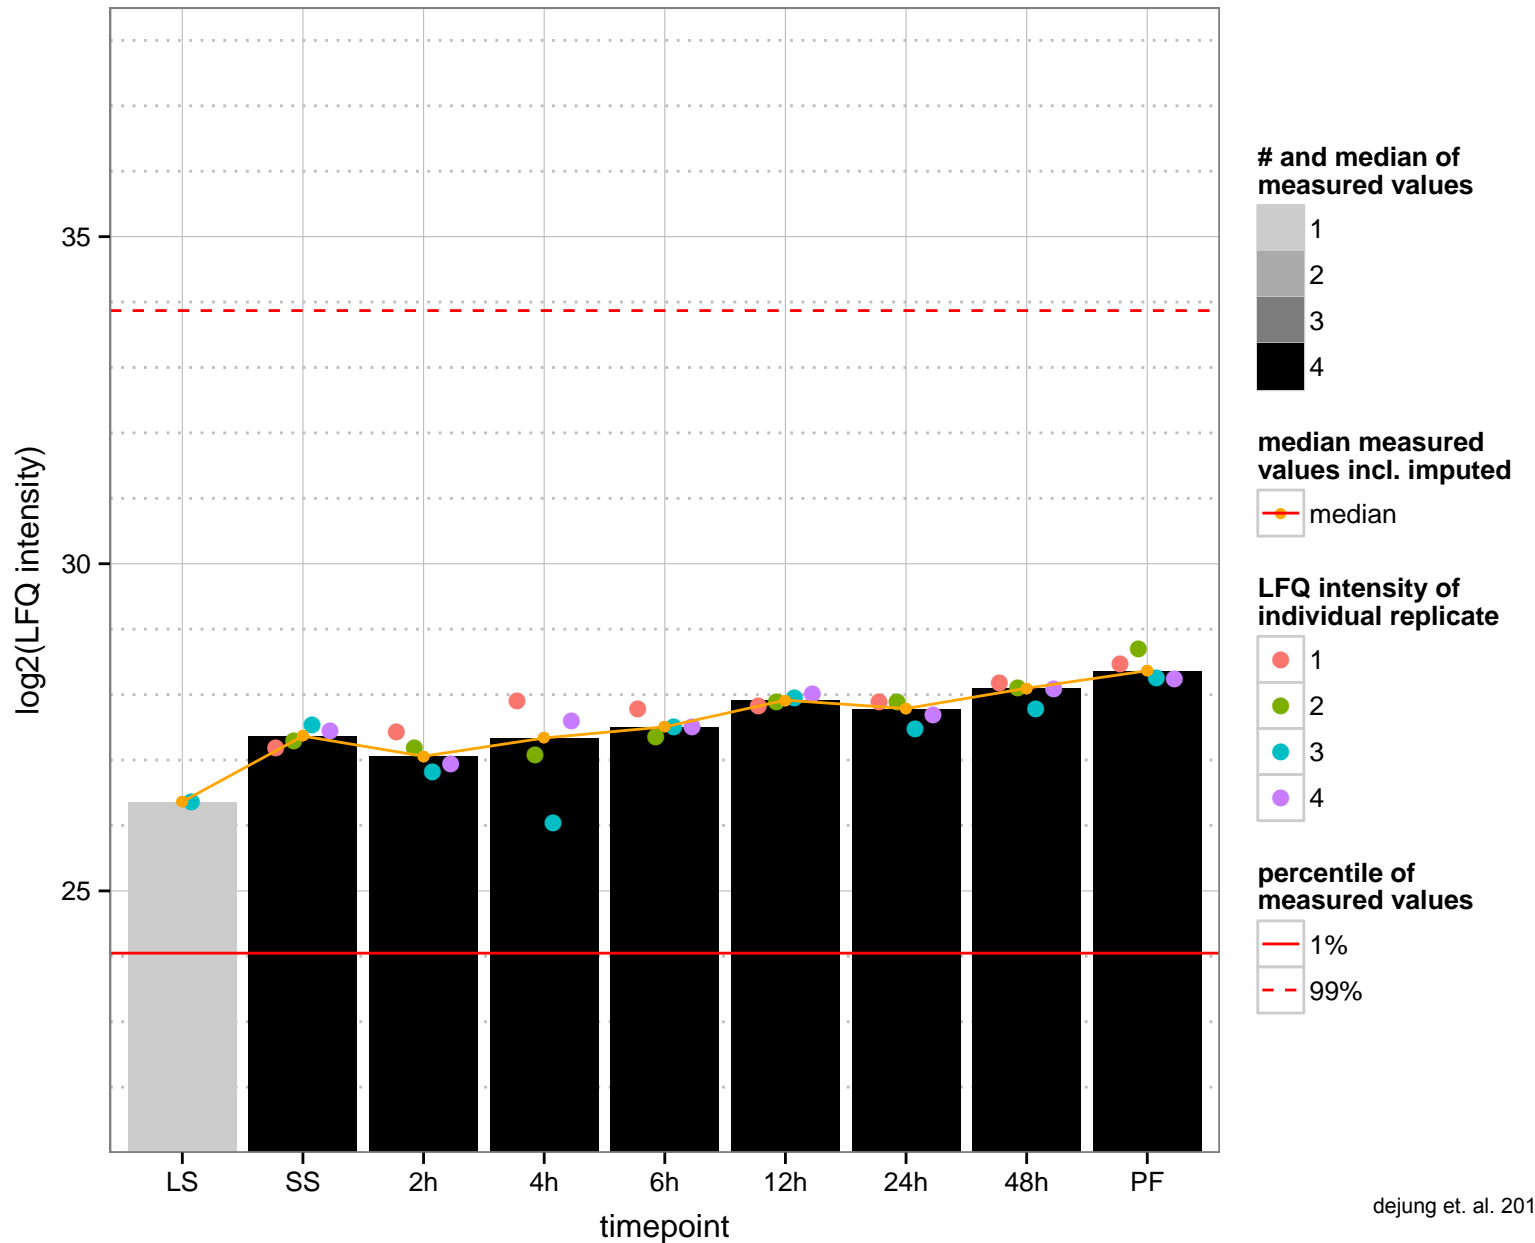

actin, putative (TRYPARP)  
 Tb927.11.3880  
 AGOF: structural constituent of cytoskeleton  
 AGOC: actin cytoskeleton  
 AGOP: cytoskeleton organization  
 PGO: null  
 PGOC: null  
 PGOP: null

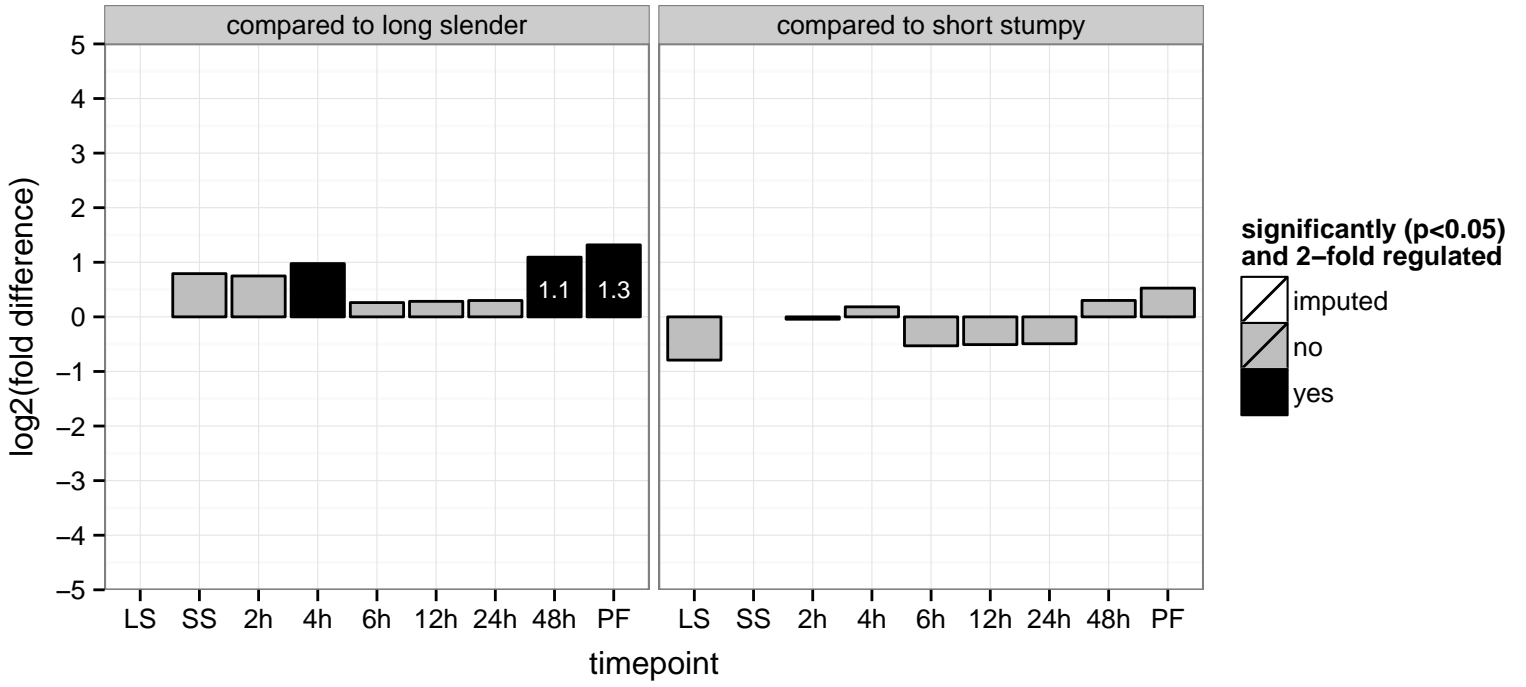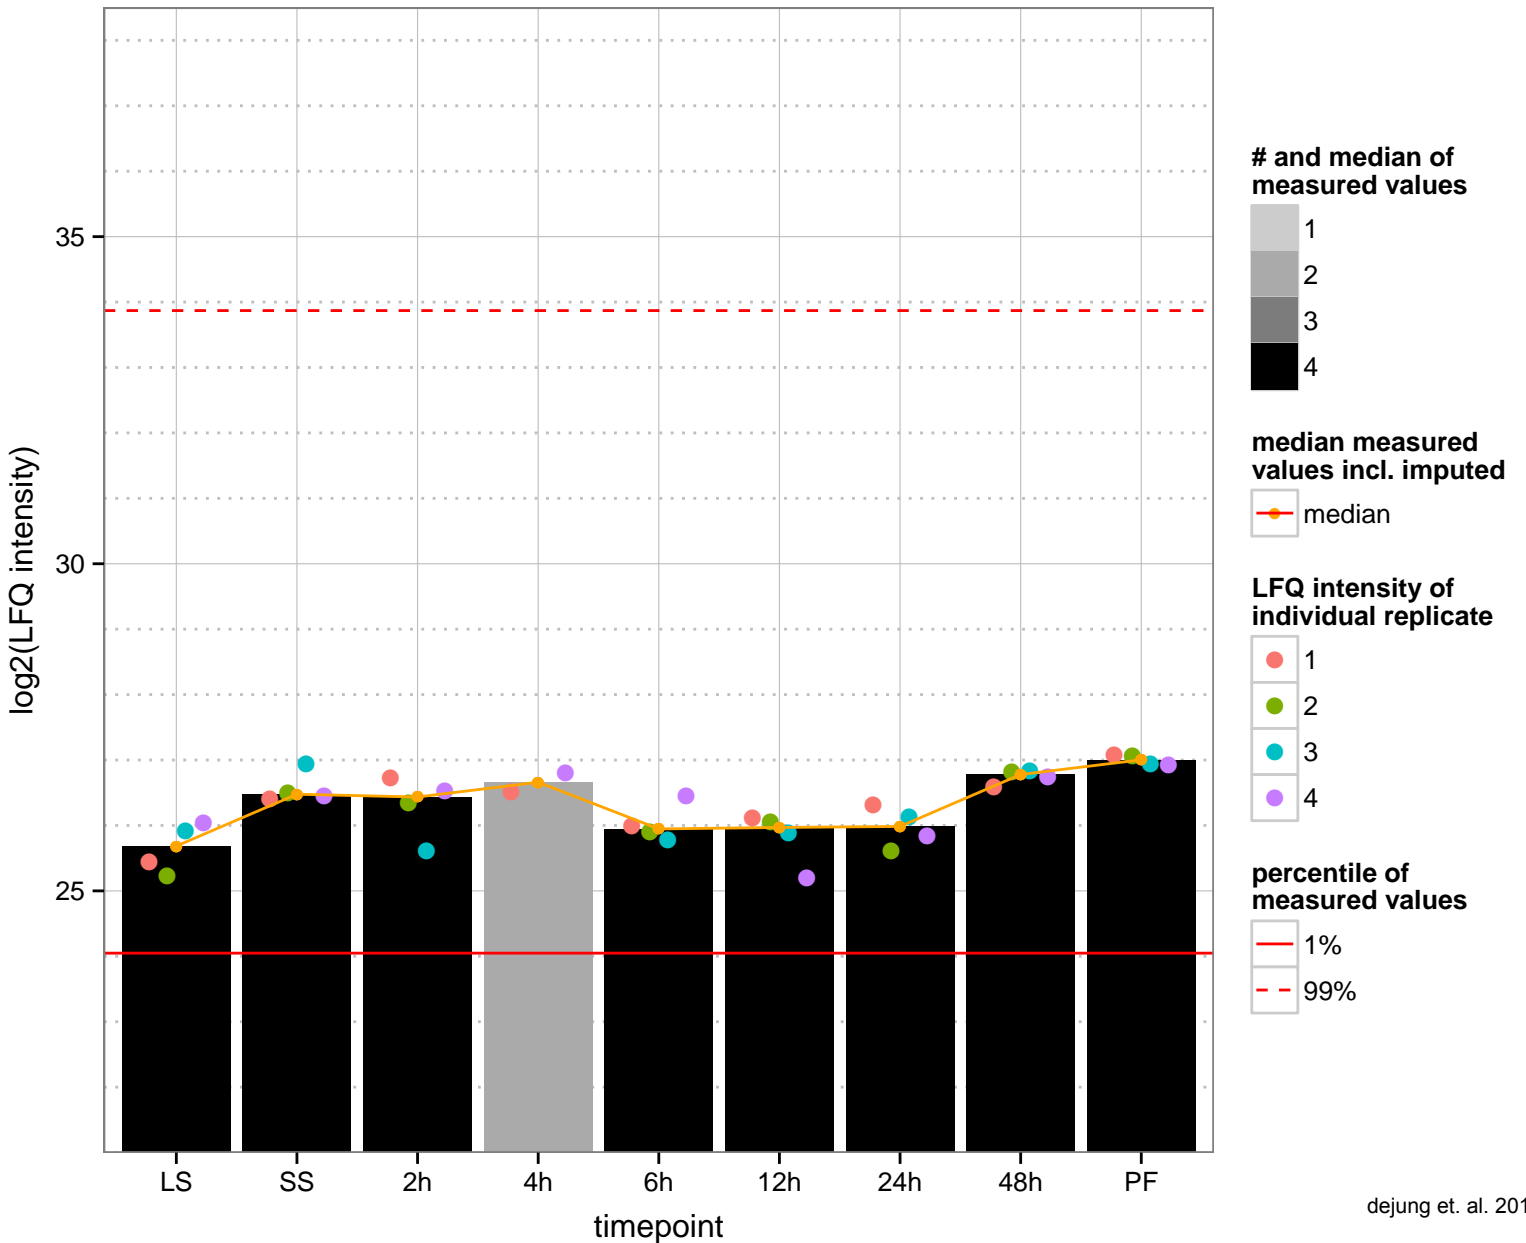

hypothetical protein, conserved  
 Tb927.11.3910  
 AGOF: null  
 AGOC: null  
 AGOP: null  
 PGOF: null  
 PGO C: null  
 PGOP: null

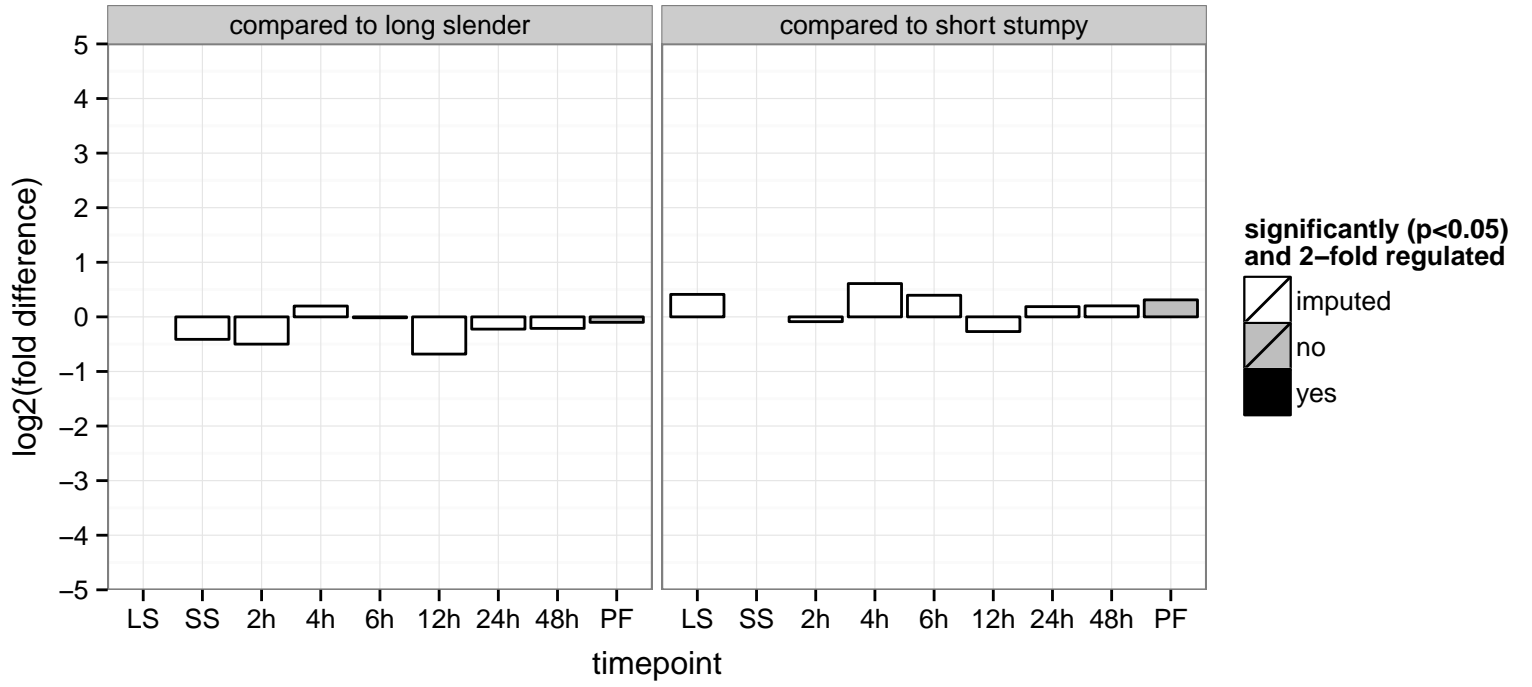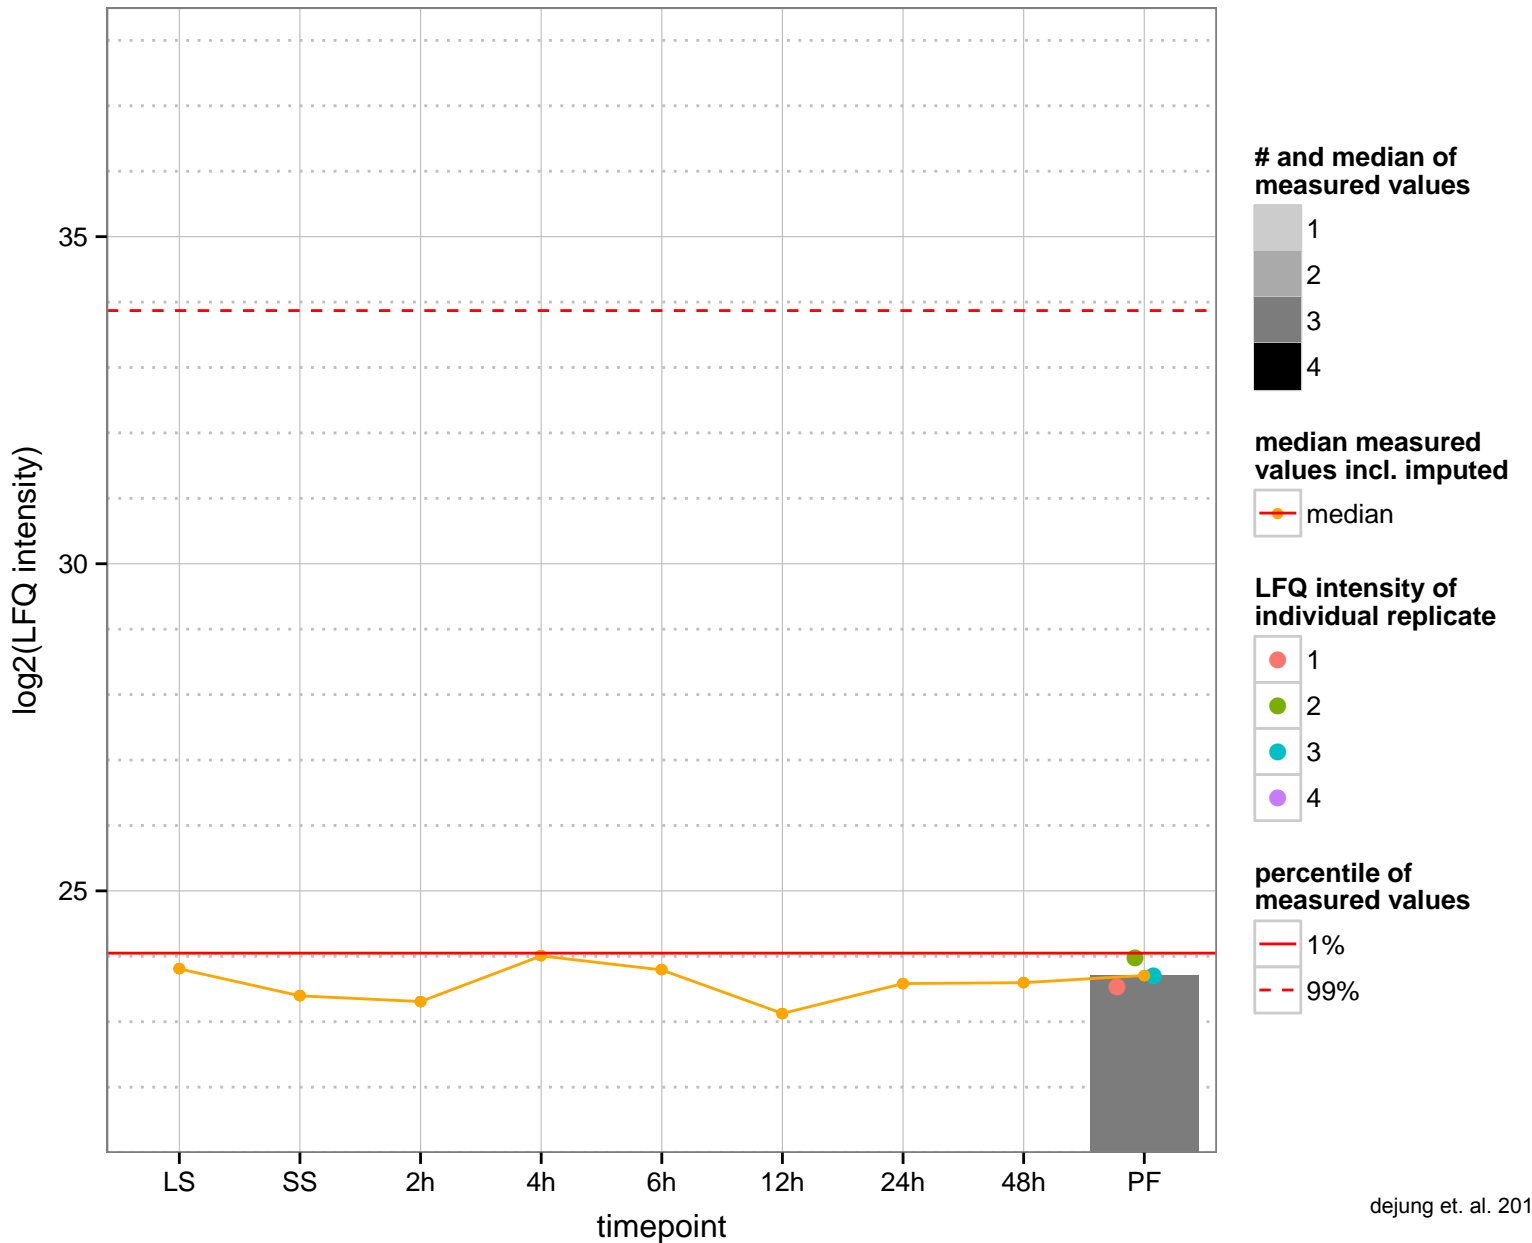

hypothetical protein, conserved  
 Tb927.11.3940  
 AGOF: null  
 AGOC: mitochondrion  
 AGOP: null  
 PGO: null  
 PGO: null  
 PGO: null  
 PGO: metabolic process

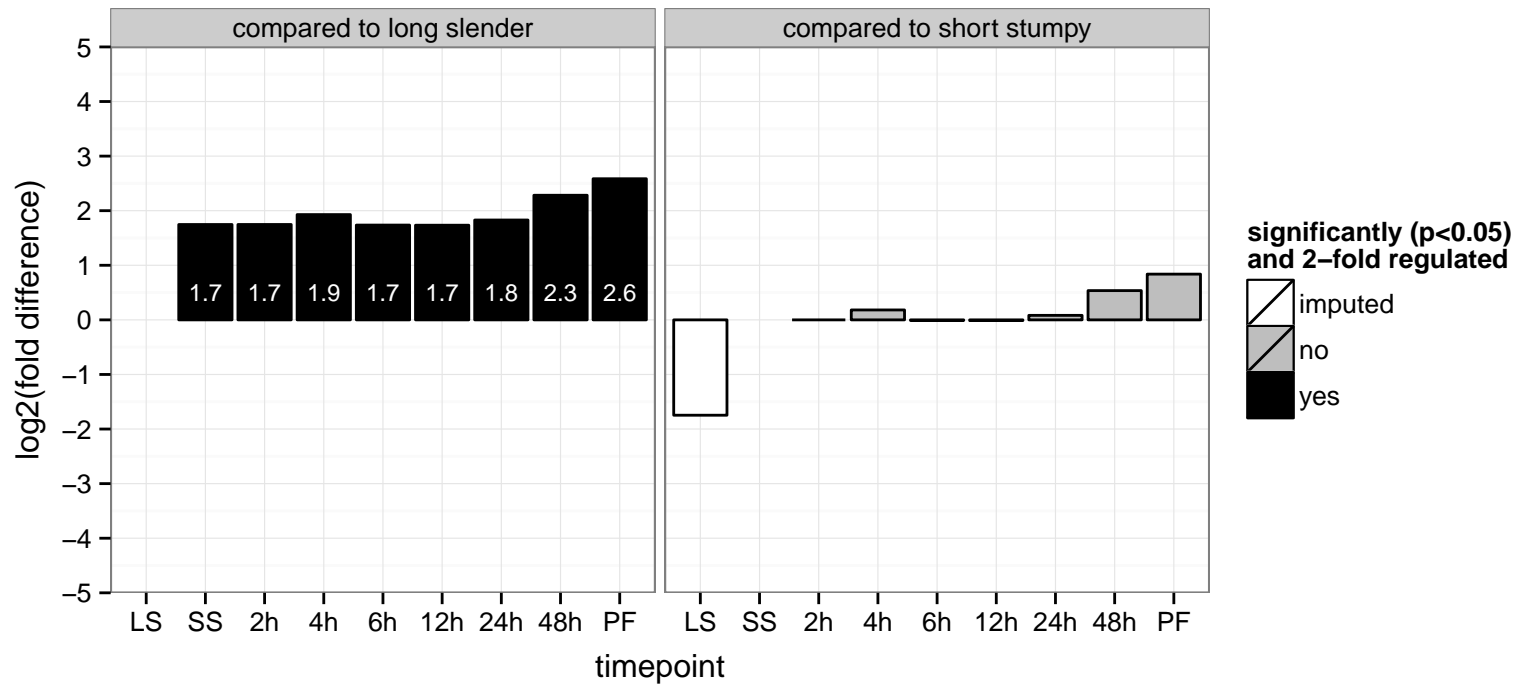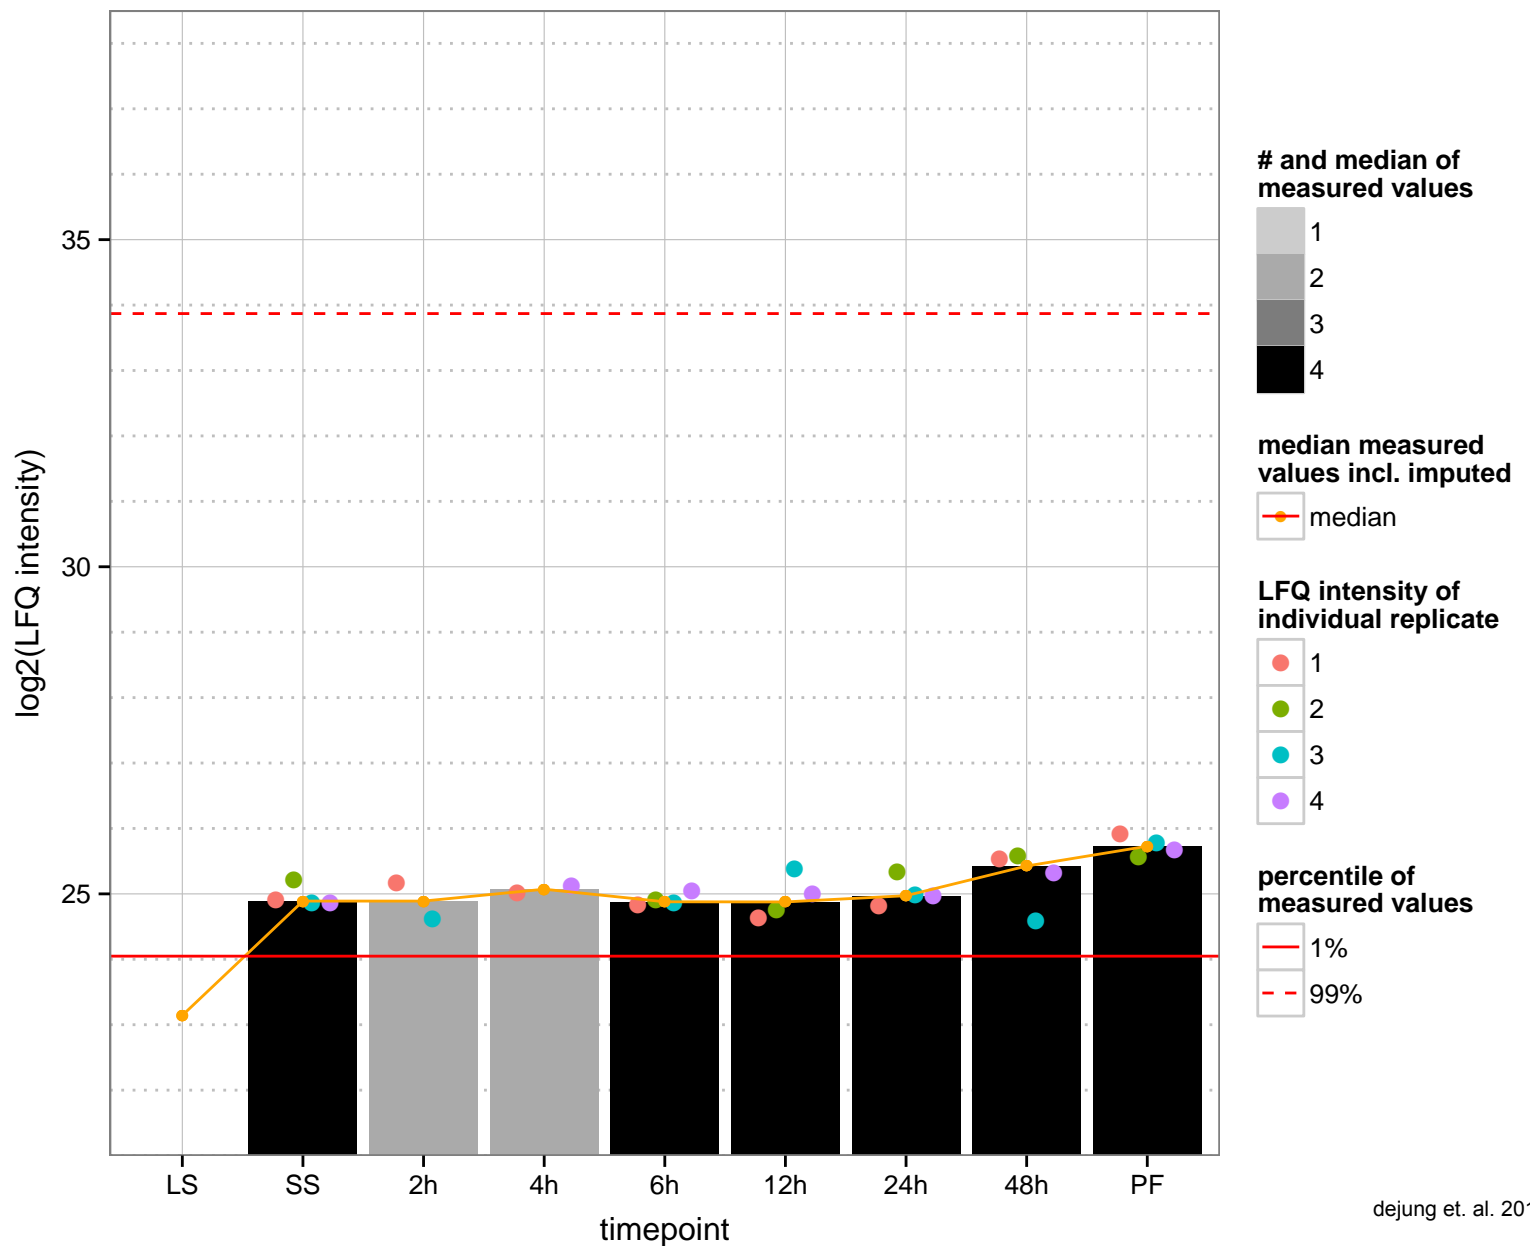

hypothetical protein, conserved  
 Tb927.11.3970  
 AGOF: RNA binding  
 AGOC: null  
 AGOP: null  
 PGOF: nucleic acid binding, zinc ion binding  
 PGO: null  
 PGOP: null

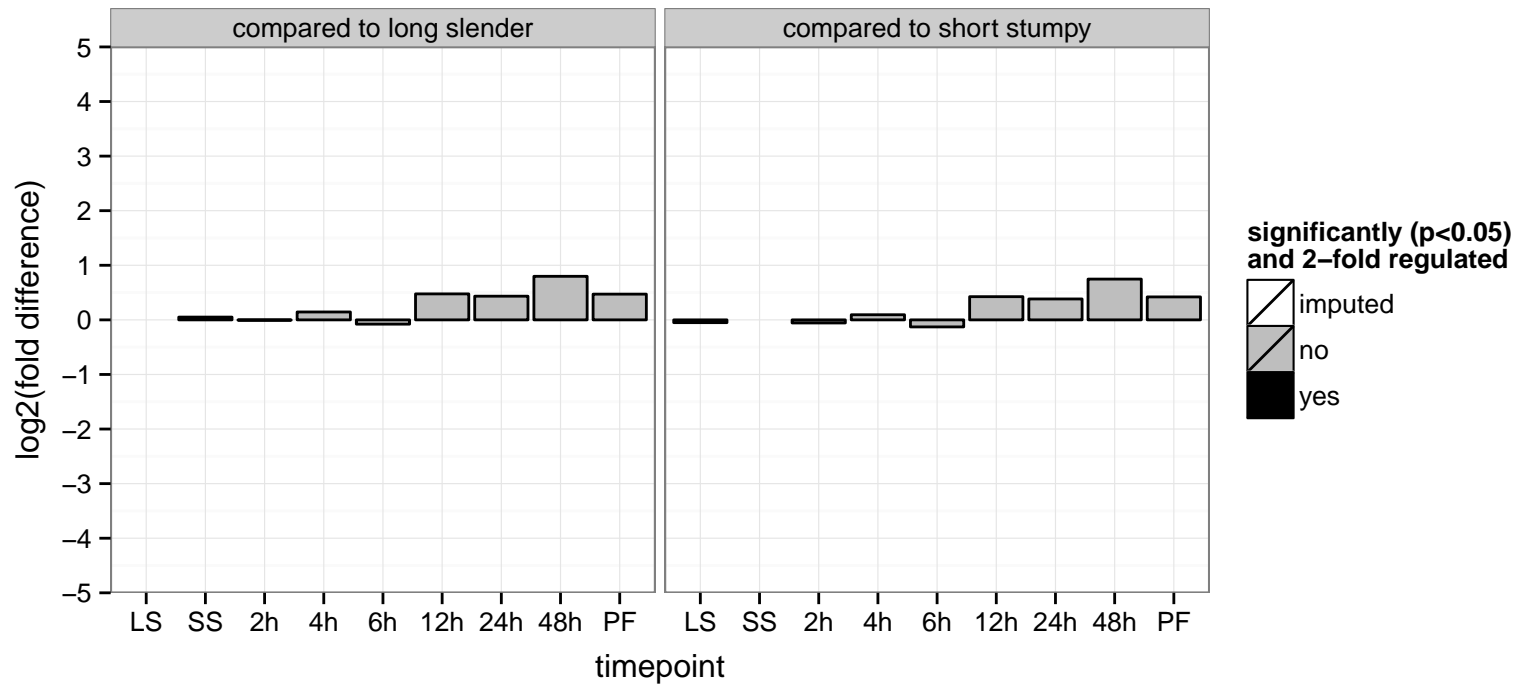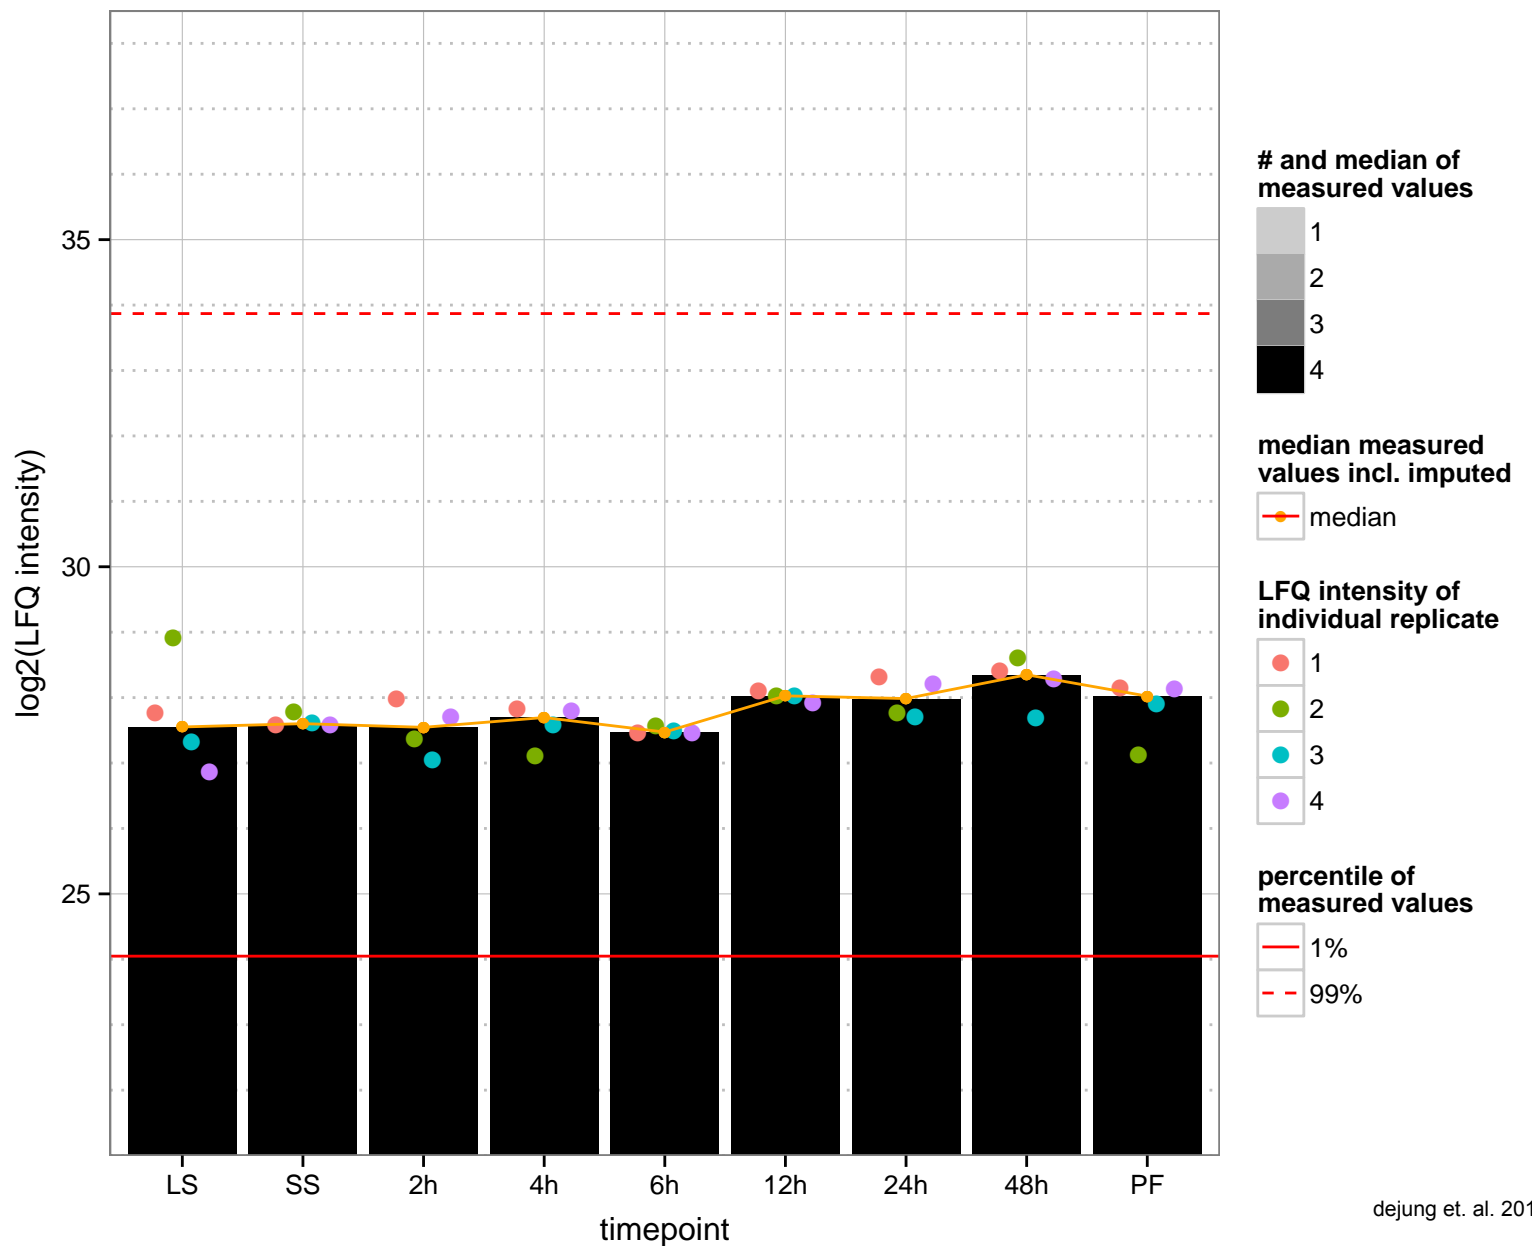



hypothetical protein, conserved  
 Tb927.11.400  
 AGOF: null  
 AGOC: null  
 AGOP: null  
 PGOF: null  
 PGOC: null  
 PGOP: null

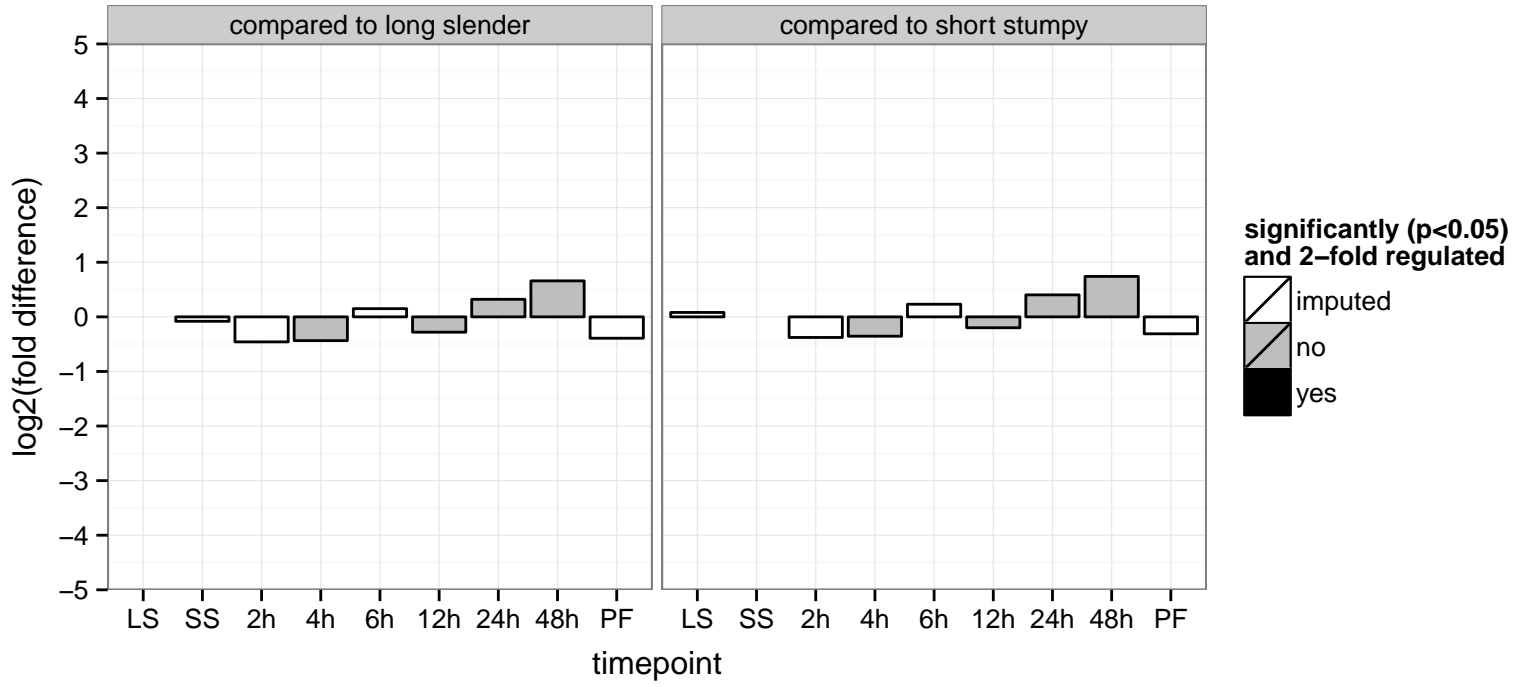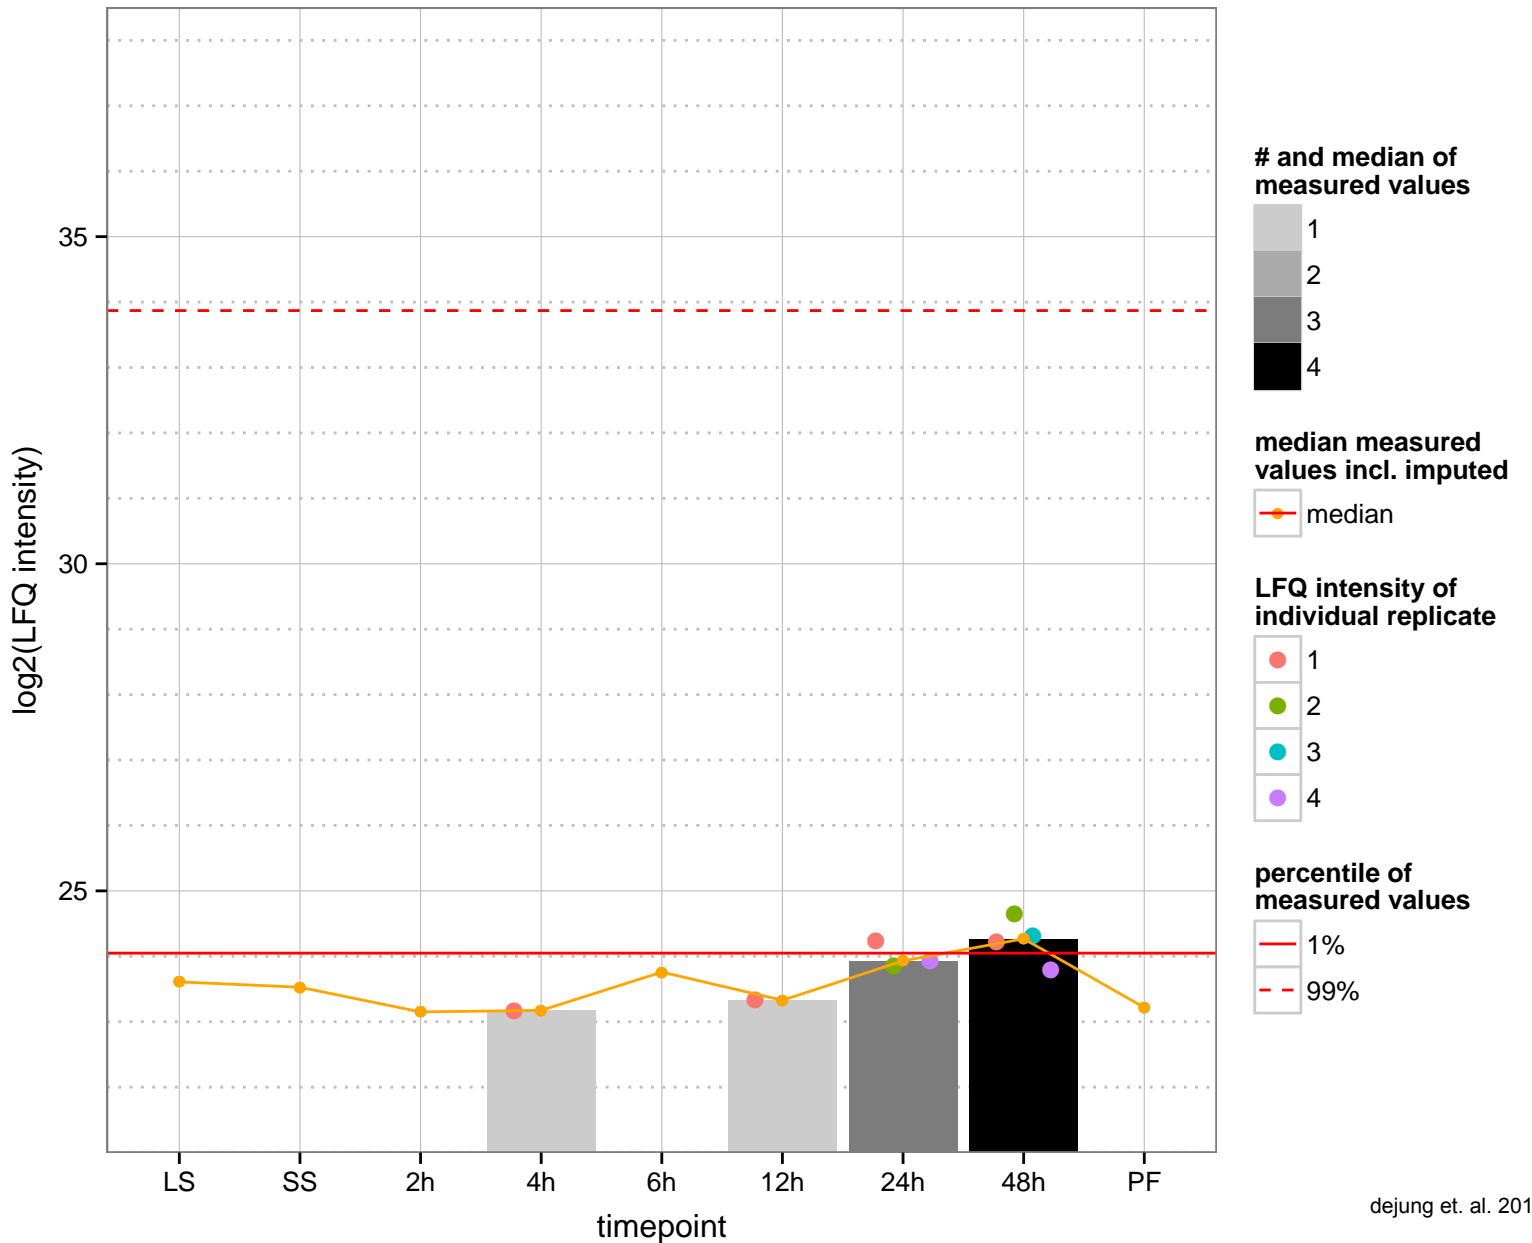

hypothetical protein, conserved  
 Tb927.11.4000  
 AGOF: null  
 AGOC: null  
 AGOP: null  
 PGO: null  
 PGOC: null  
 PGOP: null

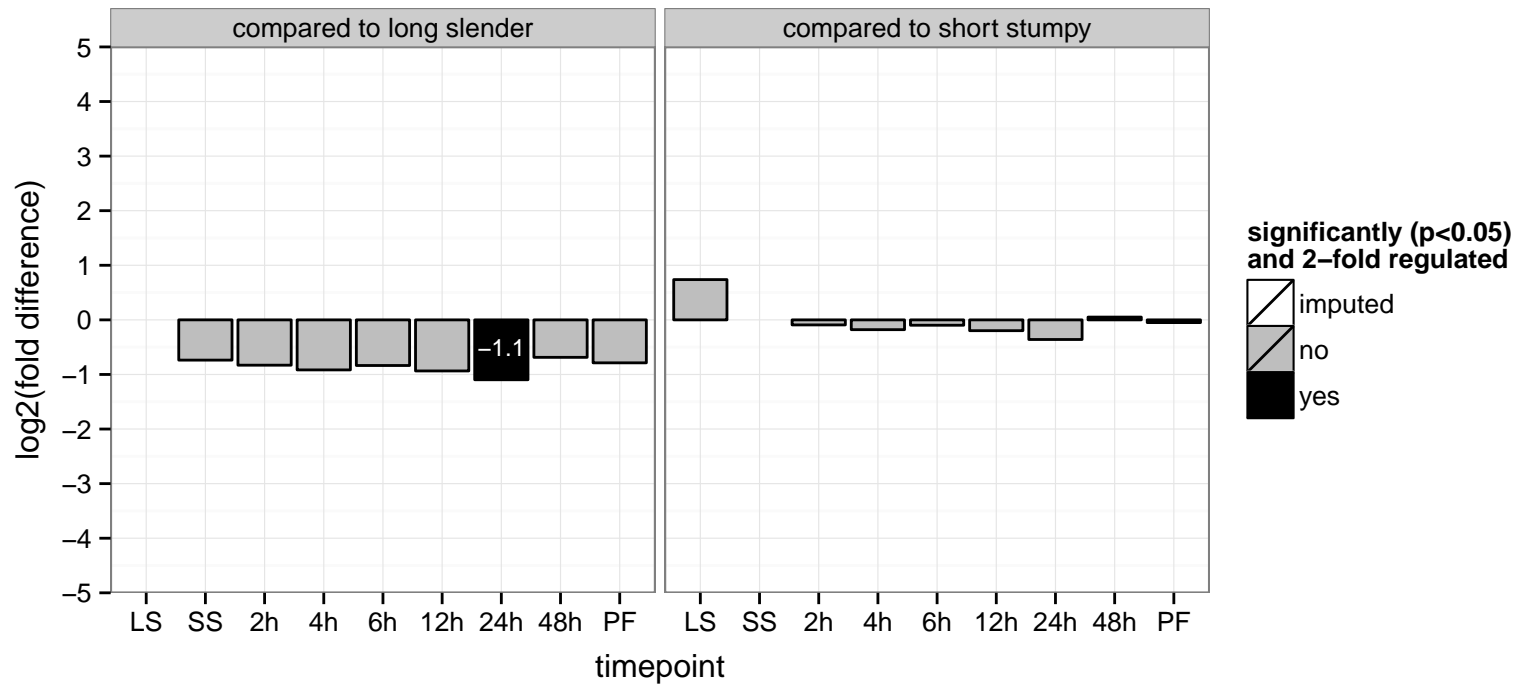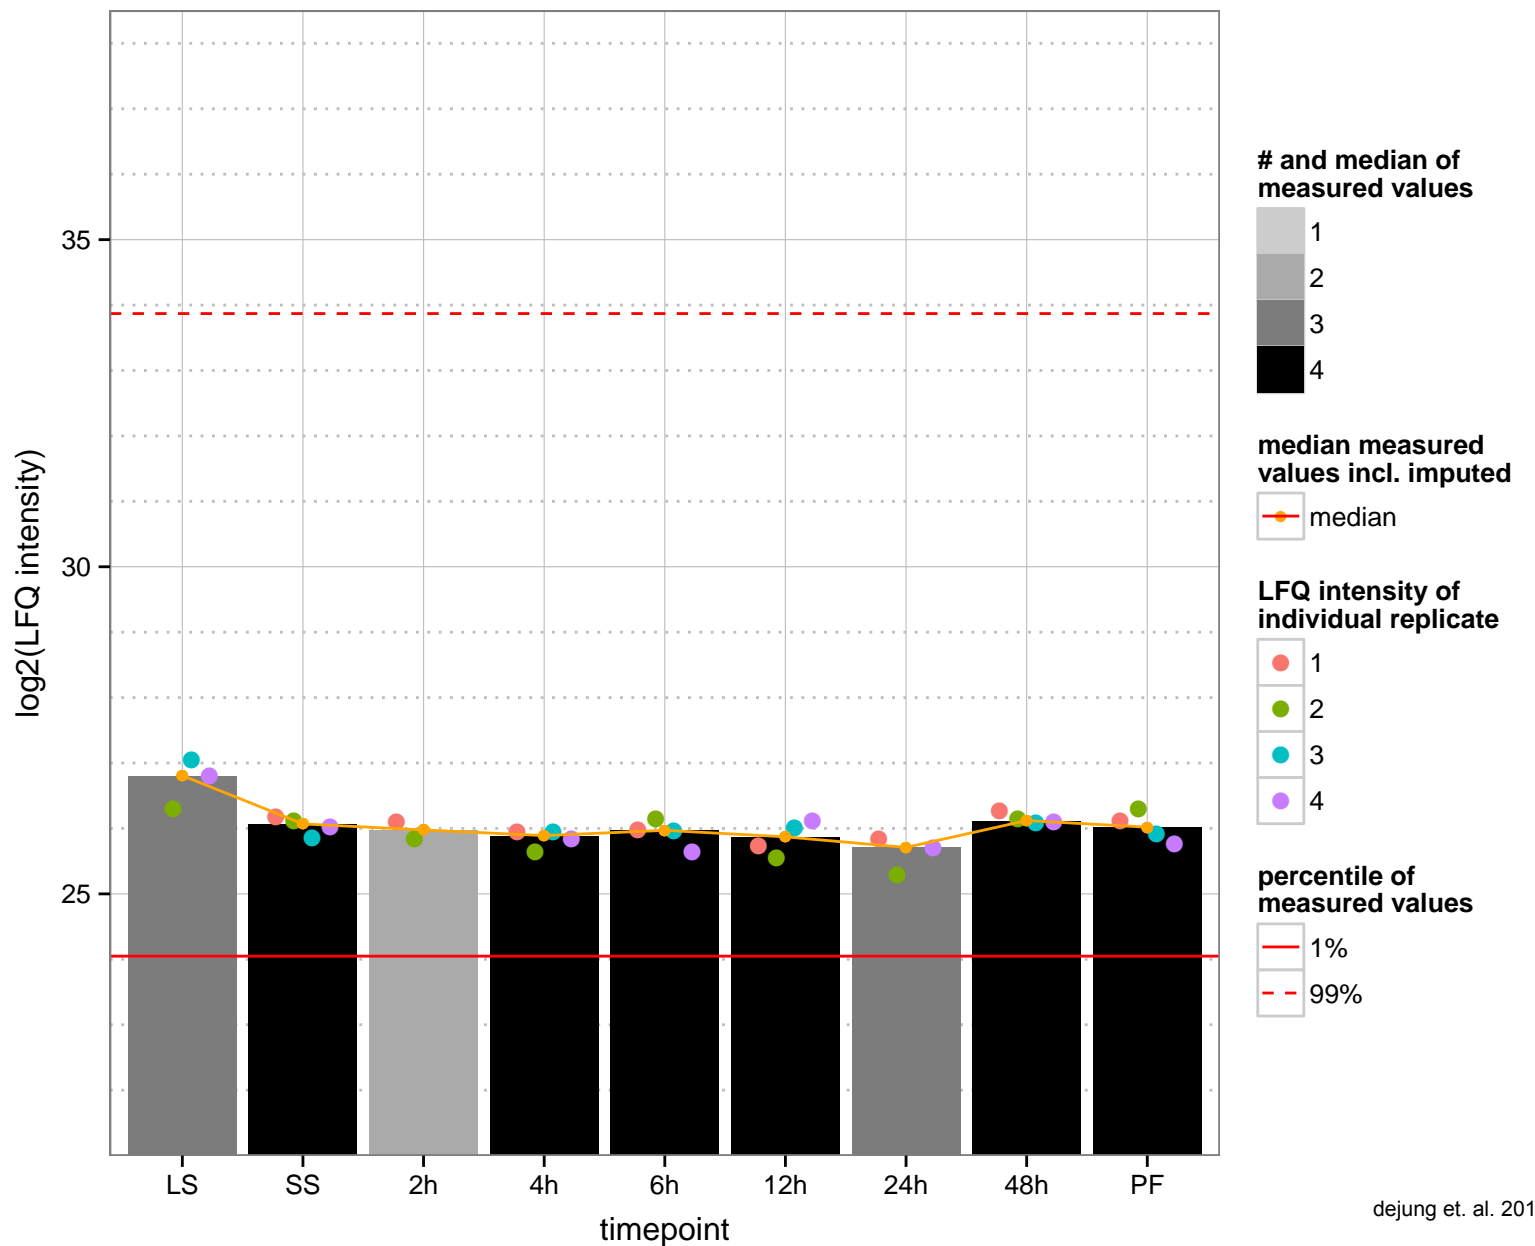

ubiquitin-like protein, putative  
 Tb927.11.4130  
 AGOF: null  
 AGOC: null  
 AGOP: null  
 PGOF: protein binding  
 PGO: null  
 PGOP: null

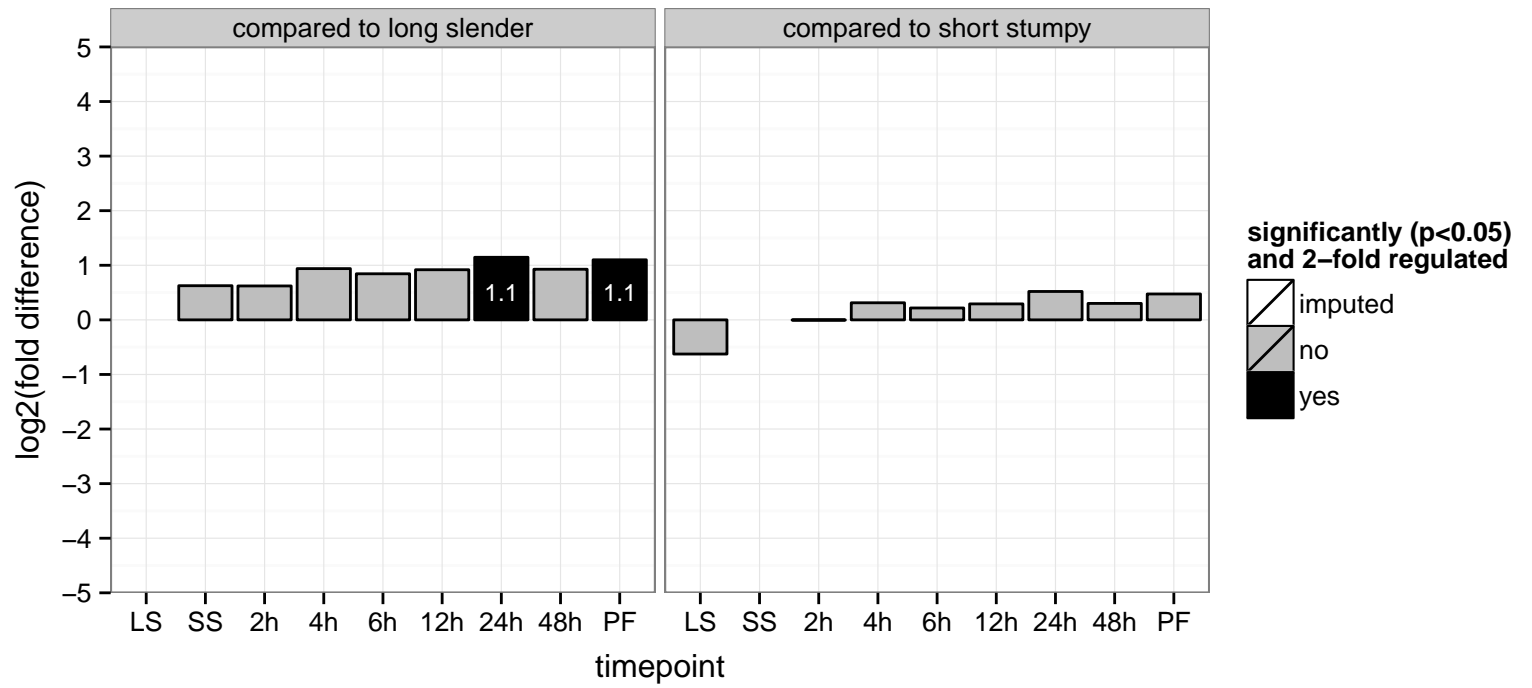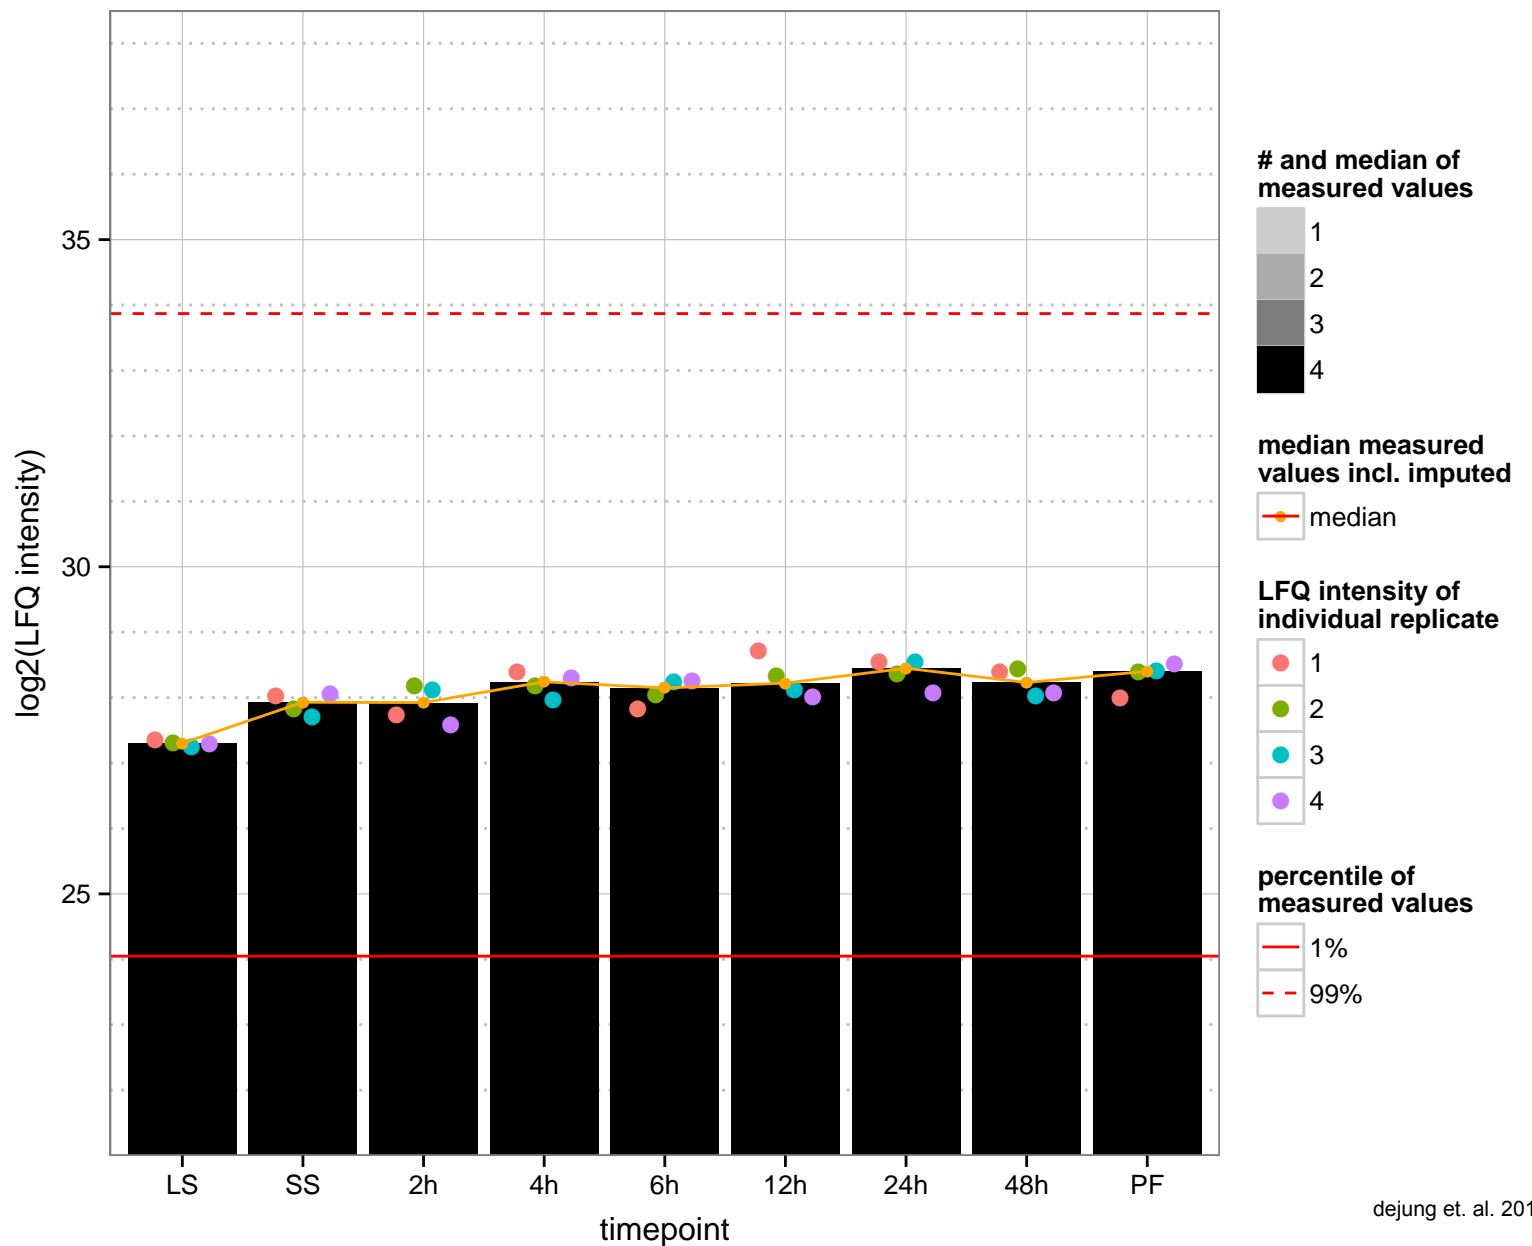

lectin, putative, mannose-specific lectin  
 Tb927.11.4200  
 AGOF: mannose binding  
 AGOC: integral to membrane, membrane  
 AGOP: protein secretion  
 PGO: null  
 PGO: membrane  
 PGO: null

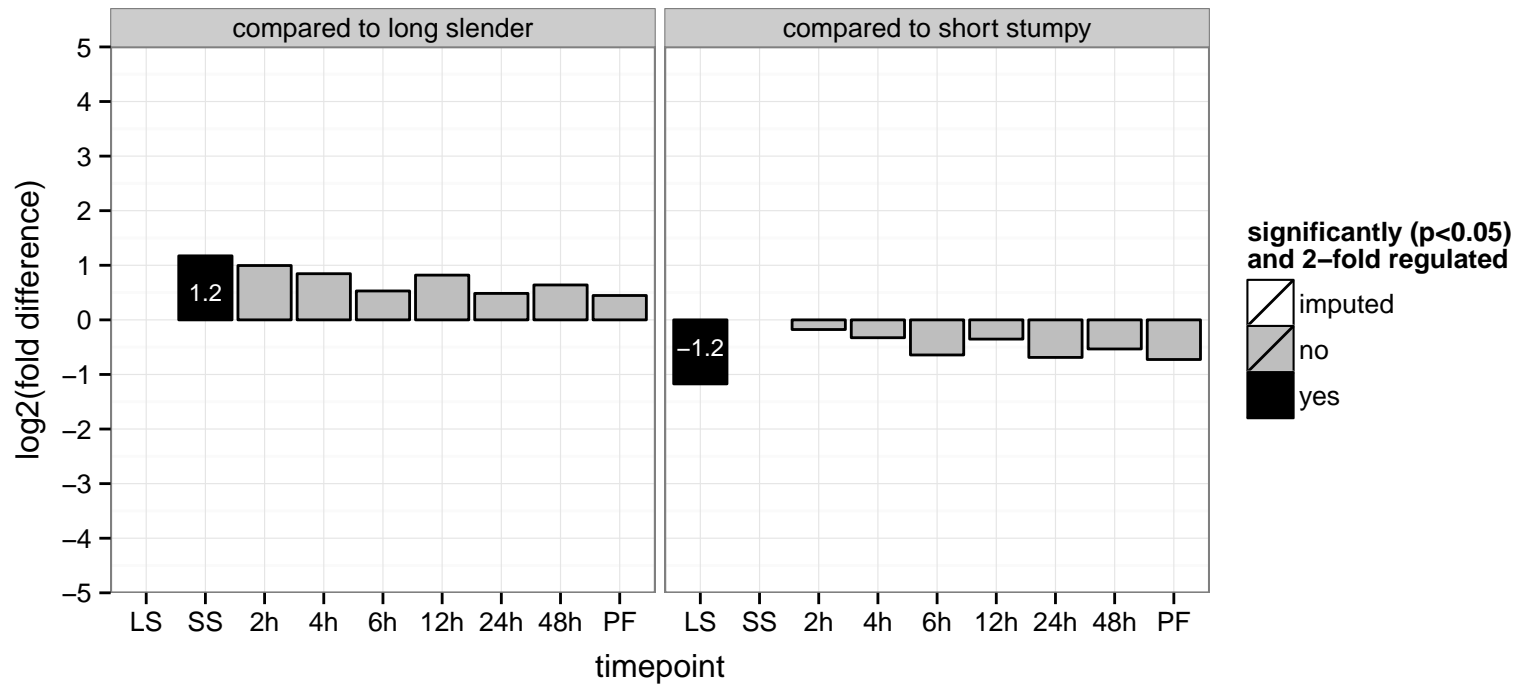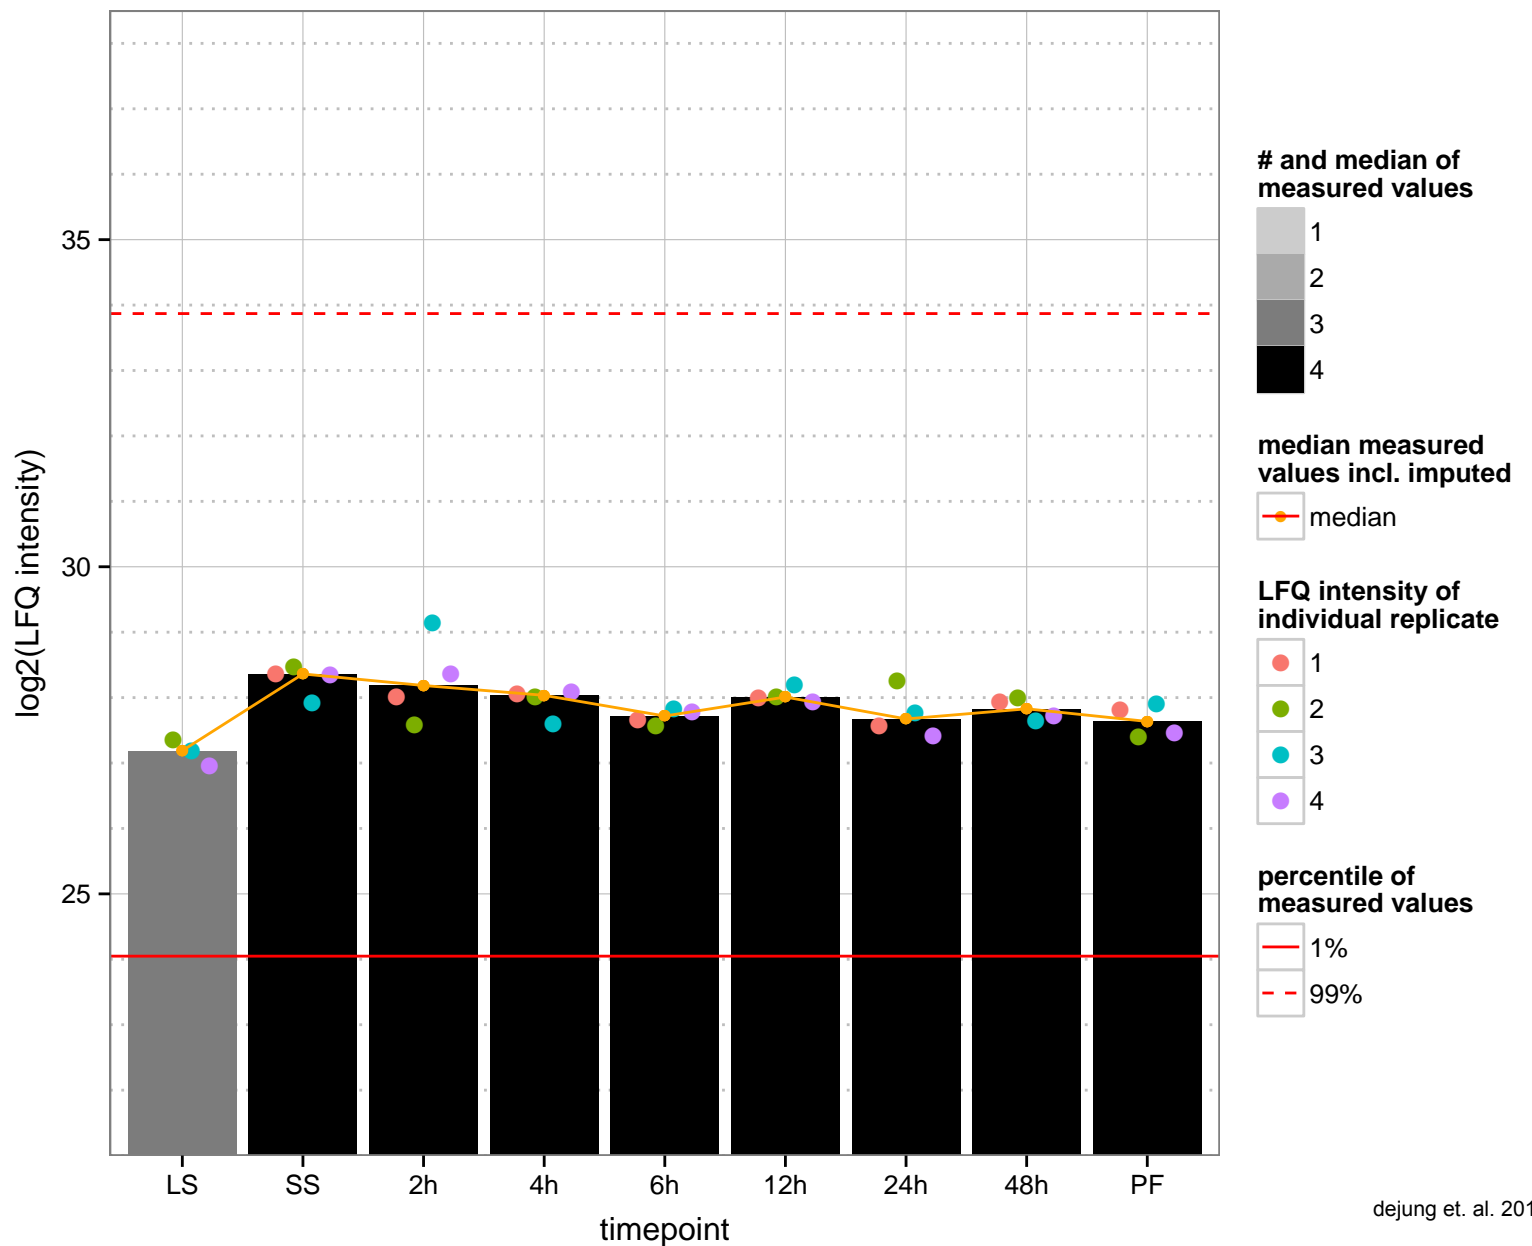

hypothetical protein, conserved  
 Tb927.11.4210  
 AGOF: ubiquitin-protein ligase activity  
 AGOC: ubiquitin ligase complex  
 AGOP: protein ubiquitination  
 PGOF: binding, ubiquitin-protein ligase activity  
 PGOC: ubiquitin ligase complex  
 PGOP: protein ubiquitination

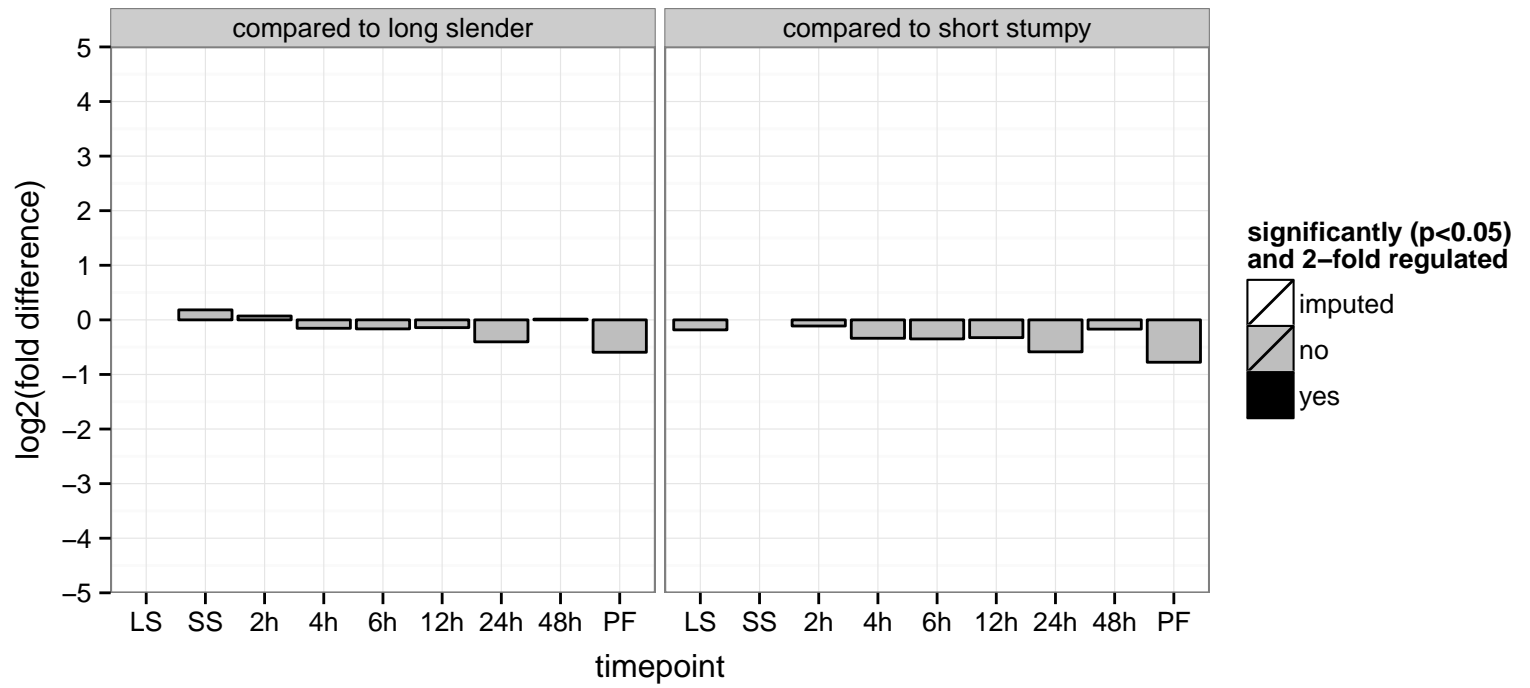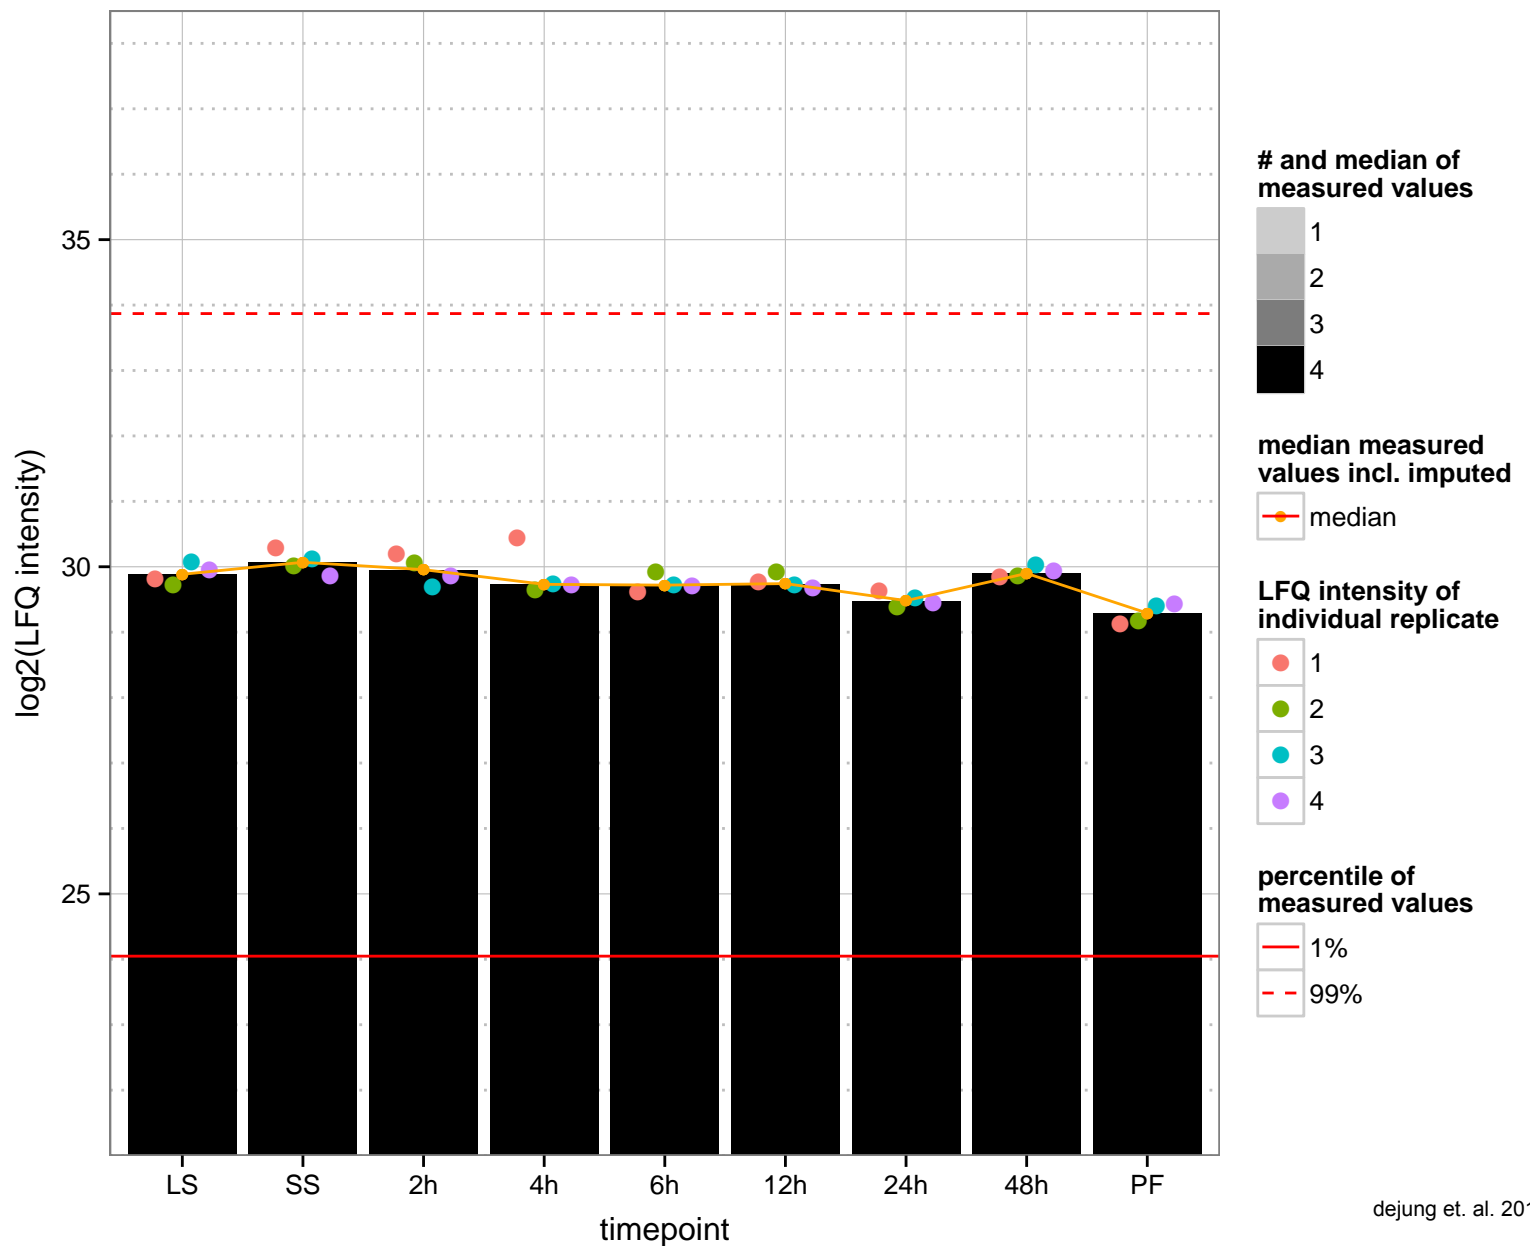

hypothetical protein, conserved  
 Tb927.11.4230  
 AGOF: null  
 AGOC: null  
 AGOP: null  
 PGOF: binding  
 PGO: null  
 PGOP: null

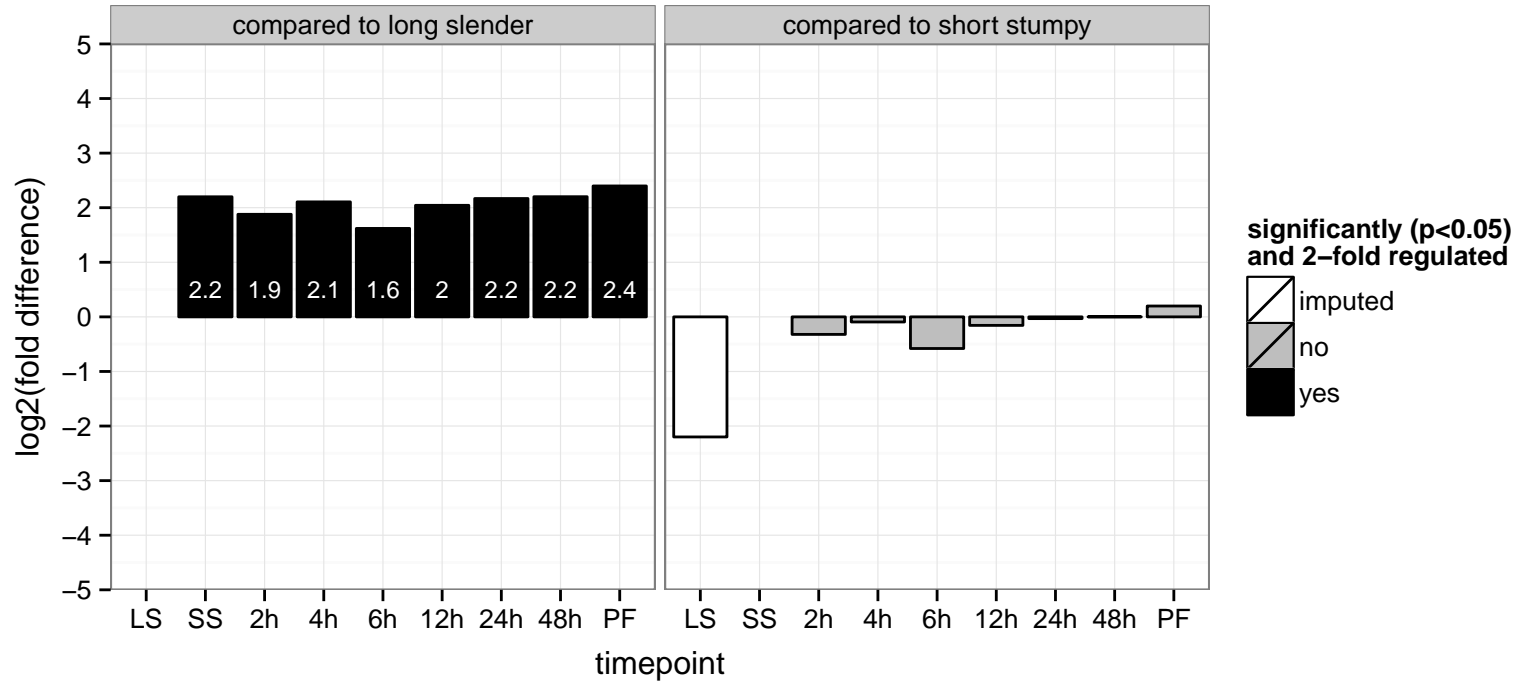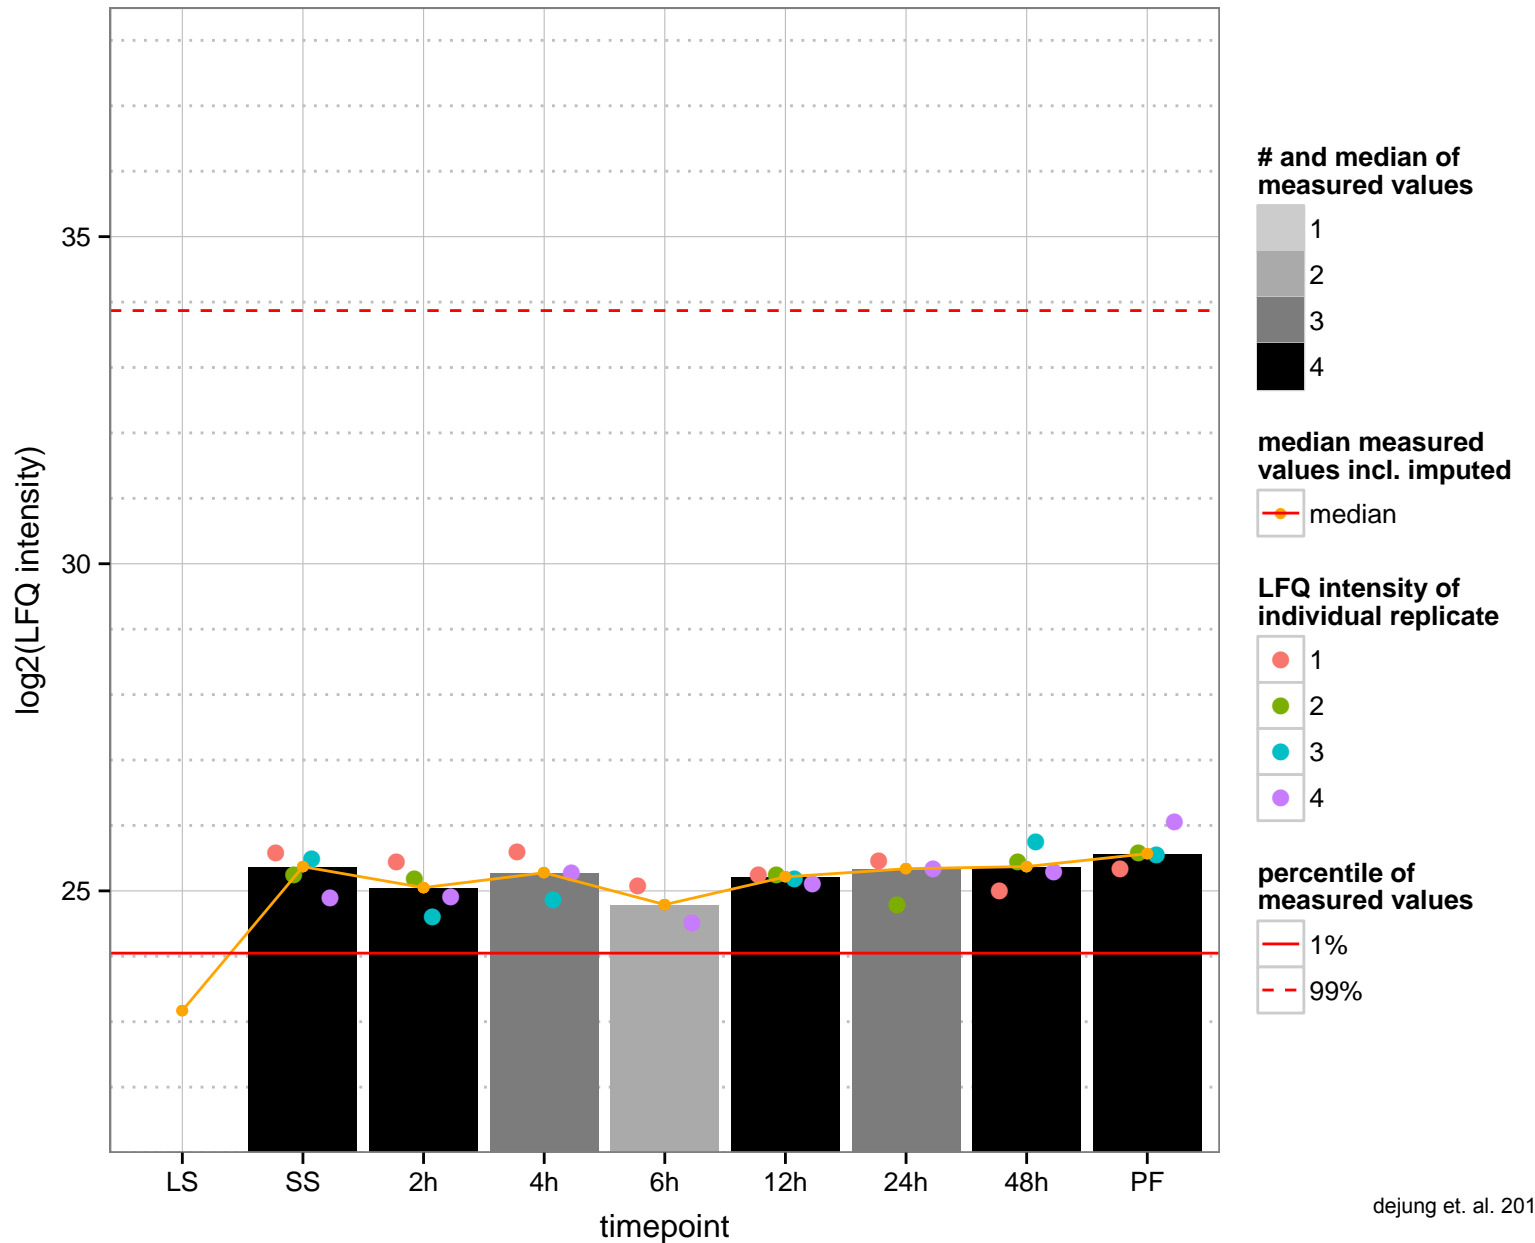

hypothetical protein, conserved  
 Tb927.11.4280  
 AGOF: null  
 AGOC: null  
 AGOP: null  
 PGOF: protein binding  
 PGOC: null  
 PGOP: null

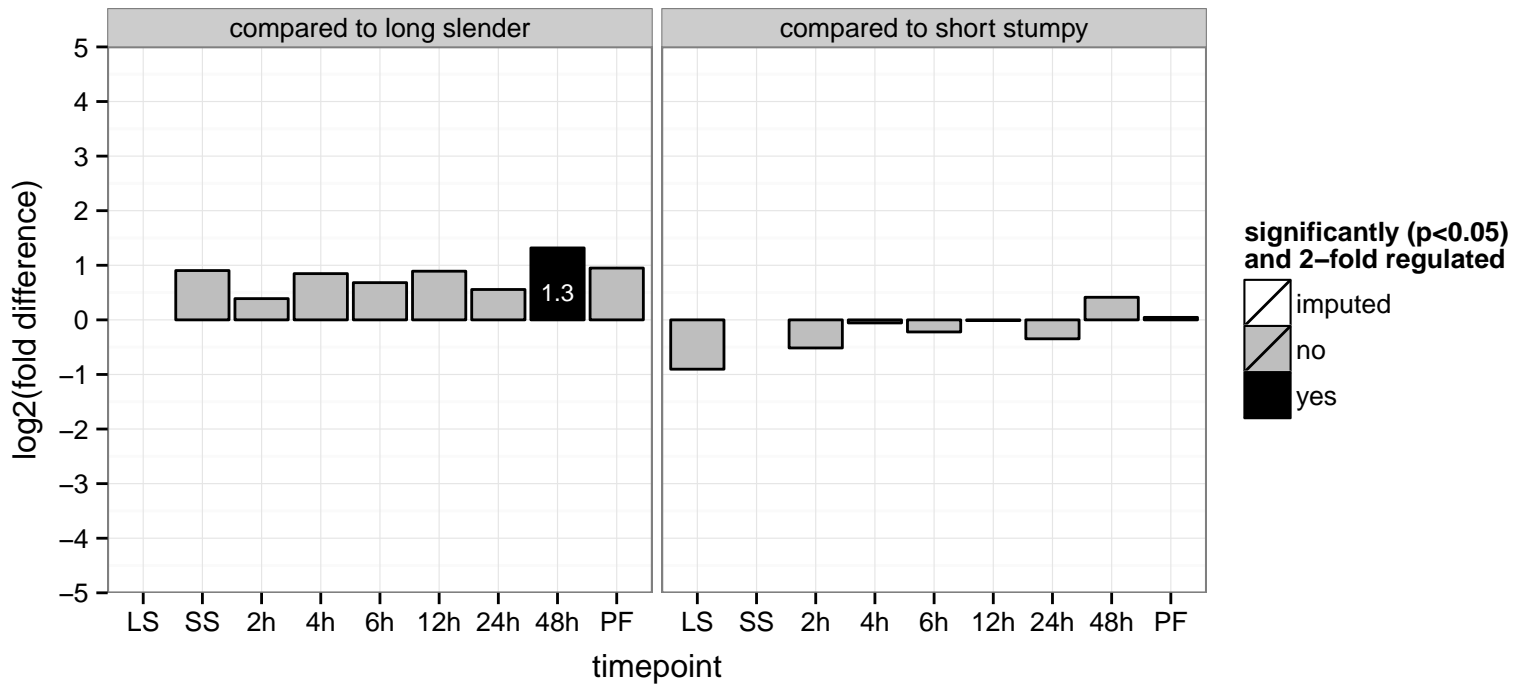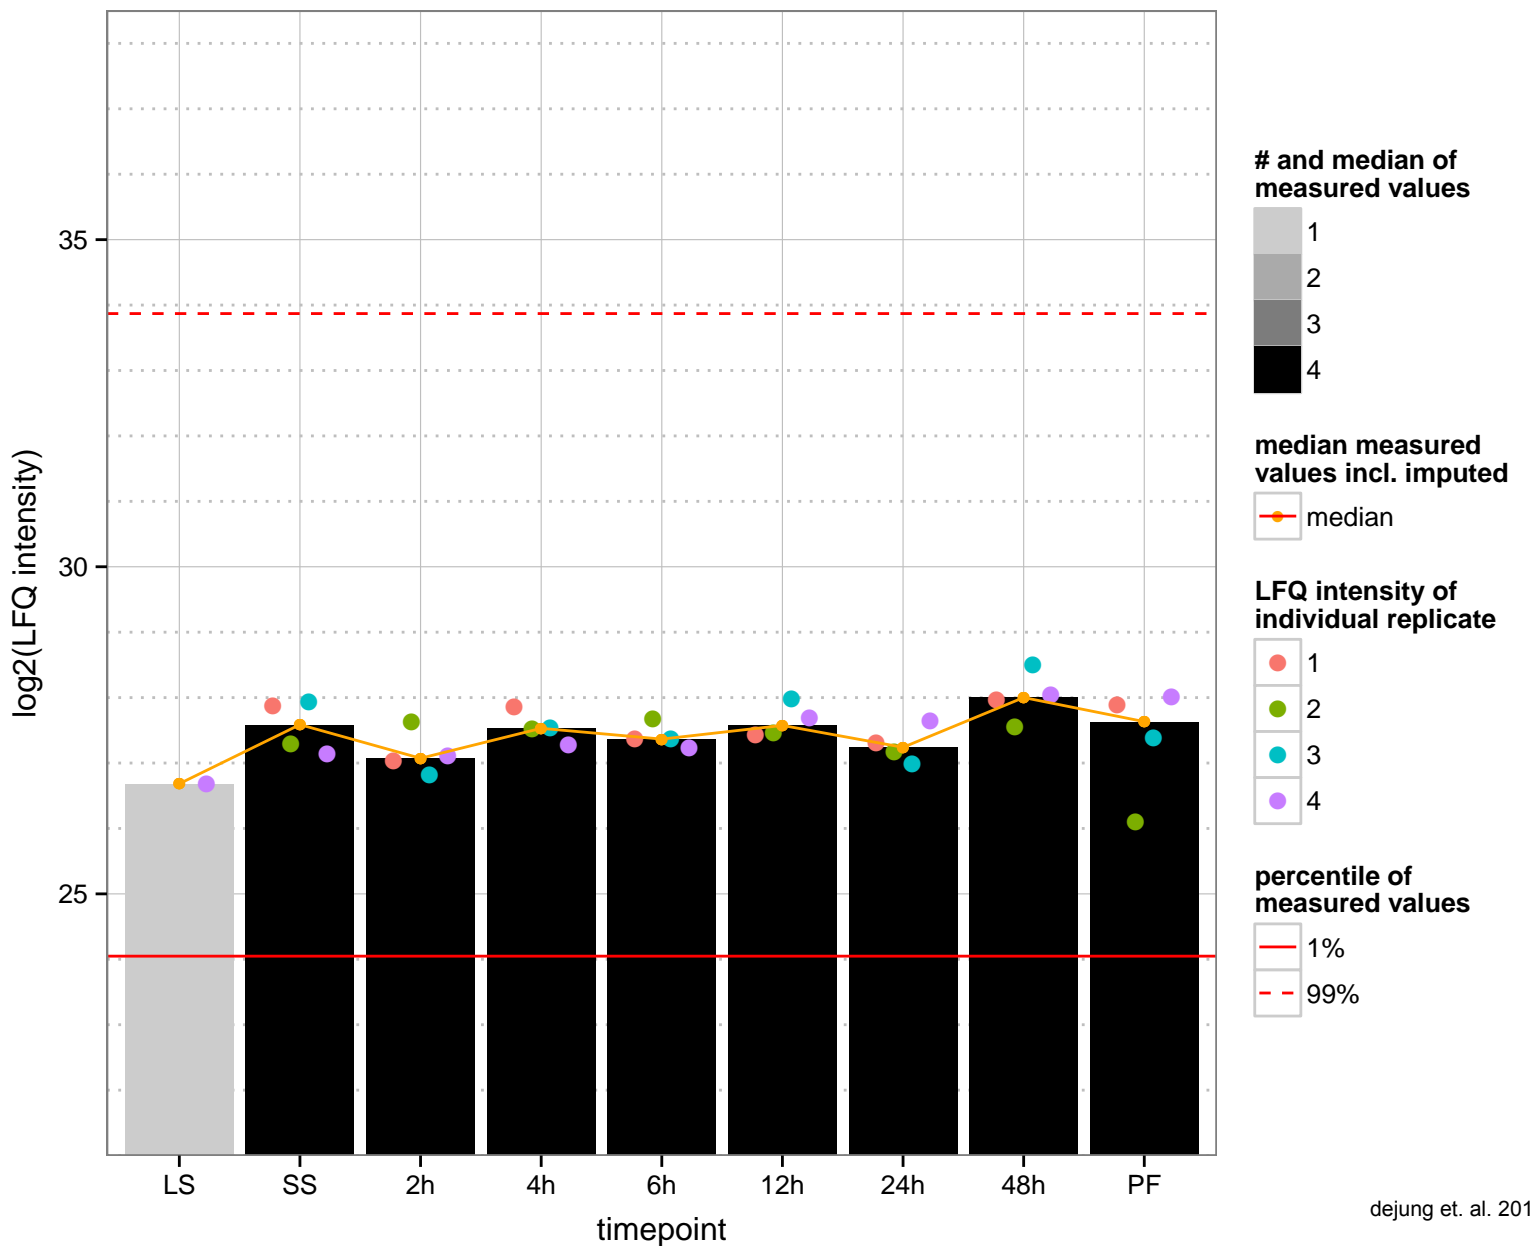

40S ribosomal protein S12 (RPS12)  
 Tb927.11.4290  
 AGOF: structural constituent of ribosome  
 AGOC: intracellular, ribosome  
 AGOP: translation  
 PGO: null  
 PGOC: null  
 PGOP: null

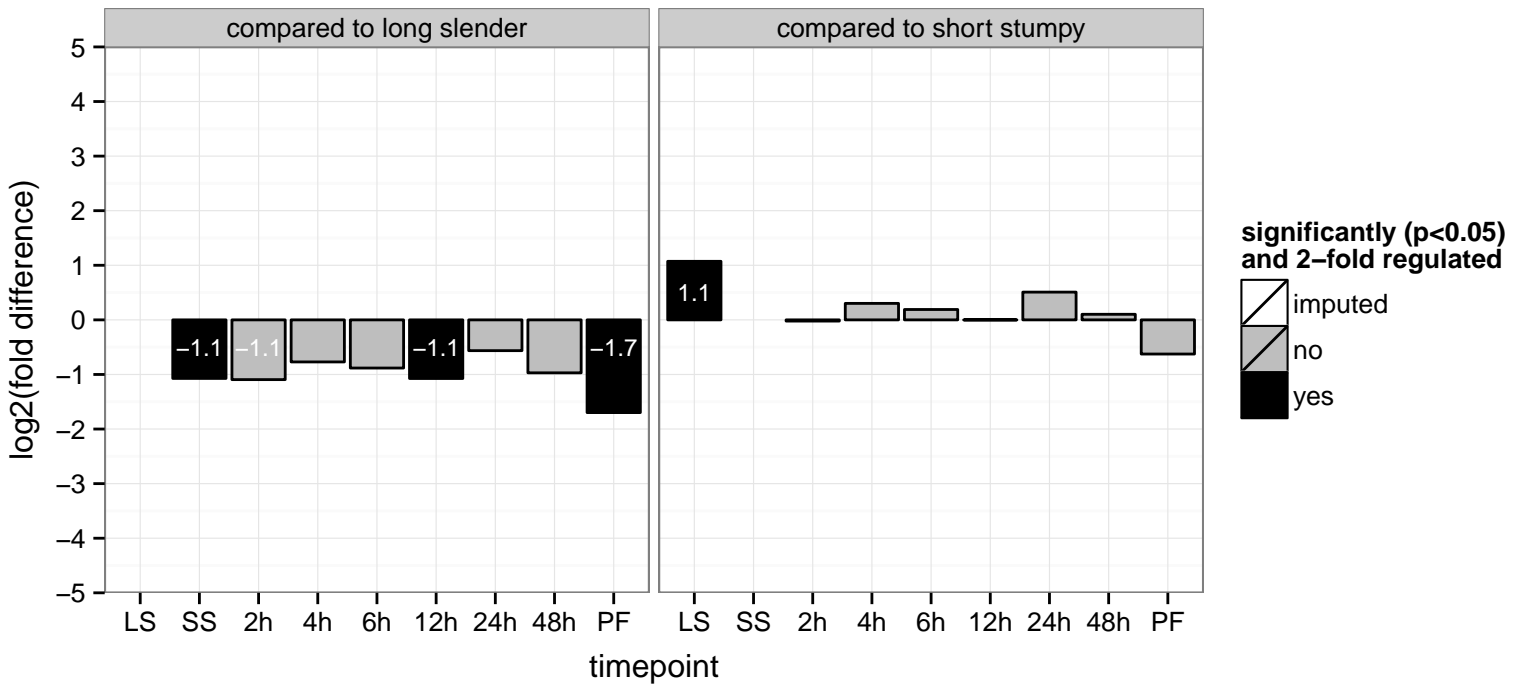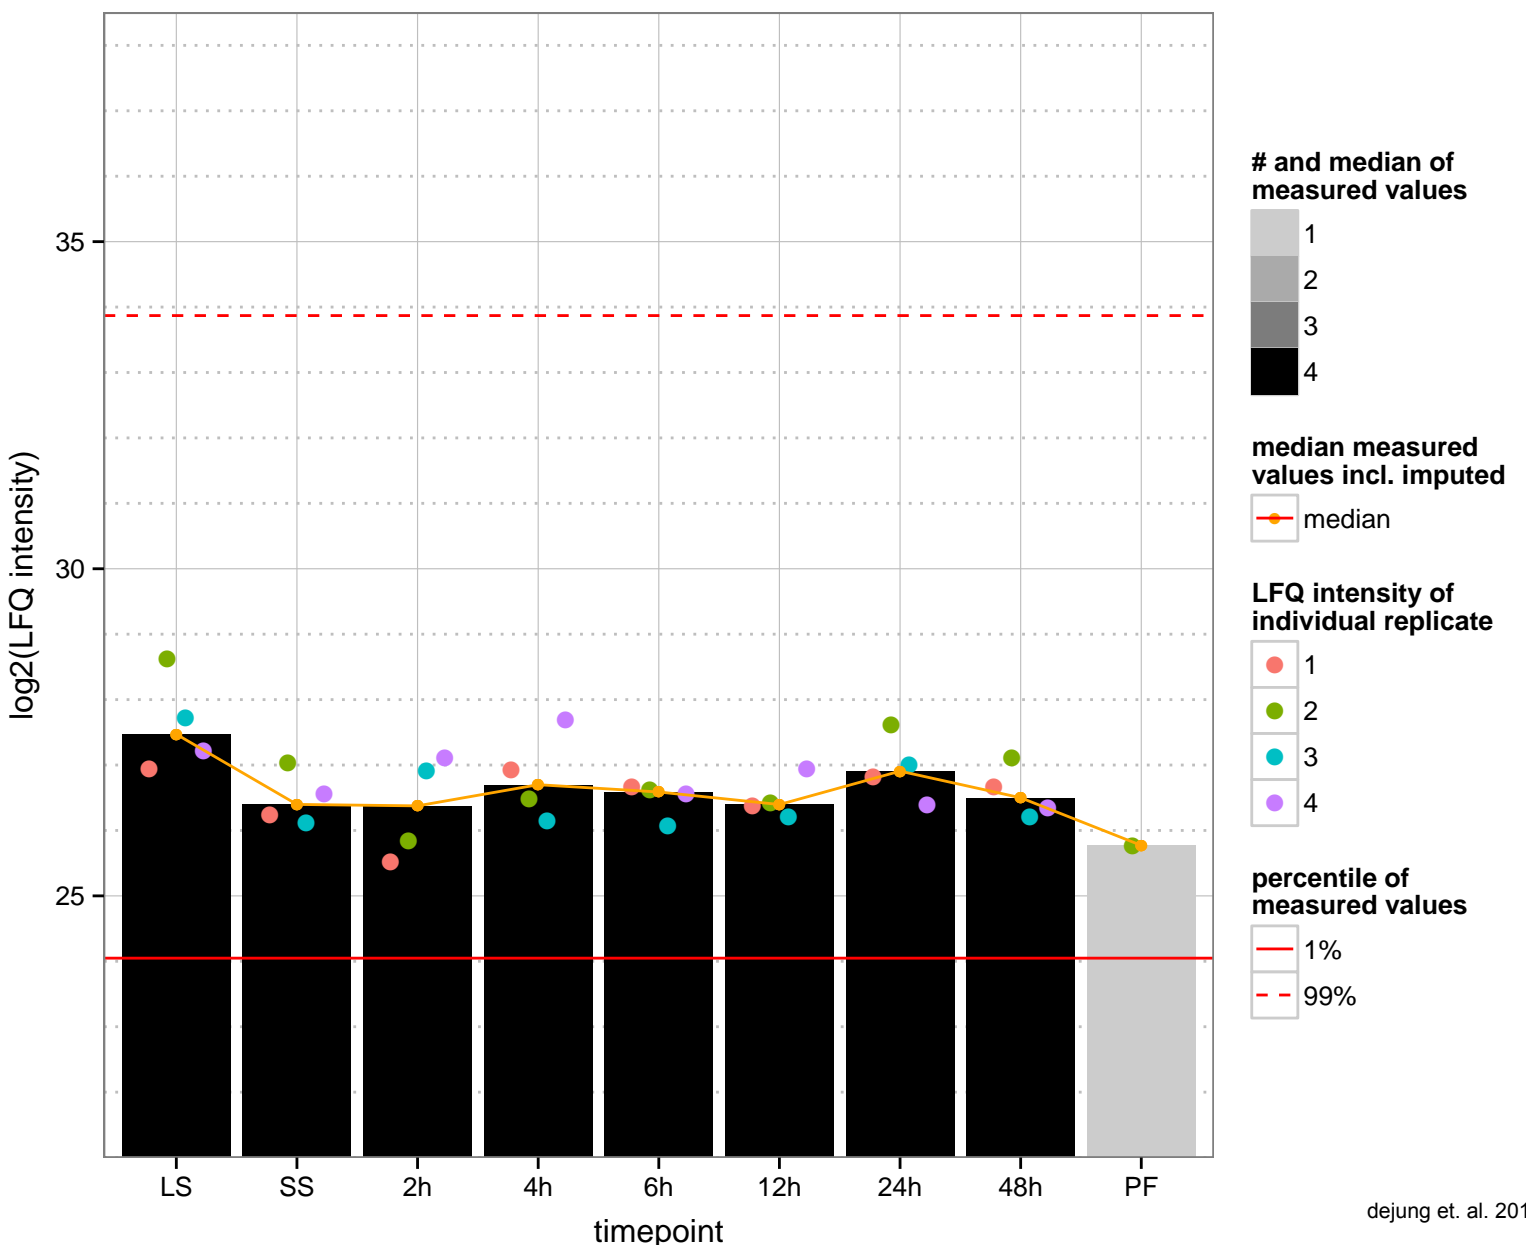



hypothetical protein, conserved  
 Tb927.11.4320  
 AGOF: null  
 AGOC: mitochondrion  
 AGOP: null  
 PGO: null  
 PGO: null  
 PGO: null

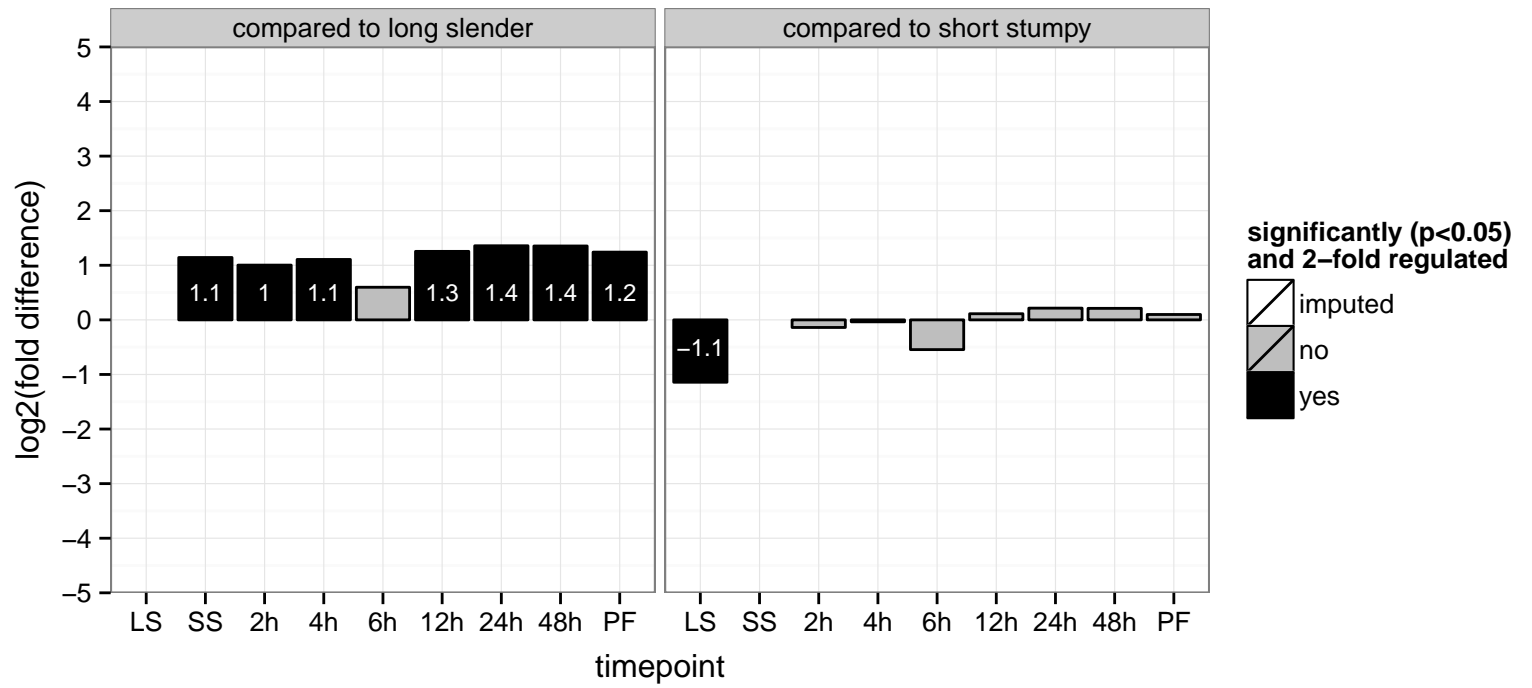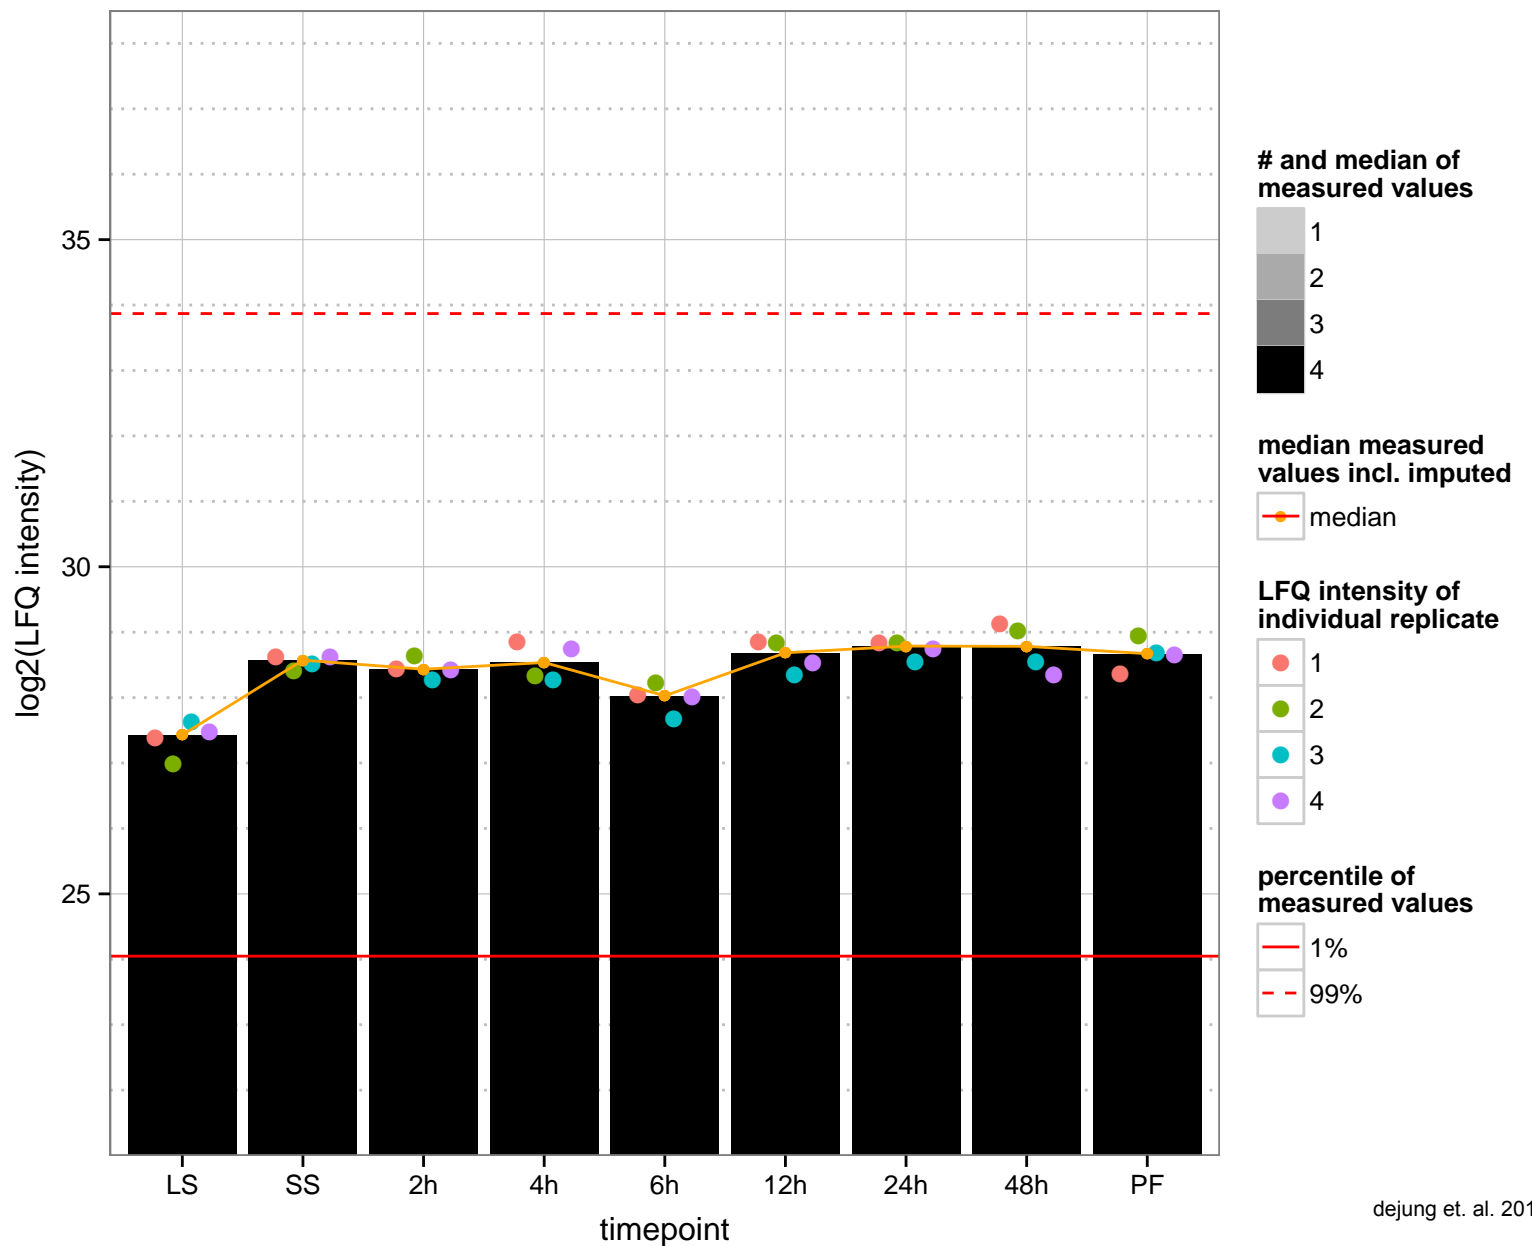

hypothetical protein, conserved  
 Tb927.11.4360  
 AGOF: null  
 AGOC: null  
 AGOP: null  
 PGO: protein binding  
 PGOC: null  
 PGOP: null

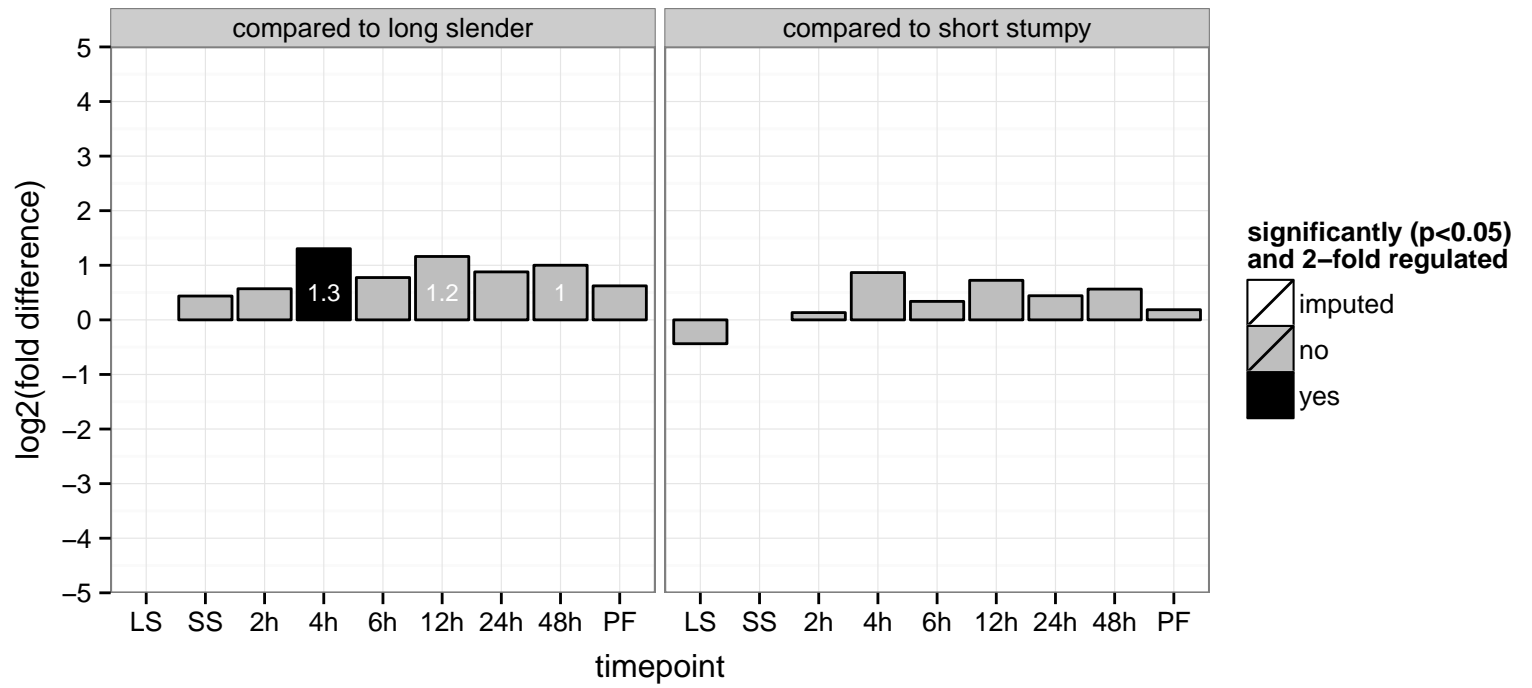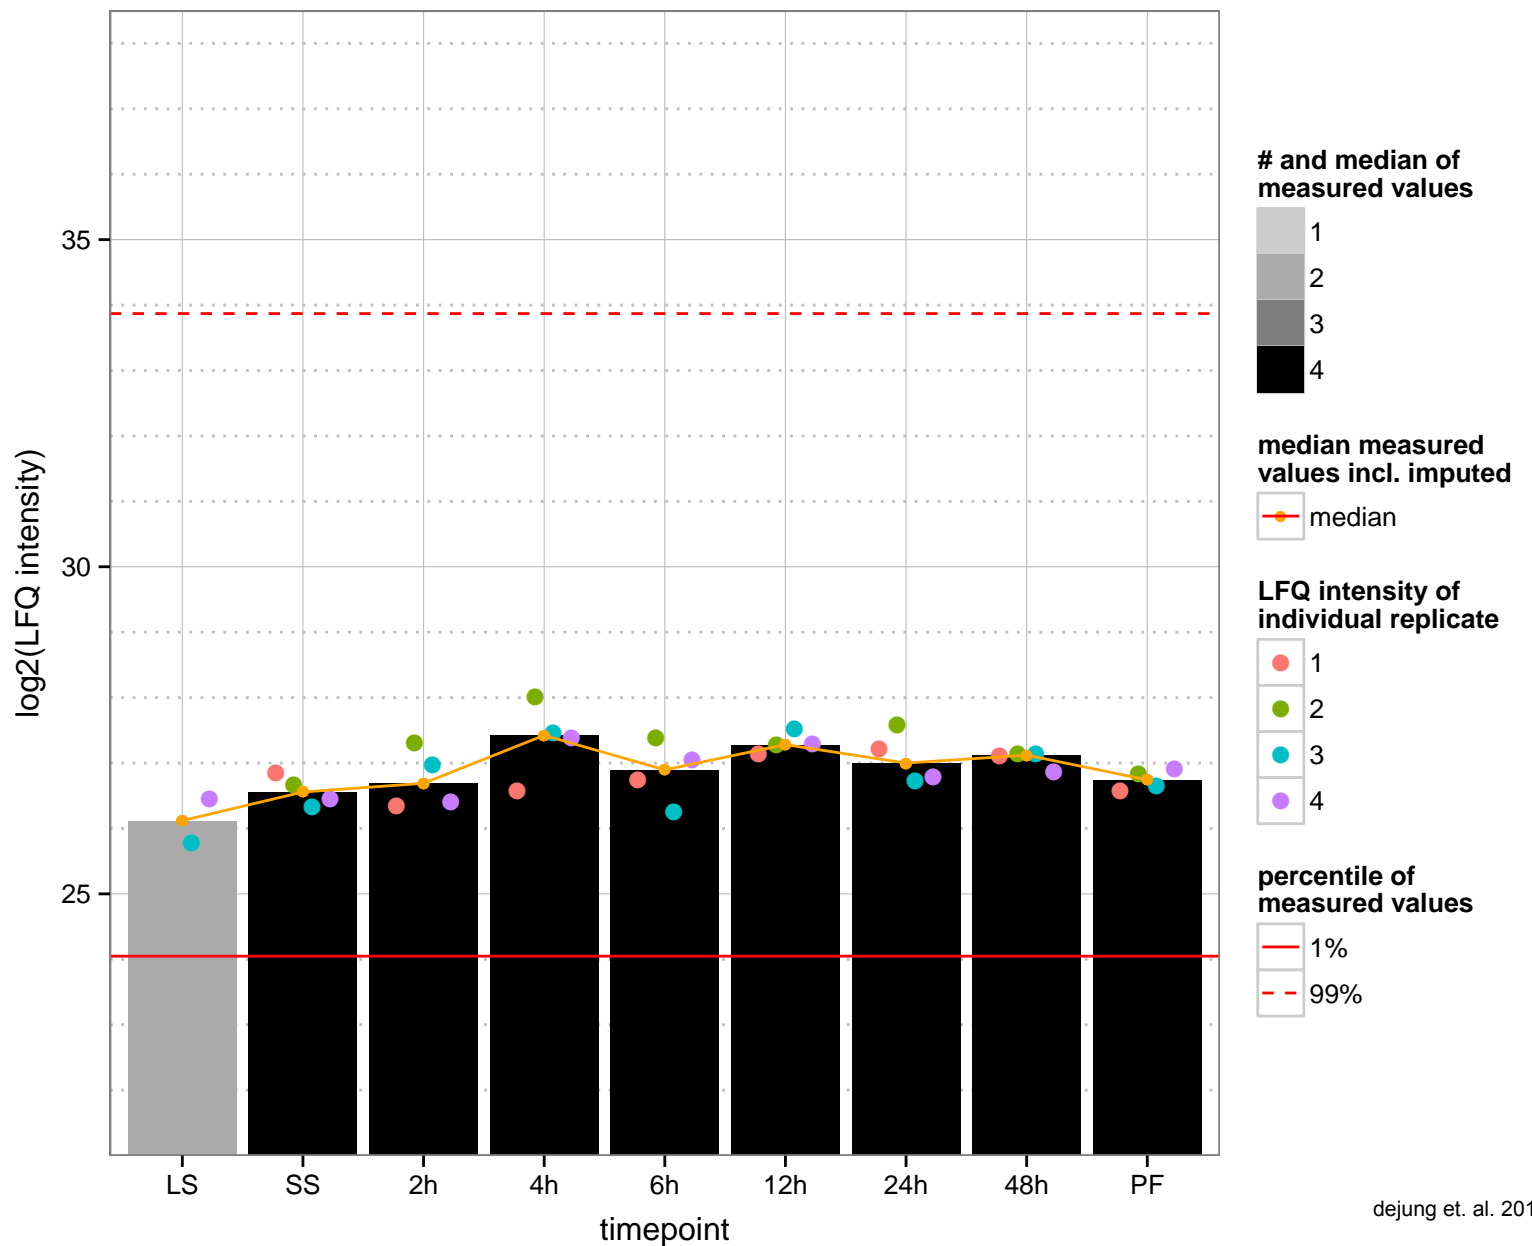

ALBA-Domain Protein (ALBA2)  
 Tb927.11.4450  
 AGOF: nucleic acid binding  
 AGOC: cytoplasm, cytoplasmic stress granule  
 AGOP: null  
 PGO: nucleic acid binding  
 PGOC: null  
 PGOP: null

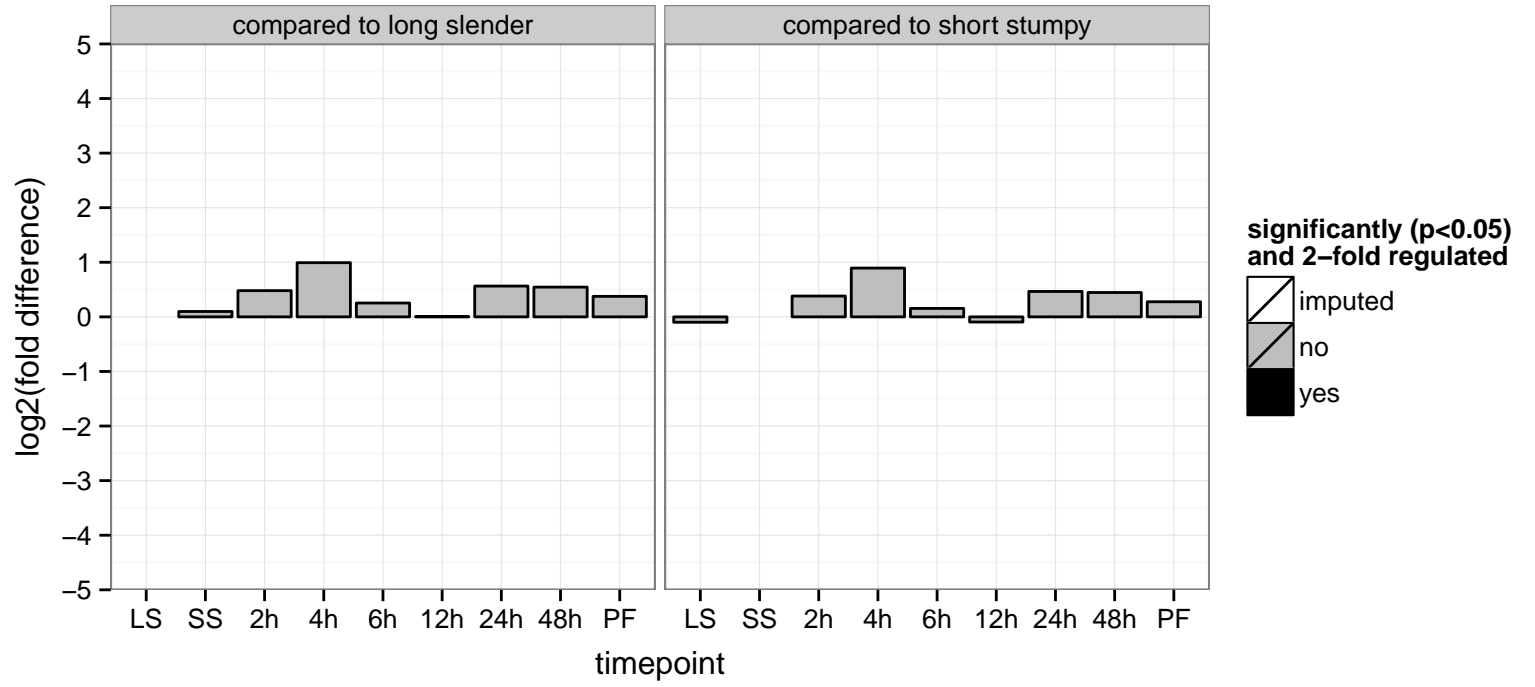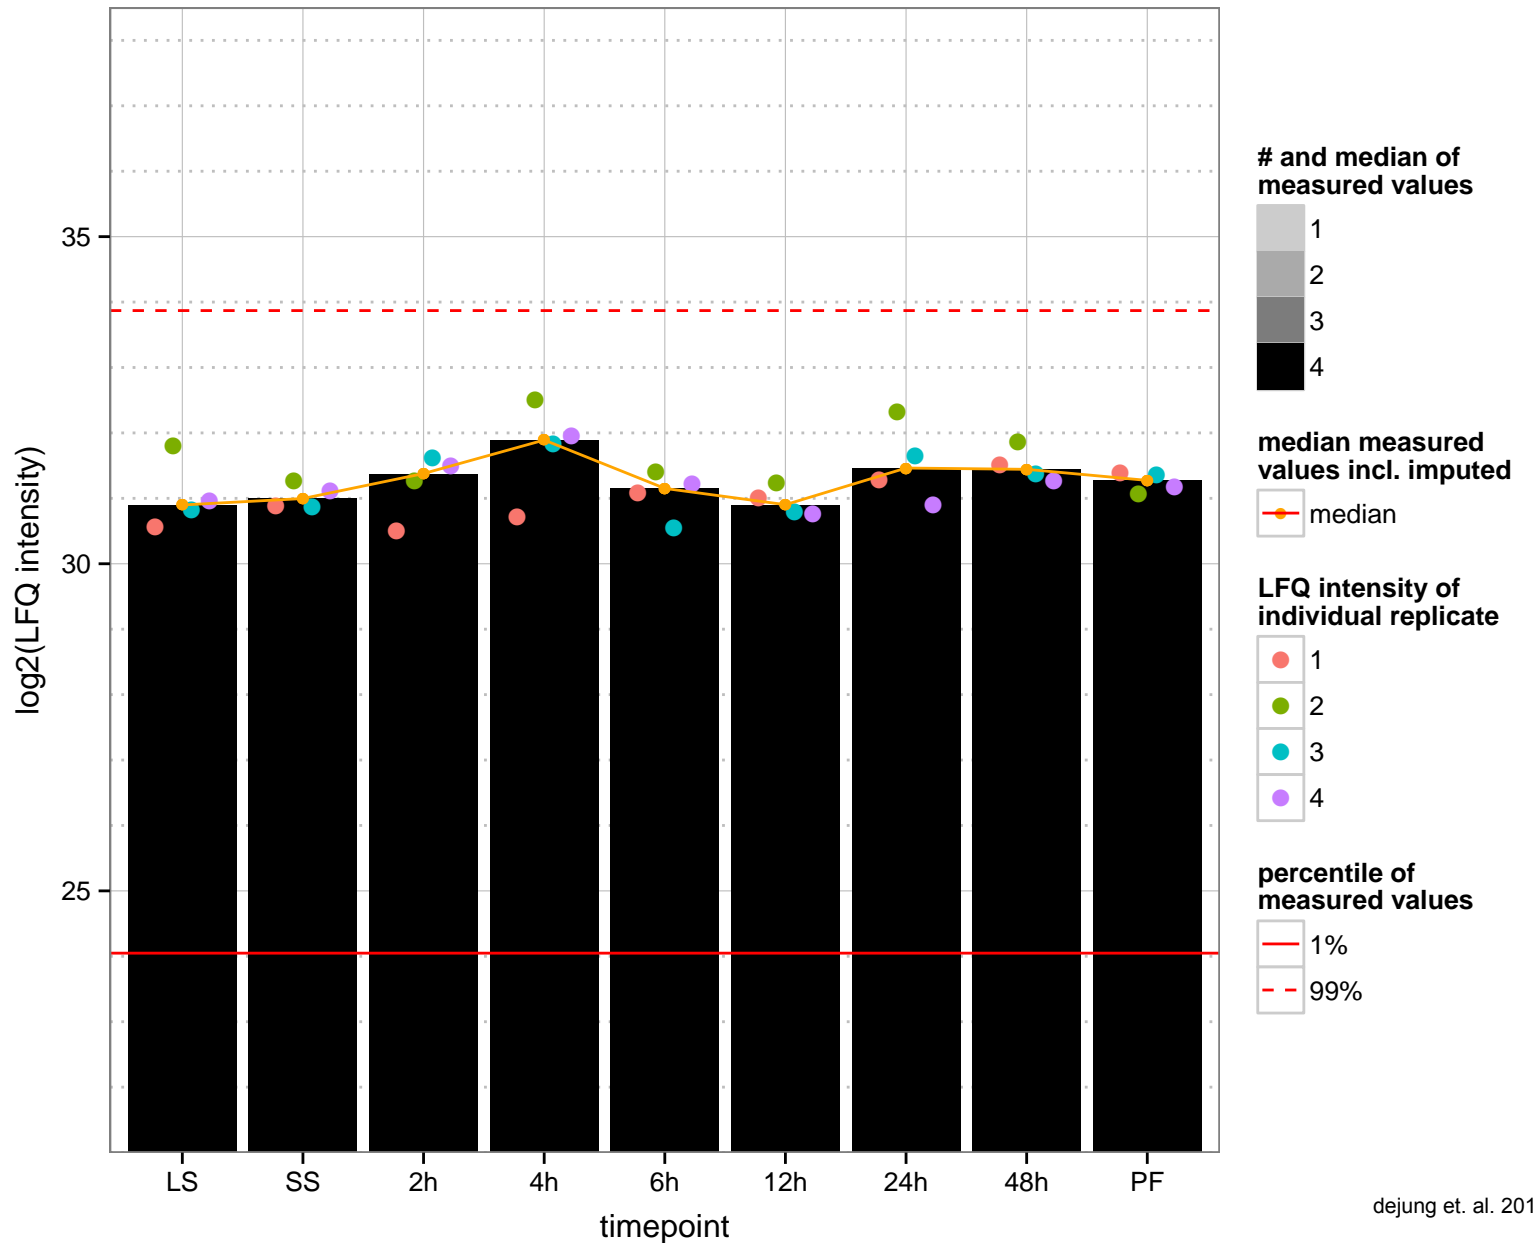

ALBA-Domain Protein (ALBA1)  
 Tb927.11.4460  
 AGOF: nucleic acid binding  
 AGOC: cytoplasm, cytoplasmic stress granule  
 AGOP: null  
 PGO: nucleic acid binding  
 PGOC: null  
 PGOP: null

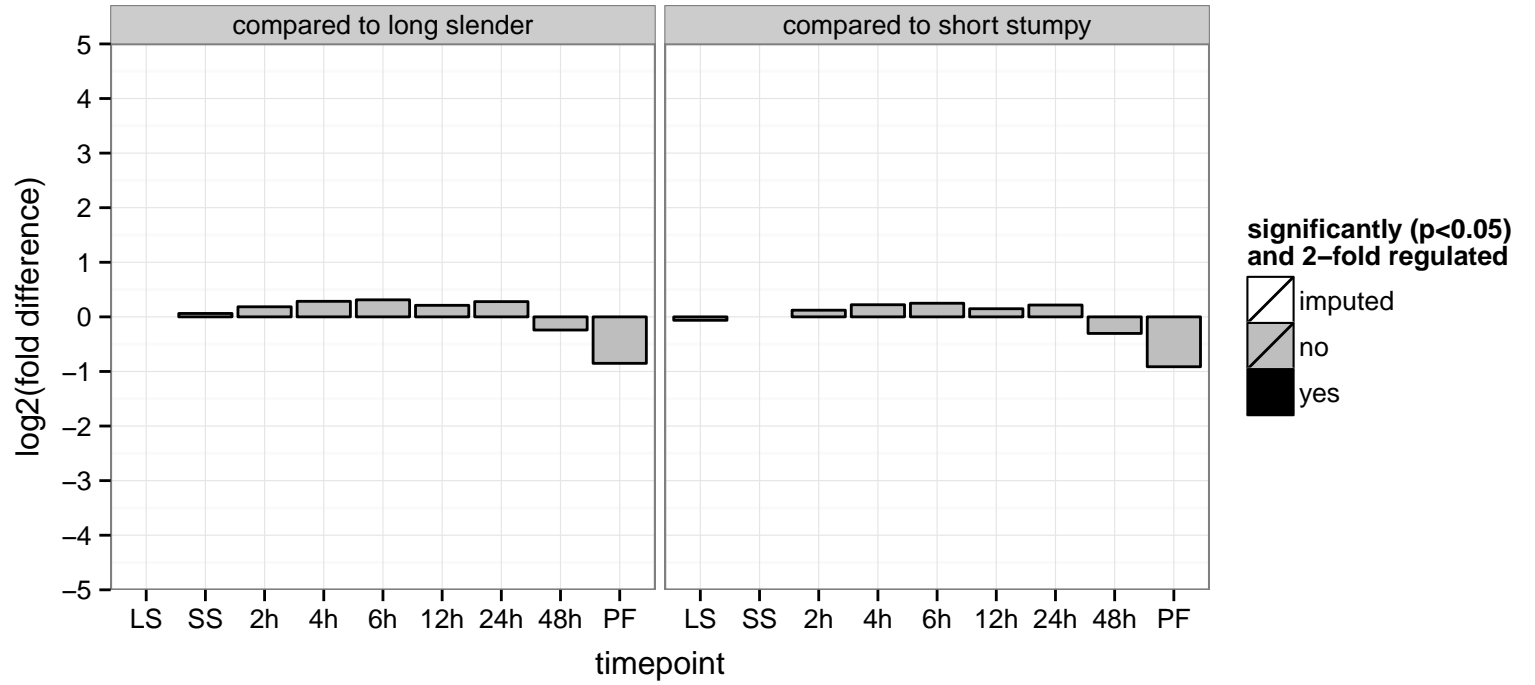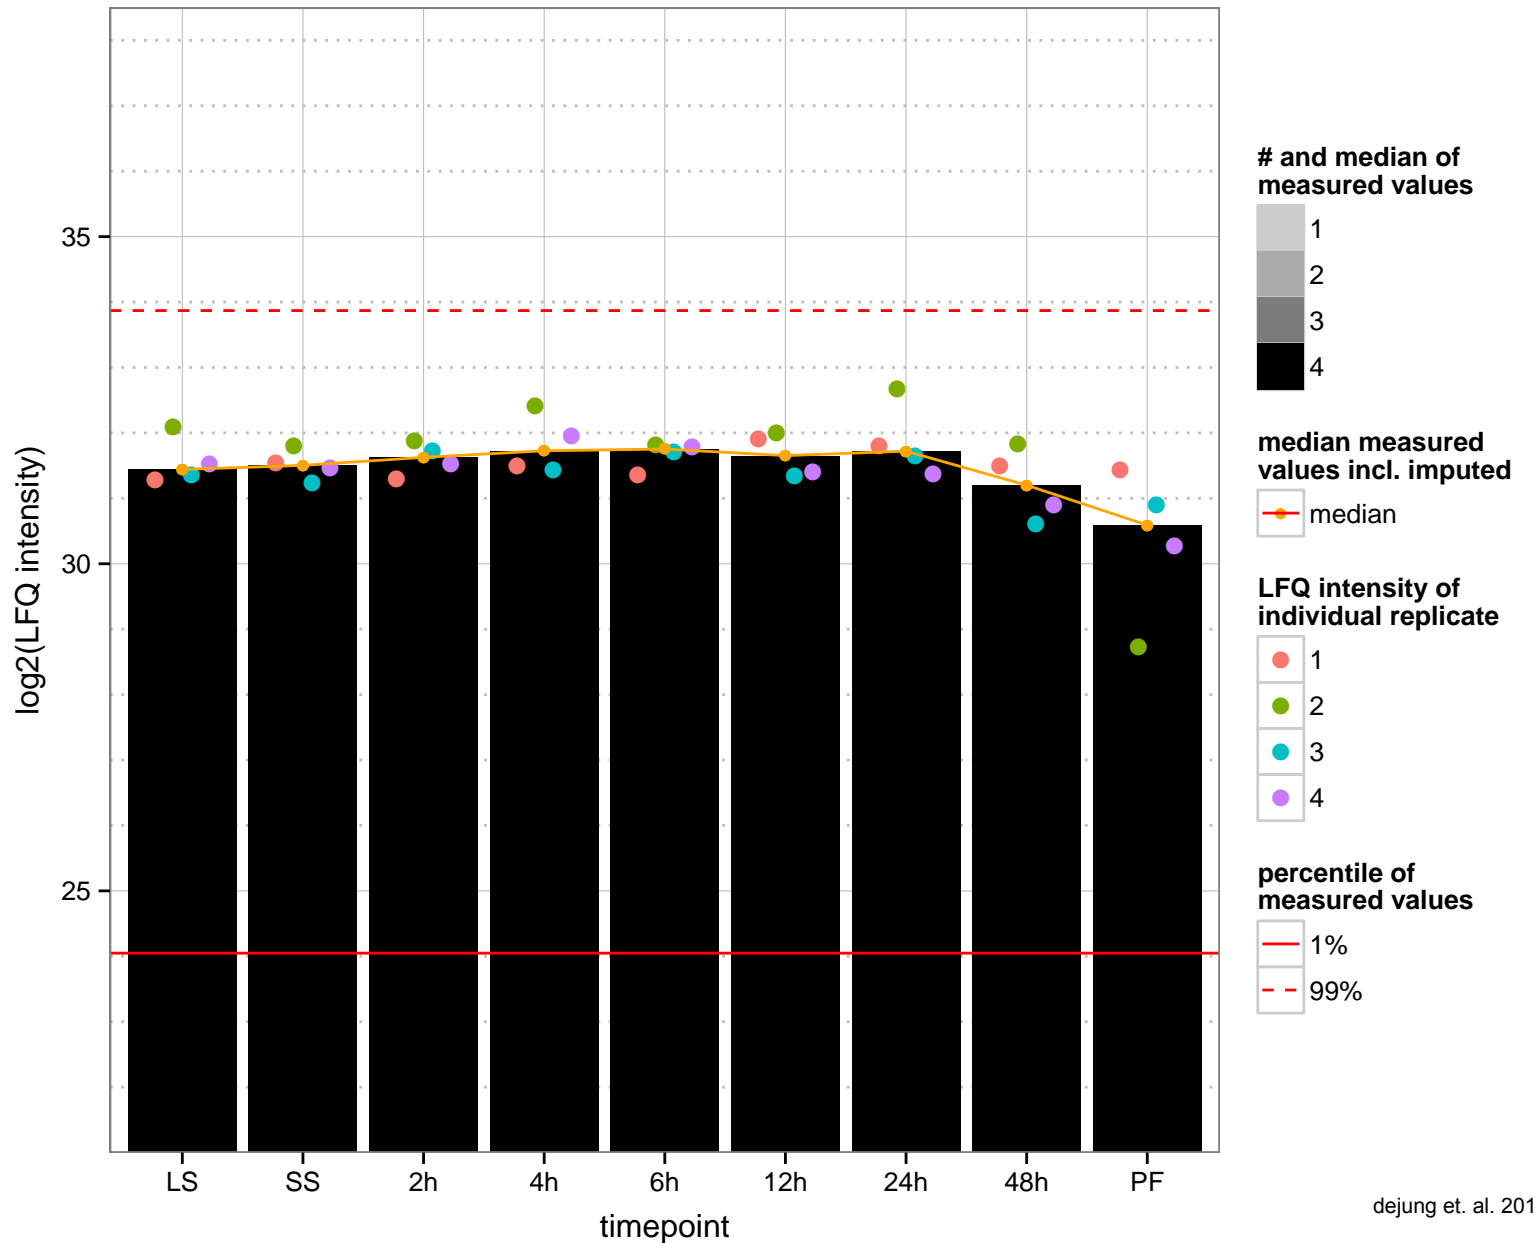

radial spoke protein RSP4/6, putative  
 Tb927.11.4480  
 AGOF: null  
 AGOC: radial spoke  
 AGOP: ciliary or flagellar motility  
 PGO: null  
 PGOC: null  
 PGOP: null

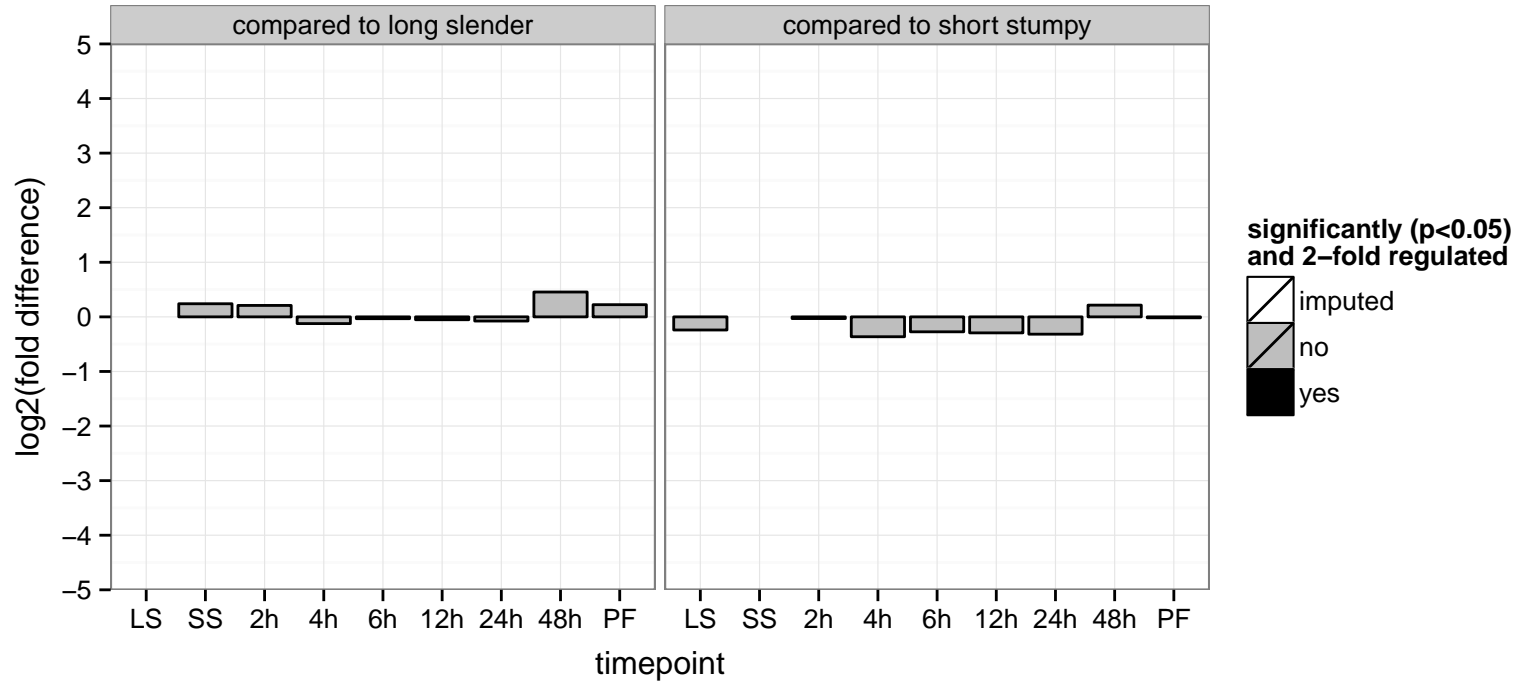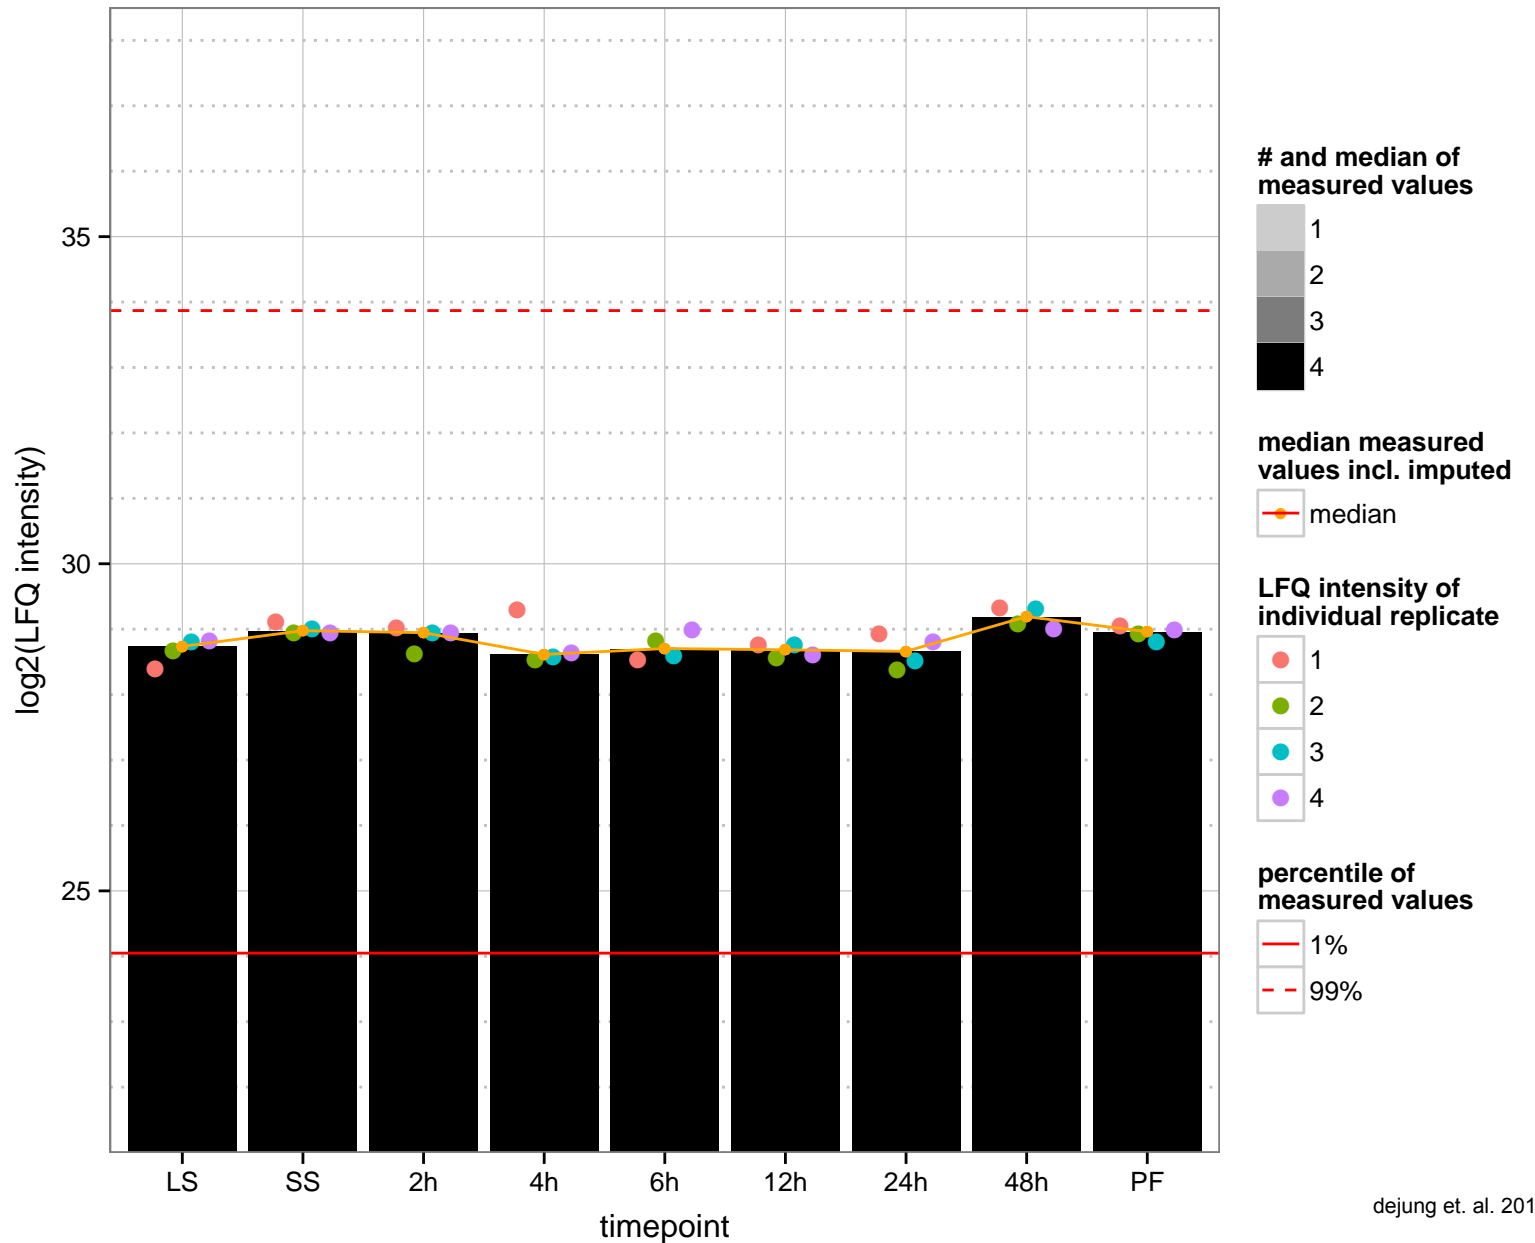

hypothetical protein, conserved  
 Tb927.11.450  
 AGOF: null  
 AGOC: null  
 AGOP: null  
 PGO: null  
 PGOC: null  
 PGOP: null

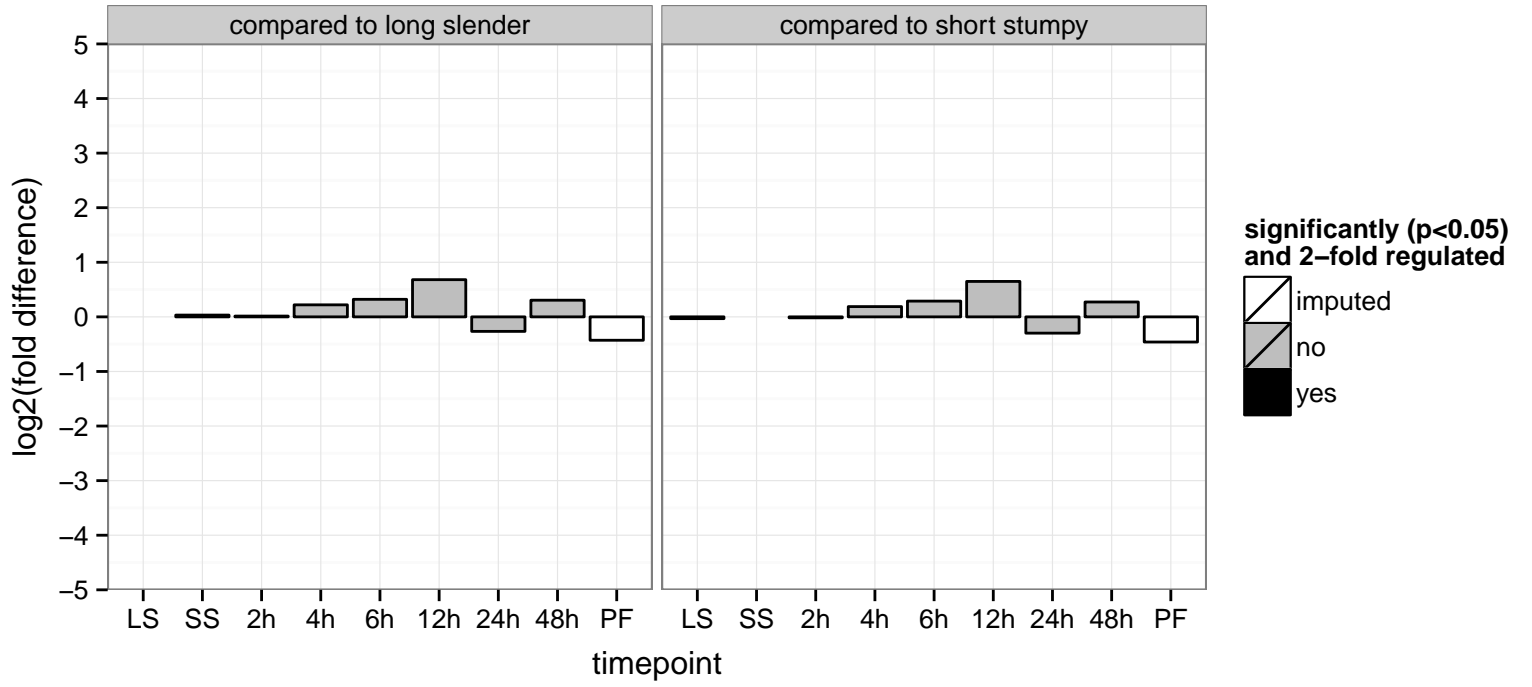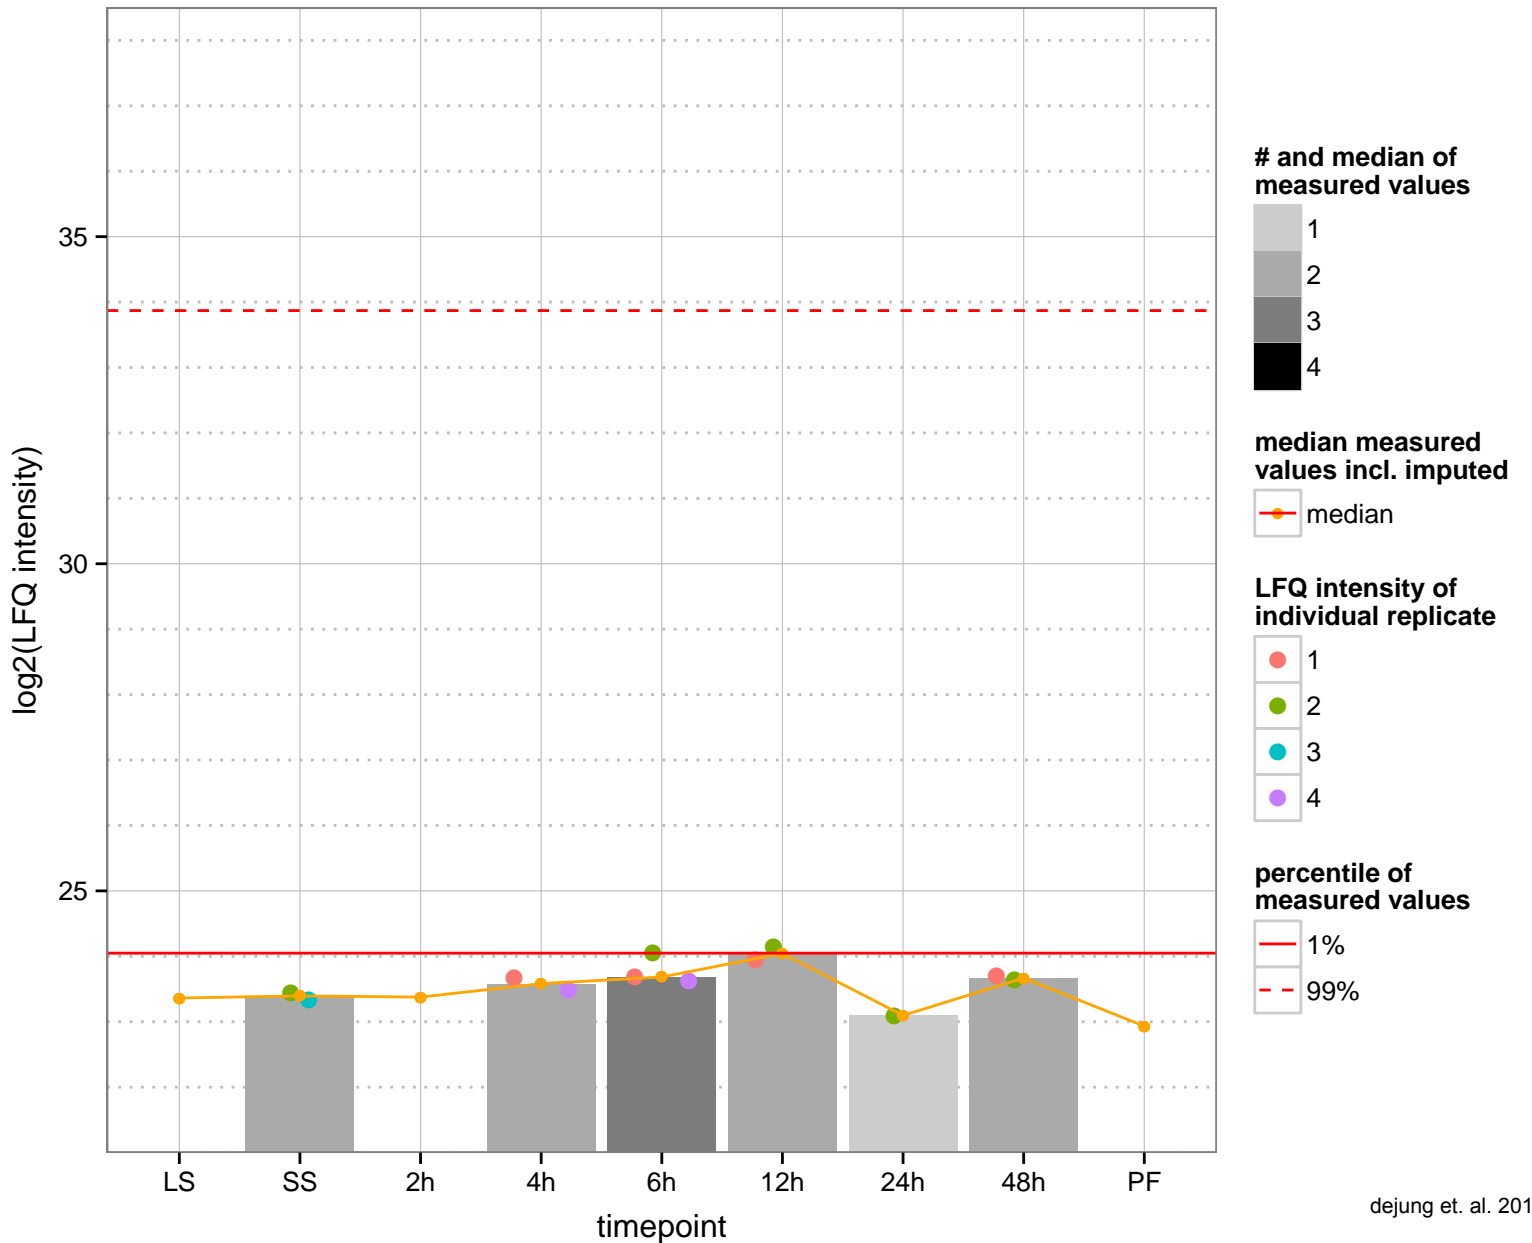

hypothetical protein, conserved  
 Tb927.11.4510  
 AGOF: null  
 AGOC: null  
 AGOP: null  
 PGOF: binding  
 PGO: null  
 PGO: null

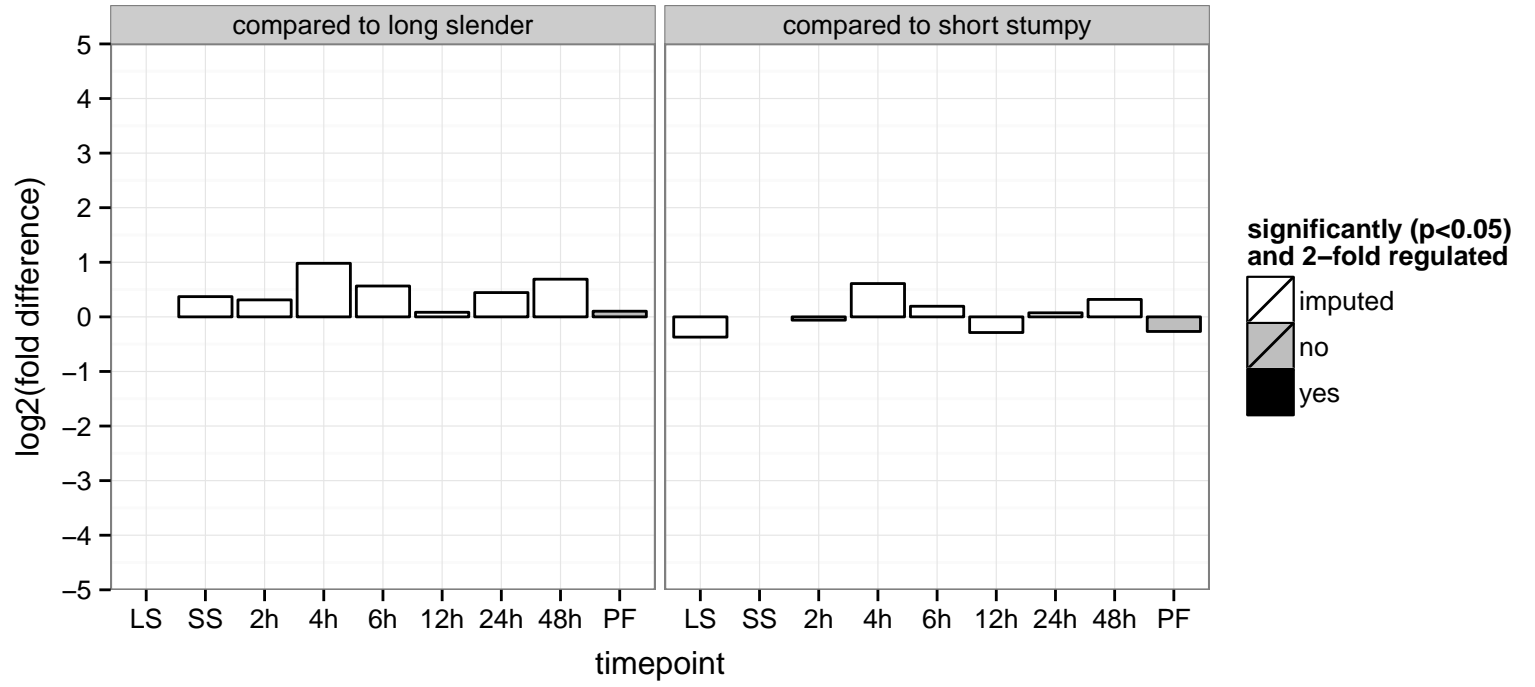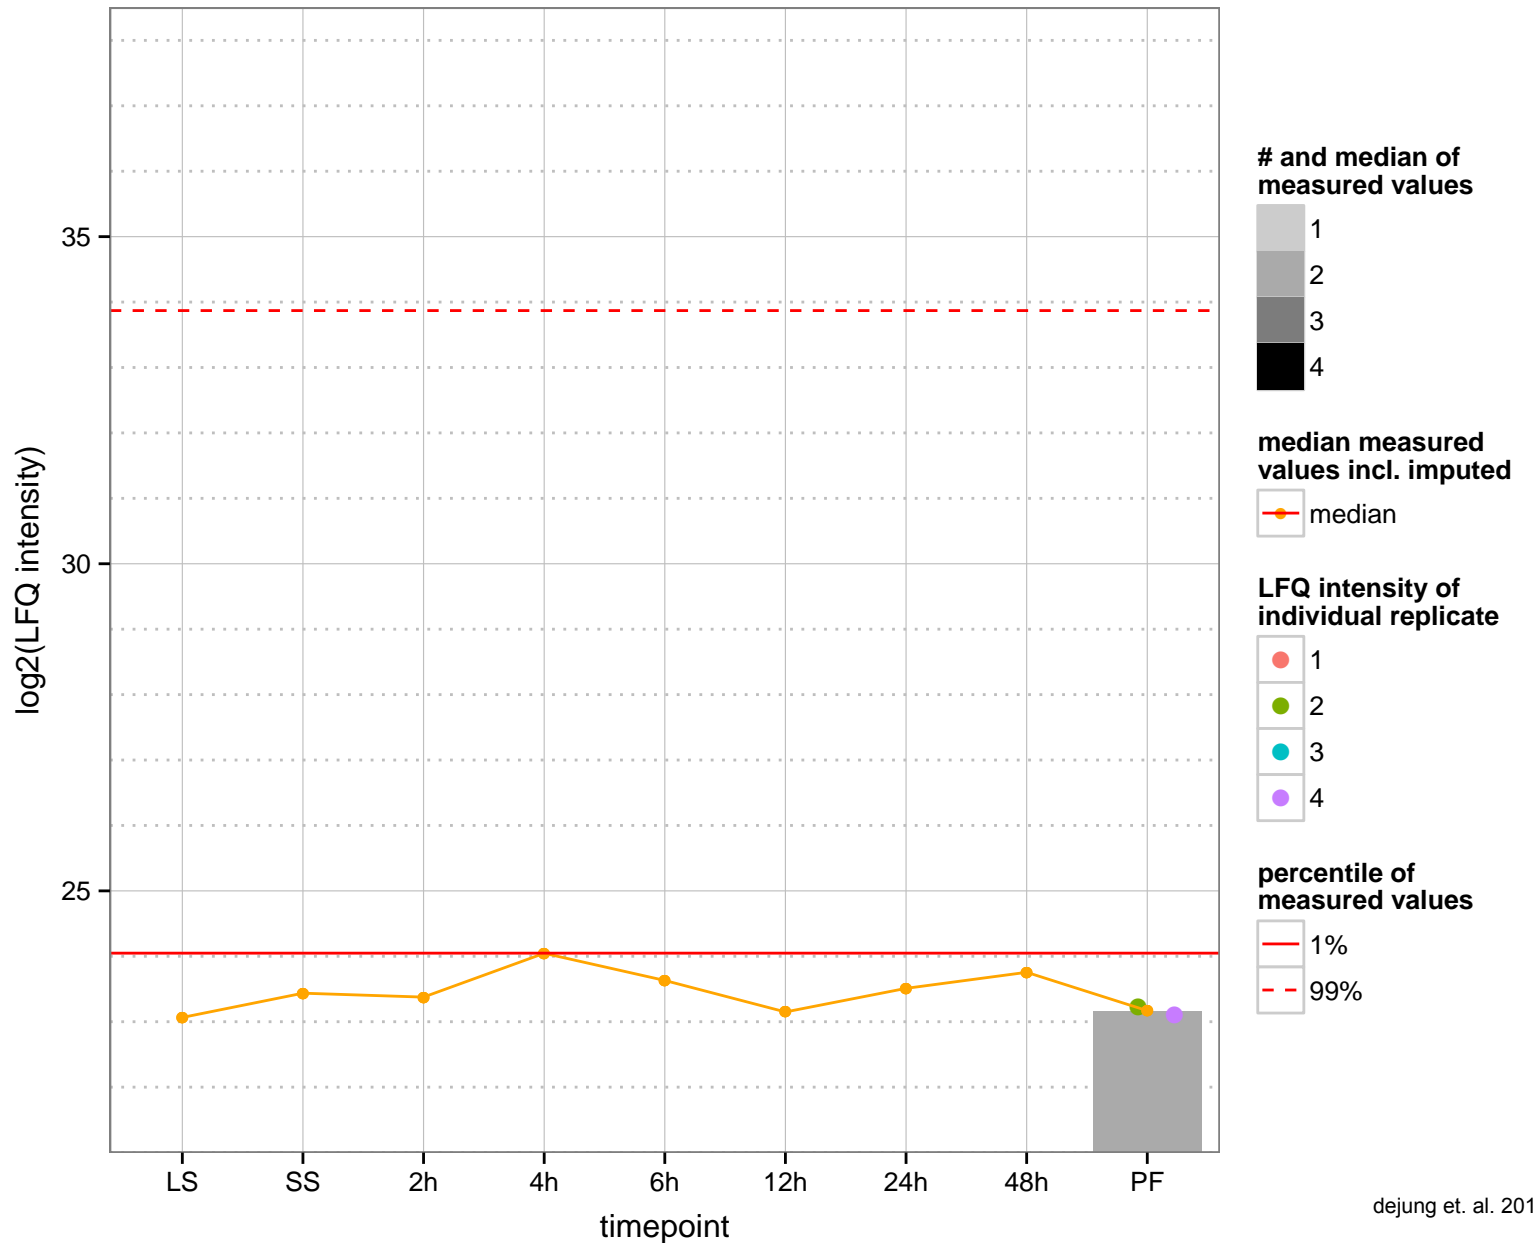

hypothetical protein, conserved  
 Tb927.11.4810  
 AGOF: null  
 AGOC: mitochondrion  
 AGOP: null  
 PGO: null  
 PGO: null  
 PGO: null

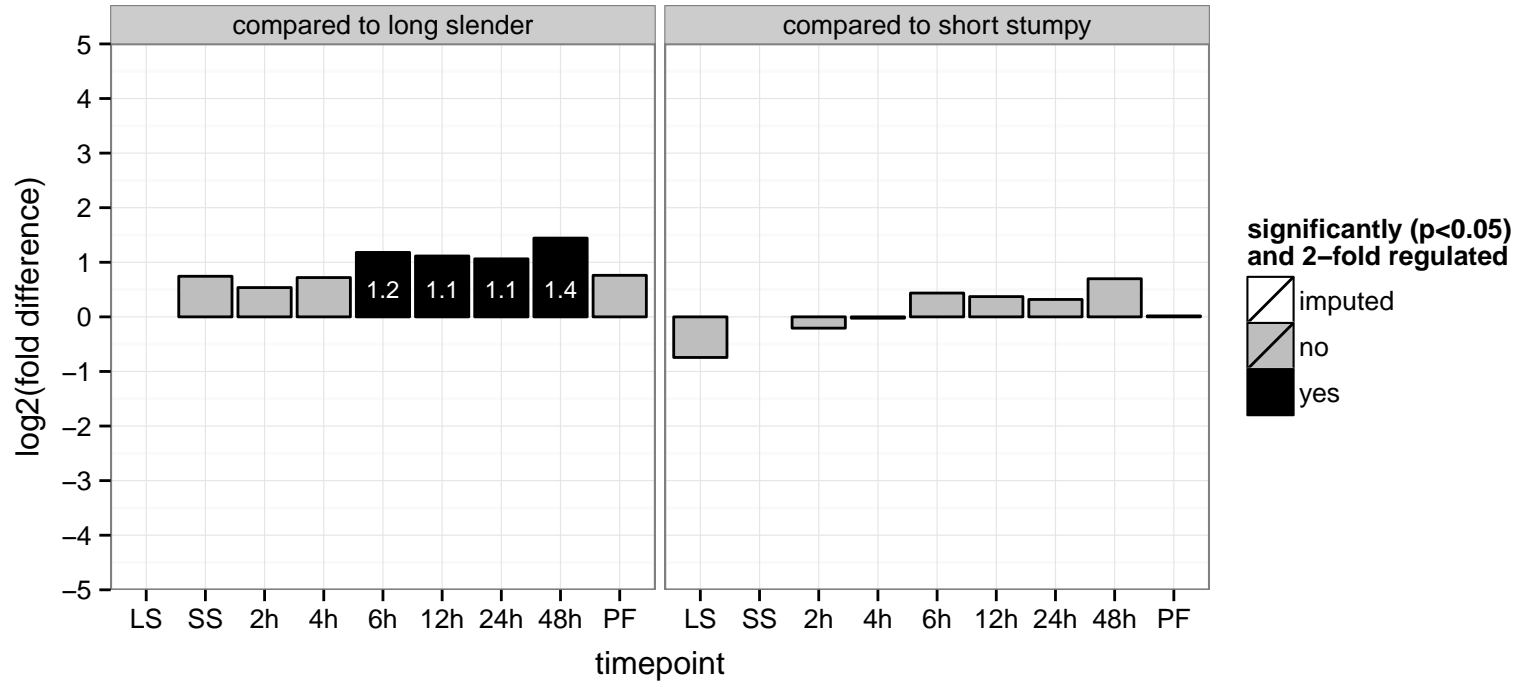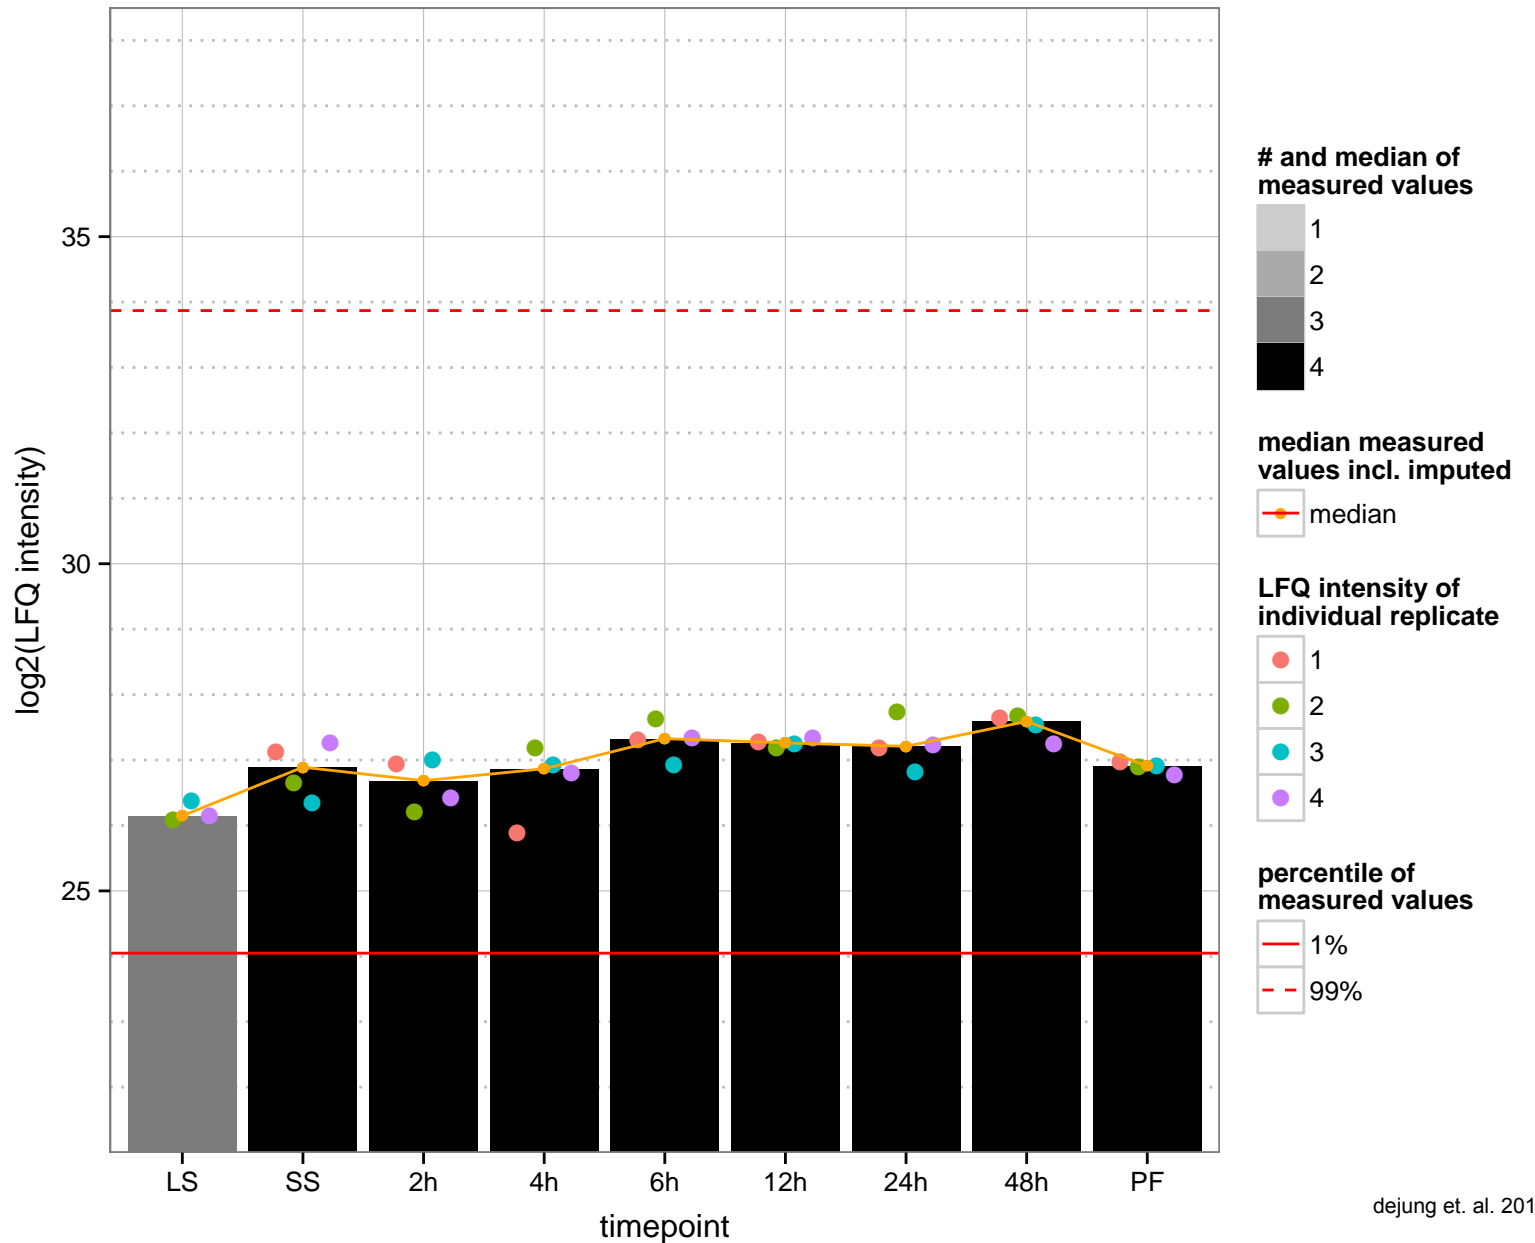



hypothetical protein, conserved  
 Tb927.11.4880  
 AGOF: null  
 AGOC: null  
 AGOP: null  
 PGO: null  
 PGOC: null  
 PGOP: null

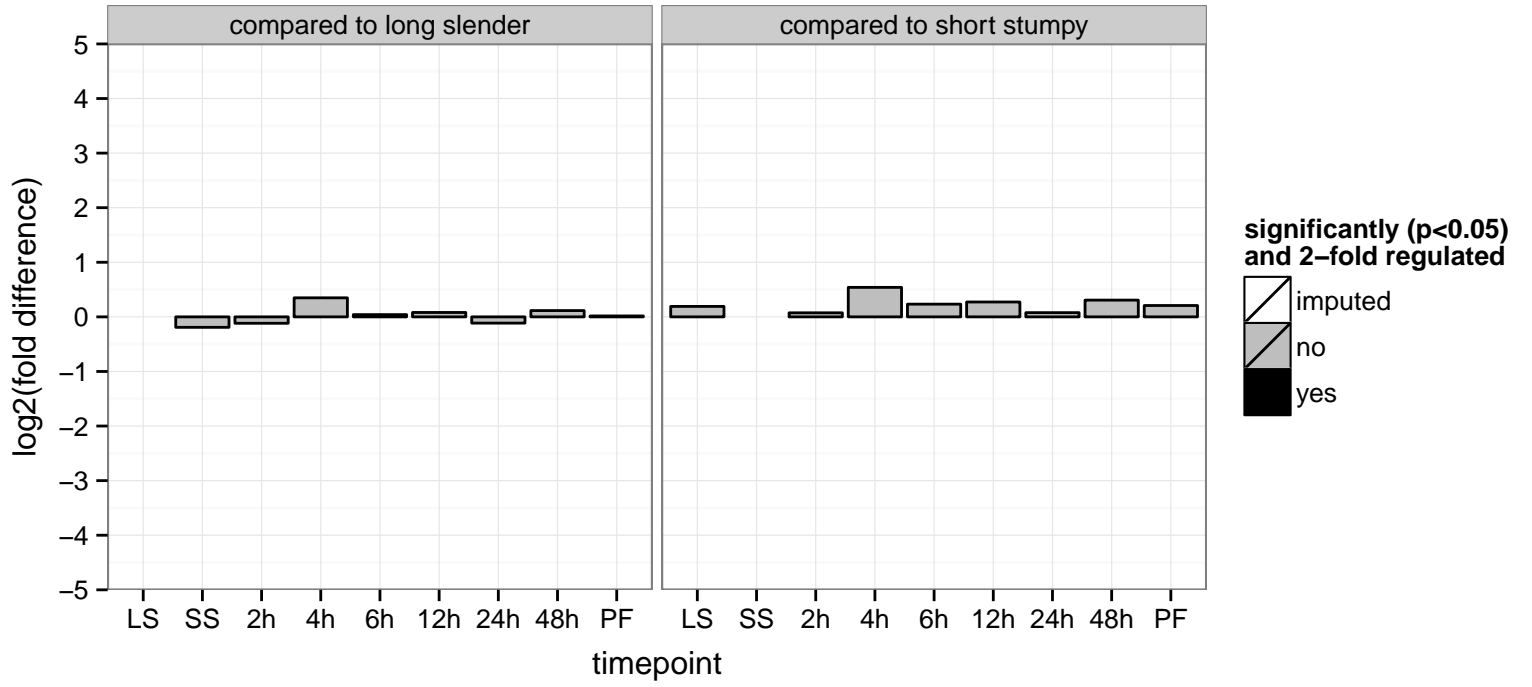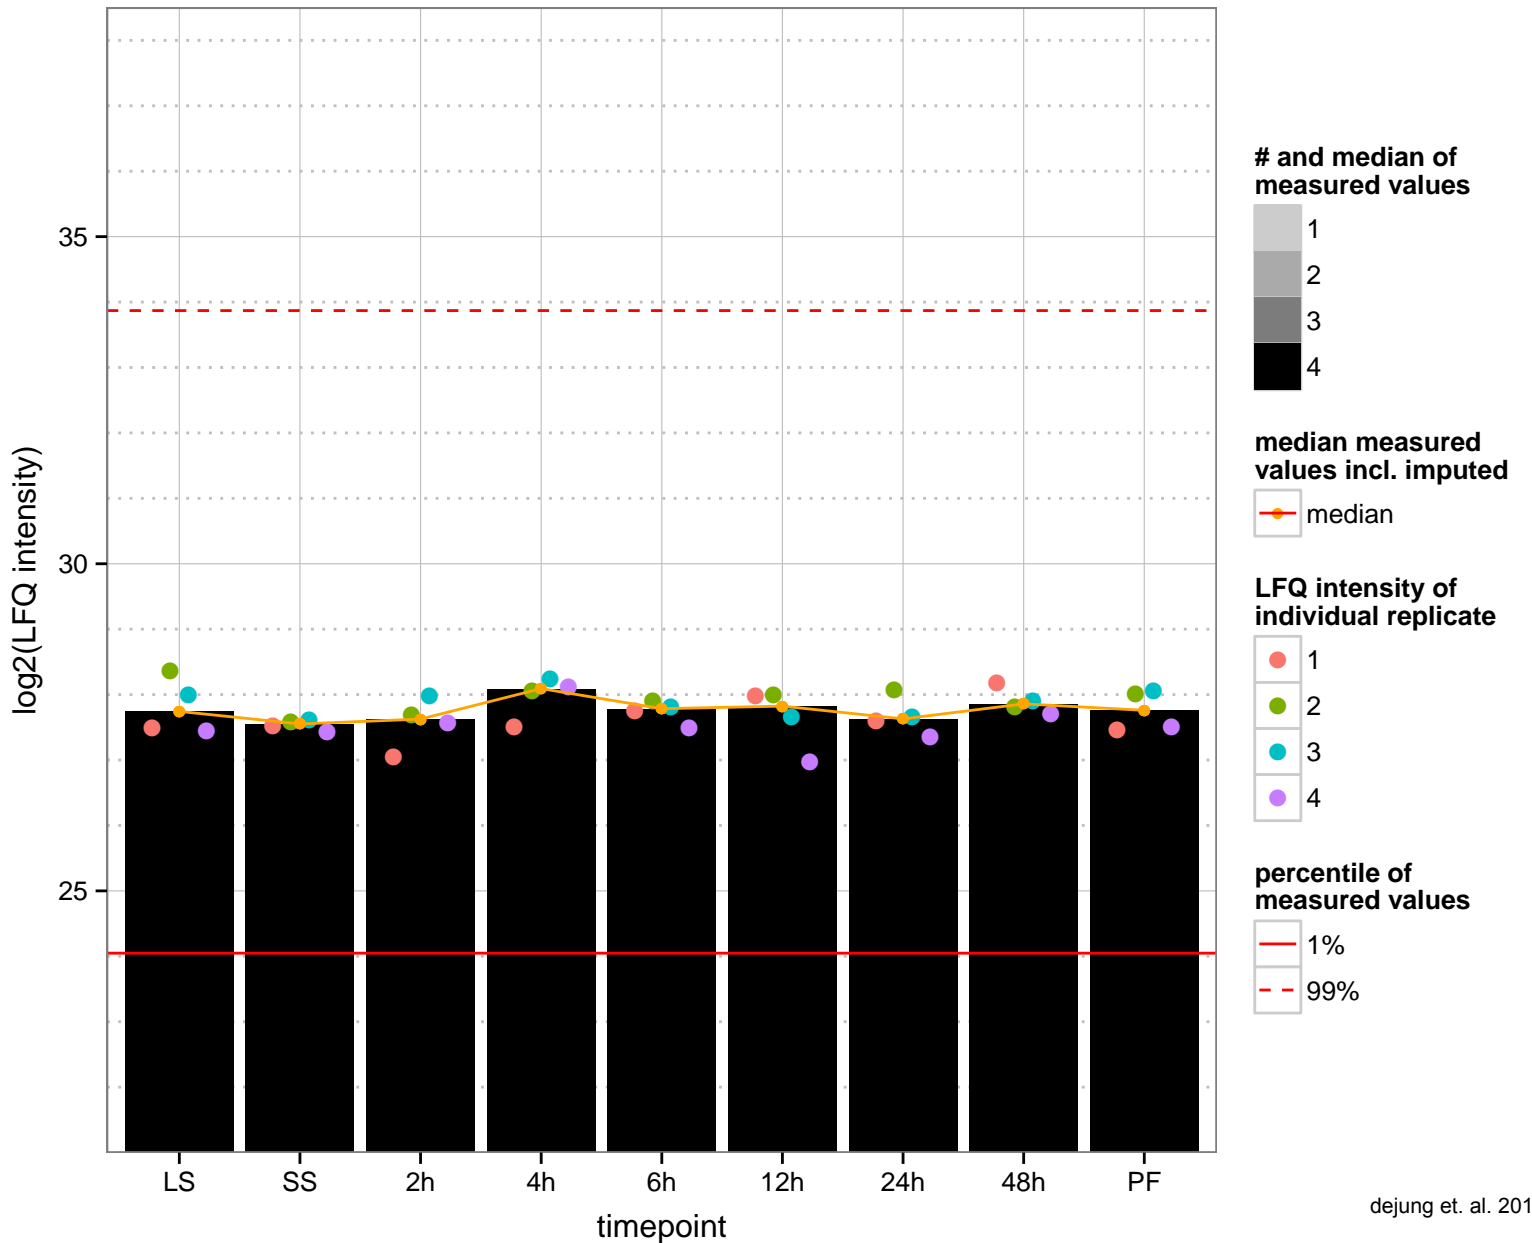

hypothetical protein, conserved  
 Tb927.11.4890  
 AGOF: mRNA (nucleoside-2'-O-)-methyltransferase activity  
 AGOC: null  
 AGOP: 7-methylguanosine mRNA capping  
 PGO: null  
 PGOC: null  
 PGOP: null

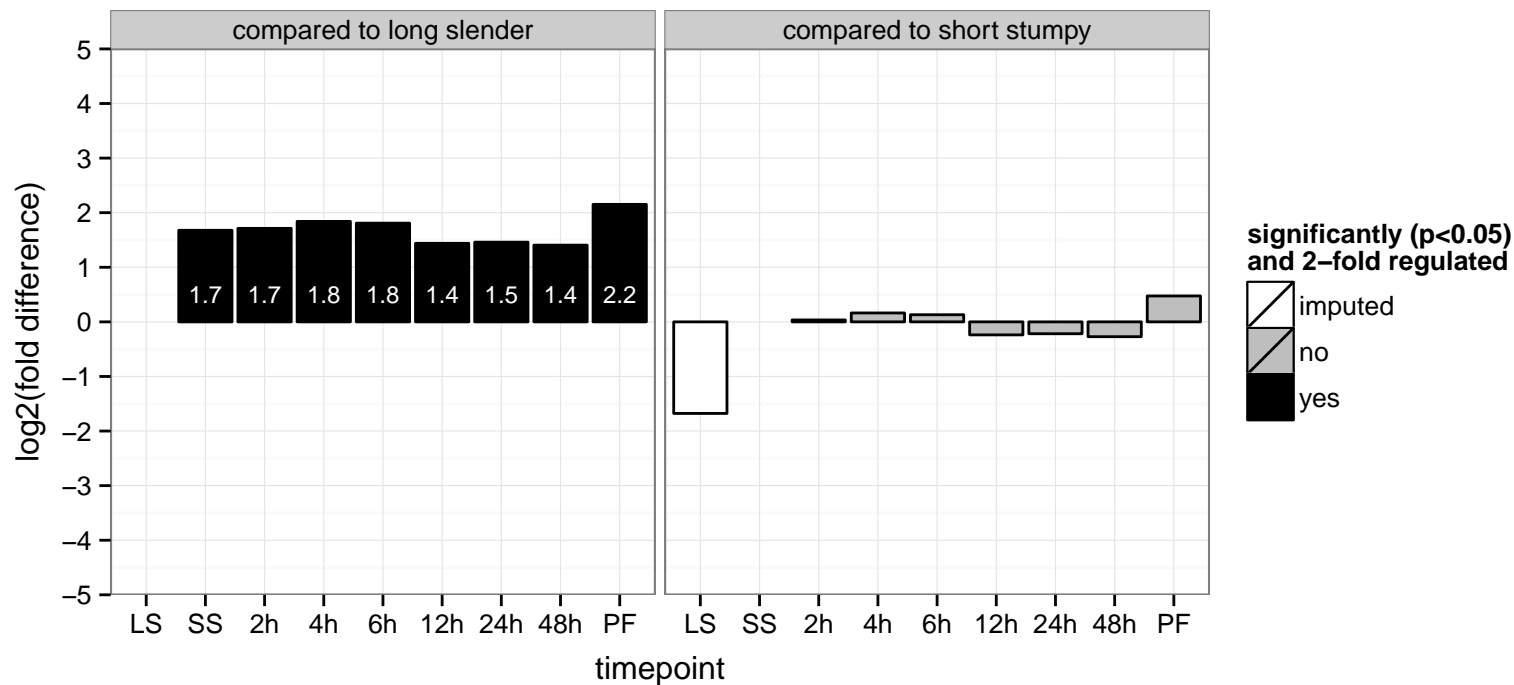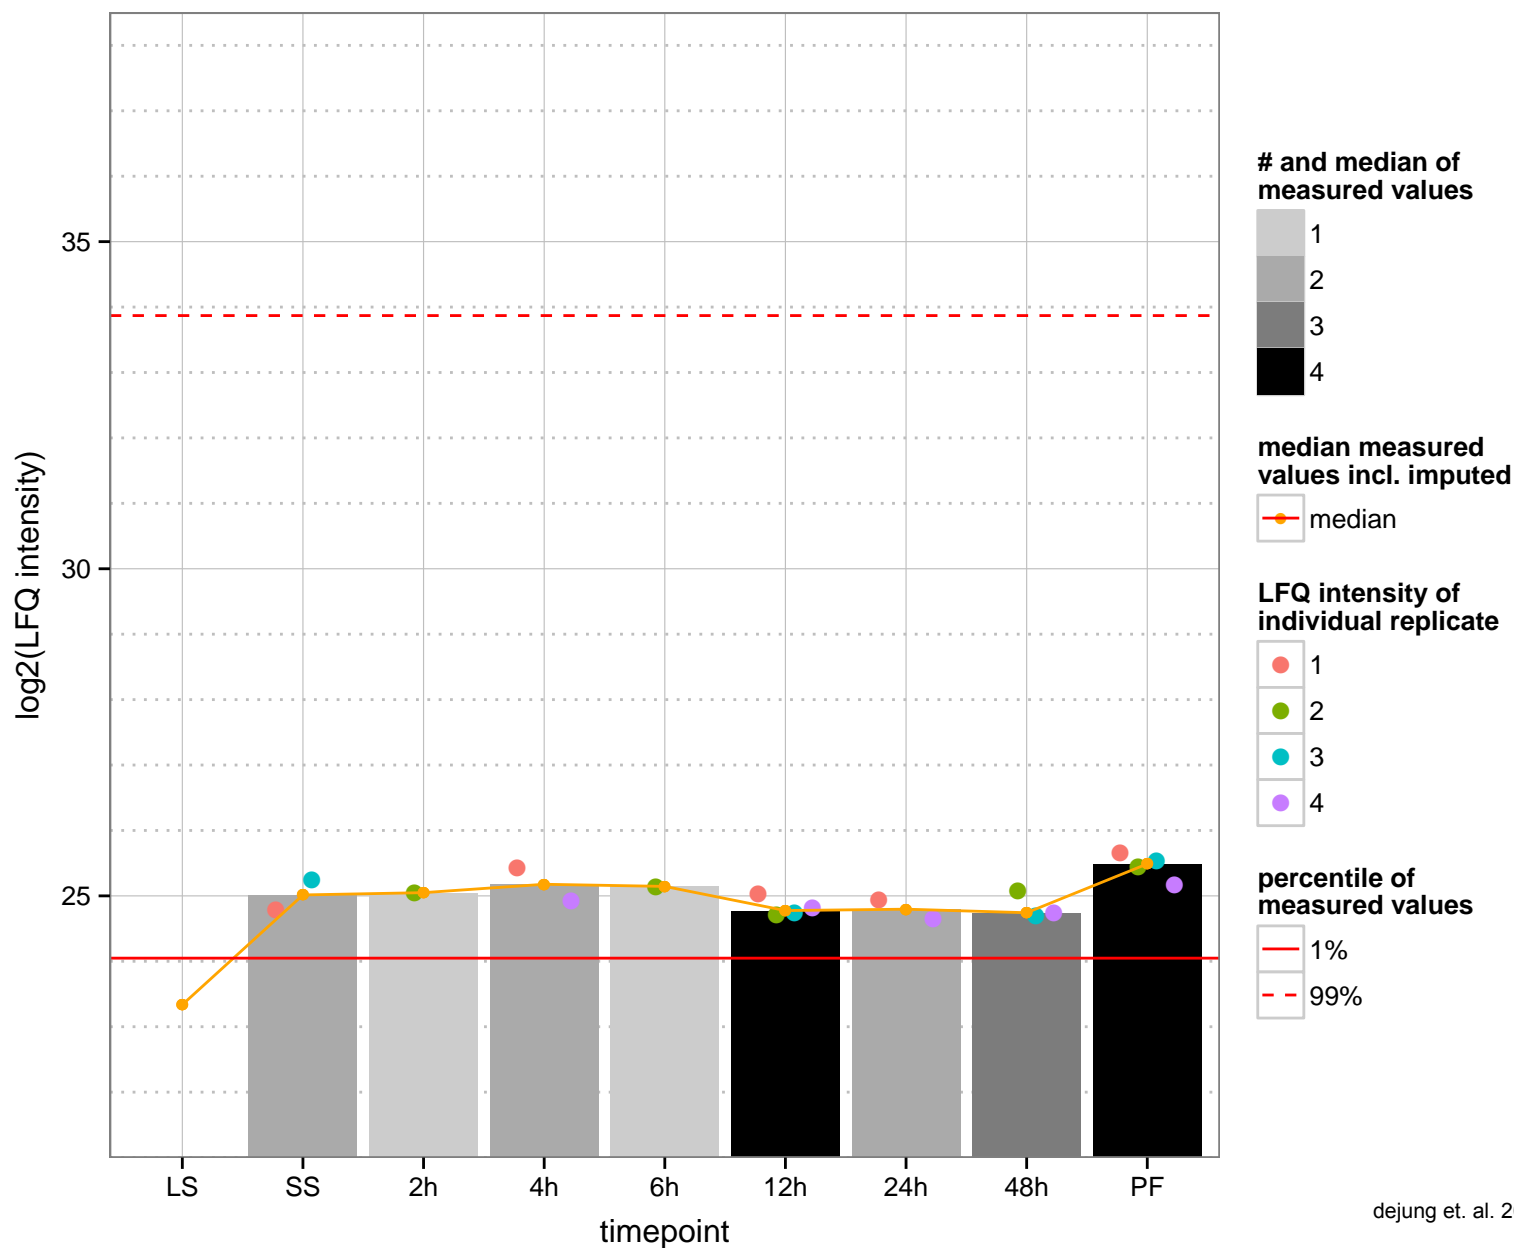

guanine nucleotide-binding beta subunit-like protein, G-protein (beta)-like protein, beta transducin-like protein  
 Tb927.11.4900  
 AGOF: null  
 AGOC: null  
 AGOP: null  
 PGO: protein binding  
 PGO: null  
 PGO: null

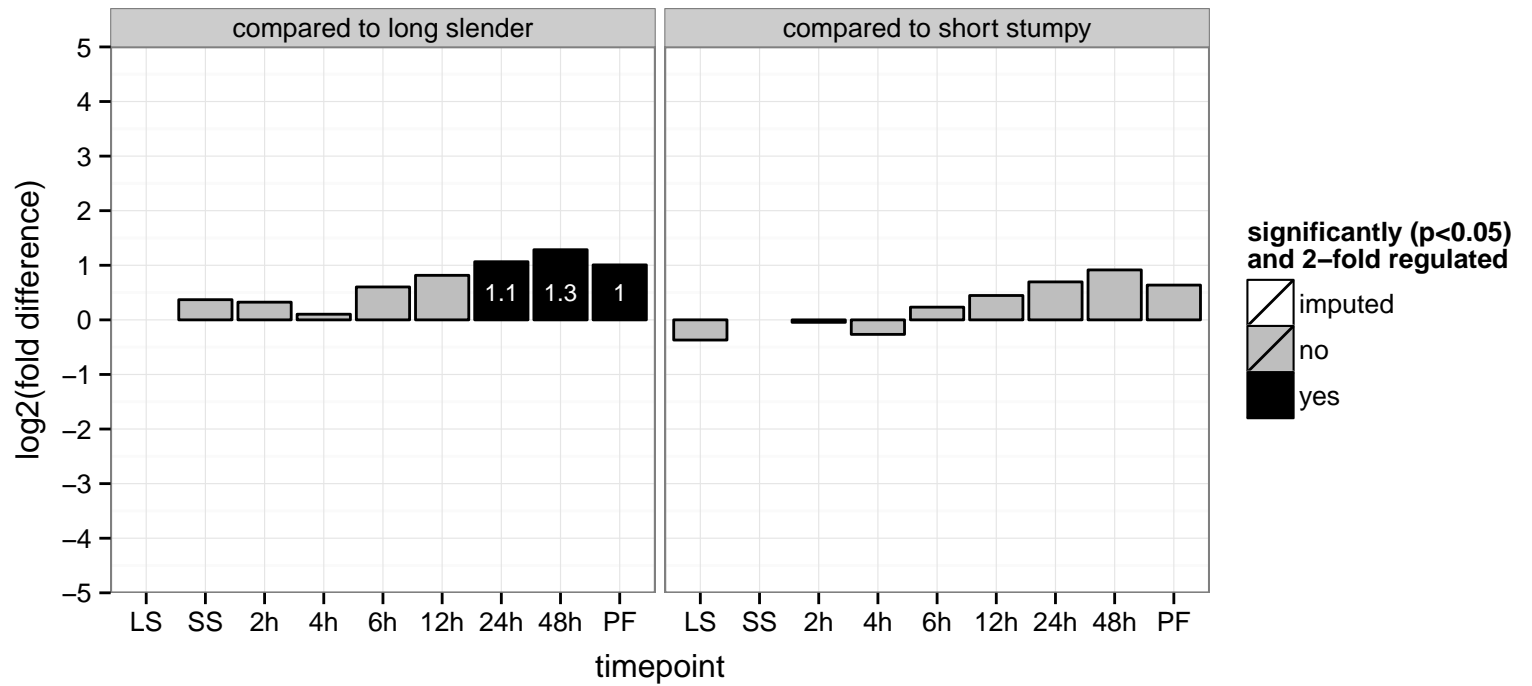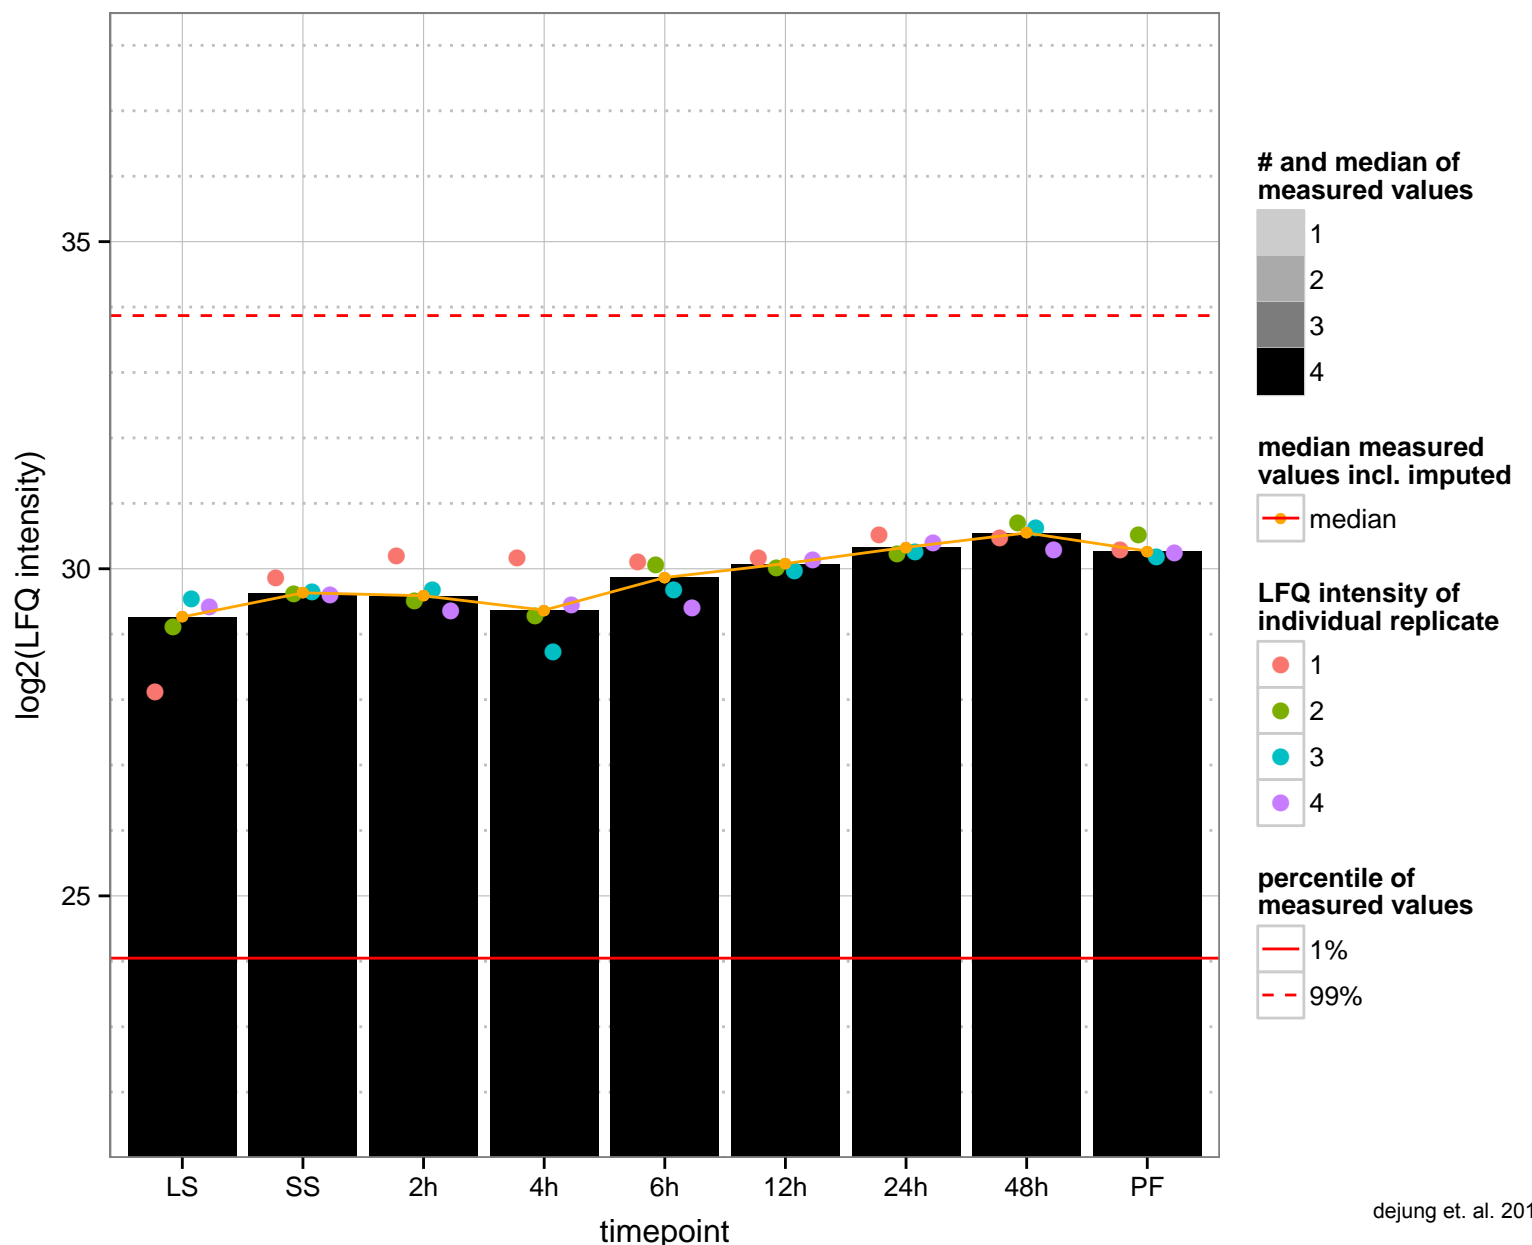

hypothetical protein, conserved  
 Tb927.11.4920  
 AGOF: null  
 AGOC: null  
 AGOP: null  
 PGOF: null  
 PGO: null  
 PGOP: null

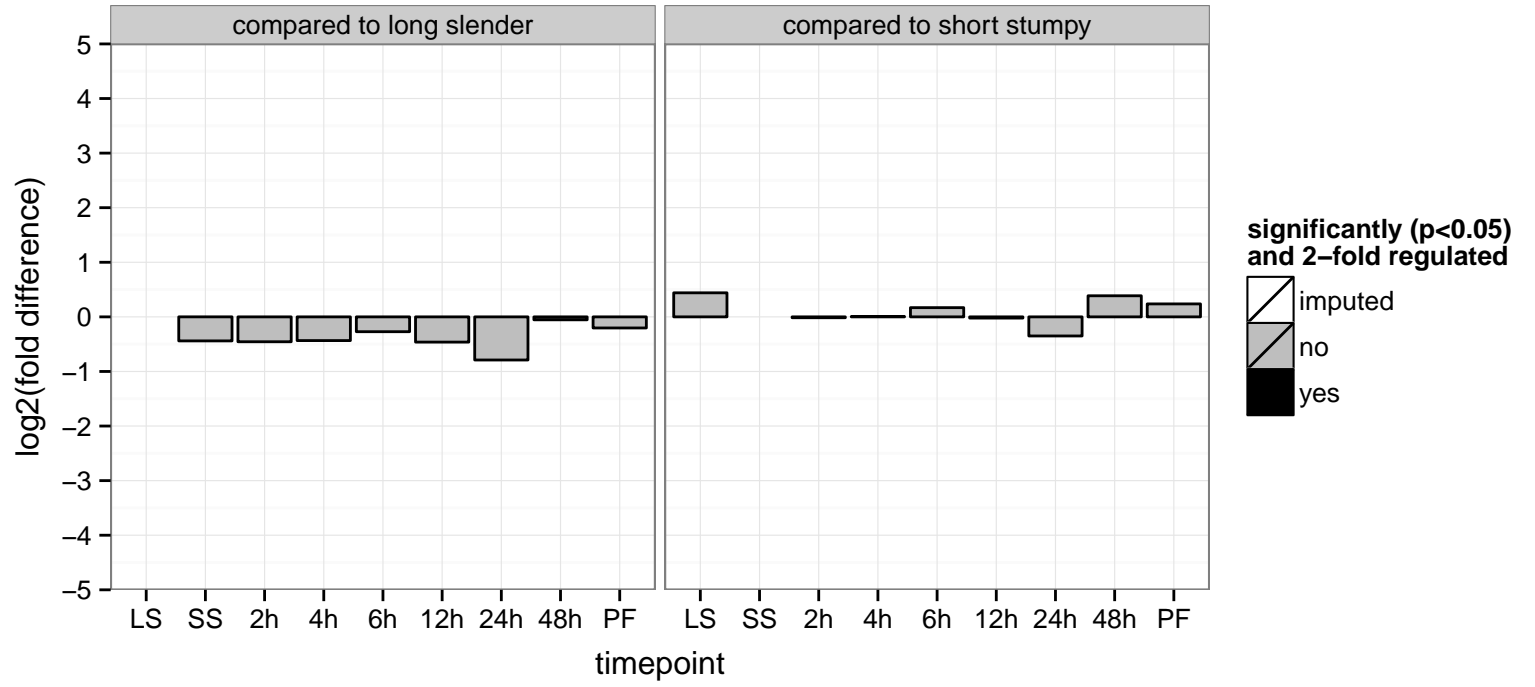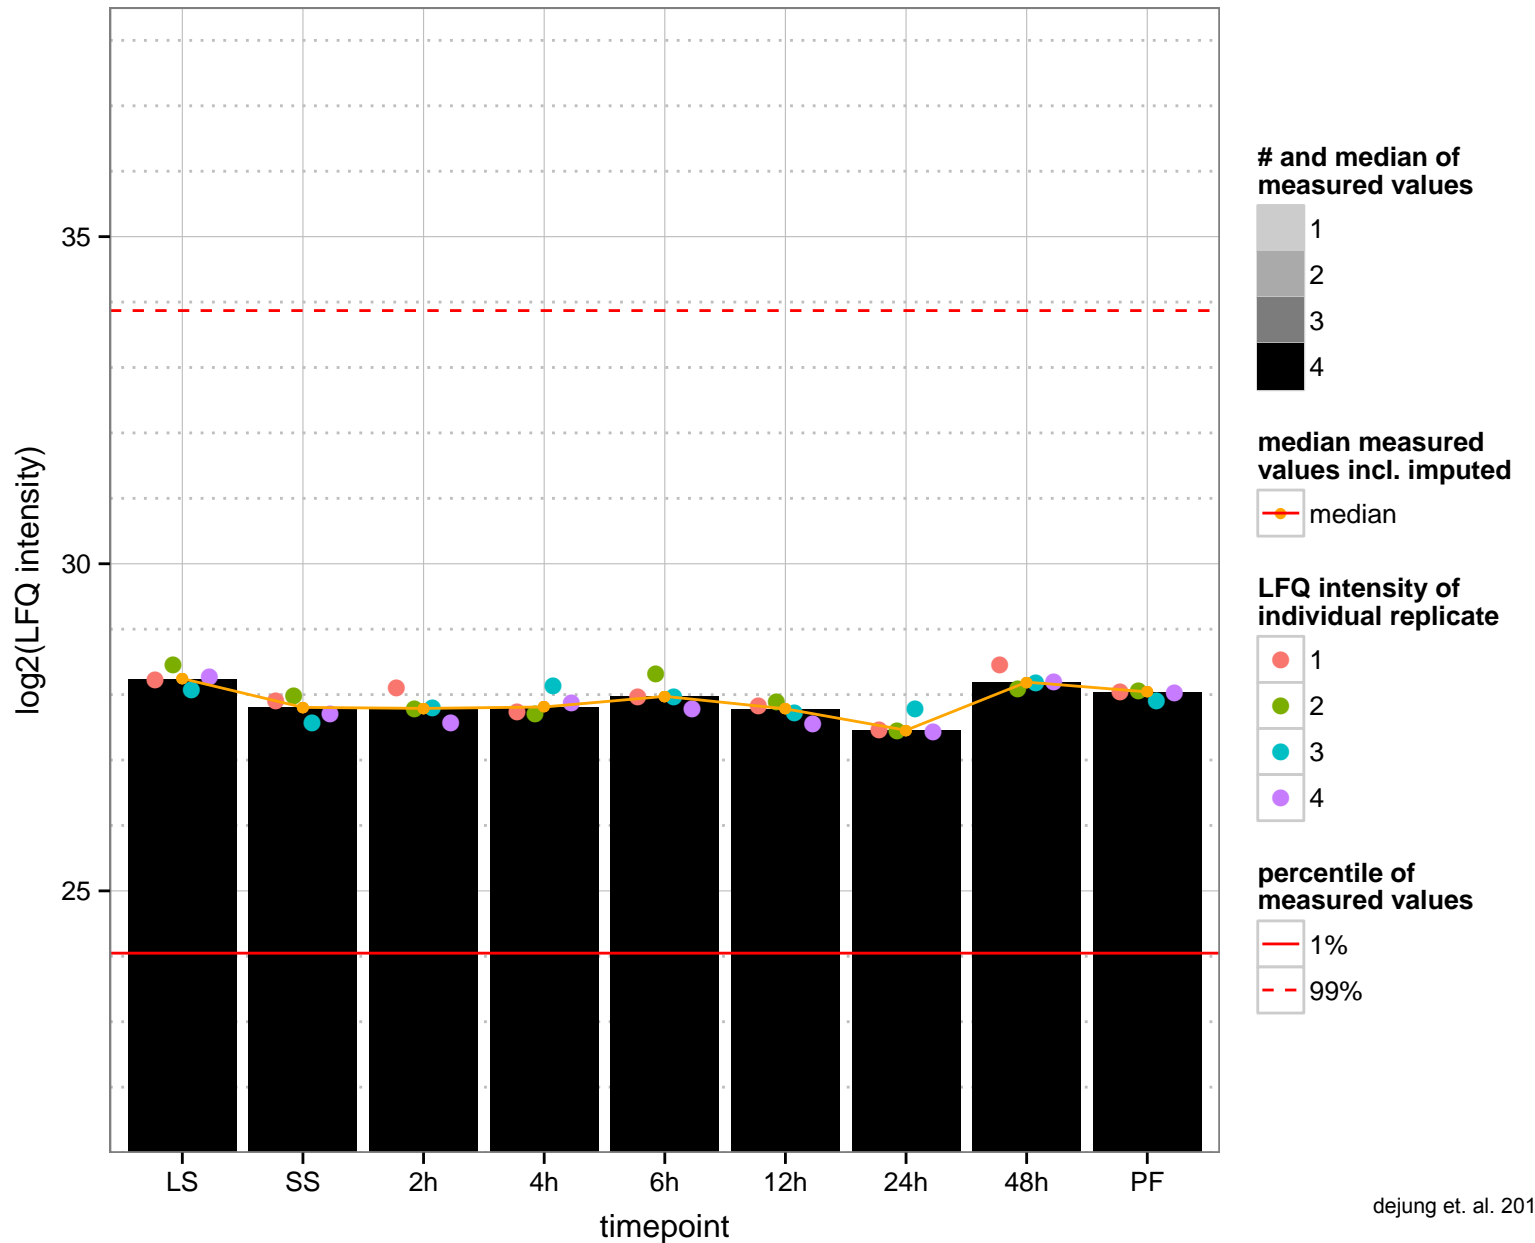

hypothetical protein, conserved  
 Tb927.11.4950  
 AGOF: null  
 AGOC: null  
 AGOP: null  
 PGO: binding  
 PGOC: null  
 PGOP: null

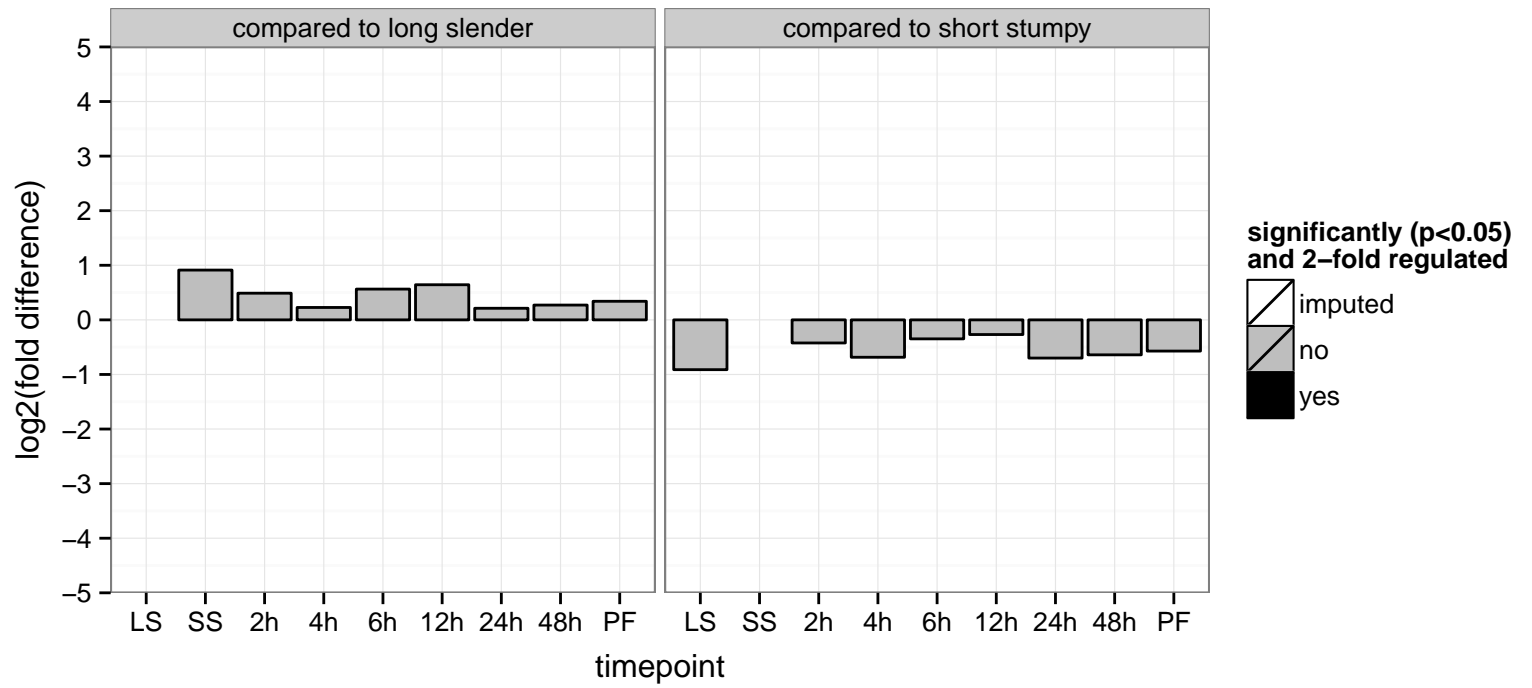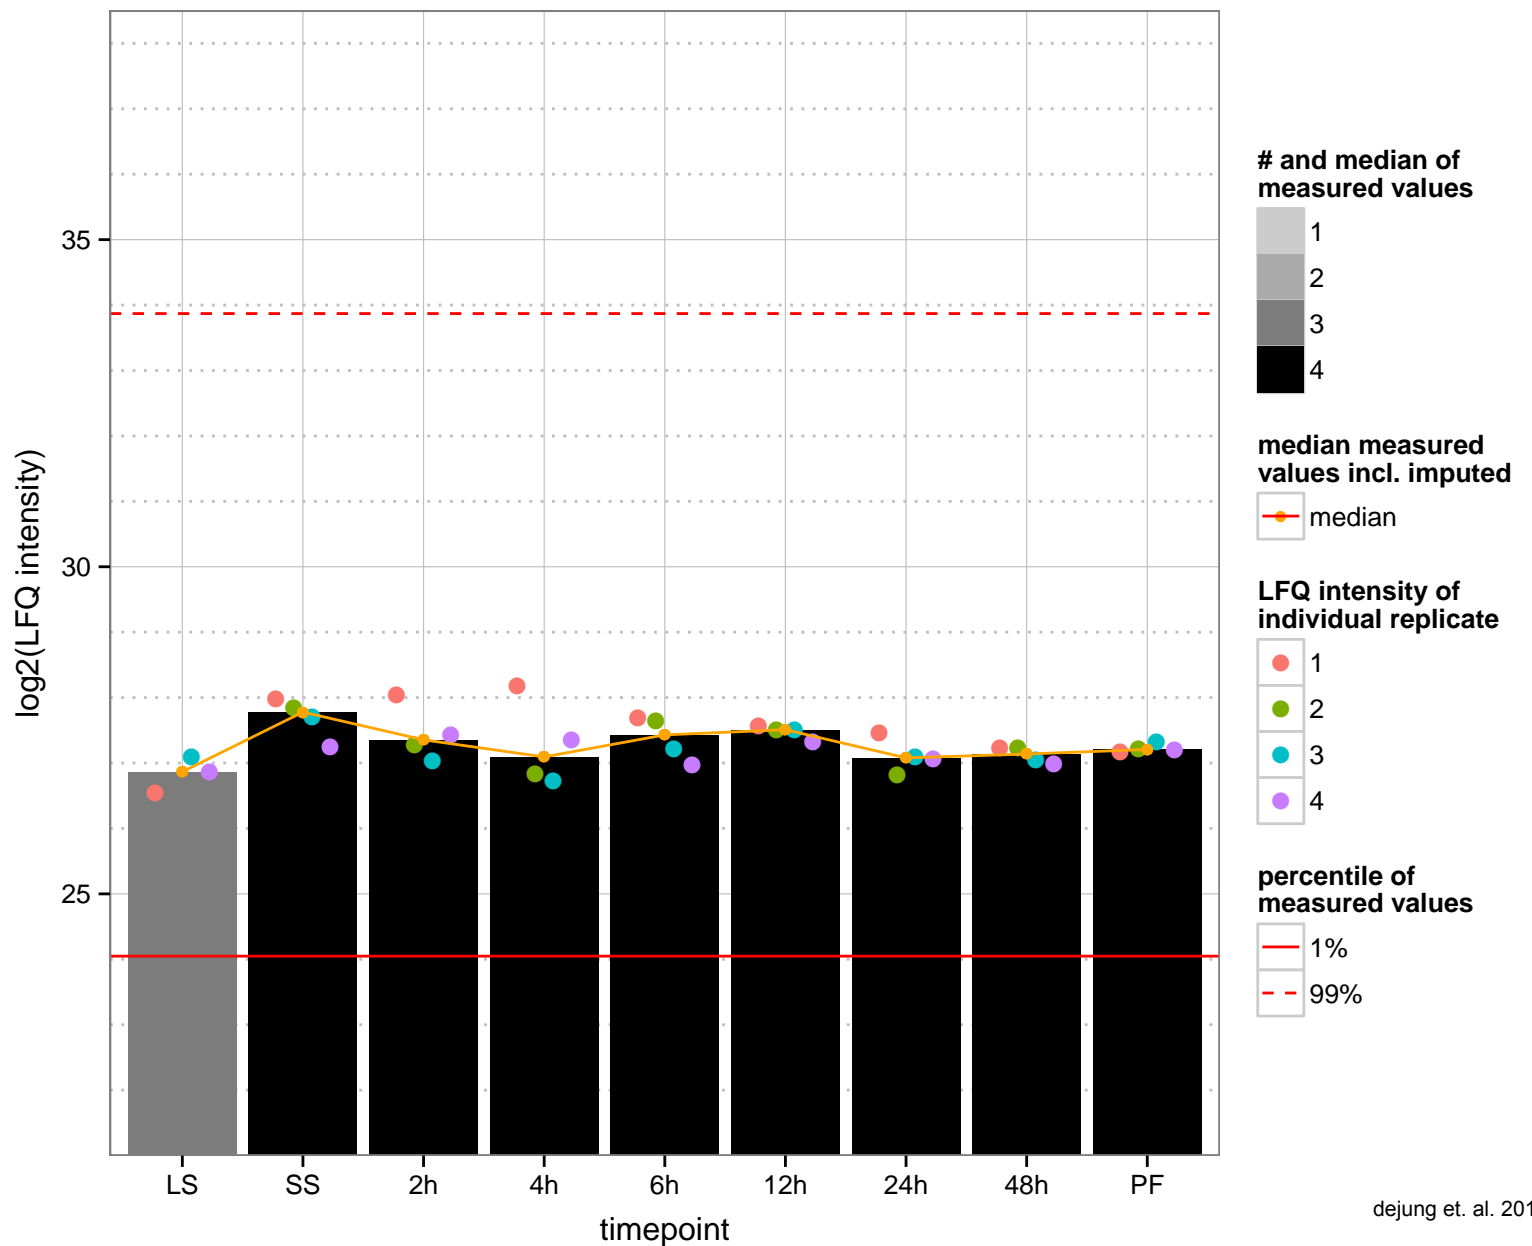

predicted WD40 repeat protein  
 Tb927.11.4970  
 AGOF: null  
 AGOC: null  
 AGOP: null  
 PGOF: protein binding  
 PGOC: null  
 PGOP: null

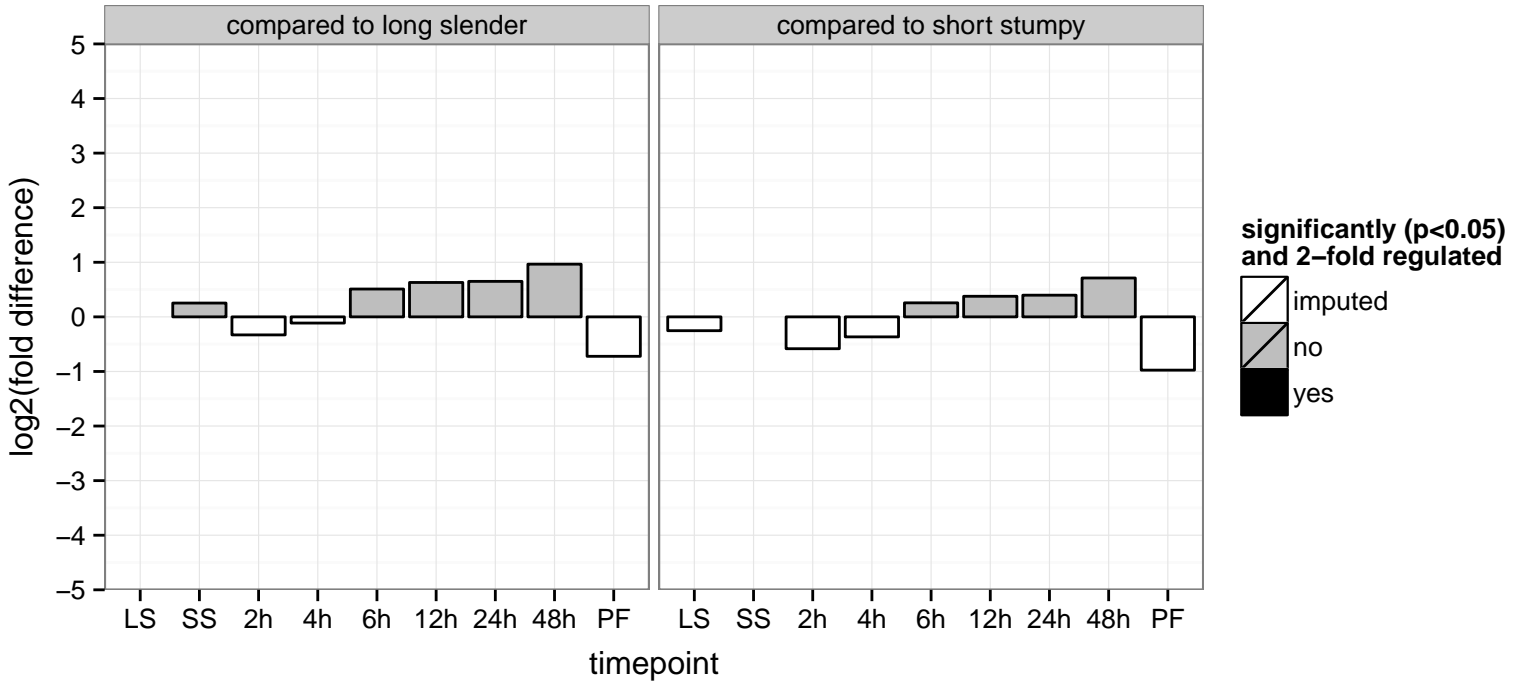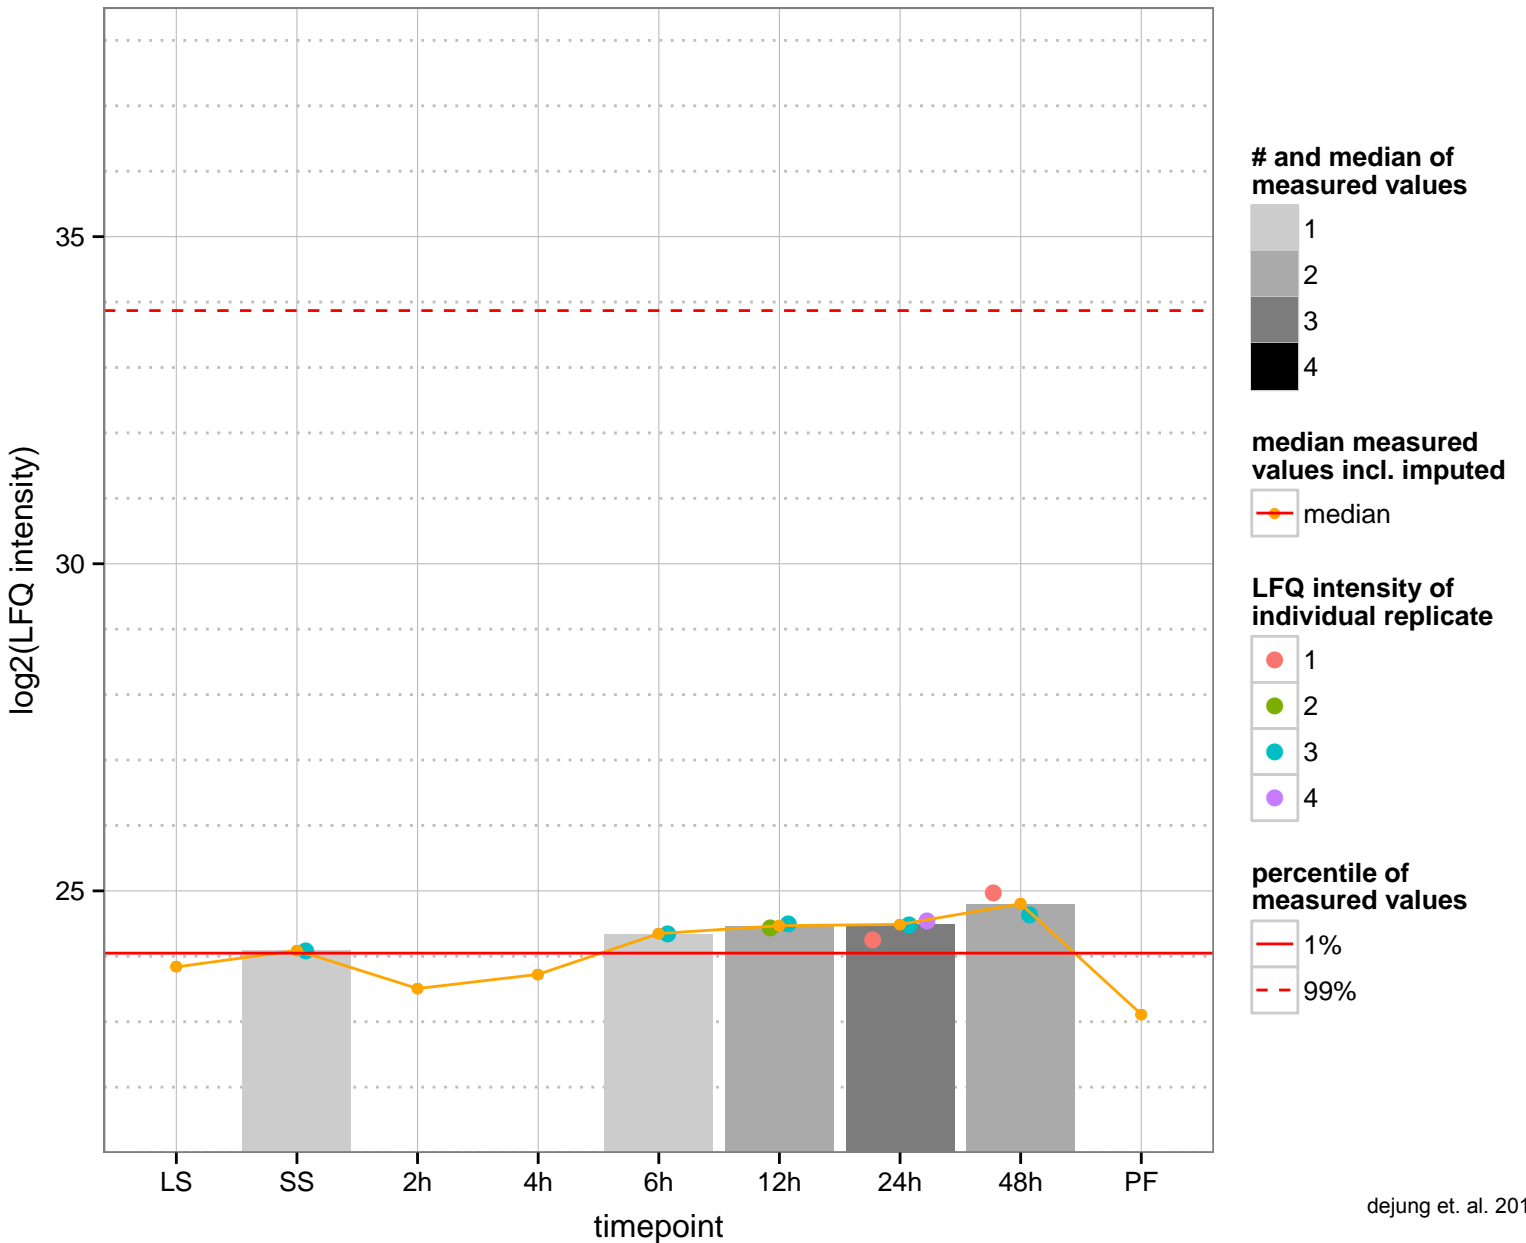

ATP-dependent DEAD/H RNA helicase, putative, ATP-dependent RNA helicase  
 Tb927.11.4980  
 AGOF: ATP binding, ATP-dependent helicase activity, helicase activity, nucleic acid binding  
 AGOC: null  
 AGOP: nucleobase-containing compound metabolic process  
 PGO: ATP binding, ATP-dependent helicase activity, helicase activity, nucleic acid binding  
 PGOC: null  
 PGOP: null

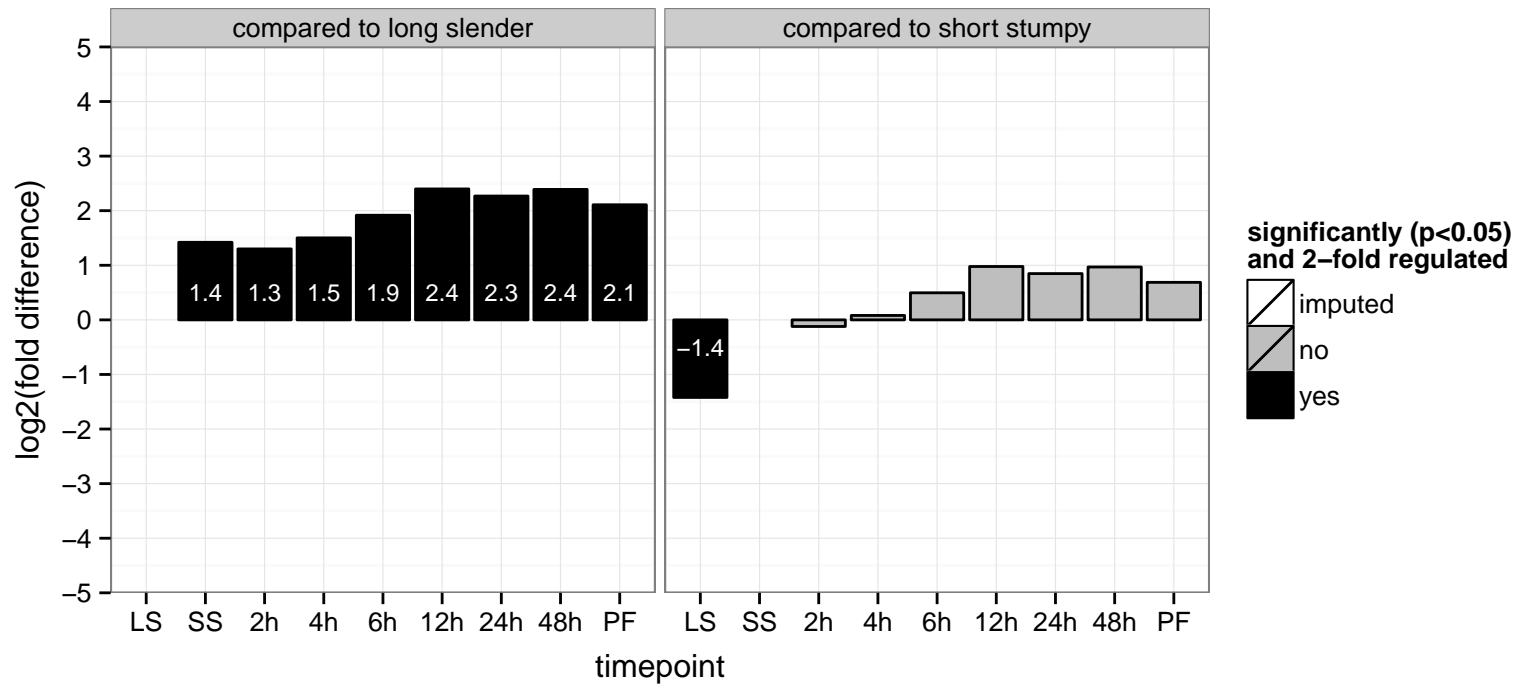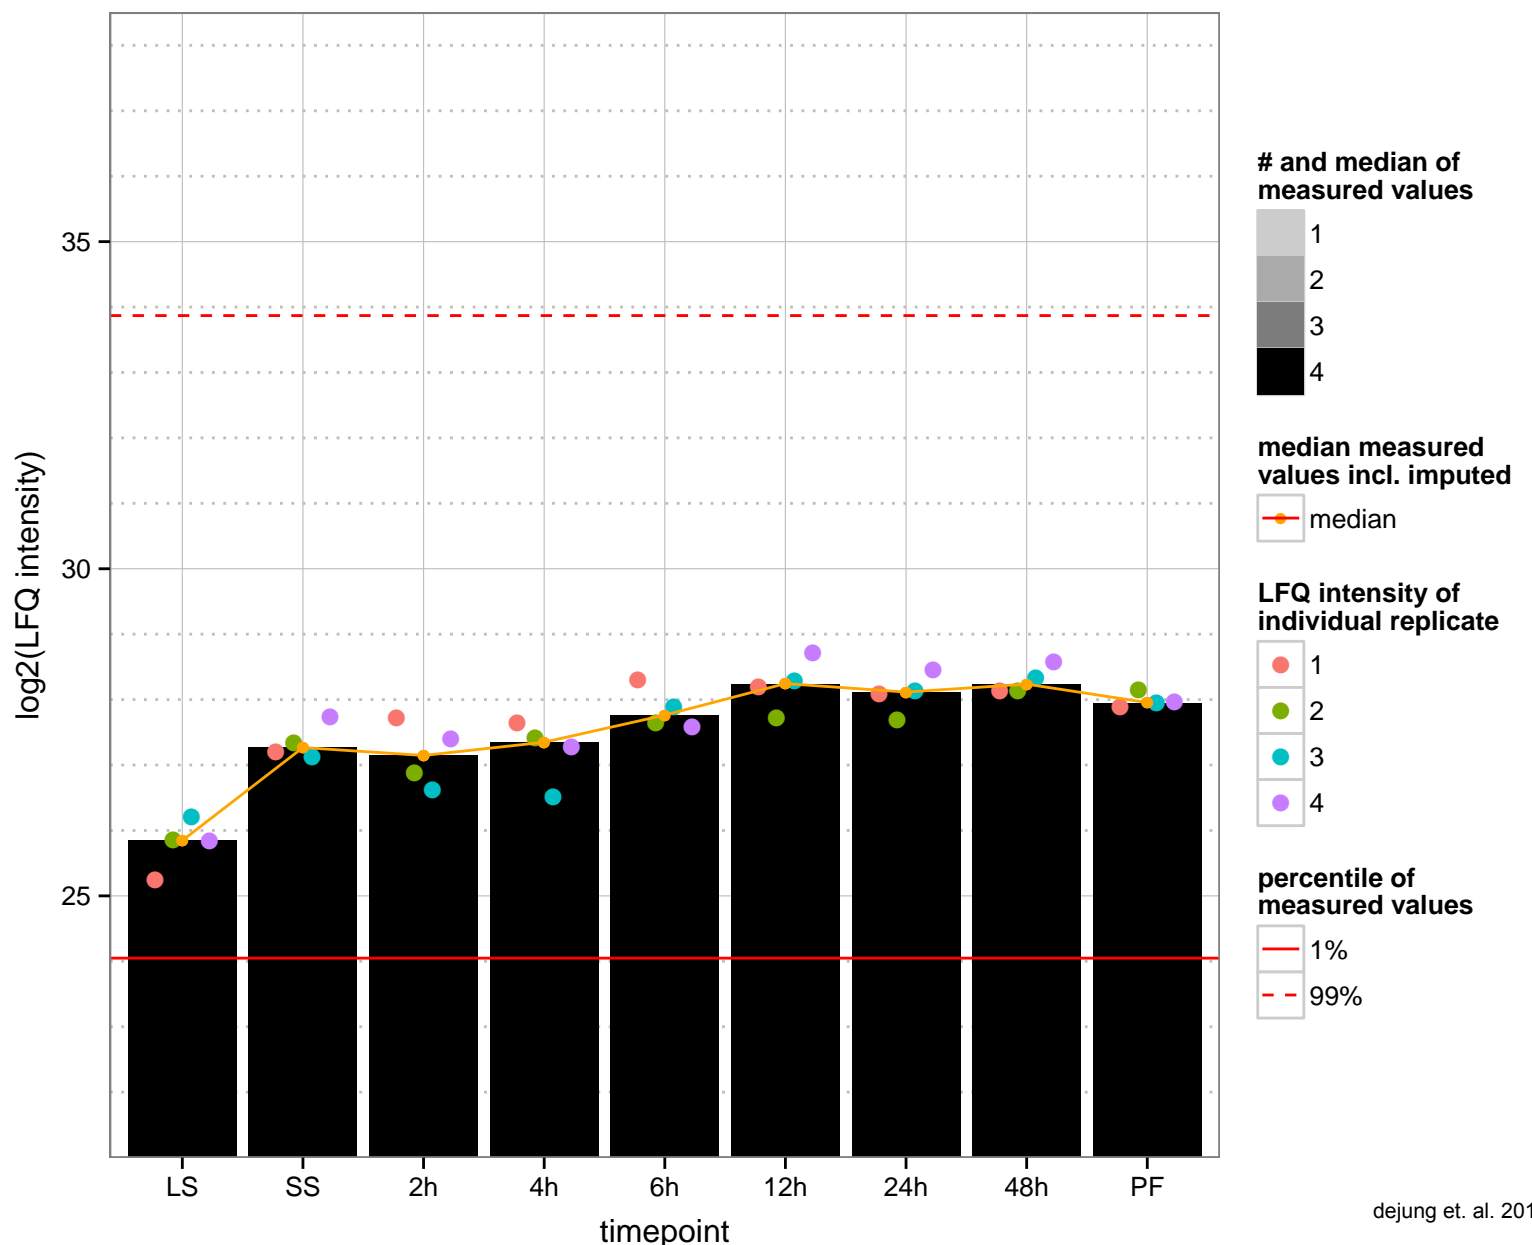

dynein intermediate chain IC78, putative  
 Tb927.11.5000  
 AGOF: motor activity  
 AGOC: cytoskeleton, dynein complex  
 AGOP: microtubule-based movement  
 PGO: protein binding  
 PGO: null  
 PGO: null

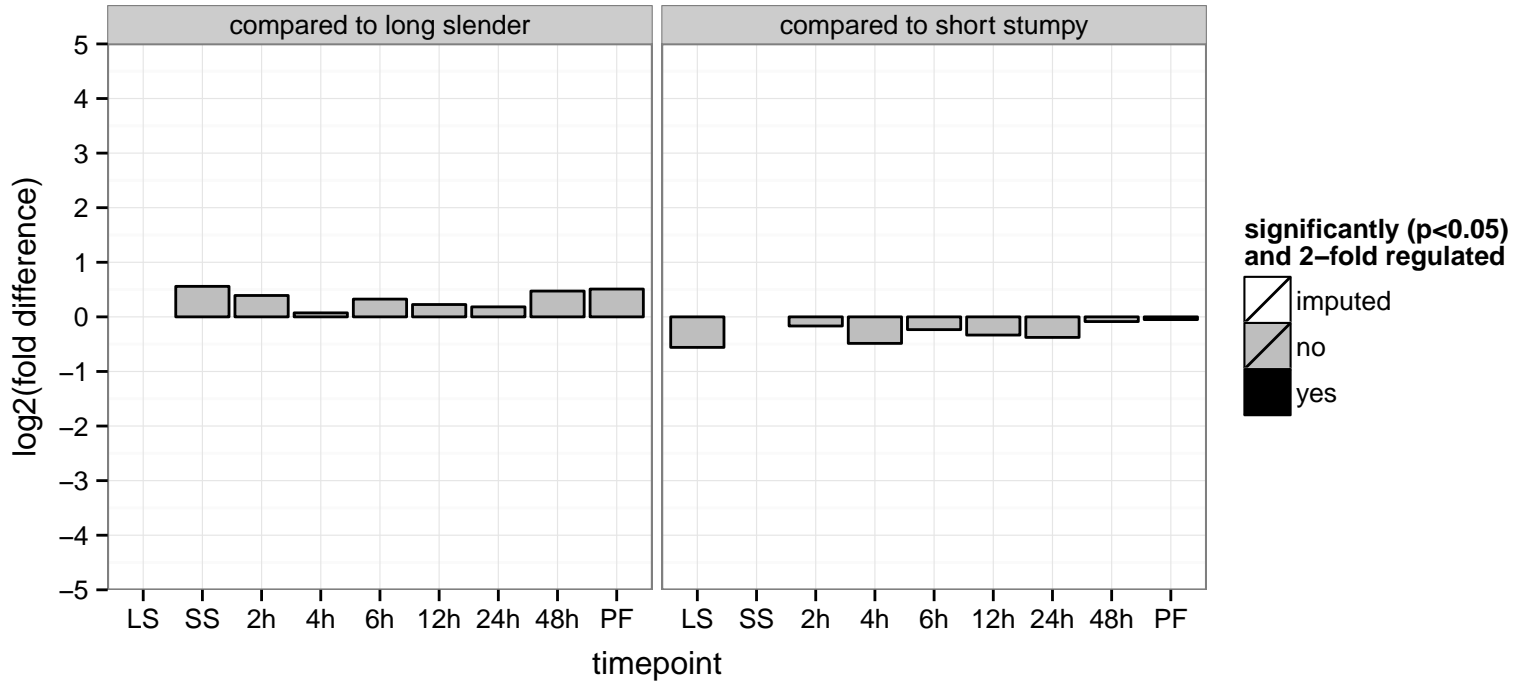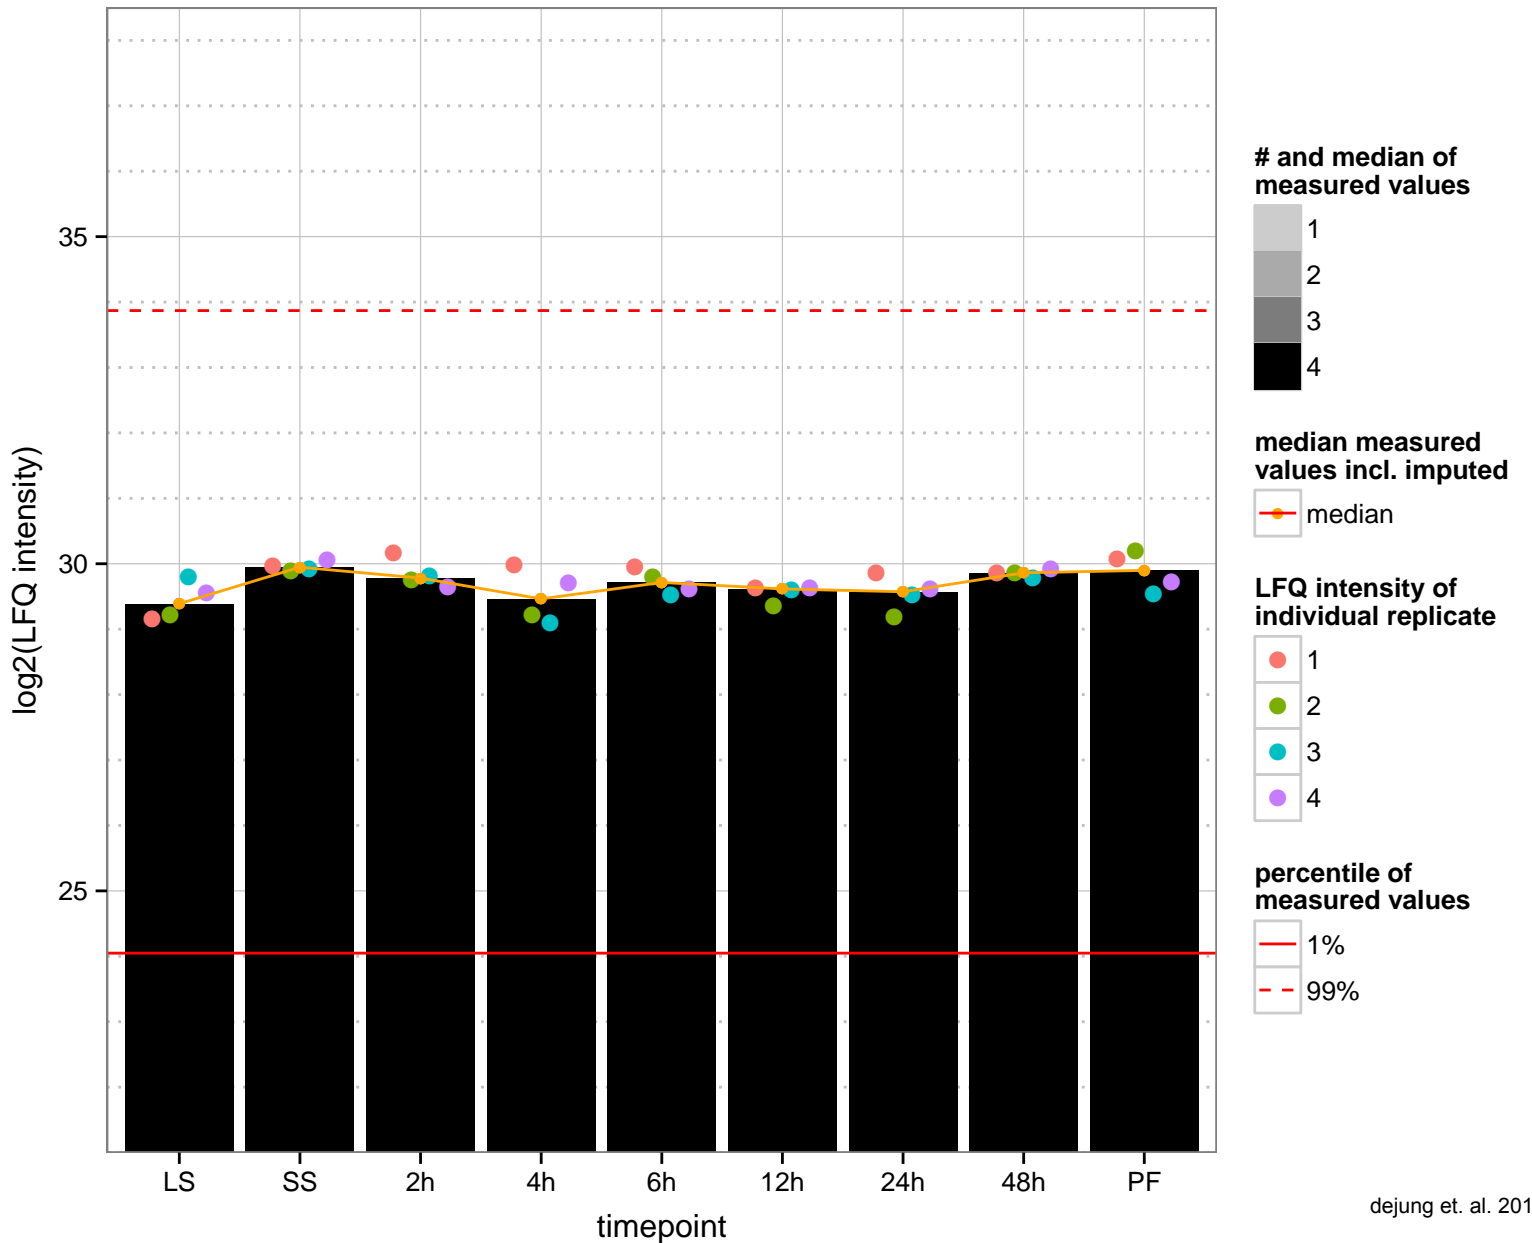



hypothetical protein, conserved  
 Tb927.11.5030  
 AGOF: null  
 AGOC: mitochondrion  
 AGOP: null  
 PGO: null  
 PGO: null  
 PGO: null

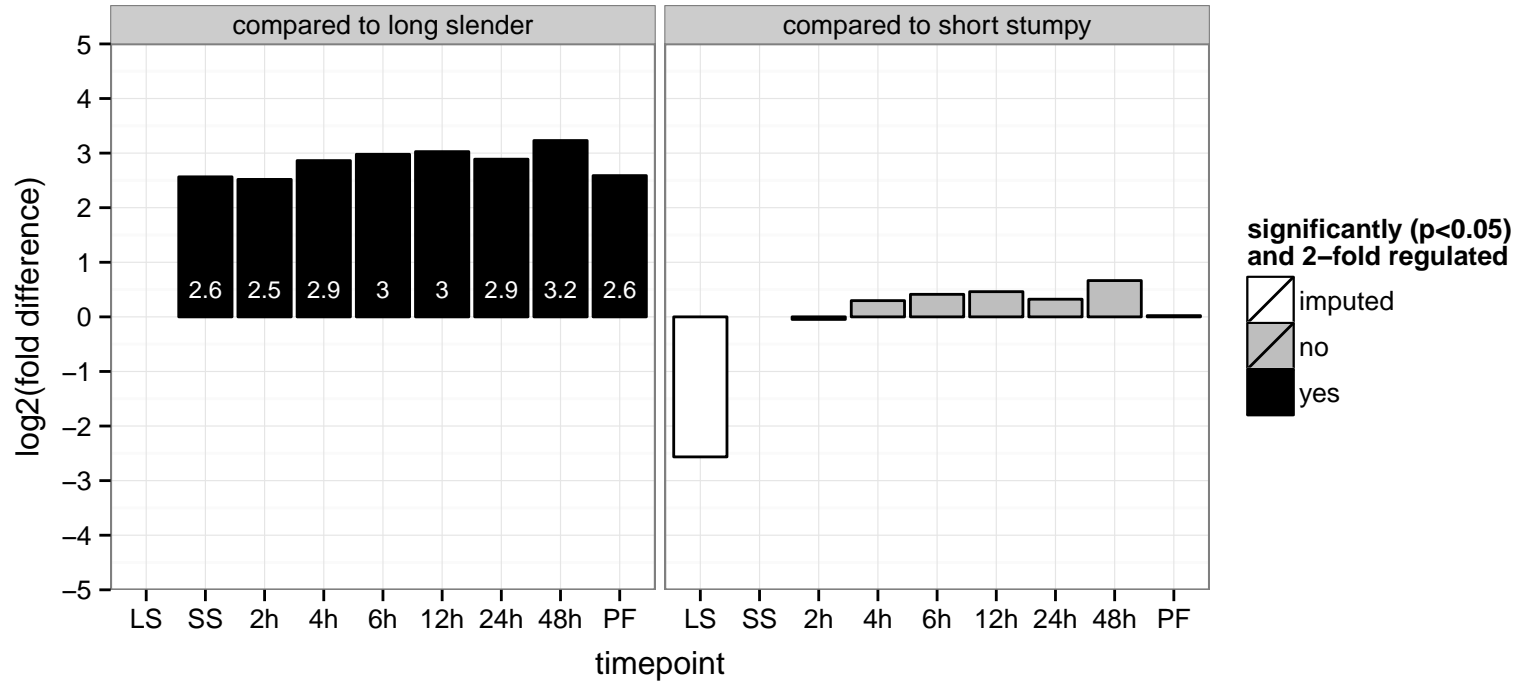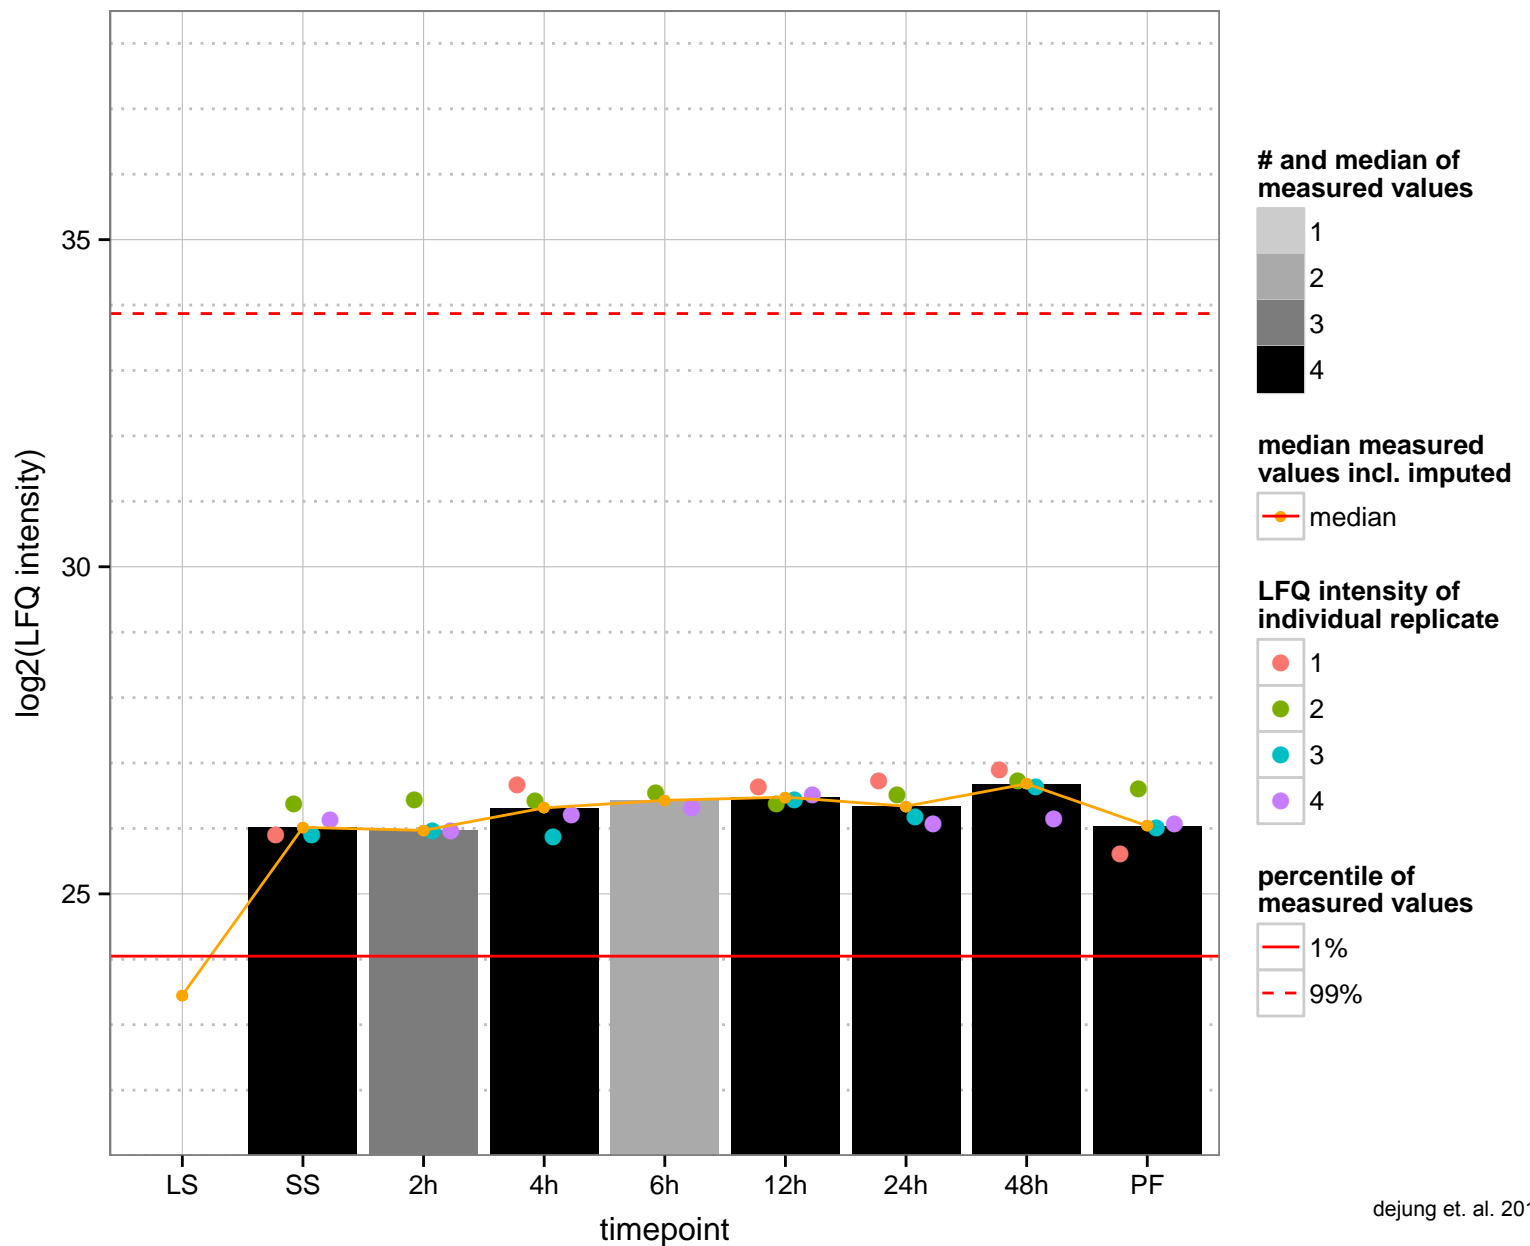

leucine-rich repeat protein (LRRP), putative  
 Tb927.11.5040  
 AGOF: null  
 AGOC: null  
 AGOP: null  
 PGOF: protein binding  
 PGO: null  
 PGOP: null

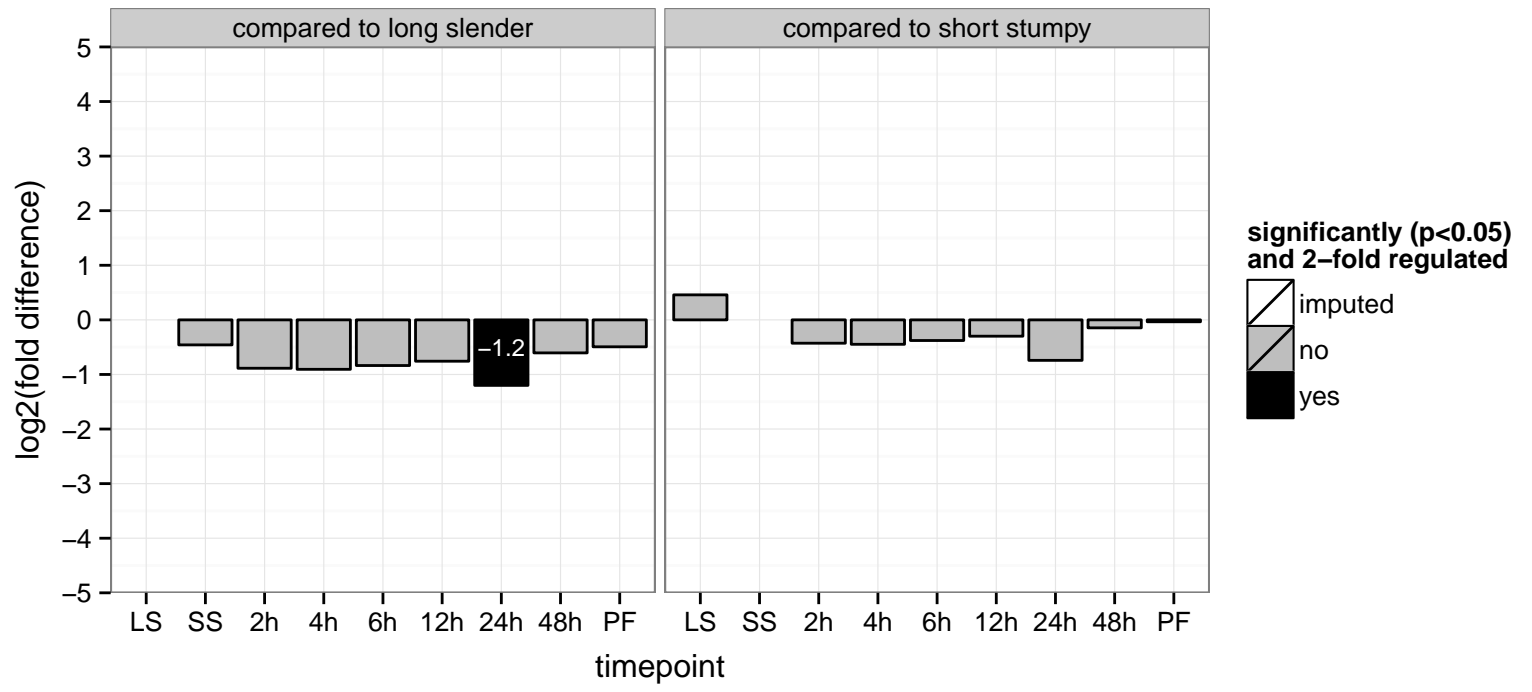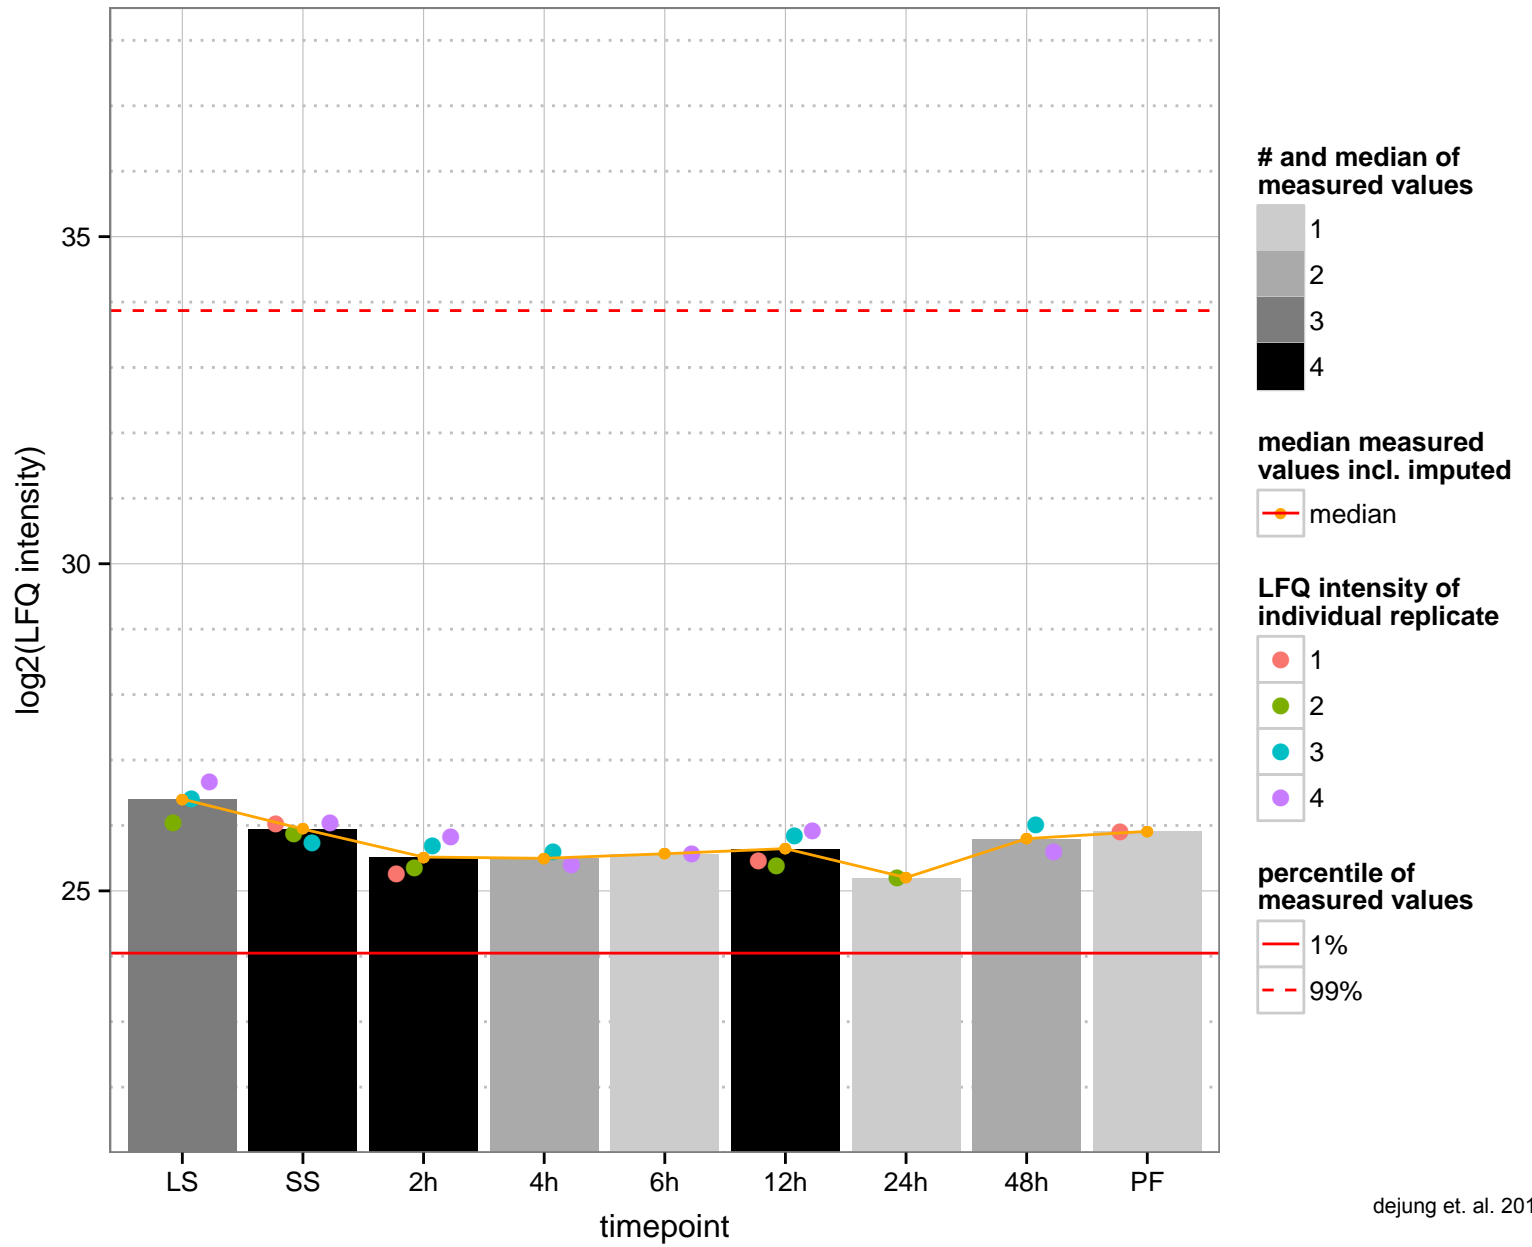

fumarate hydratase, class I (FHm)

Tb927.11.5050

AGOF: fumarate hydratase activity

AGOC: mitochondrion

AGOP: fumarate metabolic process, generation of precursor metabolites and energy

PGOF: fumarate hydratase activity, hydro-lyase activity, lyase activity

PGOC: null

PGOP: generation of precursor metabolites and energy

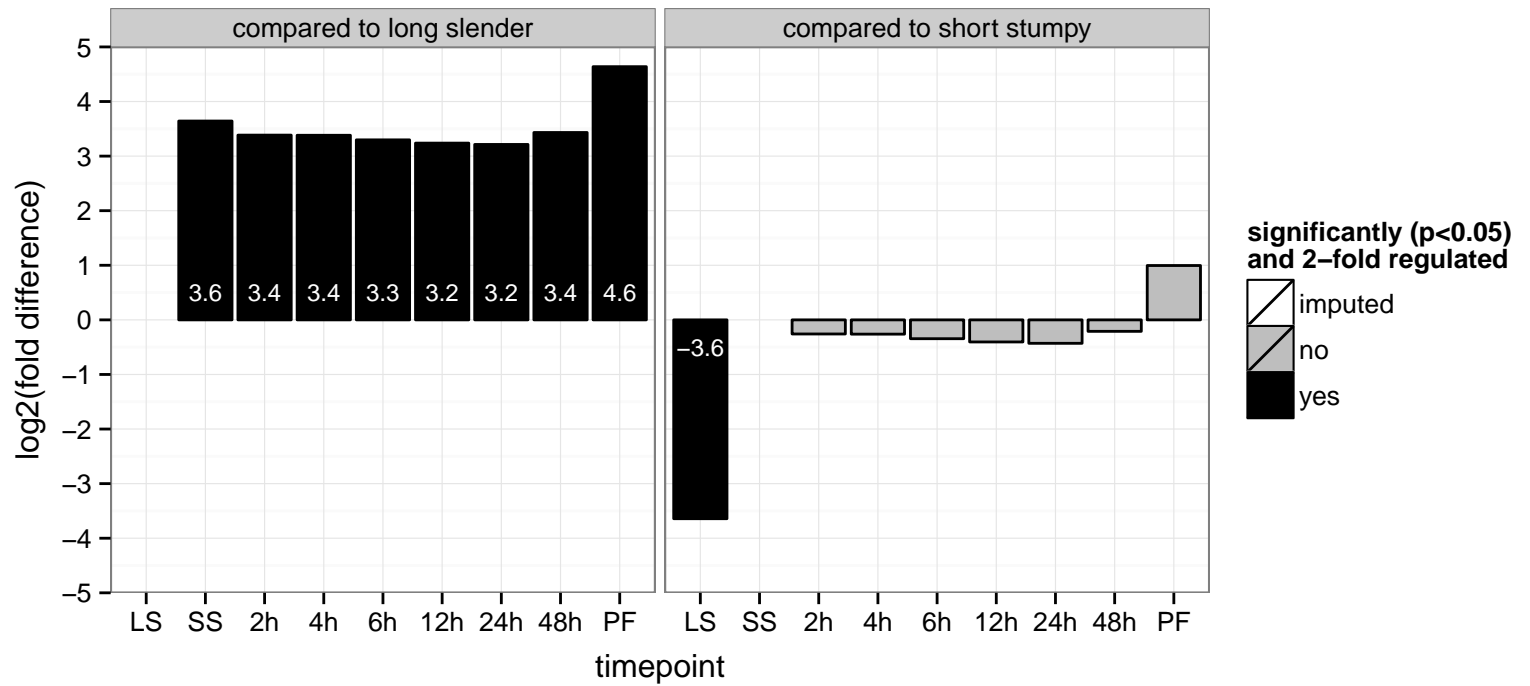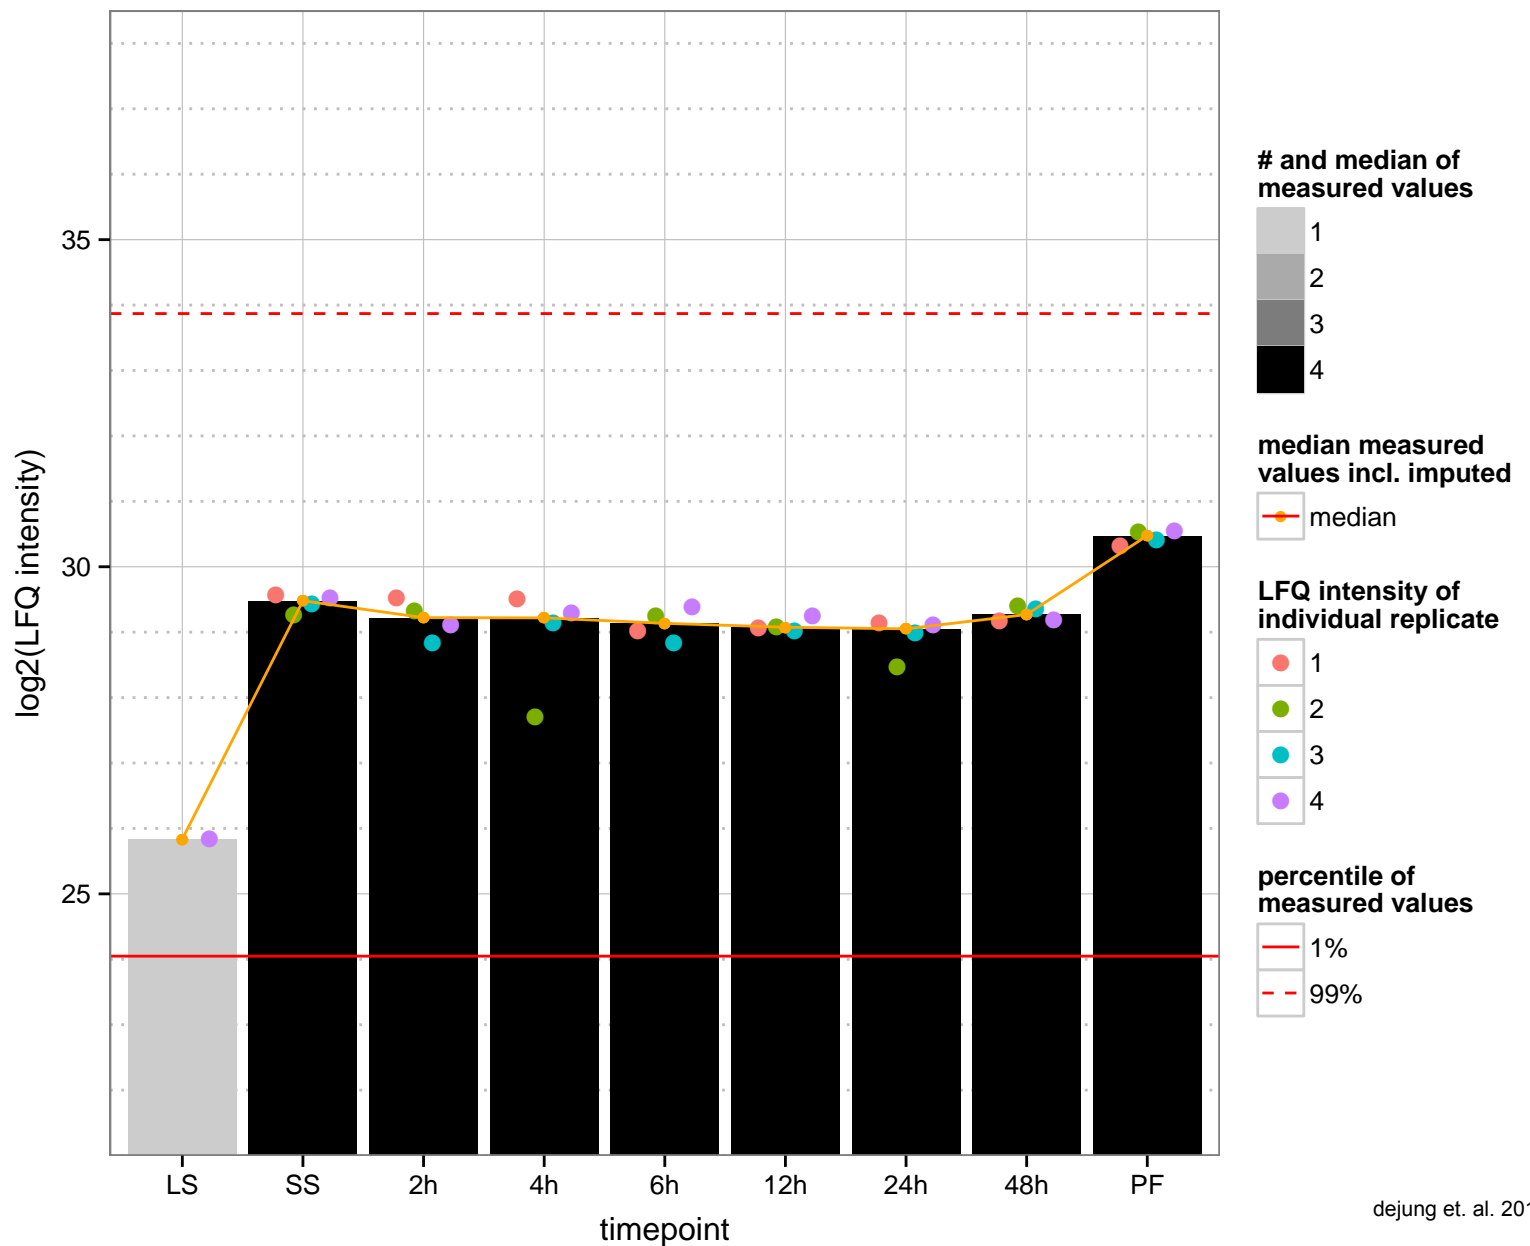

hypothetical protein, conserved  
 Tb927.11.5230  
 AGOF: null  
 AGOC: null  
 AGOP: null  
 PGO: null  
 PGOC: null  
 PGOP: null

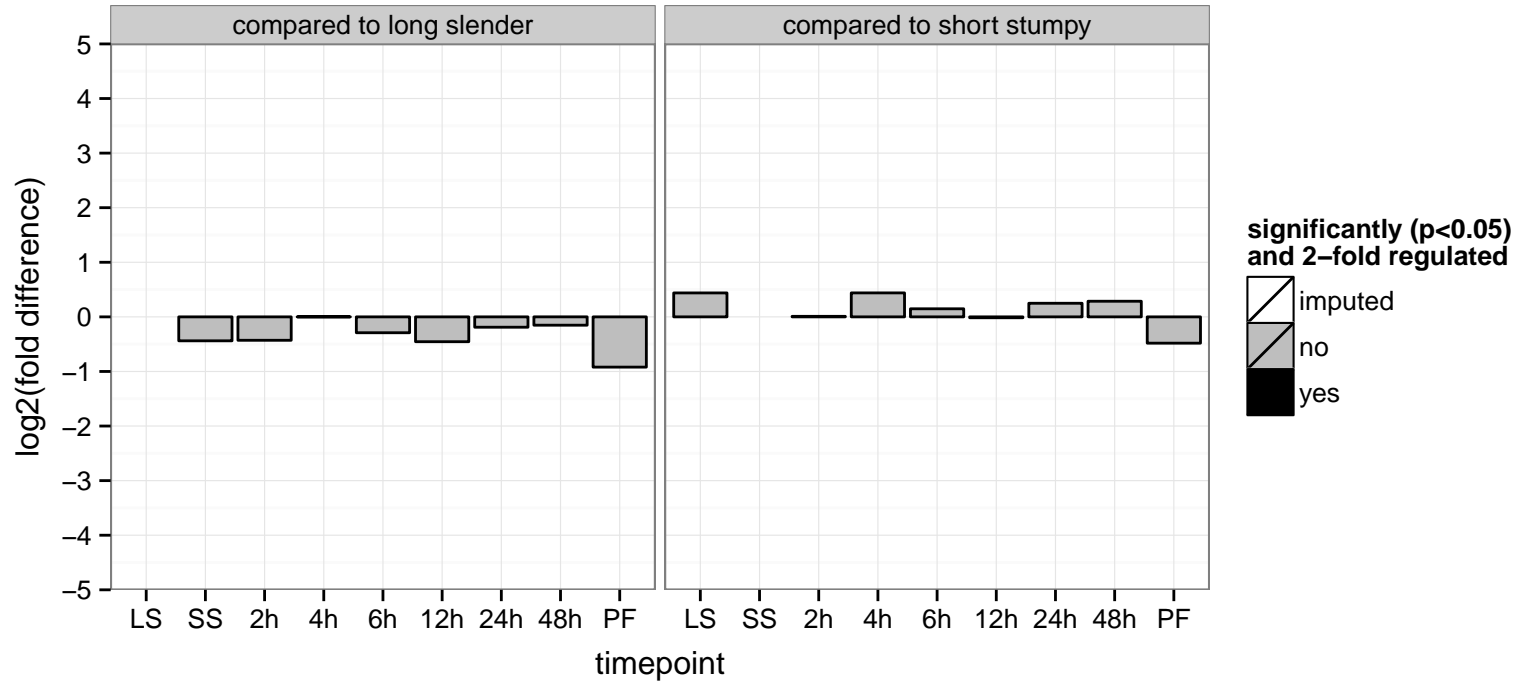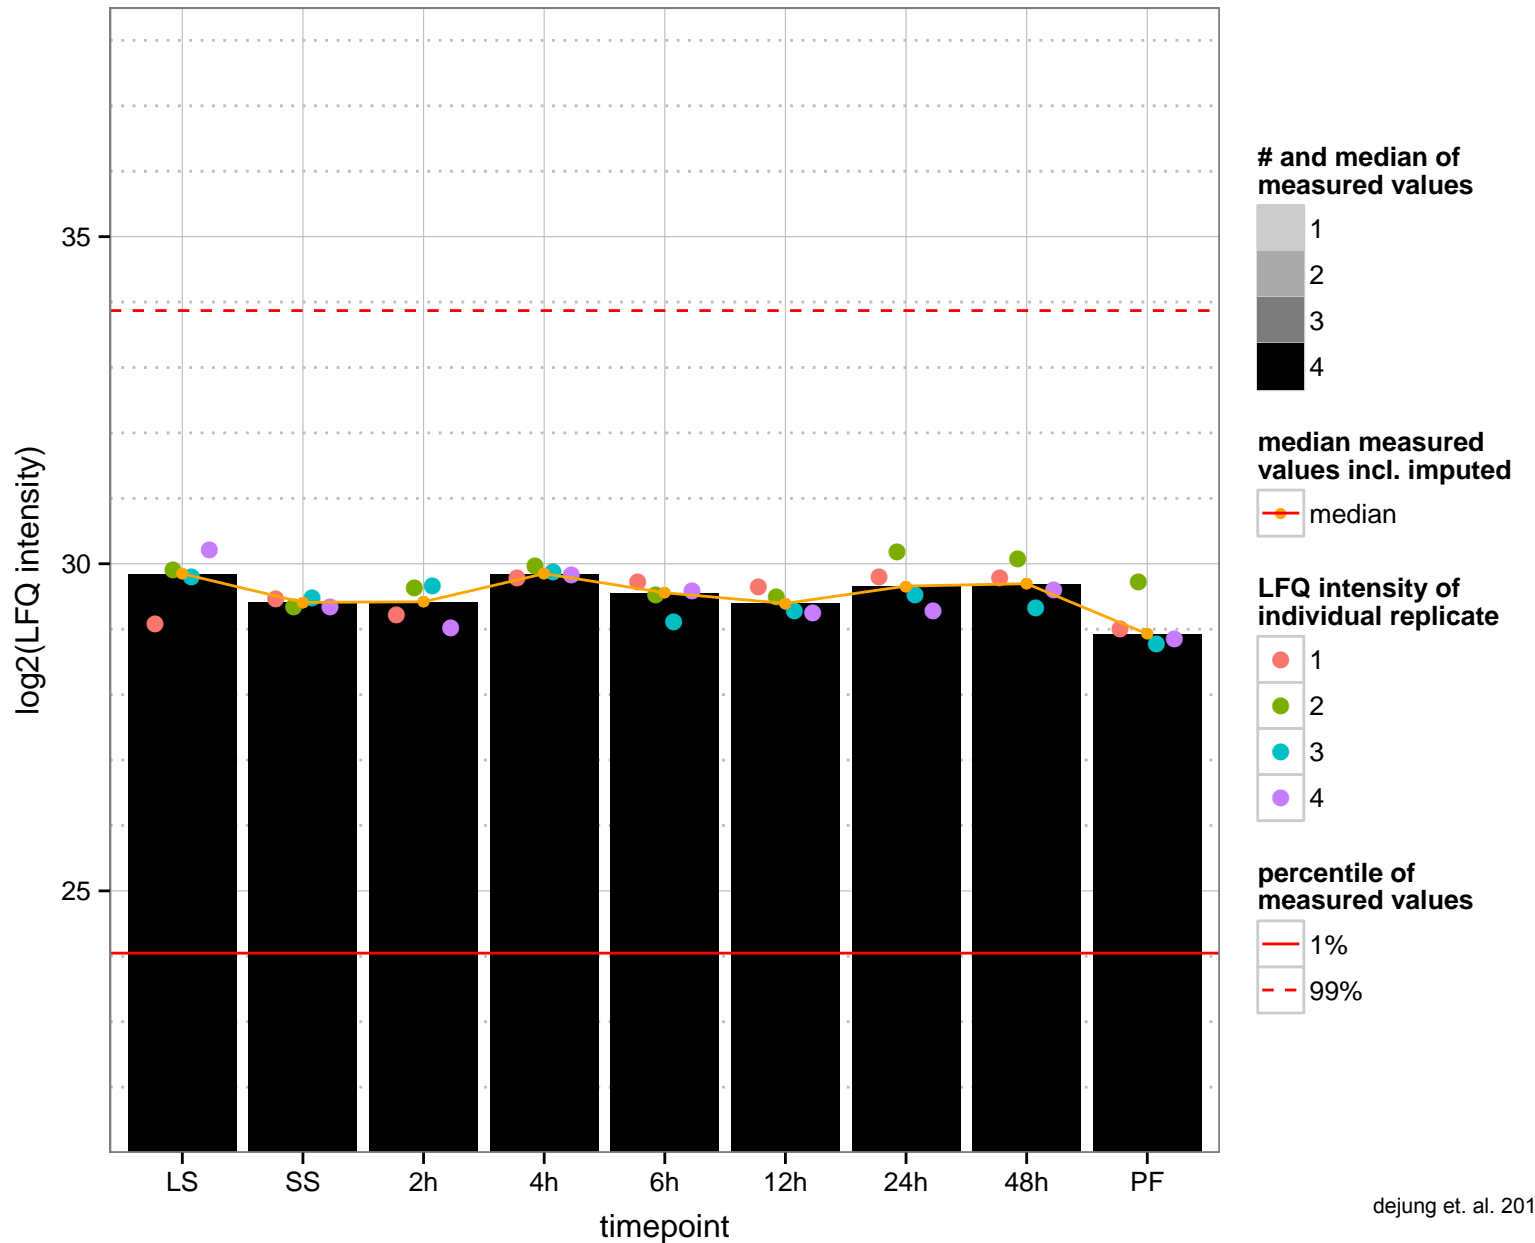

mitochondrial carrier protein (MCP9)

Tb927.11.5290

AGOF: null

AGOC: integral to membrane, membrane, mitochondrial inner membrane, mitochondrion

AGOP: transport

PGOF: null

PGOC: null

PGOP: null

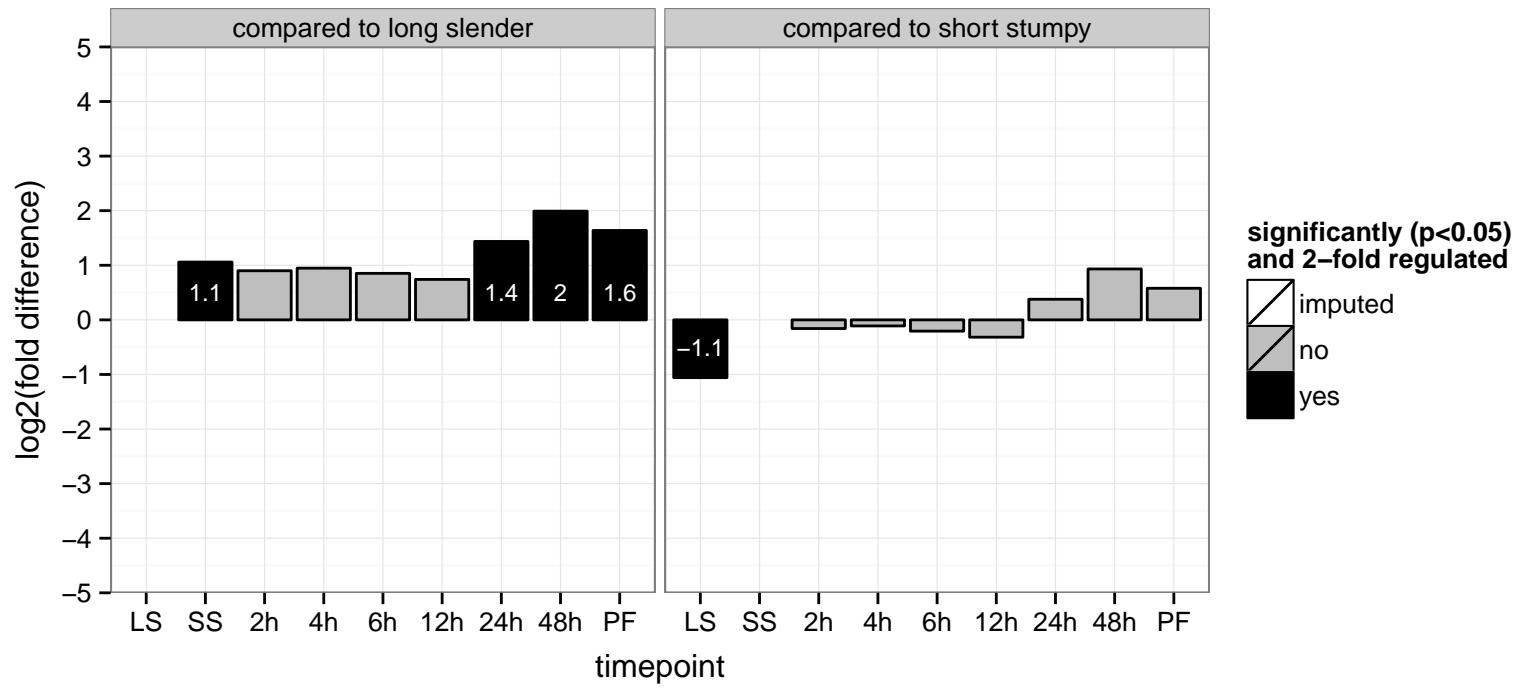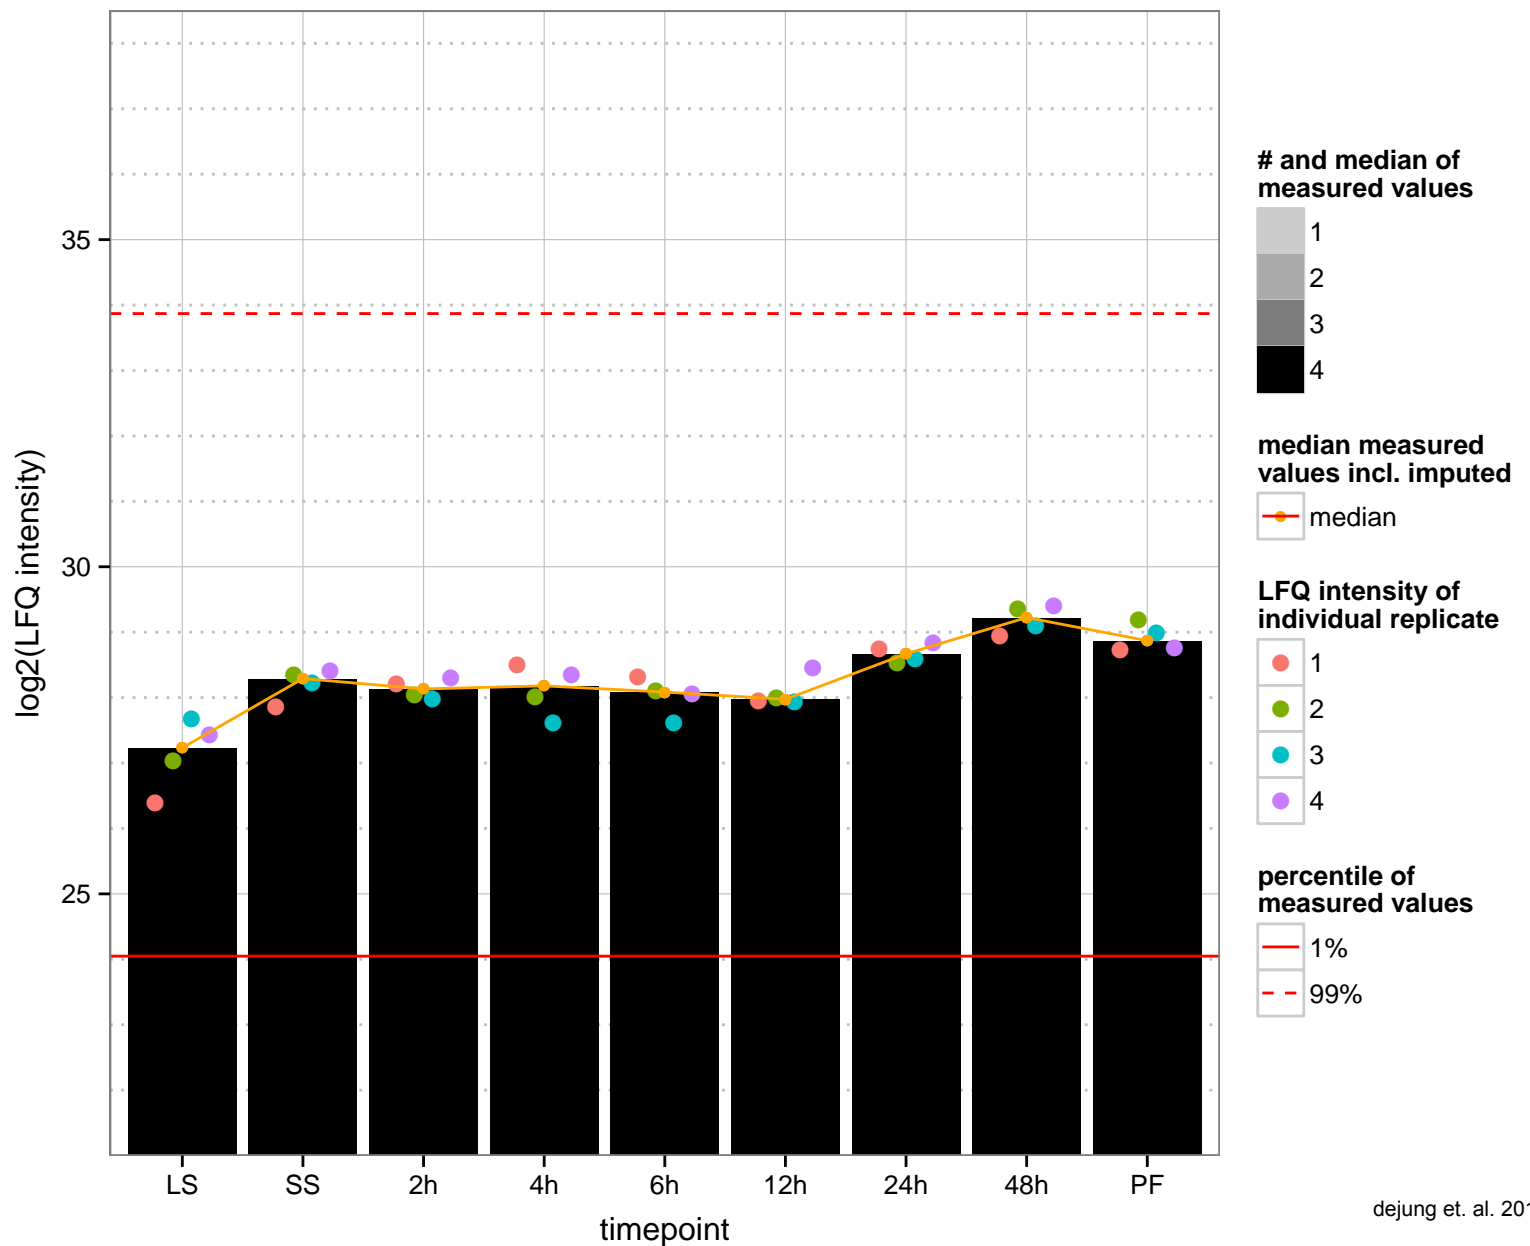

RNA-binding protein, putative (RBP3)  
 Tb927.11.530  
 AGOF: RNA binding  
 AGOC: cytoplasm  
 AGOP: null  
 PGO: nucleic acid binding  
 PGO: null  
 PGOP: null

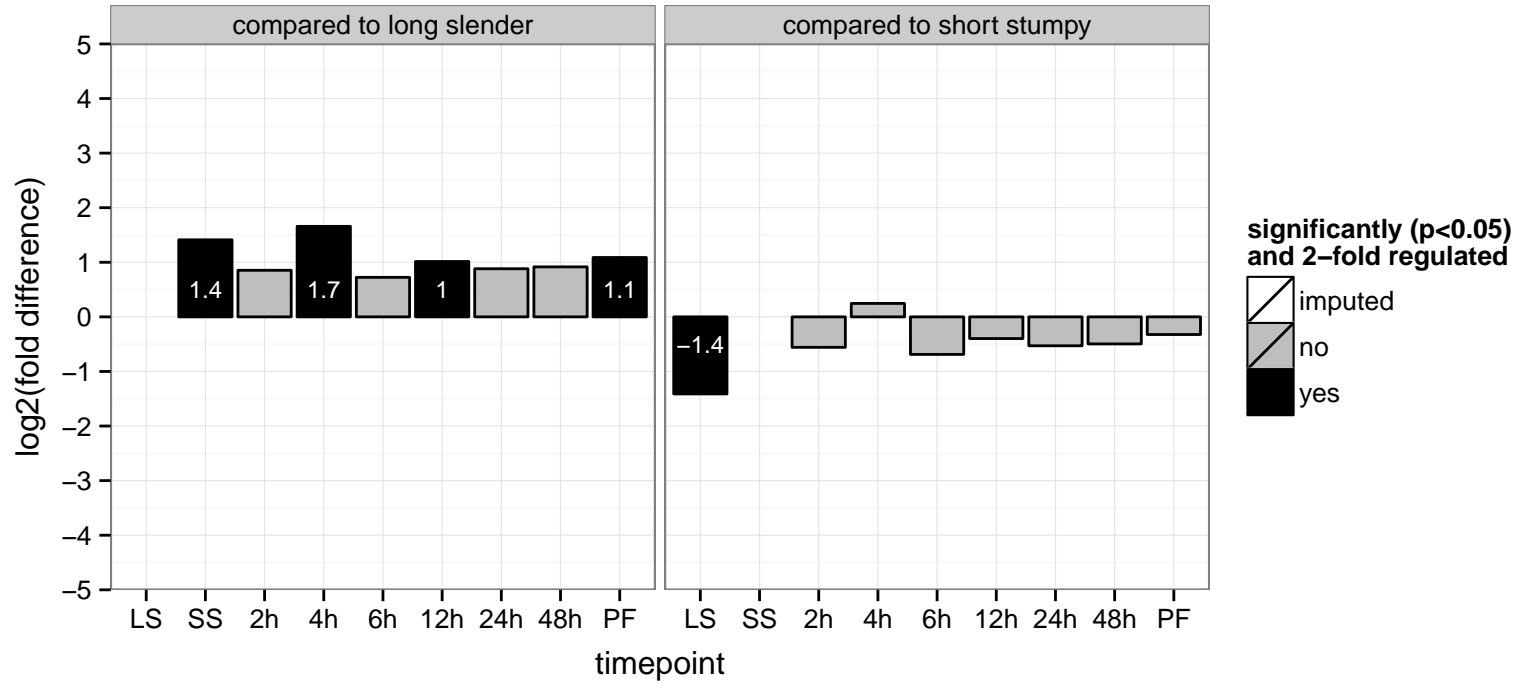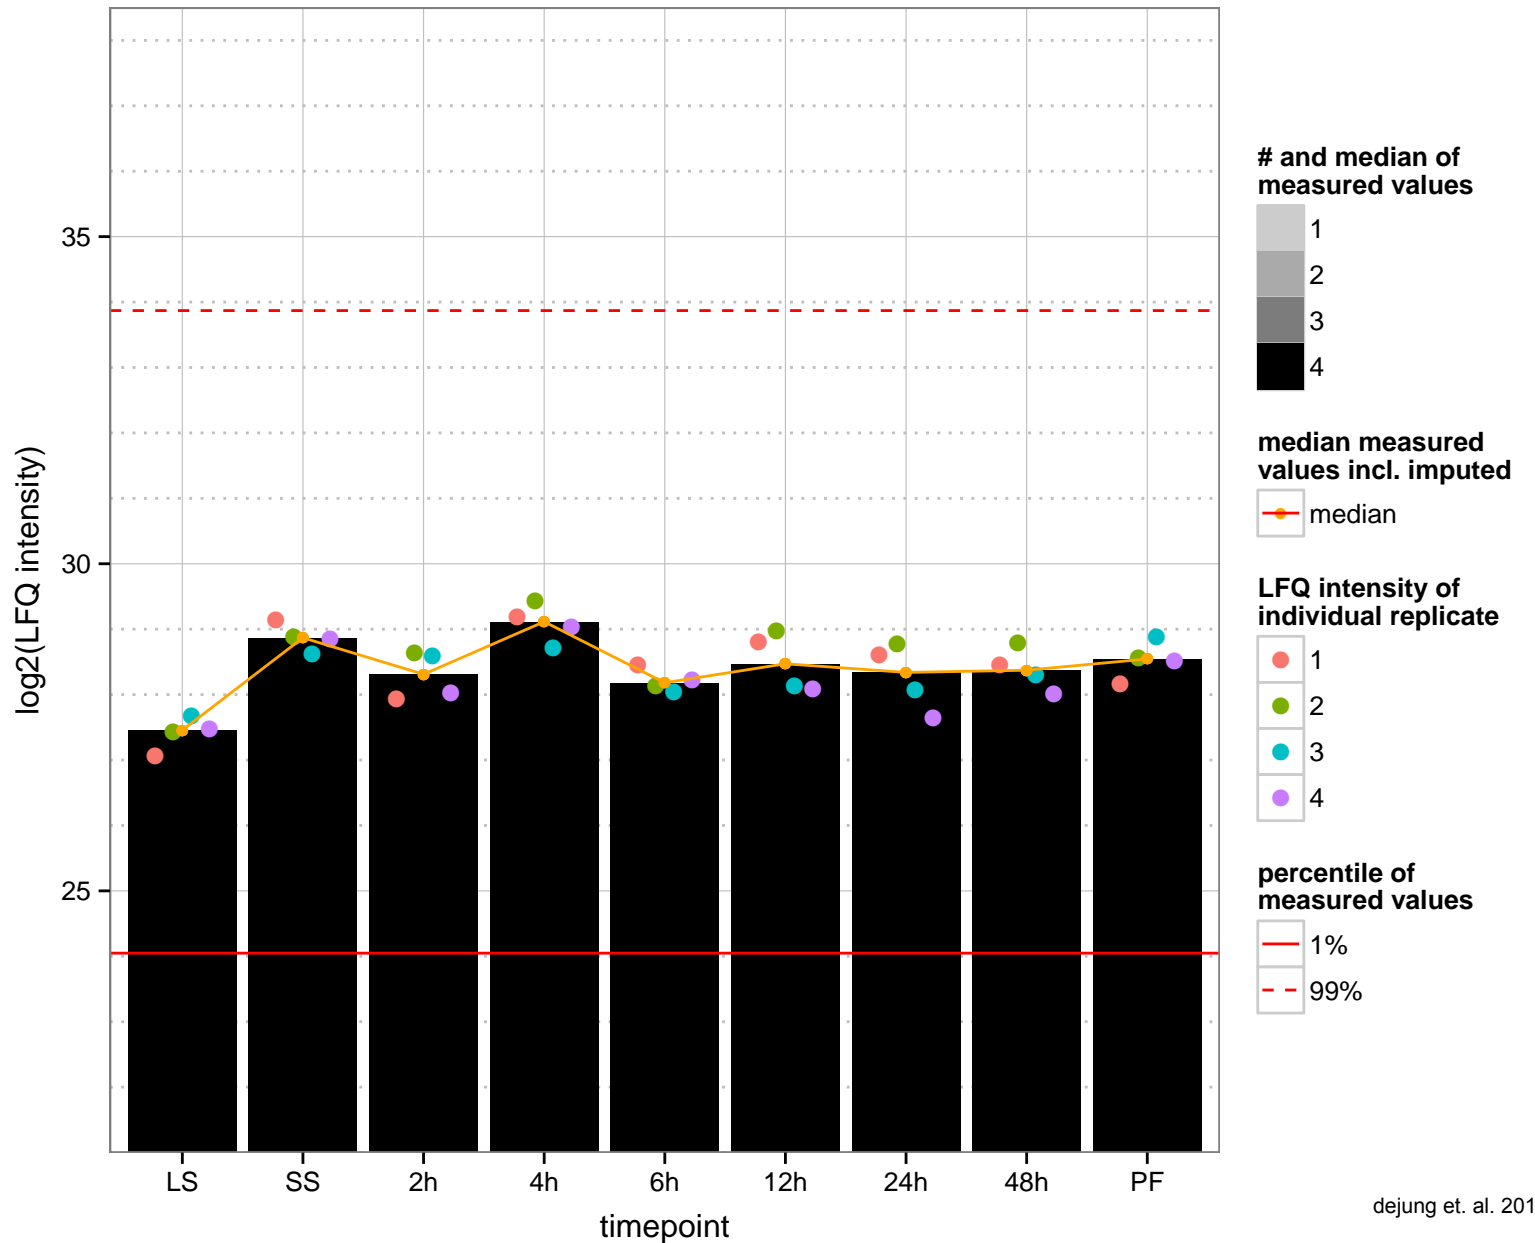

kinesin, putative, mitotic centromere-associated kinesin, putative (Kif13-3)

Tb927.11.5300

AGOF: ATP binding, microtubule motor activity, motor activity

AGOC: cell part, kinesin complex, microtubule associated complex

AGOP: microtubule-based movement

PGOF: ATP binding, microtubule motor activity

PGOC: null

PGOP: microtubule-based movement

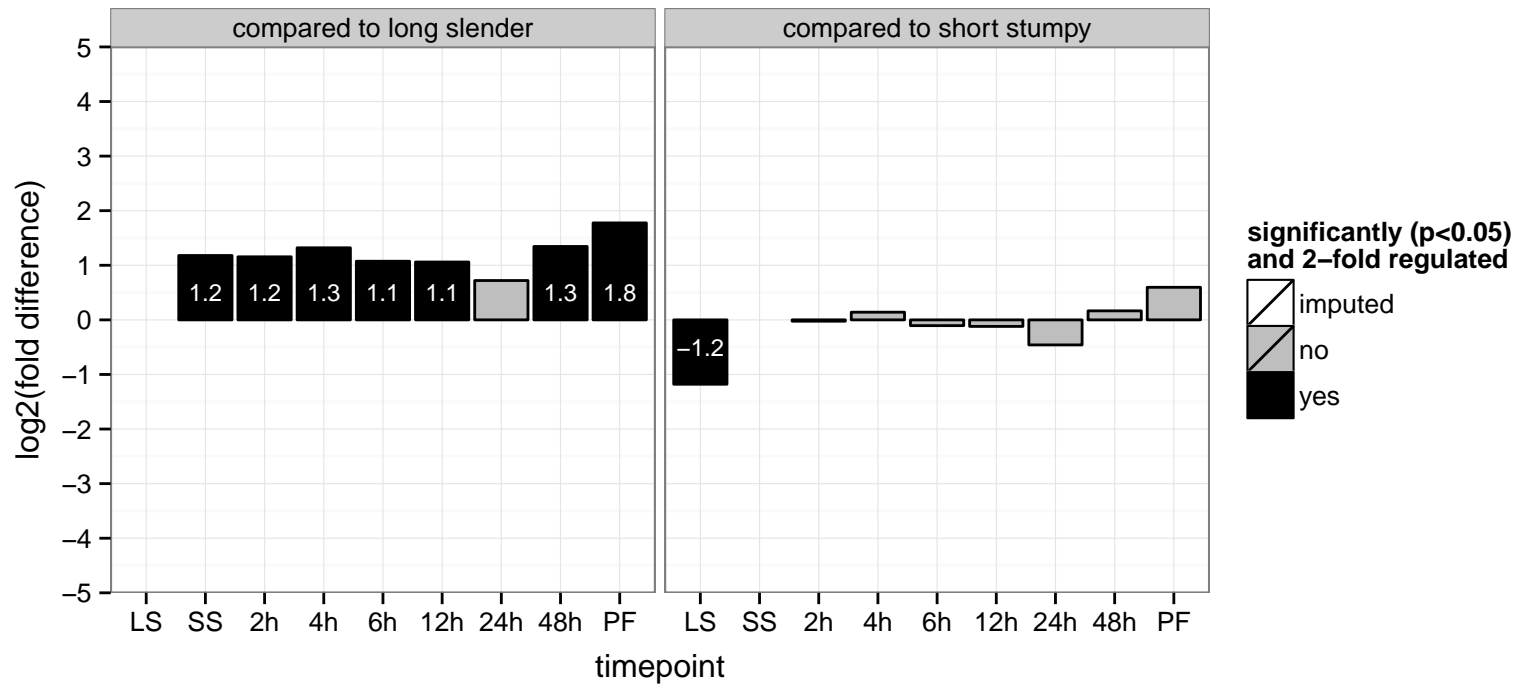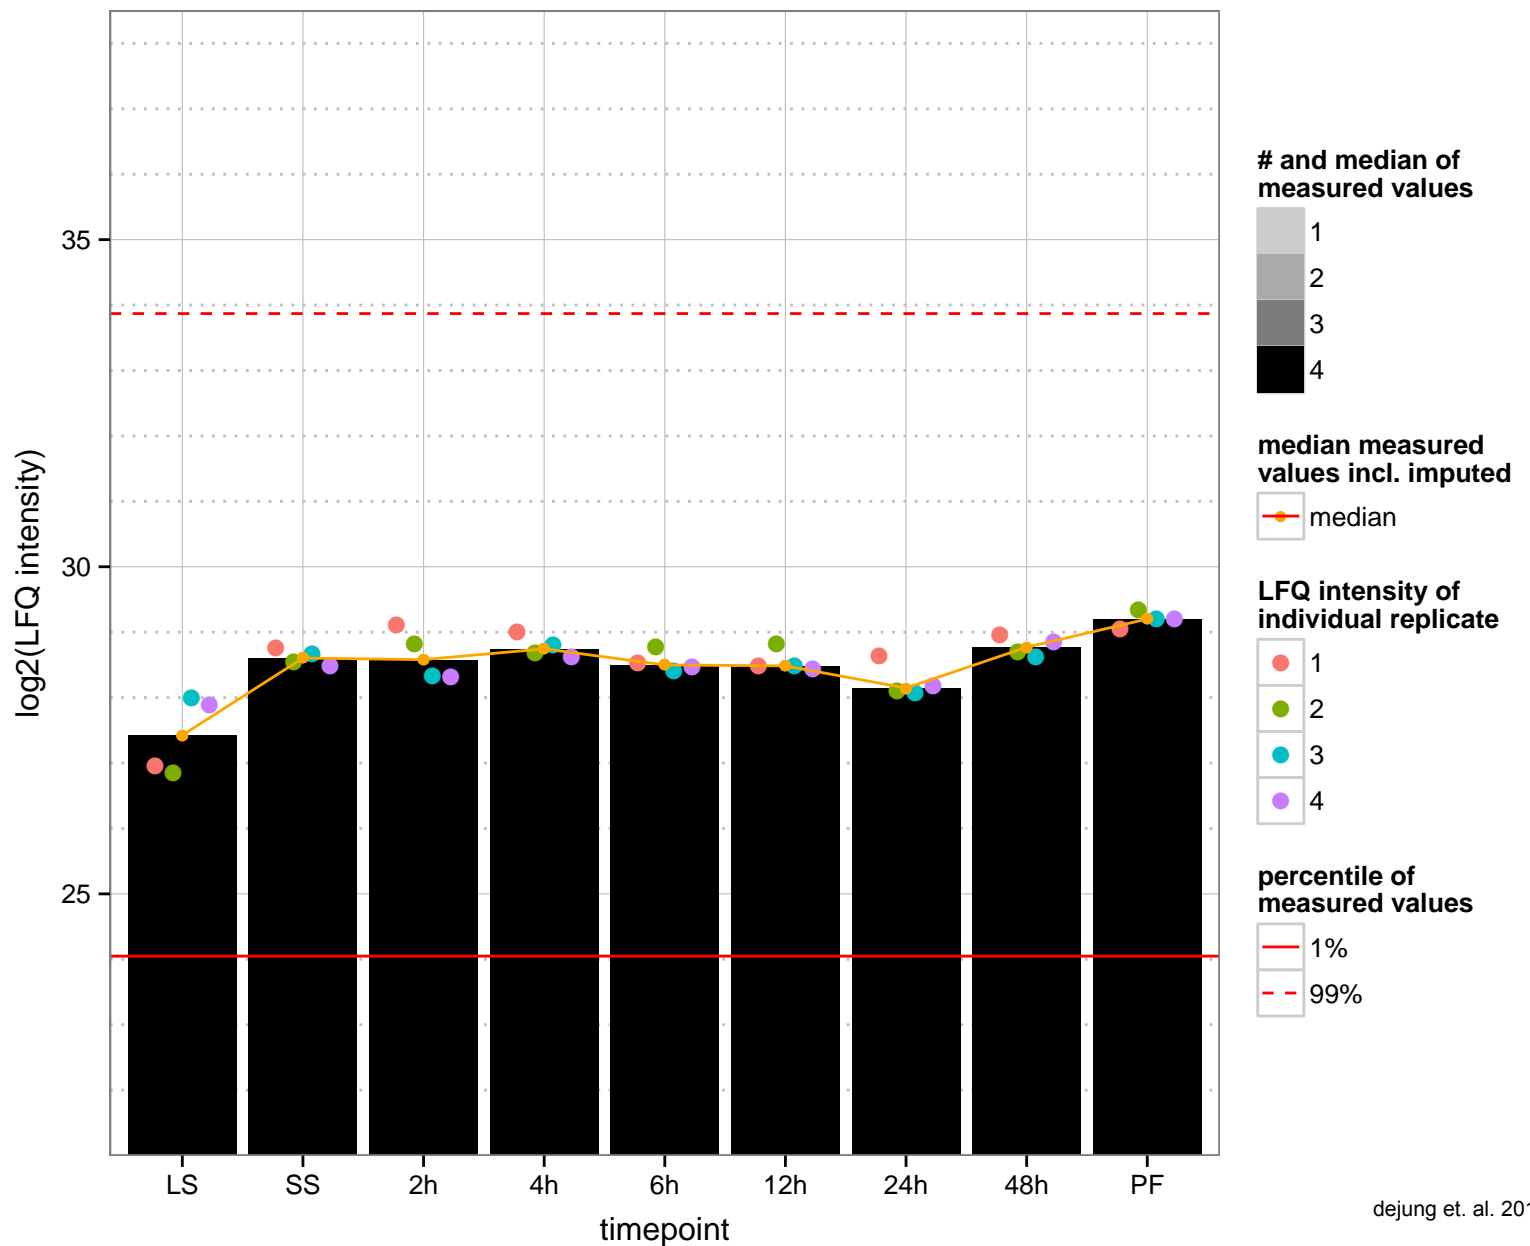

ABC transporter, putative (ABCB10)

Tb927.11.540

AGOF: ATP binding, ATPase activity, coupled to transmembrane movement of substances

AGOC: ATP-binding cassette (ABC) transporter complex, integral to membrane, mitochondrial inner membrane transport

PGOF: ATP binding, ATPase activity, coupled to transmembrane movement of substances, nucleoside-triphosphatase activity

PGOC: integral to membrane

PGOP: transmembrane transport, transport

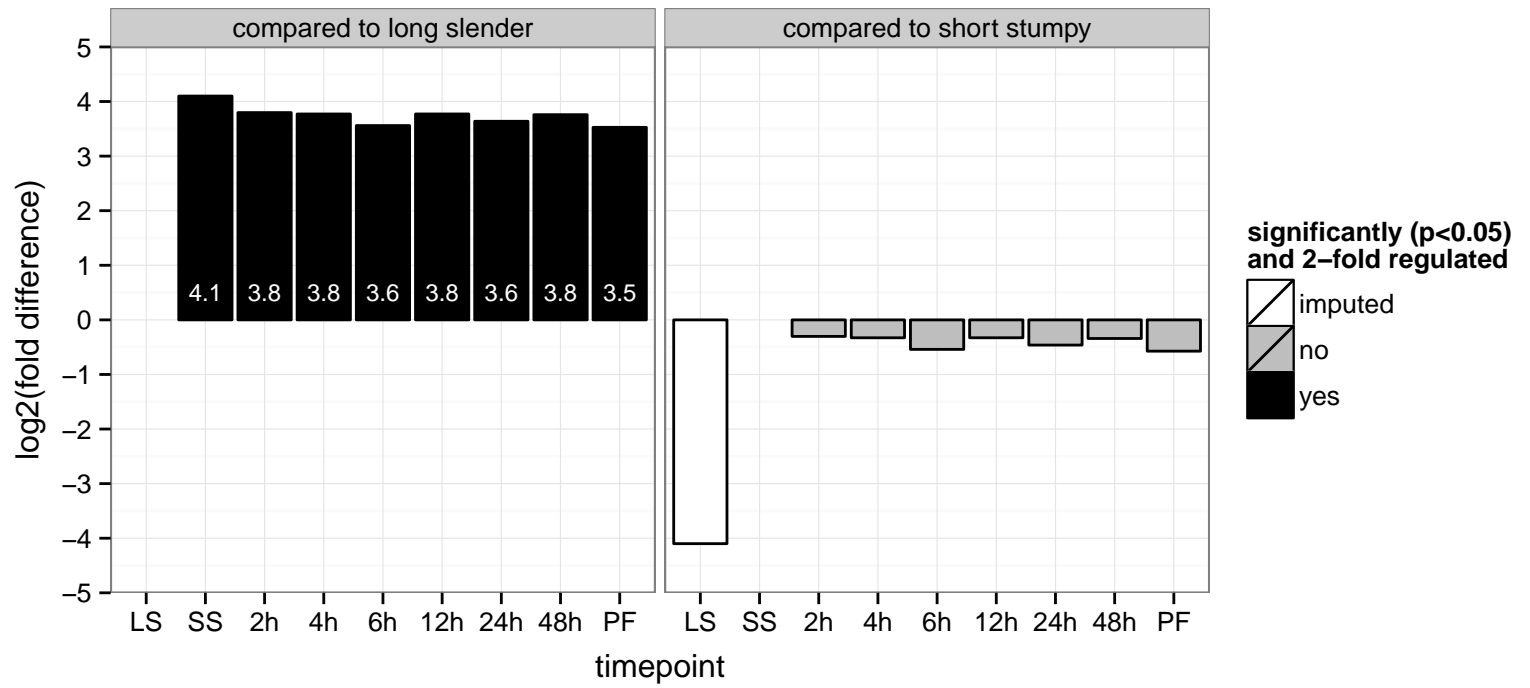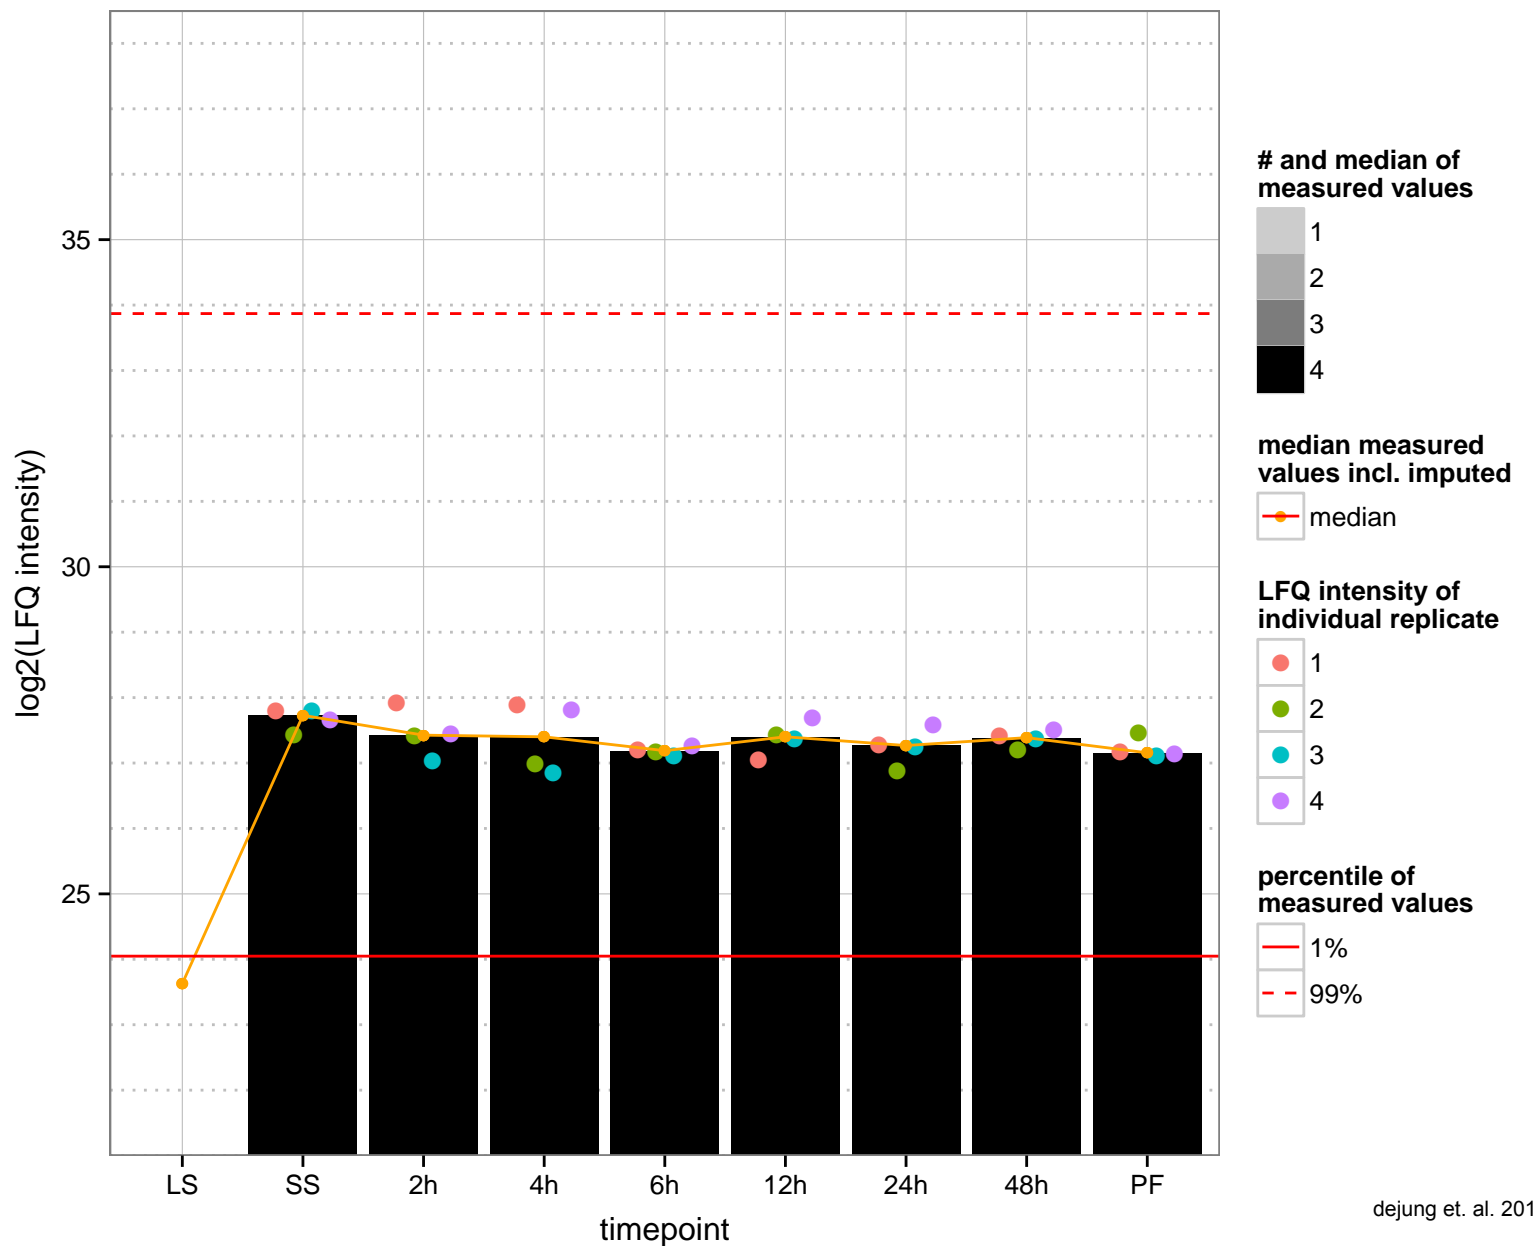



signal recognition particle 54 kDa (SRP54)

Tb927.11.5400

AGOF: 7S RNA binding, GTP binding, GTPase activity, RNA binding

AGOC: signal recognition particle, endoplasmic reticulum targeting

AGOP: SRP-dependent cotranslational protein targeting to membrane, protein targeting

PGOF: 7S RNA binding, GTP binding, nucleoside-triphosphatase activity, nucleotide binding

PGOC: signal recognition particle

PGOP: SRP-dependent cotranslational protein targeting to membrane

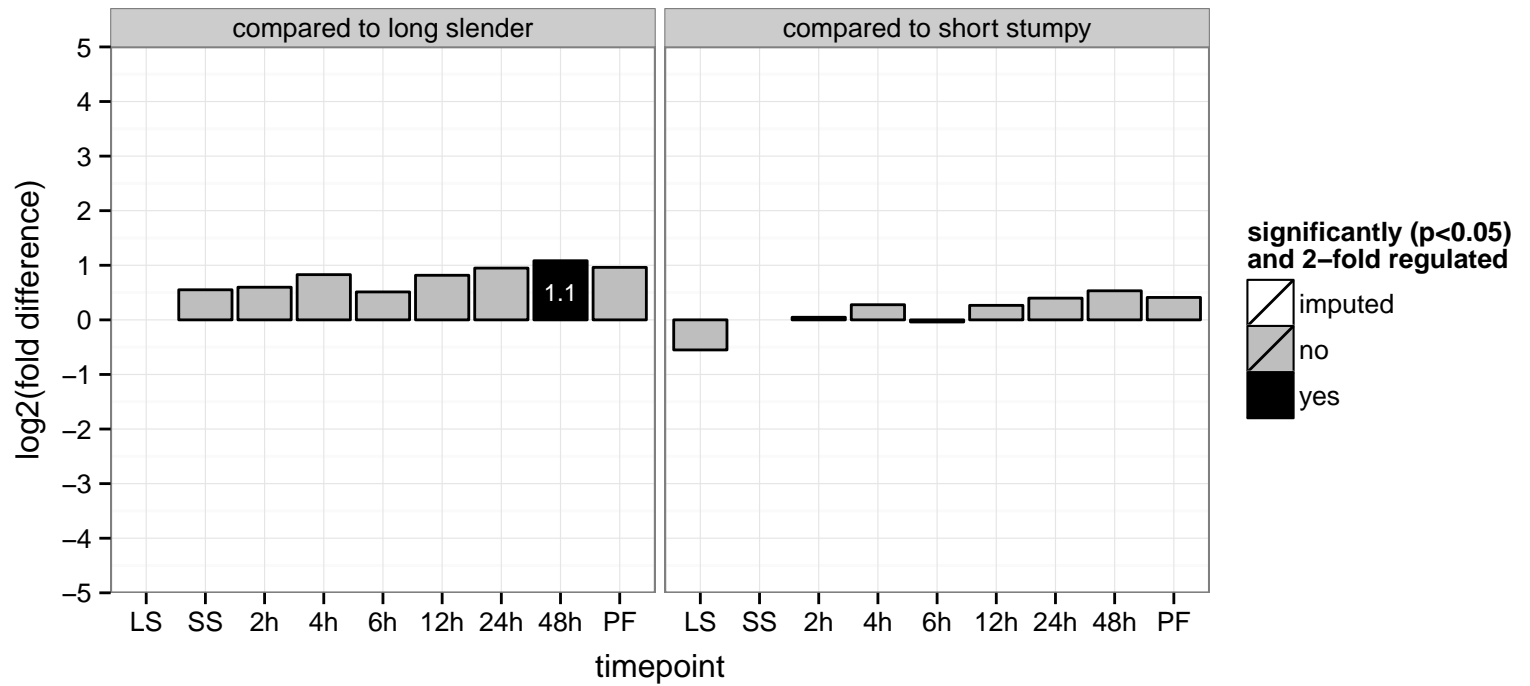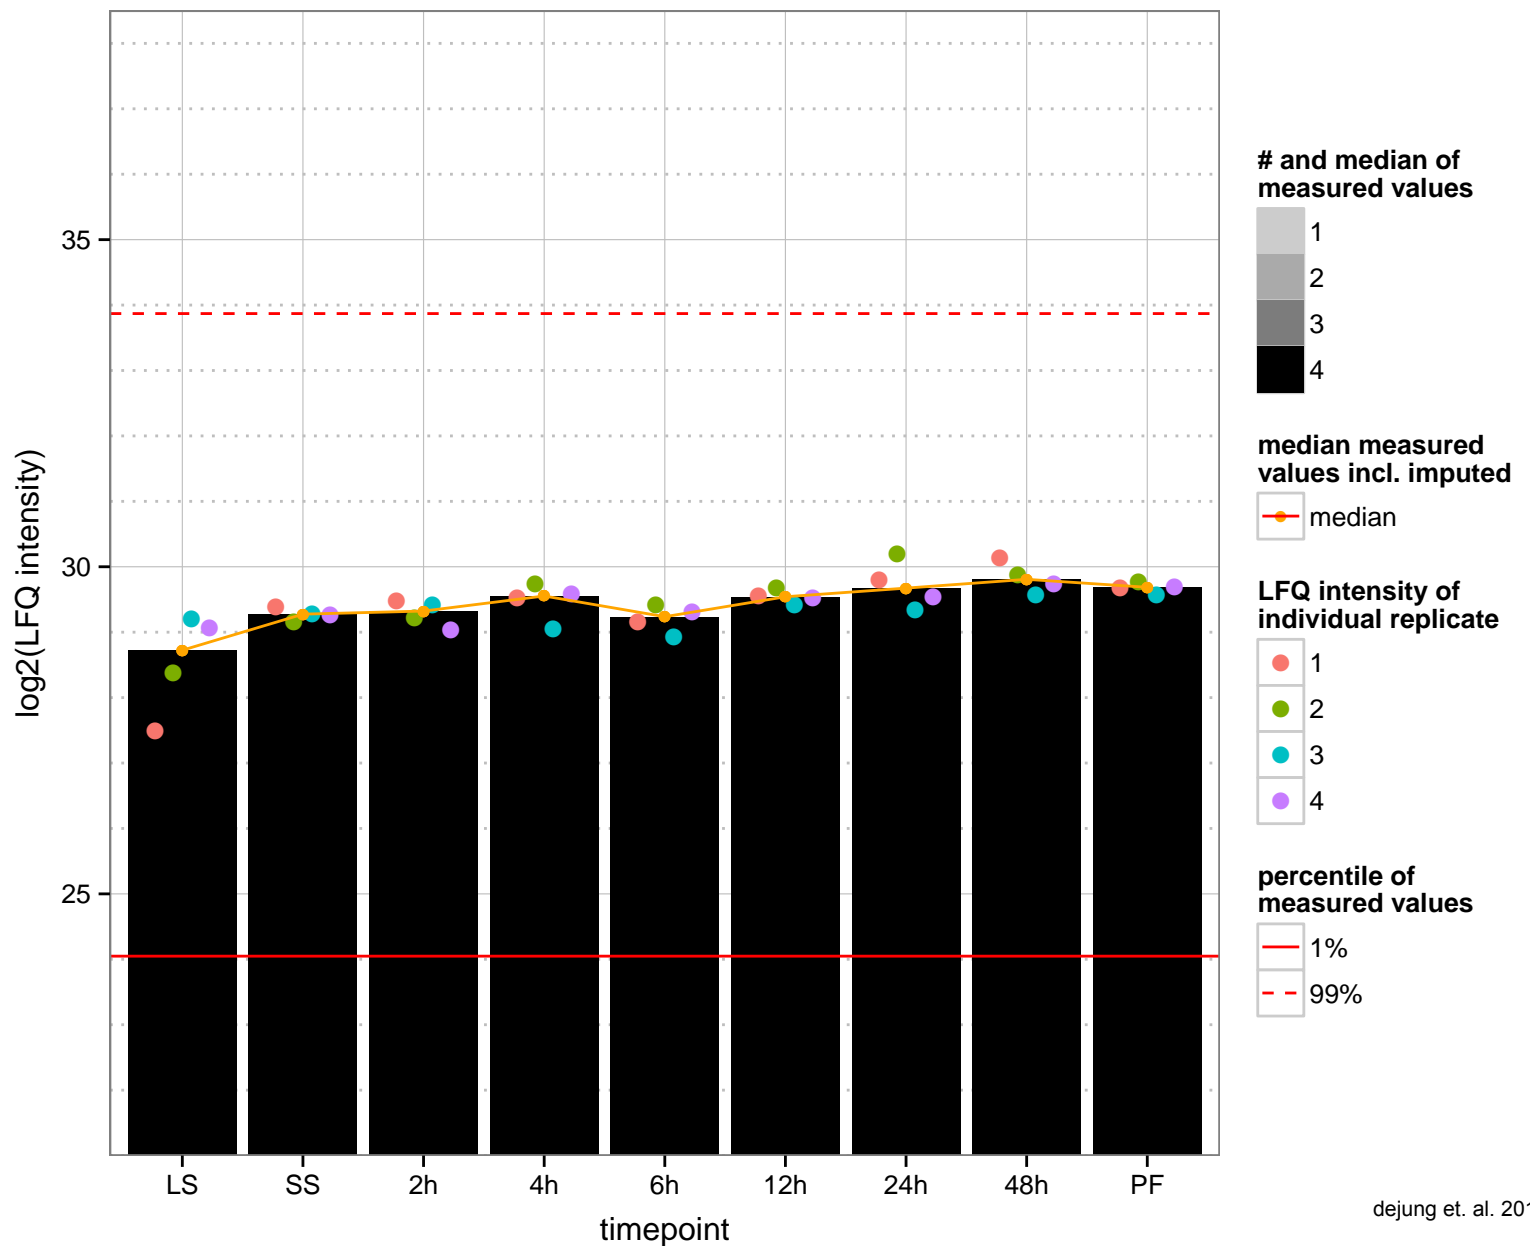

hypothetical protein, conserved  
 Tb927.11.5420  
 AGOF: null  
 AGOC: null  
 AGOP: null  
 PGO: null  
 PGOC: null  
 PGOP: null

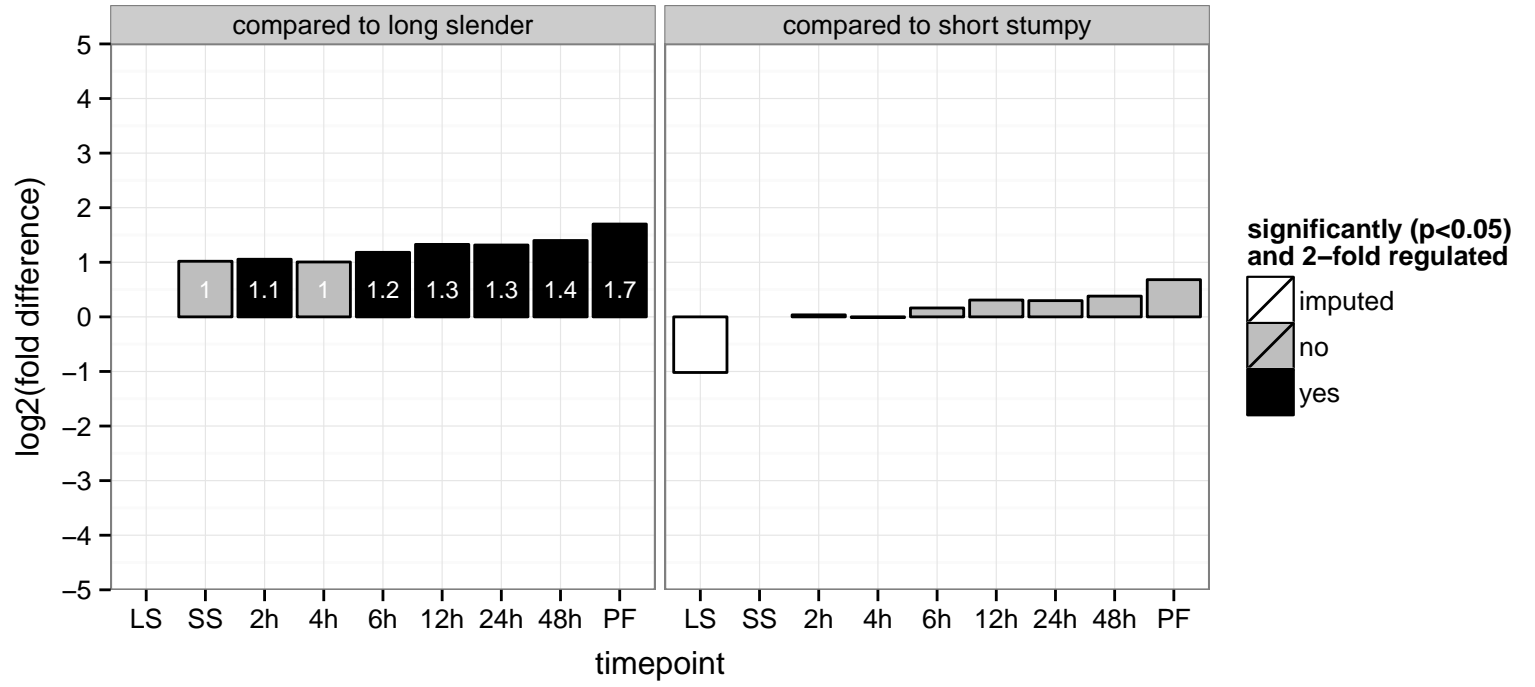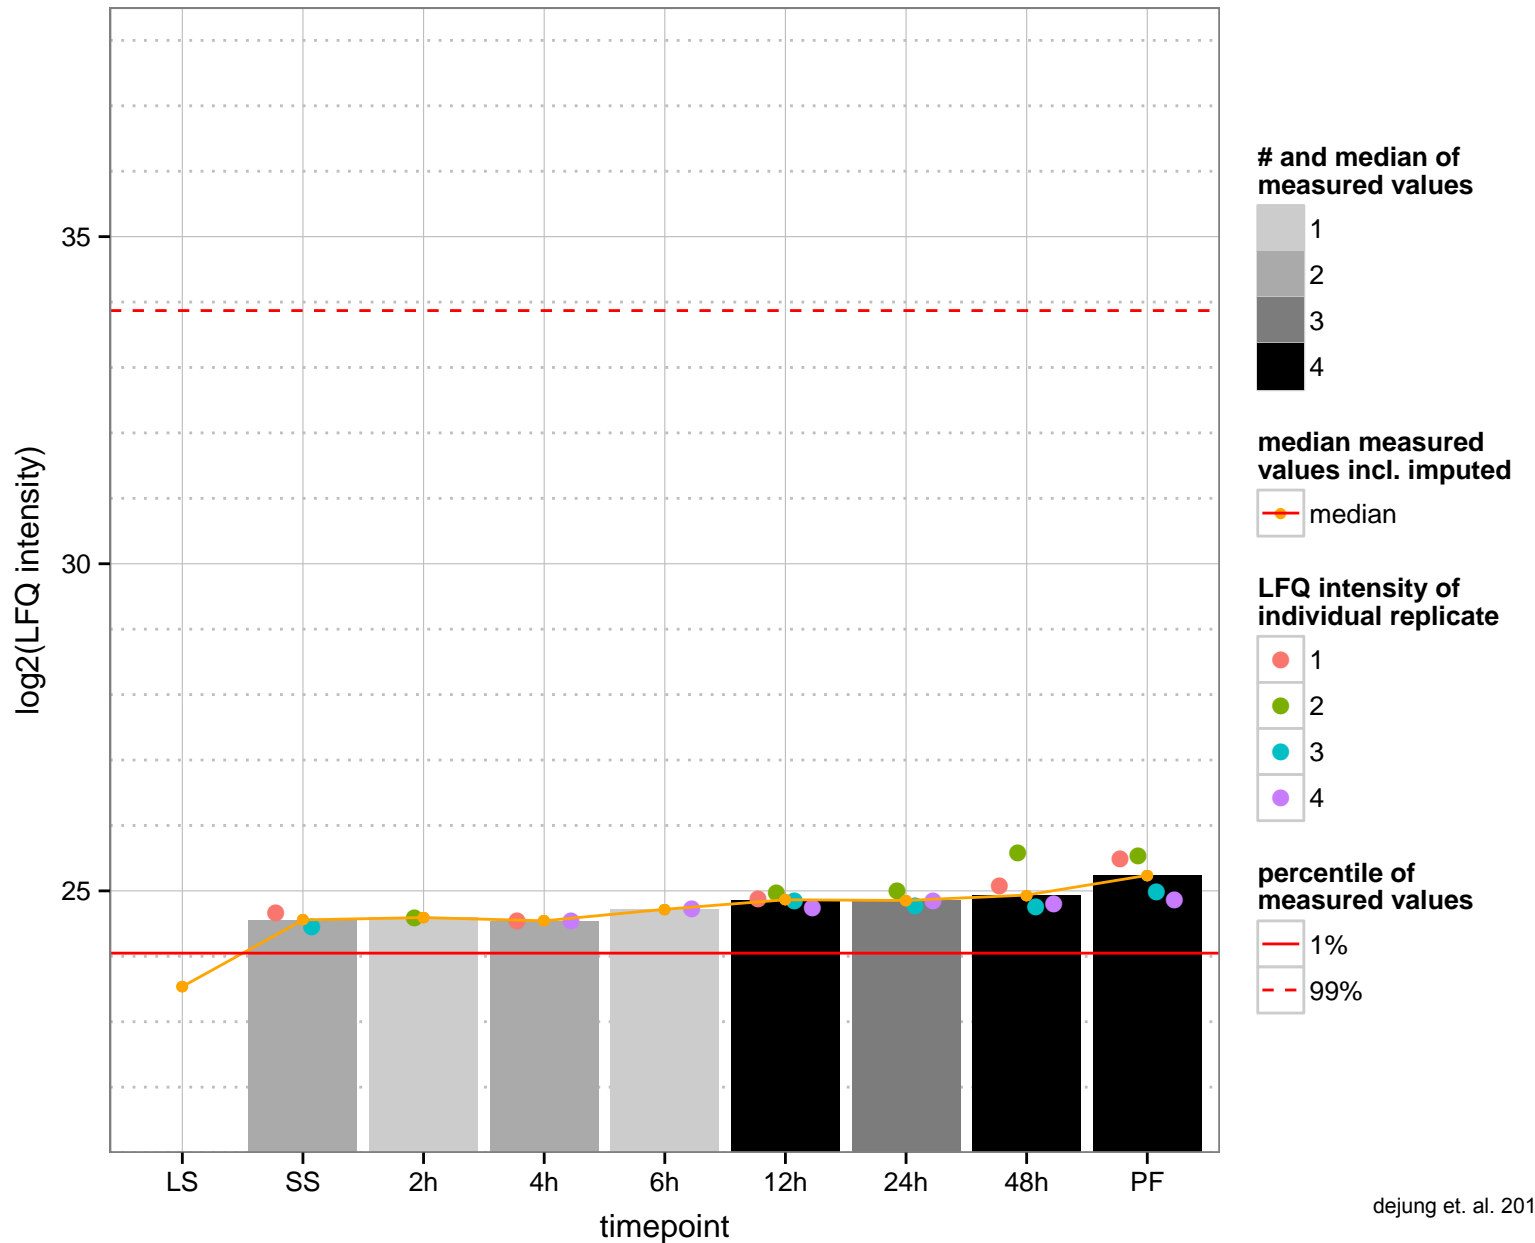

malic enzyme  
 Tb927.11.5450  
 AGOF: NAD binding, NADP+ binding, malic enzyme activity, oxidoreductase activity, acting on the CH-OH group of donors, NAD dependent  
 AGOC: mitochondrion  
 AGOP: malate metabolic process  
 PGOF: NAD binding, malate dehydrogenase (oxaloacetate-decarboxylating) activity, malic enzyme activity, oxidoreductase activity, acting on the CH-OH group of donors, NAD dependent  
 PGO: null  
 PGOP: malate metabolic process, oxidation-reduction process

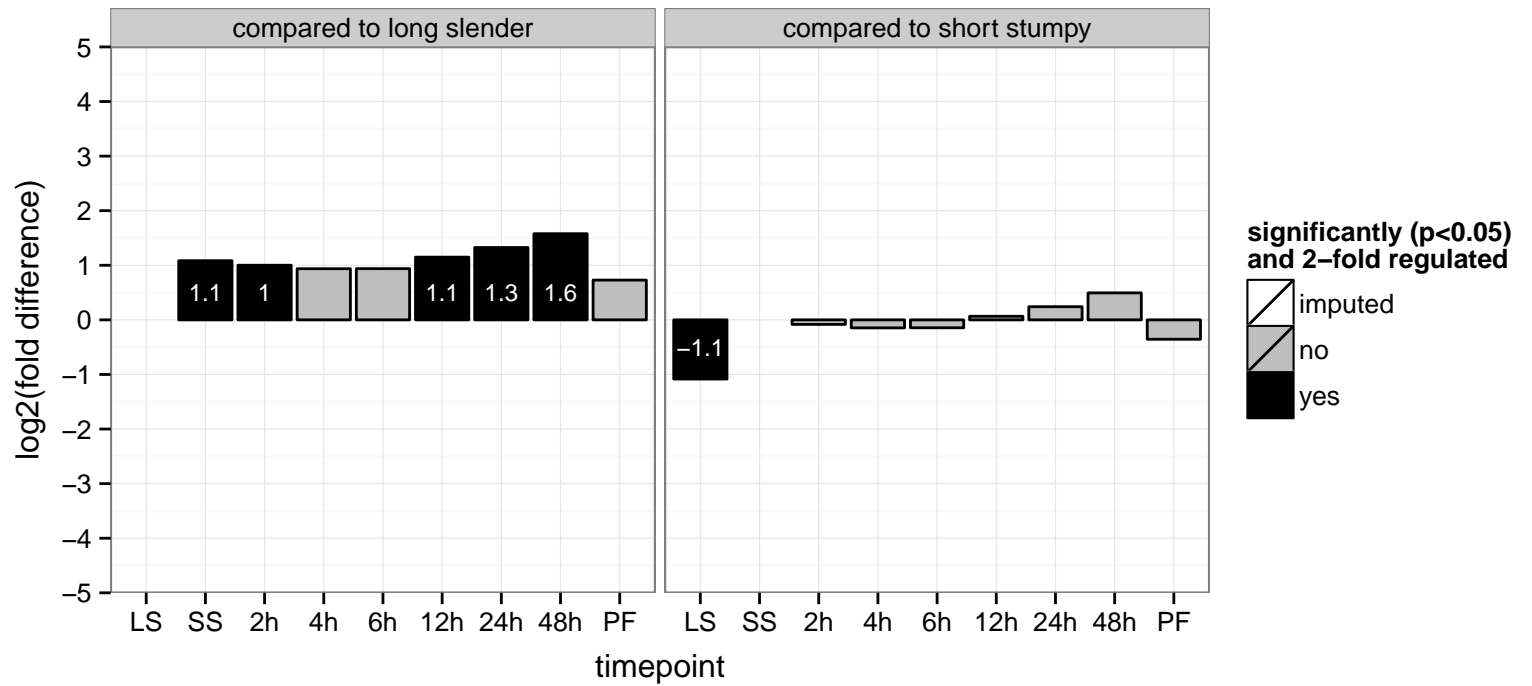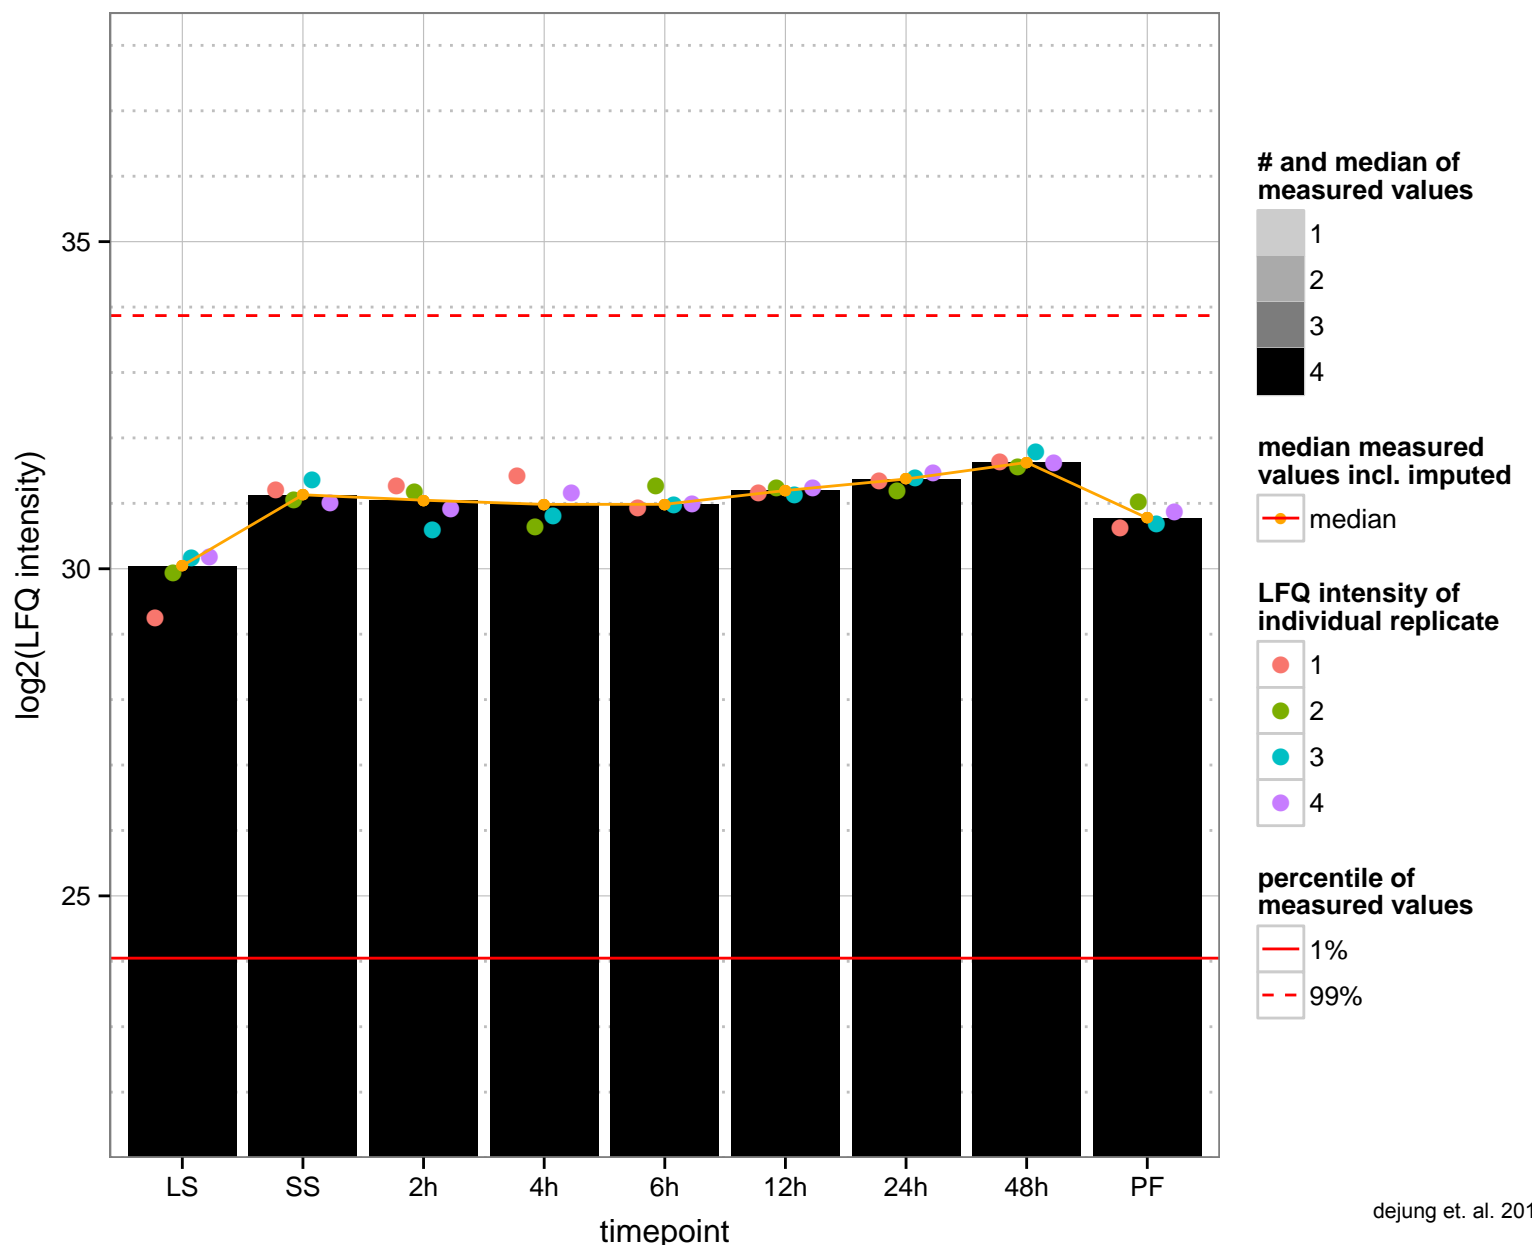

hypothetical protein SCD6.10  
 Tb927.11.550  
 AGOF: null  
 AGOC: cytoplasm  
 AGOP: null  
 PGO: null  
 PGOC: null  
 PGOP: null

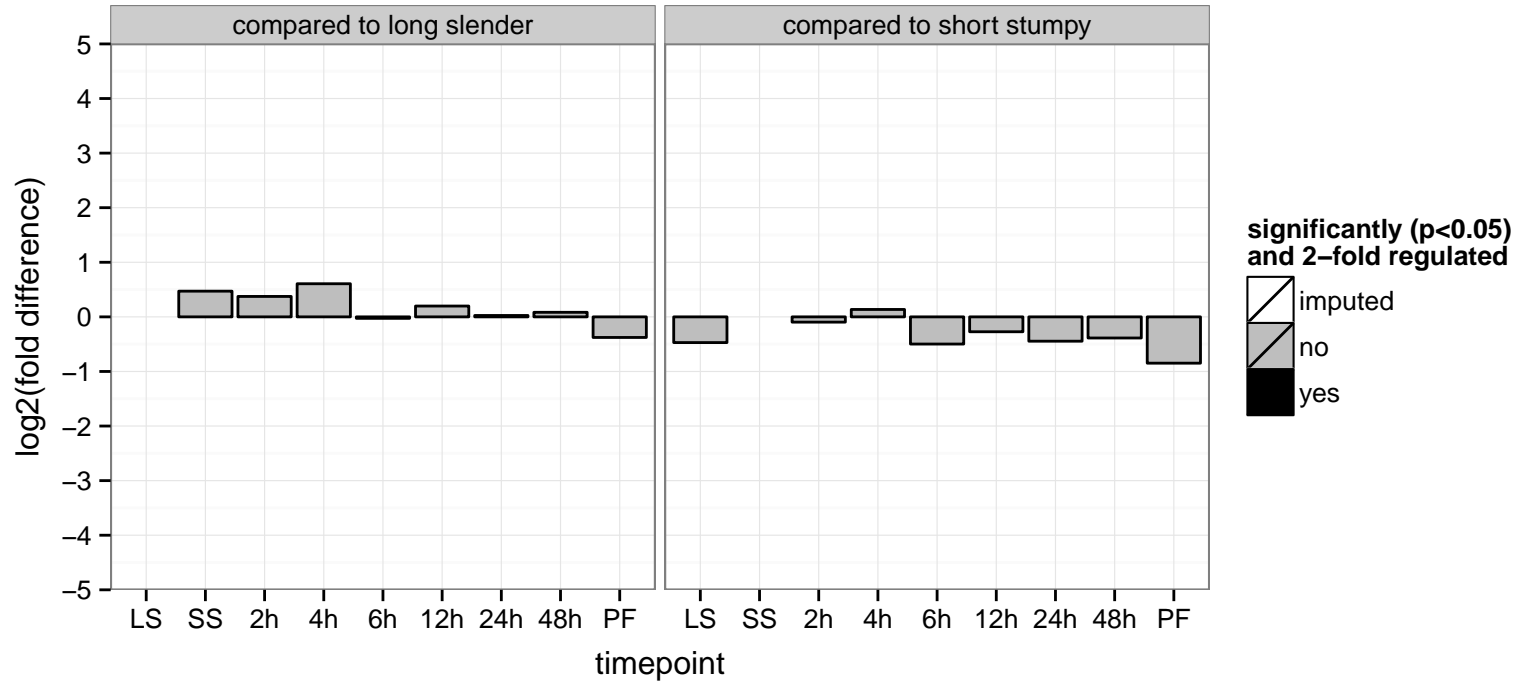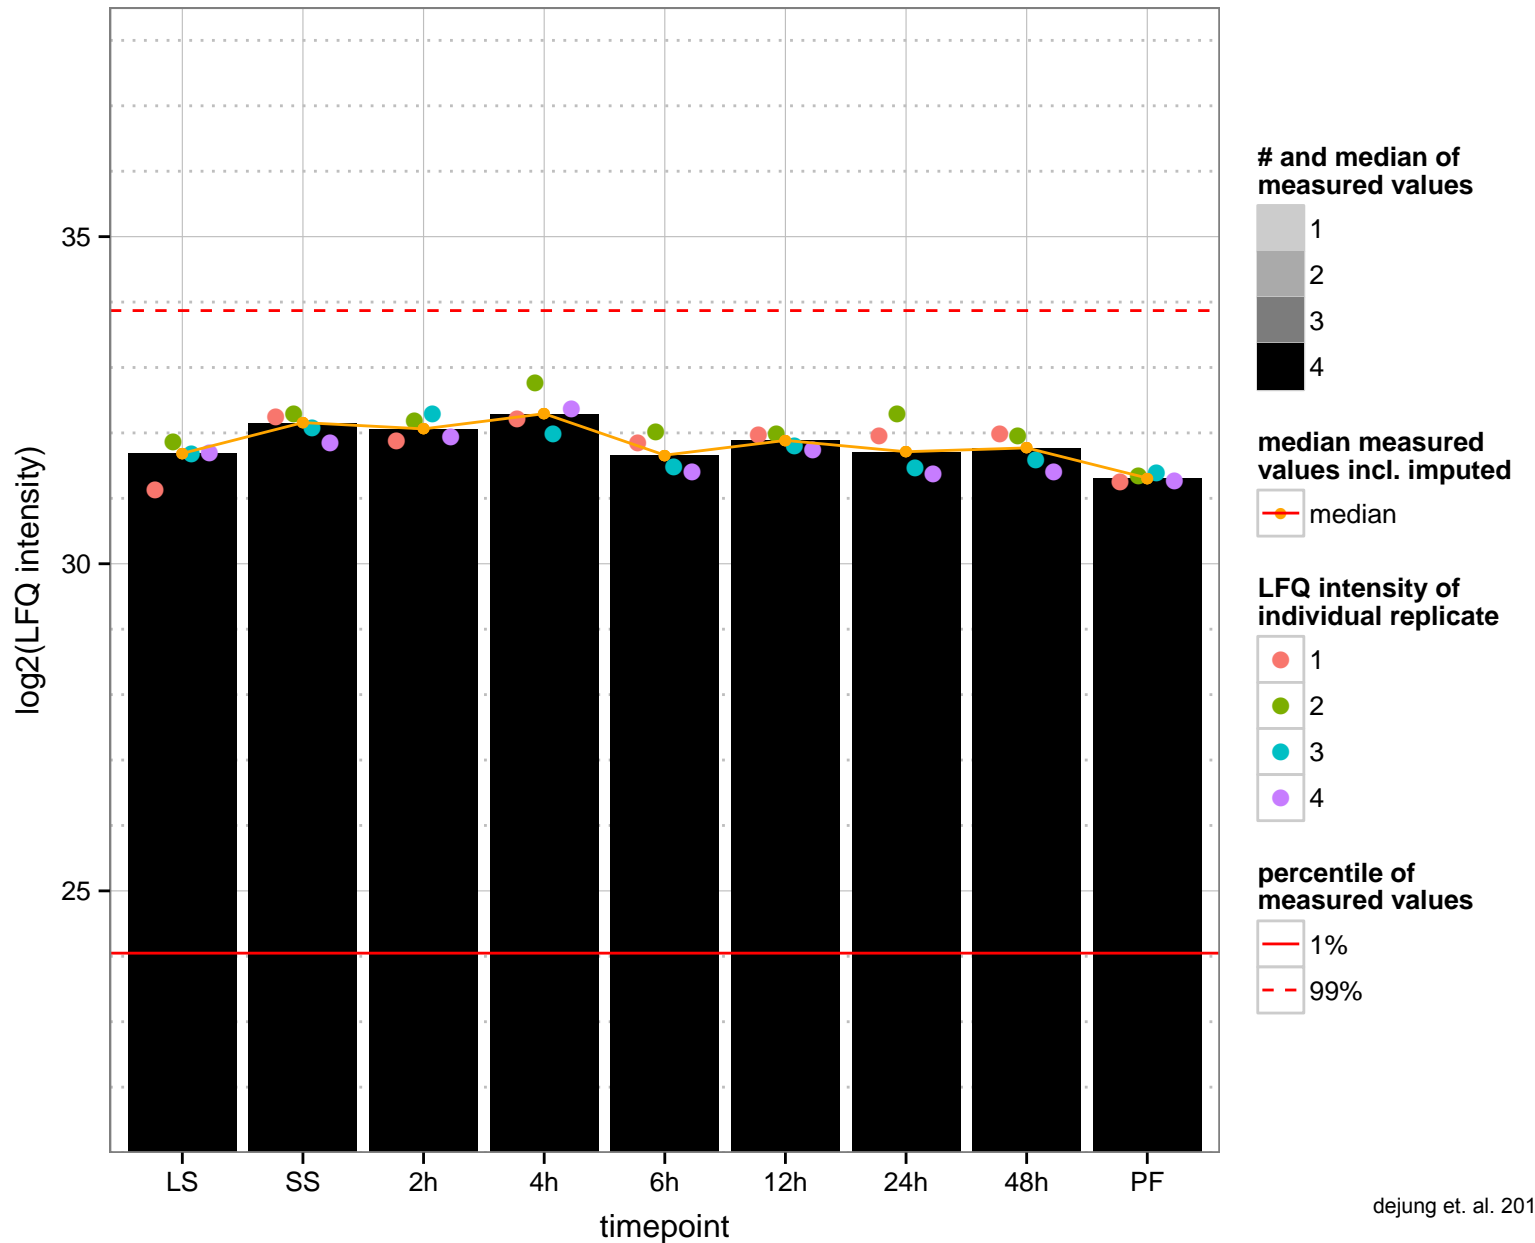

dynein light chain p28, axonemal, putative  
 Tb927.11.5510  
 AGOF: microtubule motor activity  
 AGOC: axonemal dynein complex  
 AGOP: cellular component movement  
 PGO: null  
 PGOC: null  
 PGOP: null

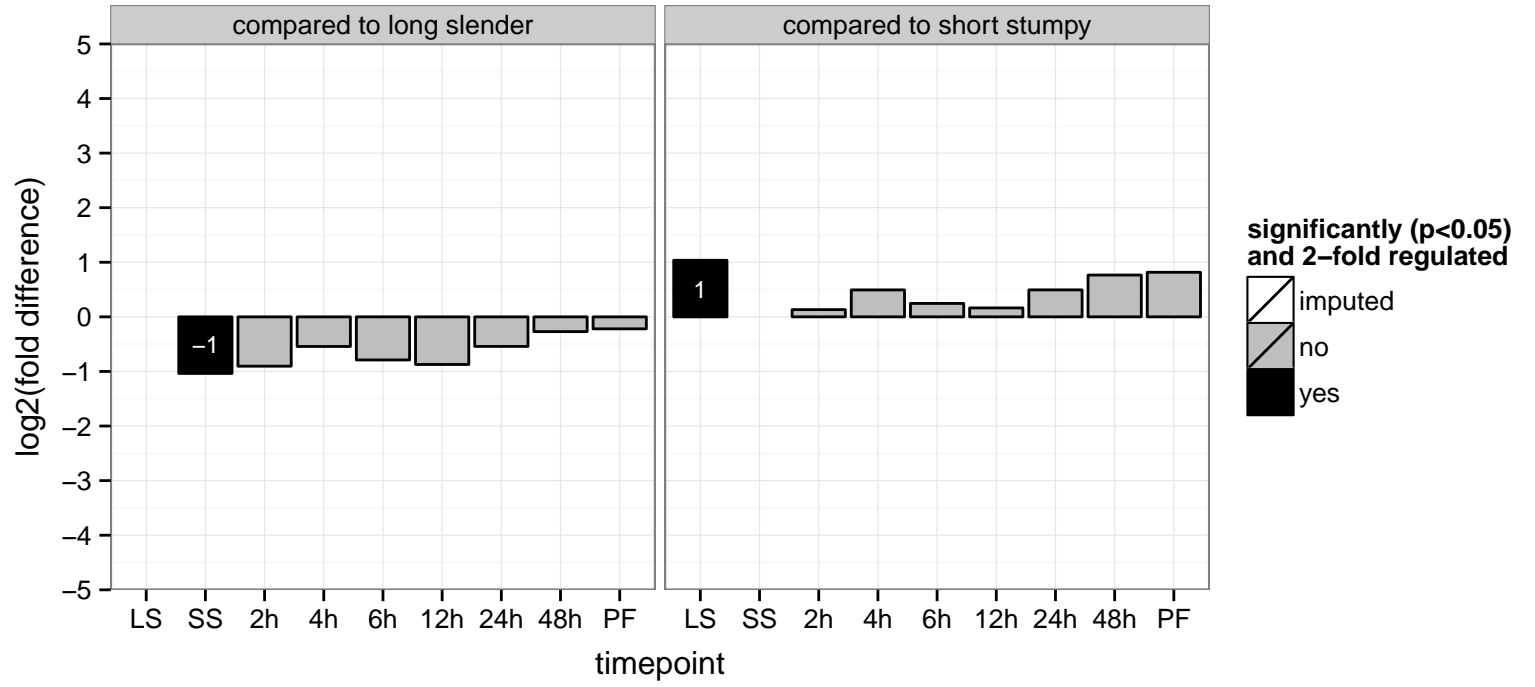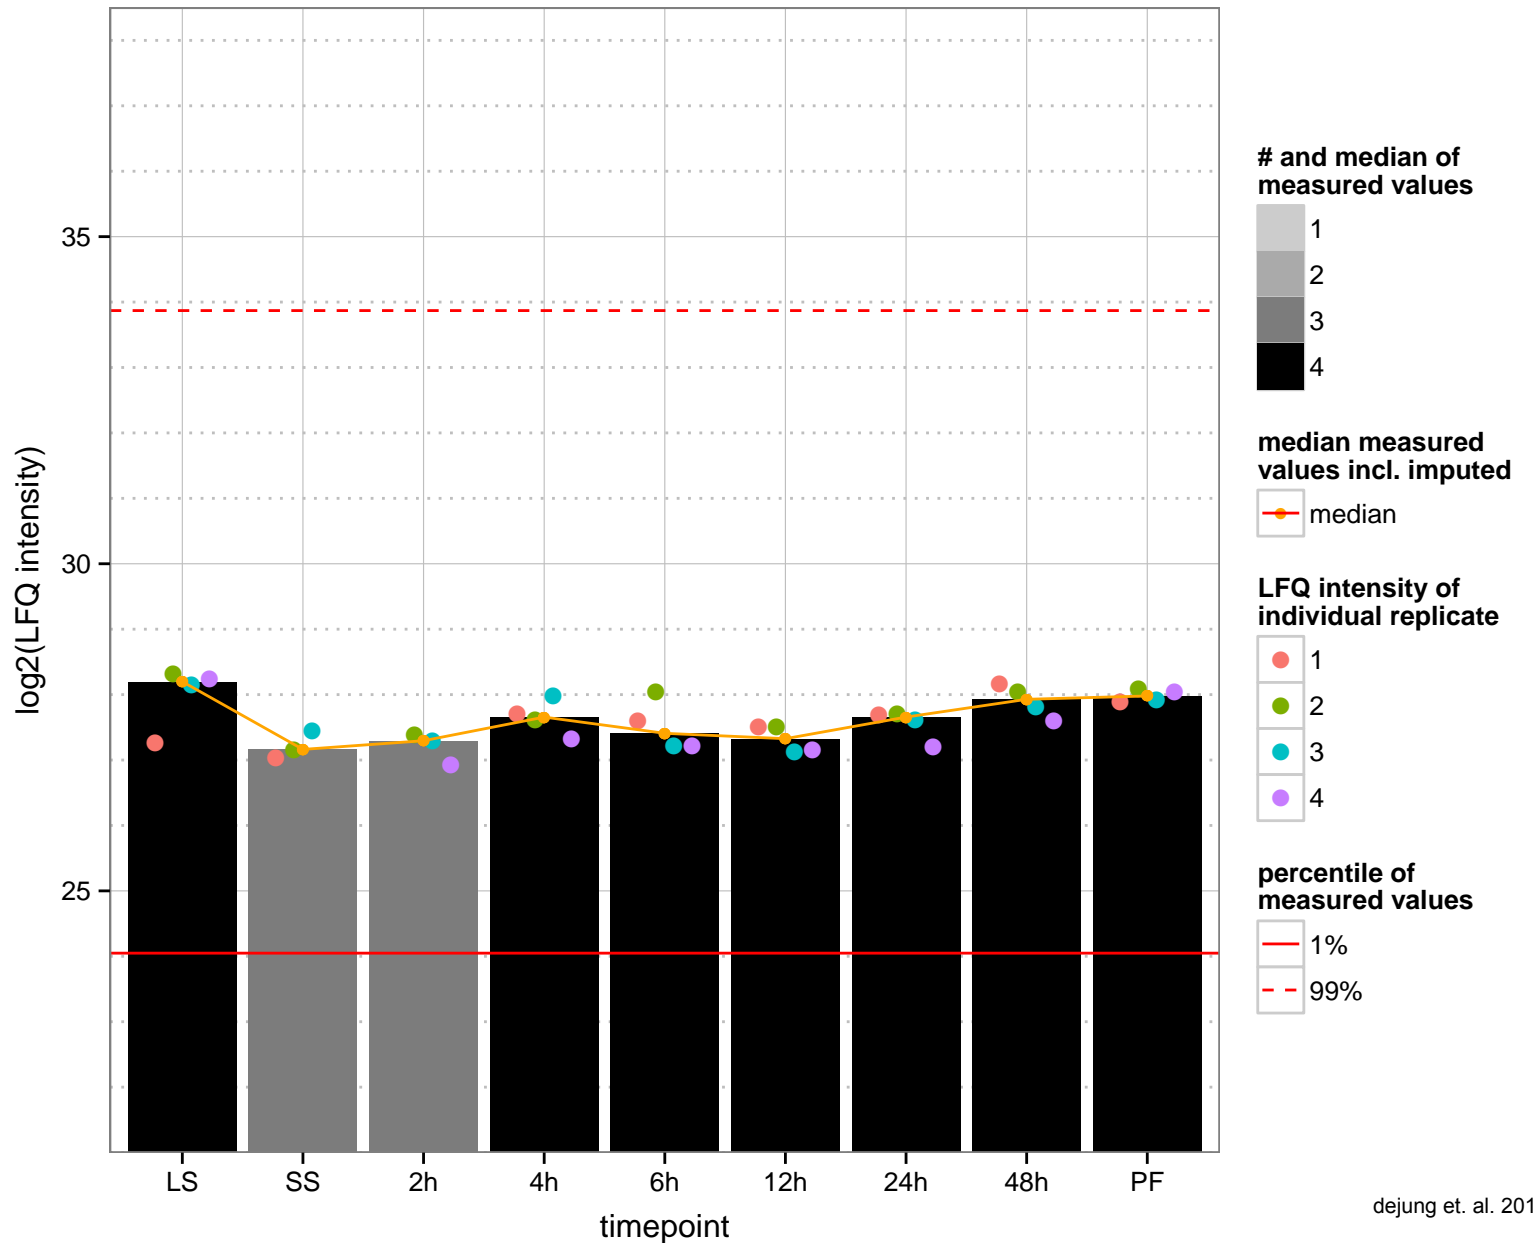

triosephosphate isomerase (TIM)  
 Tb927.11.5520  
 AGOF: triose-phosphate isomerase activity  
 AGOC: glycosome  
 AGOP: glycolysis  
 PGOF: triose-phosphate isomerase activity  
 PGO: null  
 PGO: metabolic process

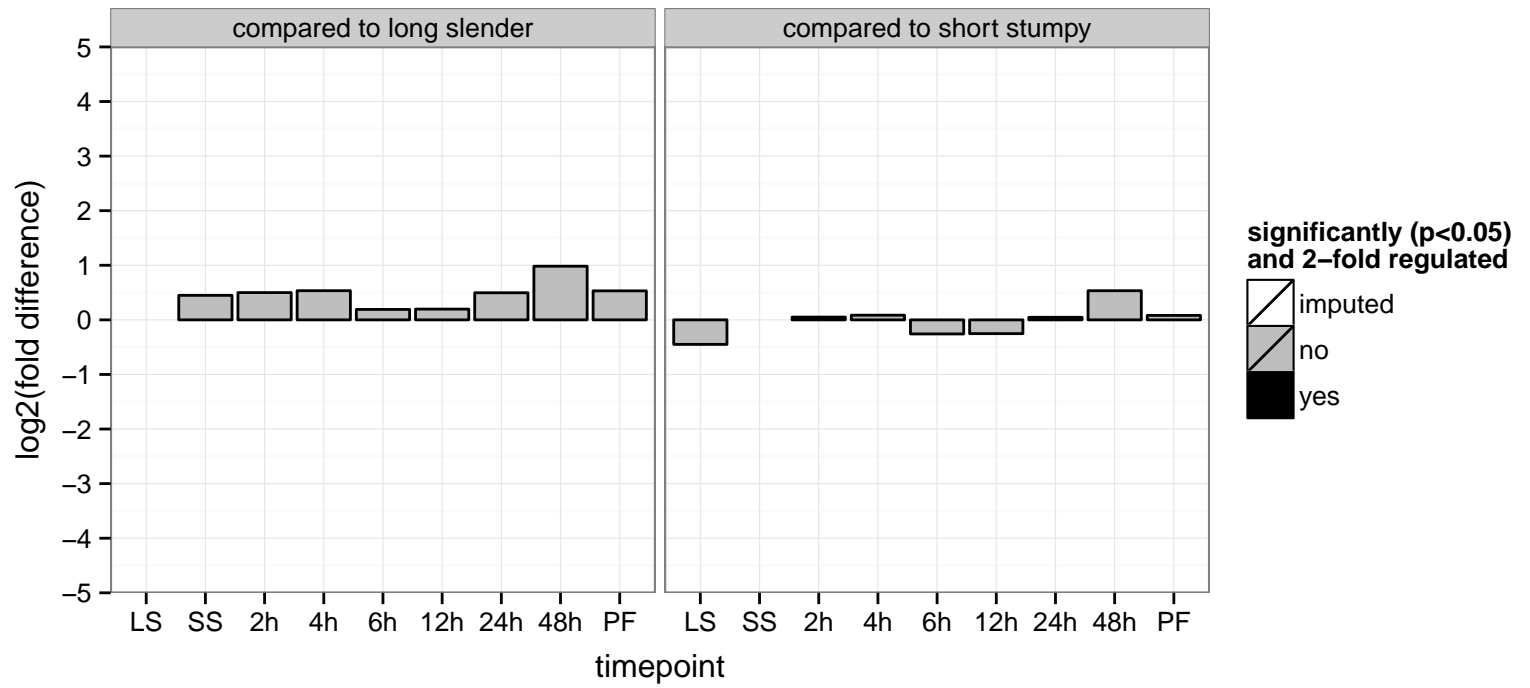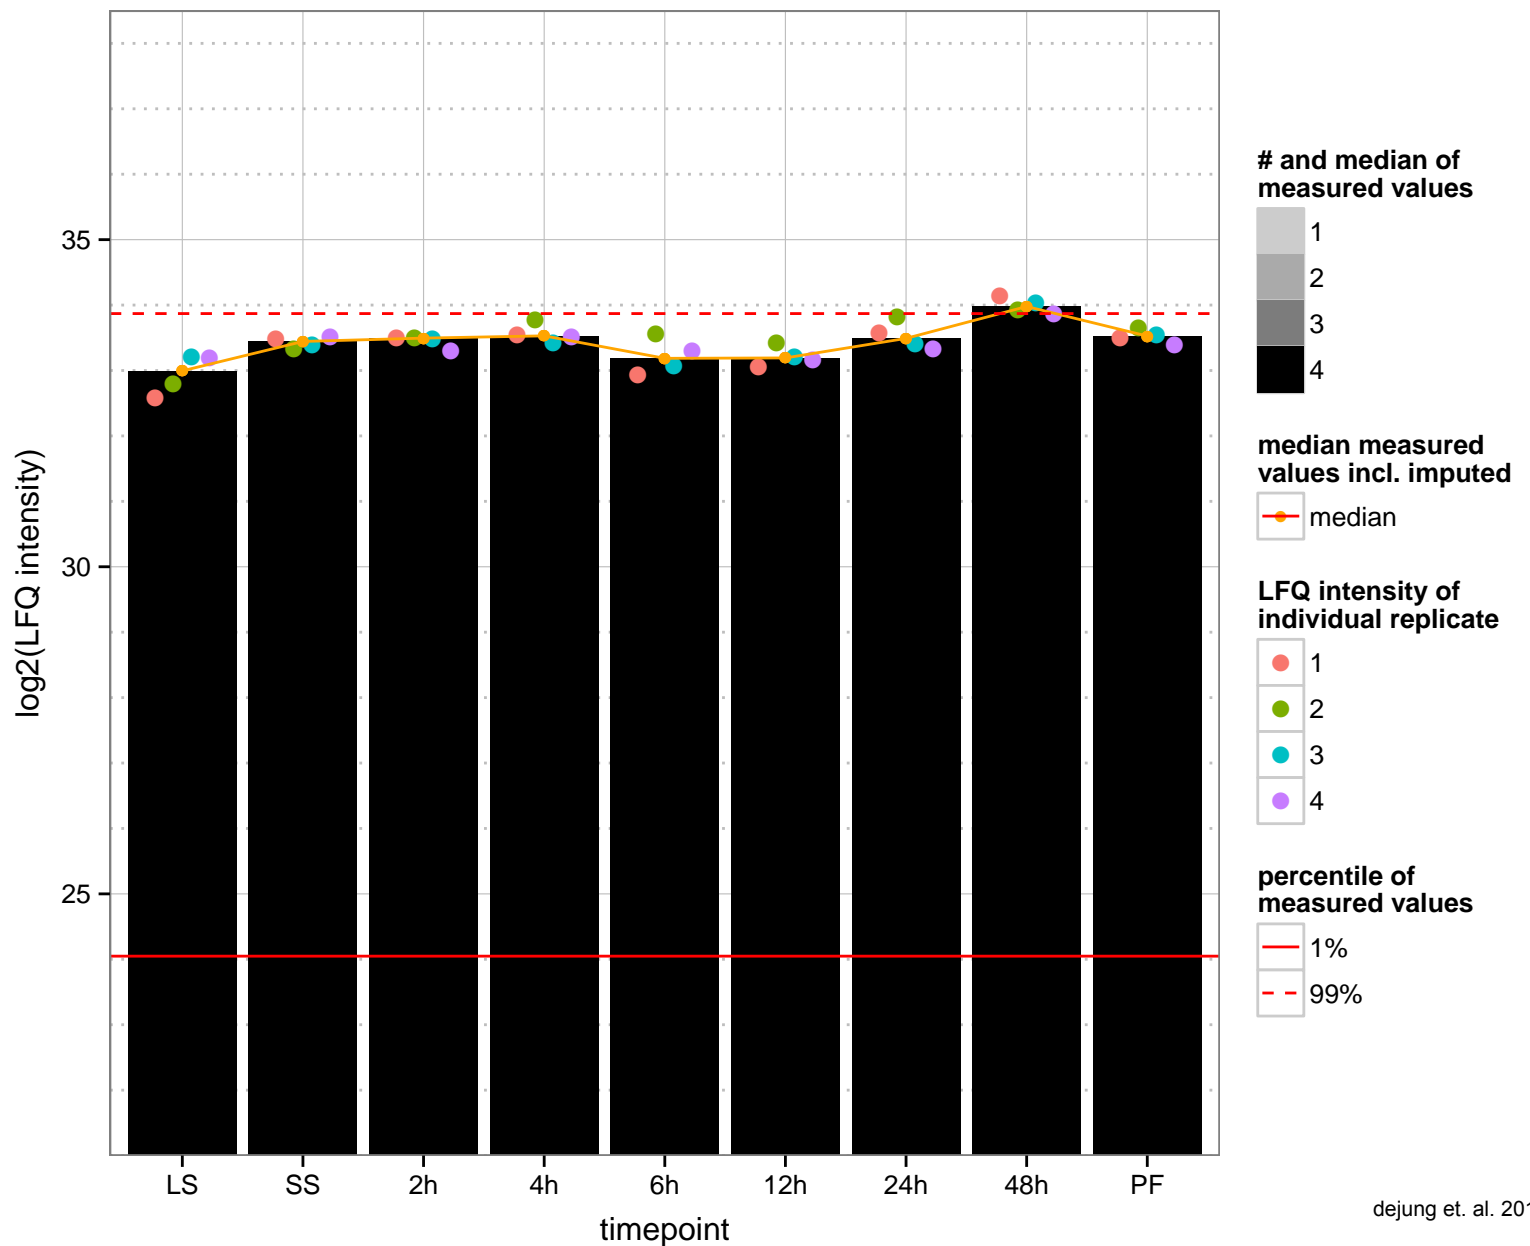

hypothetical protein, conserved  
 Tb927.11.5590  
 AGOF: null  
 AGOC: null  
 AGOP: null  
 PGO: null  
 PGOC: null  
 PGOP: null

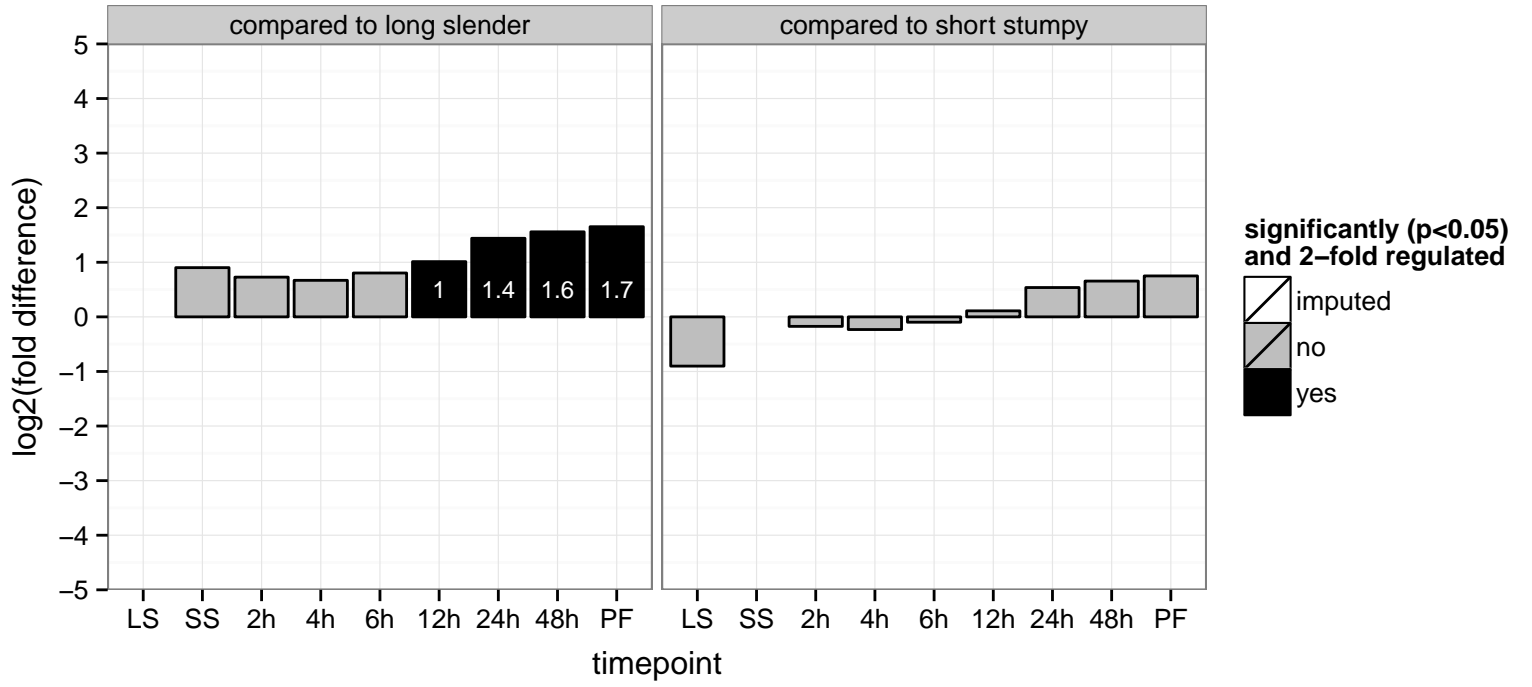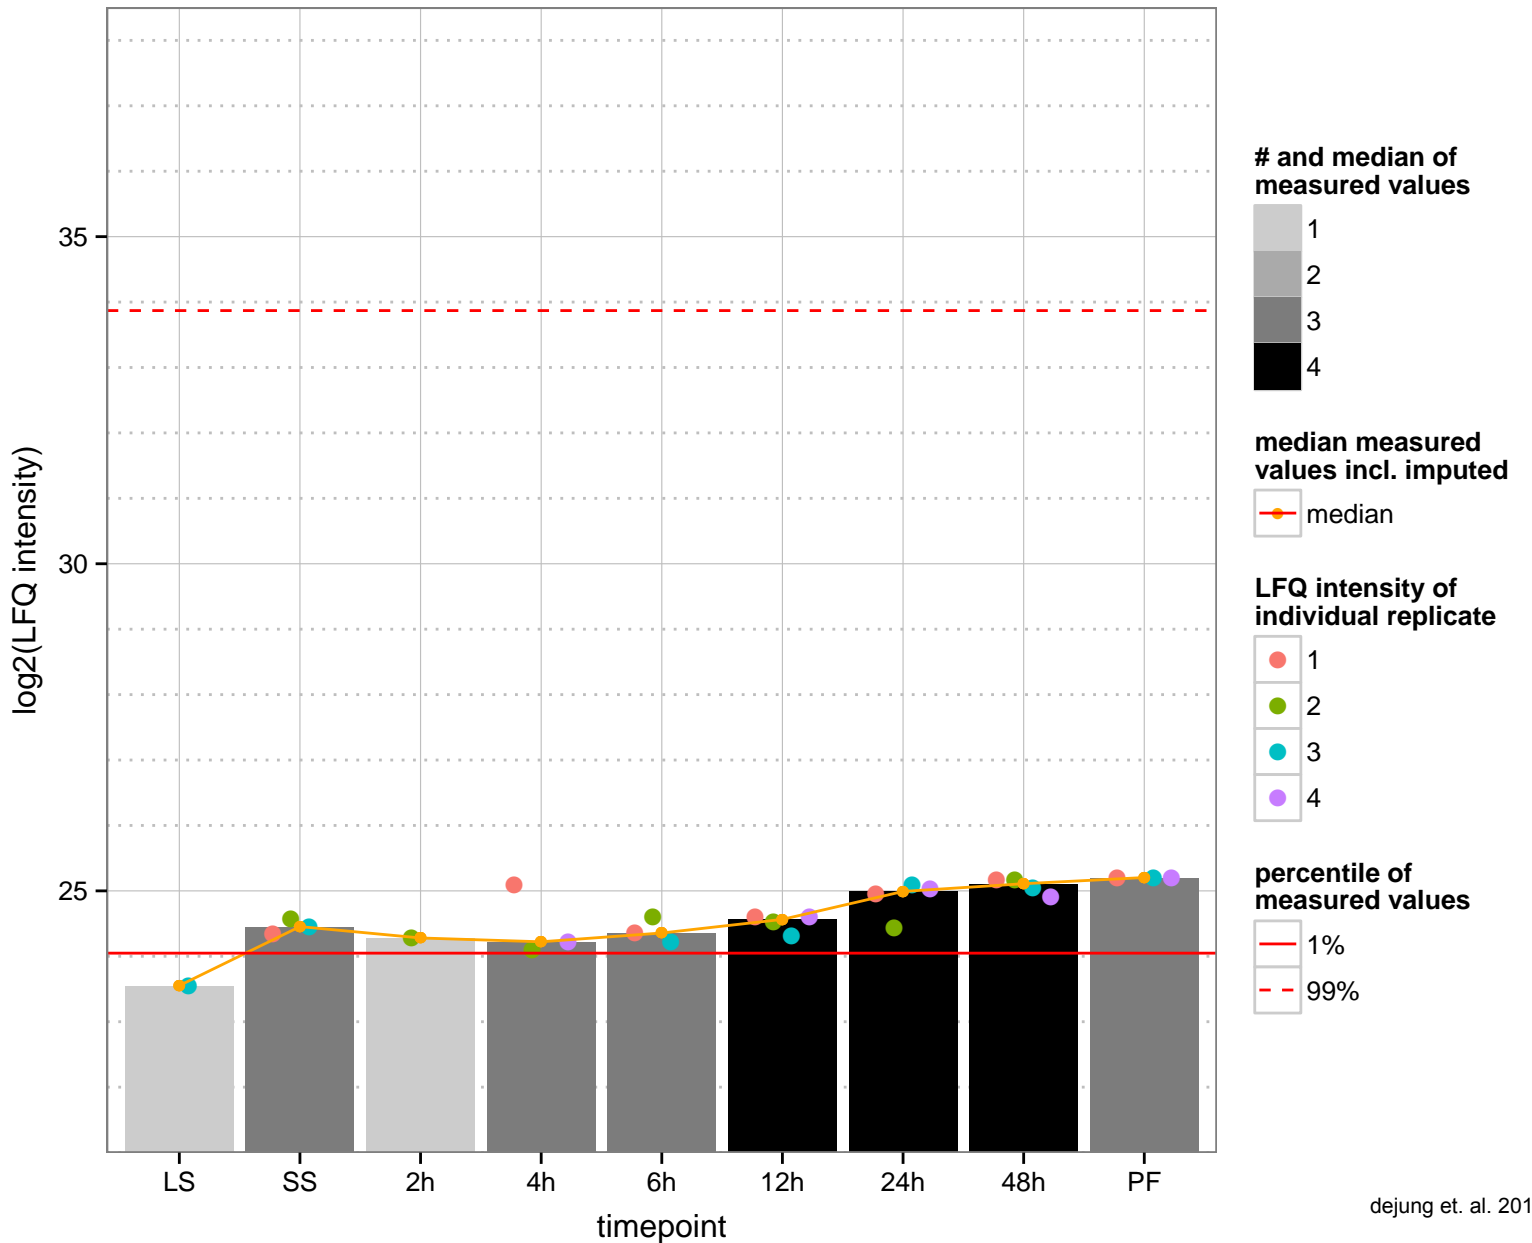

replication factor C, subunit 1, putative, replication factor C large subunit

Tb927.11.5650

AGOF: ATP binding, ATP-dependent peptidase activity, DNA binding, DNA clamp loader activity, serine-type endopeptidase a

AGOC: DNA replication factor C complex

AGOP: DNA replication, proteolysis

PGOF: ATP binding, DNA binding, DNA clamp loader activity, nucleoside-triphosphatase activity, nucleotide binding

PGOC: DNA replication factor C complex

PGOP: DNA replication

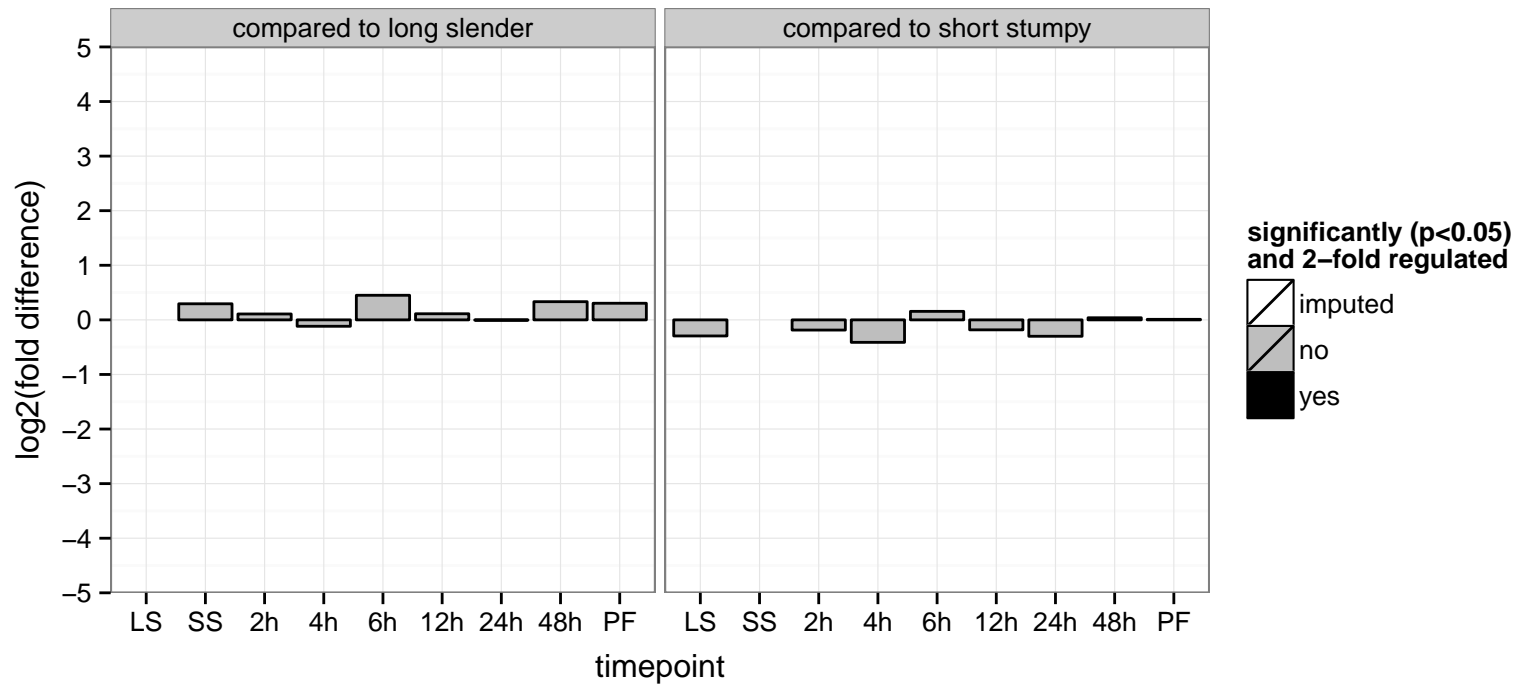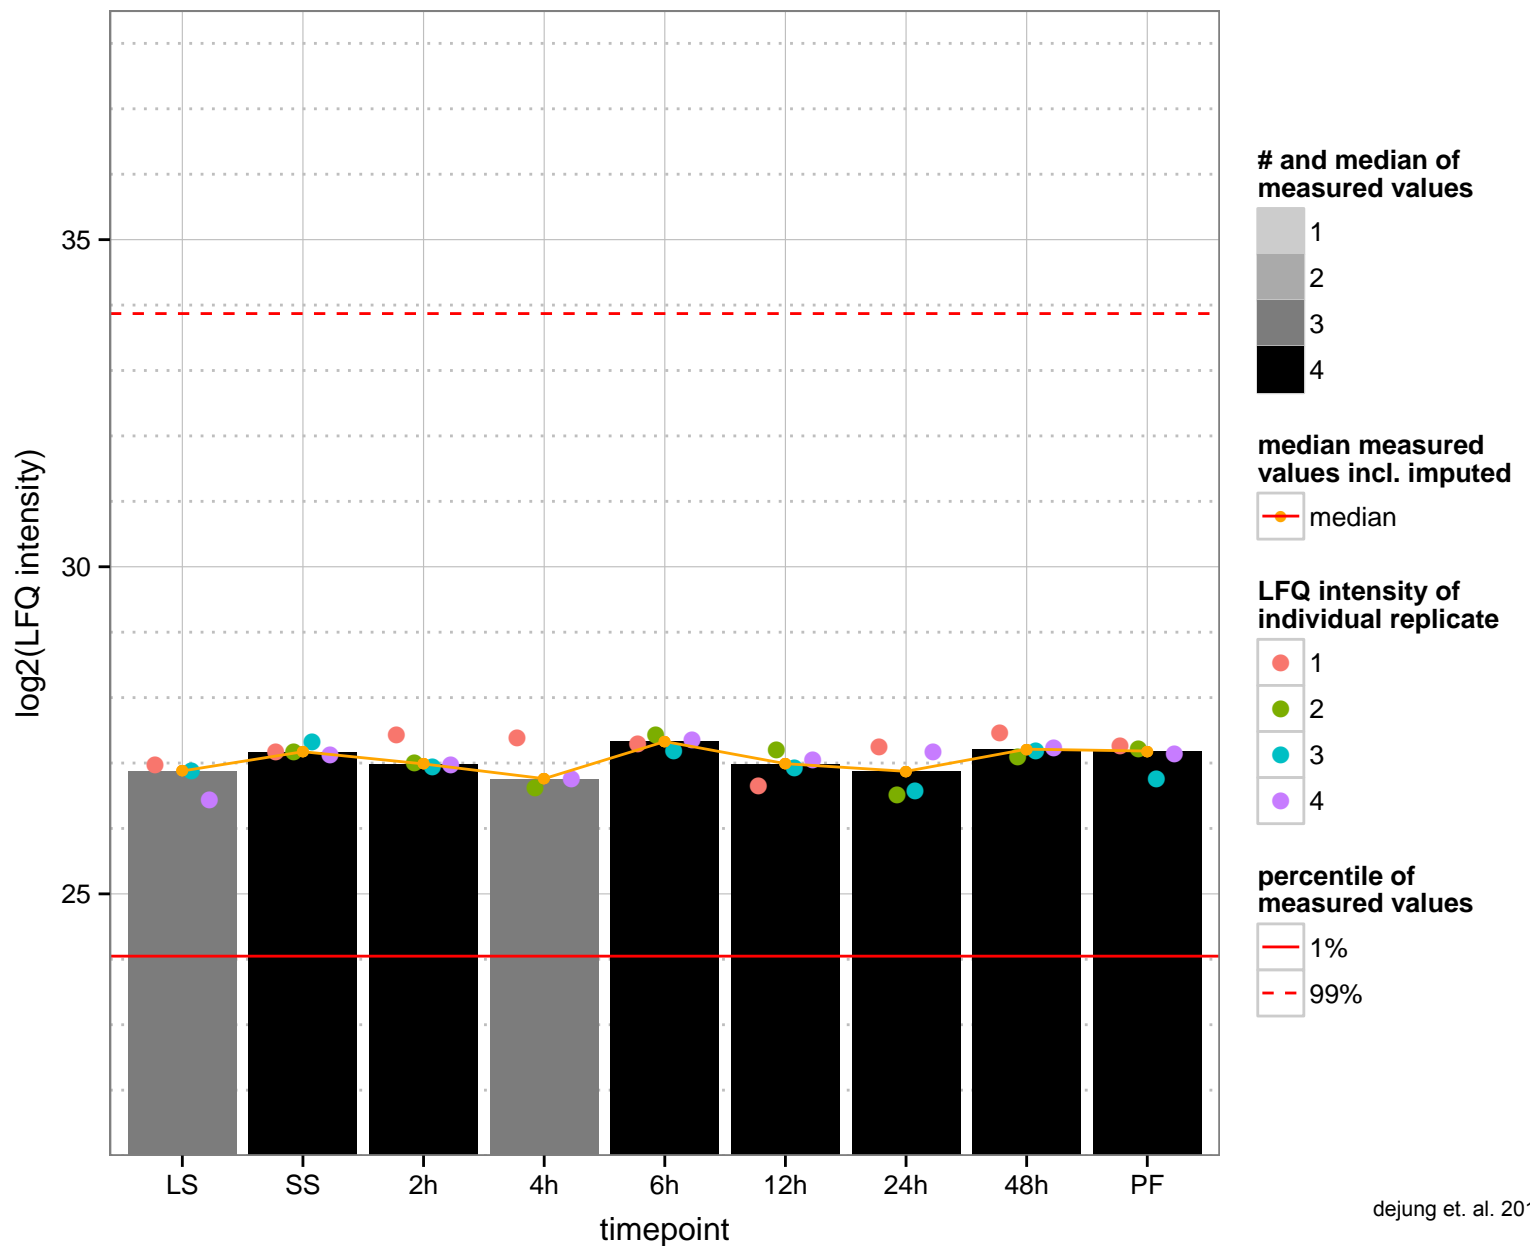



hypothetical protein, conserved  
 Tb927.11.5700  
 AGOF: null  
 AGOC: null  
 AGOP: null  
 PGOF: null  
 PGO C: null  
 PGOP: null

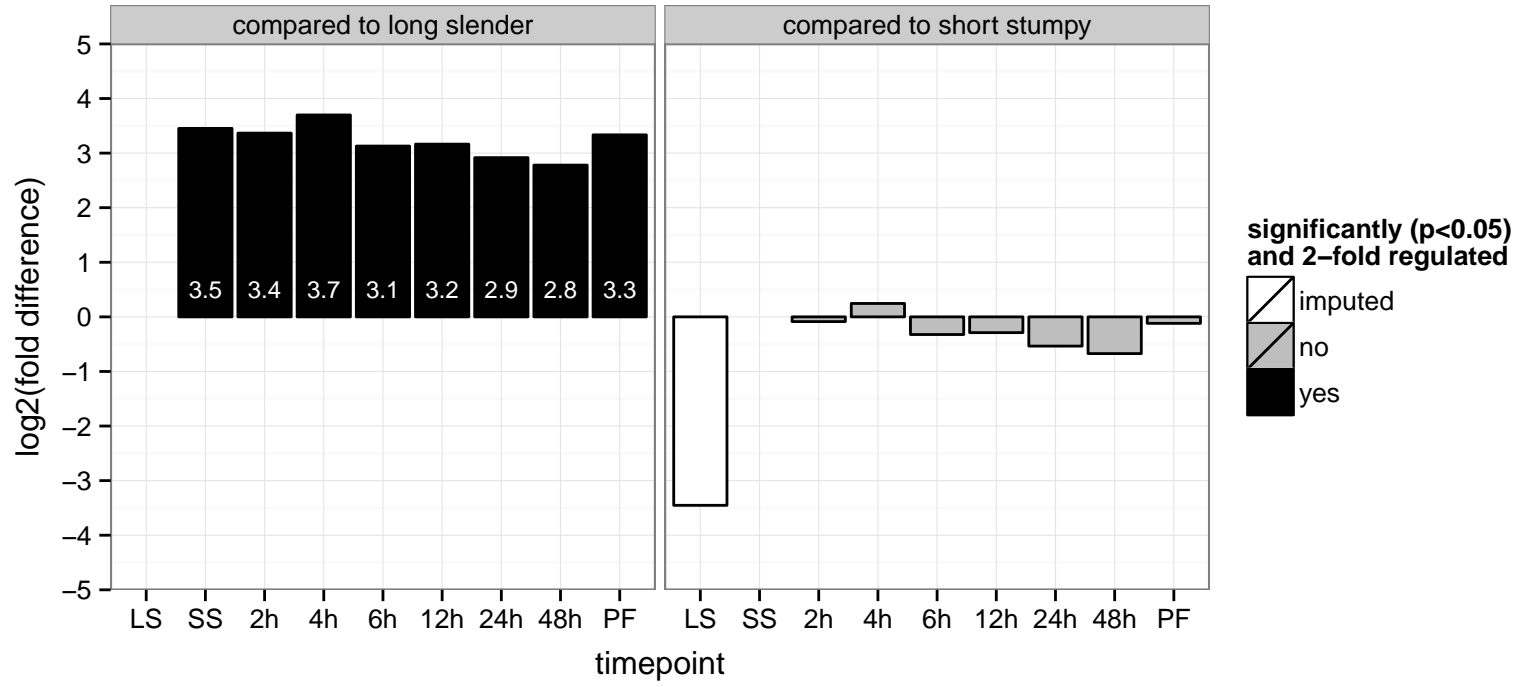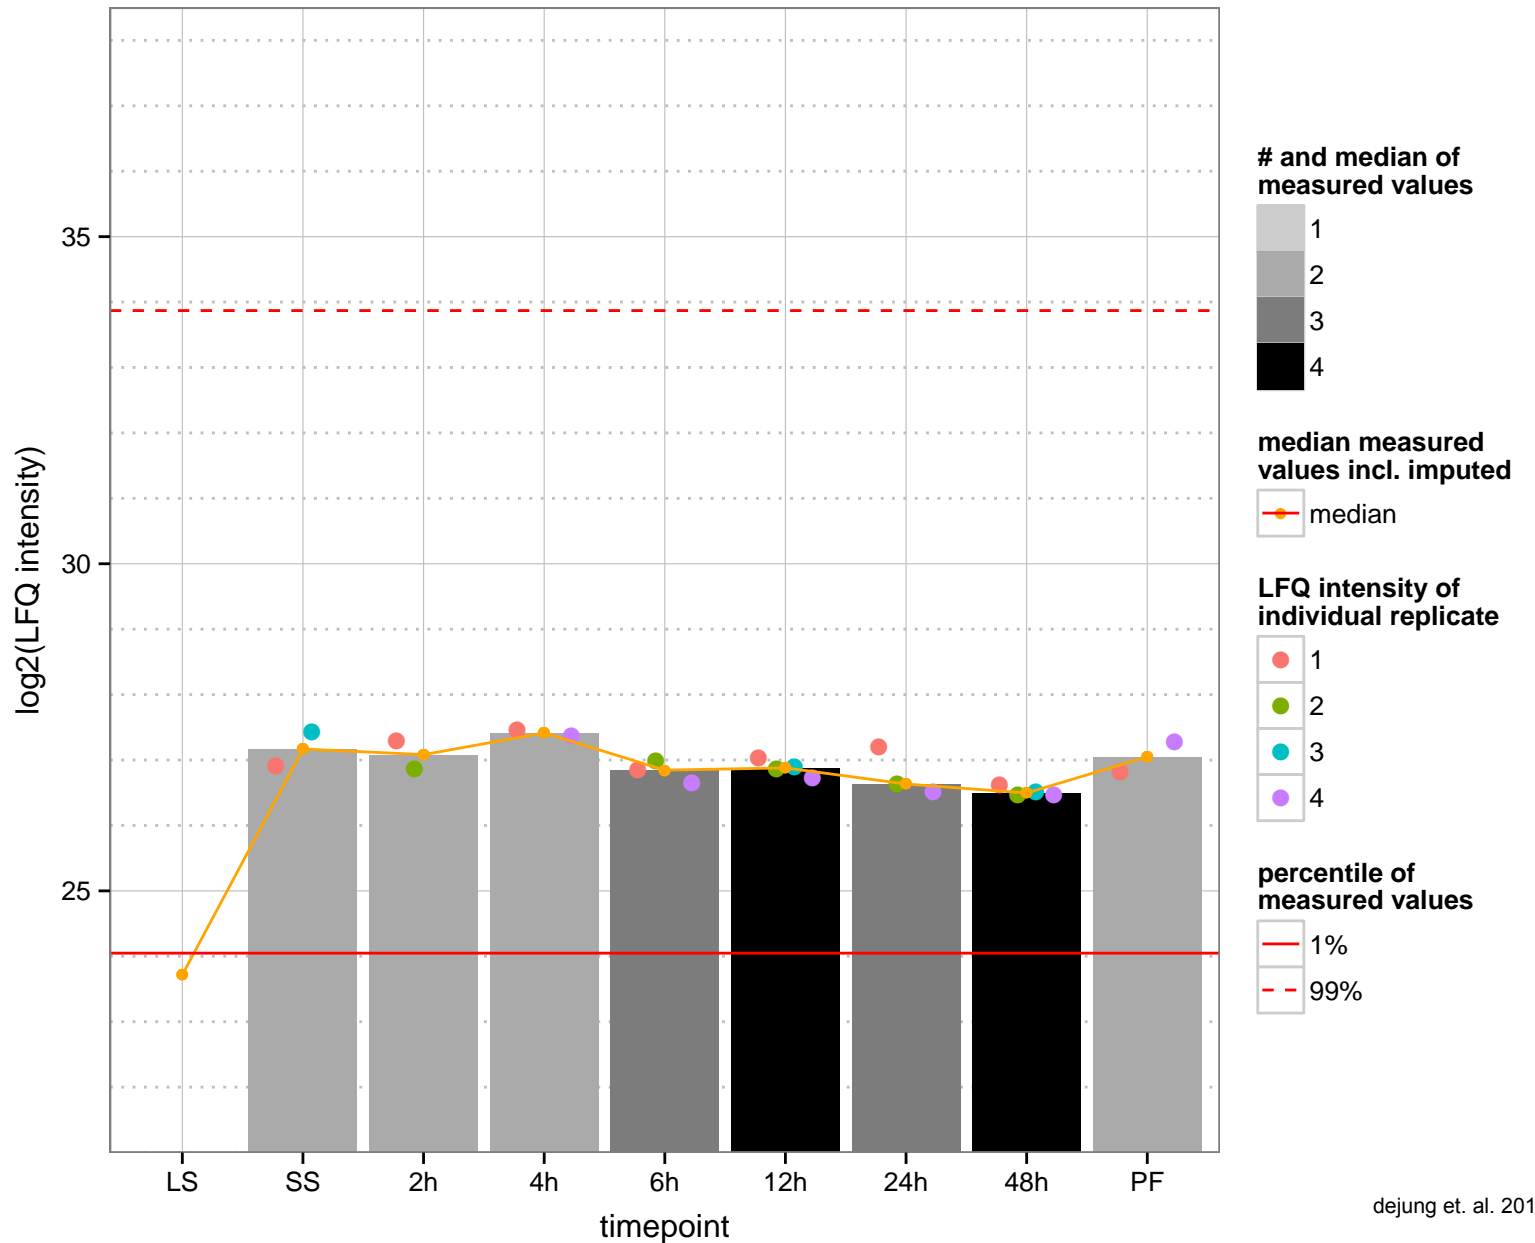

pre-mRNA splicing factor, putative, ATP- dependent RNA helicase

Tb927.11.5730

AGOF: ATP binding, ATP-dependent RNA helicase activity, nucleic acid binding

AGOC: null

AGOP: RNA splicing, RNA splicing, via transesterification reactions, nuclear mRNA splicing, via spliceosome

PGOF: ATP binding, ATP-dependent helicase activity, helicase activity, nucleic acid binding

PGOC: null

PGOP: null

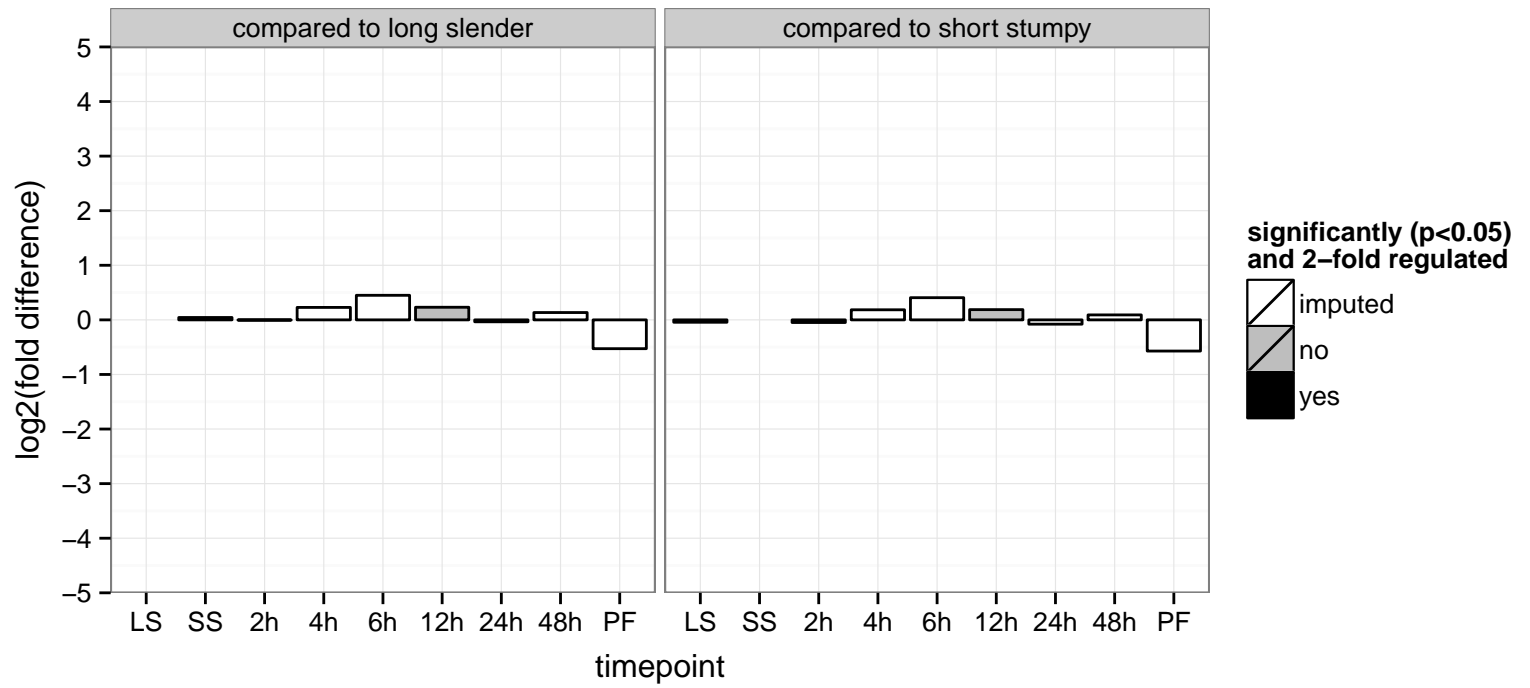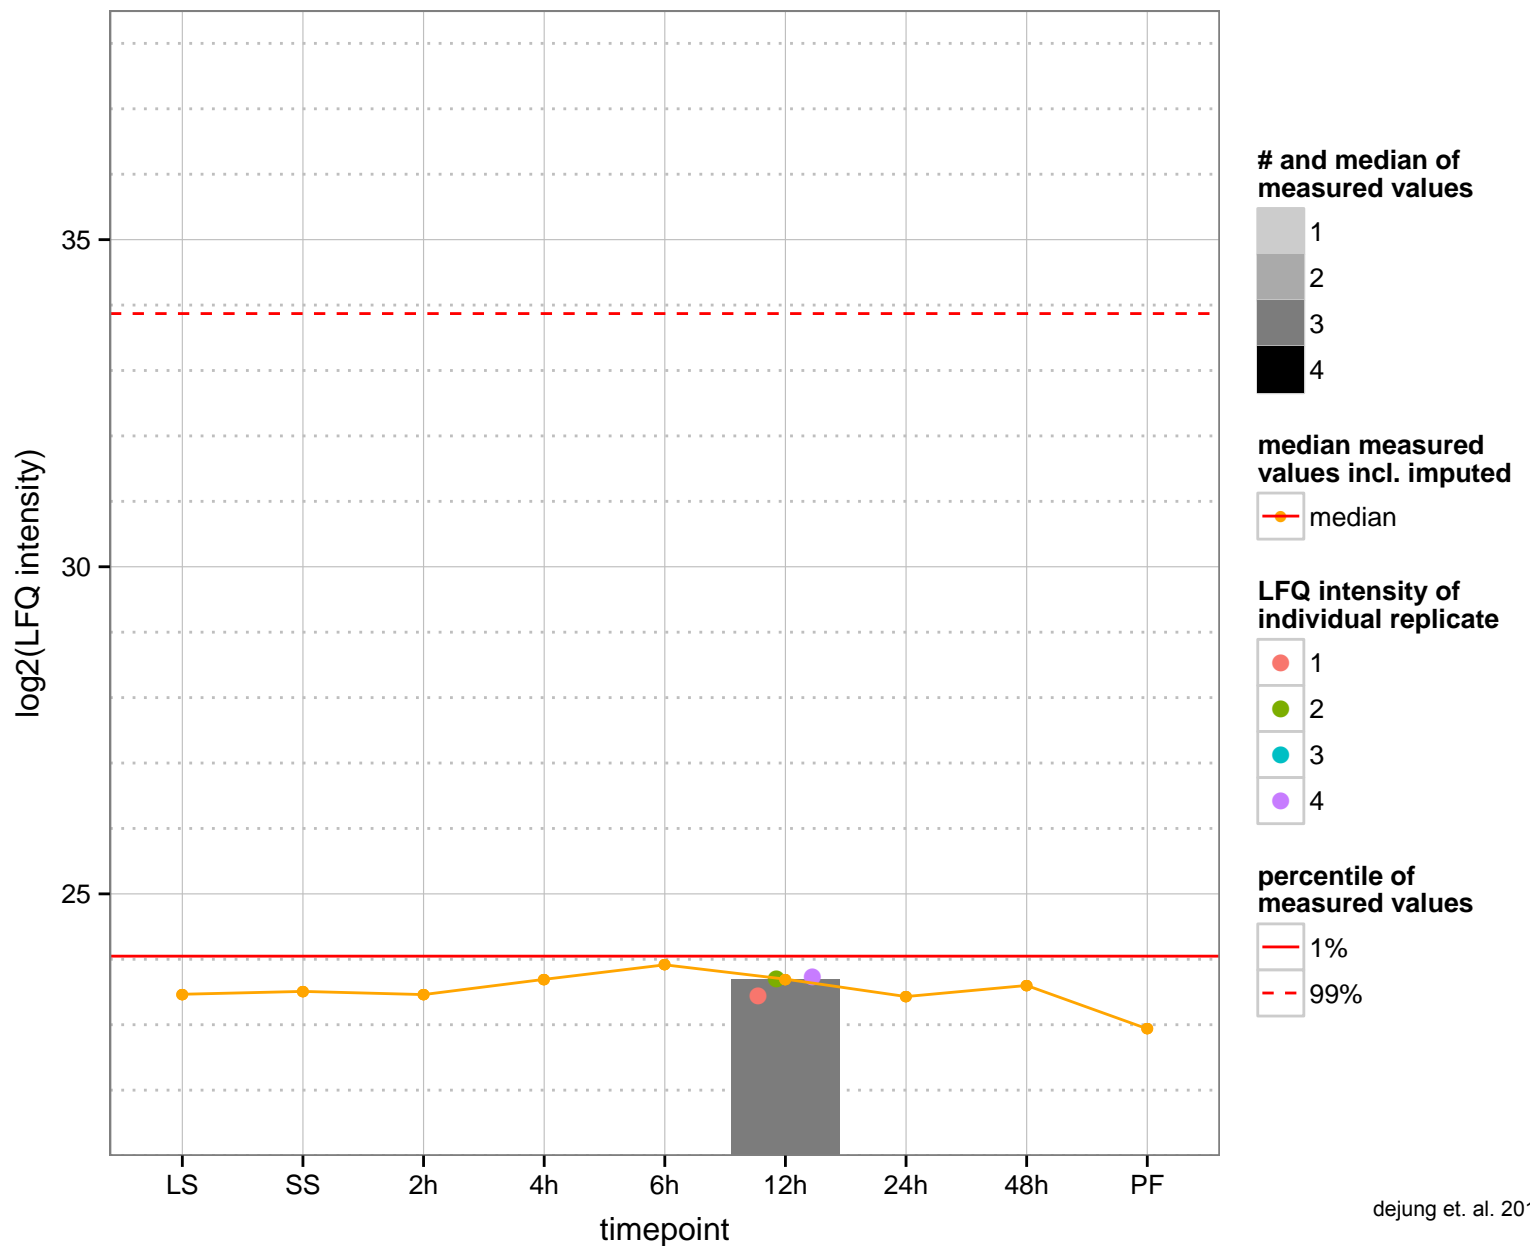

hypothetical protein, conserved  
 Tb927.11.5890  
 AGOF: null  
 AGOC: null  
 AGOP: null  
 PGOF: null  
 PGOC: null  
 PGOP: null

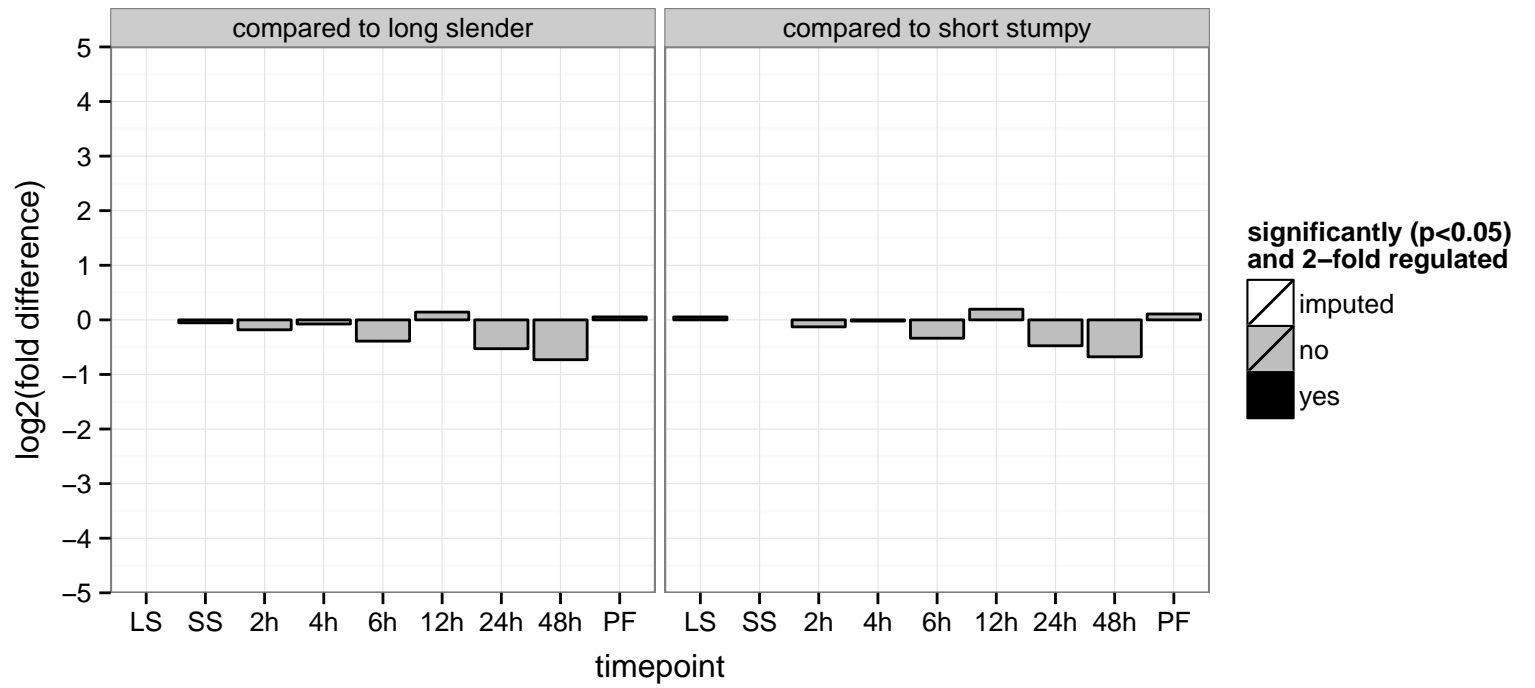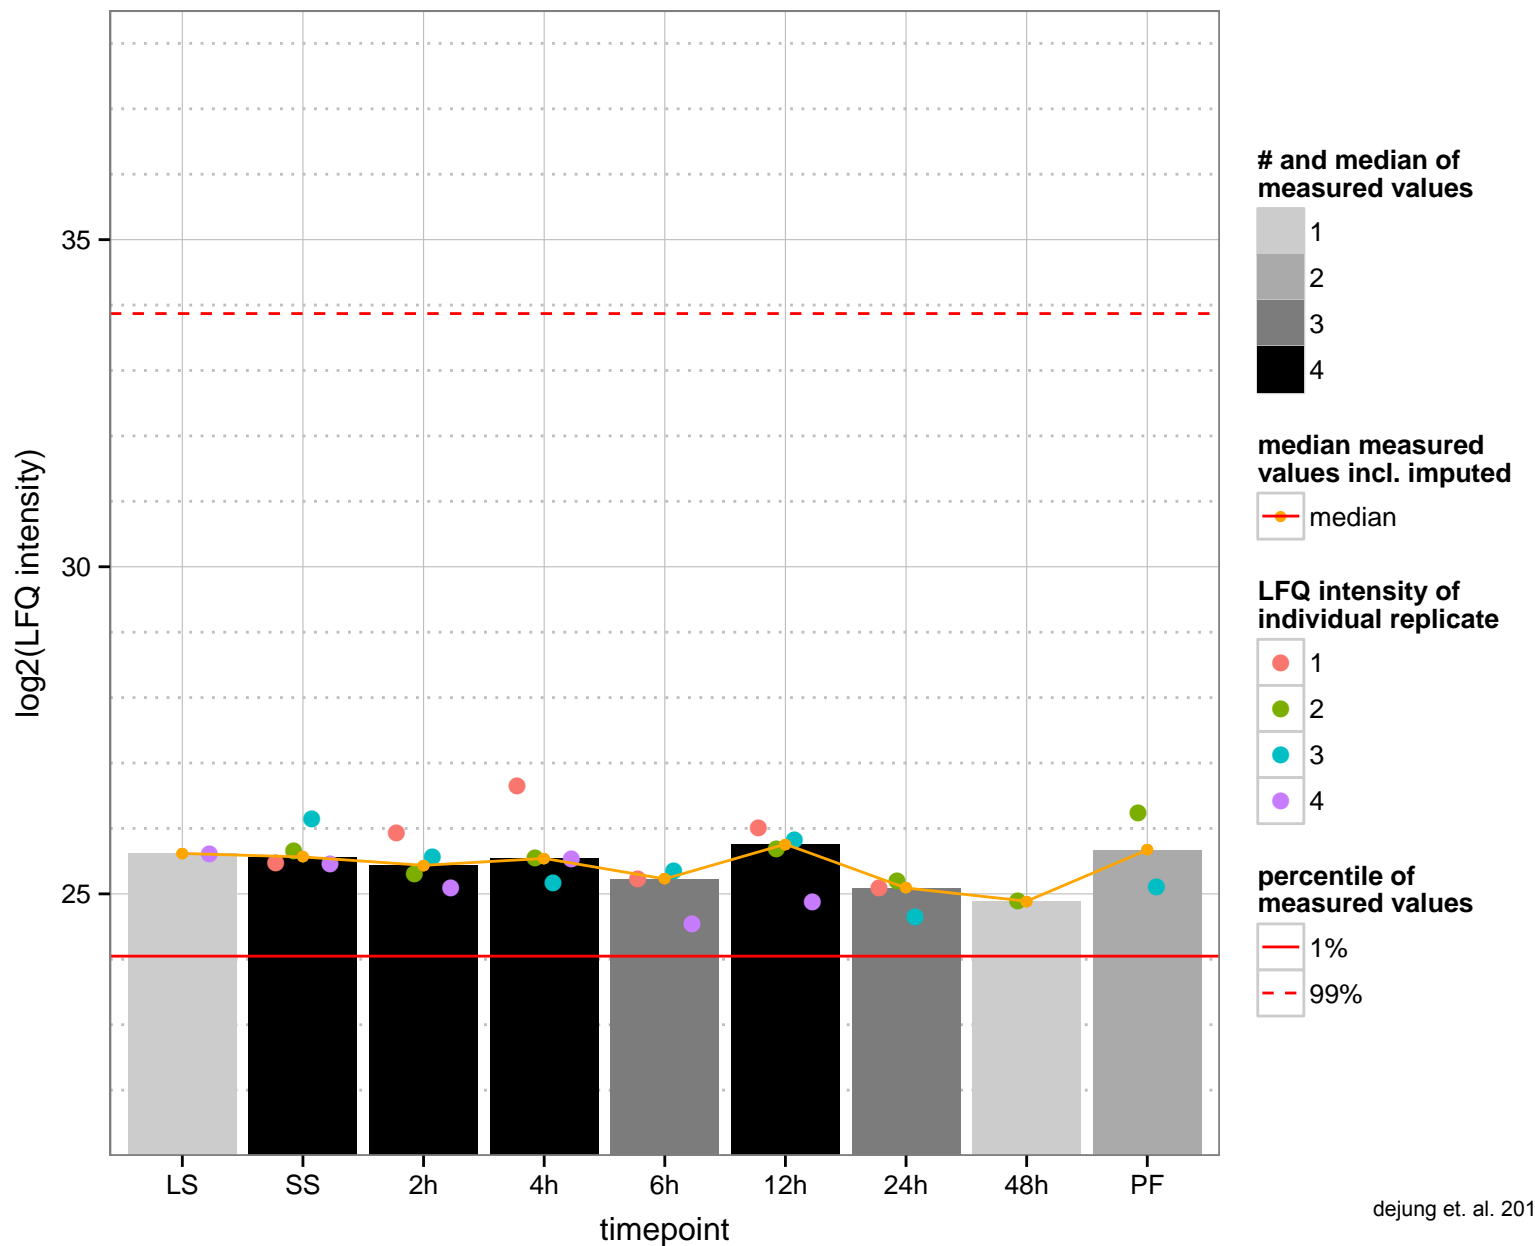

conserved protein, unknown function  
 Tb927.11.6010  
 AGOF: null  
 AGOC: mitochondrion  
 AGOP: null  
 PGO: null  
 PGOC: null  
 PGOP: null

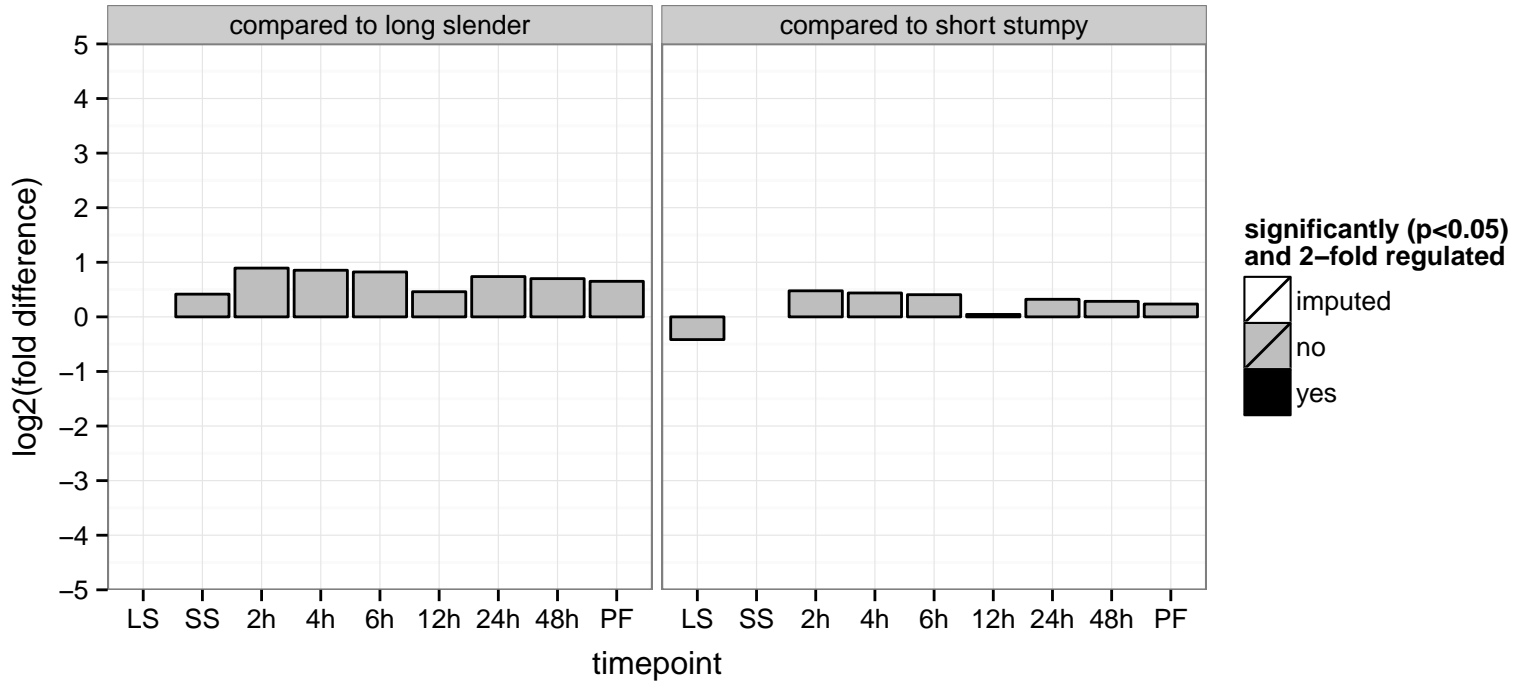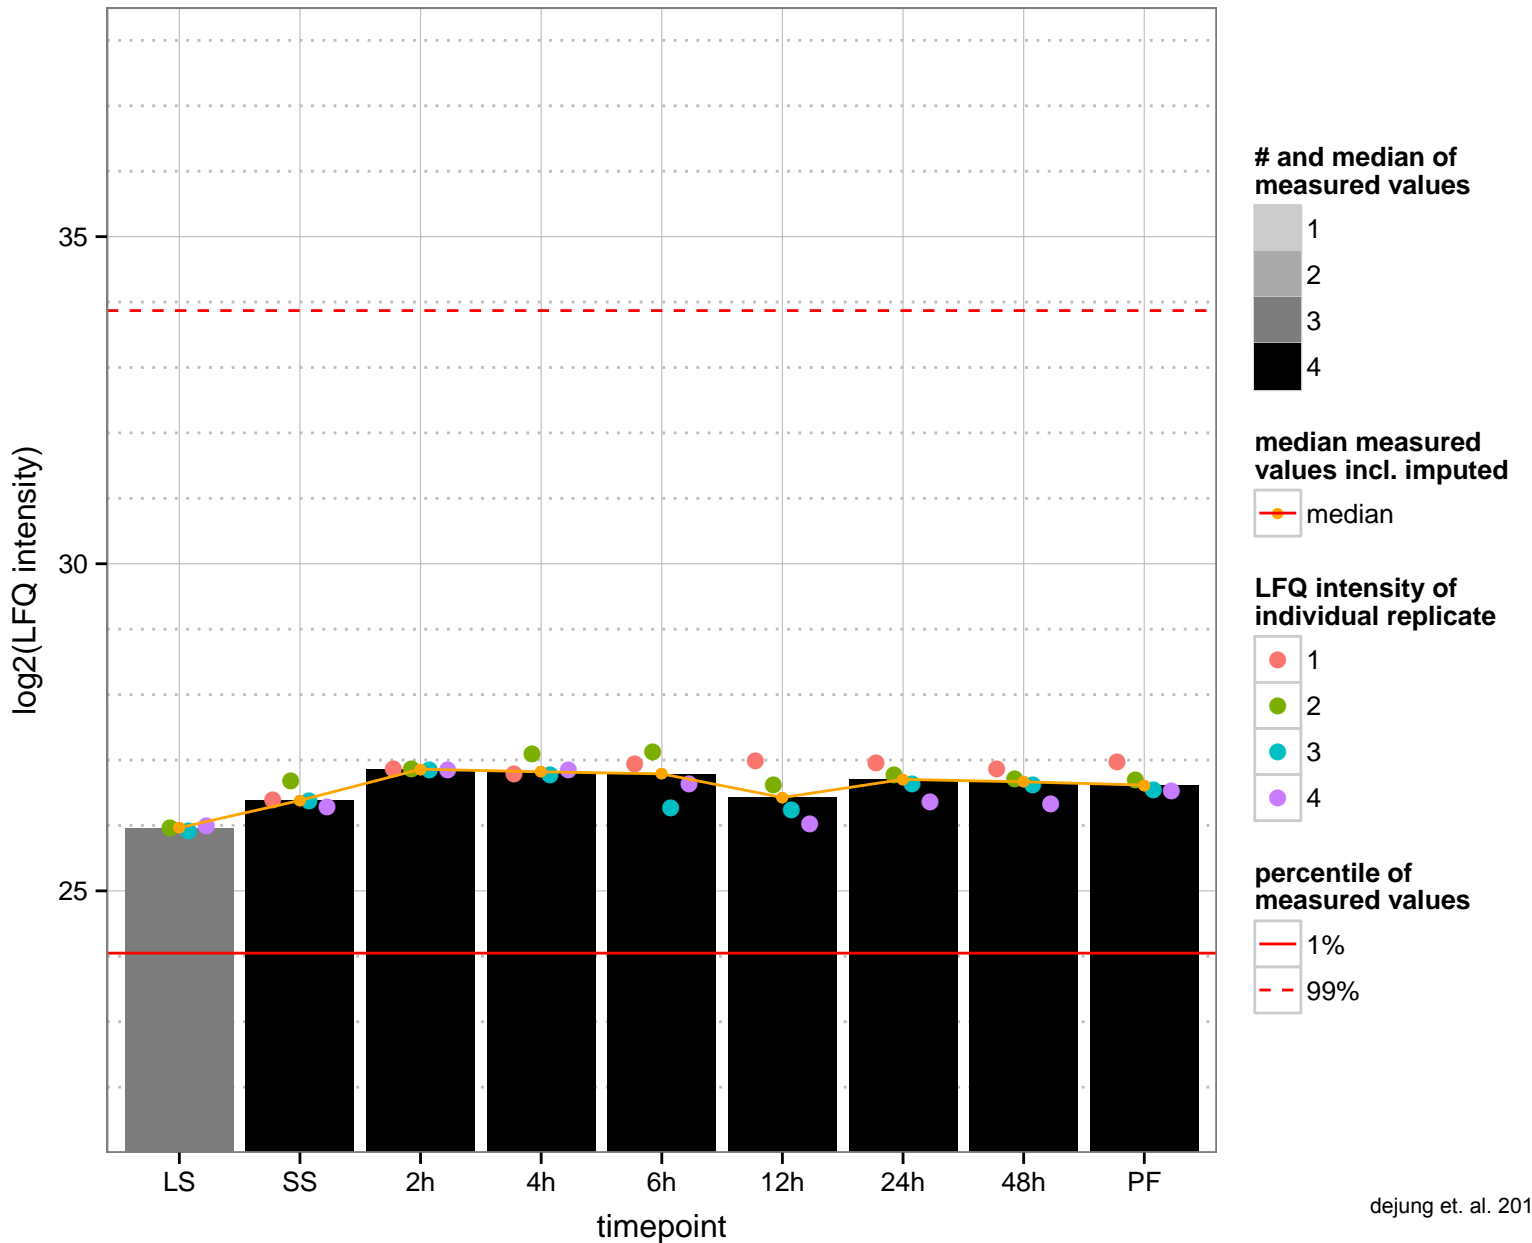

hypothetical protein, conserved  
 Tb927.11.6050  
 AGOF: null  
 AGOC: null  
 AGOP: null  
 PGO: null  
 PGOC: null  
 PGOP: null

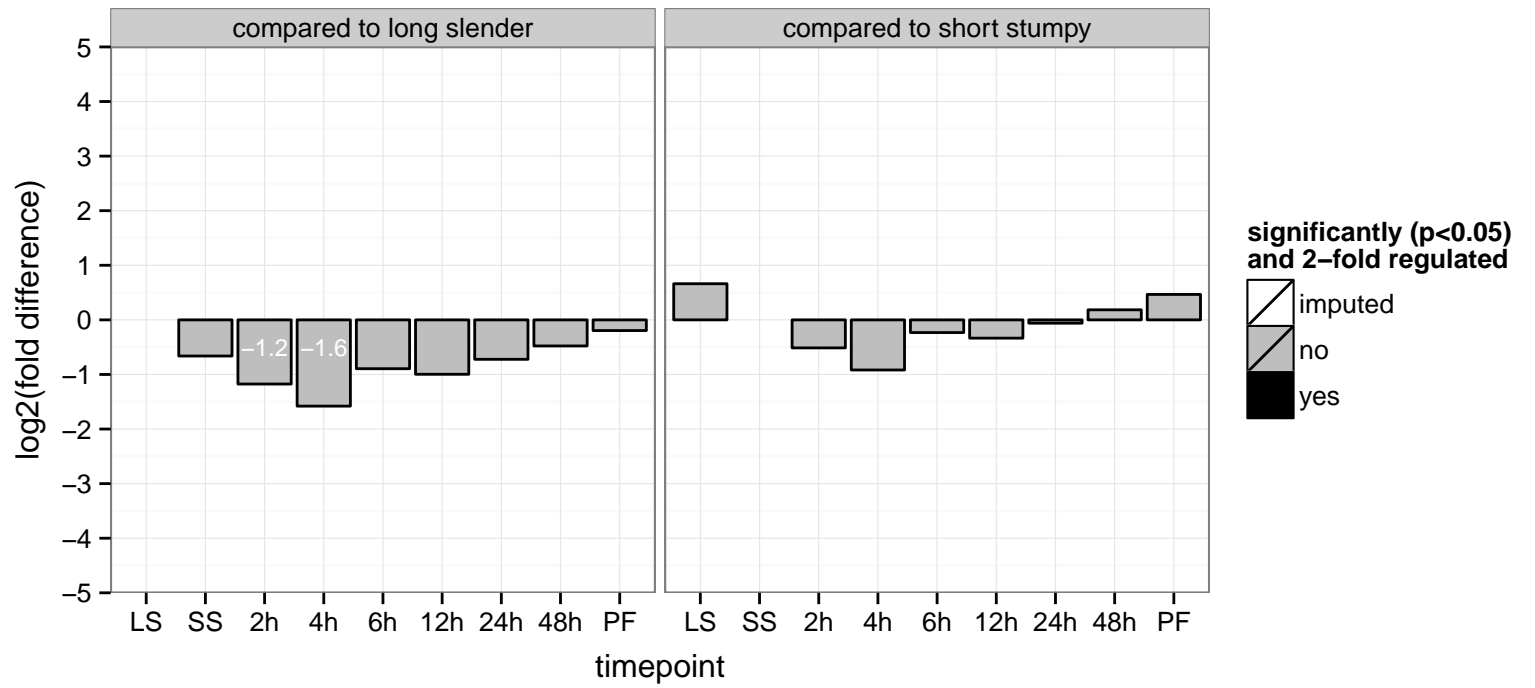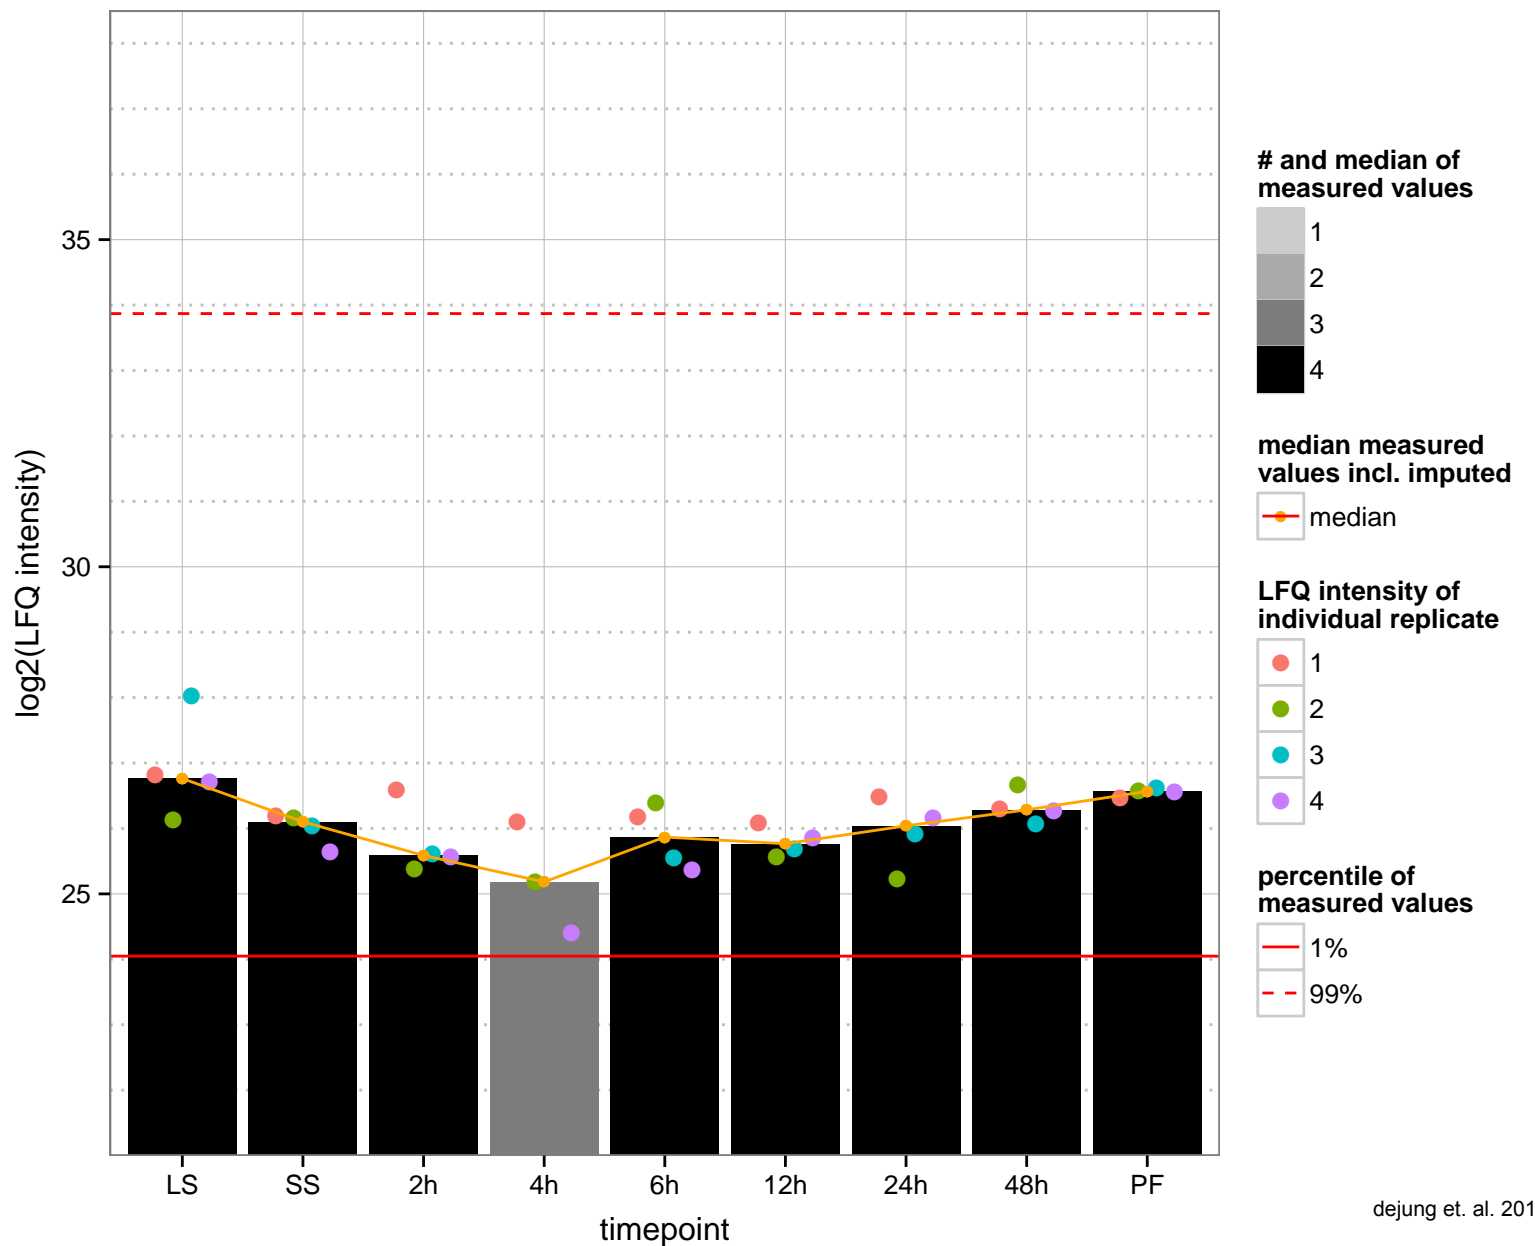

hypothetical protein, conserved  
 Tb927.11.6070  
 AGOF: null  
 AGOC: null  
 AGOP: null  
 PGO: binding  
 PGO: null  
 PGO: null

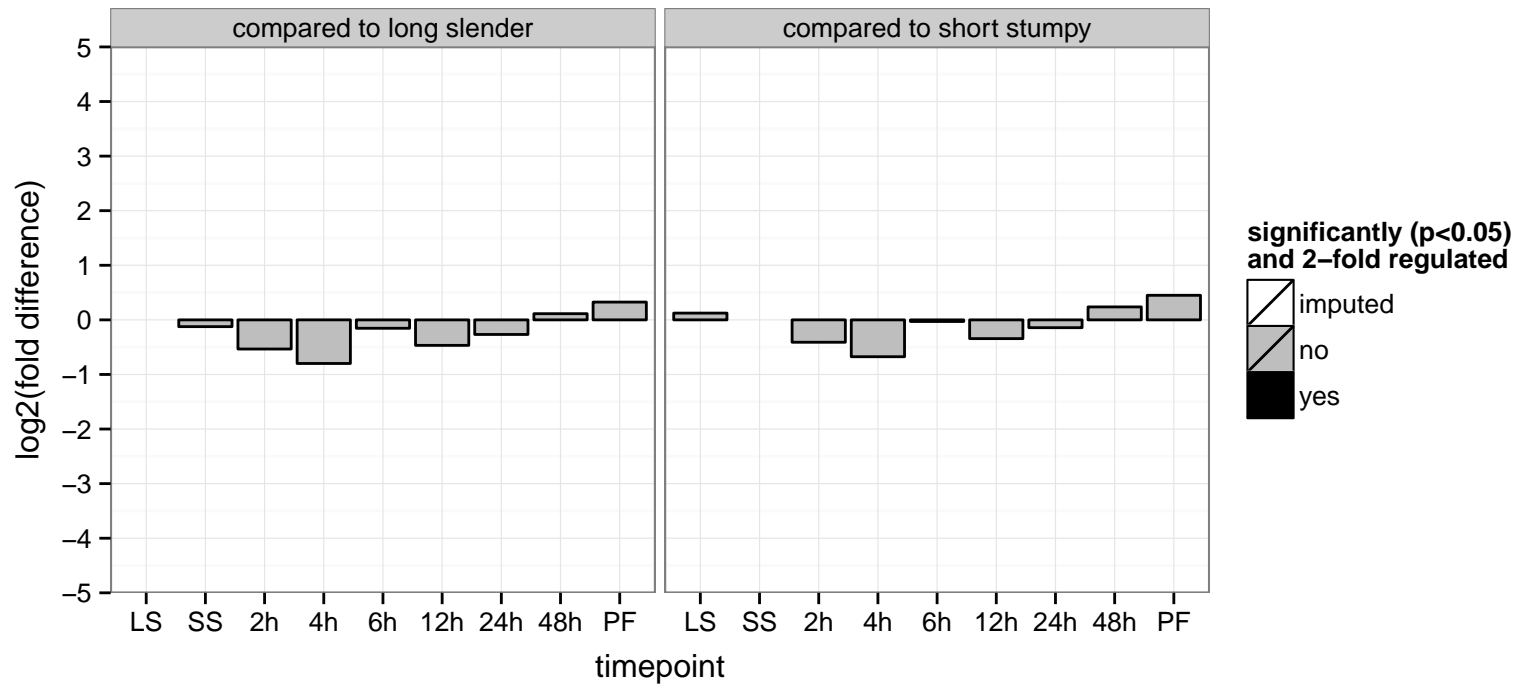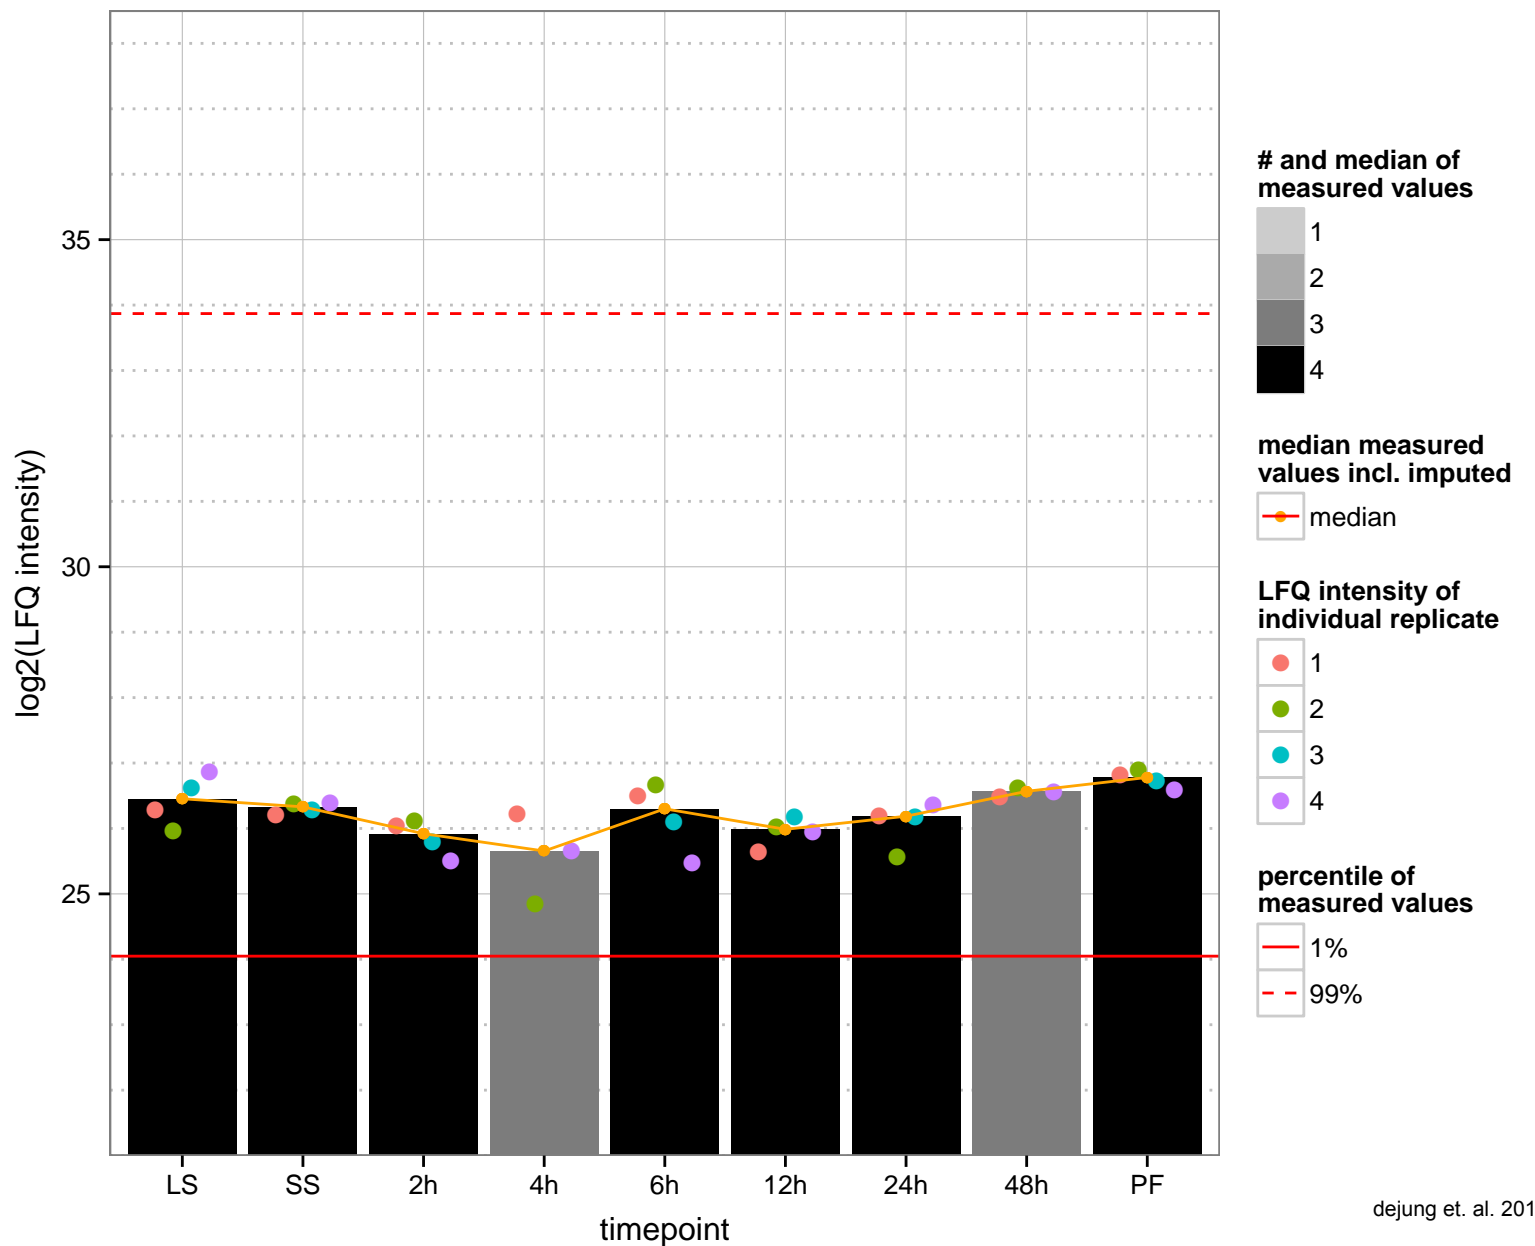

hypothetical protein, conserved  
 Tb927.11.610  
 AGOF: null  
 AGOC: null  
 AGOP: null  
 PGO: null  
 PGOC: null  
 PGOP: null

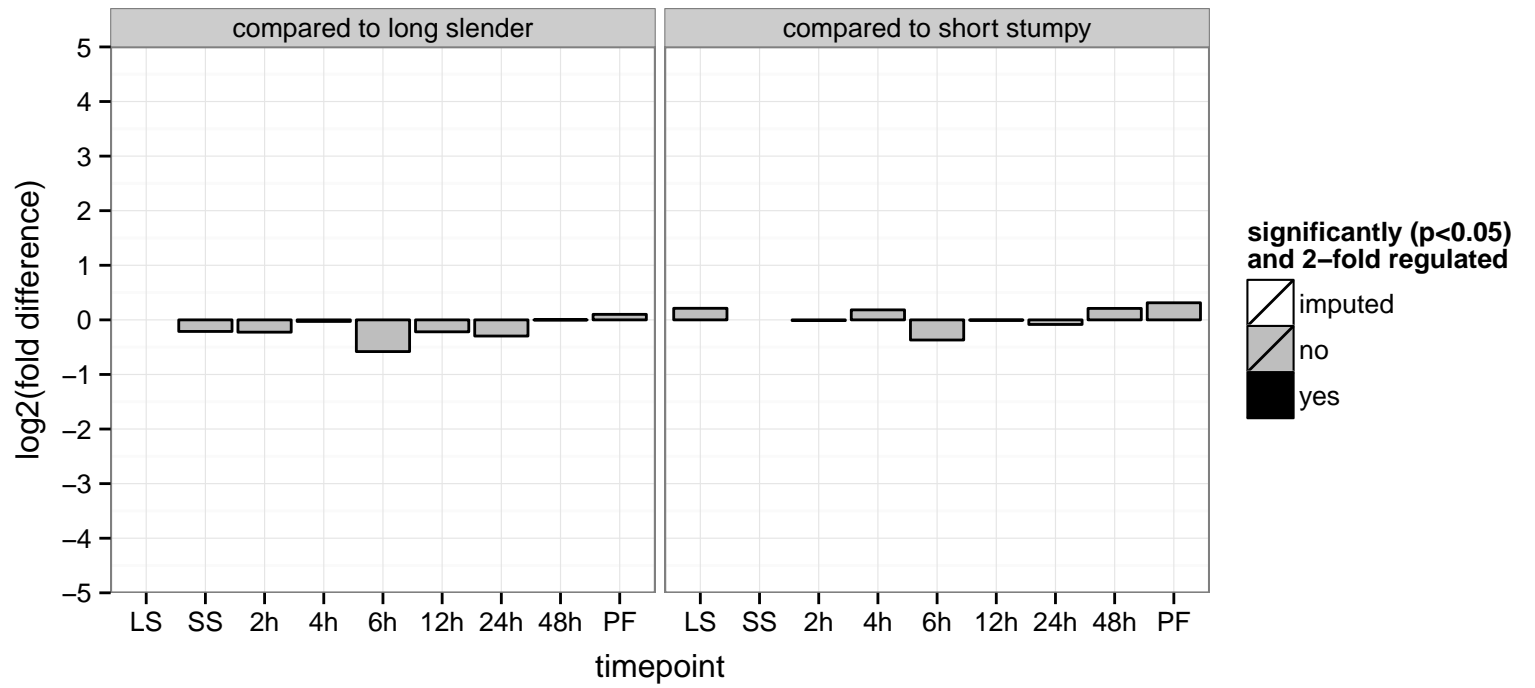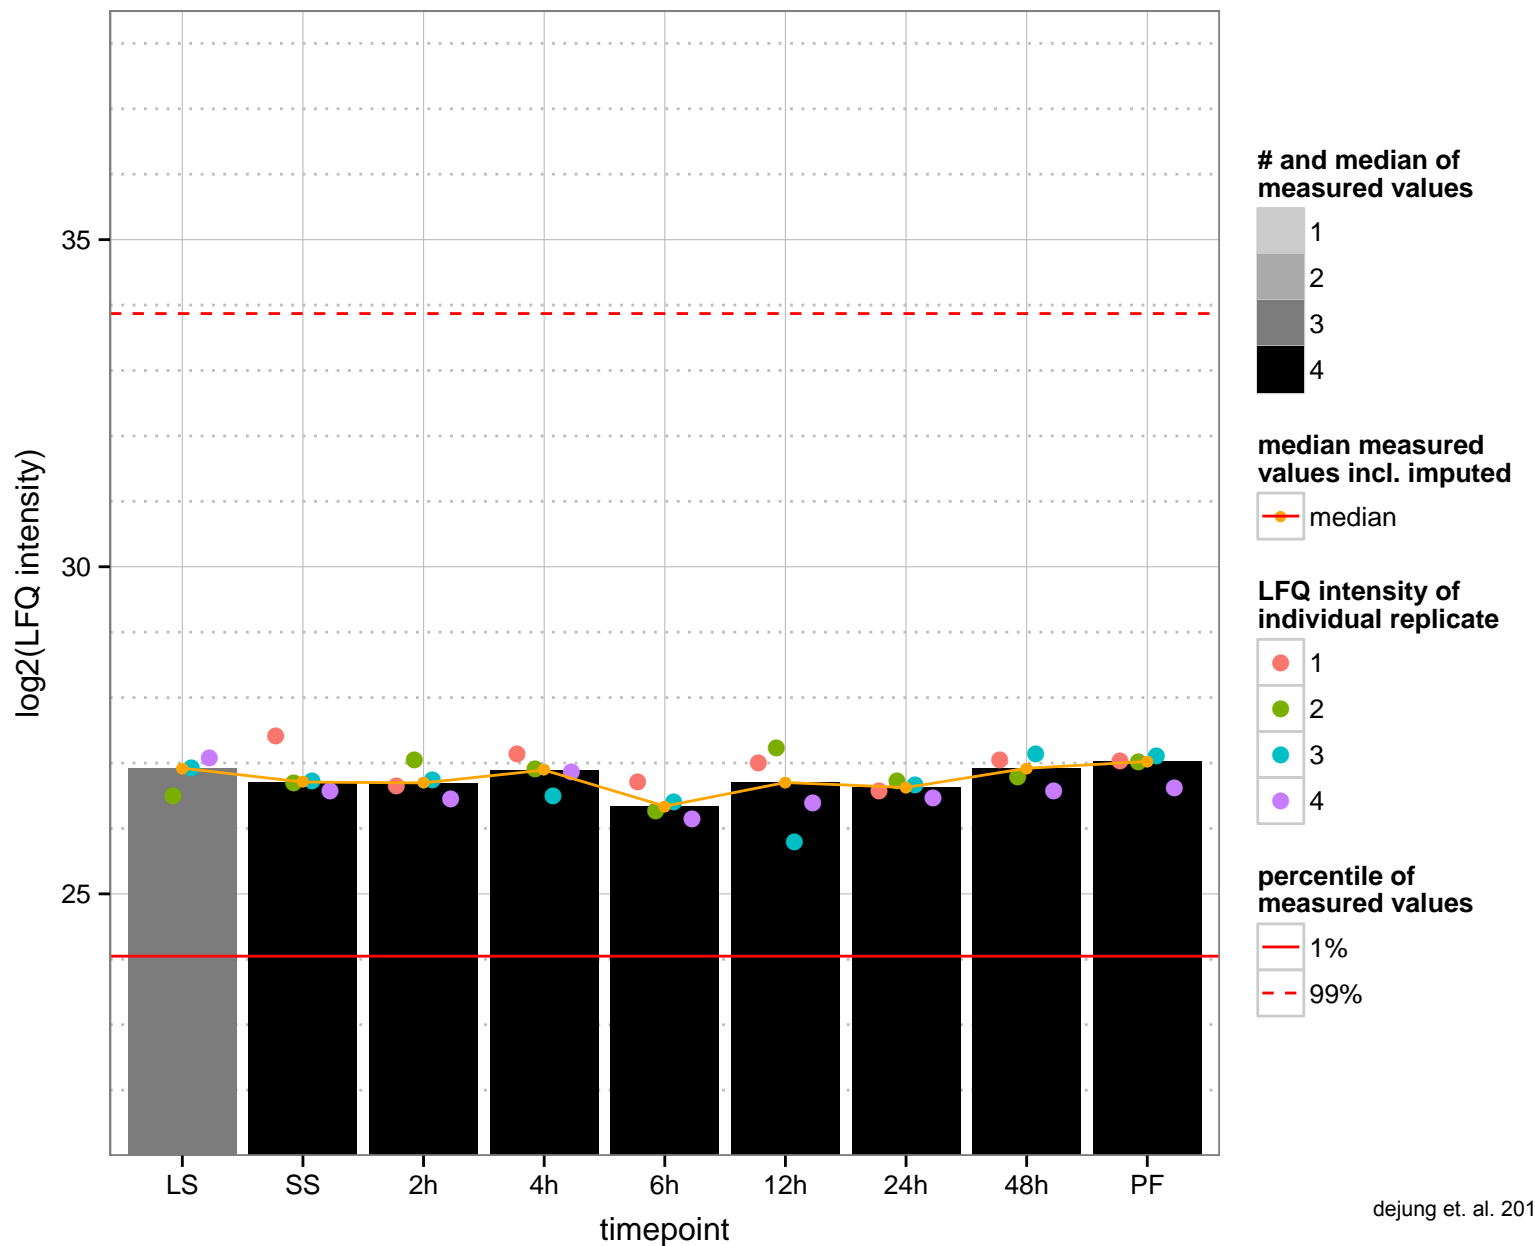

SKP1-like protein  
Tb927.11.6130  
AGOF: null  
AGOC: null  
AGOP: ubiquitin-dependent protein catabolic process  
PGOF: null  
PGOC: null  
PGOP: ubiquitin-dependent protein catabolic process

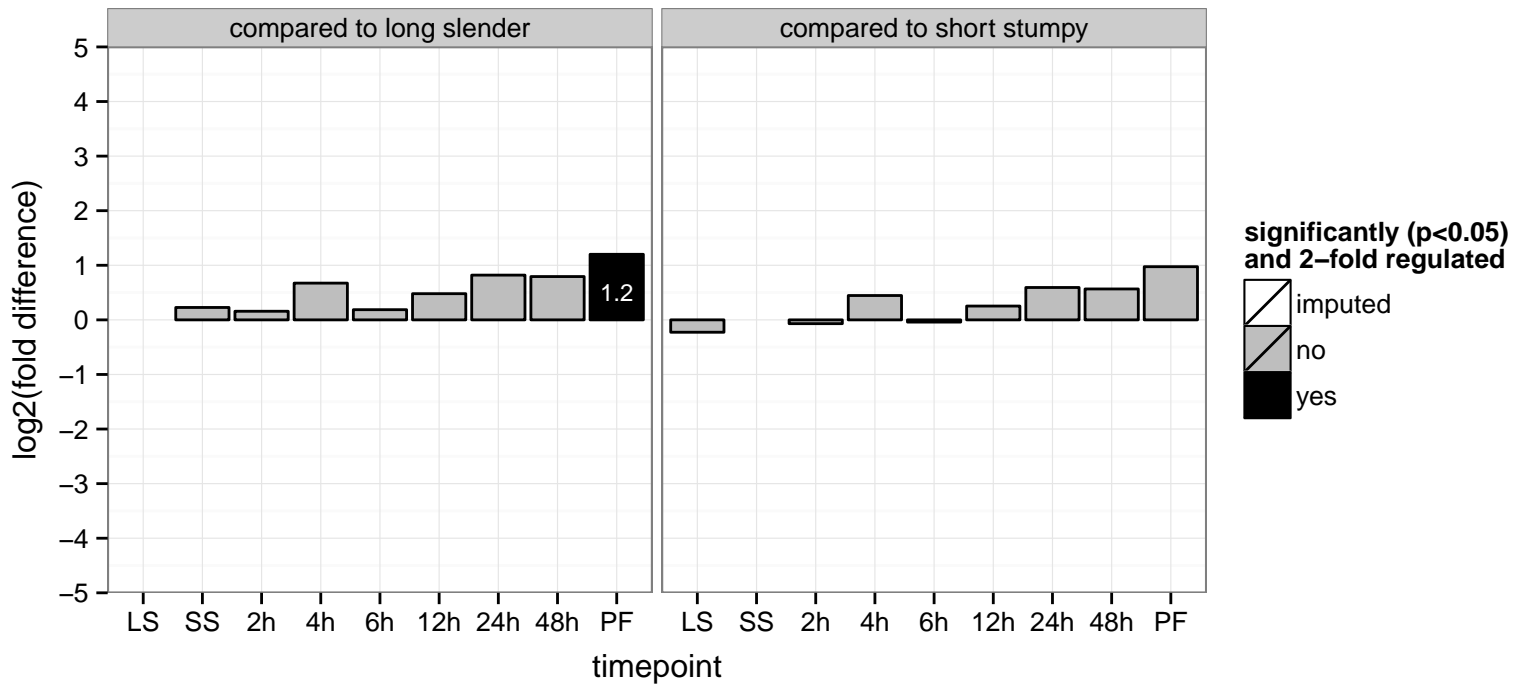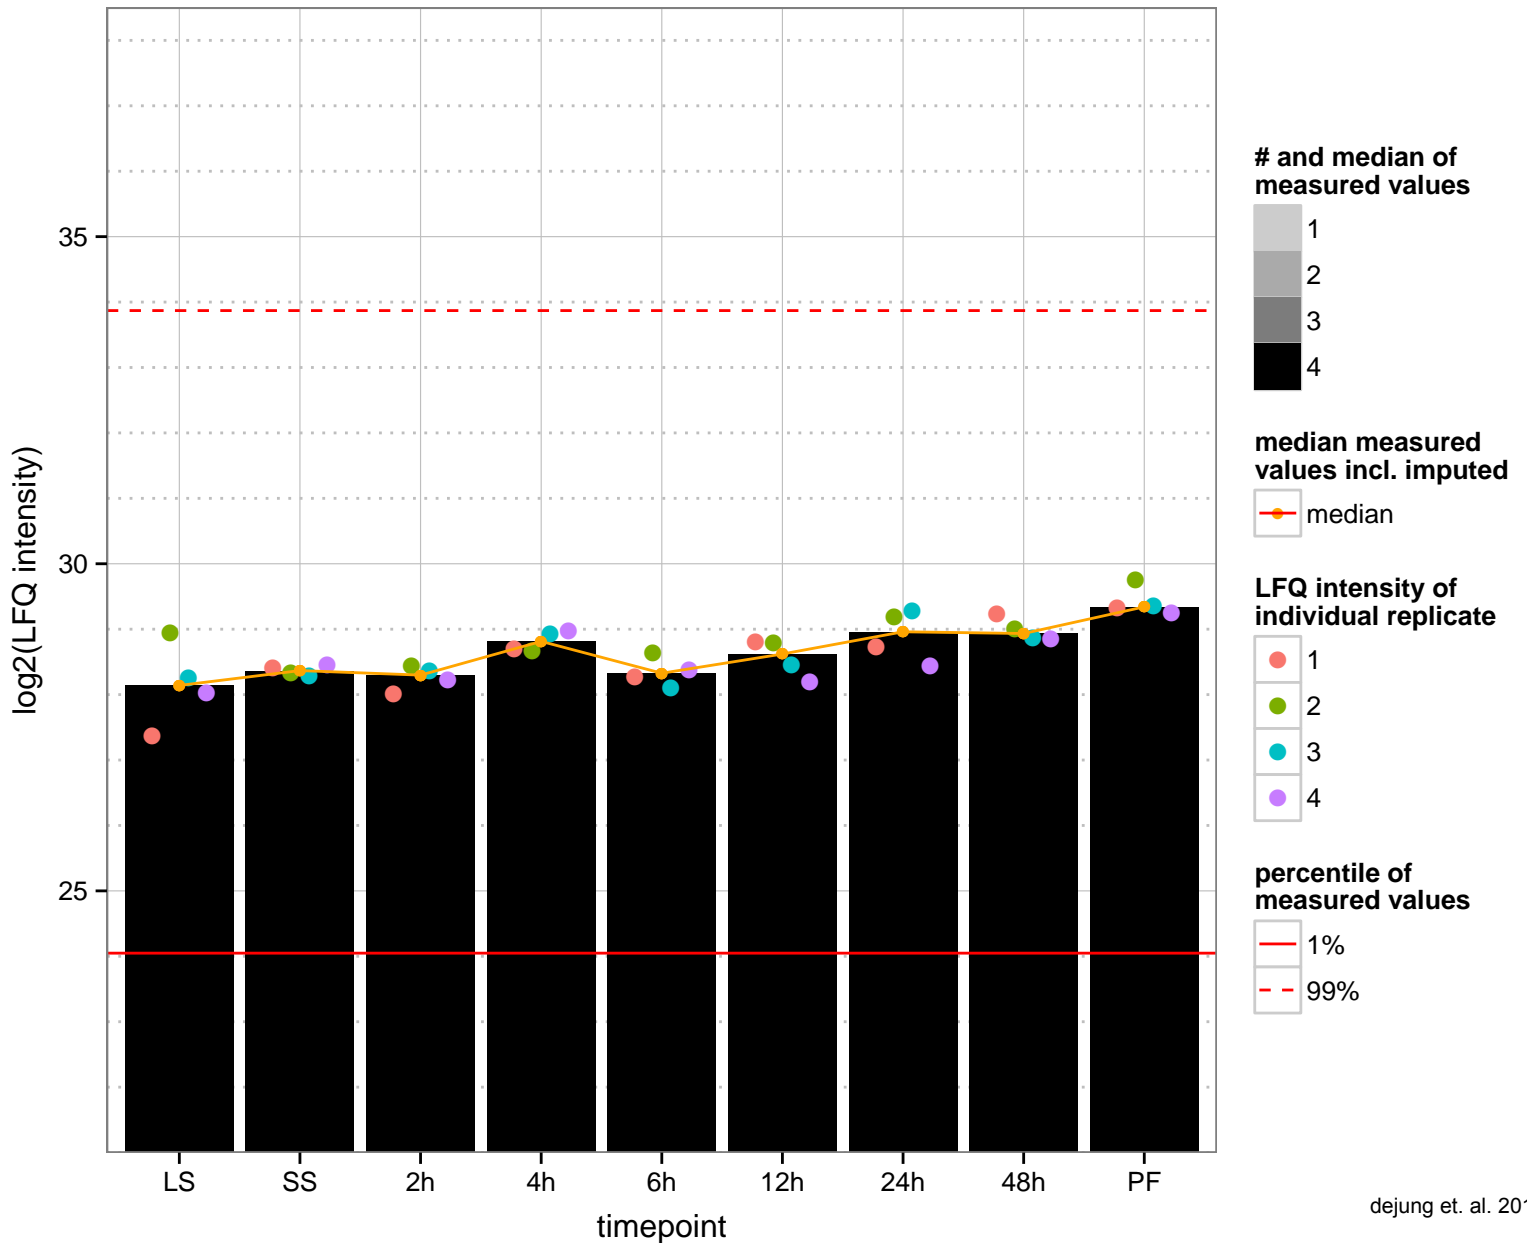



40S ribosomal protein S15A, putative  
 Tb927.11.6140;Tb927.3.4360  
 AGOF: structural constituent of ribosome  
 AGOC: intracellular, organellar small ribosomal subunit, ribosome  
 AGOP: translation  
 PGO: structural constituent of ribosome  
 PGO: intracellular, ribosome  
 PGOP: translation

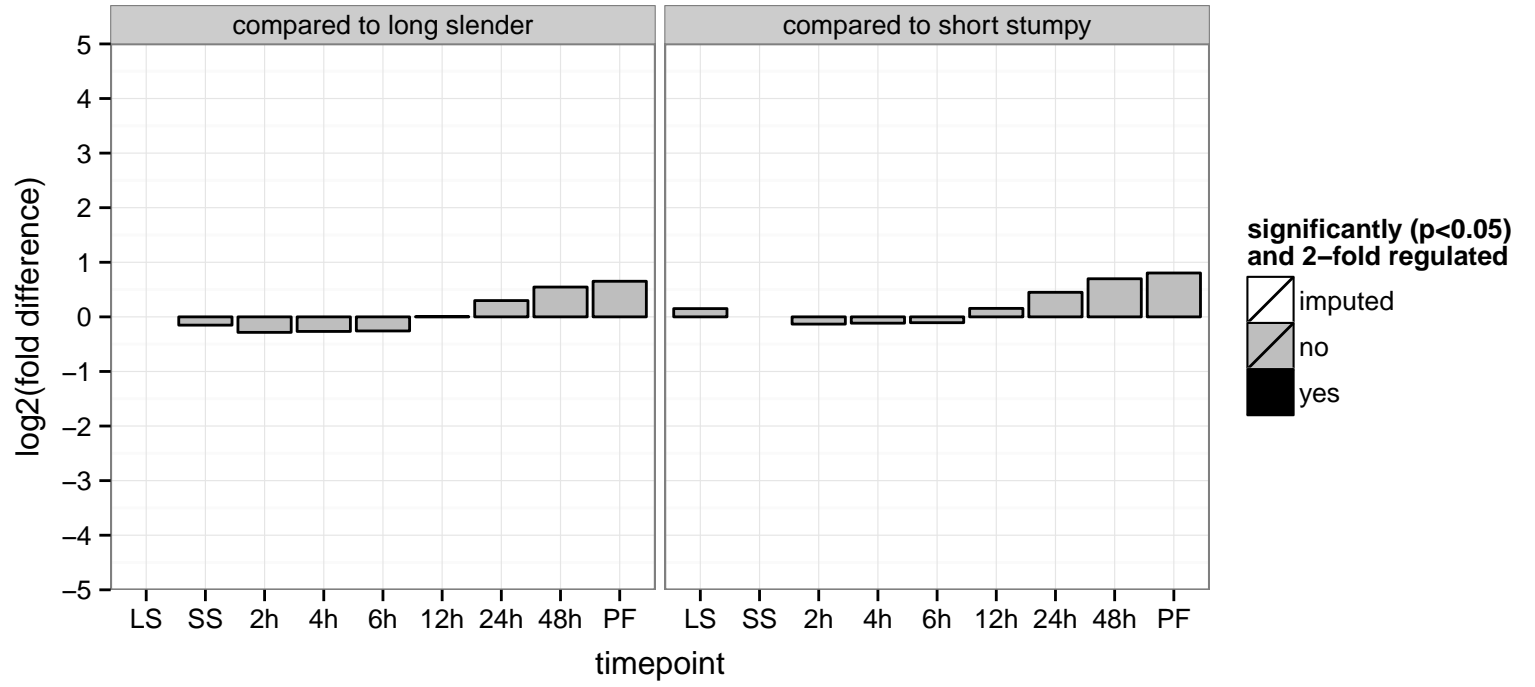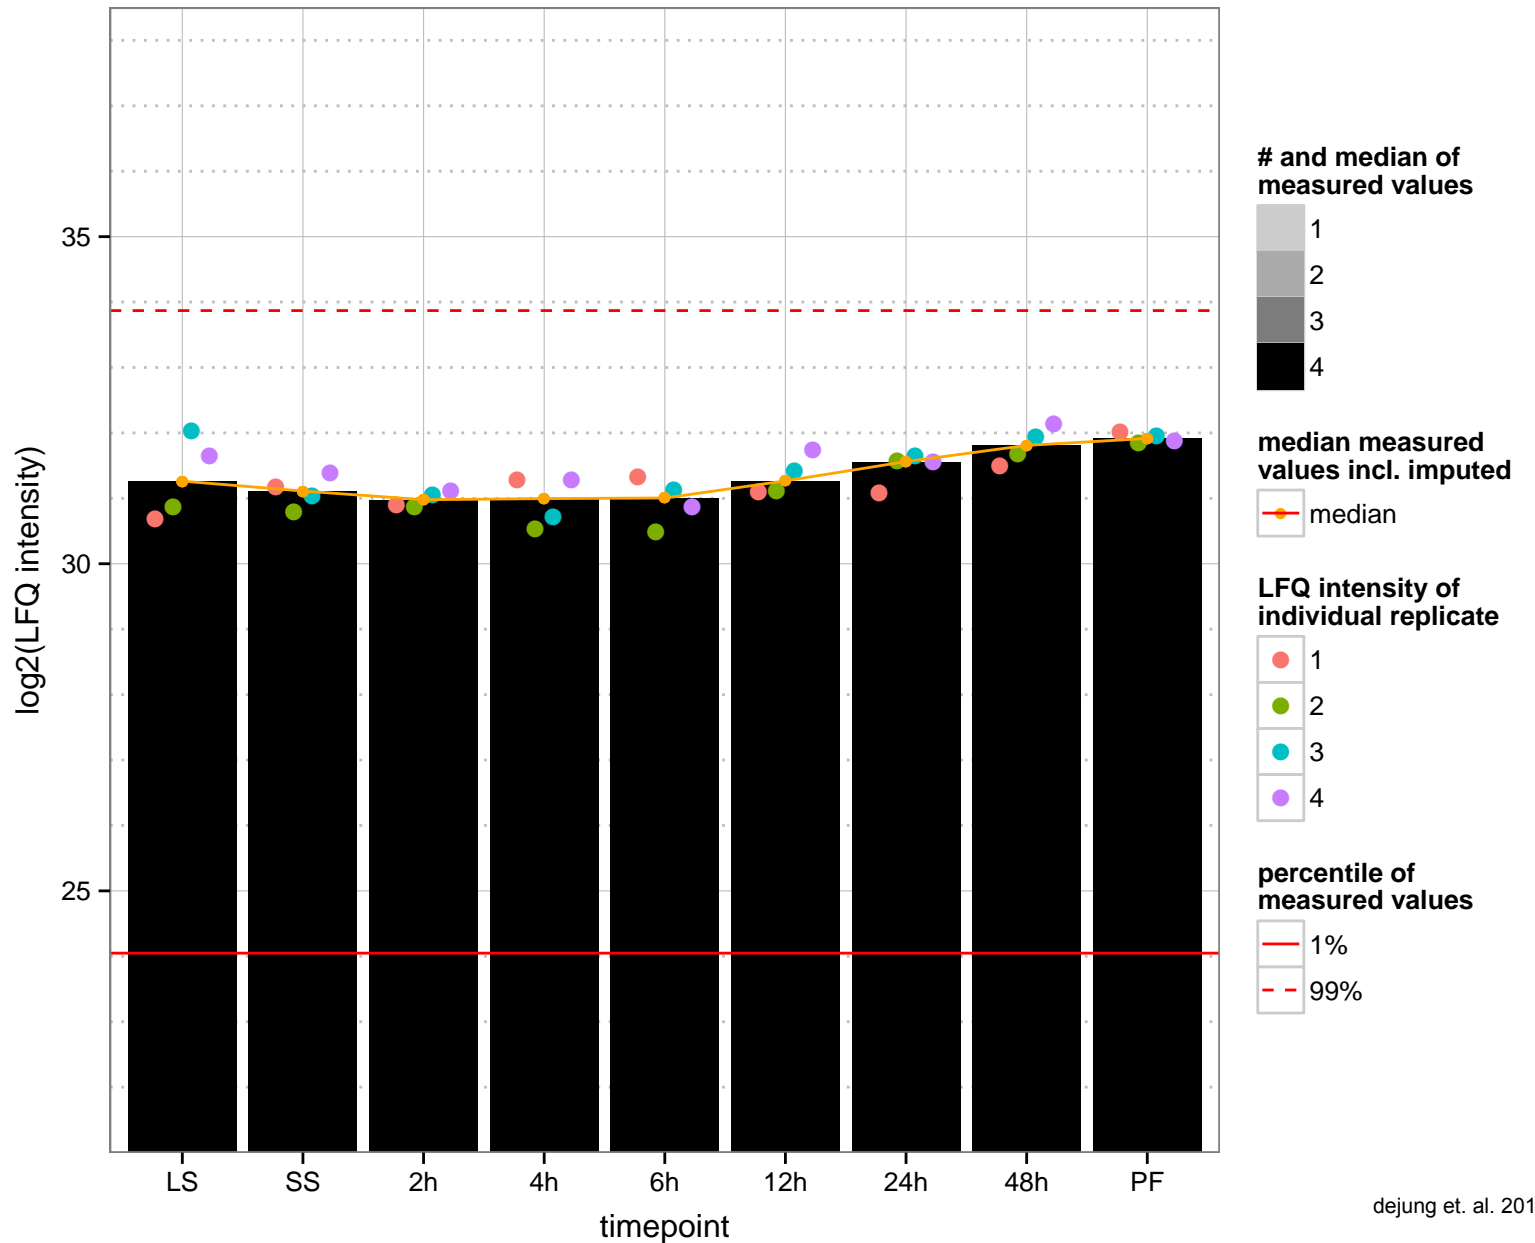

protein transport protein SEC31, putative, cytosolic coat protein  
 Tb927.11.6170  
 AGOF: null  
 AGOC: null  
 AGOP: transport  
 PGO: protein binding  
 PGO: null  
 PGO: null

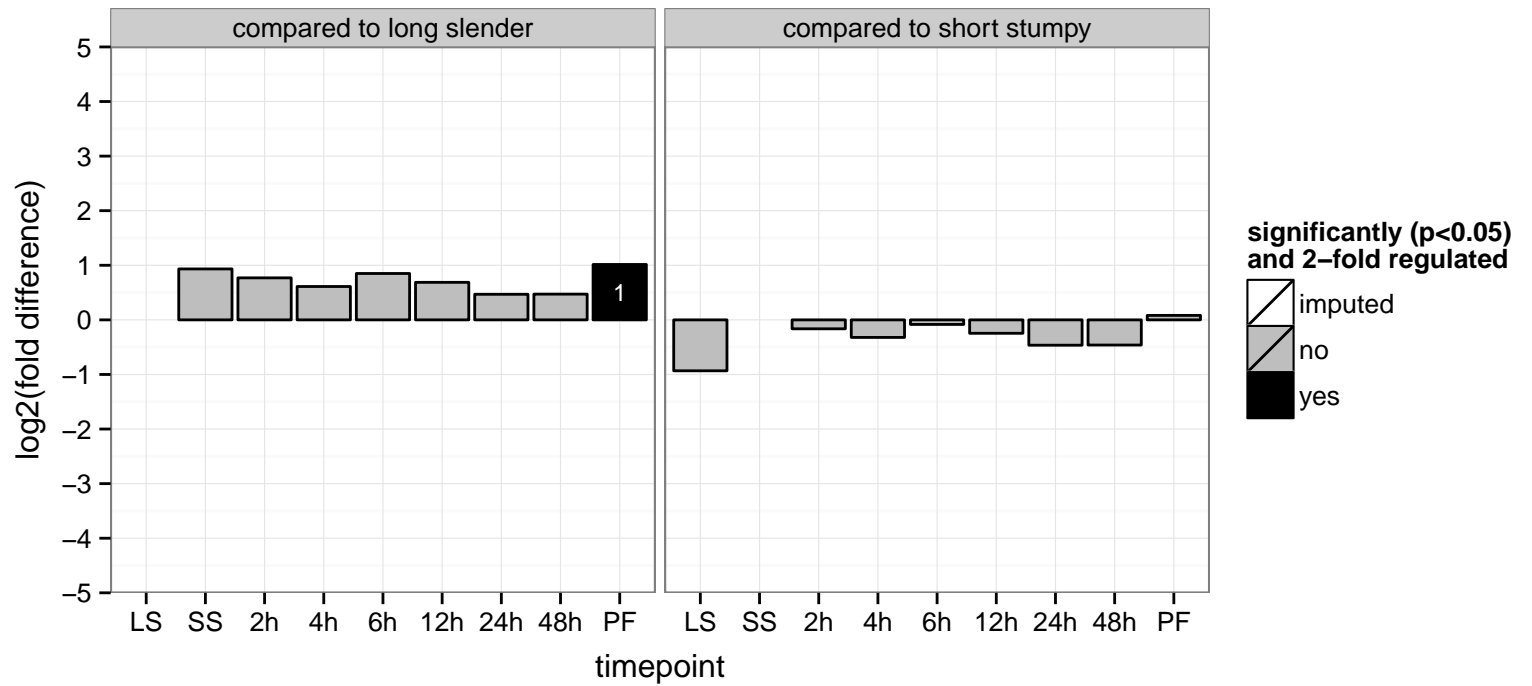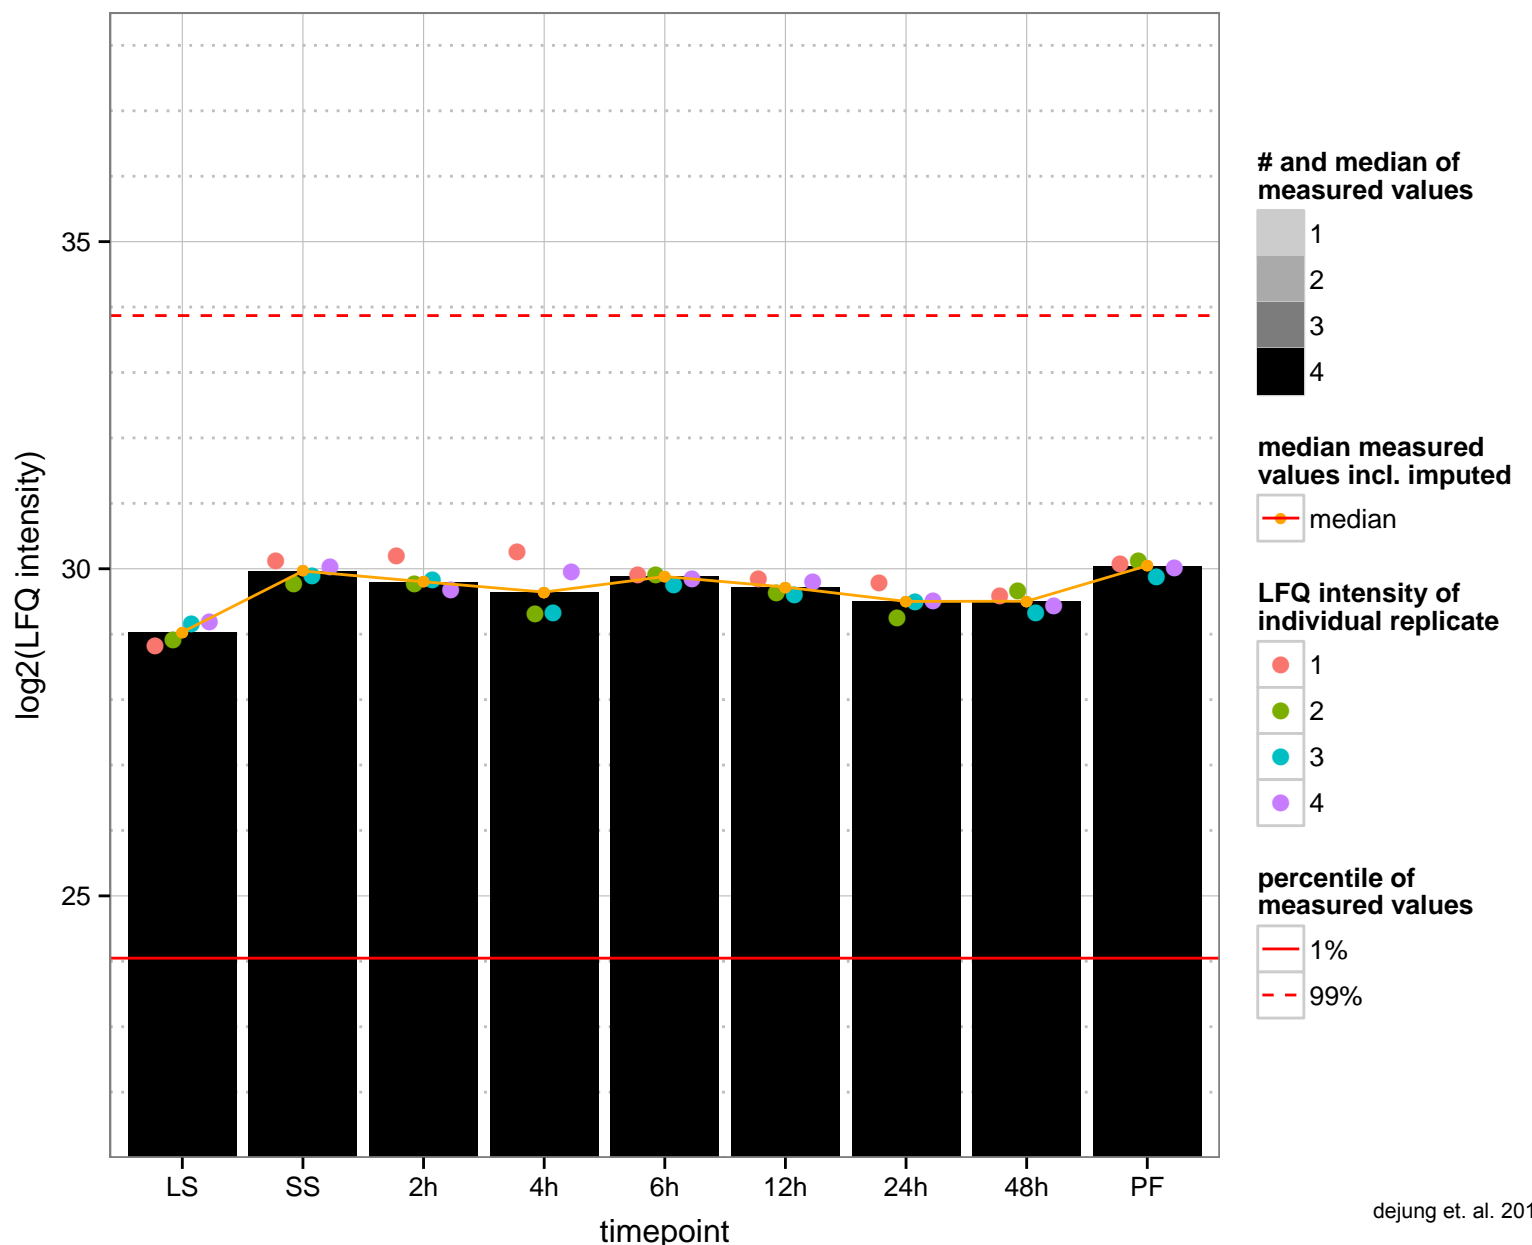

RNA polymerase I second largest subunit (RPA135)

Tb927.11.630

AGOF: DNA binding, DNA-directed RNA polymerase activity, ribonucleoside binding

AGOC: nucleus

AGOP: transcription, DNA-dependent

PGOF: DNA binding, DNA-directed RNA polymerase activity

PGOC: nucleus

PGOP: transcription, DNA-dependent

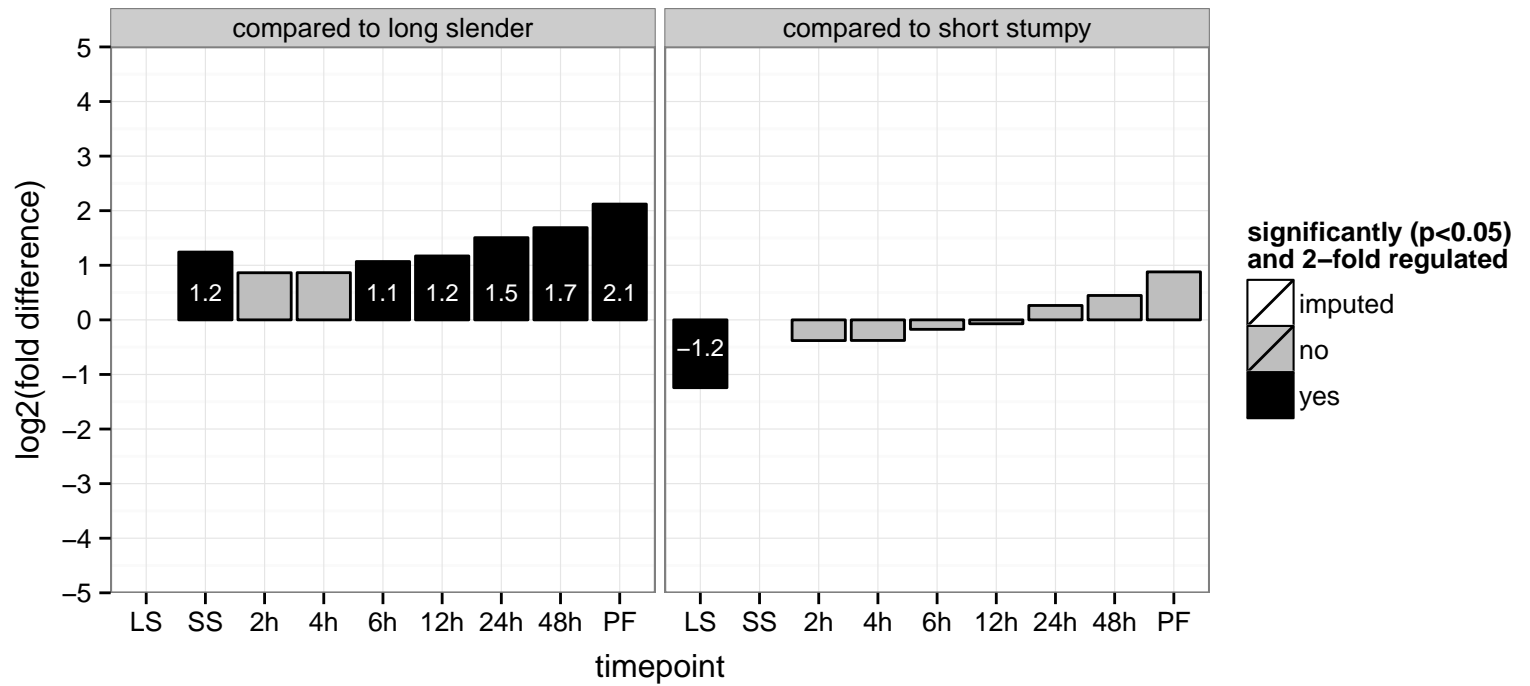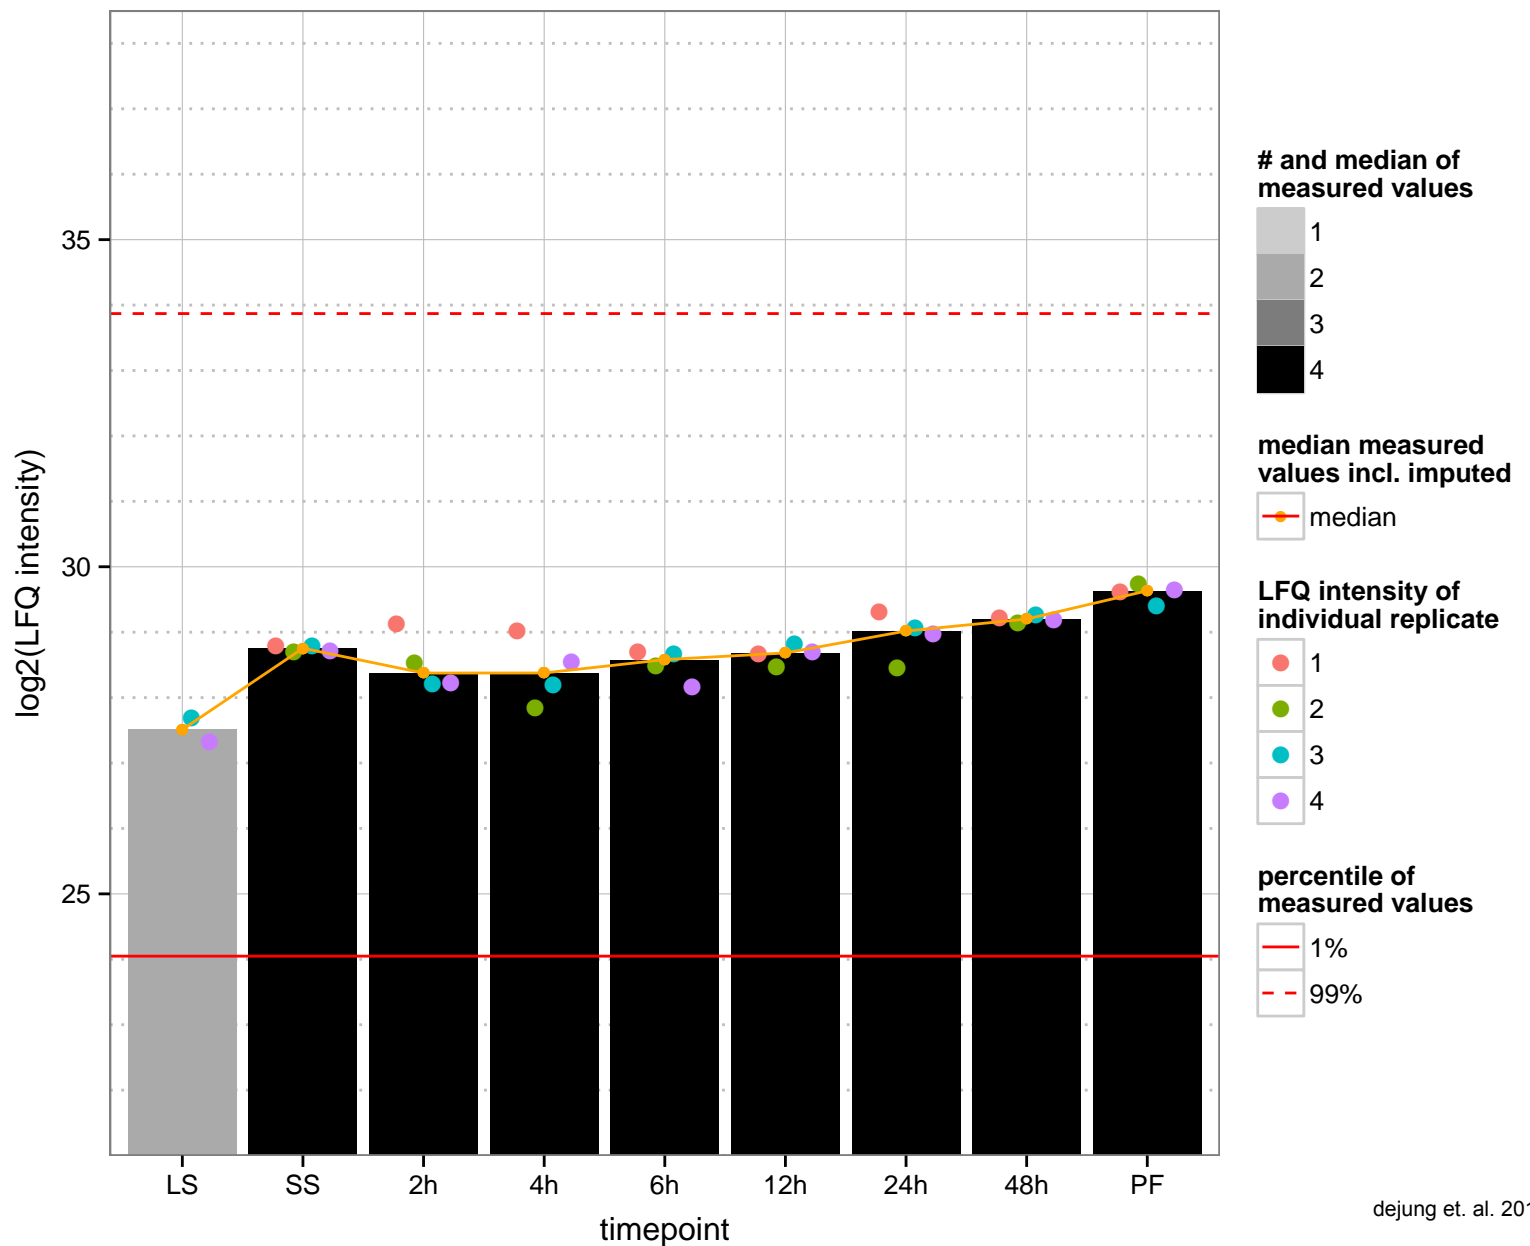

hypothetical protein, conserved  
 Tb927.11.6310  
 AGOF: null  
 AGOC: null  
 AGOP: null  
 PGOF: null  
 PGOC: null  
 PGOP: null

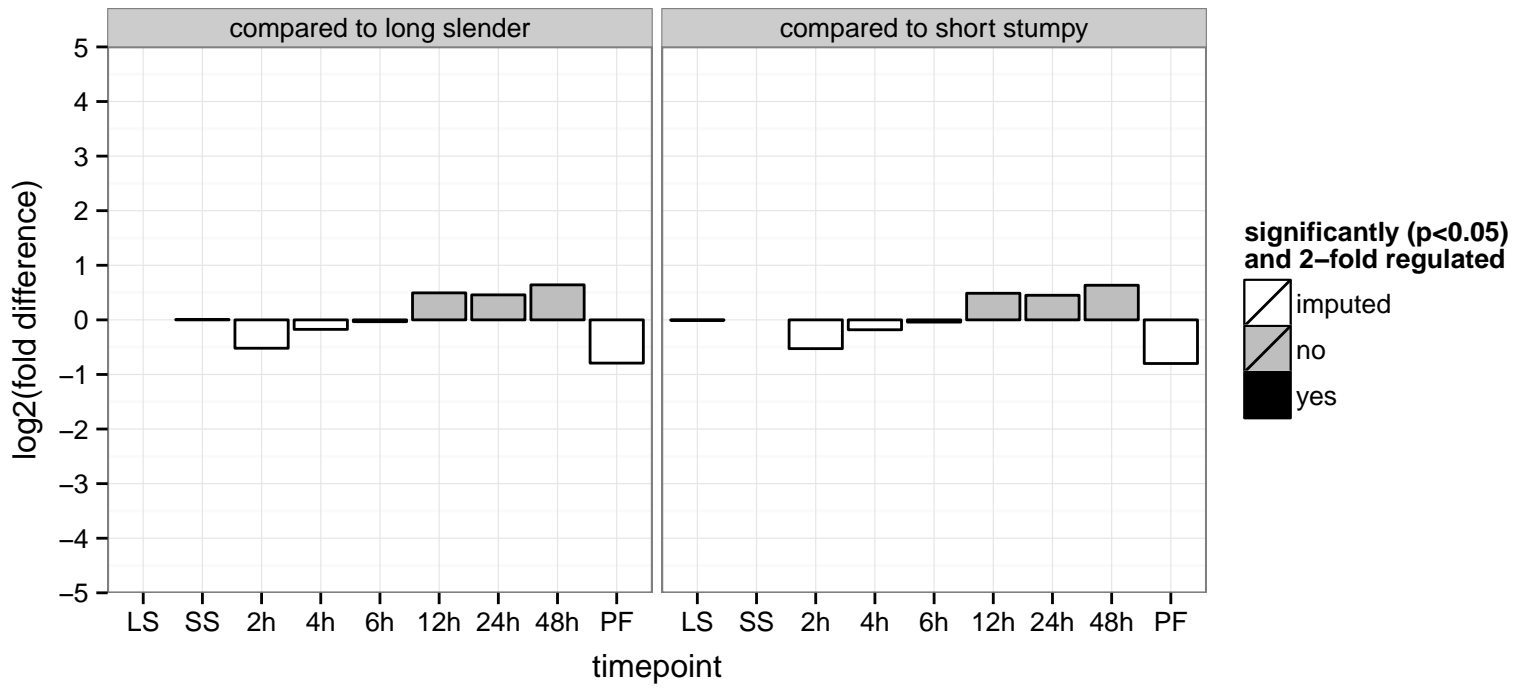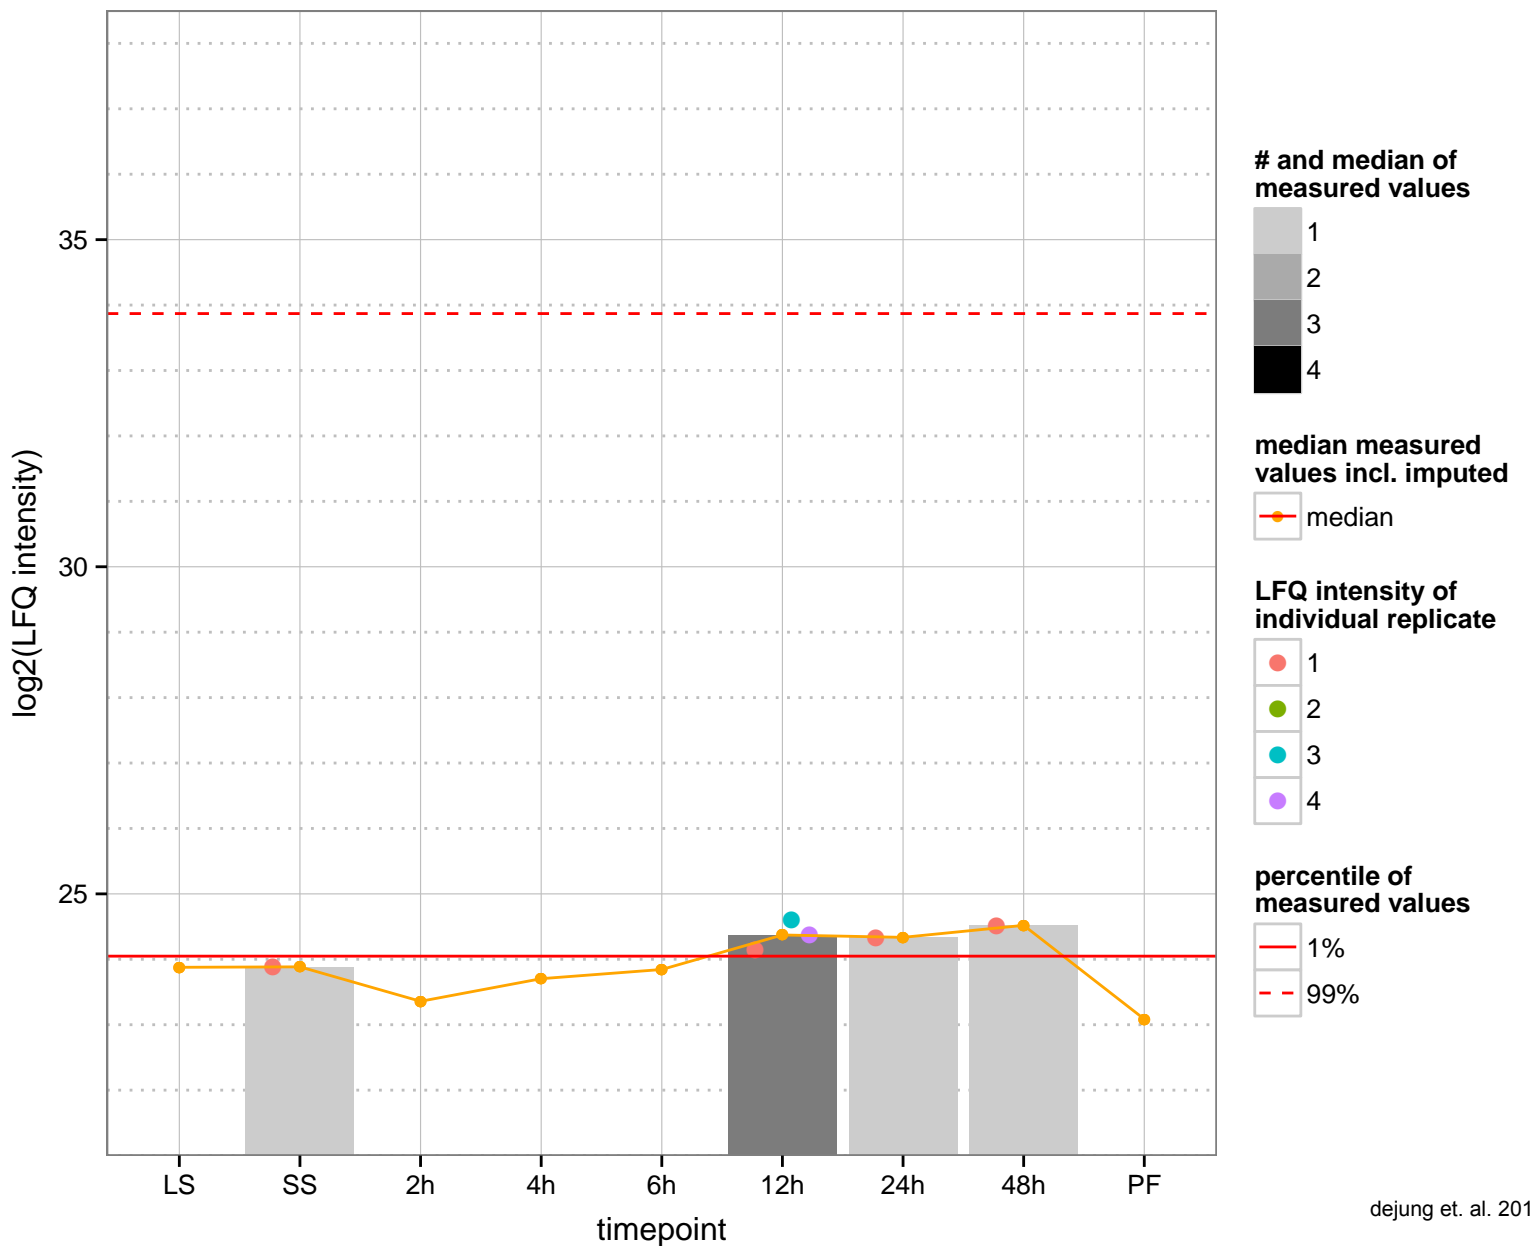

MRB1-associated protein, zinc finger ccch and cchc domain-containing protein  
 Tb927.11.6320  
 AGOF: null  
 AGOC: null  
 AGOP: null  
 PGO: nucleic acid binding, zinc ion binding  
 PGO: null  
 PGO: null

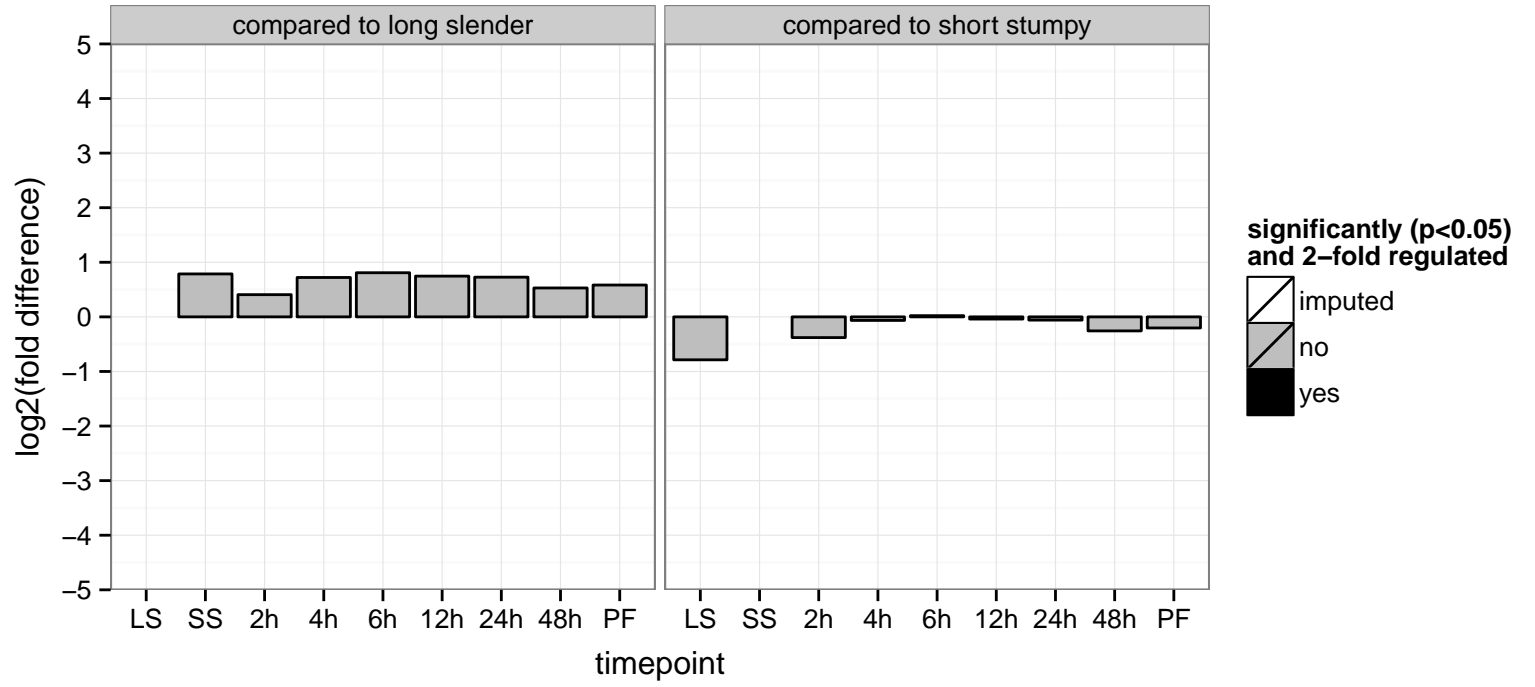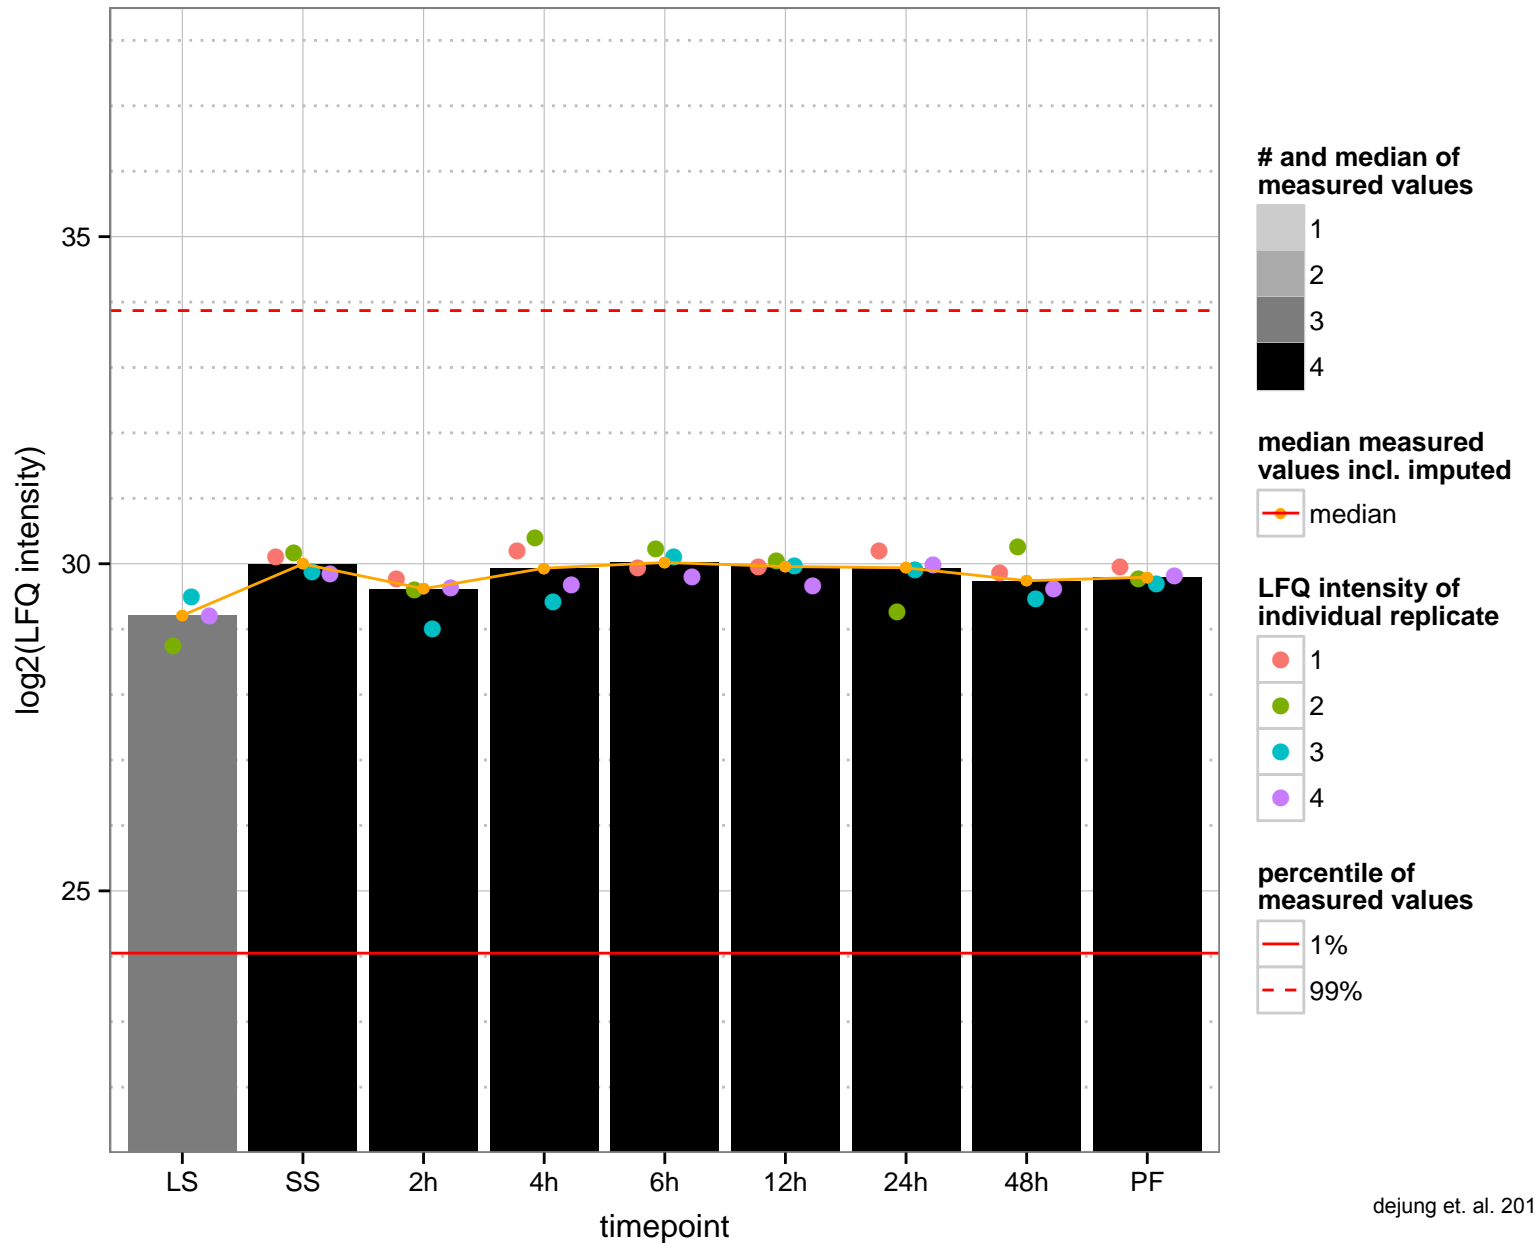

60S ribosomal protein L24, putative  
 Tb927.11.6360  
 AGOF: structural constituent of ribosome  
 AGOC: intracellular, ribosome  
 AGOP: translation  
 PGO: null  
 PGOC: null  
 PGOP: null

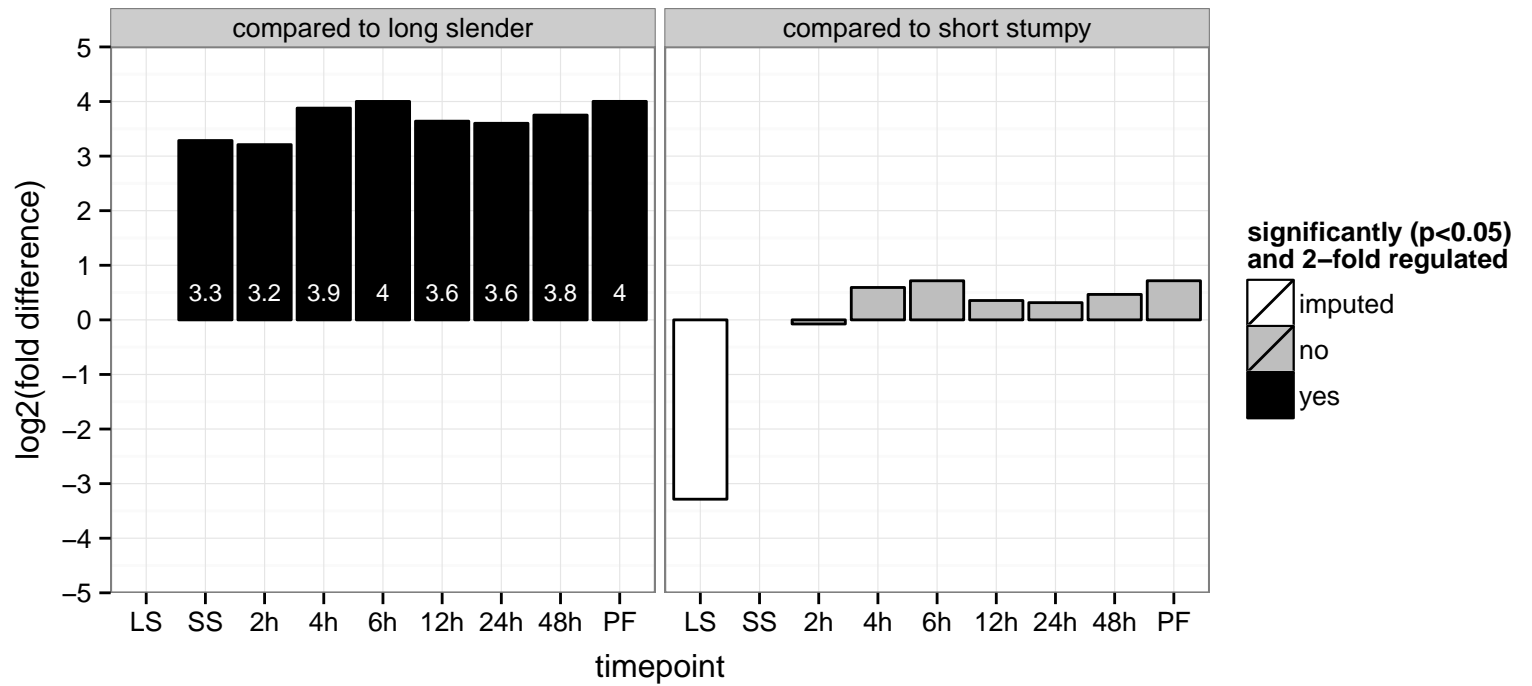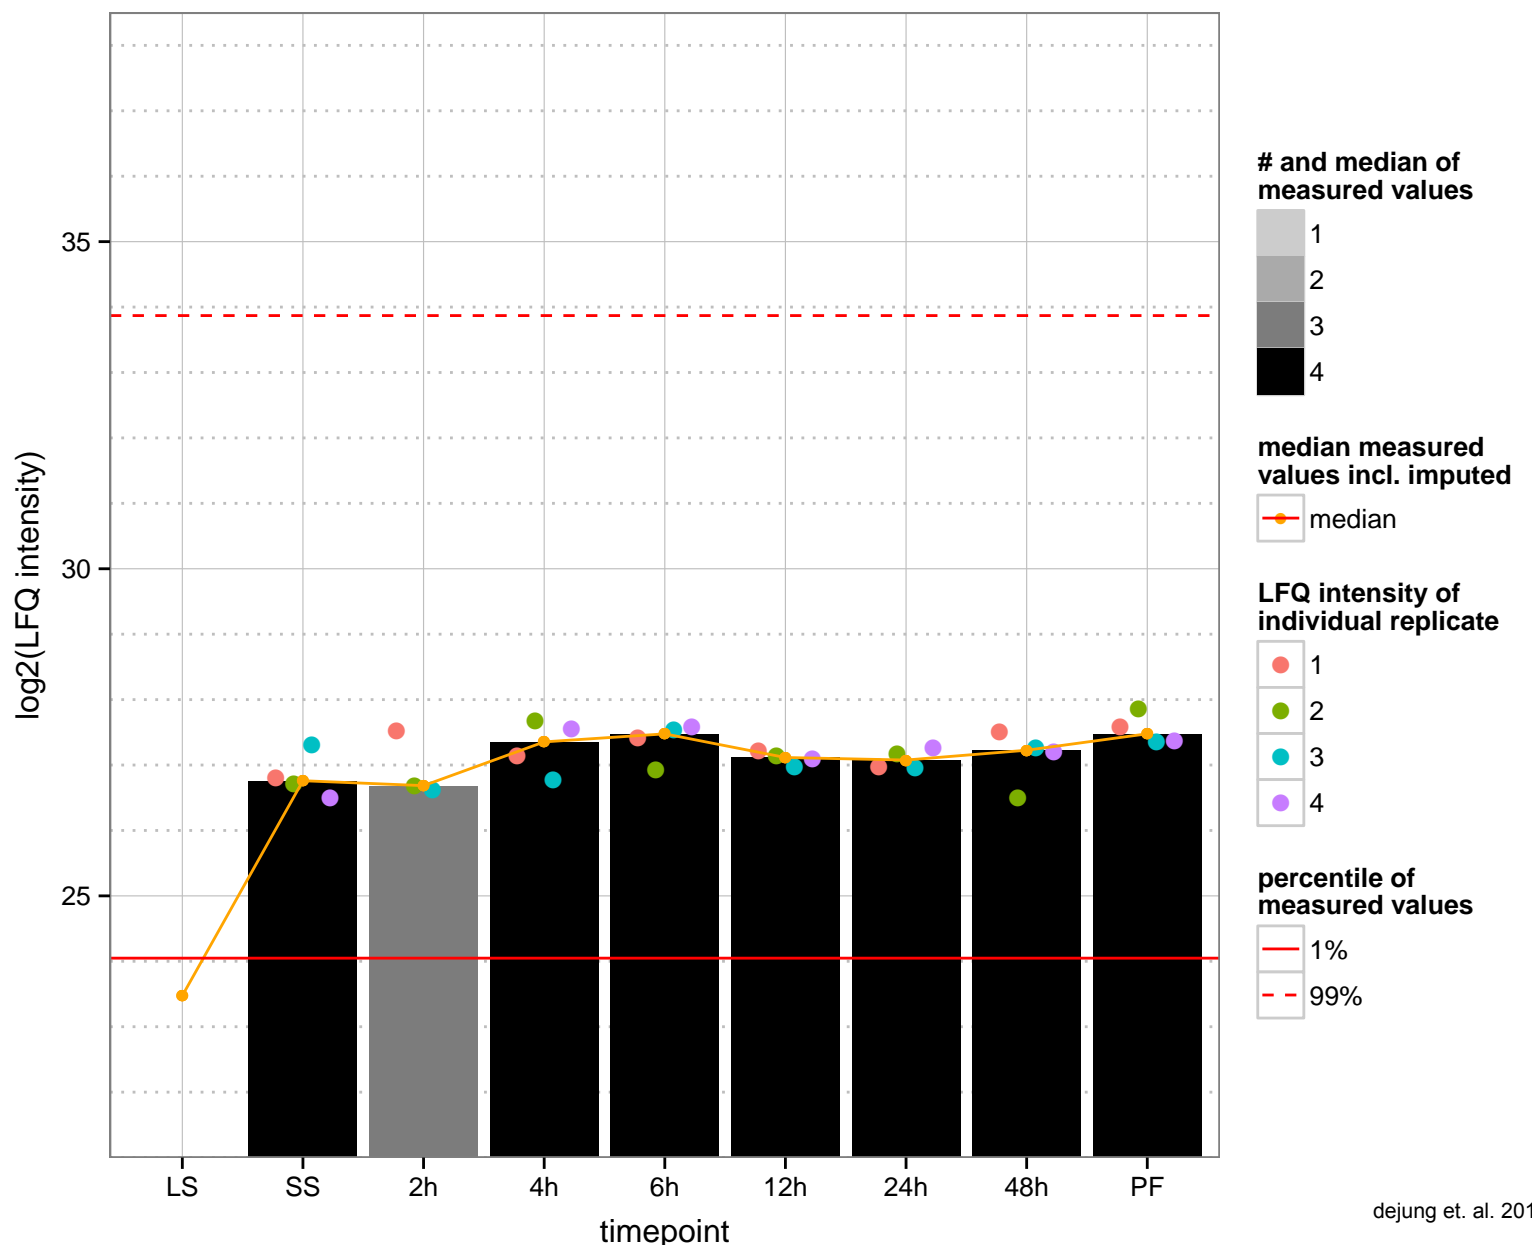

leucine-rich repeat protein (LRRP), putative  
 Tb927.11.6370  
 AGOF: null  
 AGOC: null  
 AGOP: null  
 PGO: protein binding  
 PGOC: null  
 PGOP: null

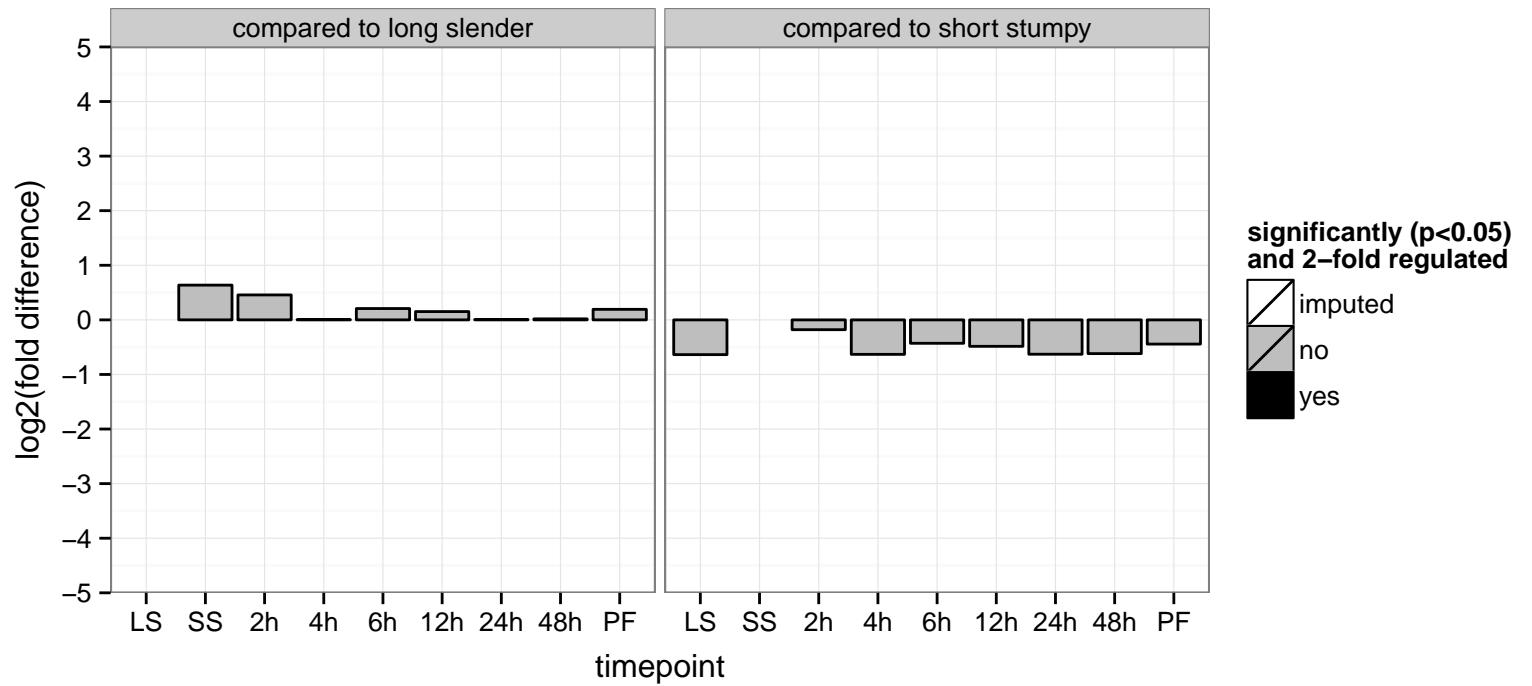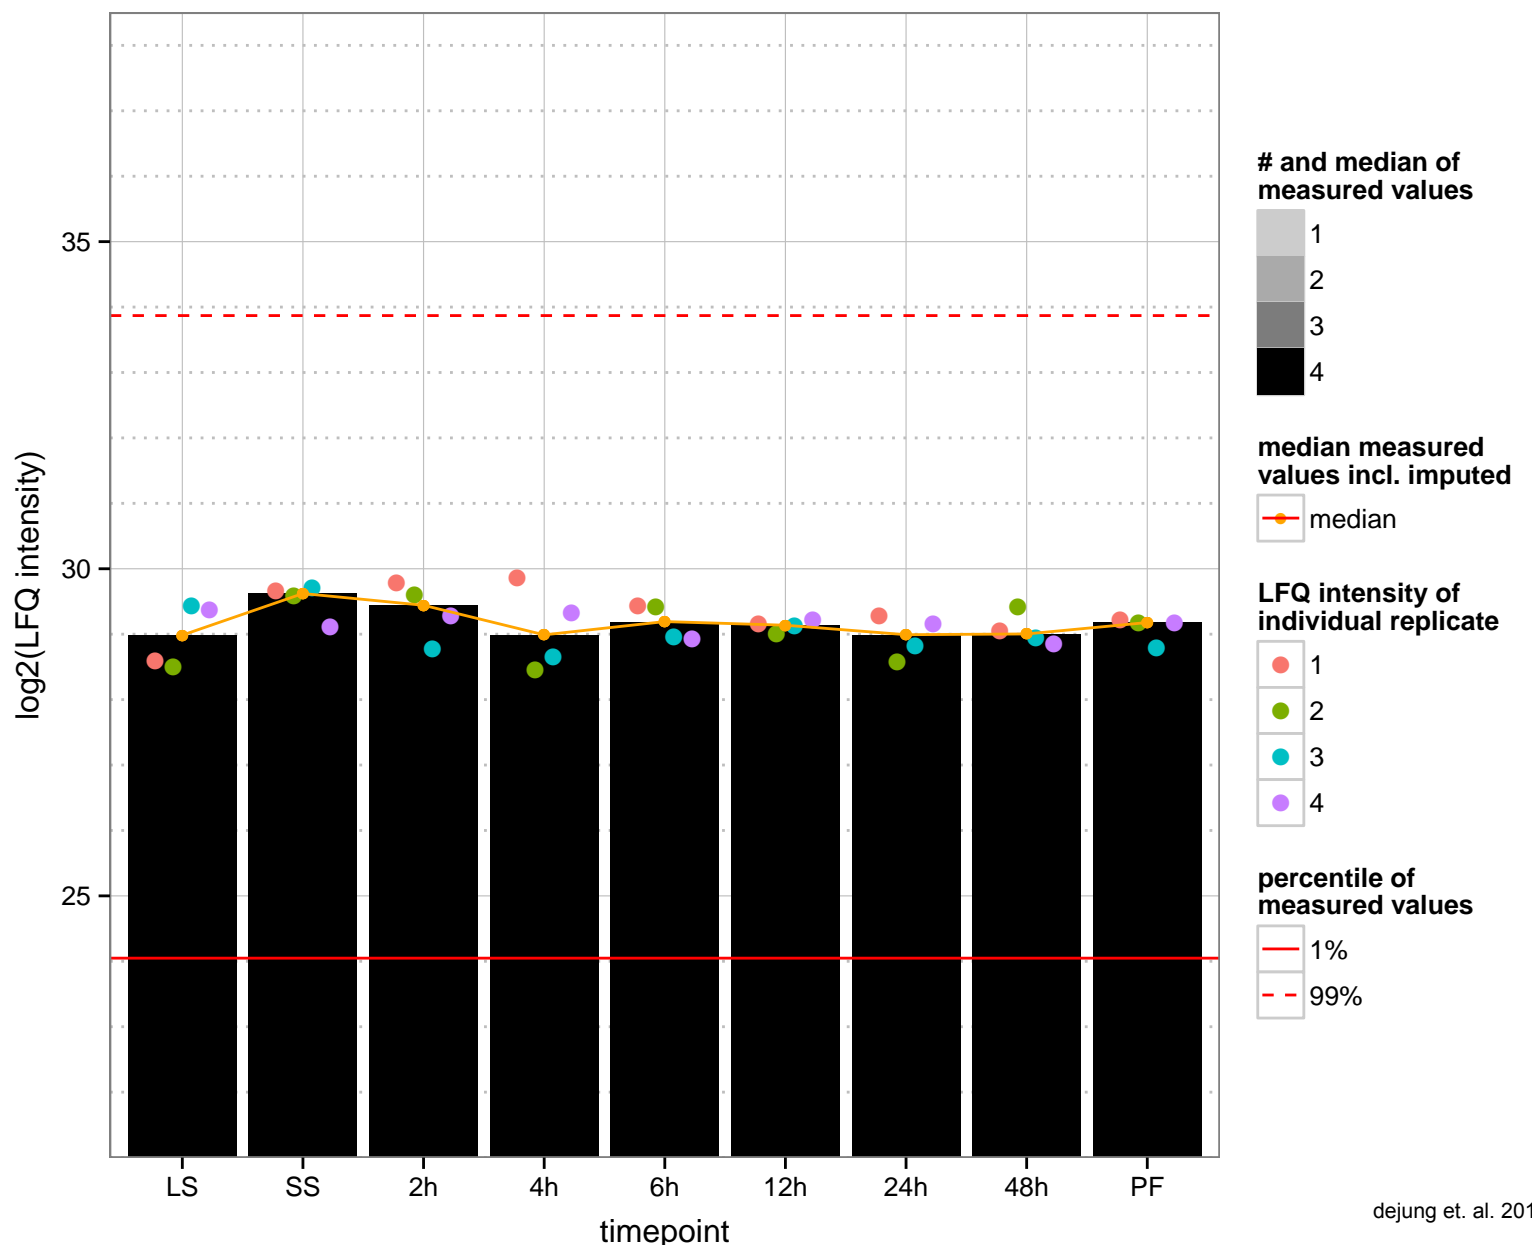

kinesin, putative  
 Tb927.11.6400  
 AGOF: ATP binding, microtubule motor activity, motor activity  
 AGOC: kinesin complex, microtubule associated complex  
 AGOP: microtubule-based movement  
 PGOF: ATP binding, microtubule motor activity  
 PGO: null  
 PGOP: microtubule-based movement

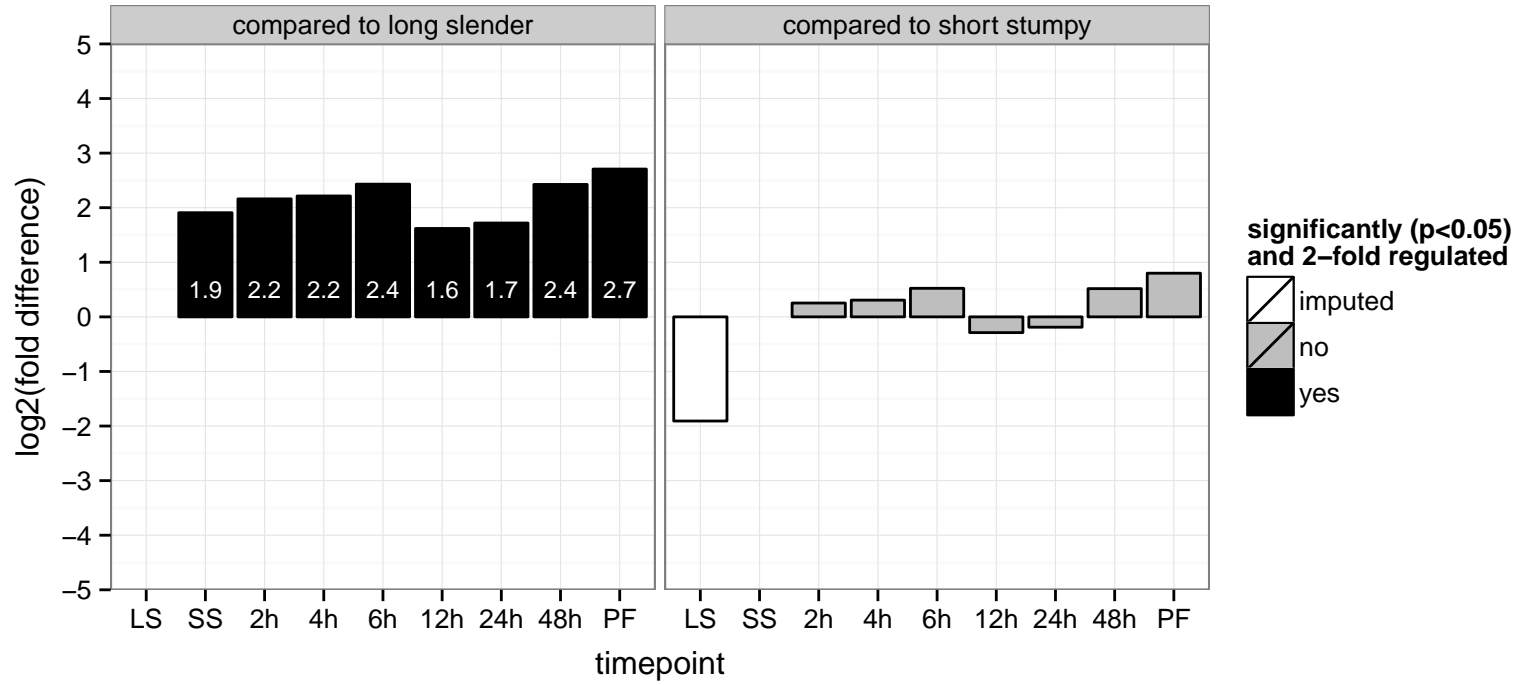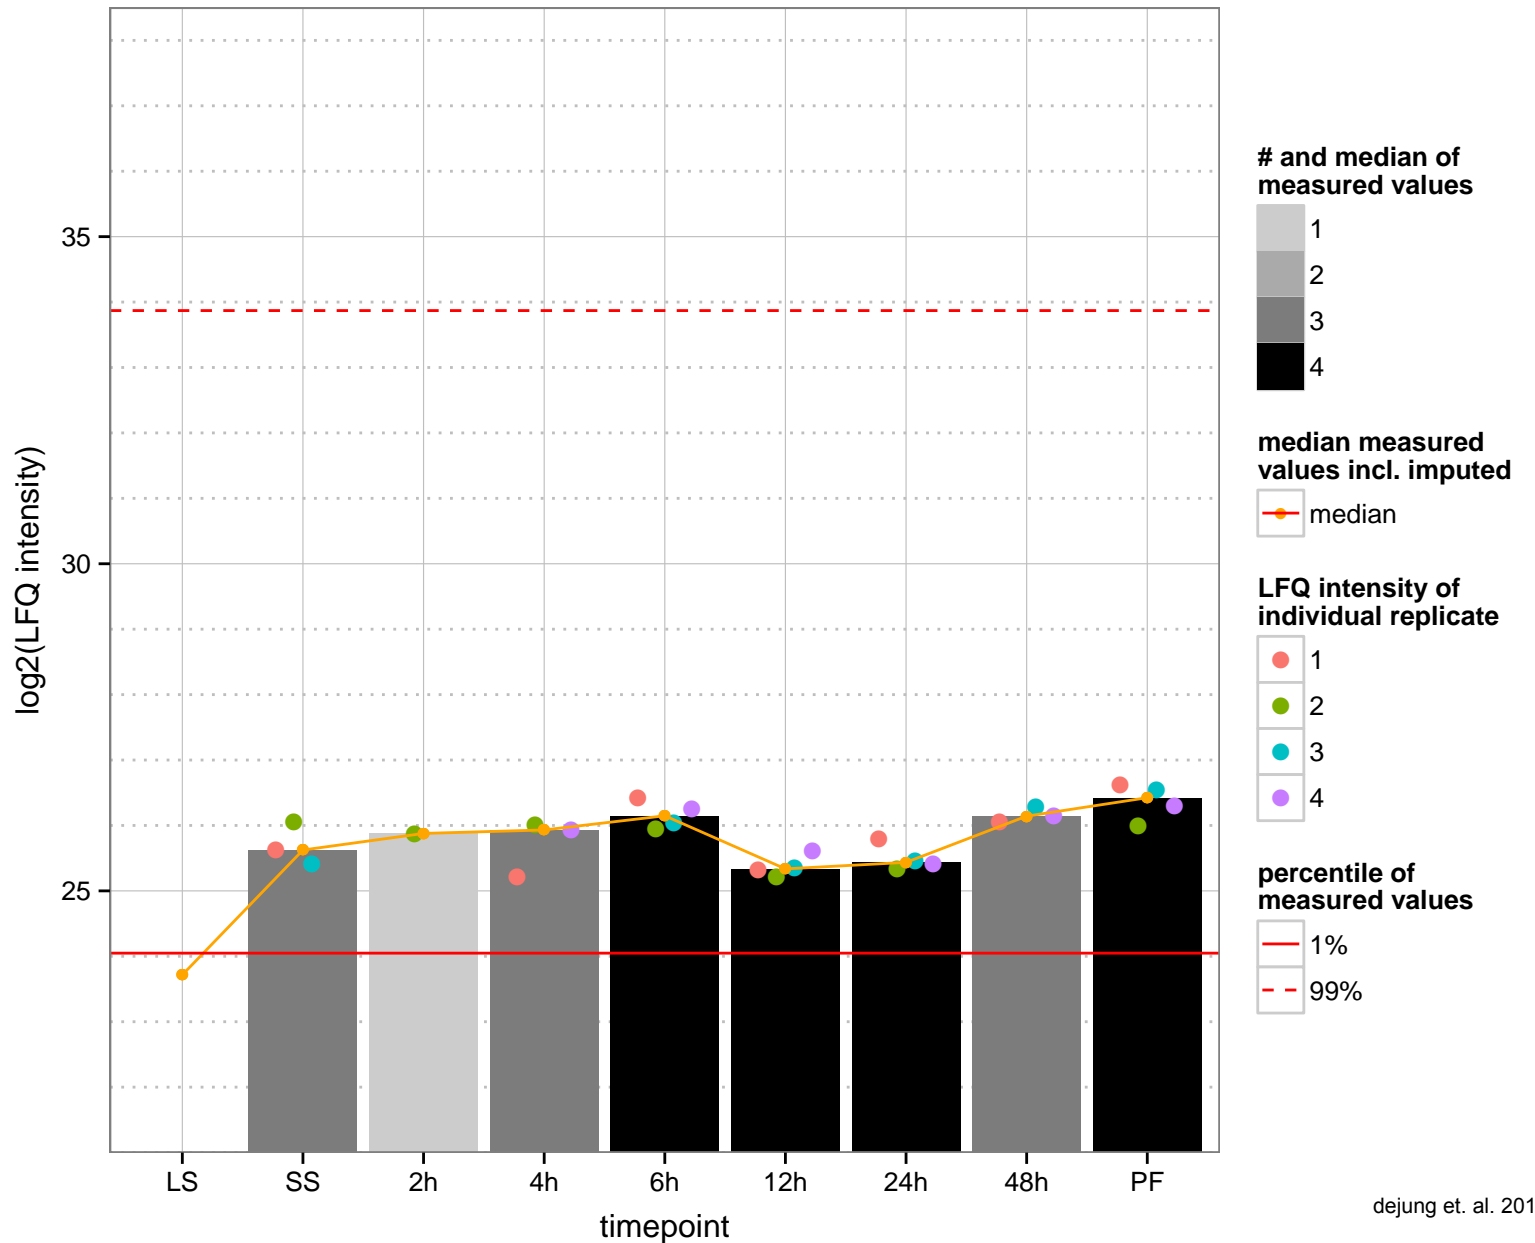



hypothetical protein, conserved  
 Tb927.11.6460  
 AGOF: null  
 AGOC: null  
 AGOP: null  
 PGO: null  
 PGO: null  
 PGO: null

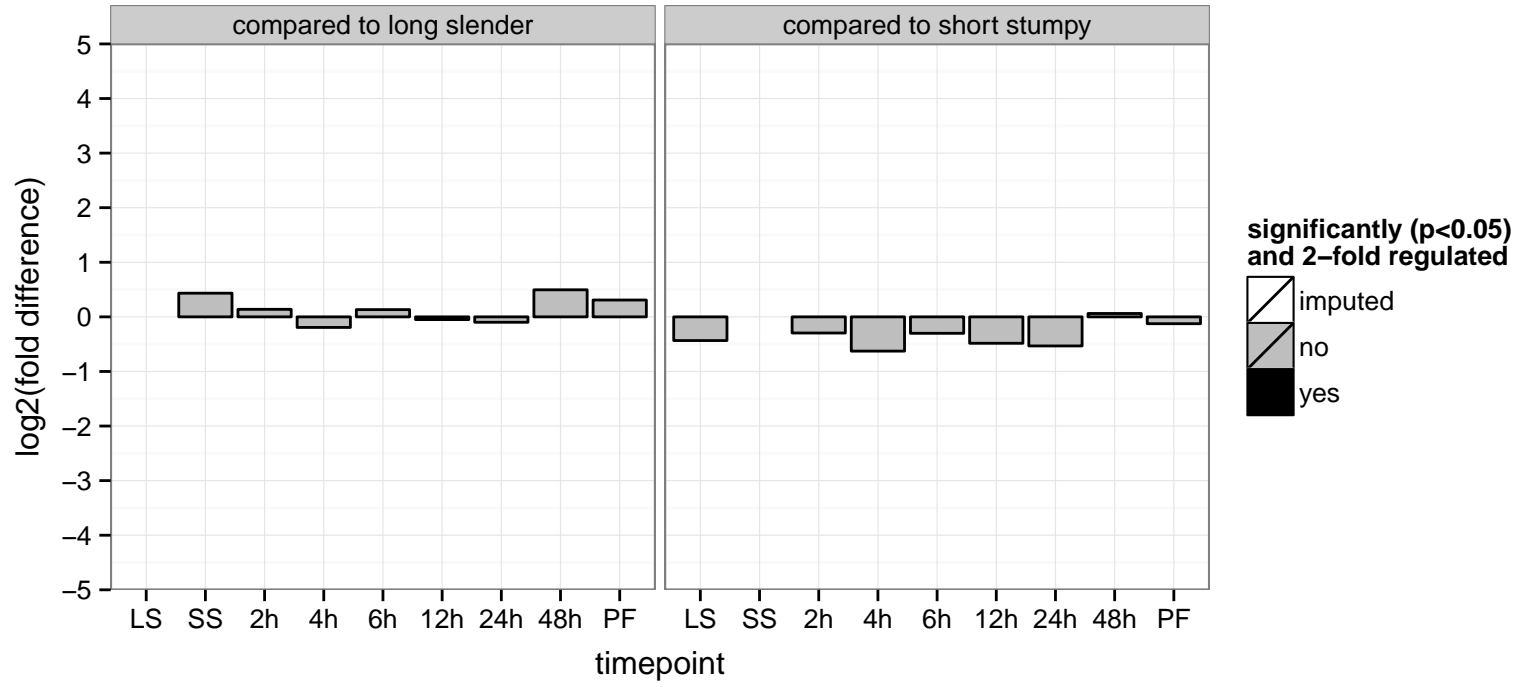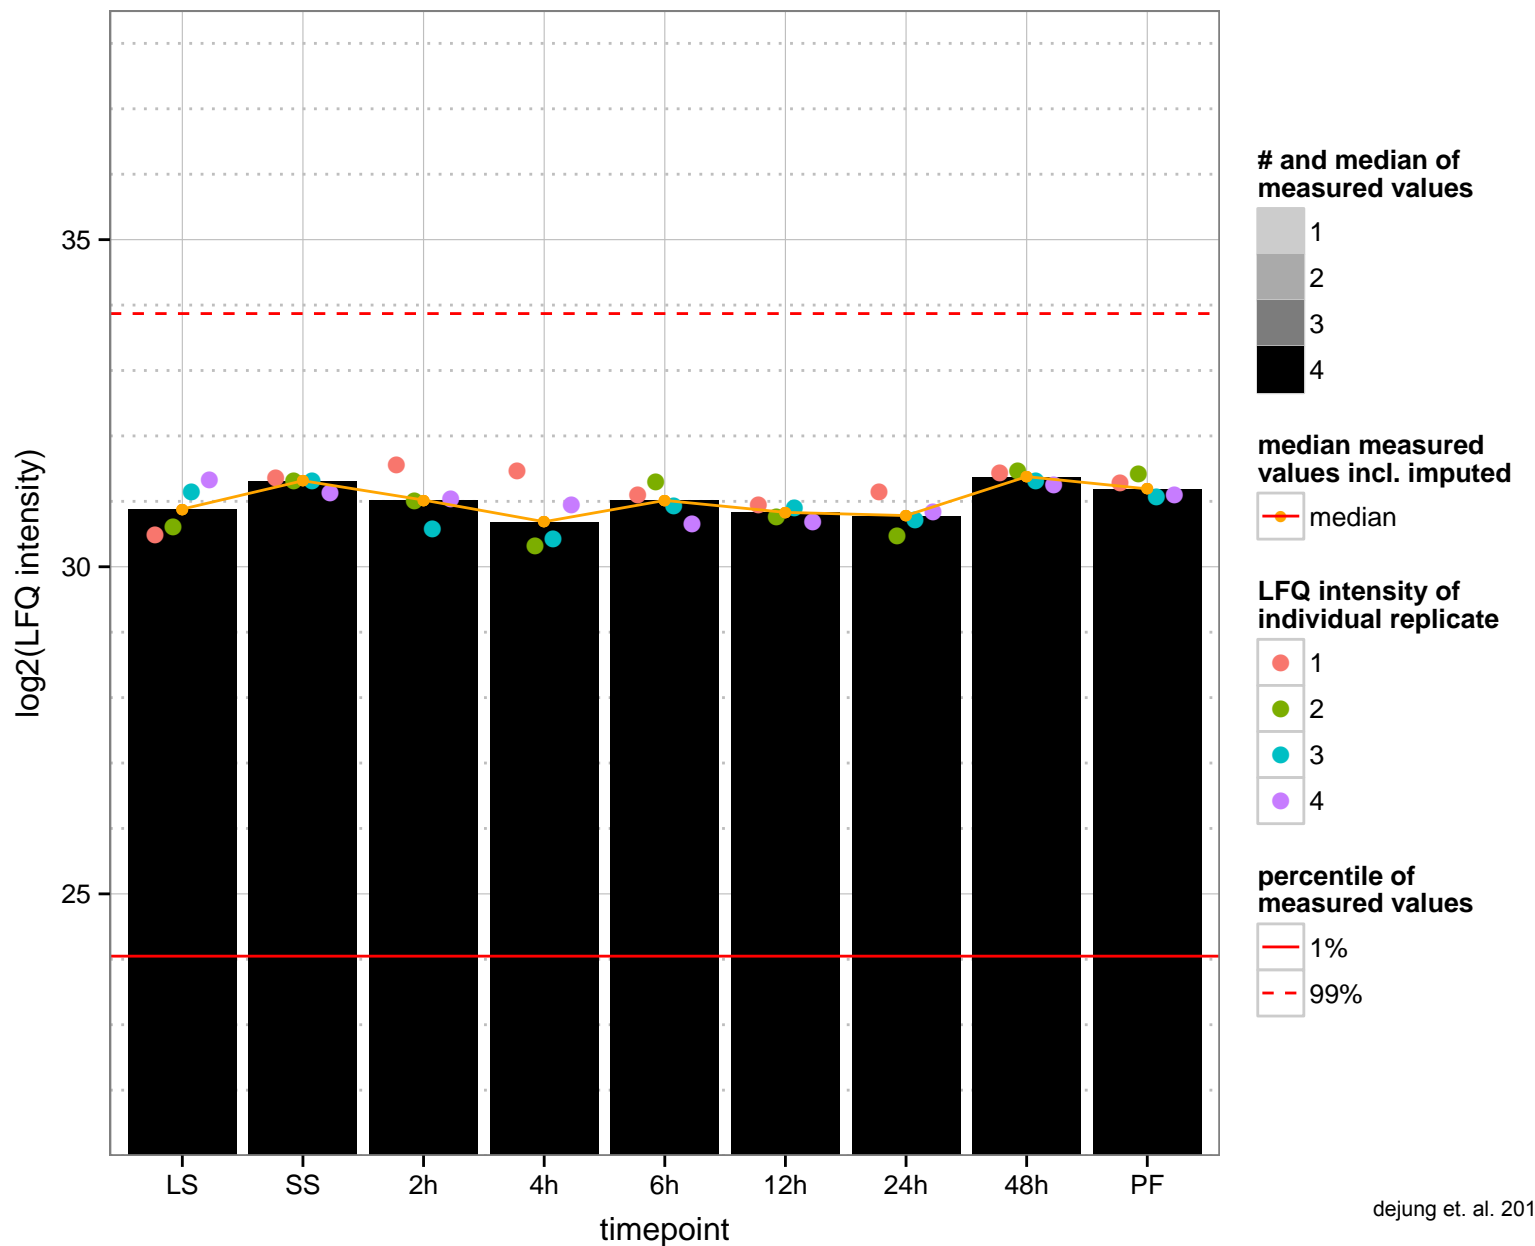

hypothetical protein, conserved  
 Tb927.11.6470  
 AGOF: null  
 AGOC: mitochondrion  
 AGOP: null  
 PGO: null  
 PGO: null  
 PGO: null

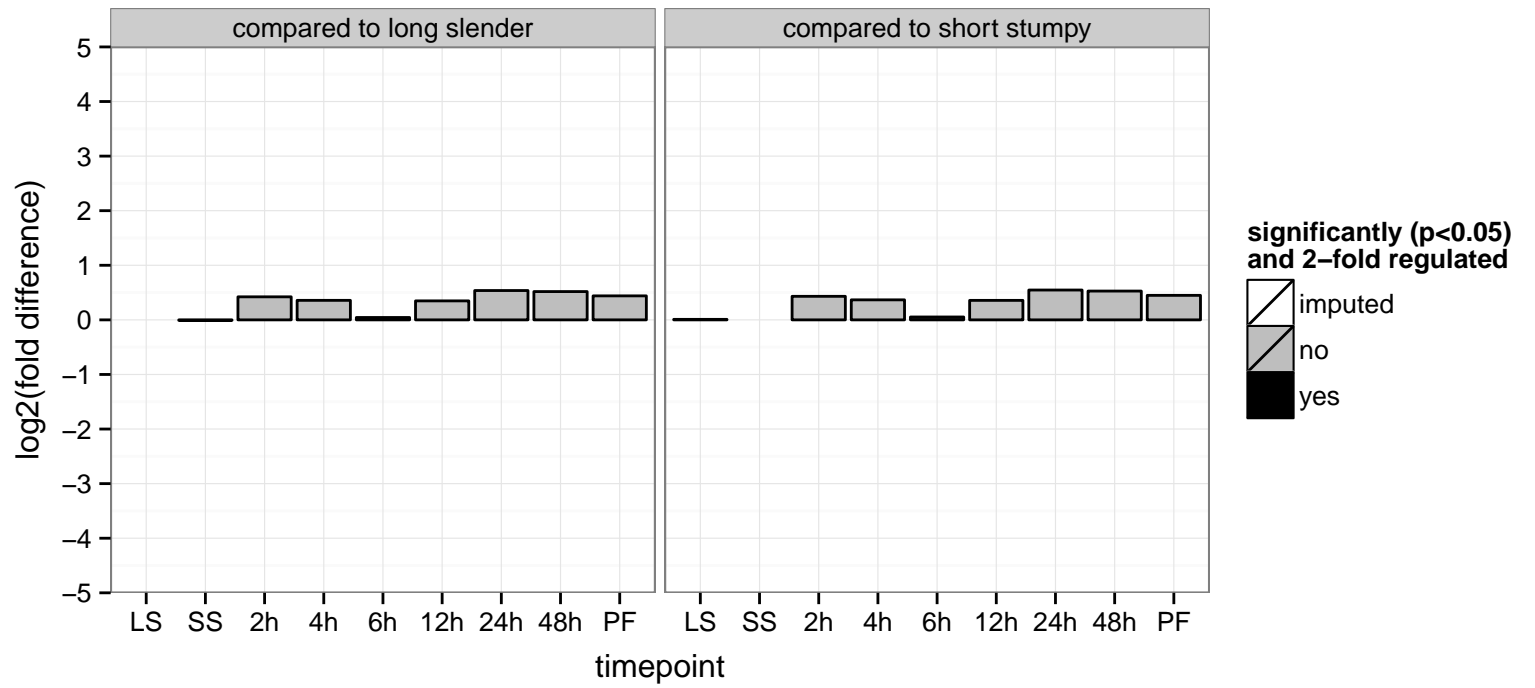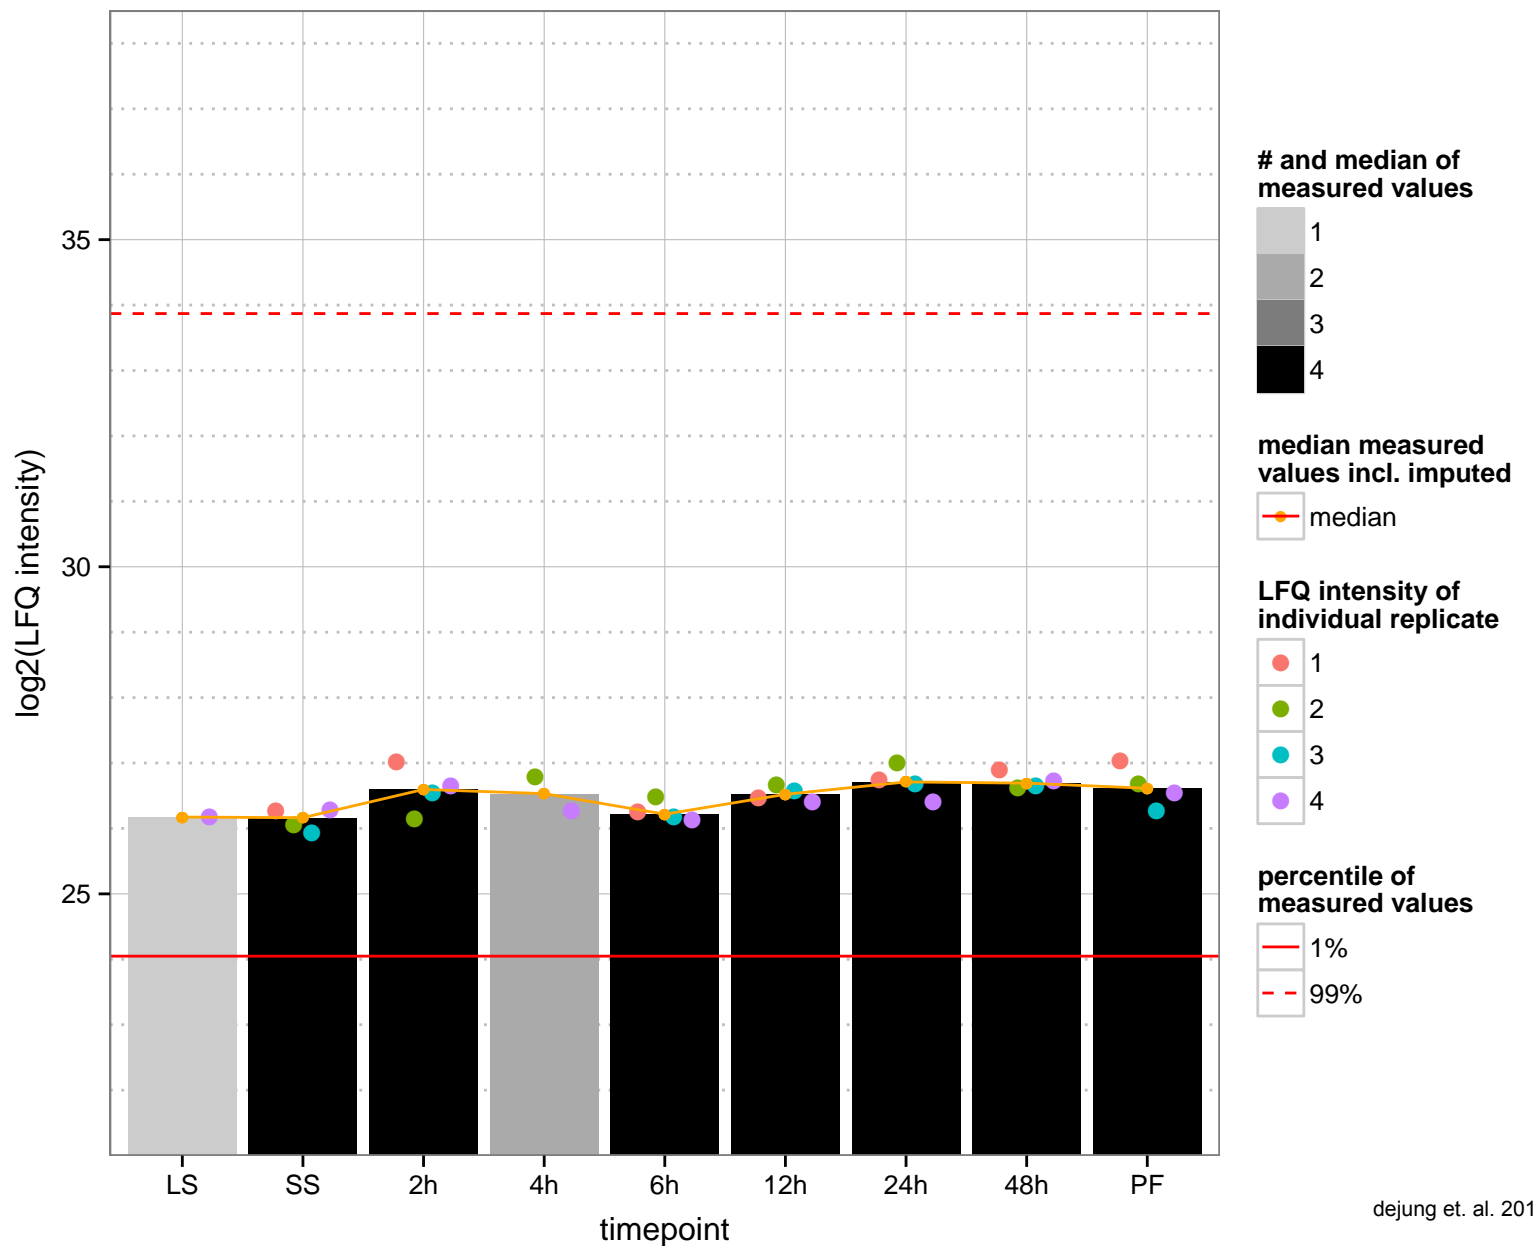

hypothetical protein, conserved  
 Tb927.11.6530  
 AGOF: null  
 AGOC: null  
 AGOP: null  
 PGO: null  
 PGOC: null  
 PGOP: null

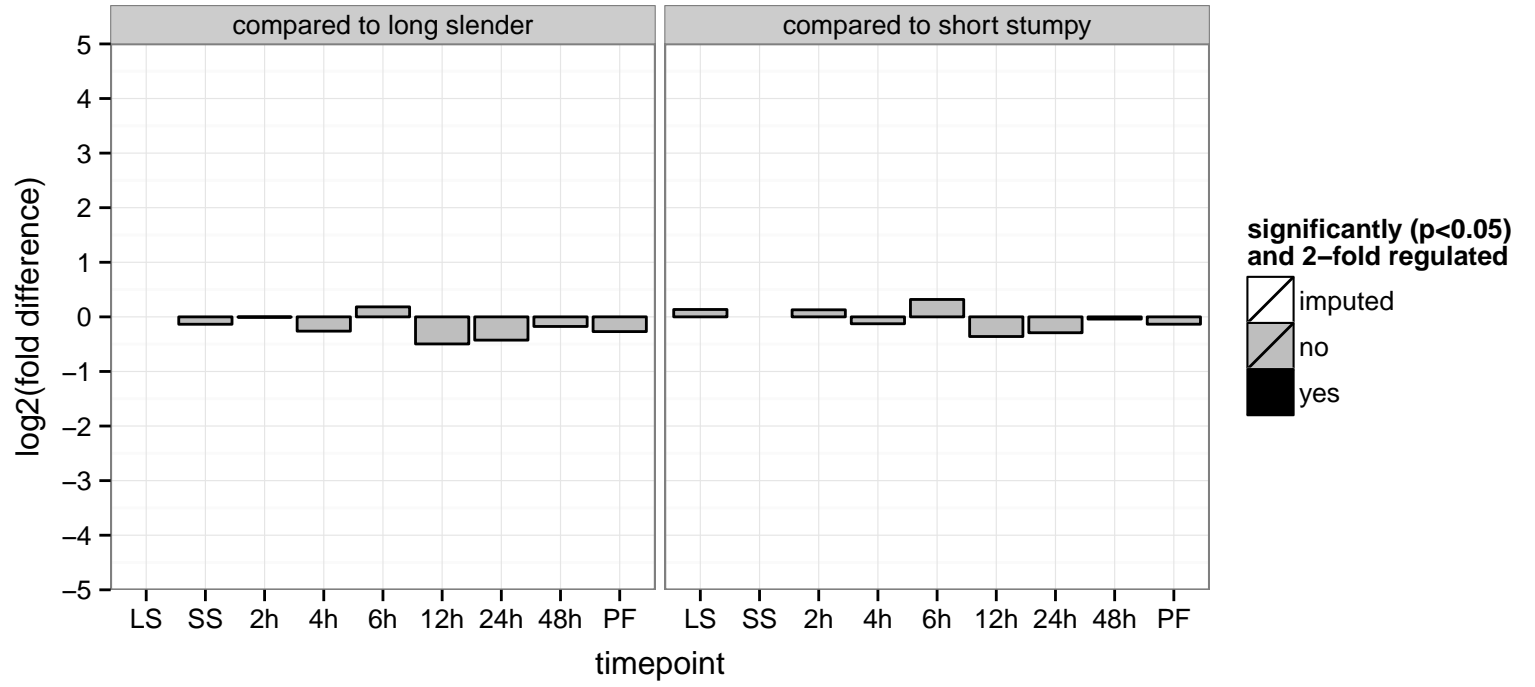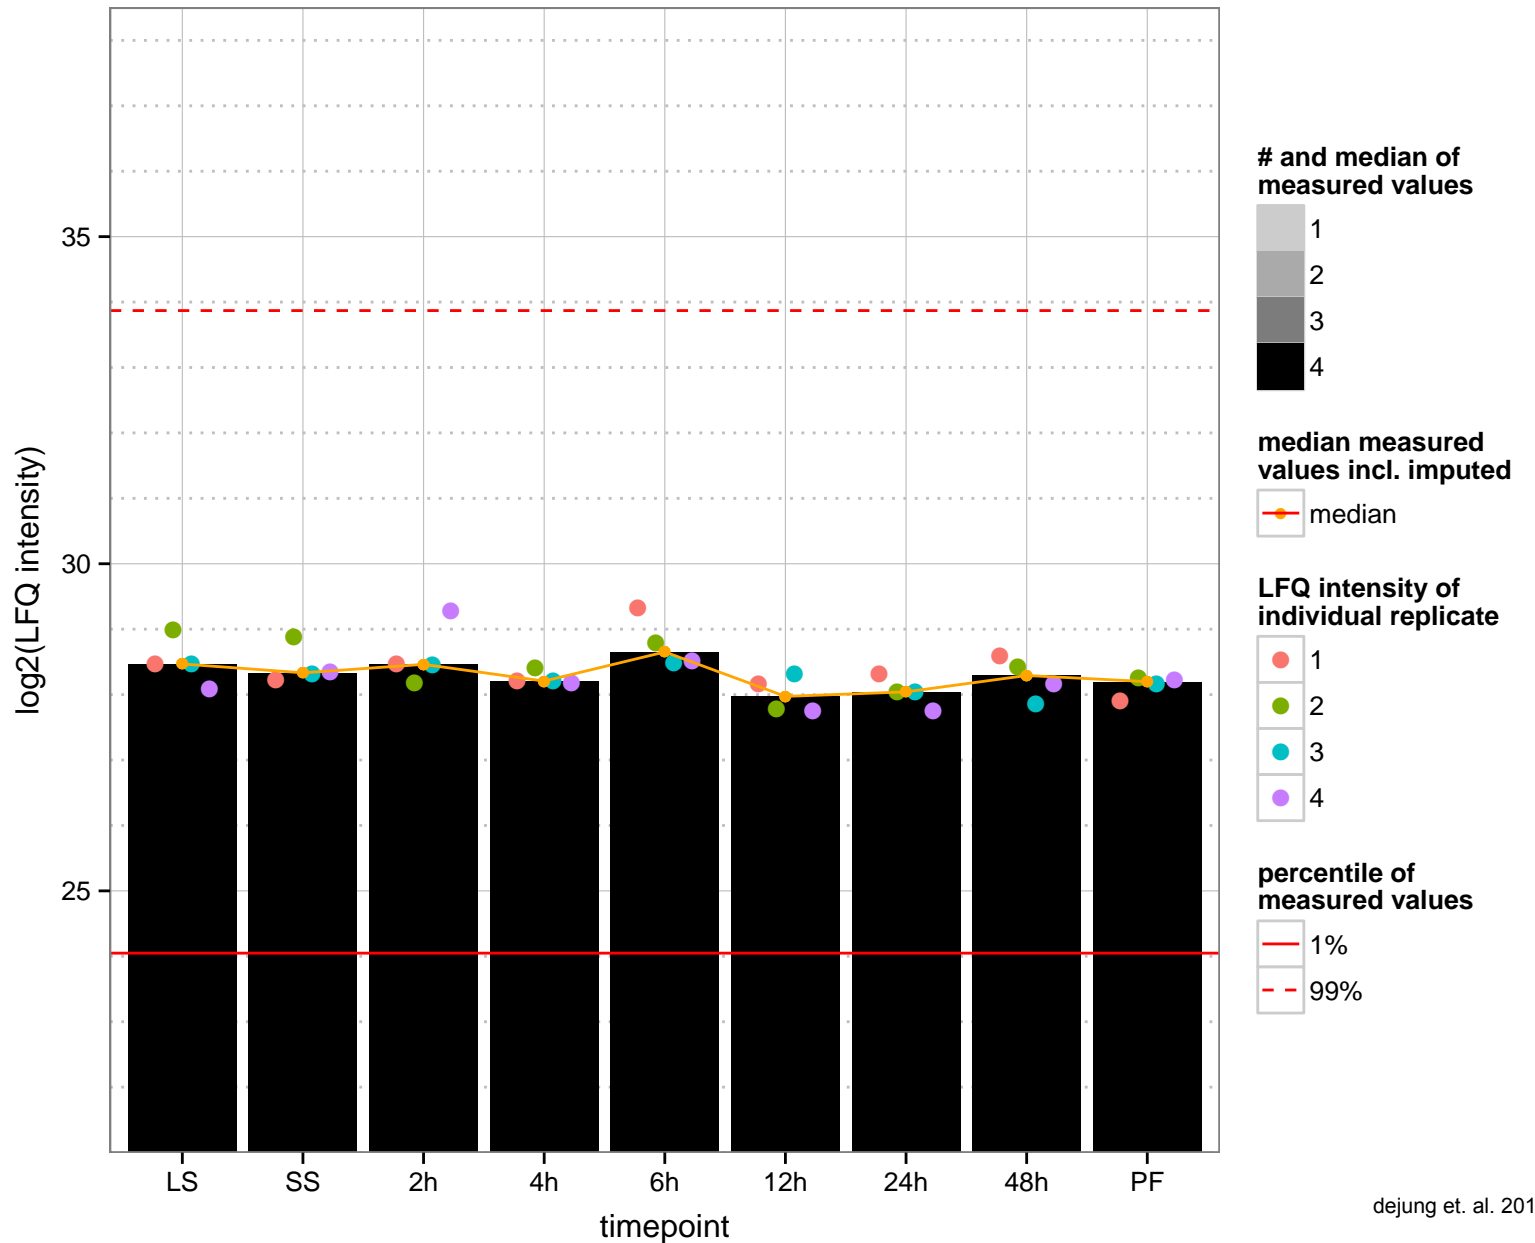

hypothetical protein, conserved

Tb927.11.6600

AGOF: null

AGOC: null

AGOP: modulation of development of symbiont involved in interaction with host, quorum sensing involved in interaction with host

PGOF: null

PGOC: null

PGOP: null

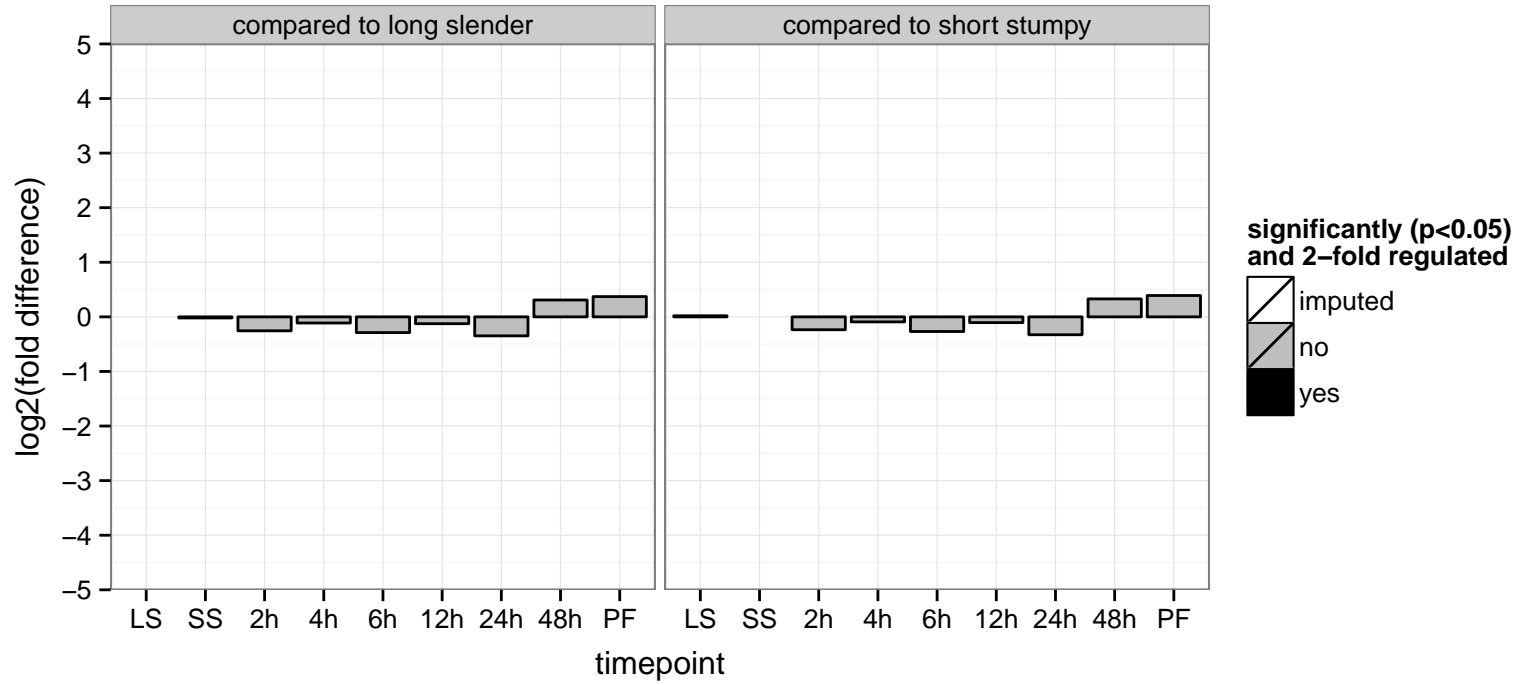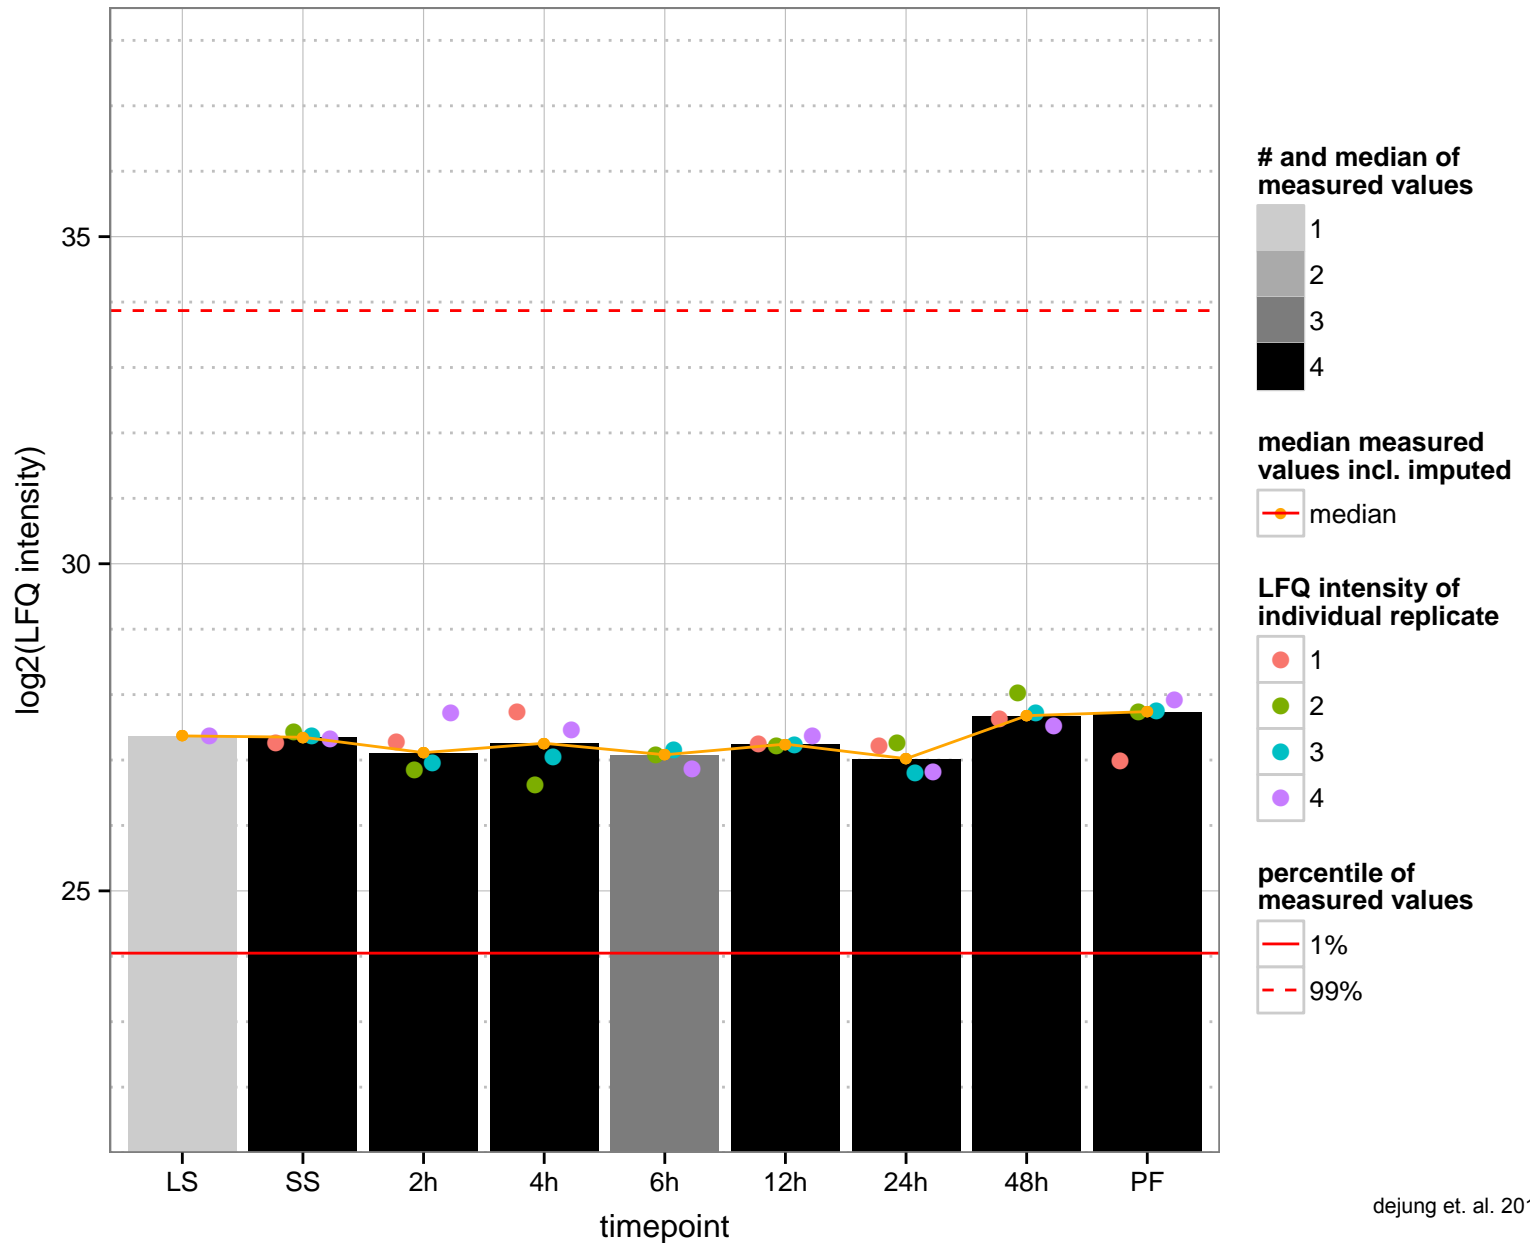

hypothetical protein, conserved  
 Tb927.11.6610  
 AGOF: null  
 AGOC: null  
 AGOP: null  
 PGO: null  
 PGOC: null  
 PGOP: null

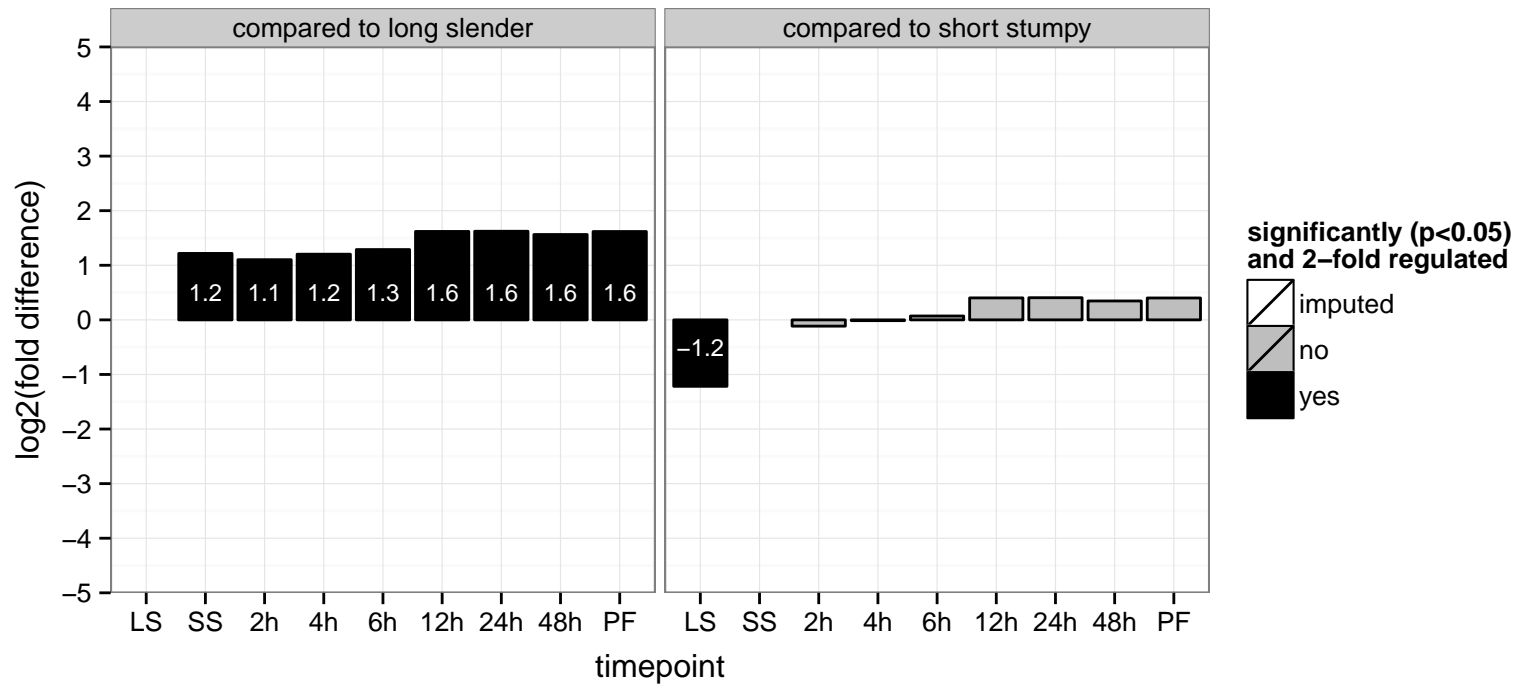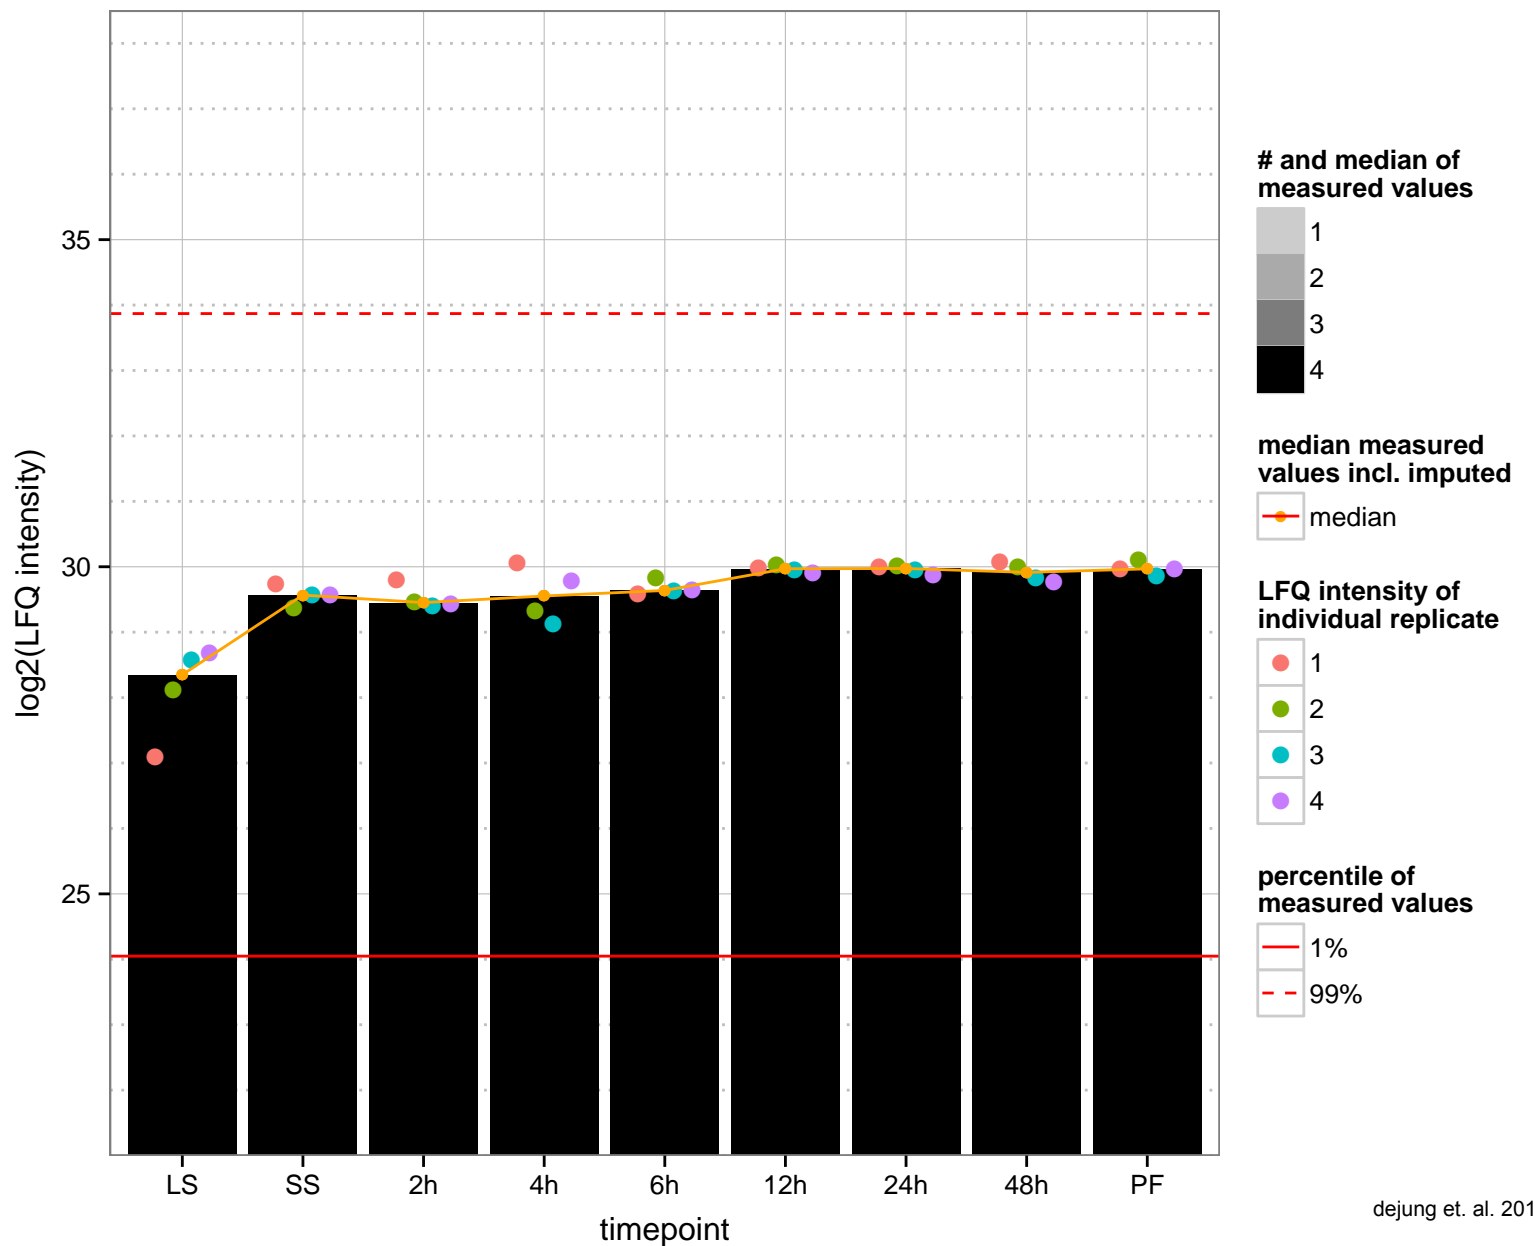

3-methylcrotonoyl-CoA carboxylase beta subunit, putative  
 Tb927.11.6630  
 AGOF: methylcrotonoyl-CoA carboxylase activity  
 AGOC: mitochondrion  
 AGOP: null  
 PGO: ligase activity  
 PGOC: null  
 PGOP: null

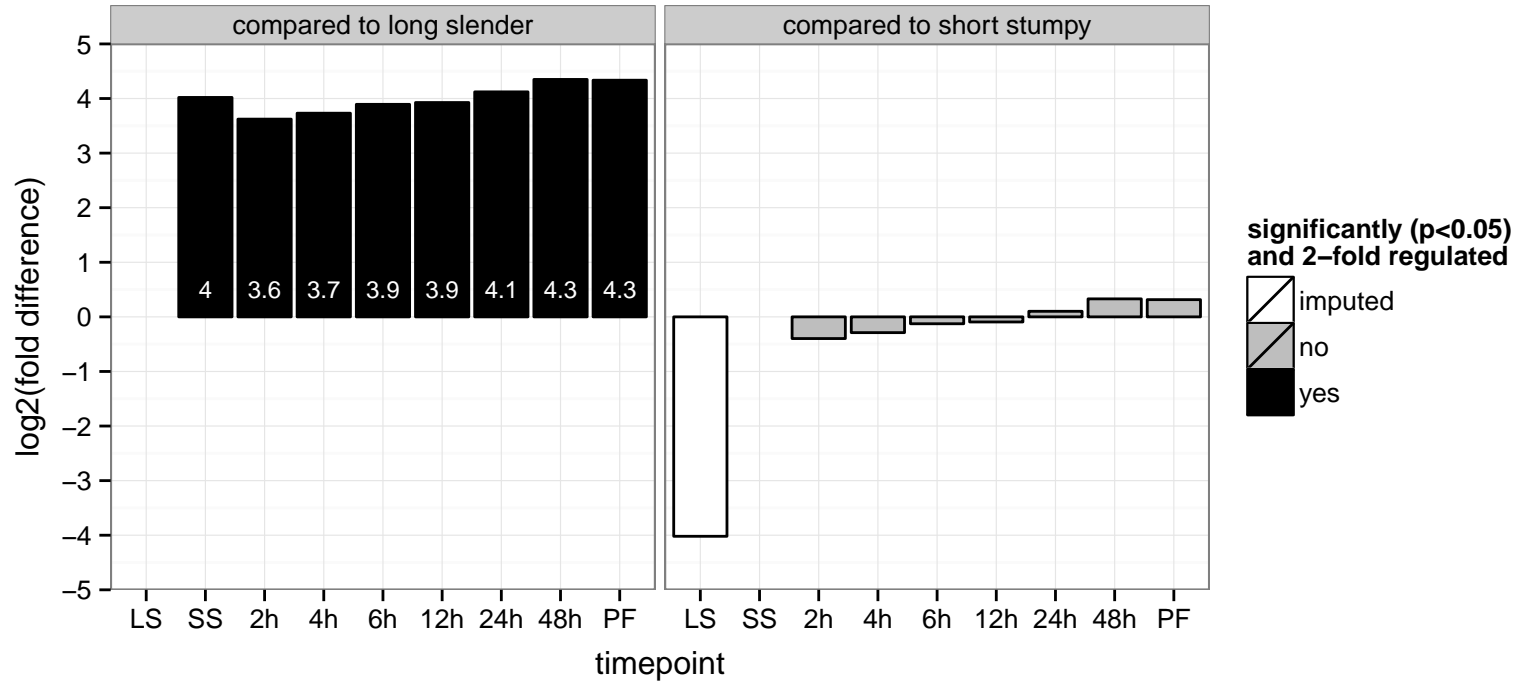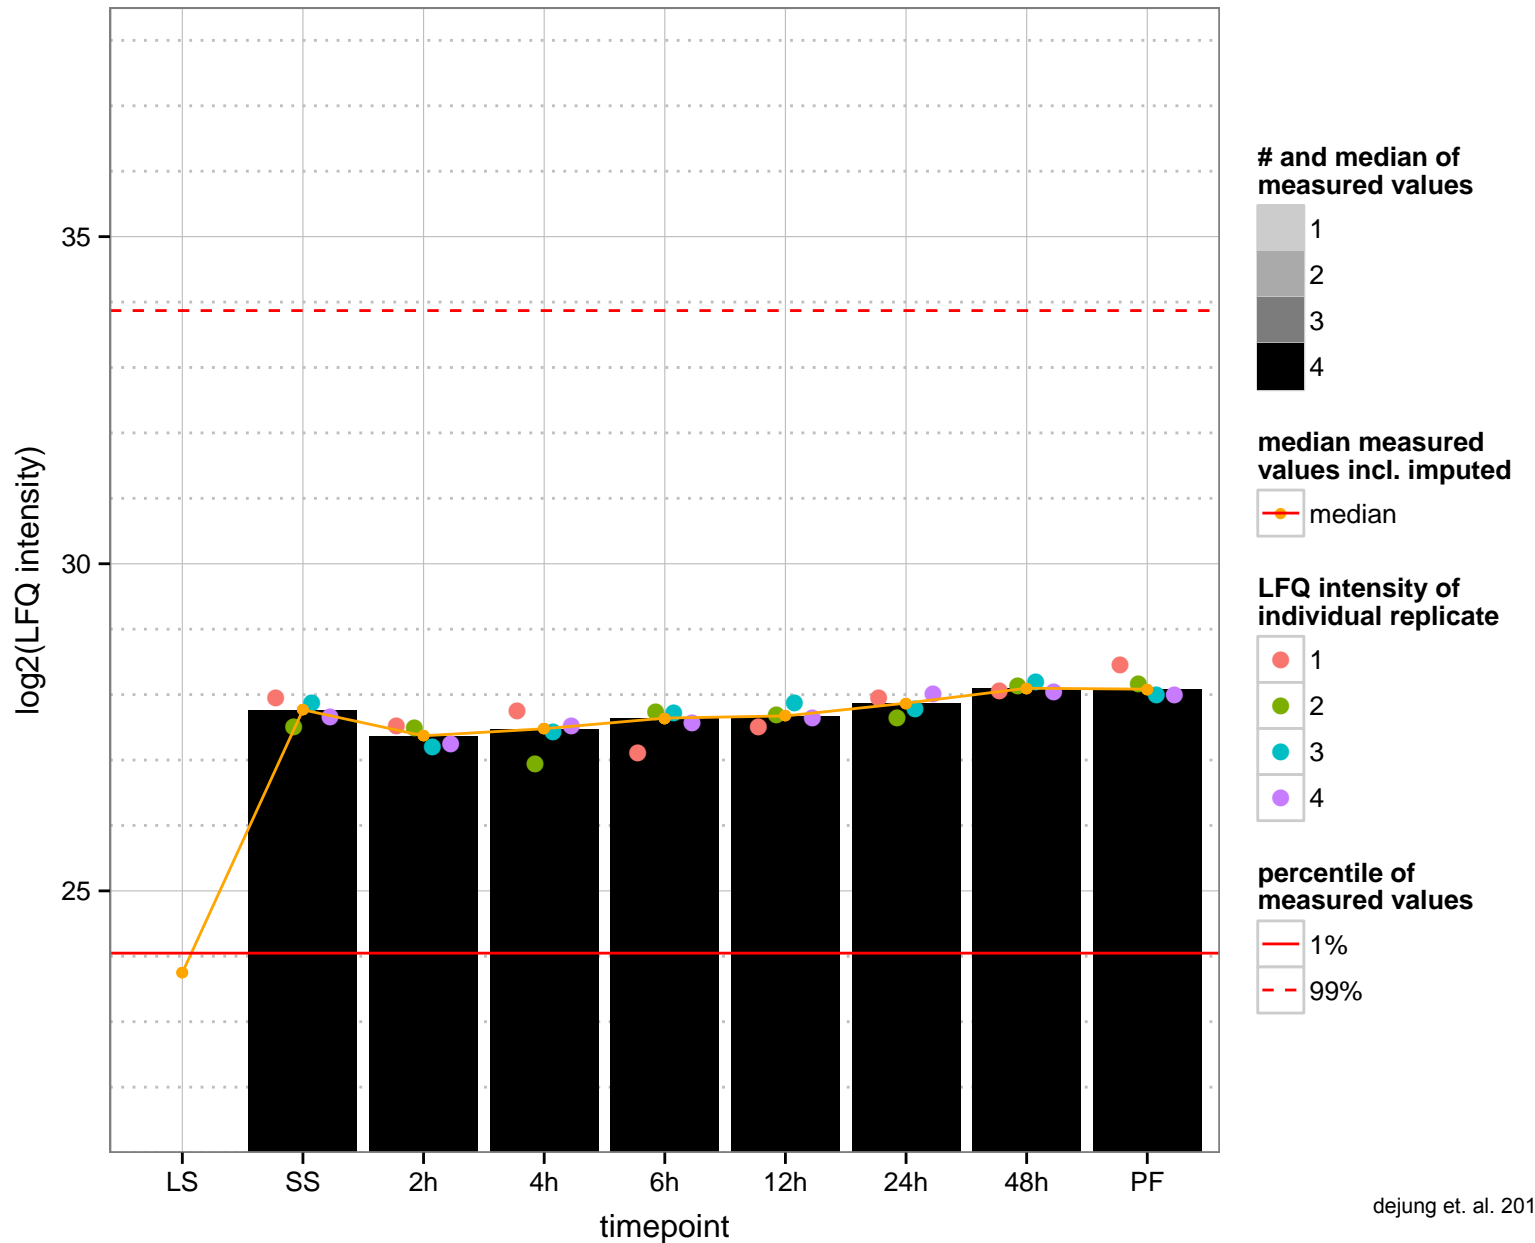

epsin, putative, chrXI additional, unordered contigs, epsinR  
 Tb927.11.670;Tb11.0890  
 AGOF: null, clathrin binding  
 AGOC: null, clathrin coat of coated pit, cytosol, endosome membrane, flagellar pocket  
 AGOP: null, receptor-mediated endocytosis  
 PGOF: null  
 PGO: null  
 PGOP: null

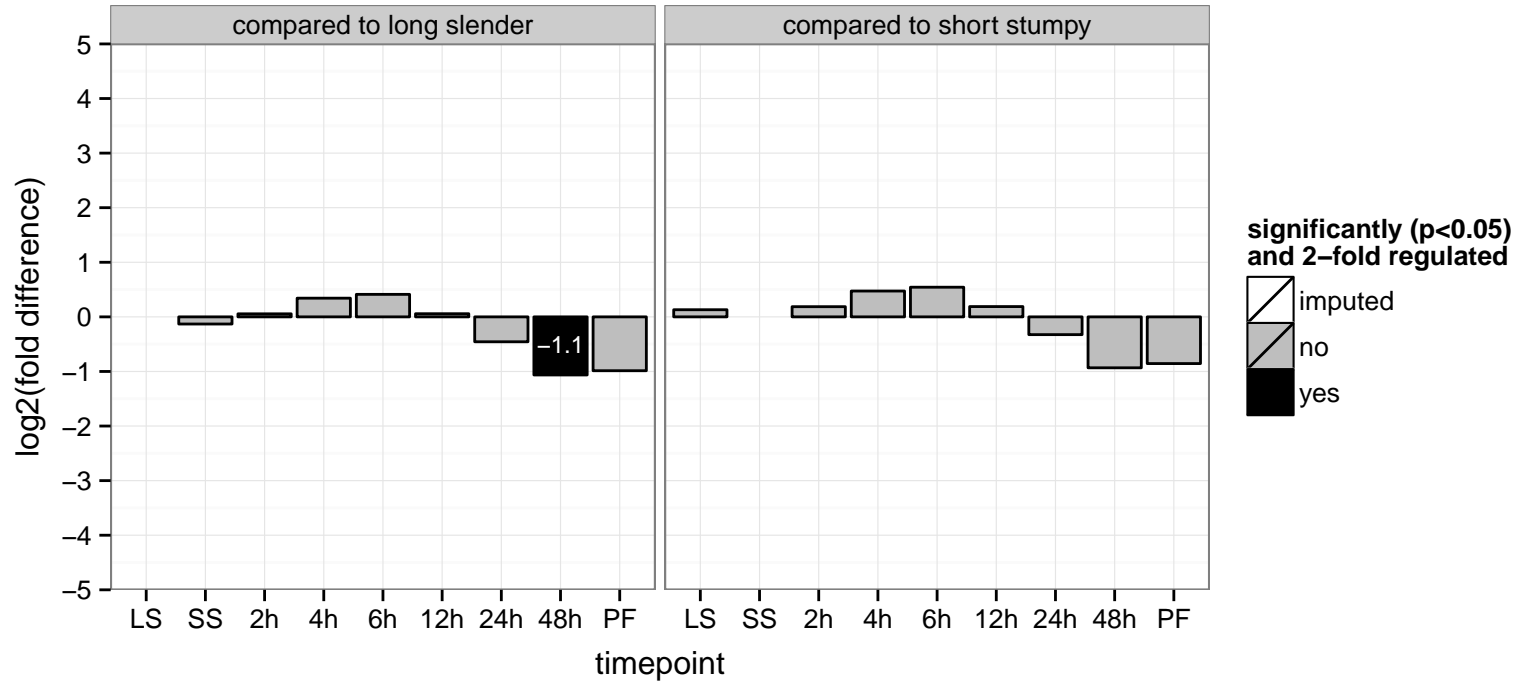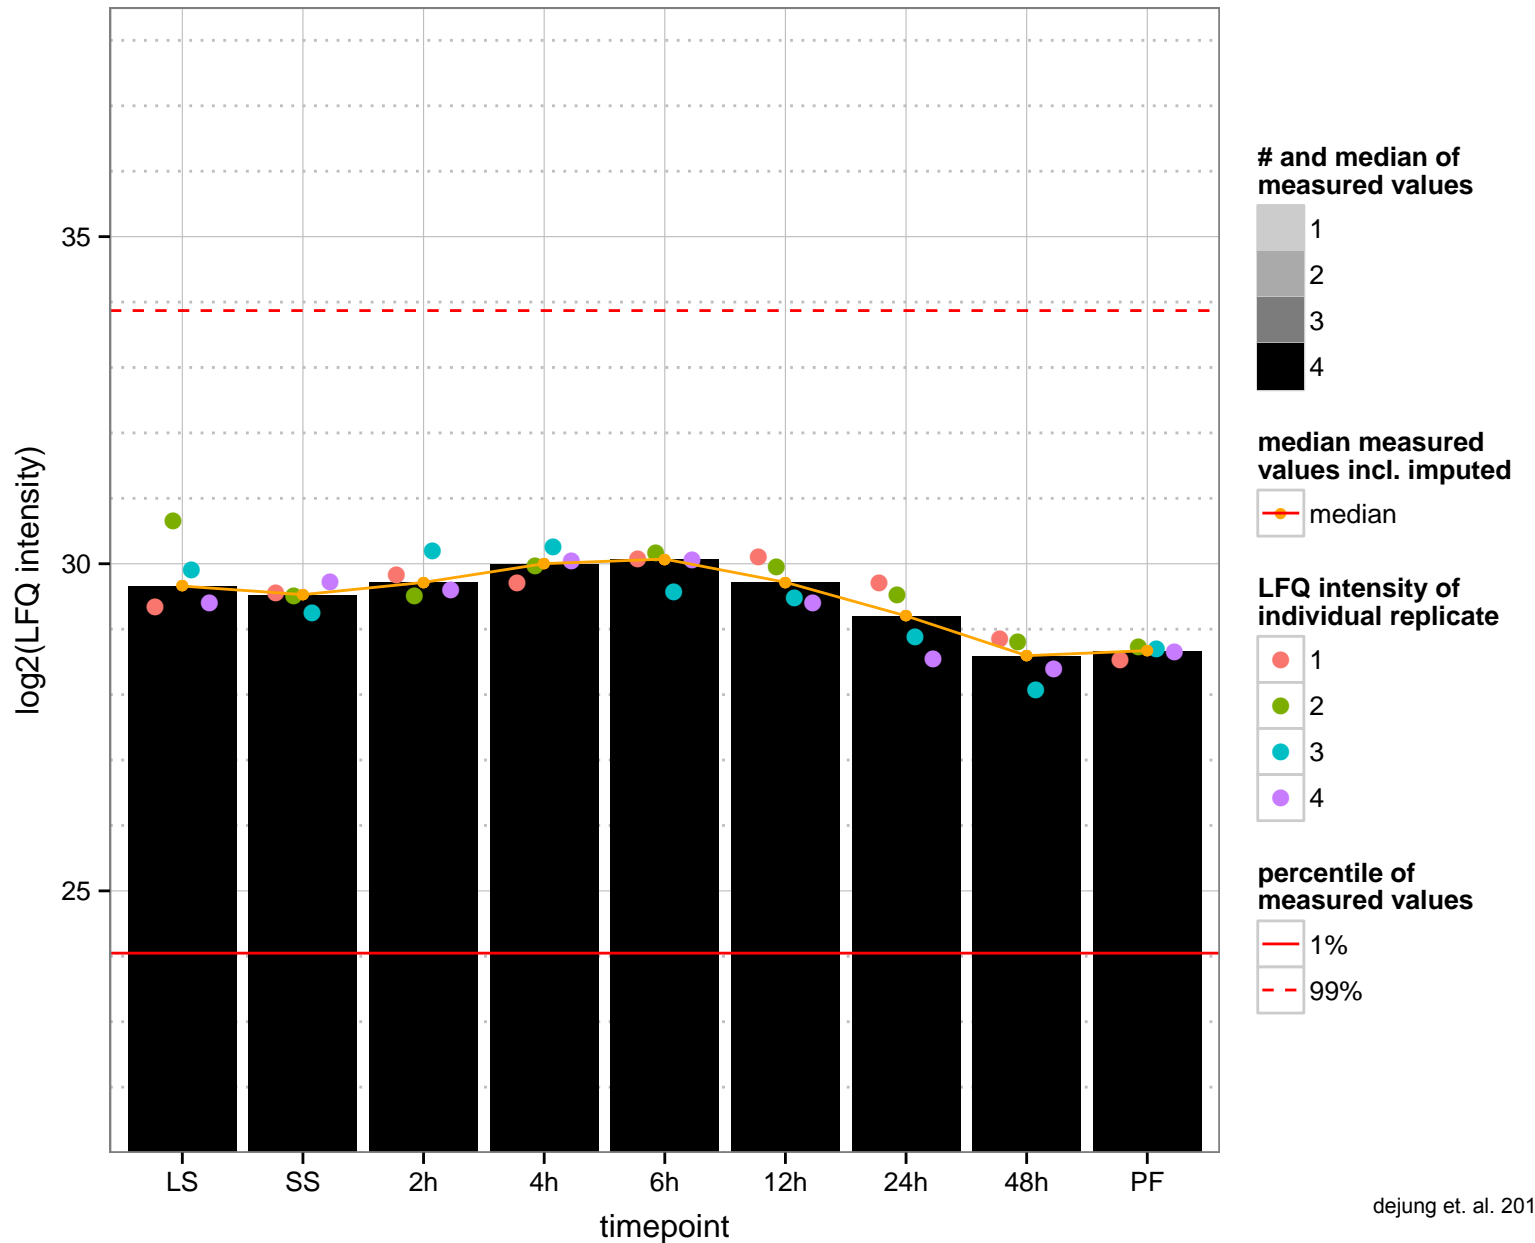

predicted tetratricopeptide repeat (TPR) protein  
 Tb927.11.6710  
 AGOF: null  
 AGOC: null  
 AGOP: null  
 PGOF: protein binding  
 PGO: null  
 PGOP: null

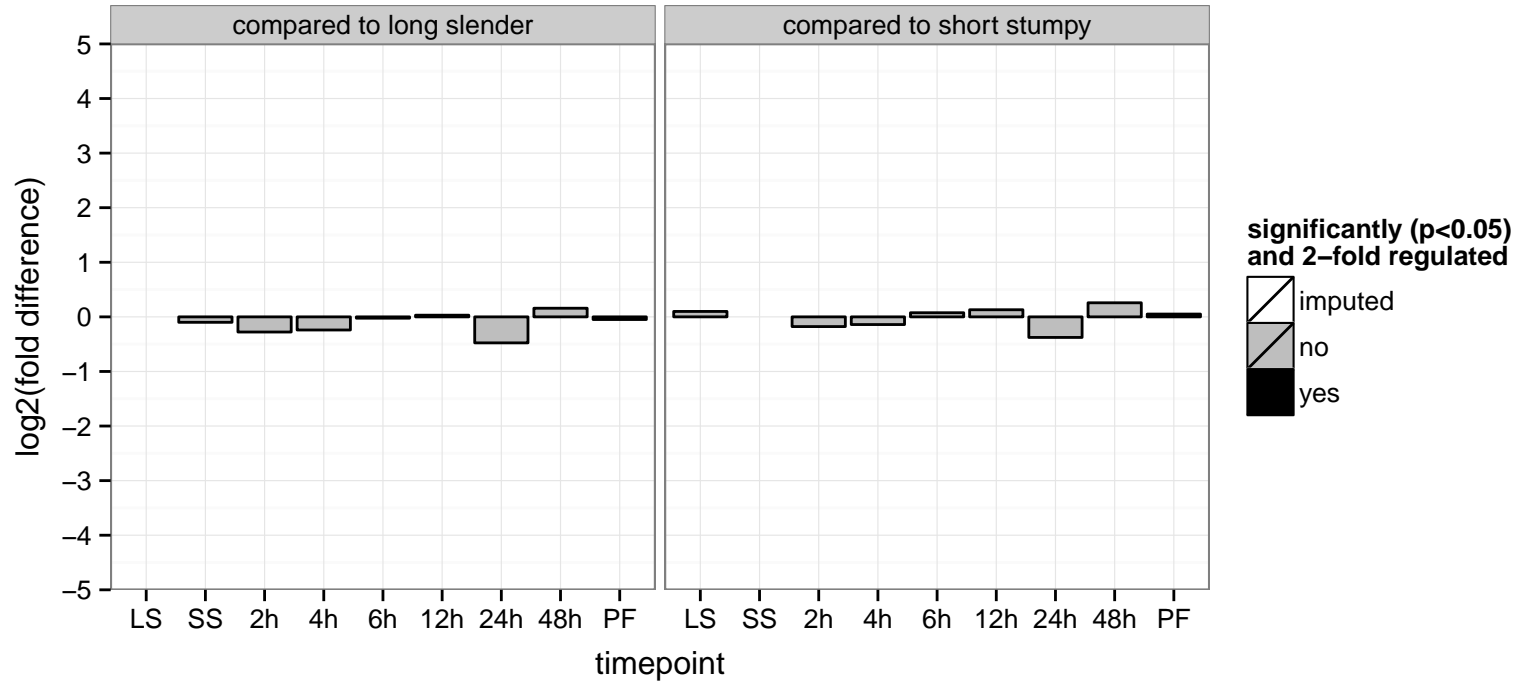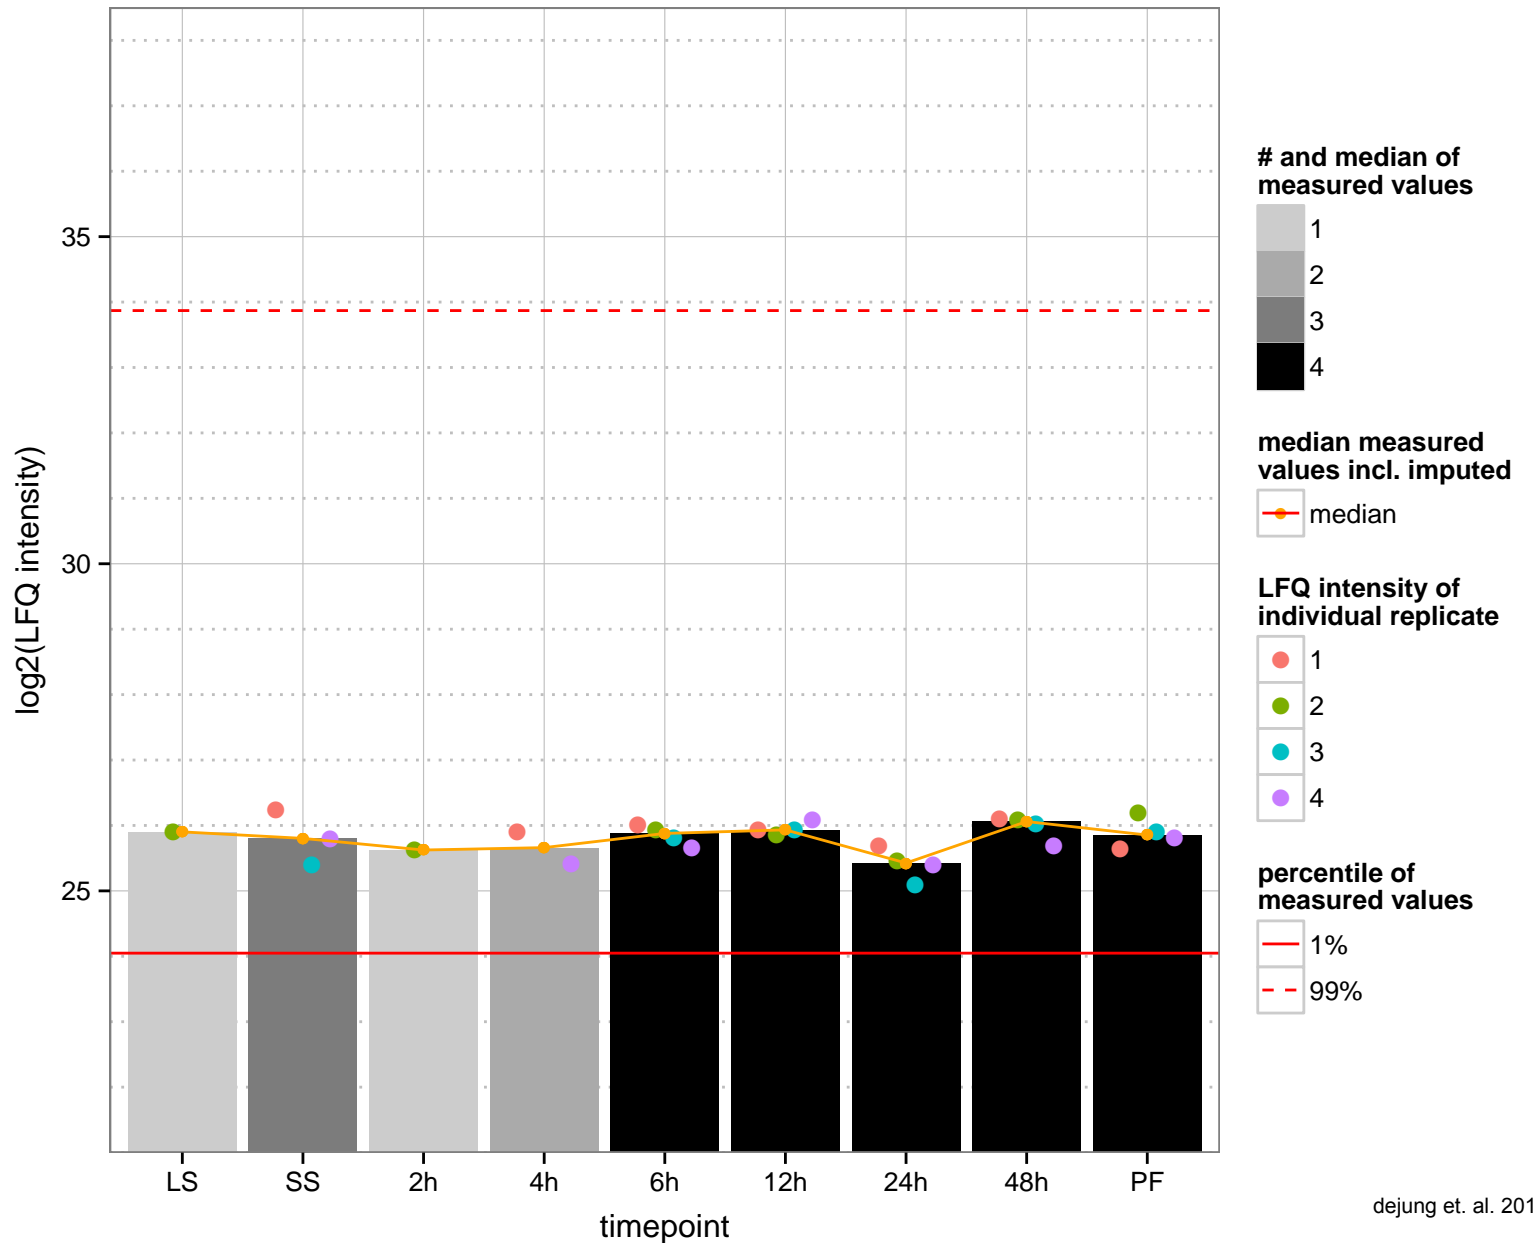



chromatin binding protein, putative, regulator of chromatin condensation, putative (RCC1)  
 Tb927.11.6780  
 AGOF: Ran GTPase binding, chromatin binding  
 AGOC: null  
 AGOP: chromosome organization  
 PGO: null  
 PGOC: null  
 PGOP: null

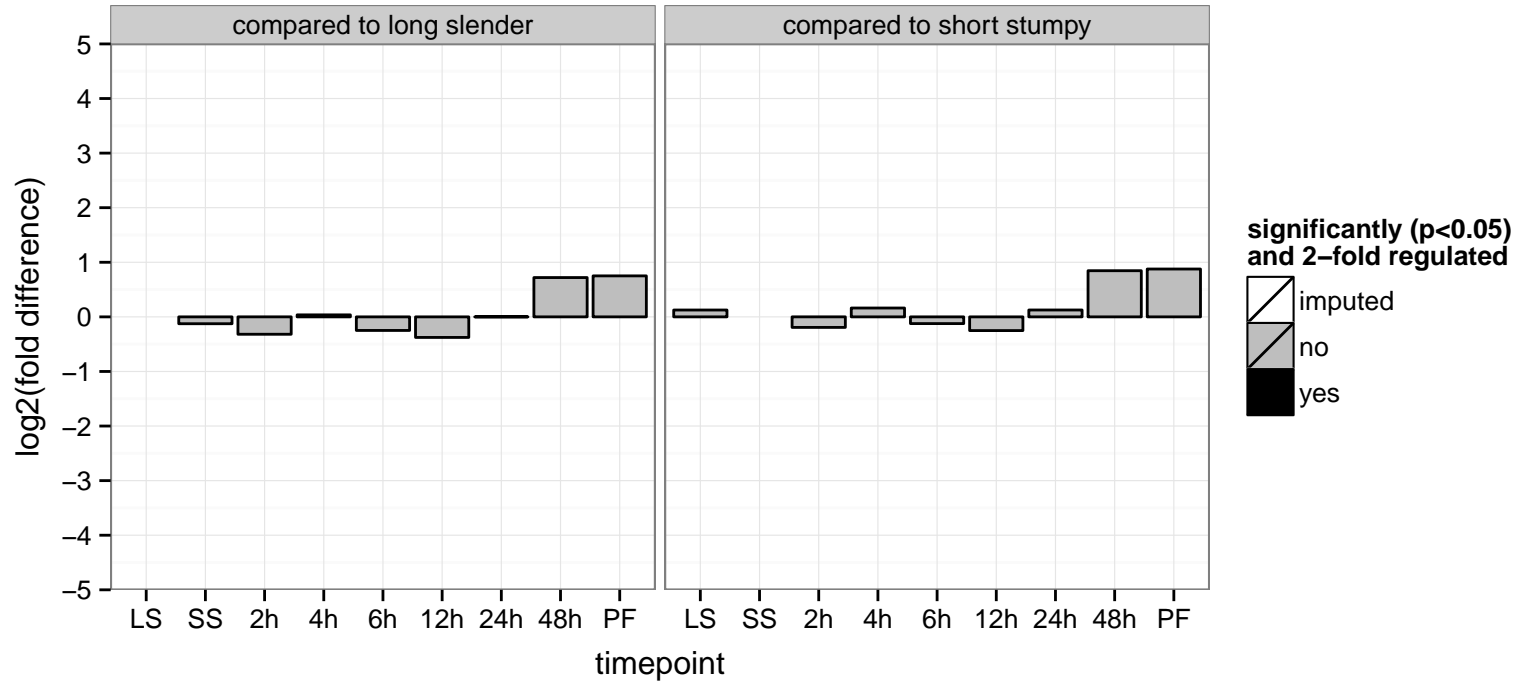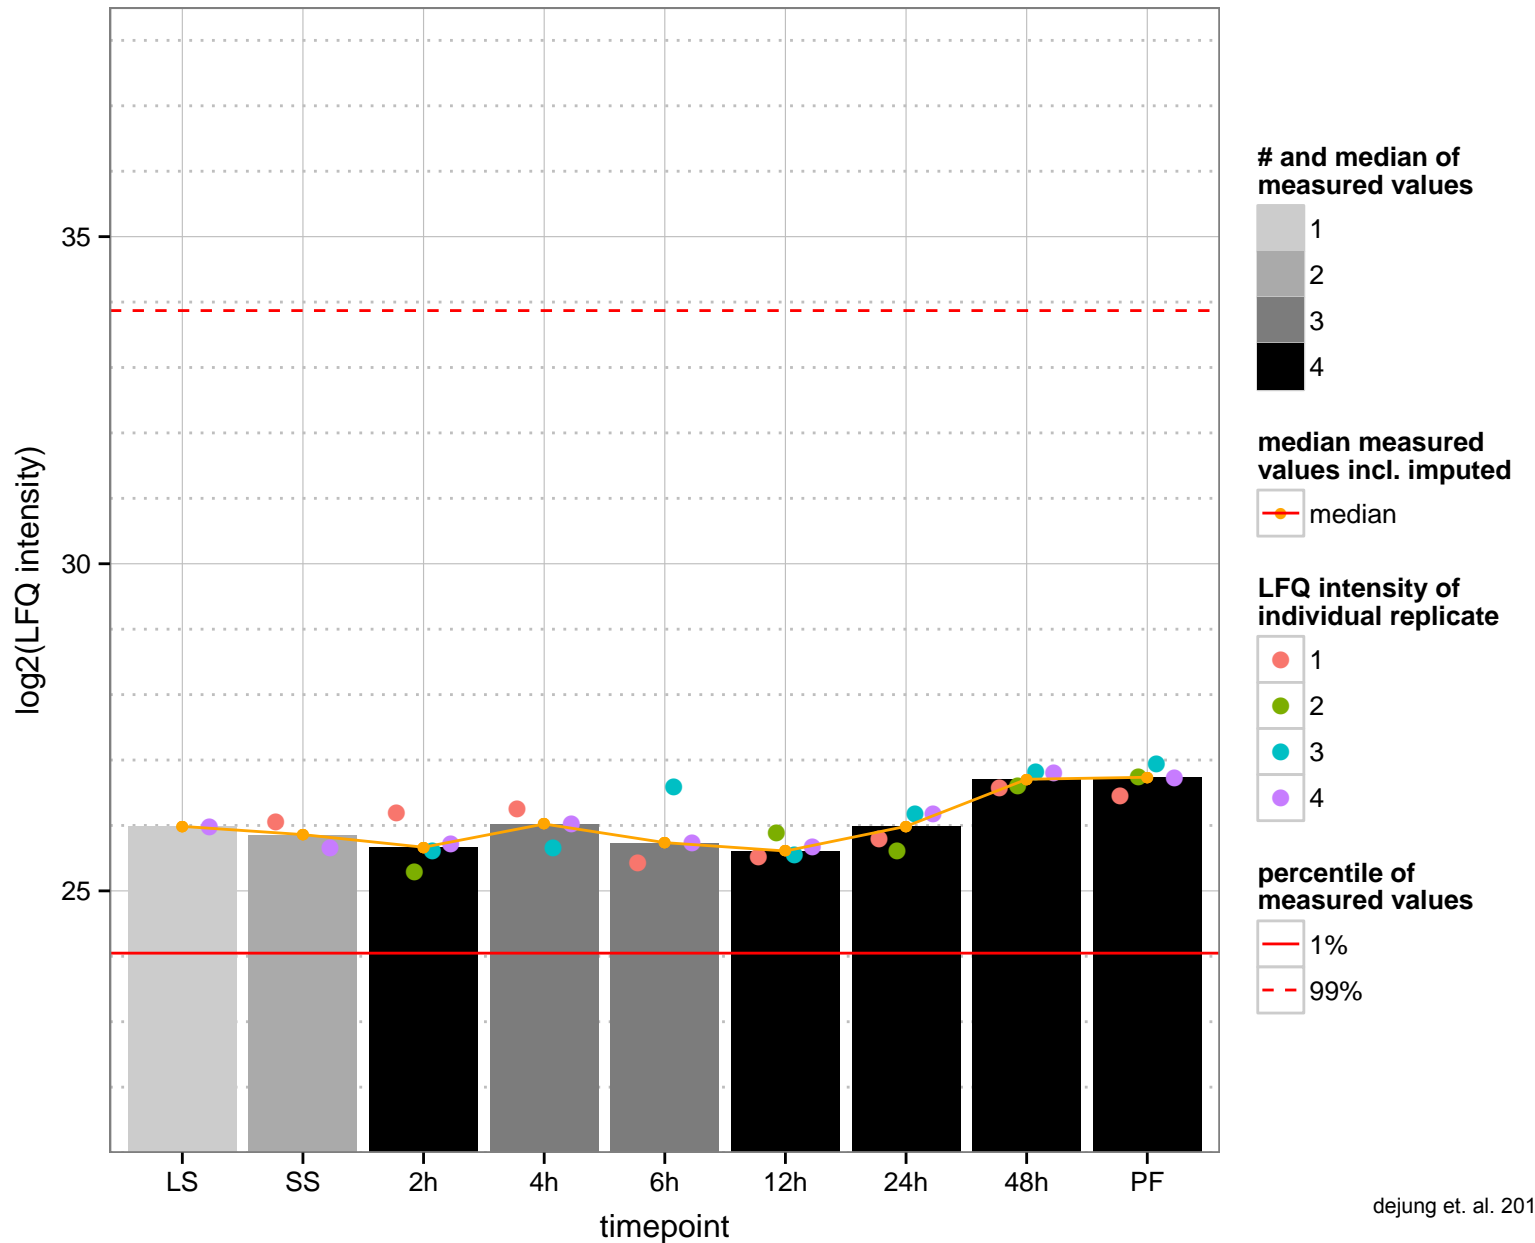

predicted WD40 repeat protein  
 Tb927.11.6790  
 AGOF: null  
 AGOC: nucleus  
 AGOP: rRNA processing  
 PGO: protein binding  
 PGO: null  
 PGO: rRNA processing, regulation of cell cycle

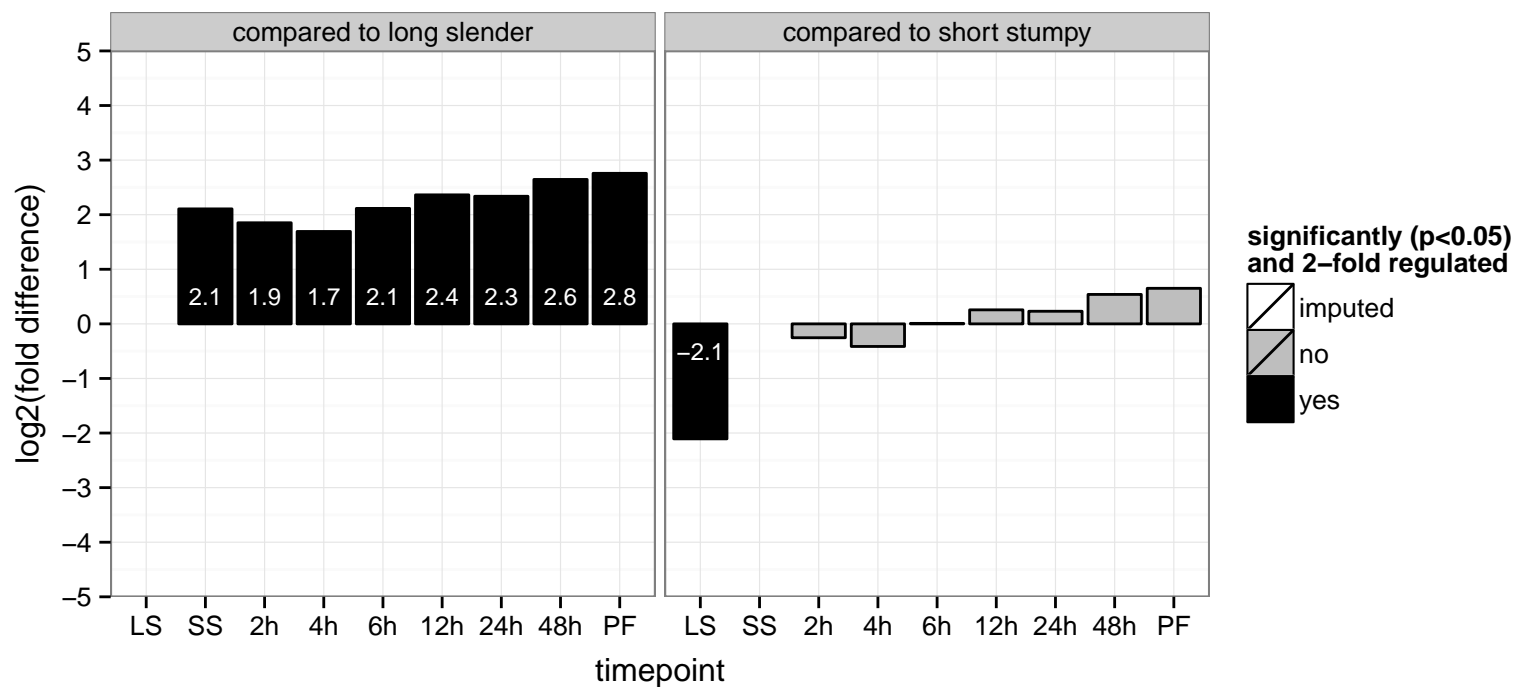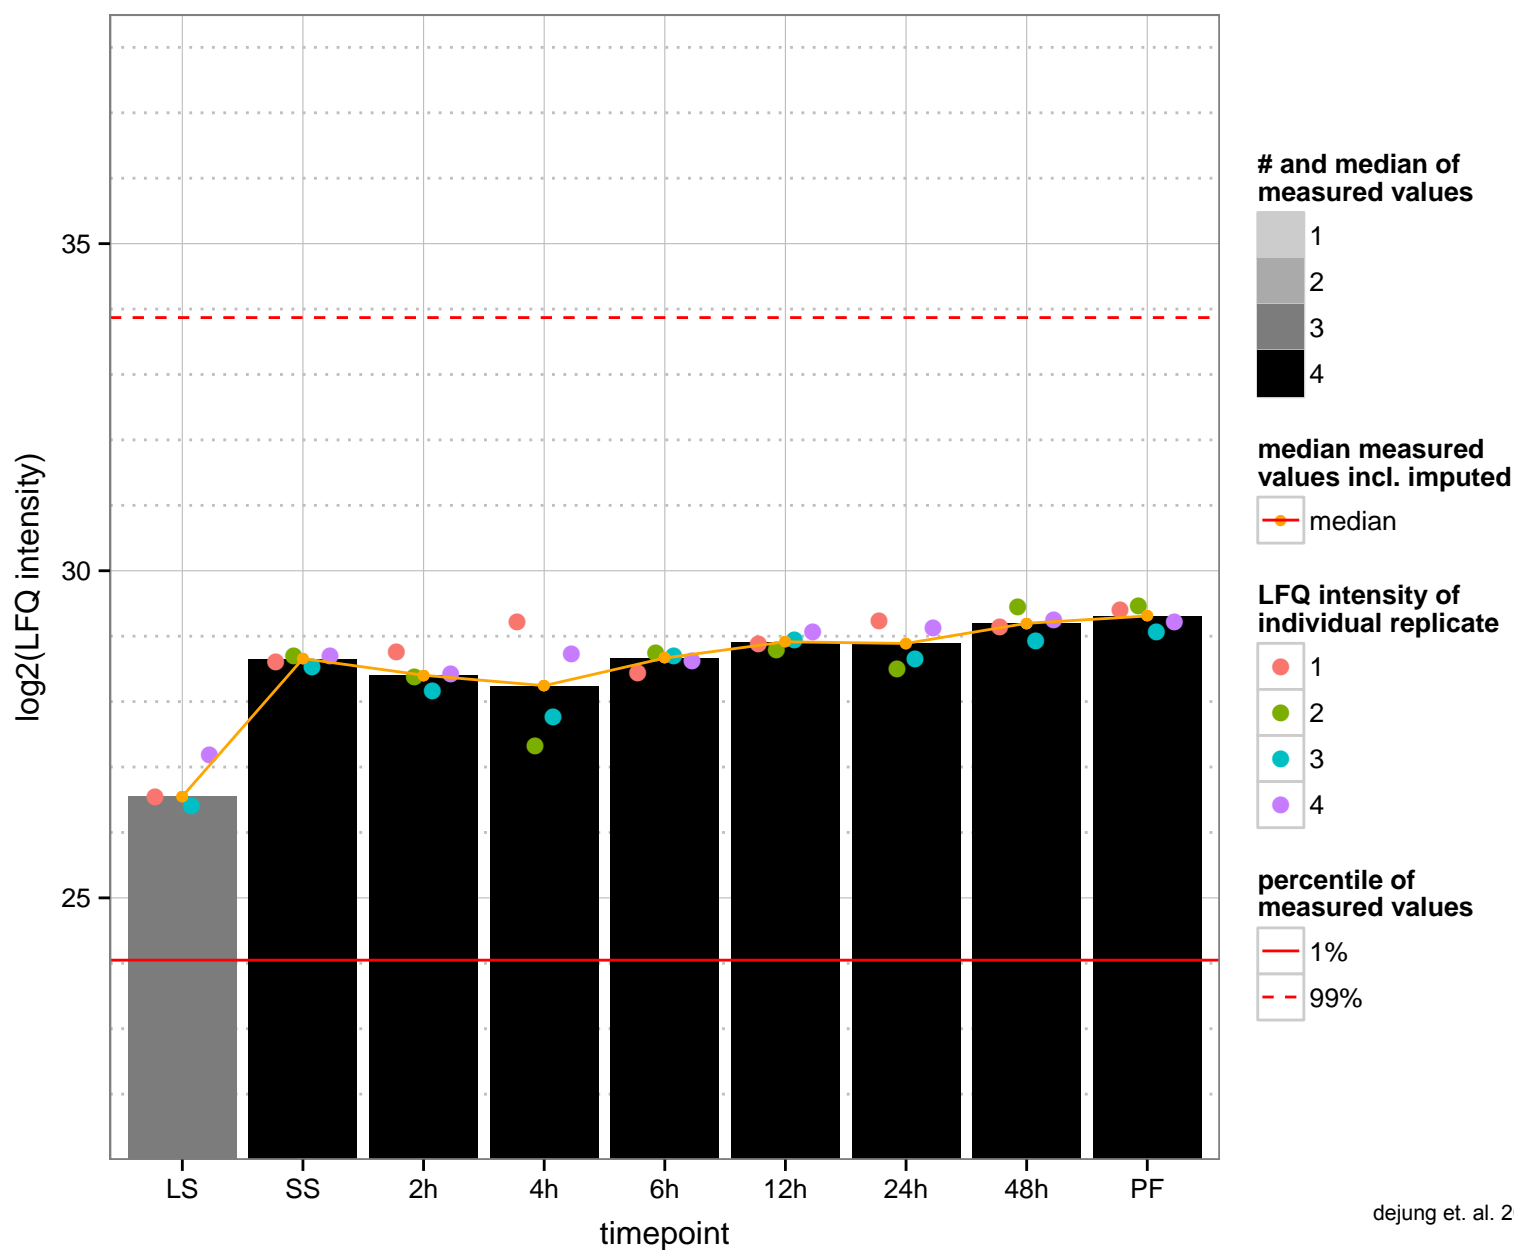

hypothetical protein, conserved  
 Tb927.11.6820;Tb11.v5.0900  
 AGOF: null  
 AGOC: null  
 AGOP: null  
 PGOF: null  
 PGO: null  
 PGOP: null

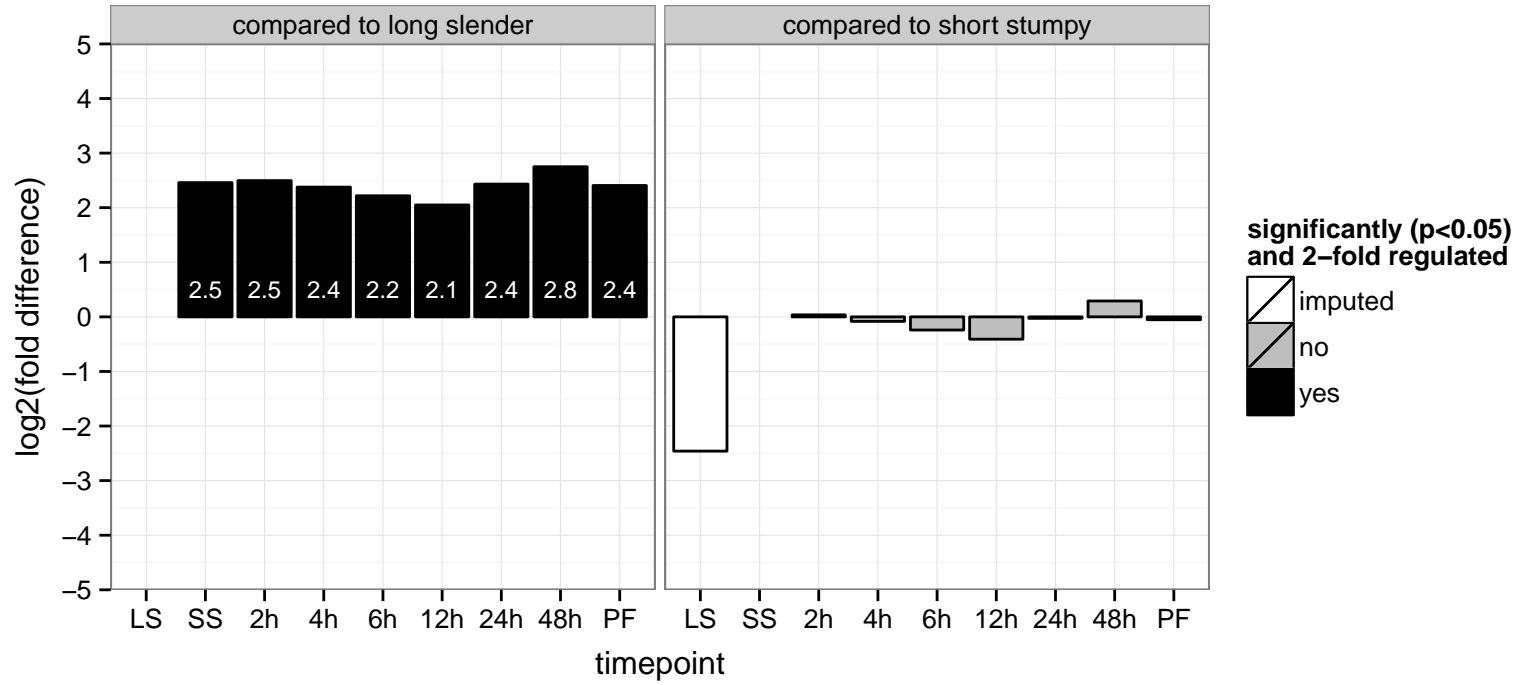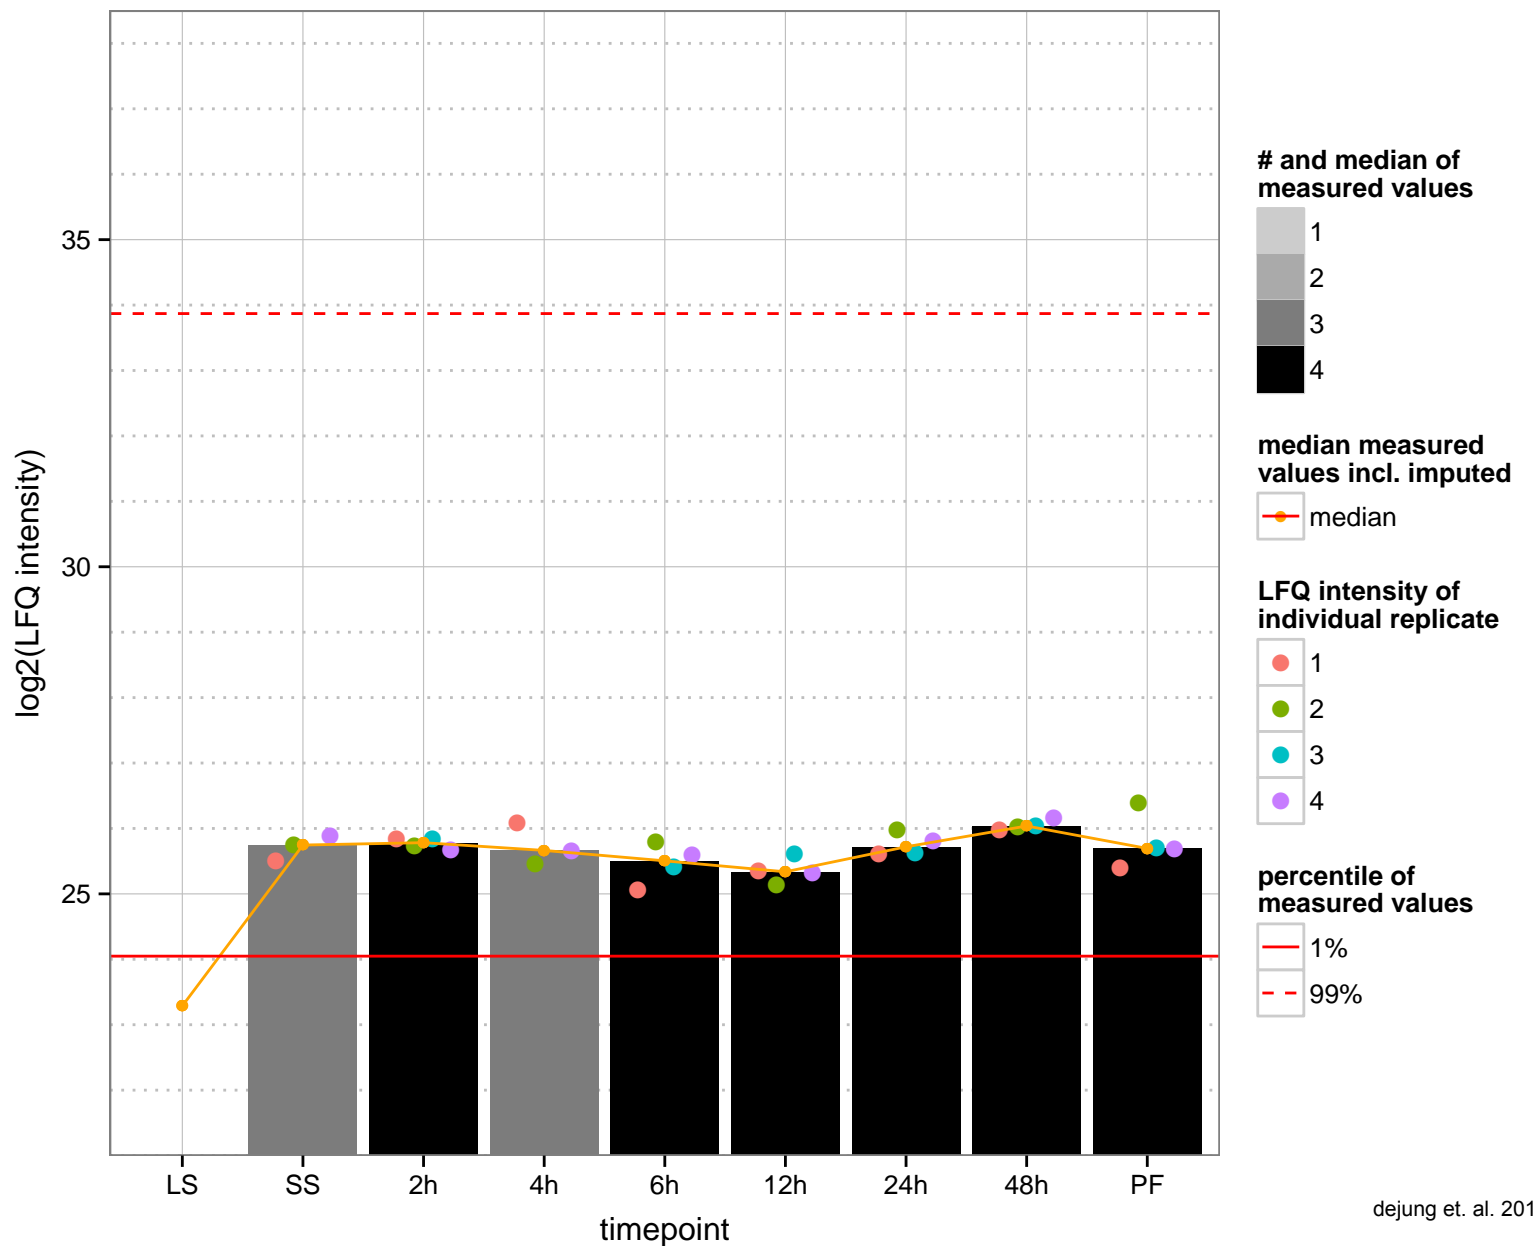

14-3-3 protein

Tb927.11.6870

AGOF: protein binding, protein domain specific binding, protein phosphorylated amino acid binding

AGOC: eukaryotic translation initiation factor 4F complex, nucleus

AGOP: DNA damage checkpoint, endocytosis, regulation of mitosis

PGOF: protein domain specific binding

PGOC: null

PGOP: null

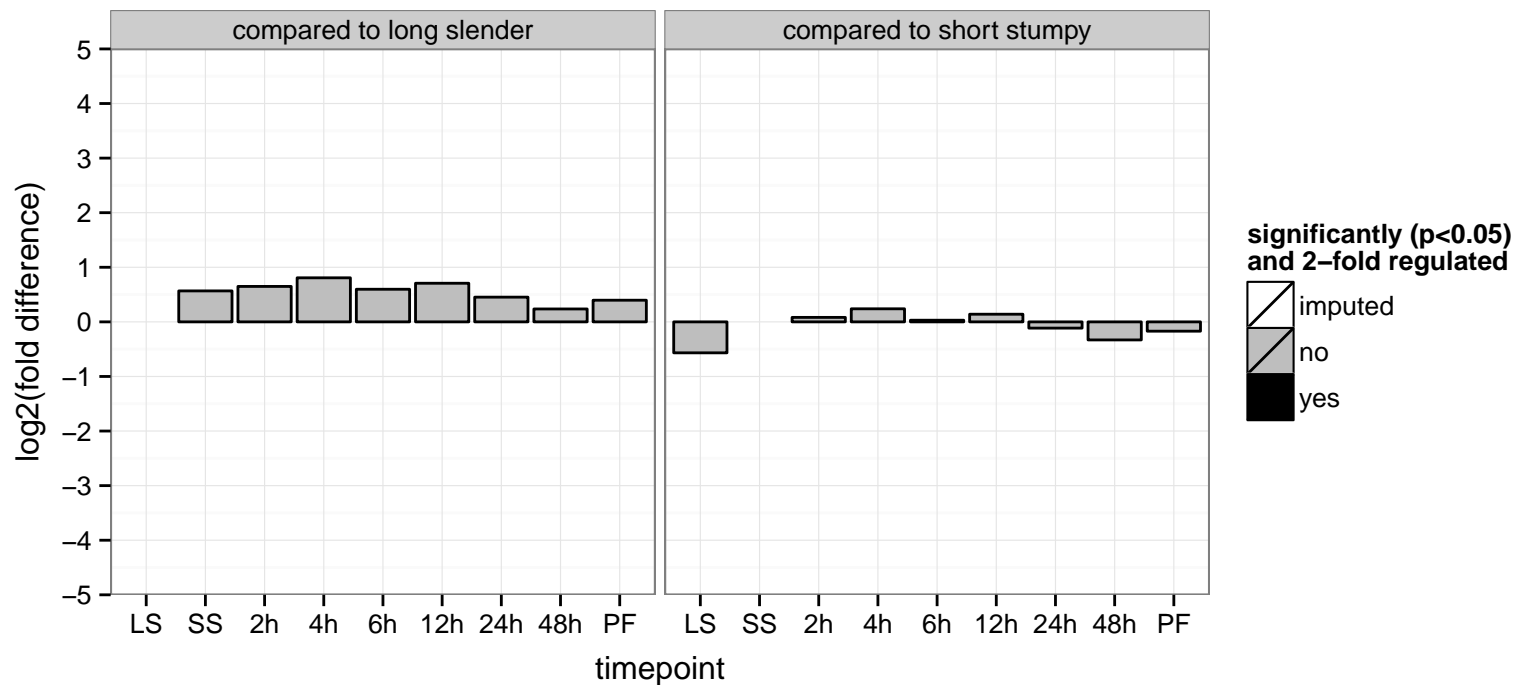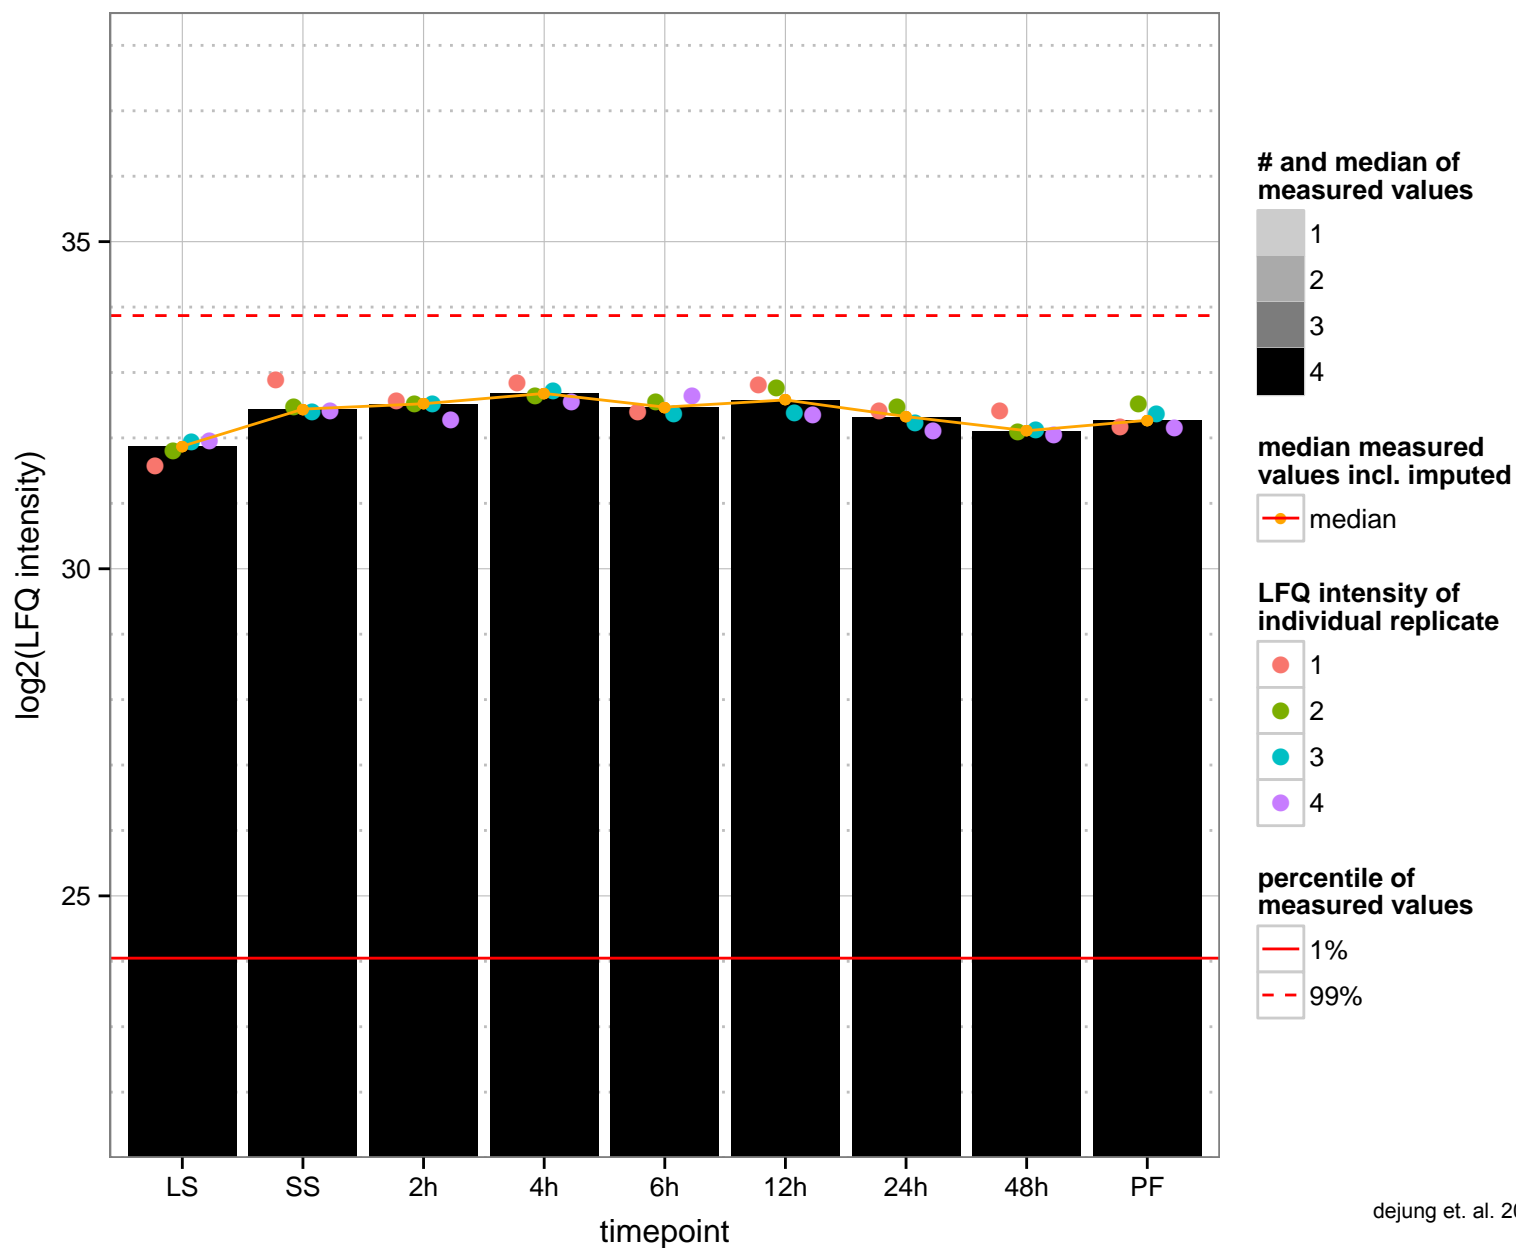

proteasome alpha 7 subunit, putative (PSA4)

Tb927.11.7020

AGOF: threonine-type endopeptidase activity

AGOC: cytosol, nucleus, proteasome core complex

AGOP: ubiquitin-dependent protein catabolic process

PGOF: endopeptidase activity, threonine-type endopeptidase activity

PGOC: proteasome core complex, proteasome core complex, alpha-subunit complex

PGOP: proteolysis involved in cellular protein catabolic process, ubiquitin-dependent protein catabolic process

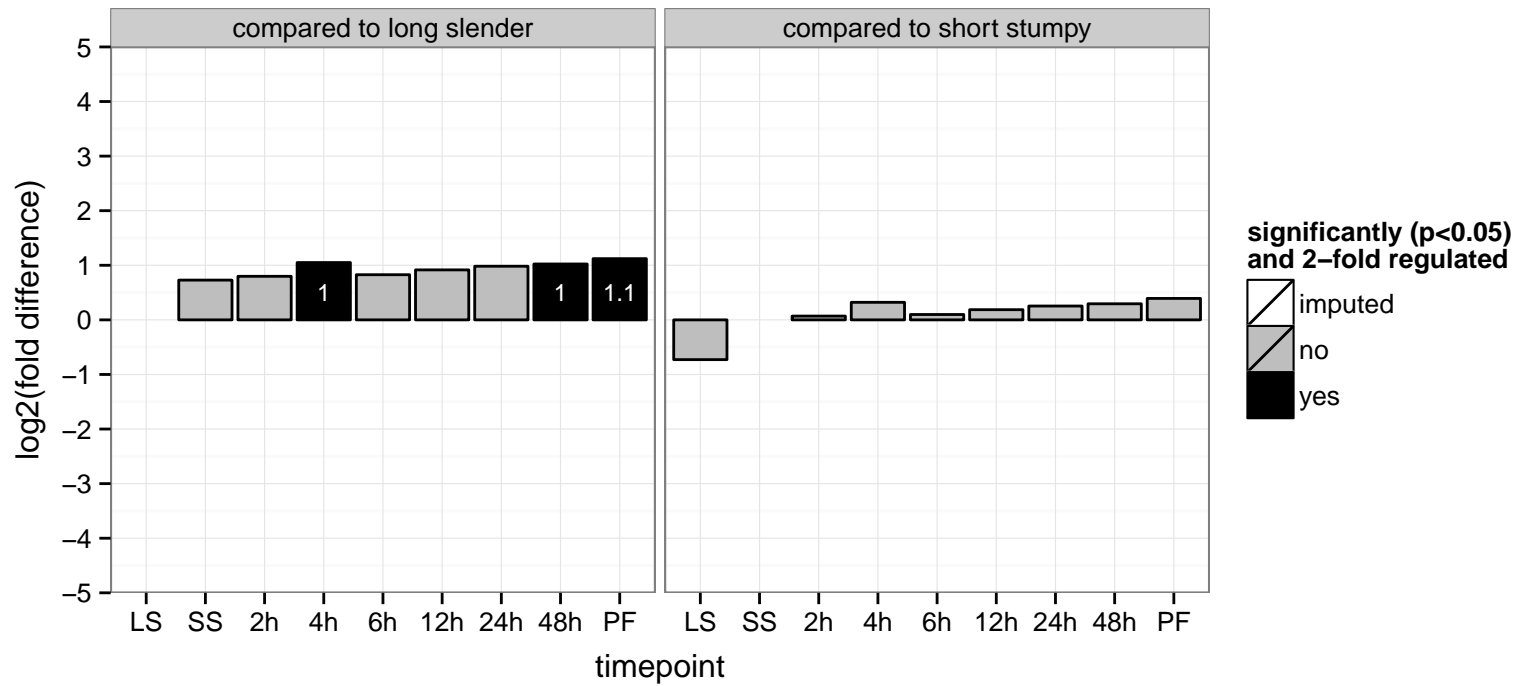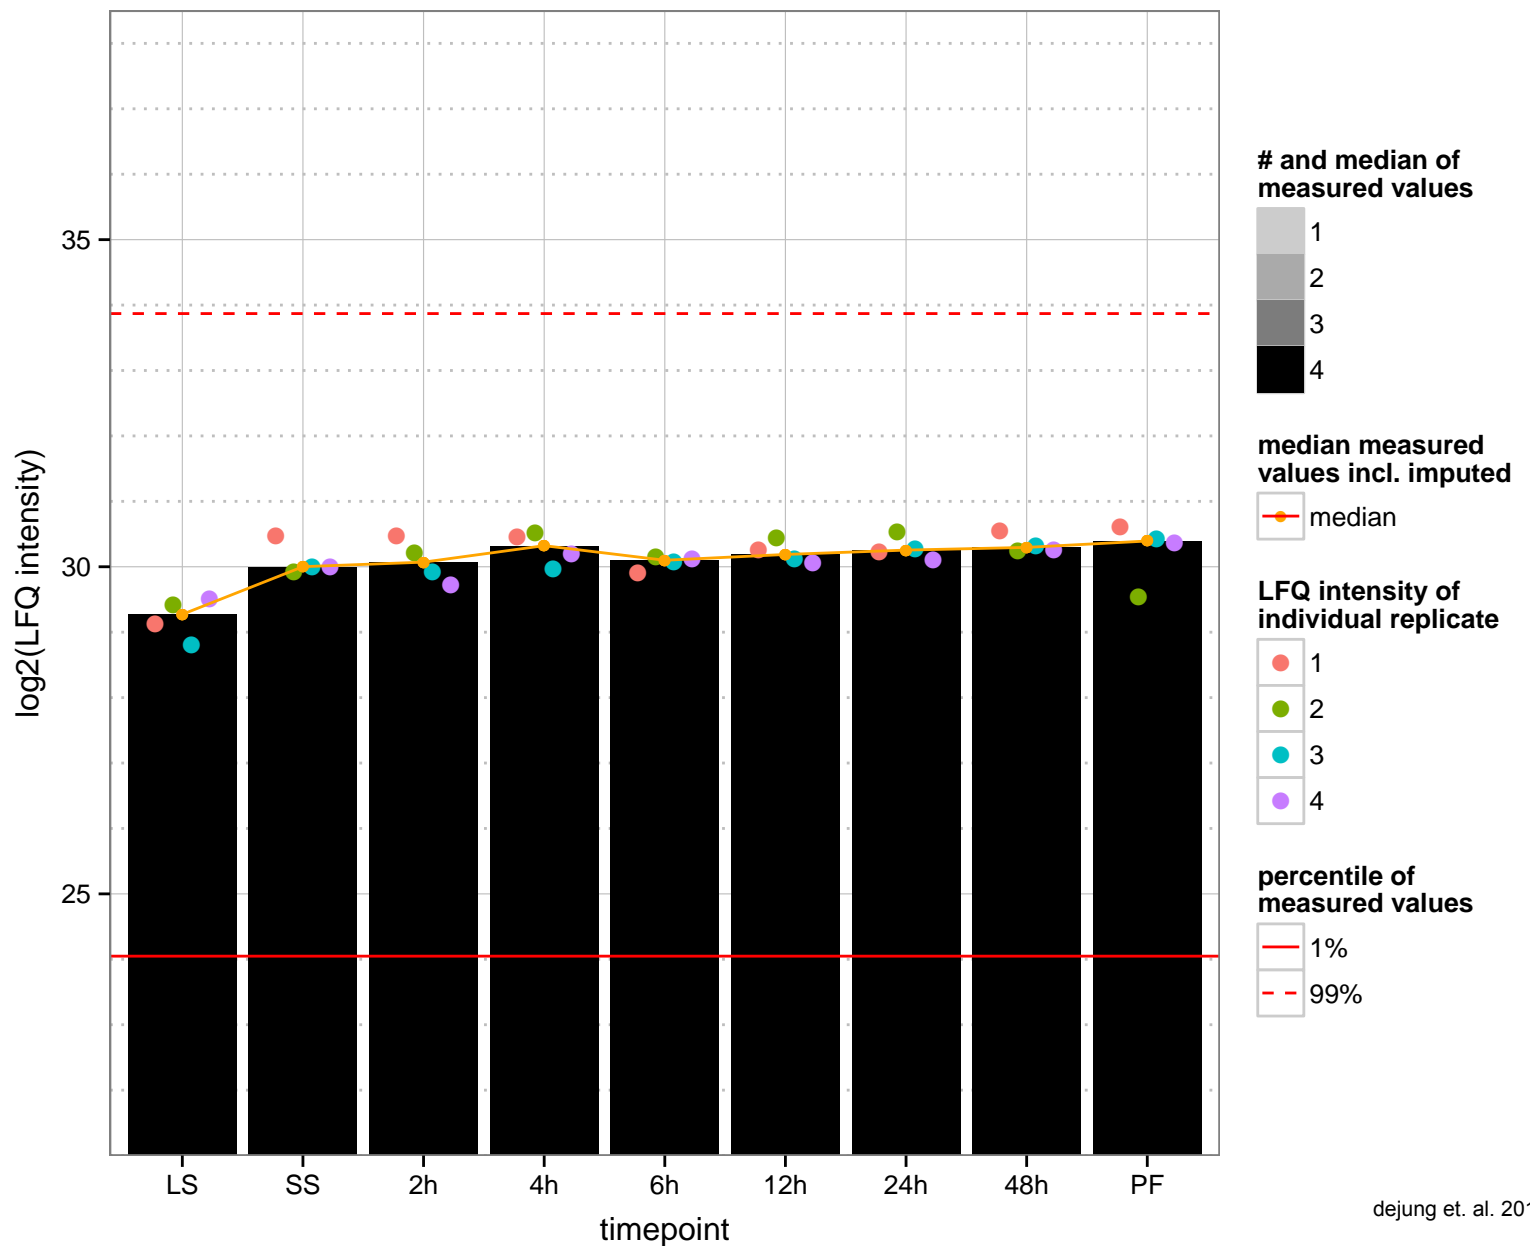

acidocalcisomal pyrophosphatase

Tb927.11.7060

AGOF: inorganic diphosphatase activity, magnesium ion binding, pyrophosphatase activity

AGOC: cytoplasm, membrane

AGOP: metabolic process, phosphate-containing compound metabolic process

PGOF: inorganic diphosphatase activity, magnesium ion binding

PGOC: cytoplasm

PGOP: phosphate-containing compound metabolic process

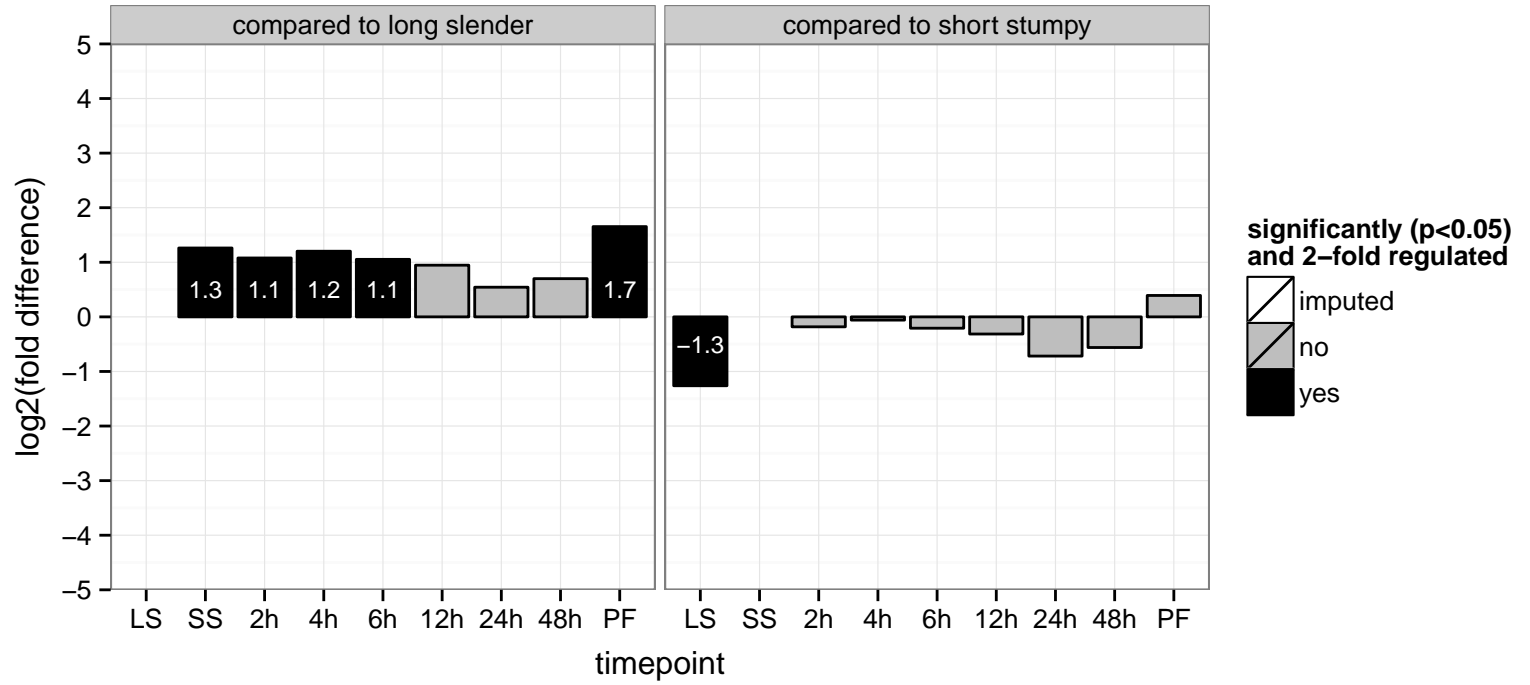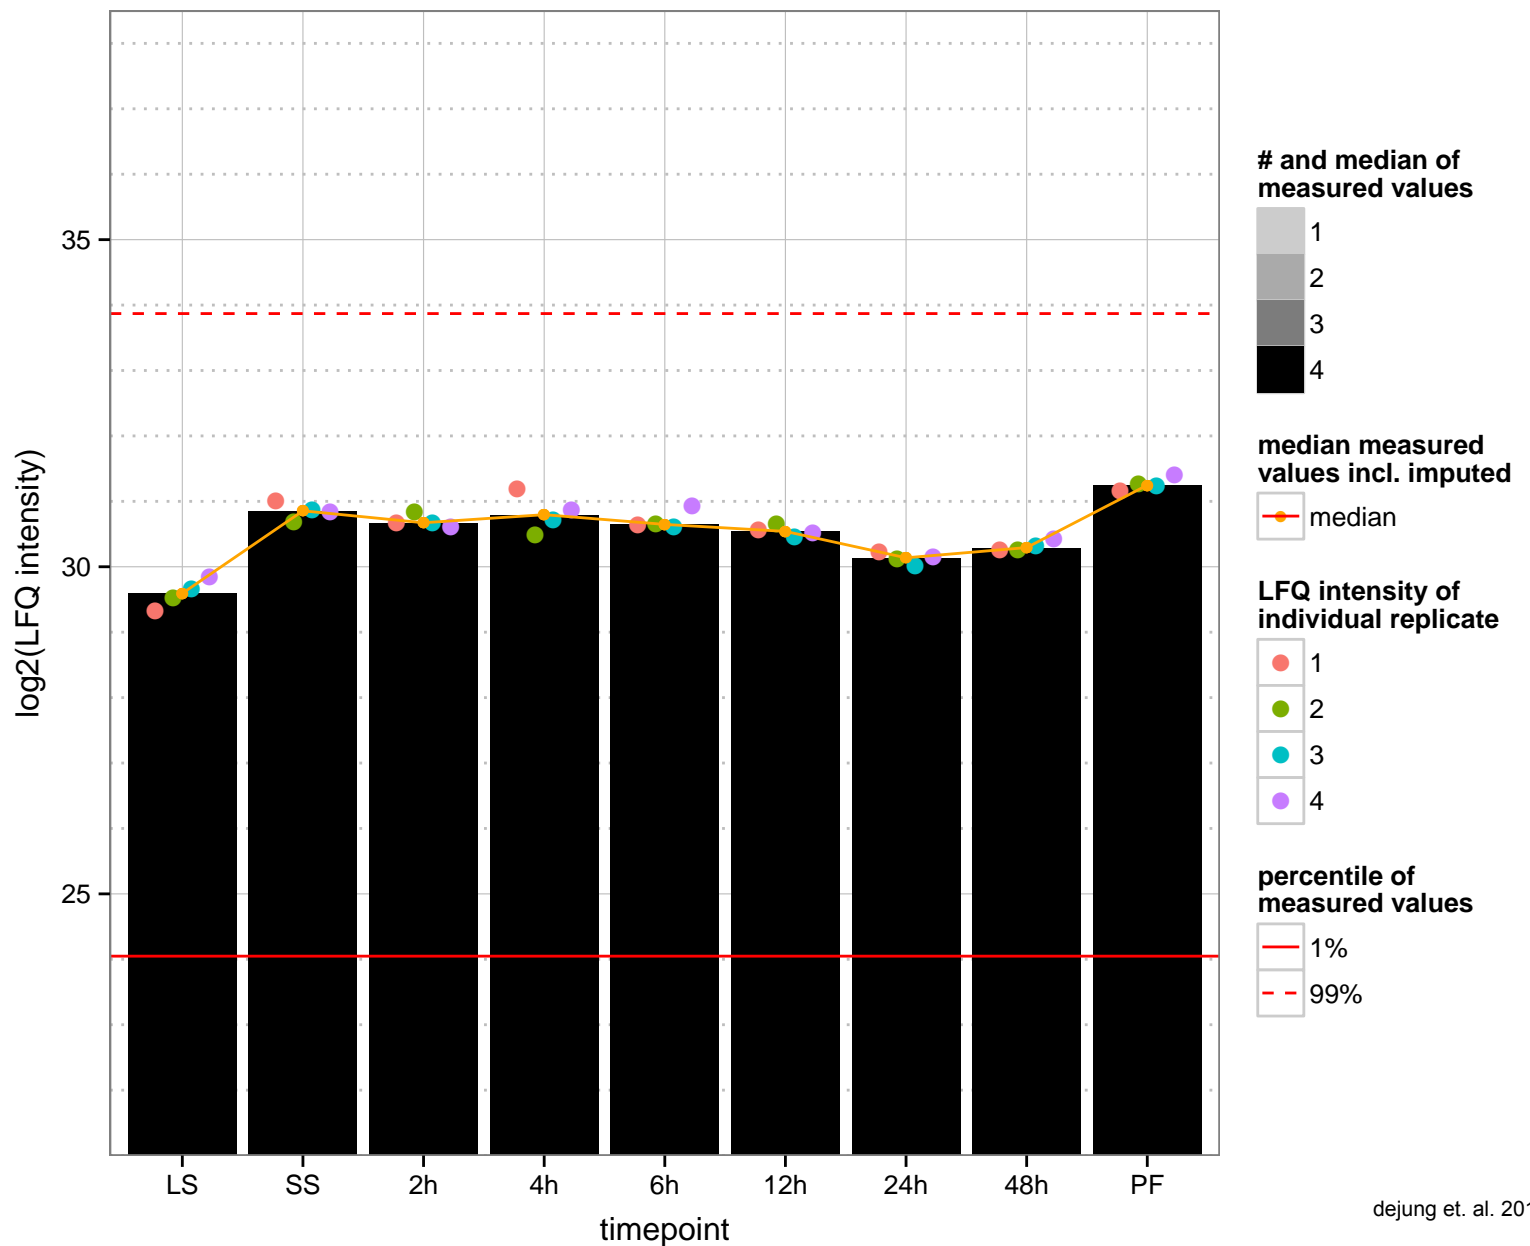

cytoplasmic translation machinery associated protein, putative  
 Tb927.11.7100  
 AGOF: RNA binding  
 AGOC: cytosol, ribosome  
 AGOP: ribosome biogenesis  
 PGO: RNA binding  
 PGO: null  
 PGO: null

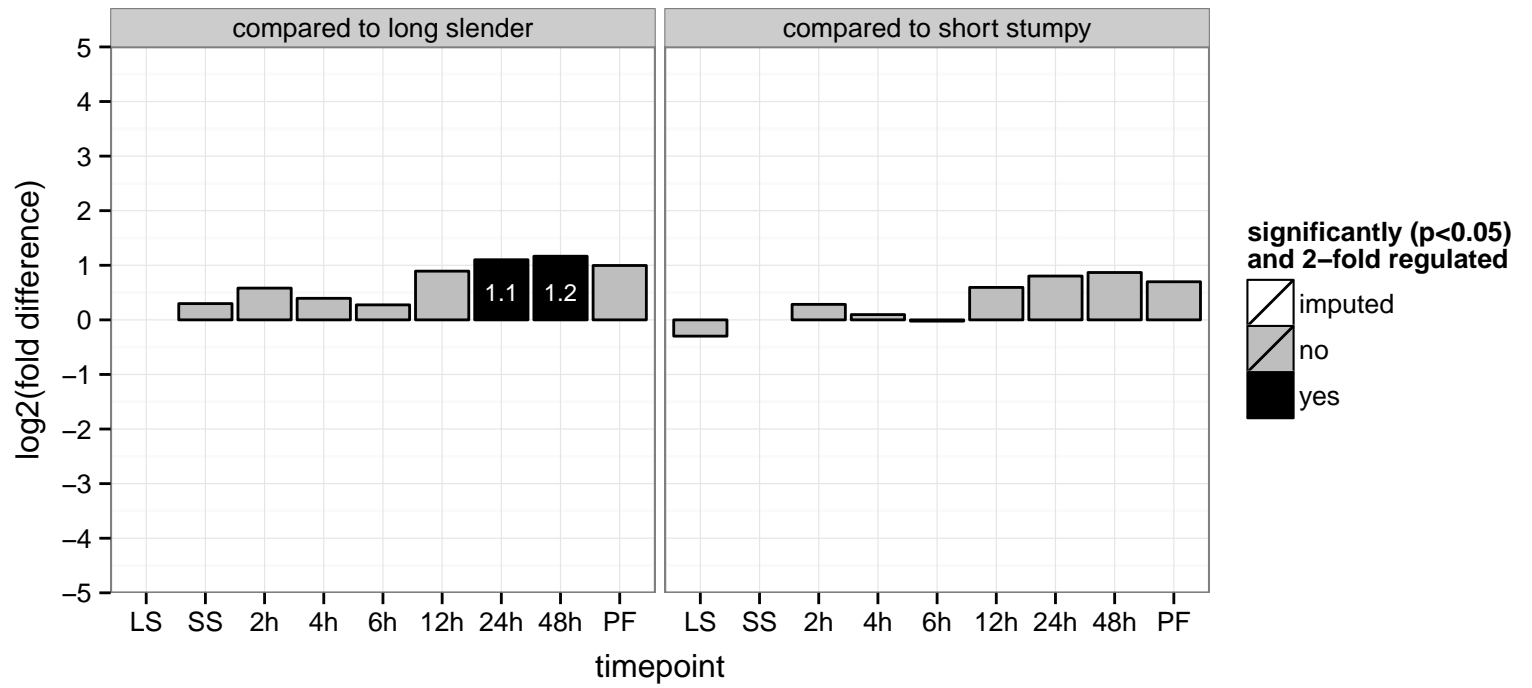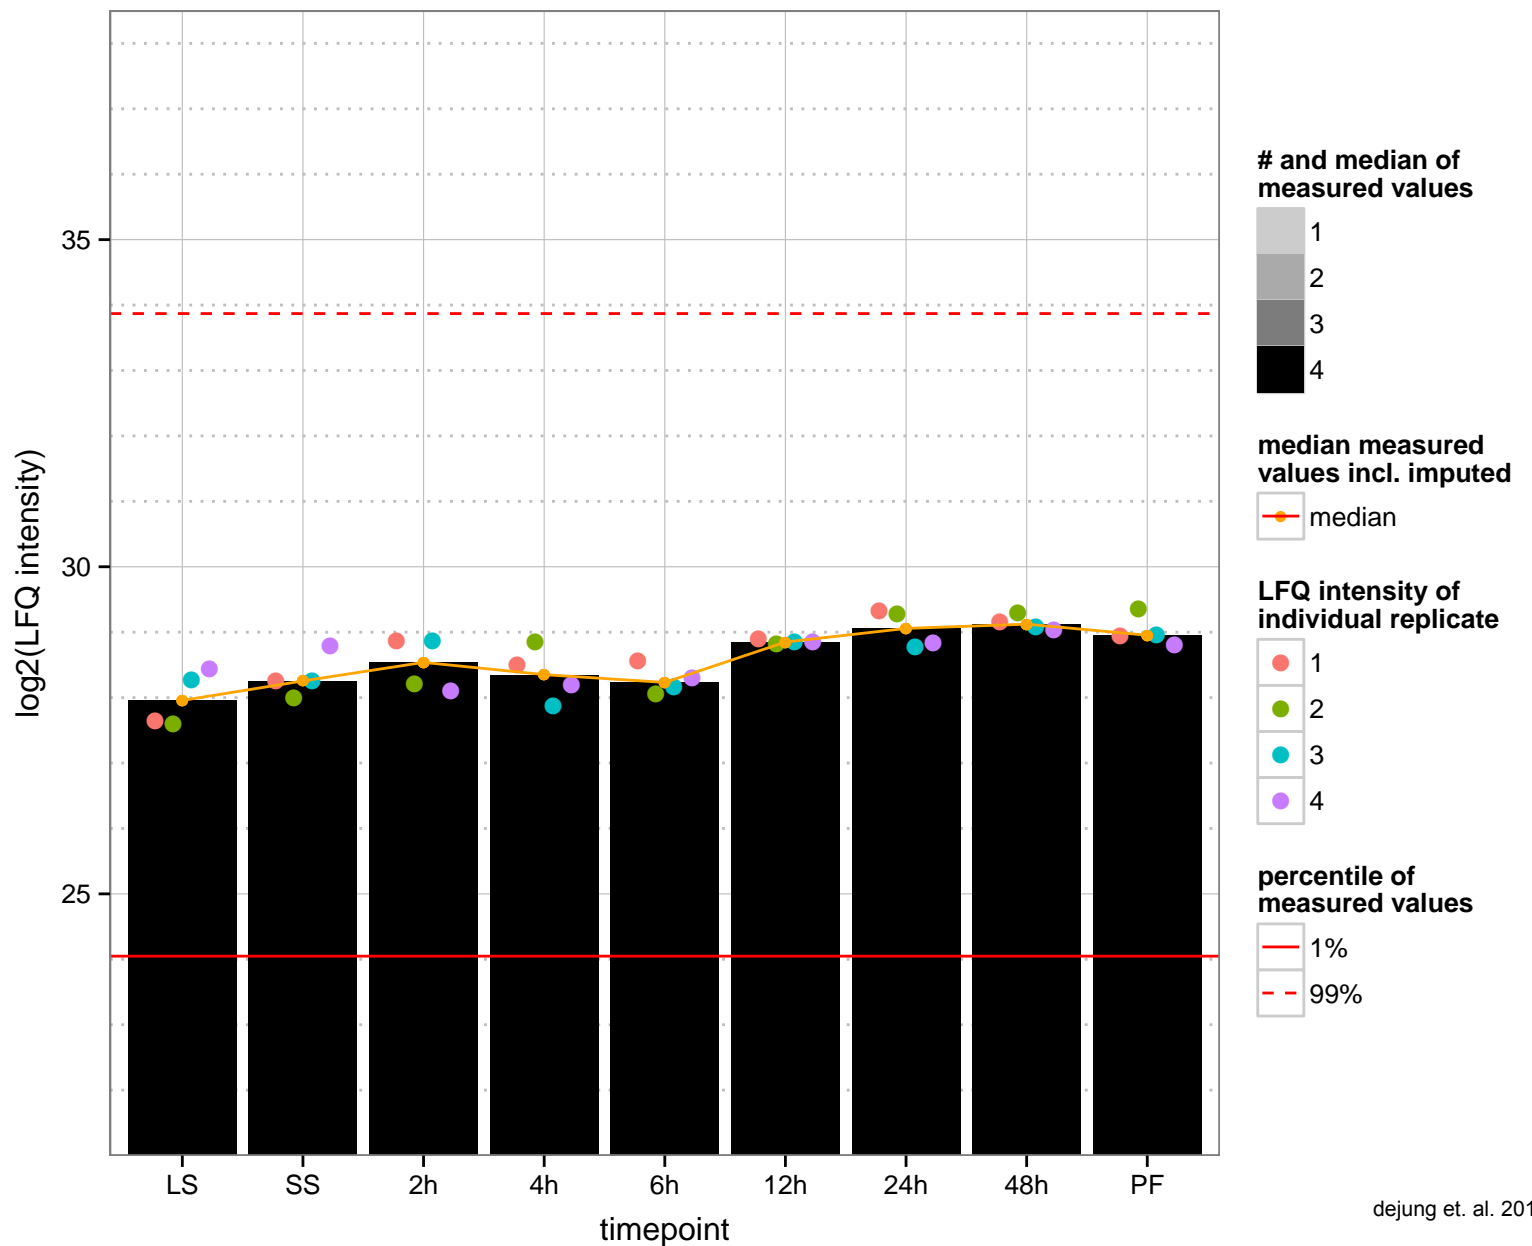

cell cycle sequence binding phosphoprotein (RBP45), putative  
 Tb927.11.7140  
 AGOF: null  
 AGOC: null  
 AGOP: null  
 PGO: null  
 PGOC: null  
 PGOP: null

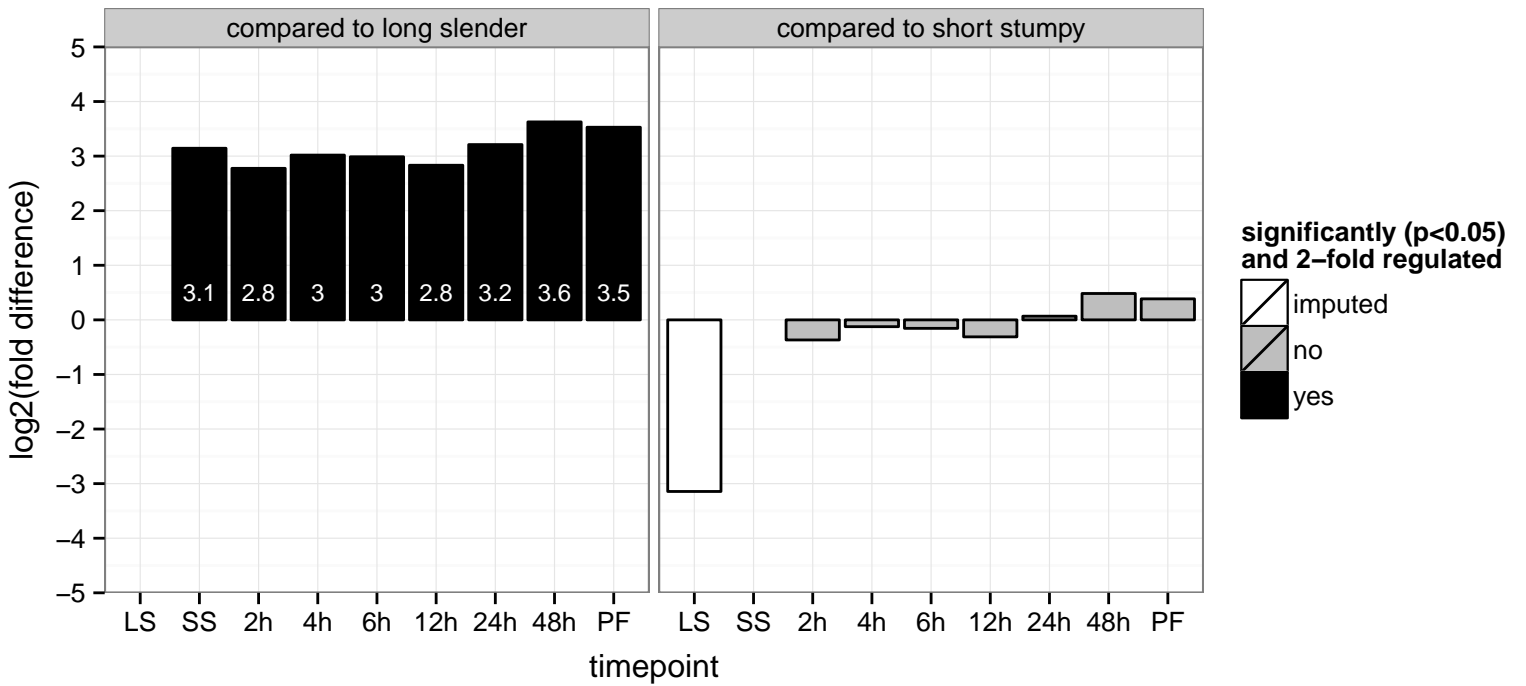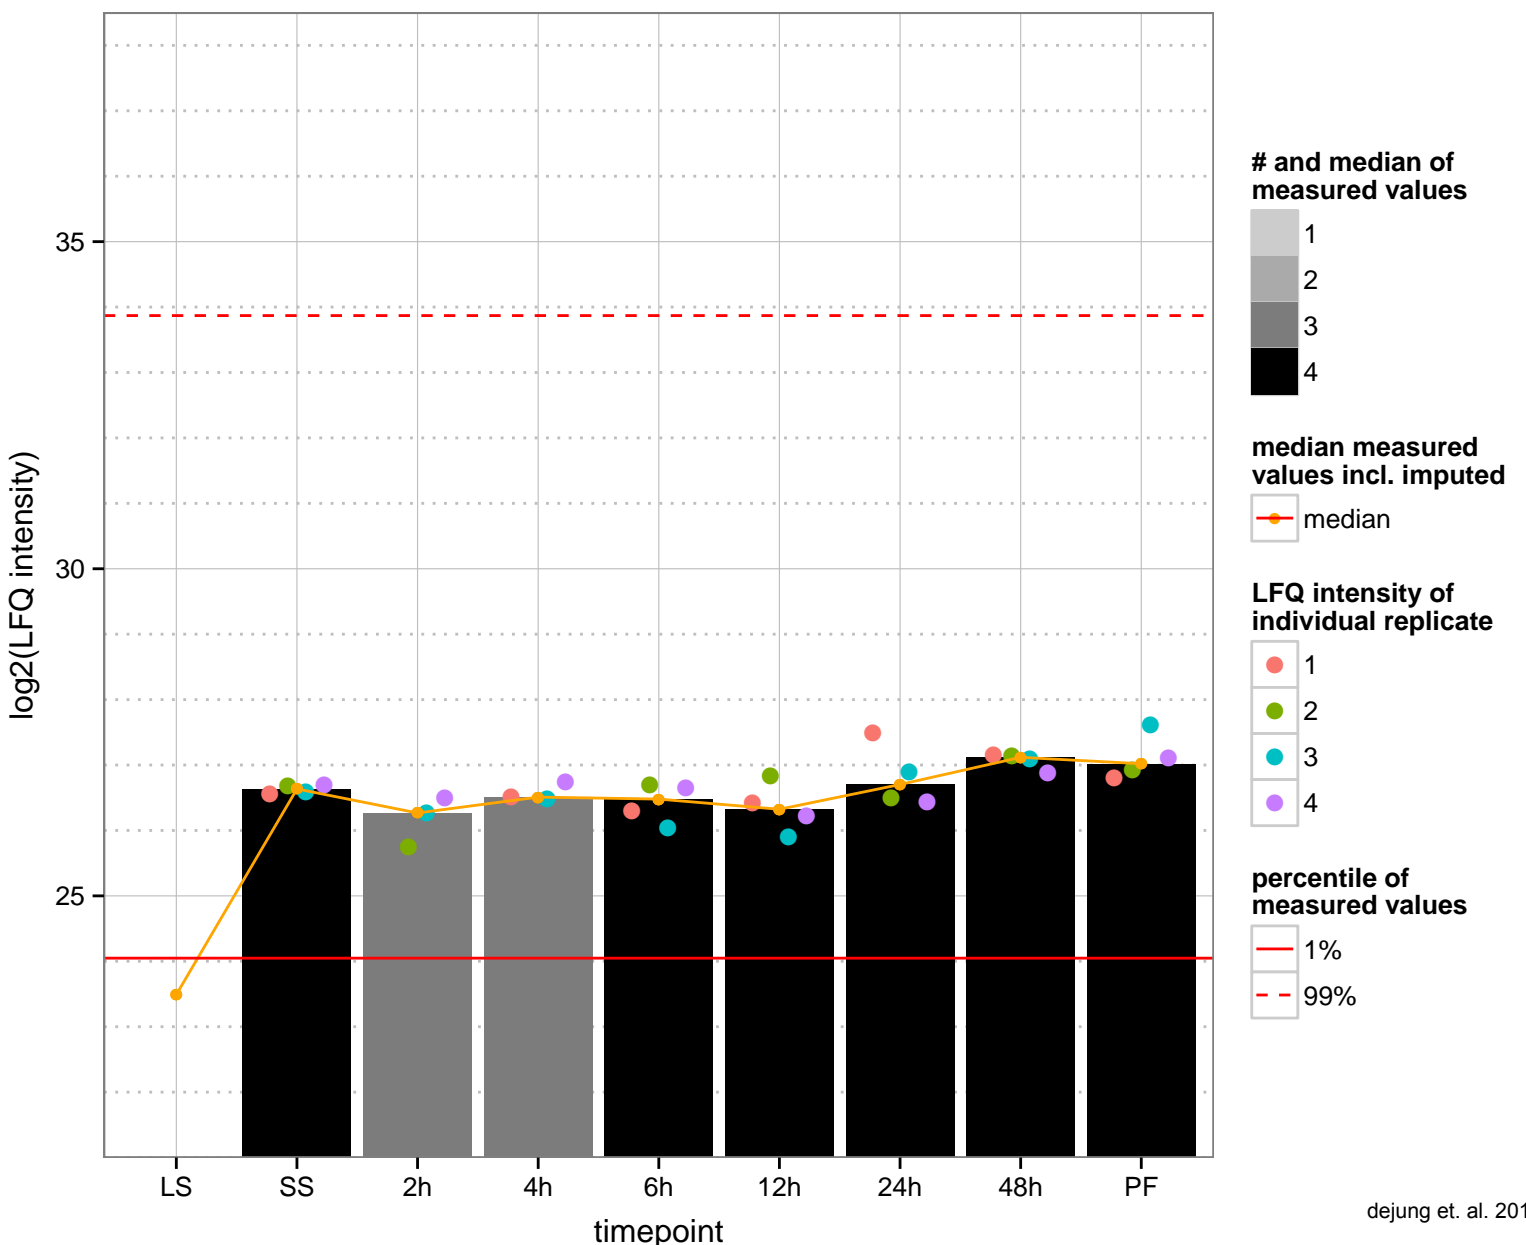



NGG1 interacting factor 3-like  
 Tb927.11.7150  
 AGOF: null  
 AGOC: null  
 AGOP: null  
 PGO: null  
 PGOC: null  
 PGOP: null

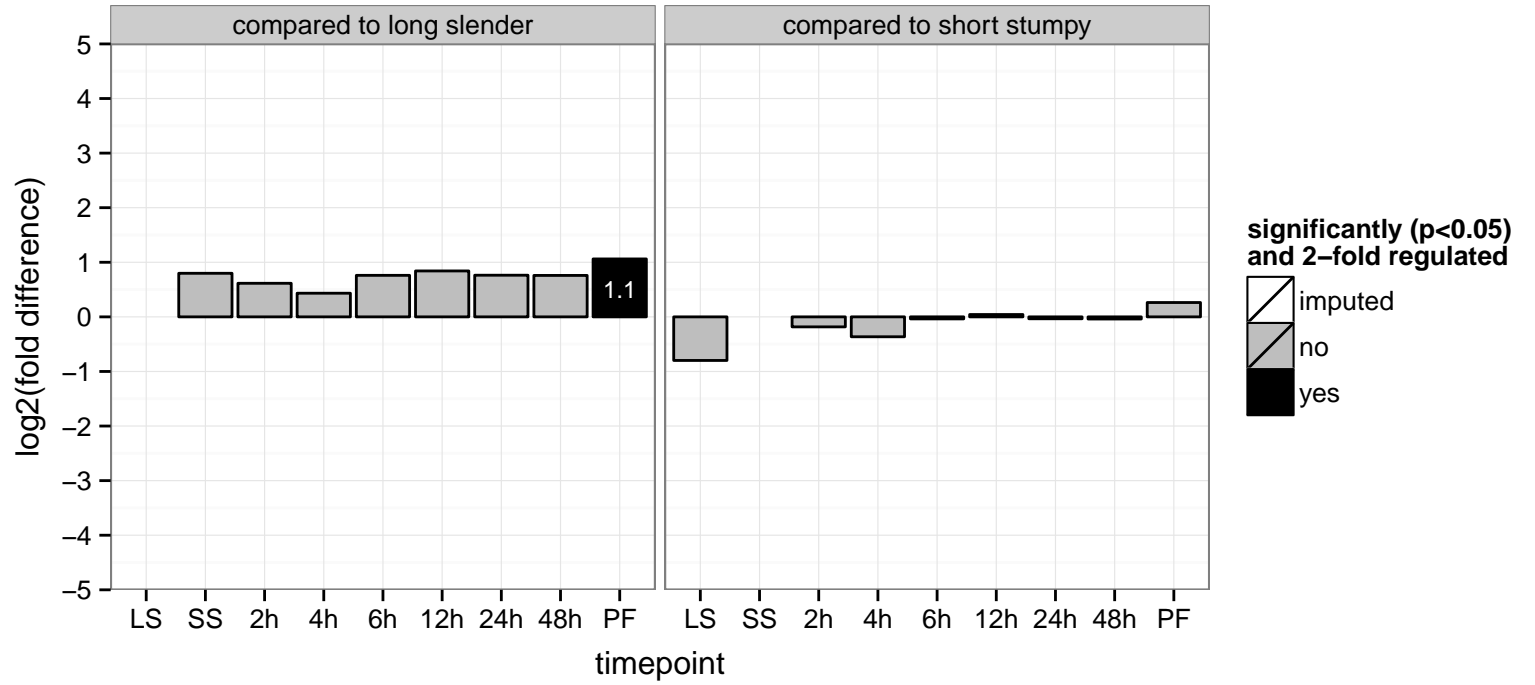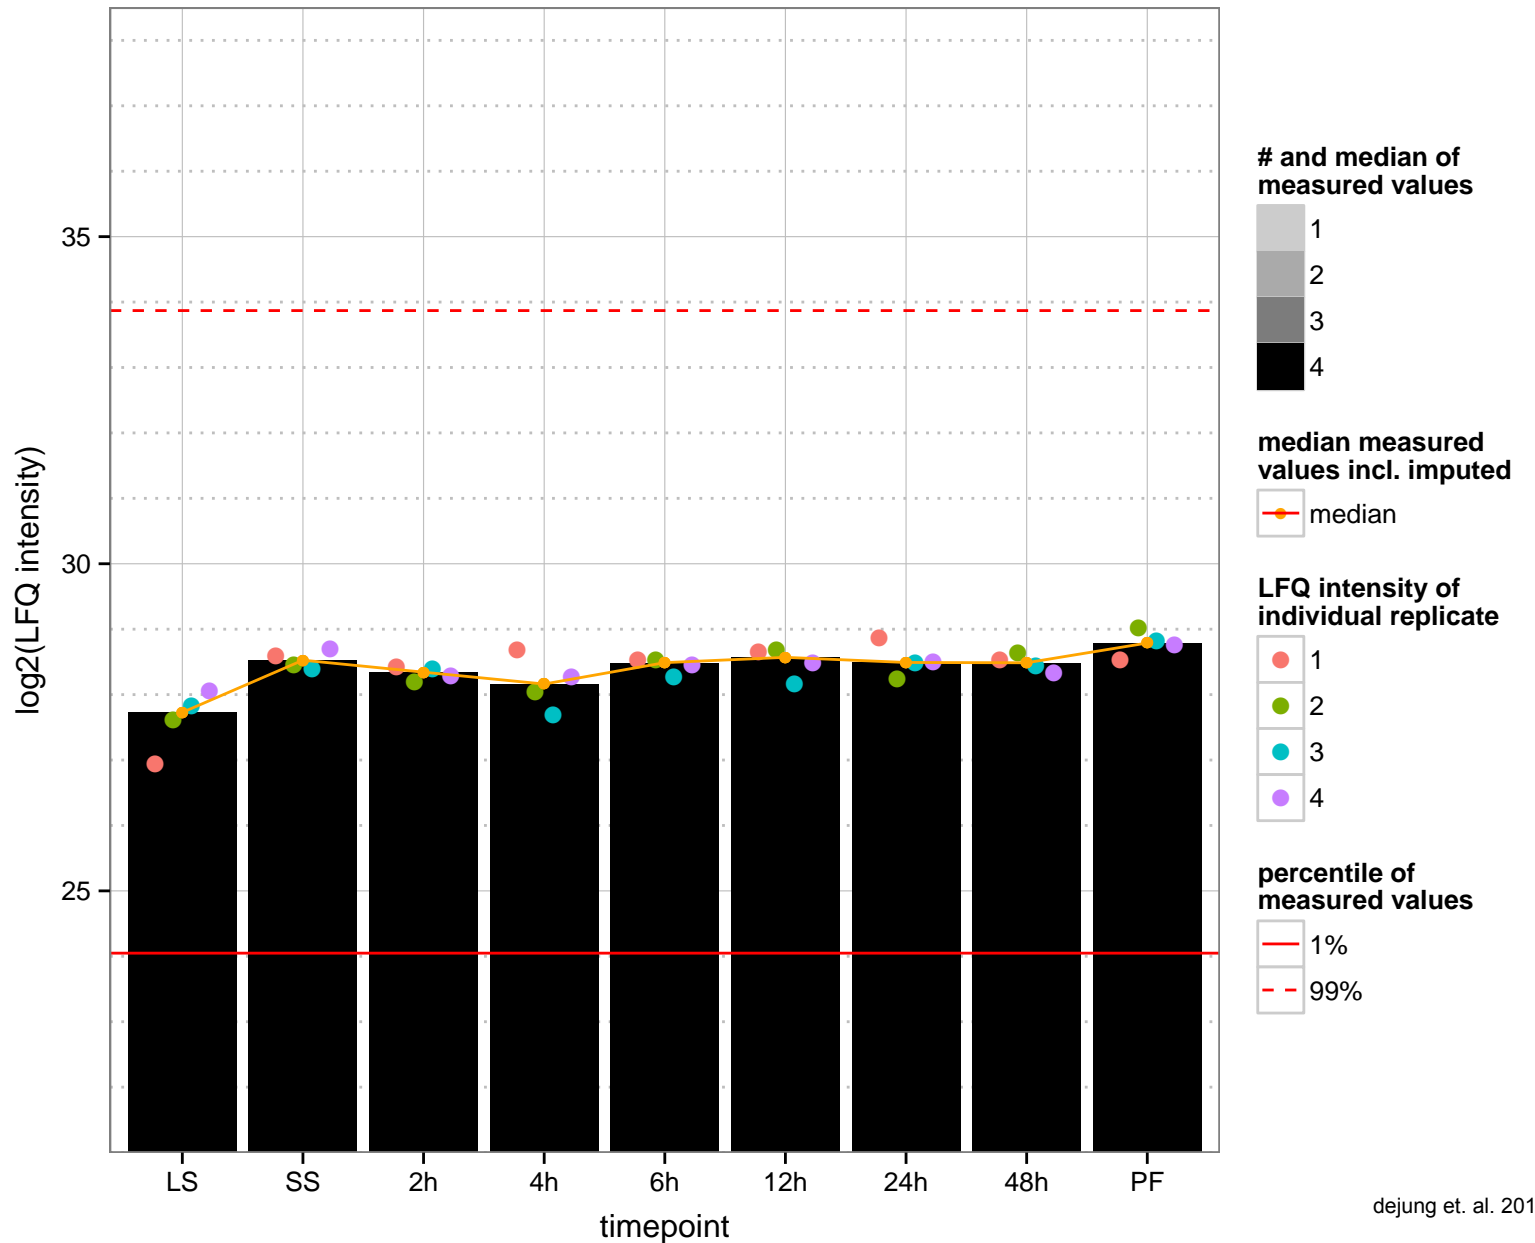

seryl-tRNA synthetase

Tb927.11.7170

AGOF: ATP binding, serine-tRNA ligase activity

AGOC: cytoplasm, cytosol, mitochondrion

AGOP: seryl-tRNA aminoacylation, translation

PGOF: ATP binding, aminoacyl-tRNA ligase activity, nucleotide binding, serine-tRNA ligase activity

PGOC: cytoplasm

PGOP: seryl-tRNA aminoacylation, tRNA aminoacylation for protein translation

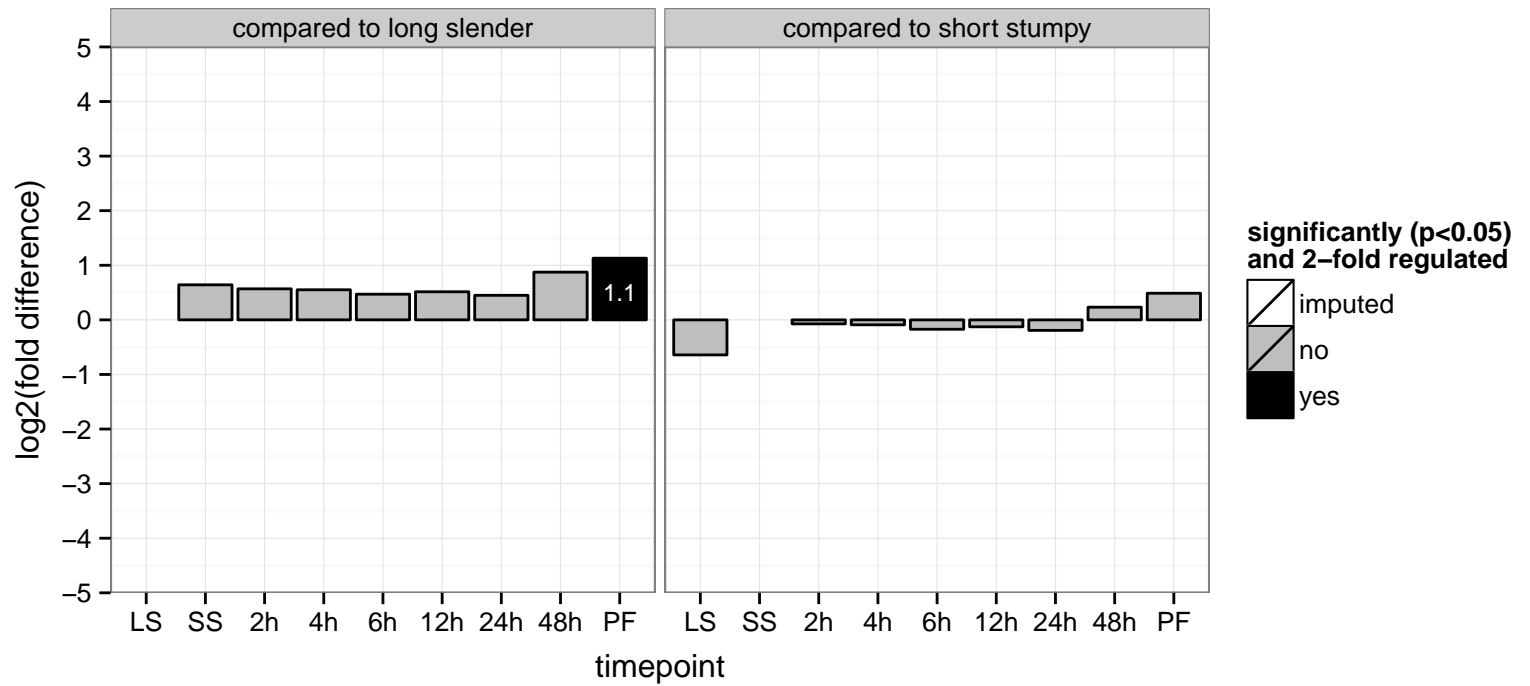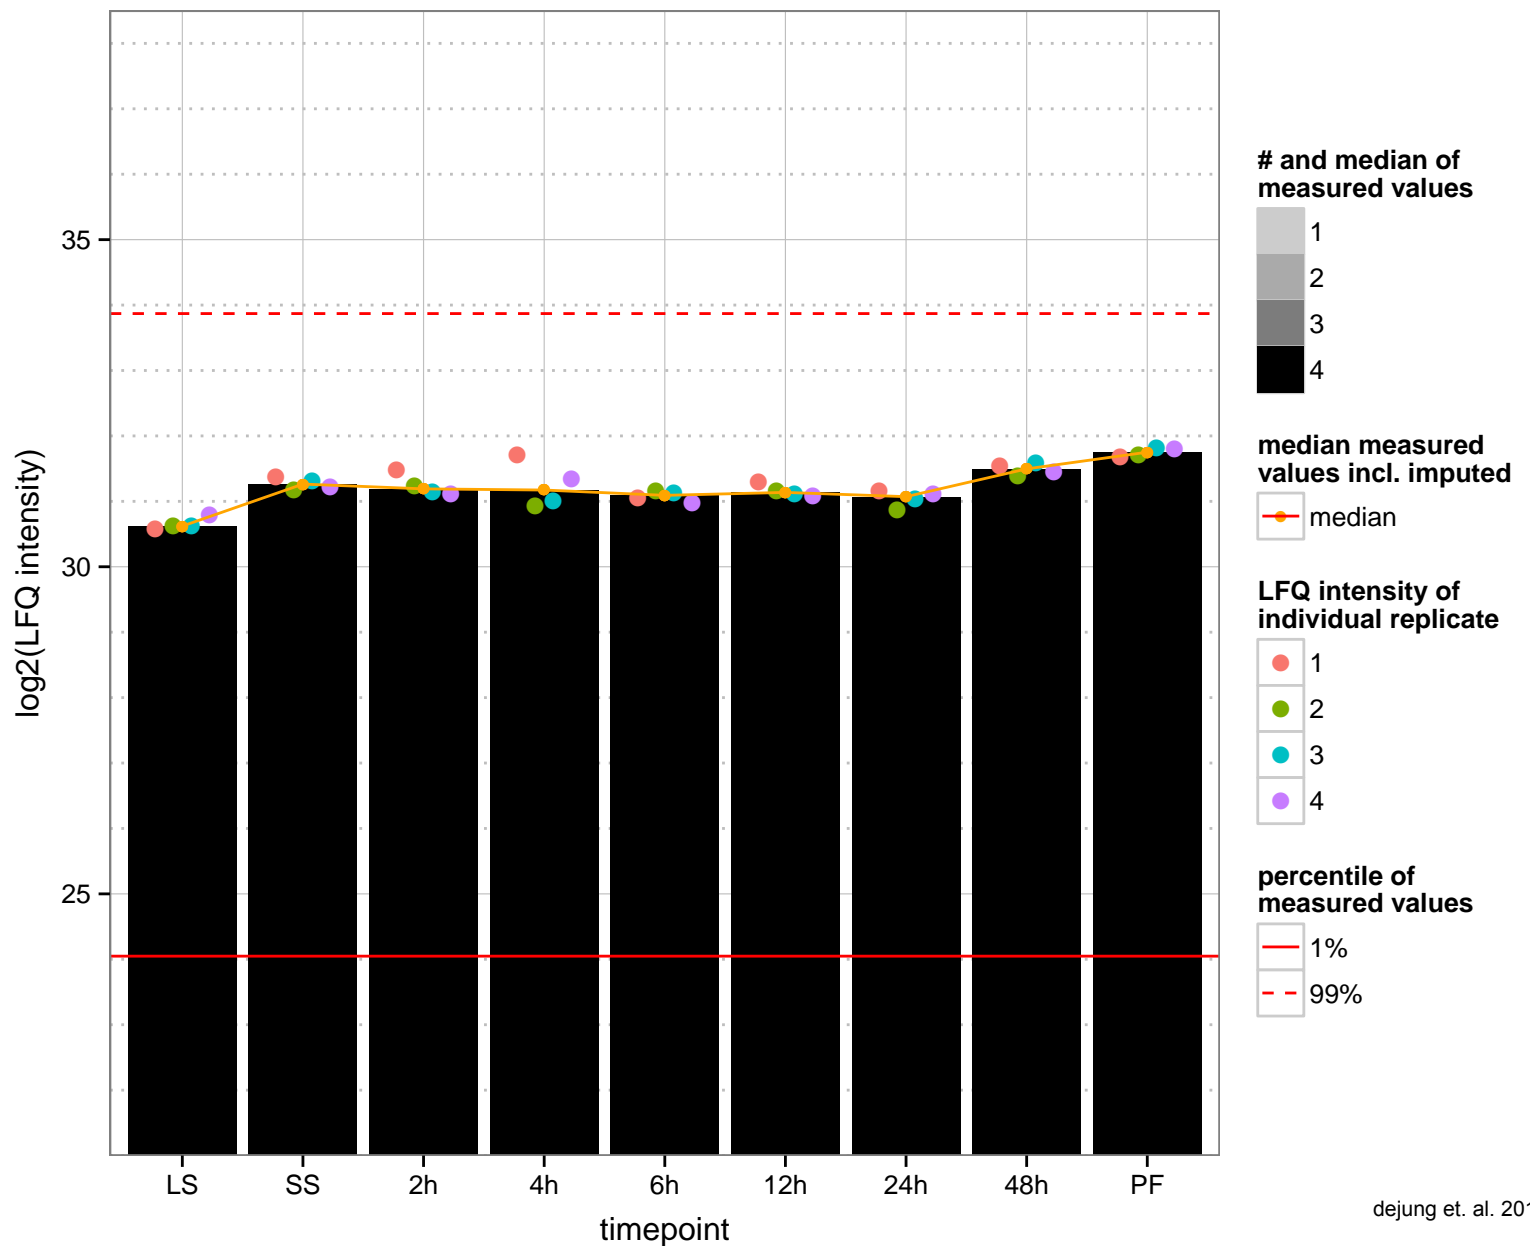

hypothetical protein  
 Tb927.11.7190  
 AGOF: null  
 AGOC: null  
 AGOP: null  
 PGO: null  
 PGOC: null  
 PGOP: null

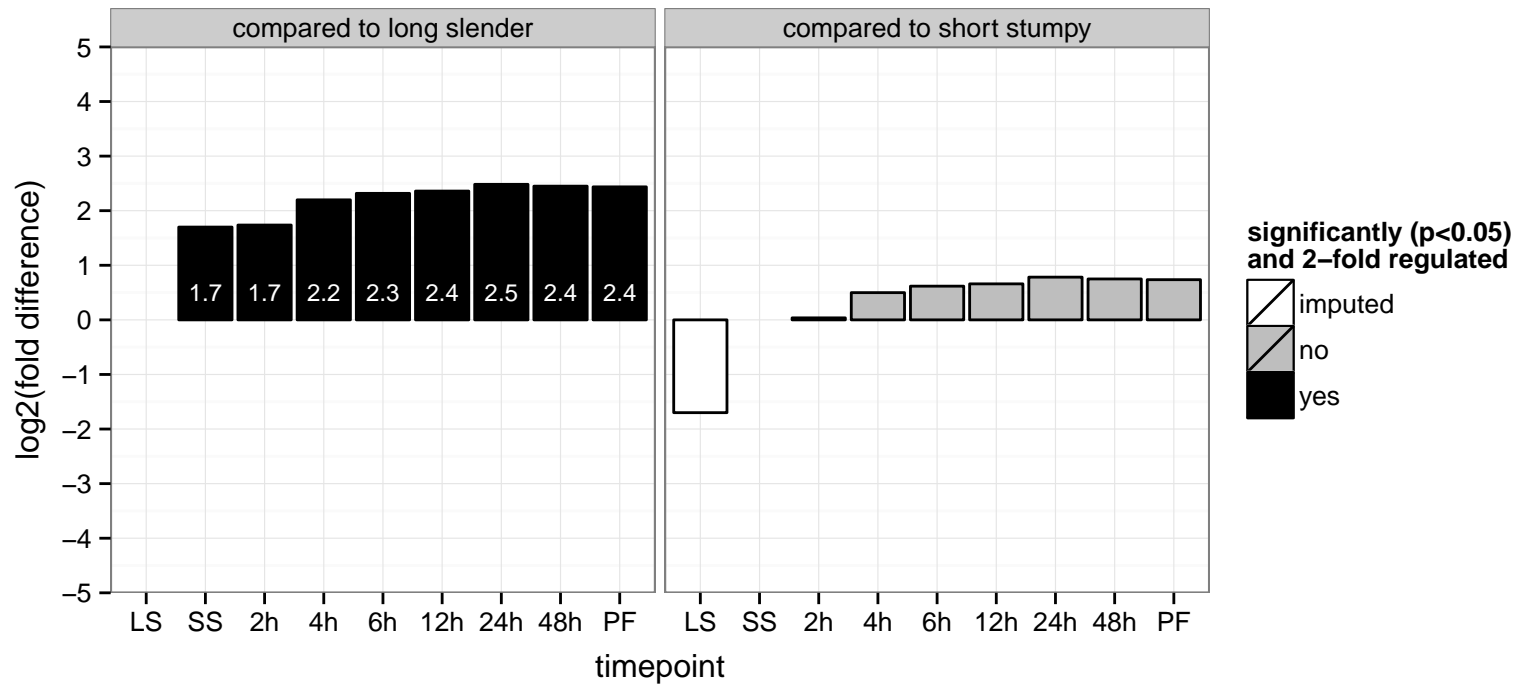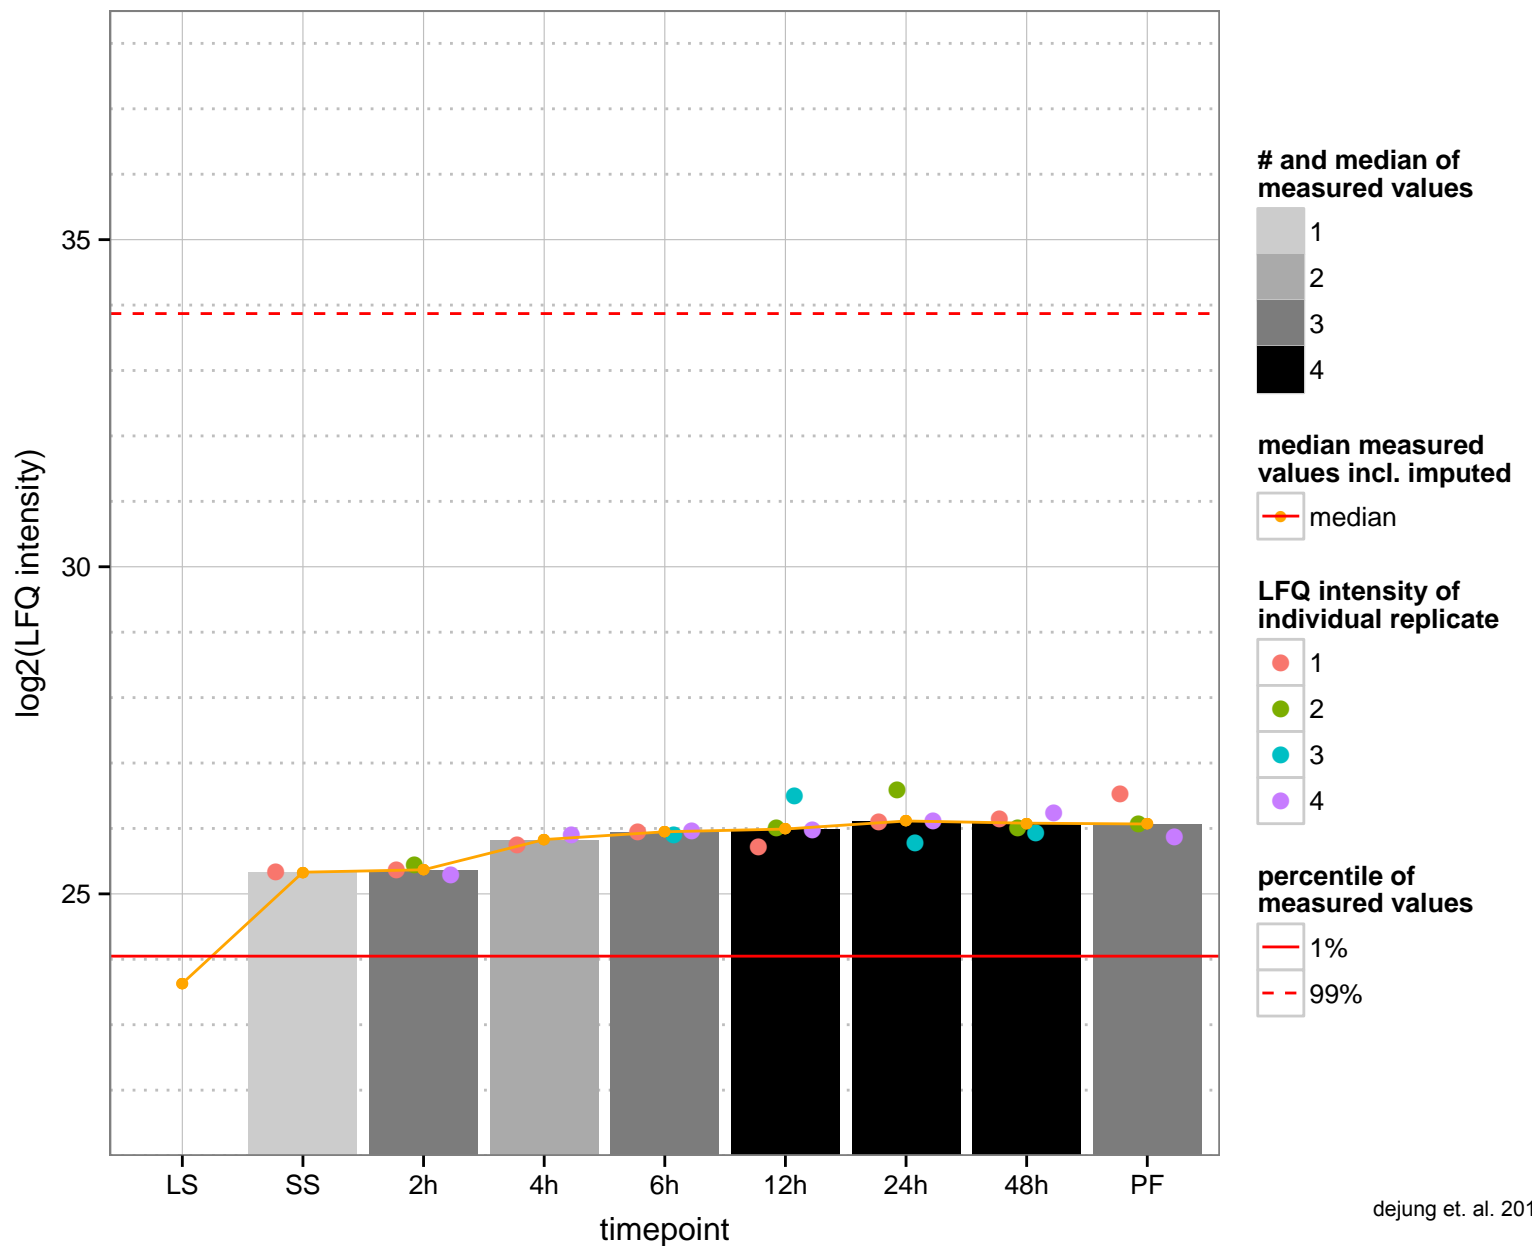

hypothetical protein, chrXI additional, unordered contigs, conserved  
 Tb927.11.720;Tb11.0840  
 AGOF: null  
 AGOC: null  
 AGOP: null  
 PGO: null  
 PGOC: null  
 PGOP: null

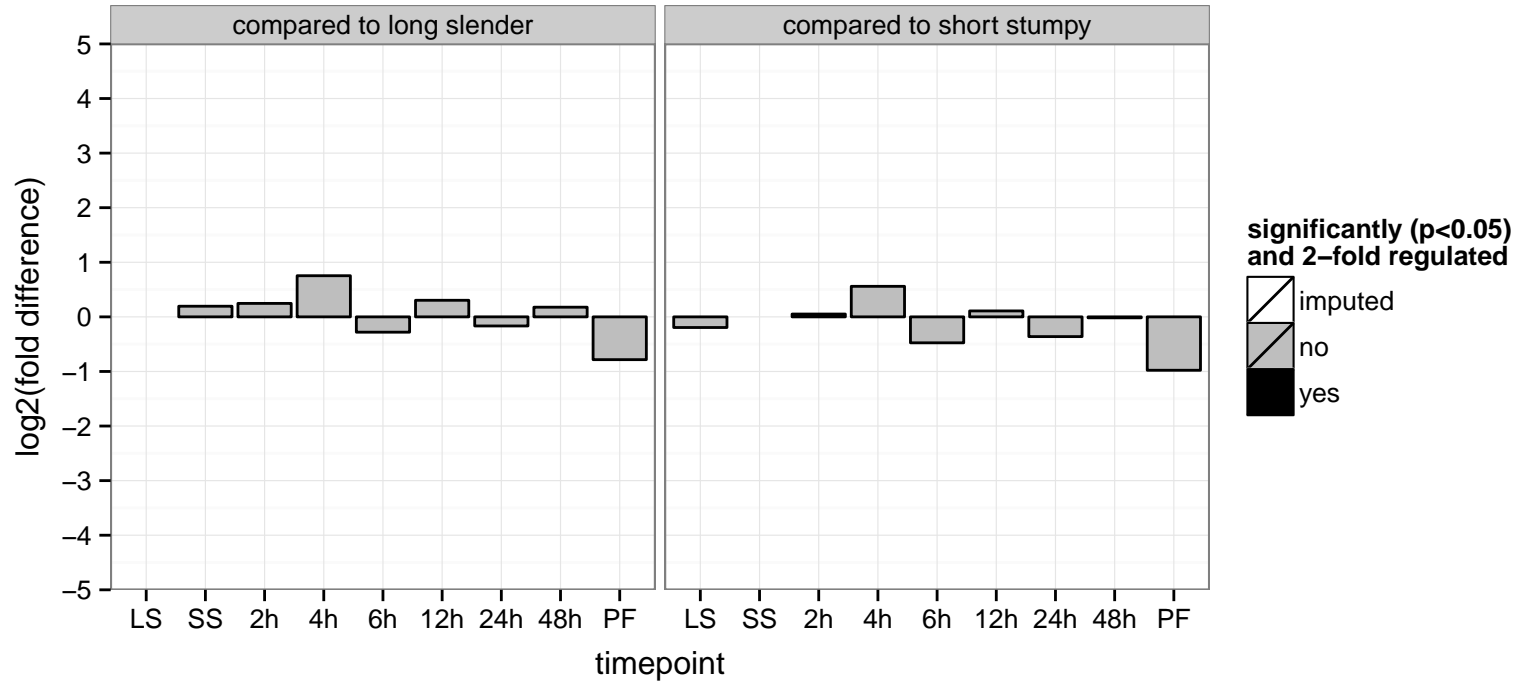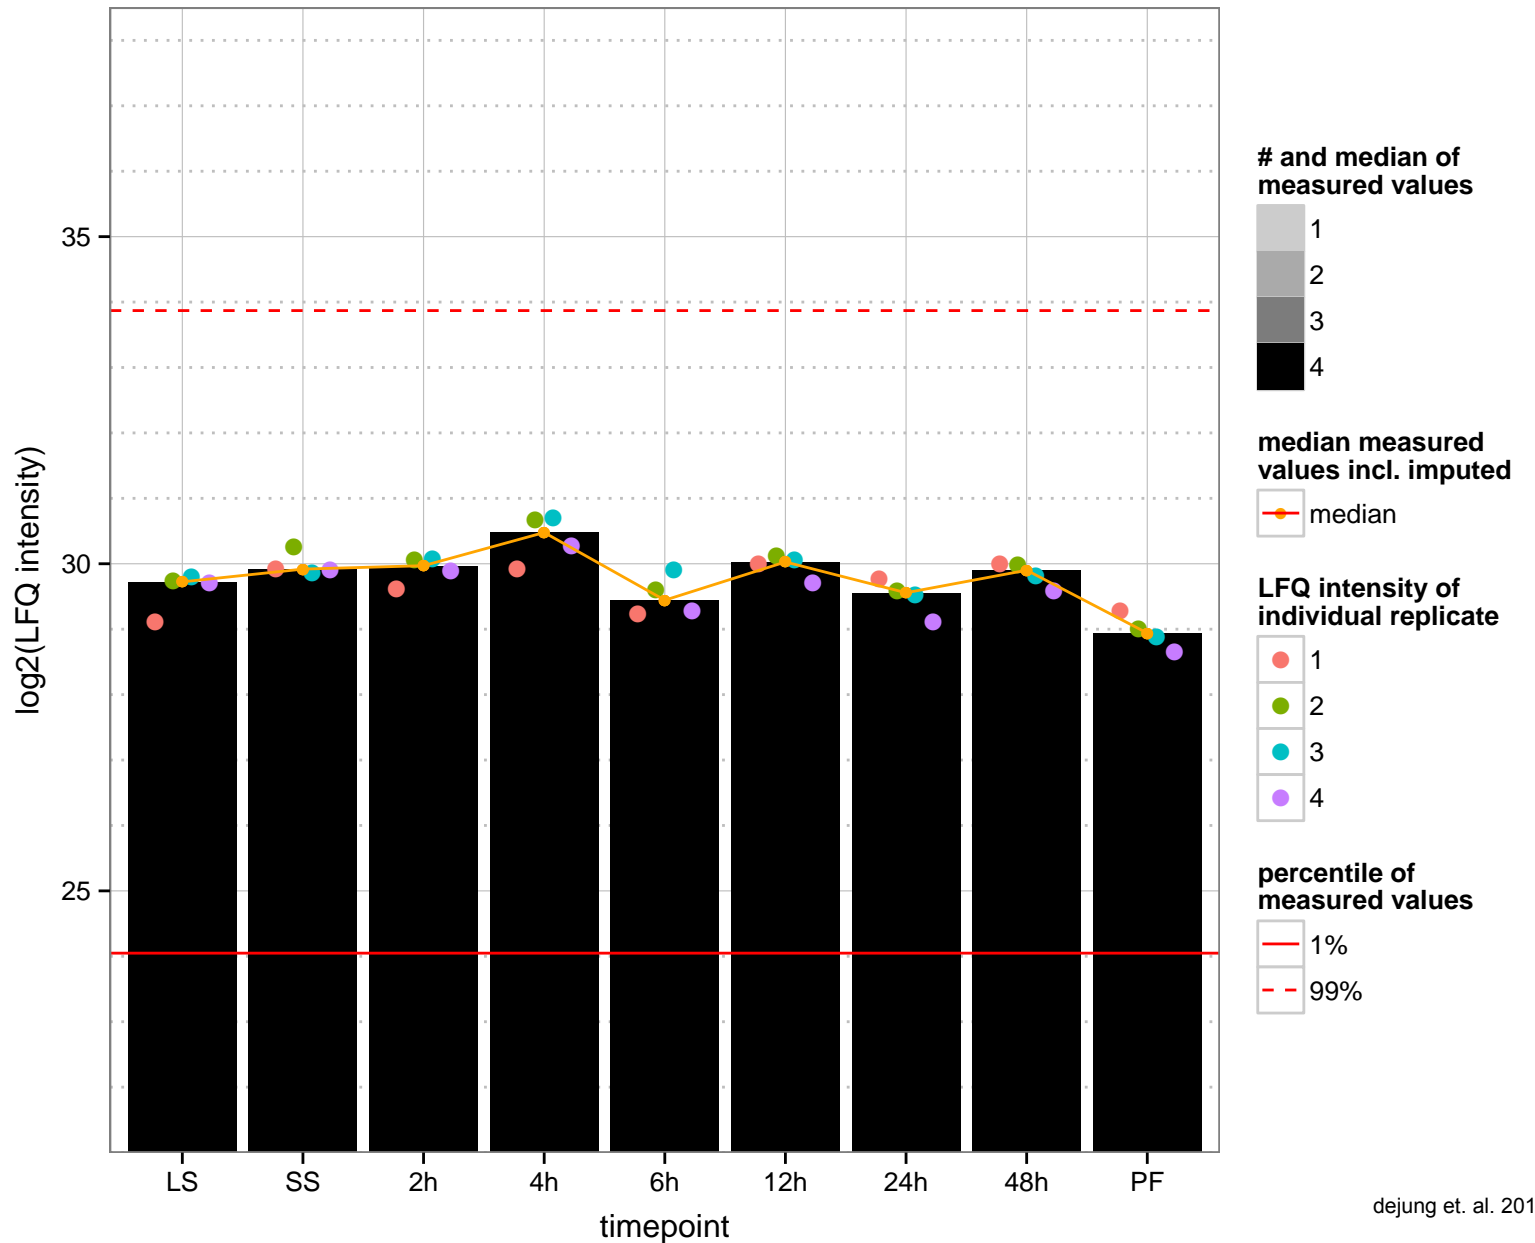

histone H2B variant, putative (H2BVAR)  
 Tb927.11.7350  
 AGOF: DNA binding  
 AGOC: nucleosome, nucleus  
 AGOP: DNA replication, nucleosome assembly  
 PGO: DNA binding  
 PGO: nucleosome, nucleus  
 PGO: nucleosome assembly

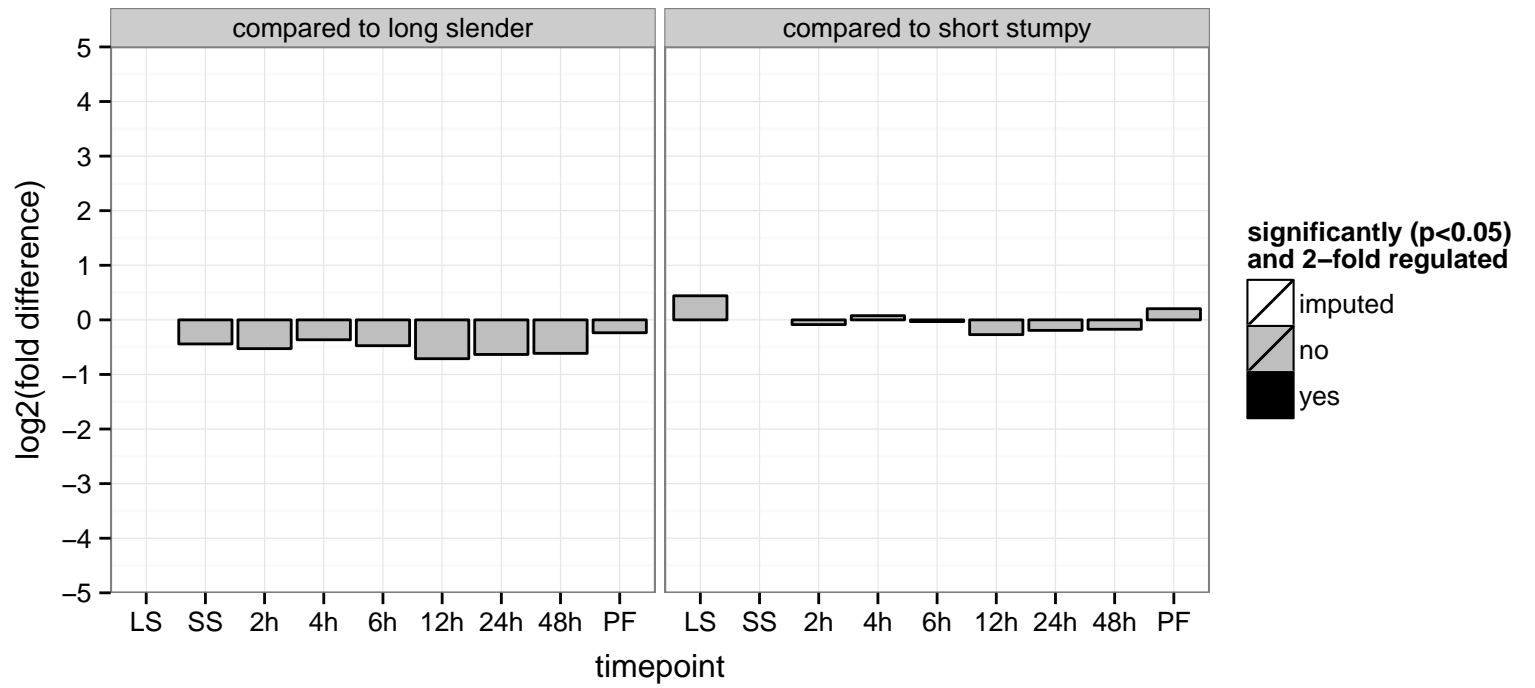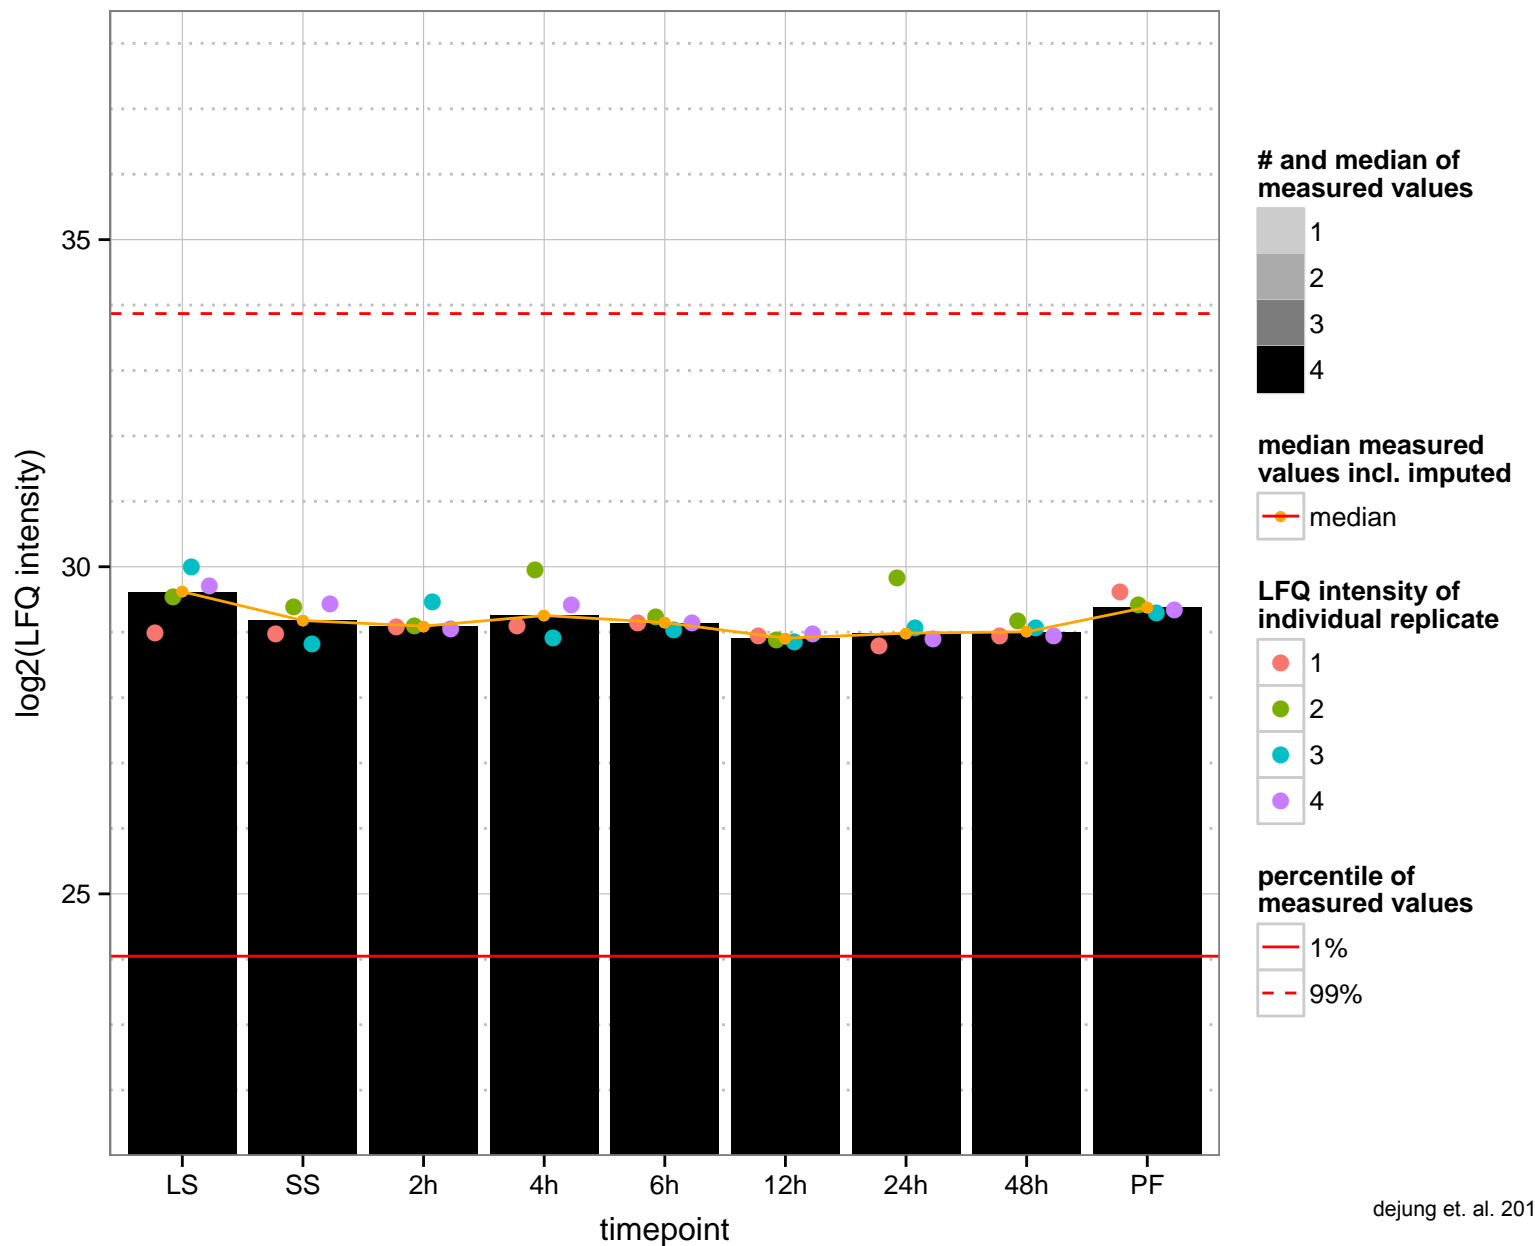

hypothetical protein, conserved  
 Tb927.11.7390  
 AGOF: null  
 AGOC: mitochondrion  
 AGOP: null  
 PGO: null  
 PGO: null  
 PGO: null

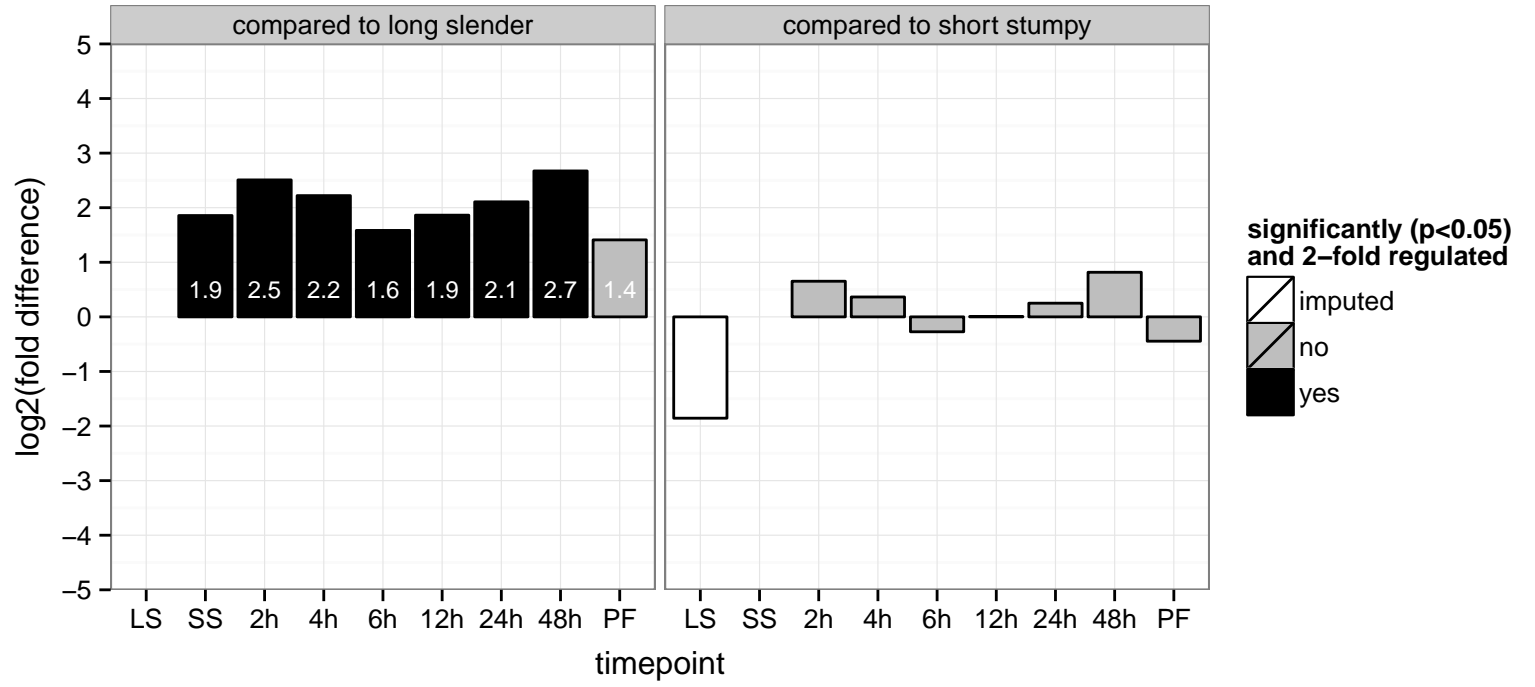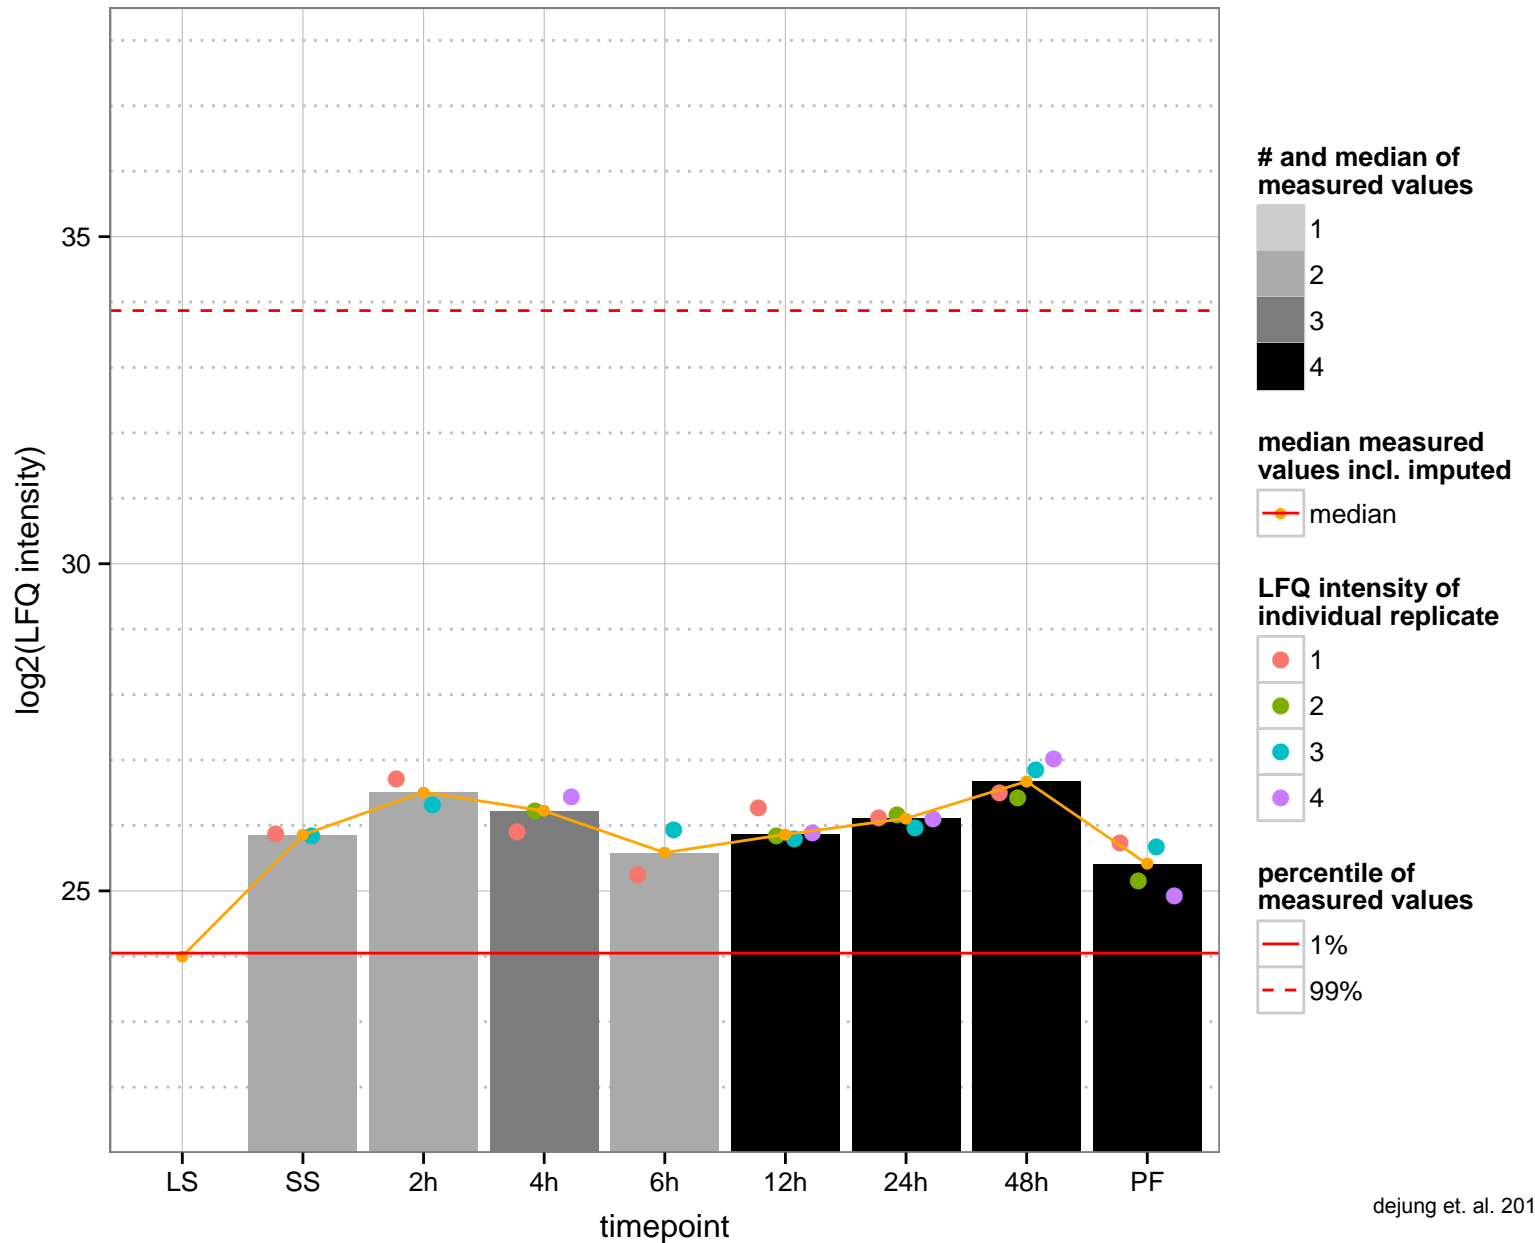

hypothetical protein, conserved  
 Tb927.11.7430  
 AGOF: null  
 AGOC: null  
 AGOP: ubiquitin-dependent protein catabolic process  
 PGO: null  
 PGO: null  
 PGO: null  
 PGO: null  
 PGOP: ubiquitin-dependent protein catabolic process

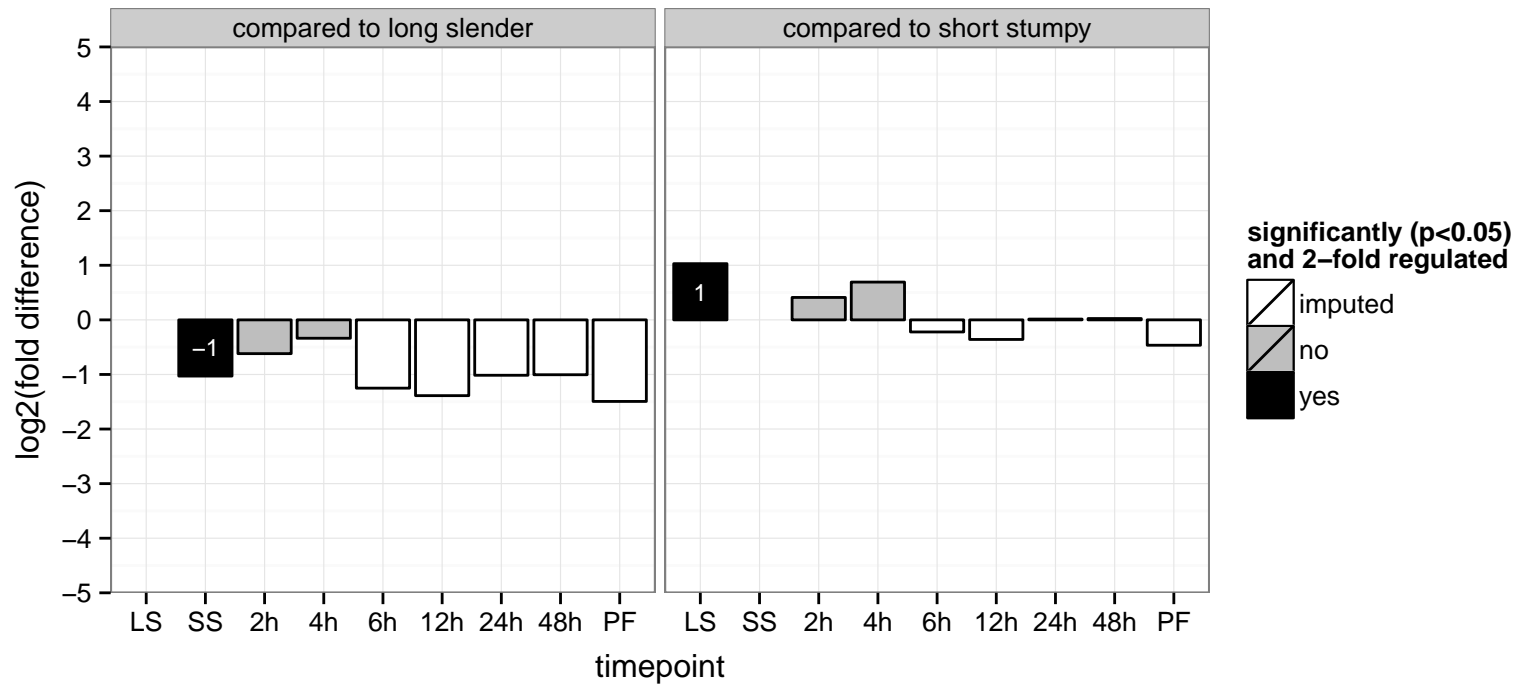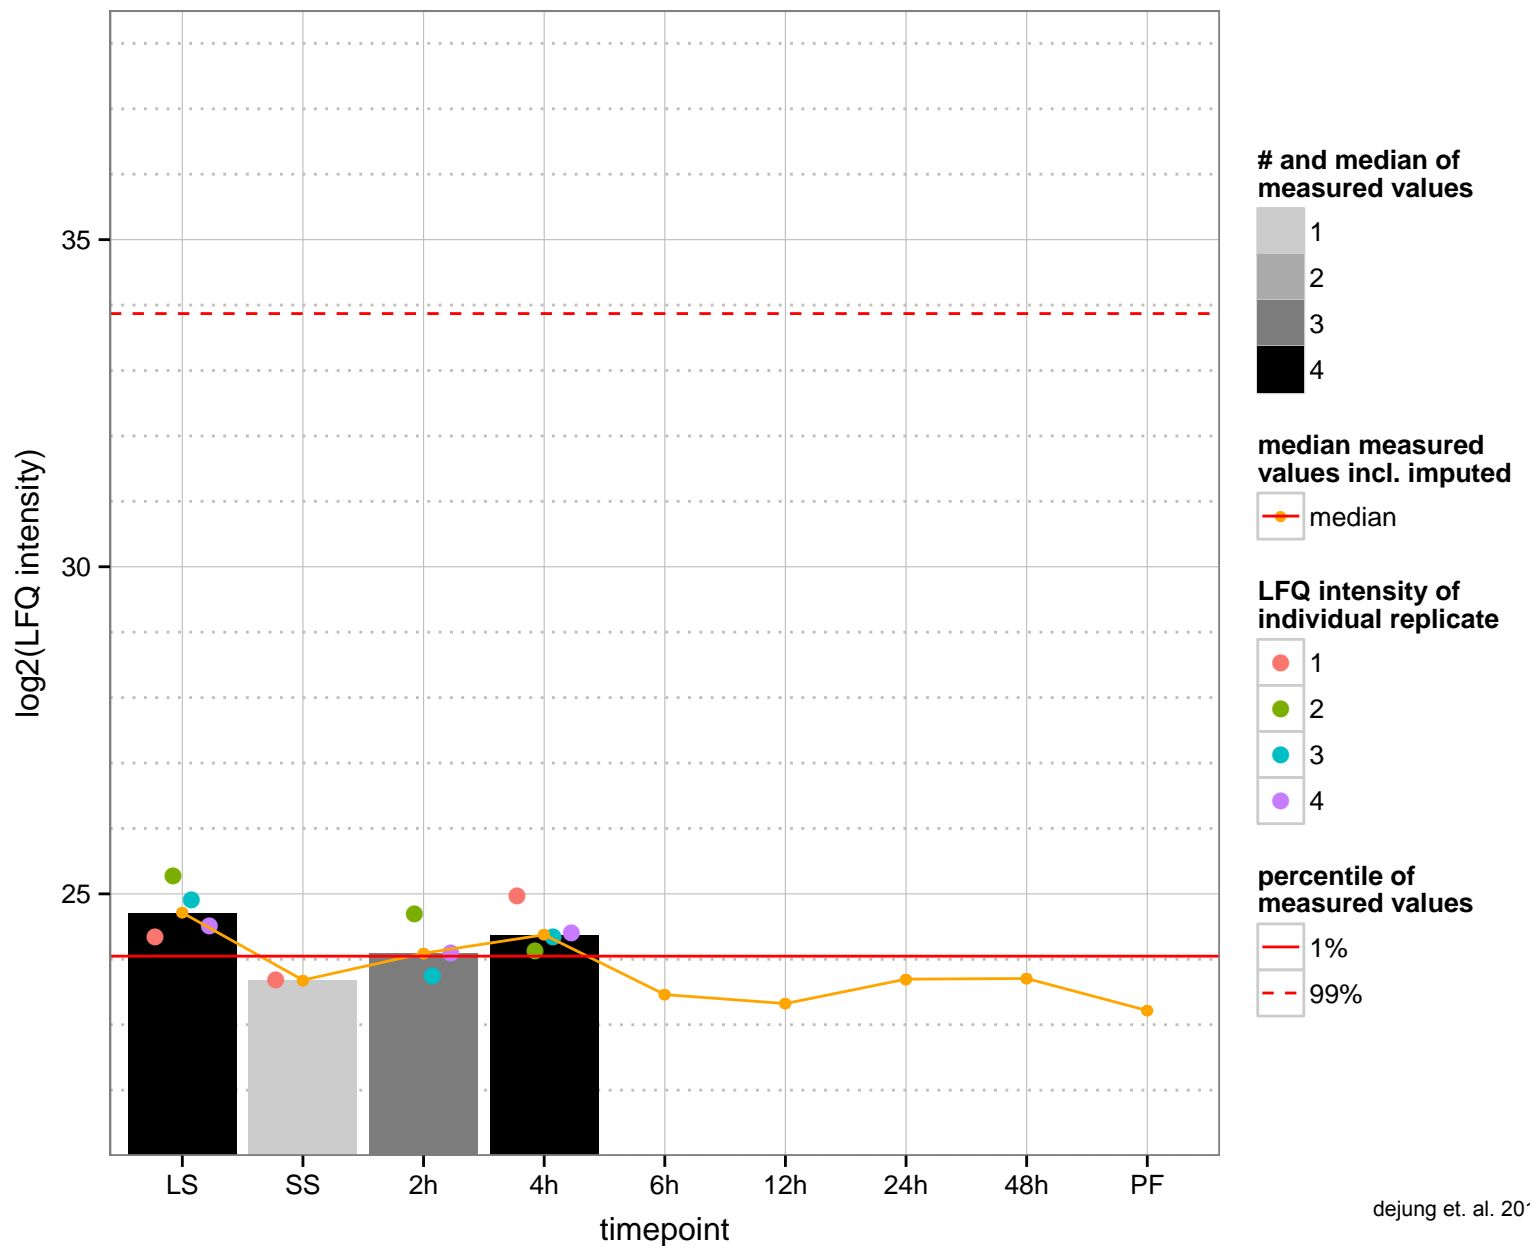

hypothetical protein, conserved  
 Tb927.11.7440  
 AGOF: null  
 AGOC: null  
 AGOP: null  
 PGO: null  
 PGOC: null  
 PGOP: ubiquitin-dependent protein catabolic process

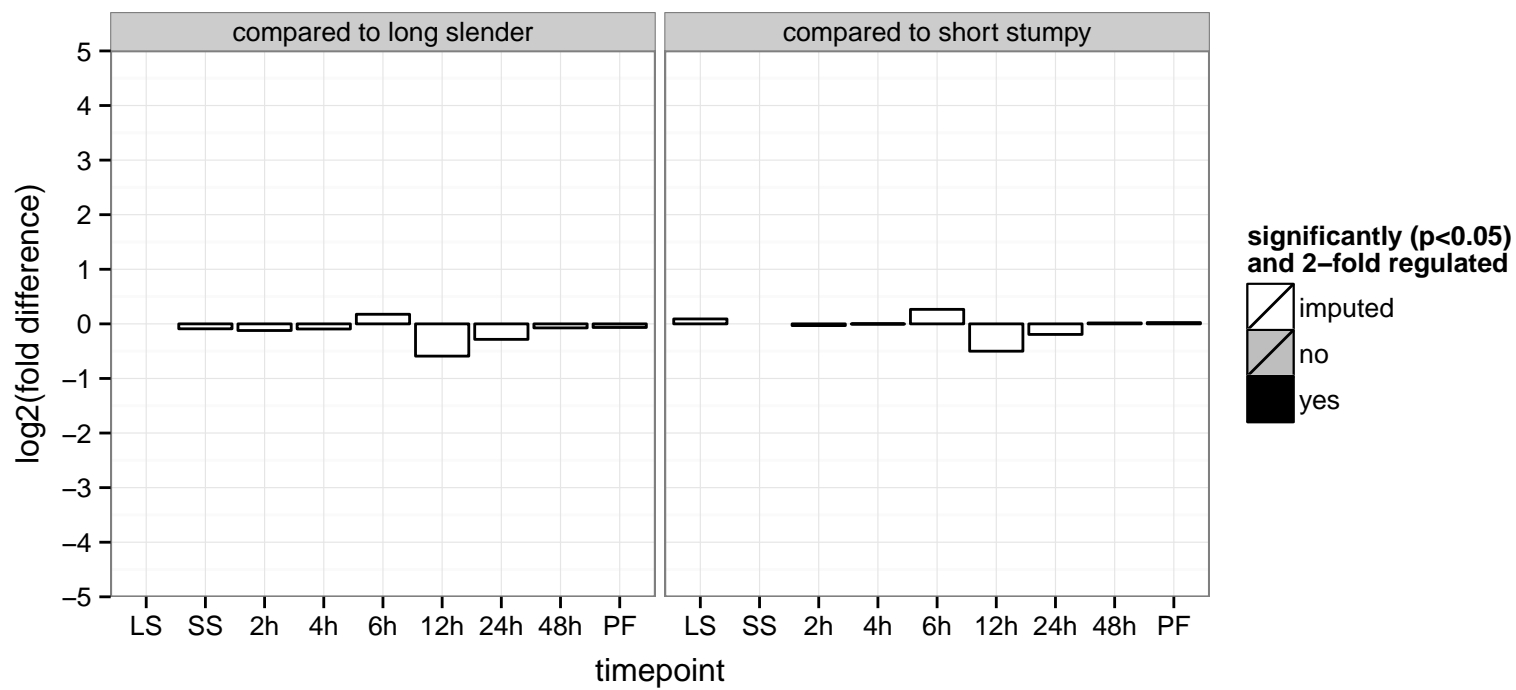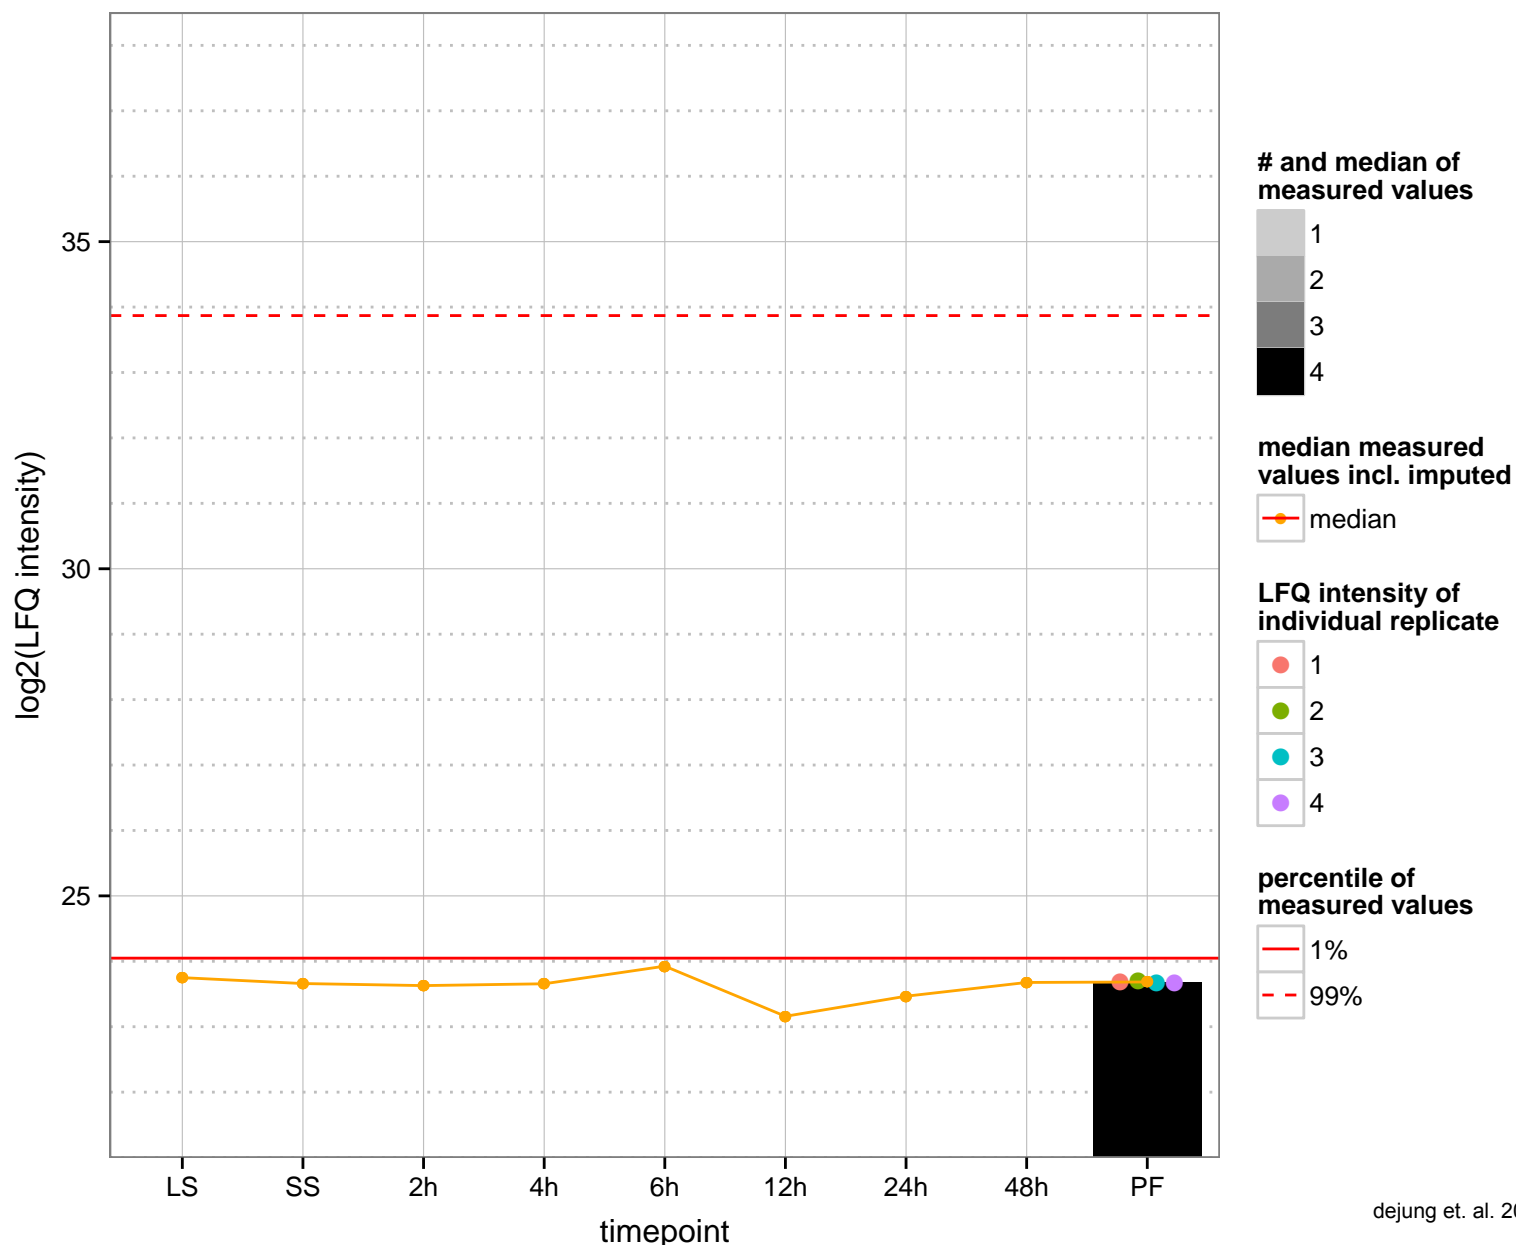



glucose-regulated protein 78, putative, luminal binding protein 1 (BiP)

Tb927.11.7510;Tb927.11.7460

AGOF: ATP binding

AGOC: endoplasmic reticulum

AGOP: SRP-dependent cotranslational protein targeting to membrane, protein folding

PGOF: null

PGOC: null

PGOP: null

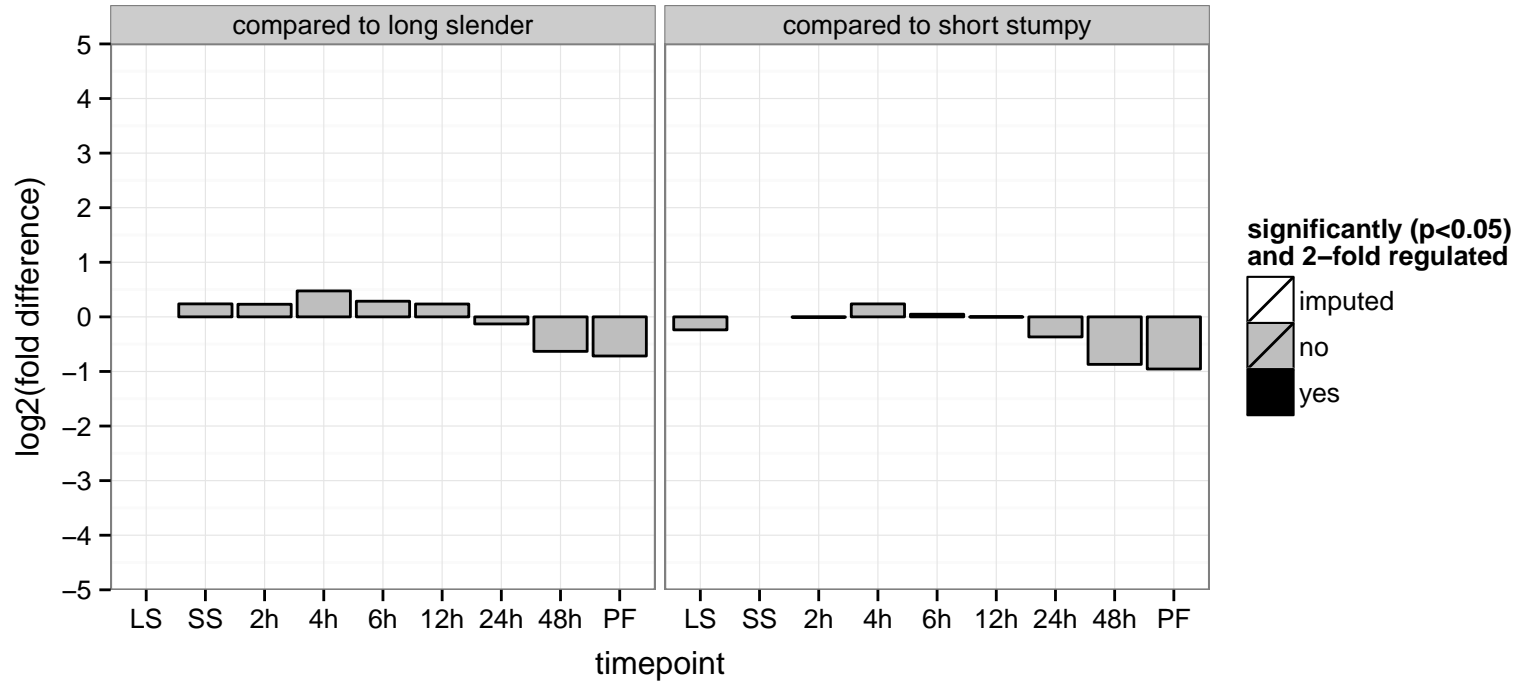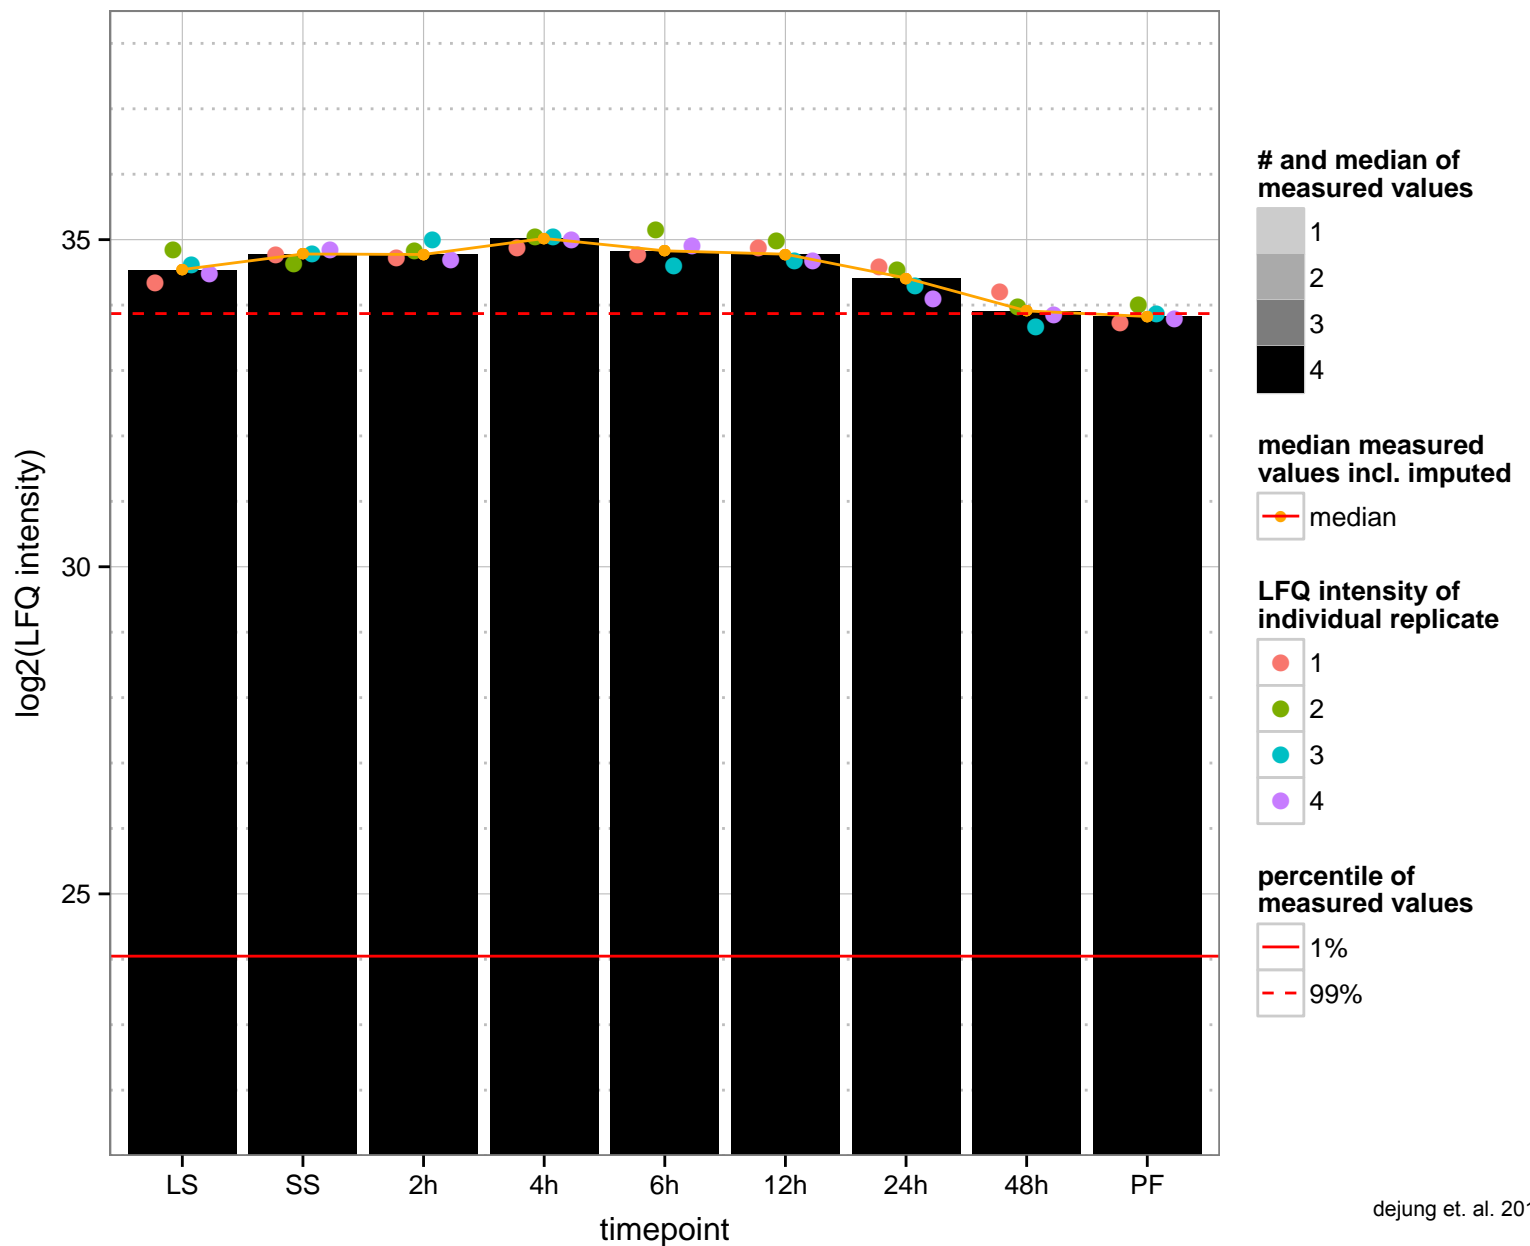

hypothetical protein, conserved  
 Tb927.11.7470  
 AGOF: null  
 AGOC: null  
 AGOP: null  
 PGO: null  
 PGOC: null  
 PGOP: null

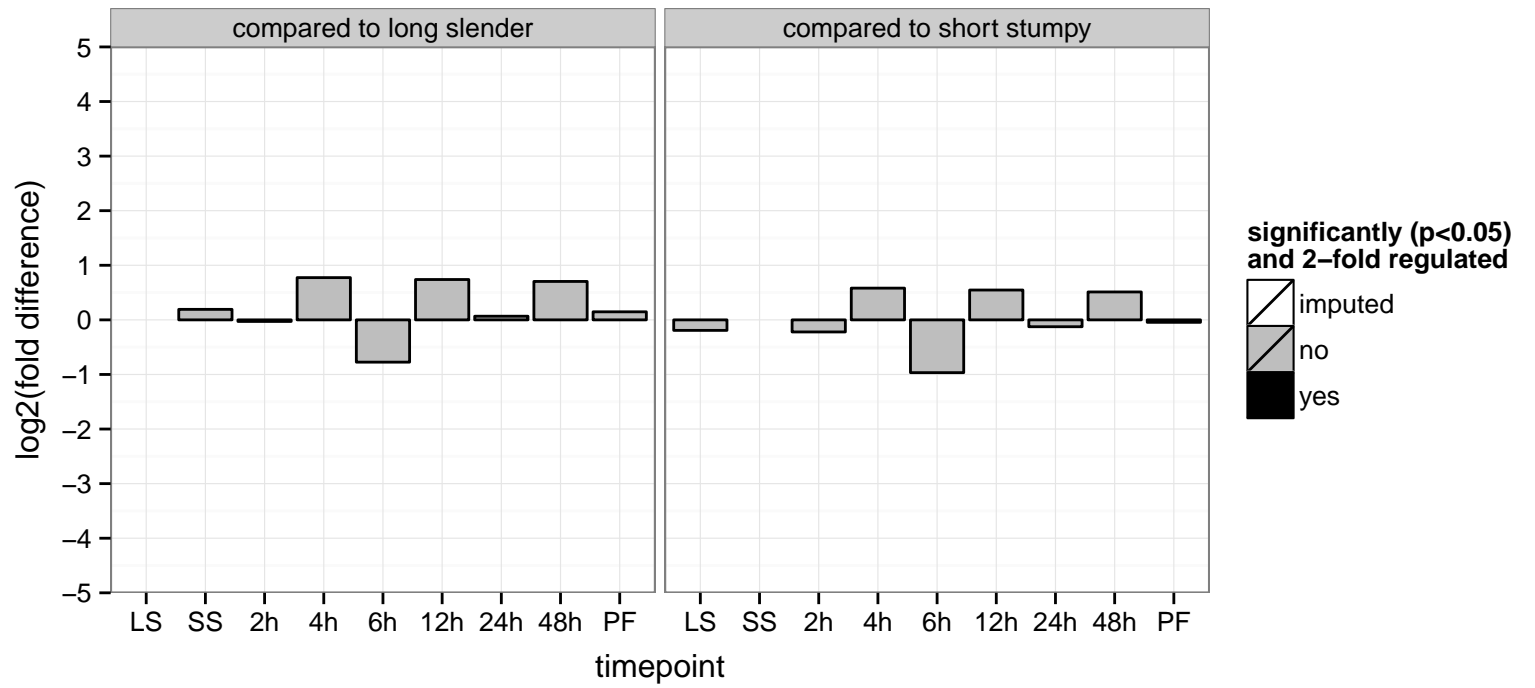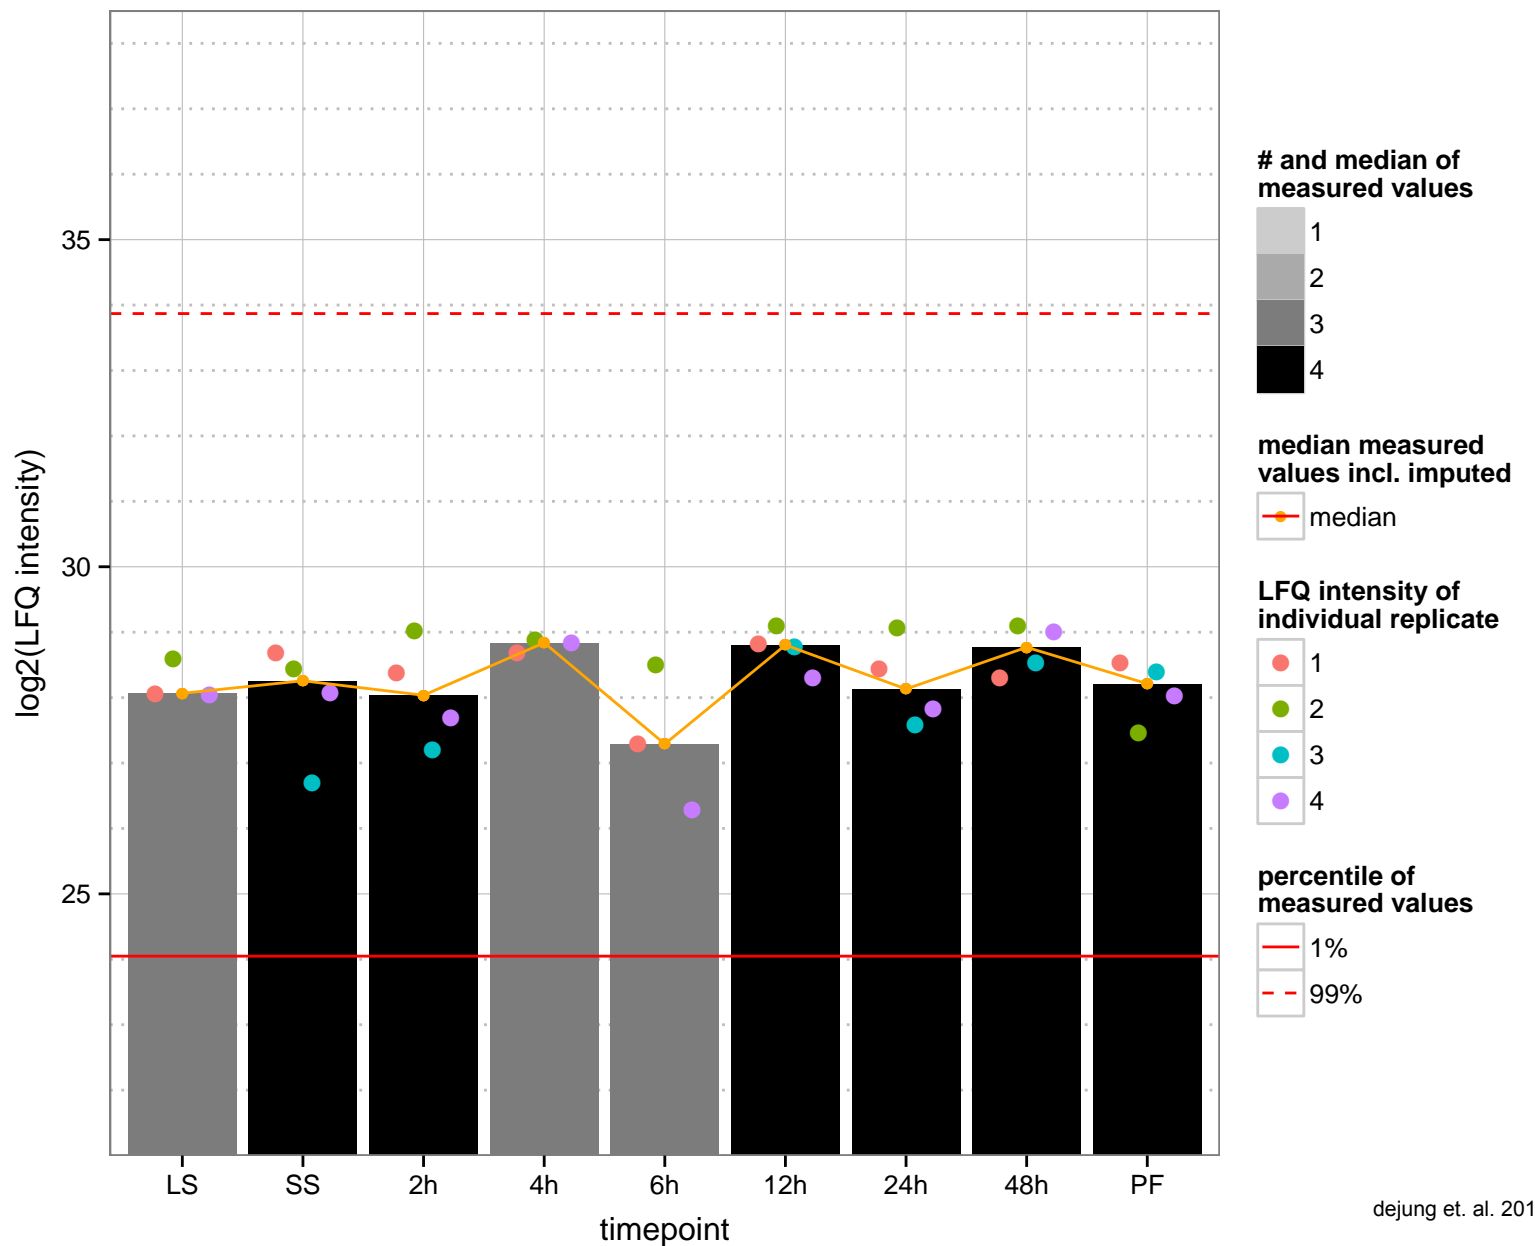

long-chain-fatty-acid-CoA ligase, putative  
 Tb927.11.7530  
 AGOF: catalytic activity  
 AGOC: null  
 AGOP: metabolic process  
 PGO: catalytic activity  
 PGOC: null  
 PGOP: metabolic process

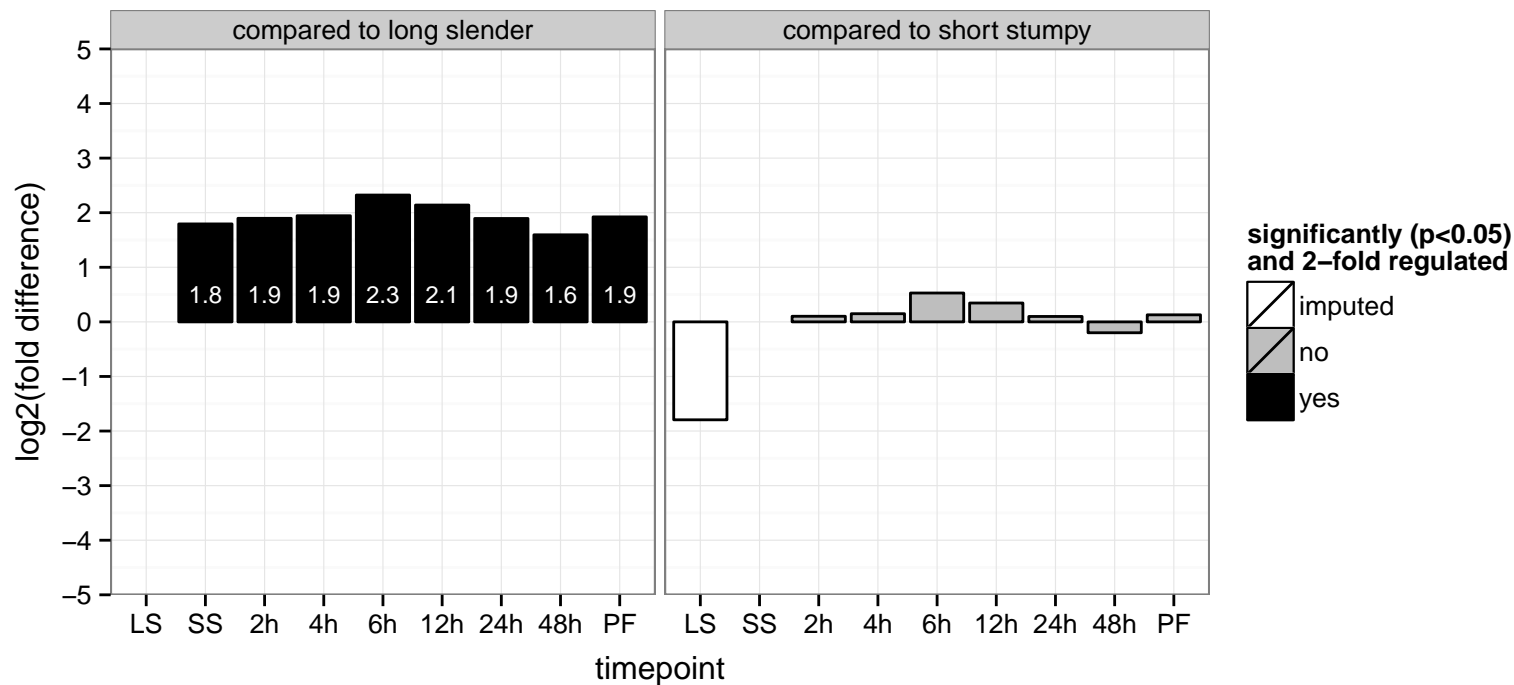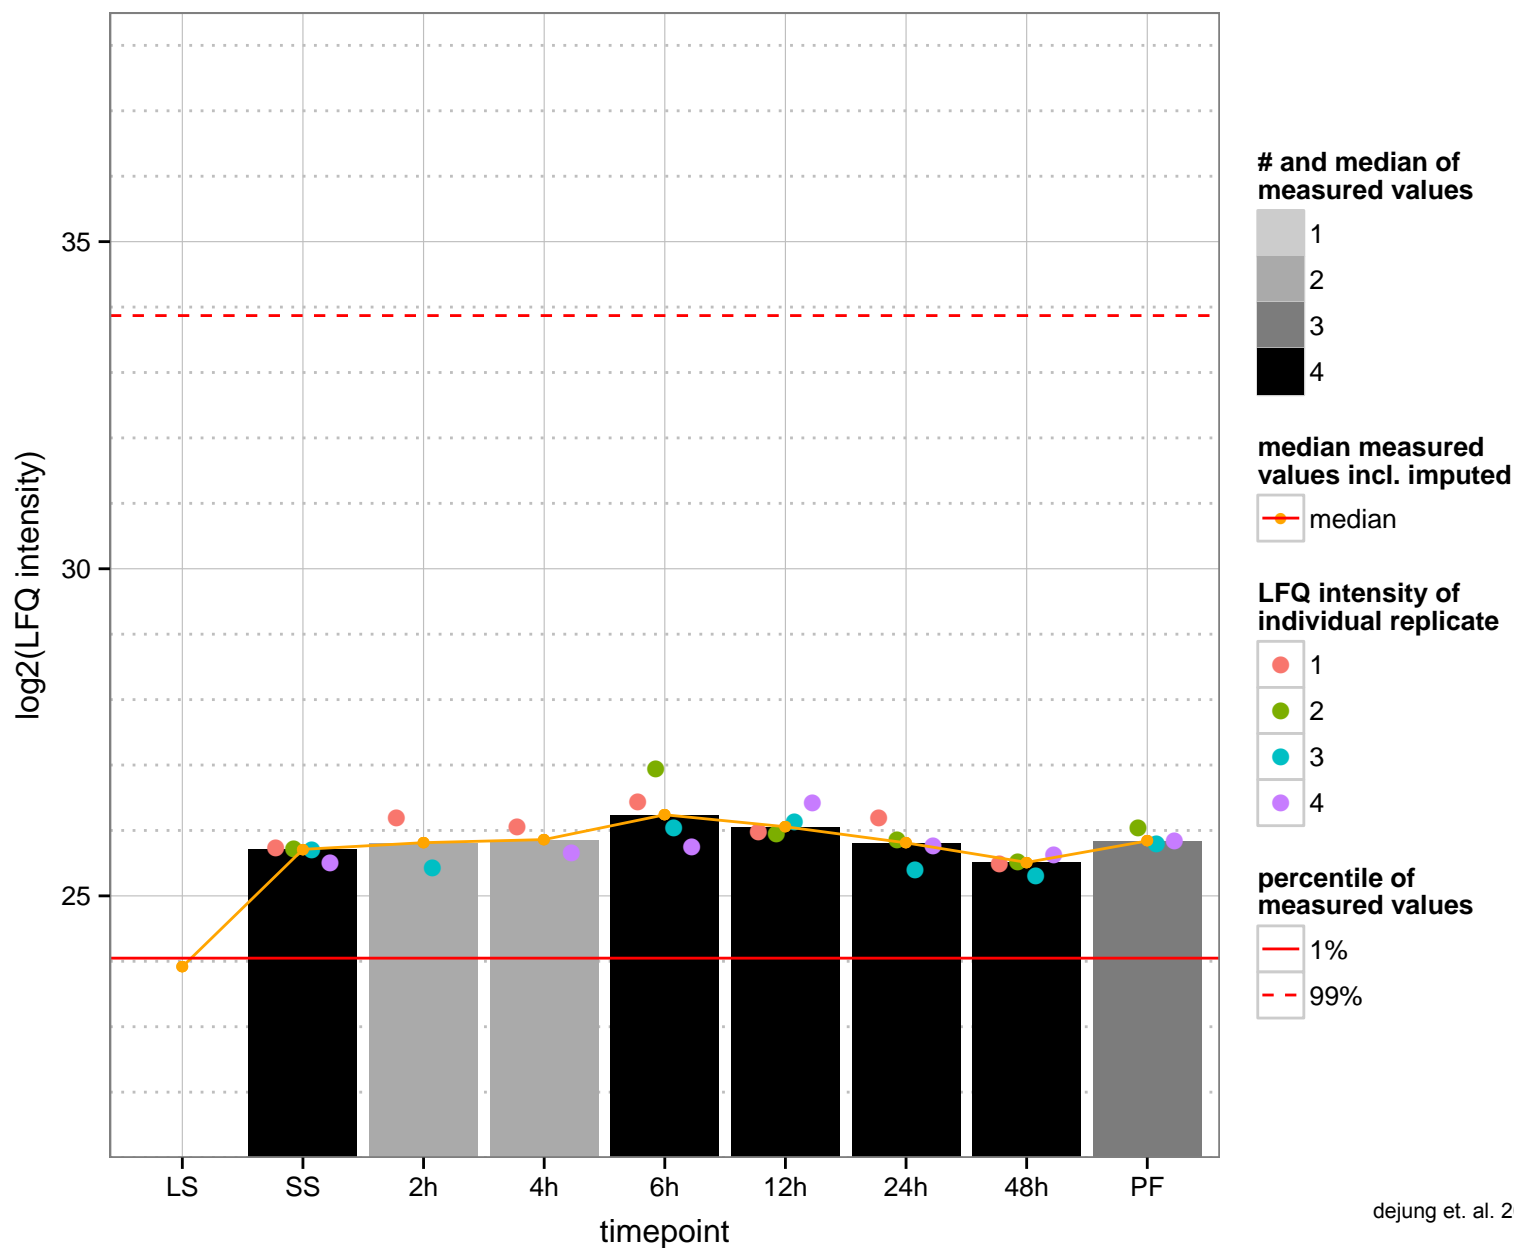

predicted WD40 repeat protein  
 Tb927.11.7560  
 AGOF: null  
 AGOC: null  
 AGOP: ciliary or flagellar motility  
 PGO: protein binding  
 PGOC: null  
 PGOP: null

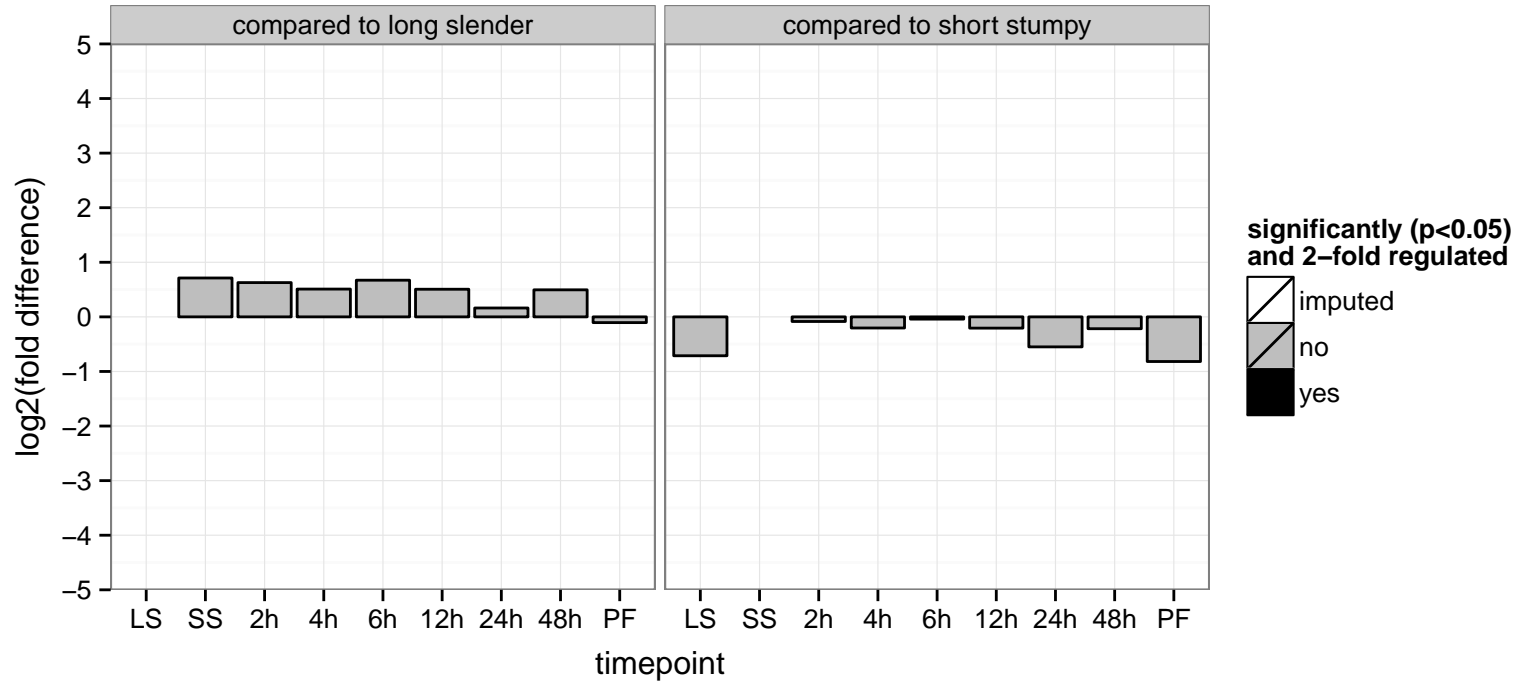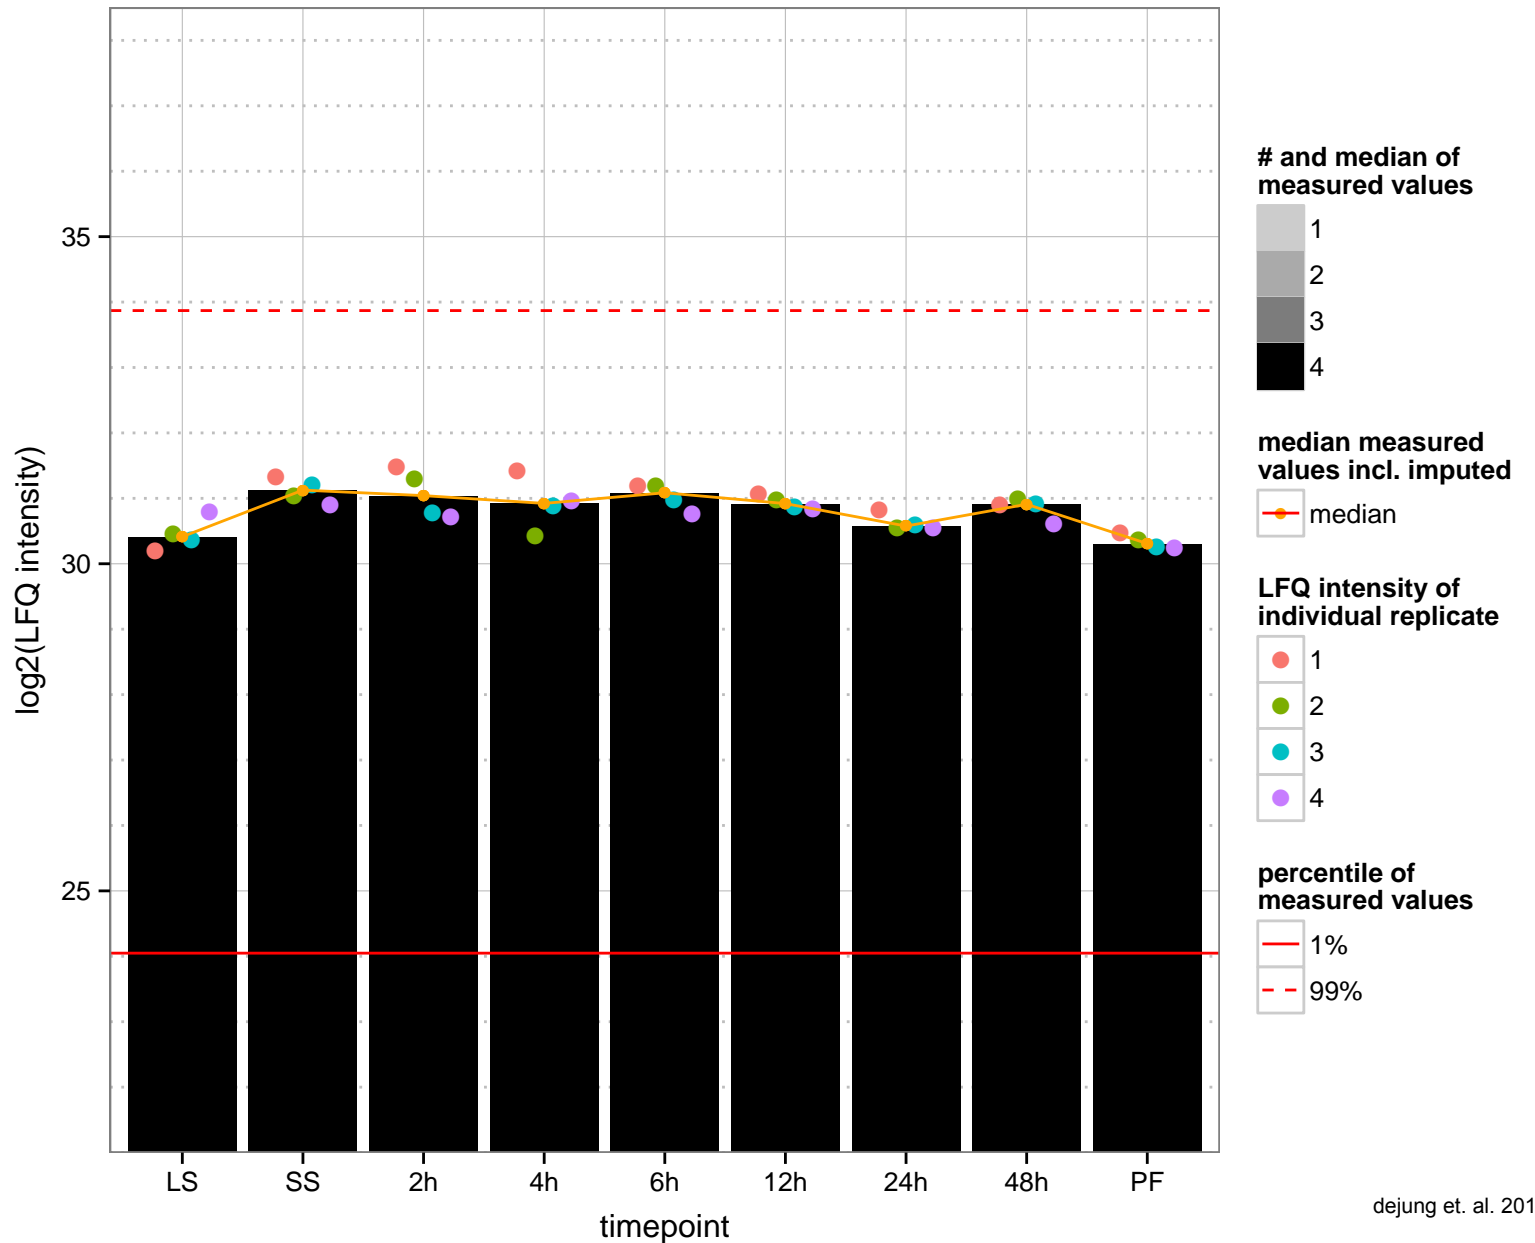

protein phosphatase 2C, putative

Tb927.11.760

AGOF: protein serine/threonine phosphatase activity

AGOC: protein serine/threonine phosphatase complex

AGOP: modulation of development of symbiont involved in interaction with host, protein dephosphorylation, quorum sensing in

PGOF: catalytic activity

PGOC: null

PGOP: null

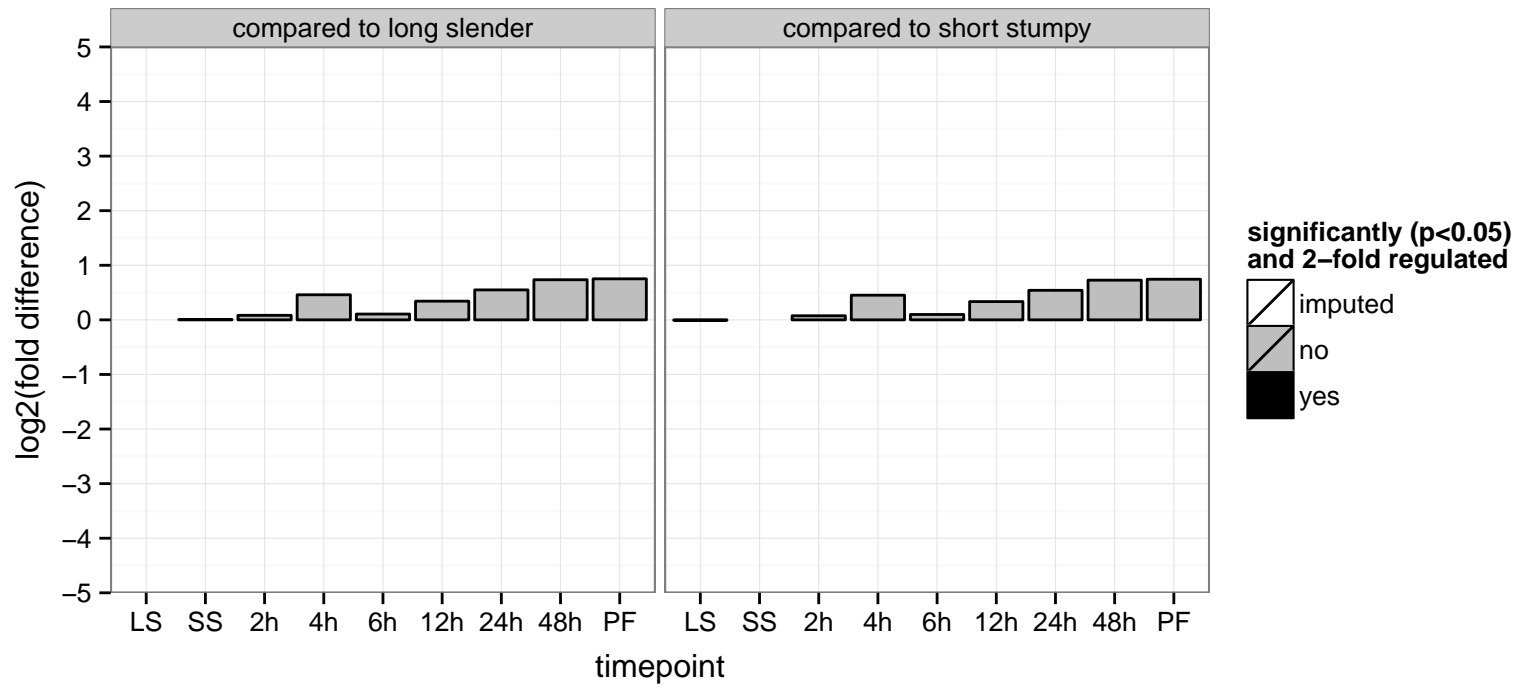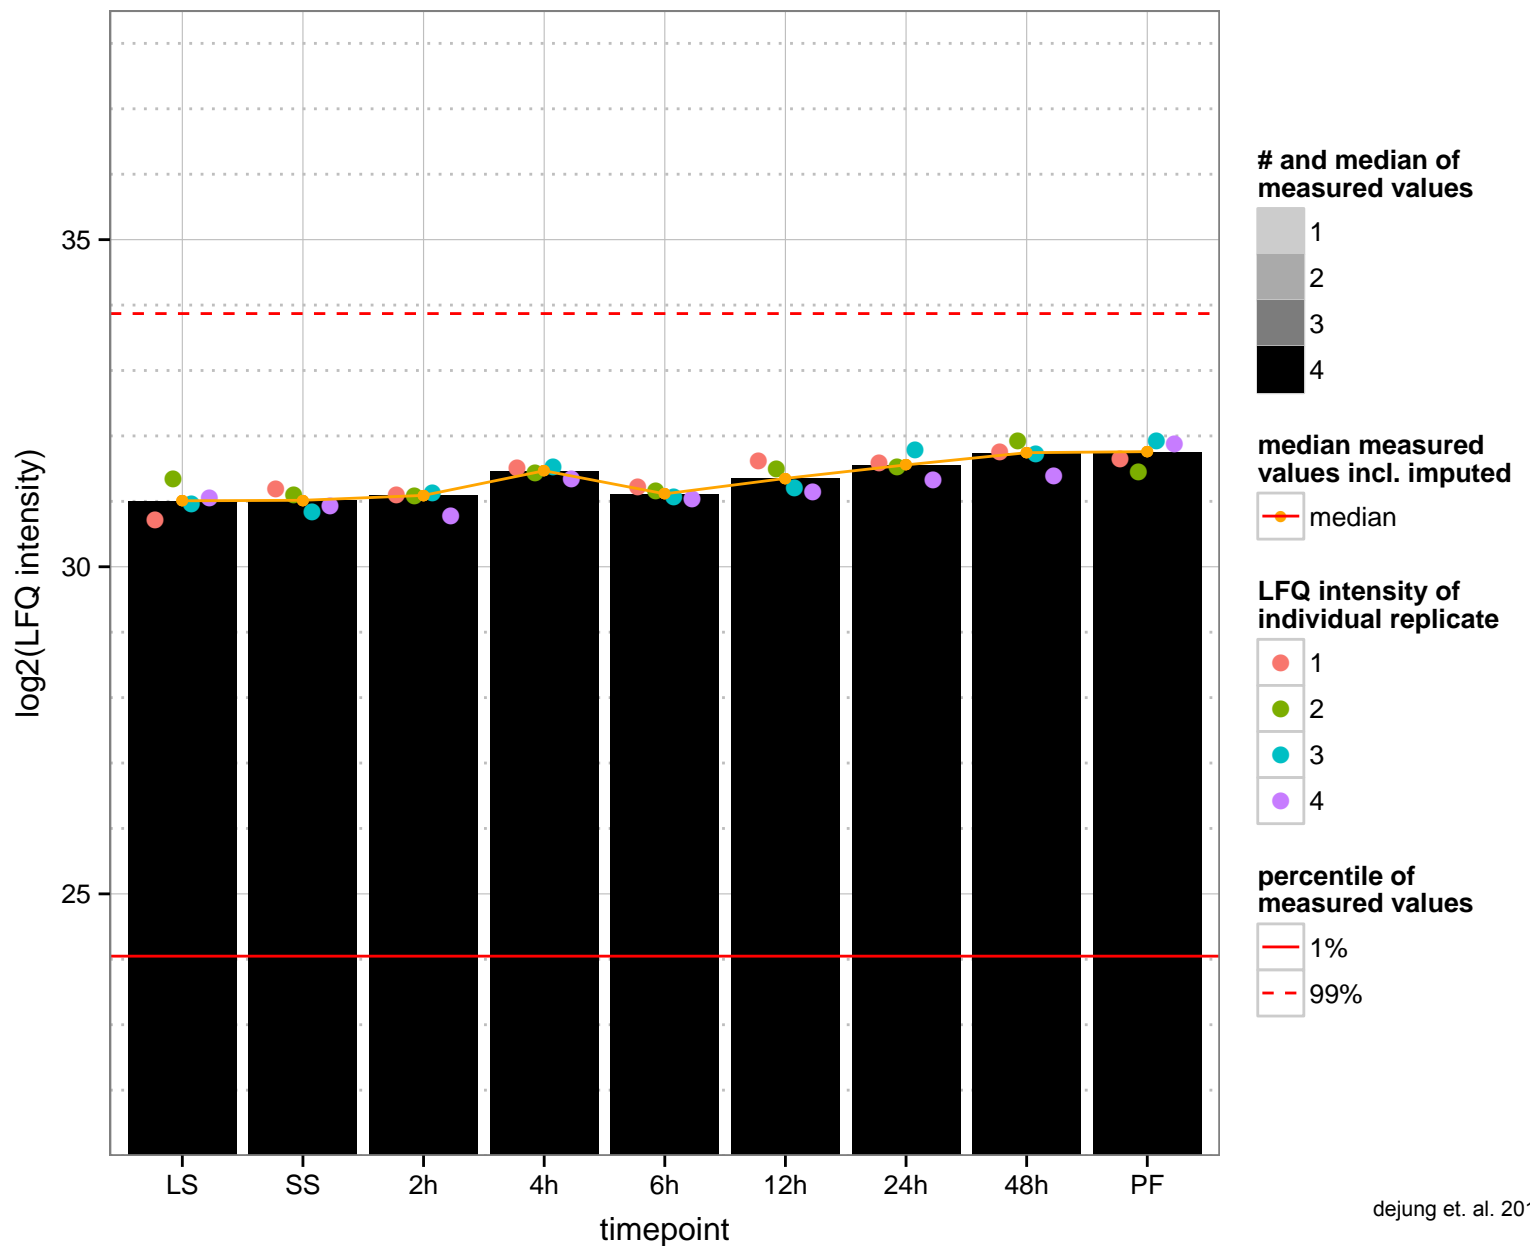

dynein light chain, putative, dynein Tctex2 family  
 Tb927.11.7740  
 AGOF: microtubule motor activity  
 AGOC: microtubule associated complex  
 AGOP: microtubule-based process  
 PGO: null  
 PGOC: null  
 PGOP: null

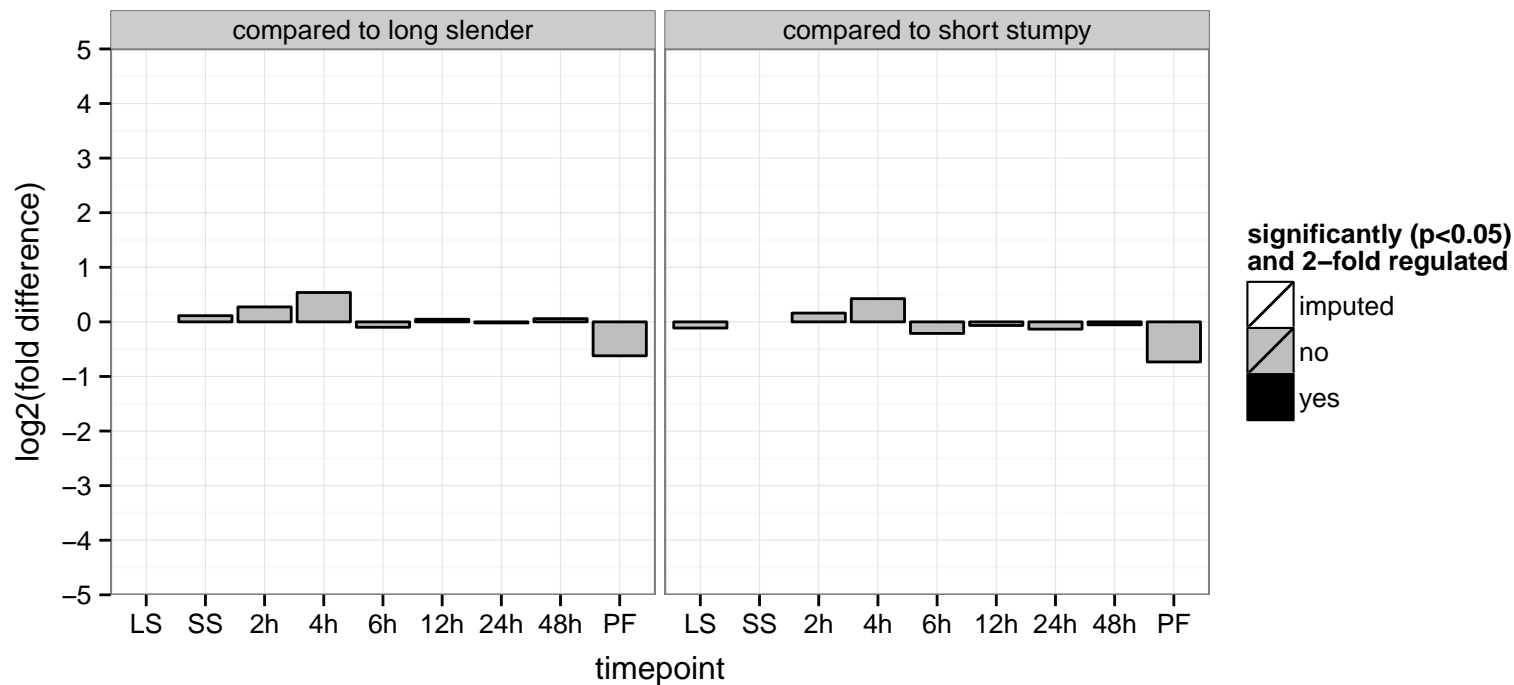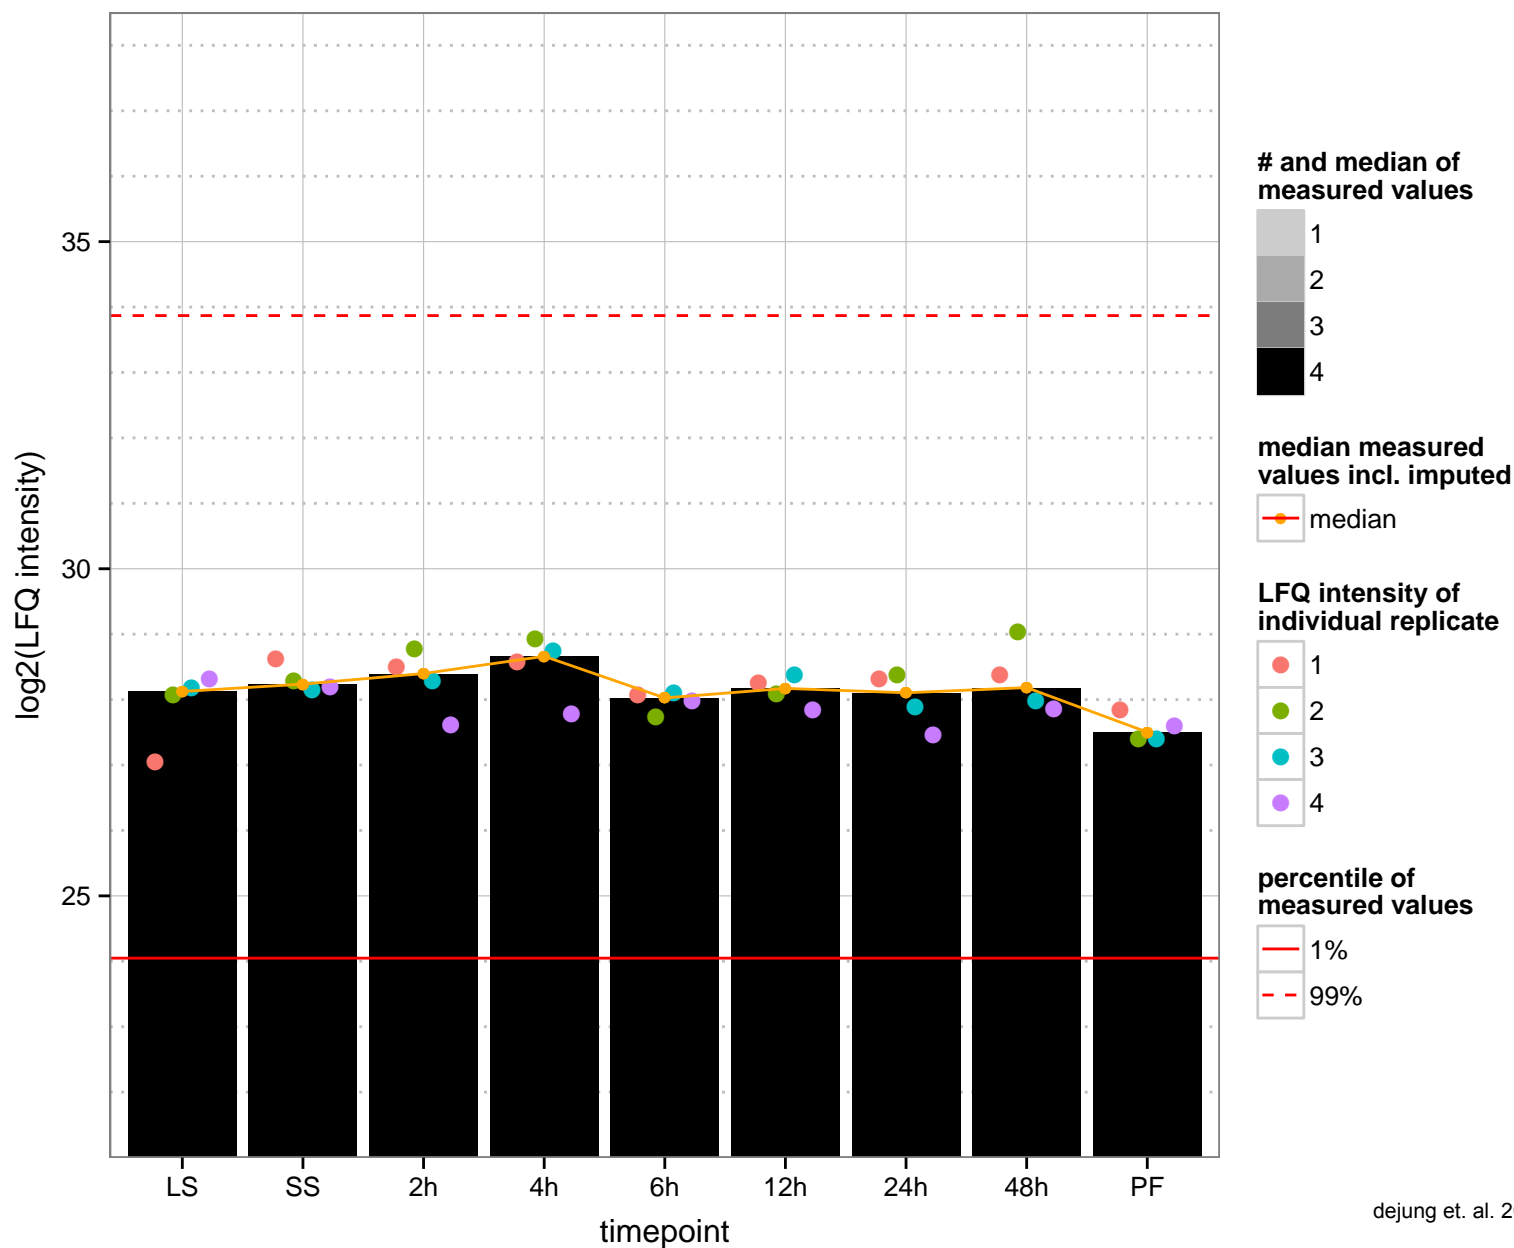

hypothetical protein, conserved  
 Tb927.11.7800  
 AGOF: null  
 AGOC: integral to membrane  
 AGOP: null  
 PGO: null  
 PGOC: null  
 PGOP: null

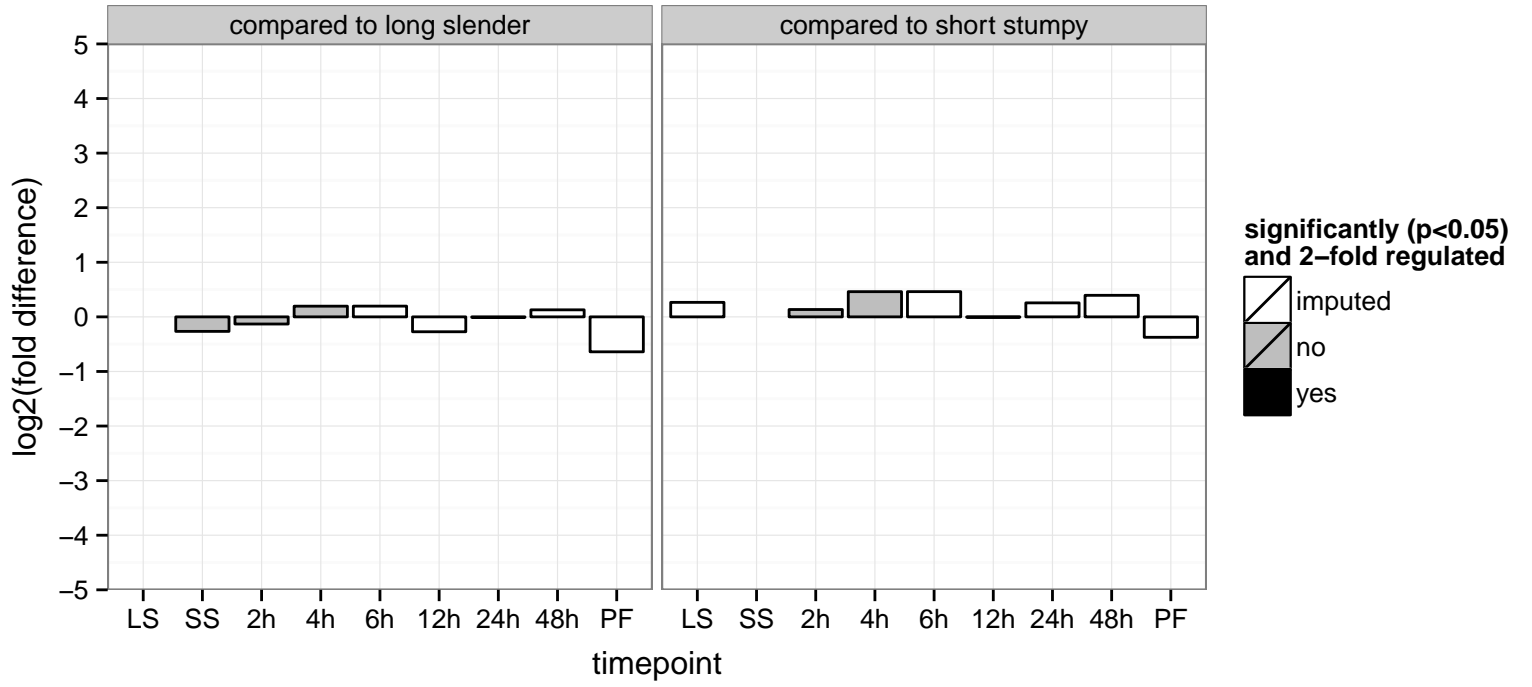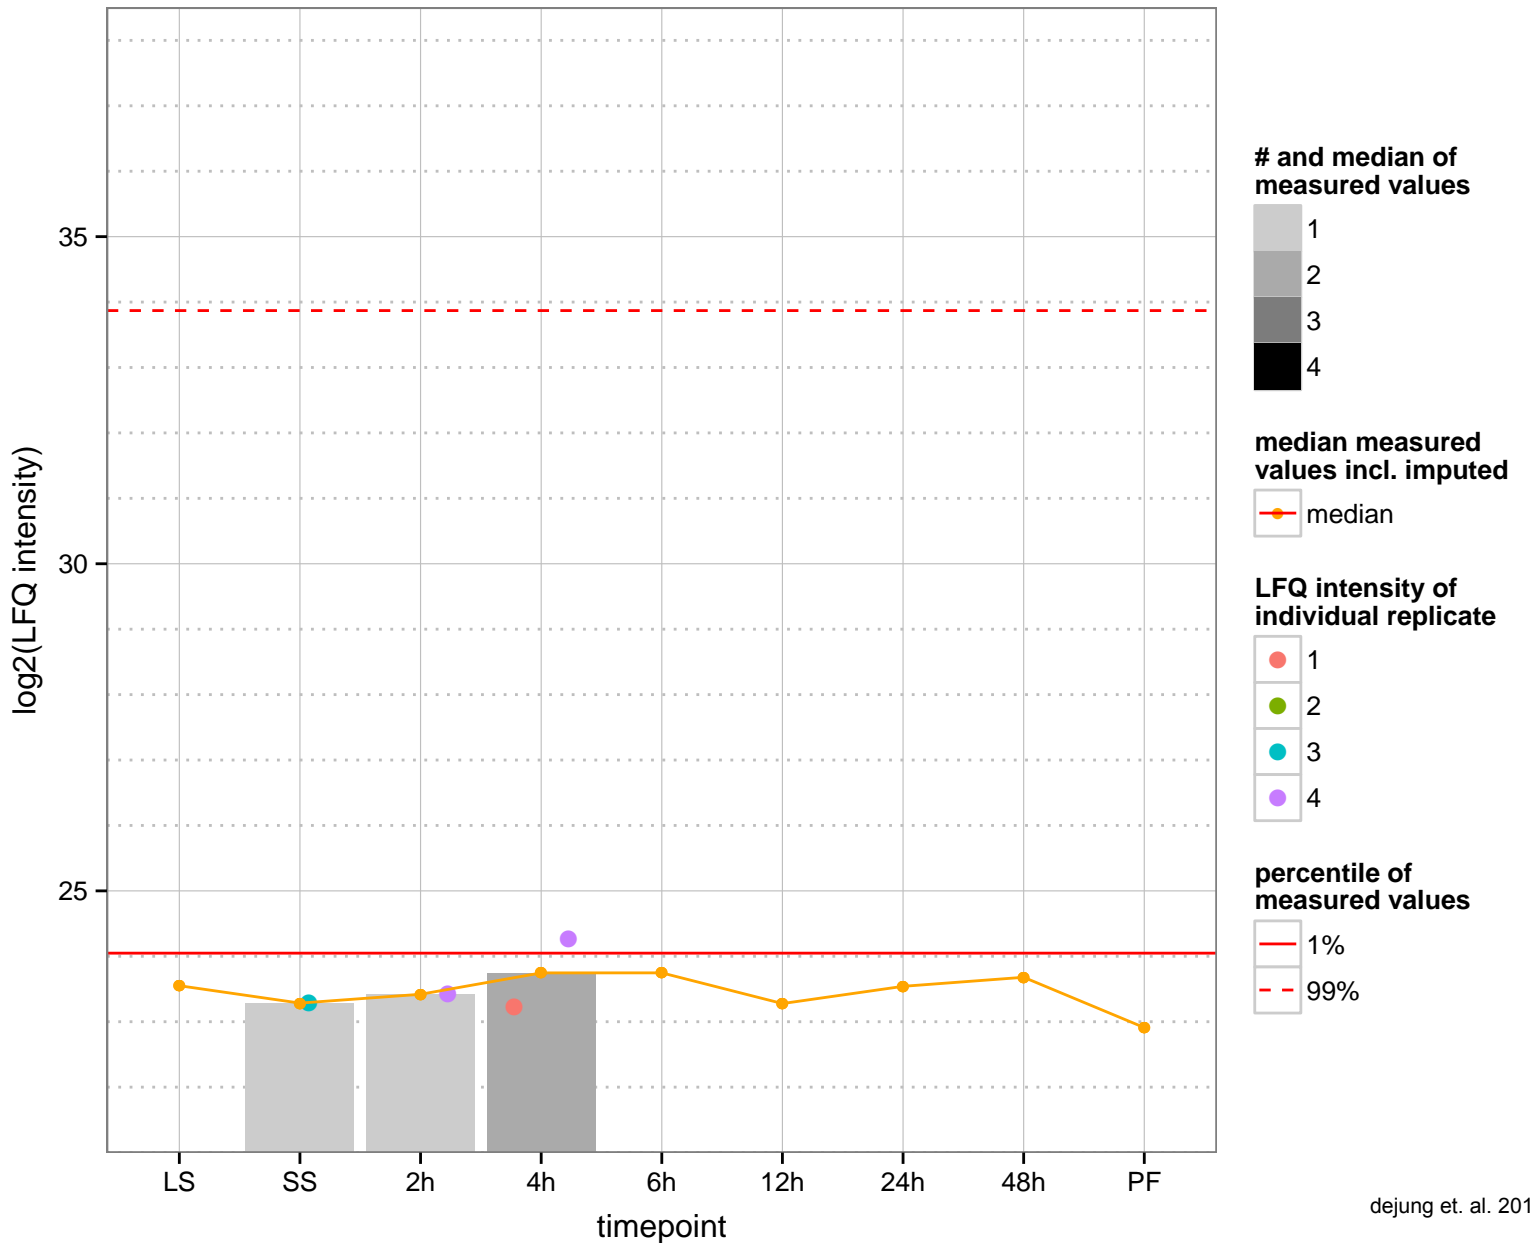

ribonucleoside-diphosphate reductase large chain (RNR1)

Tb927.11.7840

AGOF: ATP binding, ribonucleoside-diphosphate reductase activity, thioredoxin disulfide as acceptor

AGOC: ribonucleoside-diphosphate reductase complex

AGOP: DNA replication, oxidation-reduction process

PGOF: ATP binding, ribonucleoside-diphosphate reductase activity, thioredoxin disulfide as acceptor

PGOC: ribonucleoside-diphosphate reductase complex

PGOP: DNA replication, oxidation-reduction process

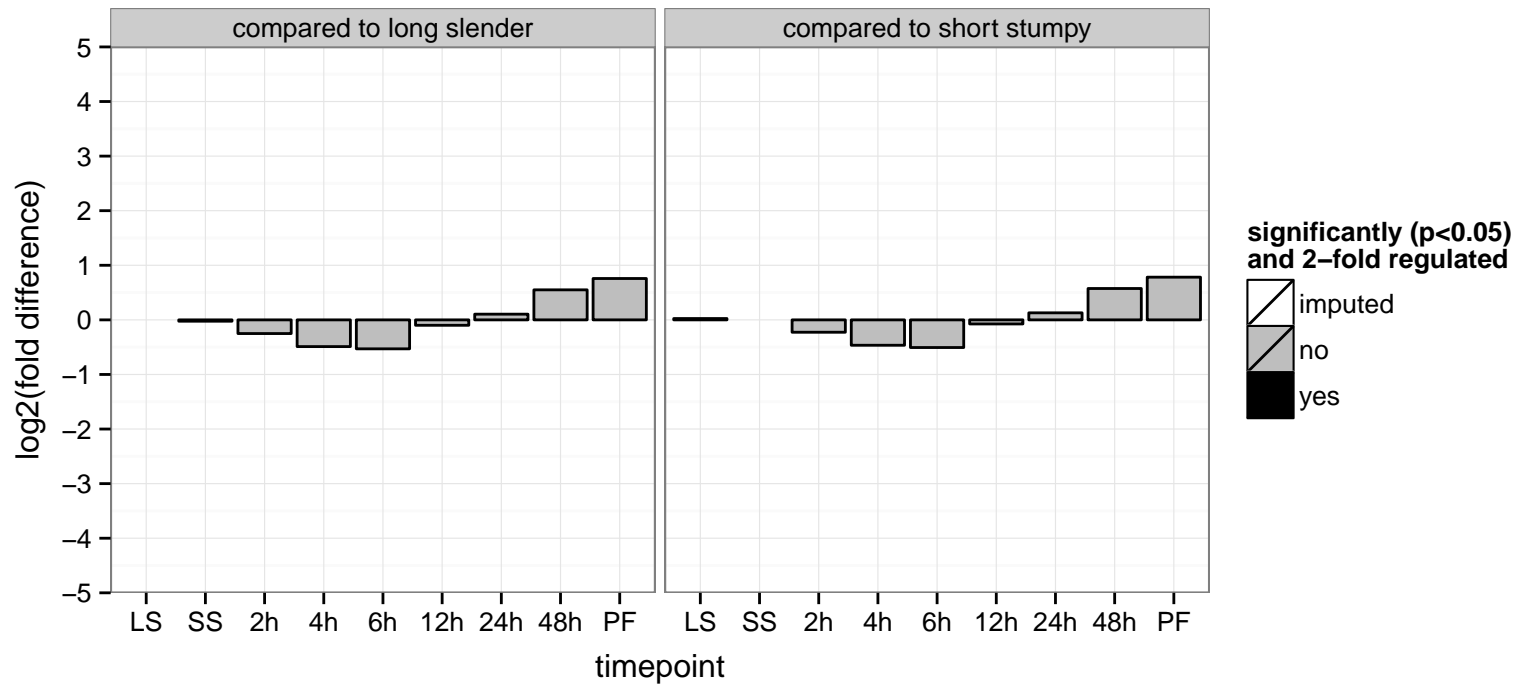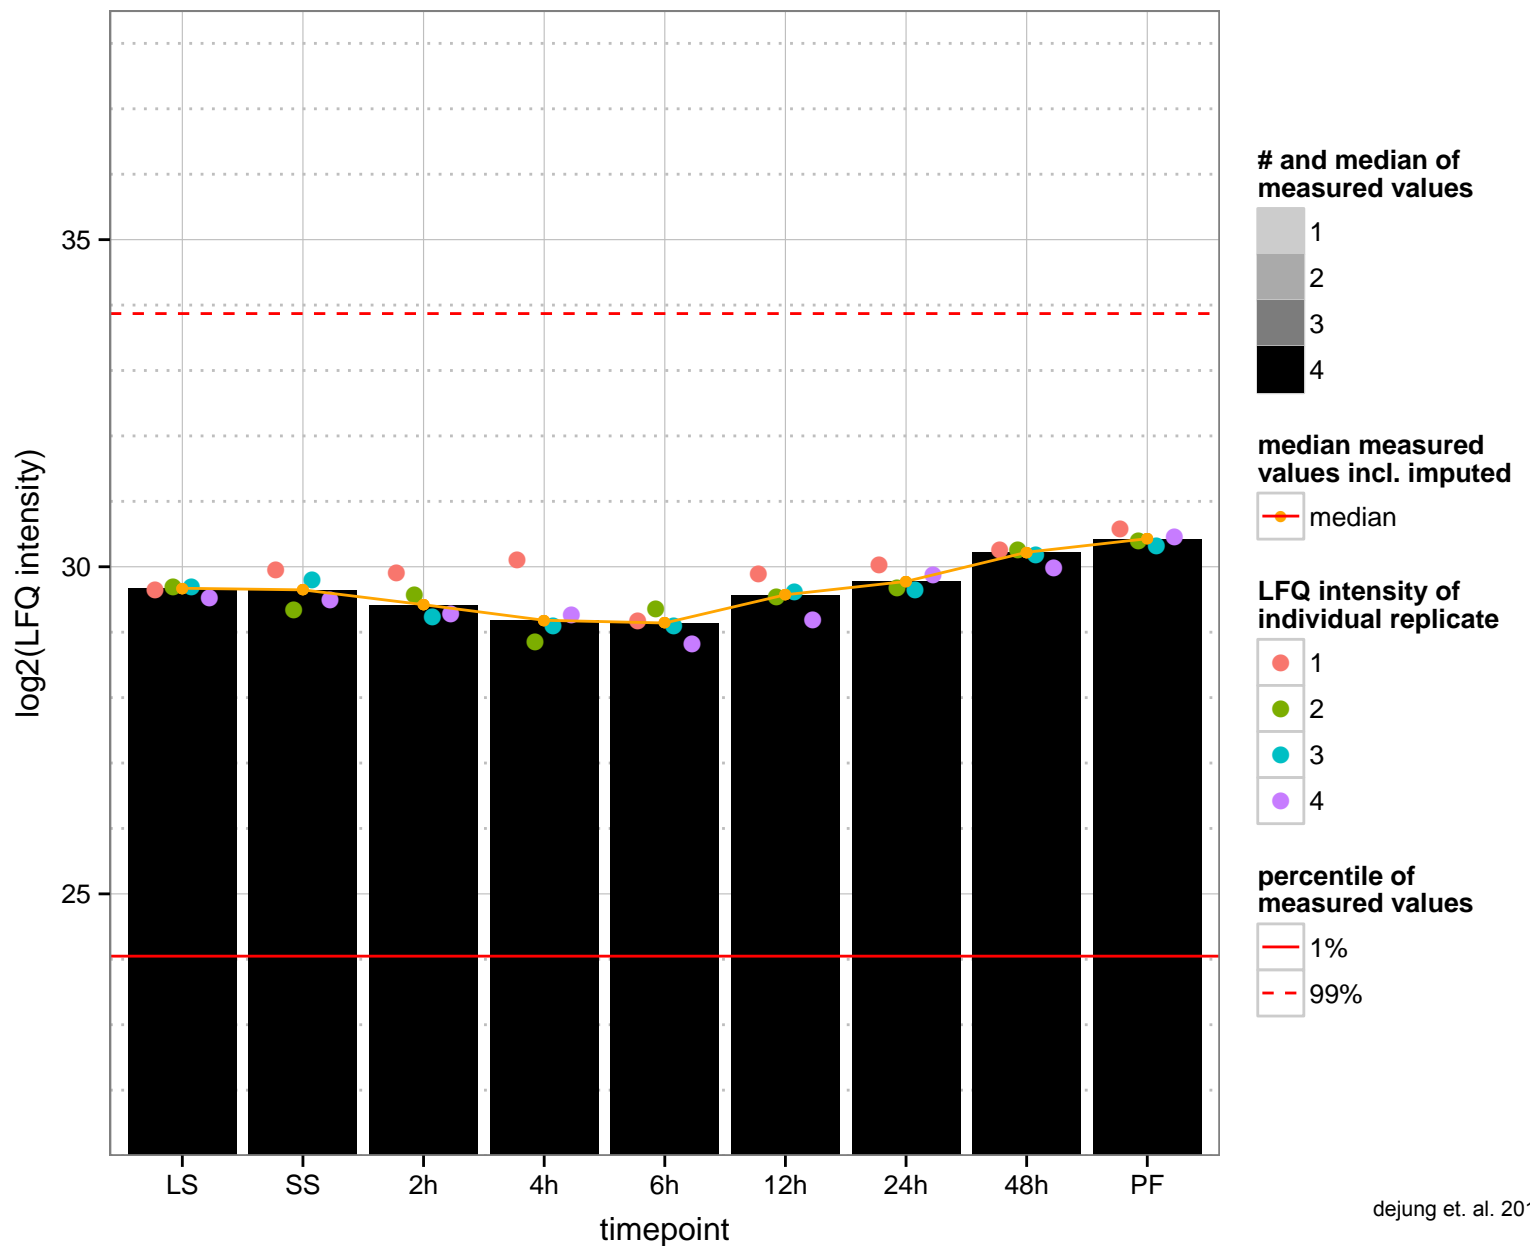



hypothetical protein, conserved  
 Tb927.11.7850  
 AGOF: null  
 AGOC: null  
 AGOP: null  
 PGOF: null  
 PGOE: null  
 PGOP: null

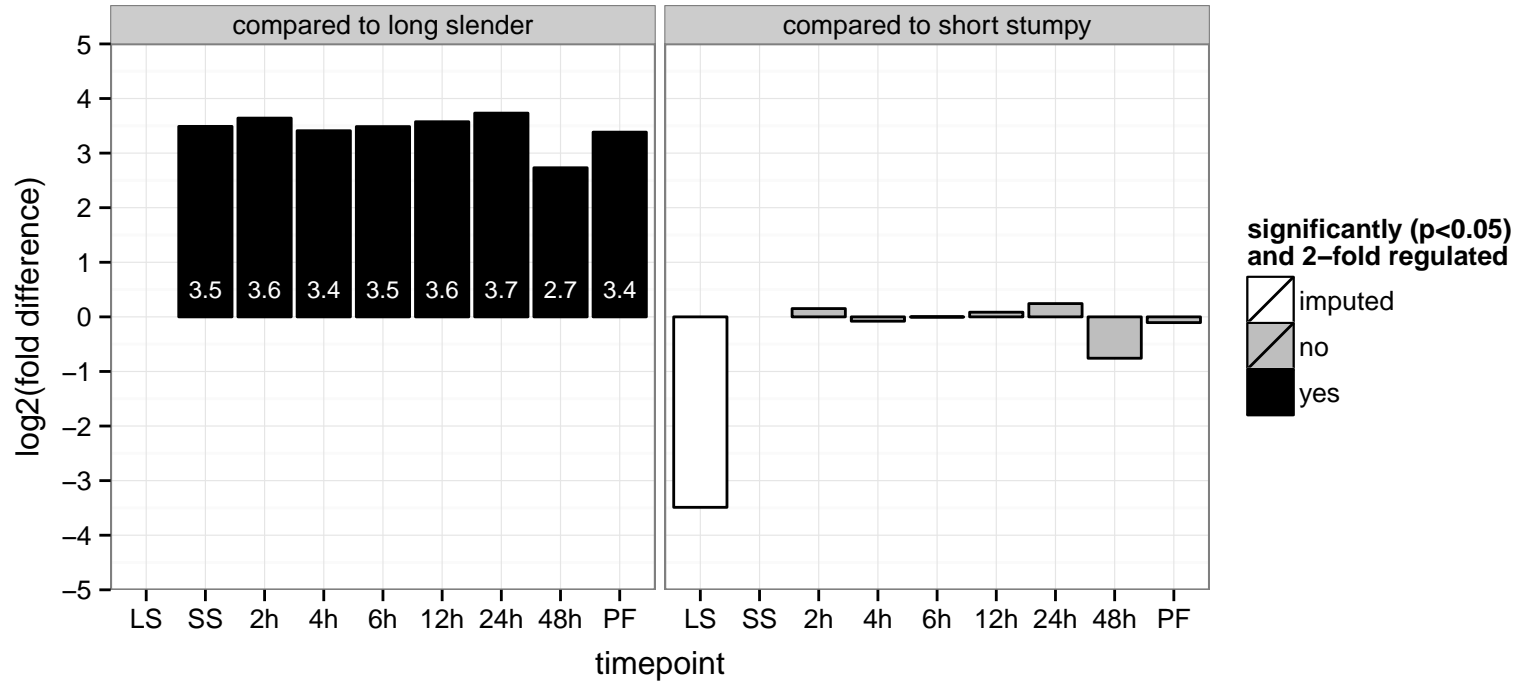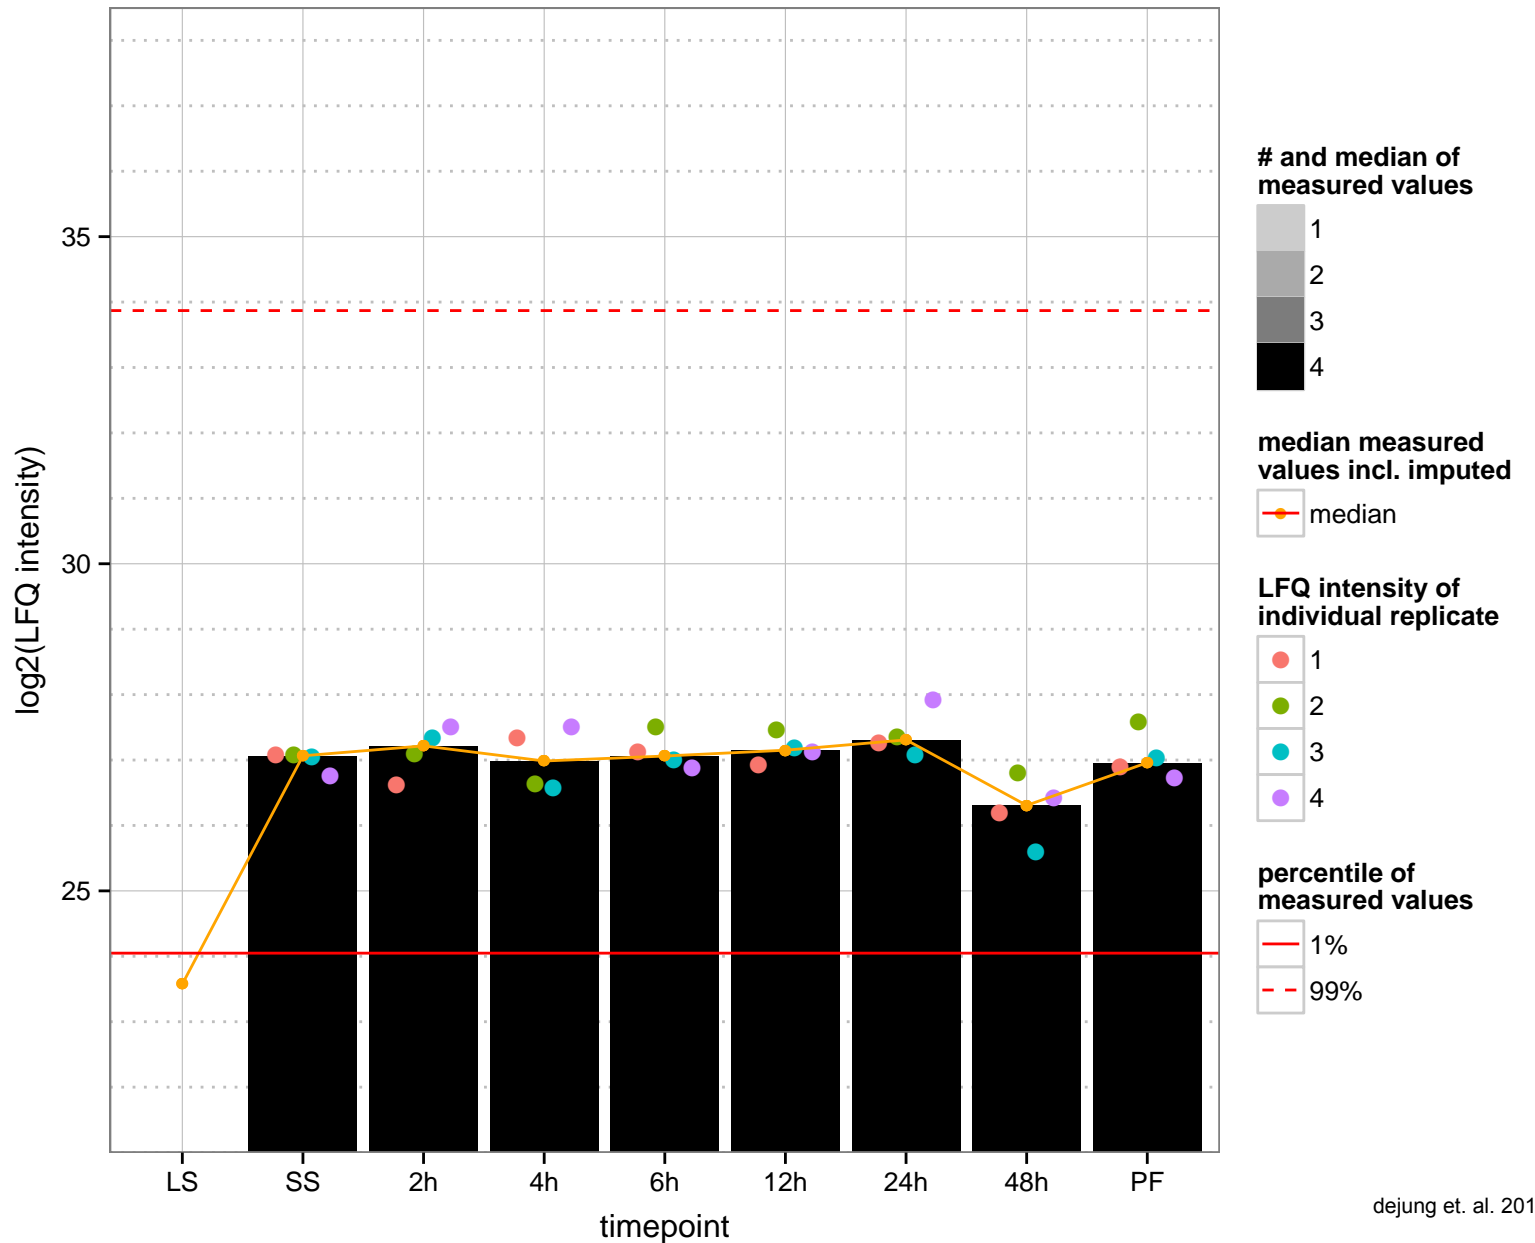

zinc finger CCCH domain containing protein 44 (ZC3H44)  
 Tb927.11.7890  
 AGOF: RNA binding  
 AGOC: null  
 AGOP: null  
 PGOF: nucleic acid binding, zinc ion binding  
 PGO: null  
 PGOP: null

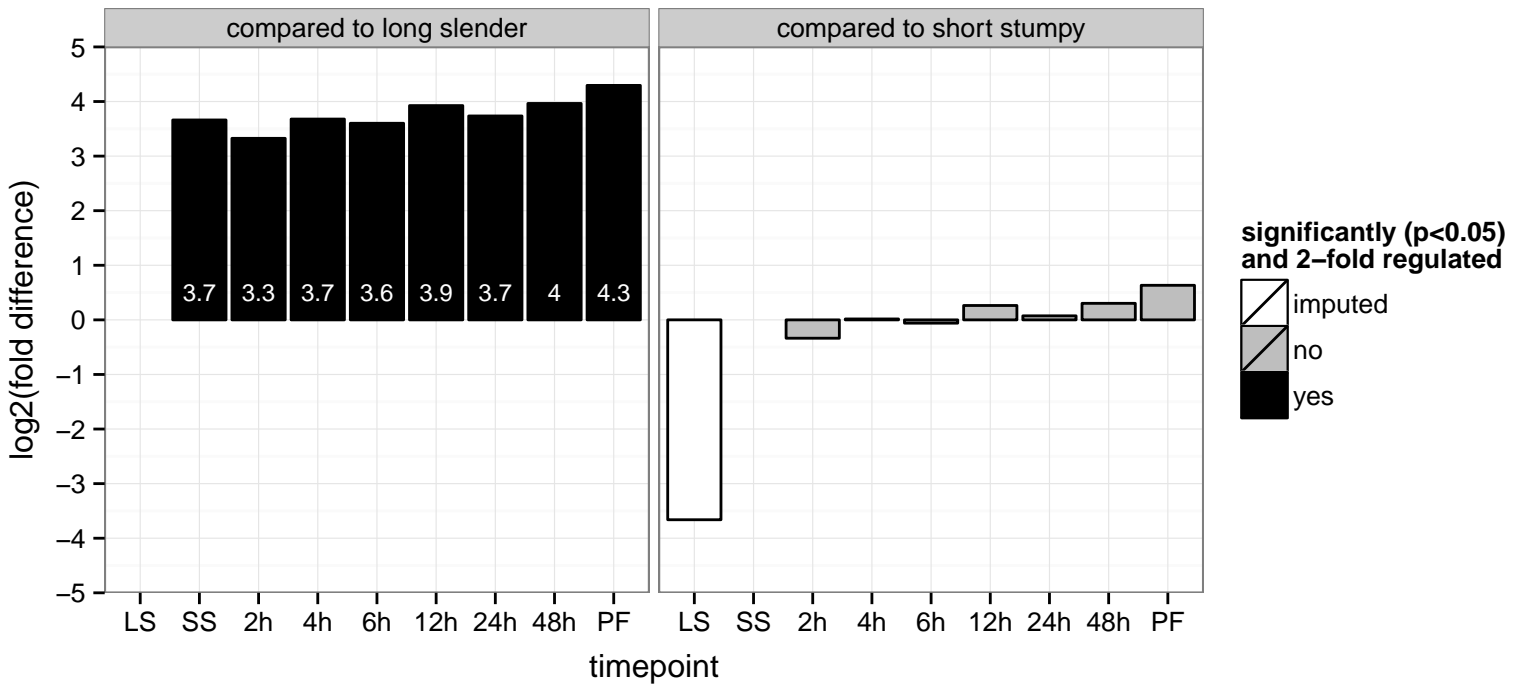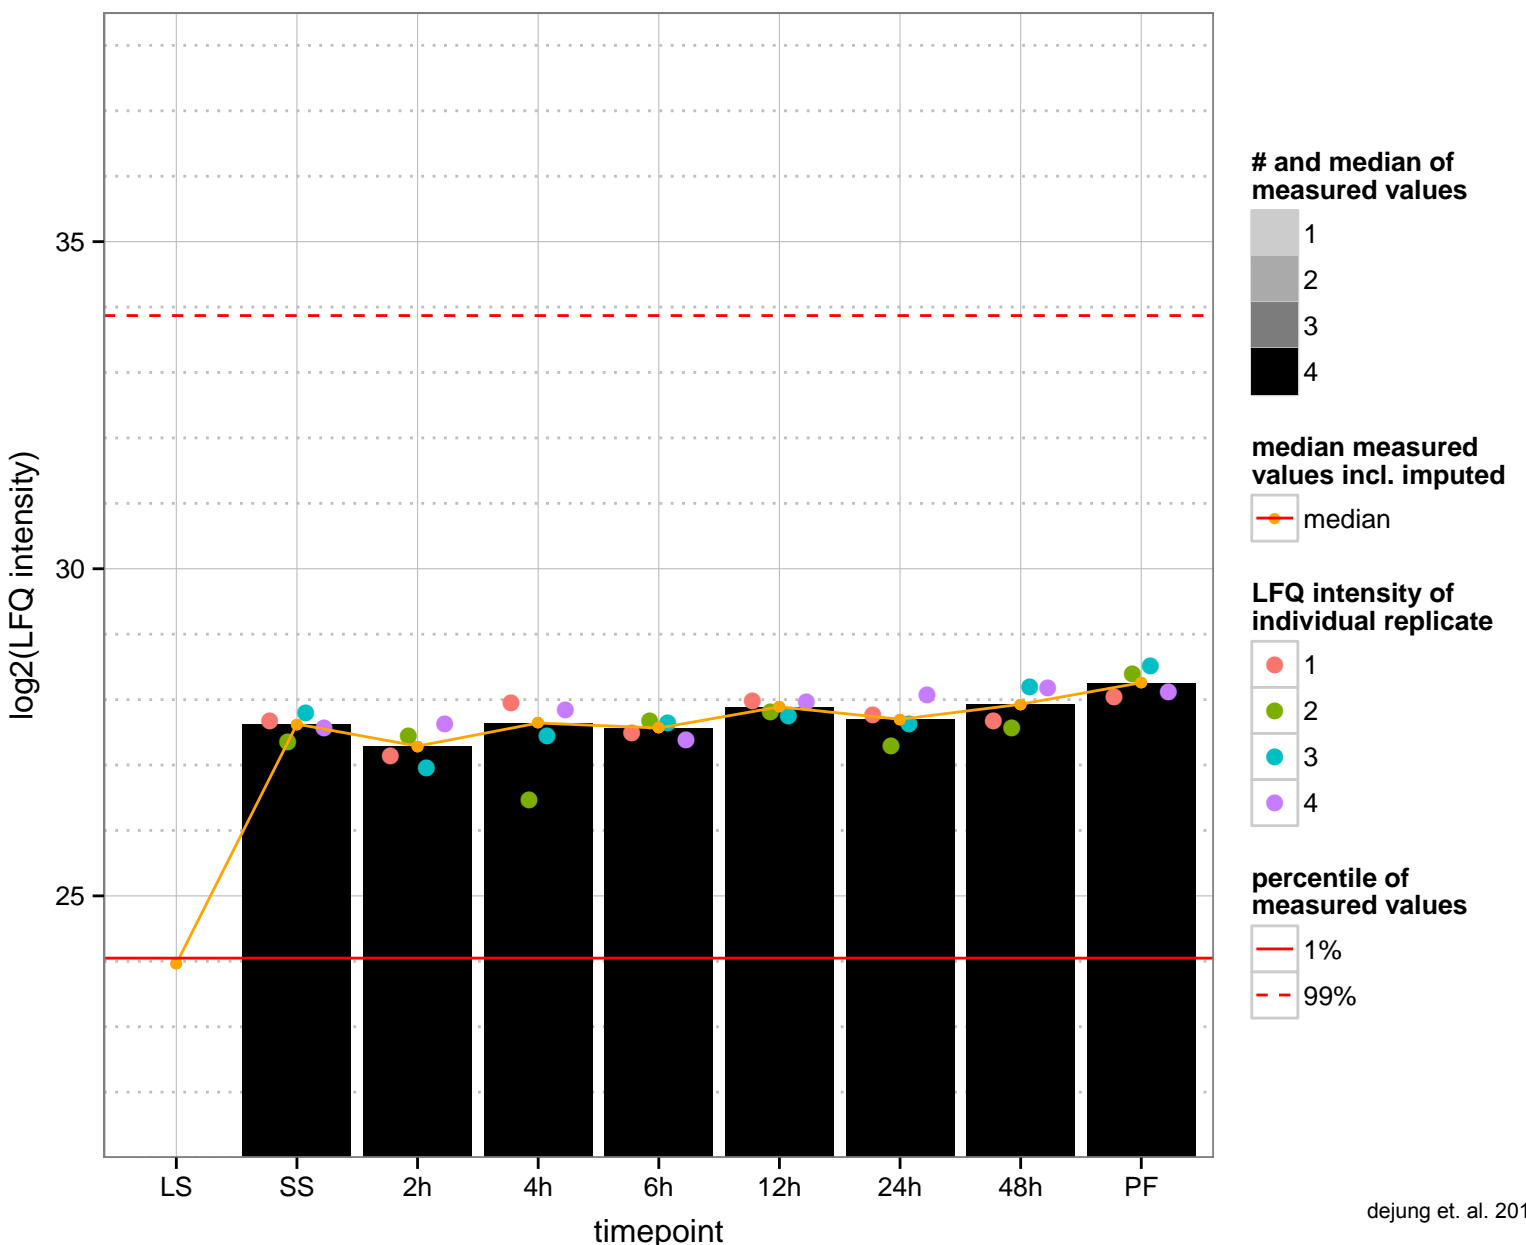

RNA polymerase B subunit RPB8, putative (RPB8)  
 Tb927.11.7930  
 AGOF: DNA-directed RNA polymerase activity  
 AGOC: null  
 AGOP: transcription, DNA-dependent  
 PGO: null  
 PGO: null  
 PGO: null  
 PGO: transcription, DNA-dependent

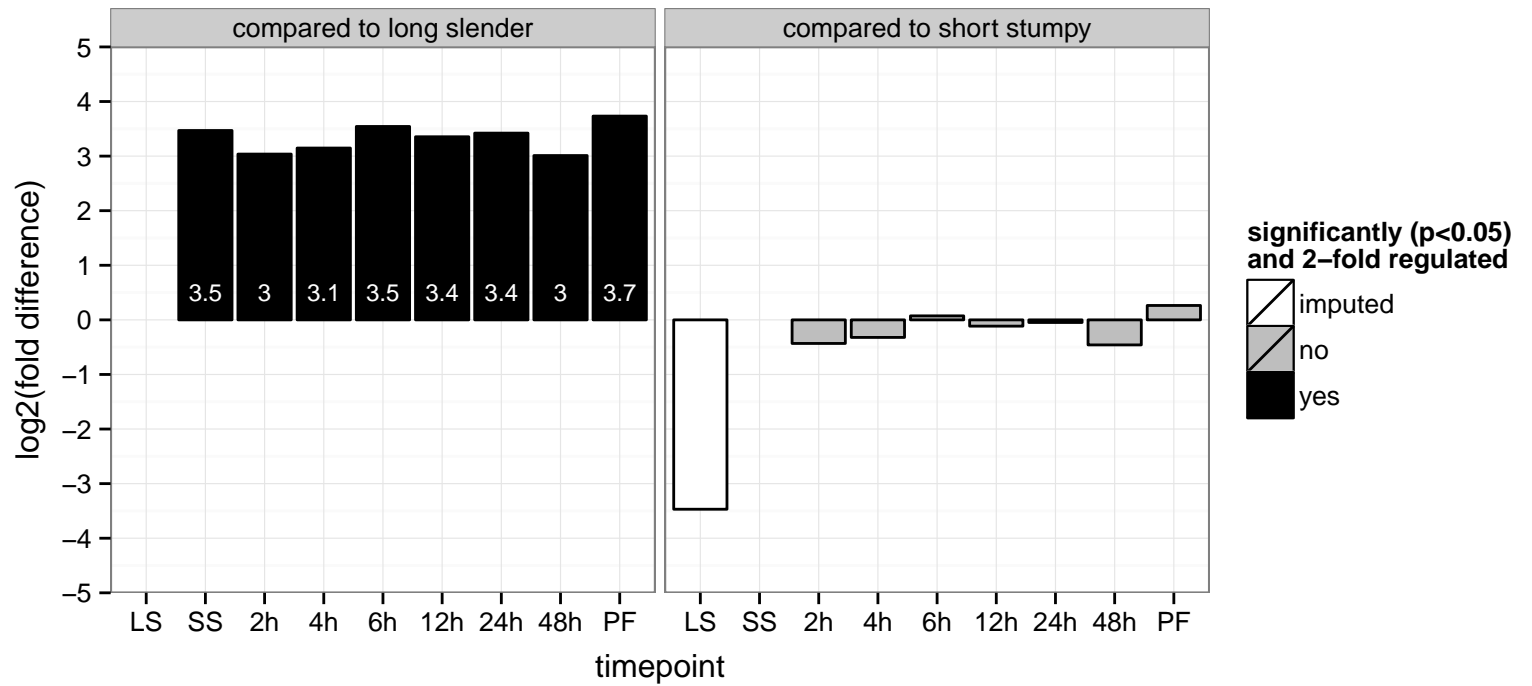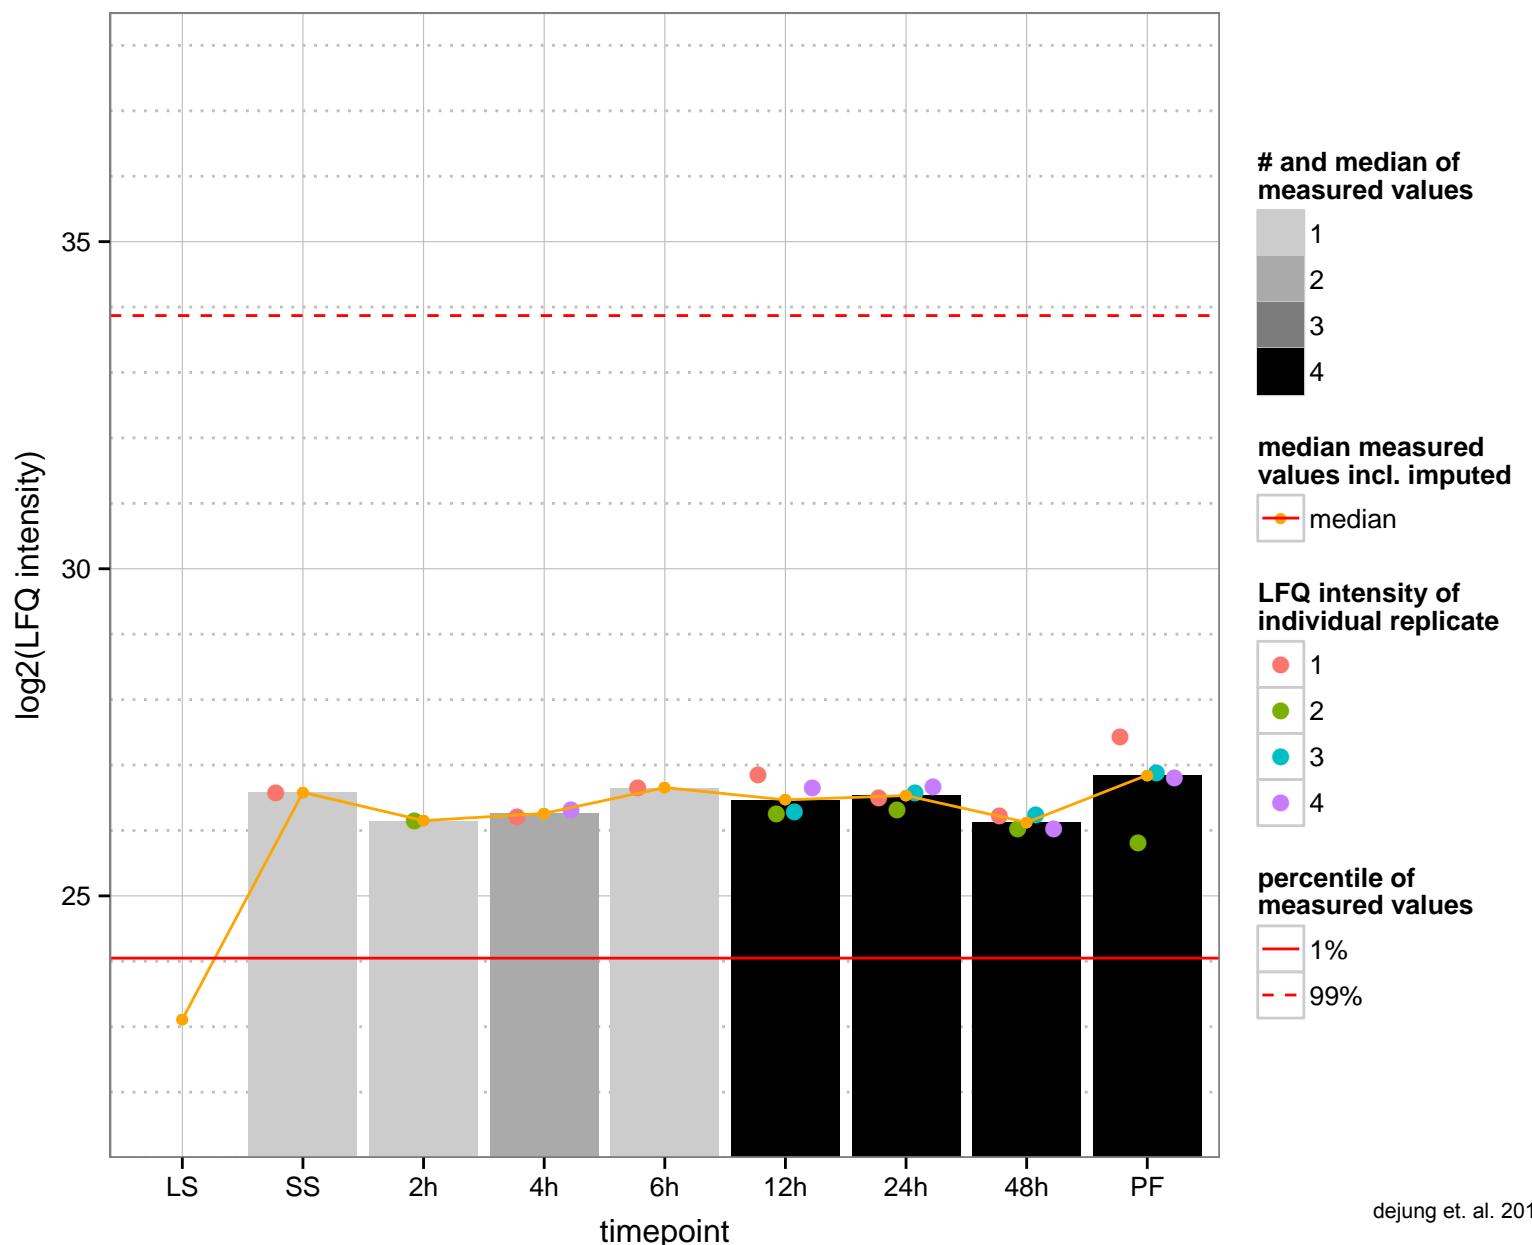

kinetoplast poly(A) polymerase 1, KPAP1  
 Tb927.11.7960  
 AGOF: polynucleotide adenylyltransferase activity  
 AGOC: mitochondrion  
 AGOP: mRNA polyadenylation  
 PGO: null  
 PGOC: null  
 PGOP: null

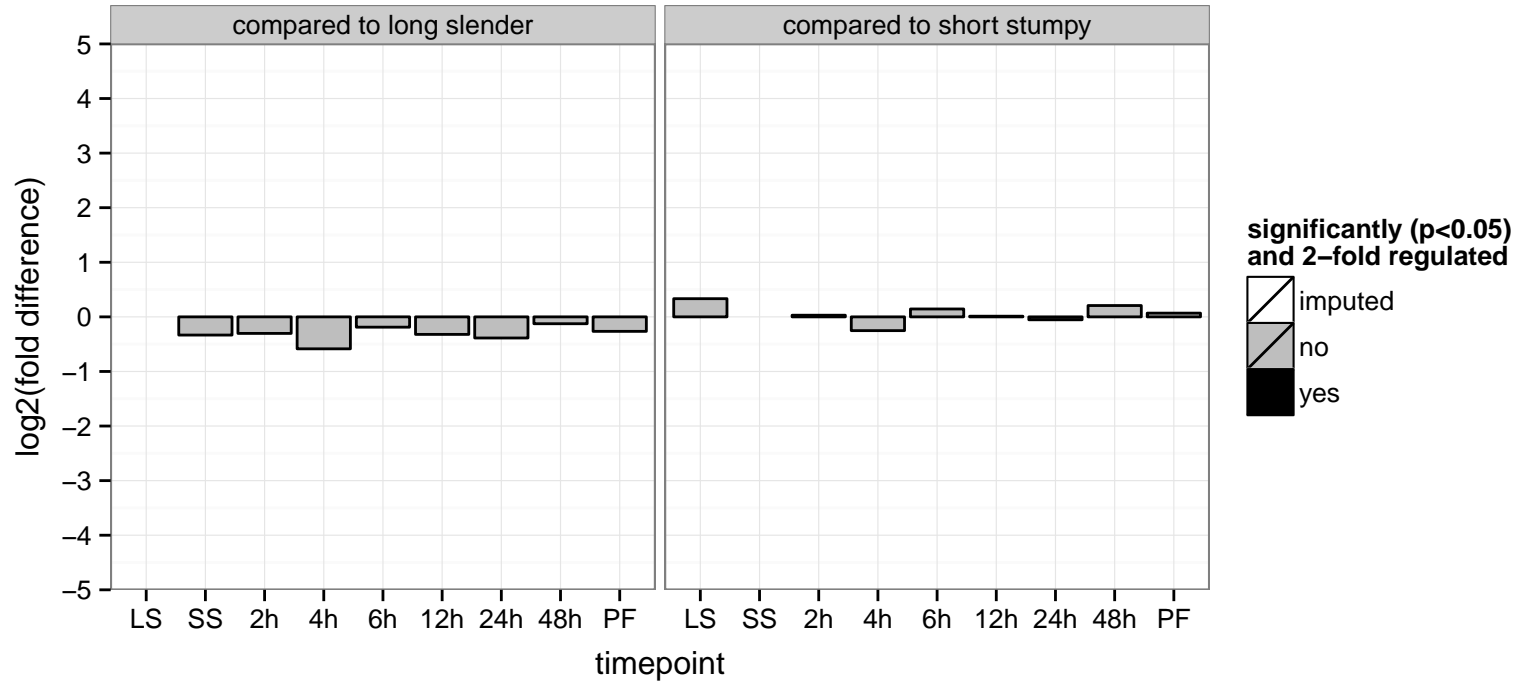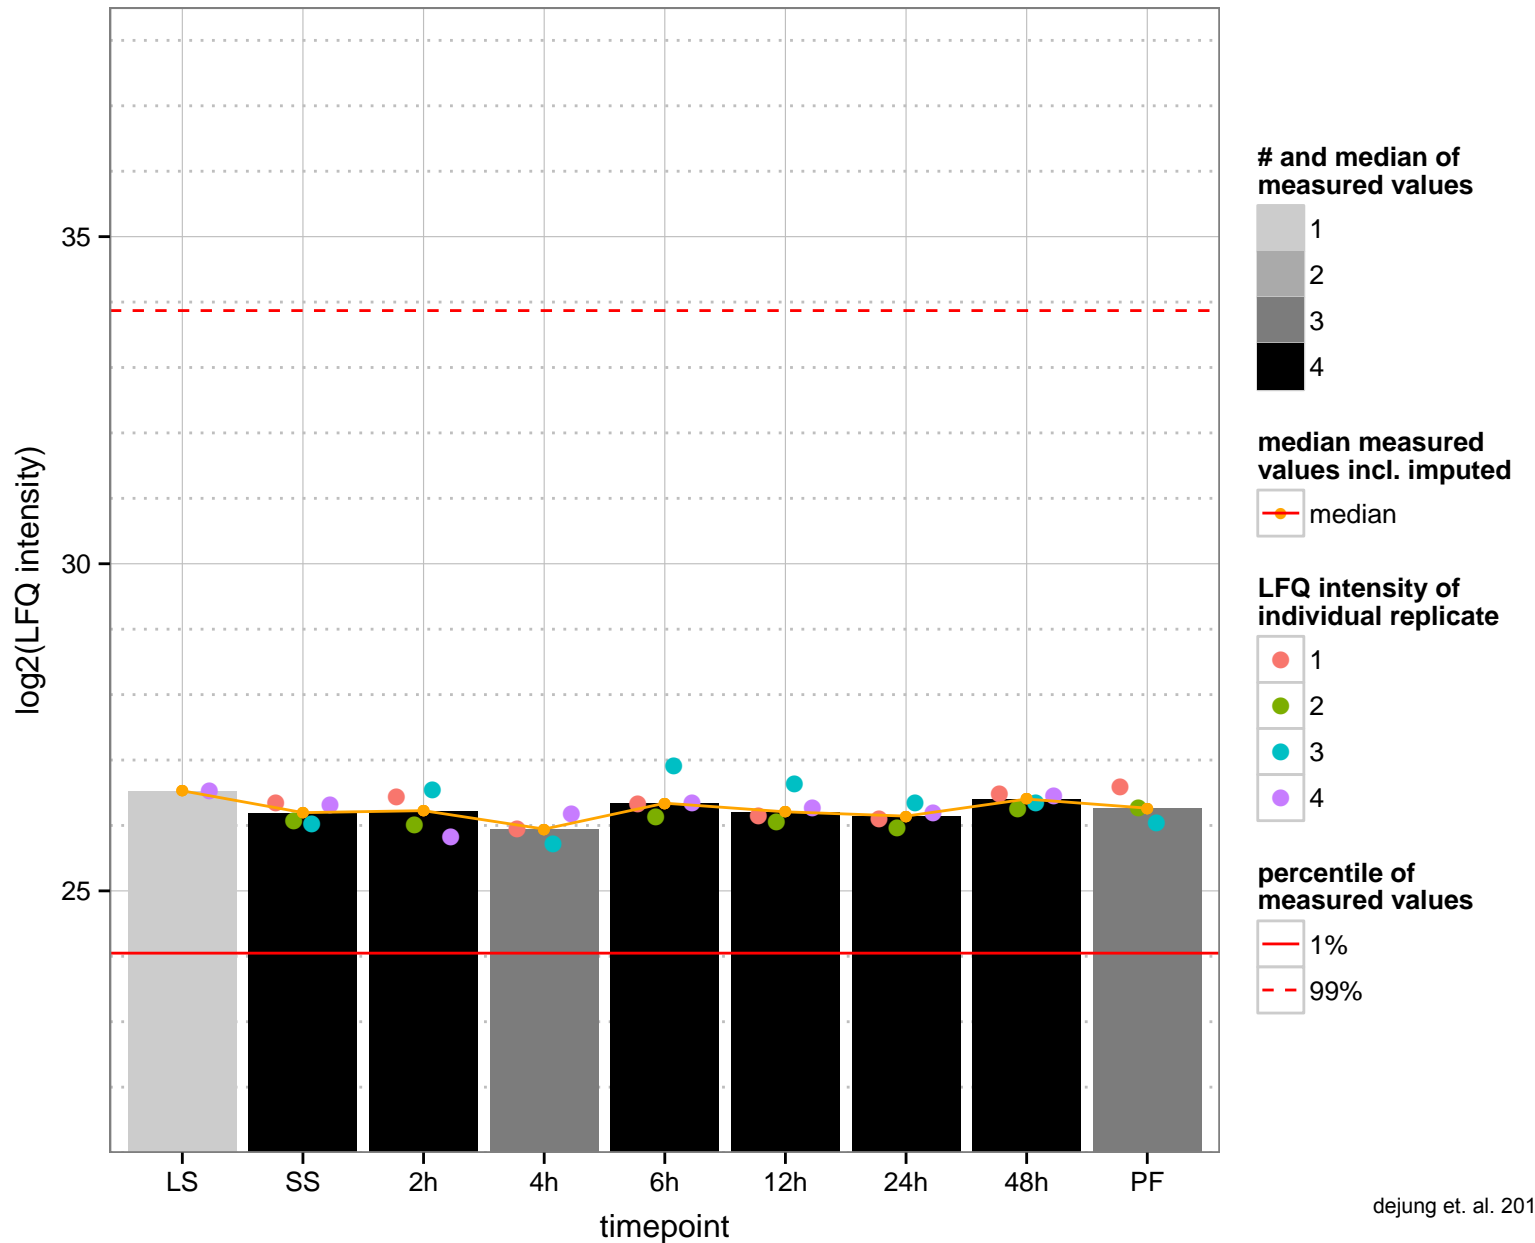

hypothetical protein, conserved  
 Tb927.11.8030  
 AGOF: null  
 AGOC: null  
 AGOP: null  
 PGOF: null  
 PGO C: null  
 PGOP: null

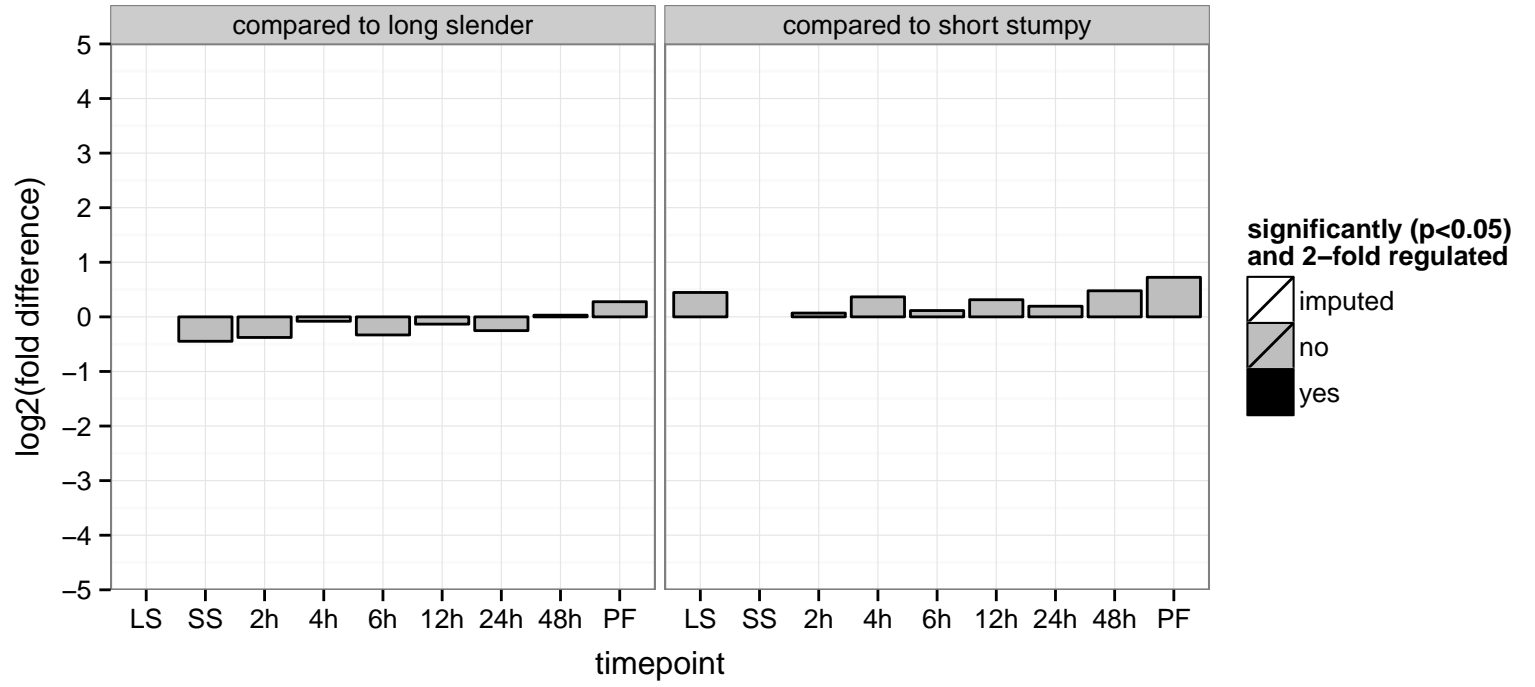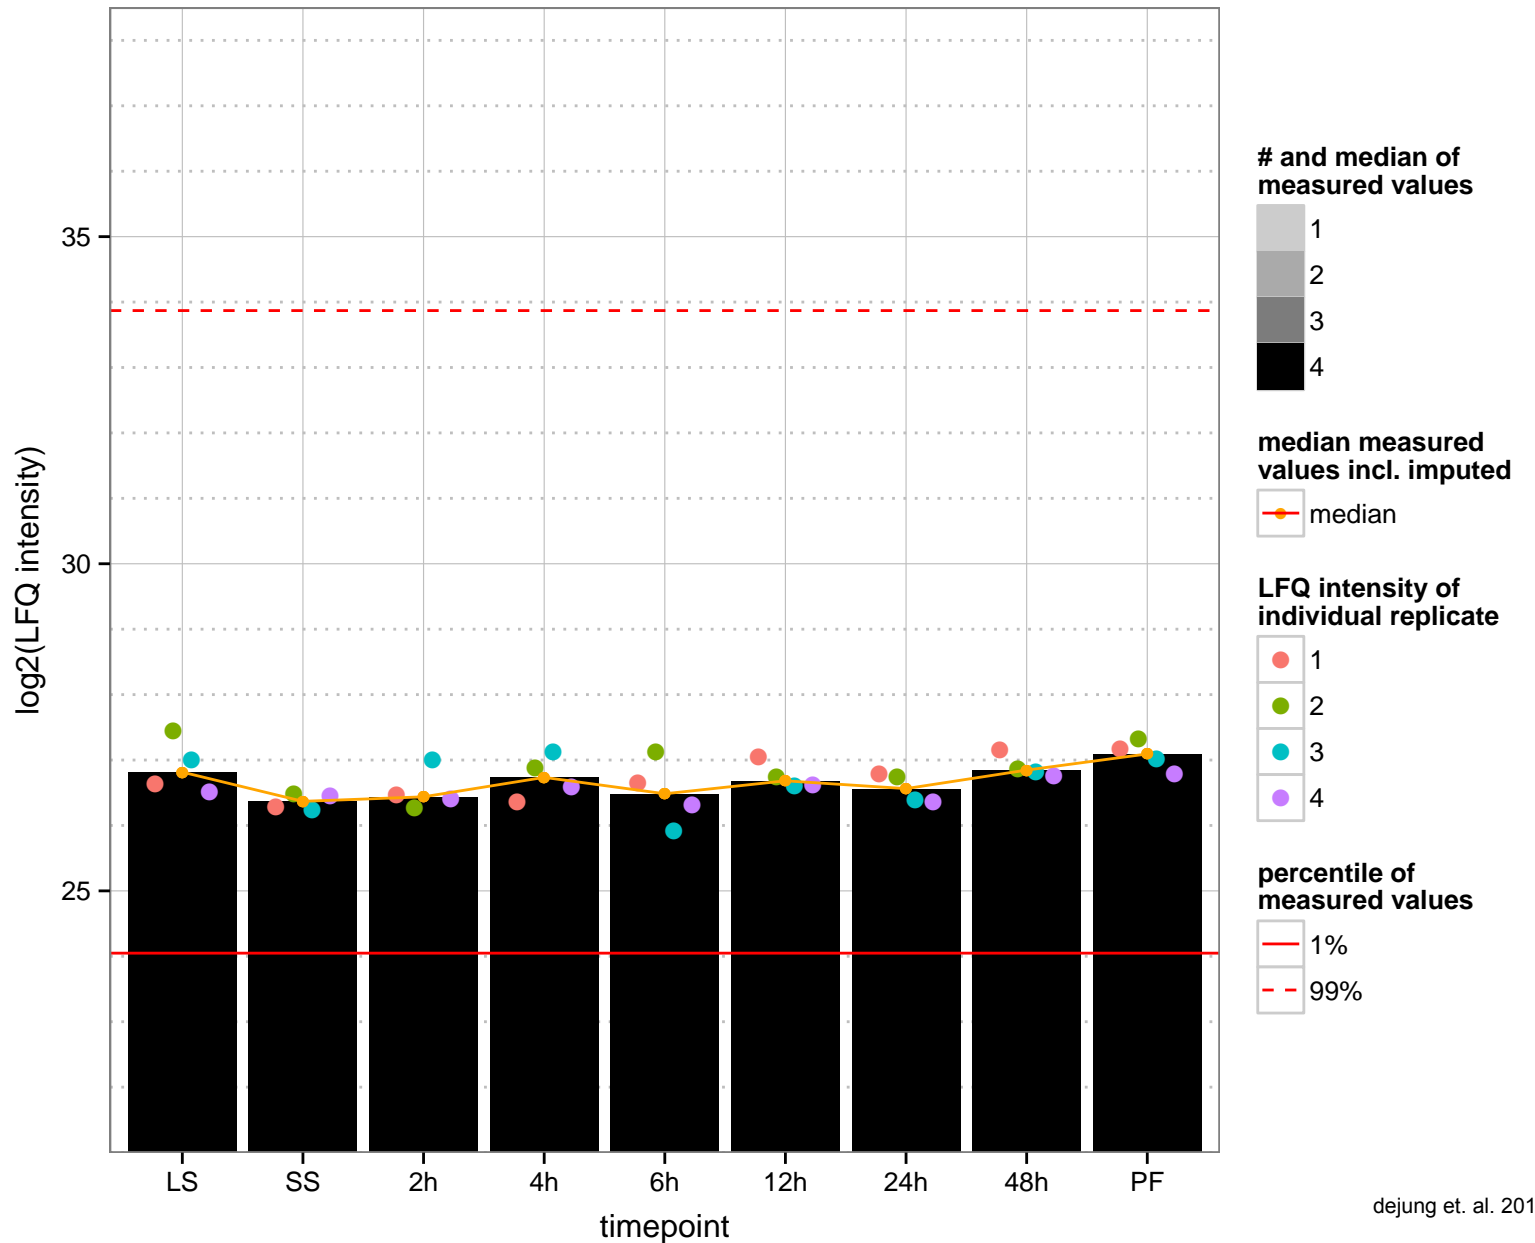

hypothetical protein, conserved  
 Tb927.11.8050  
 AGOF: null  
 AGOC: nucleus  
 AGOP: gene silencing  
 PGOF: null  
 PGO: nucleus  
 PGOP: gene silencing

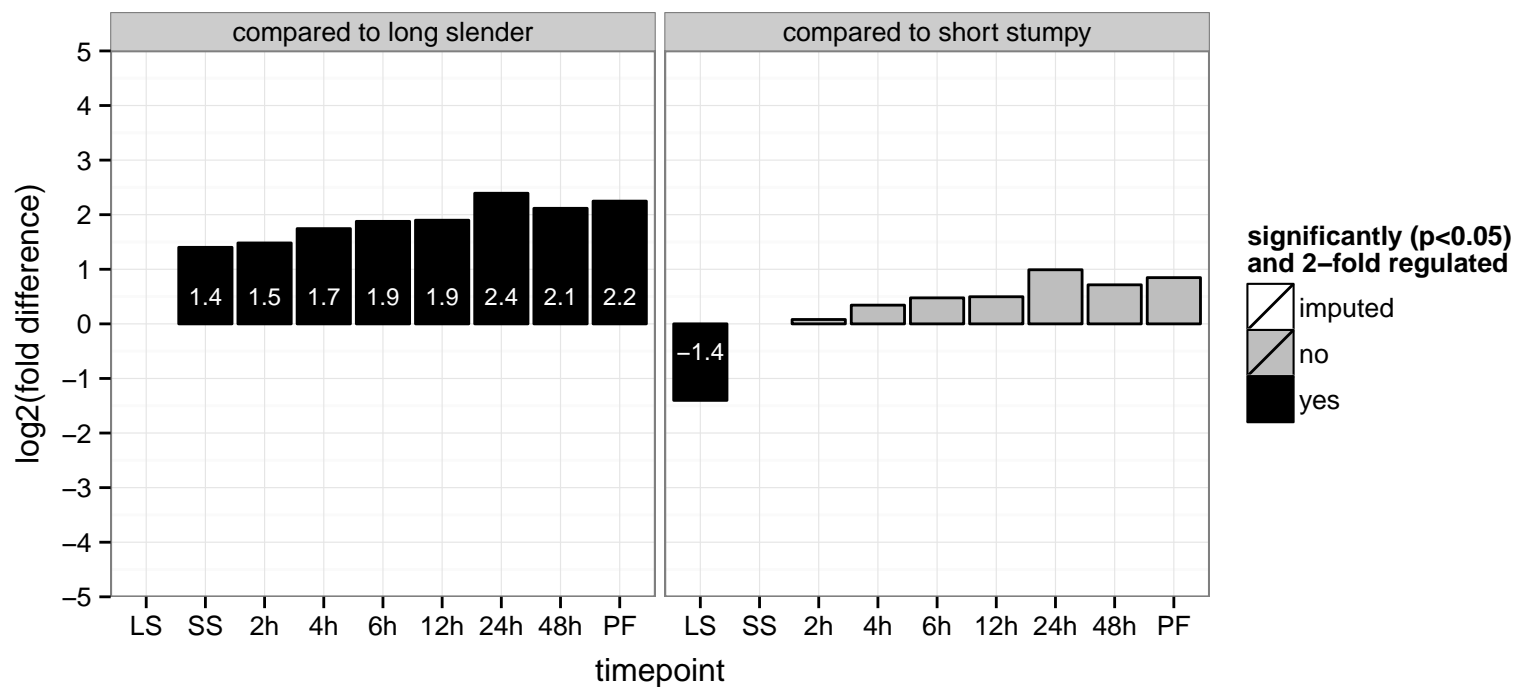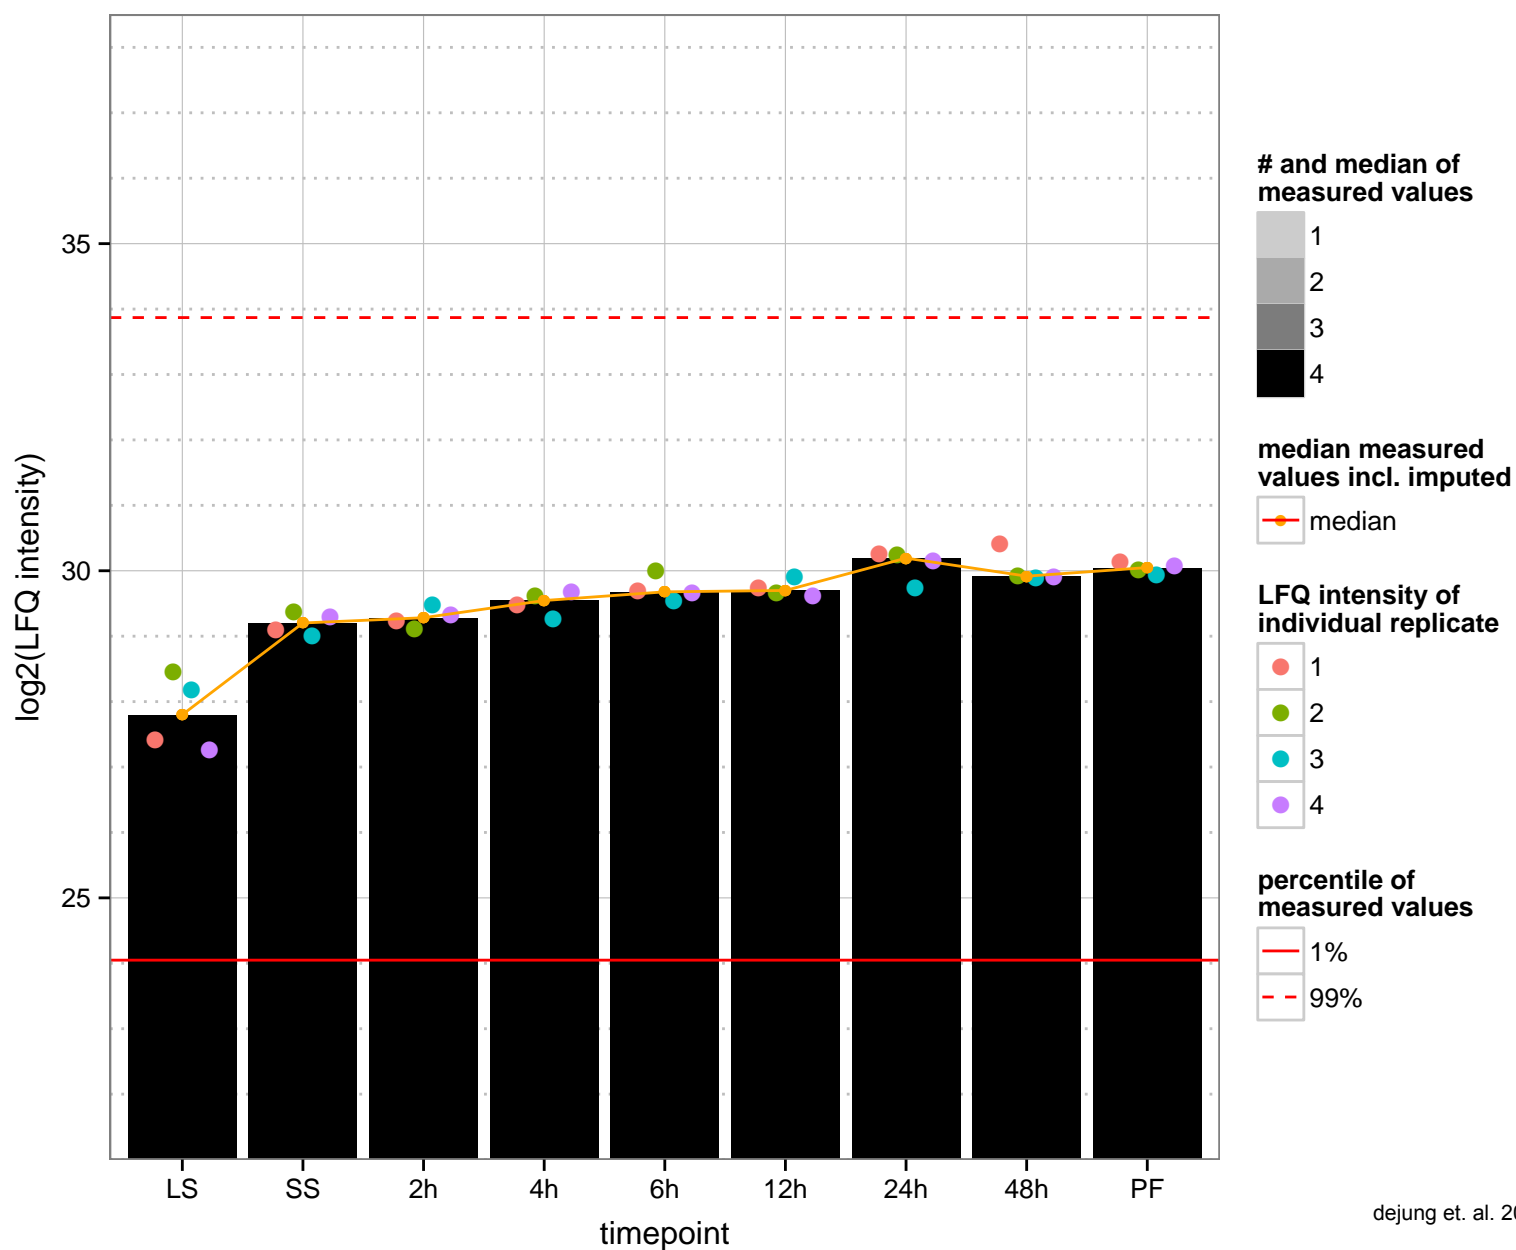

hypothetical protein, conserved  
 Tb927.11.8080  
 AGOF: voltage-gated potassium channel activity  
 AGOC: membrane, voltage-gated potassium channel complex  
 AGOP: potassium ion transport  
 PGO: protein binding  
 PGO: null  
 PGO: protein homooligomerization

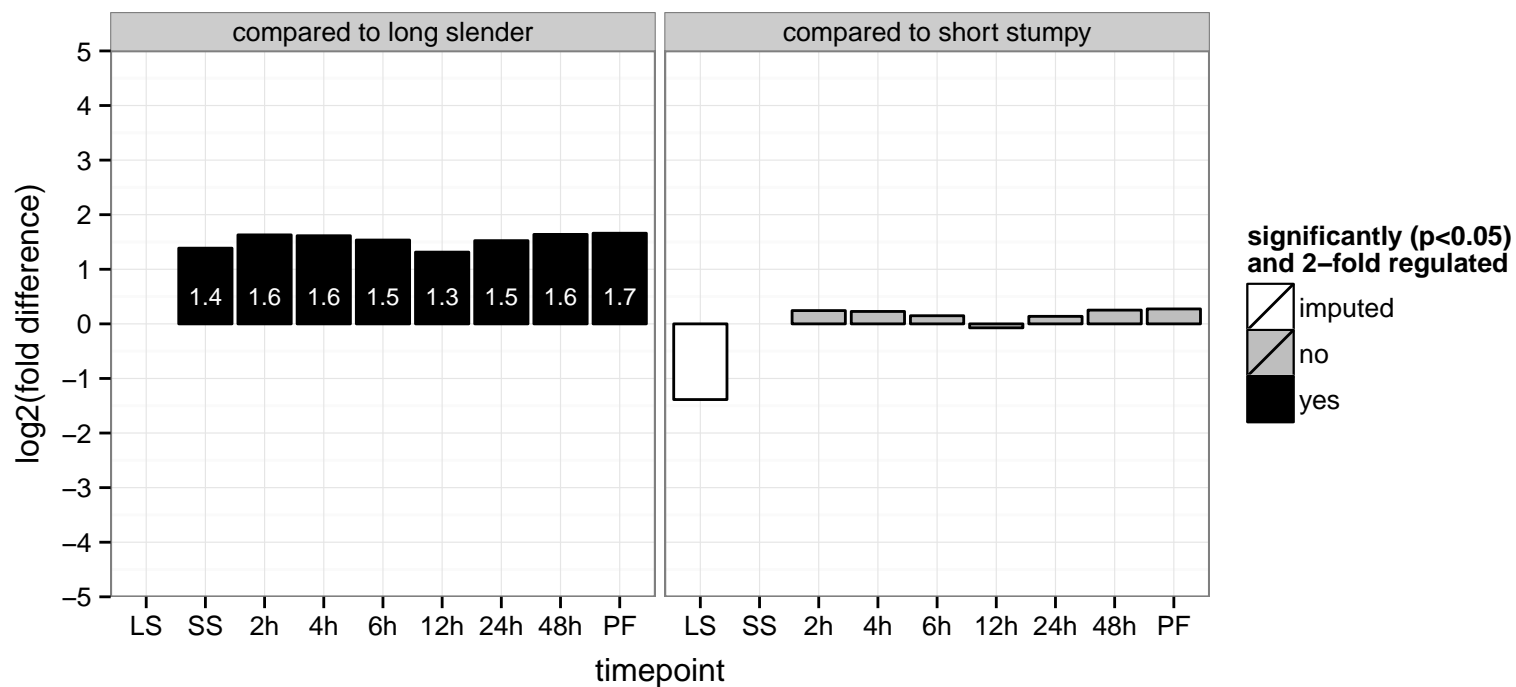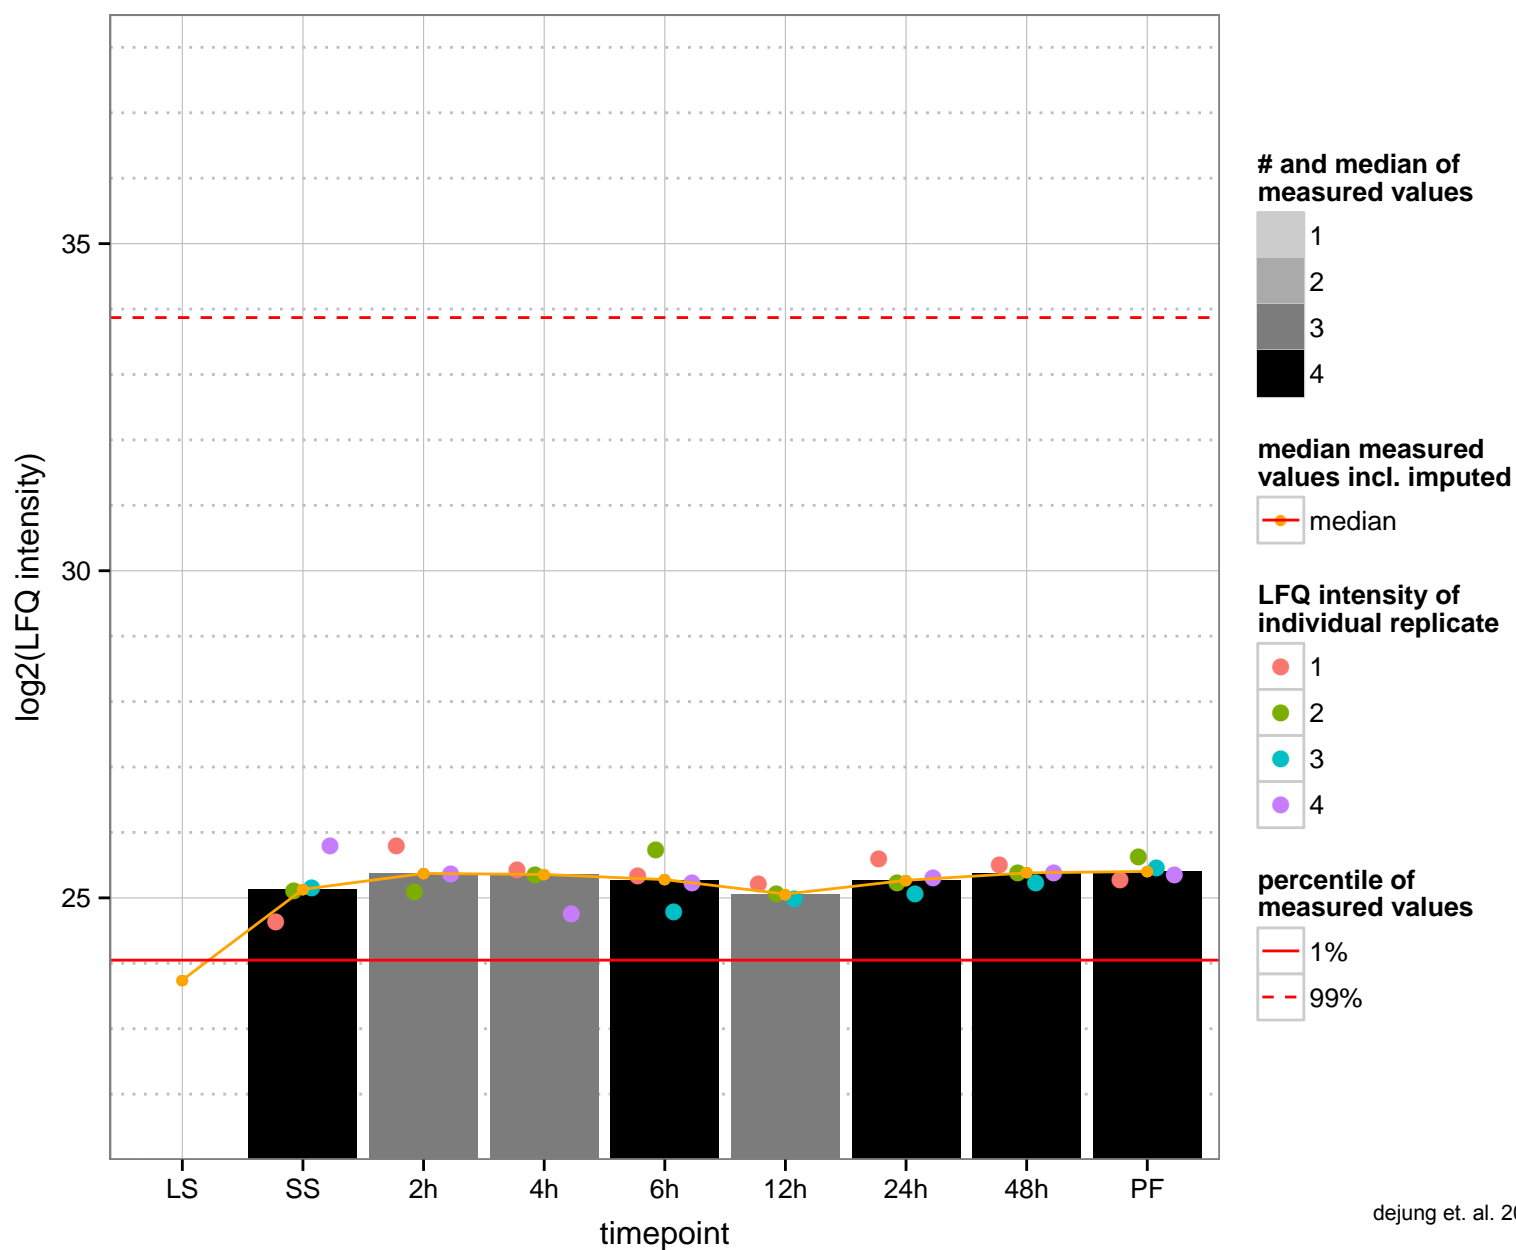

protein transport protein SEC13, putative  
 Tb927.11.8120  
 AGOF: null  
 AGOC: null  
 AGOP: intracellular protein transport  
 PGO: protein binding  
 PGO: null  
 PGO: null

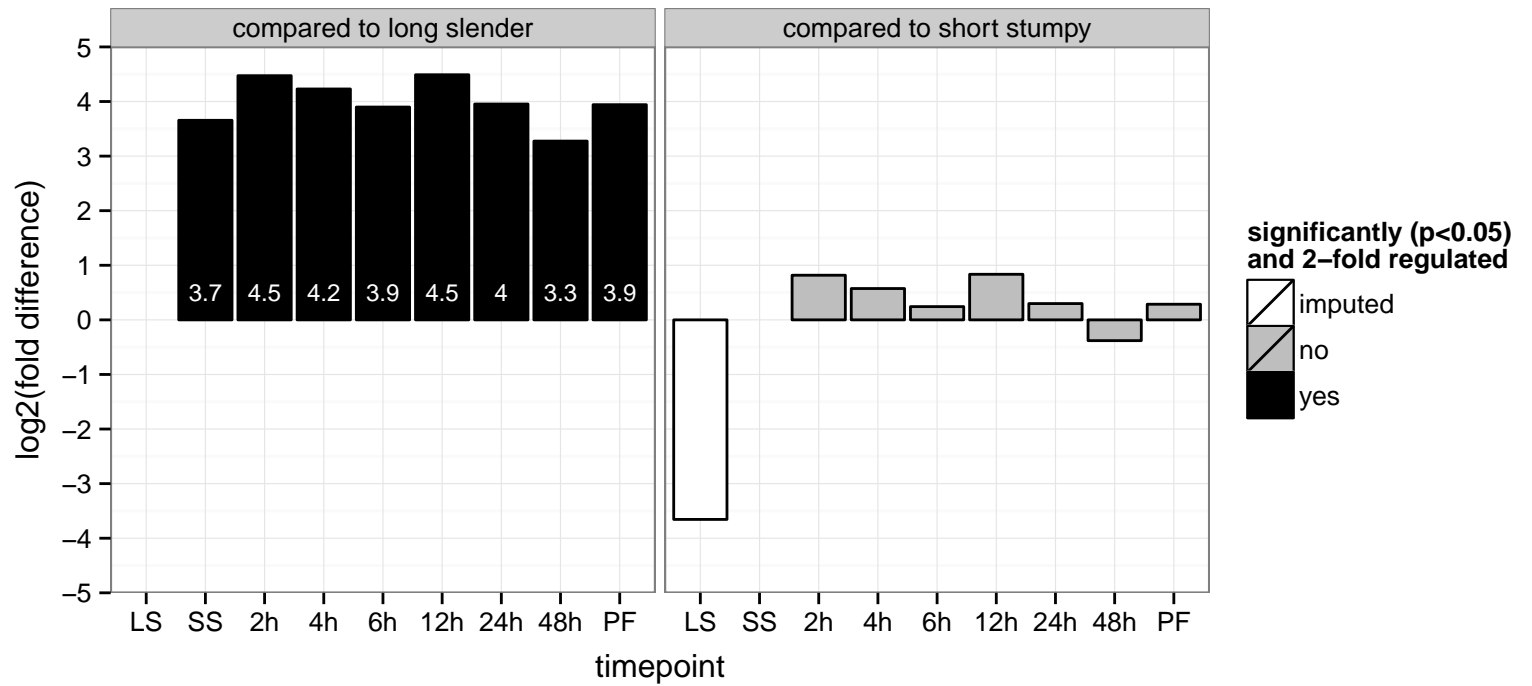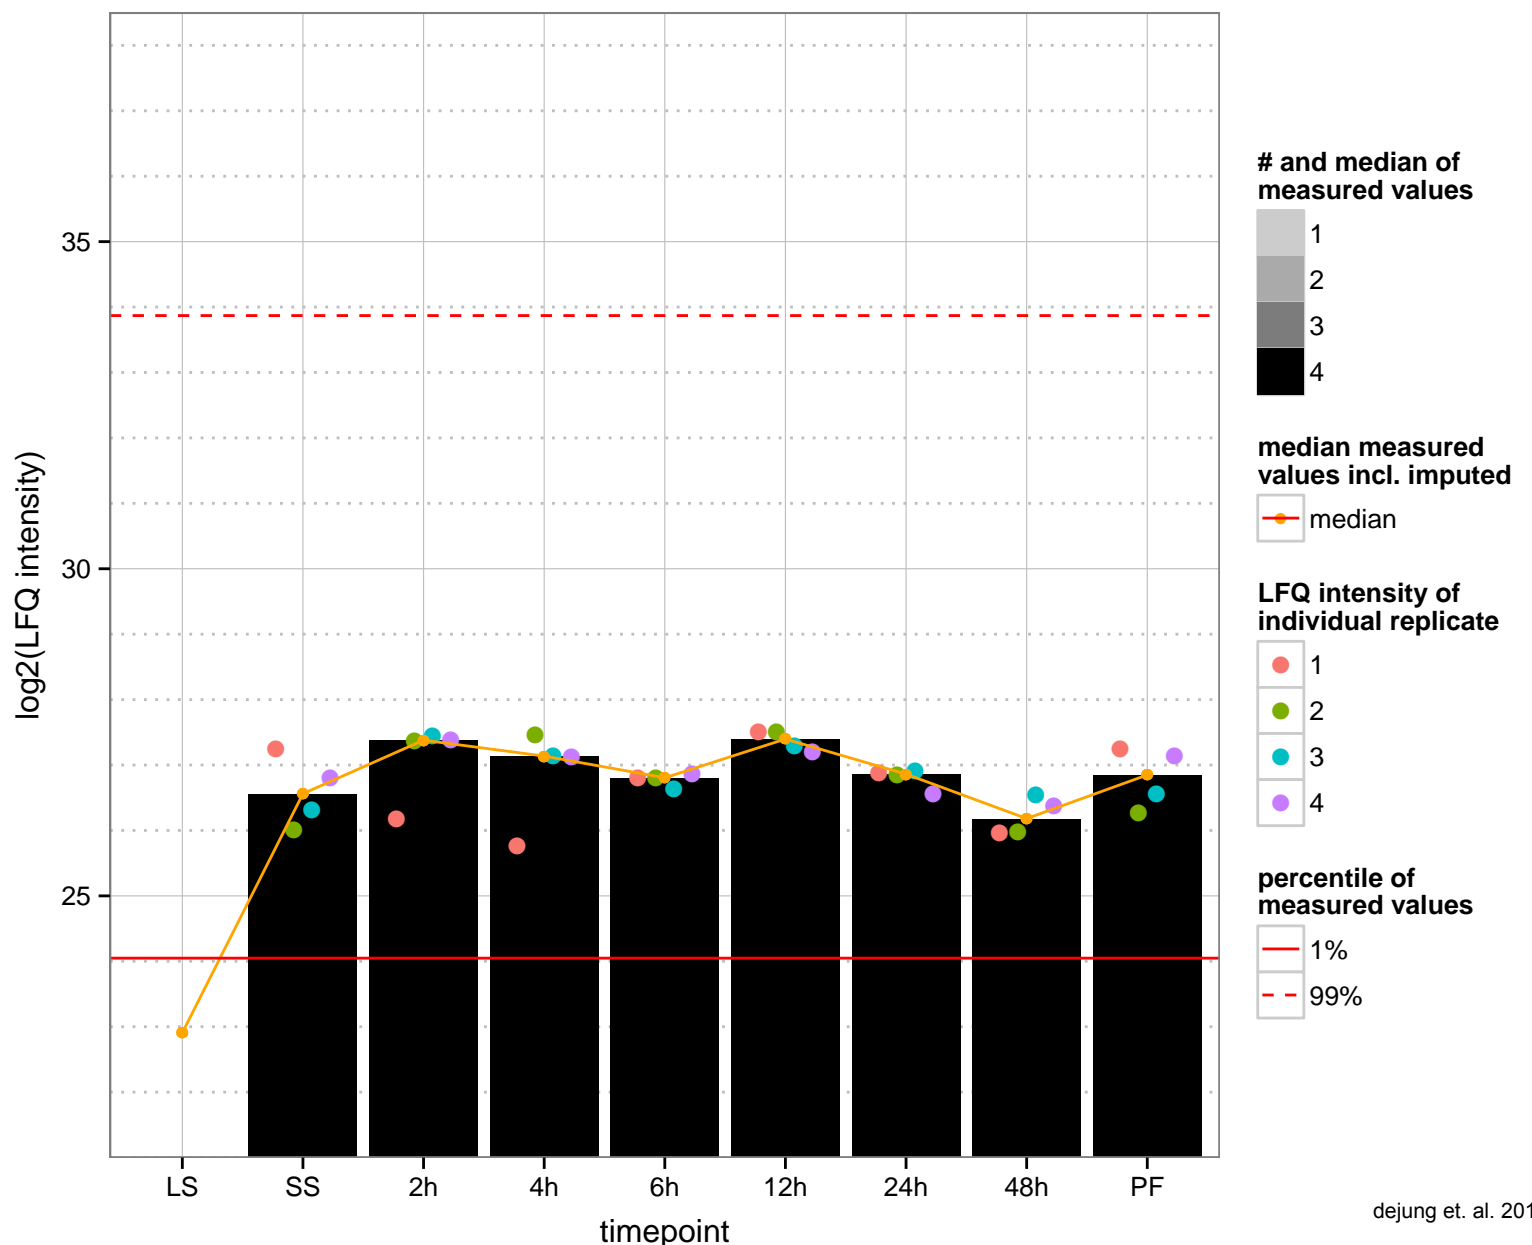



ER lumen retaining receptor protein, putative  
 Tb927.11.8140  
 AGOF: ER retention sequence binding  
 AGOC: integral to membrane  
 AGOP: protein retention in ER lumen  
 PGOF: ER retention sequence binding  
 PGOC: integral to membrane  
 PGOP: protein retention in ER lumen

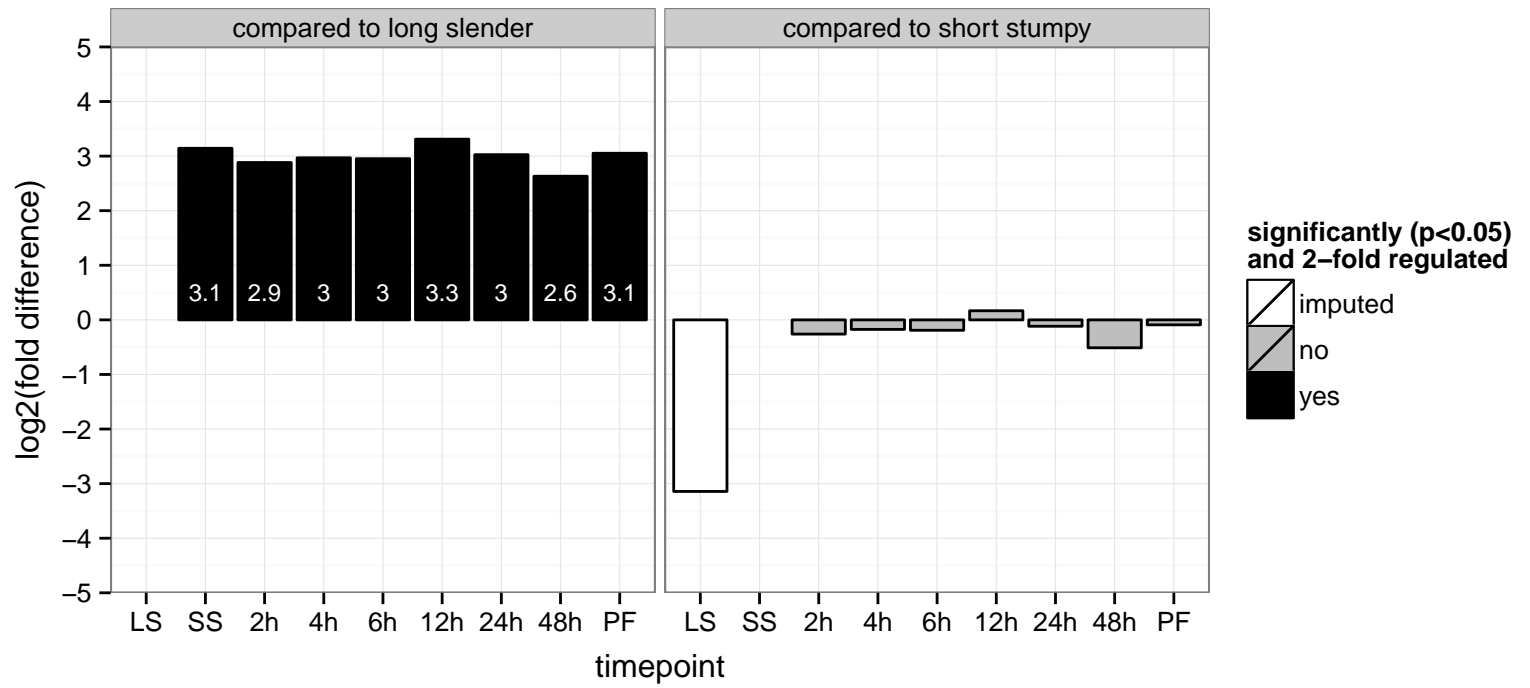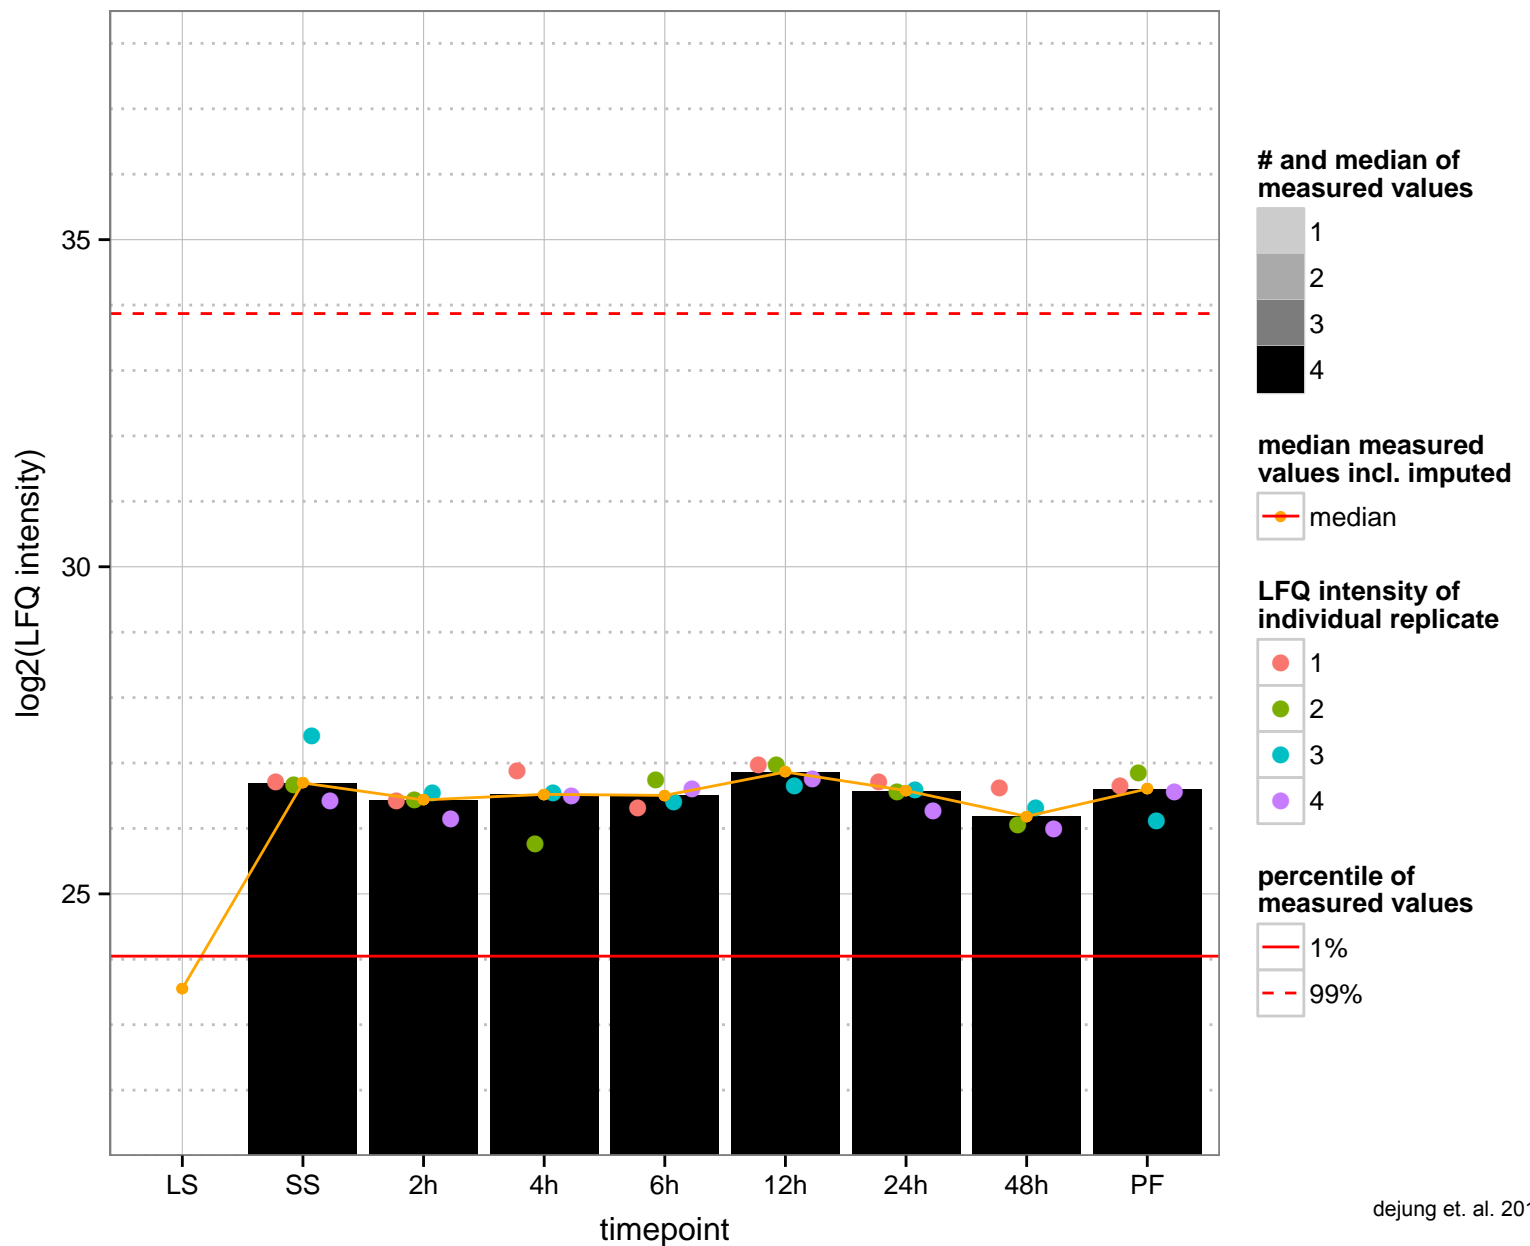

protein kinase, putative  
 Tb927.11.8150  
 AGOF: null, ATP binding, protein tyrosine kinase activity  
 AGOC: null  
 AGOP: null, protein phosphorylation  
 PGOF: binding, ATP binding, binding, protein kinase activity, transferase activity, transferring phosphorus-containing groups  
 PGOC: null  
 PGOP: null, protein phosphorylation

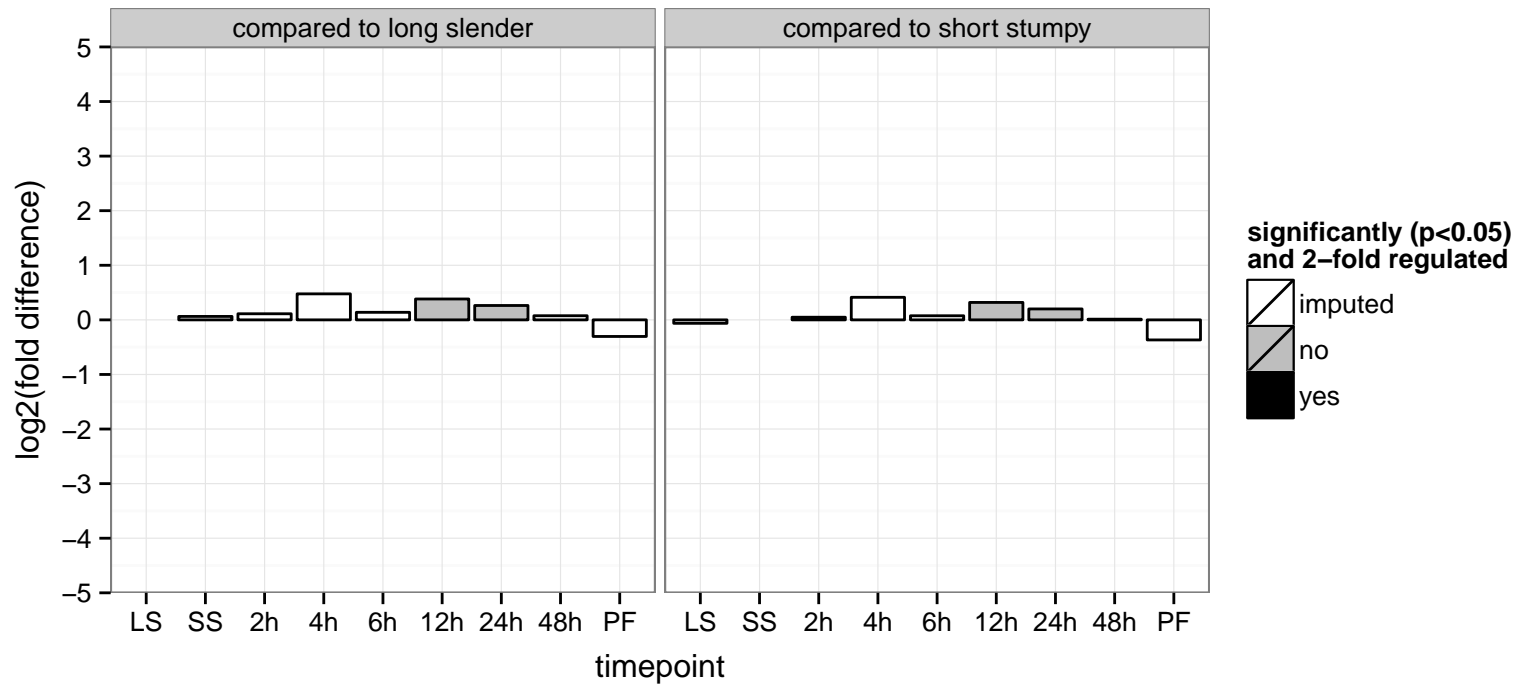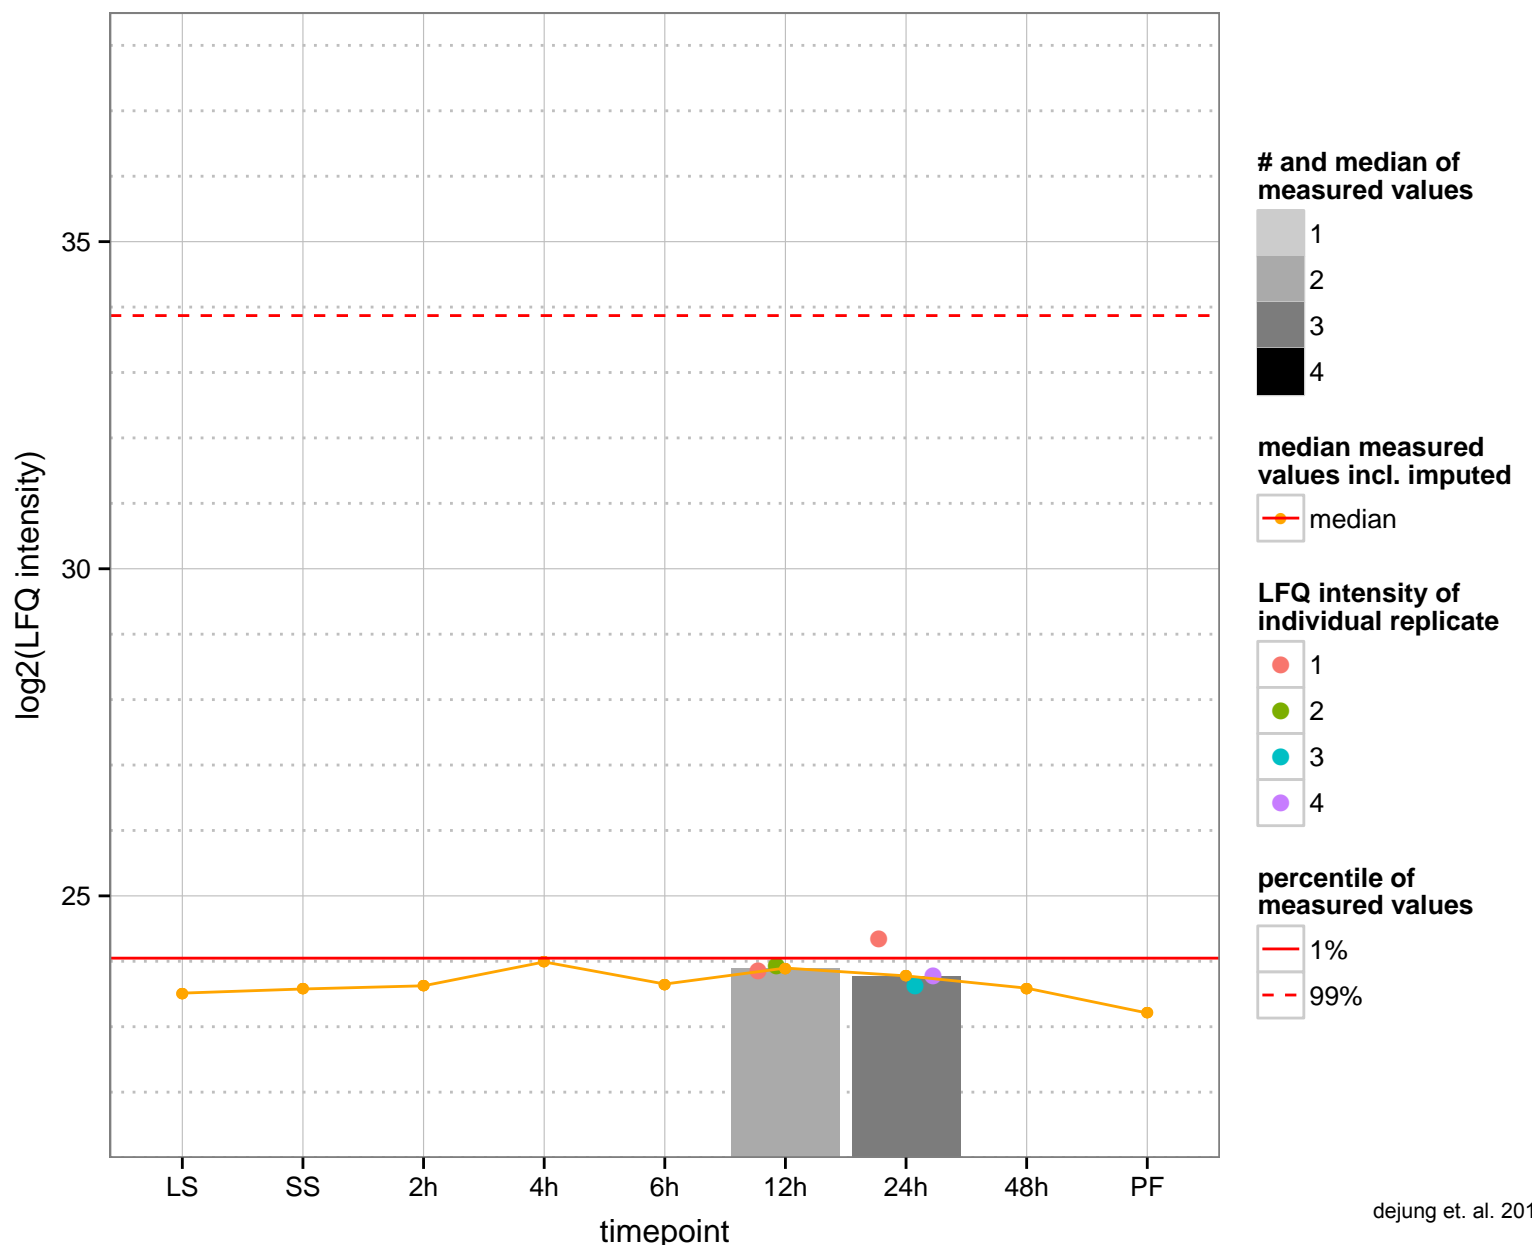

dynein heavy chain, putative  
 Tb927.11.8160  
 AGOF: ATP binding, ATPase activity, microtubule motor activity  
 AGOC: dynein complex  
 AGOP: microtubule-based movement  
 PGOF: microtubule motor activity  
 PGO: dynein complex  
 PGOP: microtubule-based movement

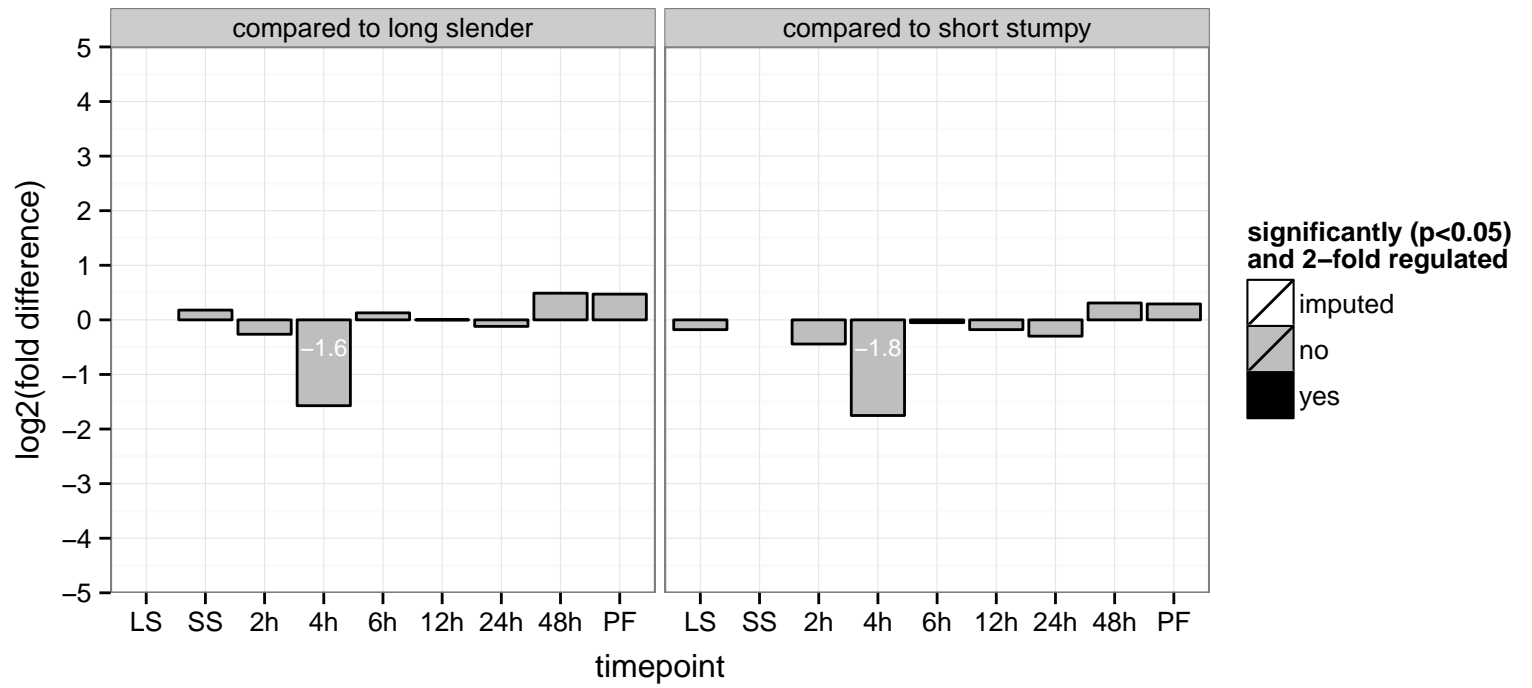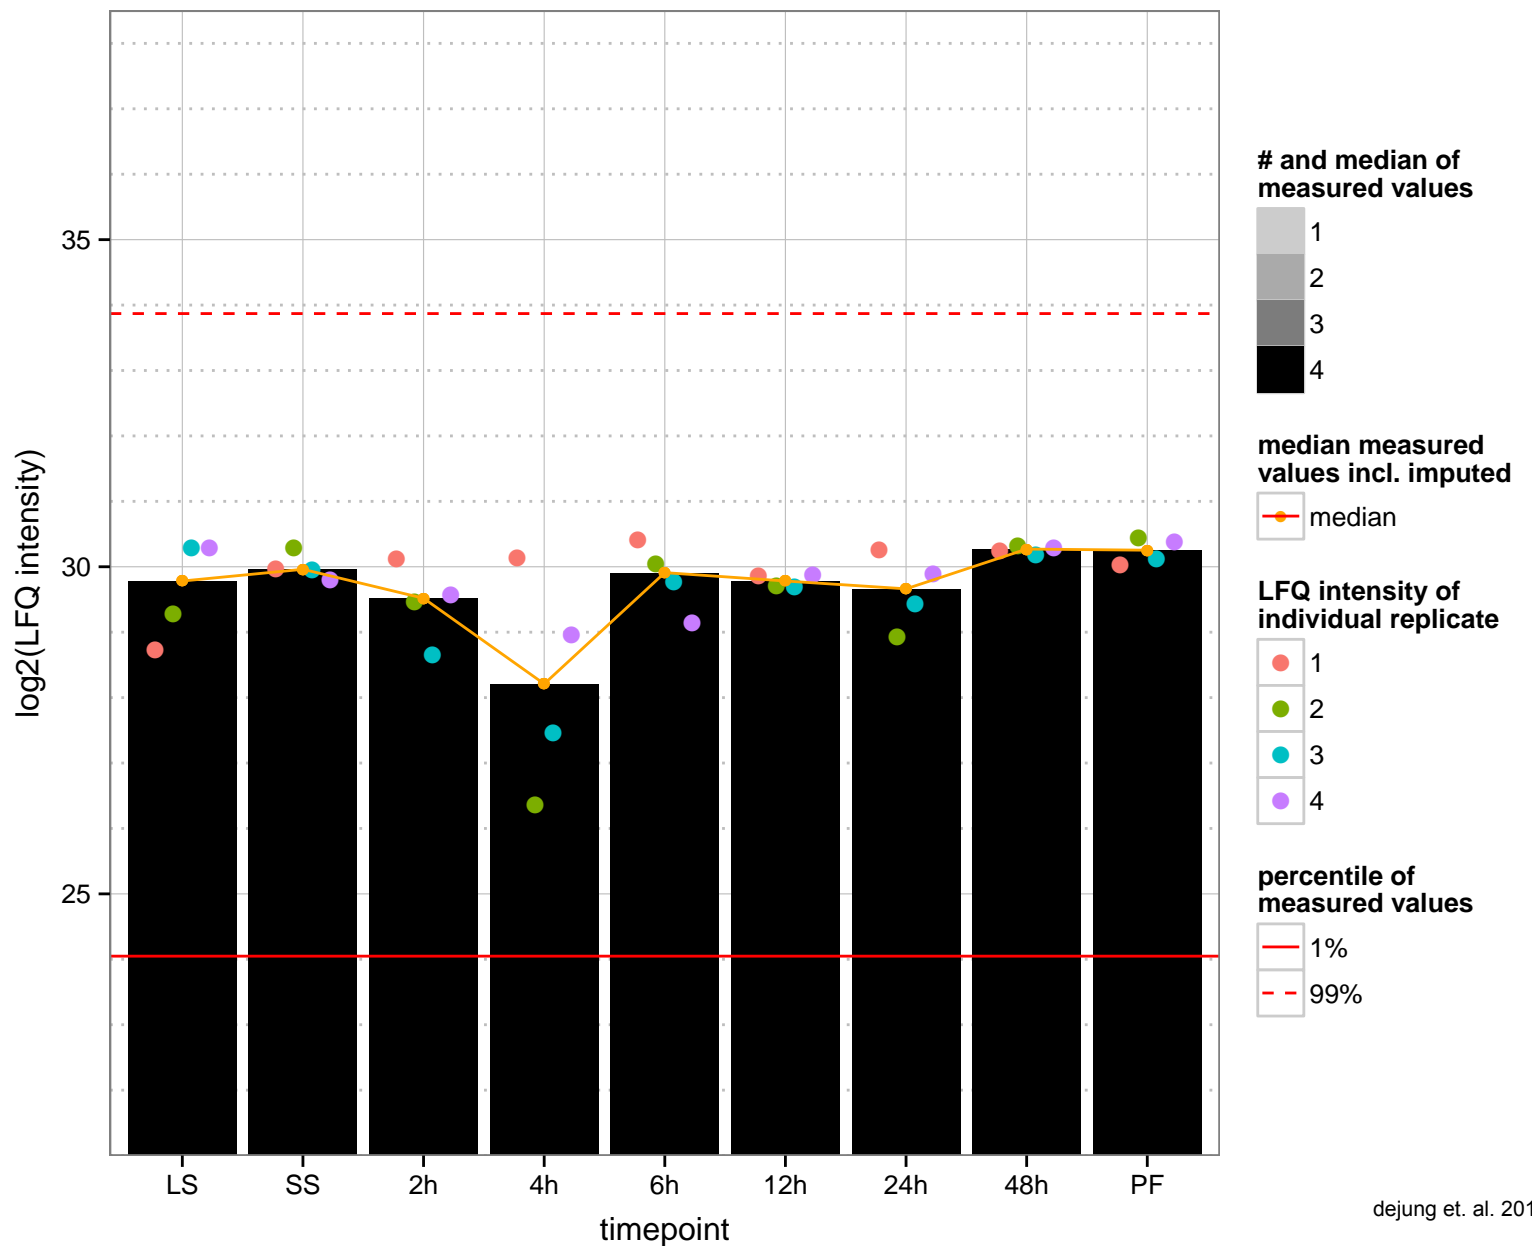

carbonic anhydrase-like protein  
 Tb927.11.8260  
 AGOF: carbonate dehydratase activity, zinc ion binding  
 AGOC: null  
 AGOP: one-carbon metabolic process  
 PGOF: null  
 PGO: null  
 PGOP: null

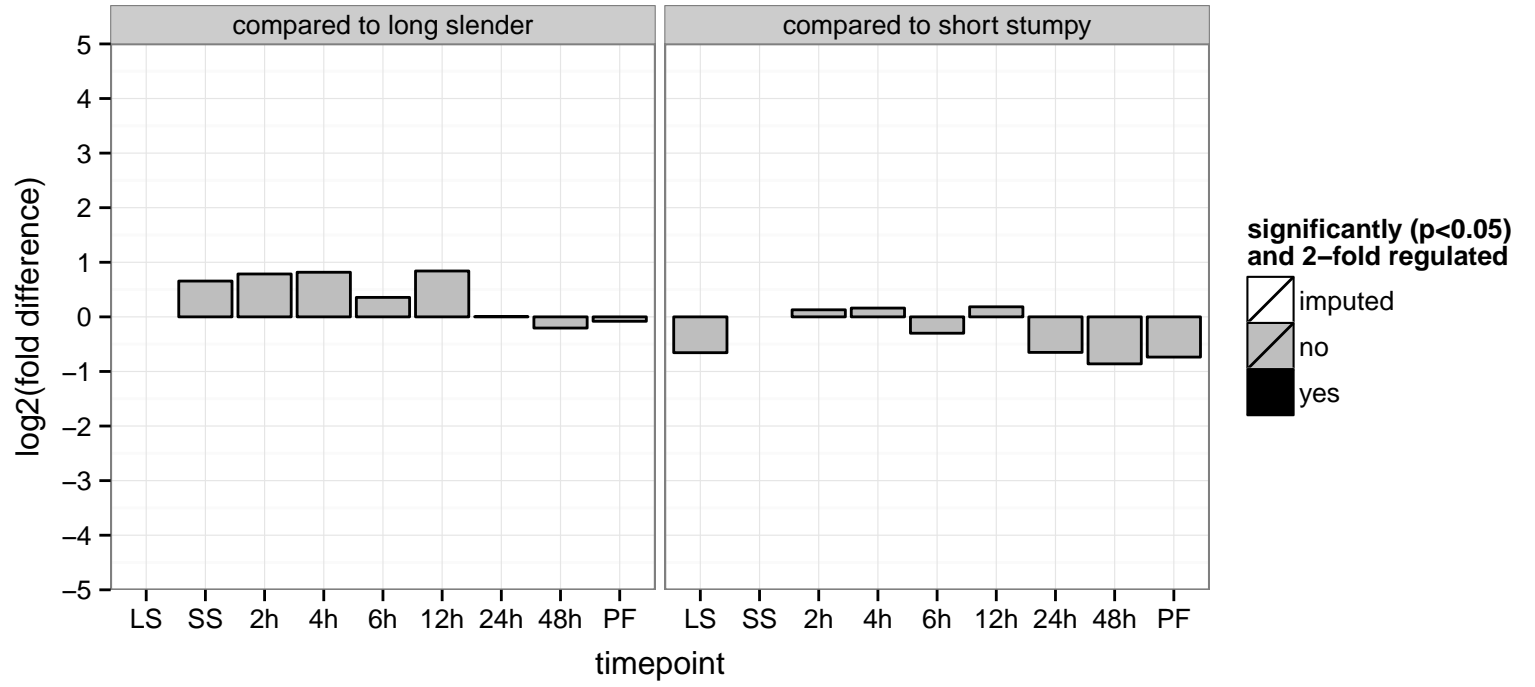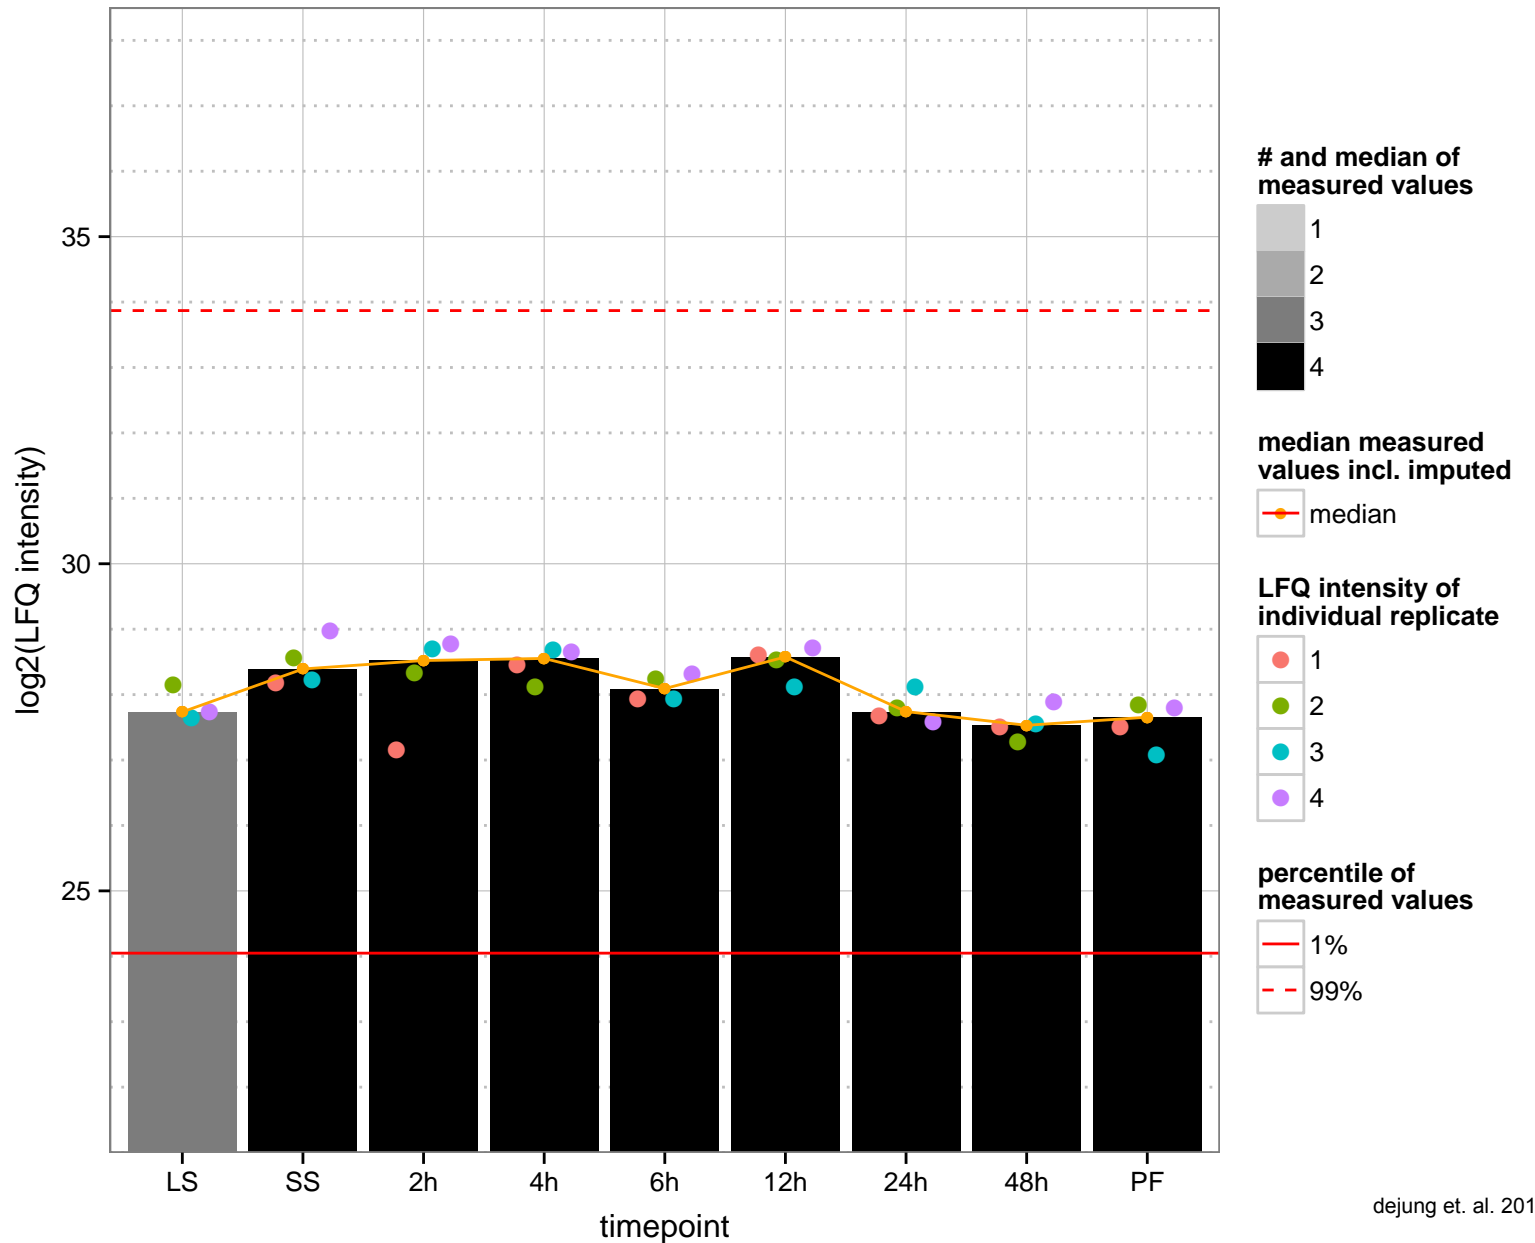

hypothetical protein, conserved  
 Tb927.11.8300  
 AGOF: null  
 AGOC: null  
 AGOP: null  
 PGO: null  
 PGOC: null  
 PGOP: null

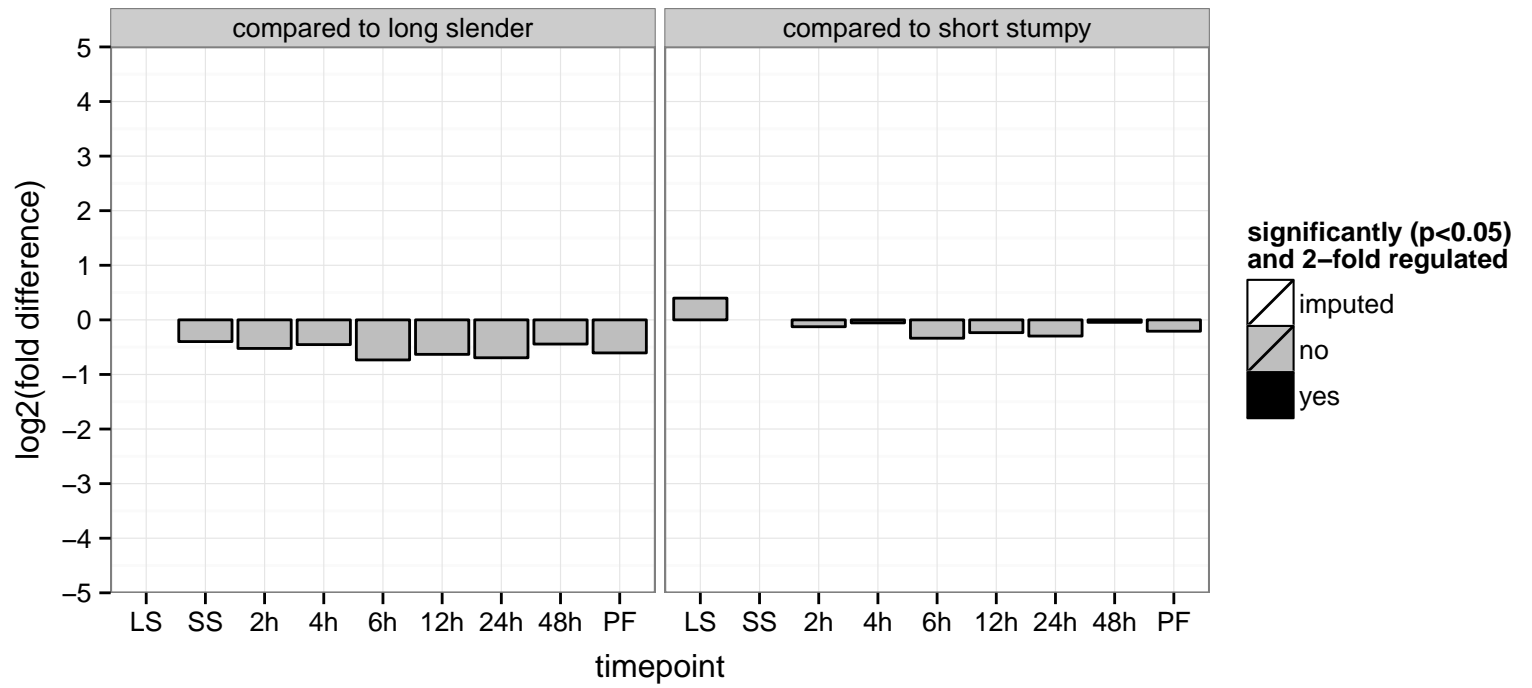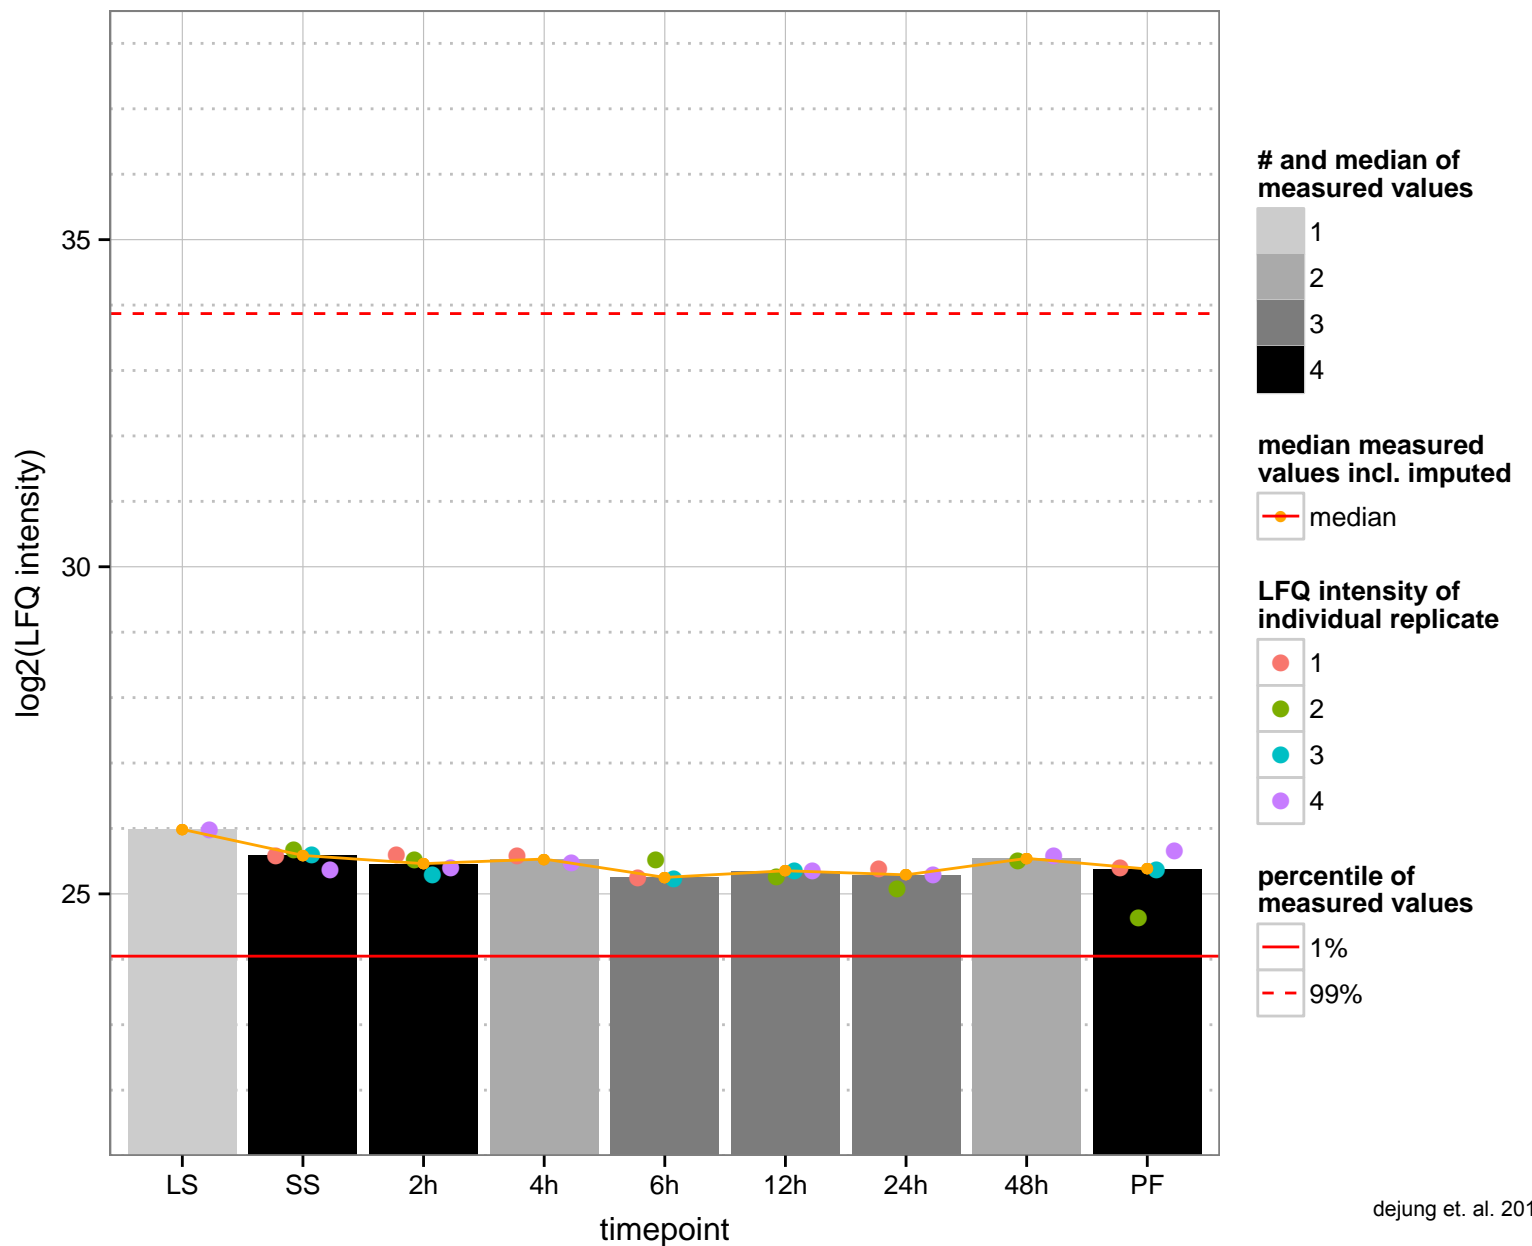

class I transcription factor A, subunit 4 (CITFA-4)  
 Tb927.11.8310  
 AGOF: null  
 AGOC: null  
 AGOP: null  
 PGO: null  
 PGOC: null  
 PGOP: null

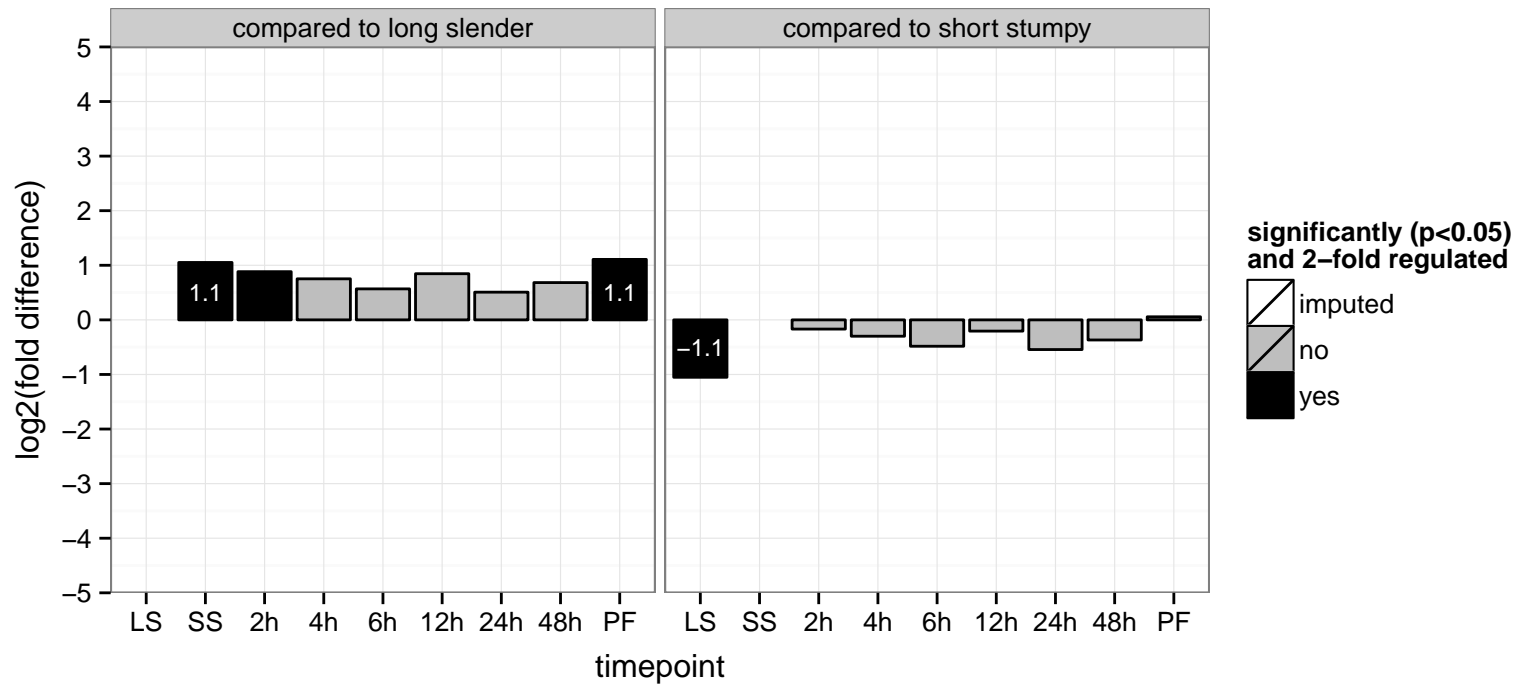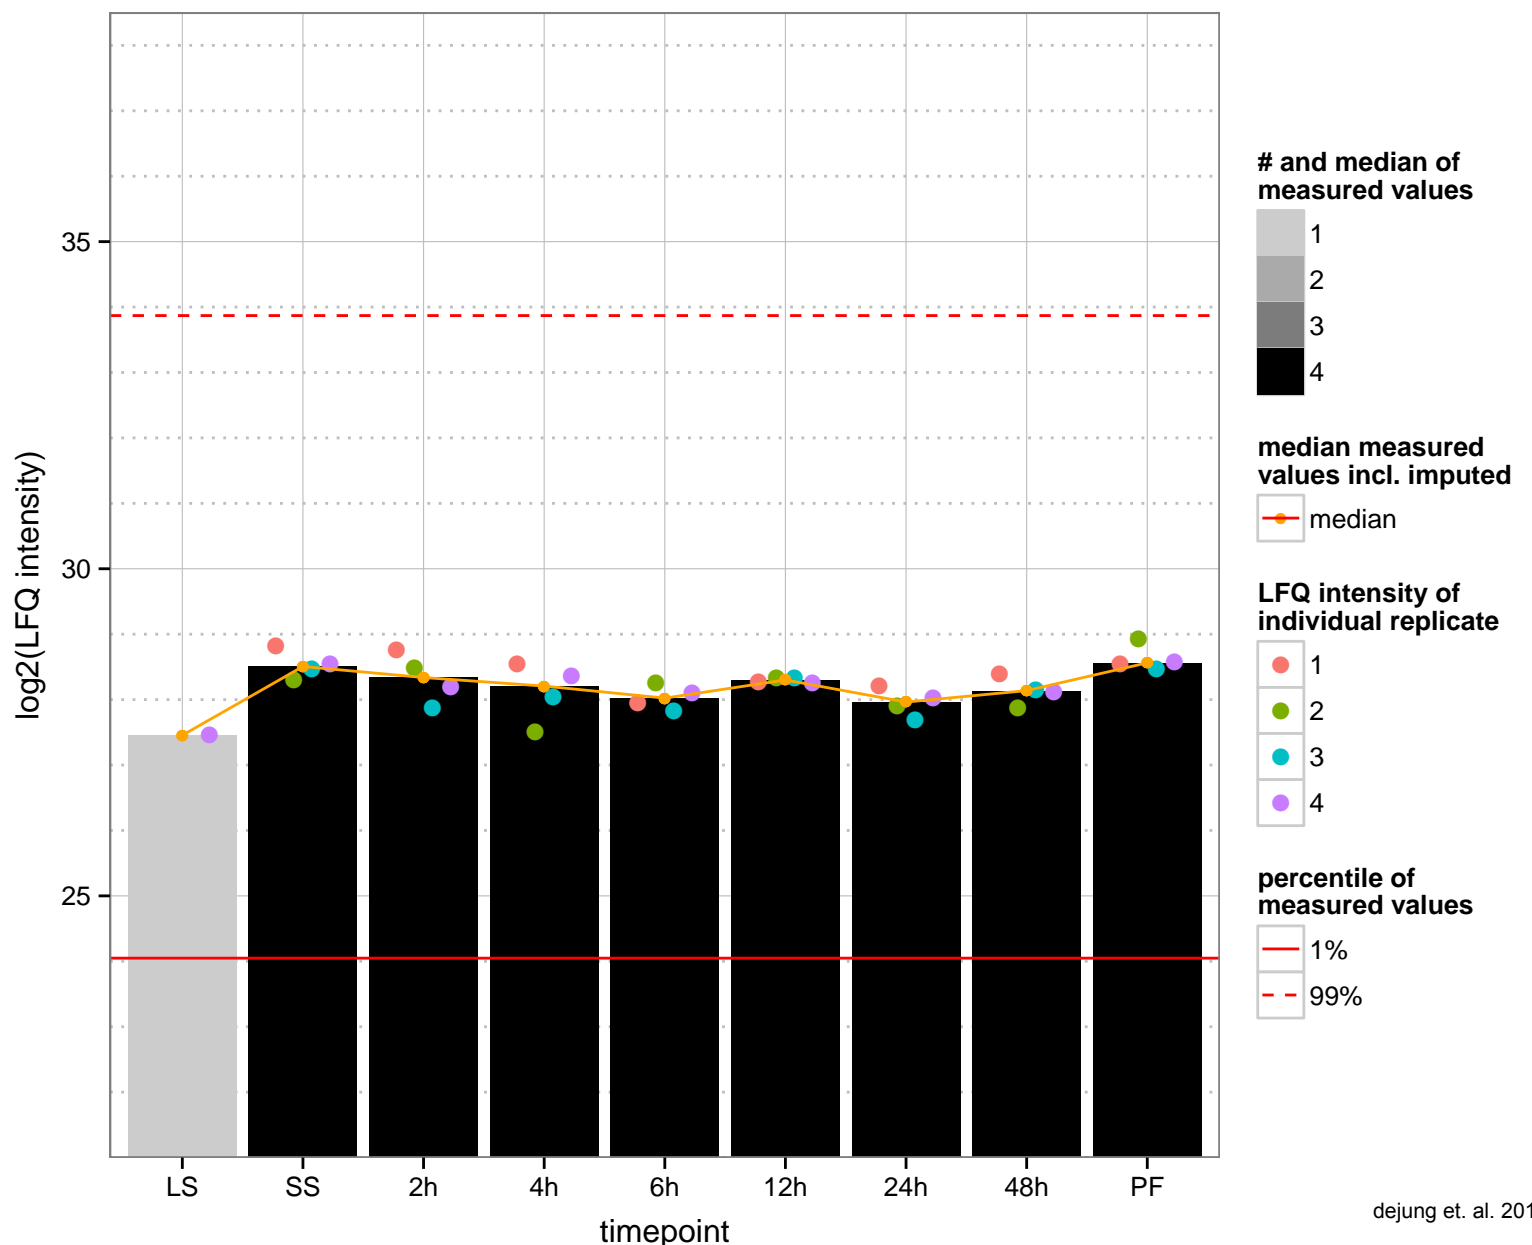

hypothetical protein, conserved  
 Tb927.11.8390  
 AGOF: null  
 AGOC: null  
 AGOP: null  
 PGO: null  
 PGOC: null  
 PGOP: null

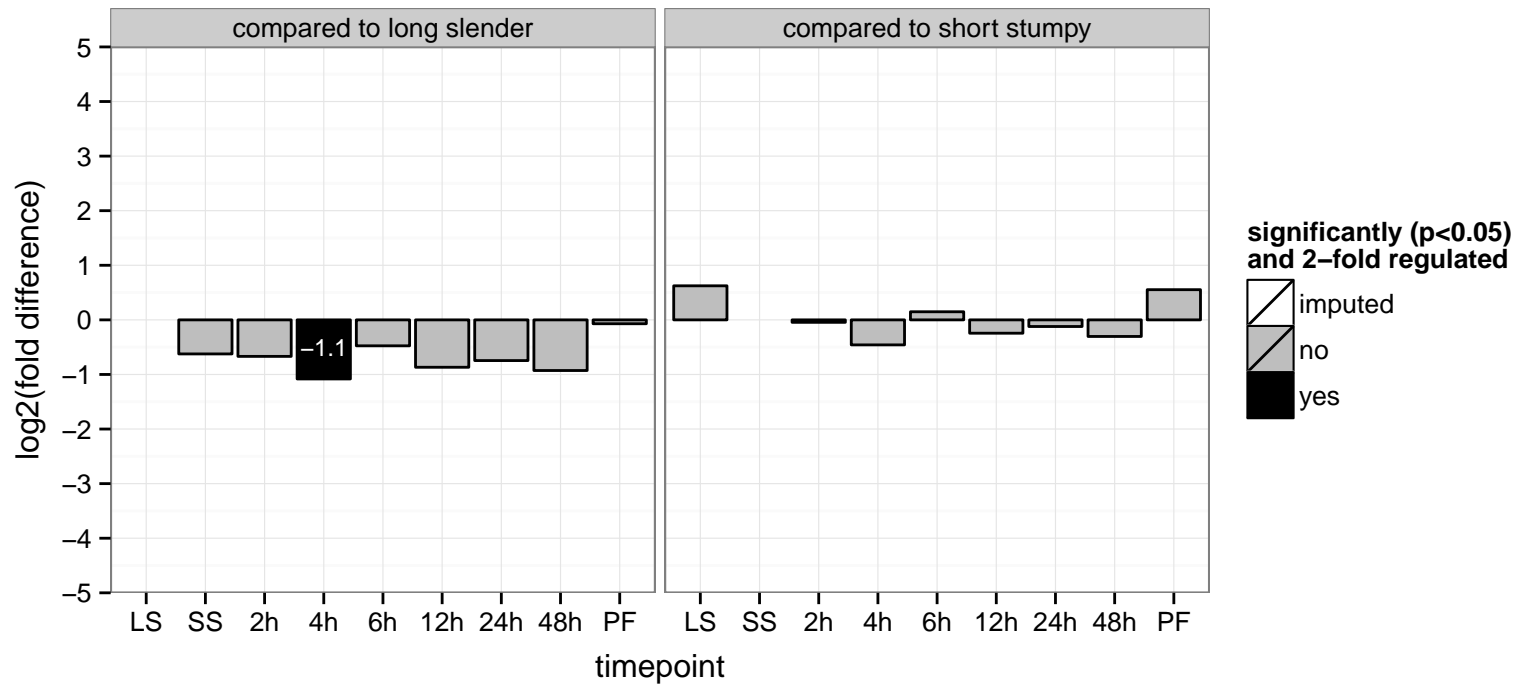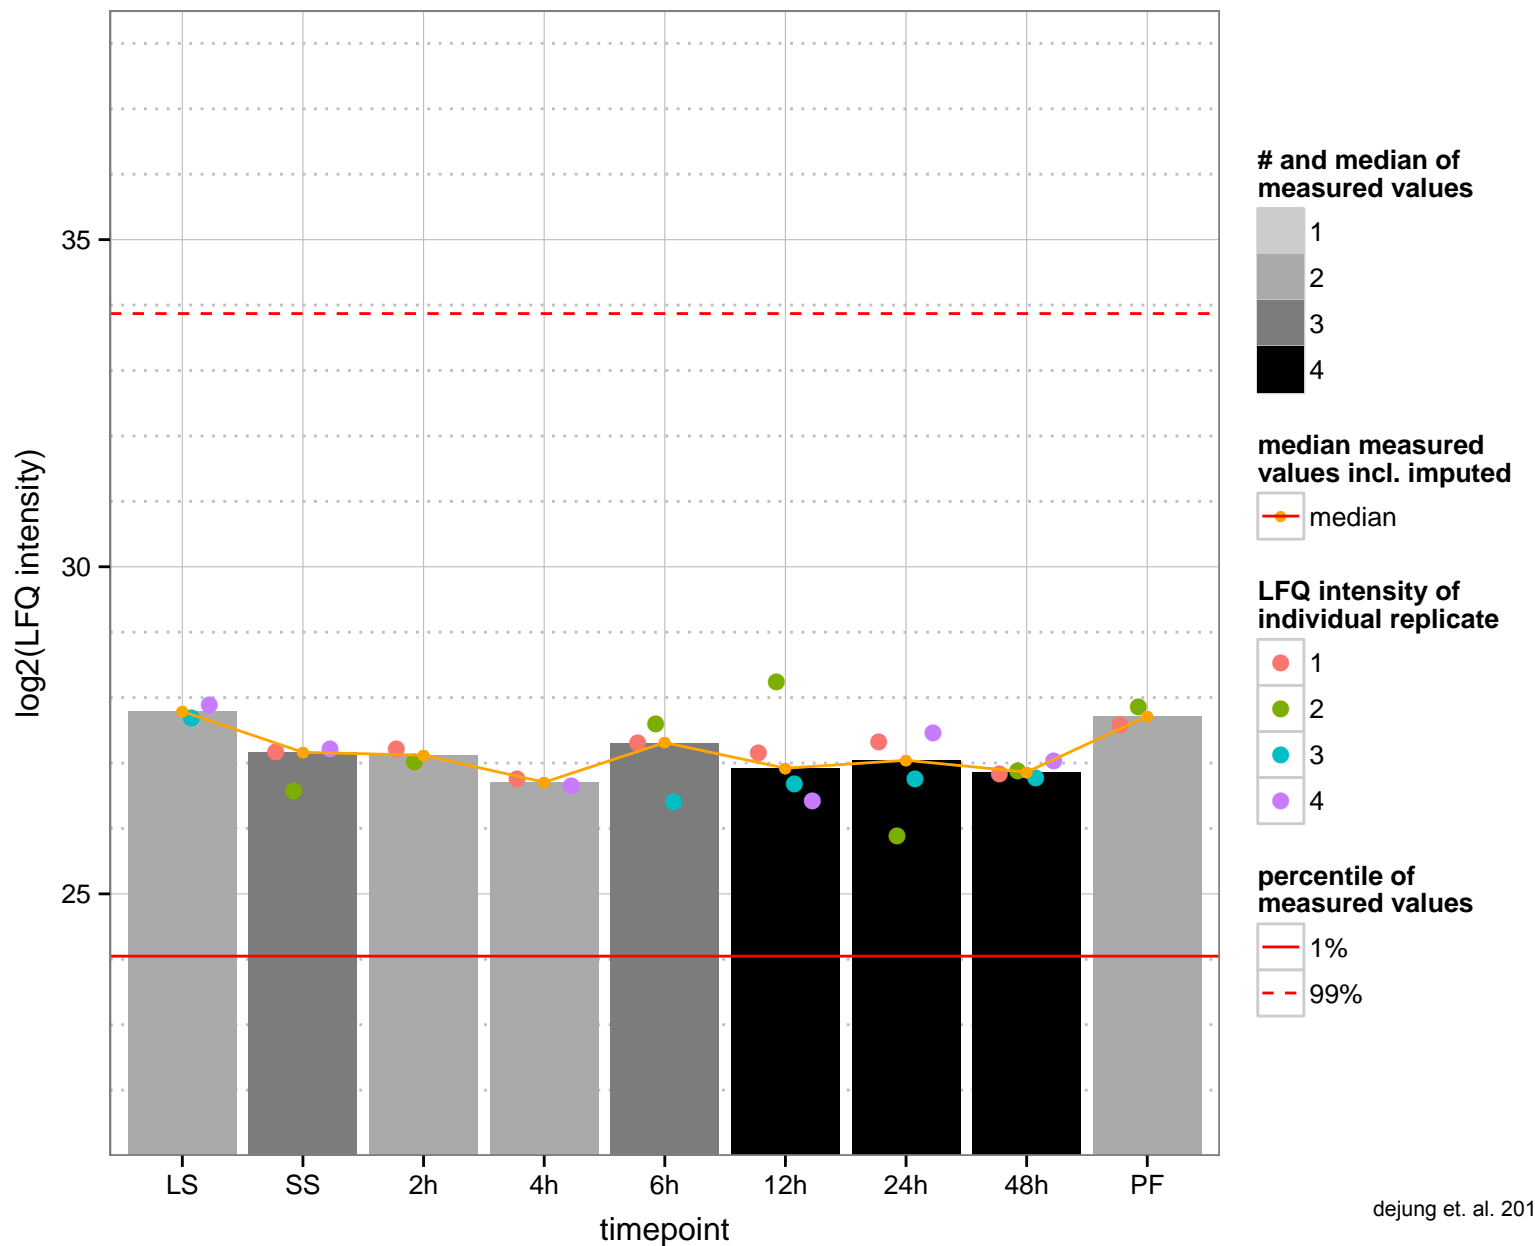

hypothetical protein, conserved  
 Tb927.11.8450  
 AGOF: null  
 AGOC: null  
 AGOP: null  
 PGOF: null  
 PGO: null  
 PGOP: null

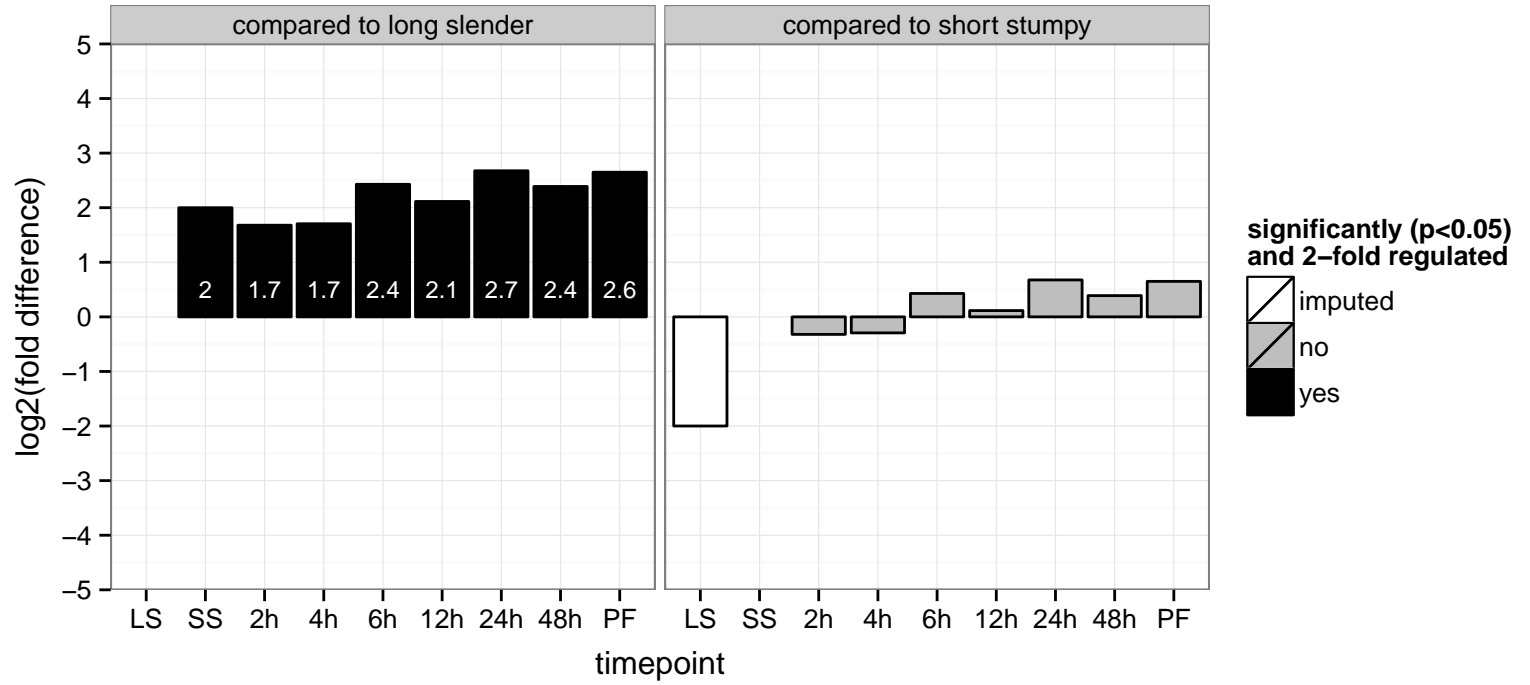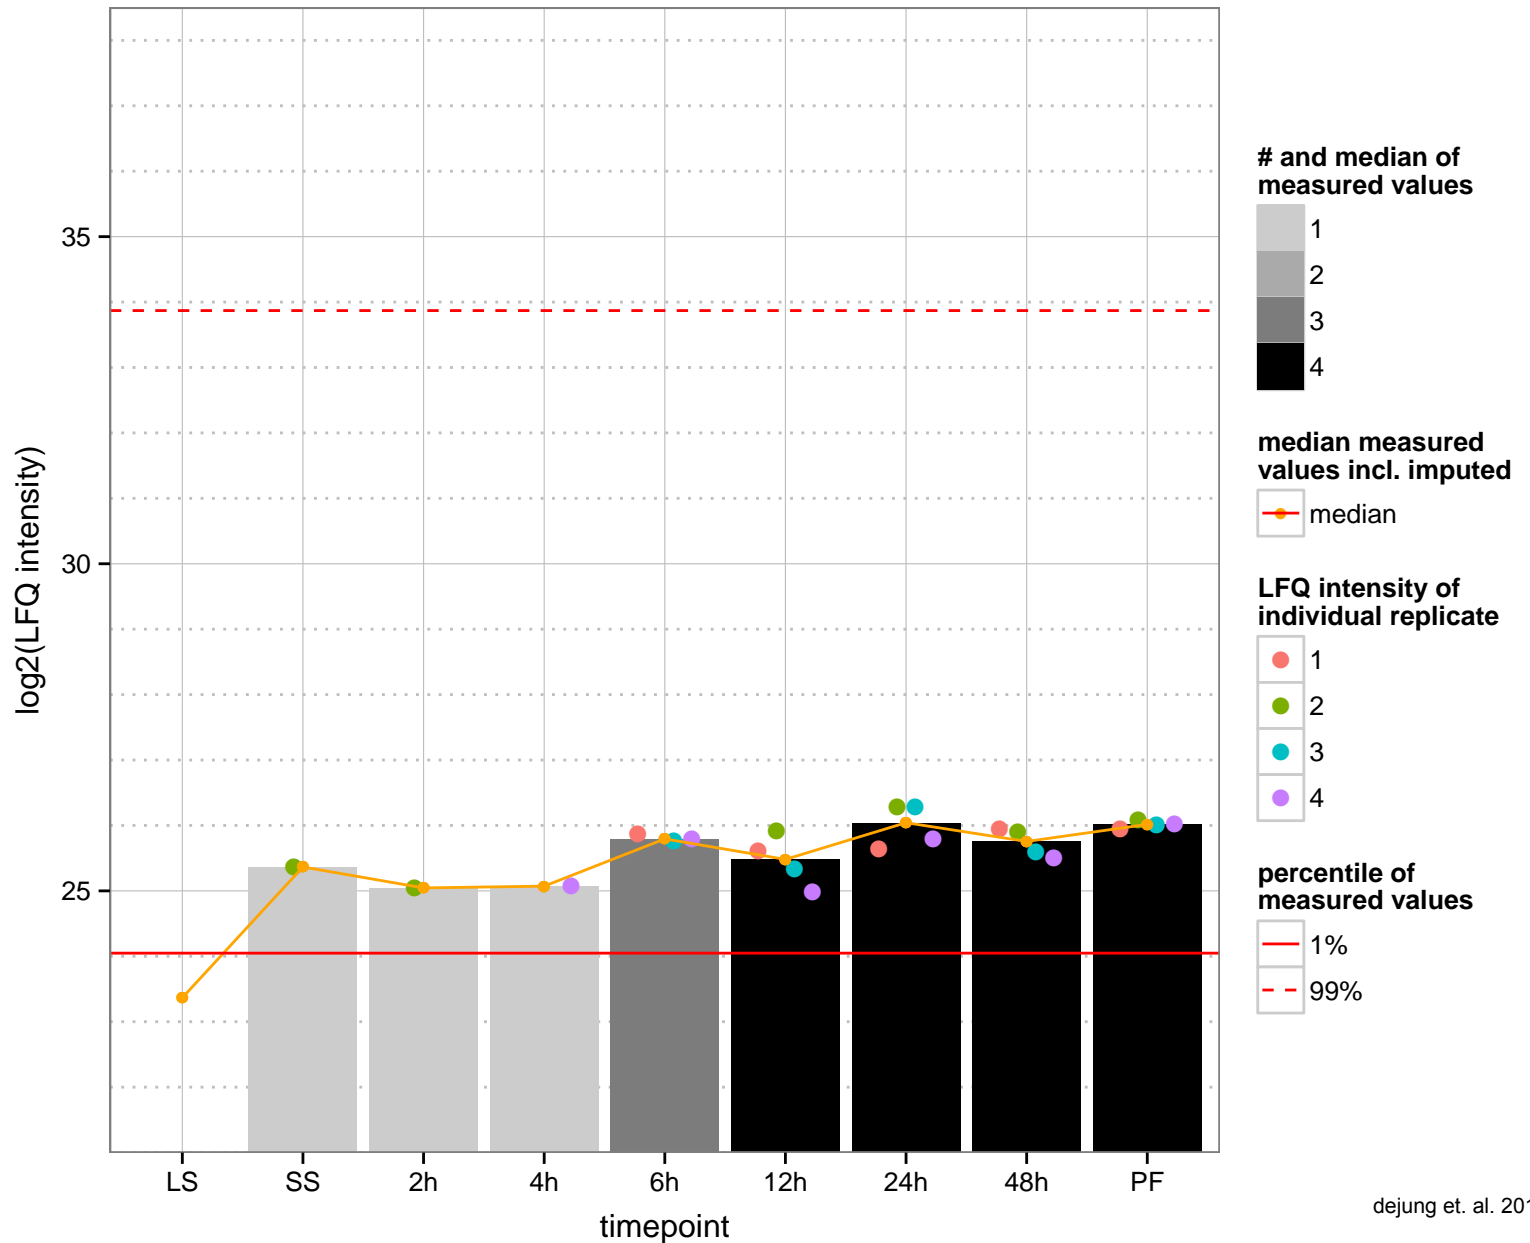



ATP-dependent RNA helicase FAL1, putative

Tb927.11.8770

AGOF: ATP binding, ATP-dependent helicase activity, helicase activity, nucleic acid binding

AGOC: nucleolus

AGOP: maturation of SSU-rRNA from tricistronic rRNA transcript (SSU-rRNA, 5.8S rRNA, LSU-rRNA)

PGOF: ATP binding, ATP-dependent helicase activity, helicase activity, nucleic acid binding

PGOC: null

PGOP: null

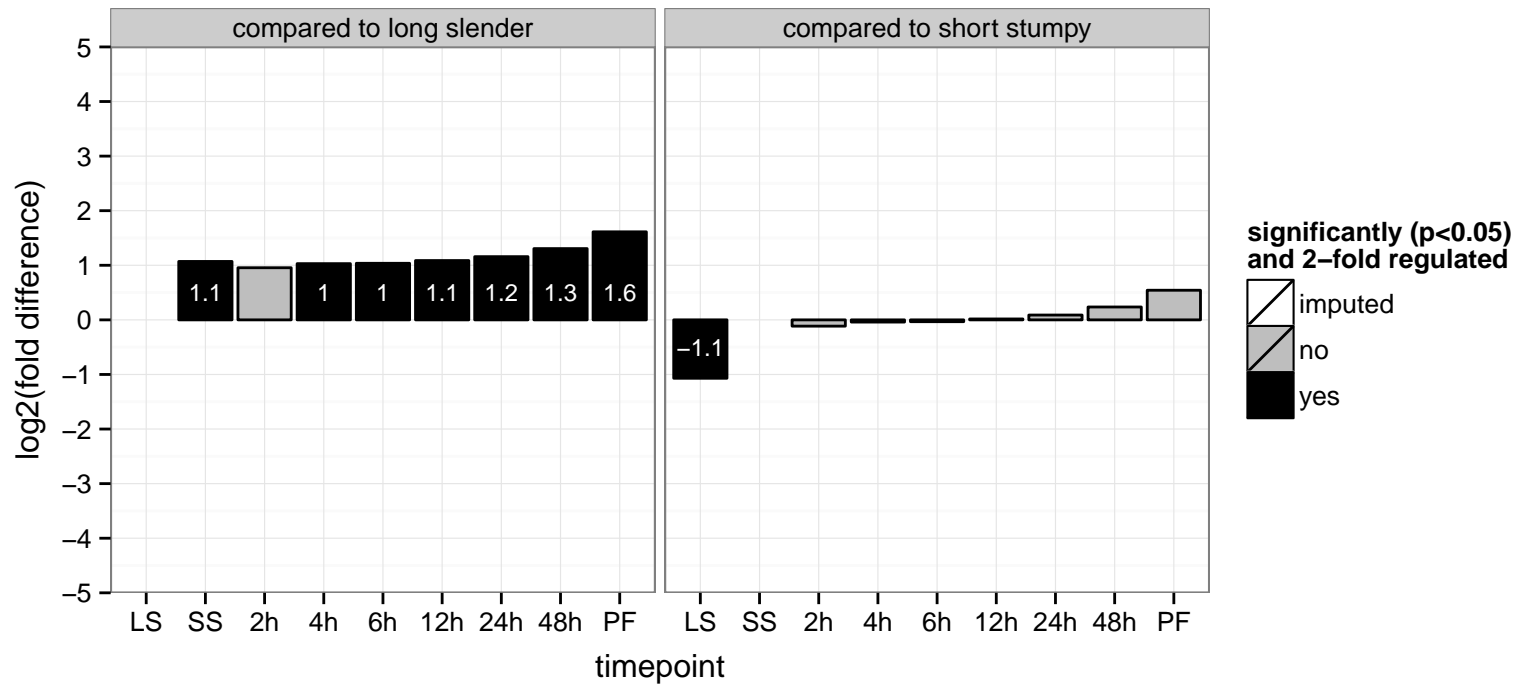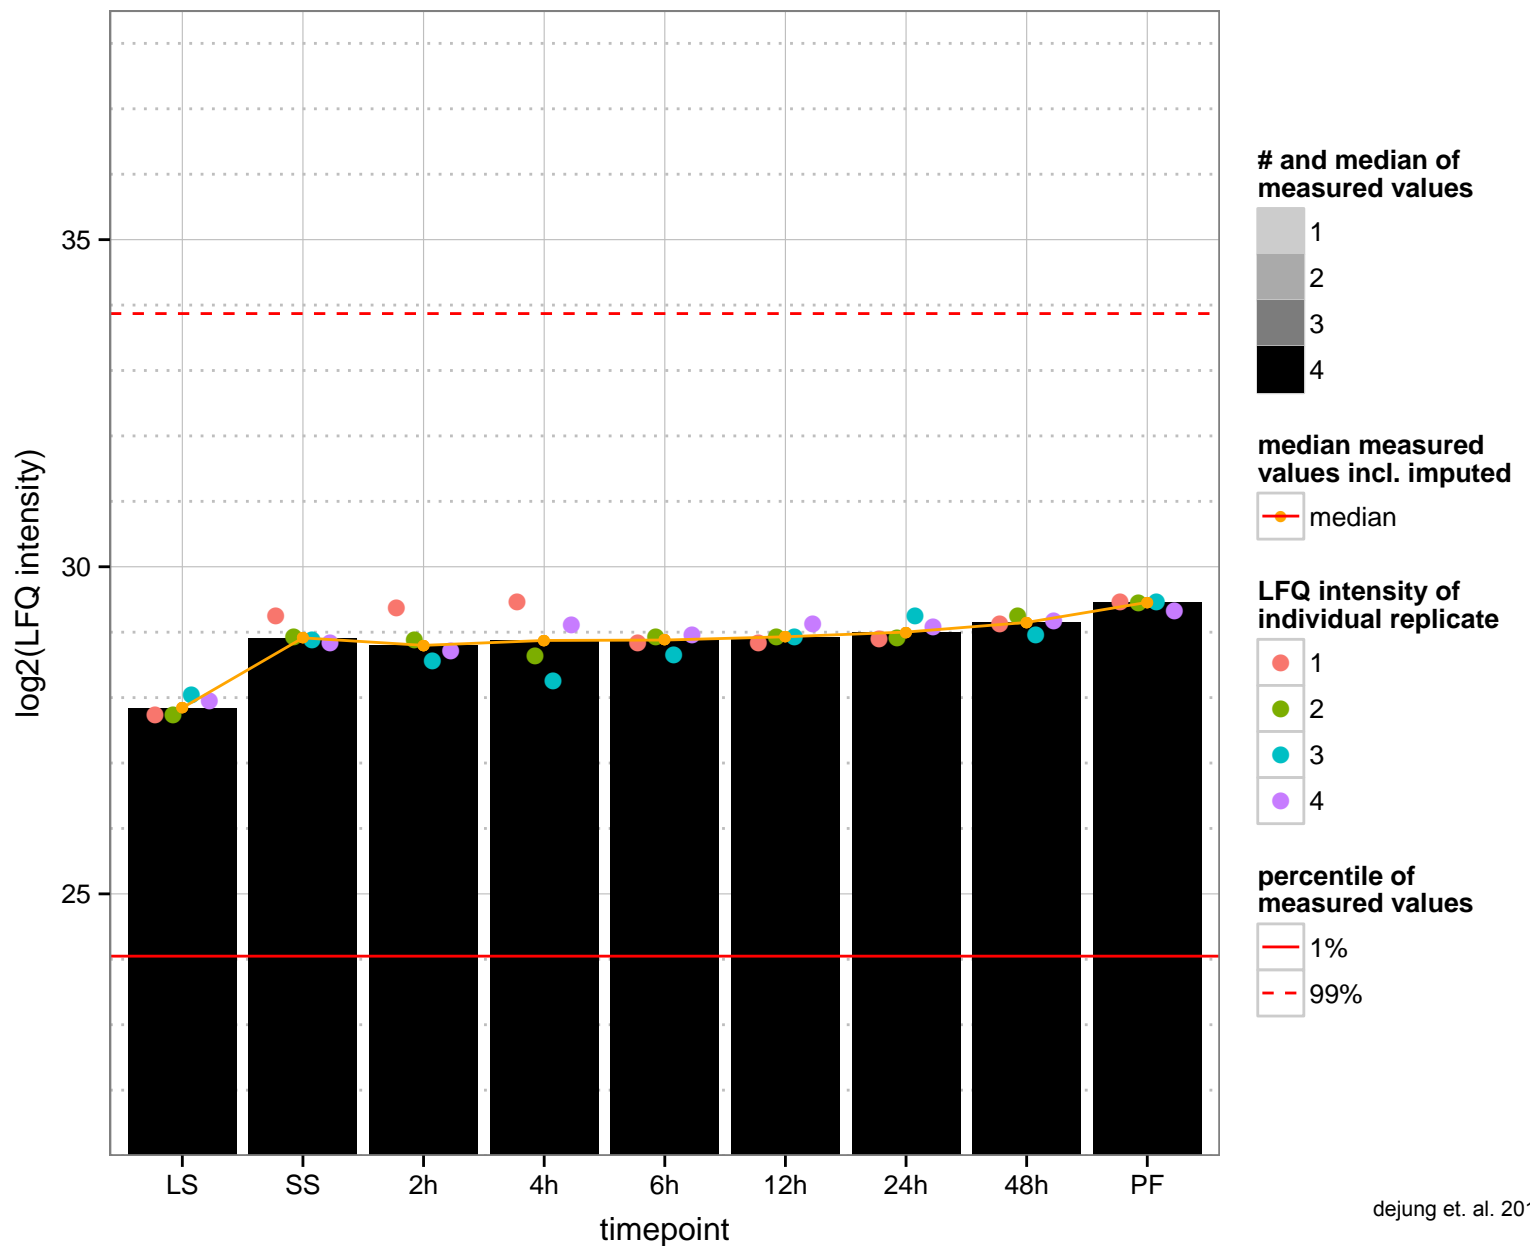

cyclophilin a, cyclophilin type peptidyl-prolyl cis-trans isomerase (CYPA)

Tb927.11.880

AGOF: peptidyl-prolyl cis-trans isomerase activity

AGOC: cilium, cytosol

AGOP: protein folding

PGOF: peptidyl-prolyl cis-trans isomerase activity

PGOC: null

PGOP: protein folding

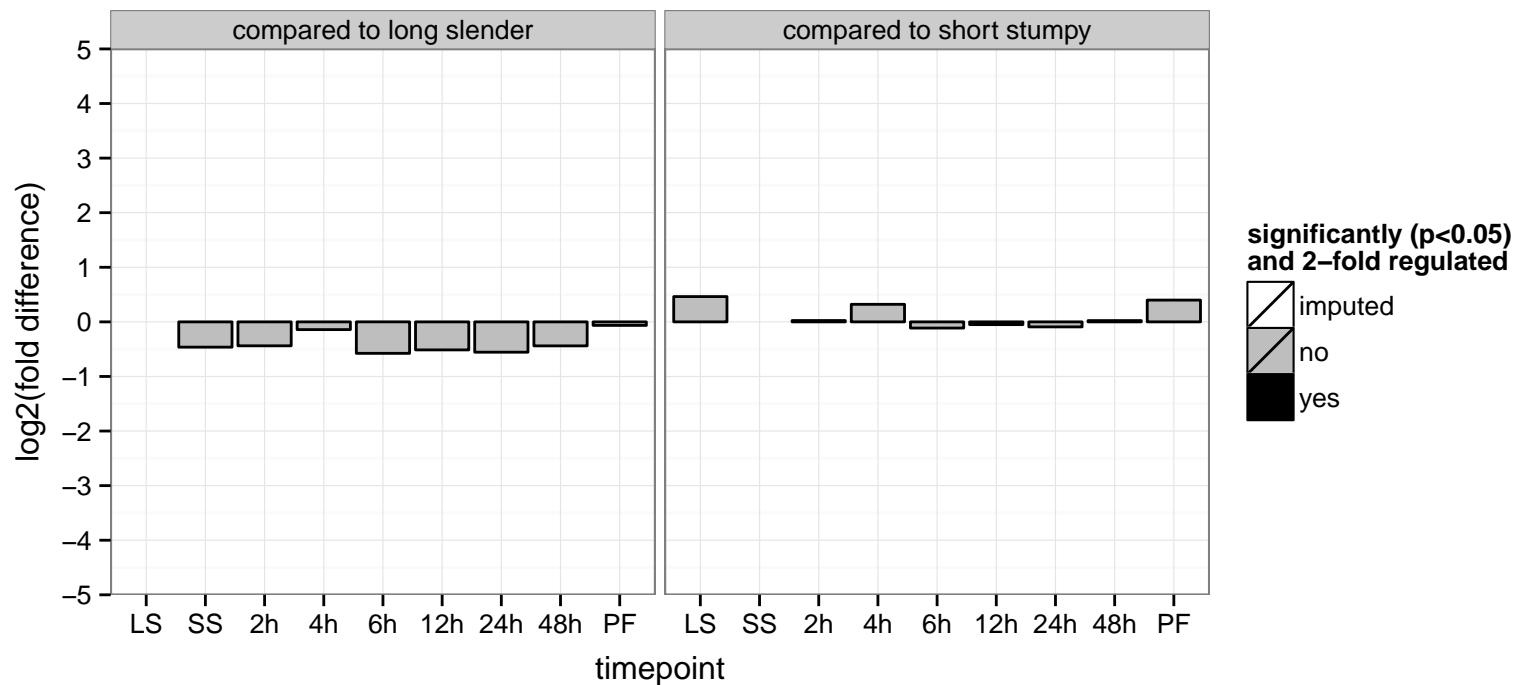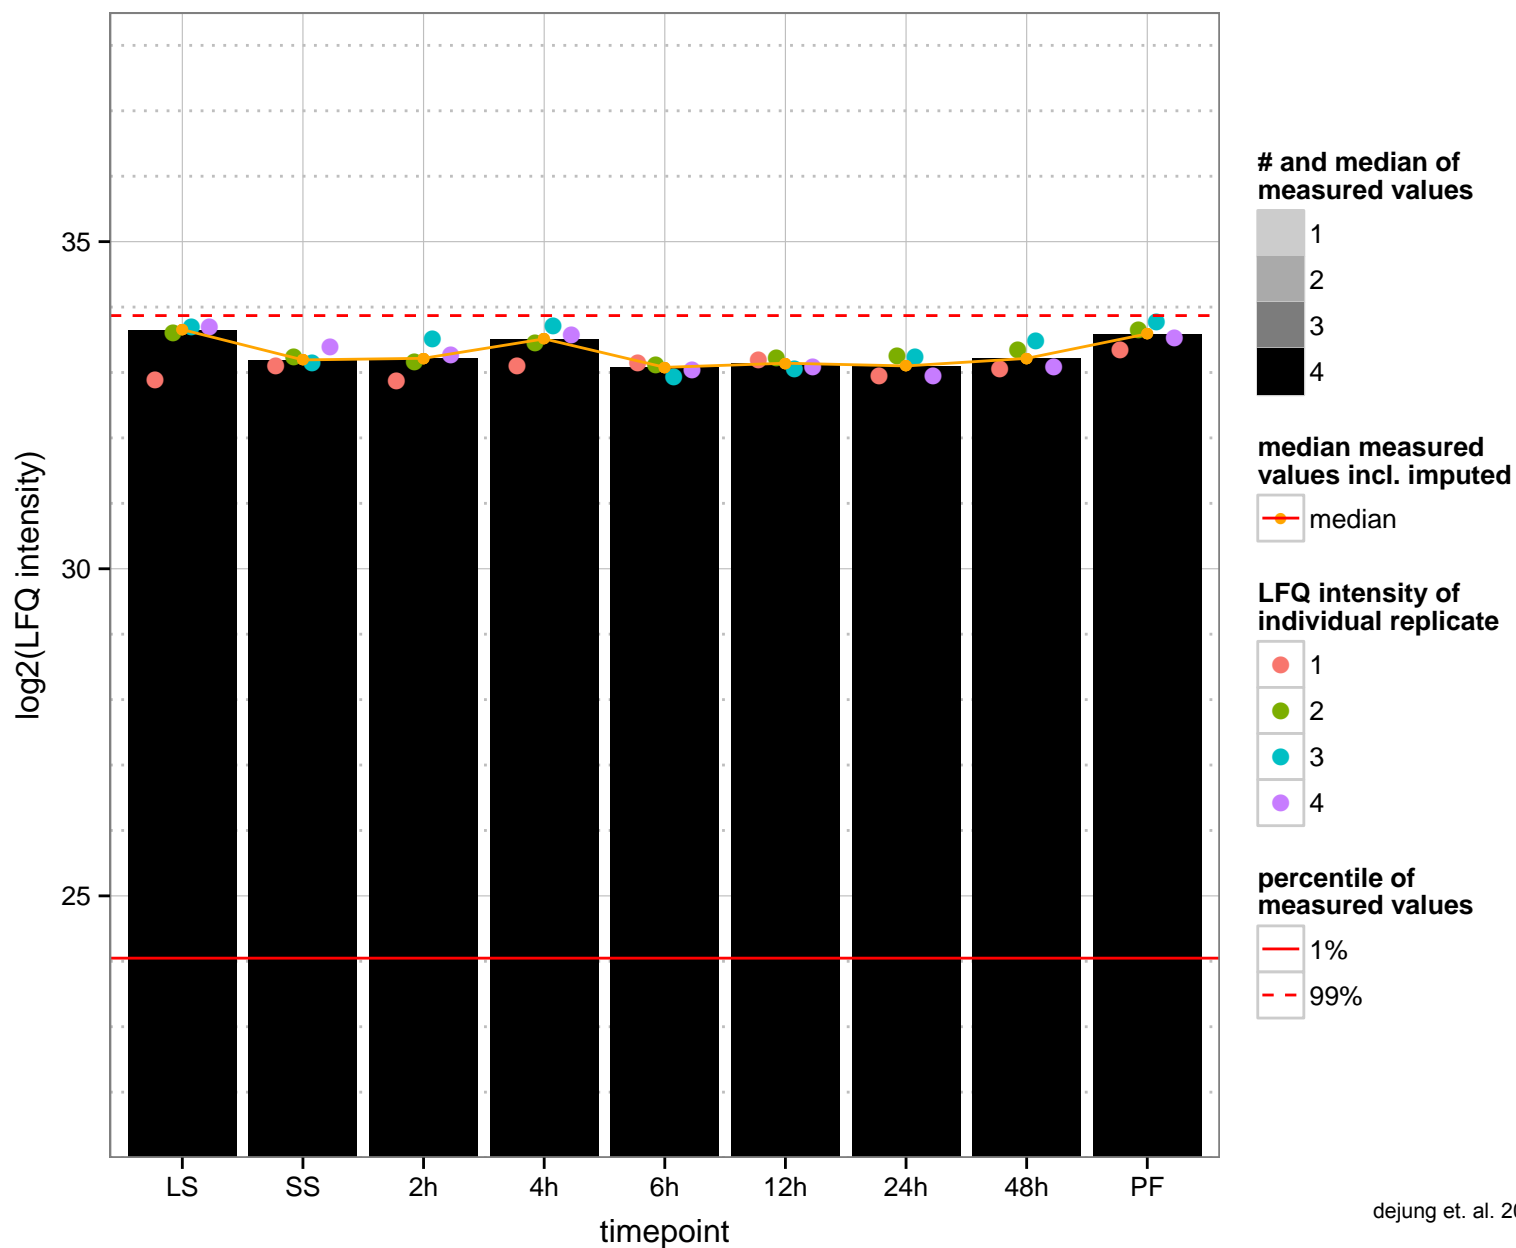

hypothetical protein, conserved  
 Tb927.11.8800  
 AGOF: null  
 AGOC: mitochondrial inner membrane, mitochondrion  
 AGOP: null  
 PGO: null  
 PGO: null  
 PGO: null

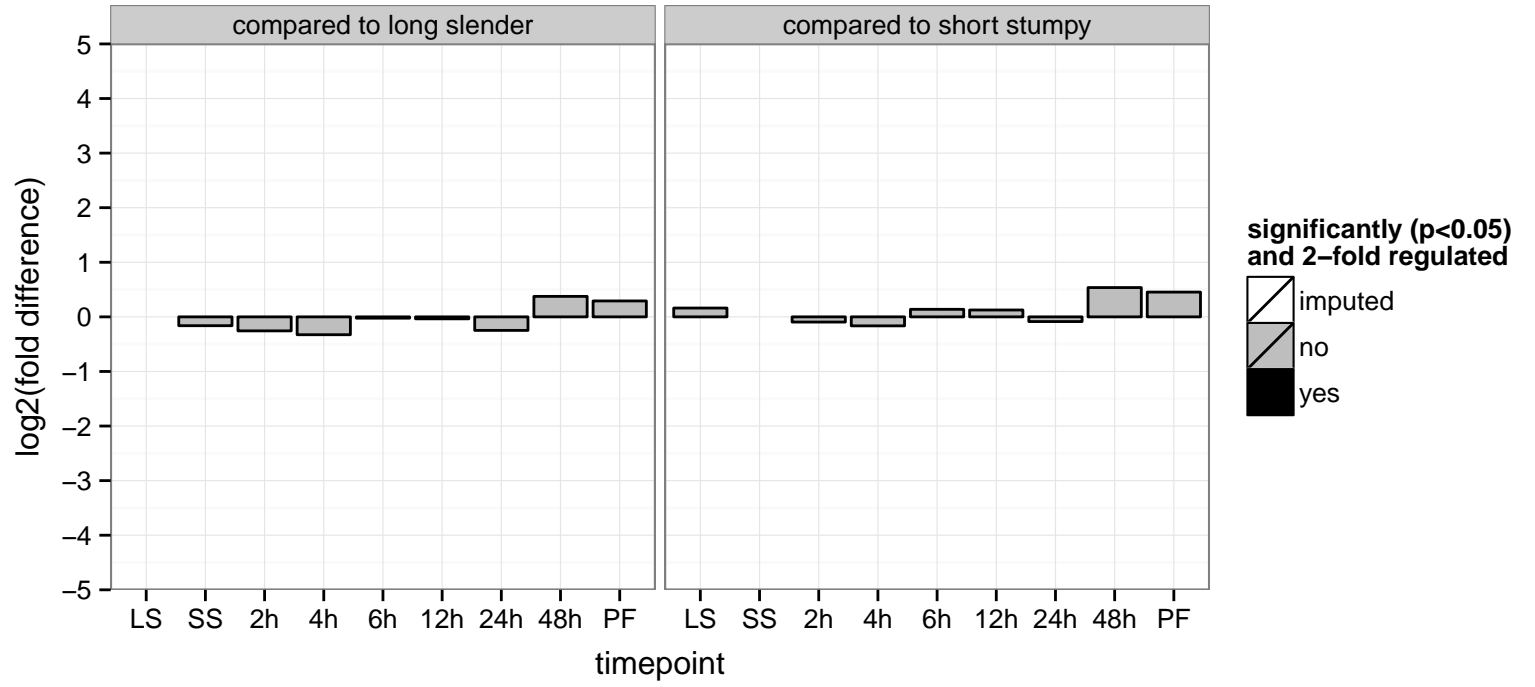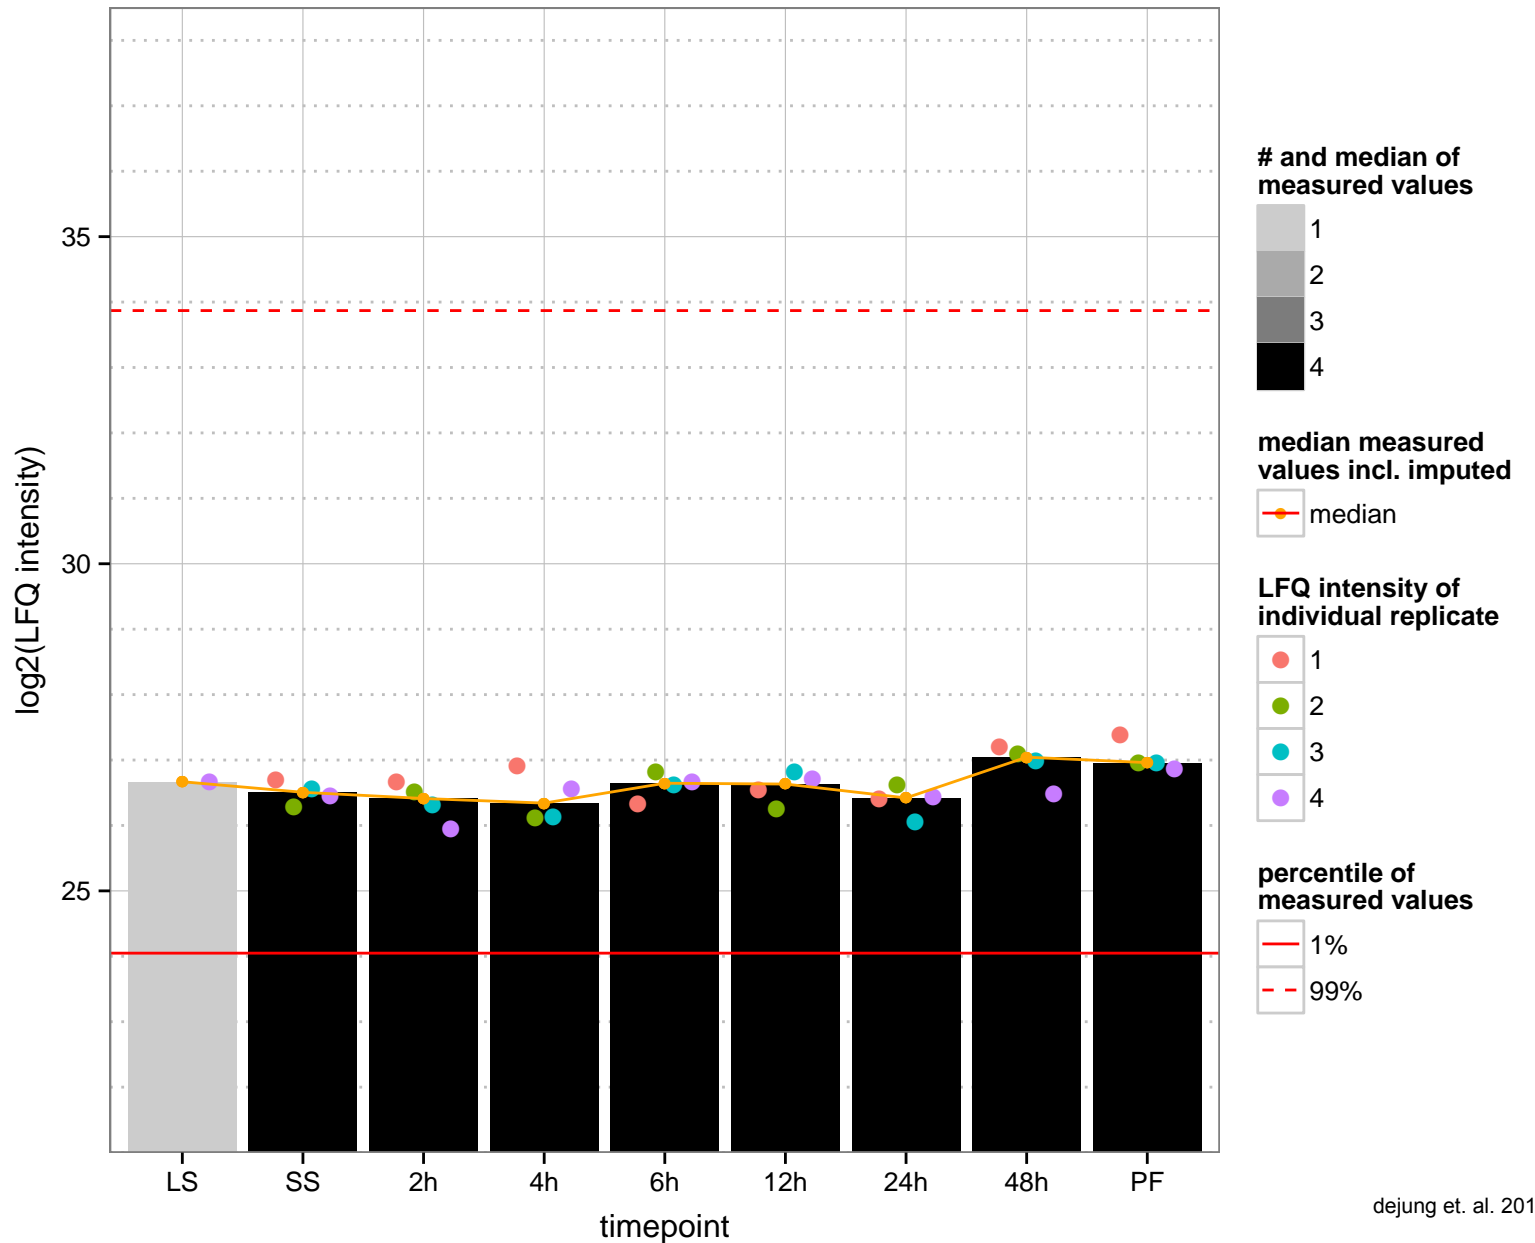

DNA-dependent RNA polymerases, putative (RPC19)

Tb927.11.8890

AGOF: DNA binding, DNA-directed RNA polymerase activity, protein dimerization activity

AGOC: nucleus

AGOP: transcription, DNA-dependent

PGOF: DNA binding, DNA-directed RNA polymerase activity

PGOC: null

PGOP: transcription, DNA-dependent

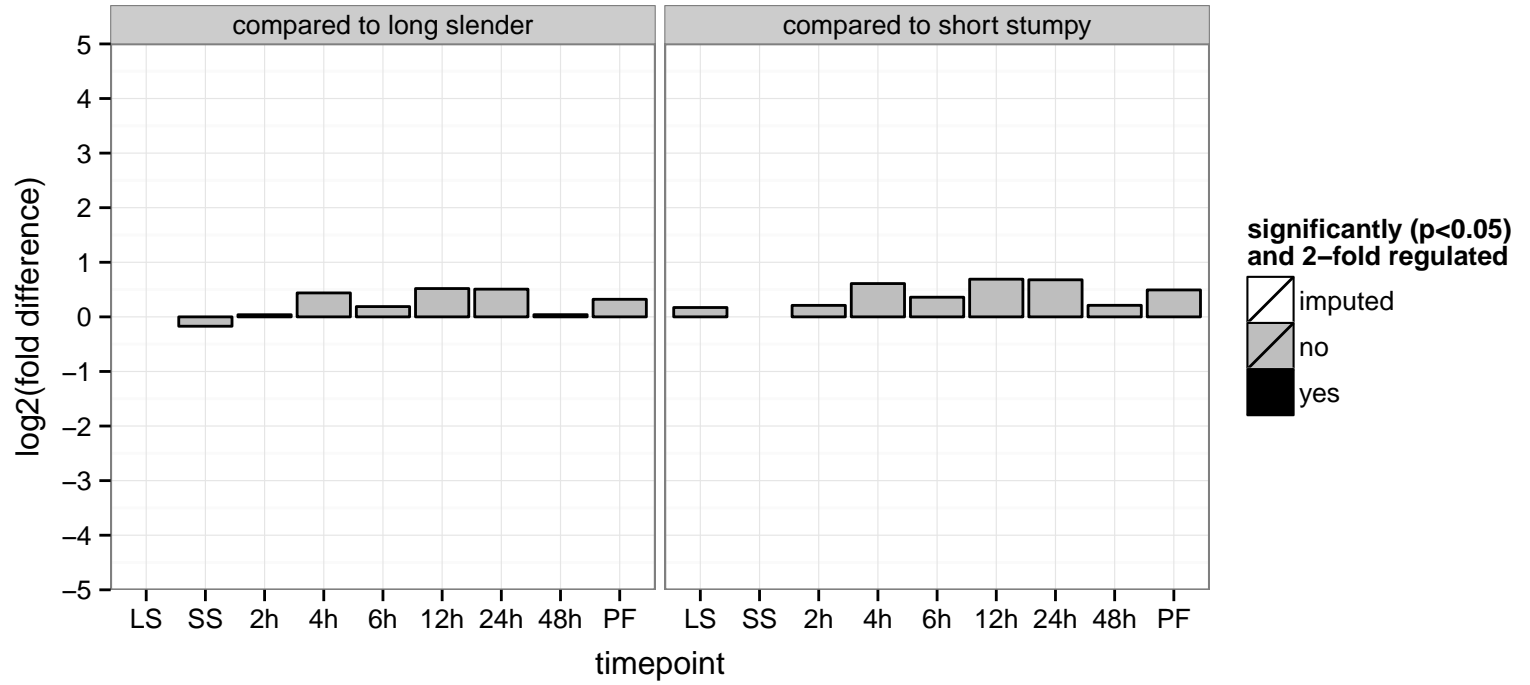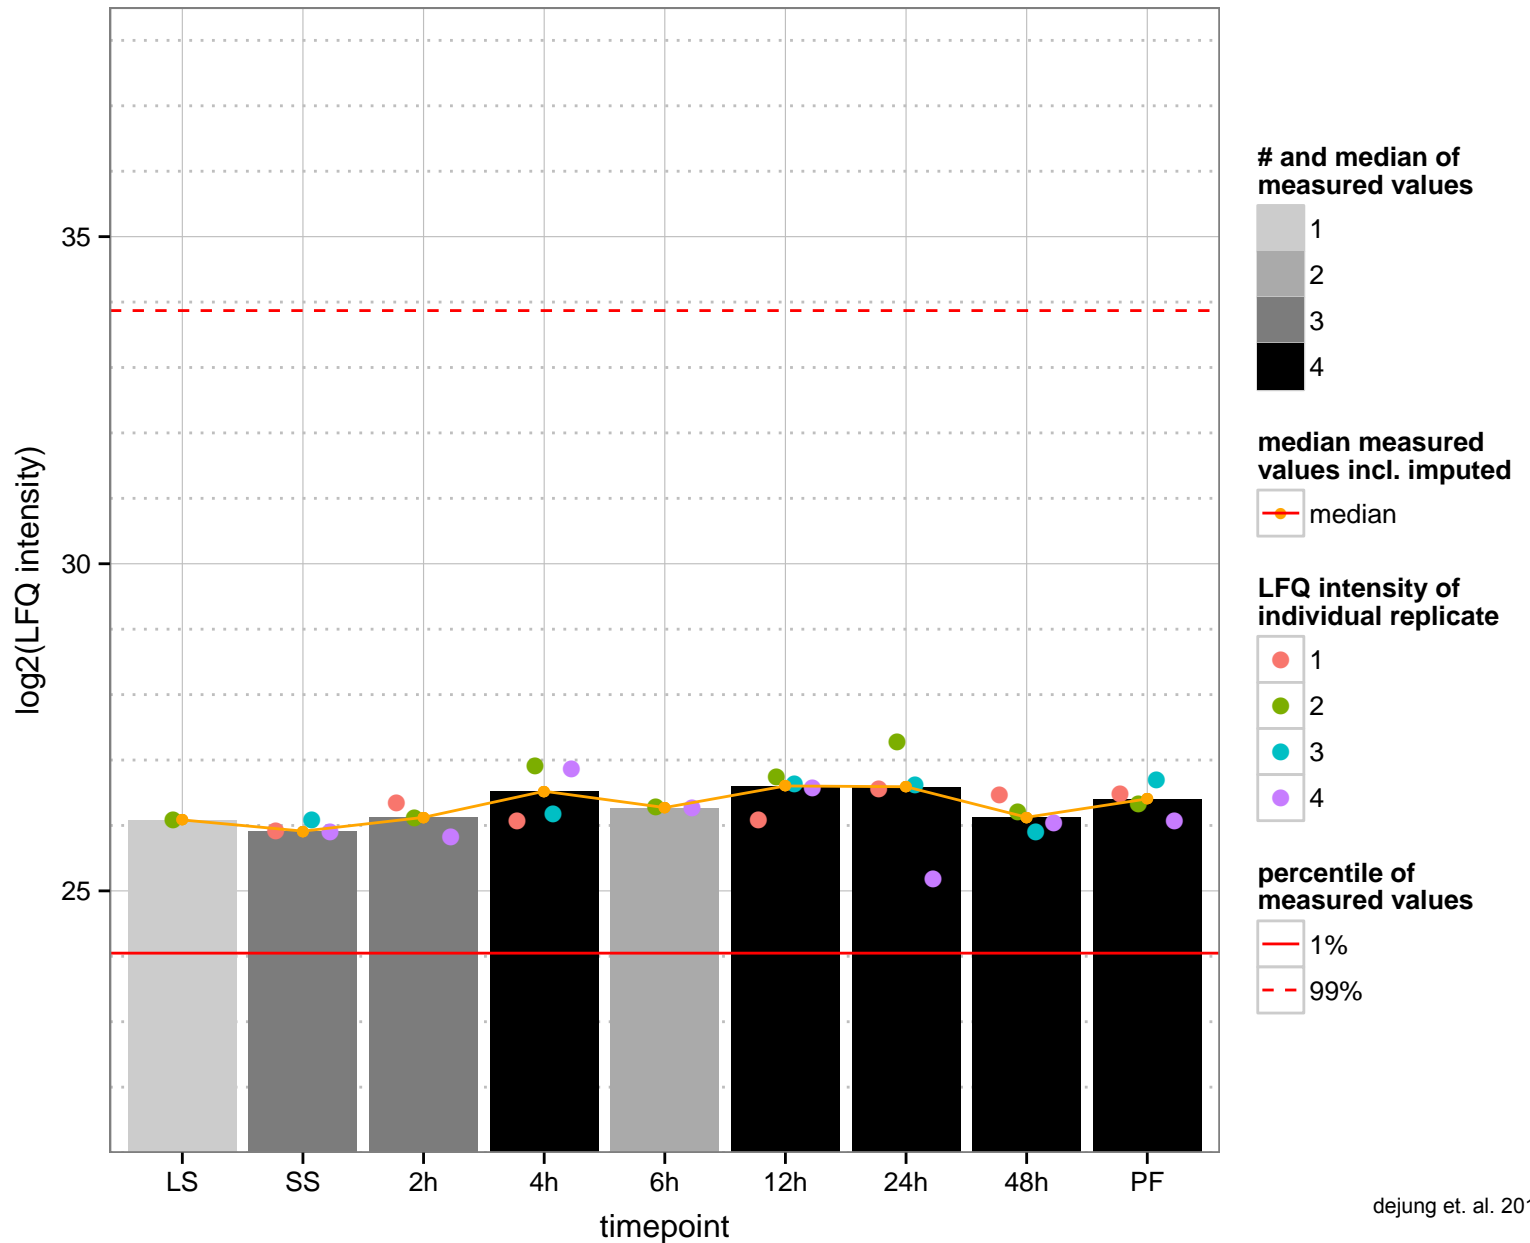

hypothetical protein, conserved  
 Tb927.11.8900  
 AGOF: null  
 AGOC: null  
 AGOP: null  
 PGO: null  
 PGOC: null  
 PGOP: null

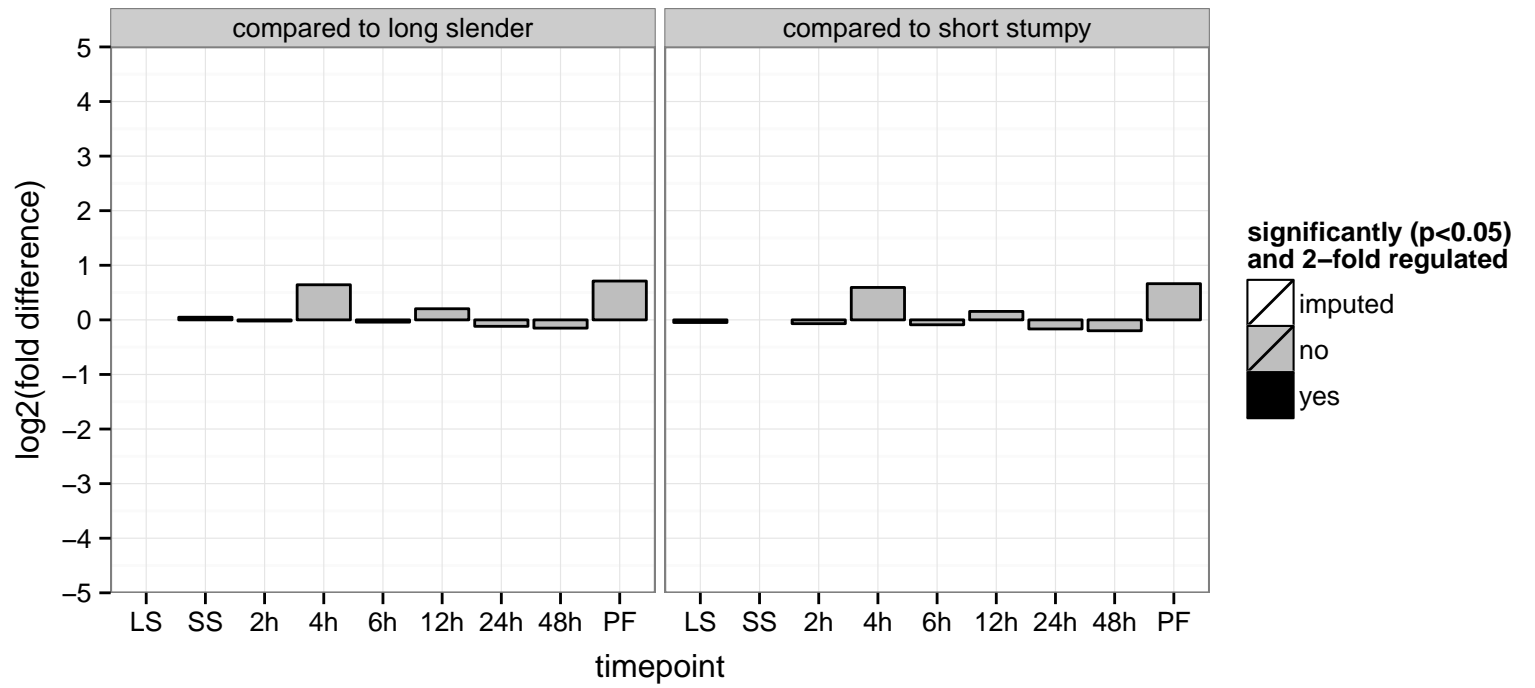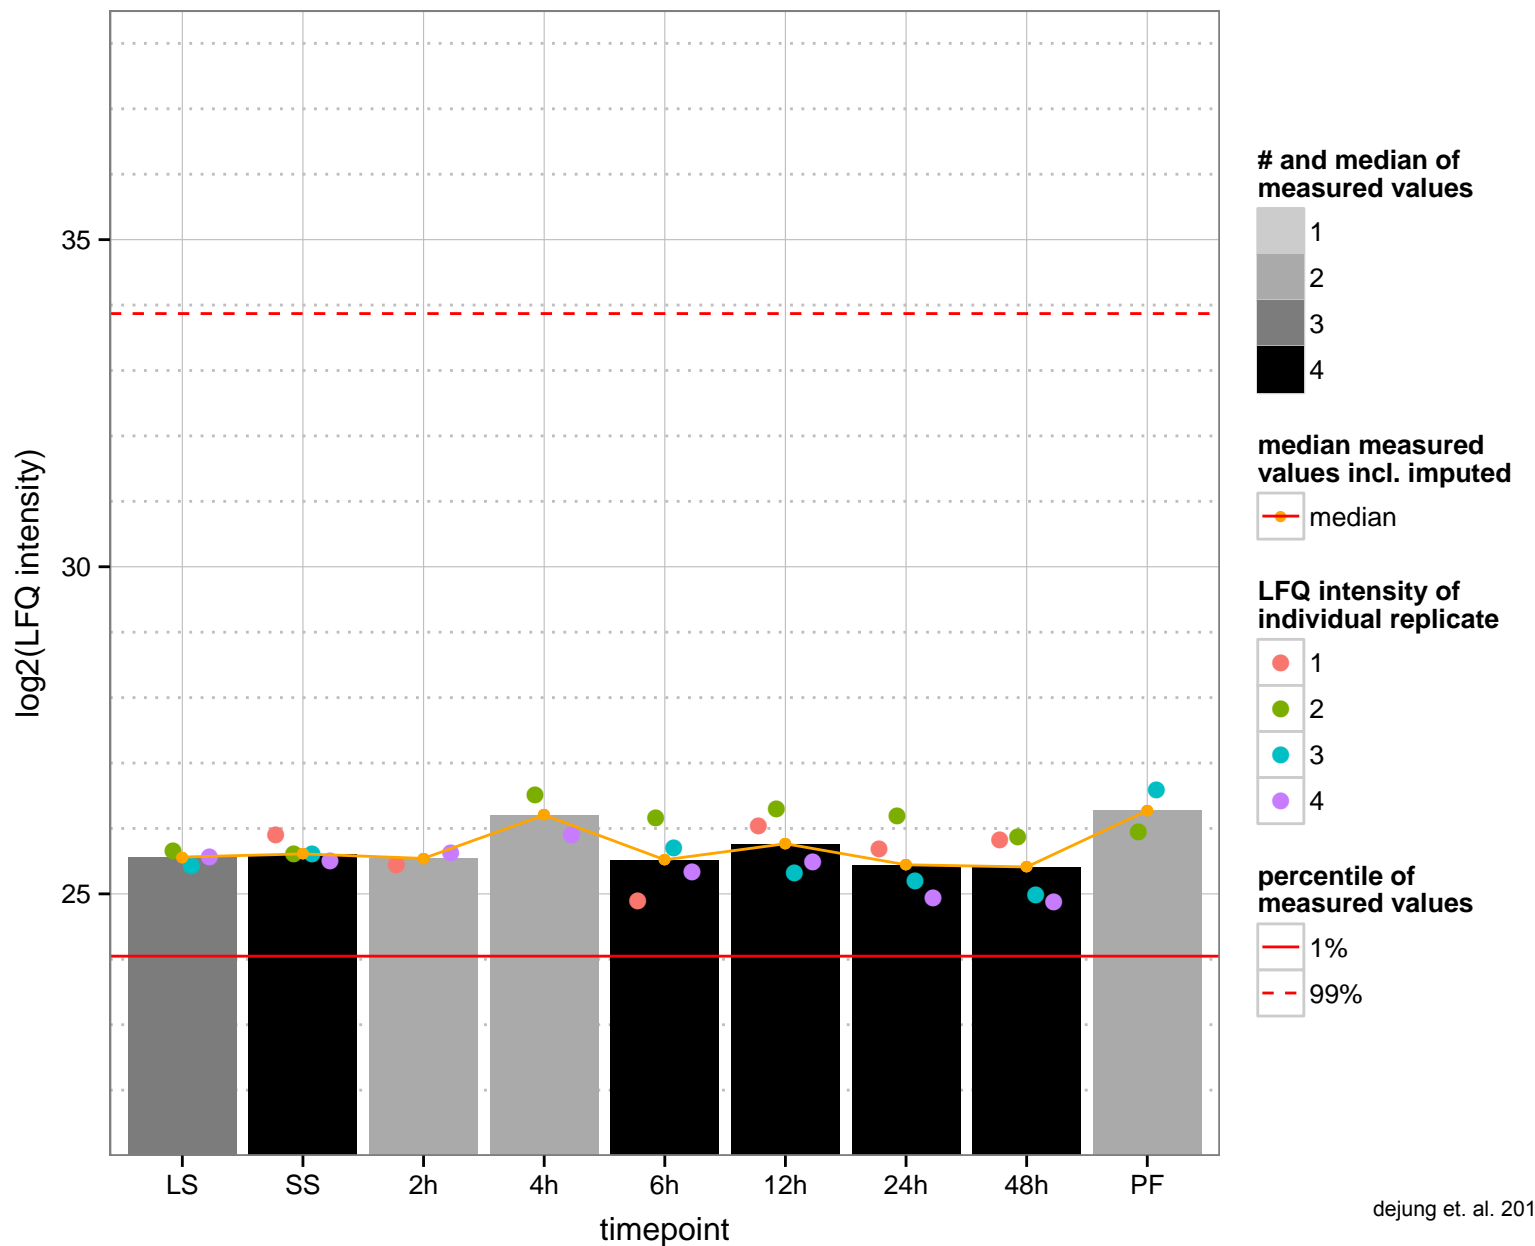

leucine rich repeat (TbLRRP1)  
 Tb927.11.8950  
 AGOF: null  
 AGOC: null  
 AGOP: null  
 PGO: protein binding  
 PGO: null  
 PGO: null

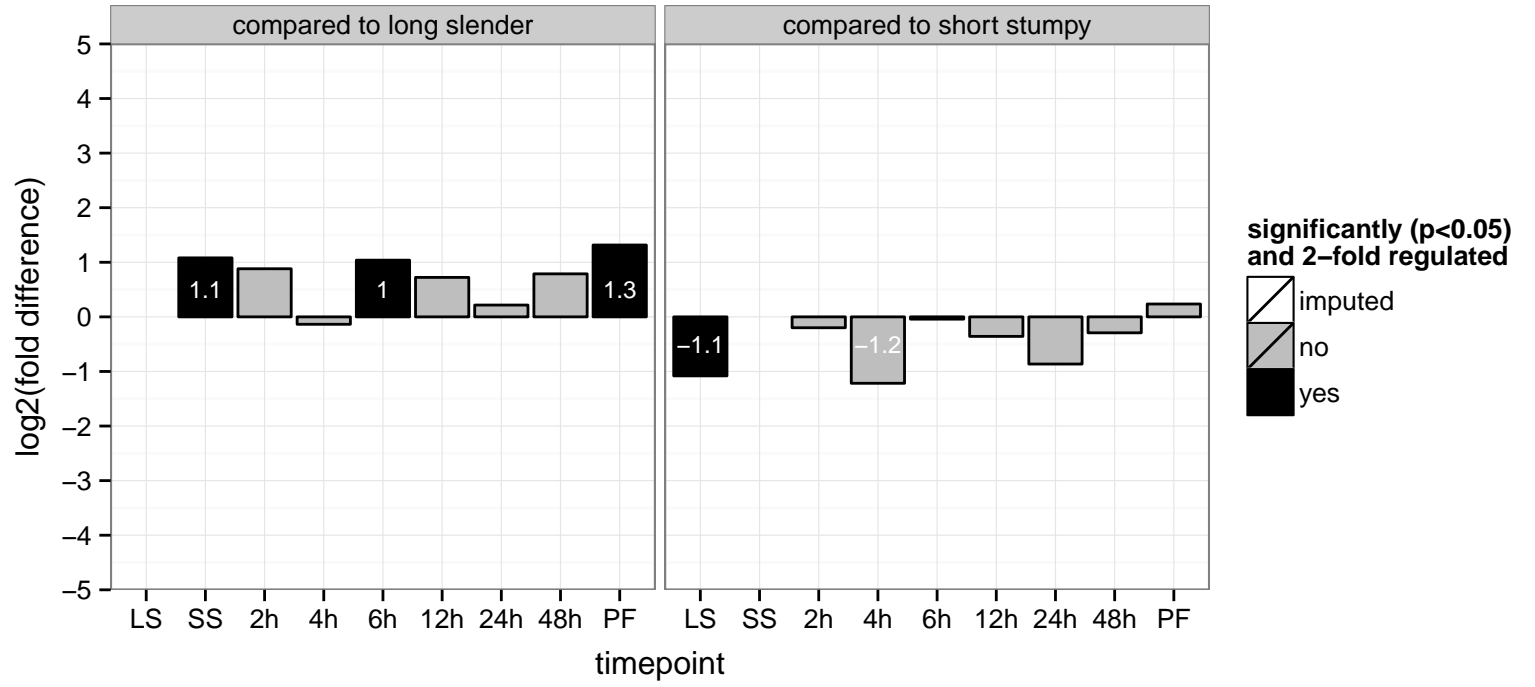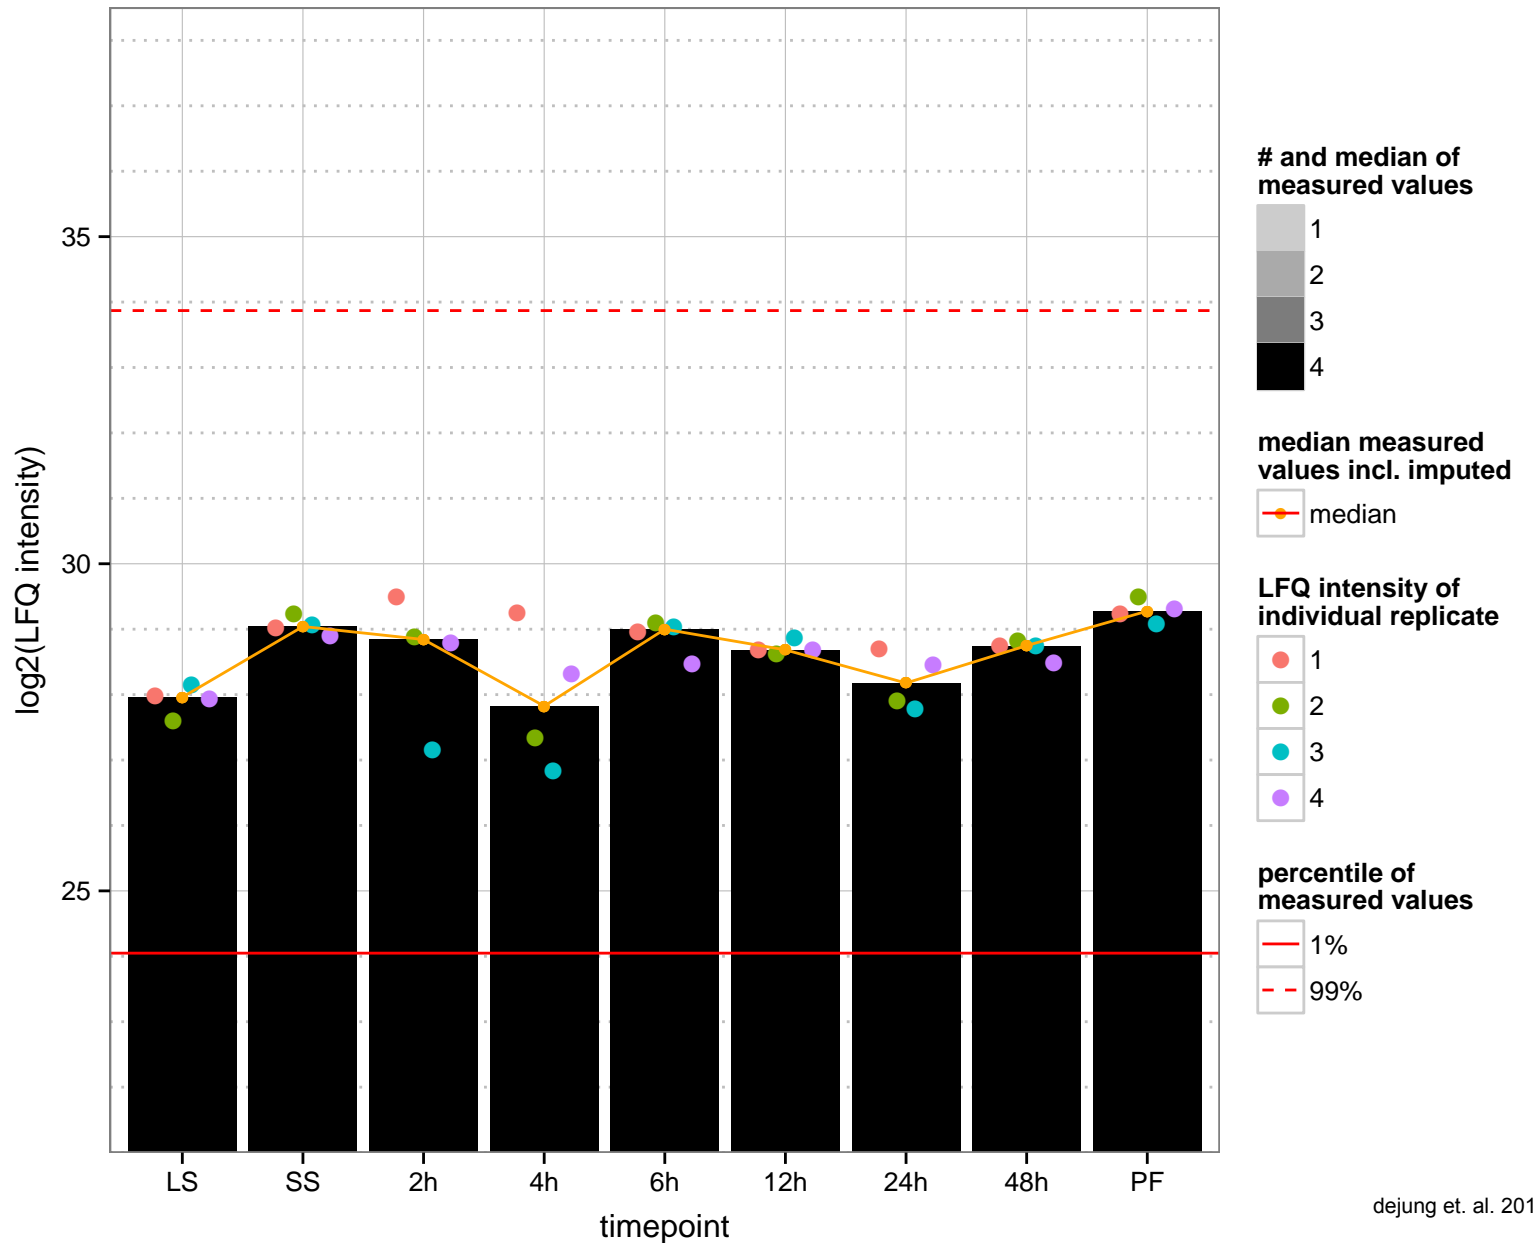

ribose 5-phosphate isomerase, putative

Tb927.11.8970

AGOF: ribose-5-phosphate isomerase activity

AGOC: null

AGOP: pentose-phosphate shunt, pentose-phosphate shunt, non-oxidative branch

PGOF: ribose-5-phosphate isomerase activity

PGOC: null

PGOP: carbohydrate metabolic process, pentose-phosphate shunt

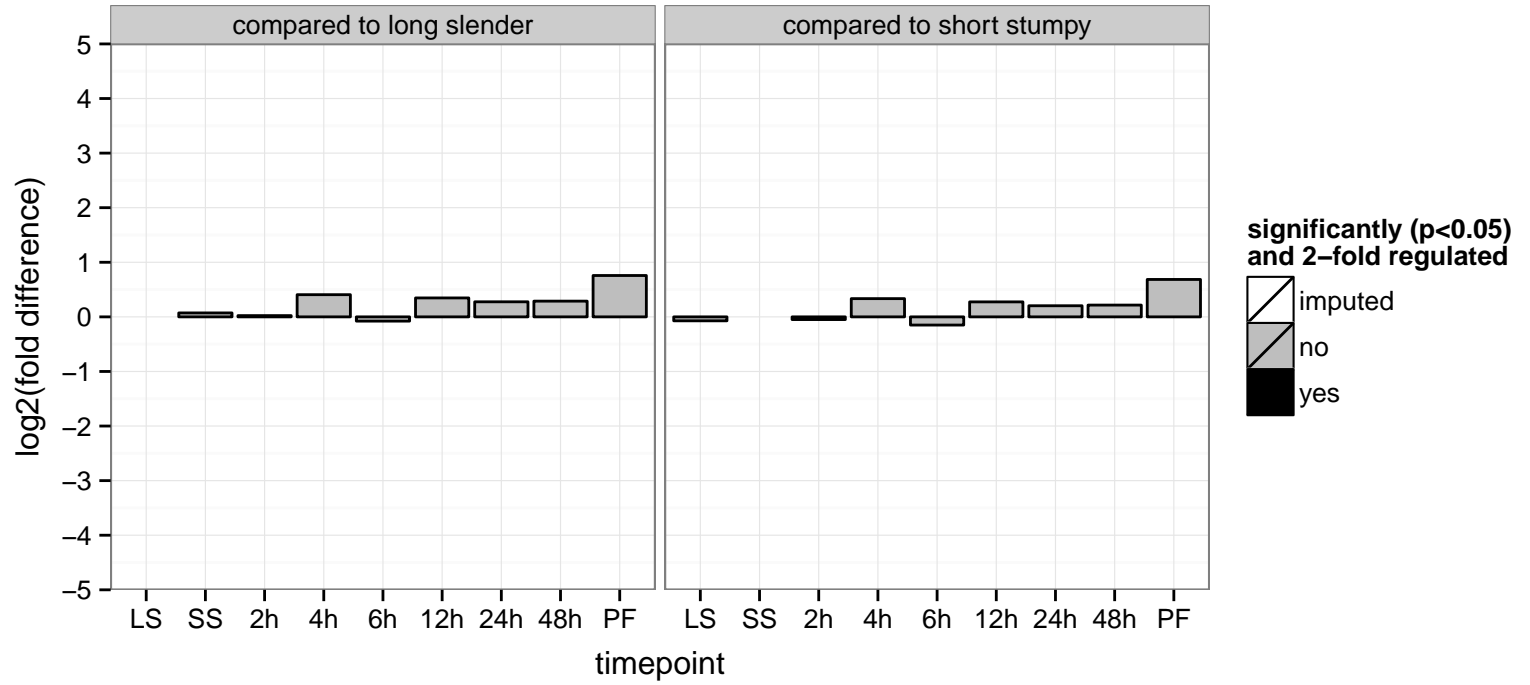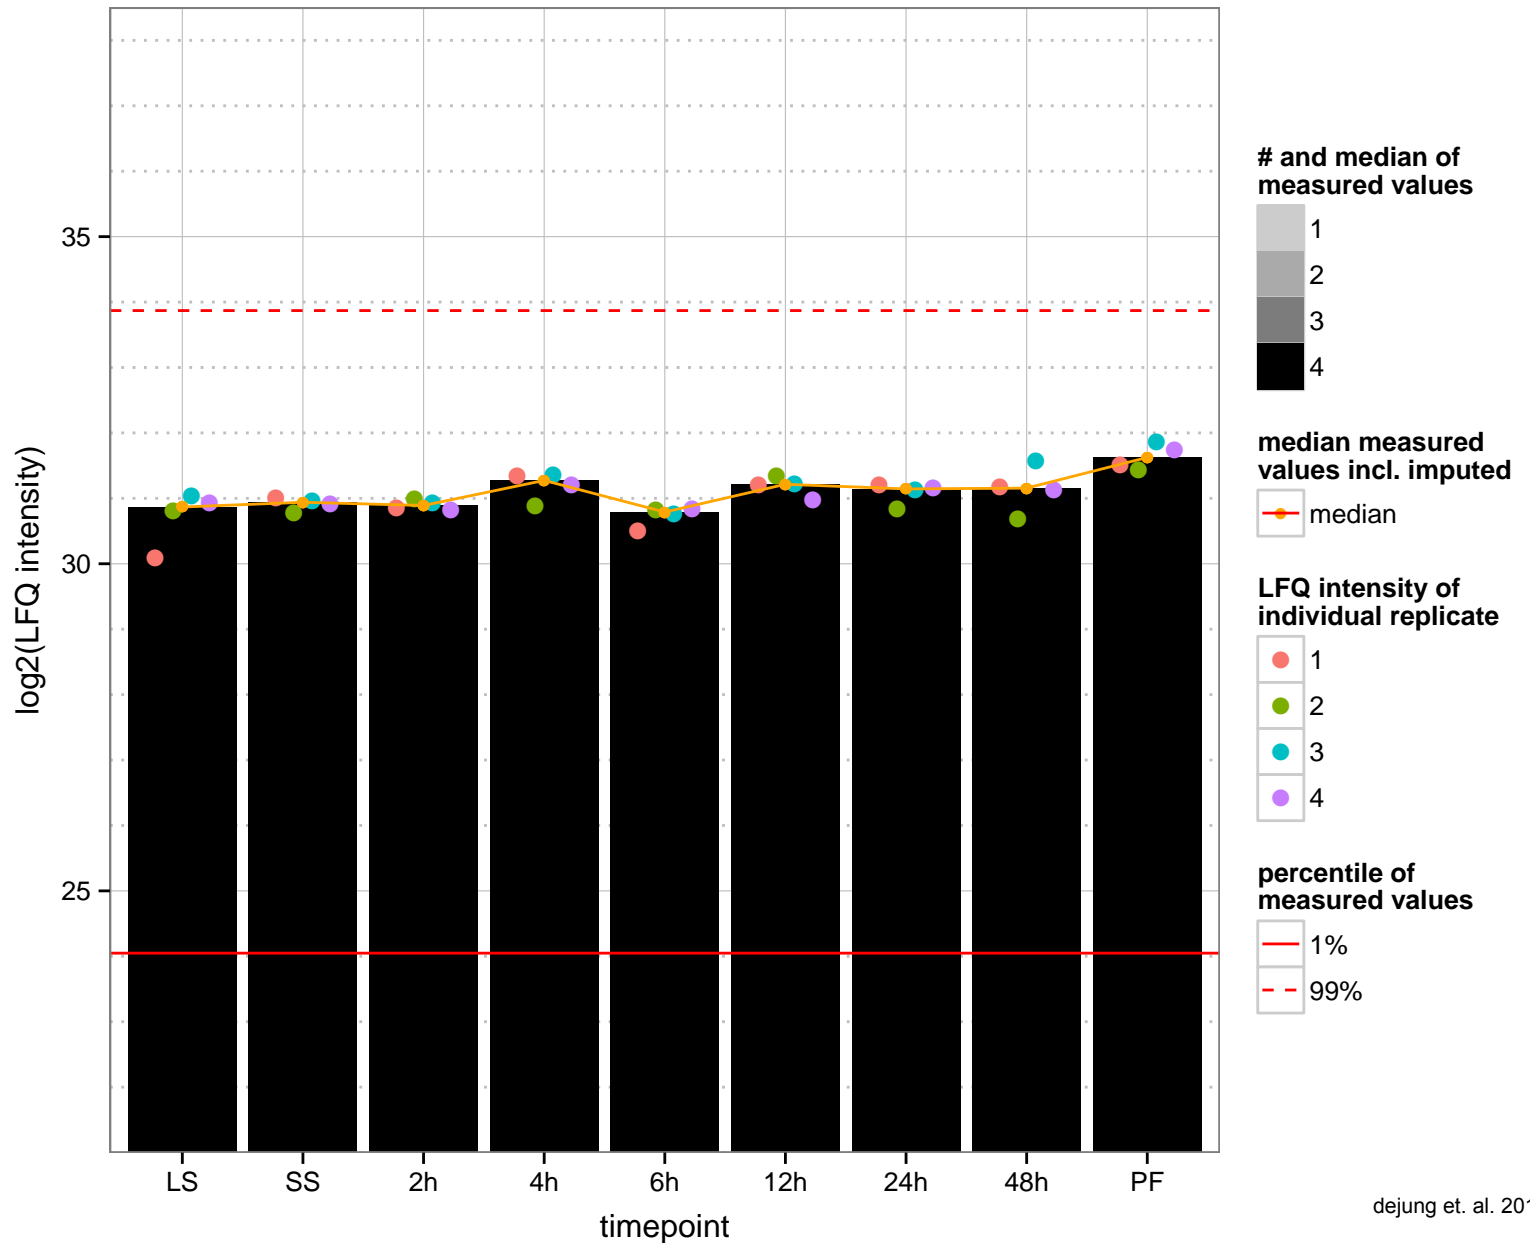

Elongation factor G 2, mitochondrial, putative (EF-G2)  
 Tb927.11.8980  
 AGOF: GTP binding, GTPase activity  
 AGOC: mitochondrion  
 AGOP: null  
 PGOF: GTP binding, GTPase activity  
 PGOC: null  
 PGOP: null

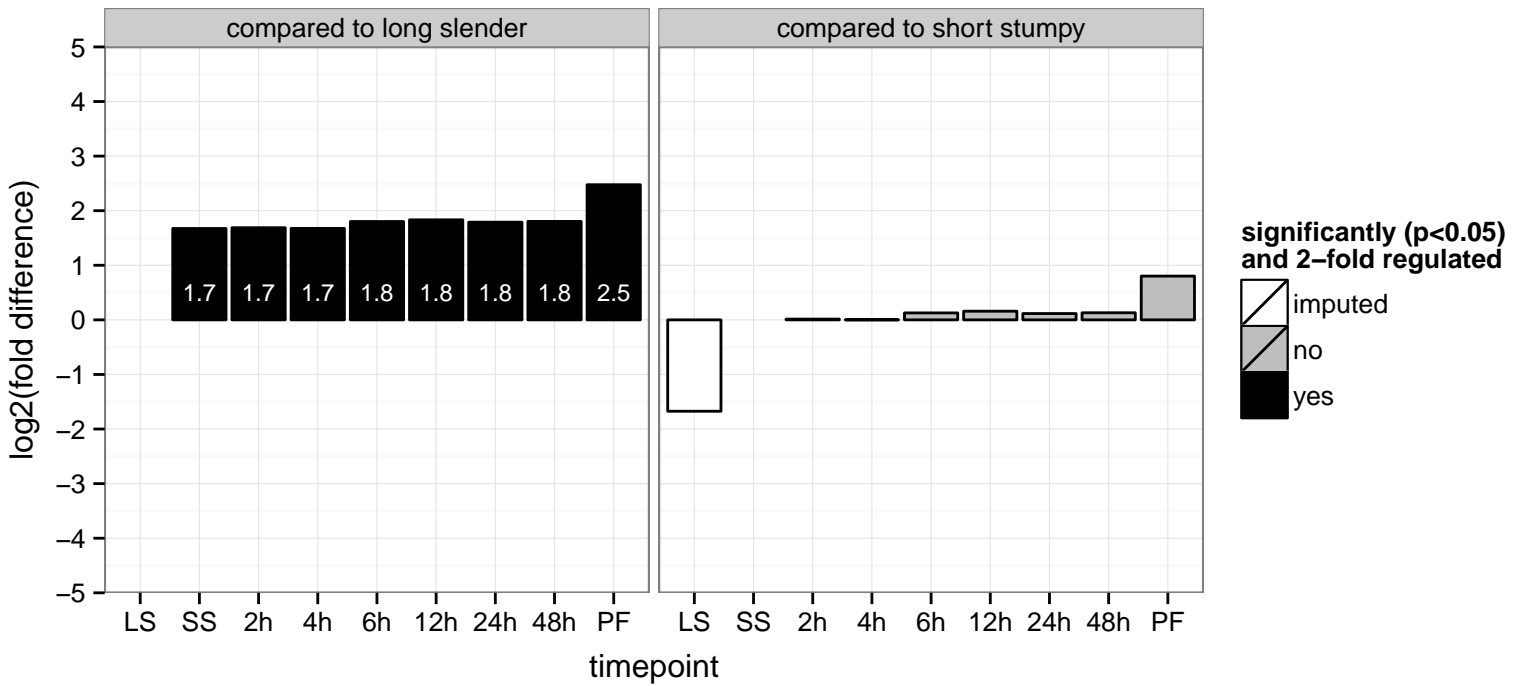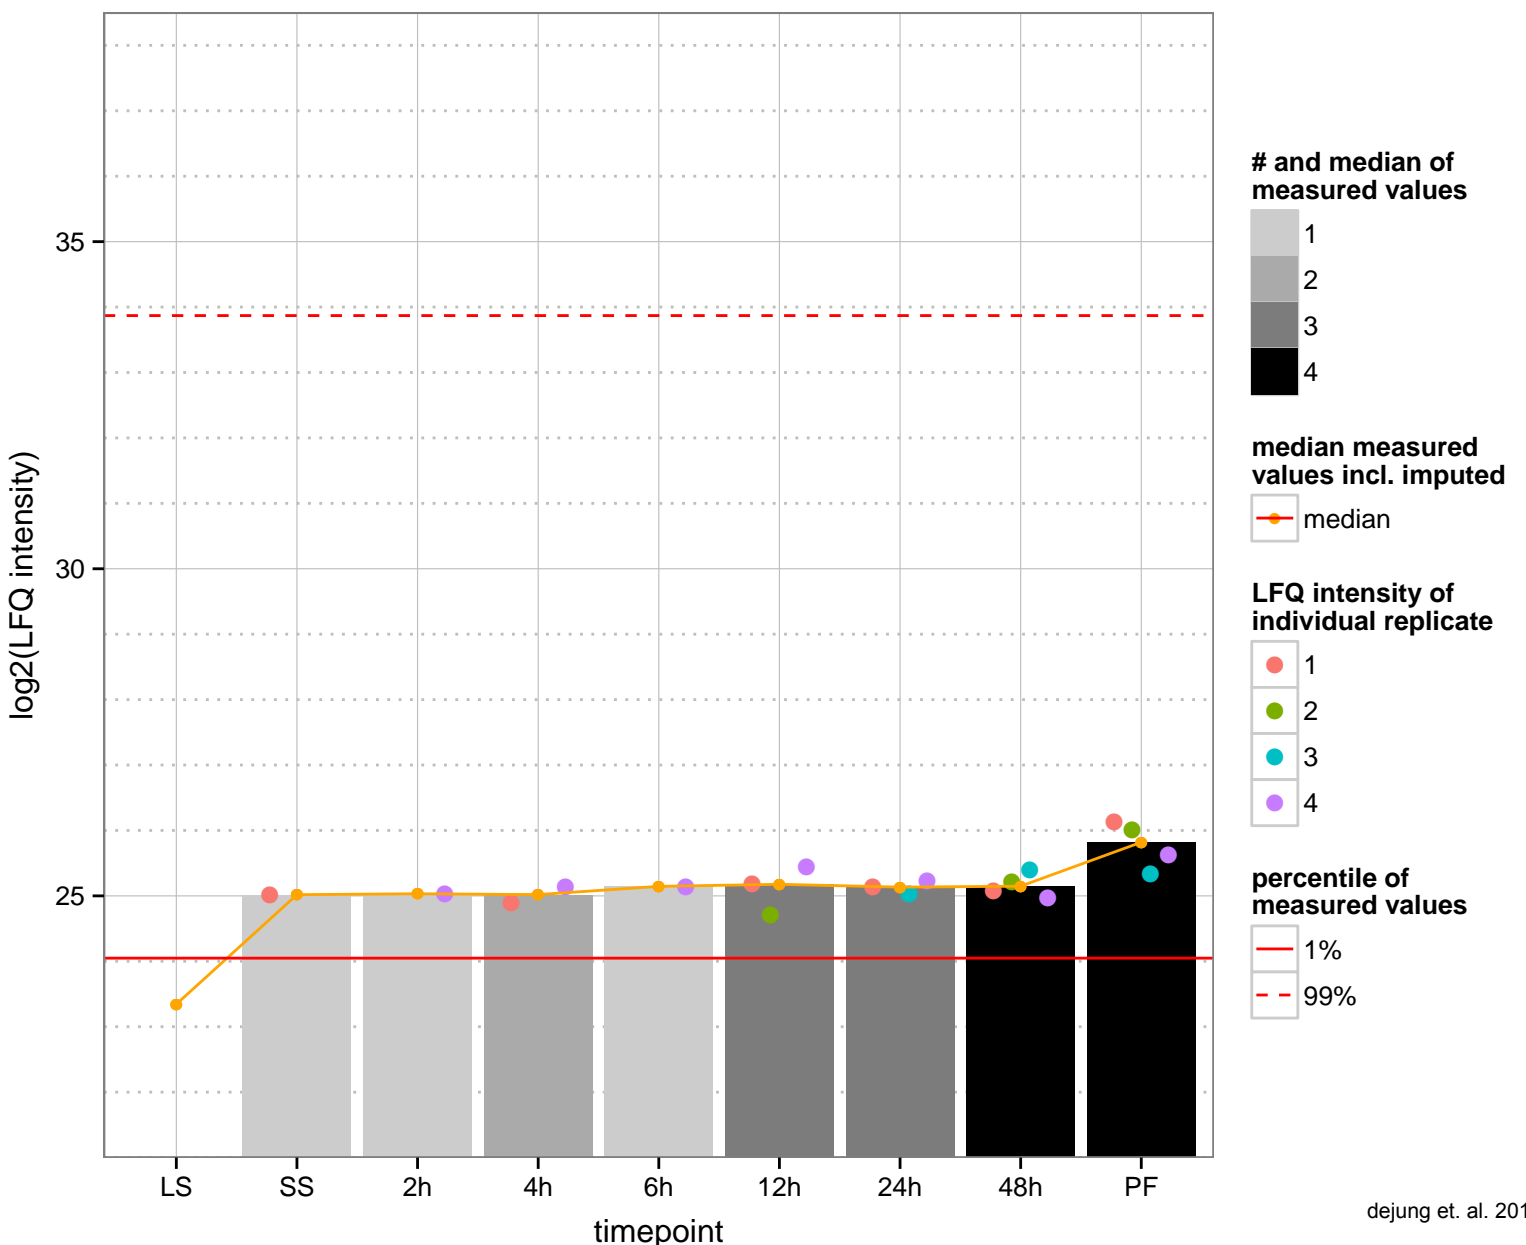



isocitrate dehydrogenase, putative (IDH)

Tb927.11.900

AGOF: NAD binding, isocitrate dehydrogenase (NADP+) activity, magnesium ion binding

AGOC: null

AGOP: isocitrate metabolic process, oxidation-reduction process

PGOF: isocitrate dehydrogenase (NADP+) activity, oxidoreductase activity, acting on the CH-OH group of donors, NAD or NA

PGOC: null

PGOP: isocitrate metabolic process, oxidation-reduction process

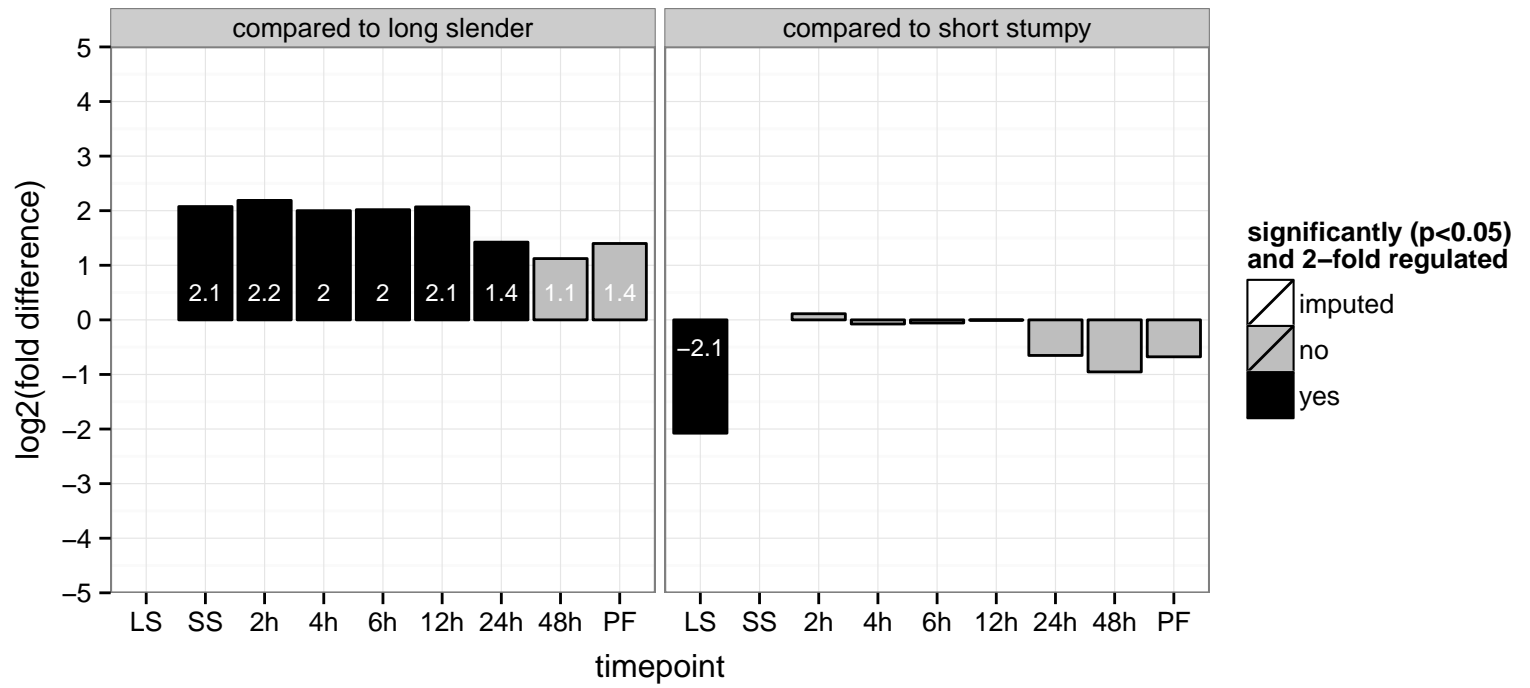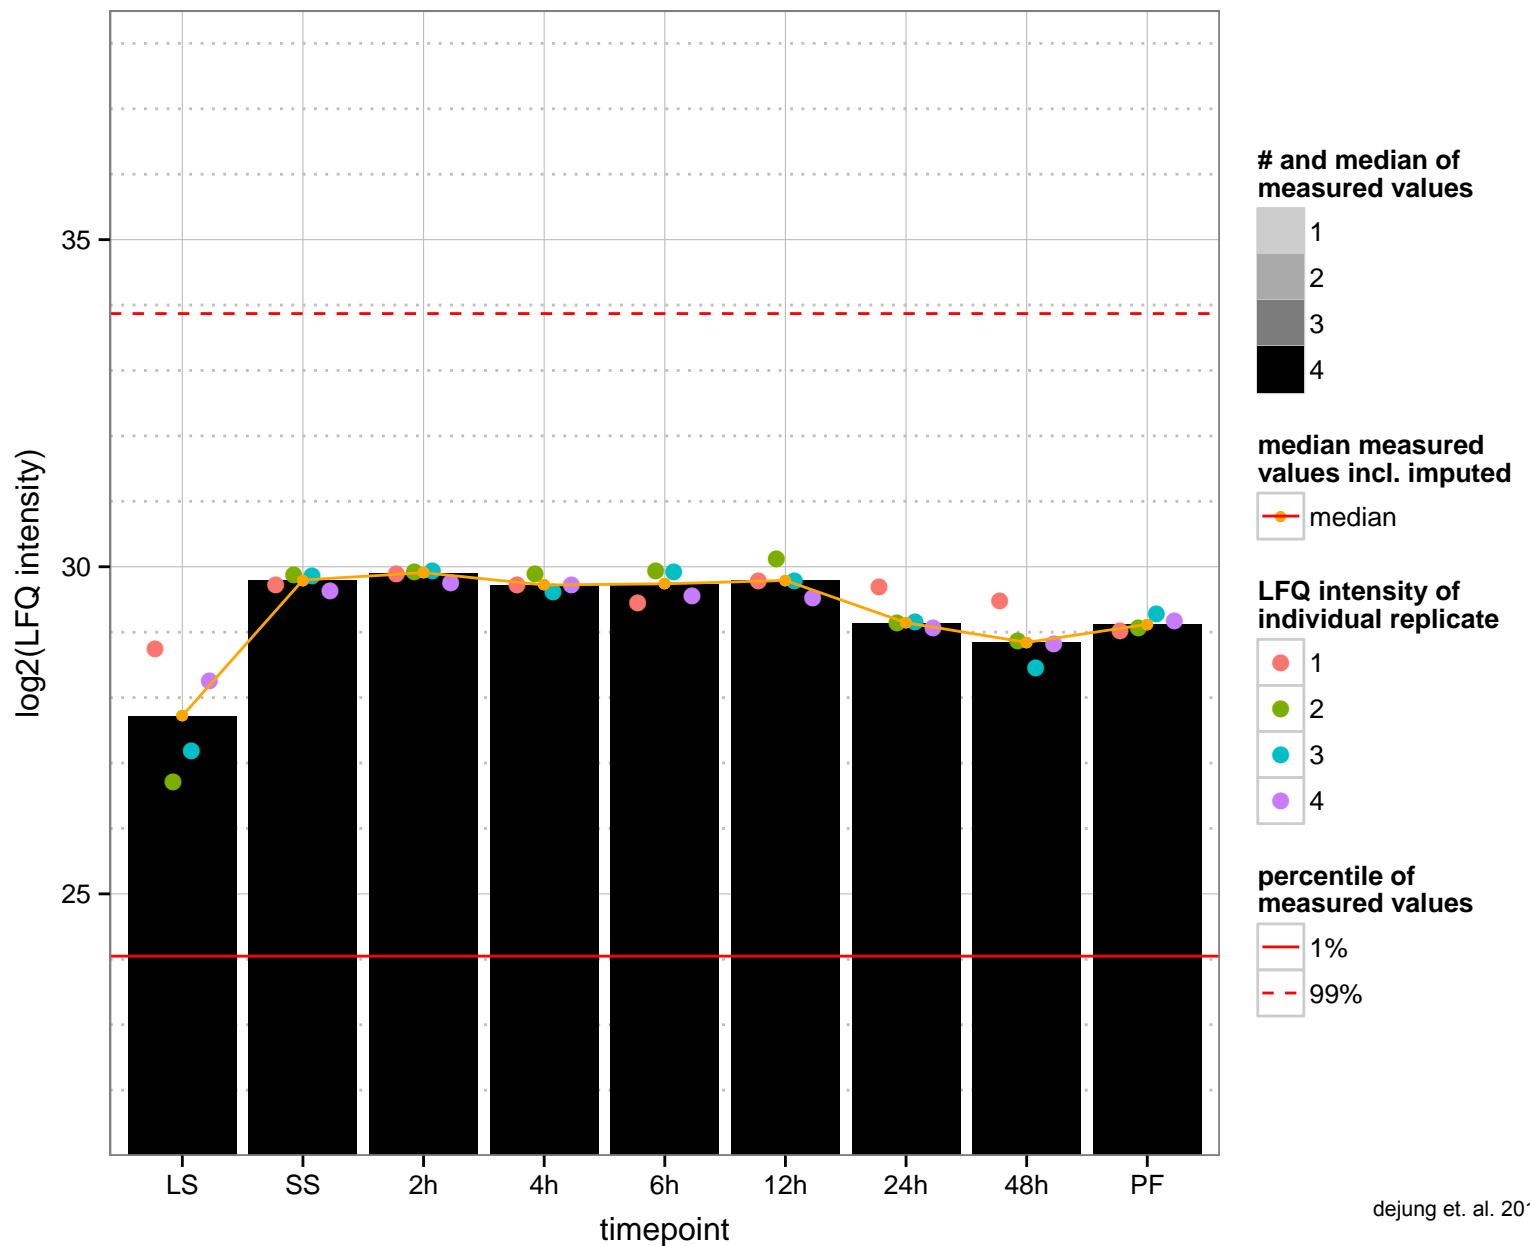

hypothetical protein, conserved  
 Tb927.11.9050  
 AGOF: null  
 AGOC: null  
 AGOP: null  
 PGOF: null  
 PGO: null  
 PGOP: null

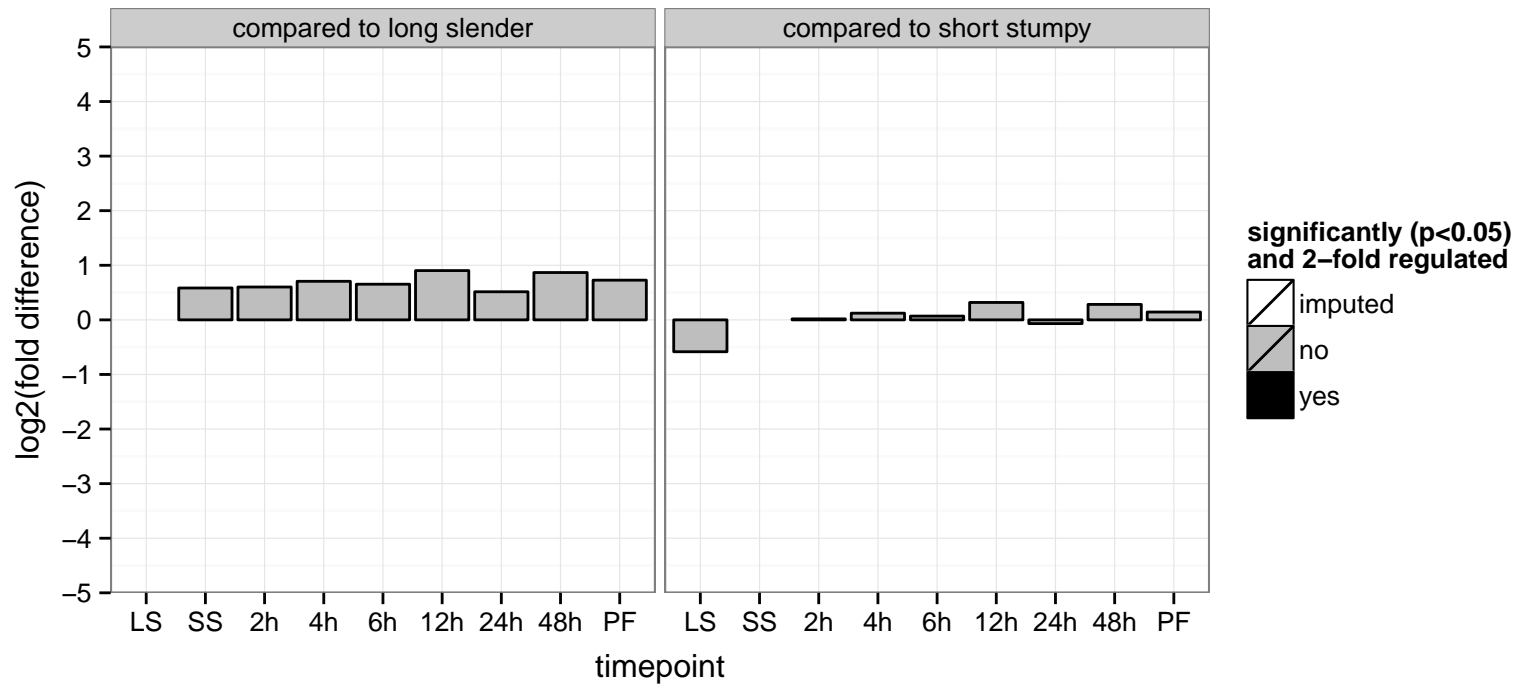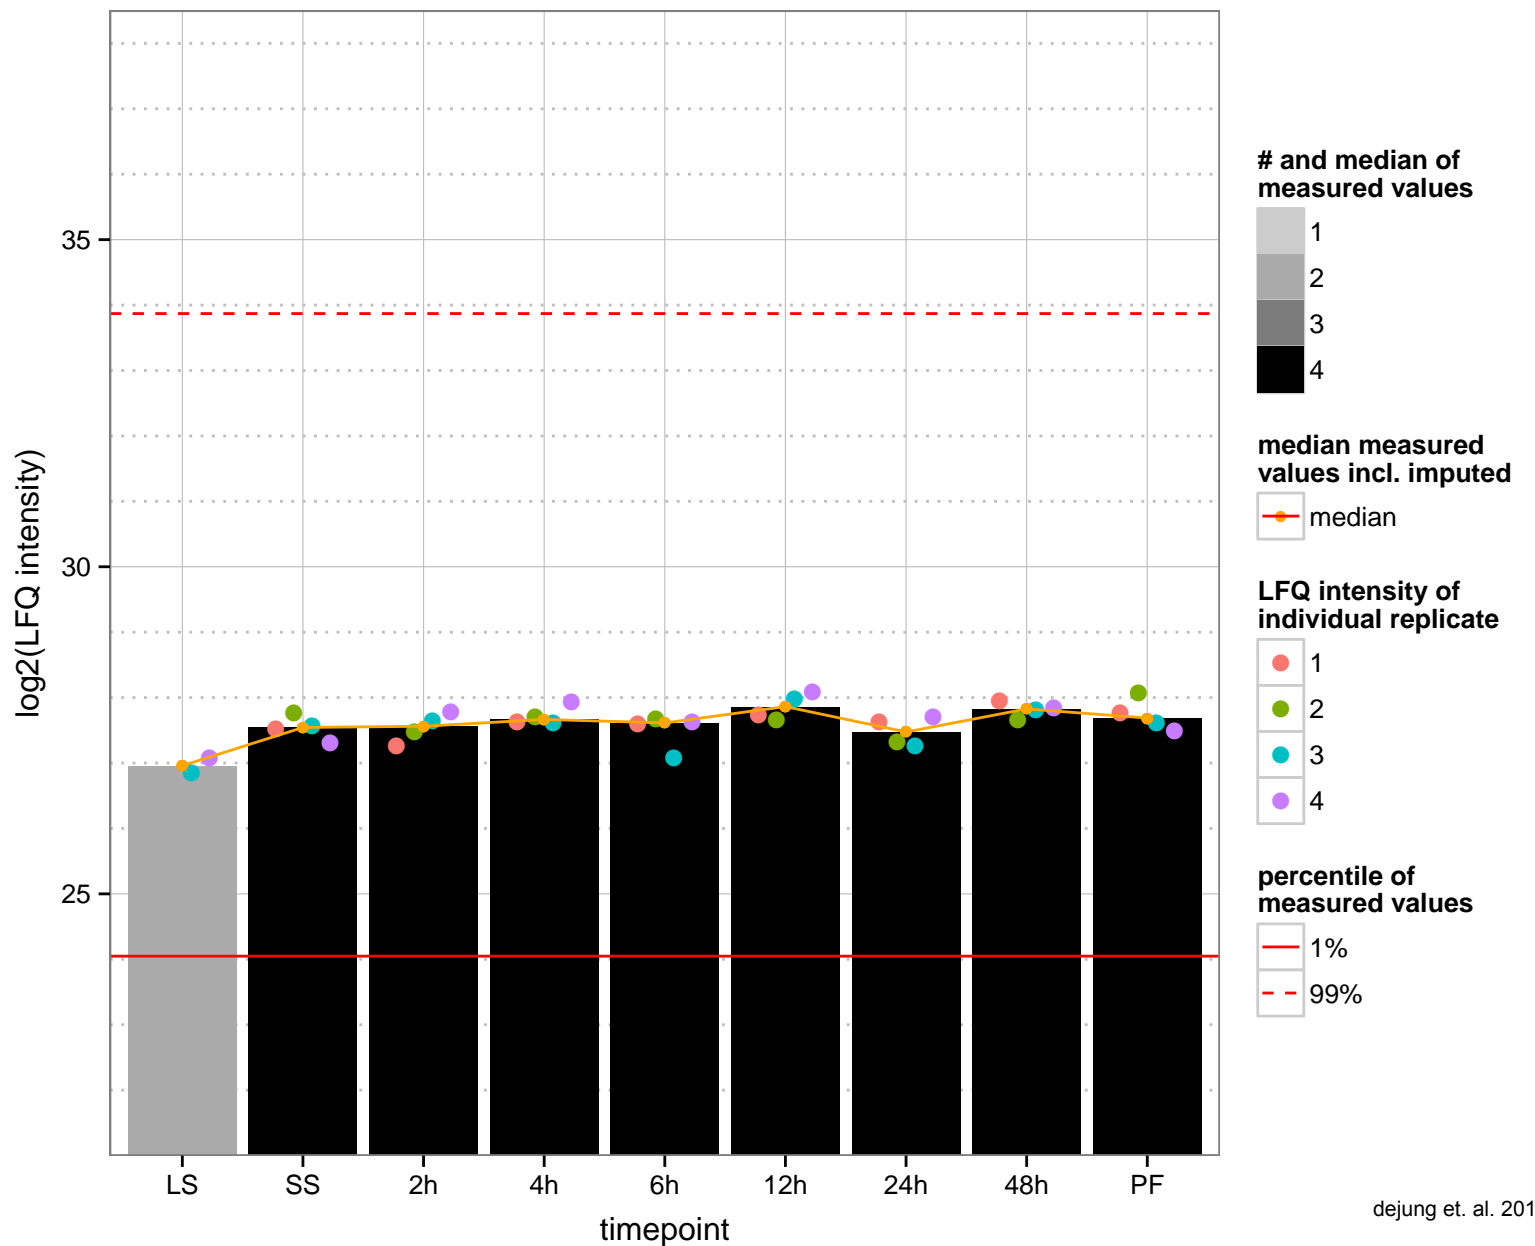

hypothetical protein, conserved  
 Tb927.11.9080  
 AGOF: nucleotide binding  
 AGOC: nucleus  
 AGOP: ribosome biogenesis  
 PGO: null  
 PGOC: nucleus  
 PGOP: ribosome biogenesis

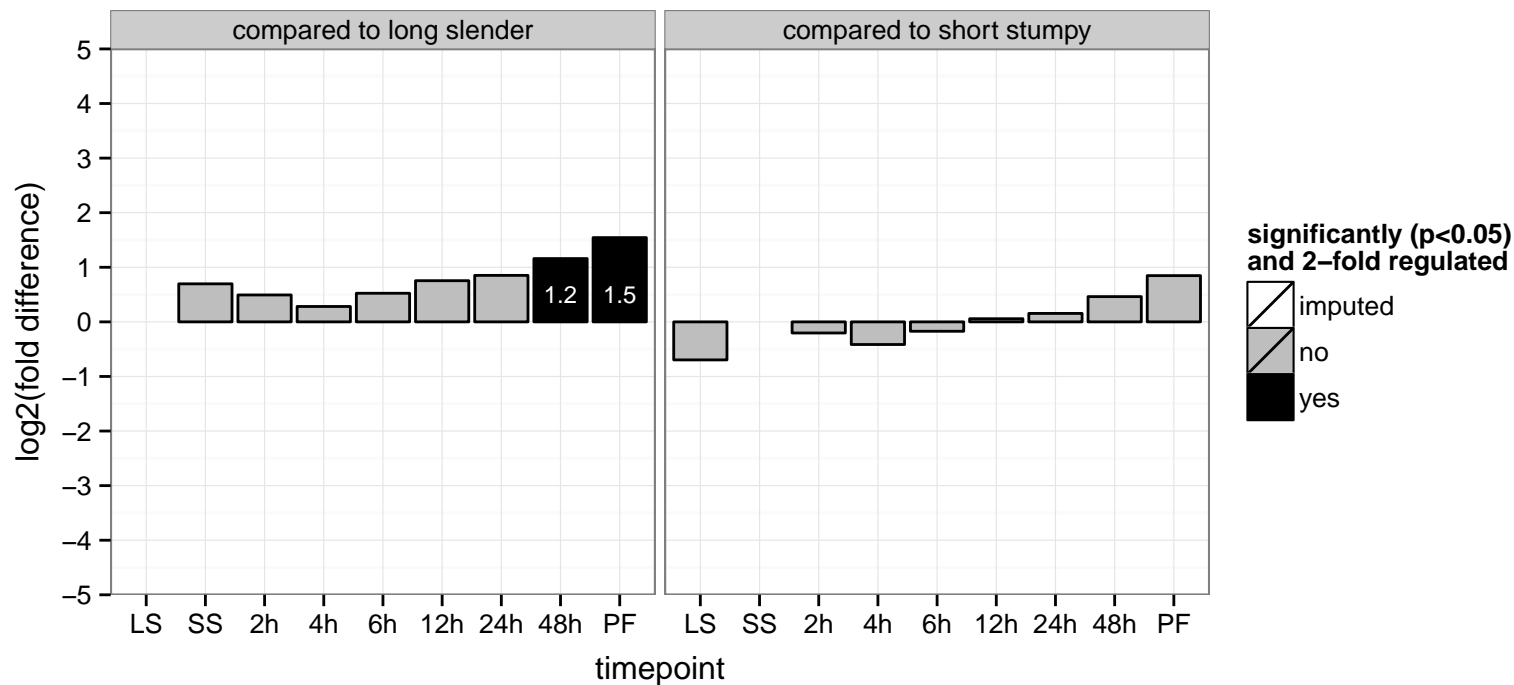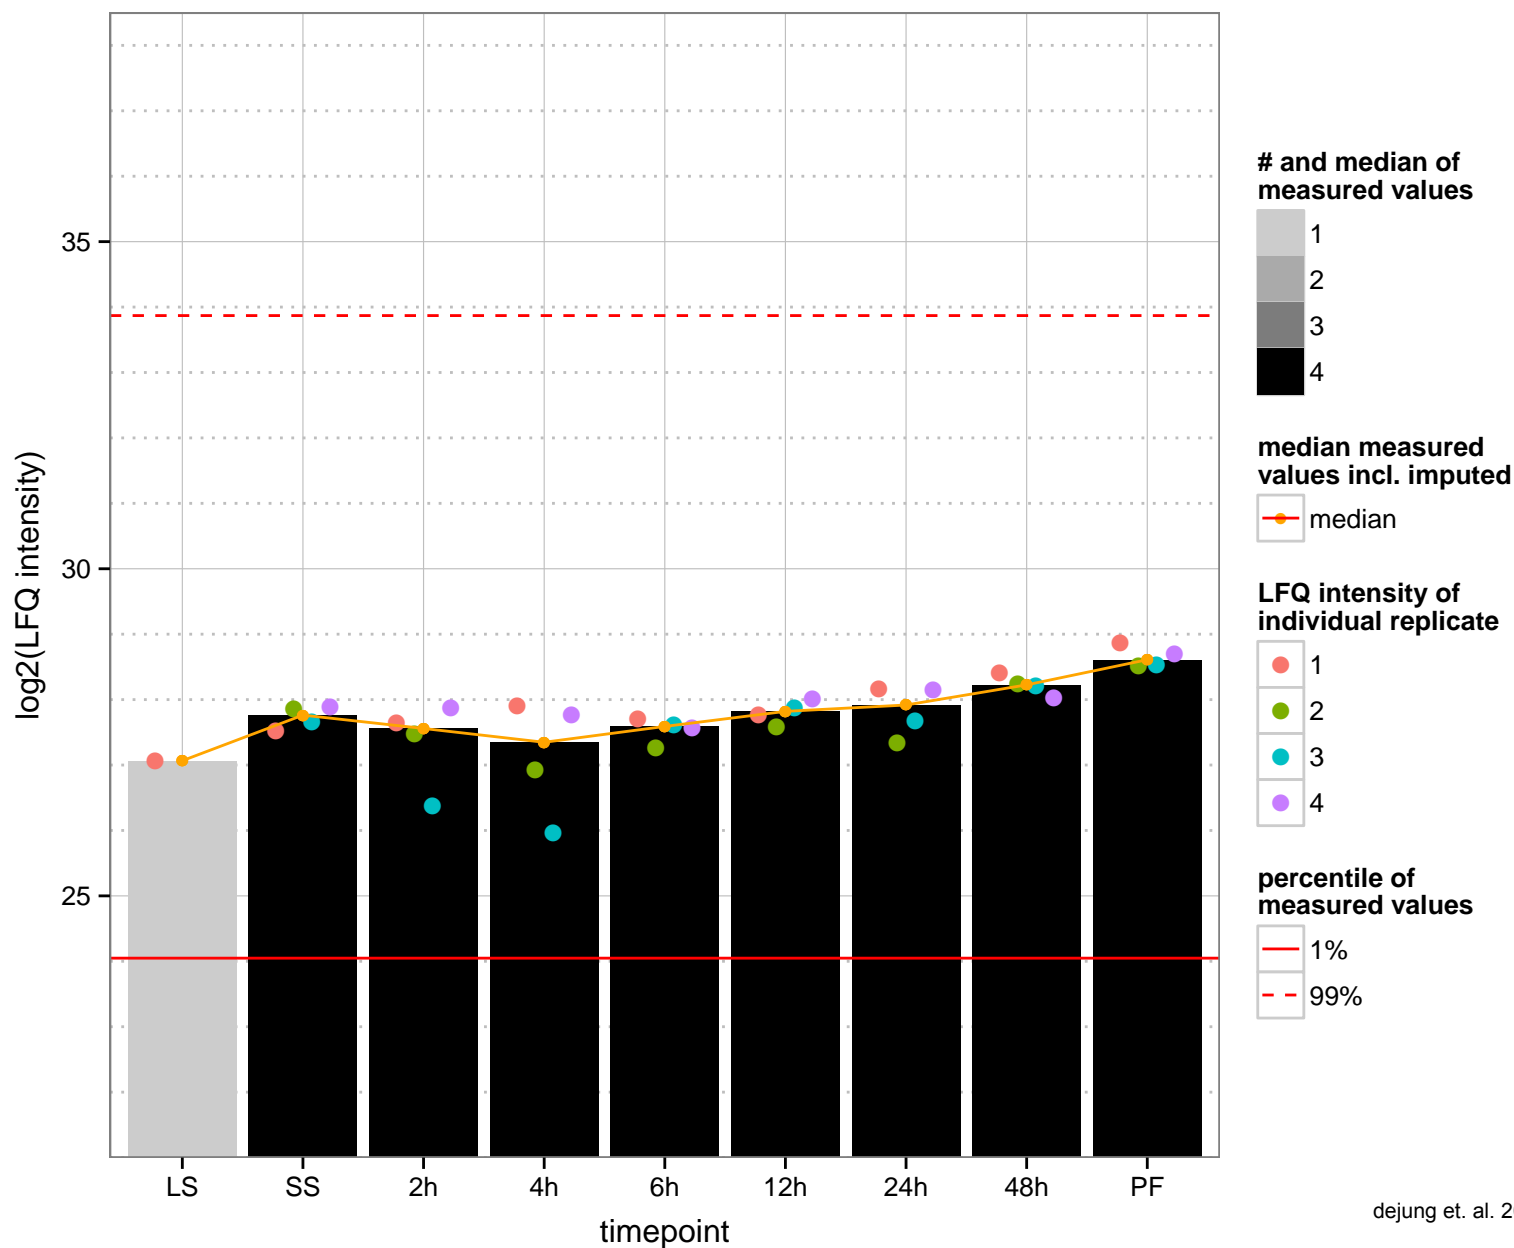

DNA topoisomerase III, putative

Tb927.11.9170

AGOF: DNA binding, DNA topoisomerase type I activity

AGOC: chromosome

AGOP: DNA modification, DNA topological change, DNA unwinding involved in replication

PGOF: DNA binding, DNA topoisomerase activity

PGOC: chromosome

PGOP: DNA topological change

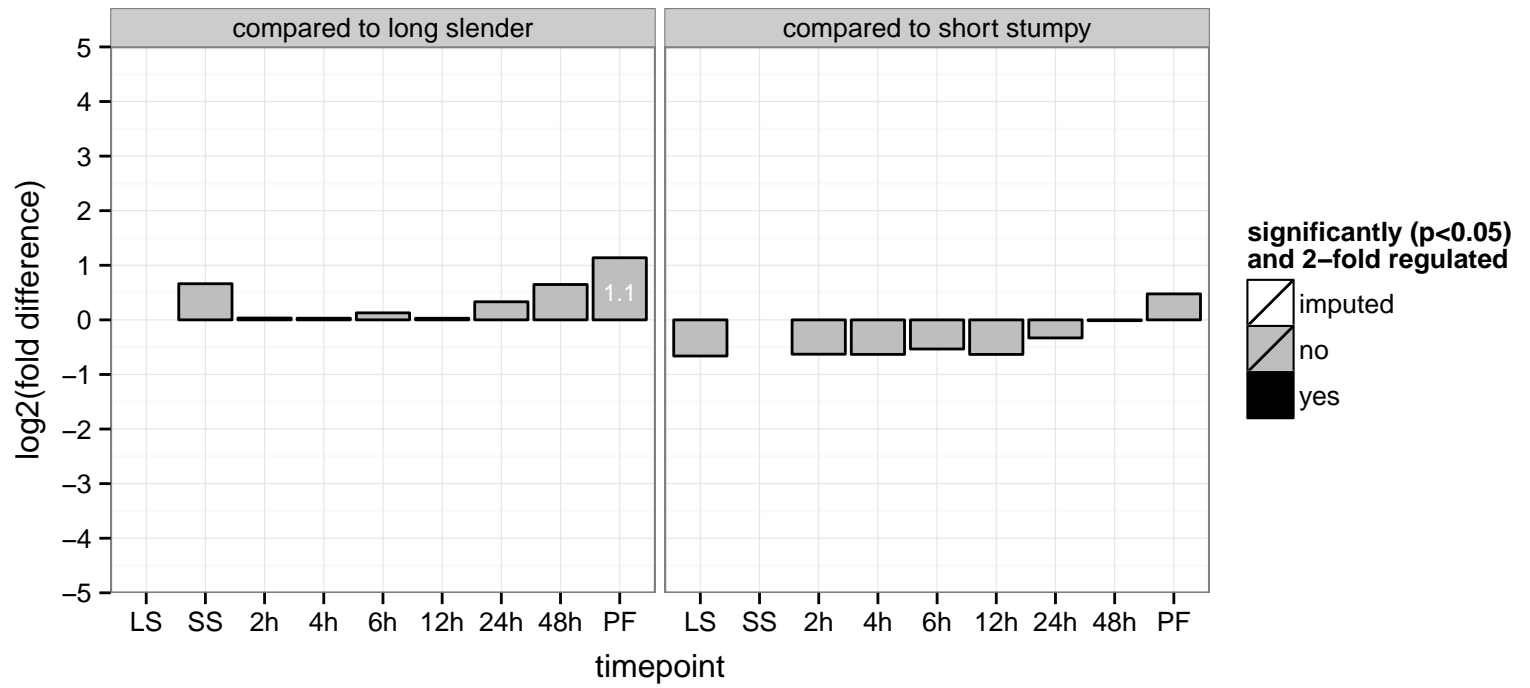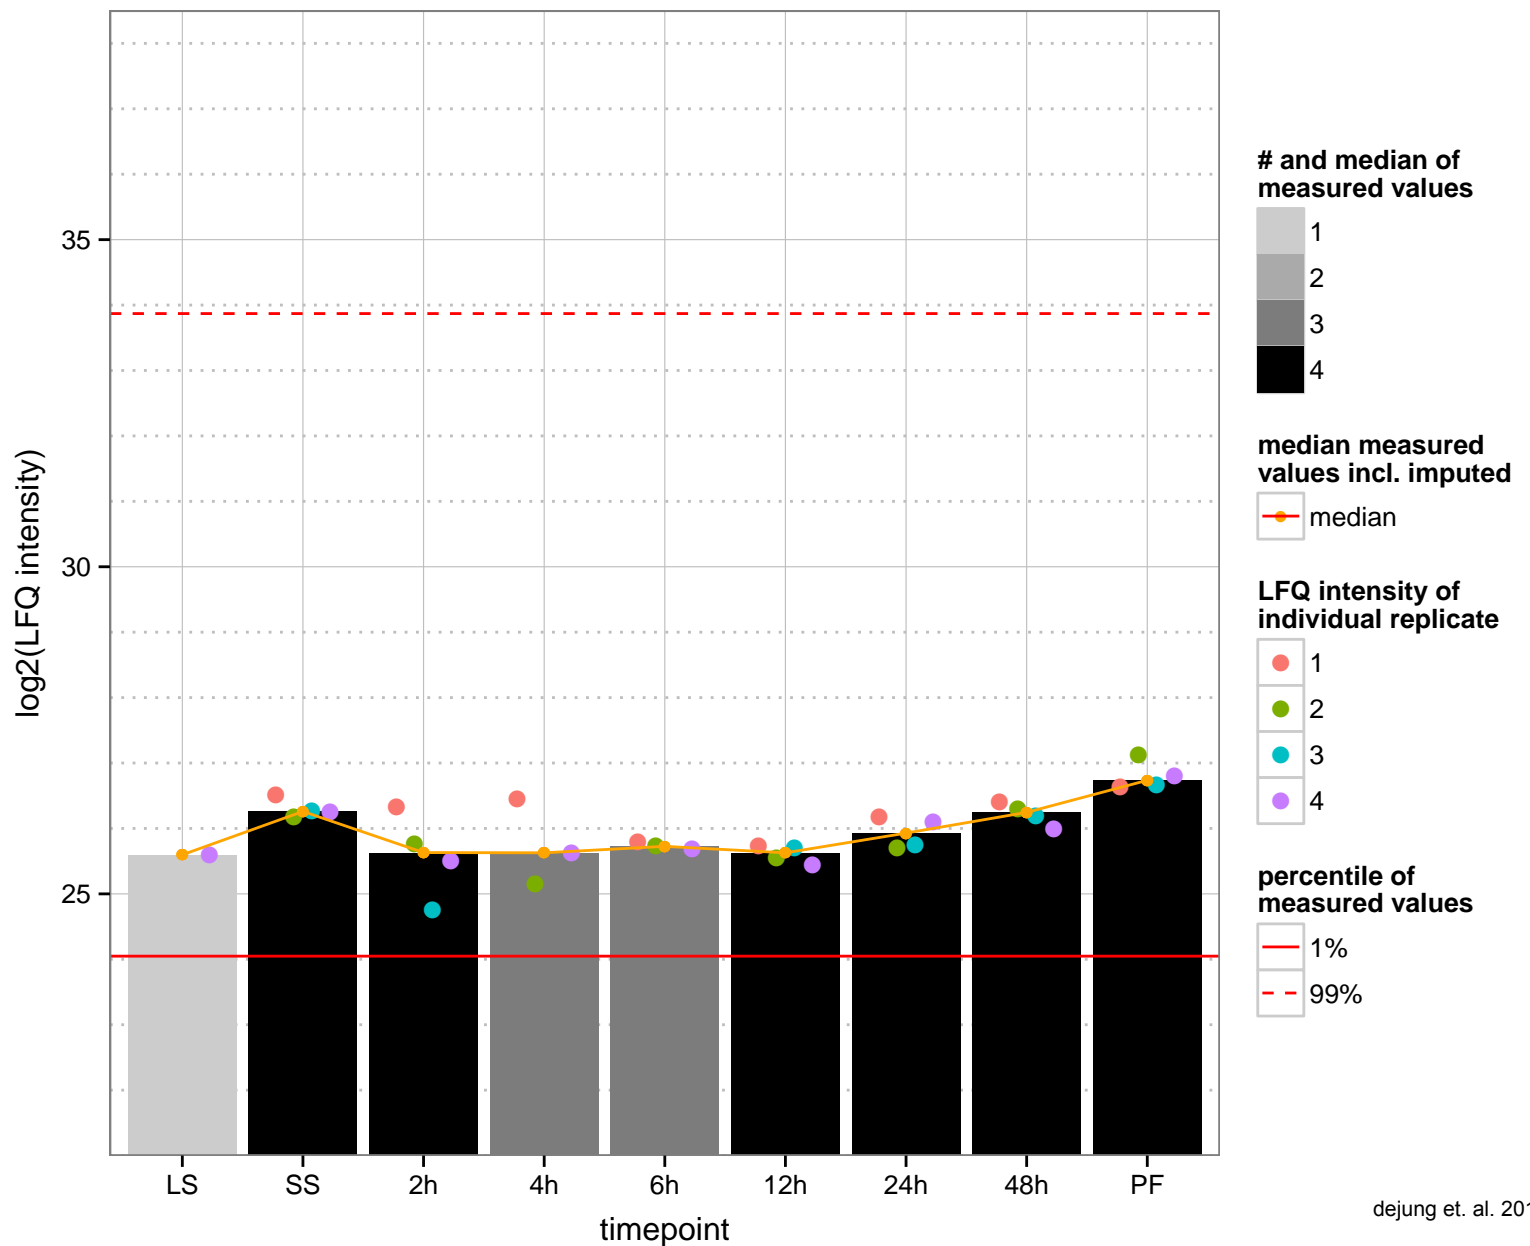

ADP-ribosylation factor GTPase activating protein, putative, putative (Cnt-b5)  
 Tb927.11.9180  
 AGOF: ARF GTPase activator activity, DNA binding, zinc ion binding  
 AGOC: nucleus  
 AGOP: ER to Golgi vesicle-mediated transport, regulation of ARF GTPase activity  
 PGO: ARF GTPase activator activity, zinc ion binding  
 PGO: null  
 PGO: regulation of ARF GTPase activity

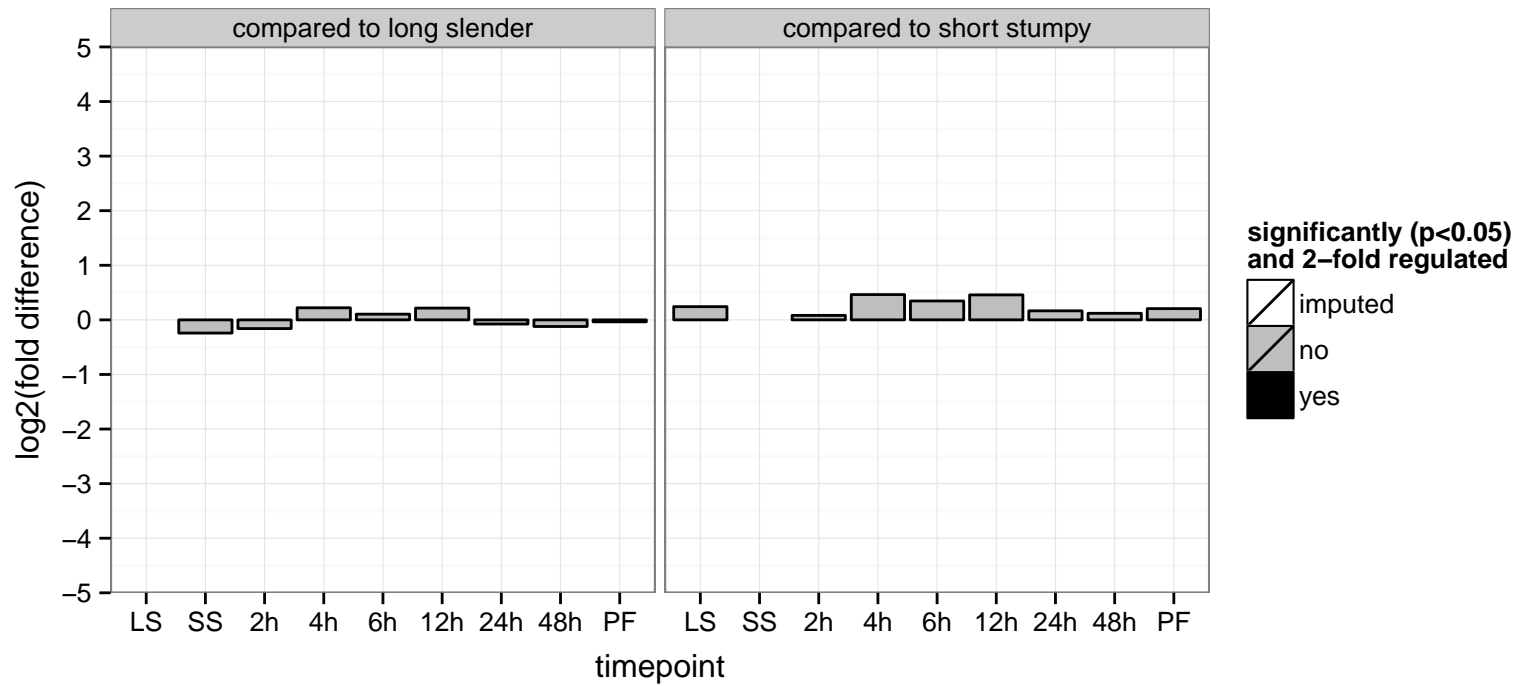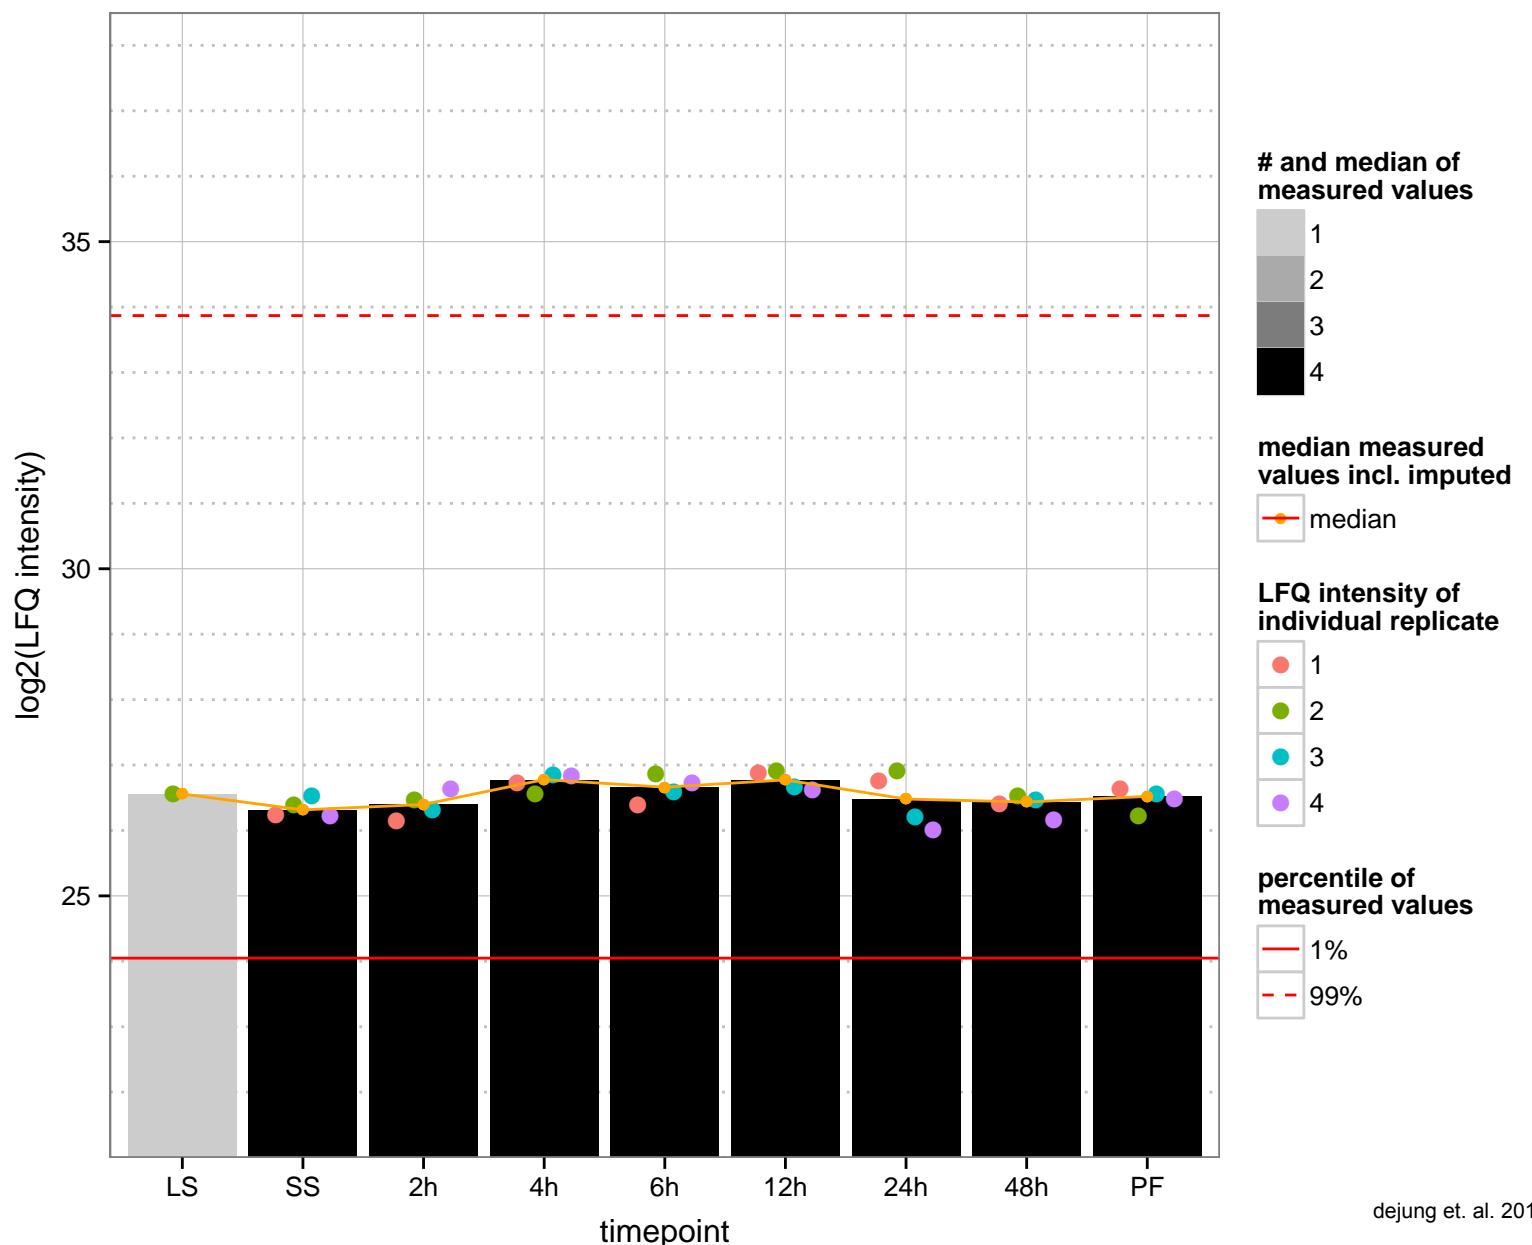

protein kinase, putative

Tb927.11.9190

AGOF: ATP binding, protein kinase activity, protein serine/threonine kinase activity

AGOC: null

AGOP: protein phosphorylation

PGOF: ATP binding, binding, protein binding, protein kinase activity, transferase activity, transferring phosphorus-containing g

PGOC: null

PGOP: protein phosphorylation

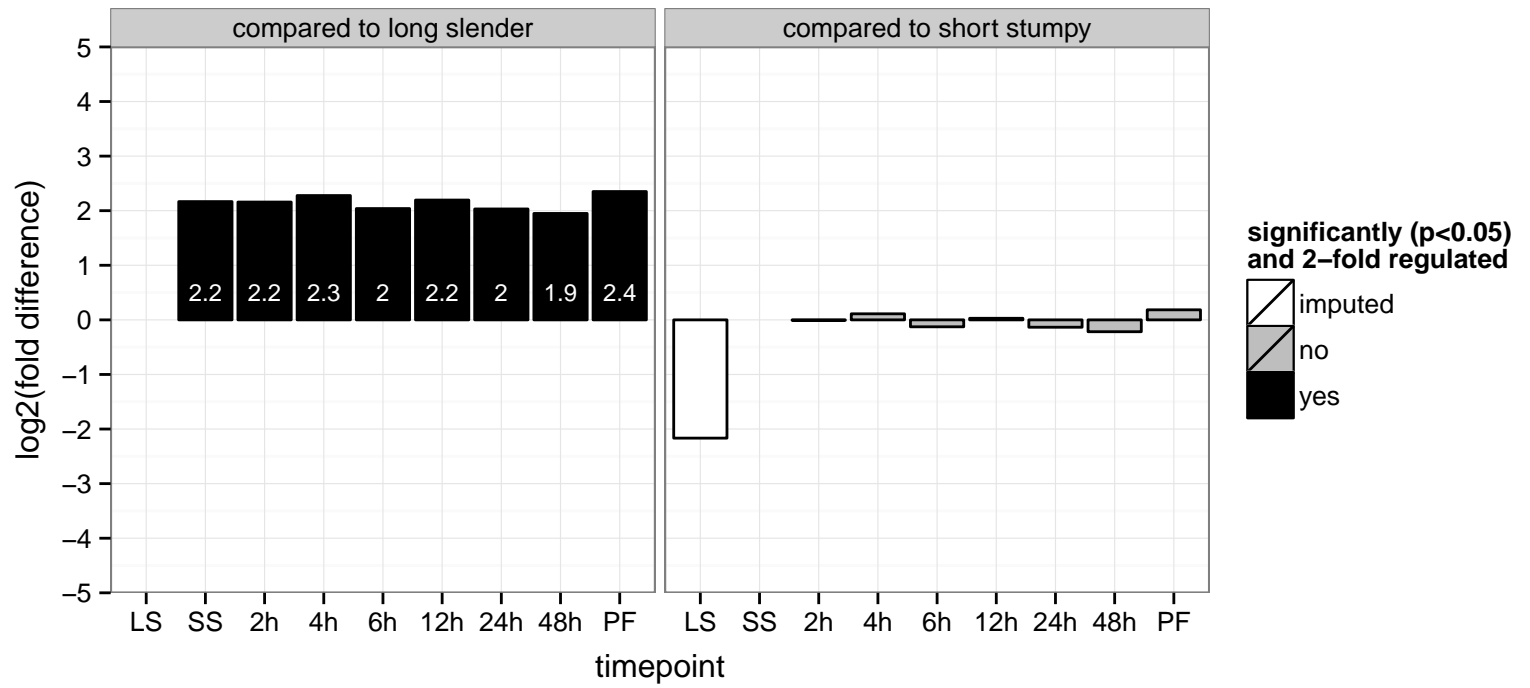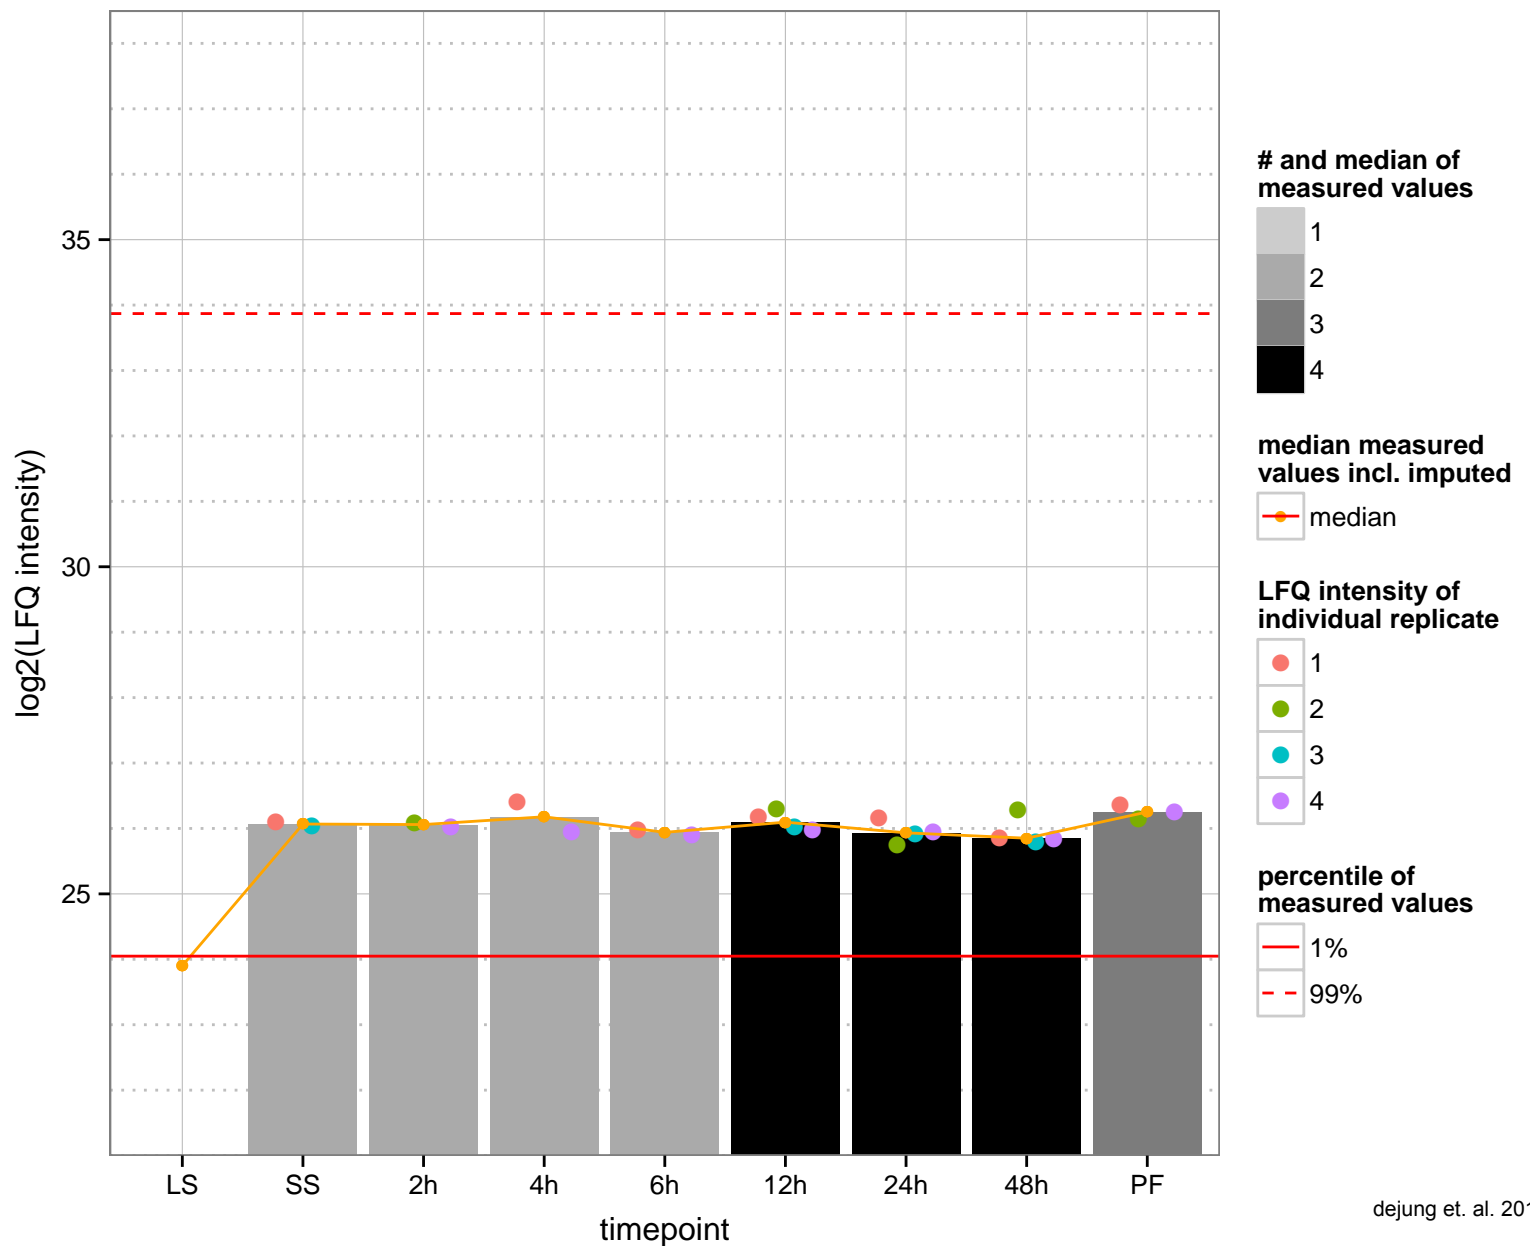

proteasome regulatory non-ATP-ase subunit 2 (RPN2)

Tb927.11.9220

AGOF: endopeptidase activity, enzyme regulator activity

AGOC: proteasome complex, proteasome regulatory particle

AGOP: proteasomal ubiquitin-dependent protein catabolic process, regulation of protein catabolic process

PGOF: binding, enzyme regulator activity

PGOC: proteasome complex

PGOP: regulation of protein catabolic process

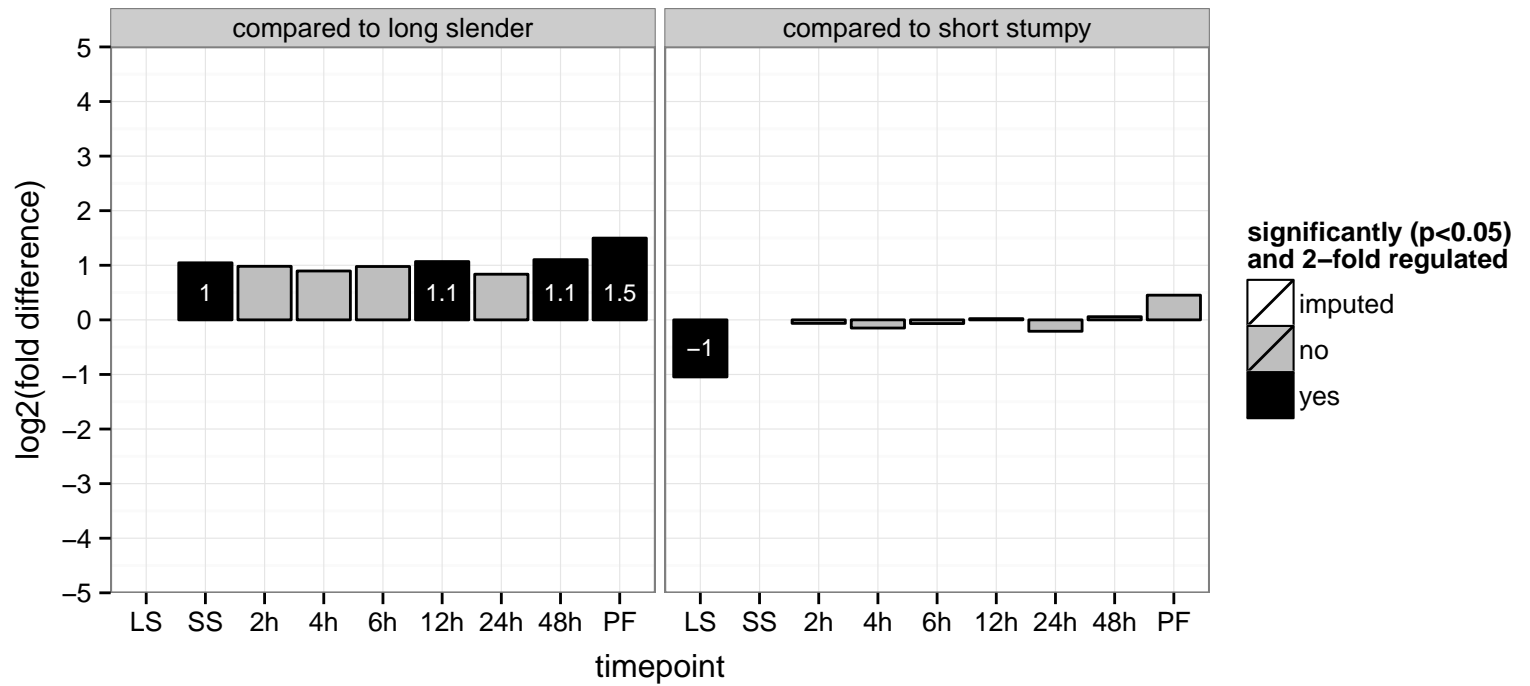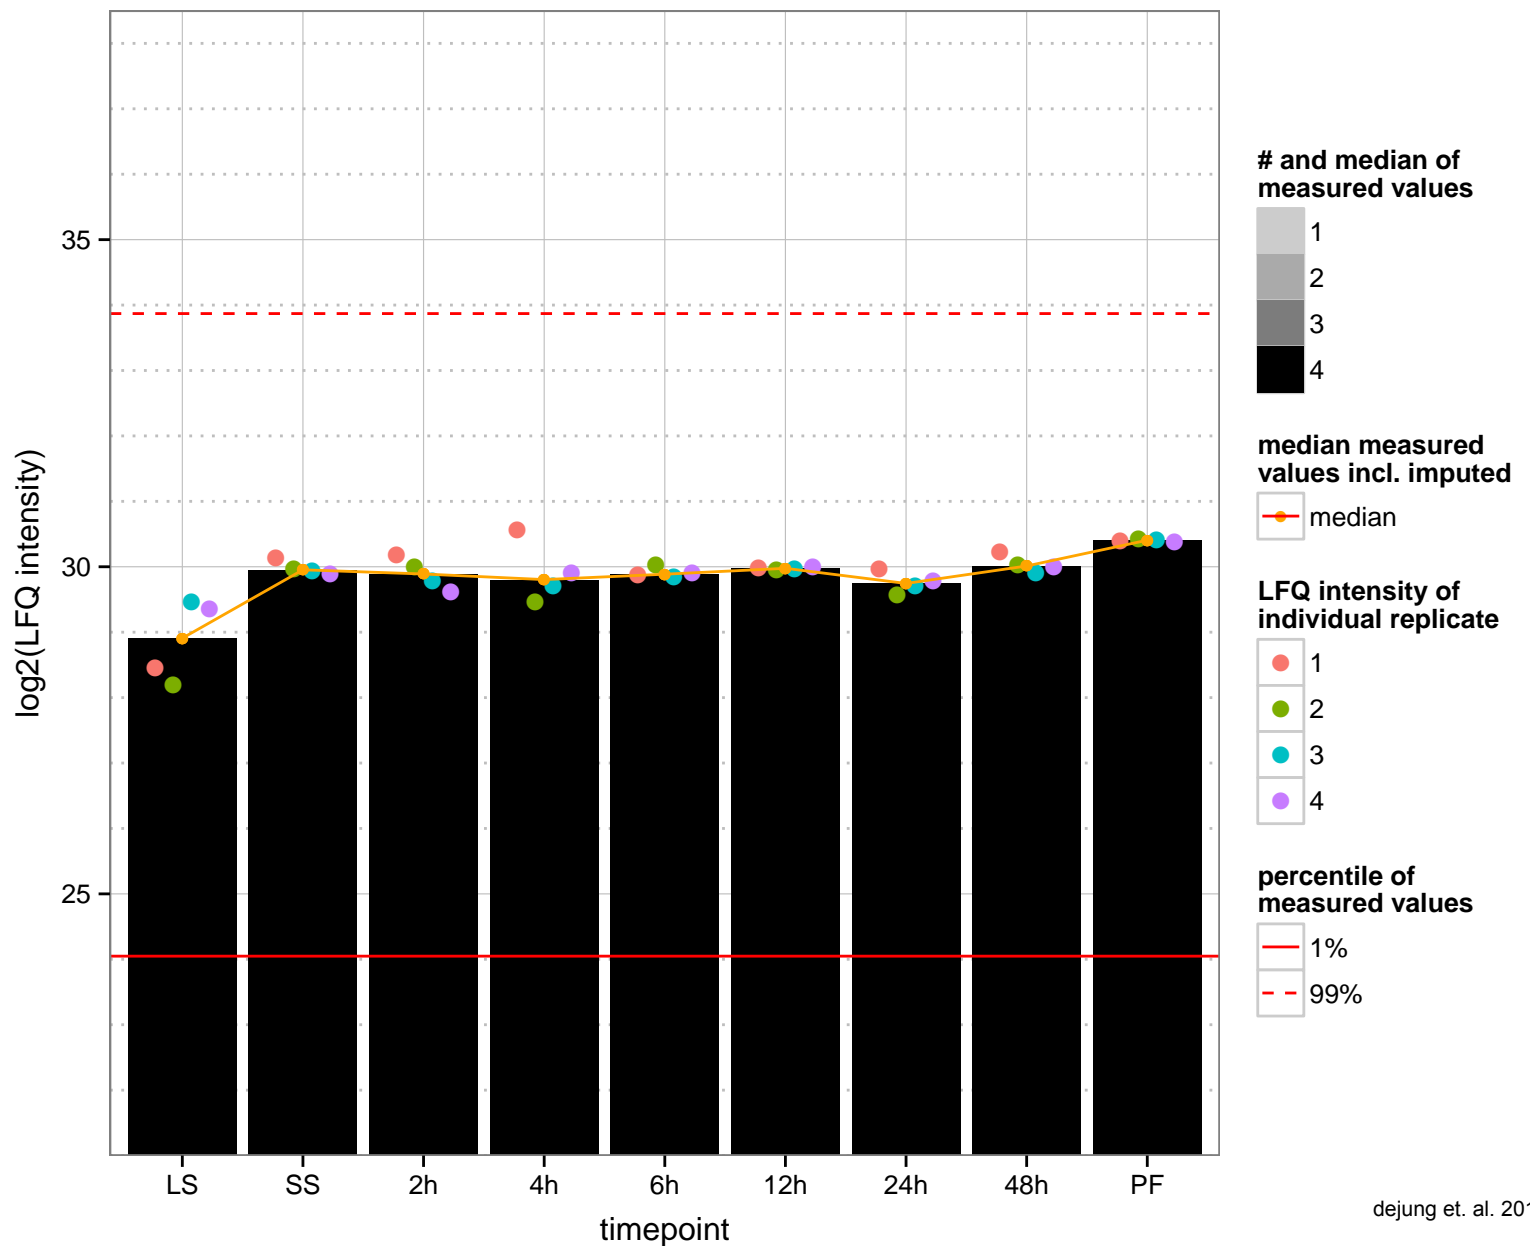

hypothetical protein, conserved  
 Tb927.11.9300  
 AGOF: null  
 AGOC: null  
 AGOP: null  
 PGO: null  
 PGOC: null  
 PGOP: null

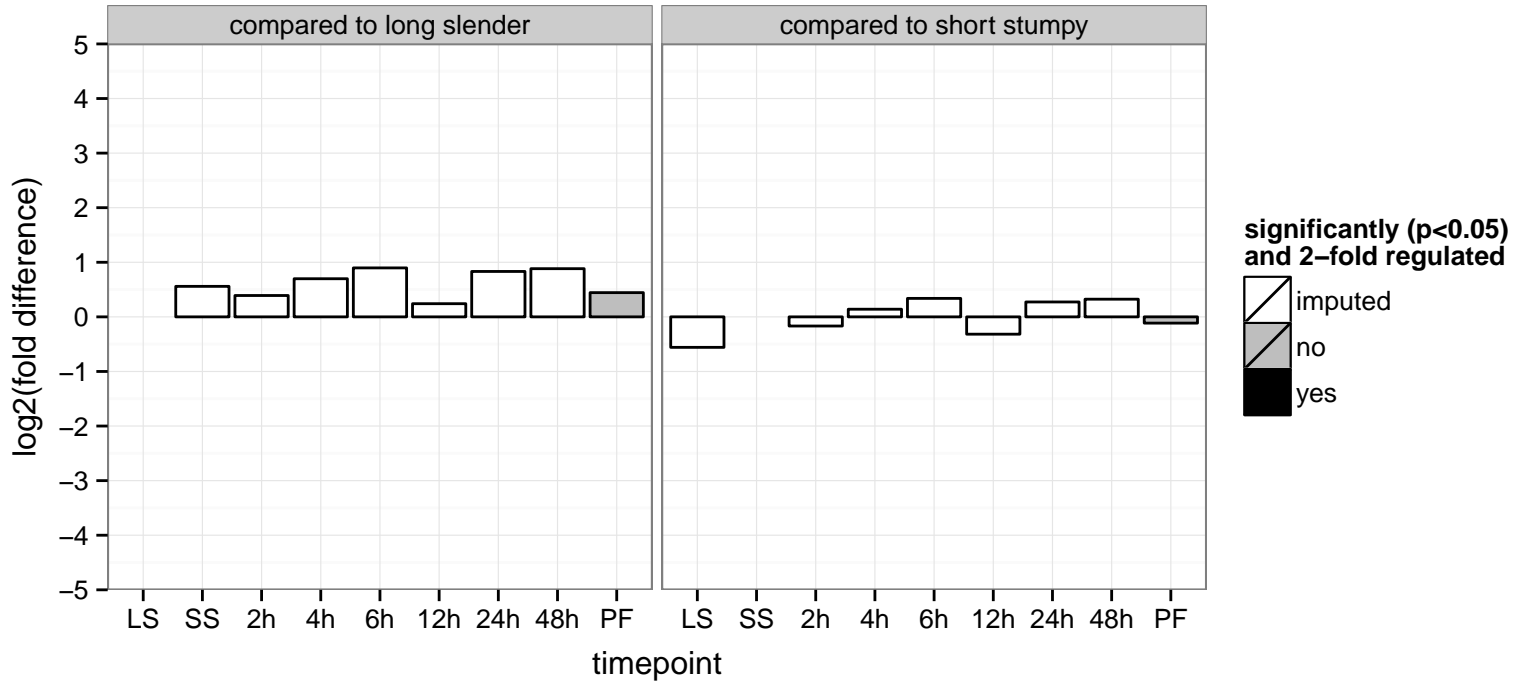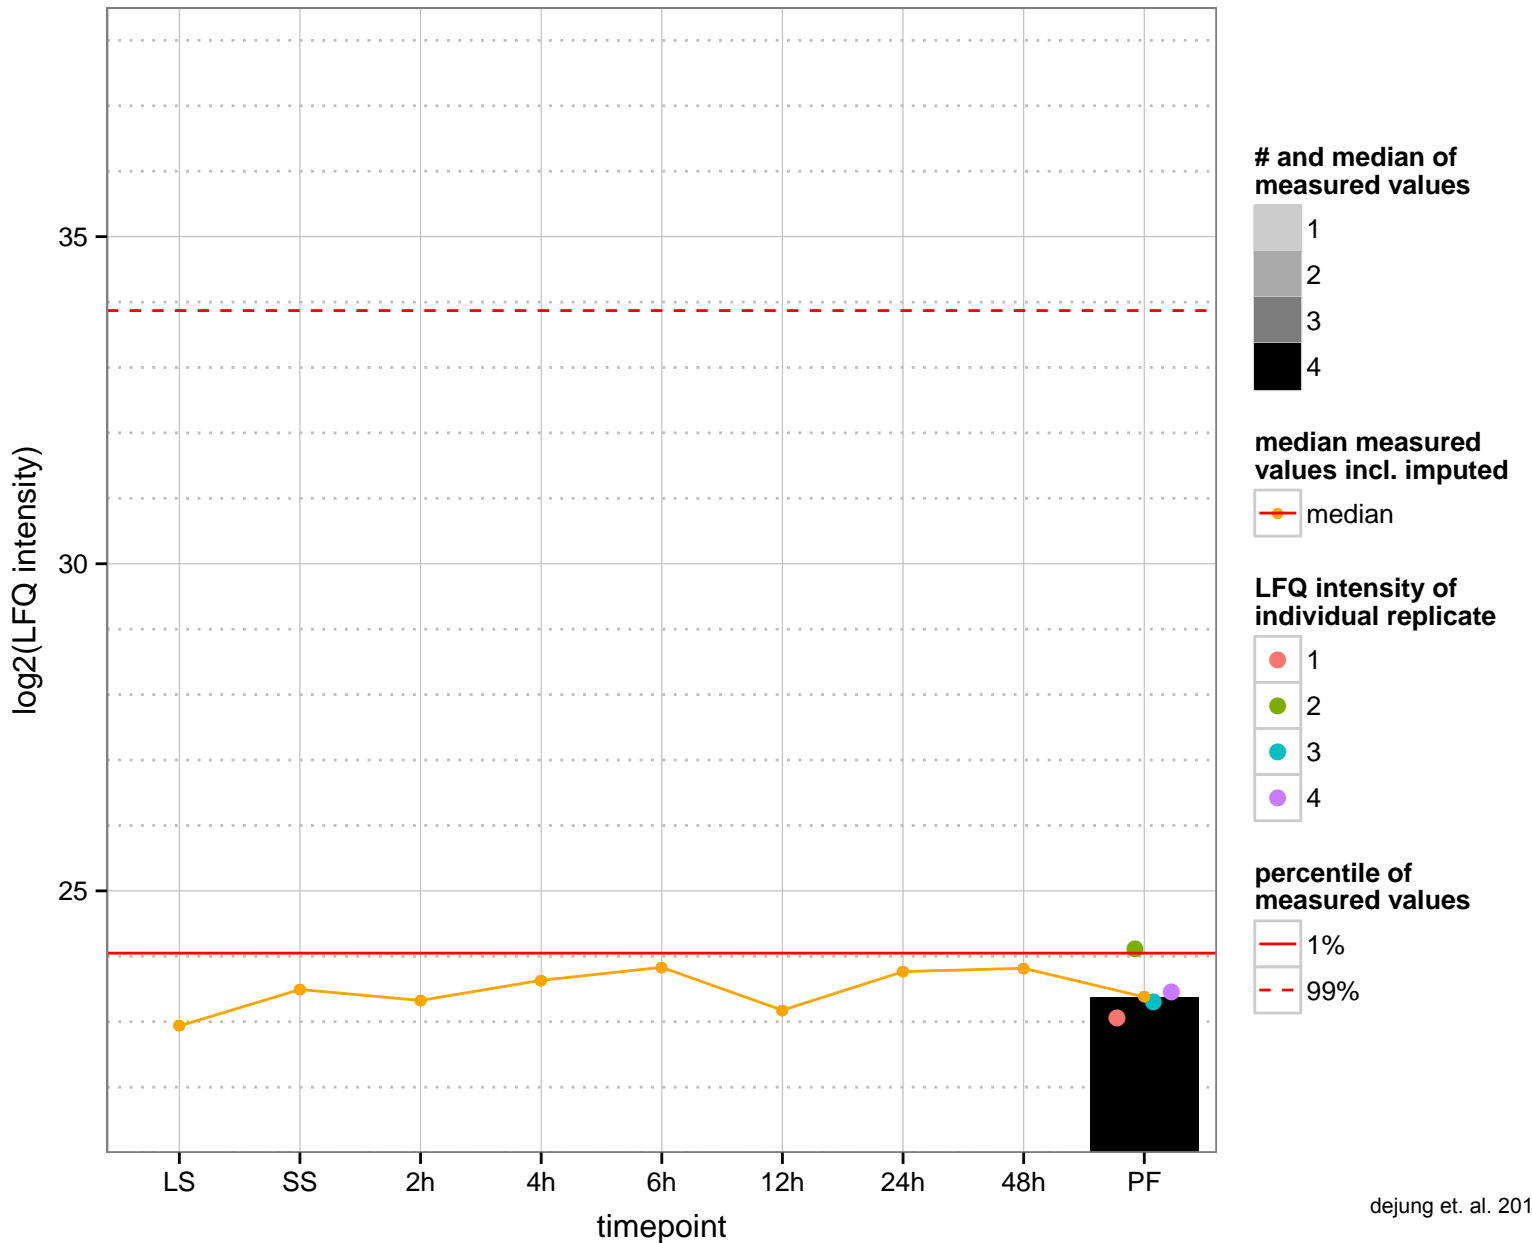



hypothetical protein, conserved  
 Tb927.11.9400  
 AGOF: null  
 AGOC: null  
 AGOP: null  
 PGO: null  
 PGOC: null  
 PGOP: null

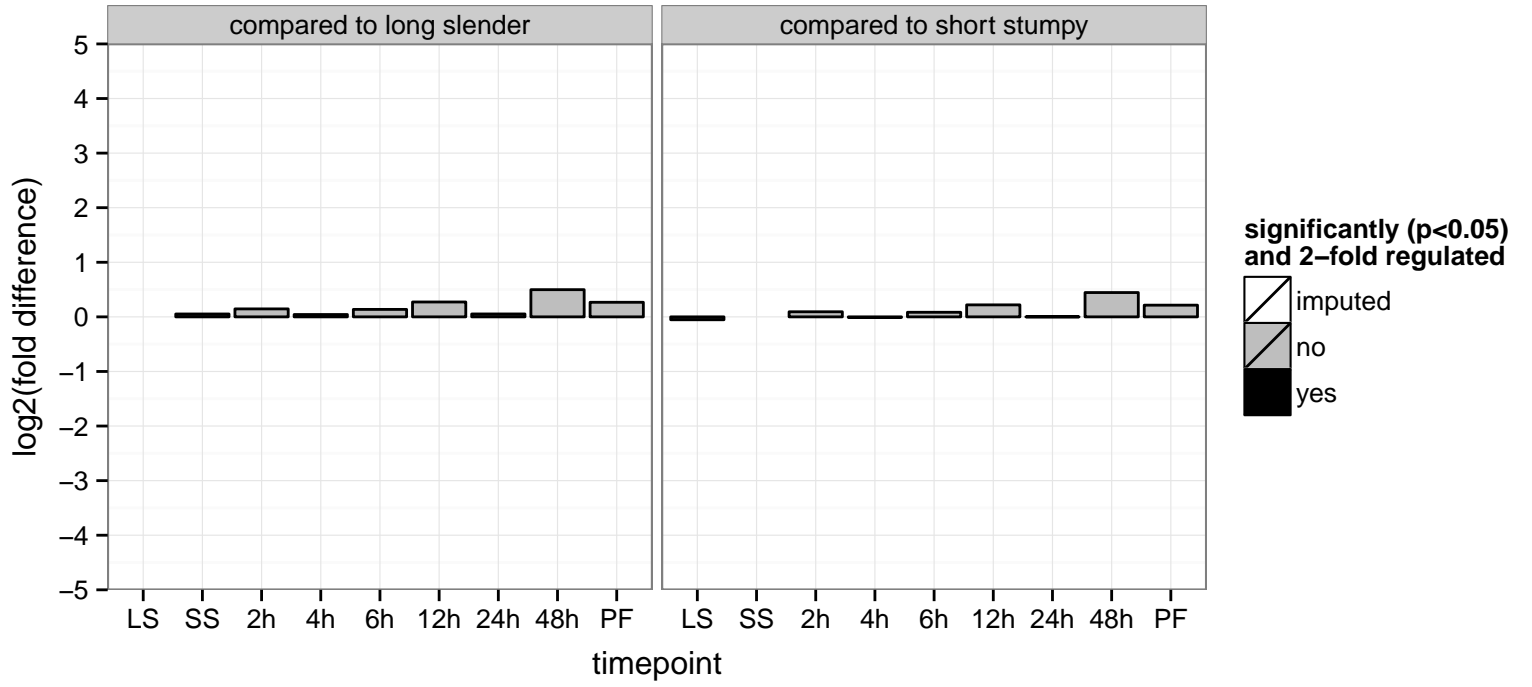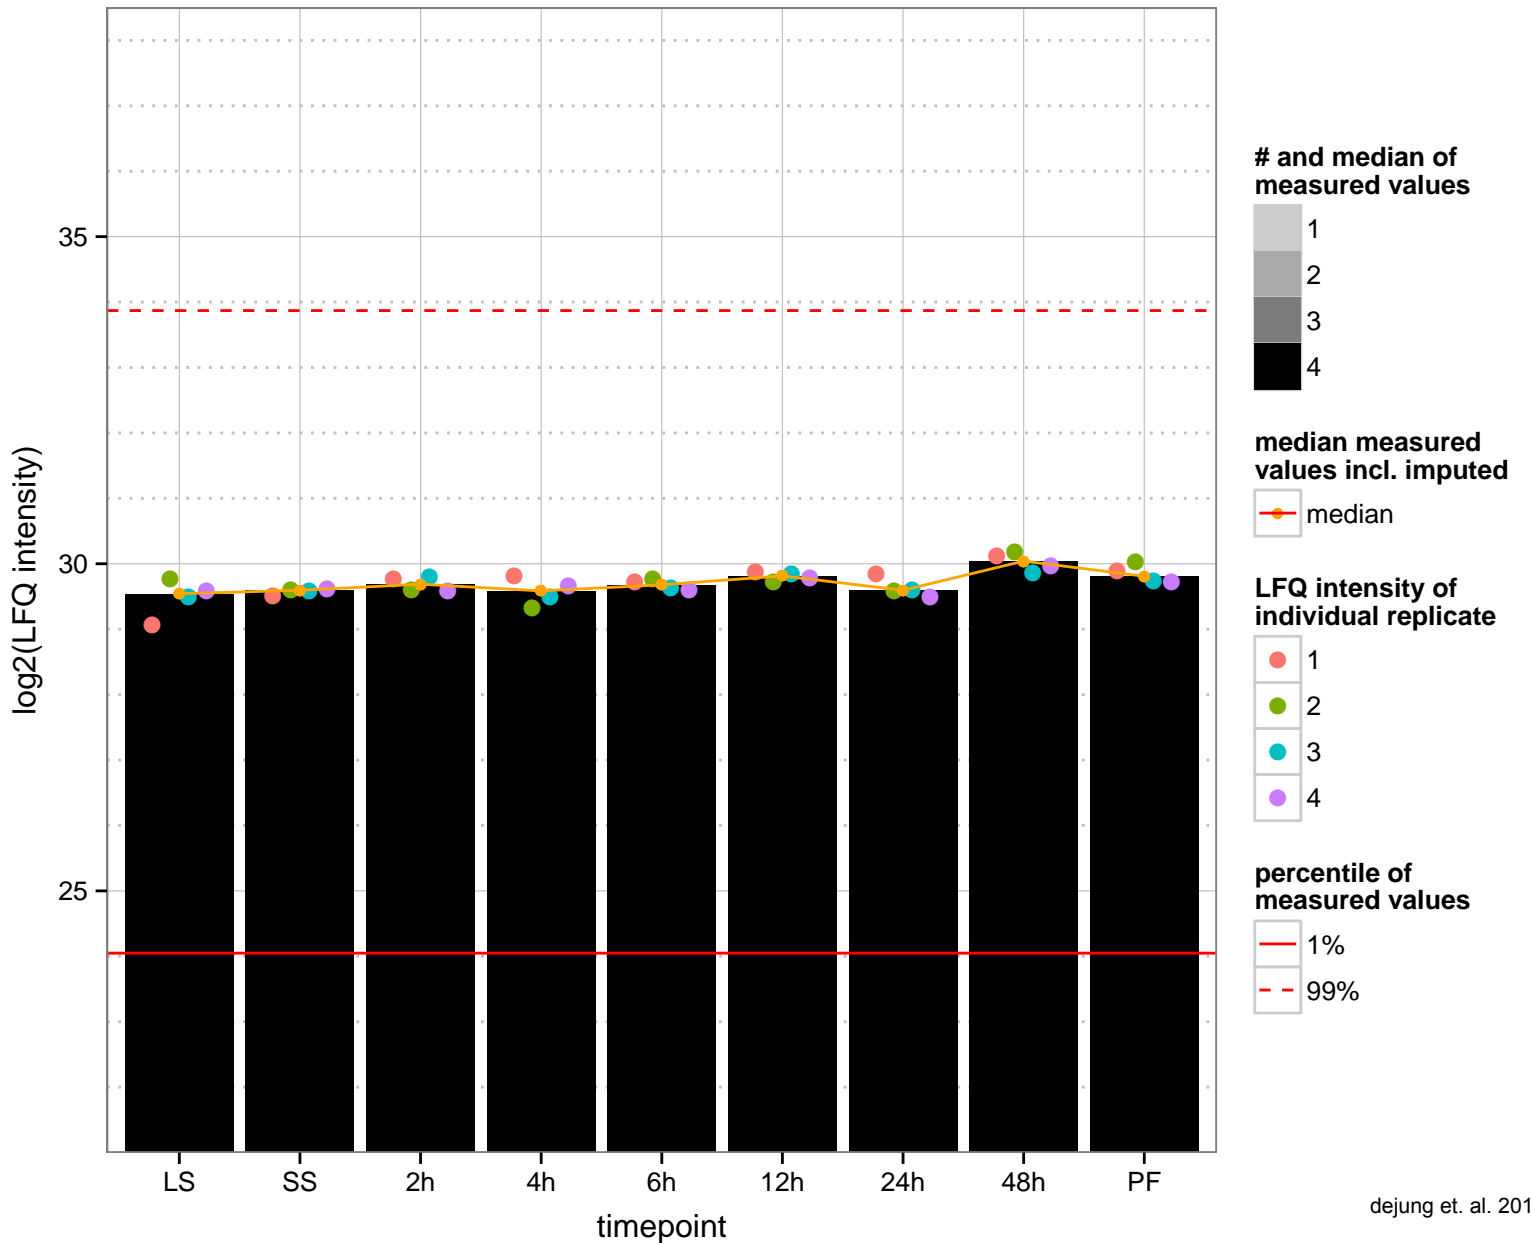

TFIIH basal transcription factor subunit (p62)  
 Tb927.11.9430  
 AGOF: sequence-specific DNA binding transcription factor activity  
 AGOC: null  
 AGOP: null  
 PGO: null  
 PGOC: null  
 PGOP: null

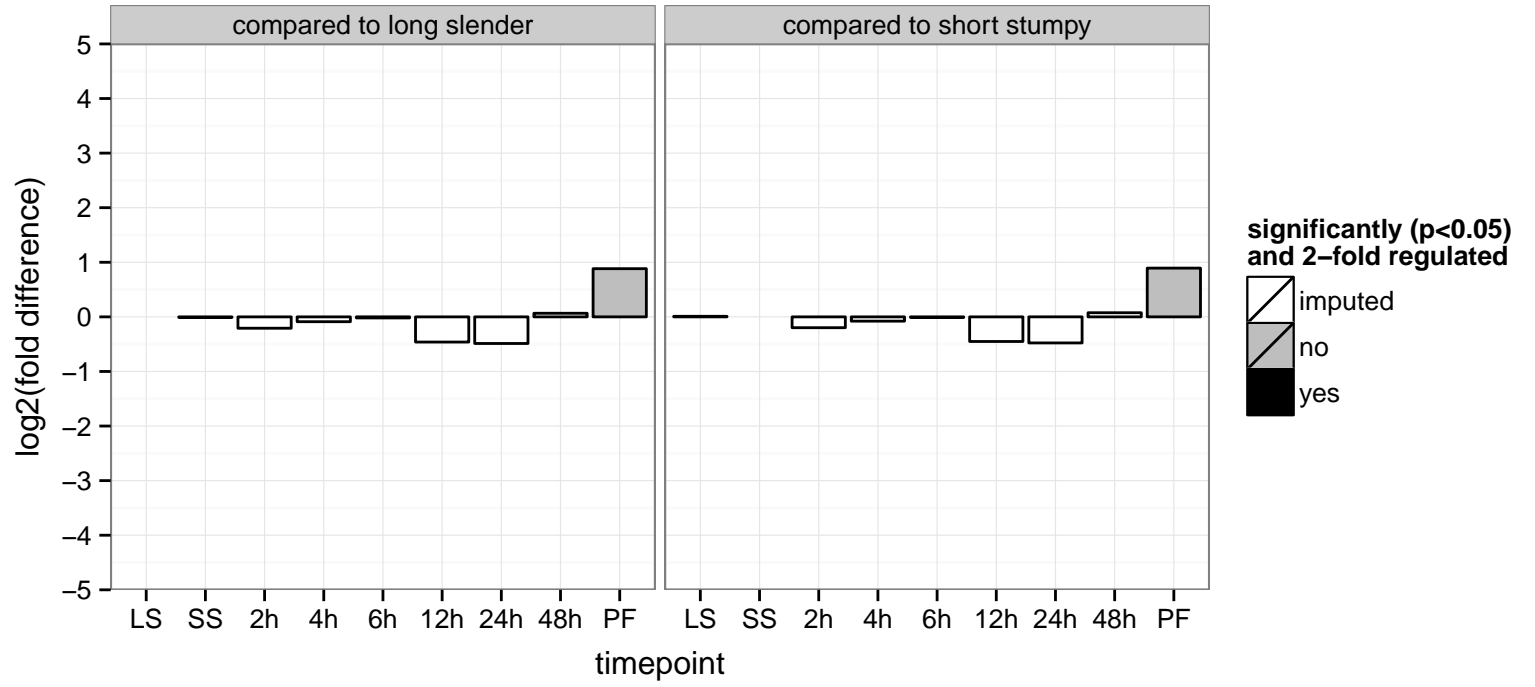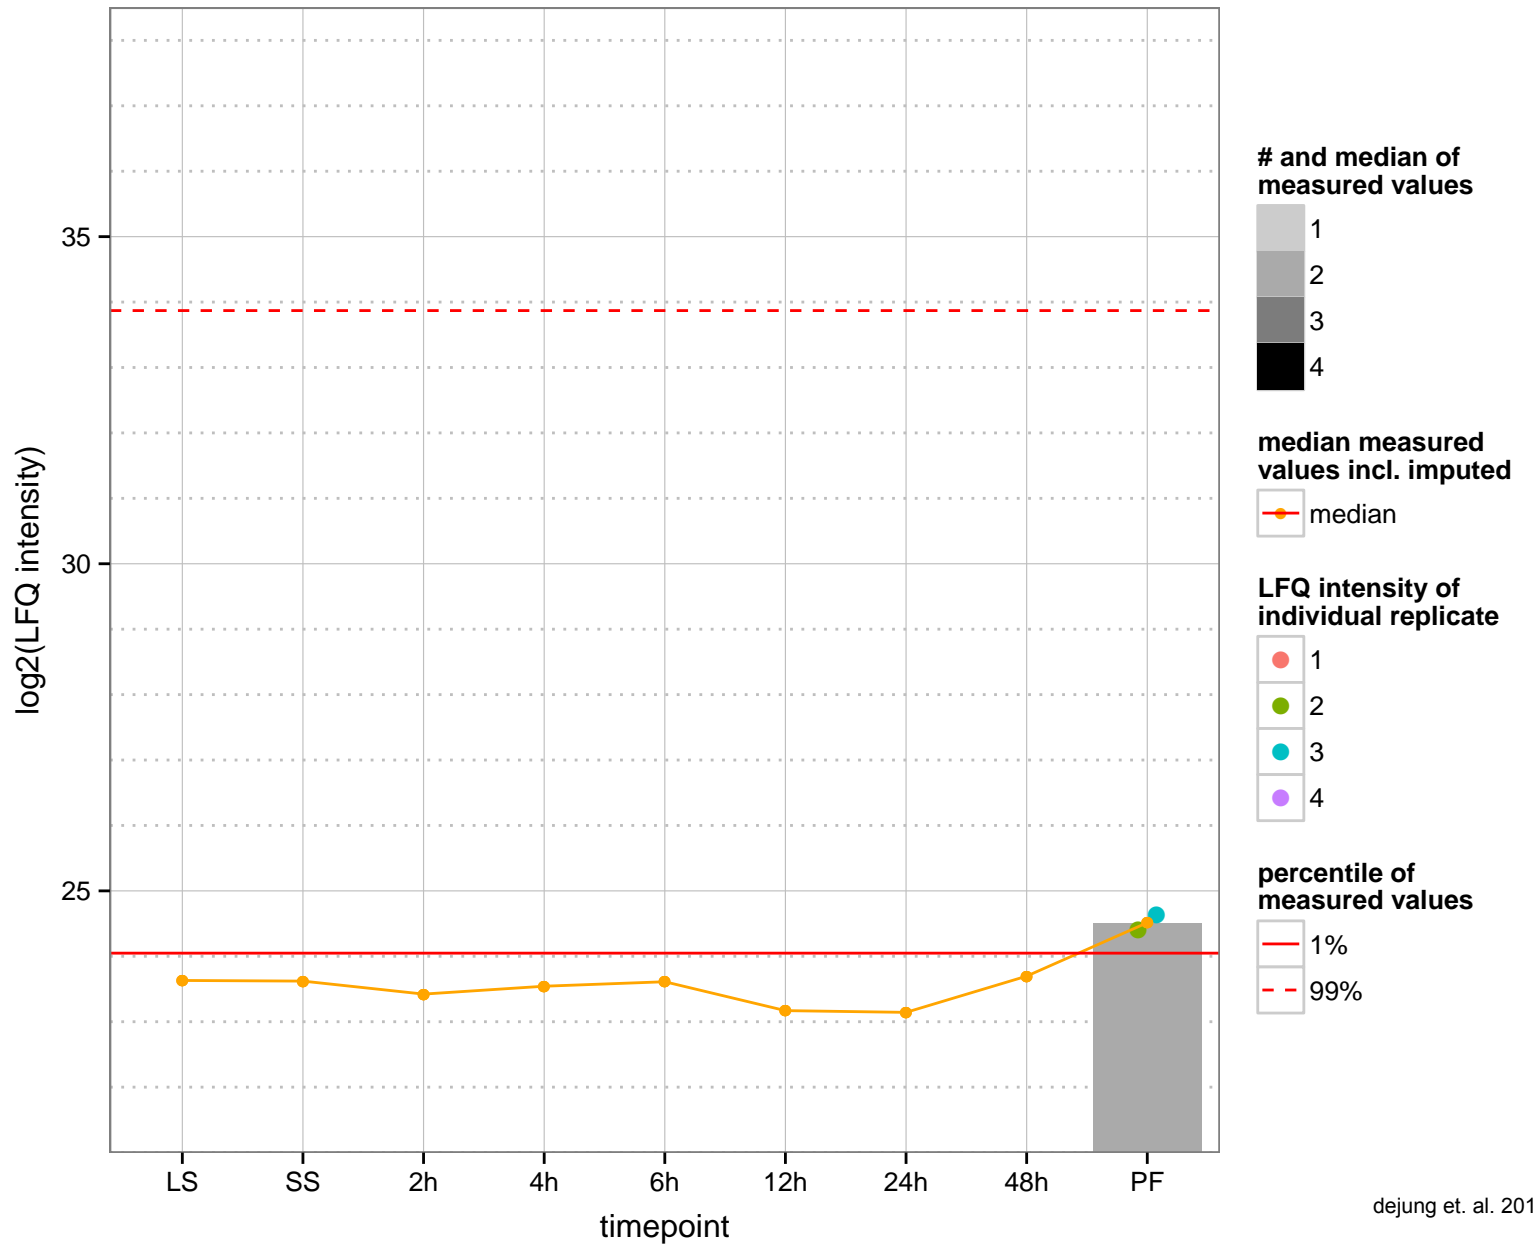

hypothetical protein, conserved  
 Tb927.11.9440  
 AGOF: null  
 AGOC: null  
 AGOP: ciliary or flagellar motility  
 PGO: null  
 PGOC: null  
 PGOP: null

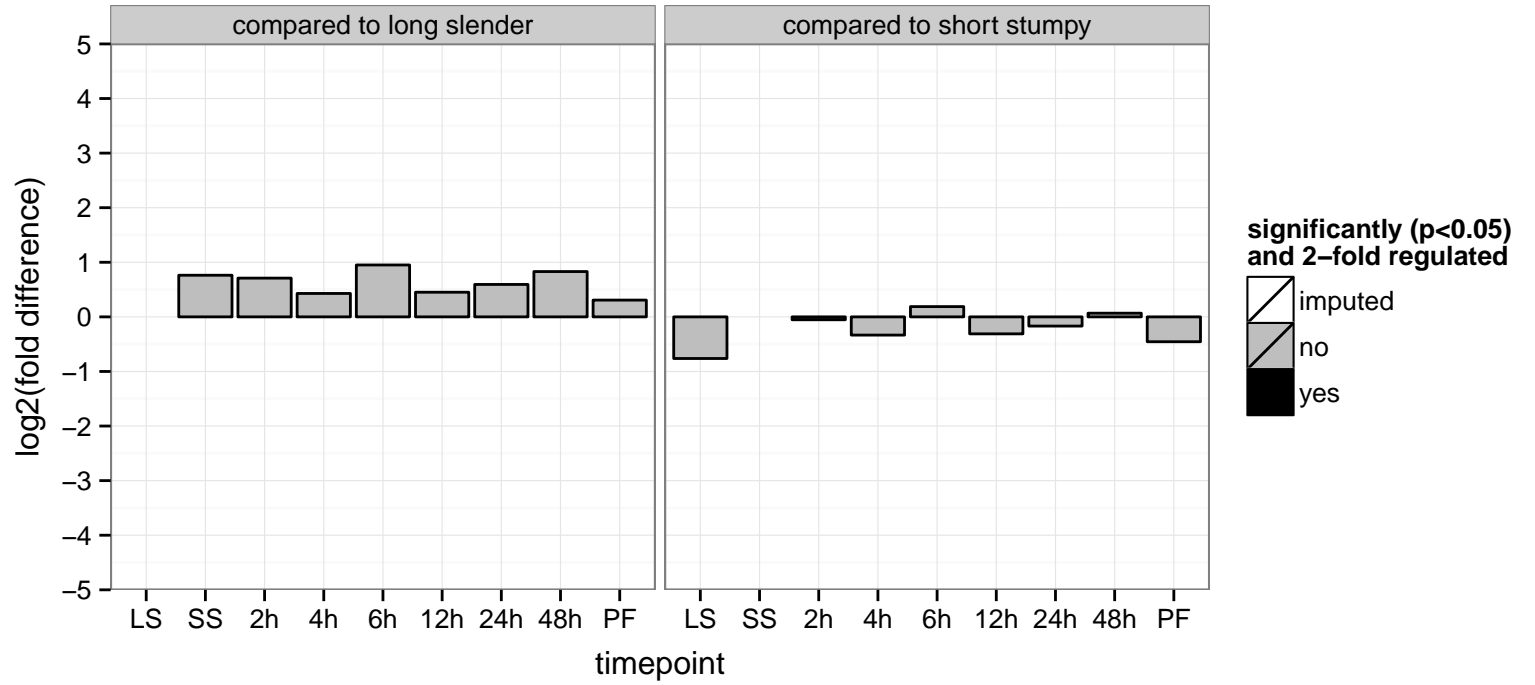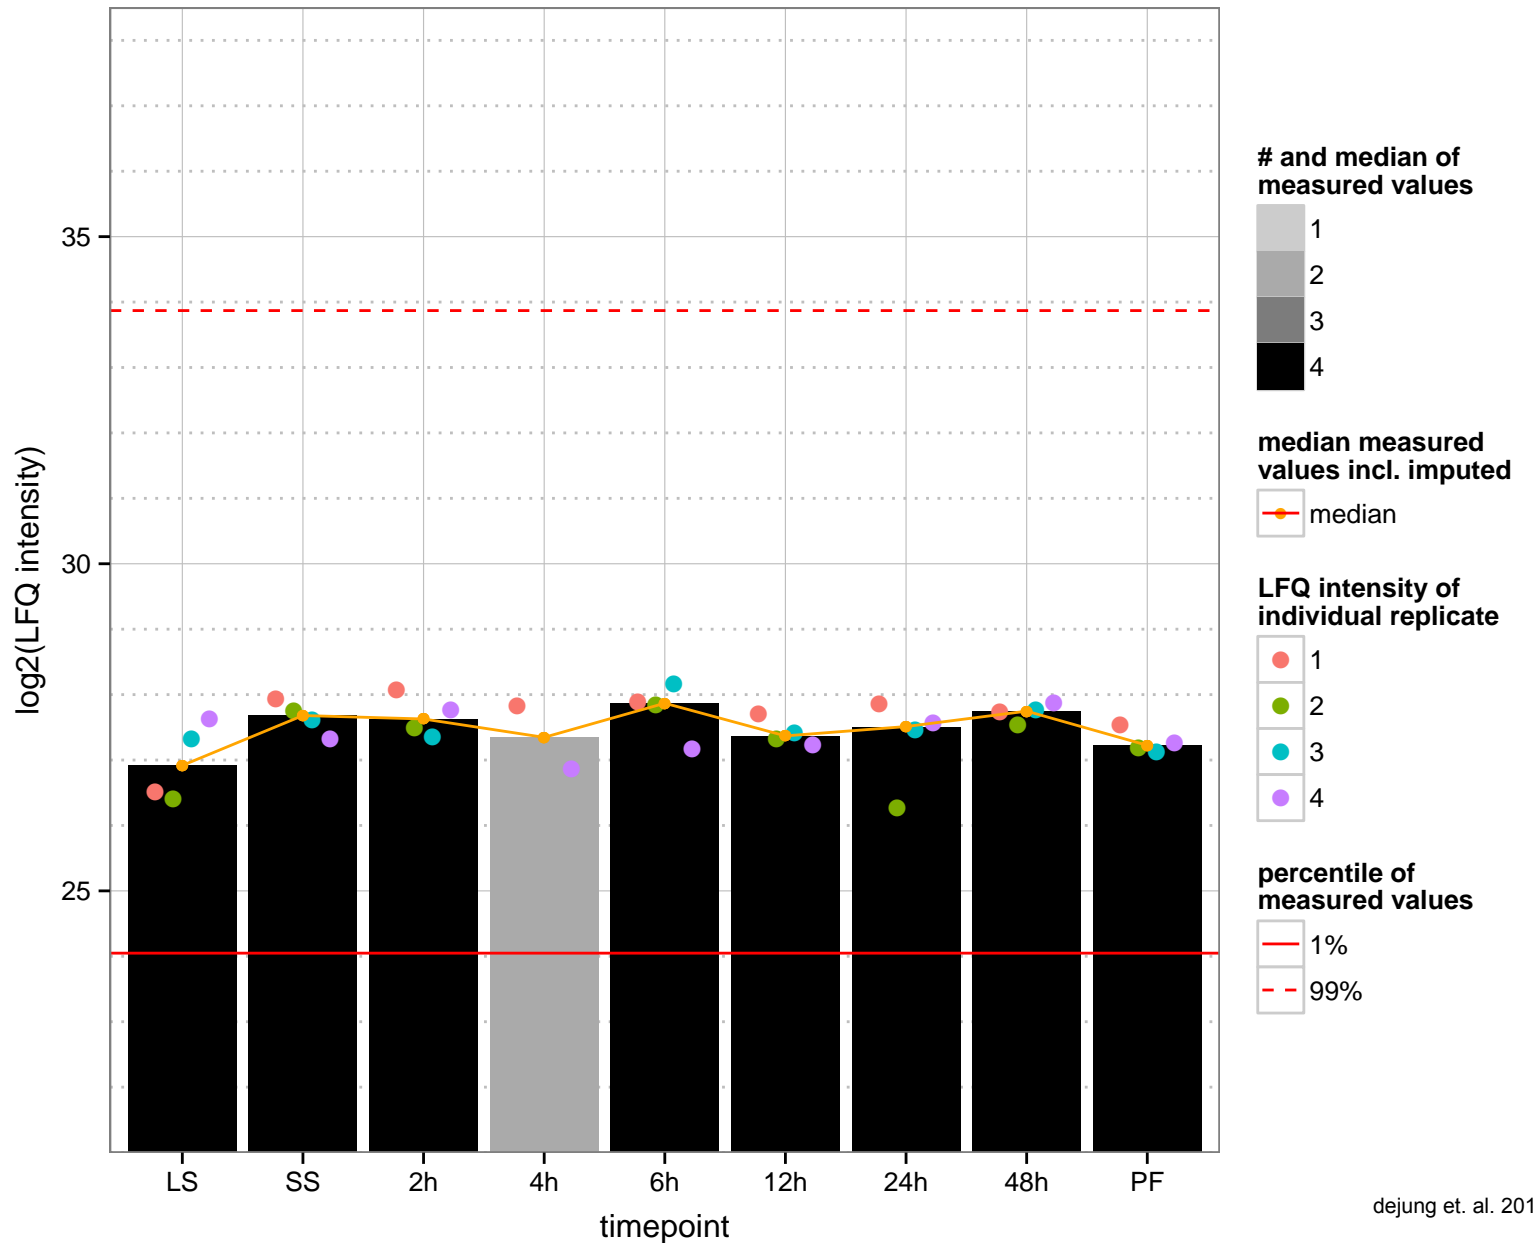

hypothetical protein, conserved  
 Tb927.11.9490  
 AGOF: null  
 AGOC: null  
 AGOP: null  
 PGO: null  
 PGOC: null  
 PGOP: null

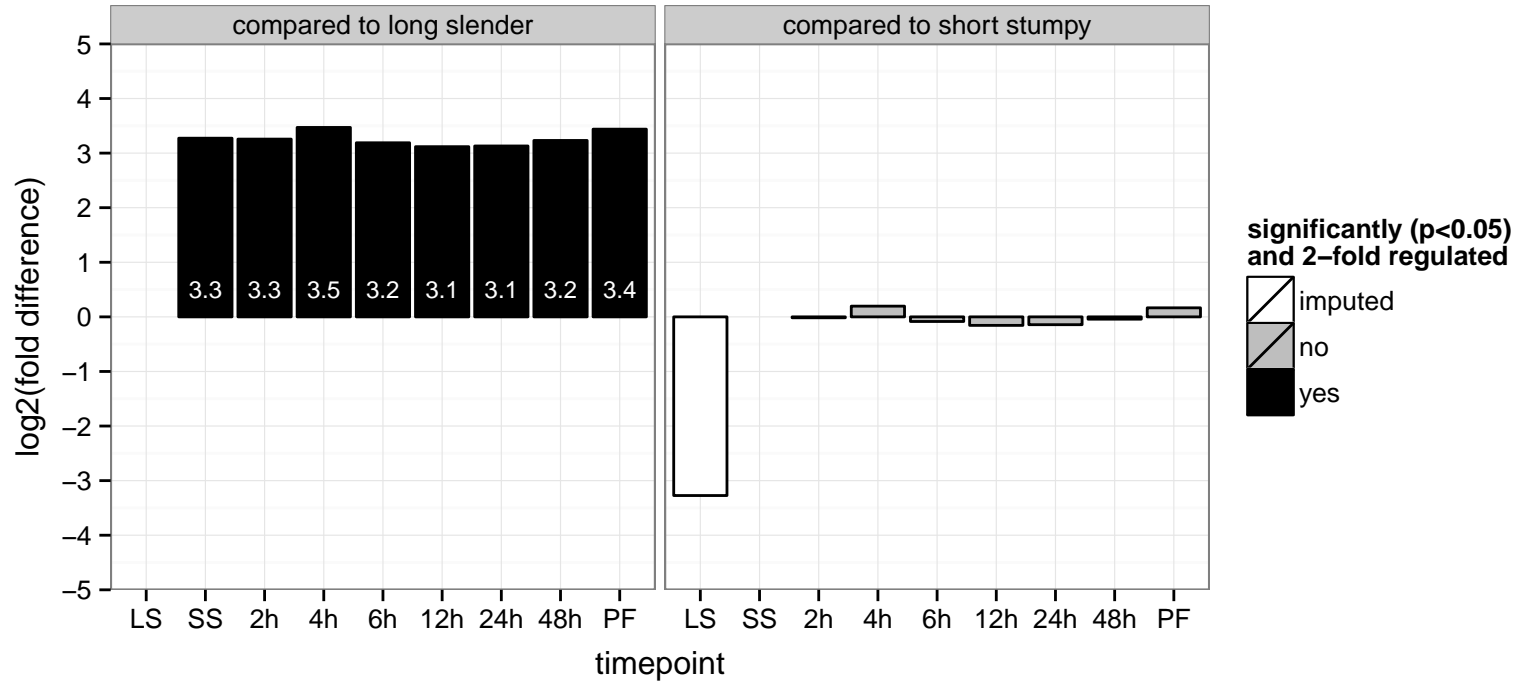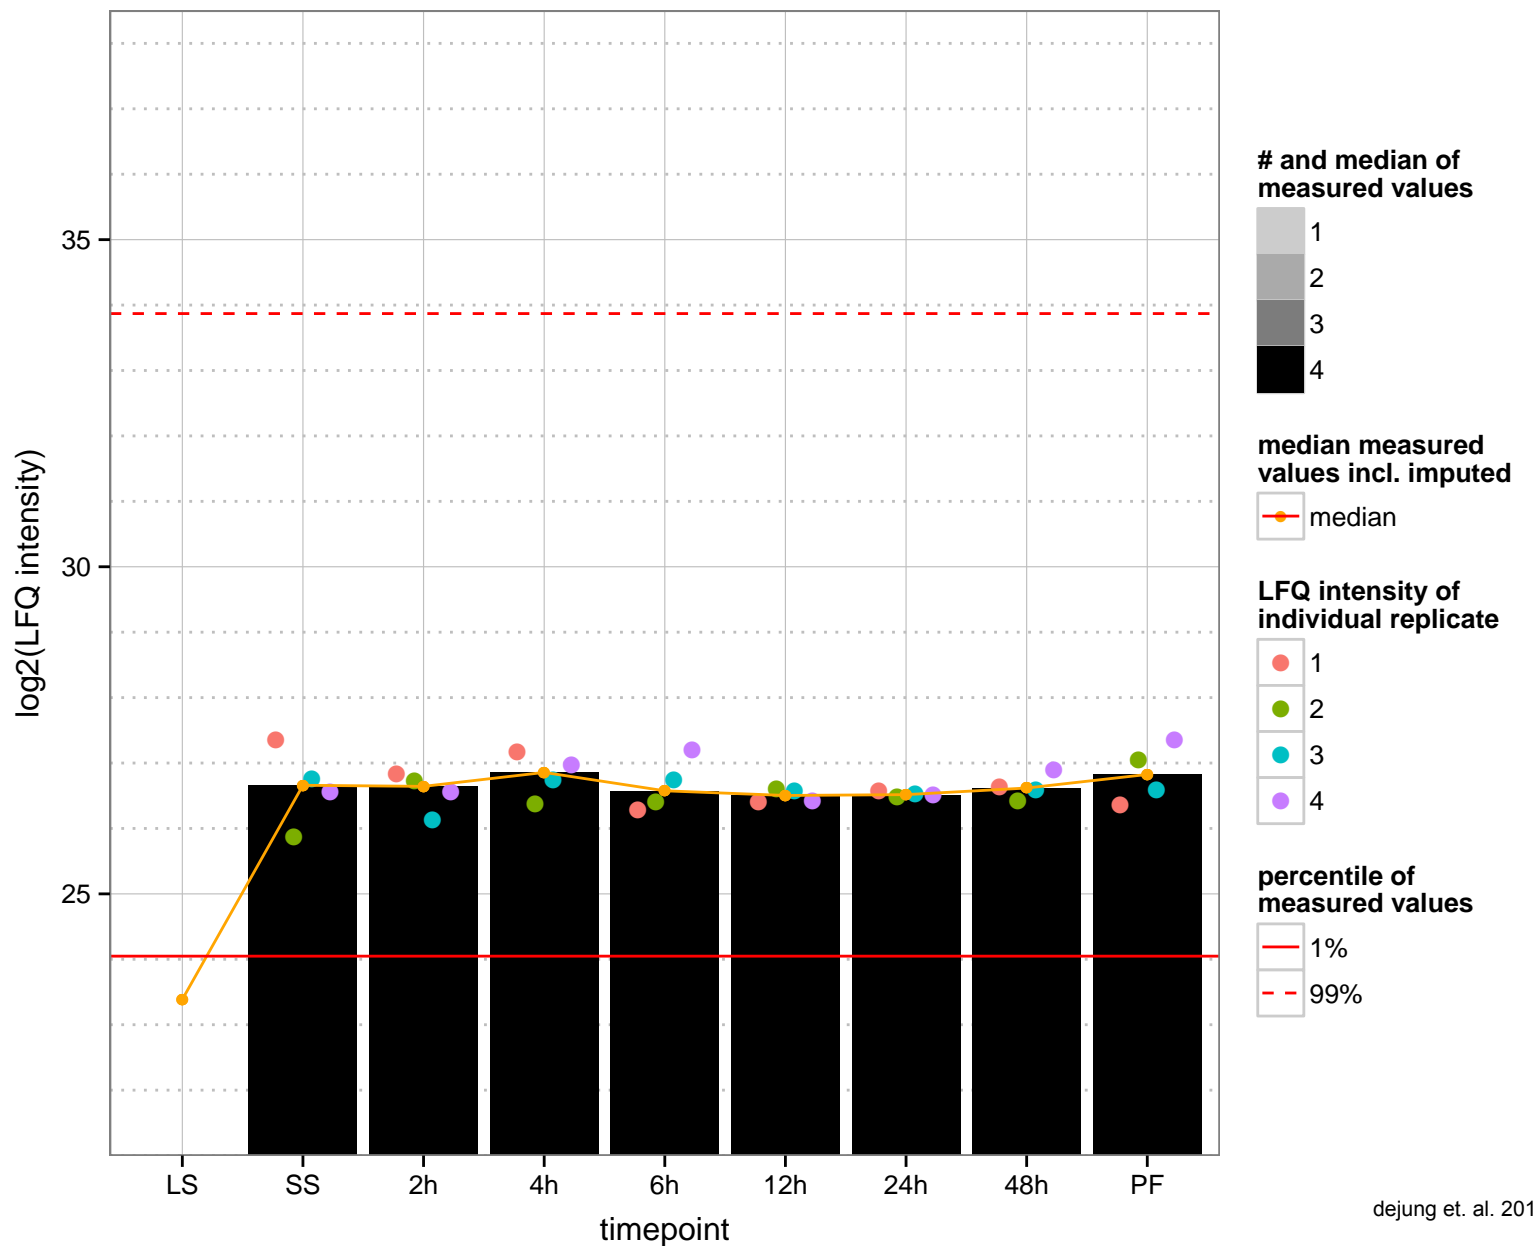

14-3-3-I protein  
 Tb927.11.9530  
 AGOF: DNA binding, protein binding, protein domain specific binding  
 AGOC: eukaryotic translation initiation factor 4F complex  
 AGOP: Ras protein signal transduction, endocytosis  
 PGO: protein domain specific binding  
 PGOC: null  
 PGOP: null

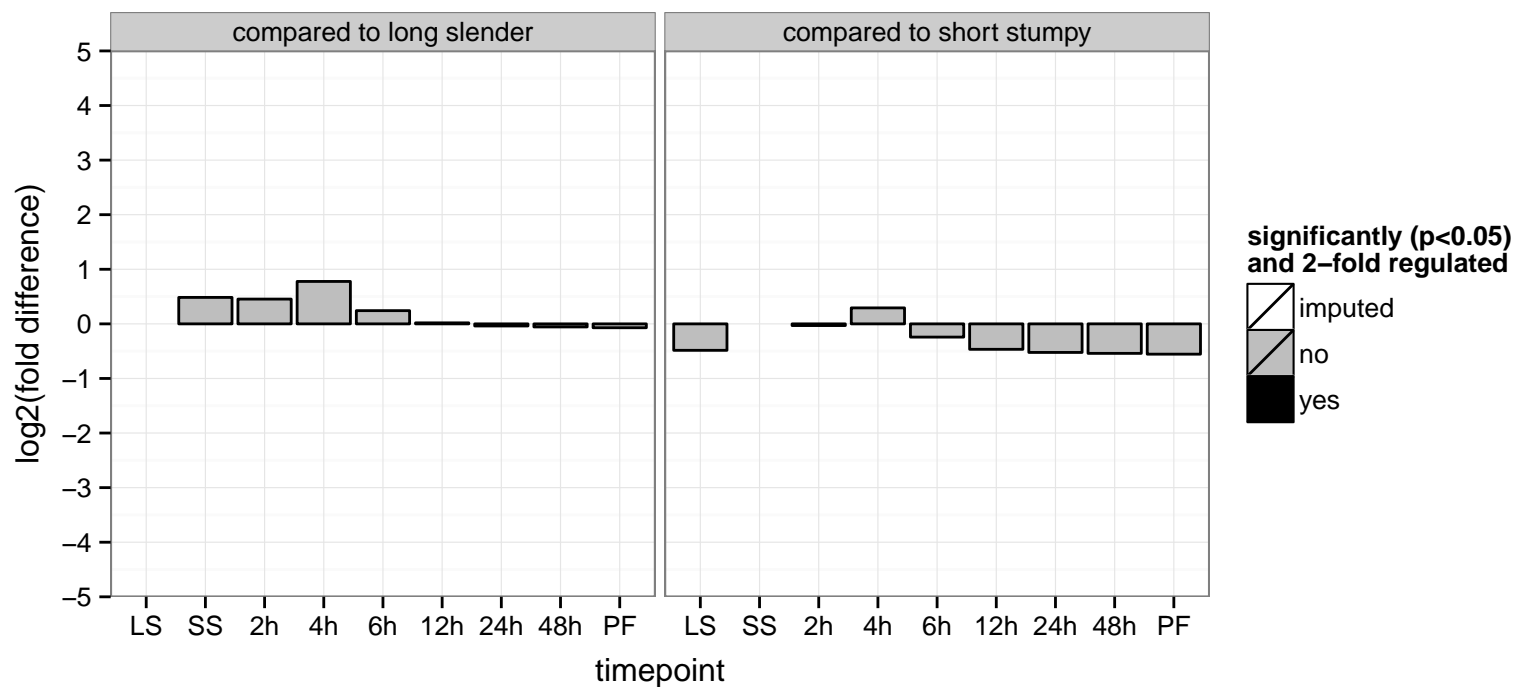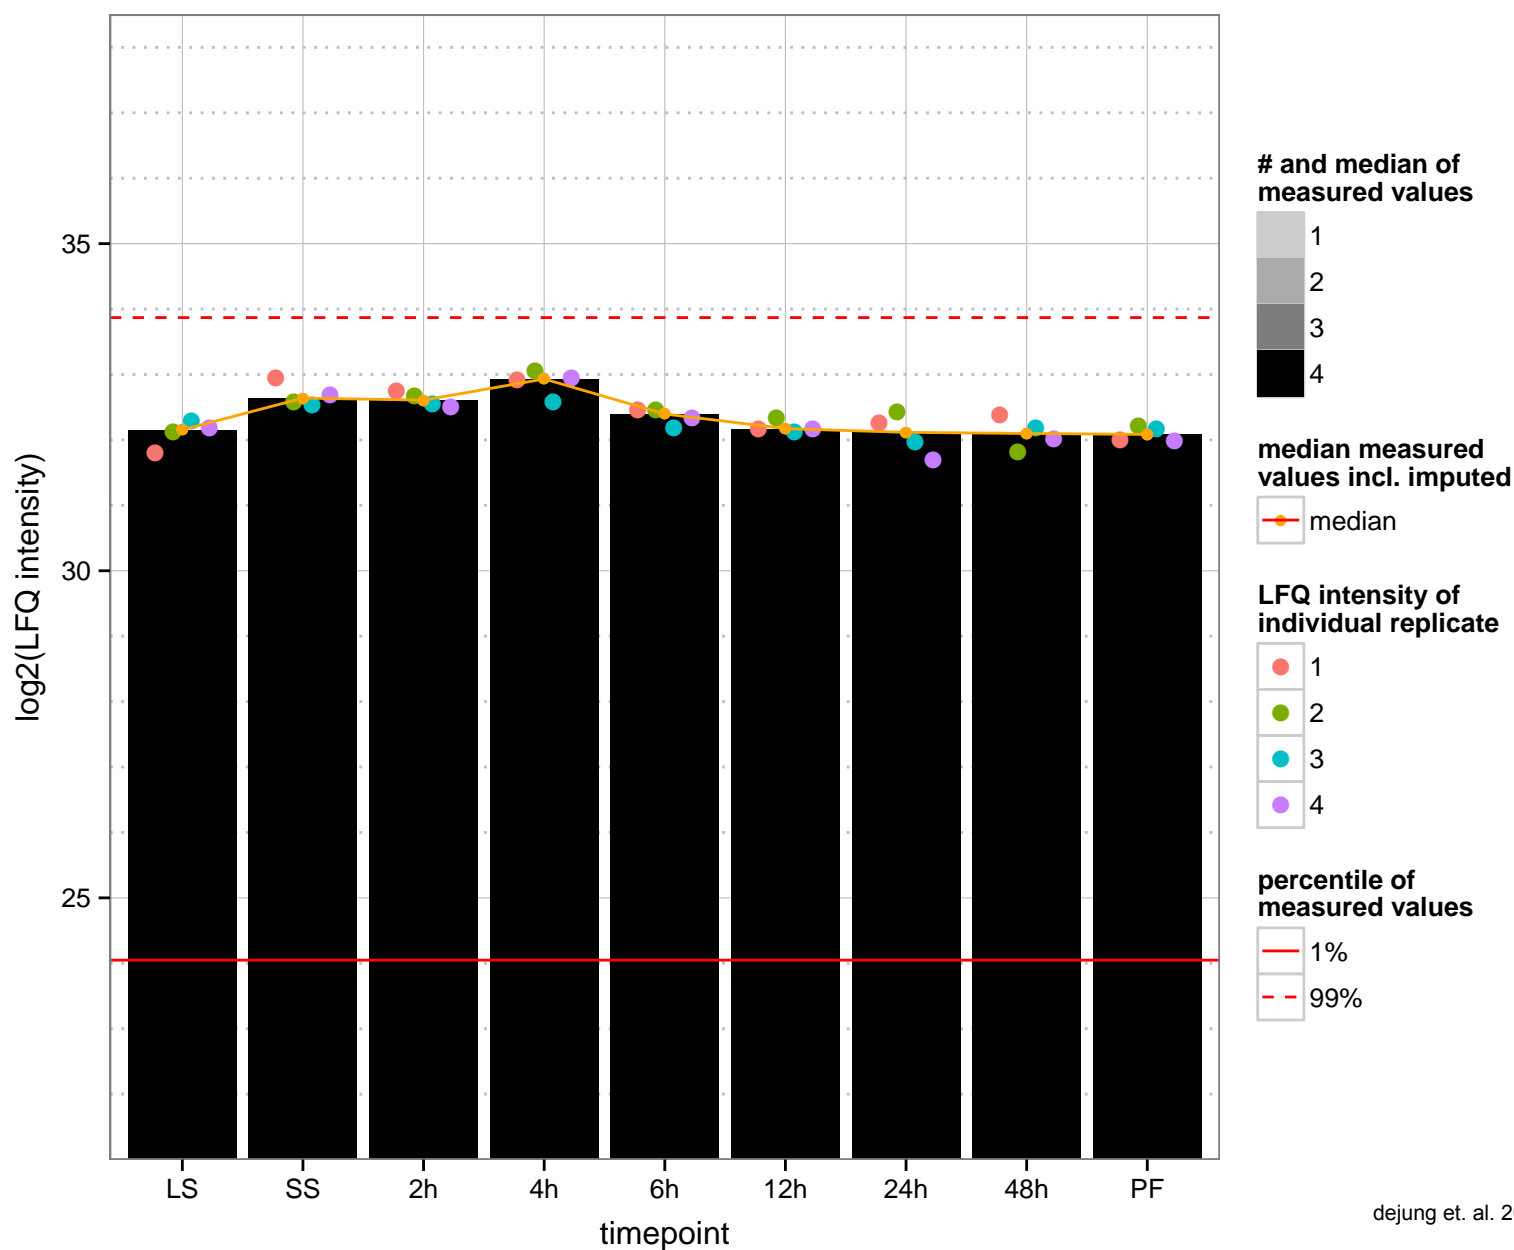

replication factor C, subunit 4, putative  
 Tb927.11.9550  
 AGOF: ATP binding, DNA binding, DNA clamp loader activity  
 AGOC: DNA replication factor C complex  
 AGOP: DNA replication  
 PGOF: DNA binding, nucleoside-triphosphatase activity, nucleotide binding  
 PGOC: null  
 PGOP: DNA replication

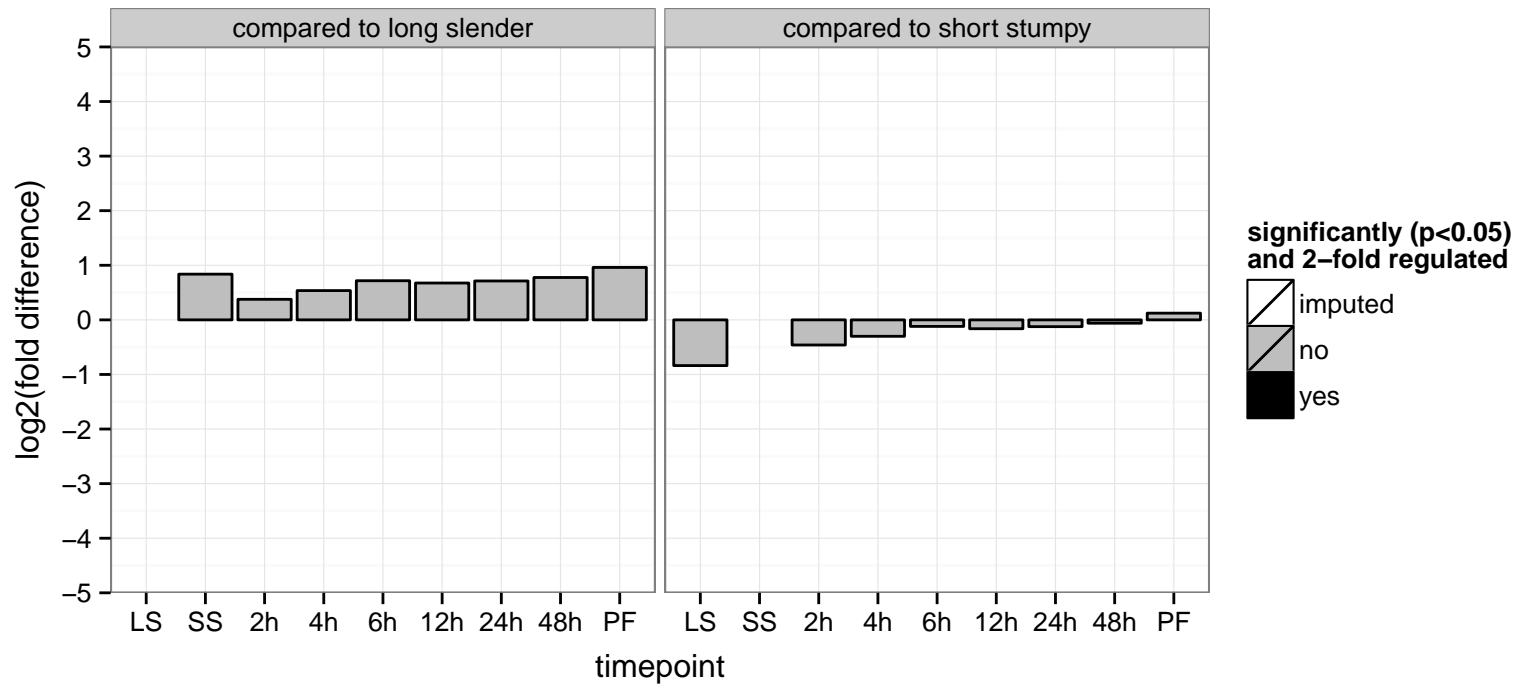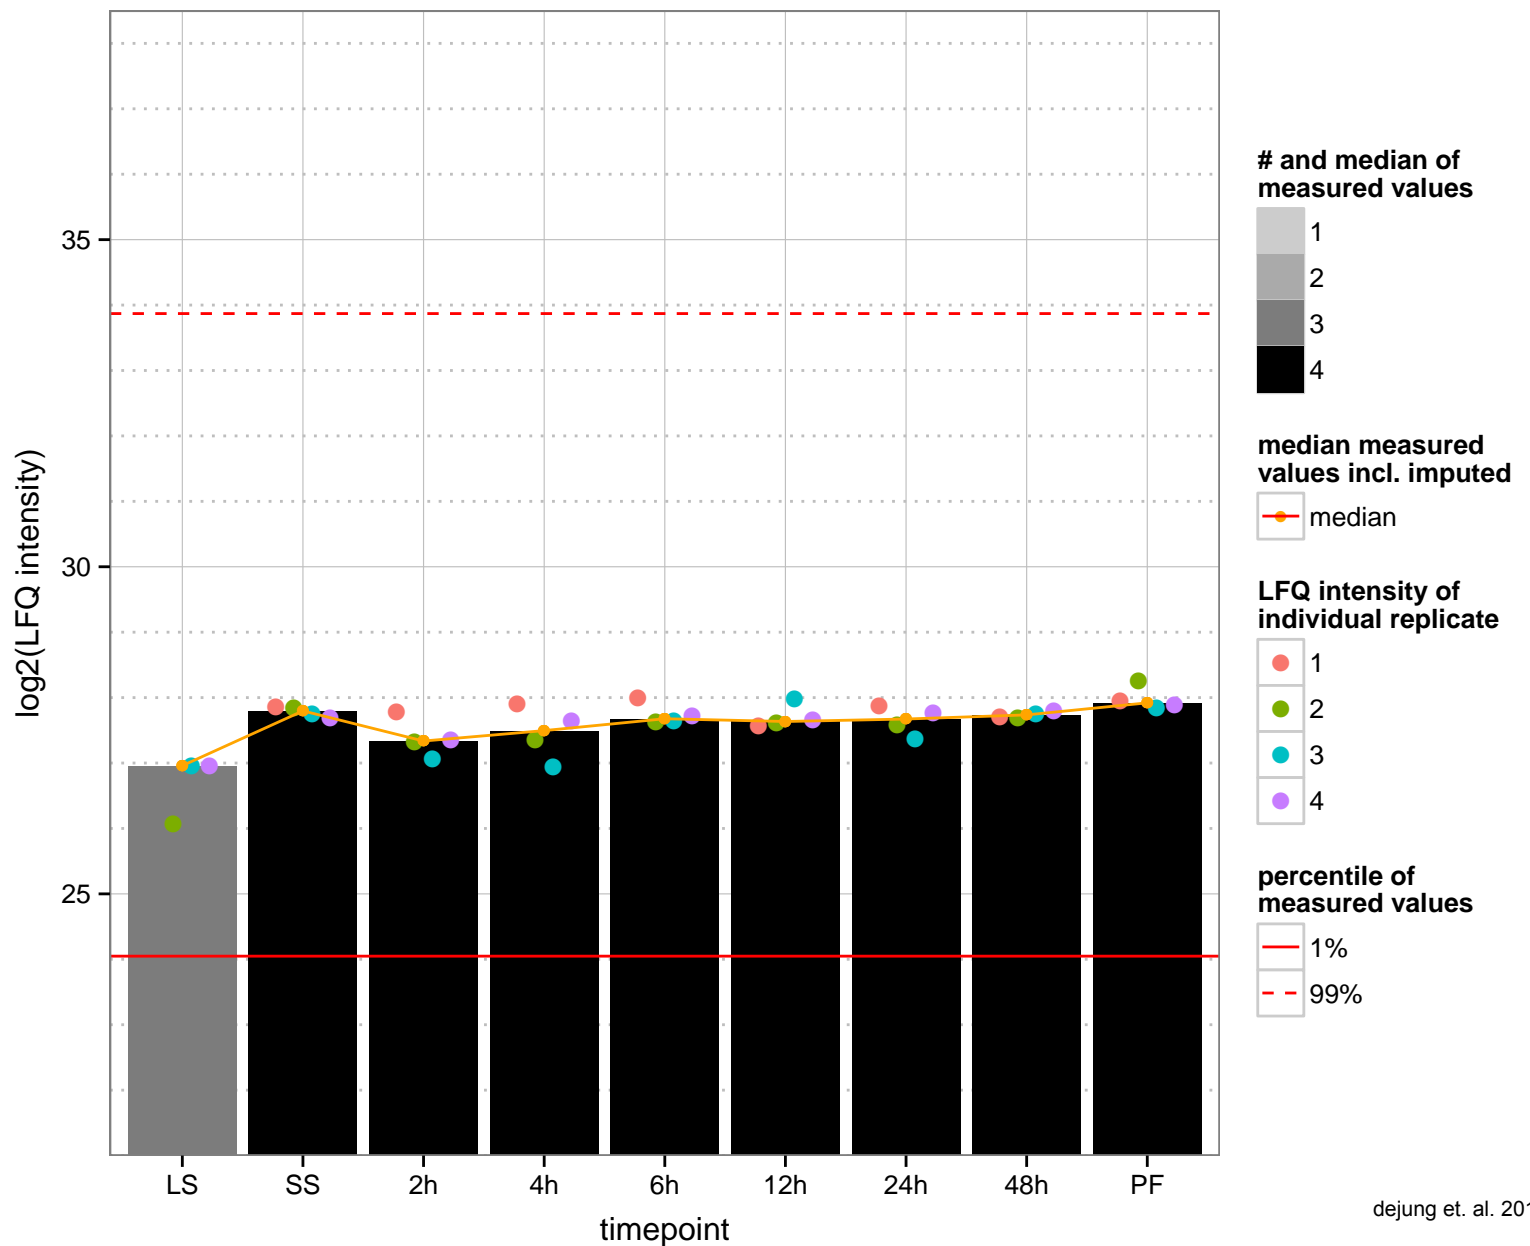

eukaryotic translation initiation factor 3 subunit 2, putative (eIF-3 beta)

Tb927.11.9610

AGOF: translation initiation factor activity

AGOC: eukaryotic translation initiation factor 3 complex

AGOP: regulation of translational initiation

PGOF: protein binding

PGOC: null

PGOP: null

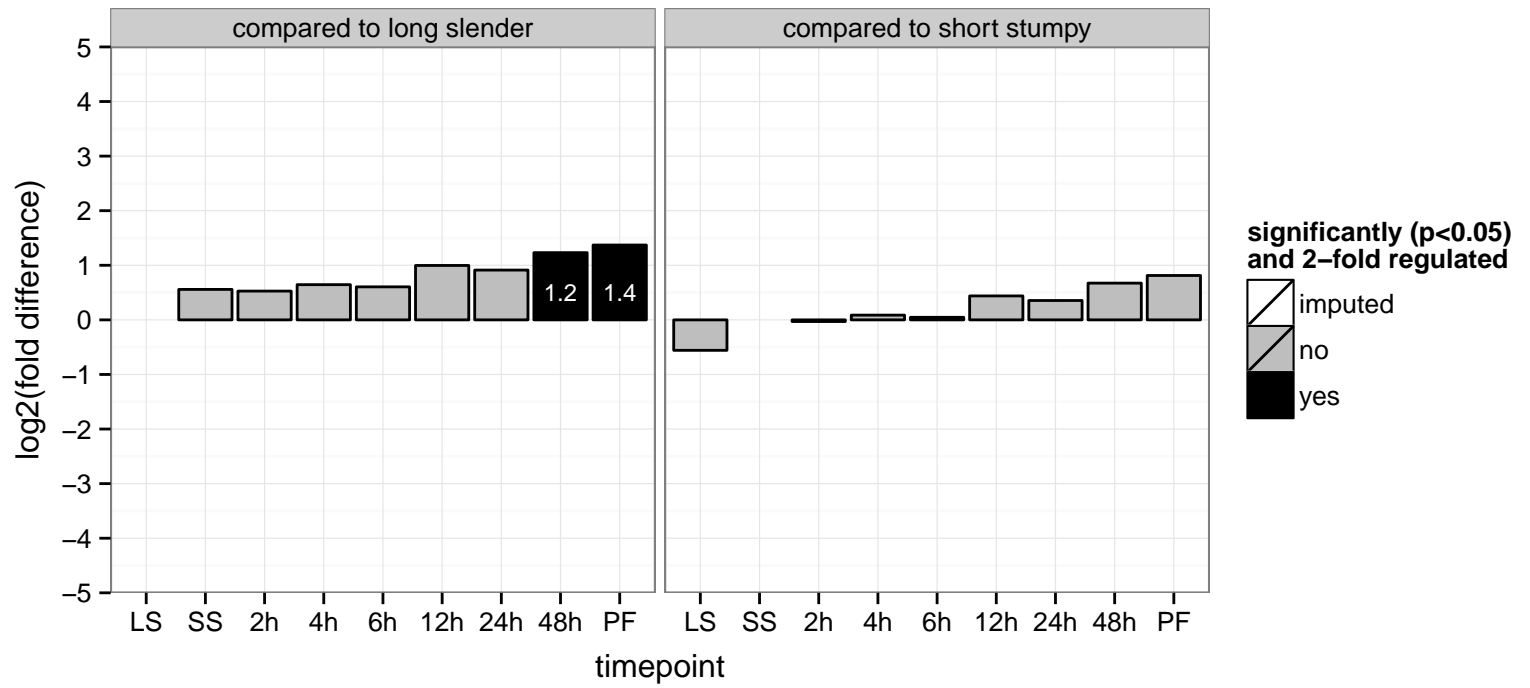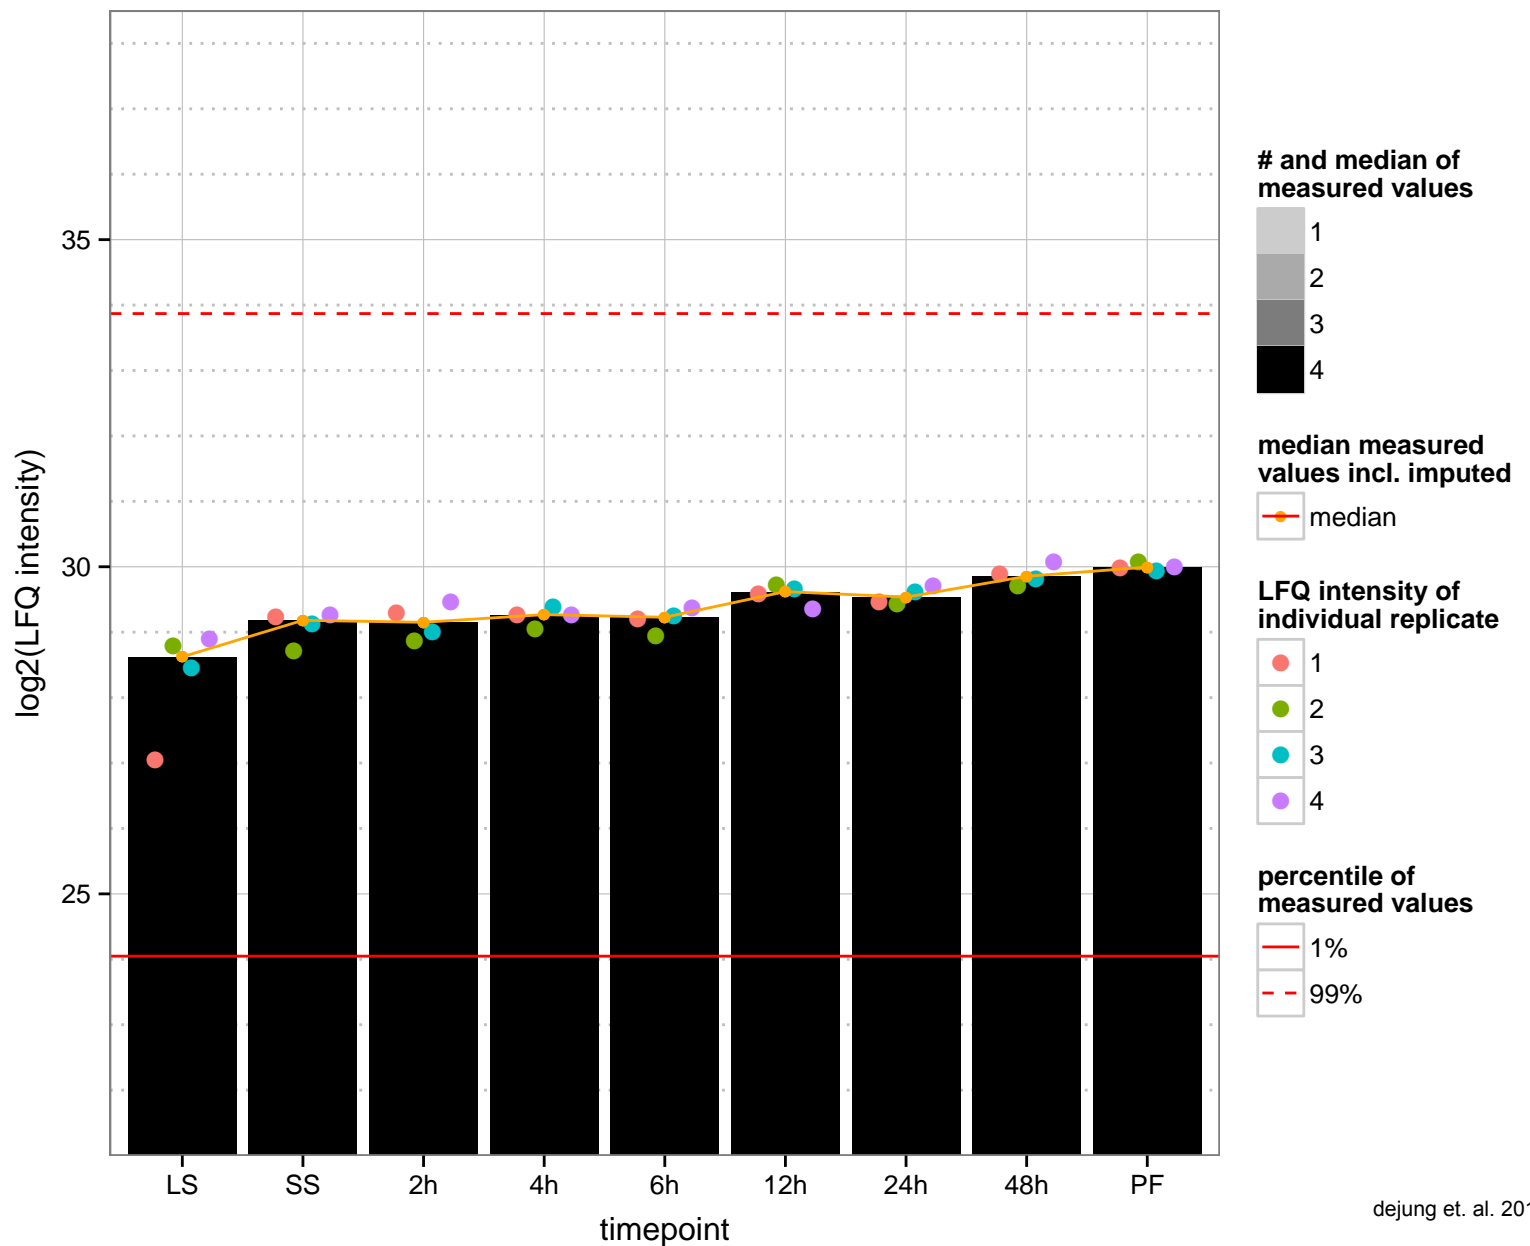

glycyl-tRNA synthetase, putative

Tb927.11.9640

AGOF: ATP binding, glycine-tRNA ligase activity

AGOC: cytoplasm, glycine-tRNA ligase complex

AGOP: glycyl-tRNA aminoacylation, translation

PGOF: ATP binding, aminoacyl-tRNA ligase activity, glycine-tRNA ligase activity, nucleotide binding

PGOC: cytoplasm

PGOP: glycyl-tRNA aminoacylation, tRNA aminoacylation for protein translation

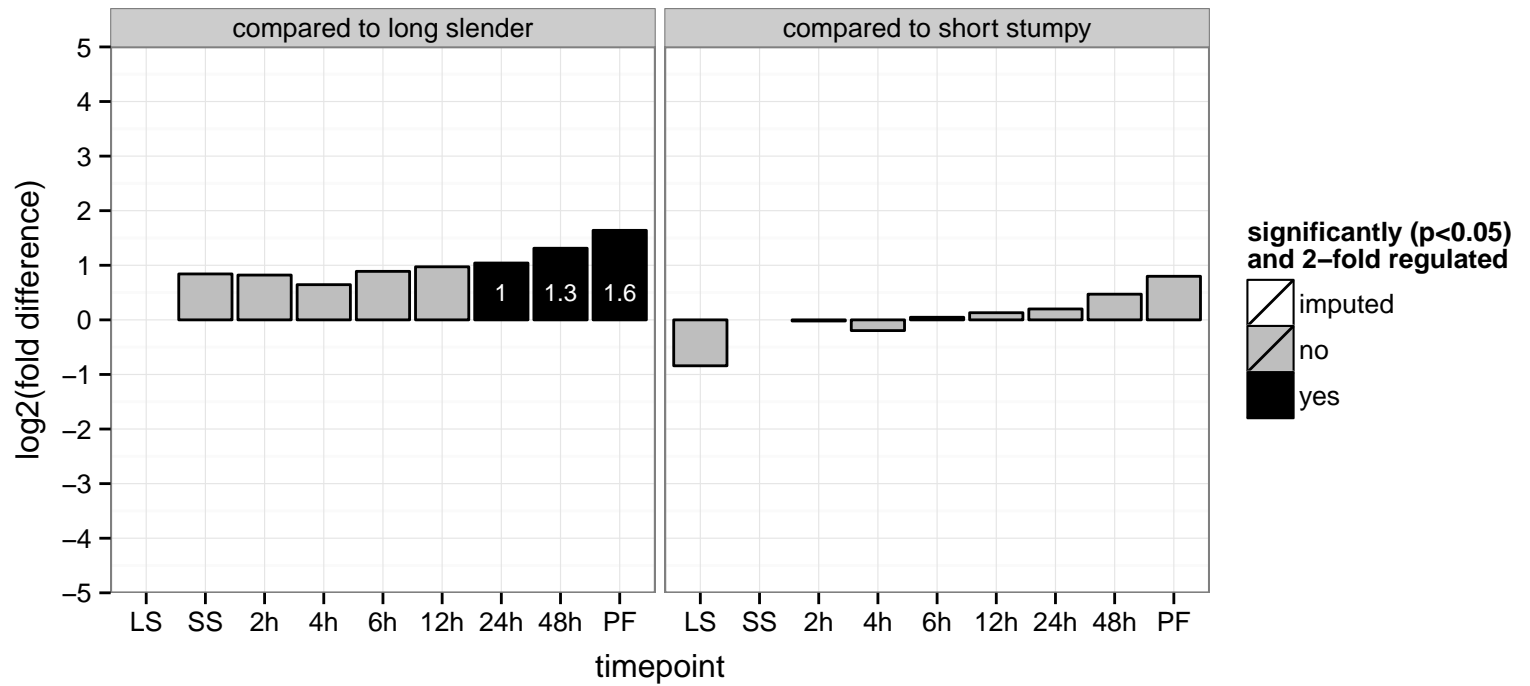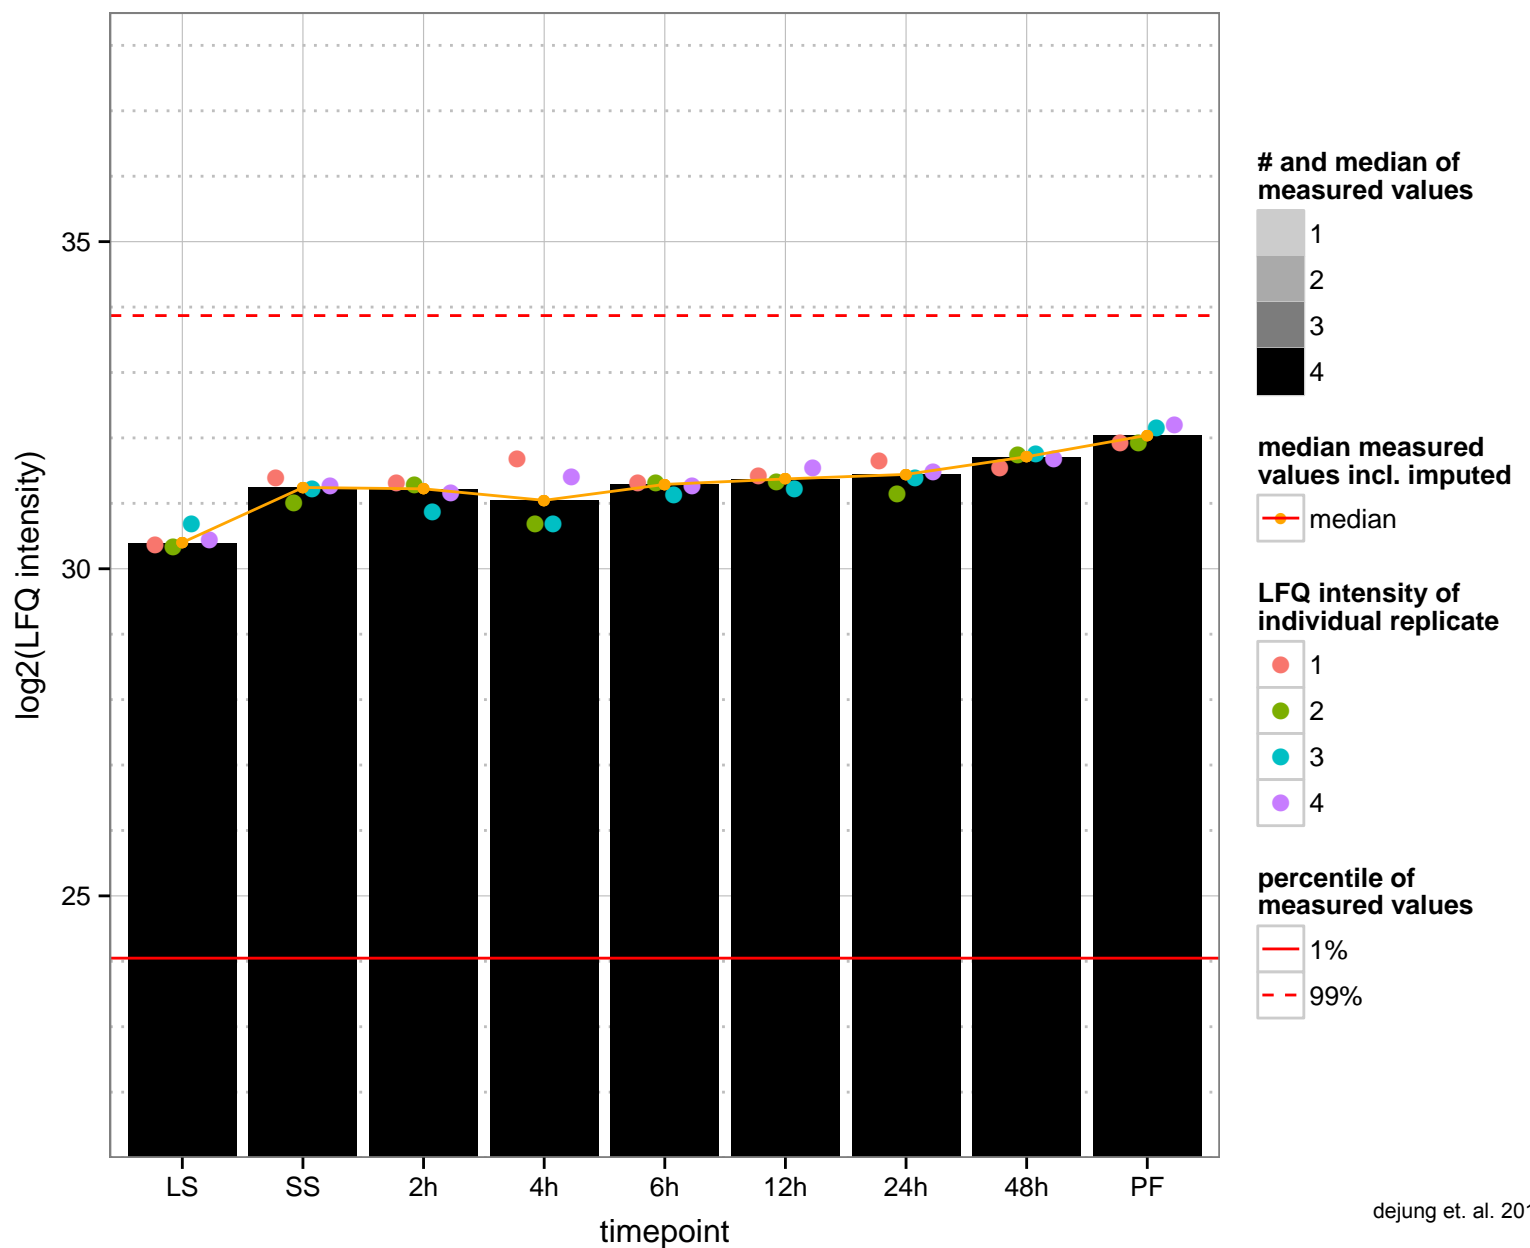



40S ribosomal protein S27, putative  
 Tb927.11.9720  
 AGOF: structural constituent of ribosome  
 AGOC: intracellular, ribosome  
 AGOP: translation  
 PGOF: structural constituent of ribosome  
 PGO: intracellular, ribosome  
 PGOP: translation

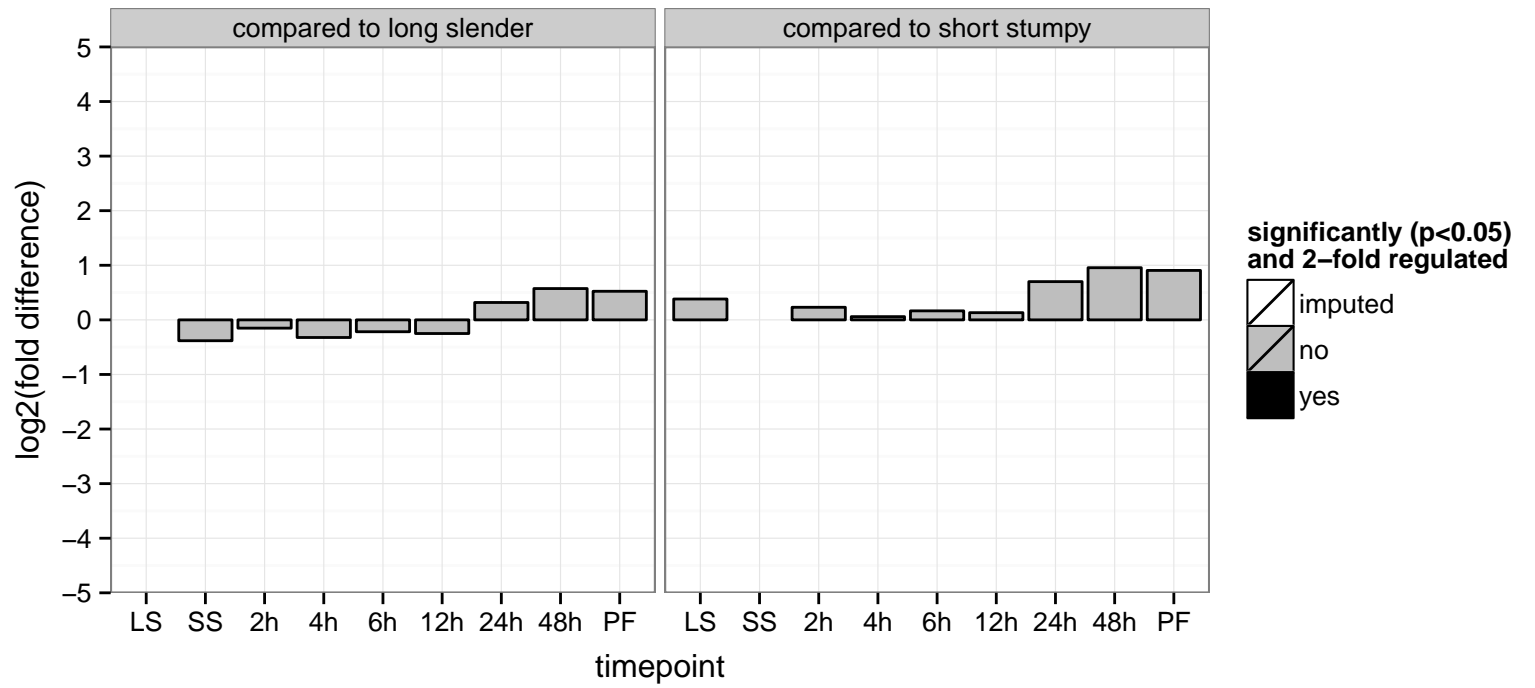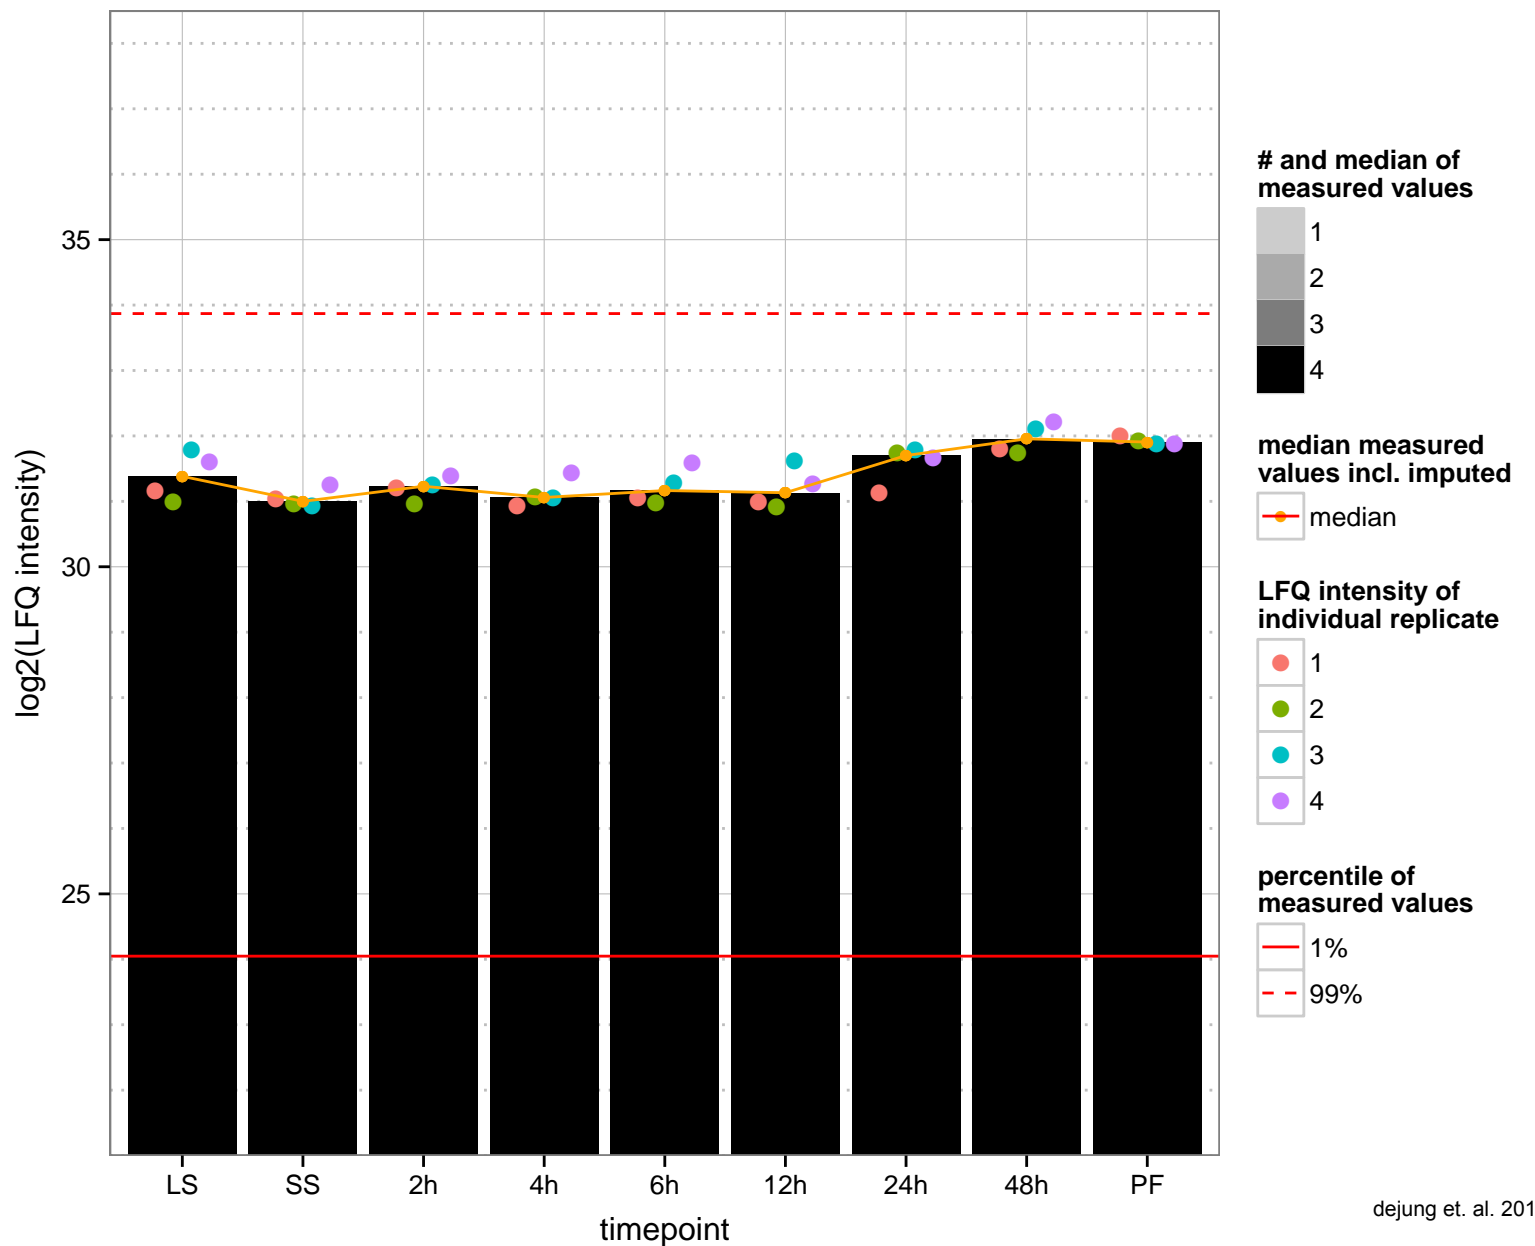

hypothetical protein, conserved  
 Tb927.11.9760  
 AGOF: null  
 AGOC: null  
 AGOP: null  
 PGO: null  
 PGOC: null  
 PGOP: null

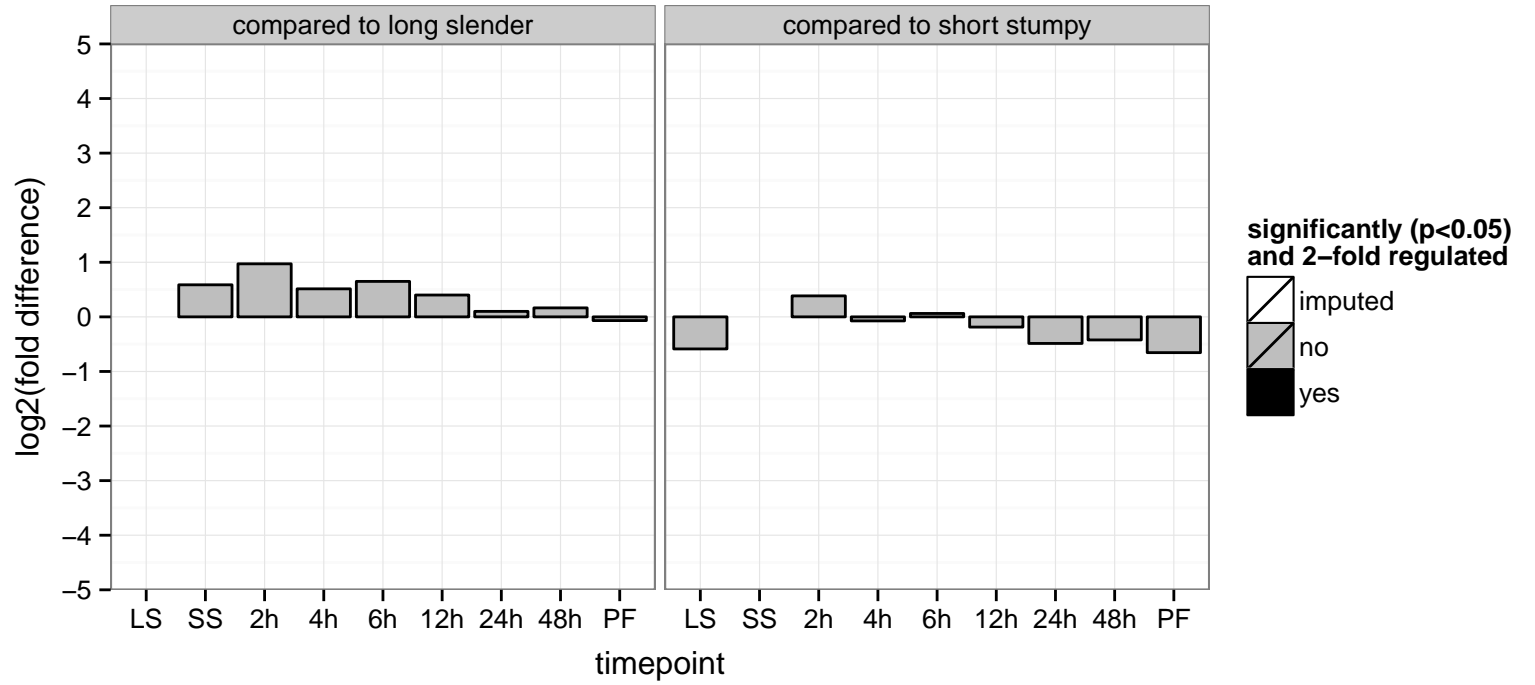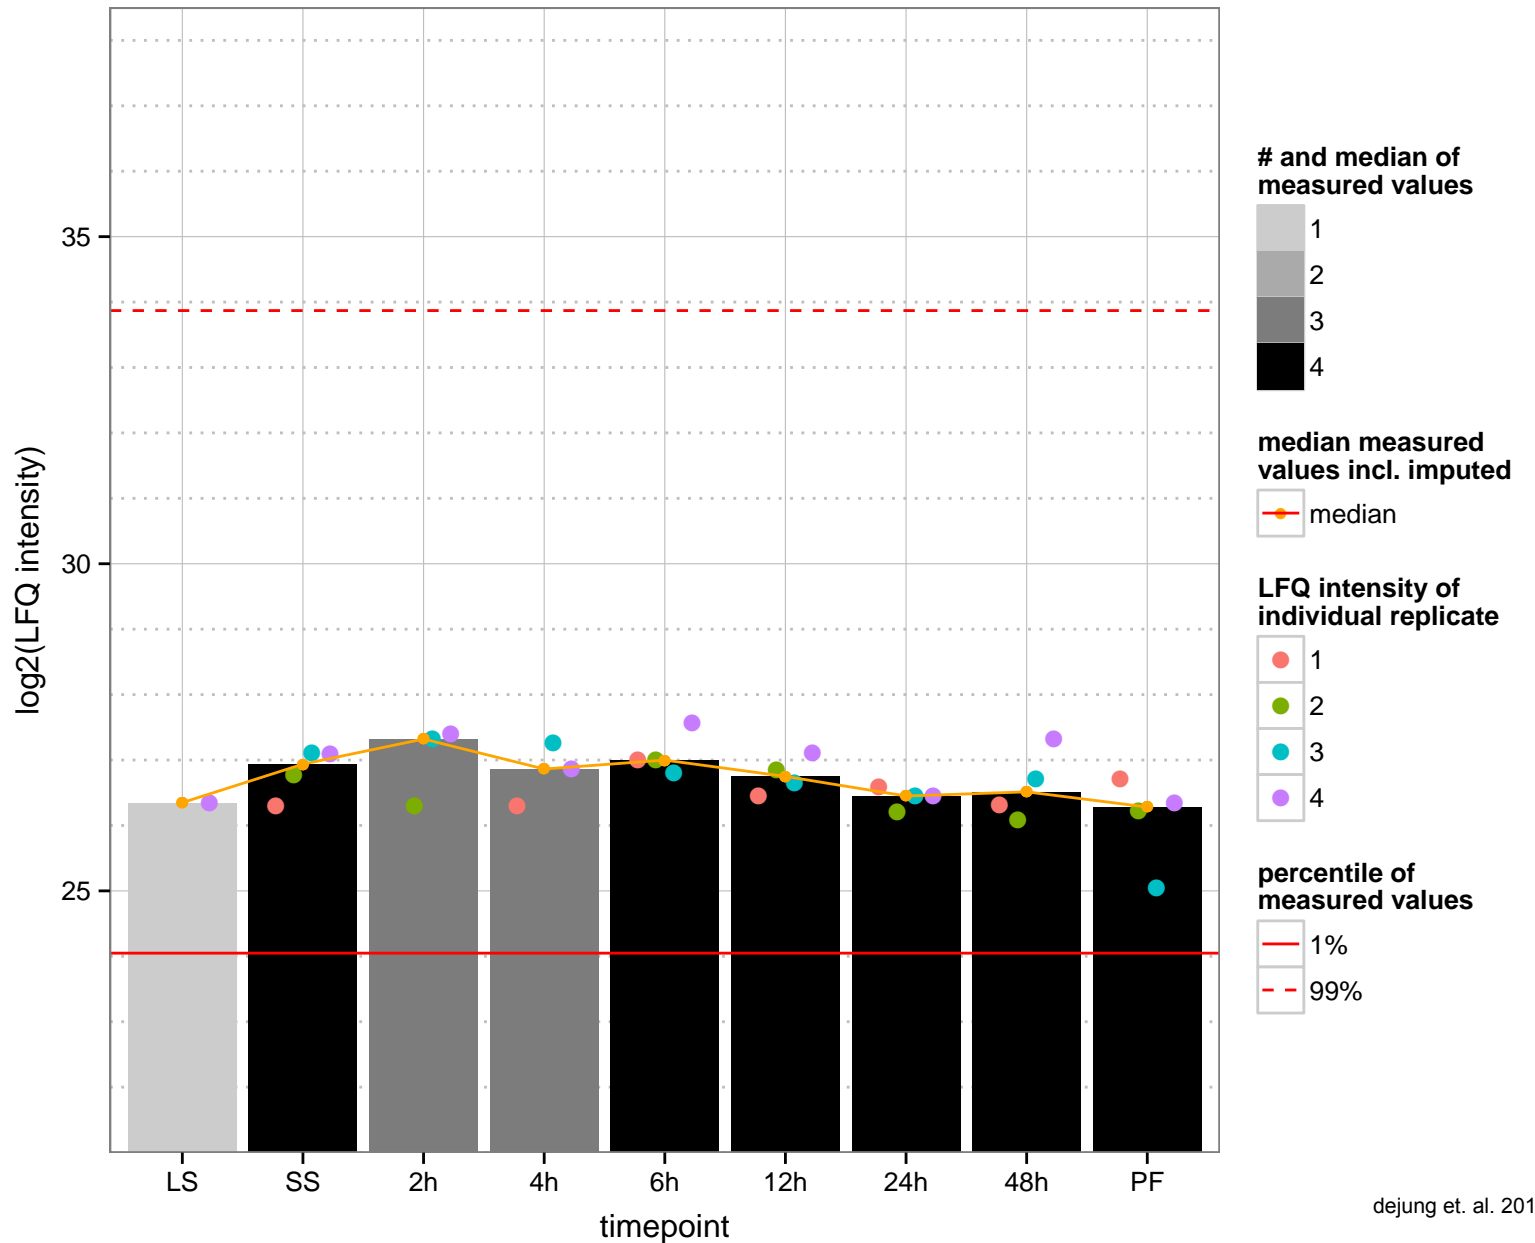

Nucleoporin, serine peptidase, Clan SP, family S59, putative (TbNup158)

Tb927.11.980

AGOF: null

AGOC: membrane, nuclear pore

AGOP: protein homooligomerization, transport

PGOF: null

PGOC: nuclear pore

PGOP: transport

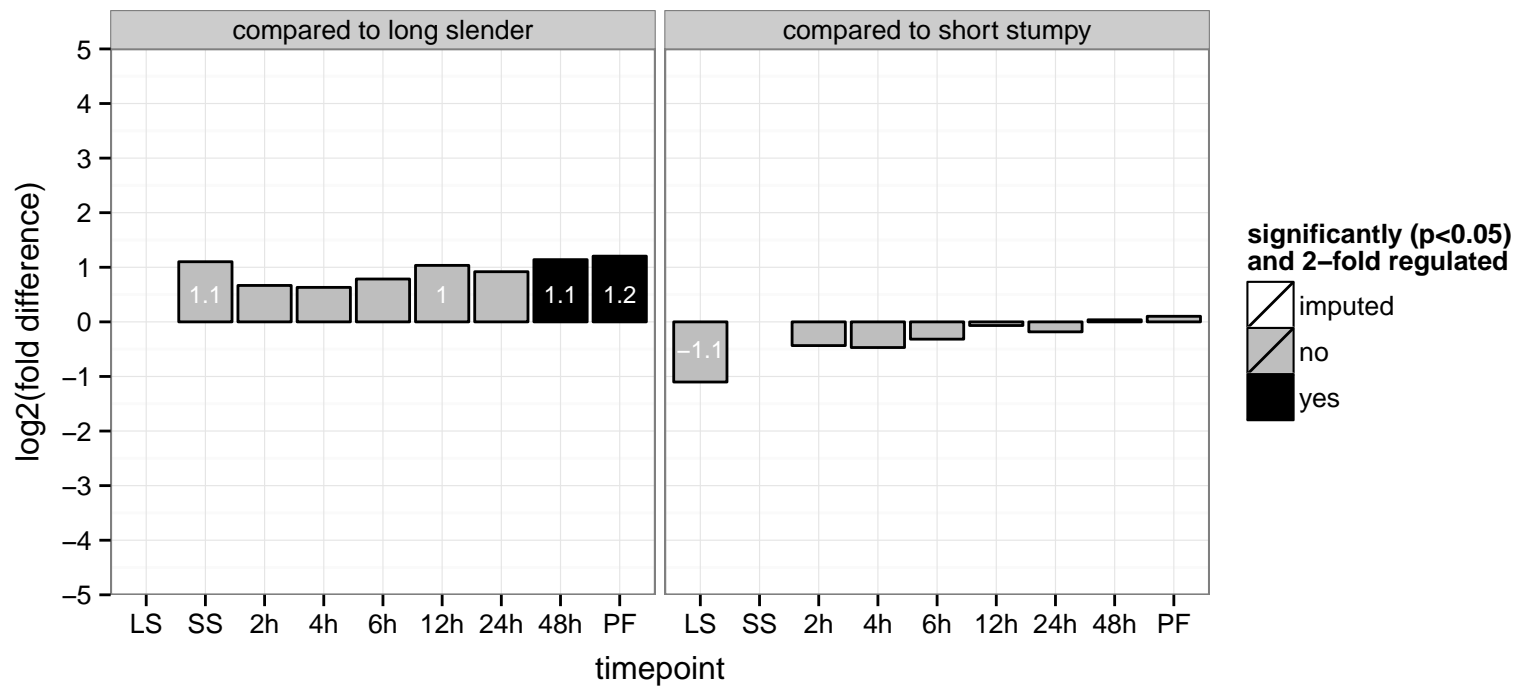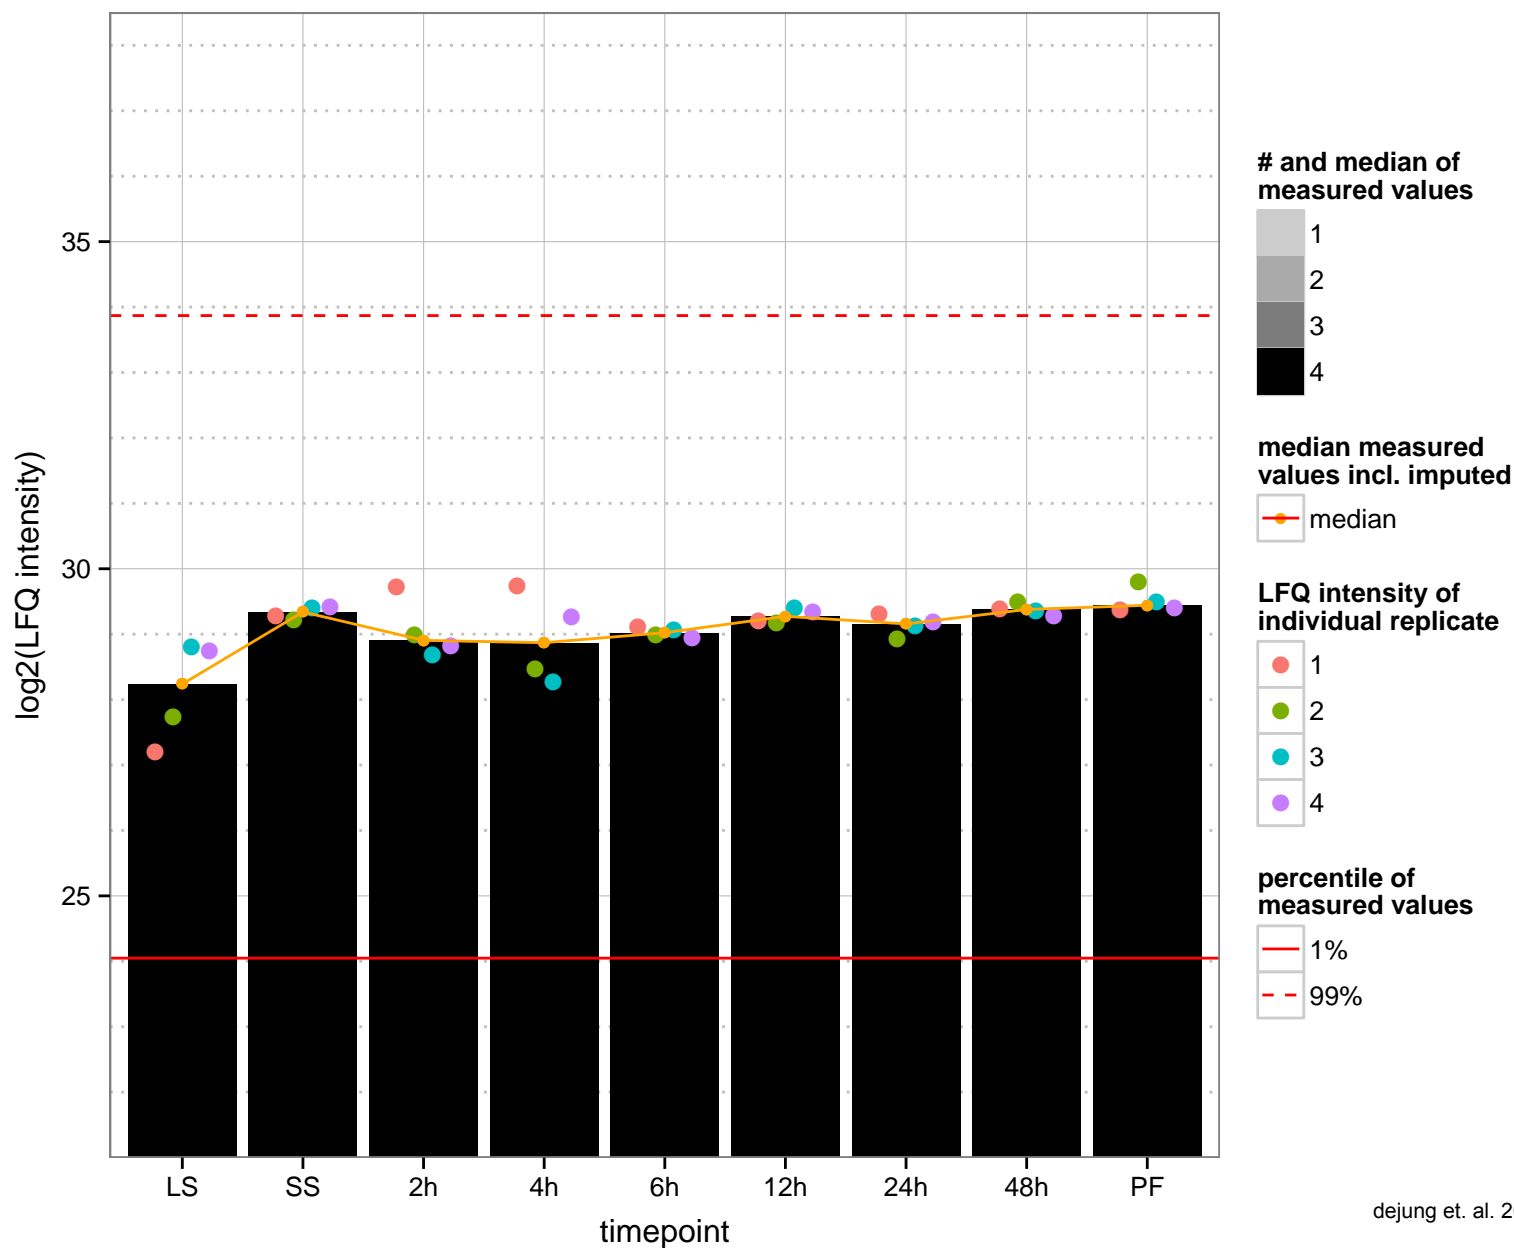

hypothetical protein, conserved  
 Tb927.11.9860  
 AGOF: calcium ion binding  
 AGOC: null  
 AGOP: null  
 PGOF: null  
 PGO: null  
 PGOP: null

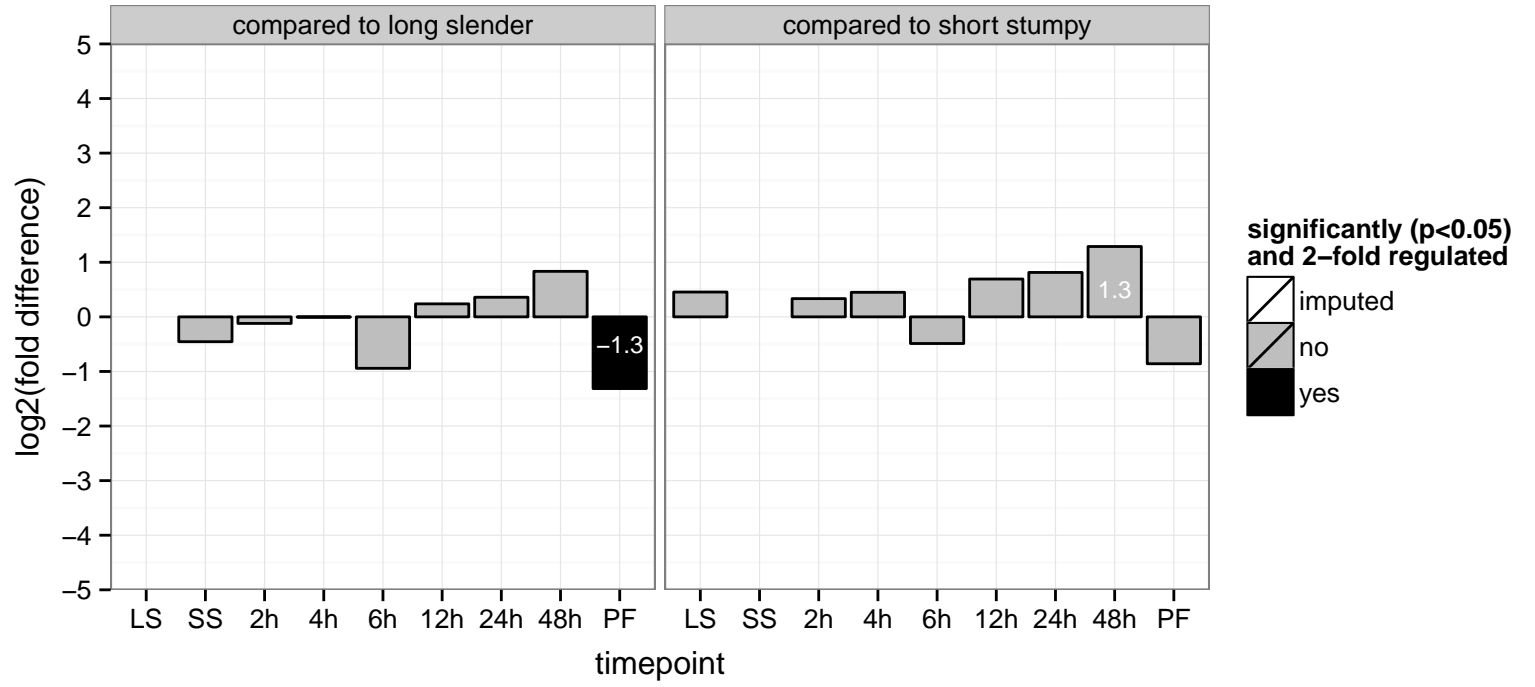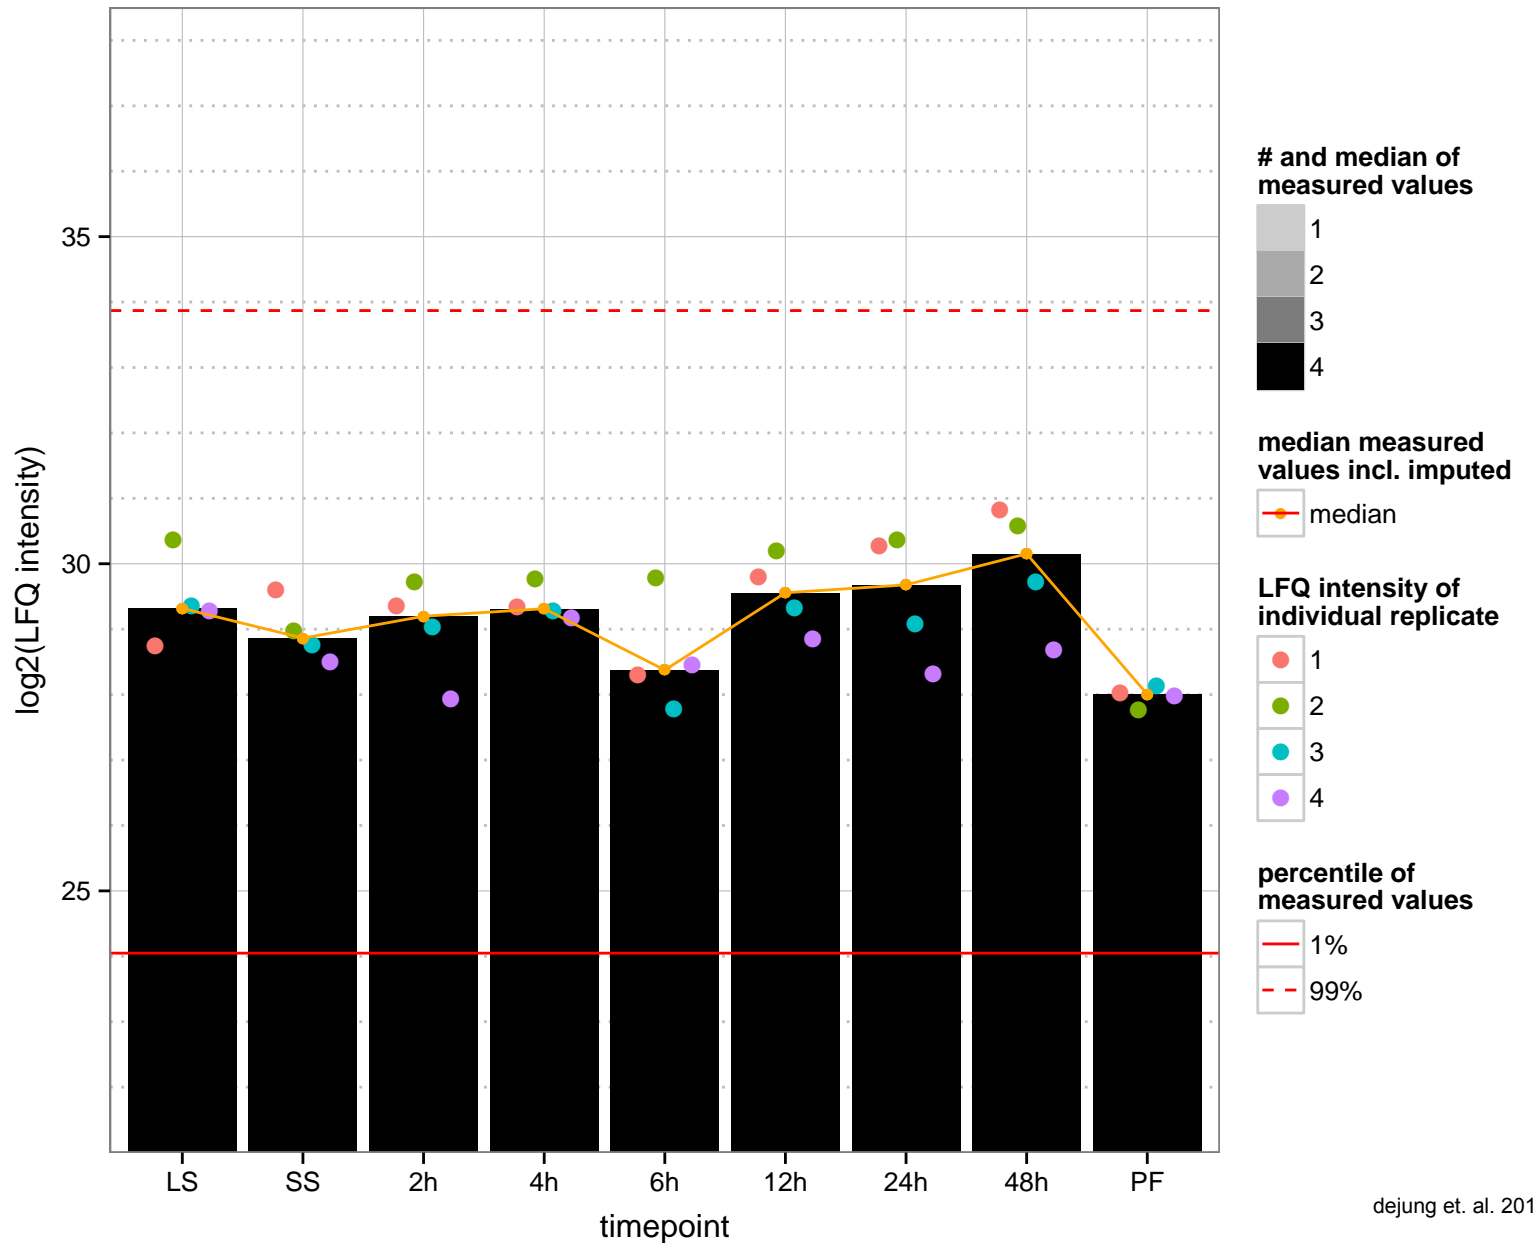

hypothetical protein, conserved  
 Tb927.11.9880  
 AGOF: null  
 AGOC: null  
 AGOP: null  
 PGOF: null  
 PGO: null  
 PGOP: null

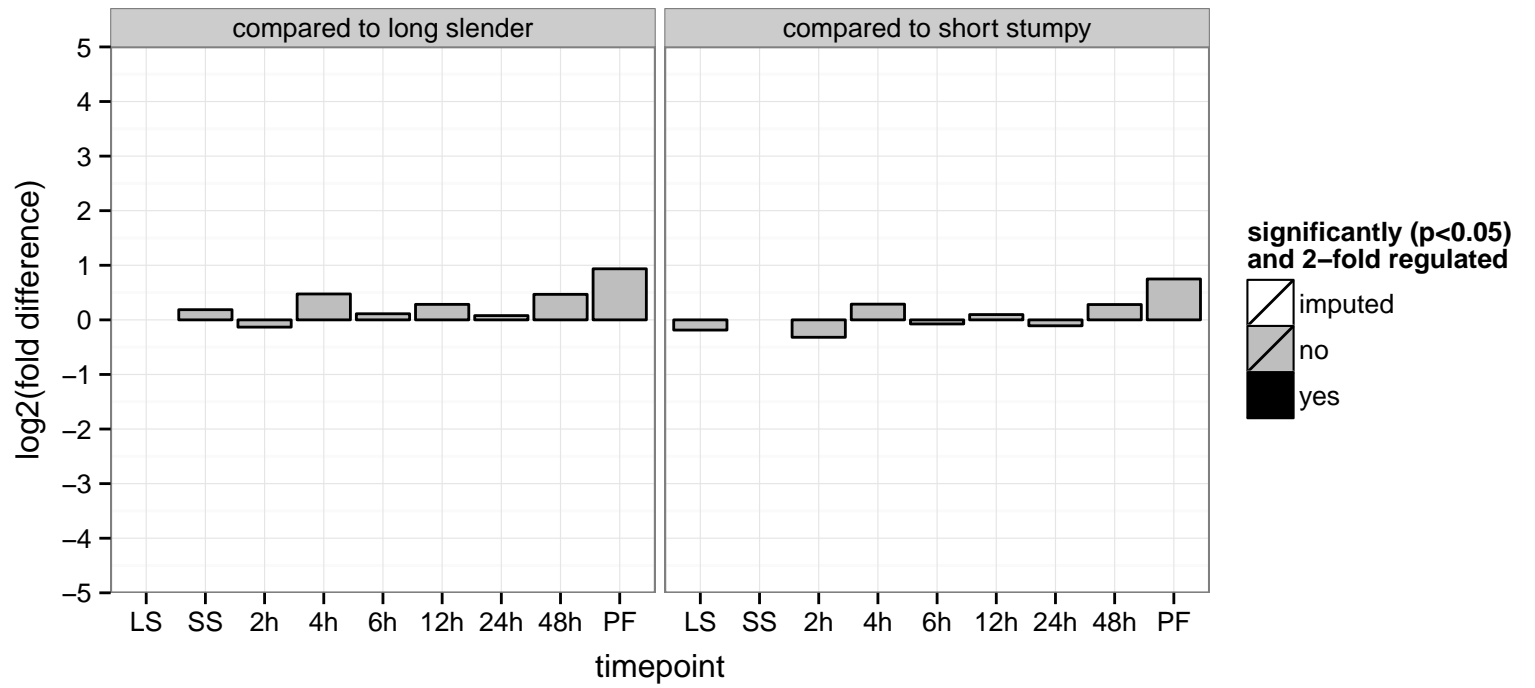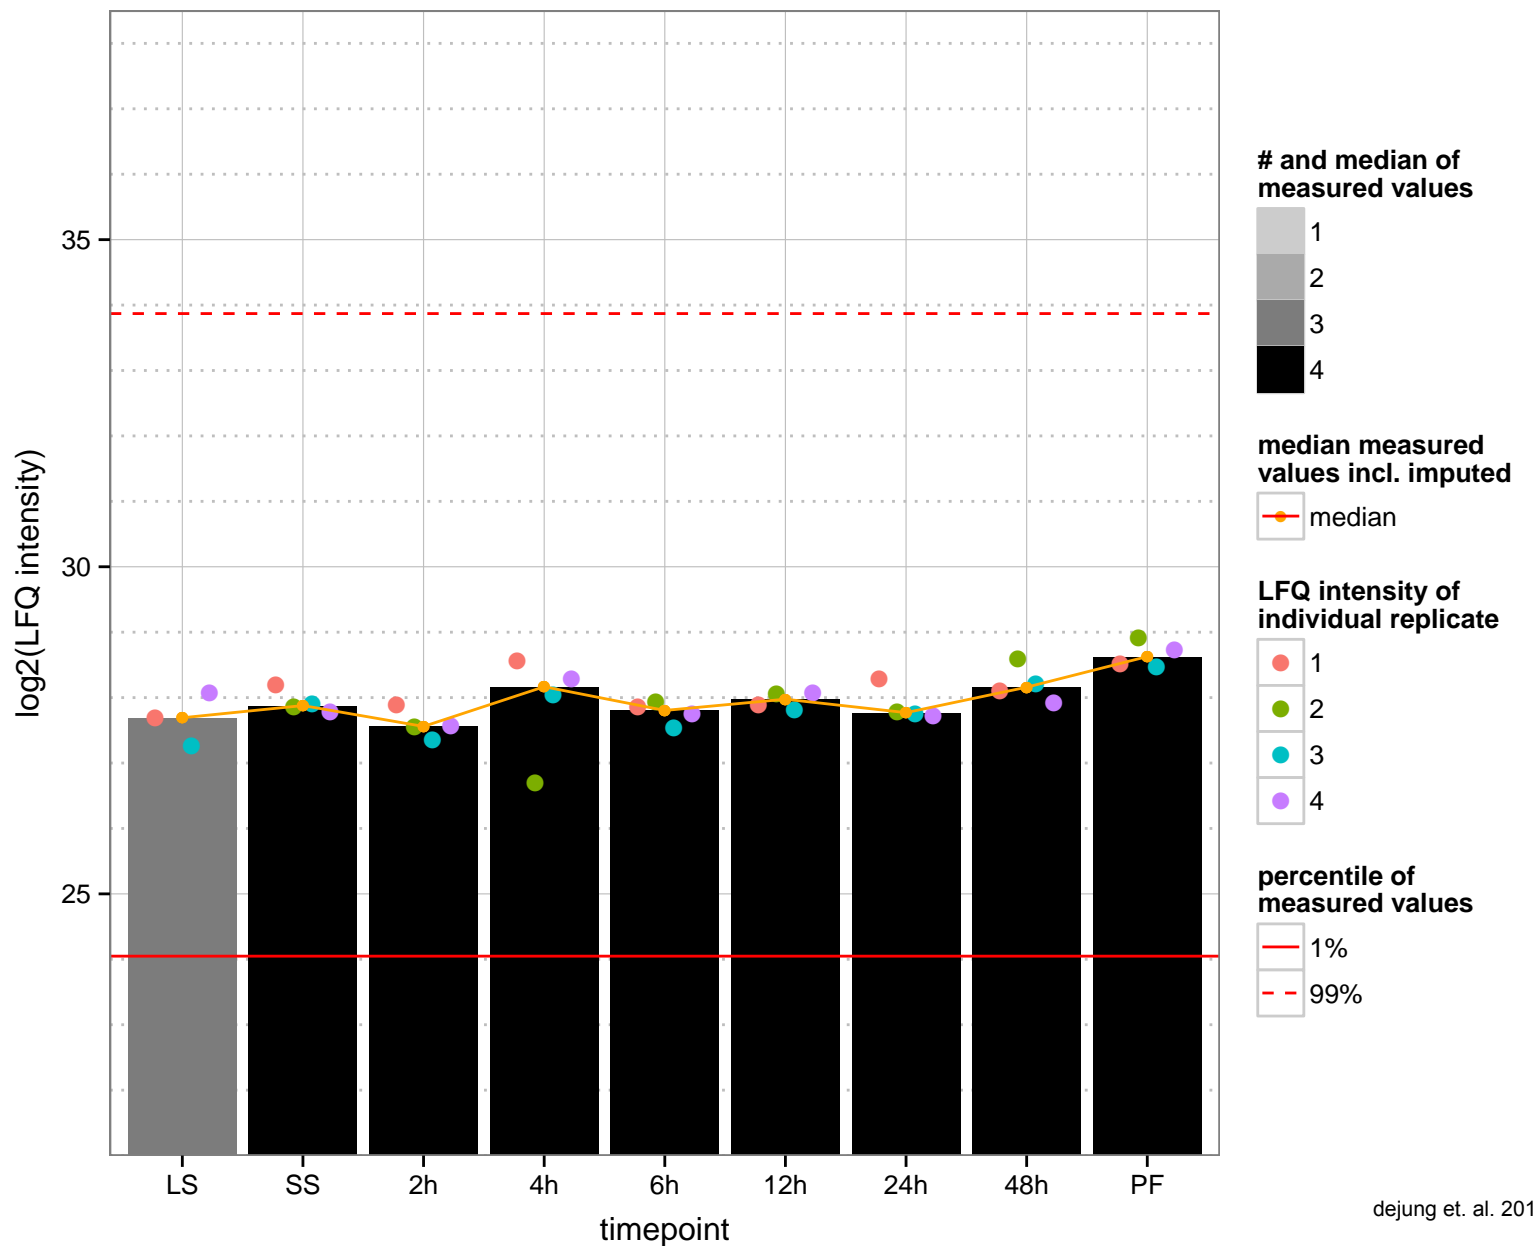

NADH-ubiquinone oxidoreductase complex I subunit, putative  
 Tb927.11.9930  
 AGOF: NADH dehydrogenase (ubiquinone) activity, oxidoreductase activity  
 AGOC: mitochondrial respiratory chain complex I, mitochondrion  
 AGOP: mitochondrial electron transport, NADH to ubiquinone  
 PGO: null  
 PGO: null  
 PGO: null

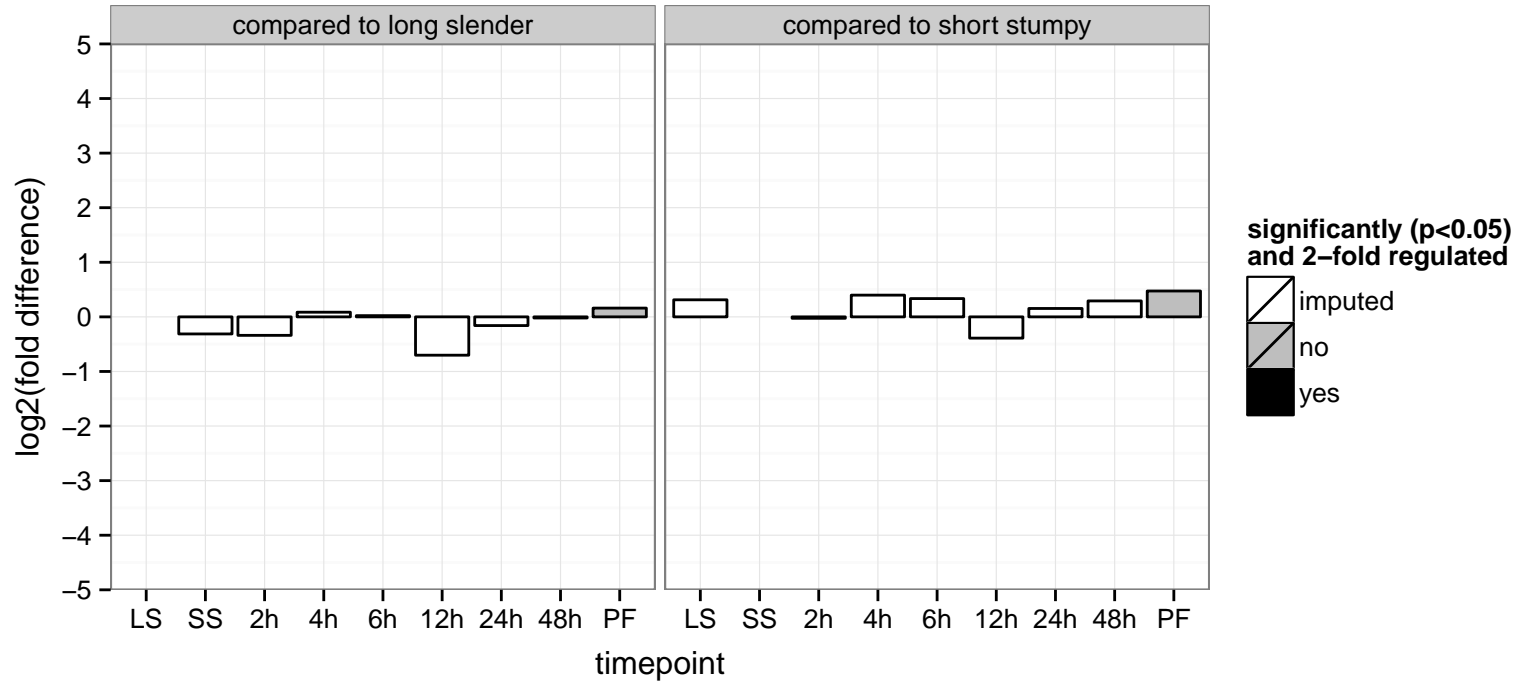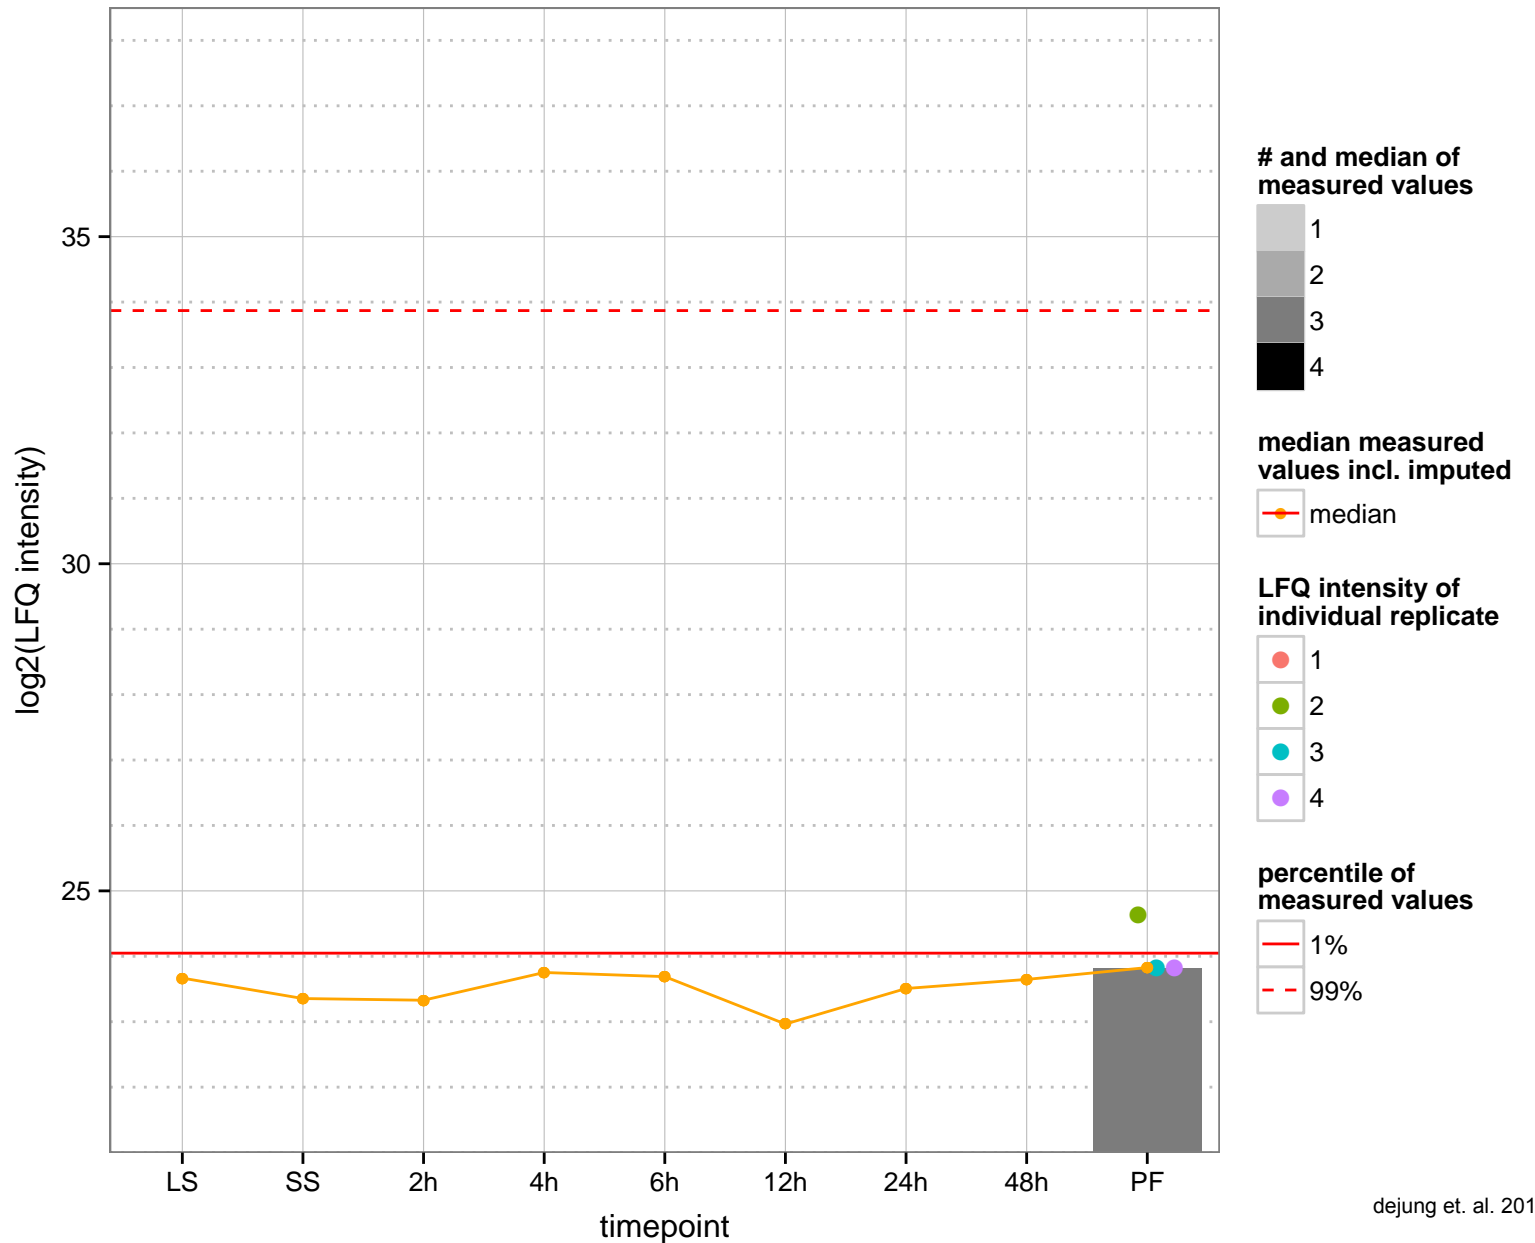

retrotransposon hot spot protein 1 (RHS1), putative, retrotransposon hot spot protein (RHS, pseudogene), interrupted  
 Tb927.2.100  
 AGOF: null  
 AGOC: nucleus, null  
 AGOP: null  
 PGO: null  
 PGO: null  
 PGO: null

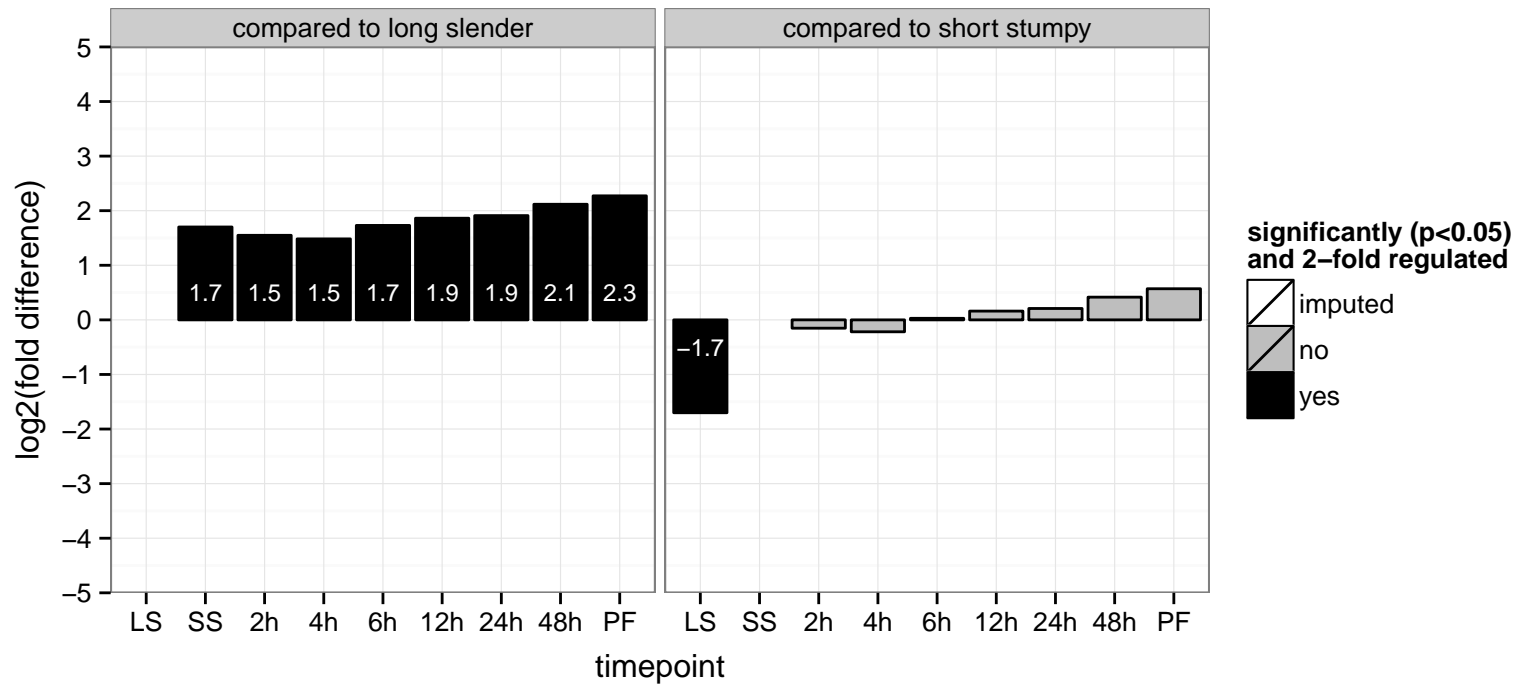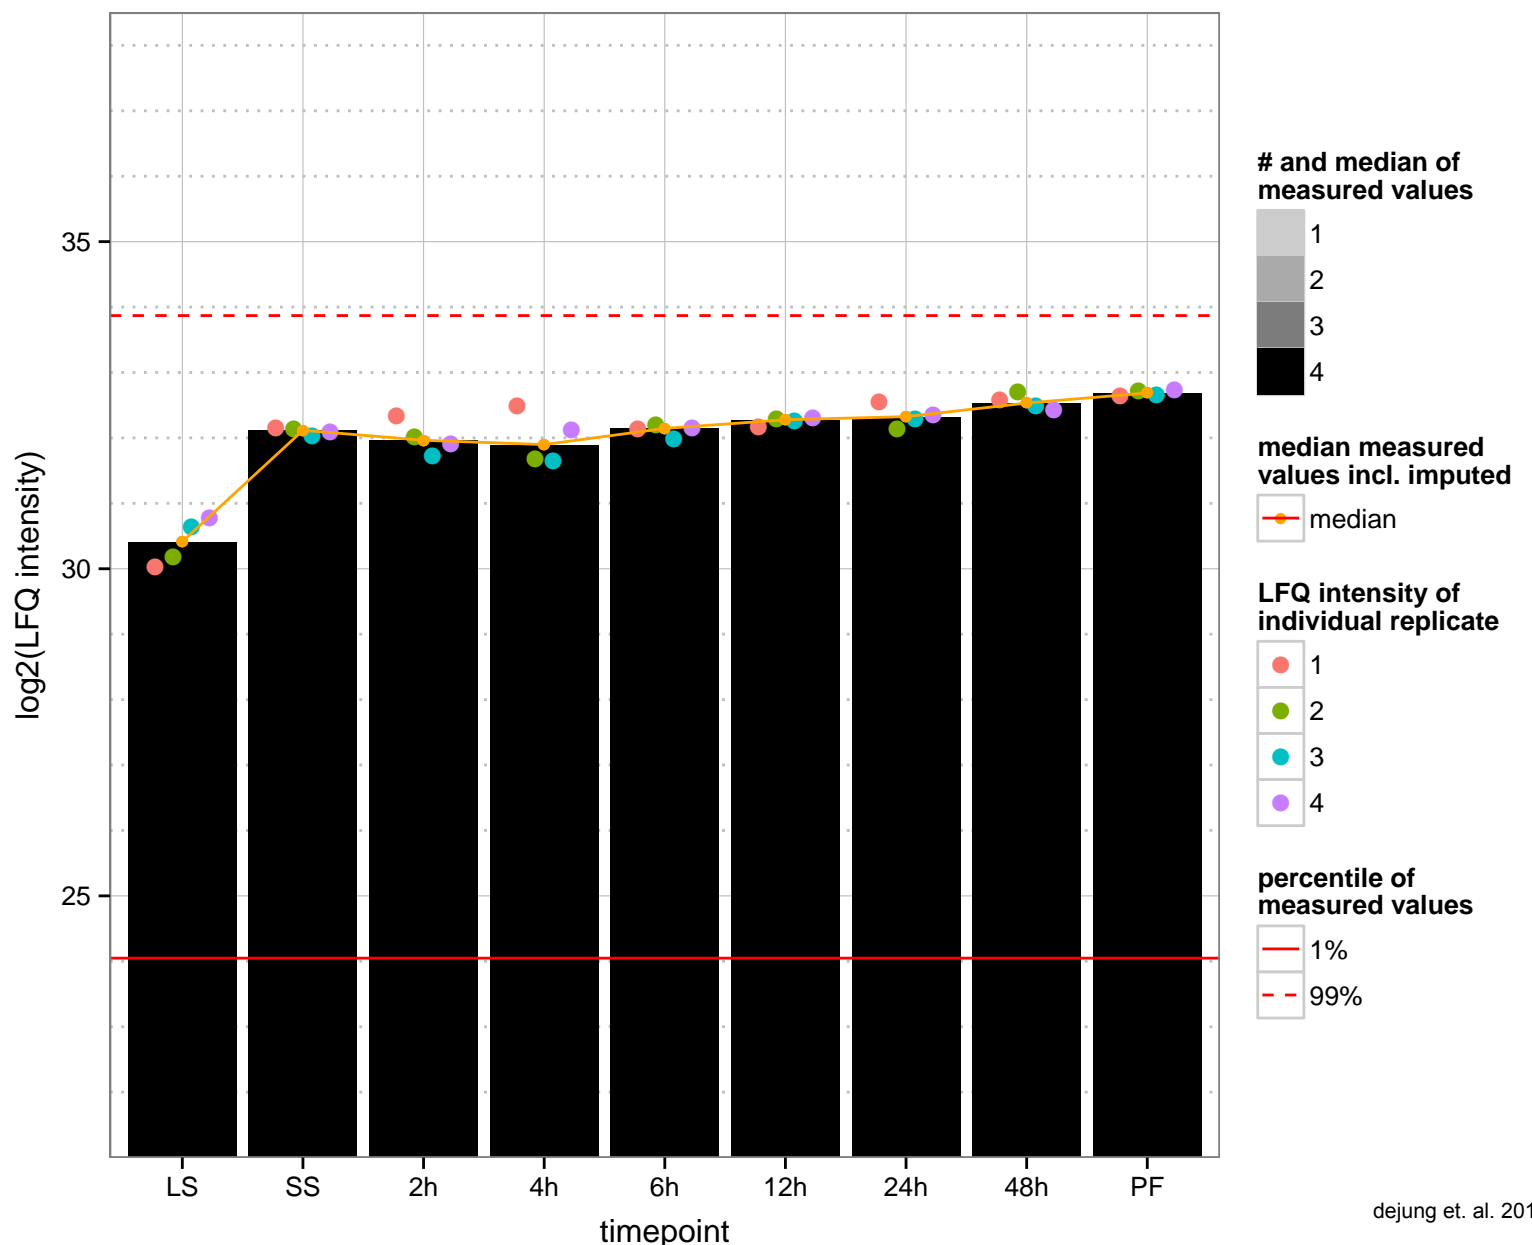

retrotransposon hot spot protein (RHS, pseudogene), putative, retrotransposon hot spot protein 4 (RHS4), point mutation  
 Tb927.2.1120  
 AGOF: null  
 AGOC: null  
 AGOP: null  
 PGOF: null  
 PGO: null  
 PGOP: null

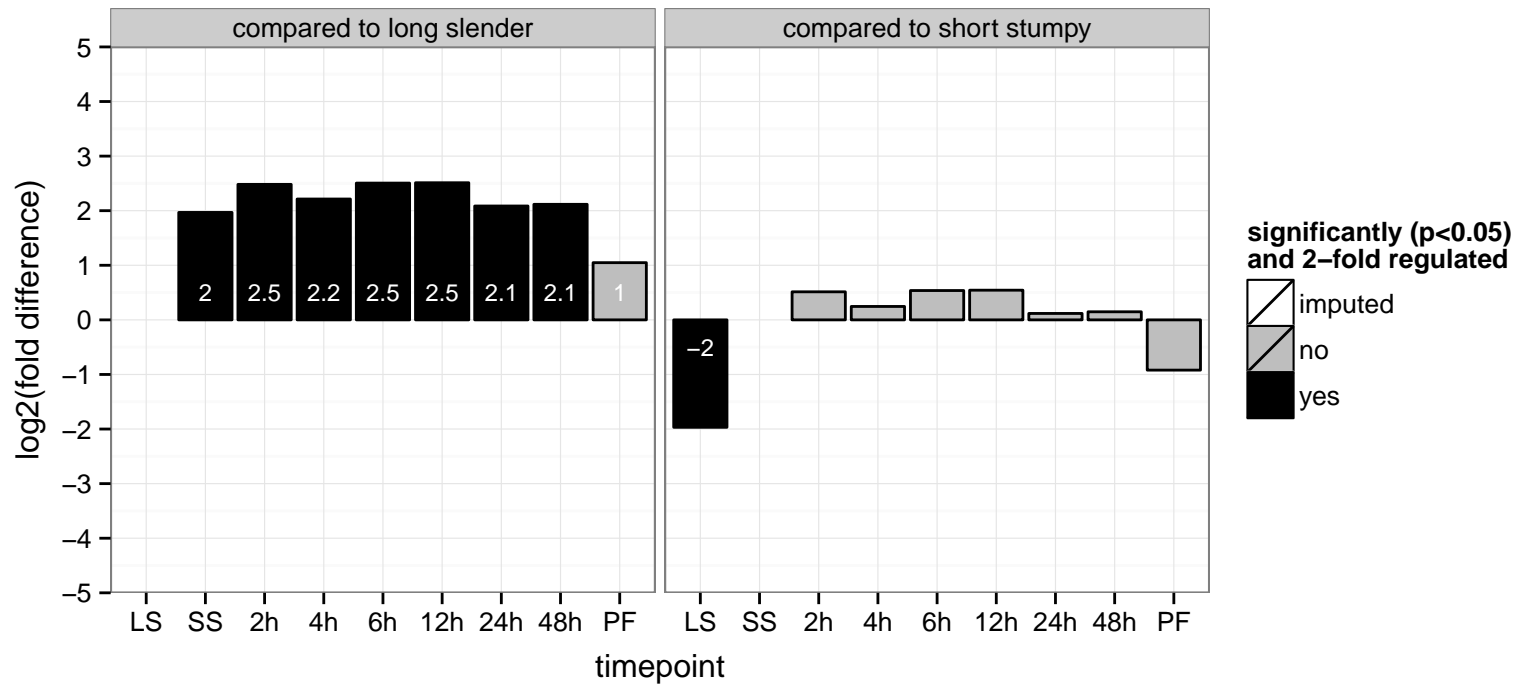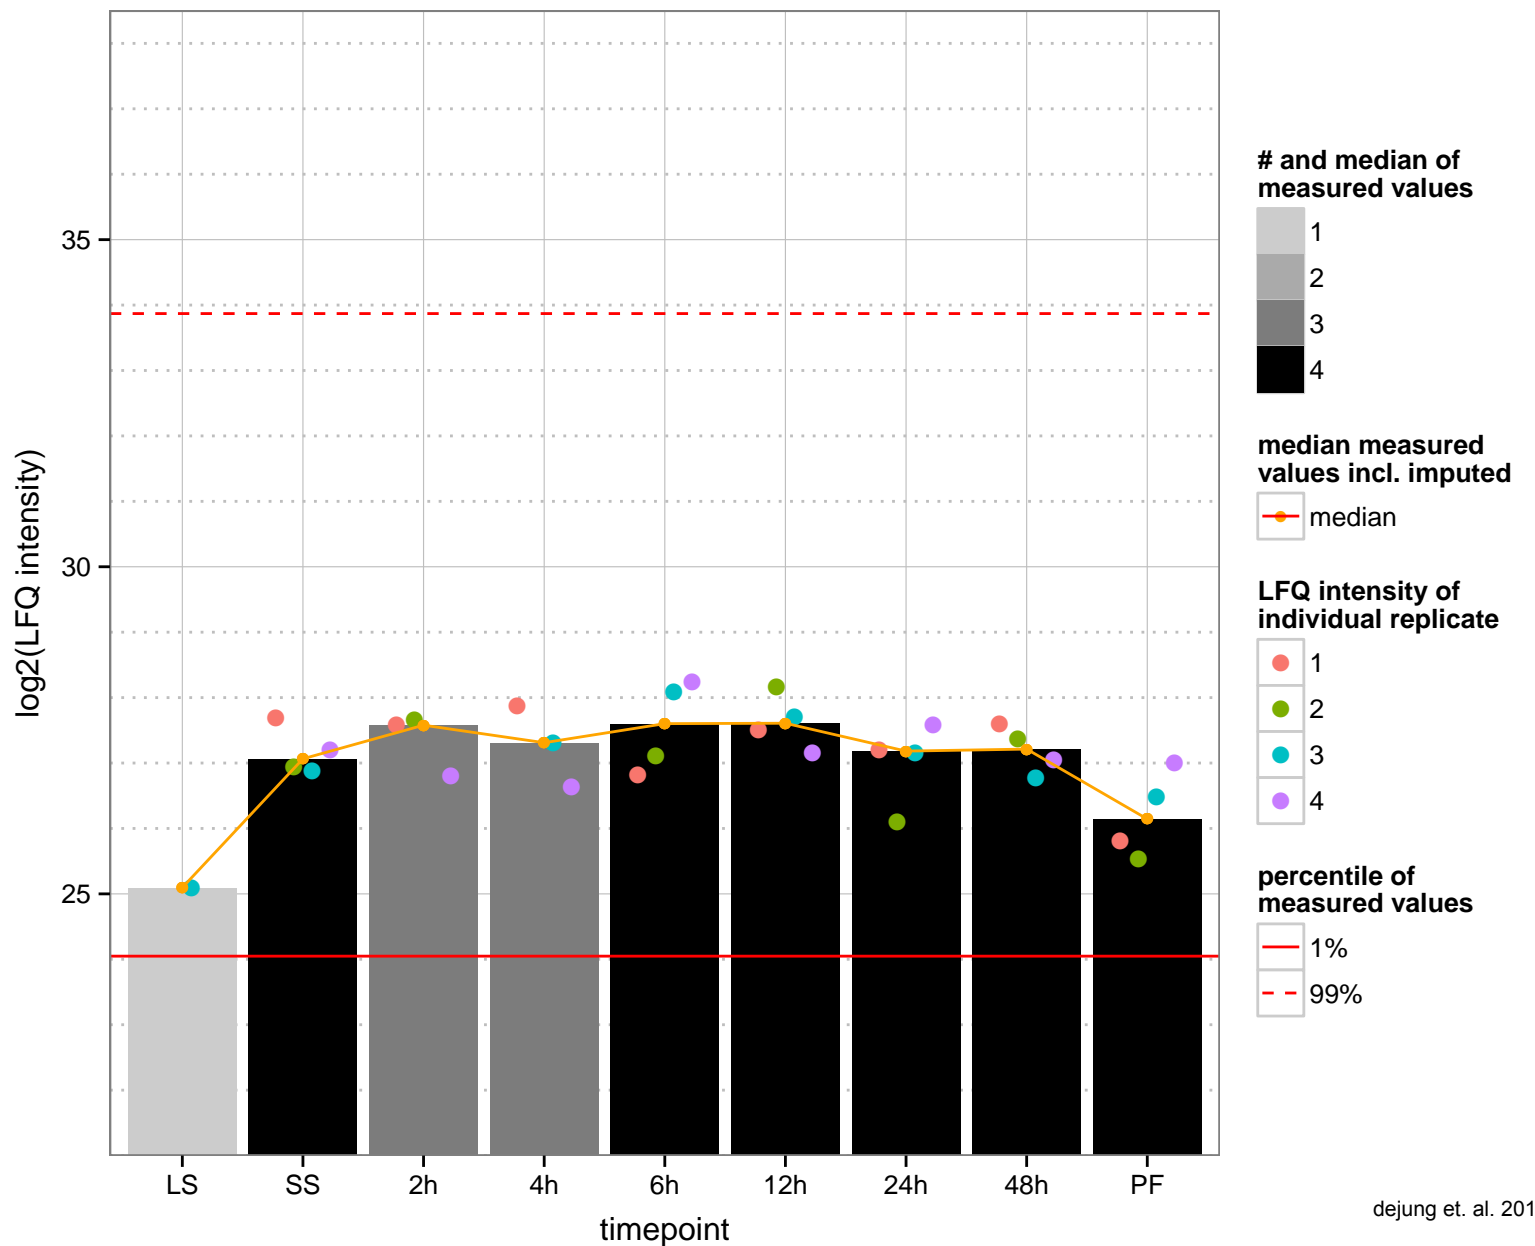



retrotransposon hot spot protein 3 (RHS3), putative  
 Tb927.2.1180  
 AGOF: null  
 AGOC: nucleus  
 AGOP: null  
 PGO: null  
 PGOC: null  
 PGOP: null

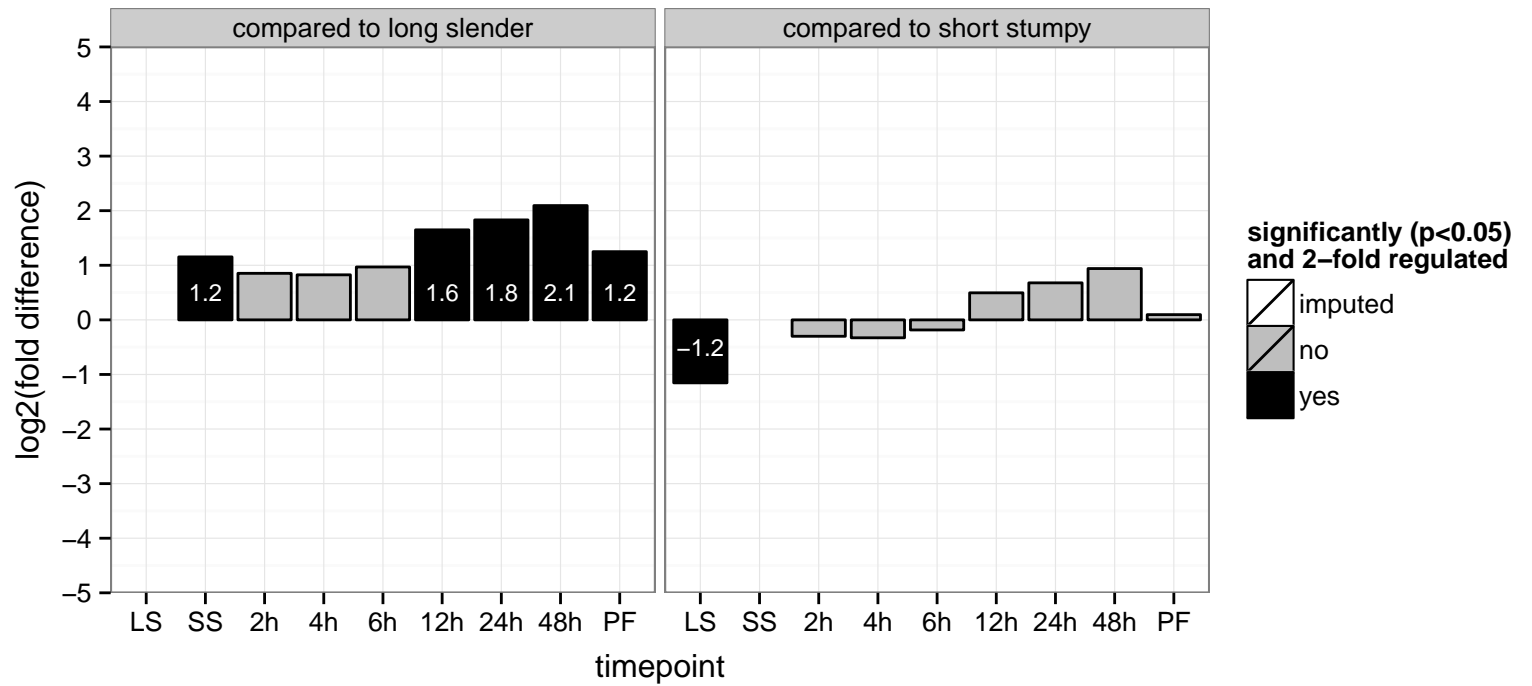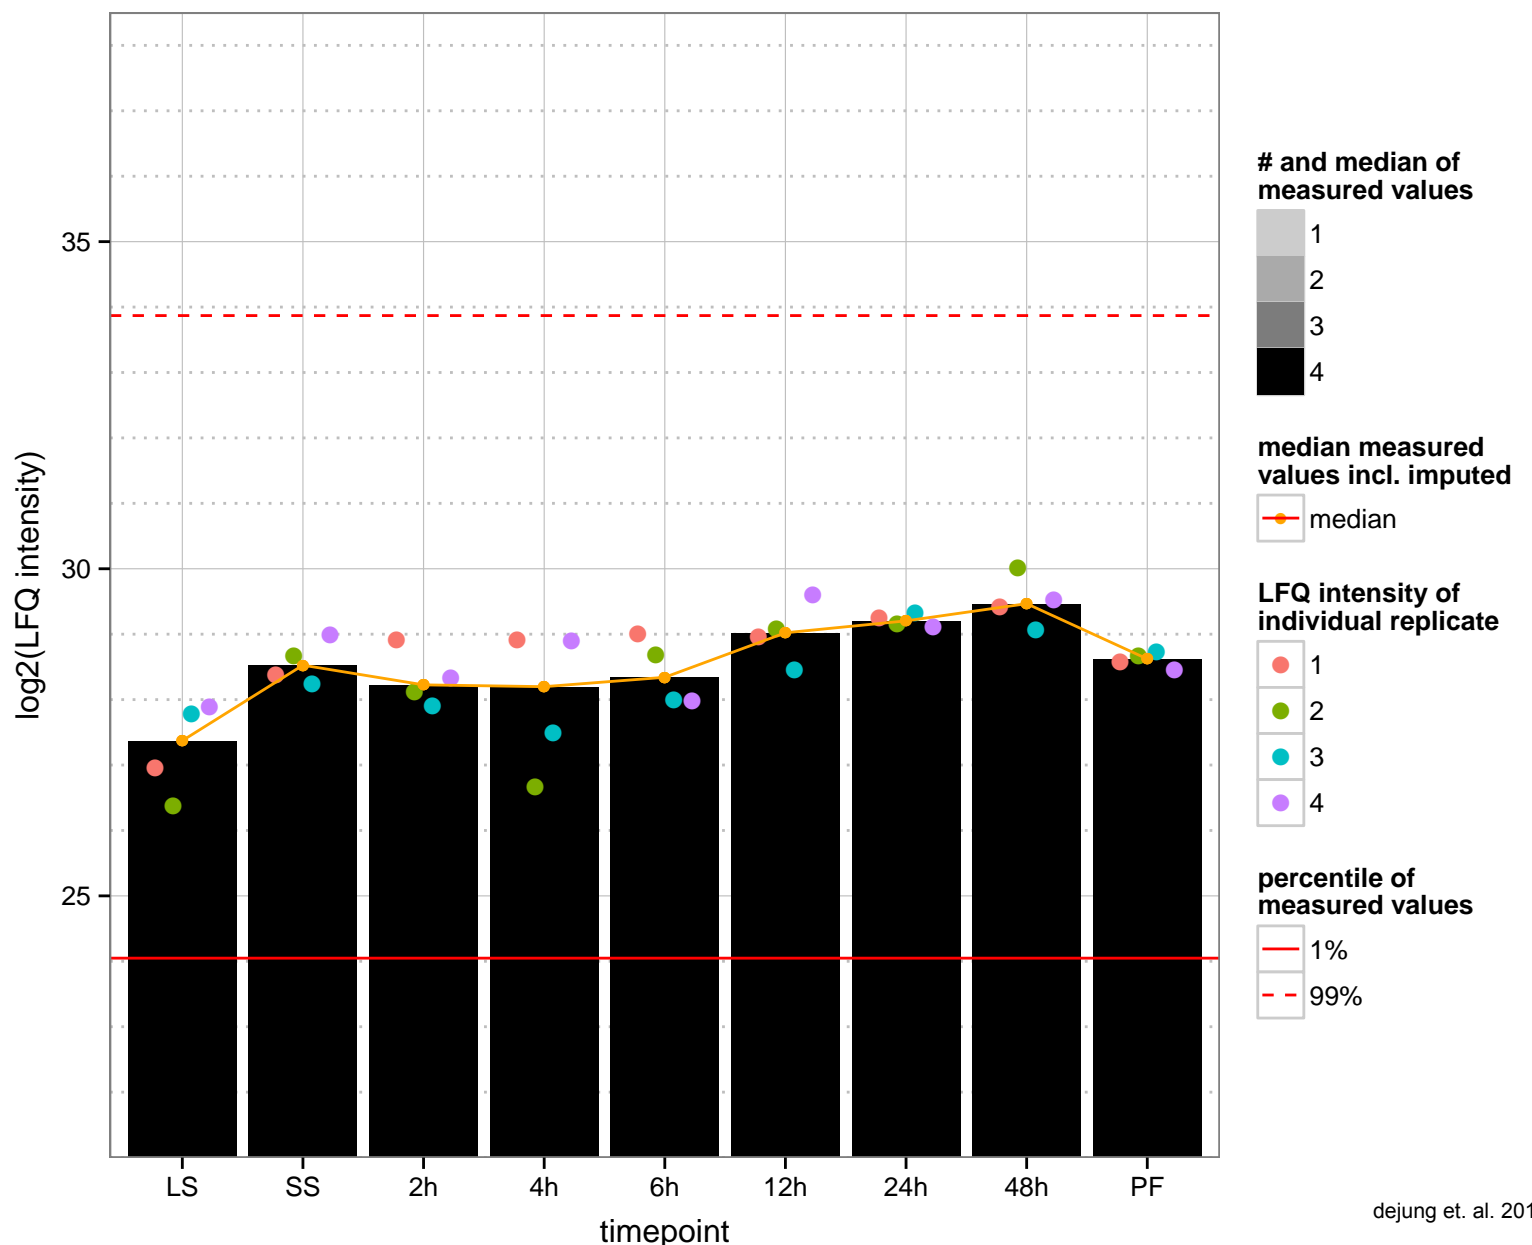

retrotransposon hot spot protein 4 (RHS4), putative  
 Tb927.2.1210  
 AGOF: null  
 AGOC: nucleus  
 AGOP: null  
 PGO: null  
 PGOC: null  
 PGOP: null

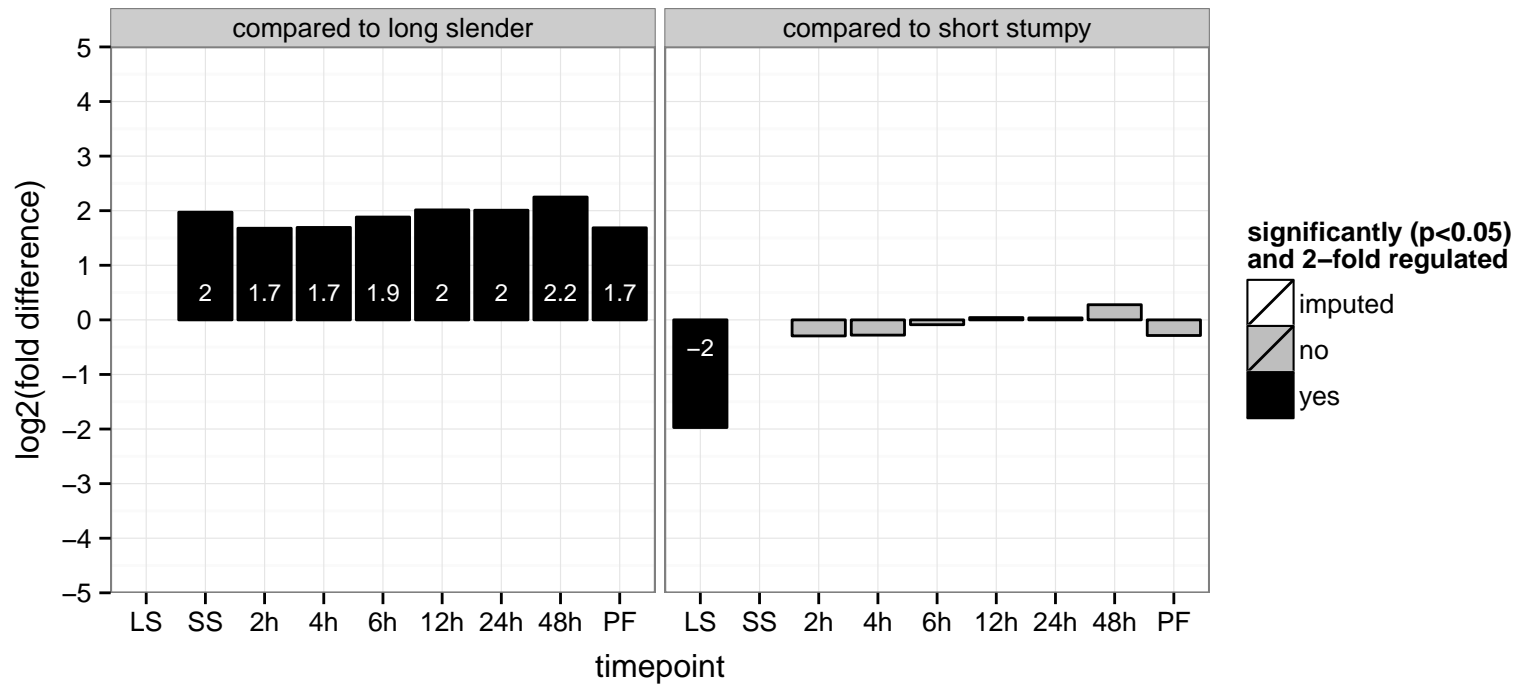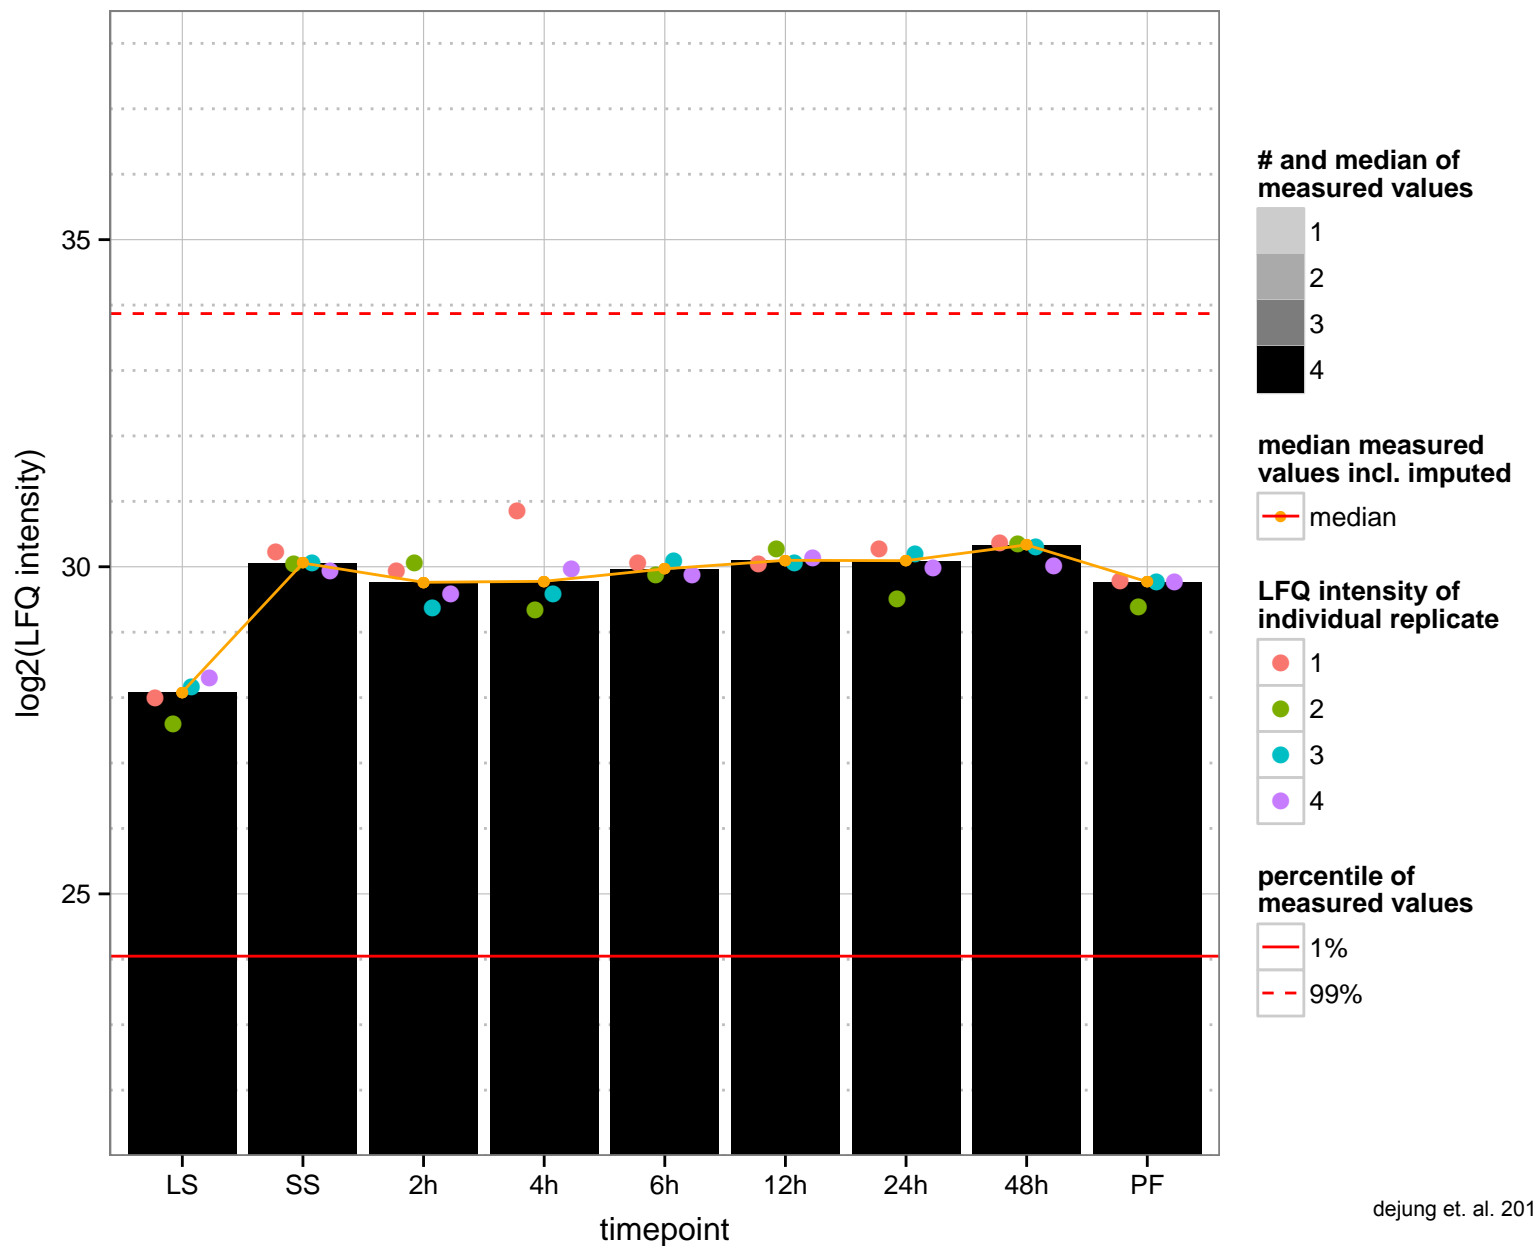

cyclophilin-type peptidyl-prolyl cis-trans isomerase, putative  
 Tb927.2.1680;Tb927.2.1560  
 AGOF: peptidyl-prolyl cis-trans isomerase activity  
 AGOC: null  
 AGOP: protein folding  
 PGOF: peptidyl-prolyl cis-trans isomerase activity  
 PGOC: null  
 PGOP: protein folding

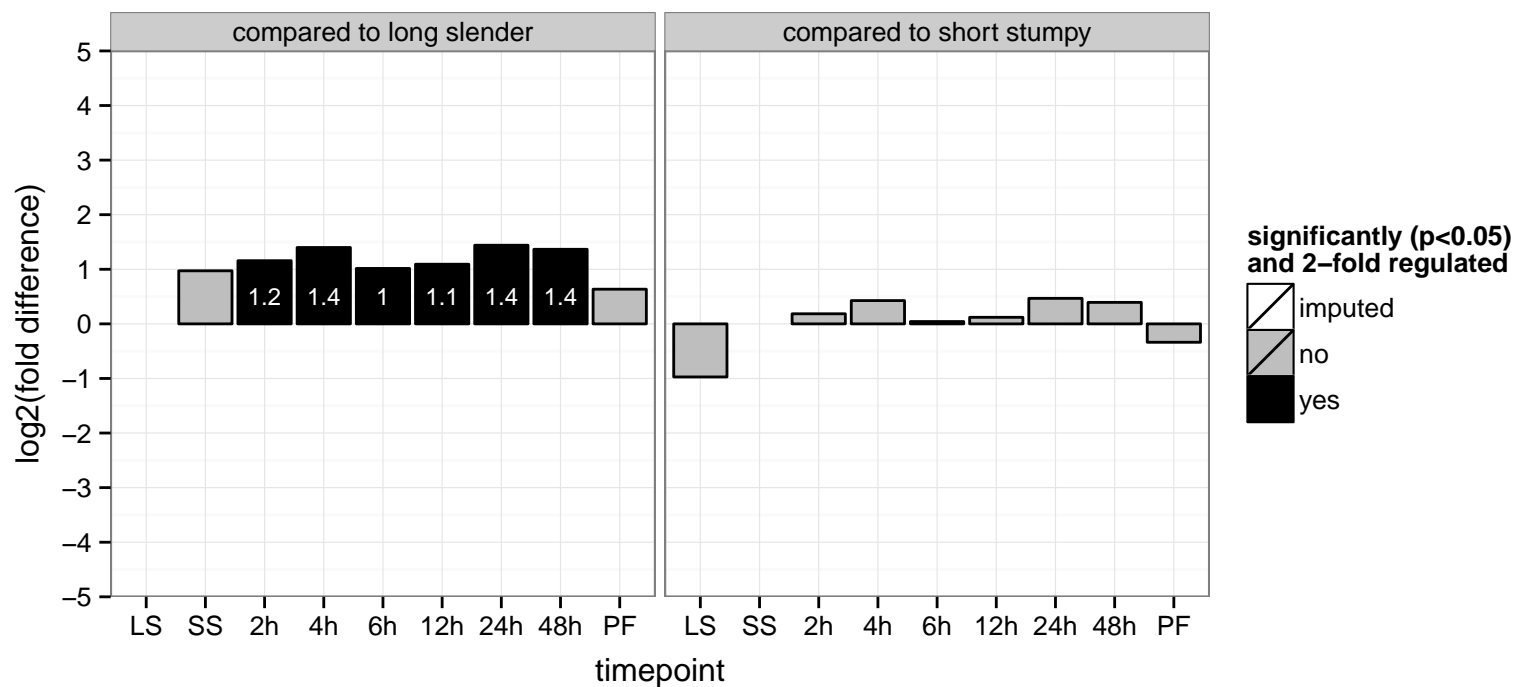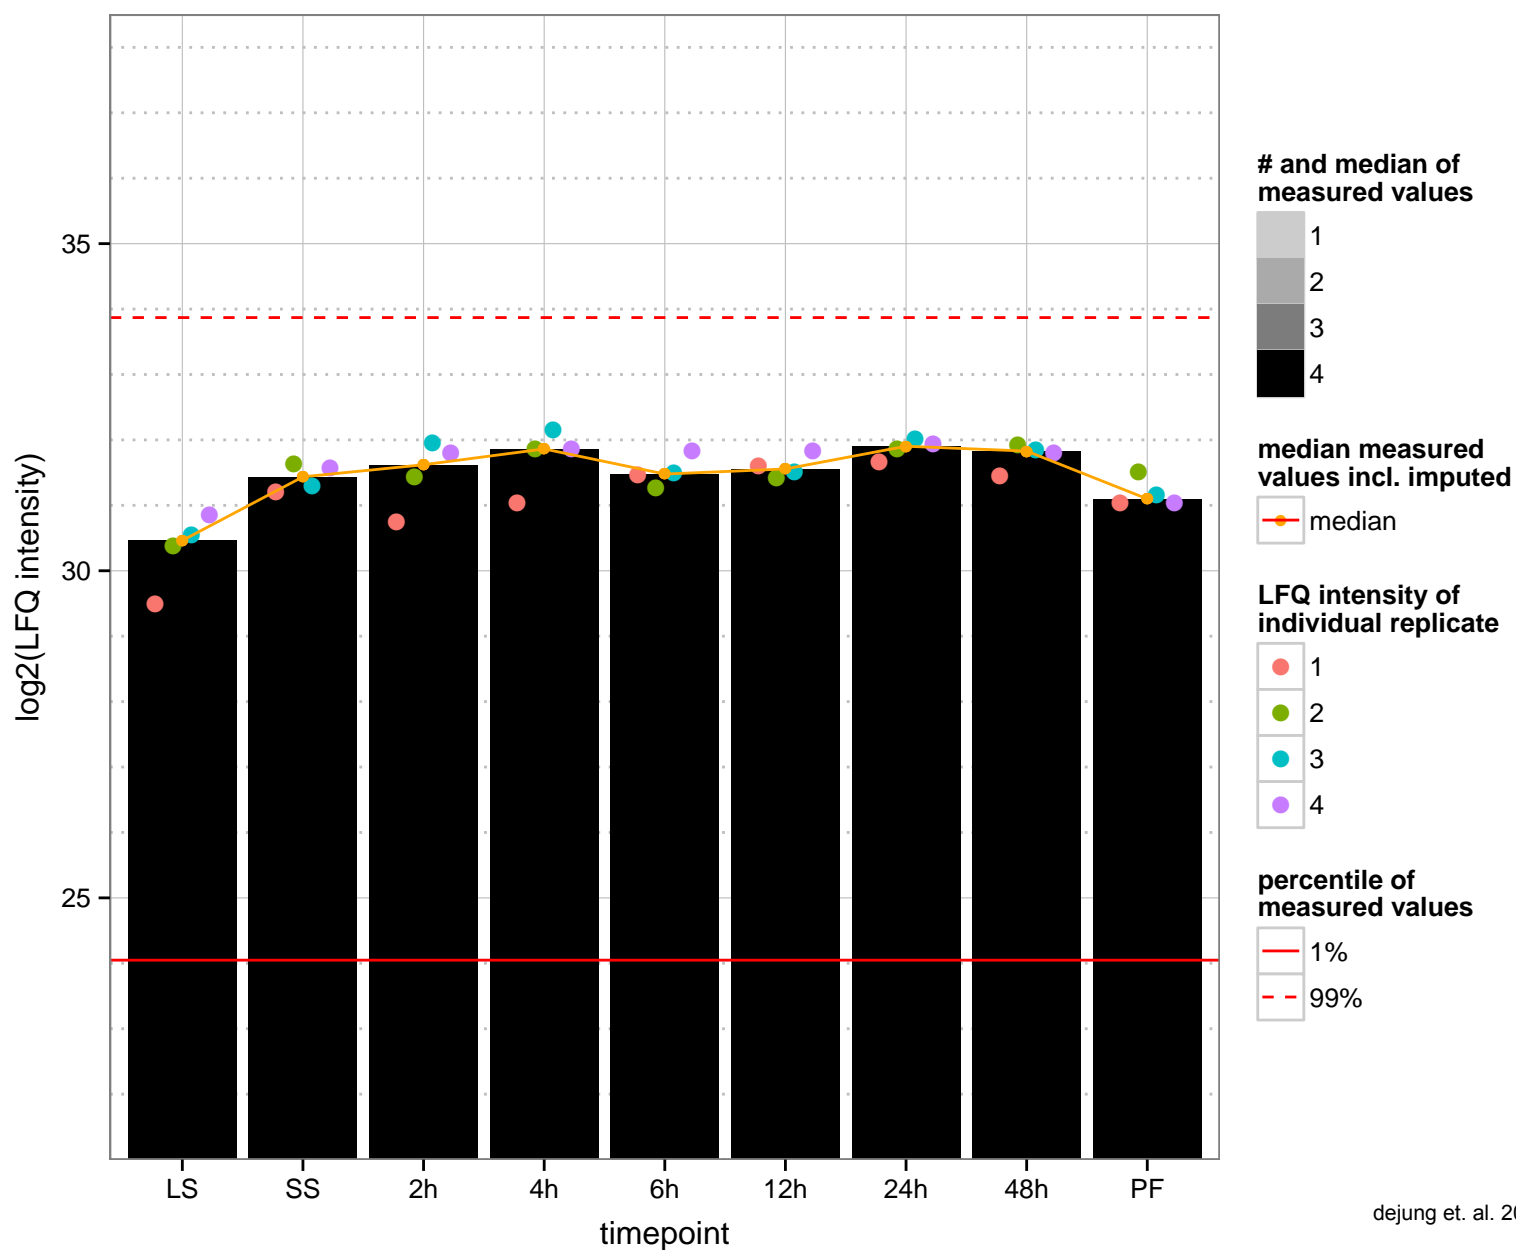

transcription silencer (ISWI)

Tb927.2.1810

AGOF: ATP binding, DNA binding, helicase activity, hydrolase activity, acting on acid anhydrides, in phosphorus-containing ar

AGOC: chromatin remodeling complex, nucleus

AGOP: ATP-dependent chromatin remodeling, modulation of development of symbiont involved in interaction with host, quoru

PGOF: ATP binding, DNA binding, helicase activity, hydrolase activity, acting on acid anhydrides, in phosphorus-containing ar

PGOC: chromatin remodeling complex, nucleus

PGOP: ATP-dependent chromatin remodeling, chromatin remodeling

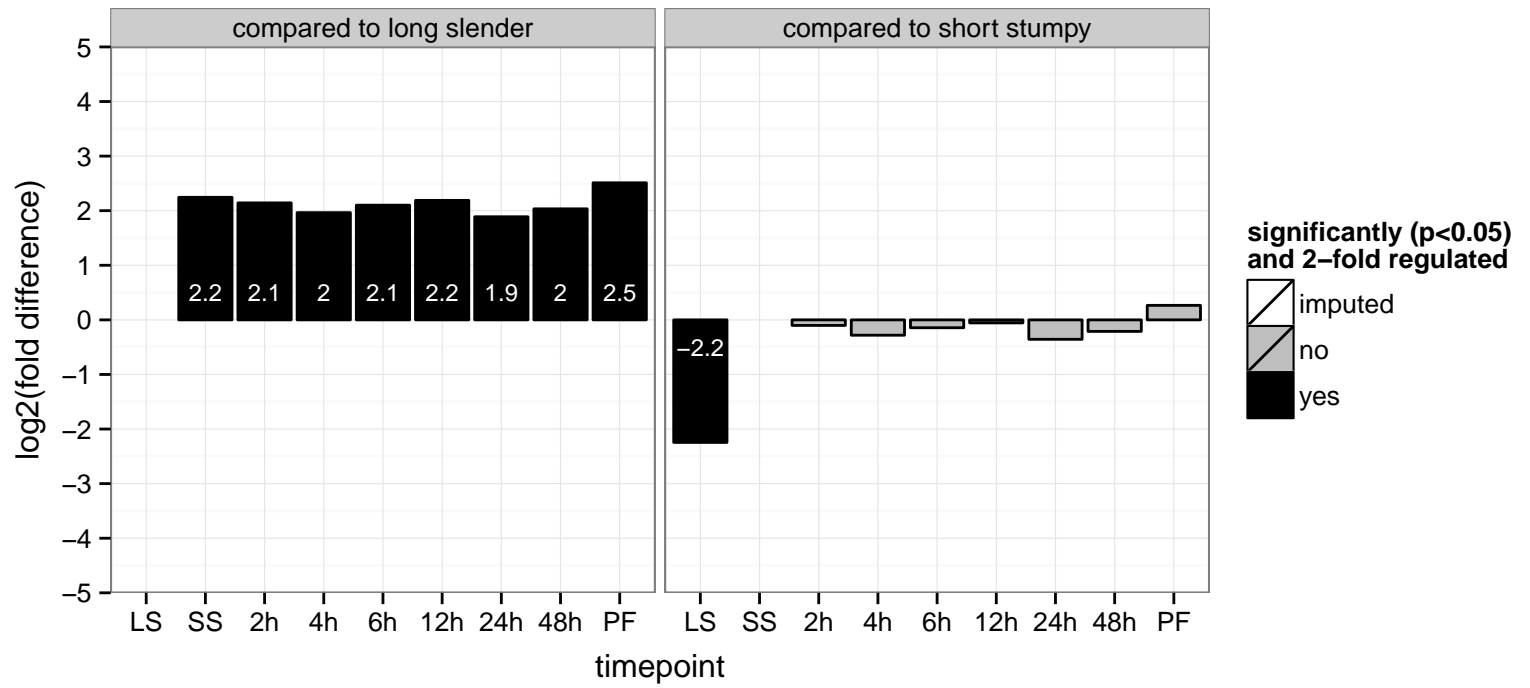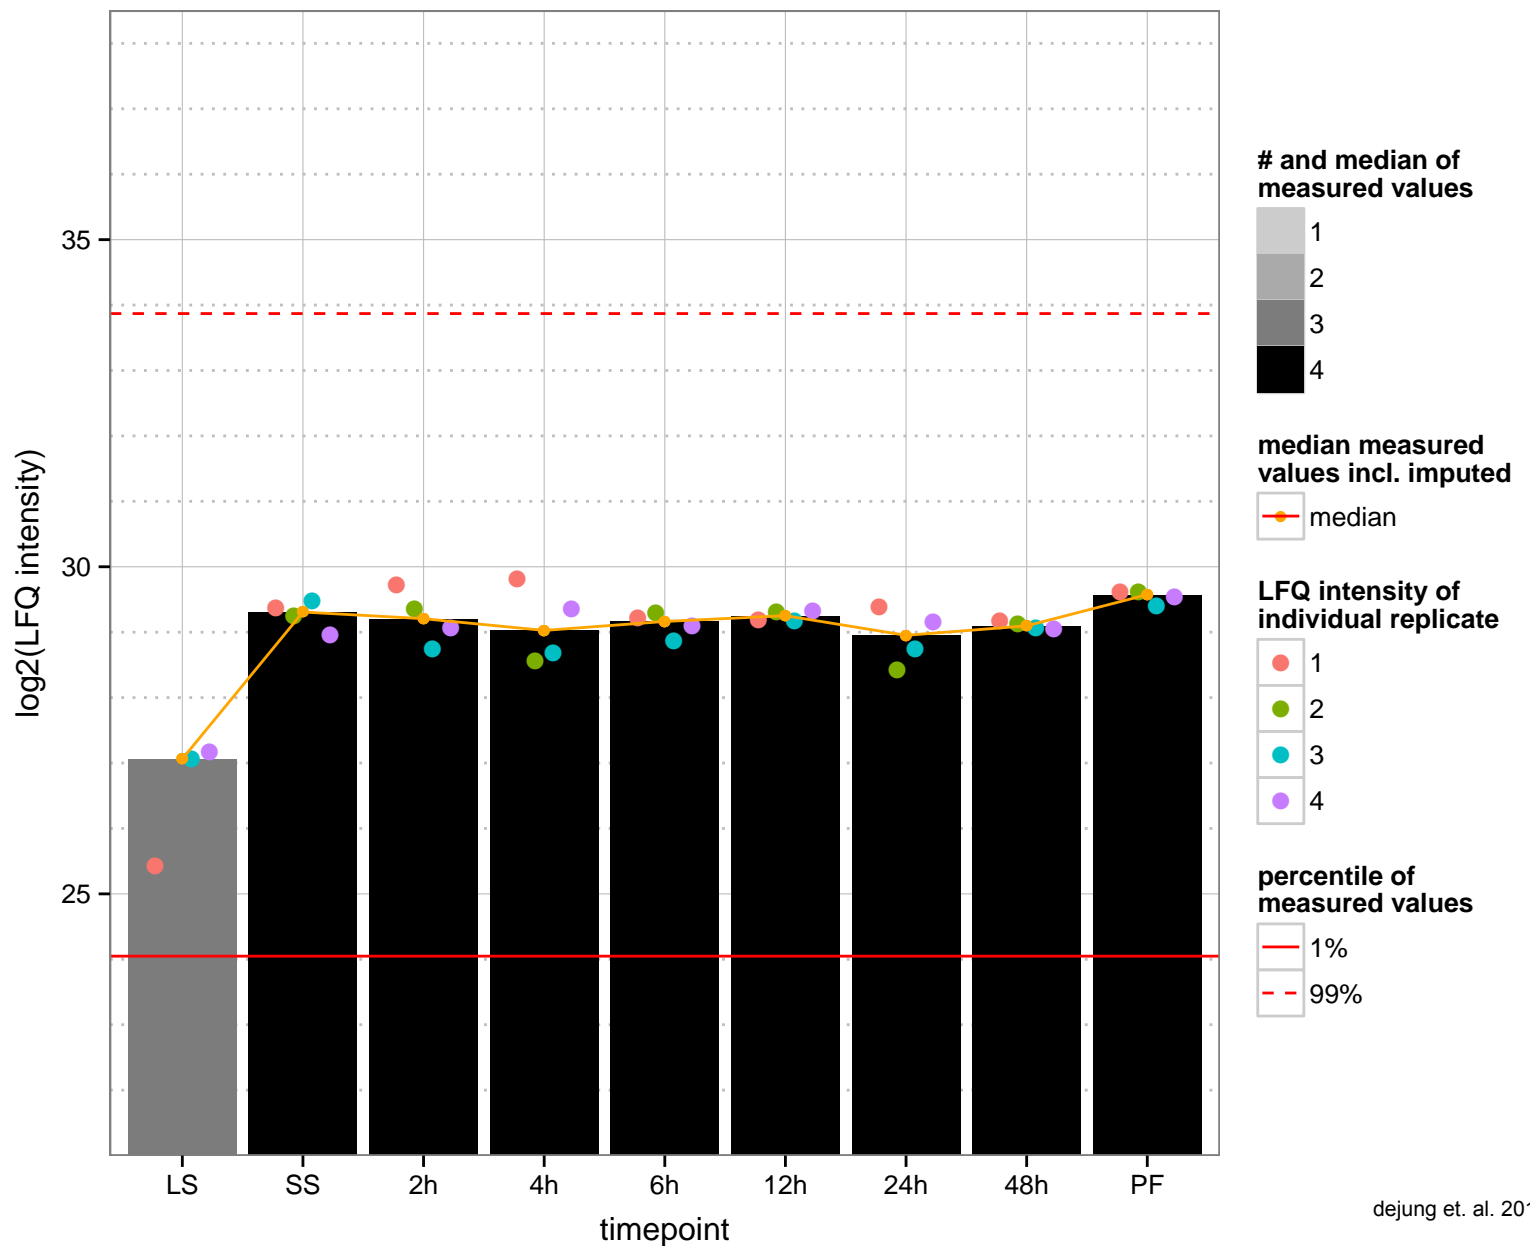

E2-like ubiquitin-conjugation enzyme (ATG3)

Tb927.2.1890

AGOF: null

AGOC: null

AGOP: autophagy, protein transport

PGOF: null

PGOC: null

PGOP: null

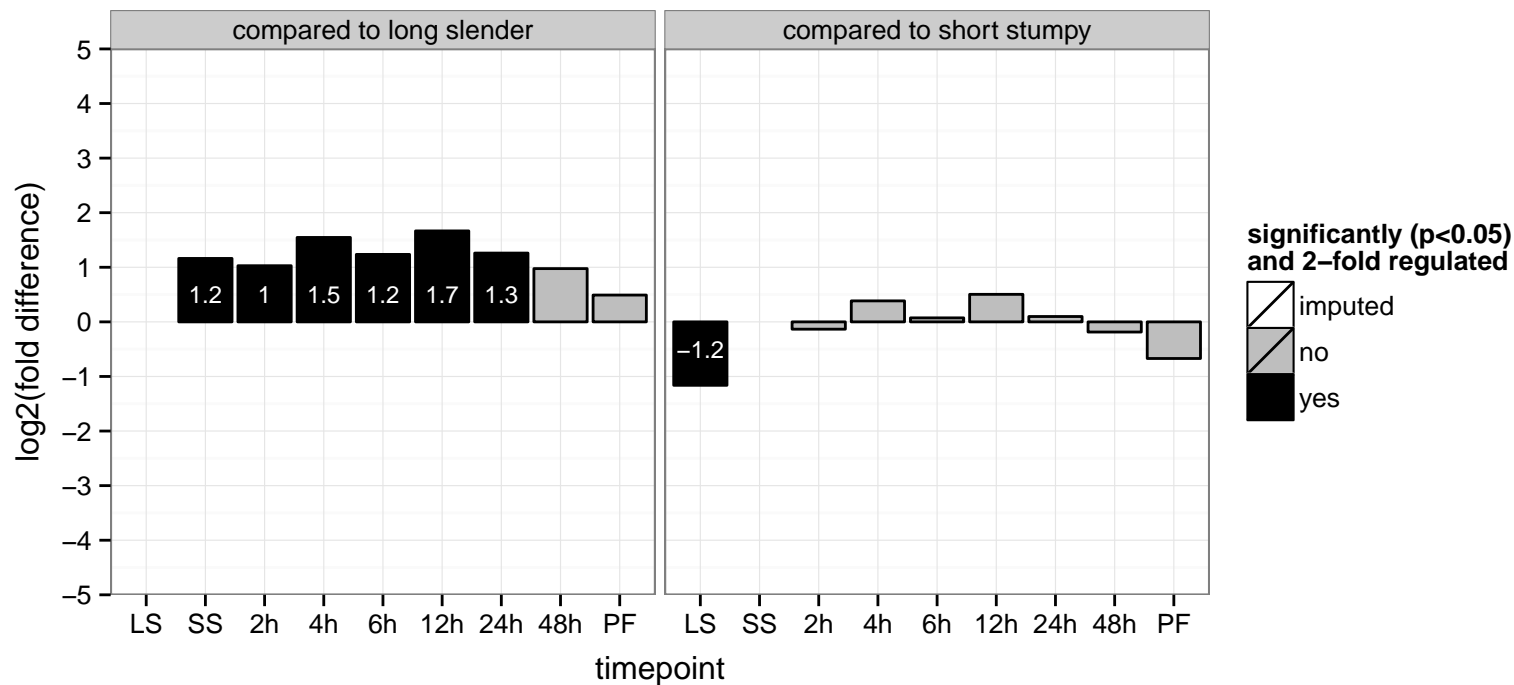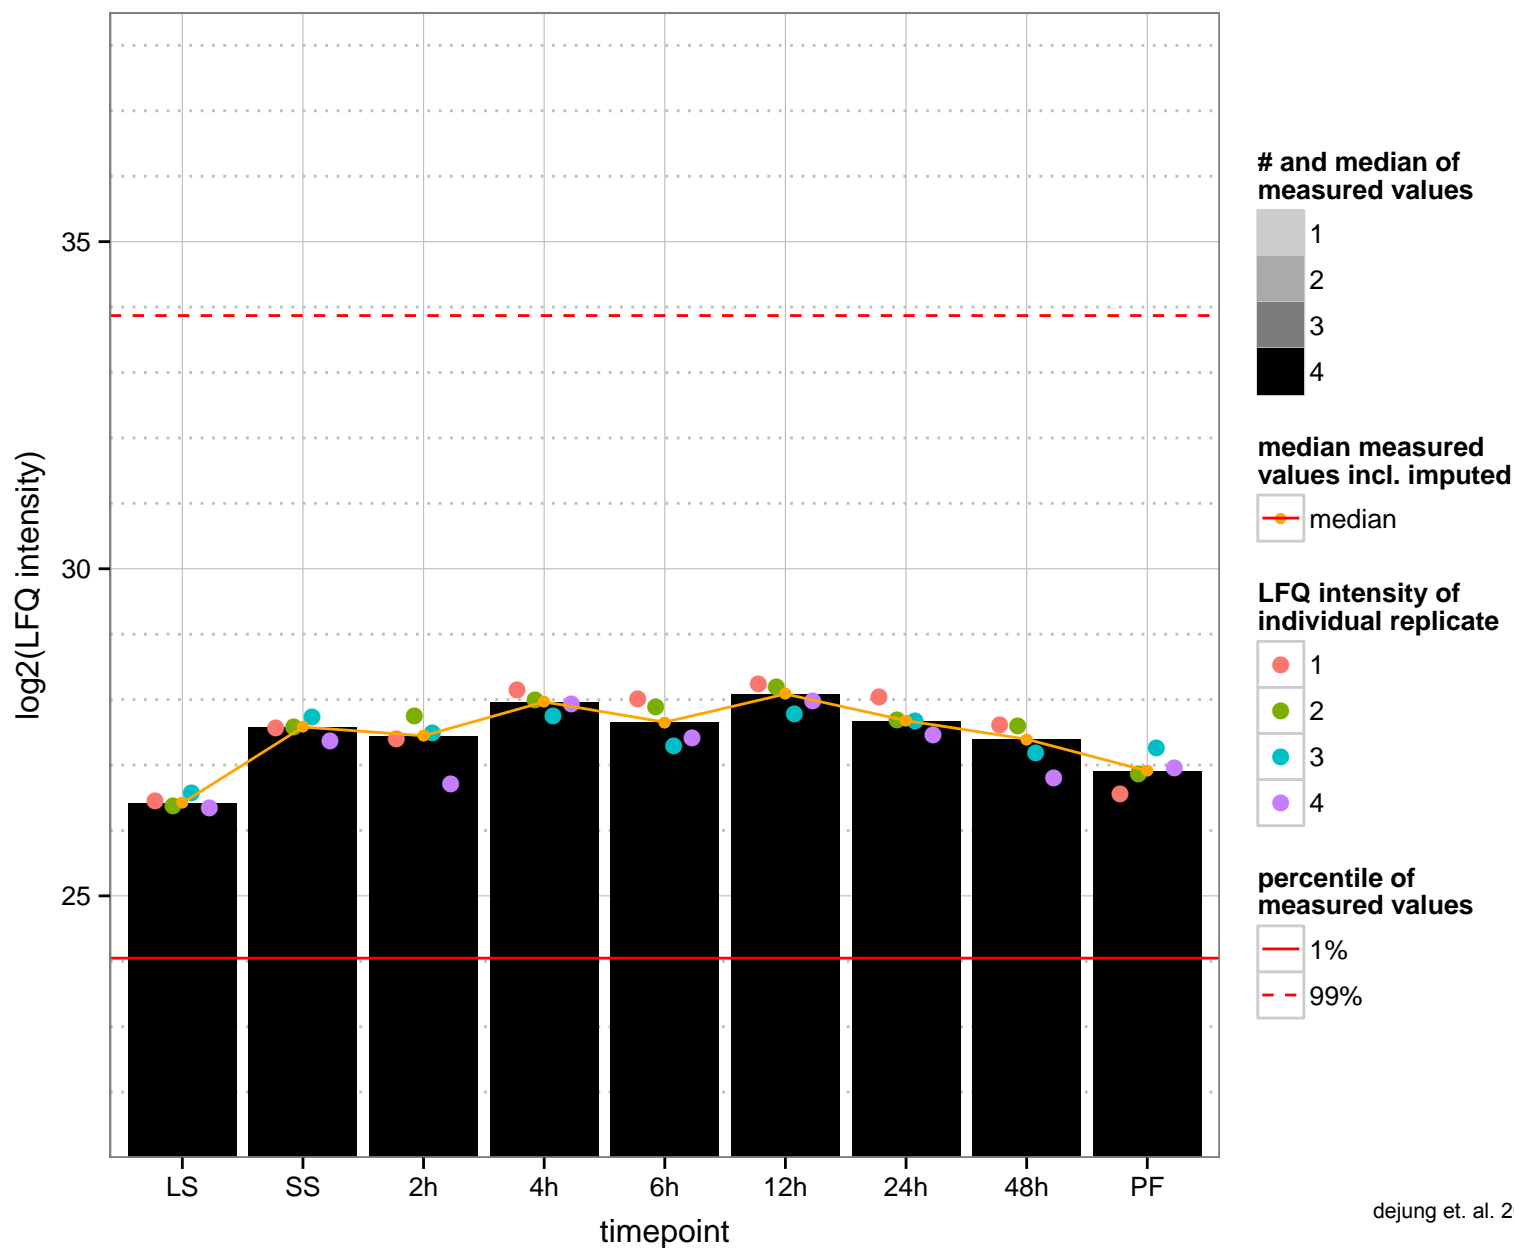

paraflagellar rod component, putative (PFC11)  
 Tb927.2.2160  
 AGOF: null  
 AGOC: Golgi apparatus, endoplasmic reticulum  
 AGOP: intracellular protein transport  
 PGOF: null  
 PGO: null  
 PGOP: null

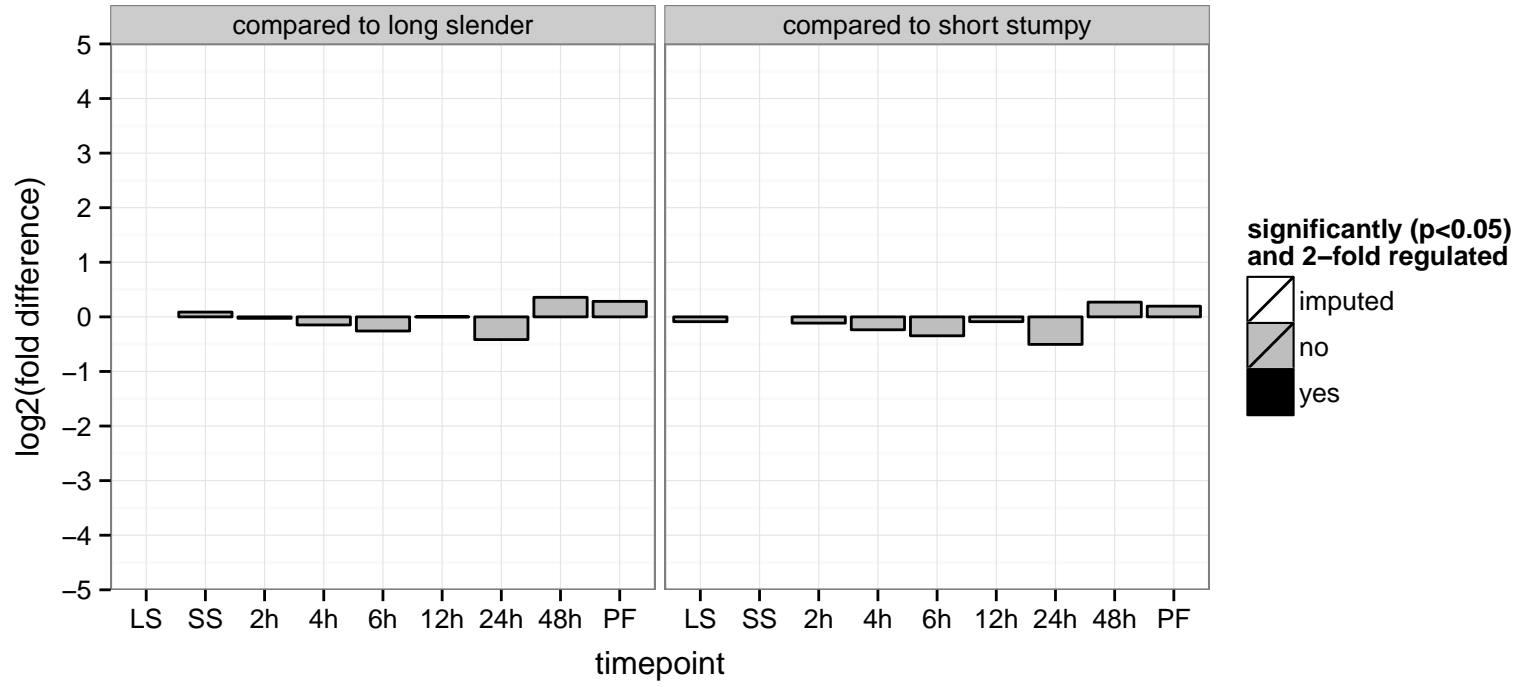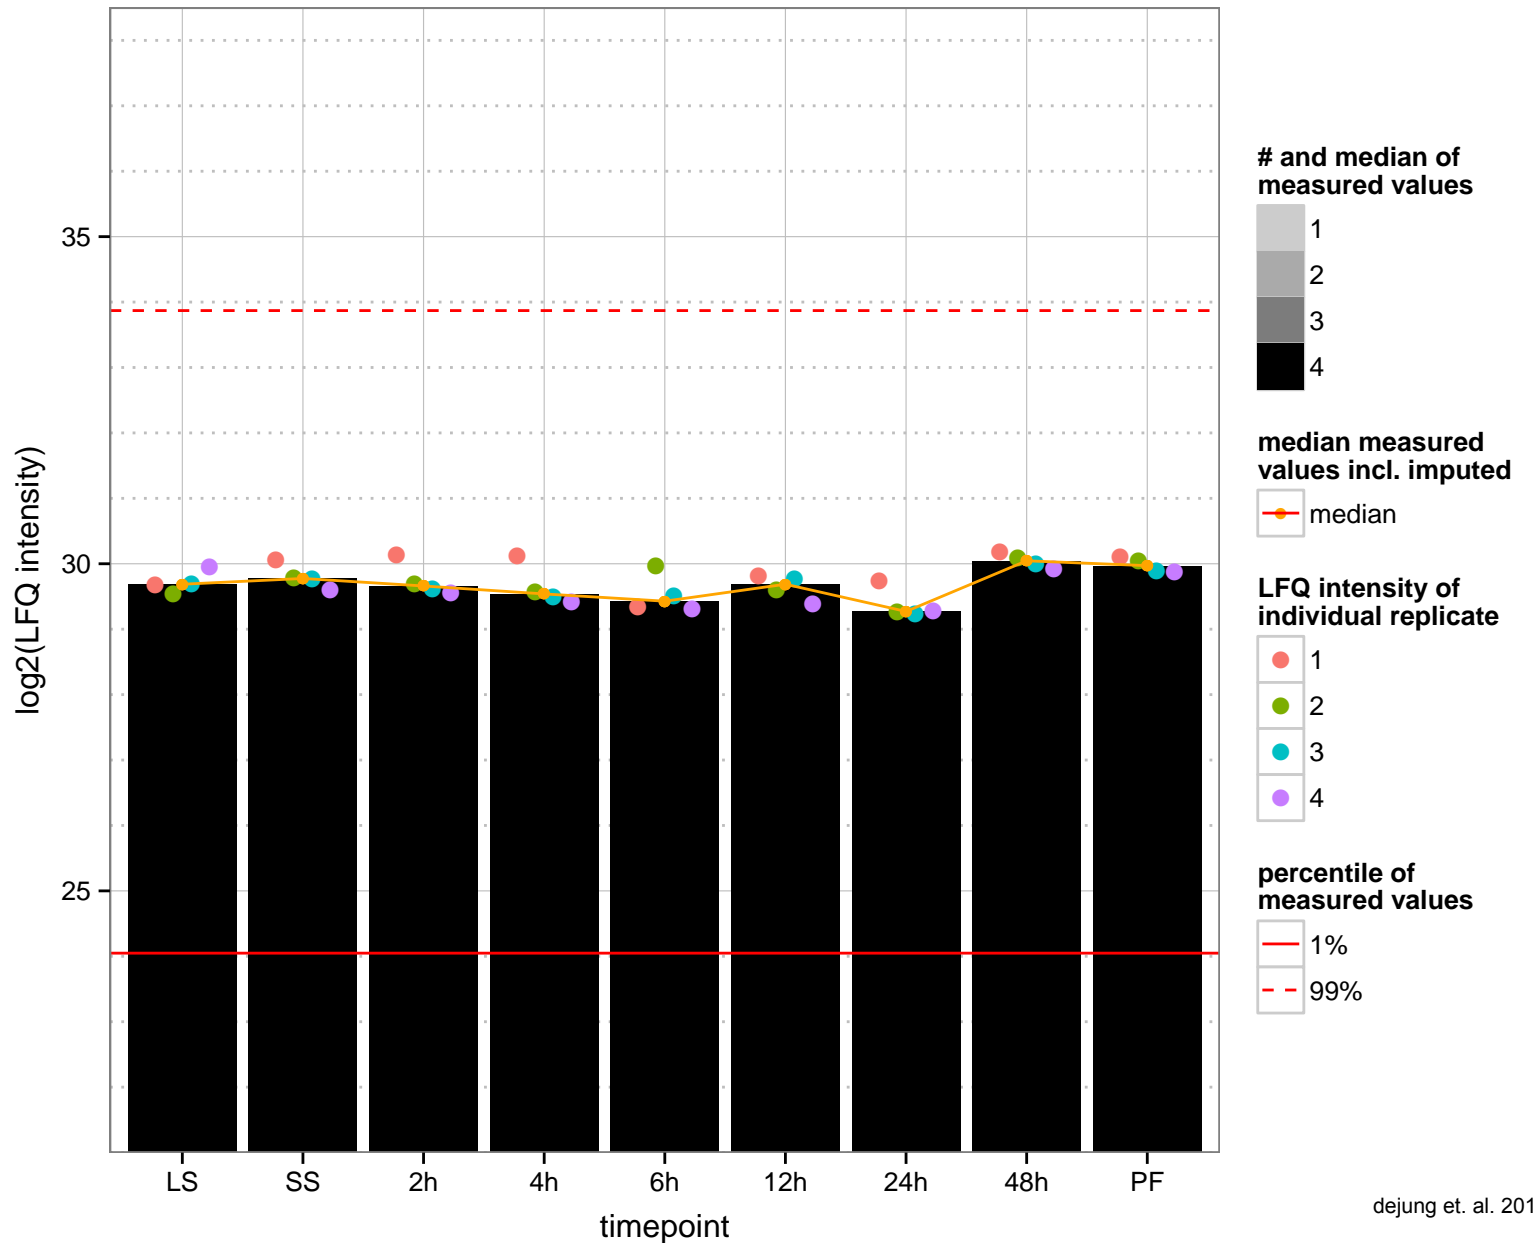

hypothetical protein, conserved  
 Tb927.2.2230  
 AGOF: null  
 AGOC: null  
 AGOP: null  
 PGO: null  
 PGOC: null  
 PGOP: null

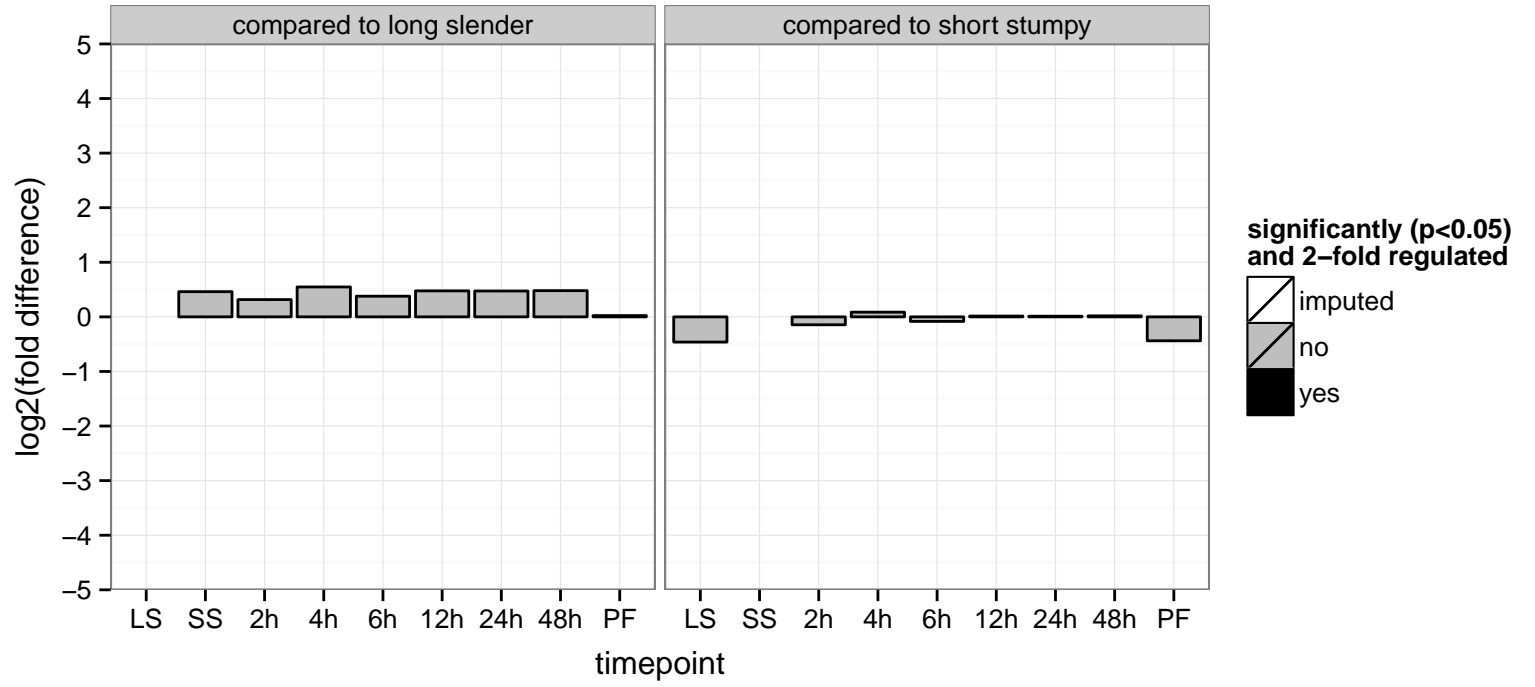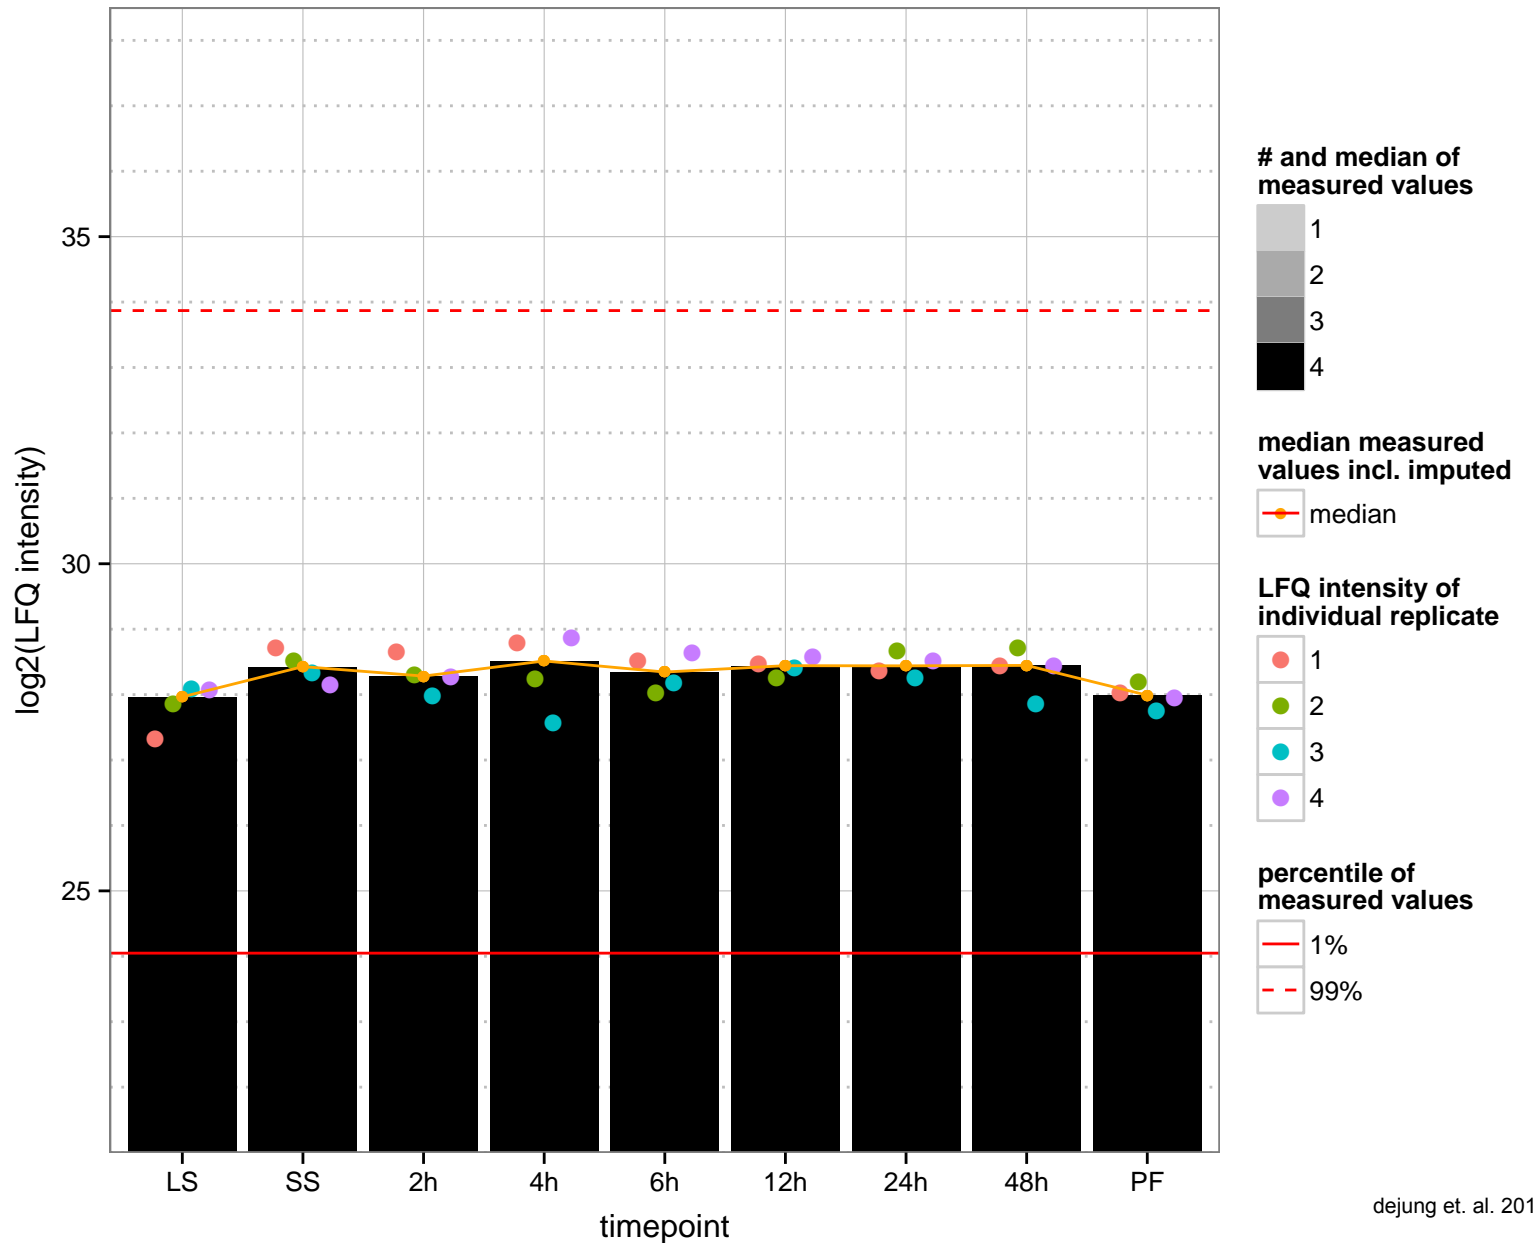

tRNA exportin, putative, exportin-T  
 Tb927.2.2240  
 AGOF: tRNA binding  
 AGOC: nucleus  
 AGOP: transport  
 PGO: binding  
 PGO: null  
 PGOP: null

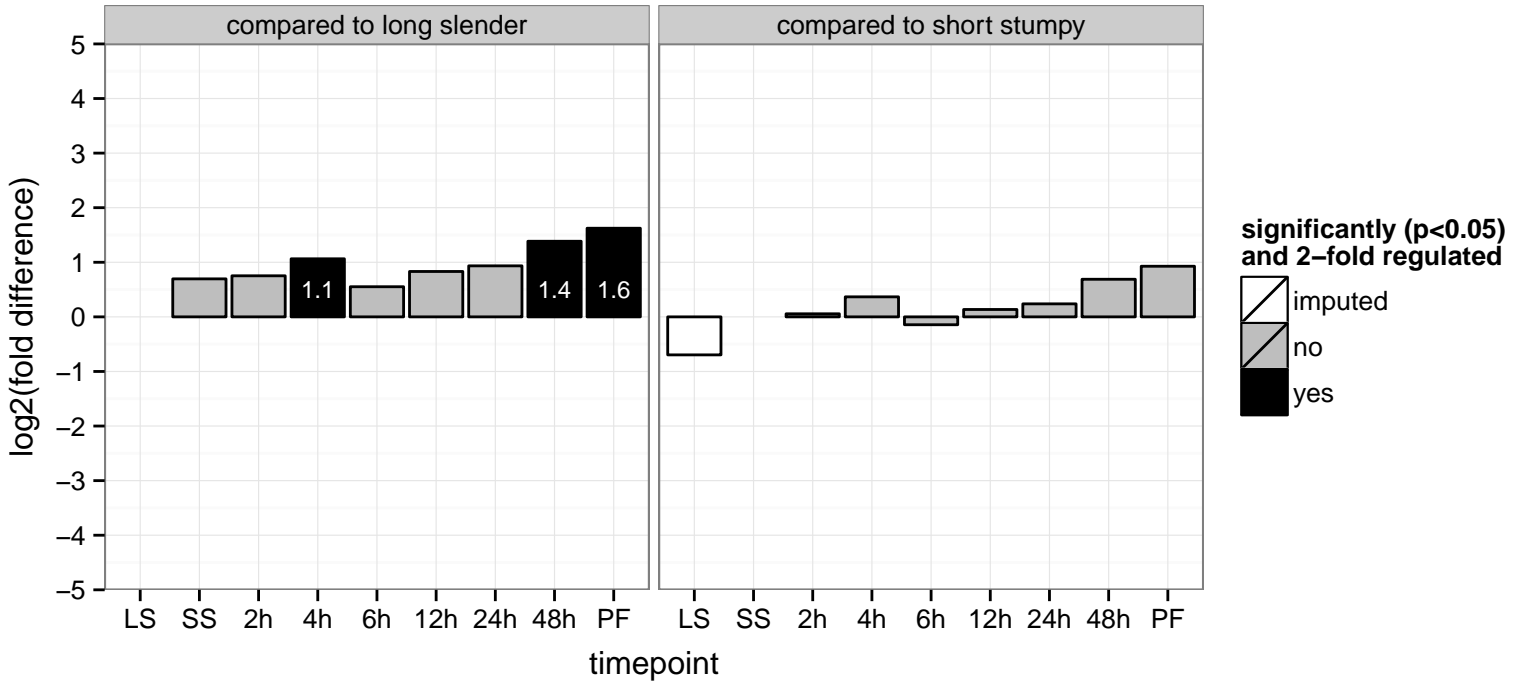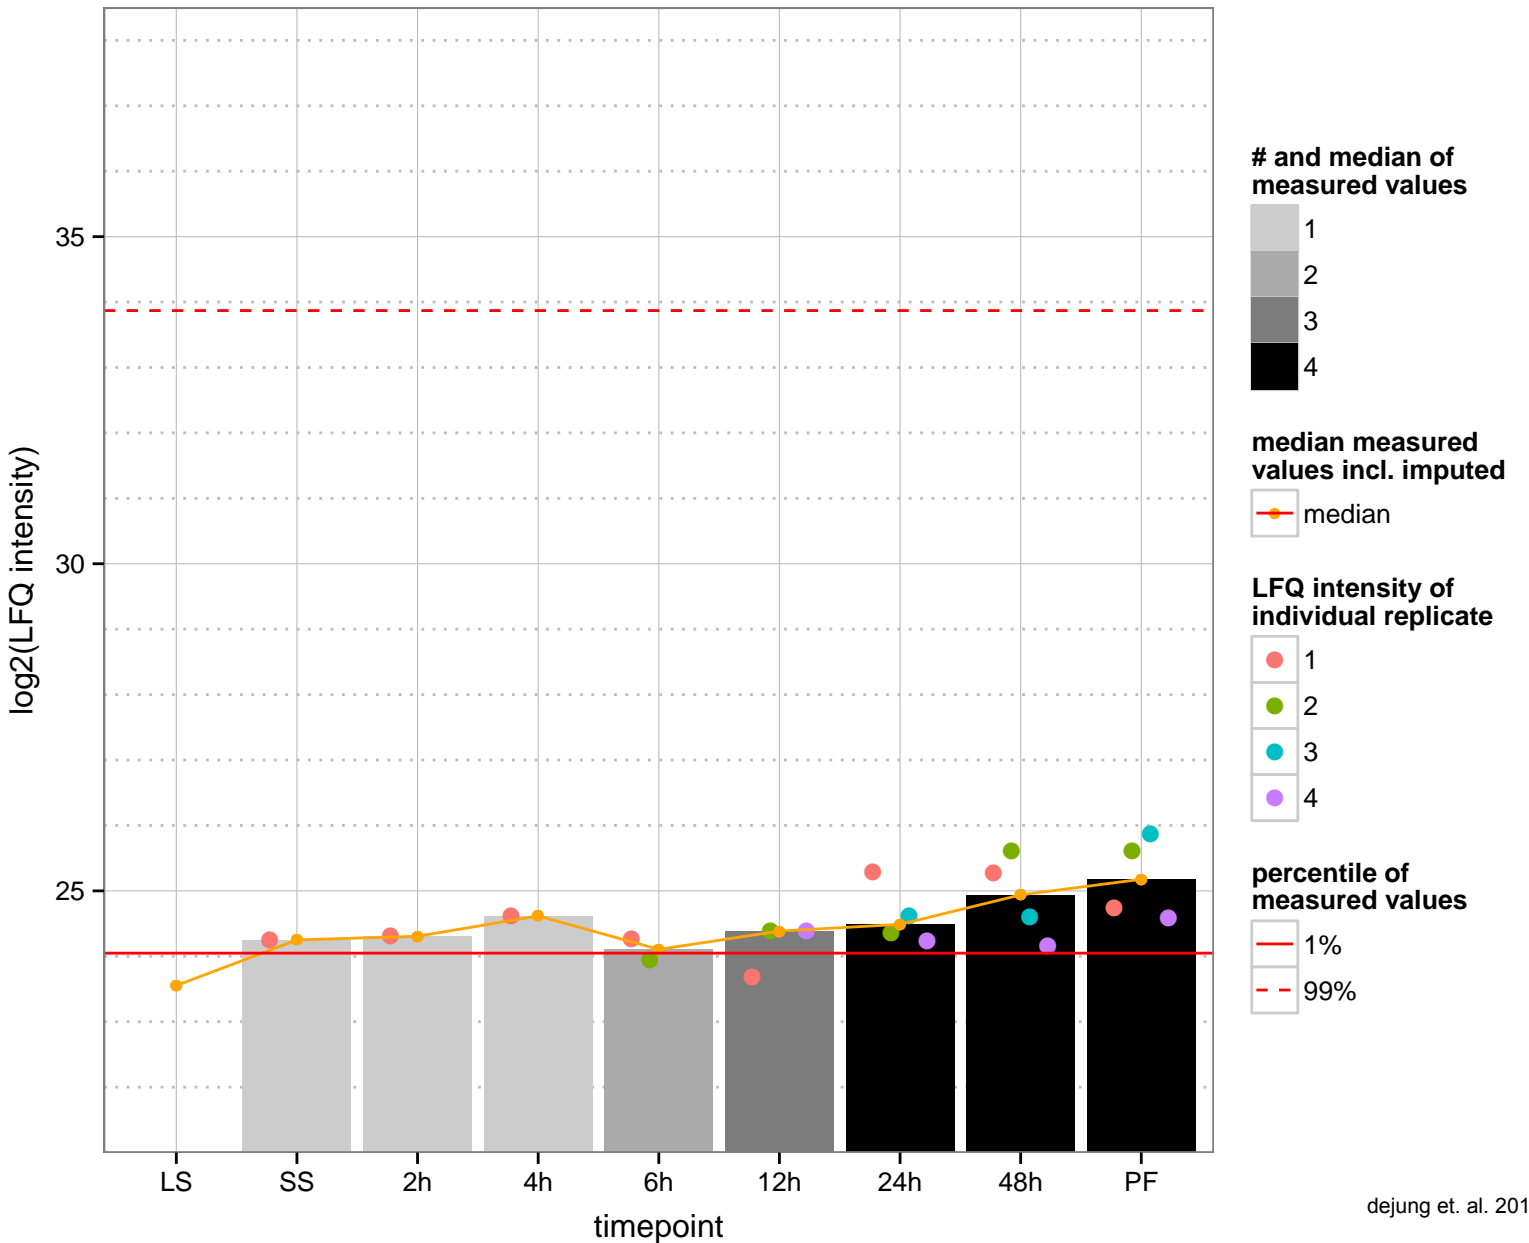



hypothetical protein, conserved  
 Tb927.2.2360  
 AGOF: zinc ion binding  
 AGOC: null  
 AGOP: null  
 PGOF: protein binding, zinc ion binding  
 PGOC: null  
 PGOP: null

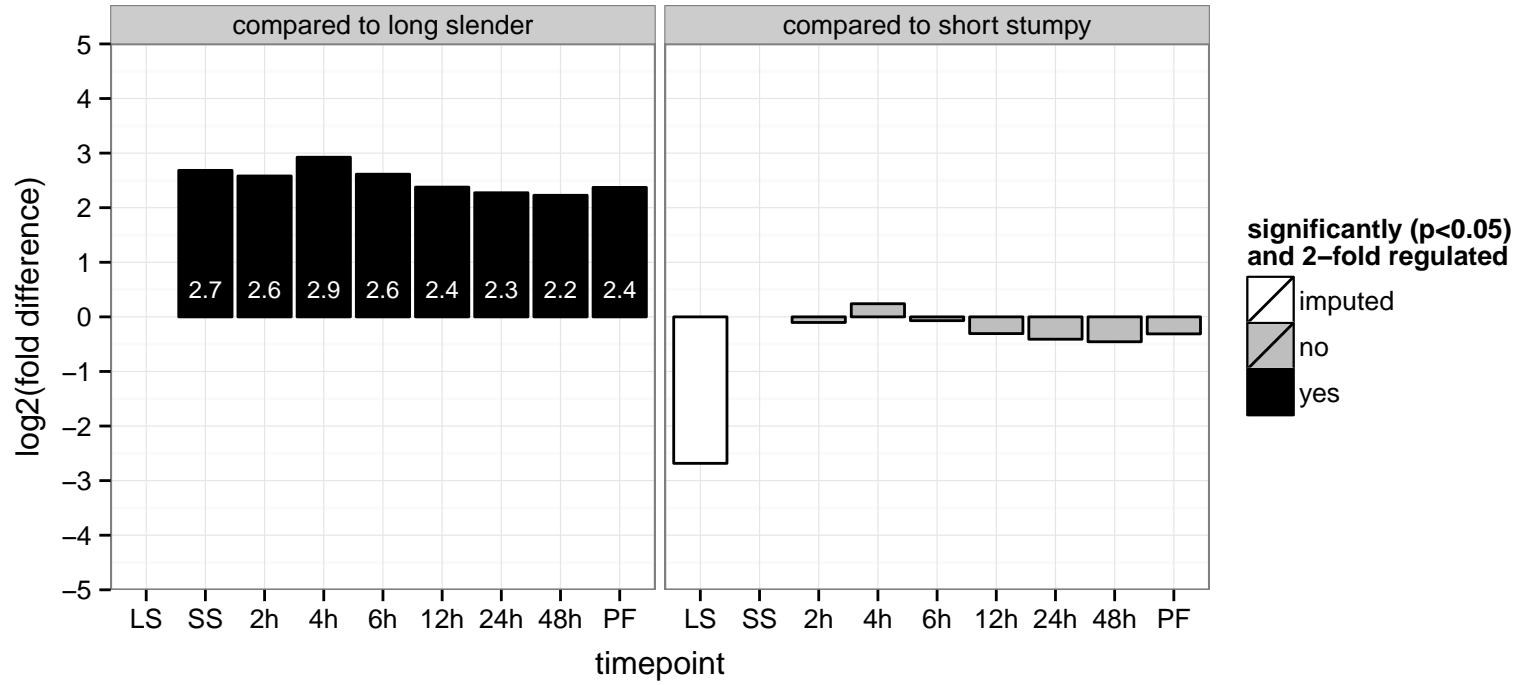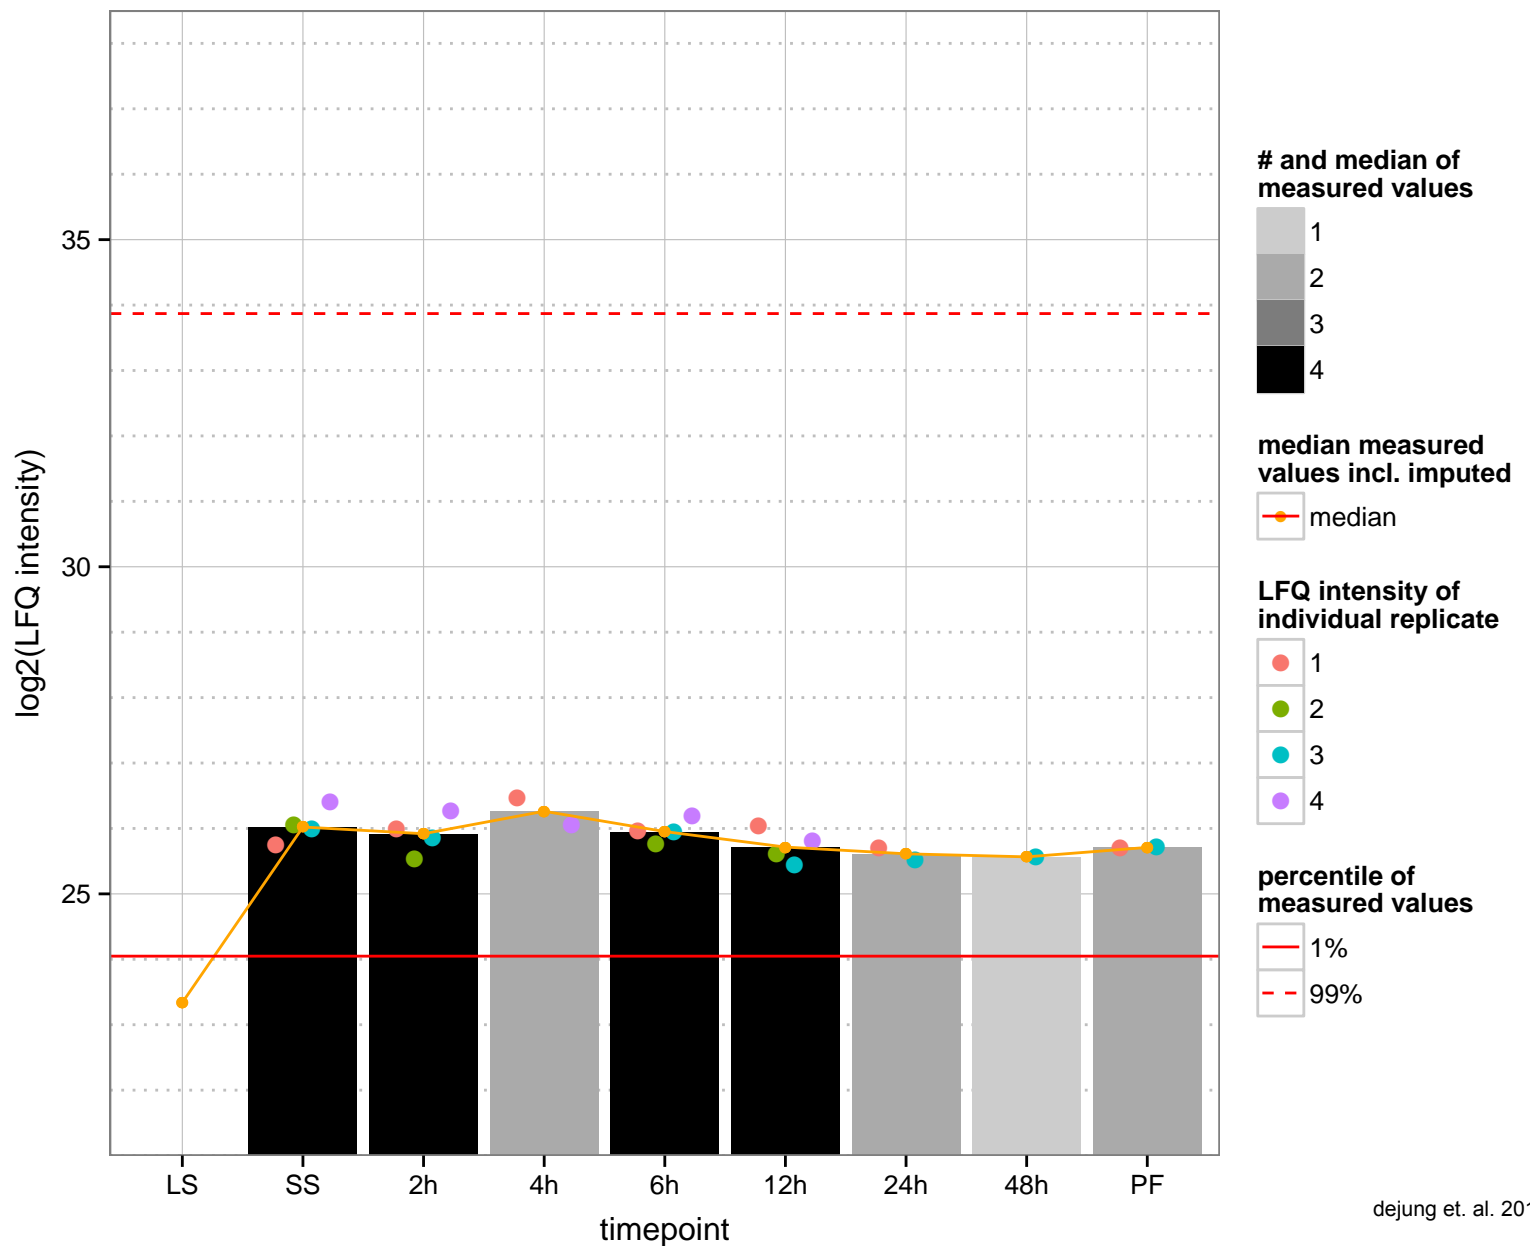

proteasome regulatory non-ATPase subunit 6 (RPN6)  
 Tb927.2.2440  
 AGOF: endopeptidase activity  
 AGOC: proteasome regulatory particle  
 AGOP: ubiquitin-dependent protein catabolic process  
 PGO: protein binding  
 PGOC: null  
 PGOP: null

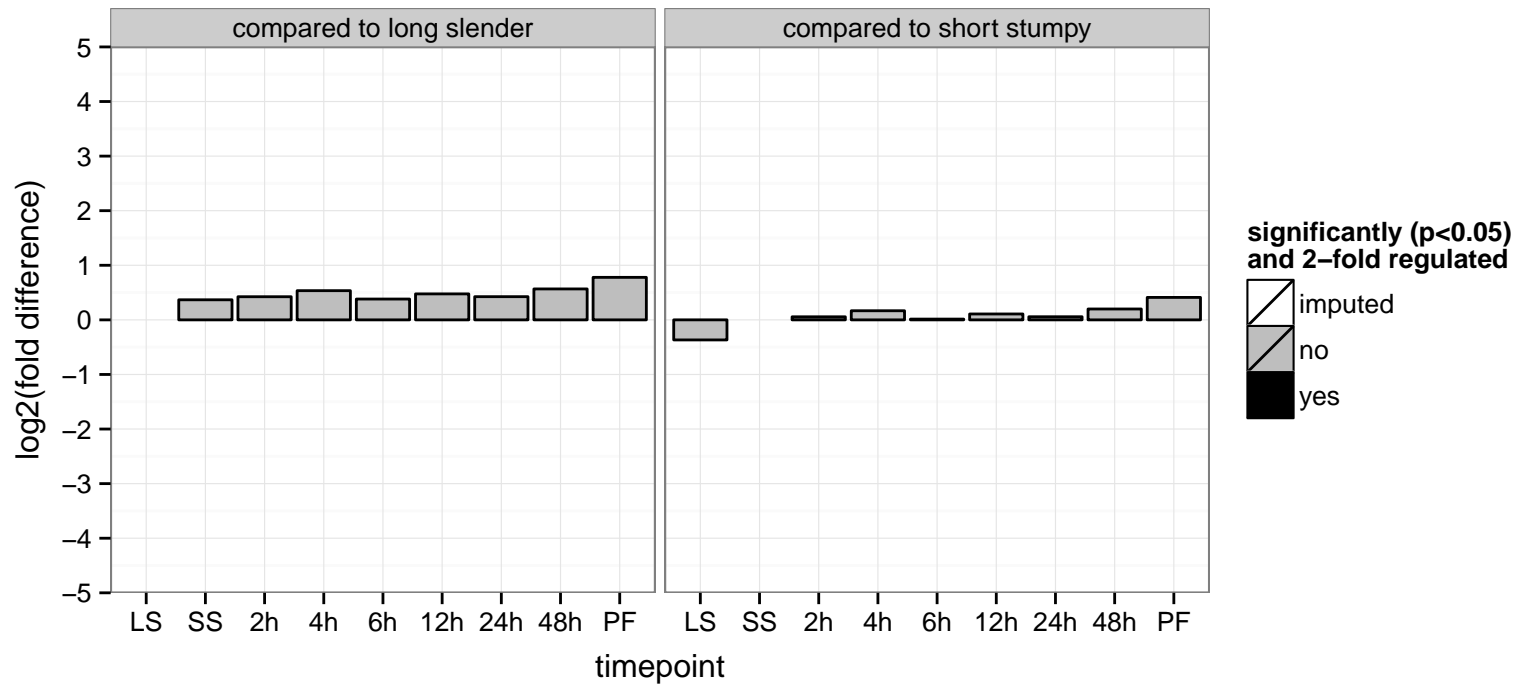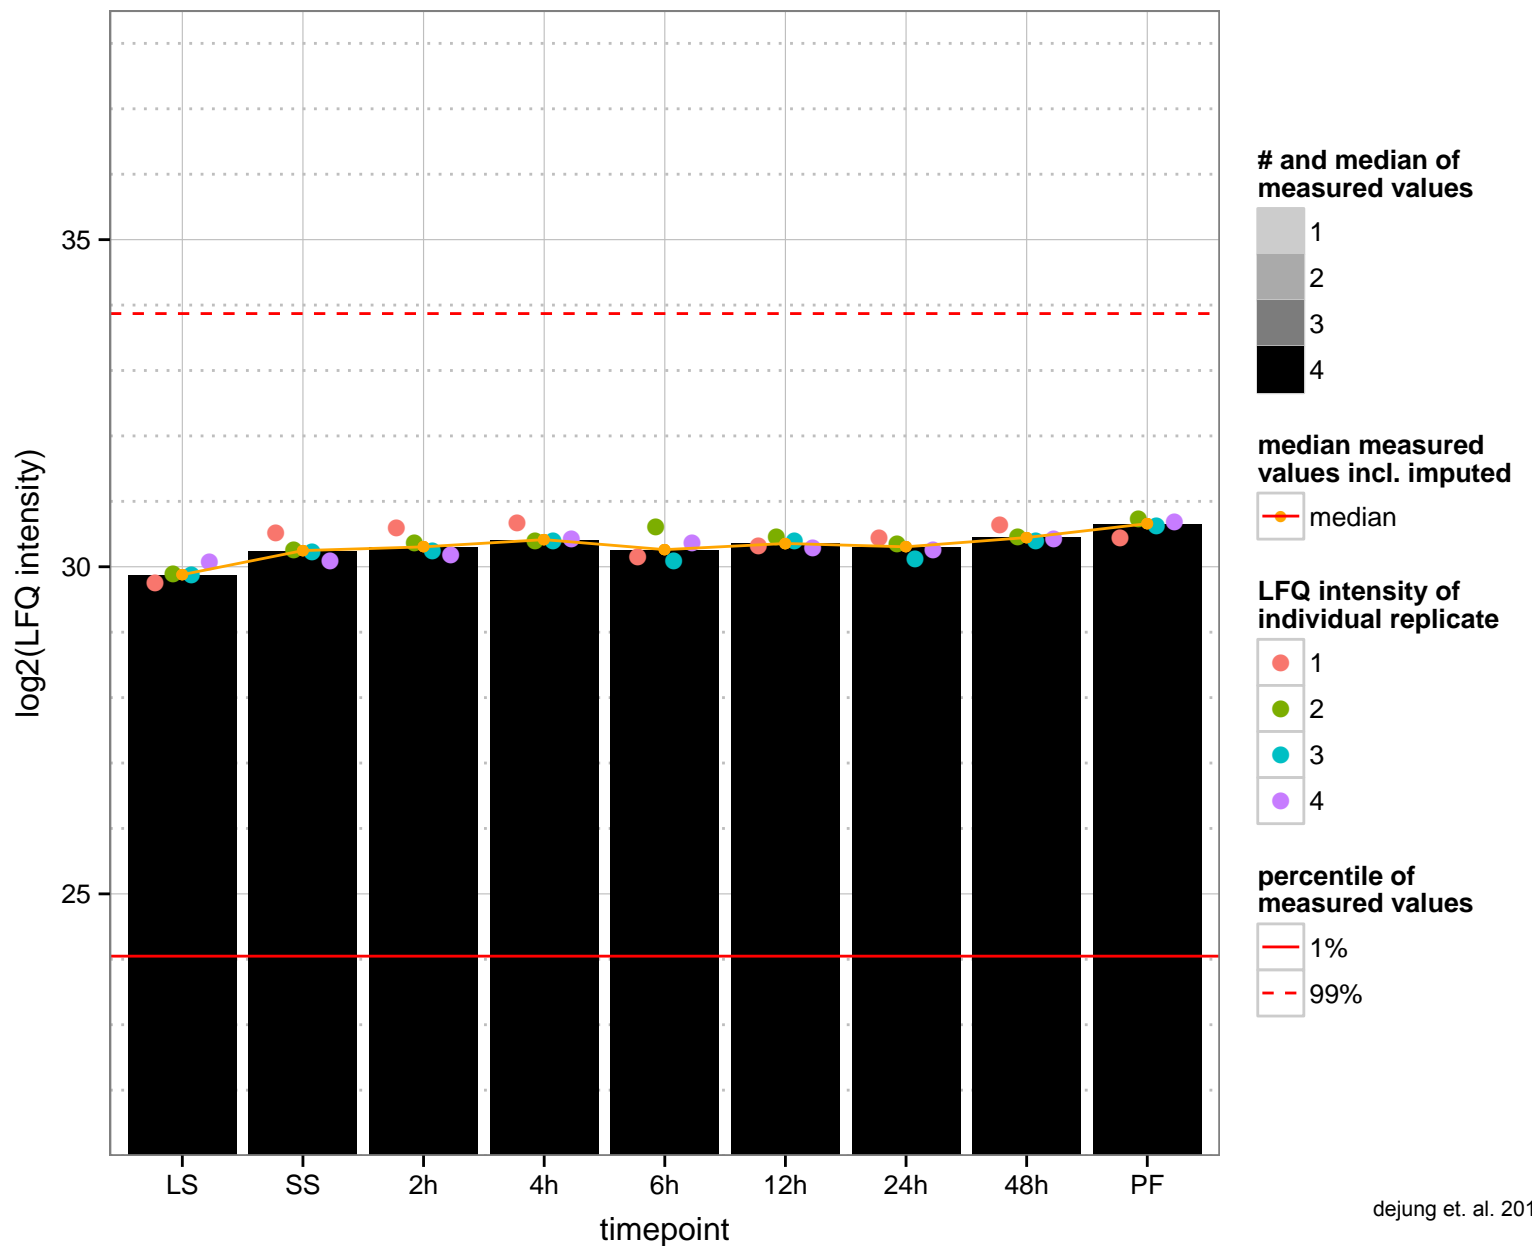

hypothetical protein, conserved  
 Tb927.2.2880  
 AGOF: null  
 AGOC: null  
 AGOP: null  
 PGO: protein binding  
 PGOC: null  
 PGOP: null

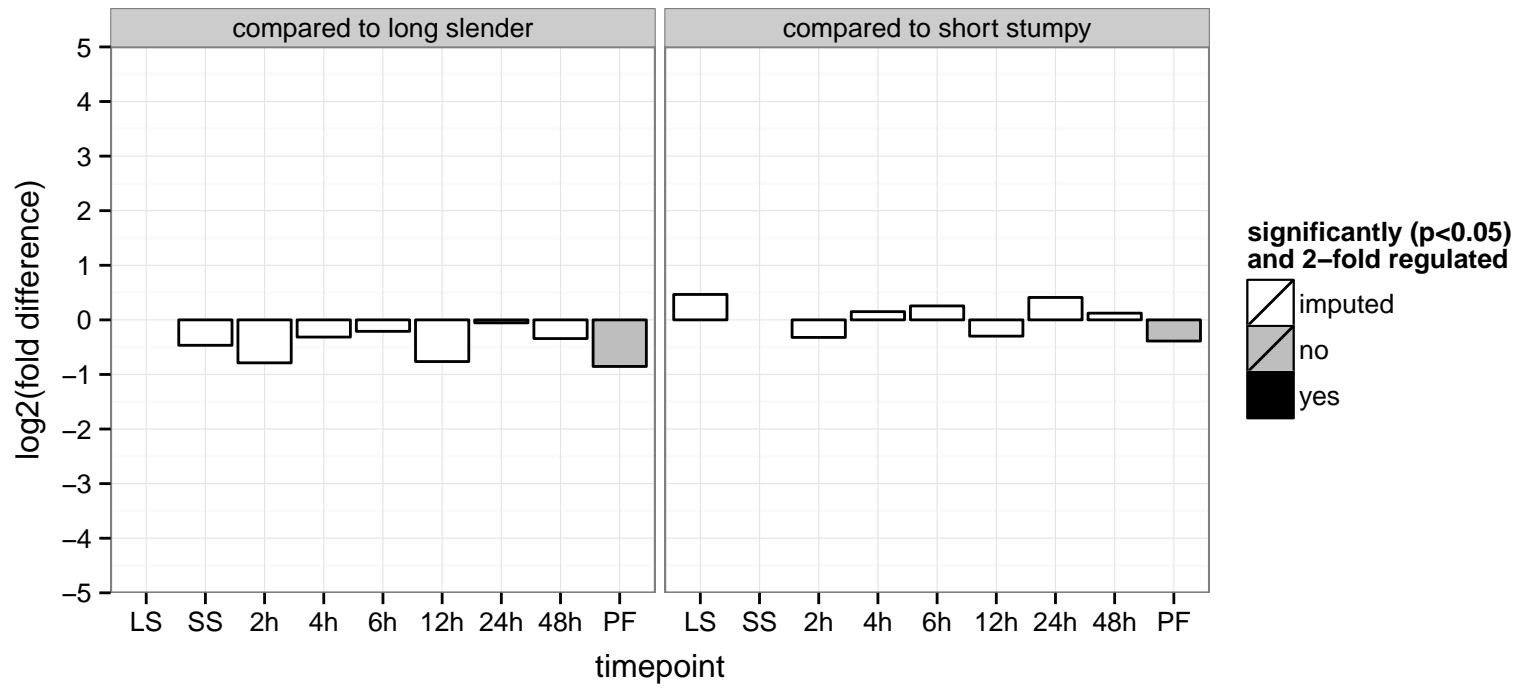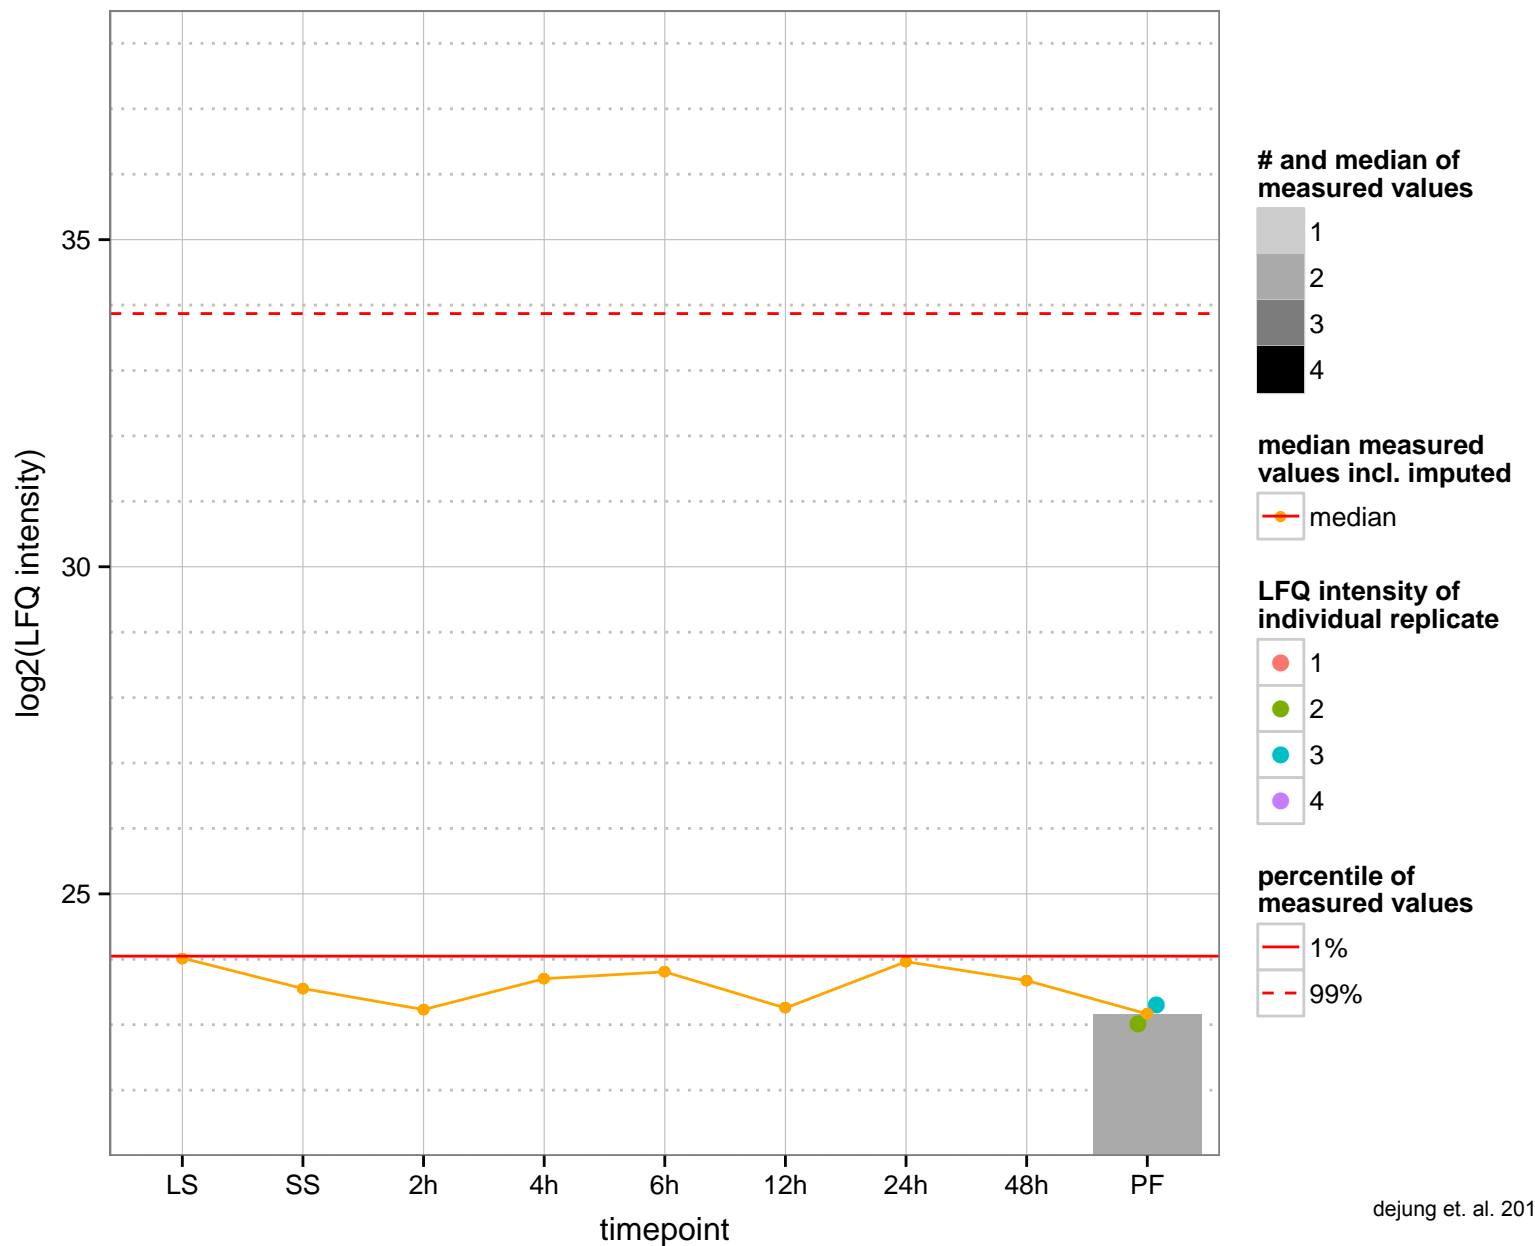

hypothetical protein, conserved  
 Tb927.2.2920  
 AGOF: null  
 AGOC: null  
 AGOP: null  
 PGO: null  
 PGOC: null  
 PGOP: transmembrane transport

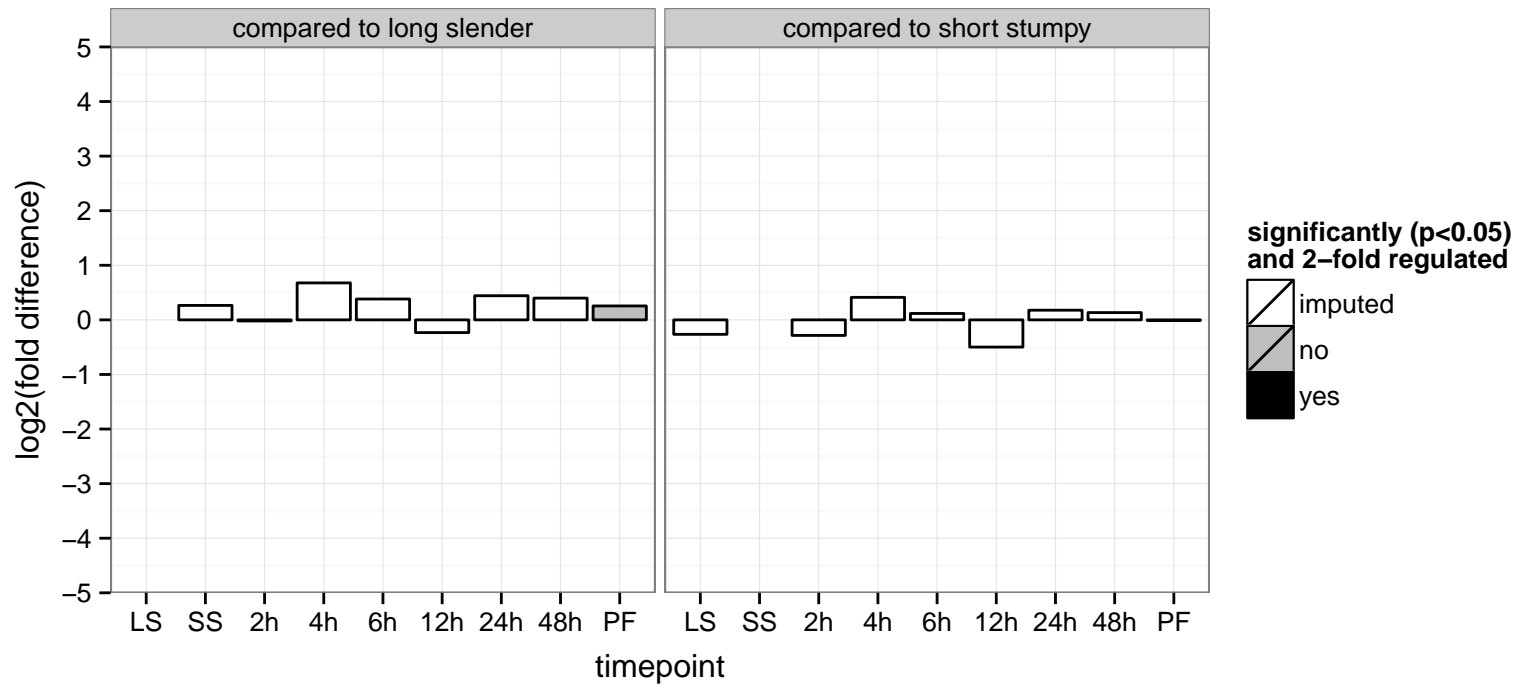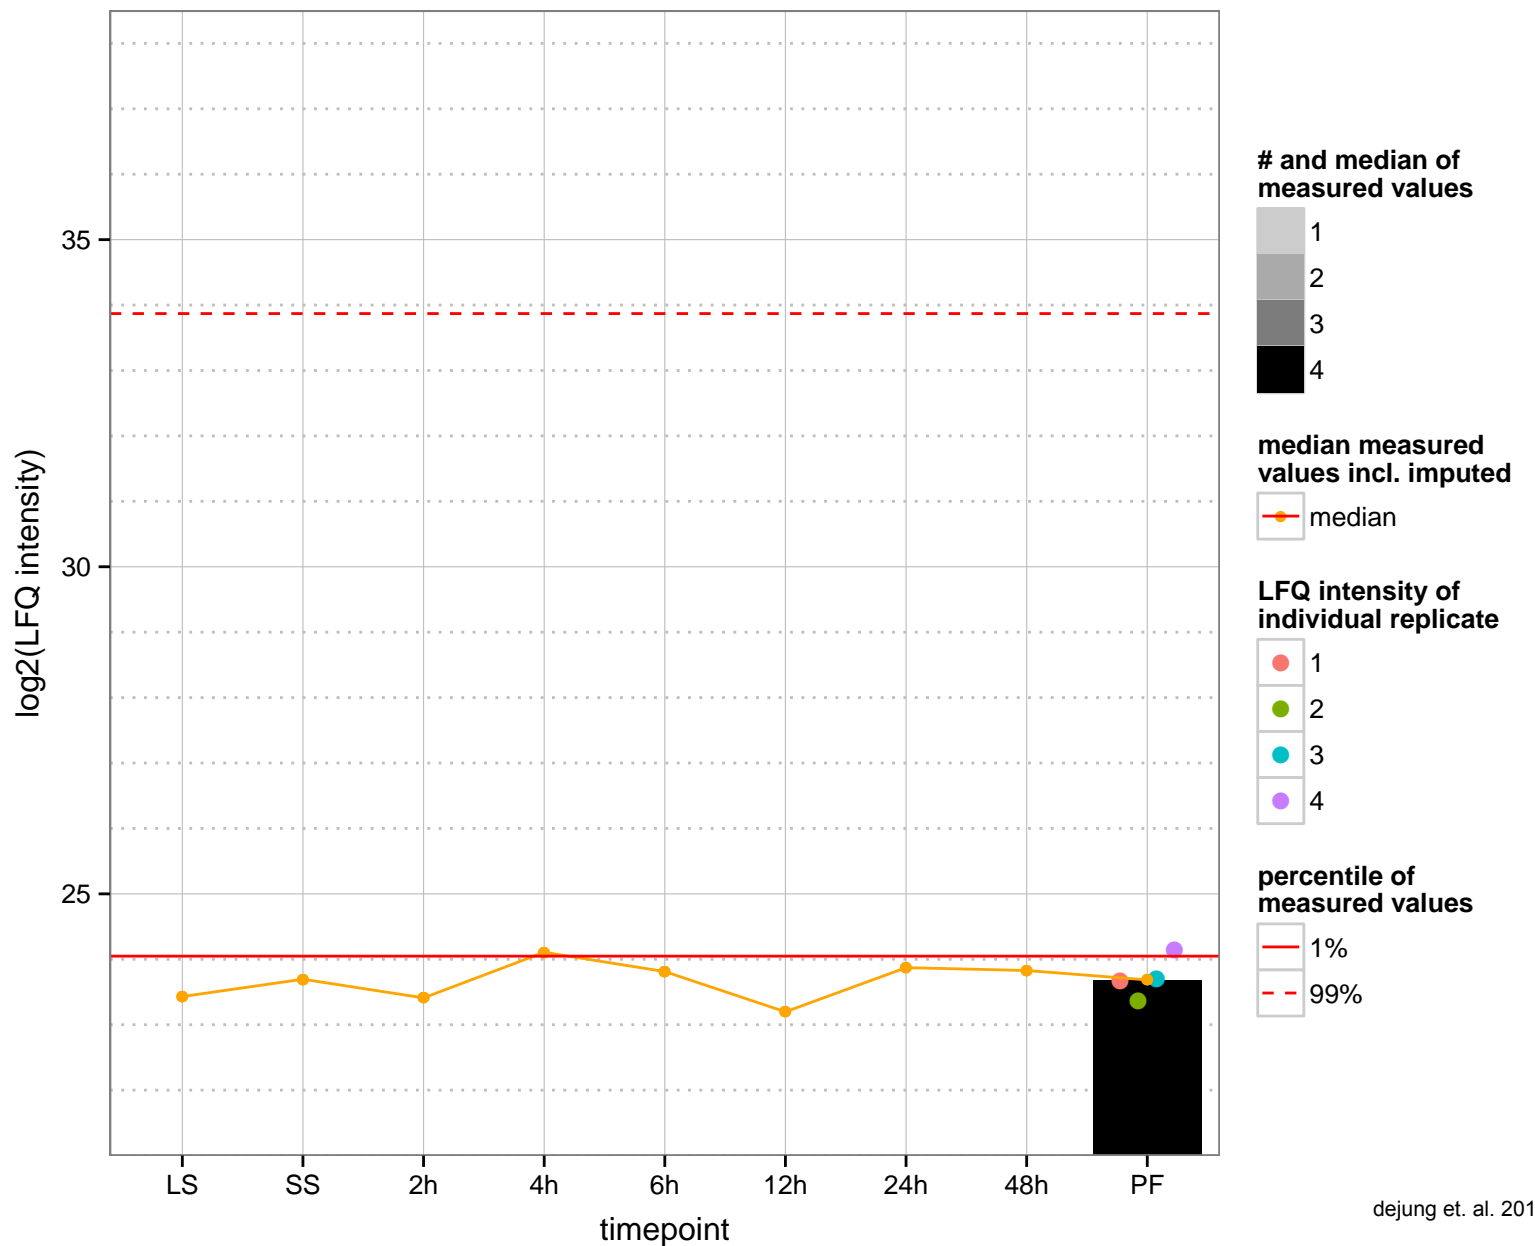

hypothetical protein, conserved  
 Tb927.2.2940  
 AGOF: null  
 AGOC: mitochondrion  
 AGOP: null  
 PGO: null  
 PGO: null  
 PGO: null

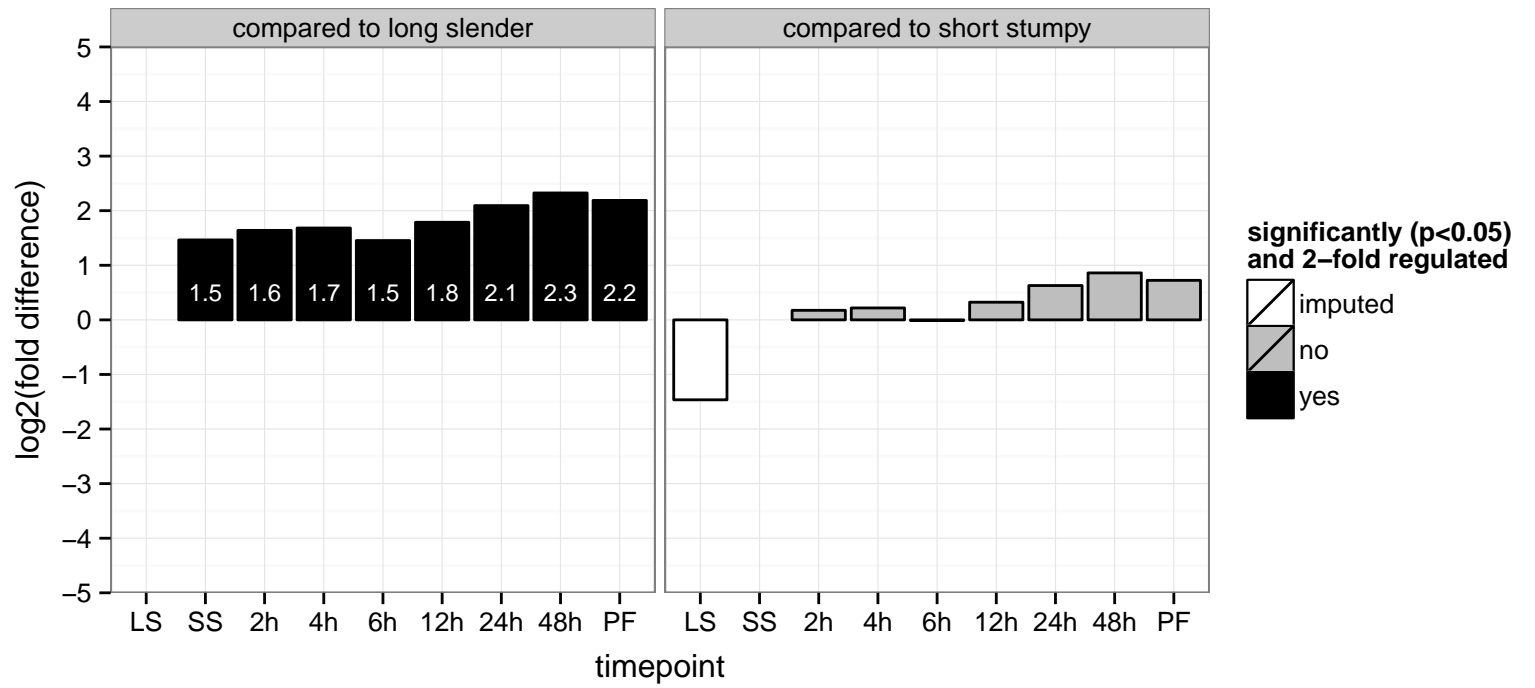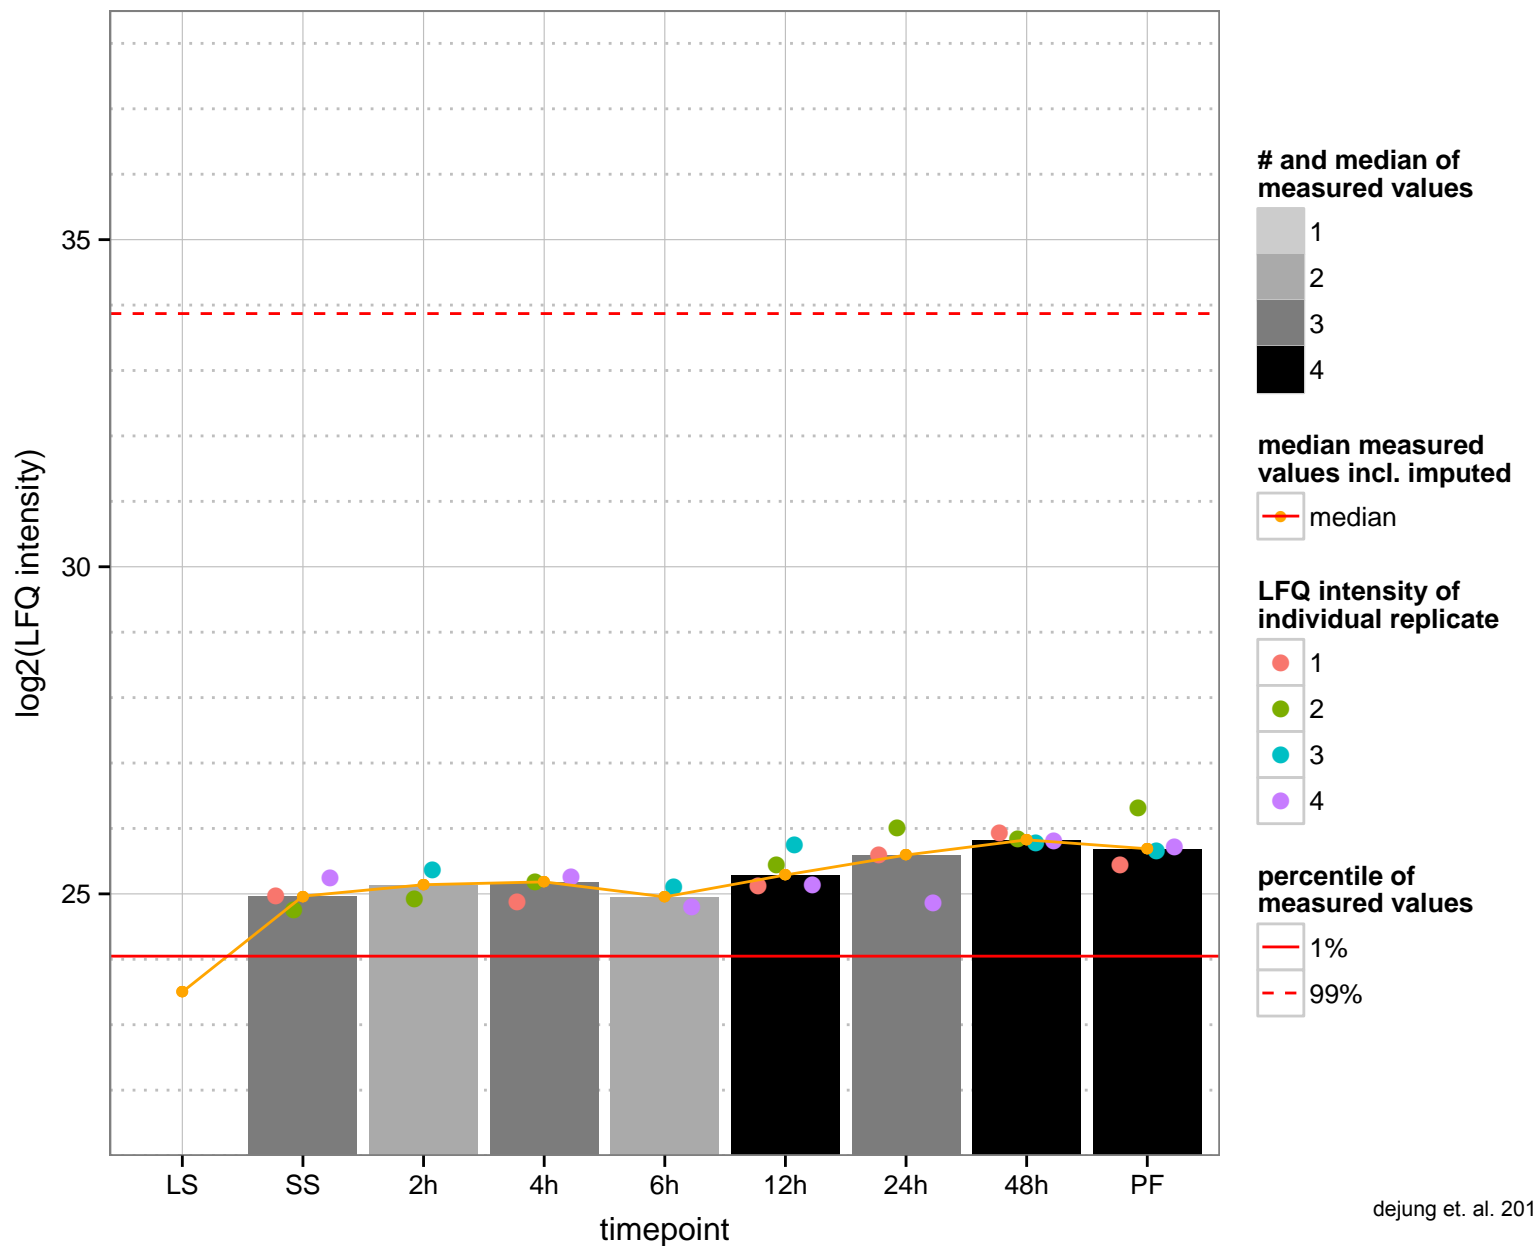

mitochondrial carrier protein (MCP13)  
 Tb927.2.2970  
 AGOF: null  
 AGOC: mitochondrial inner membrane, mitochondrial part  
 AGOP: transport  
 PGO: null  
 PGOC: null  
 PGOP: null

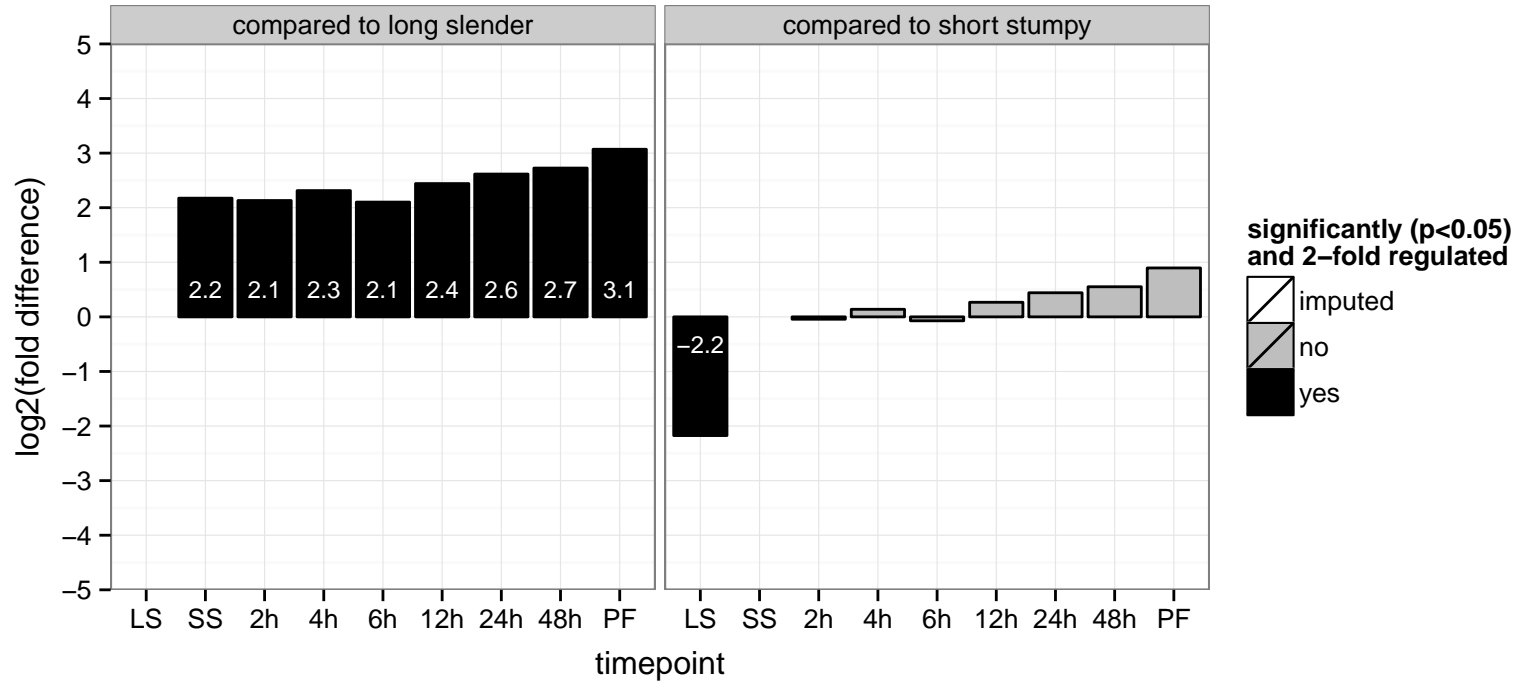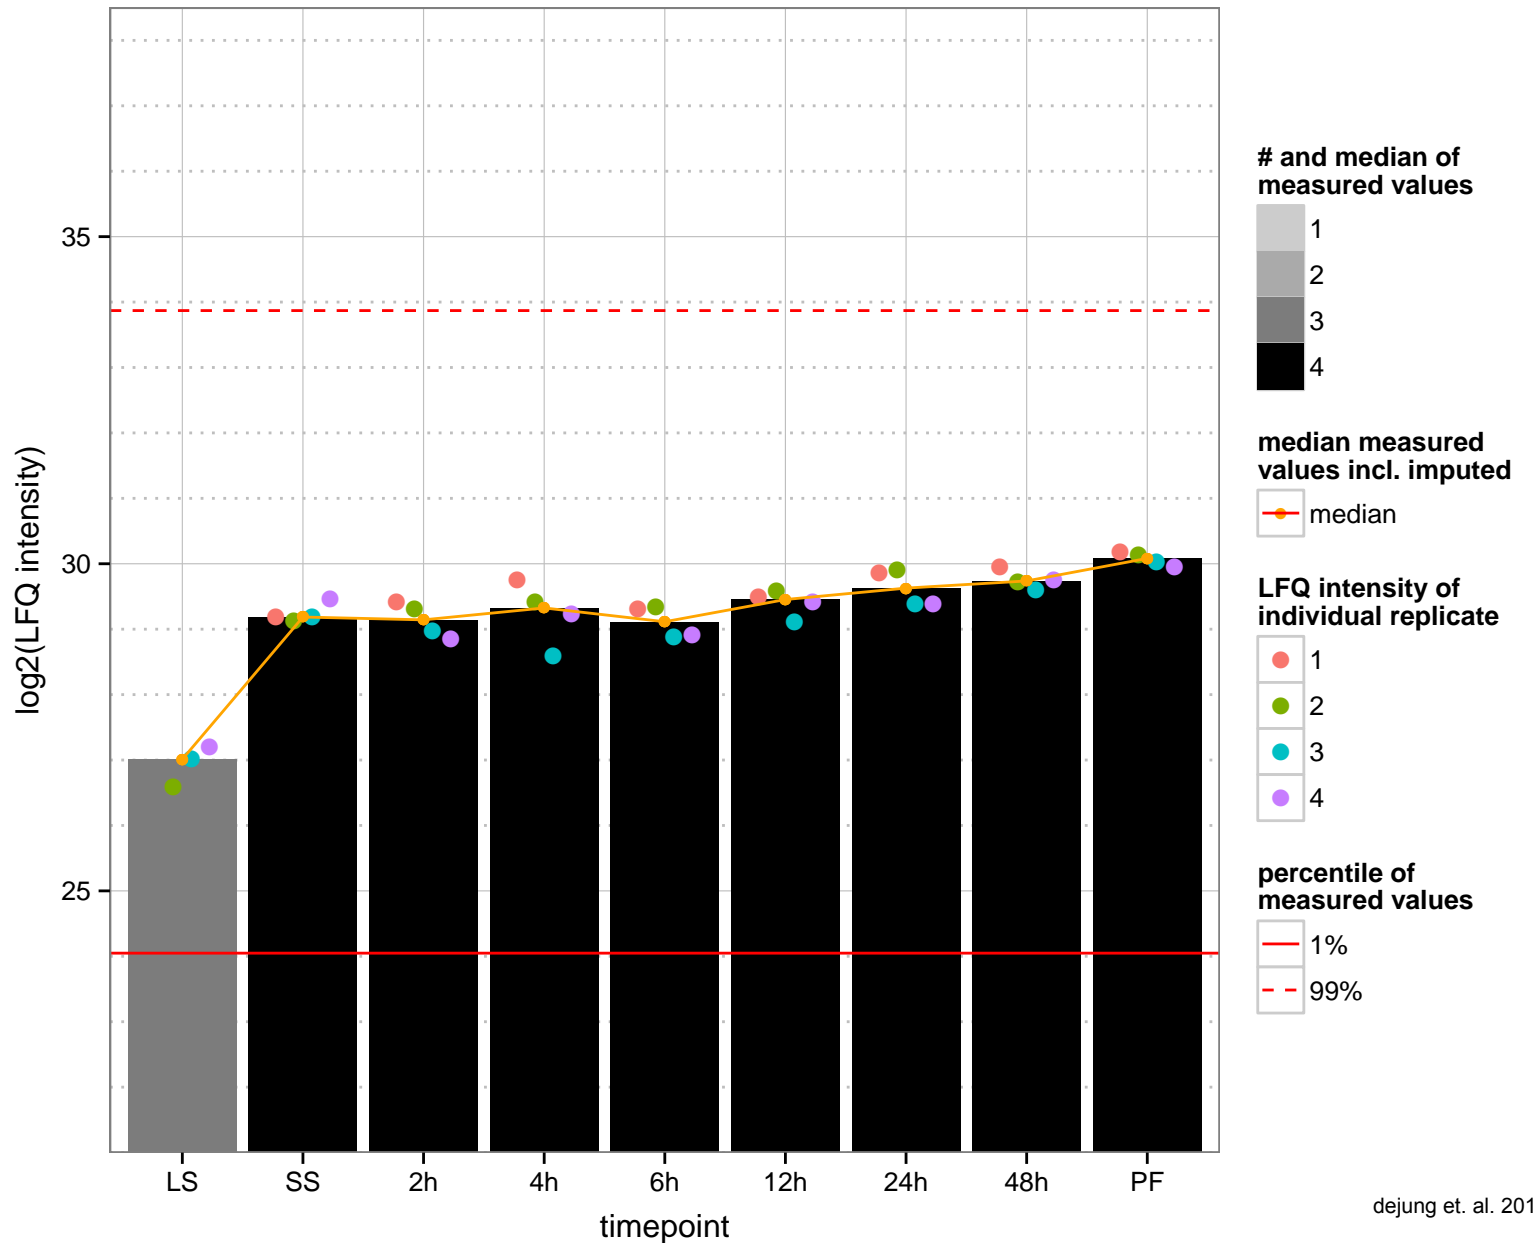

hypothetical protein, conserved  
 Tb927.2.2990  
 AGOF: DNA binding, DNA-directed RNA polymerase activity  
 AGOC: null  
 AGOP: transcription, DNA-dependent  
 PGOF: null  
 PGO: null  
 PGOP: null

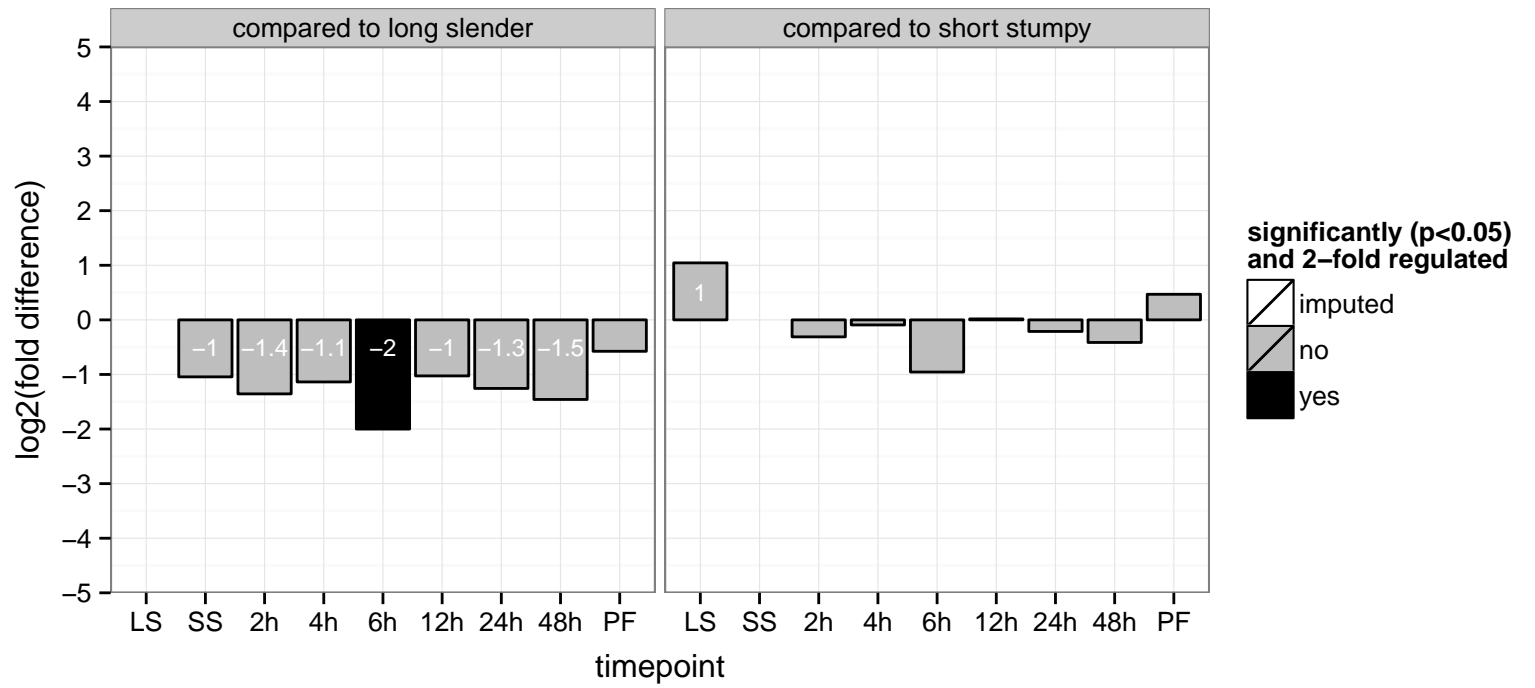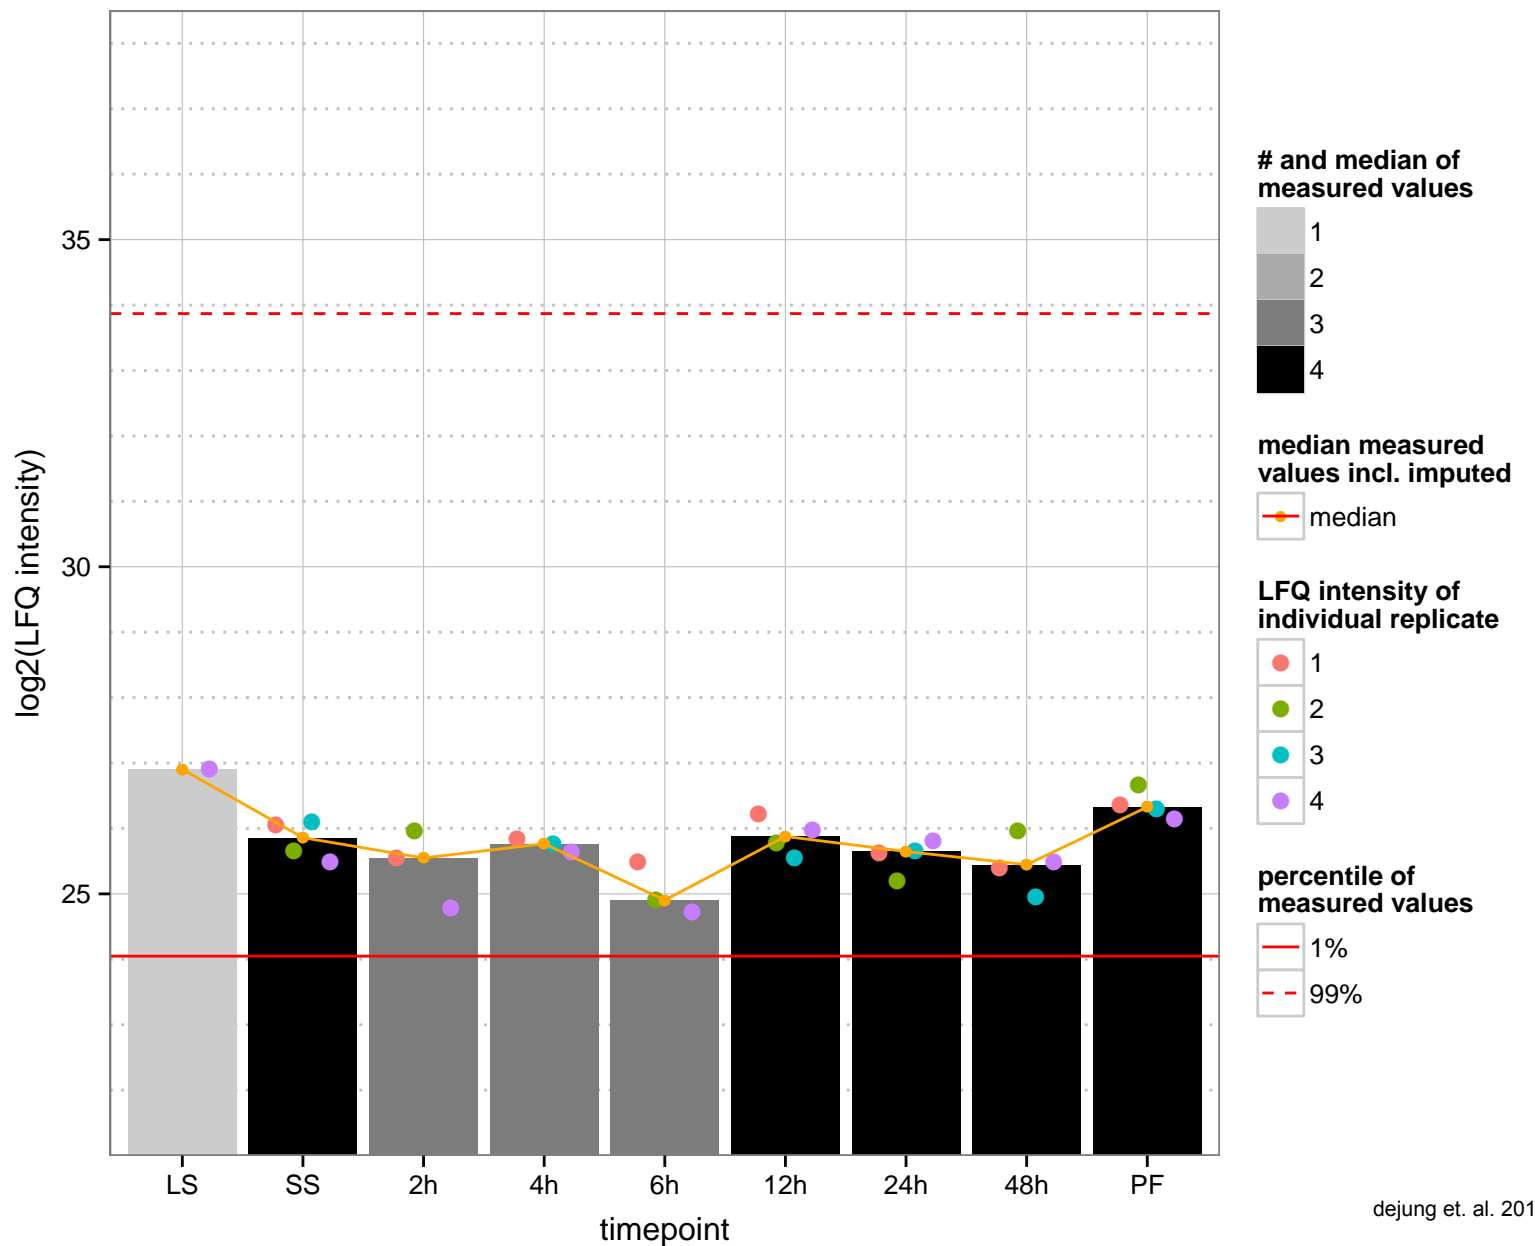

ATP-dependent Clp protease subunit, heat shock protein 78 (HSP78), putative

Tb927.2.3030

AGOF: ATP binding, nucleoside-triphosphatase activity, serine-type endopeptidase activity, unfolded protein binding

AGOC: mitochondrial endopeptidase Clp complex, mitochondrion

AGOP: protein folding, proteolysis

PGOF: ATP binding, nucleoside-triphosphatase activity, nucleotide binding

PGOC: null

PGOP: null

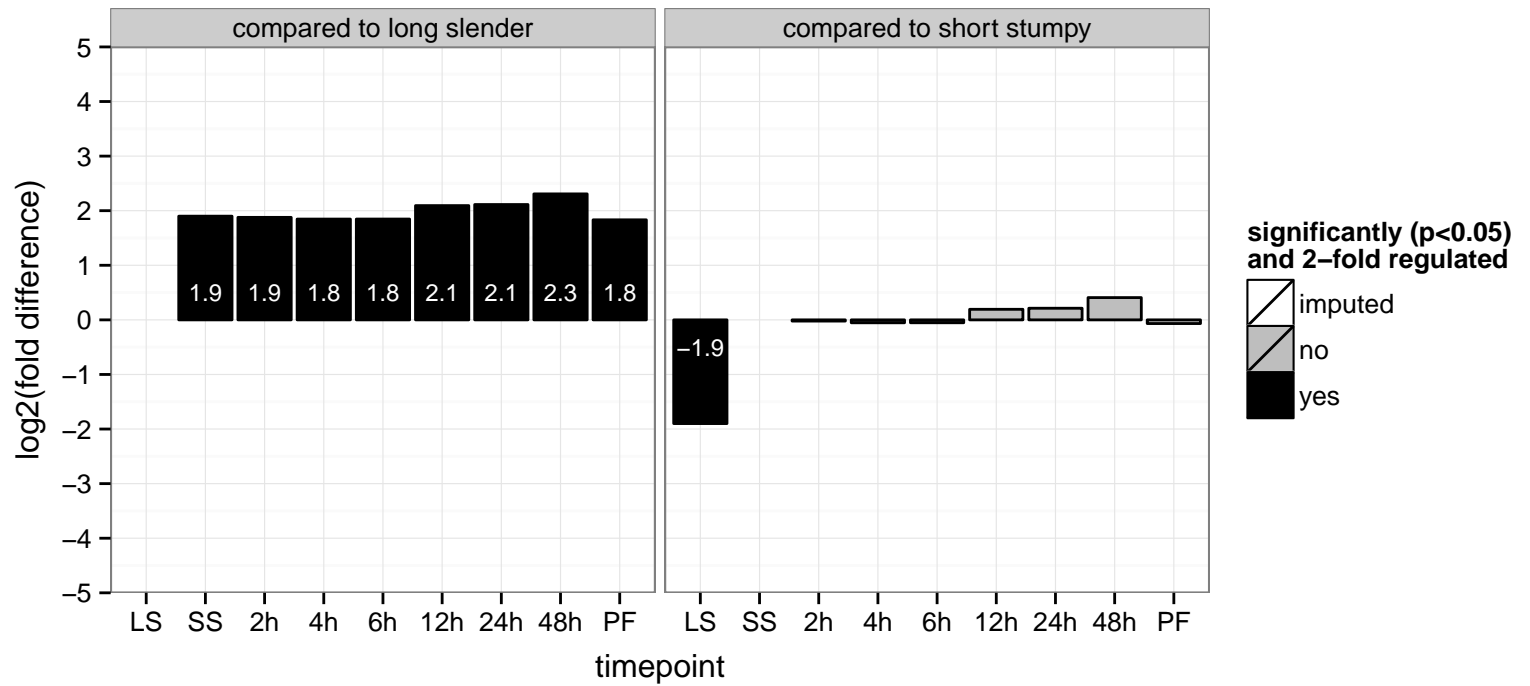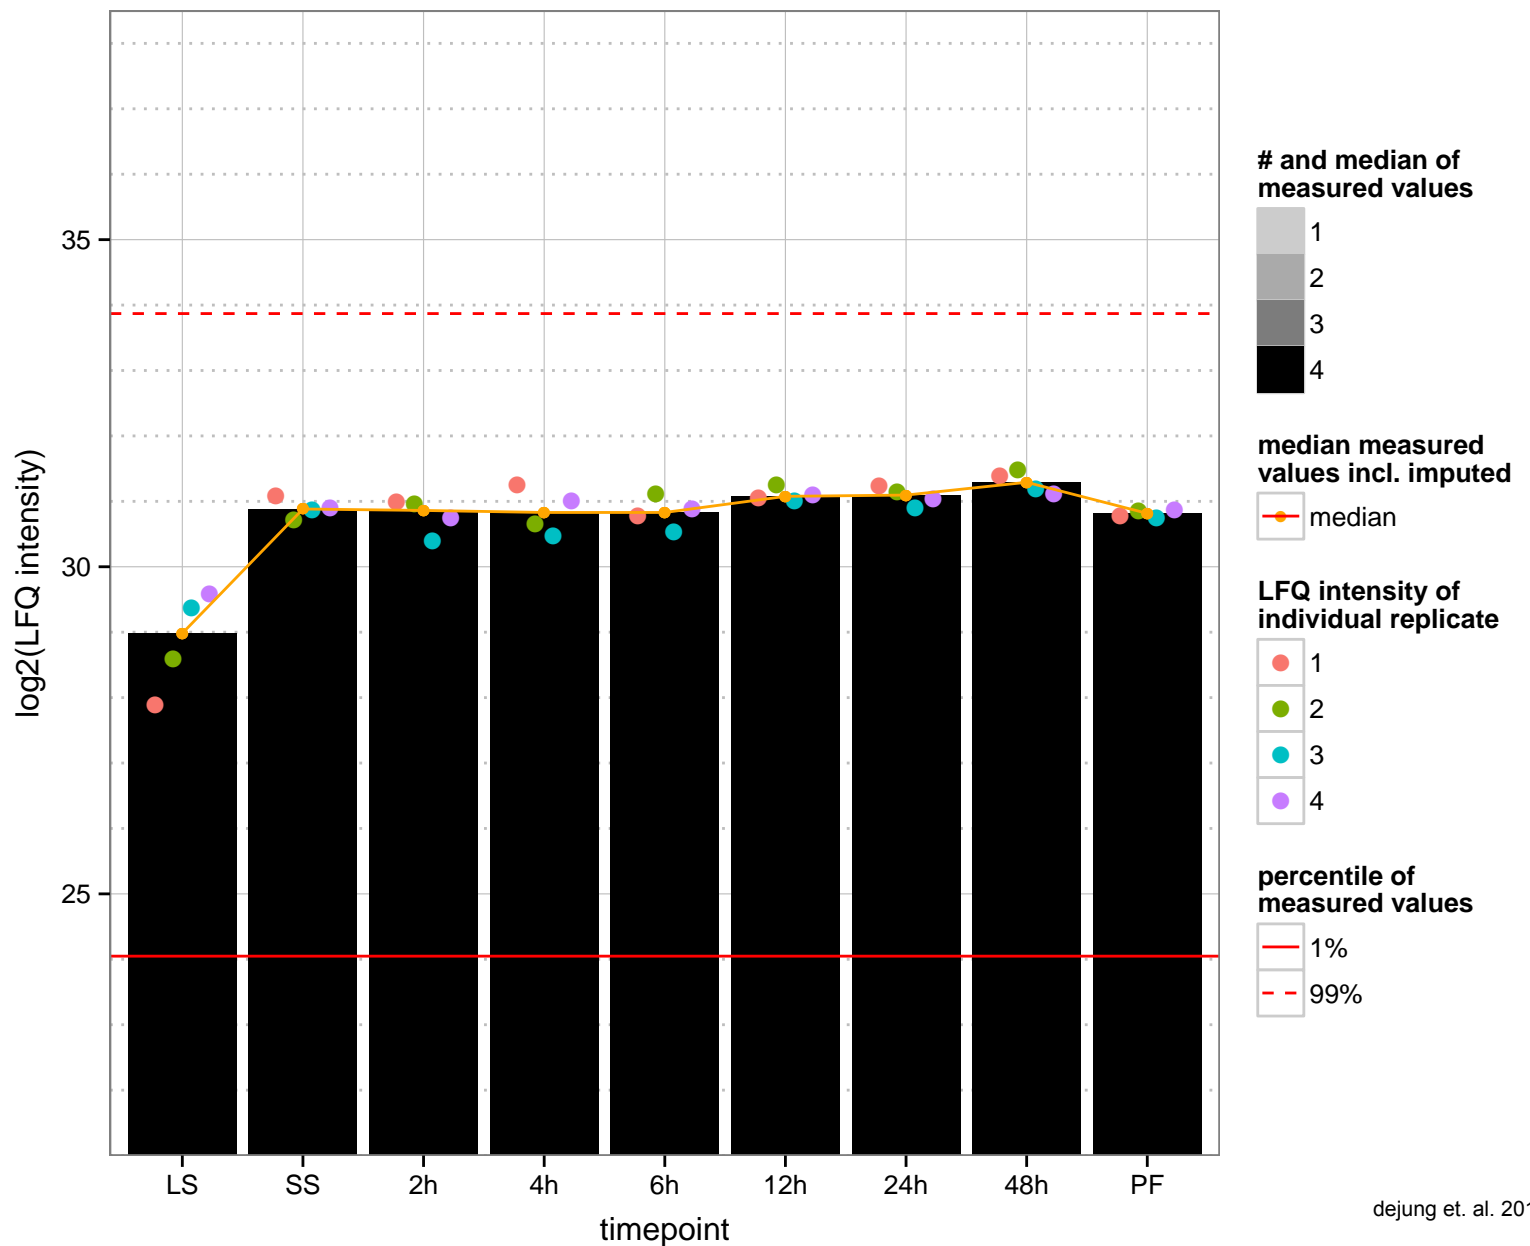



hypothetical protein, conserved, kinetoplast polyadenylation/uridylation factor 1, mitochondrial RNA binding protein 1 (KPAF1)  
 Tb927.2.3180;Tb11.v5.0782  
 AGOF: null, protein binding, ribosome binding  
 AGOC: null, mitochondrion  
 AGOP: null, mRNA 3'-end processing, mRNA polyadenylation, regulation of mRNA stability  
 PGO: null  
 PGOC: null  
 PGOP: null

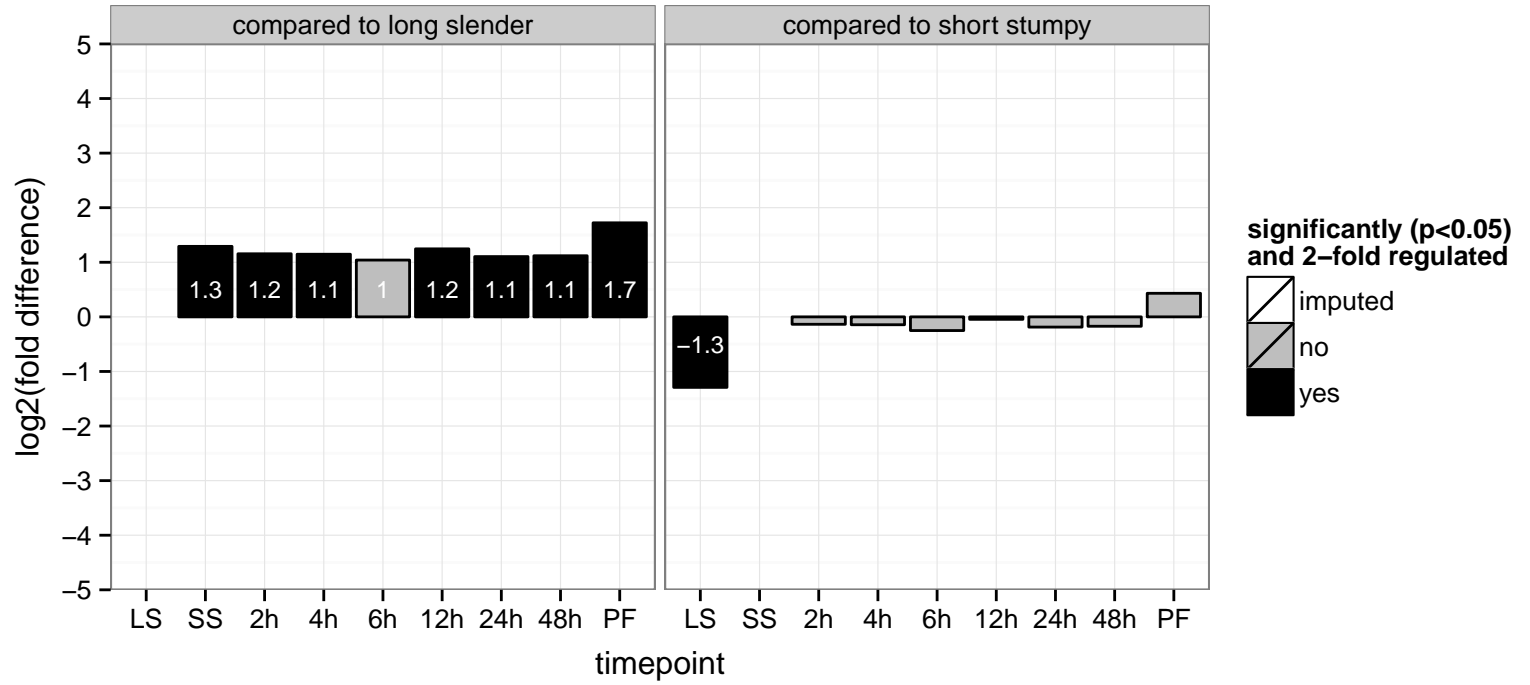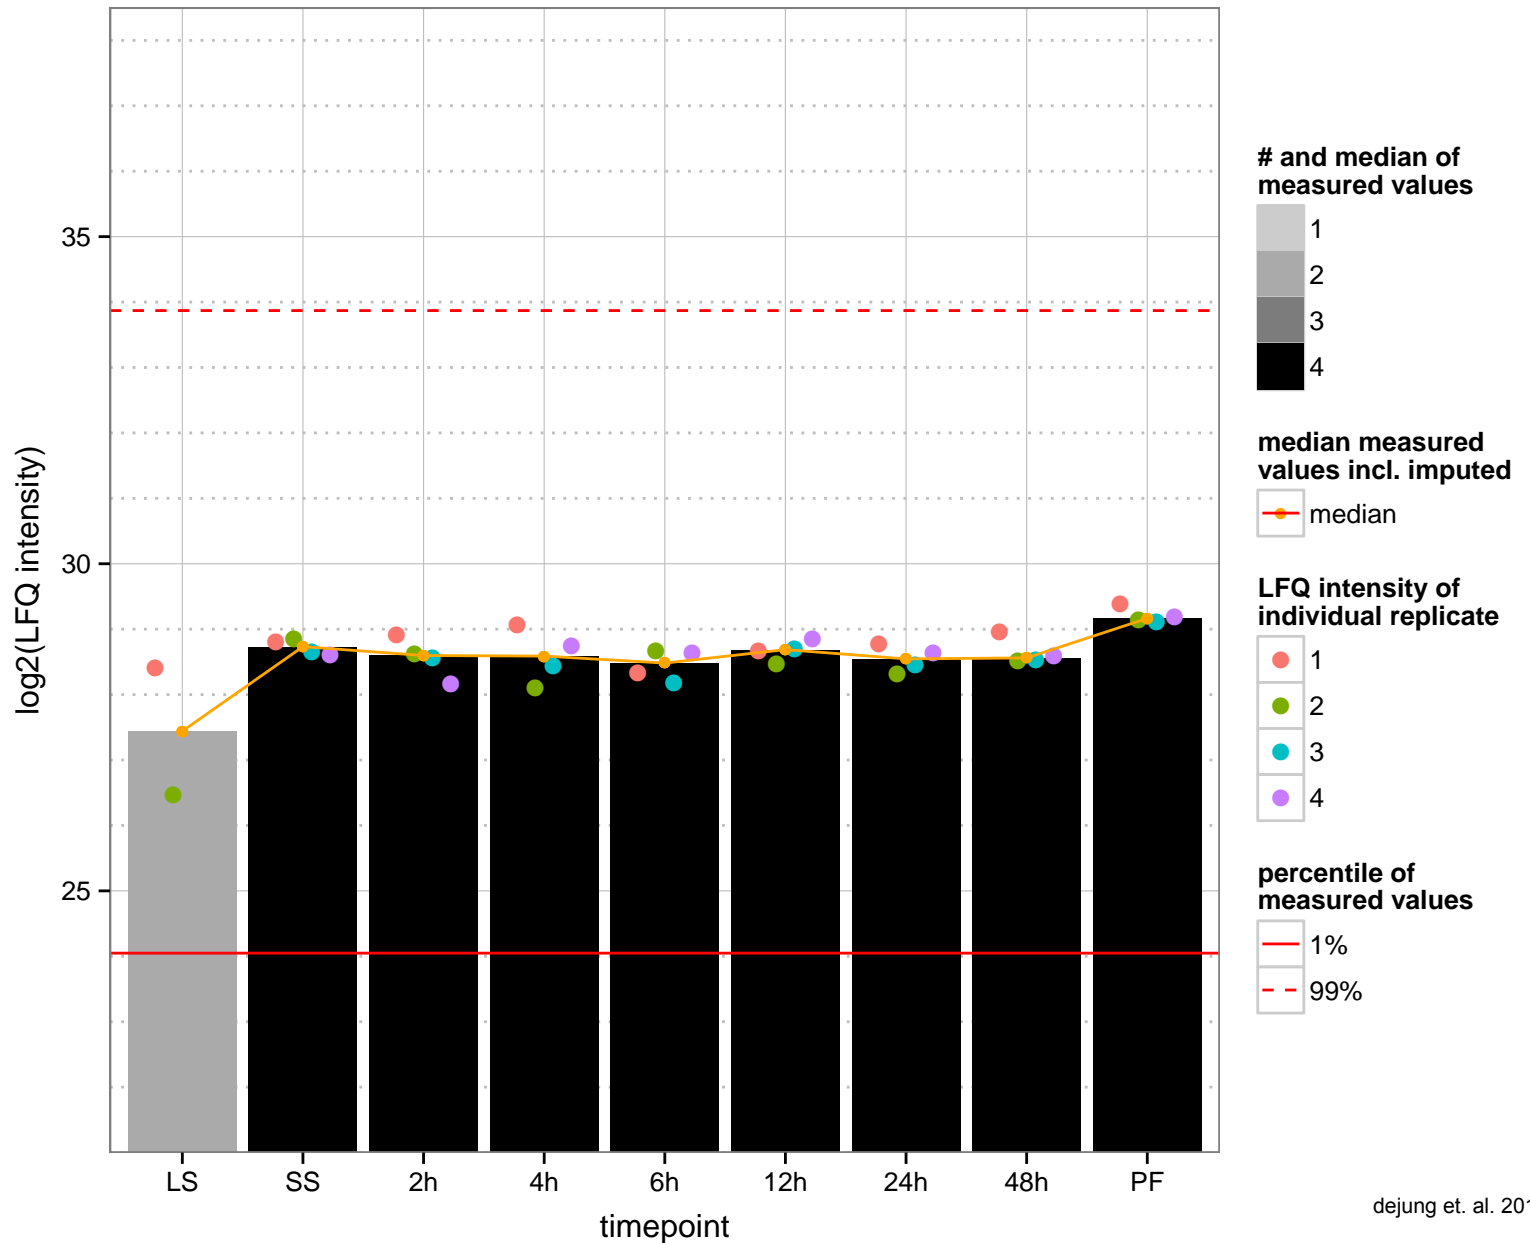

transcription elongation factor s-II, putative (TFIIS2-2)

Tb927.2.3480

AGOF: DNA binding

AGOC: nucleus

AGOP: transcription, DNA-dependent

PGOF: DNA binding

PGOC: nucleus

PGOP: transcription, DNA-dependent

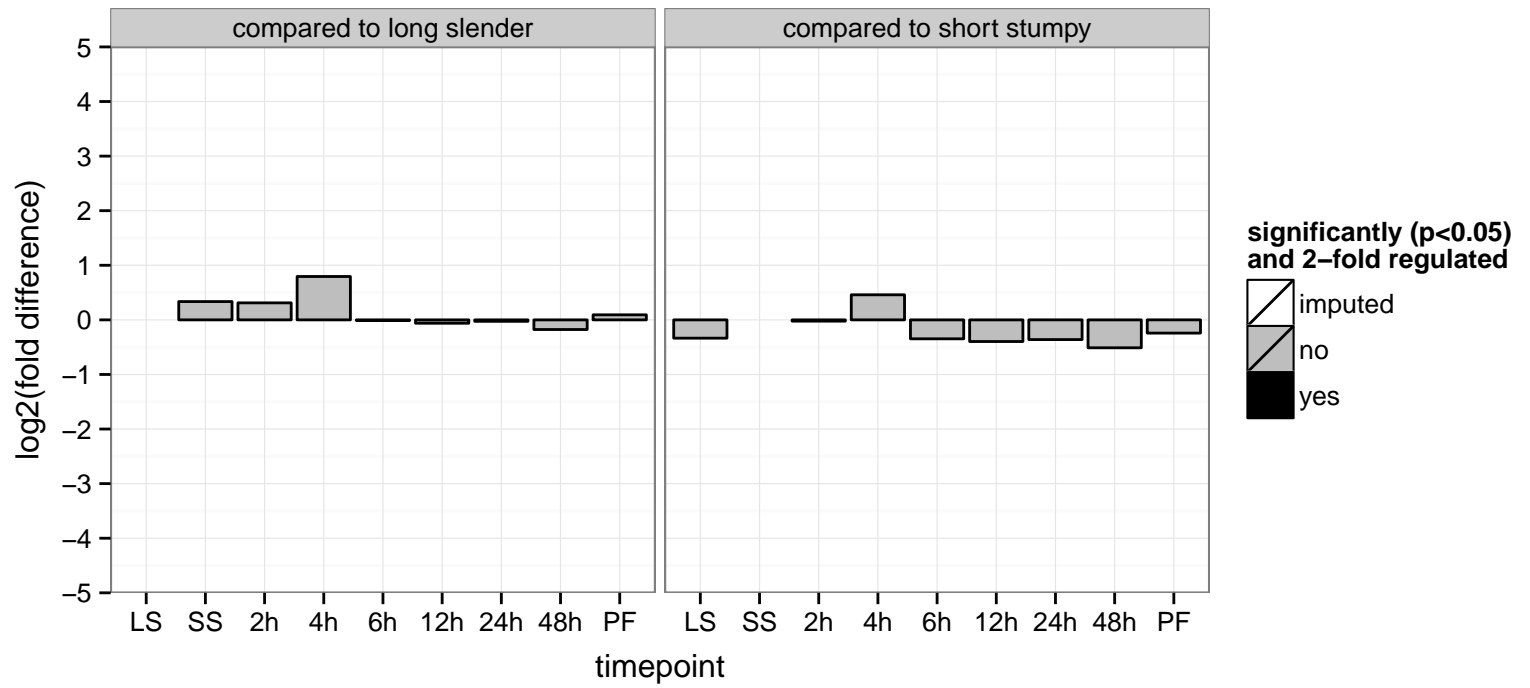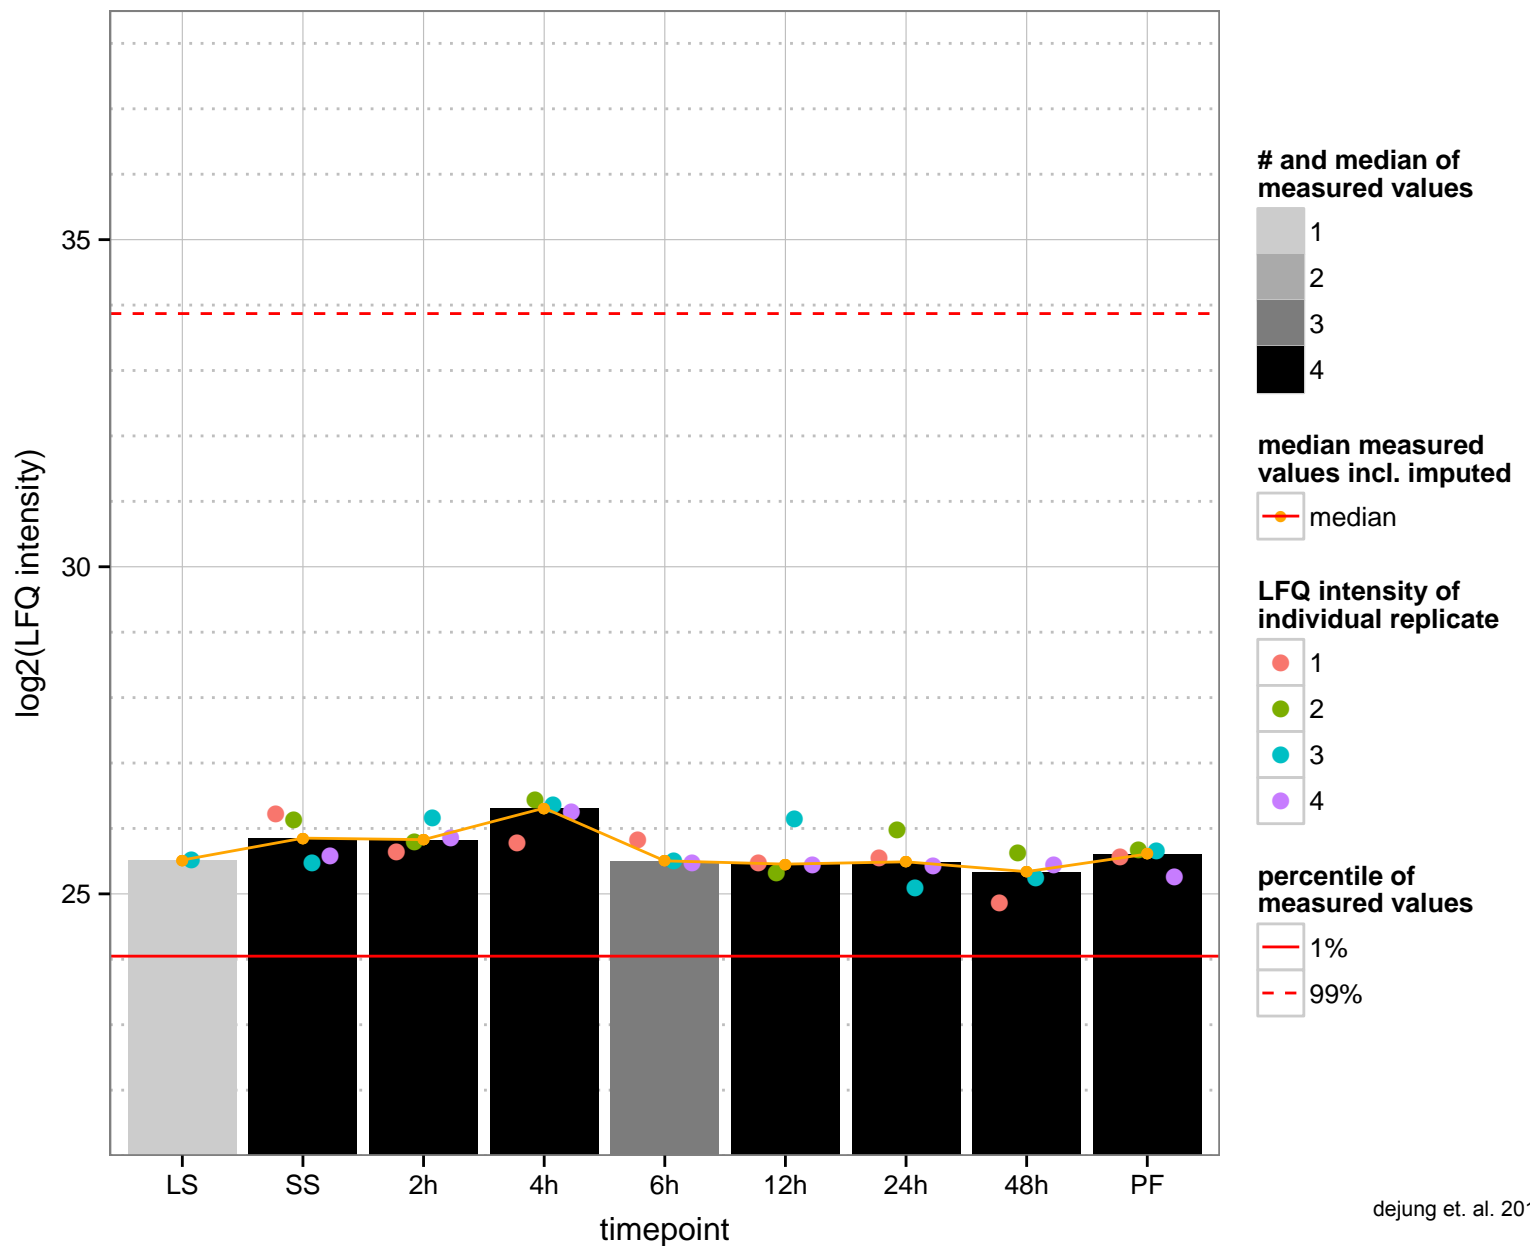

transcription elongation factor s-II, putative (TFIIS2-1)

Tb927.2.3580

AGOF: DNA binding, sequence-specific DNA binding transcription factor activity, zinc ion binding

AGOC: nucleus

AGOP: DNA-dependent transcription, elongation, regulation of transcription, DNA-dependent, transcription

PGOF: DNA binding, nucleic acid binding, zinc ion binding

PGOC: nucleus

PGOP: transcription, DNA-dependent

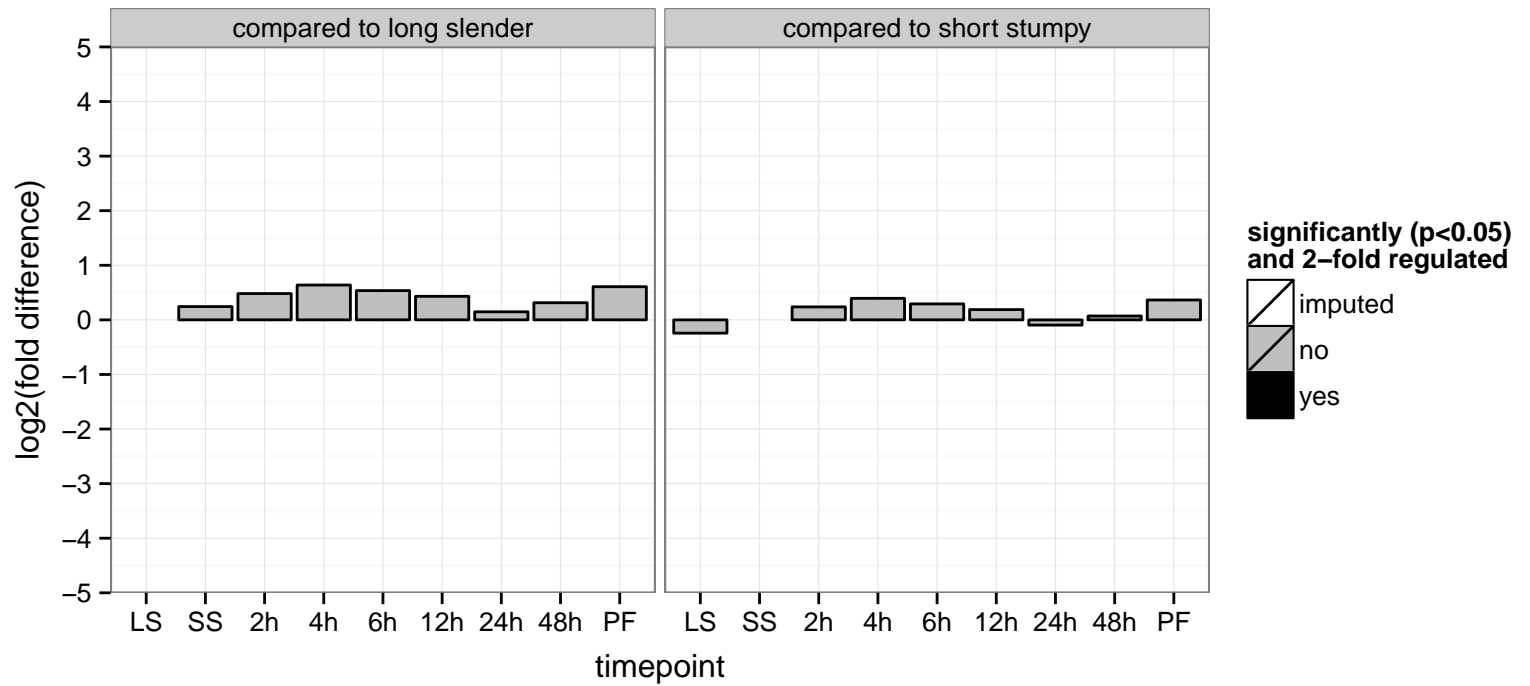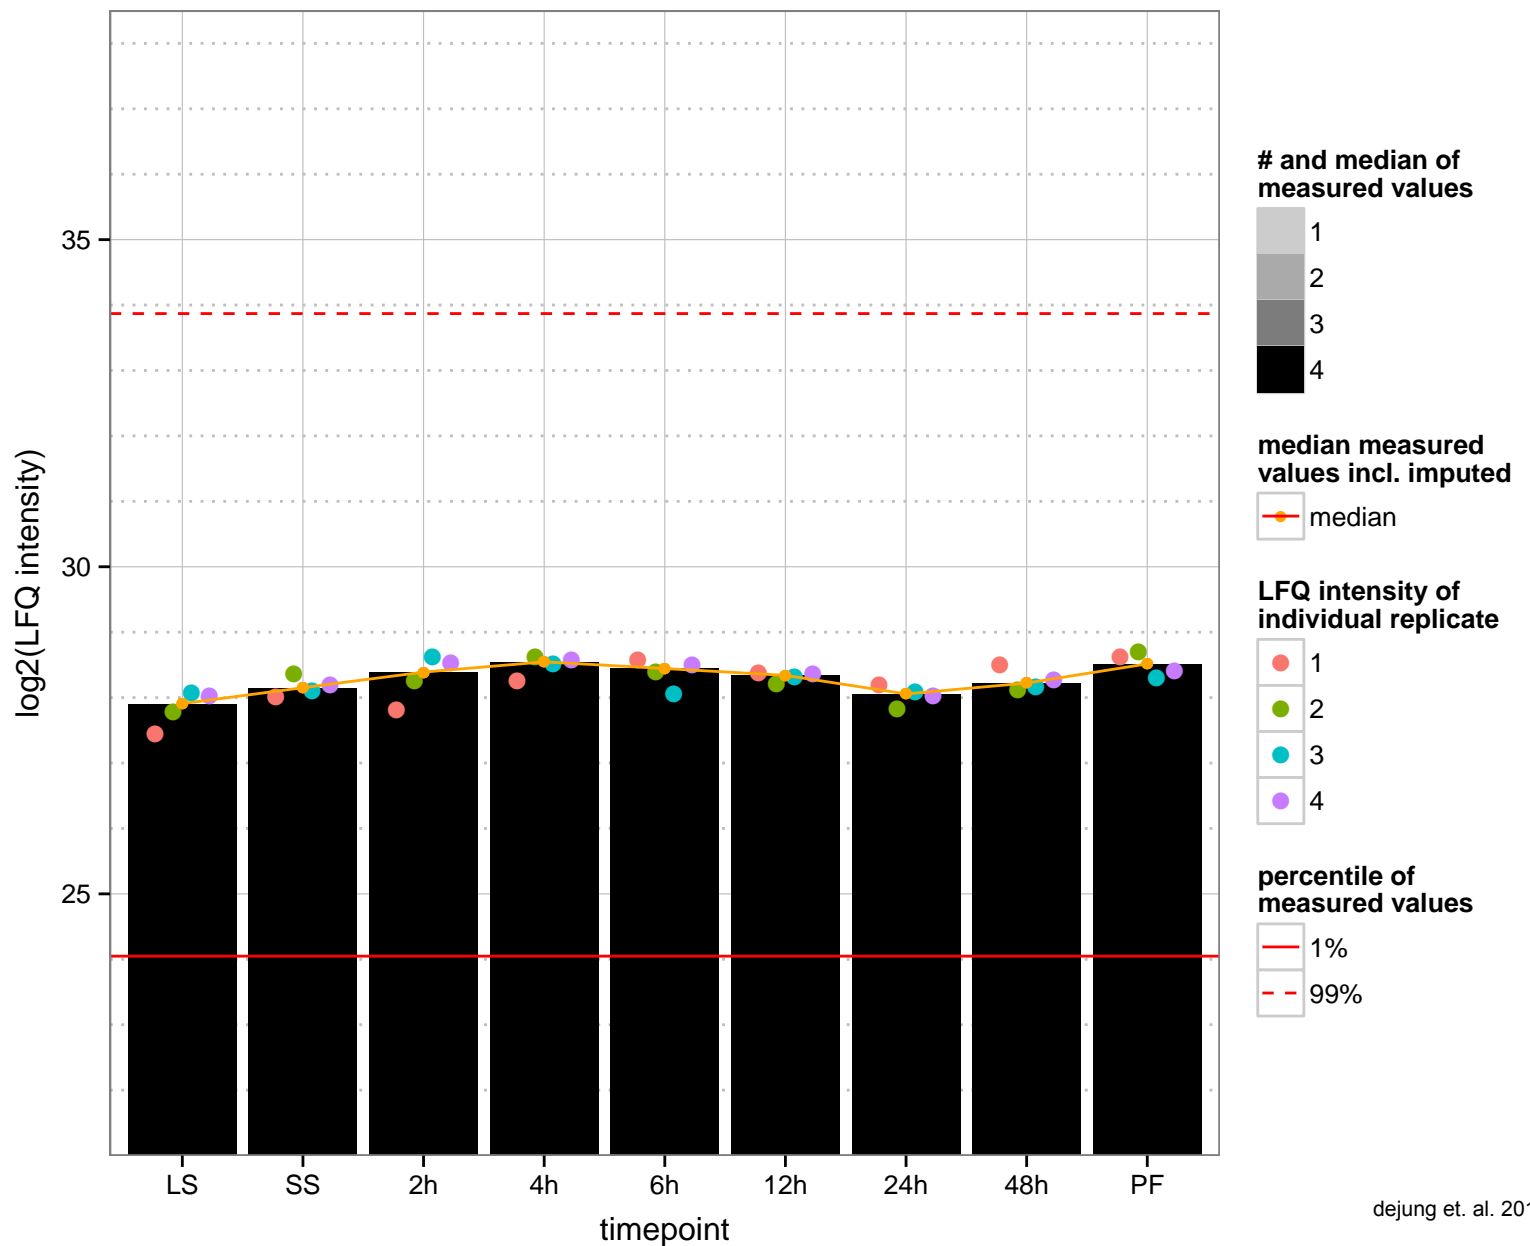

retrotransposon hot spot protein 1 (RHS1), putative  
 Tb927.2.370  
 AGOF: null  
 AGOC: nucleus  
 AGOP: null  
 PGO: null  
 PGO: null  
 PGO: null

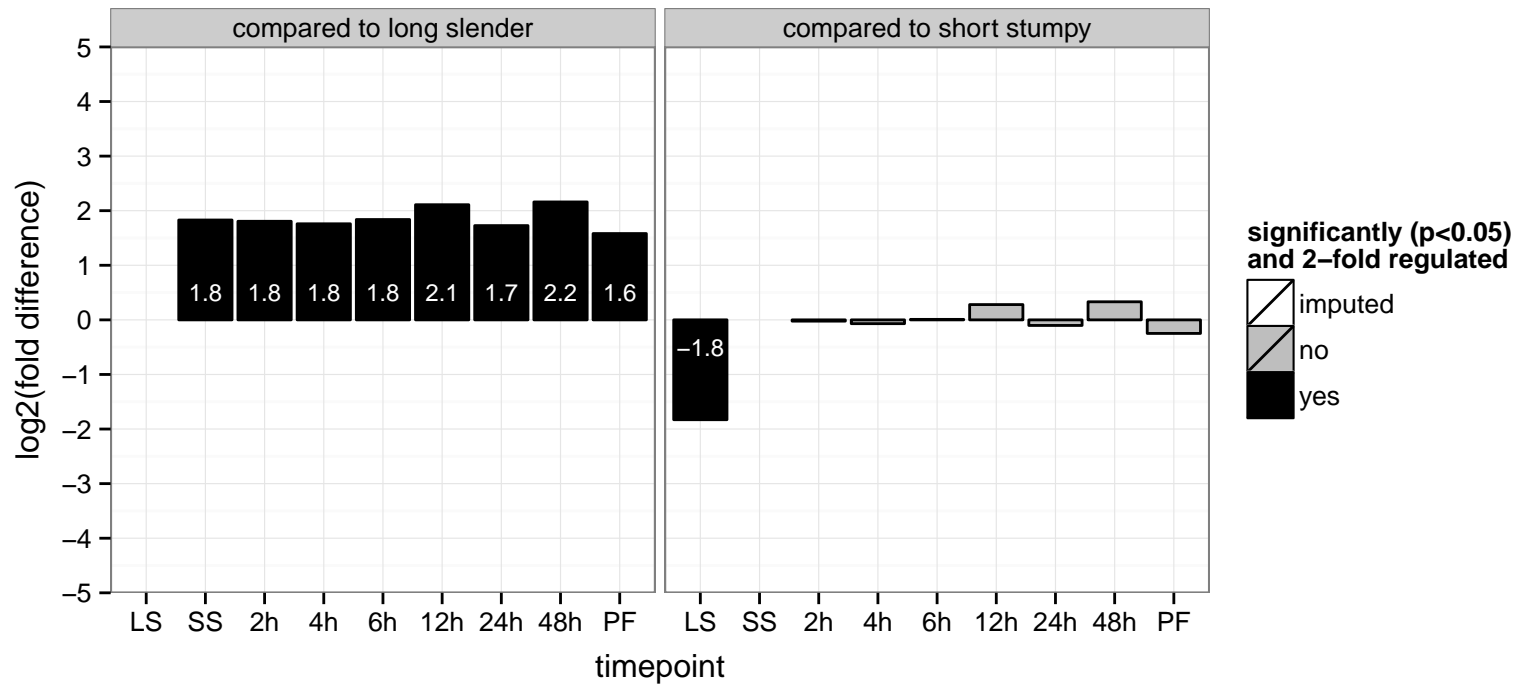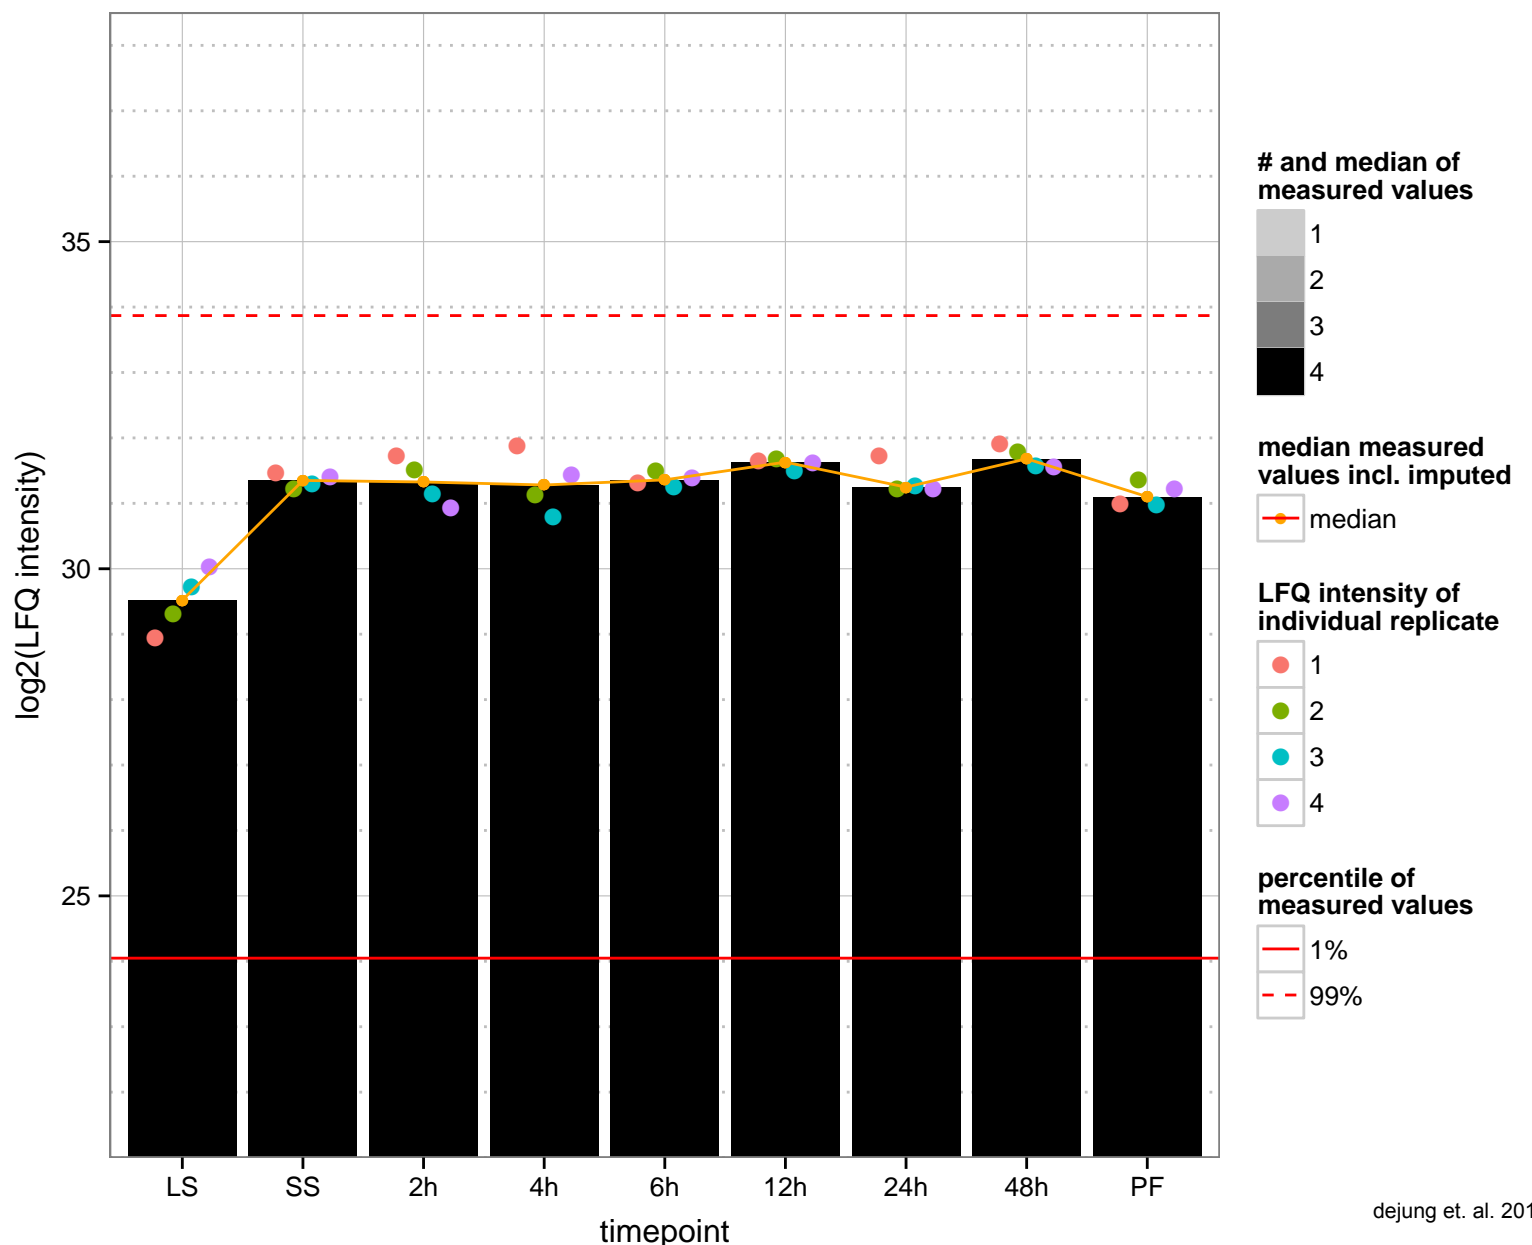

retrotransposon hot spot protein 2 (RHS2), putative  
 Tb927.2.380  
 AGOF: null  
 AGOC: nucleus  
 AGOP: null  
 PGO: null  
 PGOC: null  
 PGOP: null

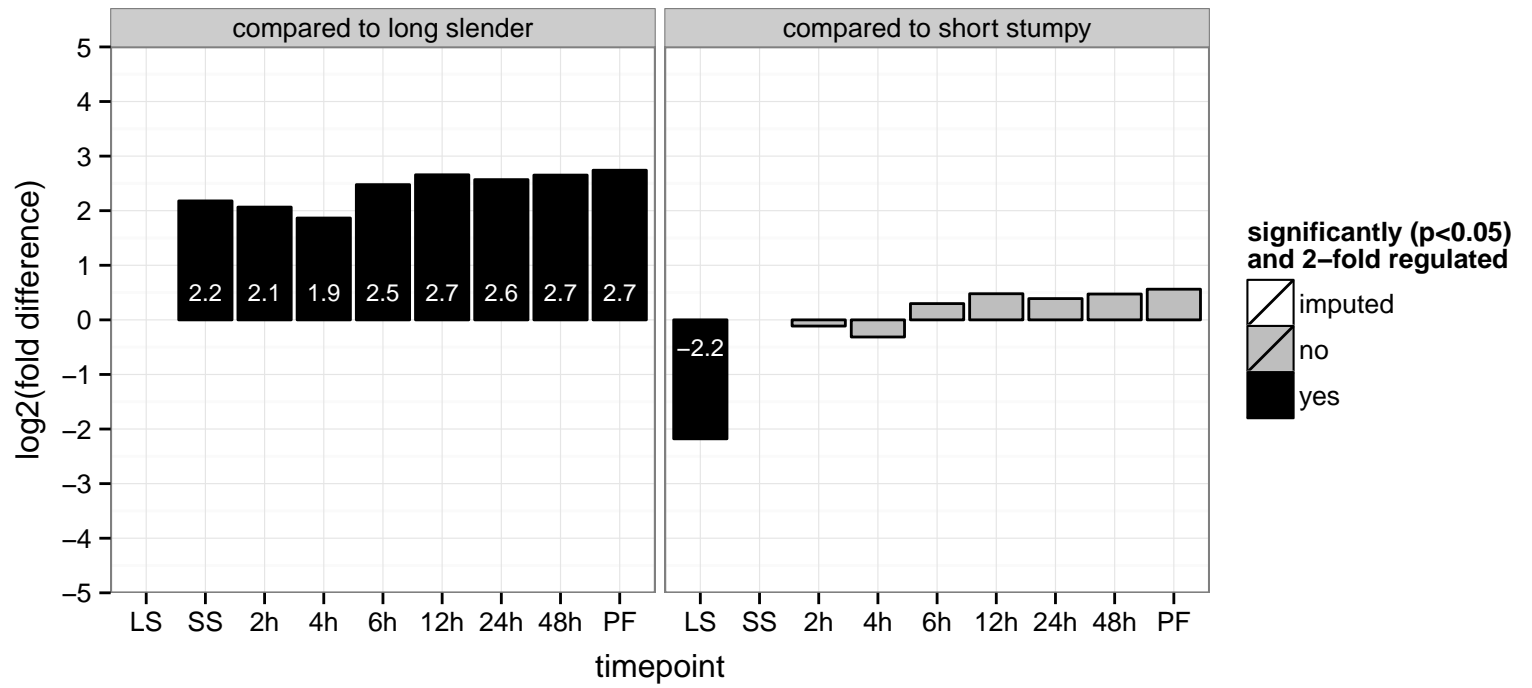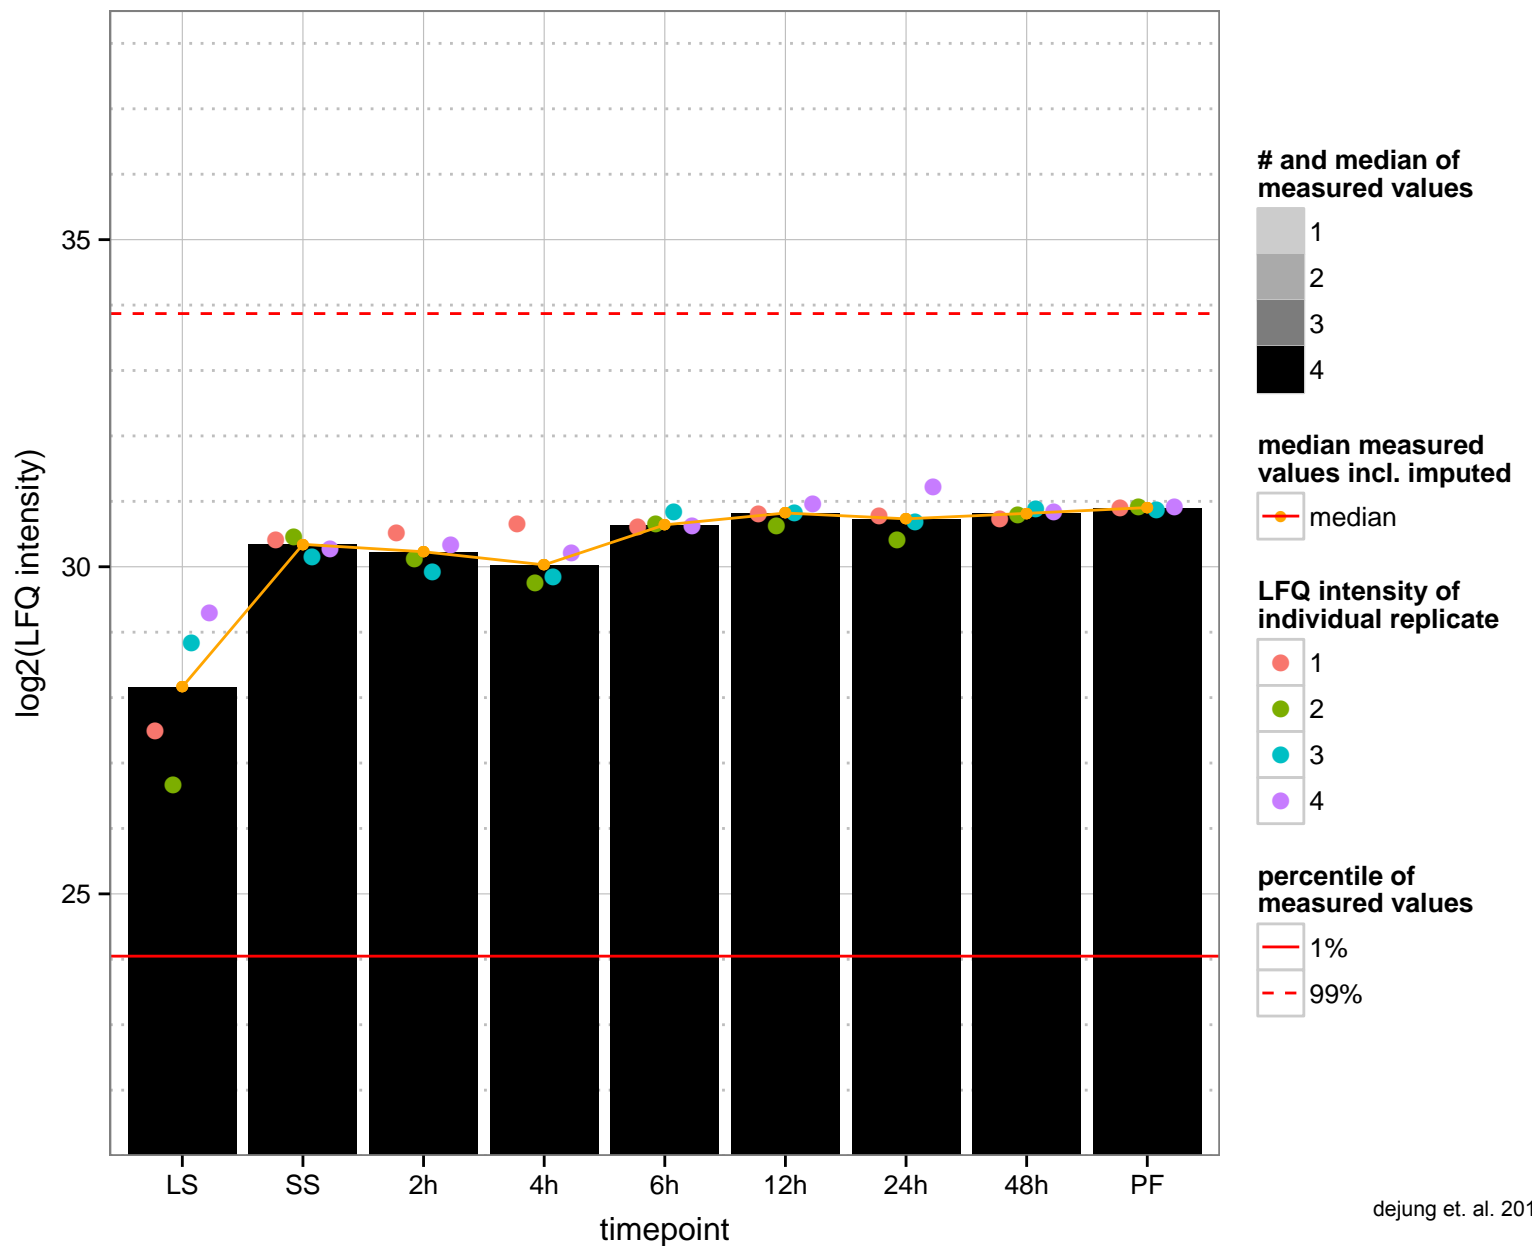

guide RNA associated protein, GAP1, MRB1-associated protein  
 Tb927.2.3800  
 AGOF: mRNA binding  
 AGOC: mitochondrion  
 AGOP: mitochondrial RNA processing  
 PGO: null  
 PGOC: null  
 PGOP: null

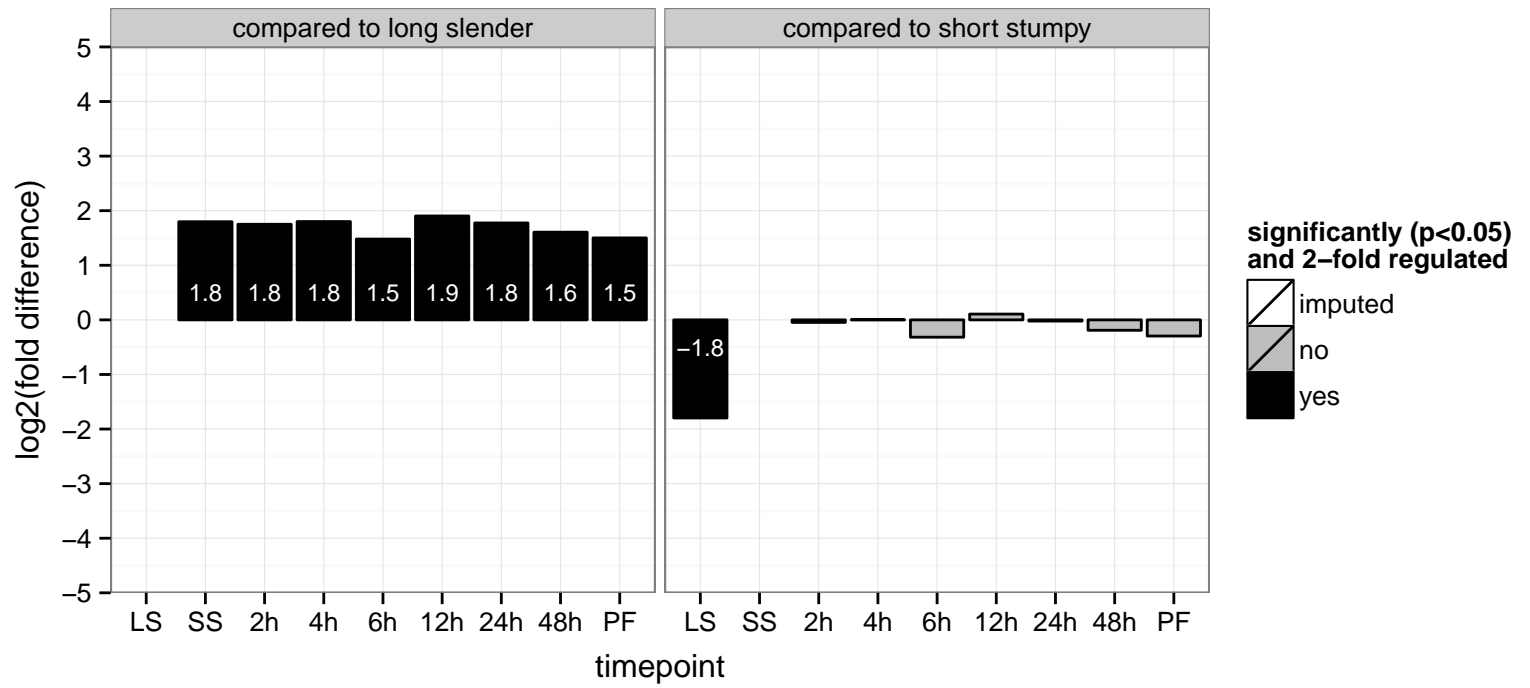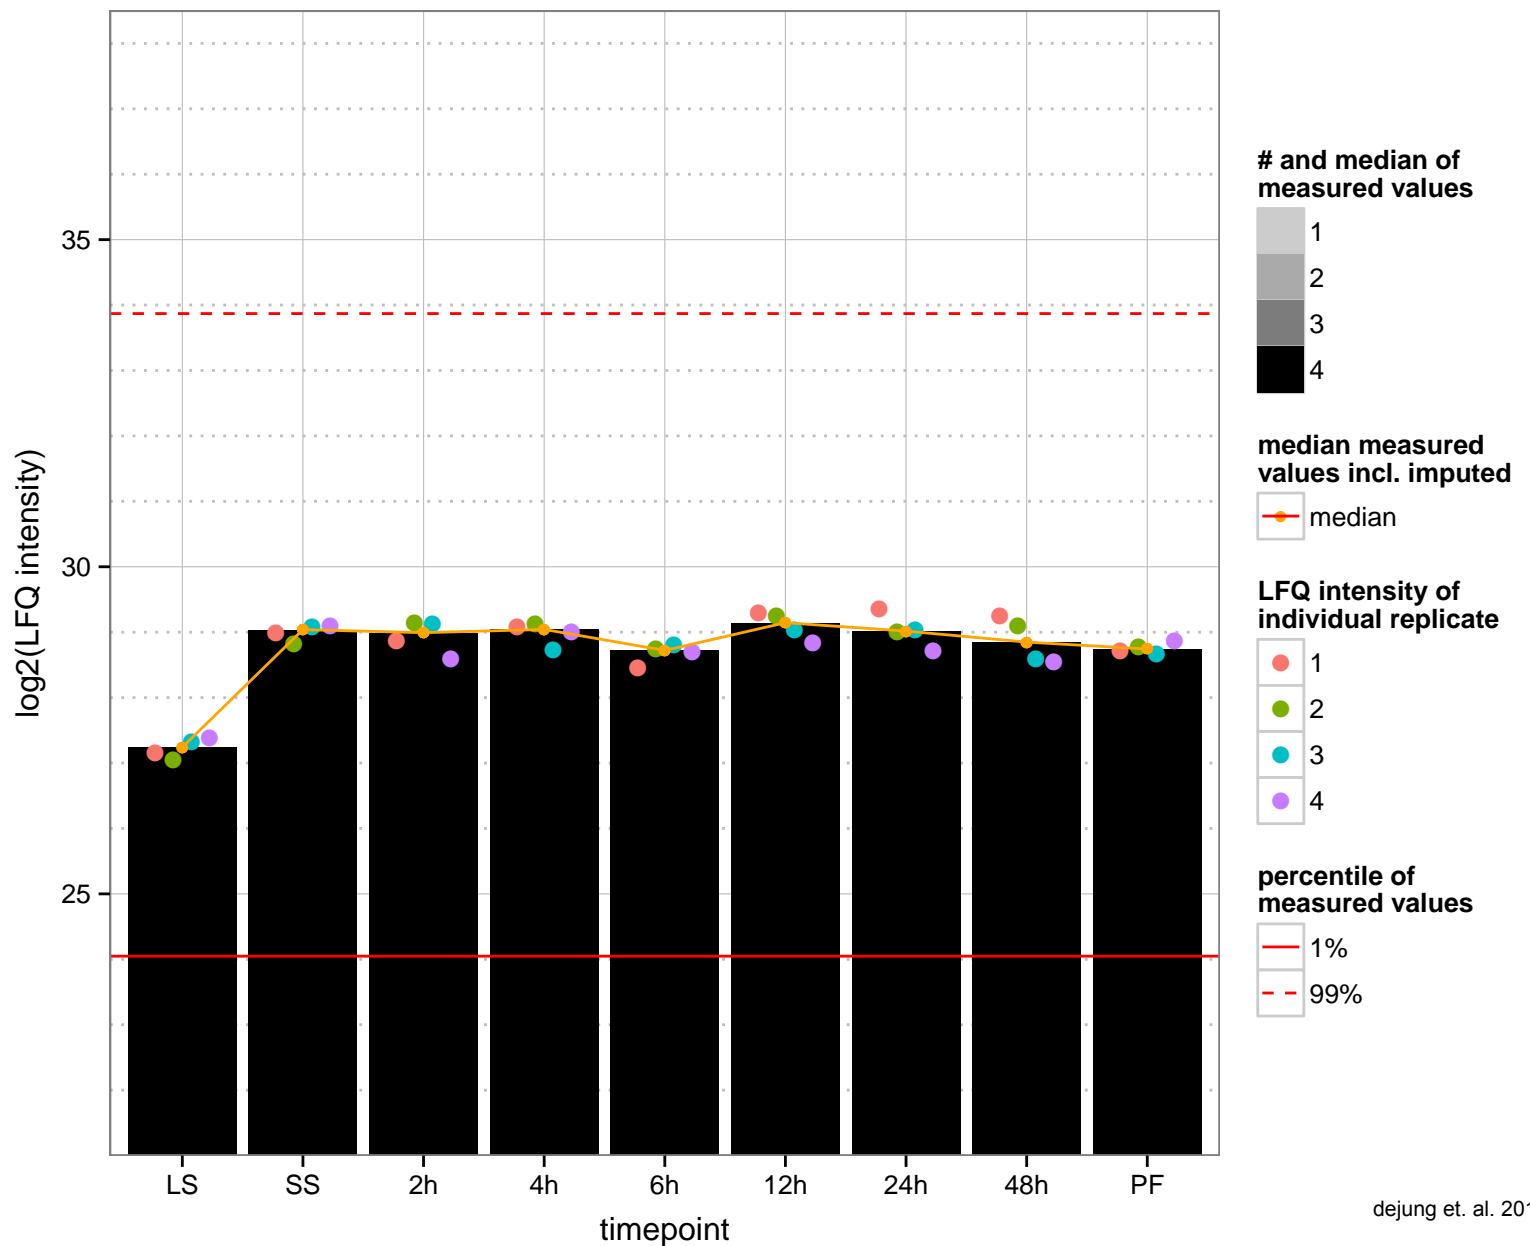

retrotransposon hot spot protein 2 (RHS2), putative  
 Tb927.2.400  
 AGOF: null  
 AGOC: nucleus  
 AGOP: null  
 PGO: null  
 PGOC: null  
 PGOP: null

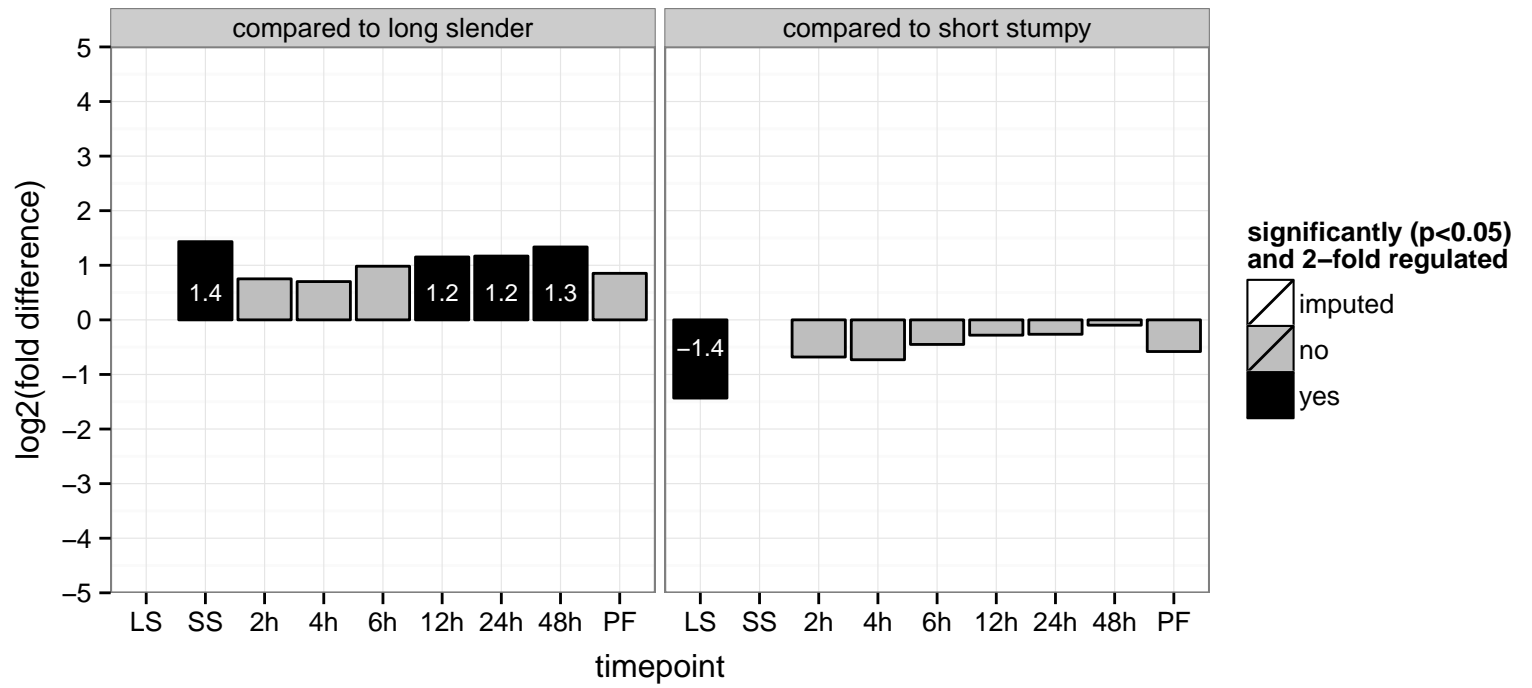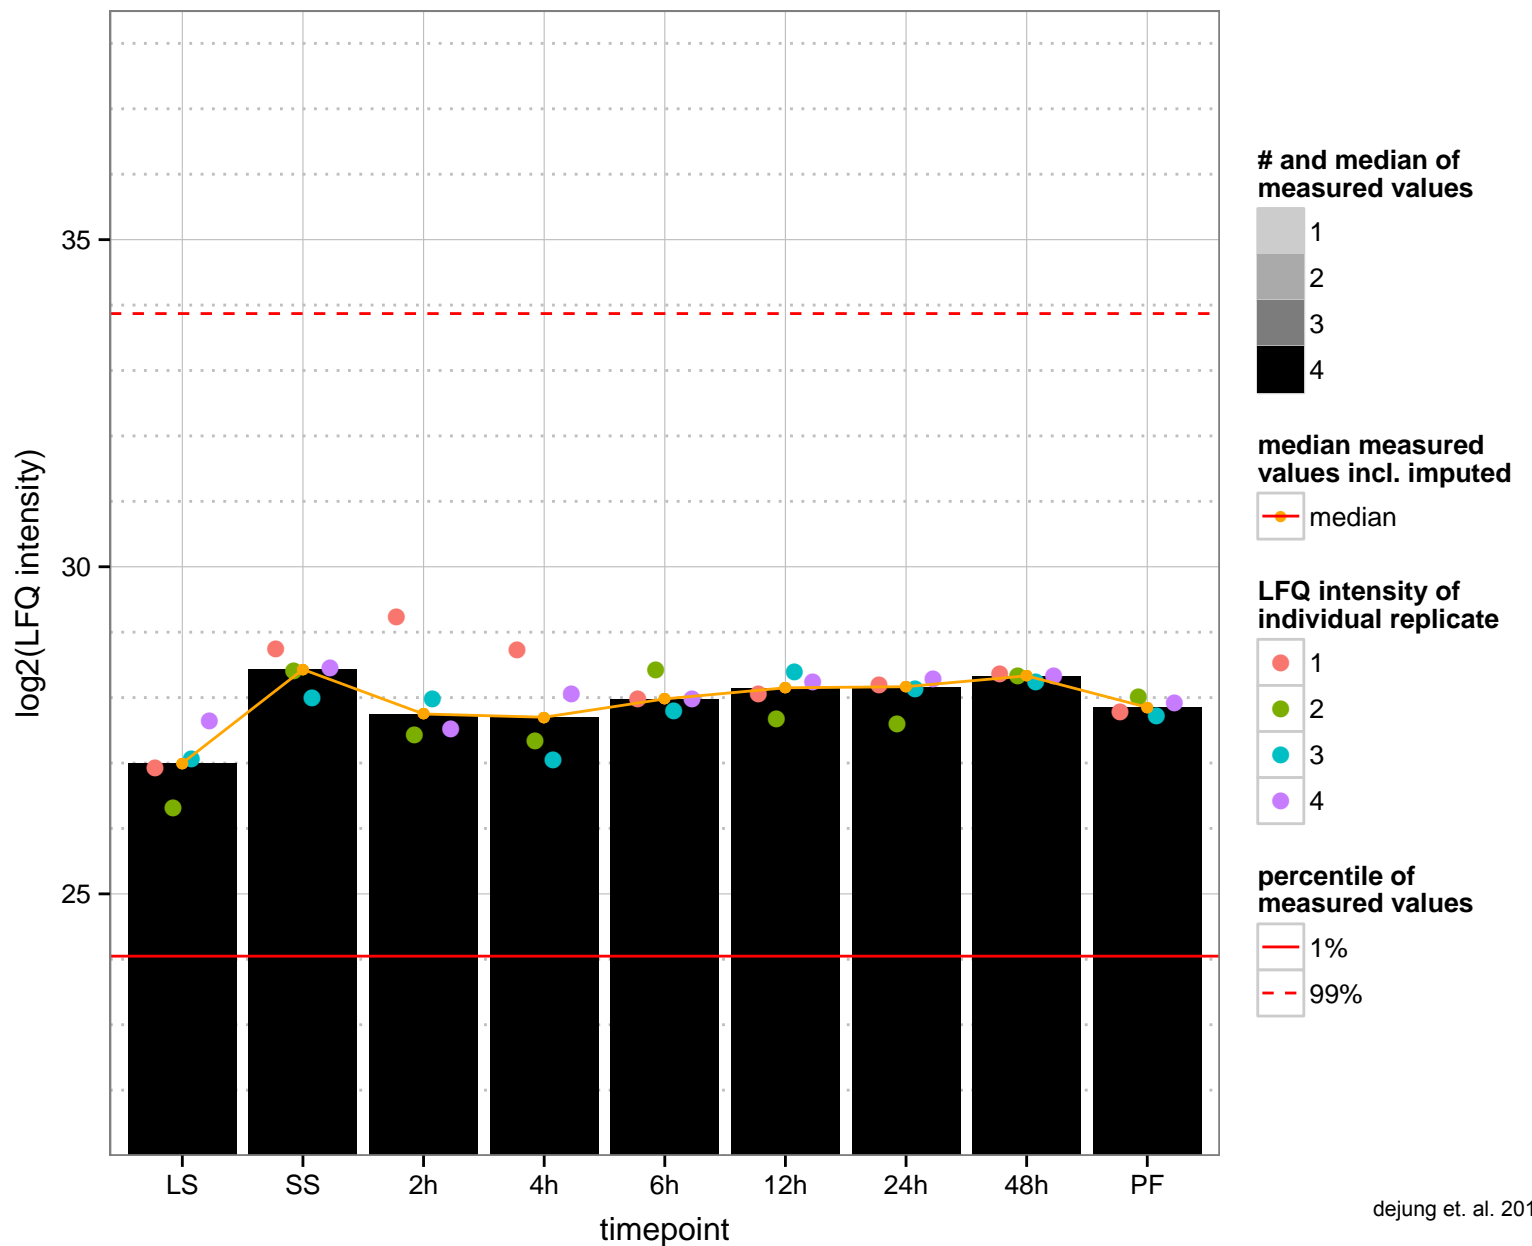

dynein intermediate chain IC 138, putative  
 Tb927.2.4060  
 AGOF: motor activity  
 AGOC: cytoskeleton, dynein complex  
 AGOP: microtubule-based movement  
 PGO: protein binding  
 PGOC: null  
 PGOP: null

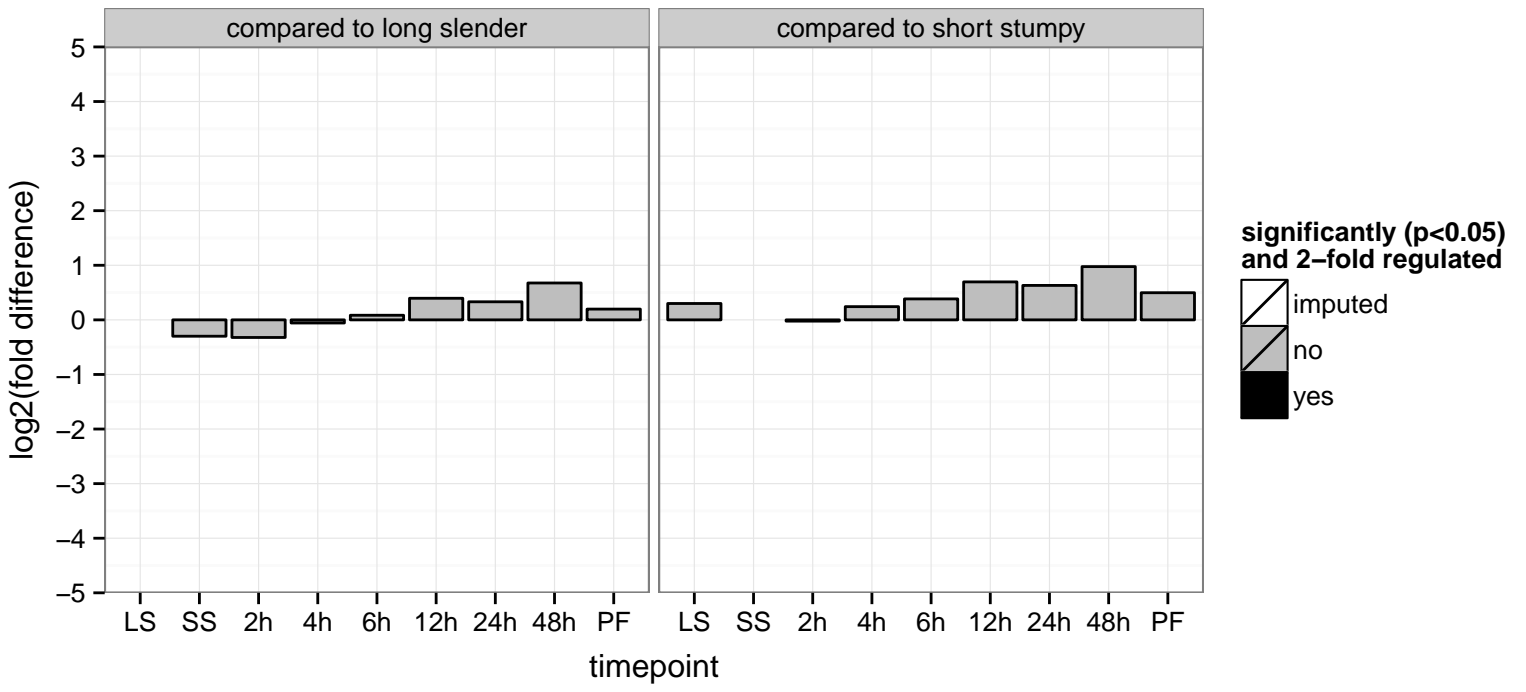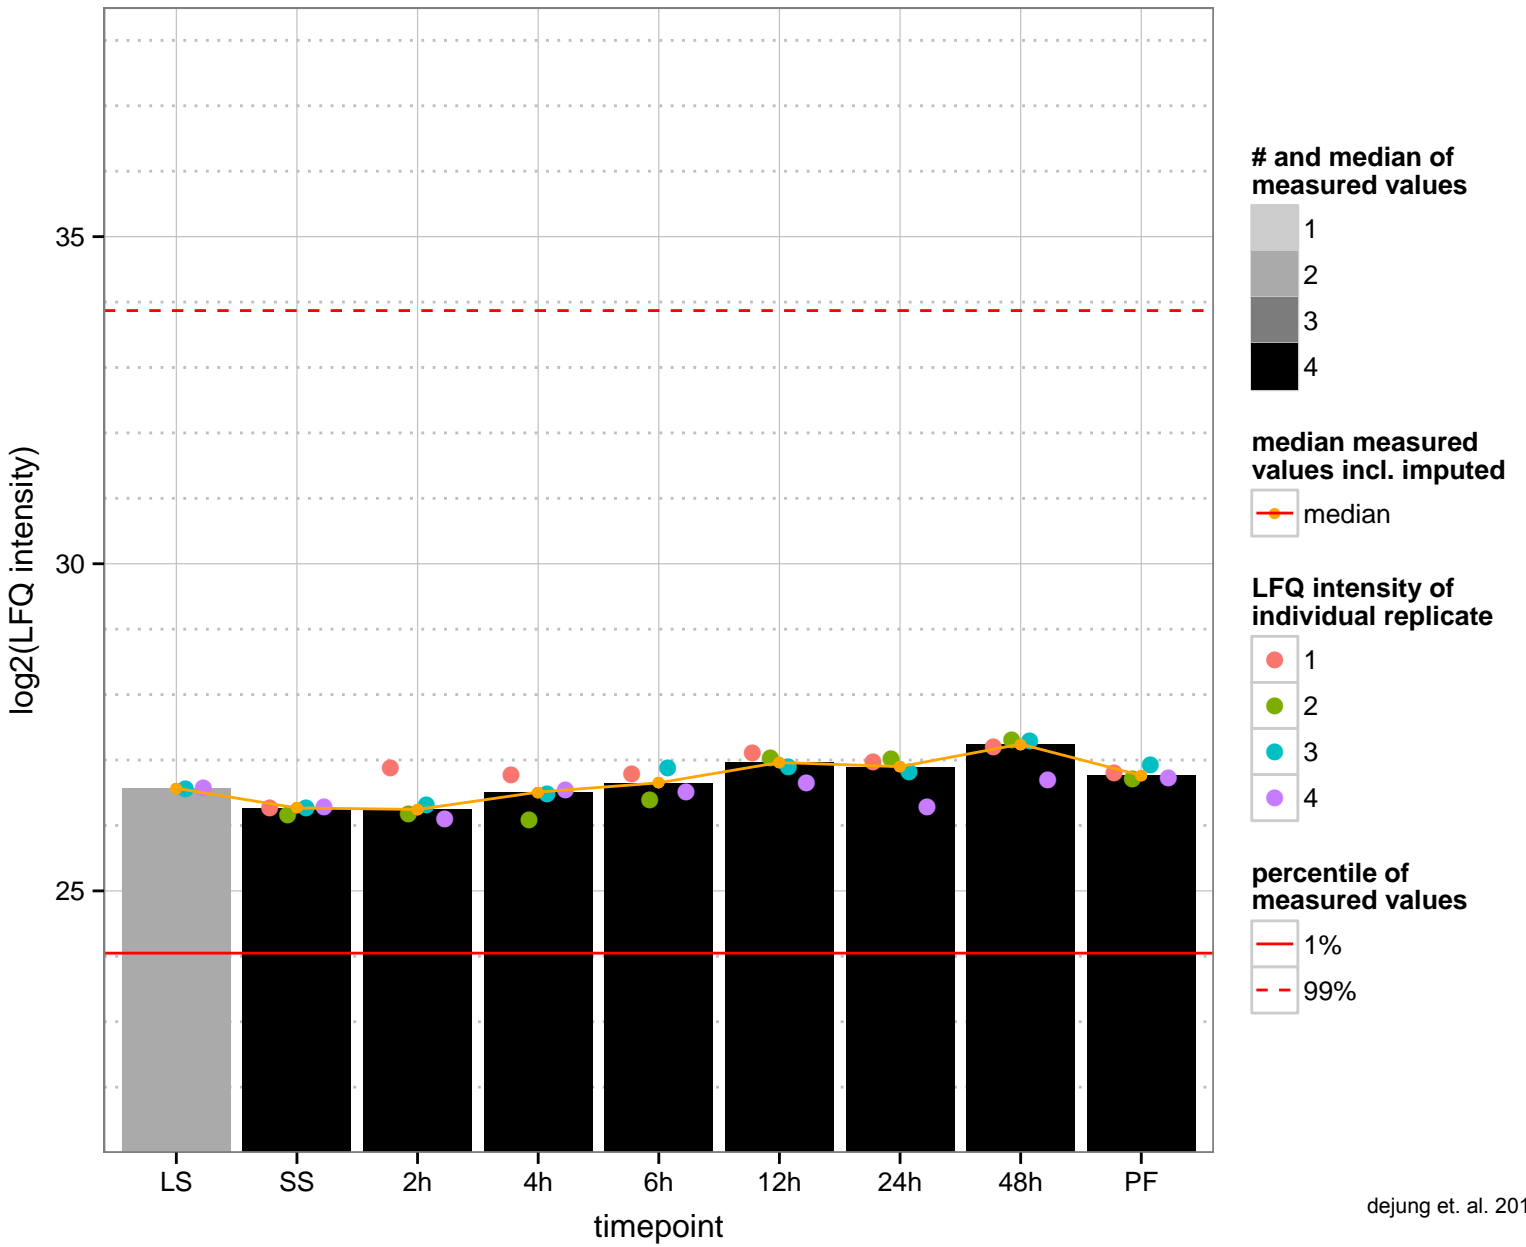



hypothetical protein, conserved

Tb927.2.4090

AGOF: null

AGOC: mitochondrial inner membrane

AGOP: null

PGOF: GTP binding

PGOC: null

PGOP: SRP-dependent cotranslational protein targeting to membrane

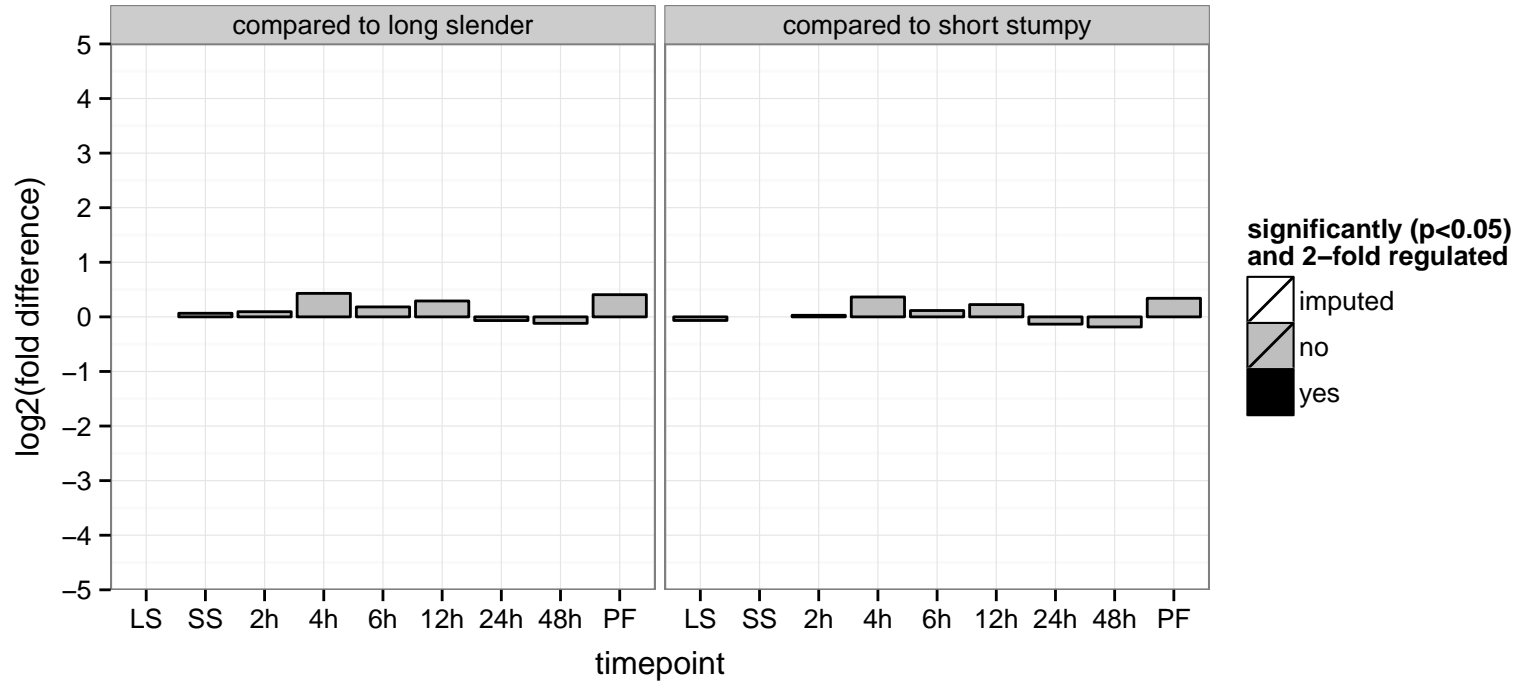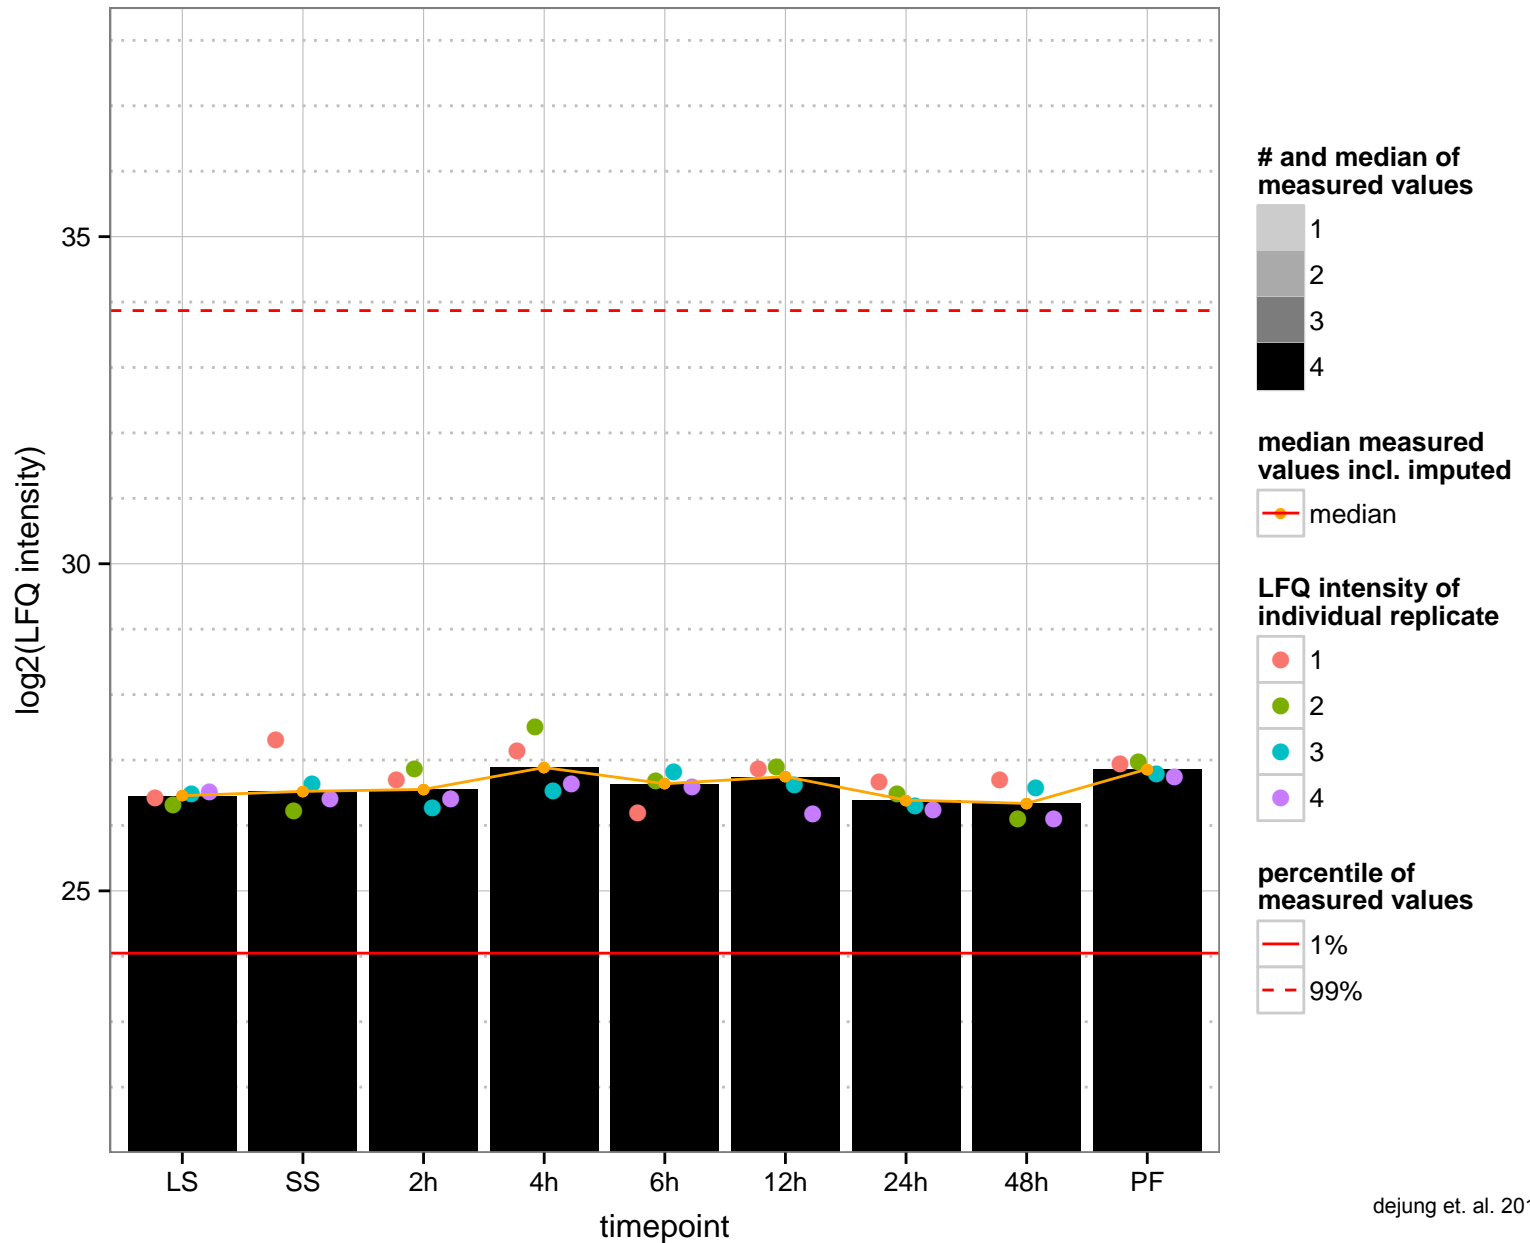

mitochondrial processing peptidase alpha subunit, putative, metallo-peptidase, Clan ME, Family M16  
 Tb927.2.4110  
 AGOF: catalytic activity, metalloendopeptidase activity, zinc ion binding  
 AGOC: mitochondrion  
 AGOP: proteolysis  
 PGO: catalytic activity, metal ion binding, metalloendopeptidase activity, zinc ion binding  
 PGO: null  
 PGO: proteolysis

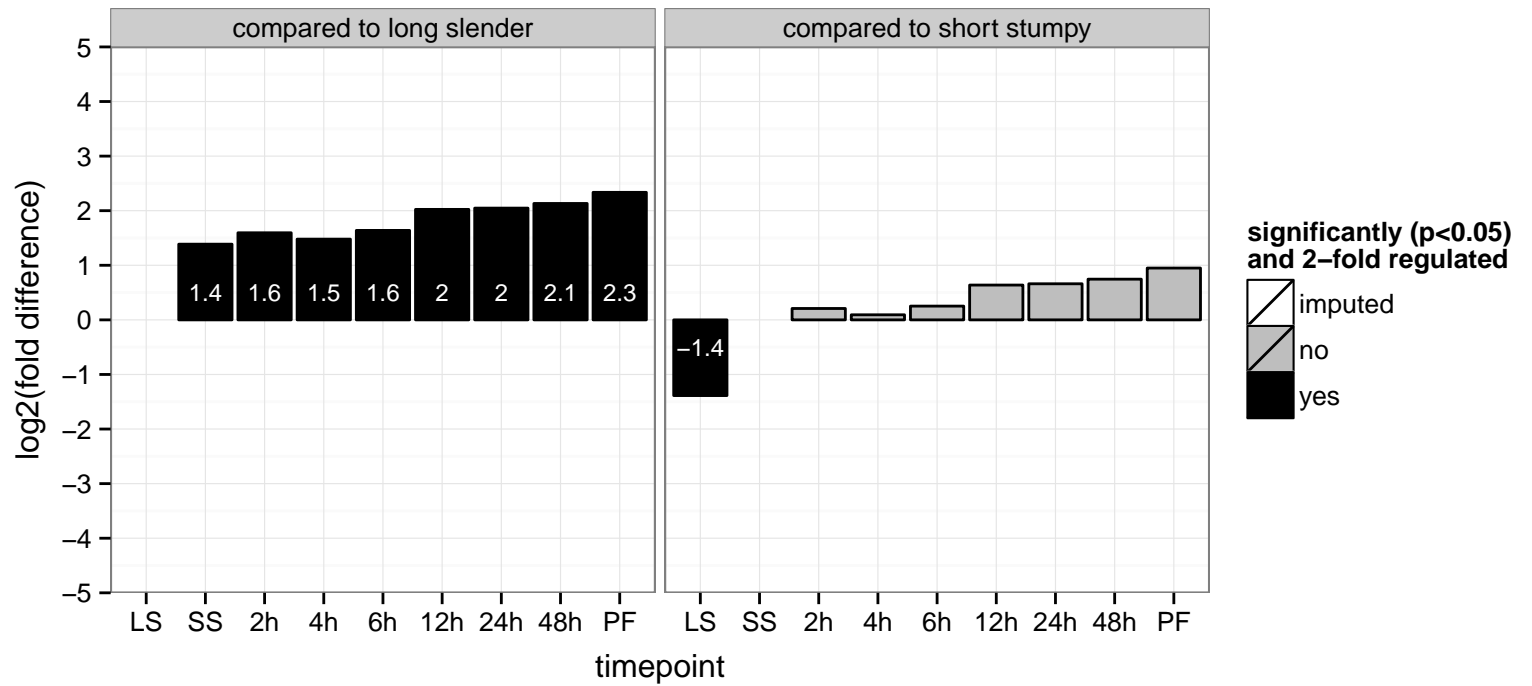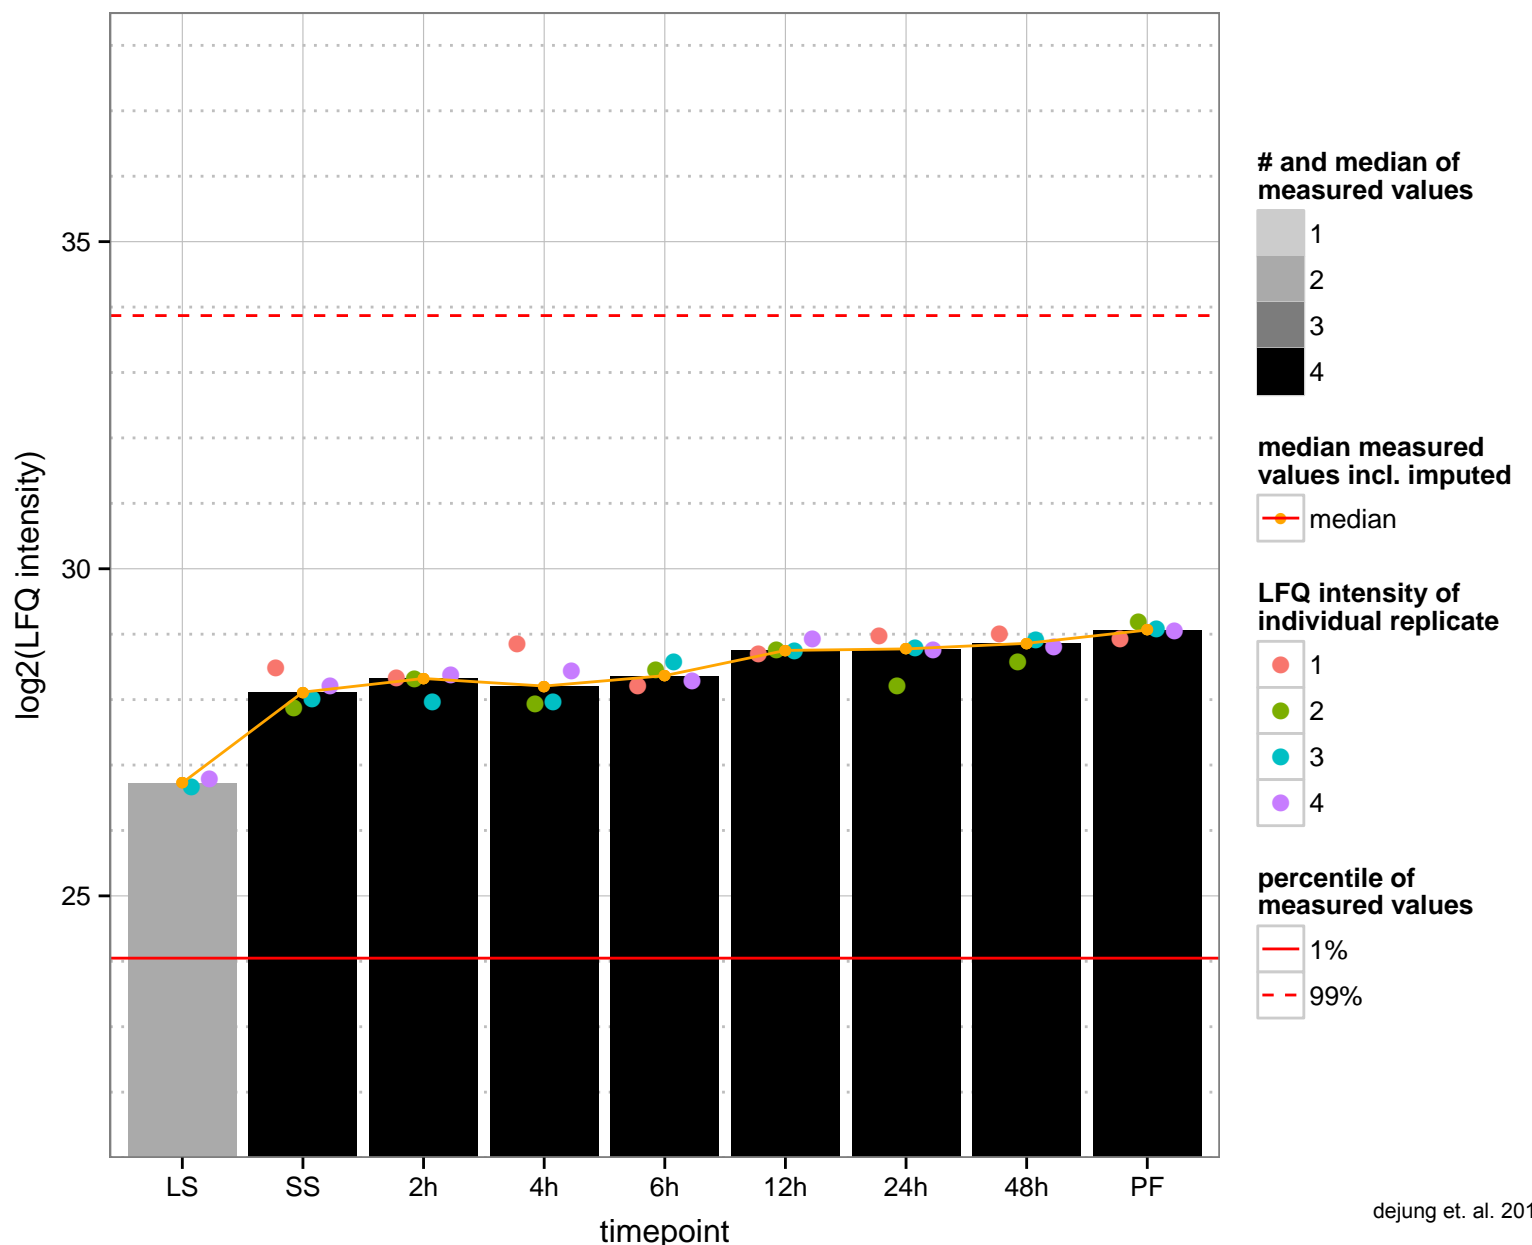

paraflagellar rod protein, putative, PFR5  
 Tb927.2.4330;Tb11.v5.0777  
 AGOF: null, calmodulin binding, structural molecule activity  
 AGOC: null, microtubule-based flagellum  
 AGOP: null, ciliary or flagellar motility  
 PGO: calmodulin binding, protein binding  
 PGO: microtubule-based flagellum  
 PGO: null

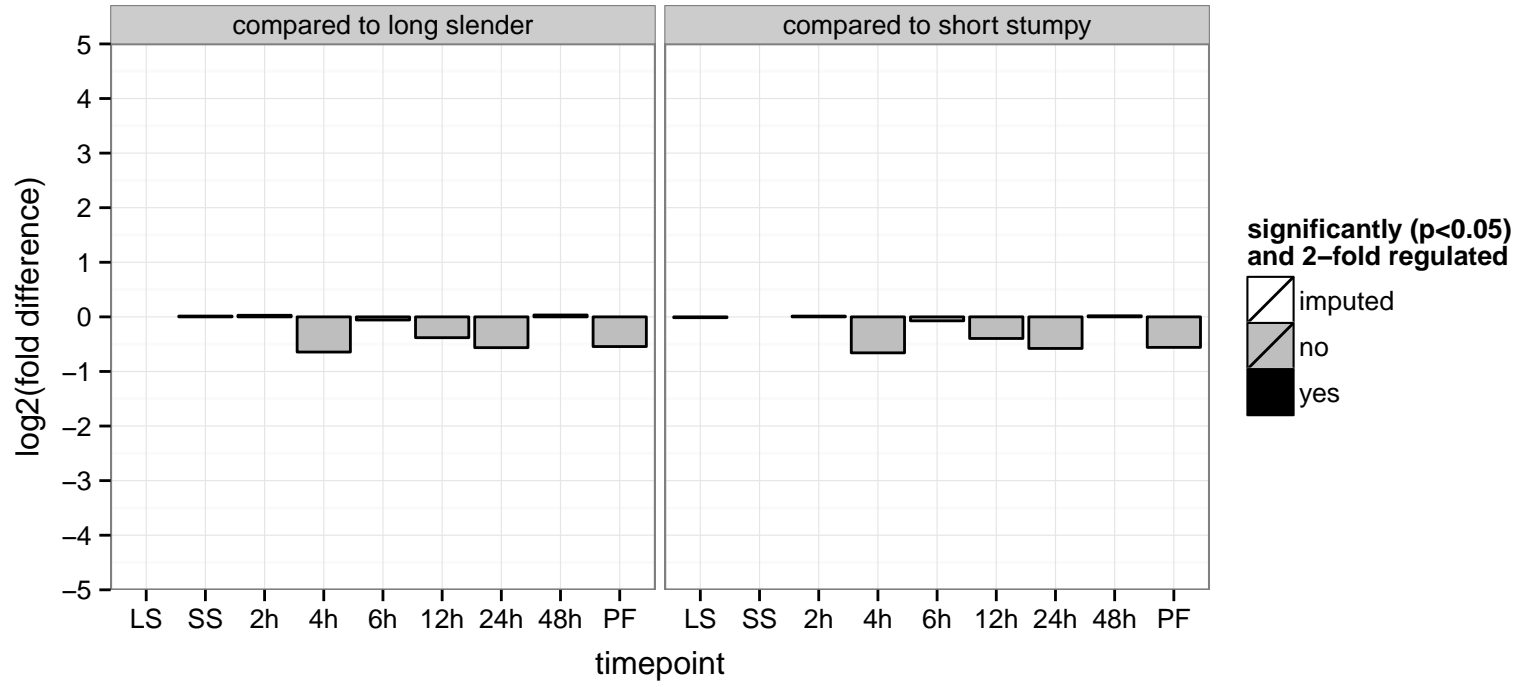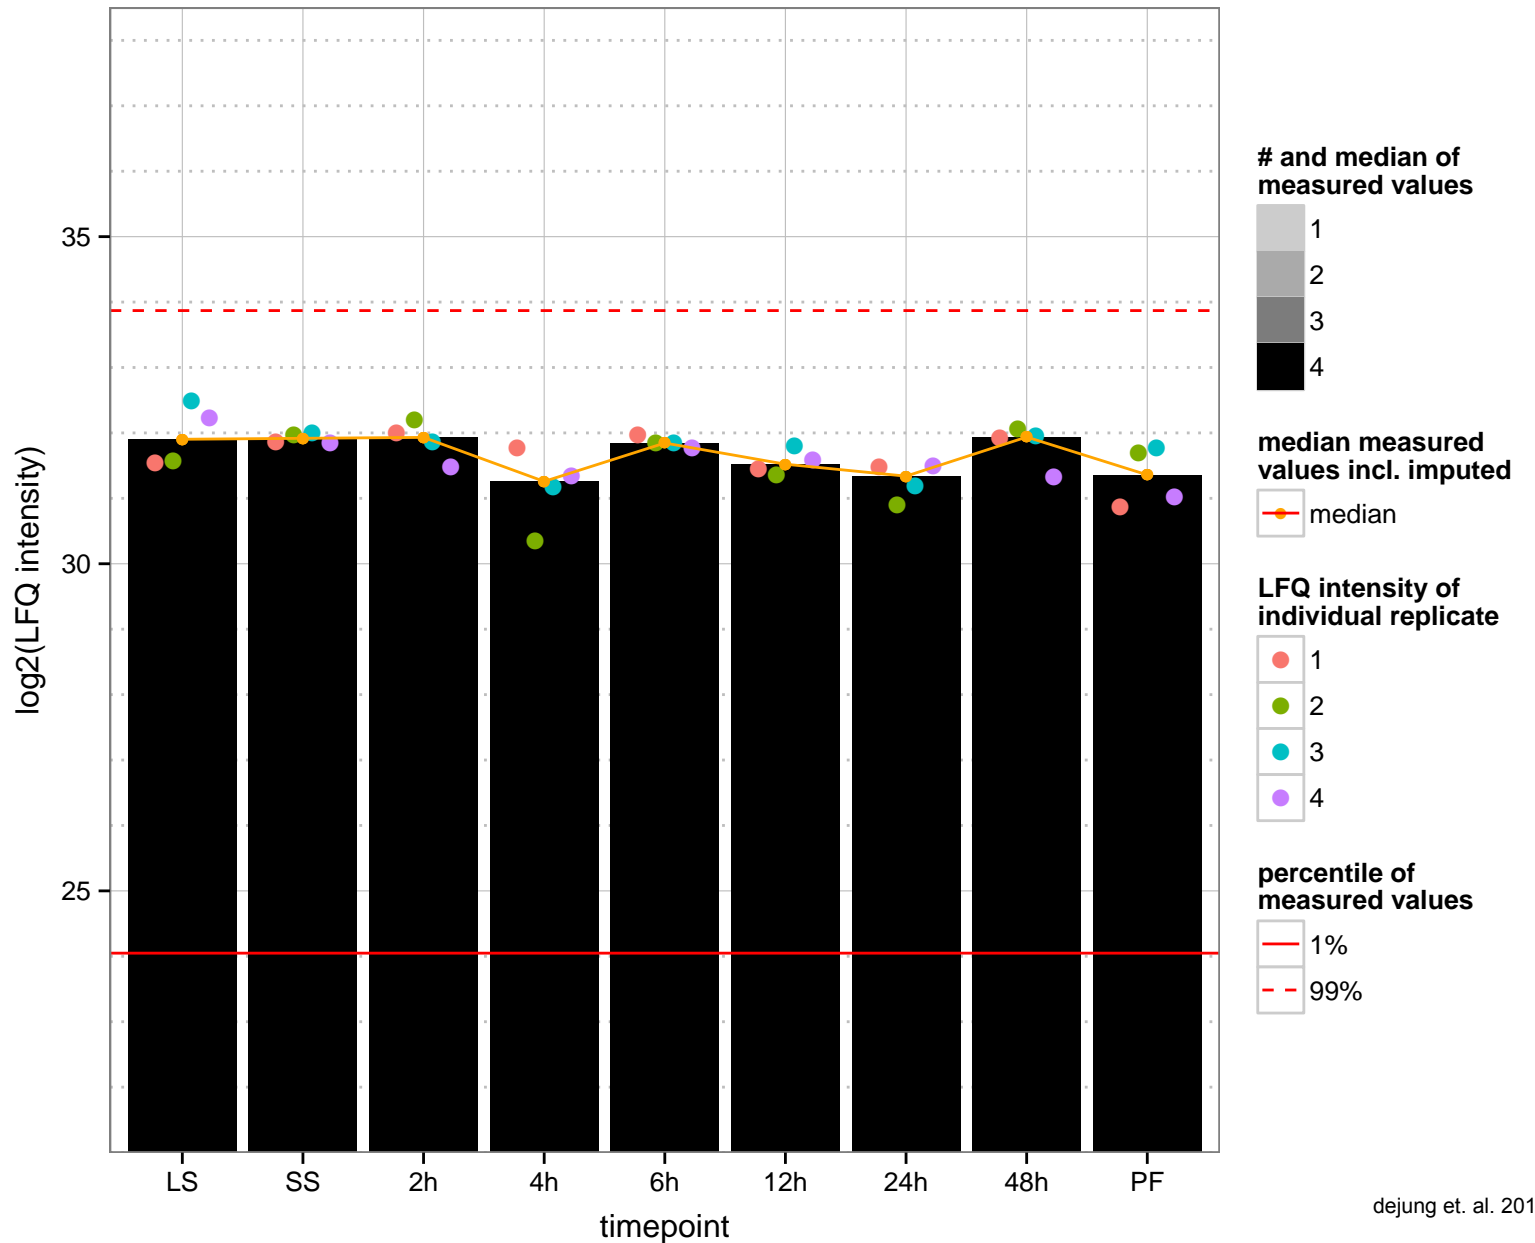

retrotransposon hot spot protein 4 (RHS4), putative  
 Tb927.2.450  
 AGOF: null  
 AGOC: nucleus  
 AGOP: null  
 PGO: null  
 PGO: null  
 PGO: null

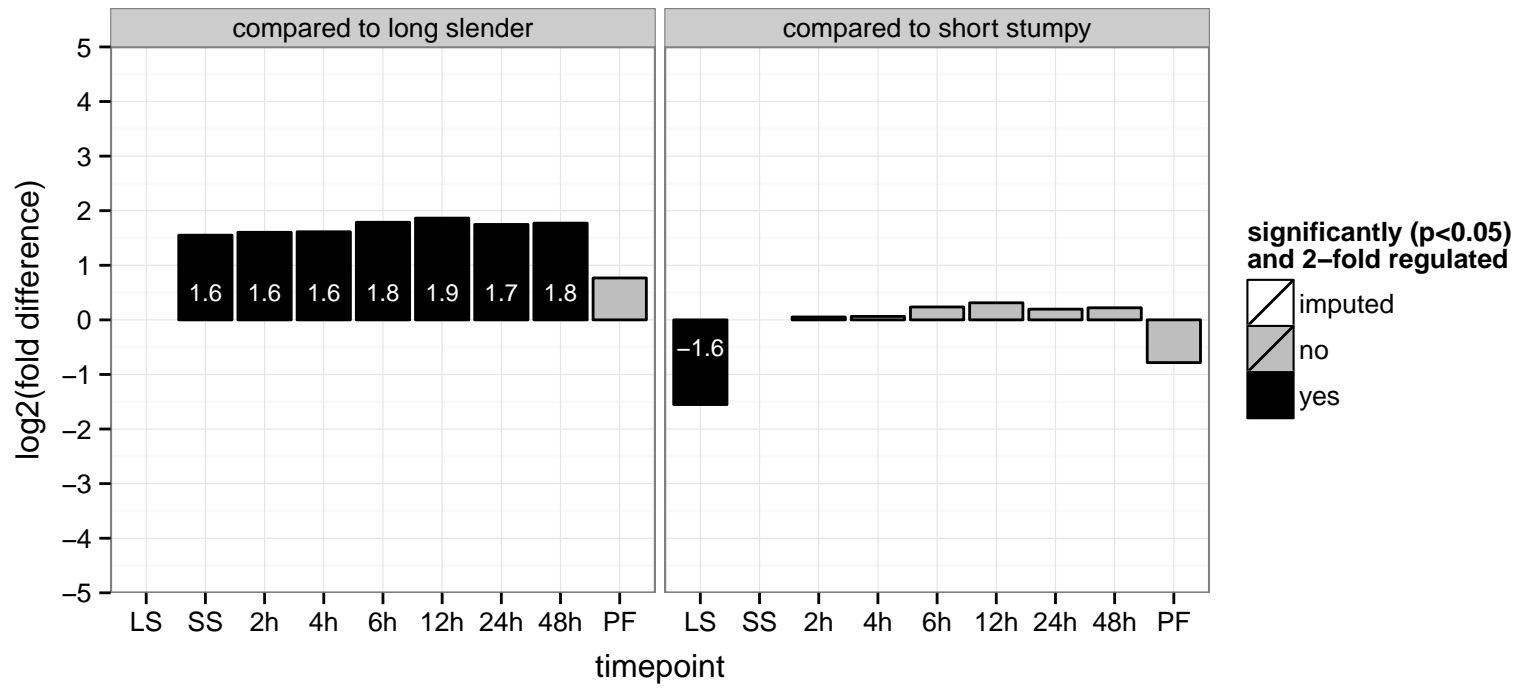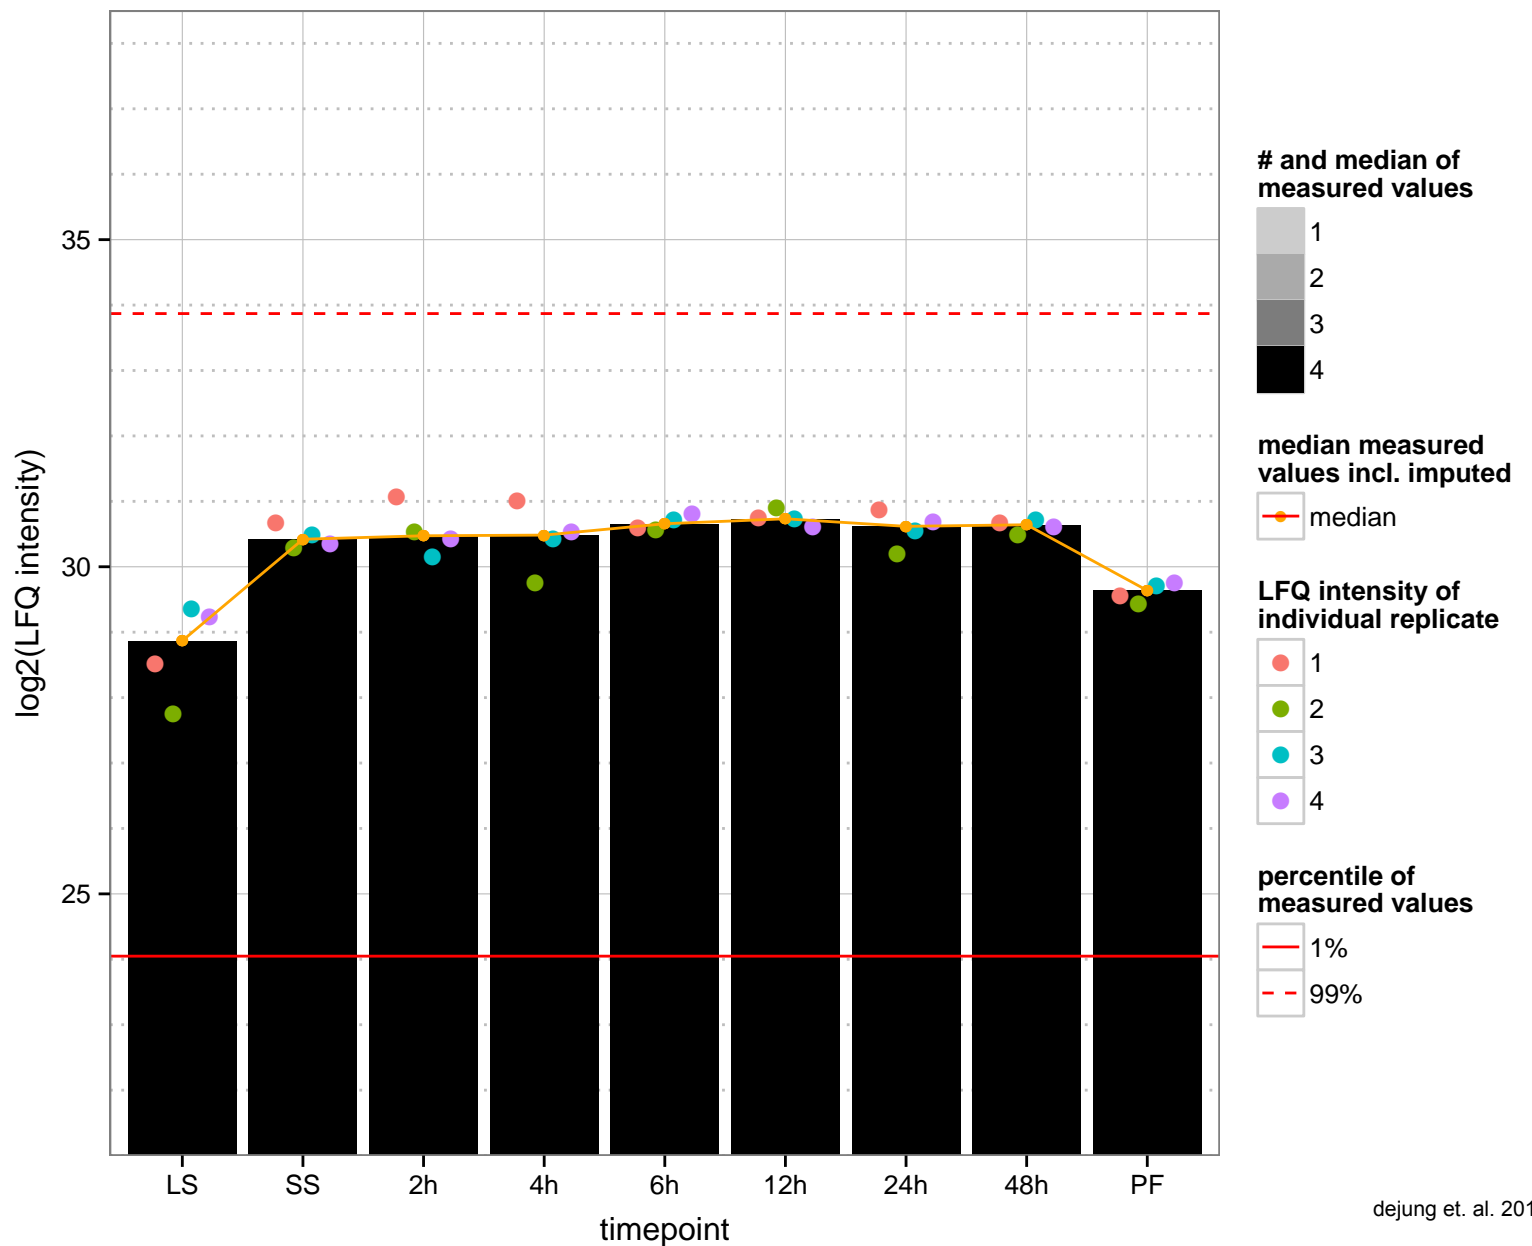

hypothetical protein, conserved  
 Tb927.2.4520  
 AGOF: catalytic activity  
 AGOC: null  
 AGOP: metabolic process  
 PGOF: null  
 PGOC: null  
 PGOP: null

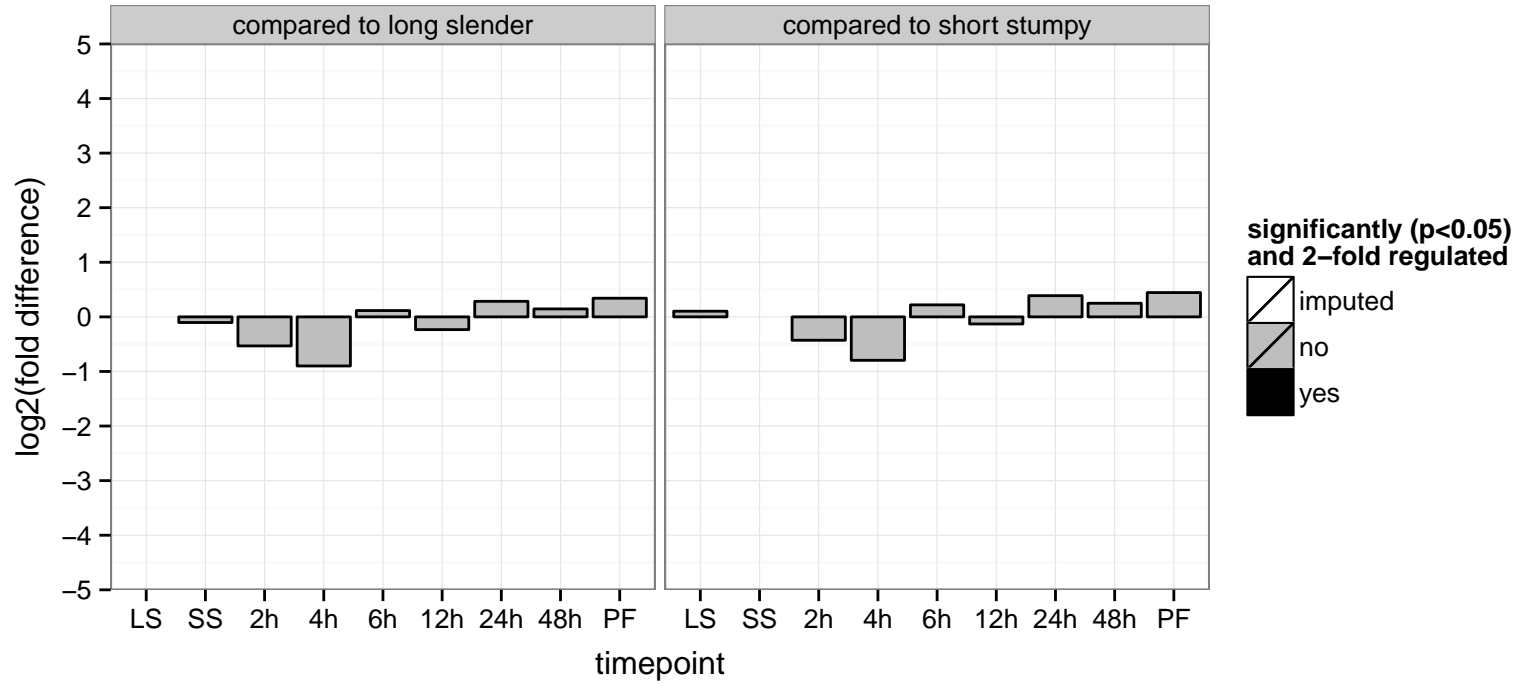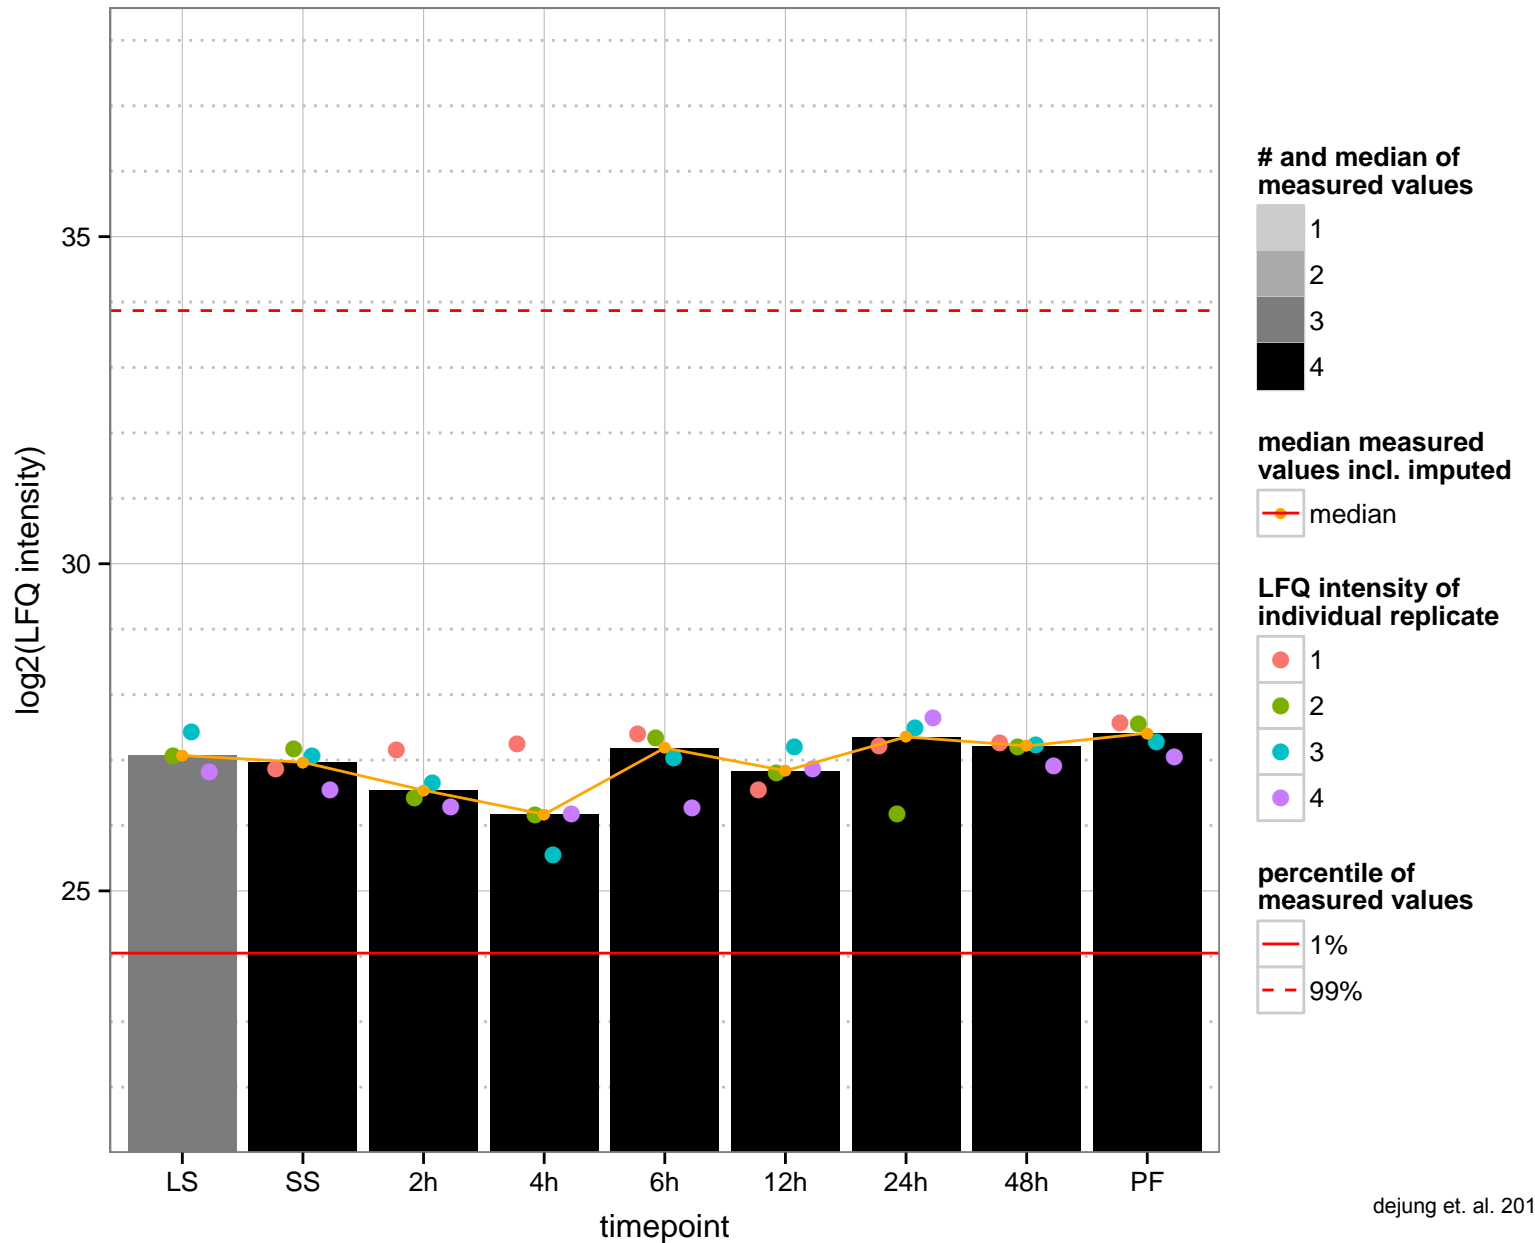

hypothetical protein, conserved  
 Tb927.2.4530  
 AGOF: null  
 AGOC: null  
 AGOP: null  
 PGO: null  
 PGOC: null  
 PGOP: null

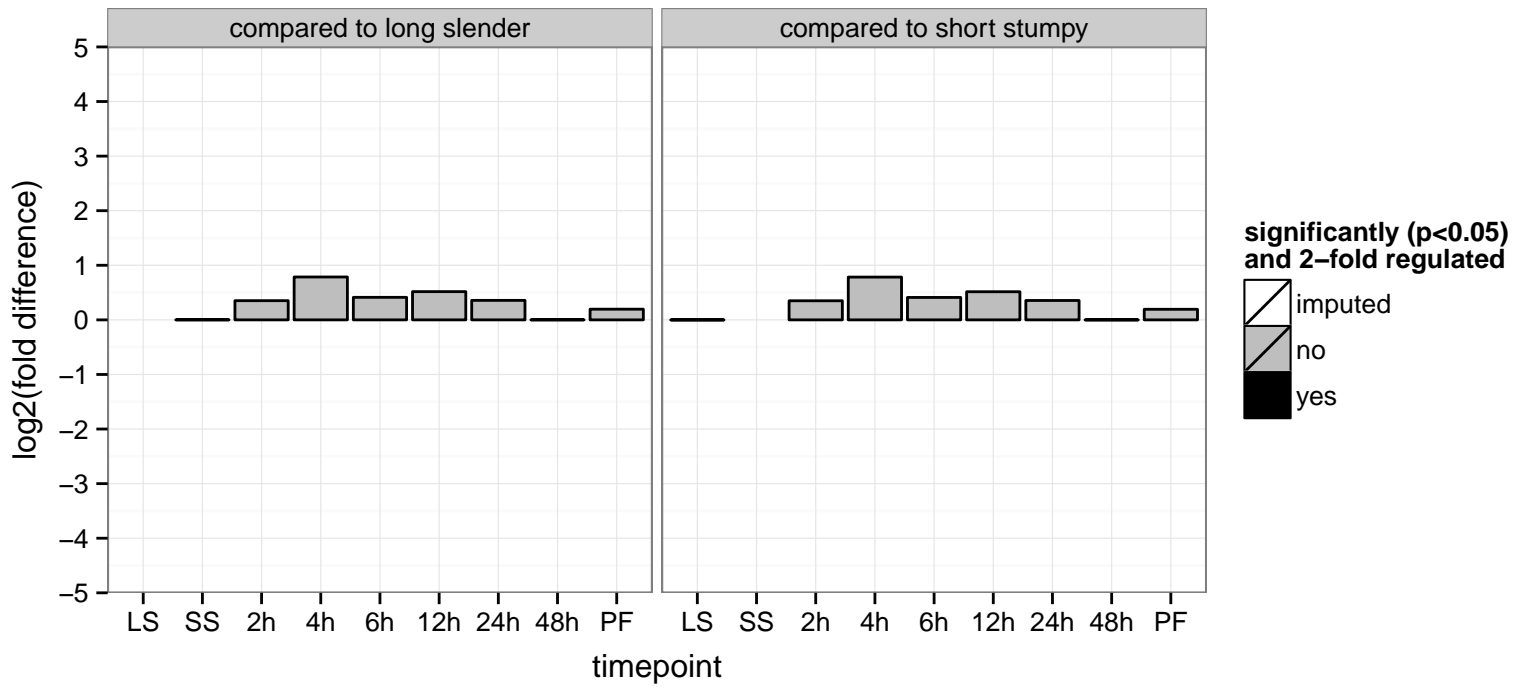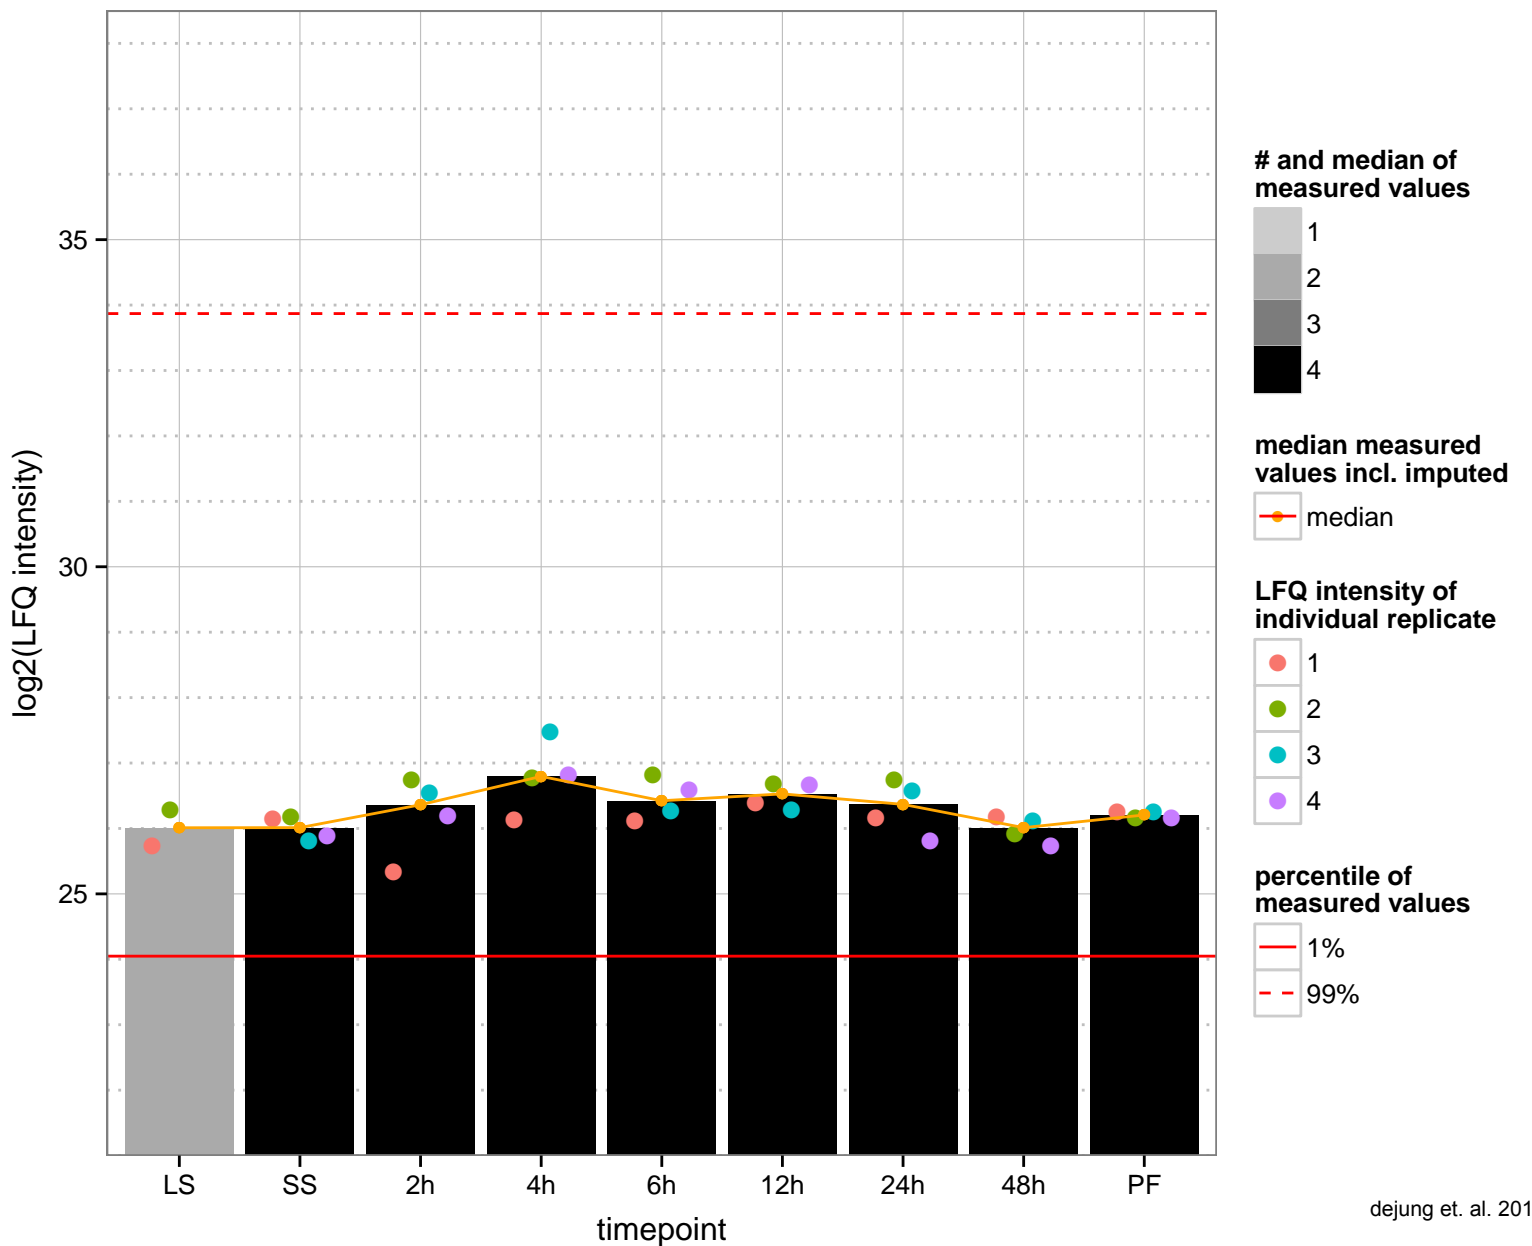

Small nuclear ribonucleoprotein-associated protein B (snRNP-B) (Sm protein B) (Sm-B) (SmB), putative (TbSmB)  
 Tb927.2.4540  
 AGOF: null  
 AGOC: nucleus, small nucleolar ribonucleoprotein complex  
 AGOP: RNA splicing, RNA splicing, via transesterification reactions  
 PGO: null  
 PGOC: null  
 PGOP: null

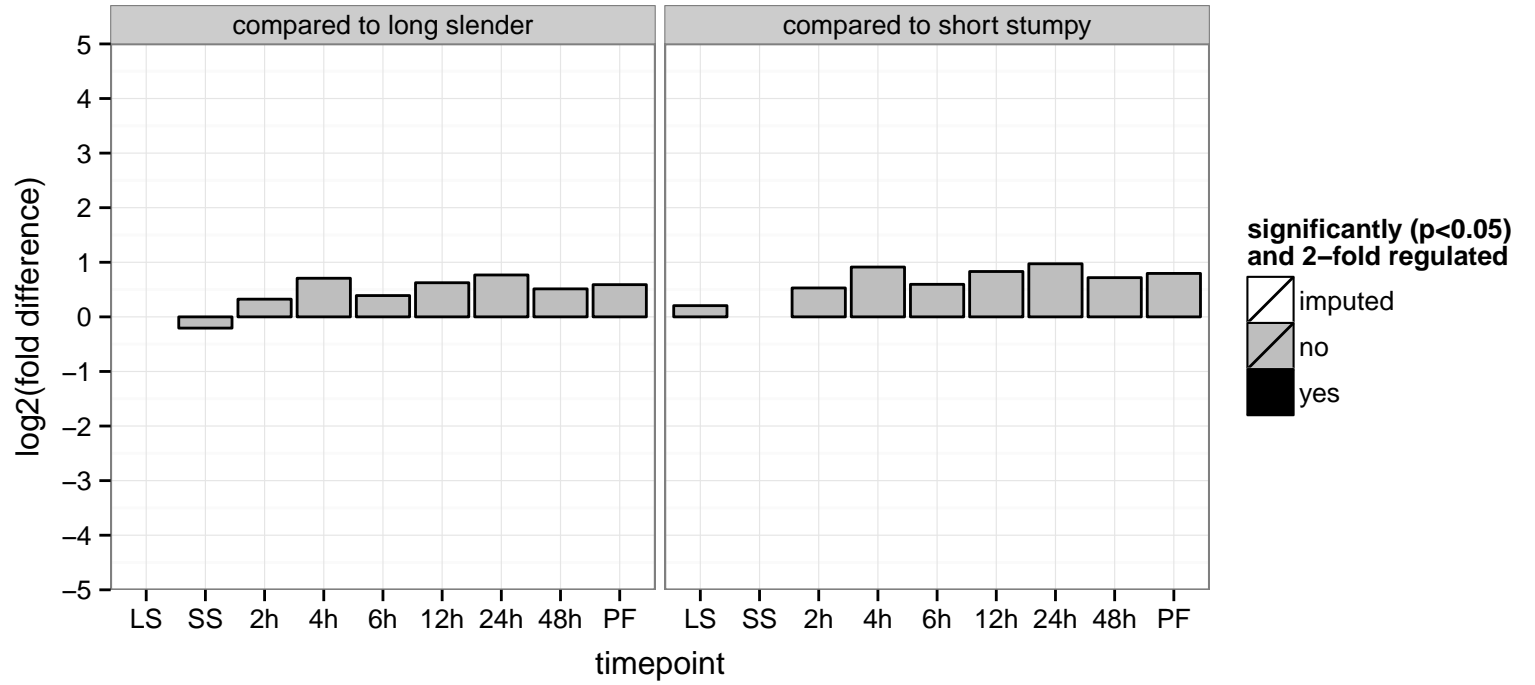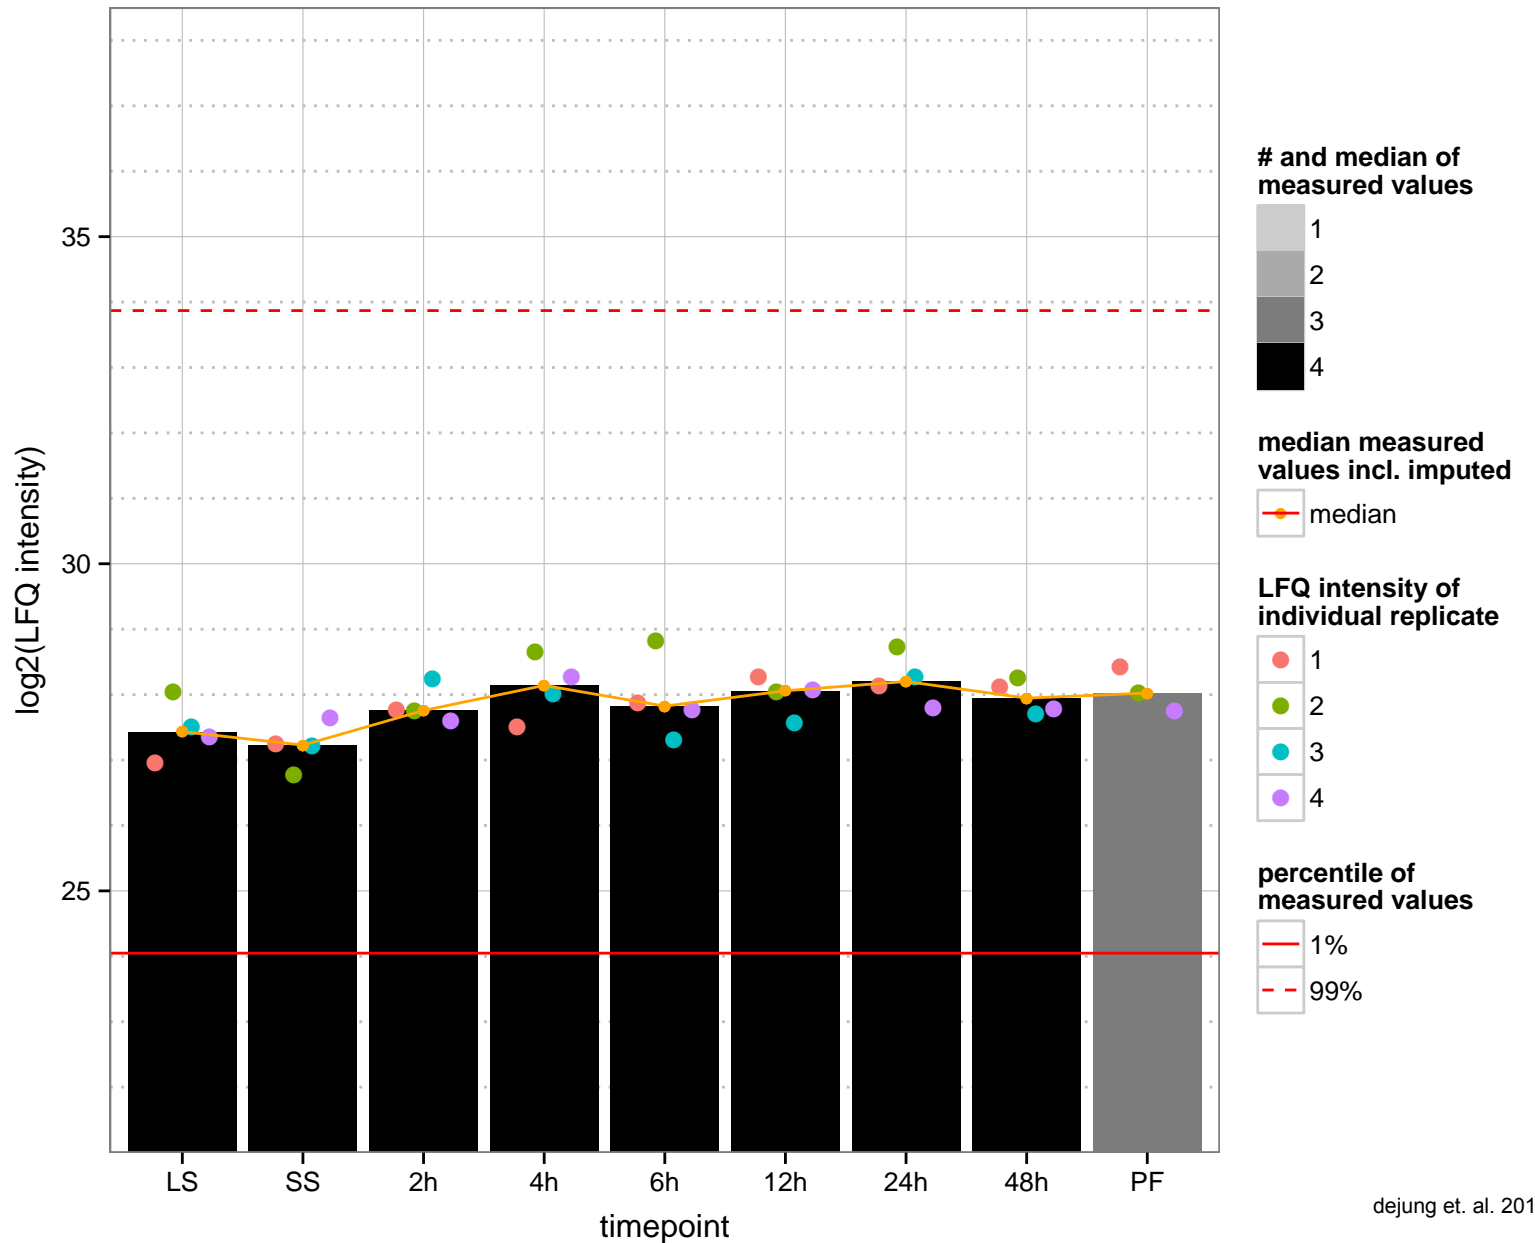

UNC119 (unc119)  
 Tb927.2.4580  
 AGOF: null  
 AGOC: cilium  
 AGOP: null  
 PGO: null  
 PGO: null  
 PGO: null

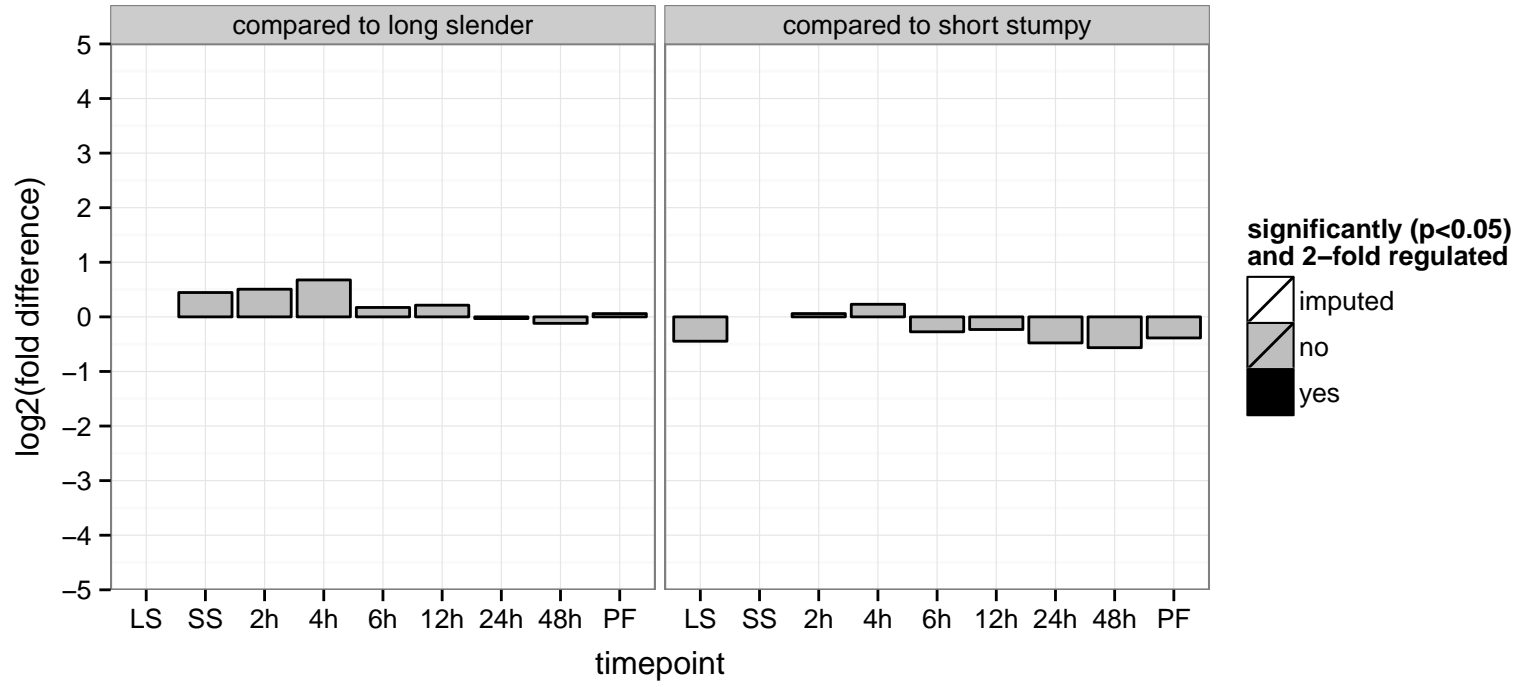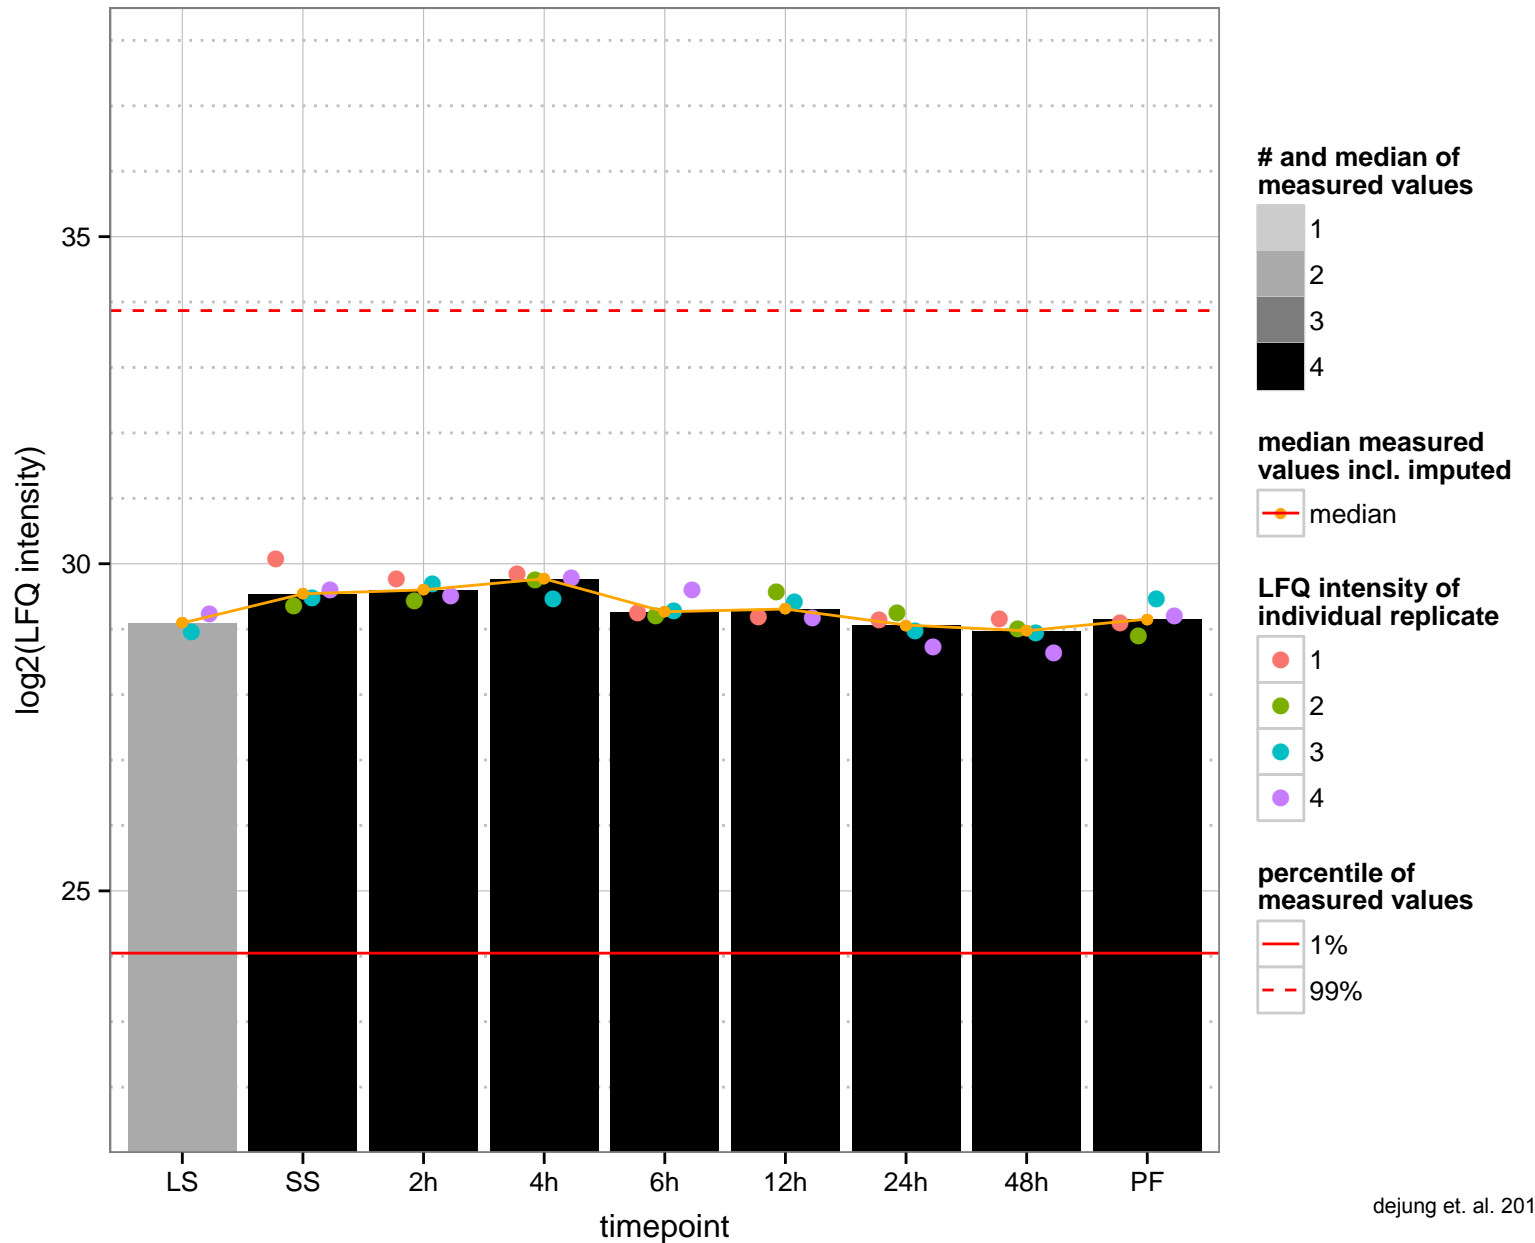



RNA-binding protein, putative (TRRM1)  
 Tb927.2.4710  
 AGOF: molecular\_function, nucleic acid binding, zinc ion binding  
 AGOC: nuclear speck  
 AGOP: RNA processing  
 PGOF: nucleic acid binding, zinc ion binding  
 PGO: null  
 PGOP: null

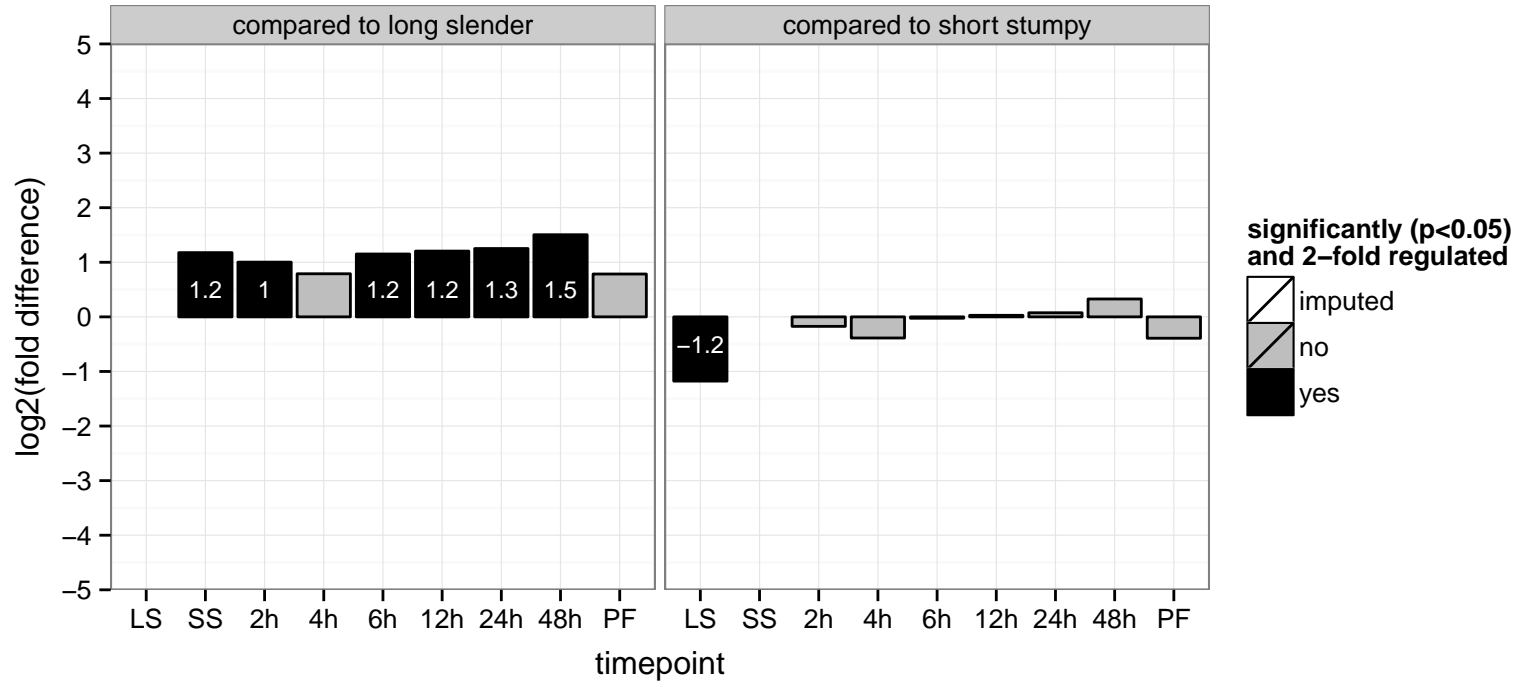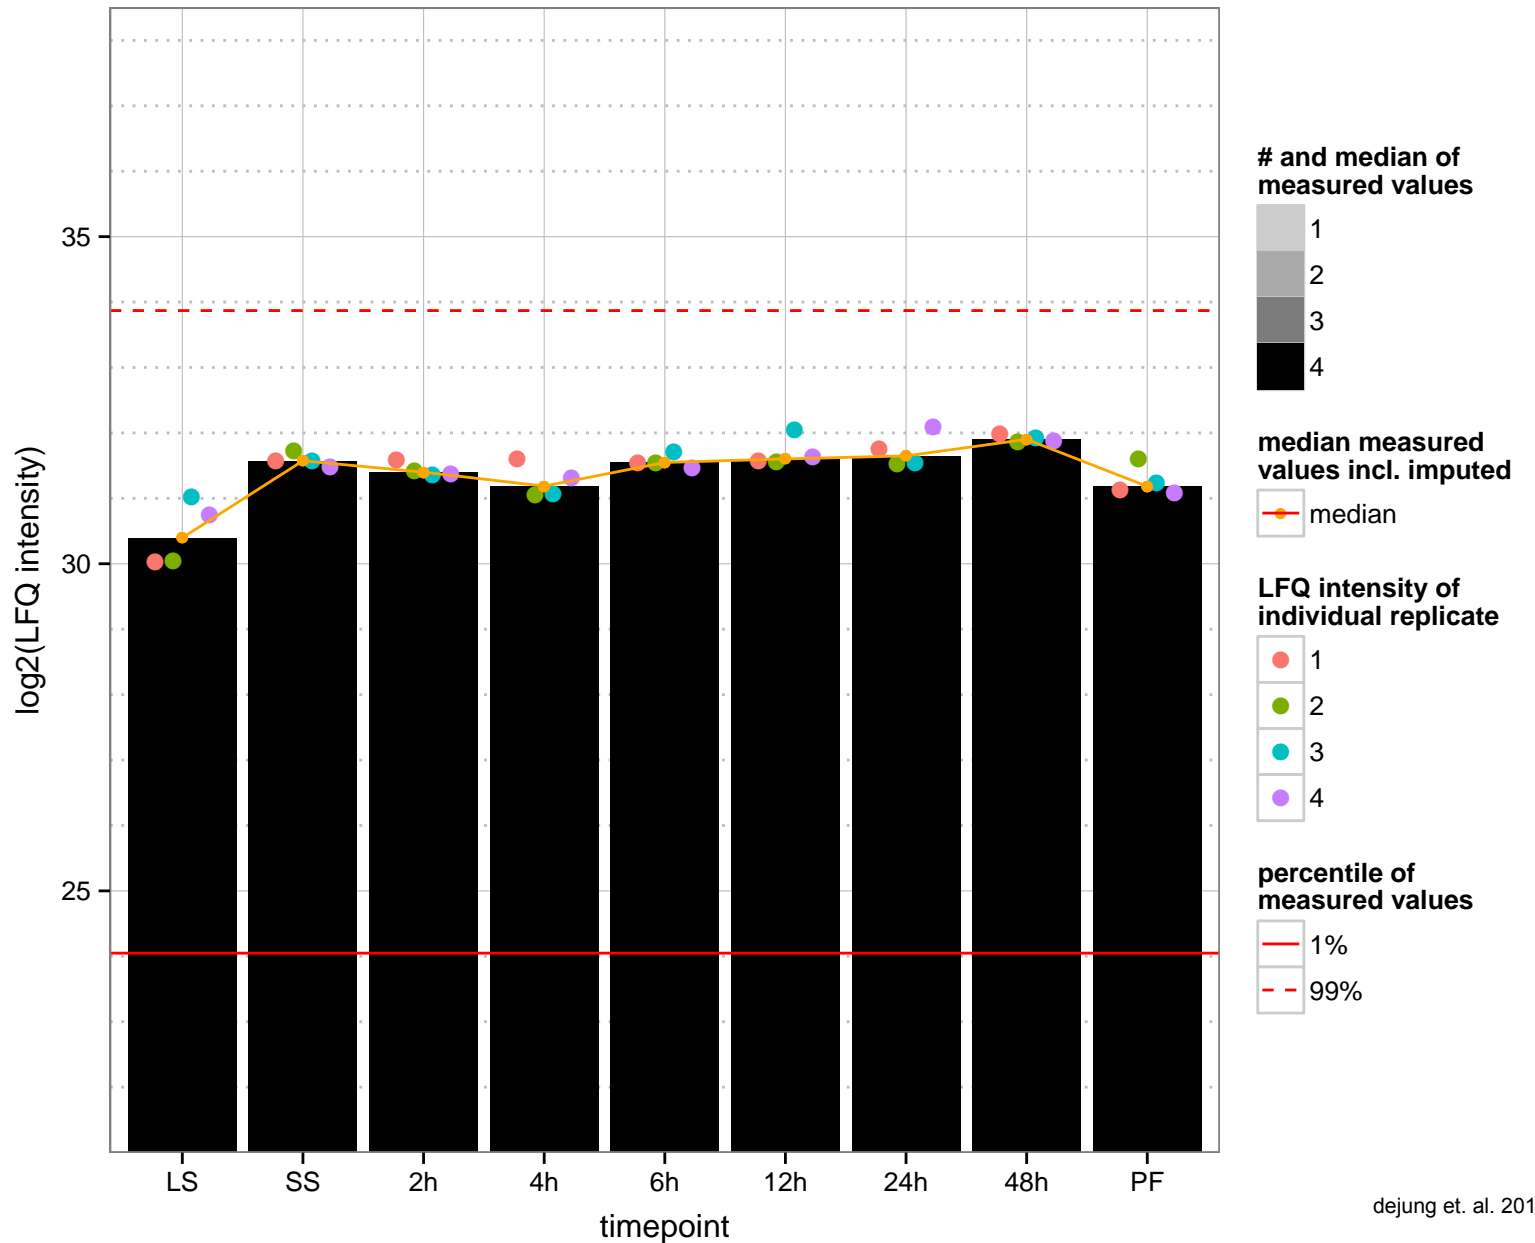

hypothetical protein, conserved  
 Tb927.2.4800  
 AGOF: null  
 AGOC: null  
 AGOP: null  
 PGO: null  
 PGOC: null  
 PGOP: null

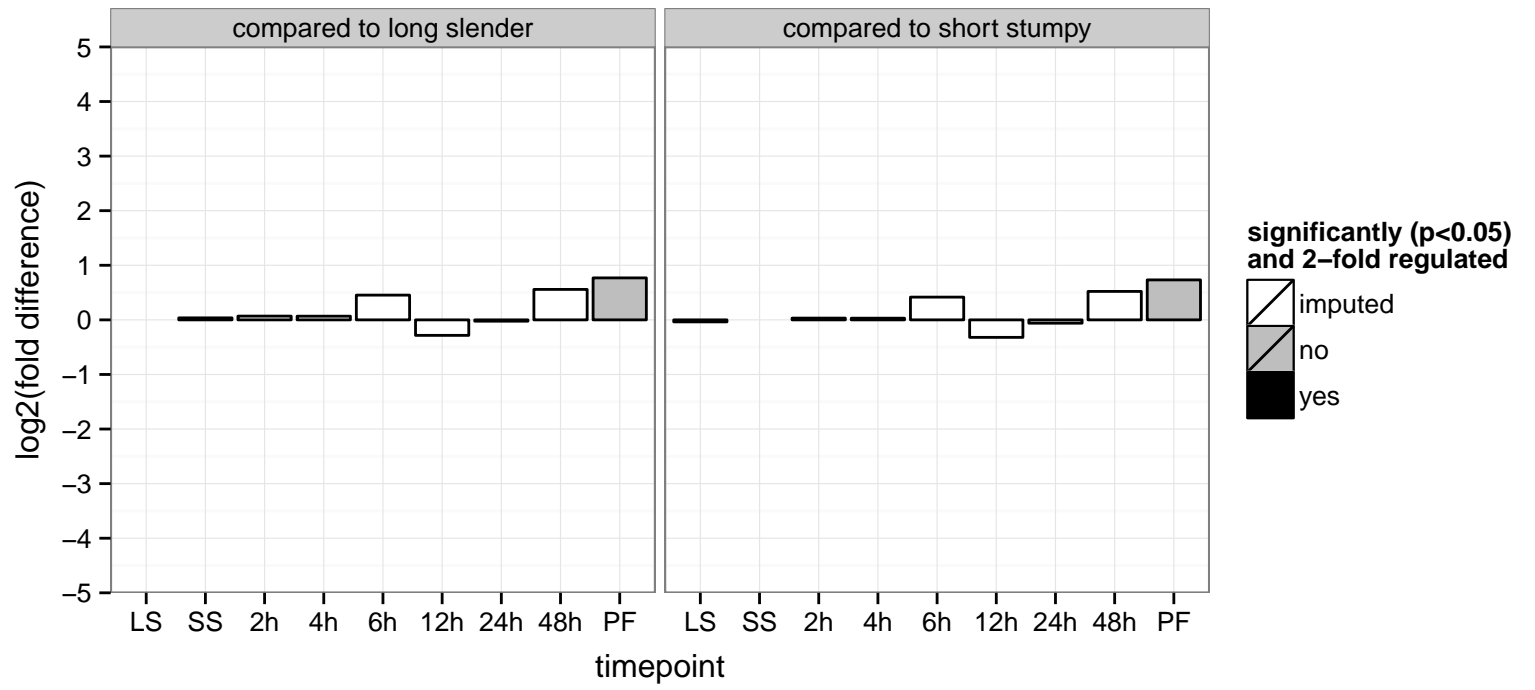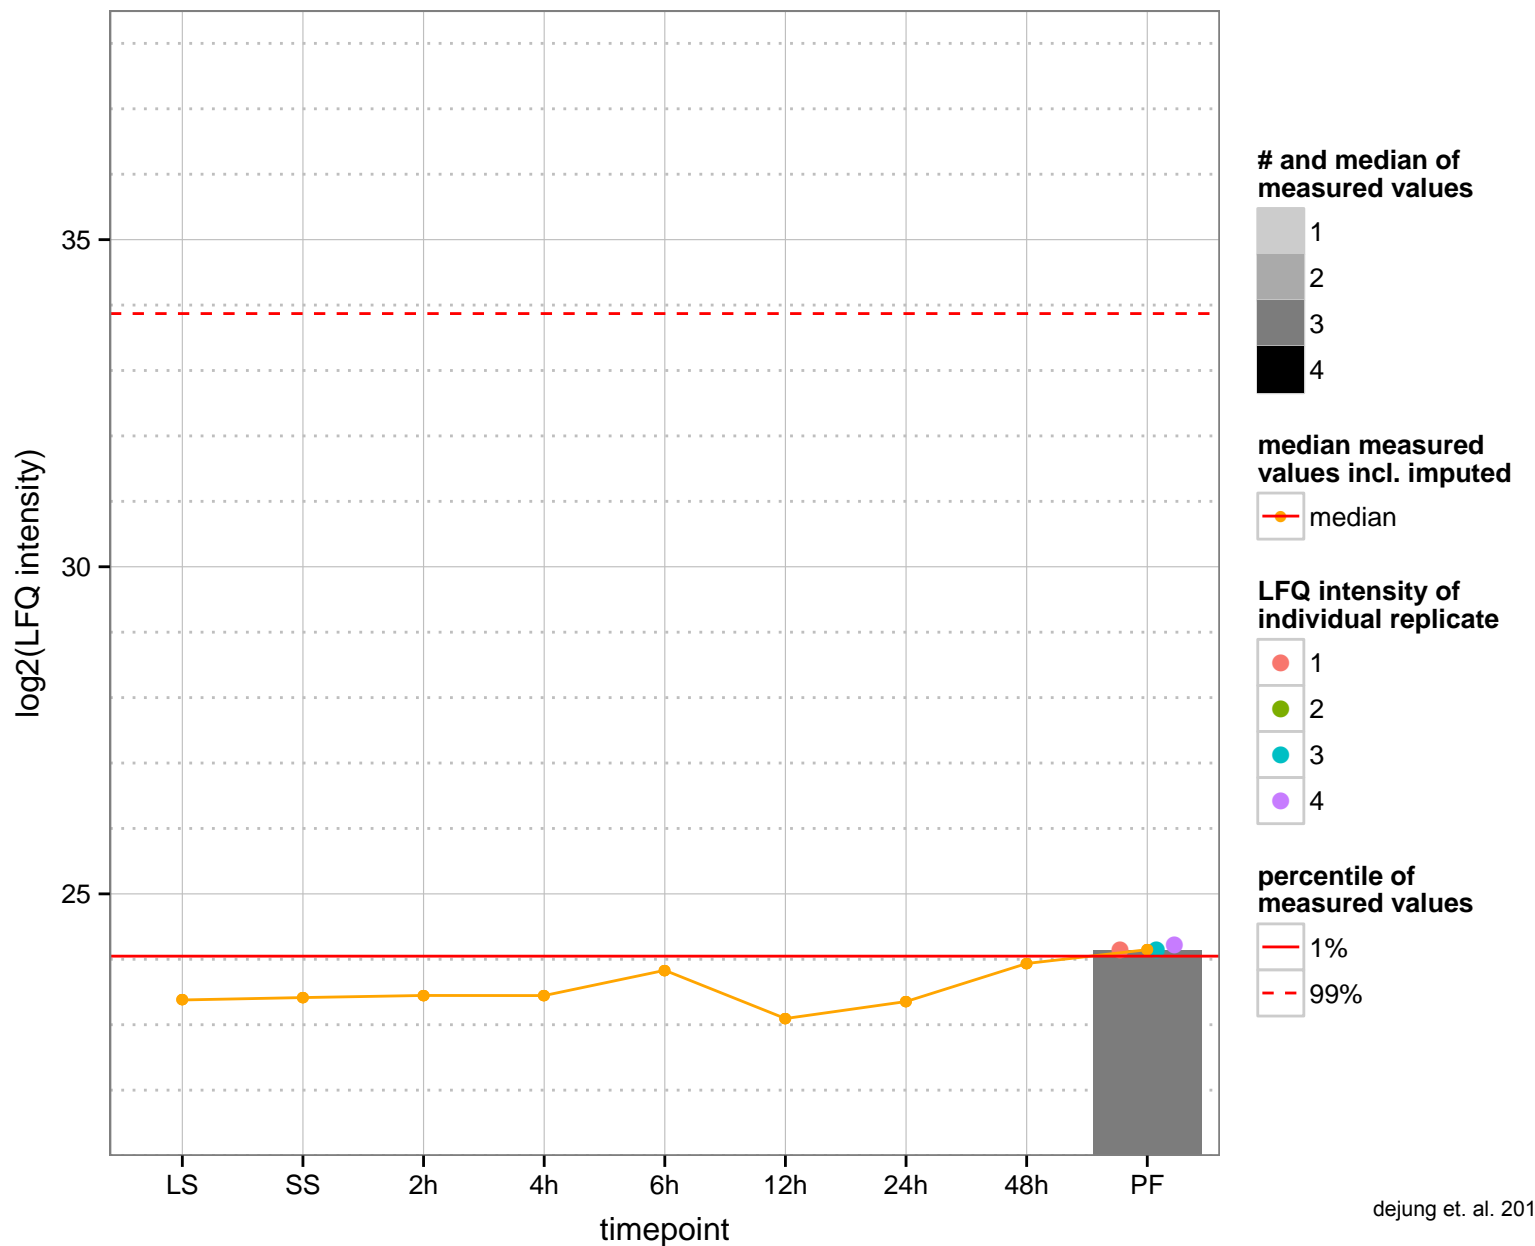

hypothetical protein, conserved  
 Tb927.2.4810  
 AGOF: null  
 AGOC: null  
 AGOP: ciliary or flagellar motility  
 PGO: protein binding  
 PGOC: null  
 PGOP: null

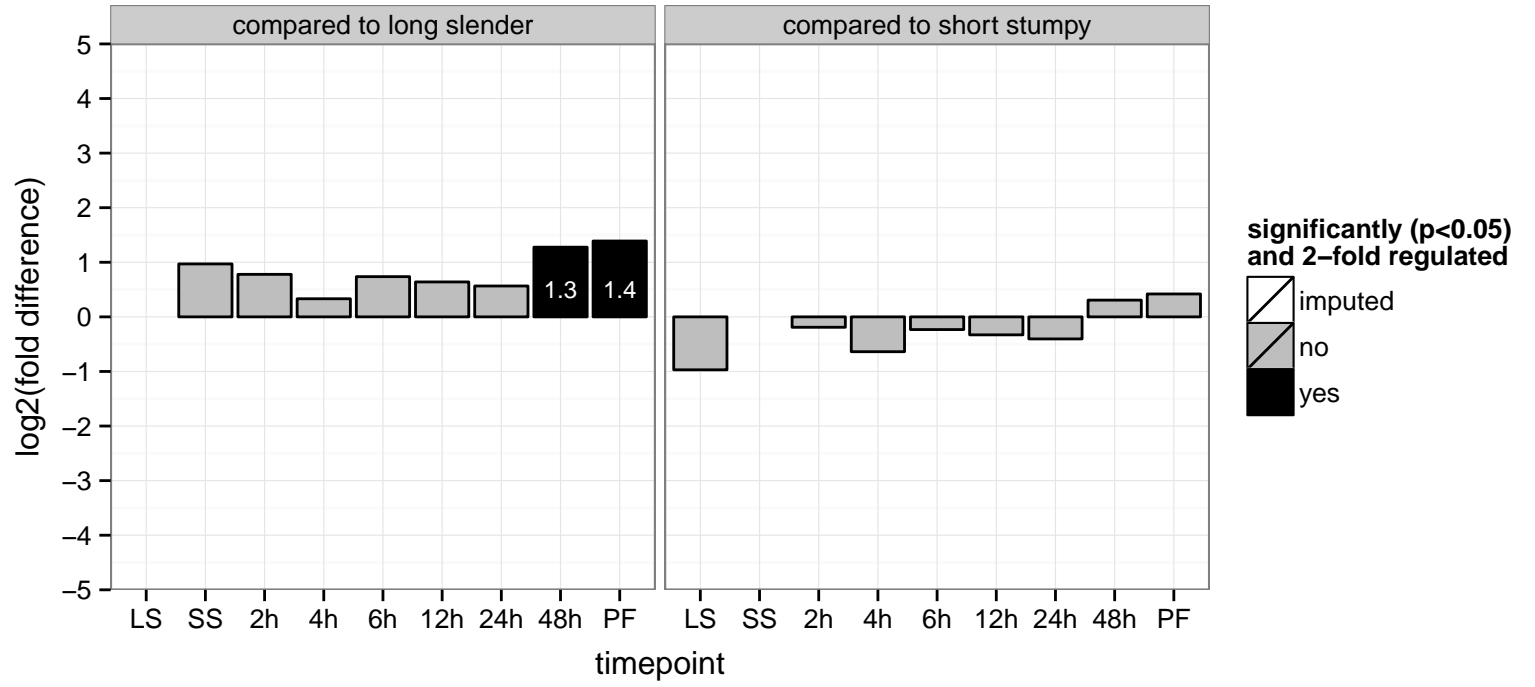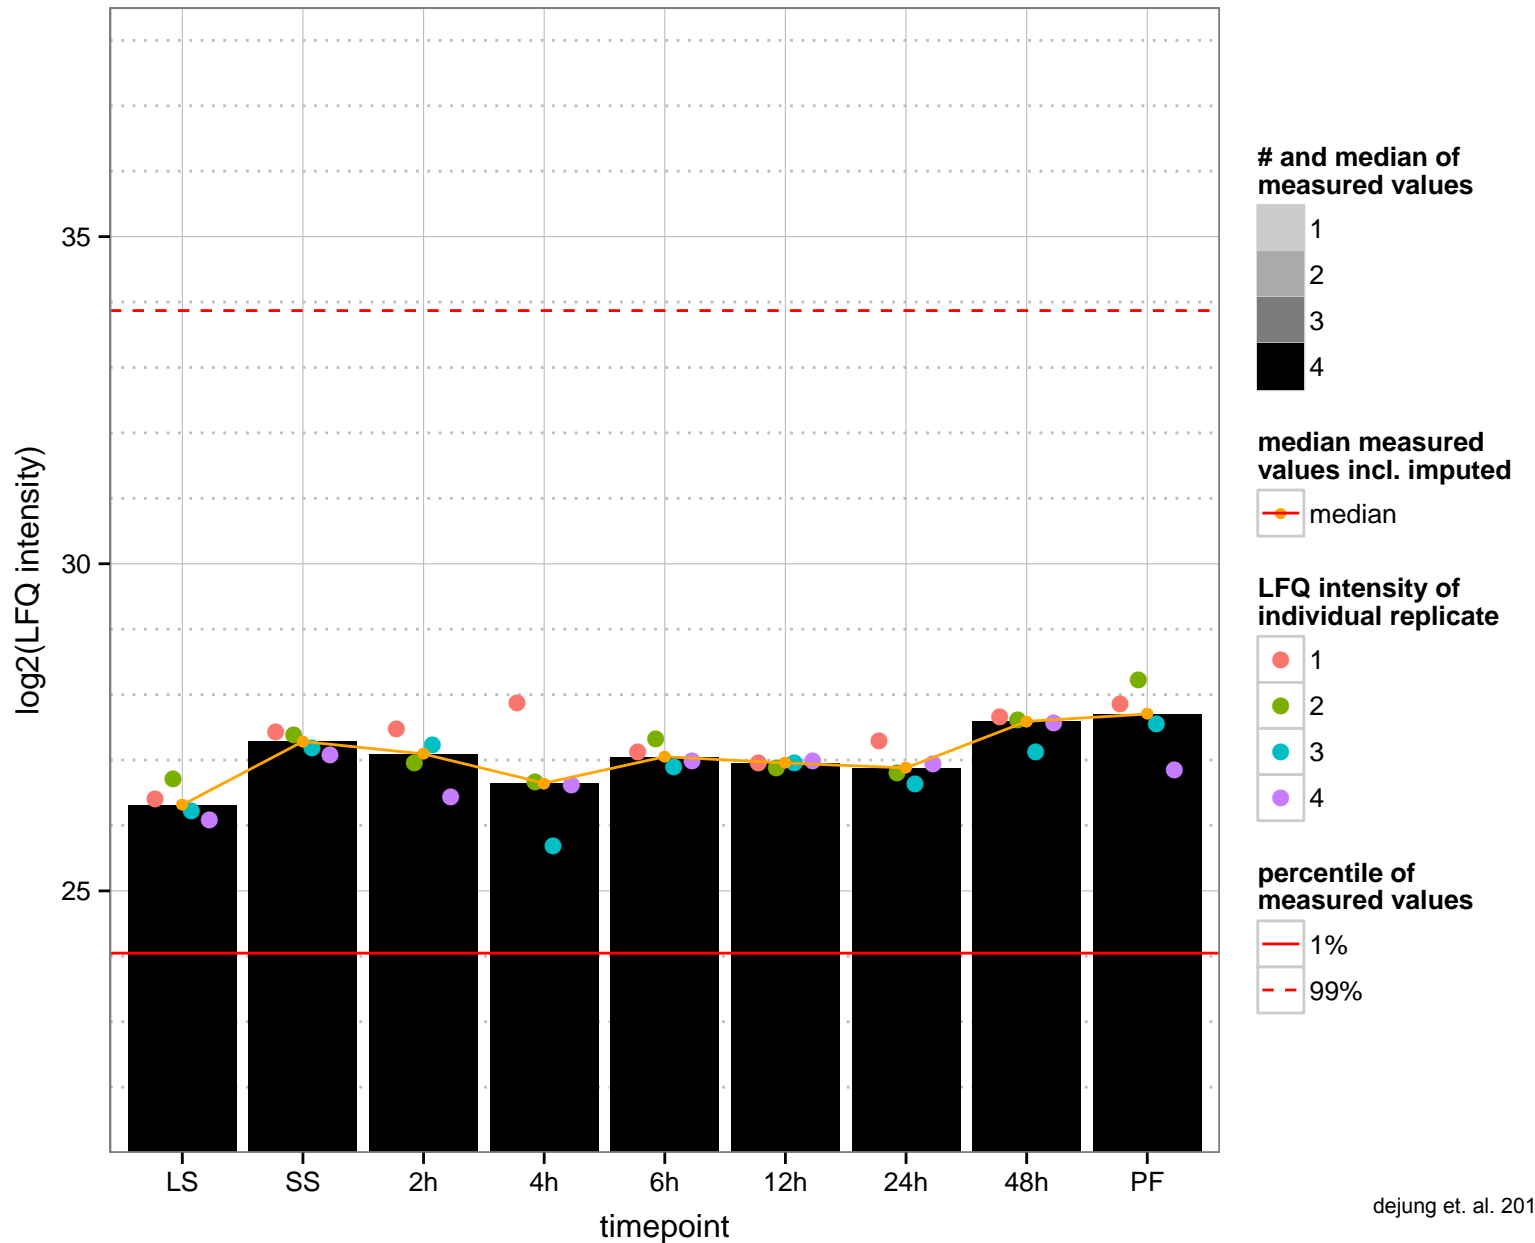

kinetoplastid-specific dual specificity phosphatase, putative  
 Tb927.2.4870  
 AGOF: protein tyrosine/serine/threonine phosphatase activity  
 AGOC: null  
 AGOP: protein dephosphorylation  
 PGO: phosphatase activity, protein tyrosine/serine/threonine phosphatase activity  
 PGOC: null  
 PGOP: dephosphorylation, protein dephosphorylation

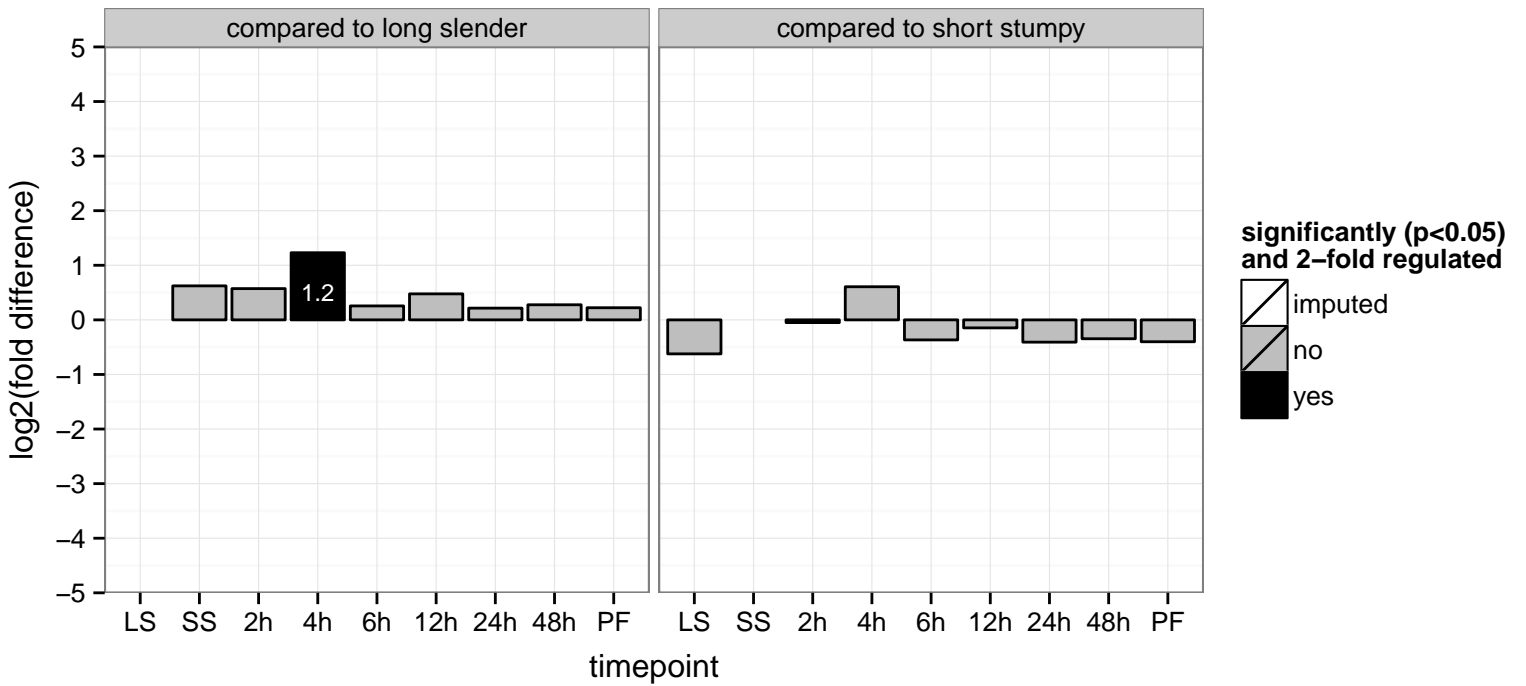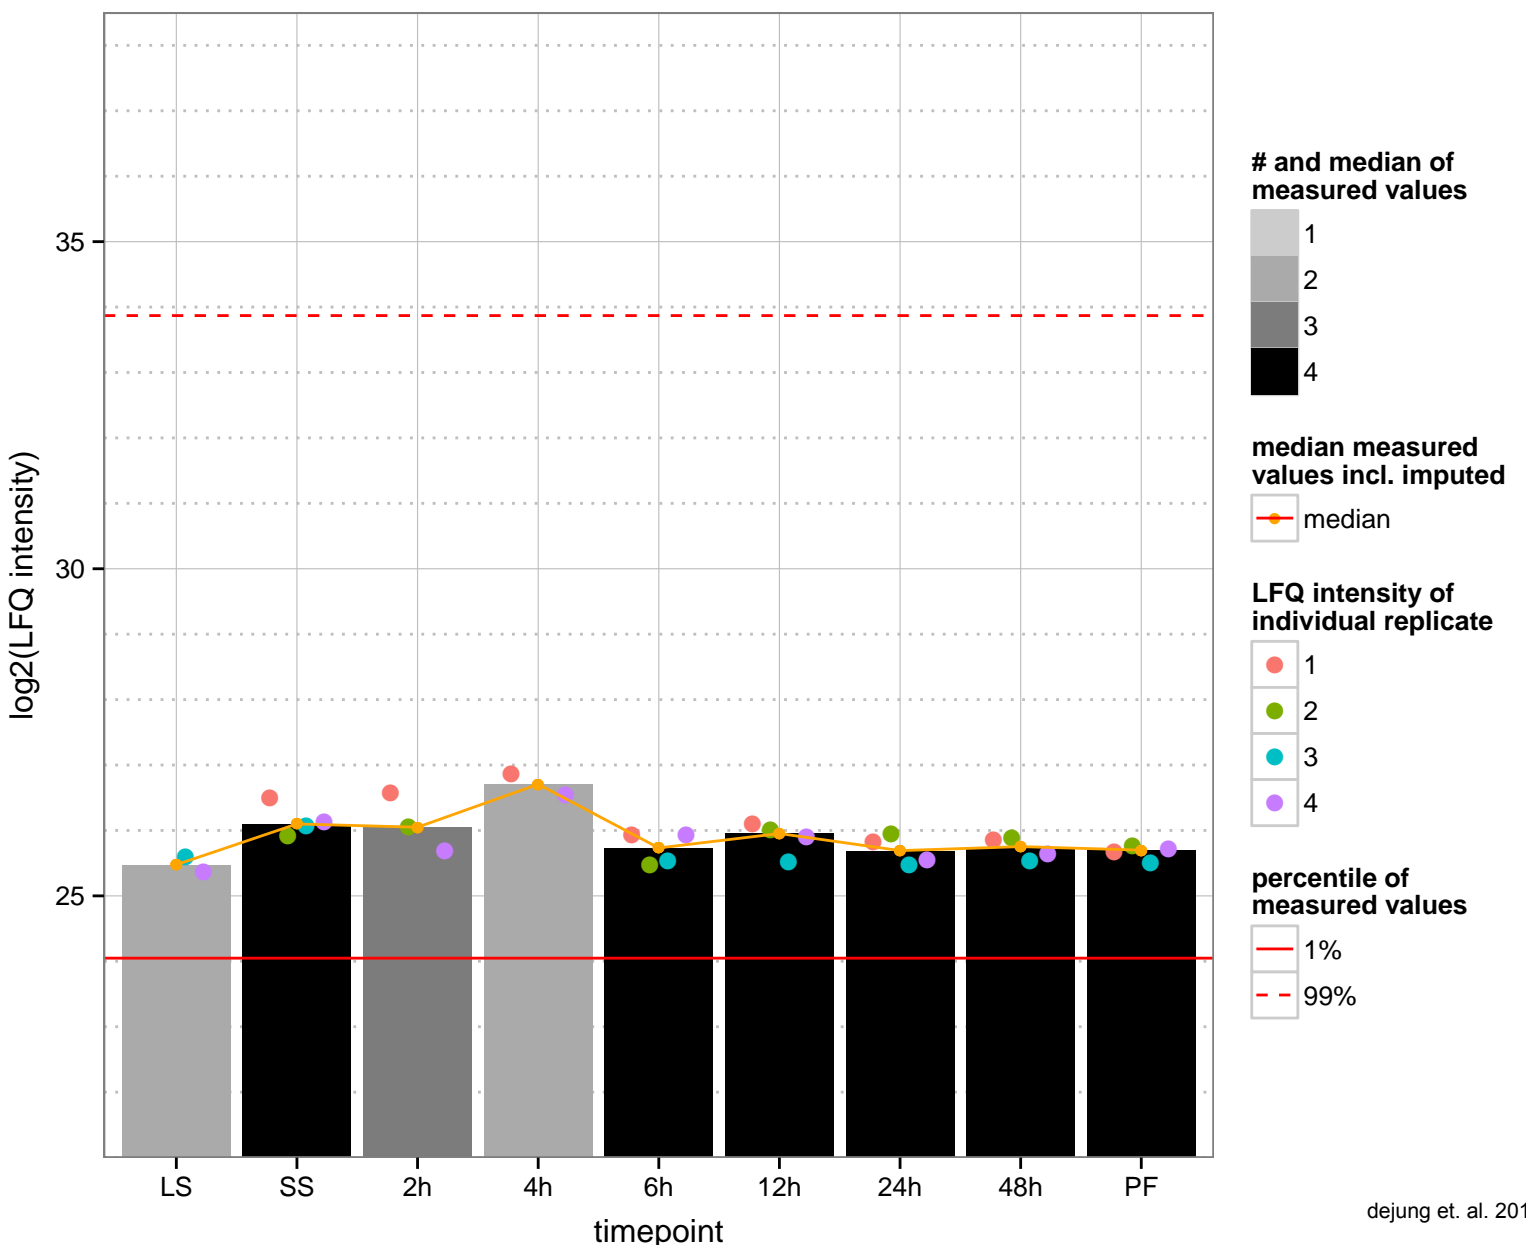

esterase, putative  
 Tb927.2.4930  
 AGOF: catalytic activity, hydrolase activity, acting on ester bonds  
 AGOC: null  
 AGOP: lipid metabolic process  
 PGO: null  
 PGOC: null  
 PGOP: null

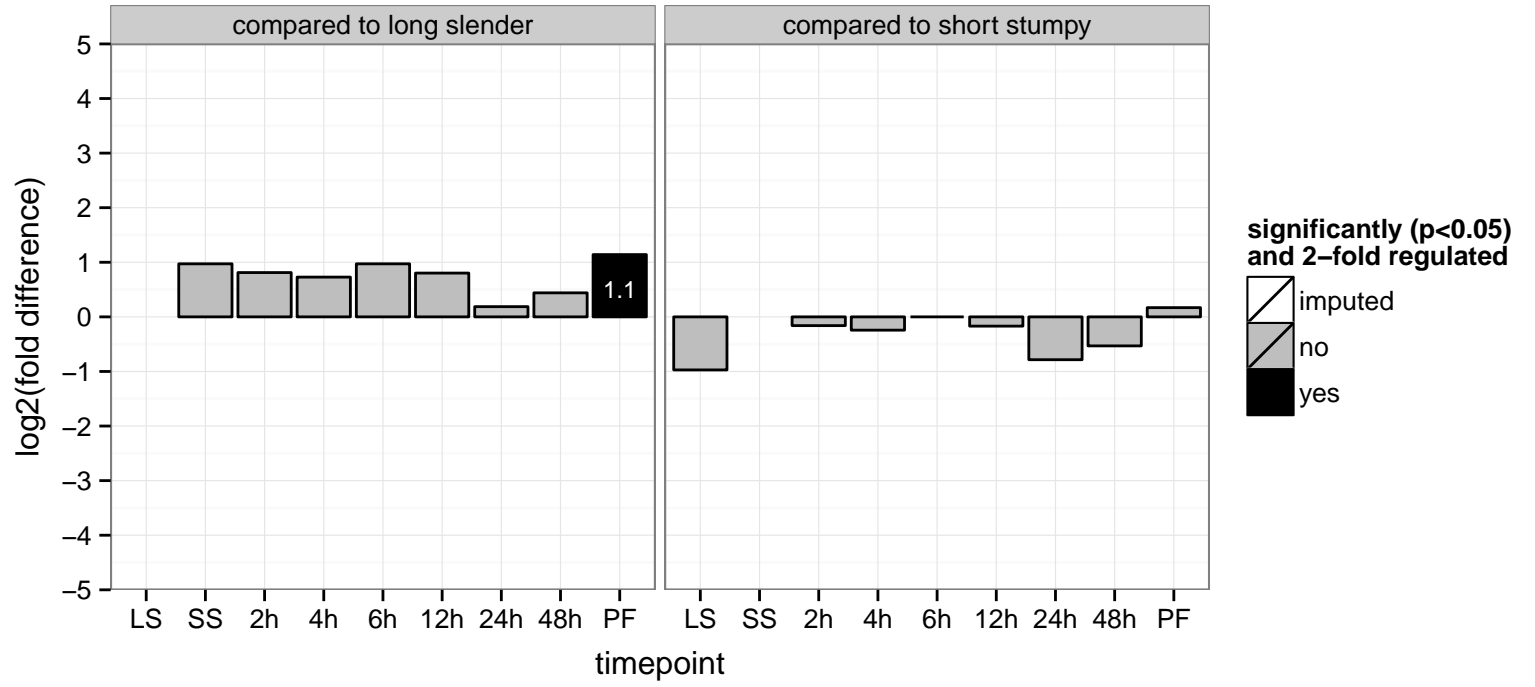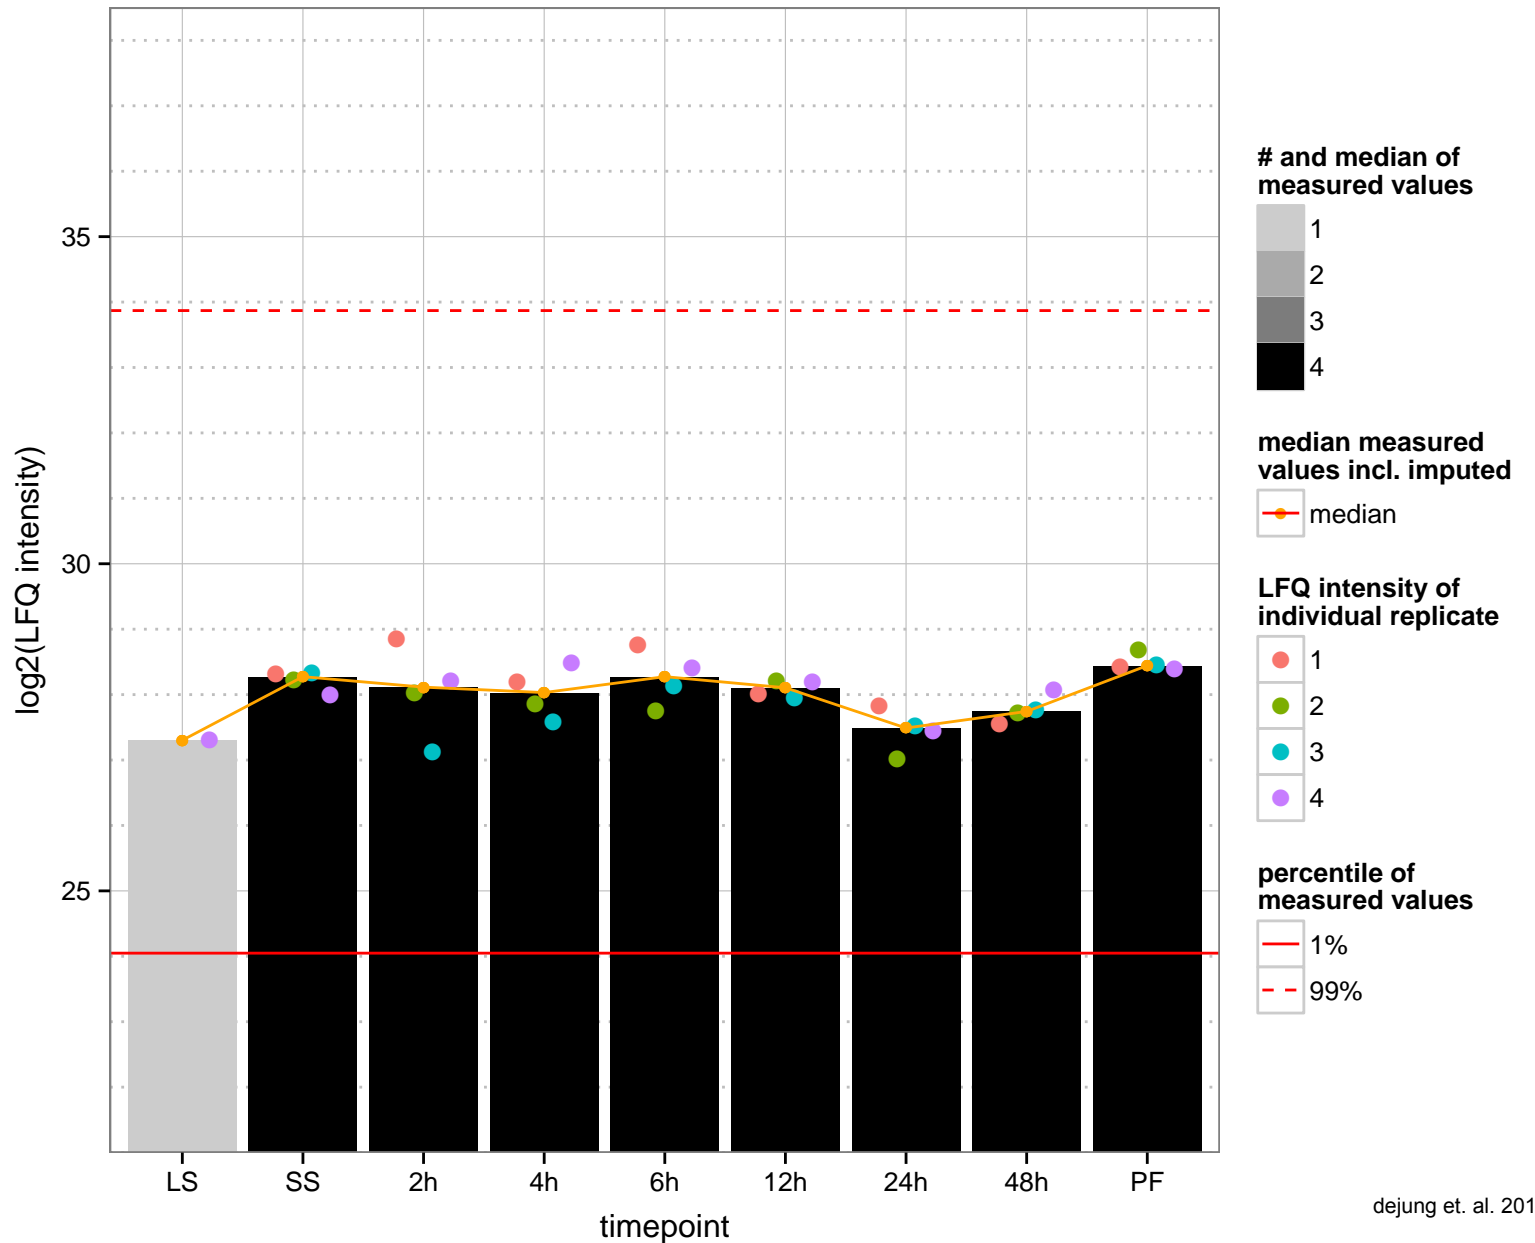

transcription initiation protein, putative  
 Tb927.2.5030  
 AGOF: structural constituent of ribosome  
 AGOC: ribosome  
 AGOP: regulation of transcription, DNA-dependent  
 PGO: null  
 PGOC: null  
 PGOP: null

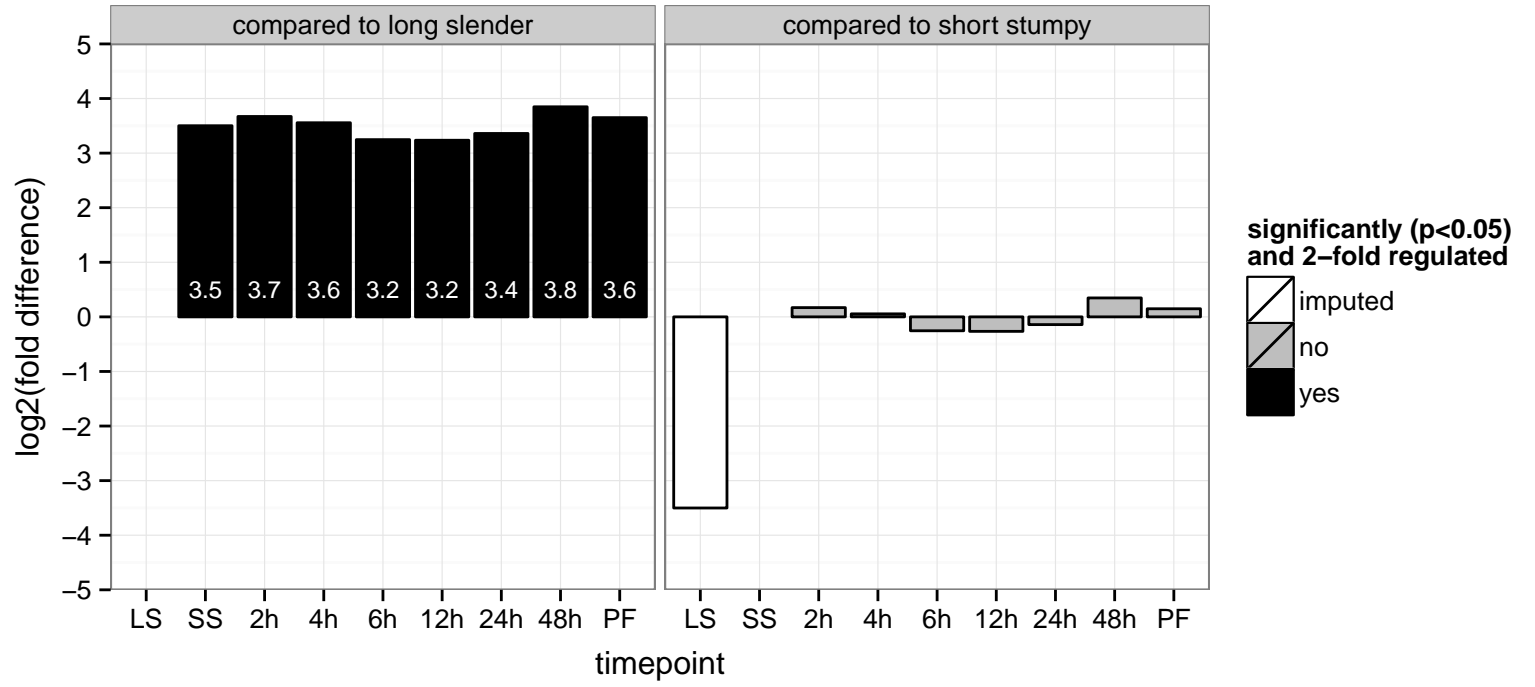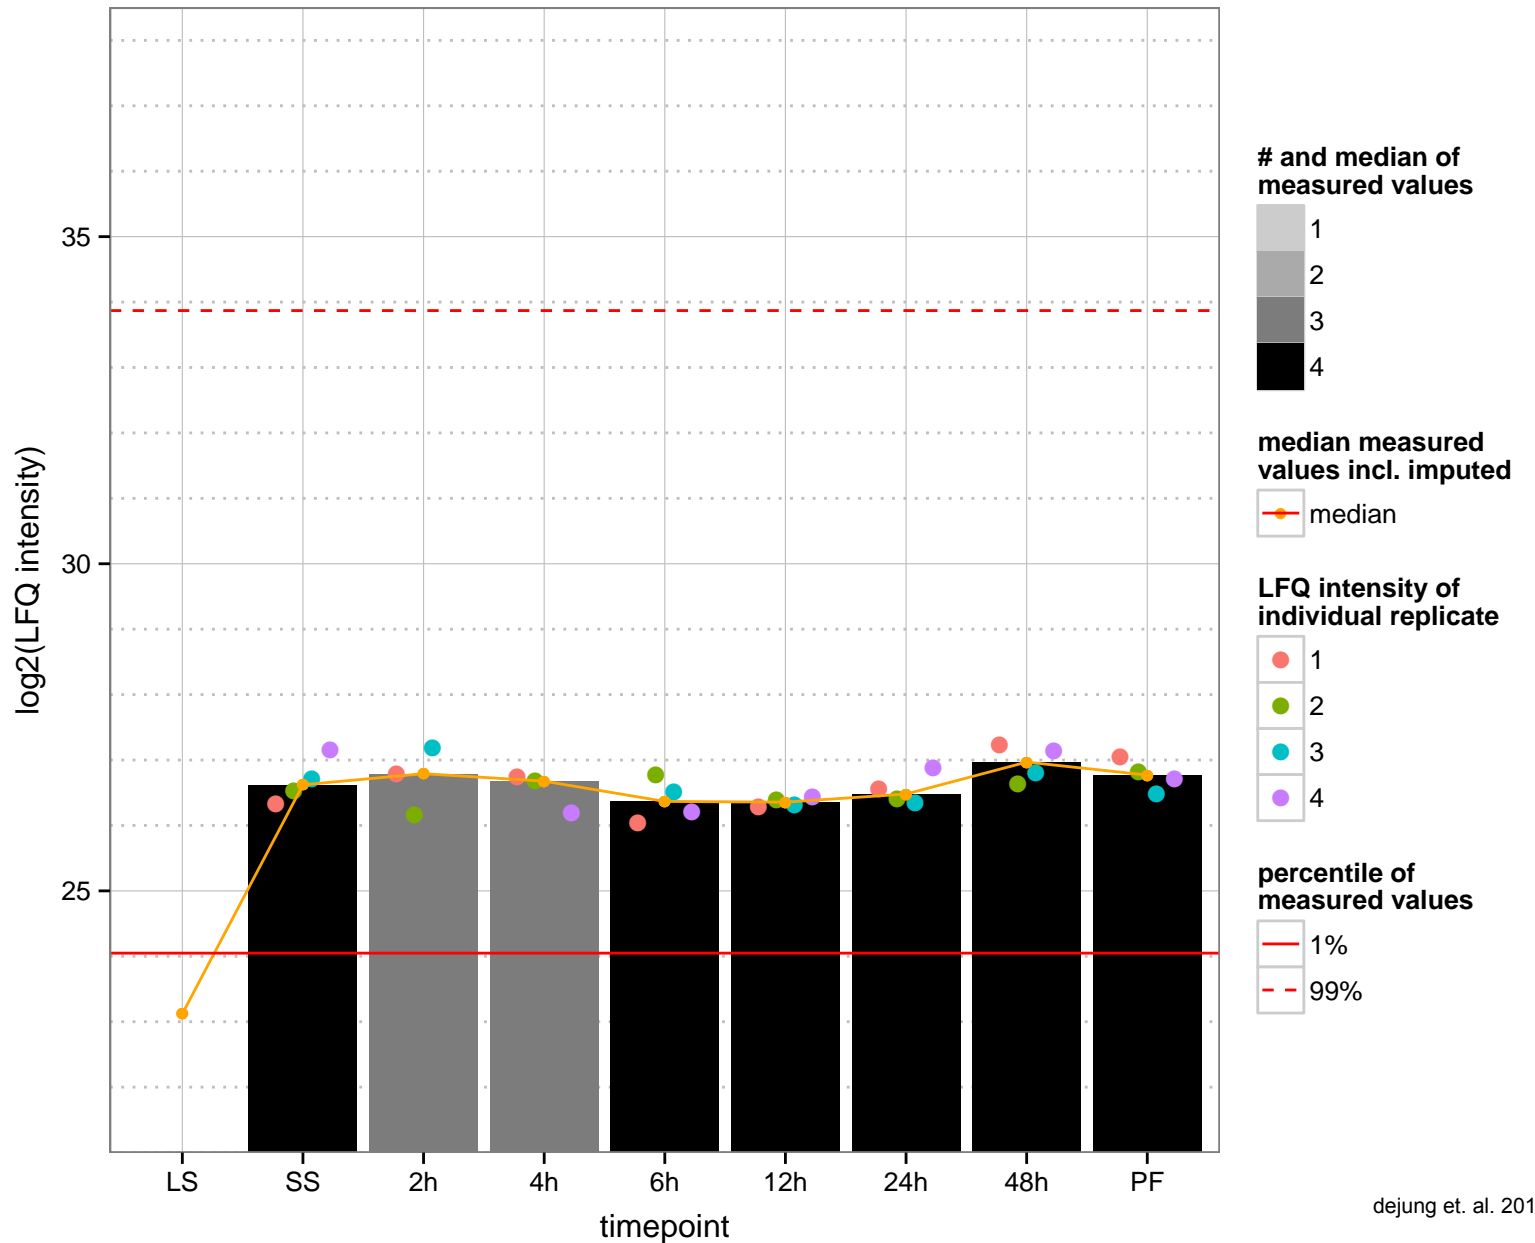

GTP binding protein, putative  
 Tb927.2.5060  
 AGOF: GTP binding  
 AGOC: intracellular  
 AGOP: null  
 PGOF: GTP binding  
 PGOC: null  
 PGOP: null

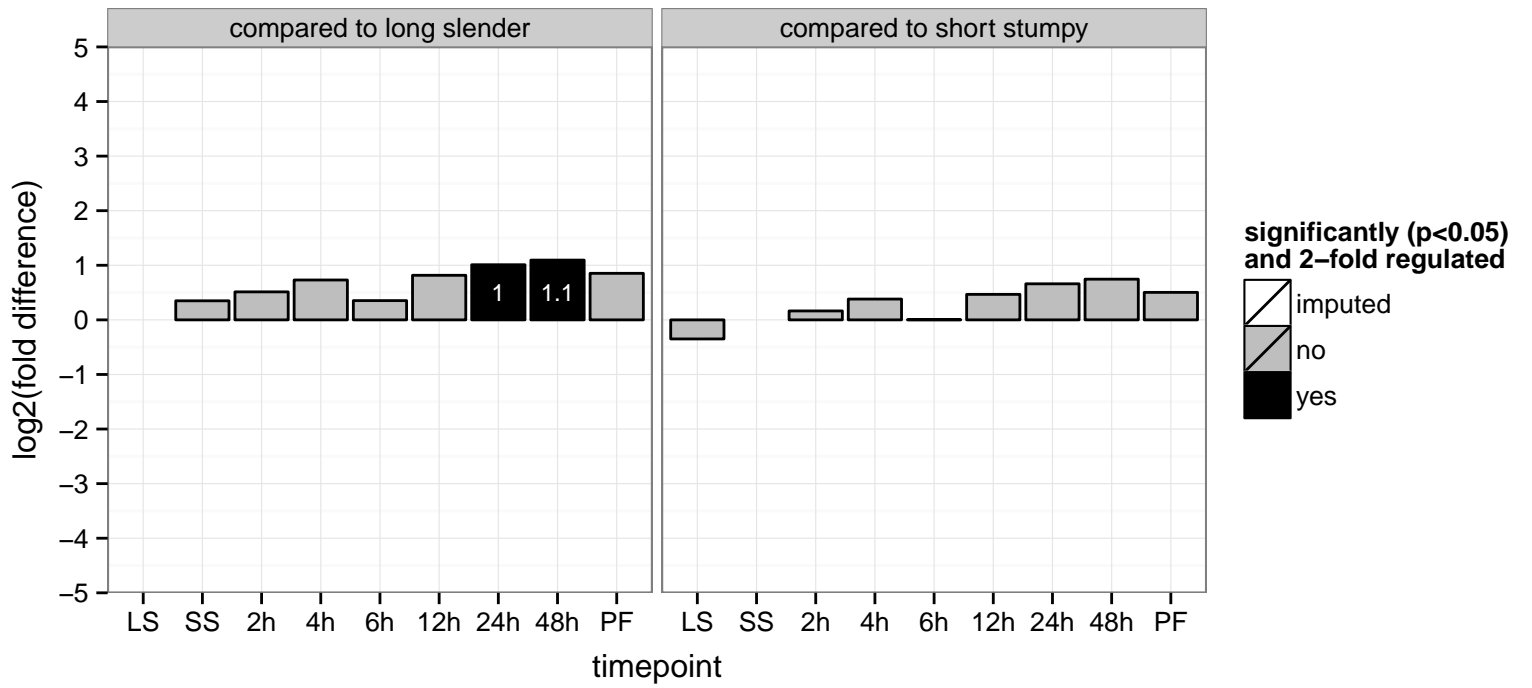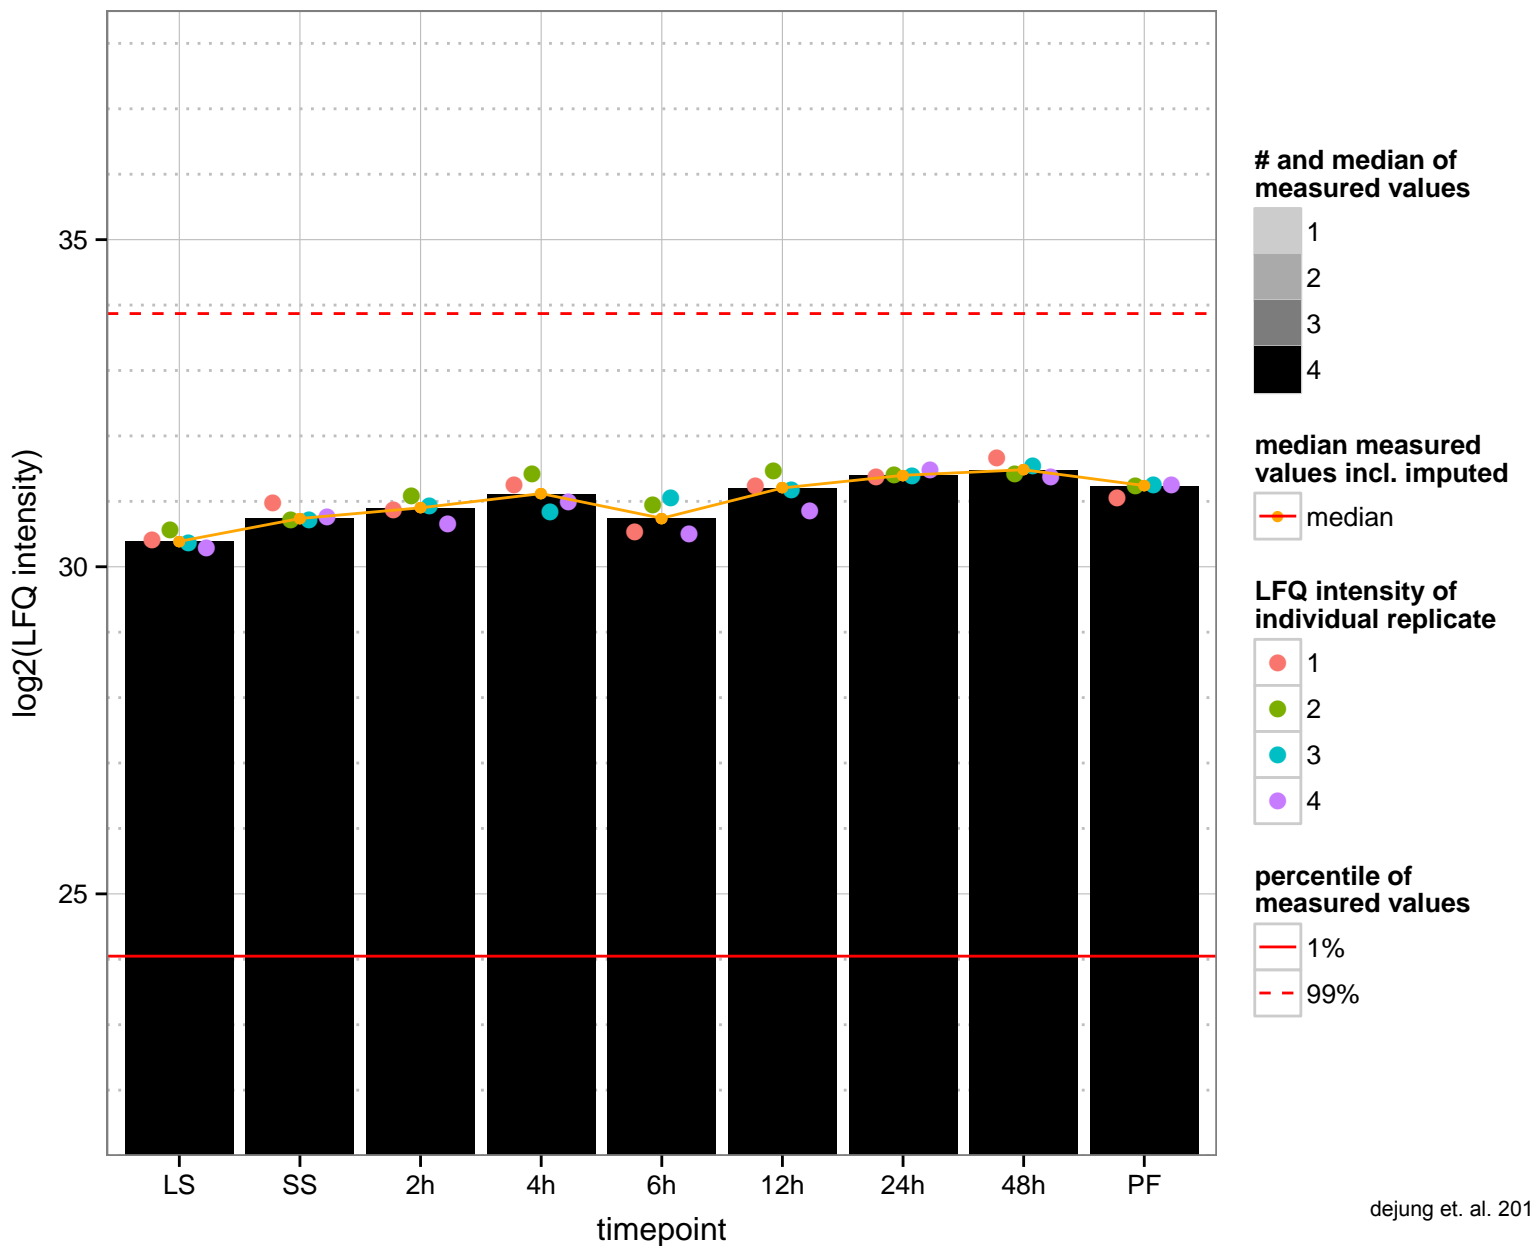

retrotransposon hot spot (RHS) protein, putative, retrotransposon hot spot protein 4 (RHS4)  
 Tb927.2.510  
 AGOF: null  
 AGOC: null, nucleus  
 AGOP: null  
 PGO: null  
 PGOC: null  
 PGOP: null

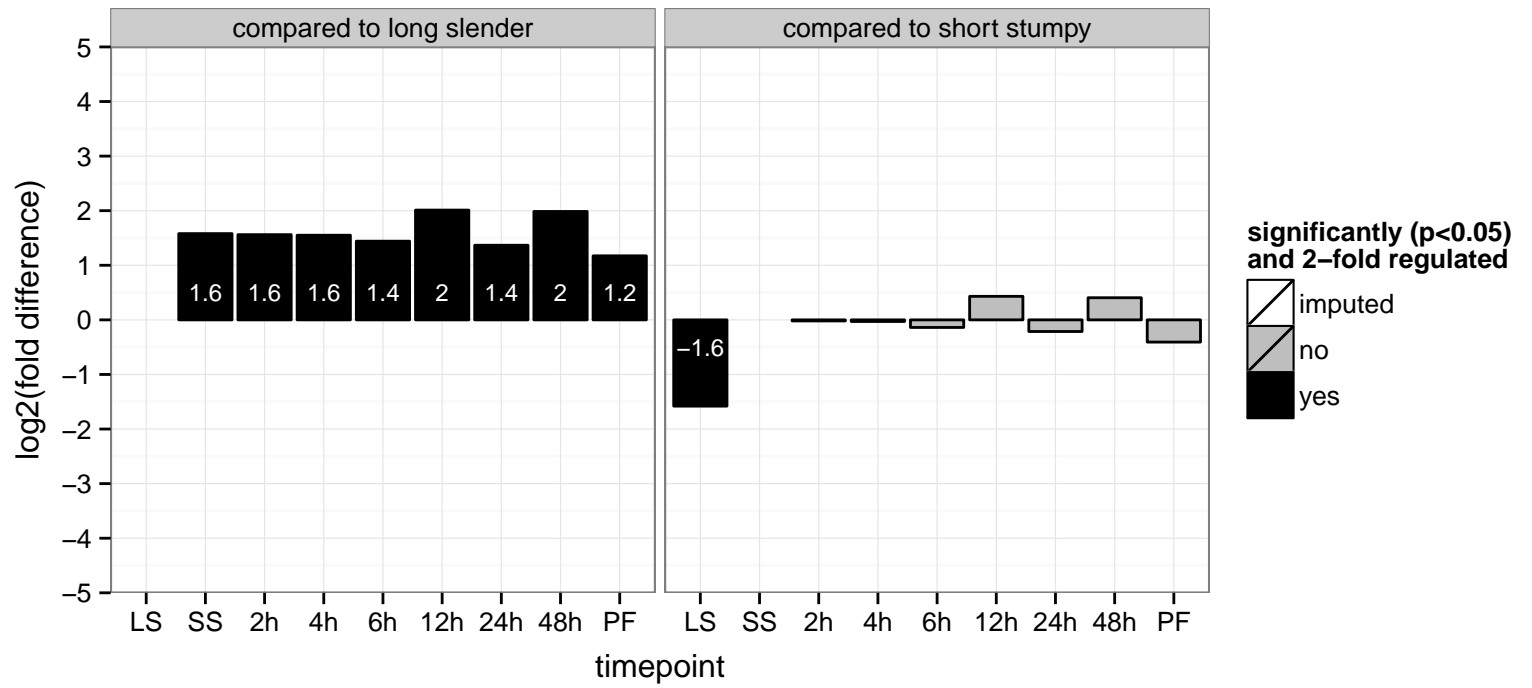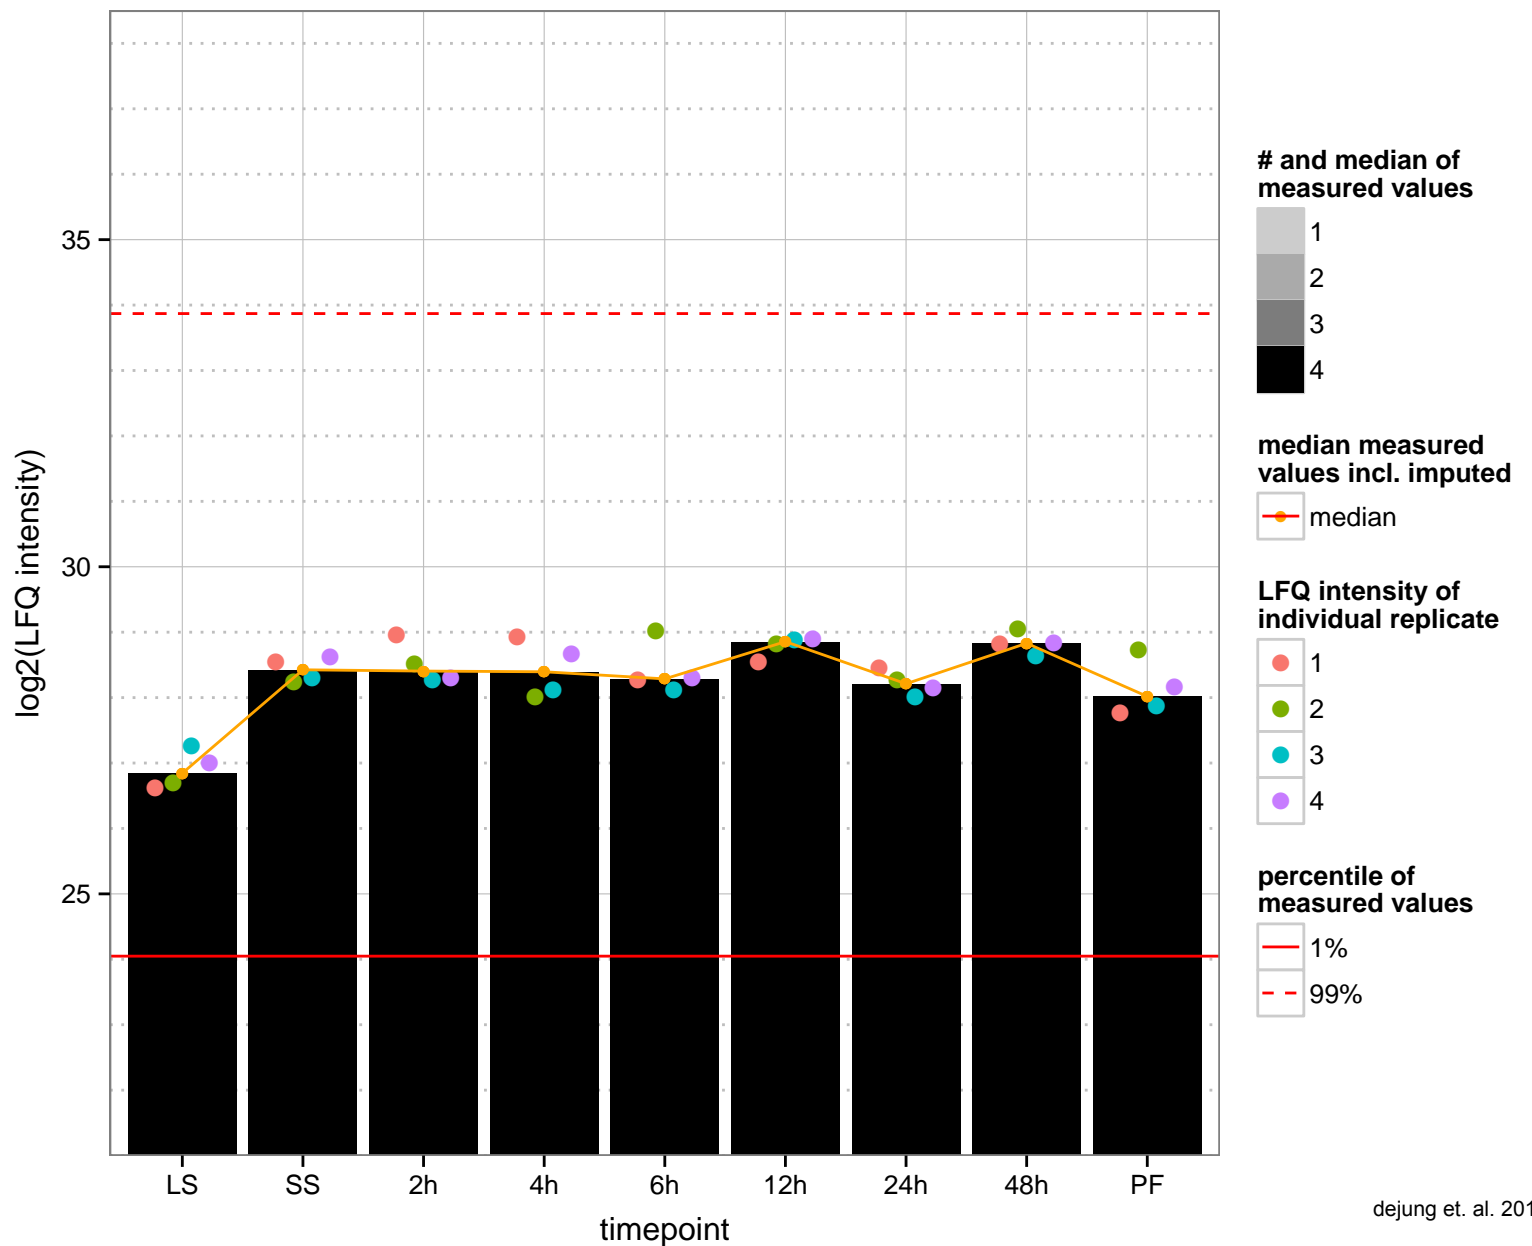



TPR-repeat protein, putative  
 Tb927.2.5150  
 AGOF: null  
 AGOC: null  
 AGOP: null  
 PGOF: protein binding  
 PGOC: null  
 PGOP: null

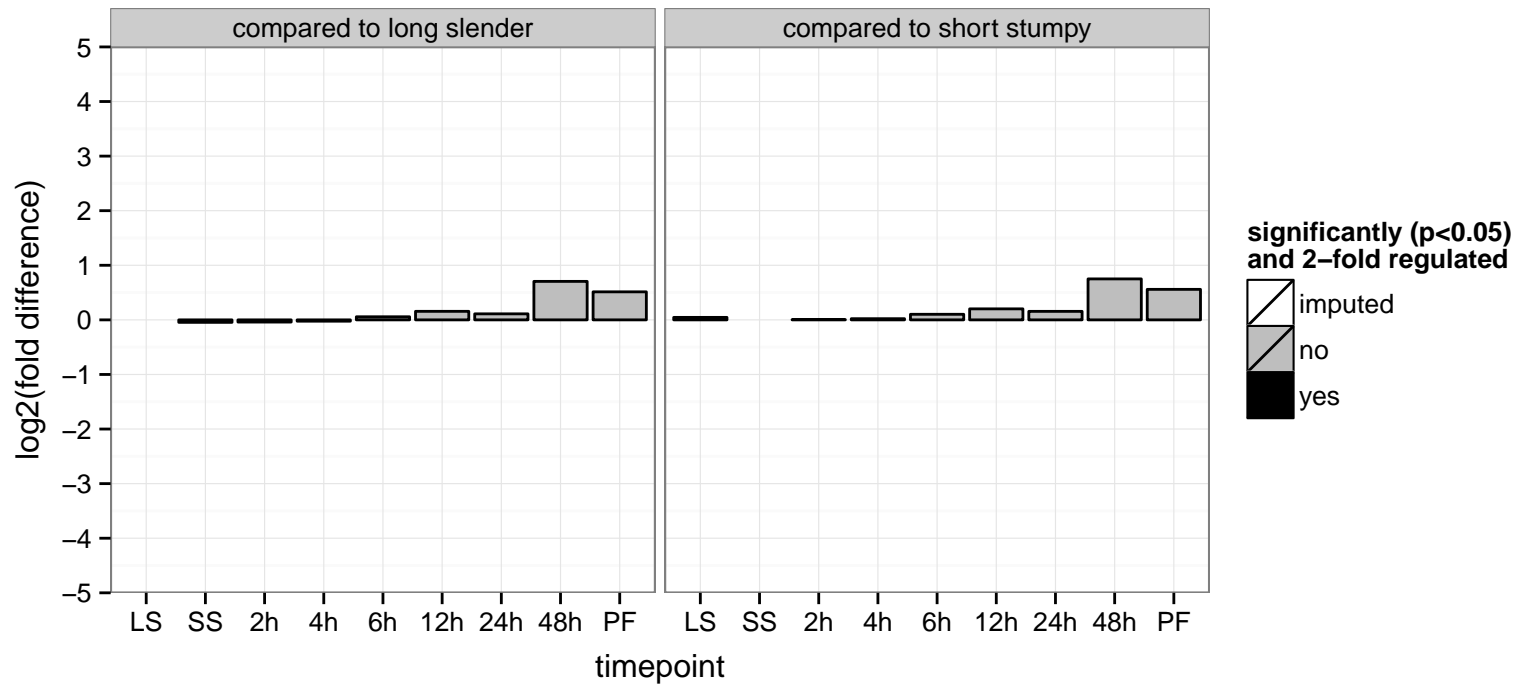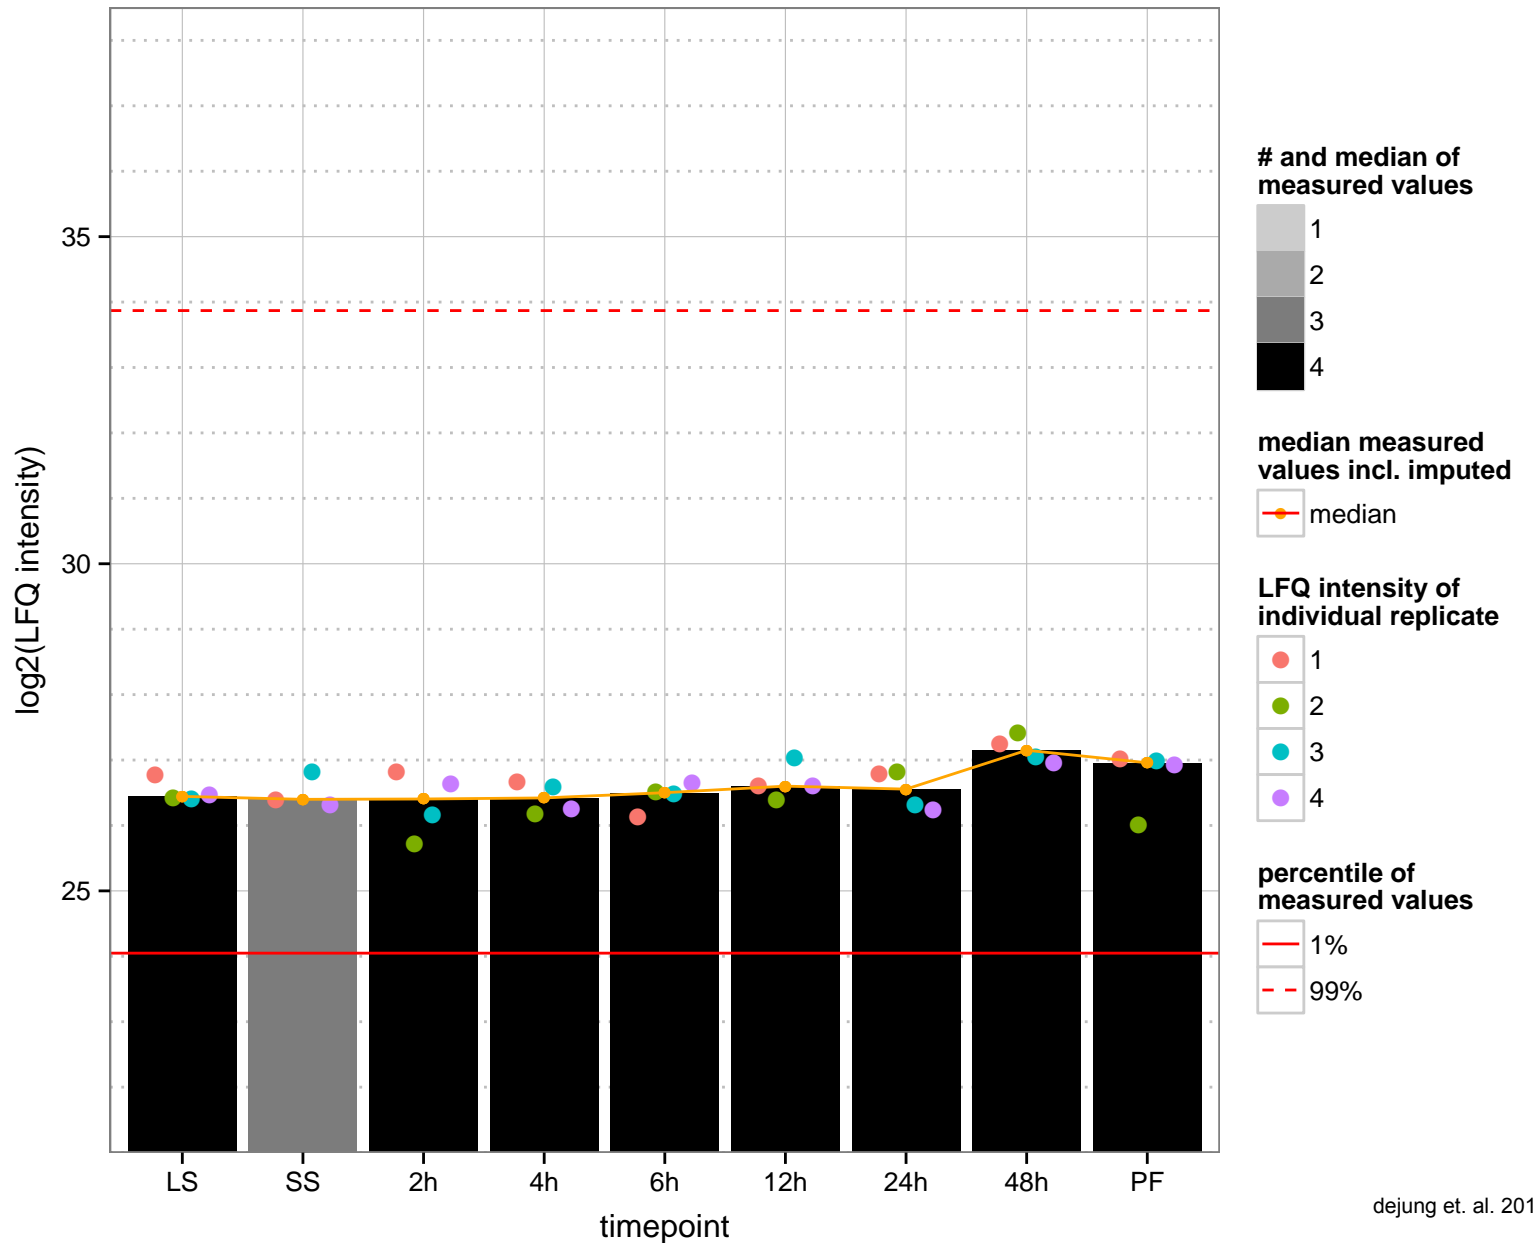

chaperone protein DNAj, putative

Tb927.2.5160

AGOF: chaperone binding, heat shock protein binding, unfolded protein binding

AGOC: null

AGOP: protein folding

PGOF: heat shock protein binding, unfolded protein binding

PGOC: null

PGOP: protein folding

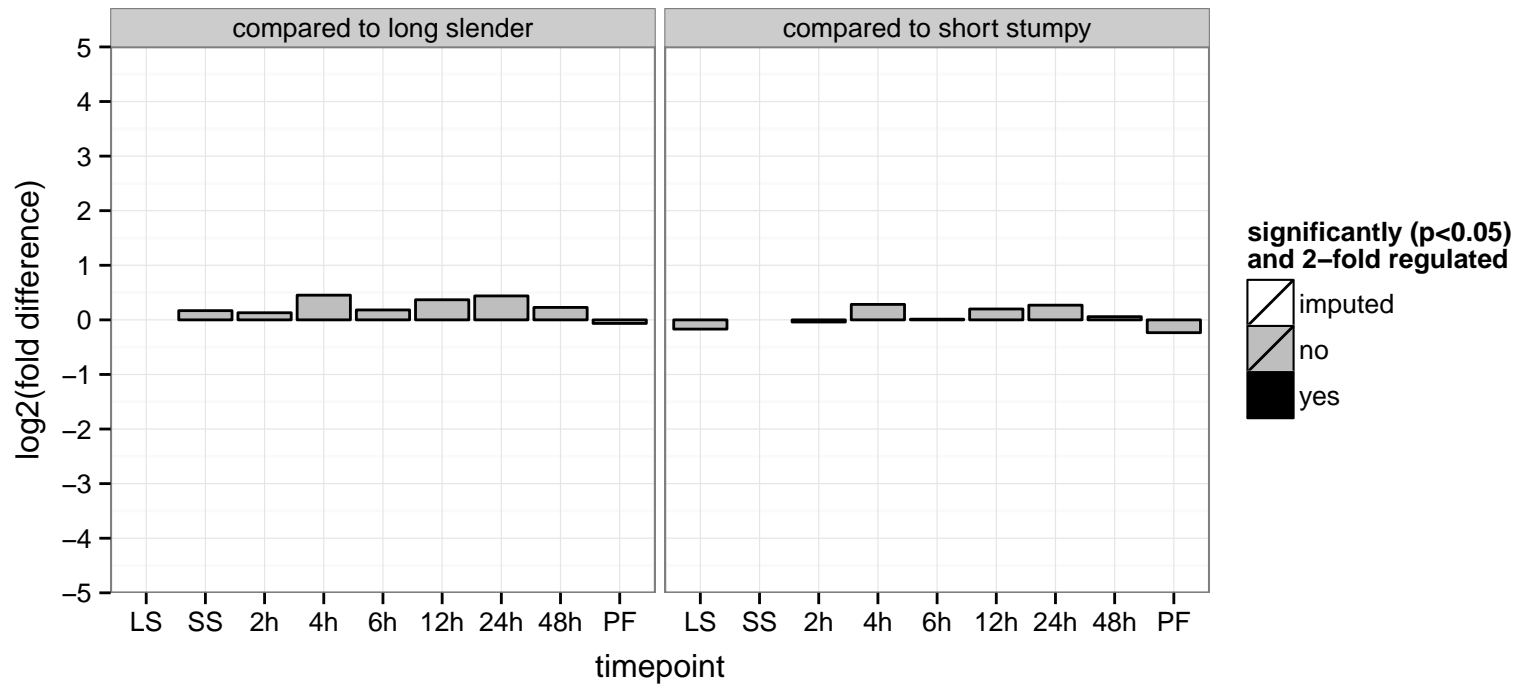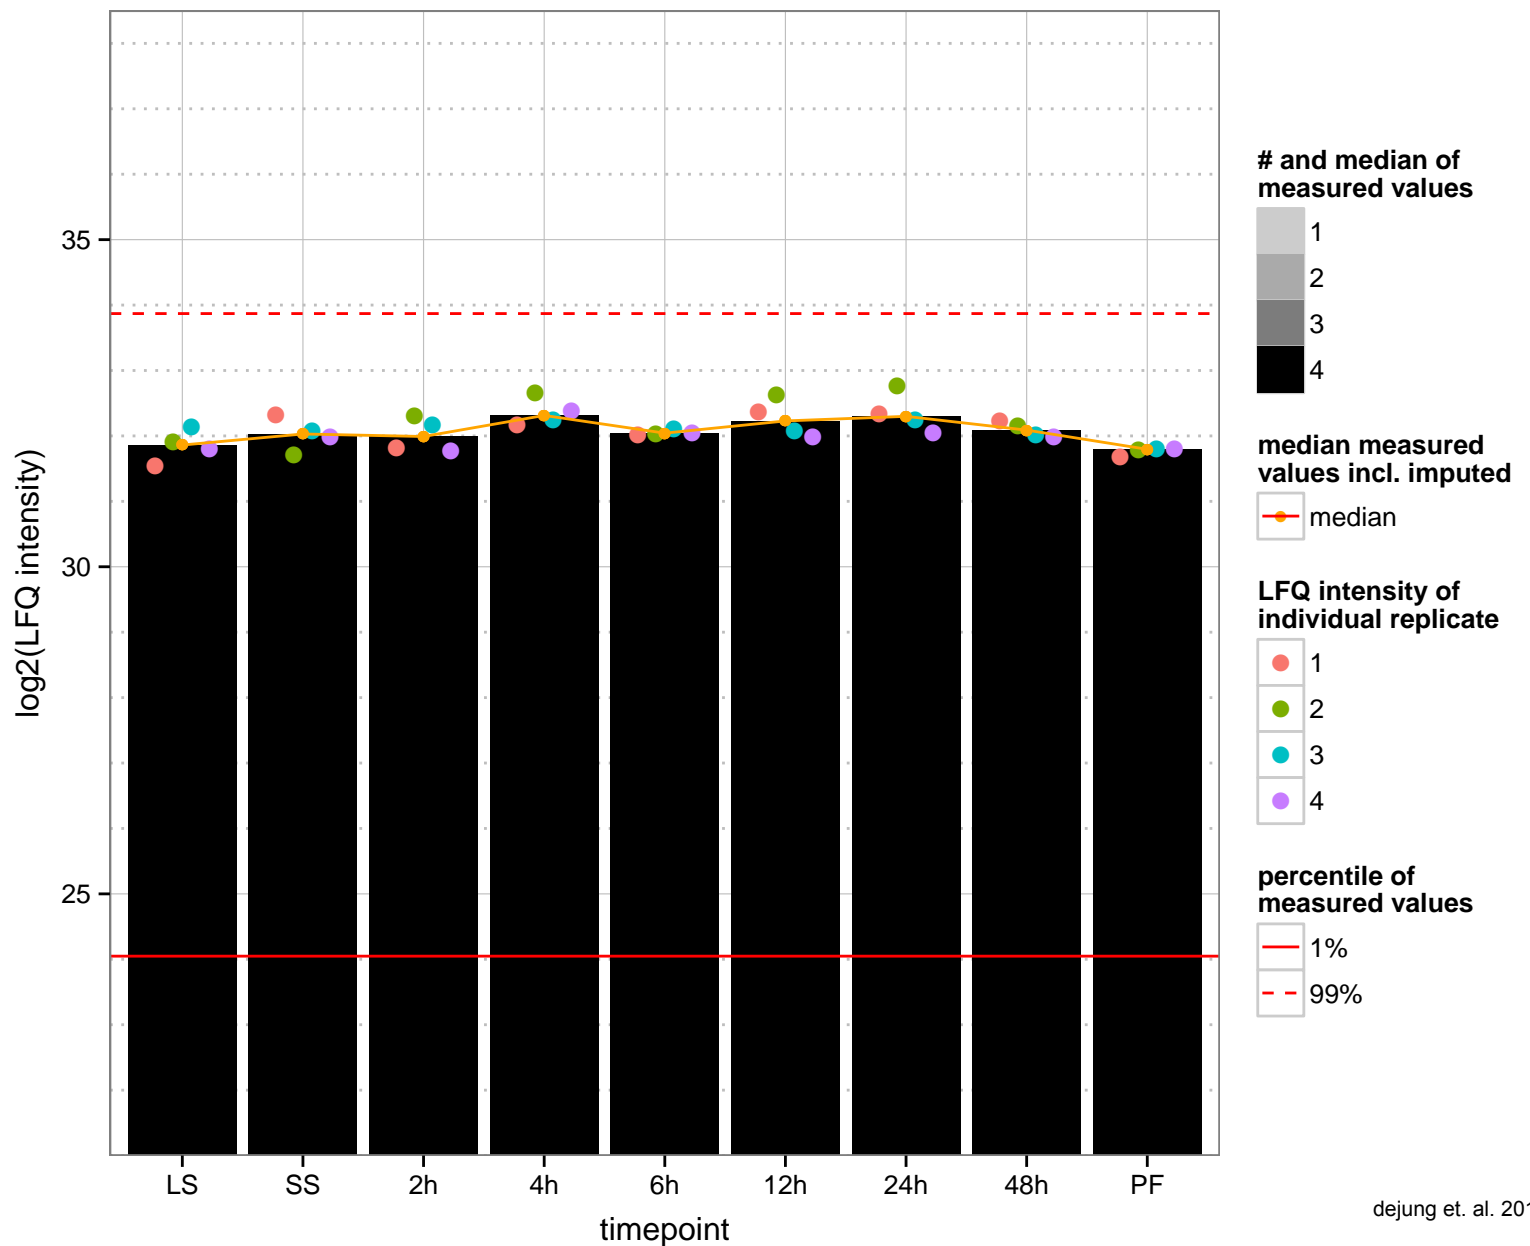

PRP19-like protein, putative (TbPRP19)  
 Tb927.2.5240  
 AGOF: ubiquitin-protein ligase activity  
 AGOC: ubiquitin ligase complex  
 AGOP: protein ubiquitination  
 PGOF: protein binding, ubiquitin-protein ligase activity  
 PGO: ubiquitin ligase complex  
 PGOP: protein ubiquitination

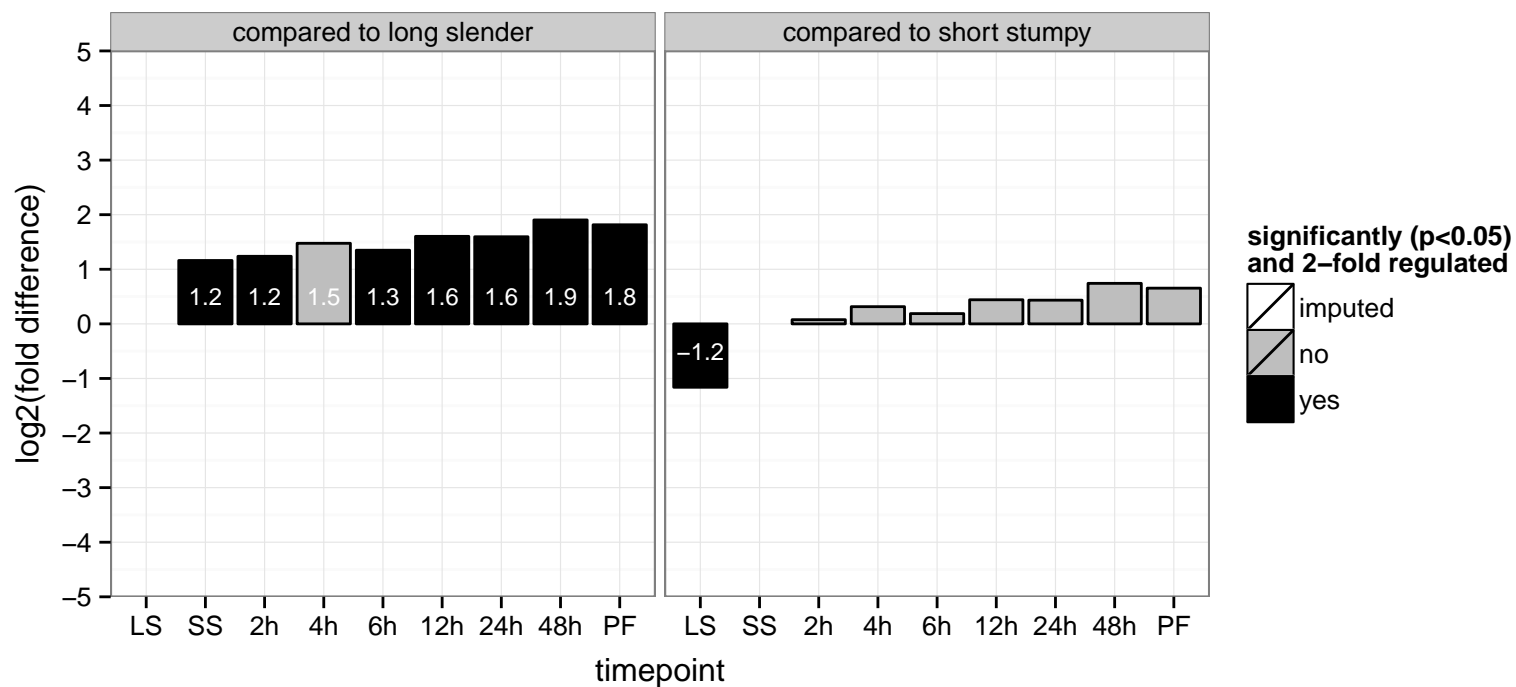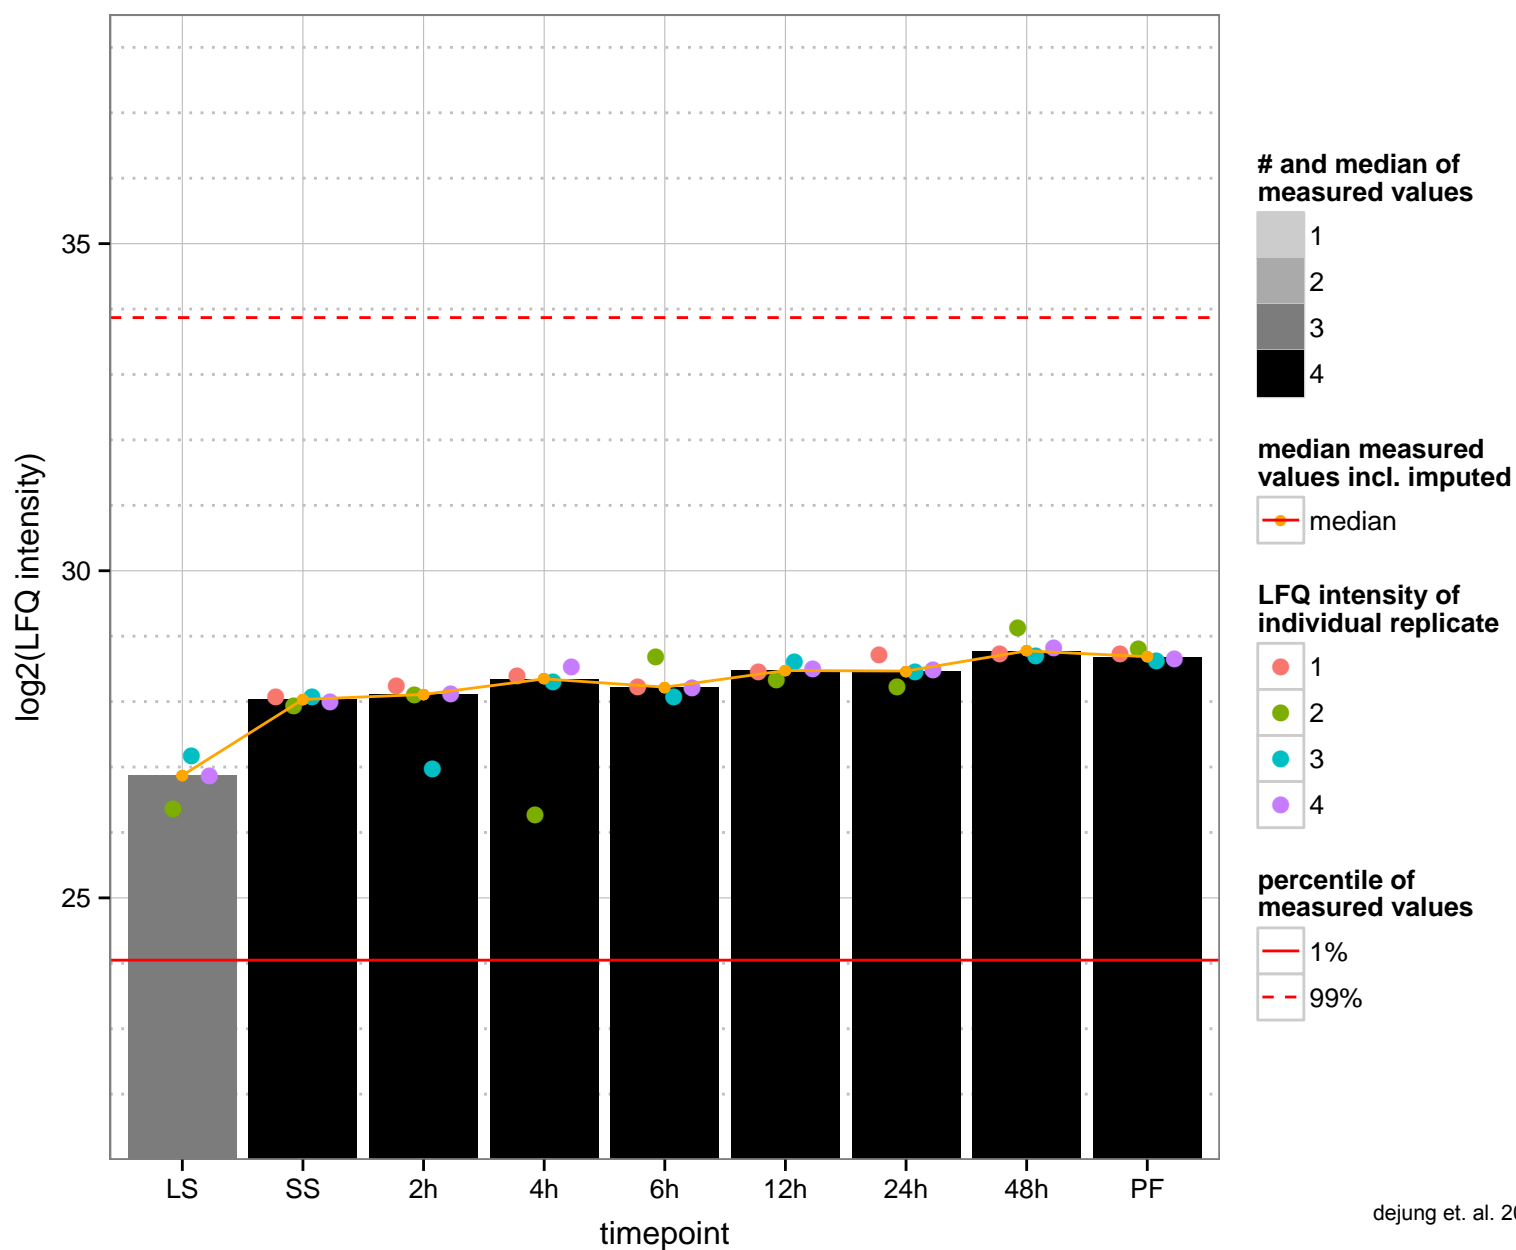

dynein heavy chain, putative  
 Tb927.2.5270  
 AGOF: ATP binding, ATPase activity  
 AGOC: cellular\_component, dynein complex  
 AGOP: microtubule-based movement  
 PGOF: microtubule motor activity, nucleoside-triphosphatase activity, nucleotide binding  
 PGO: dynein complex  
 PGOP: microtubule-based movement

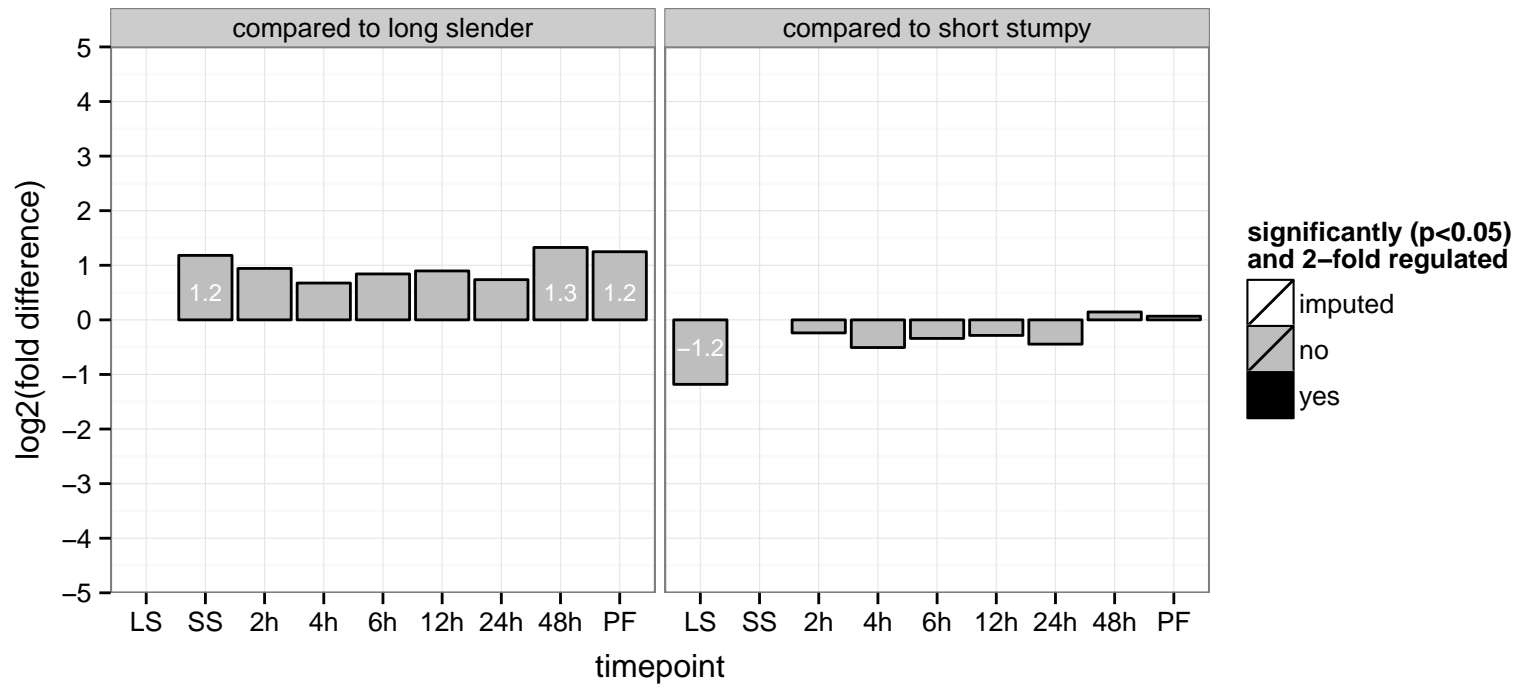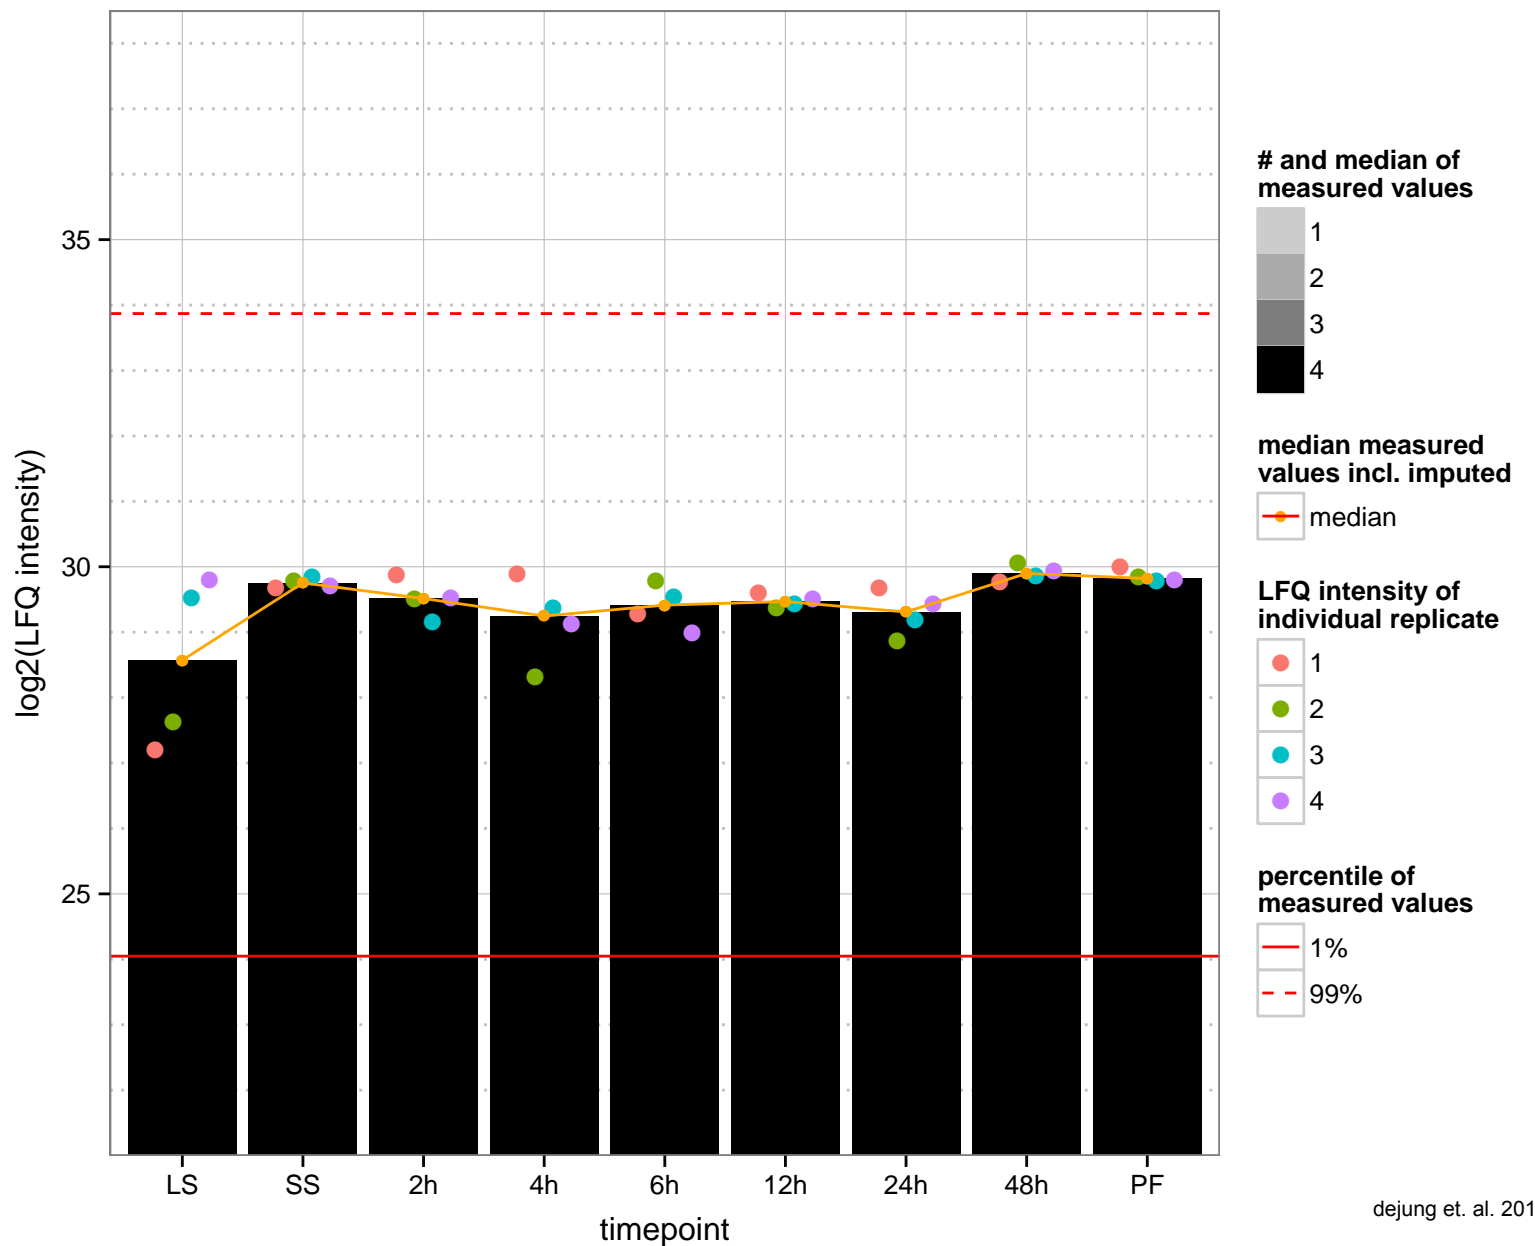

adenylate kinase, putative (ADKA)

Tb927.2.5660

AGOF: ATP binding, adenylate kinase activity

AGOC: cilium part

AGOP: nucleobase-containing compound metabolic process

PGOF: ATP binding, adenylate kinase activity, cAMP-dependent protein kinase regulator activity, nucleobase-containing compound metabolic process

PGOC: null

PGOP: nucleobase-containing compound metabolic process, signal transduction

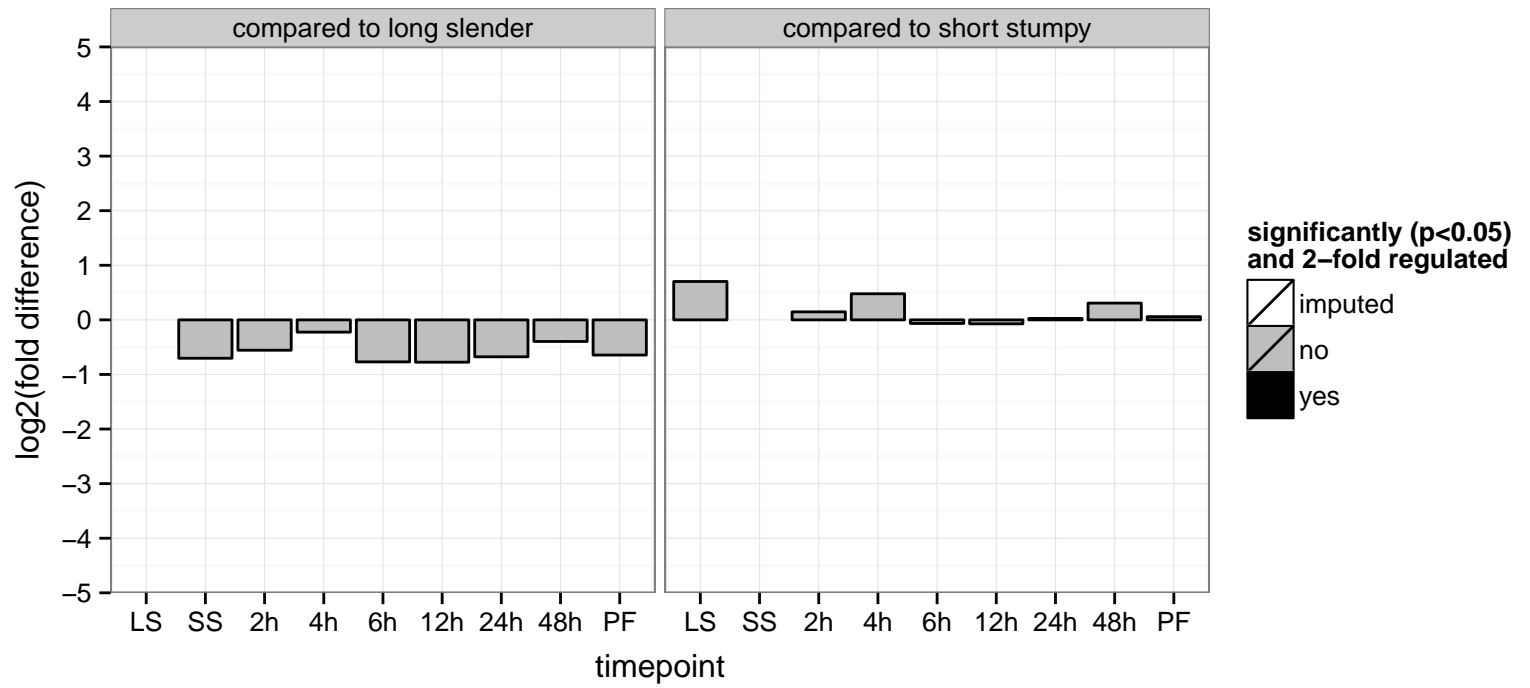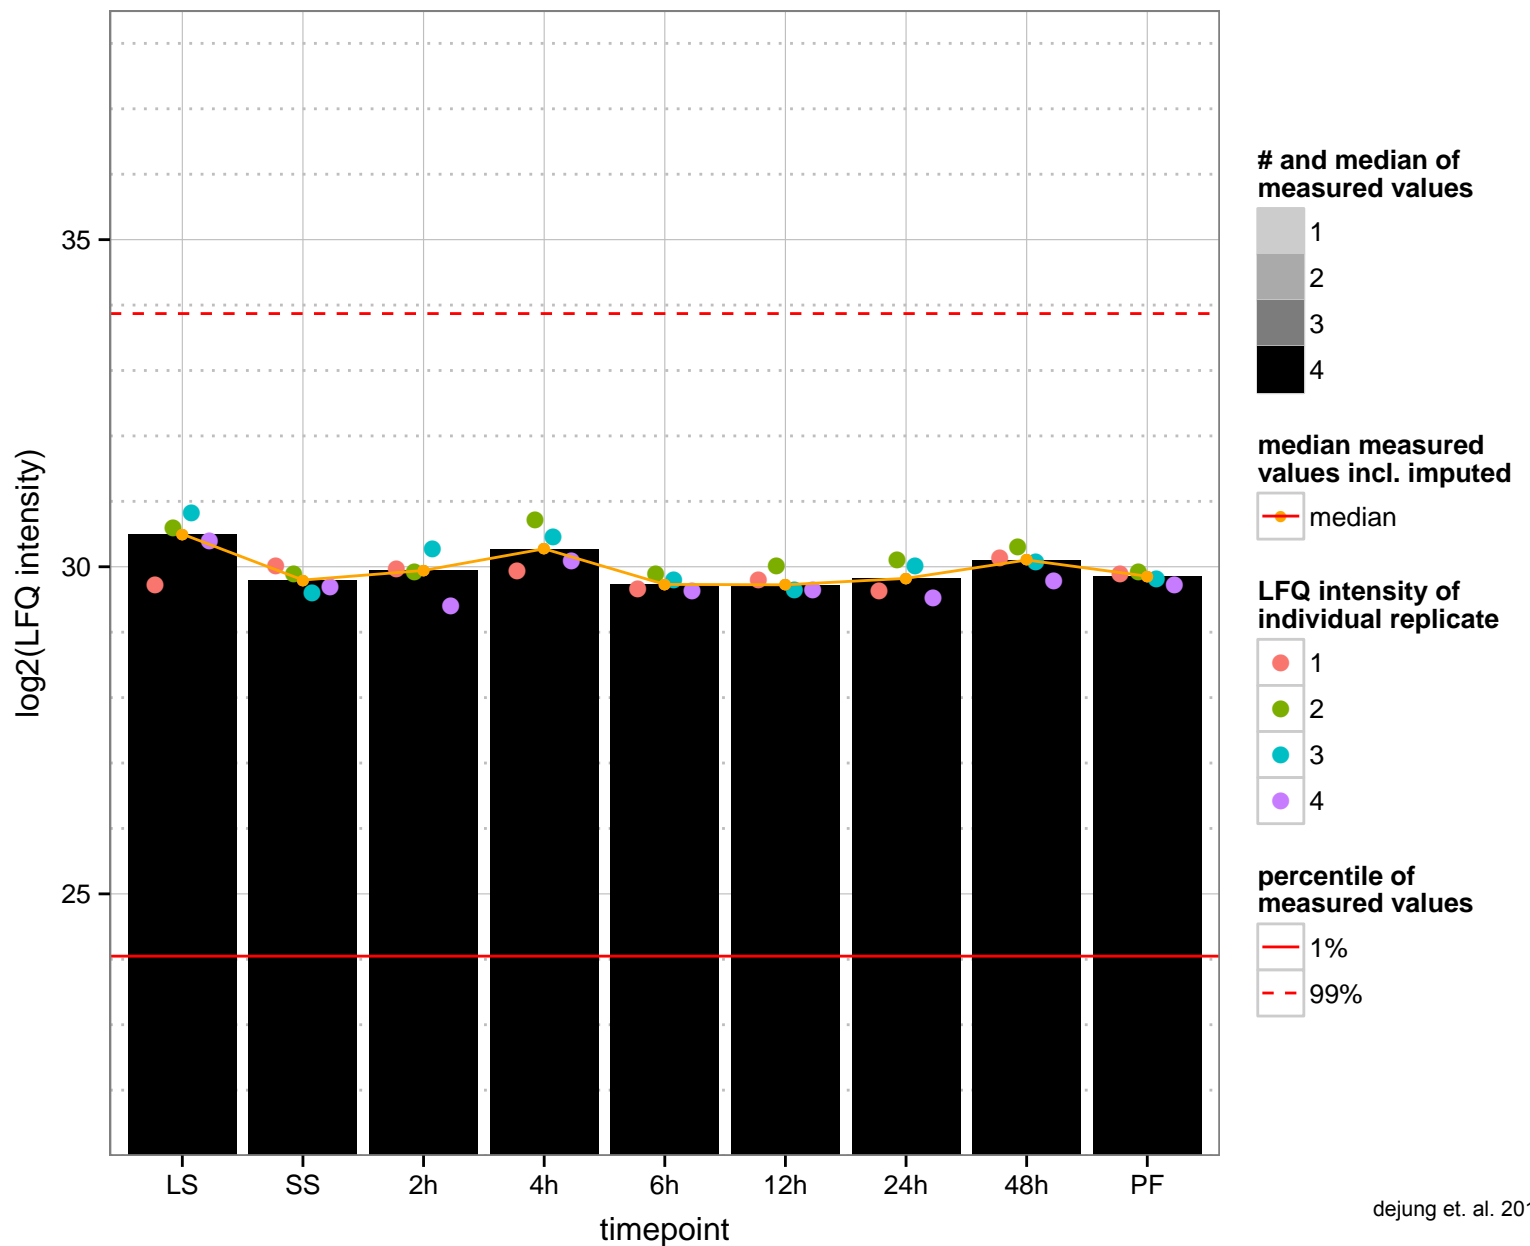

hypothetical protein, conserved  
 Tb927.2.5760  
 AGOF: null  
 AGOC: null  
 AGOP: null  
 PGOF: null  
 PGO: null  
 PGOP: null

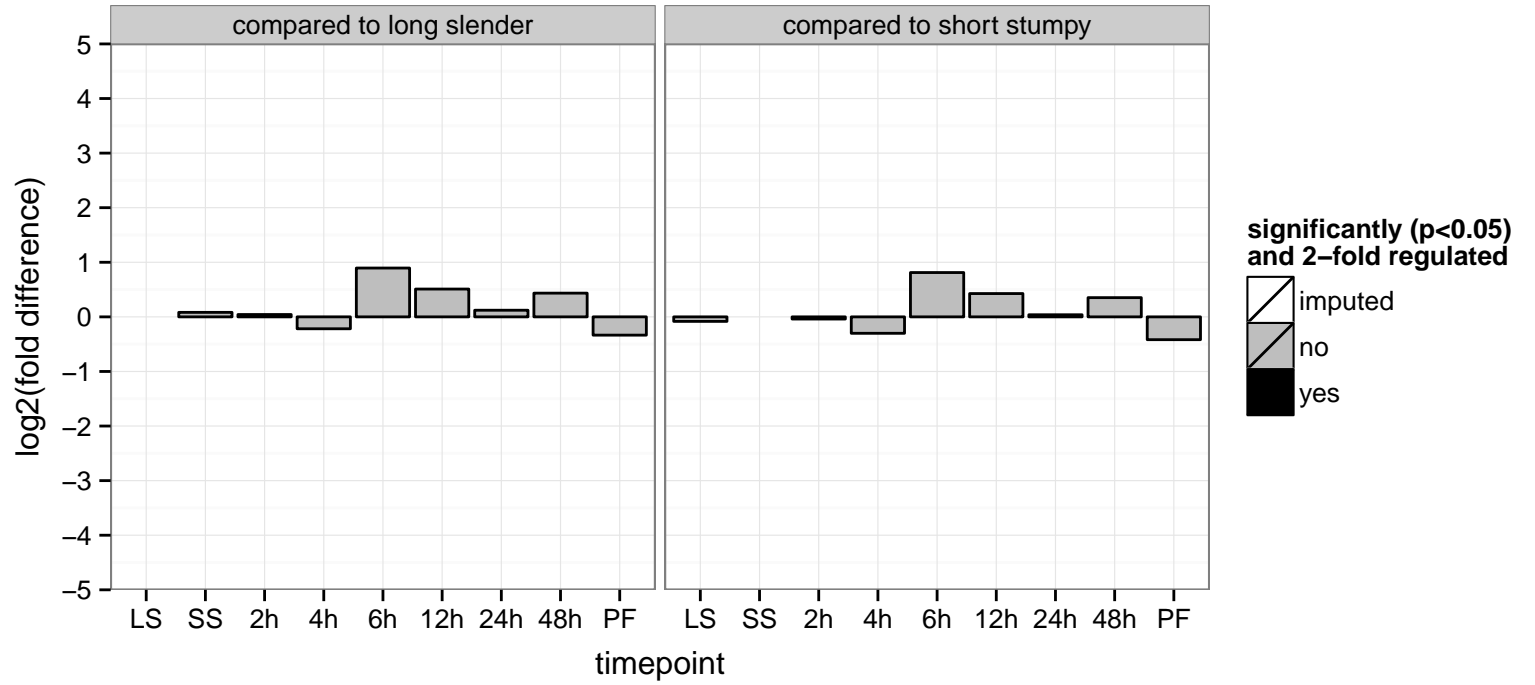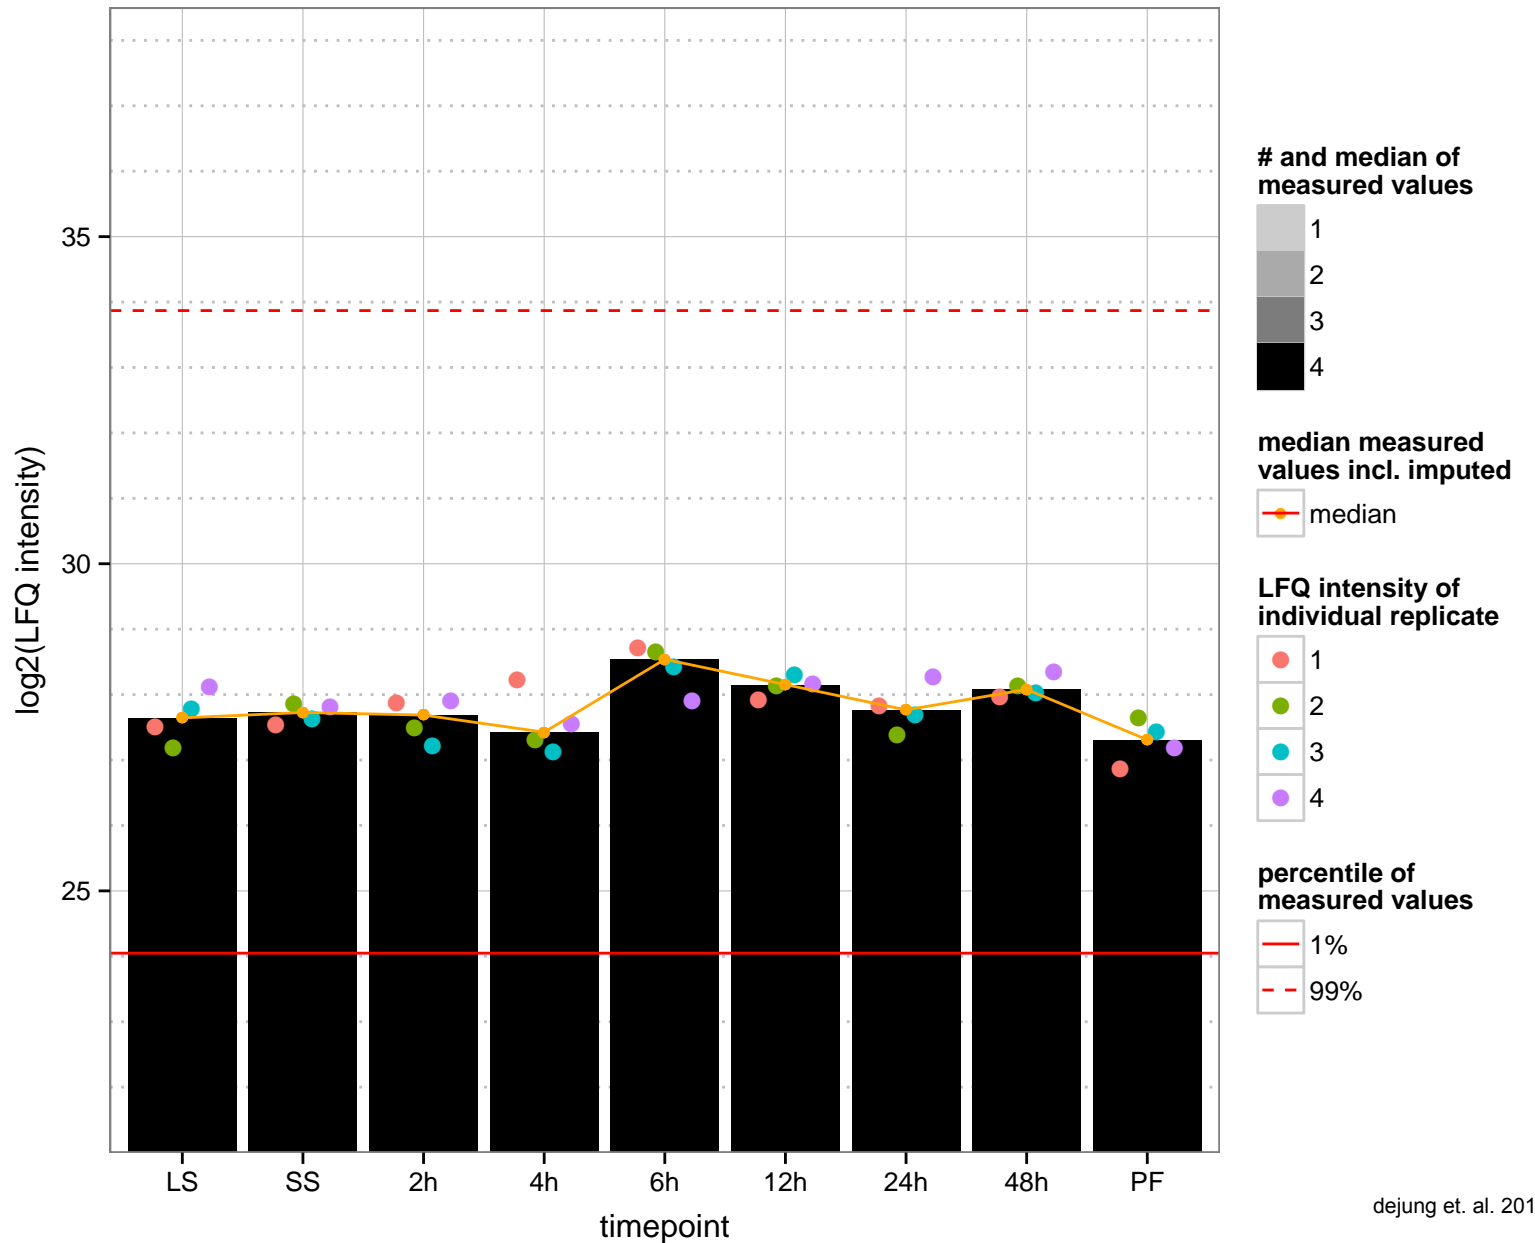

hypothetical protein, conserved  
 Tb927.2.5810  
 AGOF: null  
 AGOC: null  
 AGOP: null  
 PGO: nucleic acid binding  
 PGOC: null  
 PGOP: null

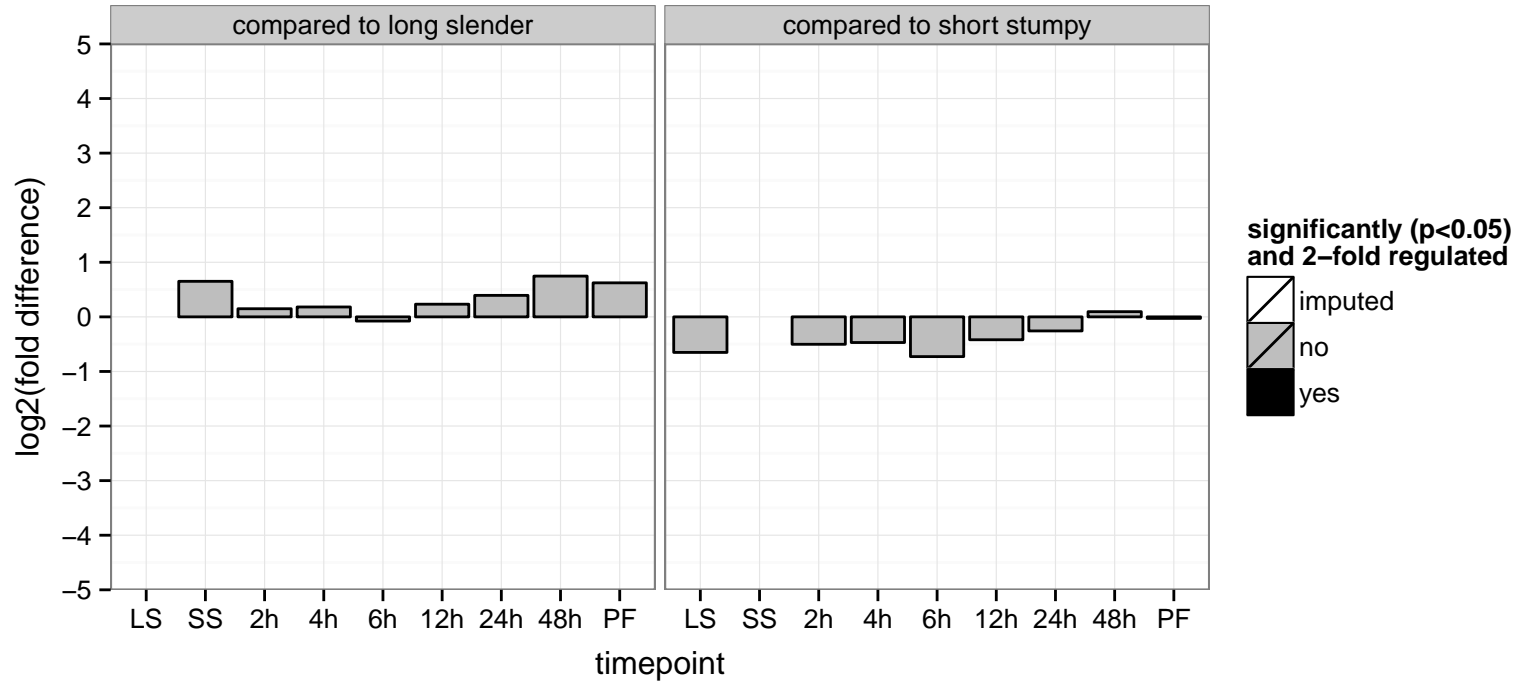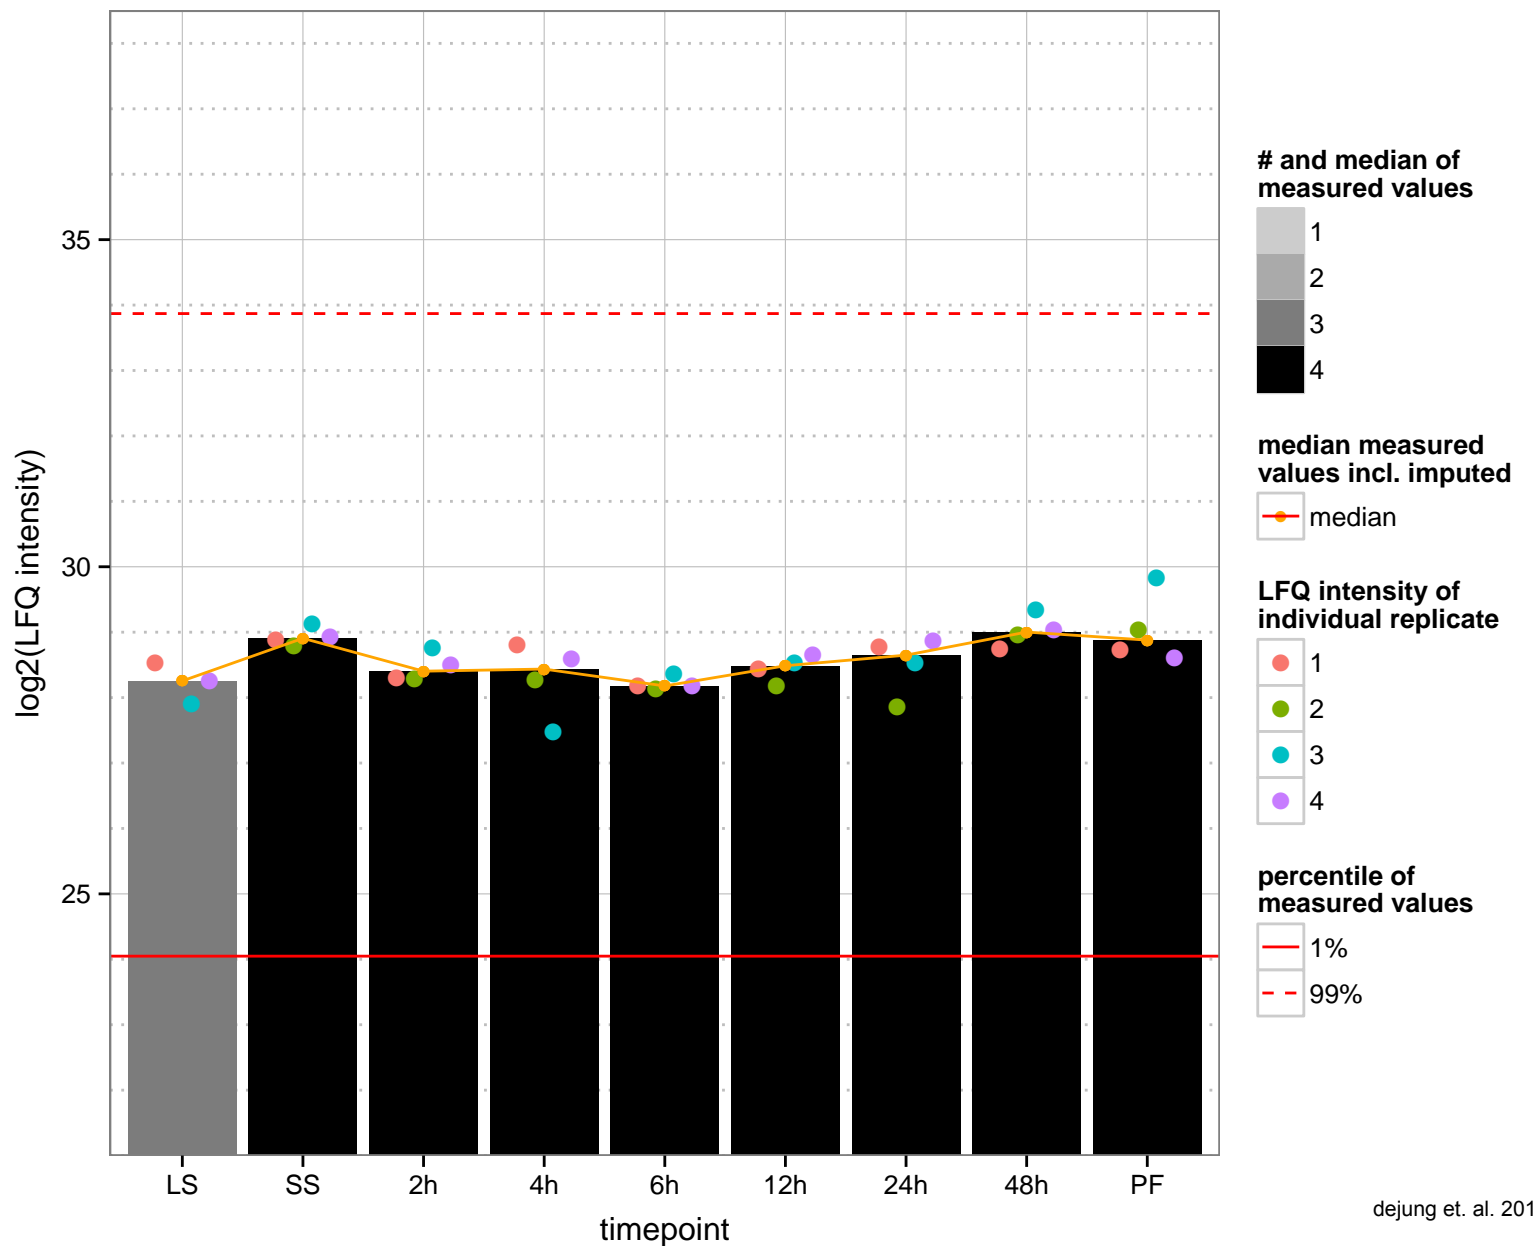

hypothetical protein, conserved  
 Tb927.2.5820  
 AGOF: null  
 AGOC: null  
 AGOP: null  
 PGOF: binding  
 PGO: null  
 PGOP: null

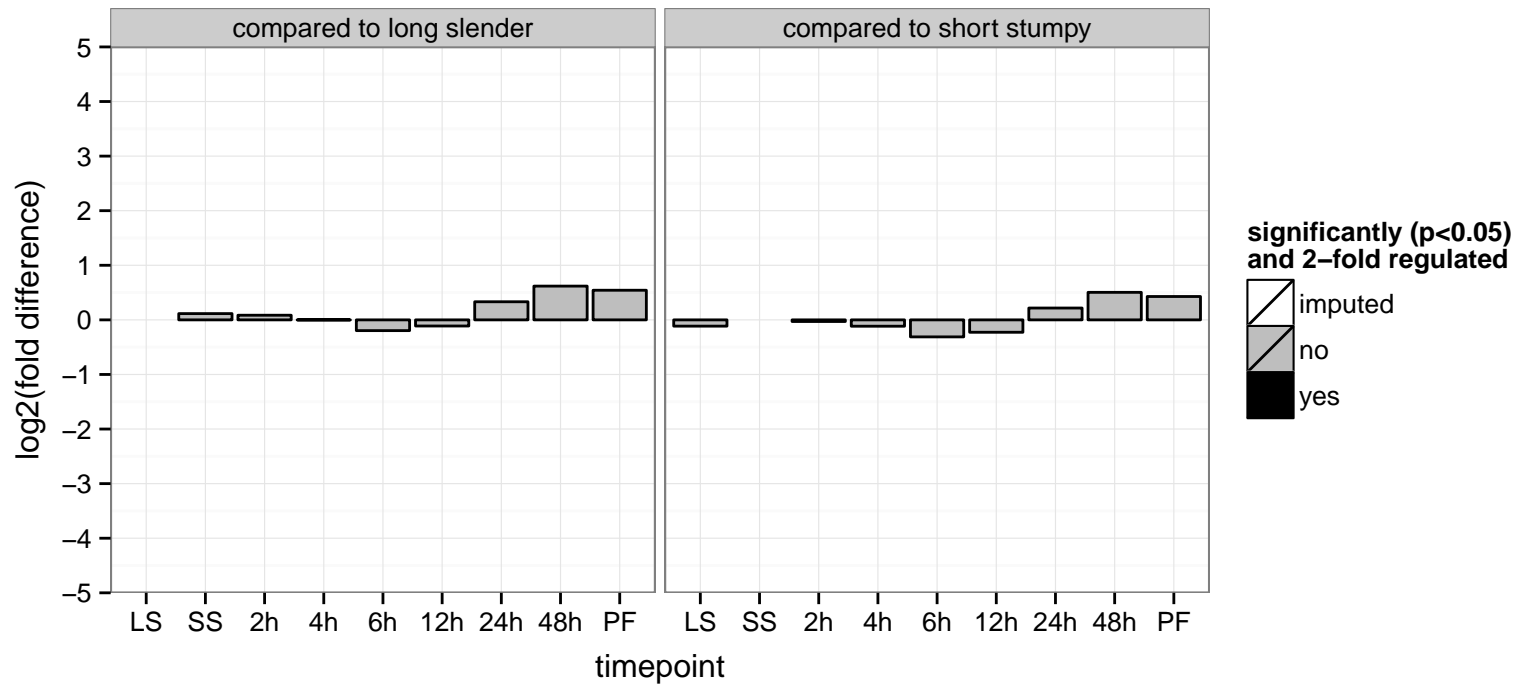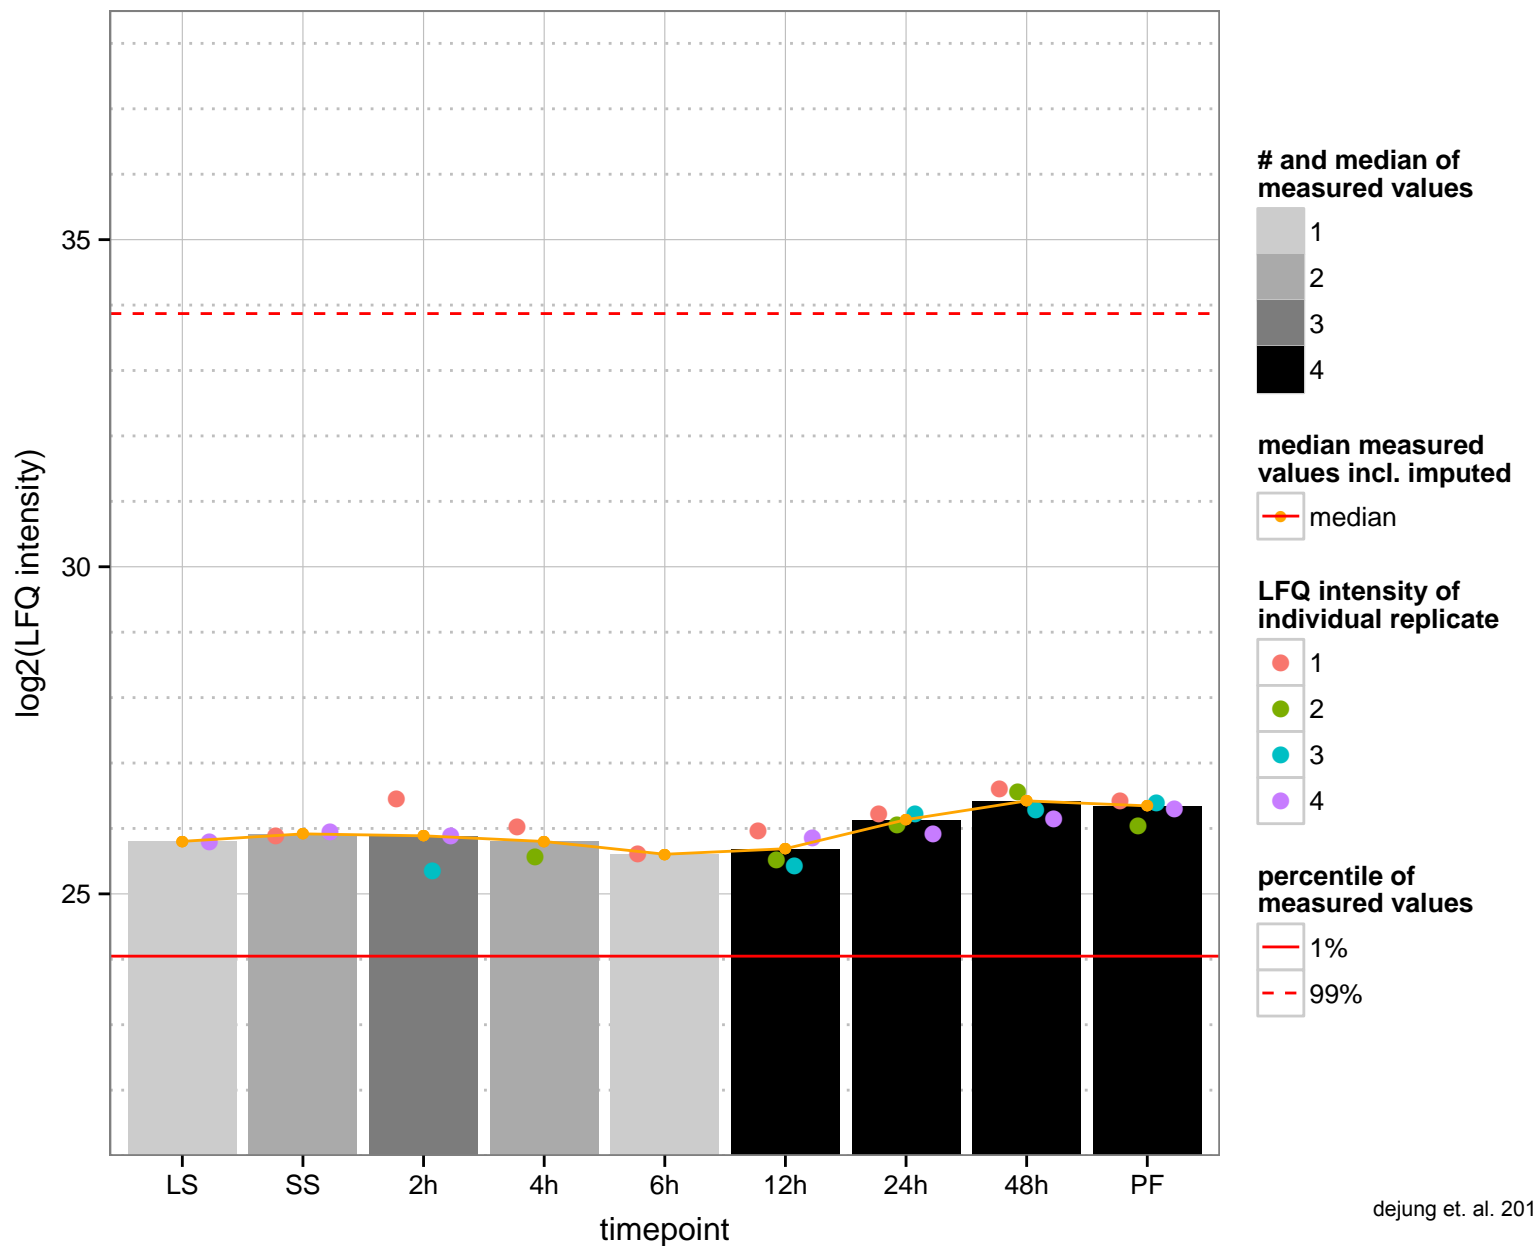



small nuclear ribonucleoprotein SmD2 (Sm-D2)

Tb927.2.5850

AGOF: snRNA binding

AGOC: nucleus, small nuclear ribonucleoprotein complex, small nucleolar ribonucleoprotein complex

AGOP: nuclear mRNA trans splicing, SL addition

PGOF: null

PGOC: null

PGOP: null

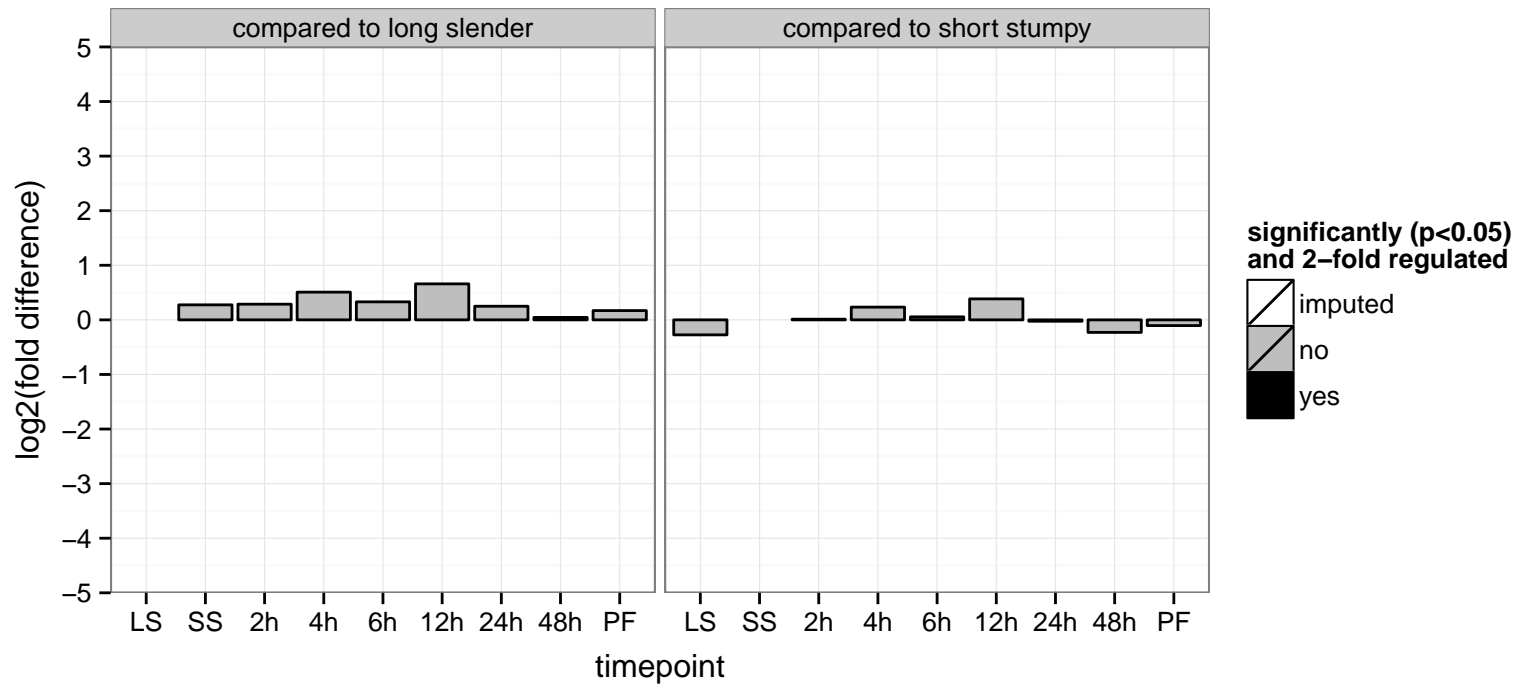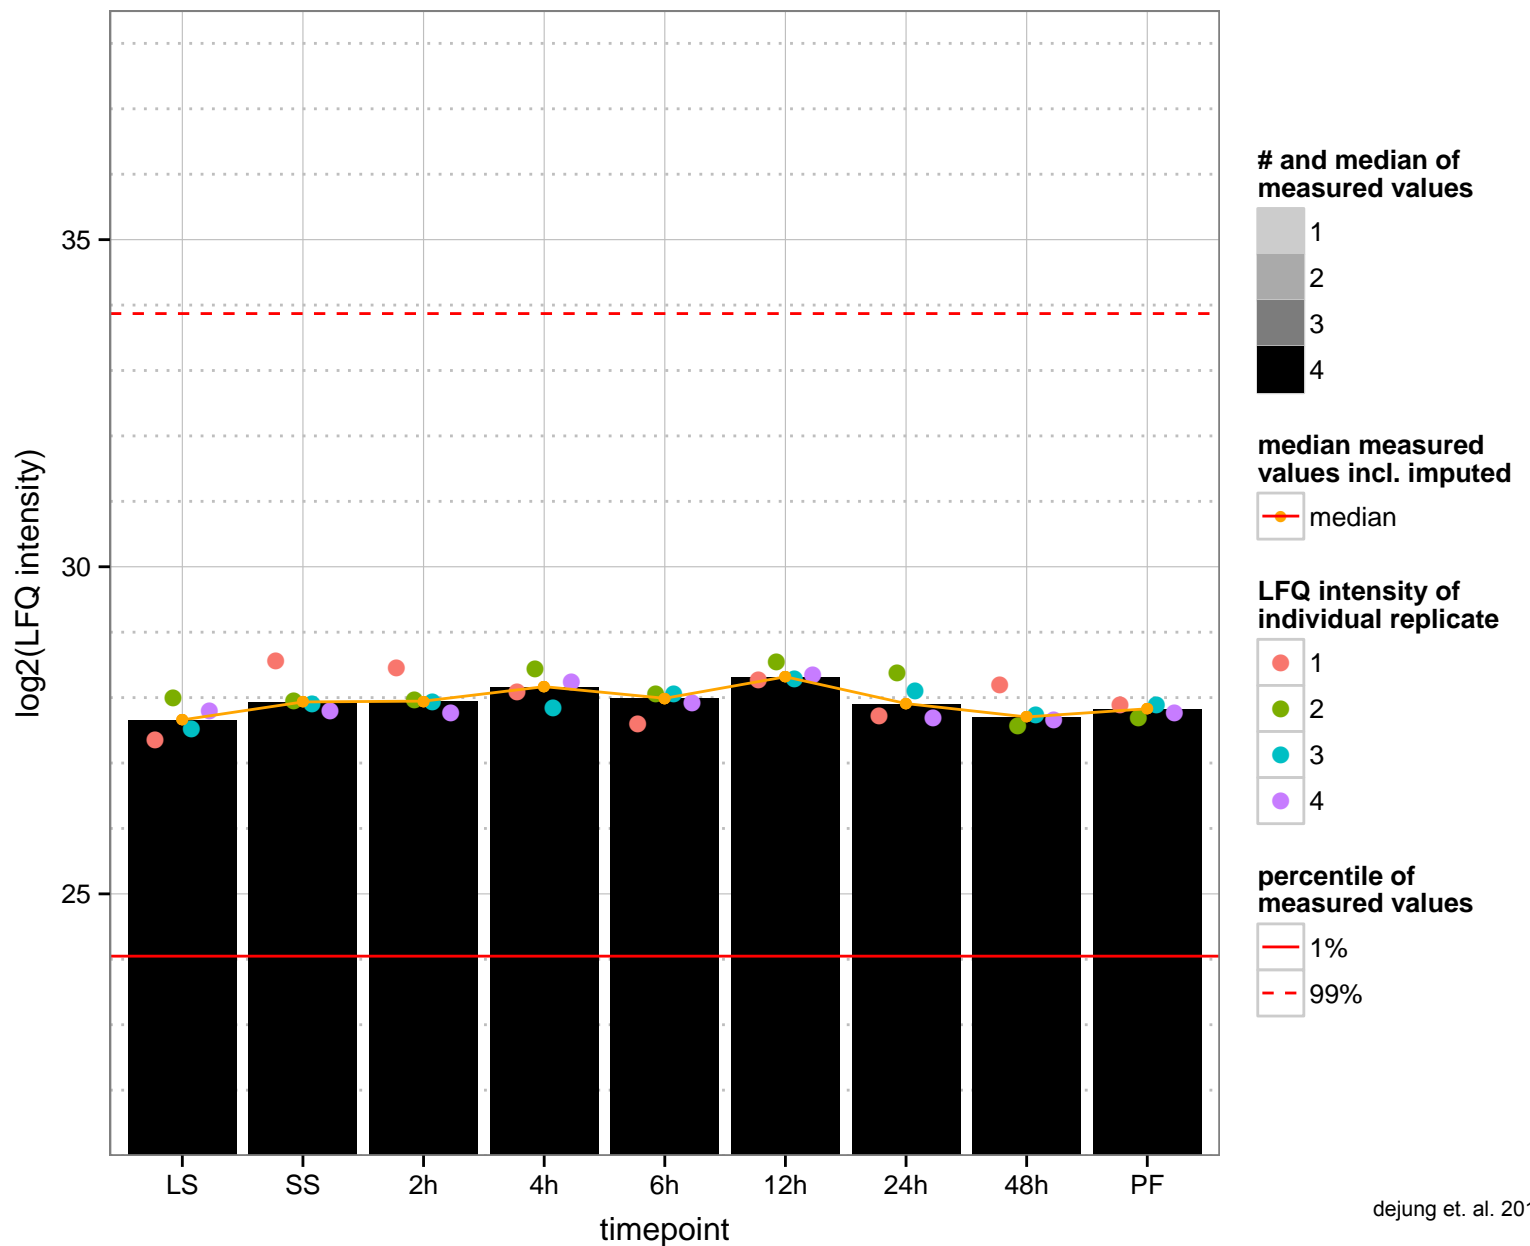

beta prime COP protein  
 Tb927.2.6050  
 AGOF: structural molecule activity  
 AGOC: COPI vesicle coat, Golgi apparatus  
 AGOP: intracellular protein transport, retrograde vesicle-mediated transport, Golgi to ER  
 PGO: protein binding, structural molecule activity  
 PGO: membrane coat  
 PGO: intracellular protein transport, vesicle-mediated transport

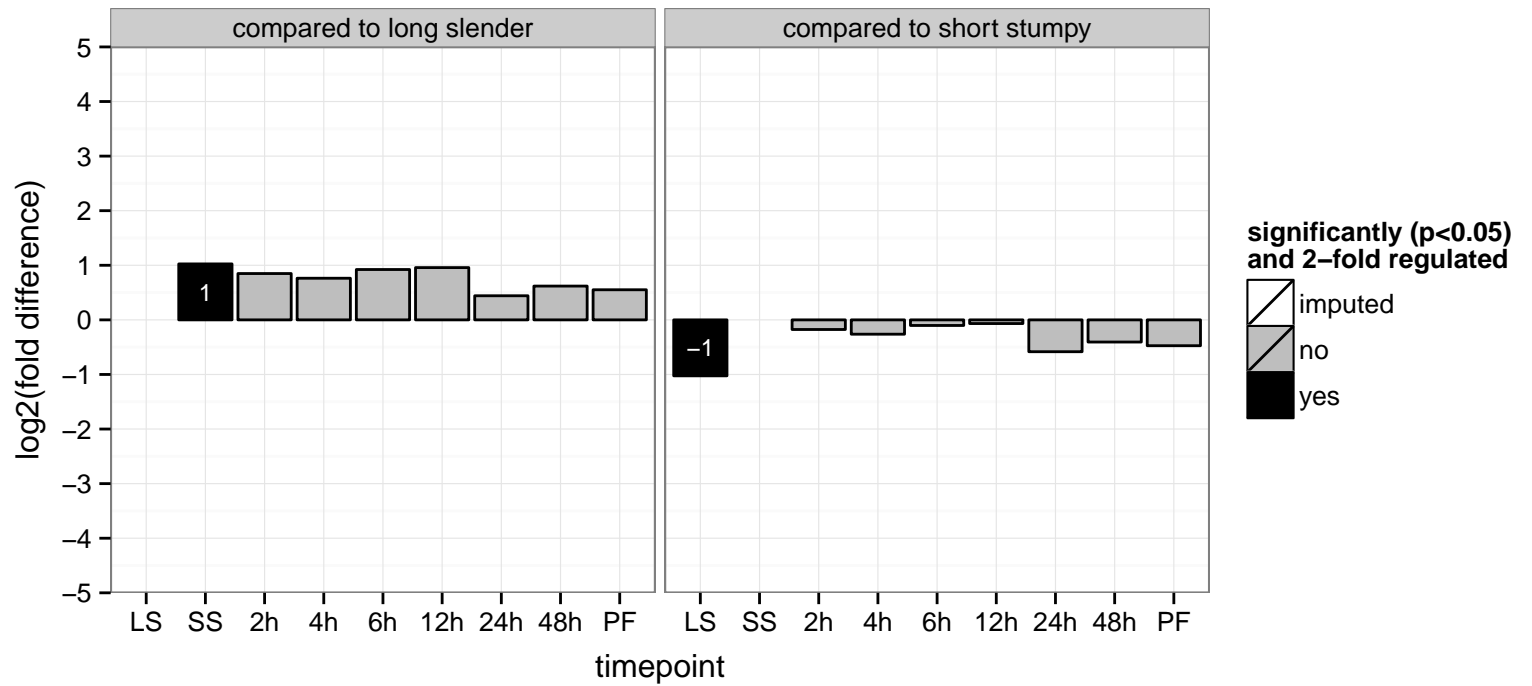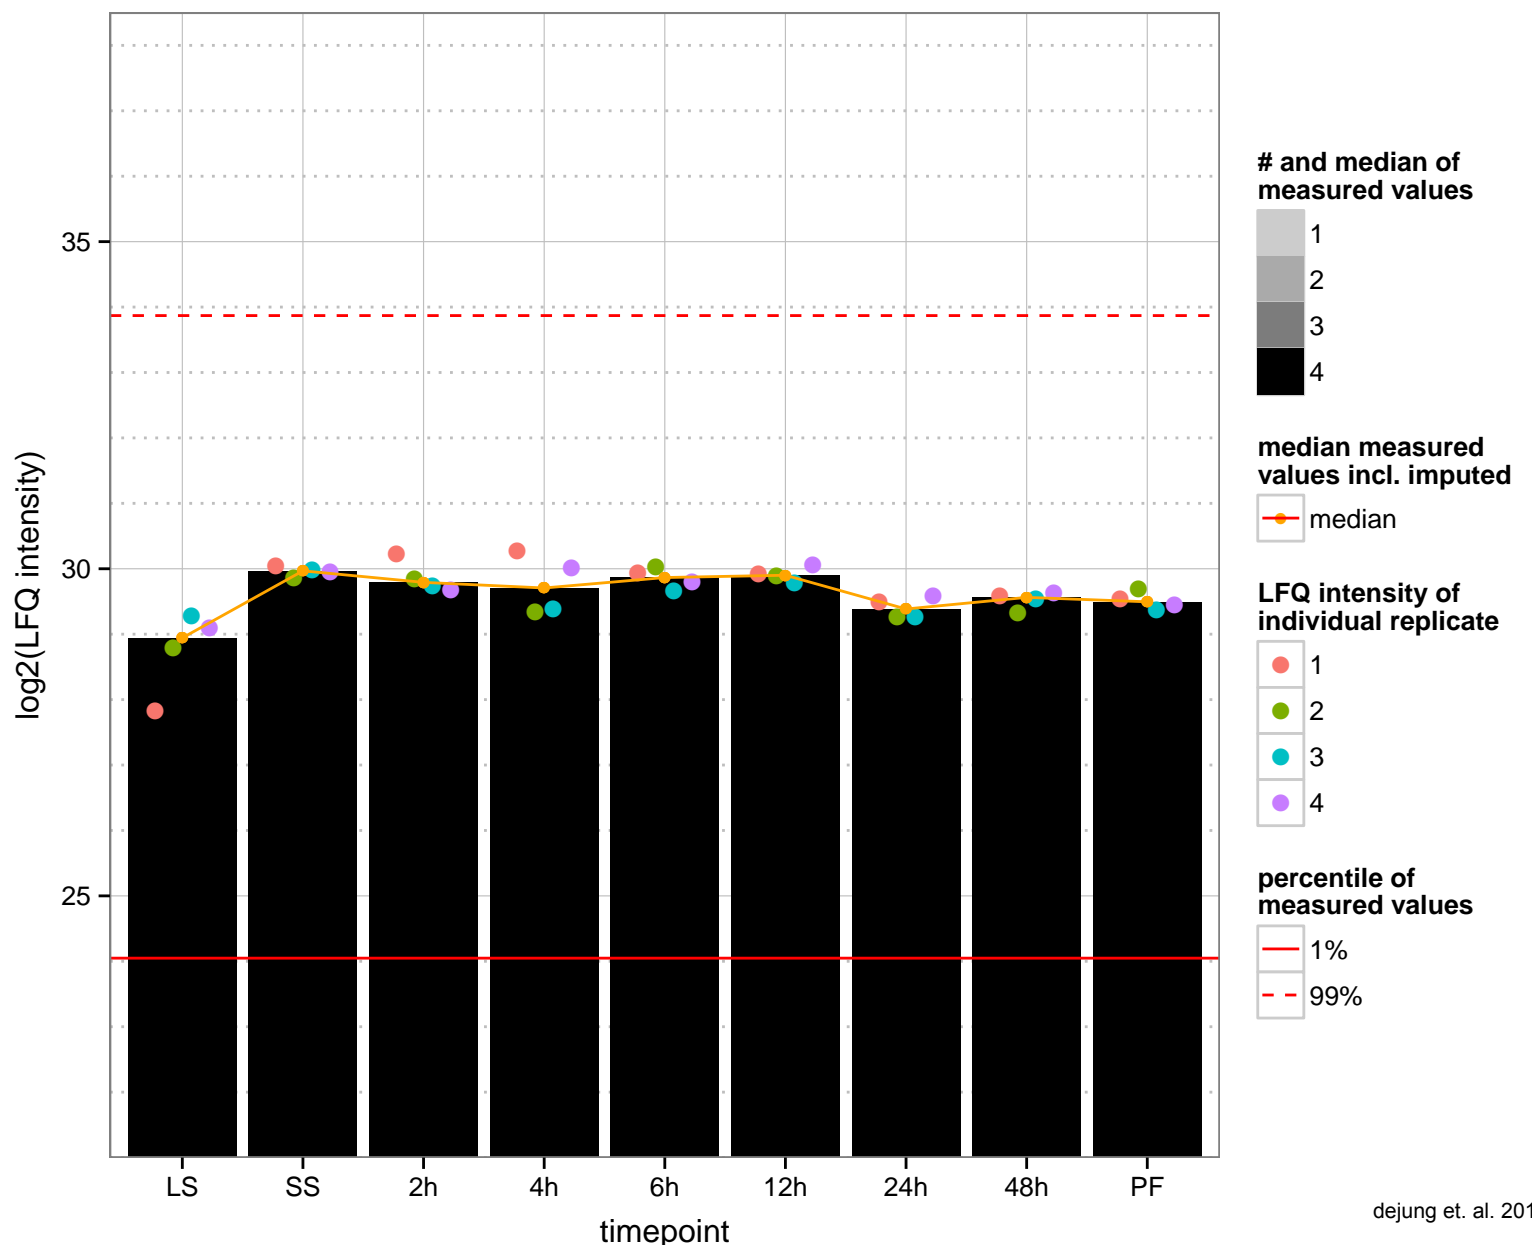

retrotransposon hot spot protein (RHS, pseudogene), putative, retrotransposon hot spot protein 1 (RHS1), interrupted  
 Tb927.2.820  
 AGOF: null  
 AGOC: null  
 AGOP: null  
 PGO: null  
 PGO: null  
 PGO: null

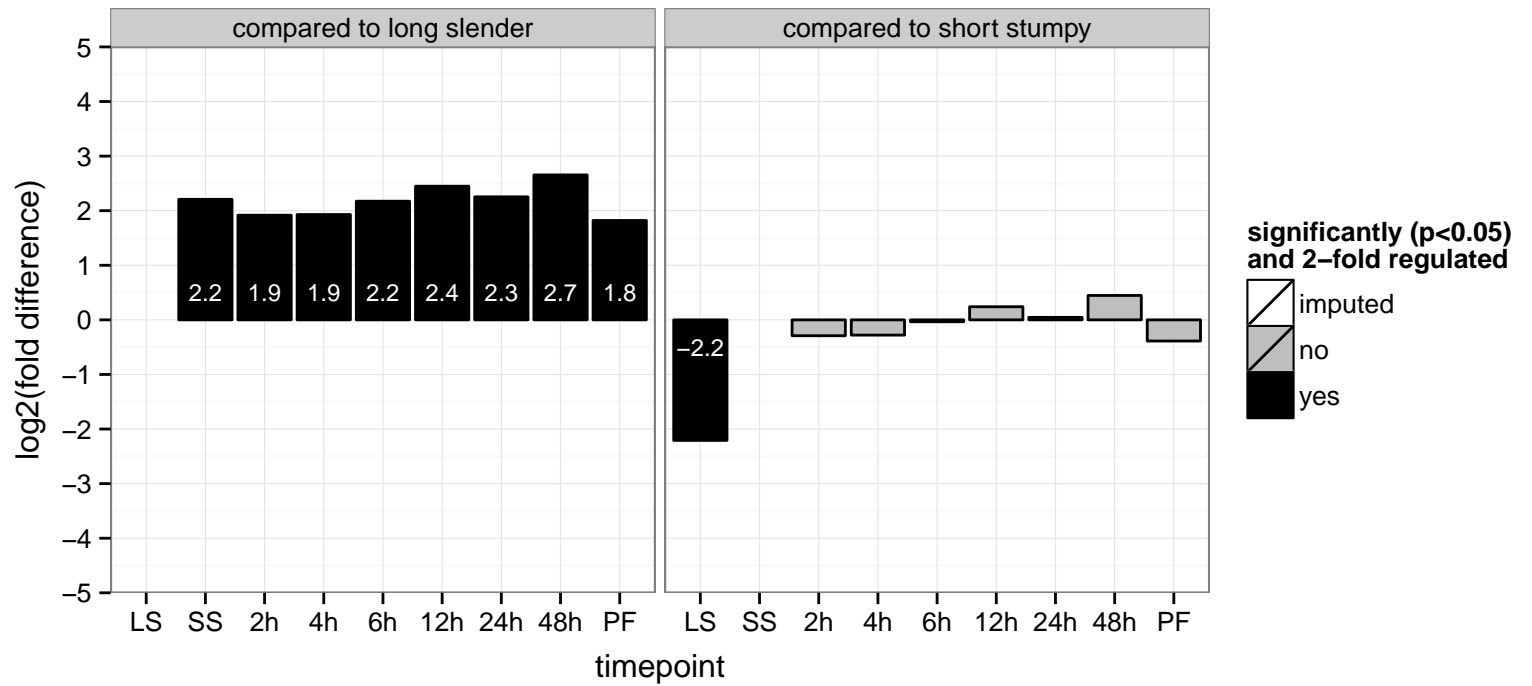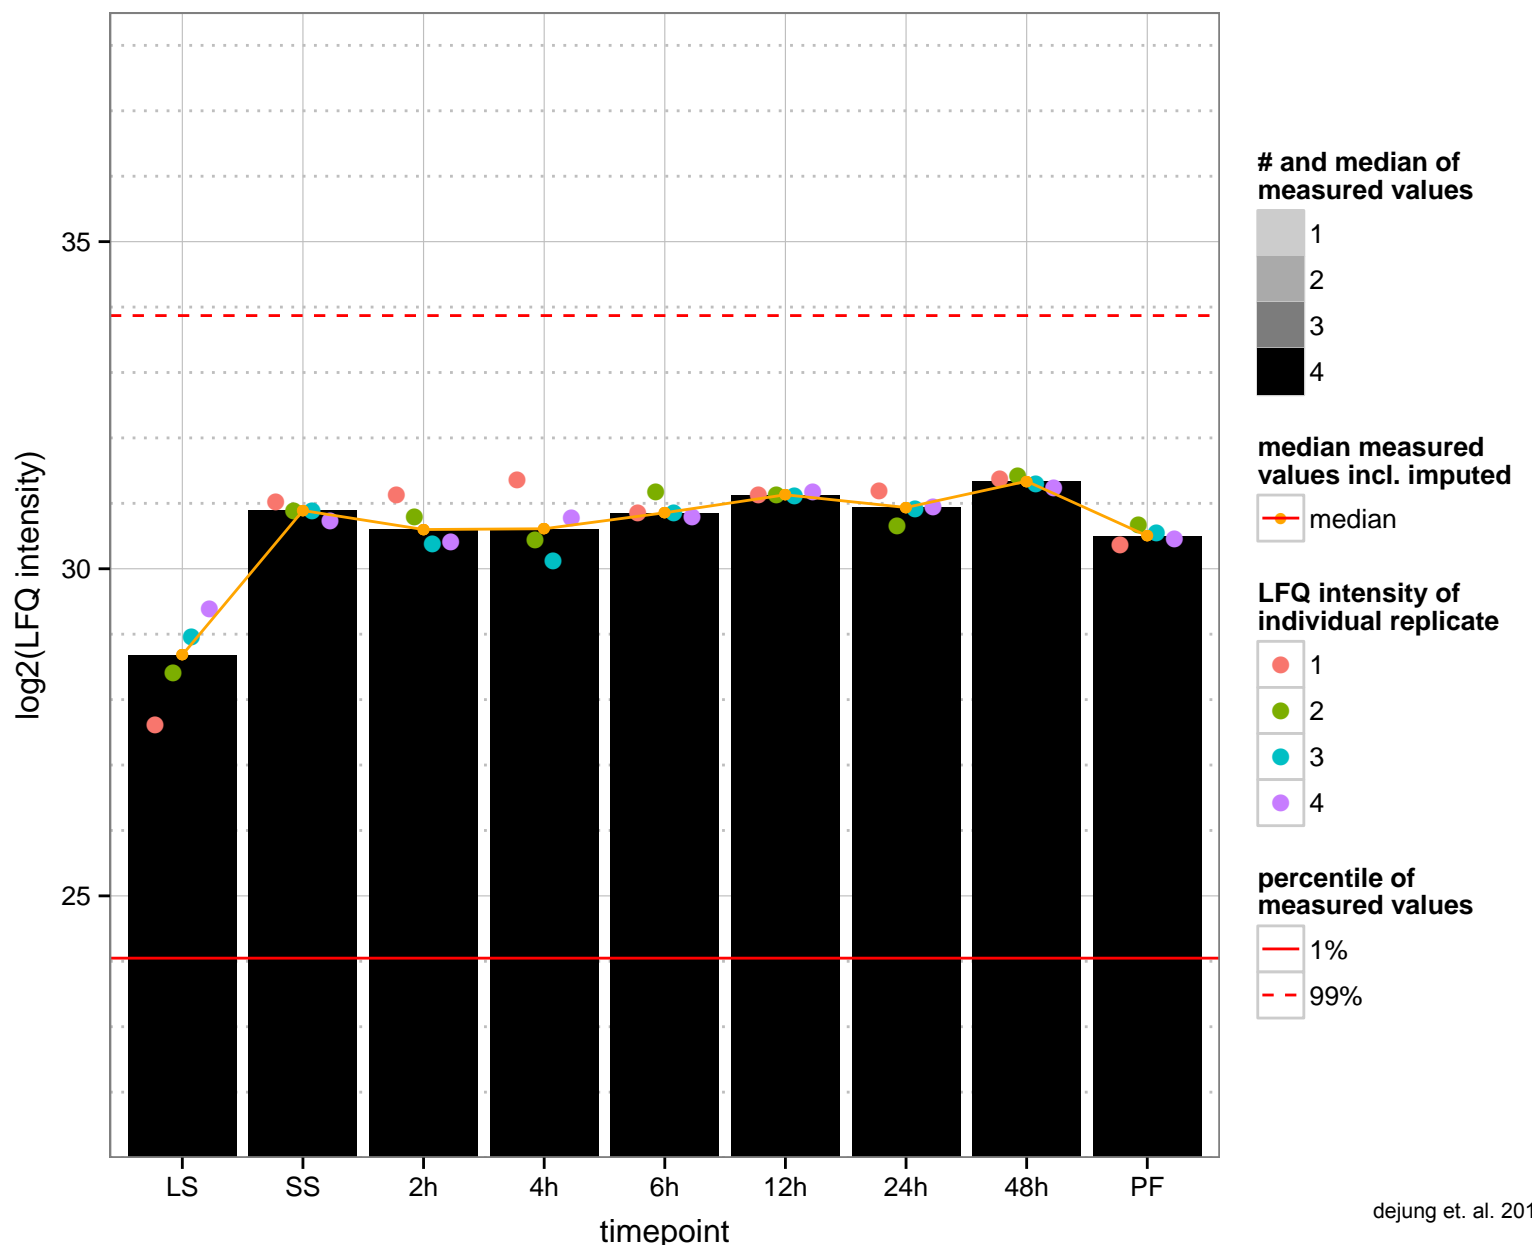

hypothetical protein, conserved  
 Tb927.3.1010  
 AGOF: null  
 AGOC: null  
 AGOP: null  
 PGO: null  
 PGOC: null  
 PGOP: null

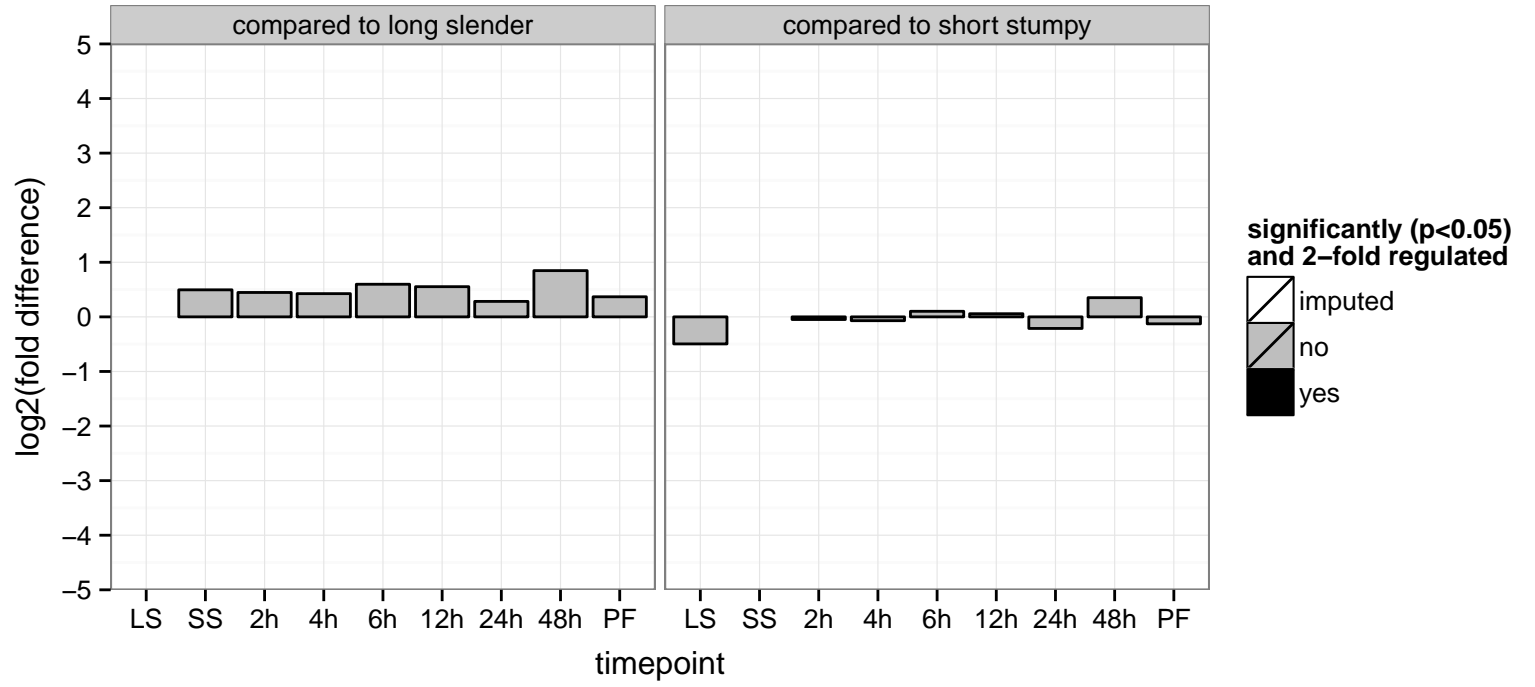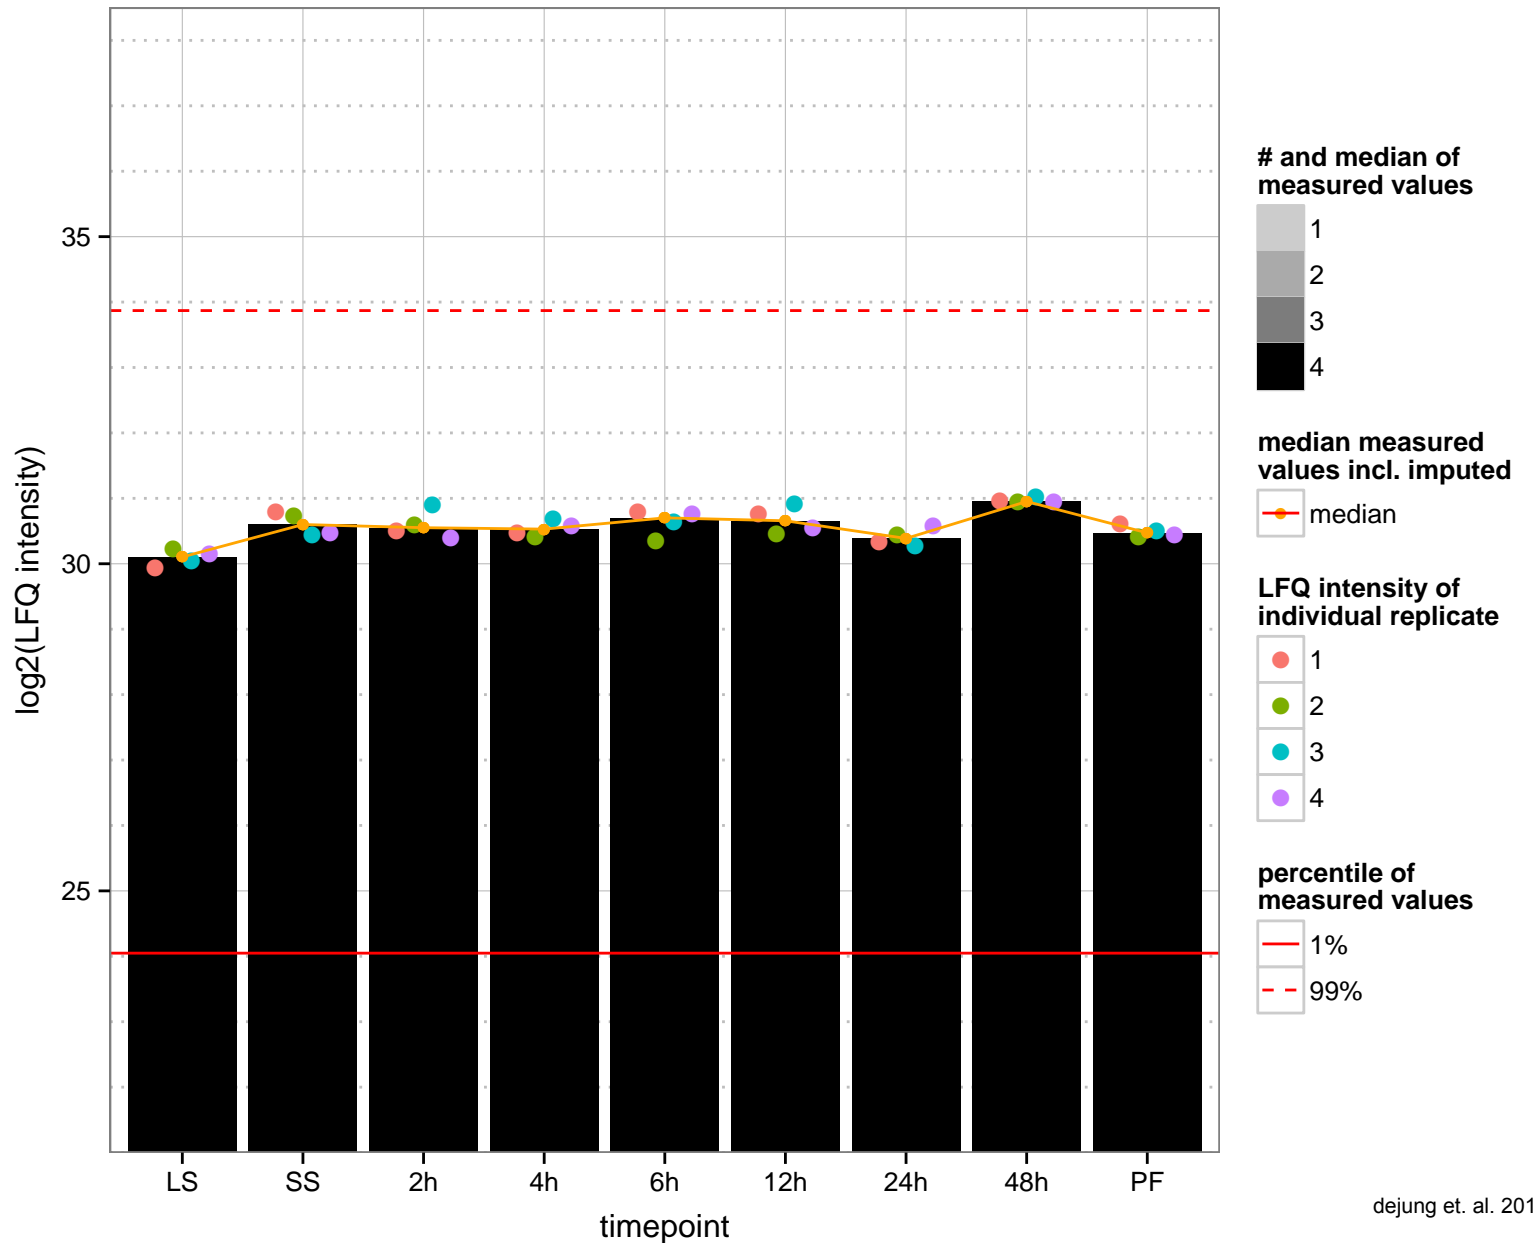

unspecified product  
 Tb927.3.1040  
 AGOF: null  
 AGOC: null  
 AGOP: null  
 PGO: null  
 PGOC: null  
 PGOP: null

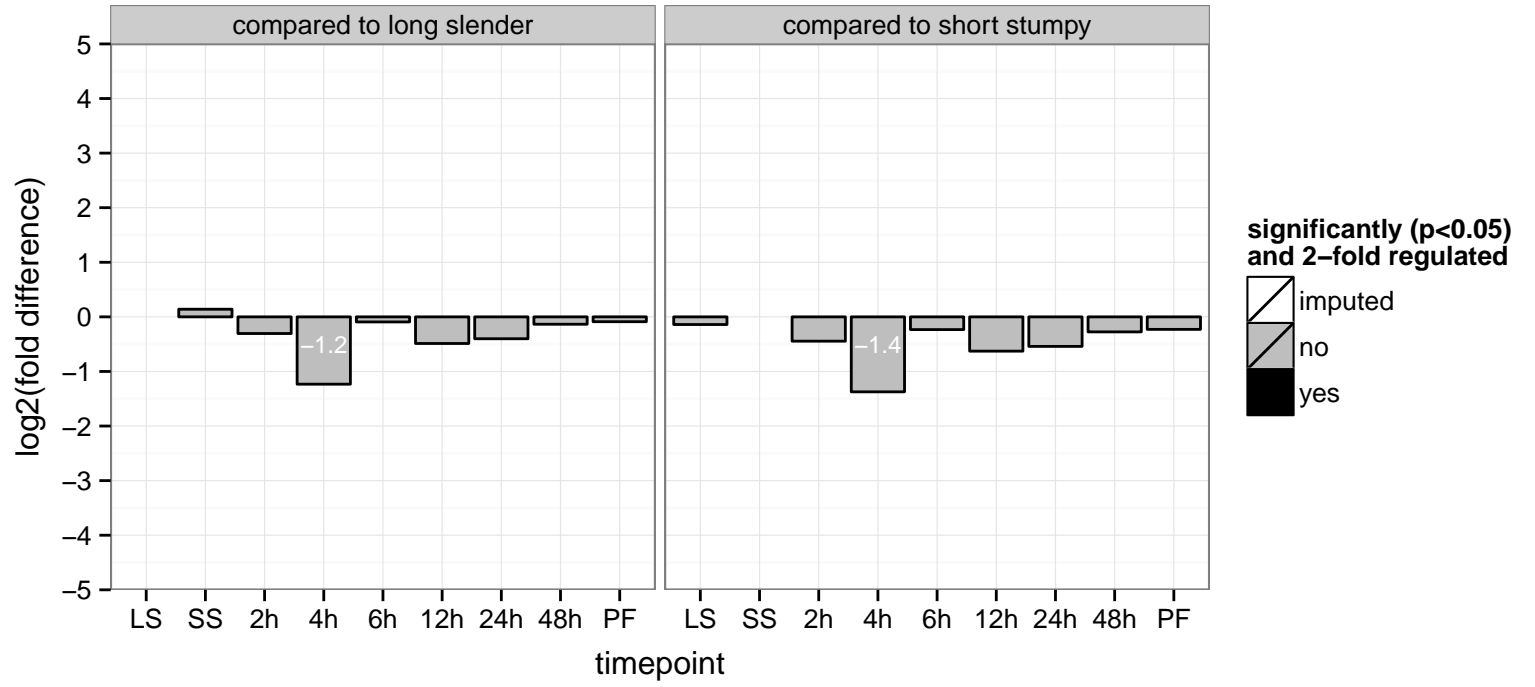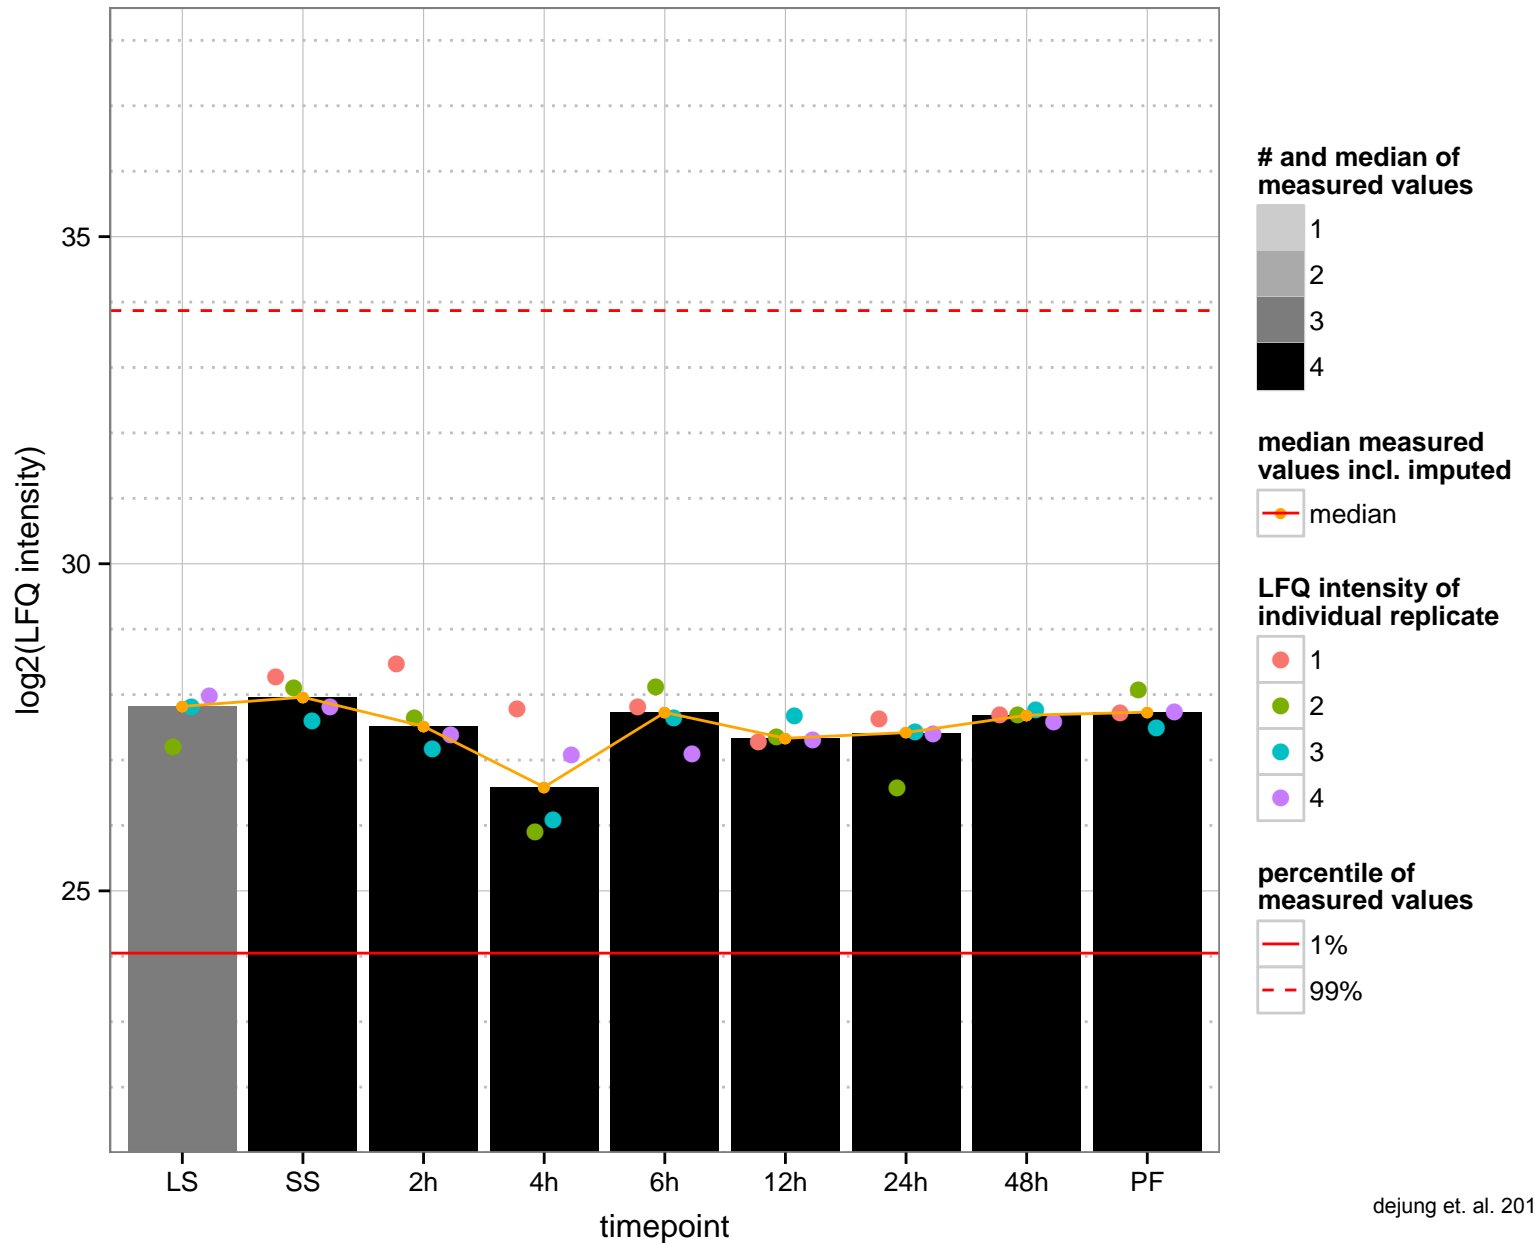

cAMP response protein, putative (CARP4)  
 Tb927.3.1060  
 AGOF: null  
 AGOC: null  
 AGOP: response to drug  
 PGO: null  
 PGOC: null  
 PGOP: null

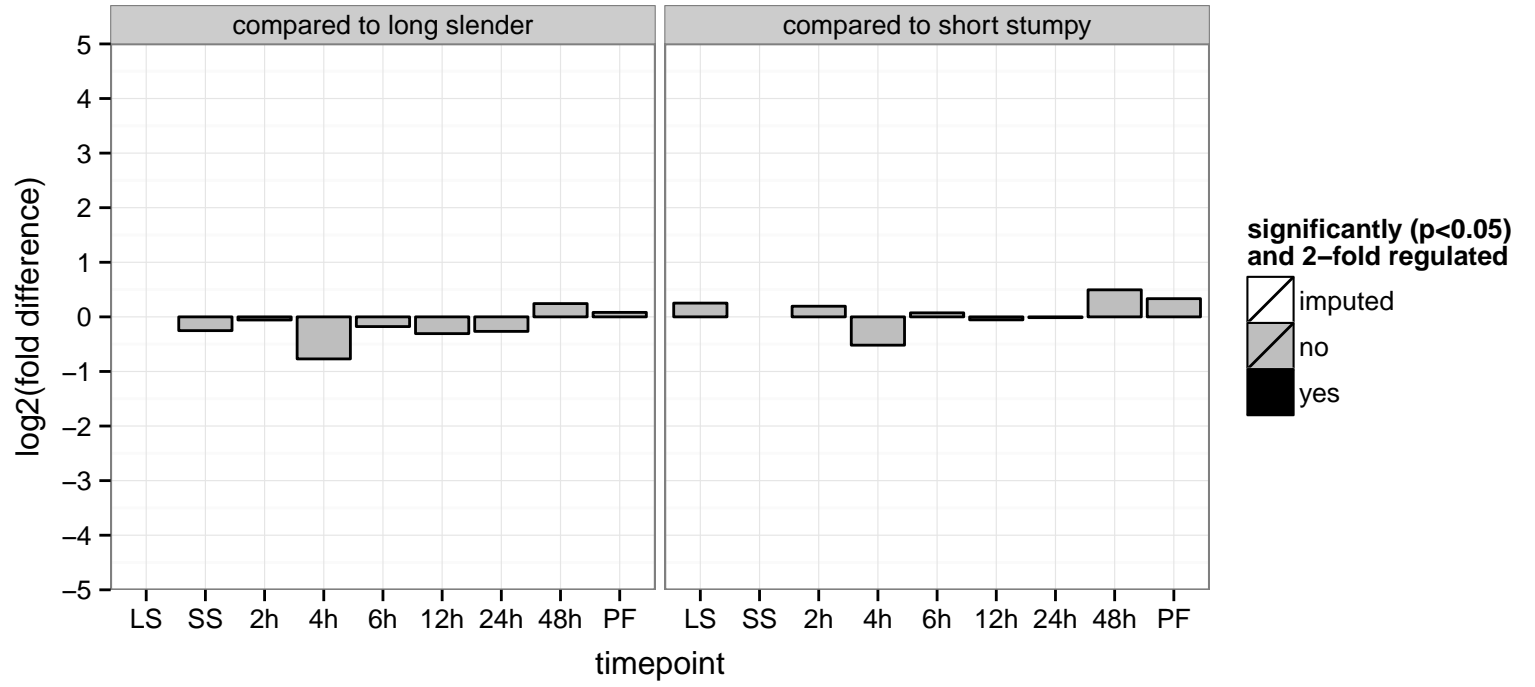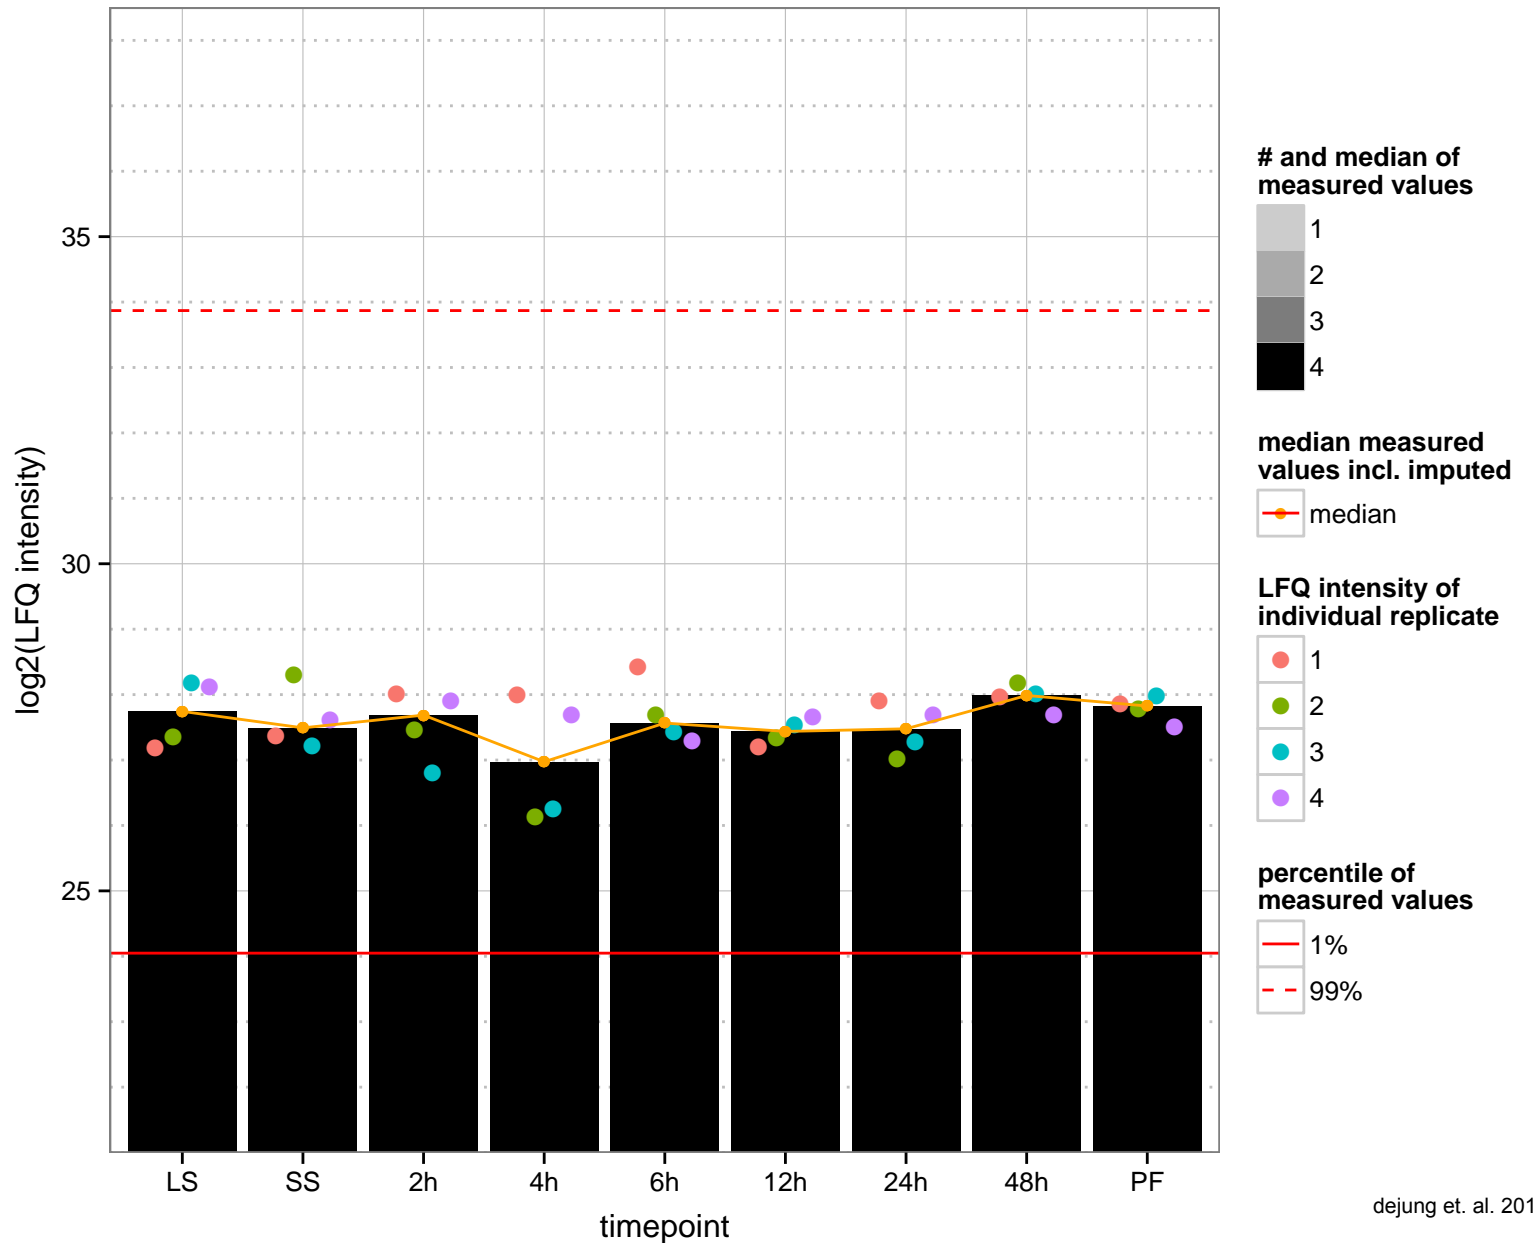

hypothetical protein, conserved  
 Tb927.3.1080  
 AGOF: null  
 AGOC: null  
 AGOP: null  
 PGO: null  
 PGOC: null  
 PGOP: null

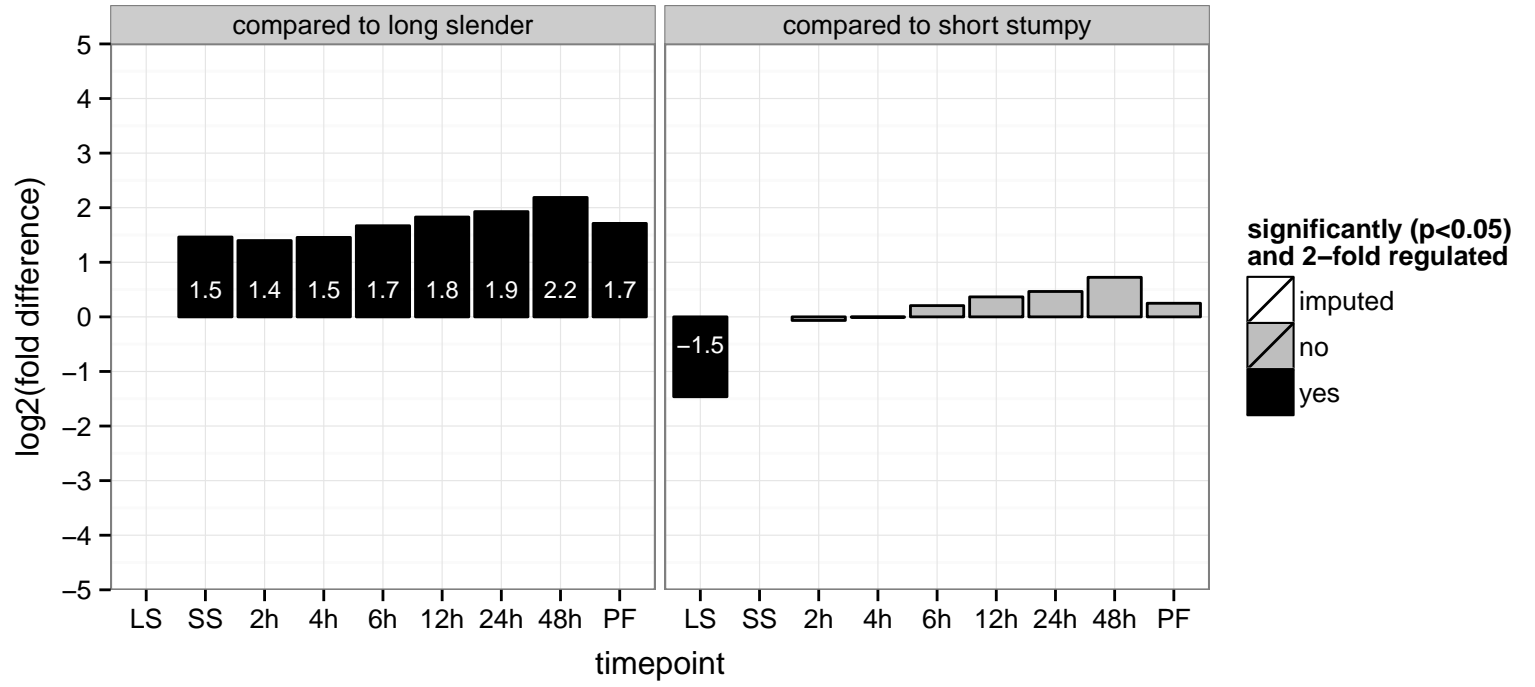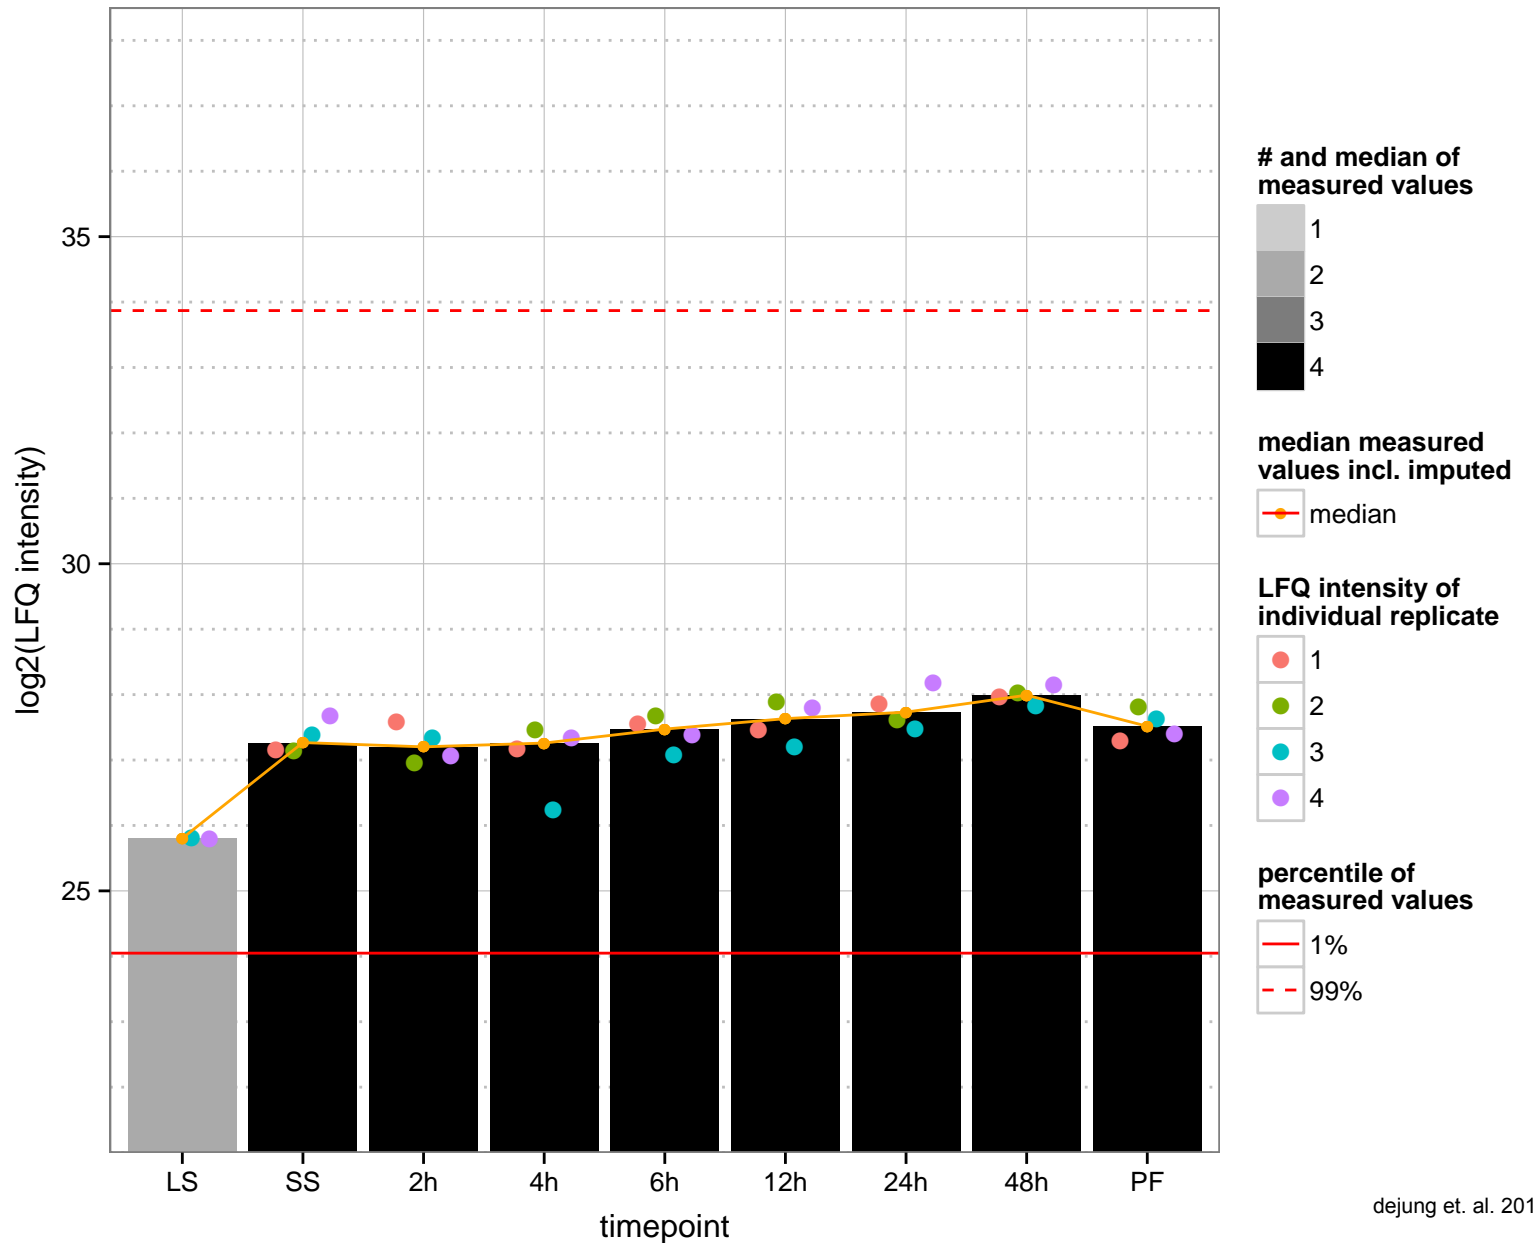

GTP-binding nuclear protein rtb2, putative (rtb2)

Tb927.3.1120

AGOF: GTP binding, GTPase activity

AGOC: intracellular

AGOP: intracellular protein transport, nucleocytoplasmic transport, small GTPase mediated signal transduction

PGOF: GTP binding, GTPase activity

PGOC: intracellular, membrane

PGOP: GTP catabolic process, intracellular protein transport, nucleocytoplasmic transport, protein transport, signal transduction

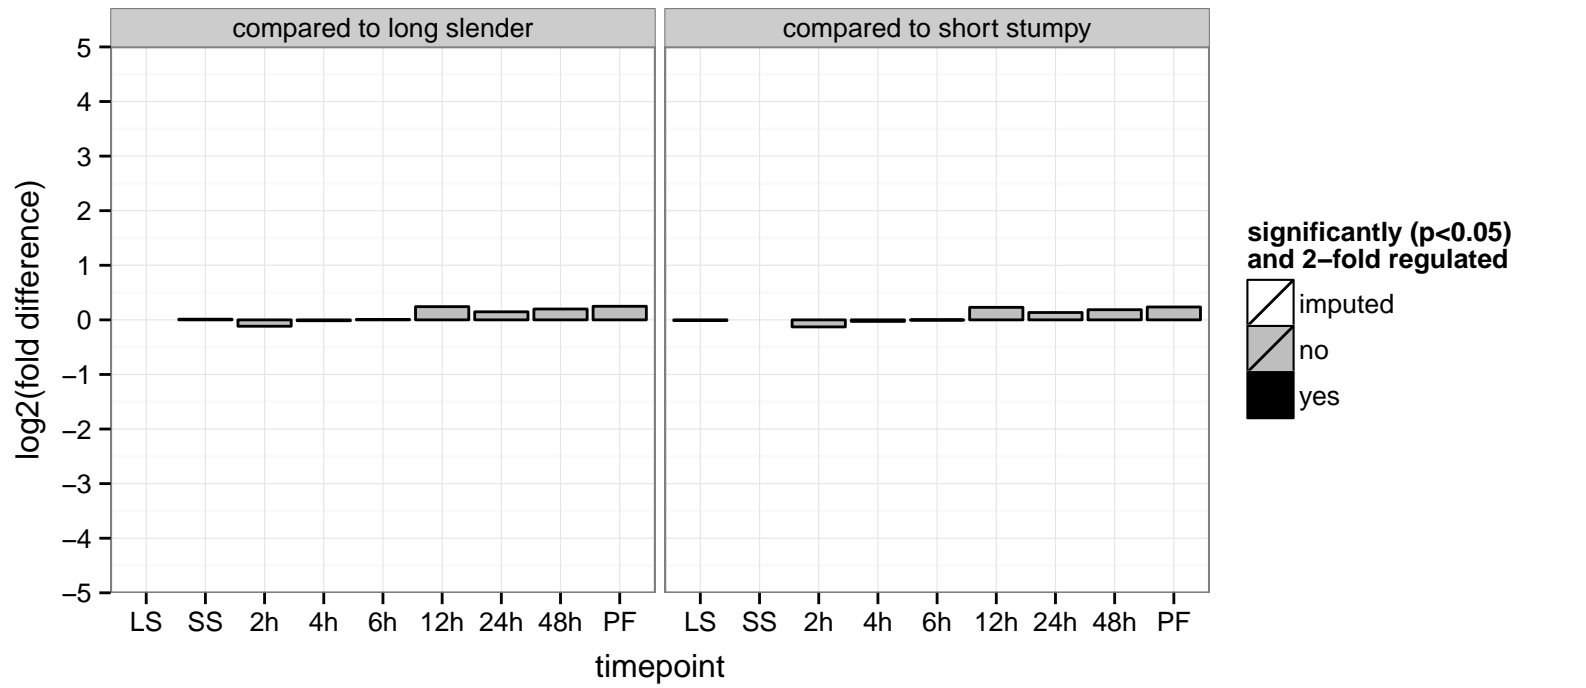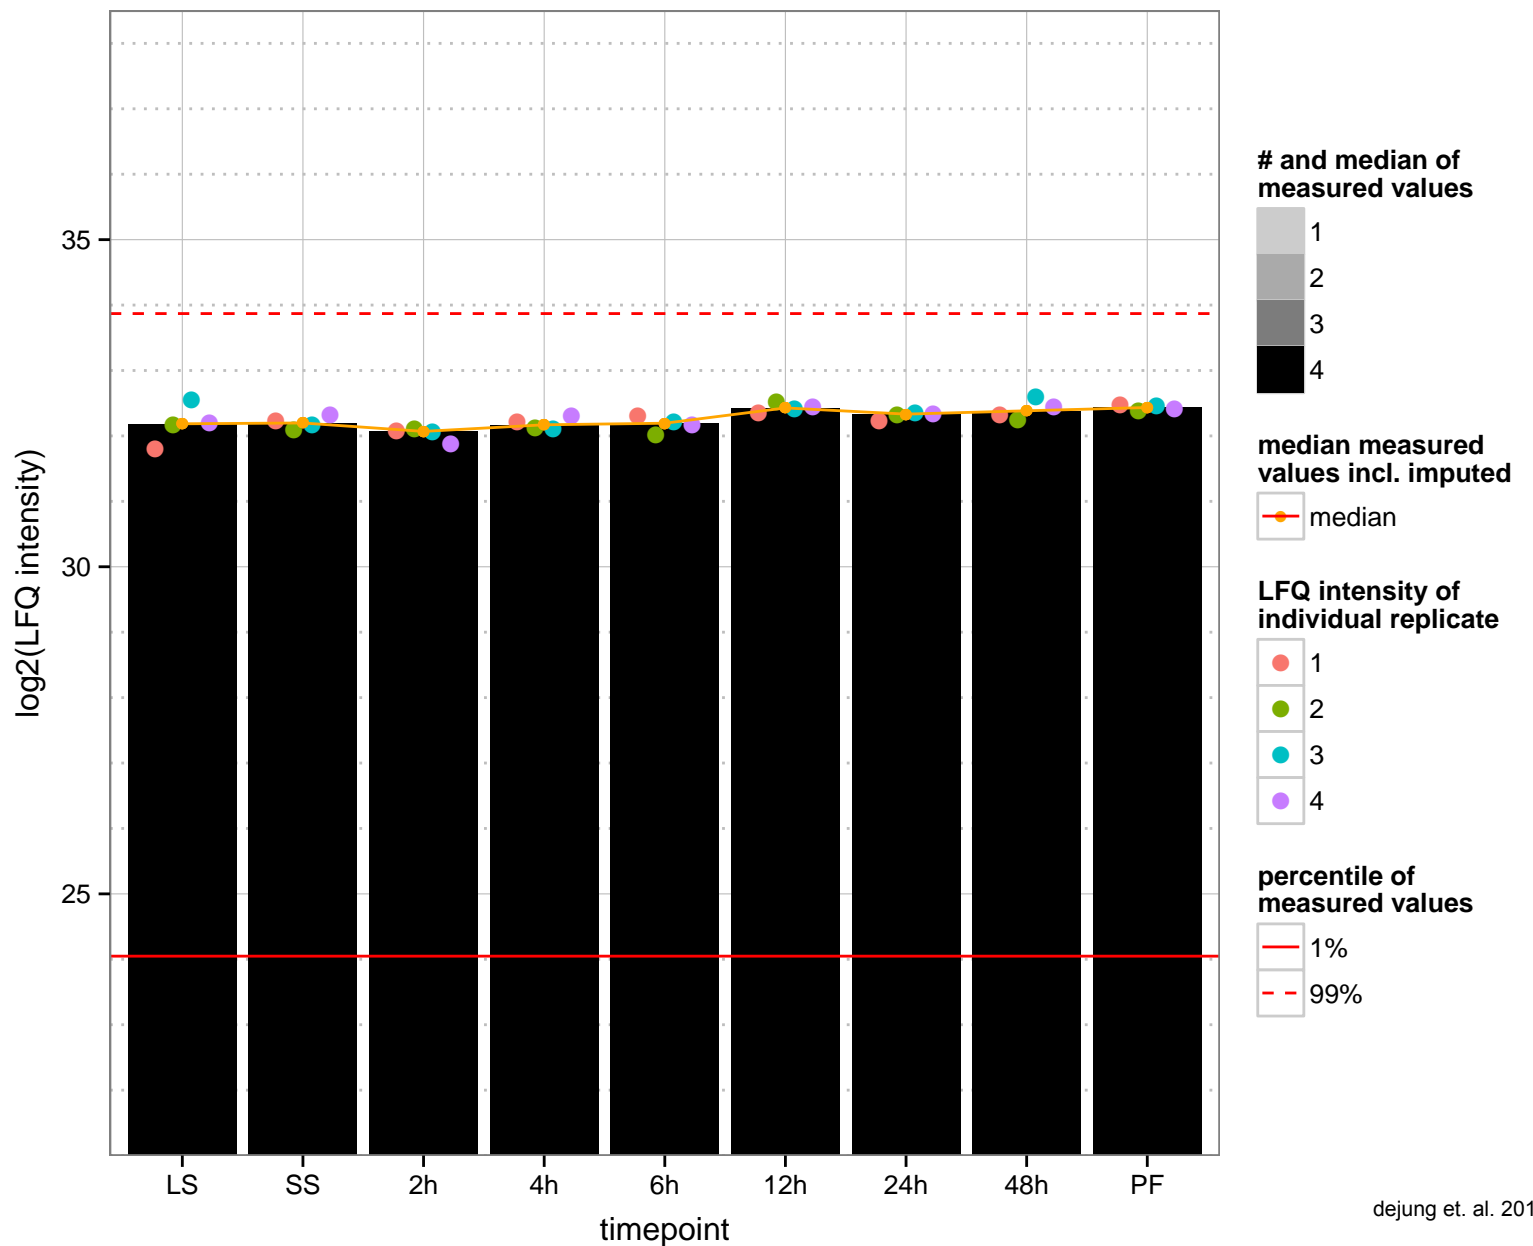



hypothetical protein, conserved  
 Tb927.3.1150  
 AGOF: nucleotide binding  
 AGOC: null  
 AGOP: null  
 PGO: nucleotide binding  
 PGOC: null  
 PGOP: null

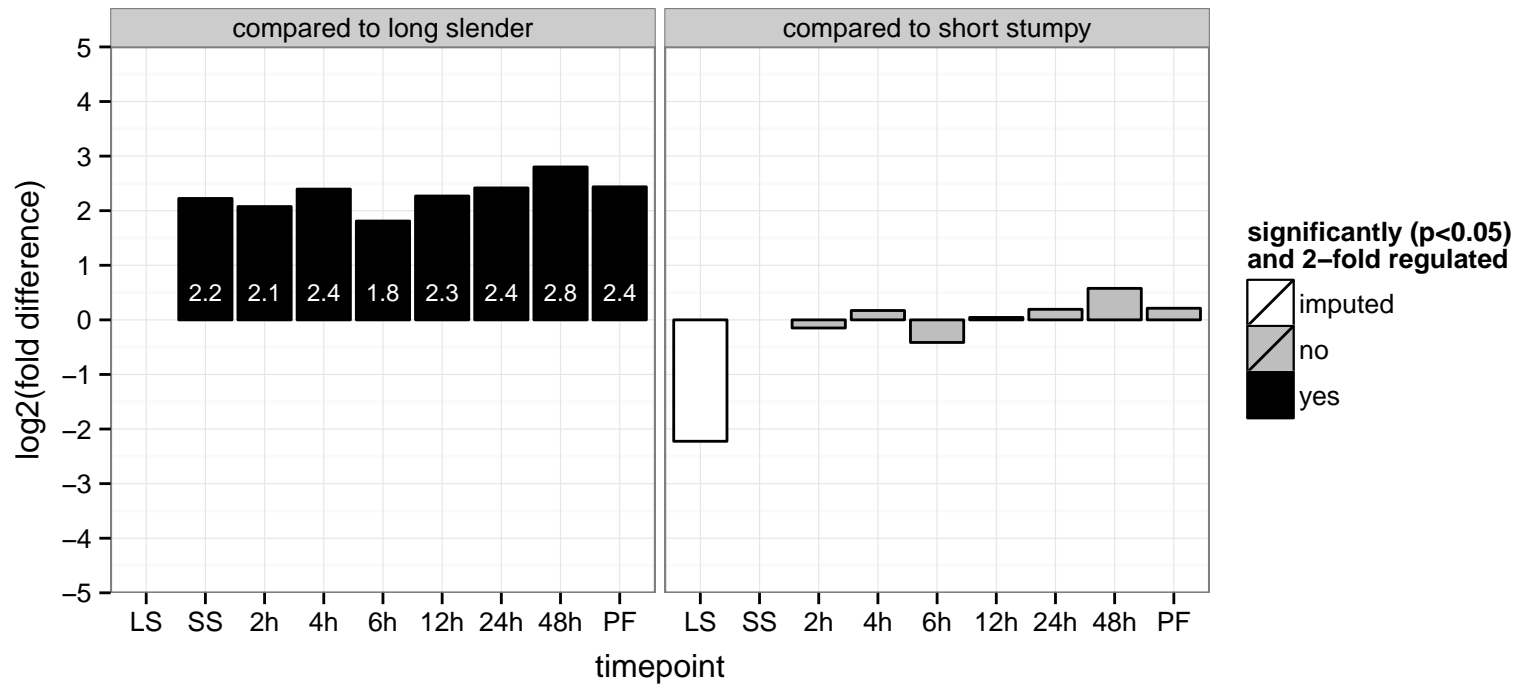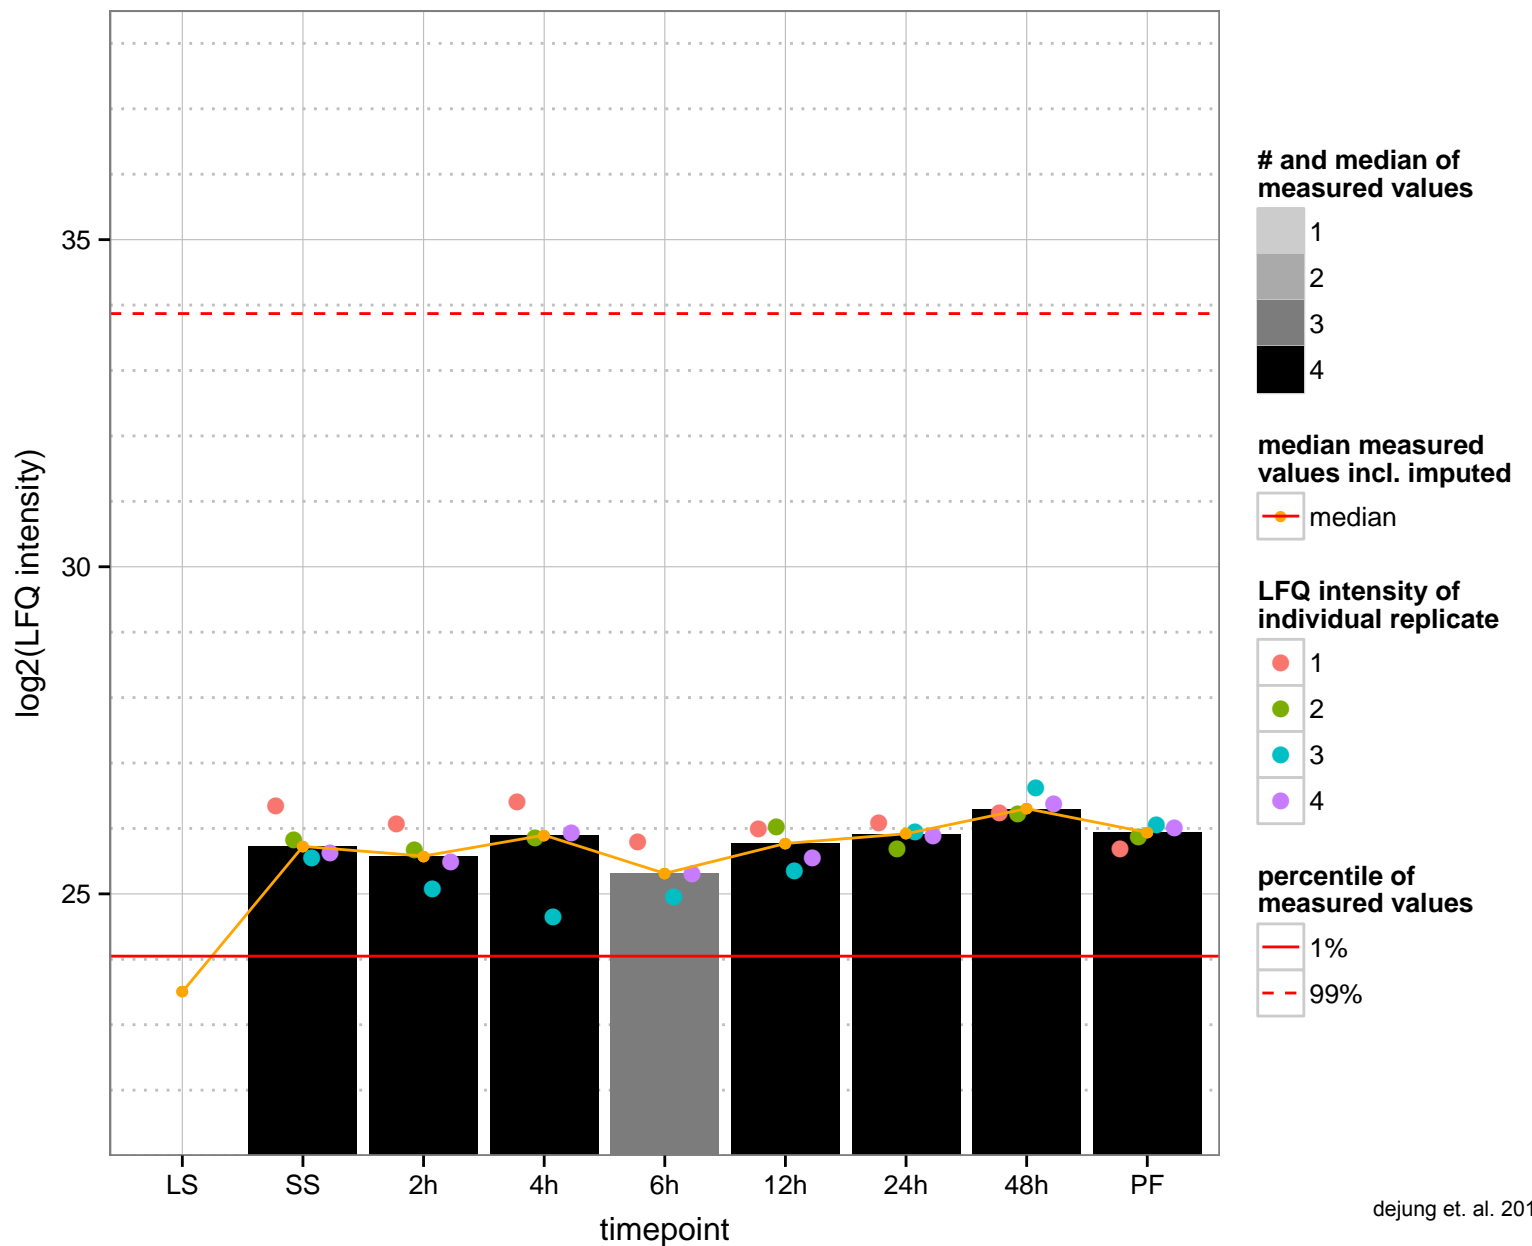

hypothetical protein, conserved  
 Tb927.3.1160  
 AGOF: null  
 AGOC: mitochondrion  
 AGOP: null  
 PGO: null  
 PGOC: null  
 PGOP: null

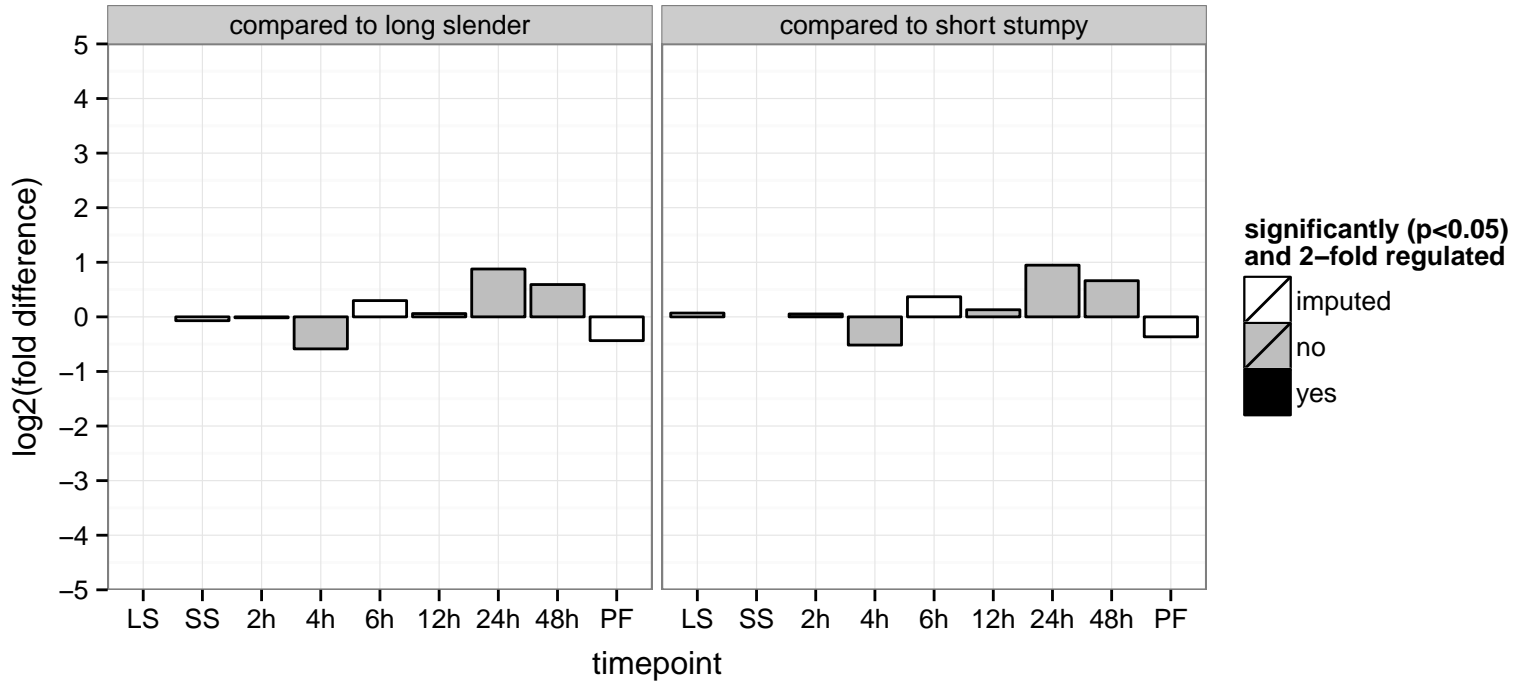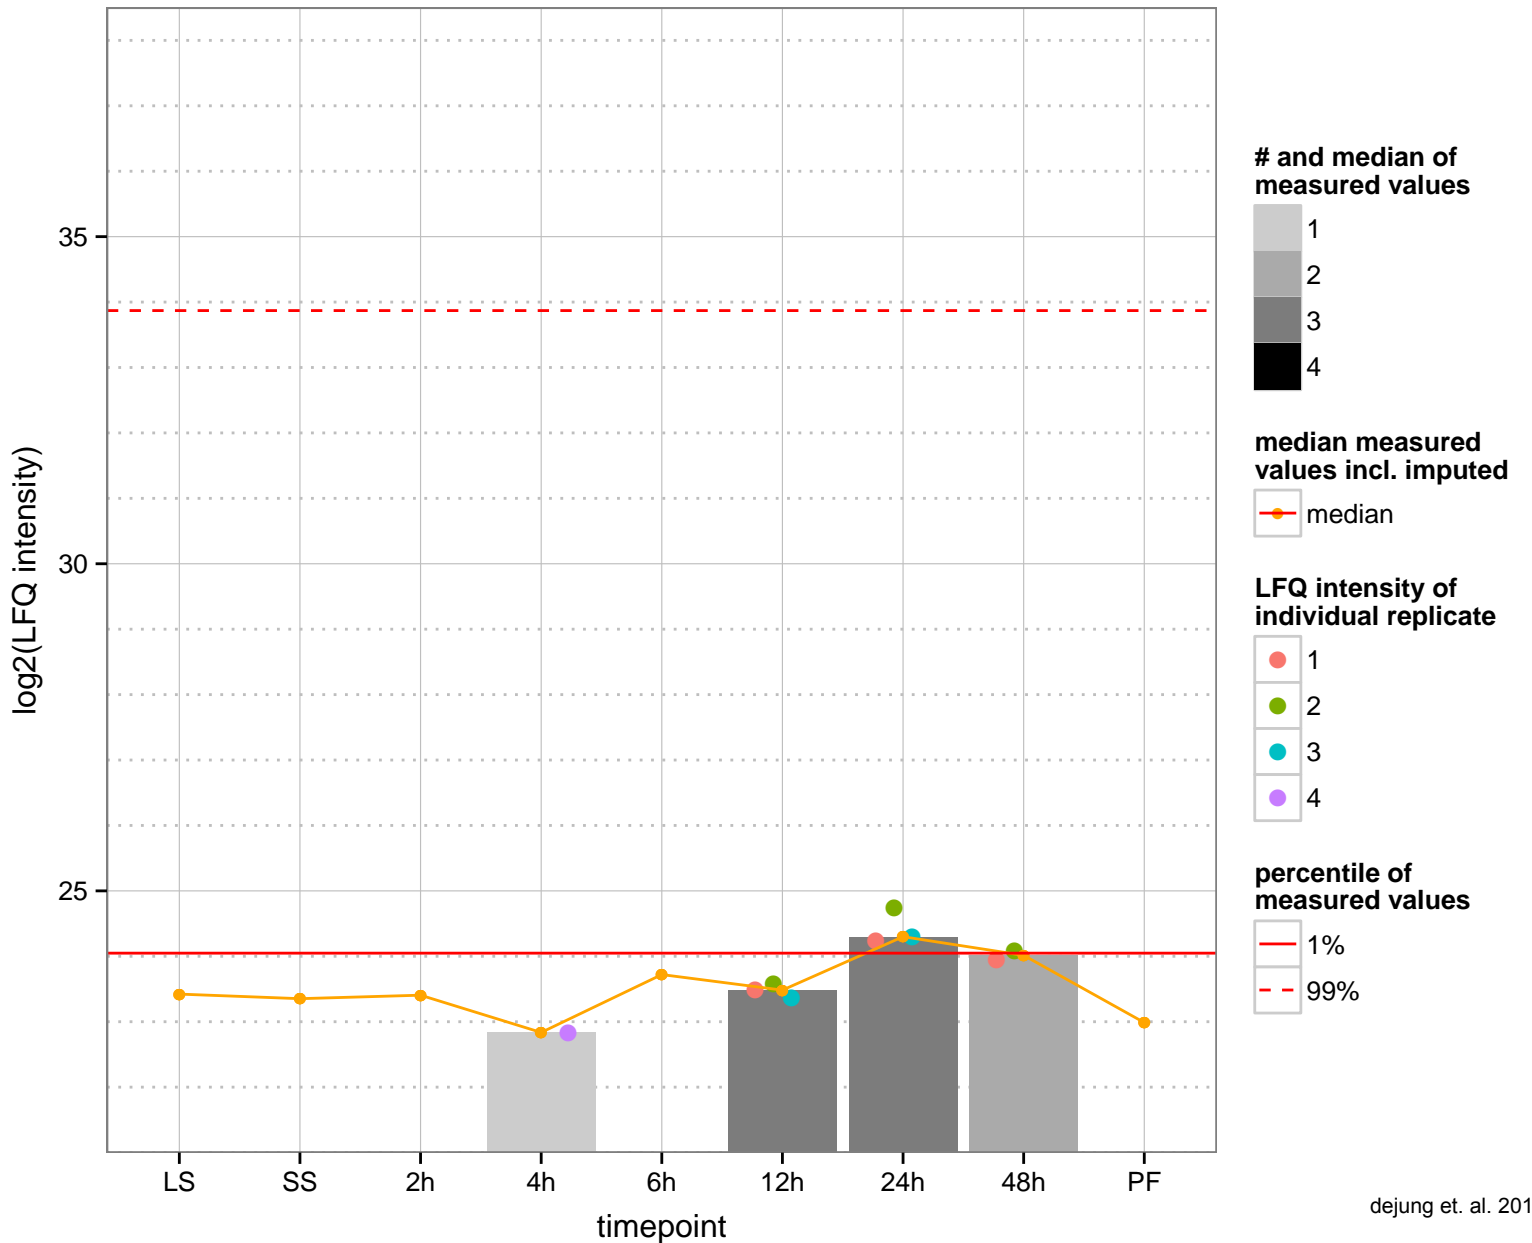

hypothetical protein, conserved  
 Tb927.3.1170  
 AGOF: null  
 AGOC: null  
 AGOP: regulation of signal transduction, response to biotic stimulus  
 PGOF: null  
 PGO: null  
 PGOP: regulation of signal transduction

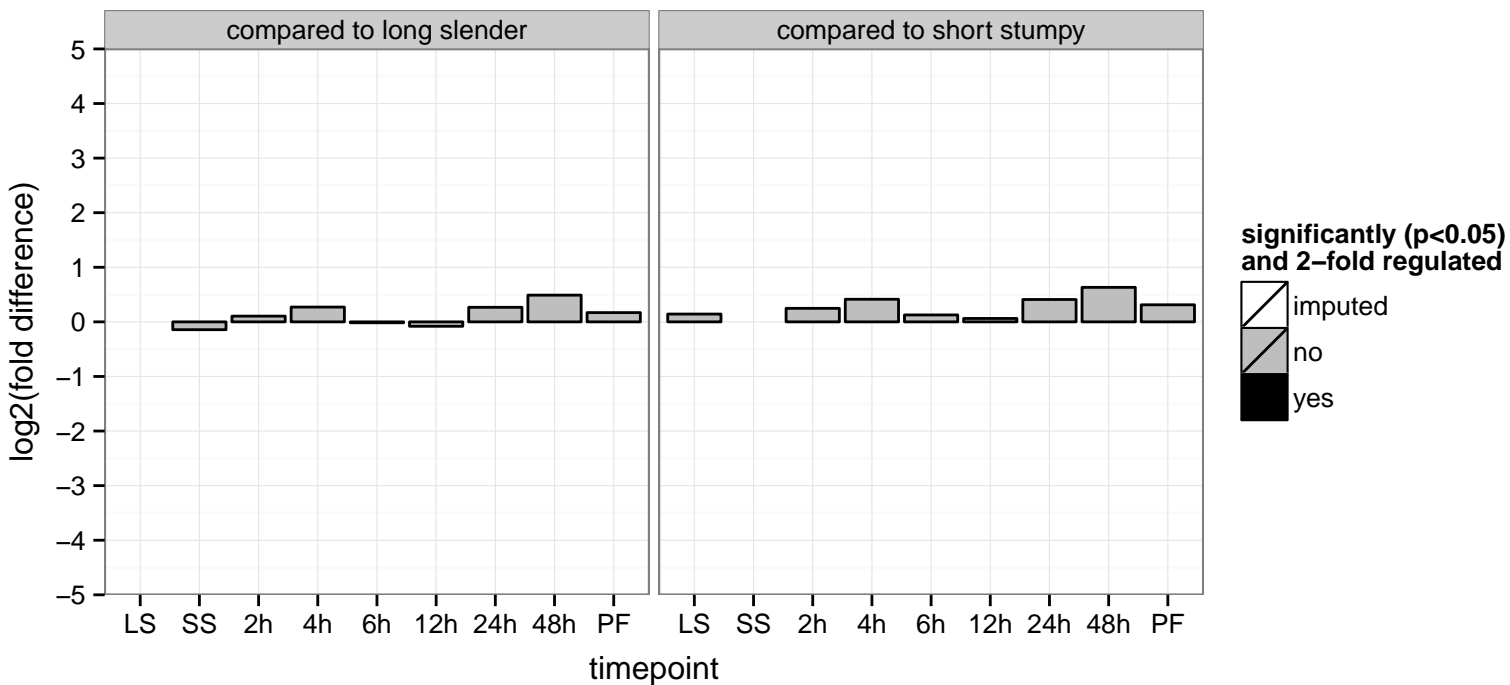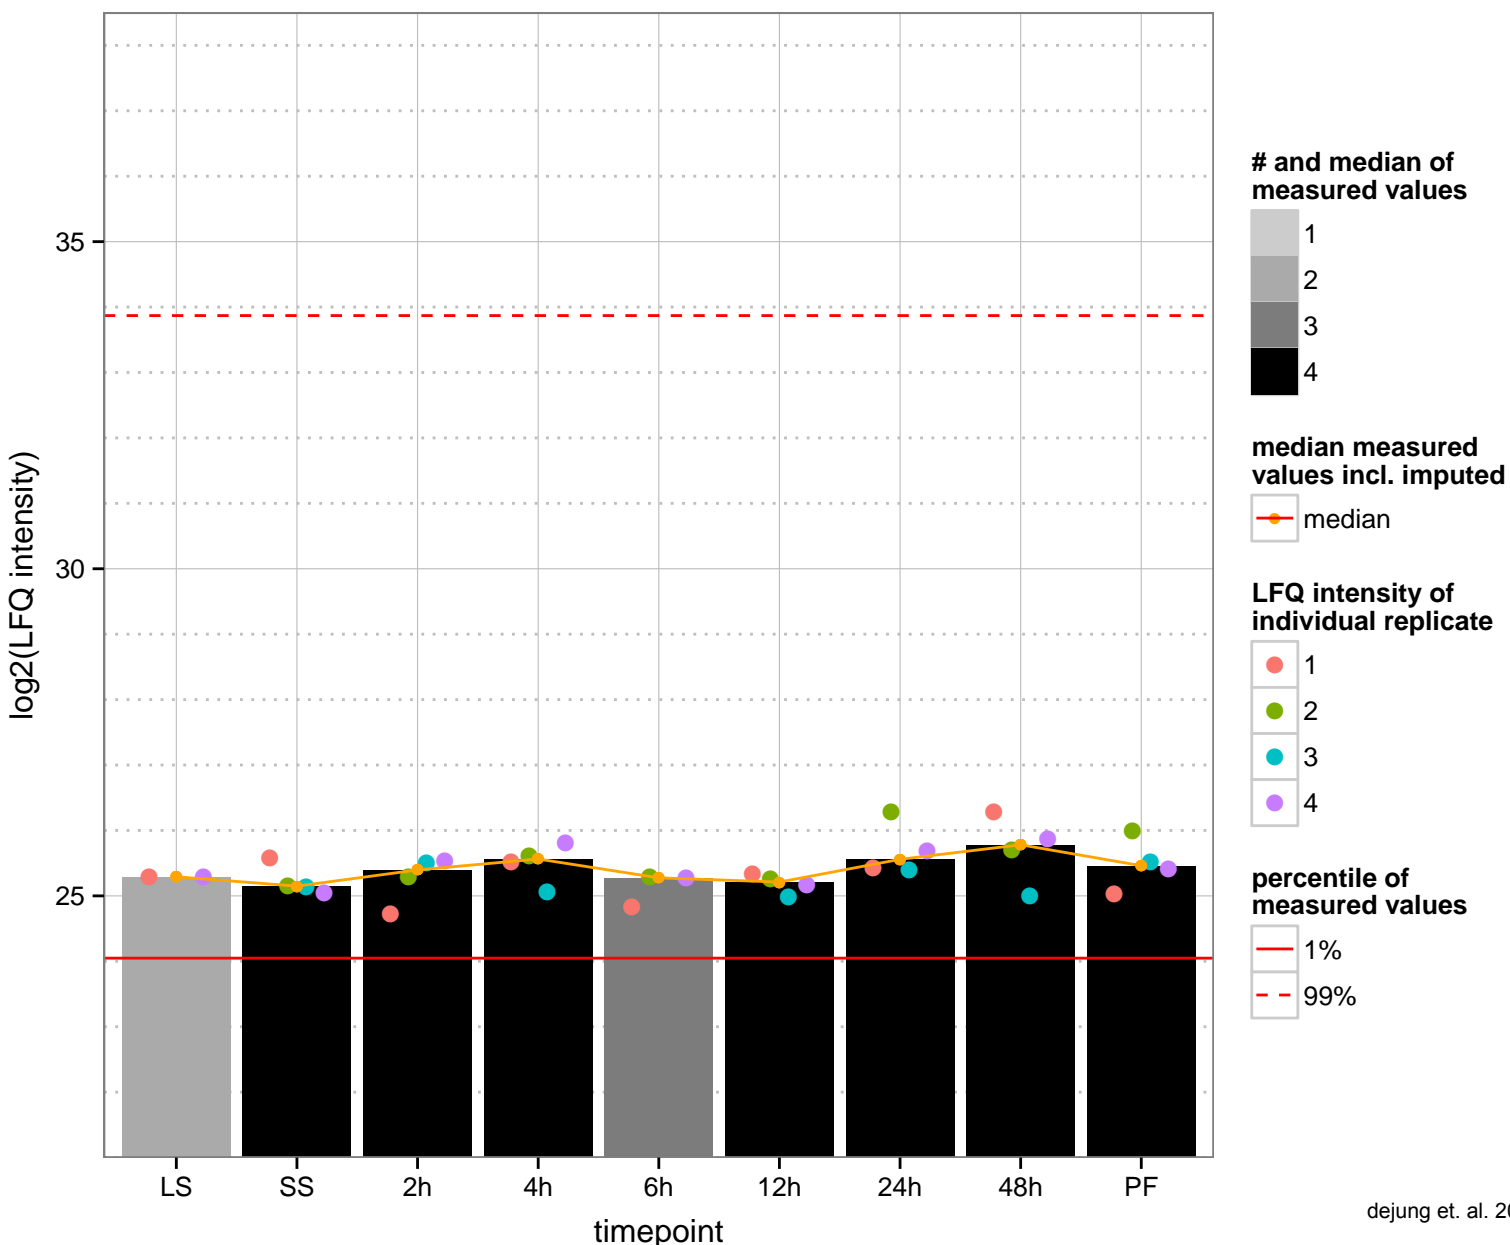

hypothetical protein, conserved  
 Tb927.3.1180  
 AGOF: null  
 AGOC: mitochondrion  
 AGOP: null  
 PGO: null  
 PGO: null  
 PGO: null

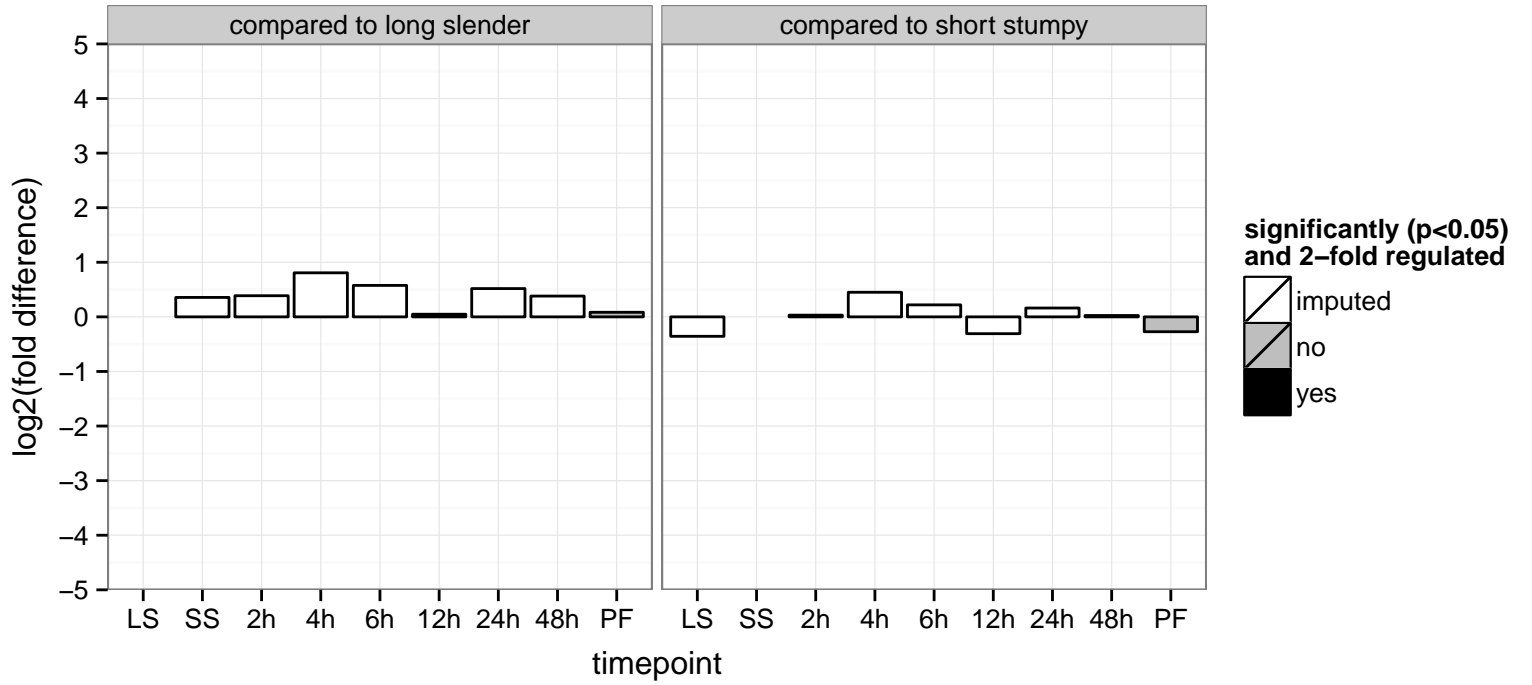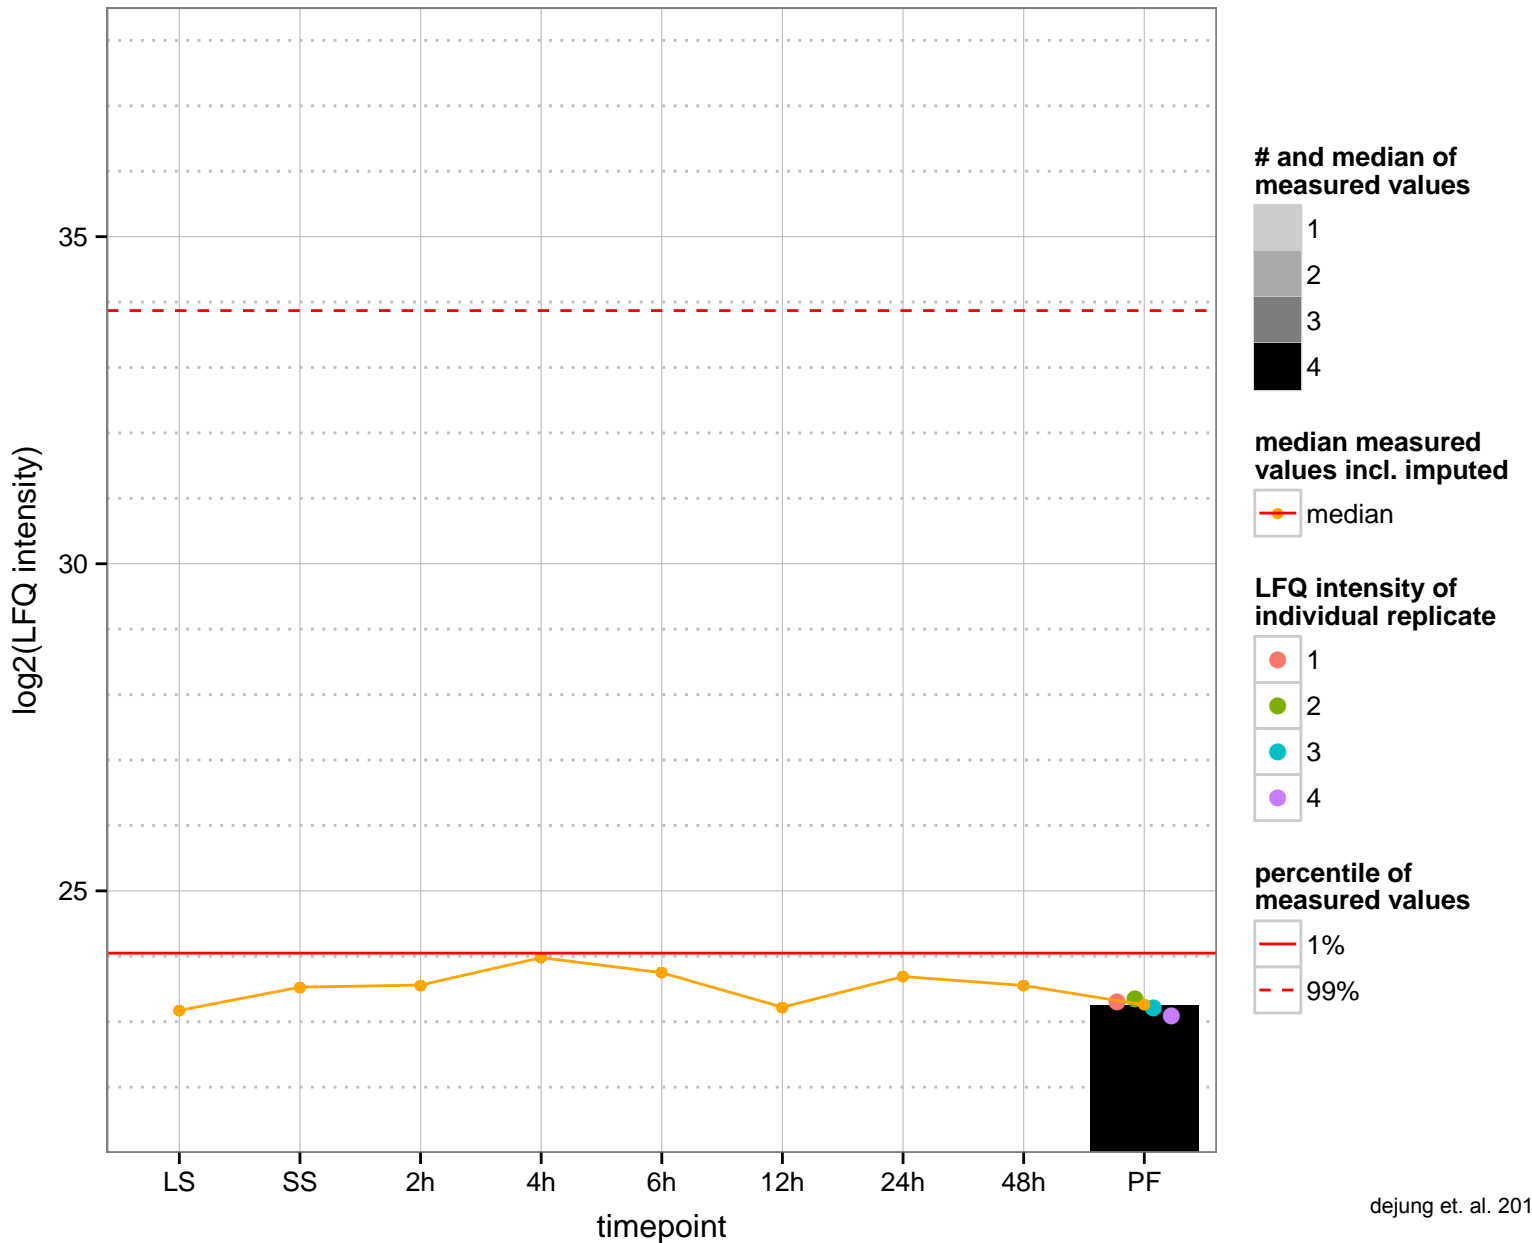

hypothetical protein, conserved  
 Tb927.3.1190  
 AGOF: null  
 AGOC: null  
 AGOP: null  
 PGO: null  
 PGOC: null  
 PGOP: null

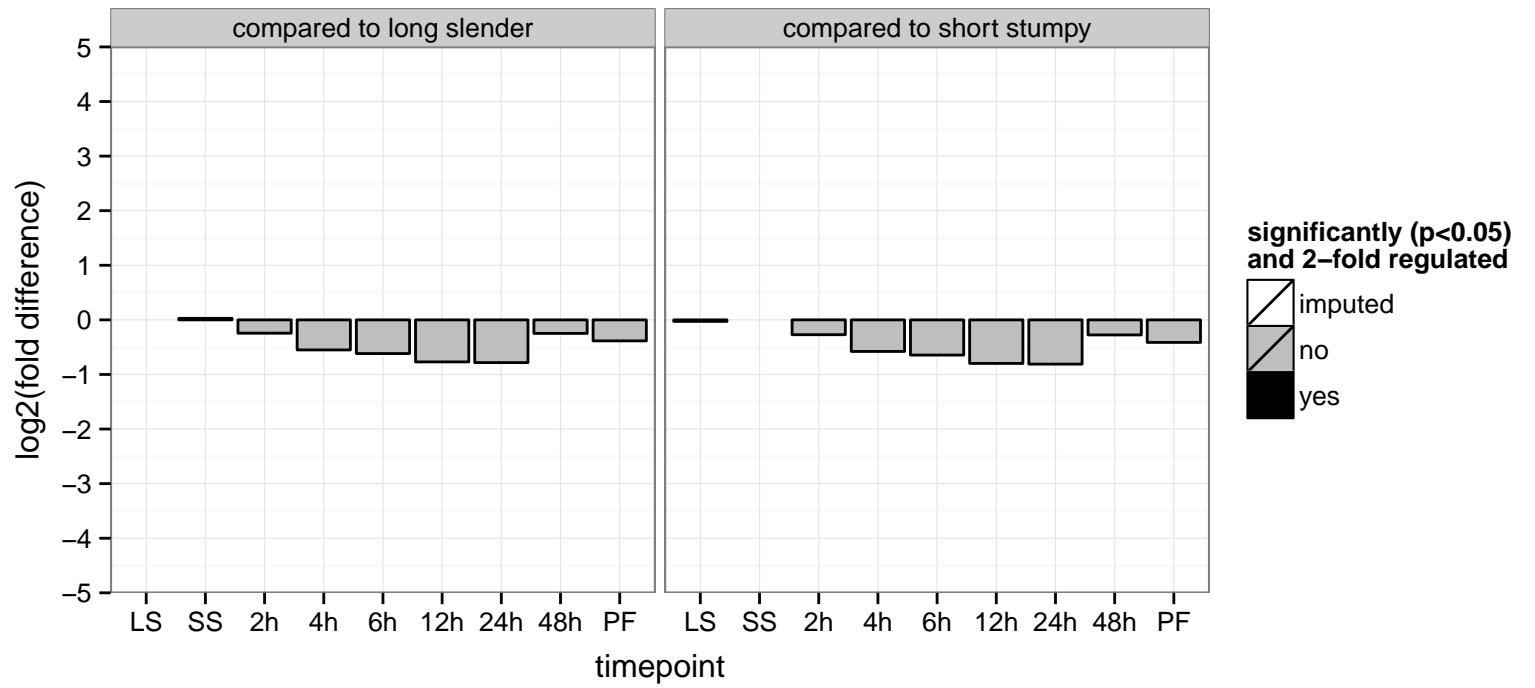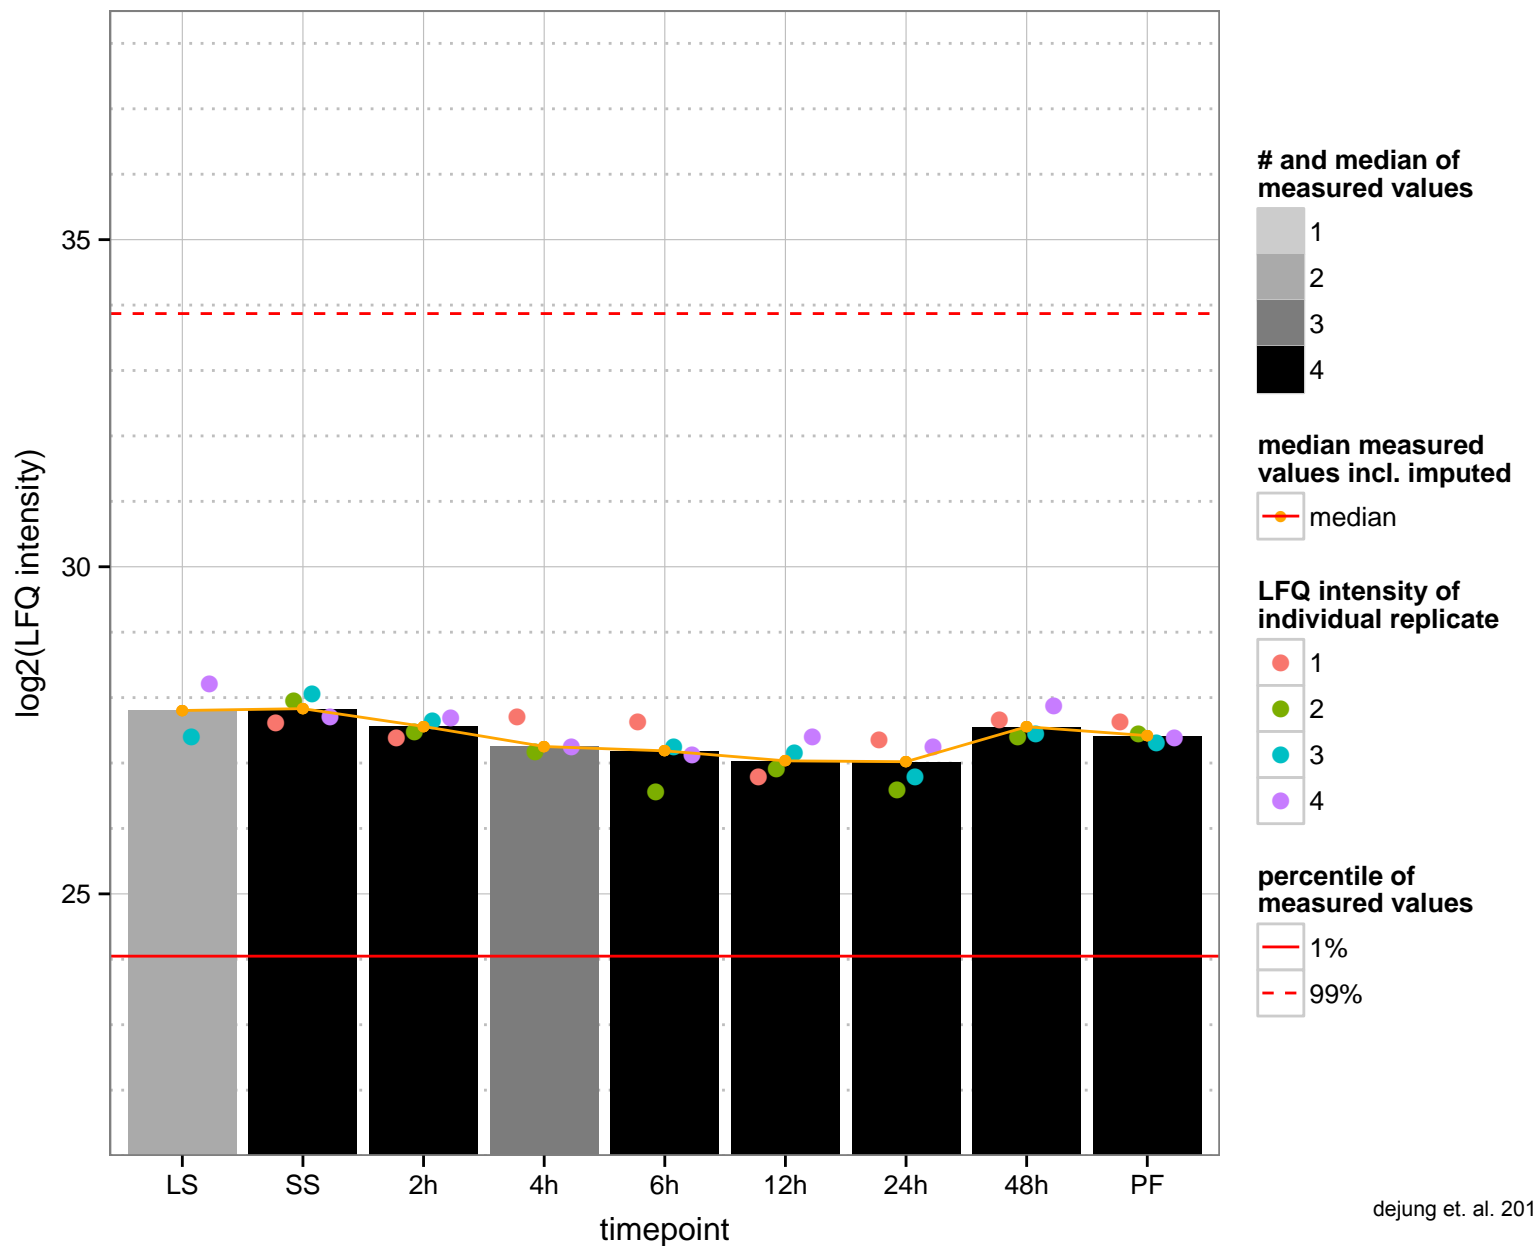

protein transport protein Sec24 (SEC24.1)

Tb927.3.1210

AGOF: protein binding, zinc ion binding

AGOC: COPII vesicle coat

AGOP: ER to Golgi vesicle-mediated transport, intracellular protein transport

PGOF: zinc ion binding

PGOC: COPII vesicle coat

PGOP: ER to Golgi vesicle-mediated transport, intracellular protein transport

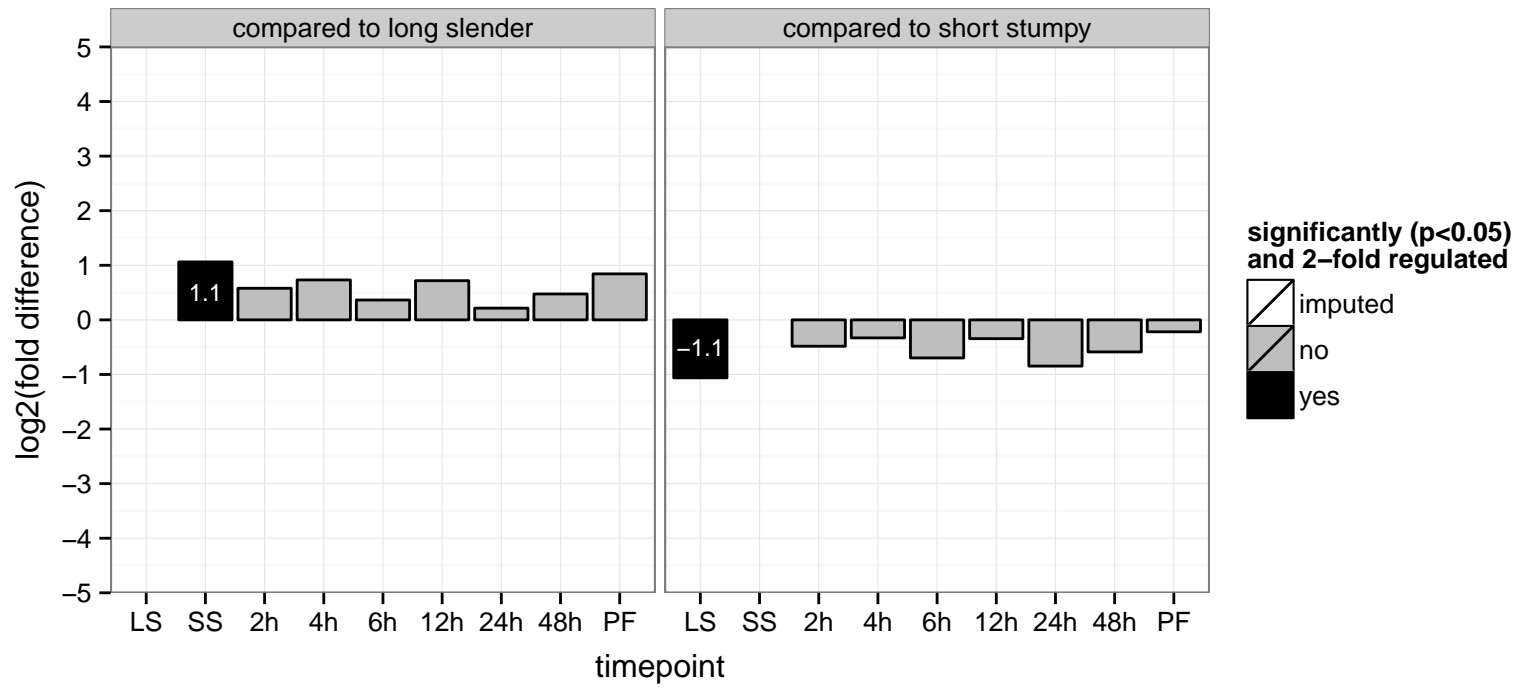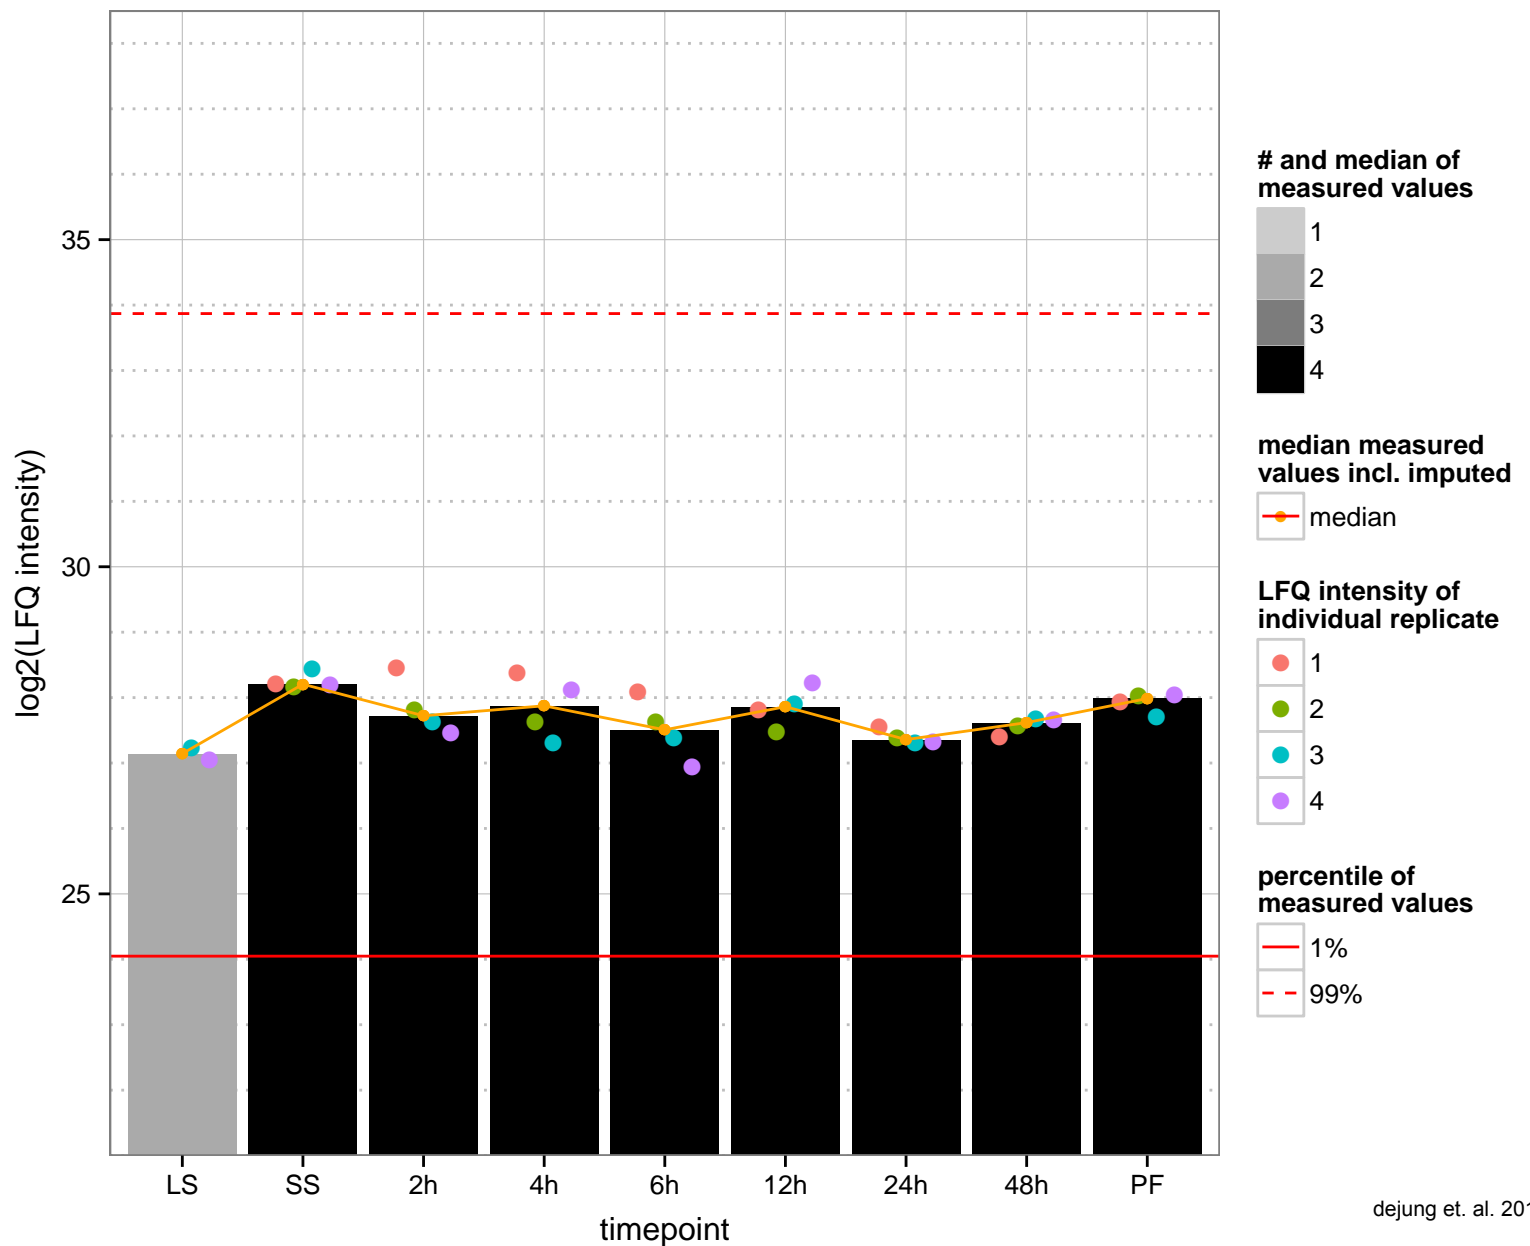

hypothetical protein, conserved  
 Tb927.3.1270  
 AGOF: null  
 AGOC: null  
 AGOP: null  
 PGO: null  
 PGOC: null  
 PGOP: null

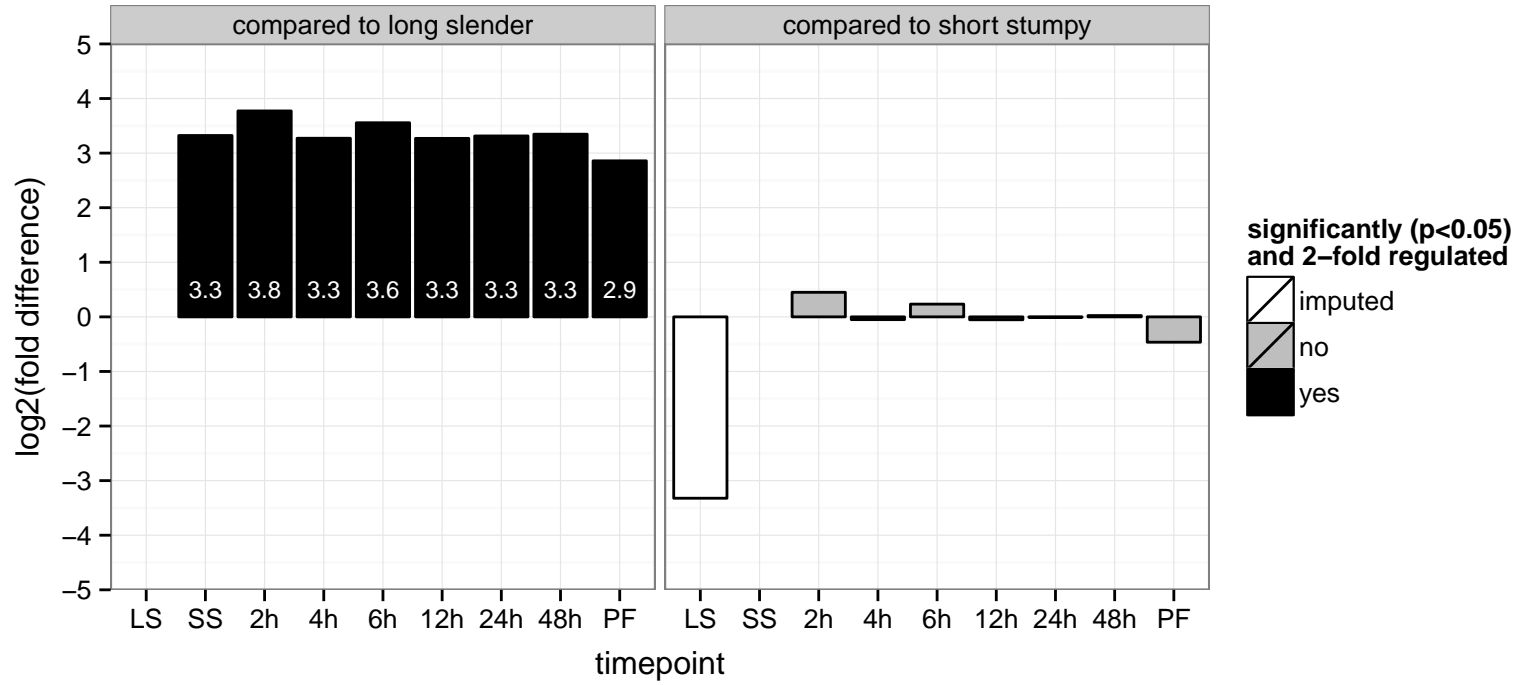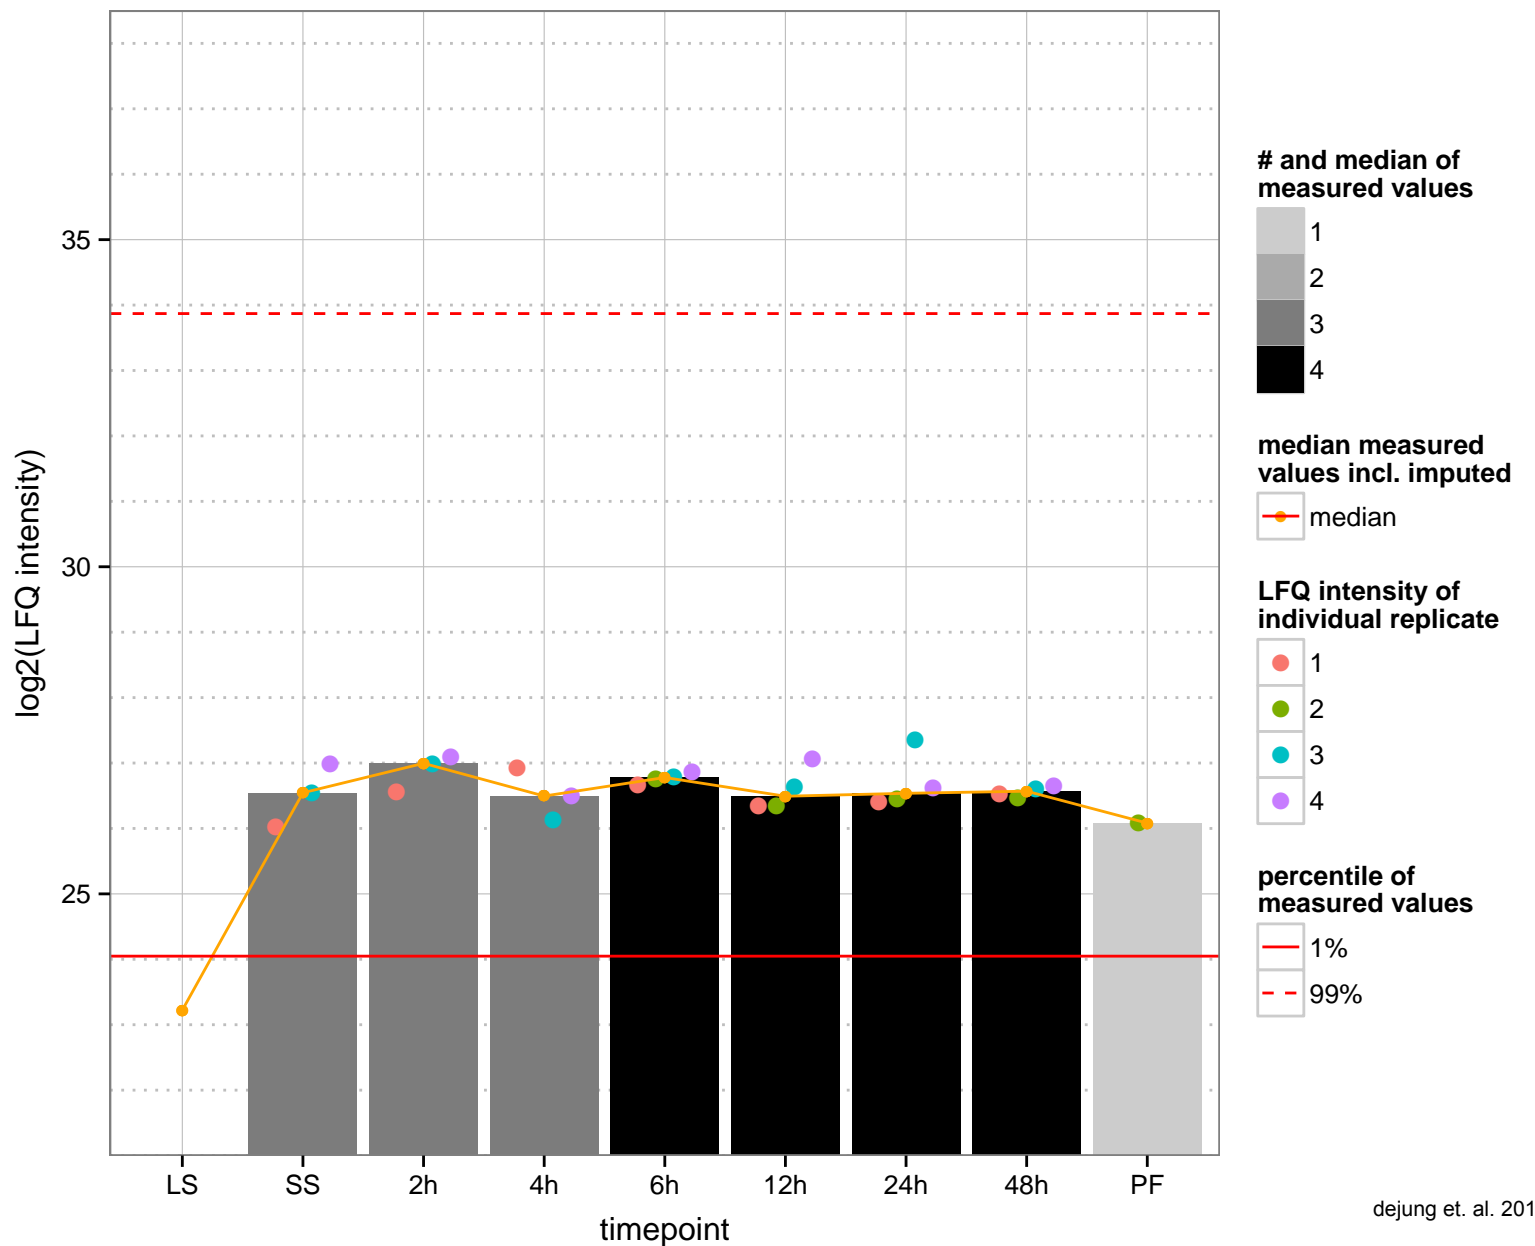

hypothetical protein, conserved  
 Tb927.3.1280  
 AGOF: null  
 AGOC: null  
 AGOP: null  
 PGO: null  
 PGOC: null  
 PGOP: null

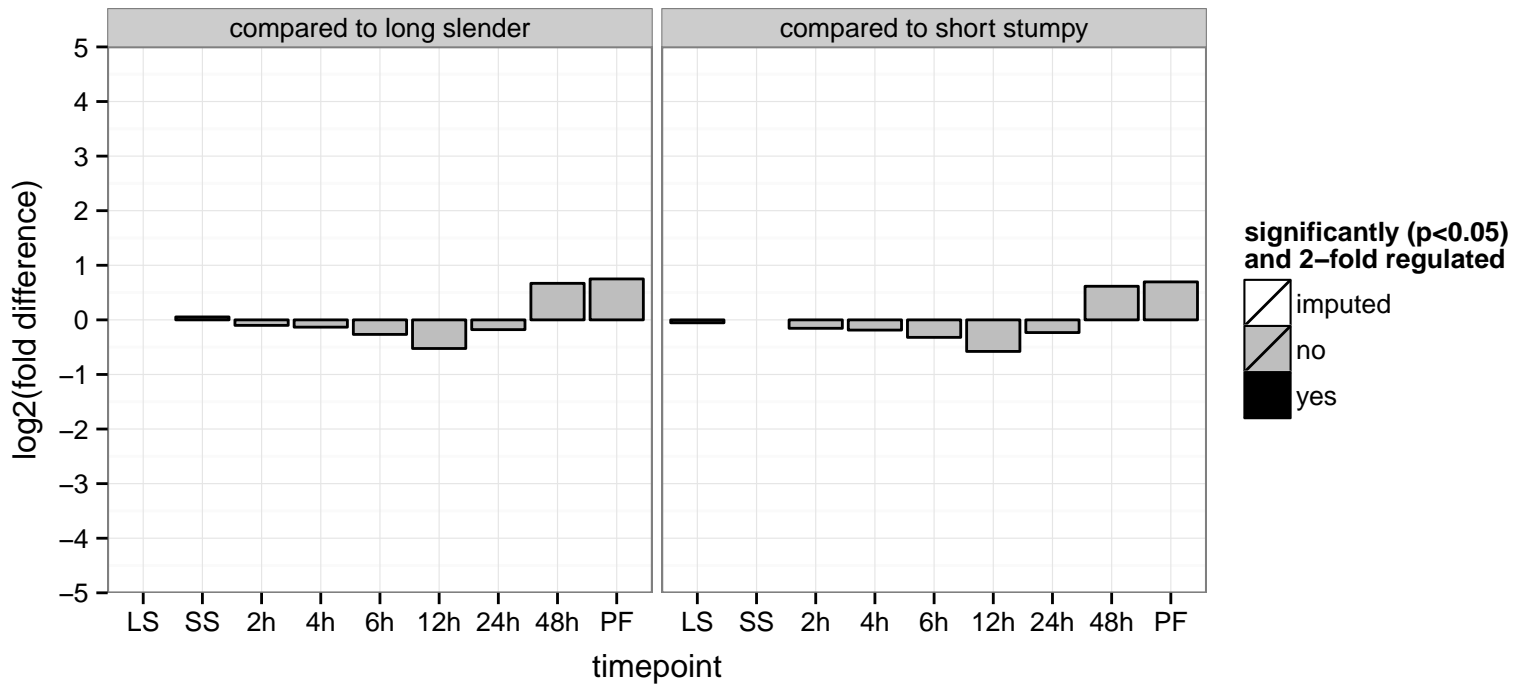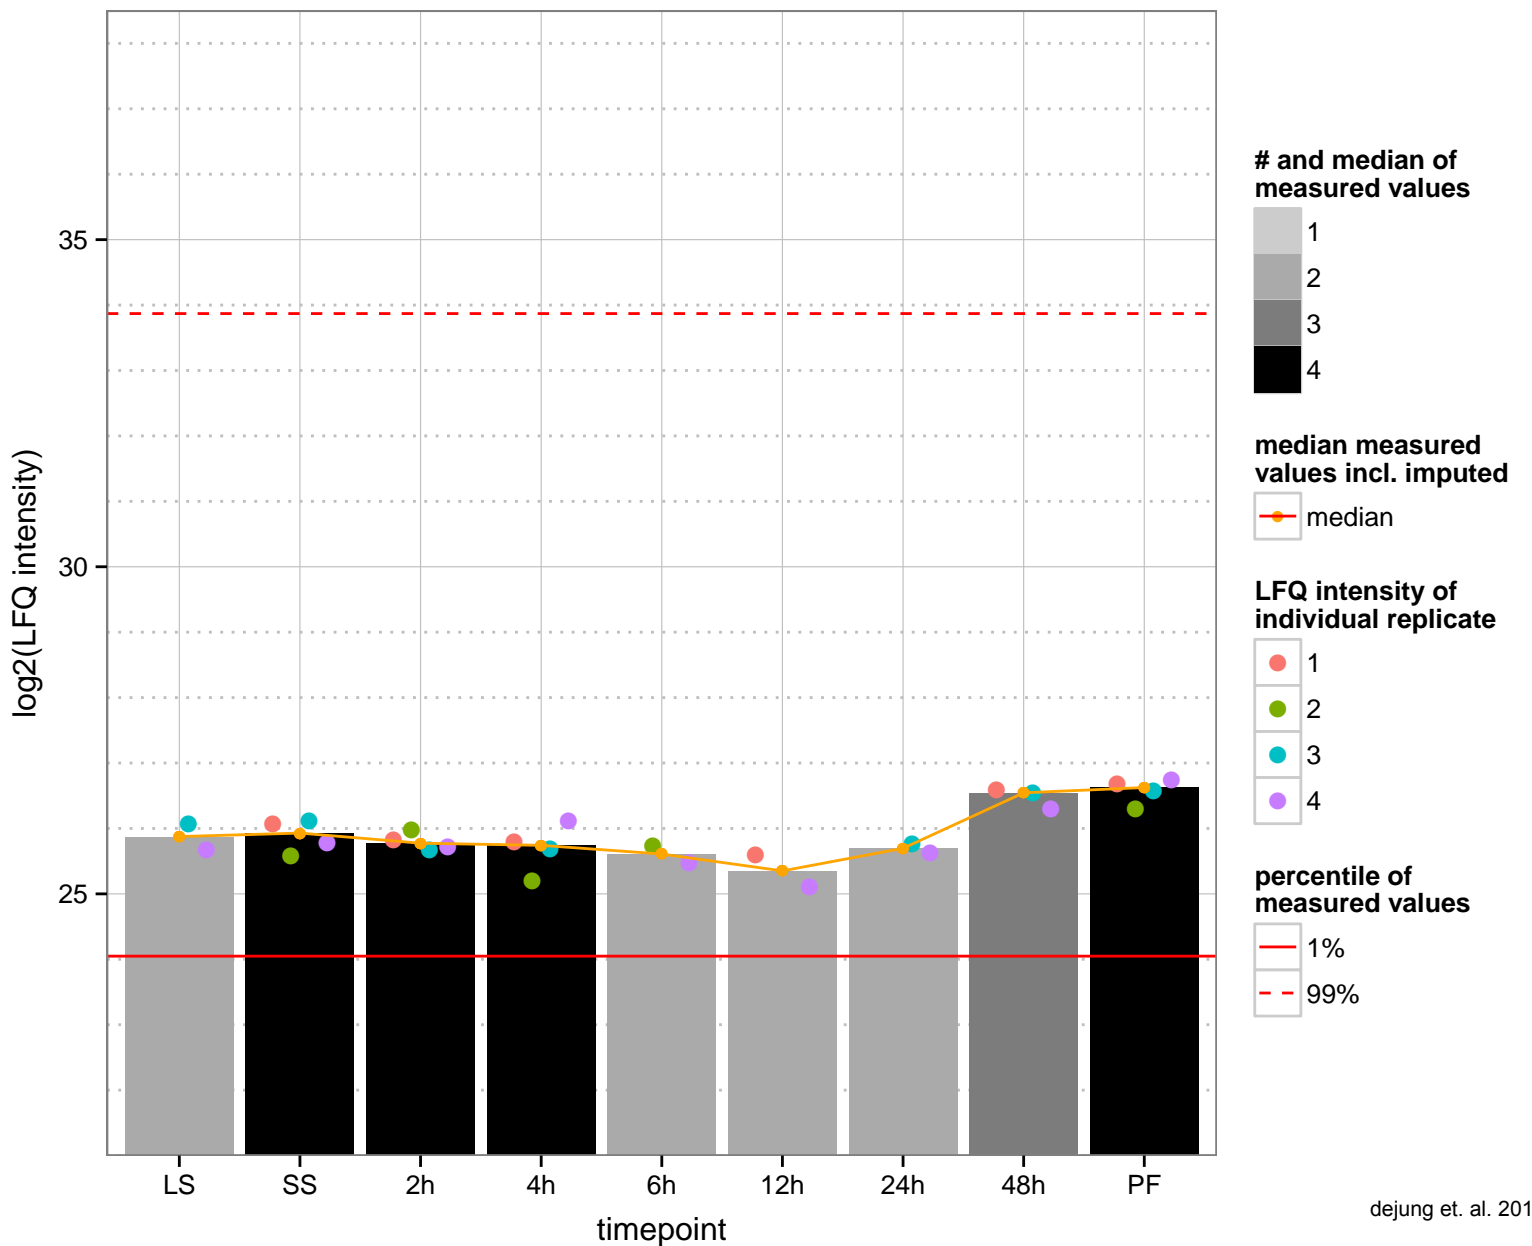



cullin 4B, putative  
 Tb927.3.1290  
 AGOF: ubiquitin protein ligase binding  
 AGOC: cullin-RING ubiquitin ligase complex  
 AGOP: ubiquitin-dependent protein catabolic process  
 PGOF: ubiquitin protein ligase binding  
 PGOC: cullin-RING ubiquitin ligase complex  
 PGOP: ubiquitin-dependent protein catabolic process

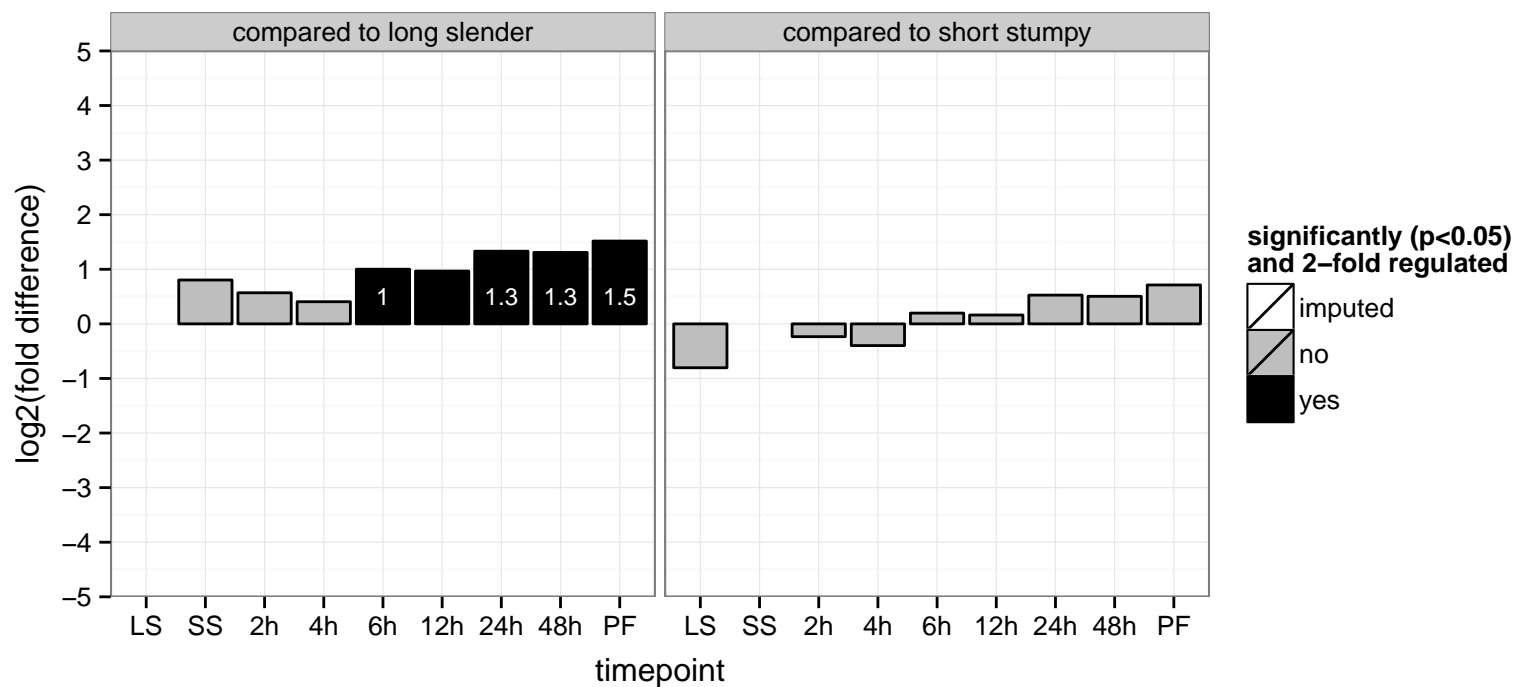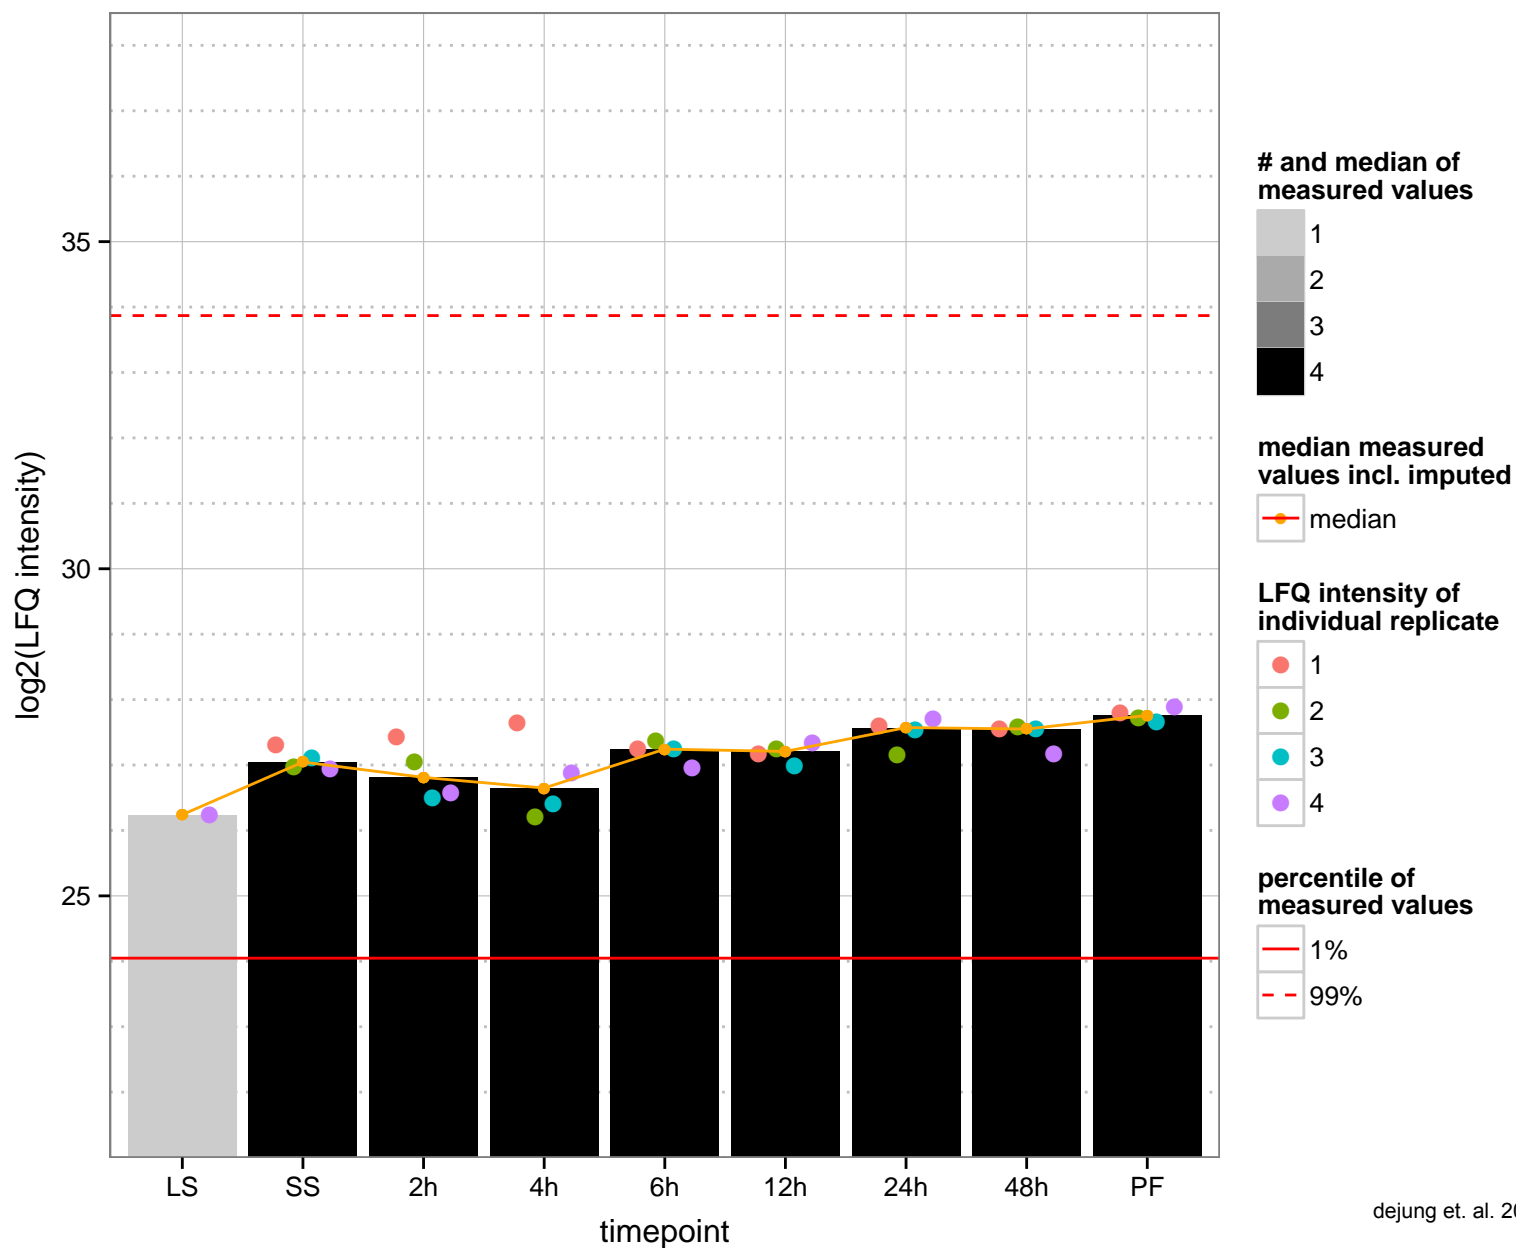

hypothetical protein, conserved  
 Tb927.3.1300  
 AGOF: null  
 AGOC: null  
 AGOP: null  
 PGO: null  
 PGOC: null  
 PGOP: null

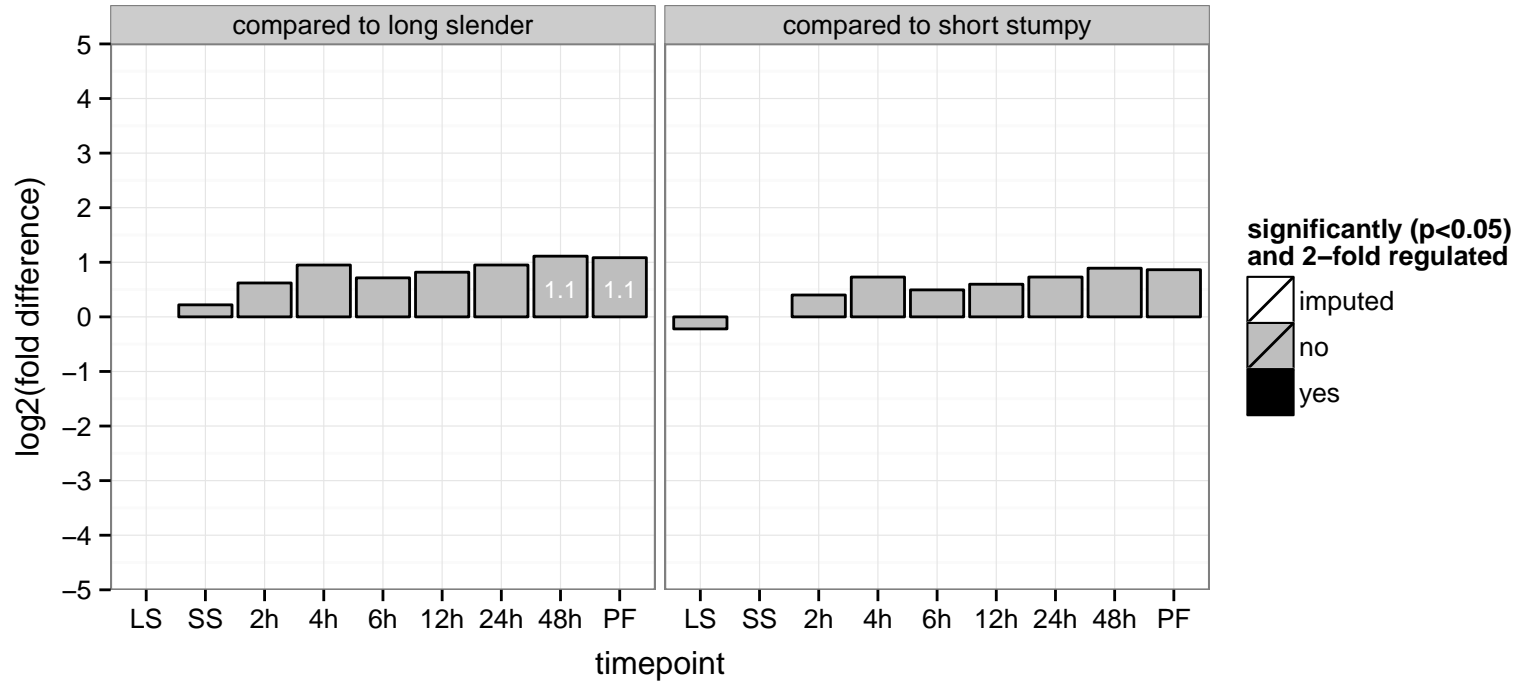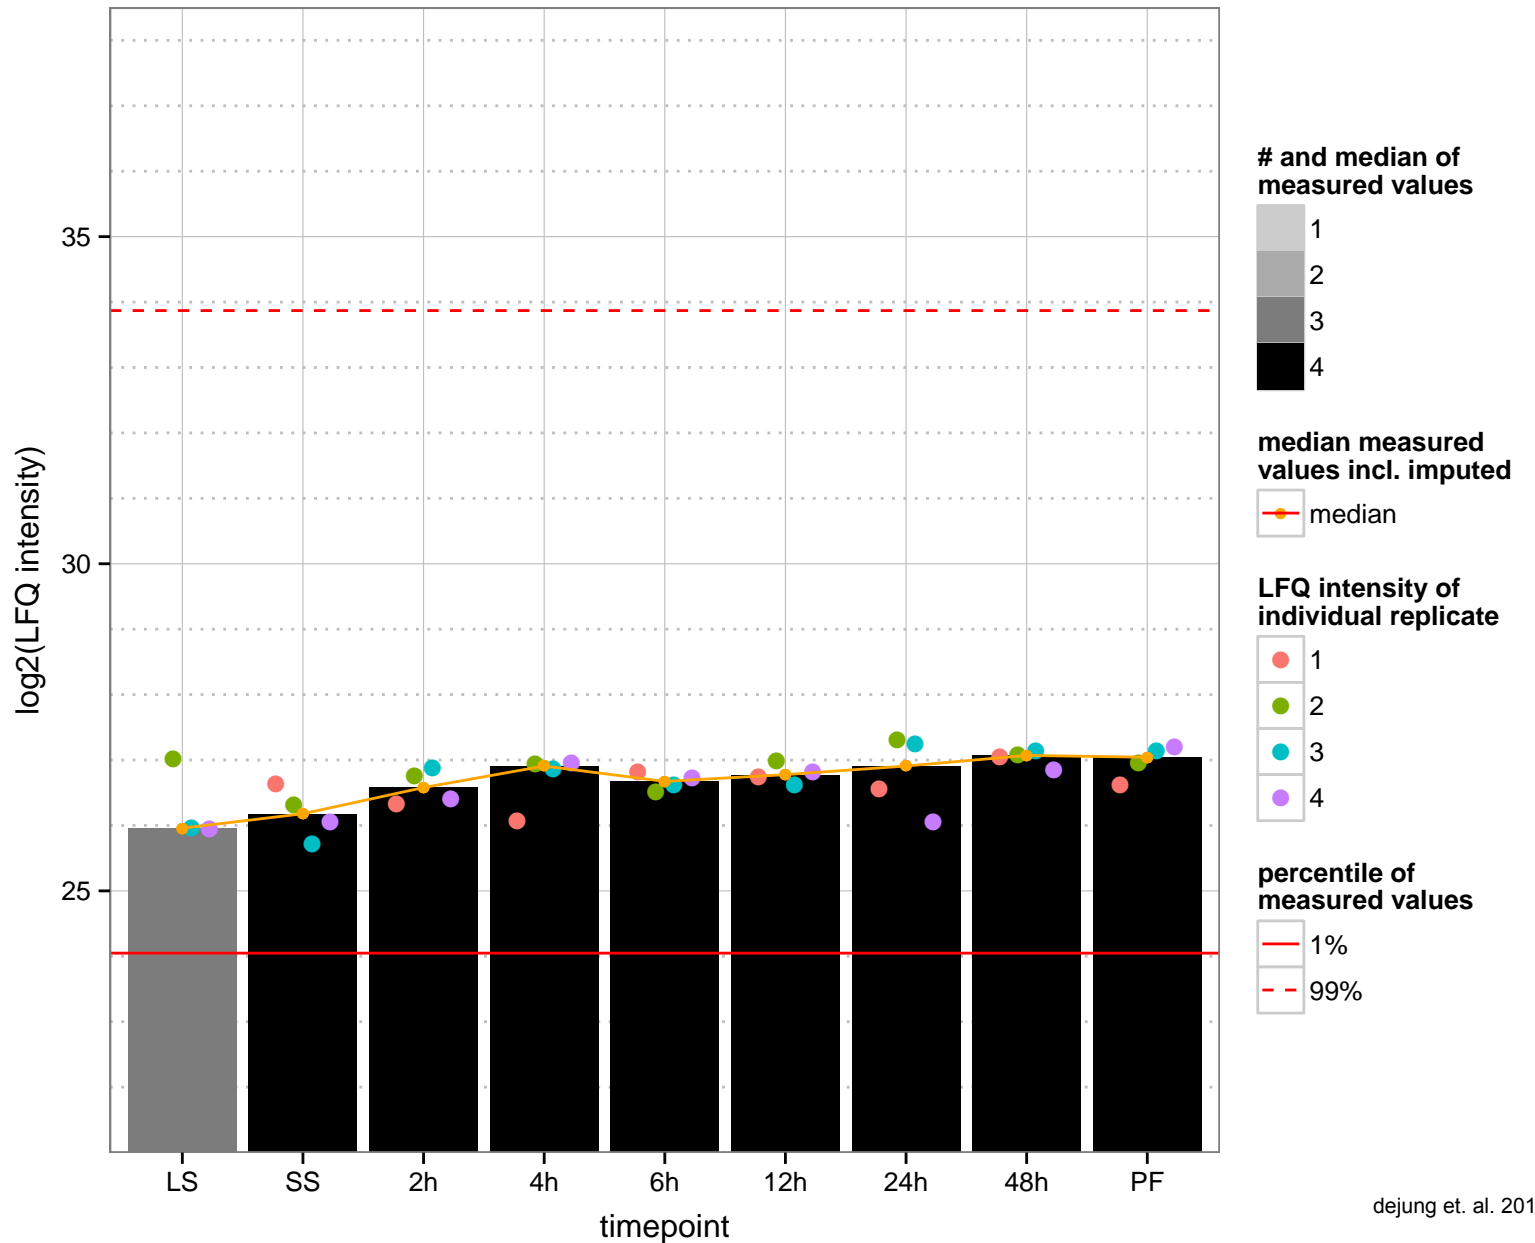

Nuclear cap-binding protein subunit 66, zinc finger CCCH domain containing protein 7 (CBP66)

Tb927.3.1340

AGOF: RNA binding

AGOC: nuclear cap binding complex

AGOP: null

PGOF: null

PGOC: null

PGOP: null

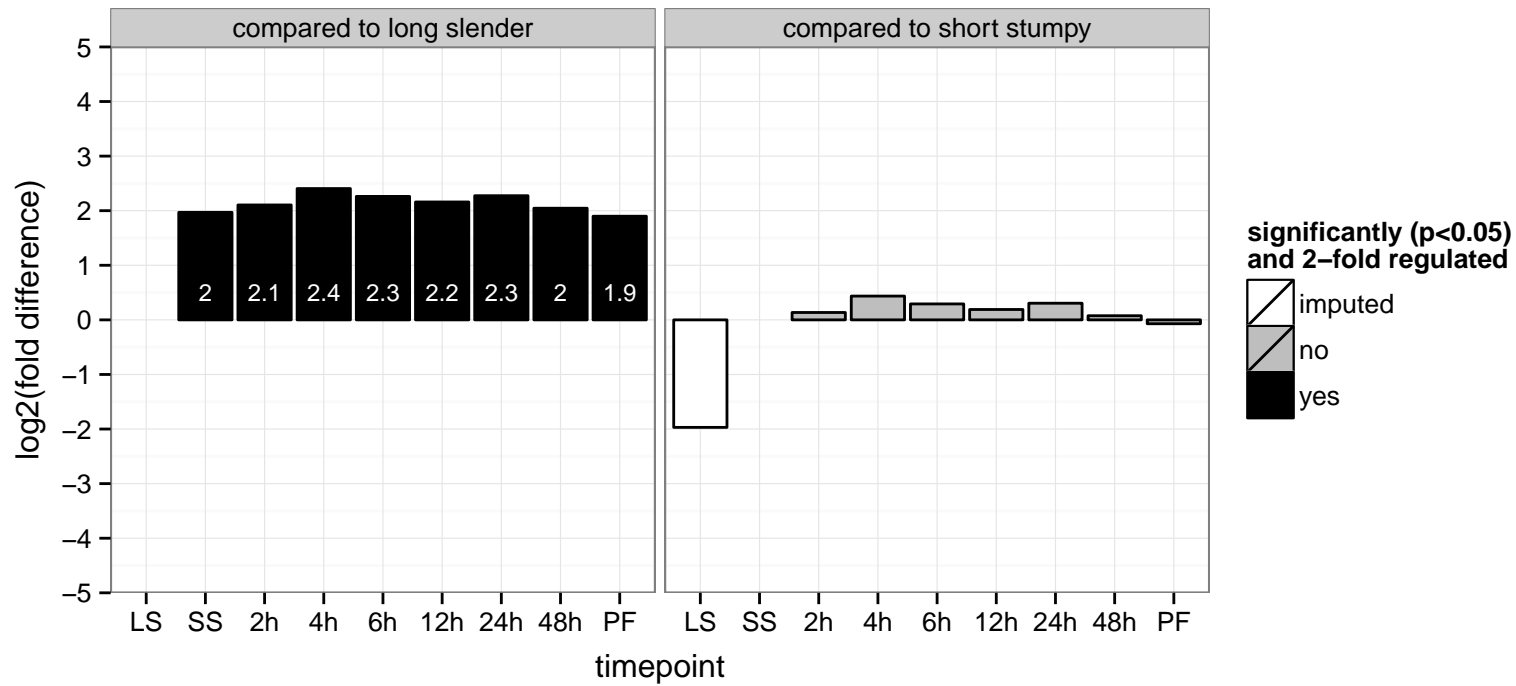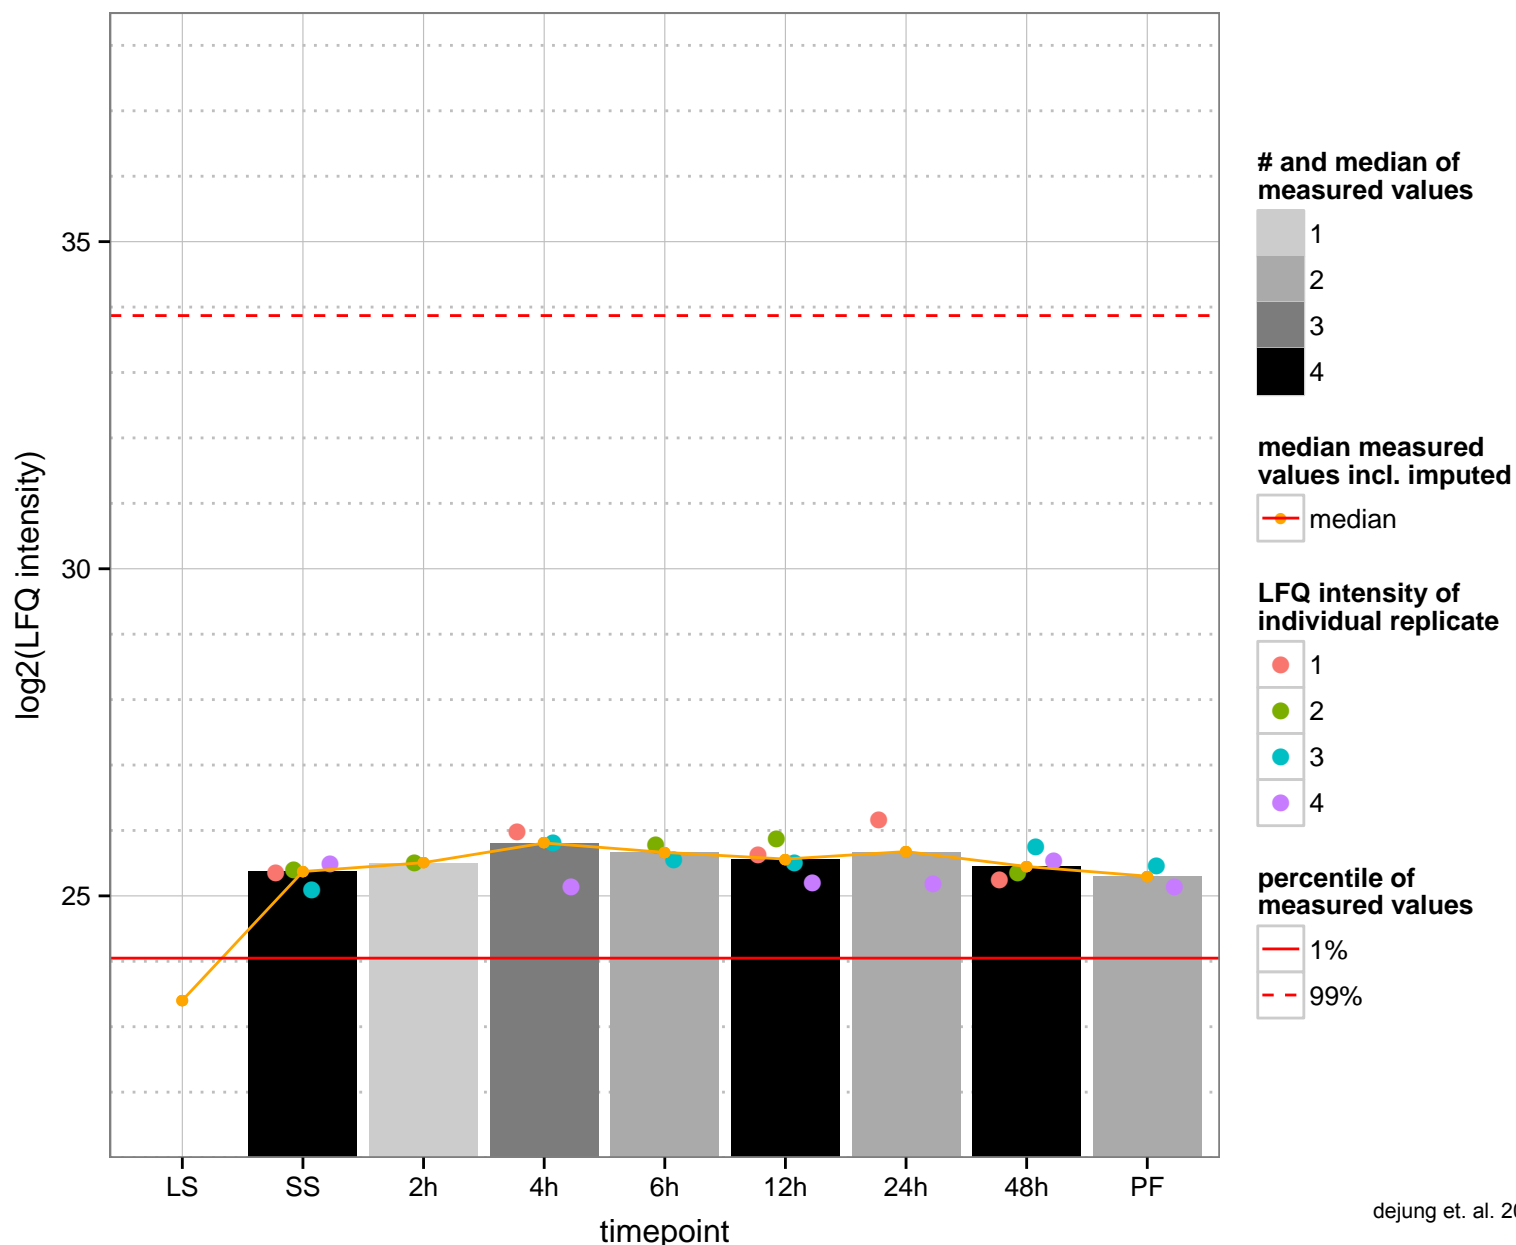

chaperone protein DNAj, putative

Tb927.3.1430

AGOF: chaperone binding, heat shock protein binding, unfolded protein binding

AGOC: null

AGOP: protein folding

PGOF: heat shock protein binding, unfolded protein binding

PGOC: null

PGOP: protein folding

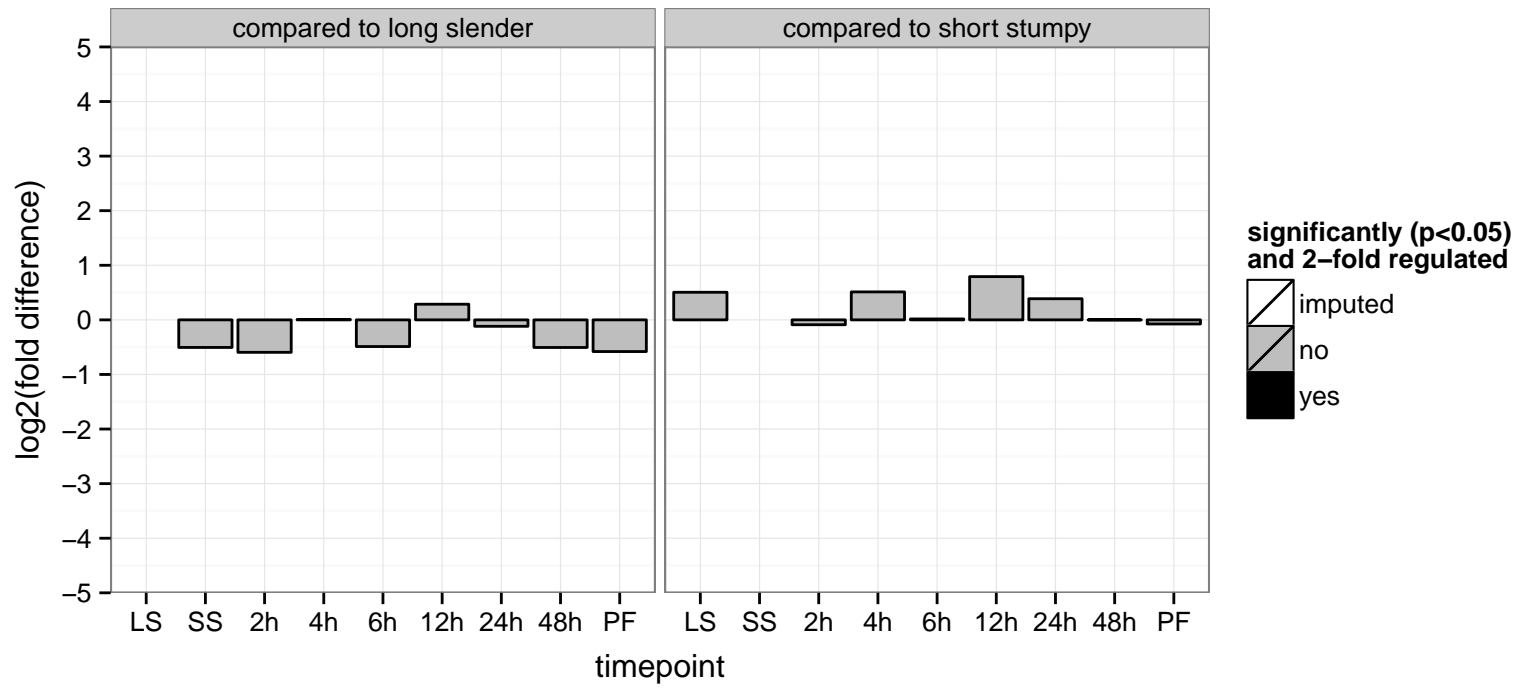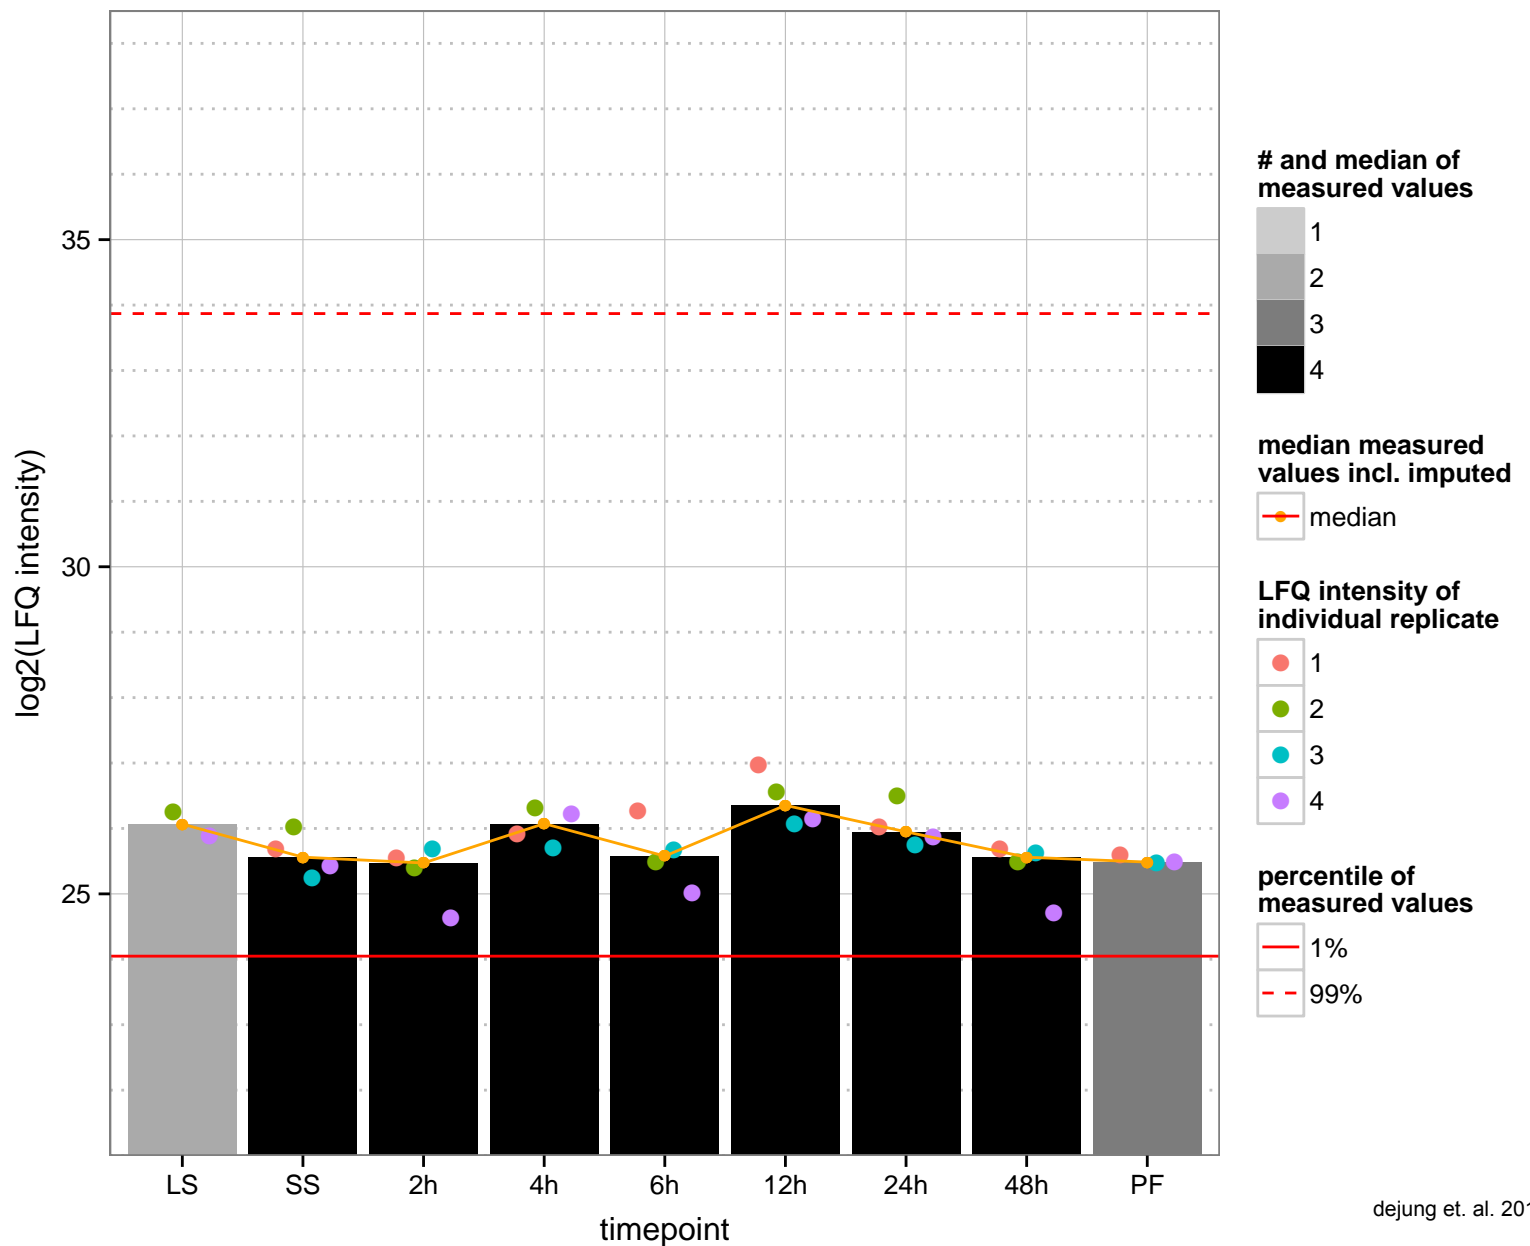

hypothetical protein, conserved  
 Tb927.3.1530;Tb927.3.1450  
 AGOF: metal ion transmembrane transporter activity, null  
 AGOC: membrane, null  
 AGOP: metal ion transport, null  
 PGO: metal ion transmembrane transporter activity  
 PGOC: membrane  
 PGOP: metal ion transport, transmembrane transport

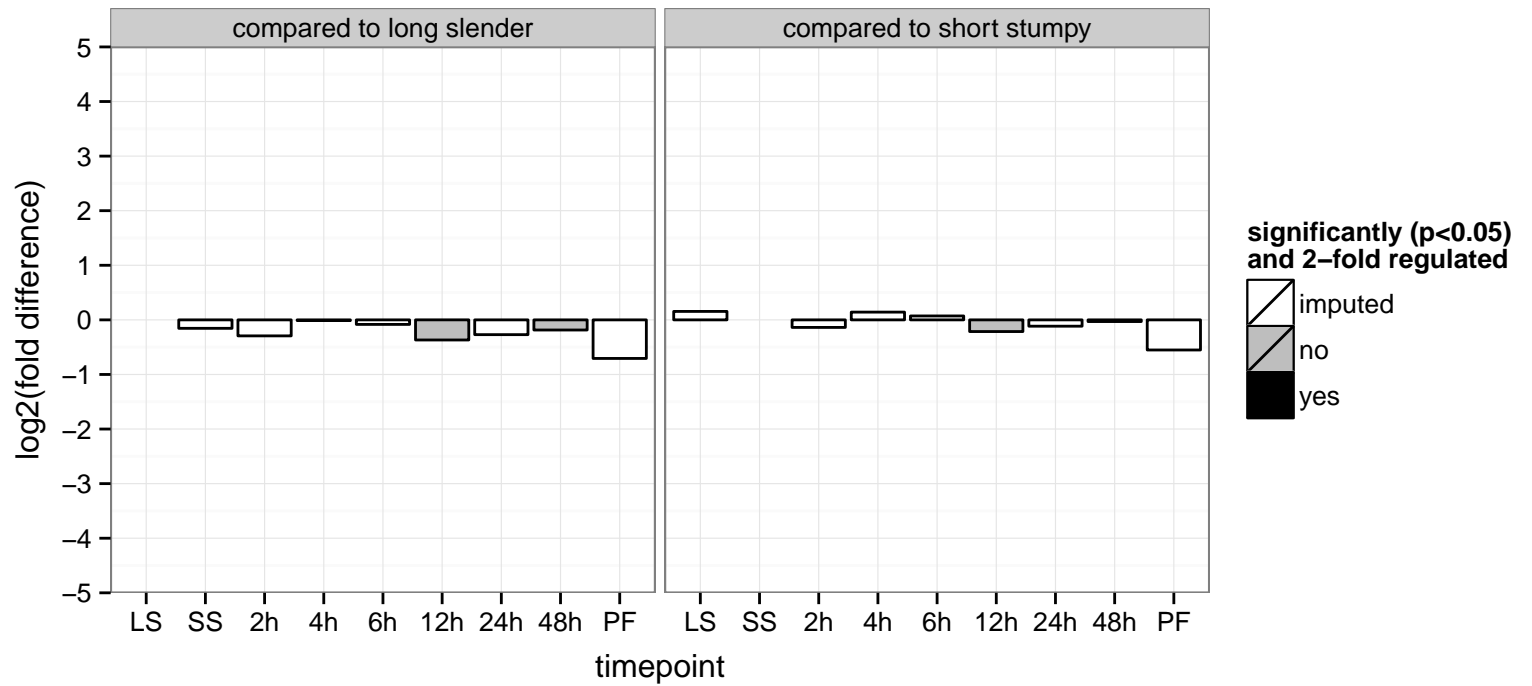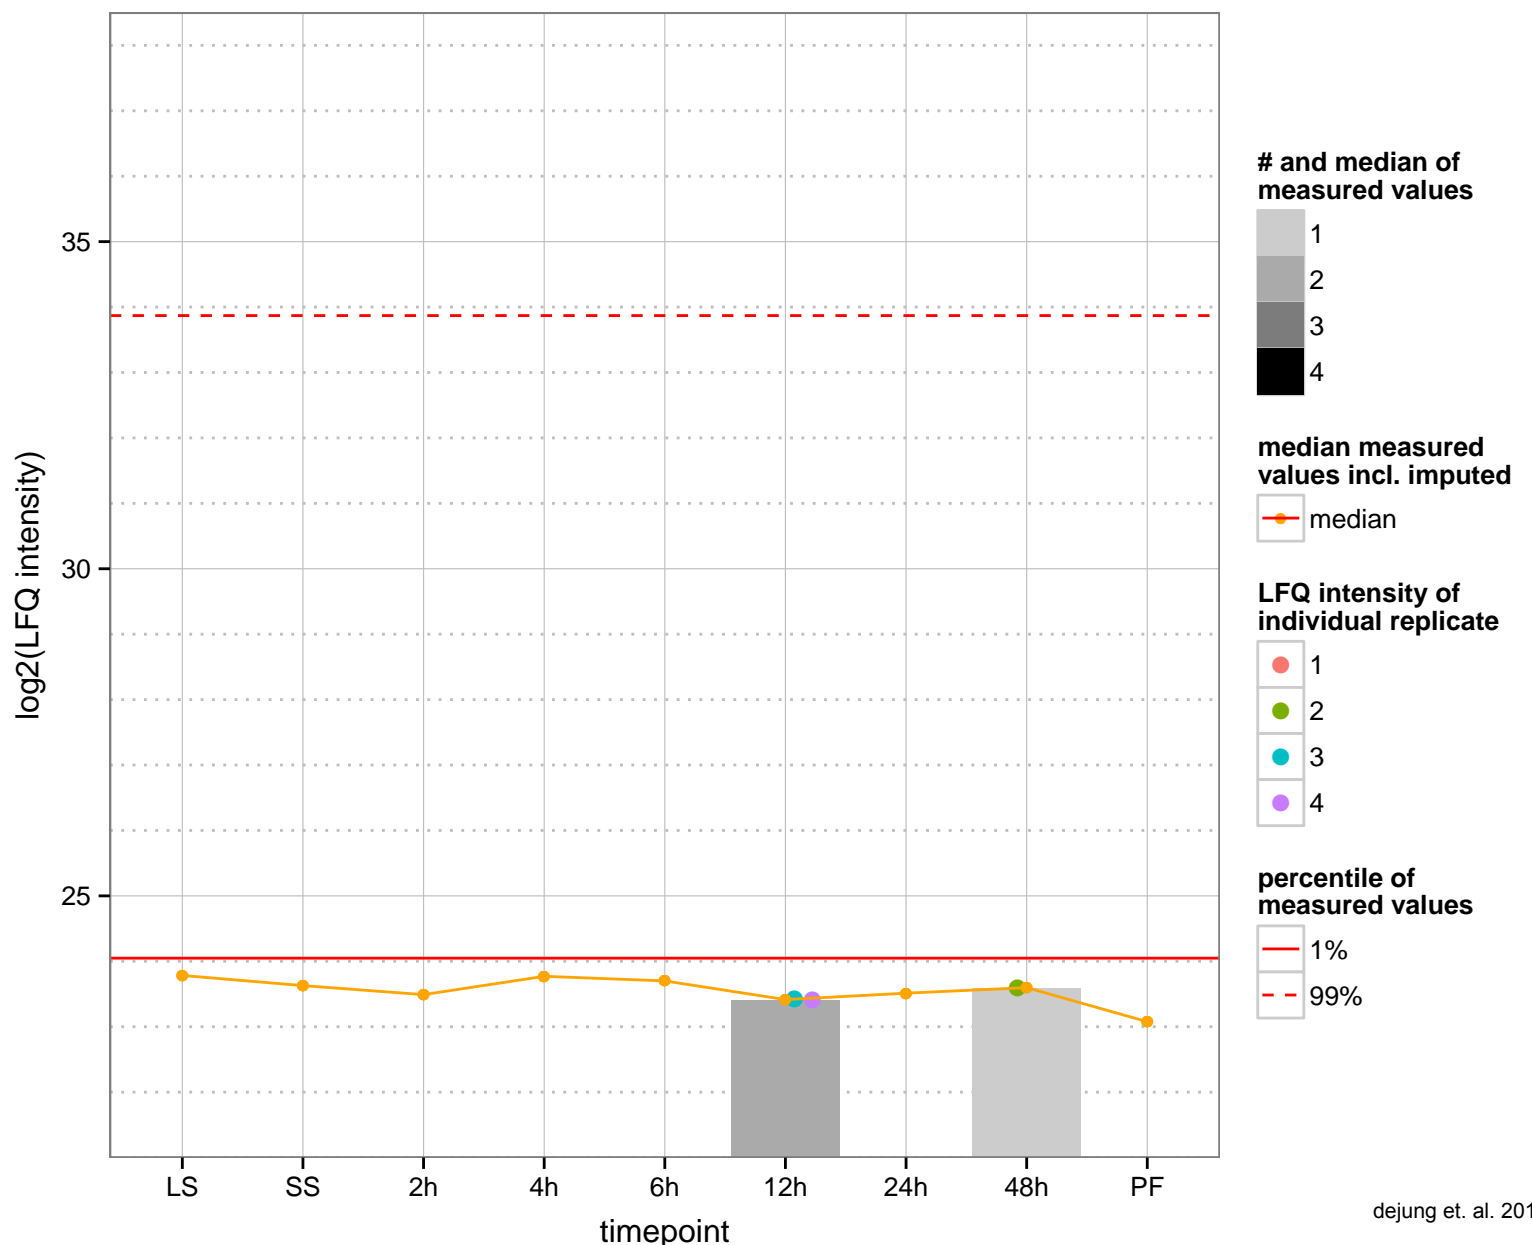

protein kinase, putative

Tb927.3.1570

AGOF: ATP binding, protein serine/threonine kinase activity, protein tyrosine kinase activity

AGOC: null

AGOP: protein phosphorylation

PGOF: ATP binding, protein kinase activity, transferase activity, transferring phosphorus-containing groups

PGOC: null

PGOP: protein phosphorylation

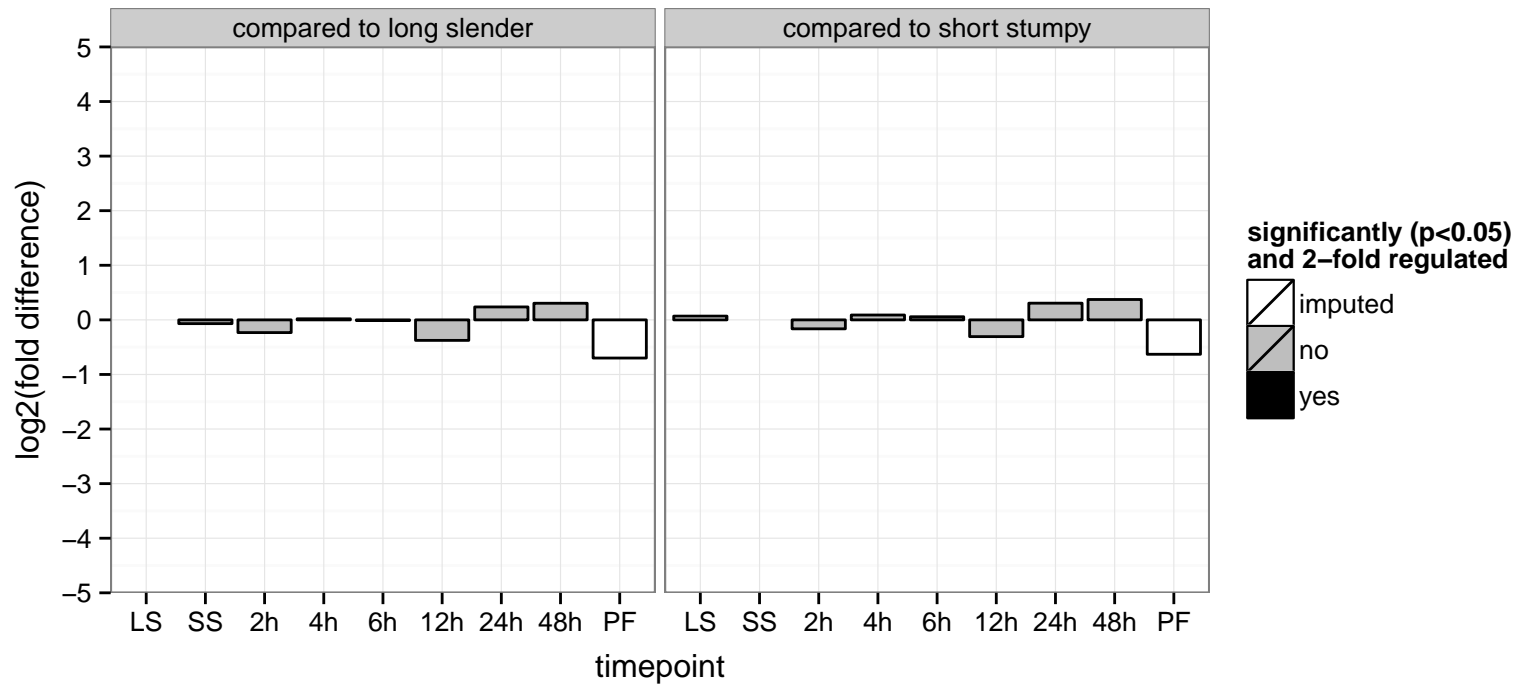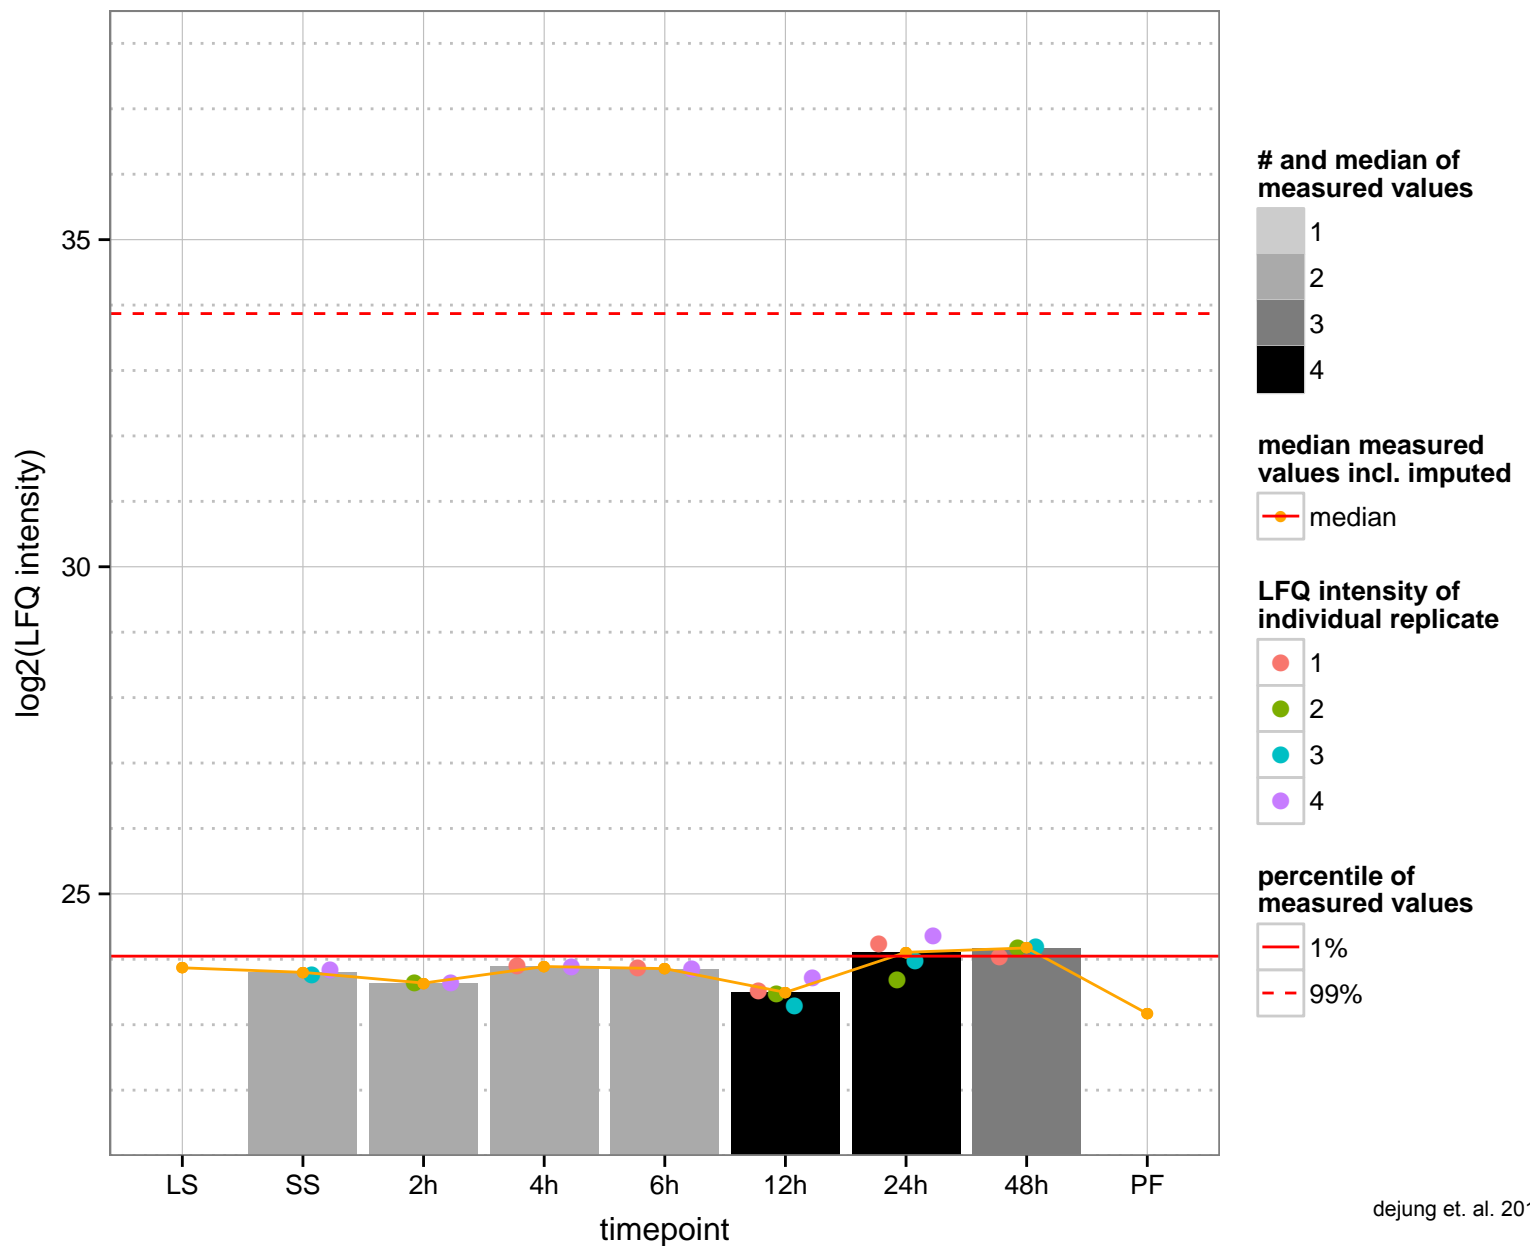

mitochondrial RNA binding complex 1 subunit (MRB1590)  
 Tb927.3.1590  
 AGOF: RNA binding  
 AGOC: mitochondrion  
 AGOP: cytidine to uridine editing, mRNA stabilization  
 PGO: null  
 PGO: null  
 PGO: null

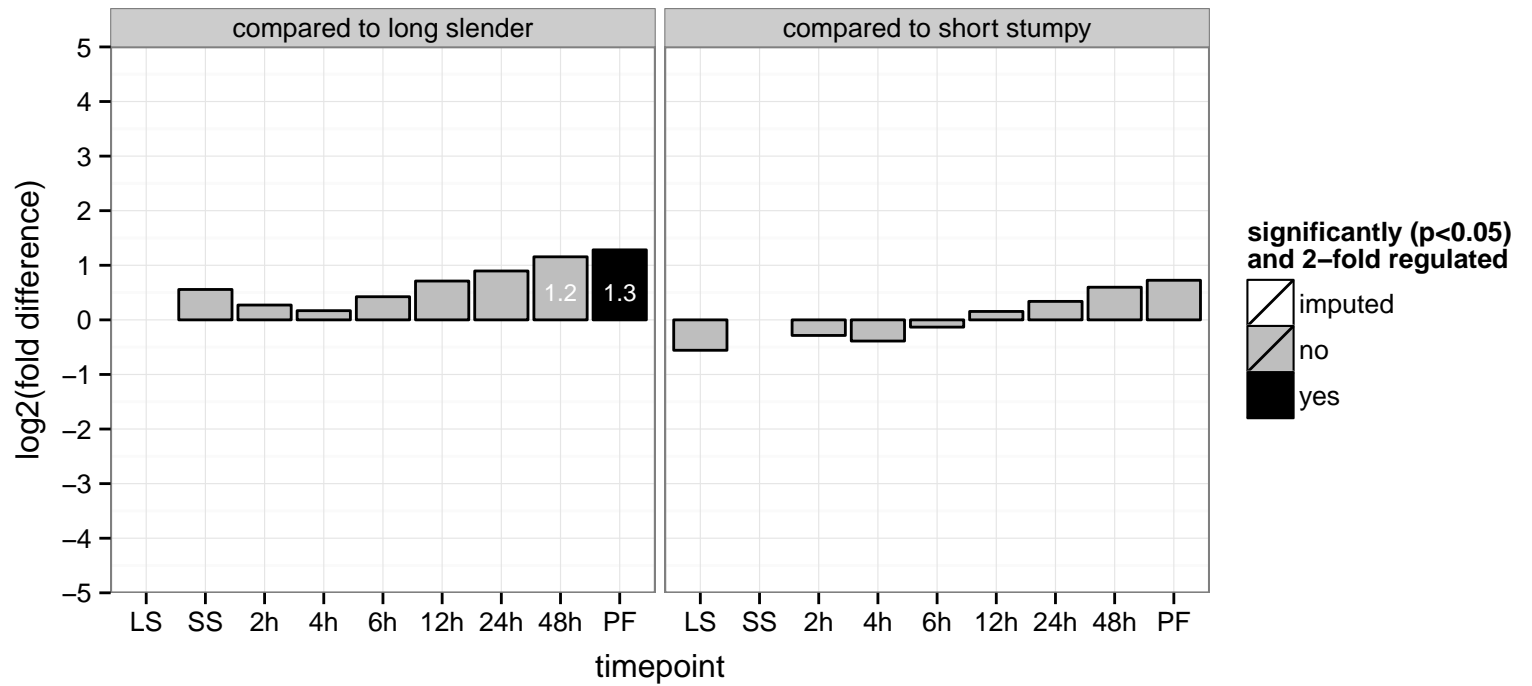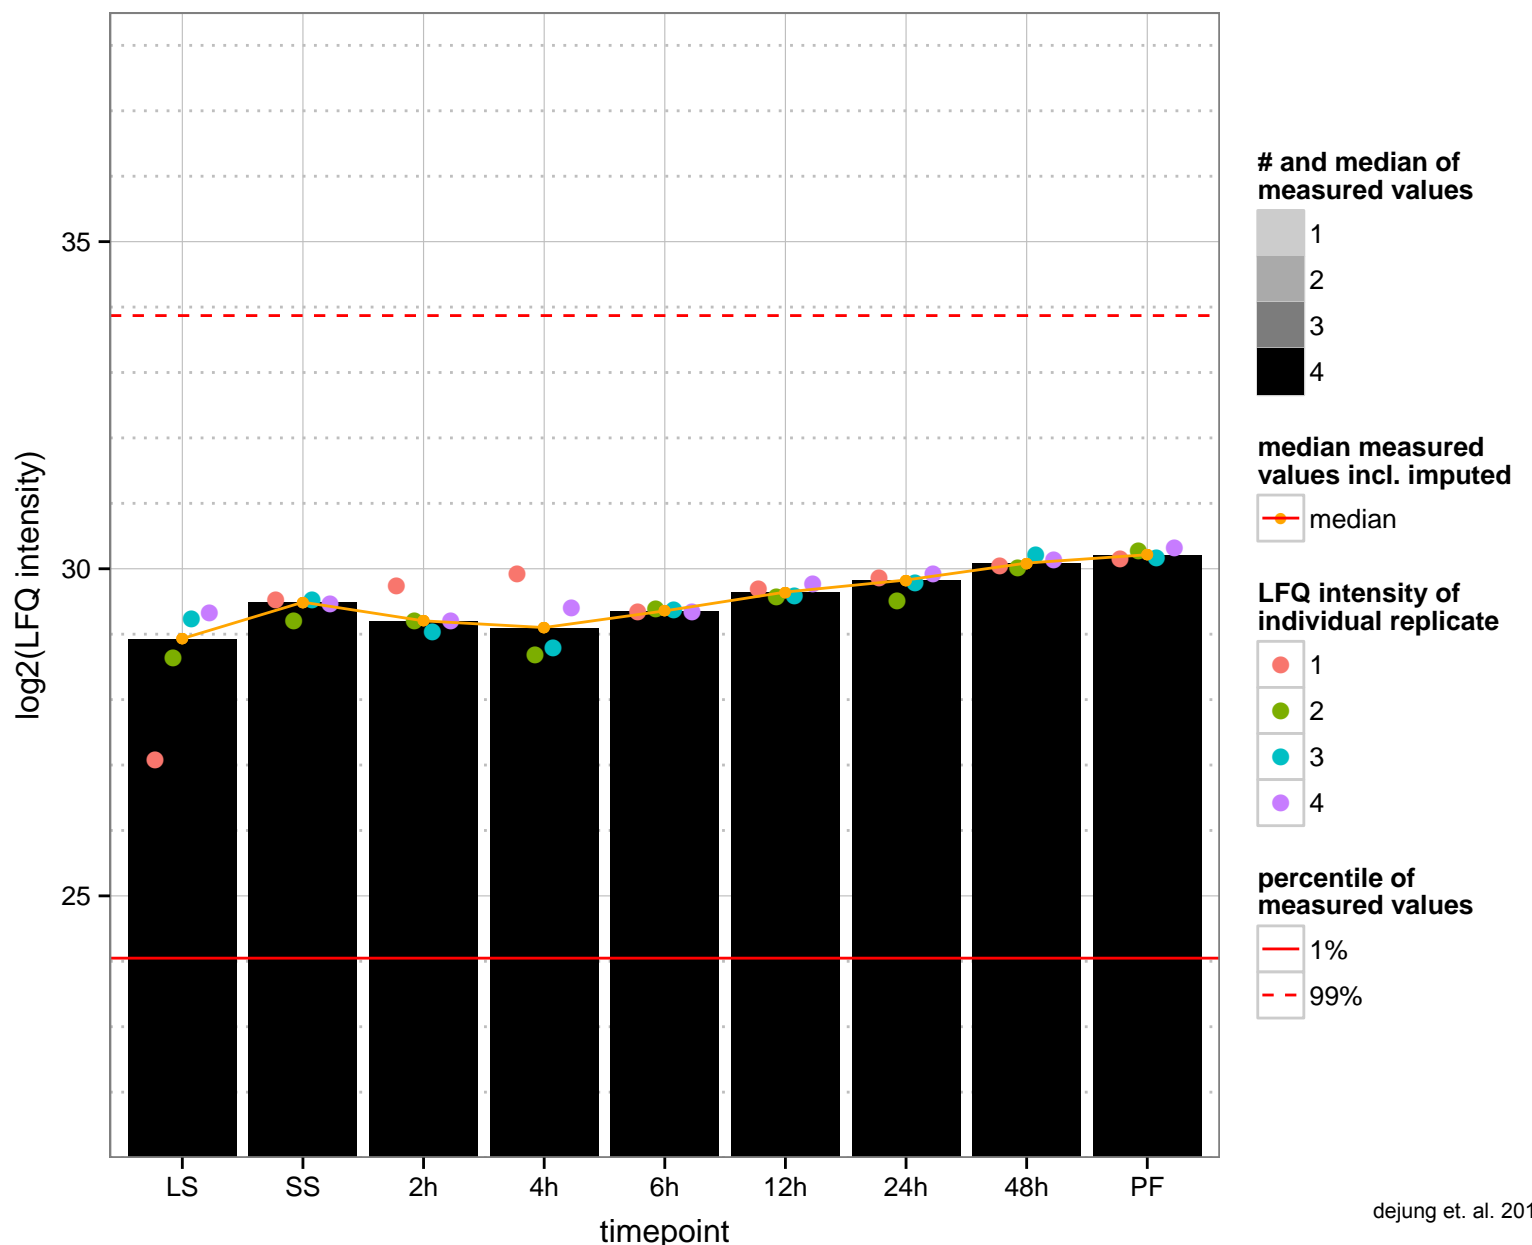

hypothetical protein, conserved  
 Tb927.3.1620  
 AGOF: null  
 AGOC: null  
 AGOP: null  
 PGO: null  
 PGOC: null  
 PGOP: null

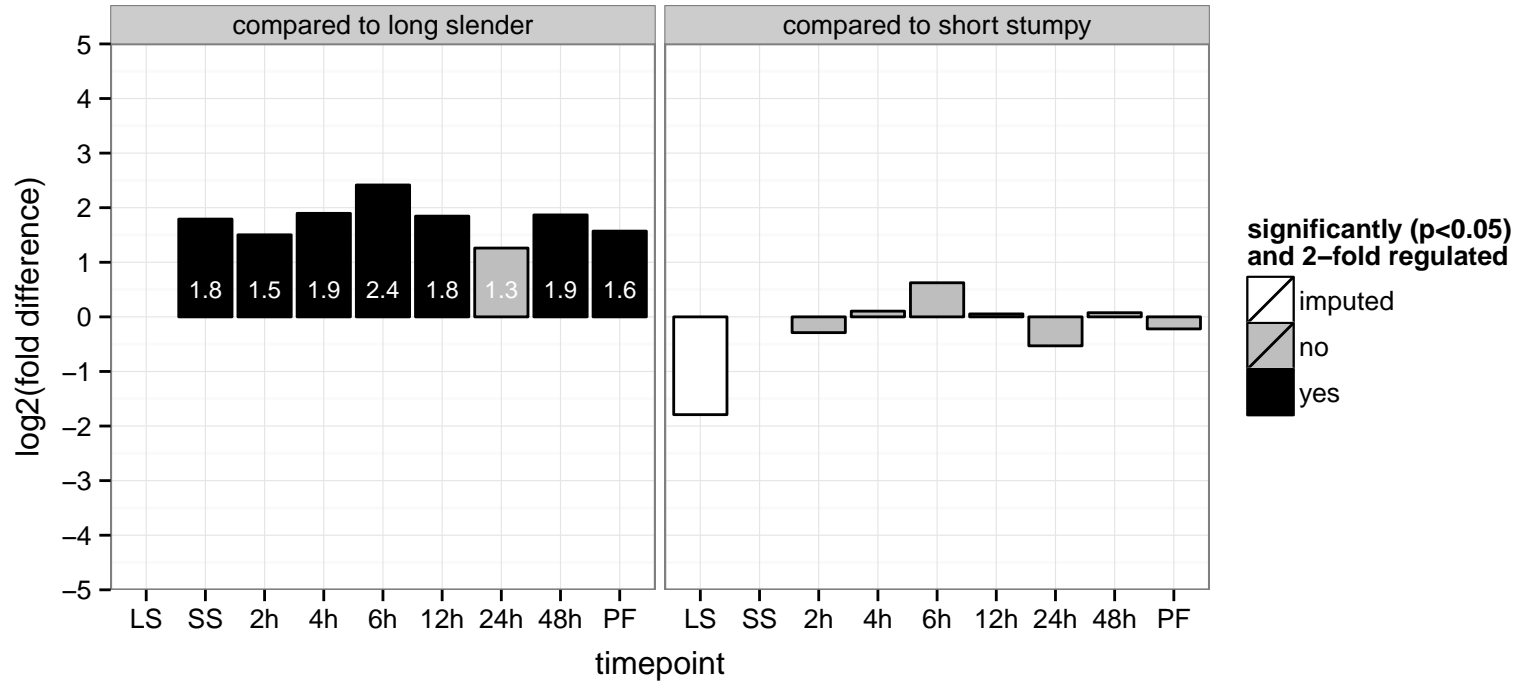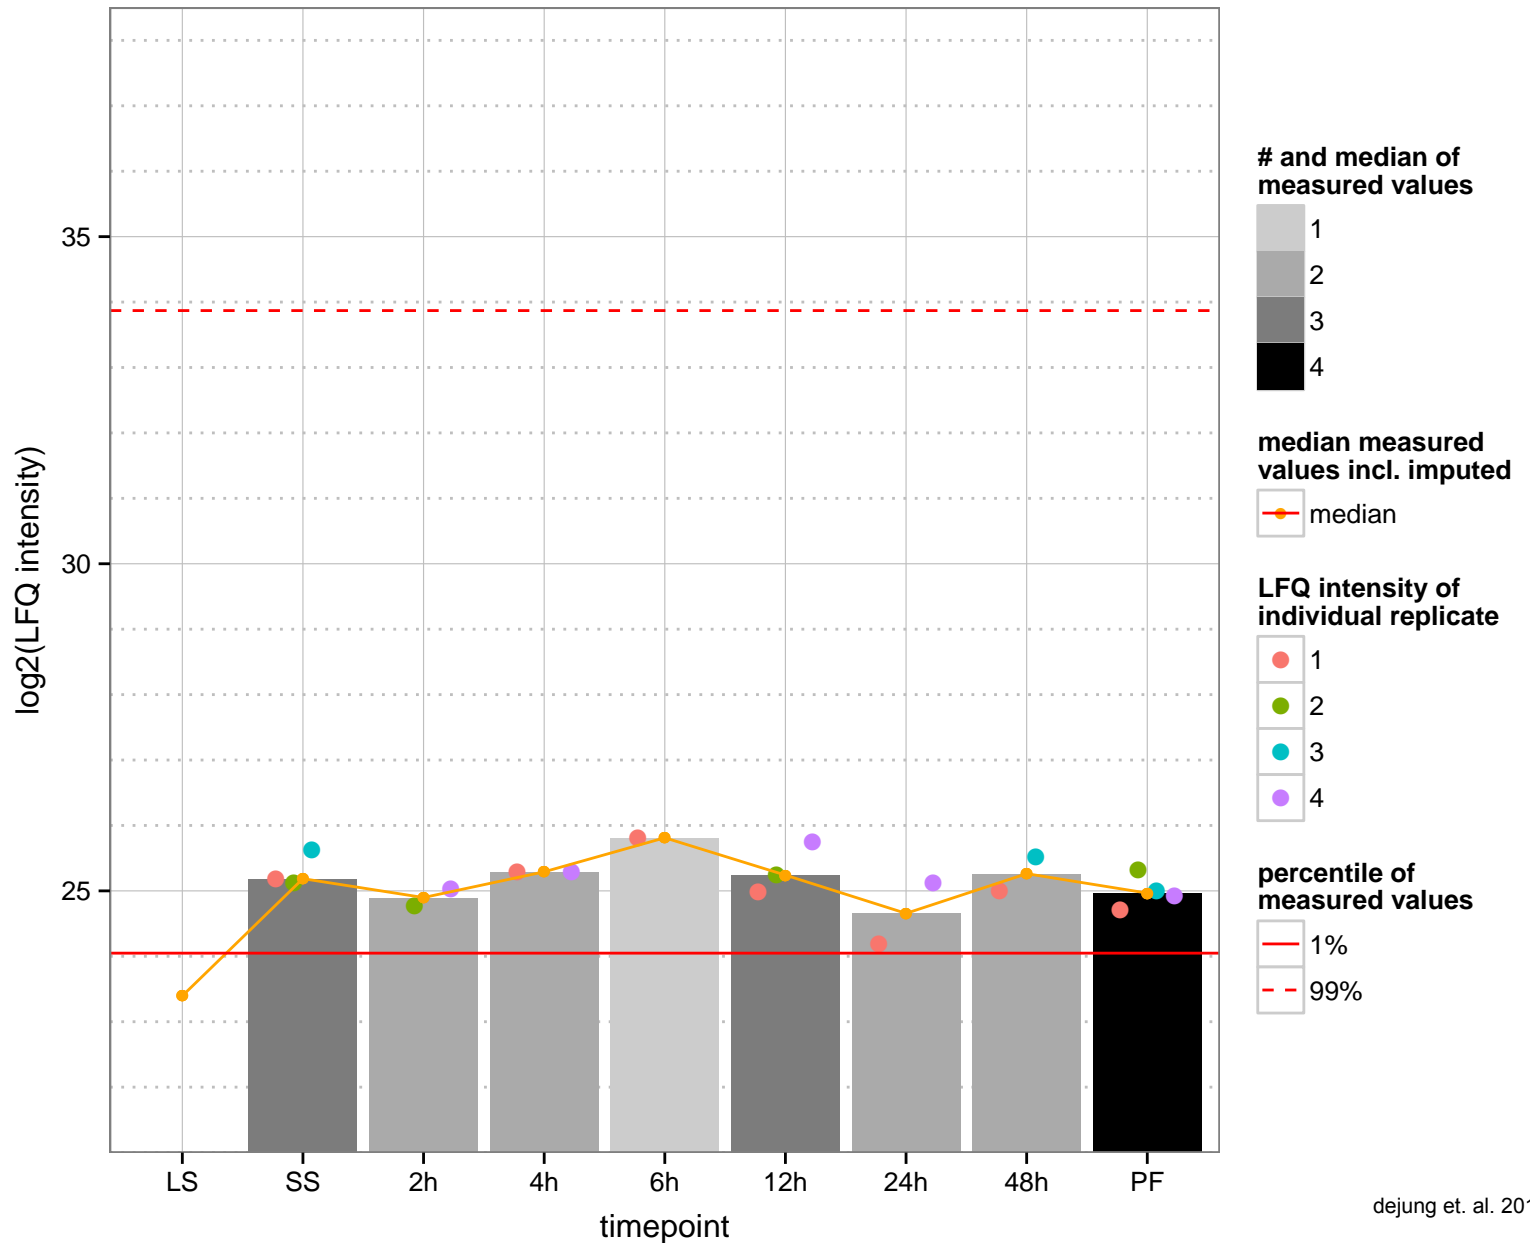



hypothetical protein, conserved  
 Tb927.3.1670  
 AGOF: null  
 AGOC: null  
 AGOP: null  
 PGOF: protein binding  
 PGOC: null  
 PGOP: null

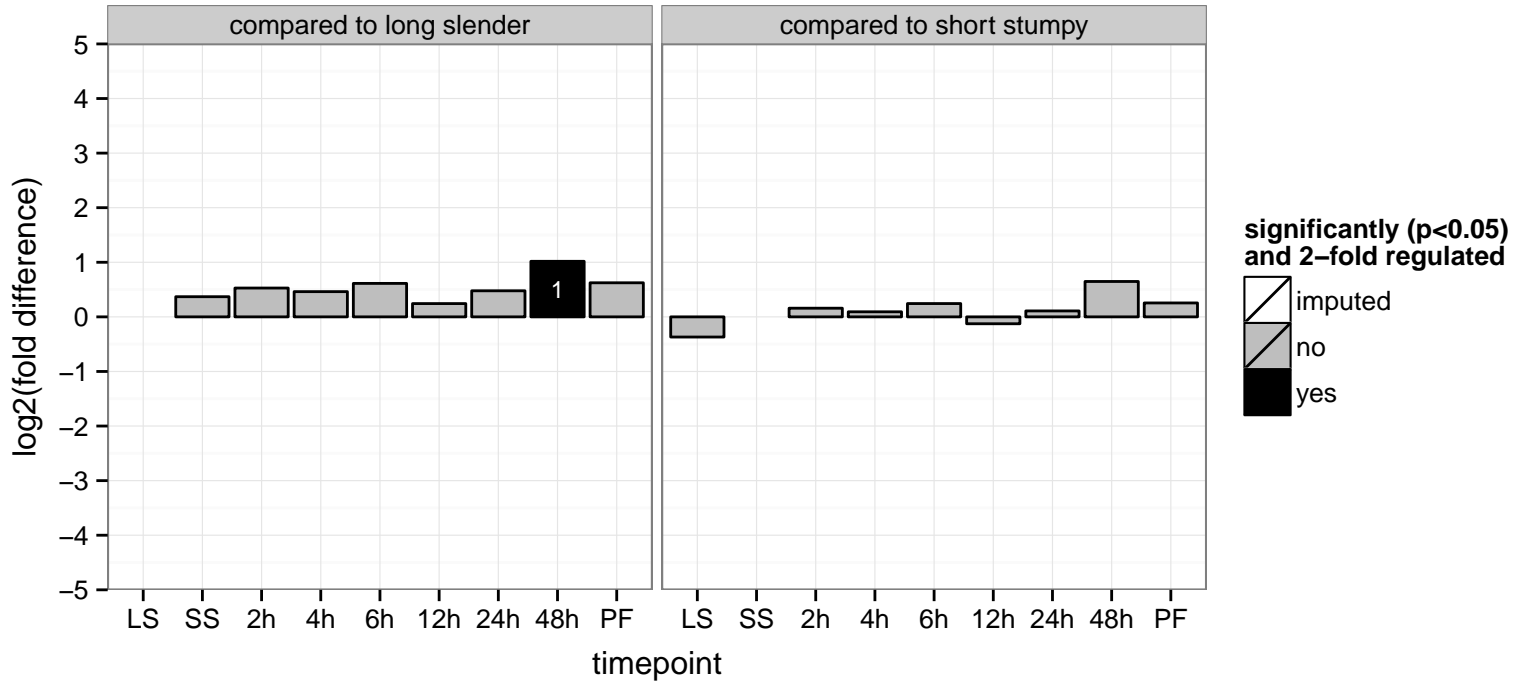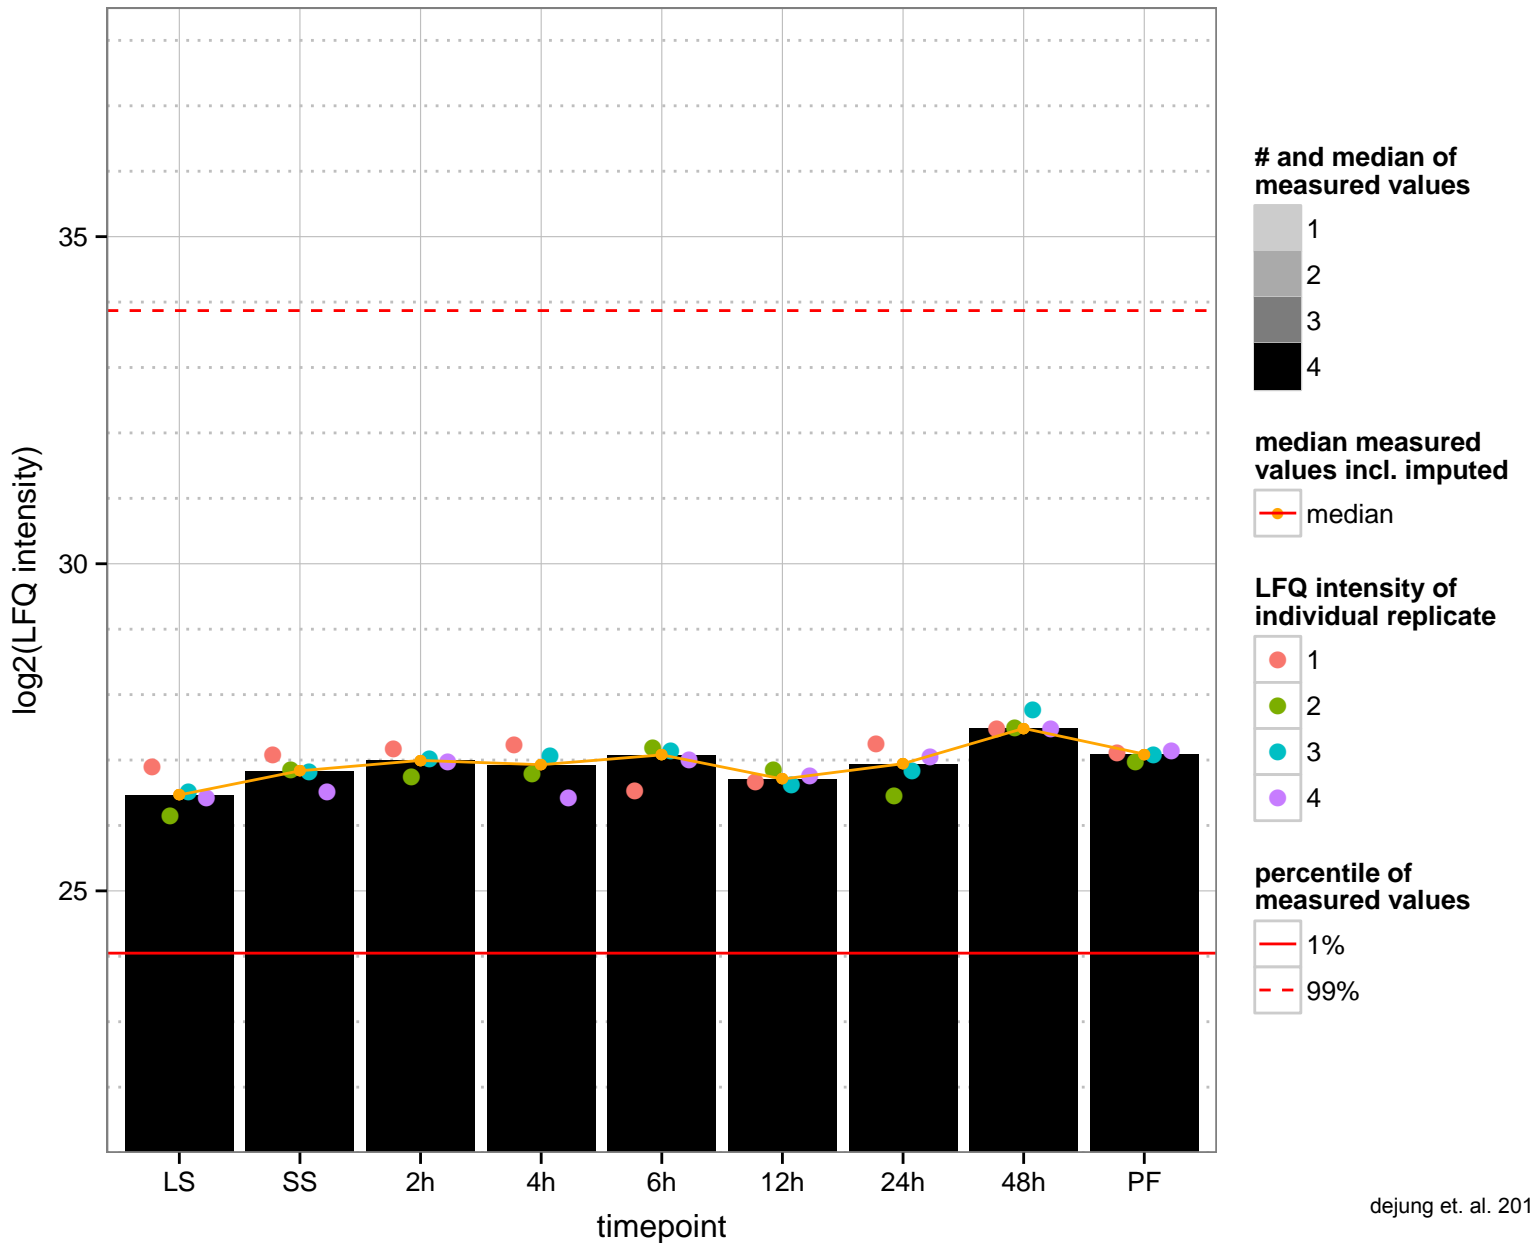

diacylglycerol acyltransferase, putative  
 Tb927.3.1700  
 AGOF: diacylglycerol O-acyltransferase activity  
 AGOC: integral to membrane  
 AGOP: membrane lipid biosynthetic process  
 PGOF: transferase activity, transferring acyl groups other than amino-acyl groups  
 PGOC: null  
 PGOP: null

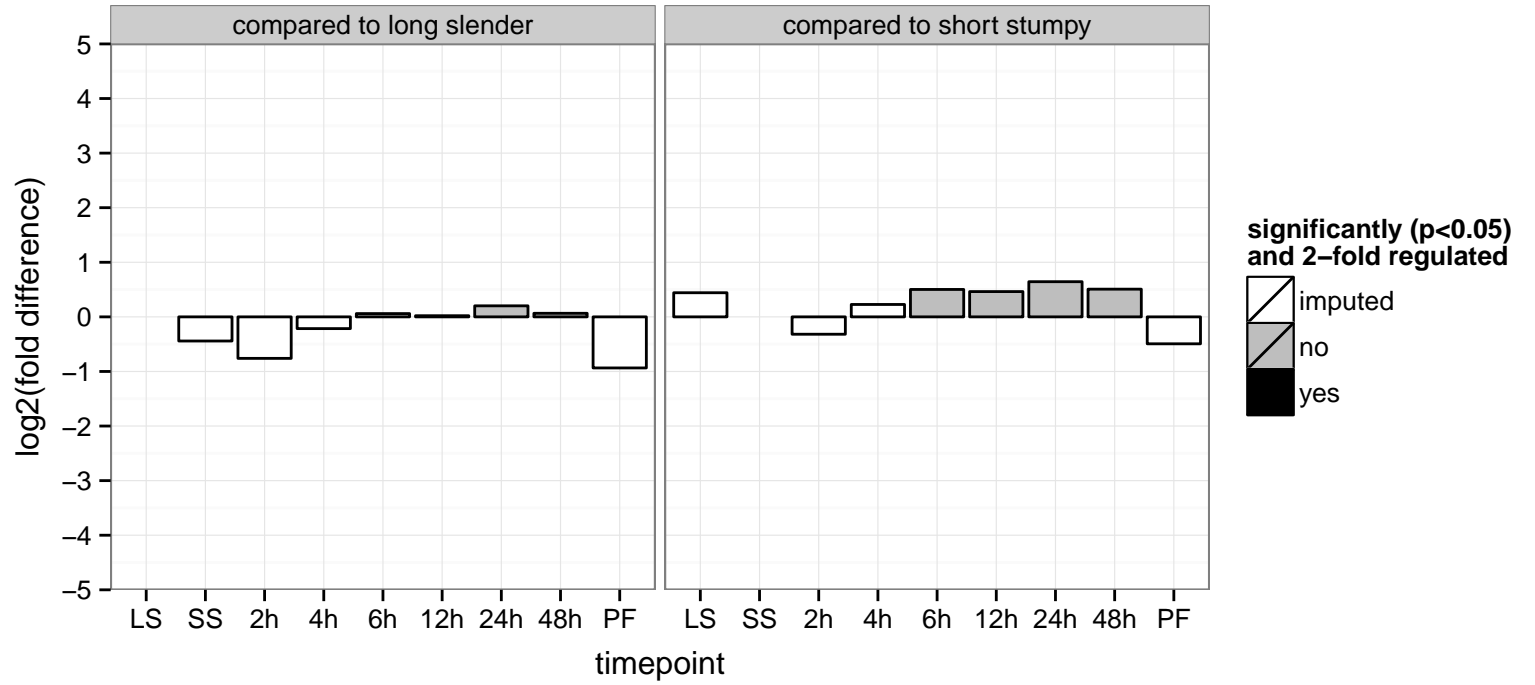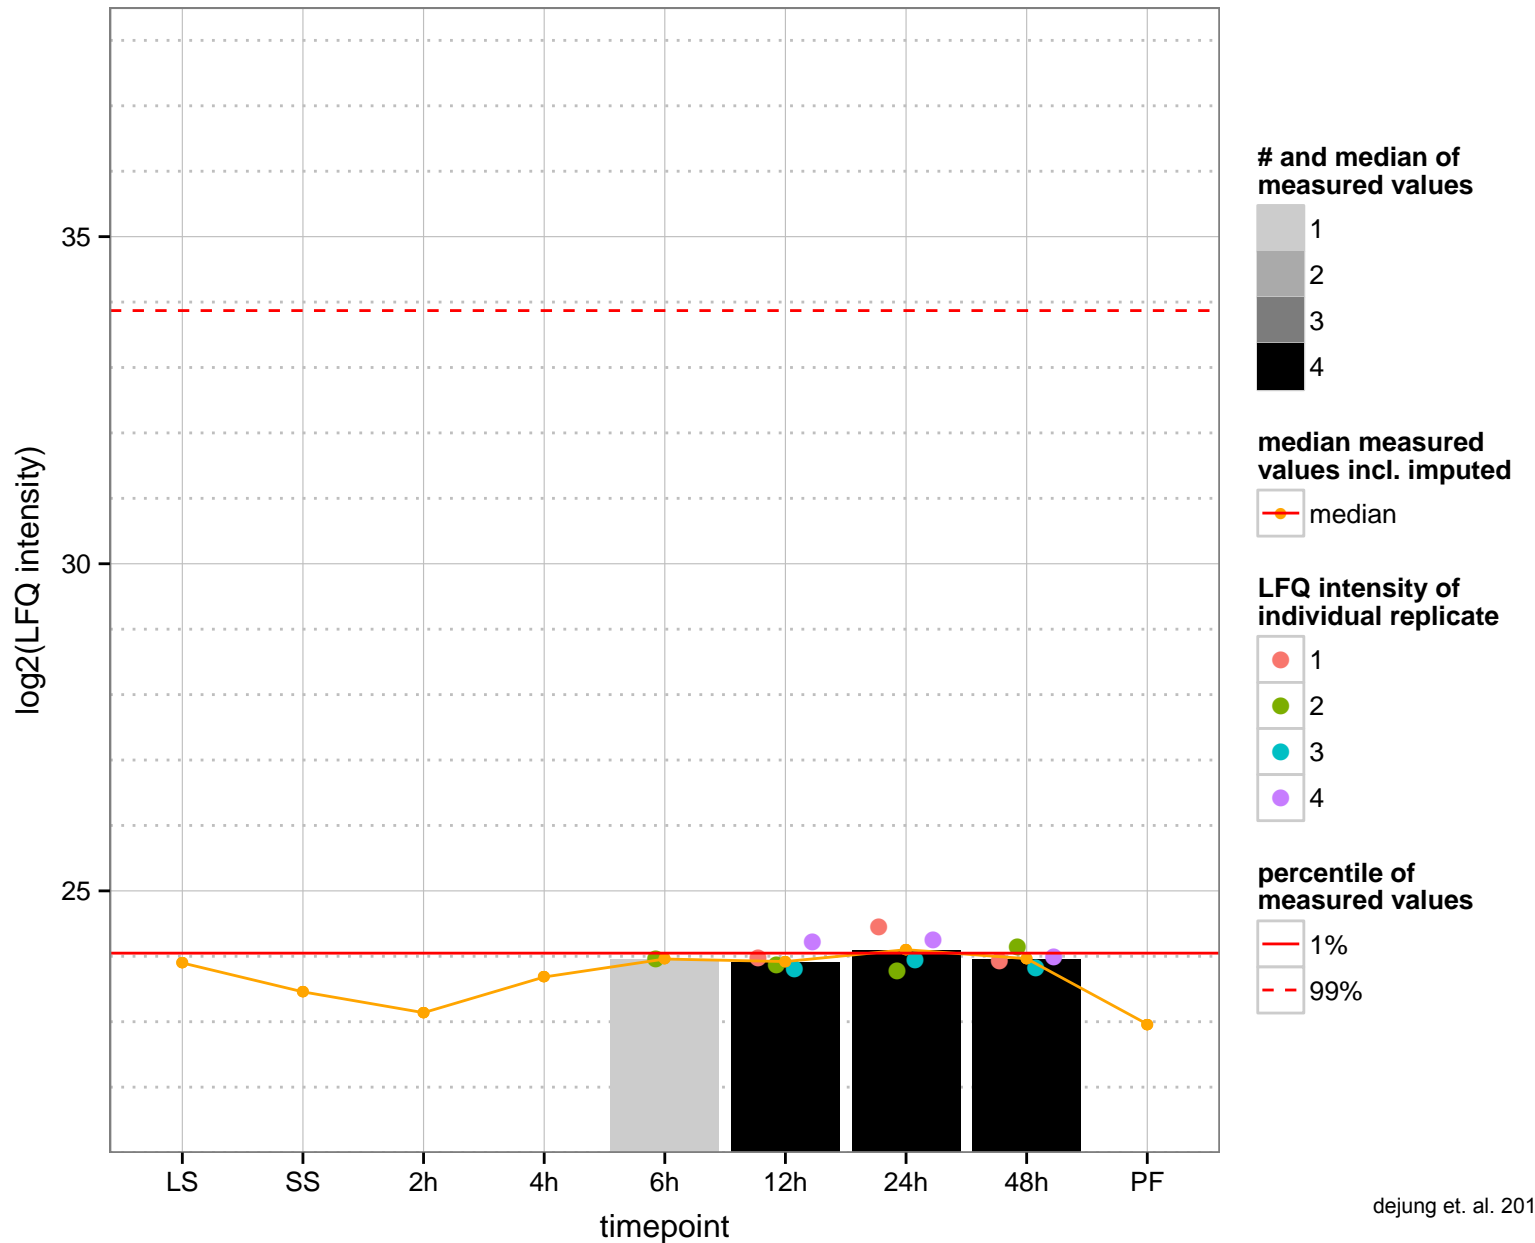

hypothetical protein, conserved  
 Tb927.3.1740  
 AGOF: null  
 AGOC: null  
 AGOP: null  
 PGO: null  
 PGOC: null  
 PGOP: null

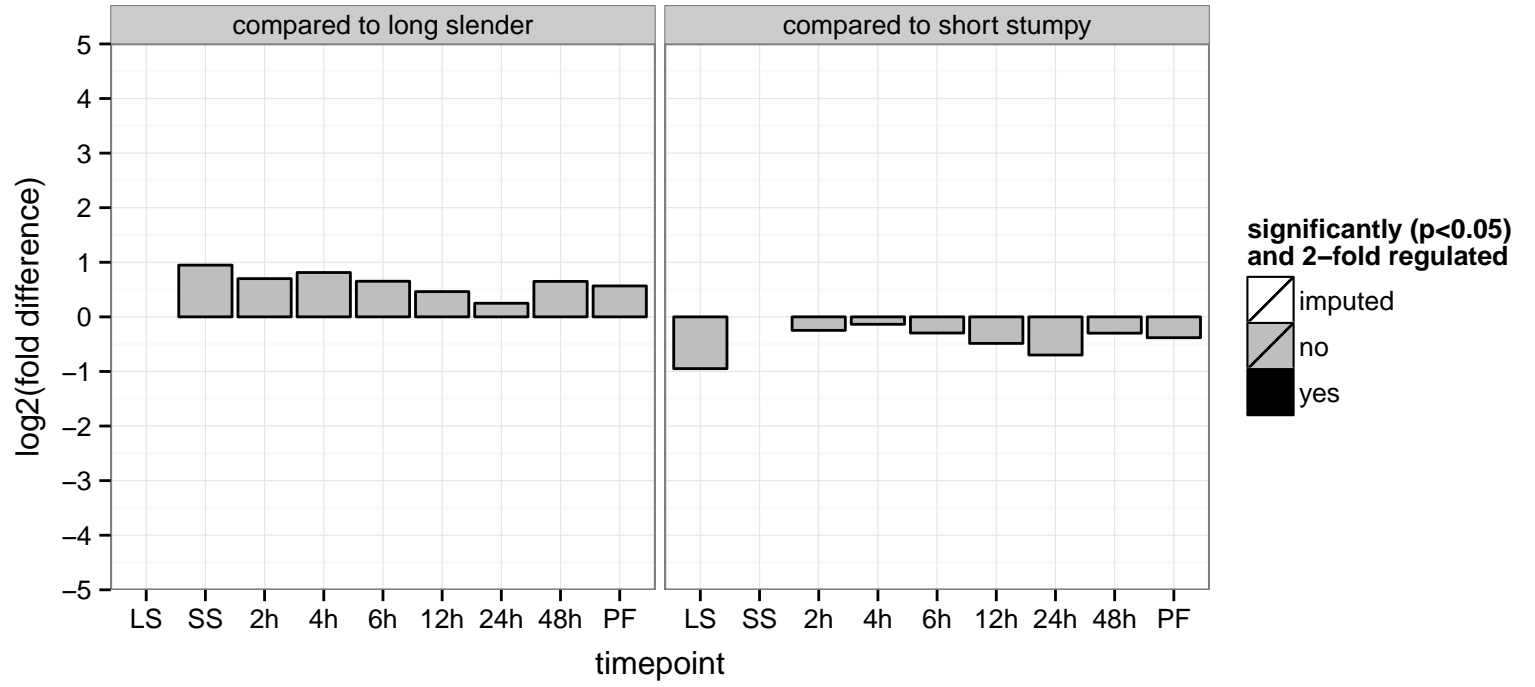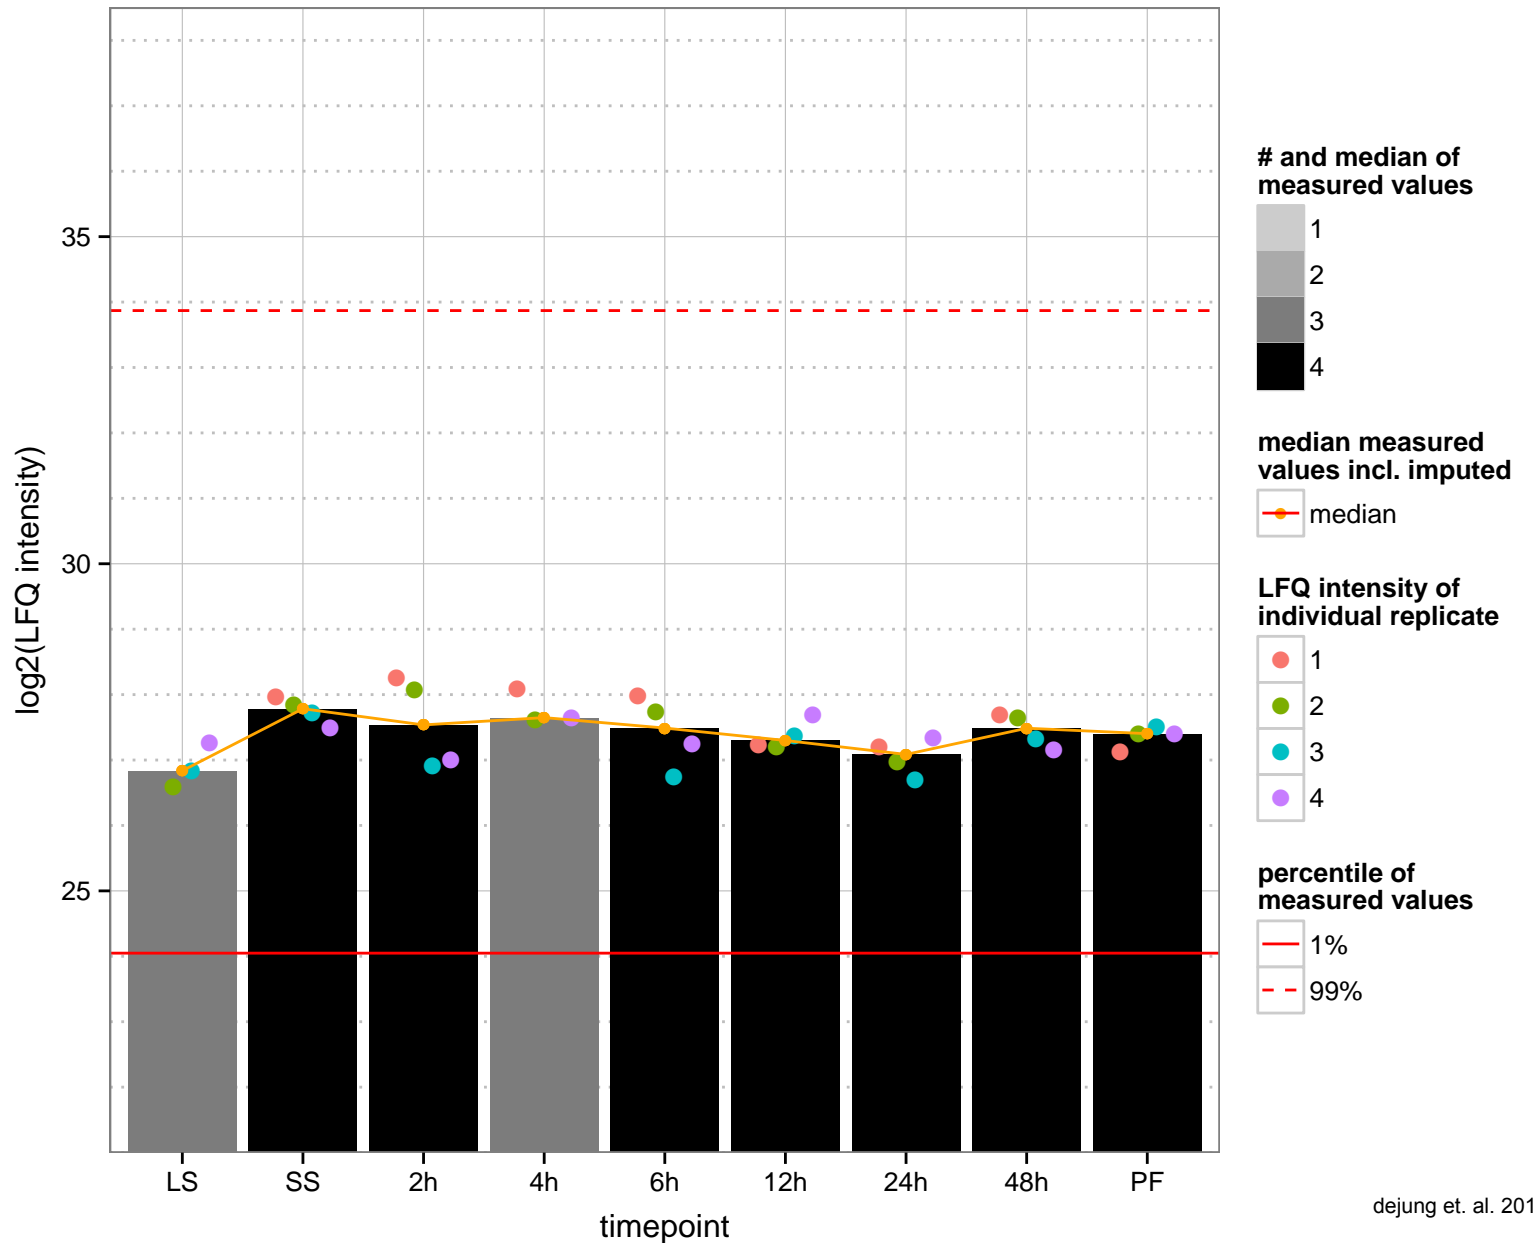

chaperone protein DNAj, putative  
 Tb927.3.1760  
 AGOF: heat shock protein binding, unfolded protein binding  
 AGOC: mitochondrion  
 AGOP: protein folding  
 PGOF: heat shock protein binding  
 PGOC: null  
 PGOP: protein folding

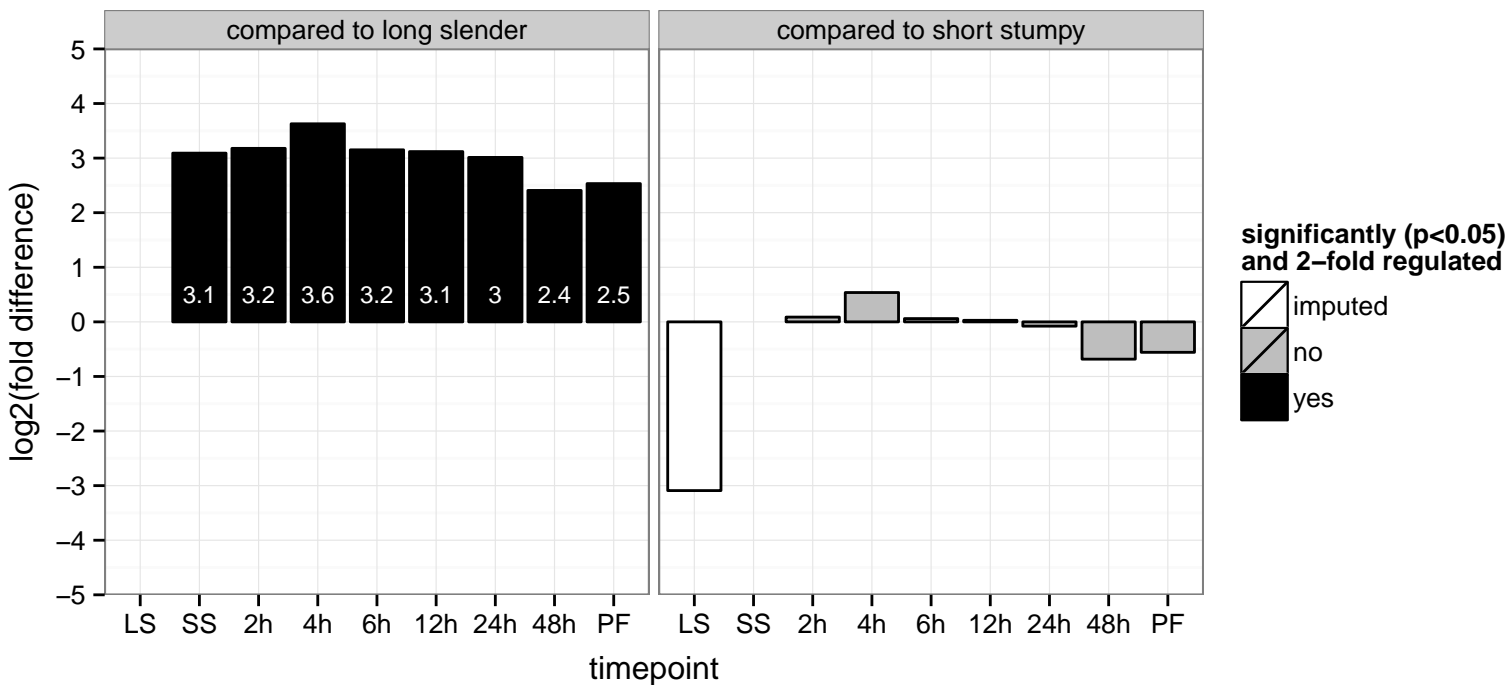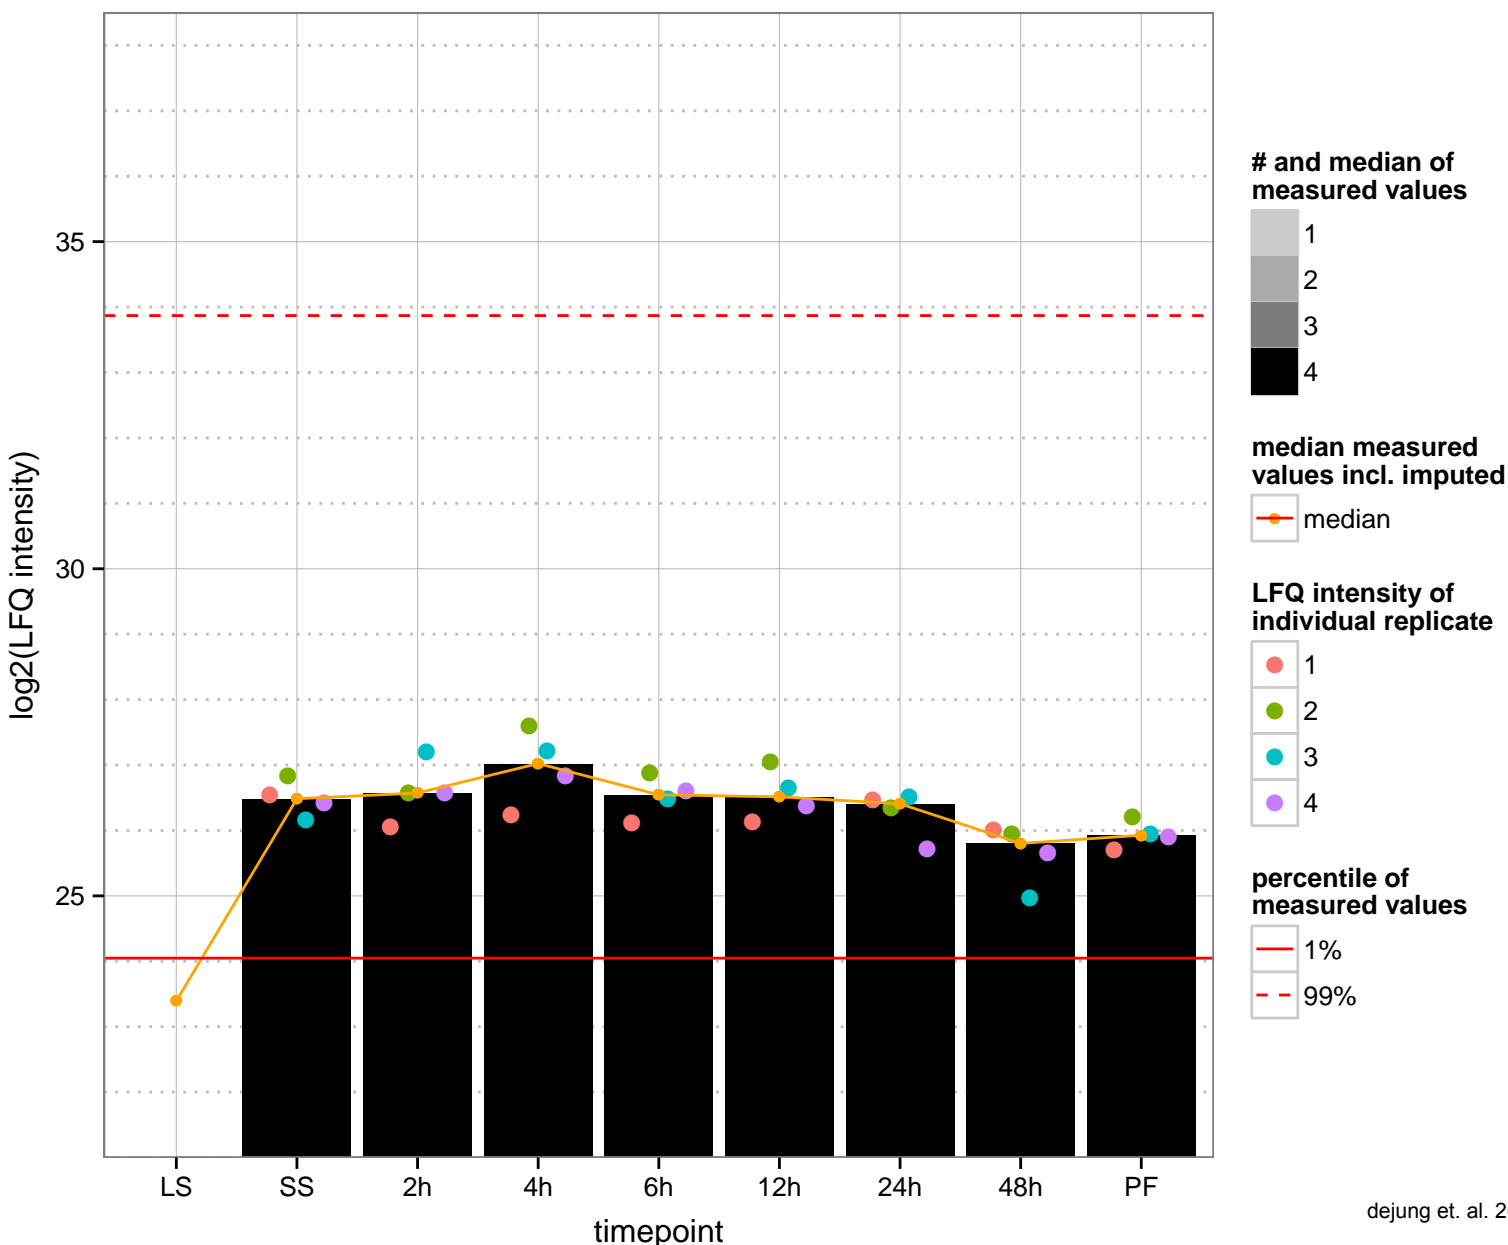

pyruvate dehydrogenase E1 beta subunit, putative  
 Tb927.3.1790  
 AGOF: catalytic activity  
 AGOC: mitochondrial inner membrane, mitochondrion  
 AGOP: metabolic process  
 PGO: catalytic activity  
 PGO: null  
 PGO: metabolic process

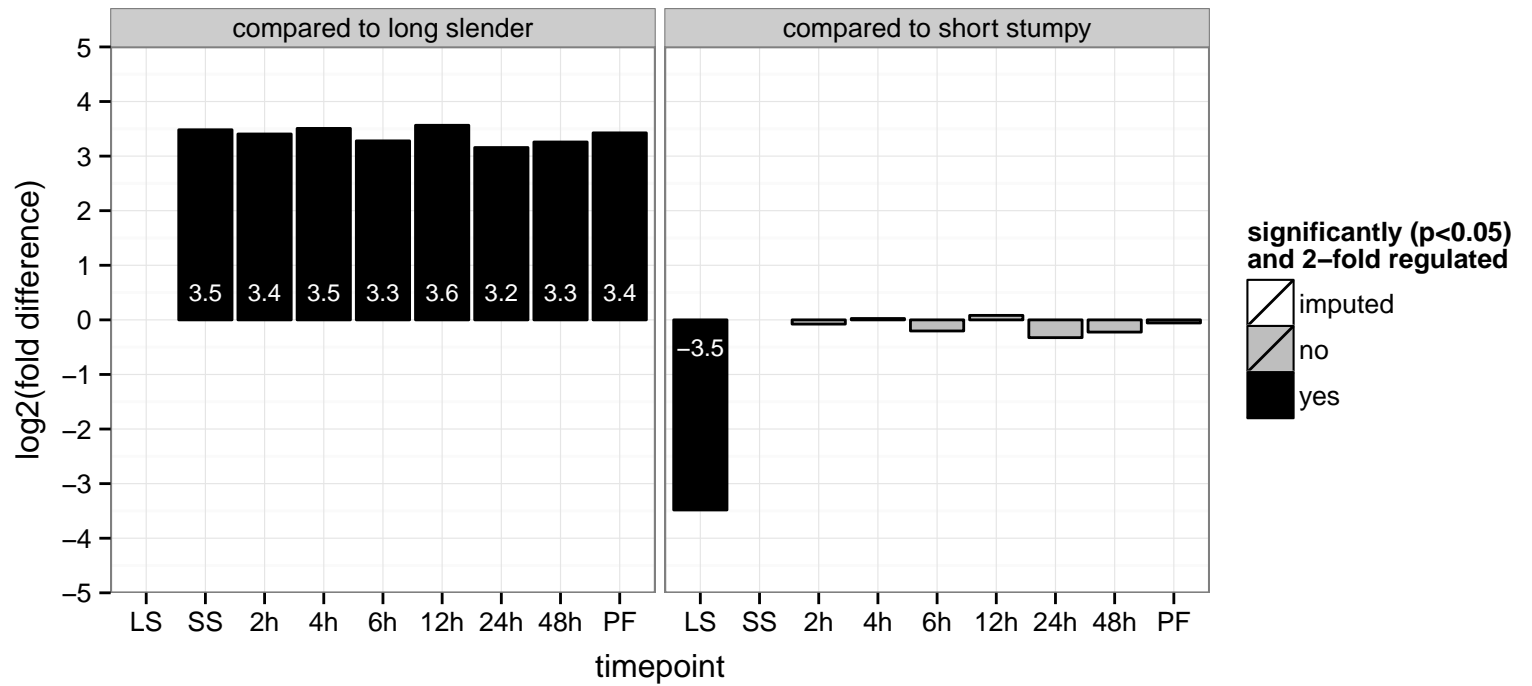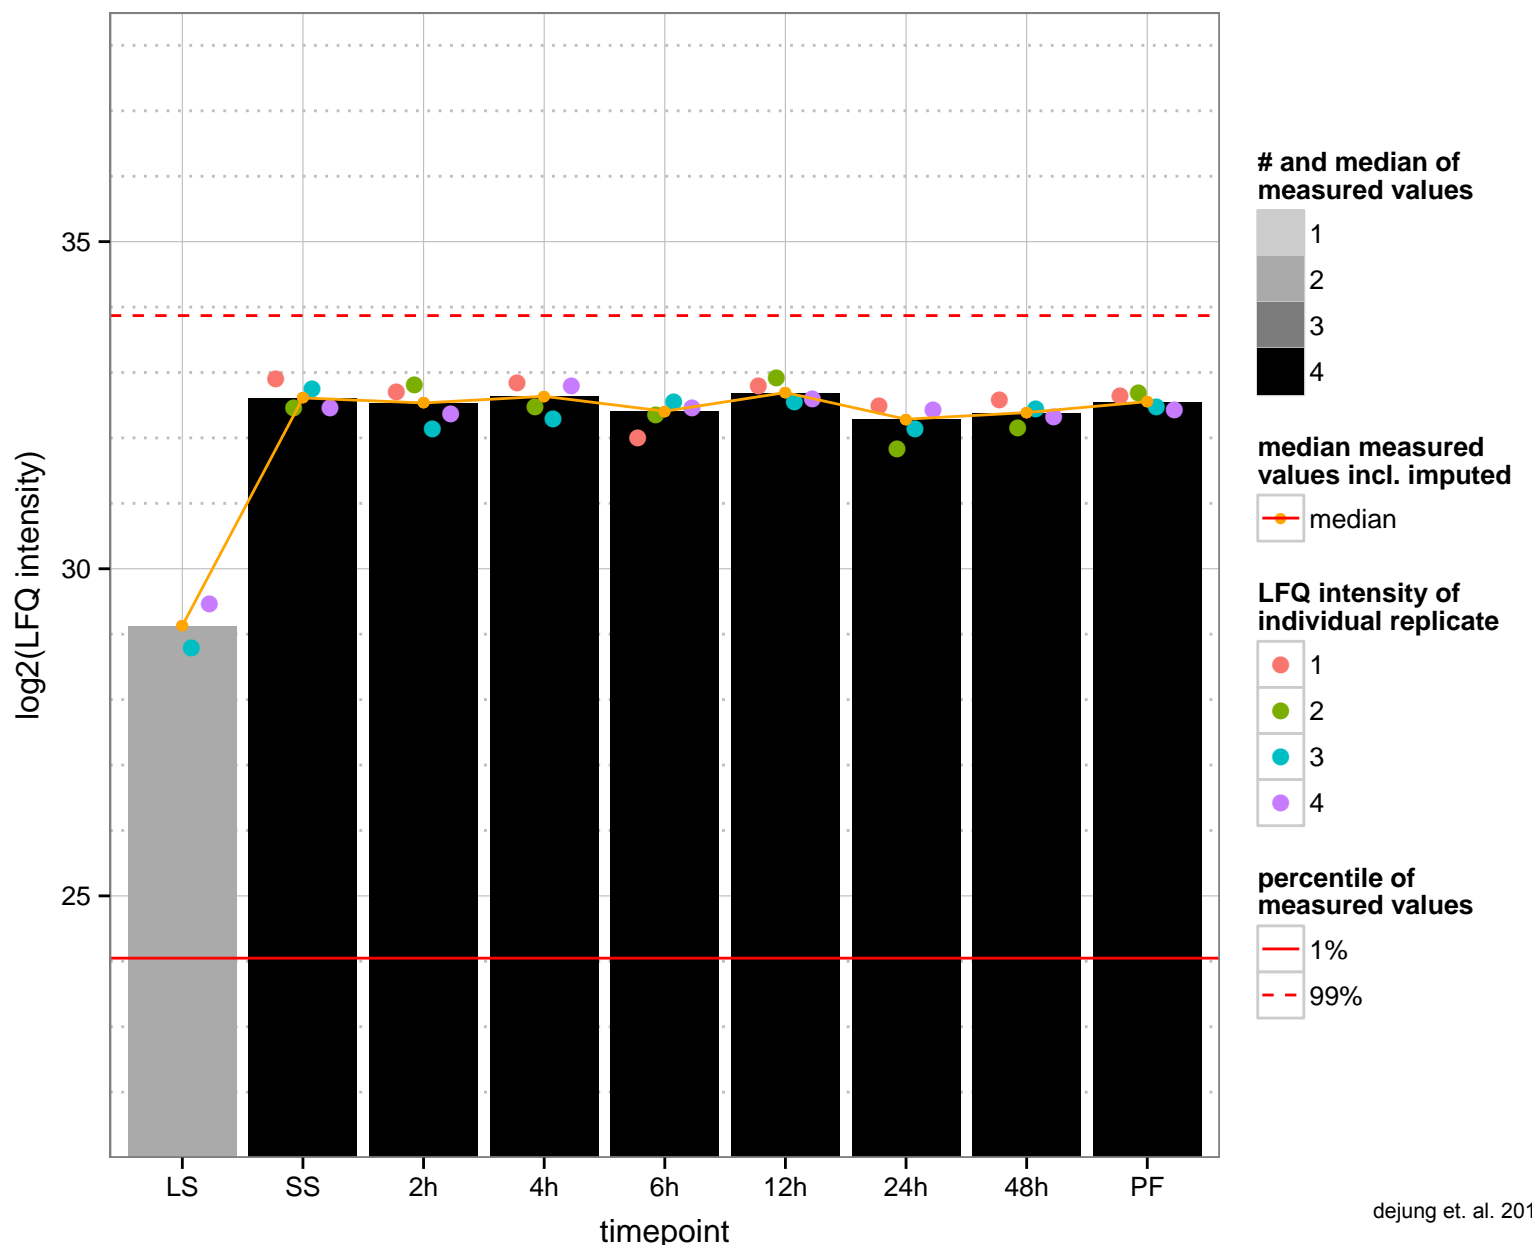

mitochondrial RNA binding complex 1 subunit (MRB1820)  
 Tb927.3.1820  
 AGOF: RNA binding  
 AGOC: mitochondrion  
 AGOP: cytidine to uridine editing, mRNA stabilization  
 PGO: null  
 PGO: null  
 PGO: null

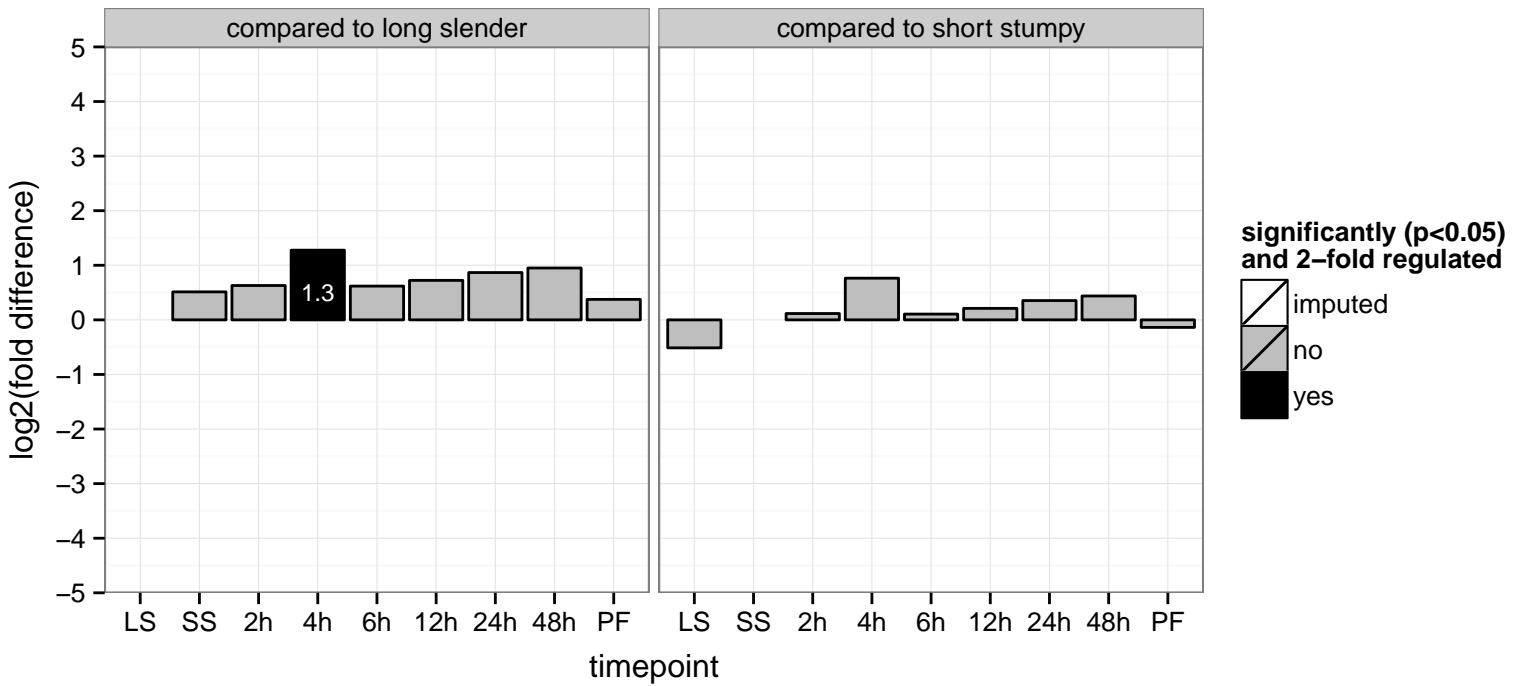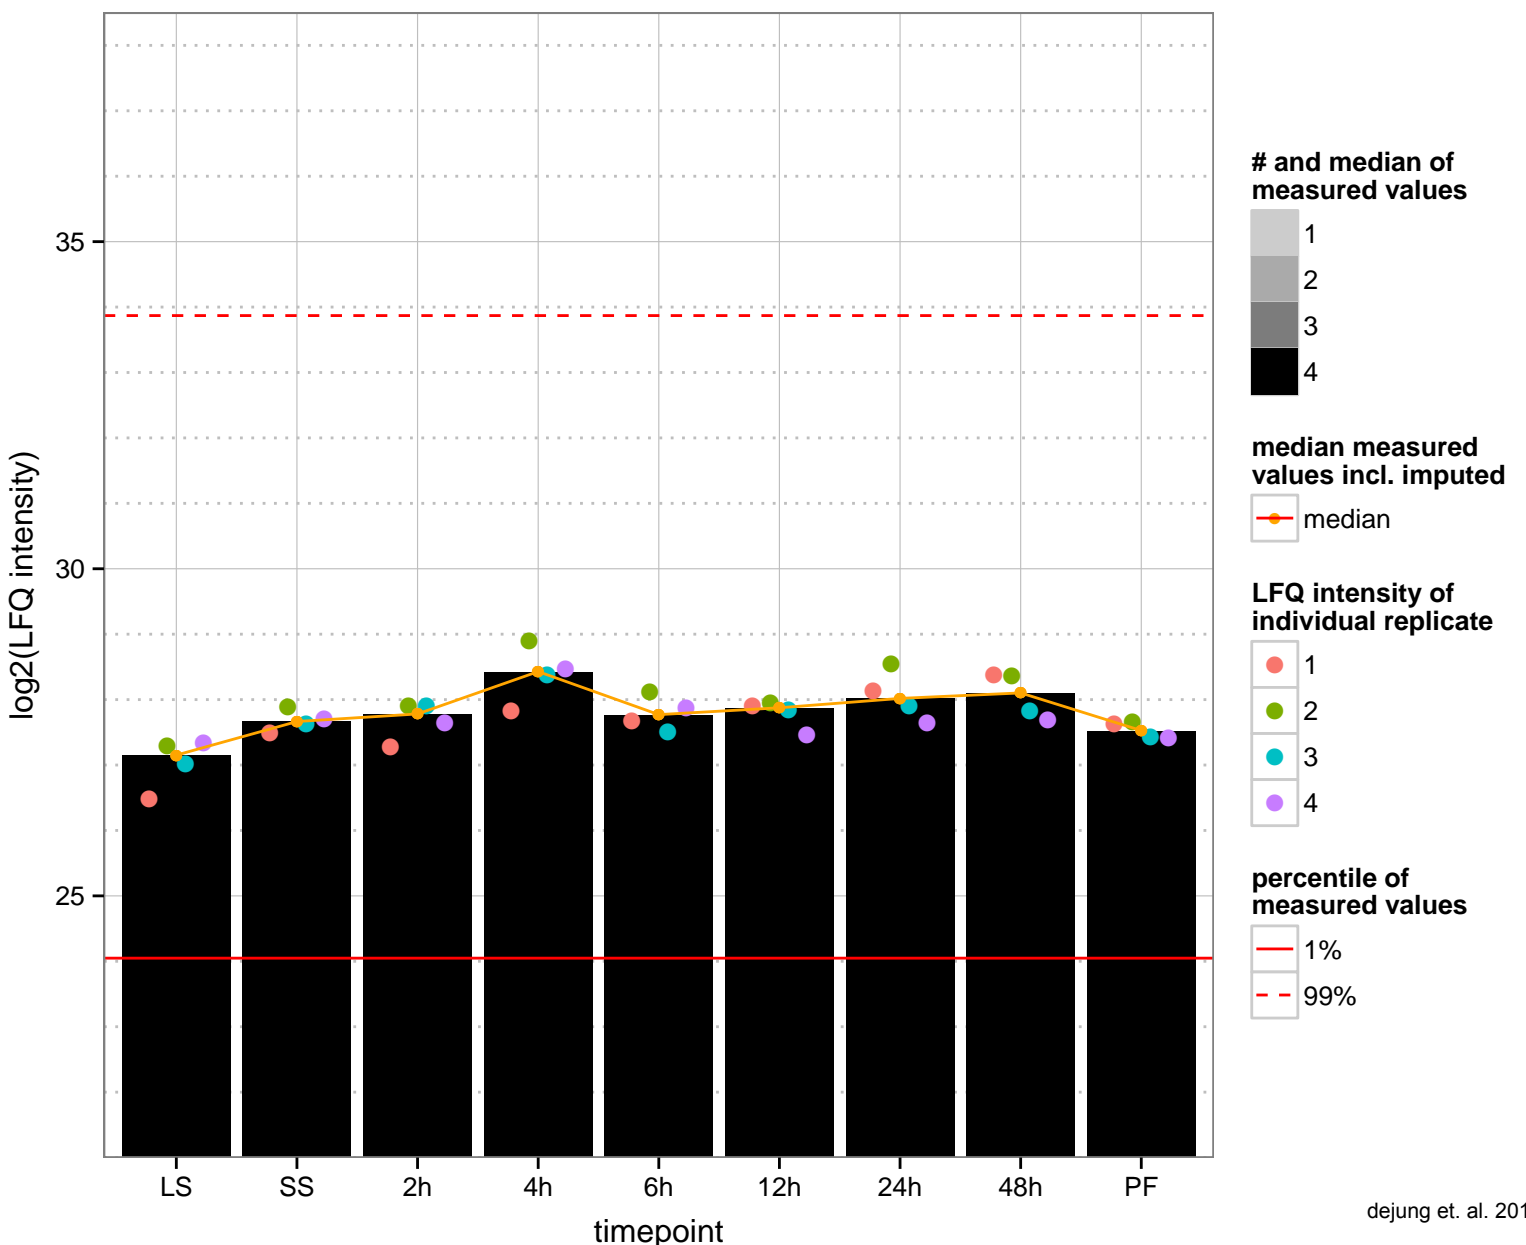

3-oxo-5-alpha-steroid 4-dehydrogenase, putative, polyprenol reductase  
 Tb927.3.1840  
 AGOF: oxidoreductase activity, acting on the CH-CH group of donors  
 AGOC: cytoplasm, integral to membrane, mitochondrial inner membrane  
 AGOP: dolichol biosynthetic process, glycosylation  
 PGOF: oxidoreductase activity, acting on the CH-CH group of donors  
 PGOC: cytoplasm, integral to membrane  
 PGOP: lipid metabolic process

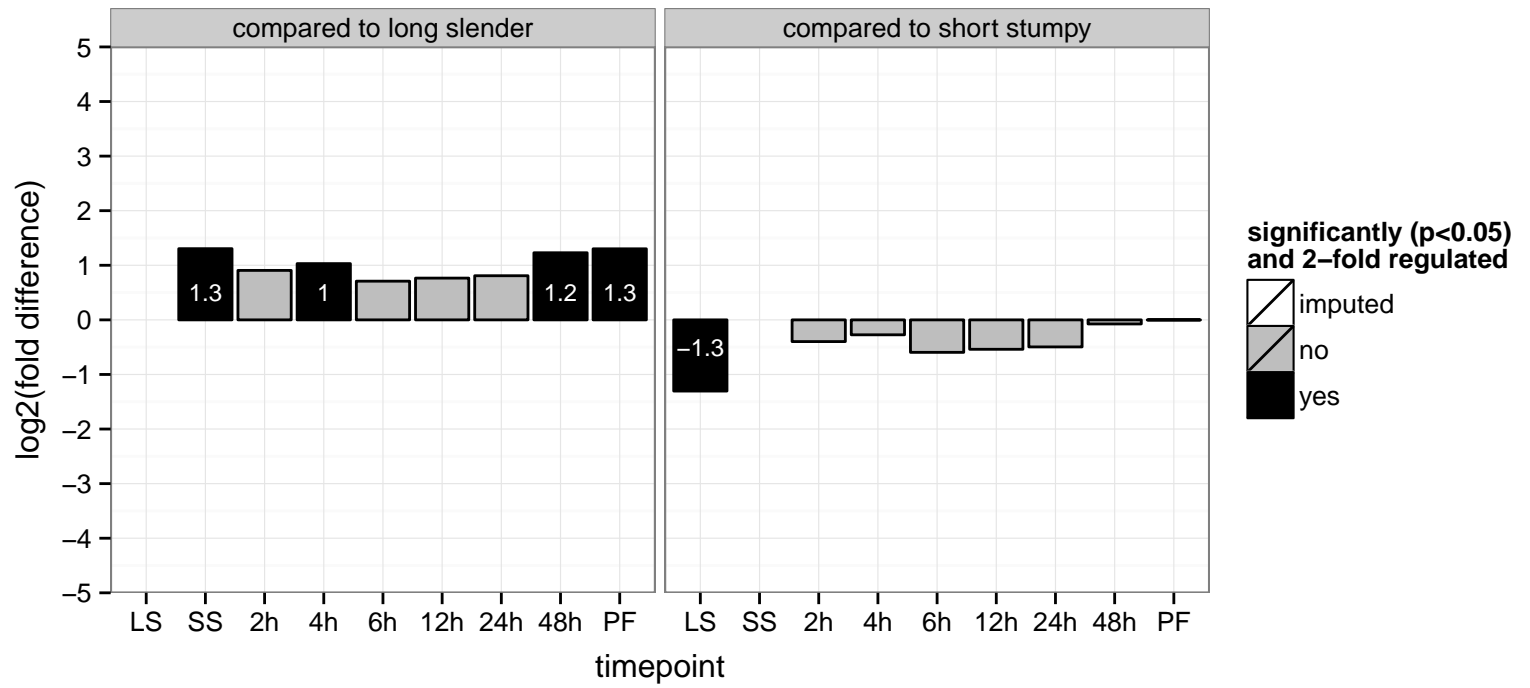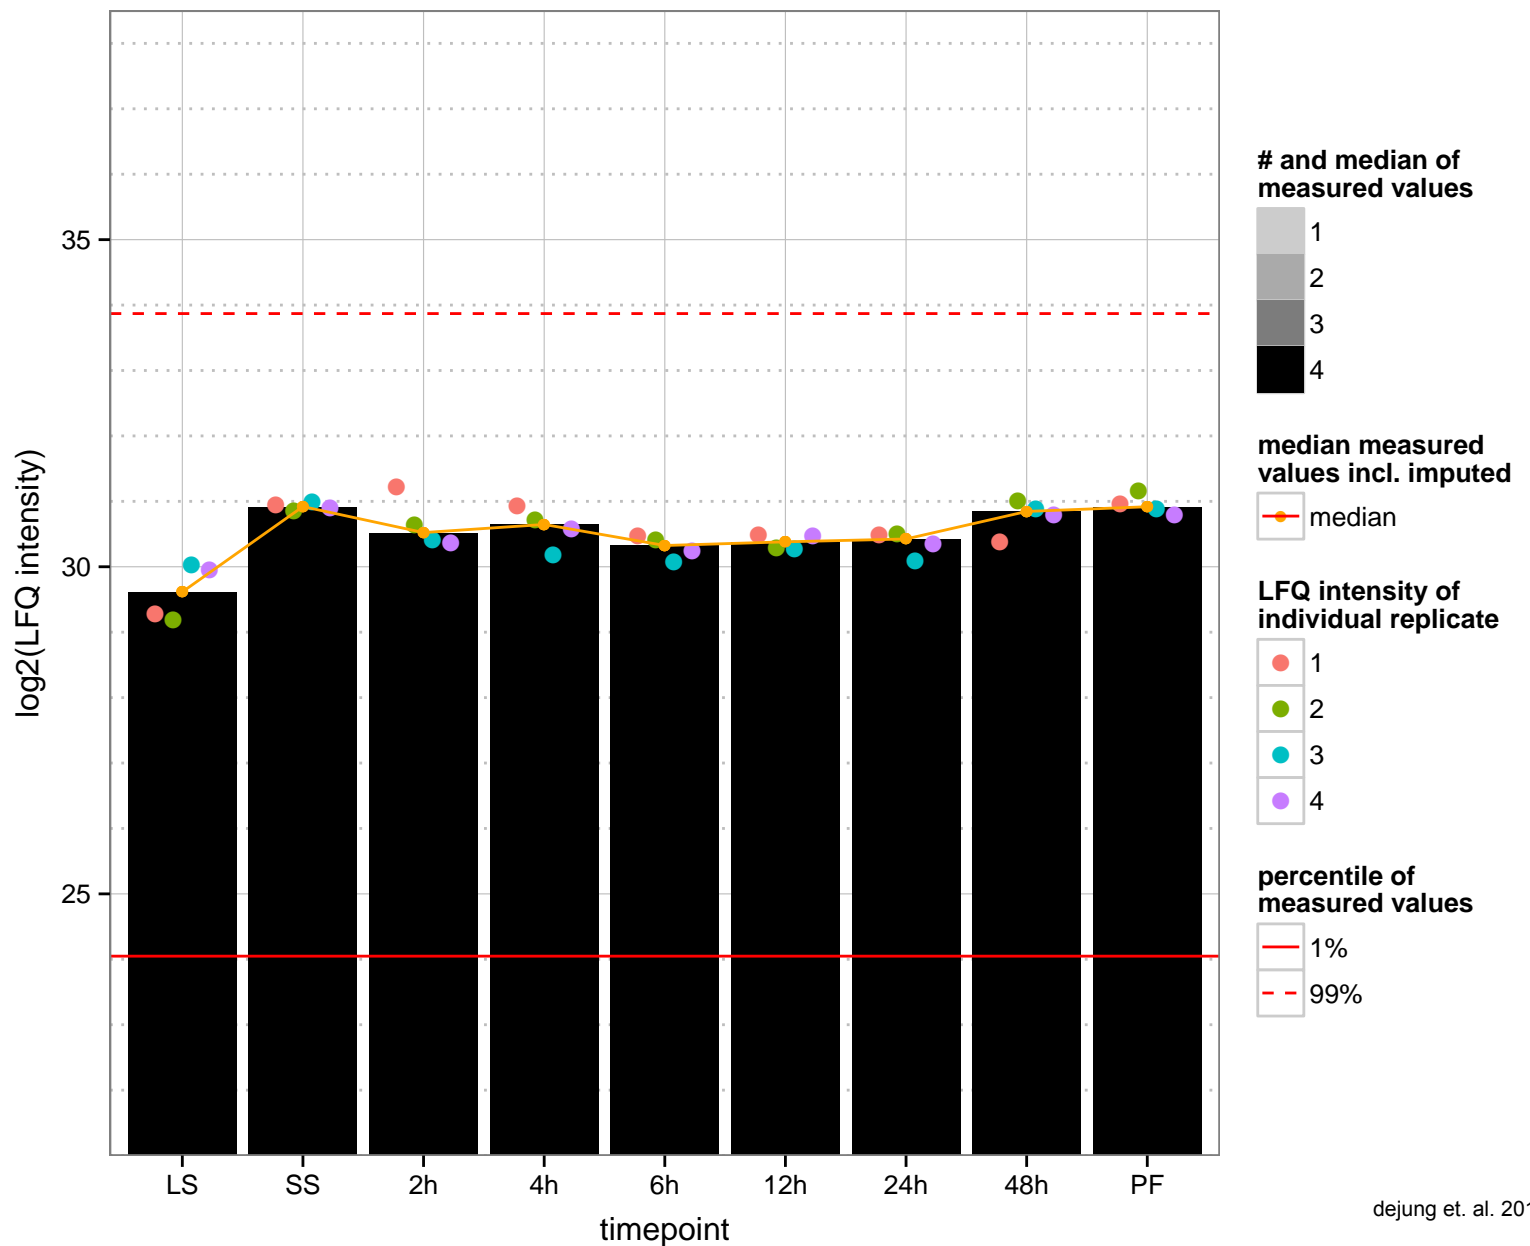

hypothetical protein, conserved  
 Tb927.3.1860  
 AGOF: ATP binding, catalytic activity  
 AGOC: null  
 AGOP: null  
 PGOF: ATP binding, metal ion binding, protein binding  
 PGOC: null  
 PGOP: null

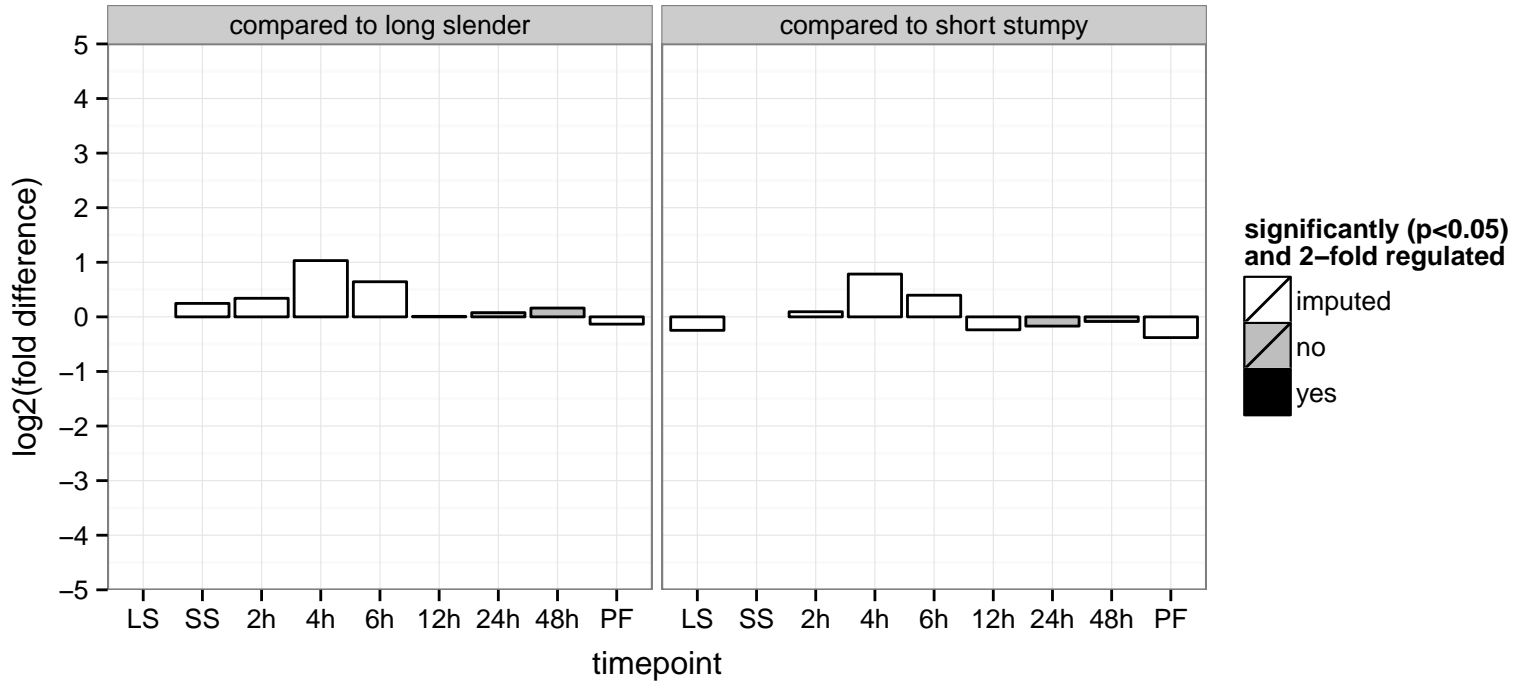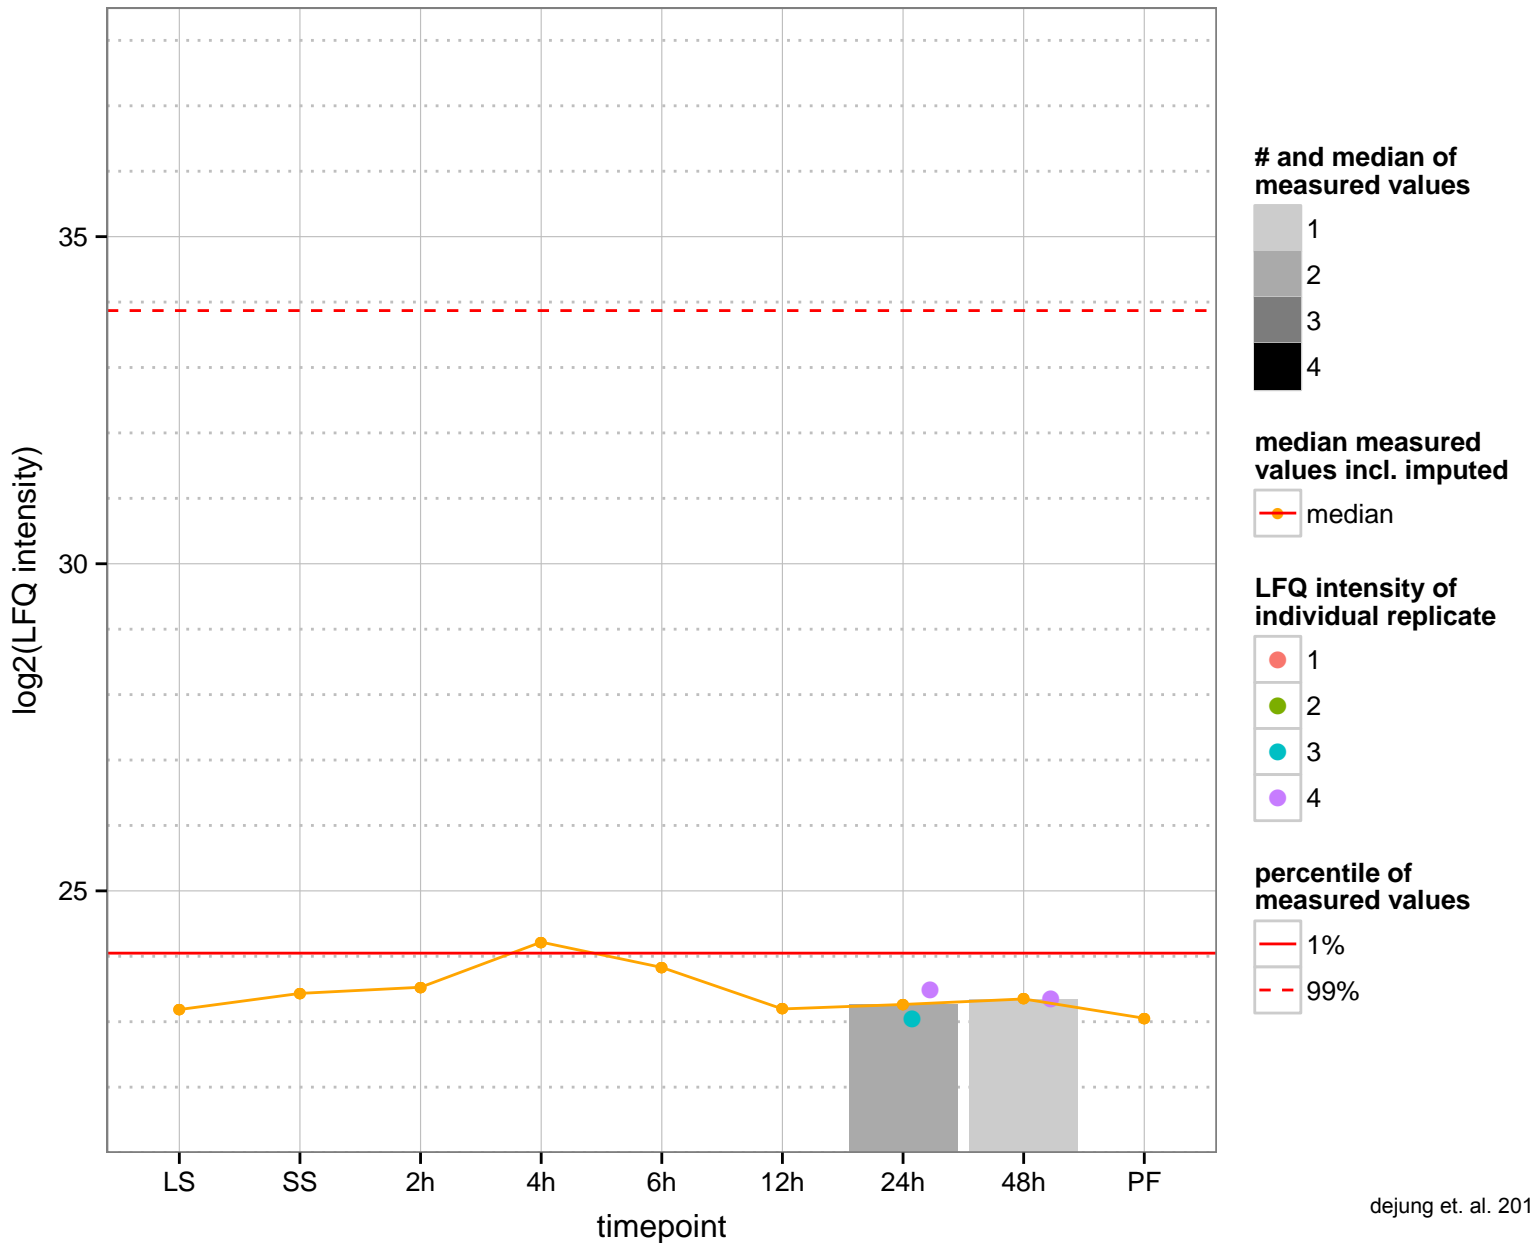



hypothetical protein, conserved  
 Tb927.3.1900  
 AGOF: null  
 AGOC: null  
 AGOP: null  
 PGO: null  
 PGOC: null  
 PGOP: null

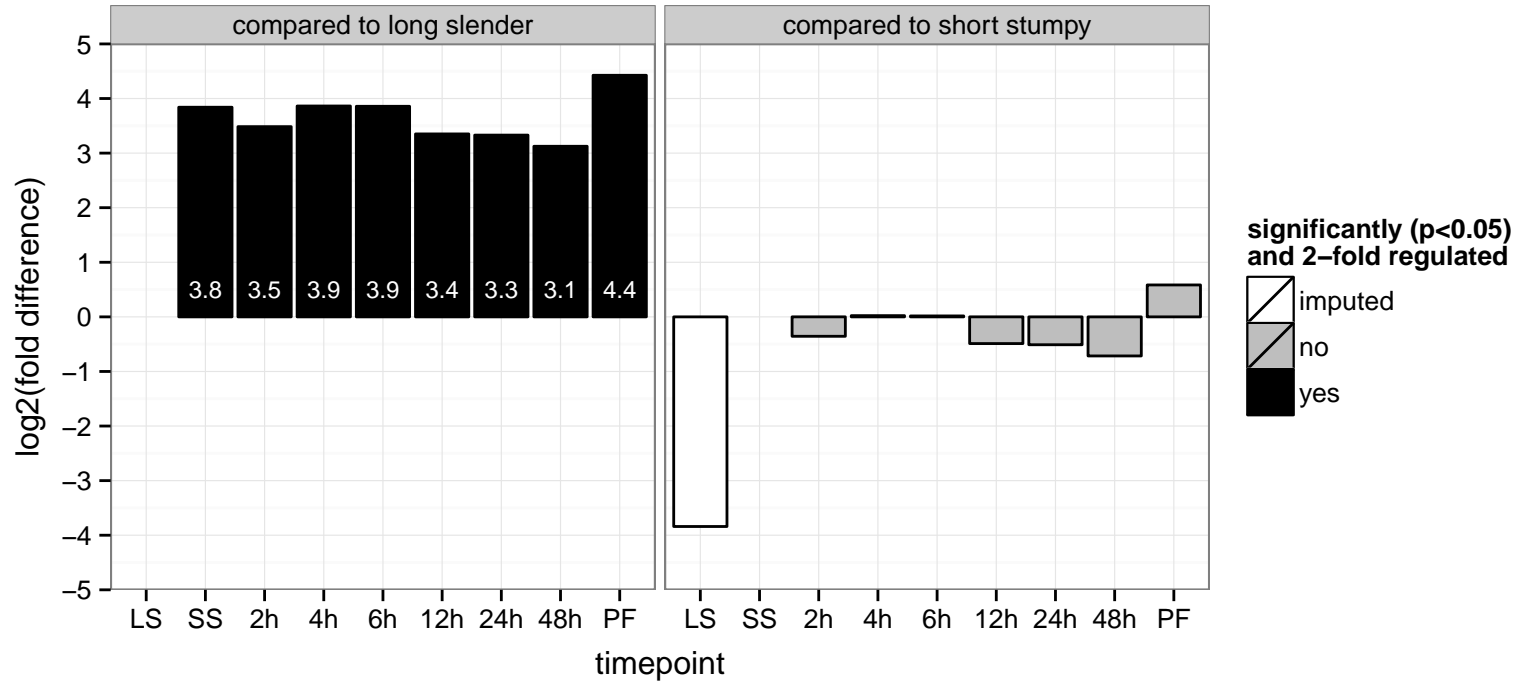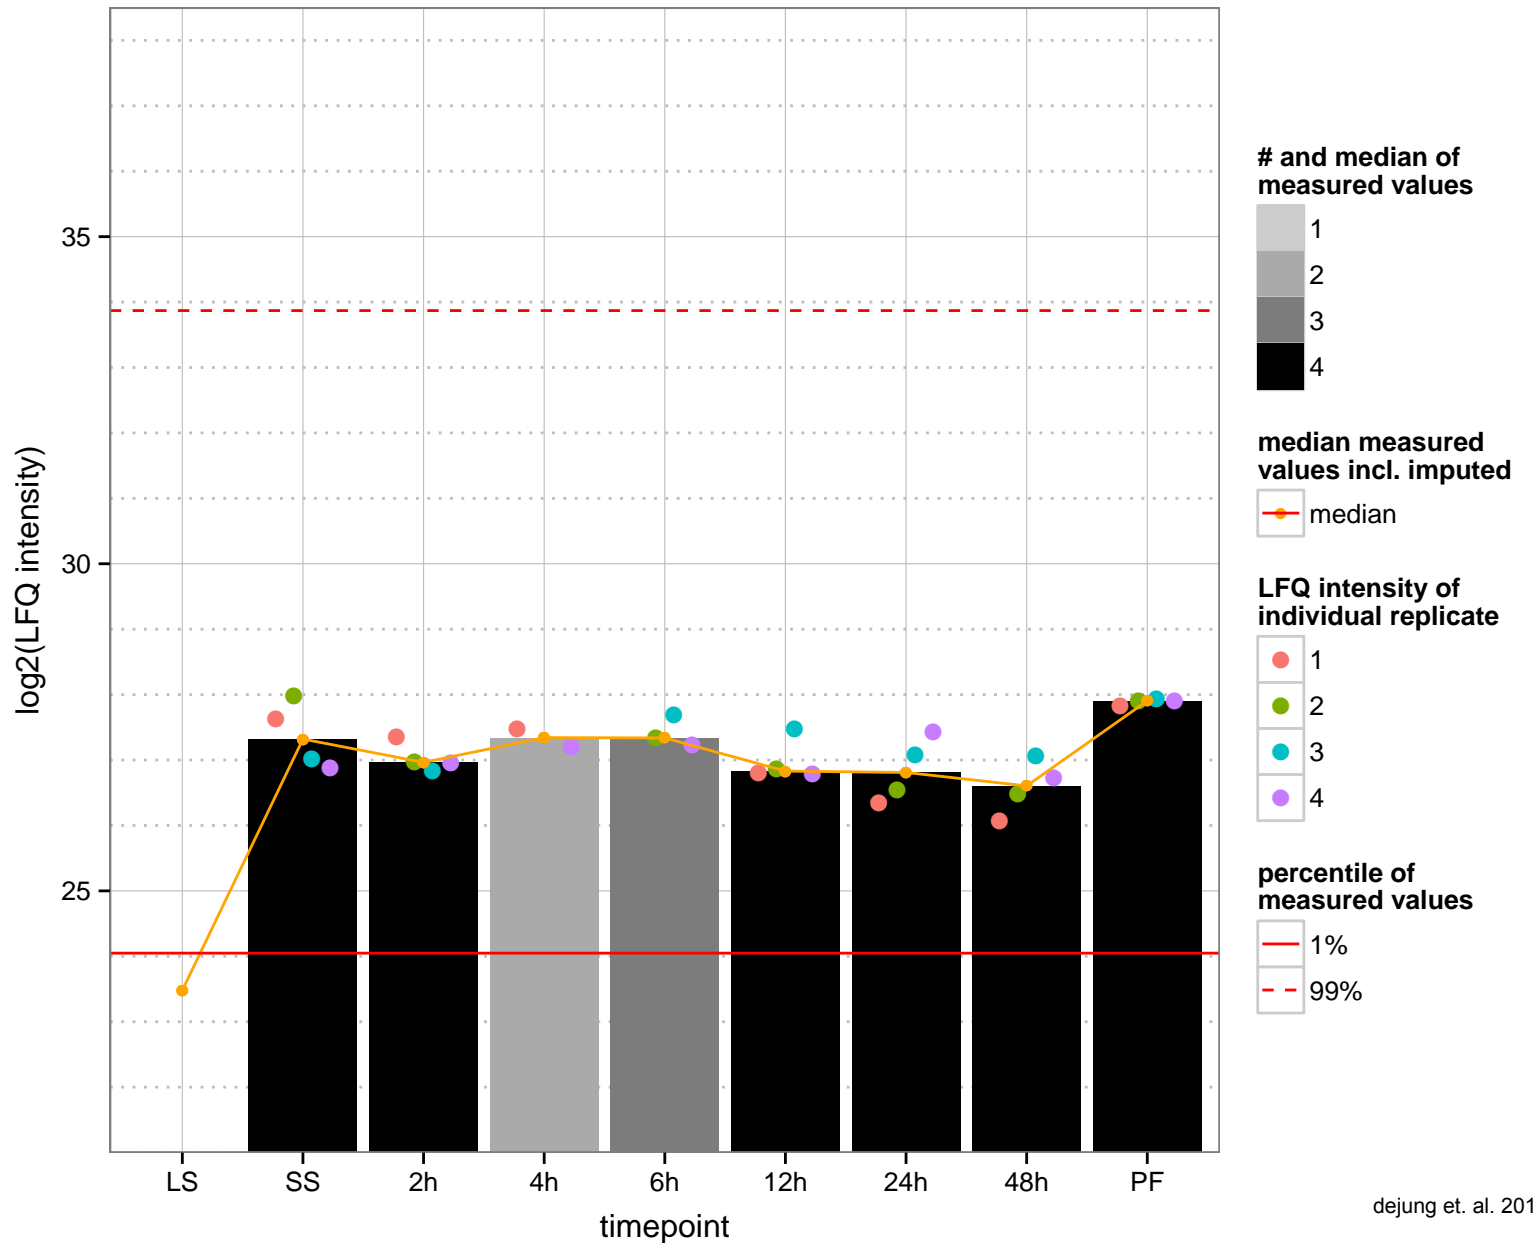

NOT5 protein (NOT5)  
 Tb927.3.1920  
 AGOF: null  
 AGOC: nucleus  
 AGOP: regulation of transcription, DNA-dependent  
 PGO: null  
 PGO: nucleus  
 PGO: regulation of transcription, DNA-dependent

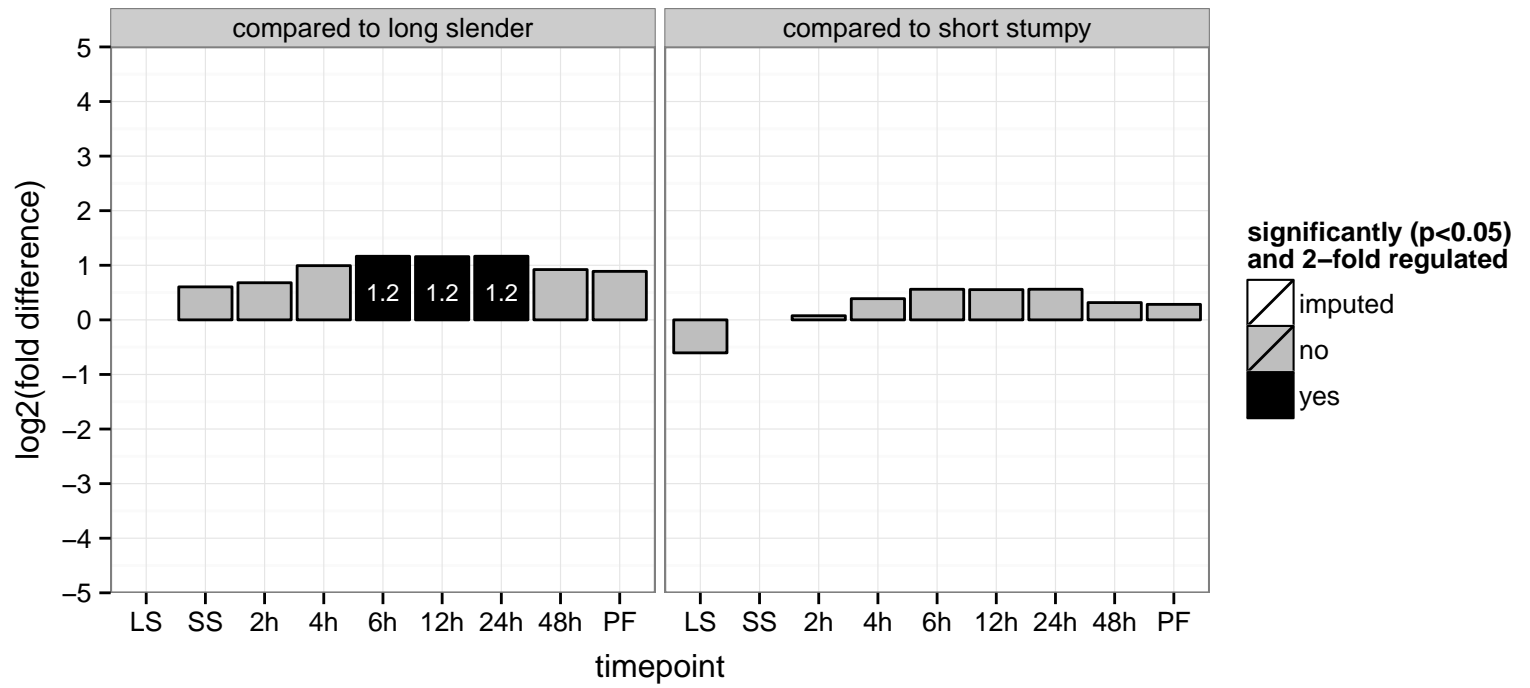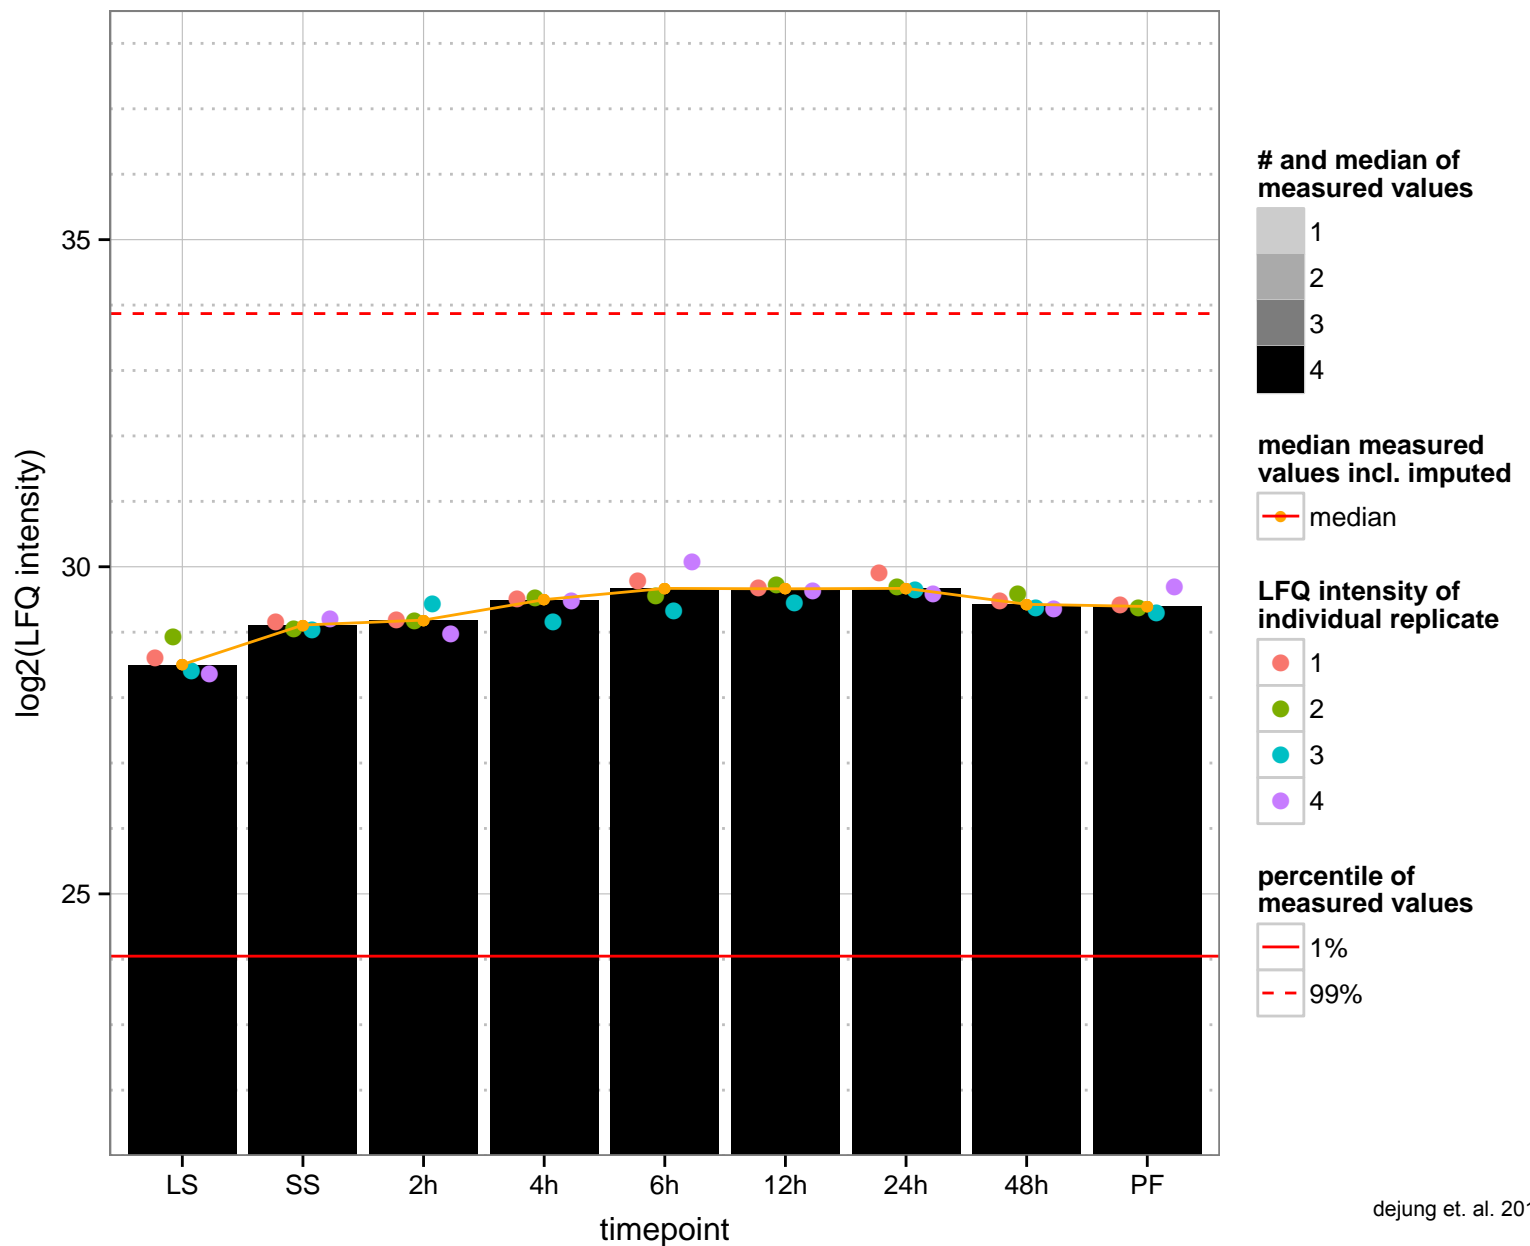

hypothetical protein, conserved  
 Tb927.3.1990  
 AGOF: null  
 AGOC: null  
 AGOP: null  
 PGOF: protein binding  
 PGO: null  
 PGOP: null

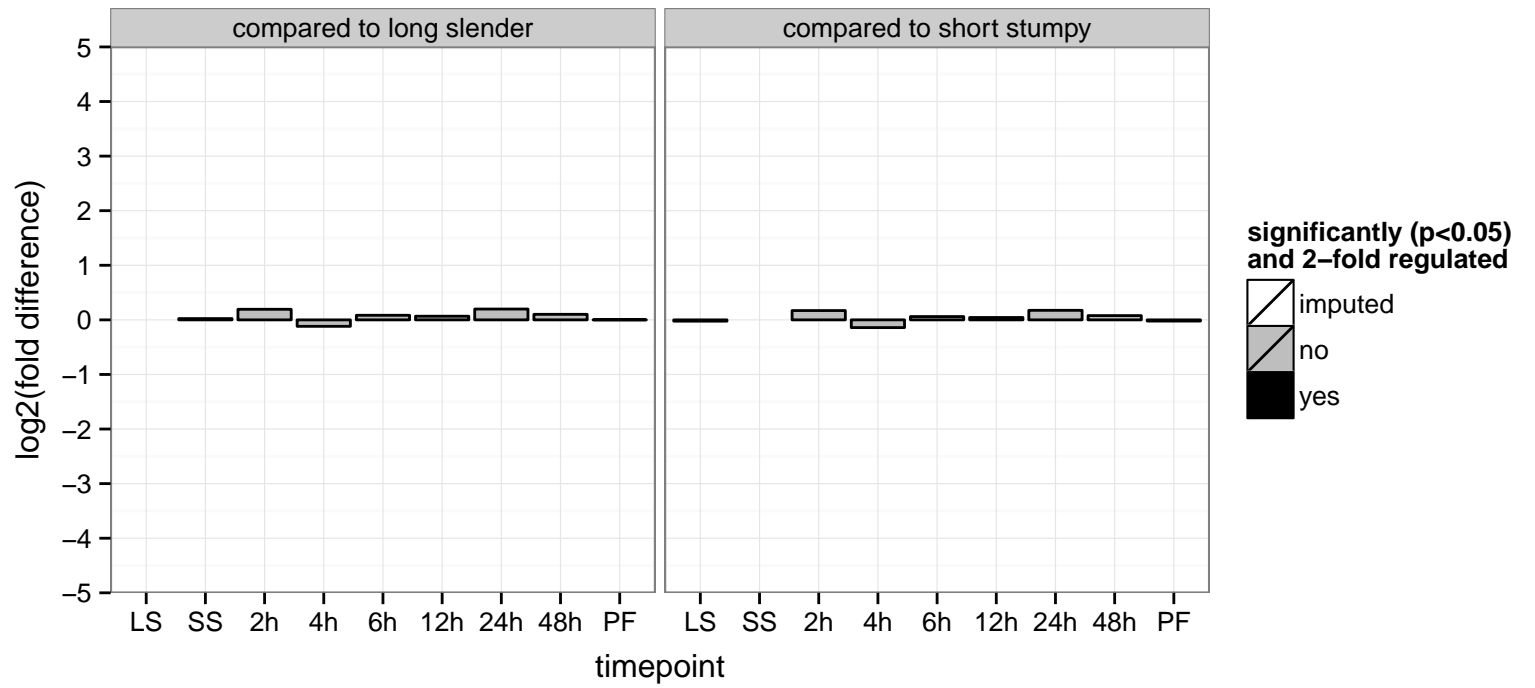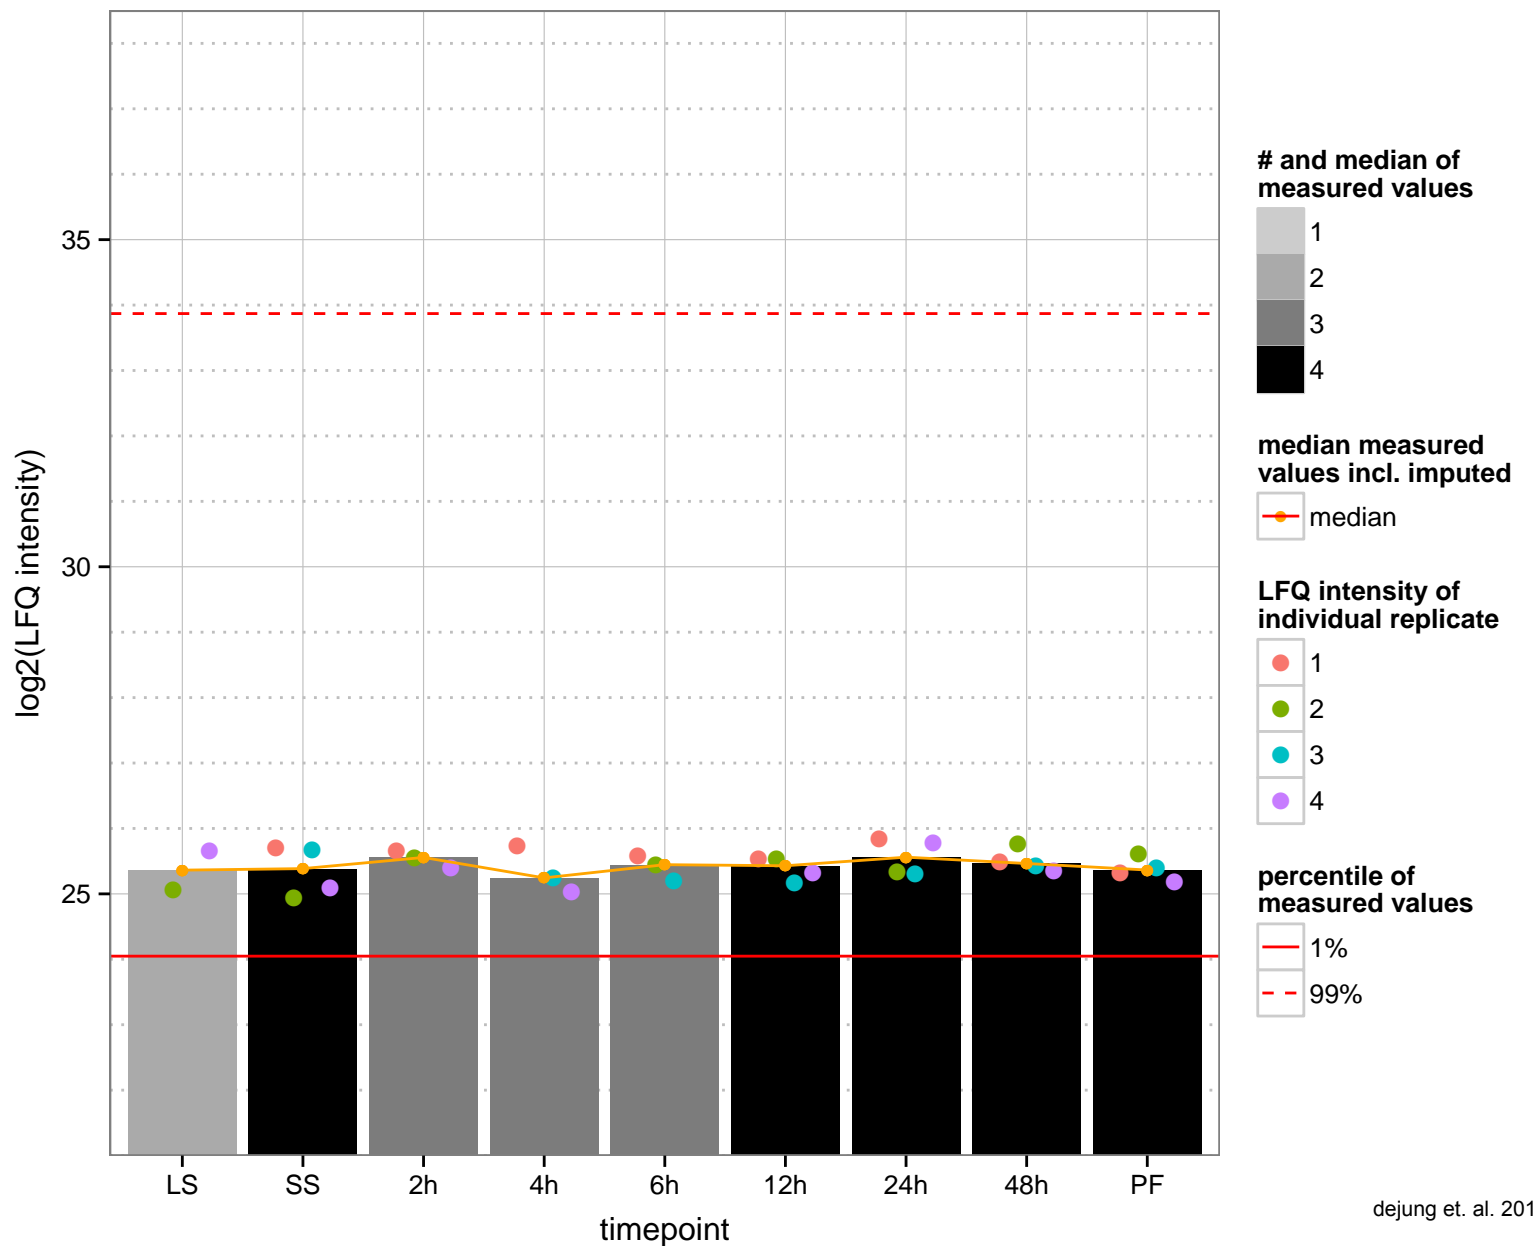

hypothetical protein, conserved  
 Tb927.3.2050  
 AGOF: null  
 AGOC: null  
 AGOP: null  
 PGO: null  
 PGOC: null  
 PGOP: null

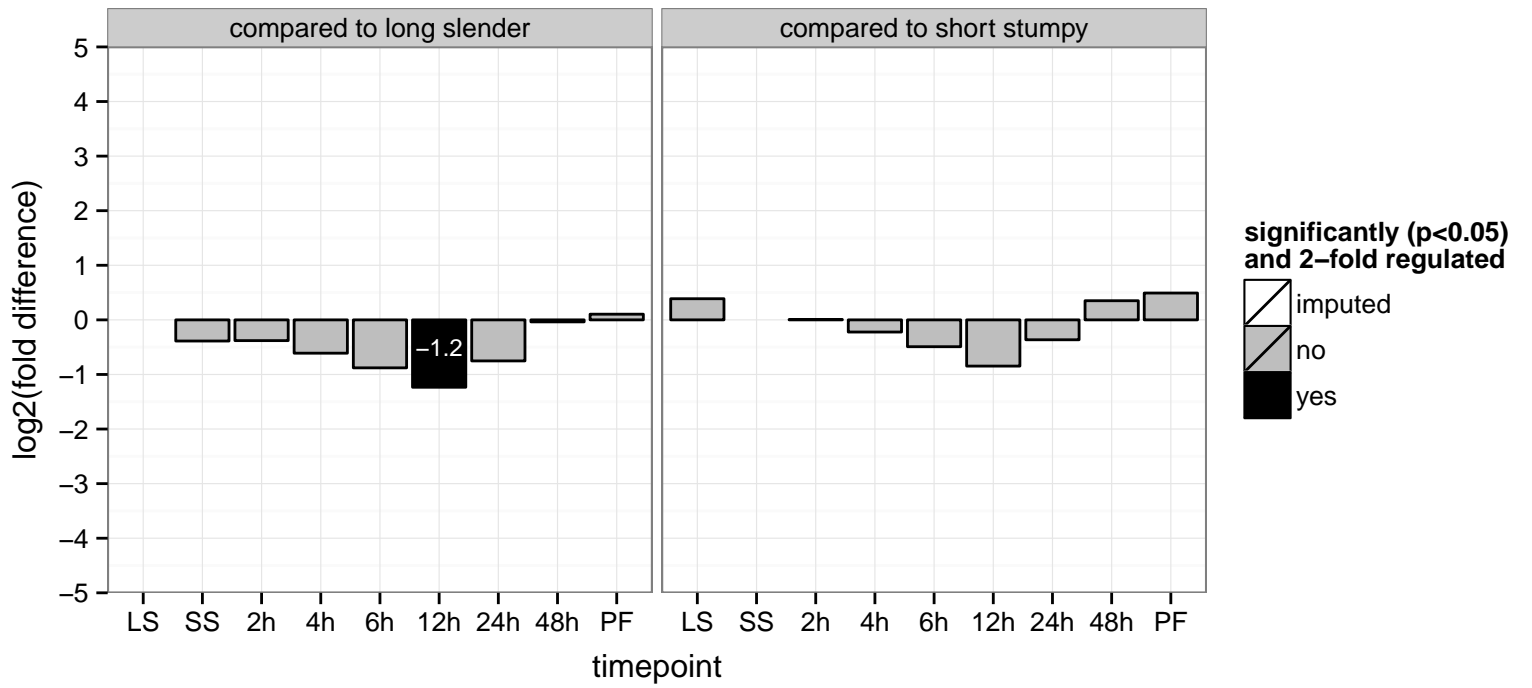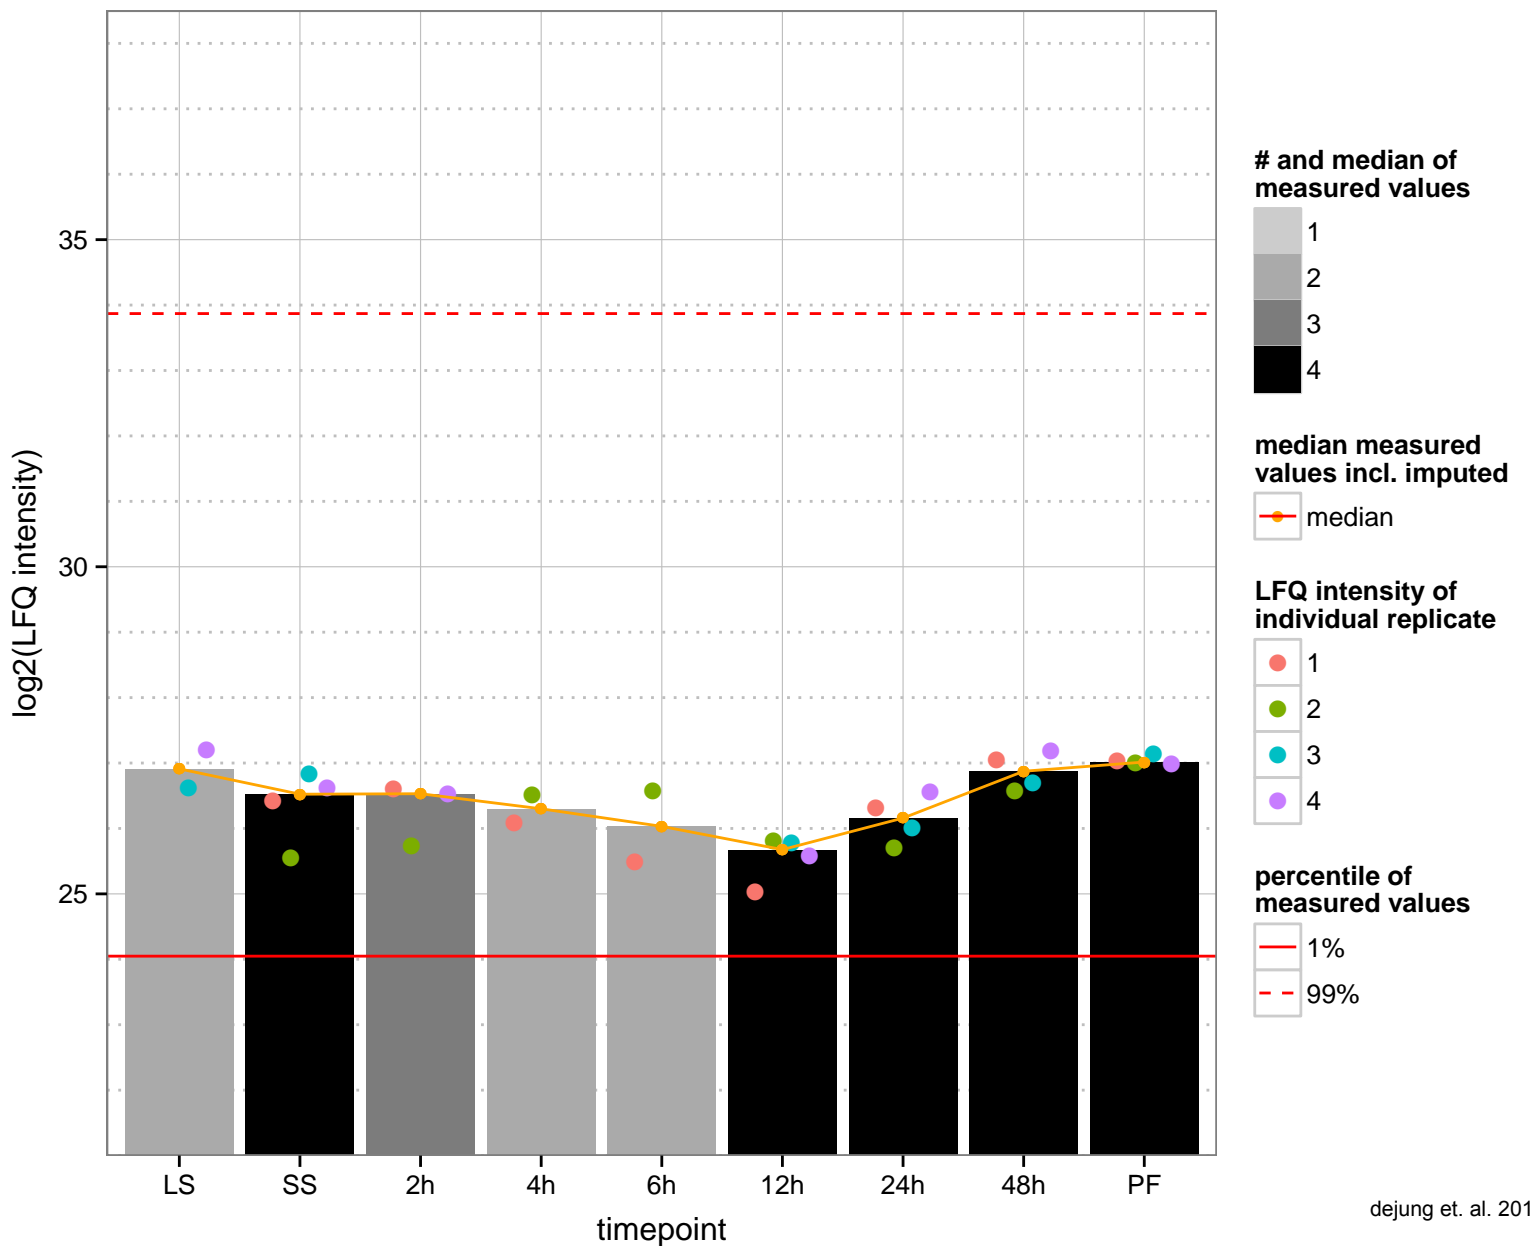

aminopeptidase P1, putative, metallo-peptidase, Clan MG, Family M24  
 Tb927.3.2090;Tb11.v5.0697  
 AGOF: null, hydrolase activity  
 AGOC: null  
 AGOP: null, cellular process  
 PGO: hydrolase activity  
 PGOC: null  
 PGOP: cellular process

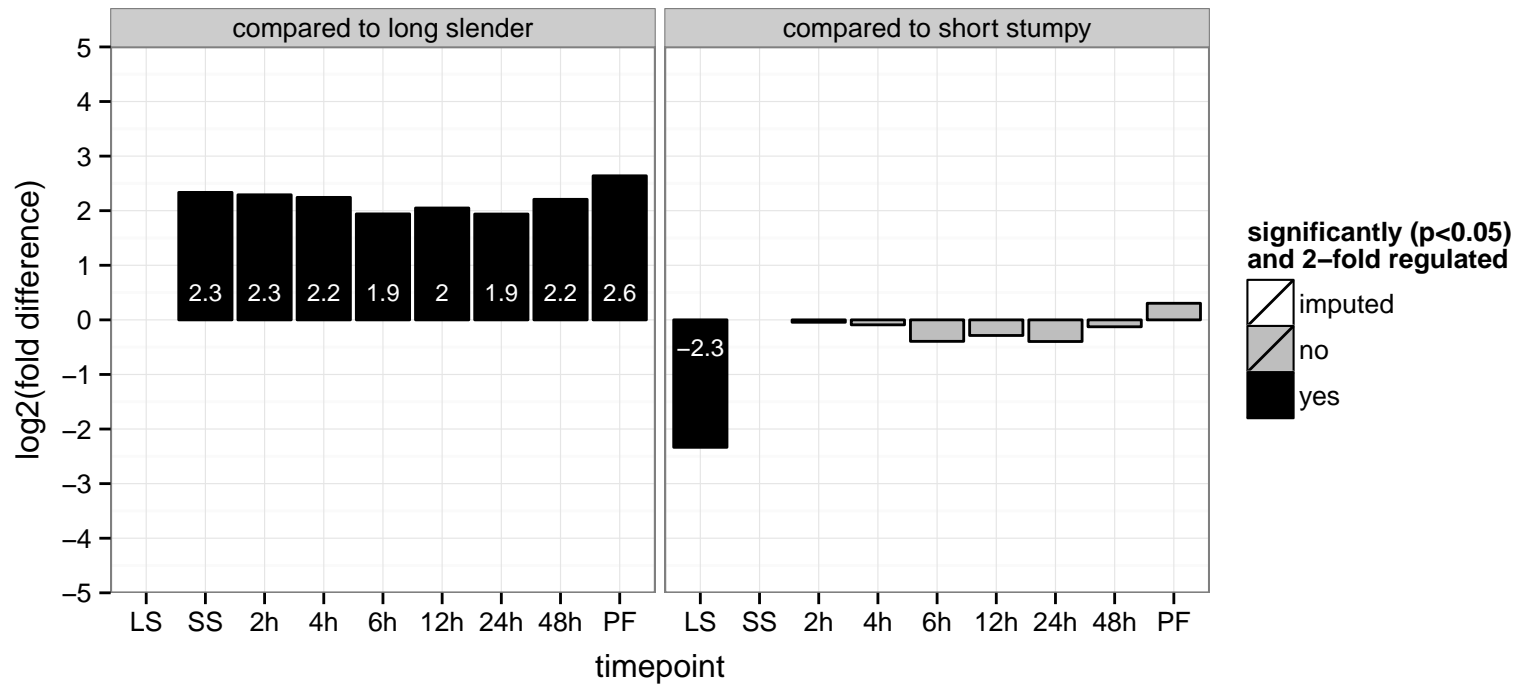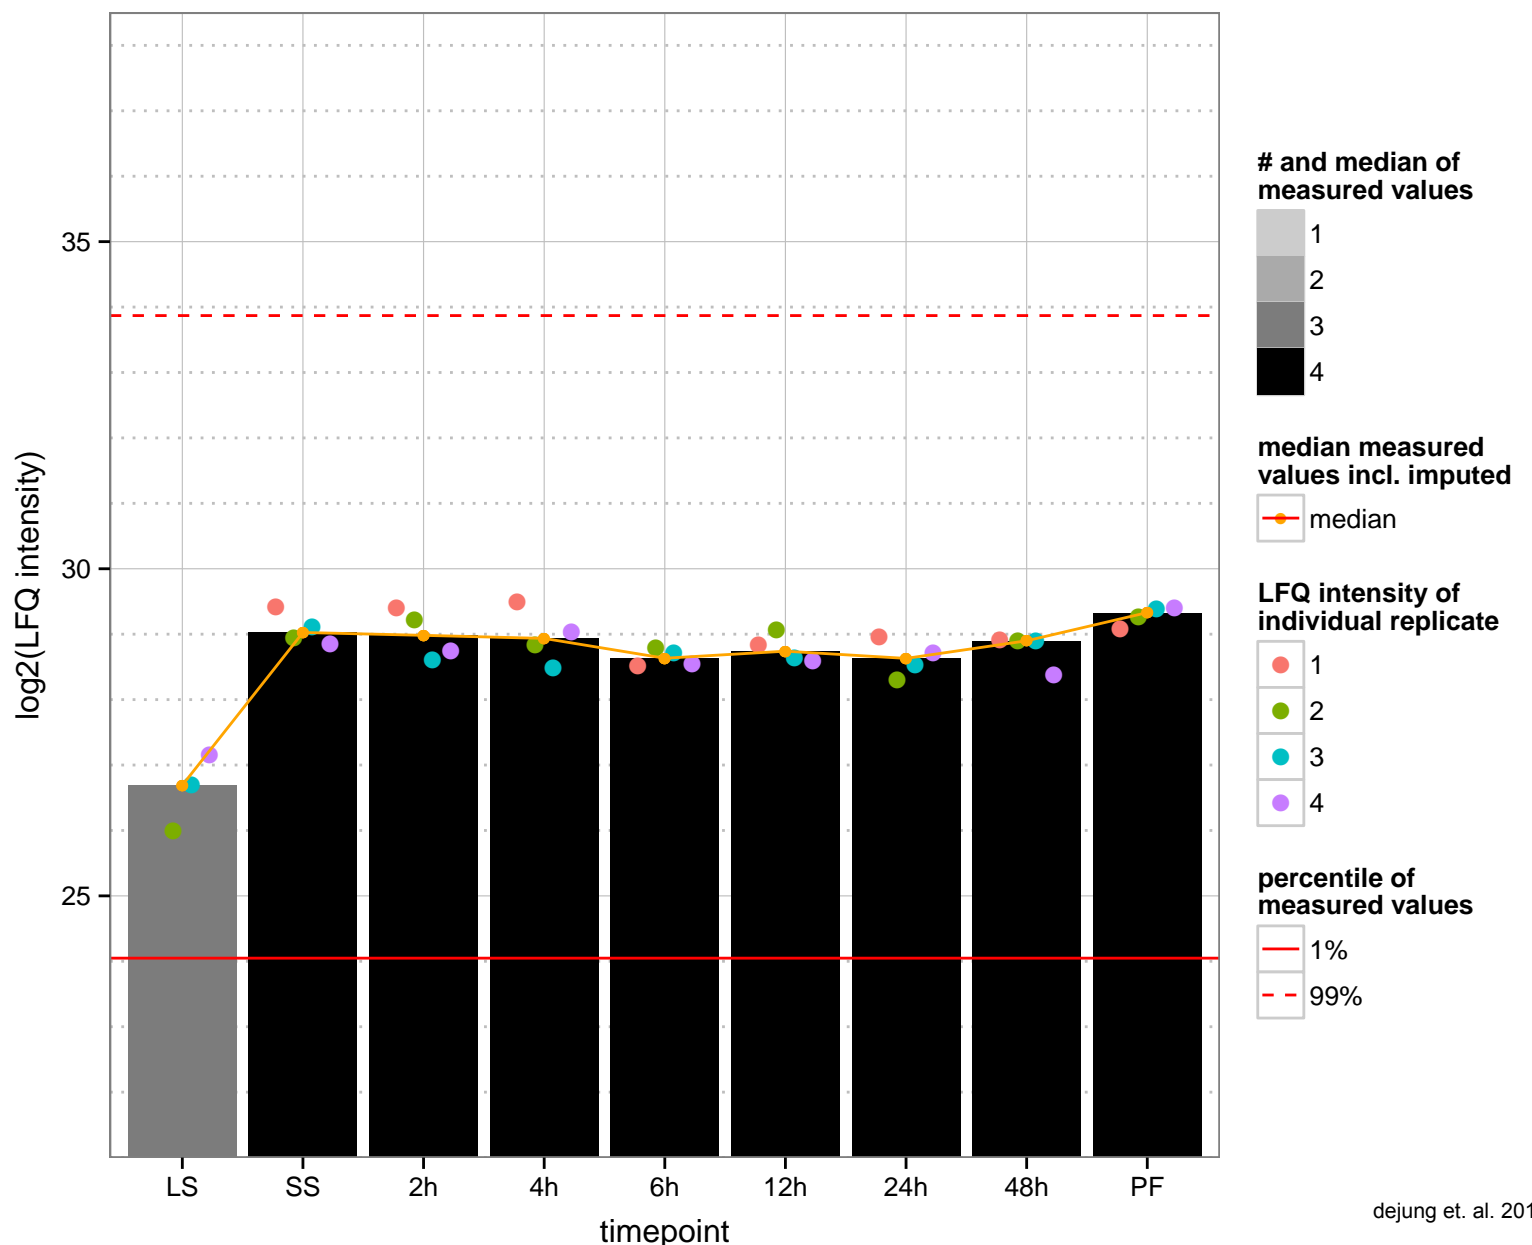

hypothetical protein, conserved, TFIIF-stimulated CTD phosphatase, putative  
 Tb927.3.2110  
 AGOF: null, phosphatase activity  
 AGOC: null, mitochondrion  
 AGOP: null  
 PGO: protein binding, phosphatase activity, protein binding  
 PGO: null  
 PGO: null

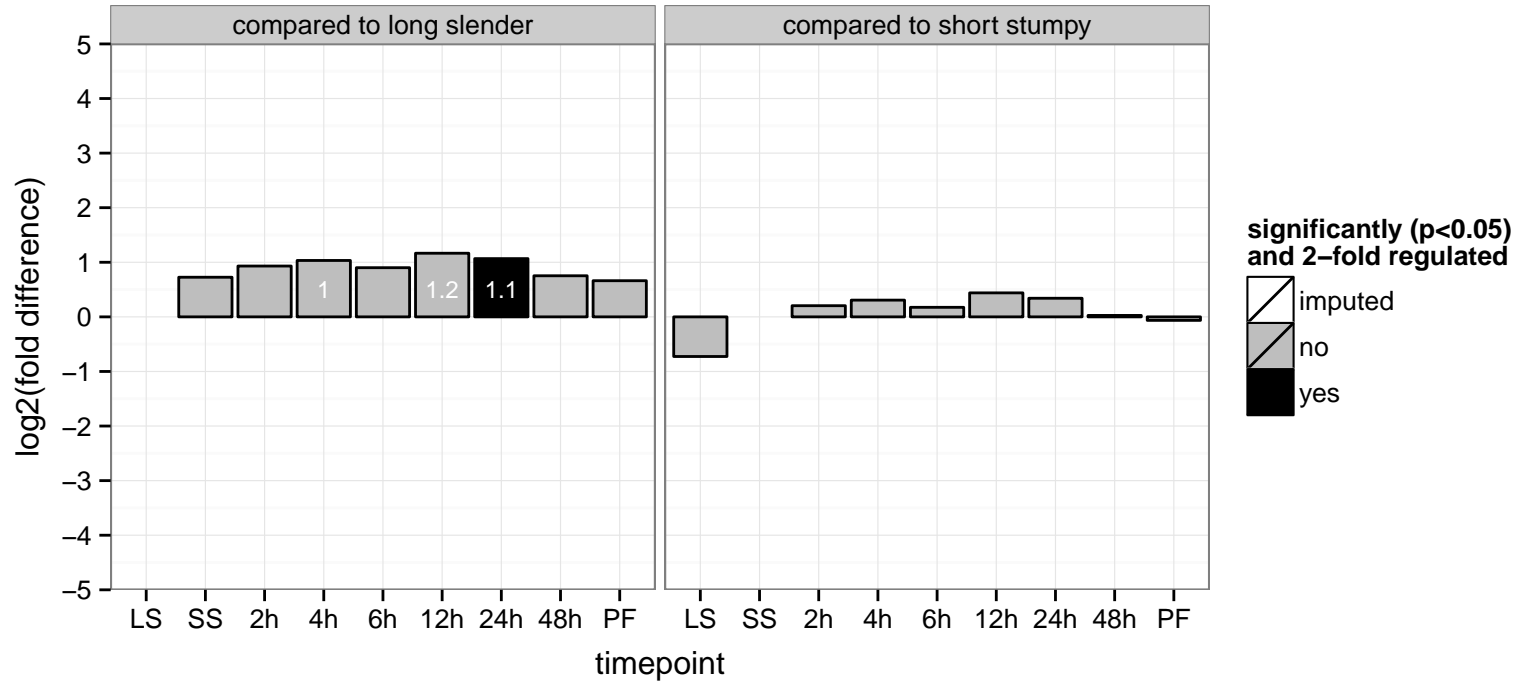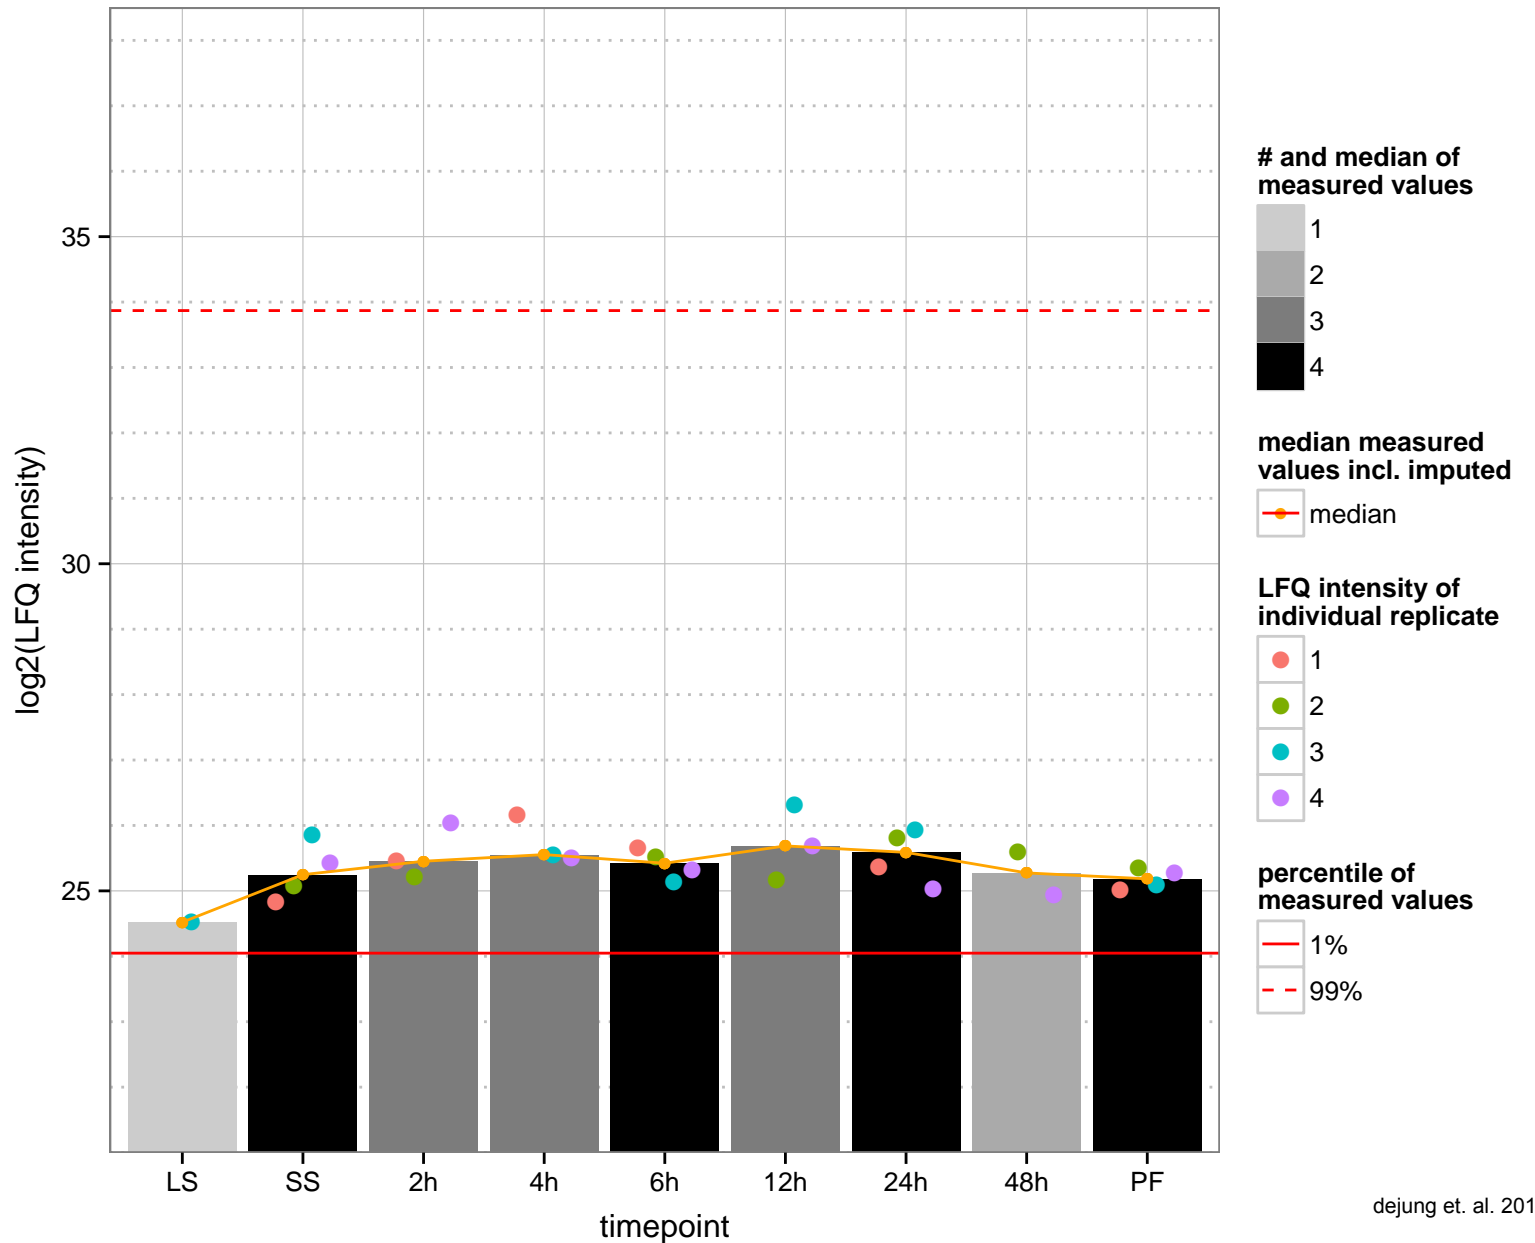

RNA triphosphatase (TbCET1)

Tb927.3.2190

AGOF: nucleoside-triphosphatase activity, polynucleotide 5'-phosphatase activity

AGOC: mRNA cap methyltransferase complex

AGOP: 7-methylguanosine mRNA capping

PGOF: polynucleotide 5'-phosphatase activity, transferase activity

PGOC: null

PGOP: null

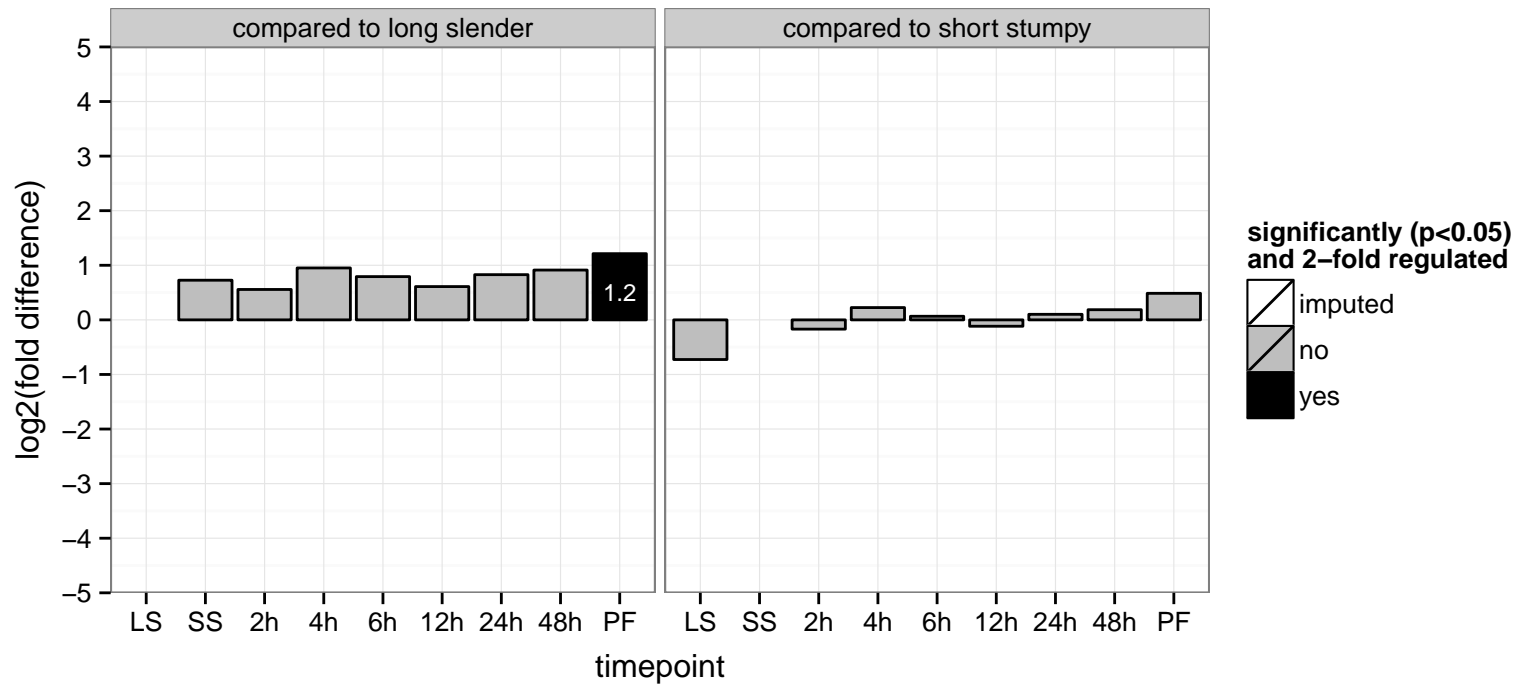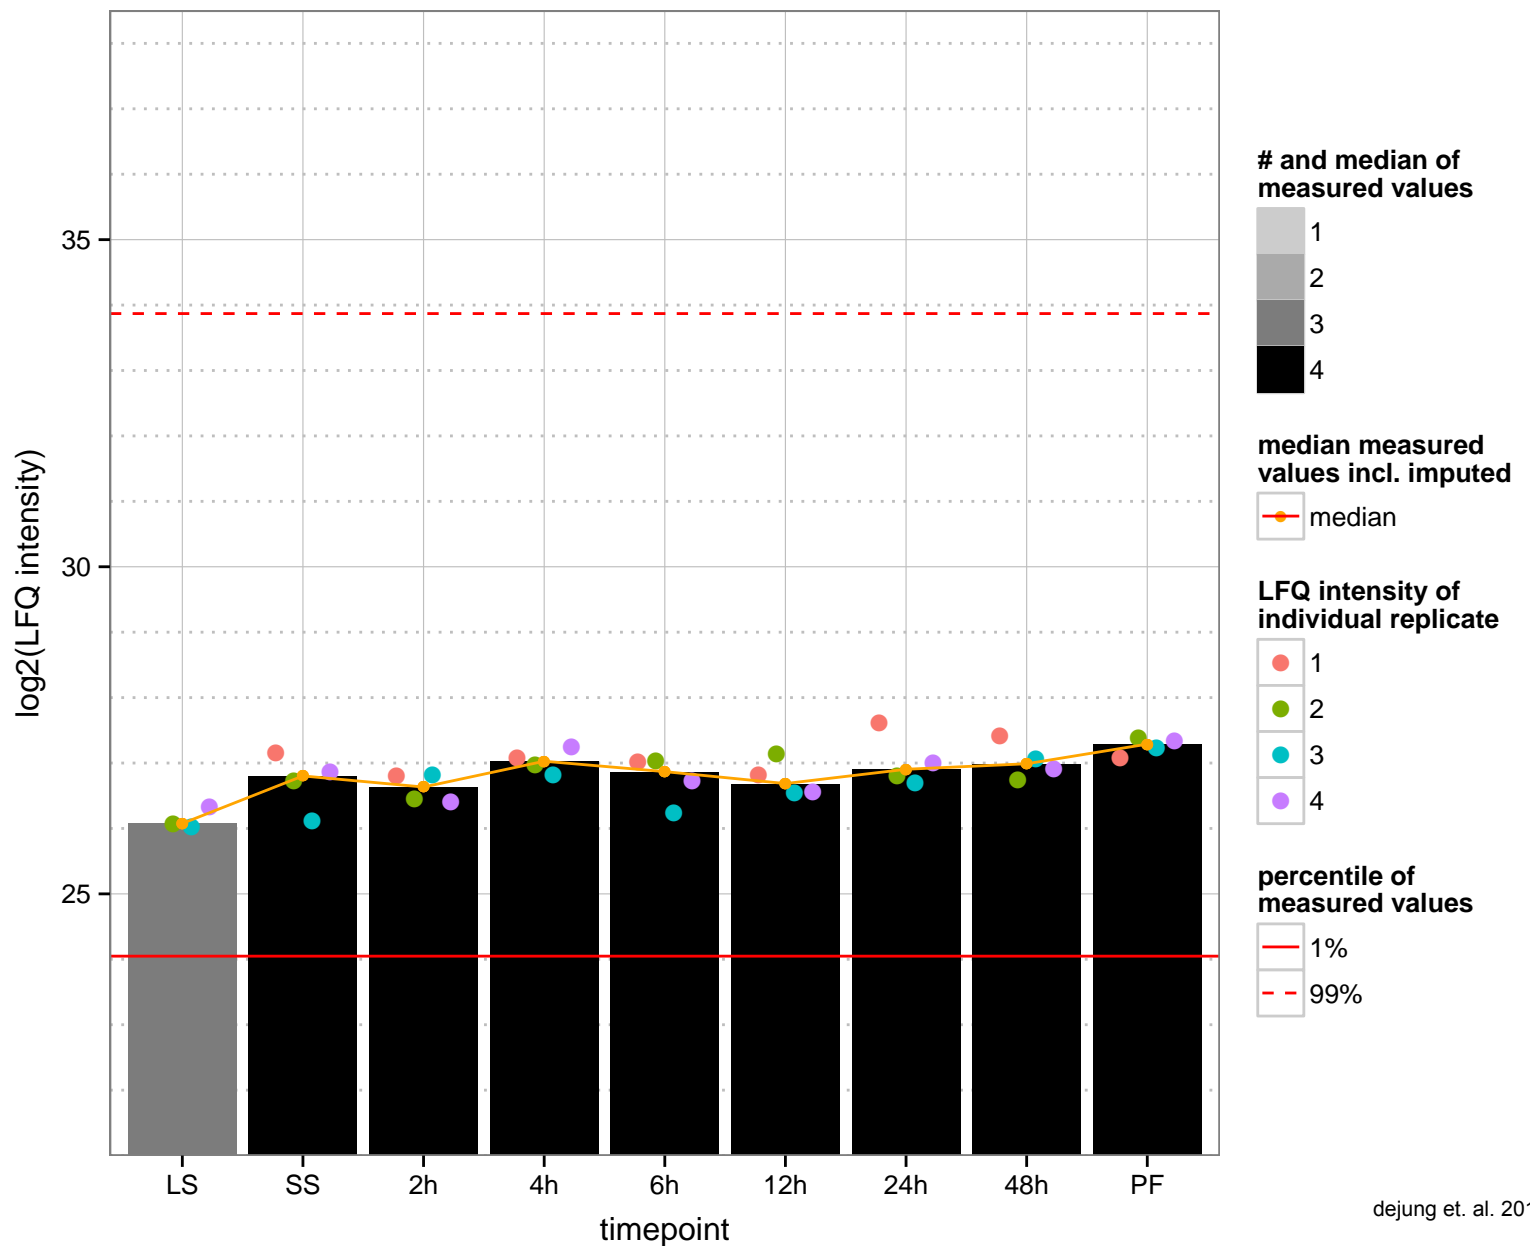

hypothetical protein, conserved  
 Tb927.3.2220  
 AGOF: null  
 AGOC: null  
 AGOP: null  
 PGO: null  
 PGOC: null  
 PGOP: null

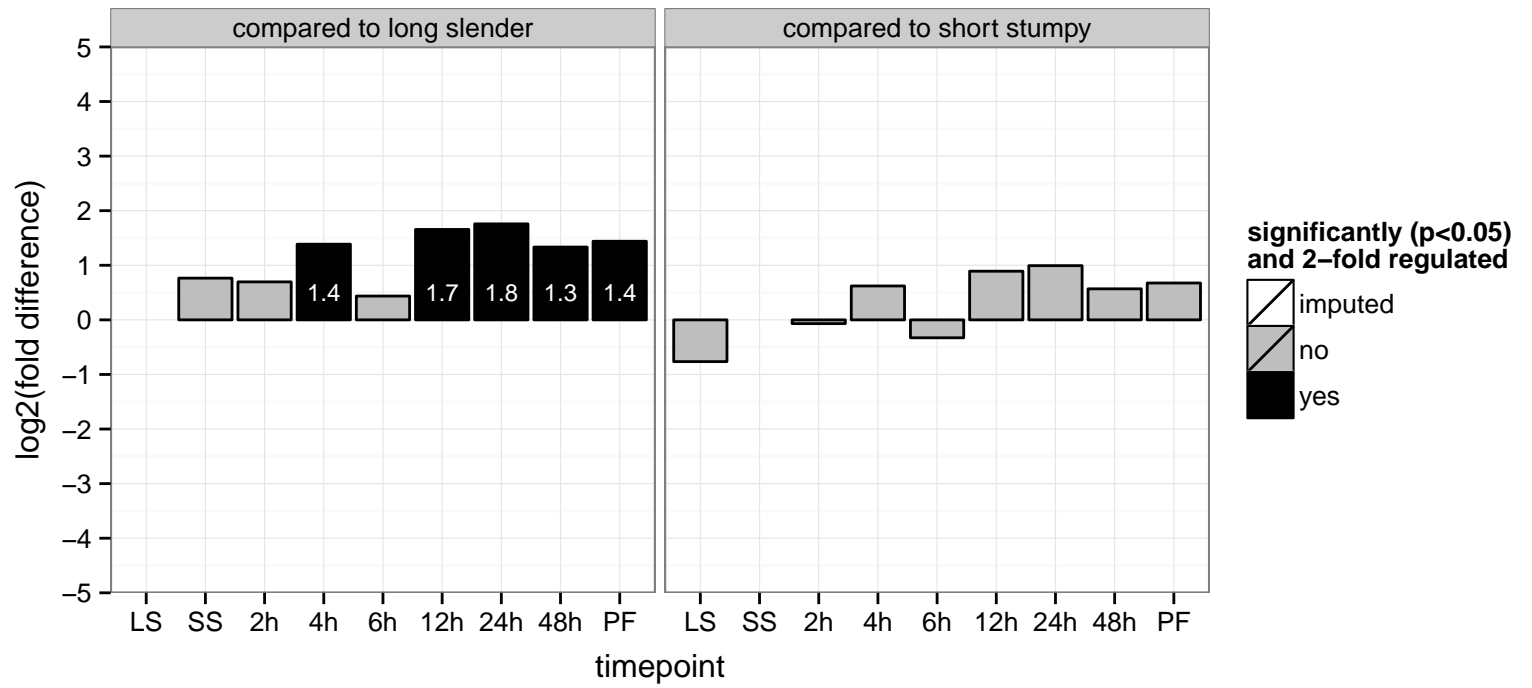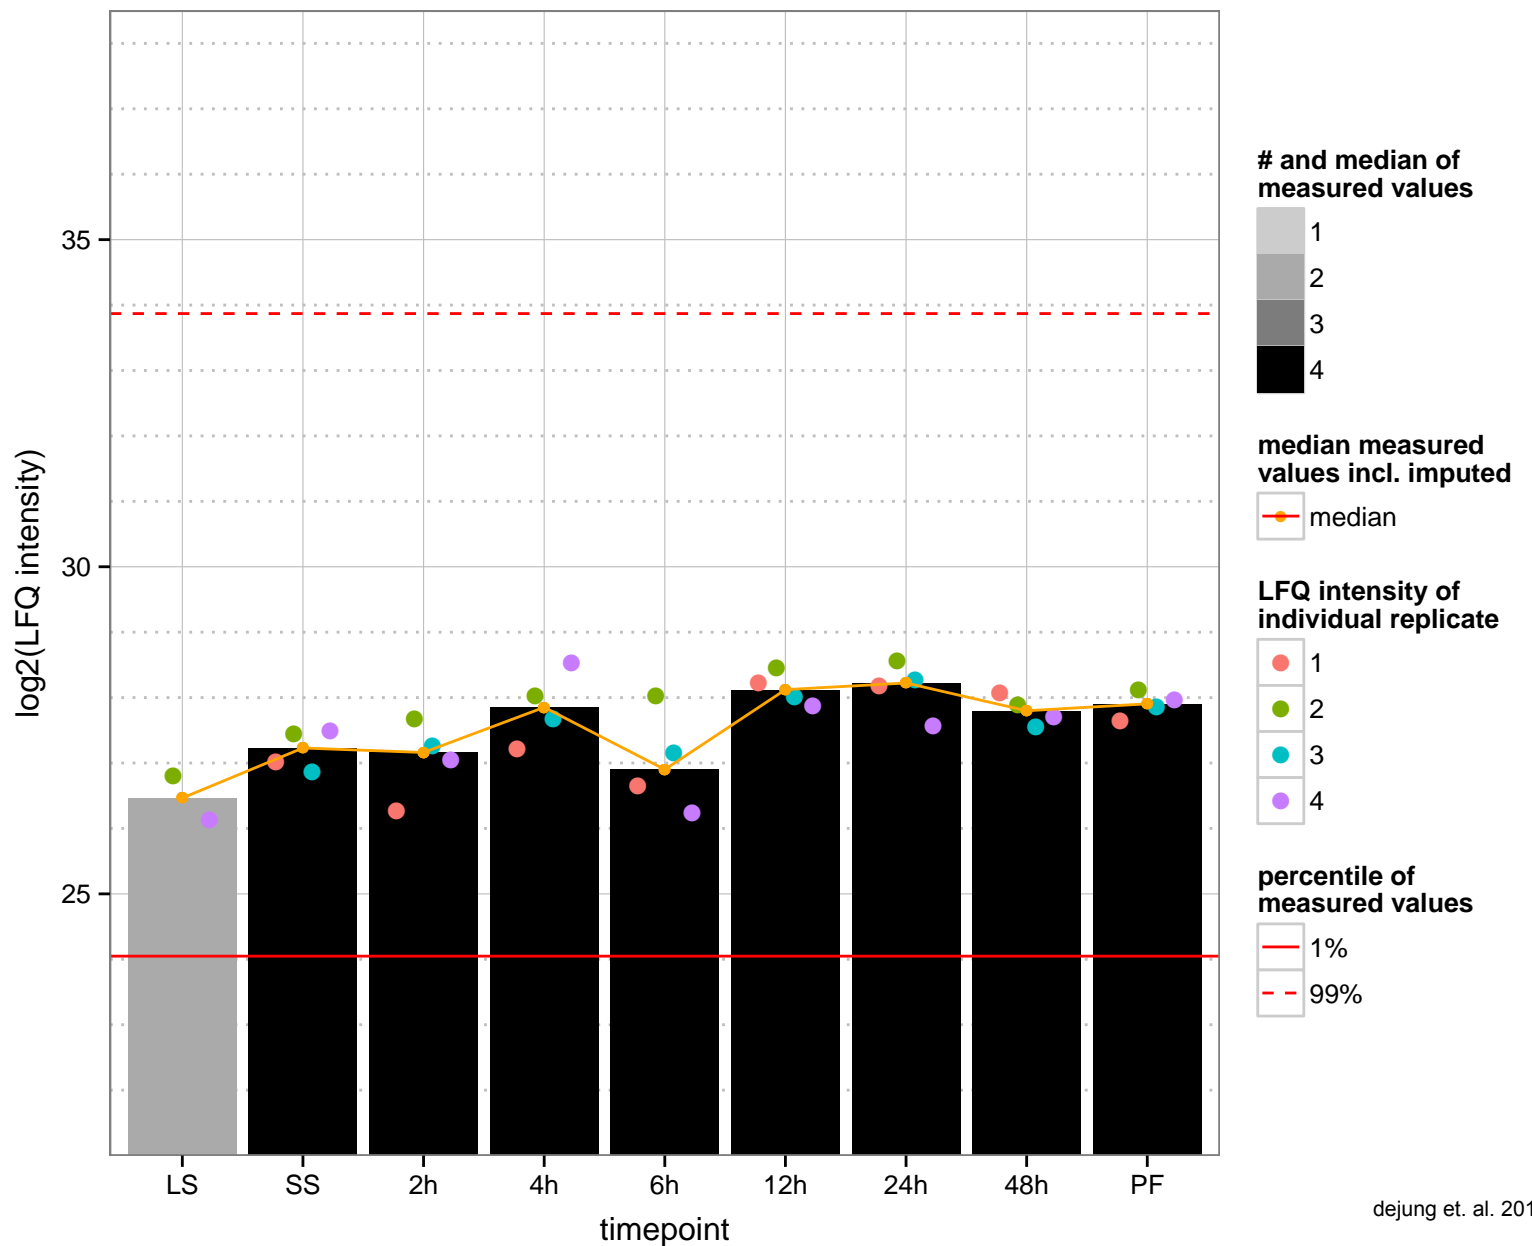



succinyl-CoA synthetase alpha subunit, putative  
 Tb927.3.2230  
 AGOF: catalytic activity  
 AGOC: mitochondrion  
 AGOP: metabolic process  
 PGOF: catalytic activity, cofactor binding  
 PGO: null  
 PGOP: metabolic process

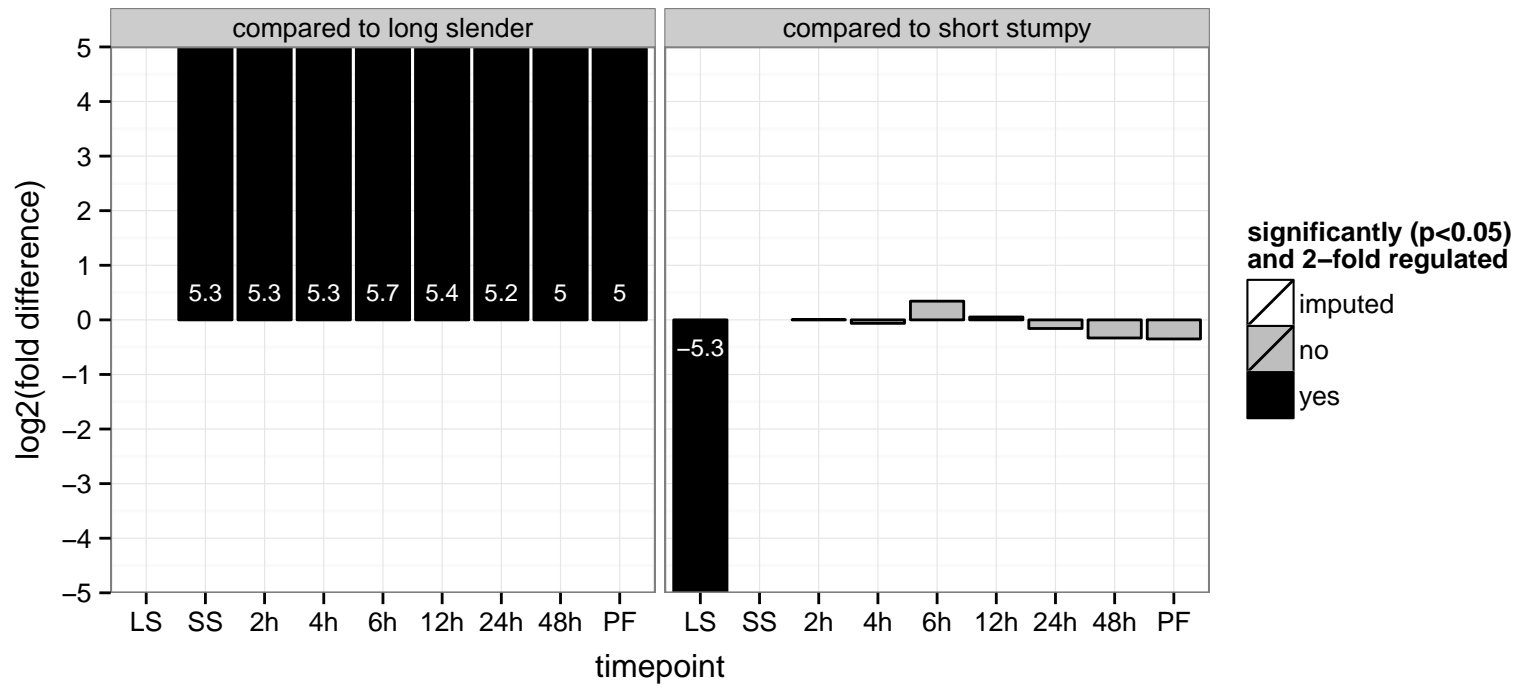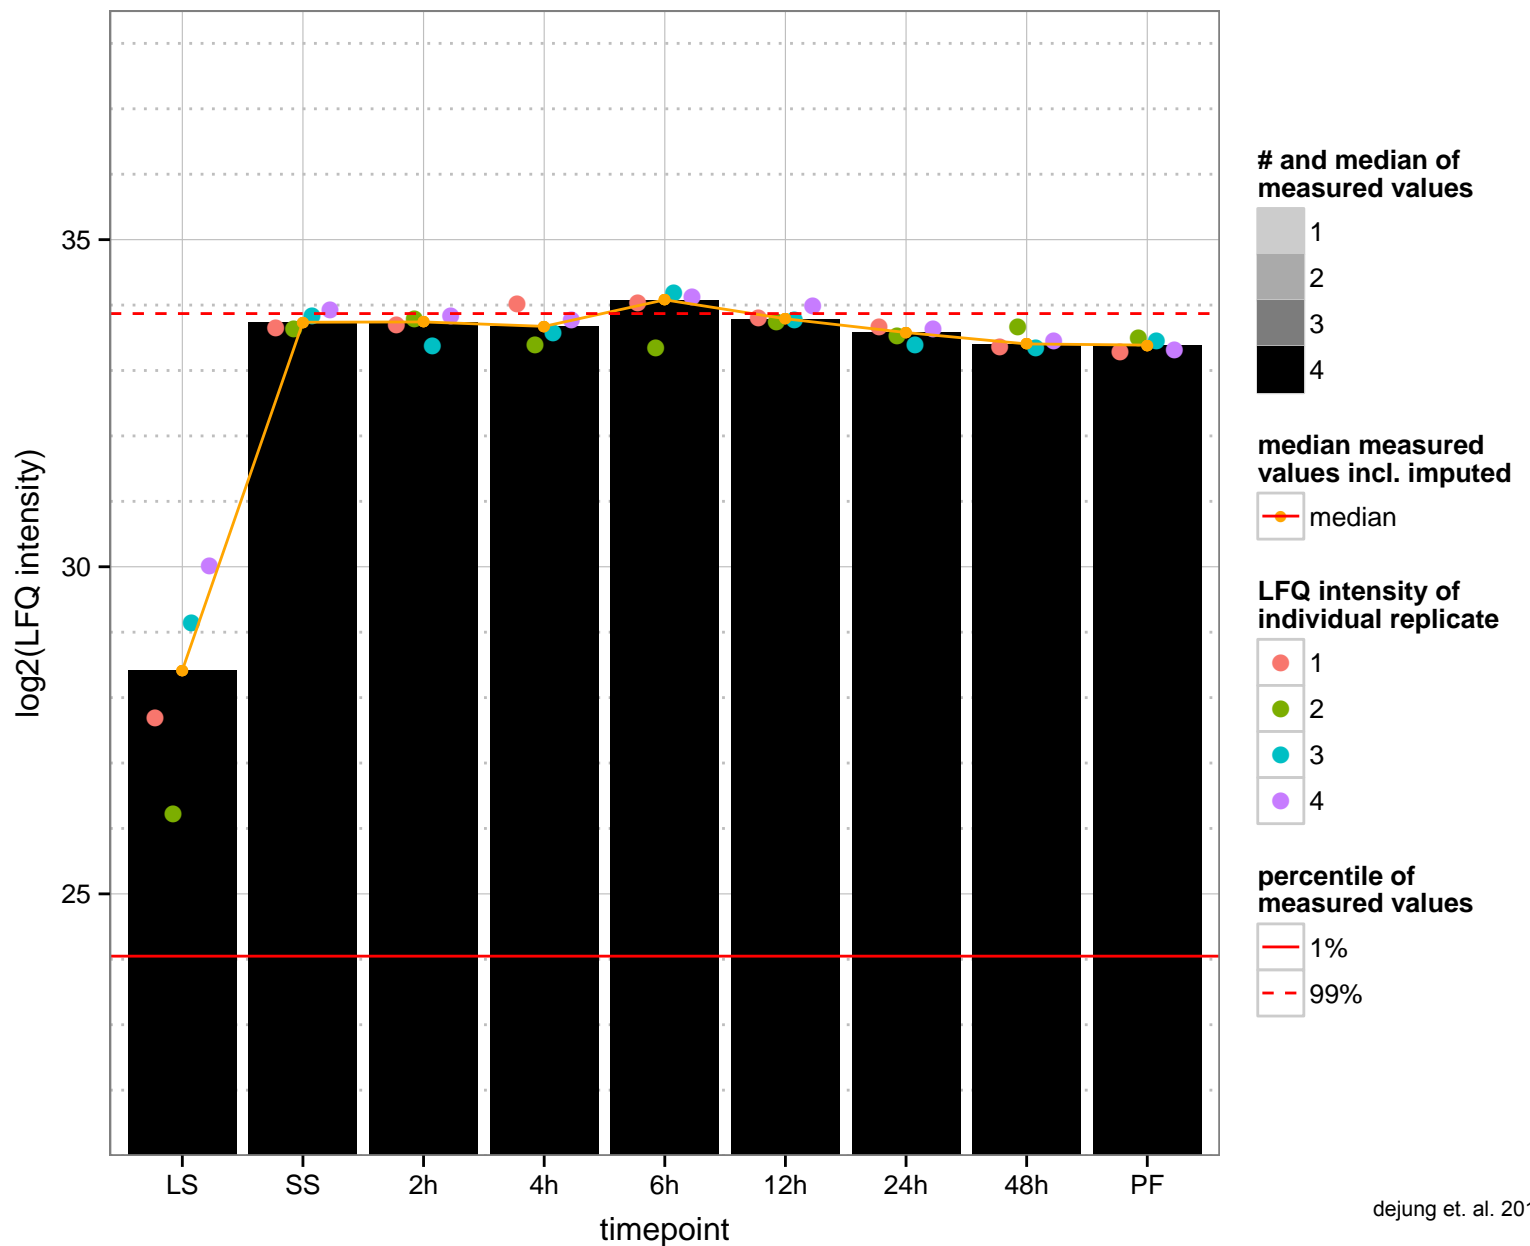

hypothetical protein, conserved  
 Tb927.3.2270  
 AGOF: null  
 AGOC: null  
 AGOP: null  
 PGO: null  
 PGOC: null  
 PGOP: null

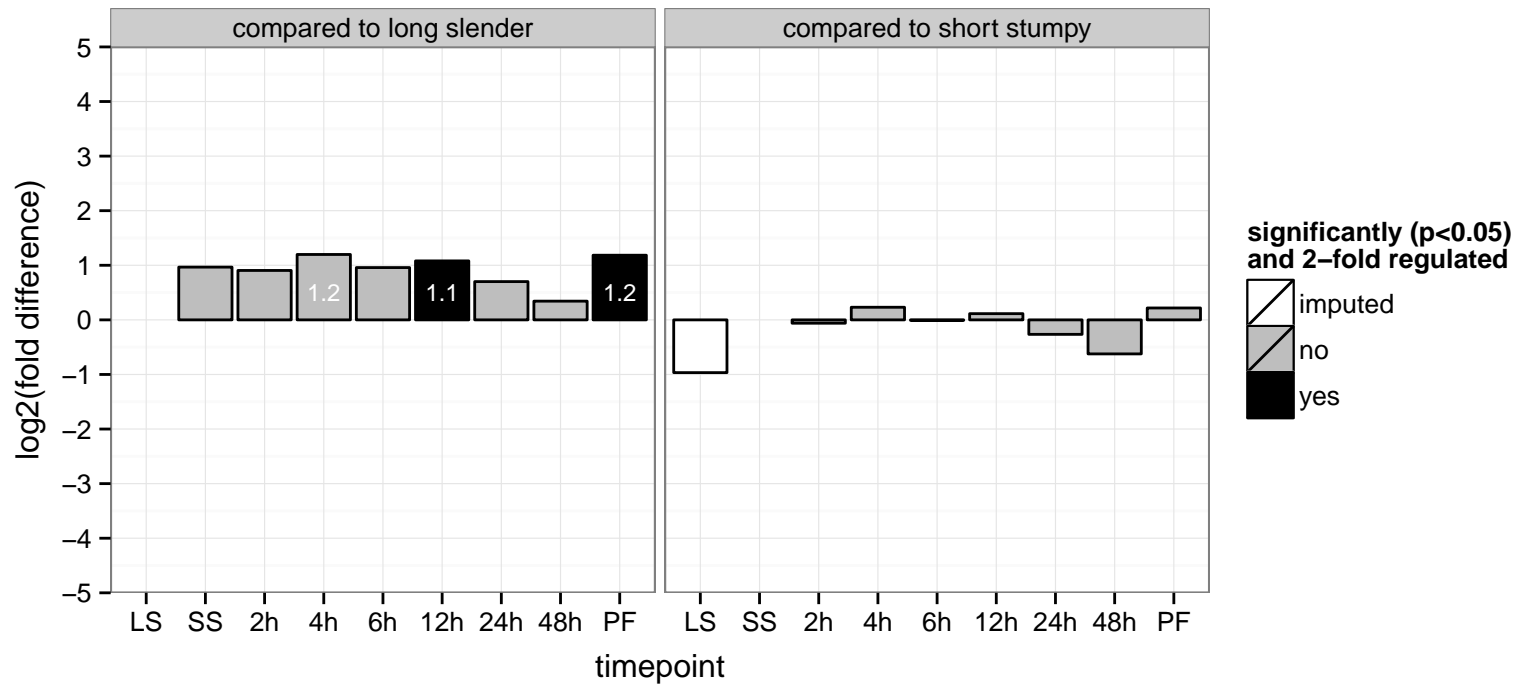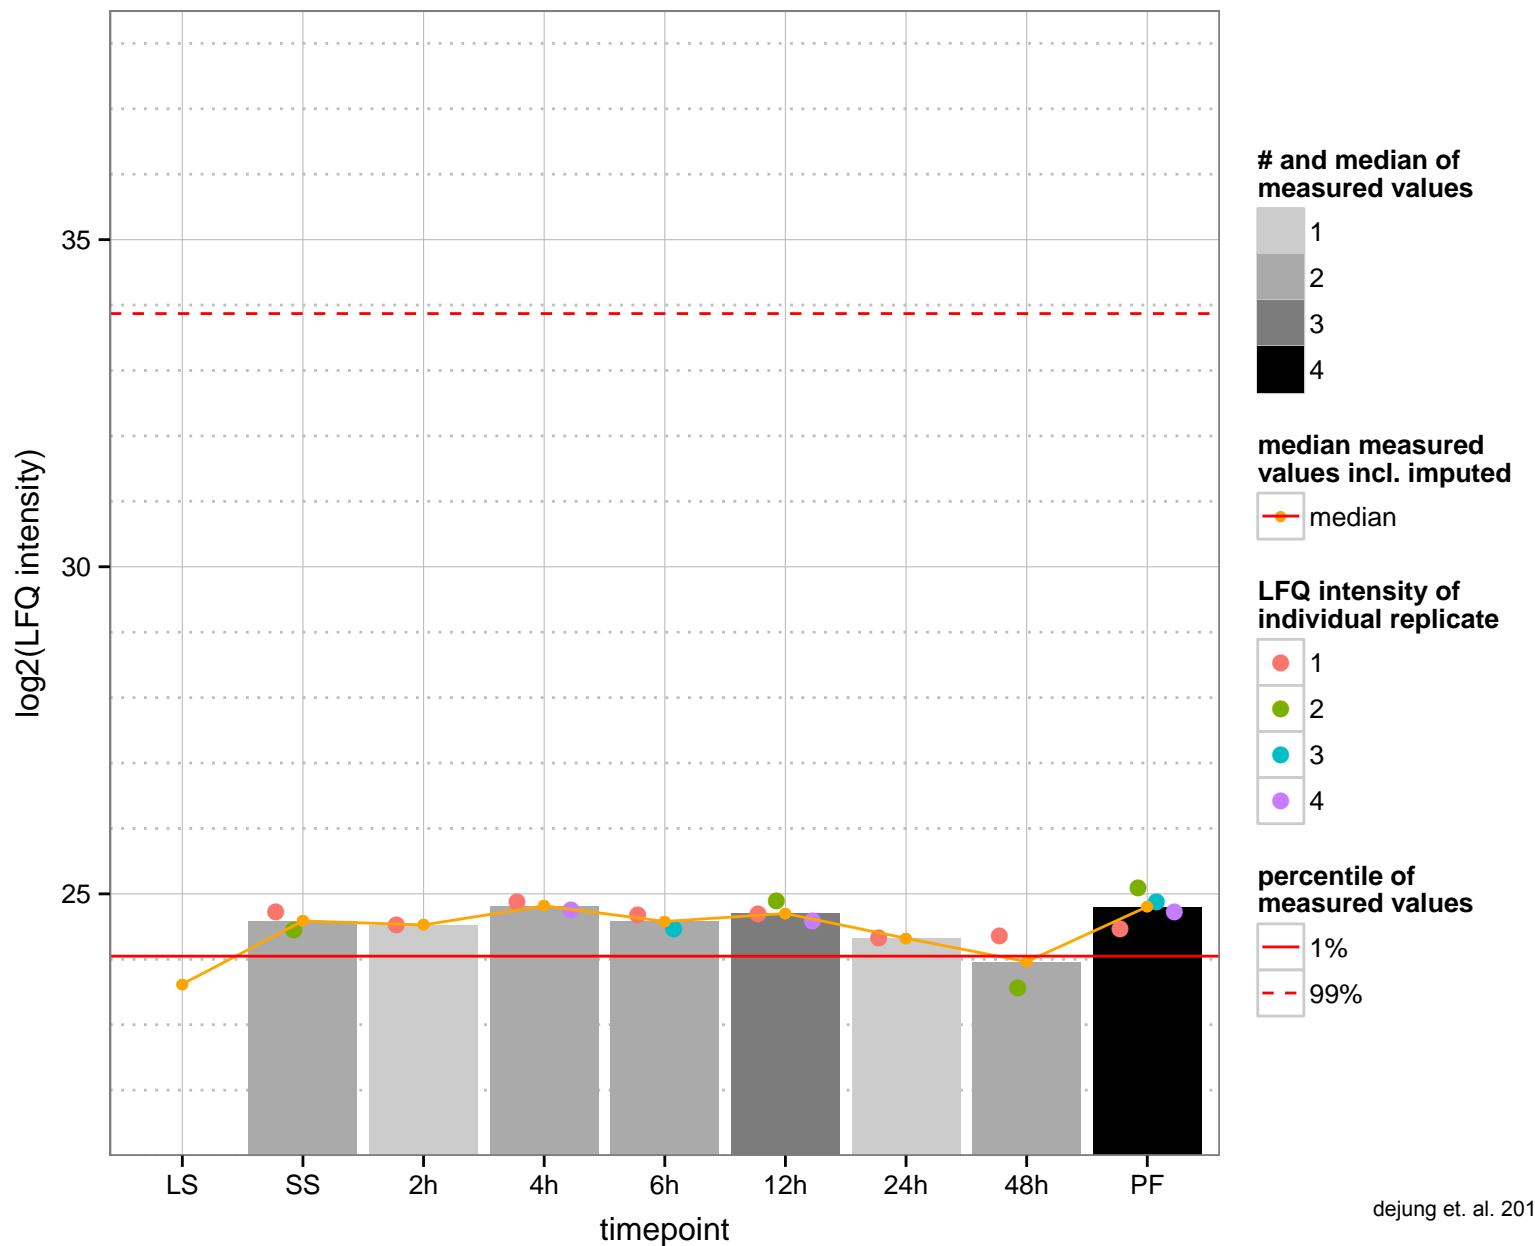

PACRGA, flagellar component  
 Tb927.3.2310  
 AGOF: null  
 AGOC: null  
 AGOP: null  
 PGO: binding  
 PGOC: null  
 PGOP: null

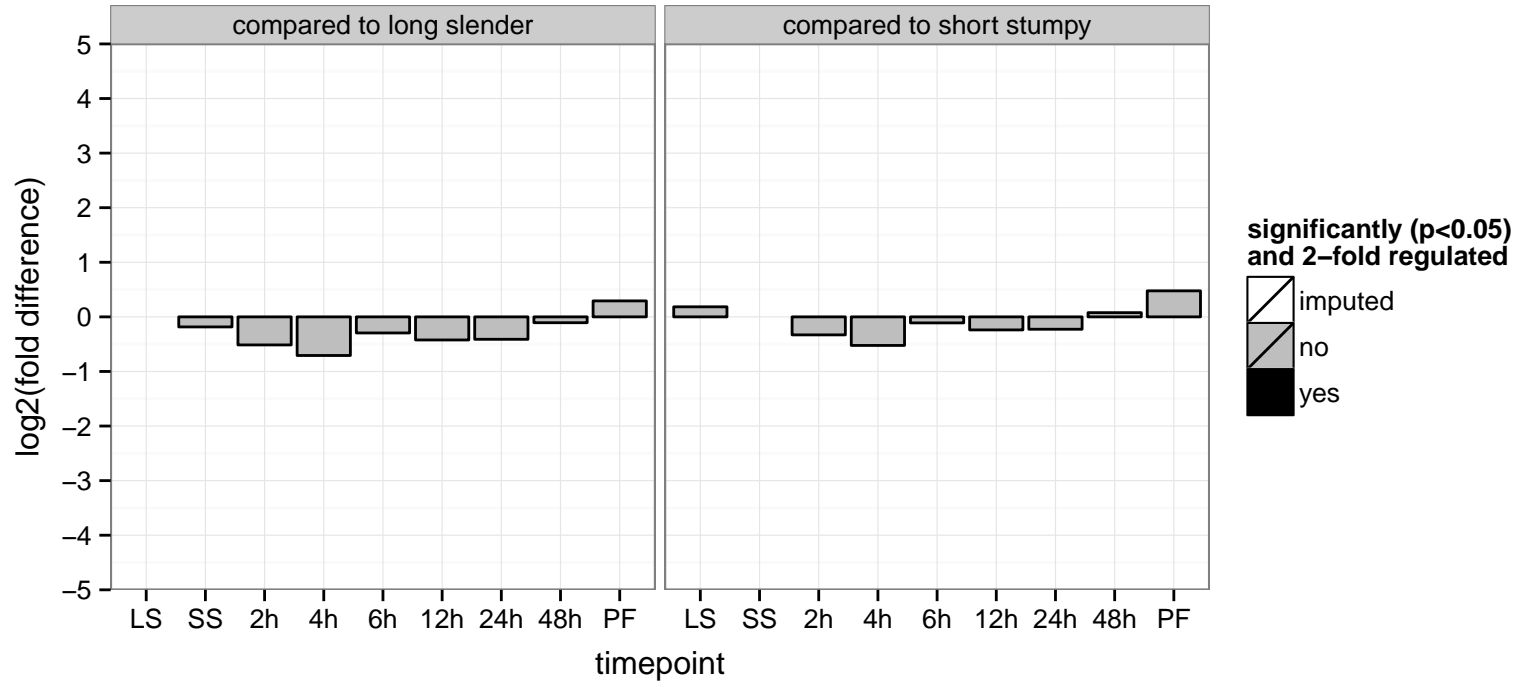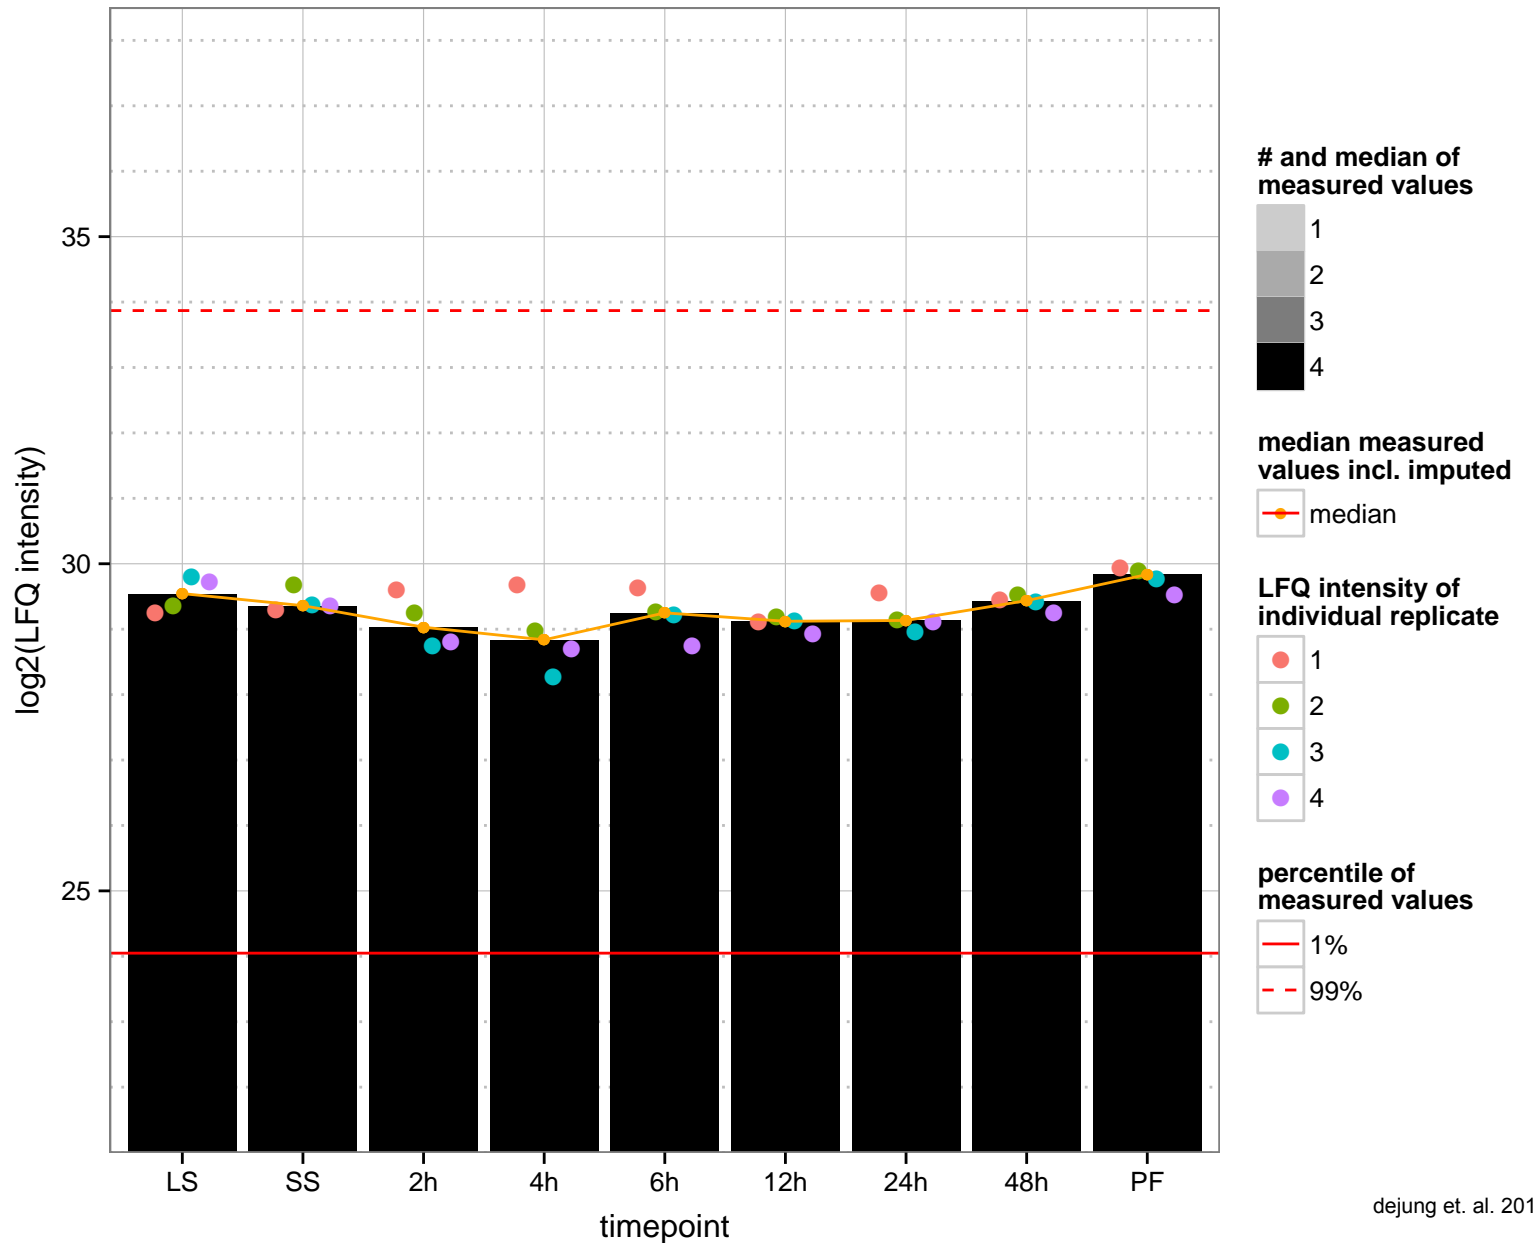

hypothetical protein, conserved  
 Tb927.3.2420  
 AGOF: null  
 AGOC: null  
 AGOP: null  
 PGO: peptidase activity  
 PGOC: integral to membrane, signal peptidase complex  
 PGO: signal peptide processing

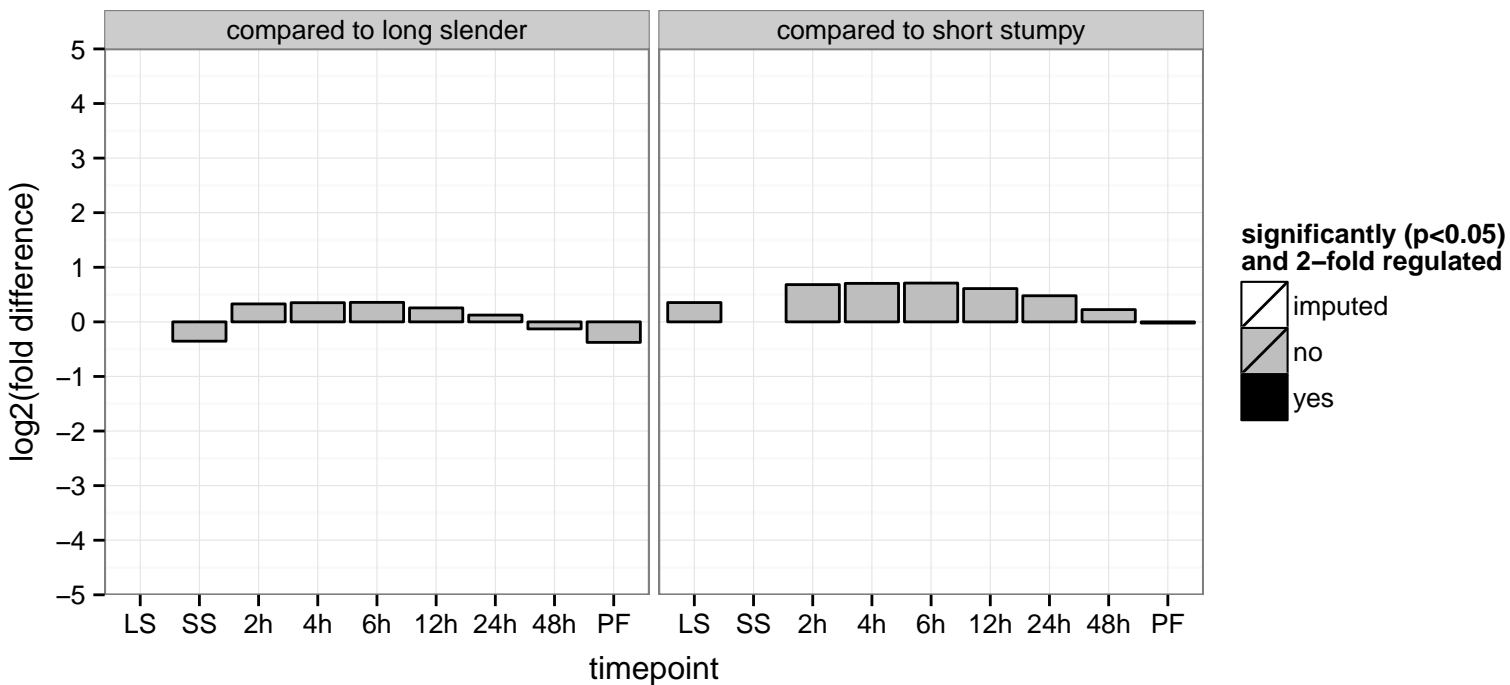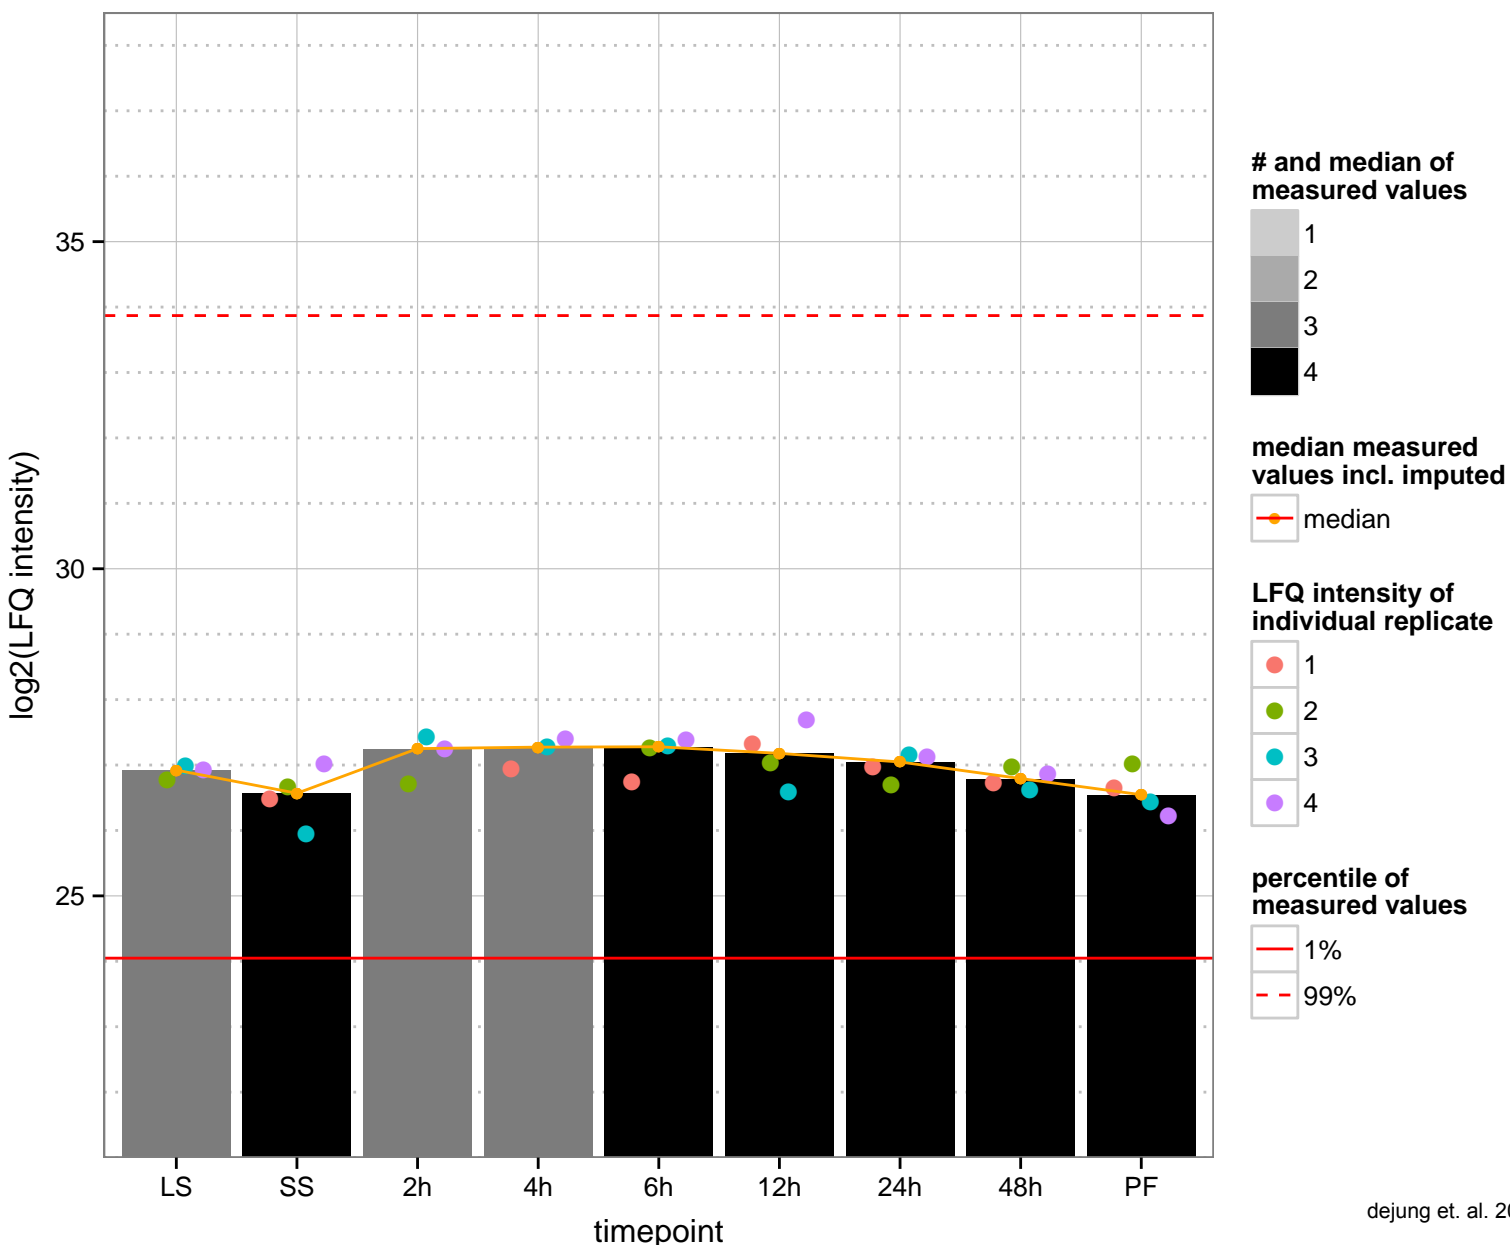

hypothetical protein, conserved  
 Tb927.3.2430  
 AGOF: null  
 AGOC: null  
 AGOP: null  
 PGO: null  
 PGOC: null  
 PGOP: null

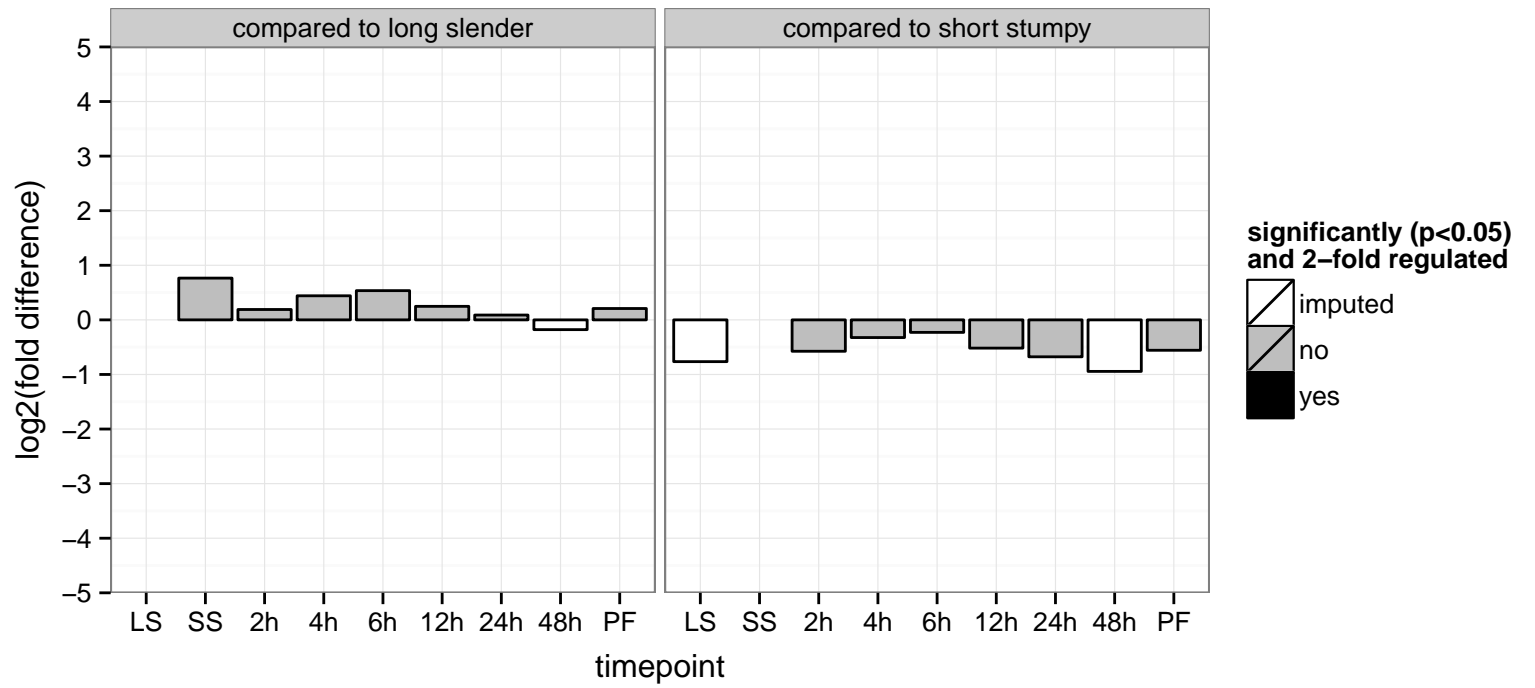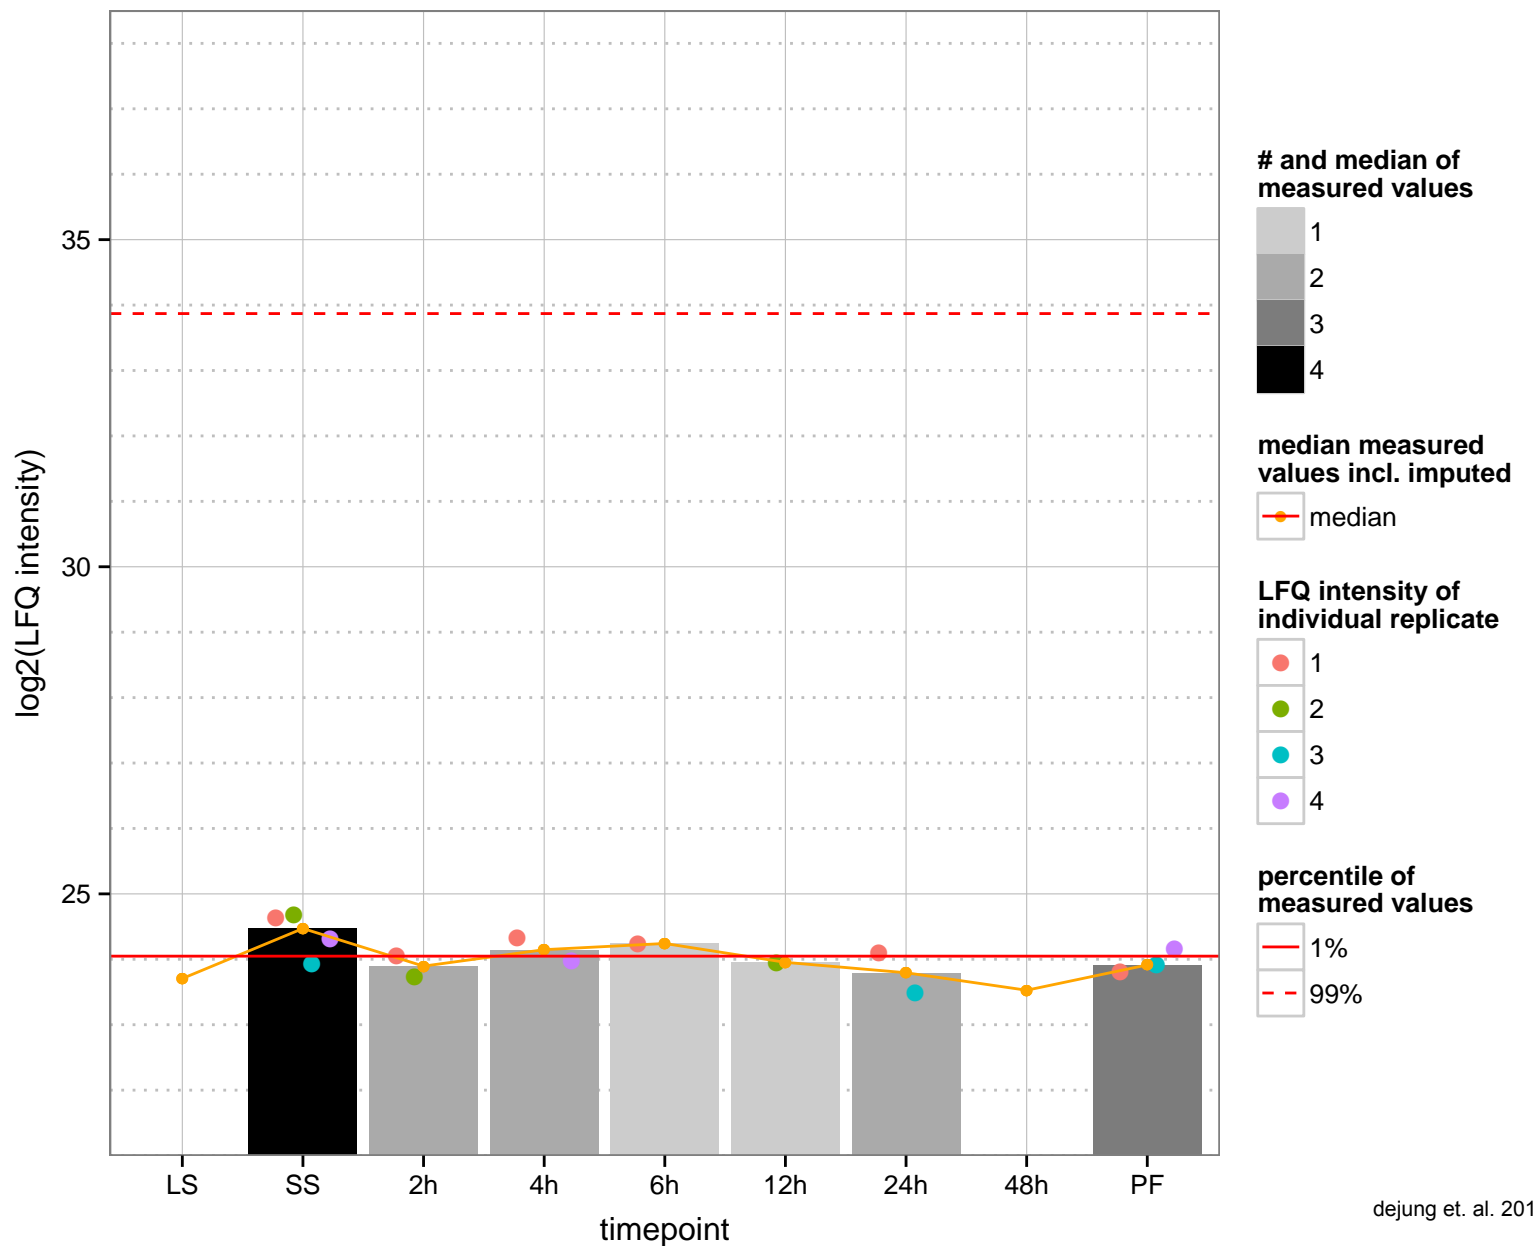

serine/threonine–protein kinase, putative, protein kinase

Tb927.3.2440

AGOF: ATP binding, protein serine/threonine kinase activity, protein tyrosine kinase activity

AGOC: null

AGOP: cytokinesis after mitosis, protein phosphorylation

PGOF: ATP binding, protein kinase activity, transferase activity, transferring phosphorus–containing groups

PGOC: null

PGOP: protein phosphorylation

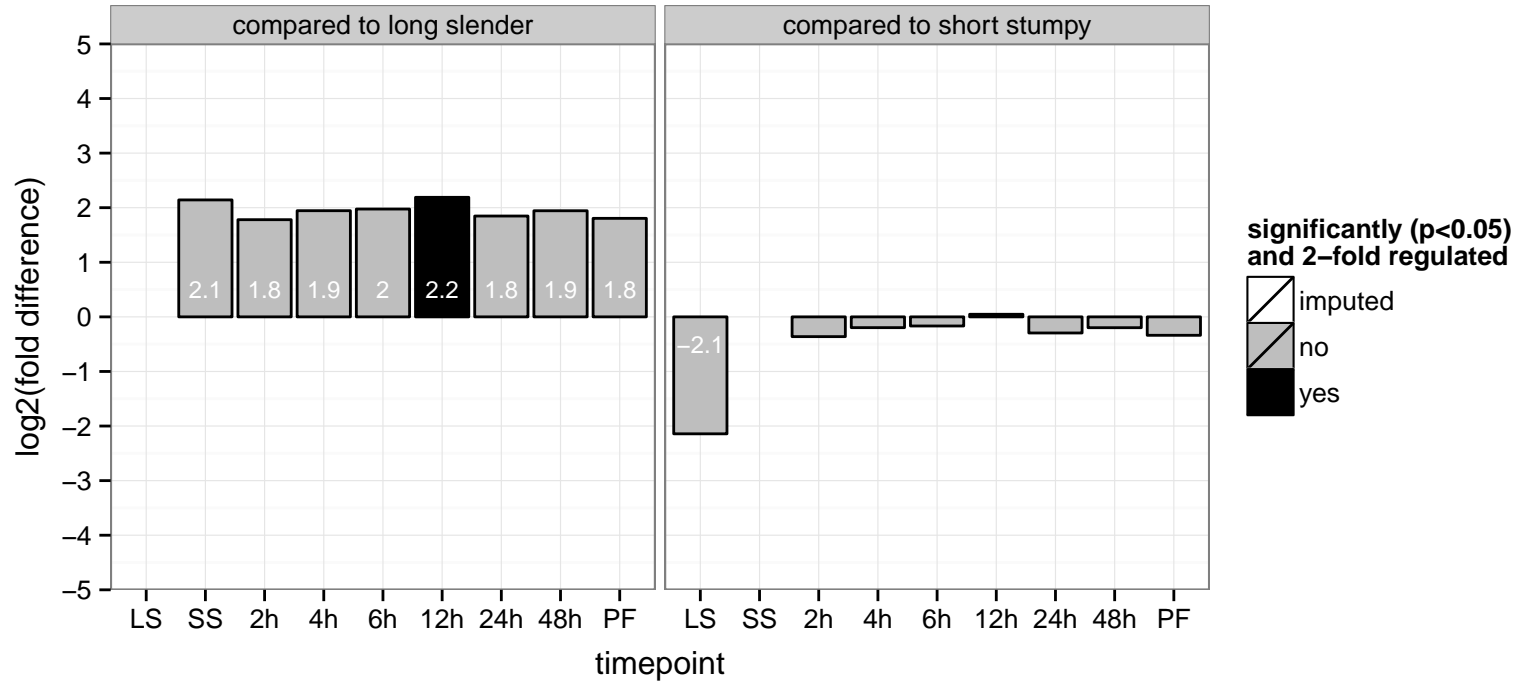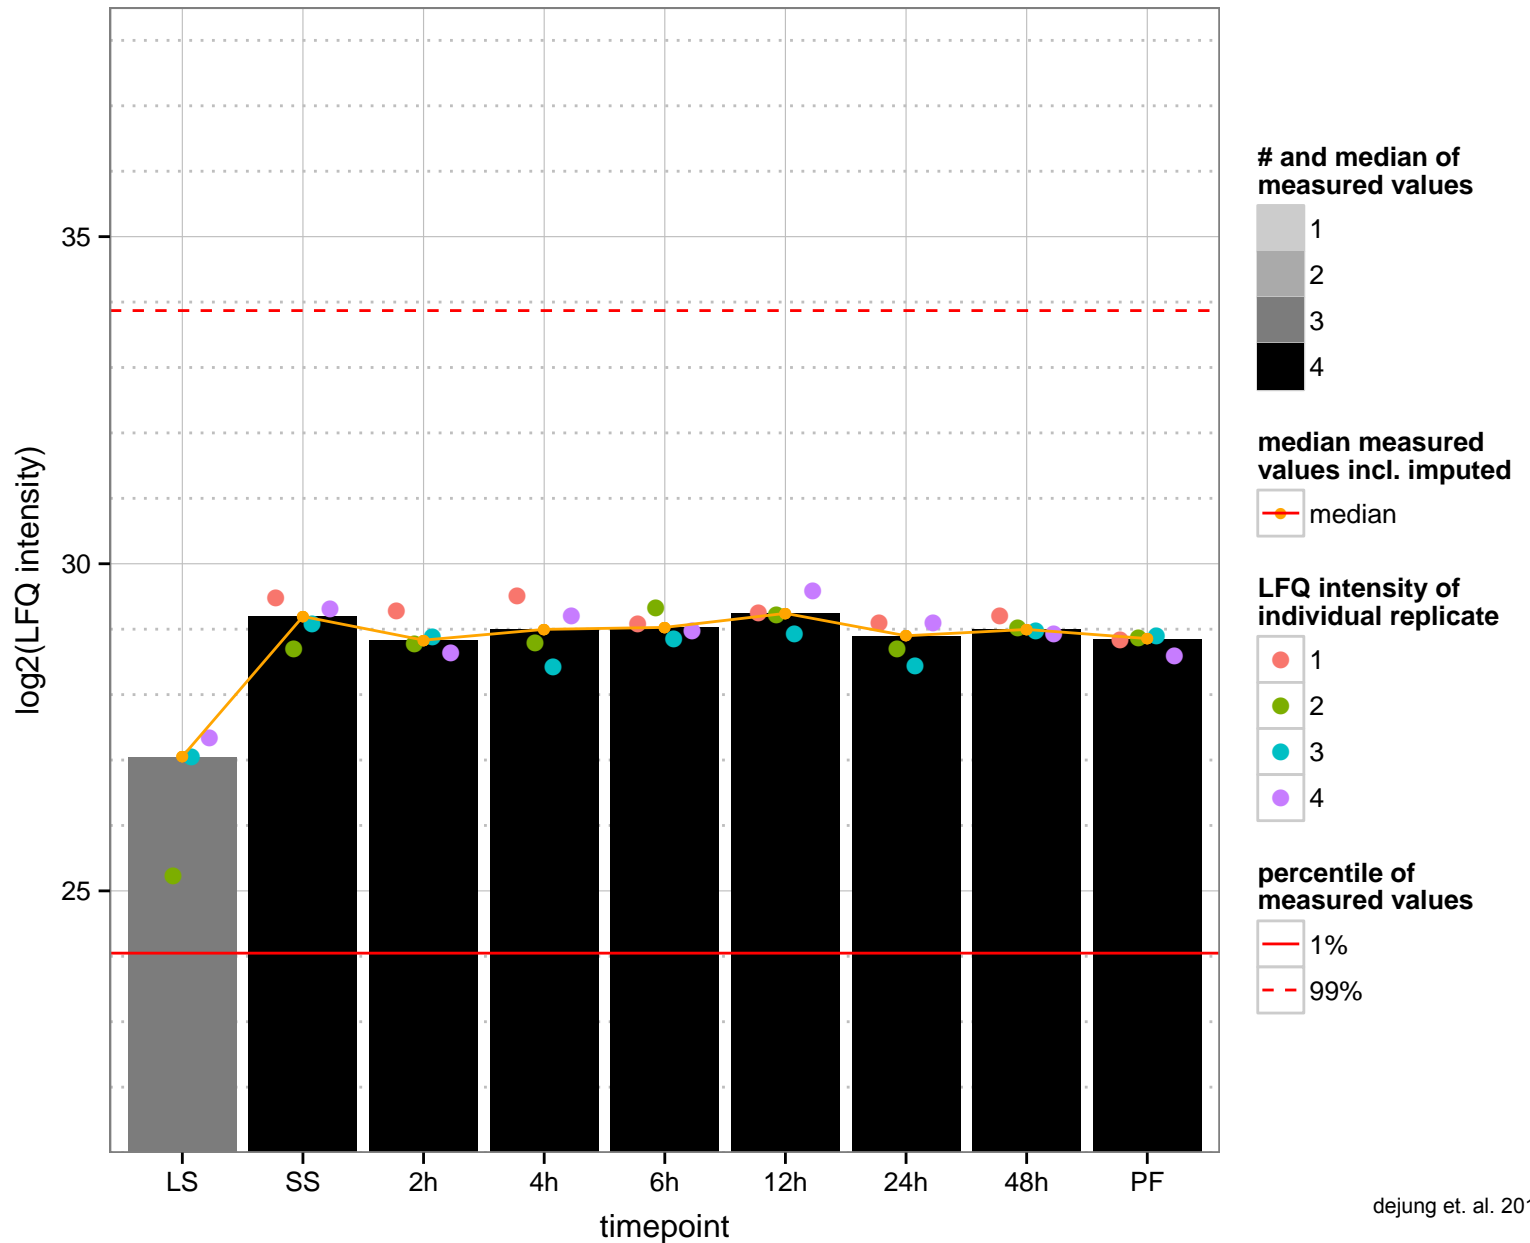

hypothetical protein, conserved  
 Tb927.3.2490  
 AGOF: null  
 AGOC: null  
 AGOP: null  
 PGOF: DNA binding  
 PGO: null  
 PGOP: null

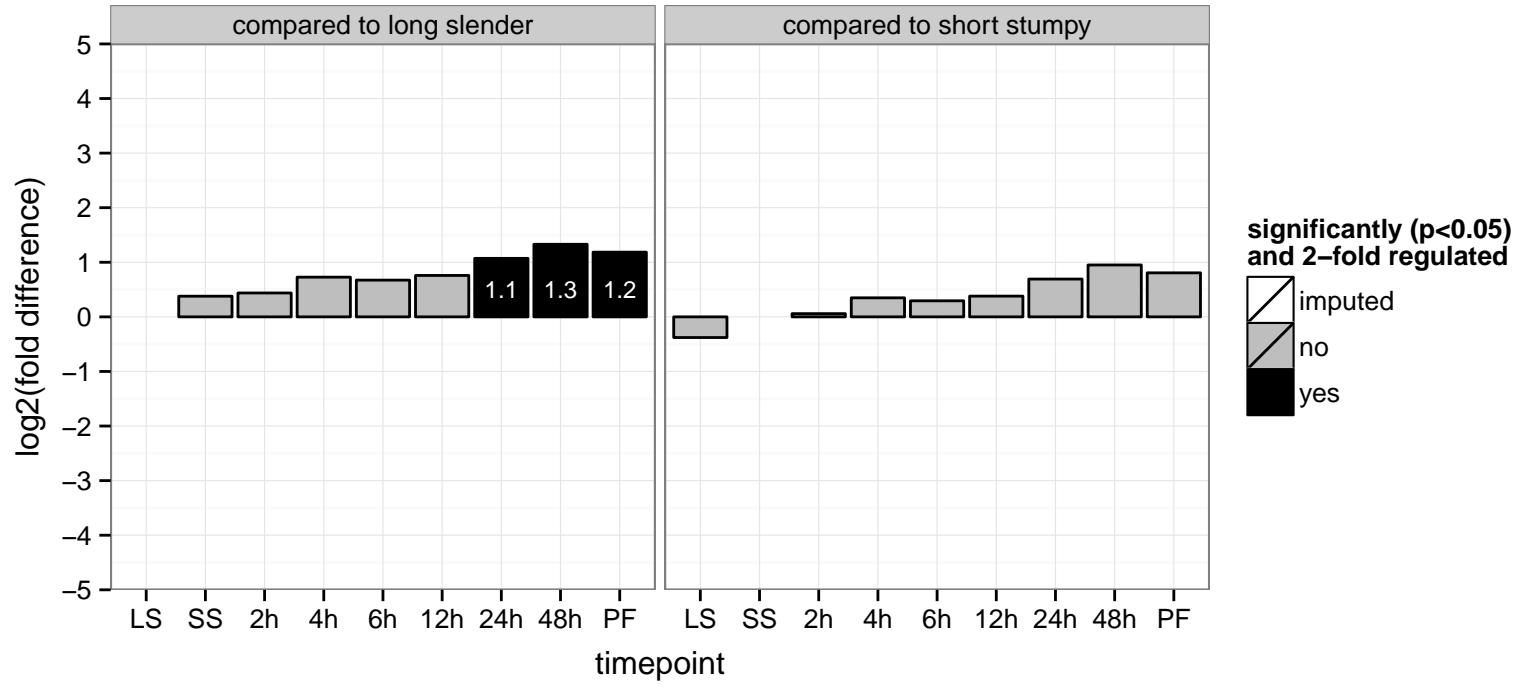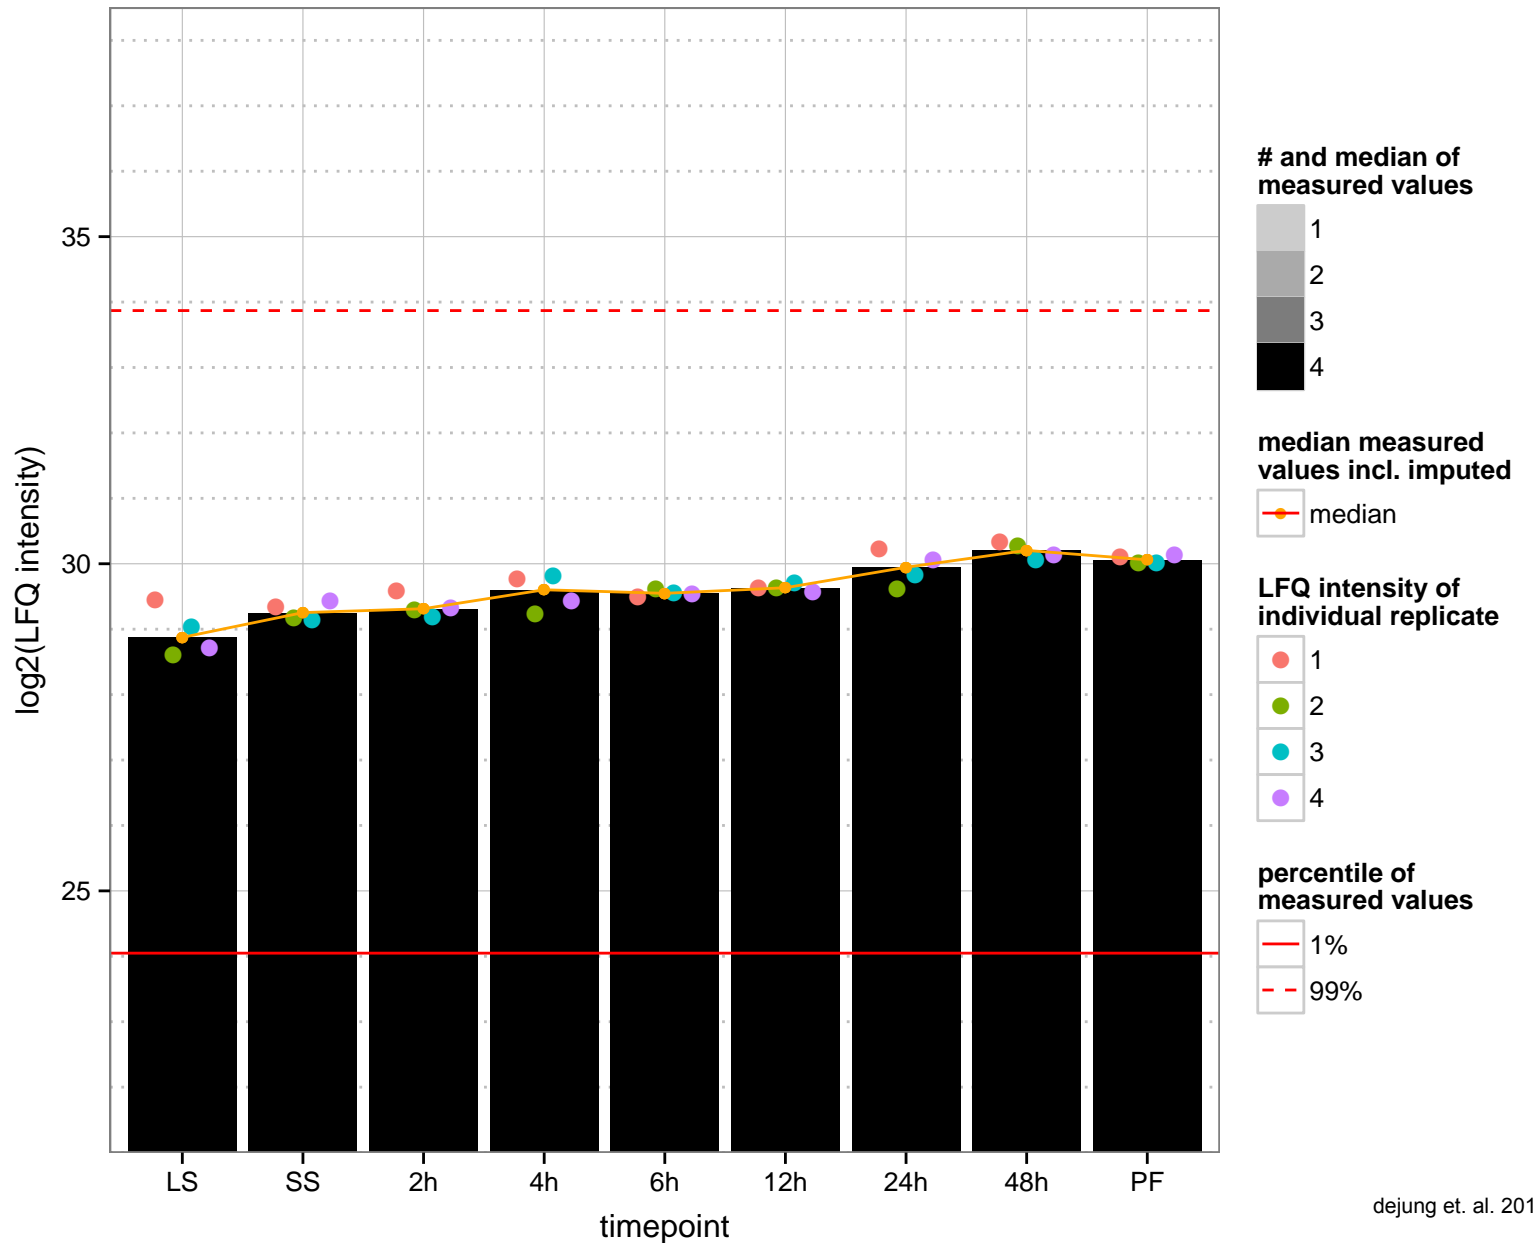

hypothetical protein, conserved  
 Tb927.3.2700  
 AGOF: null  
 AGOC: null  
 AGOP: null  
 PGO: null  
 PGOC: null  
 PGOP: null

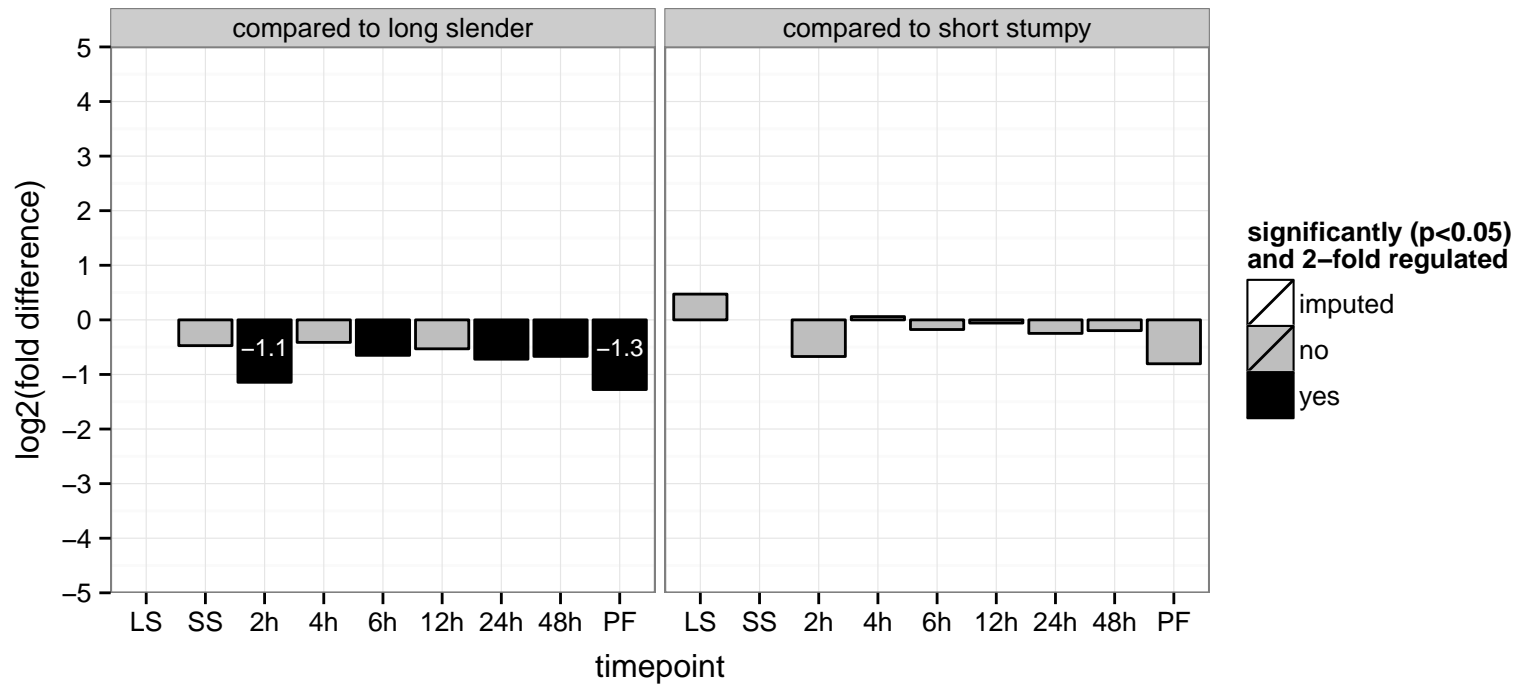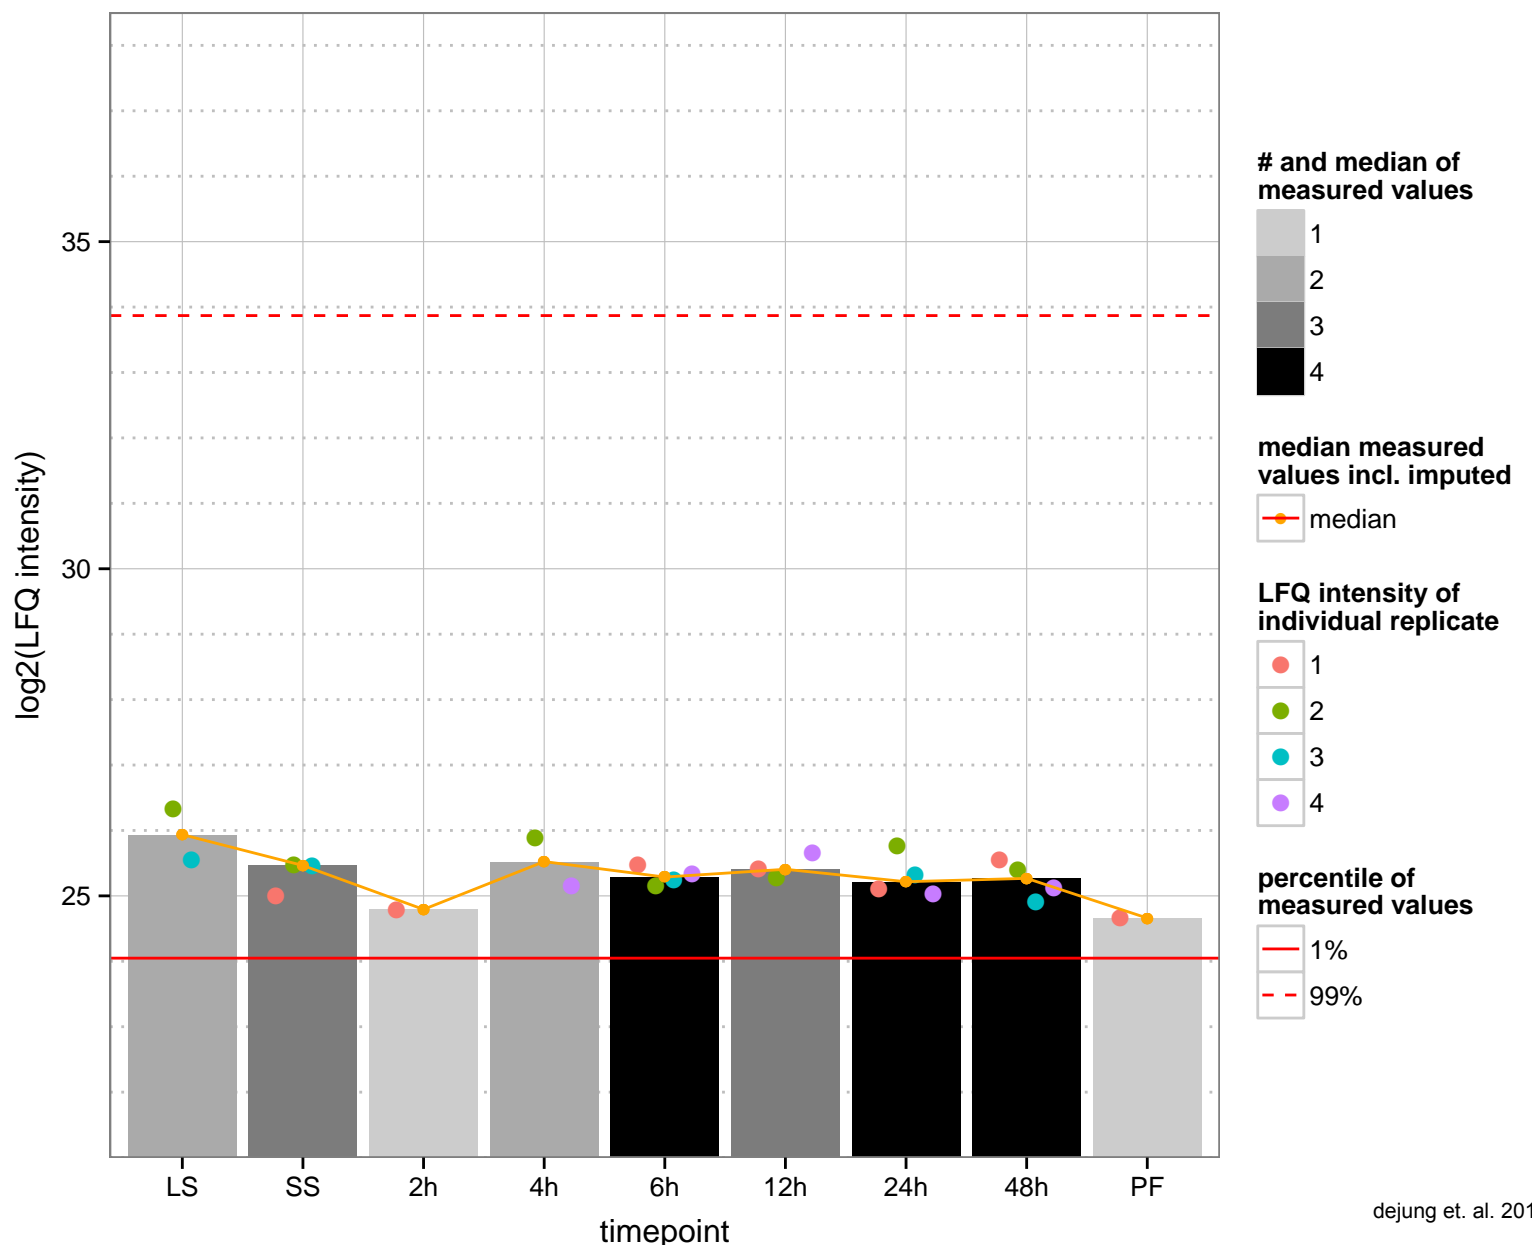



hypothetical protein, conserved  
 Tb927.3.2810  
 AGOF: null  
 AGOC: null  
 AGOP: null  
 PGO: null  
 PGOC: null  
 PGOP: null

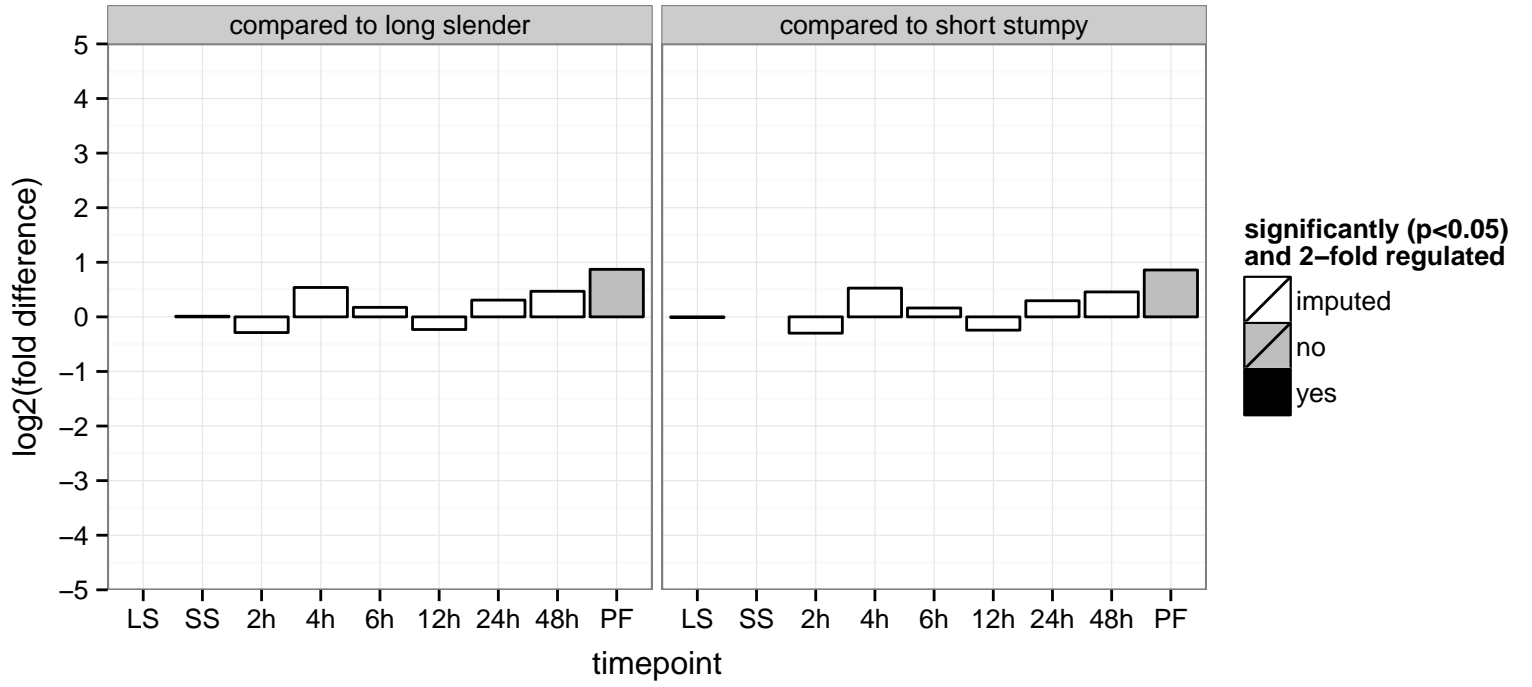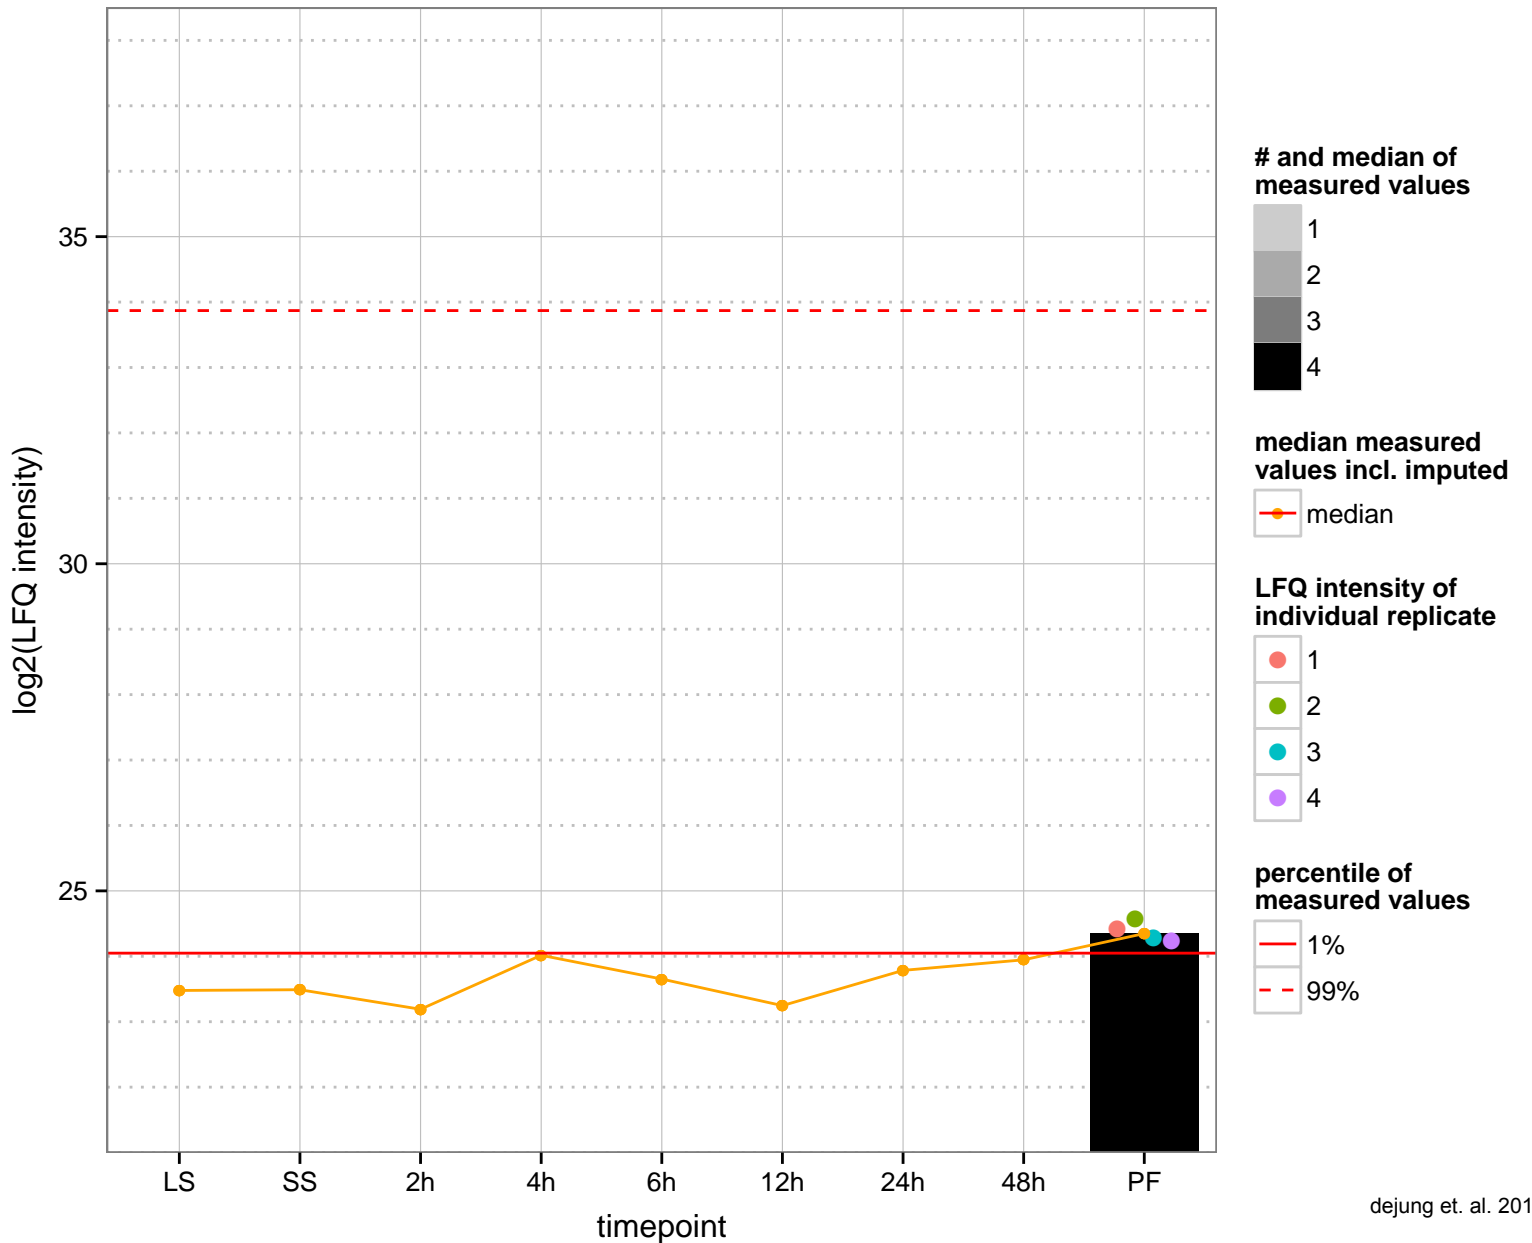

hypothetical protein, conserved  
 Tb927.3.2830  
 AGOF: null  
 AGOC: null  
 AGOP: null  
 PGO: null  
 PGOC: null  
 PGOP: null

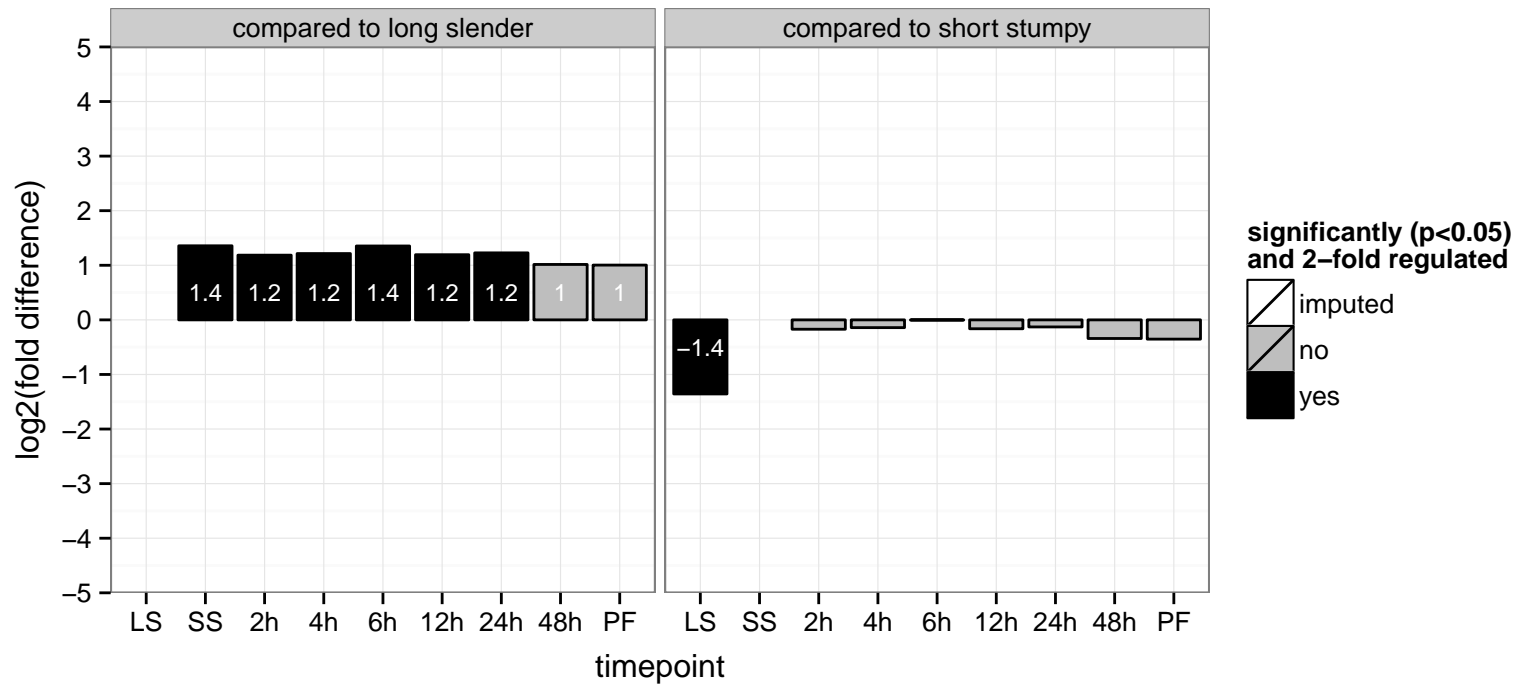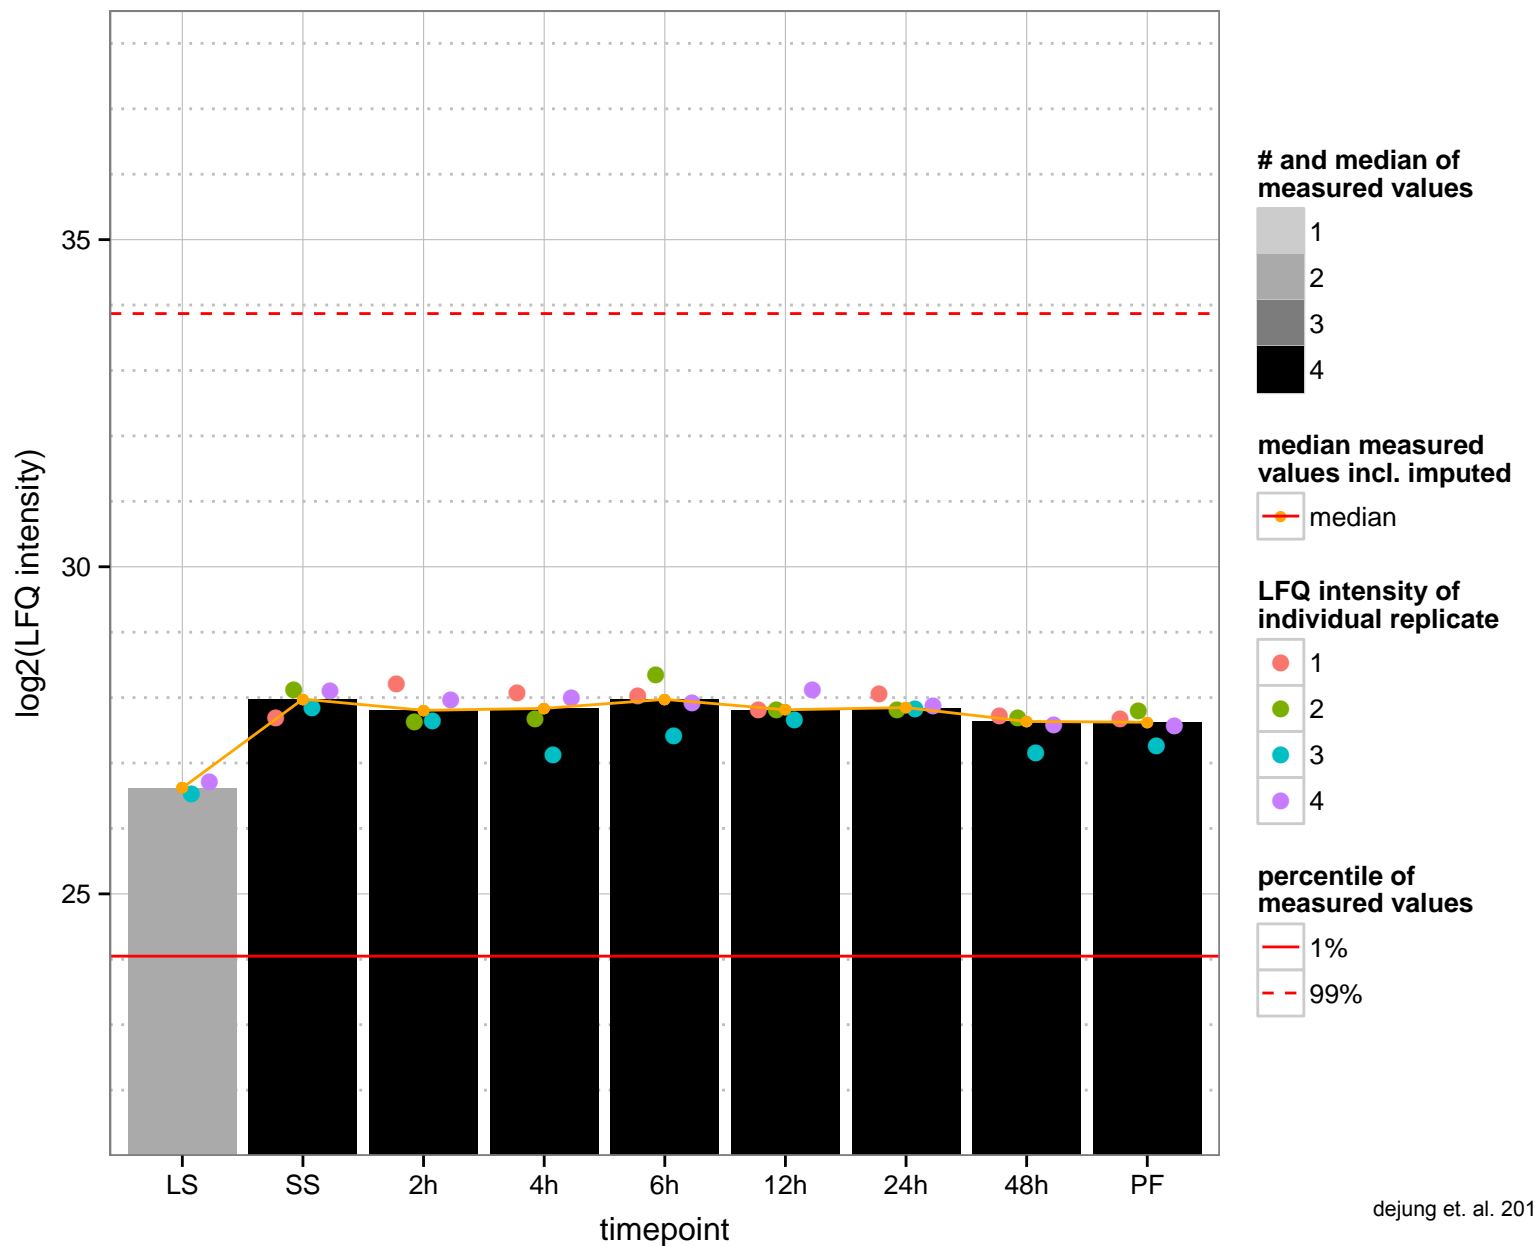

inorganic pyrophosphatase, putative  
 Tb927.3.2840  
 AGOF: inorganic diphosphatase activity, magnesium ion binding  
 AGOC: cytoplasm  
 AGOP: phosphate-containing compound metabolic process  
 PGOF: inorganic diphosphatase activity, magnesium ion binding  
 PGO: cytoplasm  
 PGO: phosphate-containing compound metabolic process

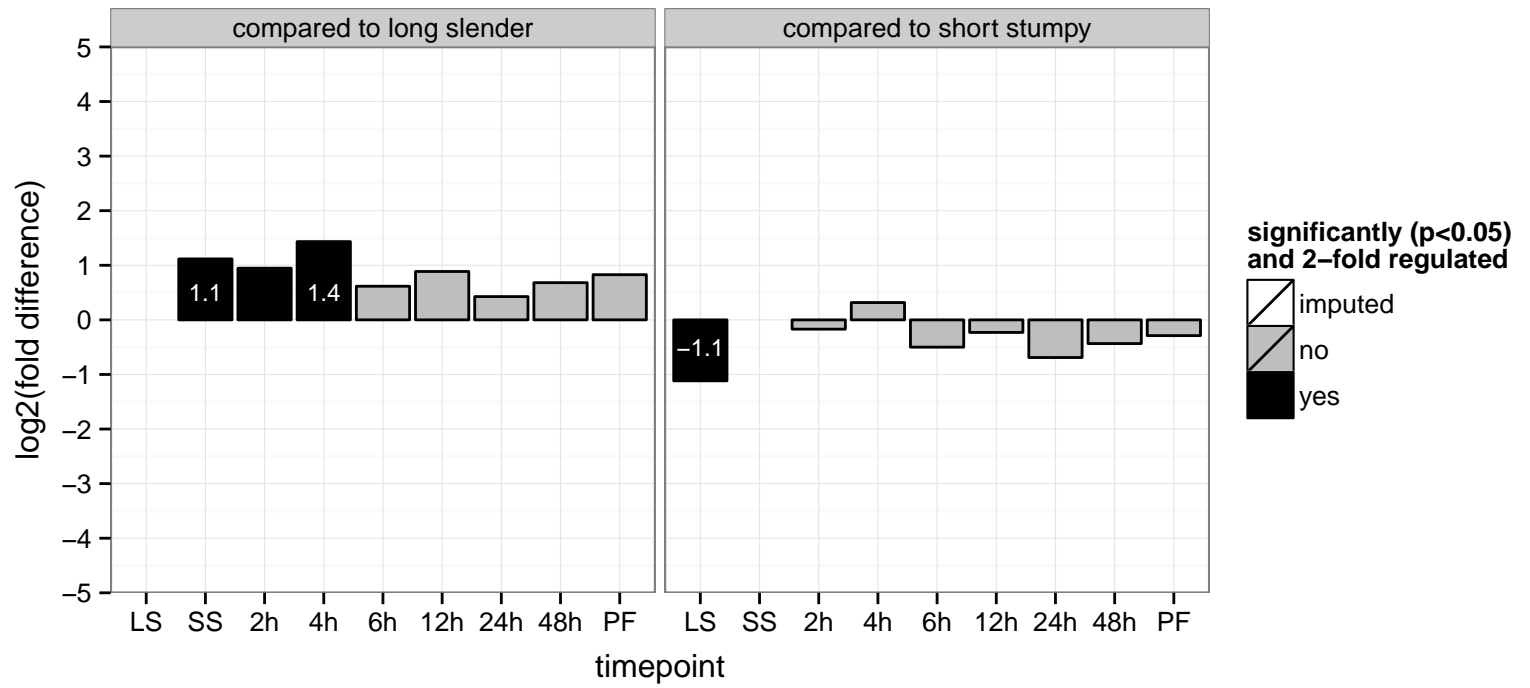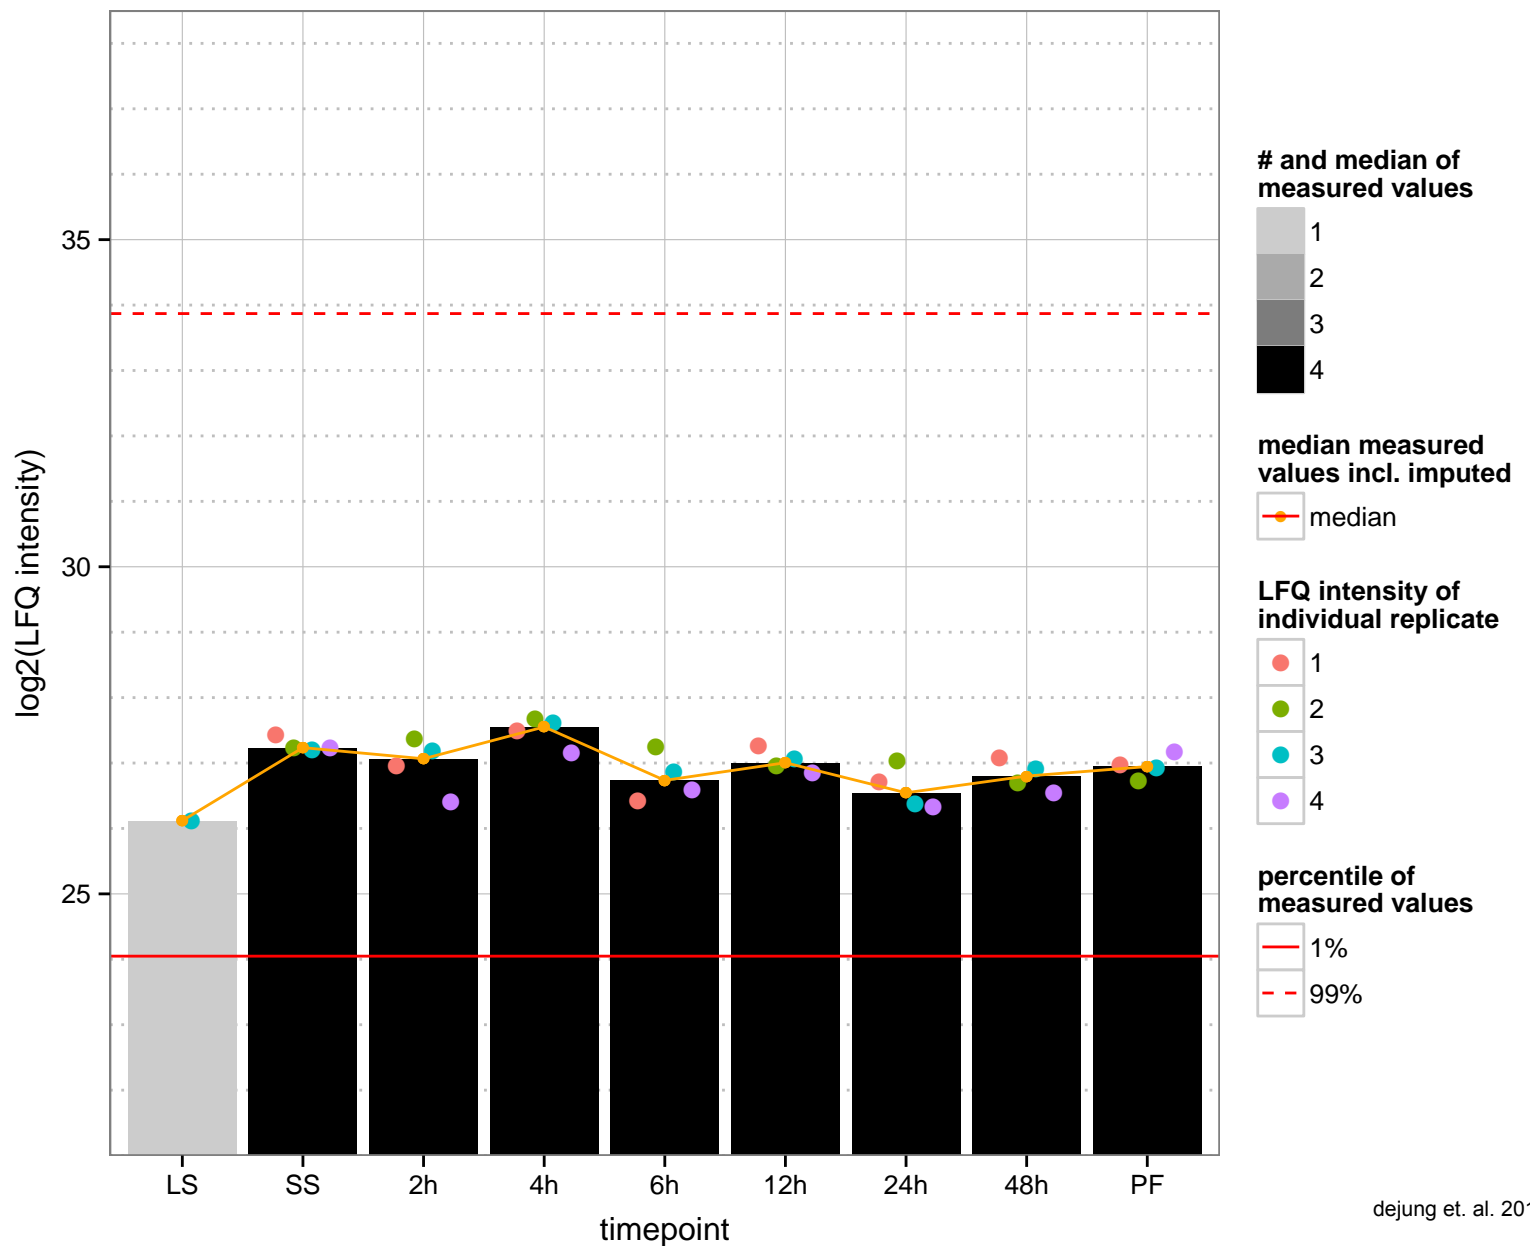

radial spoke protein RSP10, putative  
 Tb927.3.2890  
 AGOF: null  
 AGOC: null  
 AGOP: null  
 PGO: null  
 PGOC: null  
 PGOP: null

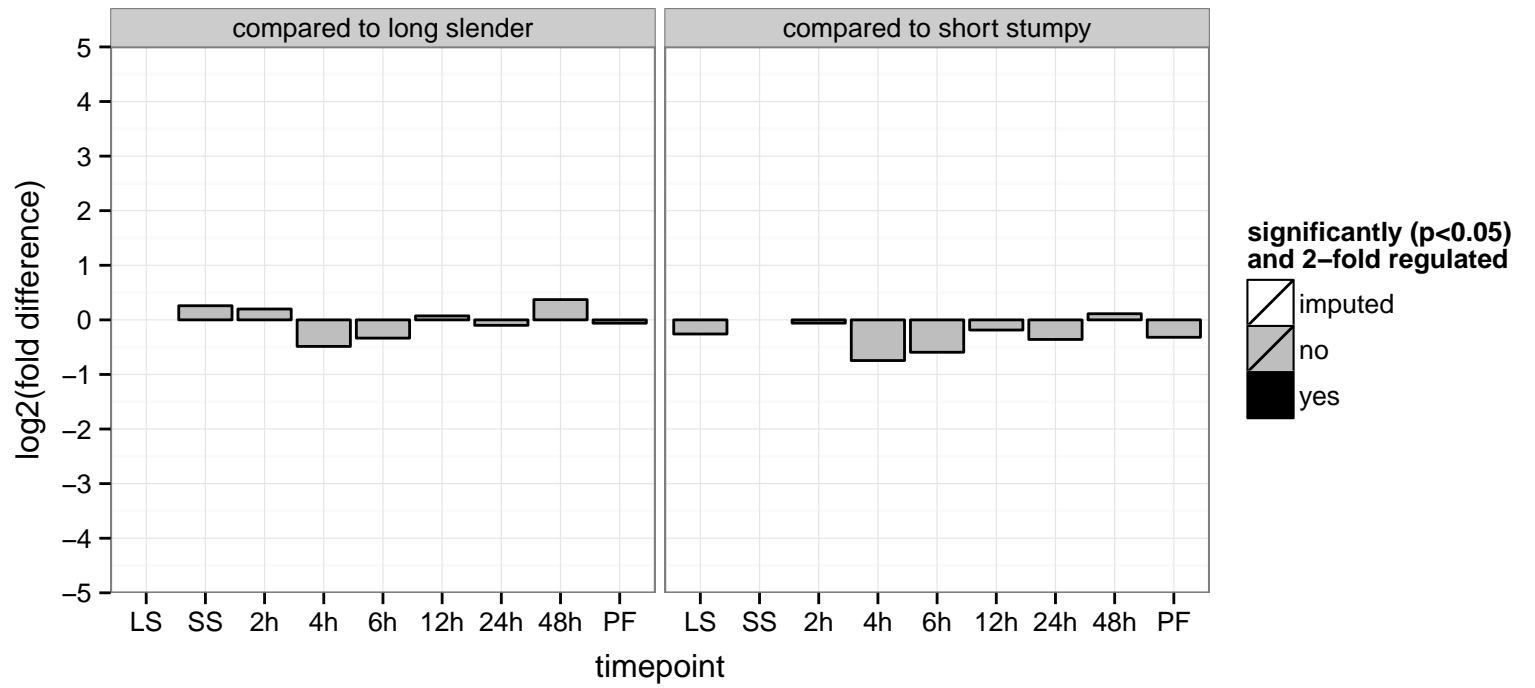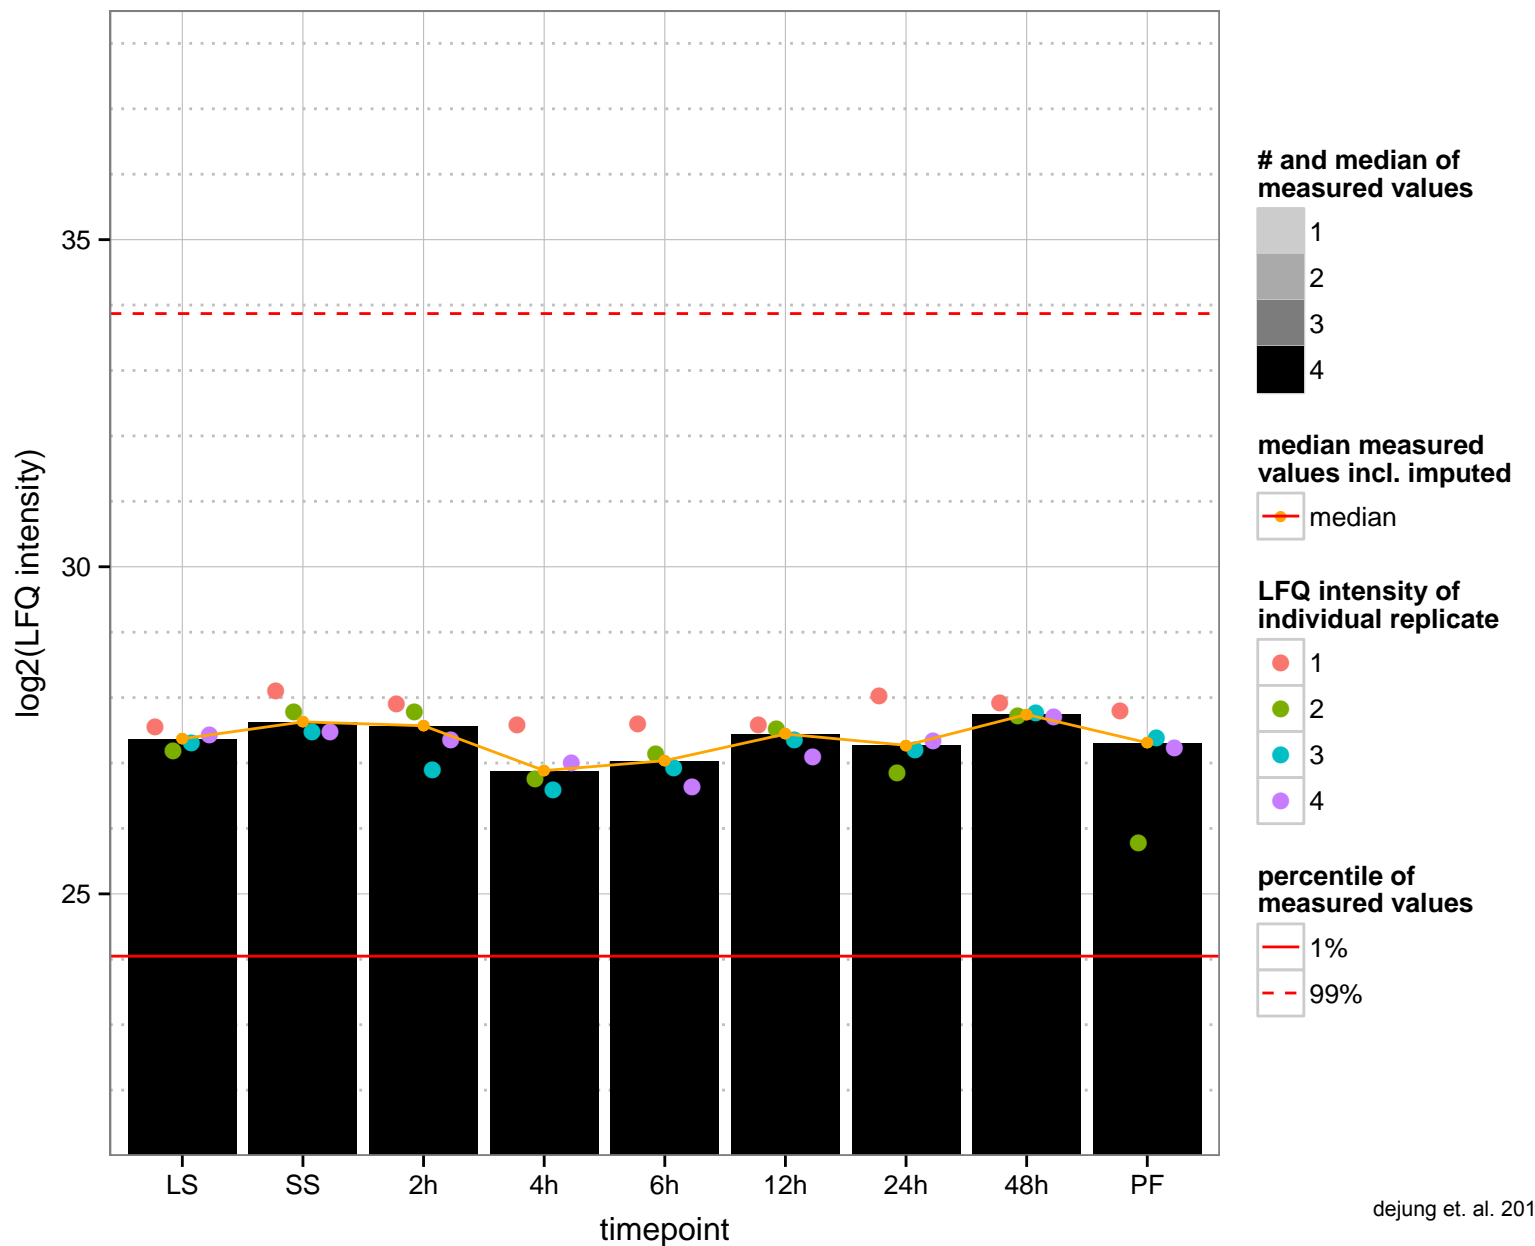

ribonuclease inhibitor– like protein, leucine–rich repeat protein (LRRP), putative  
 Tb927.3.2950  
 AGOF: null  
 AGOC: null  
 AGOP: null  
 PGO: null  
 PGO: null  
 PGO: null

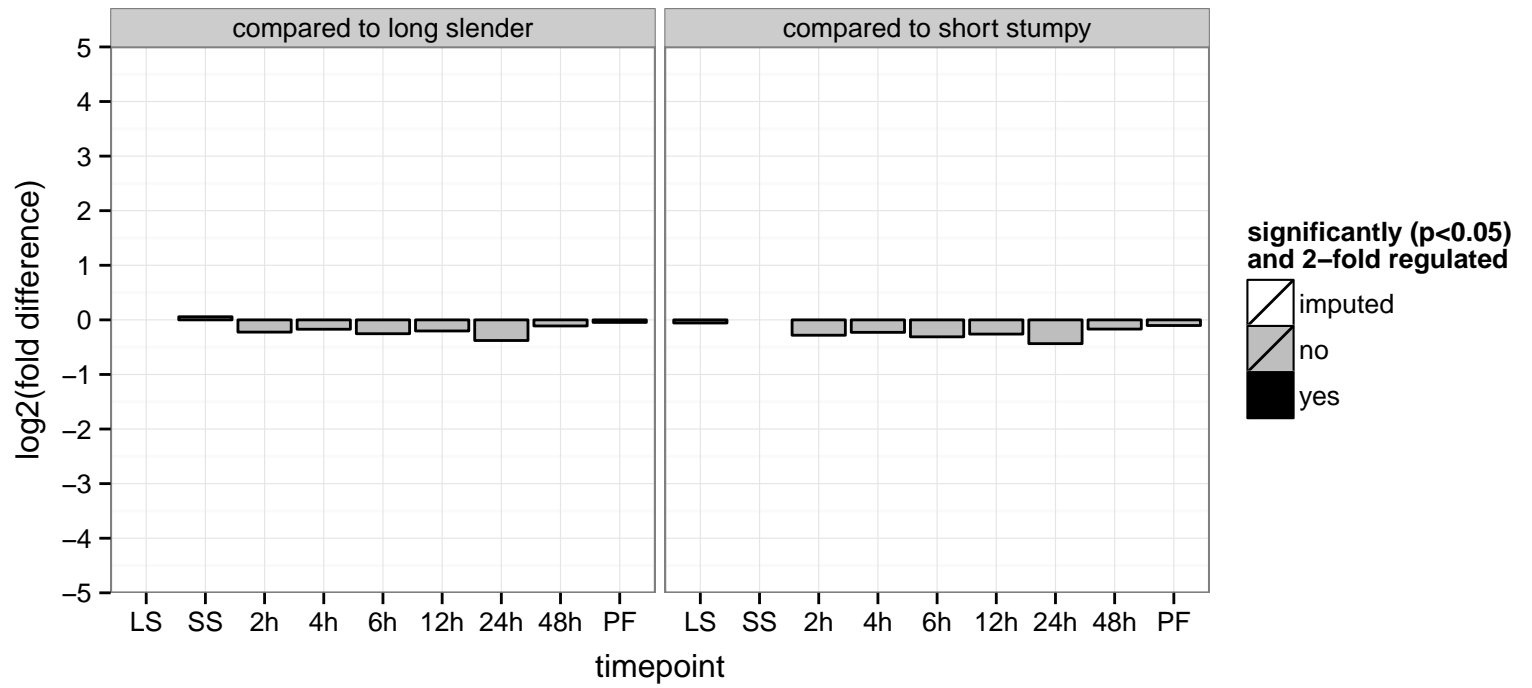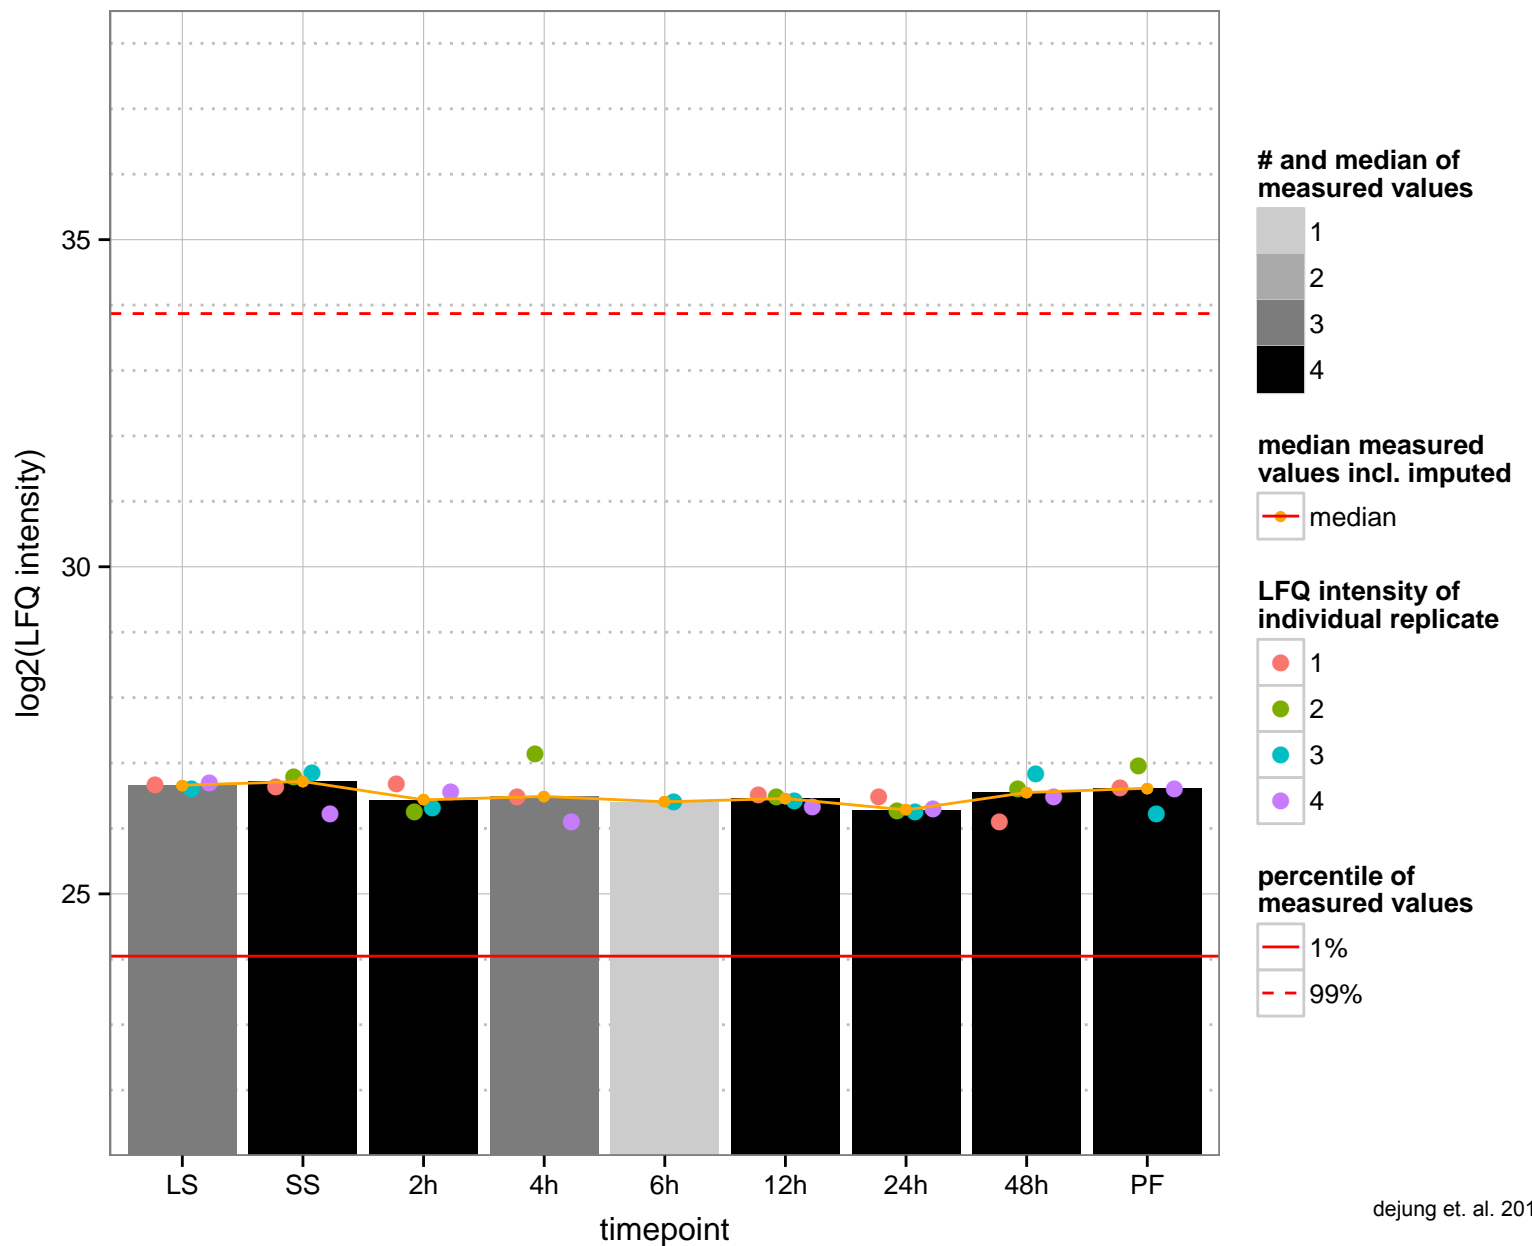

inosine–adenosine–guanosine–nucleosidehydrolase, IAG–nucleoside hydrolase (IAGNH)  
 Tb927.3.2960  
 AGOF: hydrolase activity, acting on carbon–nitrogen (but not peptide) bonds  
 AGOC: cytosol  
 AGOP: purine ribonucleoside salvage  
 PGO: null  
 PGOC: null  
 PGOP: null

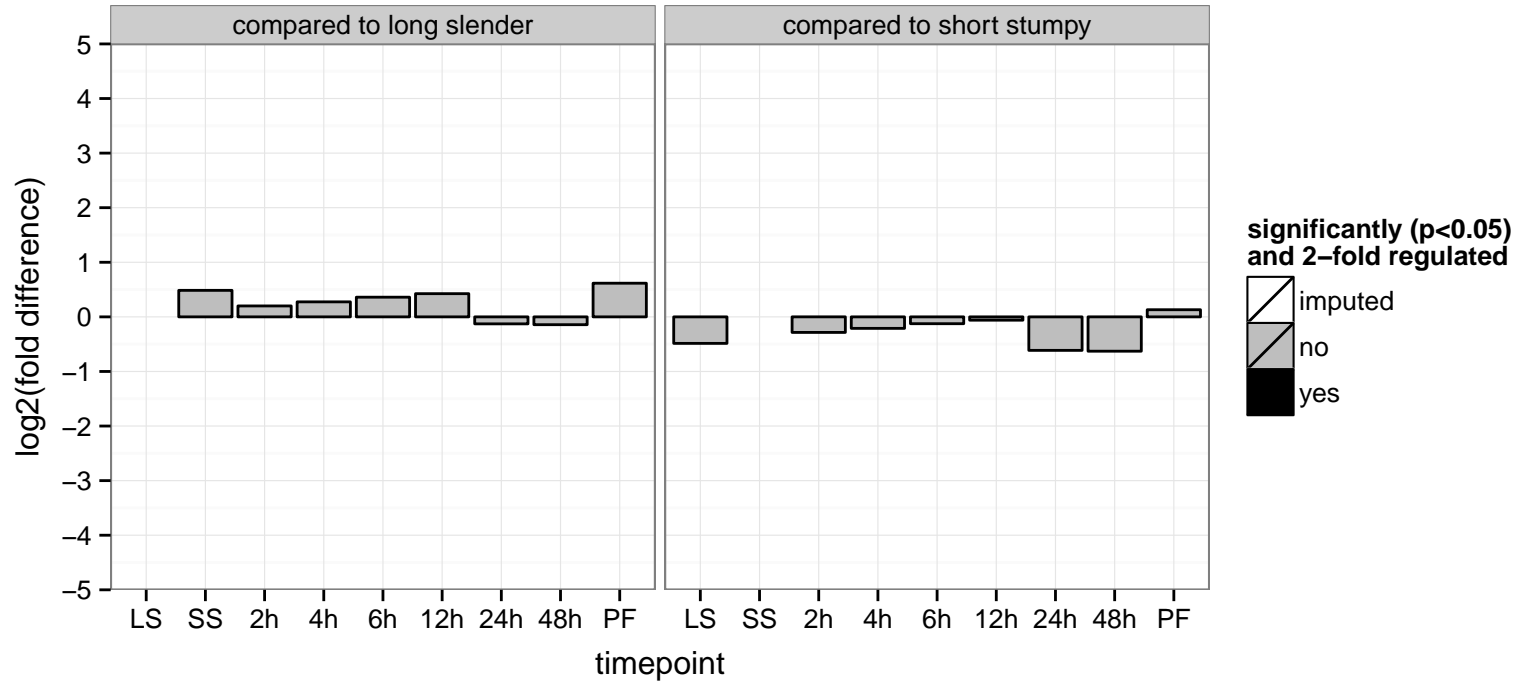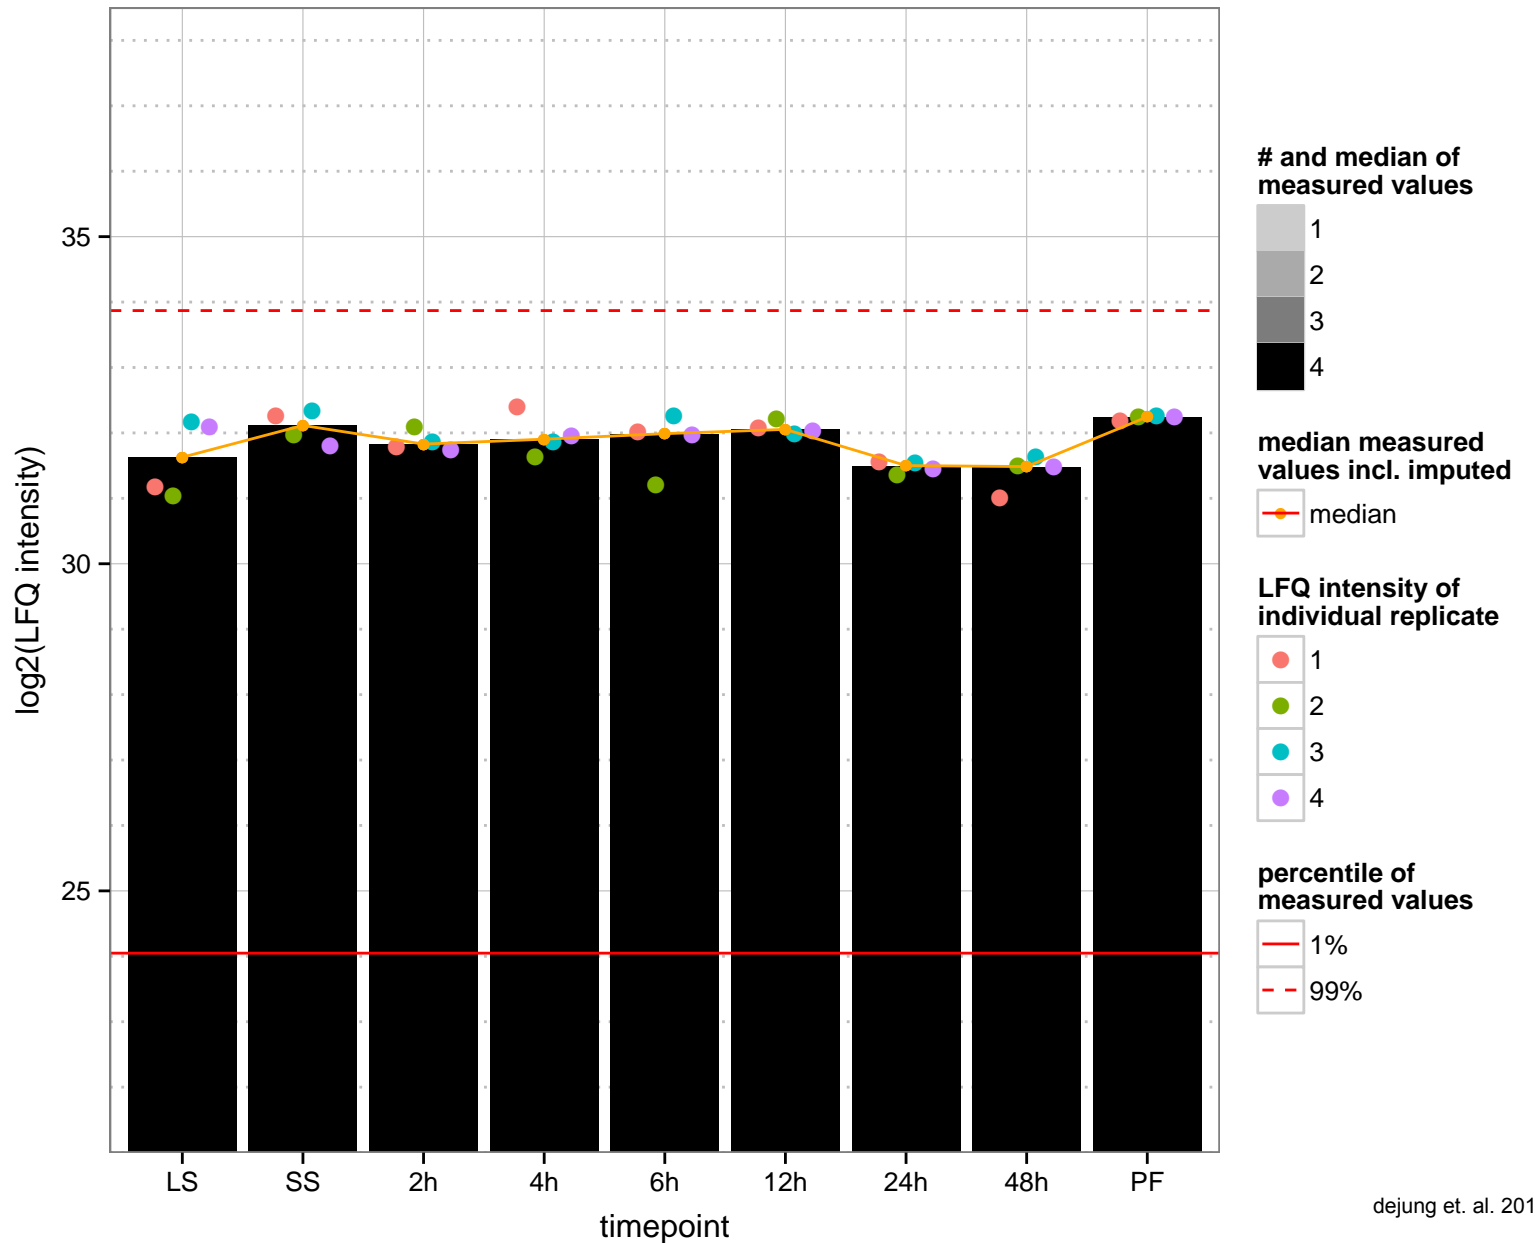

mitochondrial carrier protein (MCP17)

Tb927.3.2980

AGOF: null

AGOC: mitochondrial inner membrane, mitochondrial membrane, mitochondrial part

AGOP: transport

PGOF: null

PGOC: null

PGOP: null

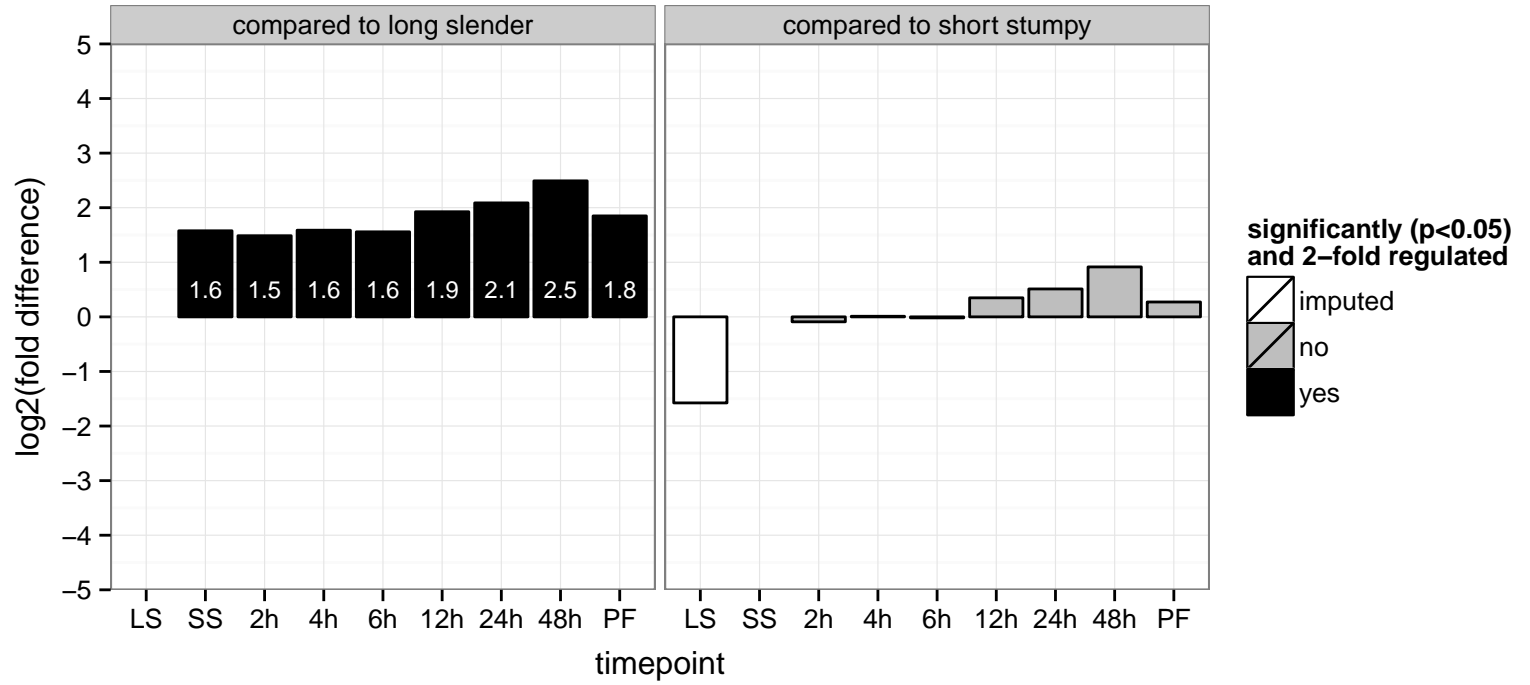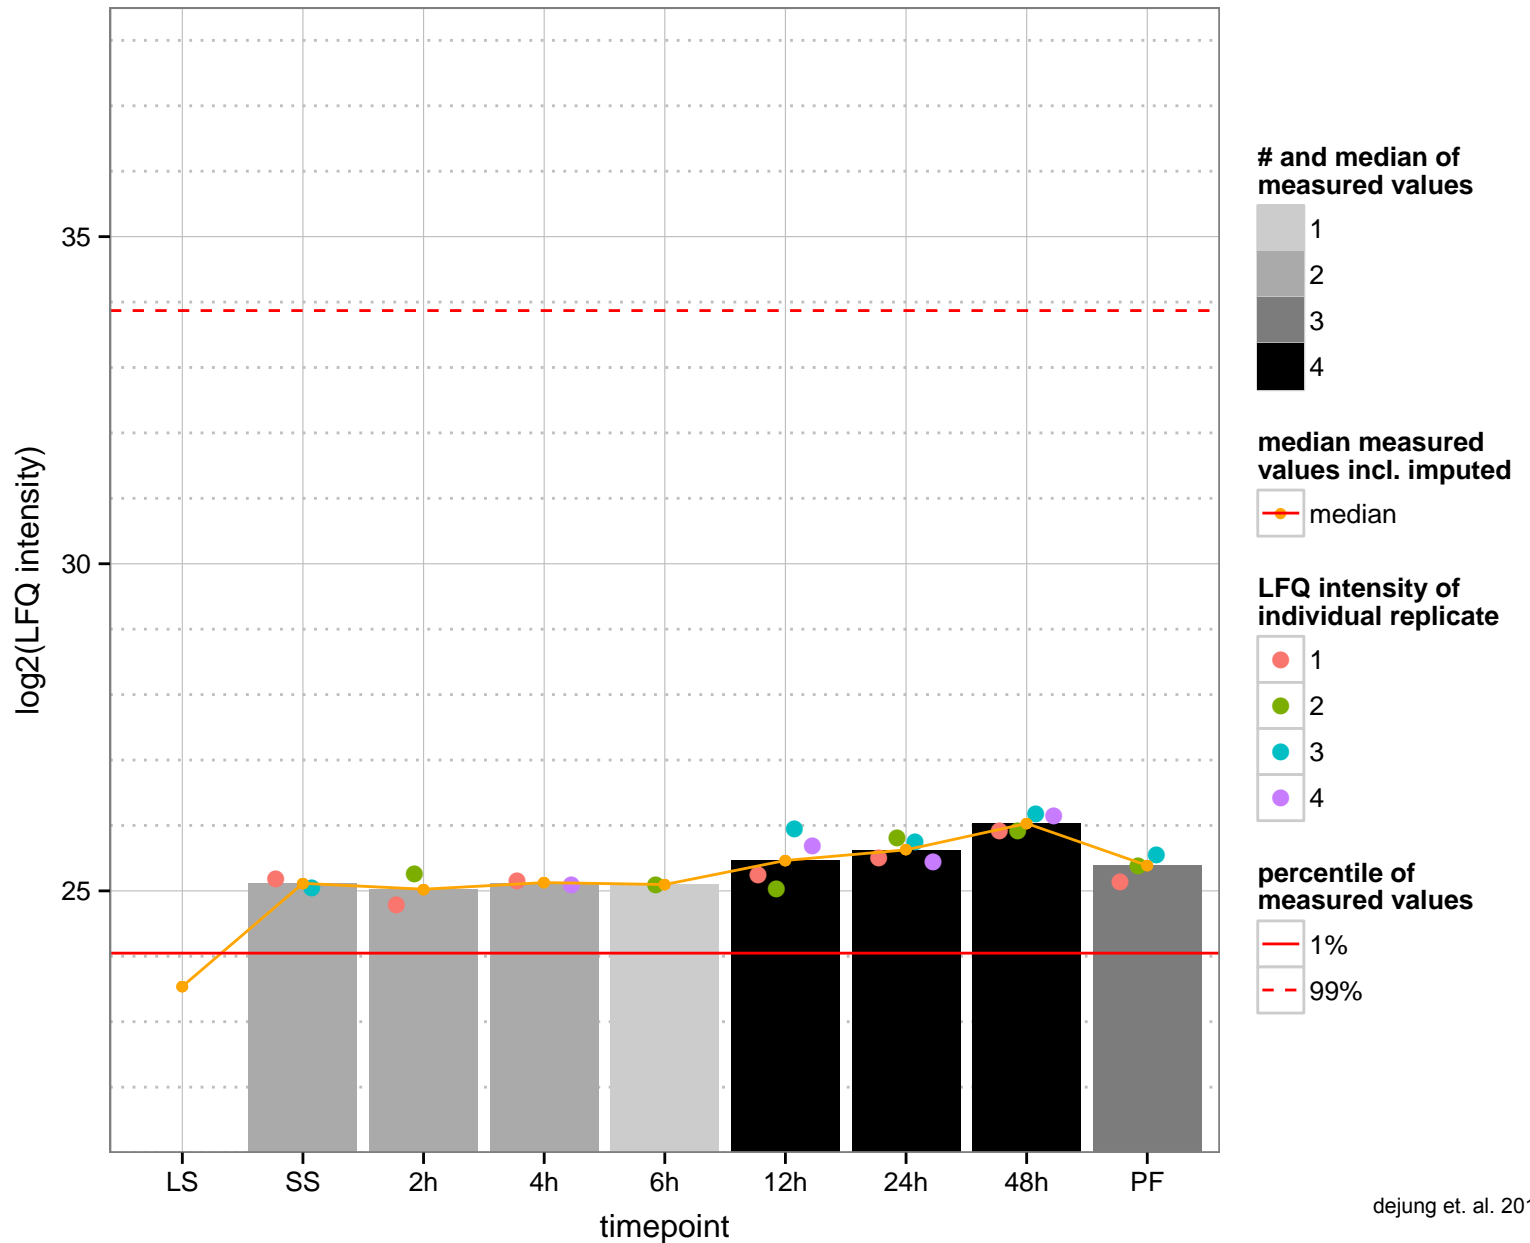

hypothetical protein, conserved  
 Tb927.3.3040  
 AGOF: null  
 AGOC: null  
 AGOP: null  
 PGO: null  
 PGOC: null  
 PGOP: null

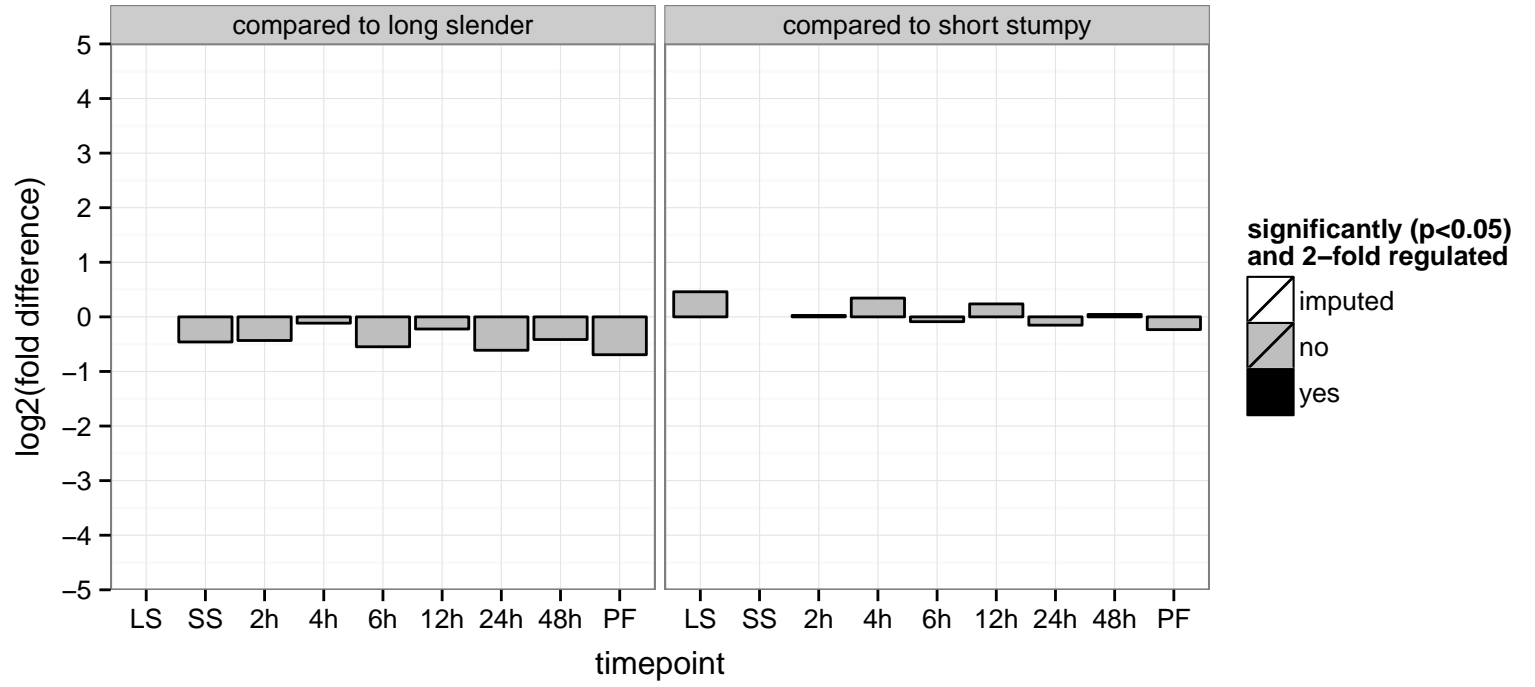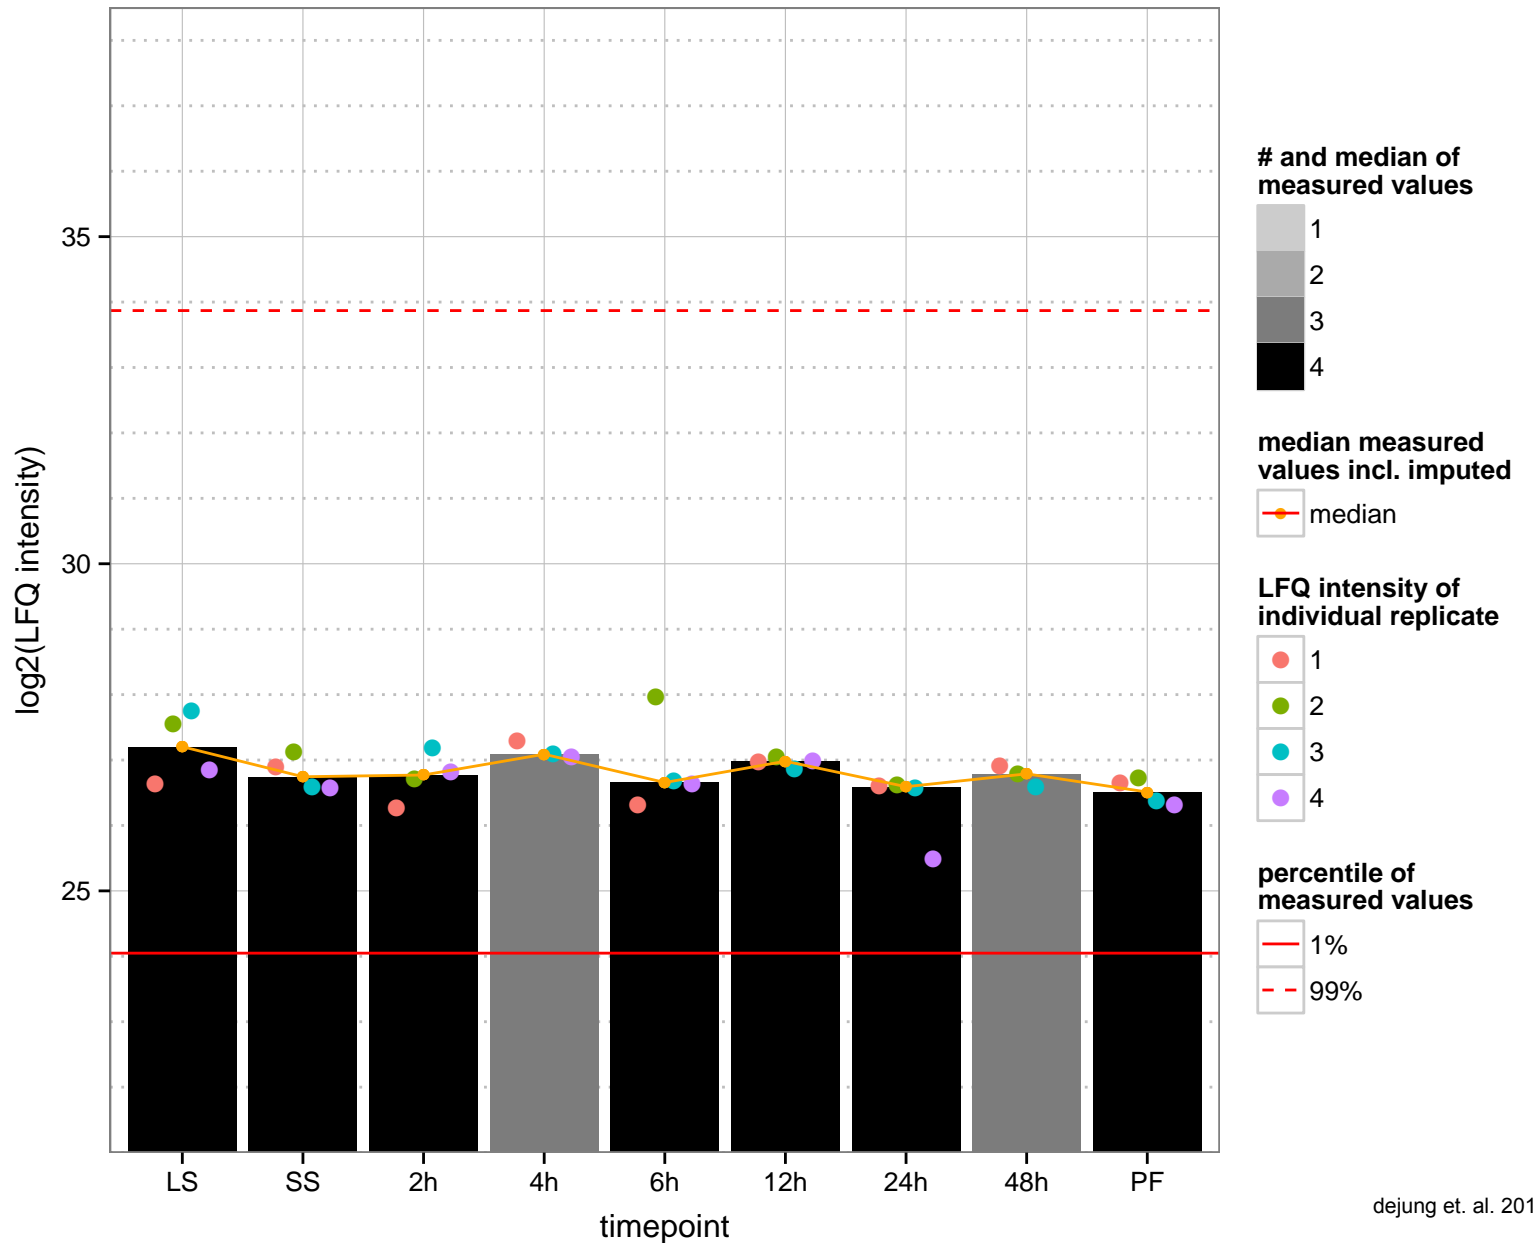



hypothetical protein, conserved  
 Tb927.3.3120  
 AGOF: null  
 AGOC: null  
 AGOP: null  
 PGO: binding  
 PGO: null  
 PGO: null

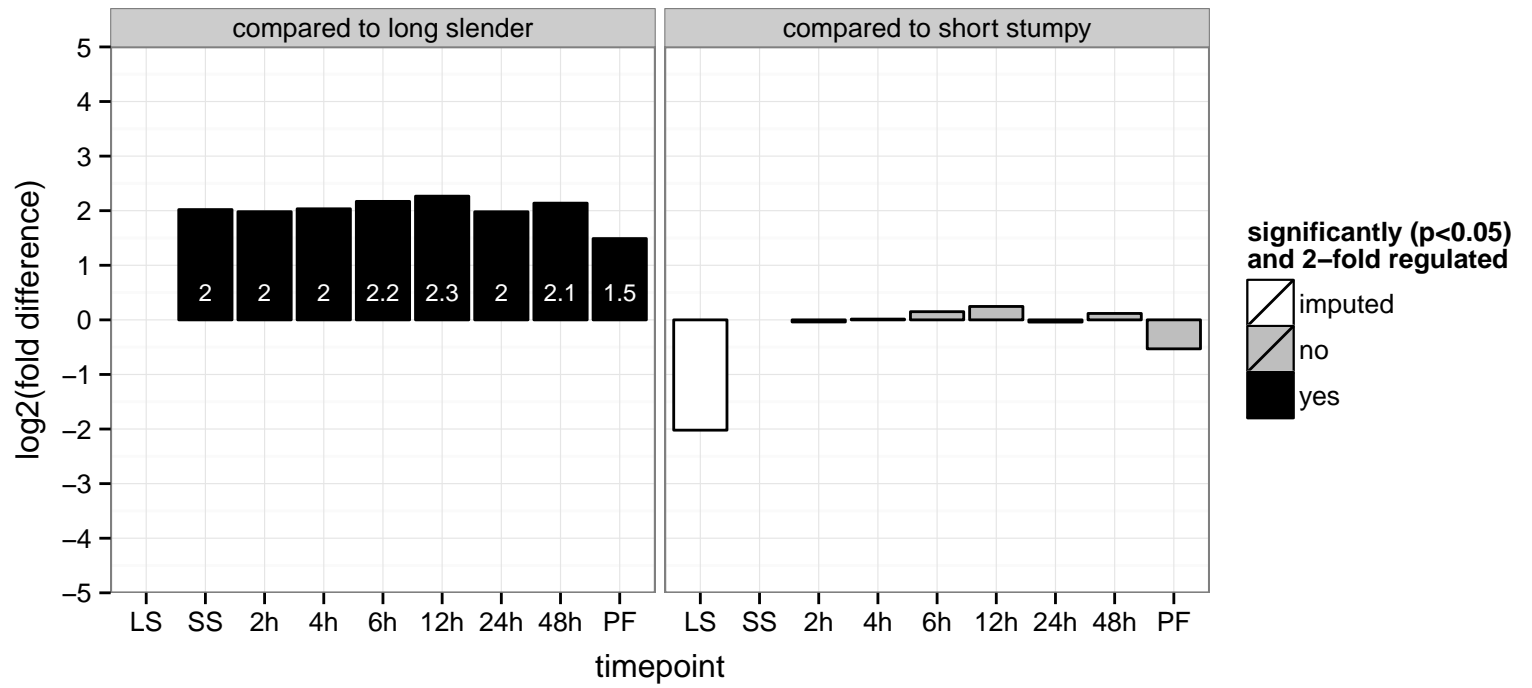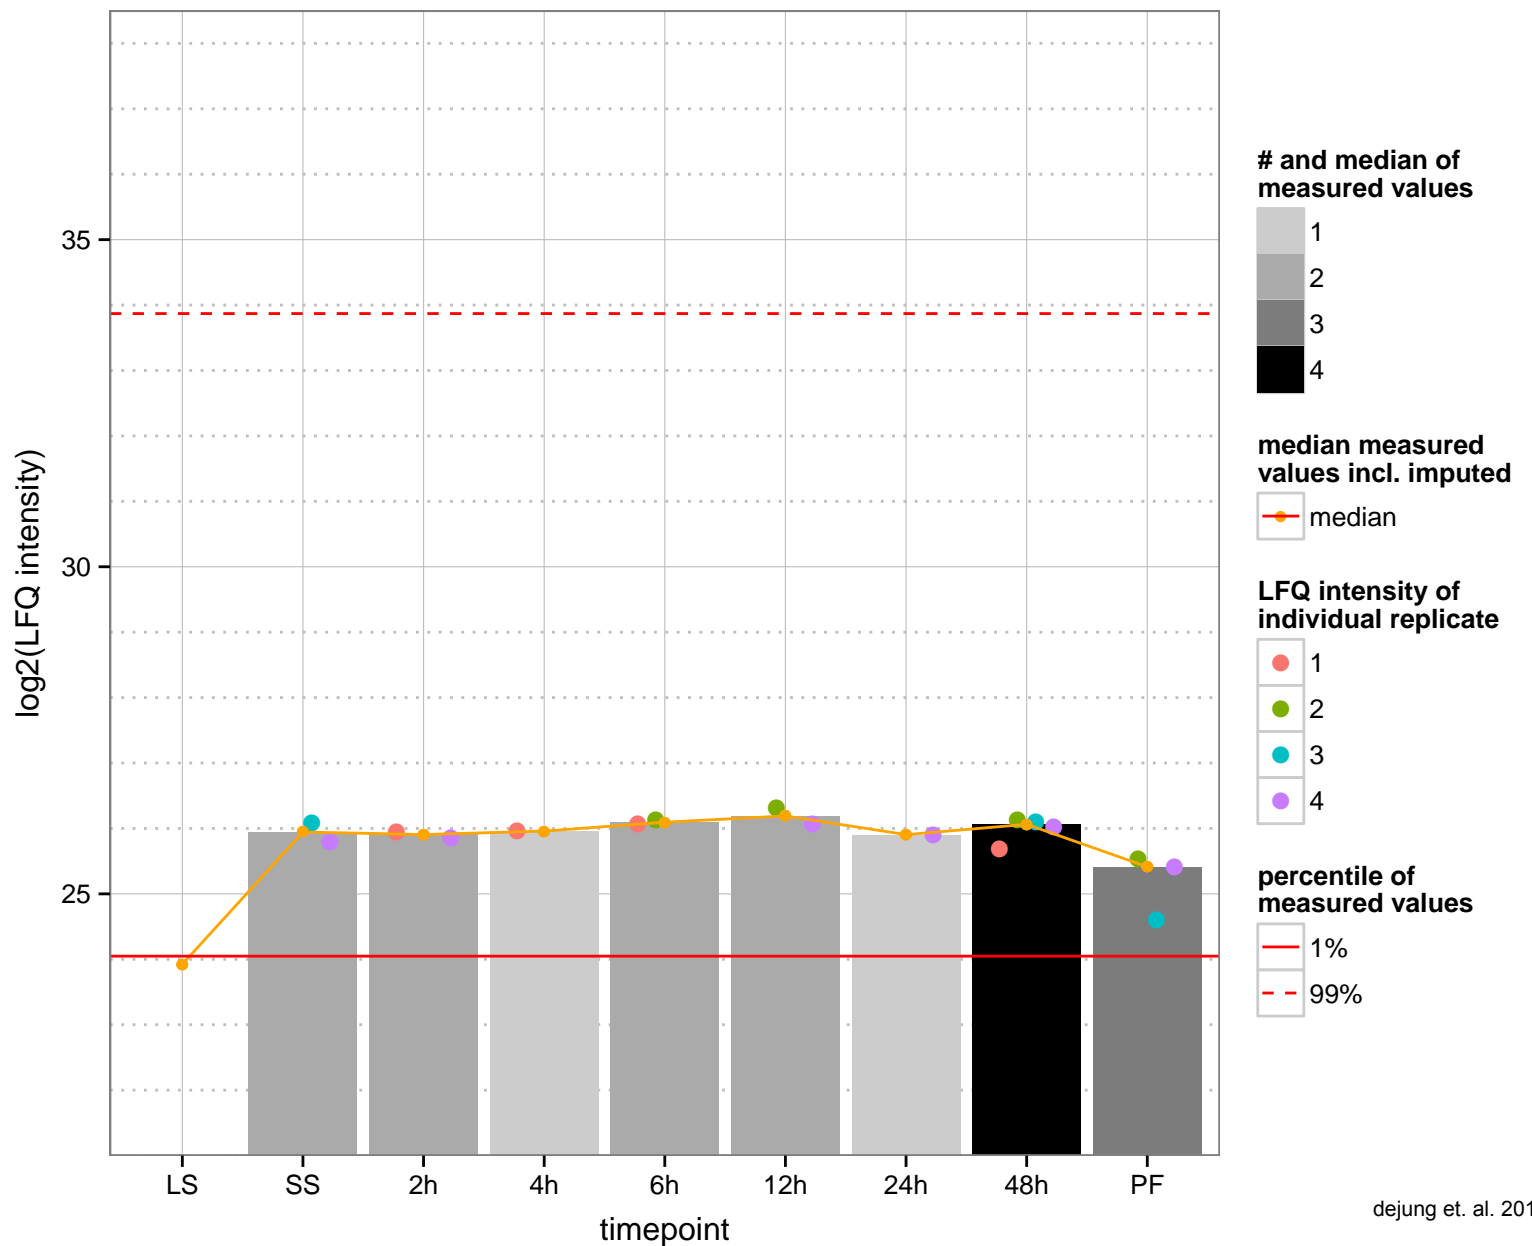

poly(A) polymerase, polynucleotide adenylyltransferase (PAP)

Tb927.3.3160

AGOF: RNA binding, nucleic acid binding, nucleotidyltransferase activity, polynucleotide adenylyltransferase activity

AGOC: null

AGOP: RNA 3'-end processing, transcription, DNA-dependent

PGOF: RNA binding, nucleotidyltransferase activity, polynucleotide adenylyltransferase activity

PGOC: nucleus

PGOP: RNA 3'-end processing, RNA polyadenylation, transcription, DNA-dependent

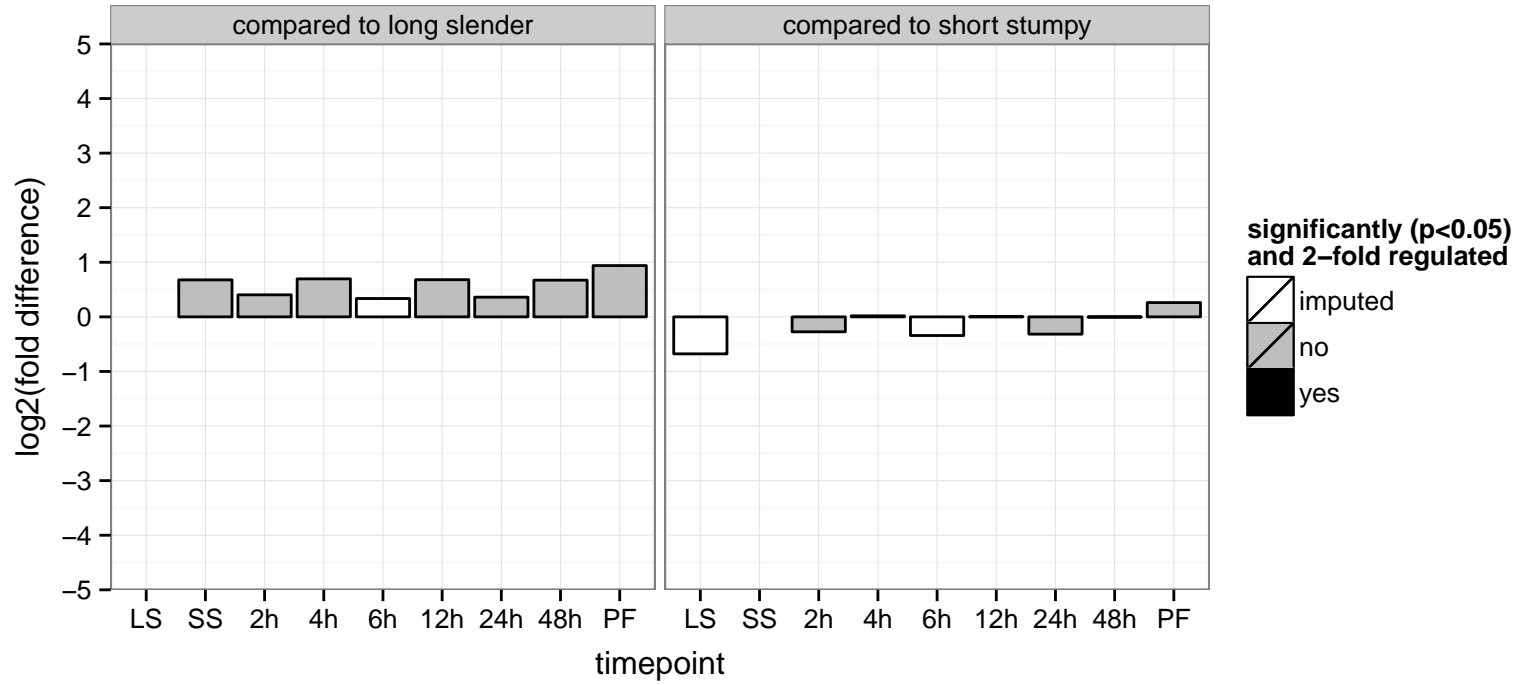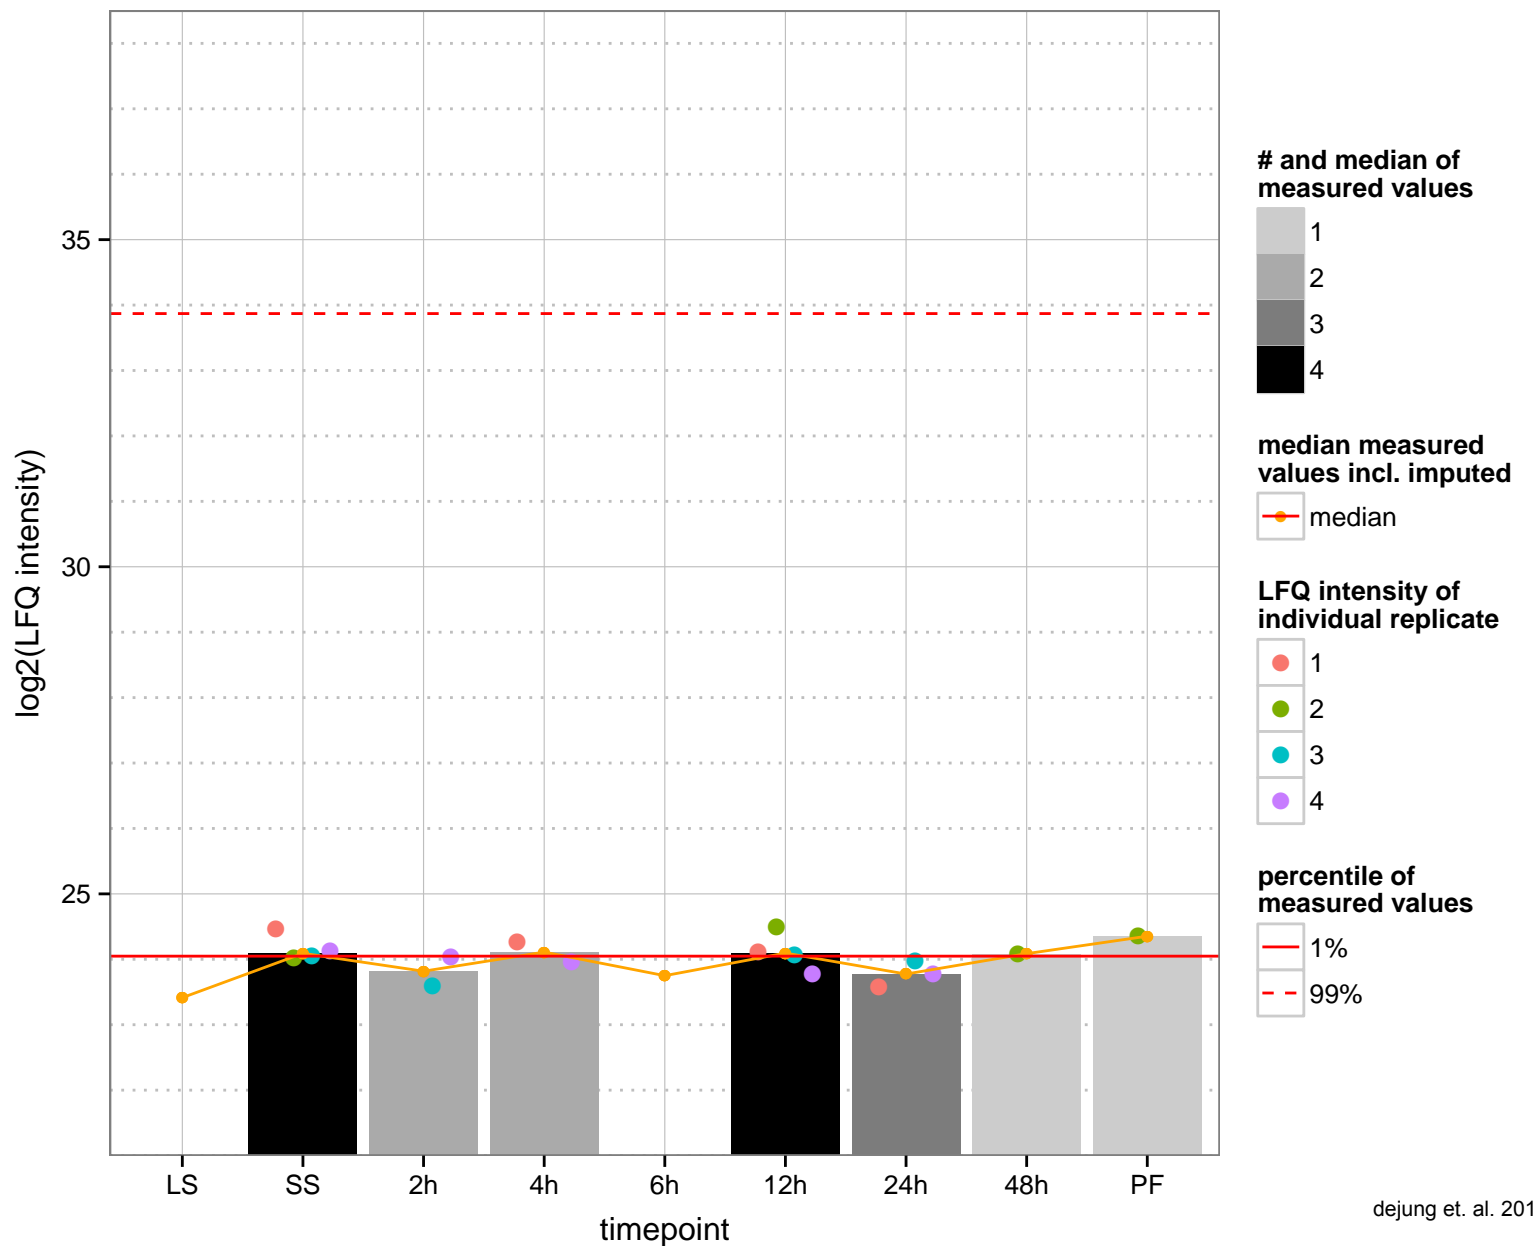

hypothetical protein, conserved, Nucleoporin (TbNup98)  
 Tb927.3.3180;Tb11.v5.0584  
 AGOF: null  
 AGOC: null, nuclear pore  
 AGOP: null  
 PGO: null  
 PGOC: null  
 PGOP: null

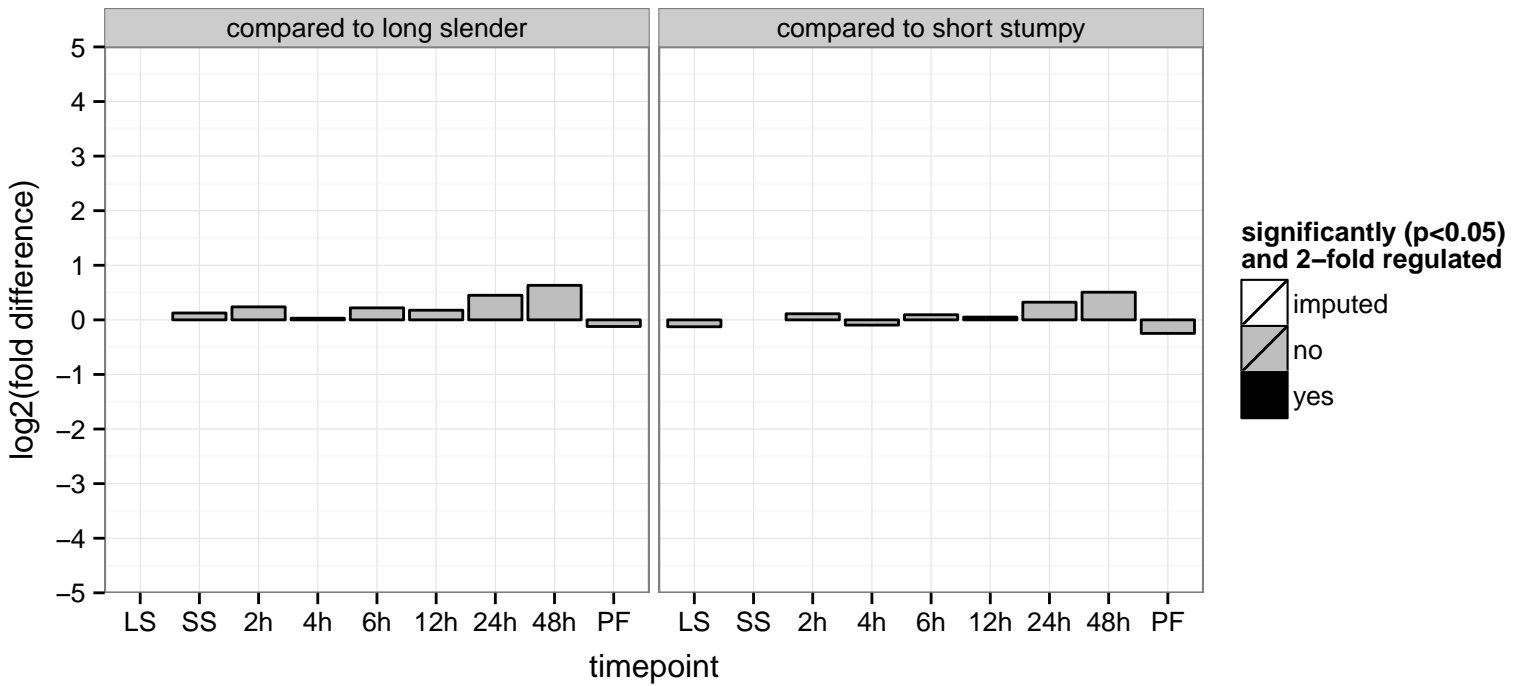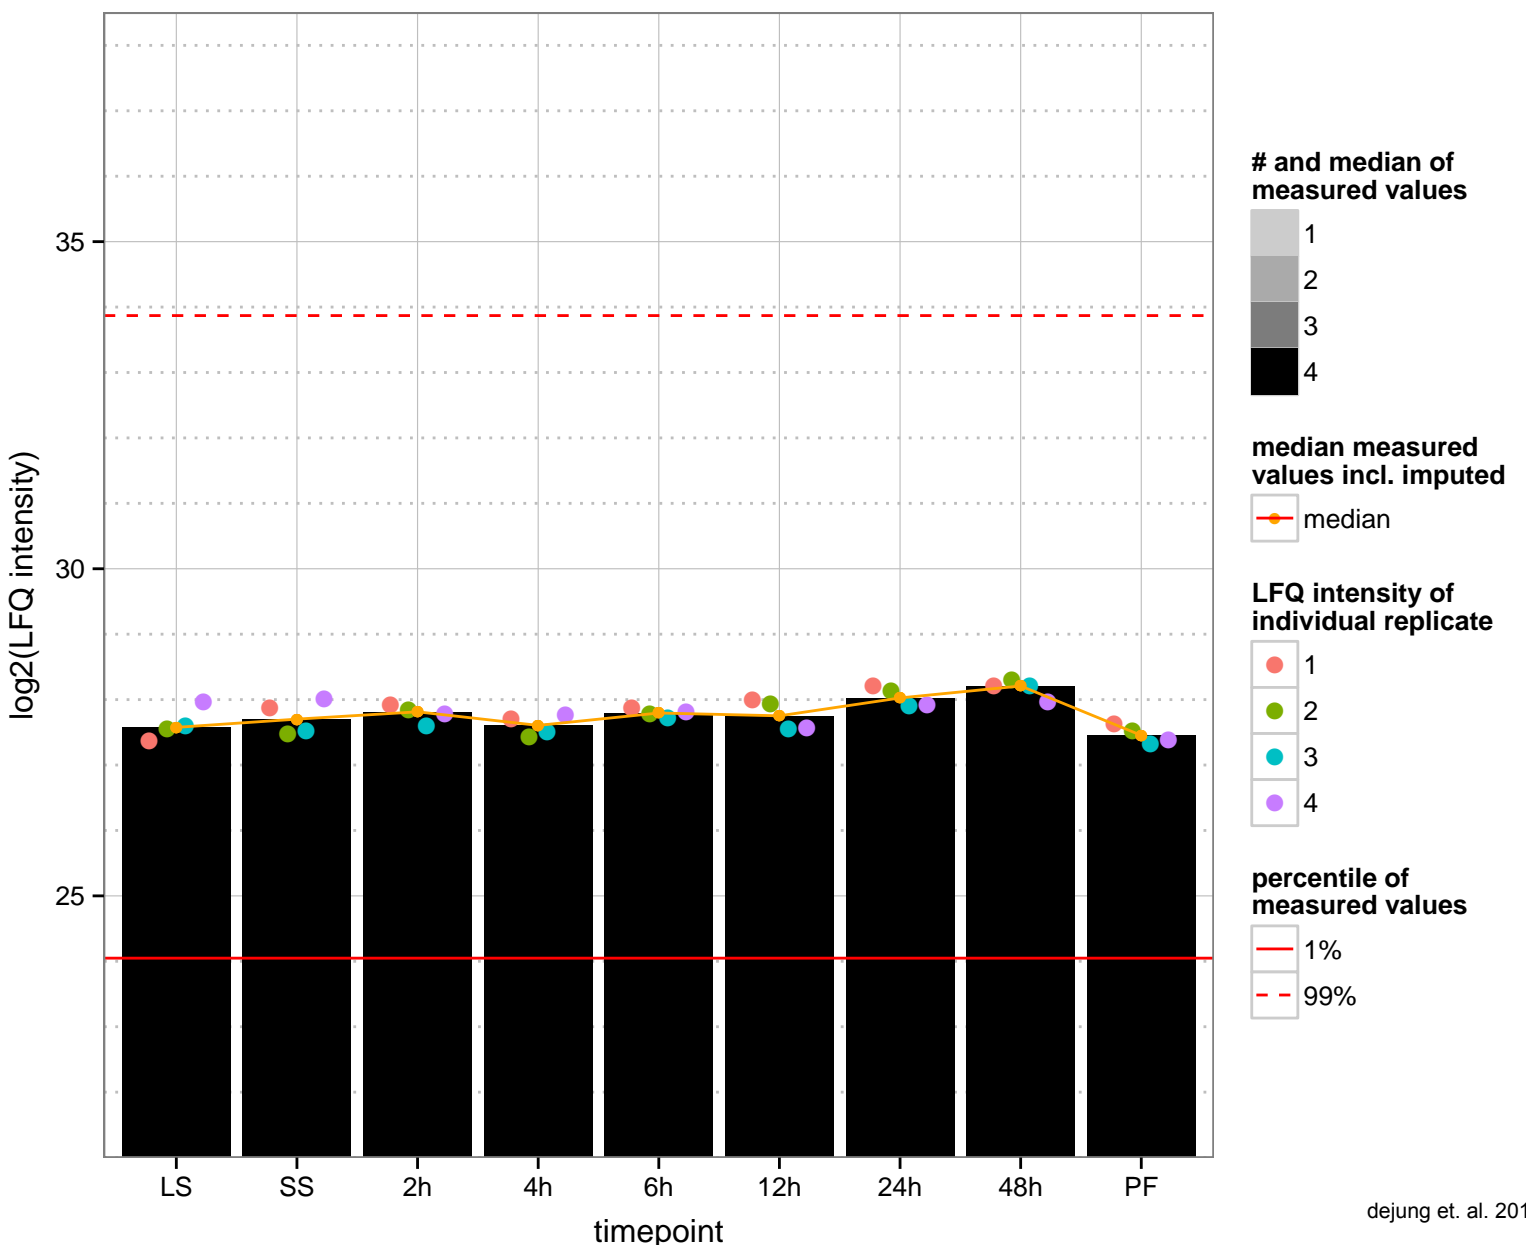

hypothetical protein, conserved  
 Tb927.3.3200  
 AGOF: null  
 AGOC: null  
 AGOP: null  
 PGO: null  
 PGOC: null  
 PGOP: null

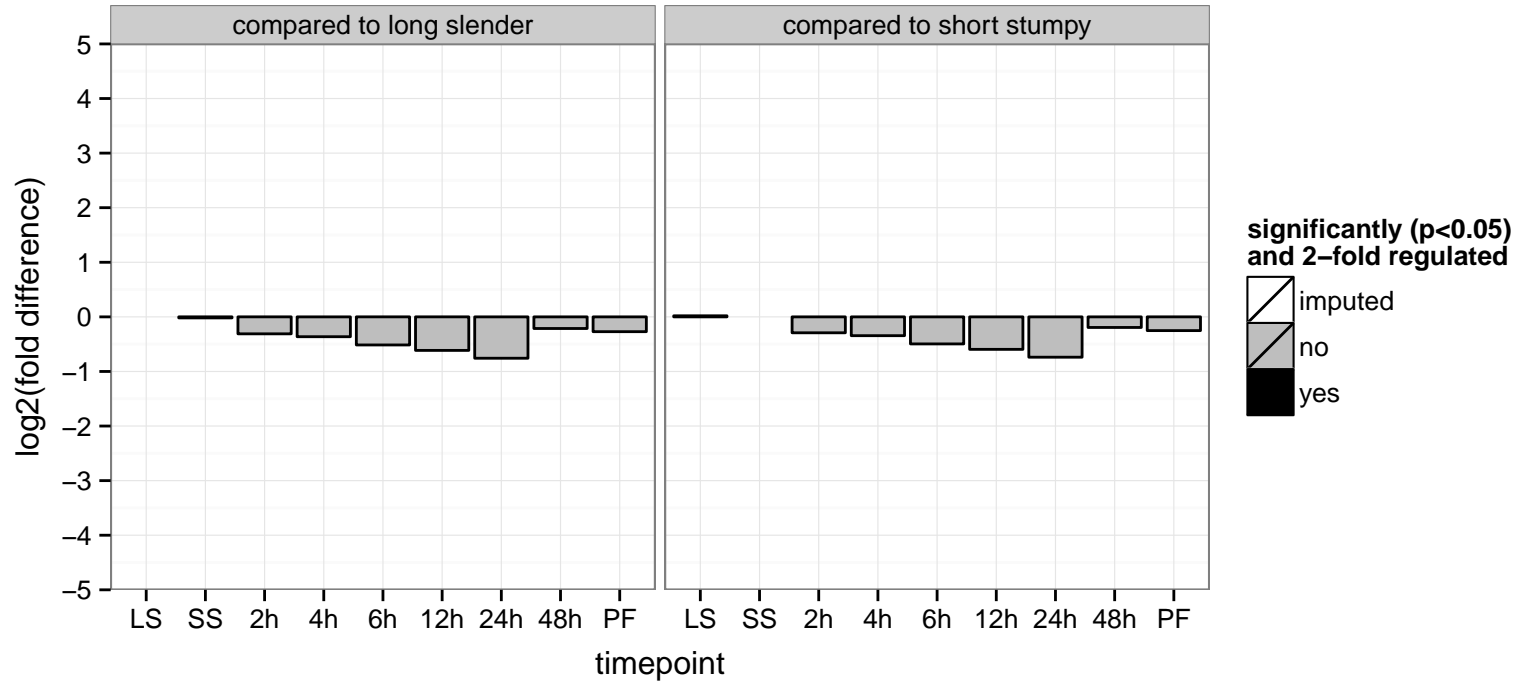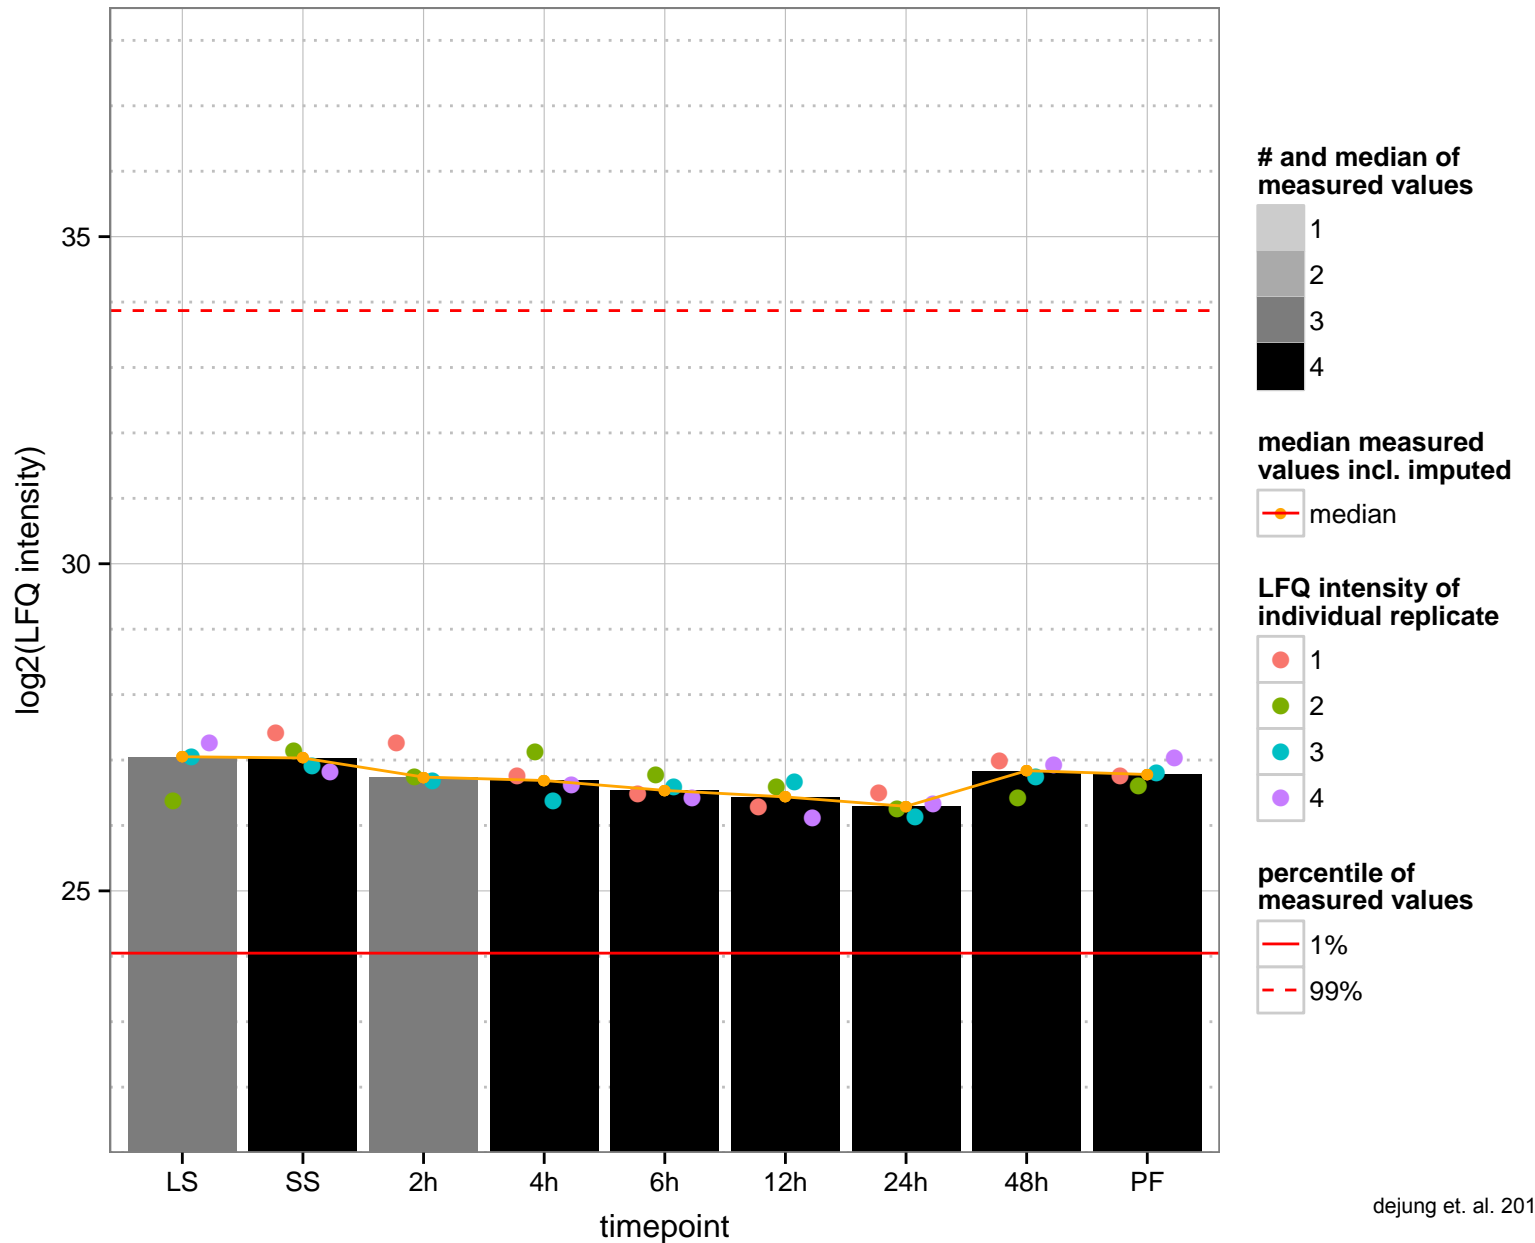

RNA polymerase-associated protein CTR9, putative  
 Tb927.3.3220  
 AGOF: null  
 AGOC: cytoplasm, nucleus  
 AGOP: transcription elongation from RNA polymerase II promoter  
 PGO: protein binding  
 PGO: null  
 PGOP: null

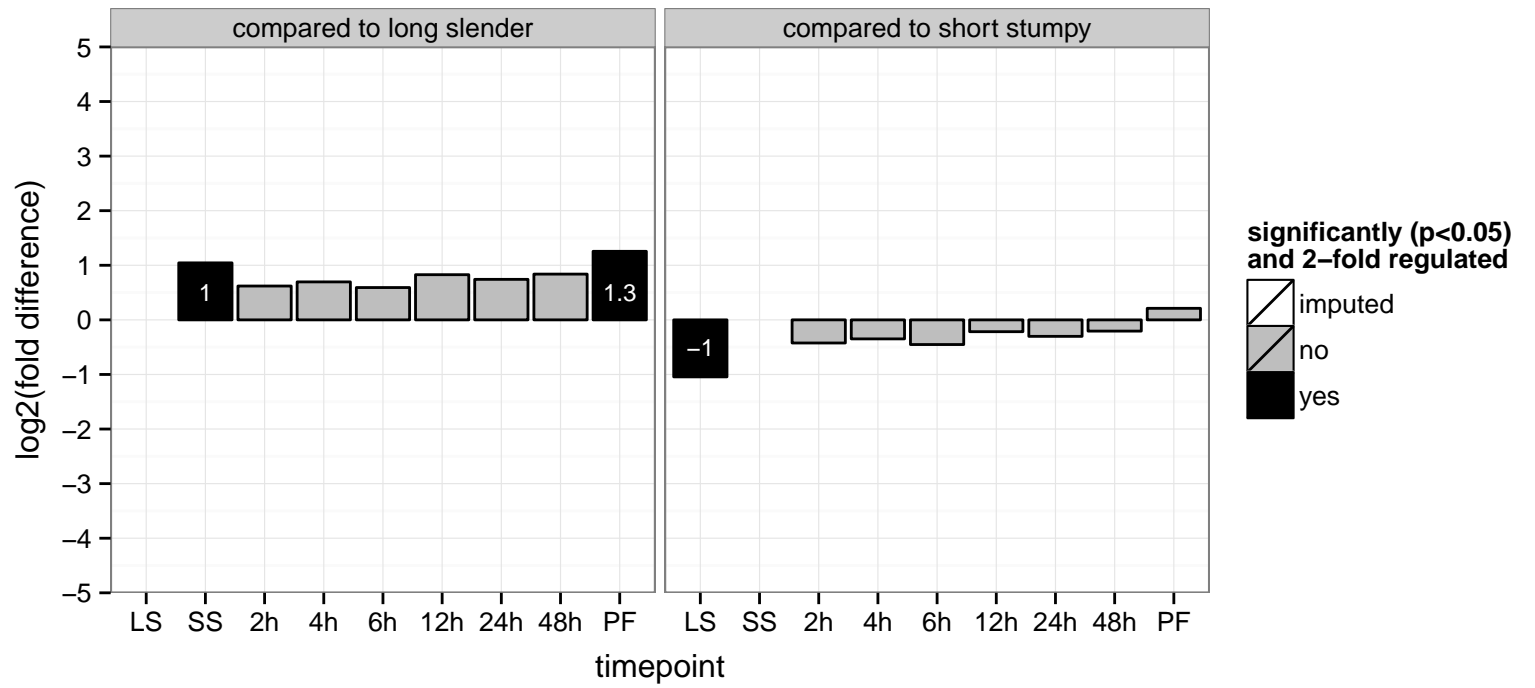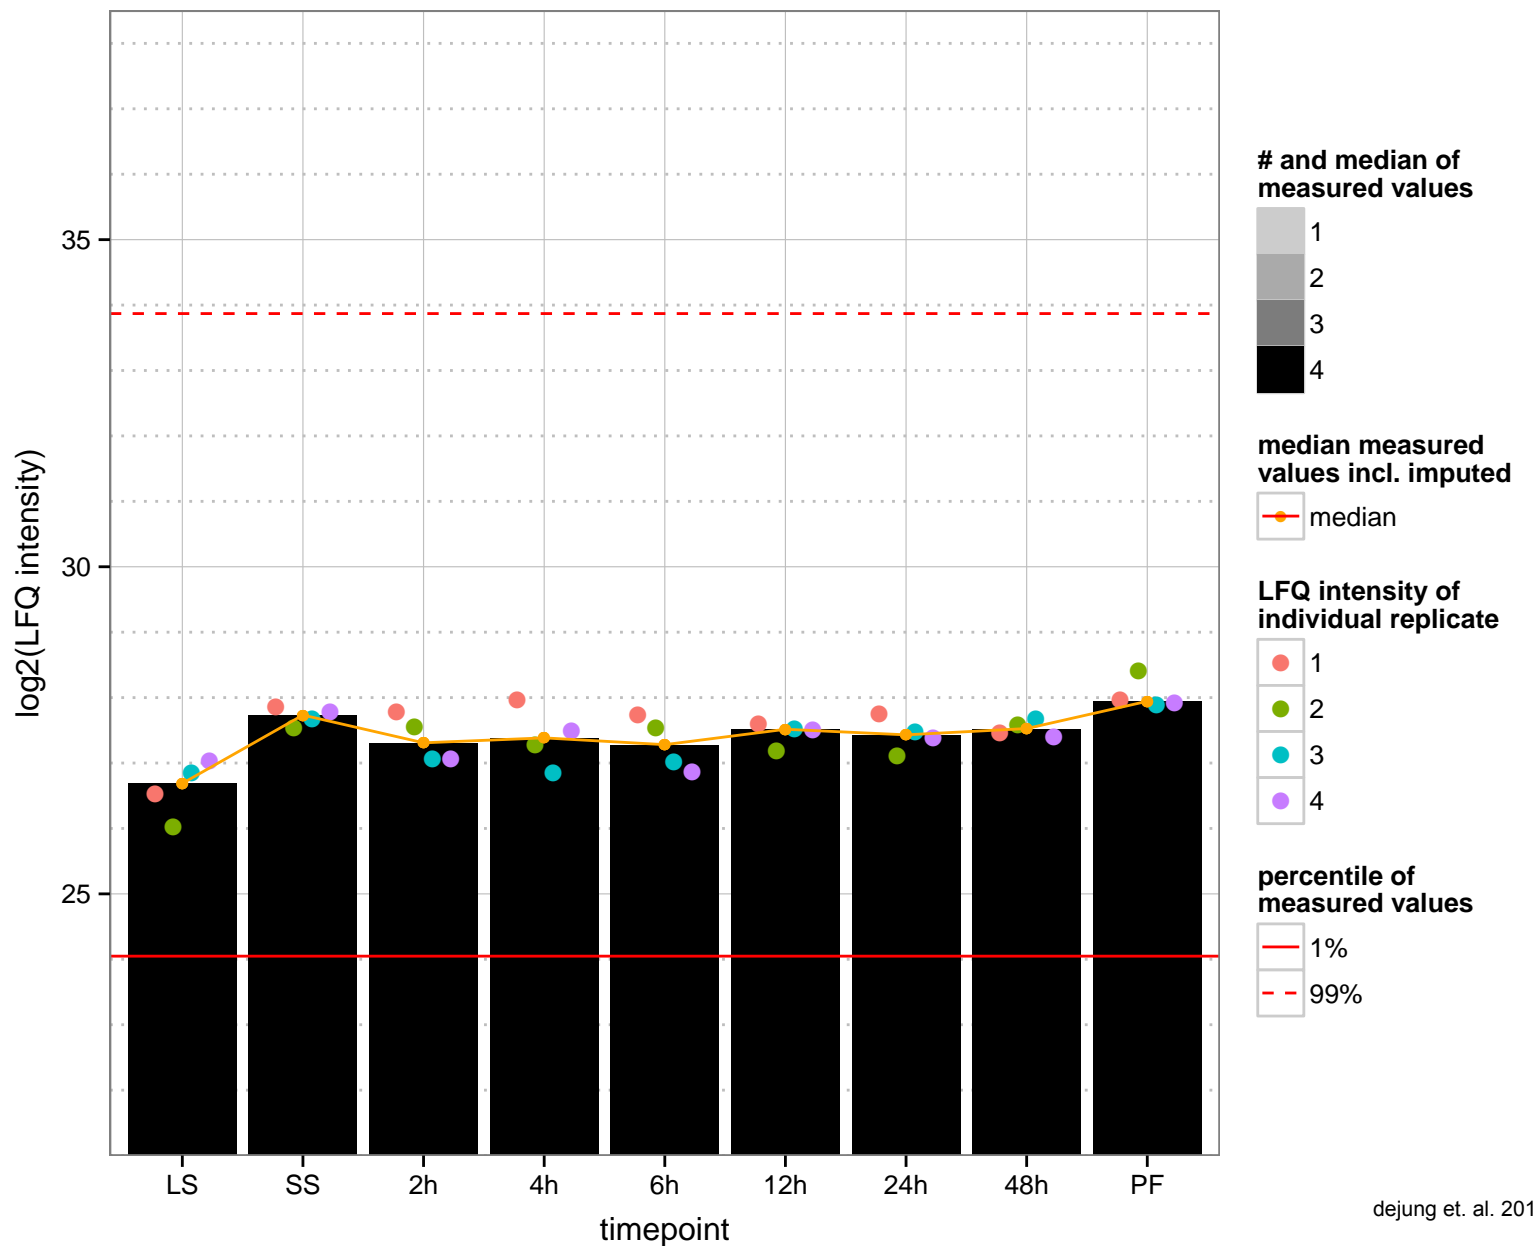

hypothetical protein, conserved  
 Tb927.3.3230  
 AGOF: null  
 AGOC: null  
 AGOP: null  
 PGO: null  
 PGOC: null  
 PGOP: null

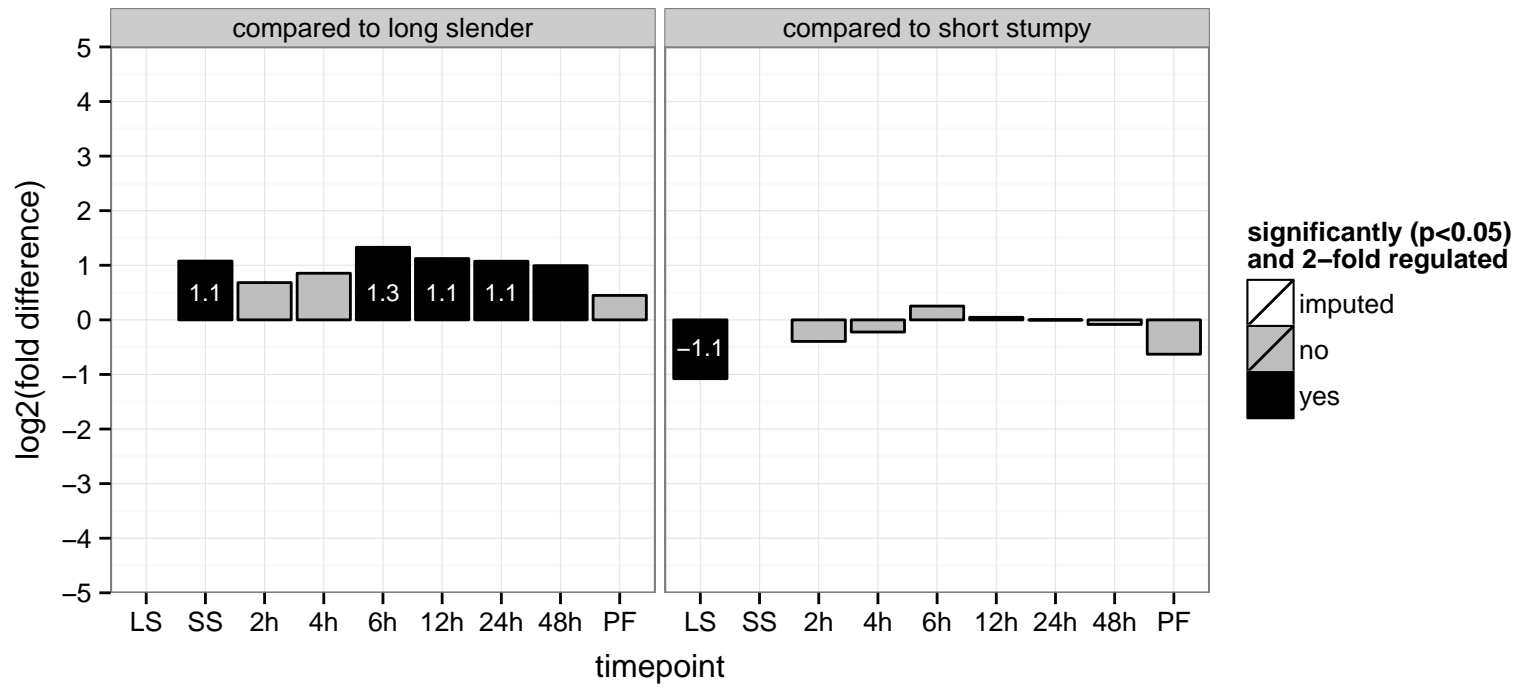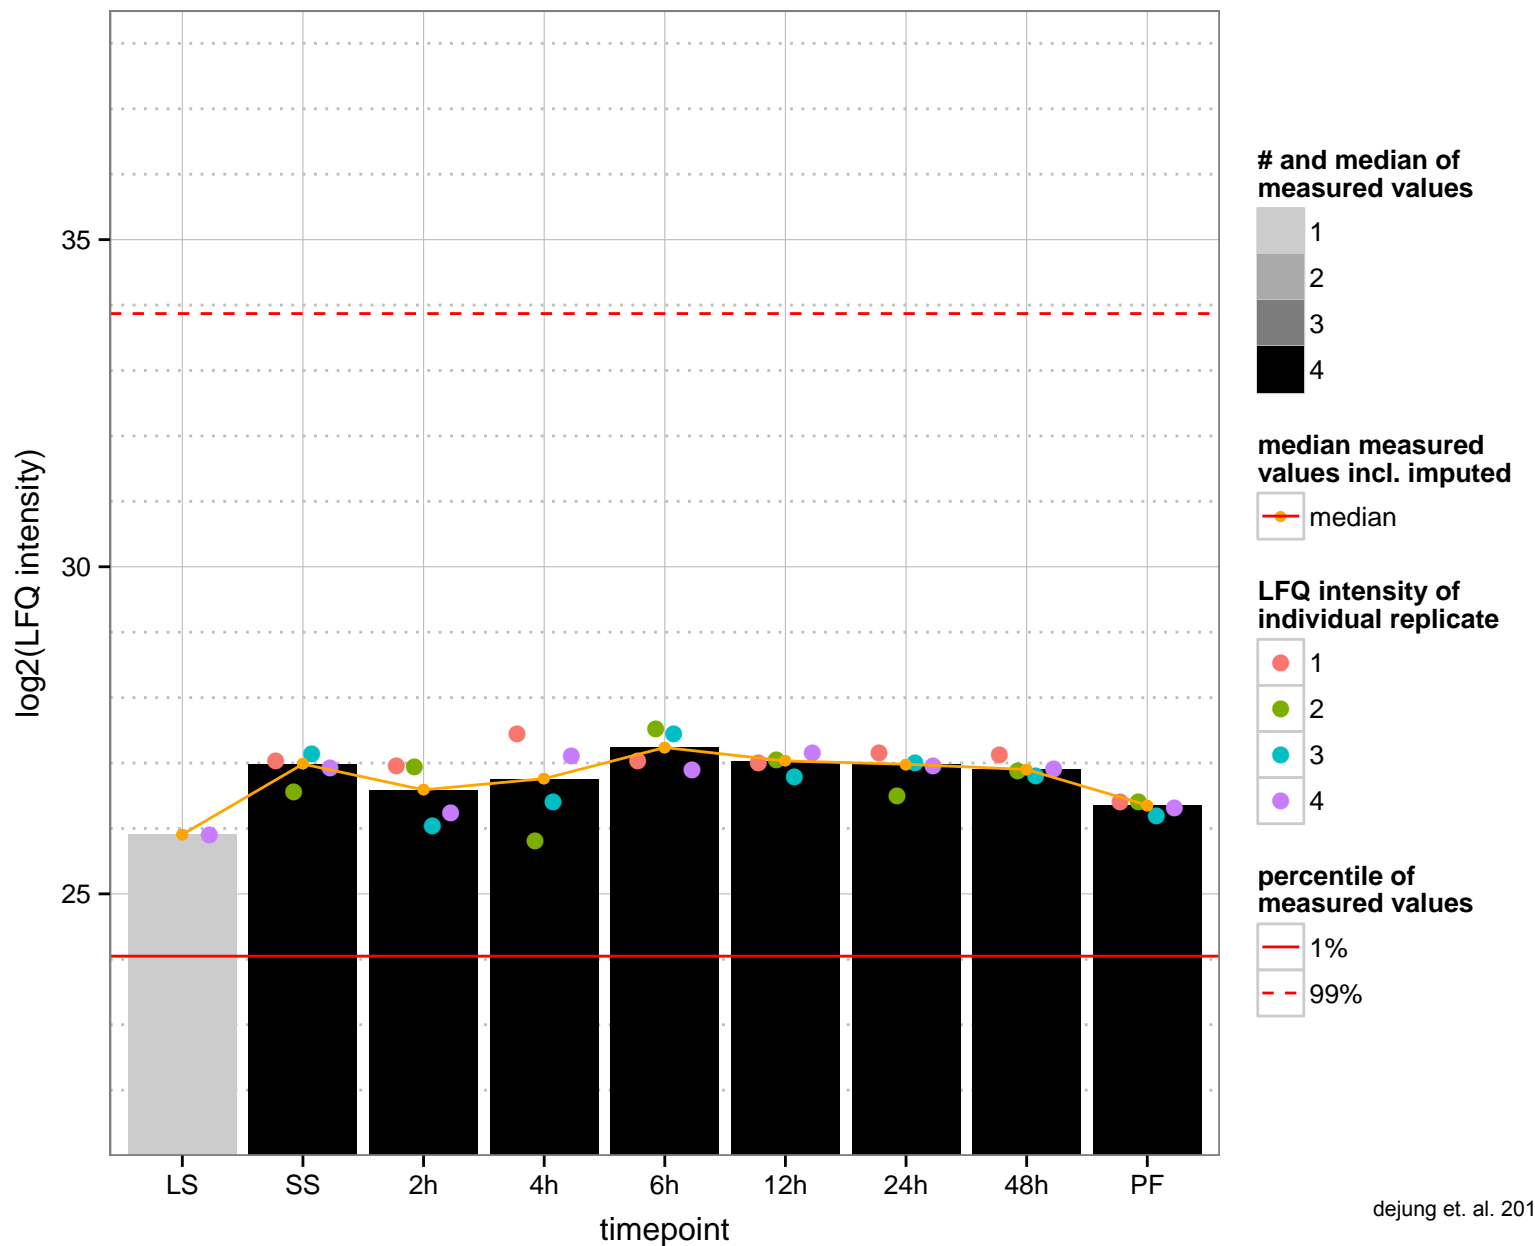

vacuolar protein sorting–associated protein 4, putative (VPS4)

Tb927.3.3280

AGOF: ATP binding

AGOC: null

AGOP: null

PGOF: ATP binding, nucleoside–triphosphatase activity, nucleotide binding

PGOC: null

PGOP: null

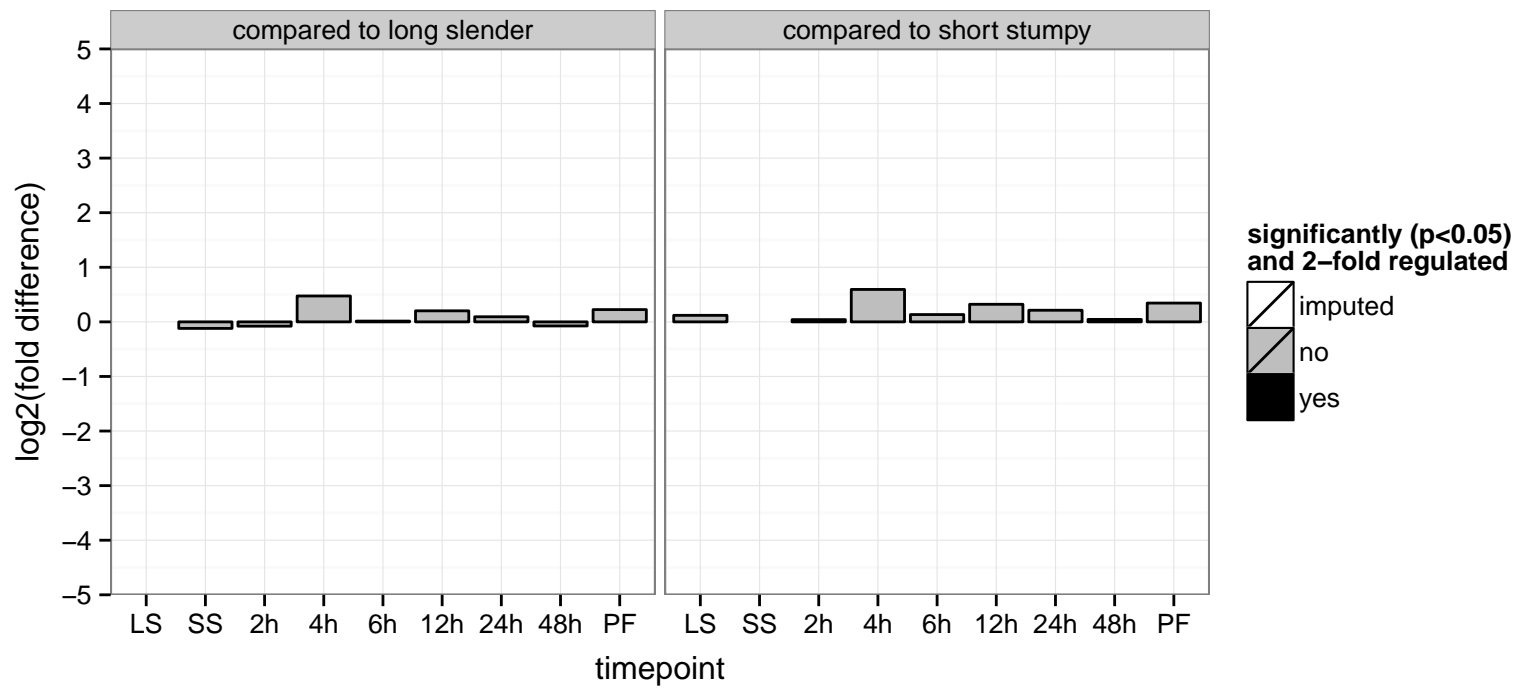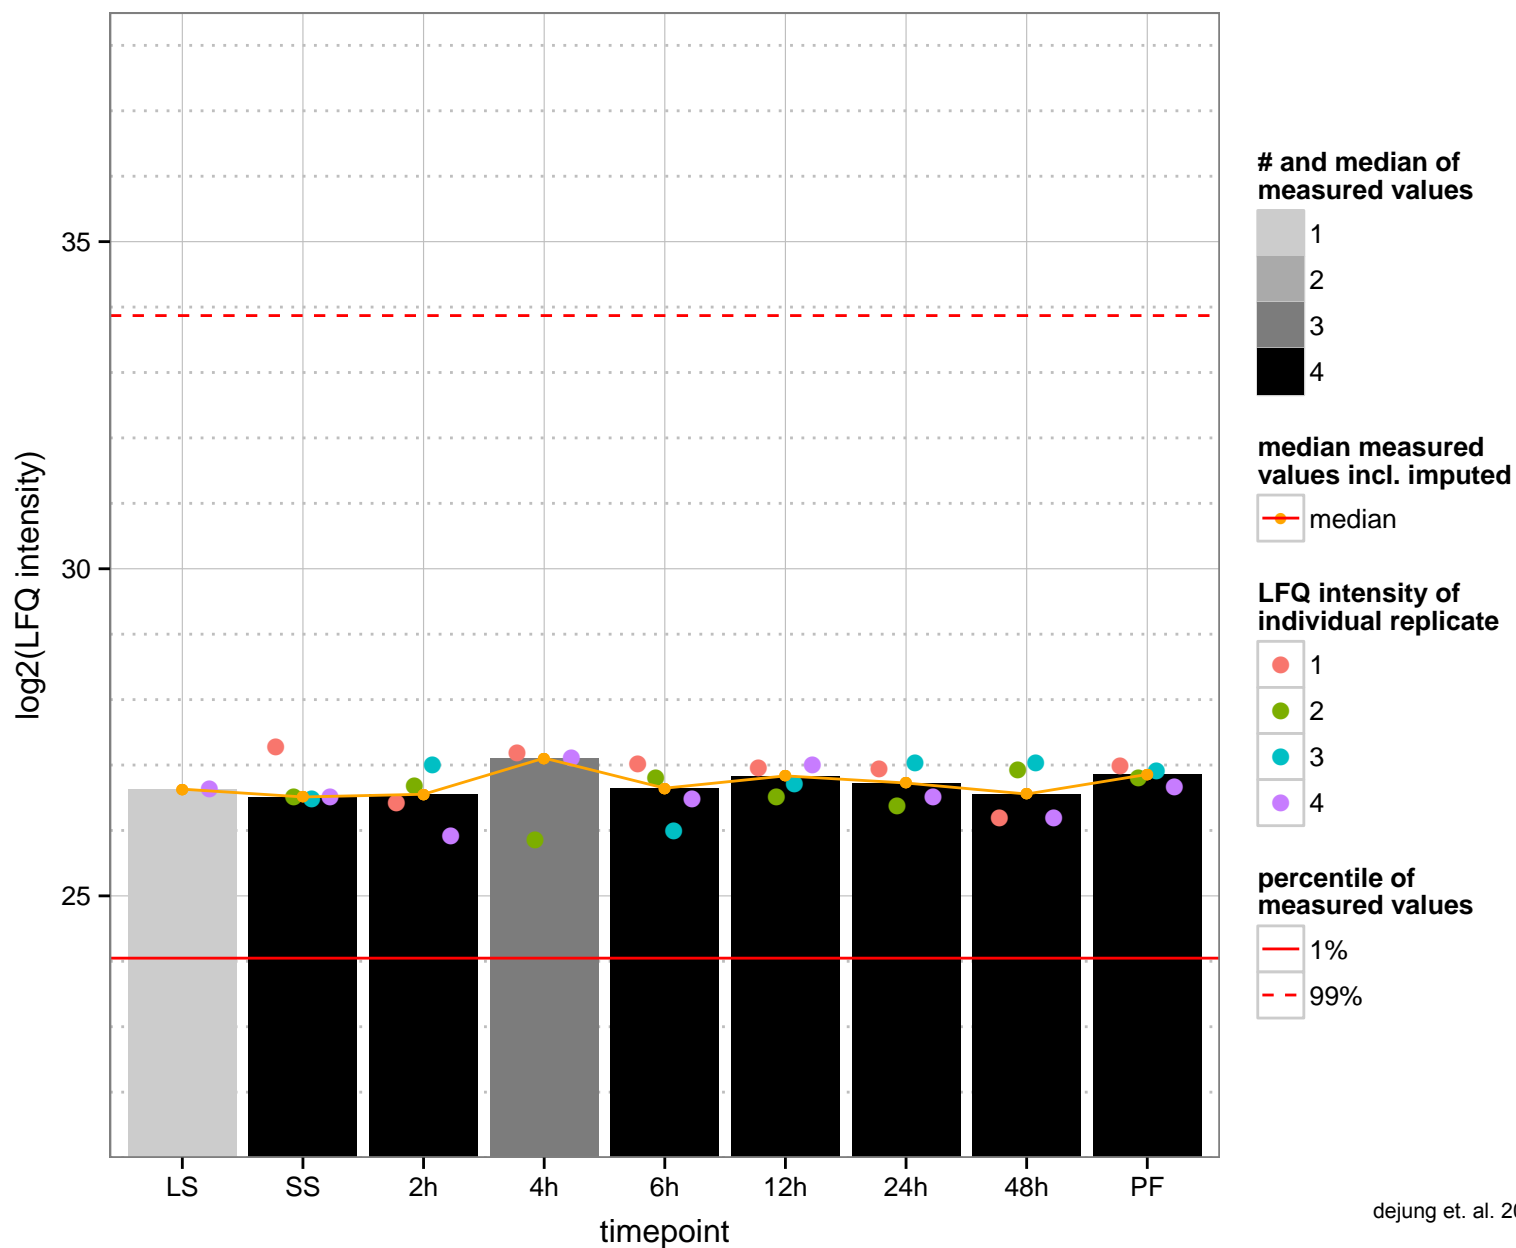

hypothetical protein, conserved  
 Tb927.3.3300  
 AGOF: null  
 AGOC: null  
 AGOP: null  
 PGOF: null  
 PGO: null  
 PGOP: null

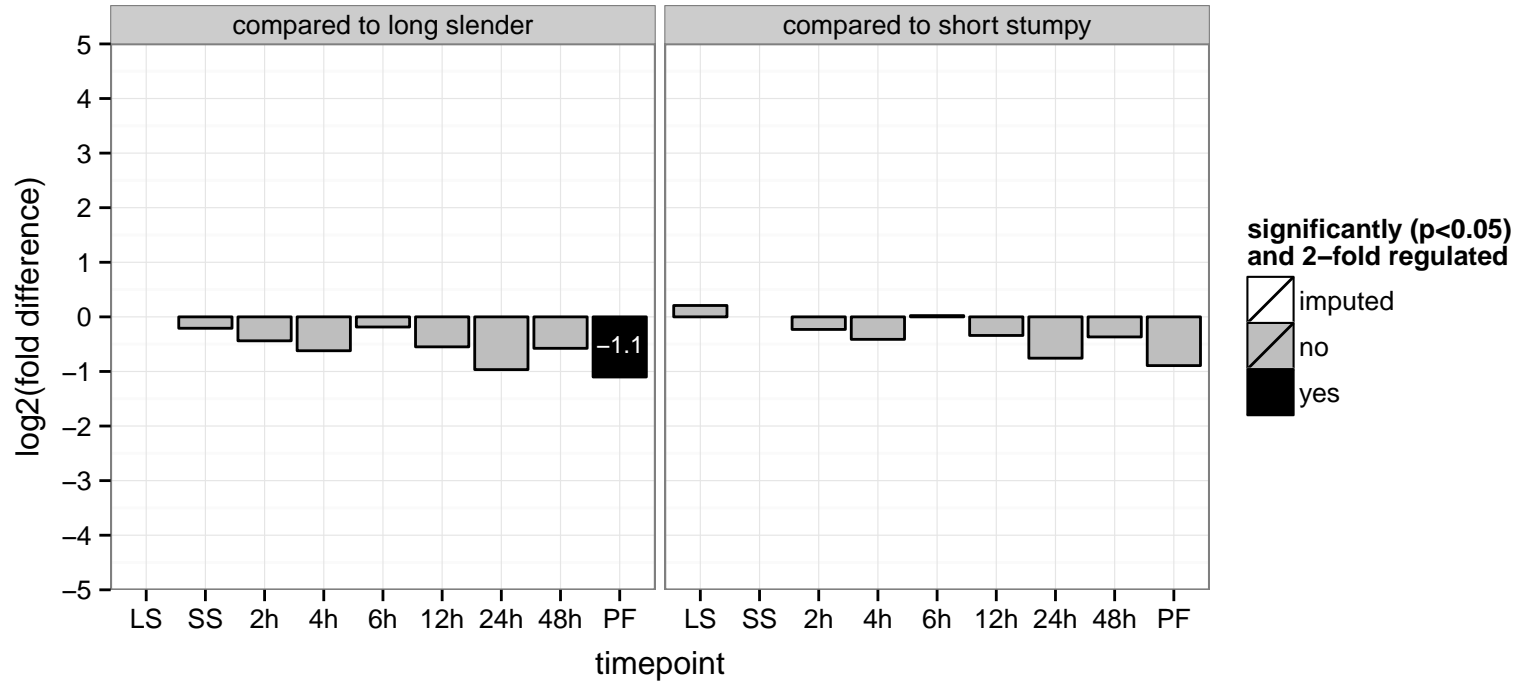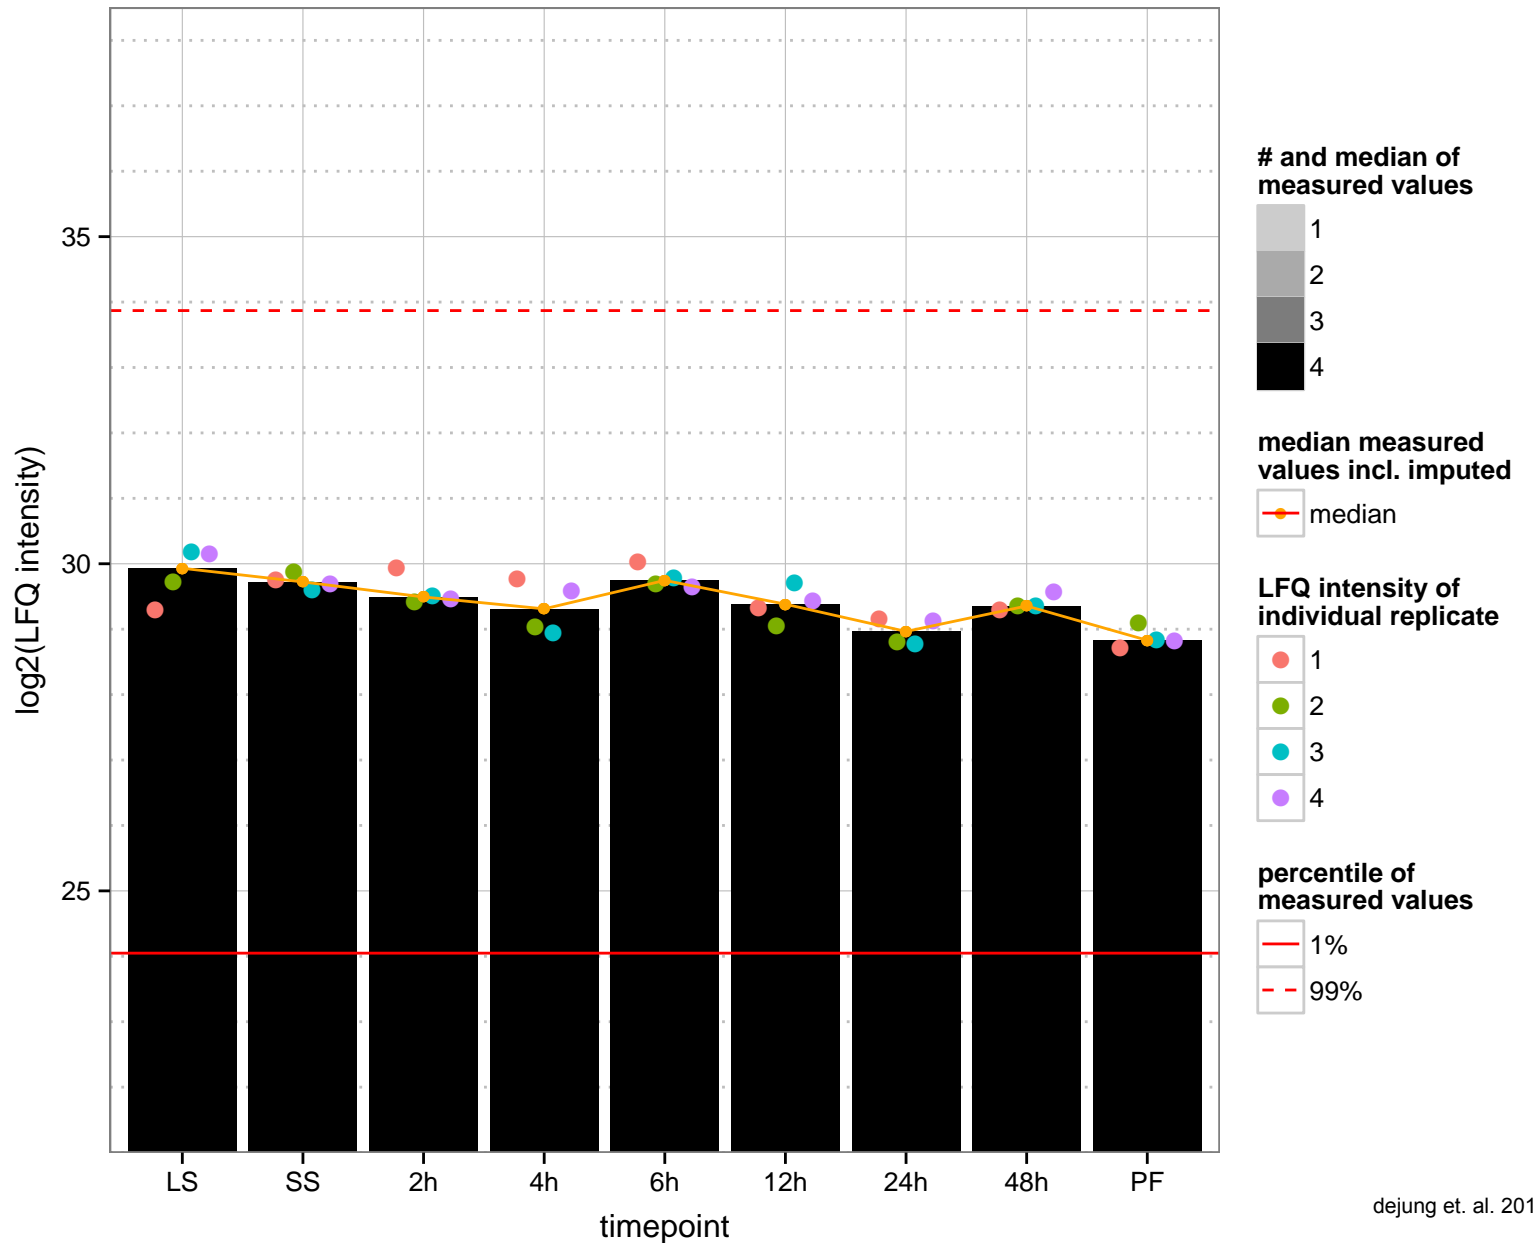



heat shock protein 20, putative  
 Tb927.3.3330  
 AGOF: null  
 AGOC: mitochondrion  
 AGOP: null  
 PGO: null  
 PGO: null  
 PGO: null

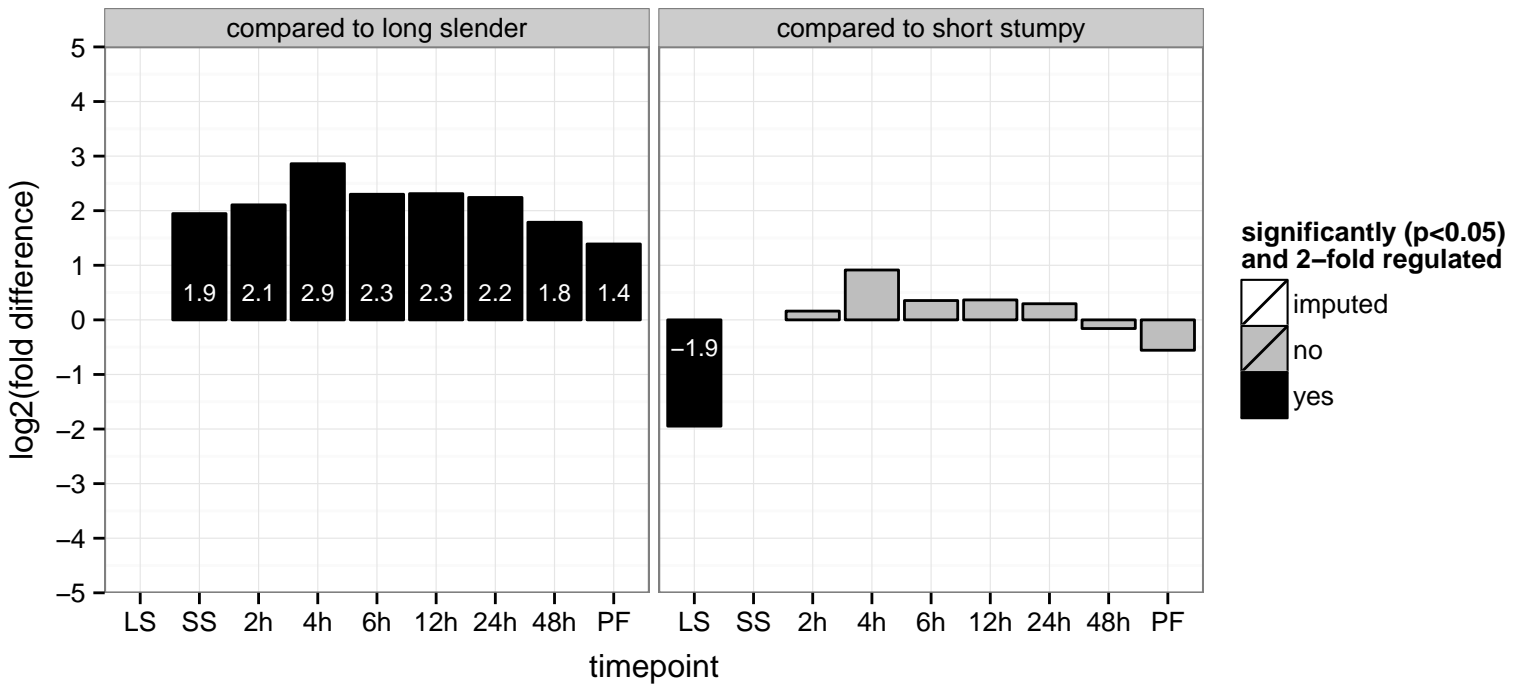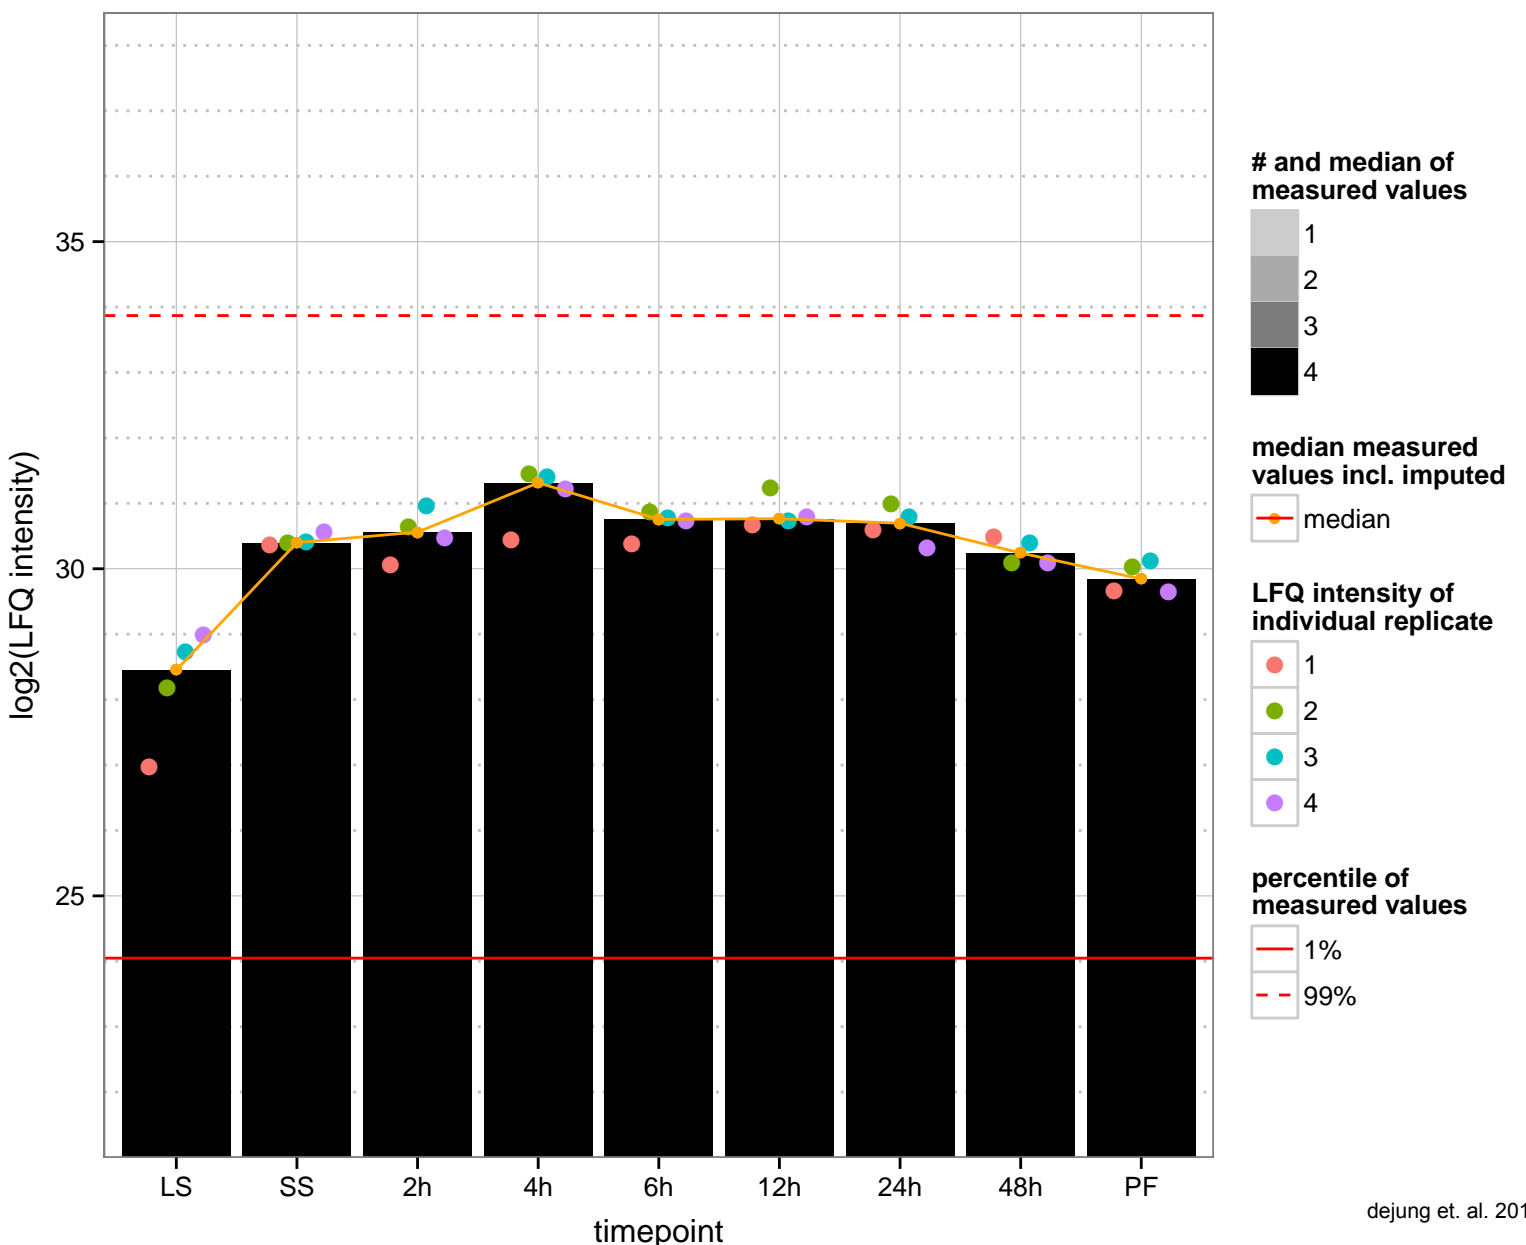

aspartyl aminopeptidase, putative, metallo-peptidase, Clan MH, Family M20  
 Tb927.3.3410;Tb11.v5.0768  
 AGOF: null, aminopeptidase activity, zinc ion binding  
 AGOC: null, vacuole  
 AGOP: null, proteolysis  
 PGOF: aminopeptidase activity, zinc ion binding  
 PGO: null  
 PGOP: proteolysis

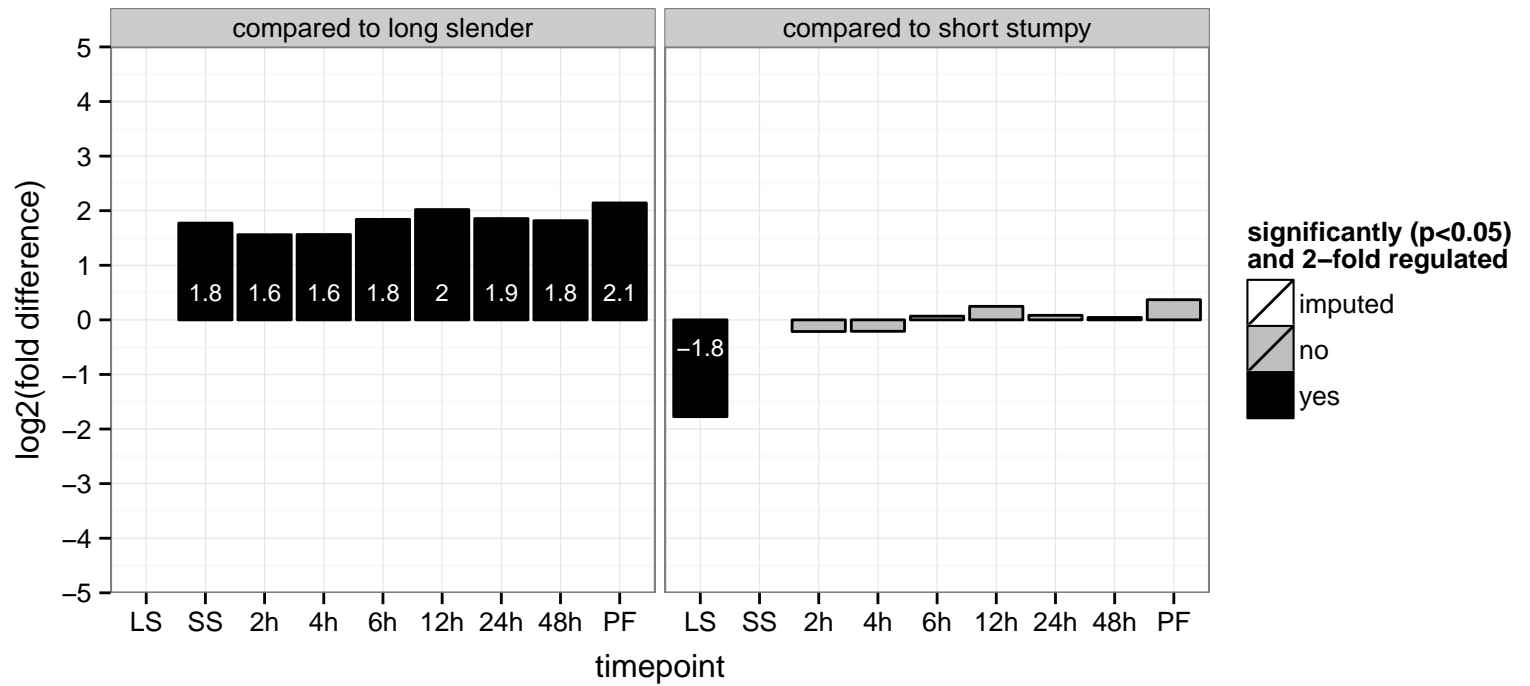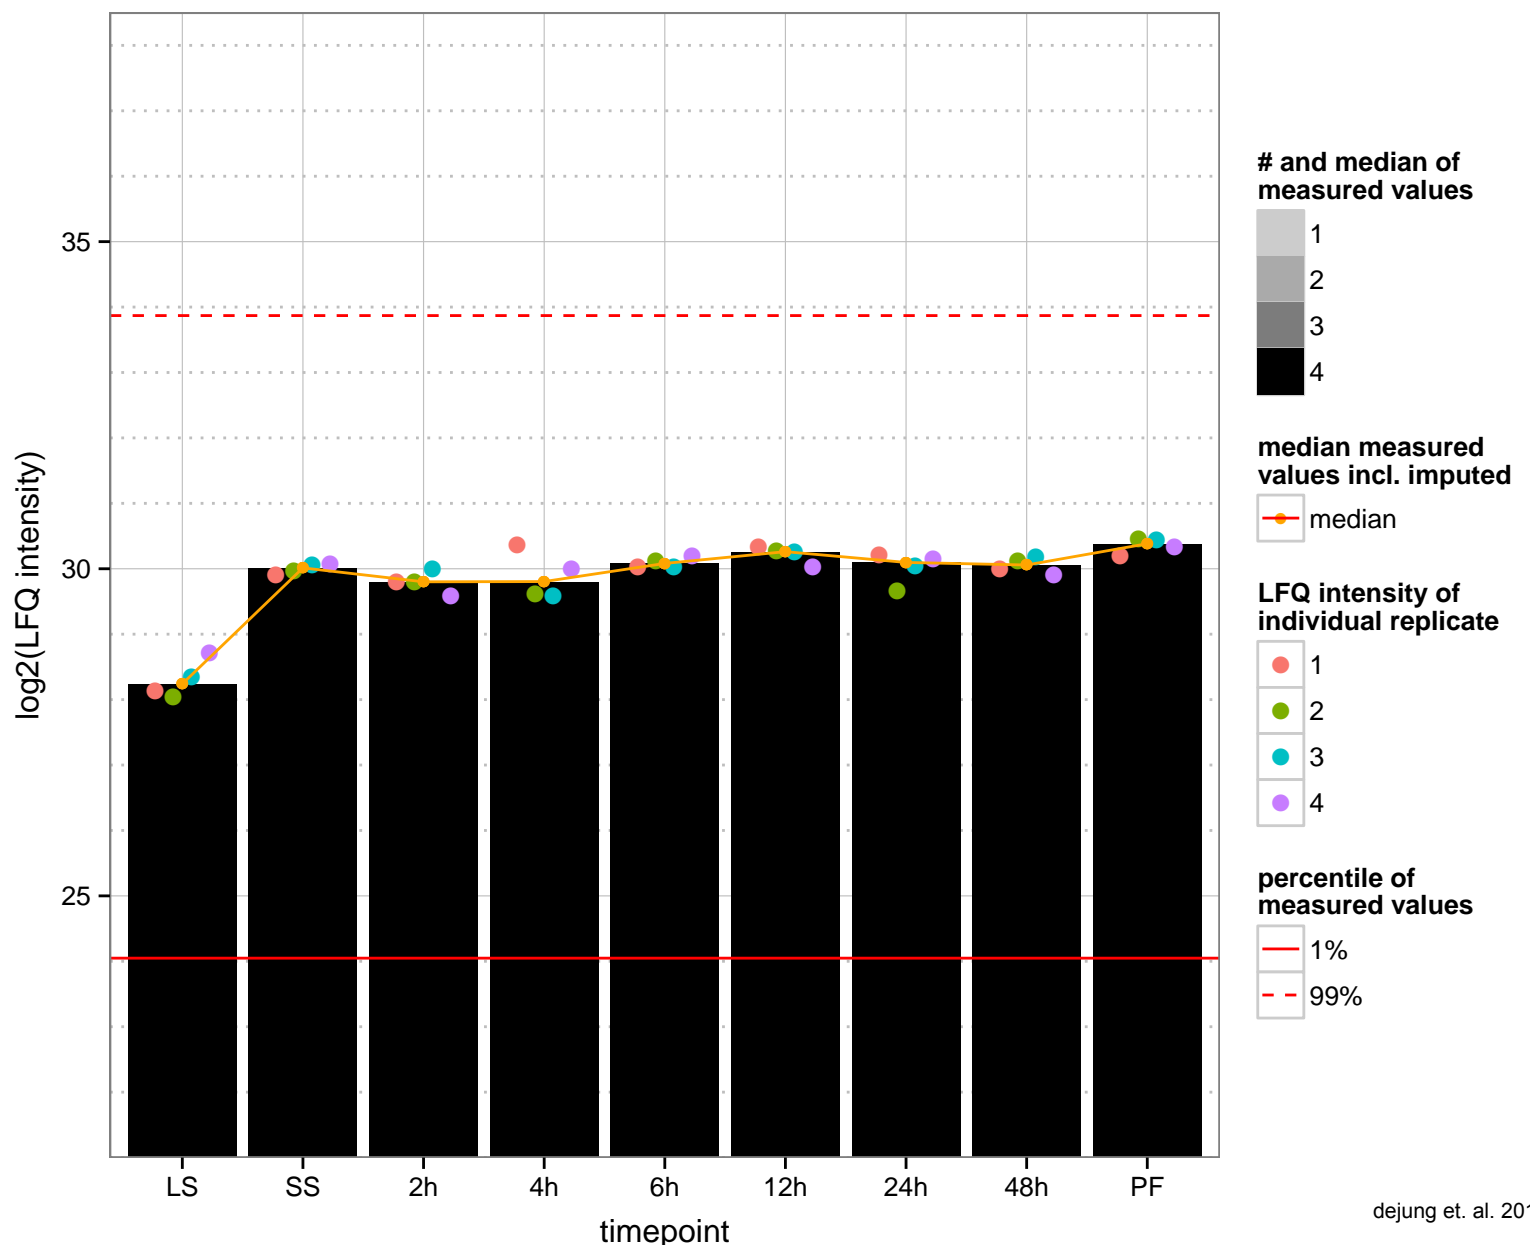

ADP-ribosylation factor-like protein 3, putative (arl3)

Tb927.3.3450

AGOF: GTP binding

AGOC: cilium membrane, flagellar pocket membrane, intracellular, plasma membrane

AGOP: cell proliferation, cilium morphogenesis, dissemination or transmission of symbiont from host by vector, intracellular protein transport

PGOF: GTP binding

PGOC: intracellular

PGOP: intracellular protein transport, protein transport, small GTPase mediated signal transduction

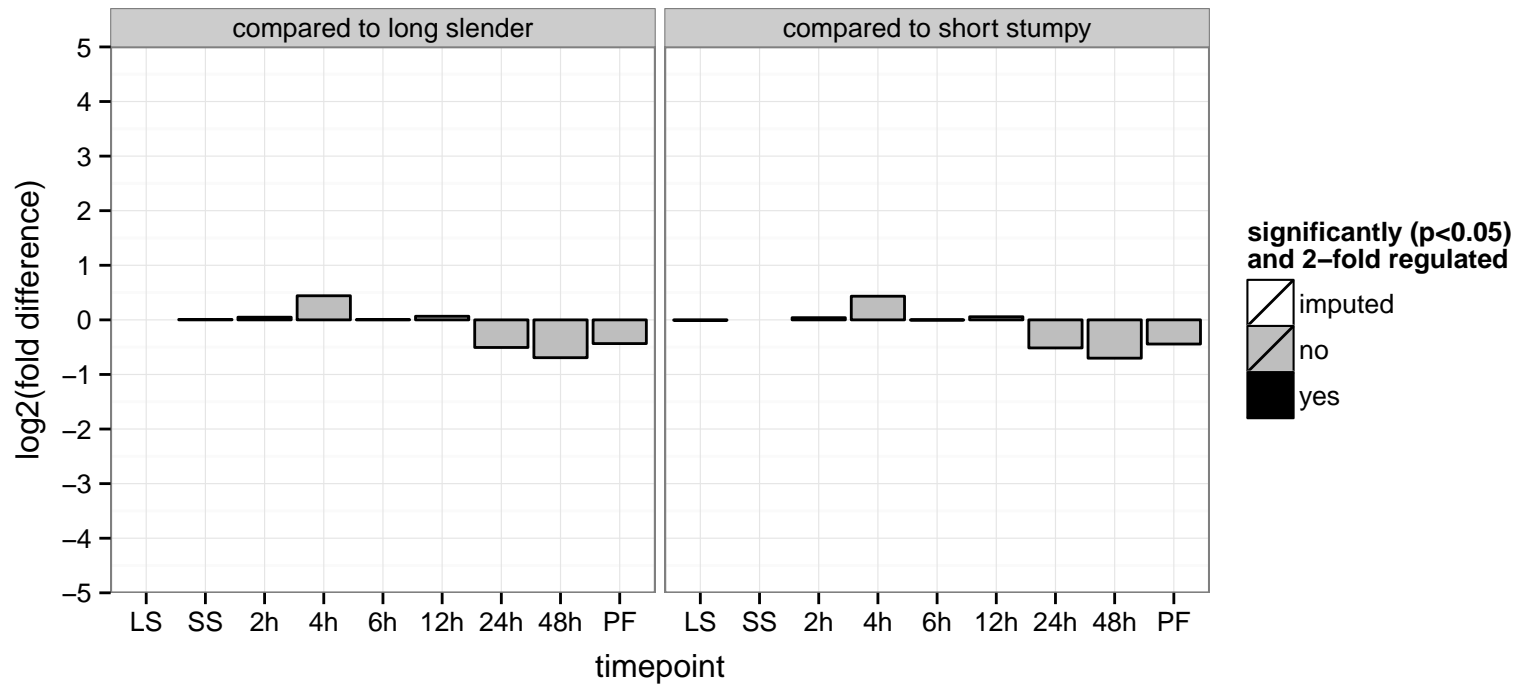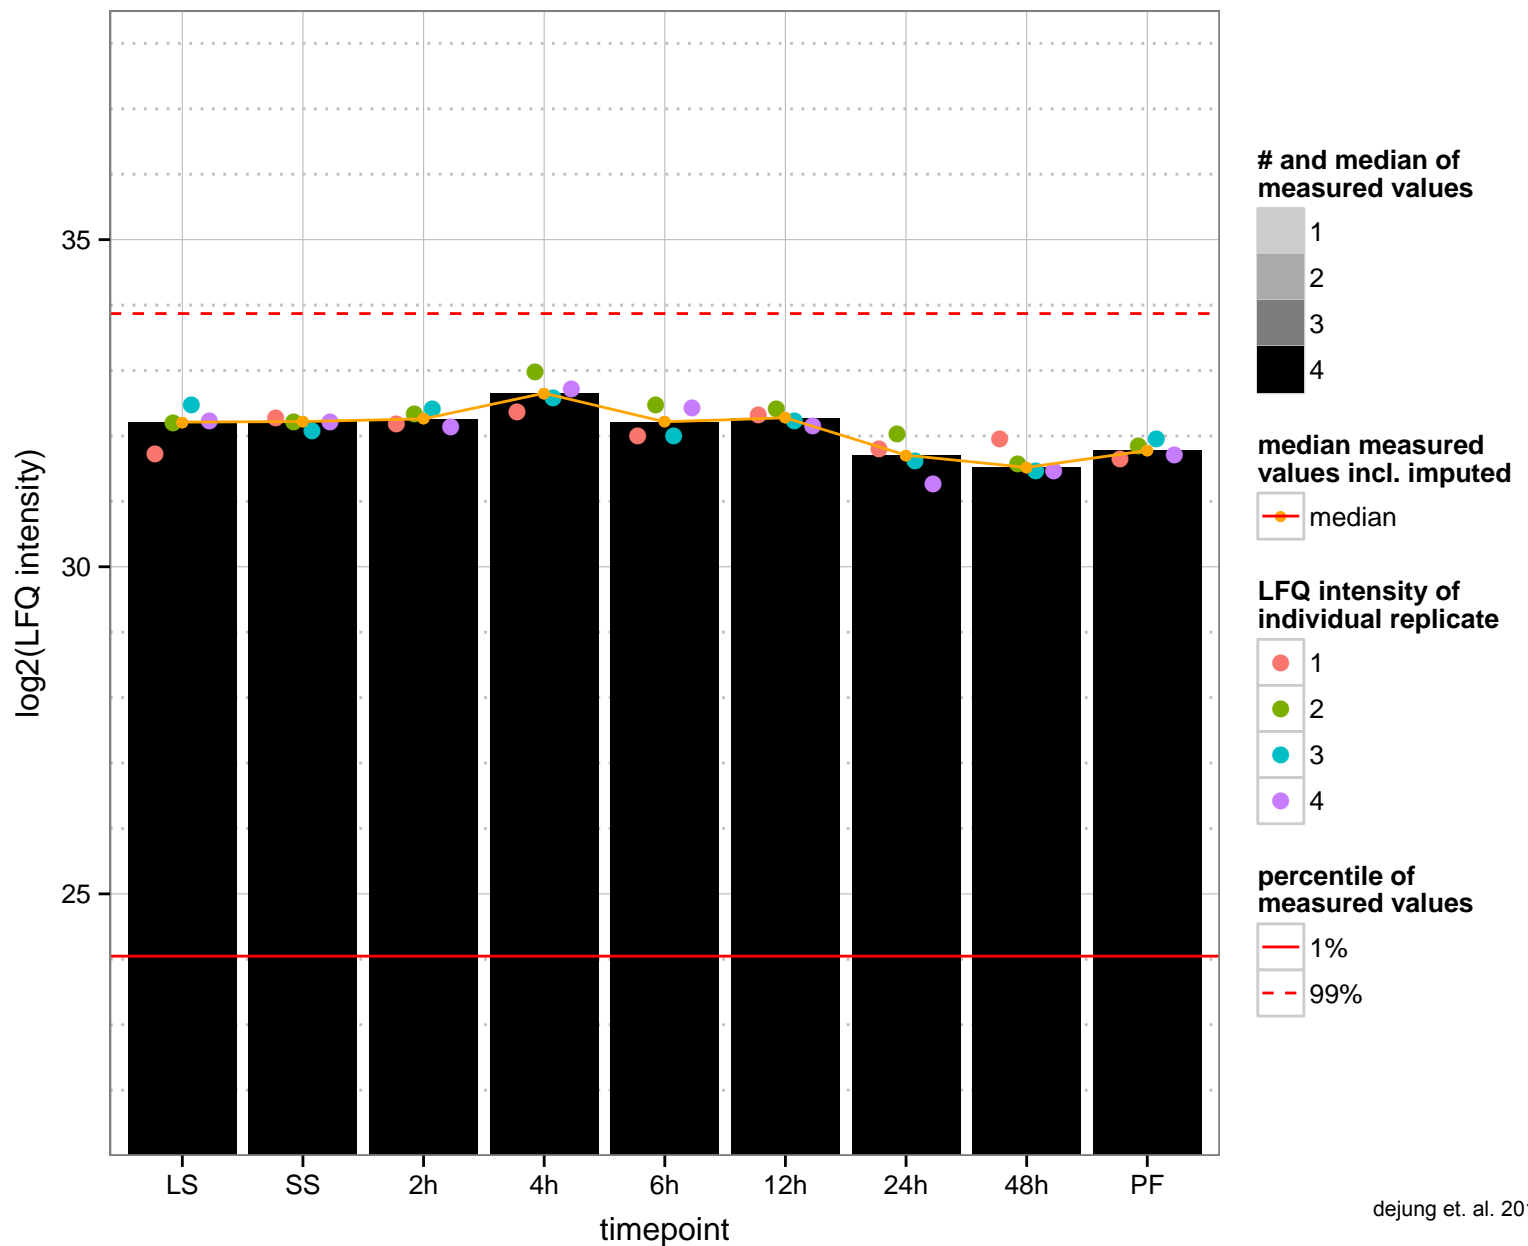

high mobility group protein, putative (TDP1)  
 Tb927.3.3490  
 AGOF: DNA binding  
 AGOC: nucleus  
 AGOP: null  
 PGO: protein binding  
 PGOC: null  
 PGOP: null

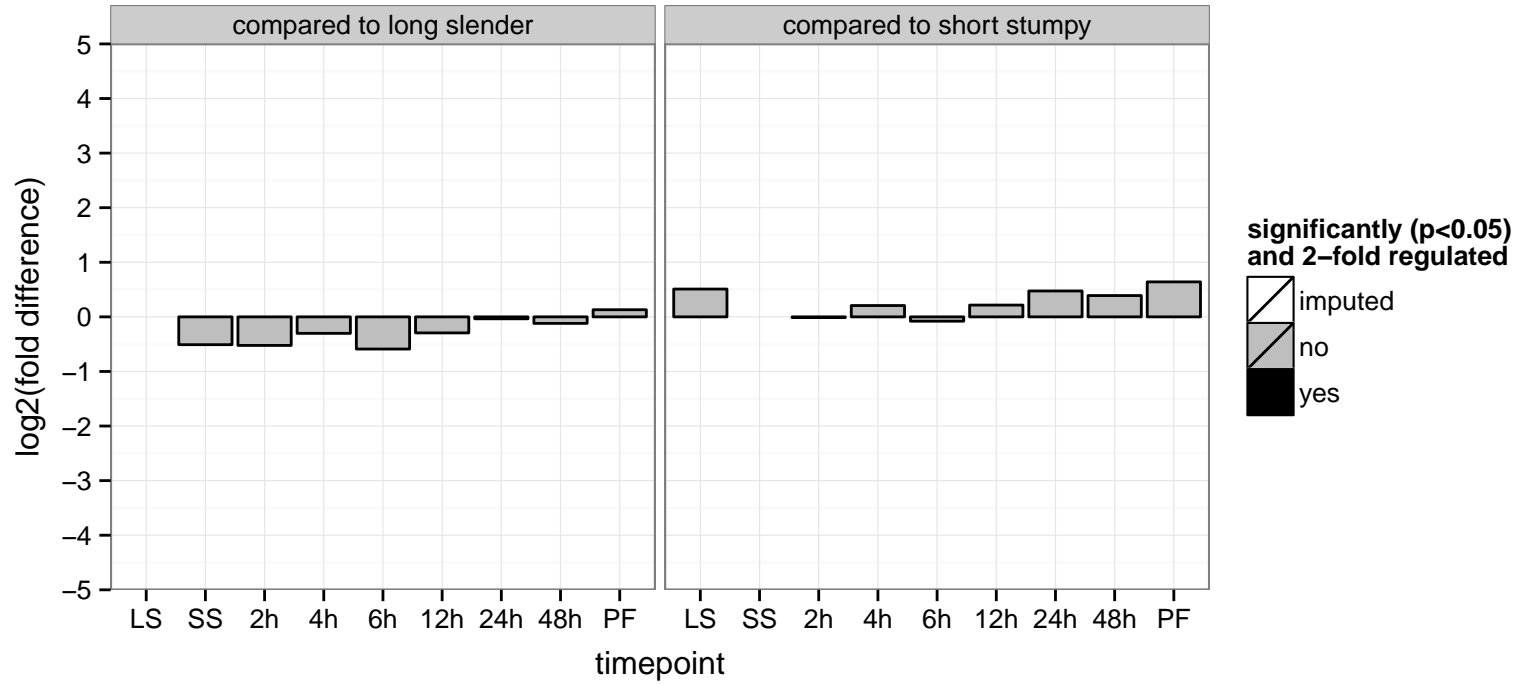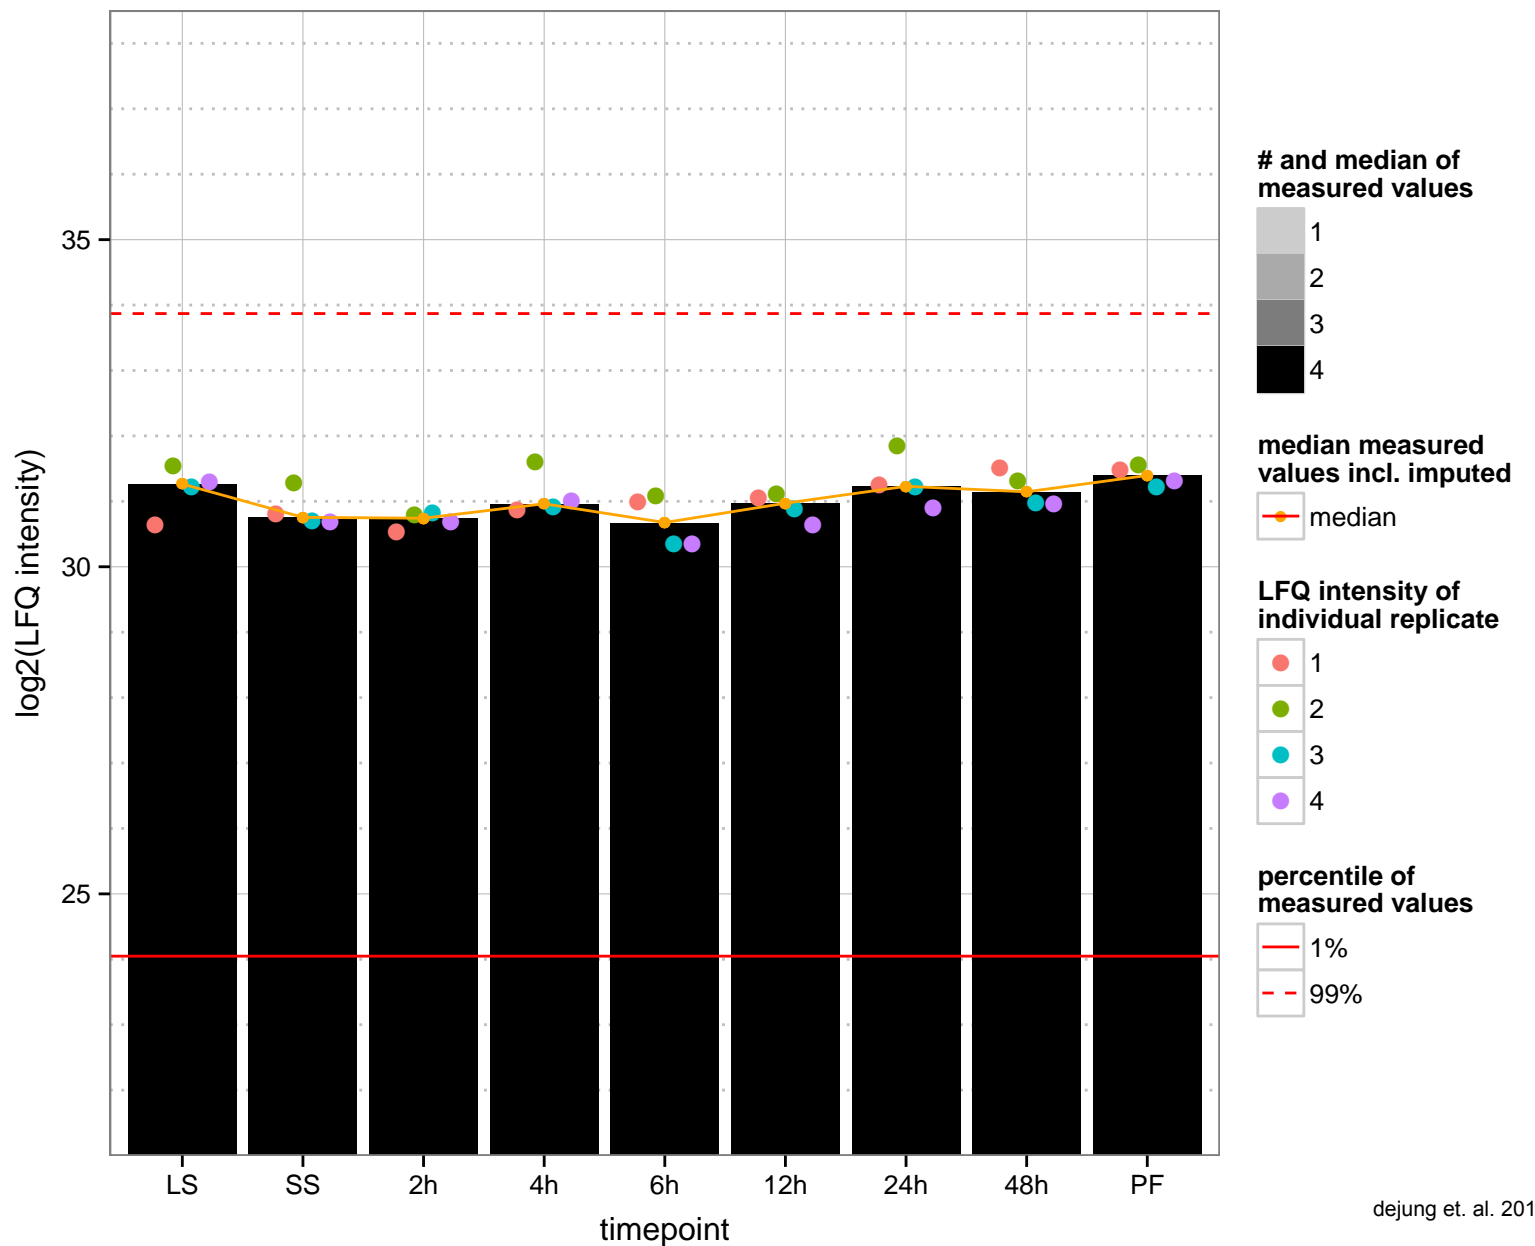

hypothetical protein, conserved  
 Tb927.3.3520  
 AGOF: null  
 AGOC: null  
 AGOP: null  
 PGO: null  
 PGOC: null  
 PGOP: null

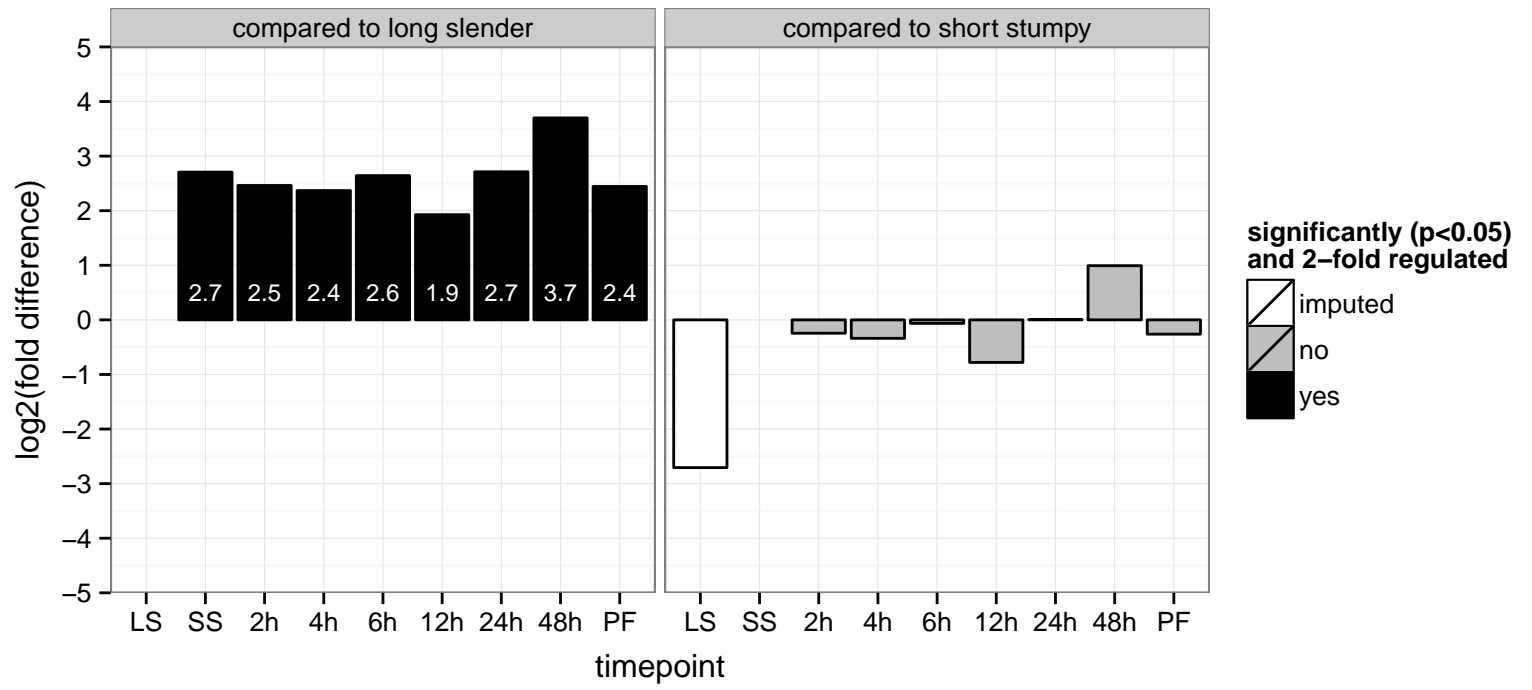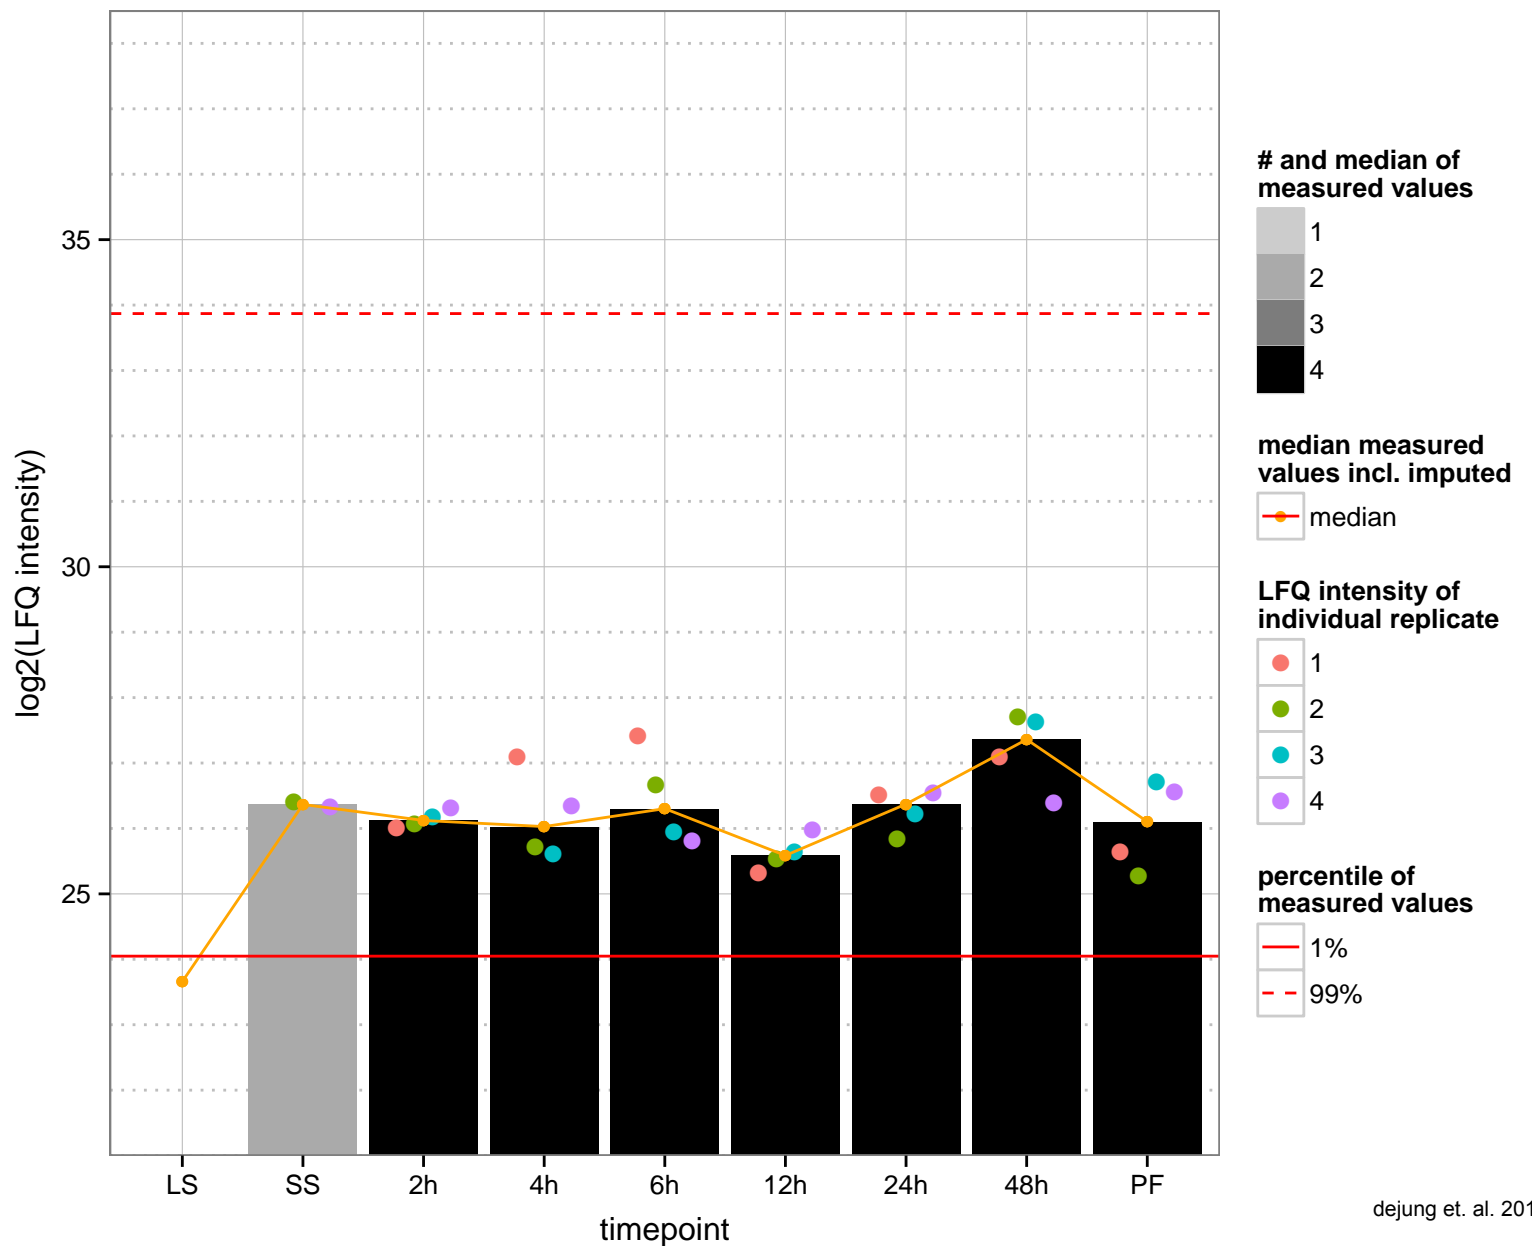

Nucleoporin (TbNup53b)  
 Tb927.3.3540  
 AGOF: null  
 AGOC: nuclear pore  
 AGOP: null  
 PGO: null  
 PGO: null  
 PGO: null

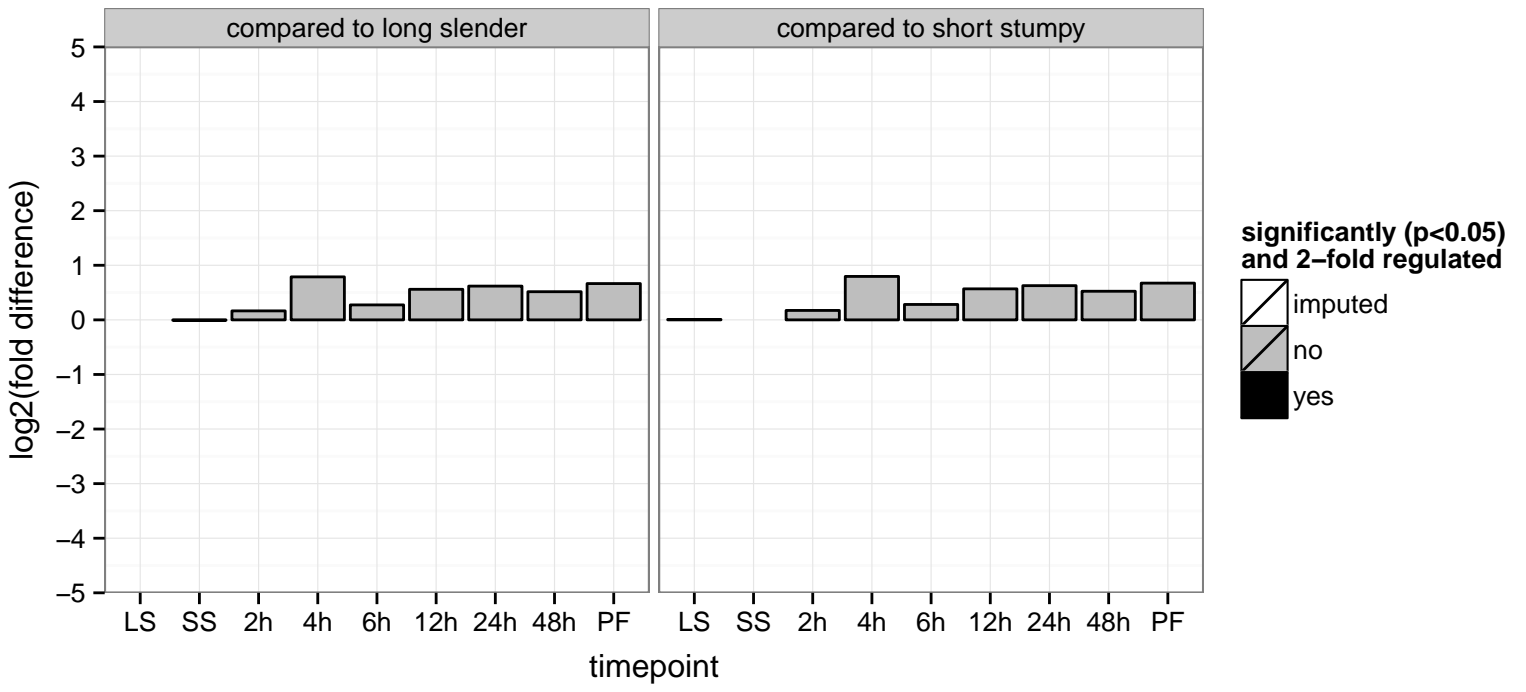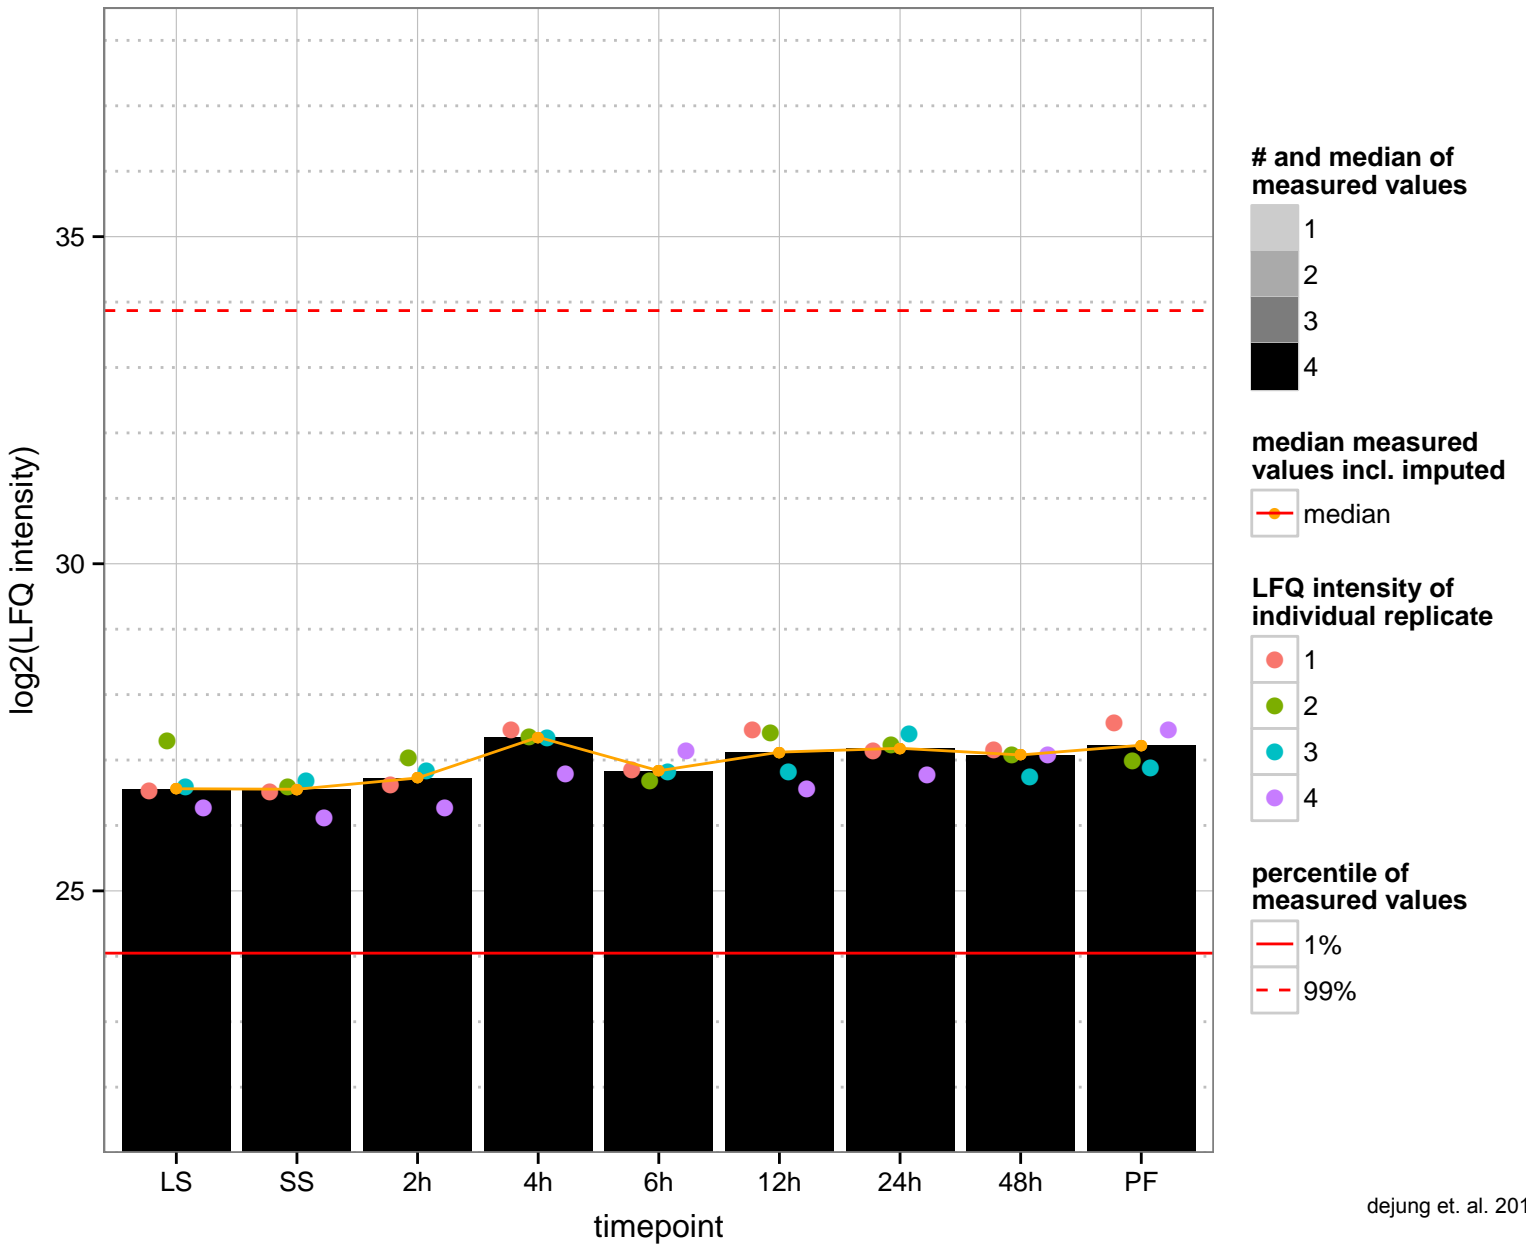

heat shock protein 90, putative, lipophosphoglycan biosynthetic protein, glucose regulated protein 94, putative (LPG3)  
 Tb927.3.3580  
 AGOF: ATP binding, unfolded protein binding  
 AGOC: null  
 AGOP: protein folding, response to stress  
 PGO: ATP binding, unfolded protein binding  
 PGO: null  
 PGOP: protein folding, response to stress

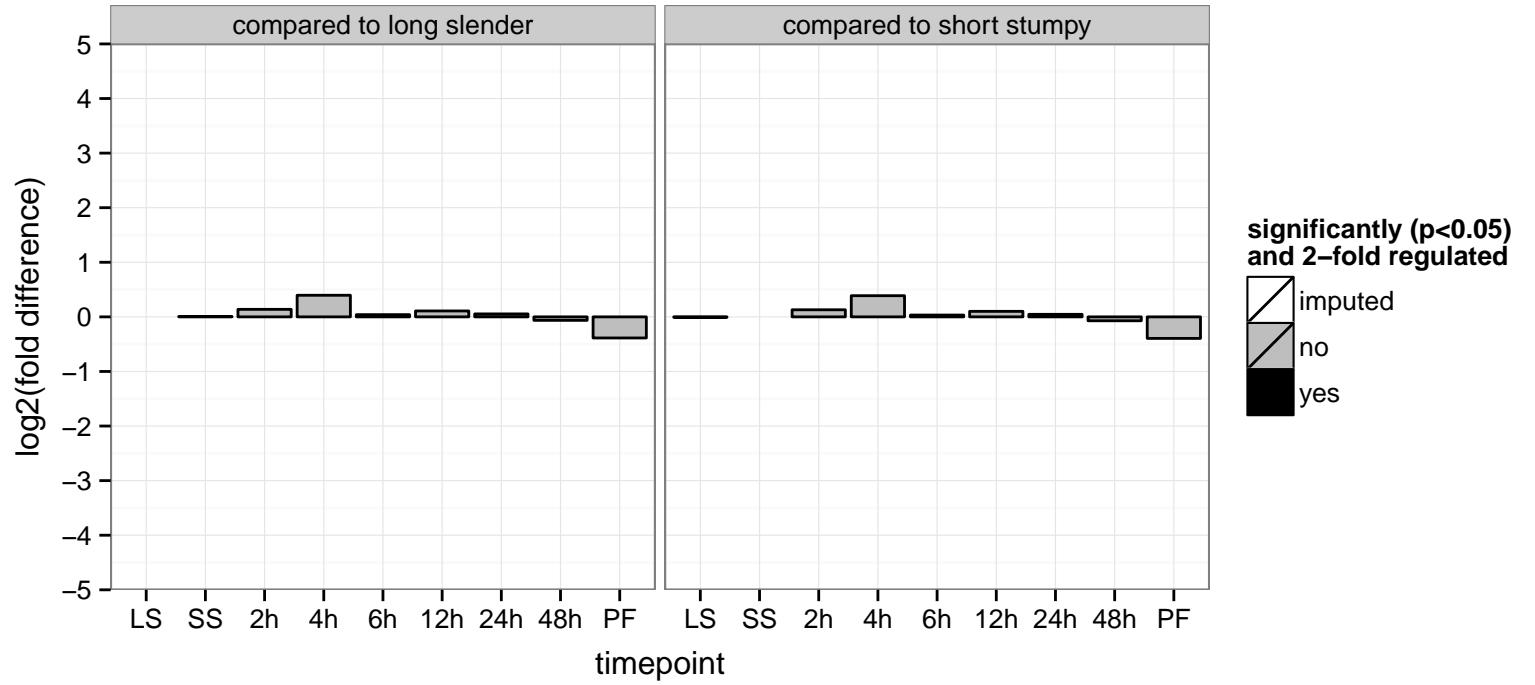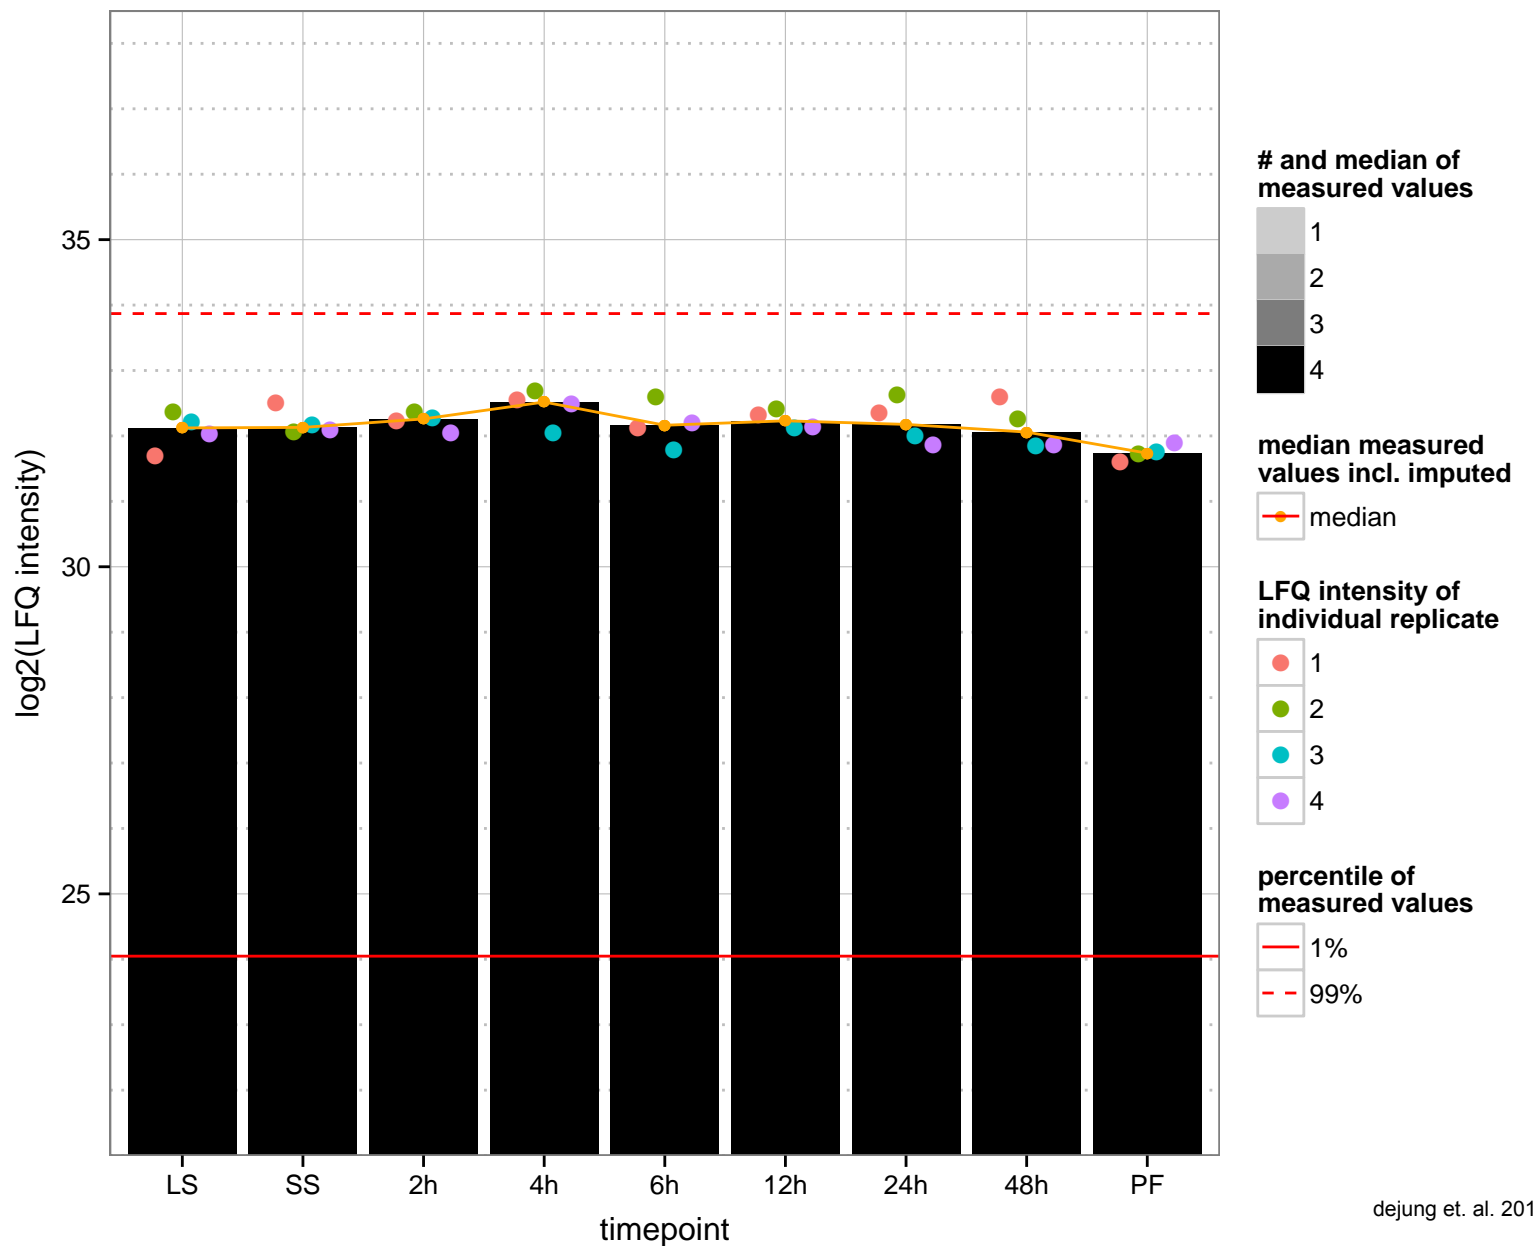

U3 small nucleolar ribonucleoprotein protein MPP10, putative  
 Tb927.3.3590  
 AGOF: null  
 AGOC: null  
 AGOP: null  
 PGO: null  
 PGOC: null  
 PGOP: null

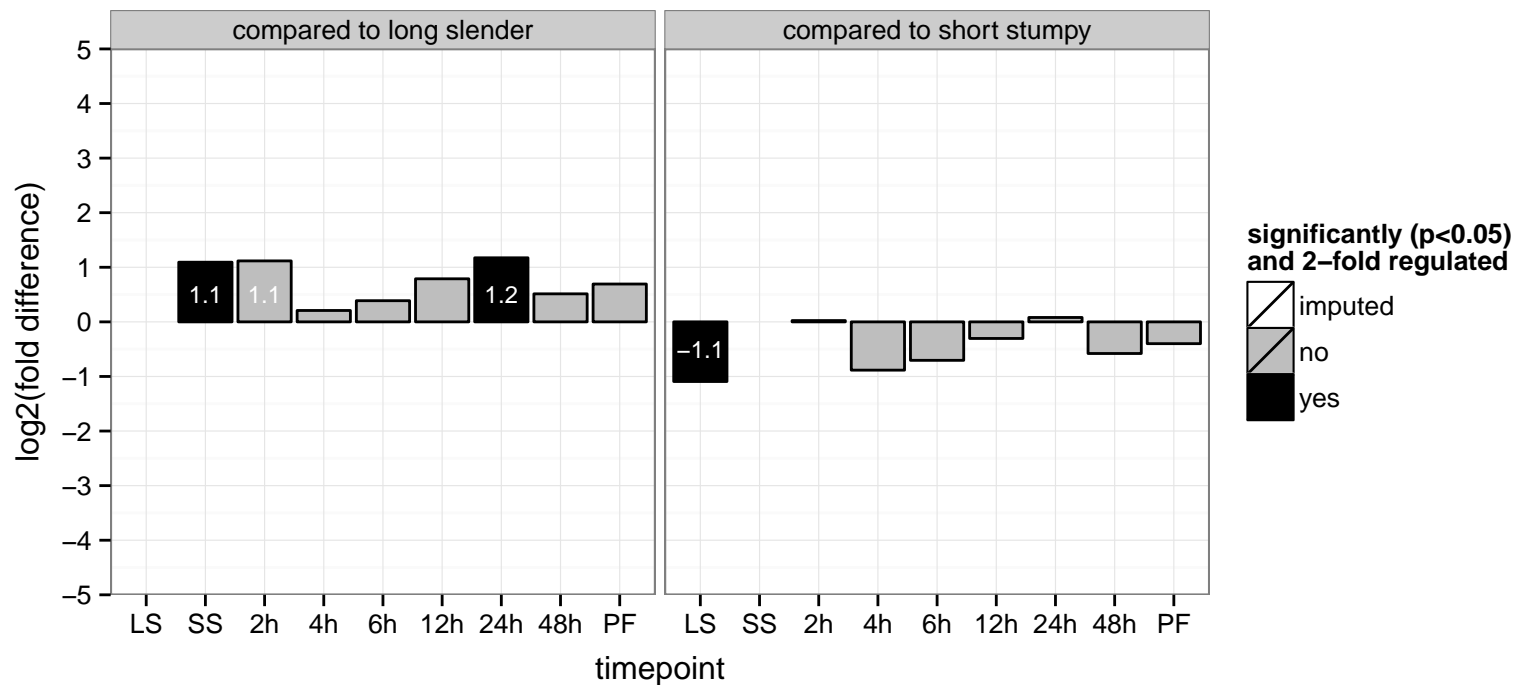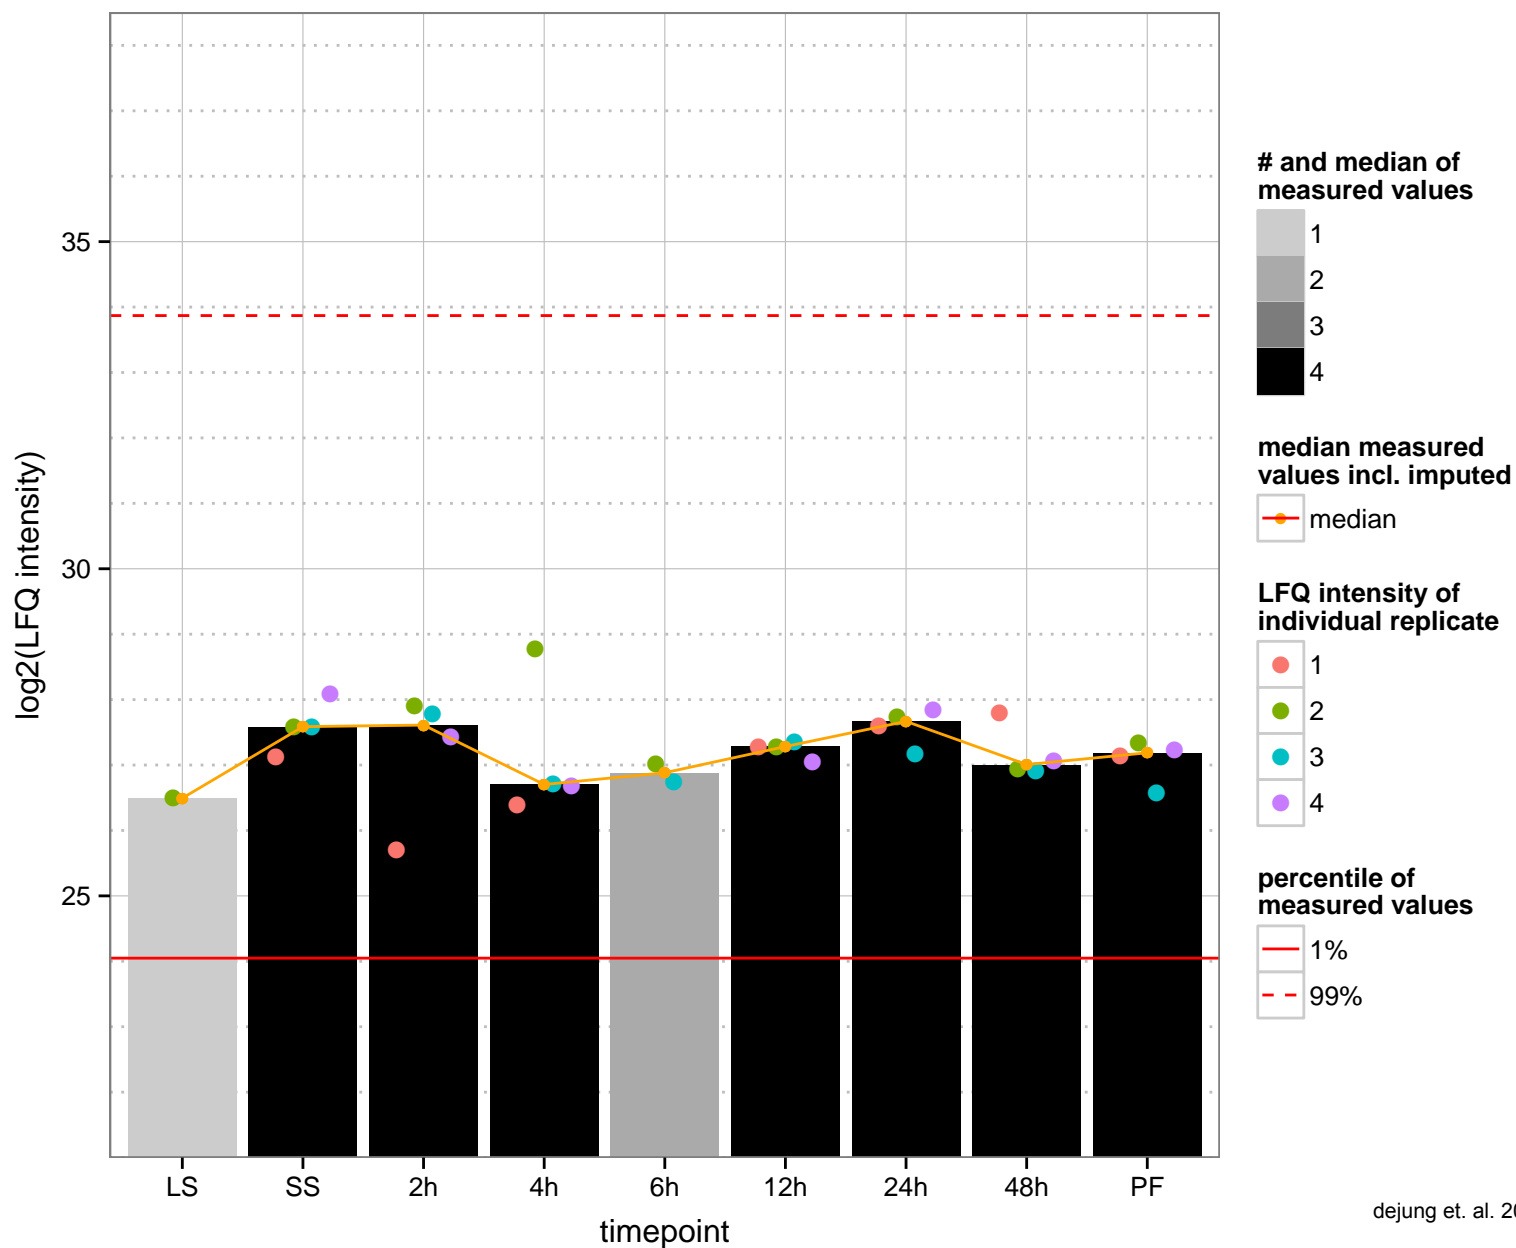



flagellar radial spoke protein-like, putative  
 Tb927.3.3690  
 AGOF: null  
 AGOC: null  
 AGOP: null  
 PGOF: null  
 PGO: null  
 PGOP: null

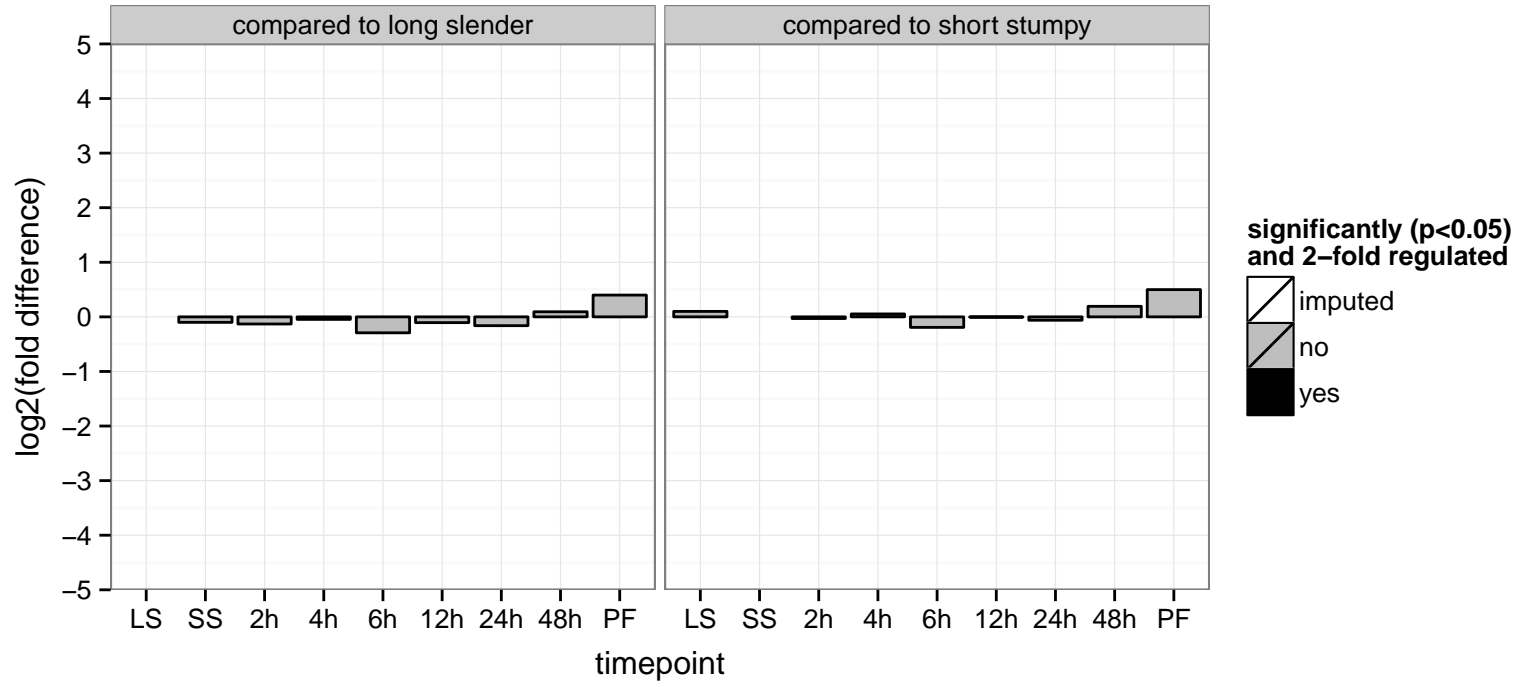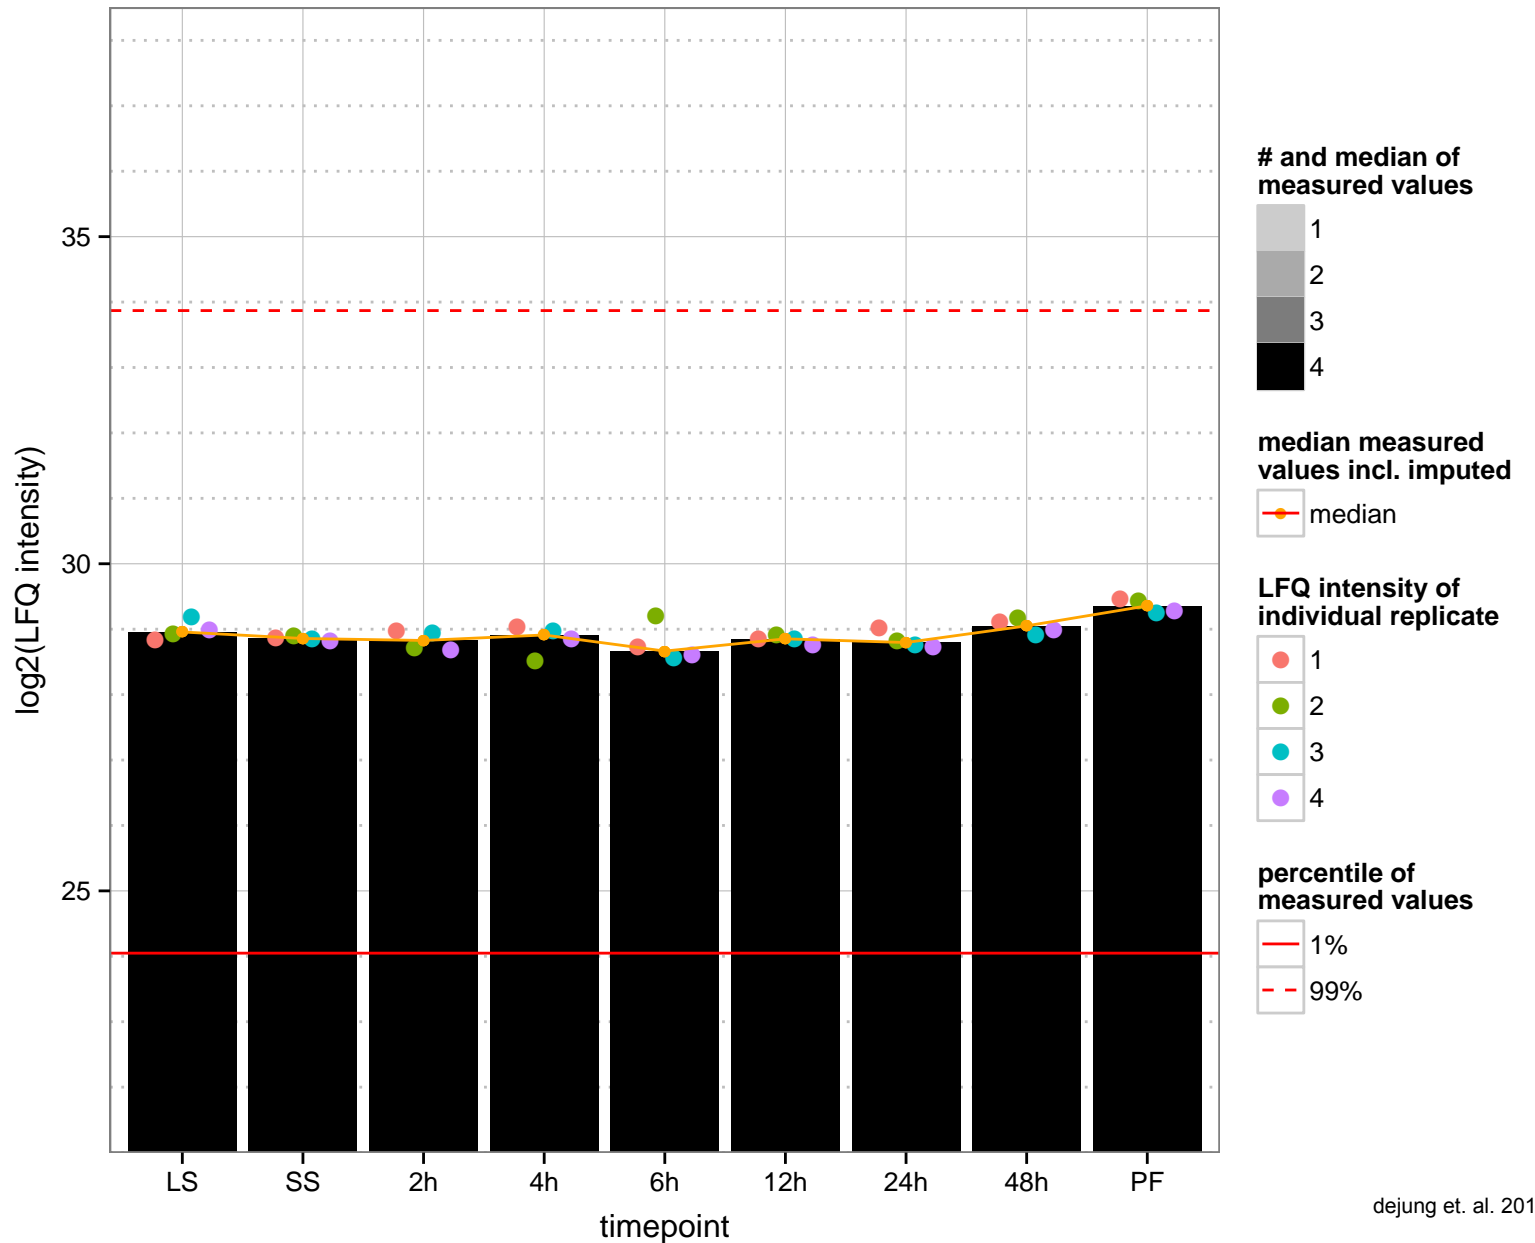

paraflagellar rod component, putative (PFC7)  
 Tb927.3.3750  
 AGOF: null  
 AGOC: null  
 AGOP: null  
 PGOF: null  
 PGO: null  
 PGOP: null

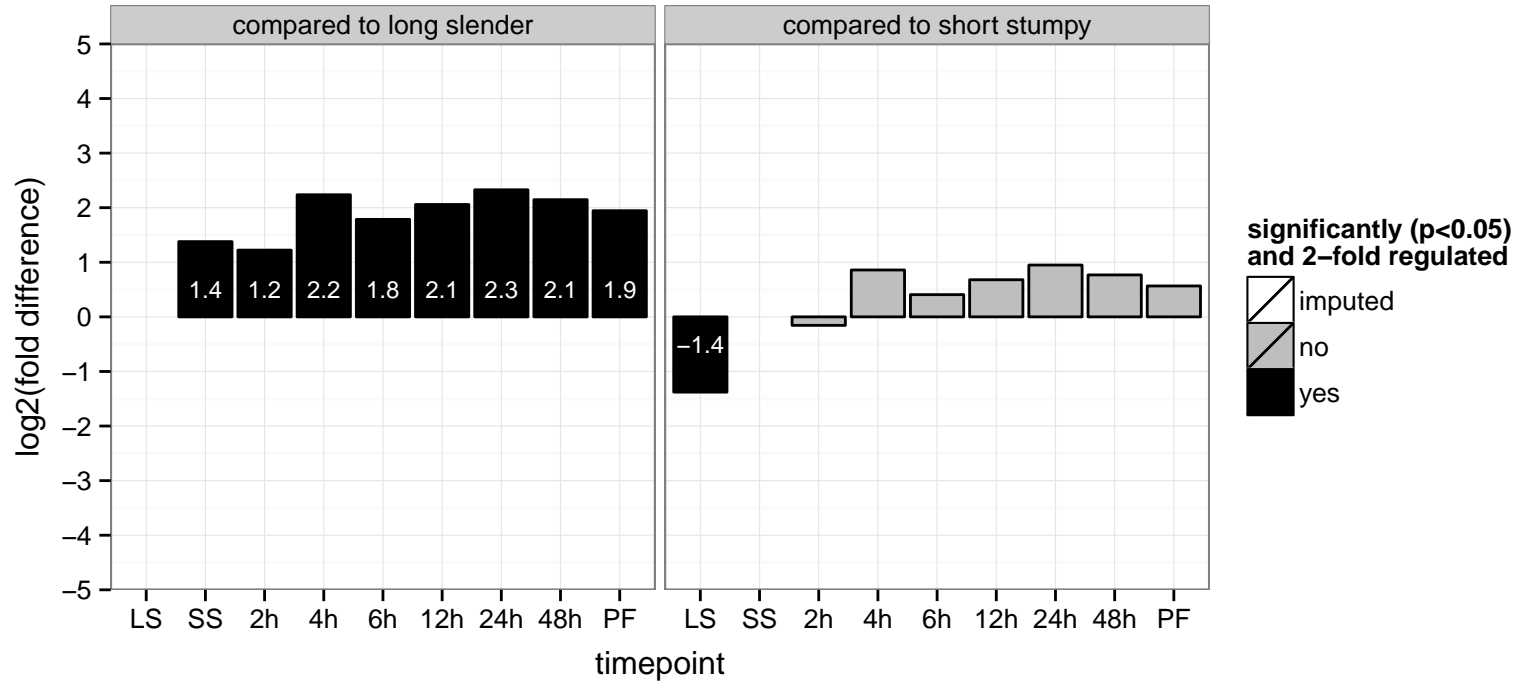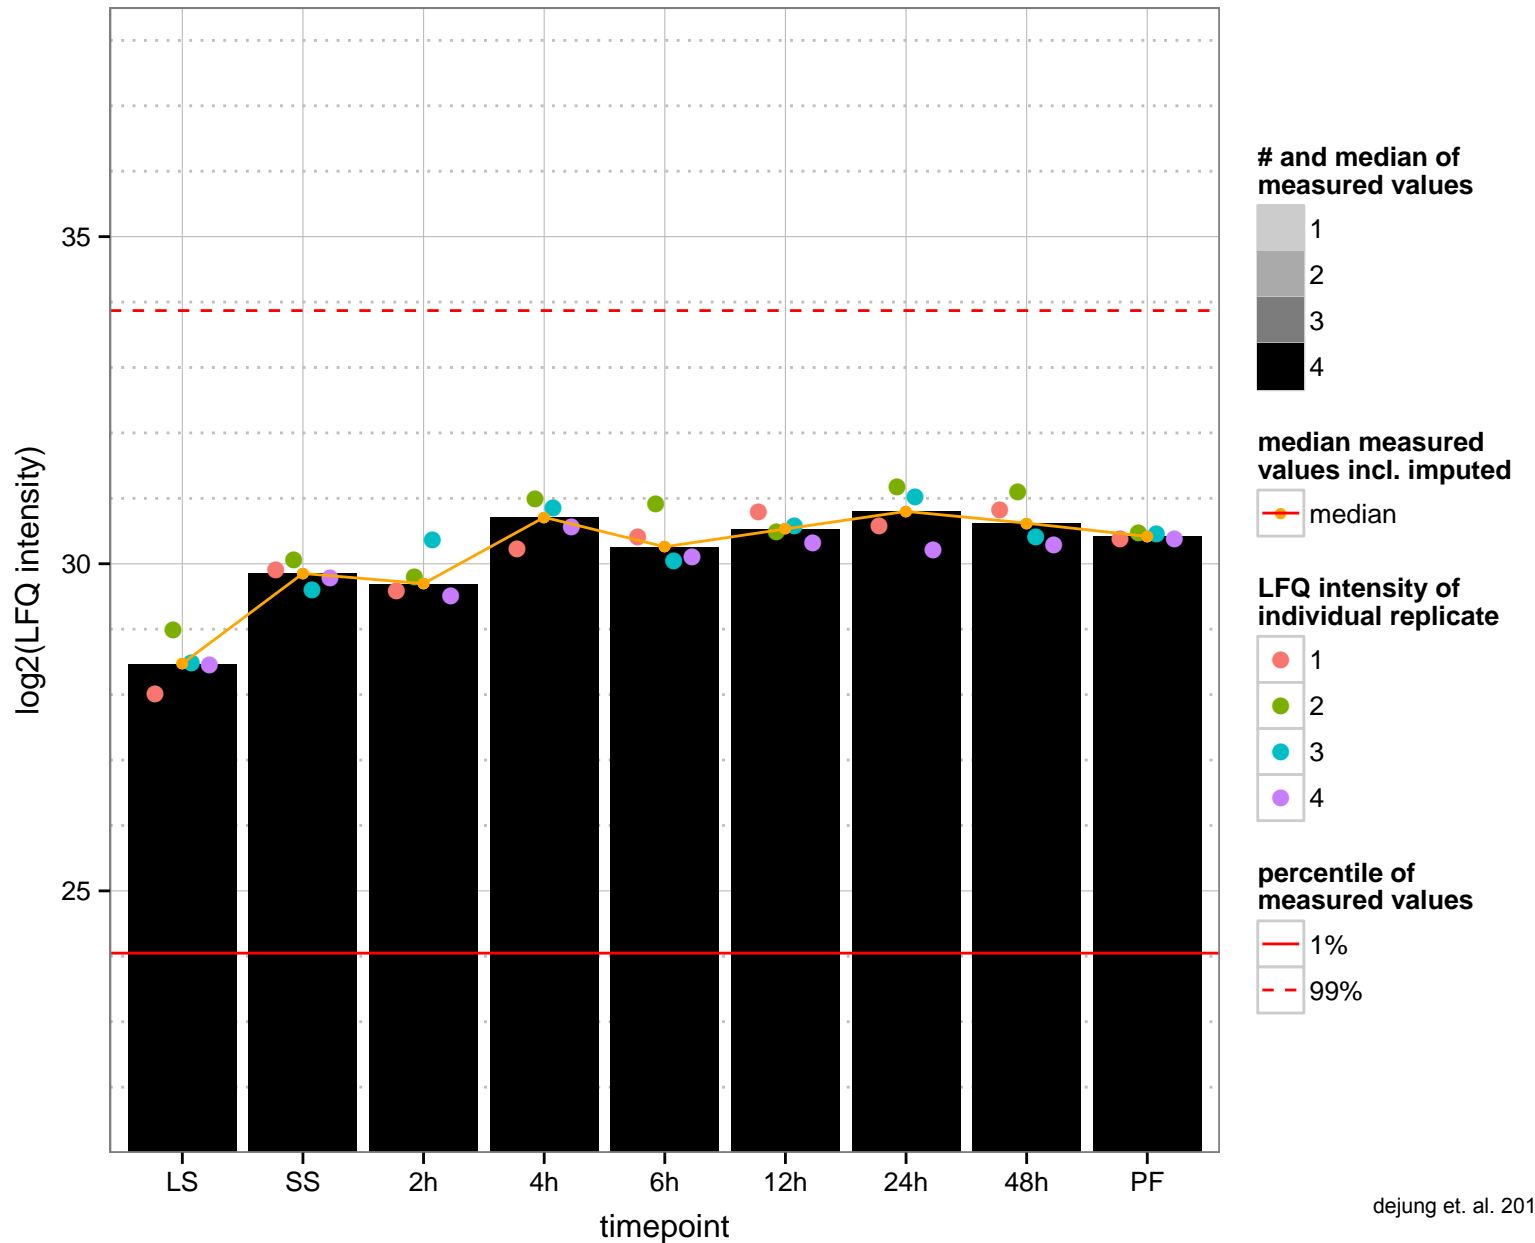

tryparedoxin 1b, putative (TXN1b), tryparedoxin 1a, putative (TXN1a)  
 Tb927.3.3780;Tb927.3.3760  
 AGOF: null  
 AGOC: null  
 AGOP: hydrogen peroxide catabolic process  
 PGO: null  
 PGOC: null  
 PGOP: null

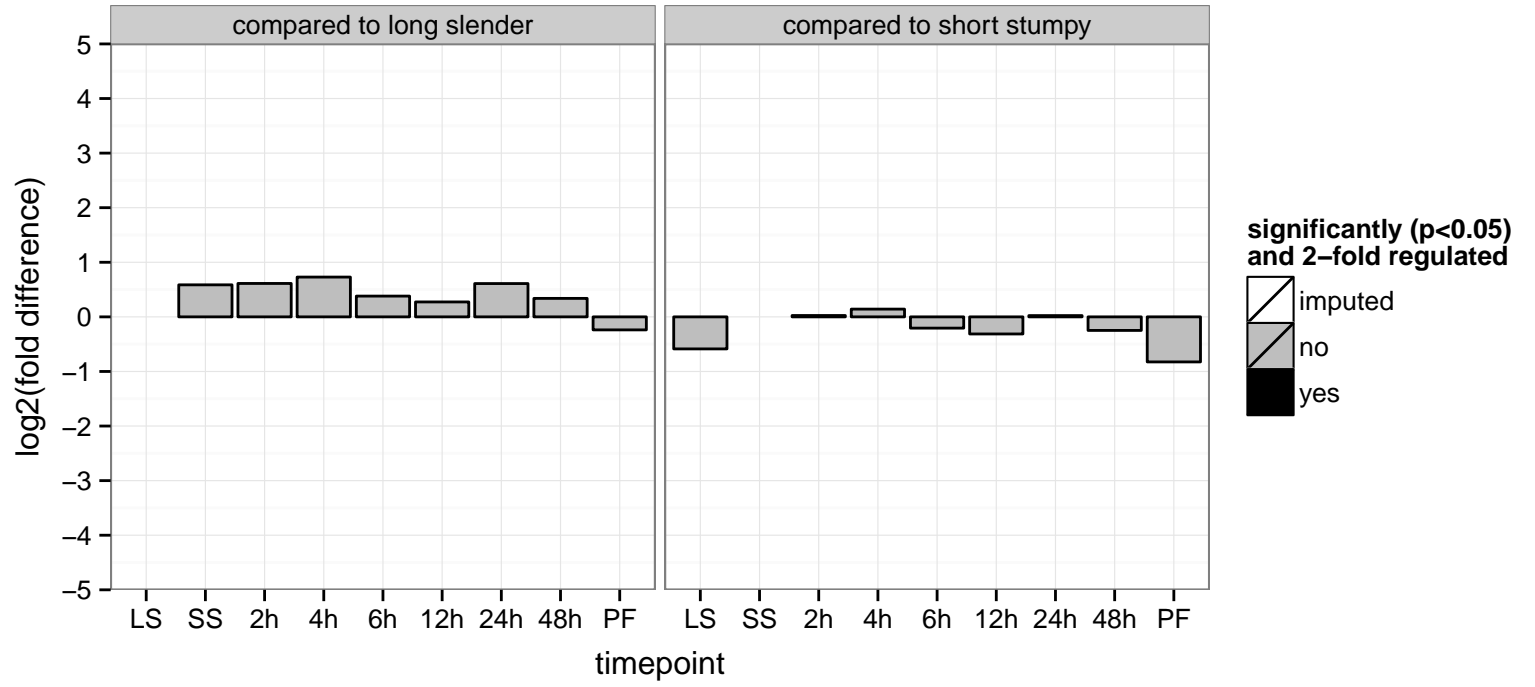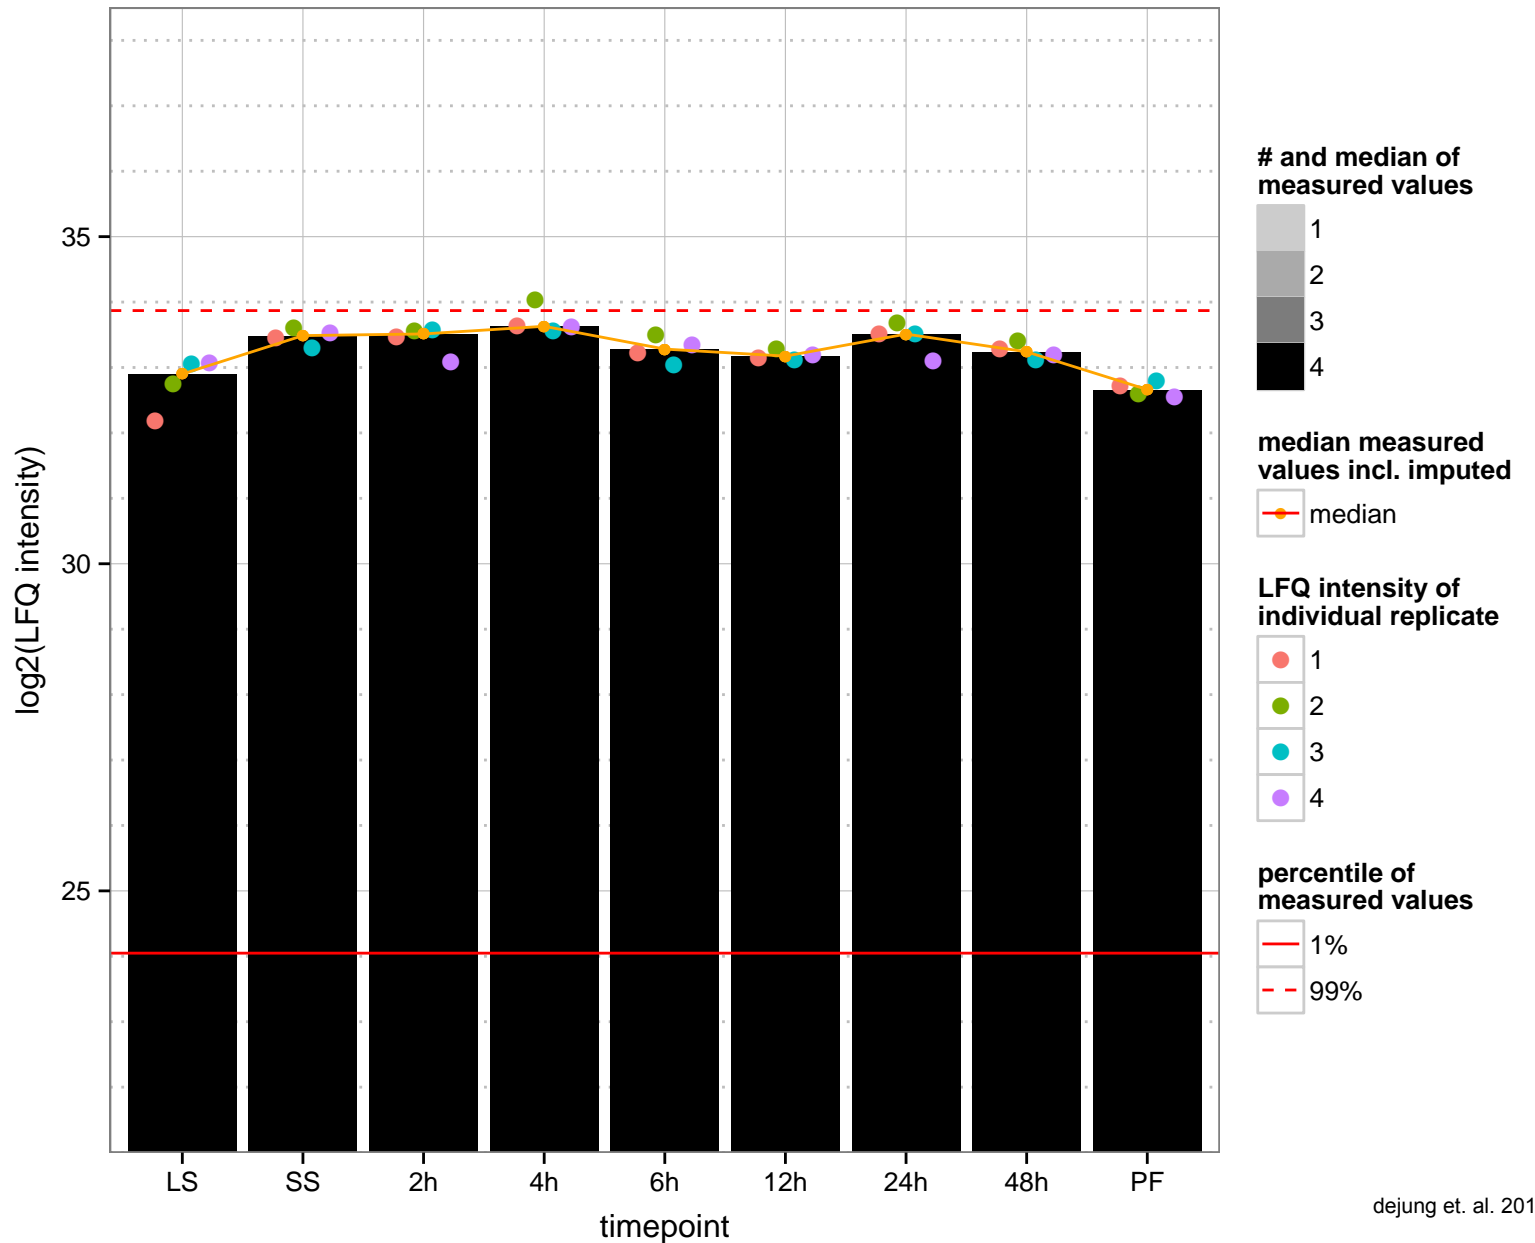

hypothetical protein, conserved  
 Tb927.3.3820  
 AGOF: null  
 AGOC: null  
 AGOP: null  
 PGO: null  
 PGOC: null  
 PGOP: null

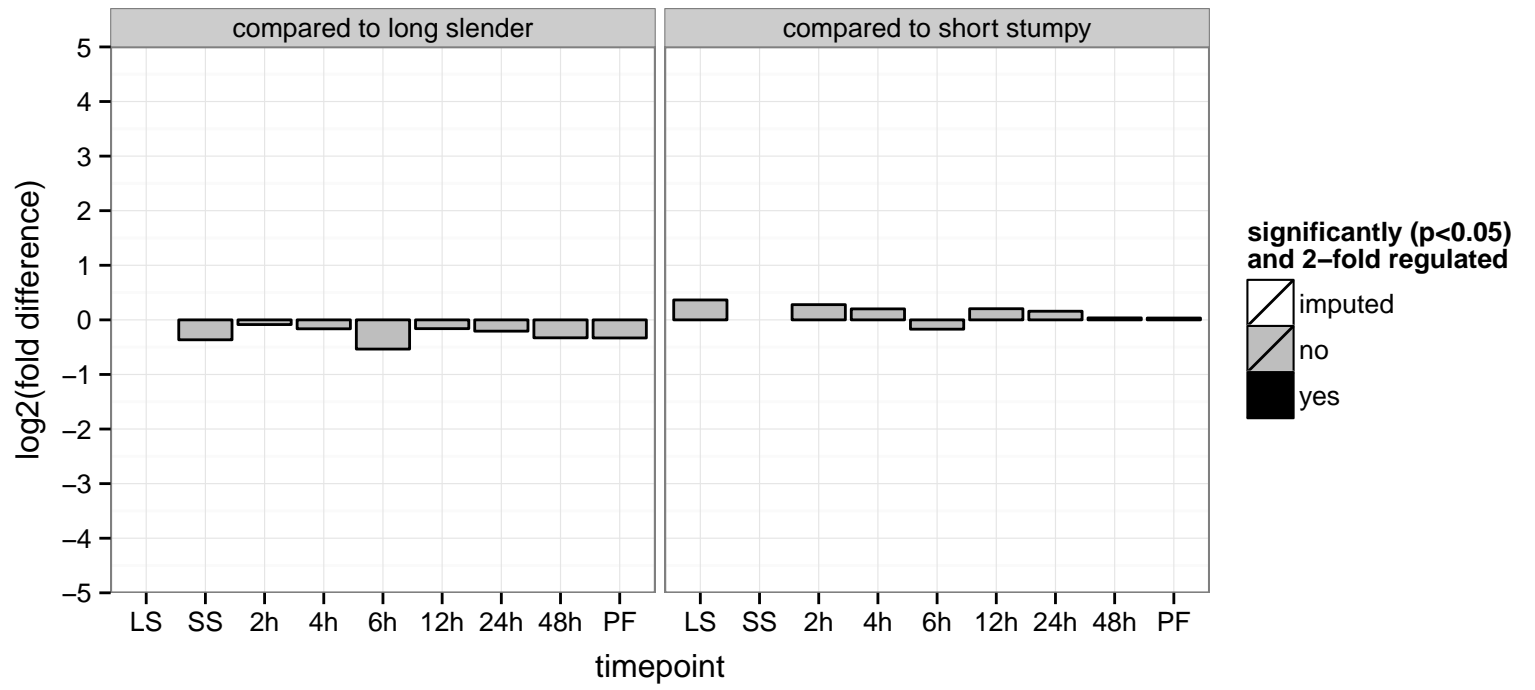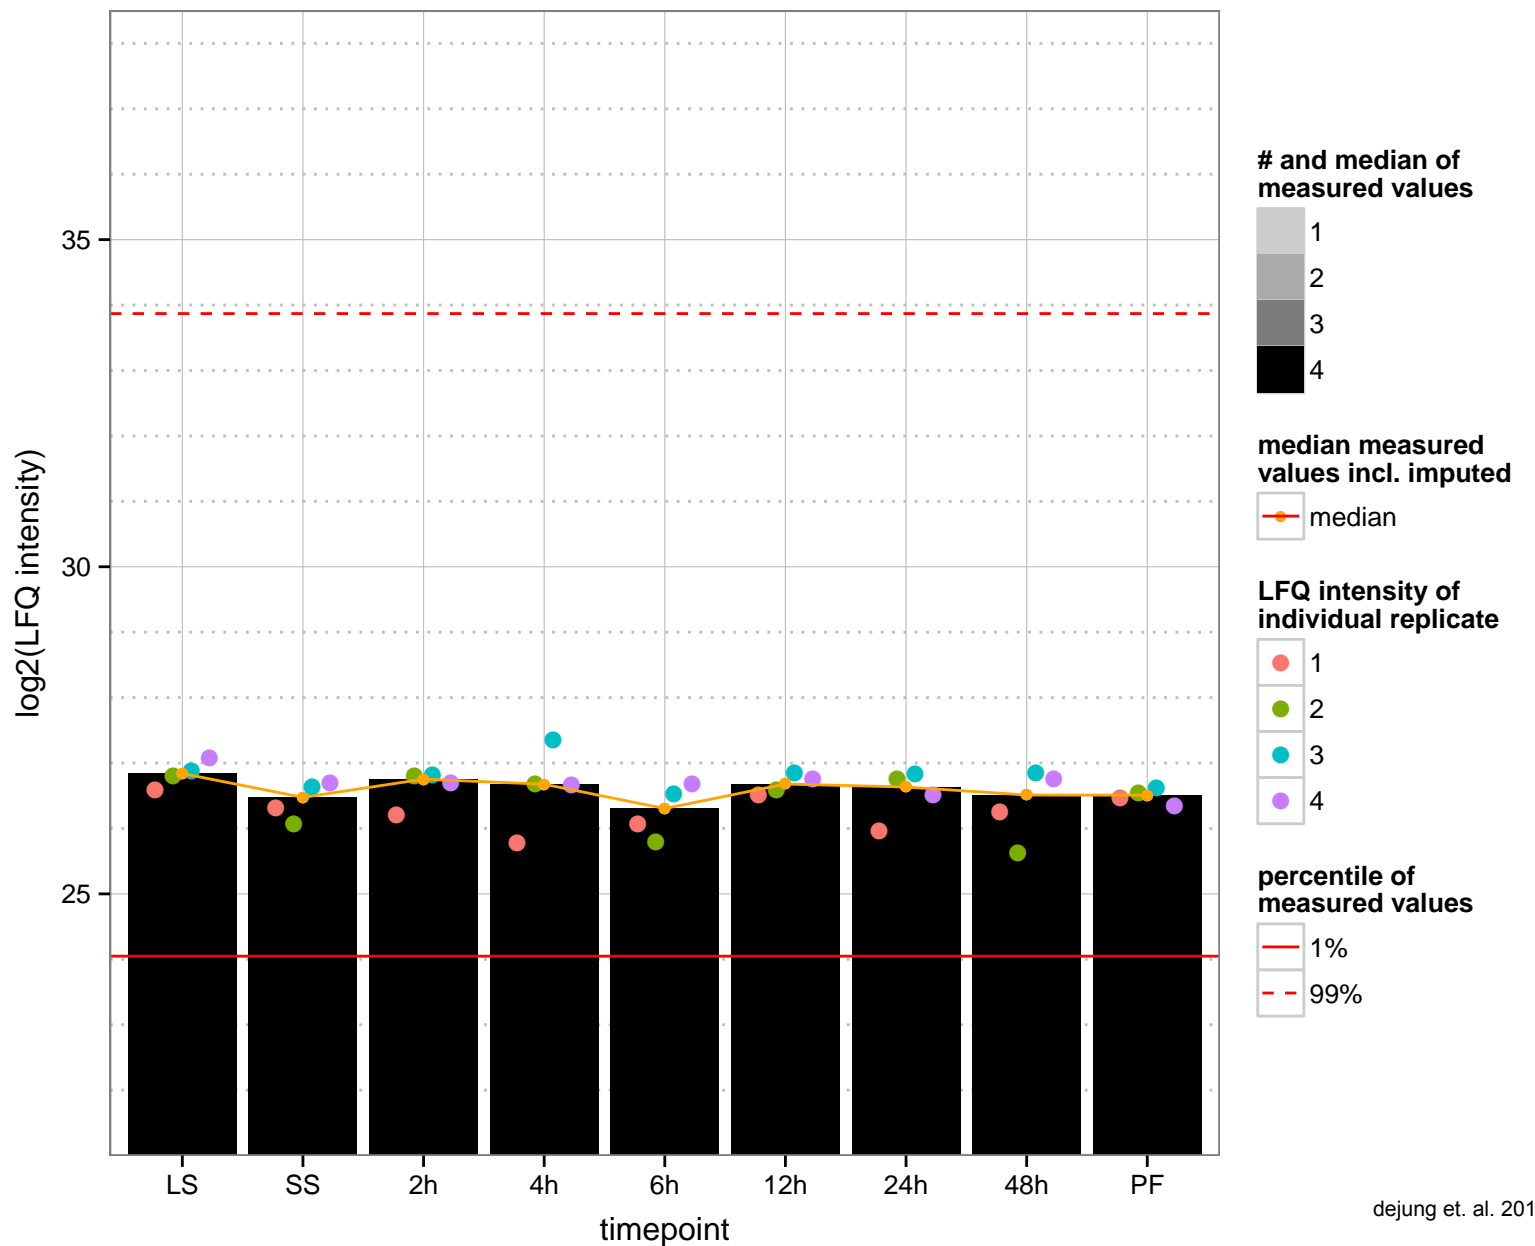

hypothetical protein, conserved  
 Tb927.3.3830  
 AGOF: null  
 AGOC: null  
 AGOP: null  
 PGO: null  
 PGOC: null  
 PGOP: null

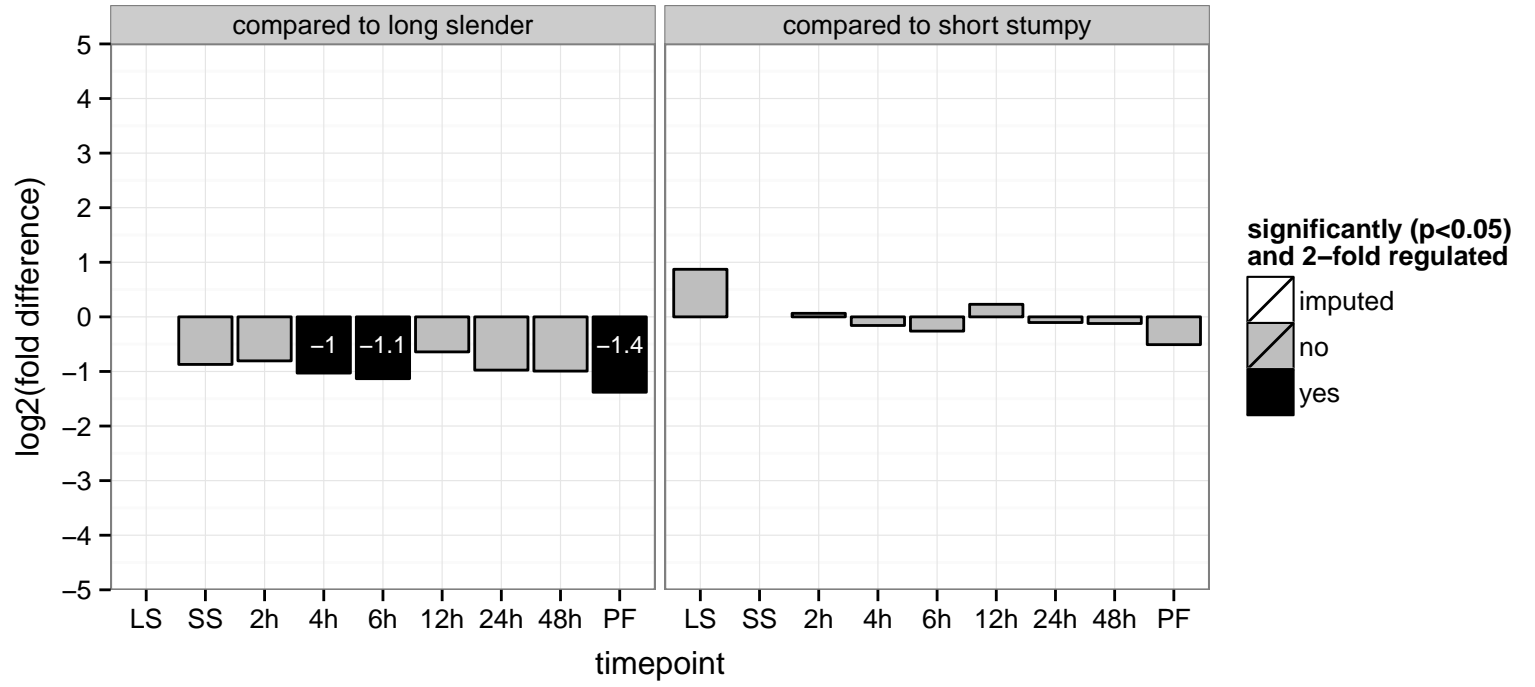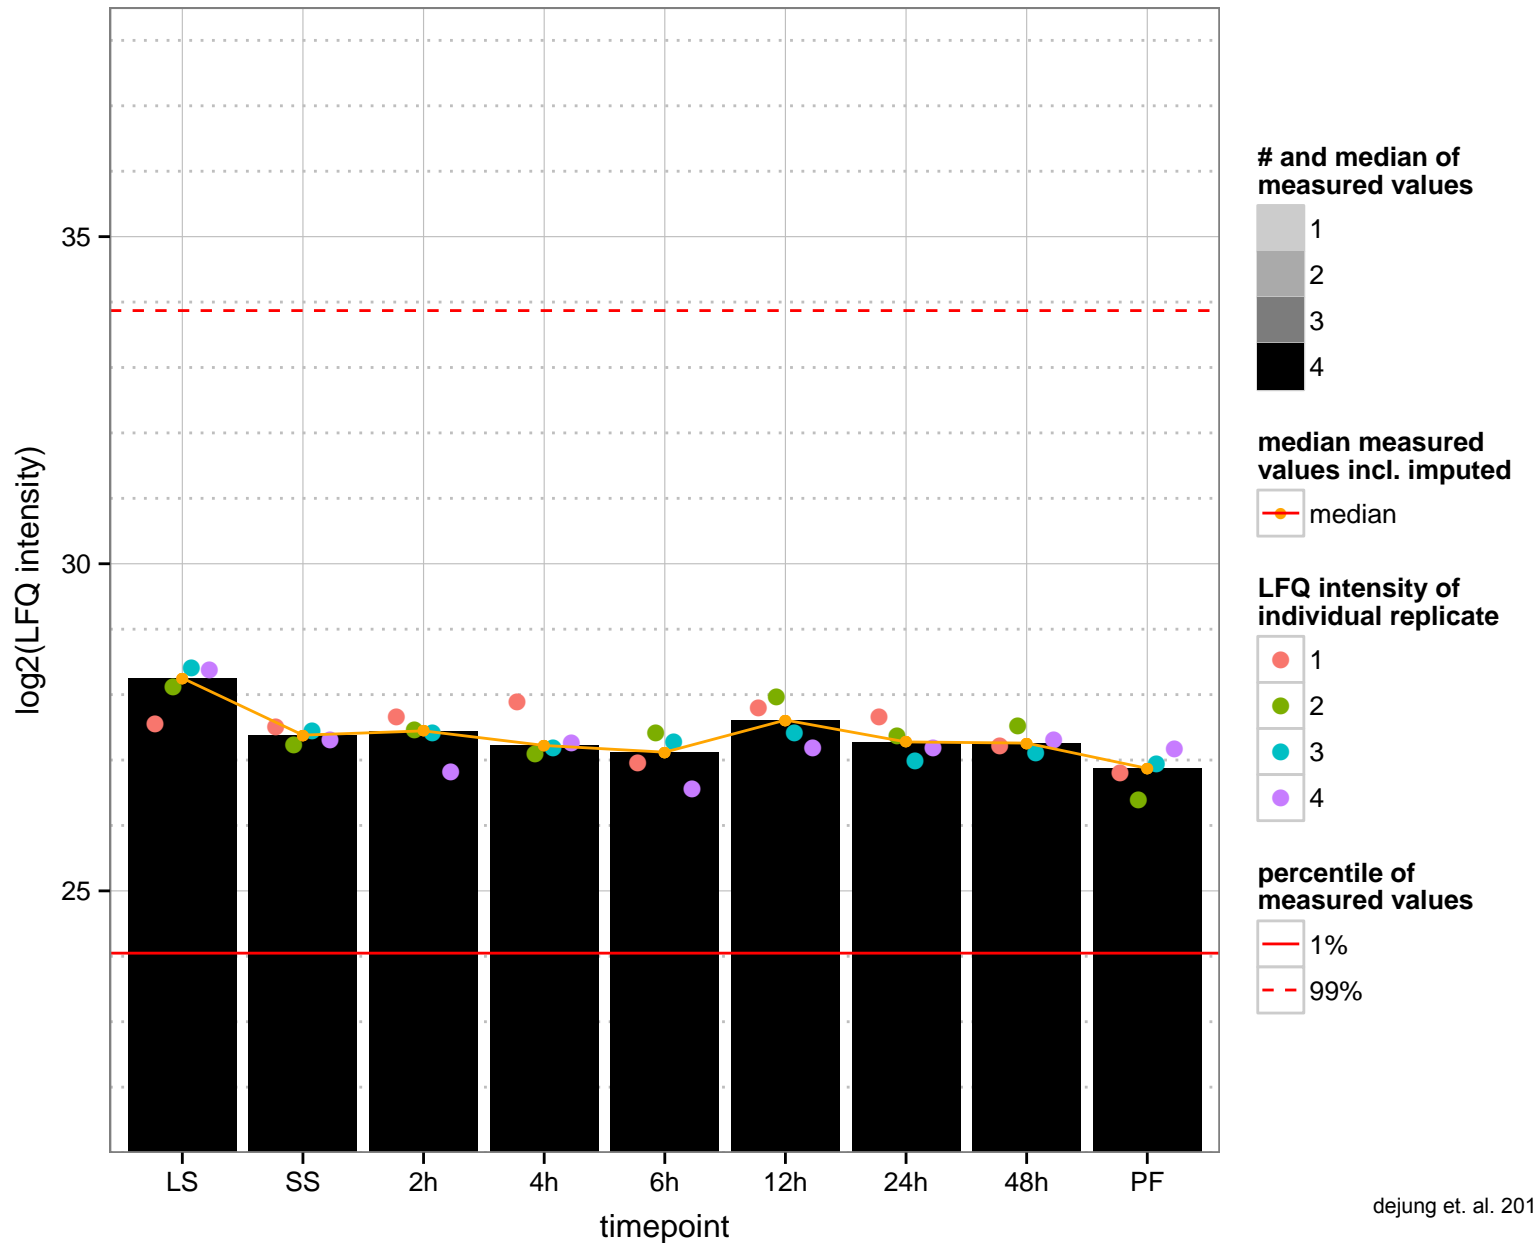

COPII coat assembly protein sec16 (sec16)

Tb927.3.3850

AGOF: null

AGOC: endoplasmic reticulum exit site

AGOP: ER to Golgi vesicle-mediated transport, Golgi organization, endoplasmic reticulum organization, protein localization to

PGOF: null

PGOC: null

PGOP: null

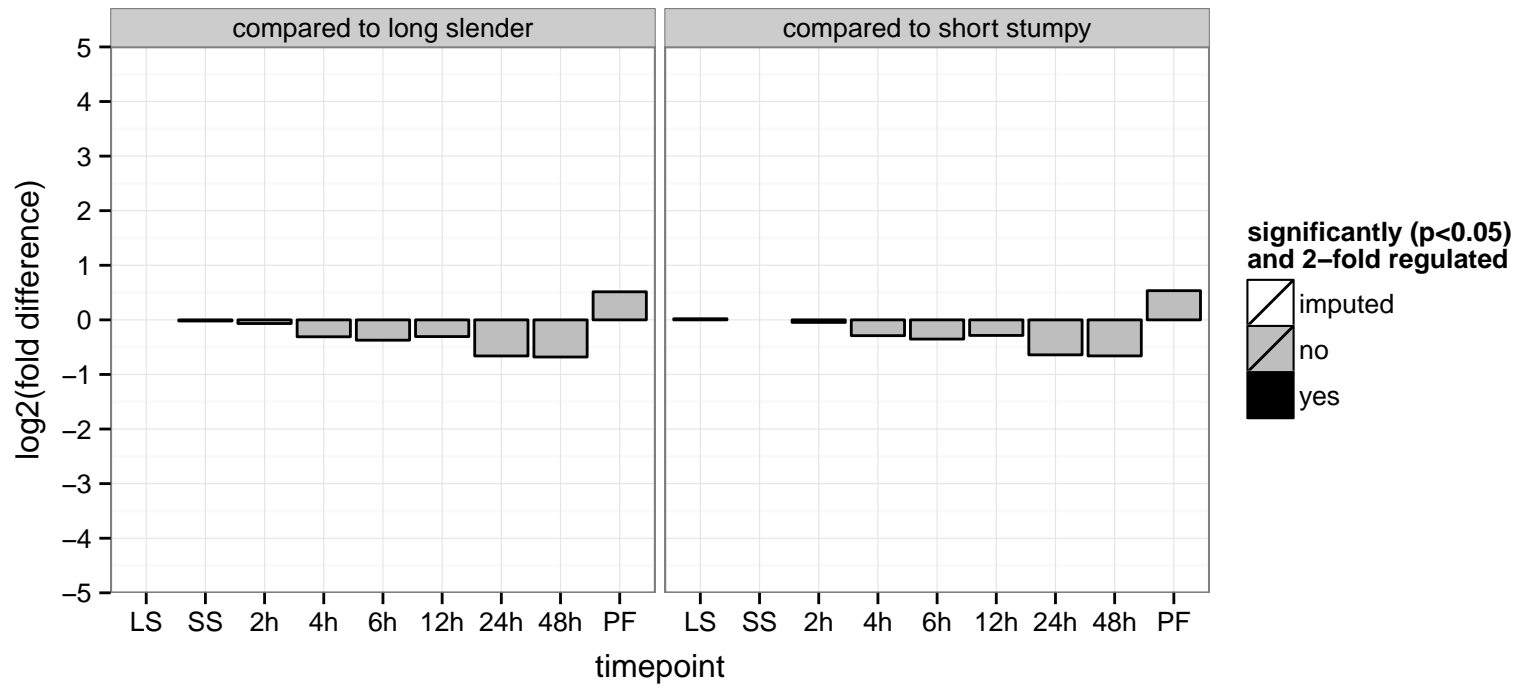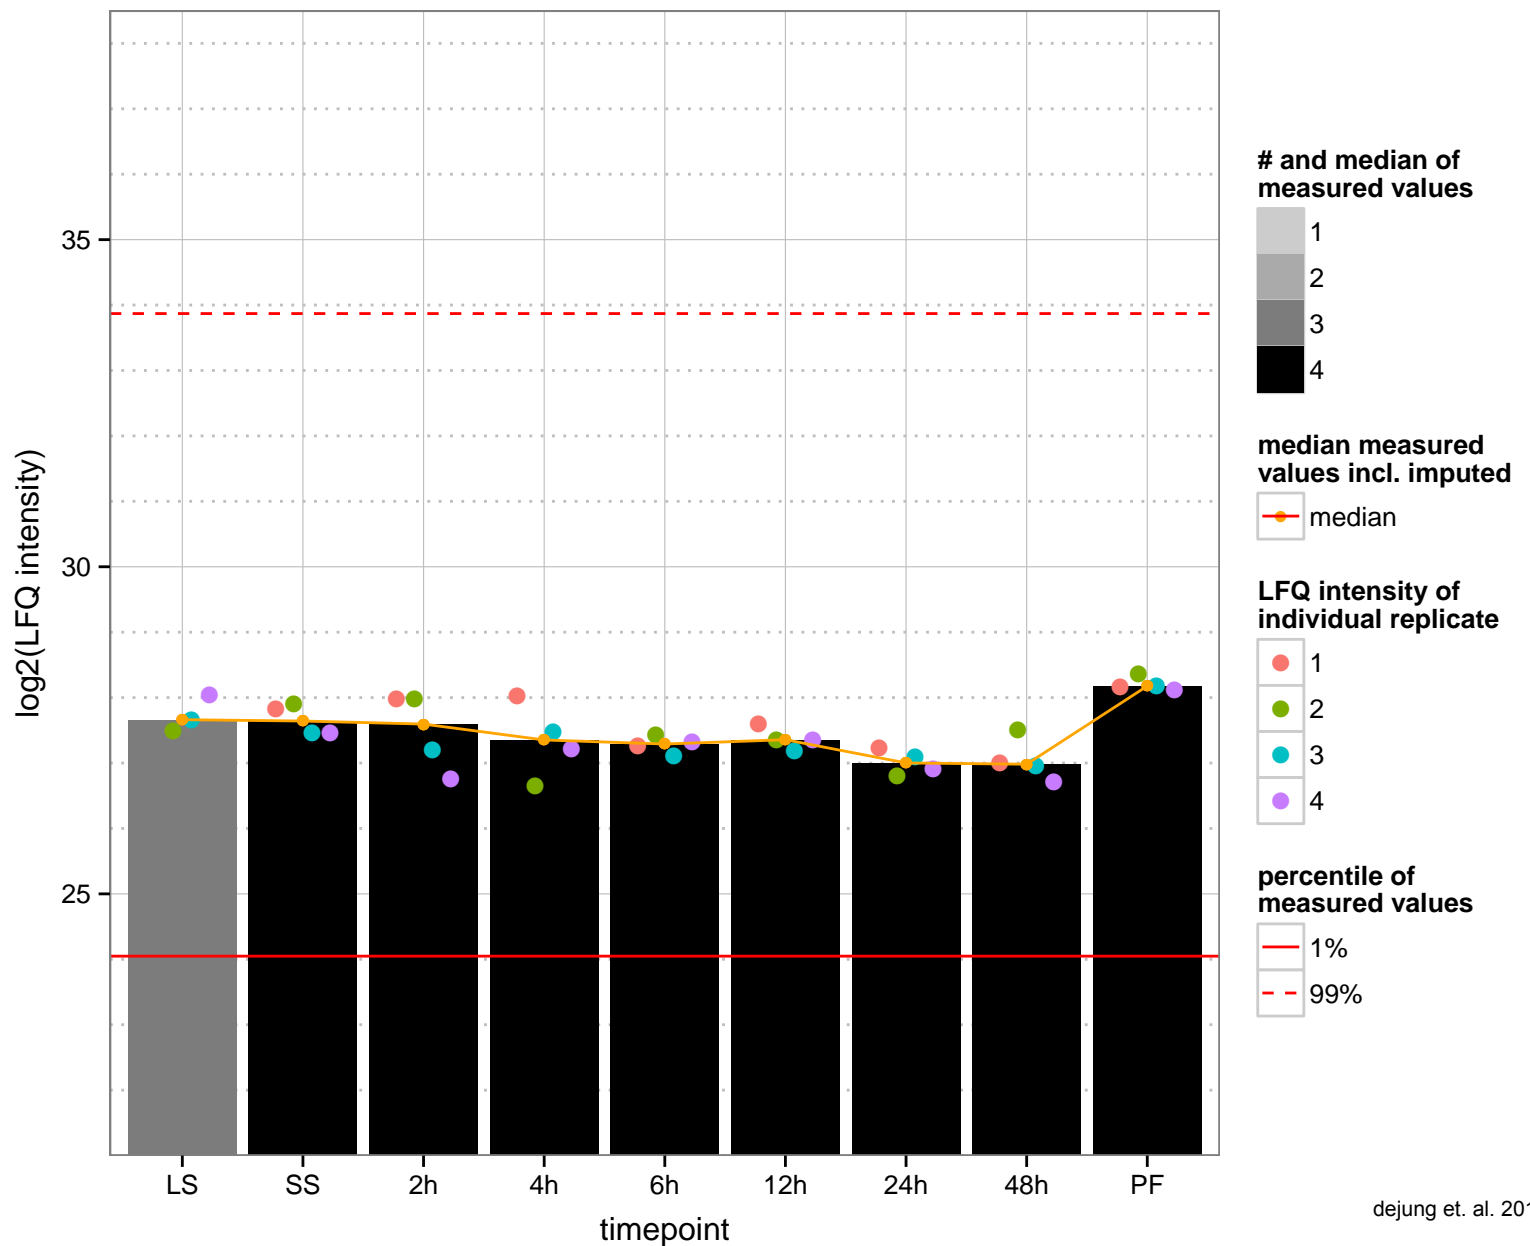

carnitine O-palmitoyltransferase II, putative (CPT II)  
 Tb927.3.3900  
 AGOF: transferase activity, transferring acyl groups  
 AGOC: null  
 AGOP: null  
 PGOF: transferase activity, transferring acyl groups  
 PGO: null  
 PGOP: null

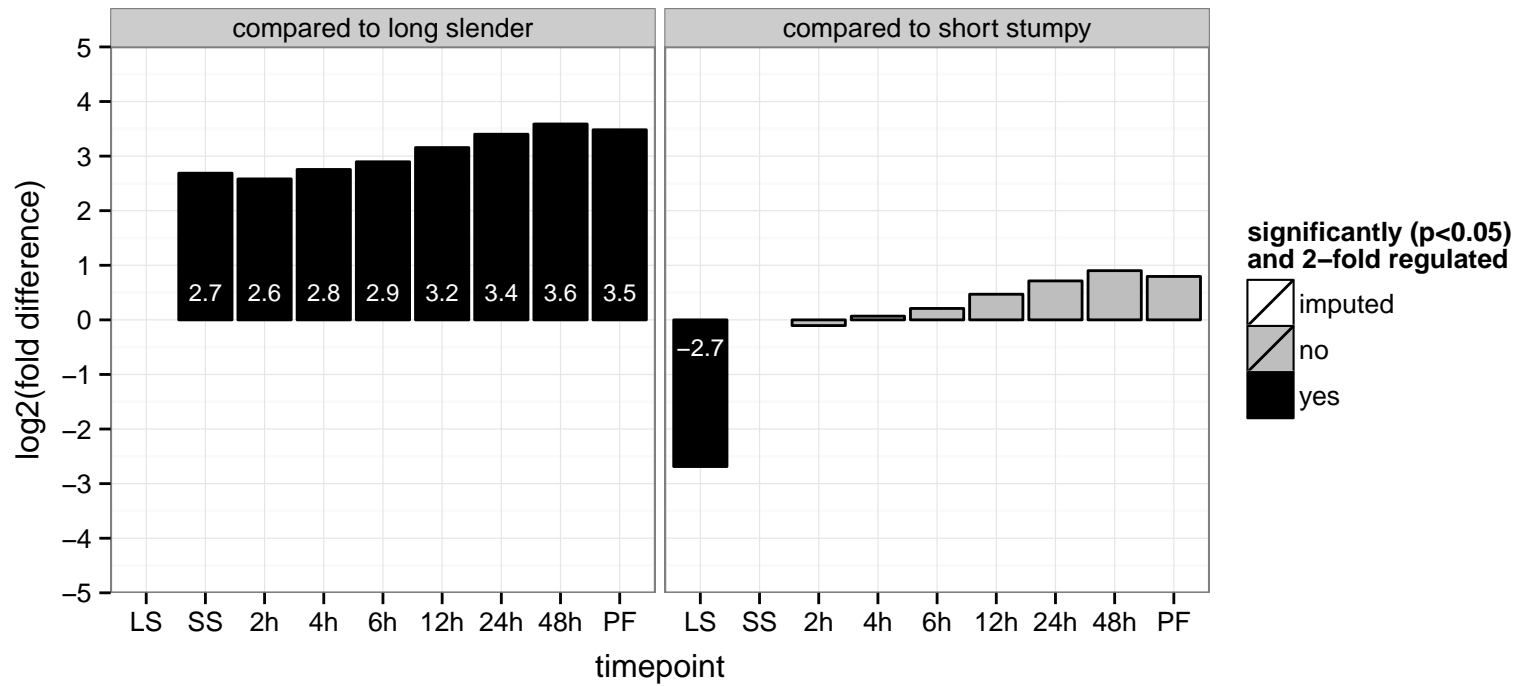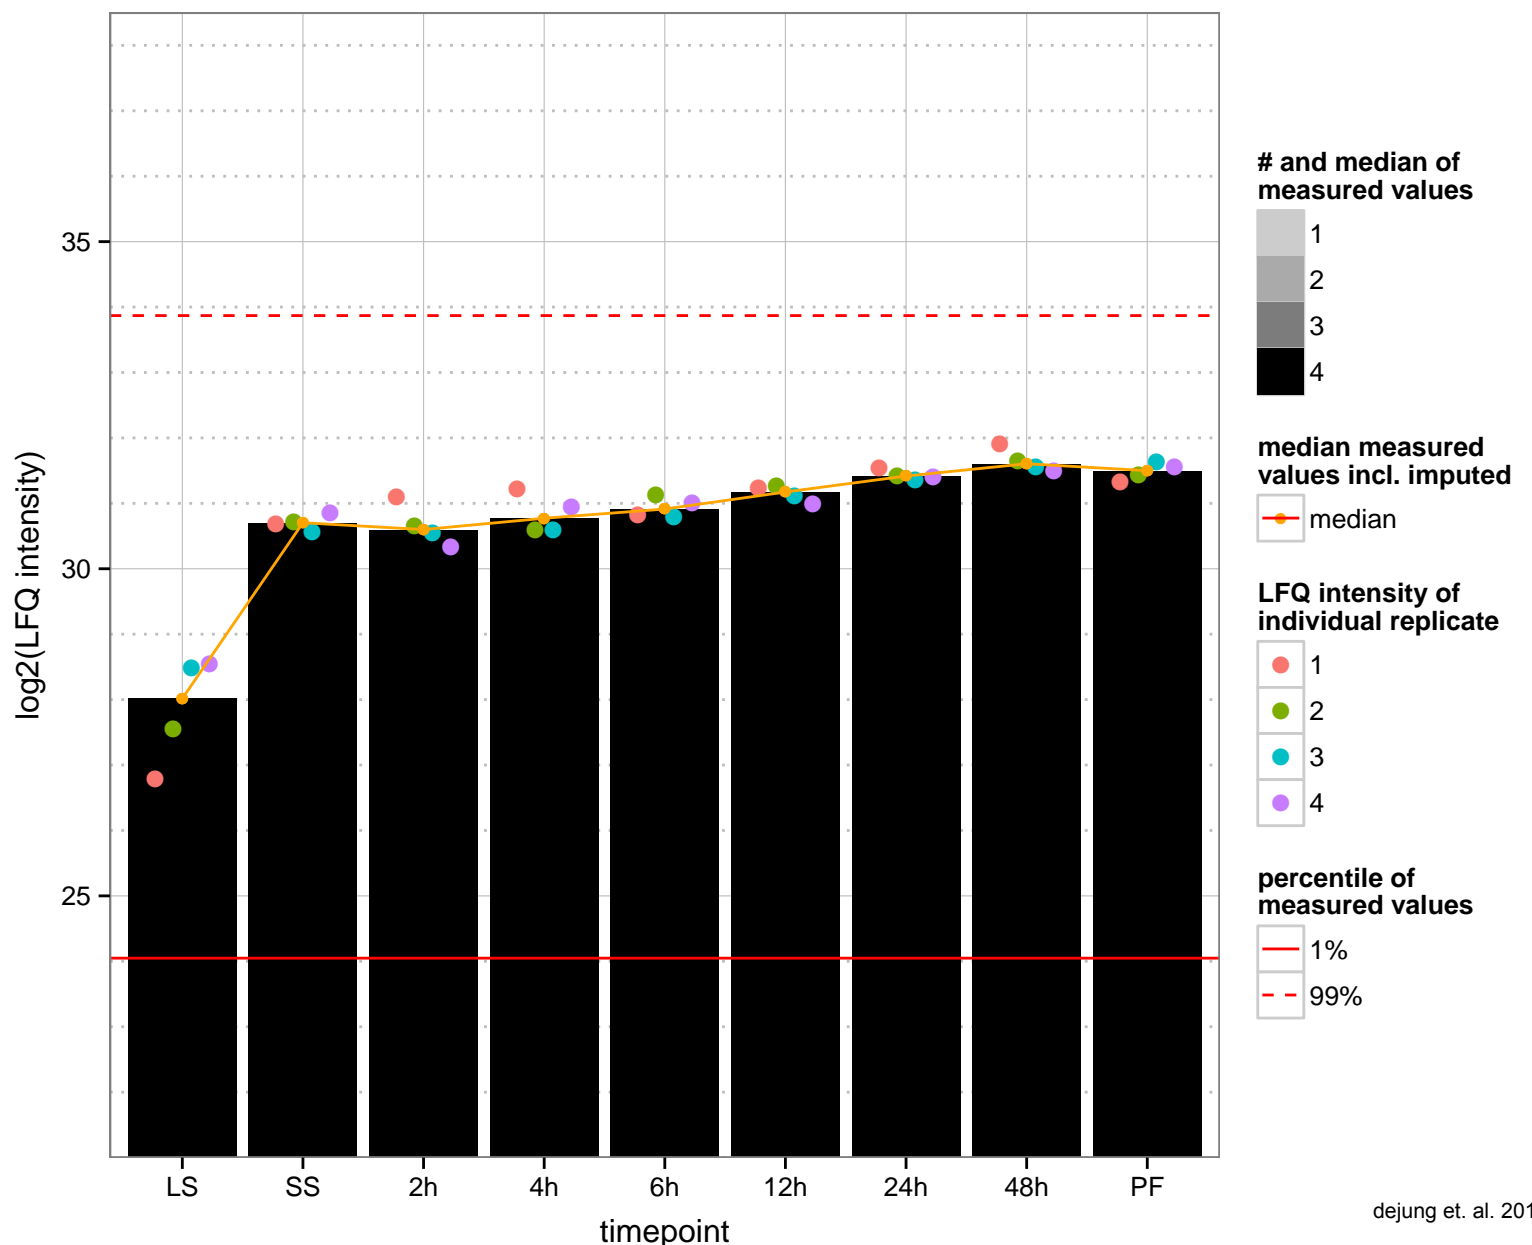

clathrin coat assembly protein ap19, putative  
 Tb927.3.4000  
 AGOF: protein transporter activity  
 AGOC: clathrin adaptor complex, clathrin coat of trans-Golgi network vesicle  
 AGOP: intracellular protein transport, vesicle-mediated transport  
 PGO: protein transporter activity  
 PGO: null  
 PGO: protein transport, transport

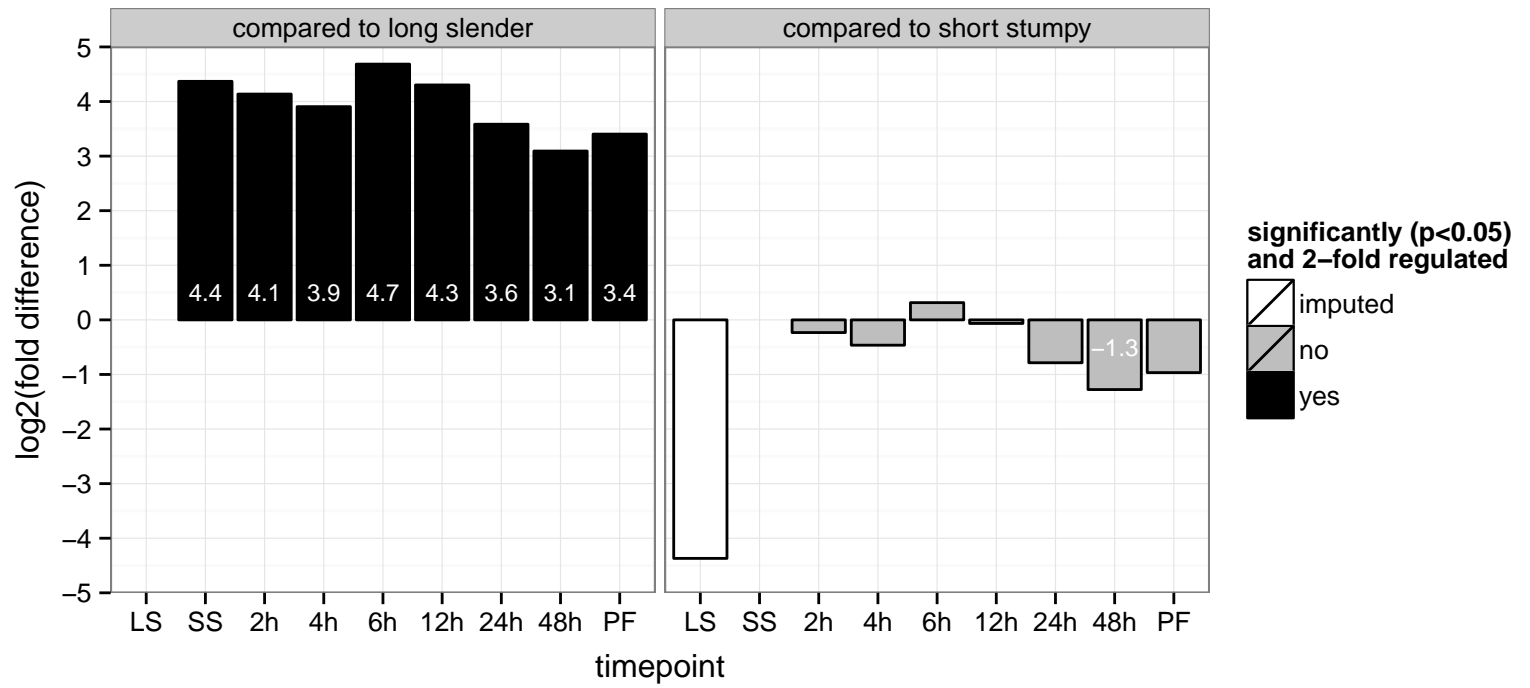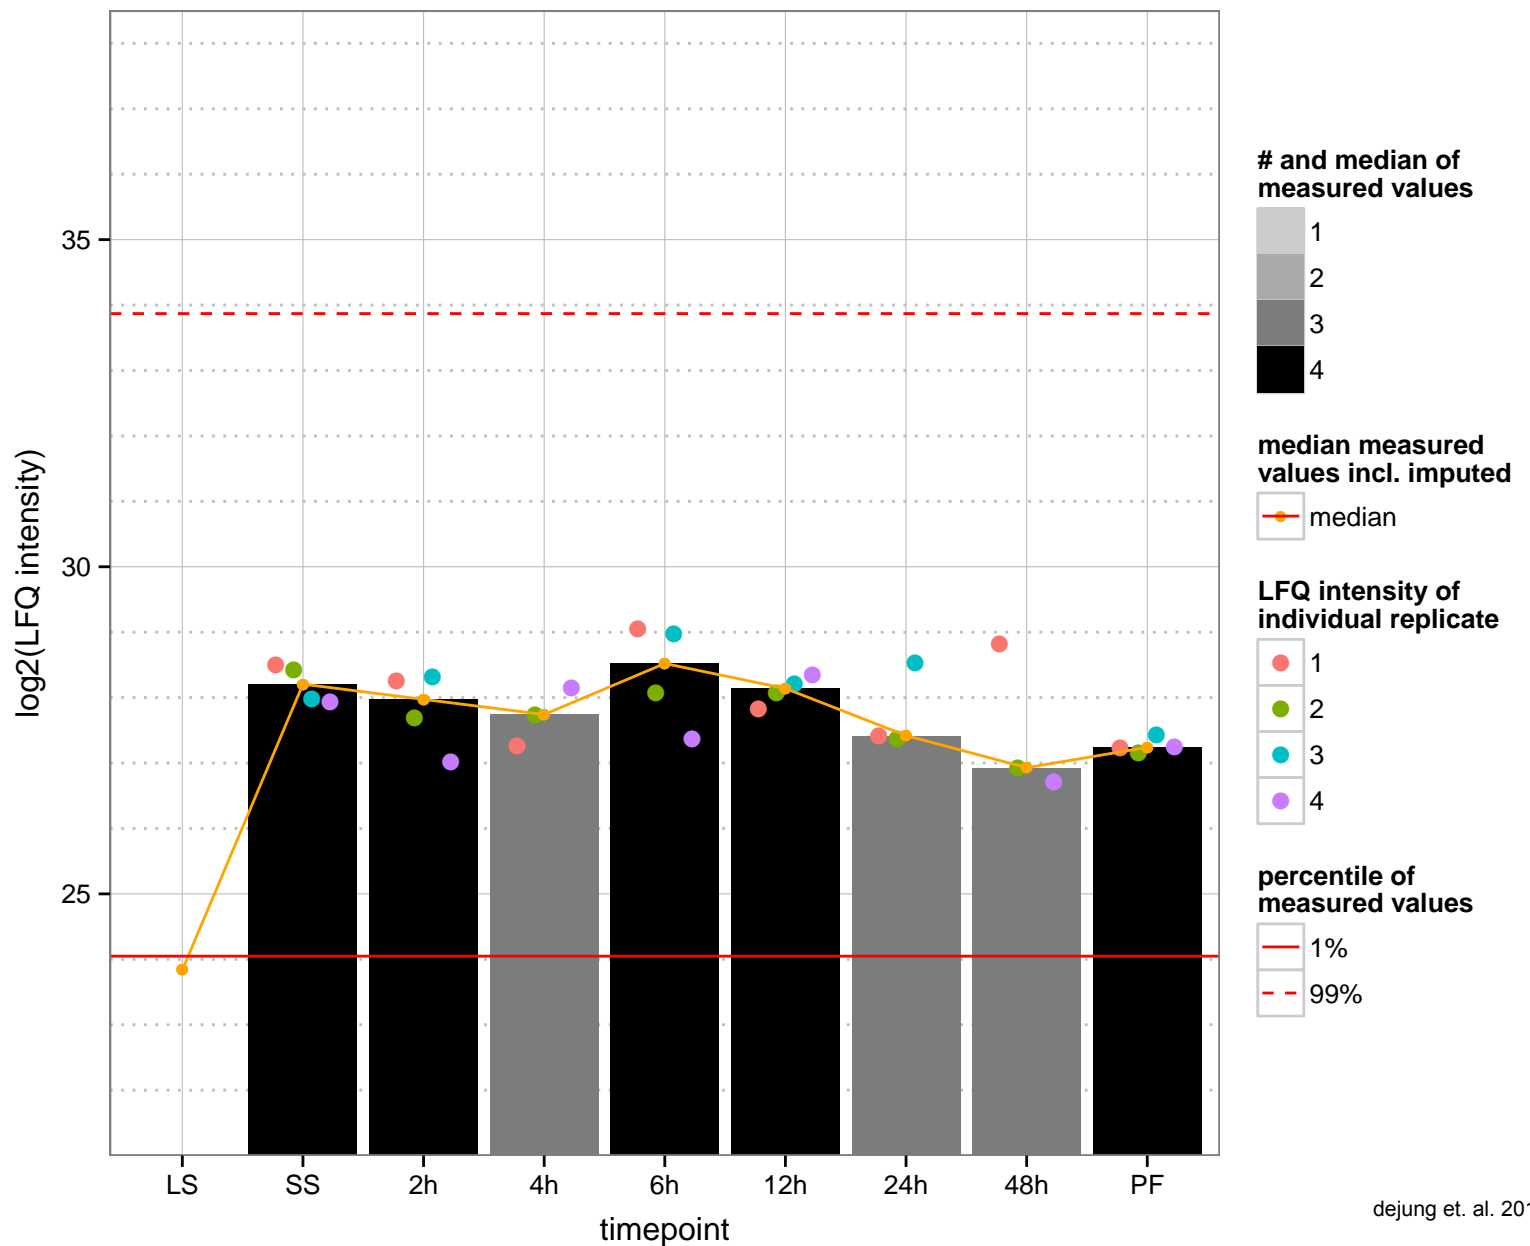



phosphatidylinositol 4-kinase alpha, putative

Tb927.3.4020

AGOF: 1-phosphatidylinositol 4-kinase activity, phosphotransferase activity, alcohol group as acceptor

AGOC: cytosol

AGOP: phosphatidylinositol phosphorylation, phosphatidylinositol-mediated signaling

PGOF: binding, phosphotransferase activity, alcohol group as acceptor, transferase activity, transferring phosphorus-containing group

PGOC: null

PGOP: null

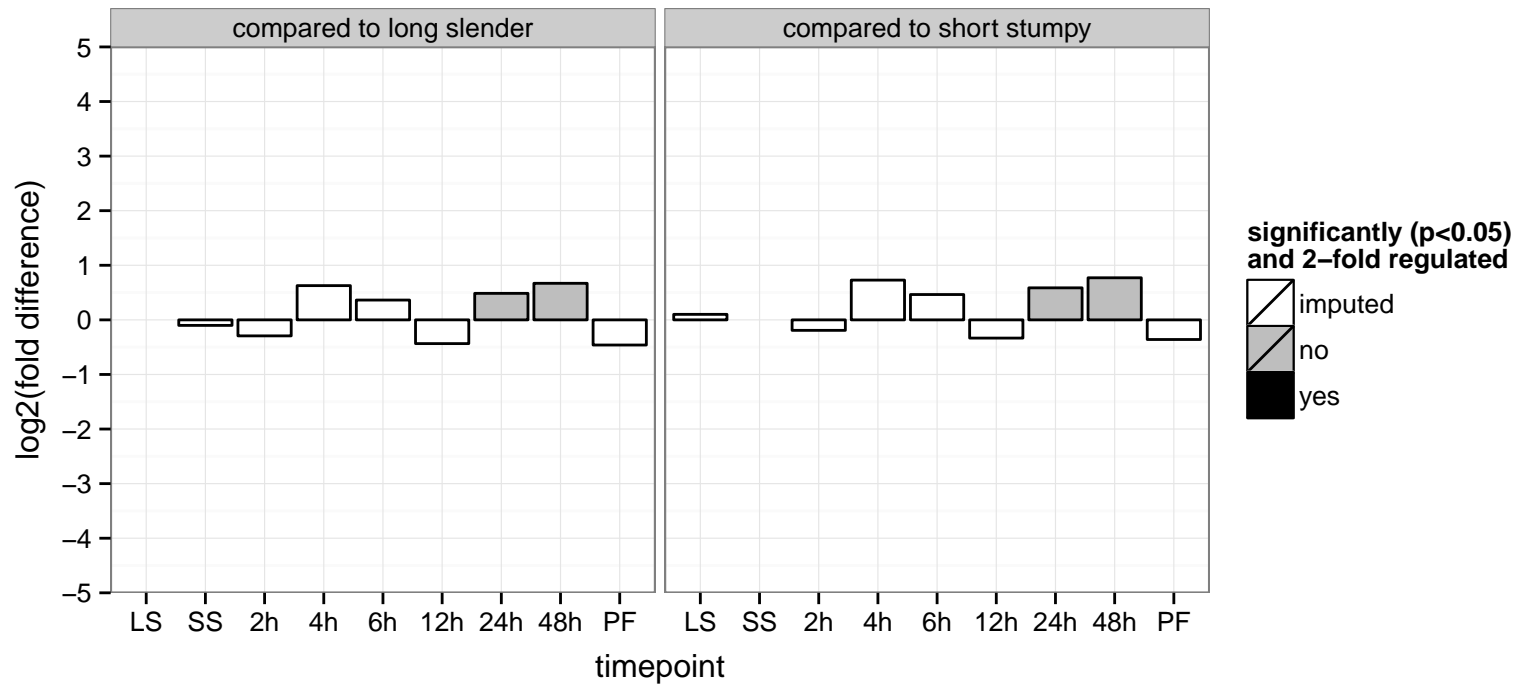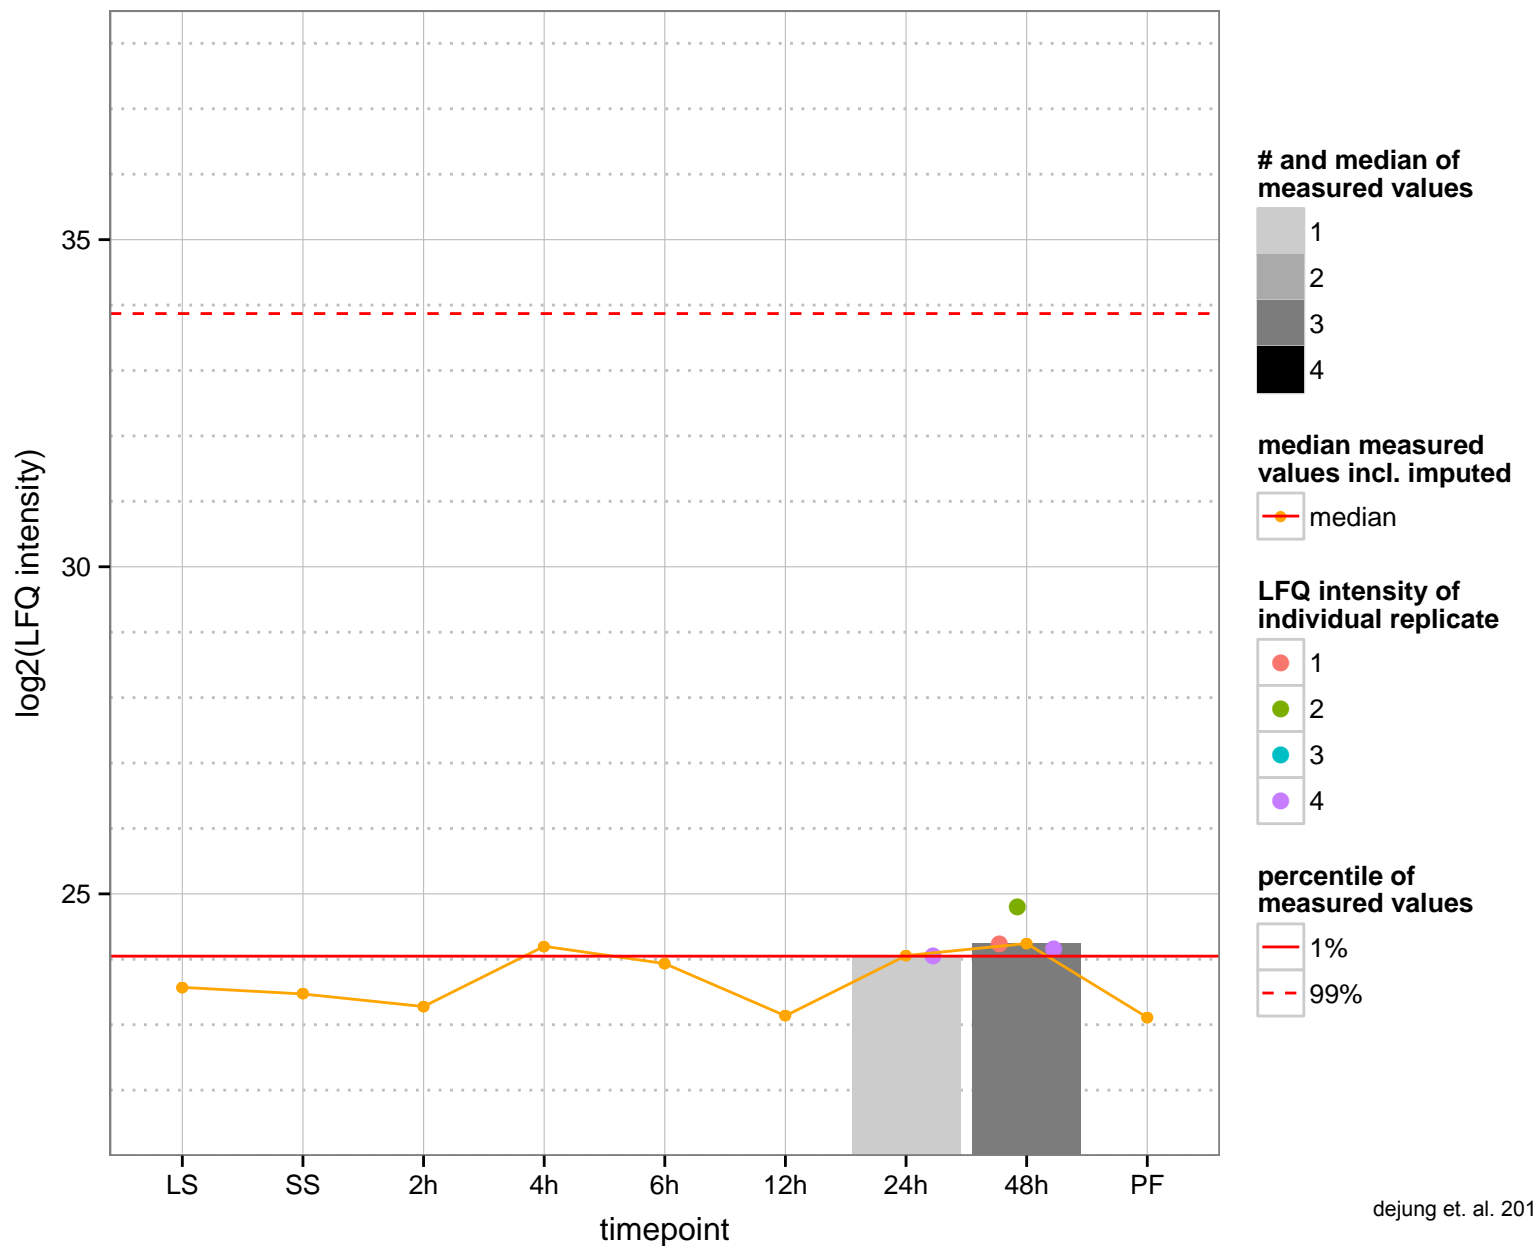

hypothetical protein, conserved  
 Tb927.3.4030  
 AGOF: null  
 AGOC: mitochondrion  
 AGOP: null  
 PGO: null  
 PGOC: null  
 PGOP: null

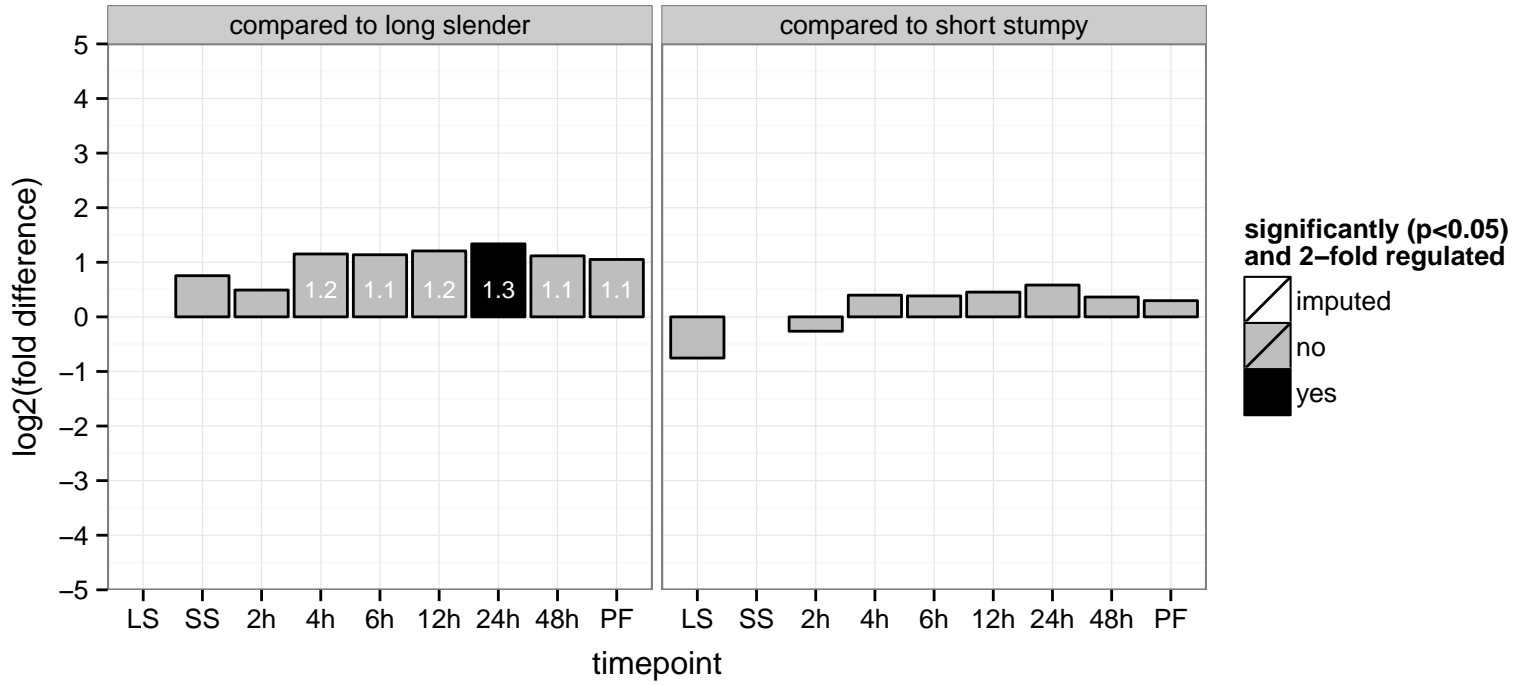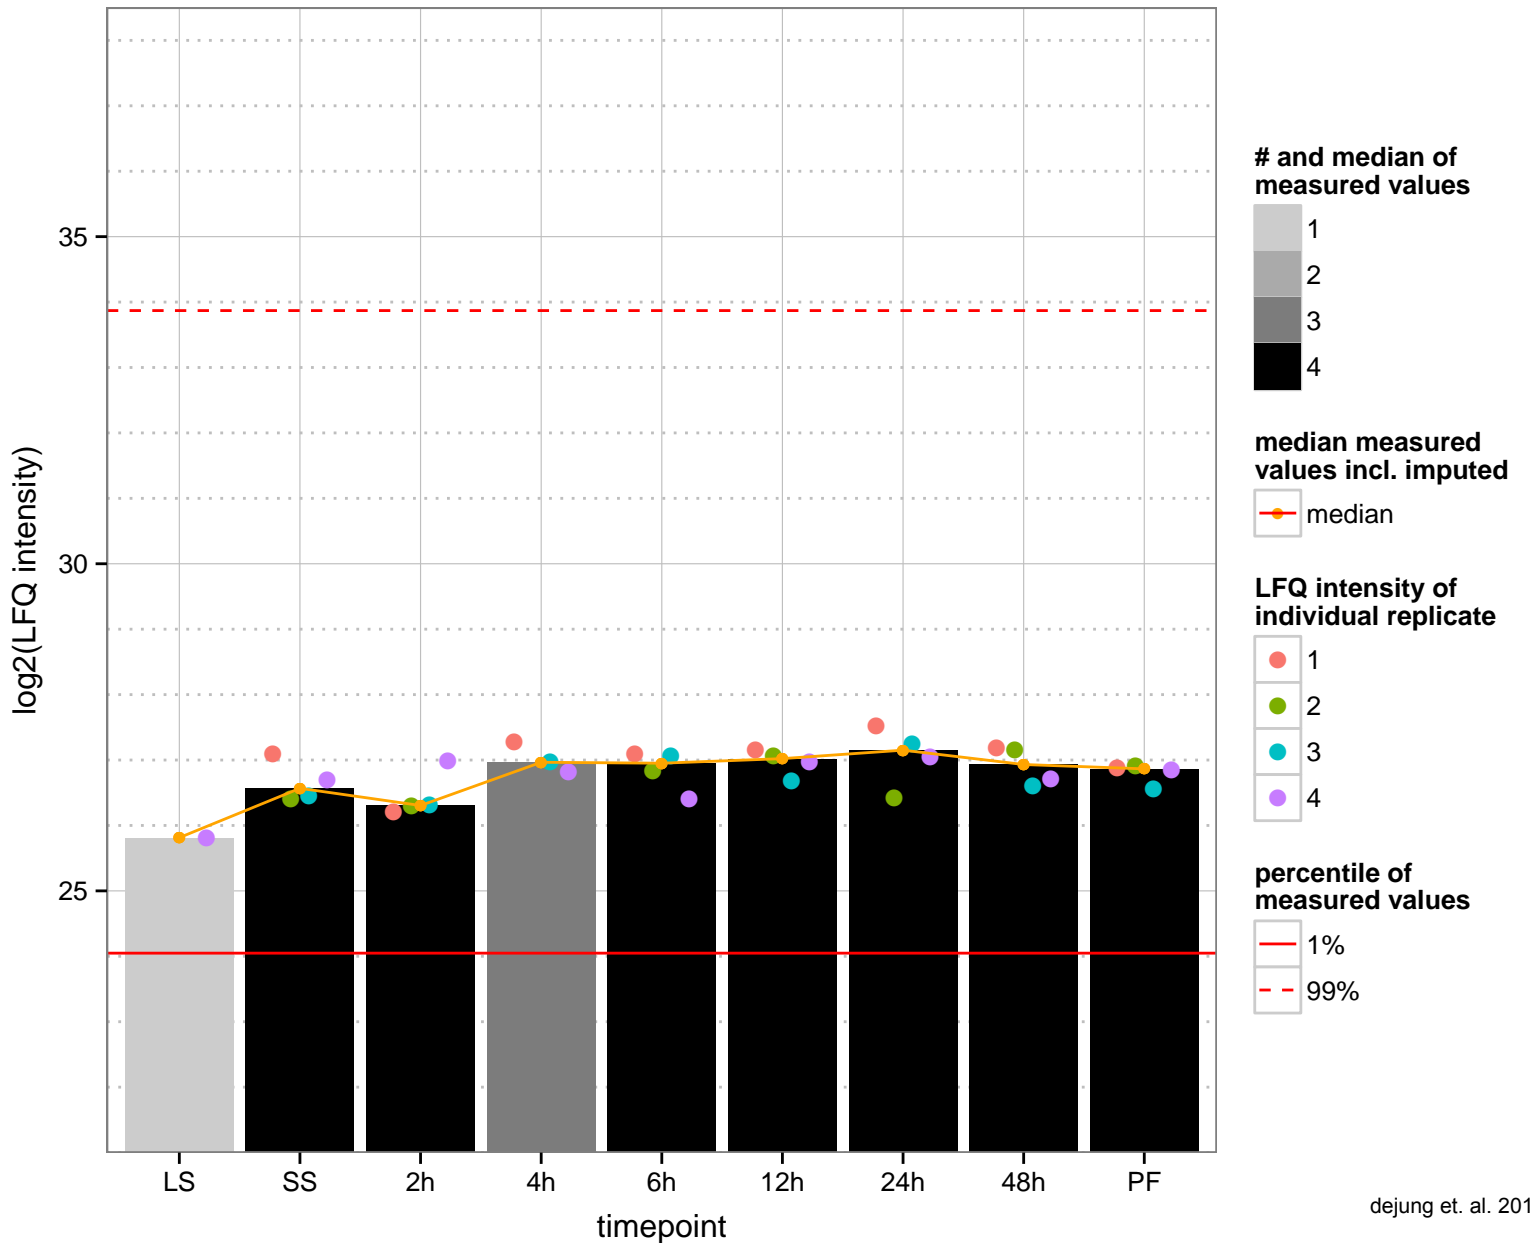

hypothetical protein, conserved  
 Tb927.3.4040  
 AGOF: null  
 AGOC: null  
 AGOP: null  
 PGOF: protein binding  
 PGO: null  
 PGOP: null

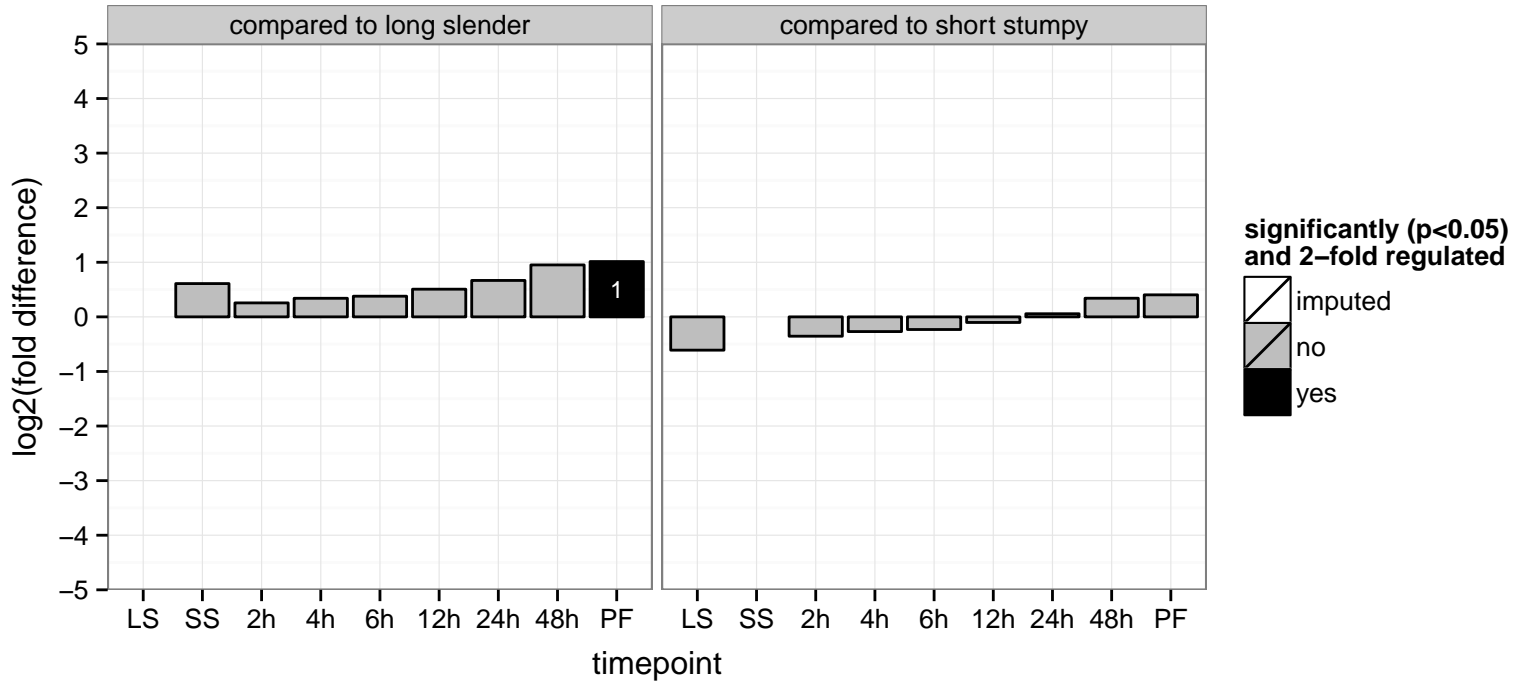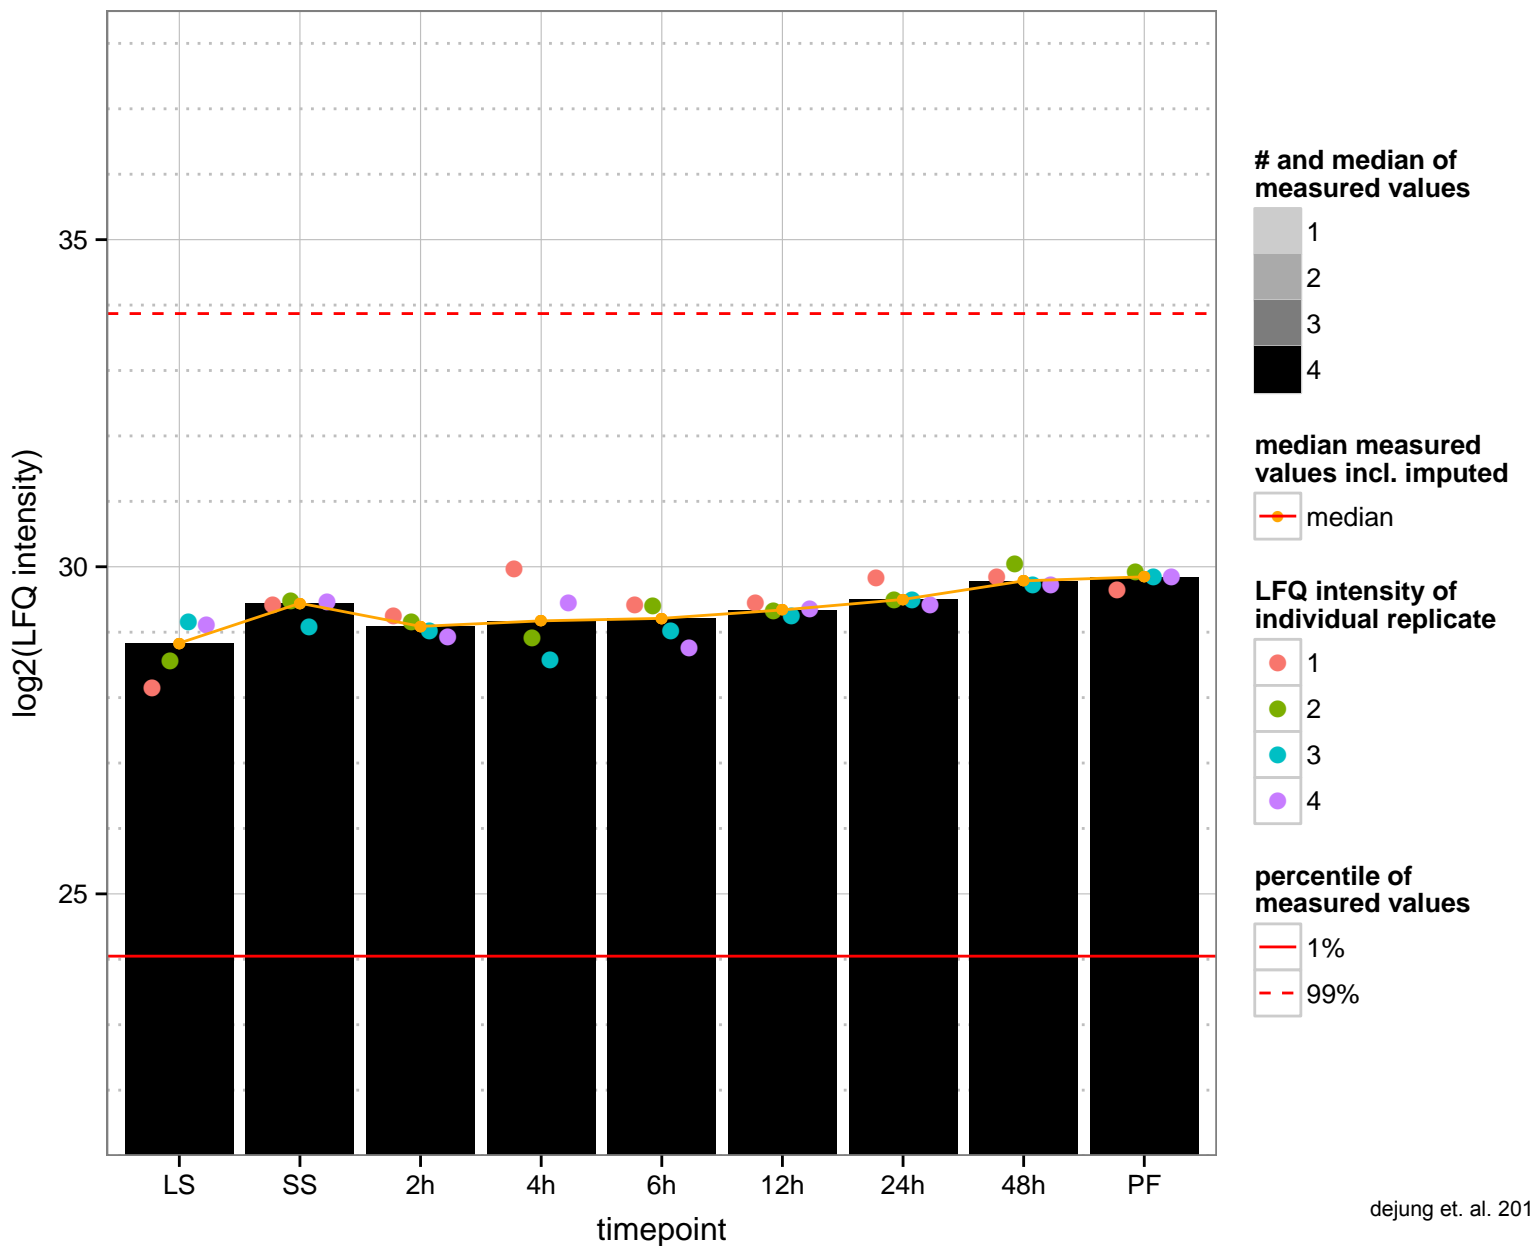

hypothetical protein, conserved  
 Tb927.3.4120  
 AGOF: null  
 AGOC: null  
 AGOP: null  
 PGO: null  
 PGOC: null  
 PGOP: null

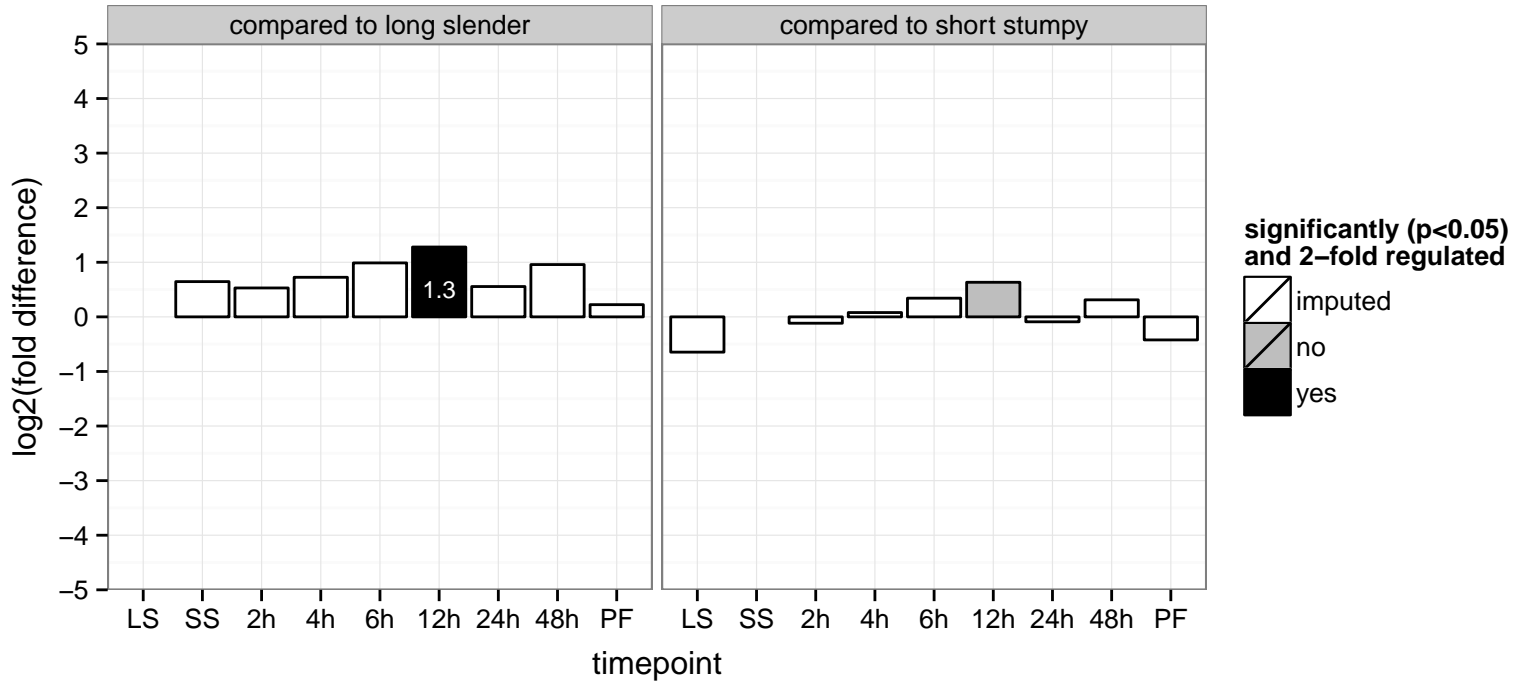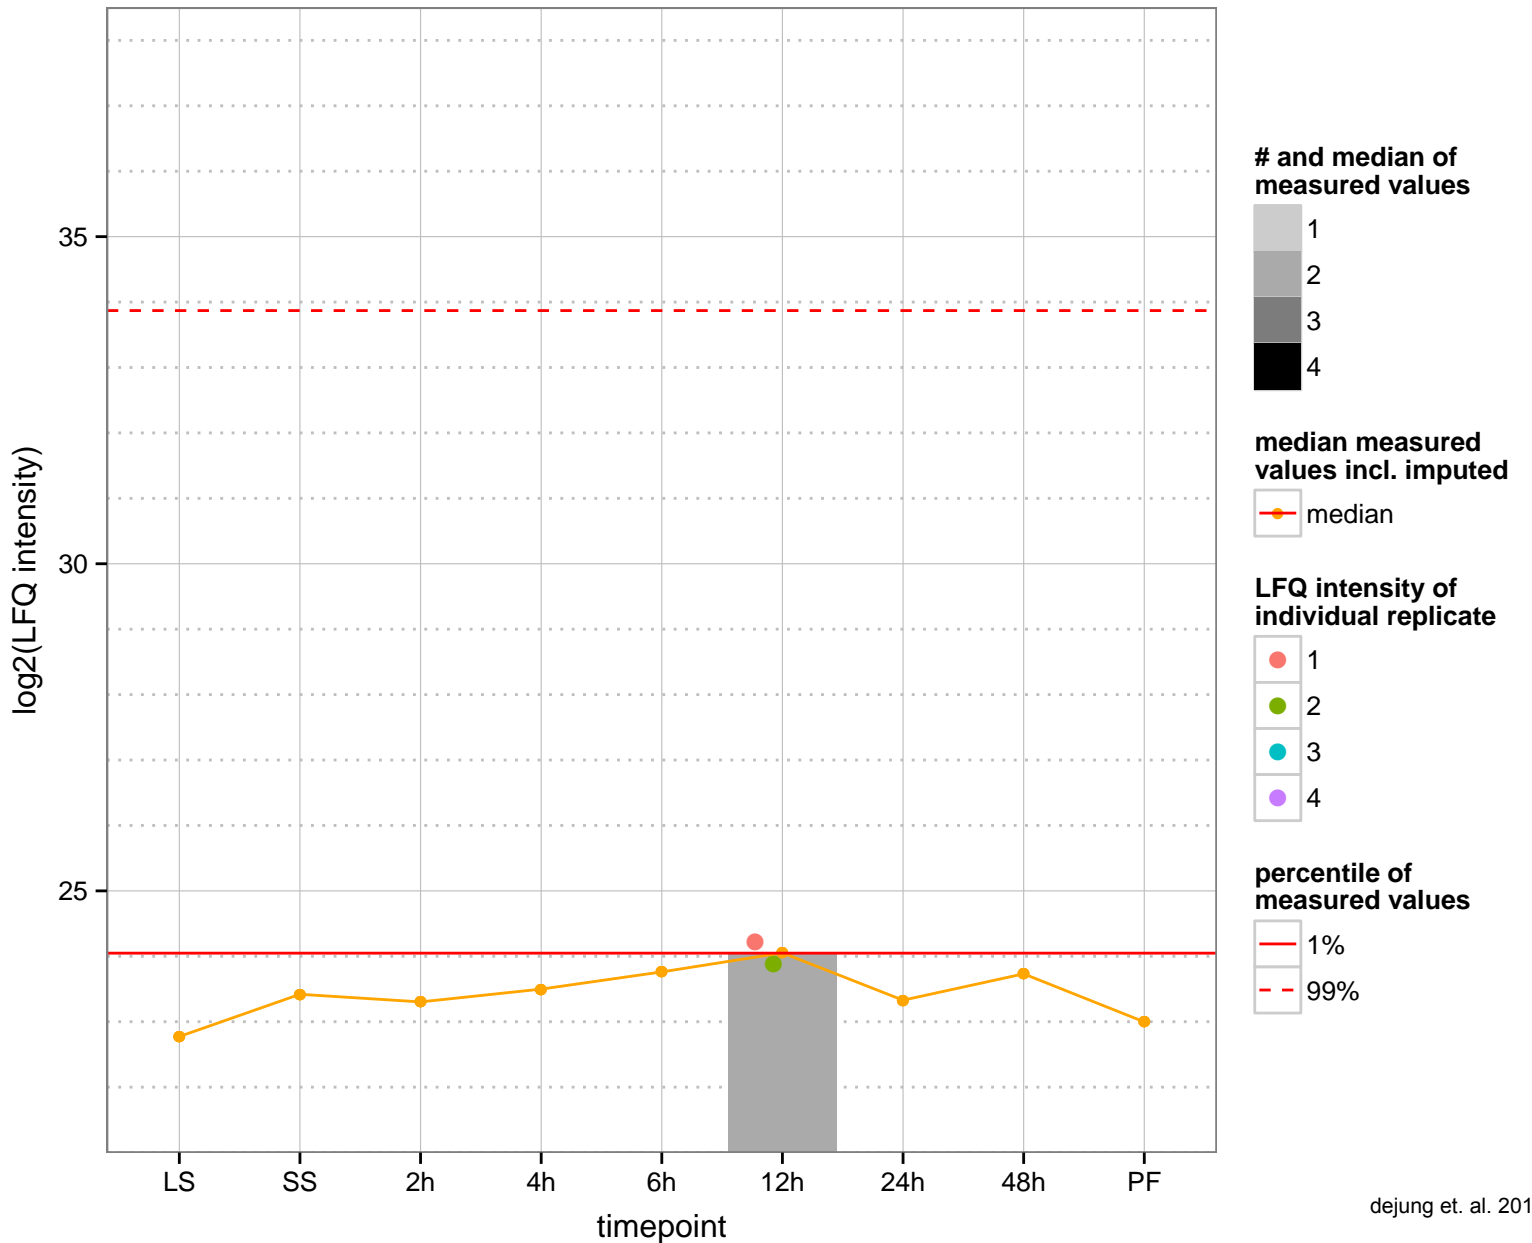

hypothetical protein, conserved  
 Tb927.3.4140  
 AGOF: null  
 AGOC: mitochondrion  
 AGOP: null  
 PGO: null  
 PGO: null  
 PGO: null

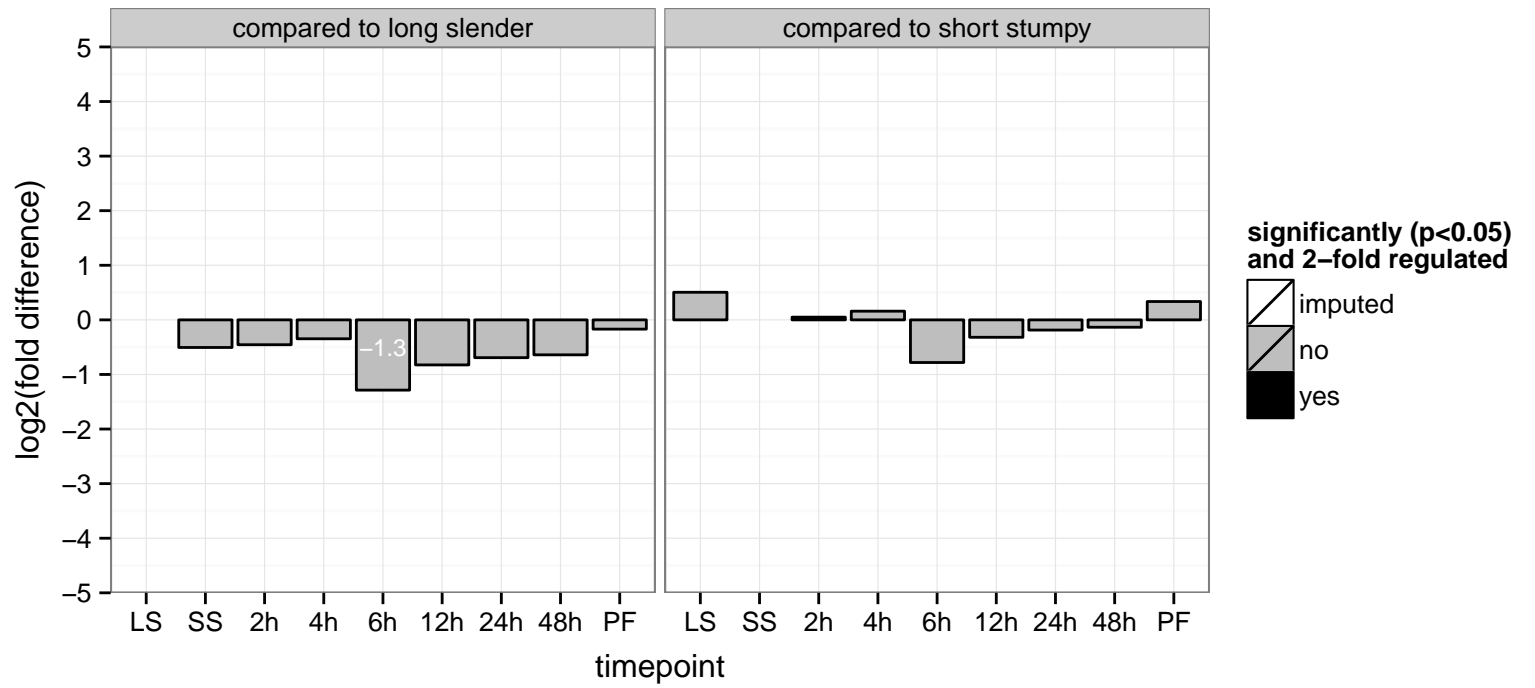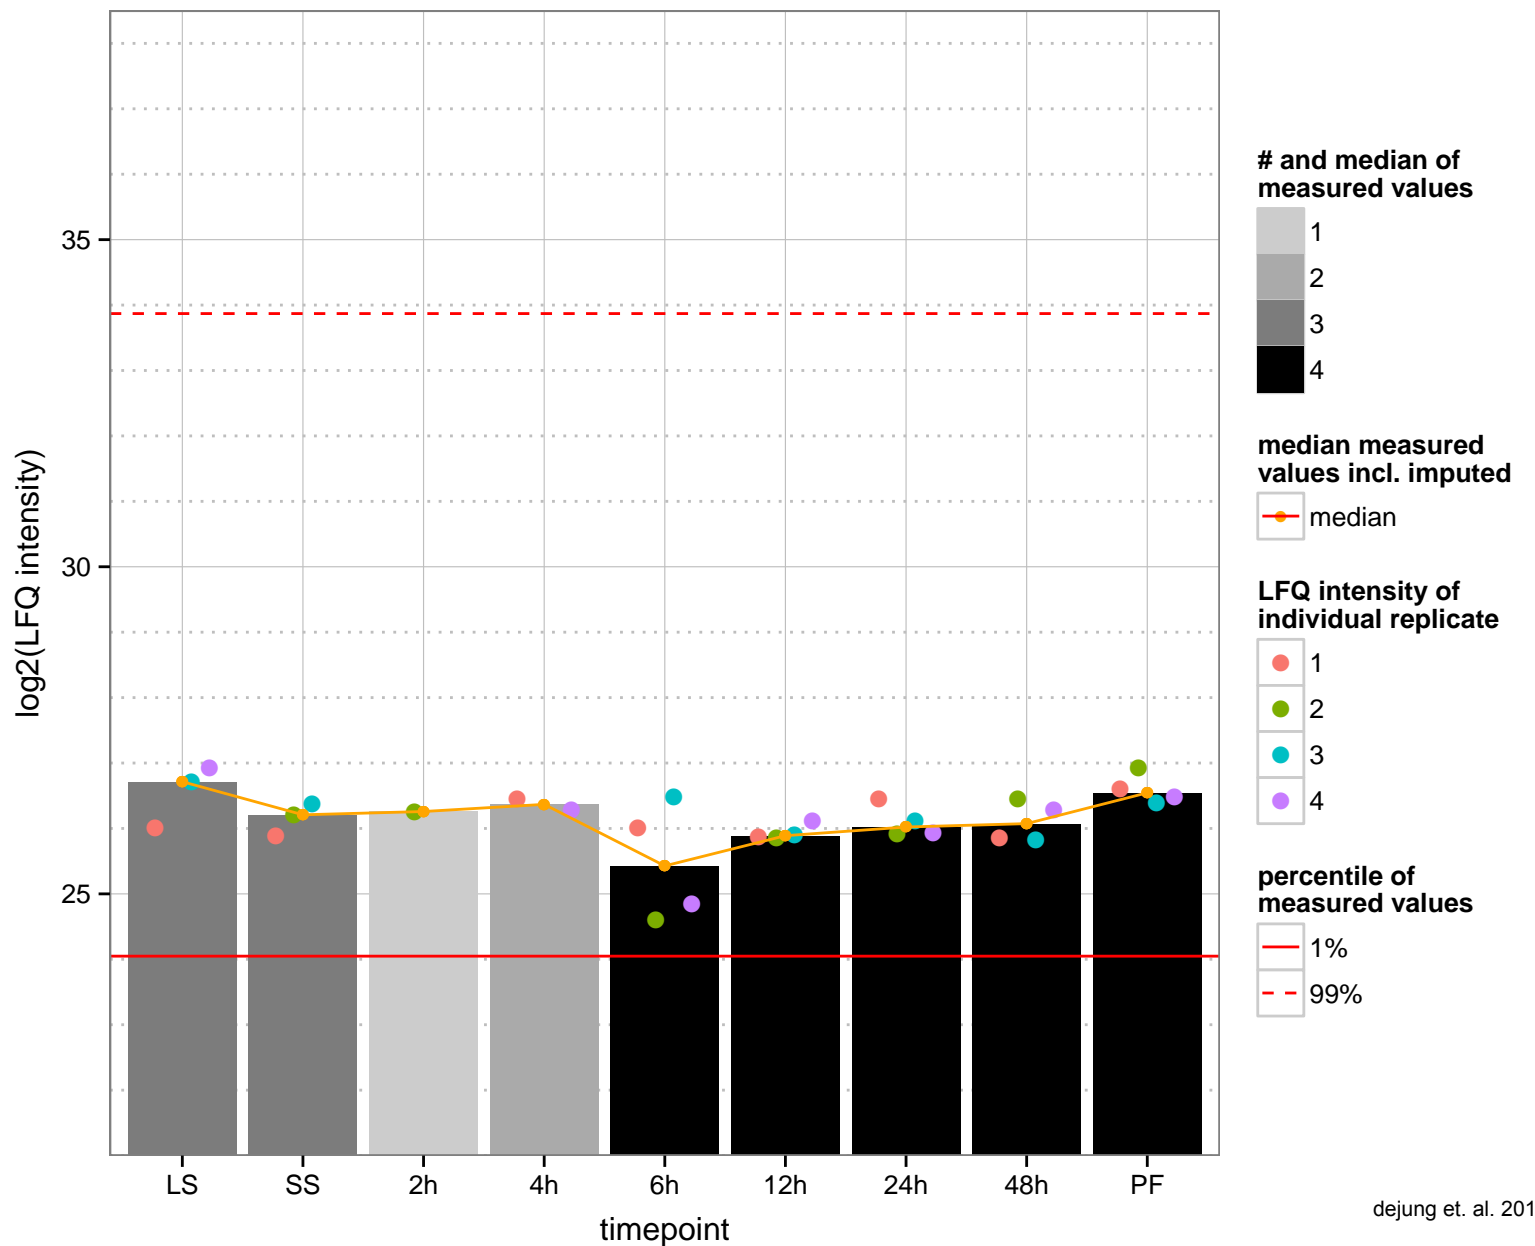

endosomal integral membrane protein, putative  
 Tb927.3.4190  
 AGOF: null  
 AGOC: integral to membrane  
 AGOP: null  
 PGOF: null  
 PGO: integral to membrane  
 PGOP: null

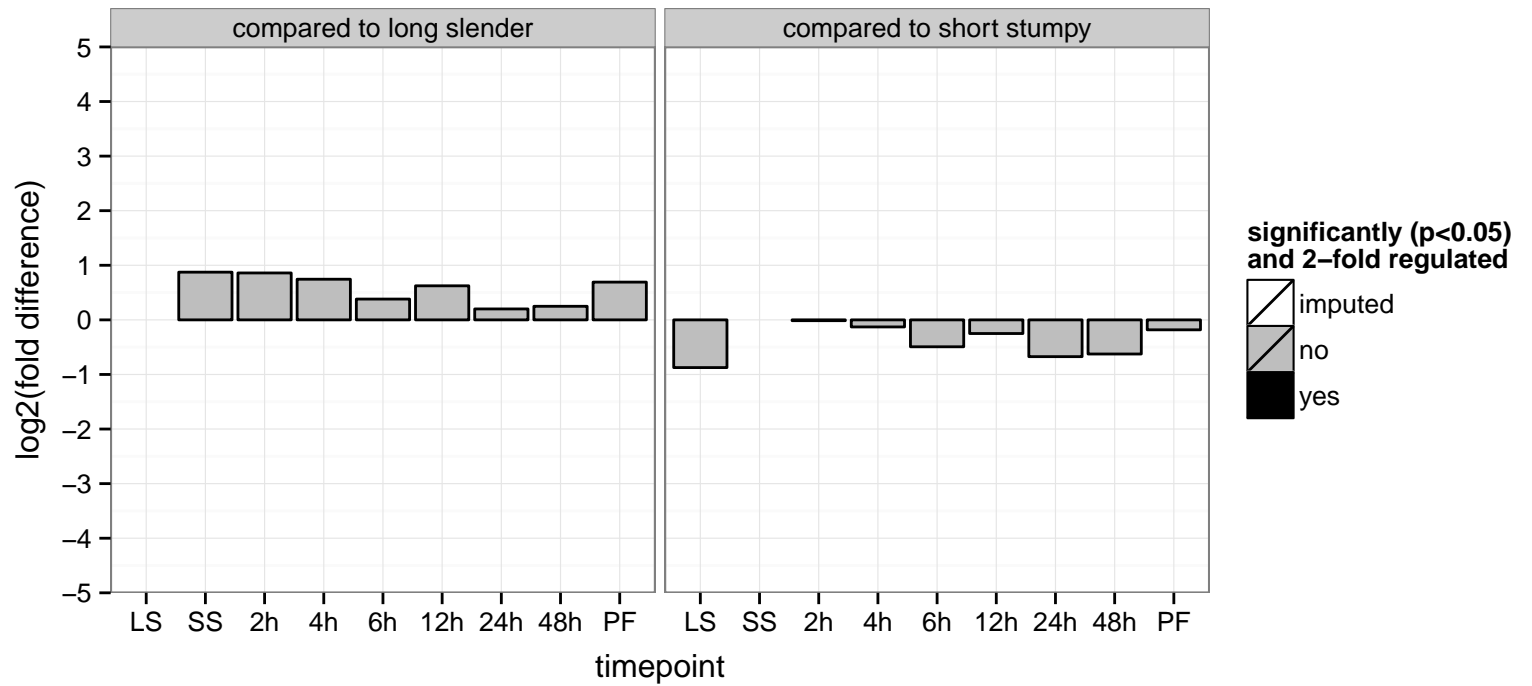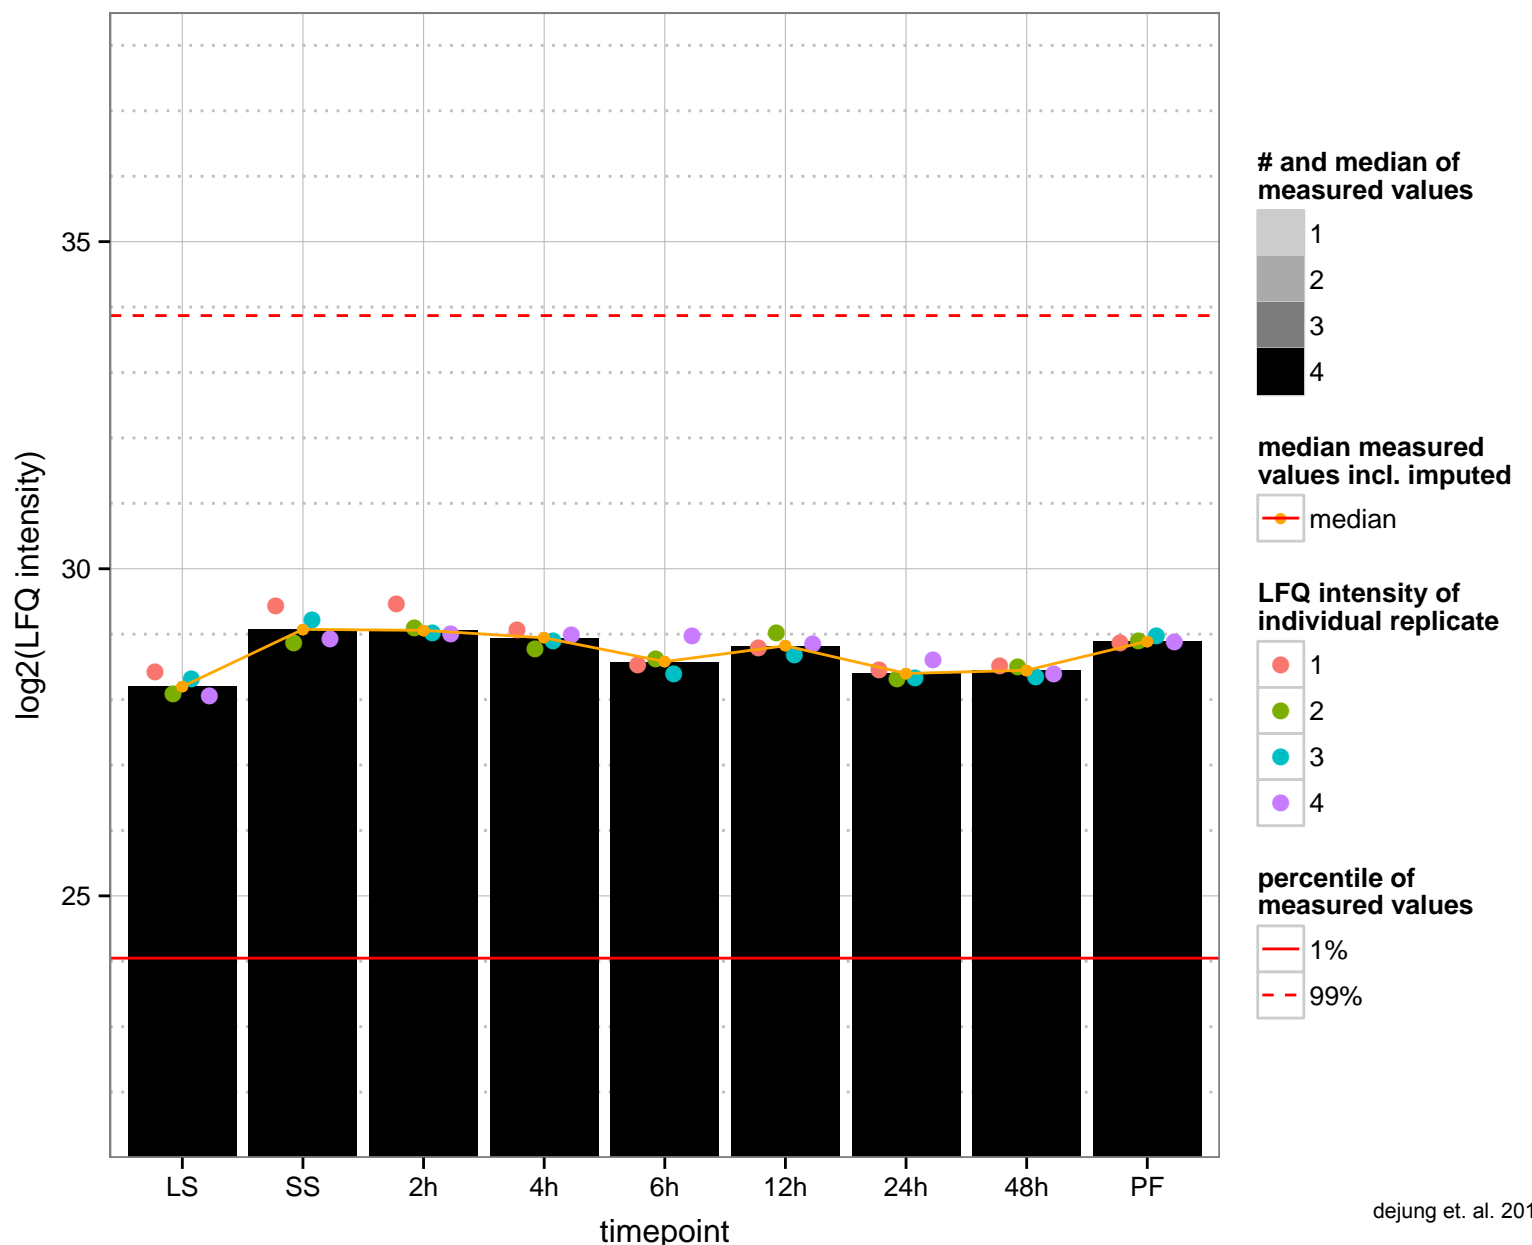

Tob55, putative  
 Tb927.3.4380  
 AGOF: null  
 AGOC: mitochondrial outer membrane  
 AGOP: cellular protein complex assembly, protein complex assembly  
 PGO: null  
 PGO: outer membrane  
 PGO: null

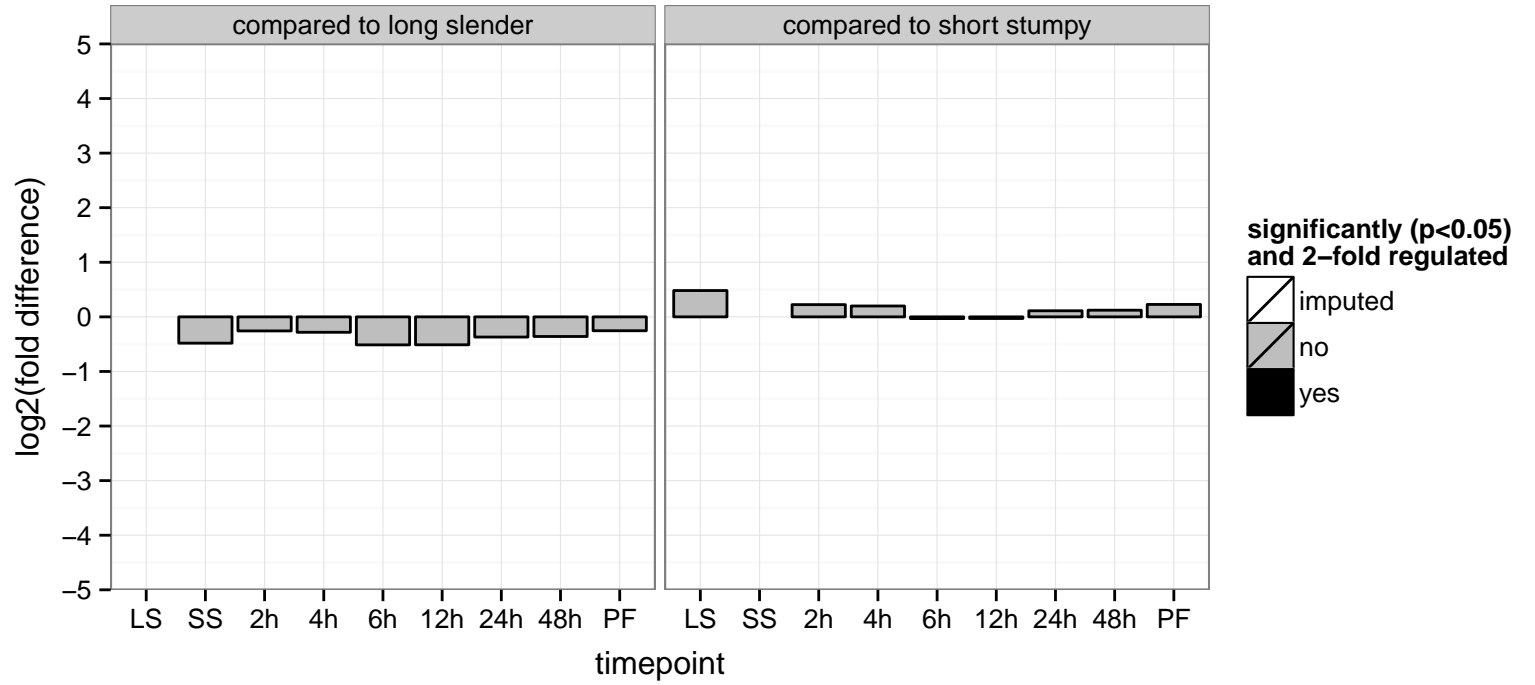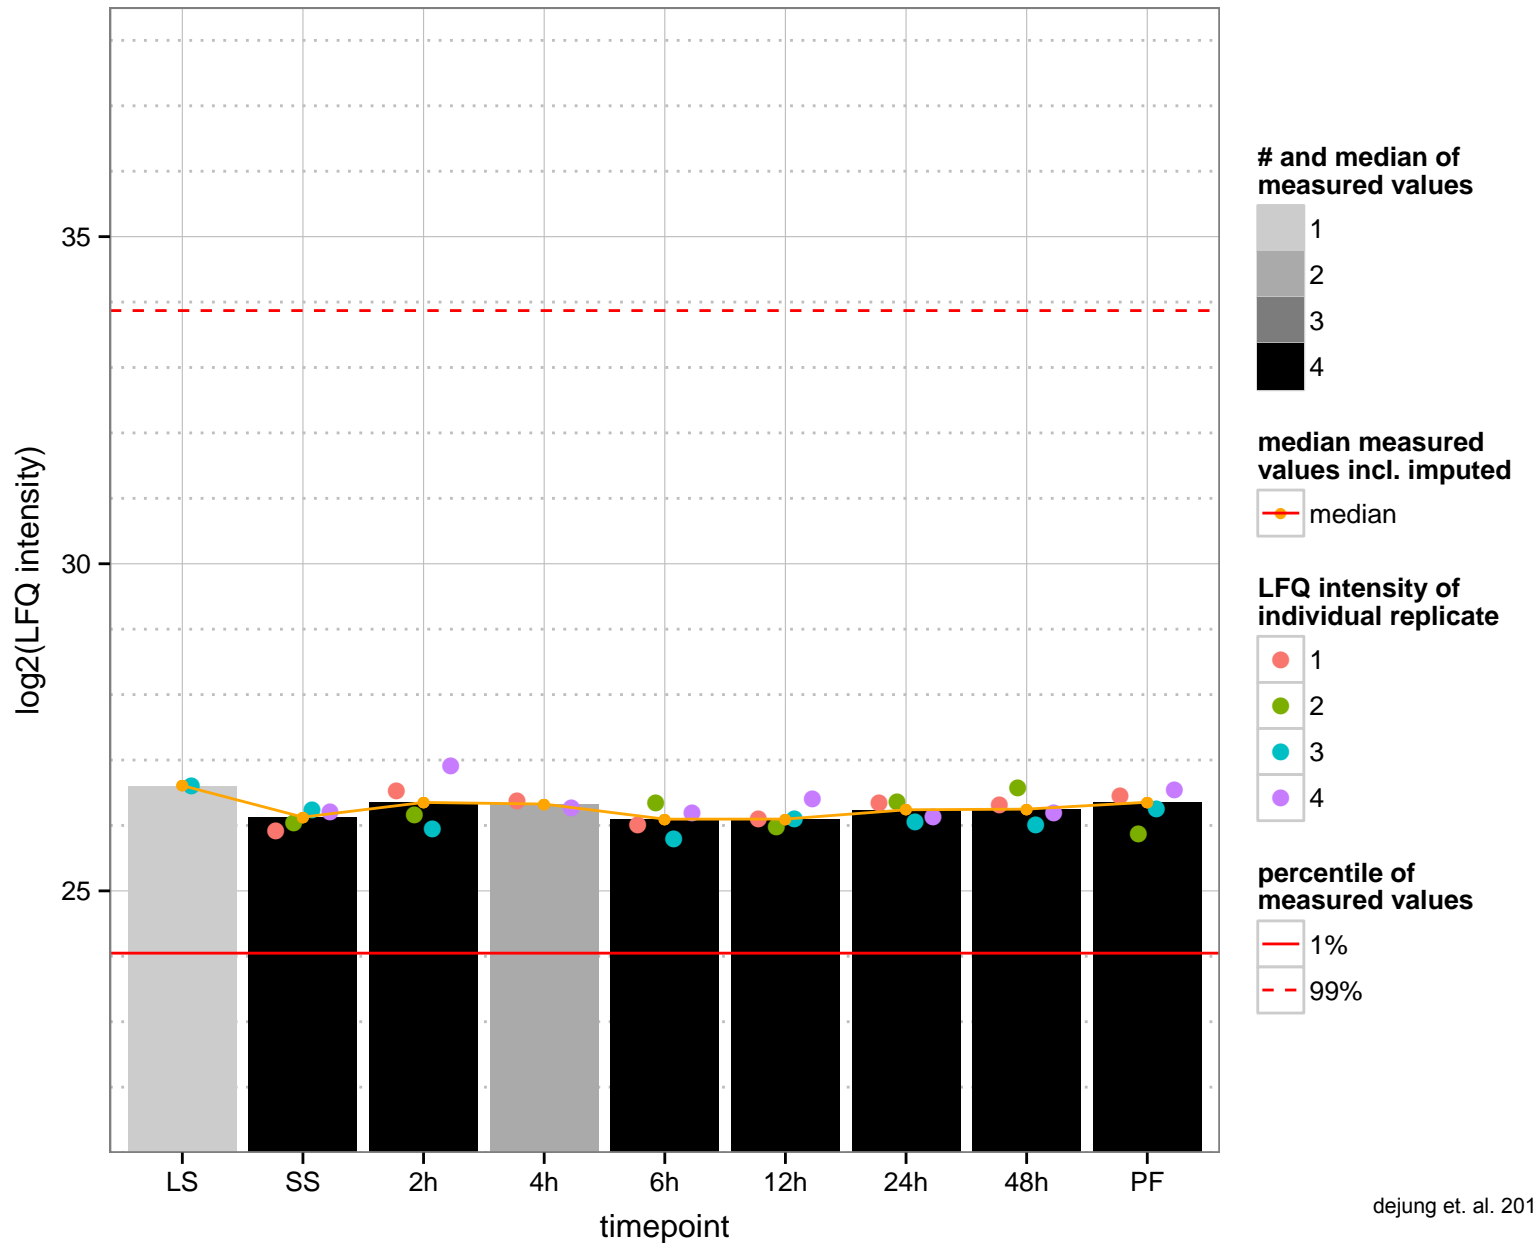

hypothetical protein, conserved  
 Tb927.3.4550  
 AGOF: null  
 AGOC: null  
 AGOP: null  
 PGOF: null  
 PGOC: null  
 PGOP: null

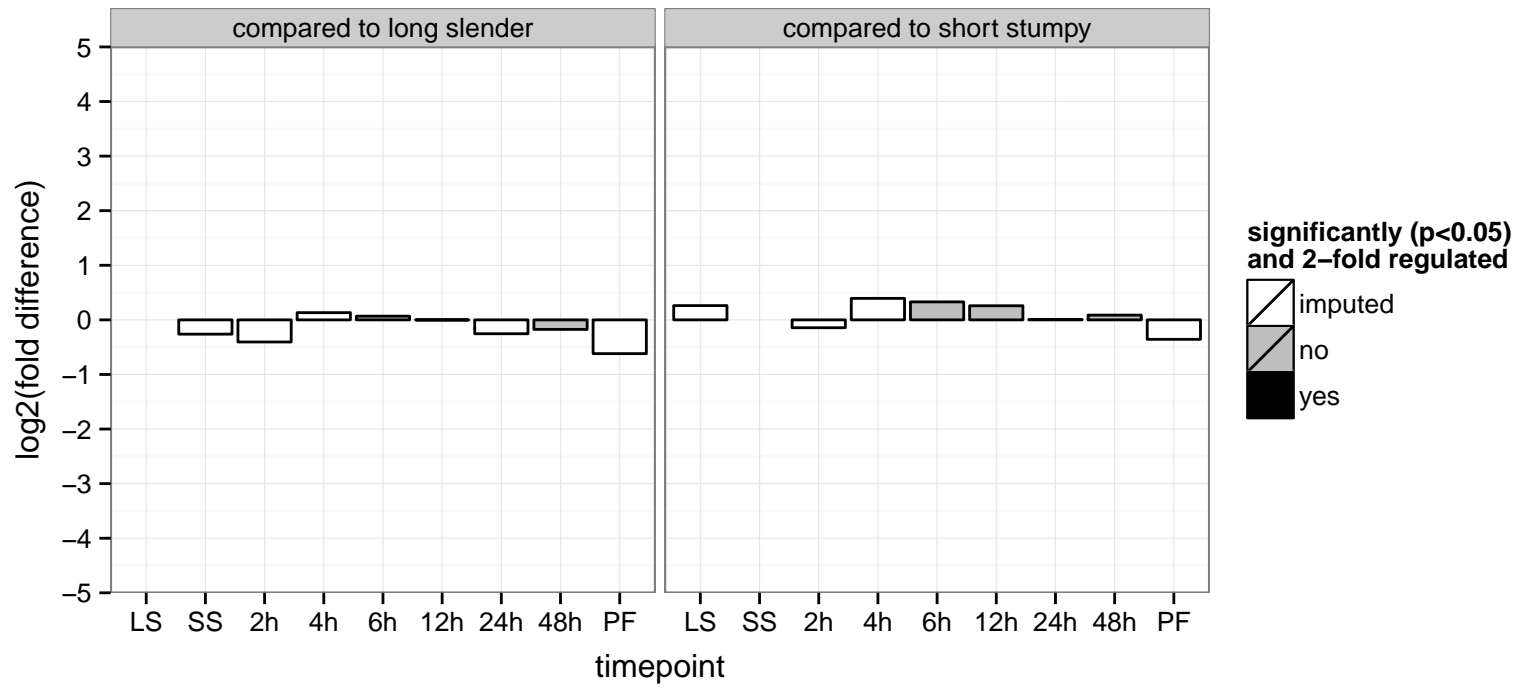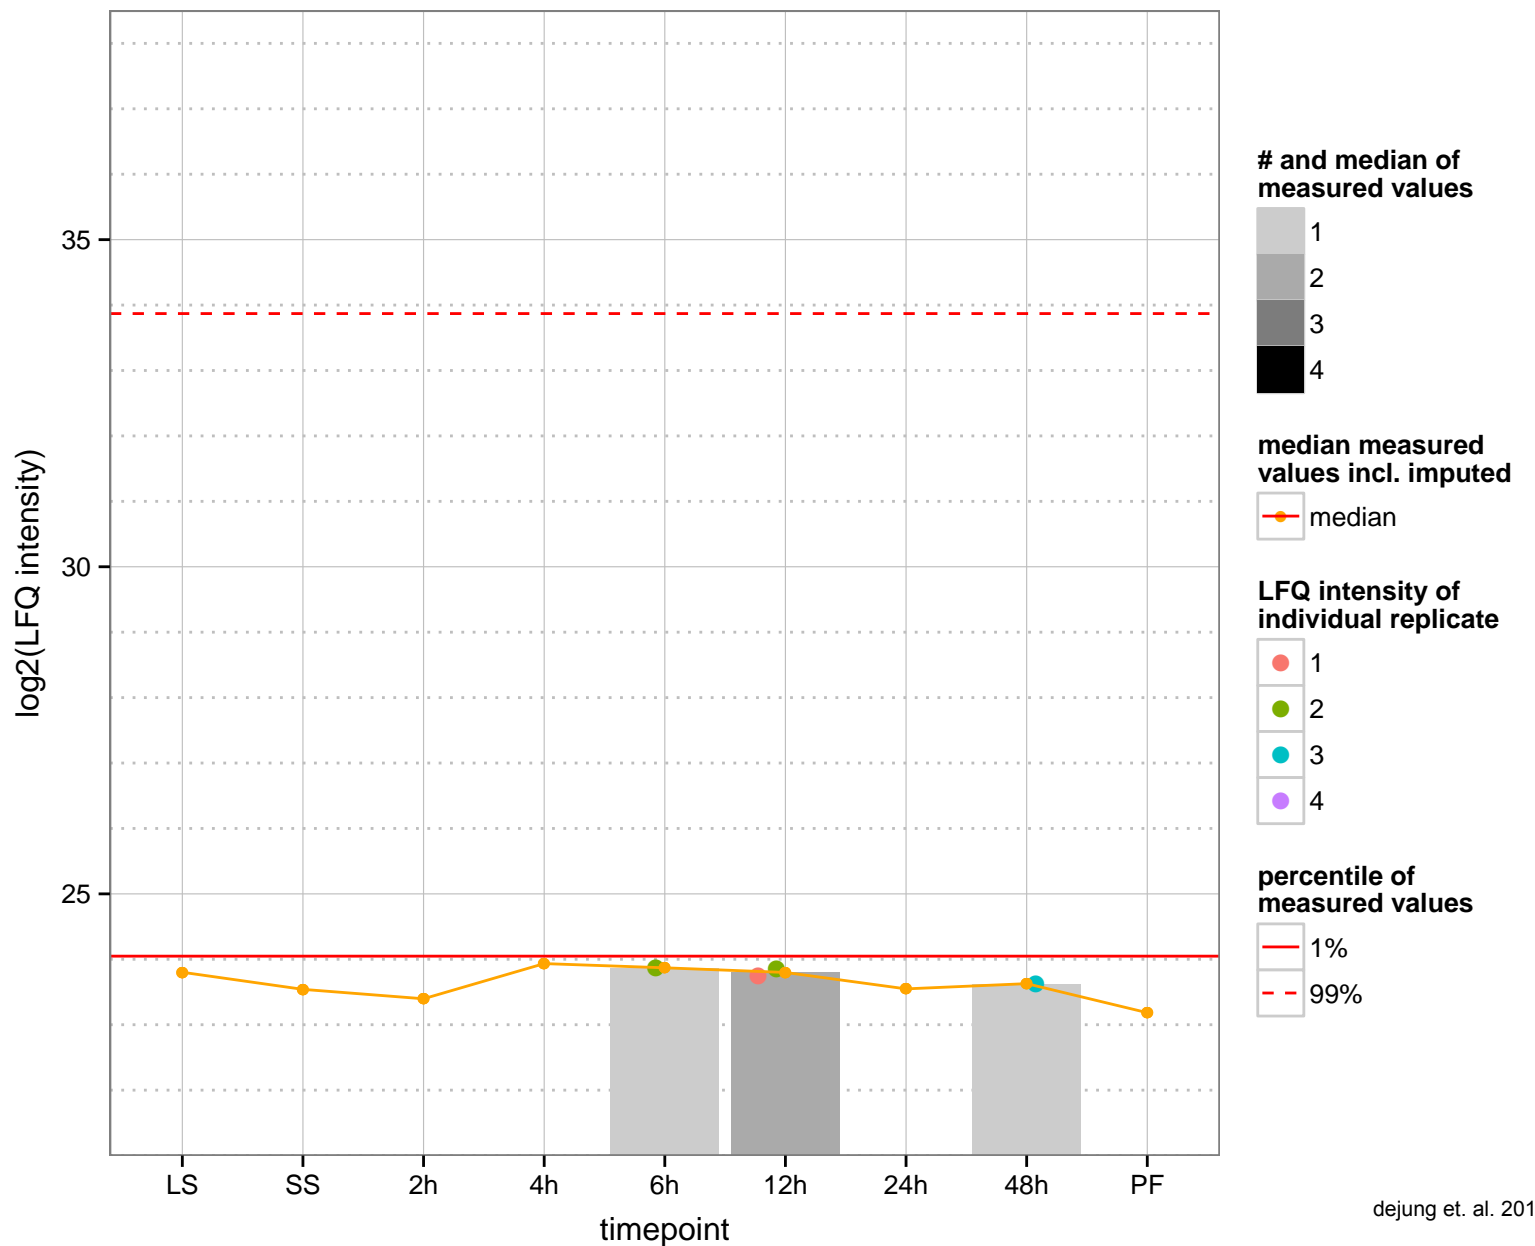



hypothetical protein, conserved  
 Tb927.3.4600  
 AGOF: null  
 AGOC: null  
 AGOP: null  
 PGO: binding  
 PGOC: null  
 PGOP: null

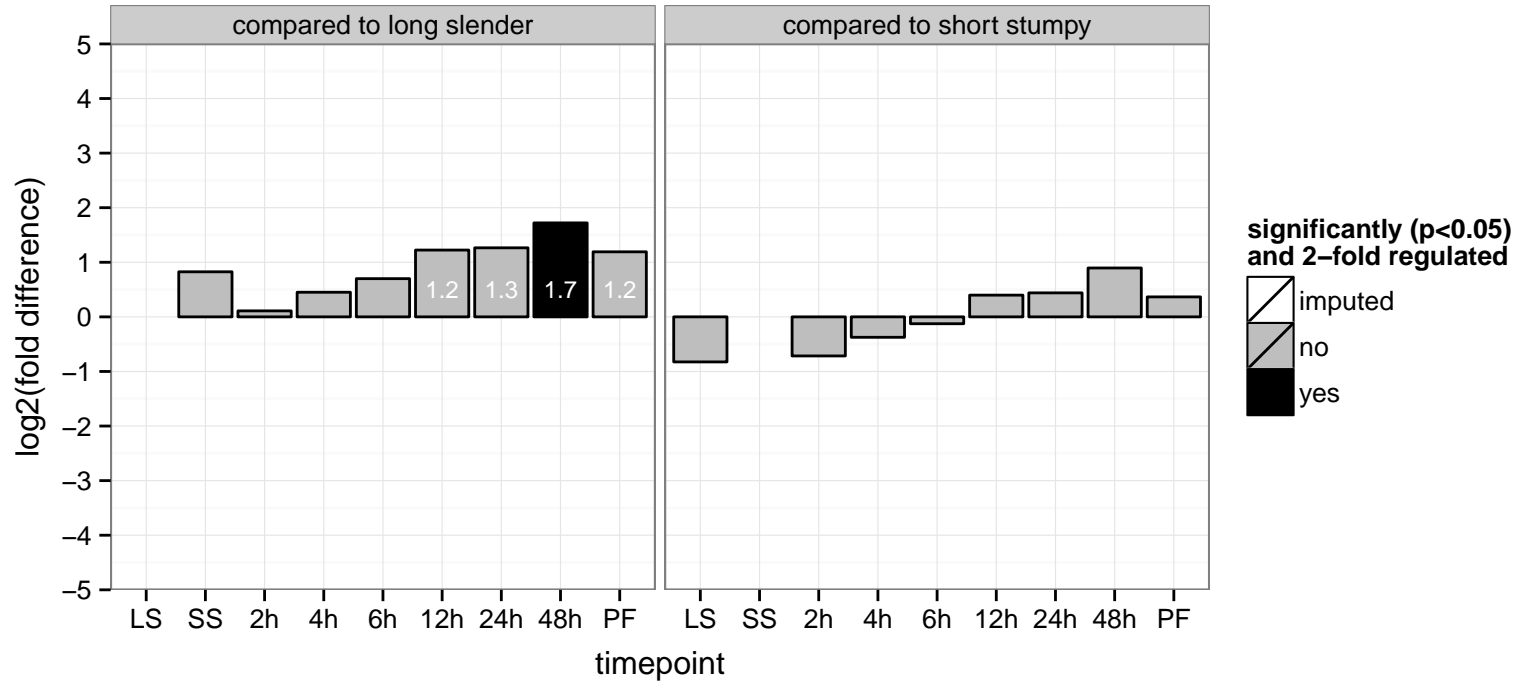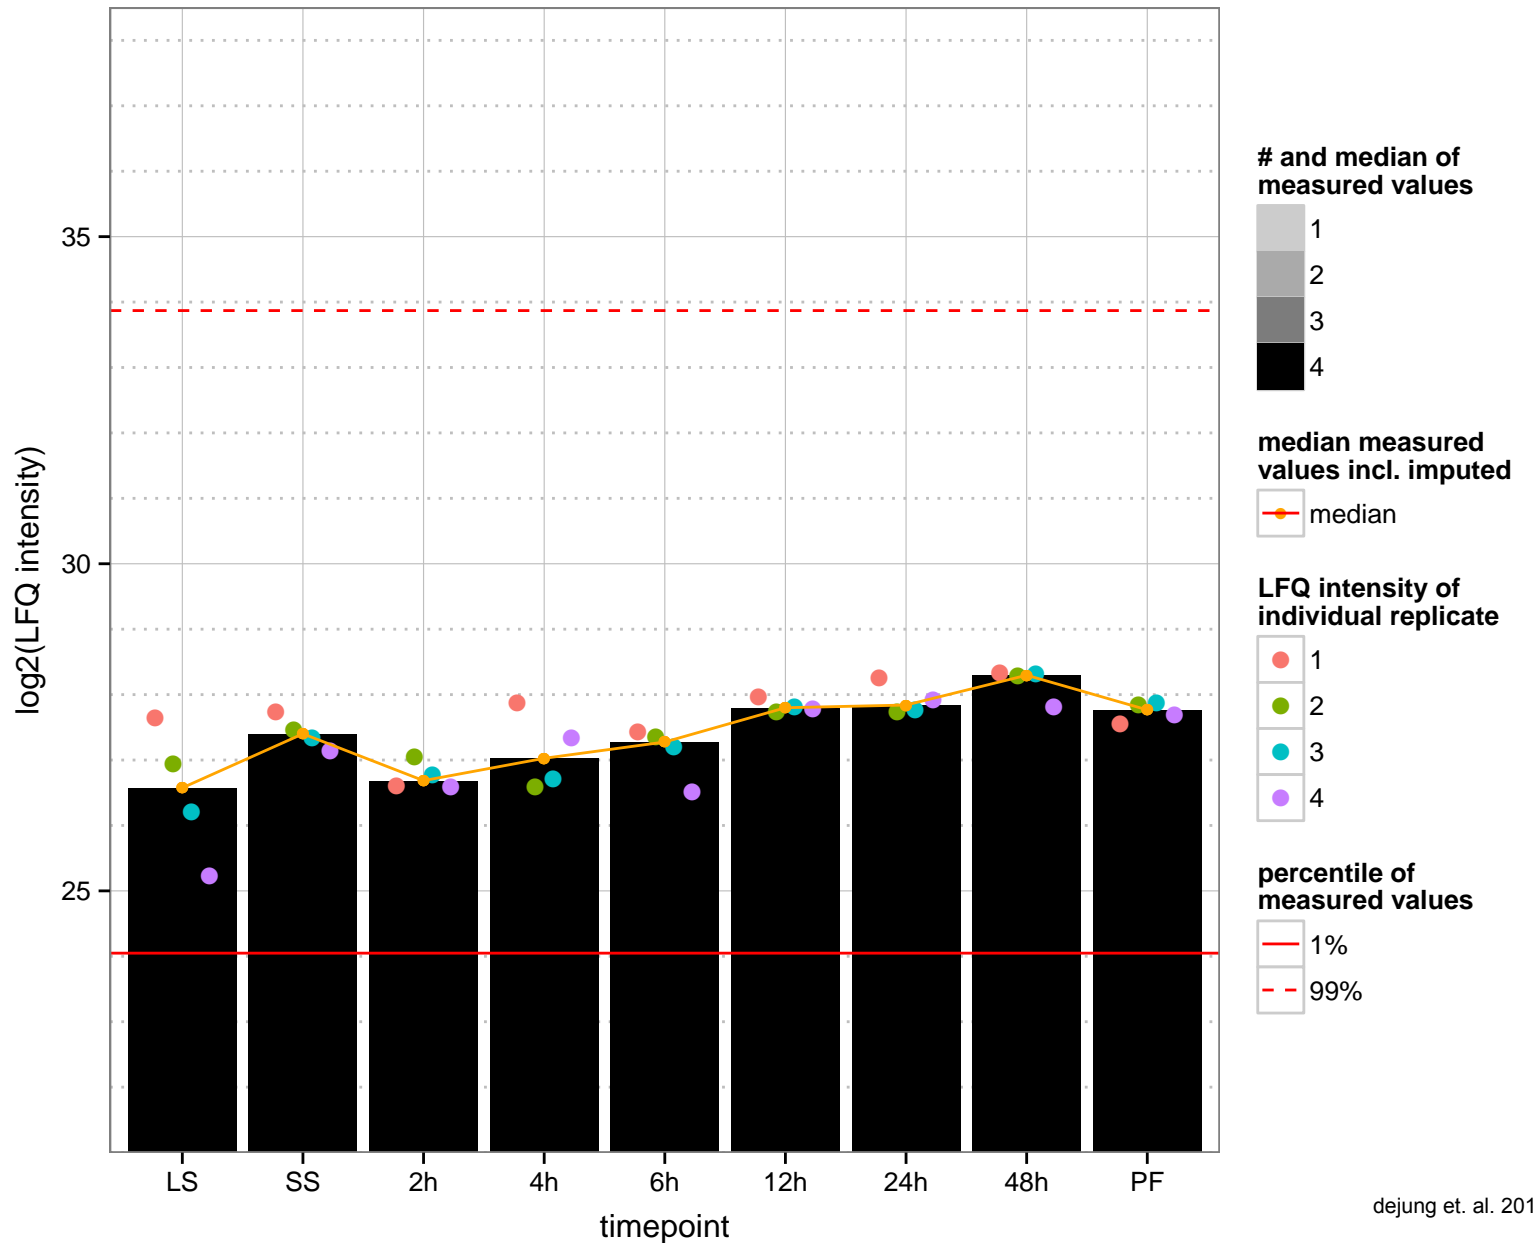

hypothetical protein, conserved  
 Tb927.3.4640  
 AGOF: null  
 AGOC: null  
 AGOP: null  
 PGOF: null  
 PGOC: null  
 PGOP: null

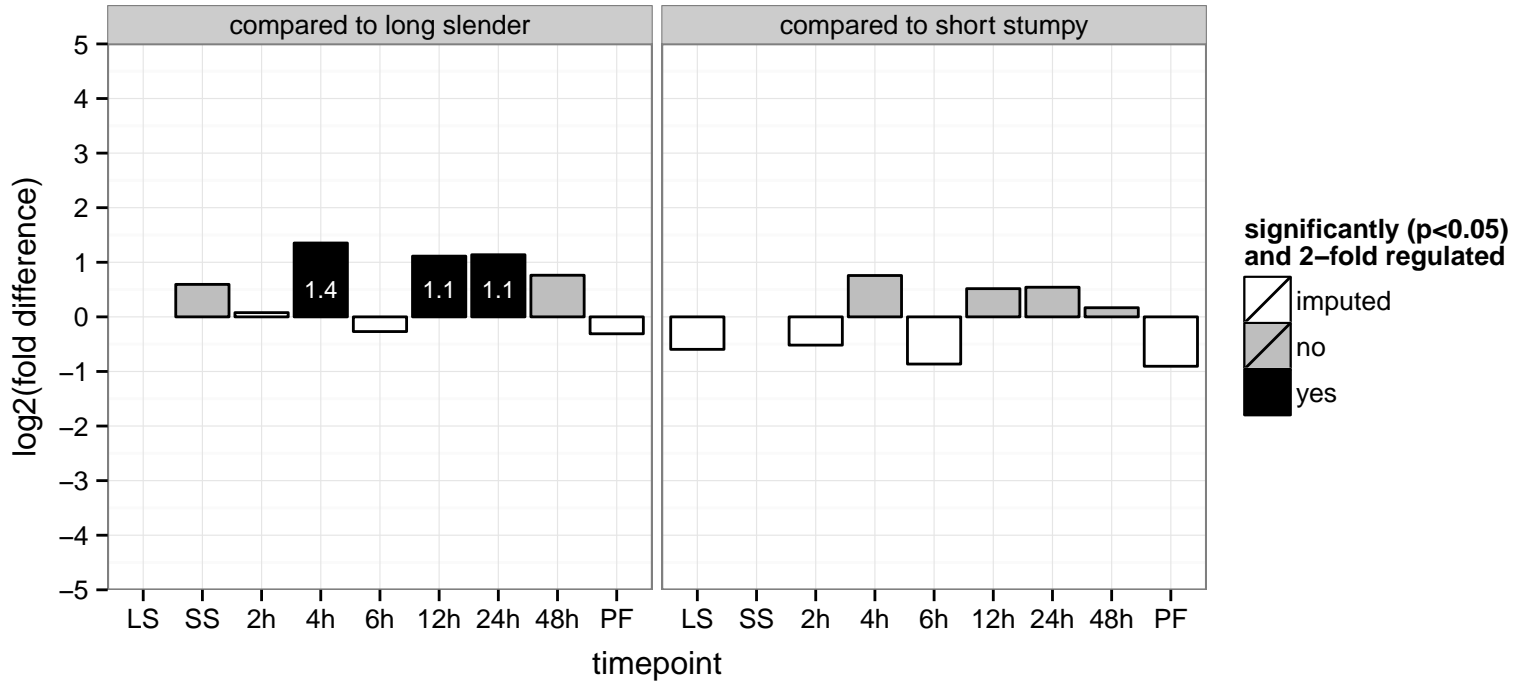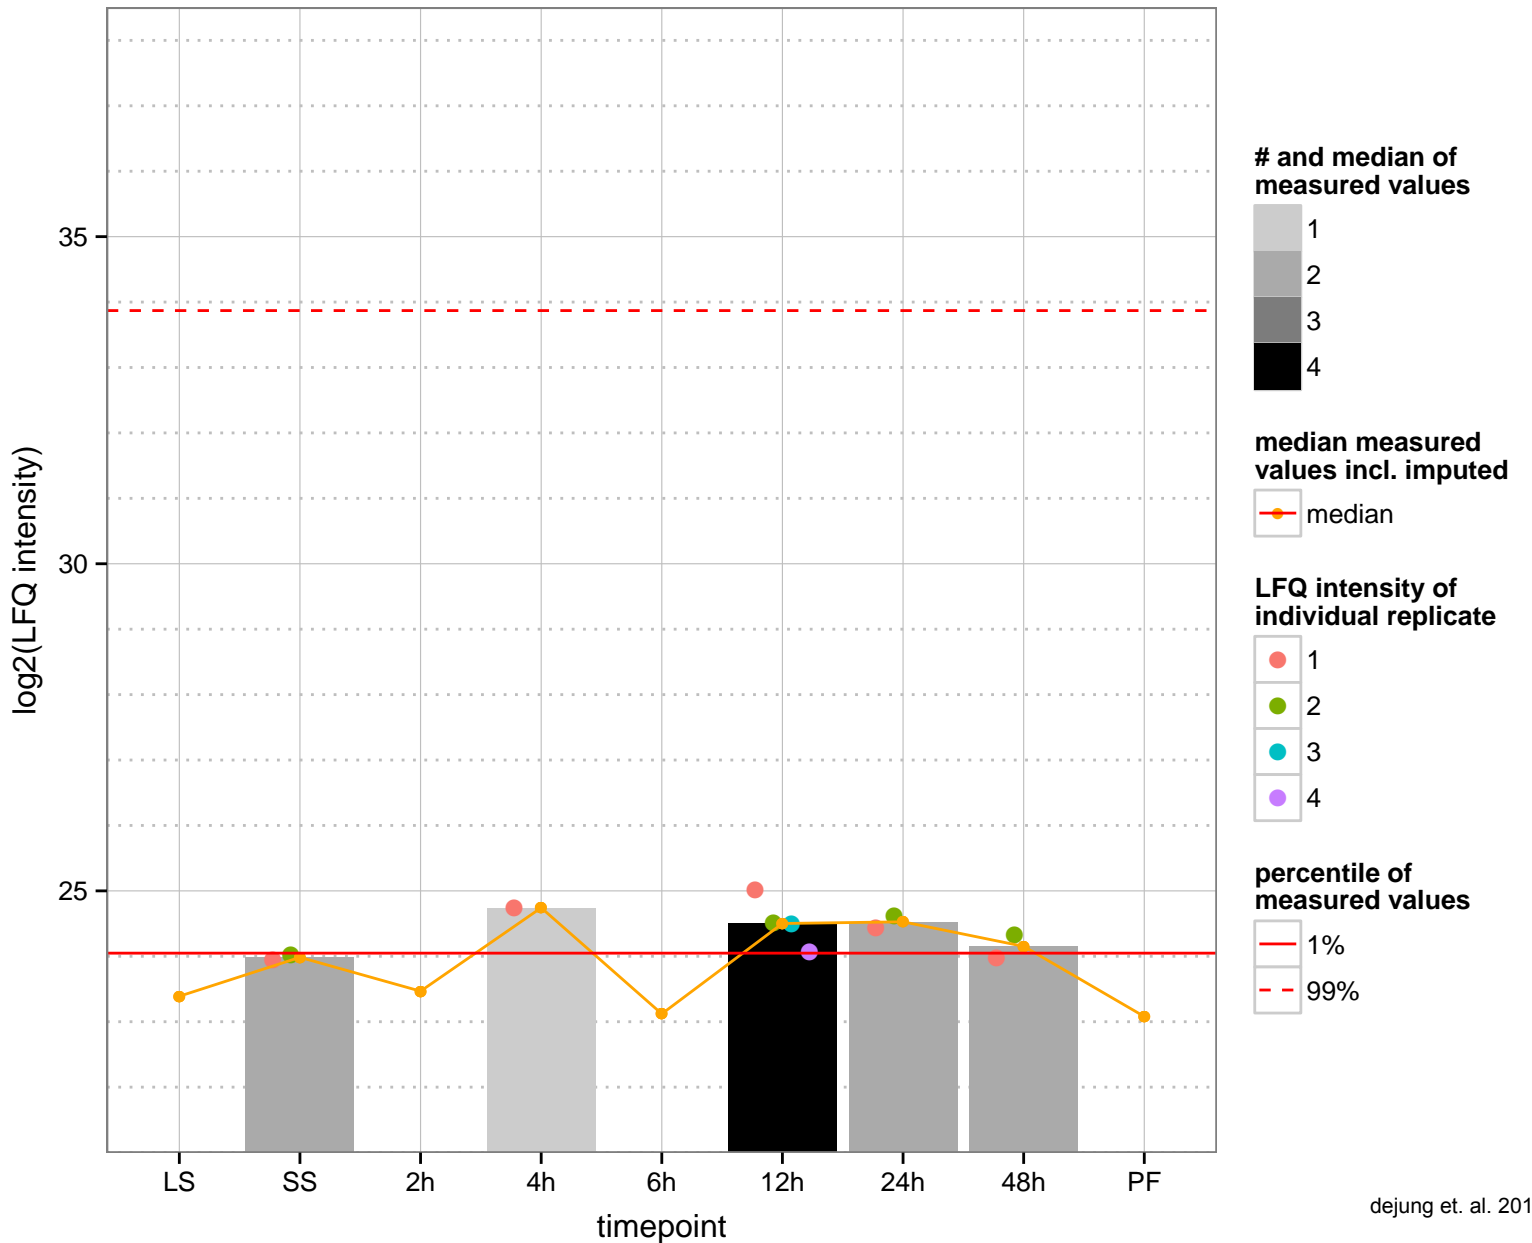

aminopeptidase, putative, metallo-peptidase, Clan MA(E) Family M1  
 Tb927.3.4790;Tb927.3.4750  
 AGOF: metallopeptidase activity, zinc ion binding  
 AGOC: null  
 AGOP: proteolysis  
 PGOF: metallopeptidase activity, zinc ion binding  
 PGO: null  
 PGOP: null

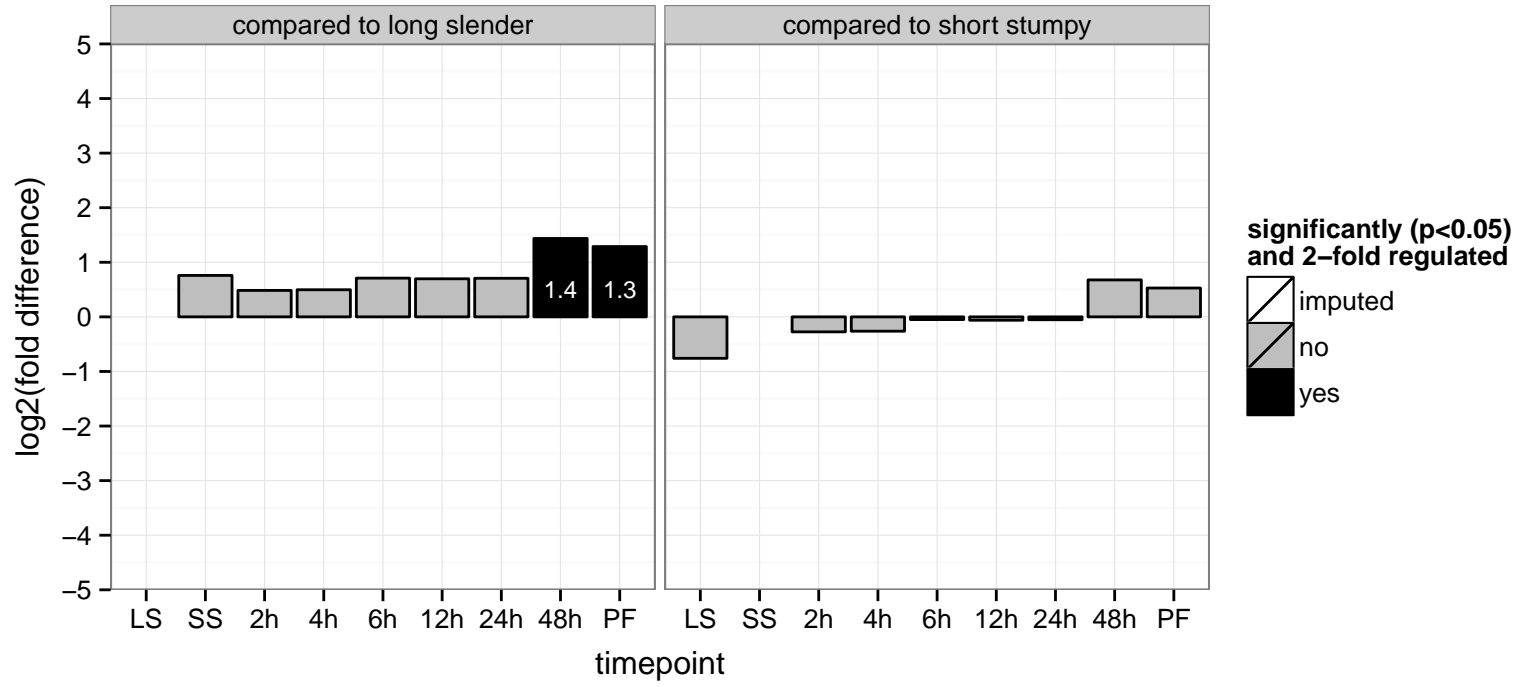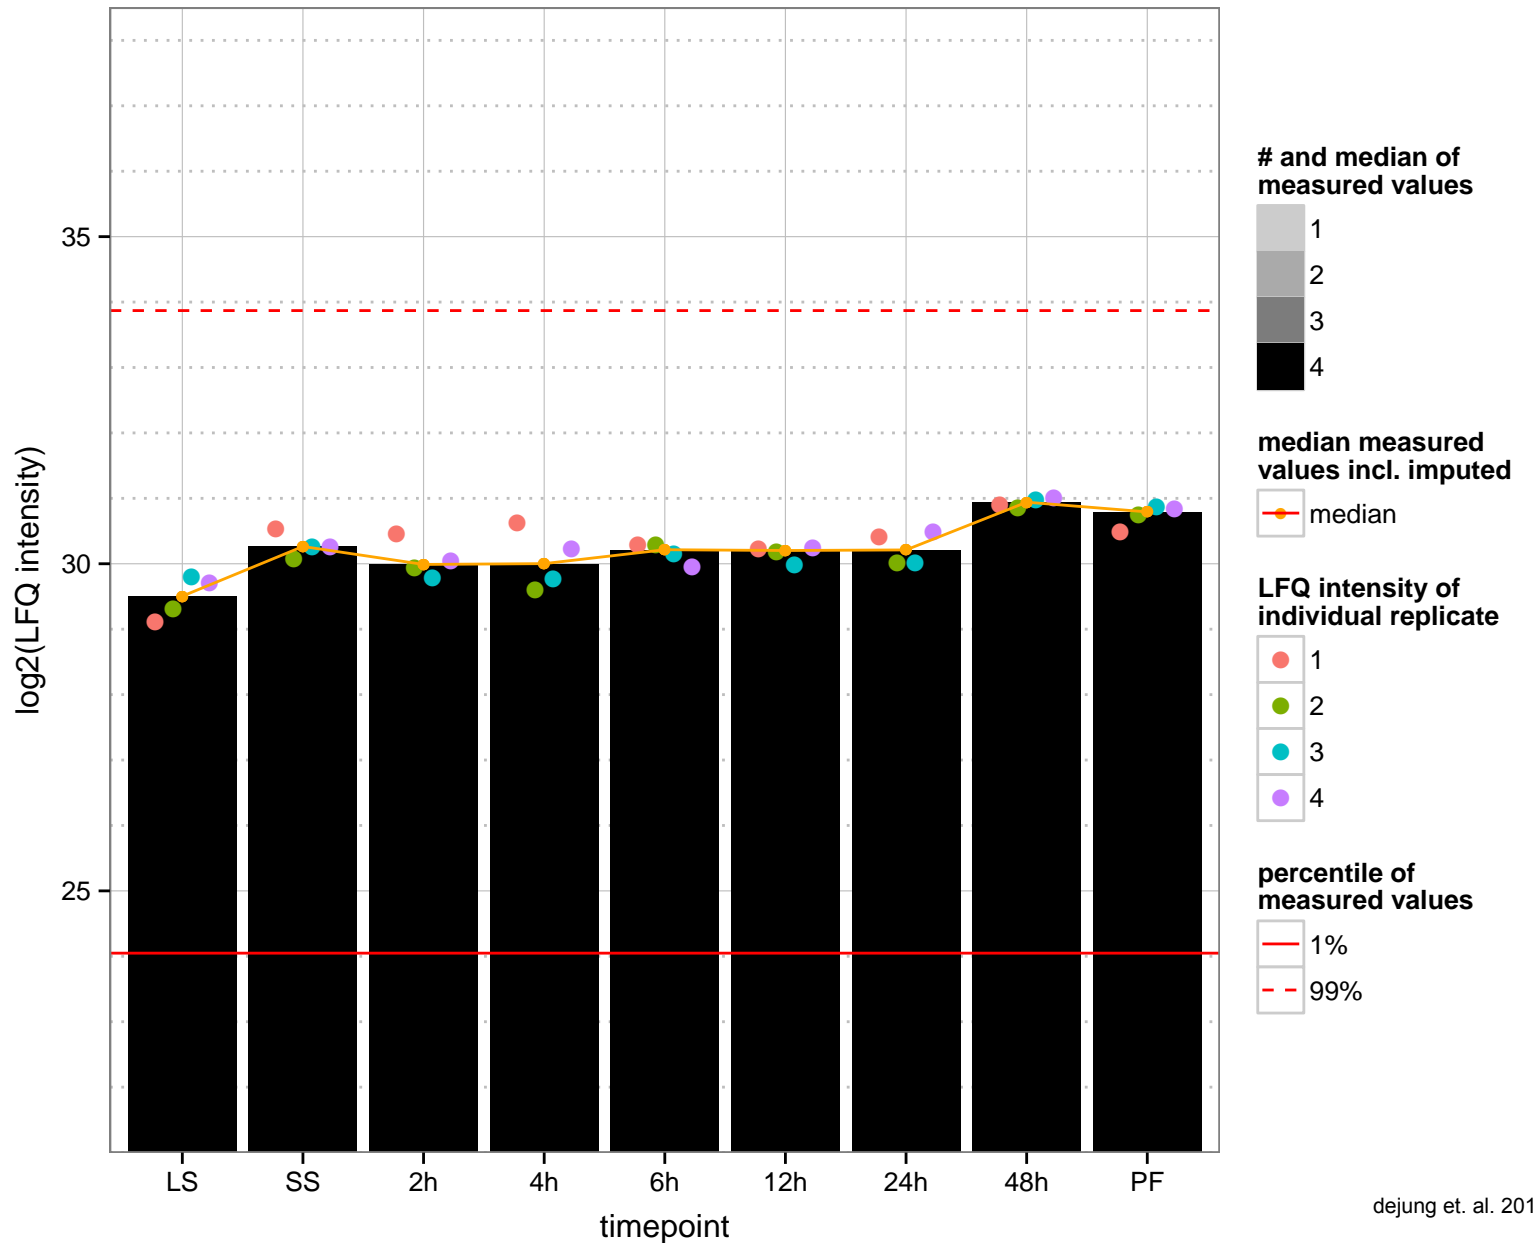

dynaminn, putative, vacuolar sortin protein 1  
 Tb927.3.4760  
 AGOF: GTP binding, GTPase activity  
 AGOC: null  
 AGOP: null  
 PGOF: GTP binding, GTPase activity  
 PGO: null  
 PGOP: null

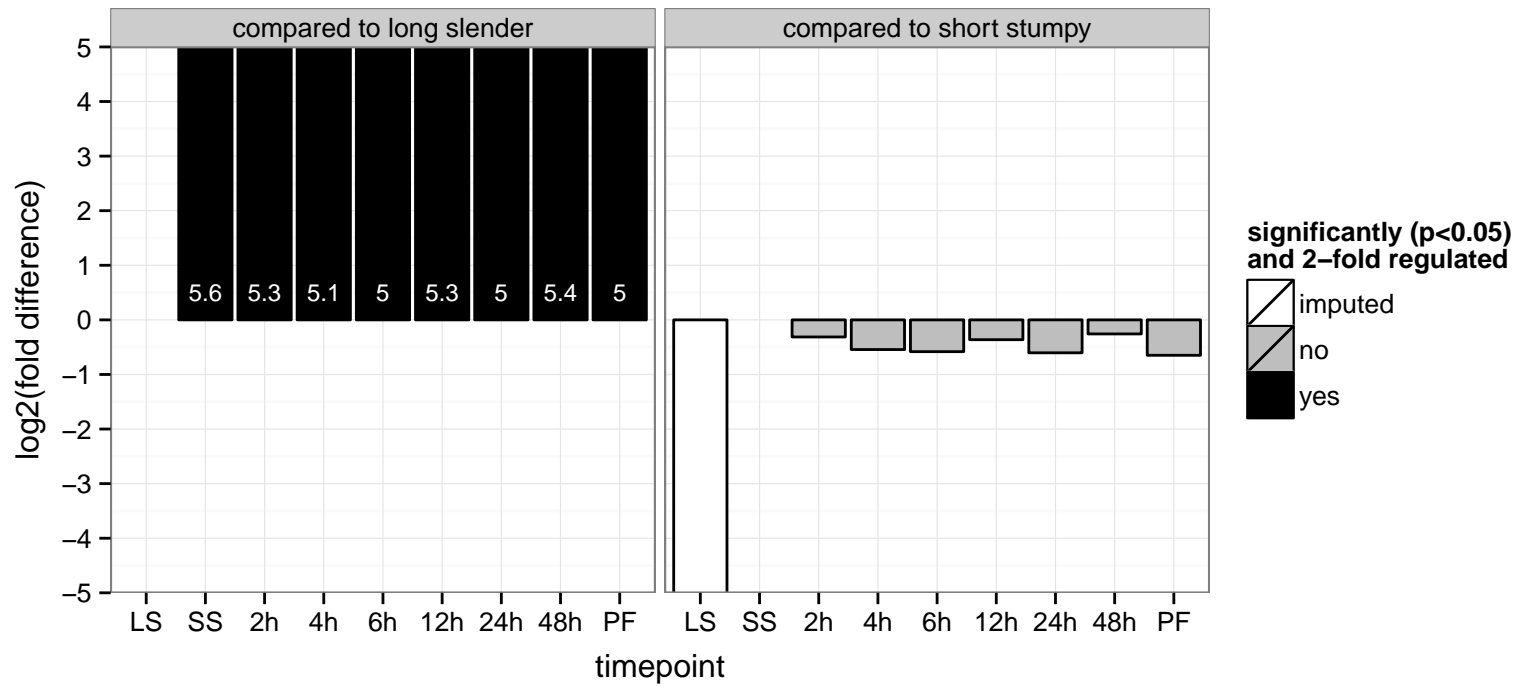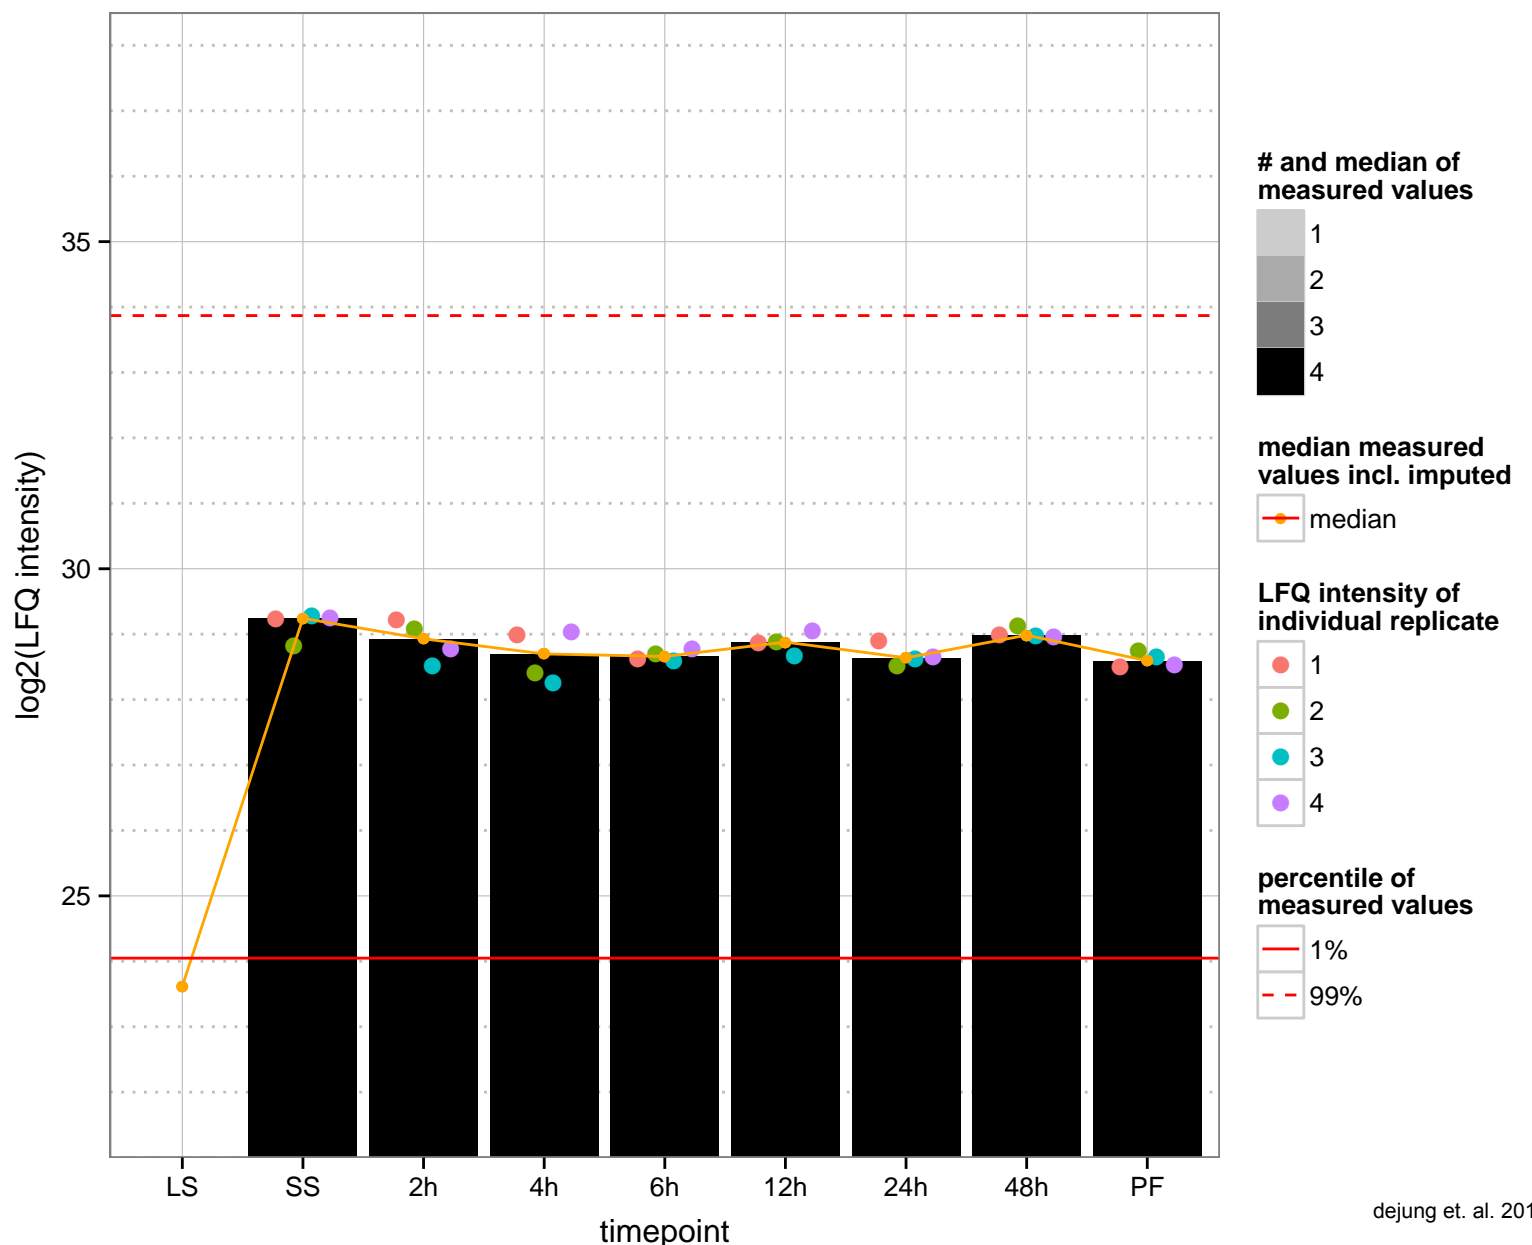

acyltransferase, putative  
 Tb927.3.4820  
 AGOF: transferase activity, transferring acyl groups  
 AGOC: null  
 AGOP: metabolic process  
 PGOF: transferase activity, transferring acyl groups  
 PGOC: null  
 PGOP: metabolic process

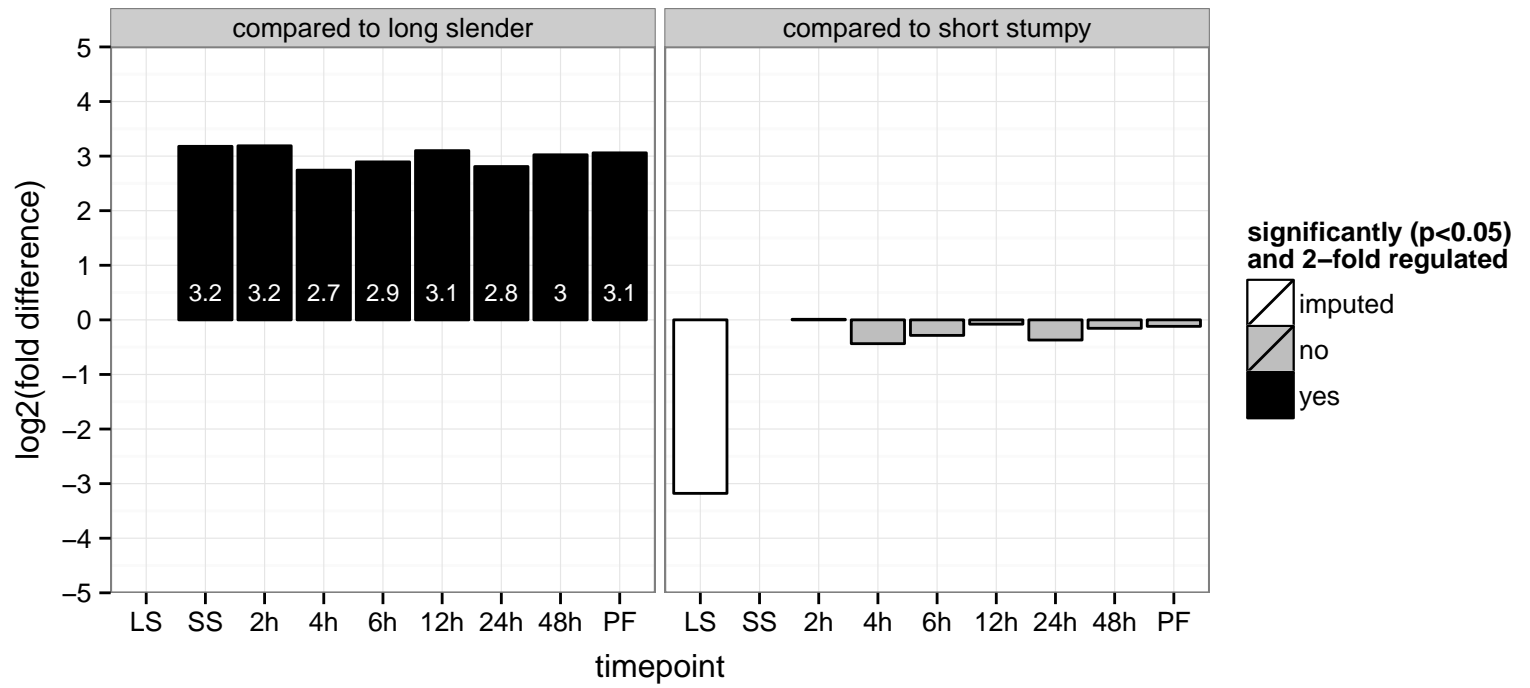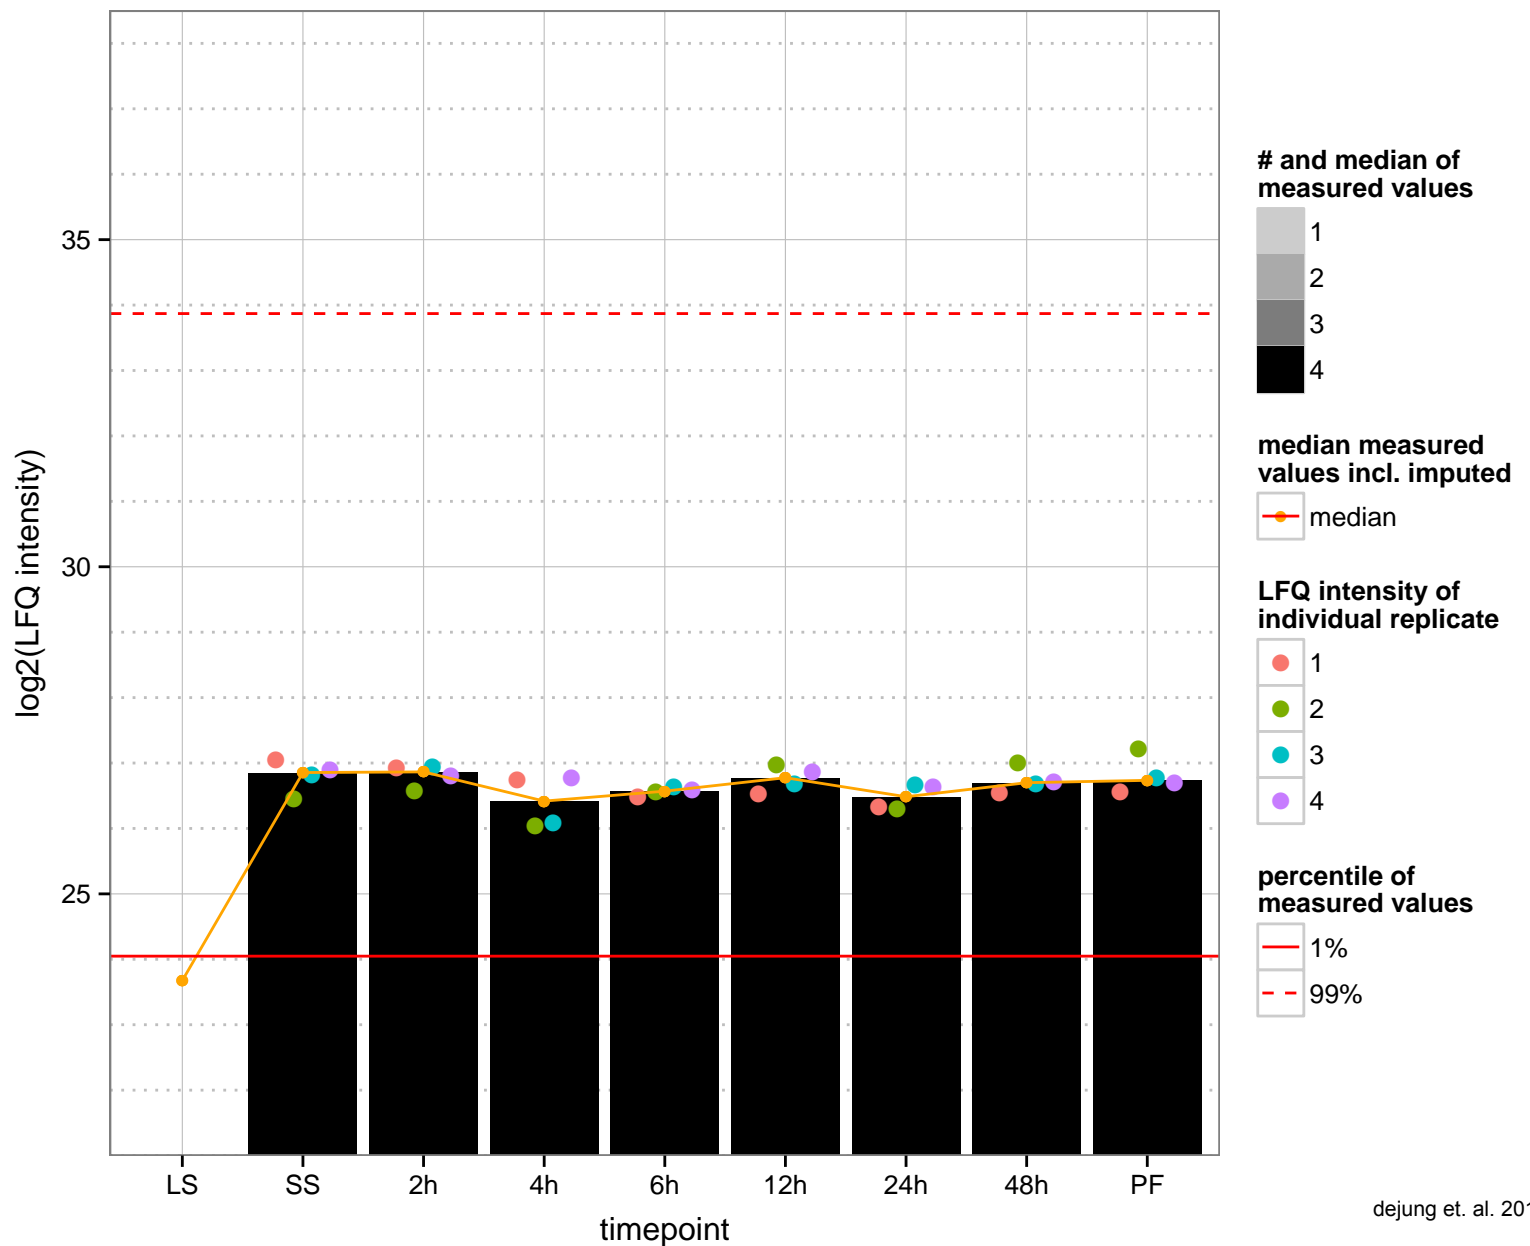

mitogen-activated protein kinase kinase, putative (MKK1)

Tb927.3.4860

AGOF: ATP binding, mitogen-activated protein kinase binding, protein kinase activity, protein serine/threonine kinase activity,

AGOC: null

AGOP: protein phosphorylation

PGOF: ATP binding, protein kinase activity, transferase activity, transferring phosphorus-containing groups

PGOC: null

PGOP: protein phosphorylation

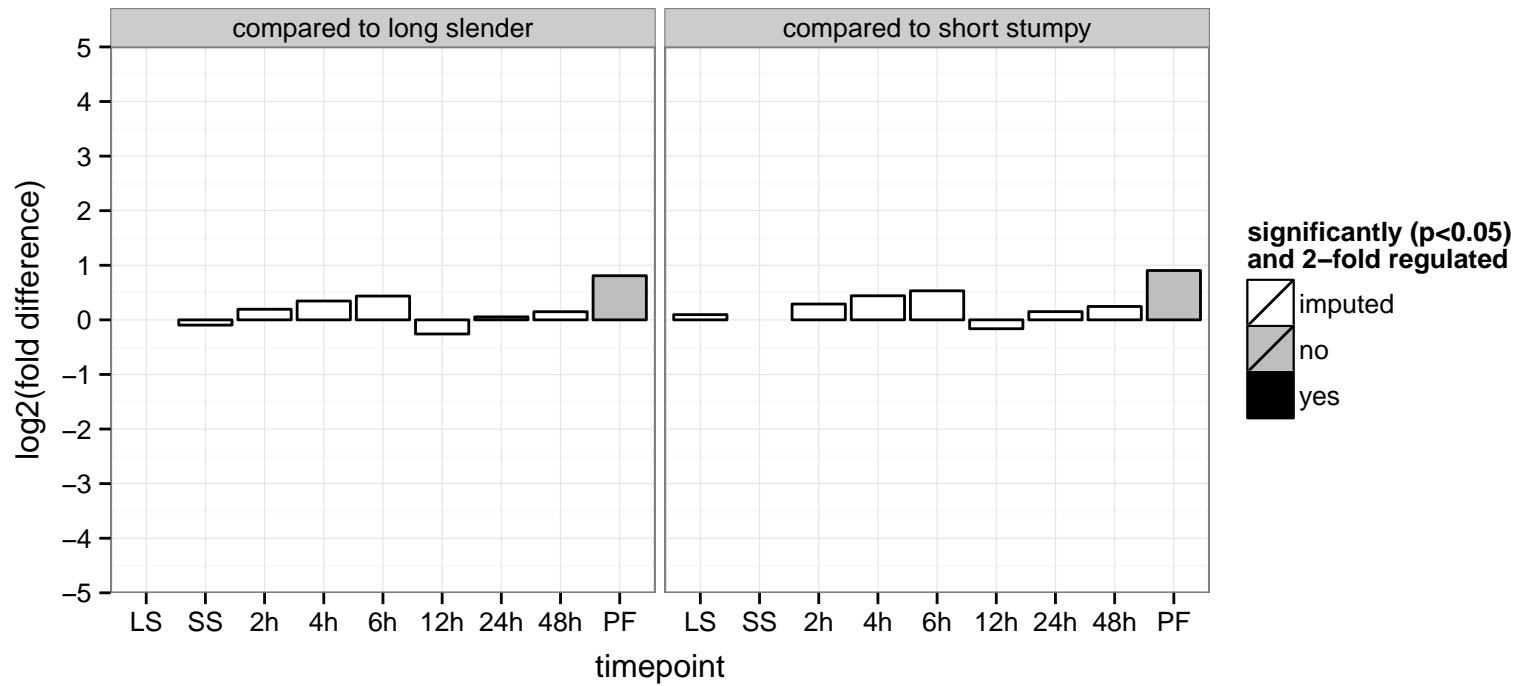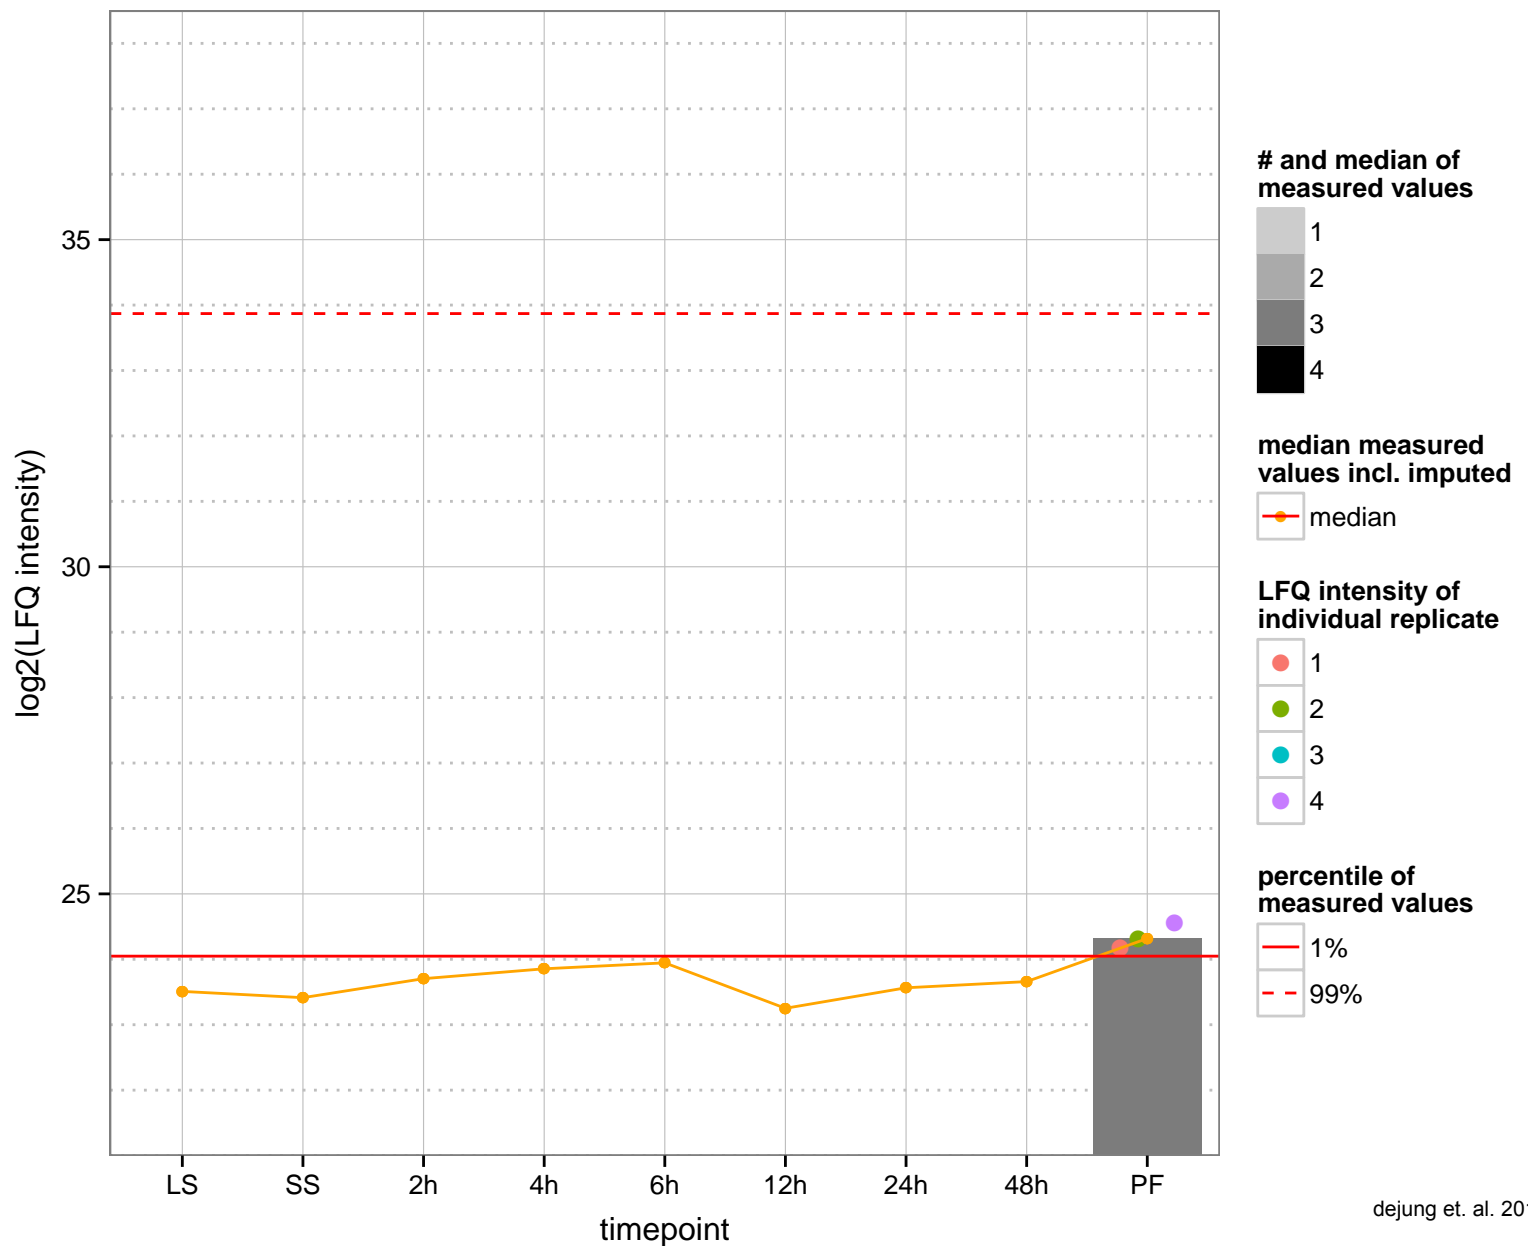

LETM1 and EF-hand domain-containing protein 1, putative  
 Tb927.3.4920  
 AGOF: calcium ion binding, calcium:sodium antiporter activity  
 AGOC: integral to membrane, mitochondrial inner membrane  
 AGOP: mitochondrial calcium ion transport  
 PGO: null  
 PGO: null  
 PGO: null

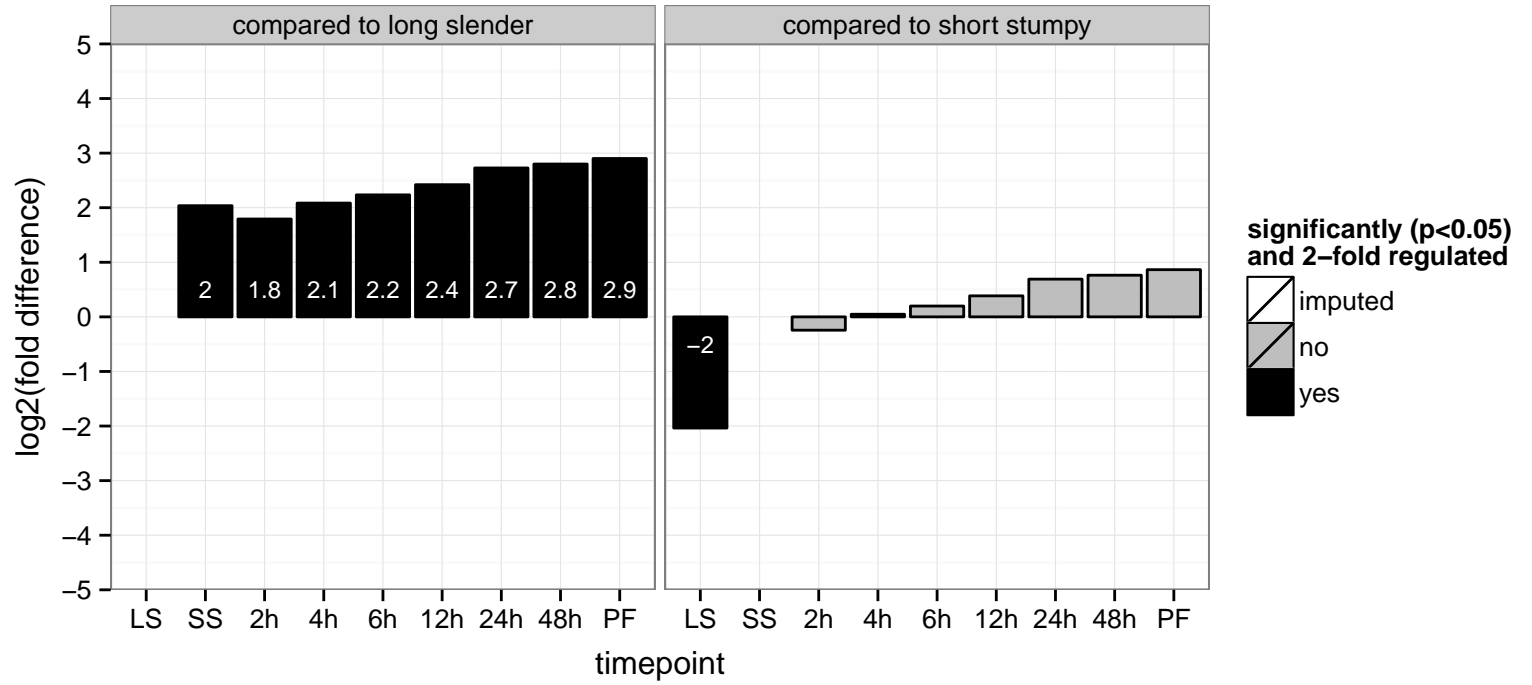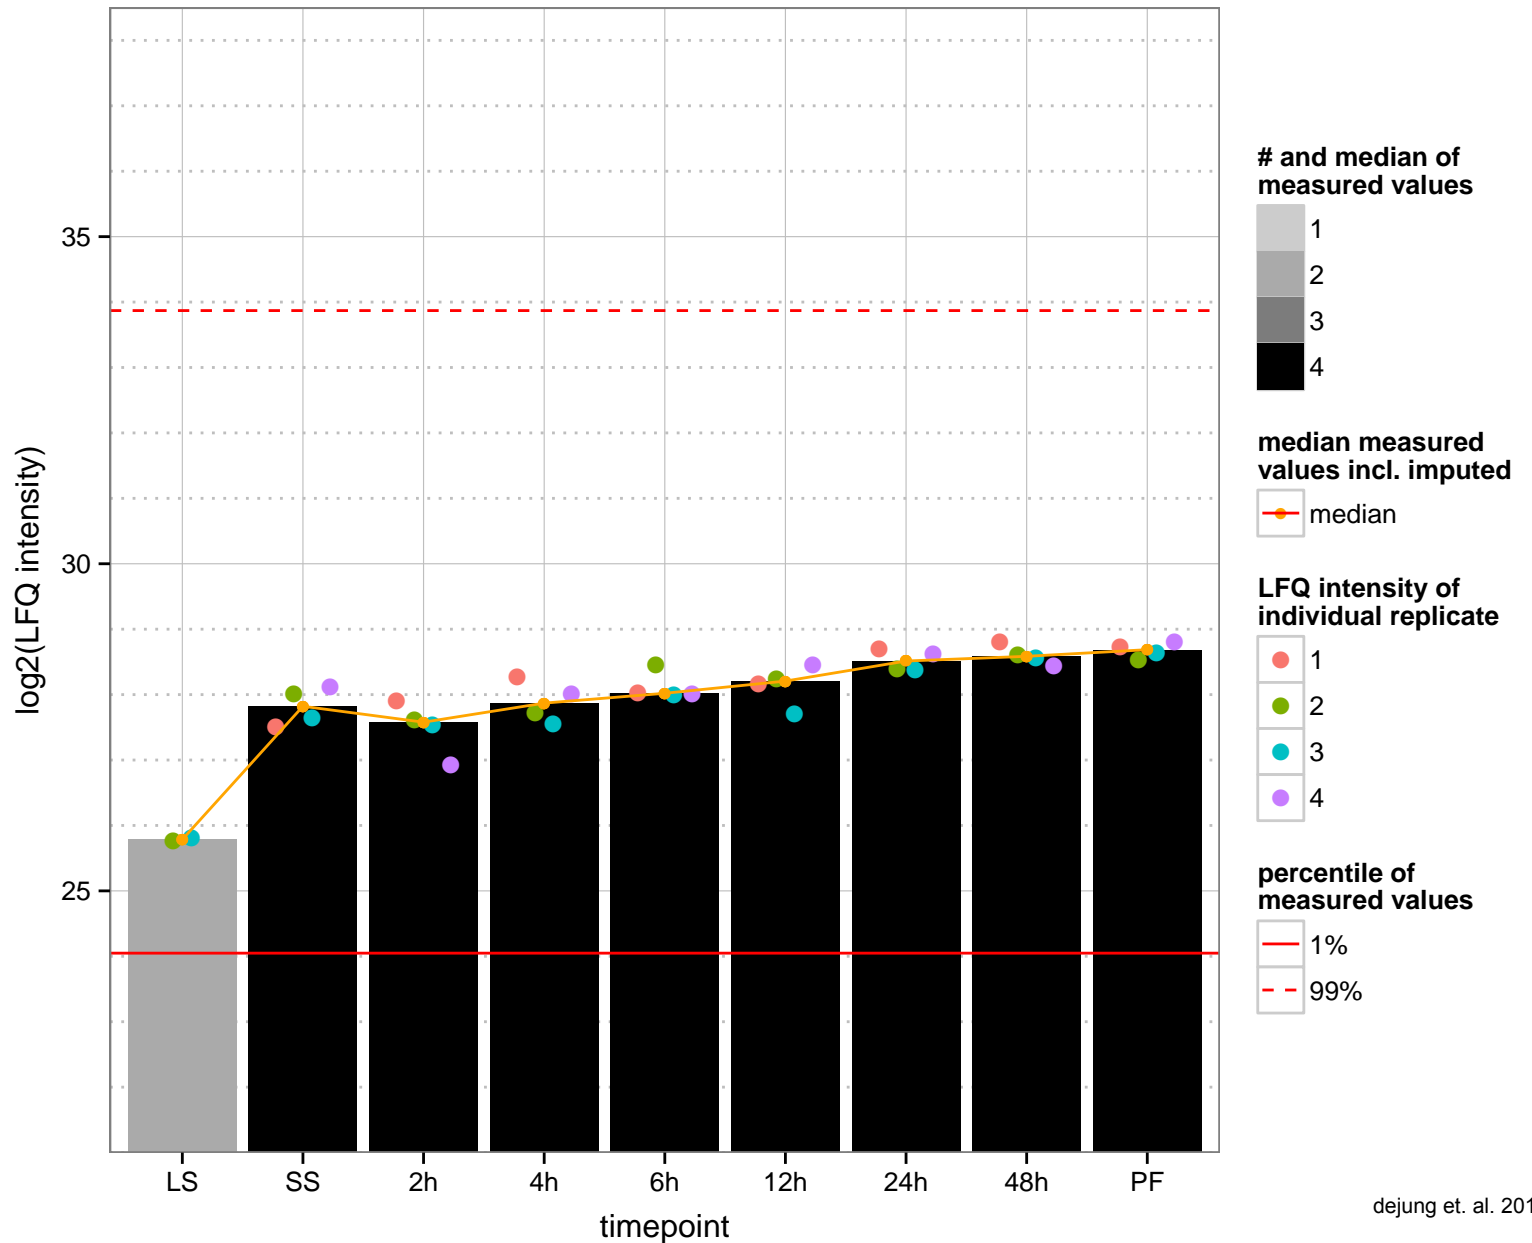

5-histidylcysteine sulfoxide synthase, putative  
 Tb927.3.4940  
 AGOF: ferrous iron binding  
 AGOC: null  
 AGOP: peptidyl-cysteine oxidation, response to iron(II) ion  
 PGO: null  
 PGO: null  
 PGO: null

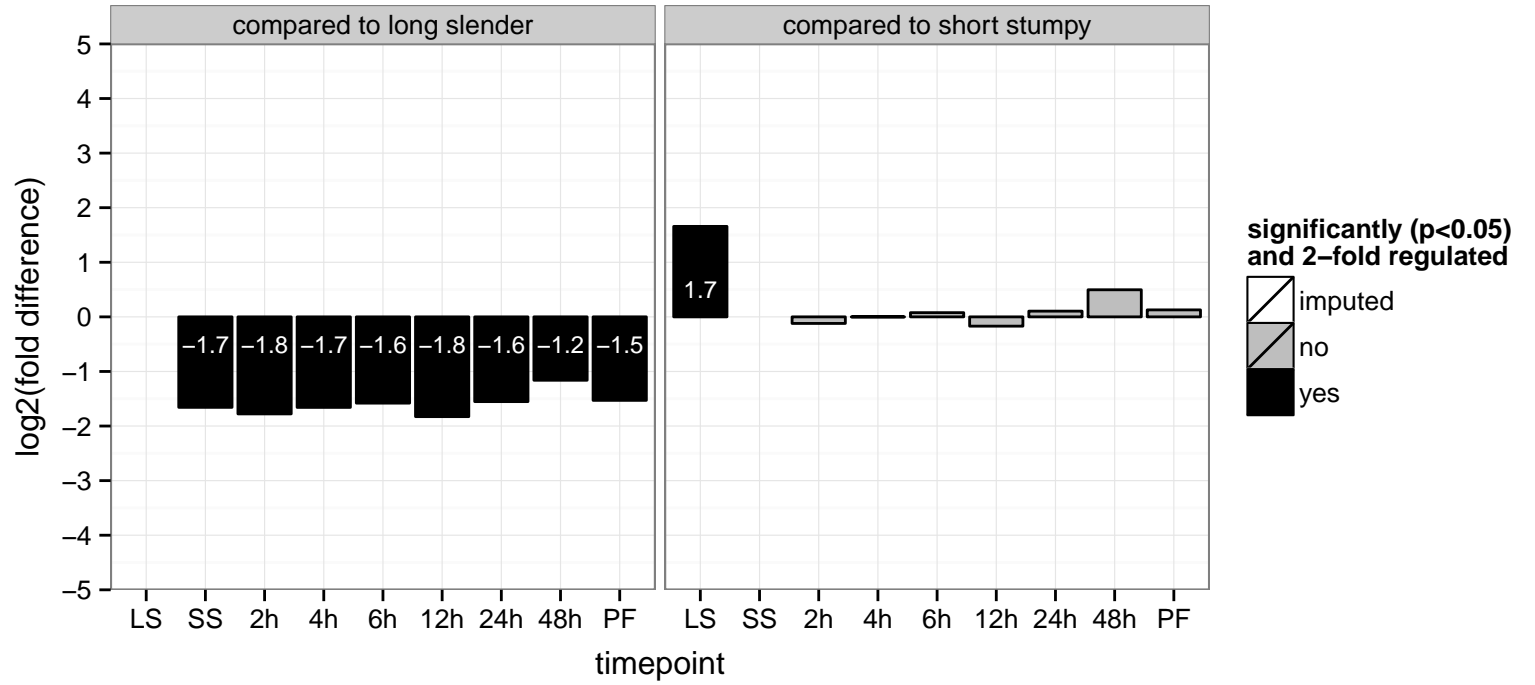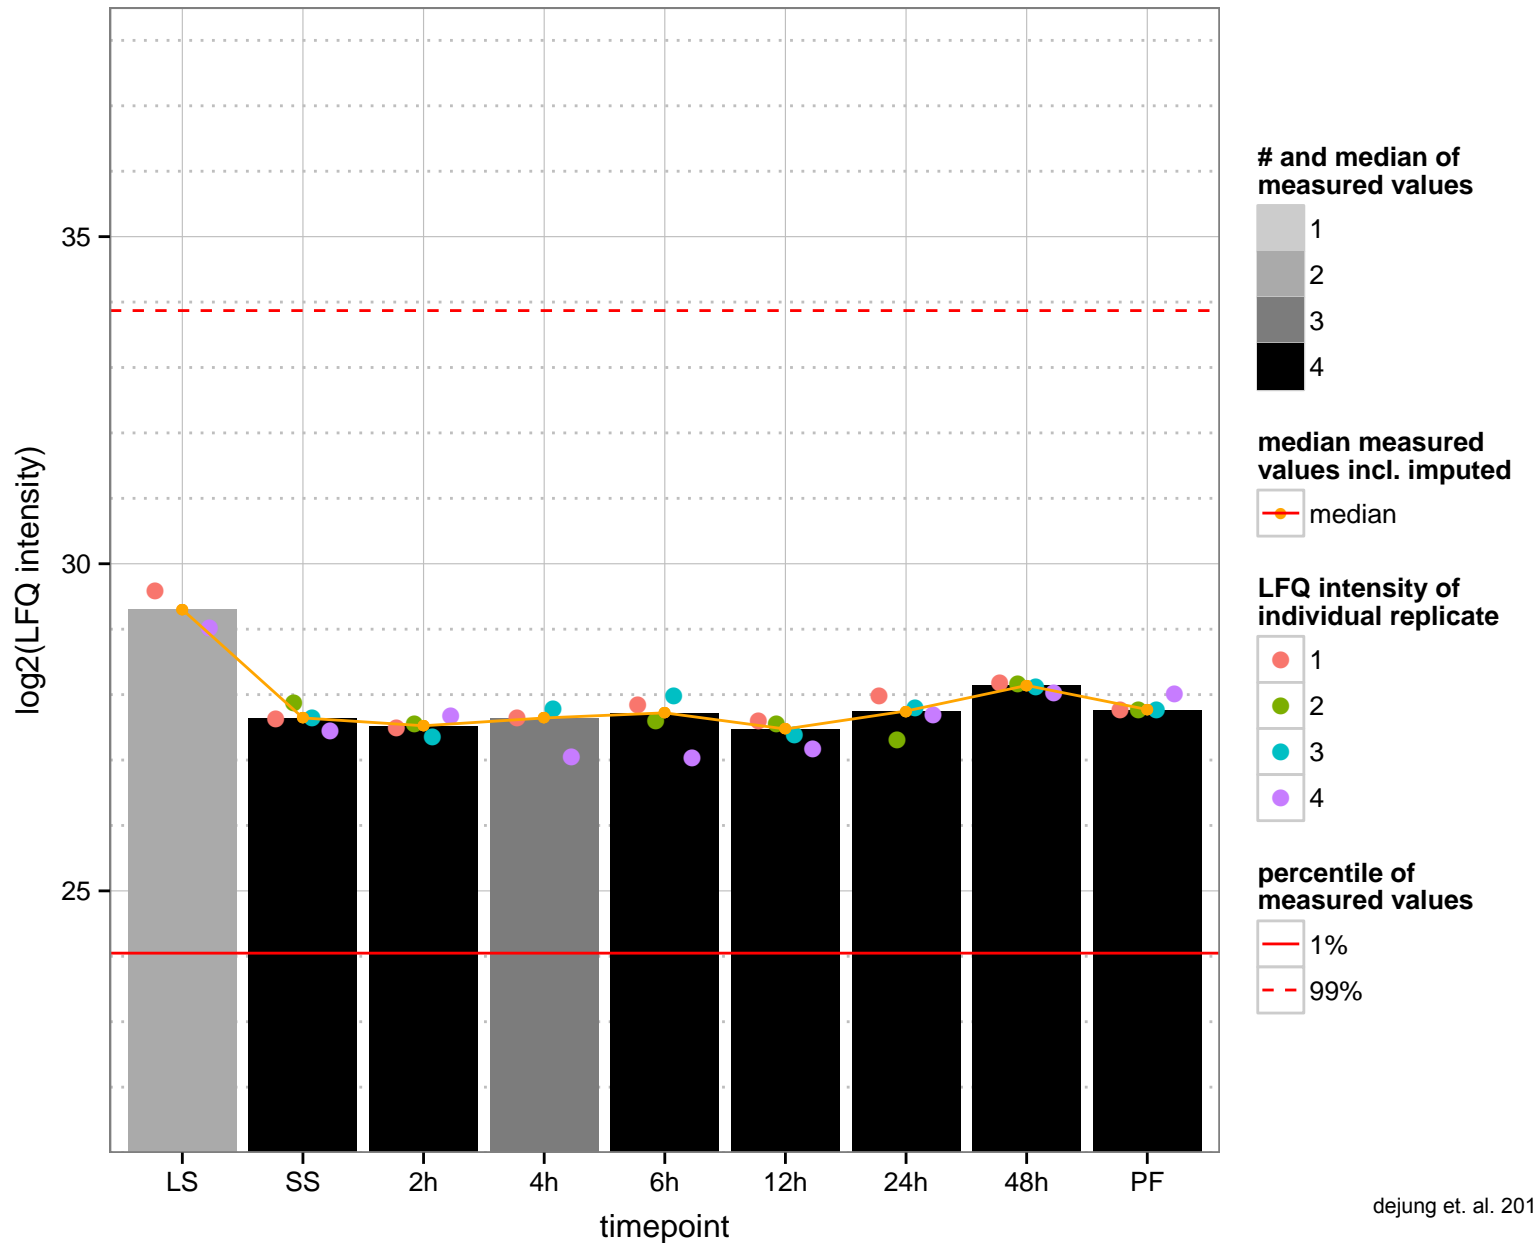



hypothetical protein, conserved  
 Tb927.3.4970  
 AGOF: null  
 AGOC: null  
 AGOP: null  
 PGOF: null  
 PGOC: null  
 PGOP: null

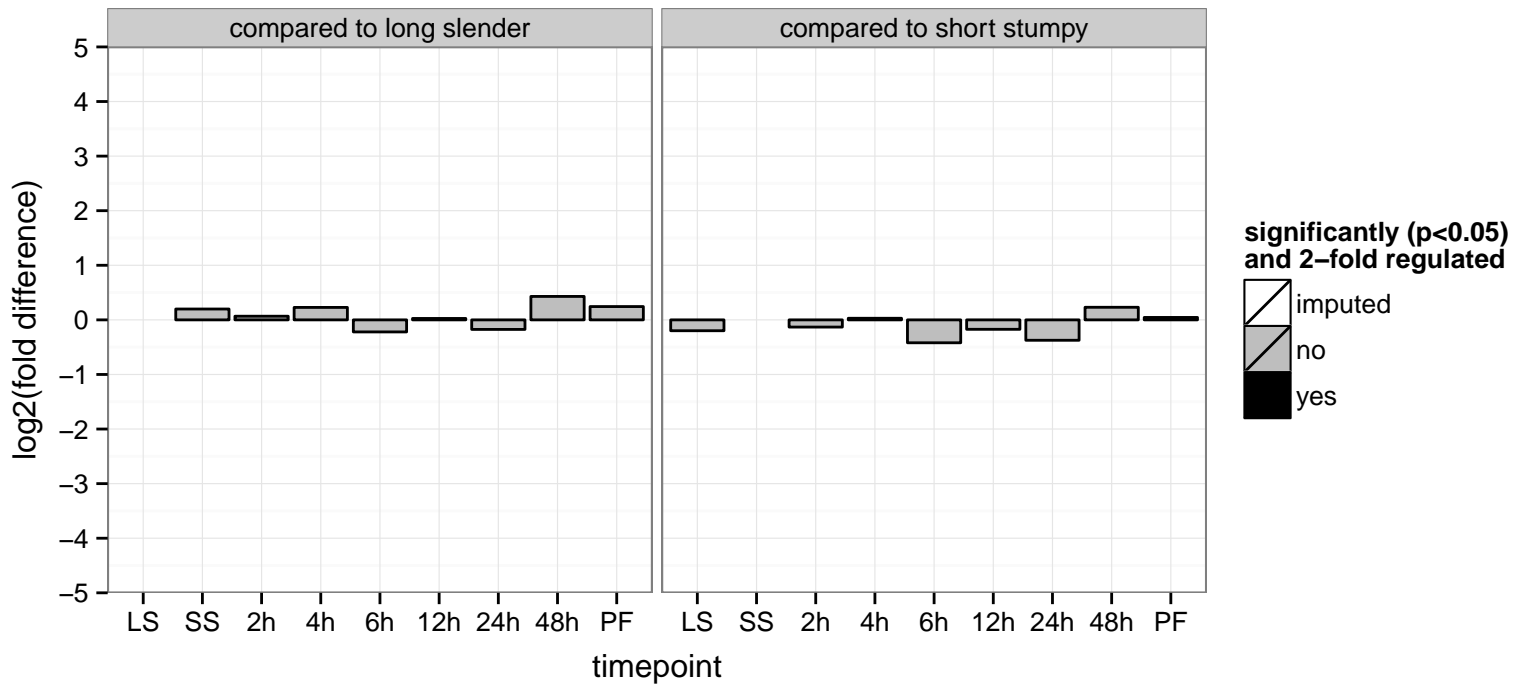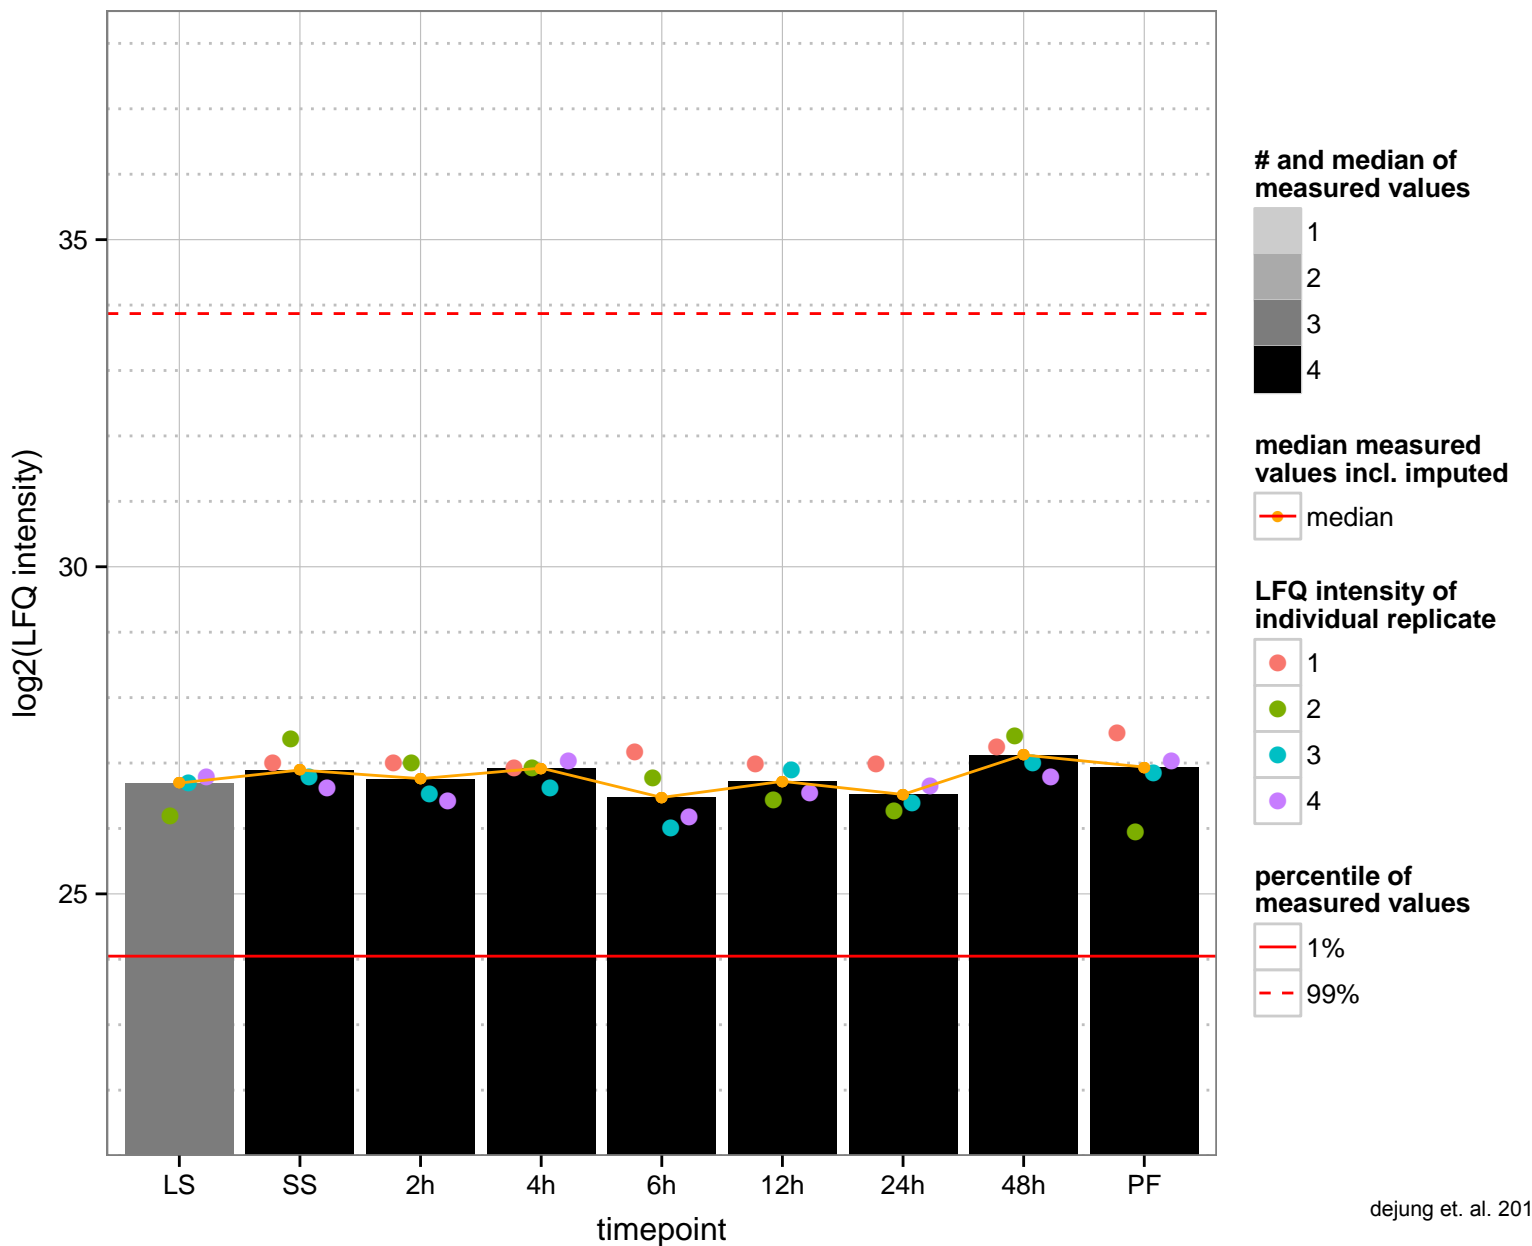

oxidoreductase, putative

Tb927.3.4990

AGOF: oxidoreductase activity, zinc ion binding

AGOC: null

AGOP: metabolic process, oxidation–reduction process

PGOF: oxidoreductase activity, transferase activity, transferring acyl groups other than amino–acyl groups, zinc ion binding

PGOC: null

PGOP: oxidation–reduction process

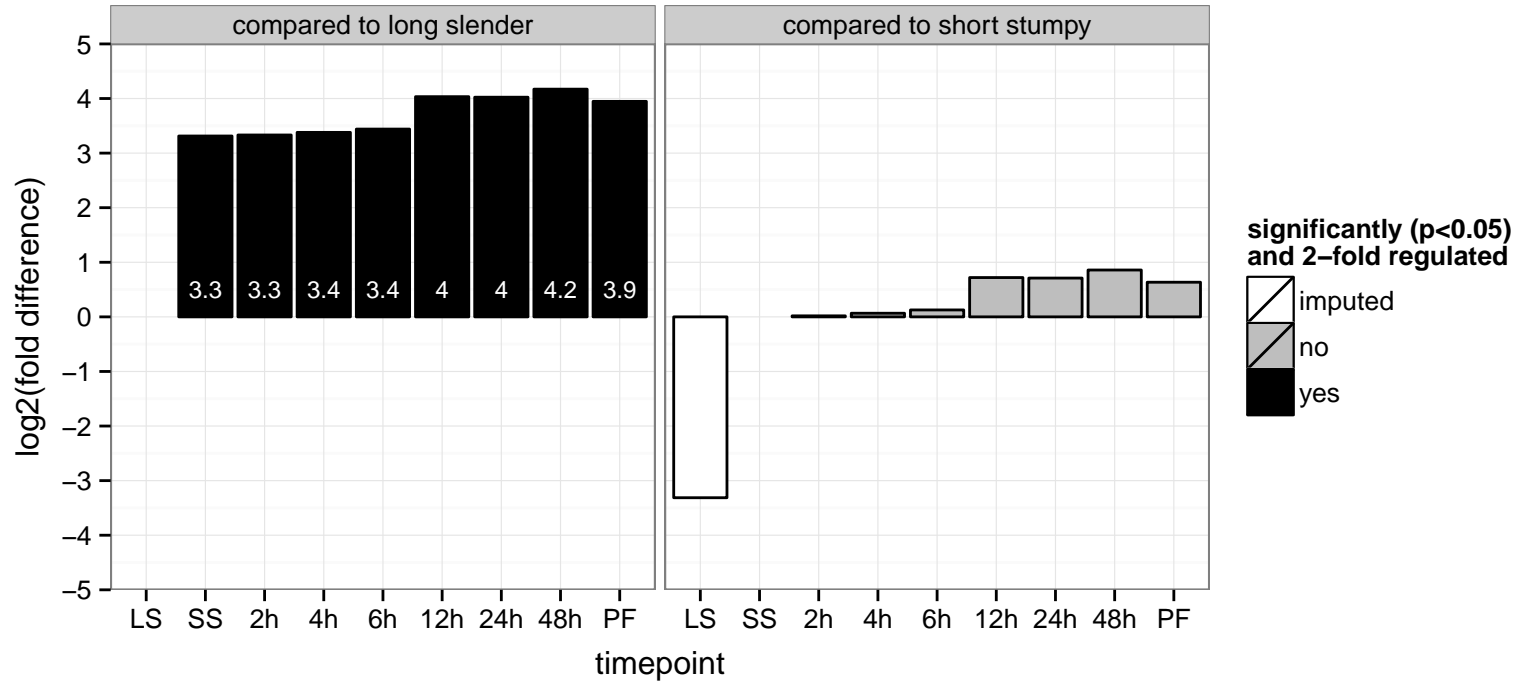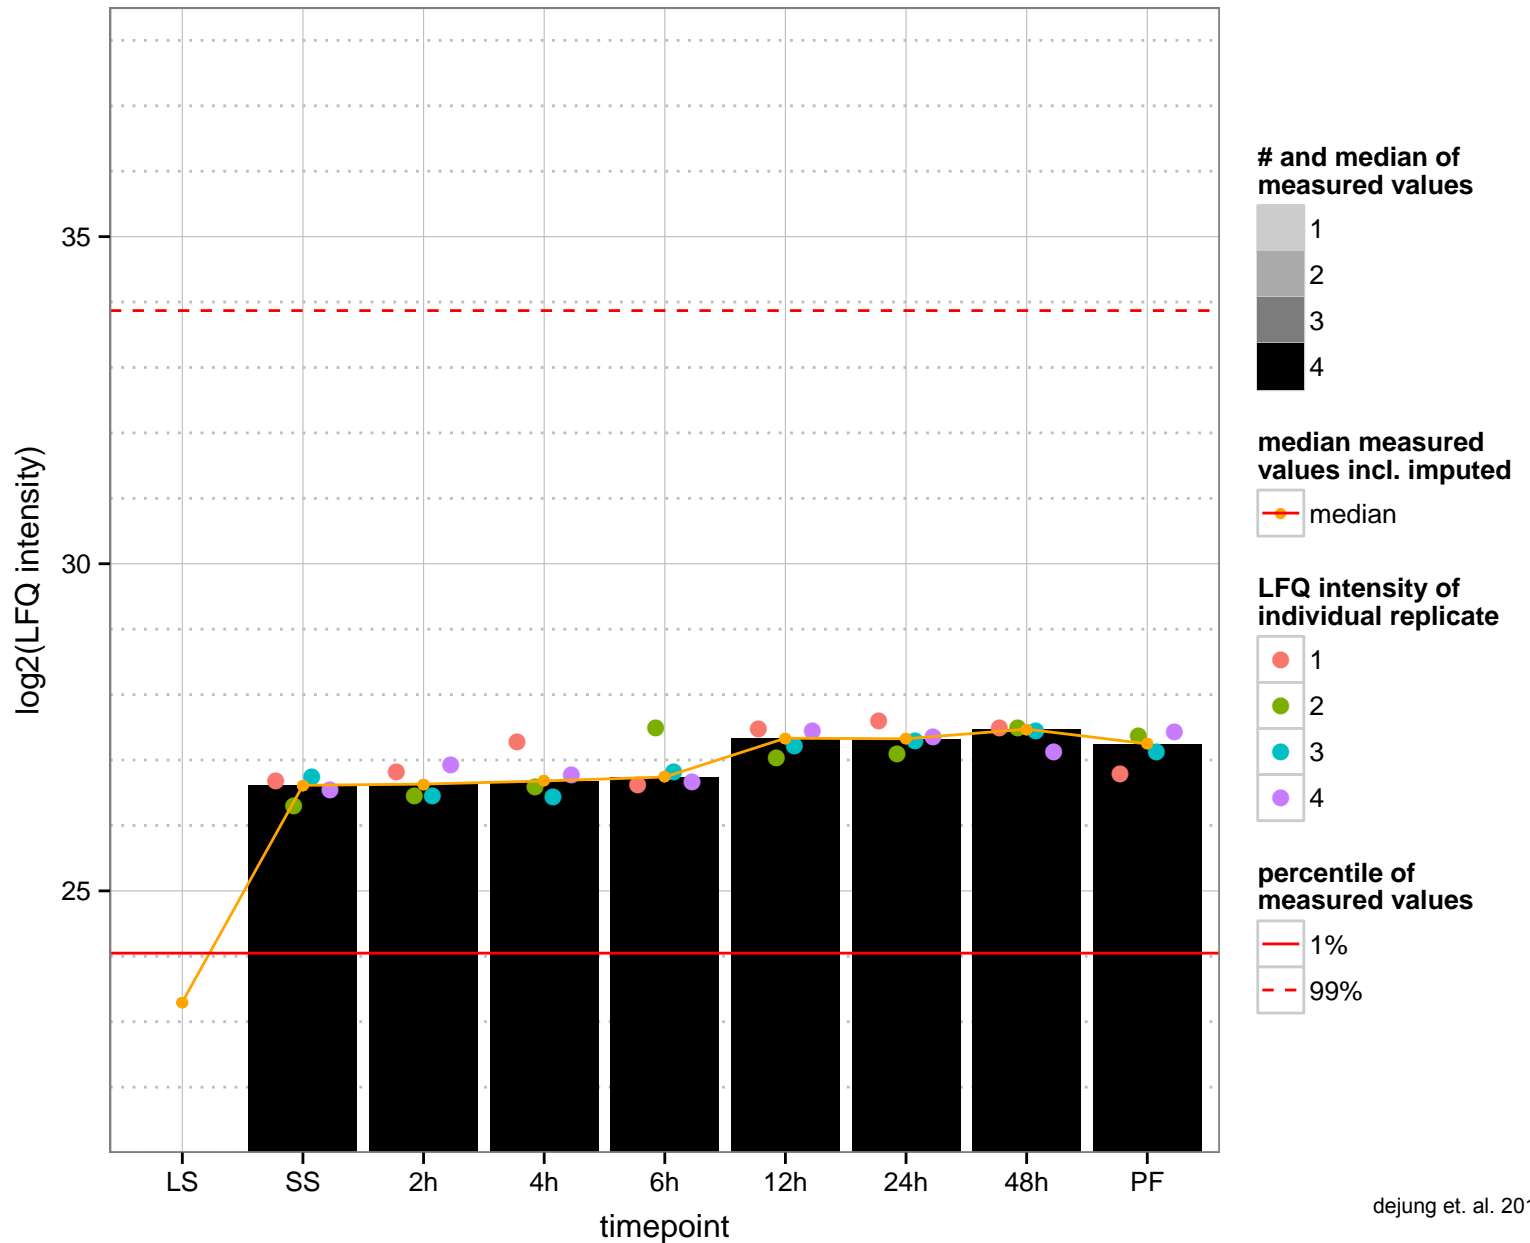

hypothetical protein, conserved  
 Tb927.3.5010  
 AGOF: null  
 AGOC: null  
 AGOP: null  
 PGO: null  
 PGOC: null  
 PGOP: null

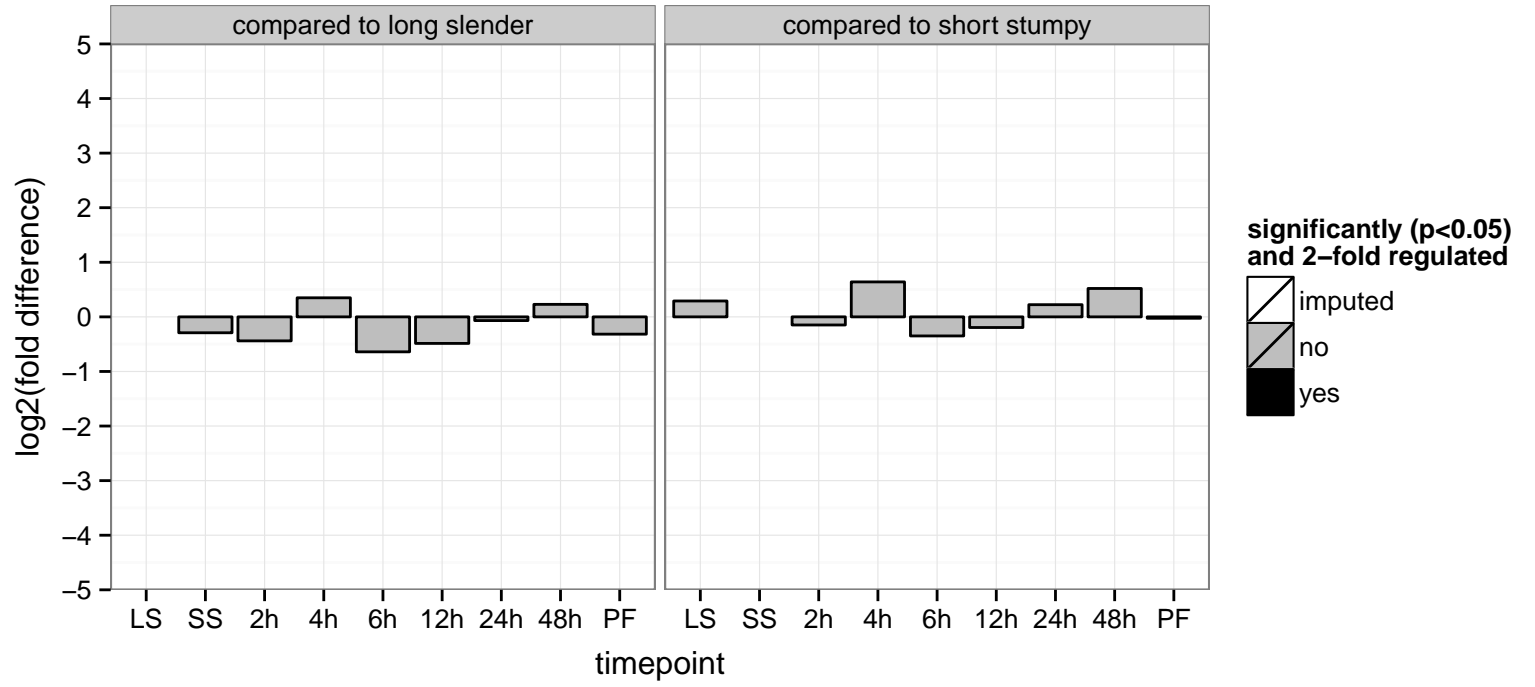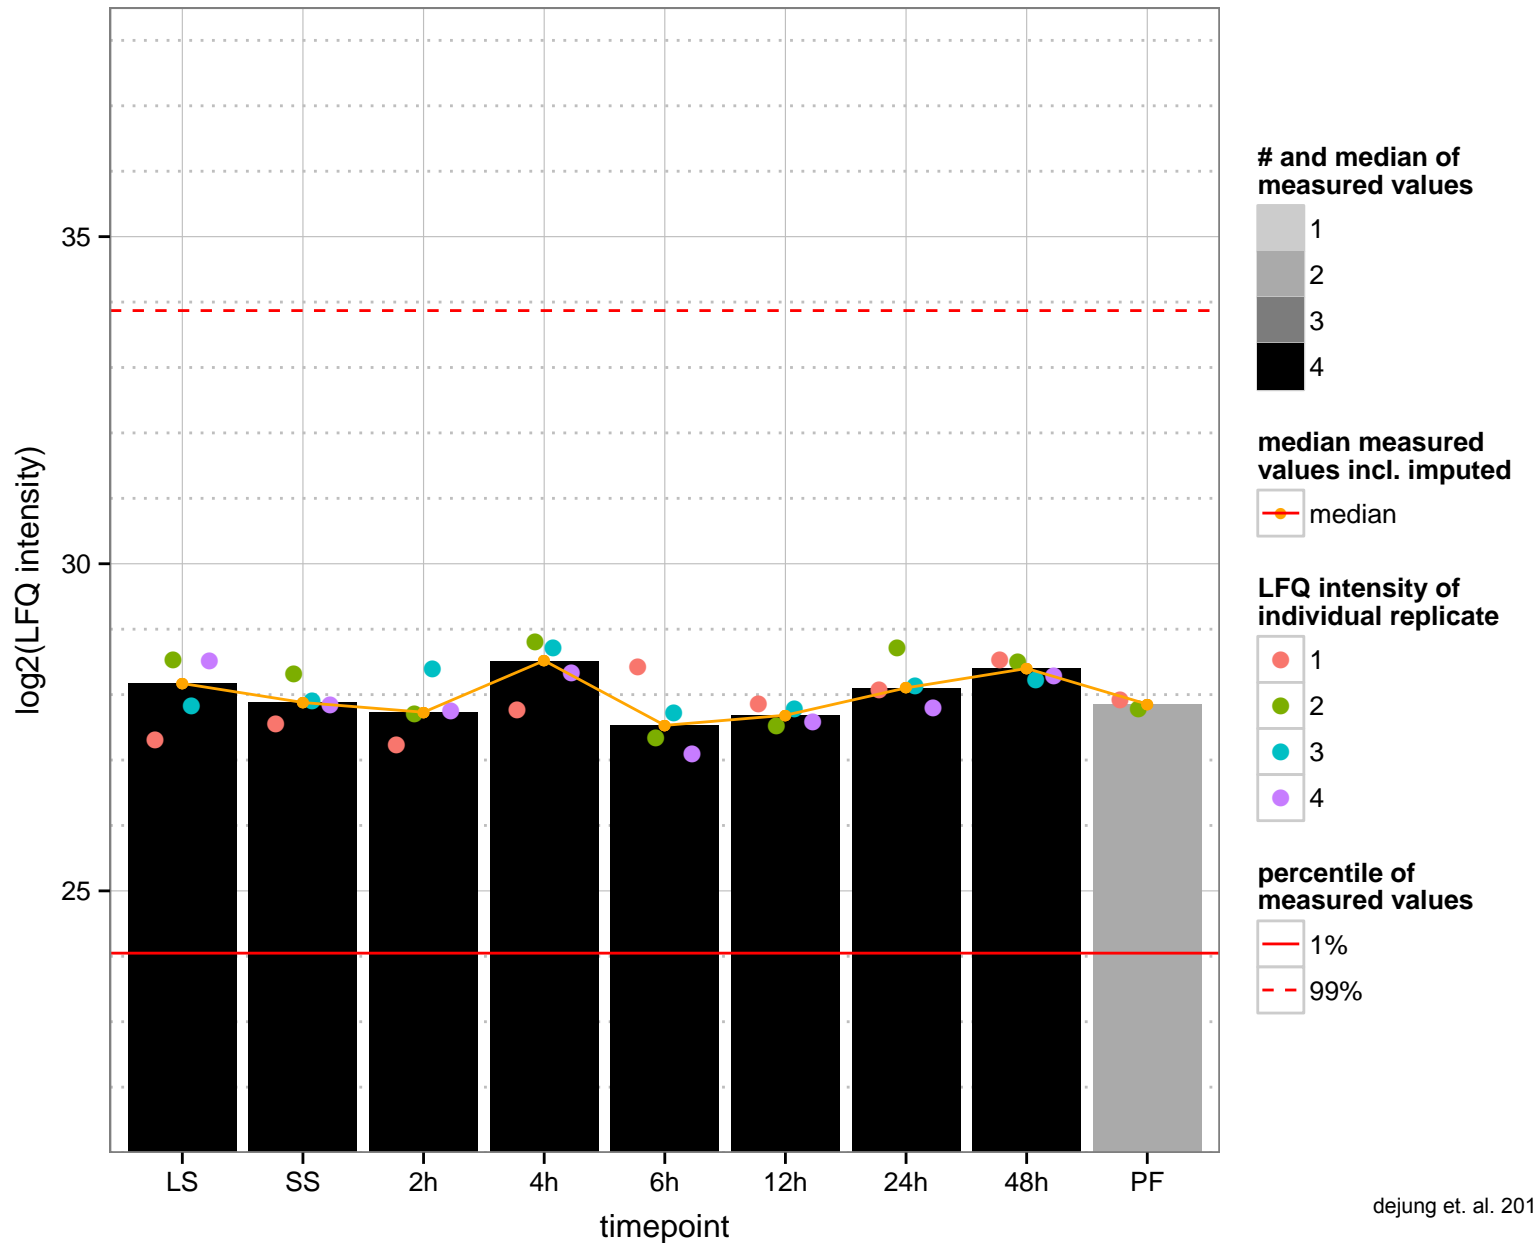

hypothetical protein, conserved  
 Tb927.3.5020  
 AGOF: null  
 AGOC: null  
 AGOP: null  
 PGOF: null  
 PGO: null  
 PGOP: null

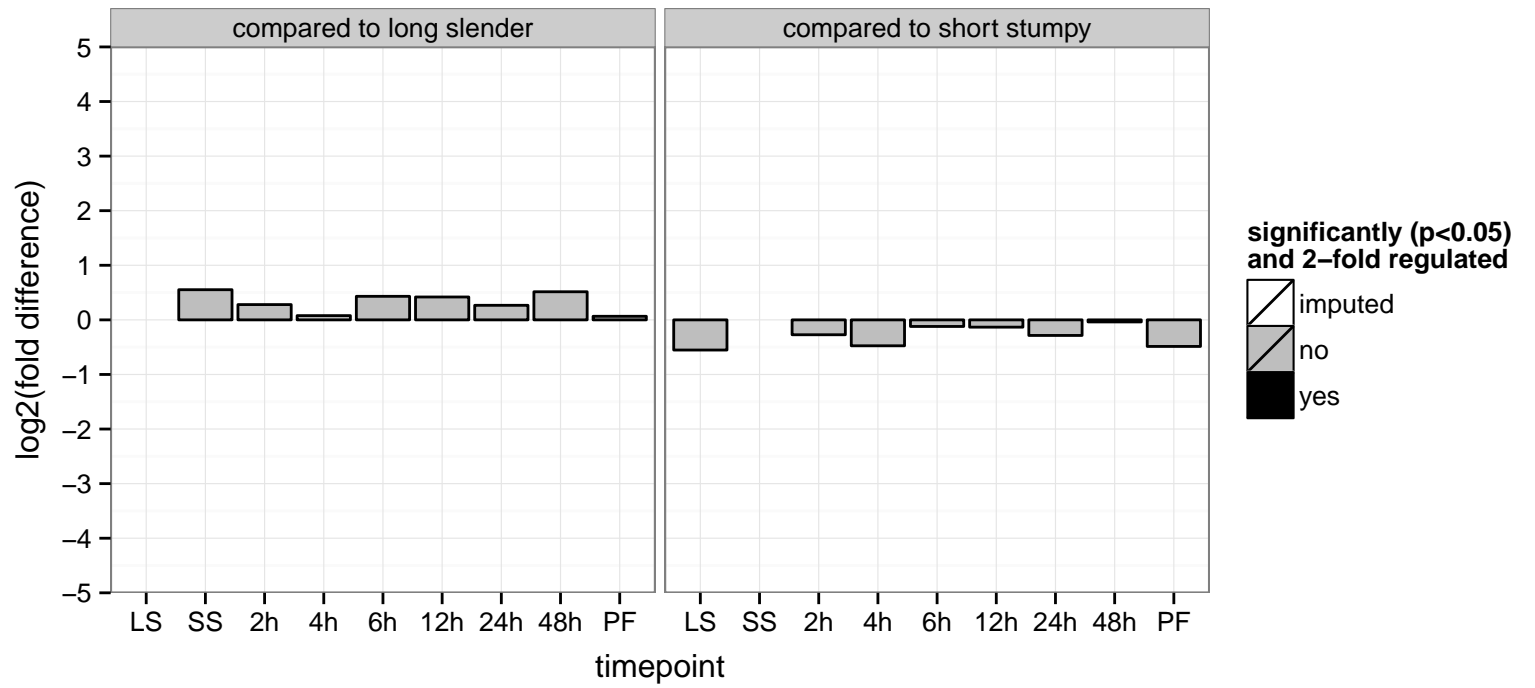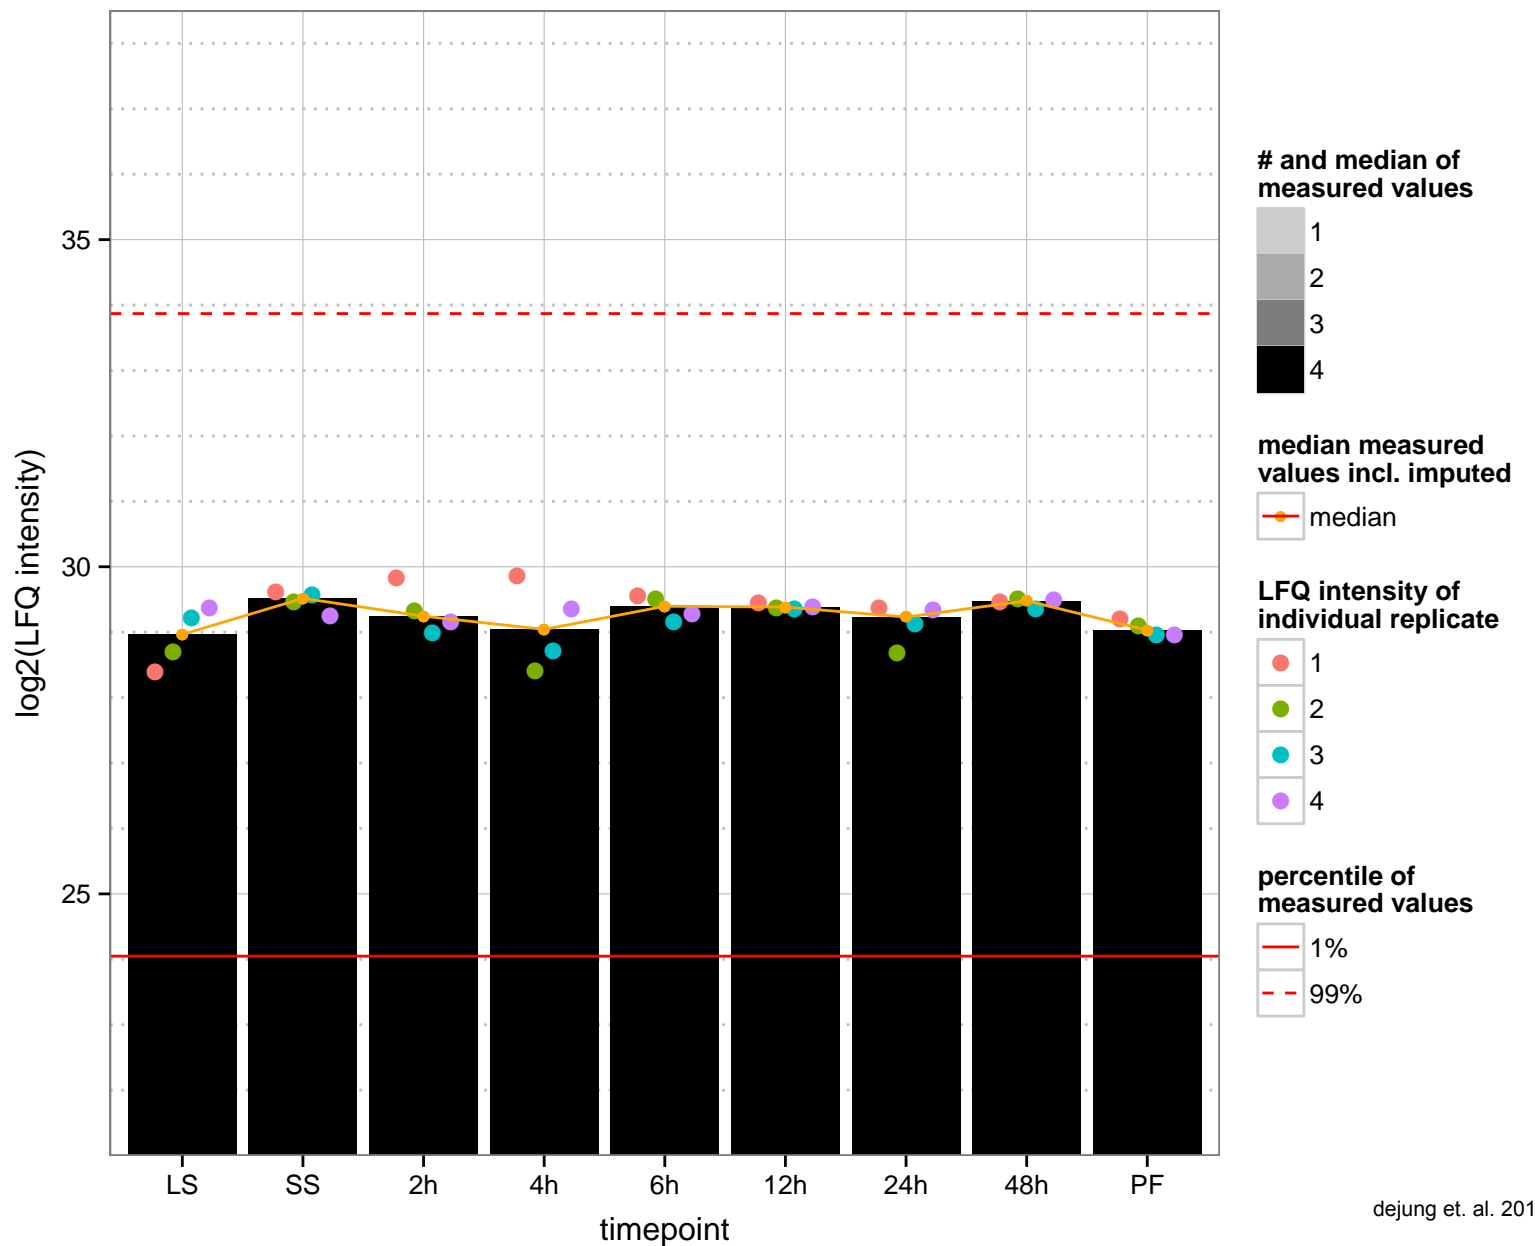

hypothetical protein, conserved  
 Tb927.3.5060  
 AGOF: null  
 AGOC: null  
 AGOP: null  
 PGO: protein binding  
 PGOC: null  
 PGOP: null

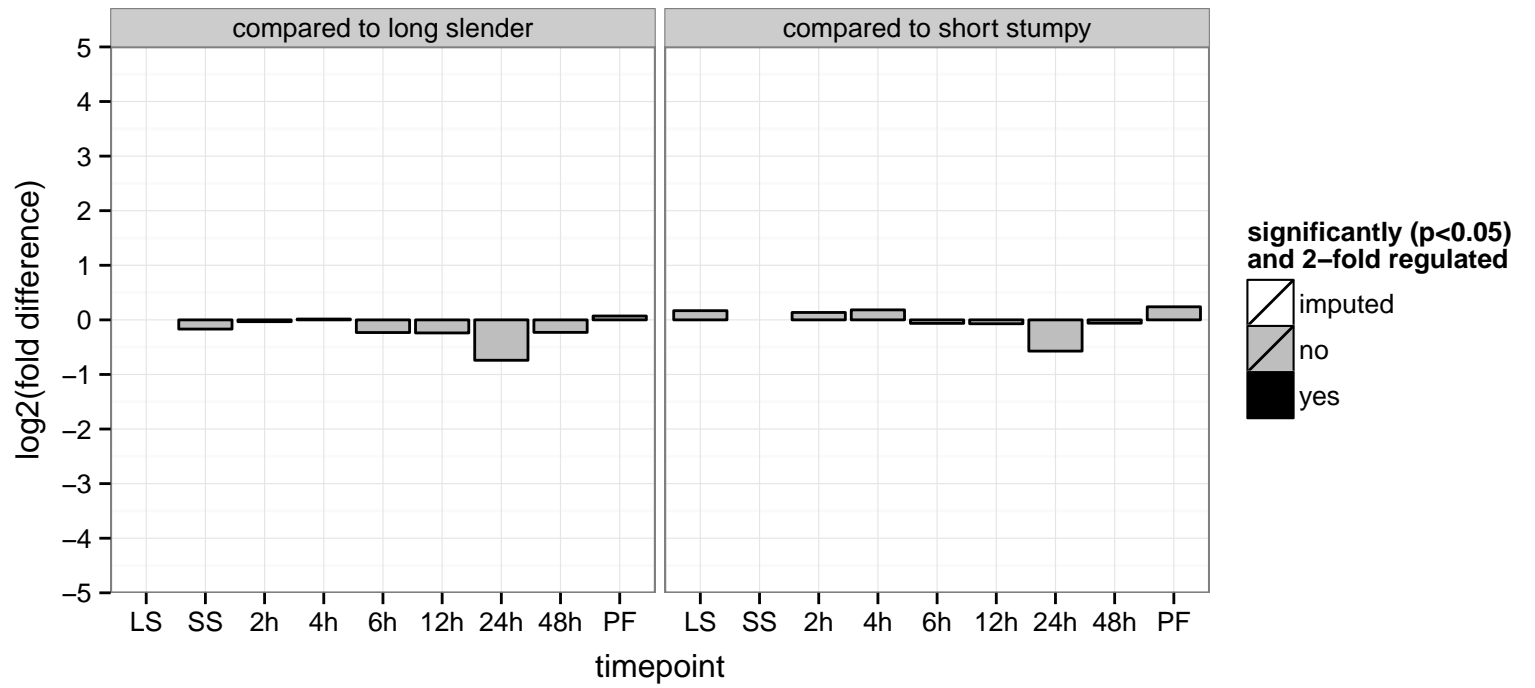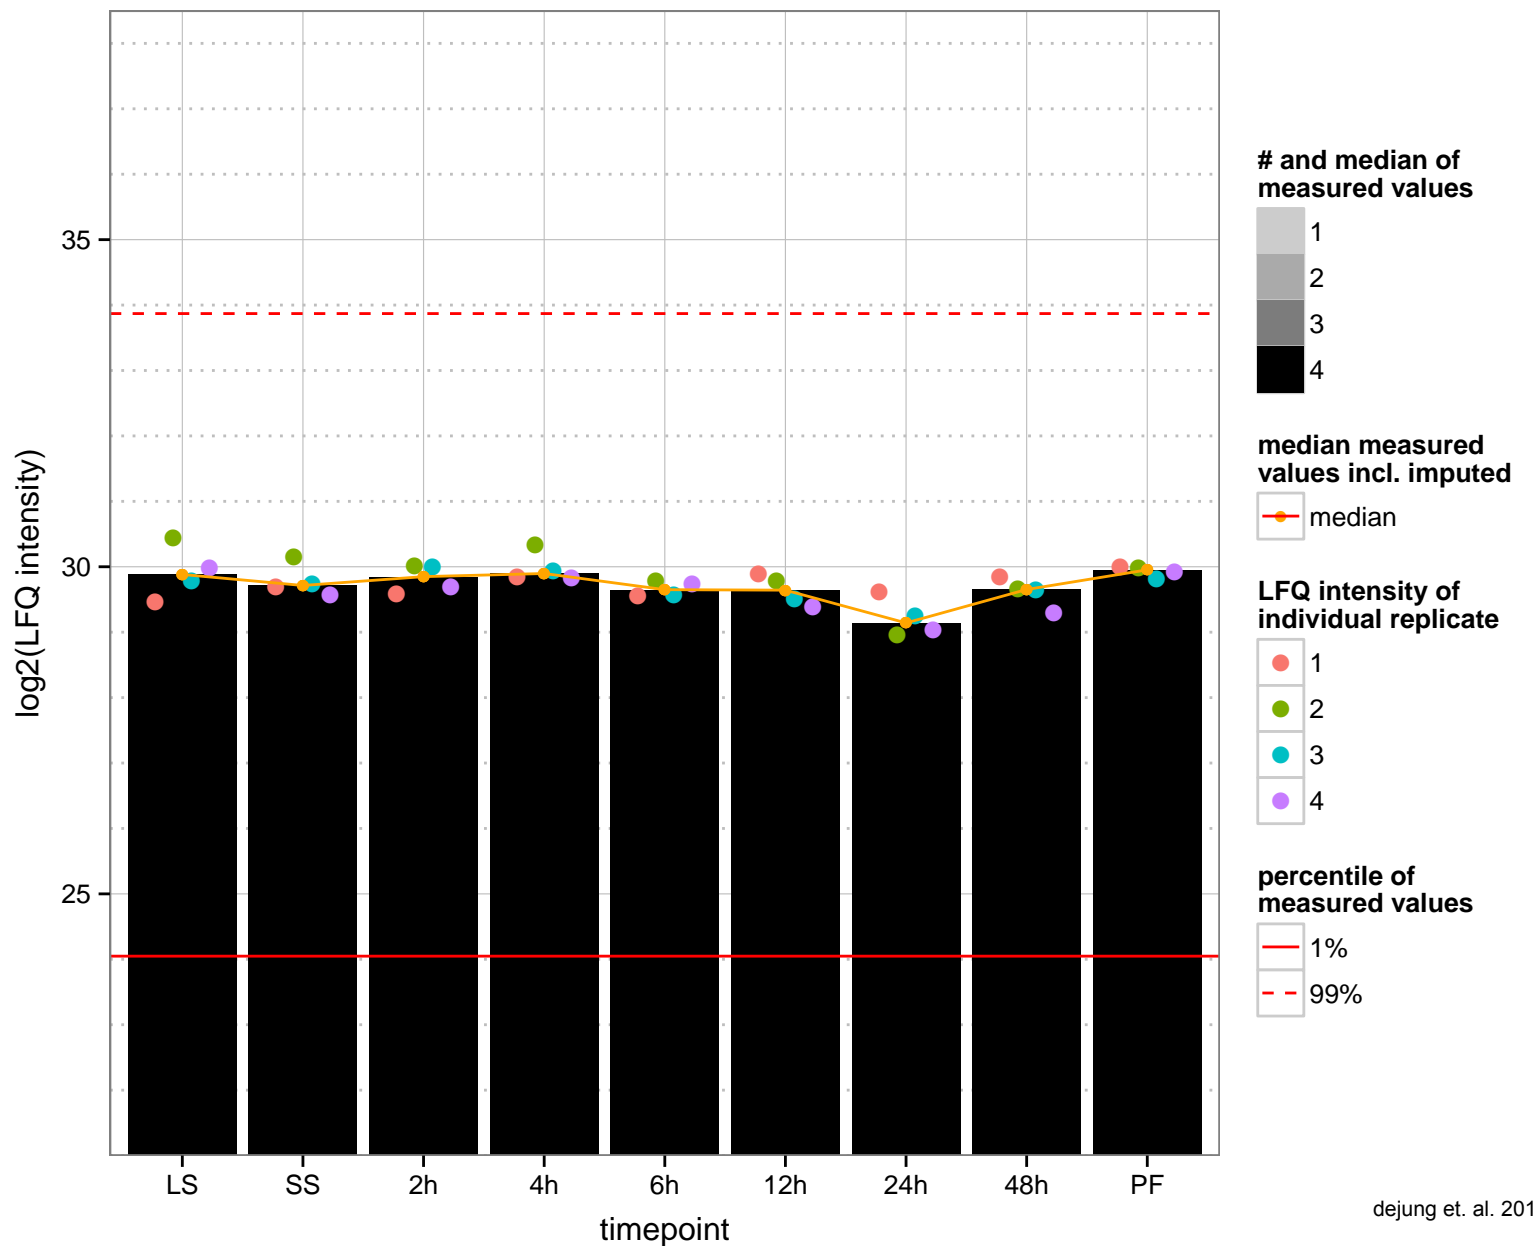

hypothetical protein, conserved  
 Tb927.3.5070  
 AGOF: null  
 AGOC: null  
 AGOP: null  
 PGO: null  
 PGOC: null  
 PGOP: null

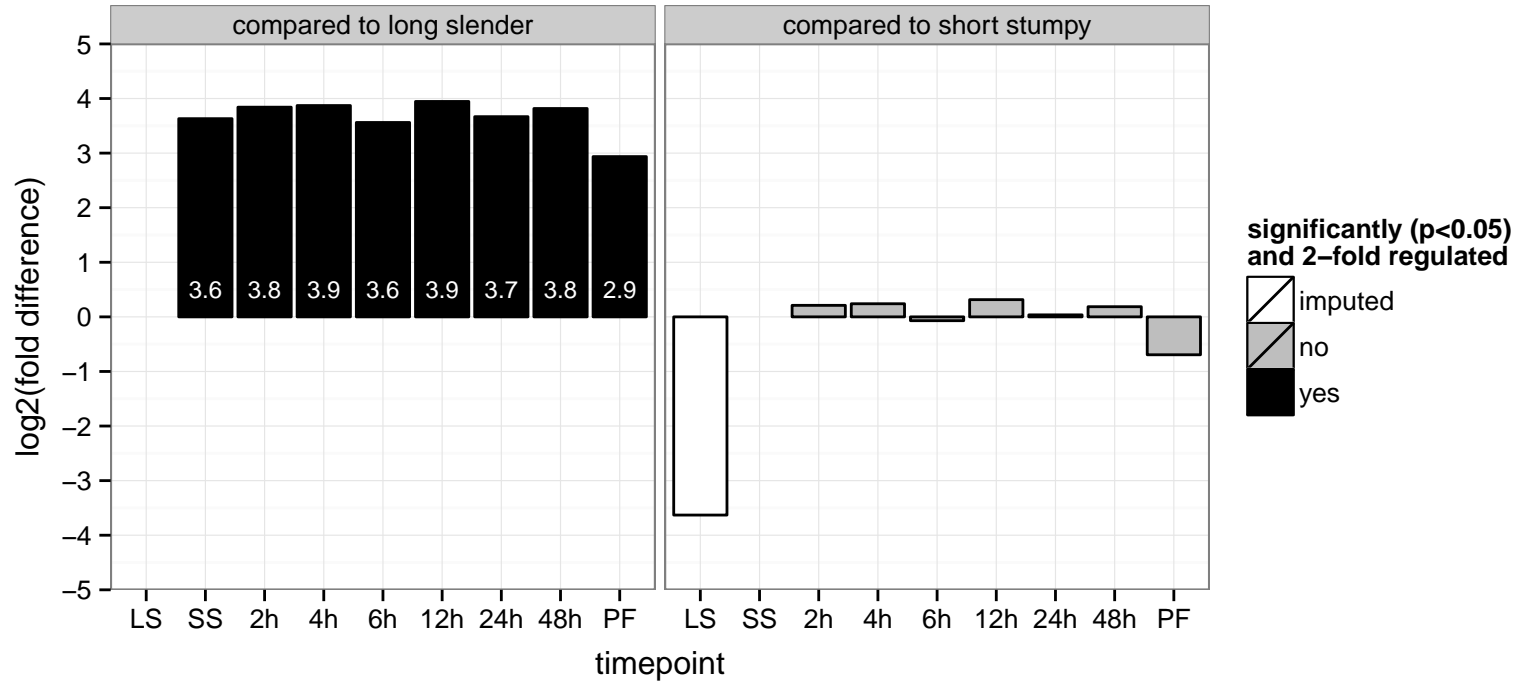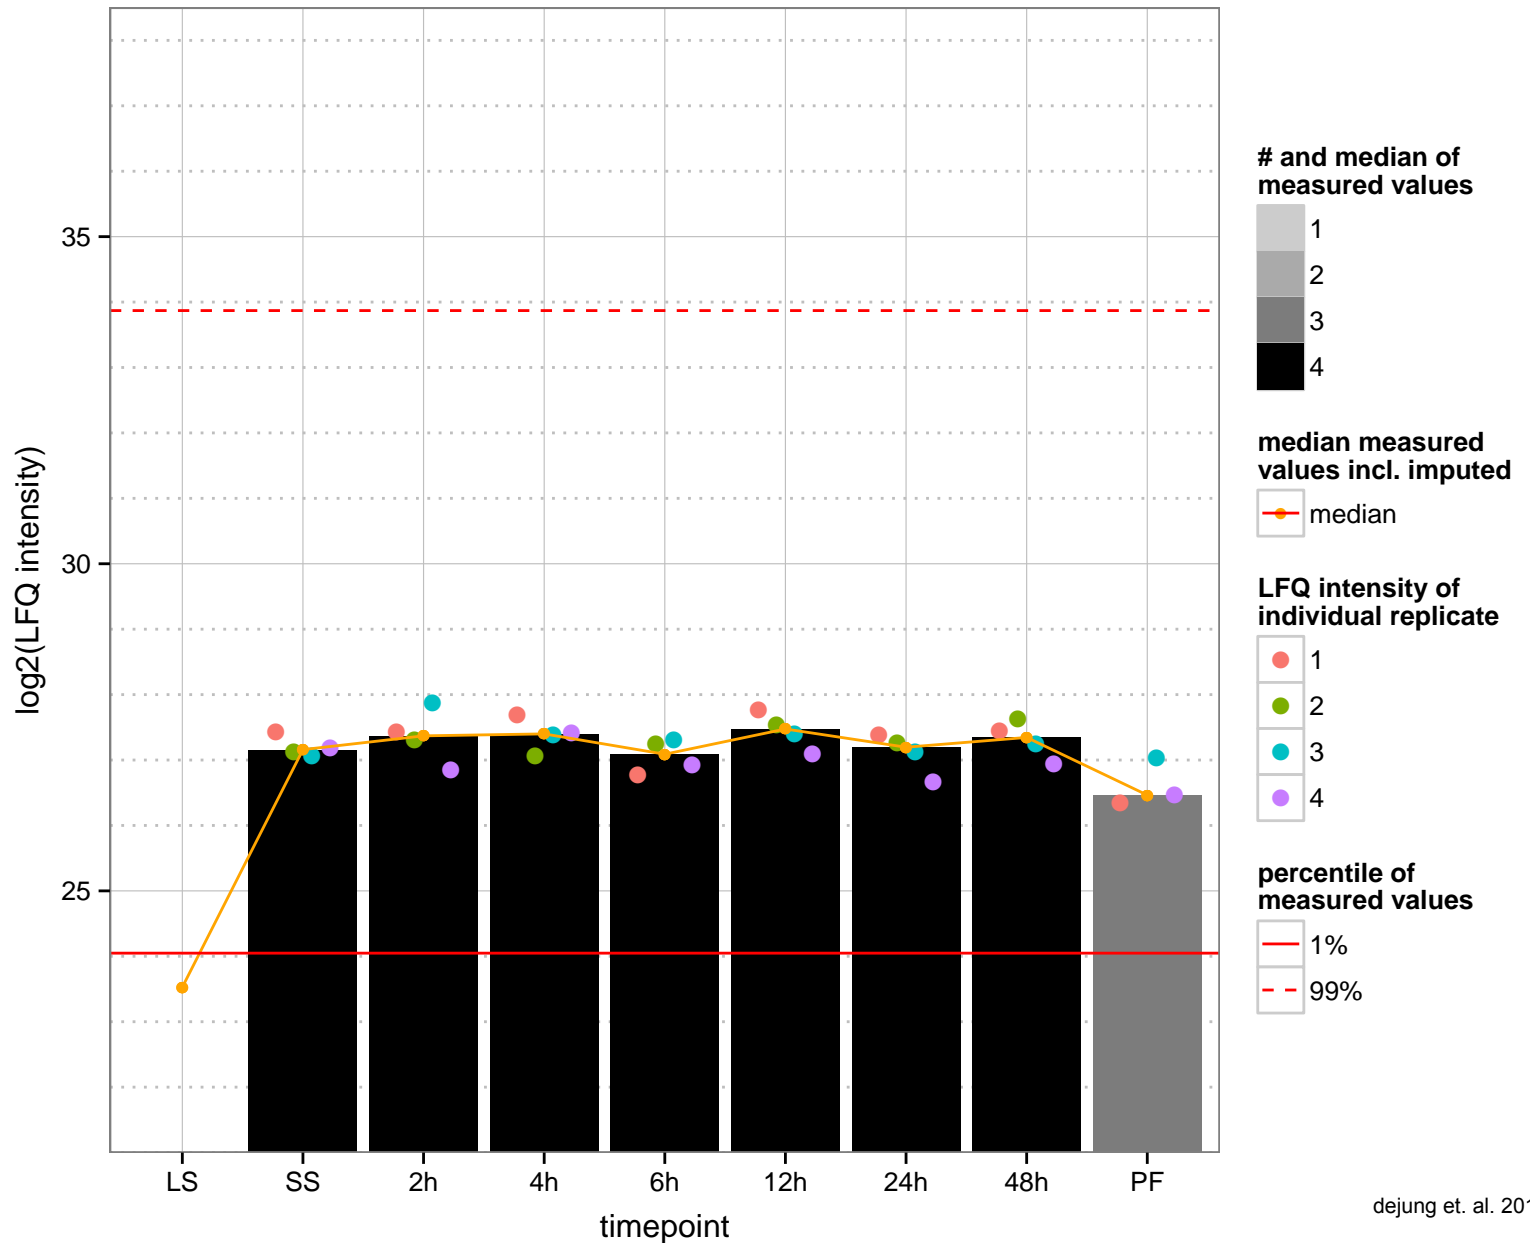

exonuclease, putative  
 Tb927.3.5150  
 AGOF: exonuclease activity, nucleic acid binding  
 AGOC: intracellular  
 AGOP: null  
 PGOF: exonuclease activity, nucleic acid binding  
 PGO: intracellular  
 PGOP: null

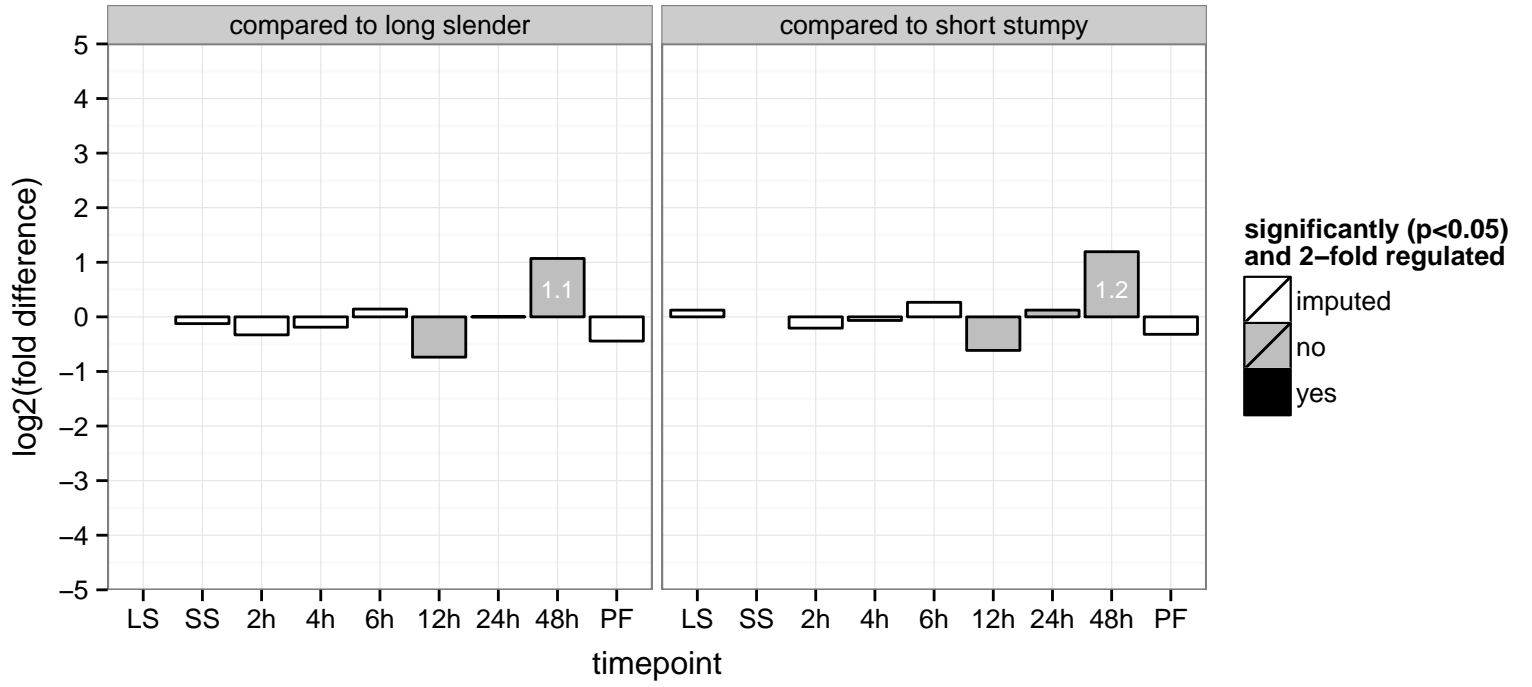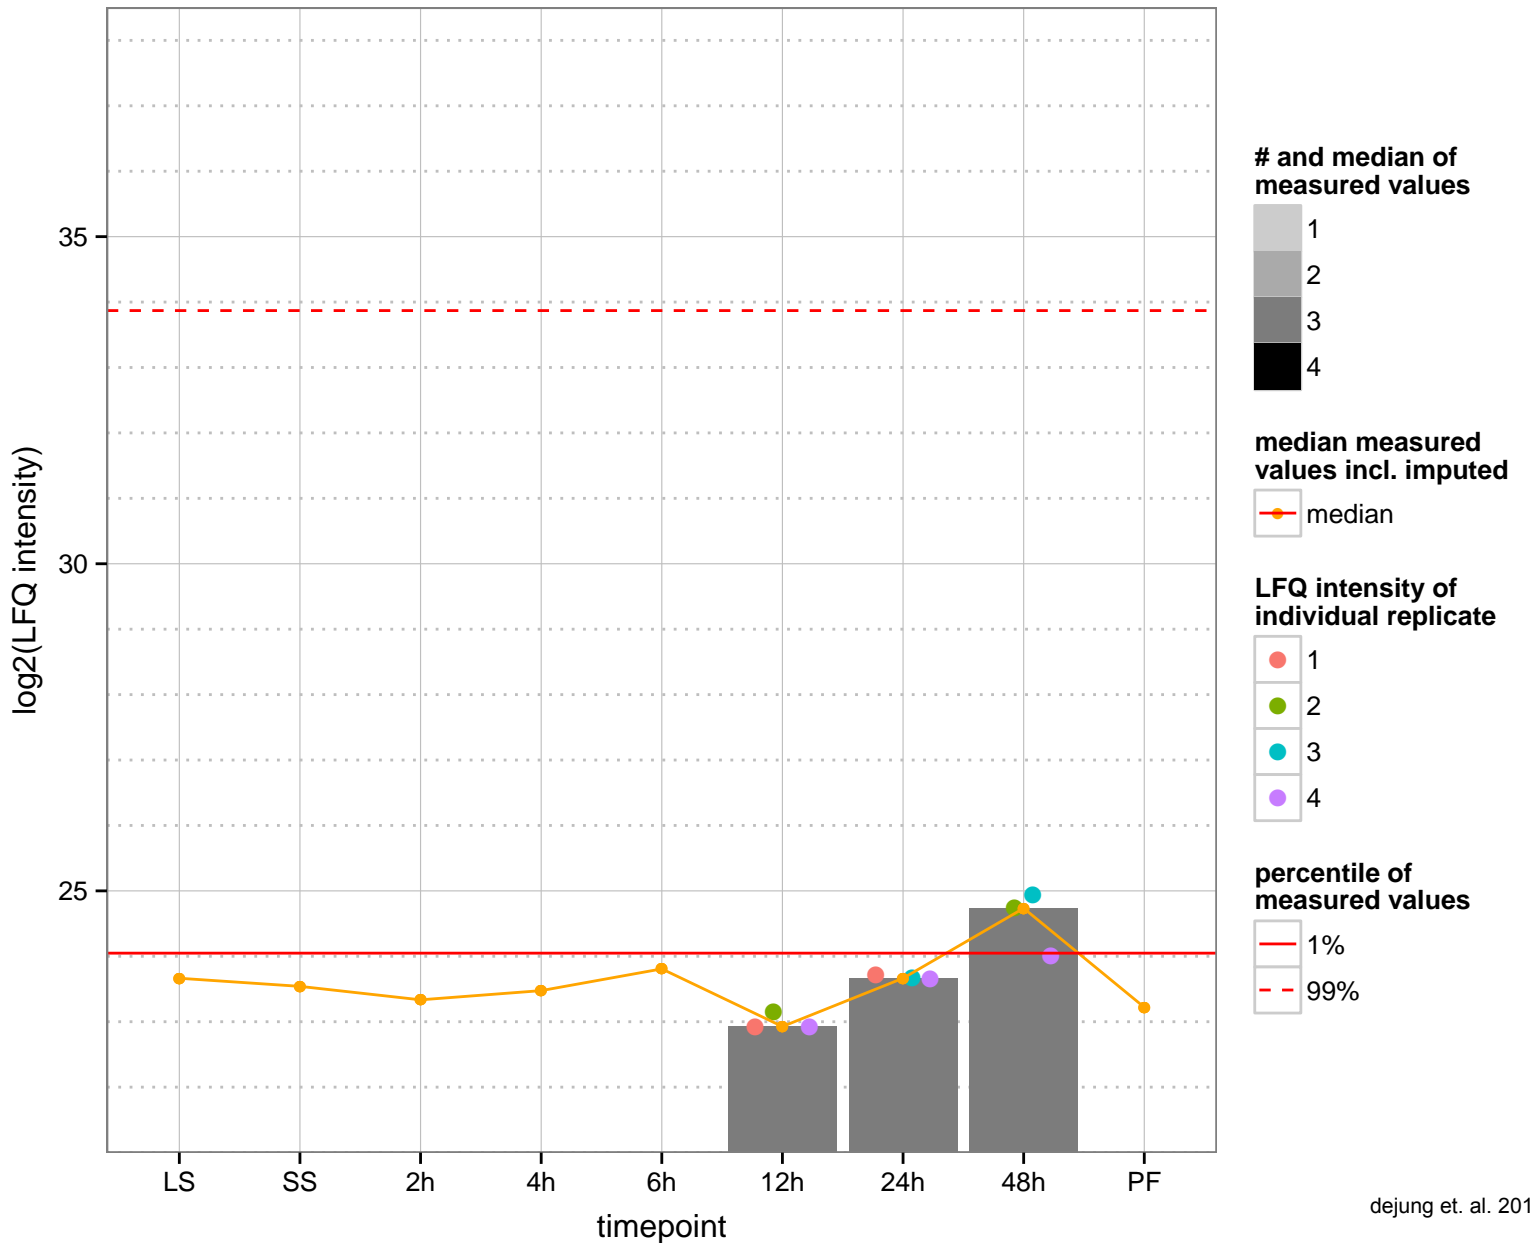

cofilin/actin depolymerizing factor, putative, cofilin-like protein

Tb927.3.5180

AGOF: actin binding

AGOC: intracellular

AGOP: actin filament depolymerization, cell division, intracellular transport, microtubule basal body duplication

PGOF: actin binding

PGOC: intracellular

PGOP: null

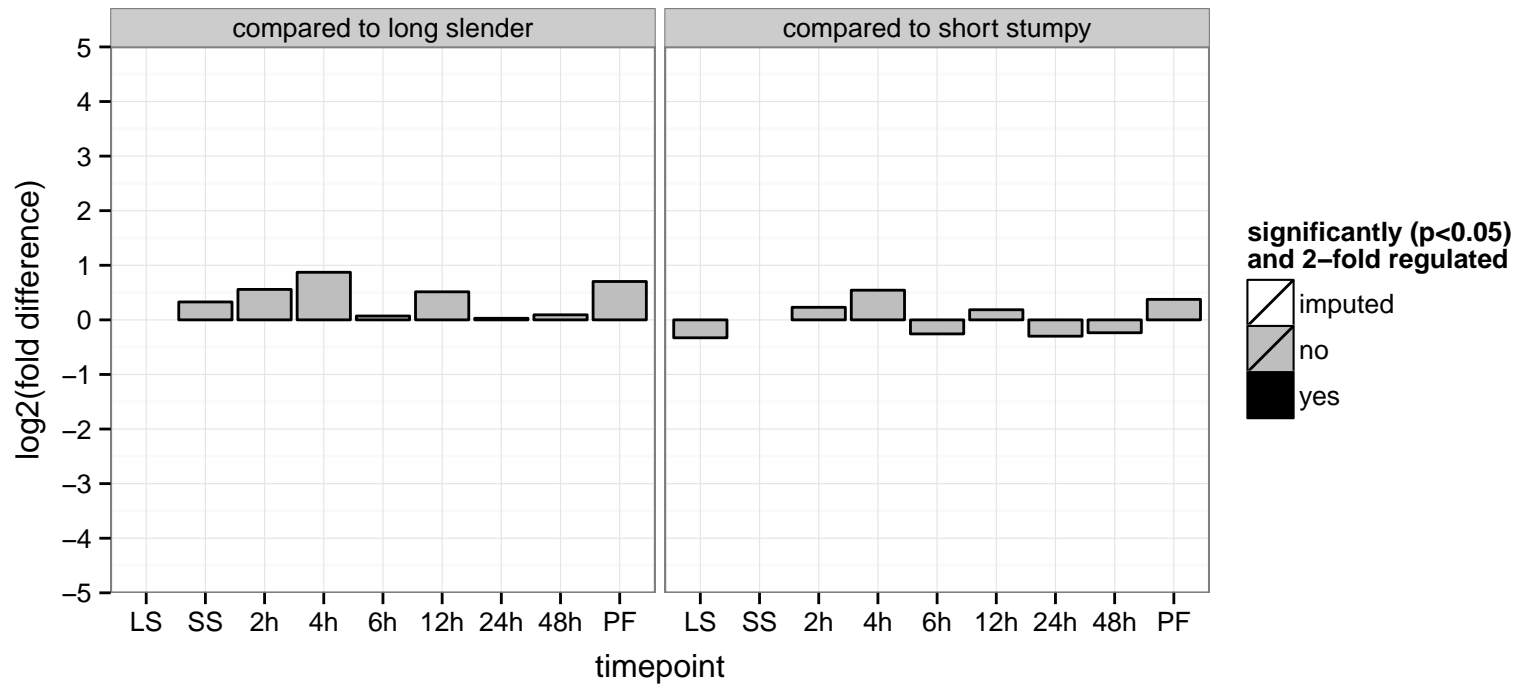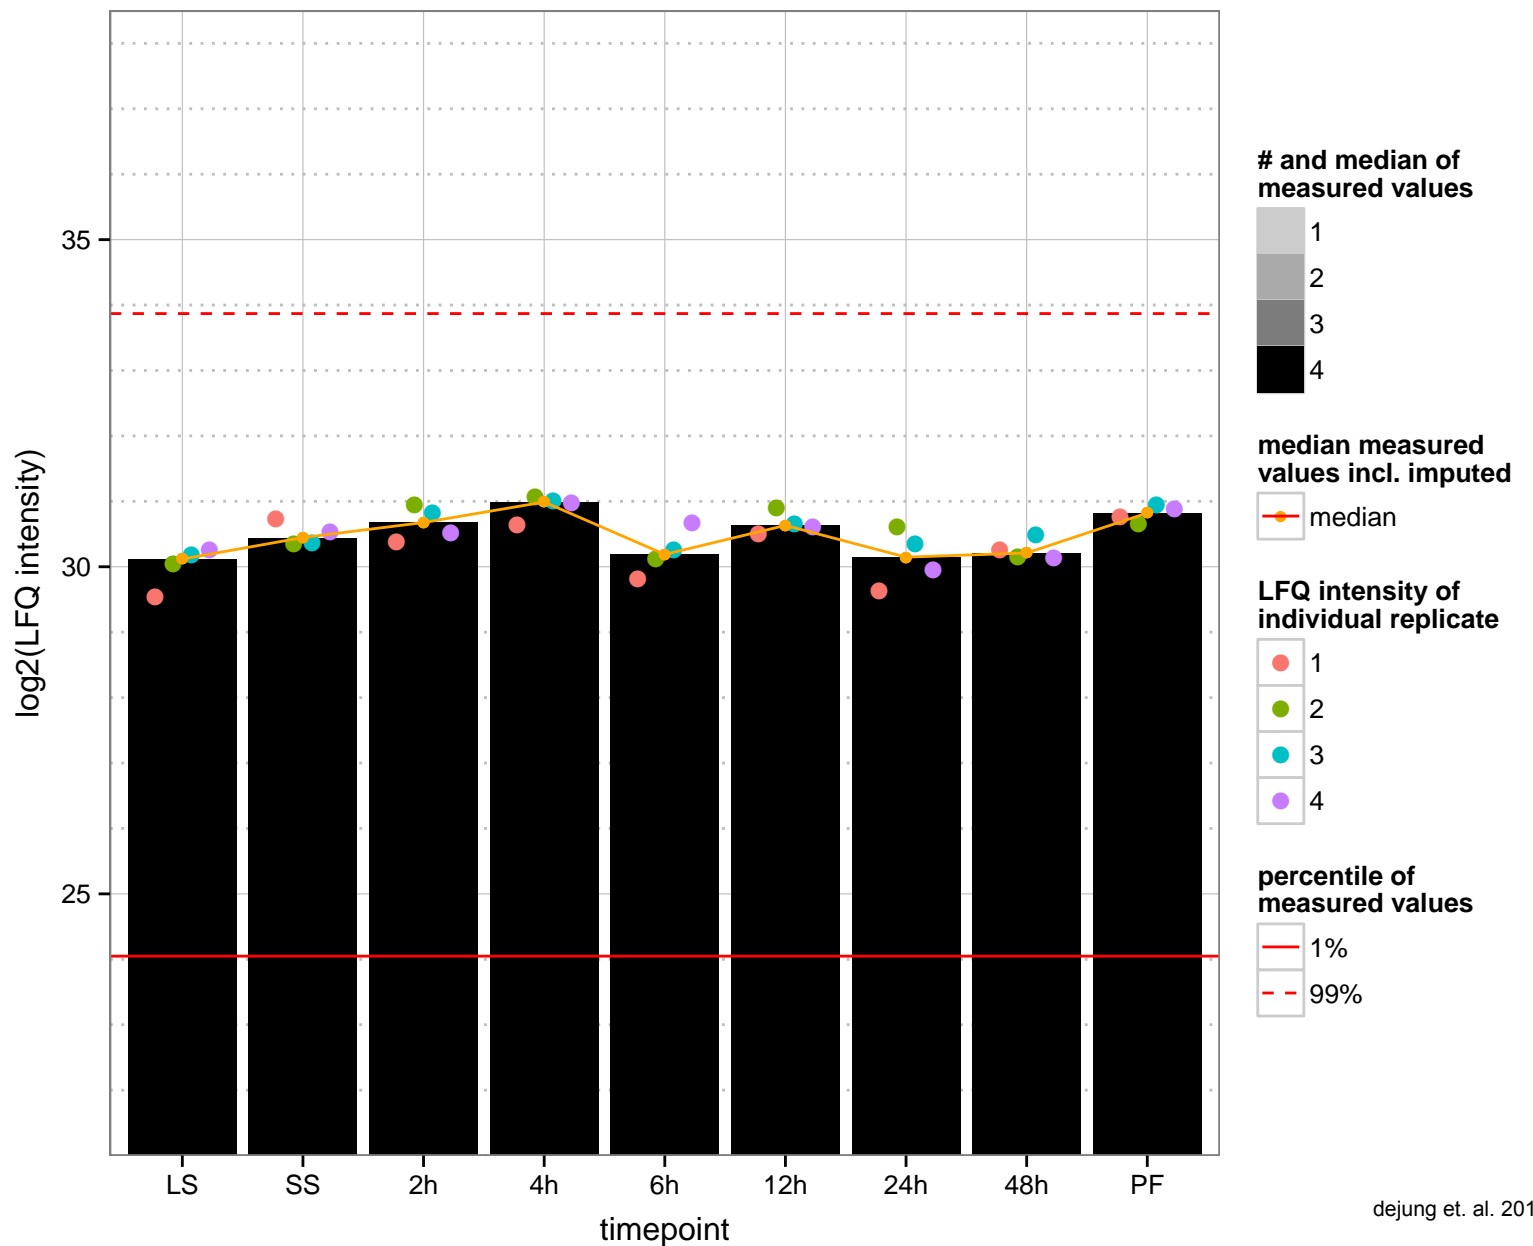



DNA repair protein, putative  
 Tb927.3.5230  
 AGOF: ATP binding, DNA binding, DNA-dependent ATPase activity  
 AGOC: null  
 AGOP: DNA metabolic process  
 PGO: ATP binding, DNA binding, DNA-dependent ATPase activity  
 PGOC: null  
 PGOP: DNA metabolic process

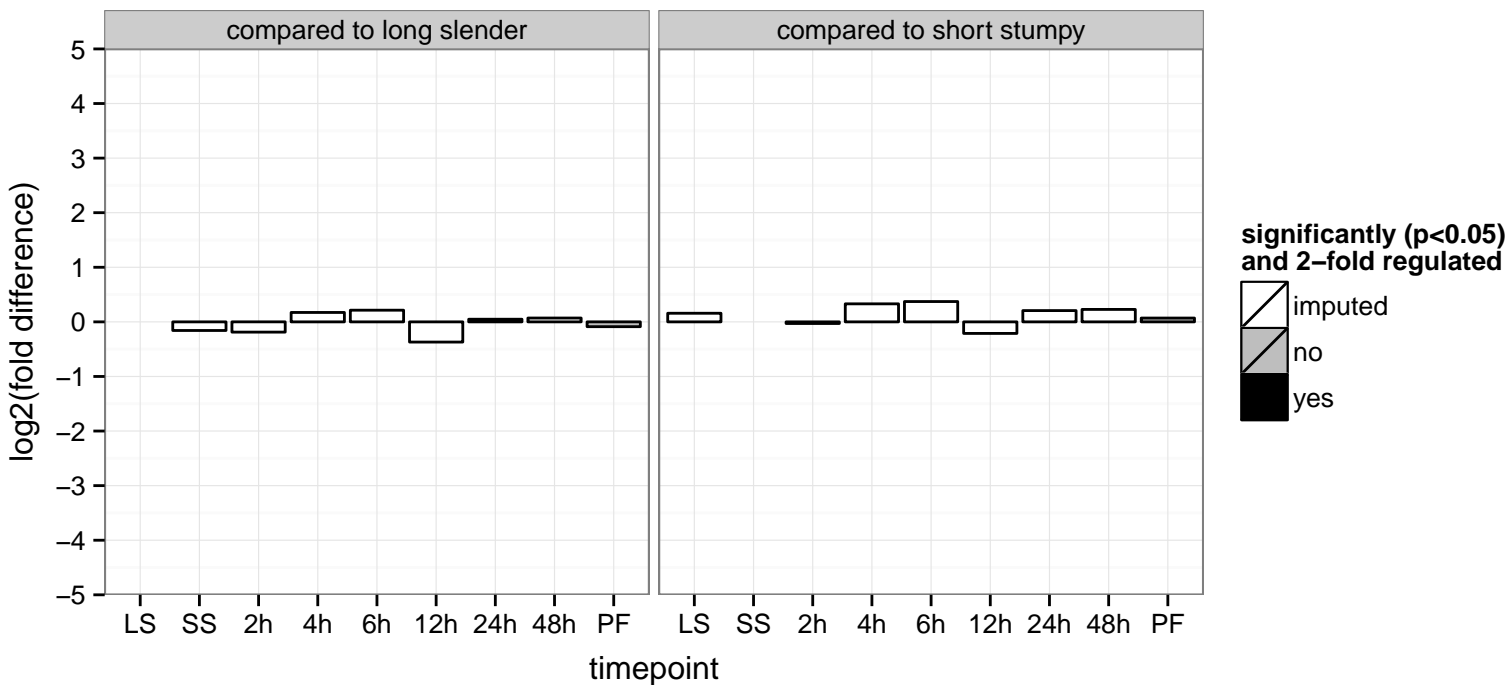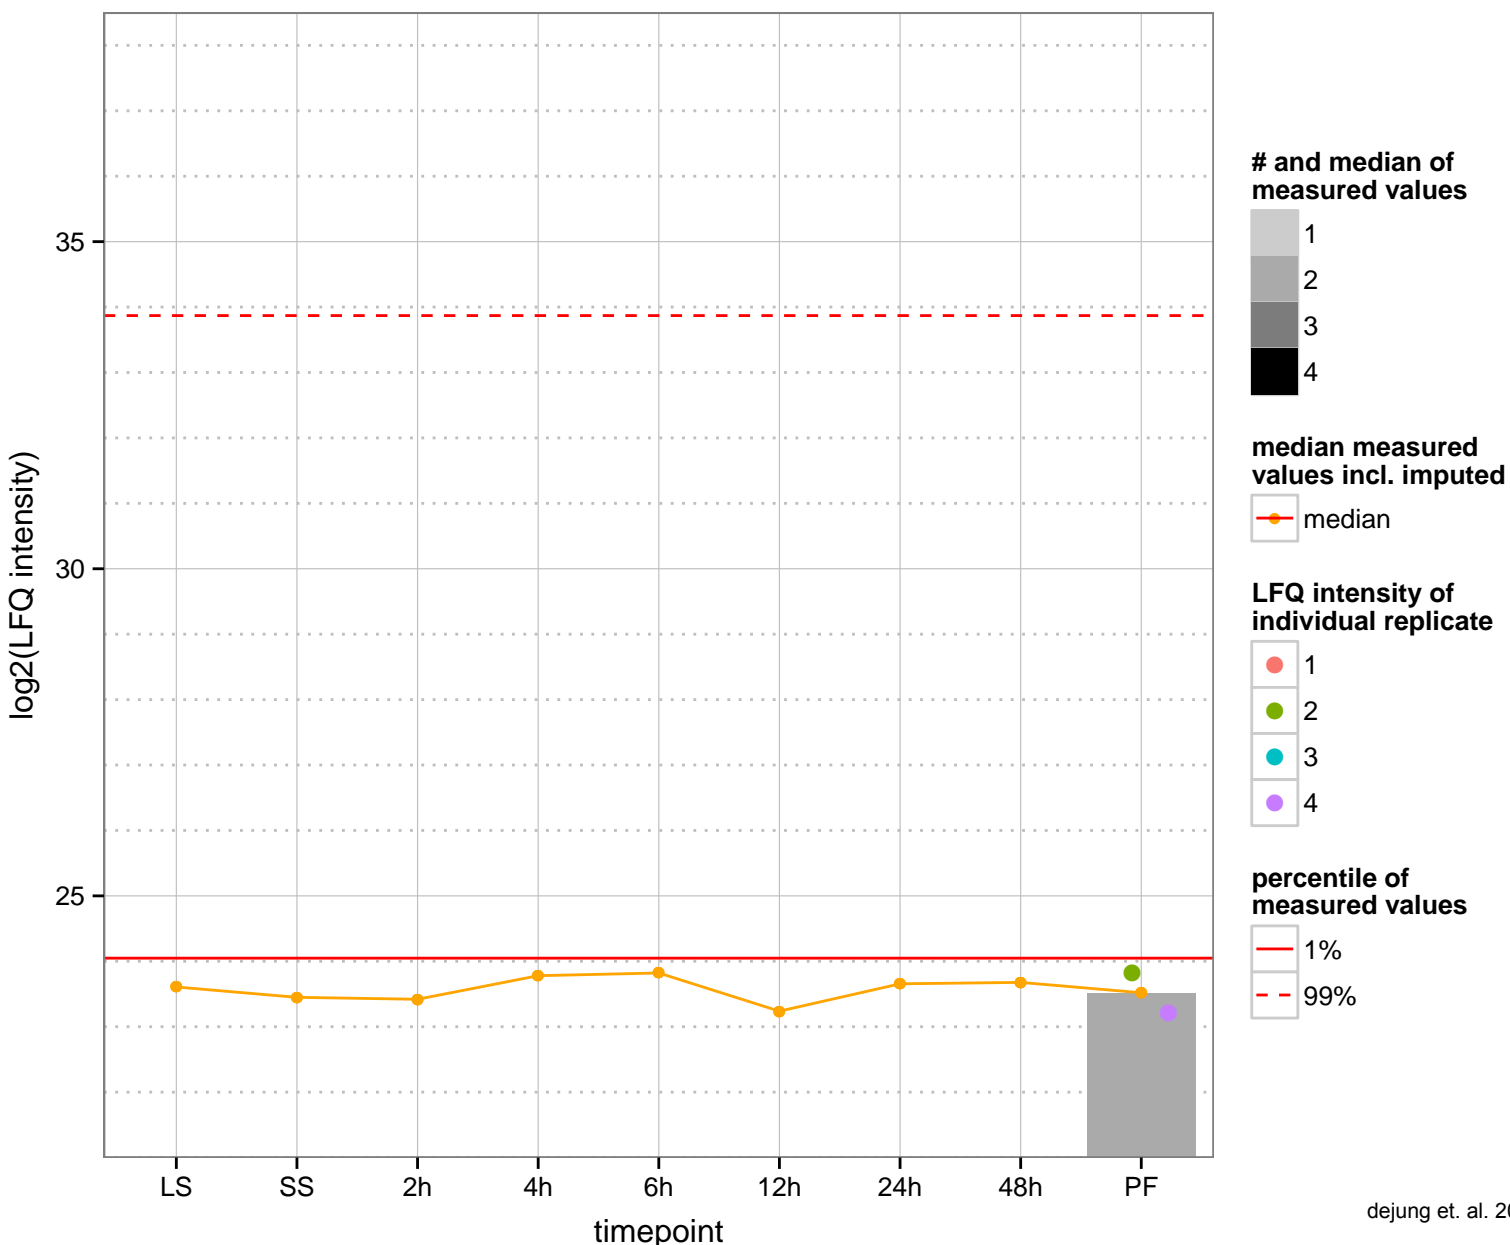

Hsc70-interacting protein (Hip), putative  
 Tb927.3.5340  
 AGOF: null  
 AGOC: null  
 AGOP: null  
 PGO: protein binding  
 PGO: null  
 PGO: null

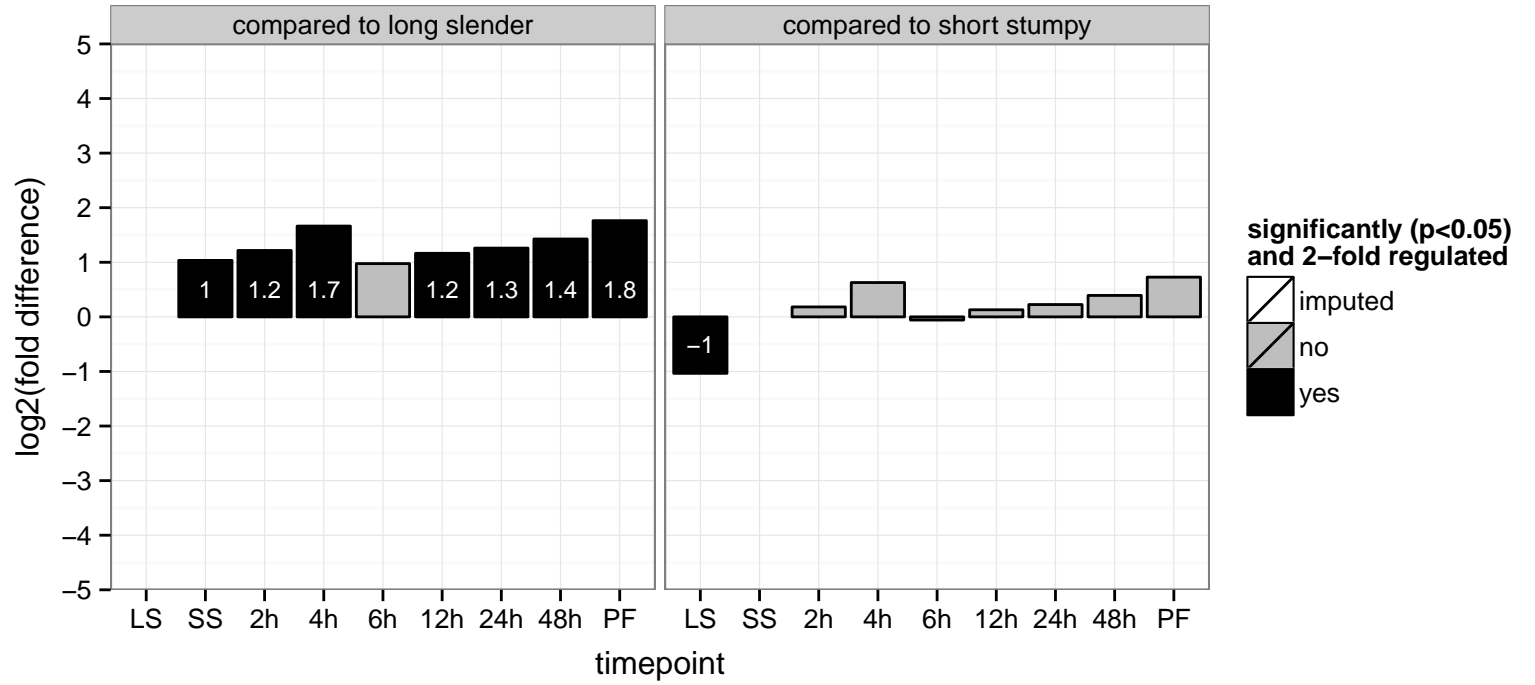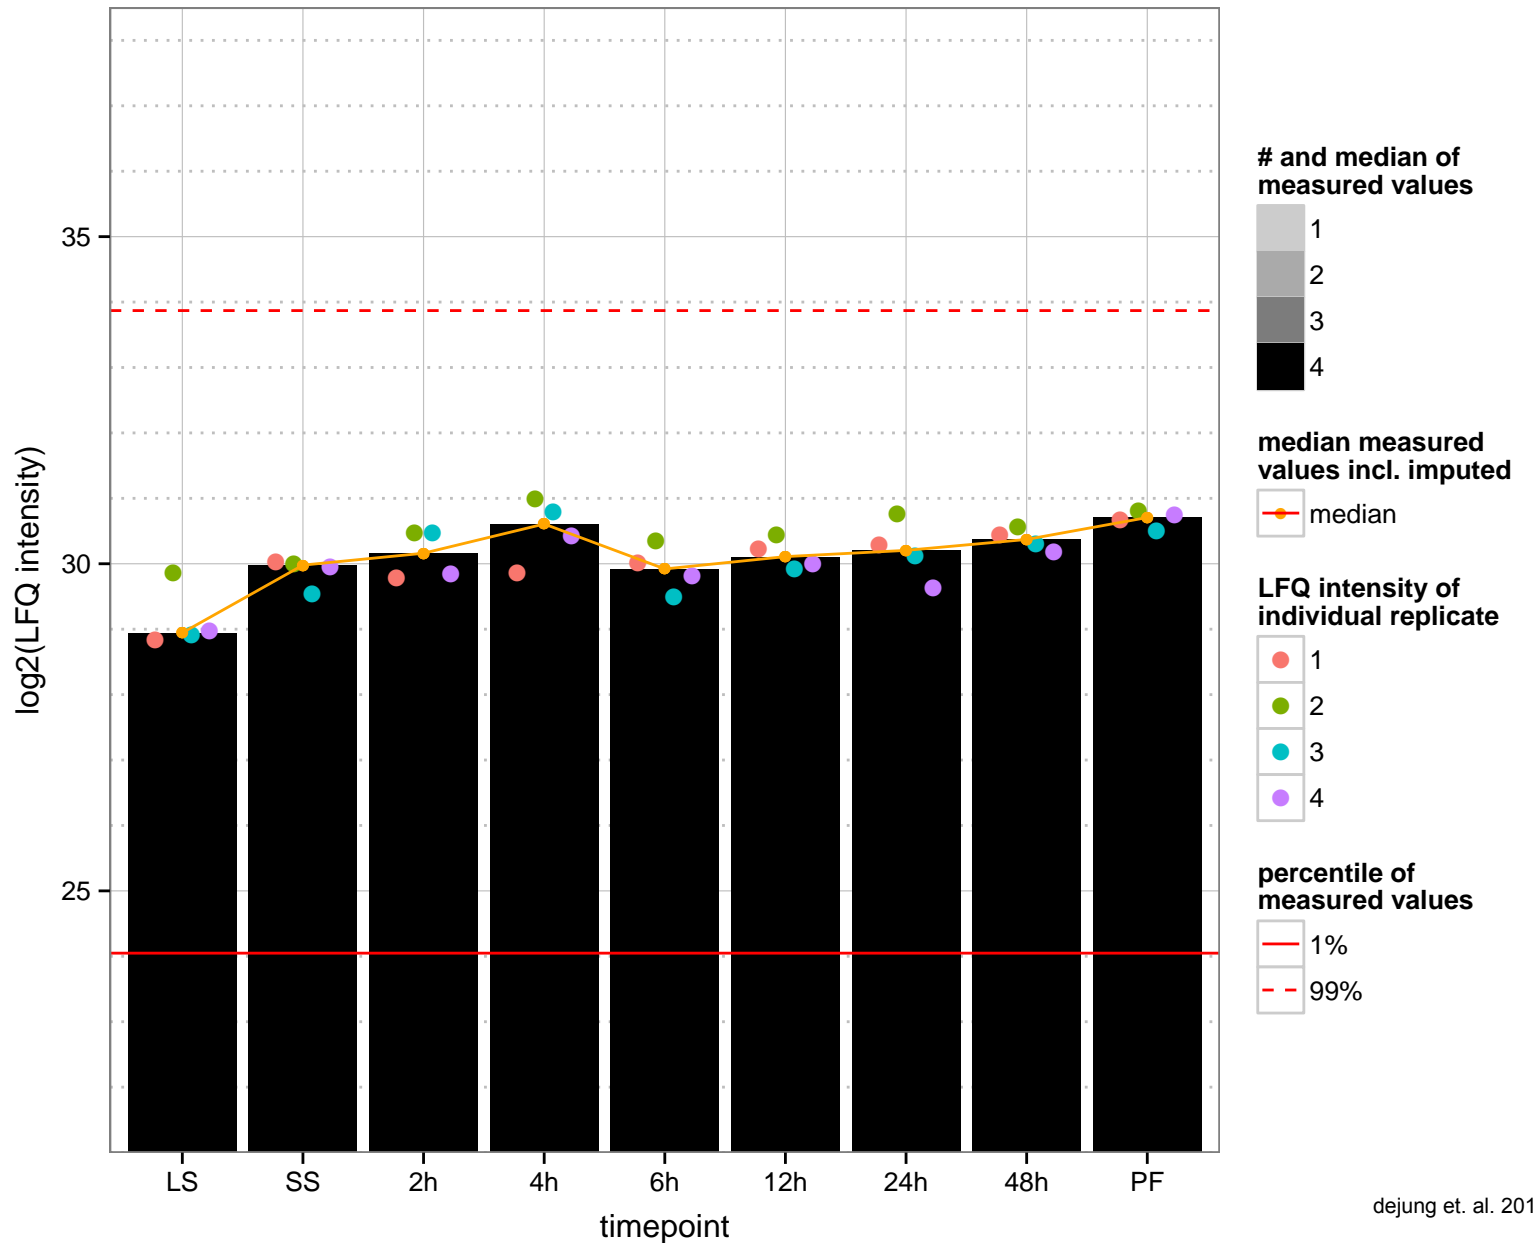

hypothetical protein, conserved  
 Tb927.3.5370  
 AGOF: null  
 AGOC: null  
 AGOP: null  
 PGO: null  
 PGOC: null  
 PGOP: null

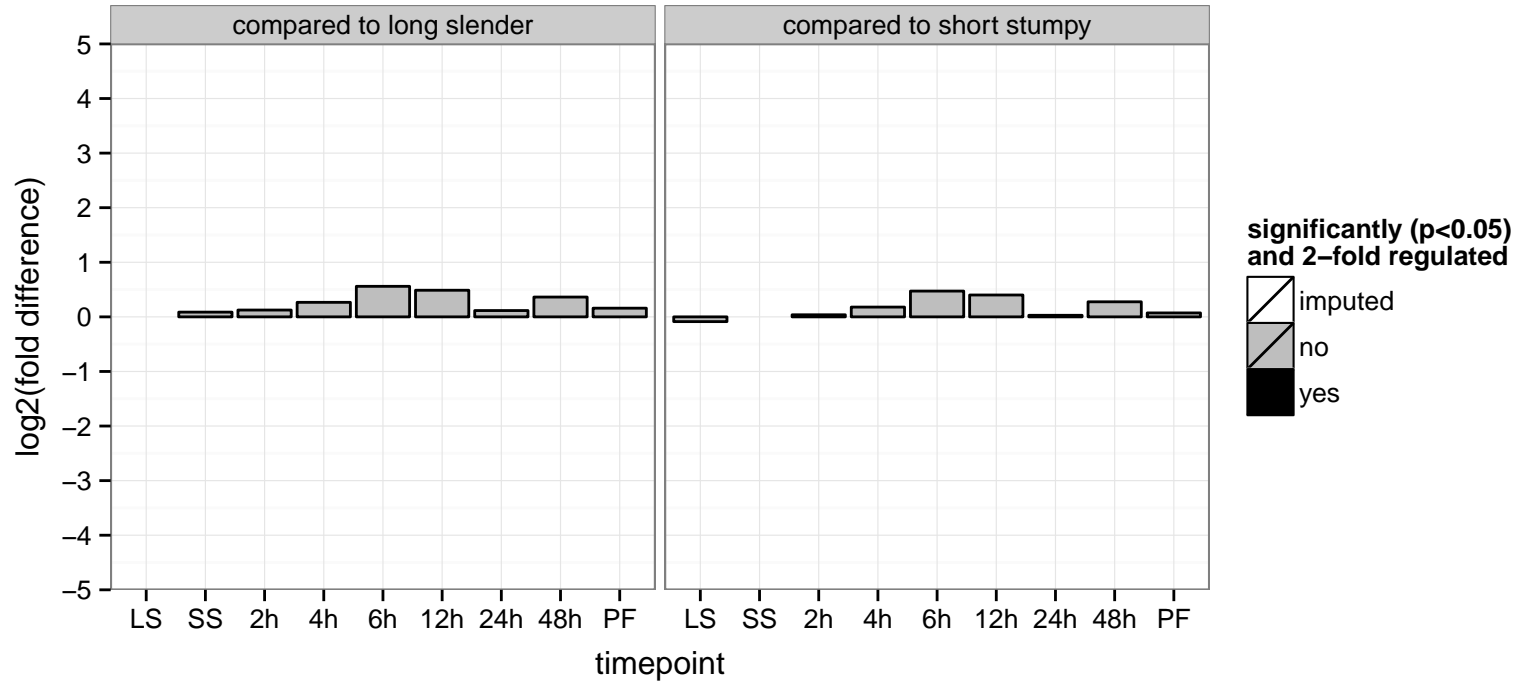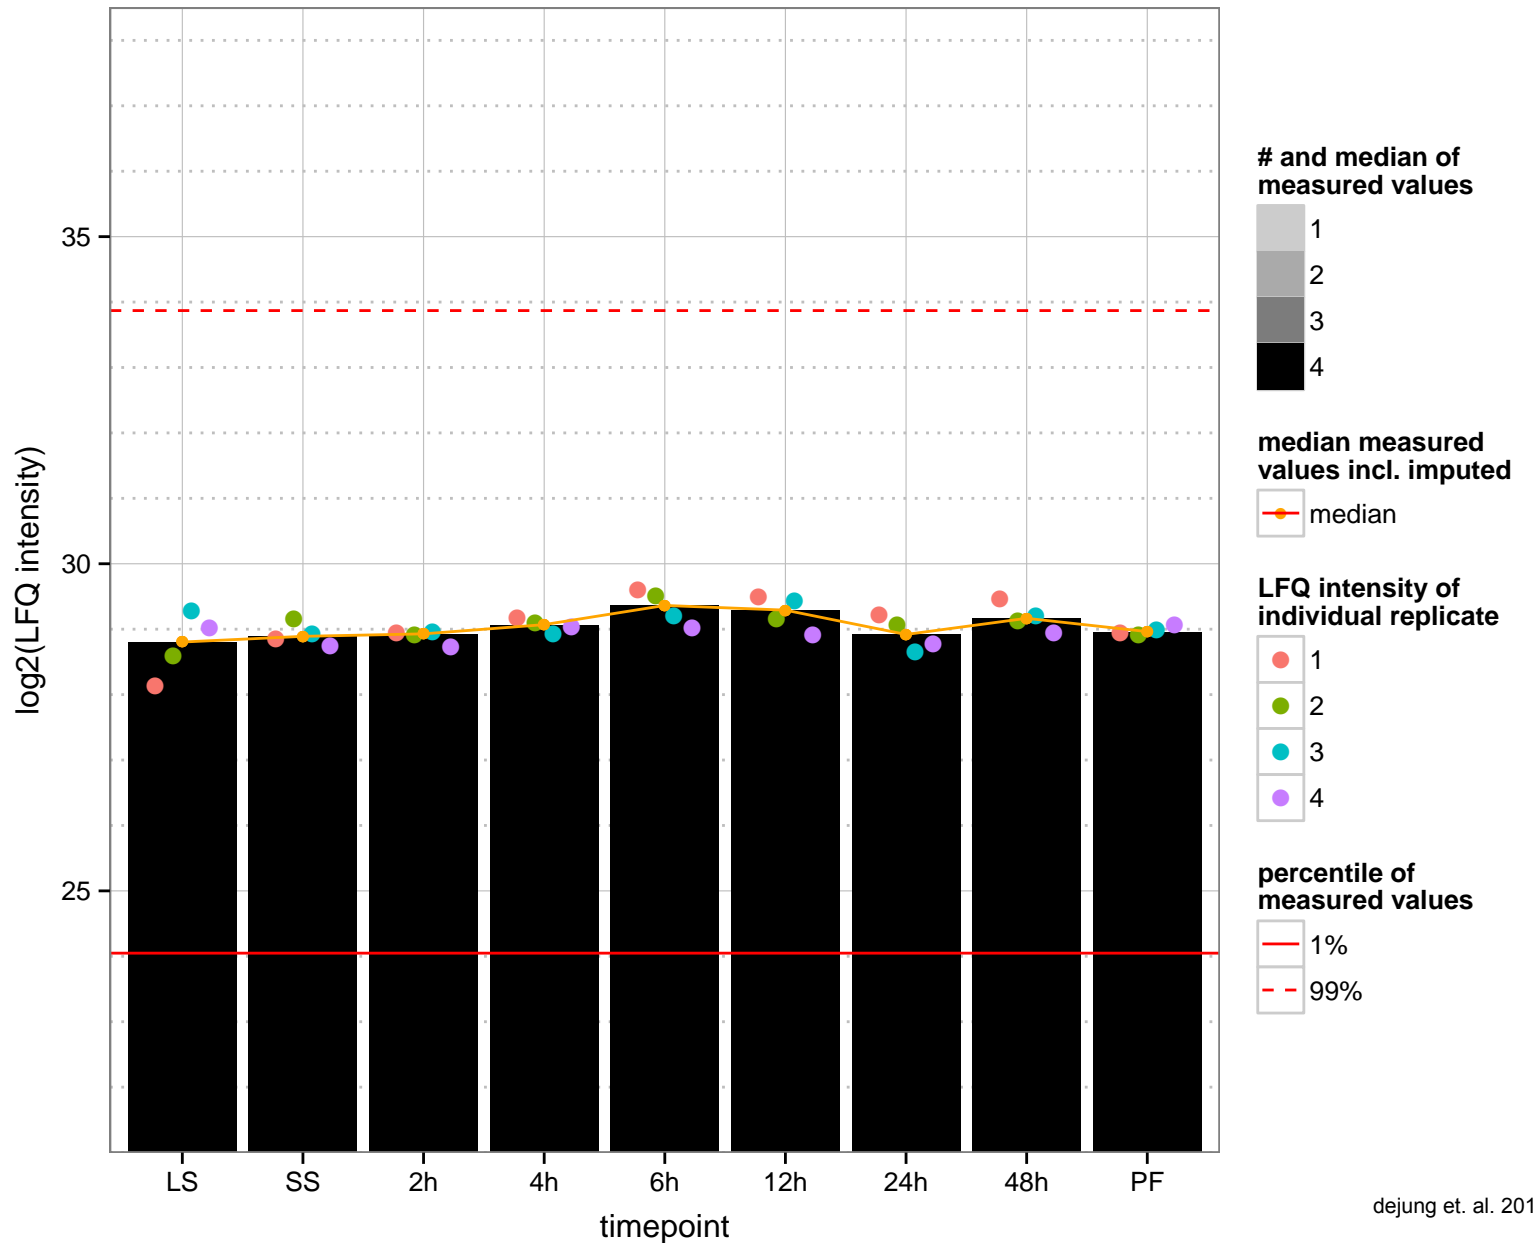

protein transport protein Sec24 (SEC24.2)

Tb927.3.5420

AGOF: protein binding, zinc ion binding

AGOC: COPII vesicle coat

AGOP: ER to Golgi vesicle-mediated transport, intracellular protein transport

PGOF: zinc ion binding

PGOC: COPII vesicle coat

PGOP: ER to Golgi vesicle-mediated transport, intracellular protein transport

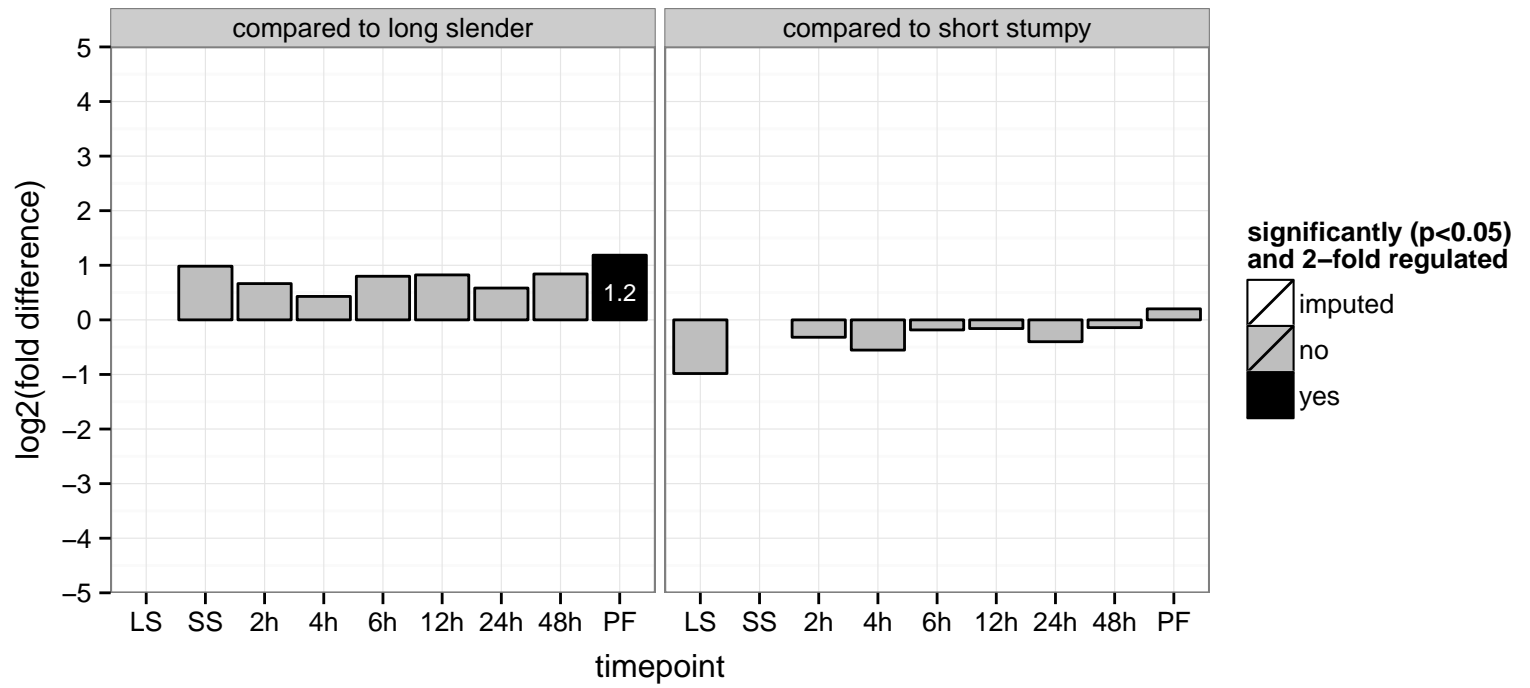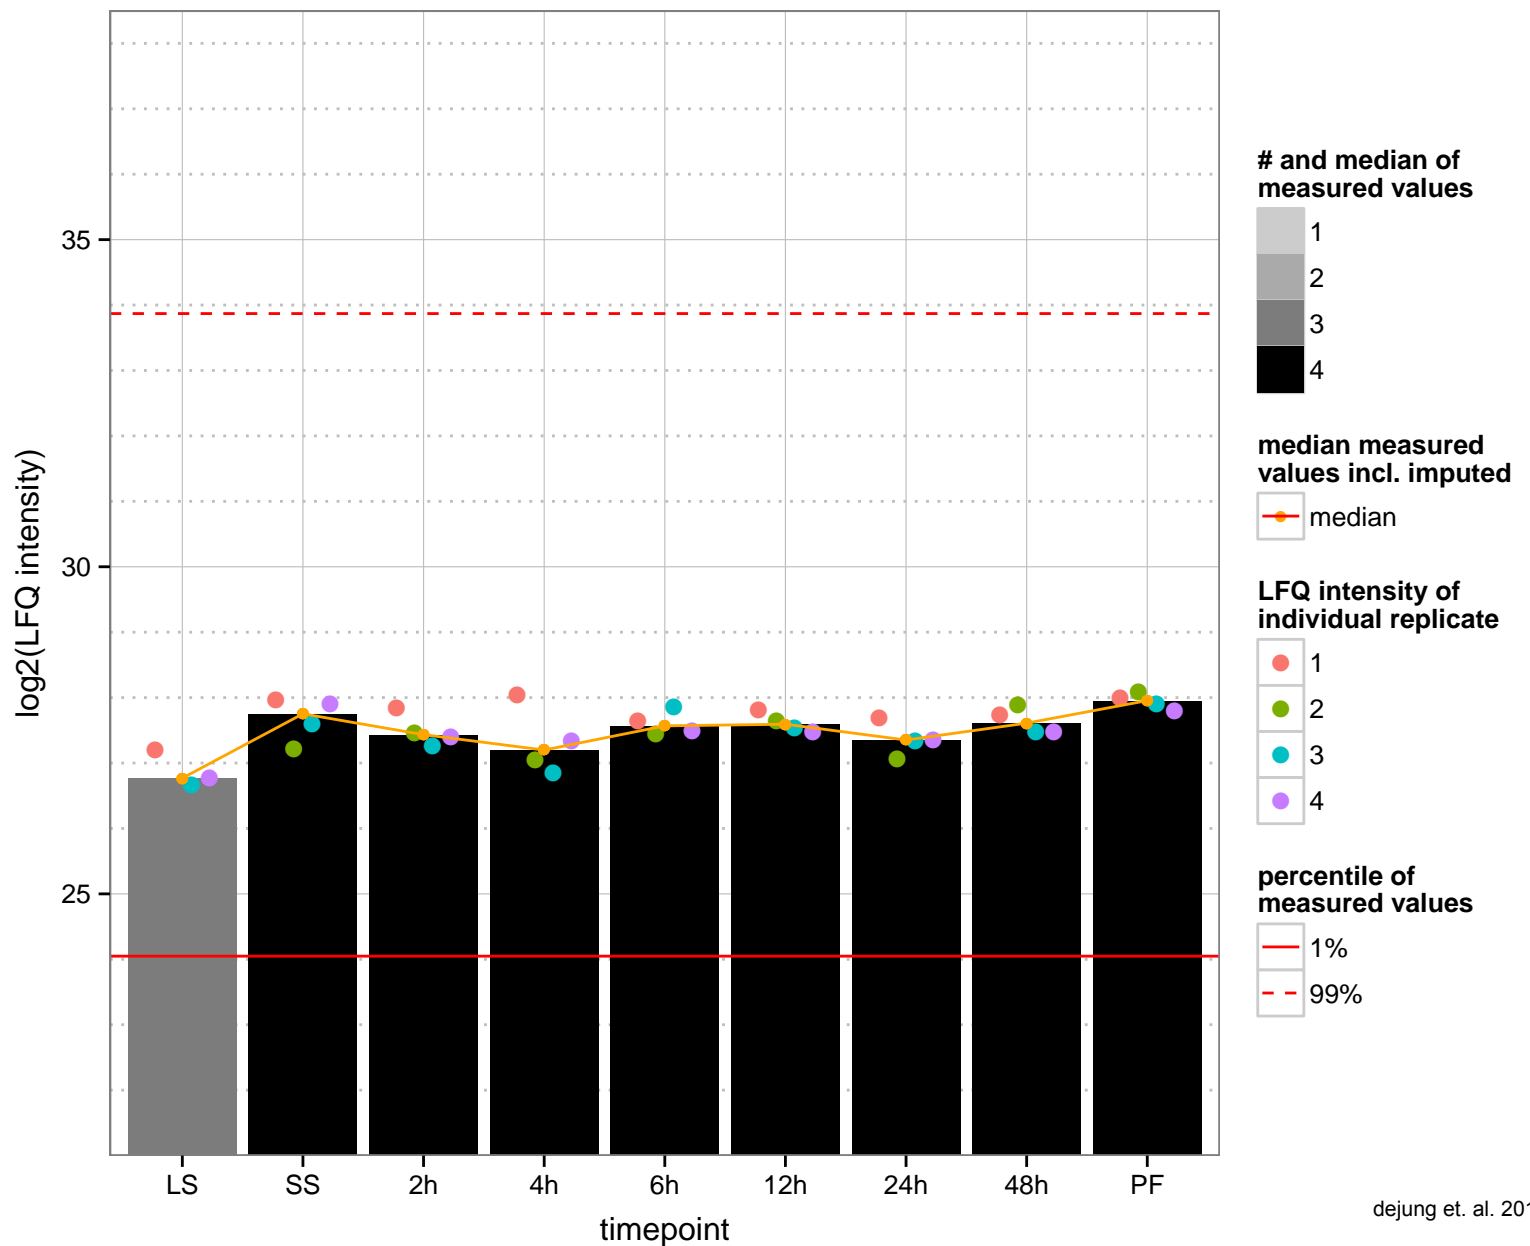

SNF2 DNA repair protein, putative

Tb927.3.5440

AGOF: ATP binding, DNA binding, helicase activity

AGOC: null

AGOP: null

PGOF: ATP binding, DNA binding, helicase activity, nucleic acid binding

PGOC: null

PGOP: null

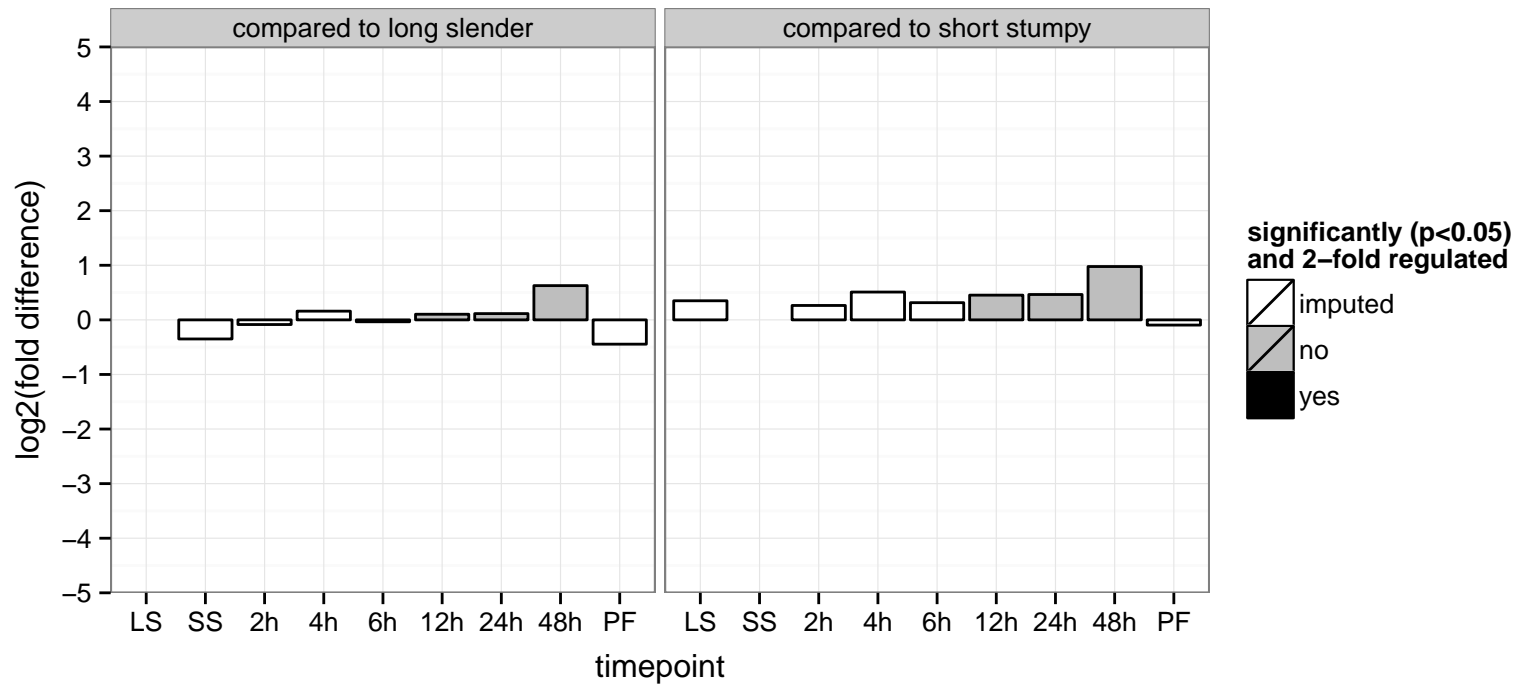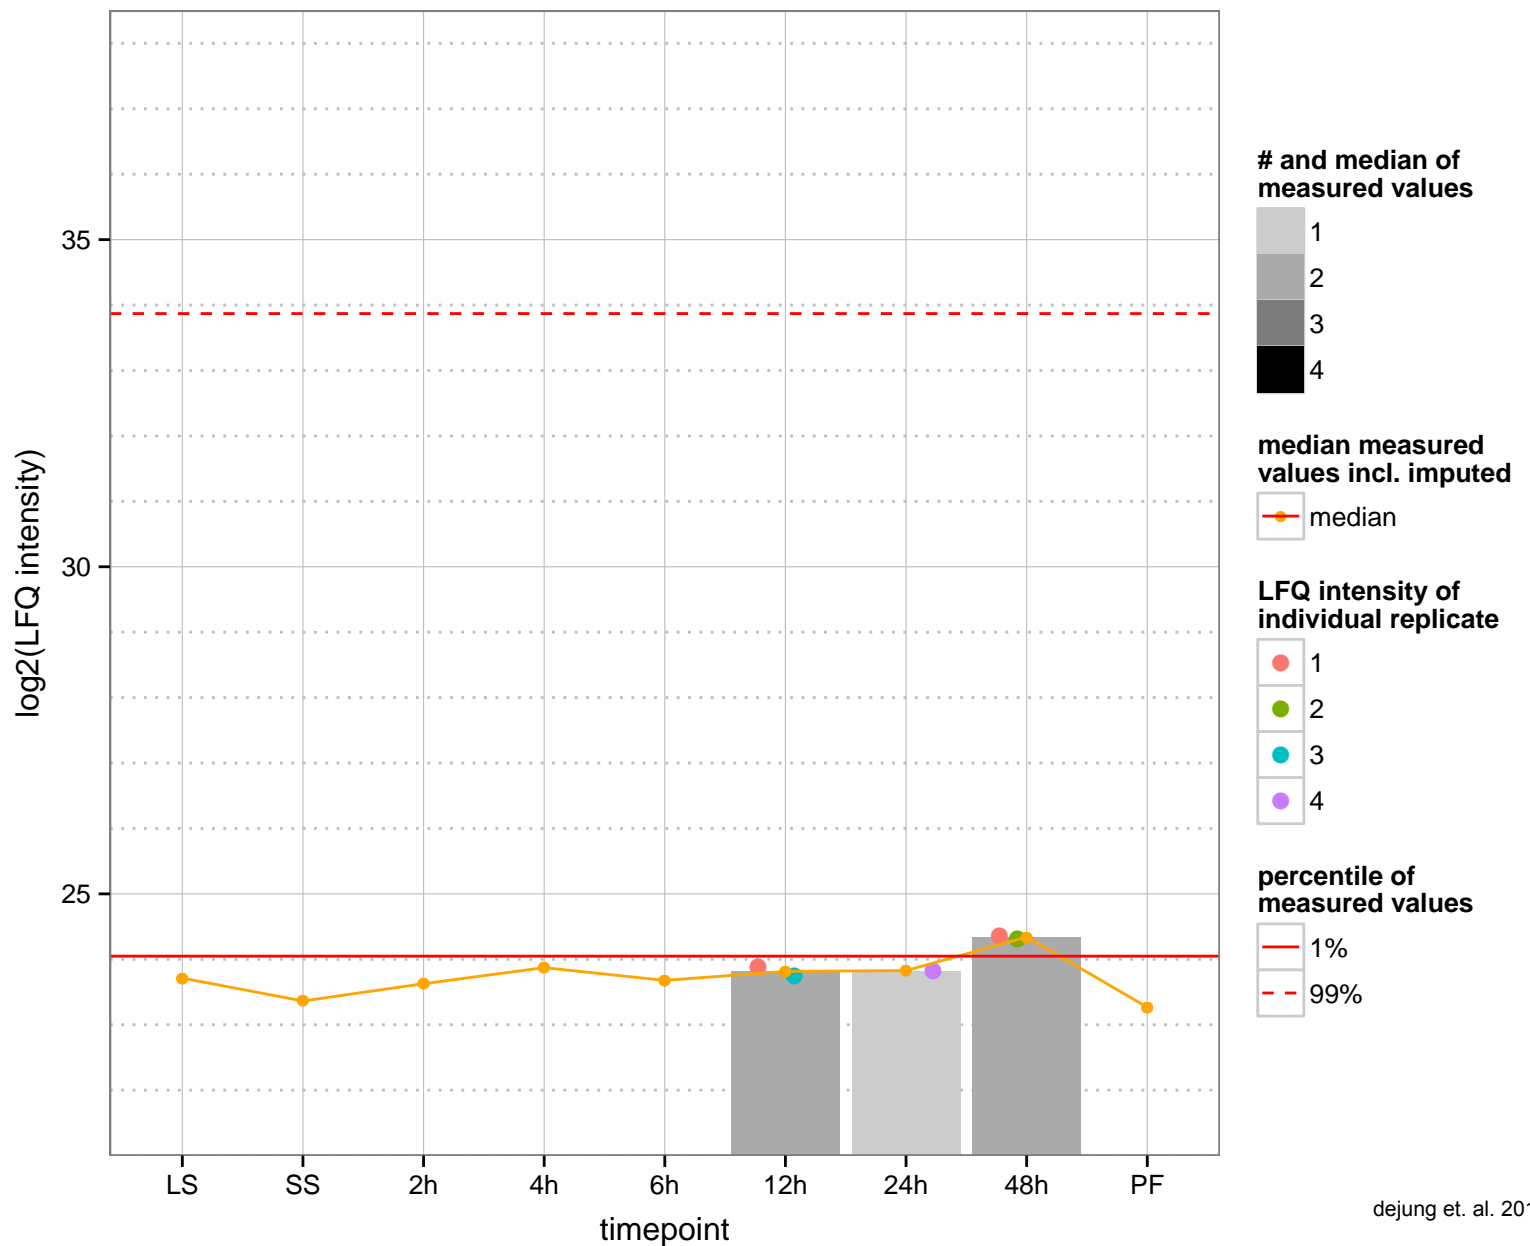

DNA-directed RNA polymerase II subunit 3, putative, RNA polymerase subunit, putative (RPB3)  
 Tb927.3.5500  
 AGOF: DNA binding, DNA-directed RNA polymerase activity, protein dimerization activity  
 AGOC: null  
 AGOP: transcription, DNA-dependent  
 PGOF: DNA binding, DNA-directed RNA polymerase activity, protein dimerization activity  
 PGO: null  
 PGO: transcription, DNA-dependent

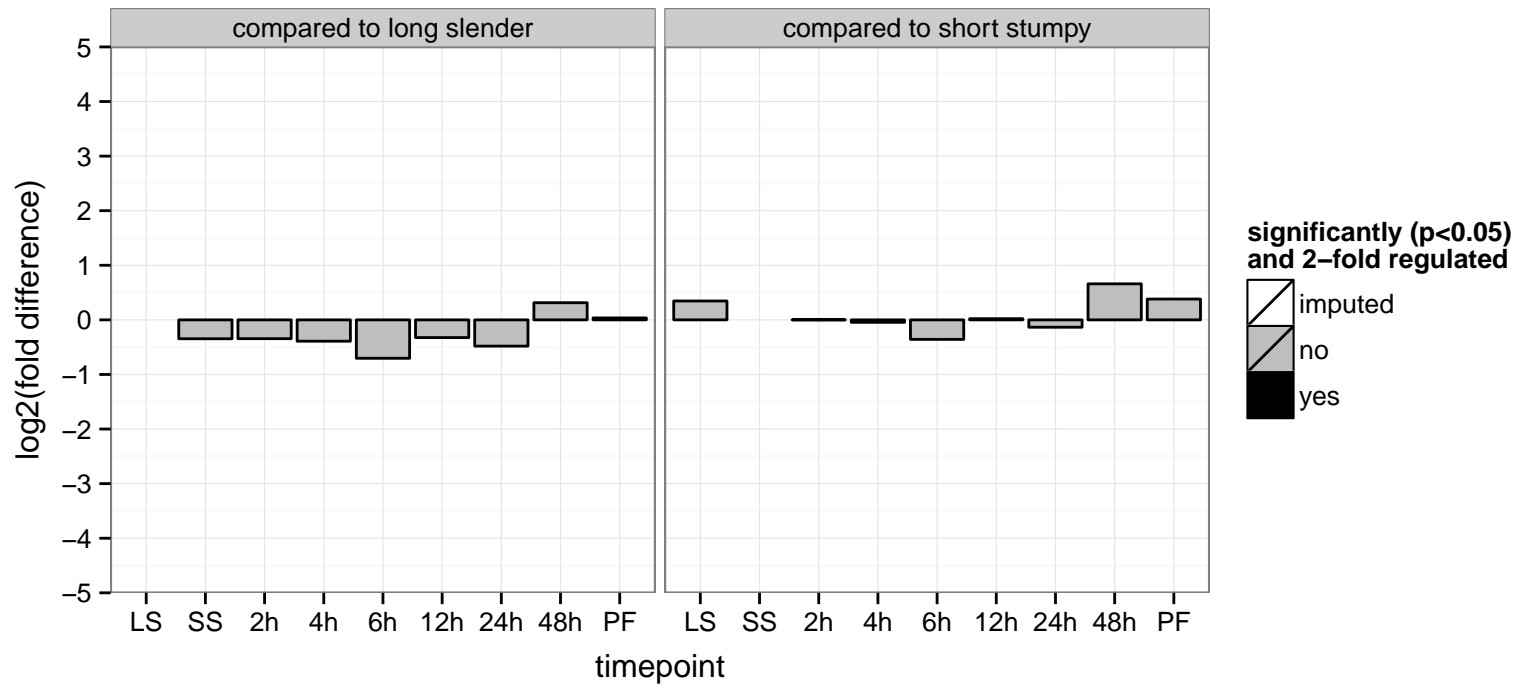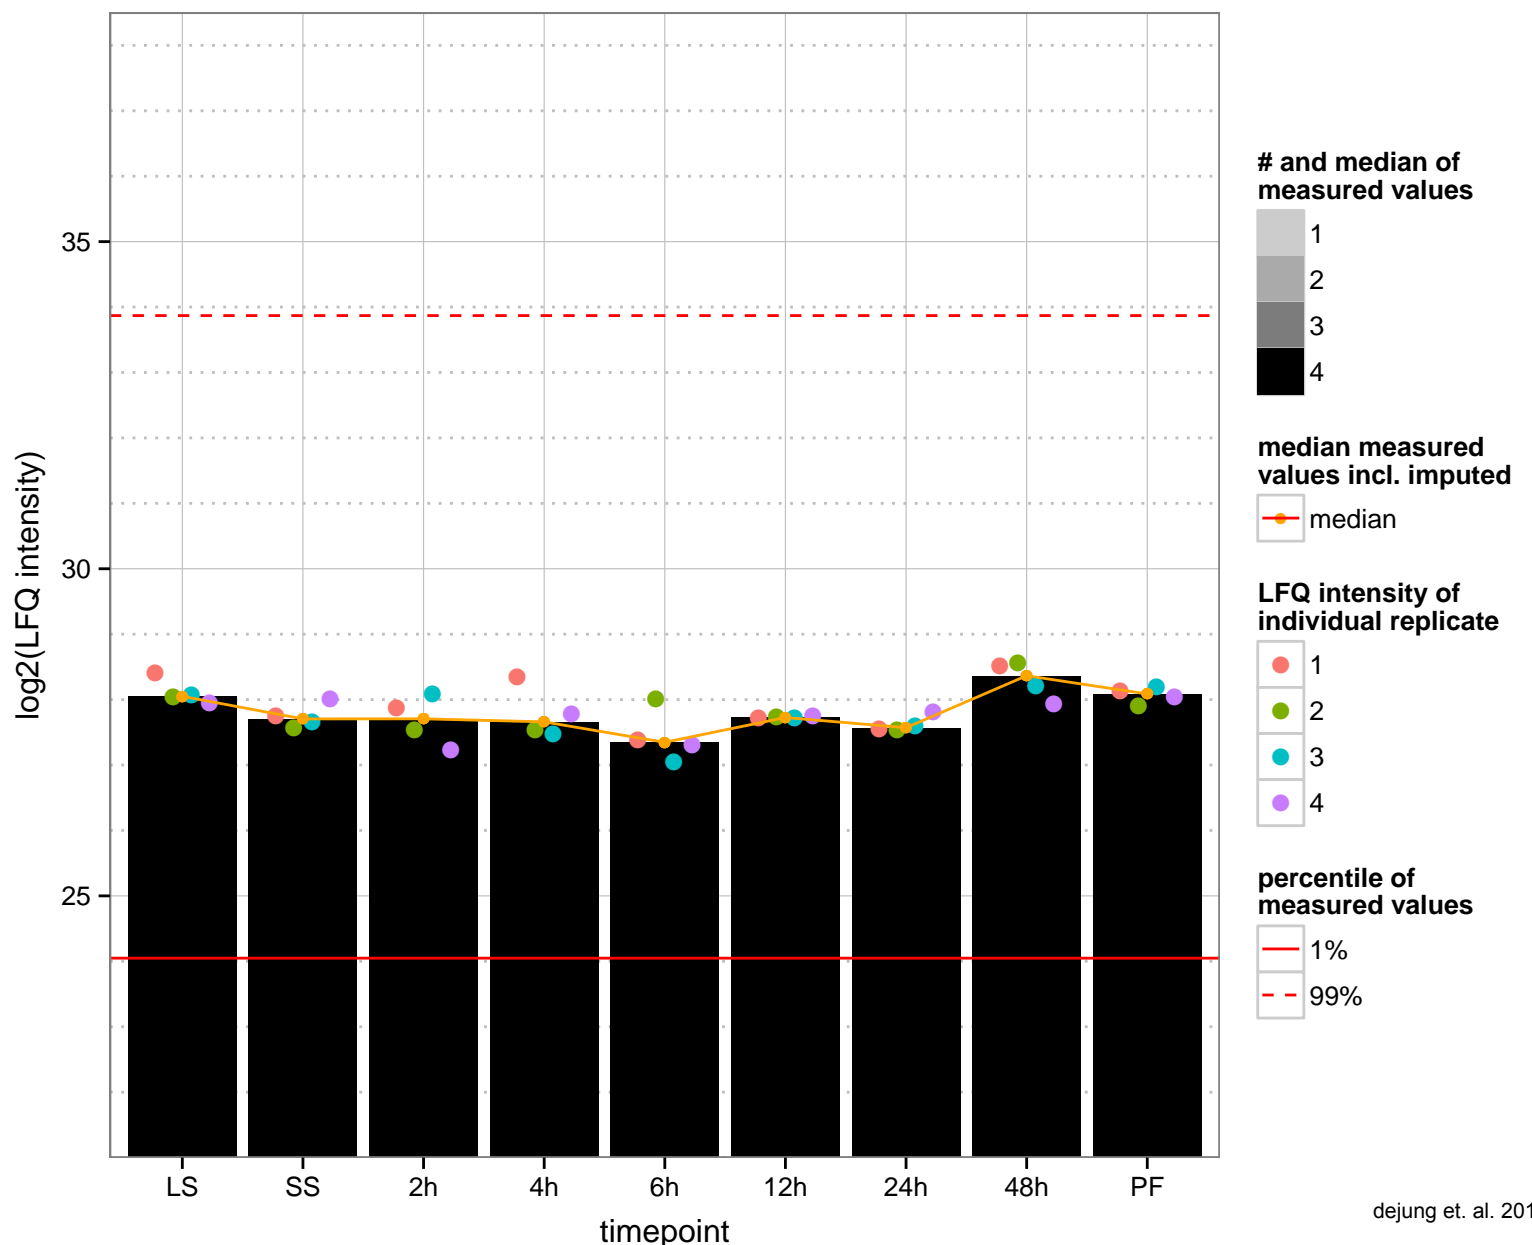

NA, 26S proteasome regulatory non-ATPase subunit (RPN1)  
 Tb927.3.5520  
 AGOF: NA, enzyme regulator activity  
 AGOC: NA, proteasome complex  
 AGOP: NA, regulation of protein catabolic process  
 PGOF: NA, binding, enzyme regulator activity  
 PGO: NA, proteasome complex  
 PGOP: NA, regulation of protein catabolic process

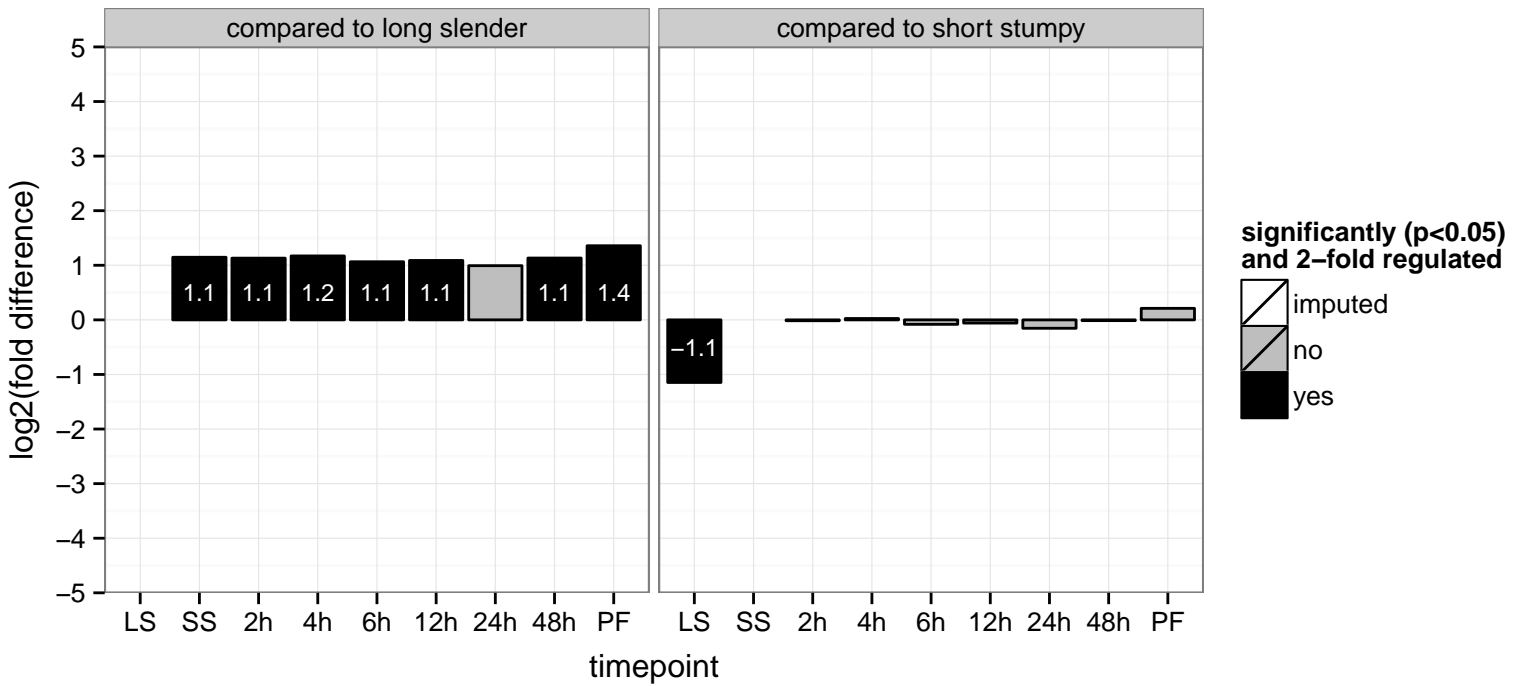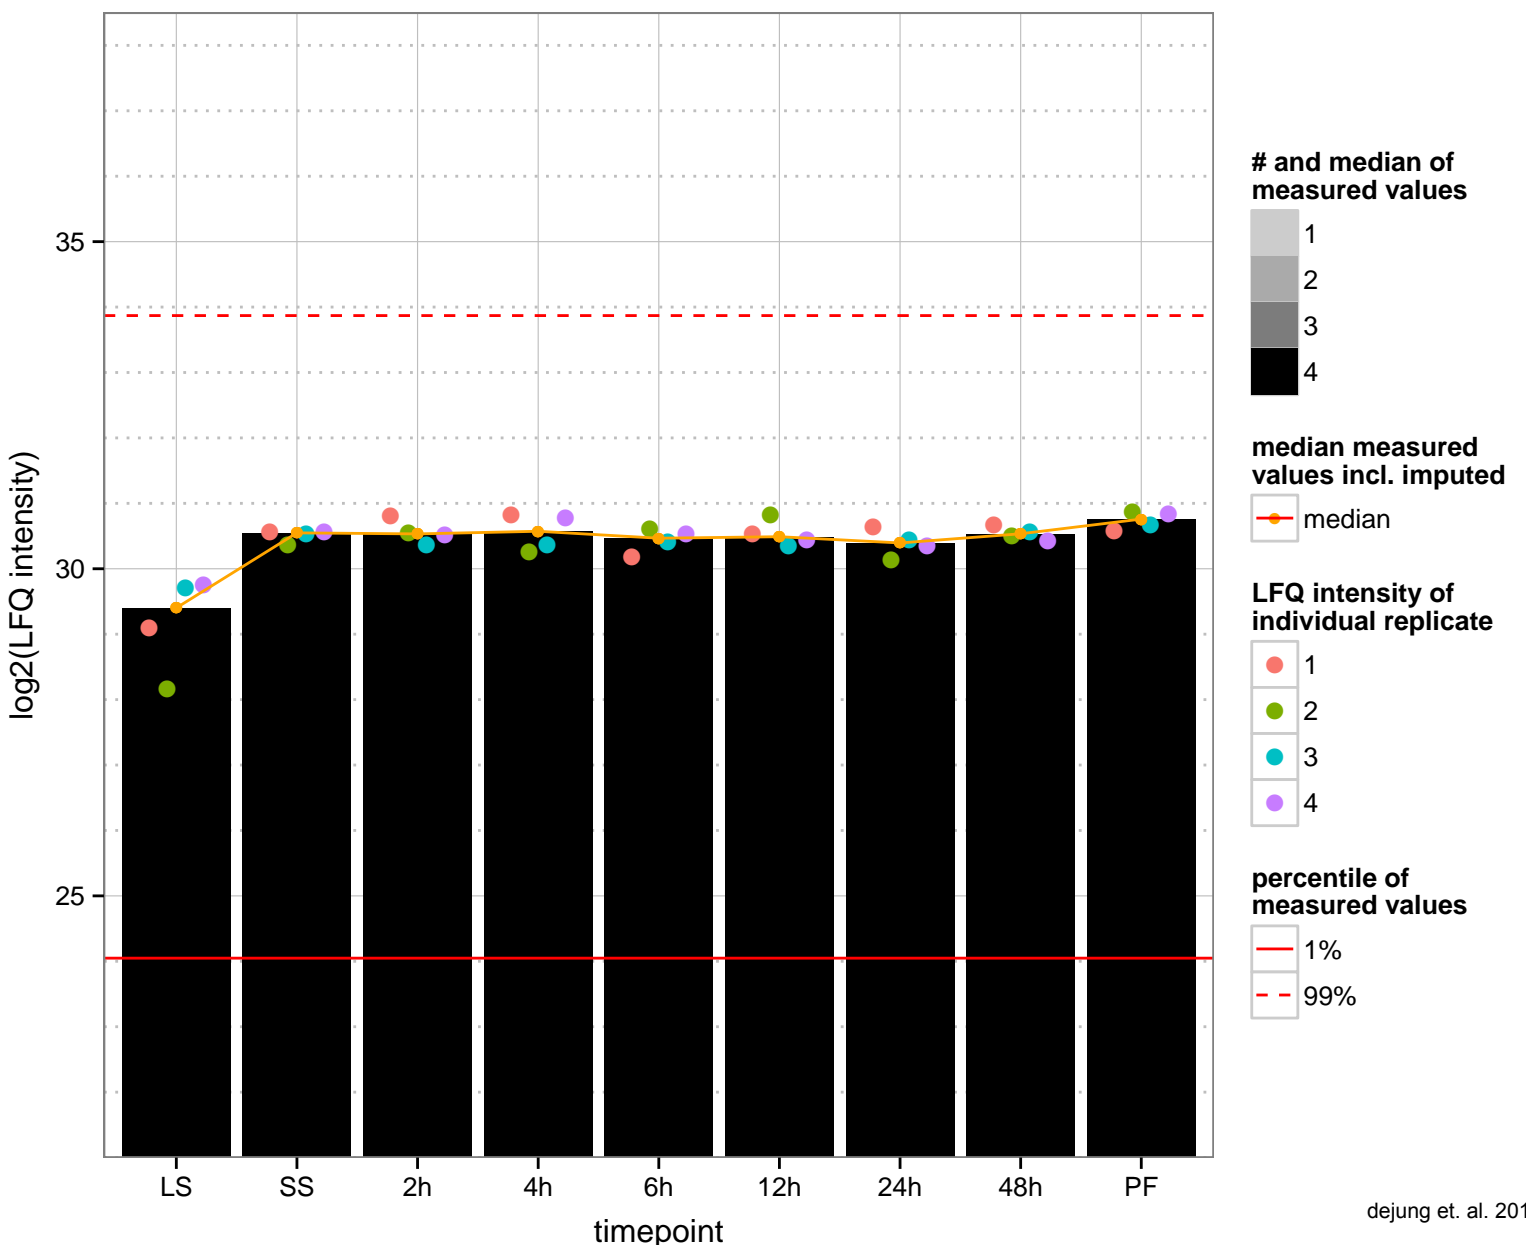

Tb-292 membrane associated protein (Tb-292)  
 Tb927.3.5530  
 AGOF: null  
 AGOC: endocytic vesicle, flagellar pocket membrane, nuclear outer membrane  
 AGOP: null  
 PGO: null  
 PGO: null  
 PGO: null

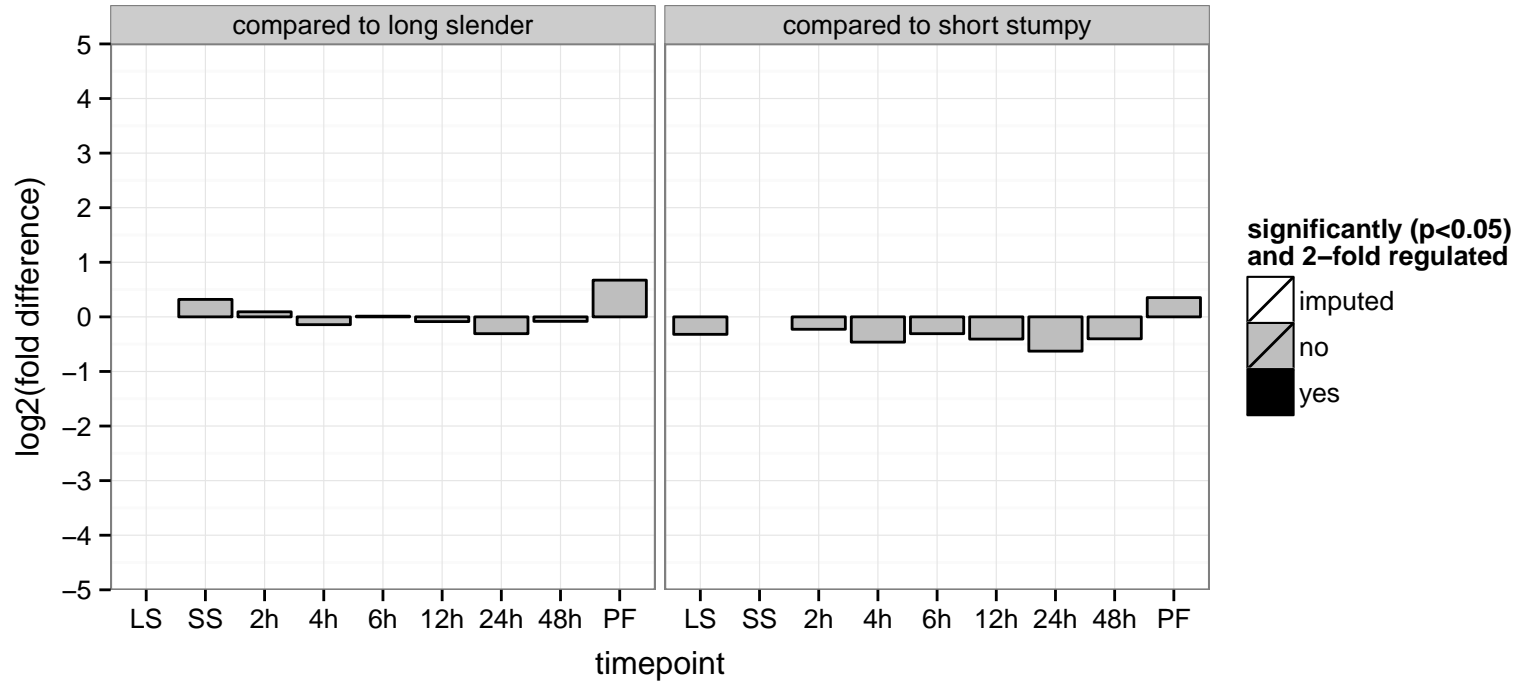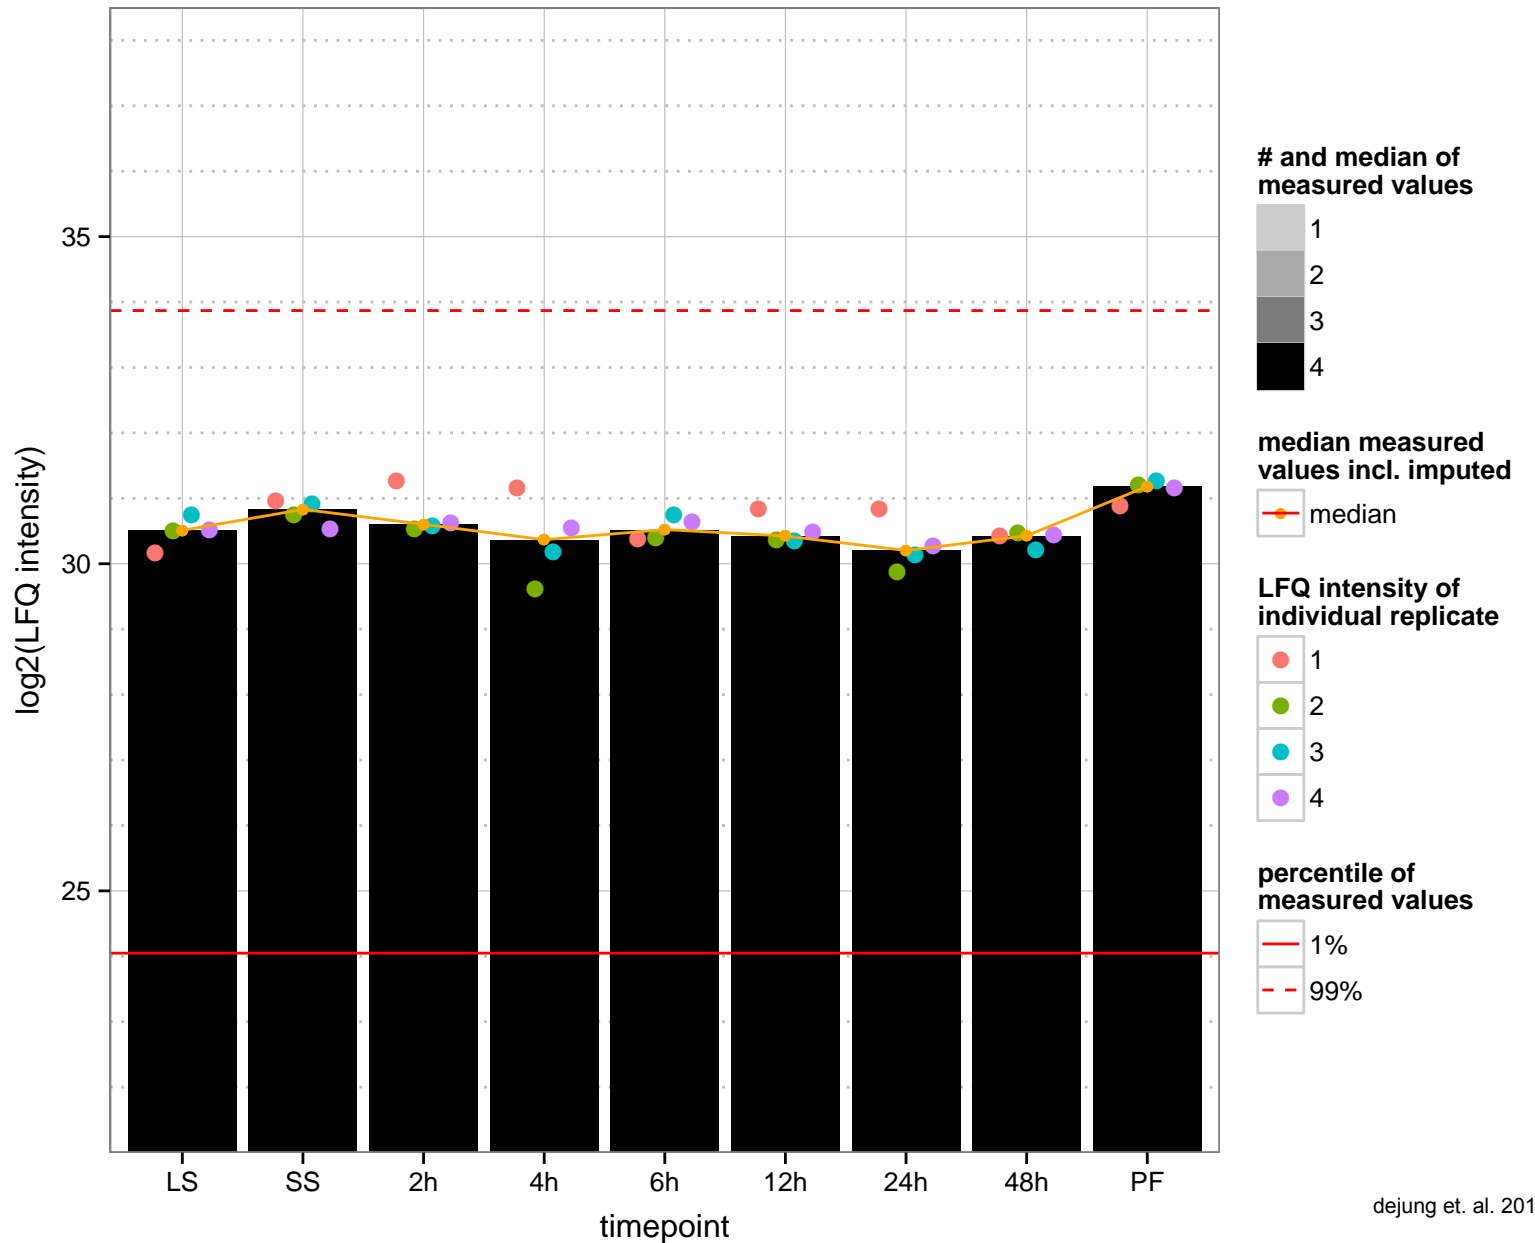



tryptophanyl-tRNA synthetase

Tb927.3.5580

AGOF: ATP binding, tryptophan-tRNA ligase activity

AGOC: cytoplasm, cytosol

AGOP: translation, tryptophanyl-tRNA aminoacylation

PGOF: ATP binding, aminoacyl-tRNA ligase activity, nucleotide binding, tryptophan-tRNA ligase activity

PGOC: cytoplasm

PGOP: tRNA aminoacylation for protein translation, tryptophanyl-tRNA aminoacylation

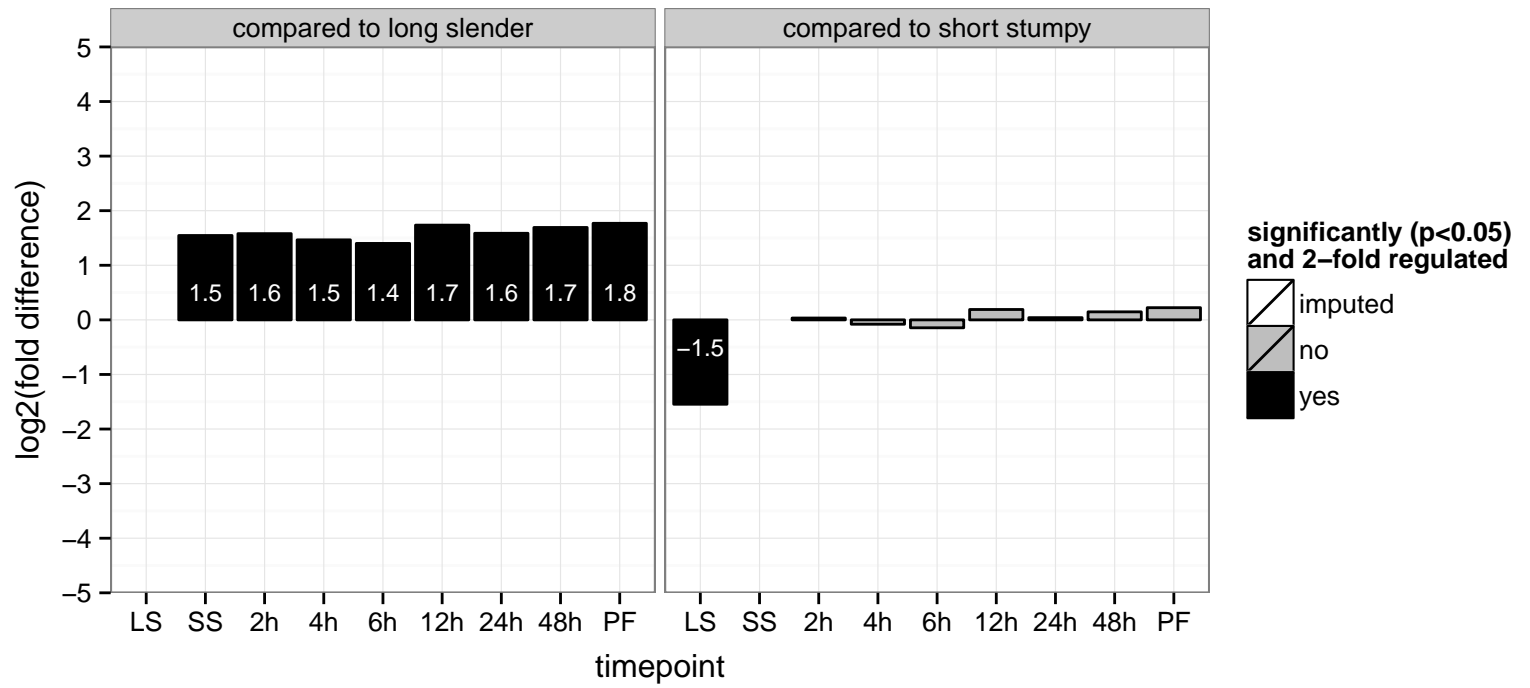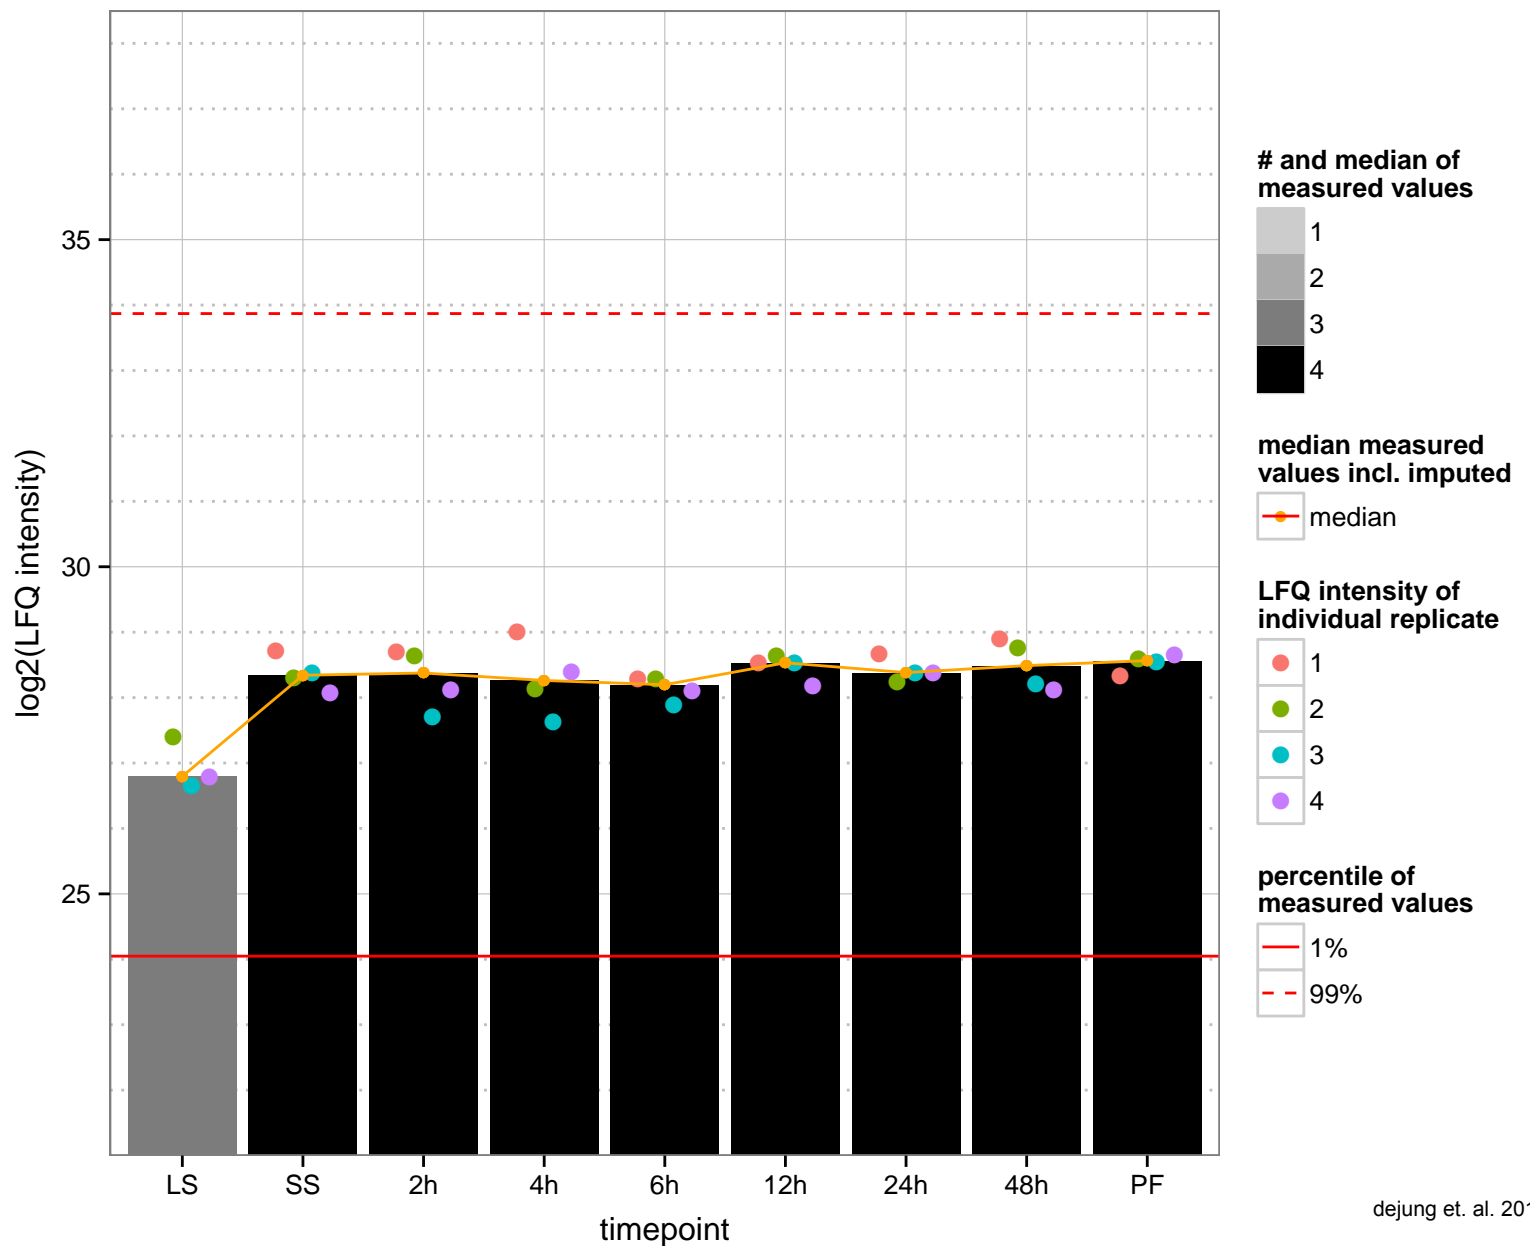

hypothetical protein, conserved  
 Tb927.3.5620  
 AGOF: null  
 AGOC: null  
 AGOP: cellular process  
 PGO: null  
 PGO: null  
 PGO: null  
 PGO: null  
 PGO: cellular process

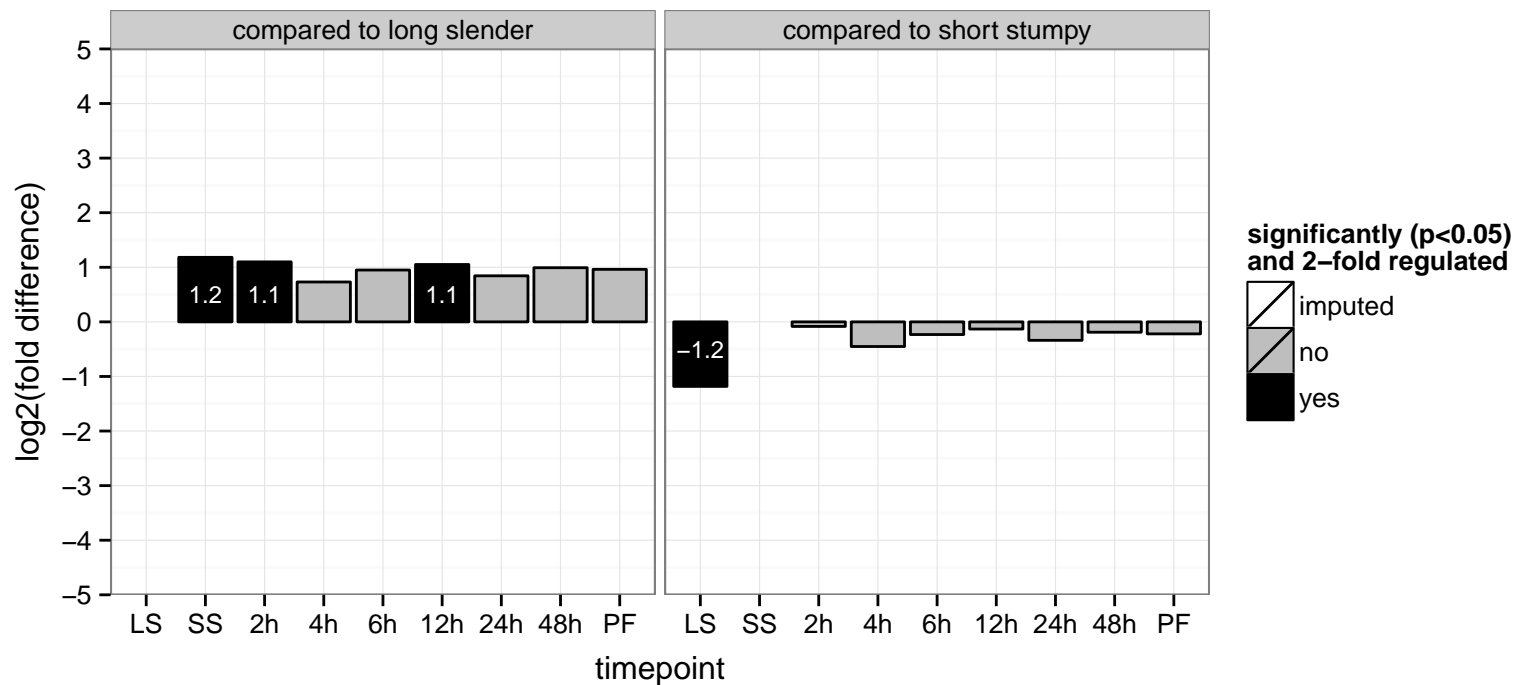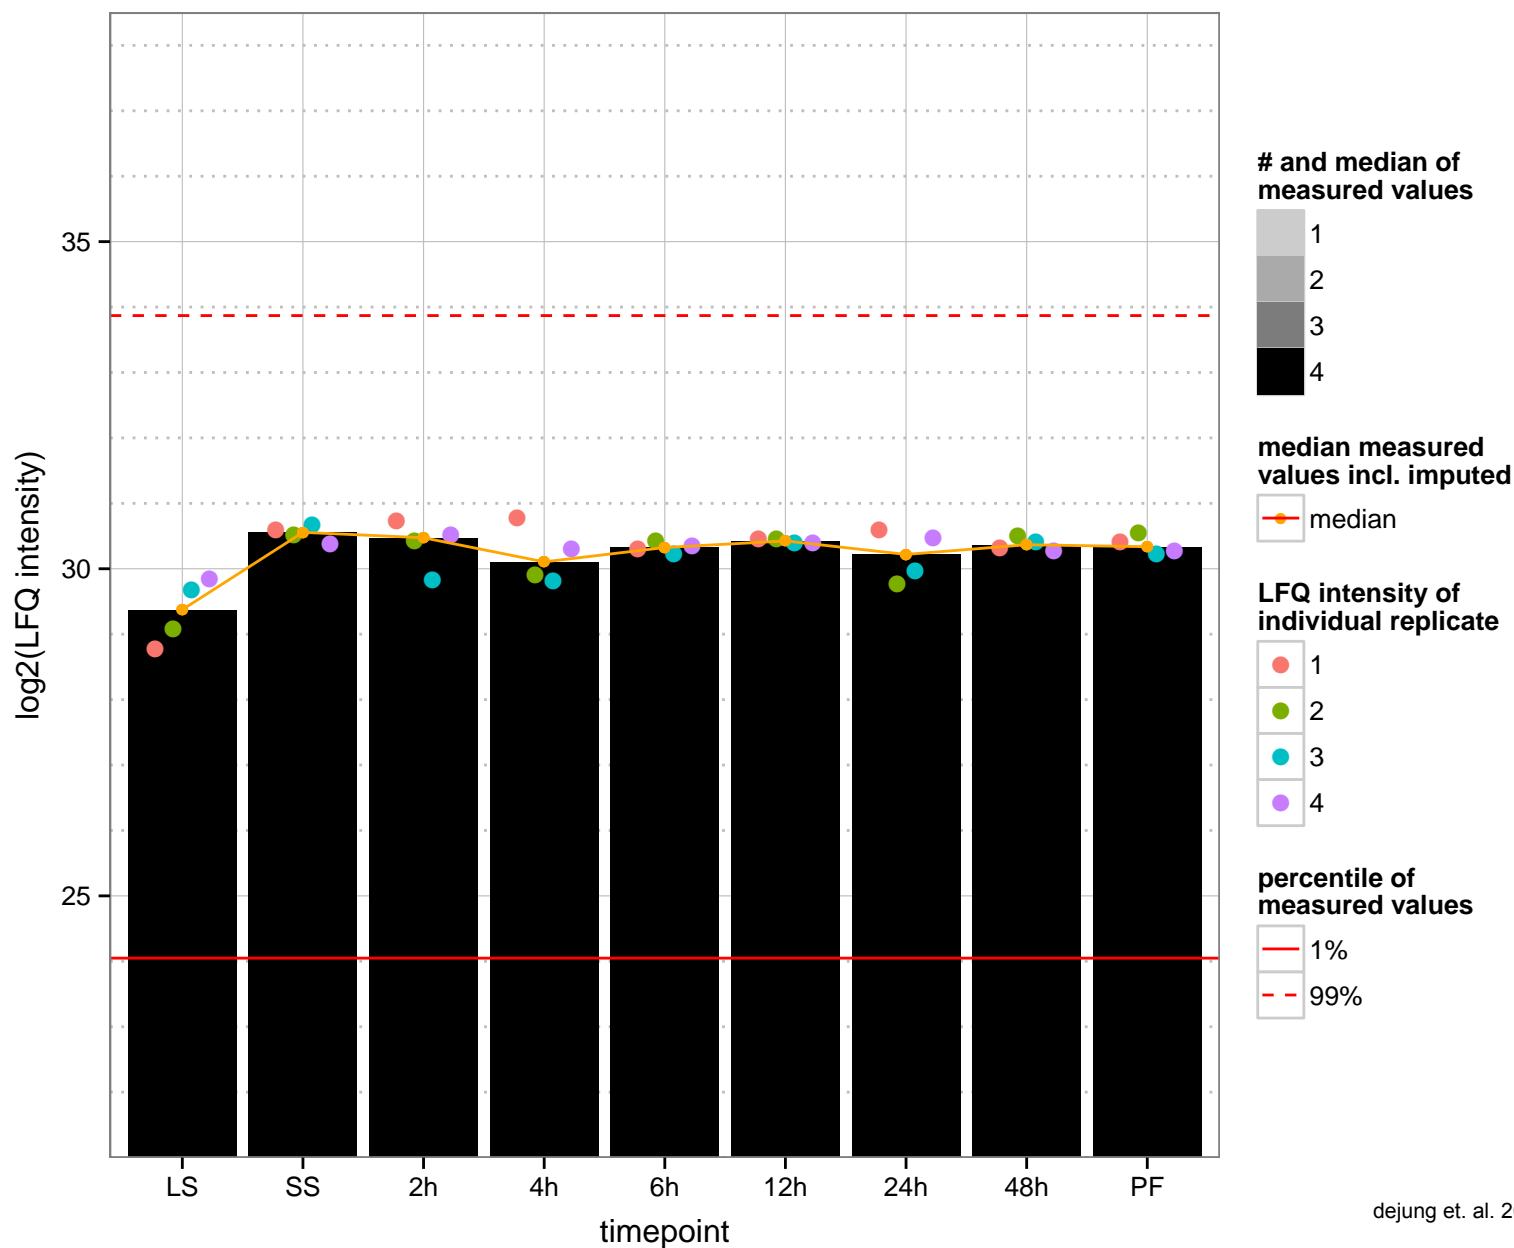

hypothetical protein, conserved  
 Tb927.3.760  
 AGOF: null  
 AGOC: null  
 AGOP: null  
 PGO: null  
 PGOC: null  
 PGOP: null

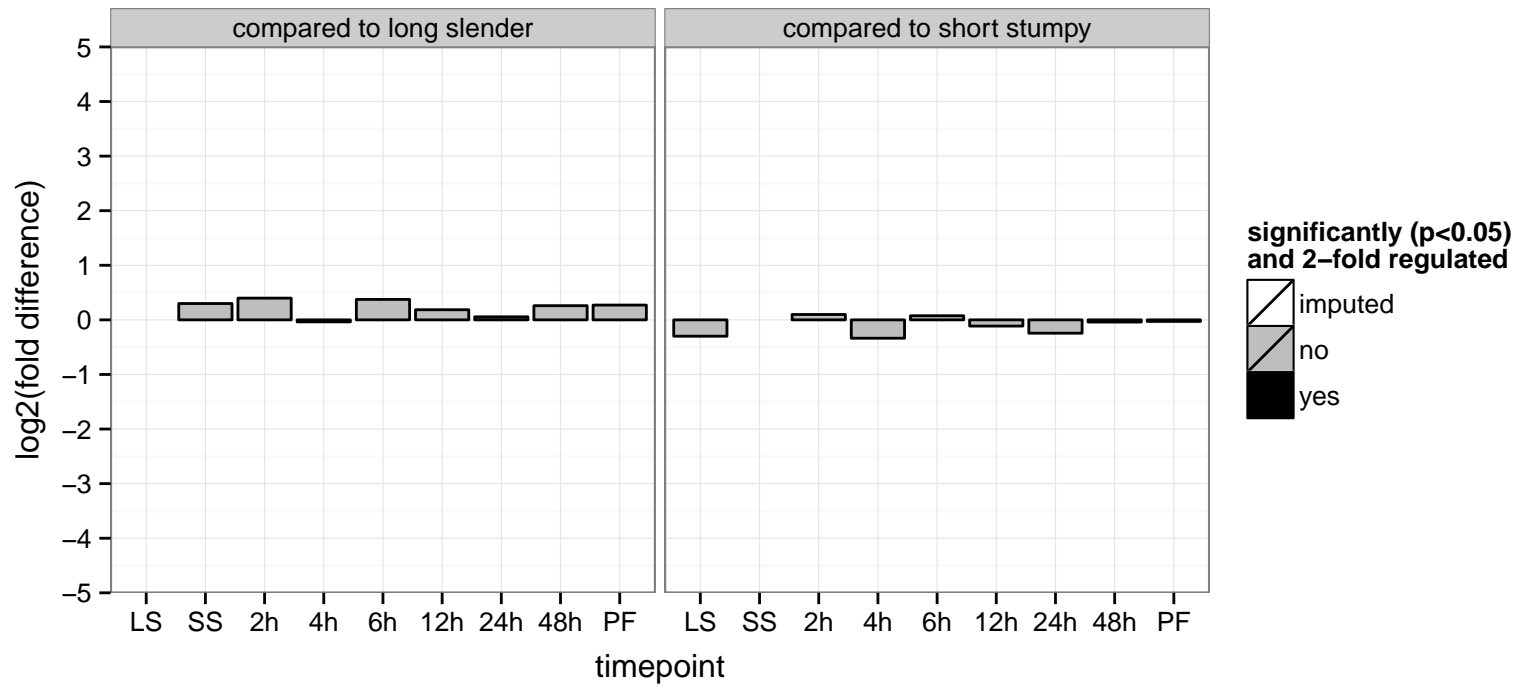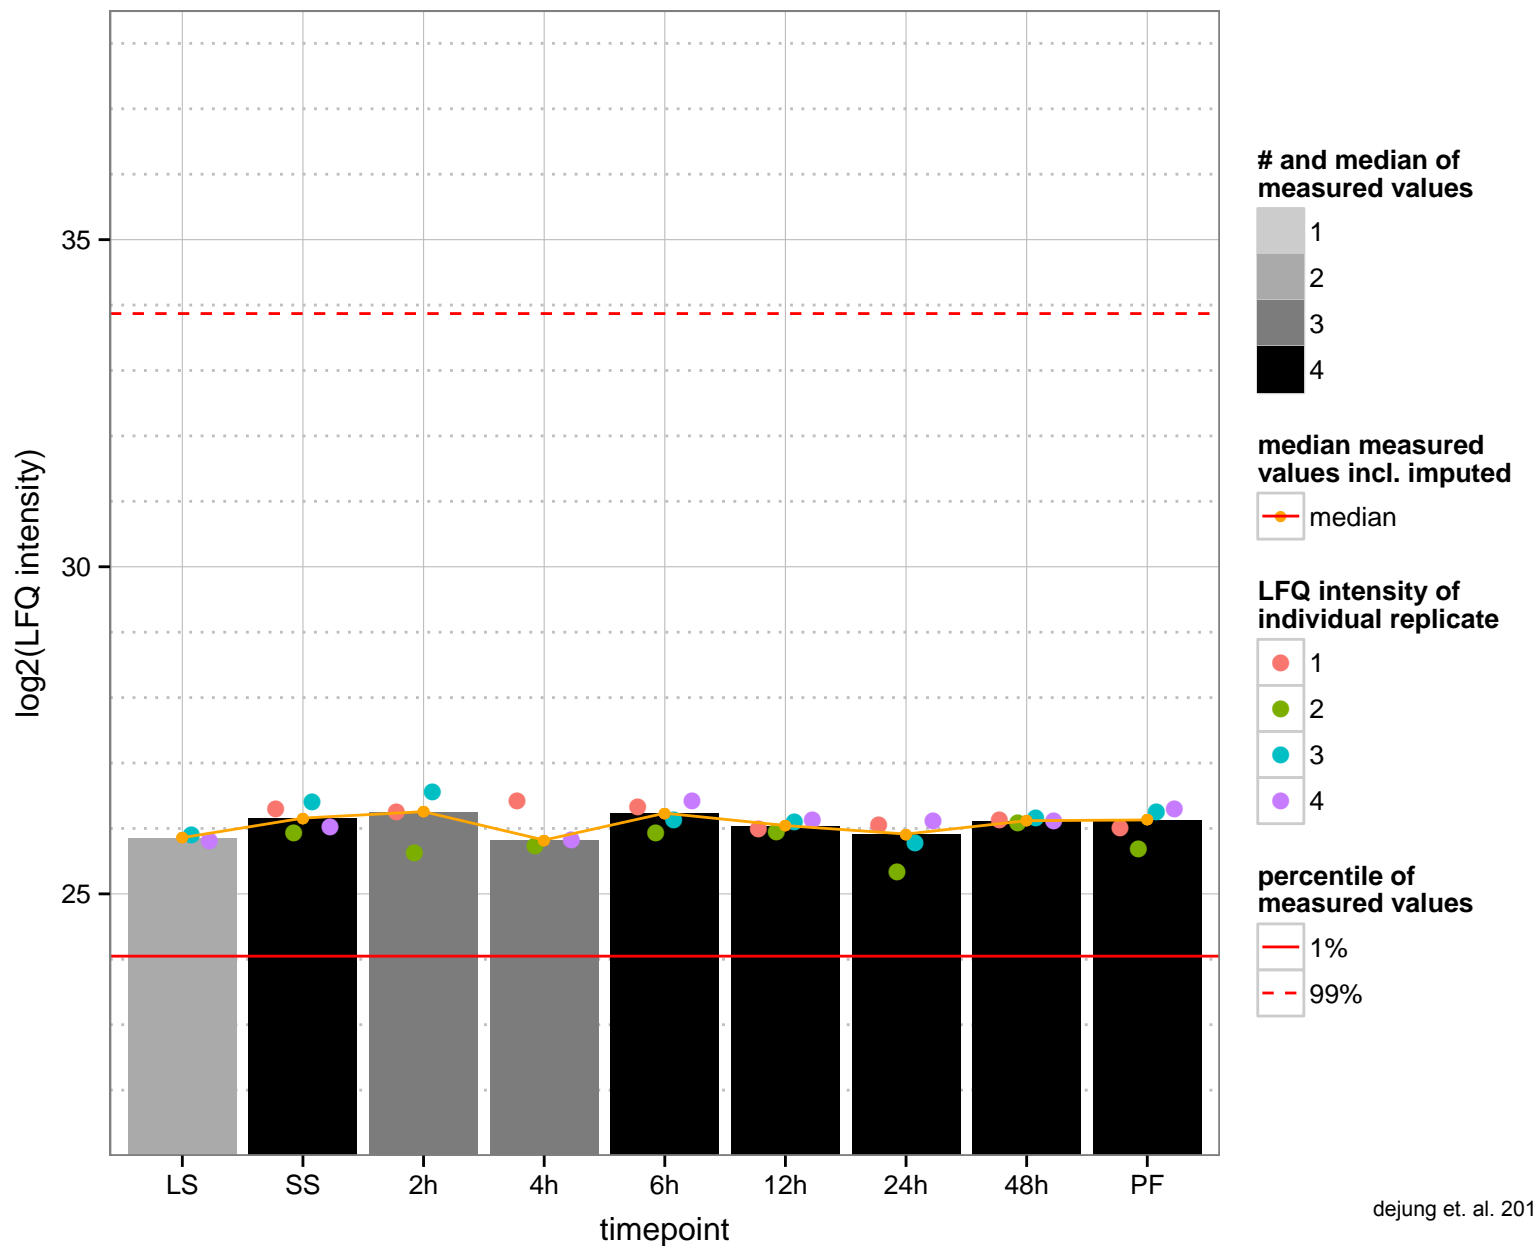

proteasome alpha 7 subunit (TbPSA7)

Tb927.3.780

AGOF: endopeptidase activity, threonine-type endopeptidase activity

AGOC: proteasome core complex, proteasome core complex, alpha-subunit complex

AGOP: protein metabolic process, ubiquitin-dependent protein catabolic process

PGOF: endopeptidase activity, threonine-type endopeptidase activity

PGOC: proteasome core complex, proteasome core complex, alpha-subunit complex

PGOP: proteolysis involved in cellular protein catabolic process, ubiquitin-dependent protein catabolic process

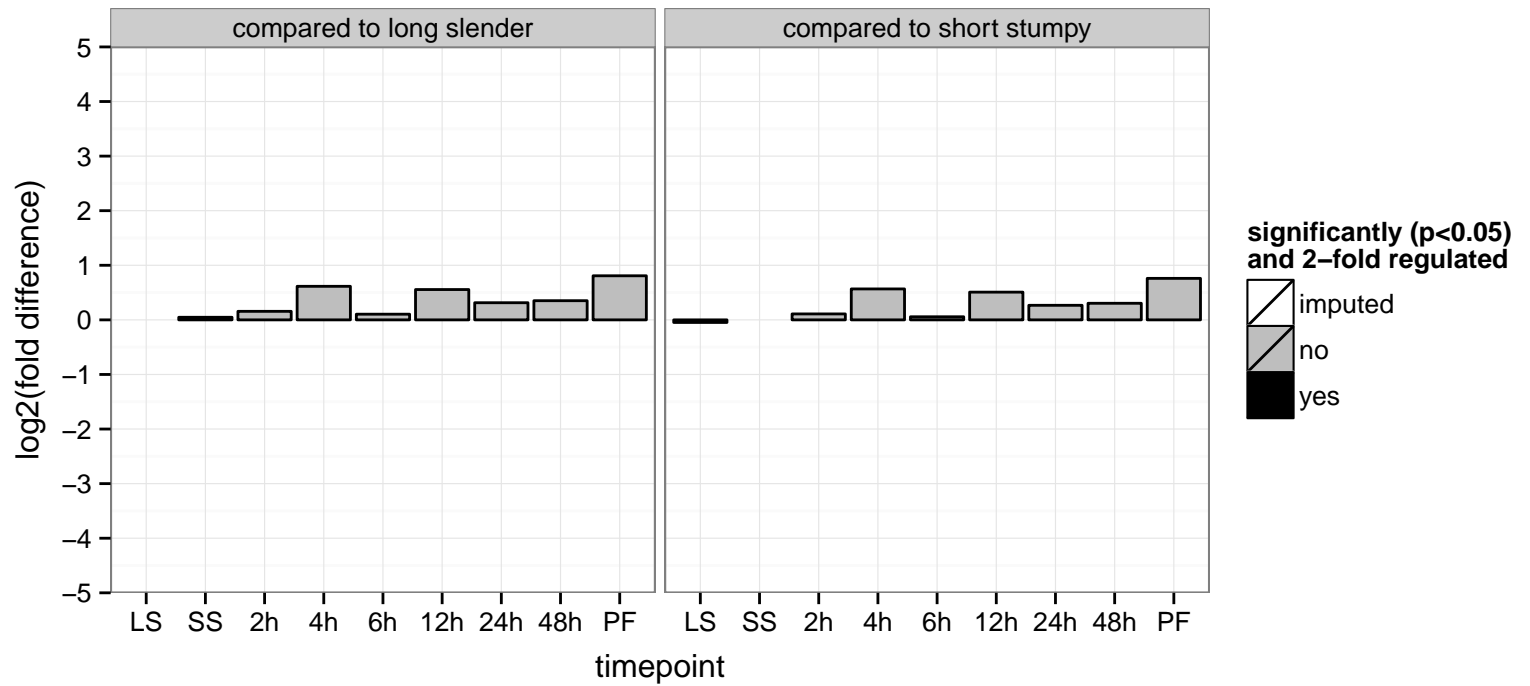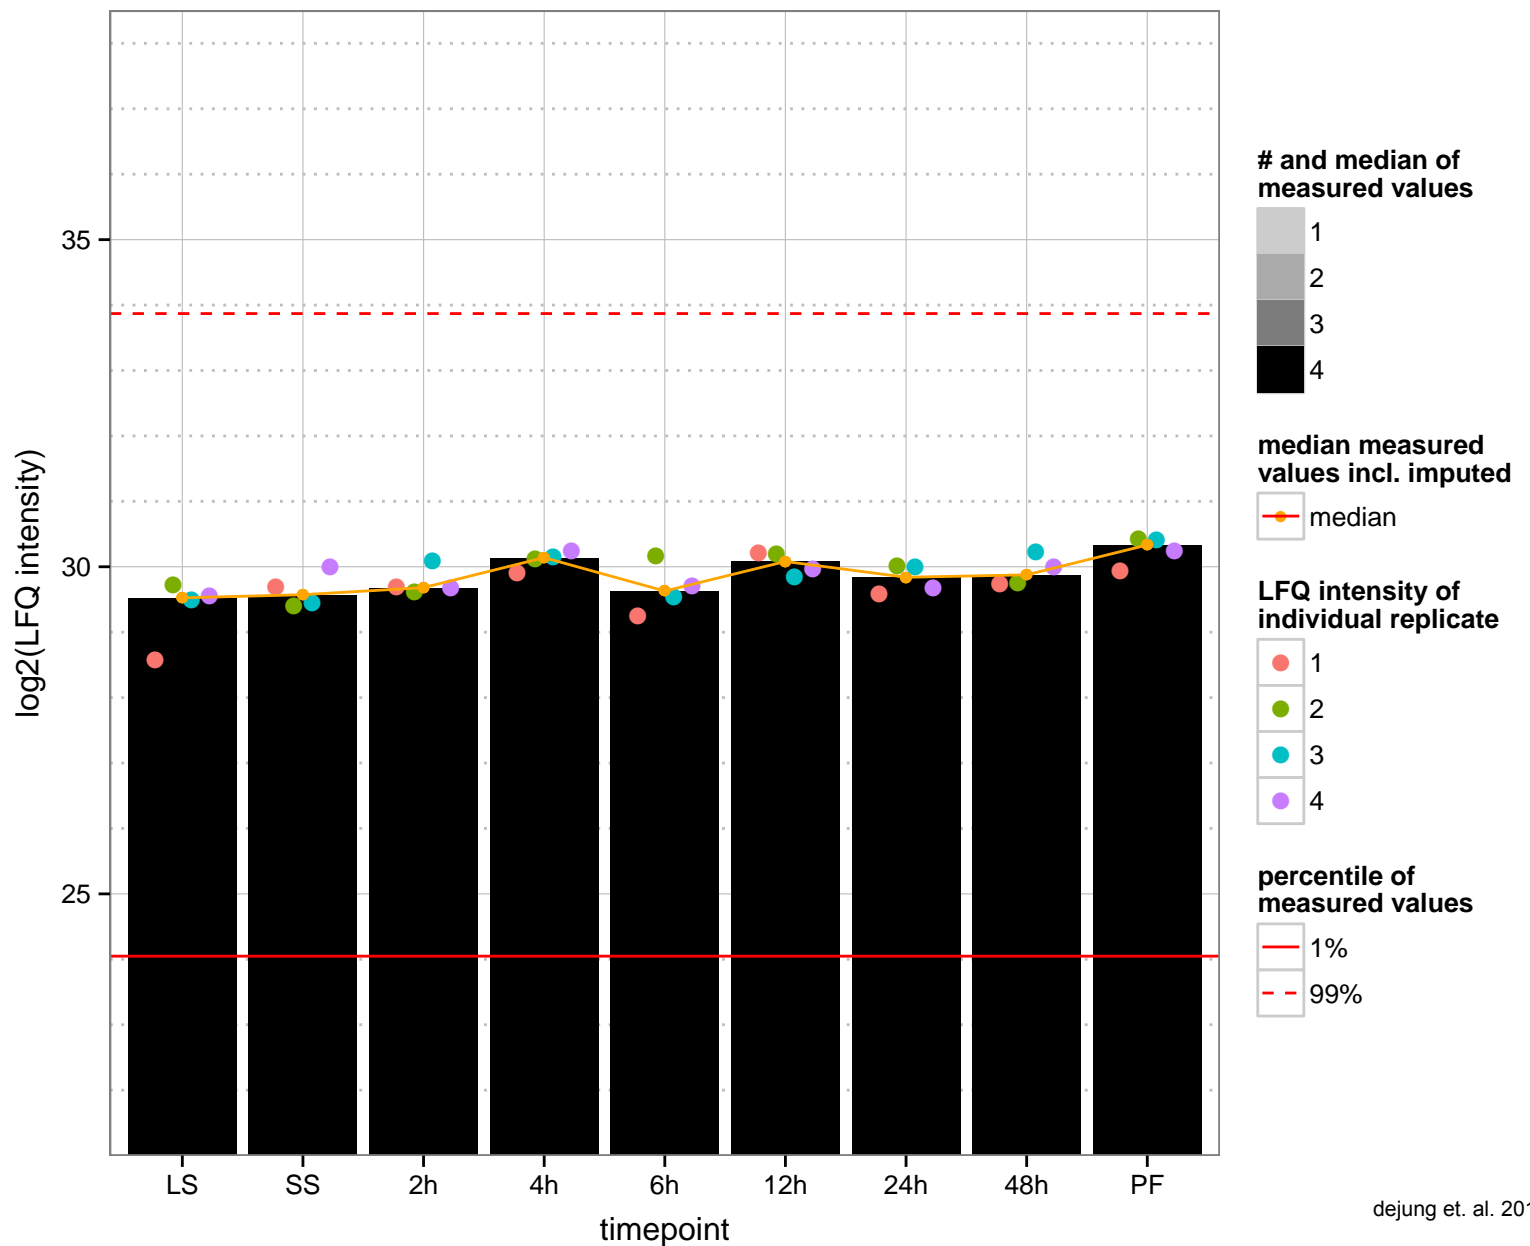

hypothetical protein, conserved  
 Tb927.3.800  
 AGOF: null  
 AGOC: null  
 AGOP: null  
 PGO: null  
 PGOC: null  
 PGOP: null

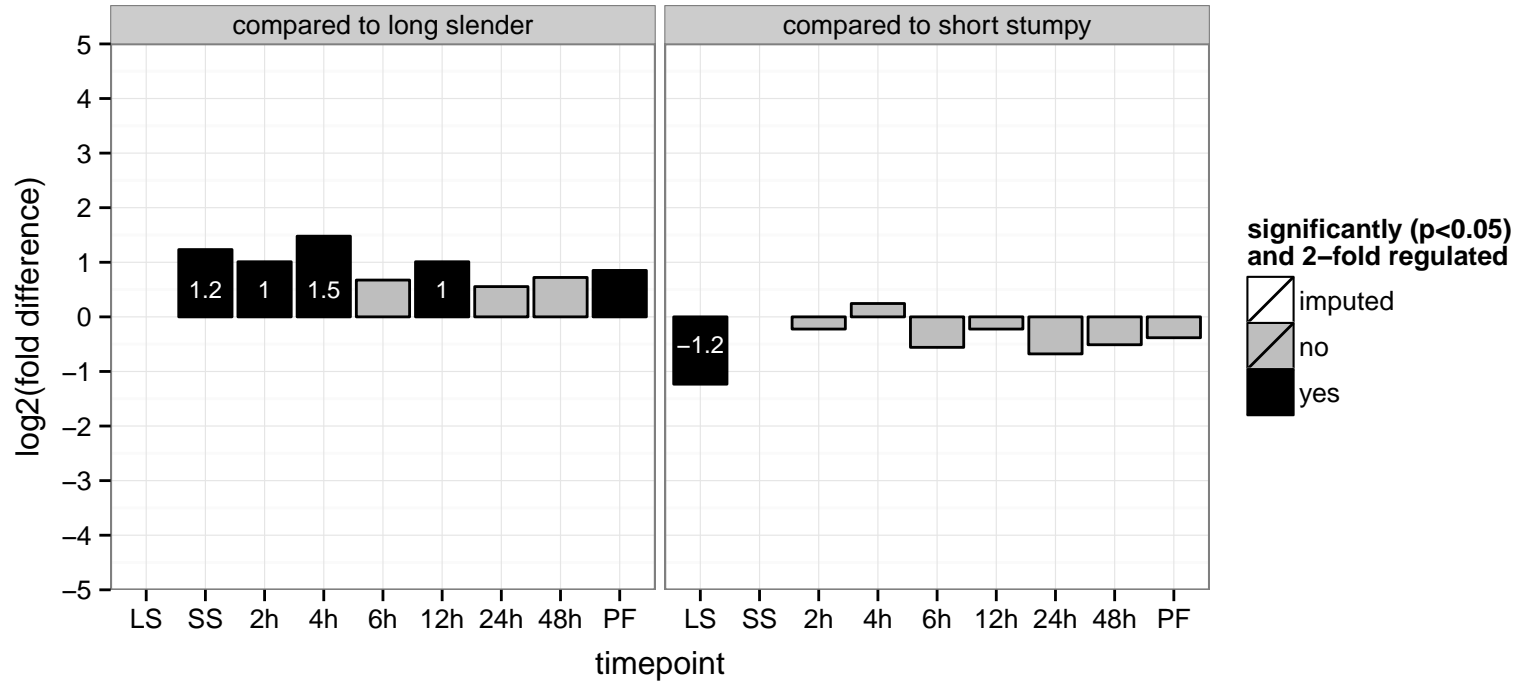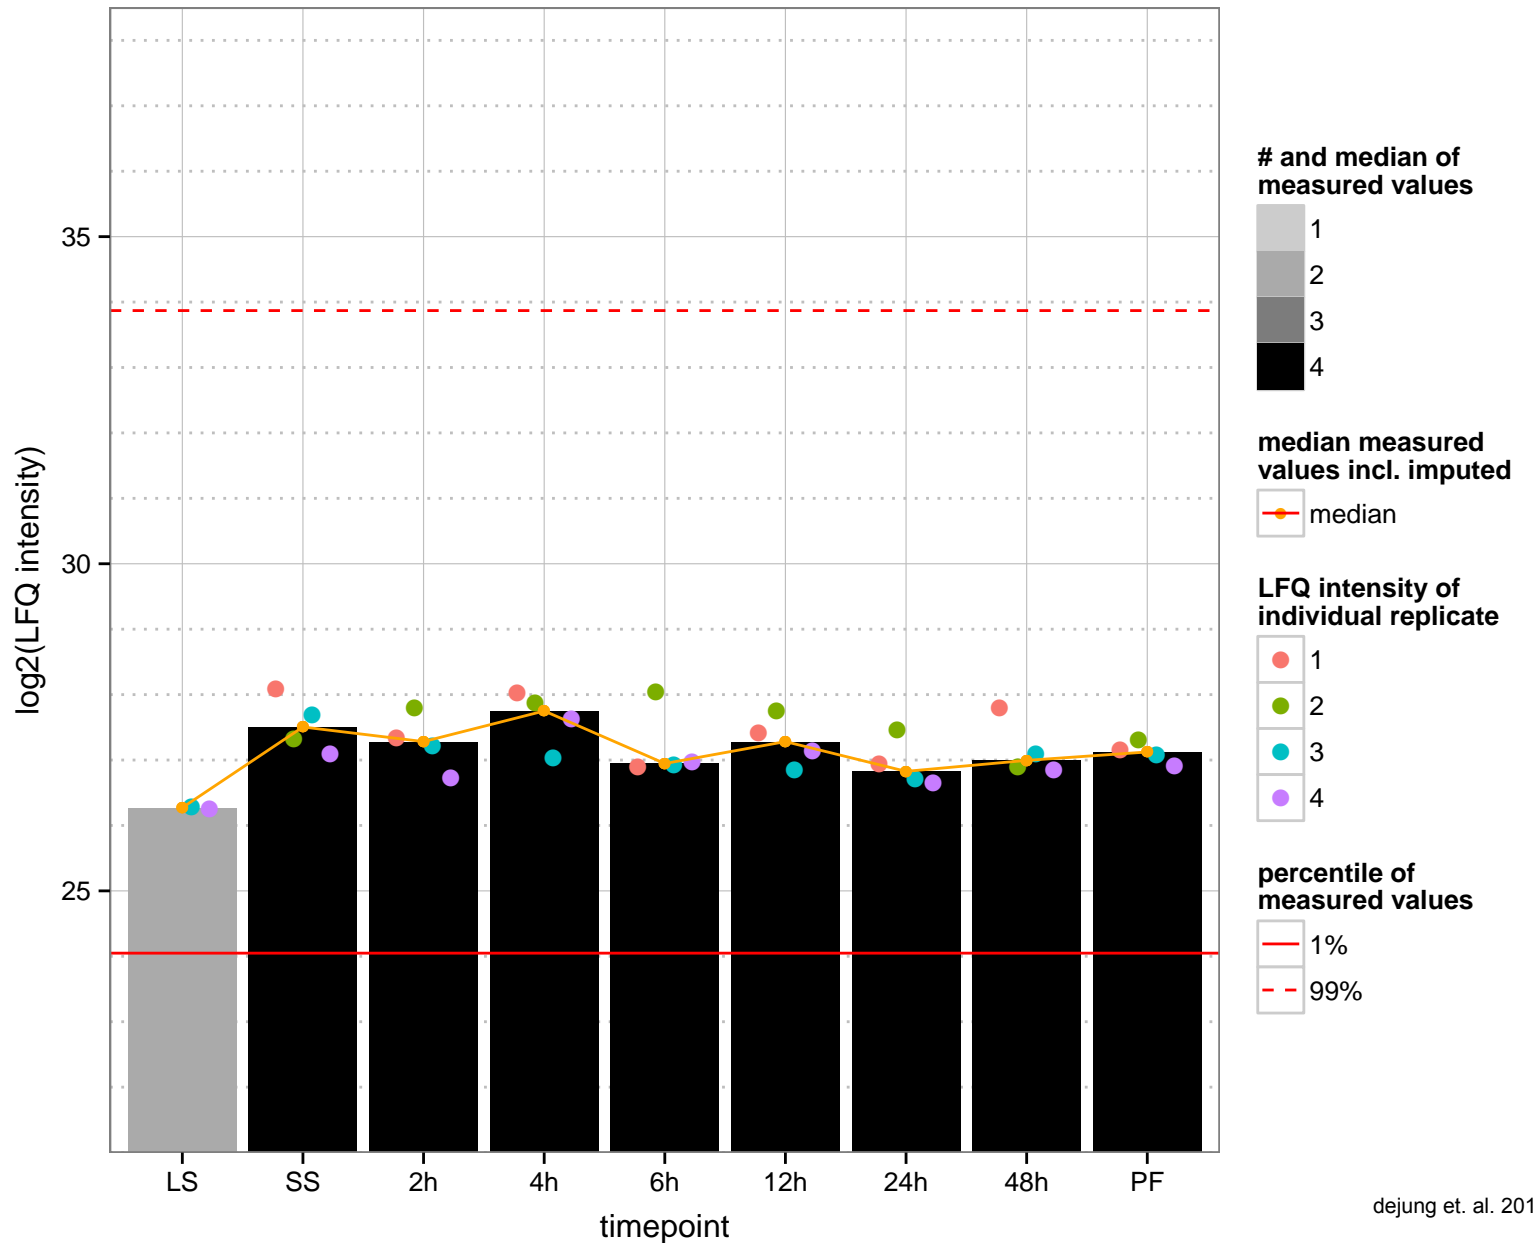

hypothetical protein, conserved  
 Tb927.3.900  
 AGOF: null  
 AGOC: null  
 AGOP: null  
 PGOF: null  
 PGOC: null  
 PGOP: null

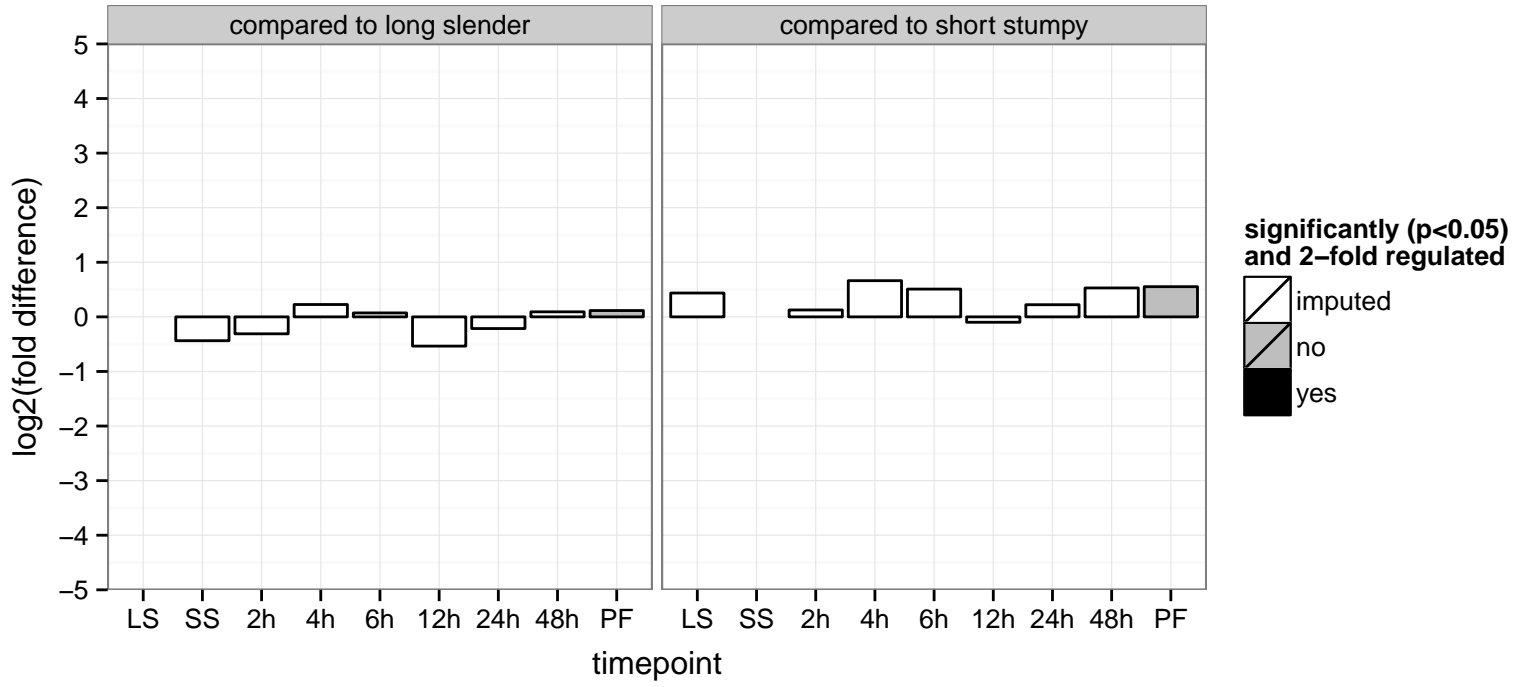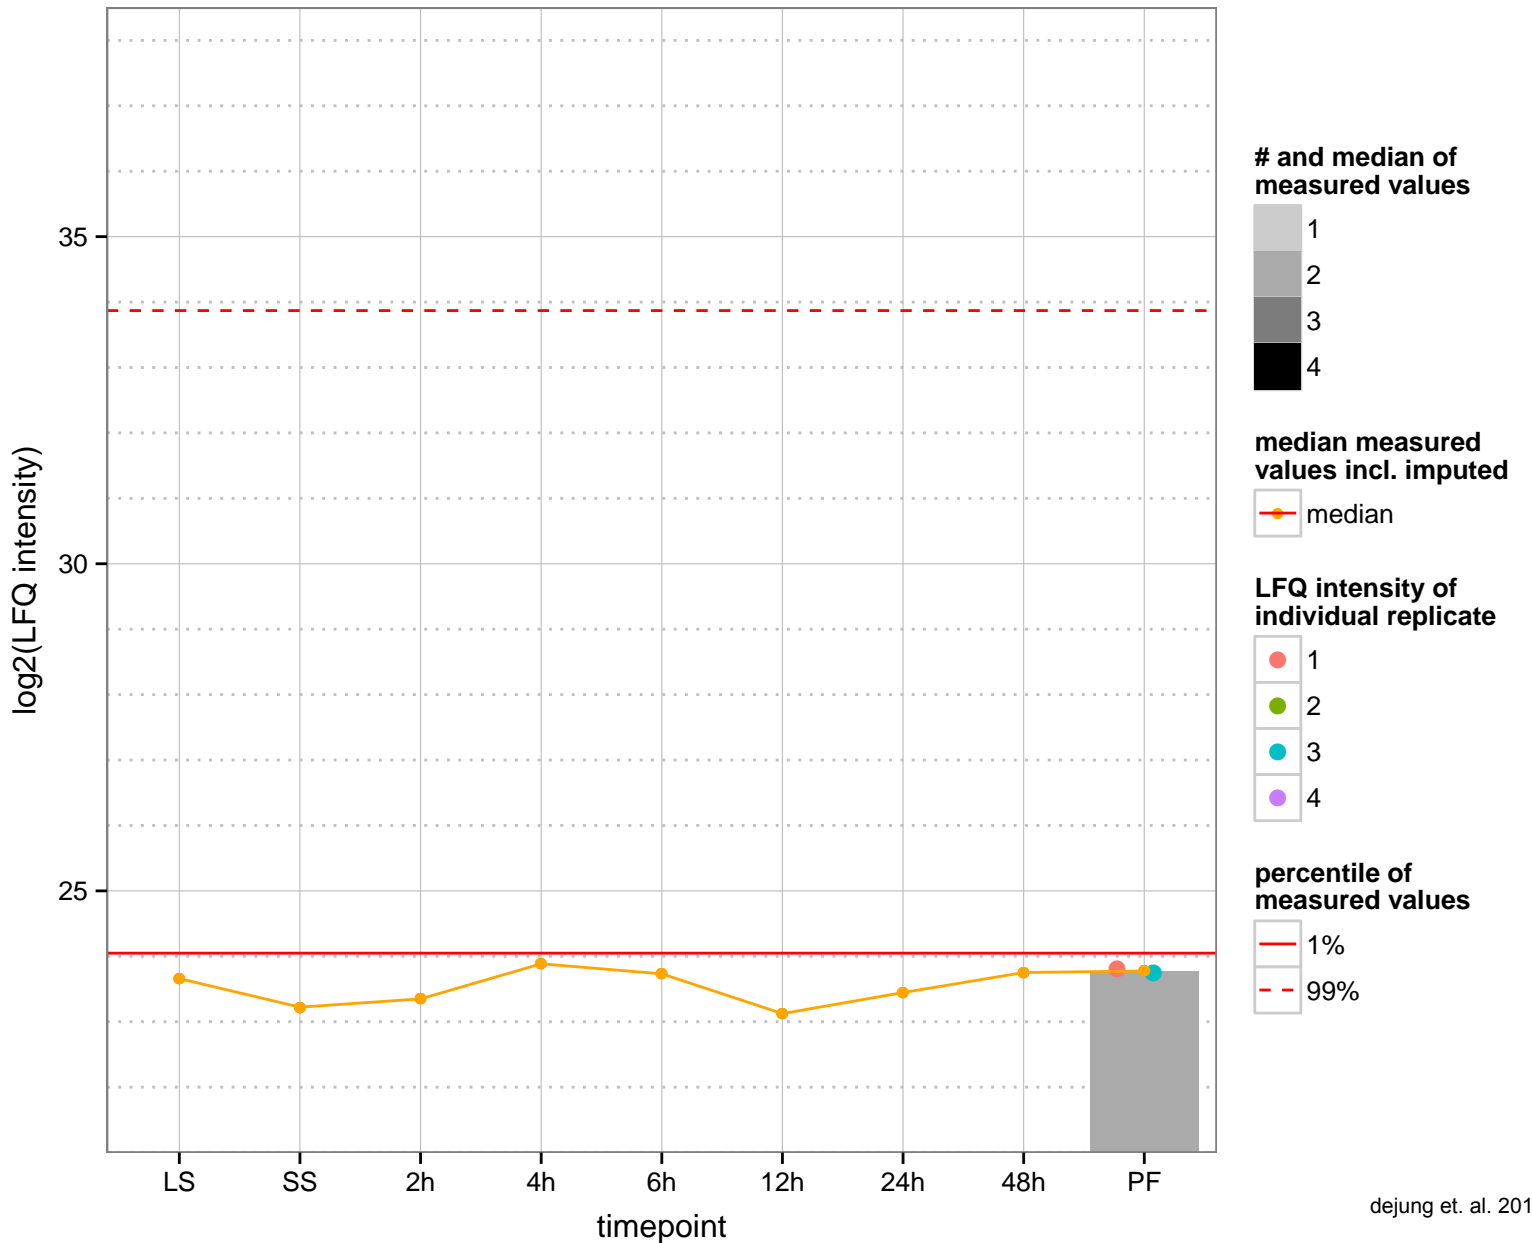

gamma-tubulin, tubulin gamma chain

Tb927.3.910

AGOF: GTP binding, GTPase activity, microtubule binding

AGOC: cilium basal body, microtubule organizing center, protein complex, spindle pole

AGOP: cell growth, microtubule nucleation, protein polymerization

PGOF: GTP binding, GTPase activity

PGOC: protein complex

PGOP: GTP catabolic process, protein polymerization

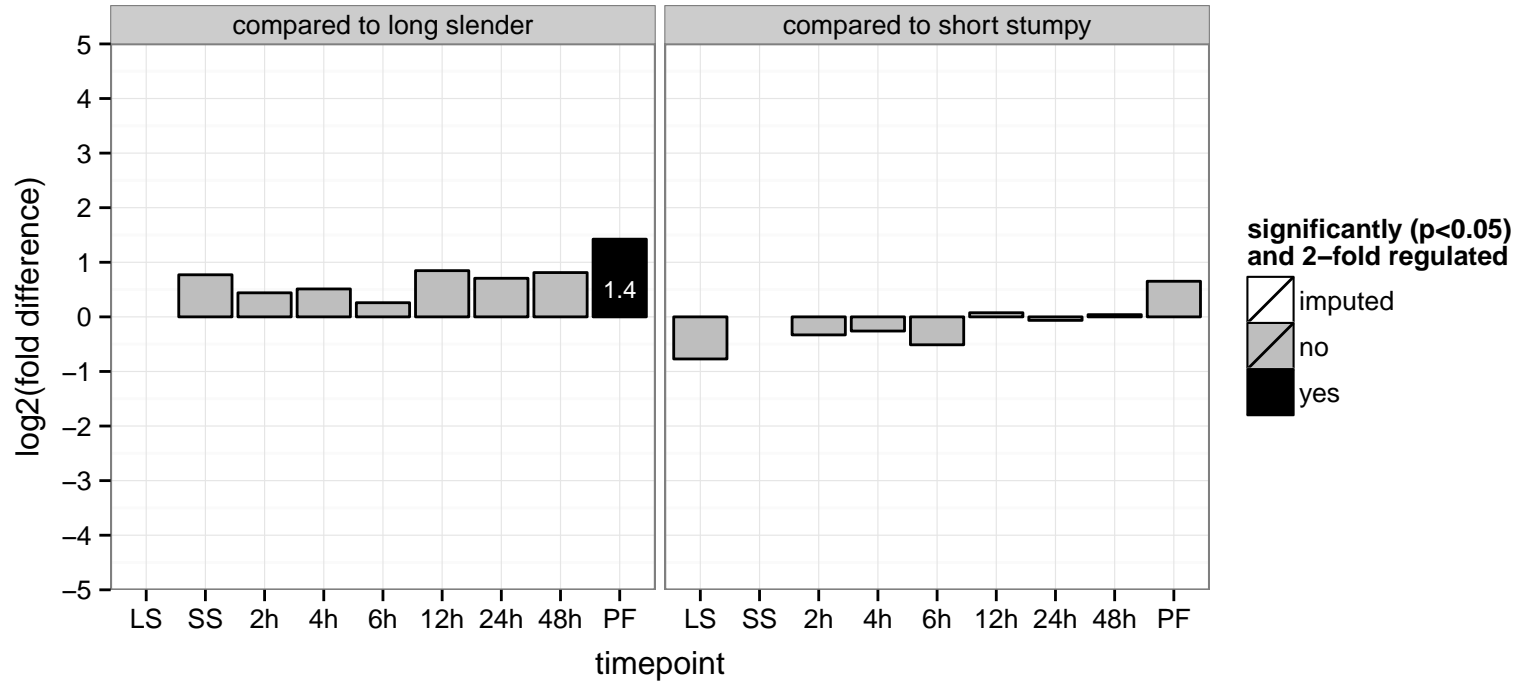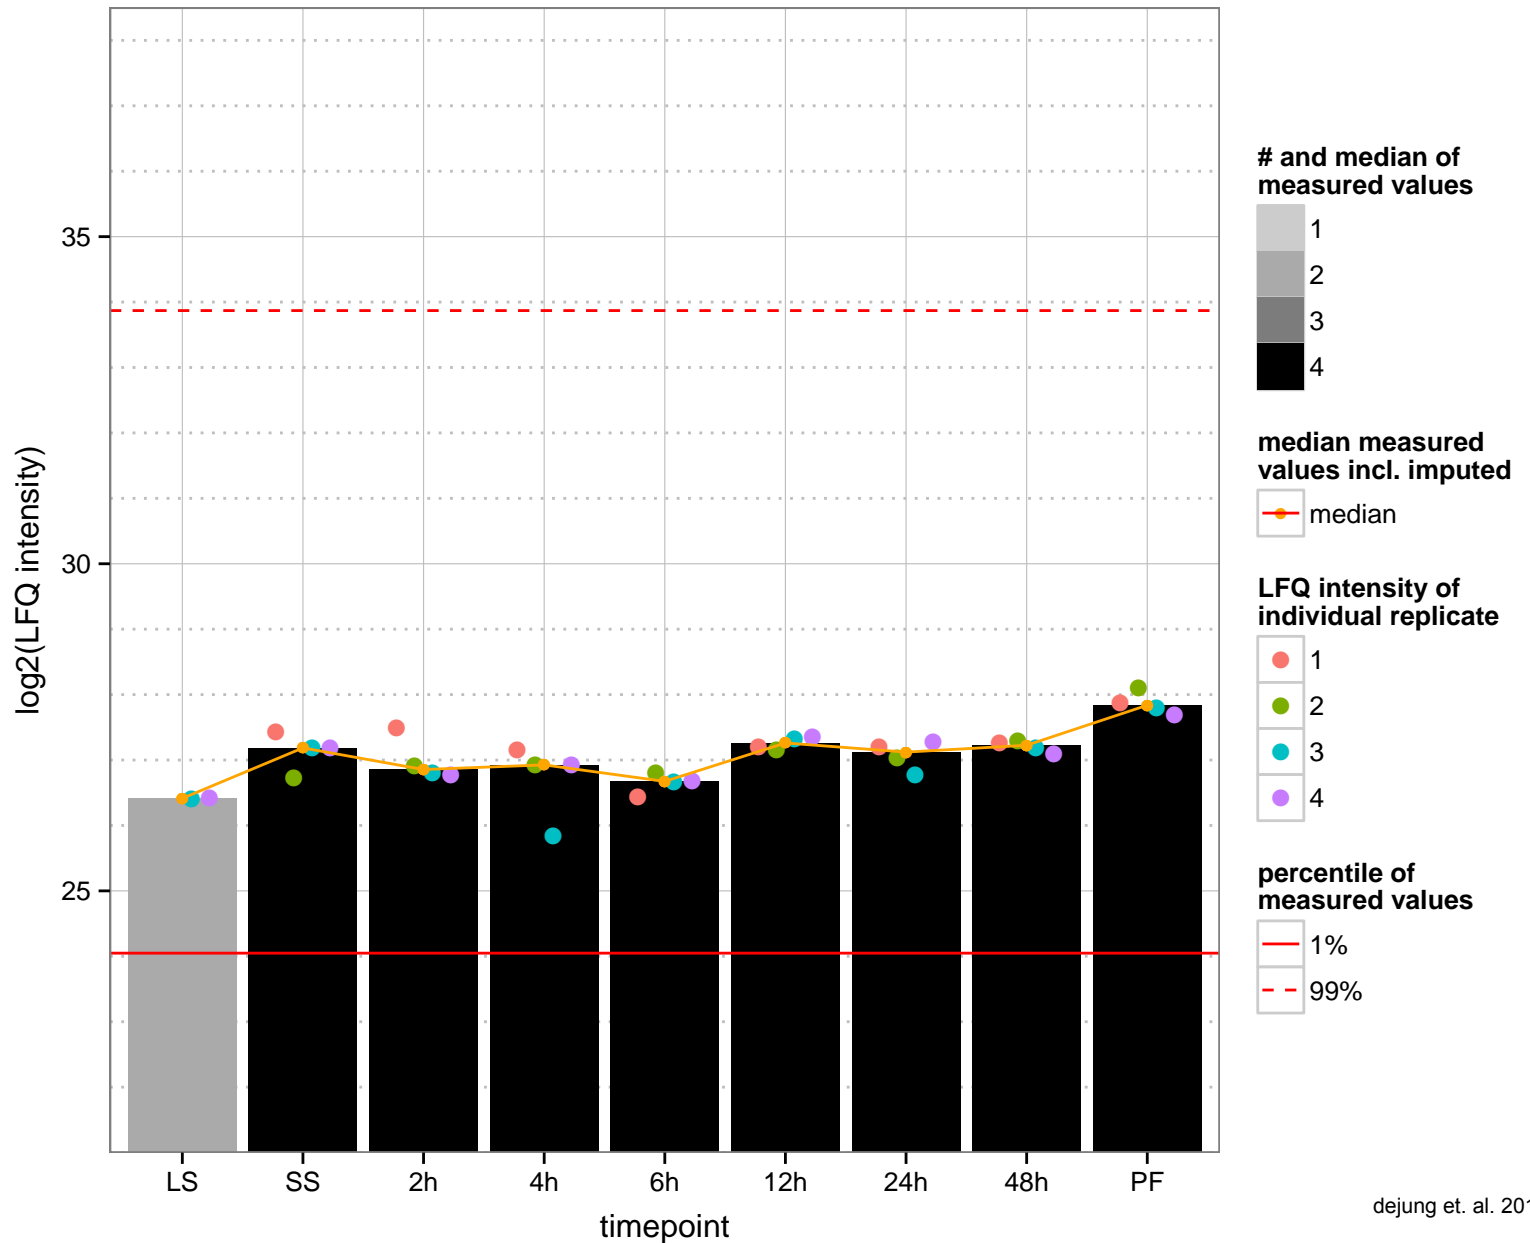

dynein heavy chain, putative

Tb927.3.930

AGOF: ATP binding, ATPase activity, microtubule motor activity

AGOC: dynein complex

AGOP: microtubule-based movement

PGOF: microtubule motor activity, nucleoside-triphosphatase activity, nucleotide binding

PGOC: dynein complex

PGOP: microtubule-based movement

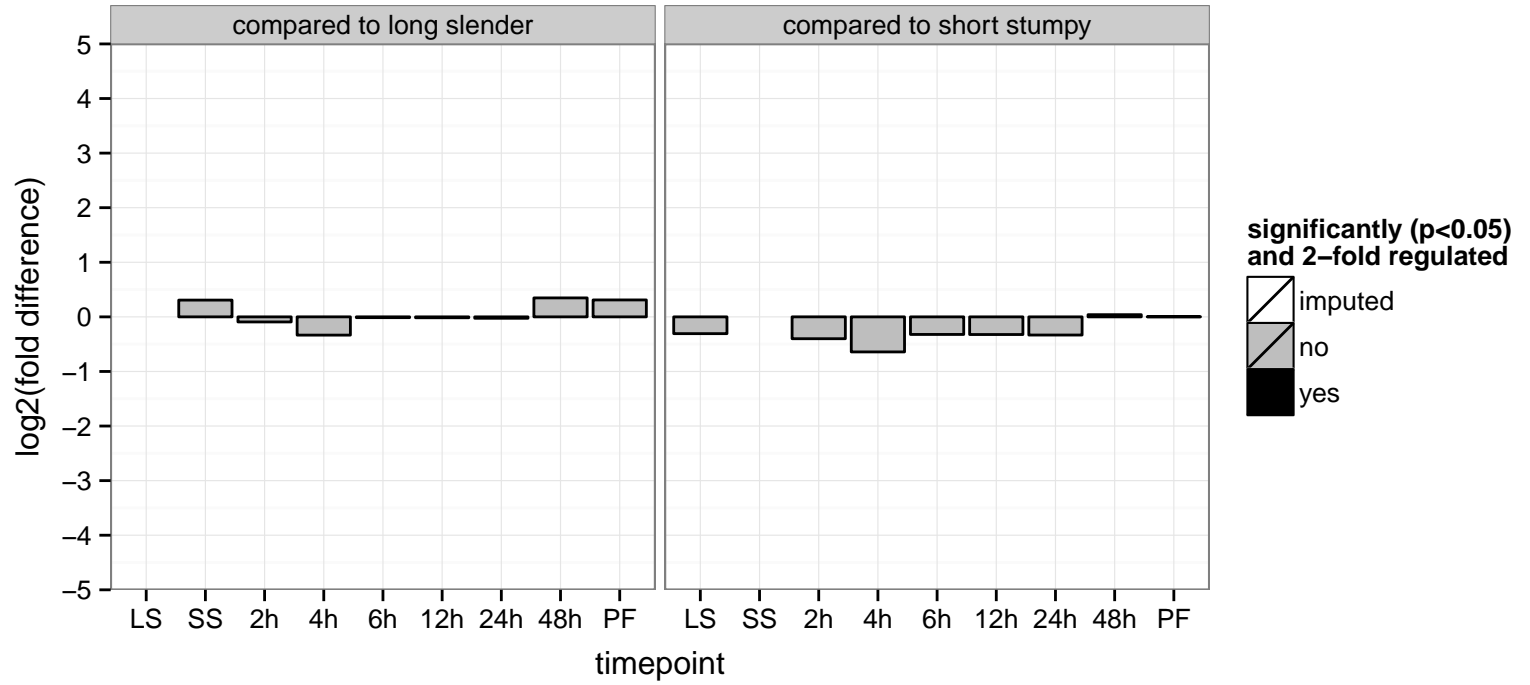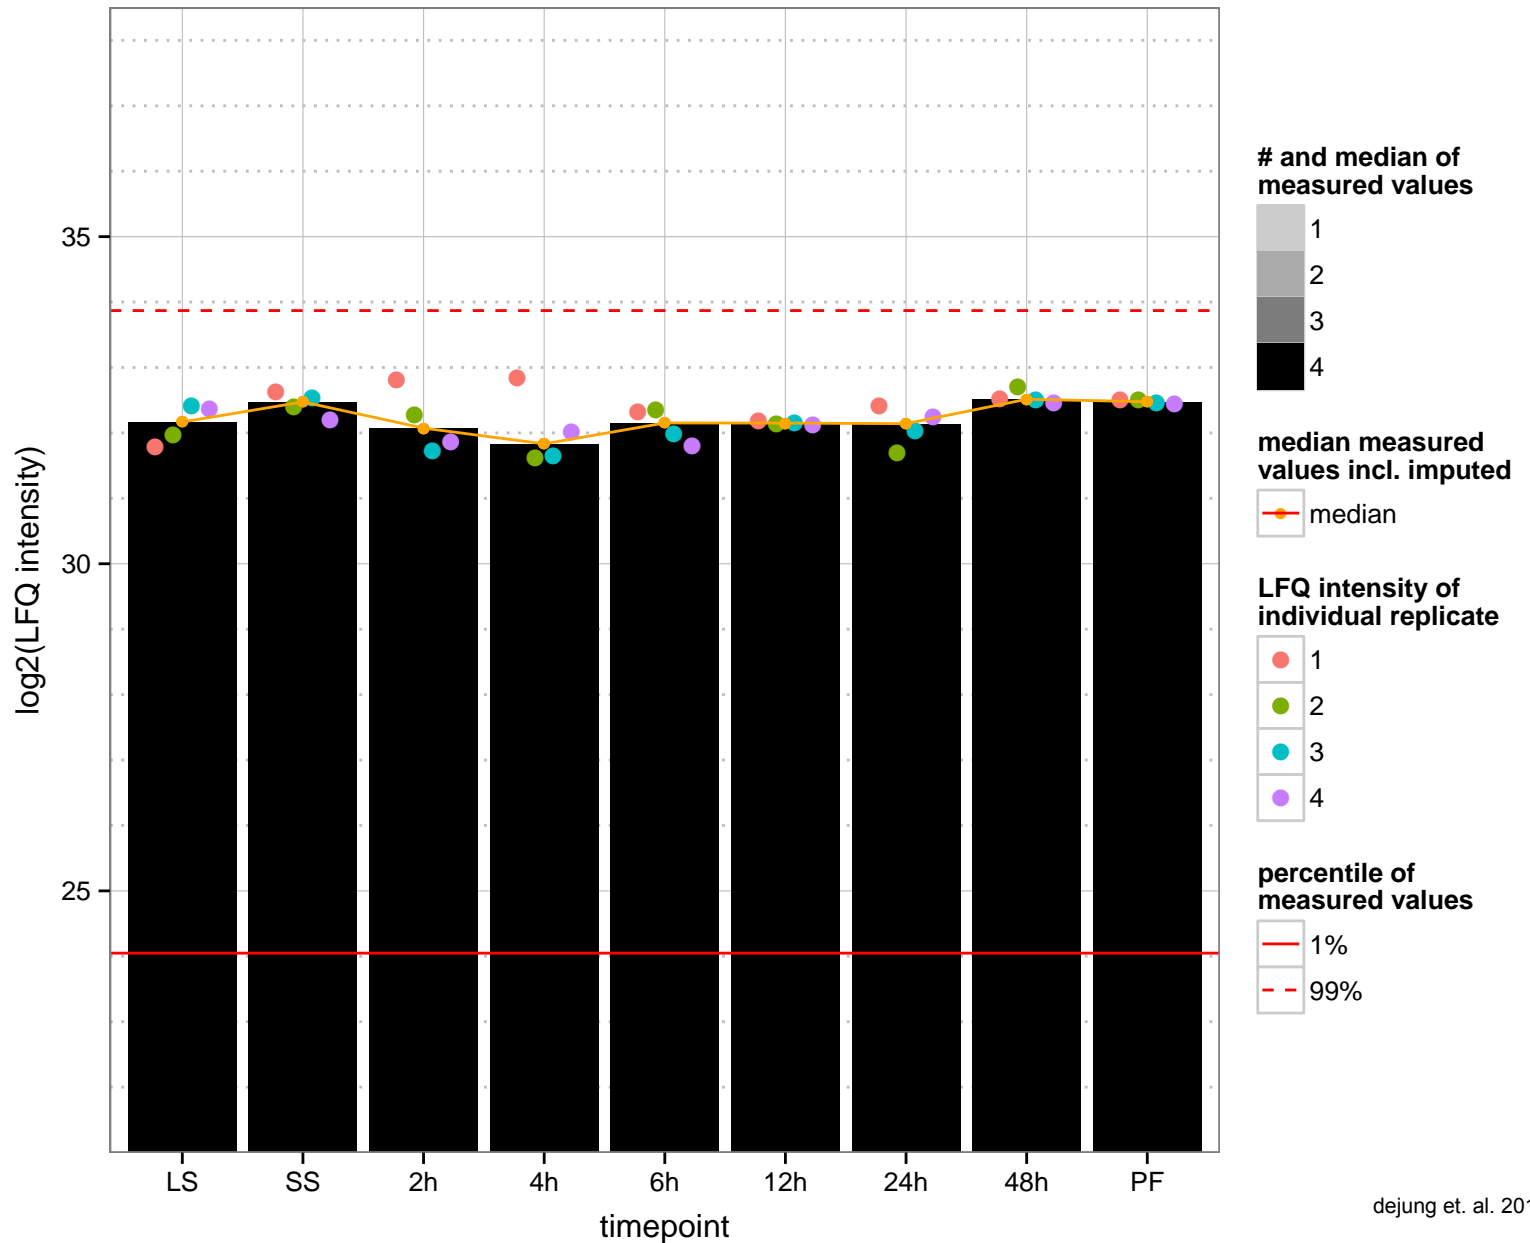



hypothetical protein, conserved  
 Tb927.3.970  
 AGOF: phosphogluconate dehydrogenase (decarboxylating) activity  
 AGOC: mitochondrion  
 AGOP: pentose-phosphate shunt  
 PGO: phosphogluconate dehydrogenase (decarboxylating) activity  
 PGOC: null  
 PGOP: oxidation-reduction process, pentose-phosphate shunt

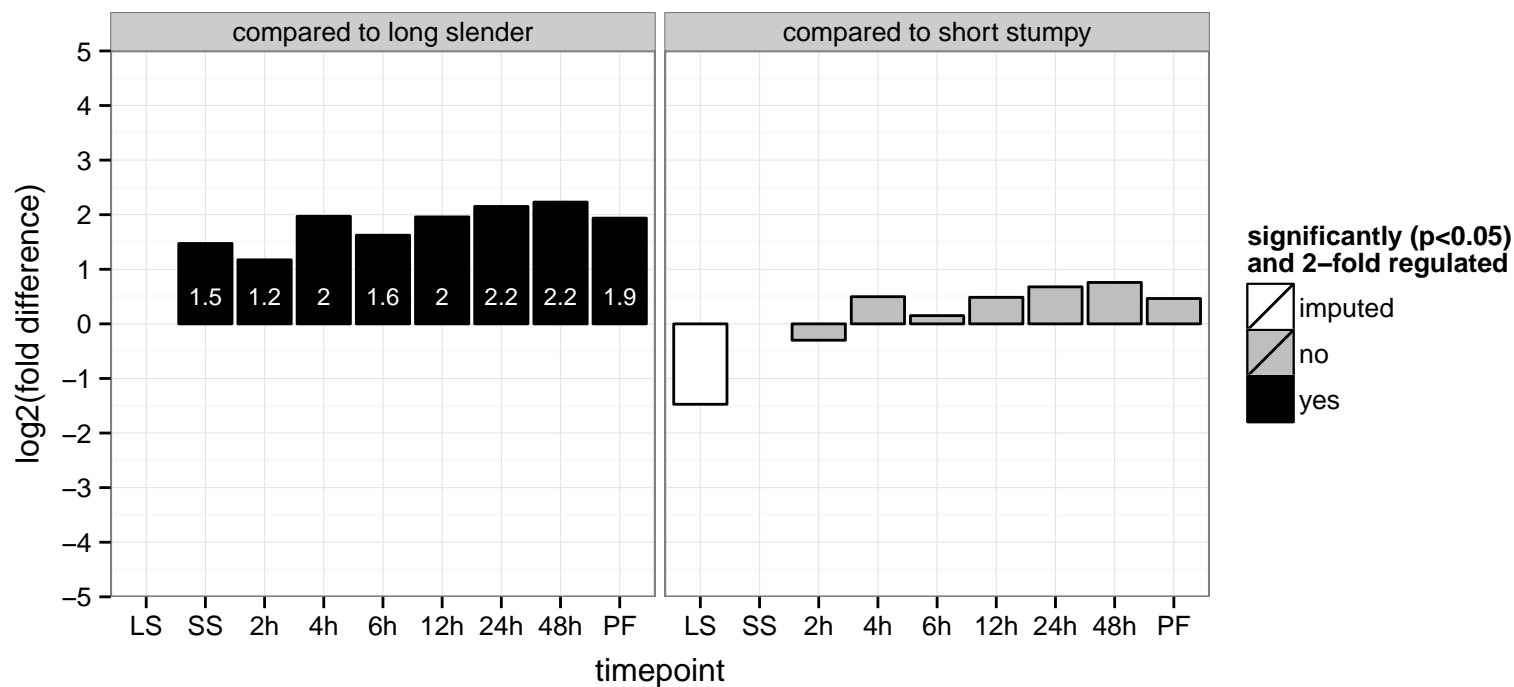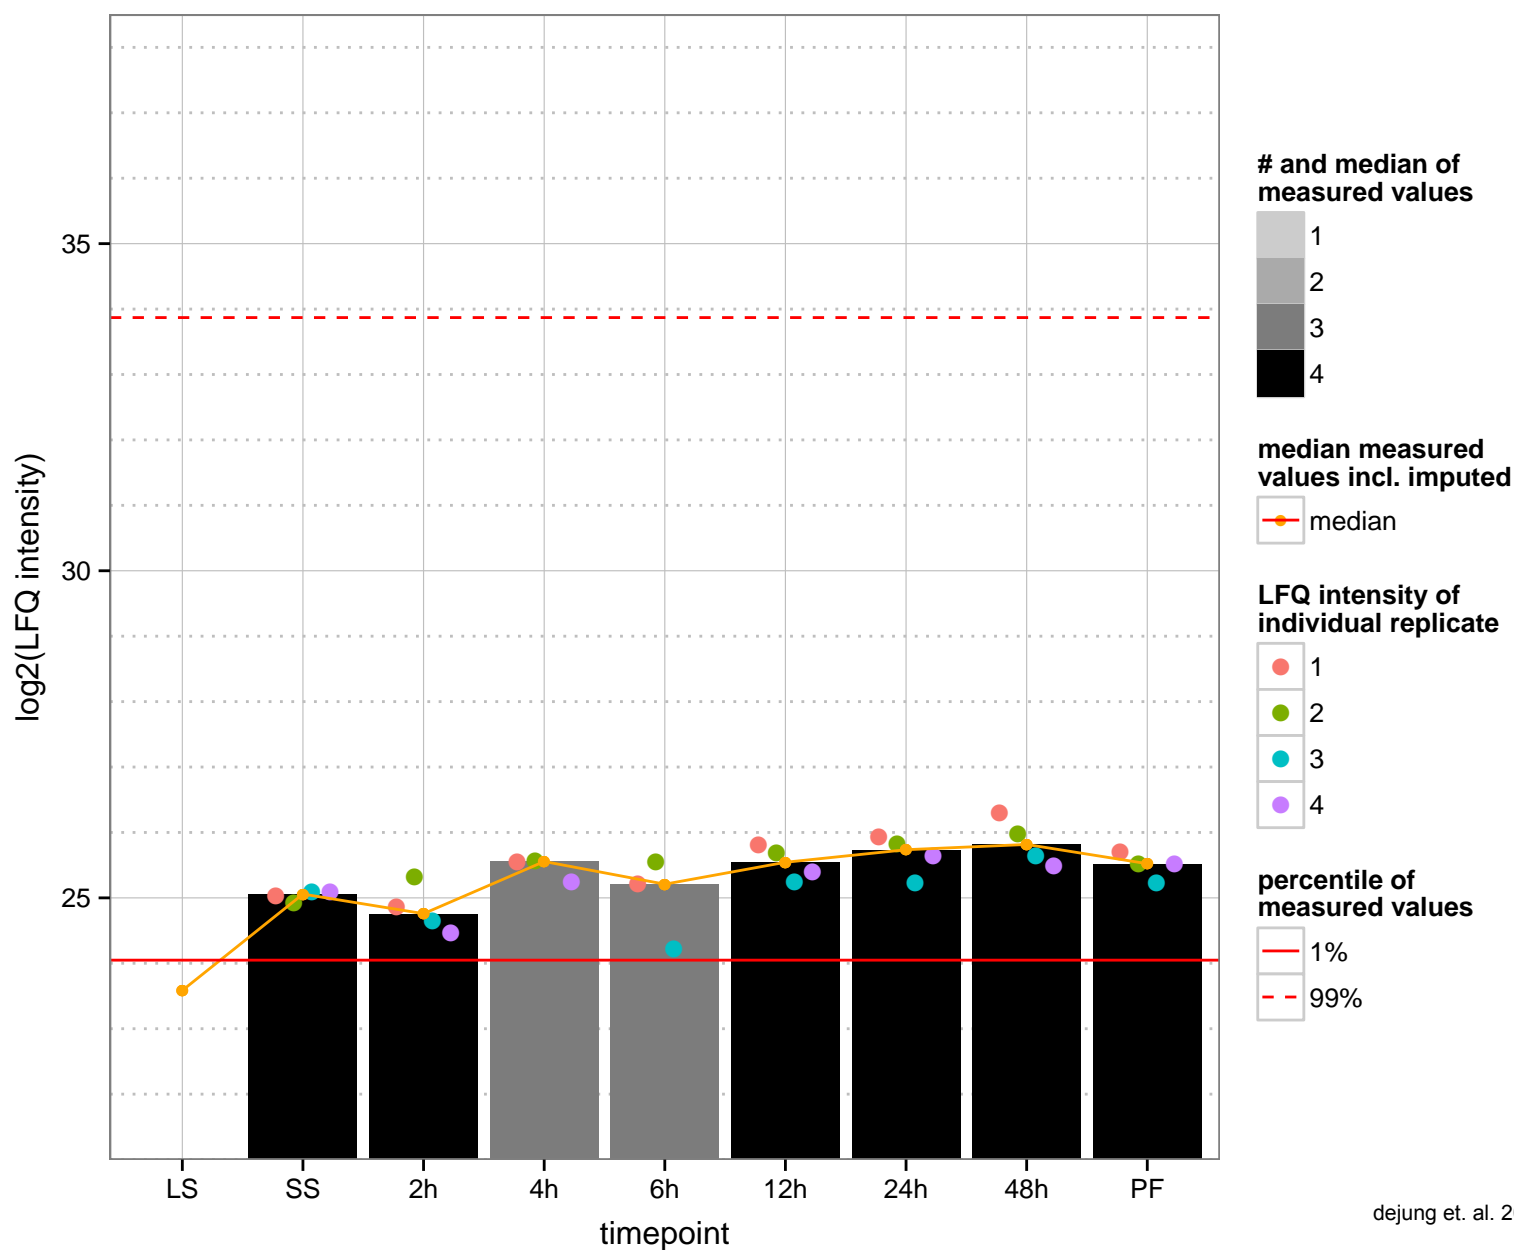

hypothetical protein, conserved  
 Tb927.3.980  
 AGOF: null  
 AGOC: null  
 AGOP: null  
 PGO: null  
 PGOC: null  
 PGOP: null

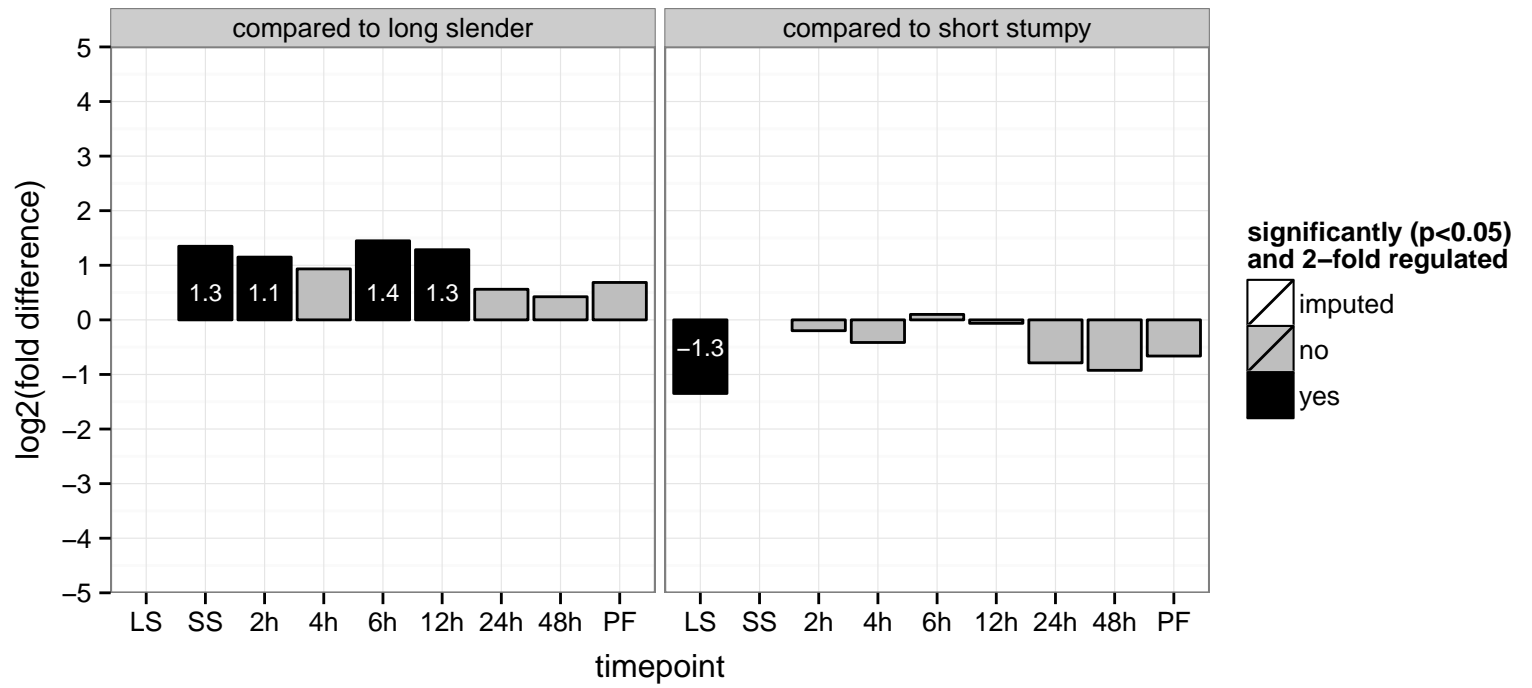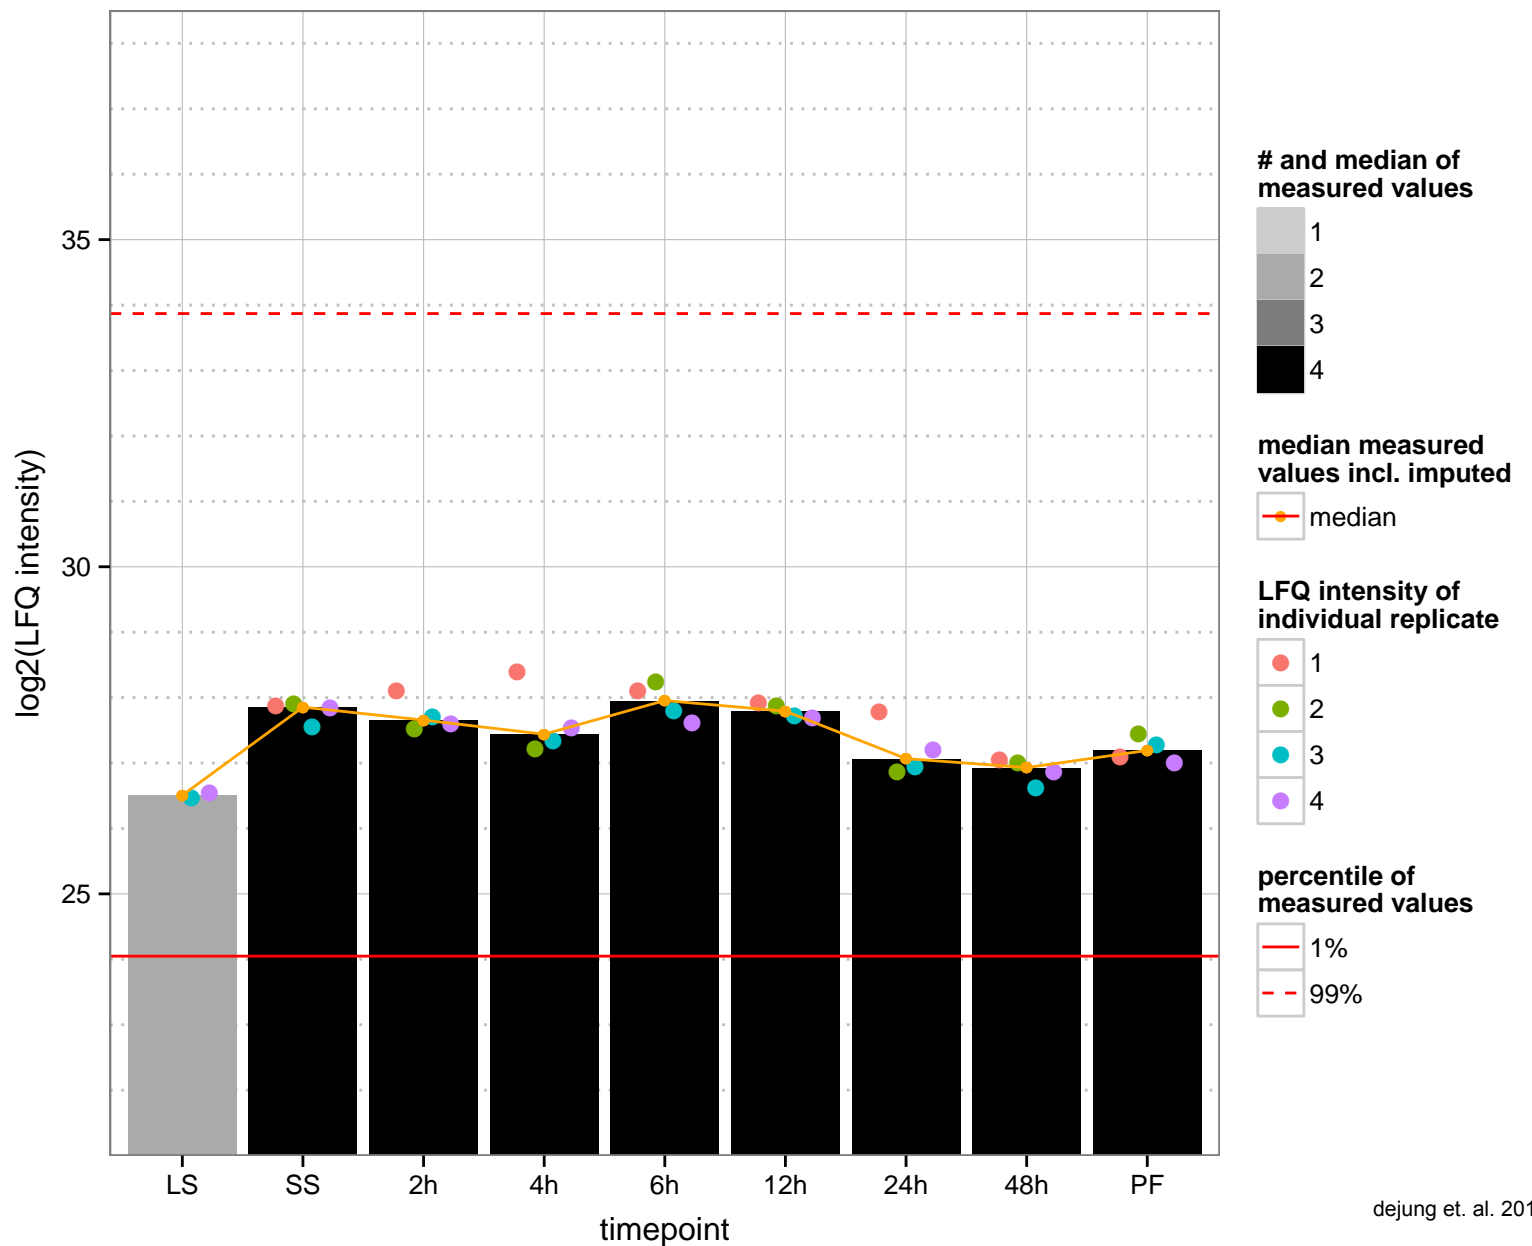

hypothetical protein, conserved  
 Tb927.4.1040  
 AGOF: null  
 AGOC: null  
 AGOP: null  
 PGO: null  
 PGOC: null  
 PGOP: null

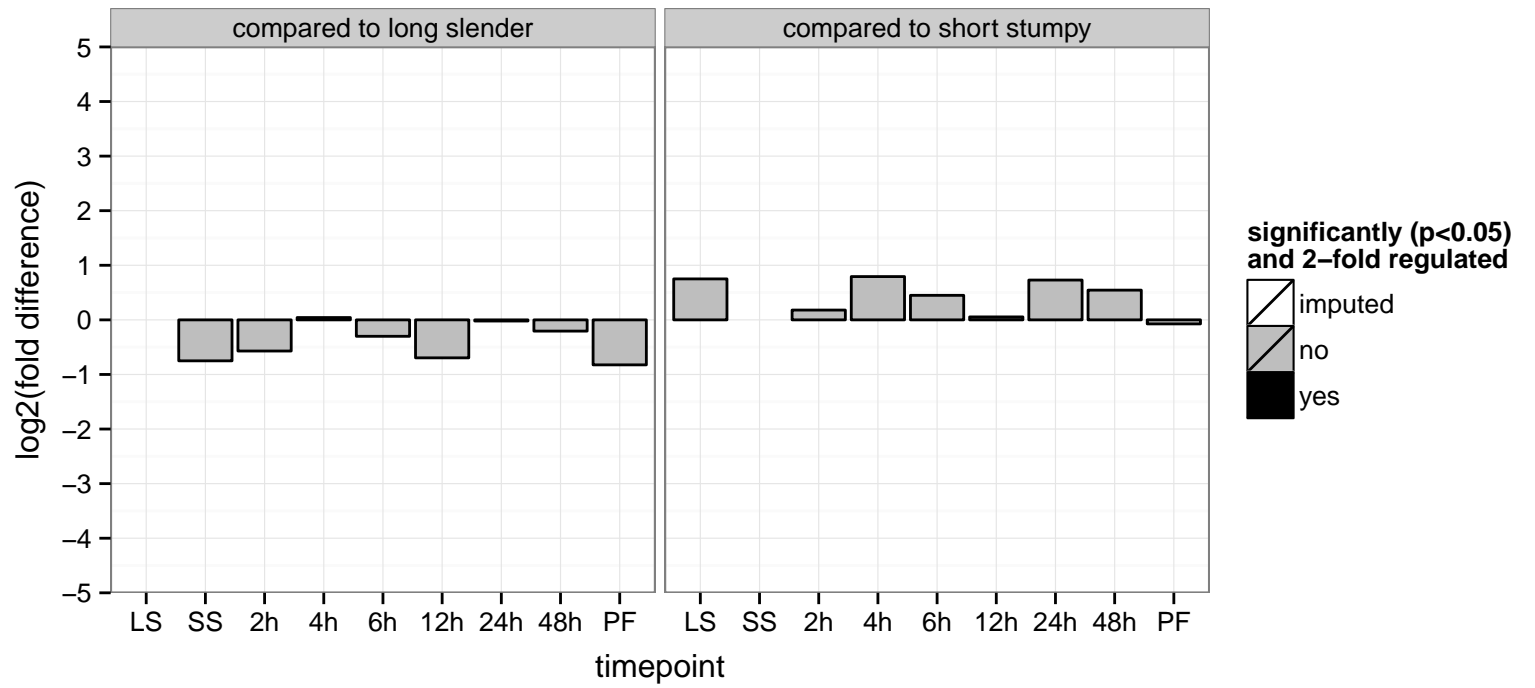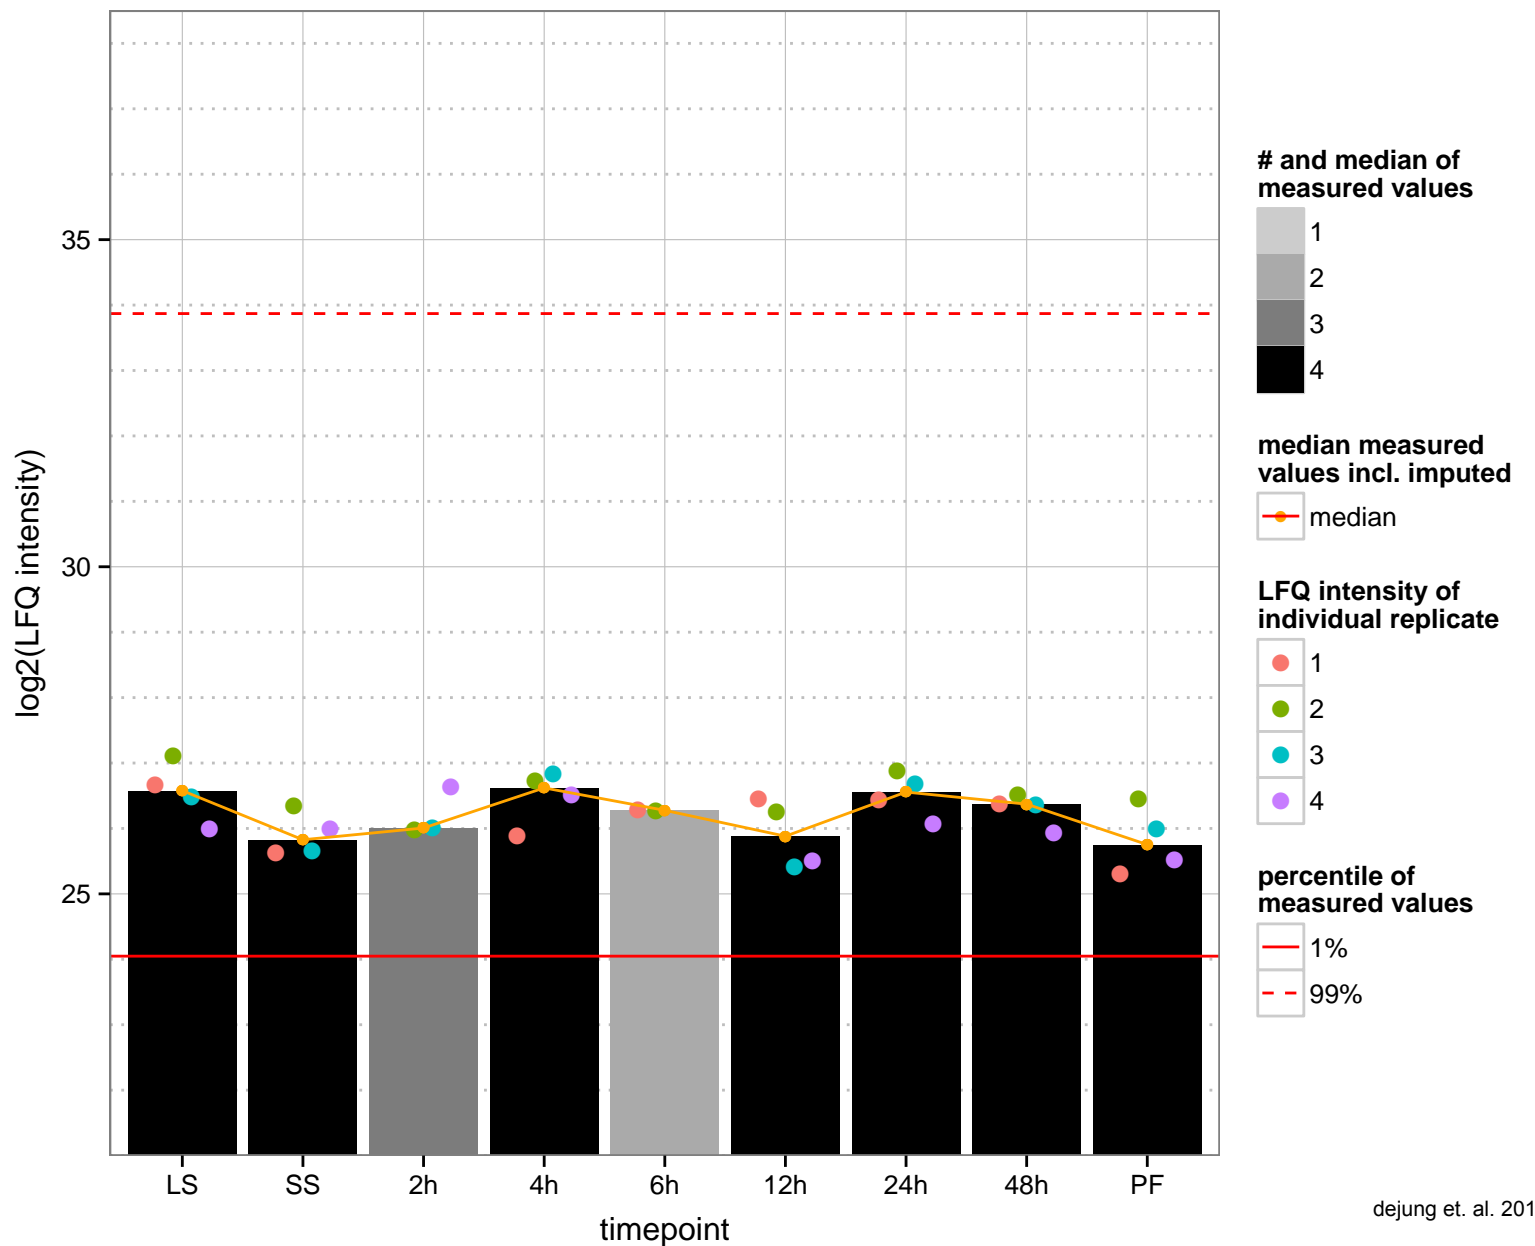

V-type ATPase, A subunit, putative

Tb927.4.1080

AGOF: hydrogen ion transporting ATP synthase activity, rotational mechanism, proton-transporting ATPase activity

AGOC: proton-transporting V-type ATPase, V1 domain, proton-transporting two-sector ATPase complex

AGOP: ATP synthesis coupled proton transport

PGOF: ATP binding, hydrogen ion transporting ATP synthase activity, rotational mechanism, hydrolase activity, acting on acid

PGOC: proton-transporting V-type ATPase, V1 domain, proton-transporting two-sector ATPase complex, catalytic domain

PGOP: ATP hydrolysis coupled proton transport, ATP metabolic process, proton transport

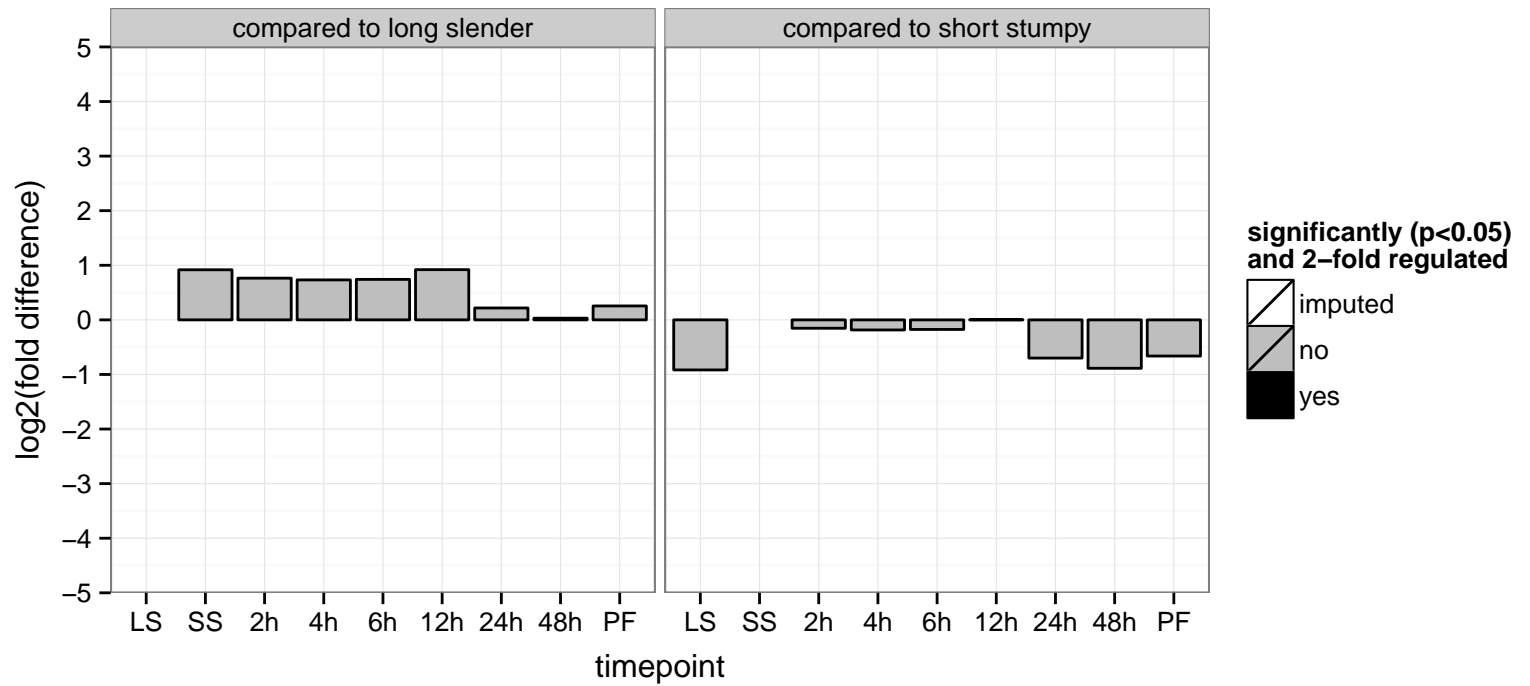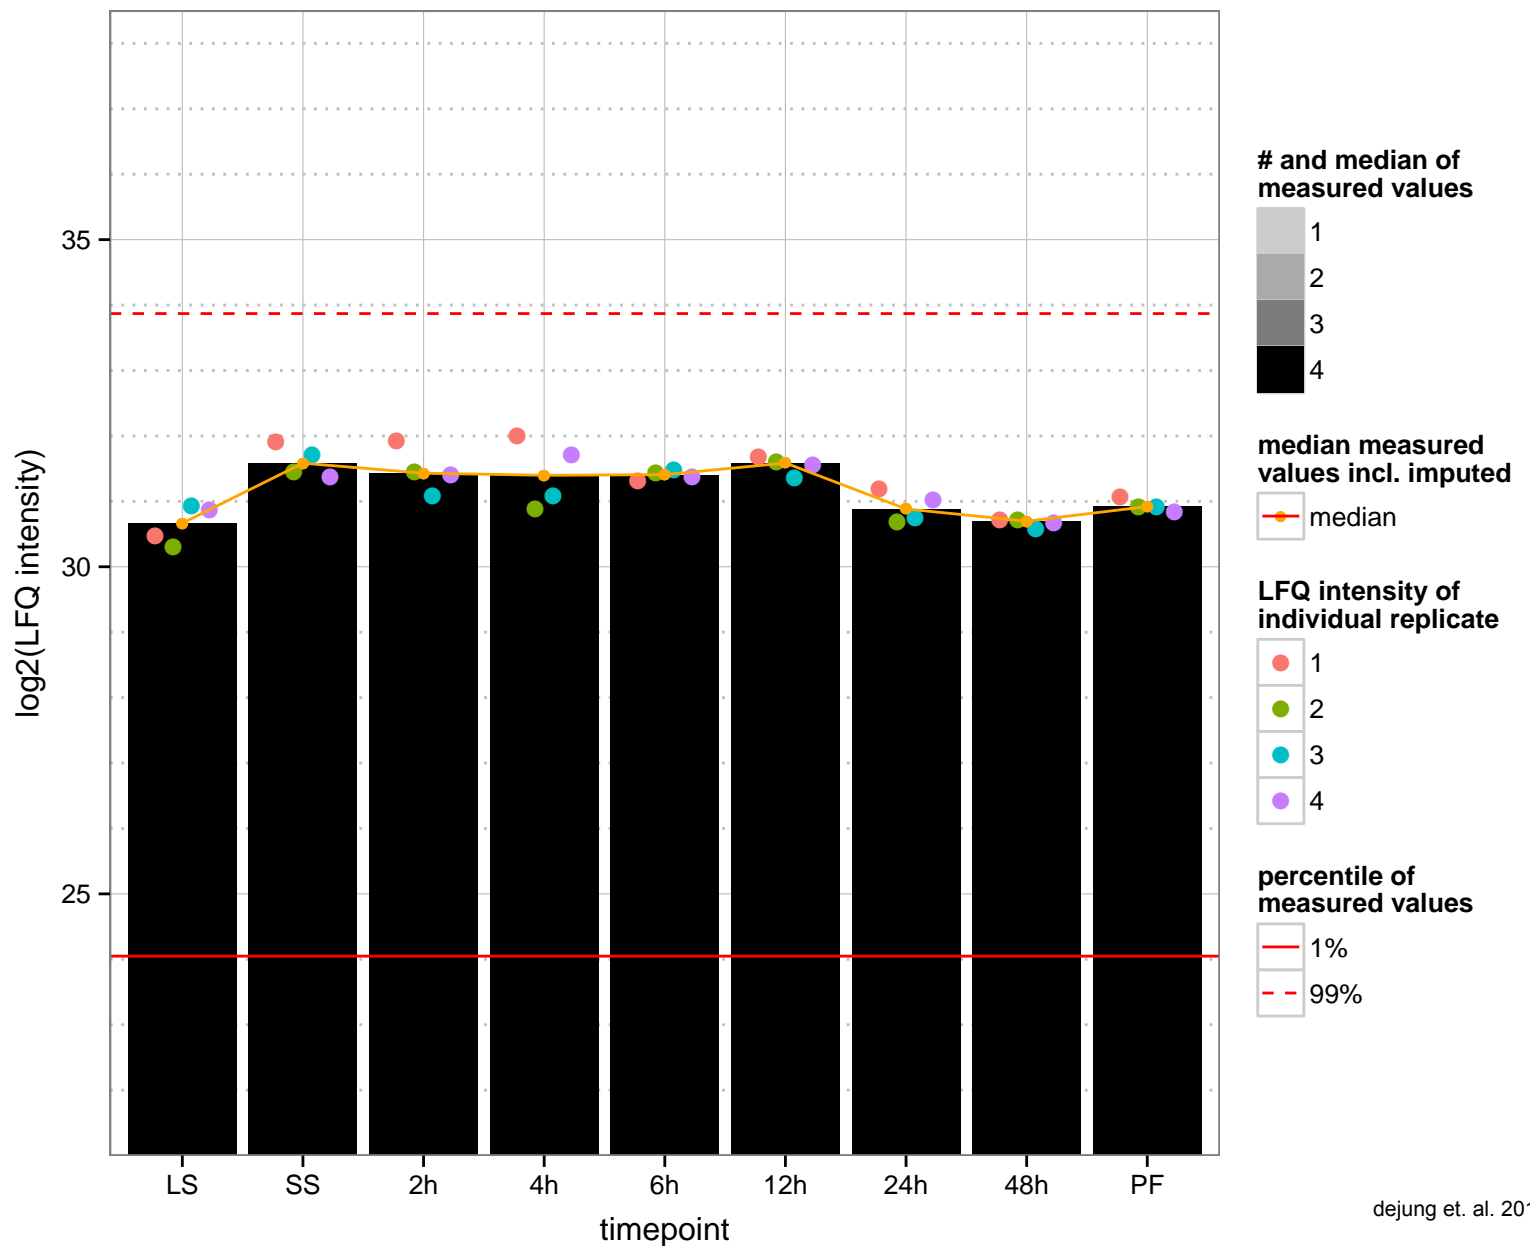

retrotransposon hot spot protein (RHS, pseudogene), putative, retrotransposon hot spot protein 1 (RHS1), interrupted  
 Tb927.4.110  
 AGOF: null  
 AGOC: null  
 AGOP: null  
 PGOF: null  
 PGO: null  
 PGOP: null

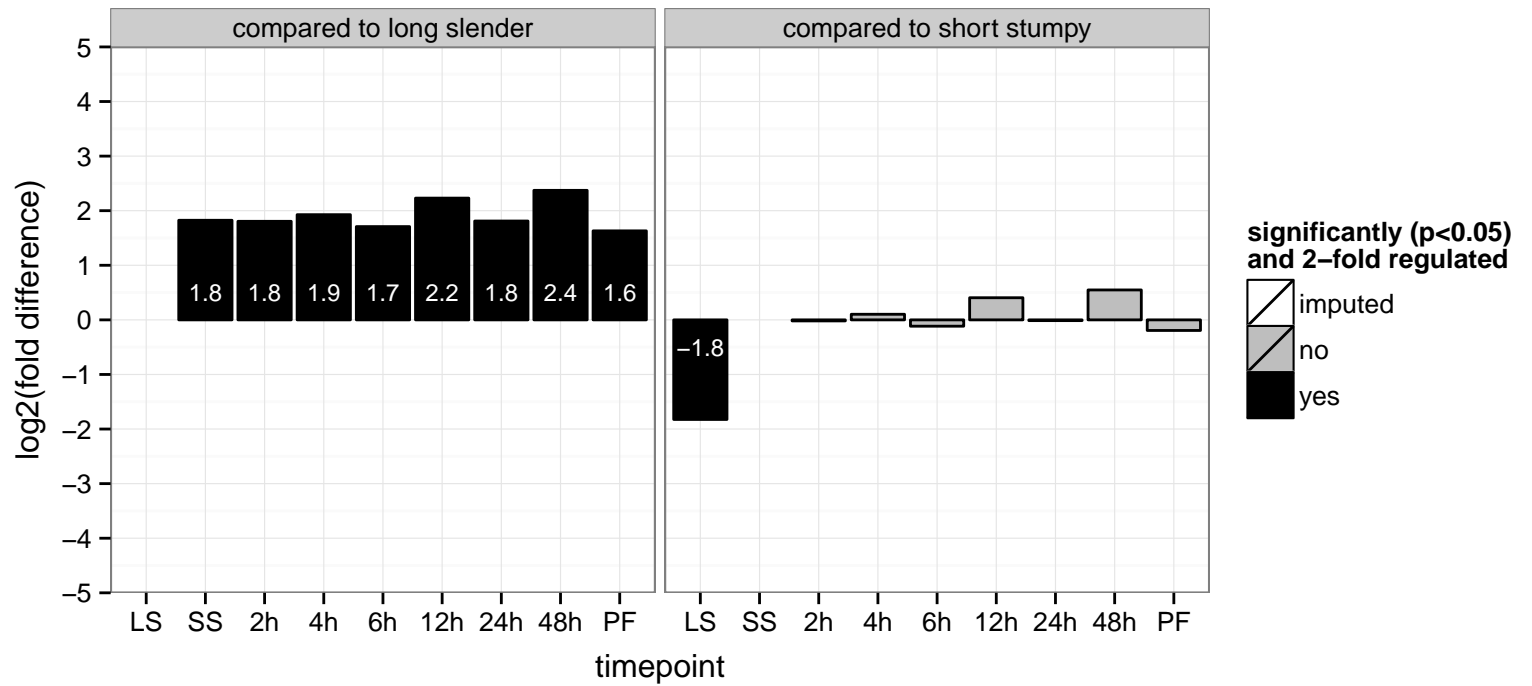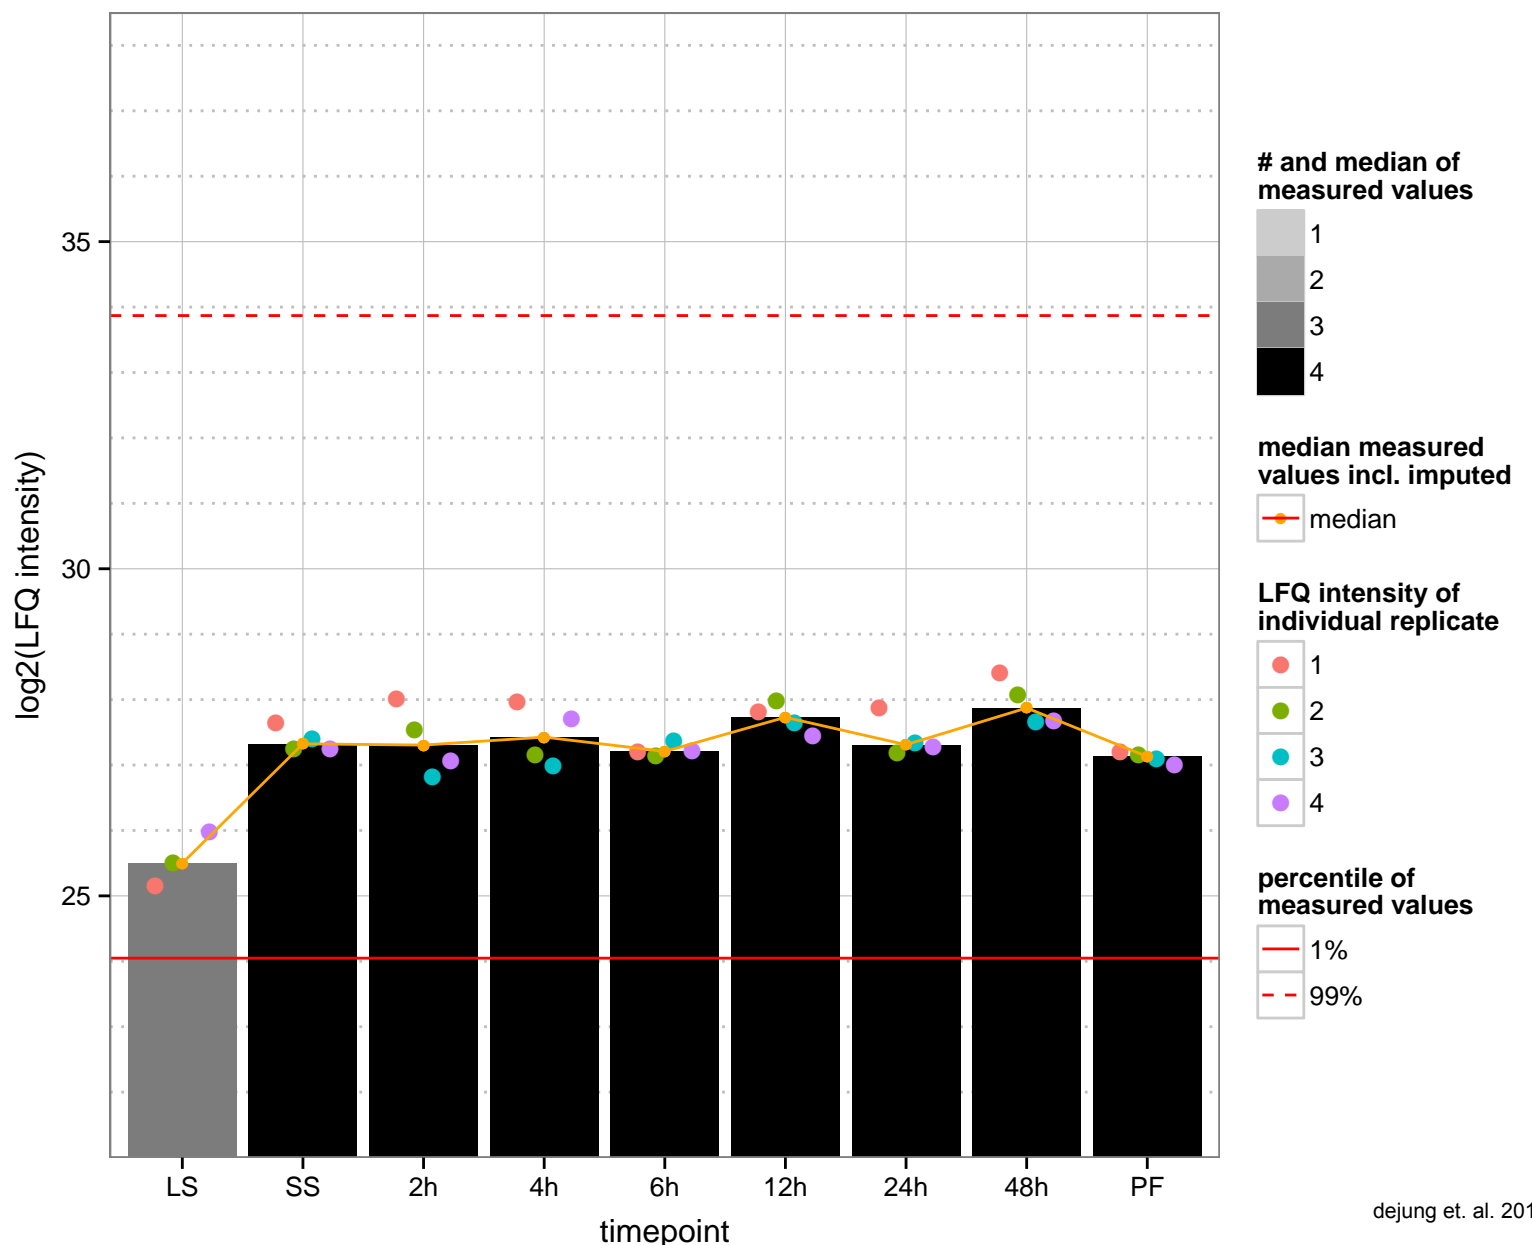

phosphatidylinositol 4-kinase, putative

Tb927.4.1140

AGOF: 1-phosphatidylinositol 4-kinase activity, phosphotransferase activity, alcohol group as acceptor

AGOC: cytosol

AGOP: phosphatidylinositol phosphorylation, phosphatidylinositol-mediated signaling

PGOF: phosphotransferase activity, alcohol group as acceptor, transferase activity, transferring phosphorus-containing groups

PGOC: null

PGOP: null

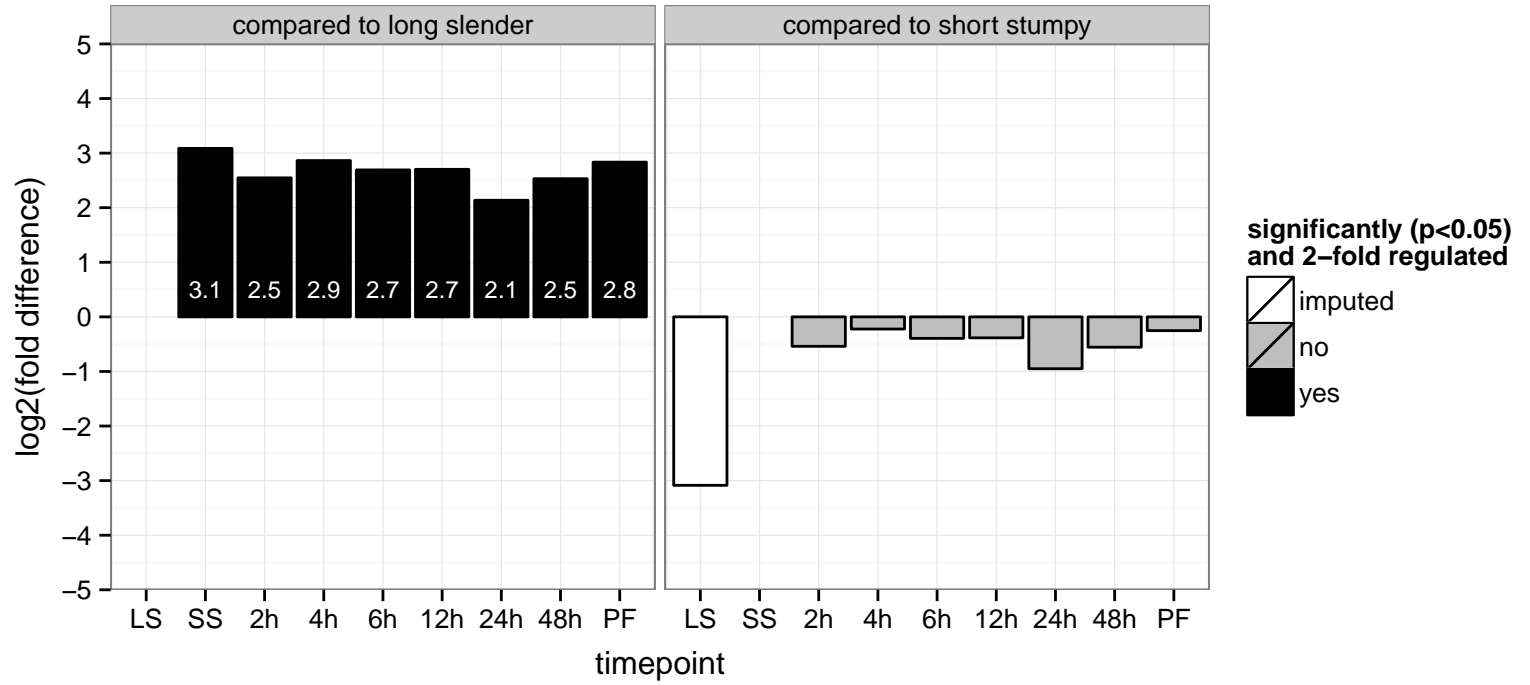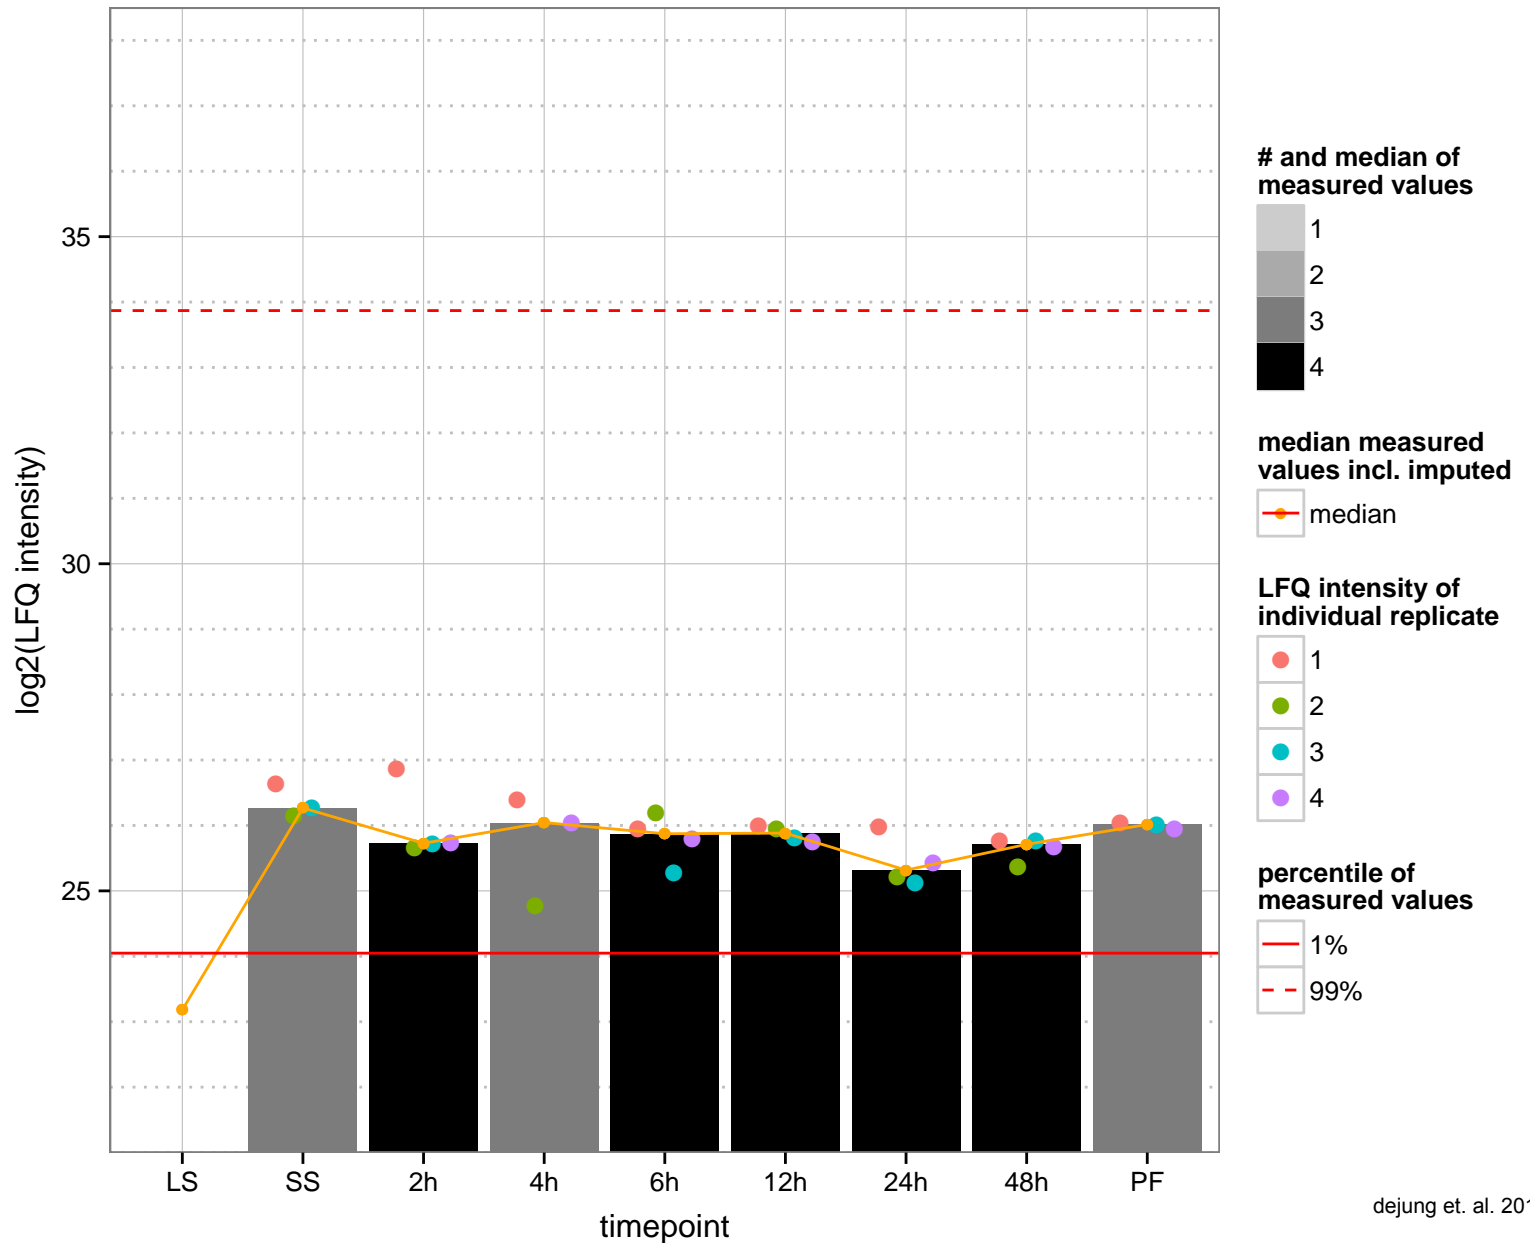

hypothetical protein, conserved  
 Tb927.4.1150  
 AGOF: null  
 AGOC: null  
 AGOP: null  
 PGO: null  
 PGOC: null  
 PGOP: null

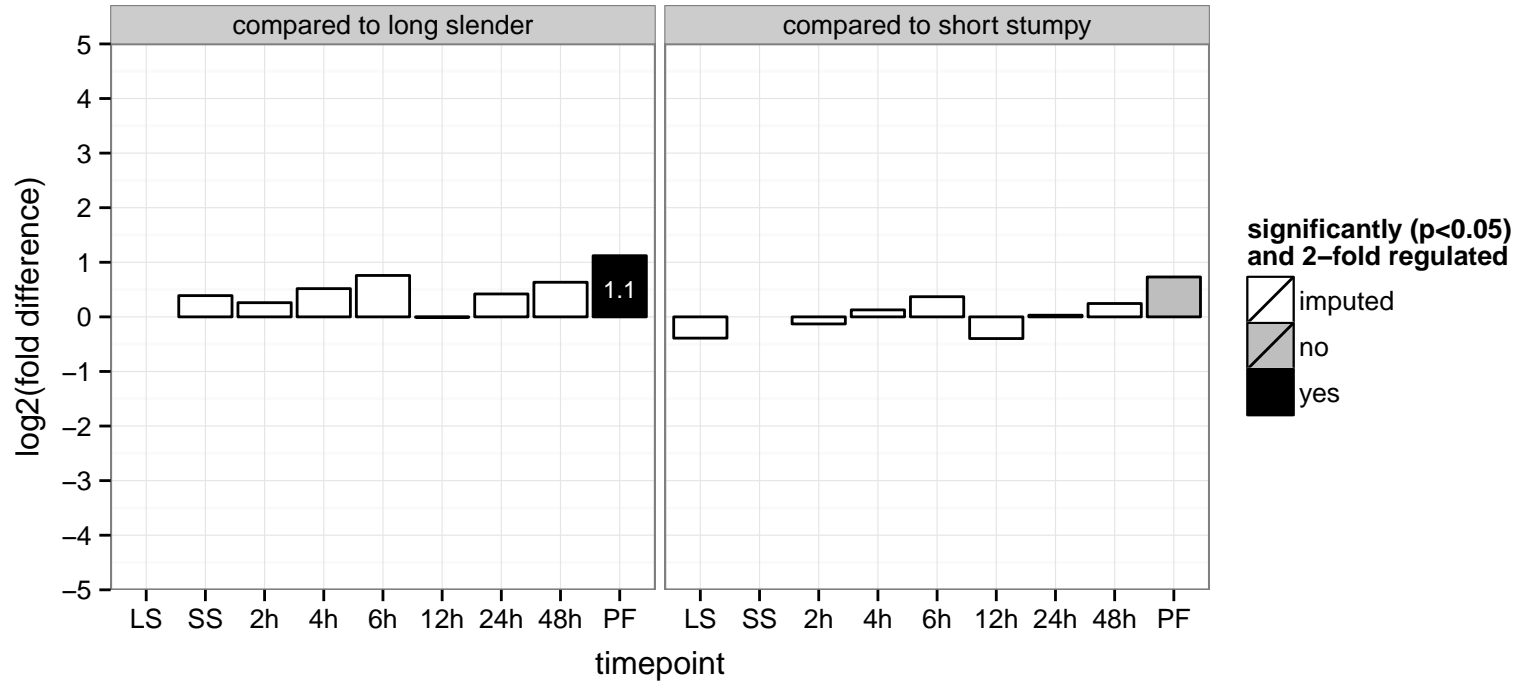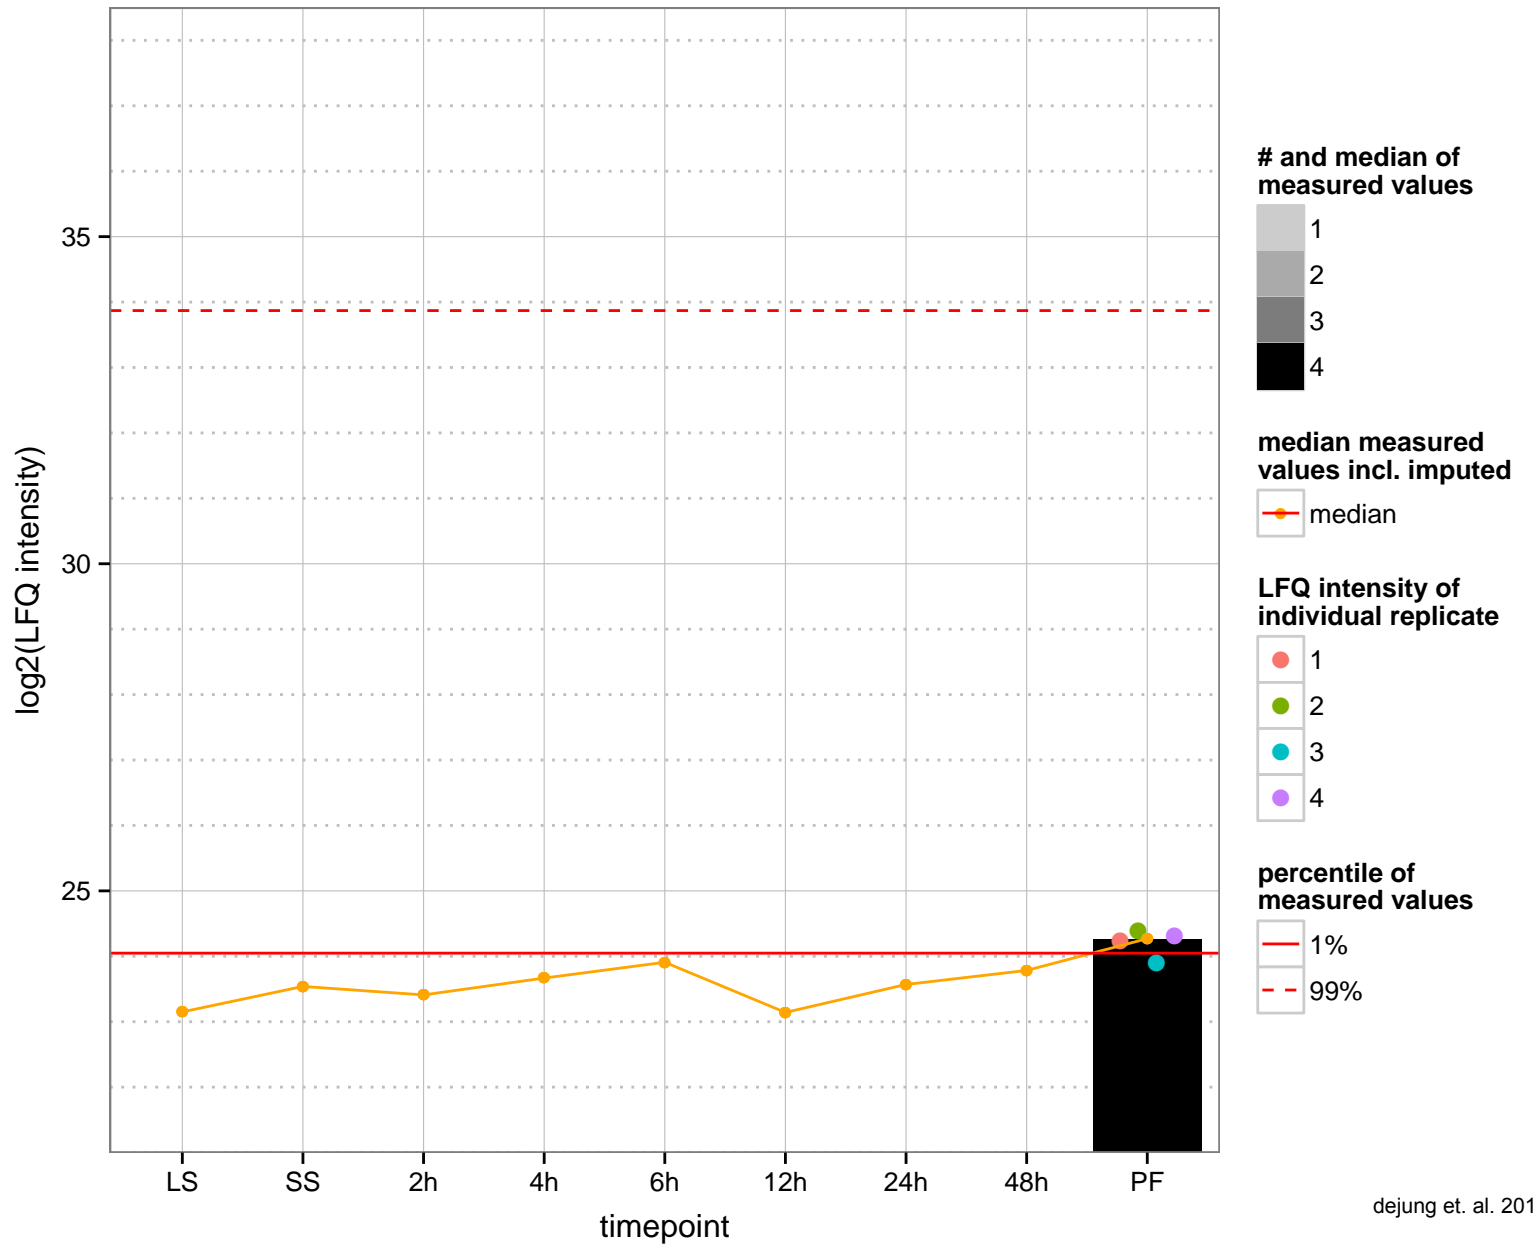

ruvB-like DNA helicase, putative

Tb927.4.1270

AGOF: ATP binding, DNA helicase activity, nucleoside-triphosphatase activity

AGOC: nucleus

AGOP: null

PGOF: ATP binding, DNA helicase activity, nucleoside-triphosphatase activity, nucleotide binding

PGOC: null

PGOP: null

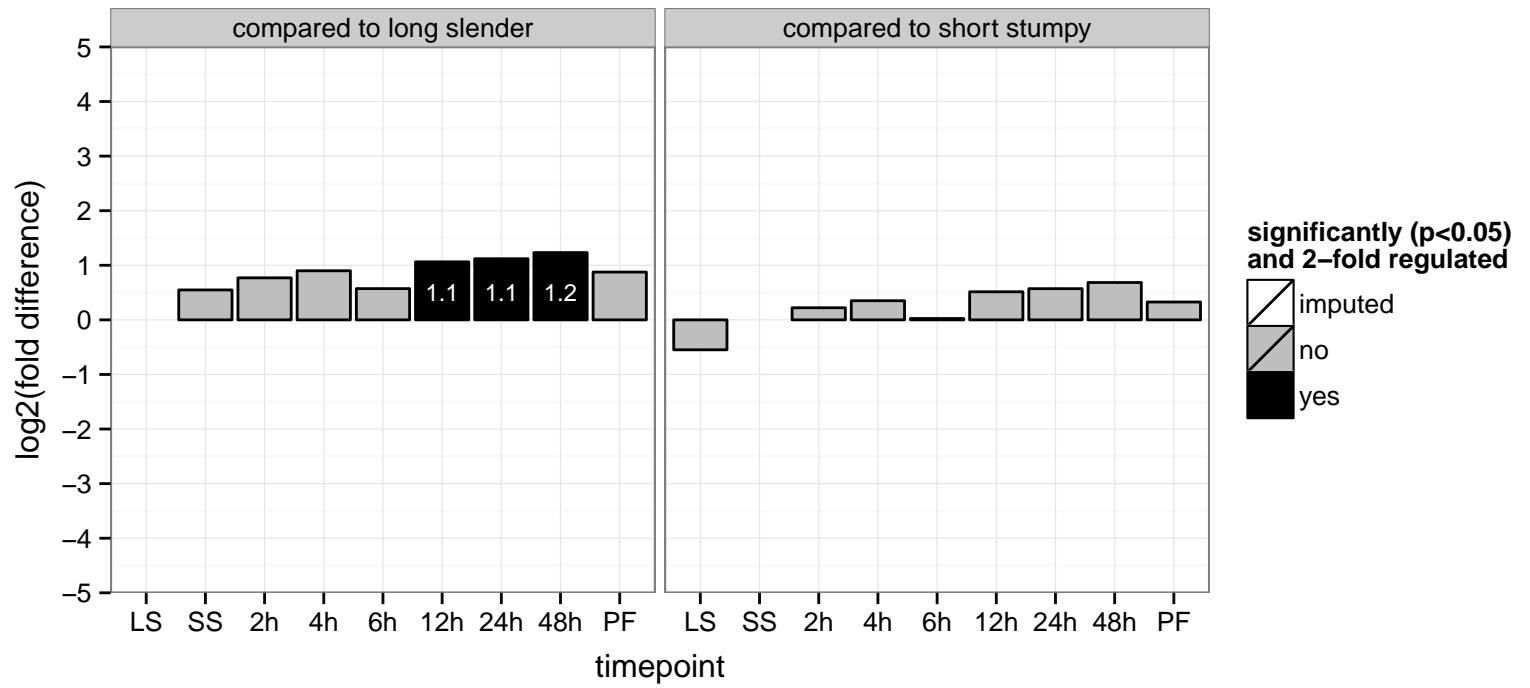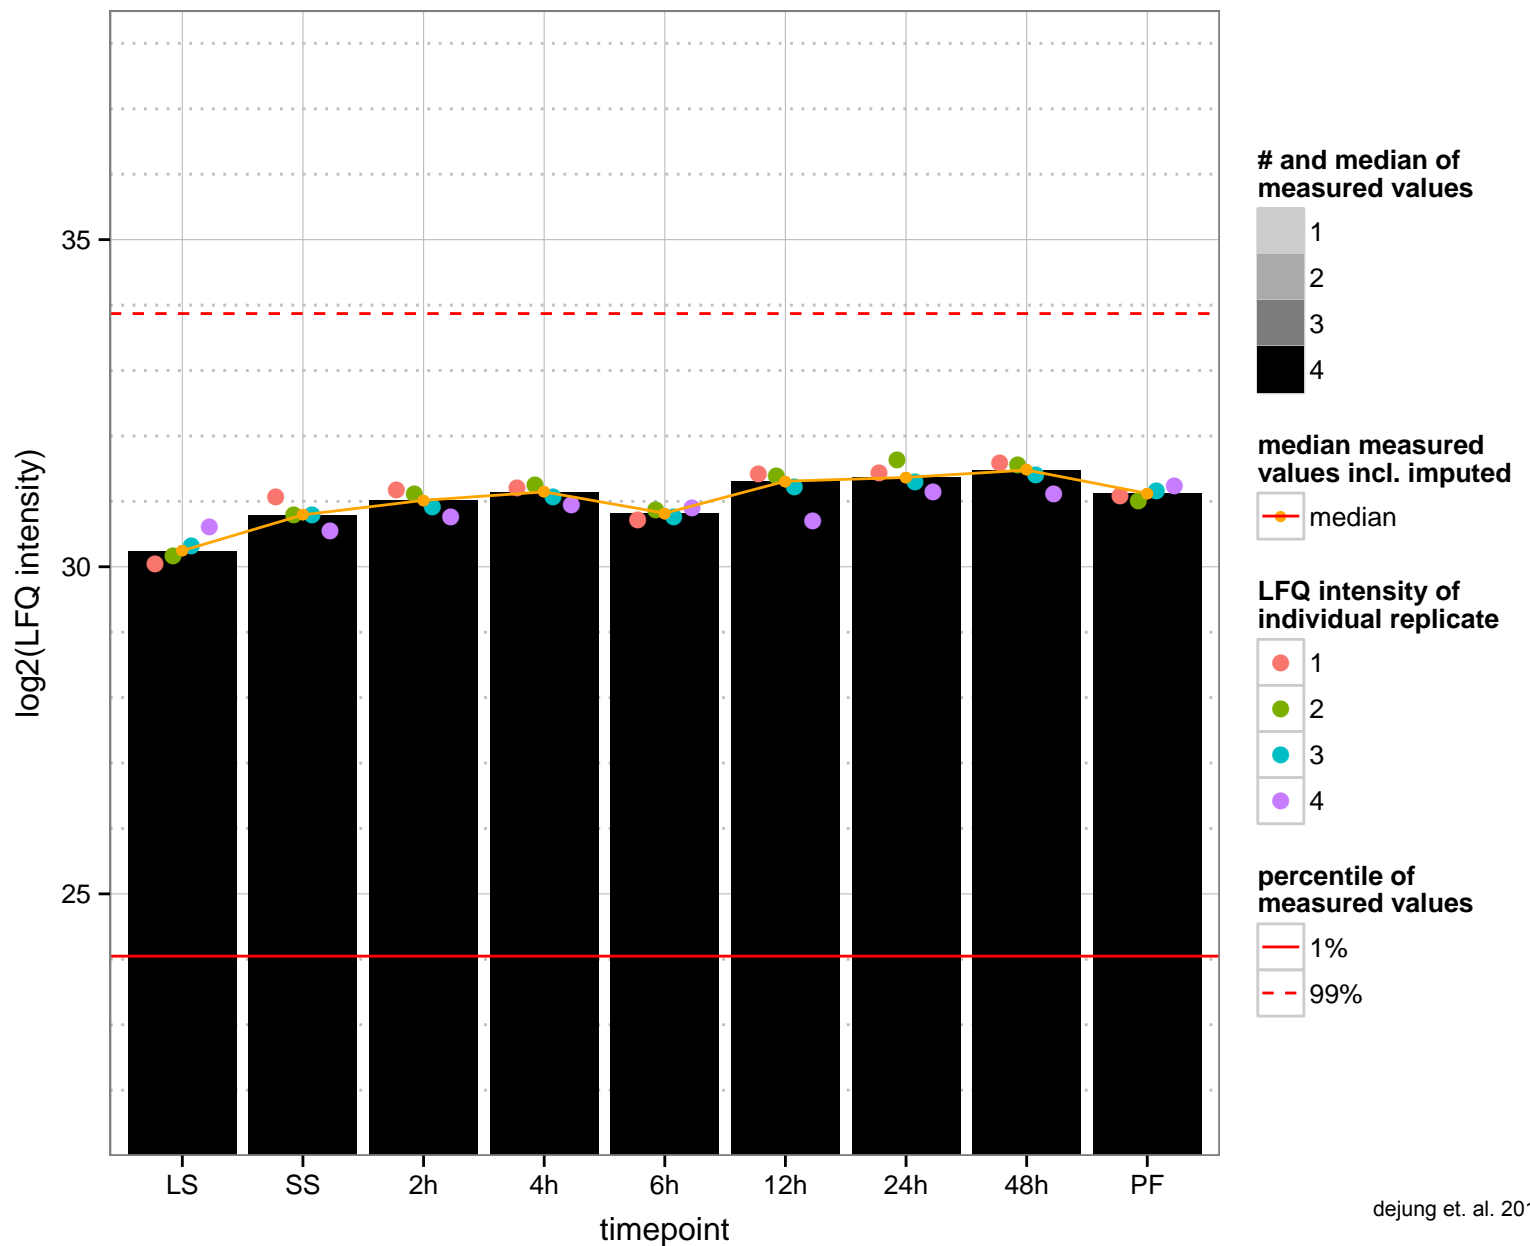



amidinotransferase, putative

Tb927.4.1300

AGOF: null

AGOC: null

AGOP: null

PGOF: hydrolase activity, acting on carbon–nitrogen (but not peptide) bonds, in linear amidines

PGOC: cytoplasm

PGOP: null

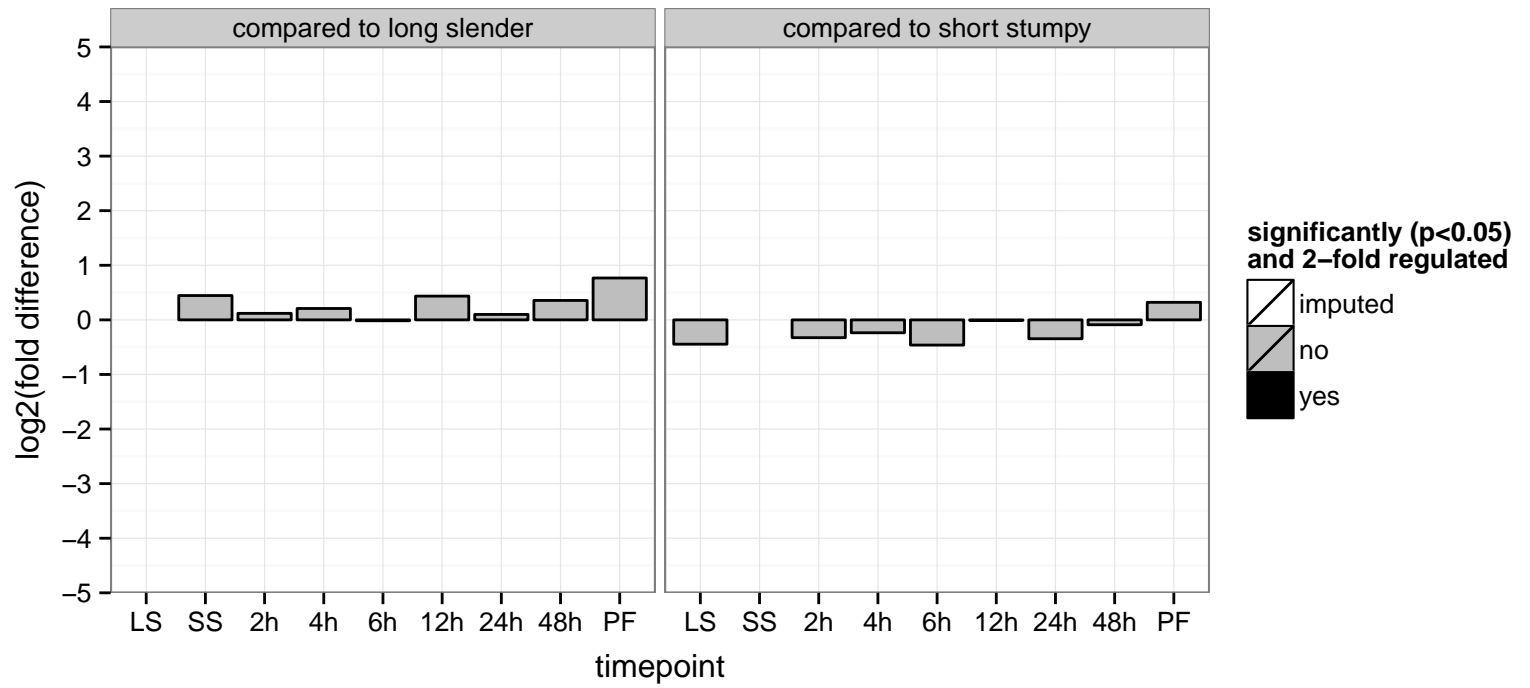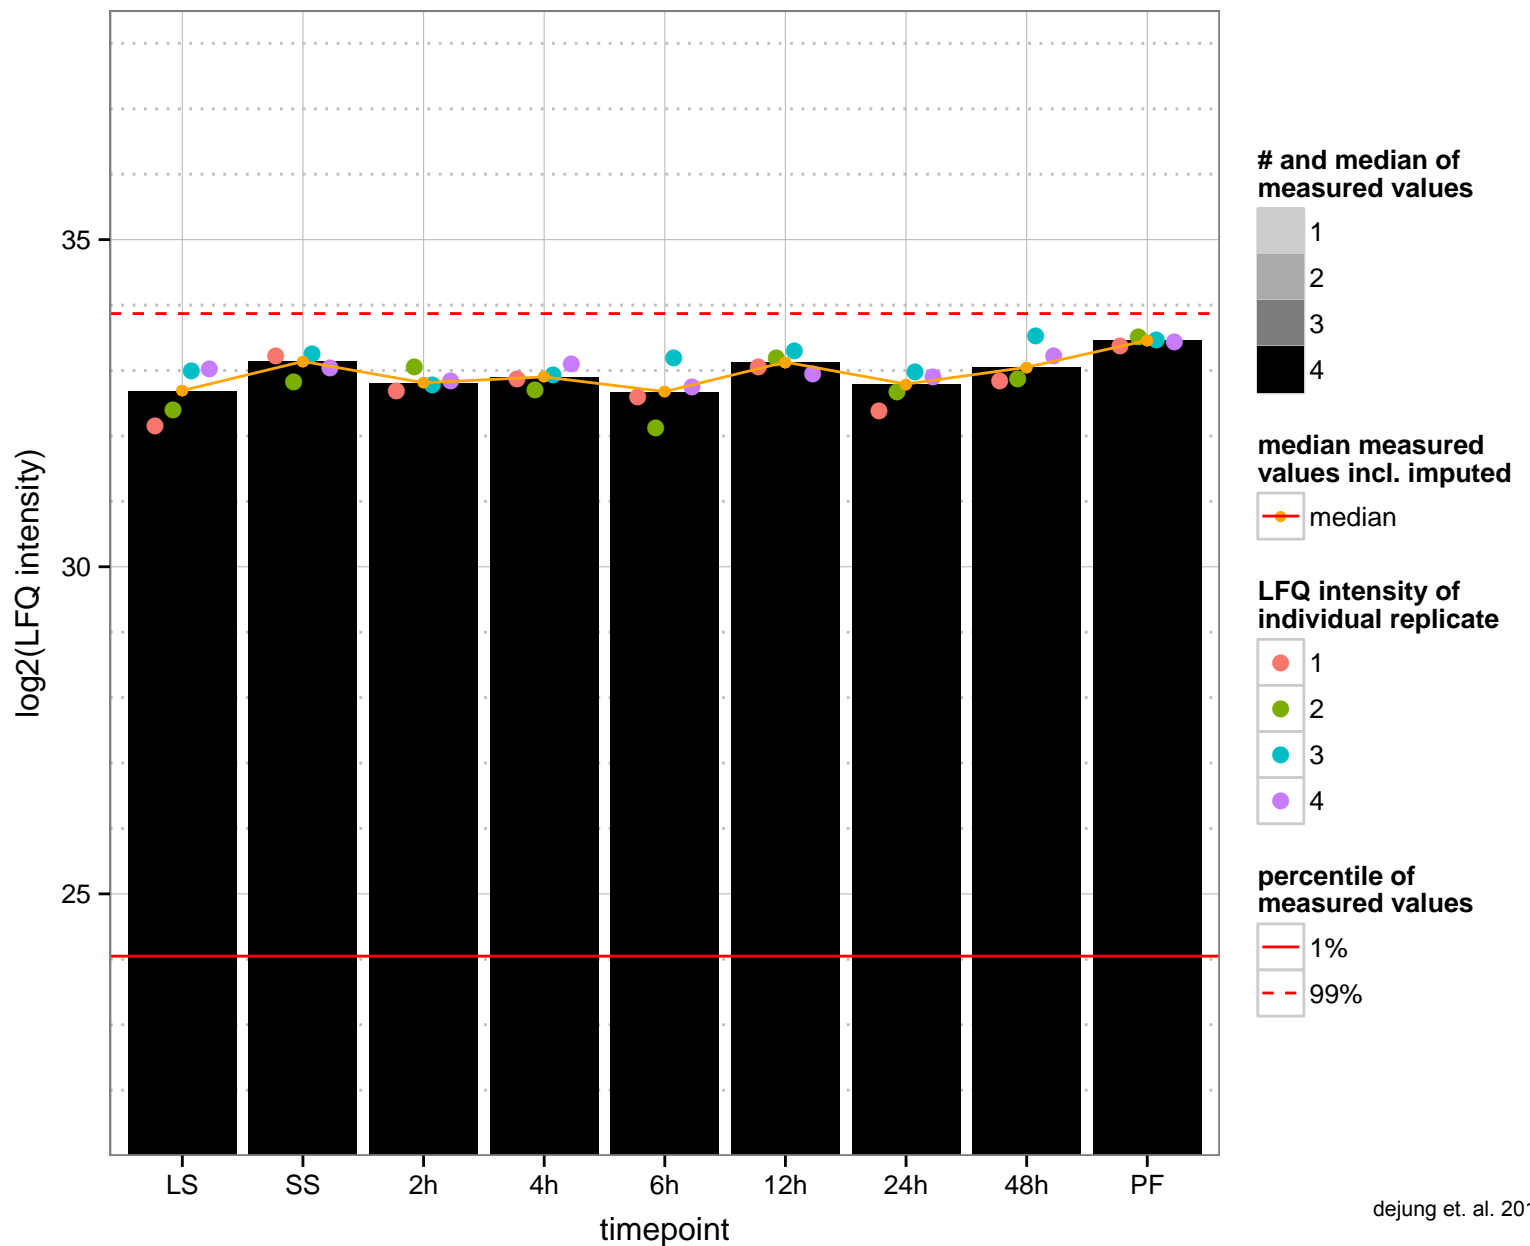

cleavage and polyadenylation specificity factor subunit, putative (CPSF3)

Tb927.4.1340

AGOF: hydrolase activity

AGOC: null

AGOP: null

PGOF: hydrolase activity

PGOC: null

PGOP: null

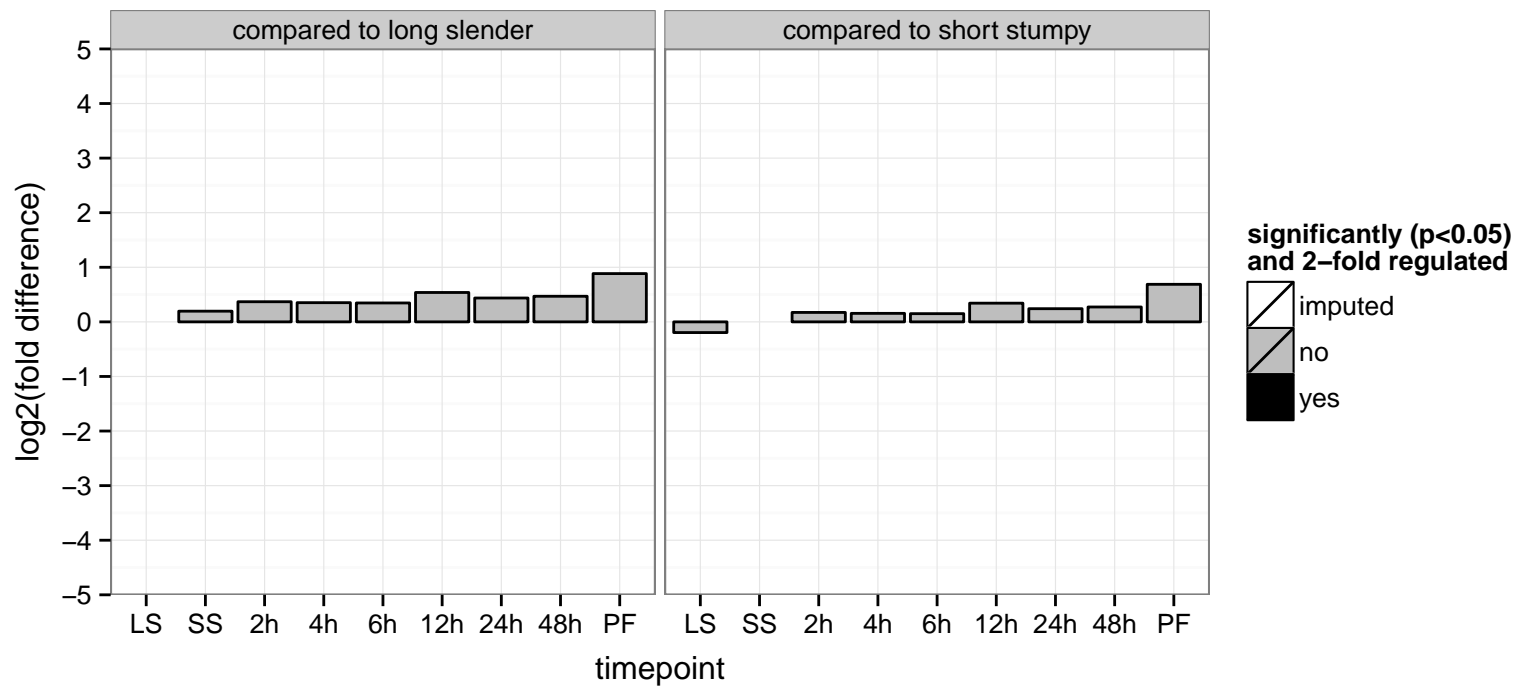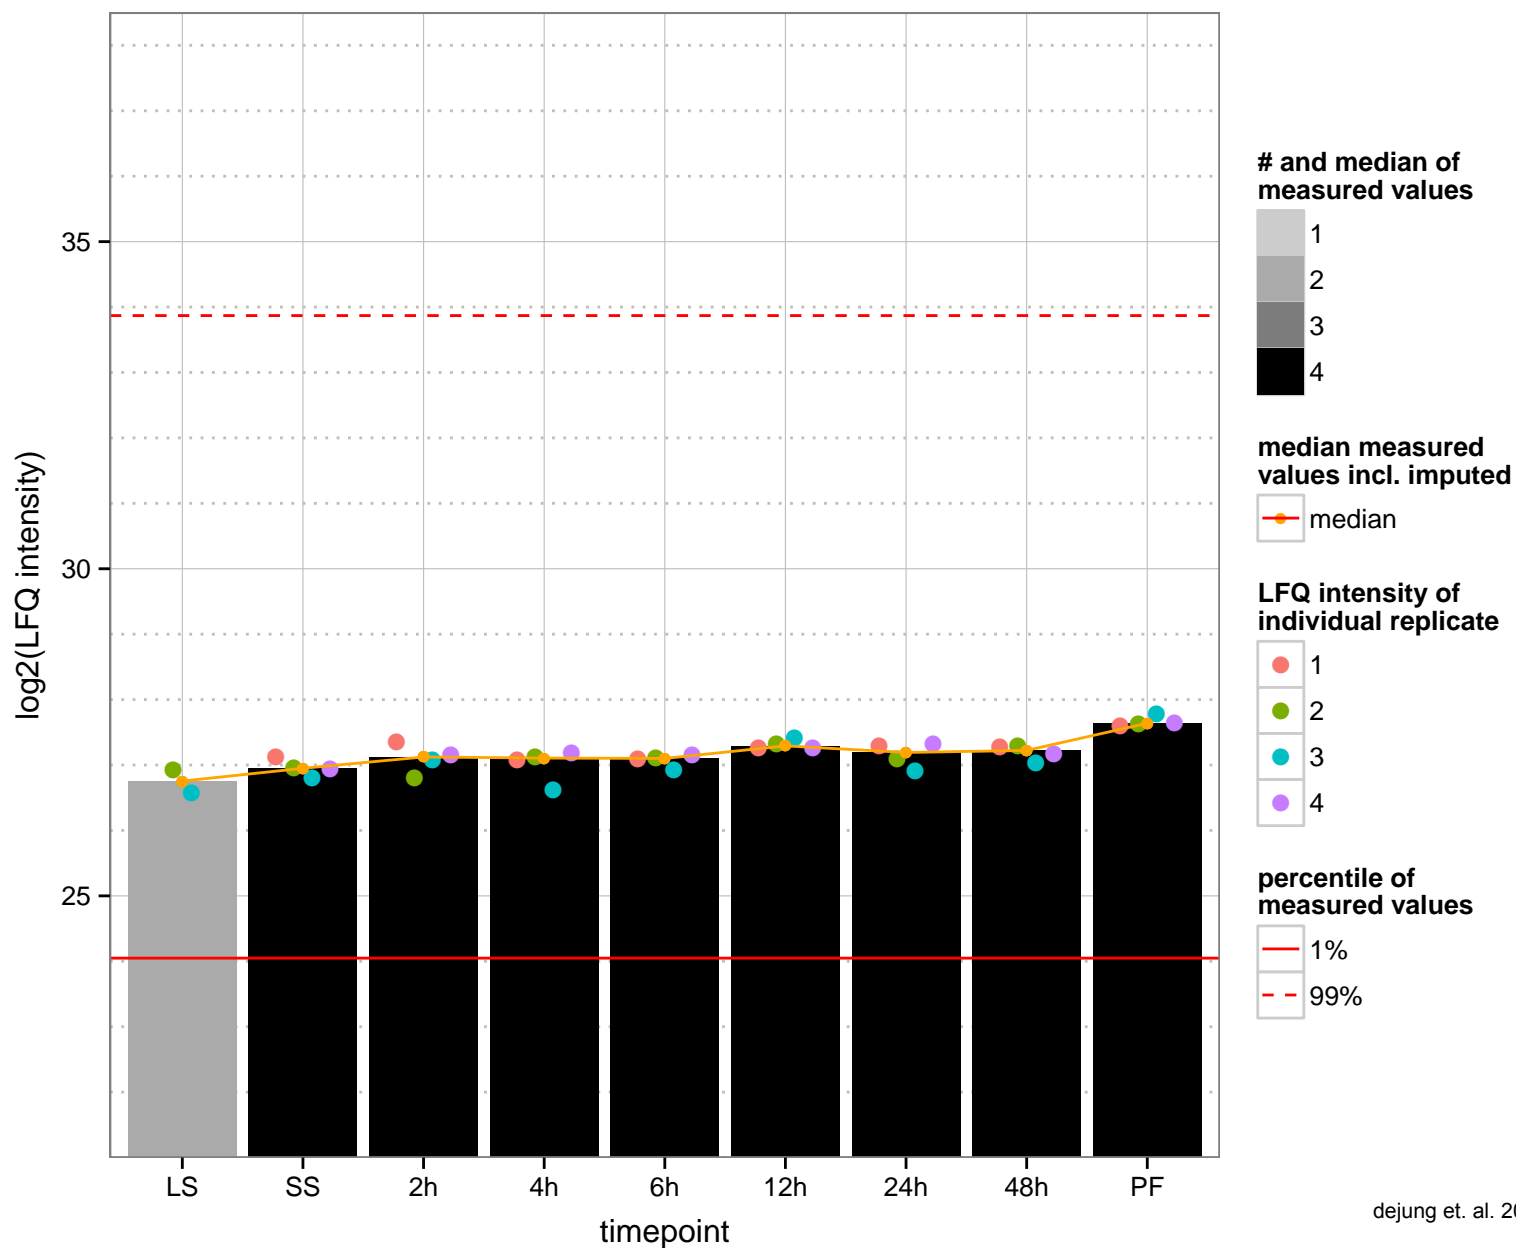

hypothetical protein, conserved  
 Tb927.4.1420  
 AGOF: null  
 AGOC: null  
 AGOP: null  
 PGO: null  
 PGOC: null  
 PGOP: null

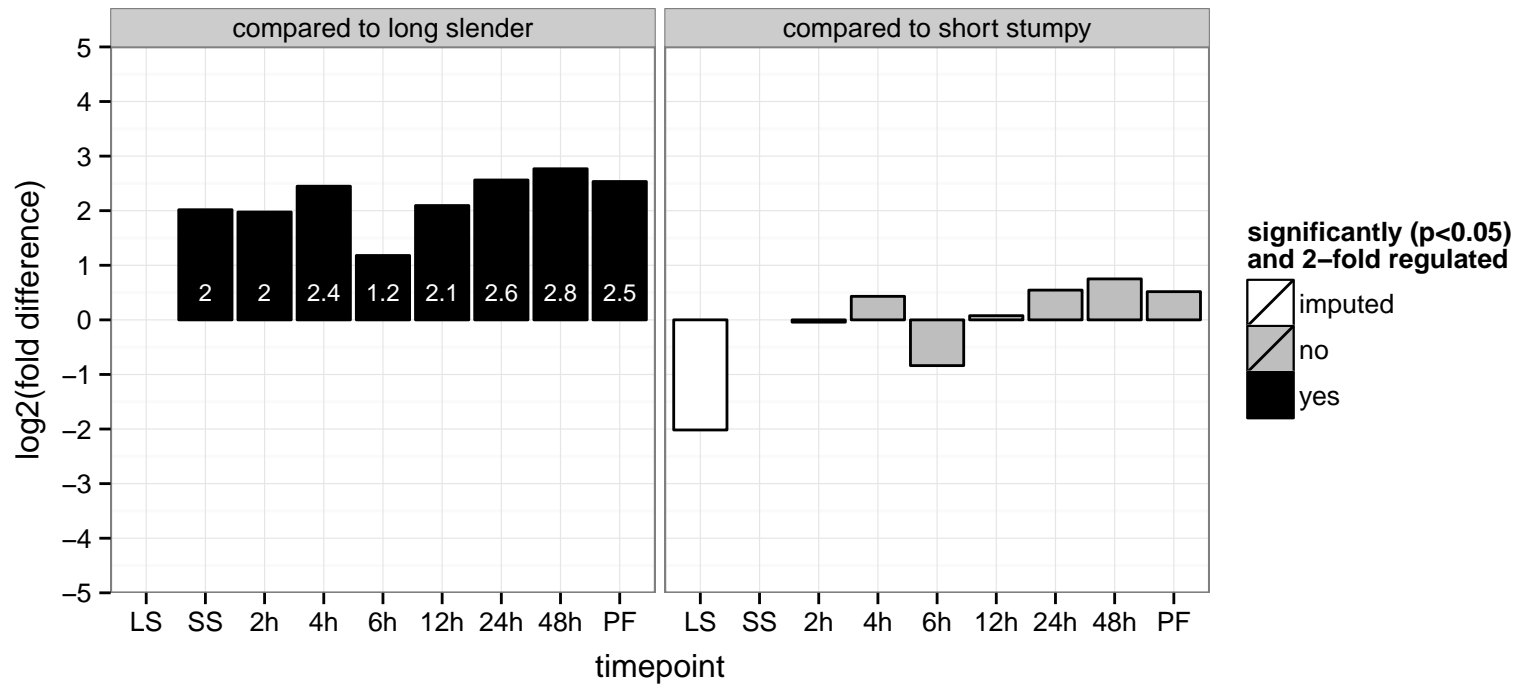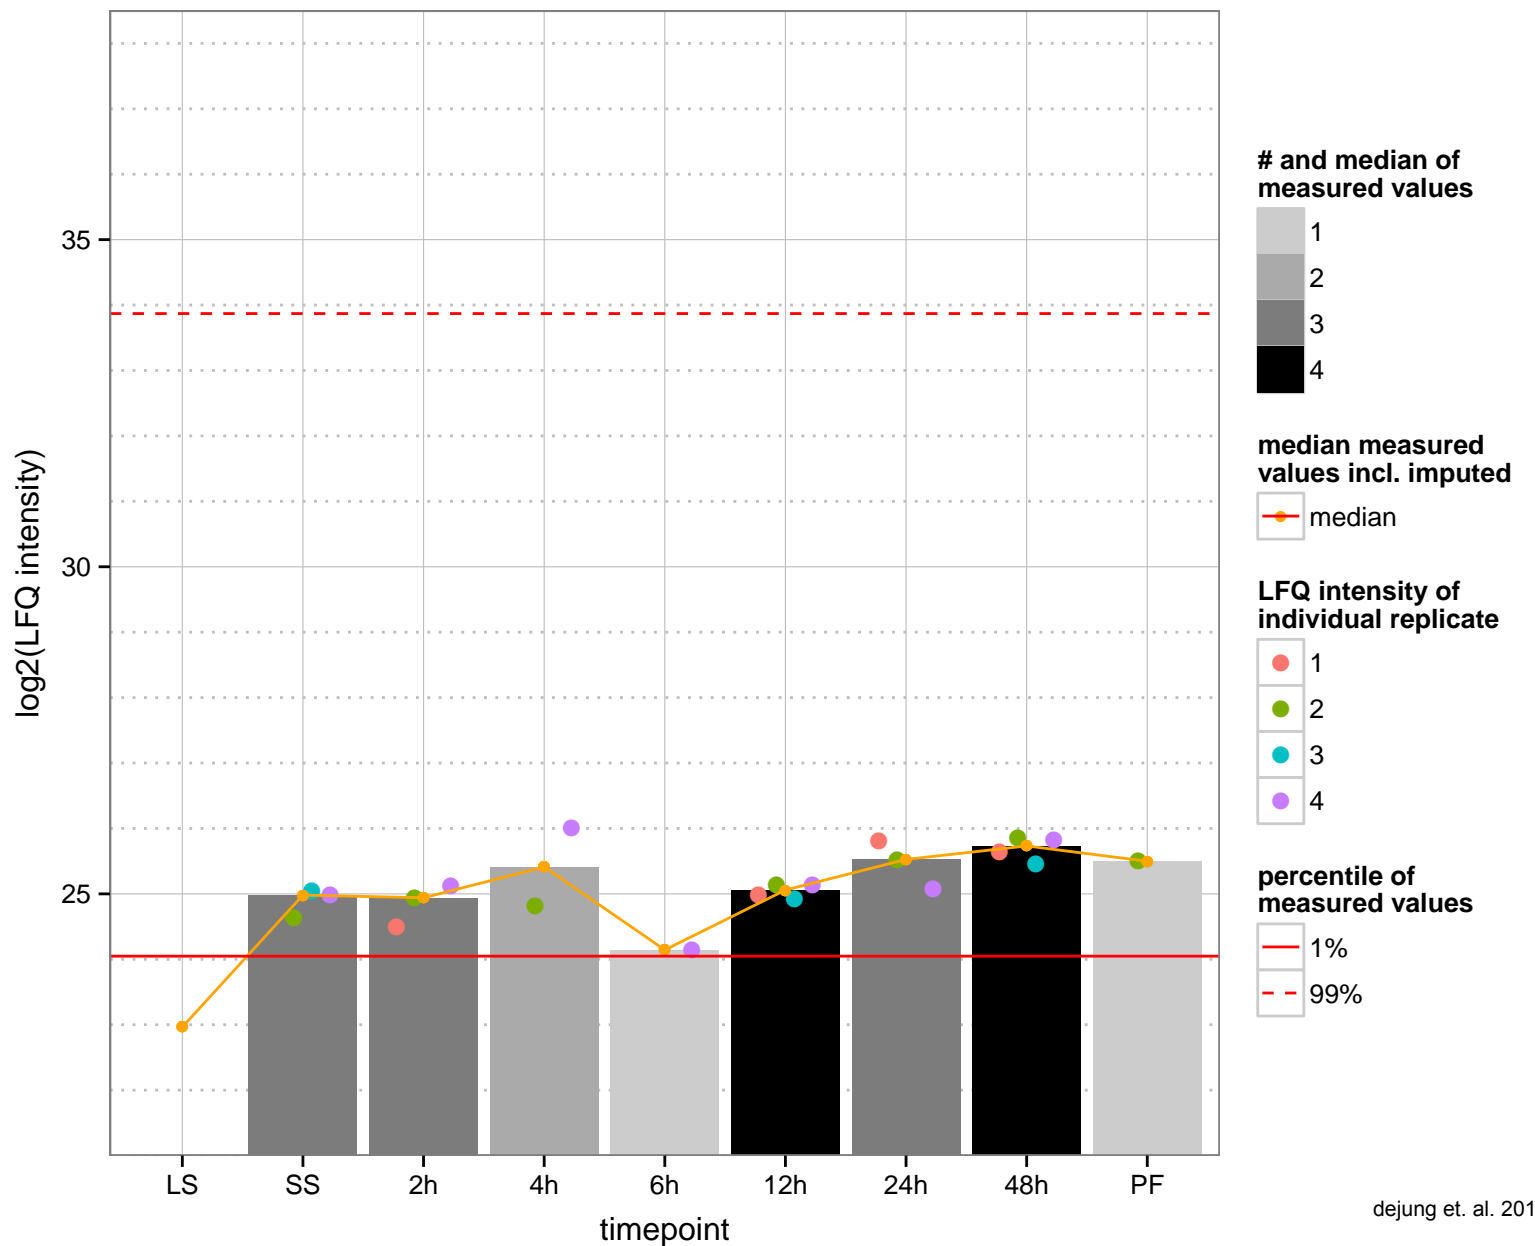

phospholipid-translocating ATPase, putative

Tb927.4.1510

AGOF: ATP binding, ATPase activity, coupled to transmembrane movement of ions, phosphorylative mechanism, magnesium

AGOC: integral to membrane, membrane

AGOP: ATP biosynthetic process, phospholipid transport

PGOF: ATP binding, ATPase activity, coupled to transmembrane movement of ions, phosphorylative mechanism, hydrolase ac

PGOC: integral to membrane, membrane

PGOP: cation transport, phospholipid transport

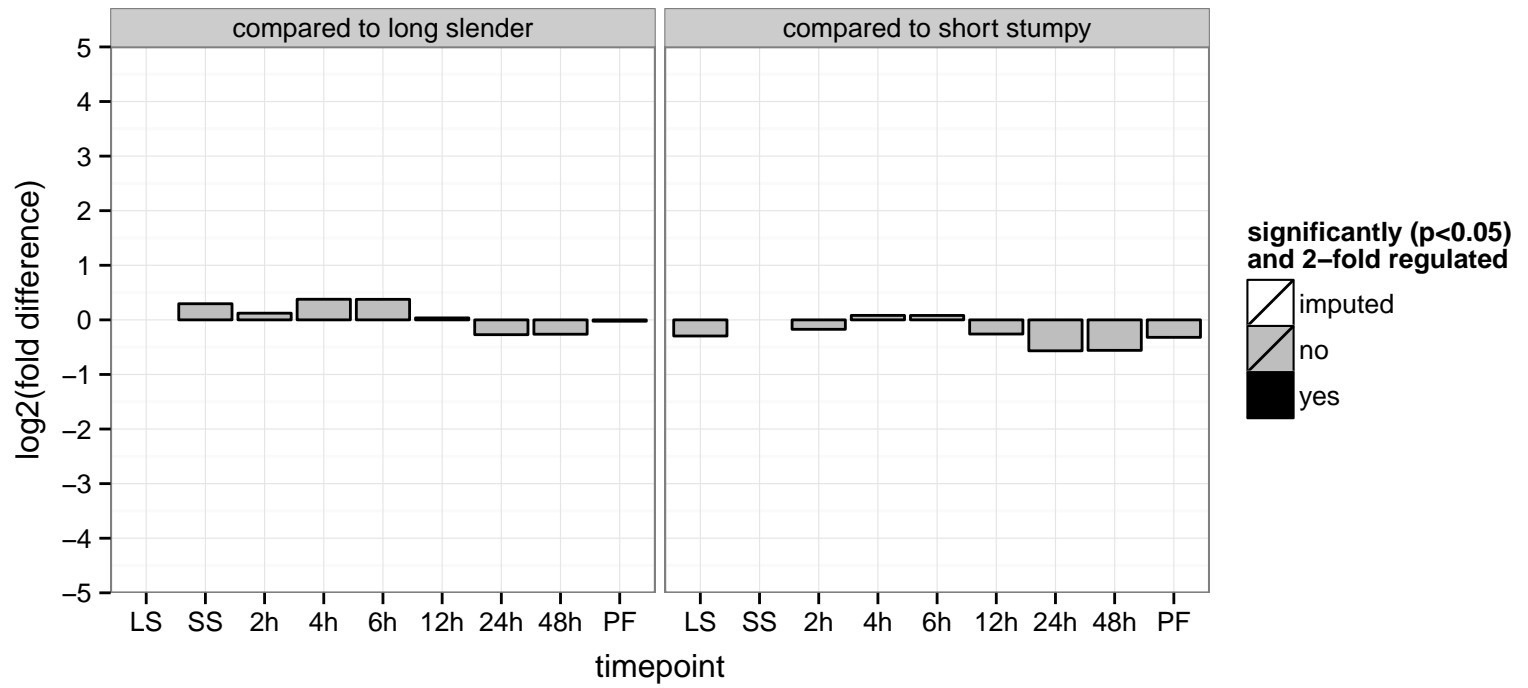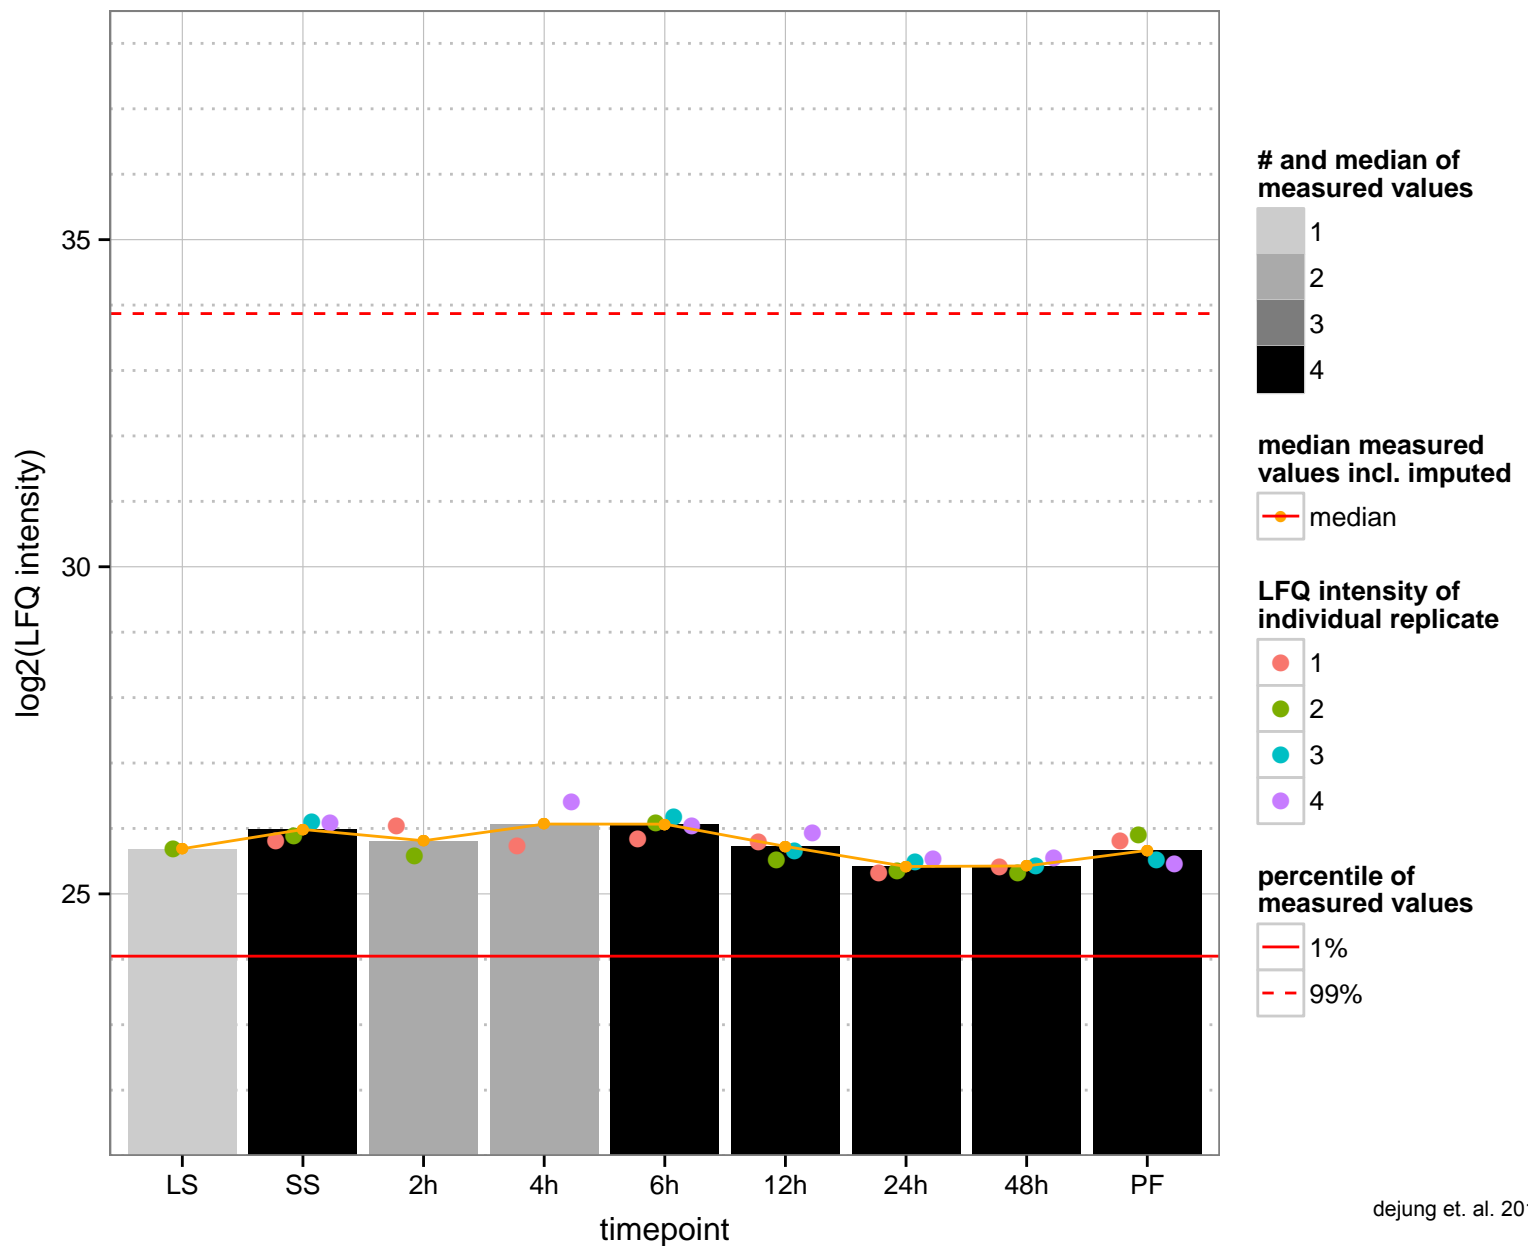

hypothetical protein, conserved  
 Tb927.4.1540  
 AGOF: catalytic activity, coenzyme binding  
 AGOC: mitochondrion  
 AGOP: cellular metabolic process  
 PGO: catalytic activity, coenzyme binding  
 PGOC: null  
 PGOP: cellular metabolic process

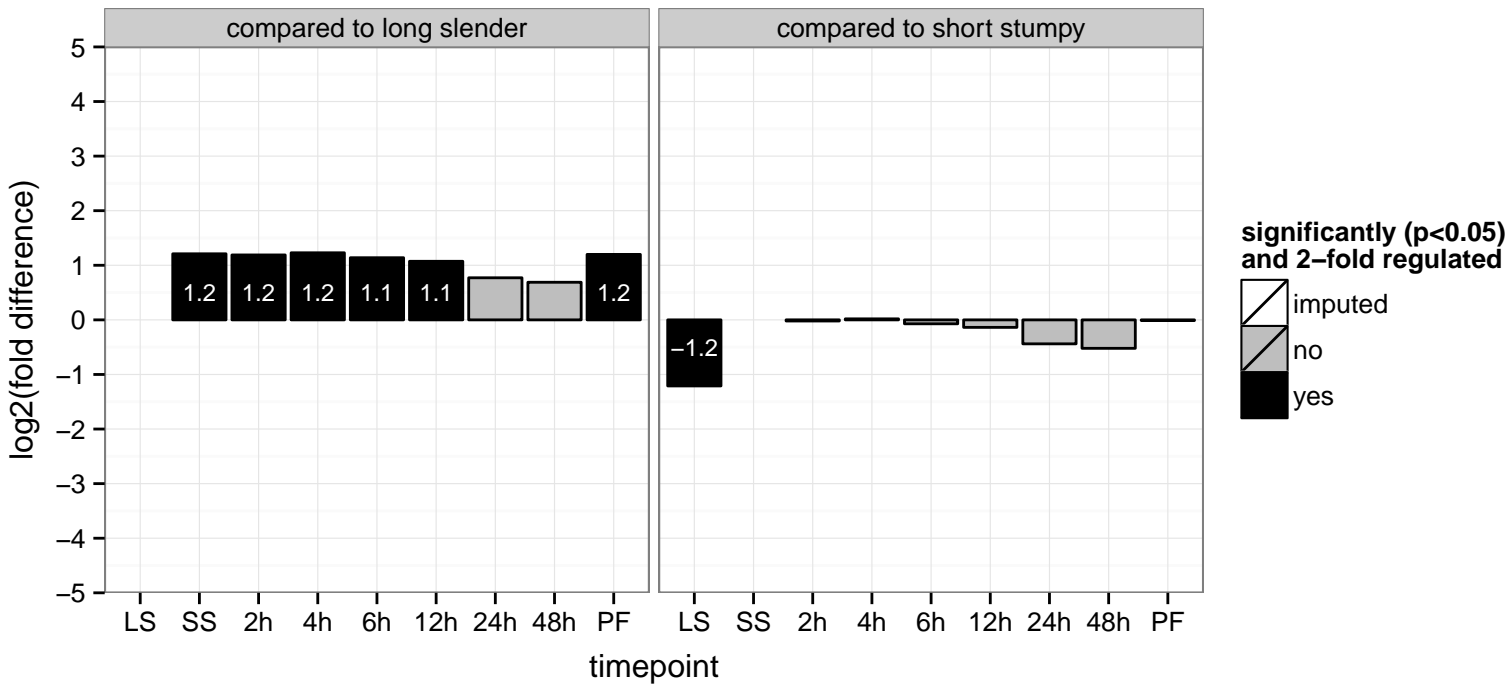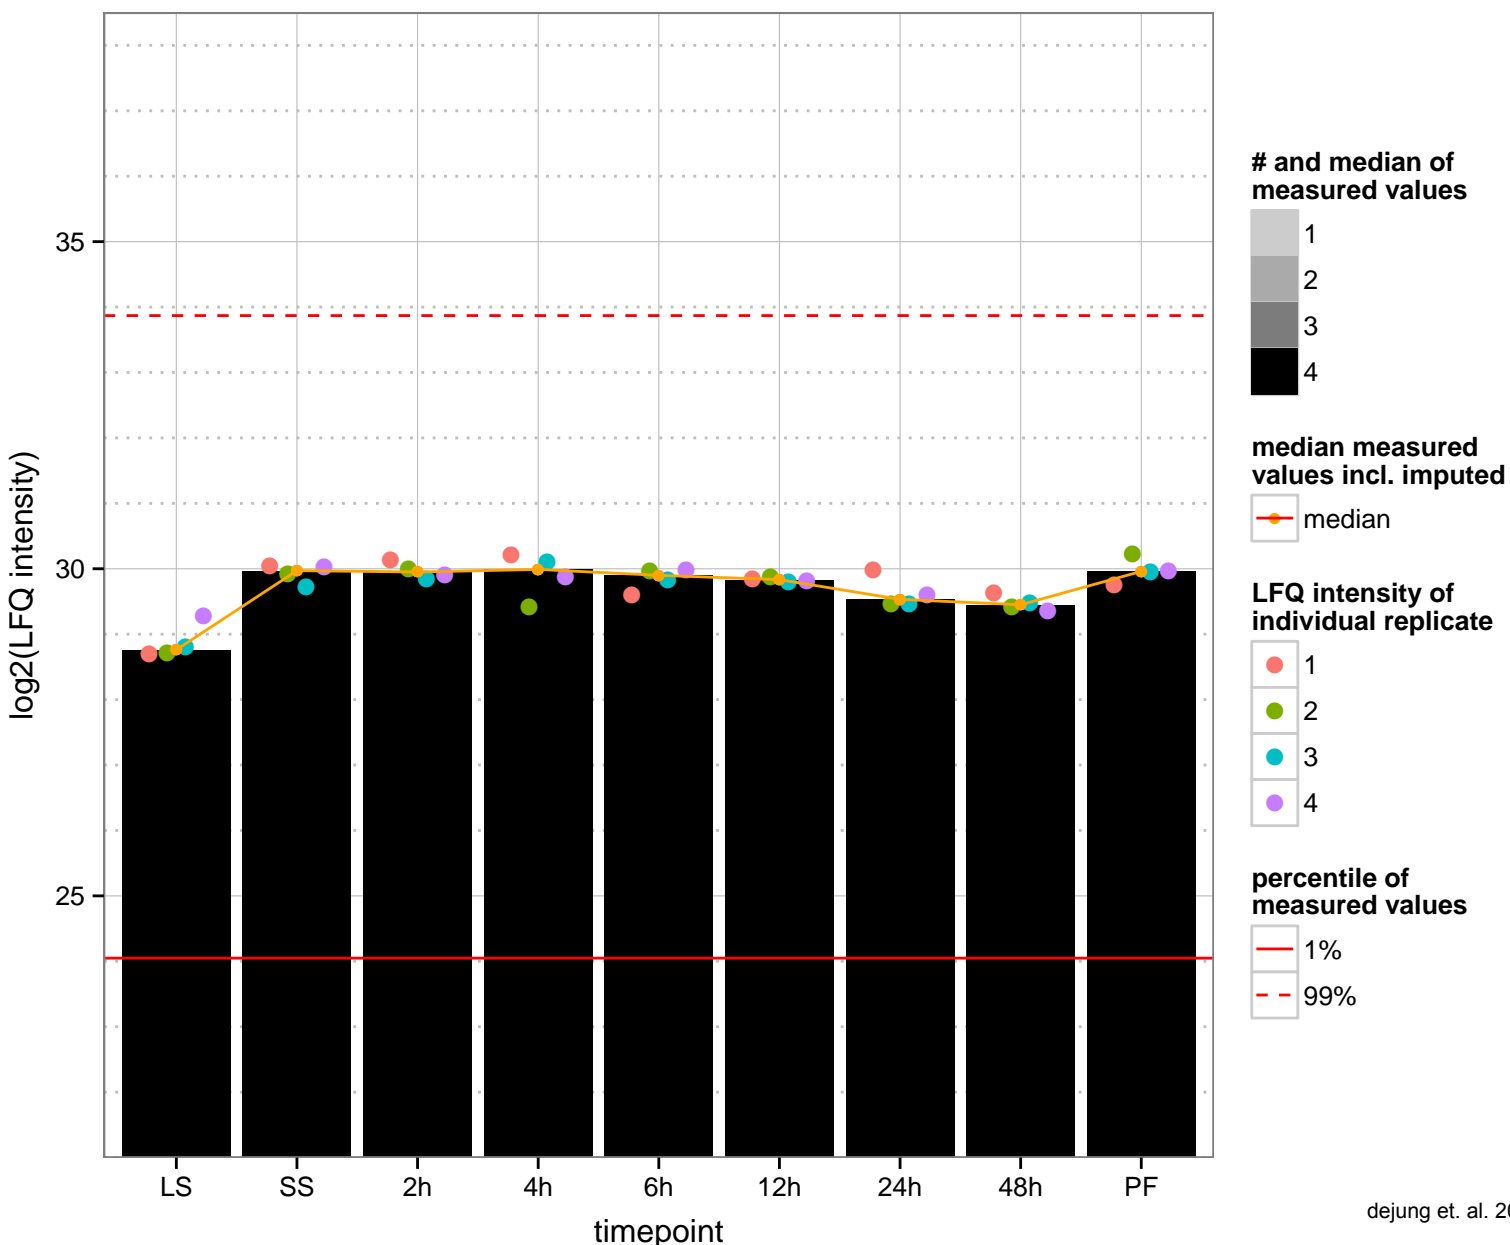

hypothetical protein, conserved  
 Tb927.4.1600  
 AGOF: null  
 AGOC: null  
 AGOP: null  
 PGO: null  
 PGOC: null  
 PGOP: null

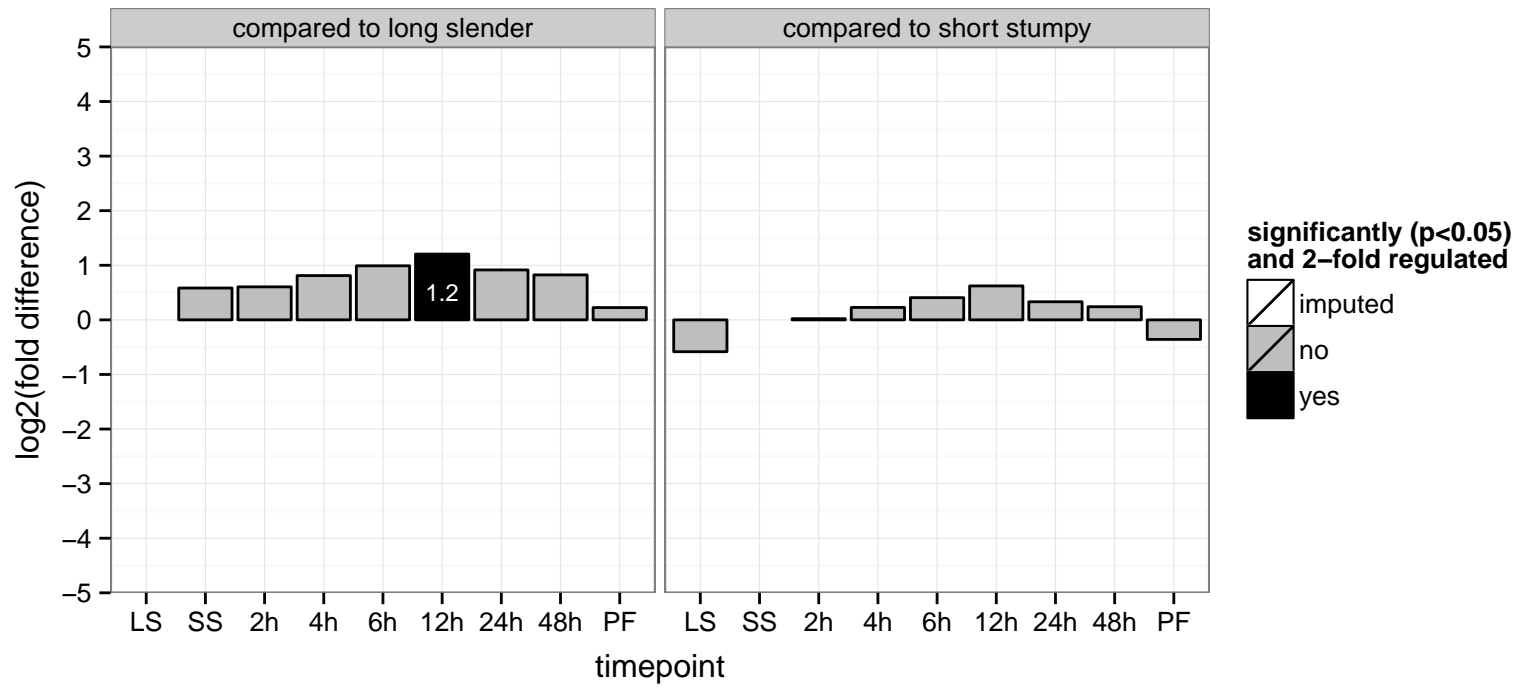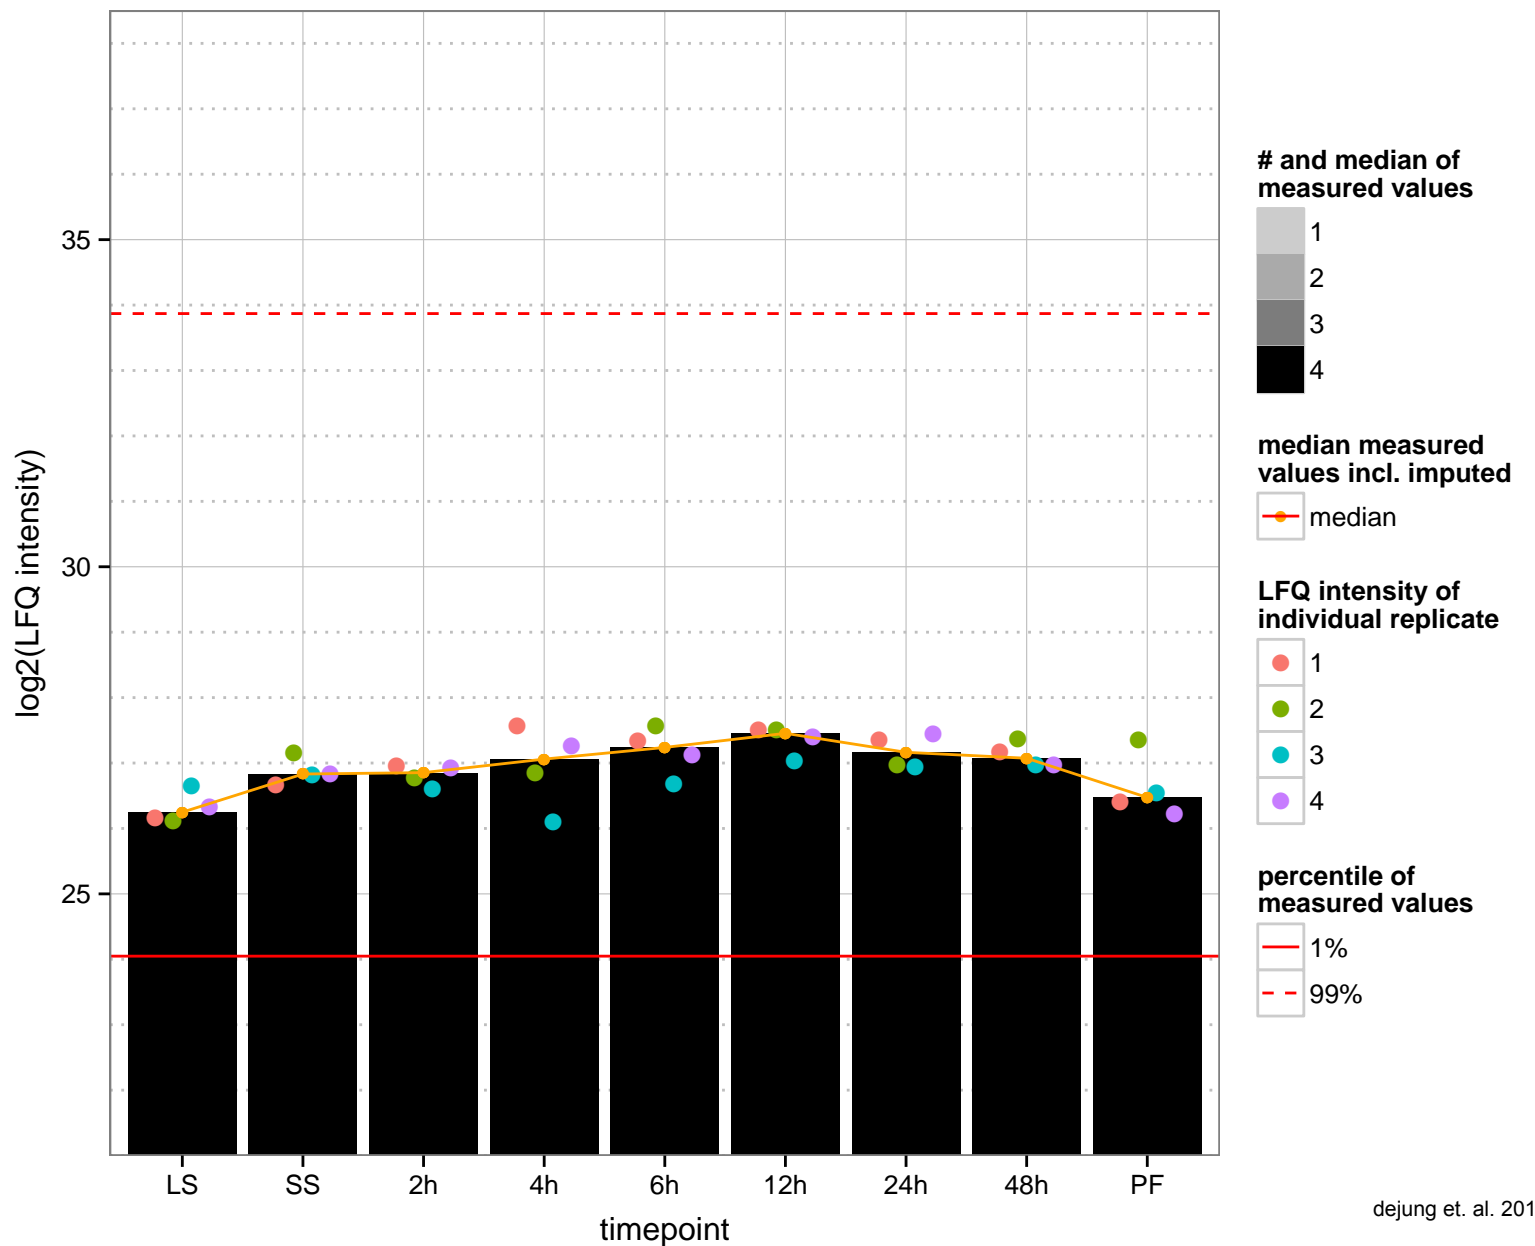

ribosomal RNA processing protein 6 (RRP6)

Tb927.4.1630

AGOF: 3'-5' exonuclease activity, nucleic acid binding

AGOC: cytoplasm, cytoplasmic exosome (RNase complex), intracellular, nuclear exosome (RNase complex), nucleus

AGOP: RNA processing, cell growth, rRNA processing

PGOF: 3'-5' exonuclease activity, catalytic activity, nucleic acid binding, nucleotide binding

PGOC: intracellular, nuclear exosome (RNase complex)

PGOP: RNA processing, cellular metabolic process, nucleobase-containing compound metabolic process

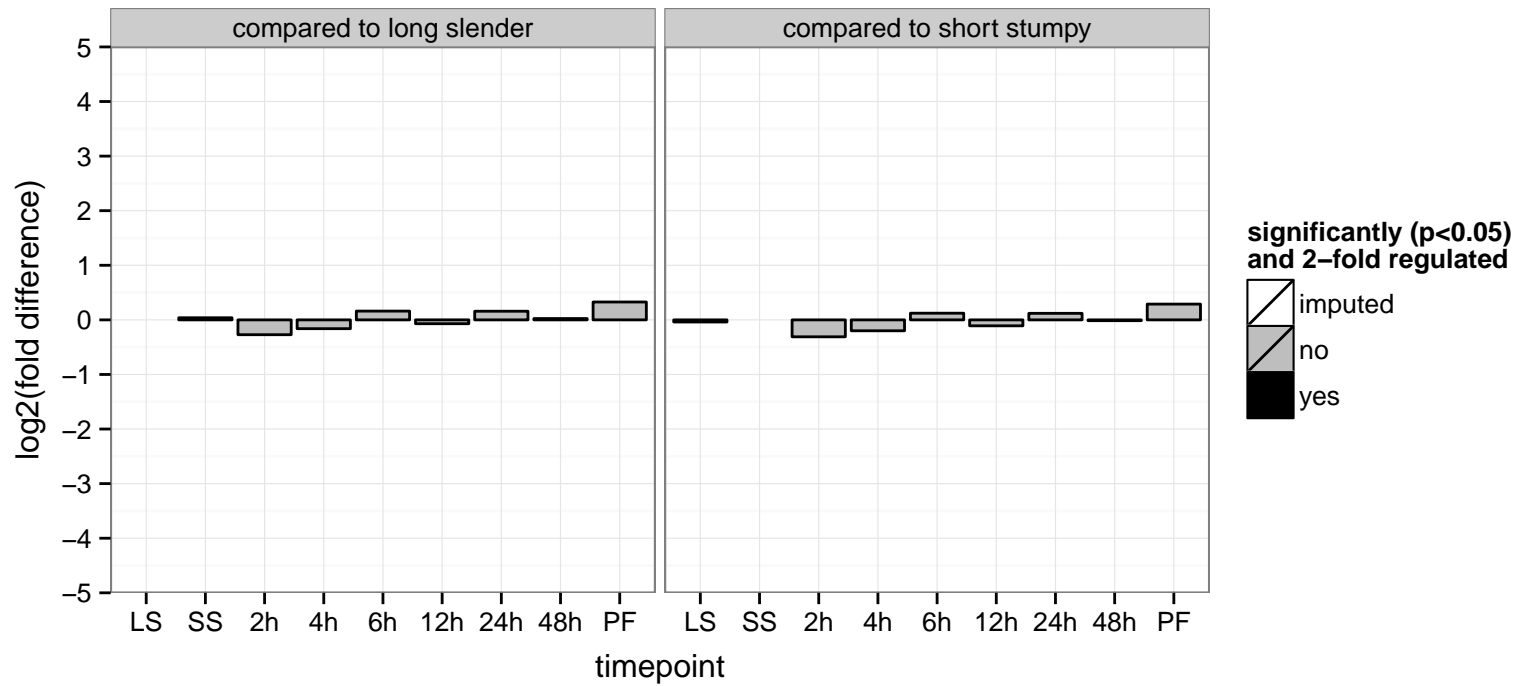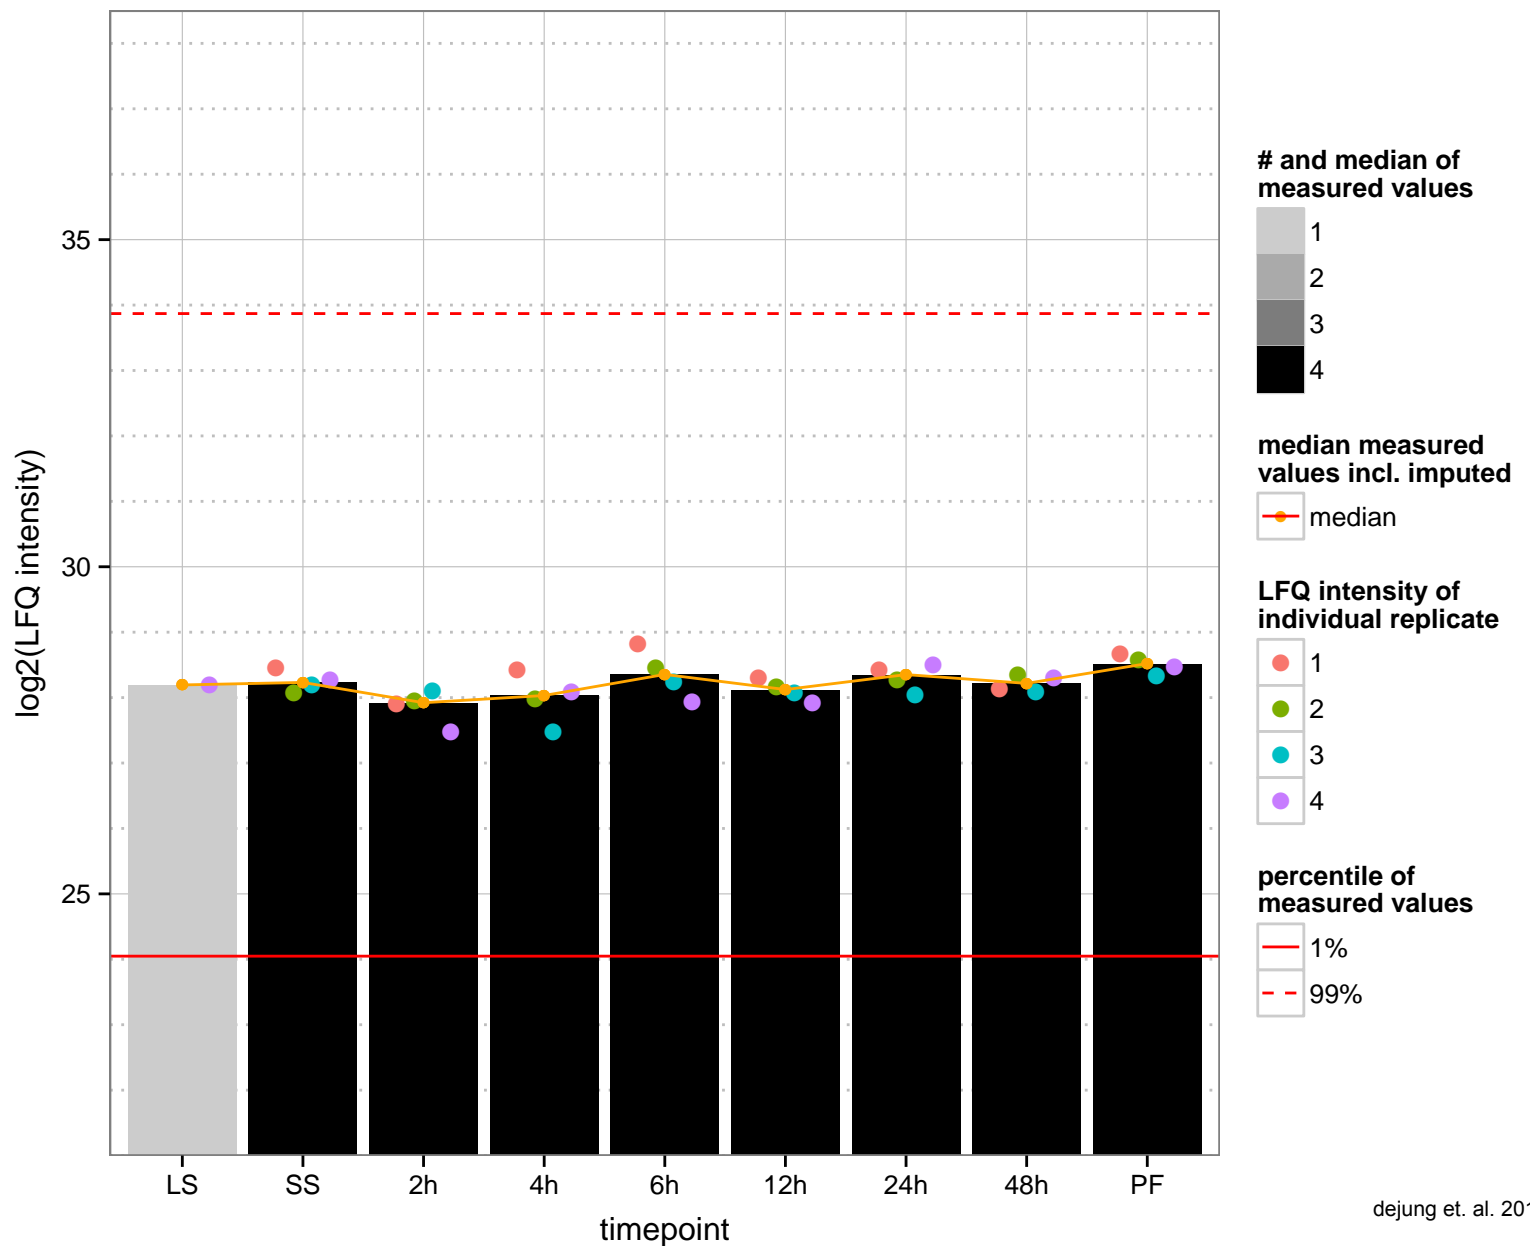

mitochondrial carrier protein, putative (MCP6)

Tb927.4.1660

AGOF: null

AGOC: glycosome, mitochondrial inner membrane, mitochondrial membrane, mitochondrion

AGOP: transport

PGOF: null

PGOC: null

PGOP: null

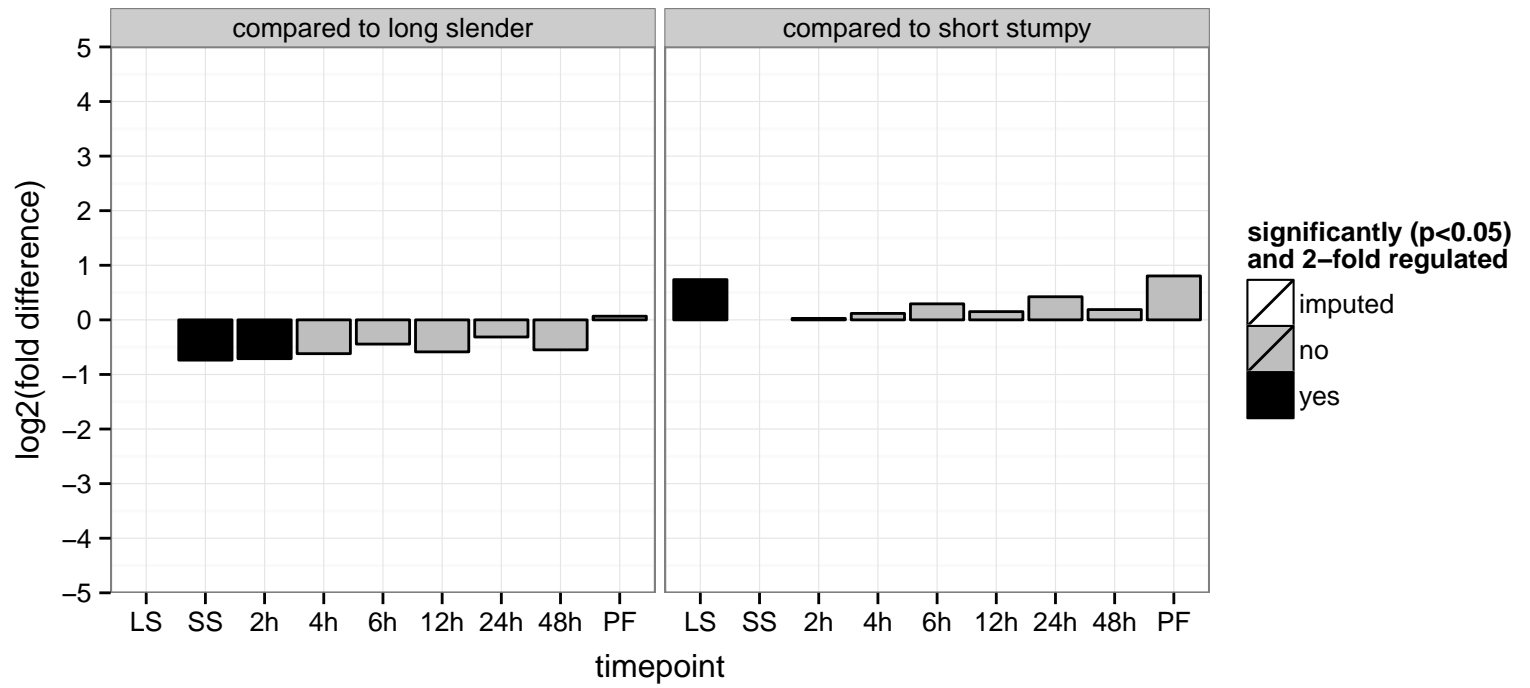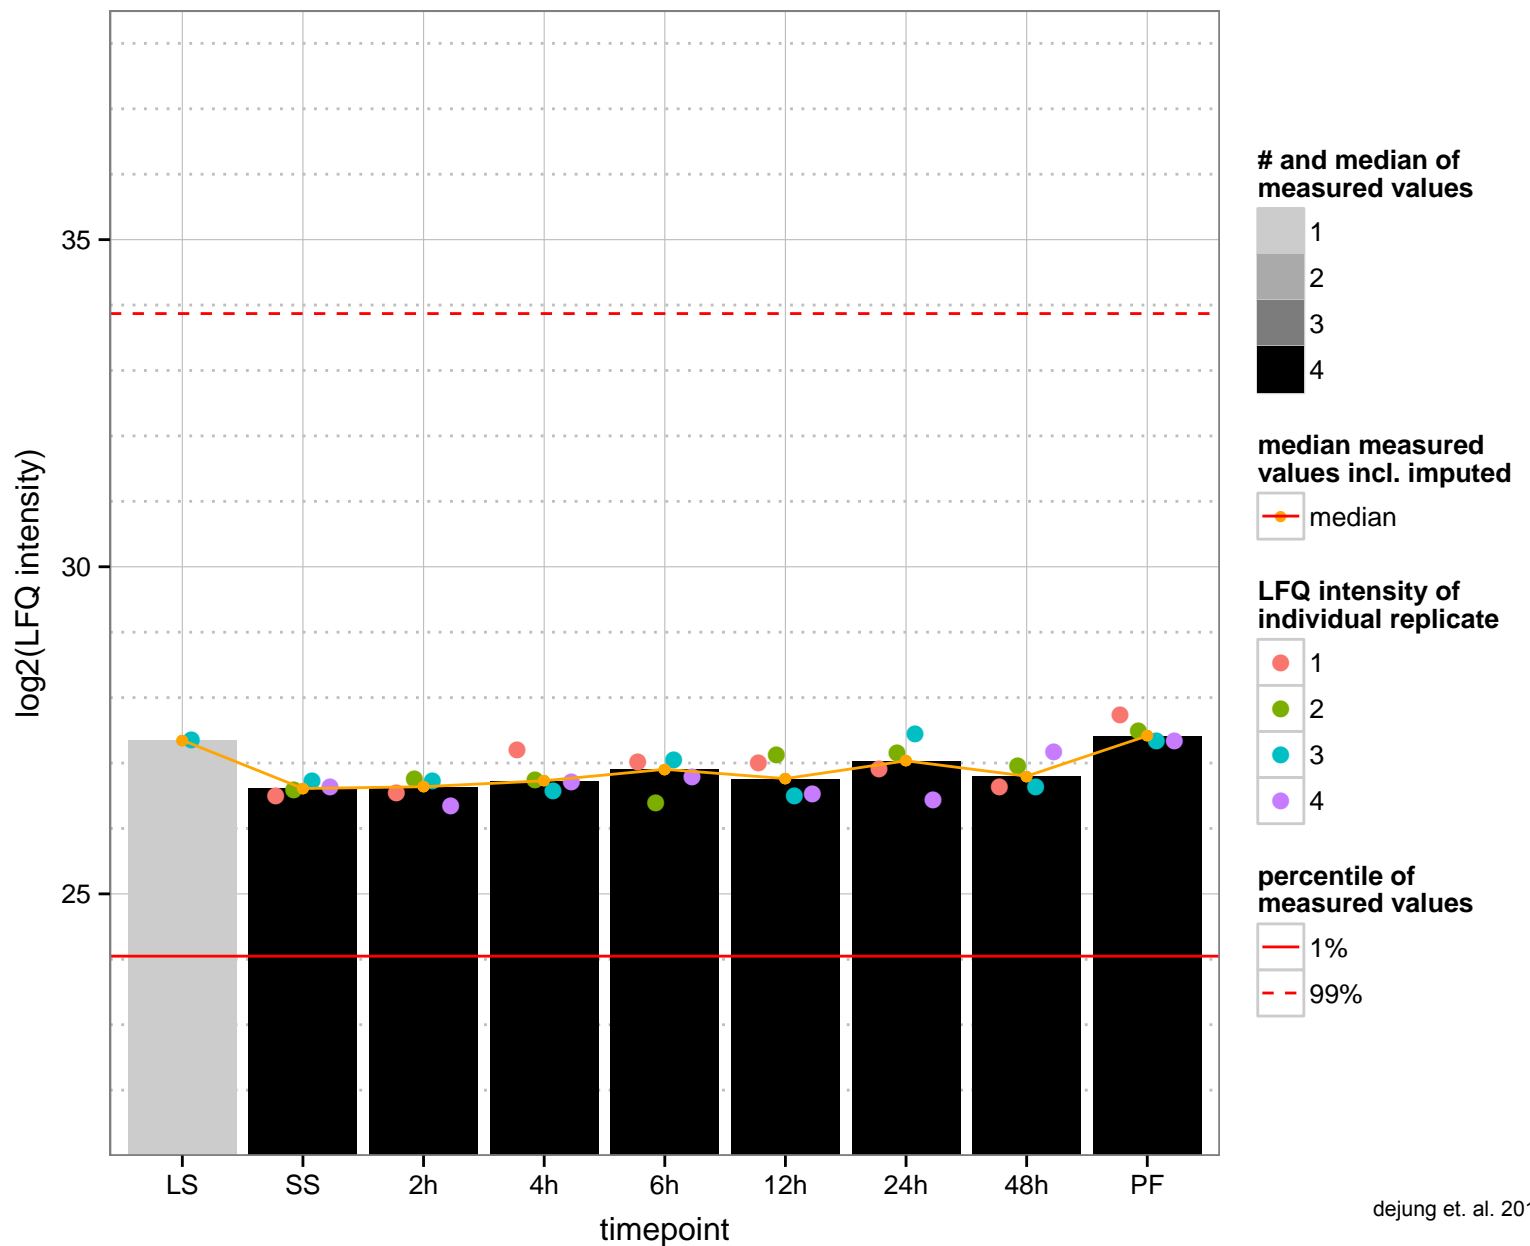



ZFP family member, putative (ZC3H10)  
 Tb927.4.1680  
 AGOF: null  
 AGOC: null  
 AGOP: null  
 PGO: null  
 PGOC: null  
 PGOP: null

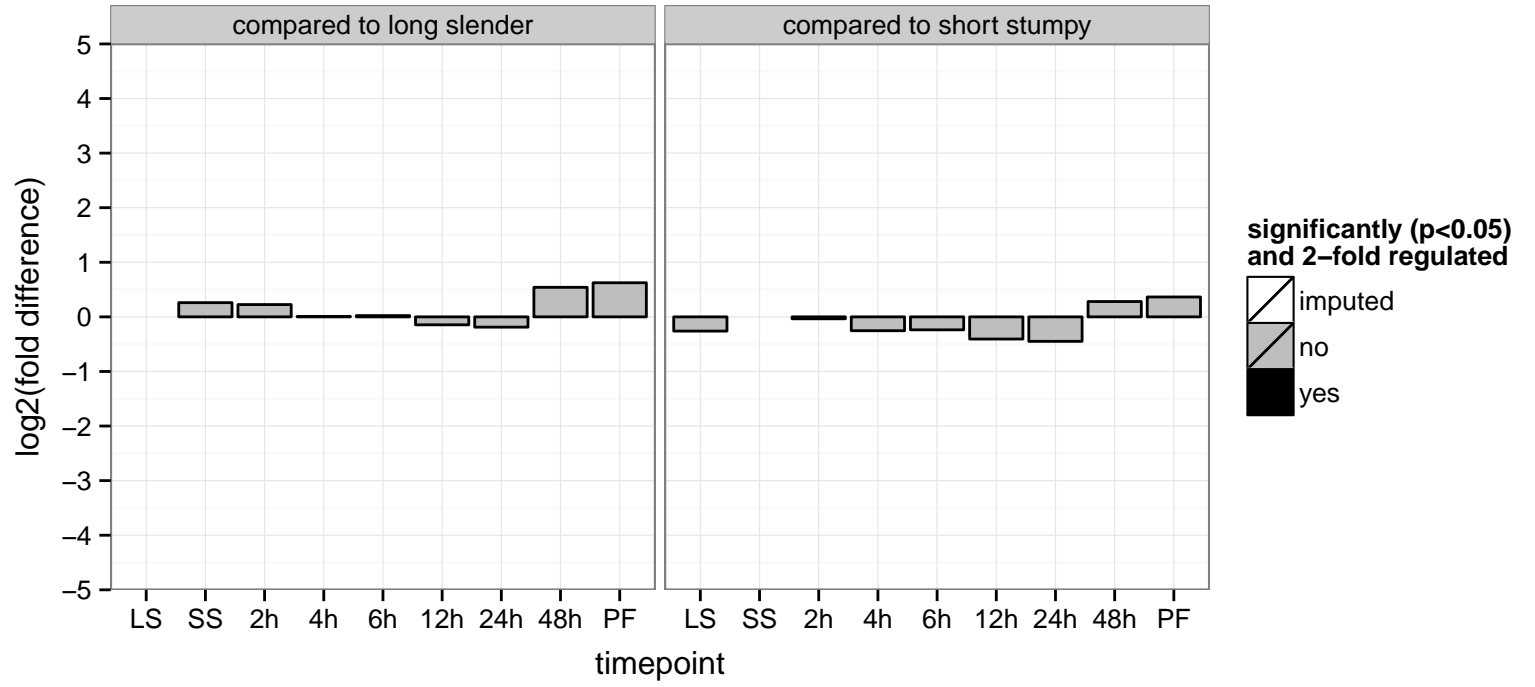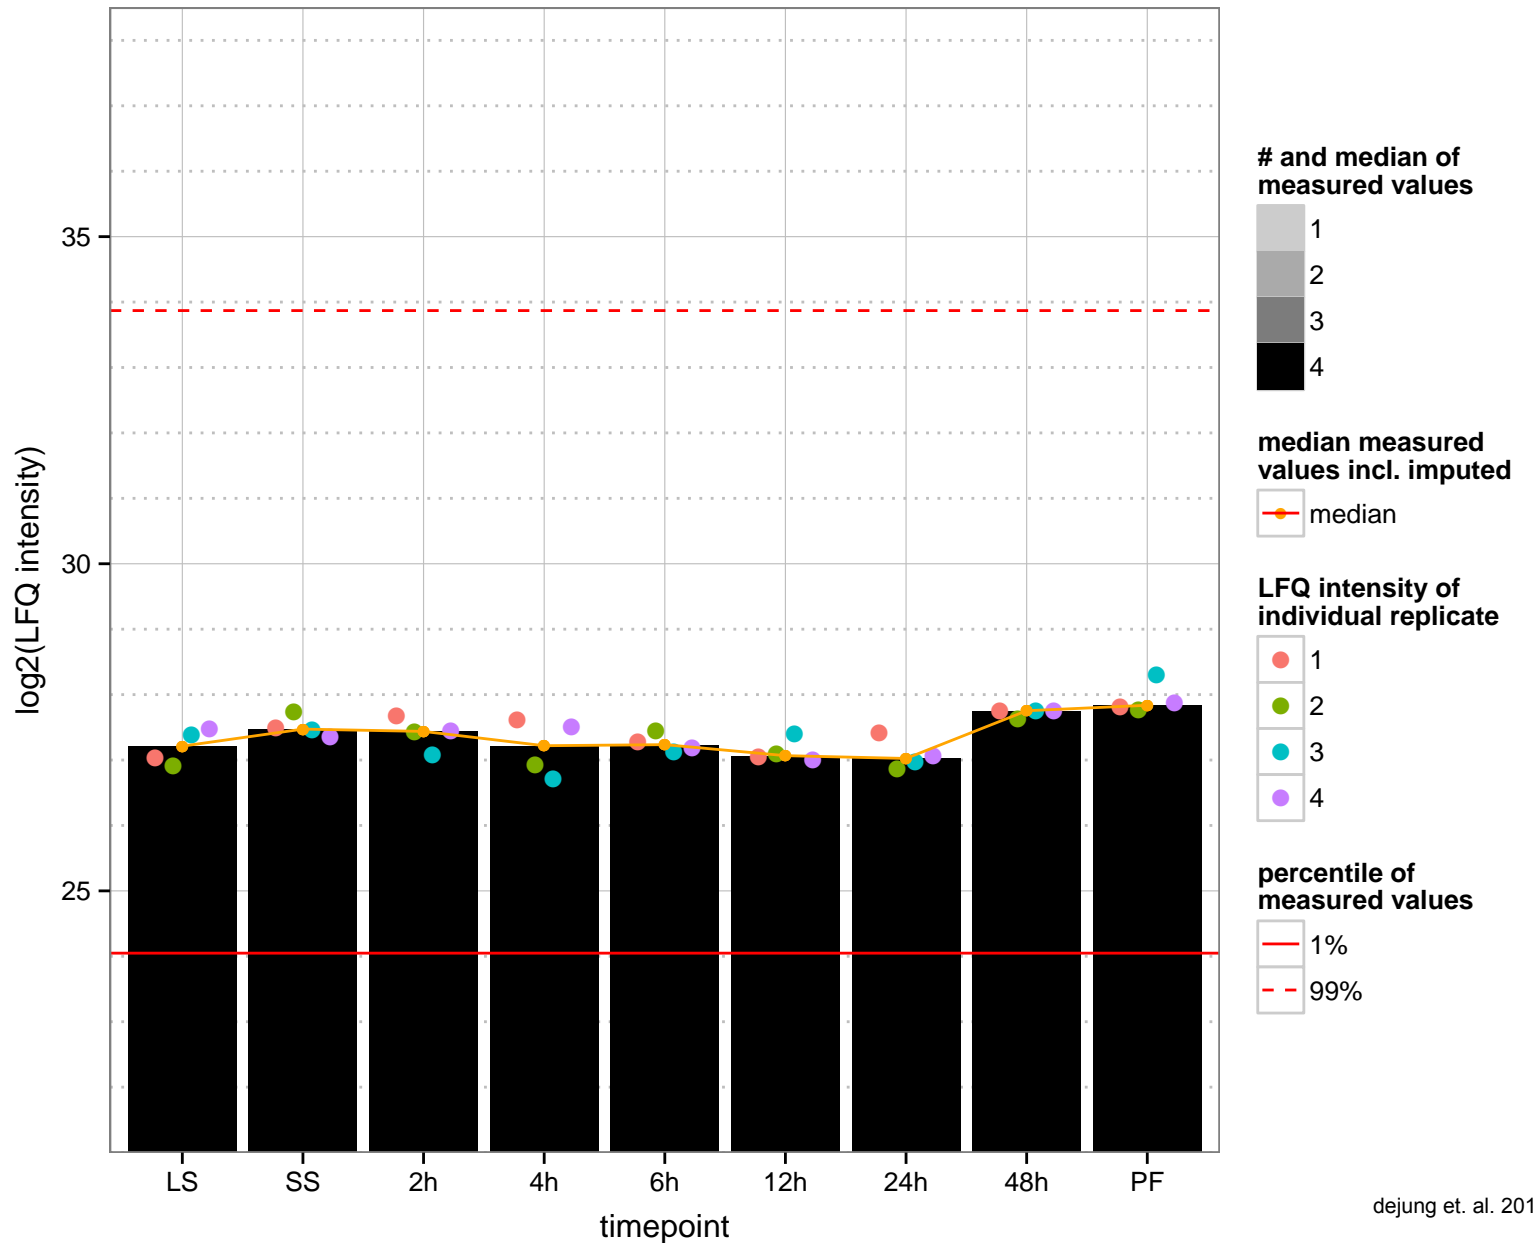

nucleoside diphosphate kinase, putative

Tb927.4.1720

AGOF: ATP binding, nucleoside diphosphate kinase activity

AGOC: null

AGOP: CTP biosynthetic process, GTP biosynthetic process, UTP biosynthetic process, ciliary or flagellar motility

PGOF: ATP binding, nucleoside diphosphate kinase activity

PGOC: null

PGOP: CTP biosynthetic process, GTP biosynthetic process, UTP biosynthetic process, nucleoside diphosphate phosphorylation

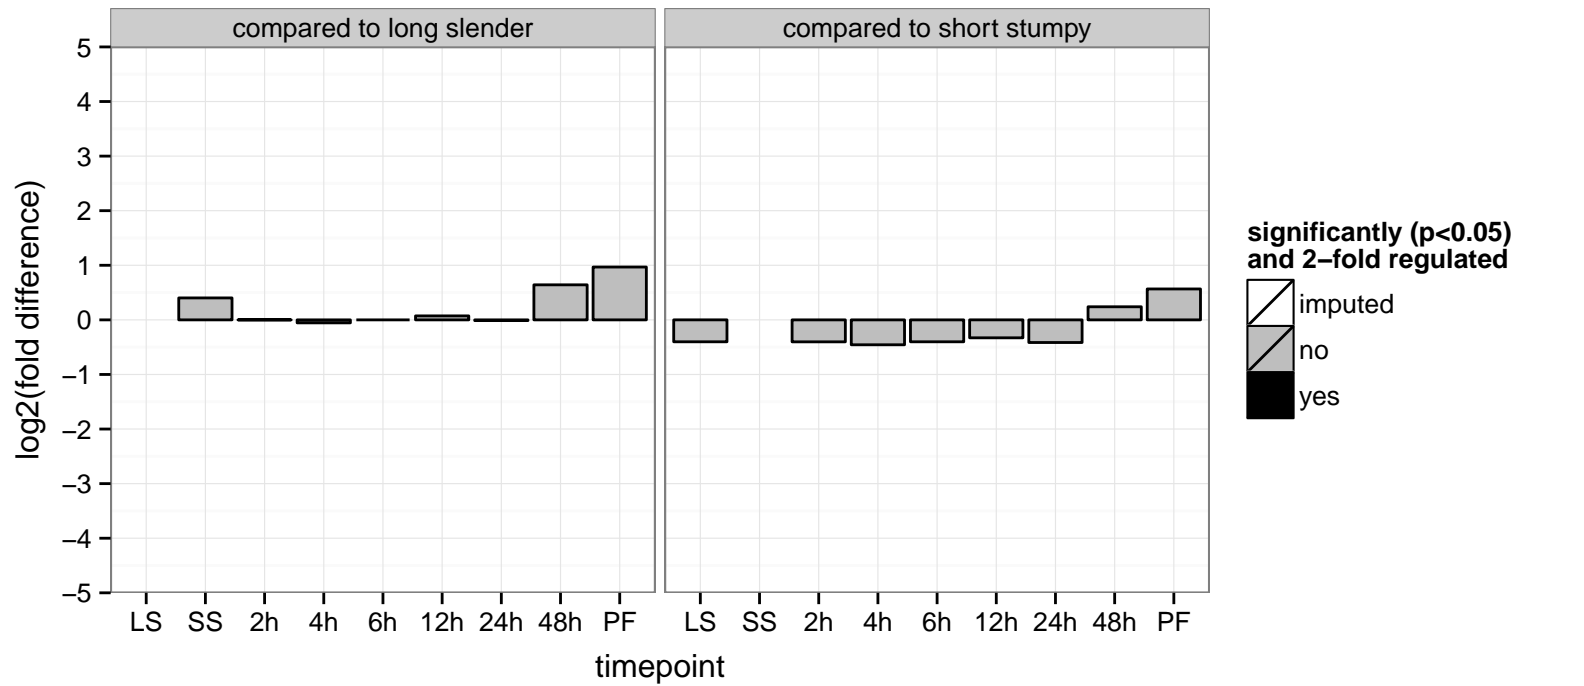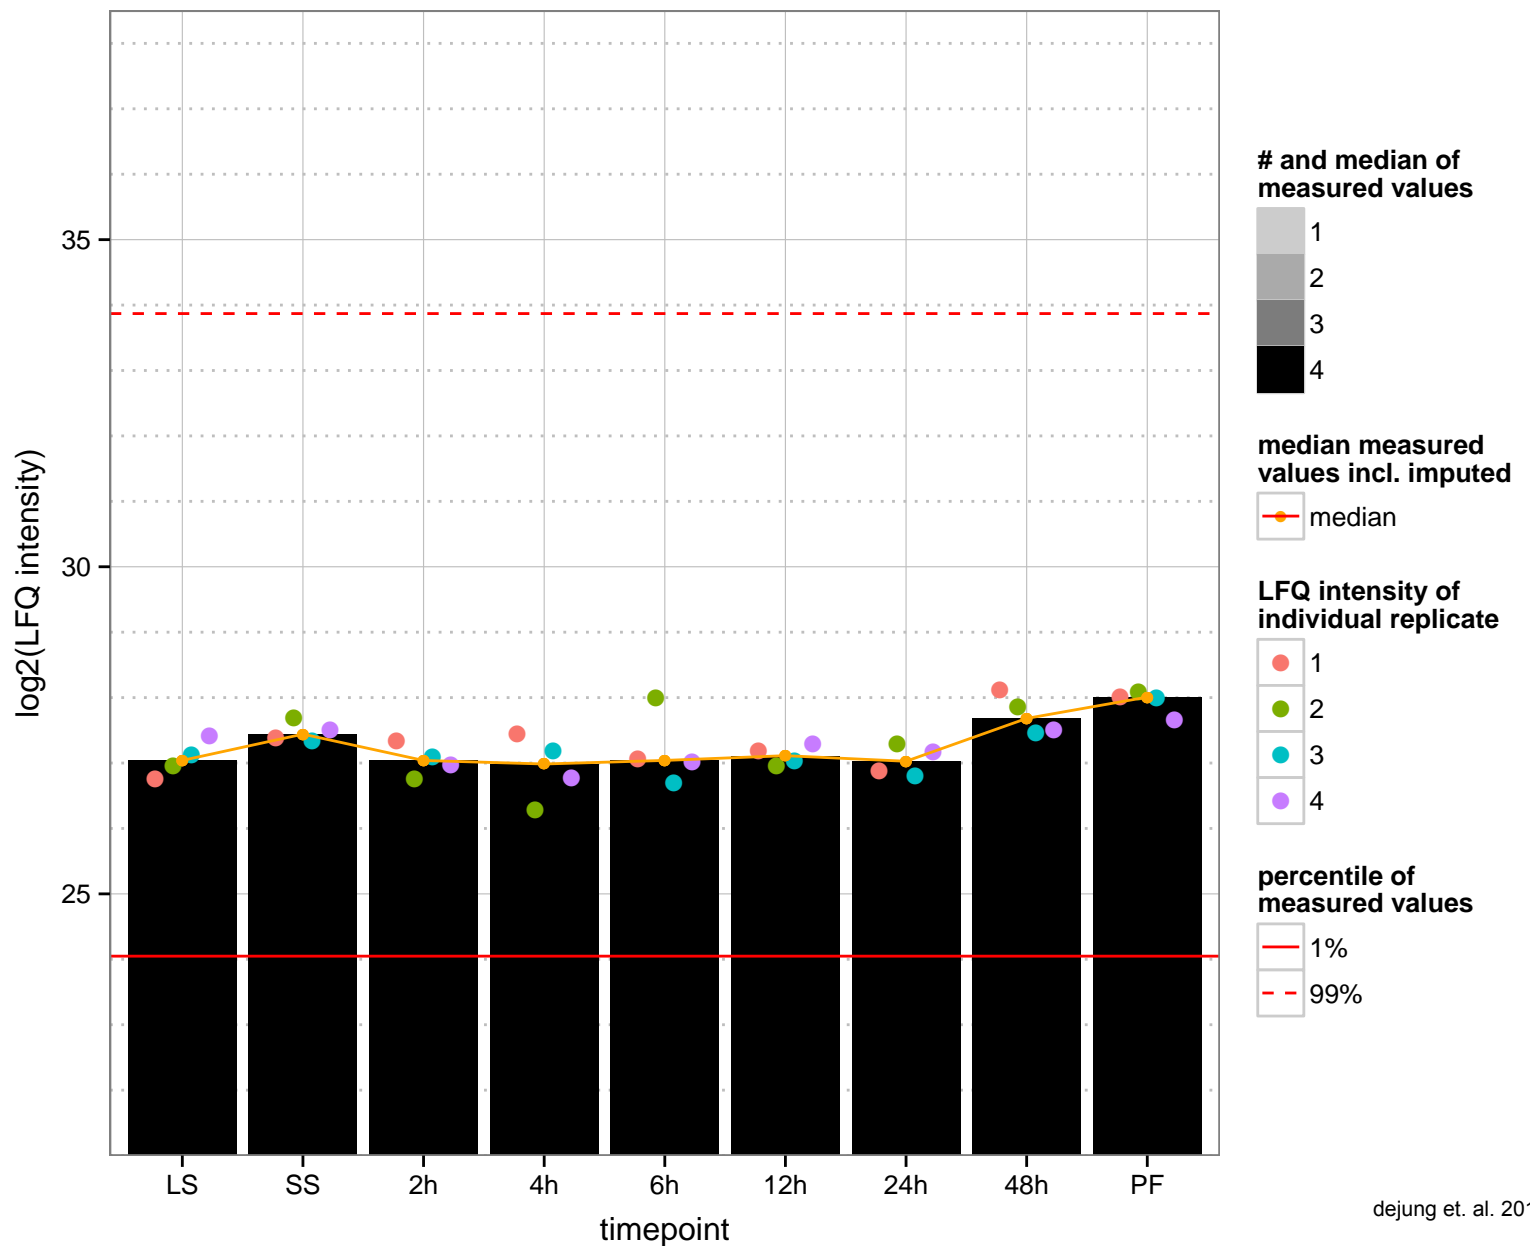

hypothetical protein, conserved  
 Tb927.4.1740  
 AGOF: calcium ion binding  
 AGOC: null  
 AGOP: ciliary or flagellar motility  
 PGO: null  
 PGOC: null  
 PGOP: null

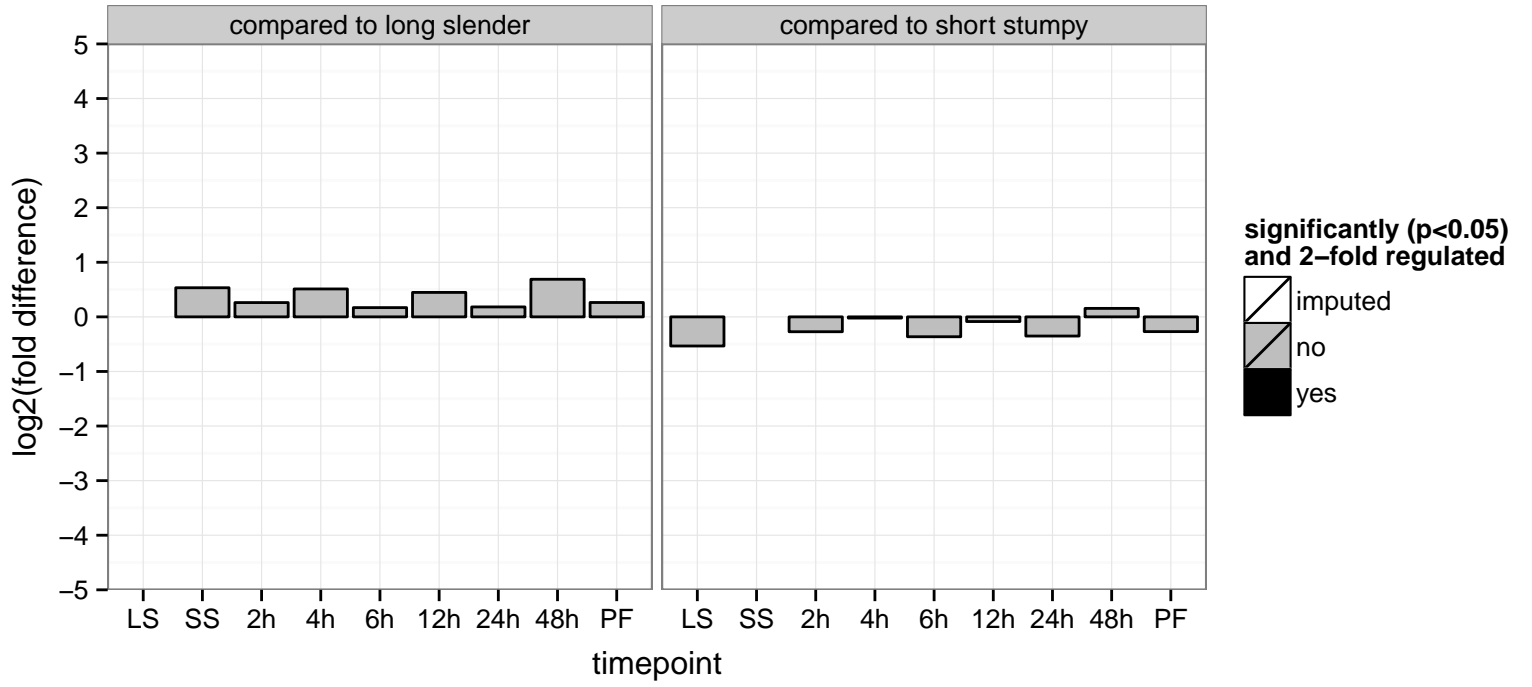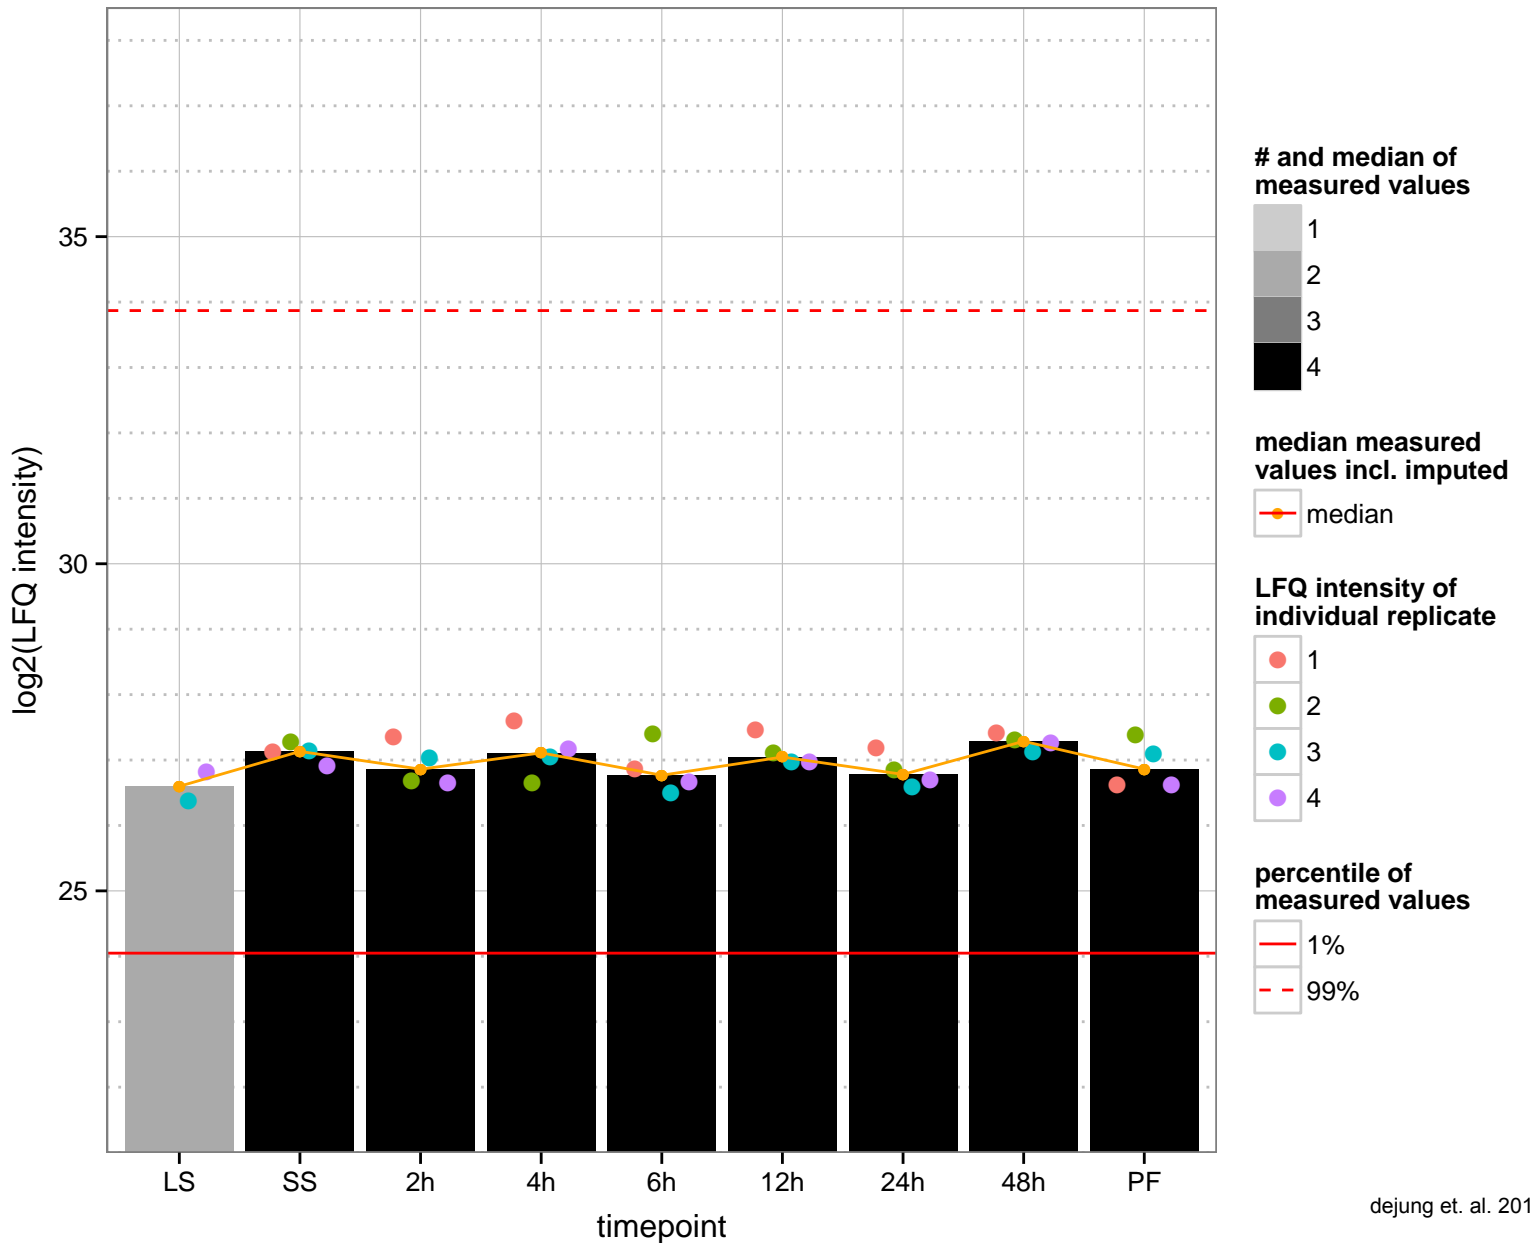

ribosomal protein L3, putative, mitochondrial  
 Tb927.4.1800;Tb927.4.1790  
 AGOF: structural constituent of ribosome  
 AGOC: intracellular, ribosome  
 AGOP: translation  
 PGO: structural constituent of ribosome, null  
 PGOC: intracellular, ribosome, null  
 PGOP: translation, null

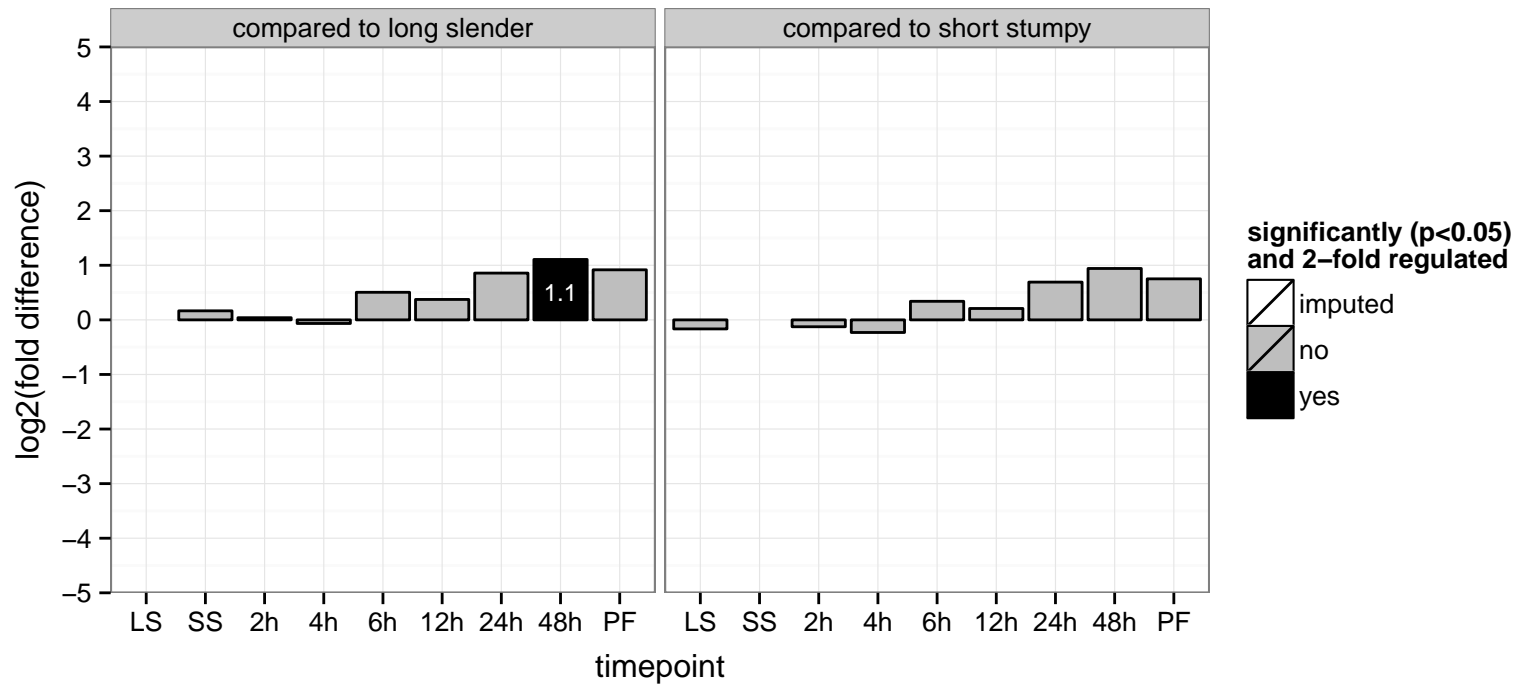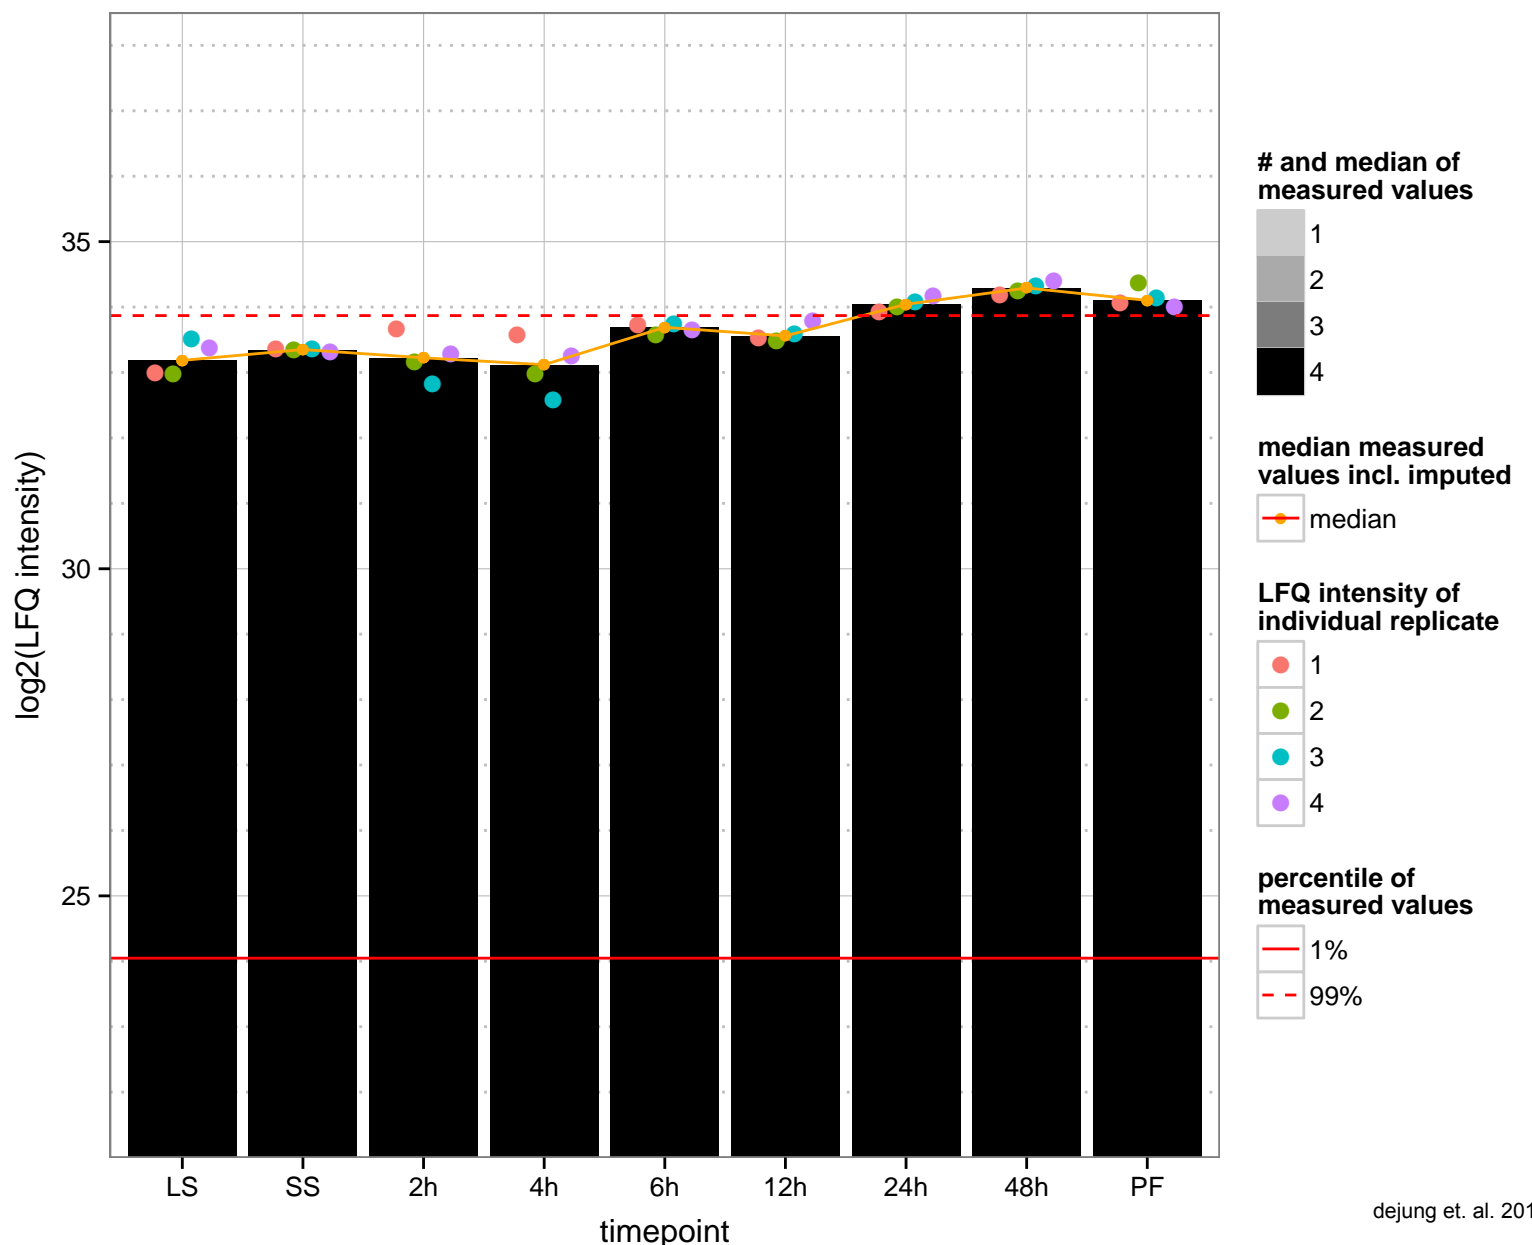

zinc carboxypeptidase, putative, metallo-peptidase, Clan MC, Family M14  
 Tb927.4.1840  
 AGOF: ADP binding, ATP binding, metallo-carboxypeptidase activity, zinc ion binding  
 AGOC: cytosol  
 AGOP: proteolysis  
 PGOF: metallo-carboxypeptidase activity, zinc ion binding  
 PGOC: null  
 PGOP: proteolysis

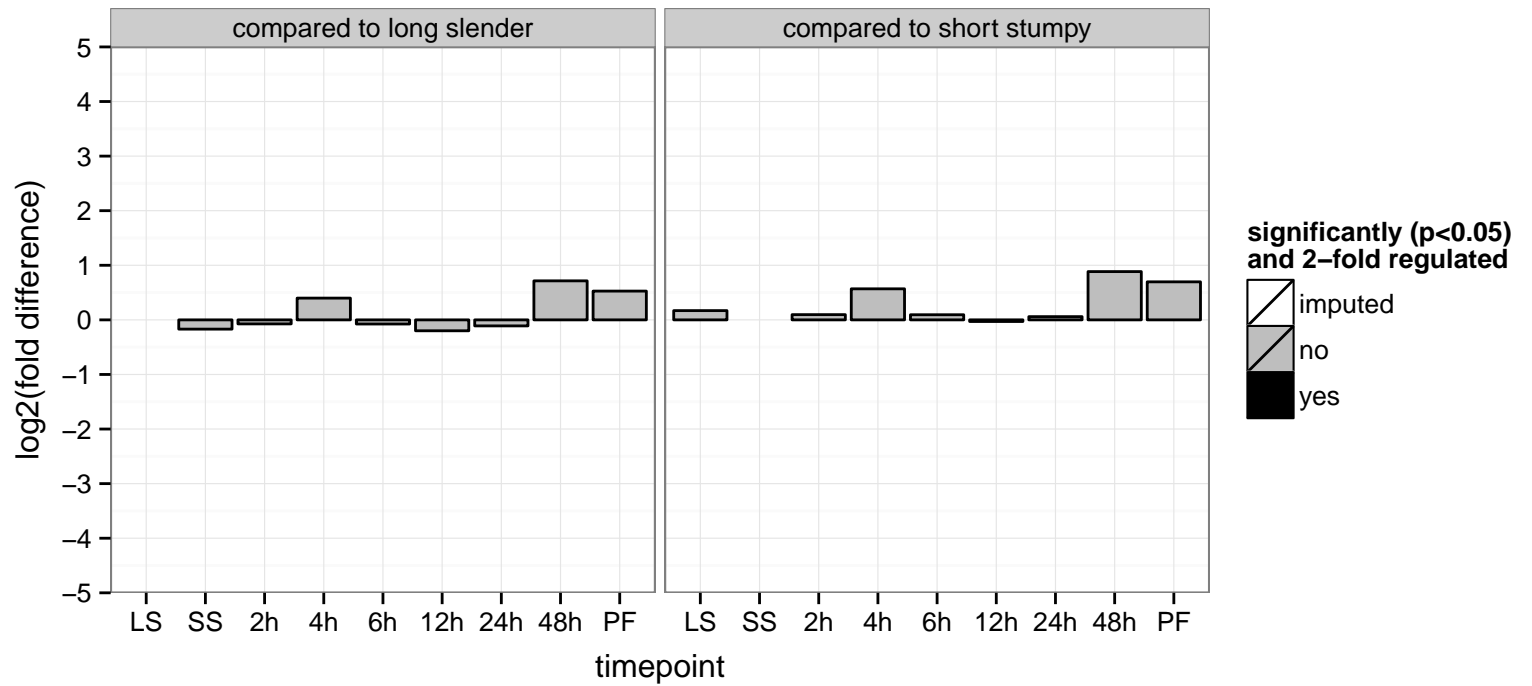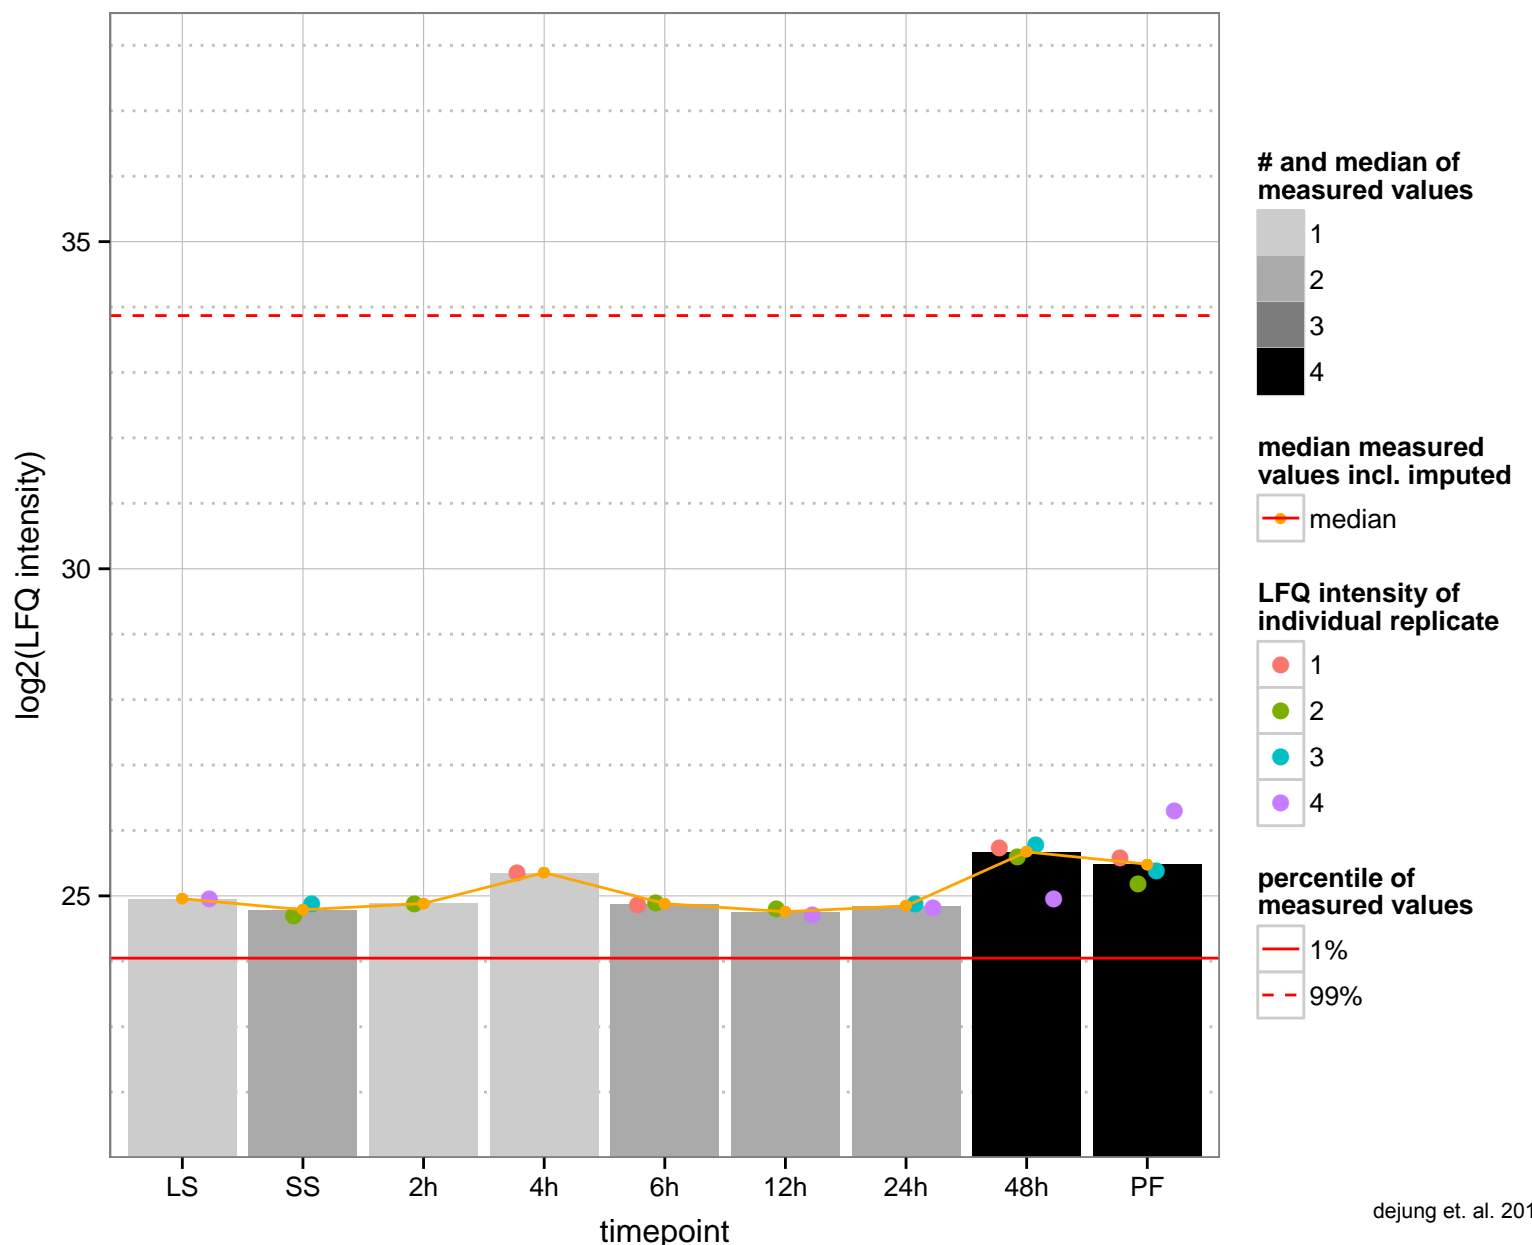

hypothetical protein, conserved  
 Tb927.4.1850  
 AGOF: null  
 AGOC: null  
 AGOP: null  
 PGO: null  
 PGOC: null  
 PGOP: null

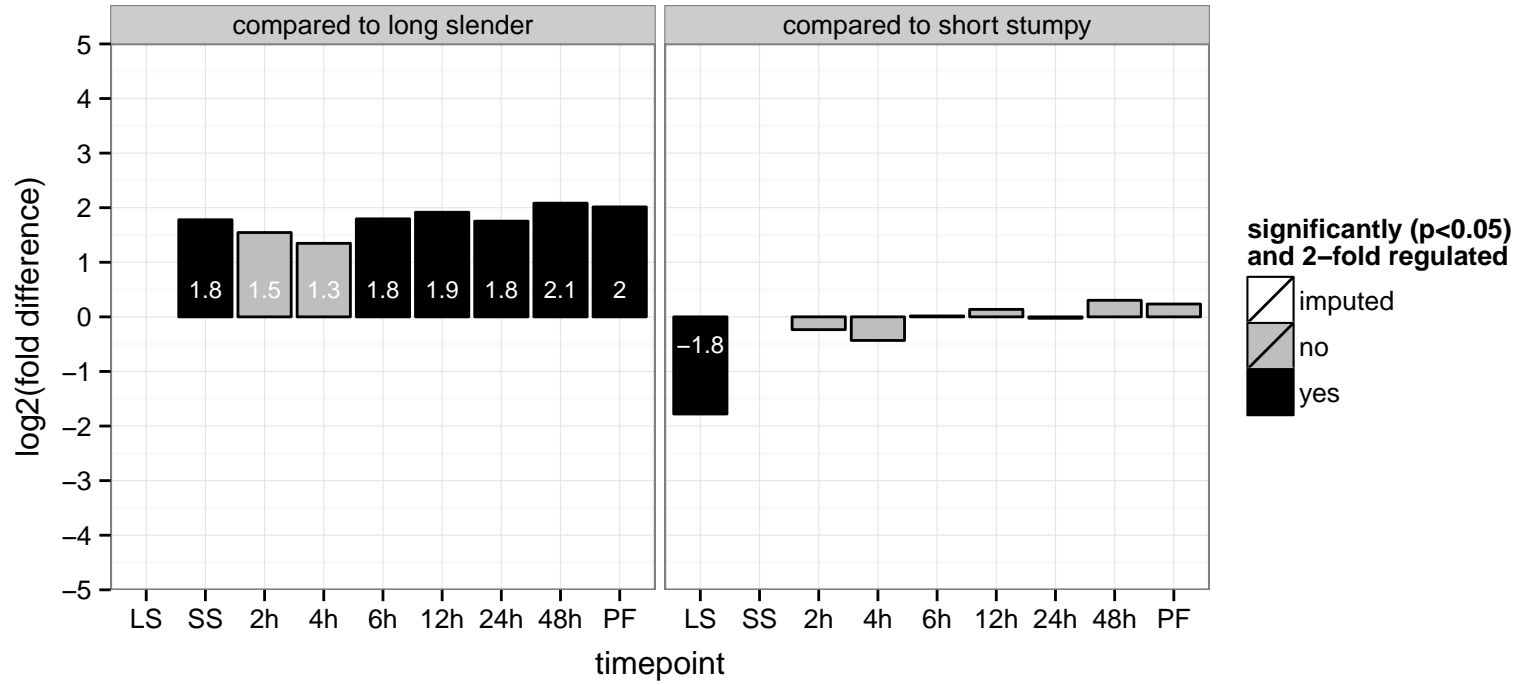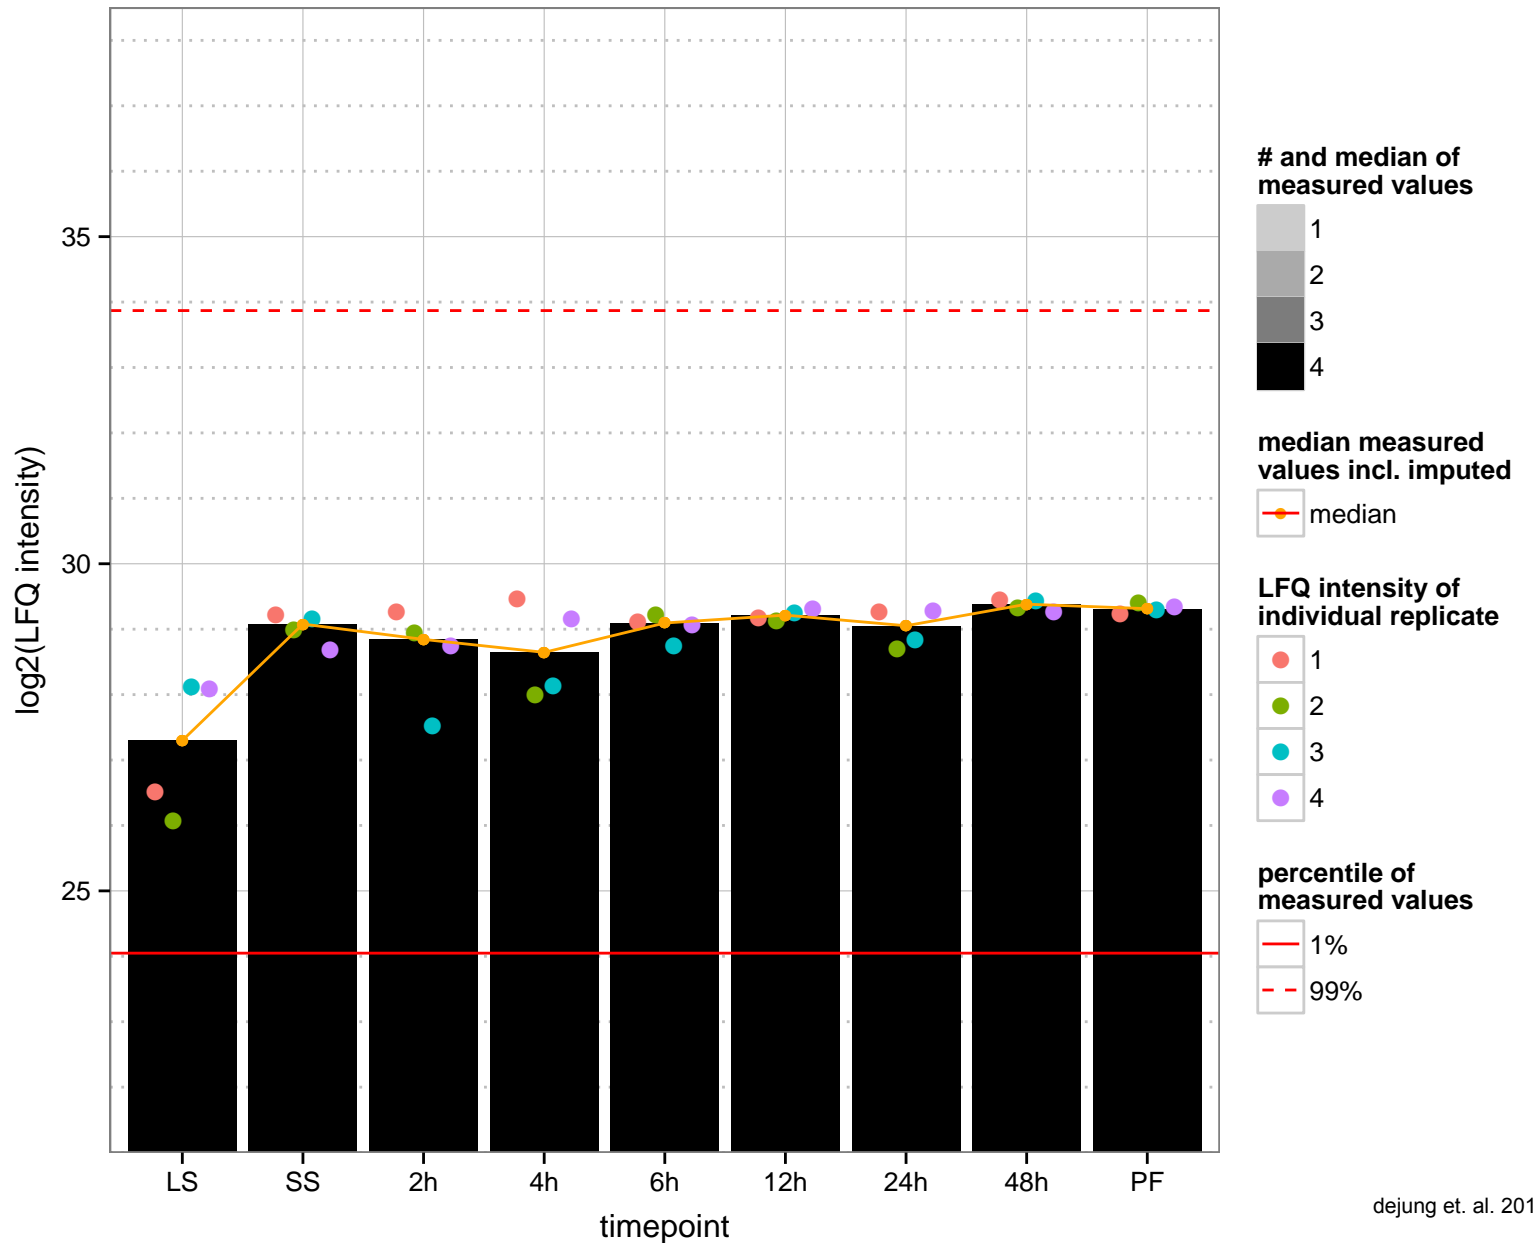

ribosomal protein S19, putative  
 Tb927.4.1860  
 AGOF: structural constituent of ribosome  
 AGOC: intracellular, ribosome  
 AGOP: translation  
 PGOF: structural constituent of ribosome  
 PGOC: intracellular, ribosome  
 PGOP: translation

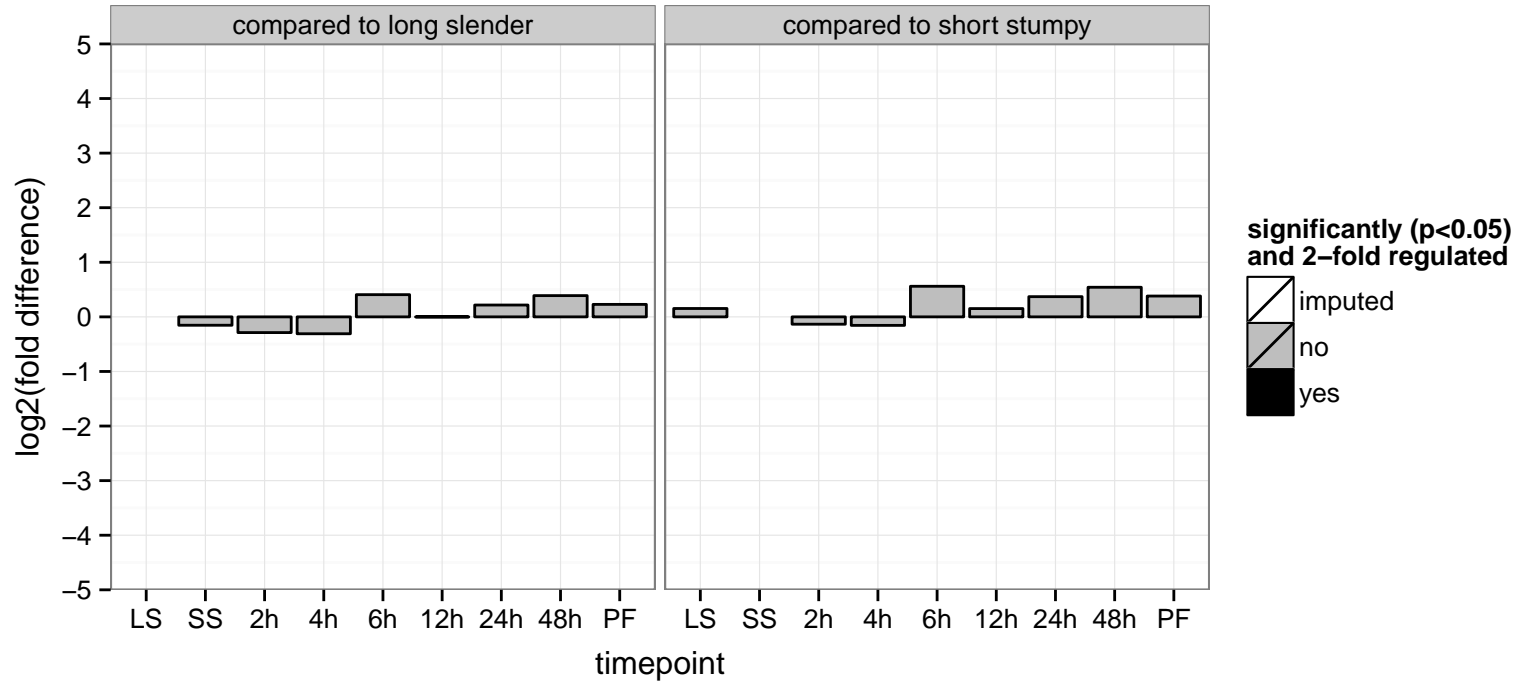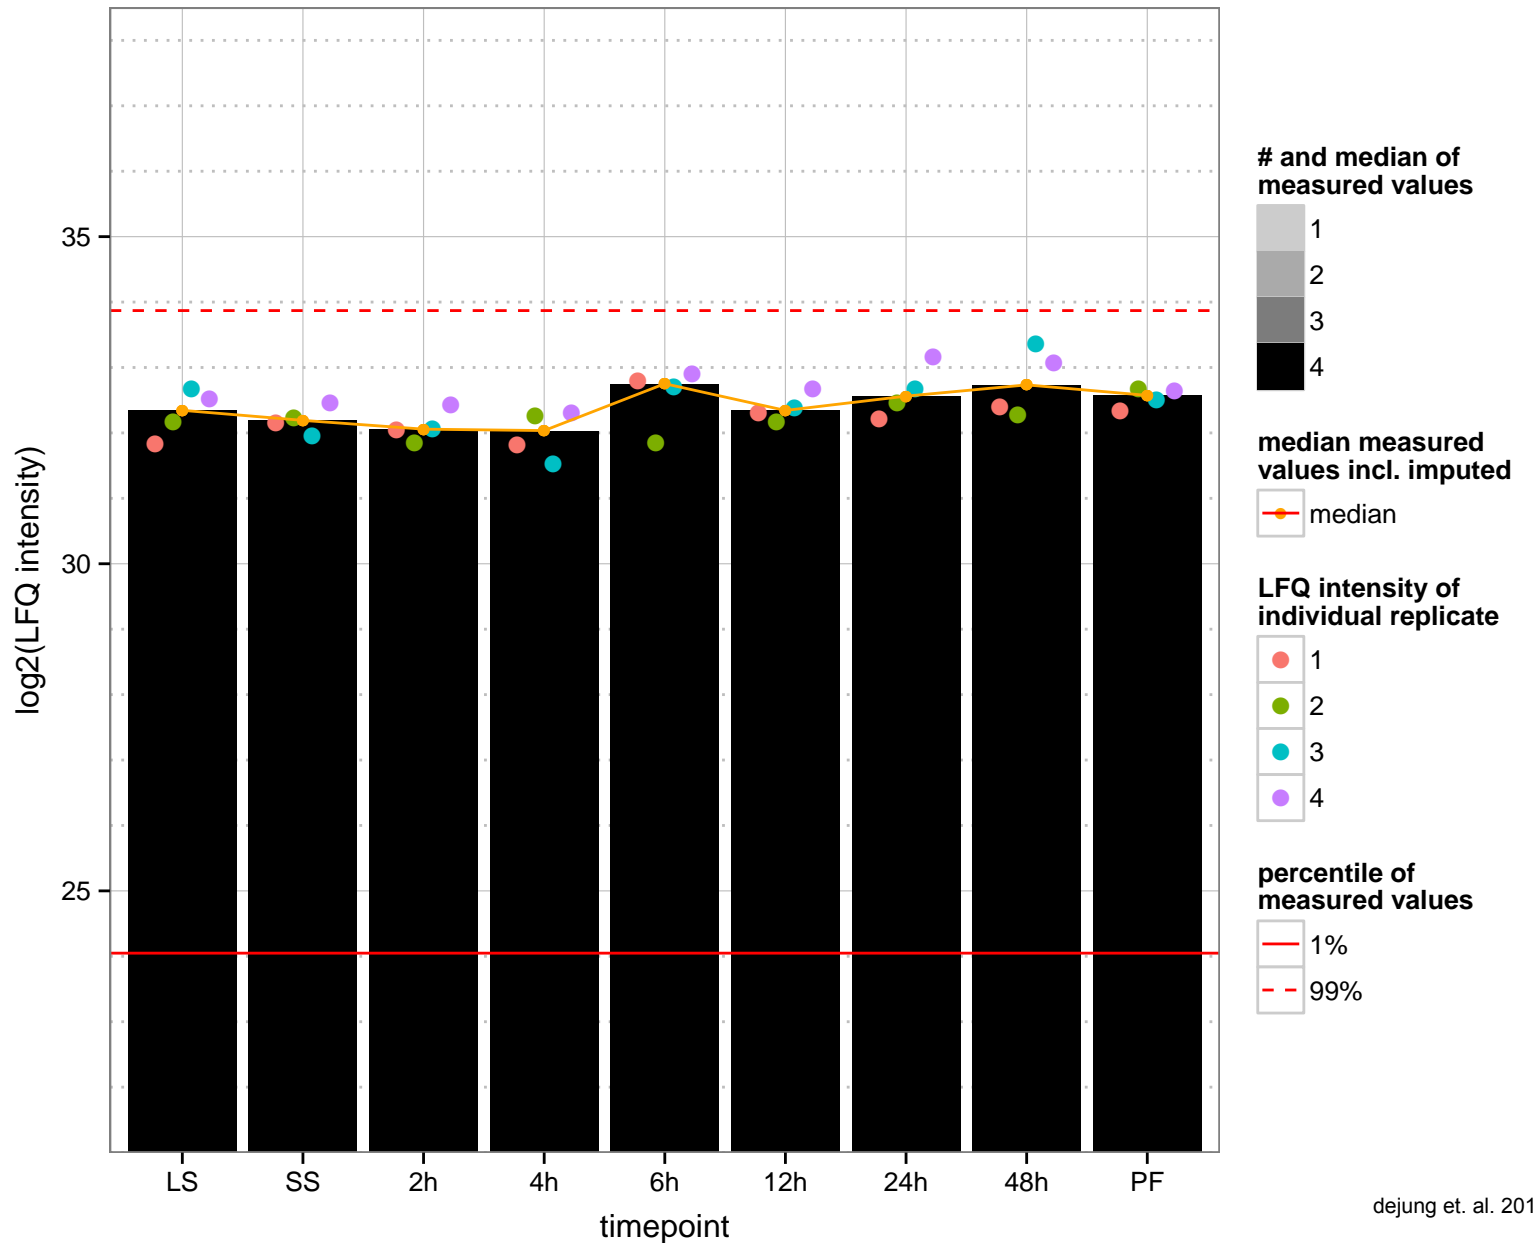

hypothetical protein, conserved  
 Tb927.4.1890  
 AGOF: null  
 AGOC: null  
 AGOP: null  
 PGOF: null  
 PGO: null  
 PGOP: null

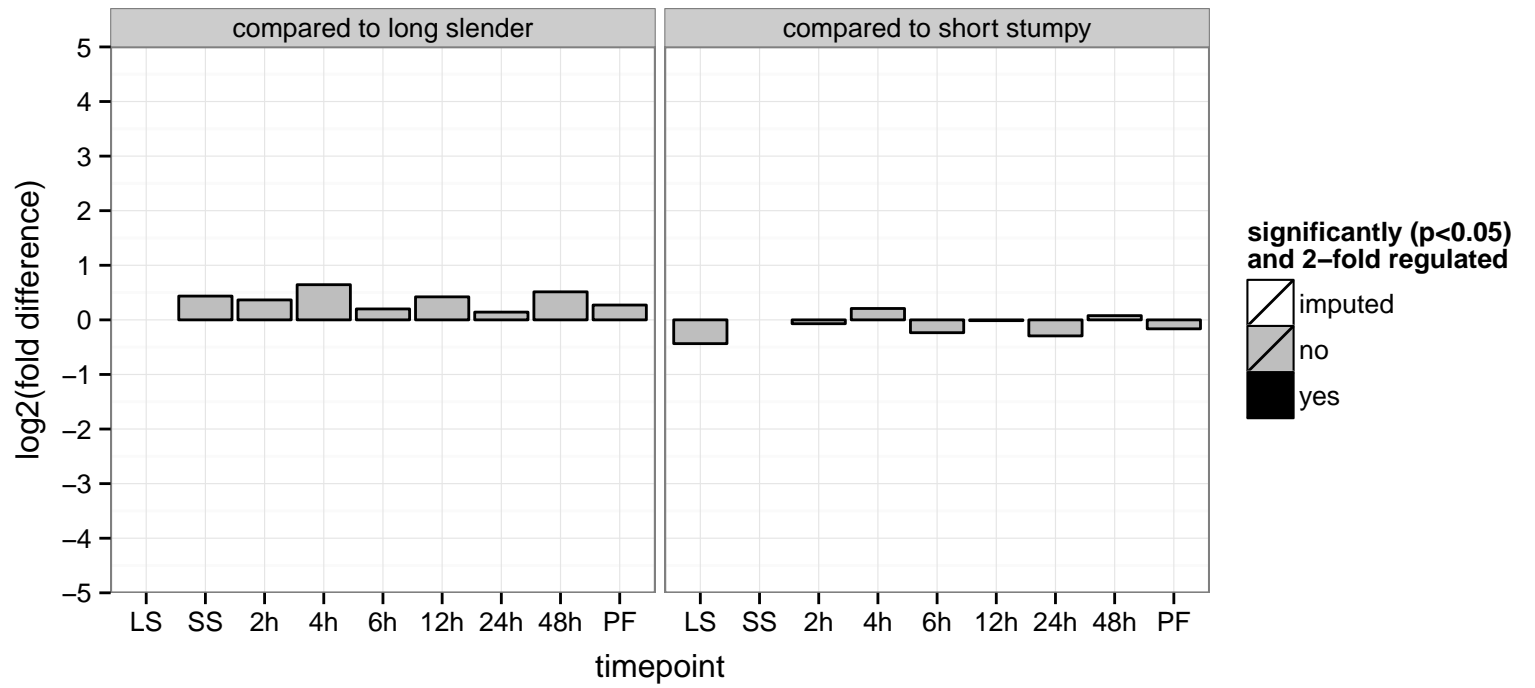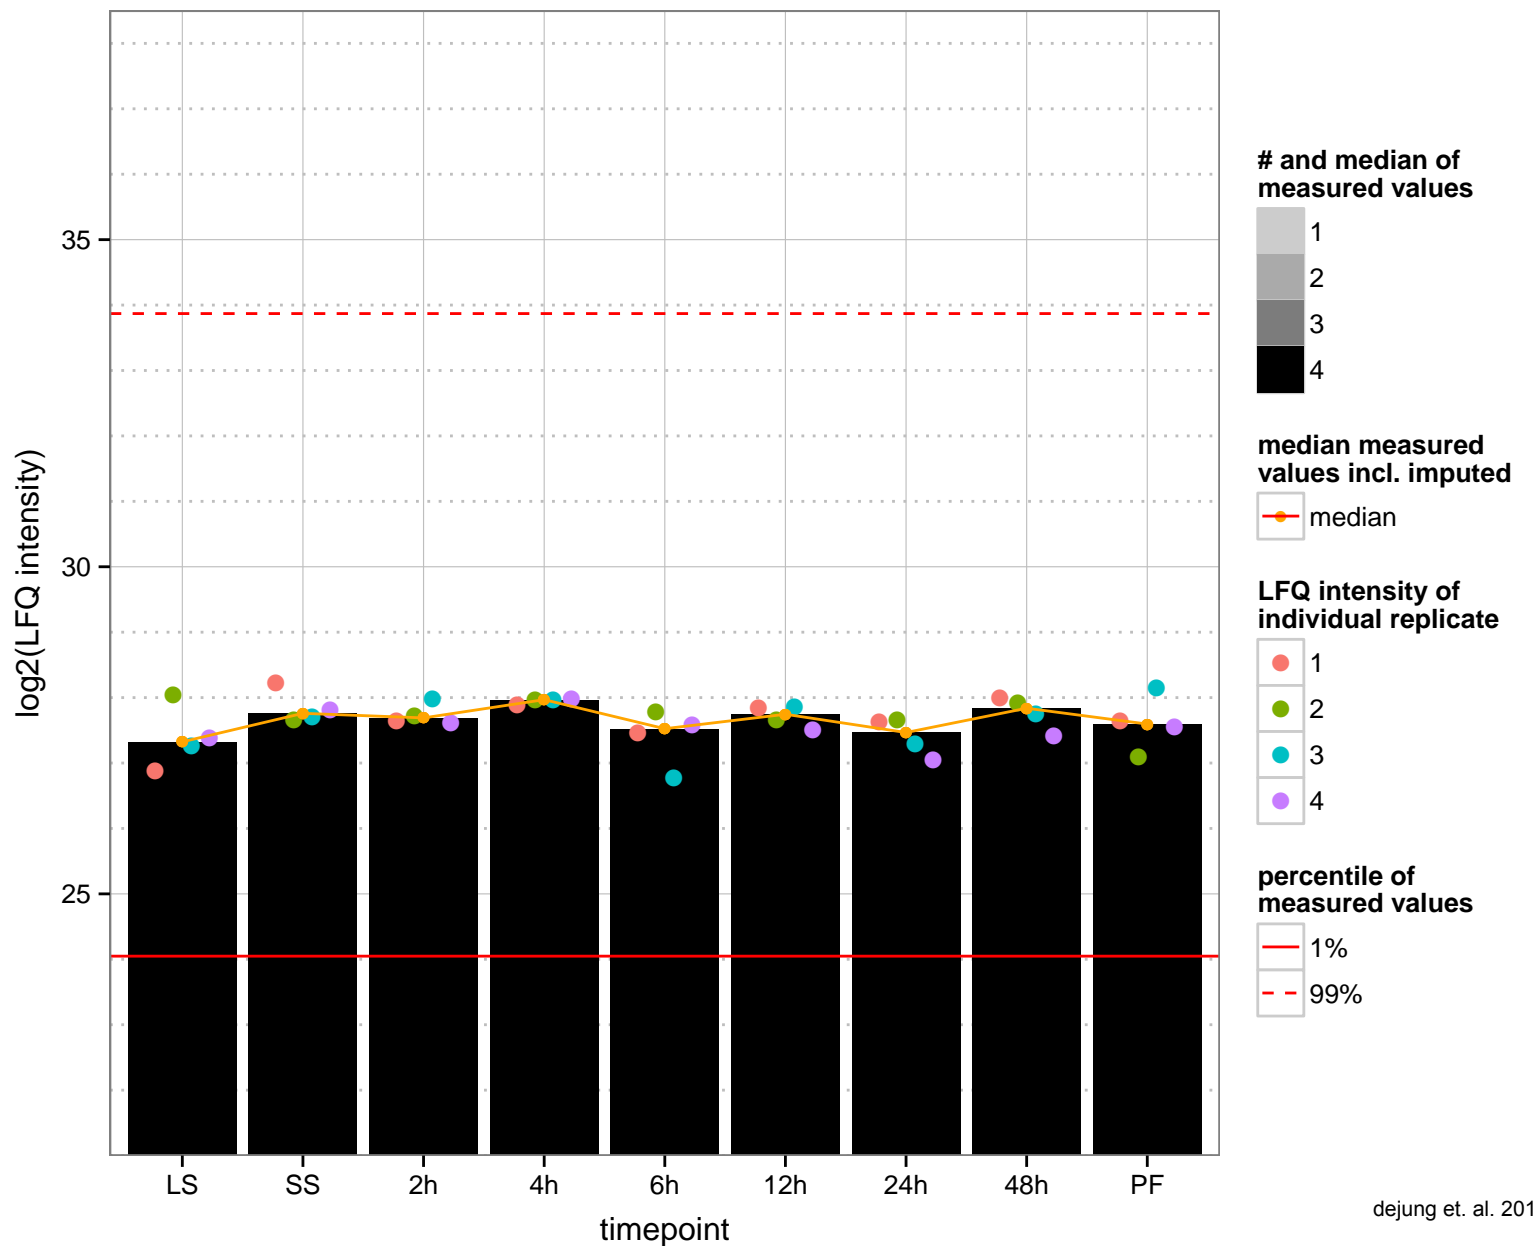



GPI transamidase, putative, glycosylphosphatidylinositol (GPI) anchor, putative (TbGPI16)  
 Tb927.4.1920  
 AGOF: GPI-anchor transamidase activity  
 AGOC: GPI-anchor transamidase complex  
 AGOP: attachment of GPI anchor to protein  
 PGOF: null  
 PGOE: null  
 PGOP: null

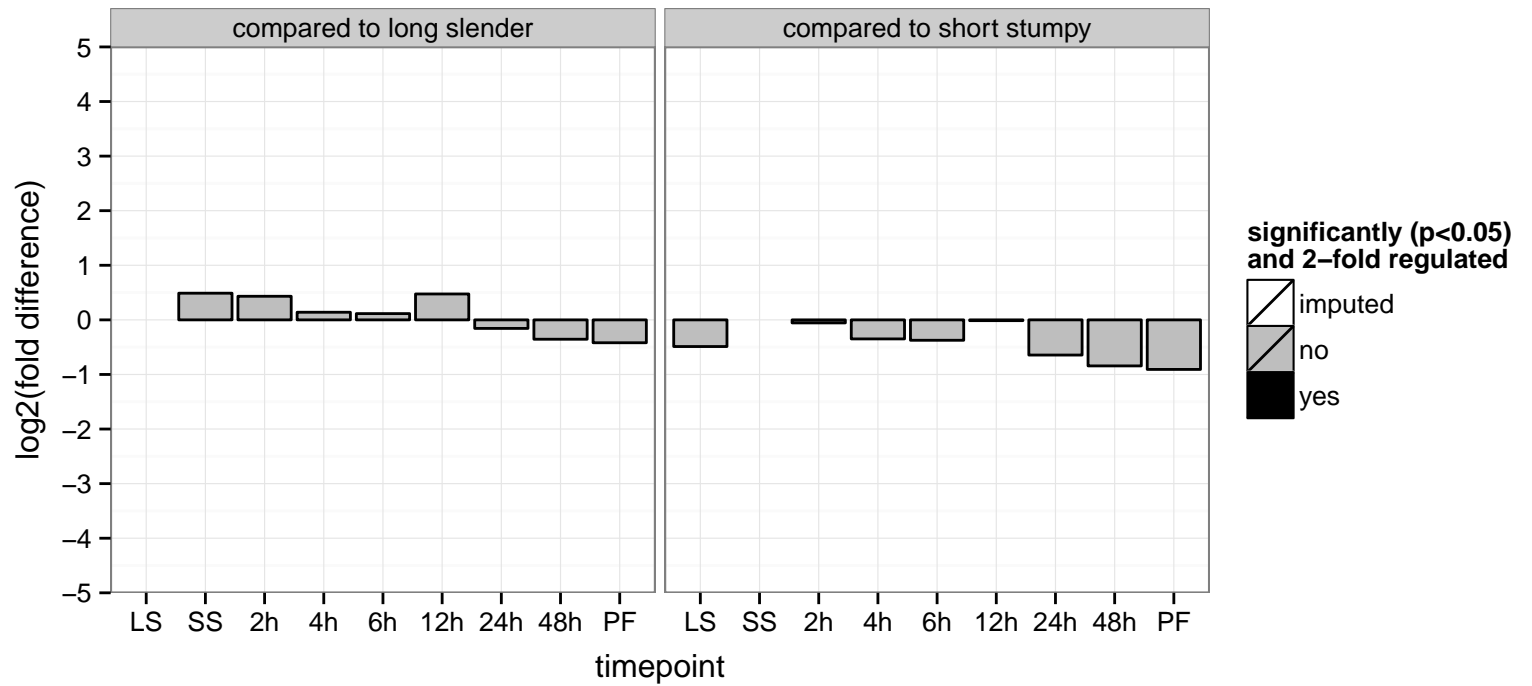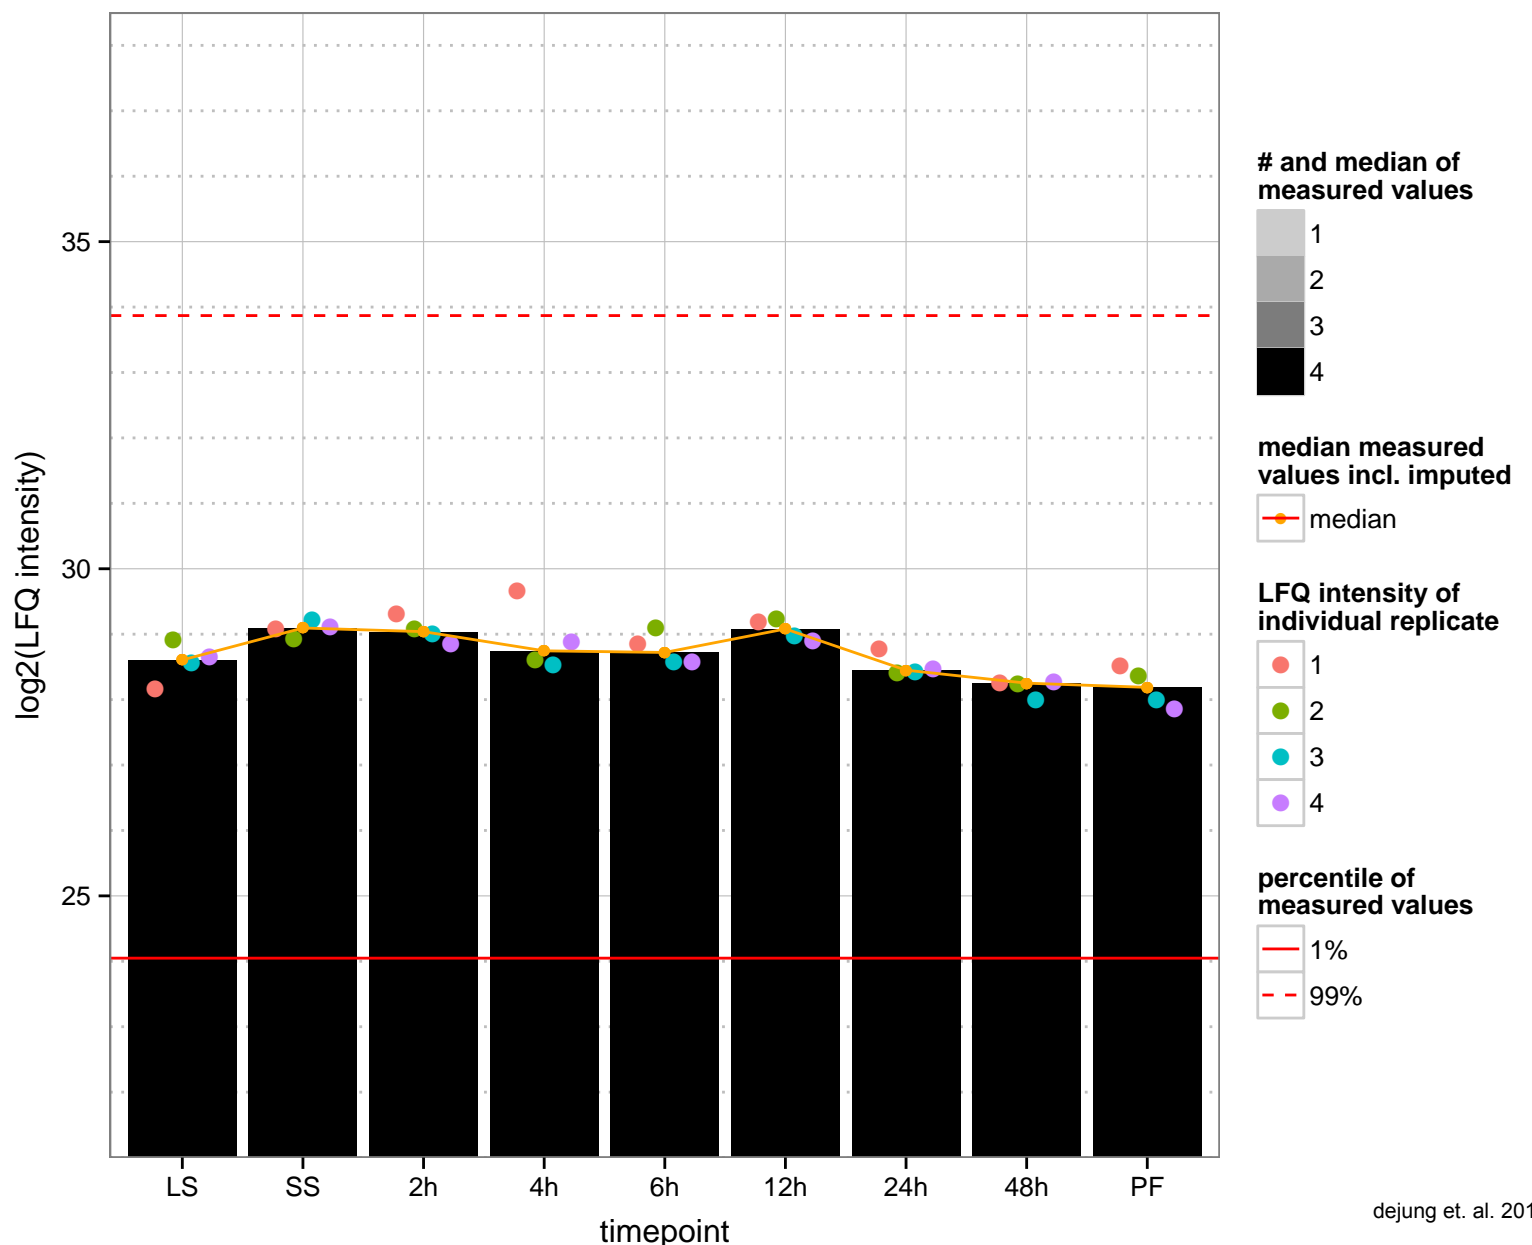

hypothetical protein, conserved  
 Tb927.4.1940  
 AGOF: null  
 AGOC: null  
 AGOP: null  
 PGO: protein binding  
 PGOC: null  
 PGOP: null

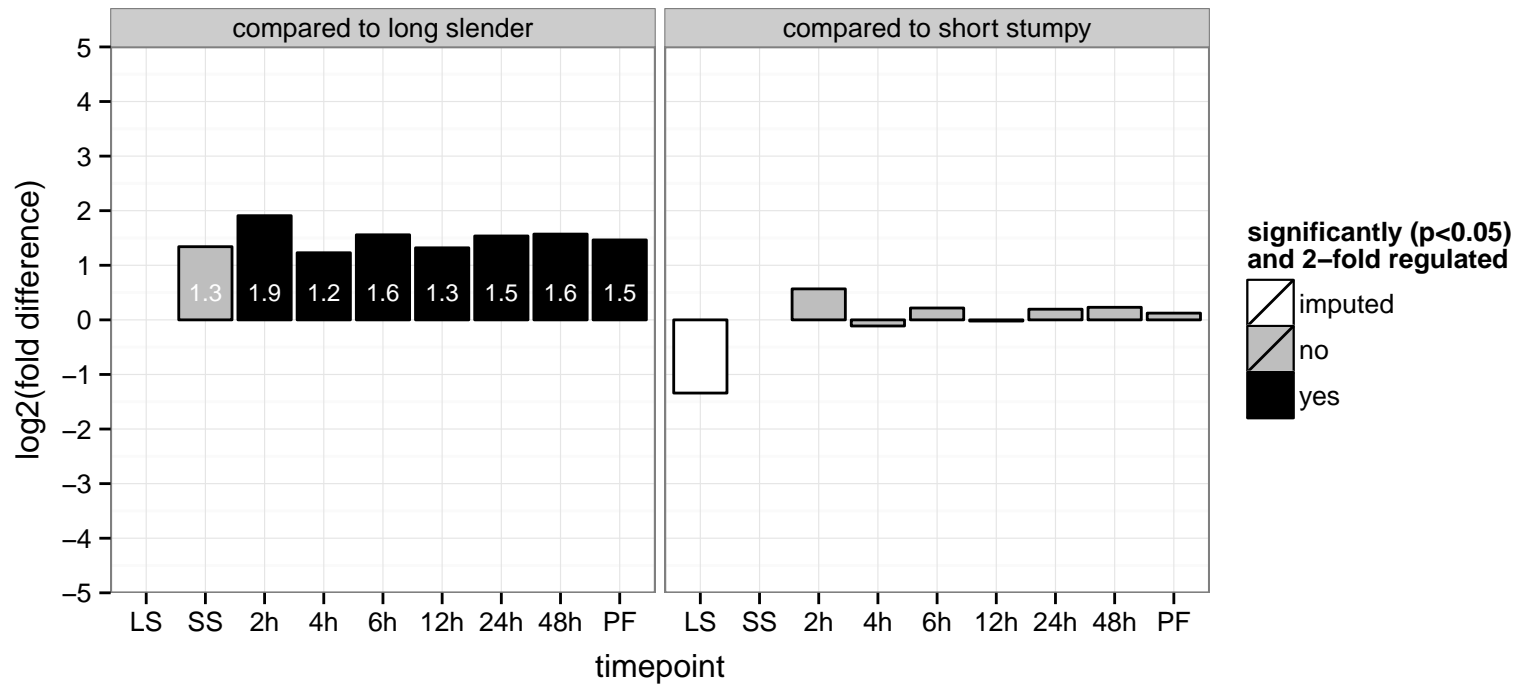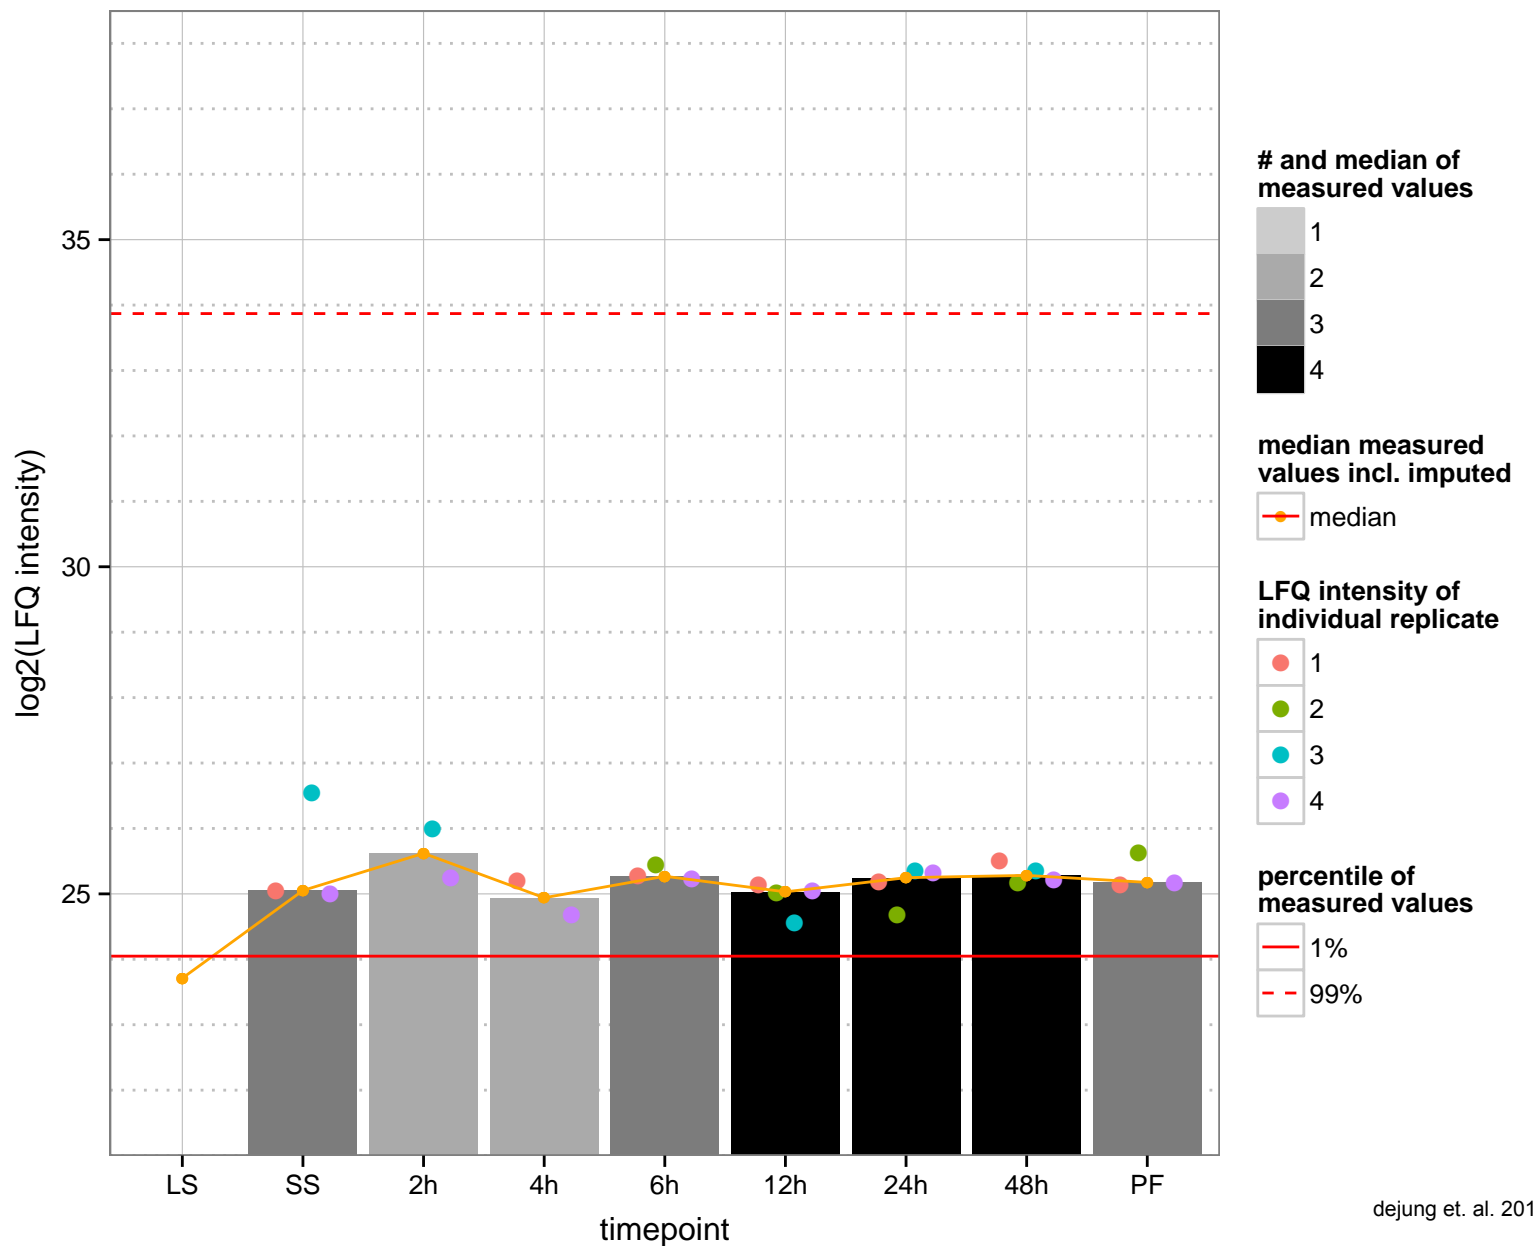

NADPH—cytochrome p450 reductase, putative (CPR)

Tb927.4.1950

AGOF: FMN binding, electron carrier activity, iron ion binding, oxidoreductase activity

AGOC: null

AGOP: null

PGOF: FMN binding, oxidoreductase activity

PGOC: null

PGOP: oxidation–reduction process

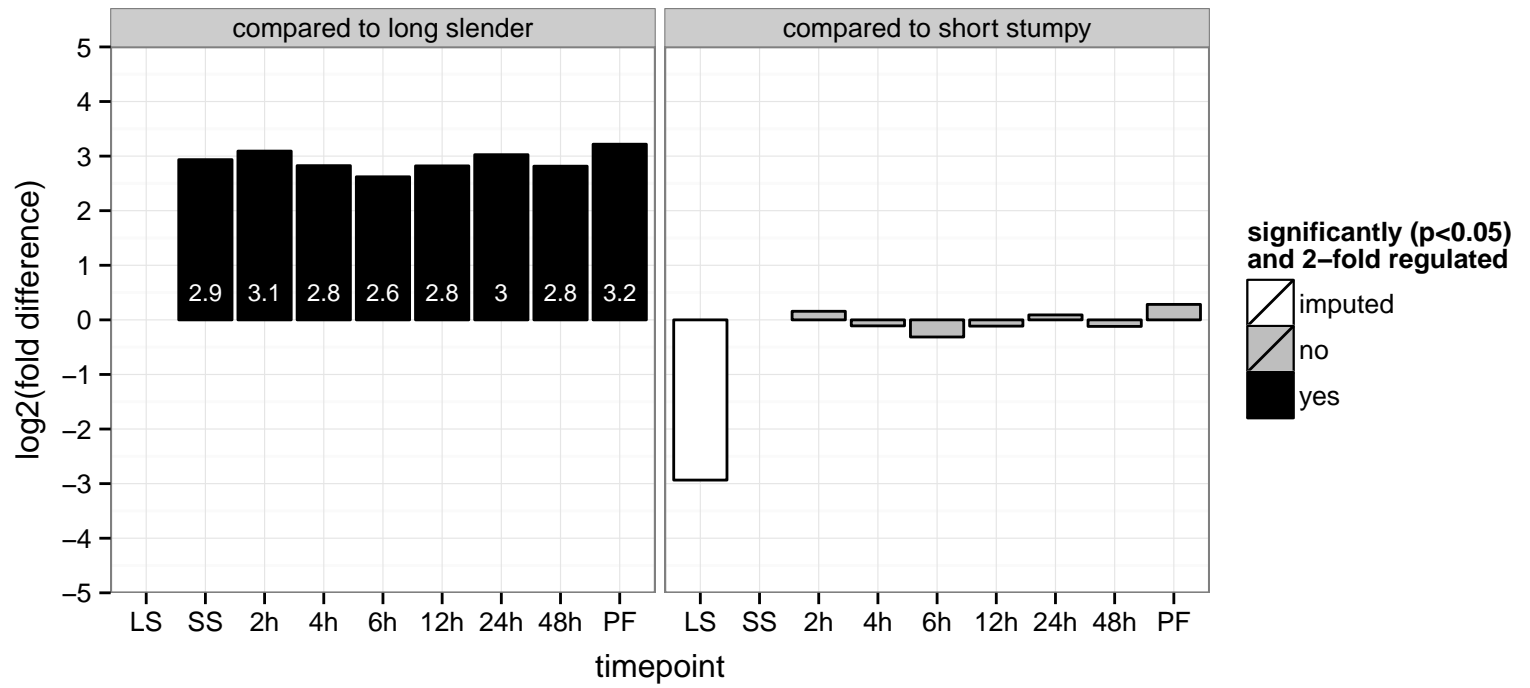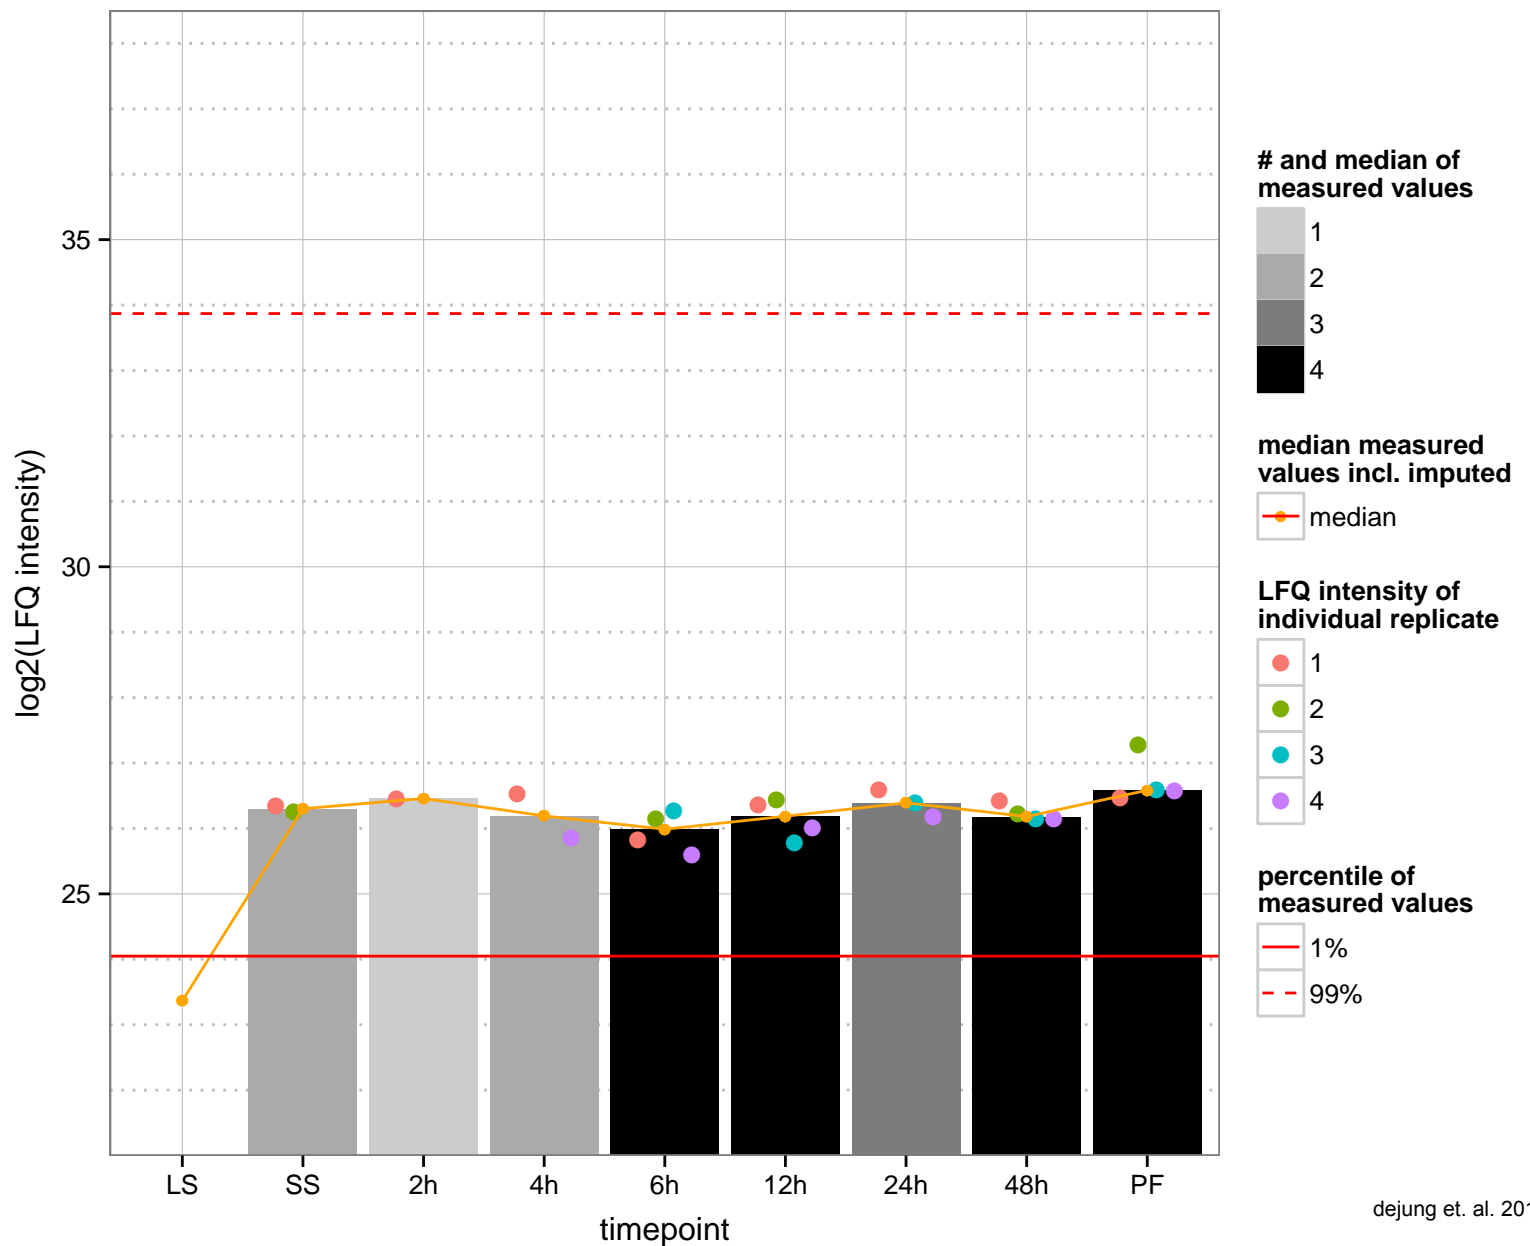

hypothetical protein, conserved  
 Tb927.4.1970  
 AGOF: null  
 AGOC: null  
 AGOP: null  
 PGO: protein binding  
 PGOC: null  
 PGOP: null

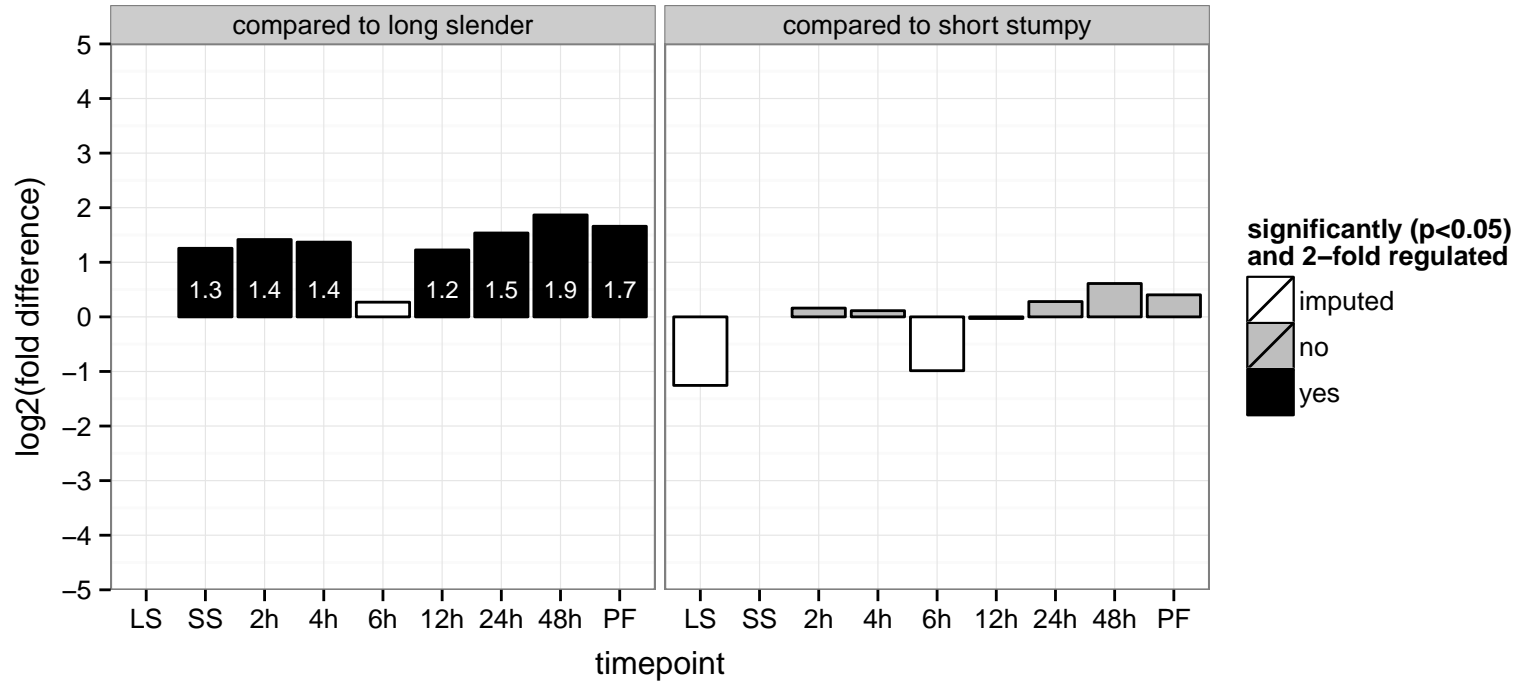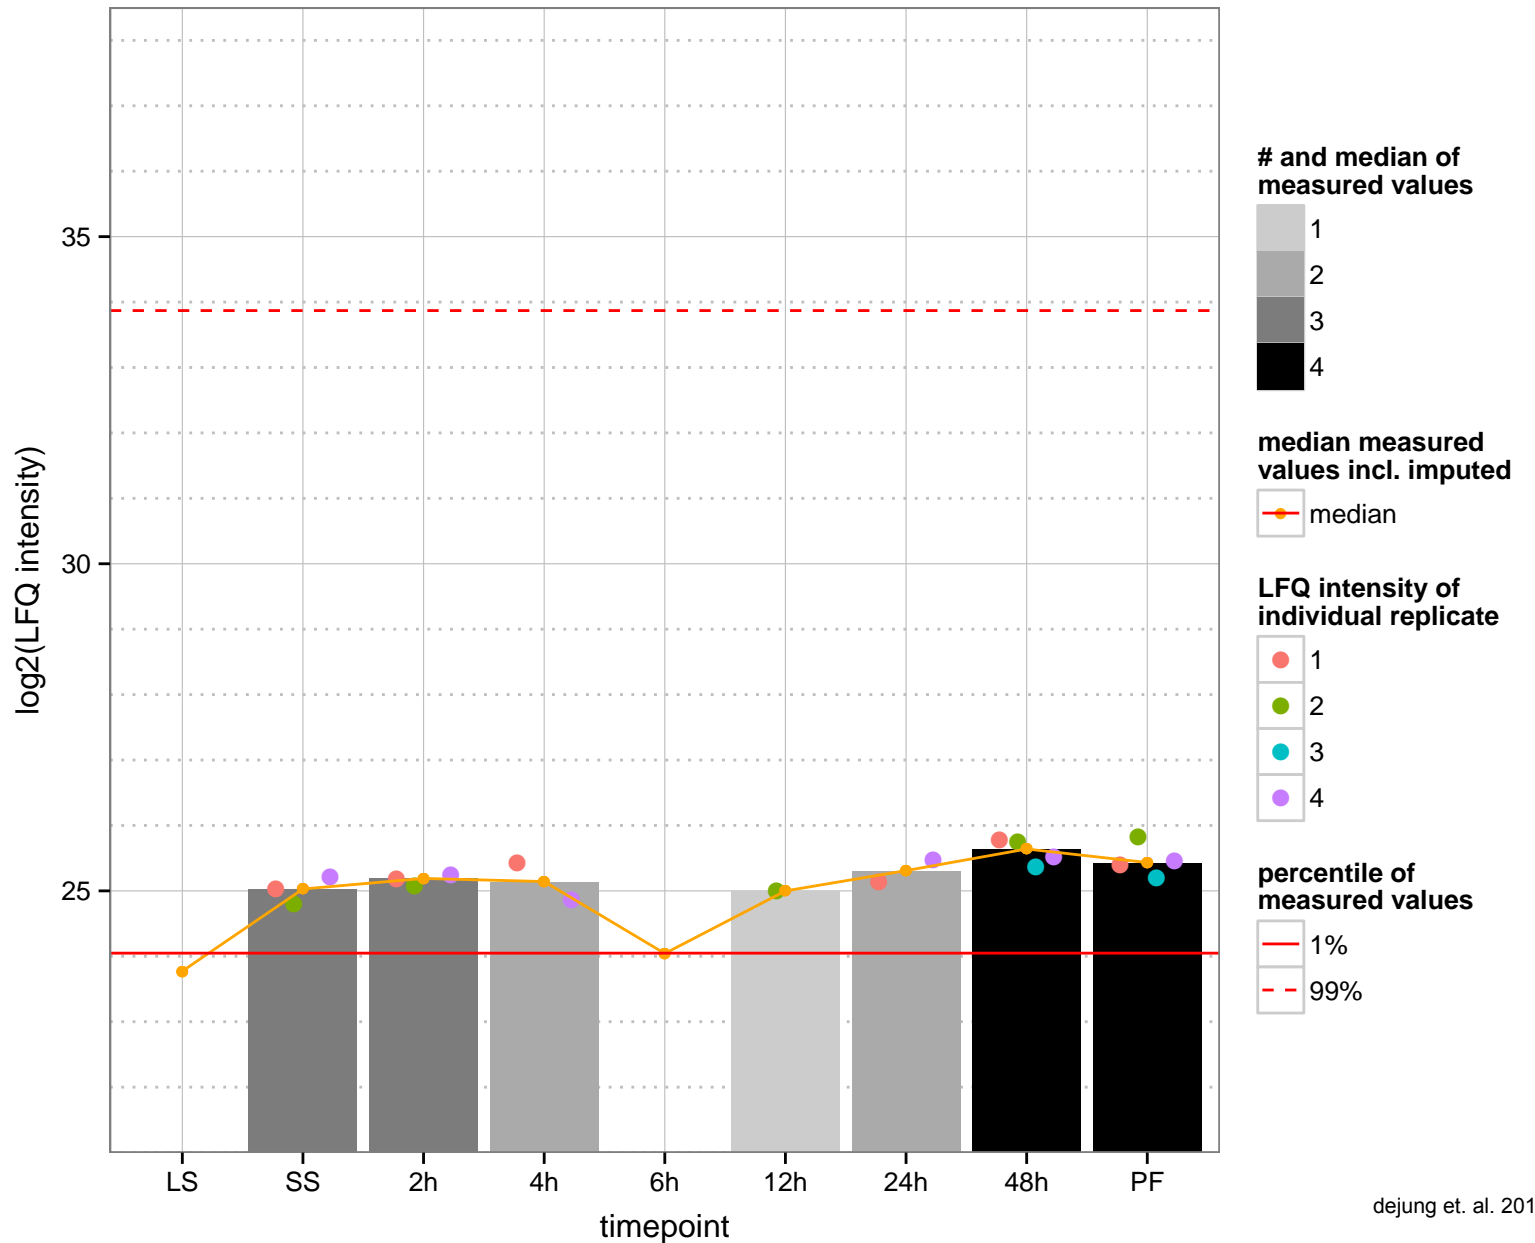

ruvB-like DNA helicase, putative, ATP-dependent DNA helicase  
 Tb927.4.2000  
 AGOF: ATP binding, DNA helicase activity, nucleoside-triphosphatase activity  
 AGOC: nucleus  
 AGOP: null  
 PGOF: ATP binding, DNA helicase activity, nucleoside-triphosphatase activity, nucleotide binding  
 PGO: null  
 PGOP: null

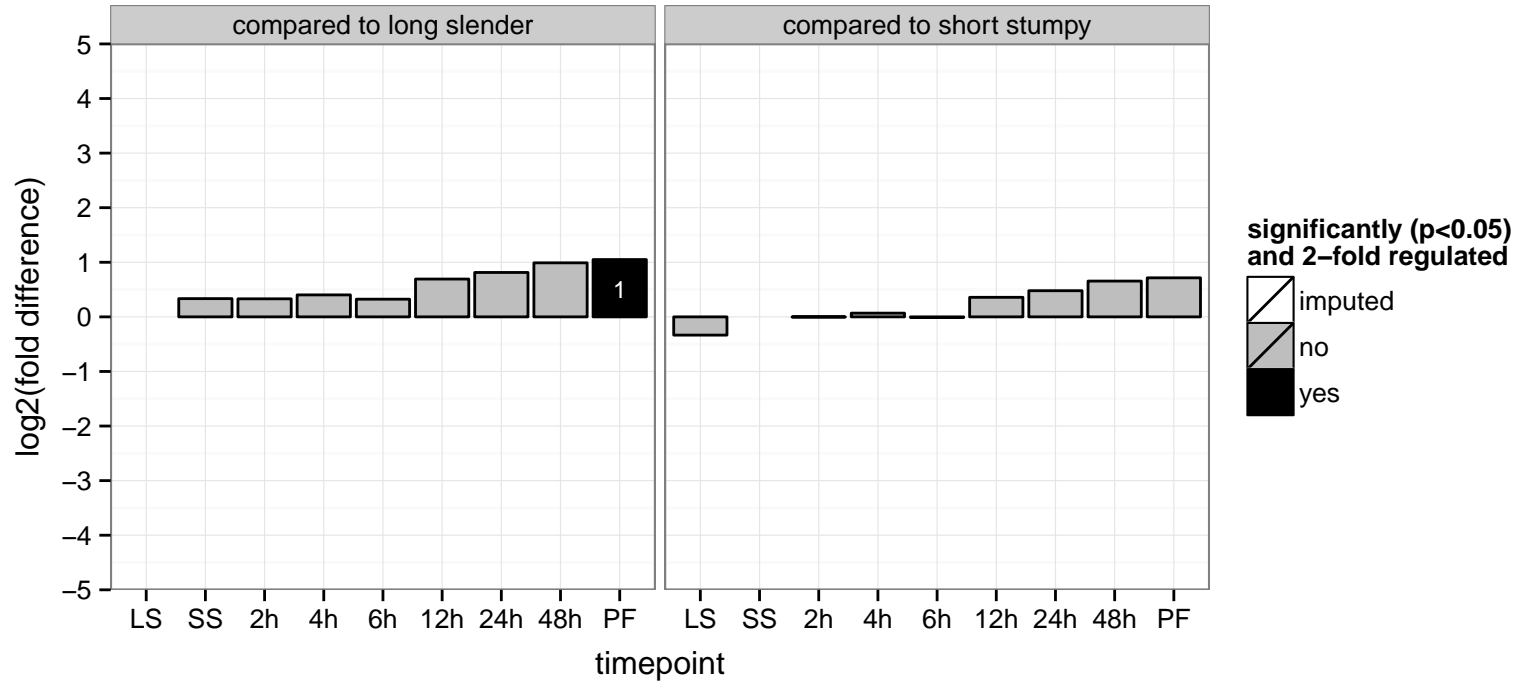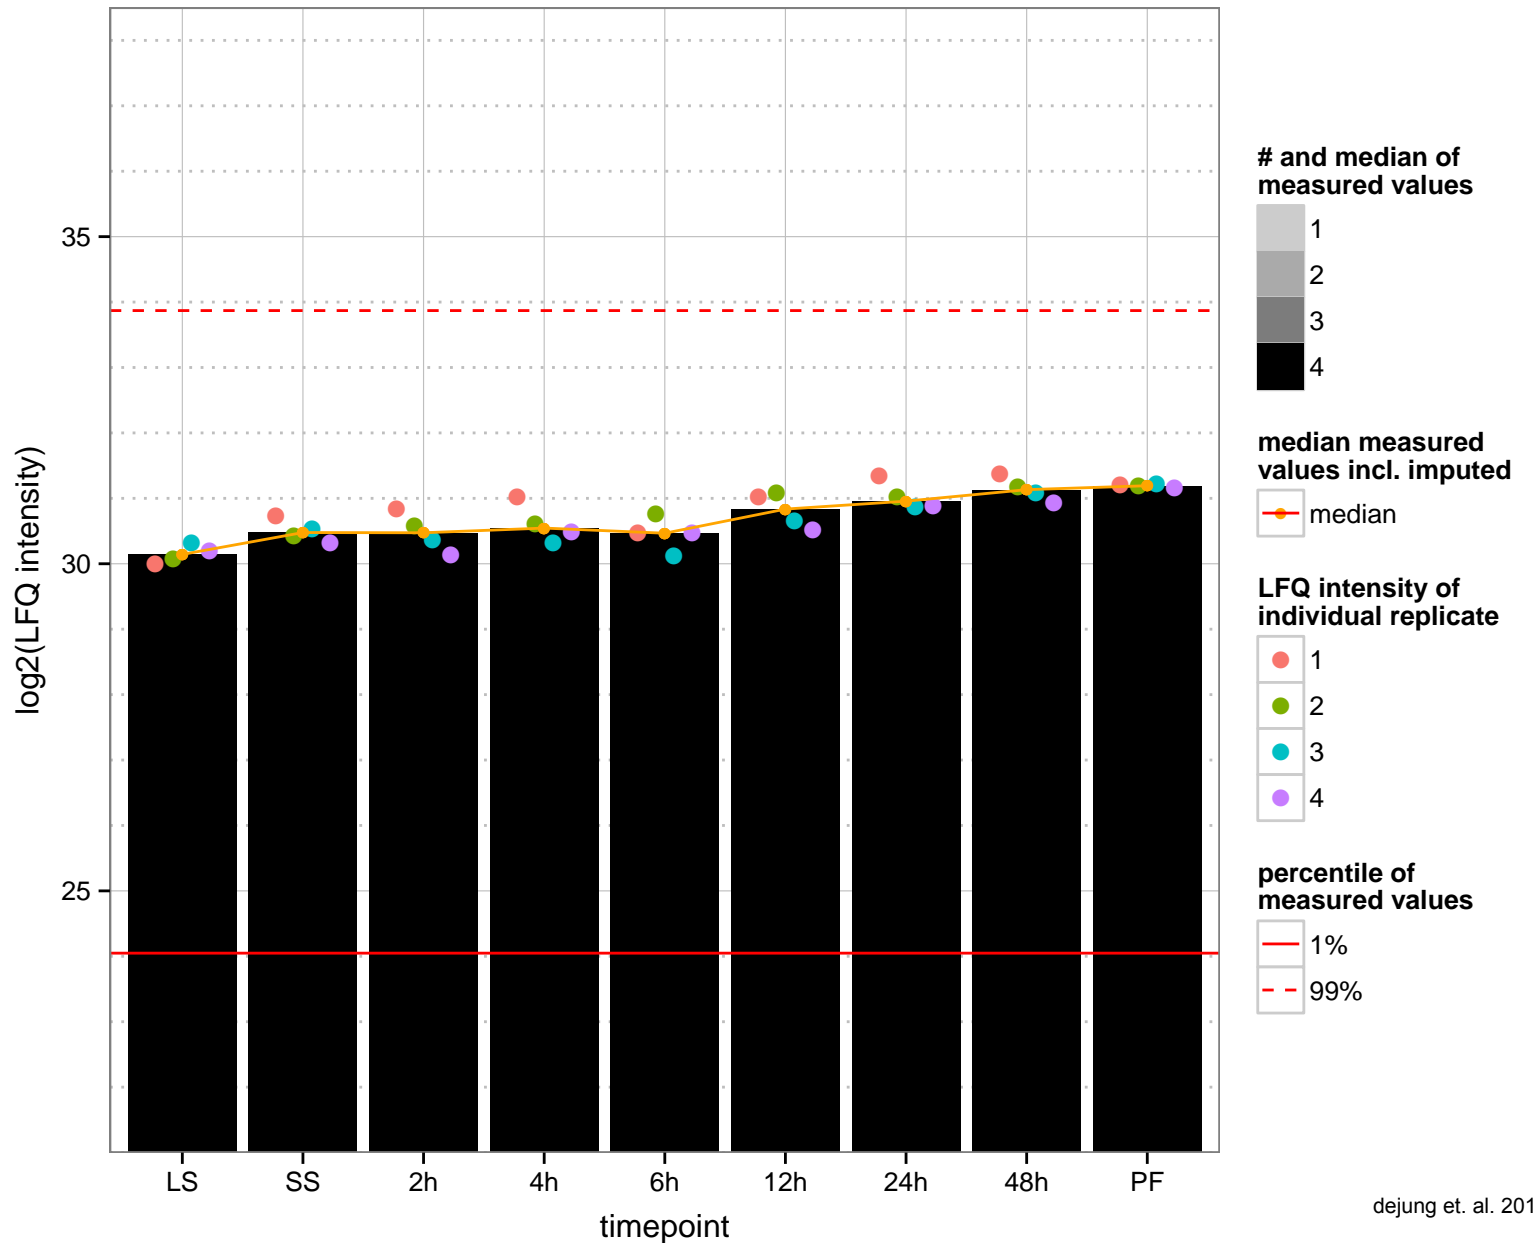

mu-adaptin 3, putative, adaptor complex AP-3 medium subunit  
 Tb927.4.2020  
 AGOF: clathrin binding  
 AGOC: clathrin adaptor complex  
 AGOP: intracellular protein transport, vesicle-mediated transport  
 PGO: protein binding  
 PGOC: clathrin adaptor complex  
 PGO: intracellular protein transport, transport, vesicle-mediated transport

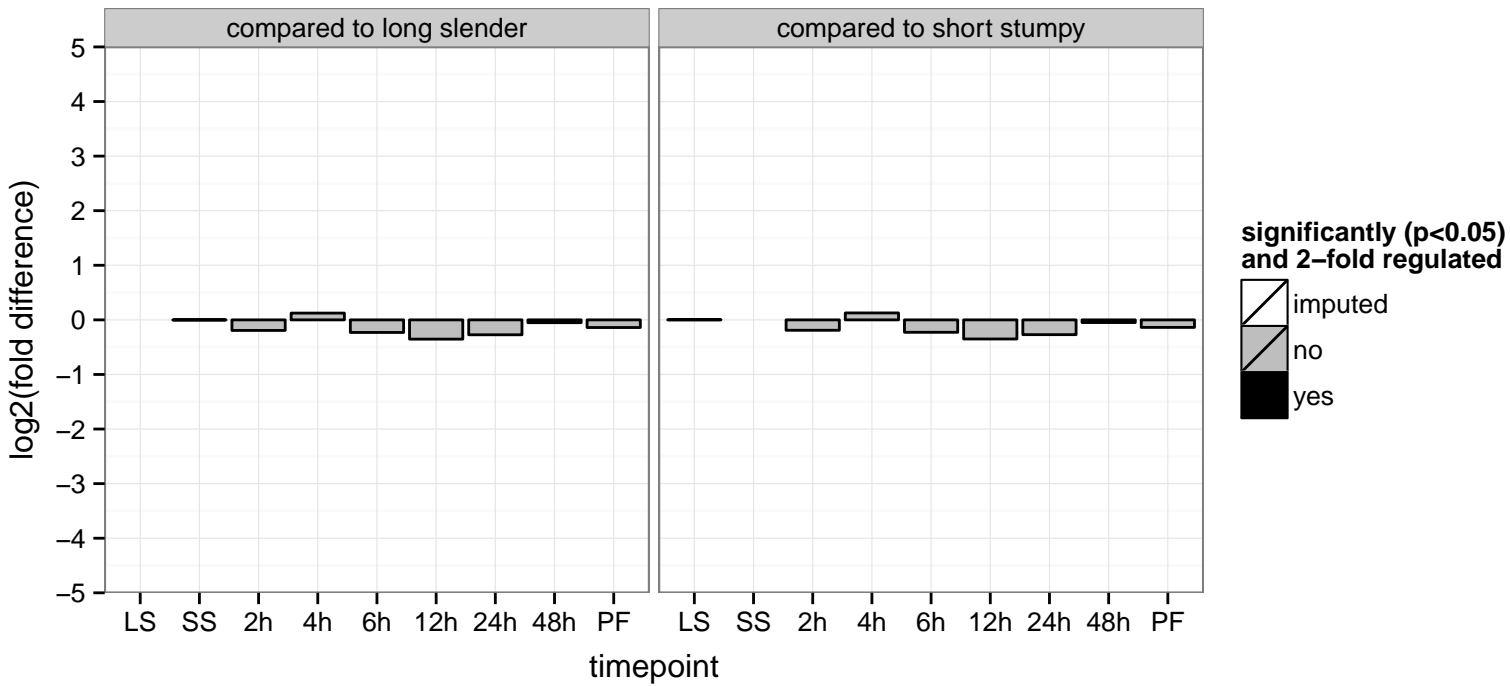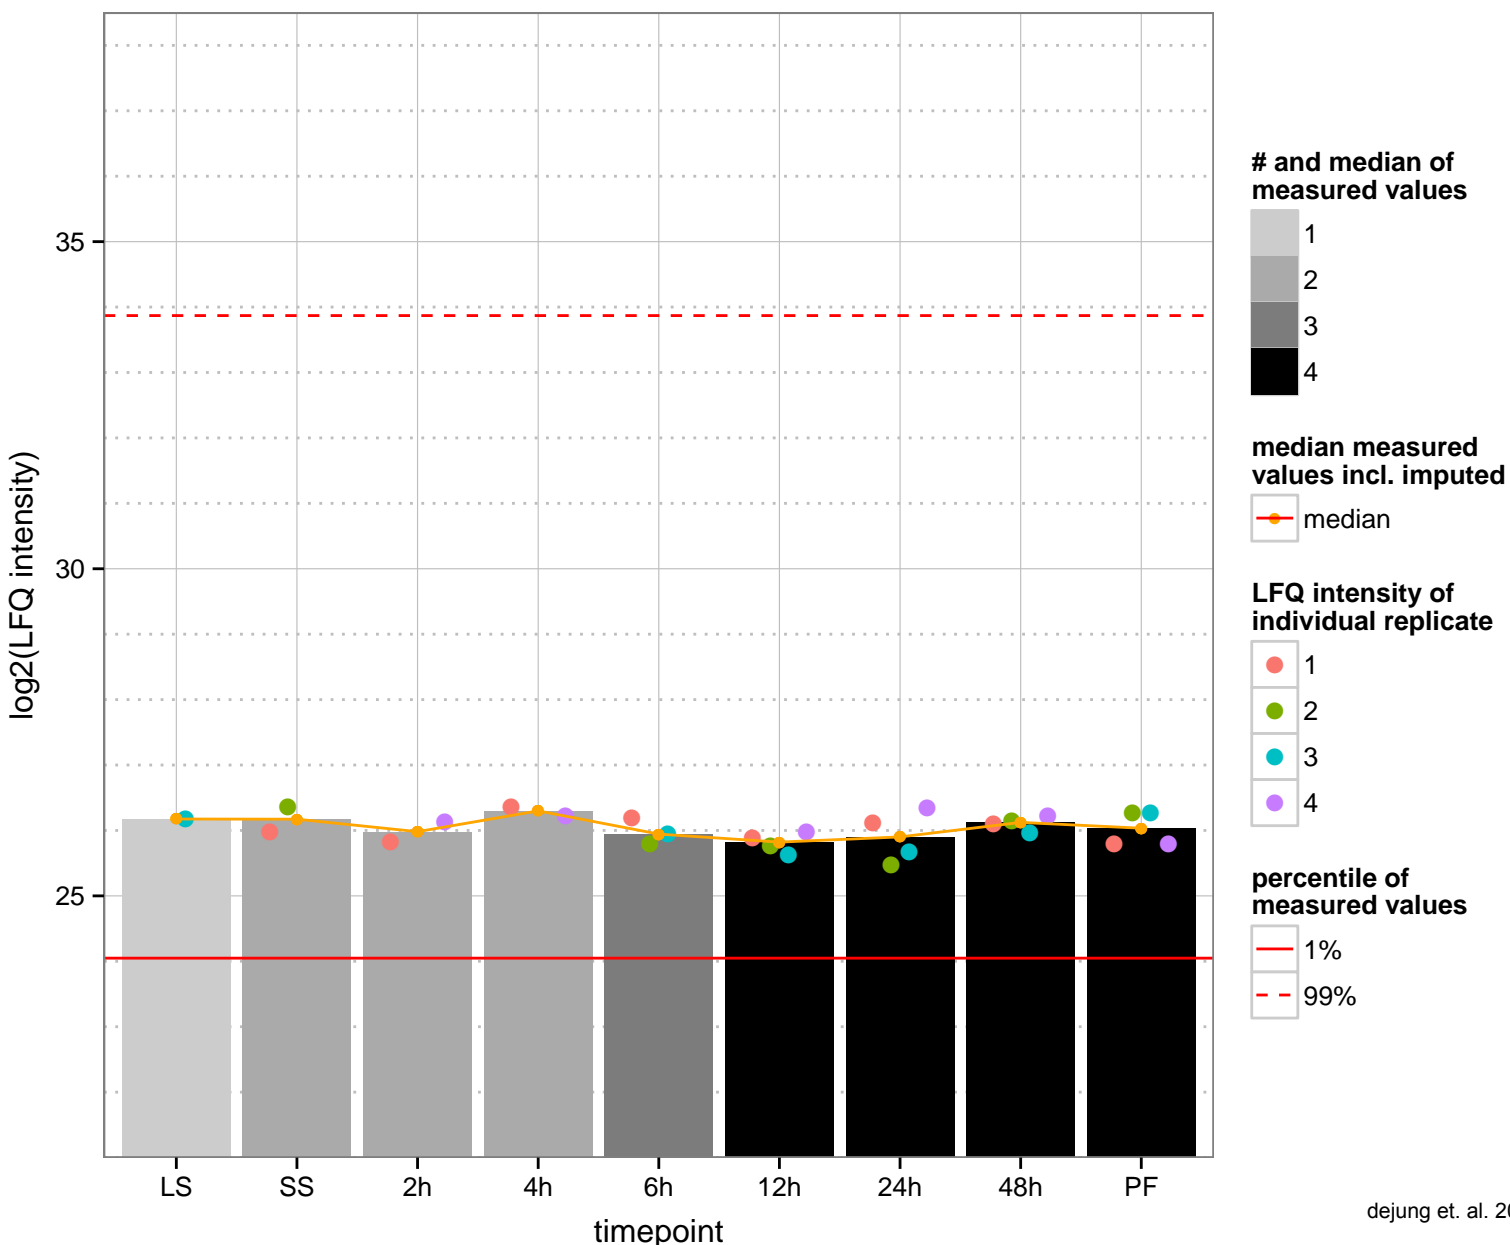

ALBA-Domain Protein (ALBA3)  
 Tb927.4.2040  
 AGOF: nucleic acid binding  
 AGOC: cytoplasm, cytoplasmic stress granule  
 AGOP: null  
 PGOF: nucleic acid binding  
 PGOC: null  
 PGOP: null

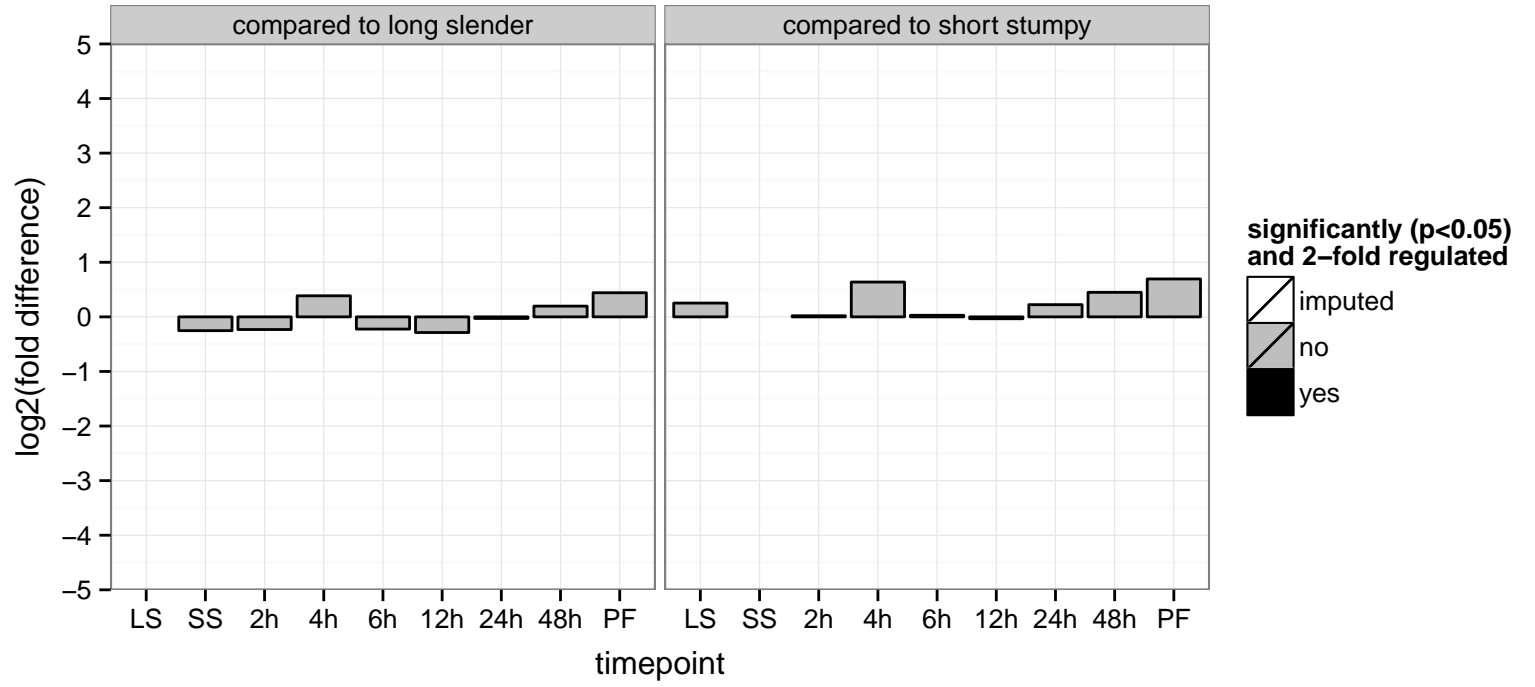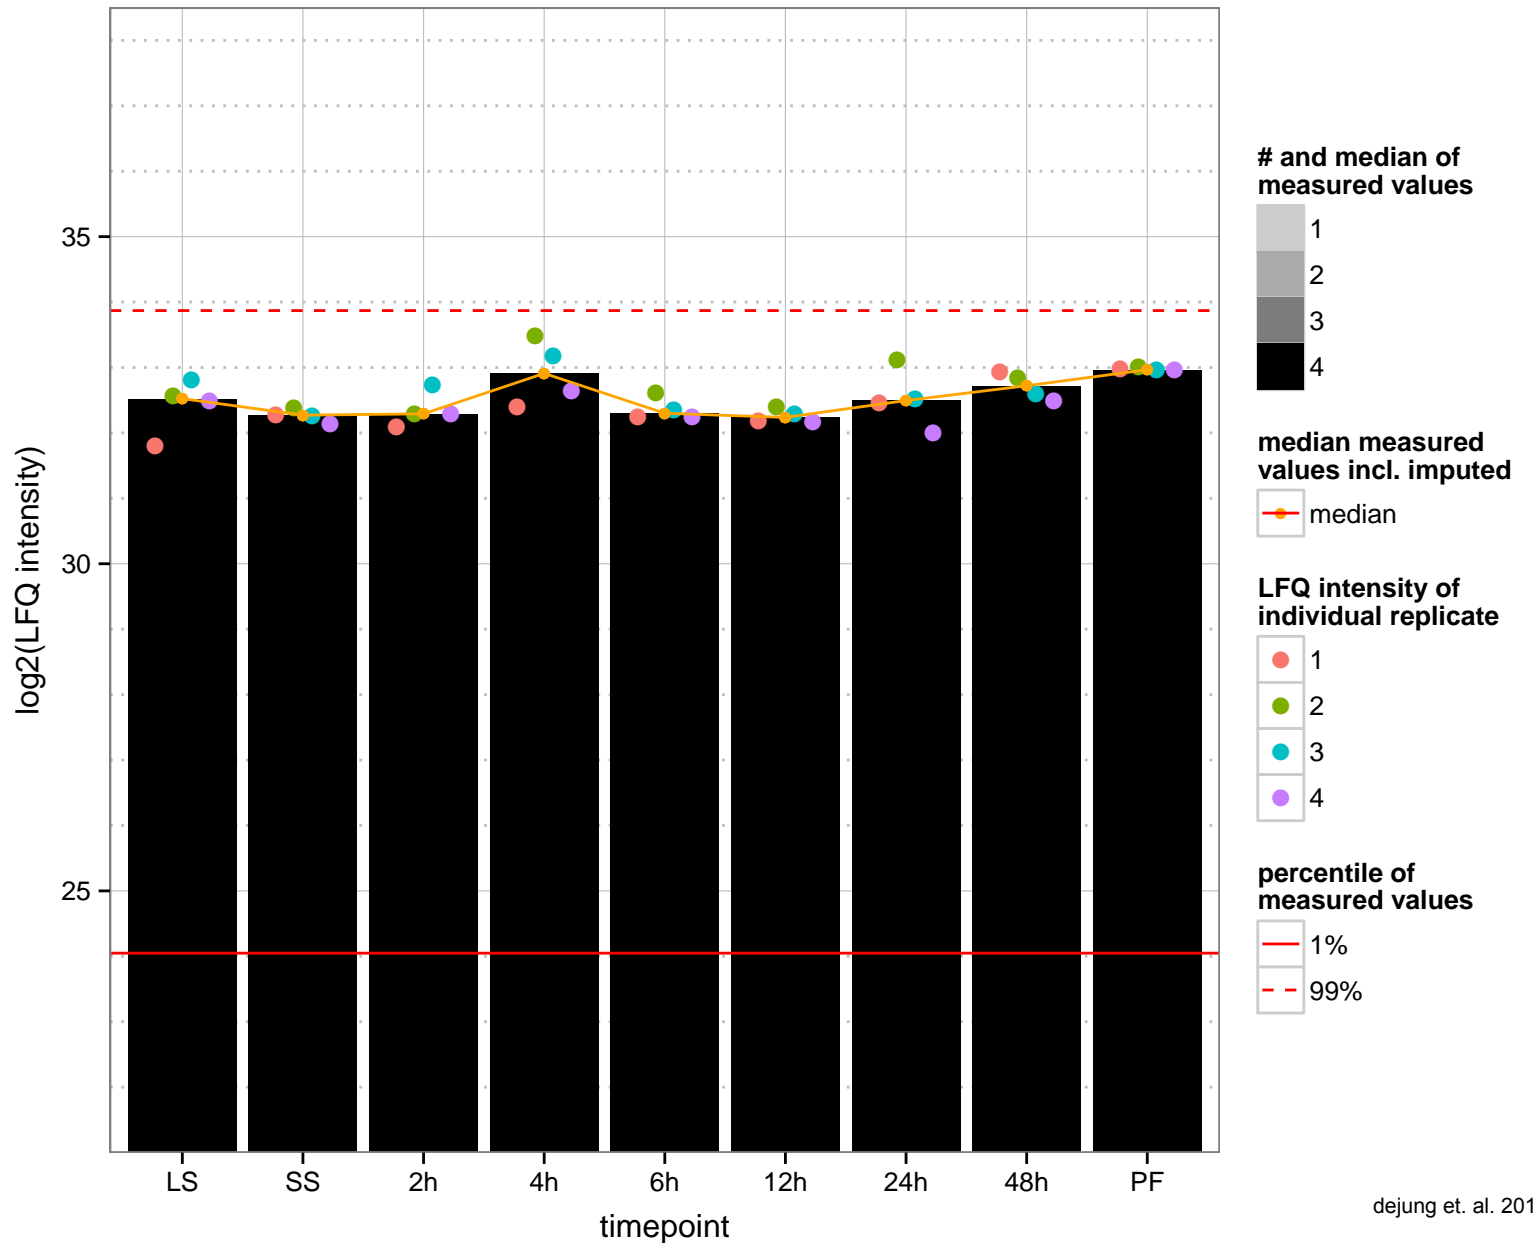

hypothetical protein, conserved  
 Tb927.4.2060  
 AGOF: null  
 AGOC: null  
 AGOP: null  
 PGO: null  
 PGOC: null  
 PGOP: null

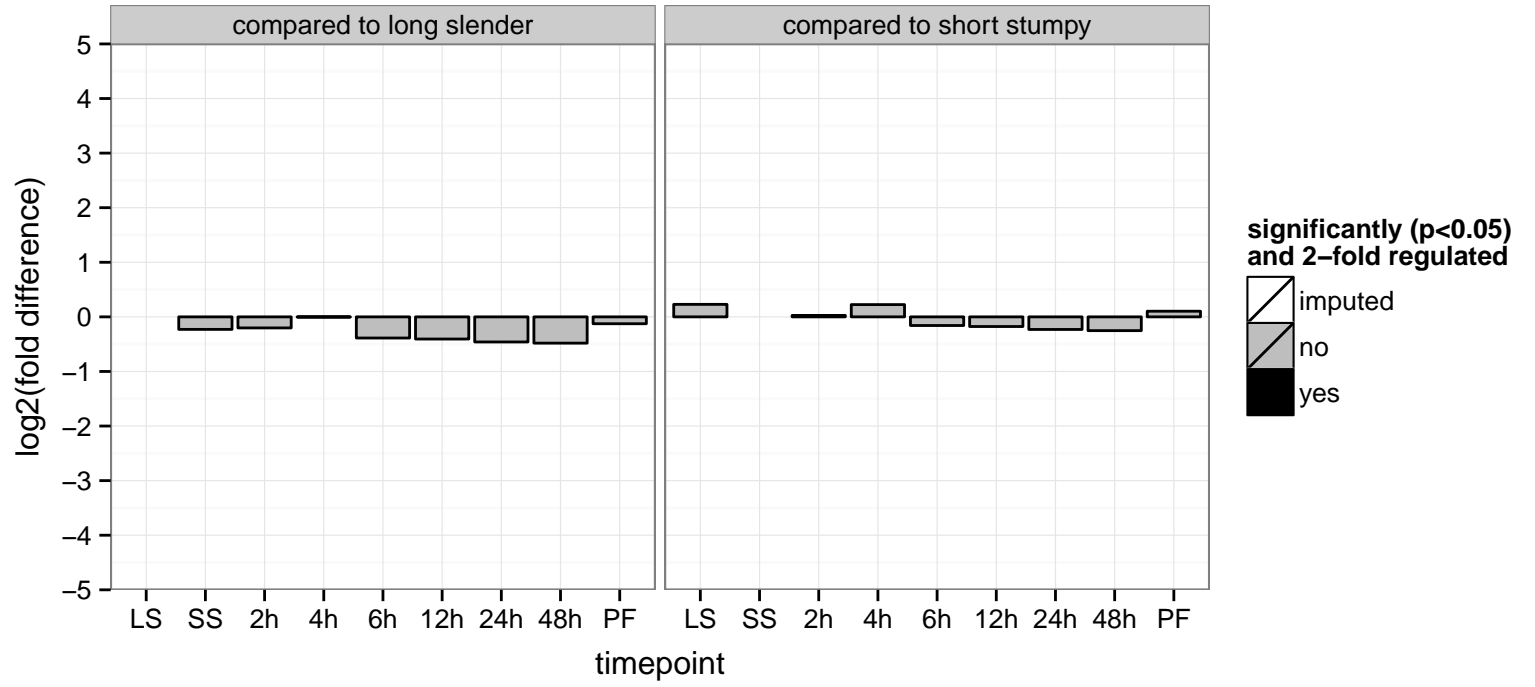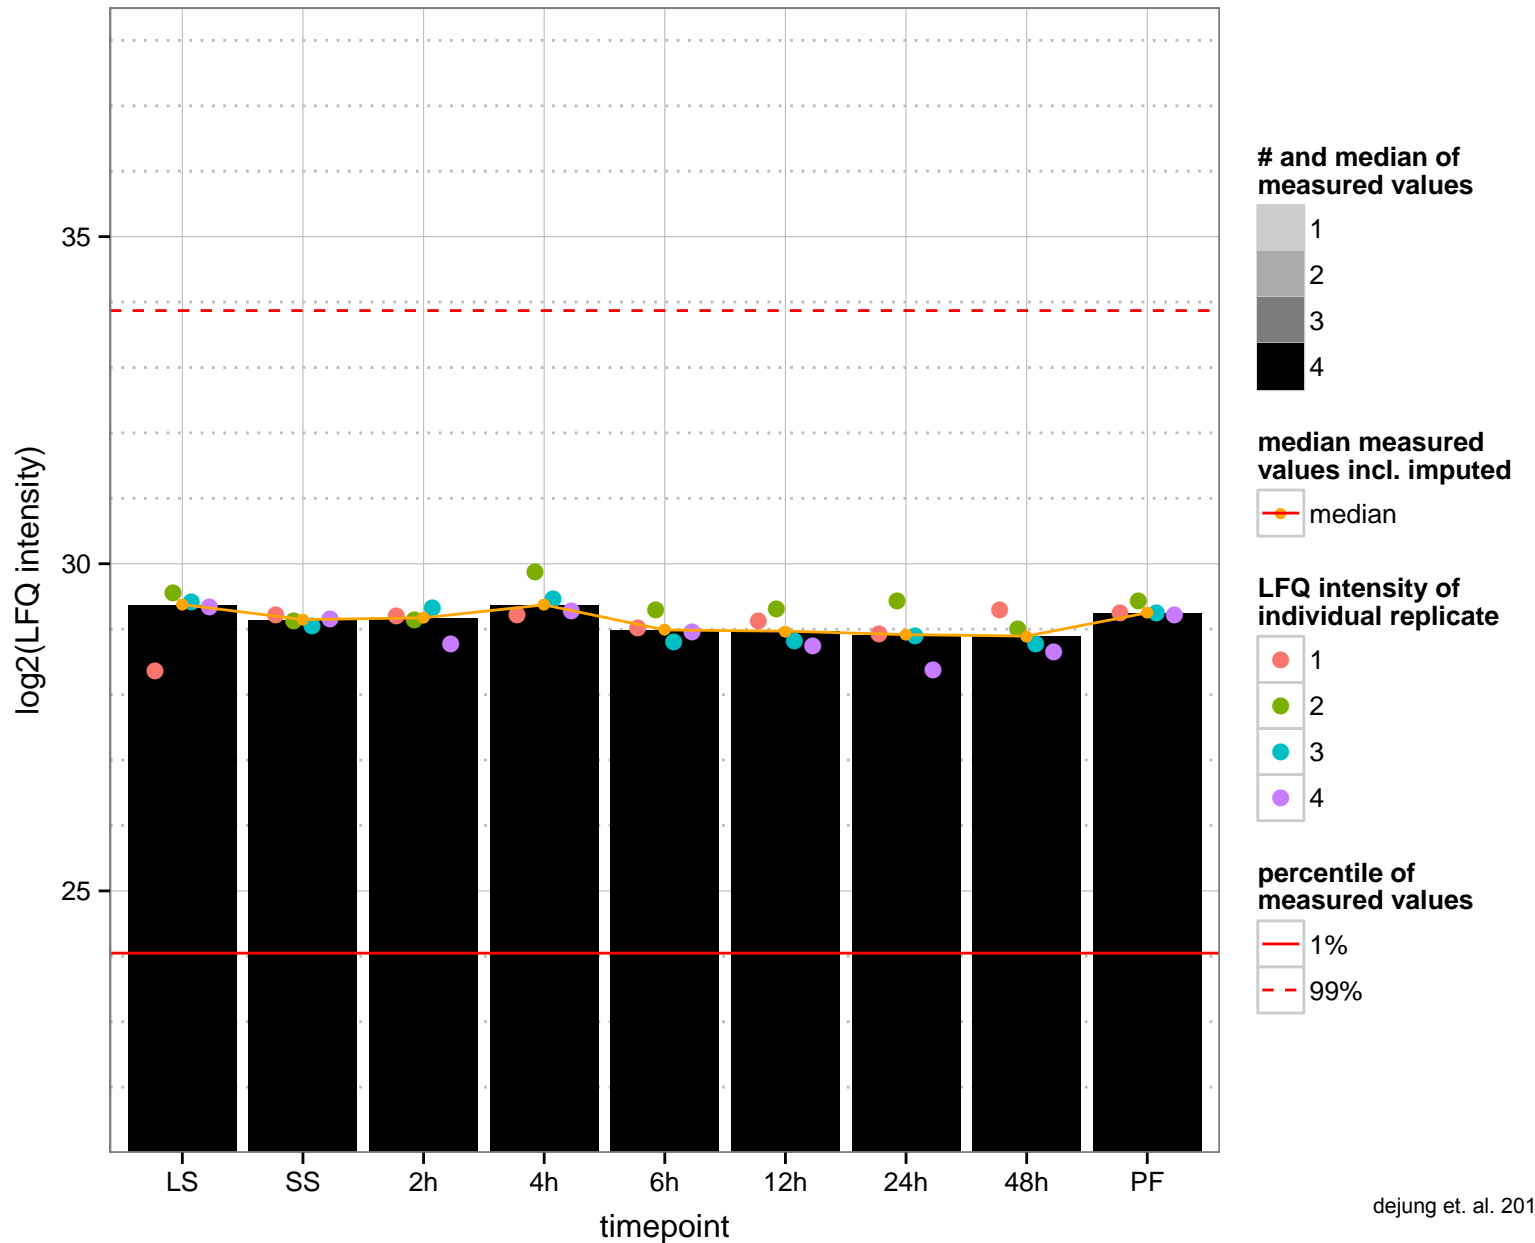



C2 domain containing protein (CC2D)  
 Tb927.4.2080  
 AGOF: null  
 AGOC: bacterial-type flagellum basal body, cell body  
 AGOP: cilium assembly  
 PGO: protein binding  
 PGO: null  
 PGO: null

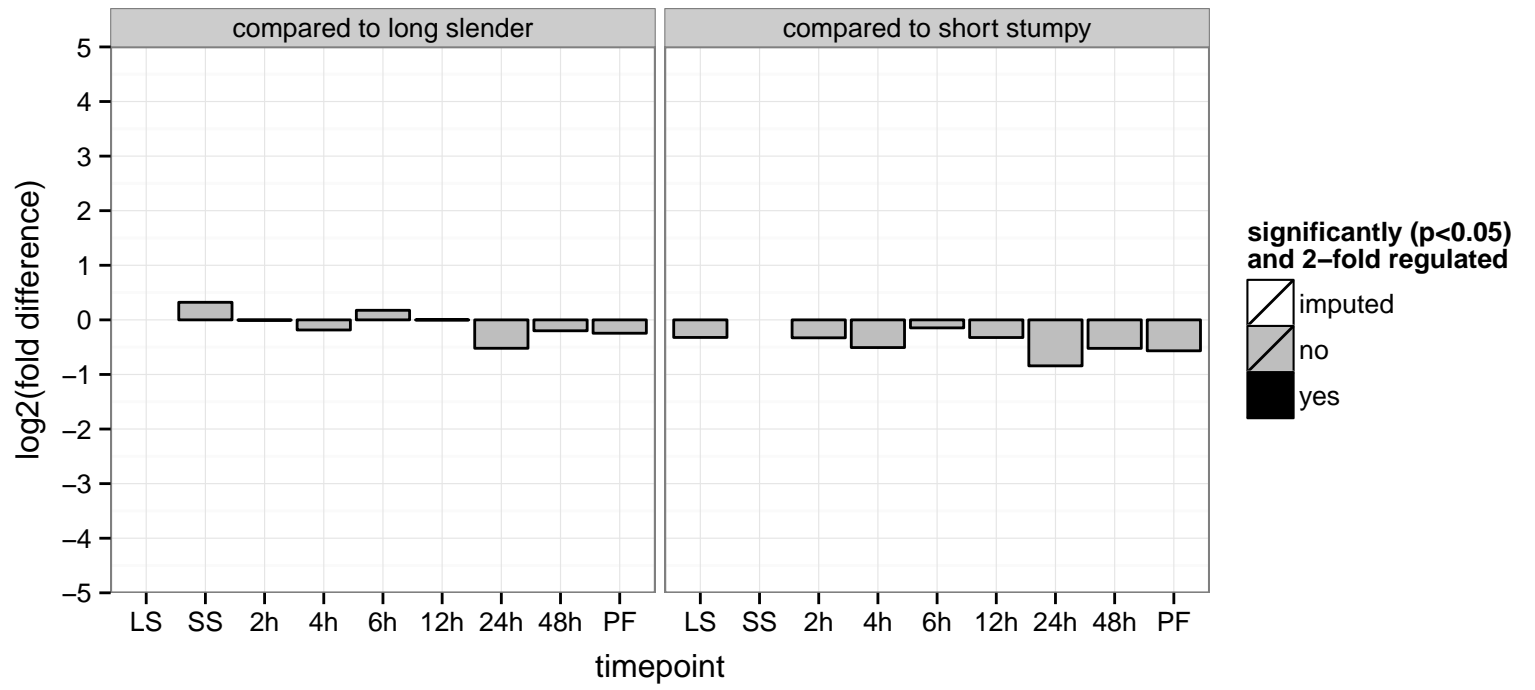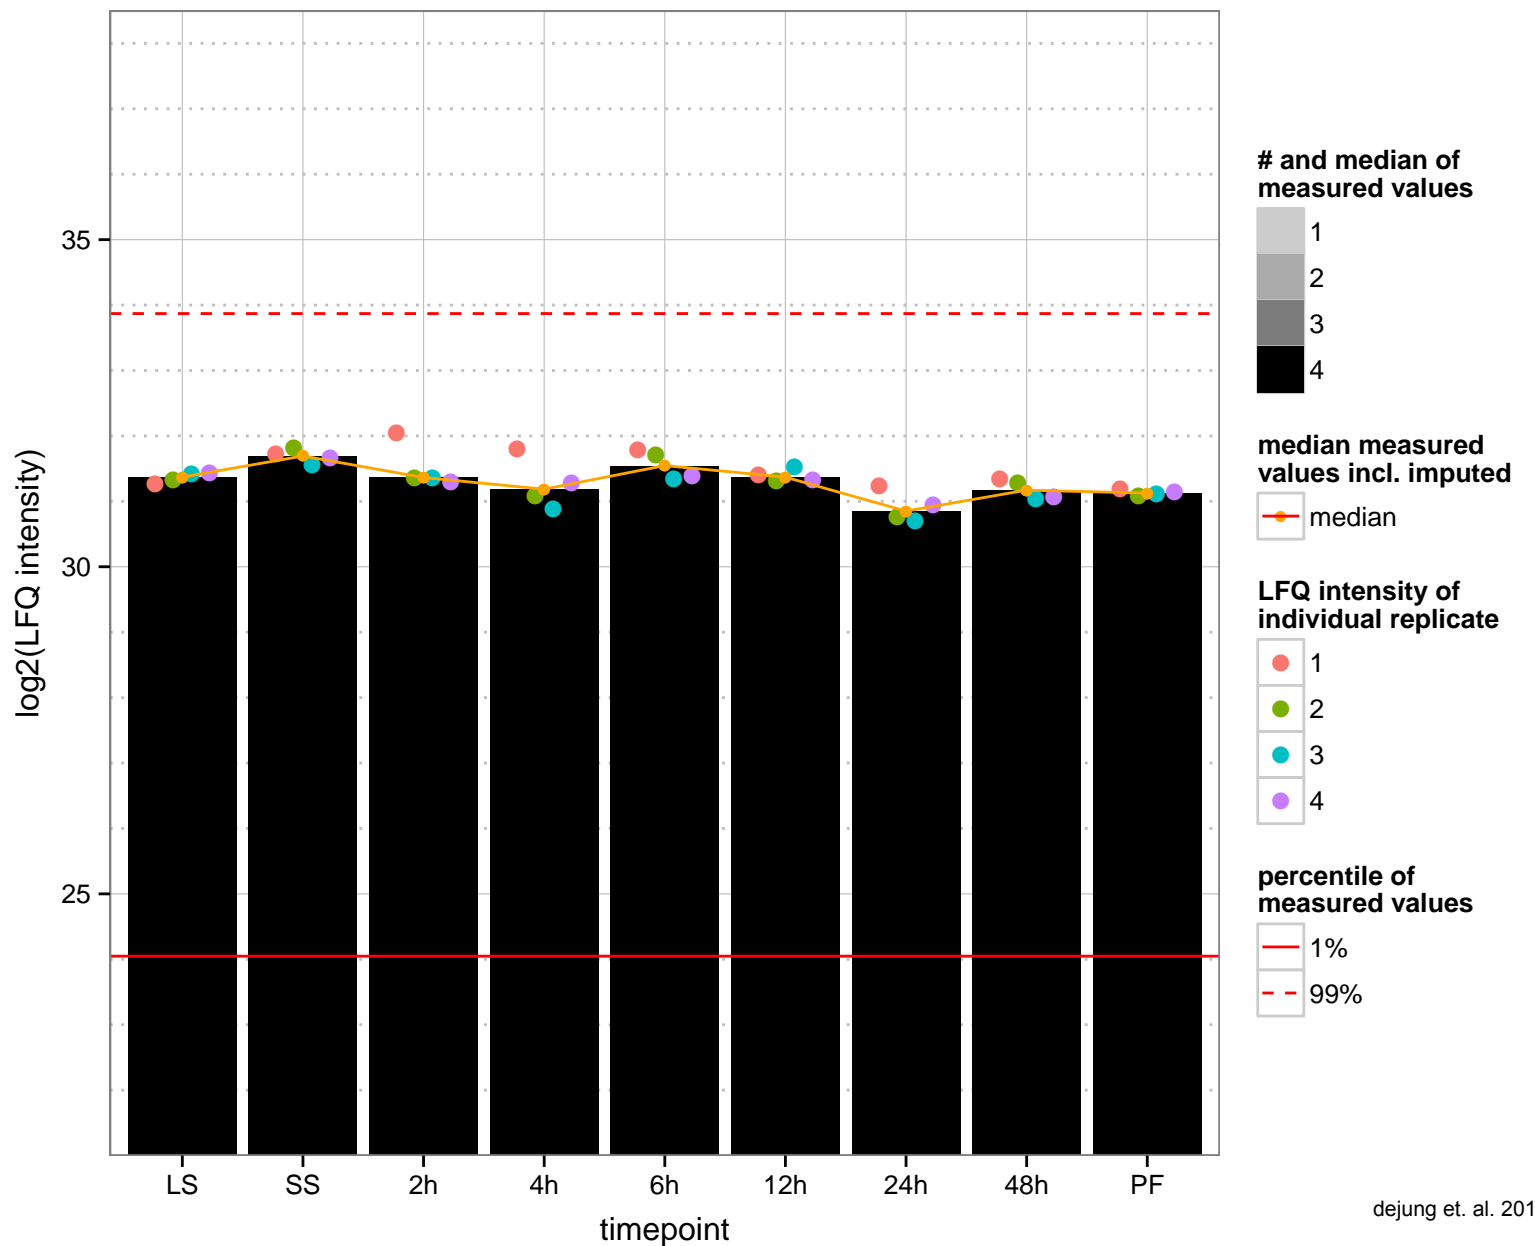

protein phosphatase 2C, putative  
 Tb927.4.2110  
 AGOF: phosphatase activity  
 AGOC: null  
 AGOP: dephosphorylation  
 PGO: catalytic activity  
 PGOC: null  
 PGOP: null

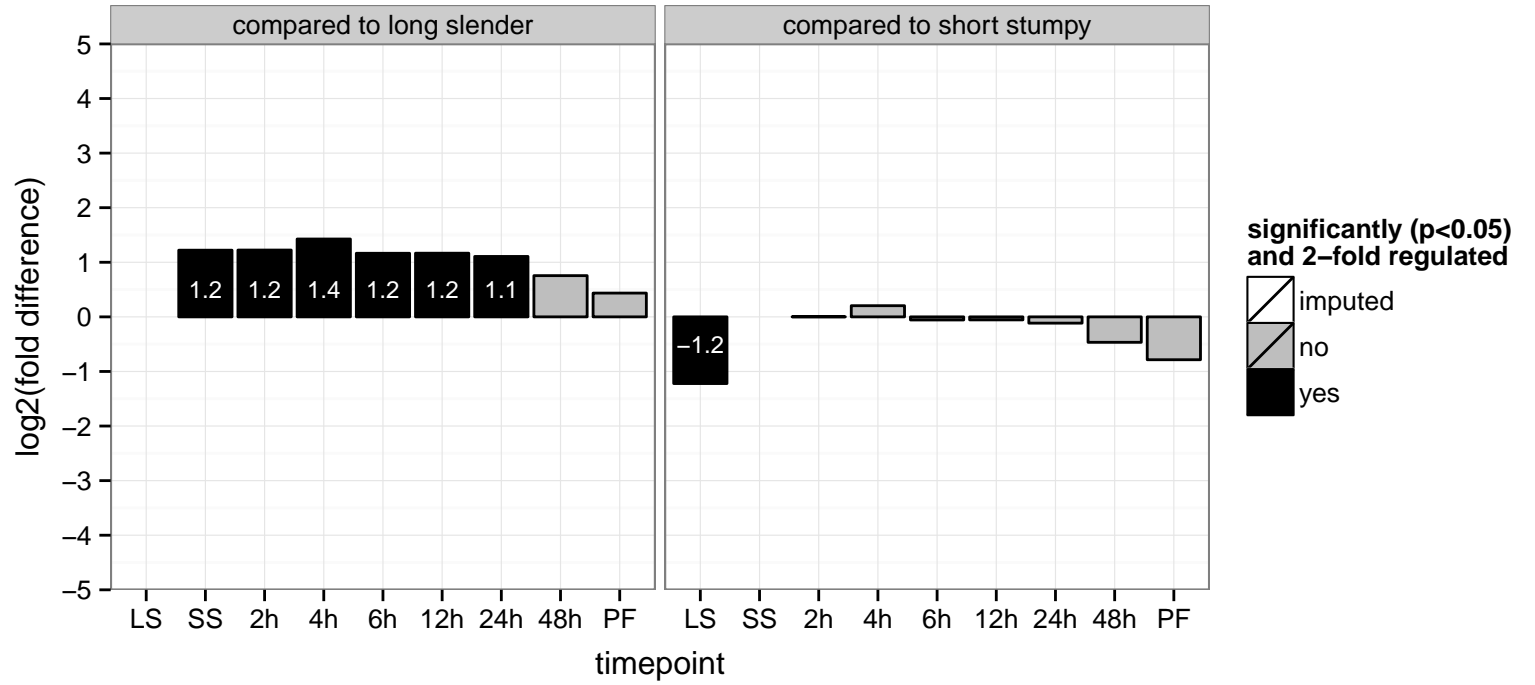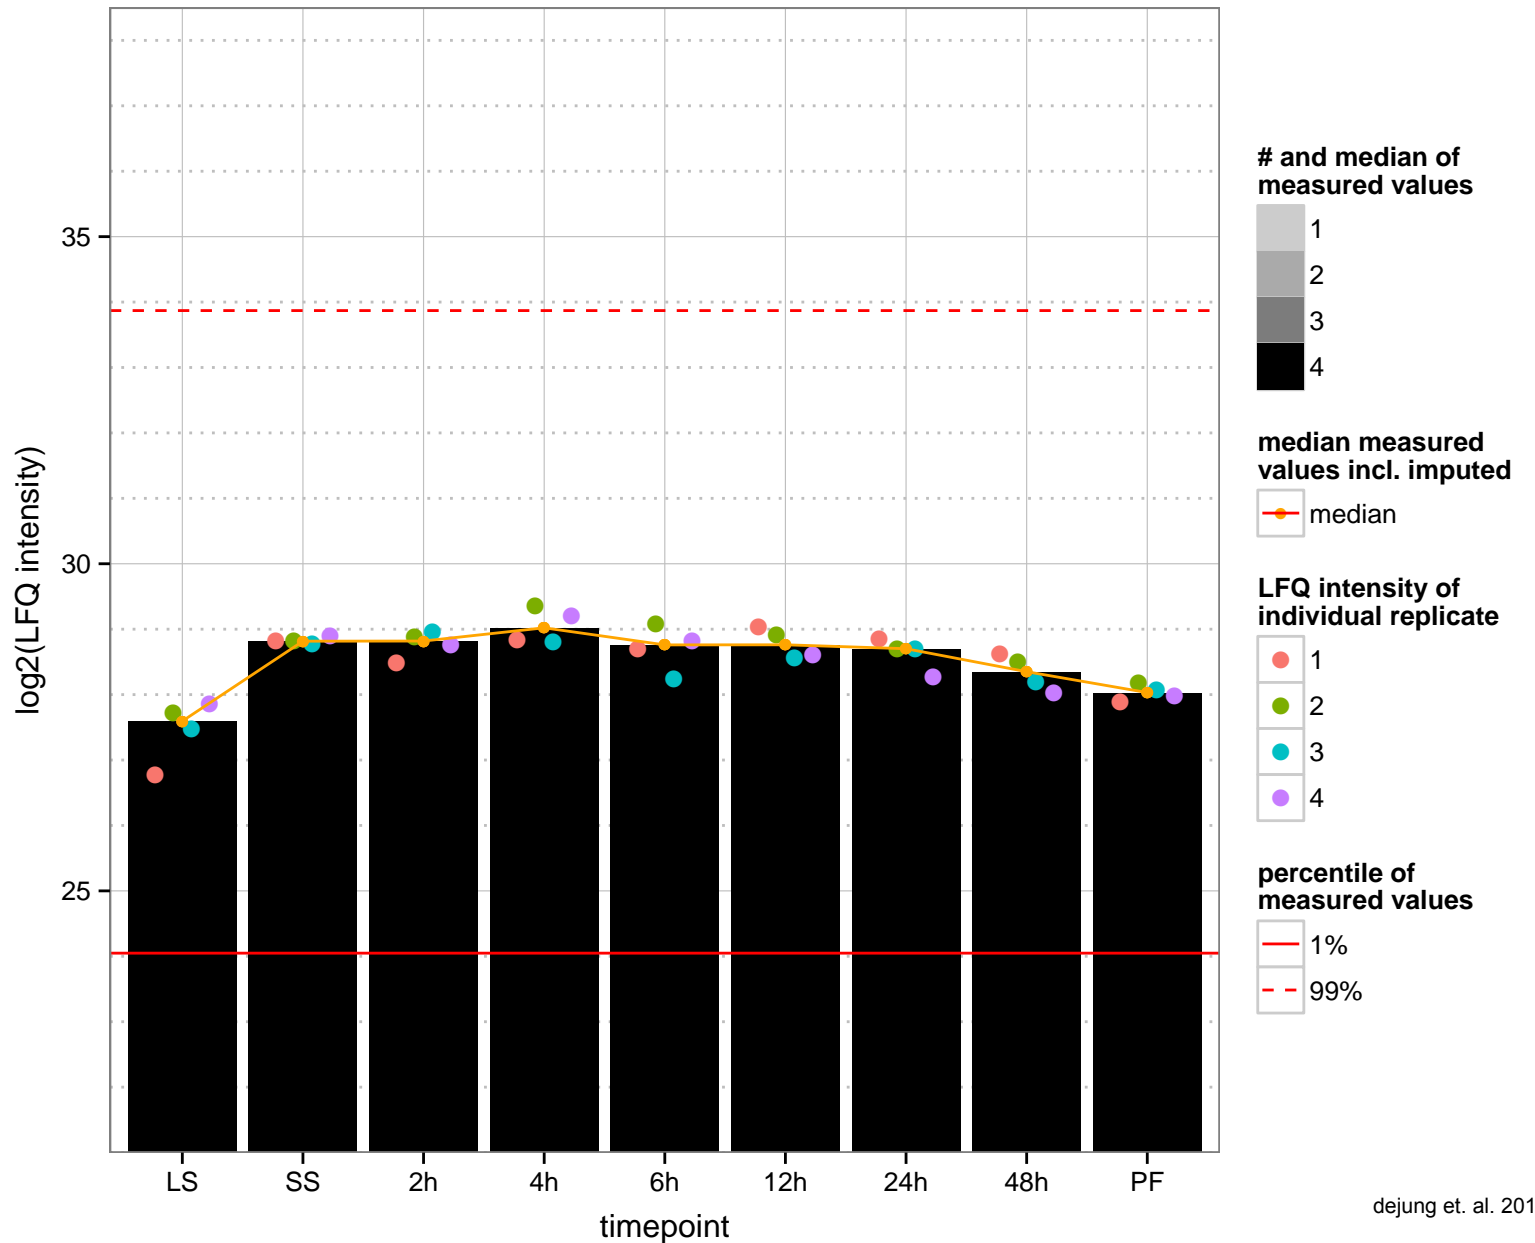

hypothetical protein, conserved  
 Tb927.4.2200  
 AGOF: null, ARF guanyl-nucleotide exchange factor activity  
 AGOC: null, intracellular  
 AGOP: null, regulation of ARF protein signal transduction  
 PGOF: null, ARF guanyl-nucleotide exchange factor activity  
 PGO: null, intracellular  
 PGOP: null, regulation of ARF protein signal transduction

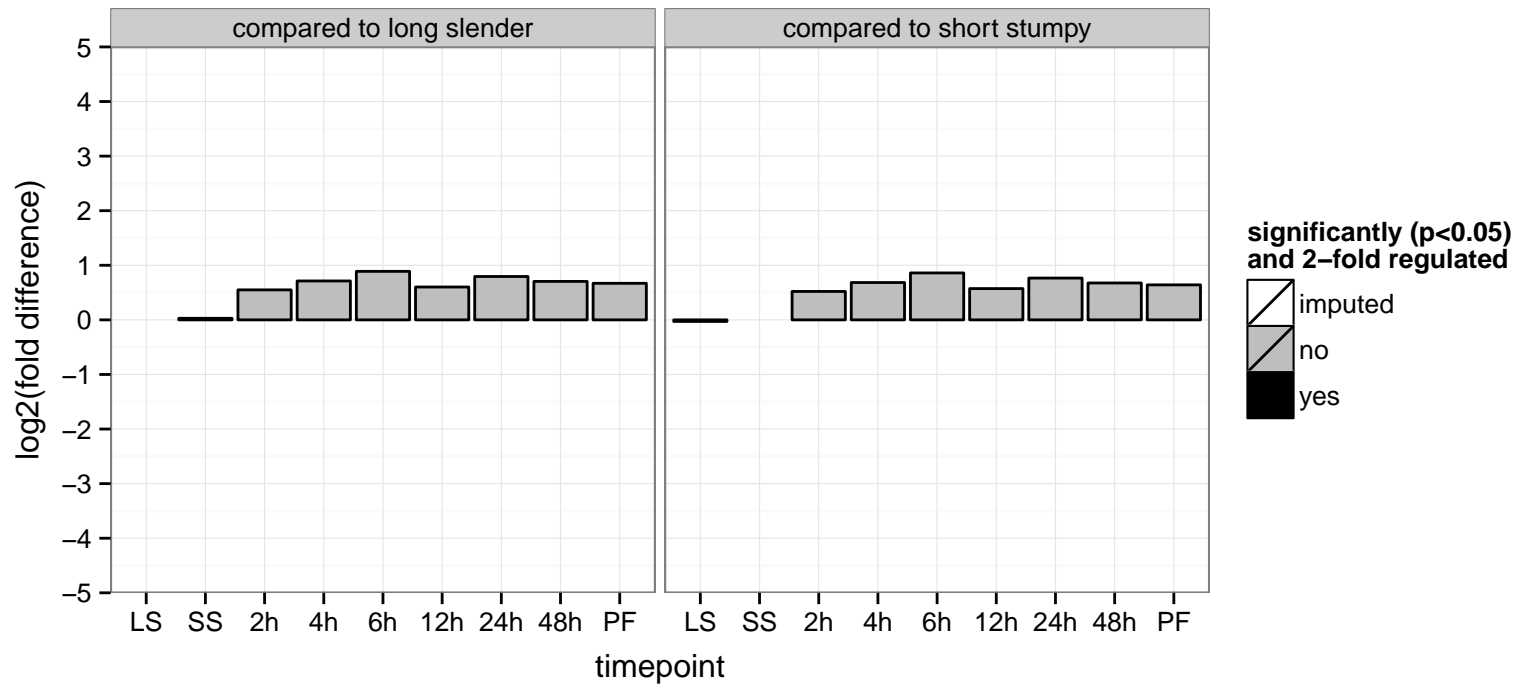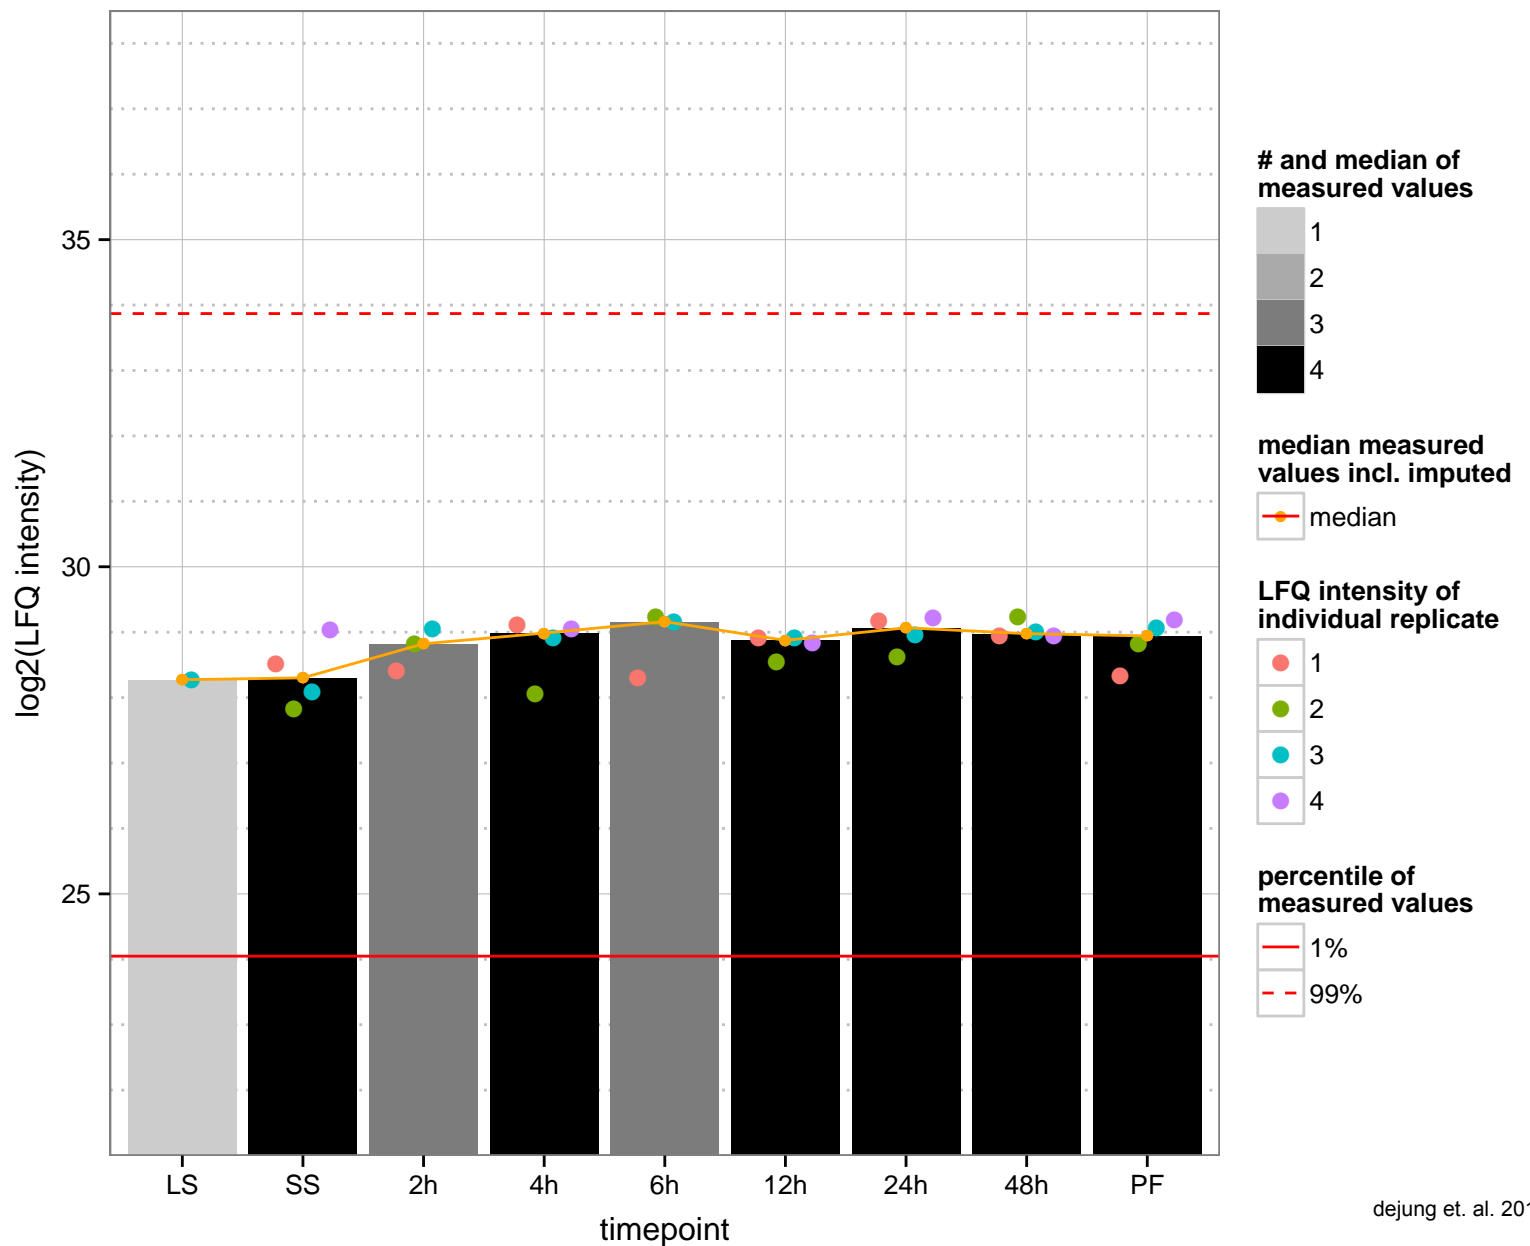

hypothetical protein, conserved  
 Tb927.4.2210  
 AGOF: null  
 AGOC: null  
 AGOP: null  
 PGO: null  
 PGOC: null  
 PGOP: null

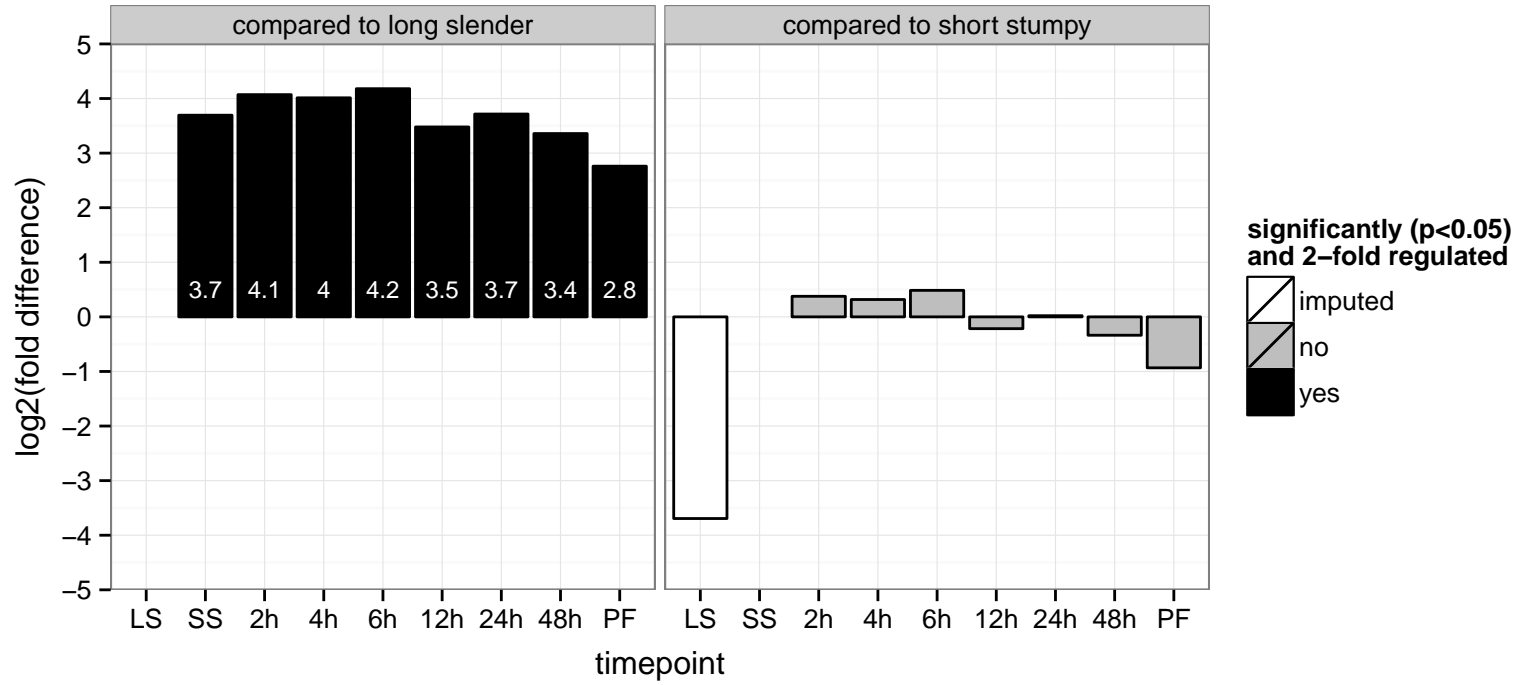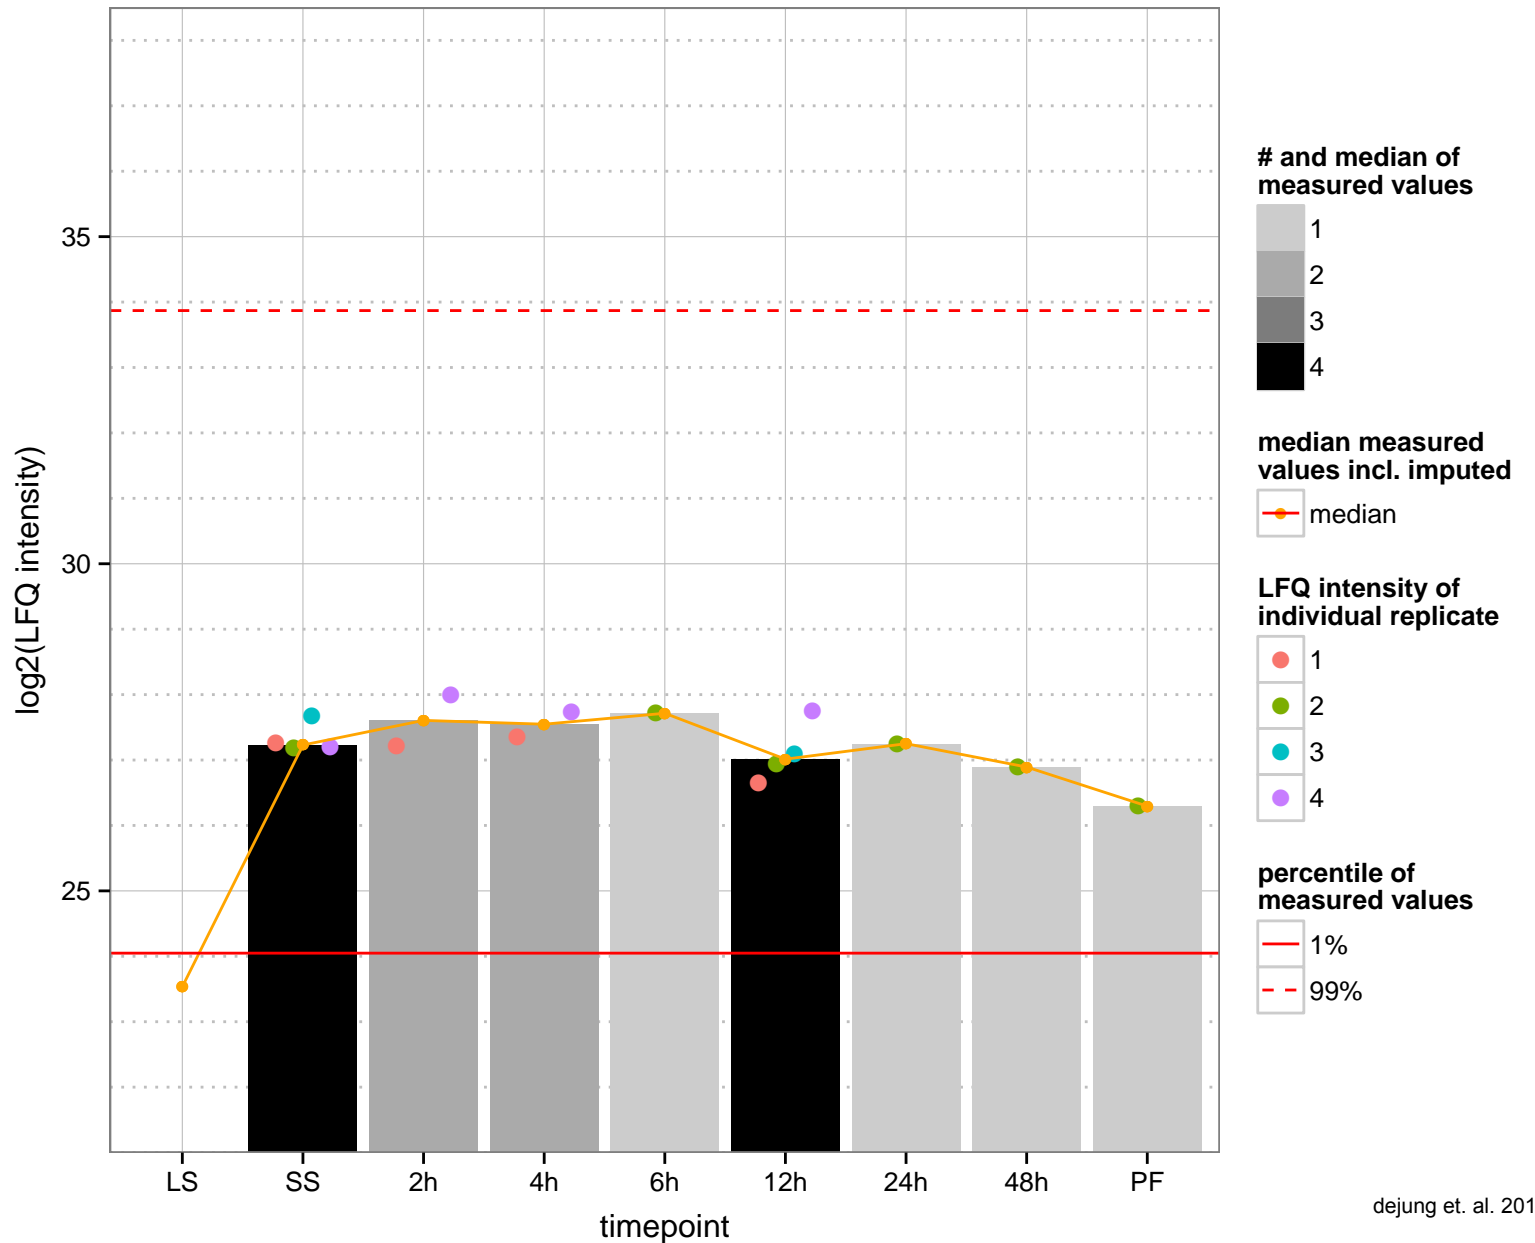

dolichyl-P-Man:GDP-Man1GlcNAc2-PP-dolichyl alpha-1, 3-mannosyltransferase, putative Tb927.4.2230  
 AGOF: GDP-Man:Man1GlcNAc2-PP-Dol alpha-1, 3-mannosyltransferase activity  
 AGOC: null  
 AGOP: biosynthetic process, dolichol-linked oligosaccharide biosynthetic process  
 PGO: null  
 PGOC: null  
 PGOP: biosynthetic process

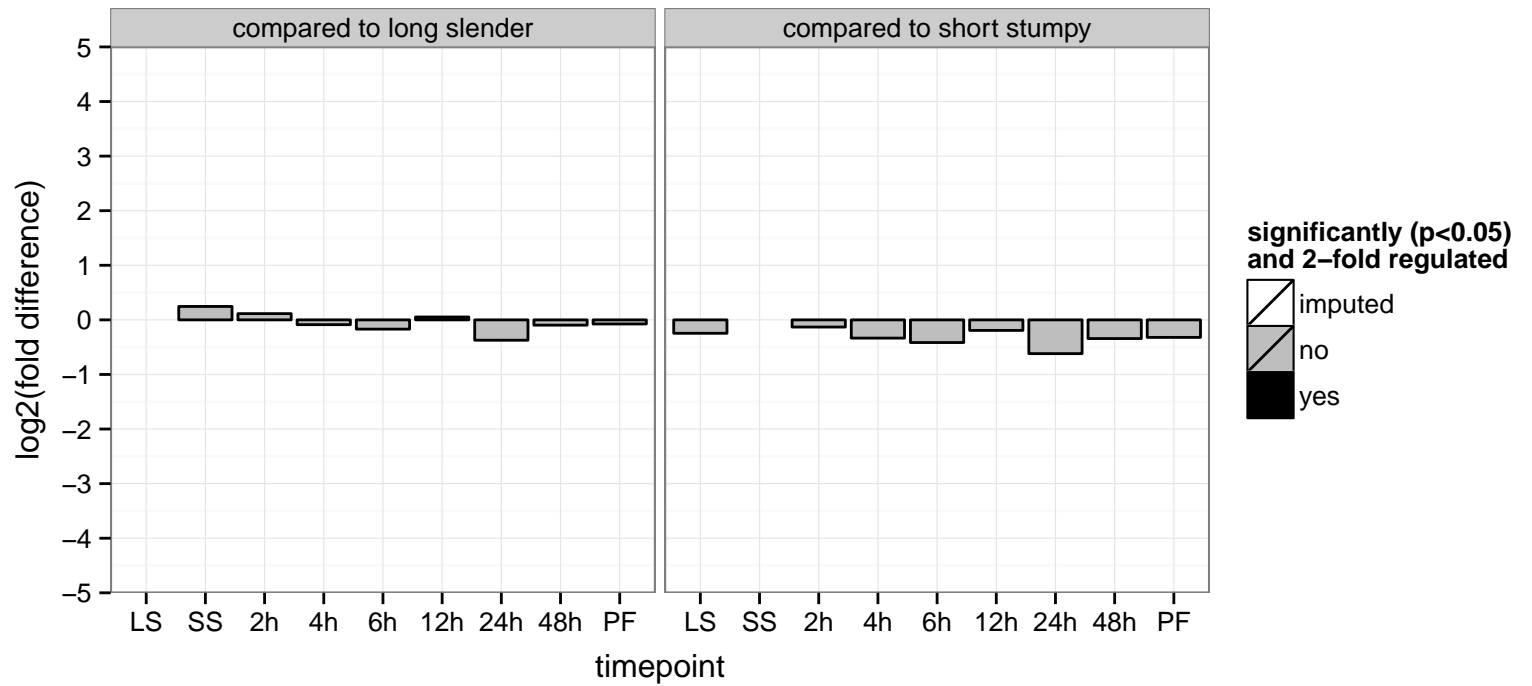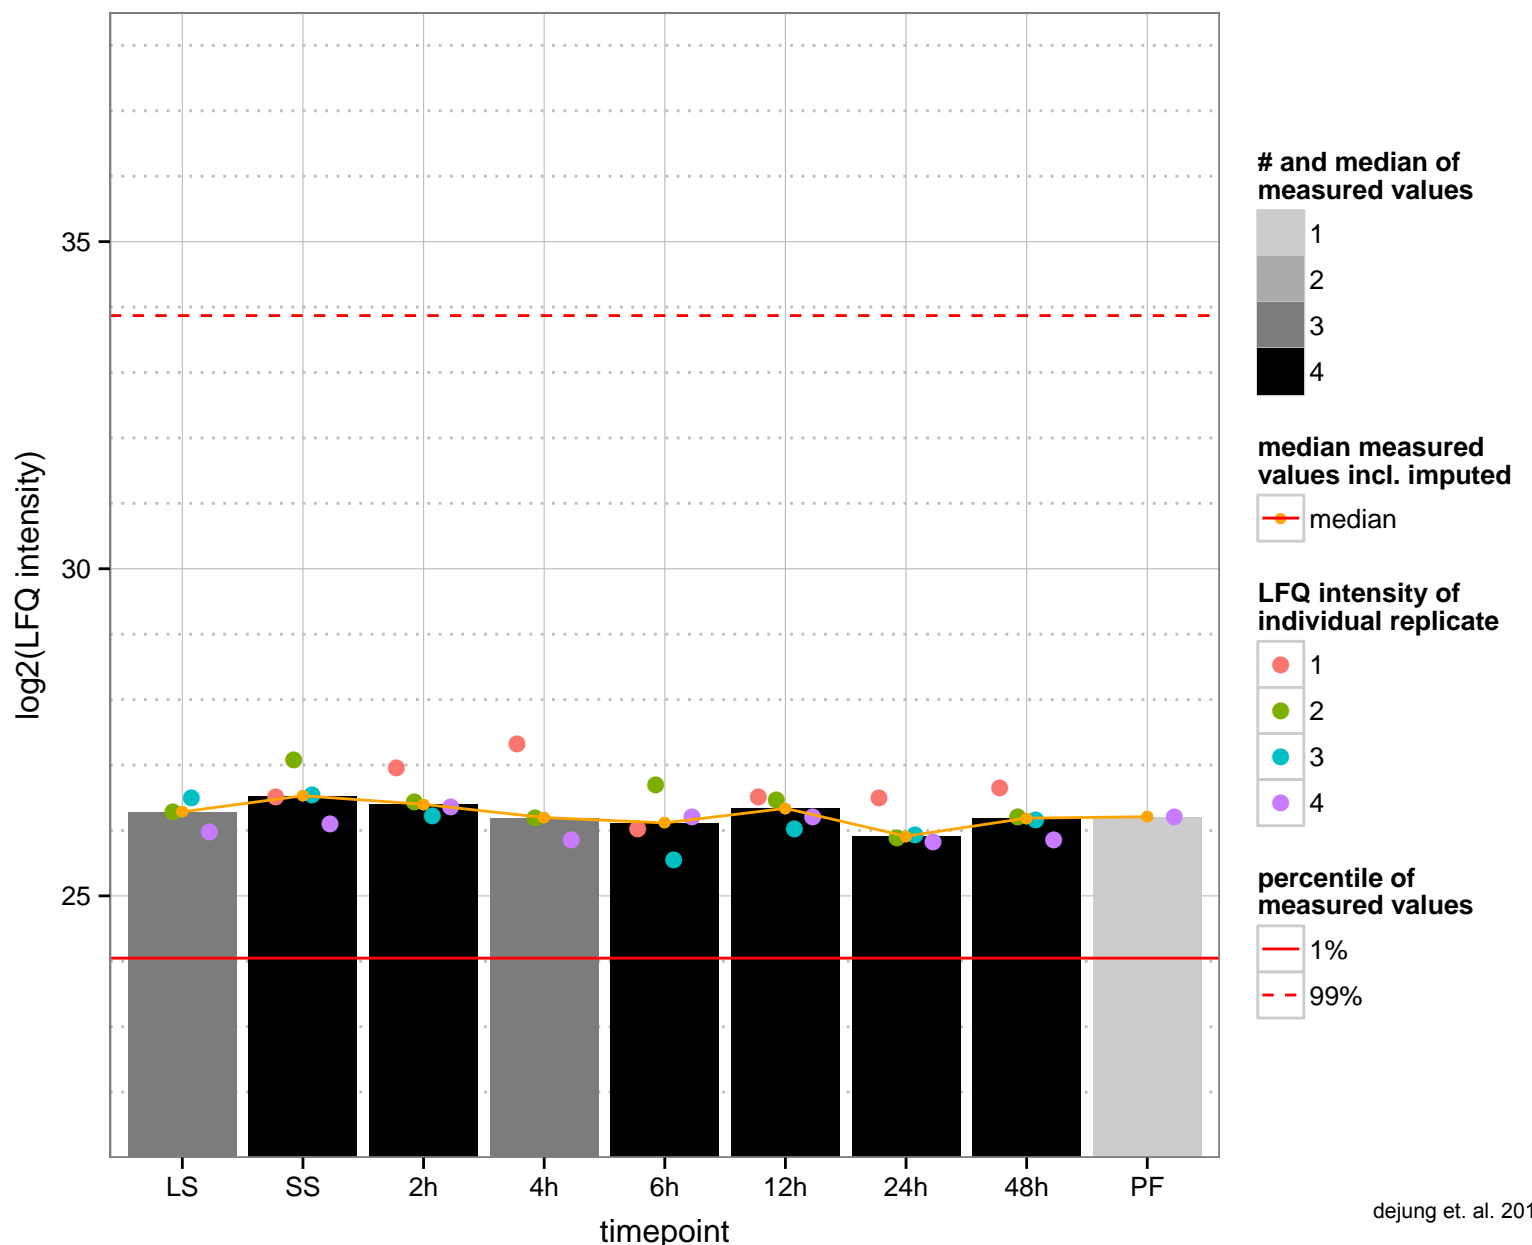

hypothetical protein, conserved  
 Tb927.4.2300  
 AGOF: null  
 AGOC: null  
 AGOP: null  
 PGOF: null  
 PGOE: null  
 PGOP: null

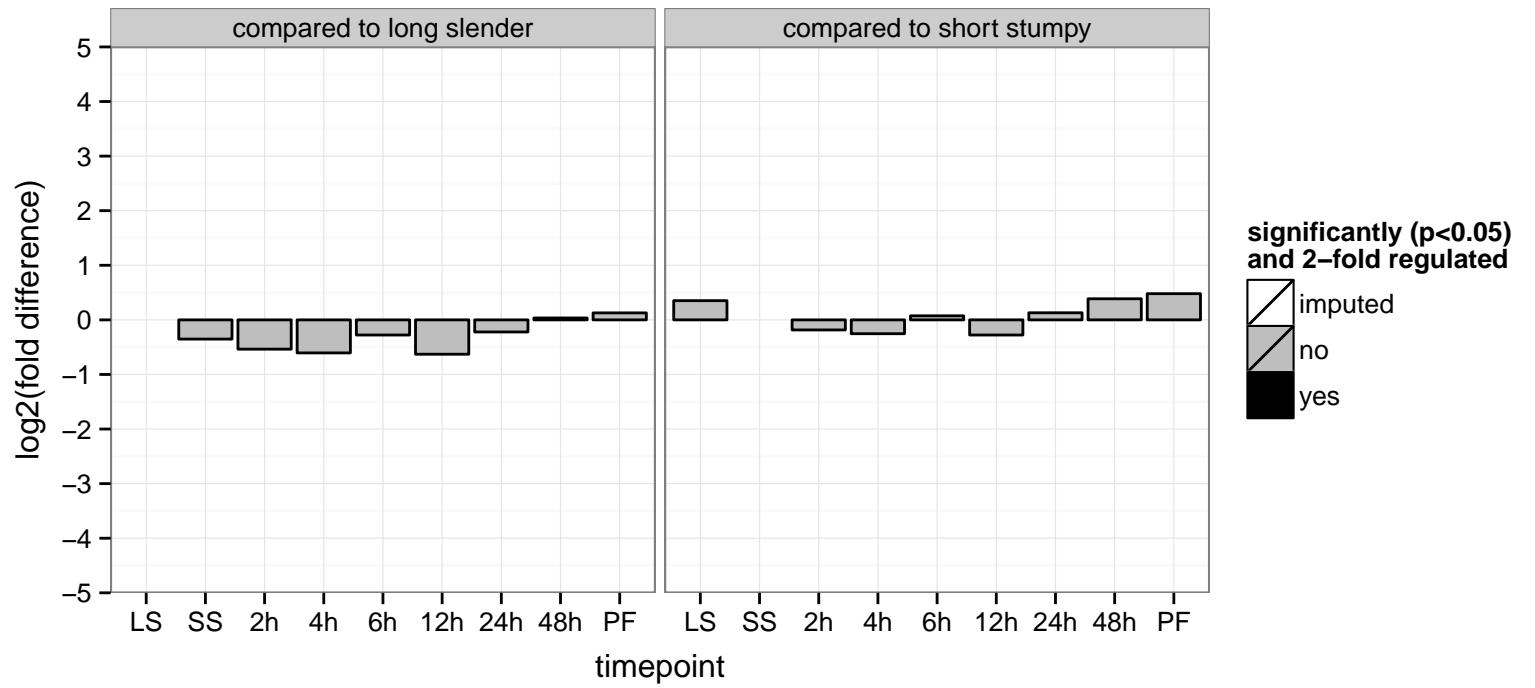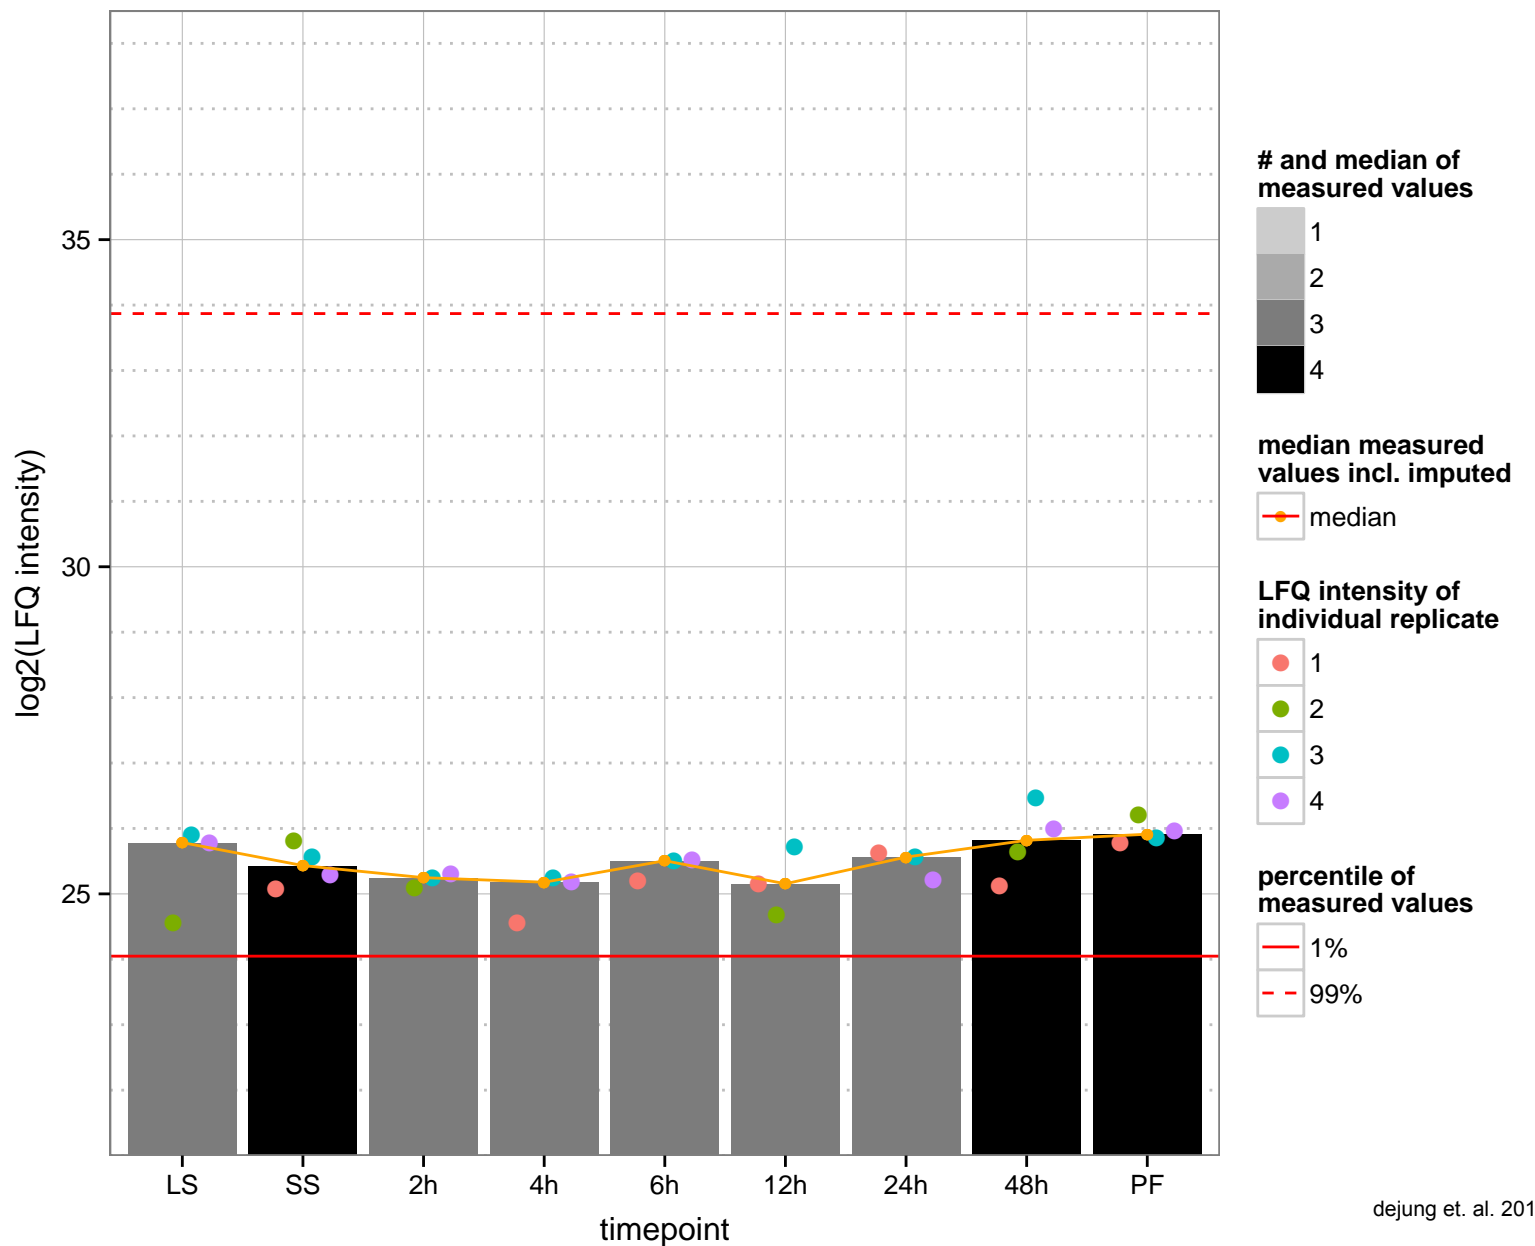

asparaginyl-tRNA synthetase, putative

Tb927.4.2310

AGOF: ATP binding, asparagine-tRNA ligase activity, aspartate-tRNA ligase activity, nucleic acid binding

AGOC: cytoplasm, mitochondrion

AGOP: asparaginyl-tRNA aminoacylation, aspartyl-tRNA aminoacylation, translation

PGOF: ATP binding, aminoacyl-tRNA ligase activity, asparagine-tRNA ligase activity, nucleic acid binding, nucleotide binding

PGOC: cytoplasm

PGOP: asparaginyl-tRNA aminoacylation, tRNA aminoacylation for protein translation

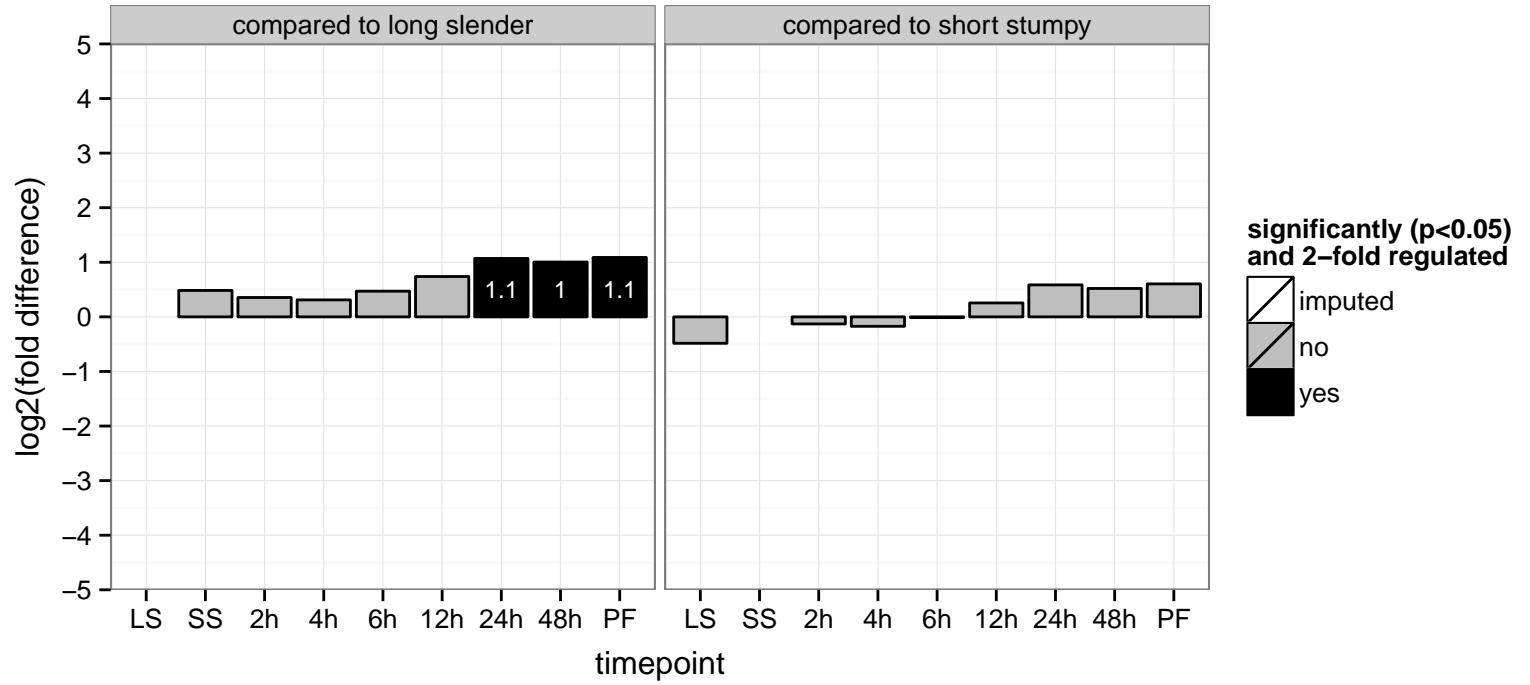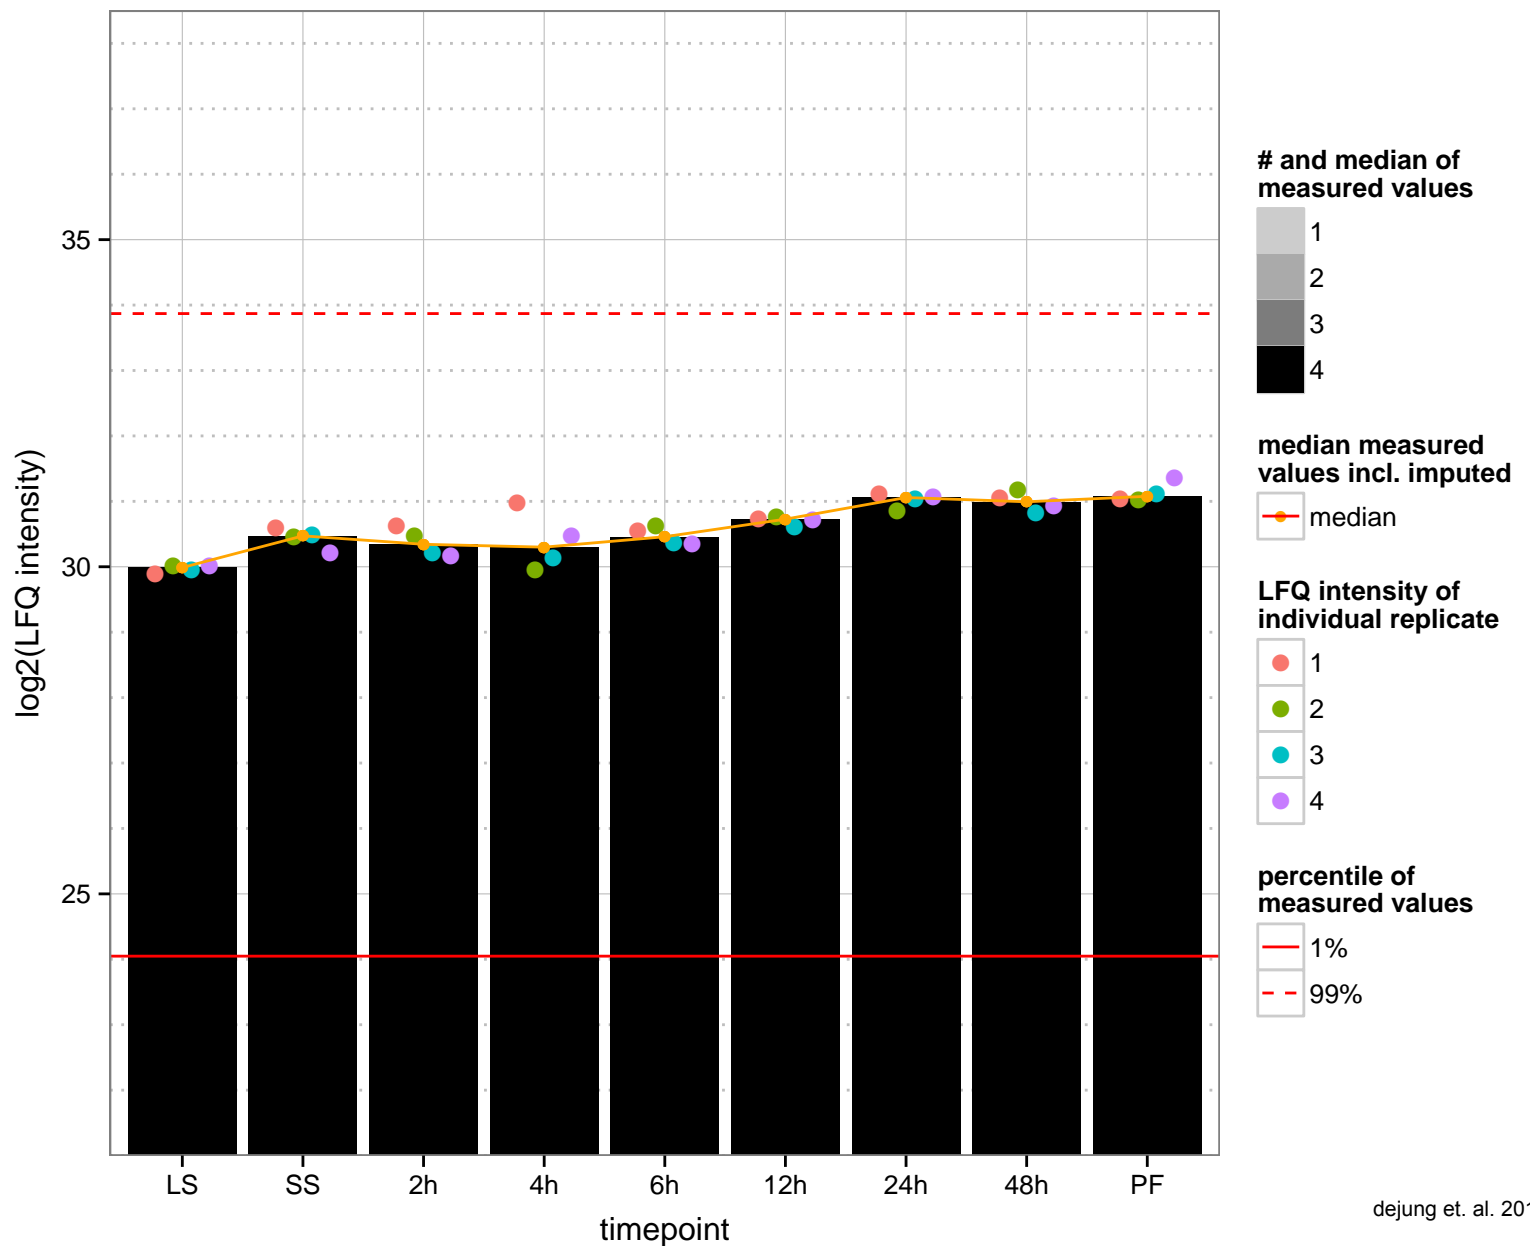

hypothetical protein, conserved  
 Tb927.4.2340  
 AGOF: null  
 AGOC: null  
 AGOP: null  
 PGO: null  
 PGOC: null  
 PGOP: null

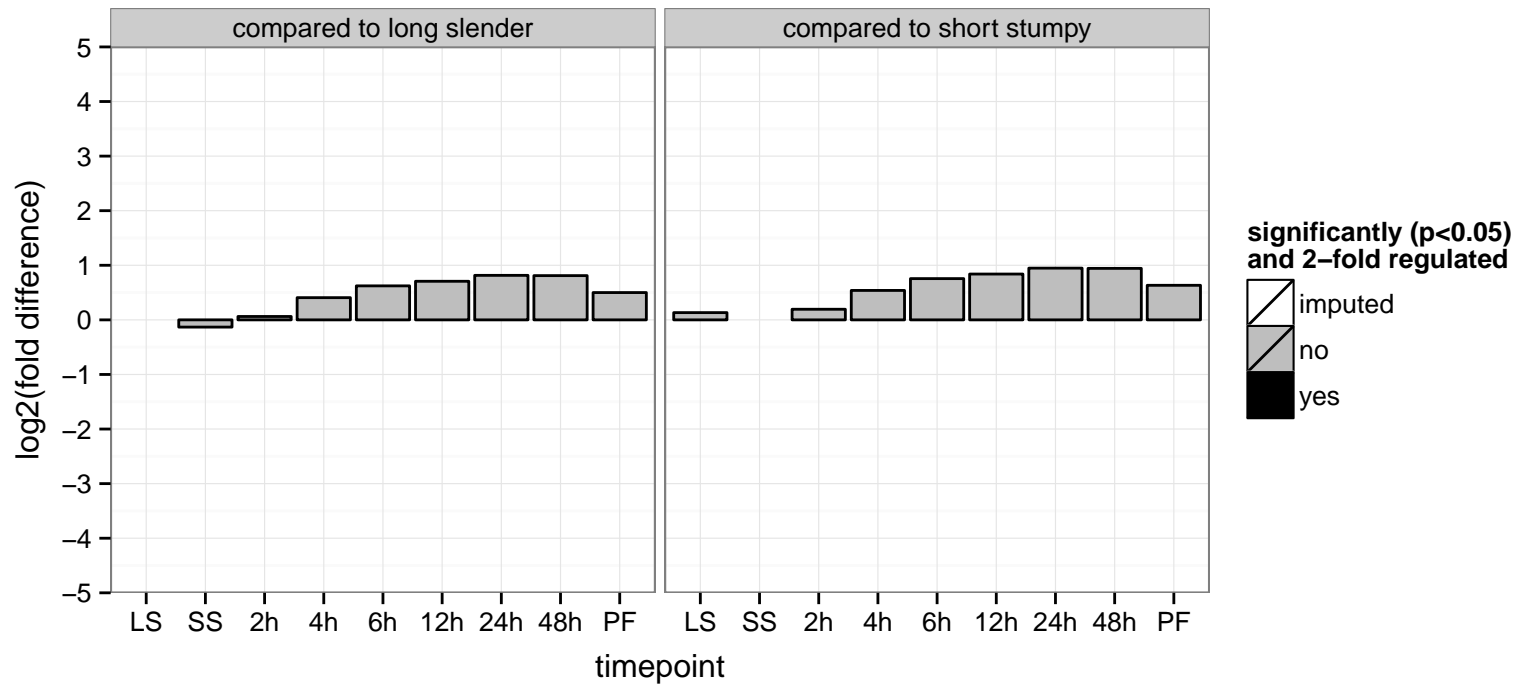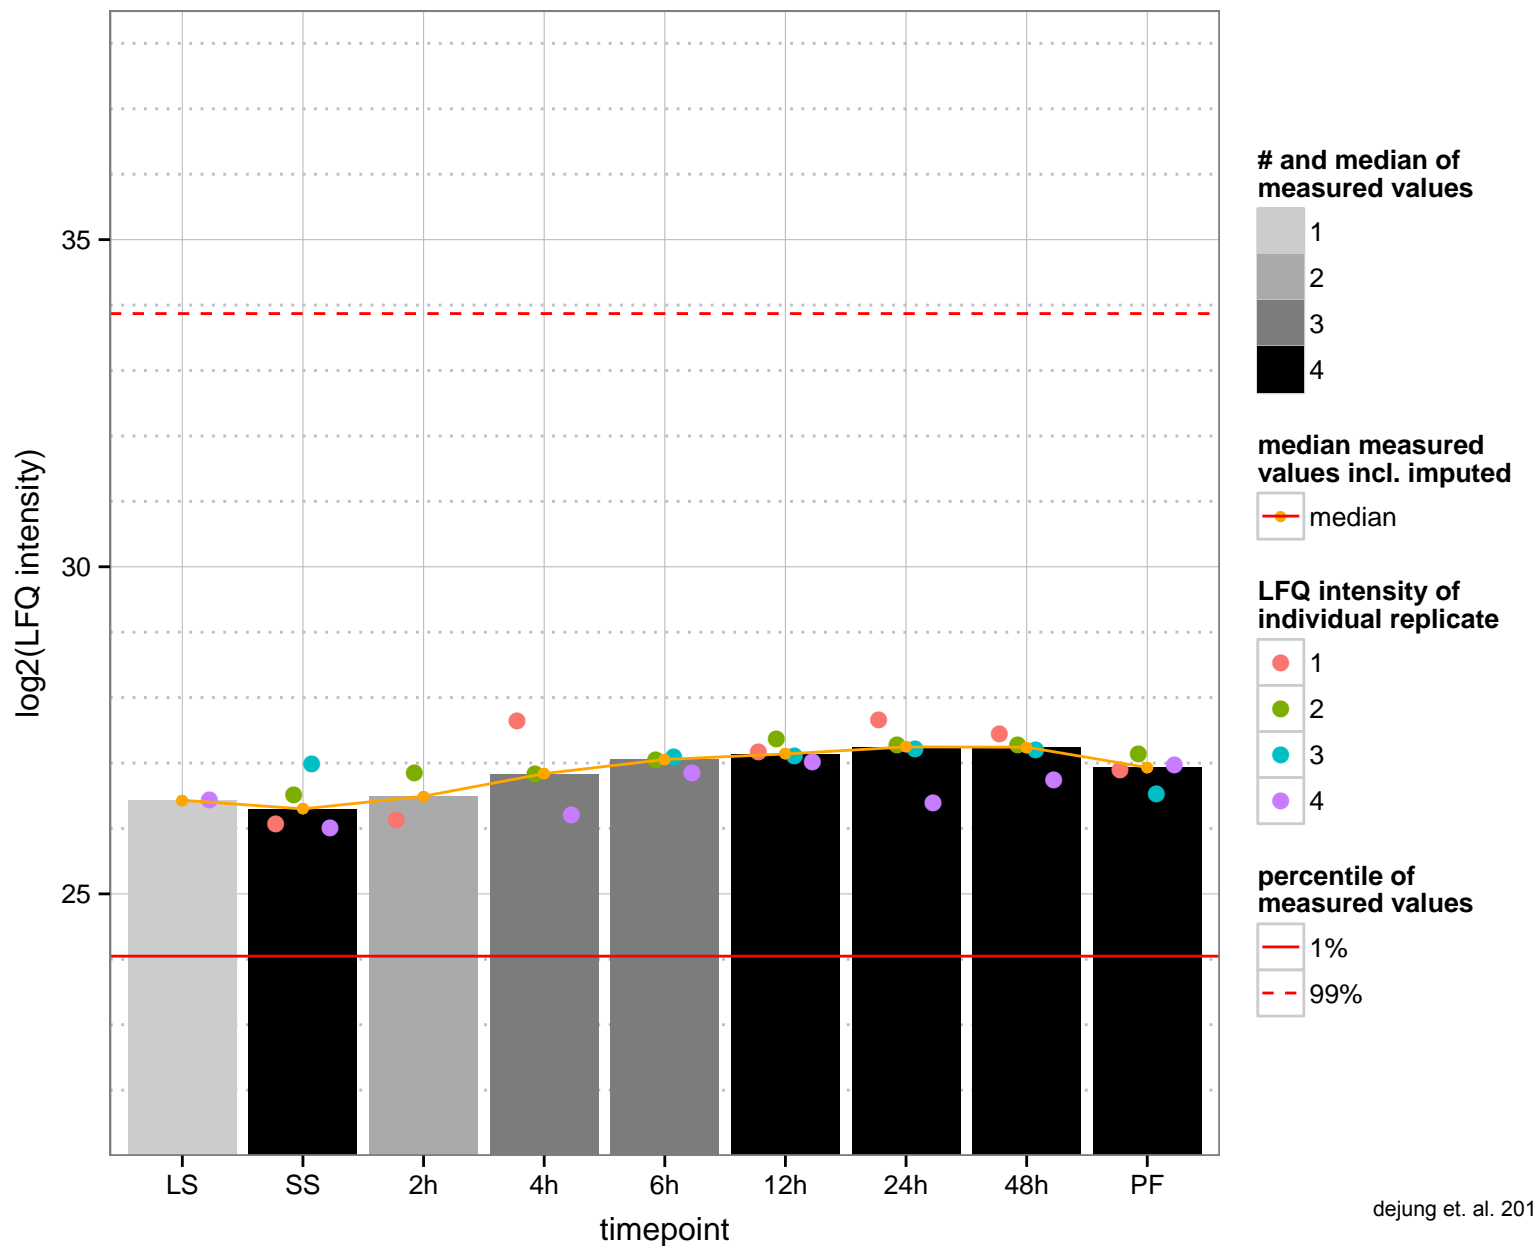



hypothetical protein, conserved  
 Tb927.4.2530  
 AGOF: null  
 AGOC: null  
 AGOP: null  
 PGO: null  
 PGOC: null  
 PGOP: null

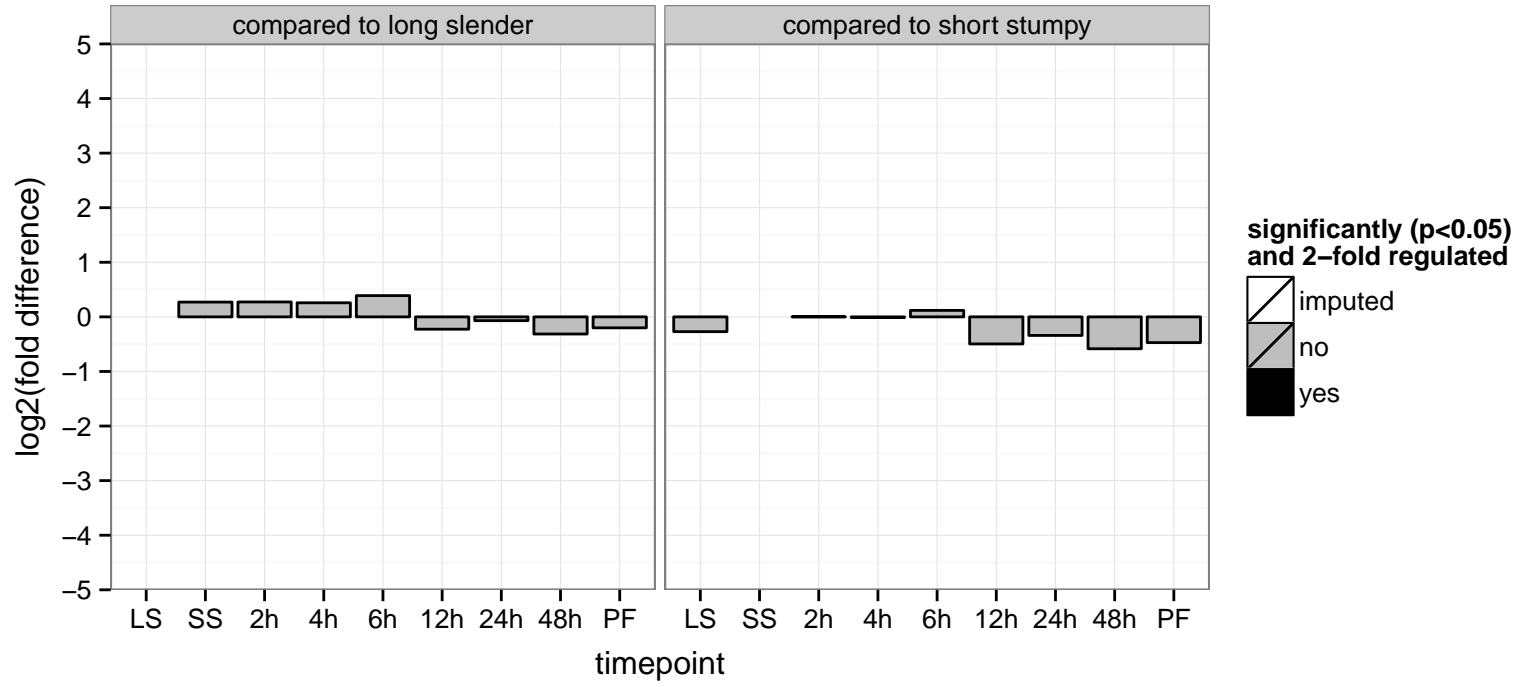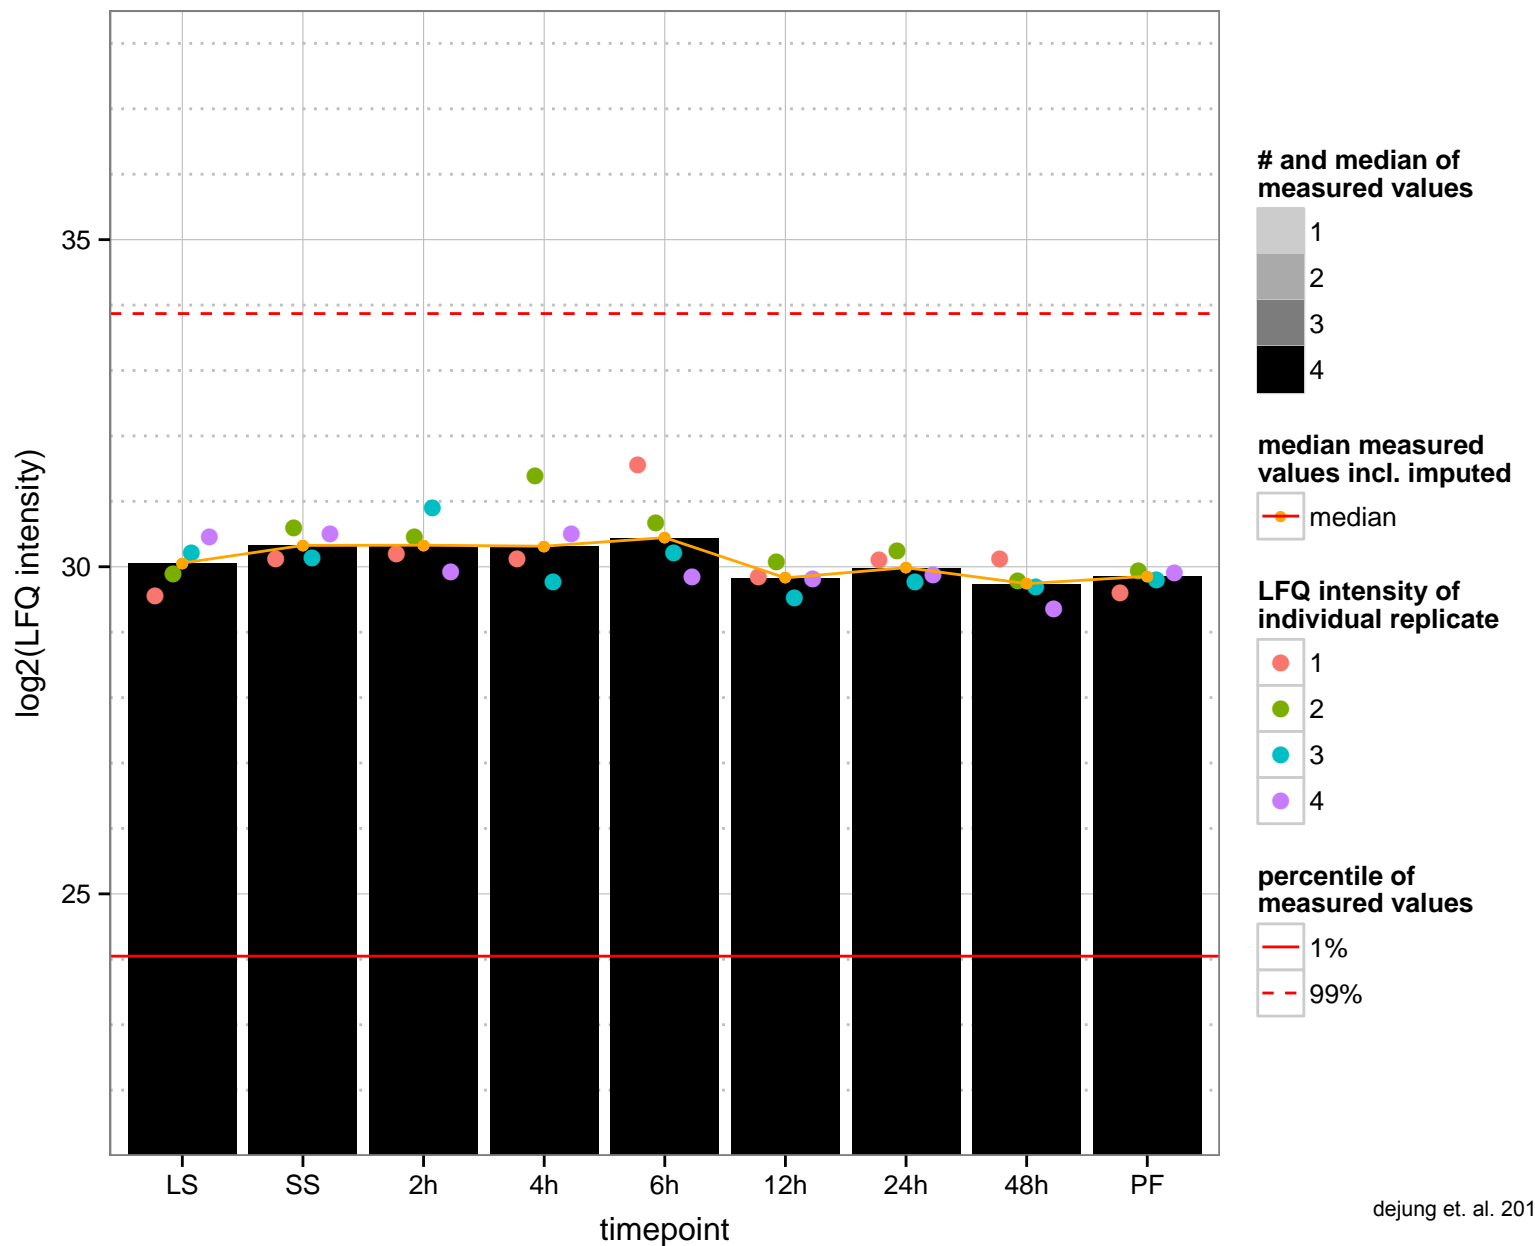

hypothetical protein, conserved  
 Tb927.4.2600  
 AGOF: null  
 AGOC: null  
 AGOP: null  
 PGO: null  
 PGOC: null  
 PGOP: null

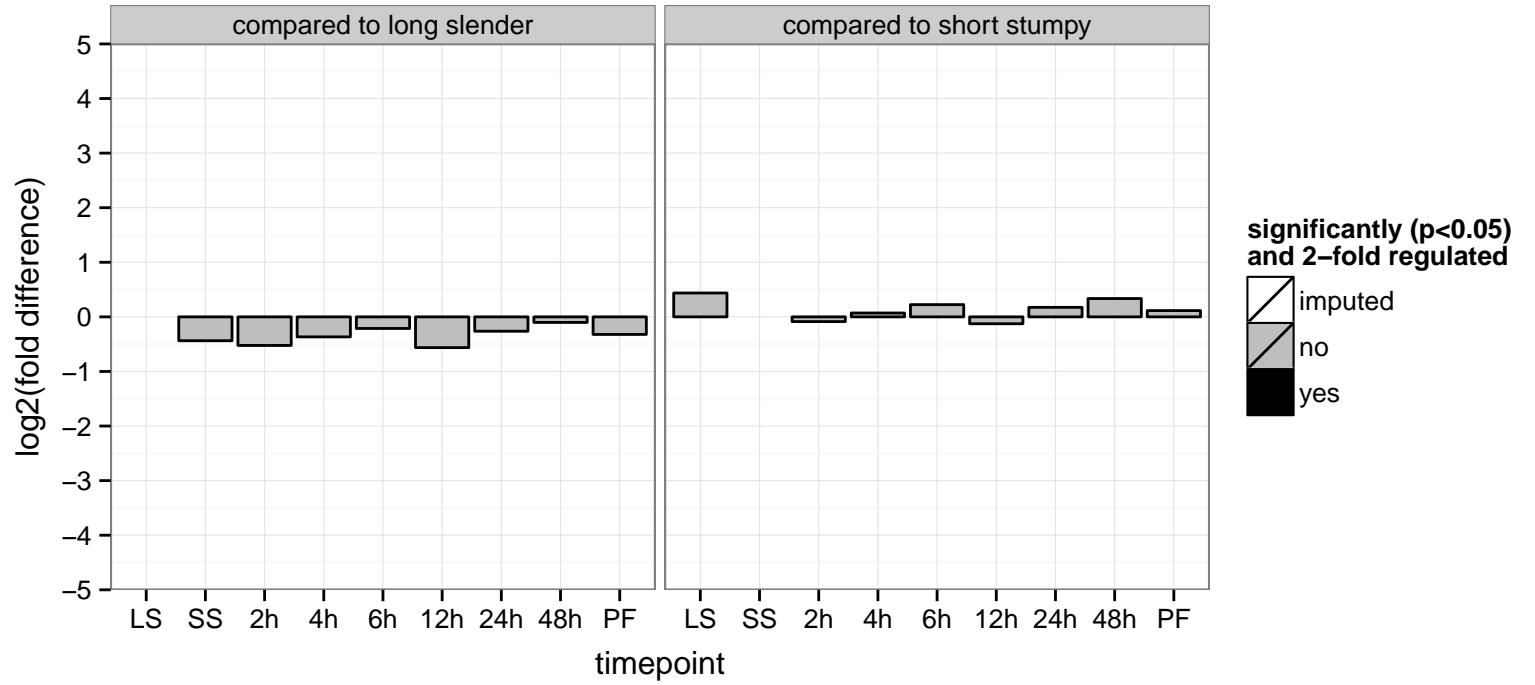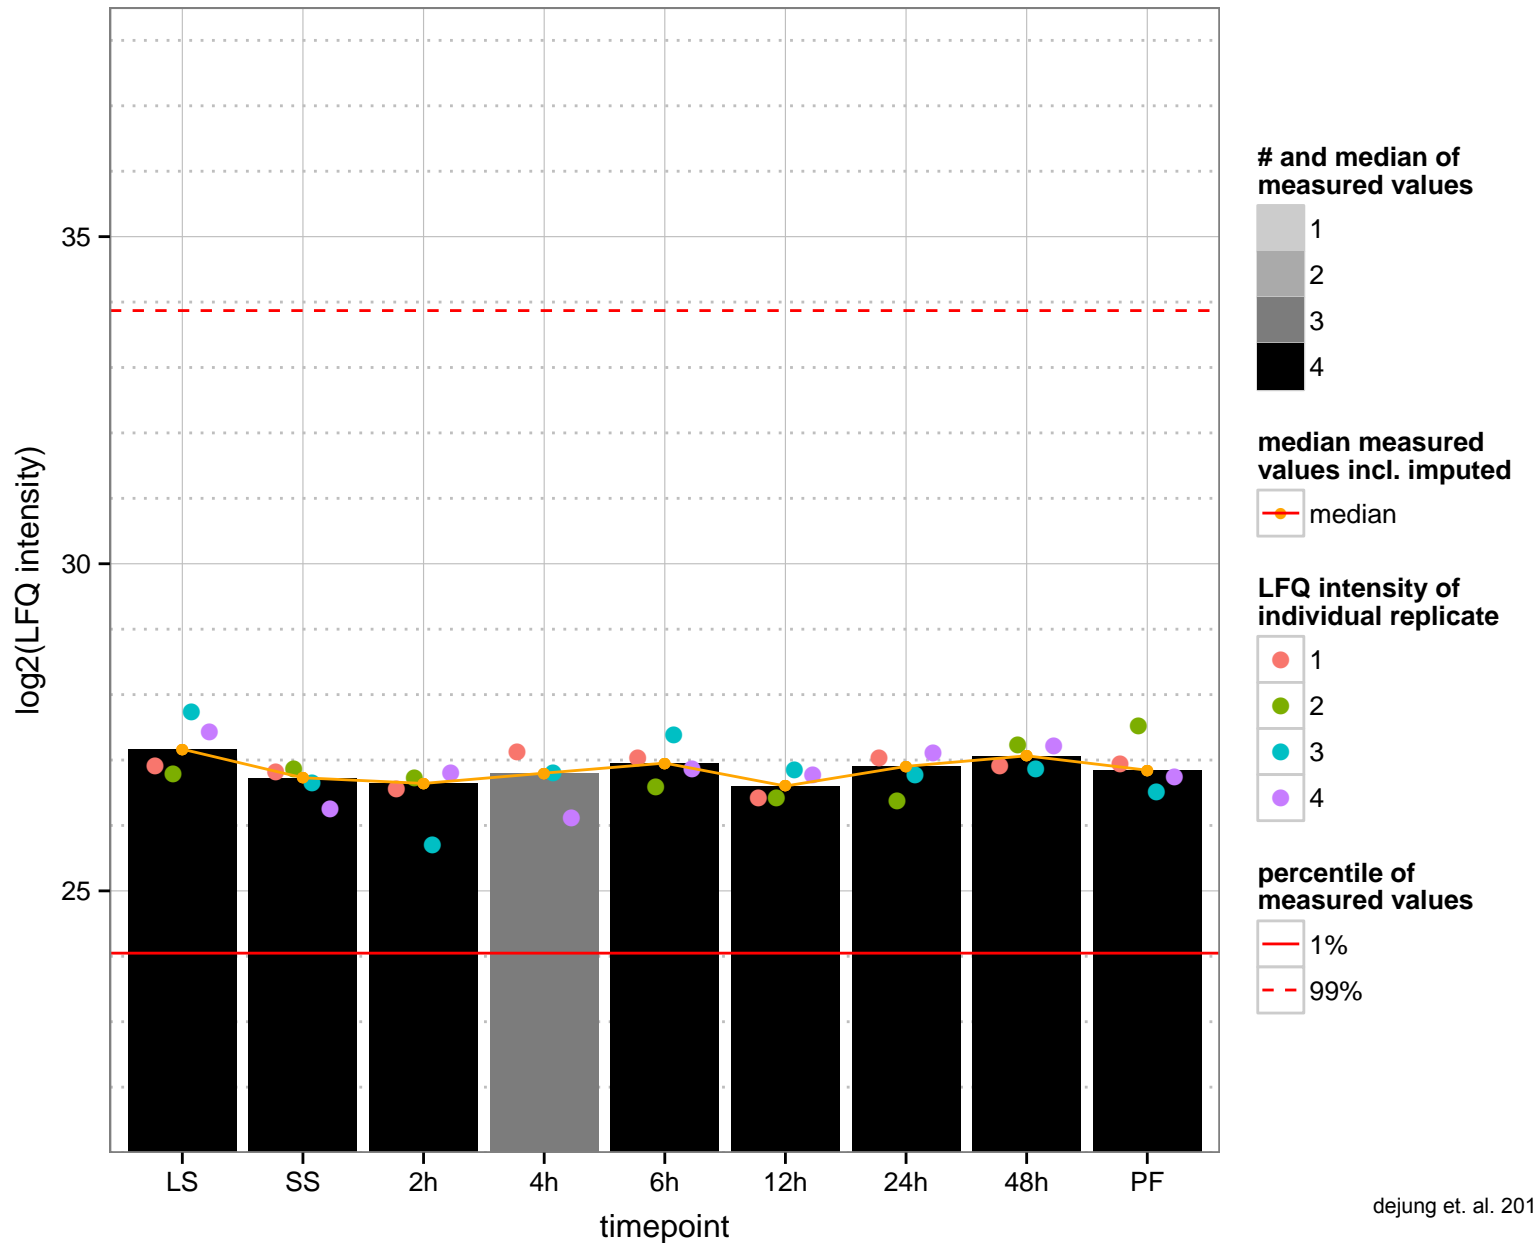

hypothetical protein, conserved  
 Tb927.4.2650  
 AGOF: null  
 AGOC: null  
 AGOP: null  
 PGO: null  
 PGOC: null  
 PGOP: null

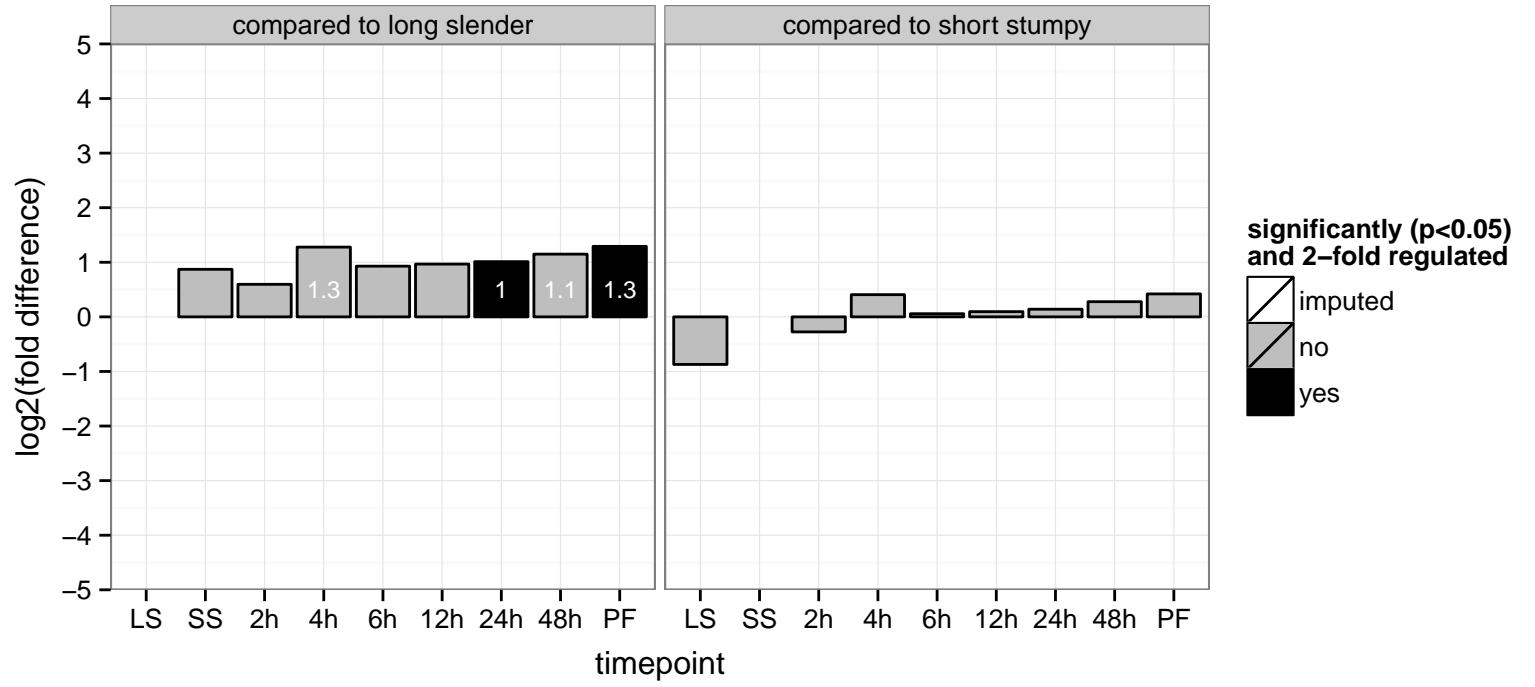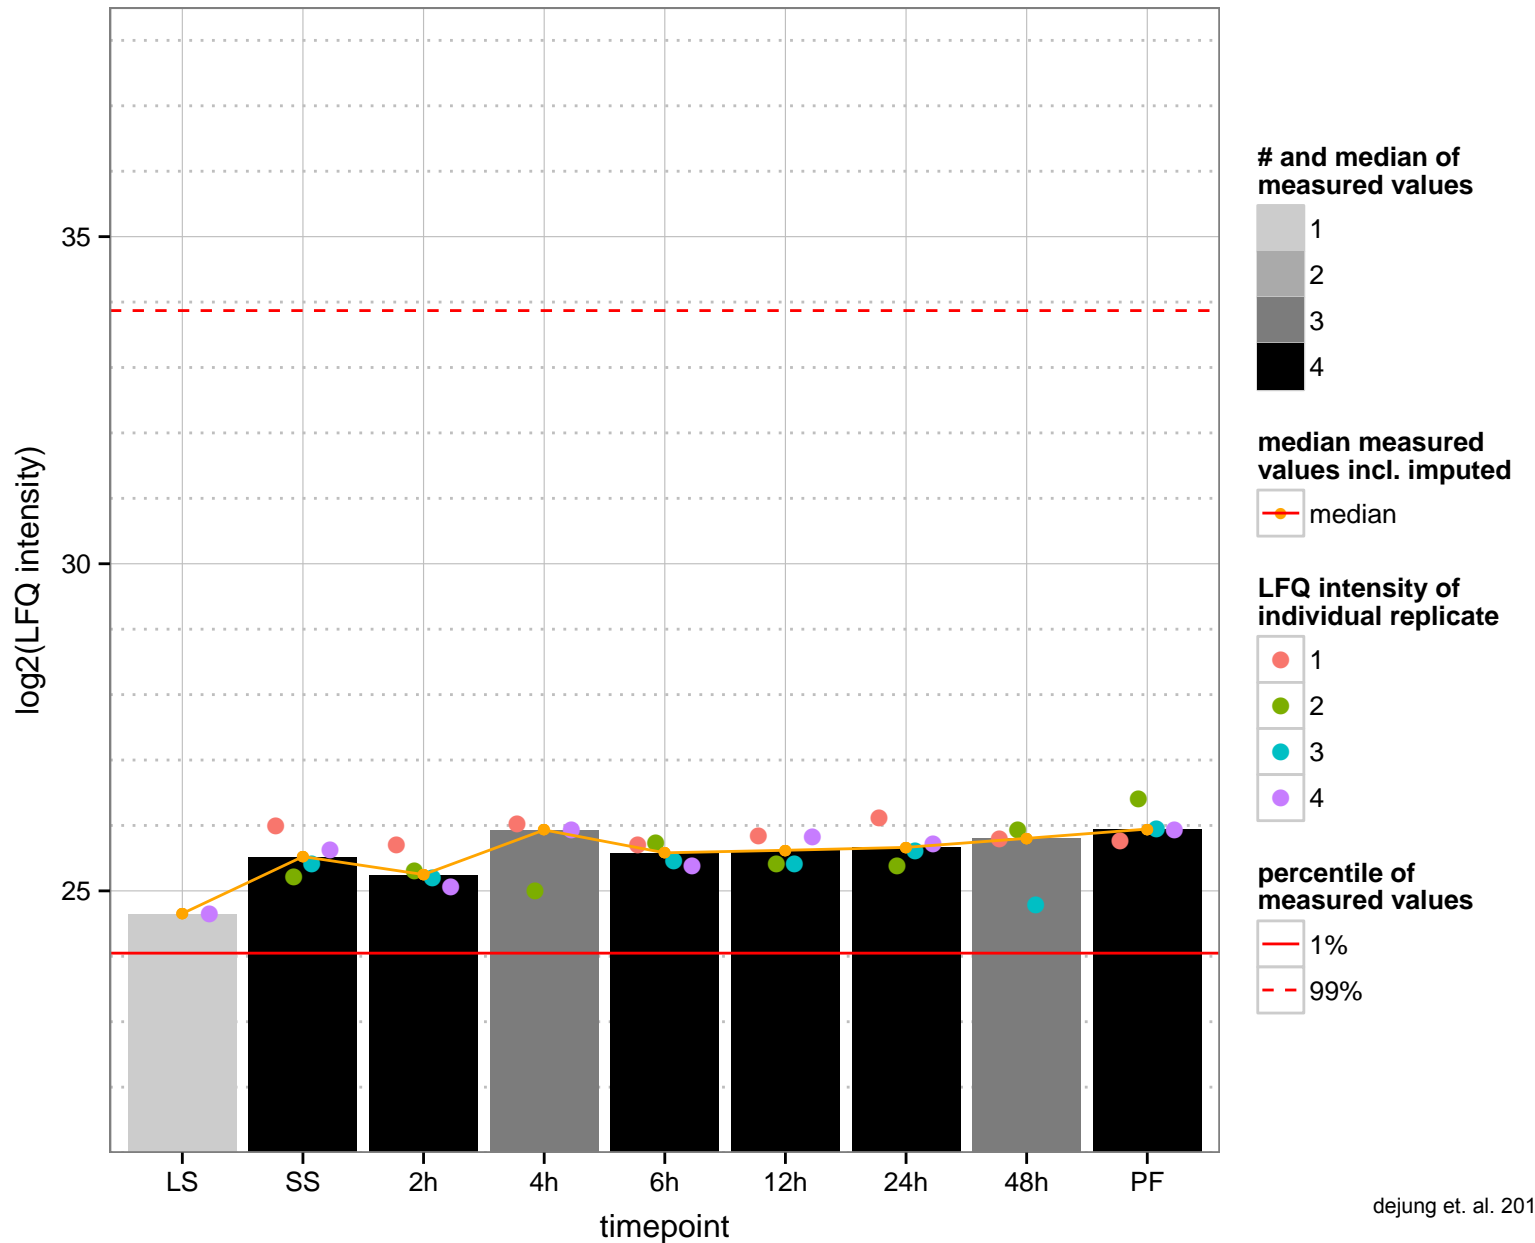

hypothetical protein, conserved  
 Tb927.4.2840  
 AGOF: null  
 AGOC: null  
 AGOP: null  
 PGO: null  
 PGOC: null  
 PGOP: null

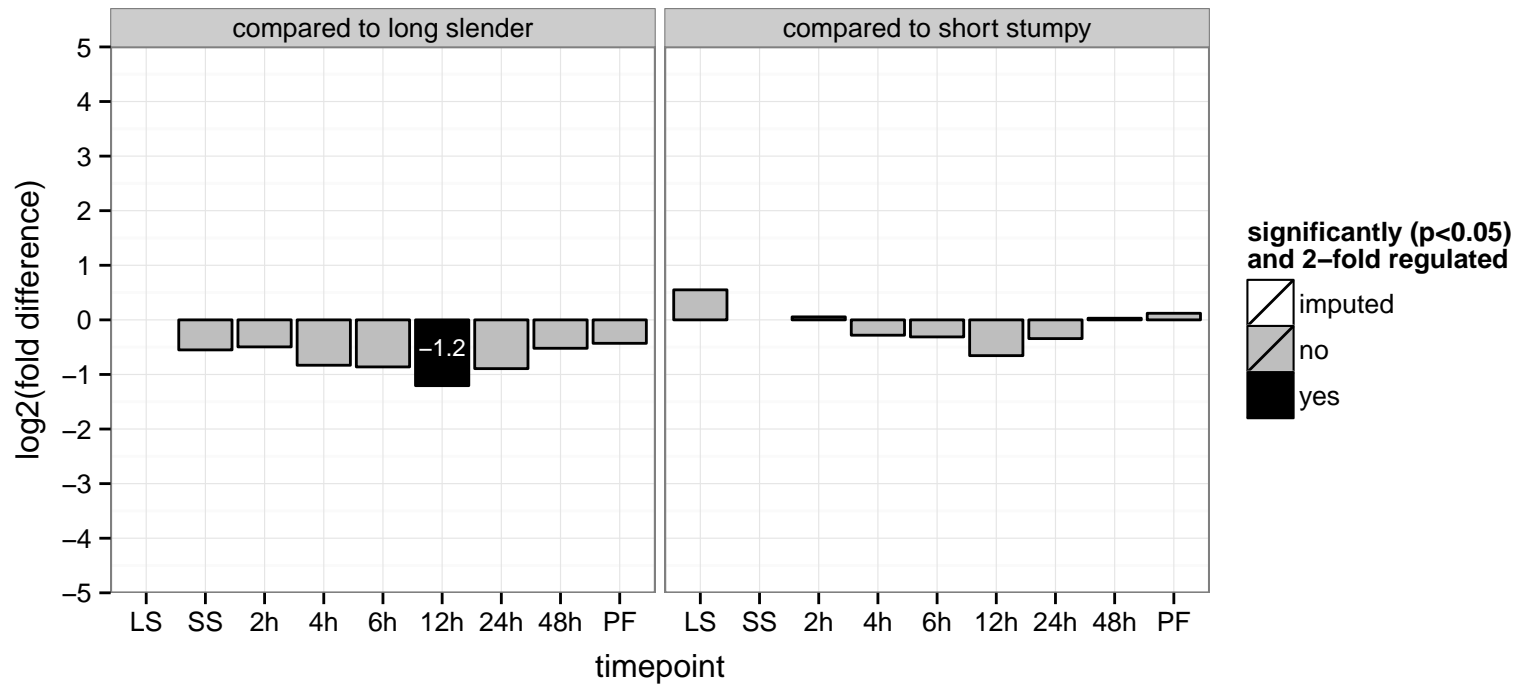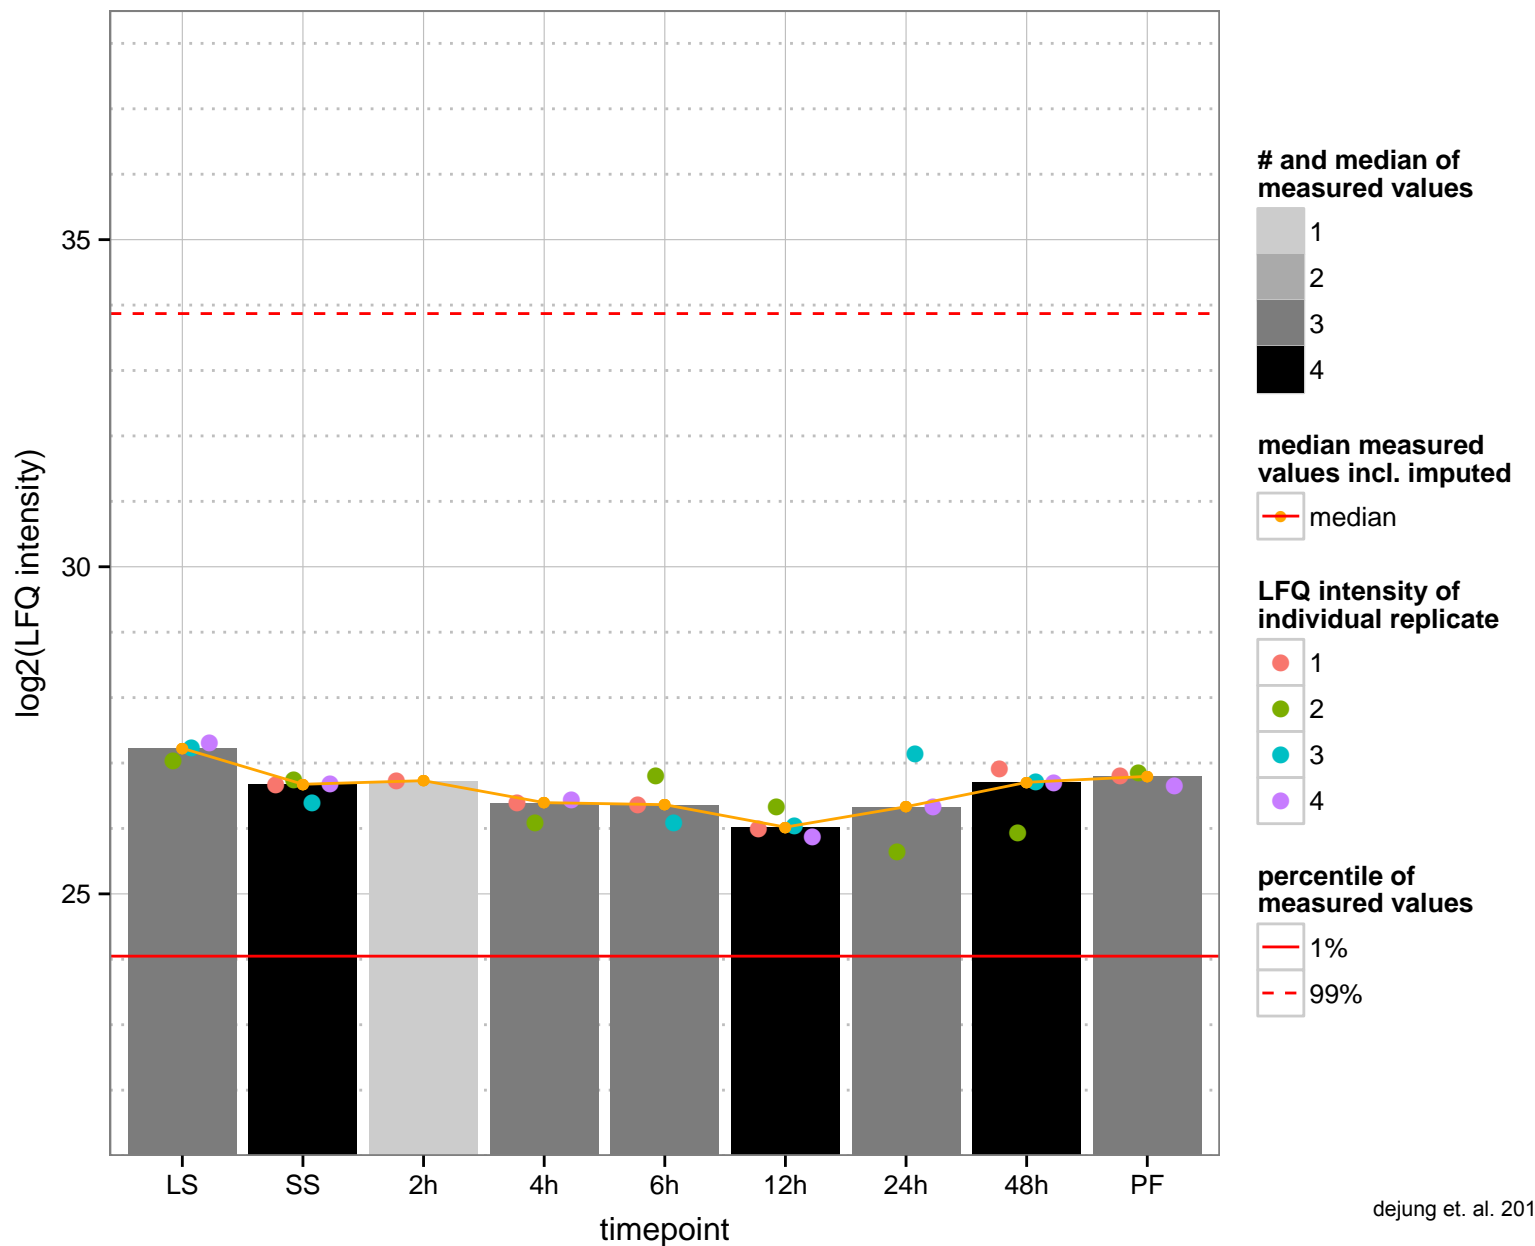

hypothetical protein, conserved  
 Tb927.4.2850  
 AGOF: null  
 AGOC: null  
 AGOP: null  
 PGO: null  
 PGOC: null  
 PGOP: null

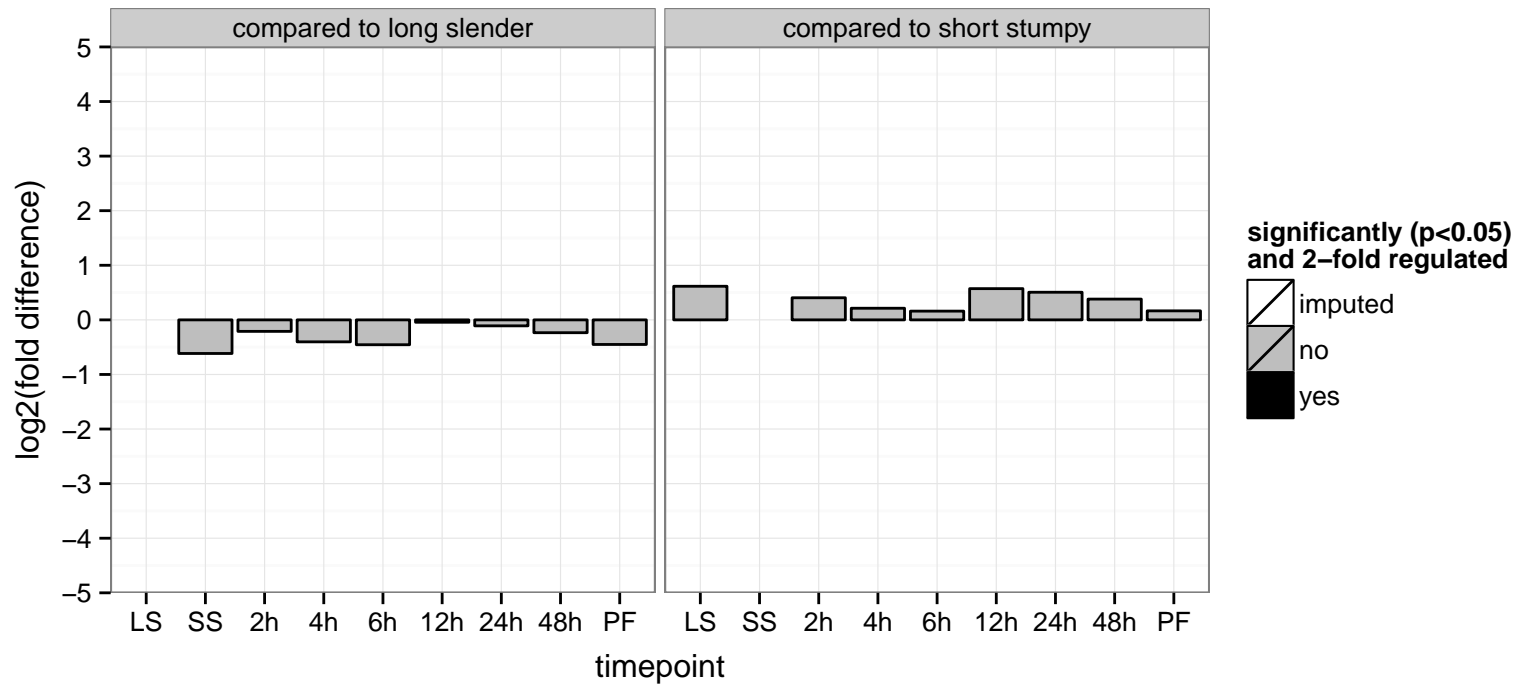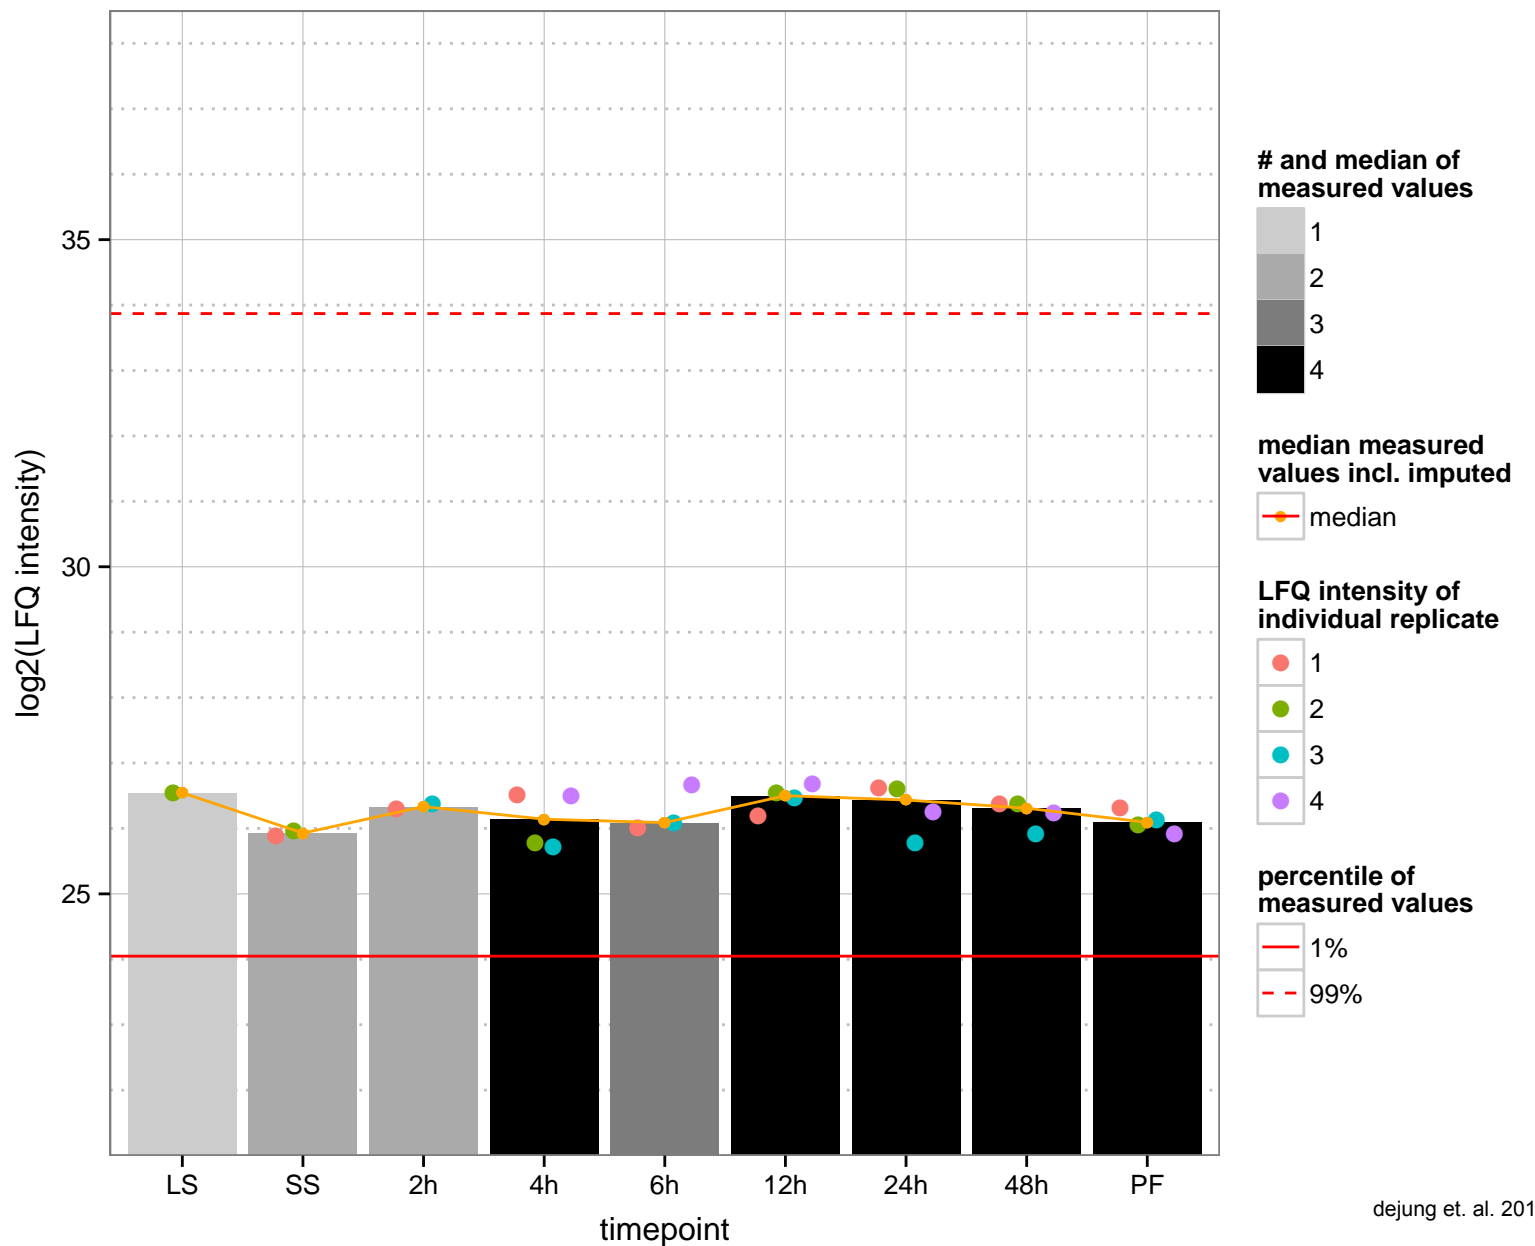

hypothetical protein, conserved  
 Tb927.4.2890  
 AGOF: null  
 AGOC: null  
 AGOP: null  
 PGO: null  
 PGO: null  
 PGO: null

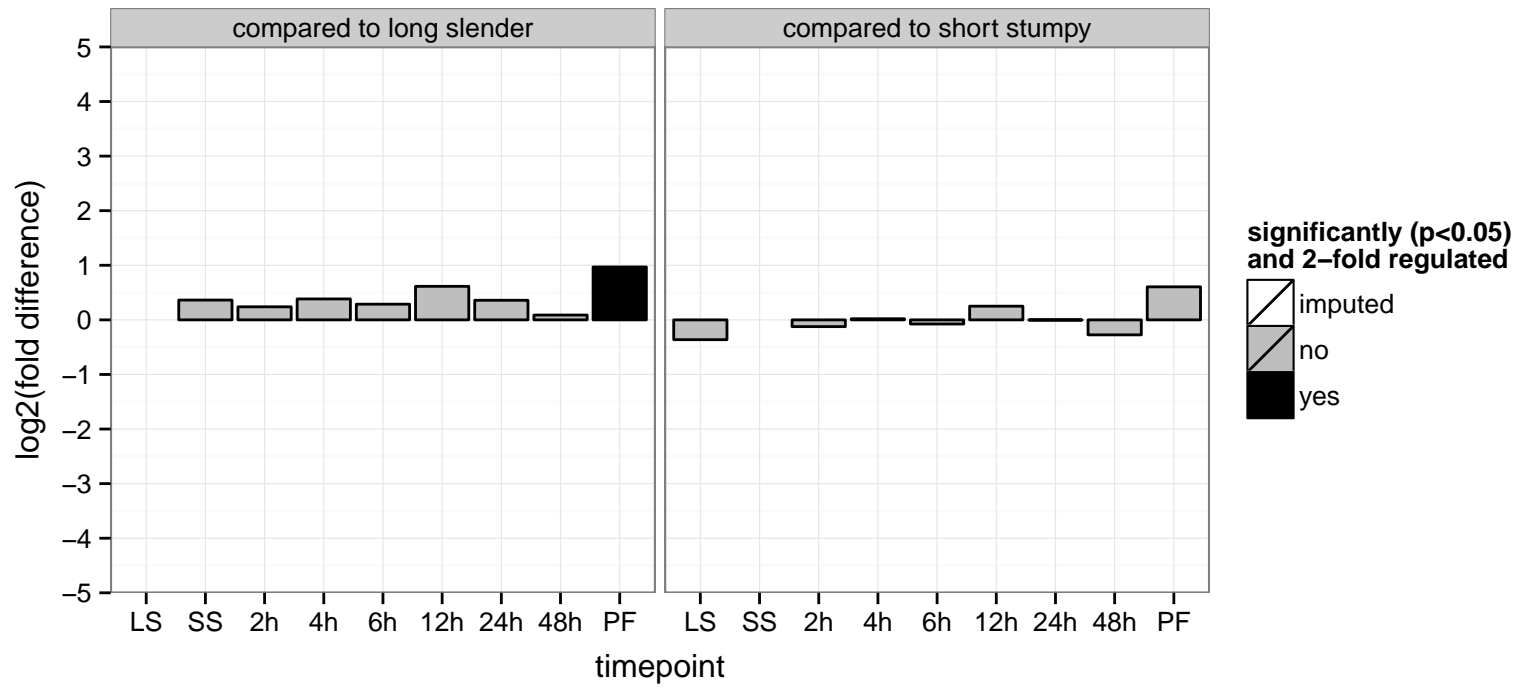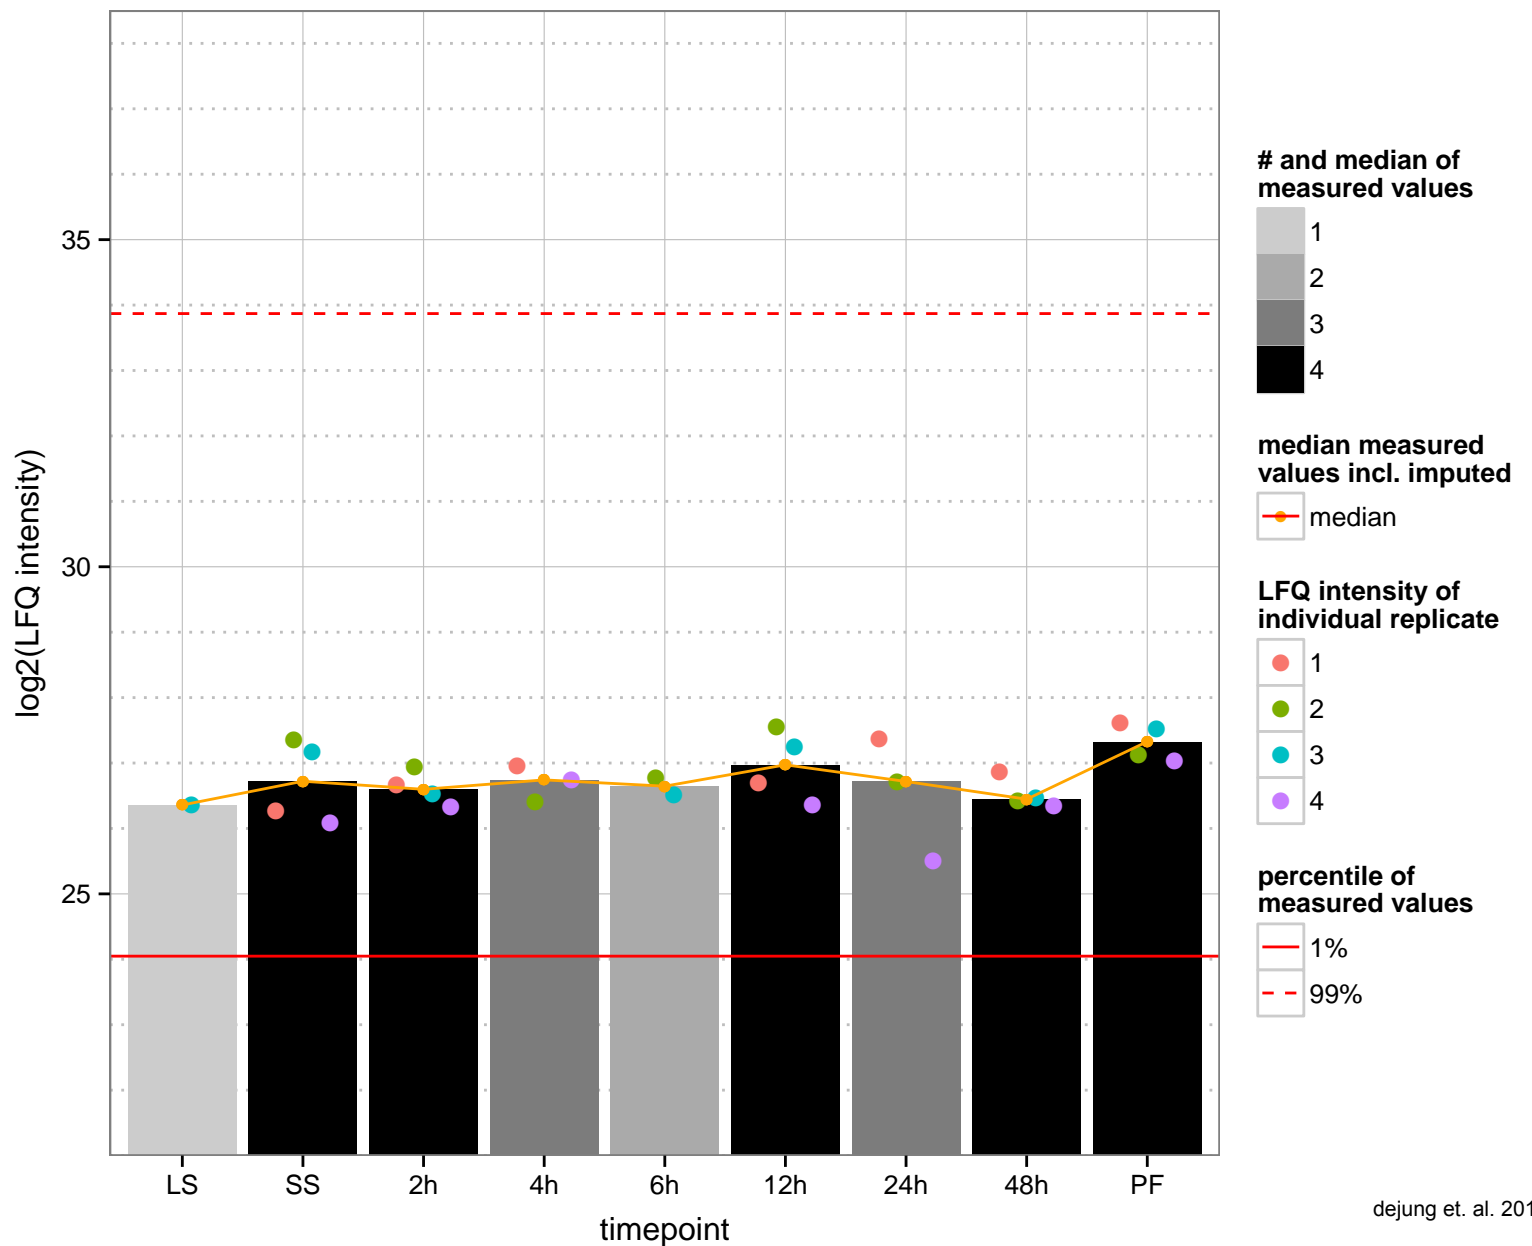

hypothetical protein, conserved  
 Tb927.4.3060  
 AGOF: null  
 AGOC: null  
 AGOP: null  
 PGO: null  
 PGOC: null  
 PGOP: null

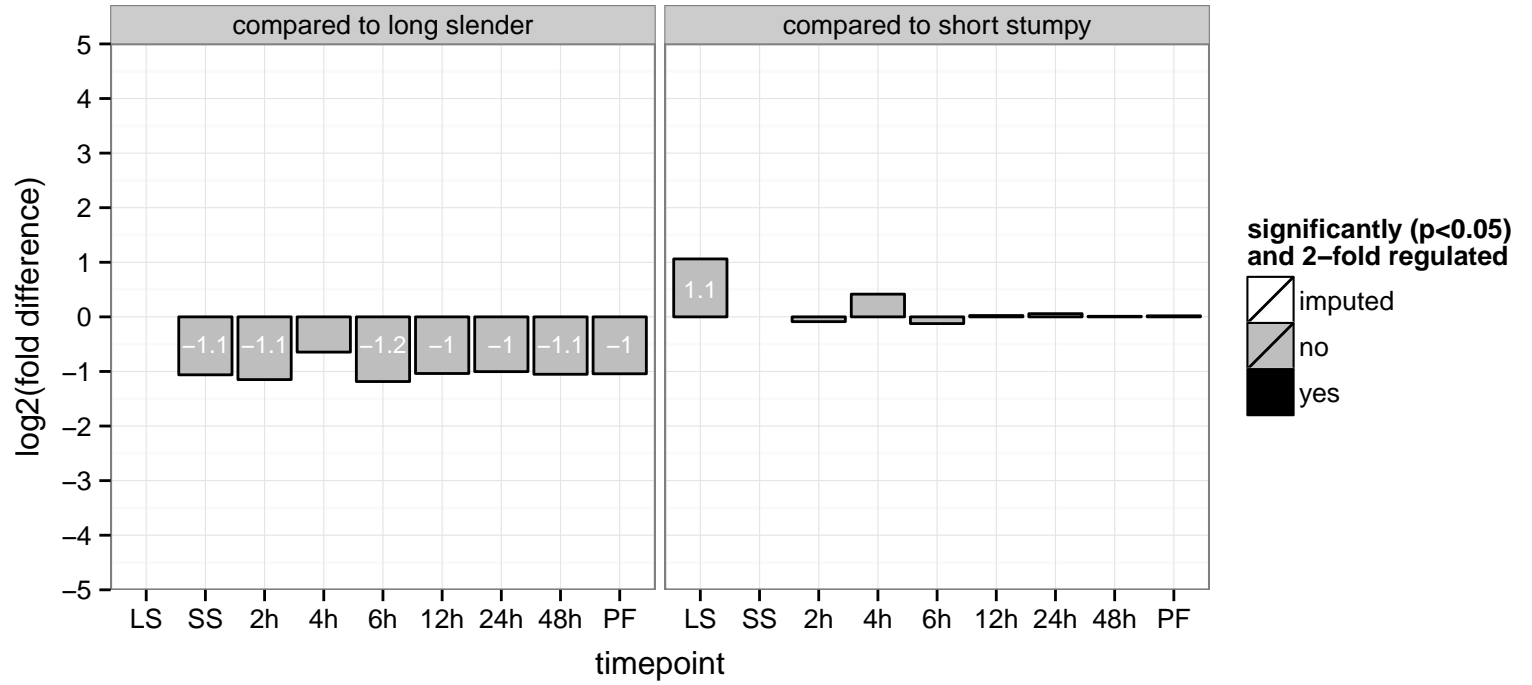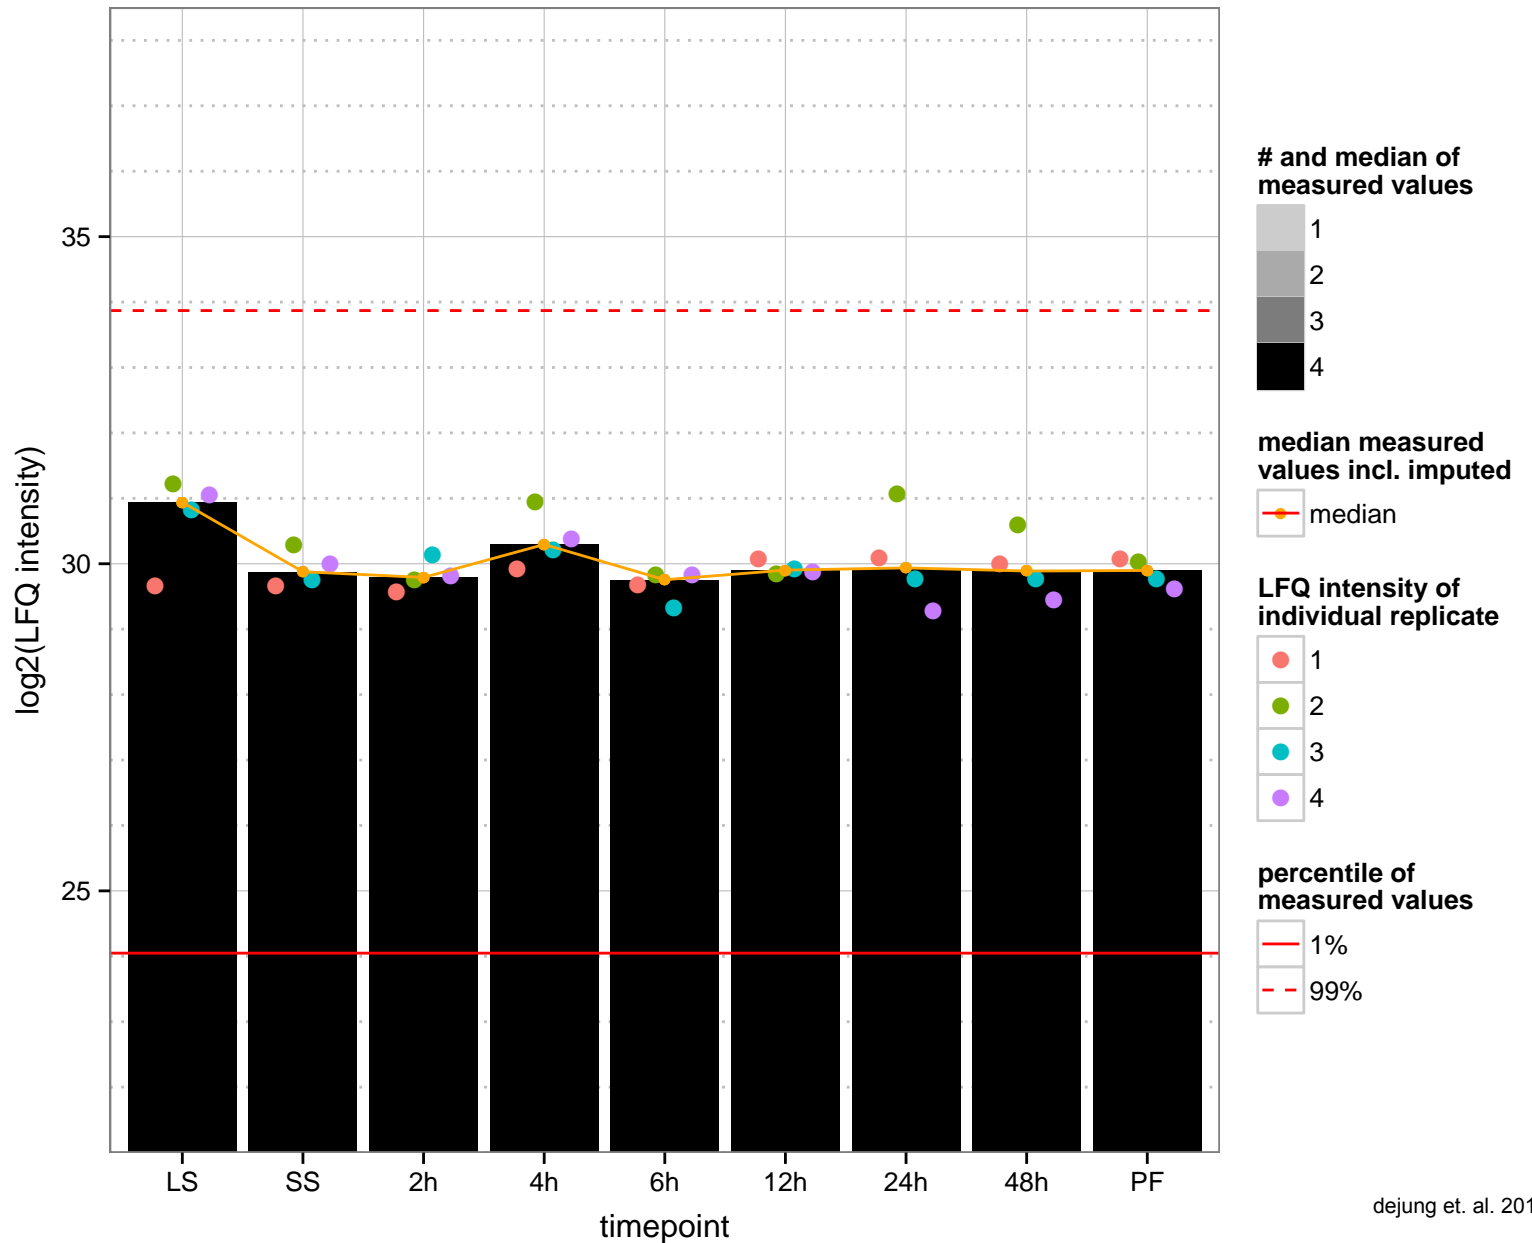

hypothetical protein, conserved  
 Tb927.4.3150  
 AGOF: null  
 AGOC: mitochondrion  
 AGOP: null  
 PGO: null  
 PGO: null  
 PGO: null

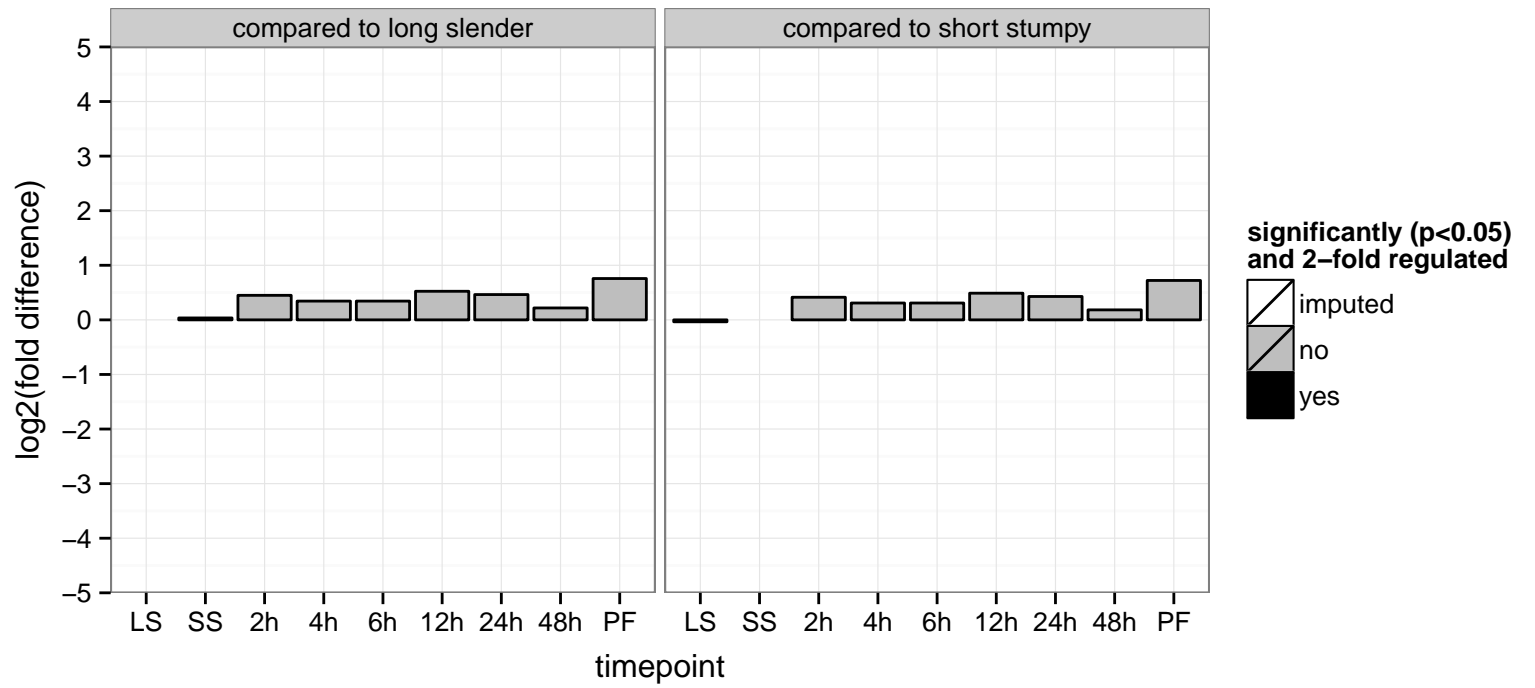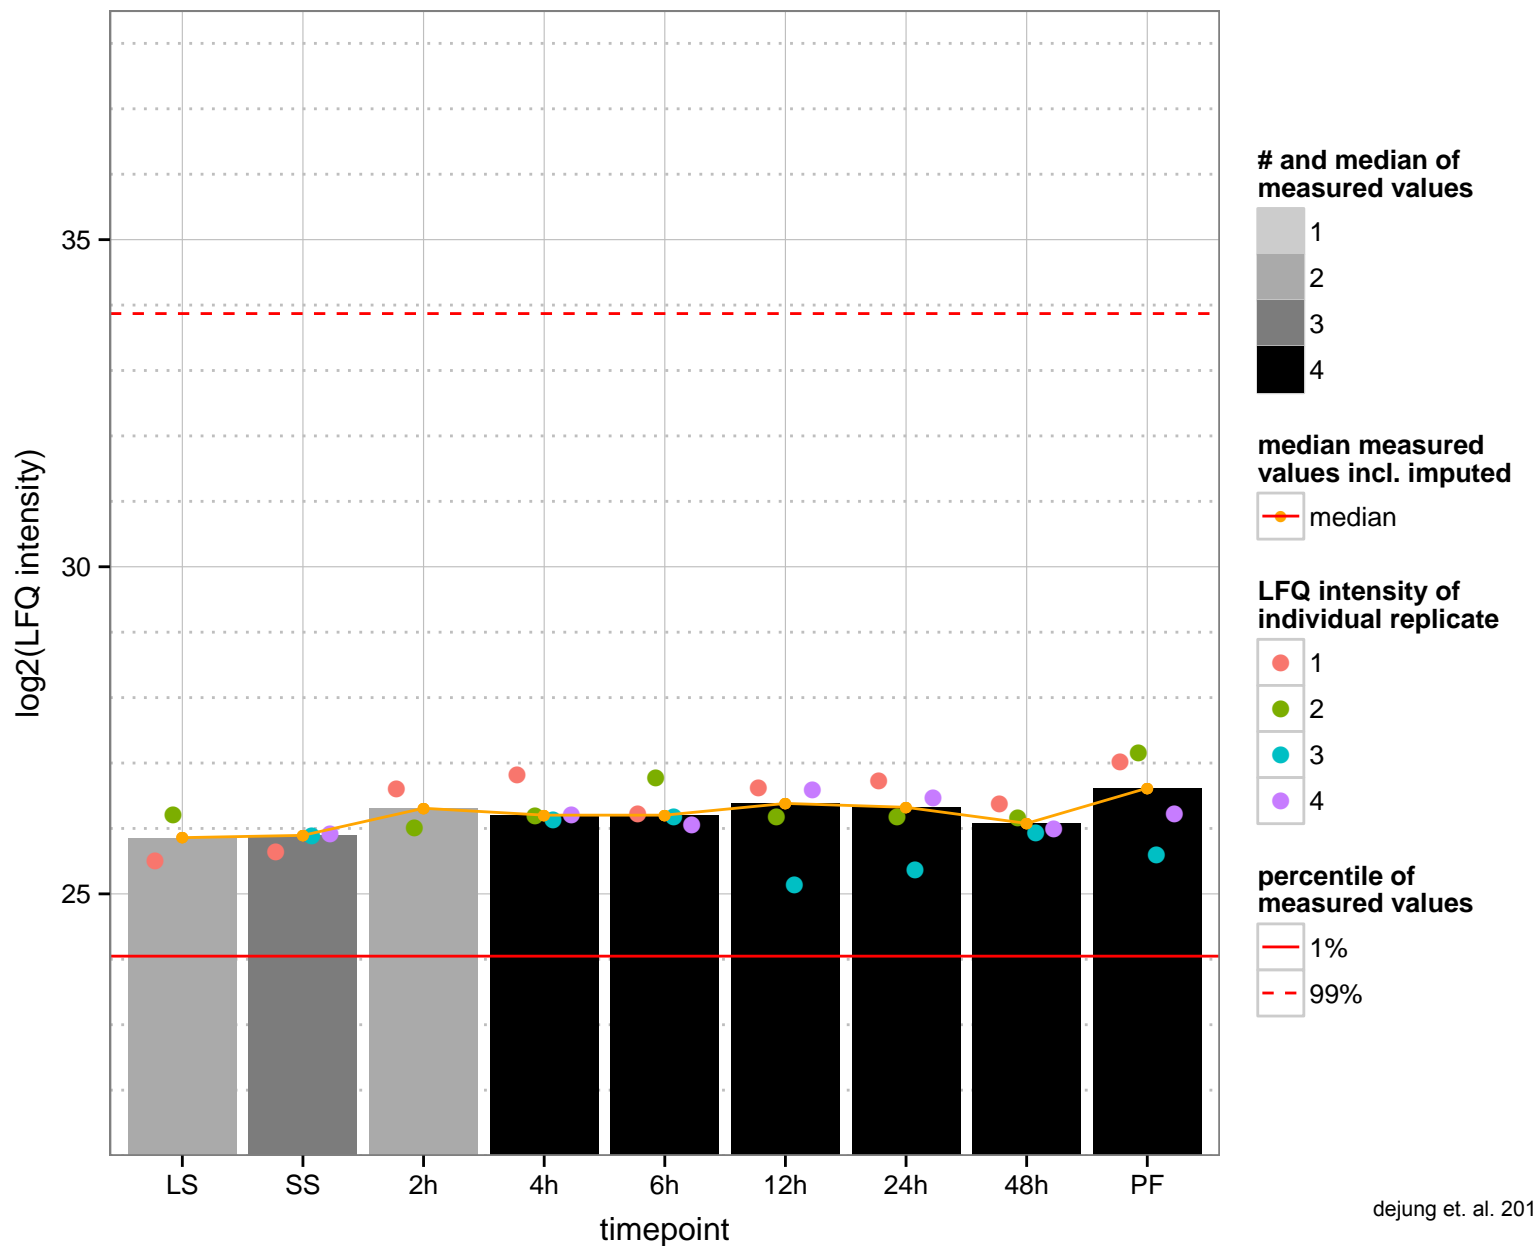



dihydroxyacetone phosphate acyltransferase, putative (DAT)  
 Tb927.4.3160  
 AGOF: null  
 AGOC: glycosome  
 AGOP: ether lipid biosynthetic process  
 PGO: transferase activity, transferring acyl groups  
 PGO: null  
 PGO: metabolic process

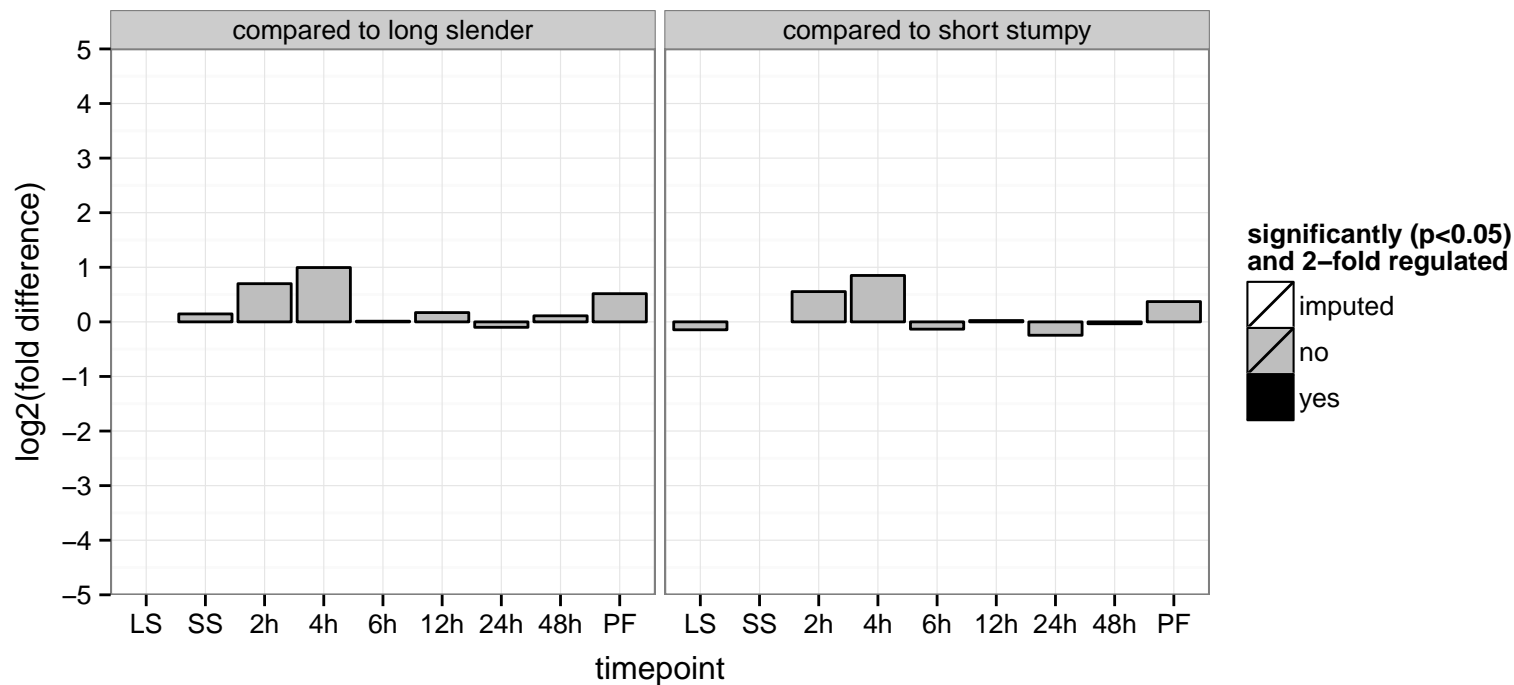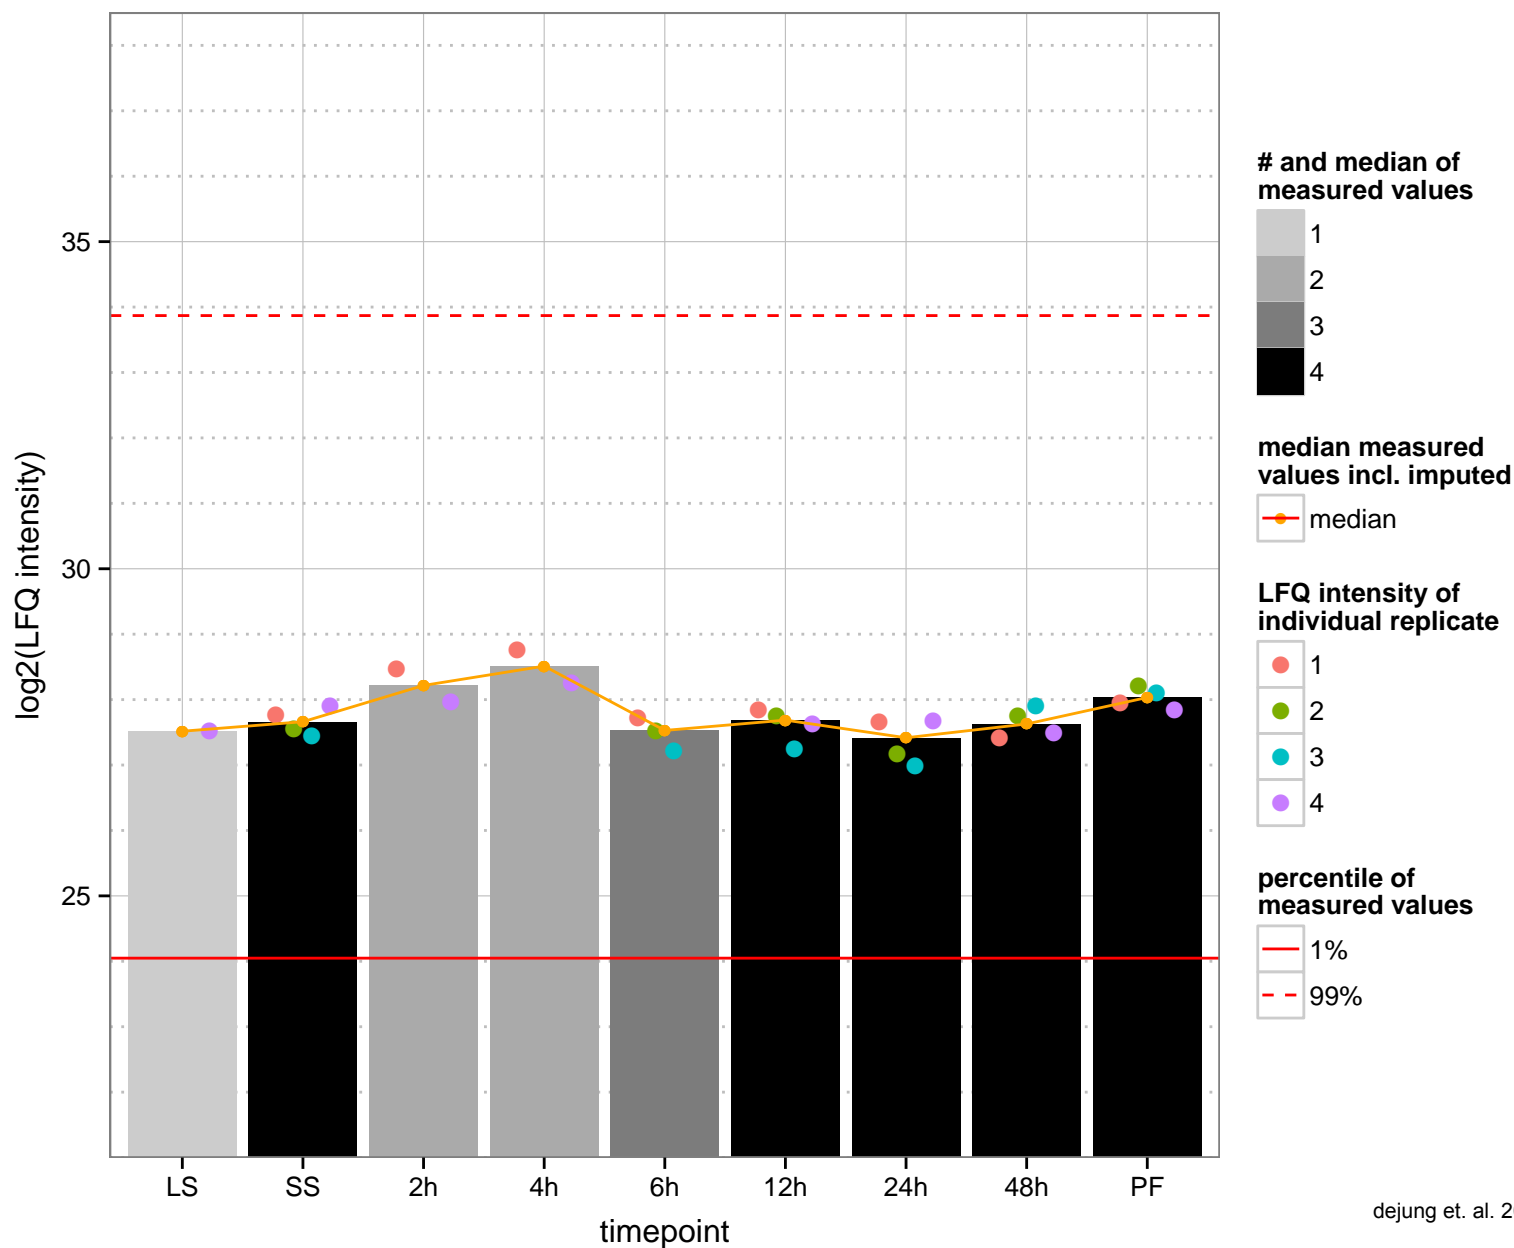

hypothetical protein, conserved  
 Tb927.4.3180  
 AGOF: null  
 AGOC: null  
 AGOP: null  
 PGO: protein binding  
 PGOC: null  
 PGOP: null

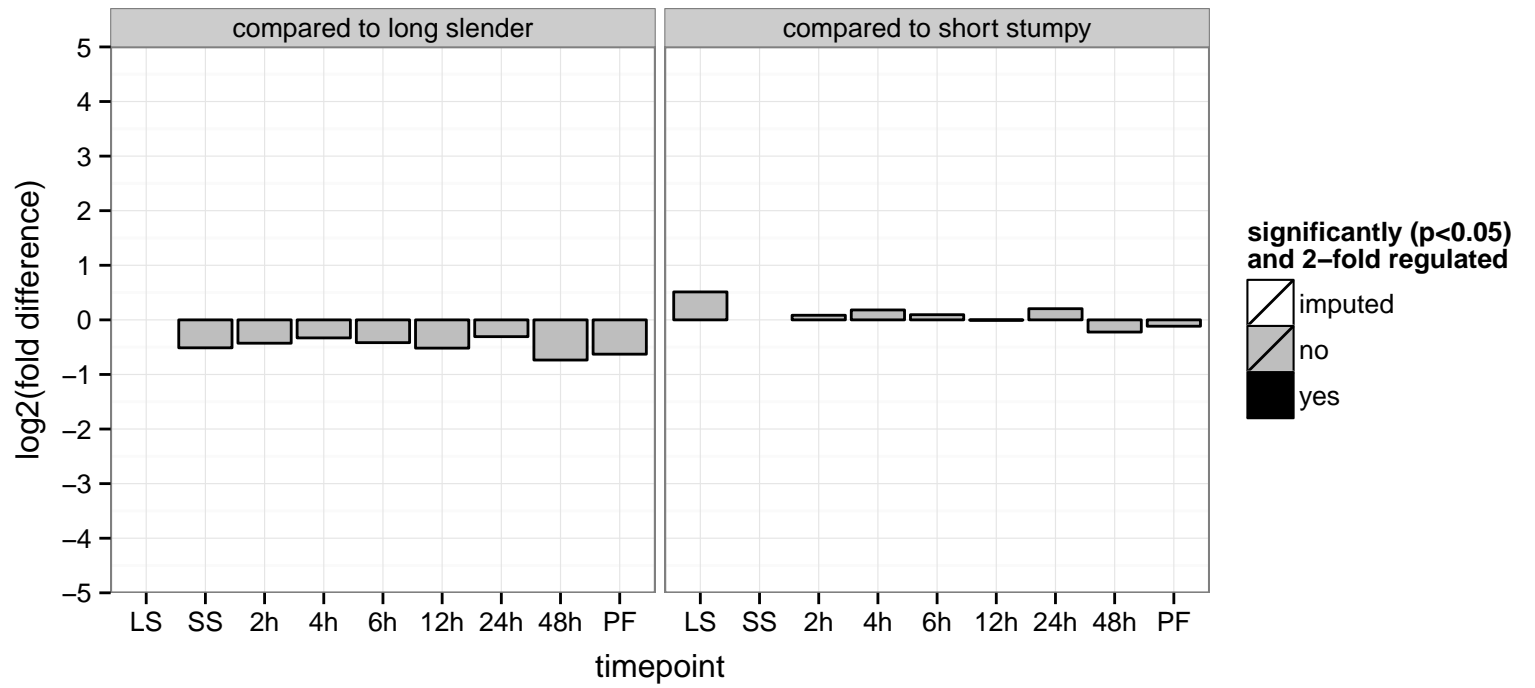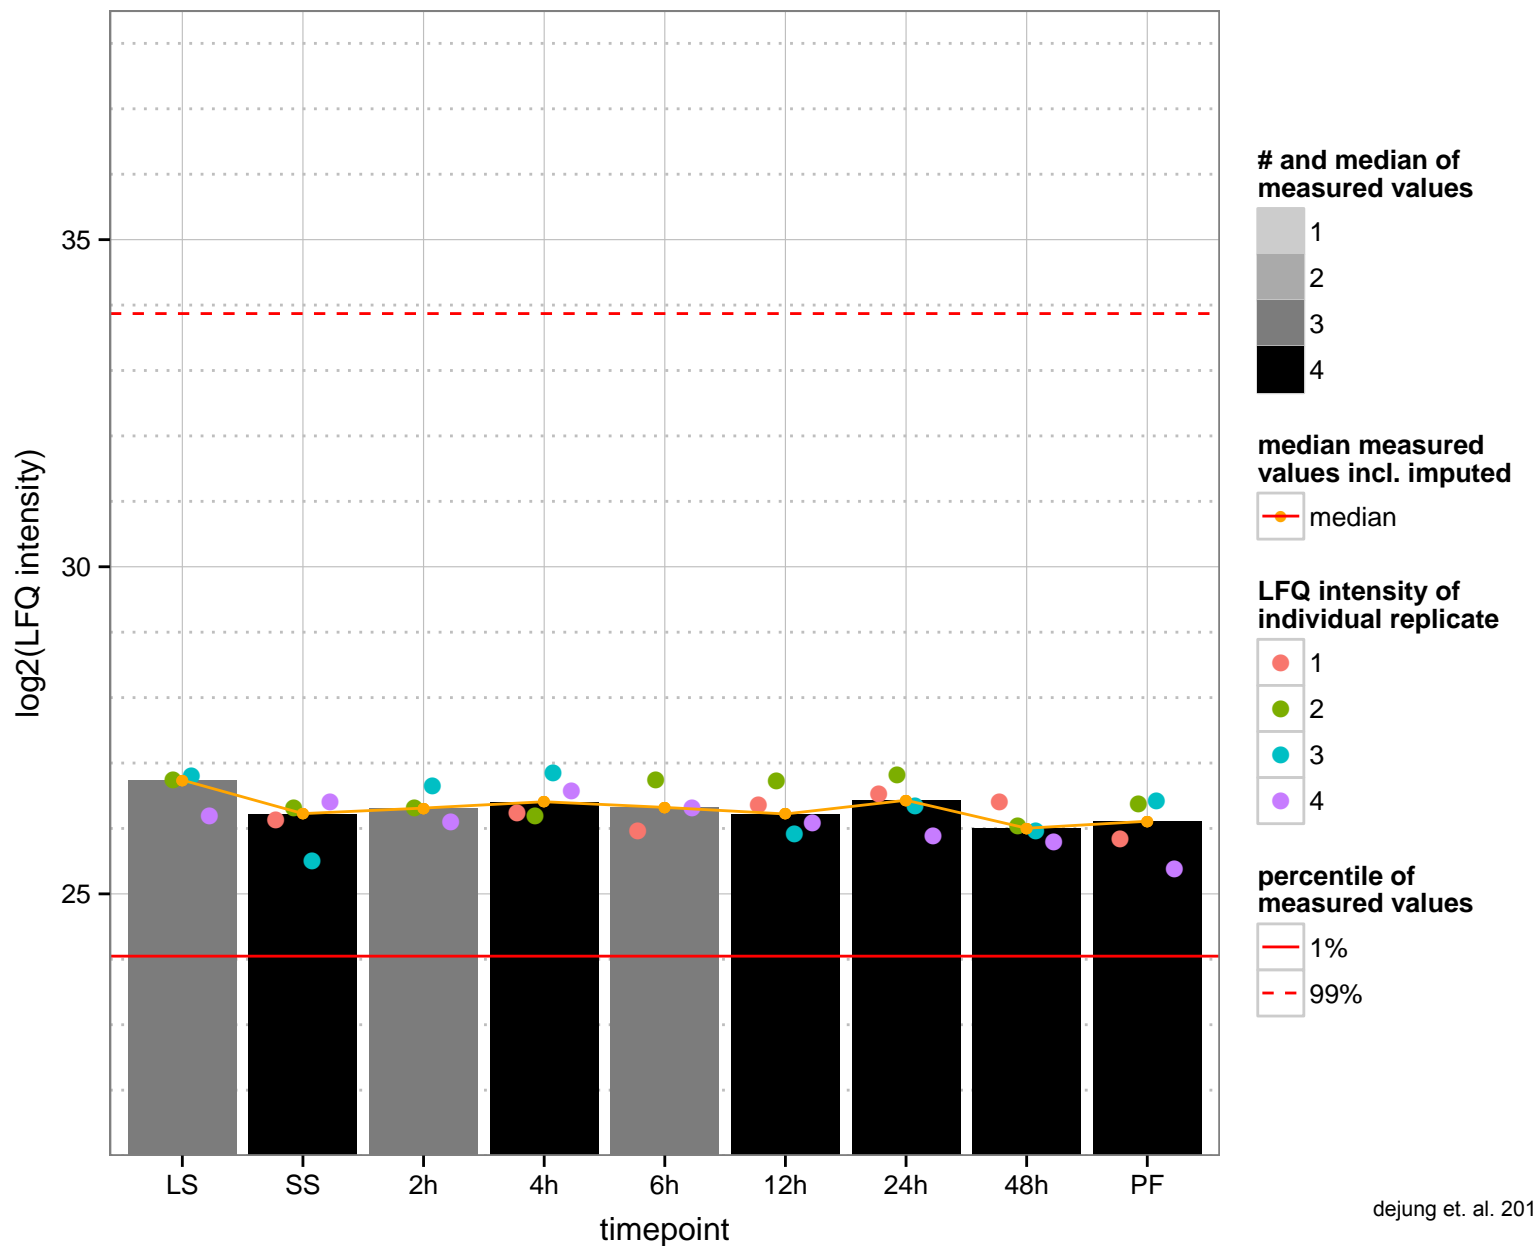

hypothetical protein, conserved  
 Tb927.4.330  
 AGOF: null  
 AGOC: mitochondrion  
 AGOP: null  
 PGO: null  
 PGOC: null  
 PGOP: null

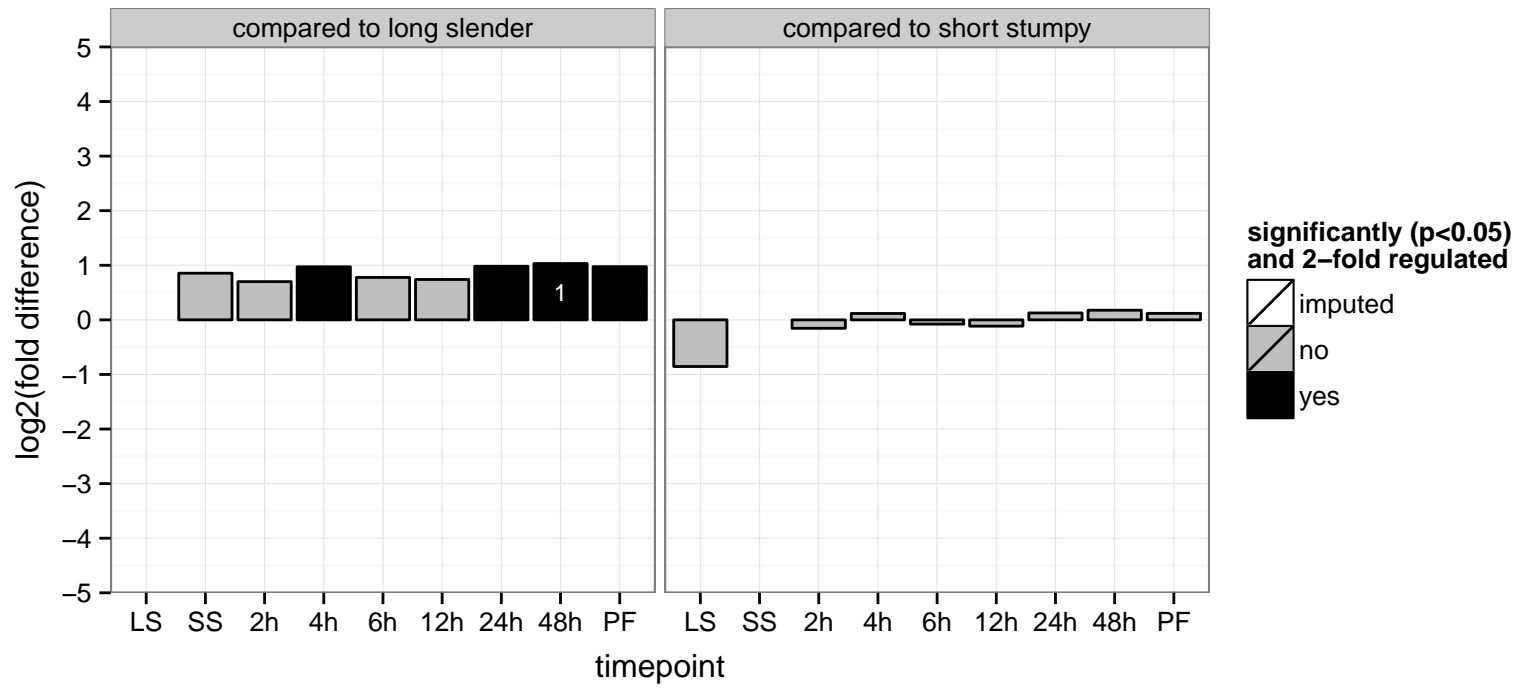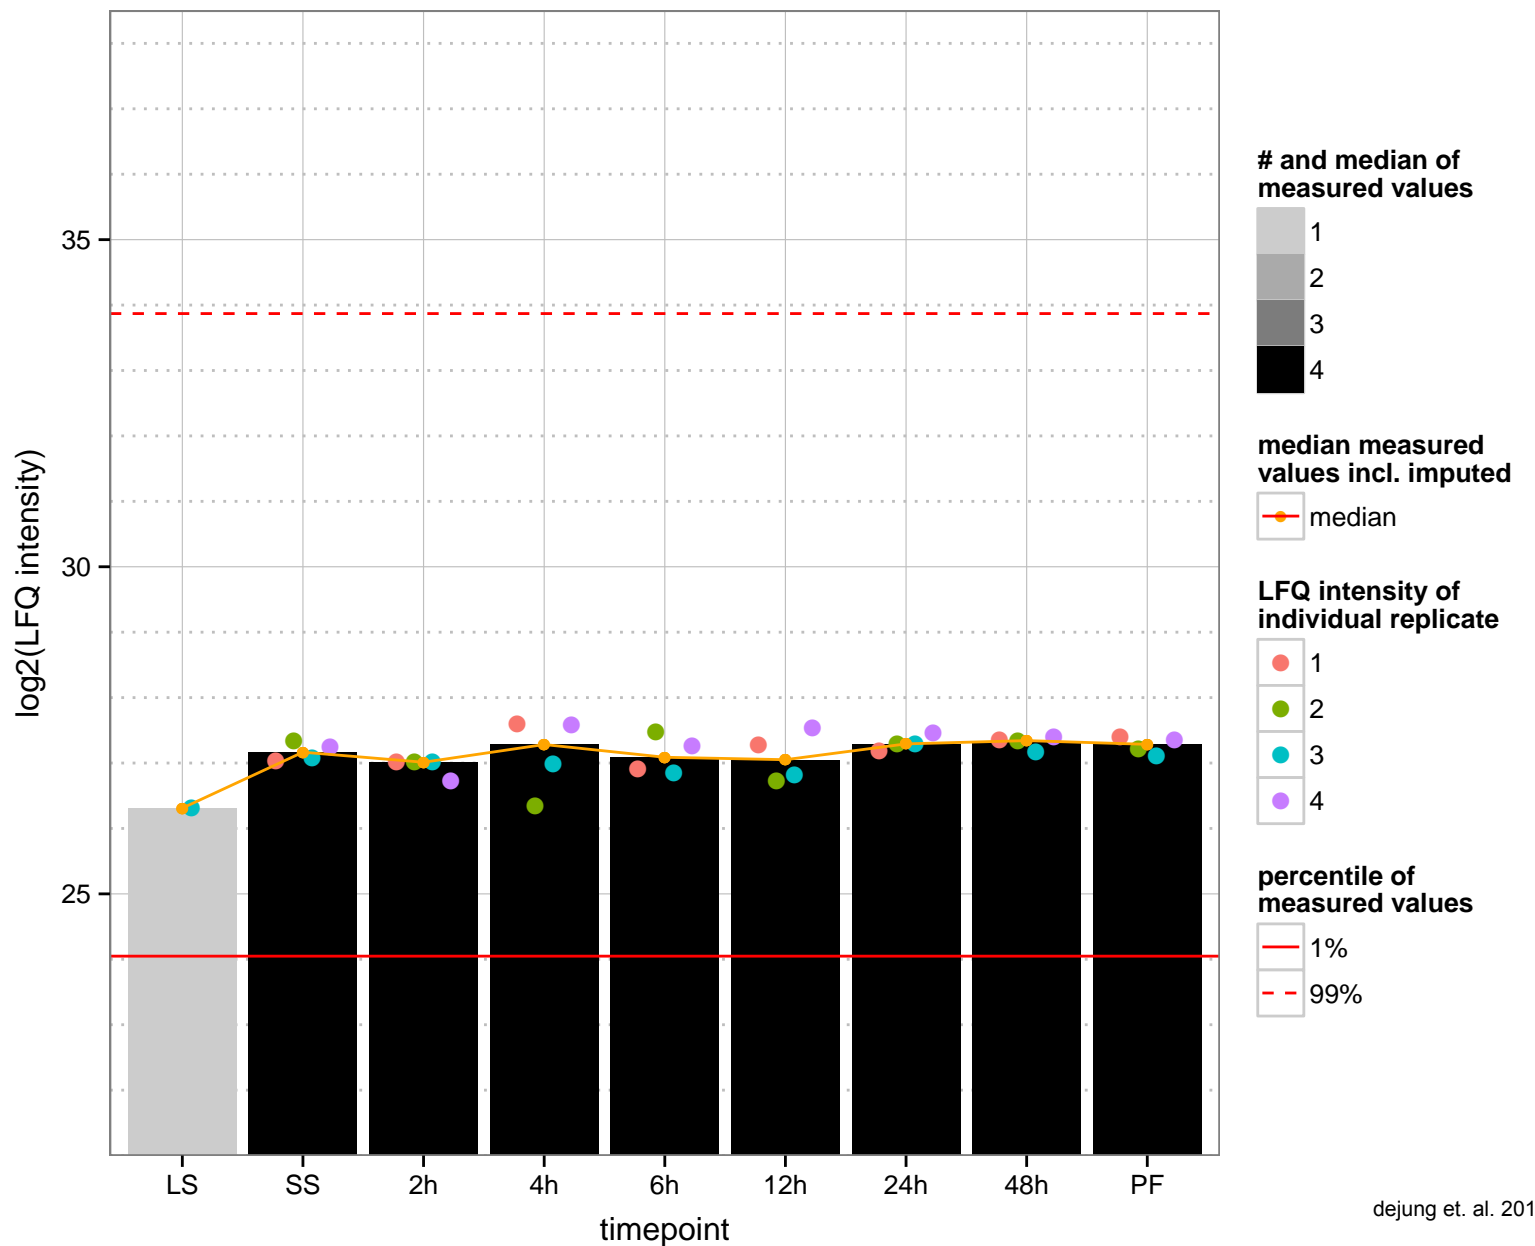

mitochondrial ATP-dependent zinc metallopeptidase, putative, metallo-peptidase, Clan MA(E) Family M41  
 Tb927.4.3300  
 AGOF: ATP binding, metalloendopeptidase activity, nucleoside-triphosphatase activity  
 AGOC: mitochondrial membrane, mitochondrion  
 AGOP: protein catabolic process, proteolysis  
 PGO: ATP binding, metalloendopeptidase activity, nucleoside-triphosphatase activity, nucleotide binding  
 PGOC: membrane  
 PGOP: protein catabolic process, proteolysis

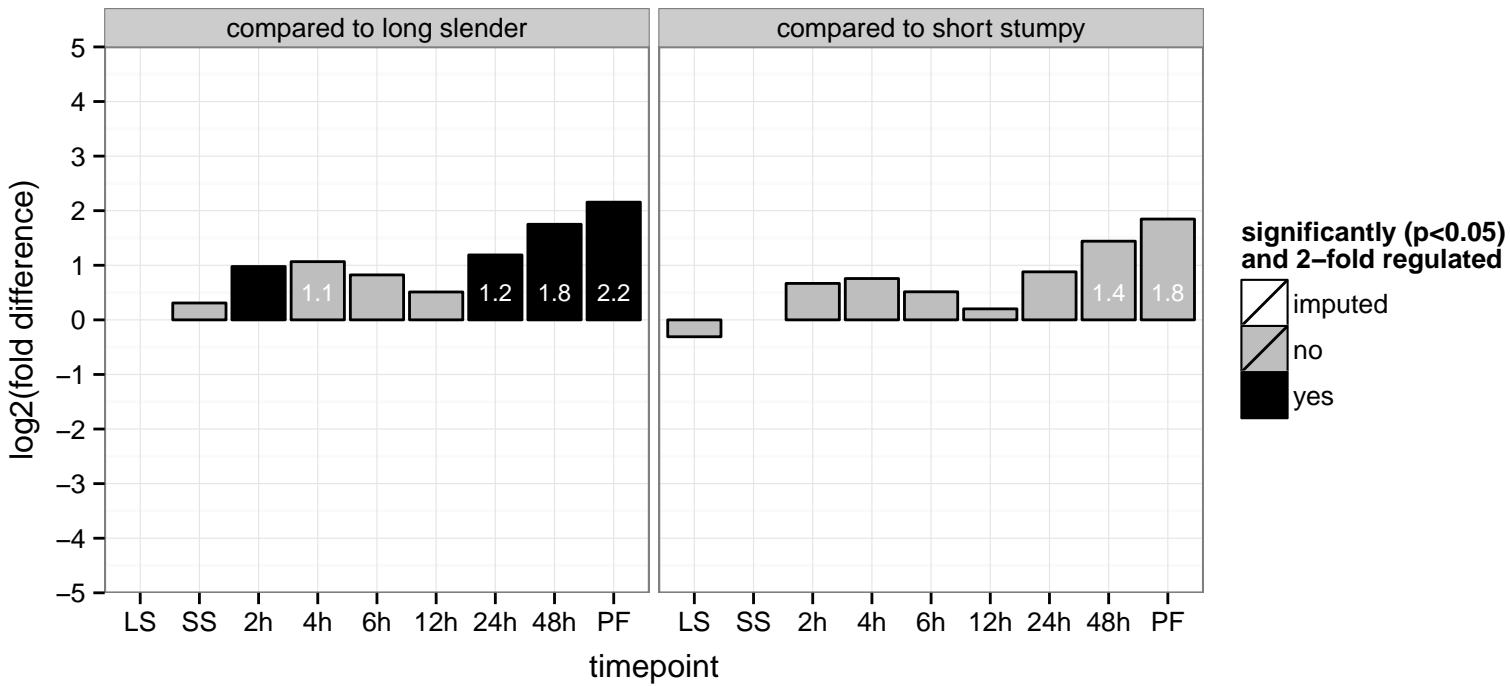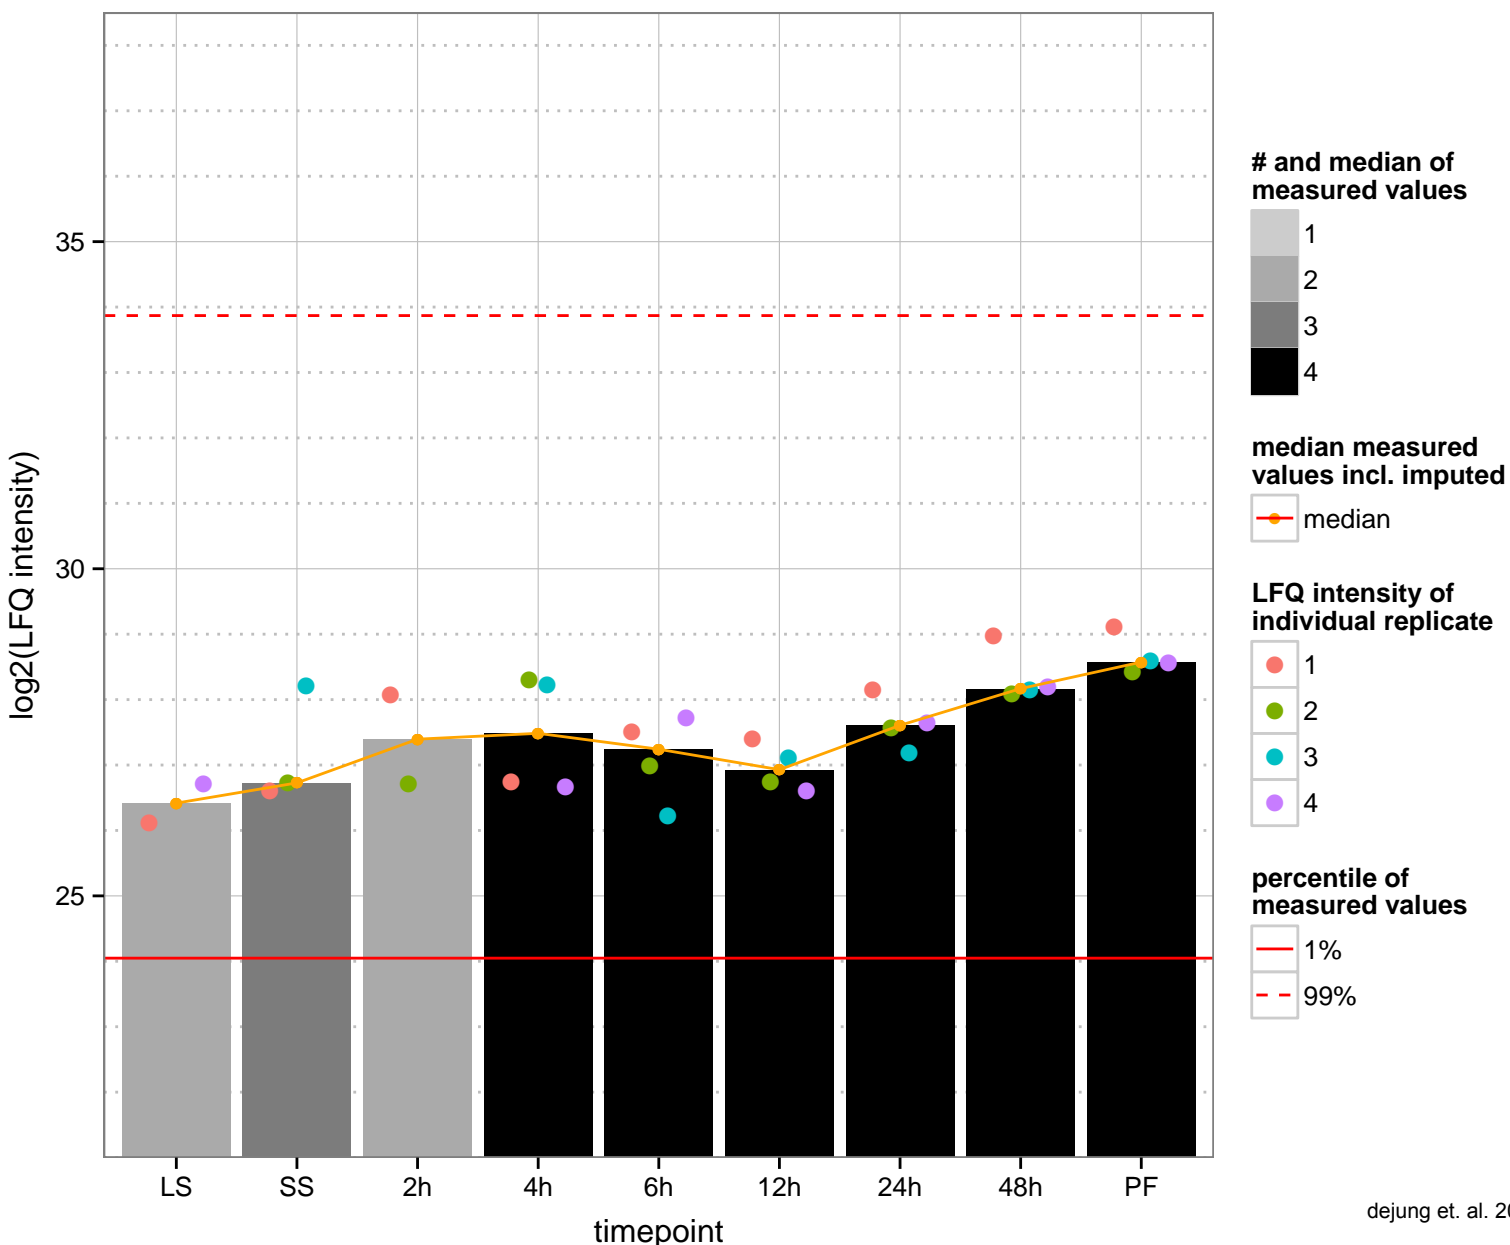

selenoprotein, putative  
 Tb927.4.3410  
 AGOF: null  
 AGOC: null  
 AGOP: null  
 PGO: null  
 PGOC: null  
 PGOP: null

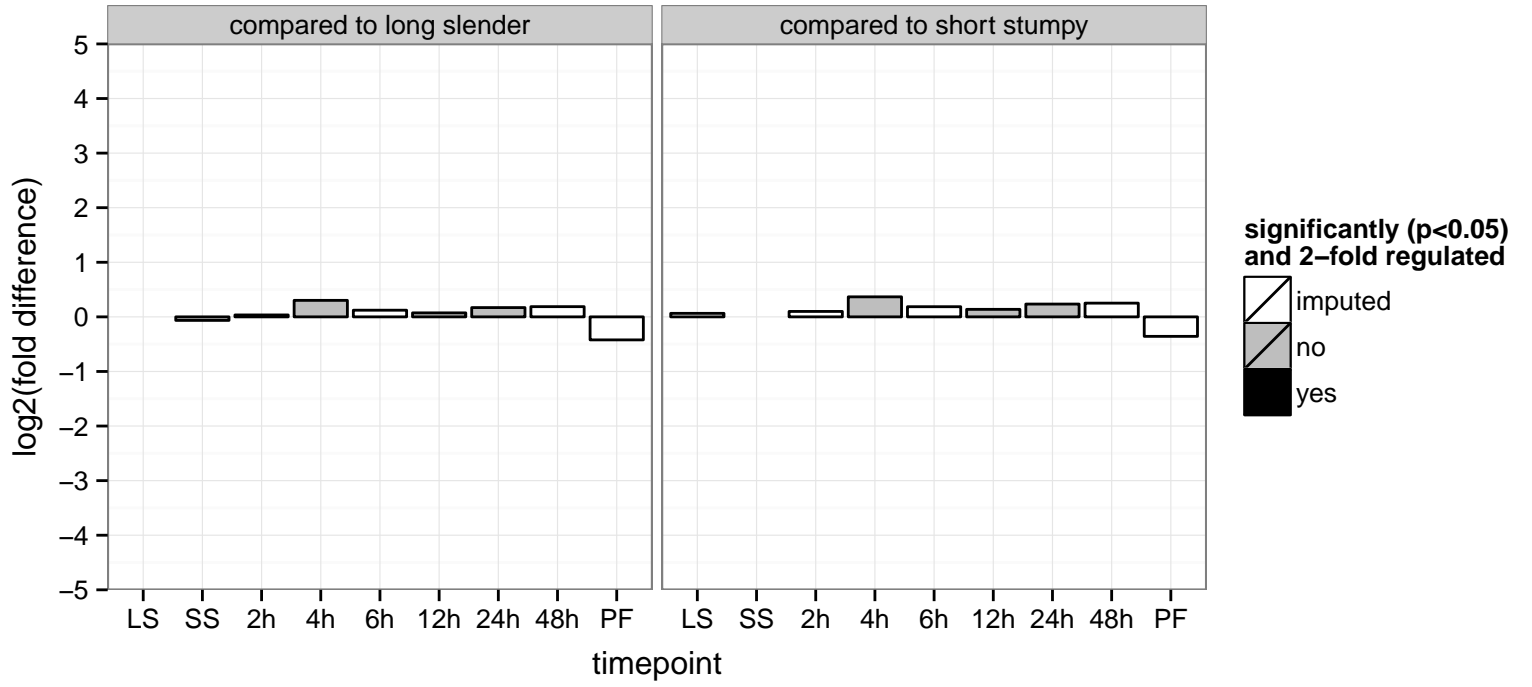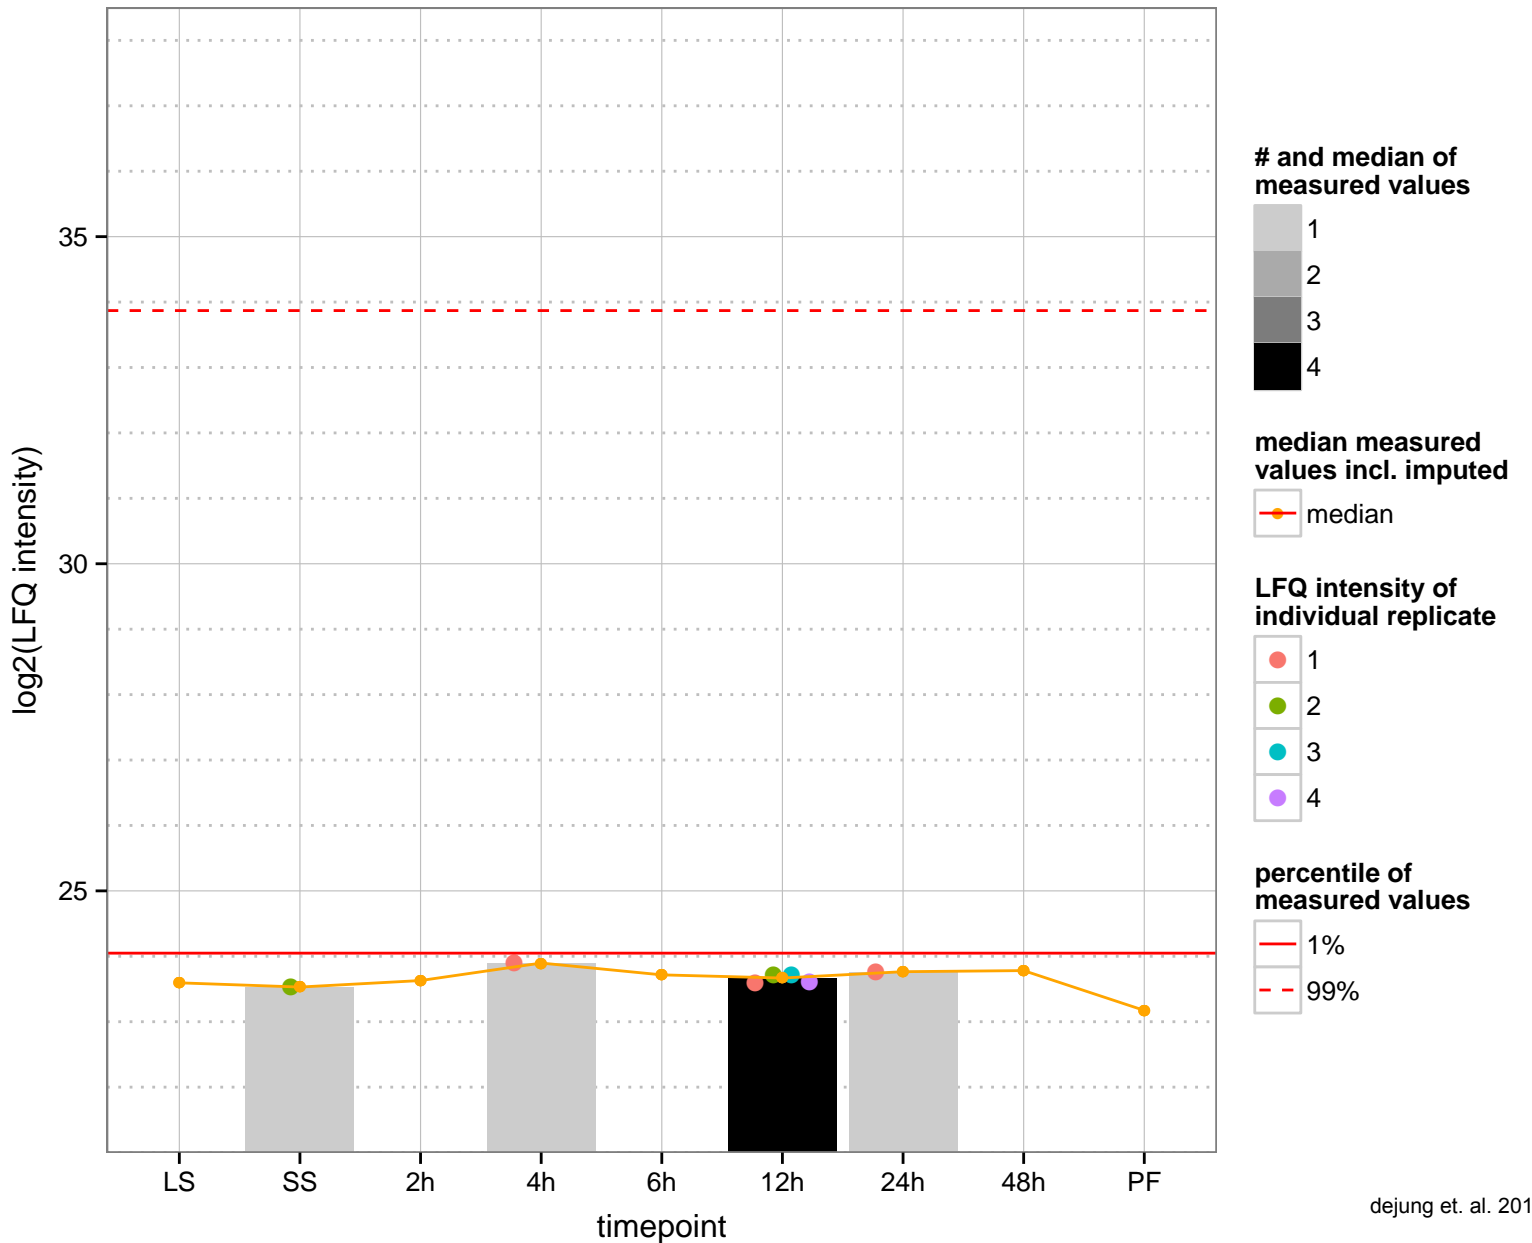

60S ribosomal protein L13a, putative  
 Tb927.5.1610;Tb927.4.3550  
 AGOF: structural constituent of ribosome  
 AGOC: intracellular, large ribosomal subunit, ribosome  
 AGOP: translation  
 PGO: structural constituent of ribosome  
 PGO: large ribosomal subunit, ribosome  
 PGO: translation

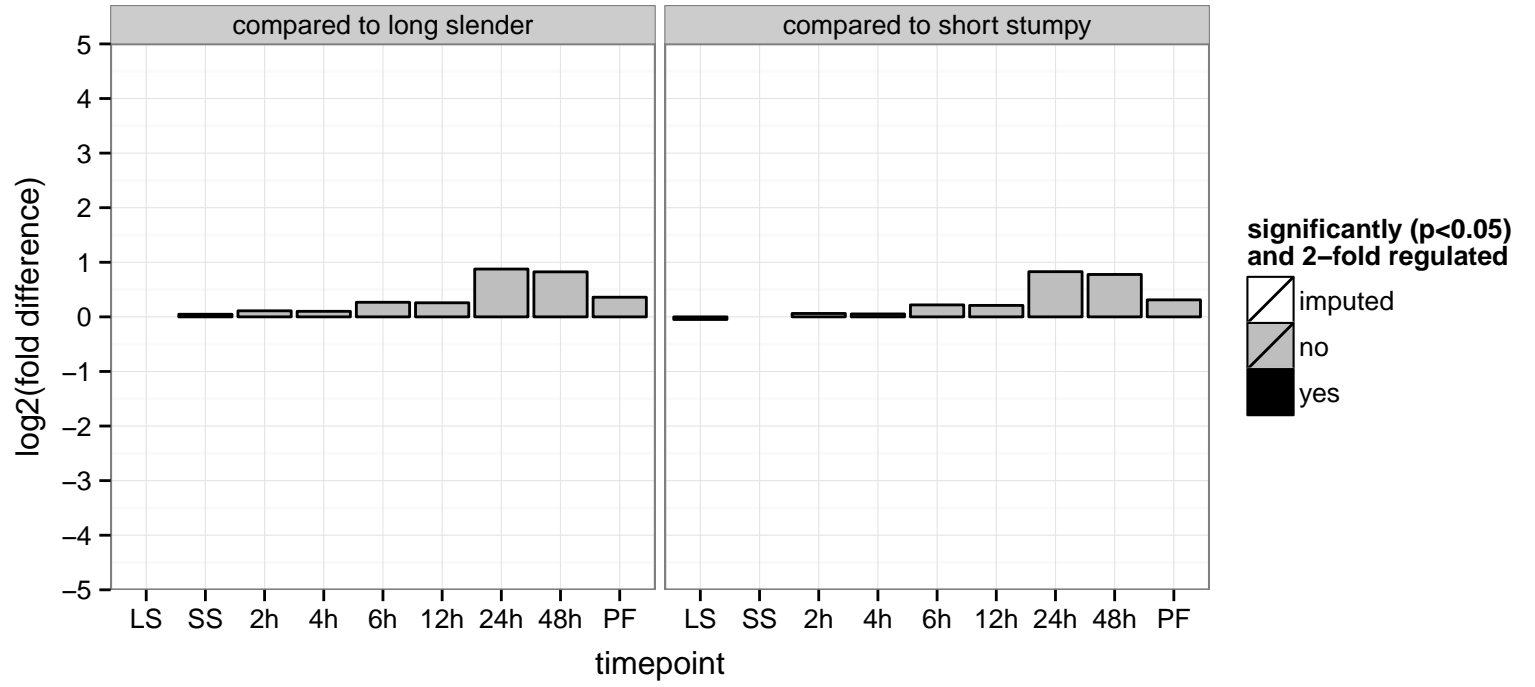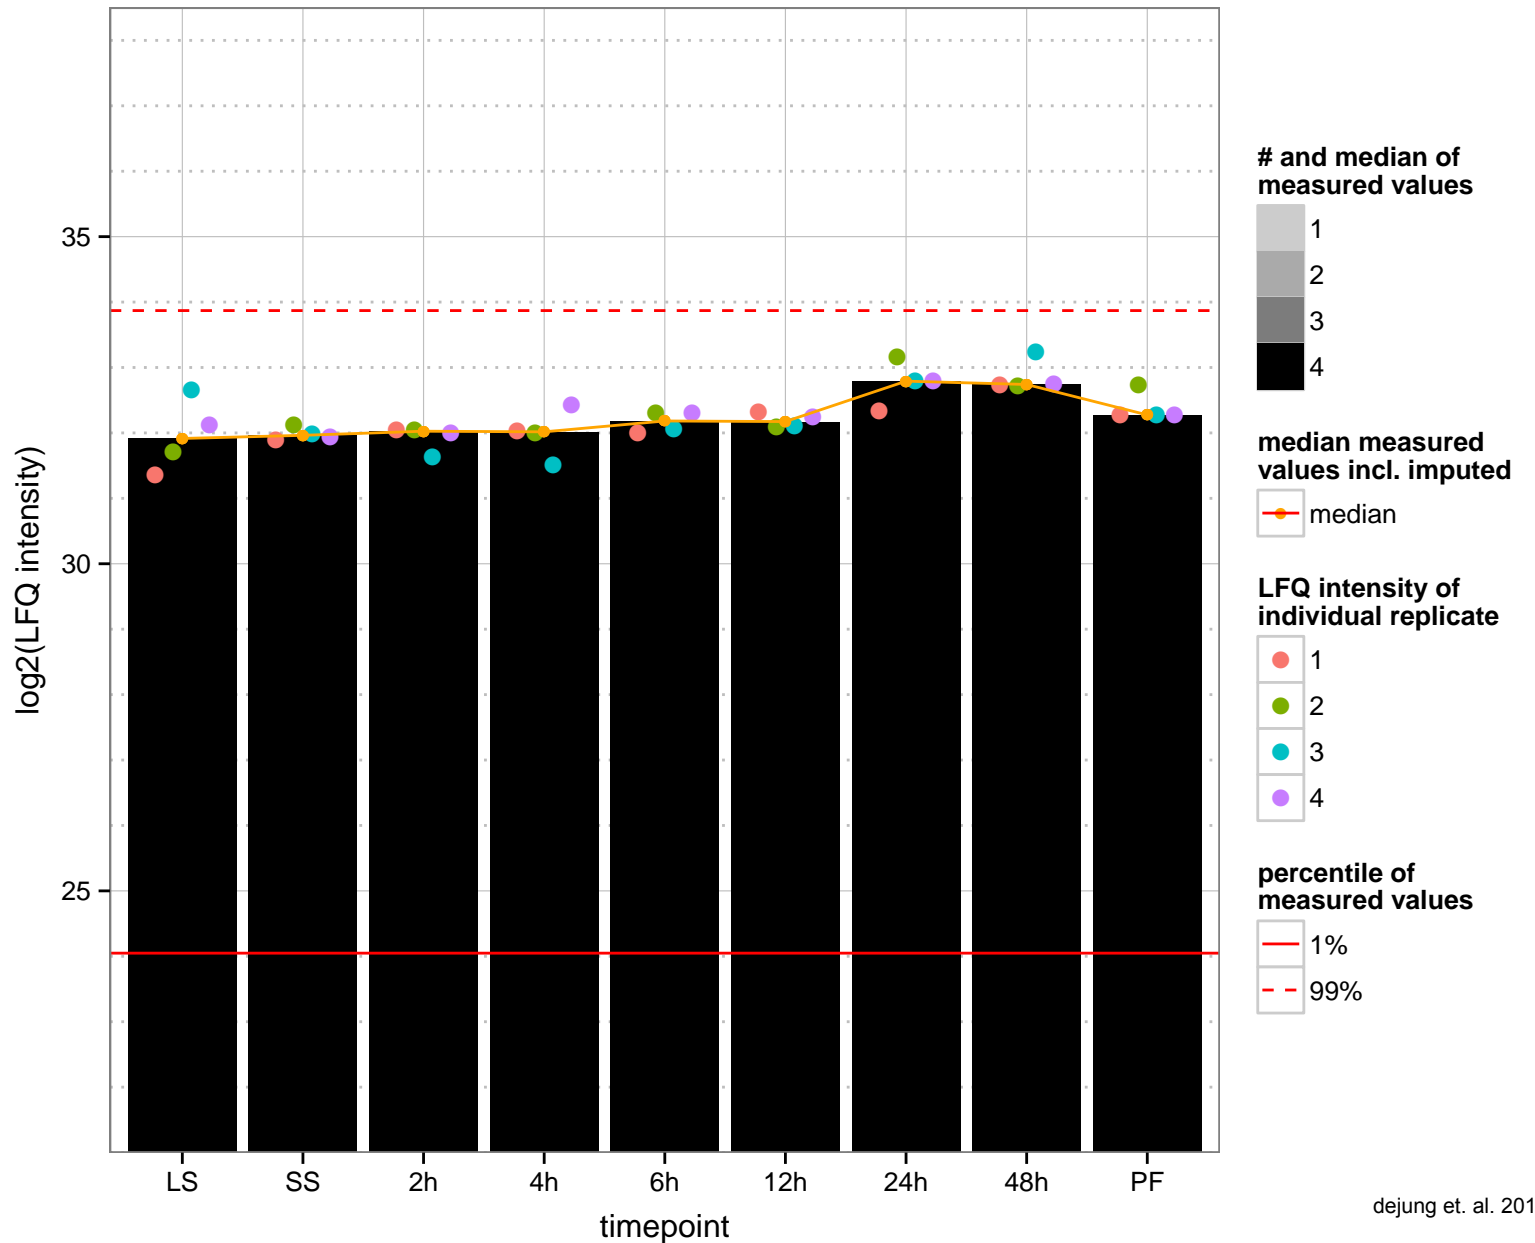

protein phosphatase 1, putative, protein phosphatase 1  
 Tb927.4.3560;Tb927.4.3610  
 AGOF: hydrolase activity, protein serine/threonine phosphatase activity  
 AGOC: null  
 AGOP: protein dephosphorylation  
 PGO: hydrolase activity  
 PGO: null  
 PGO: null

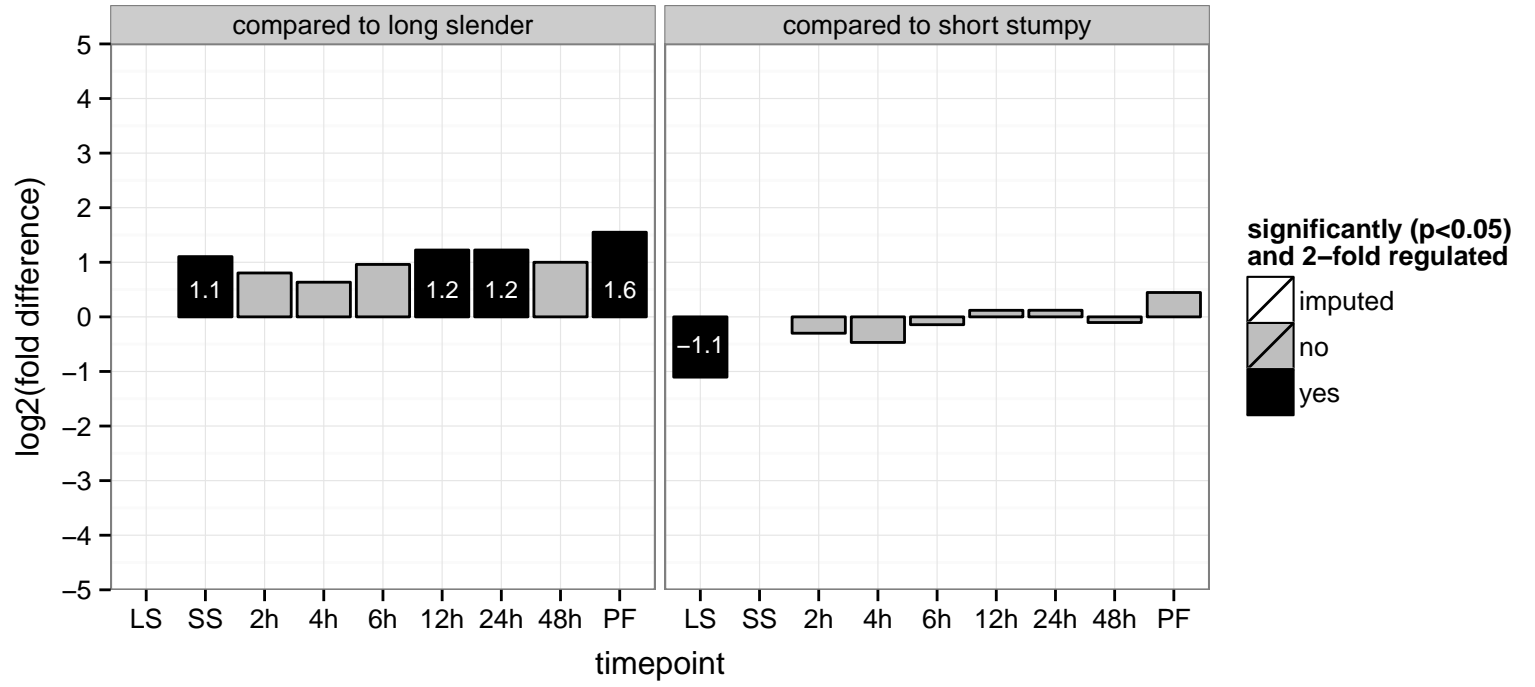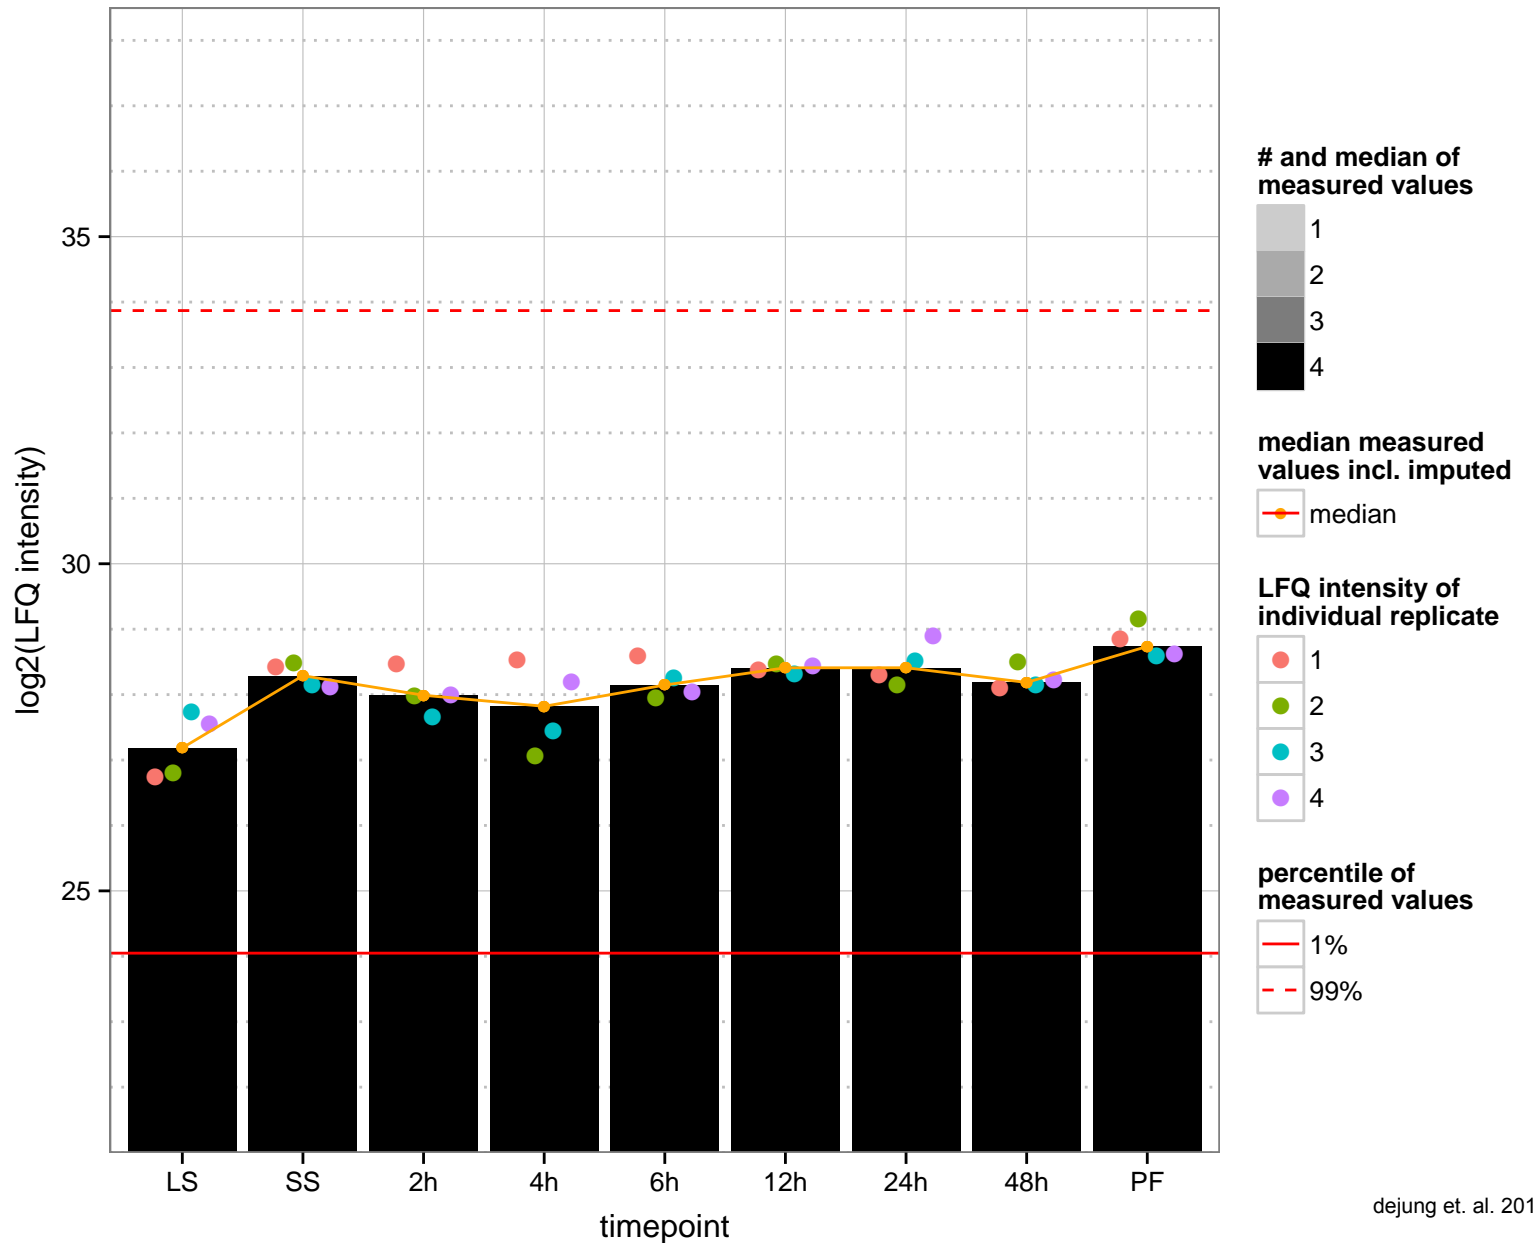

1, 2-Dihydroxy-3-keto-5-methylthiopentene dioxygenase, putative  
 Tb927.4.360  
 AGOF: dioxygenase activity, metal ion binding  
 AGOC: cytosol  
 AGOP: L-methionine salvage from methylthioadenosine  
 PGO: acireductone dioxygenase [iron(II)-requiring] activity  
 PGO: null  
 PGO: oxidation-reduction process

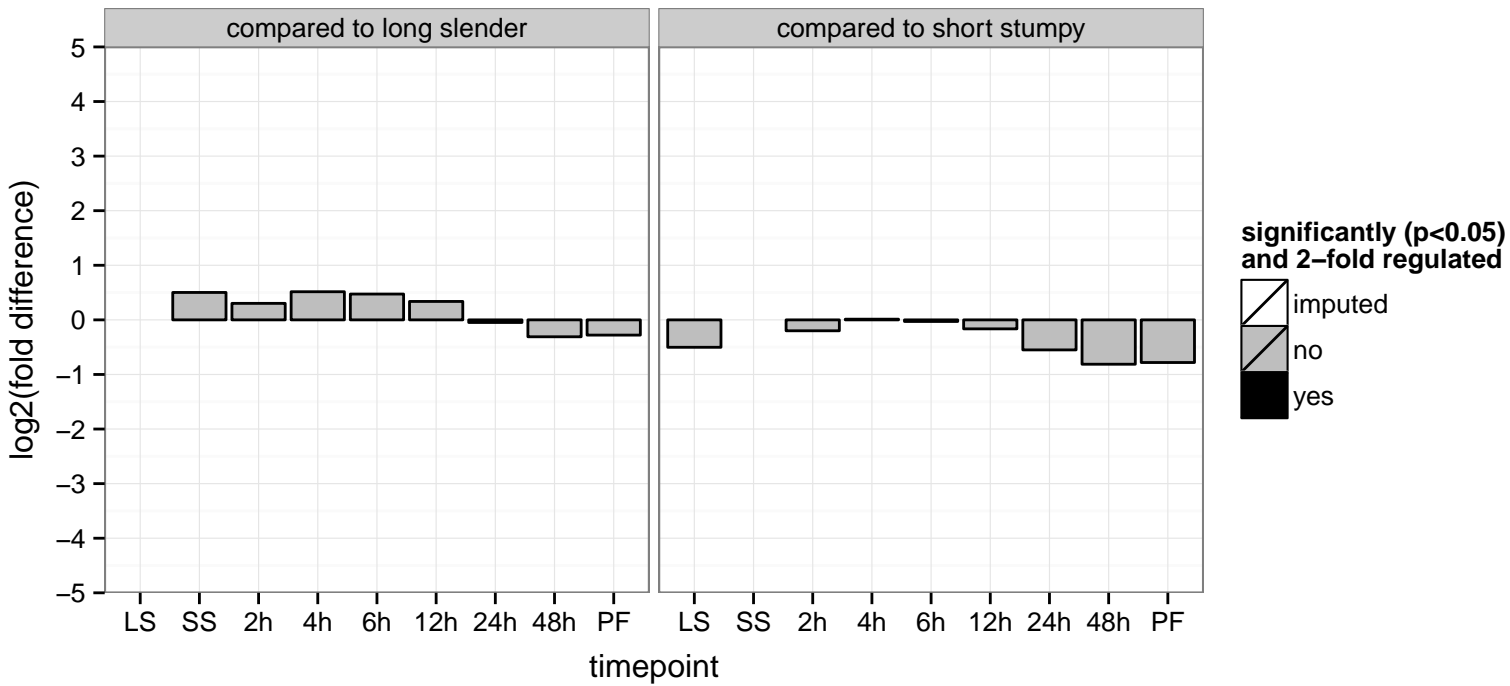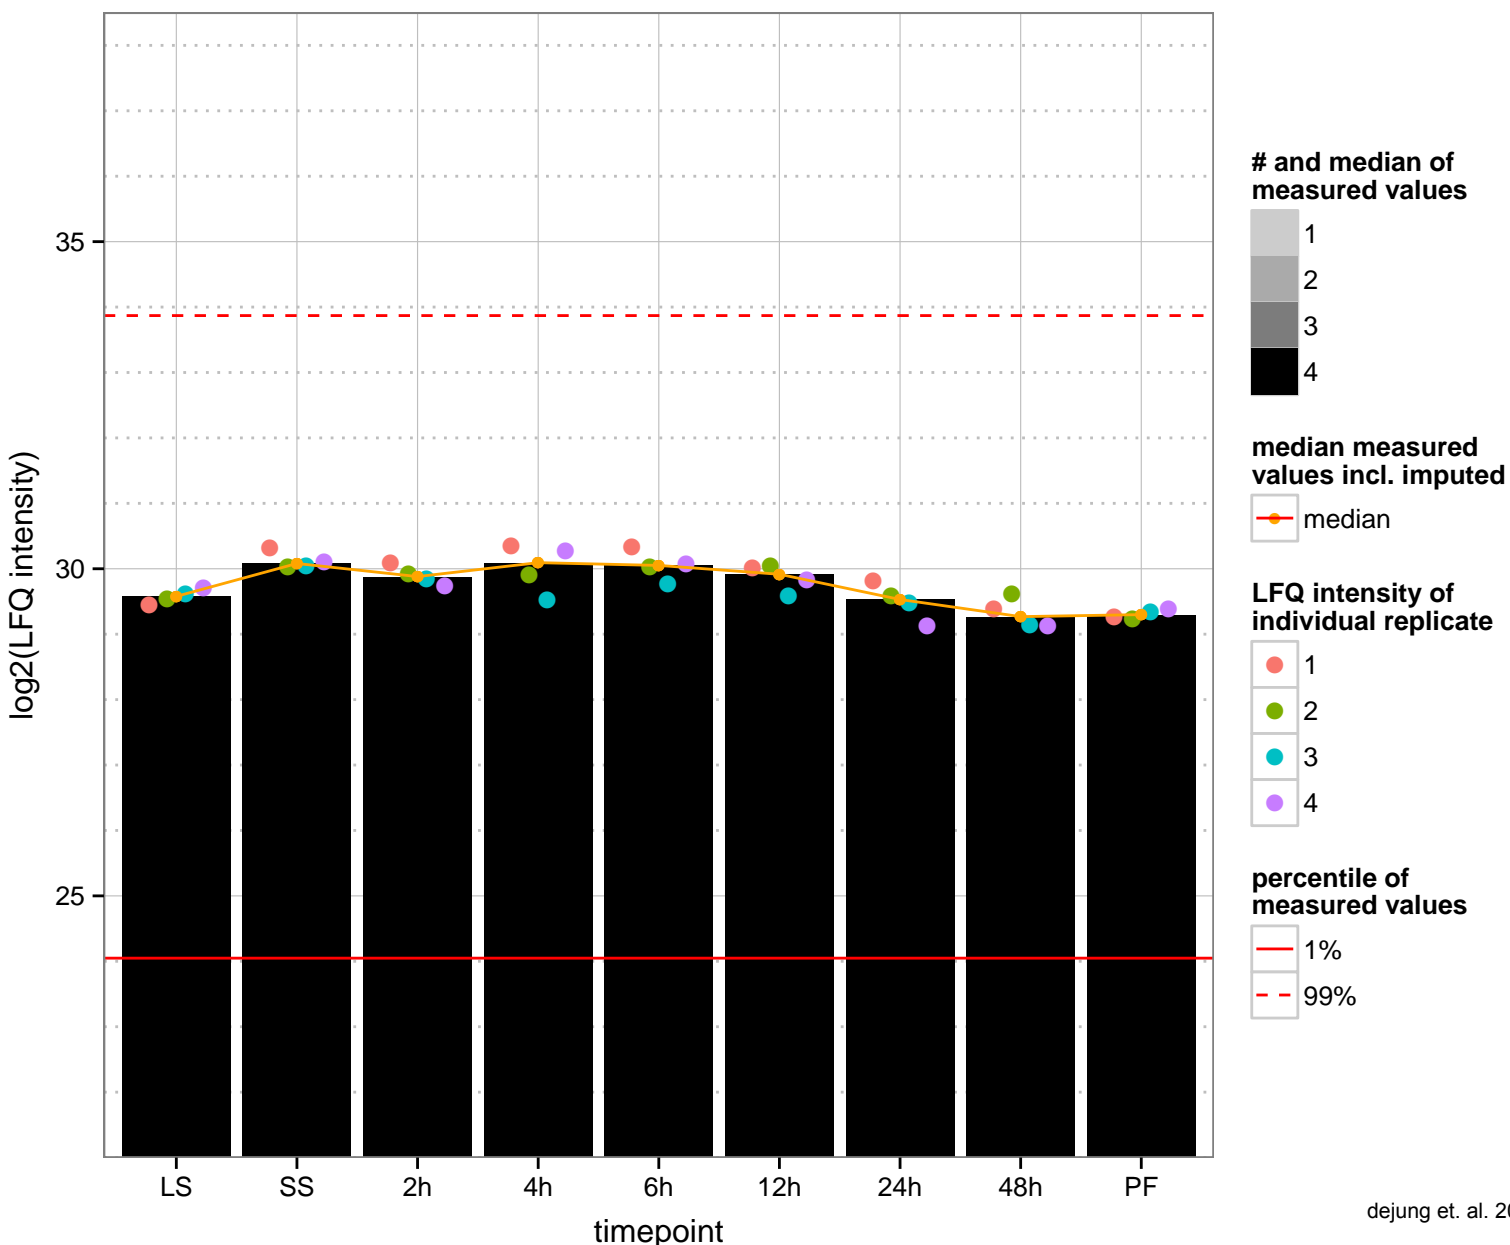



serine threonine-protein phosphatase PP1, putative (PP1-6)

Tb927.4.3620

AGOF: hydrolase activity, protein serine/threonine phosphatase activity

AGOC: null

AGOP: modulation of development of symbiont involved in interaction with host, protein dephosphorylation, quorum sensing in

PGOF: hydrolase activity

PGOC: null

PGOP: null

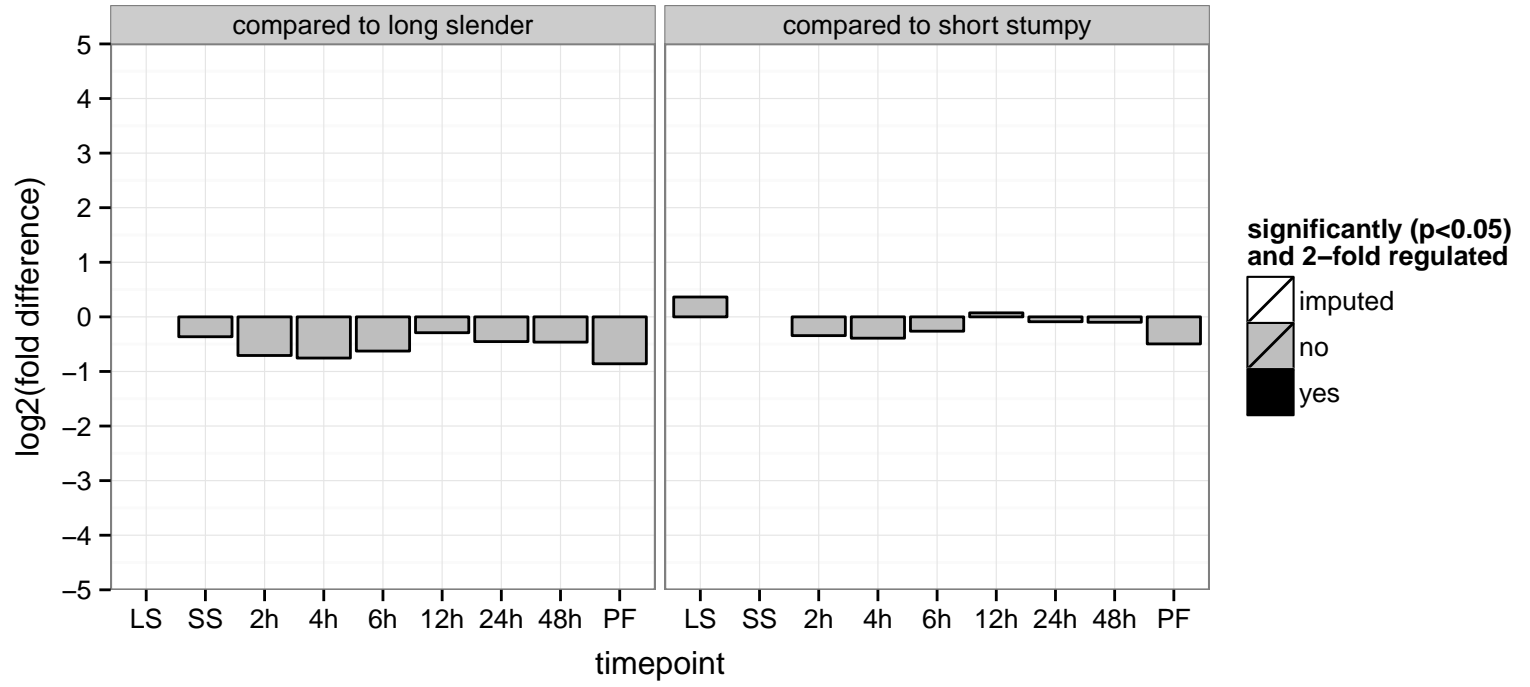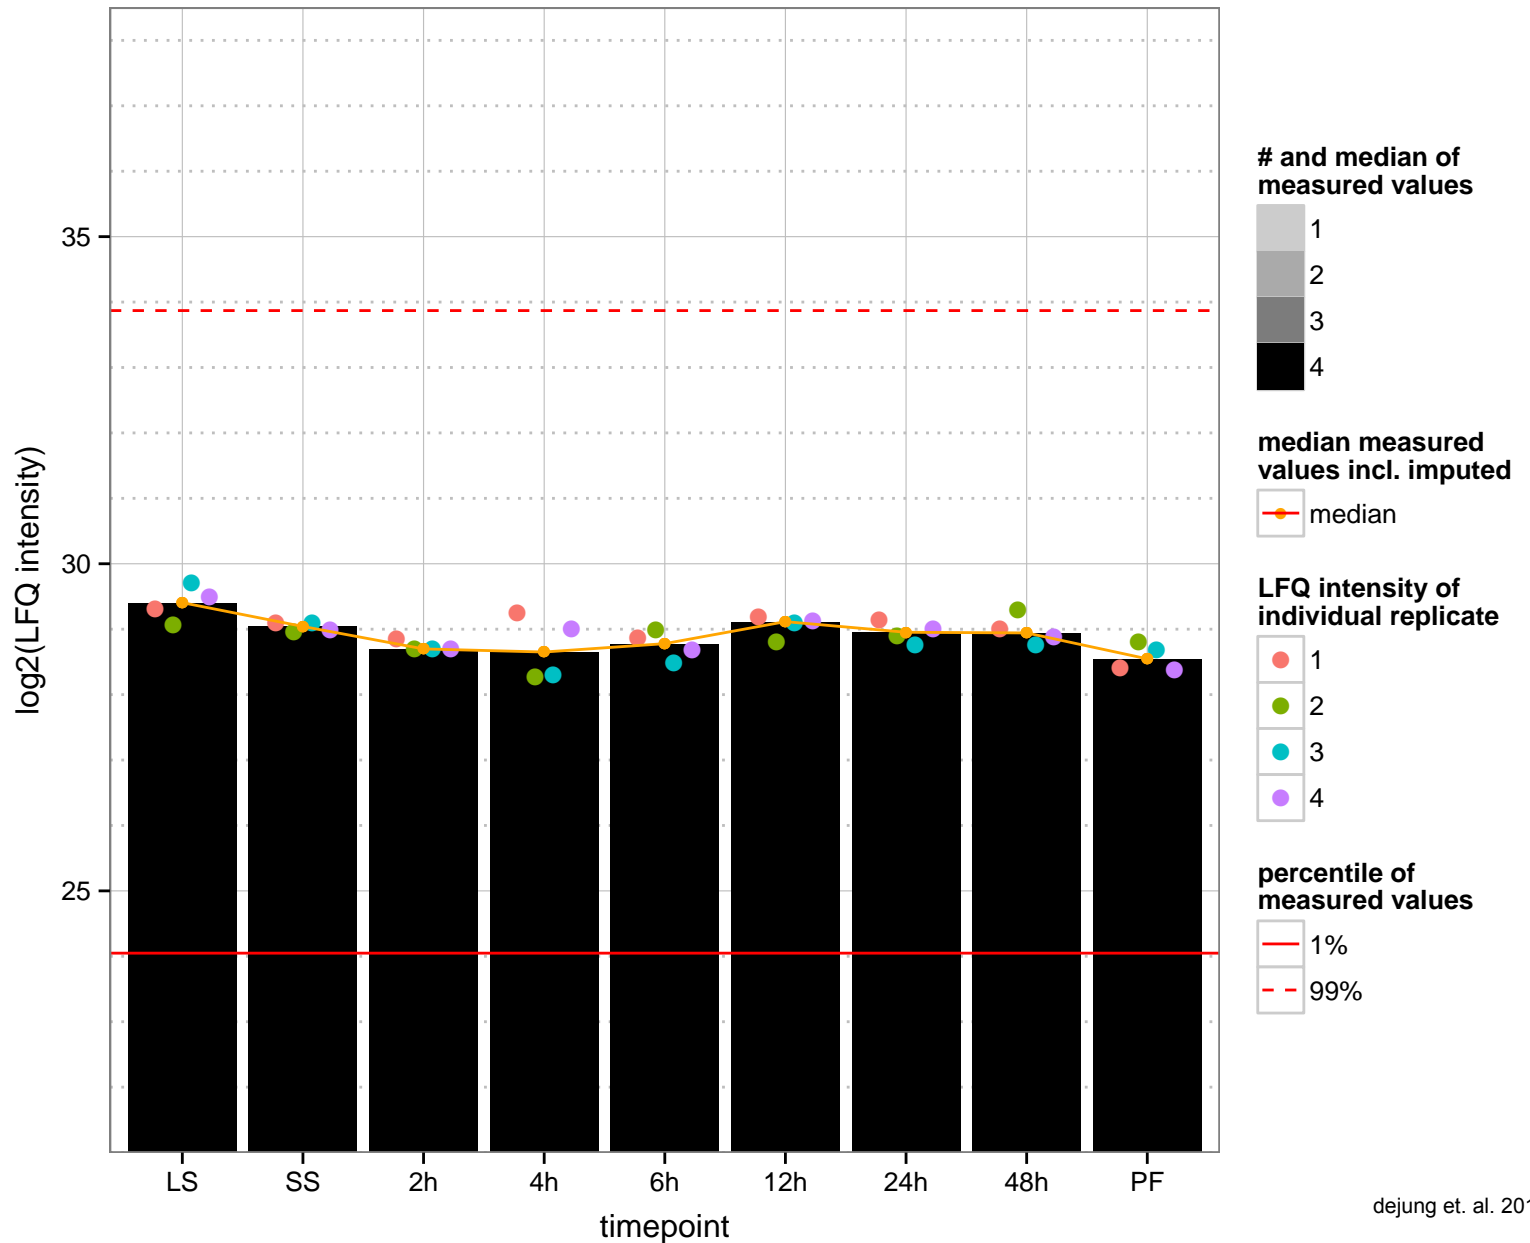

hypothetical protein, conserved  
 Tb927.4.3660  
 AGOF: null  
 AGOC: mitochondrion  
 AGOP: null  
 PGO: null  
 PGO: null  
 PGO: null

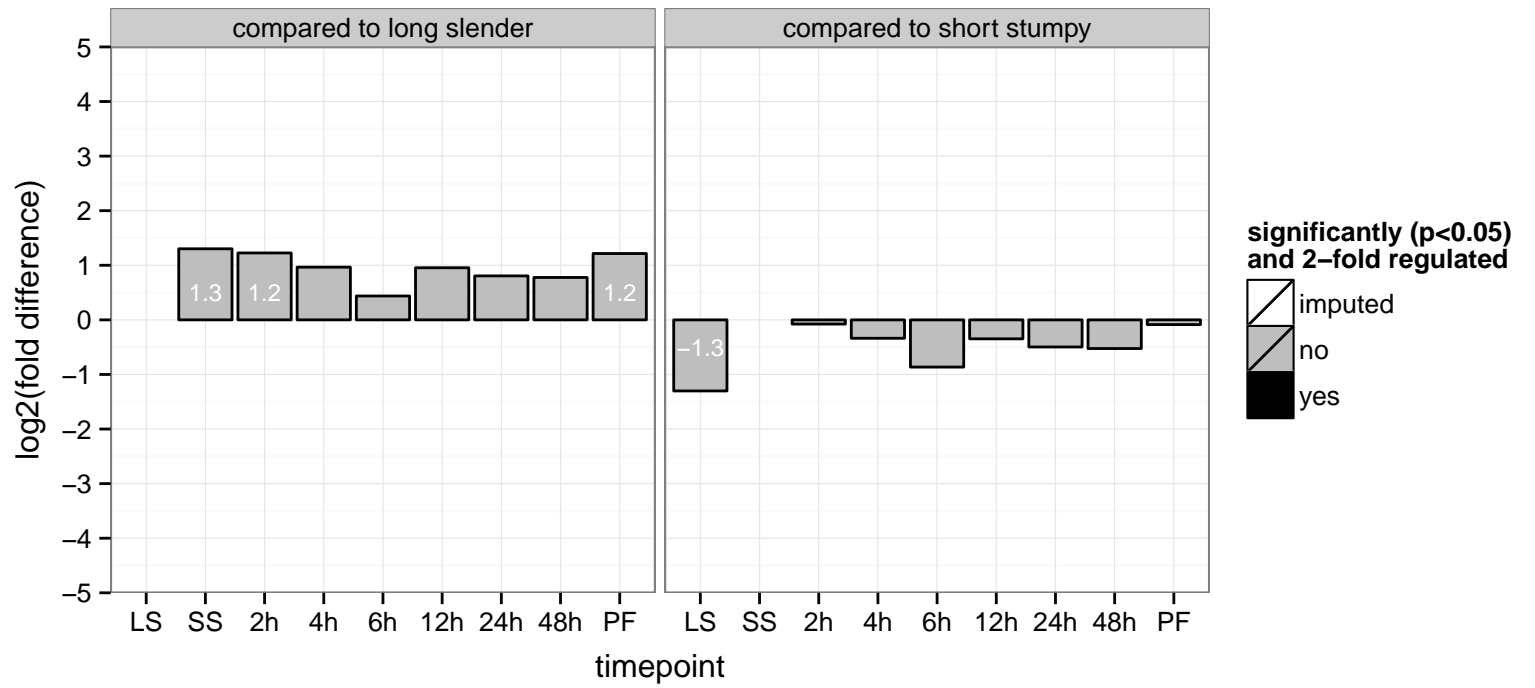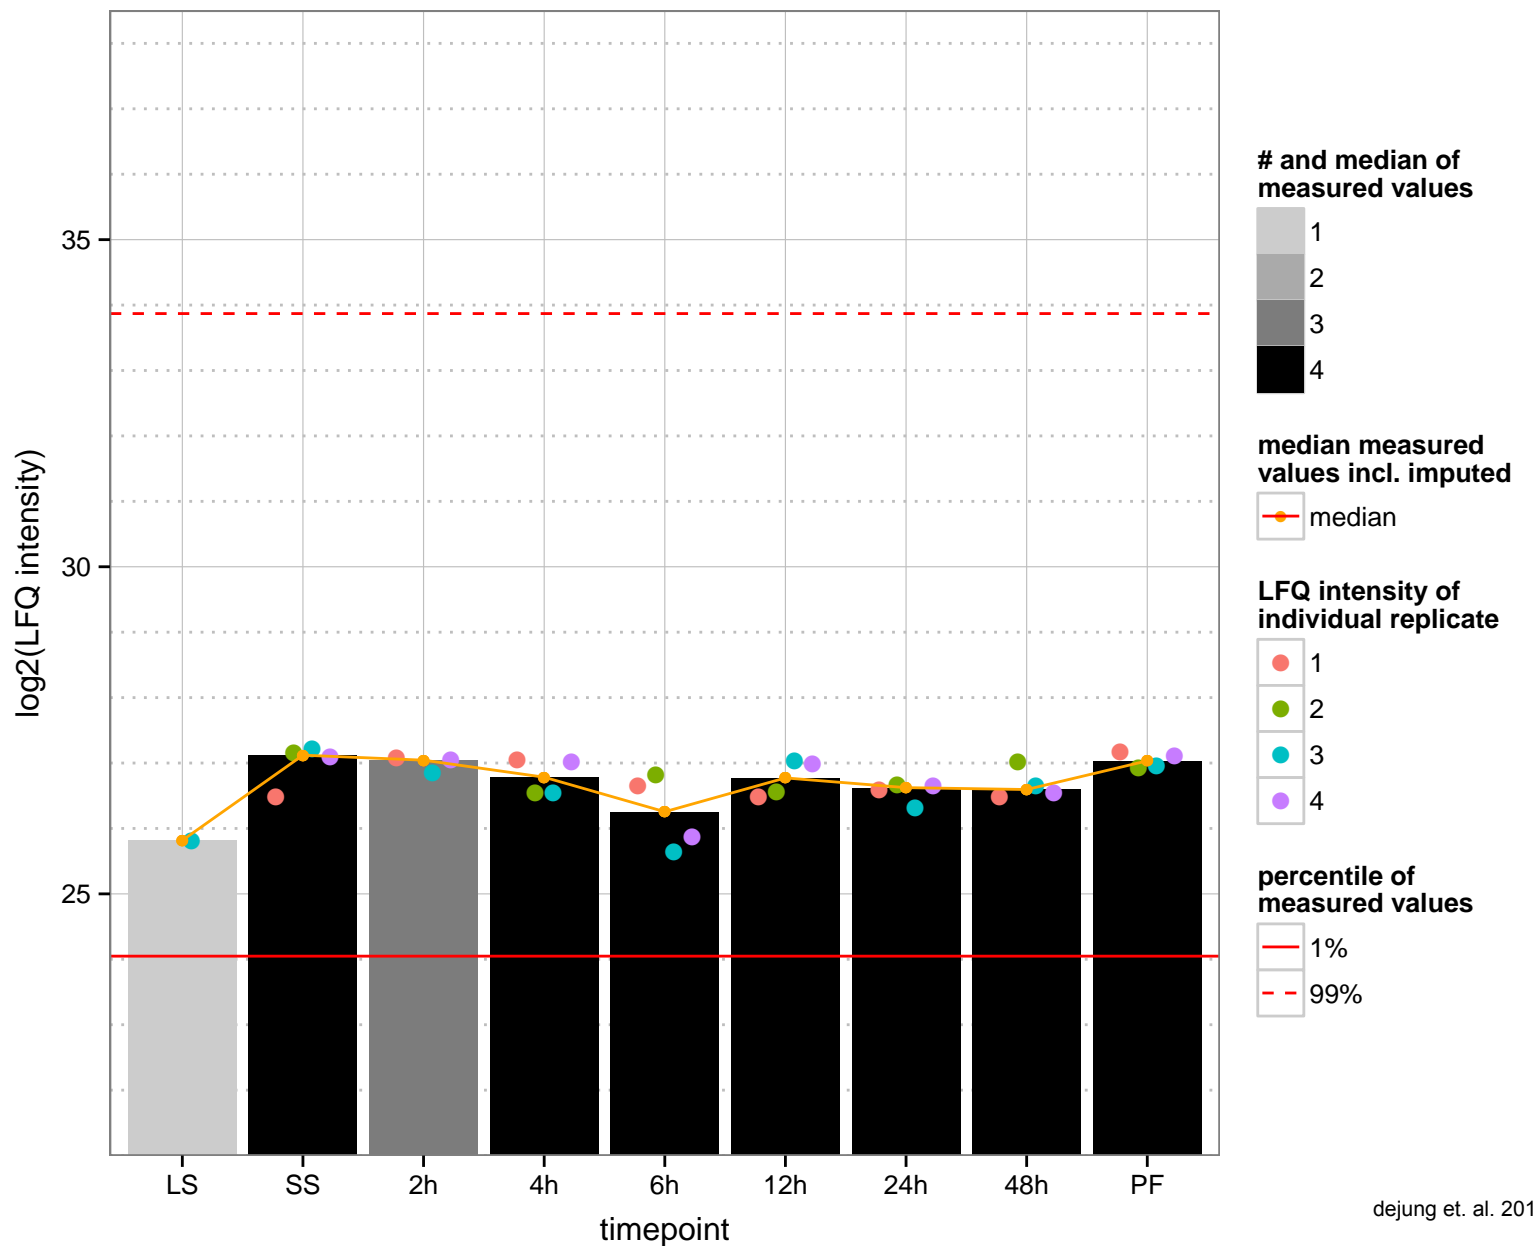

flagellar attachment zone protein (FAZ1)  
 Tb927.4.3740  
 AGOF: null  
 AGOC: cilium part, cytoskeletal part  
 AGOP: cilium assembly, cytokinesis  
 PGO: null  
 PGOC: null  
 PGOP: null

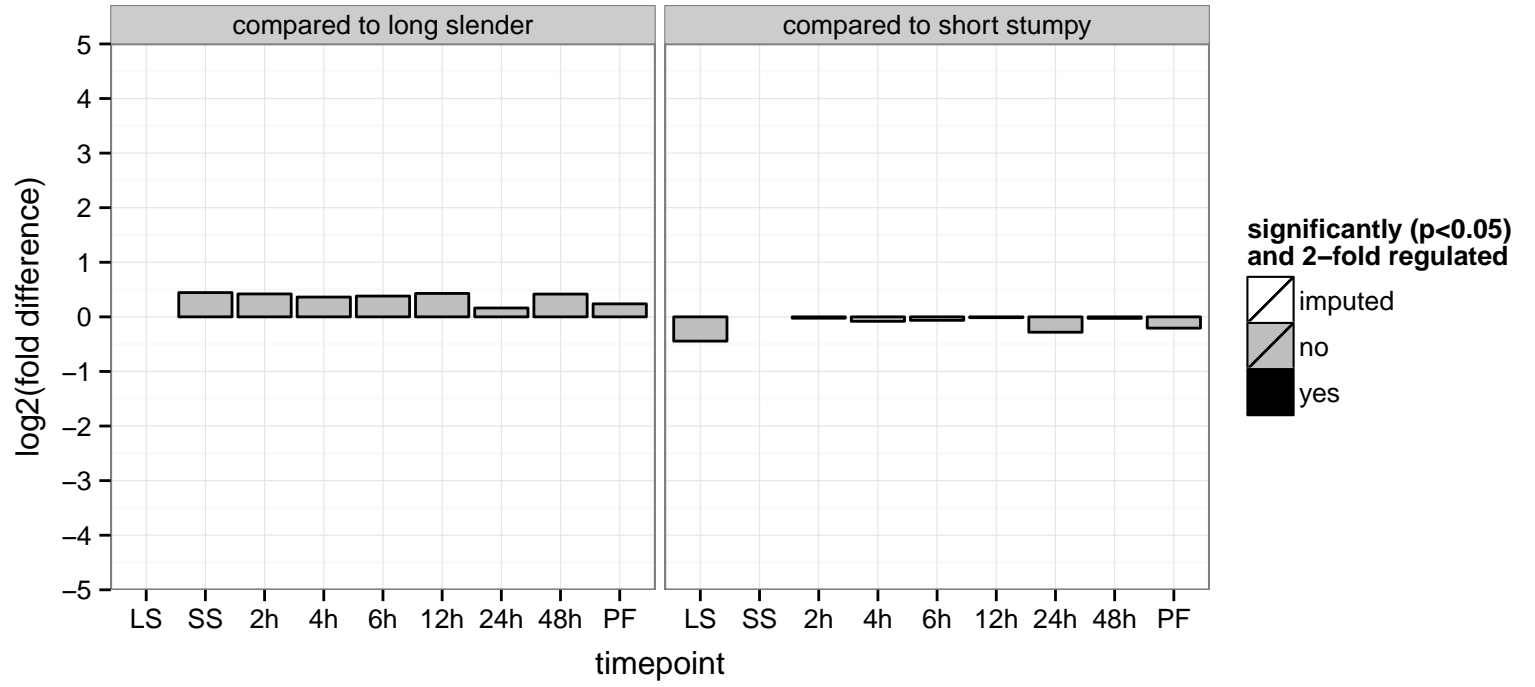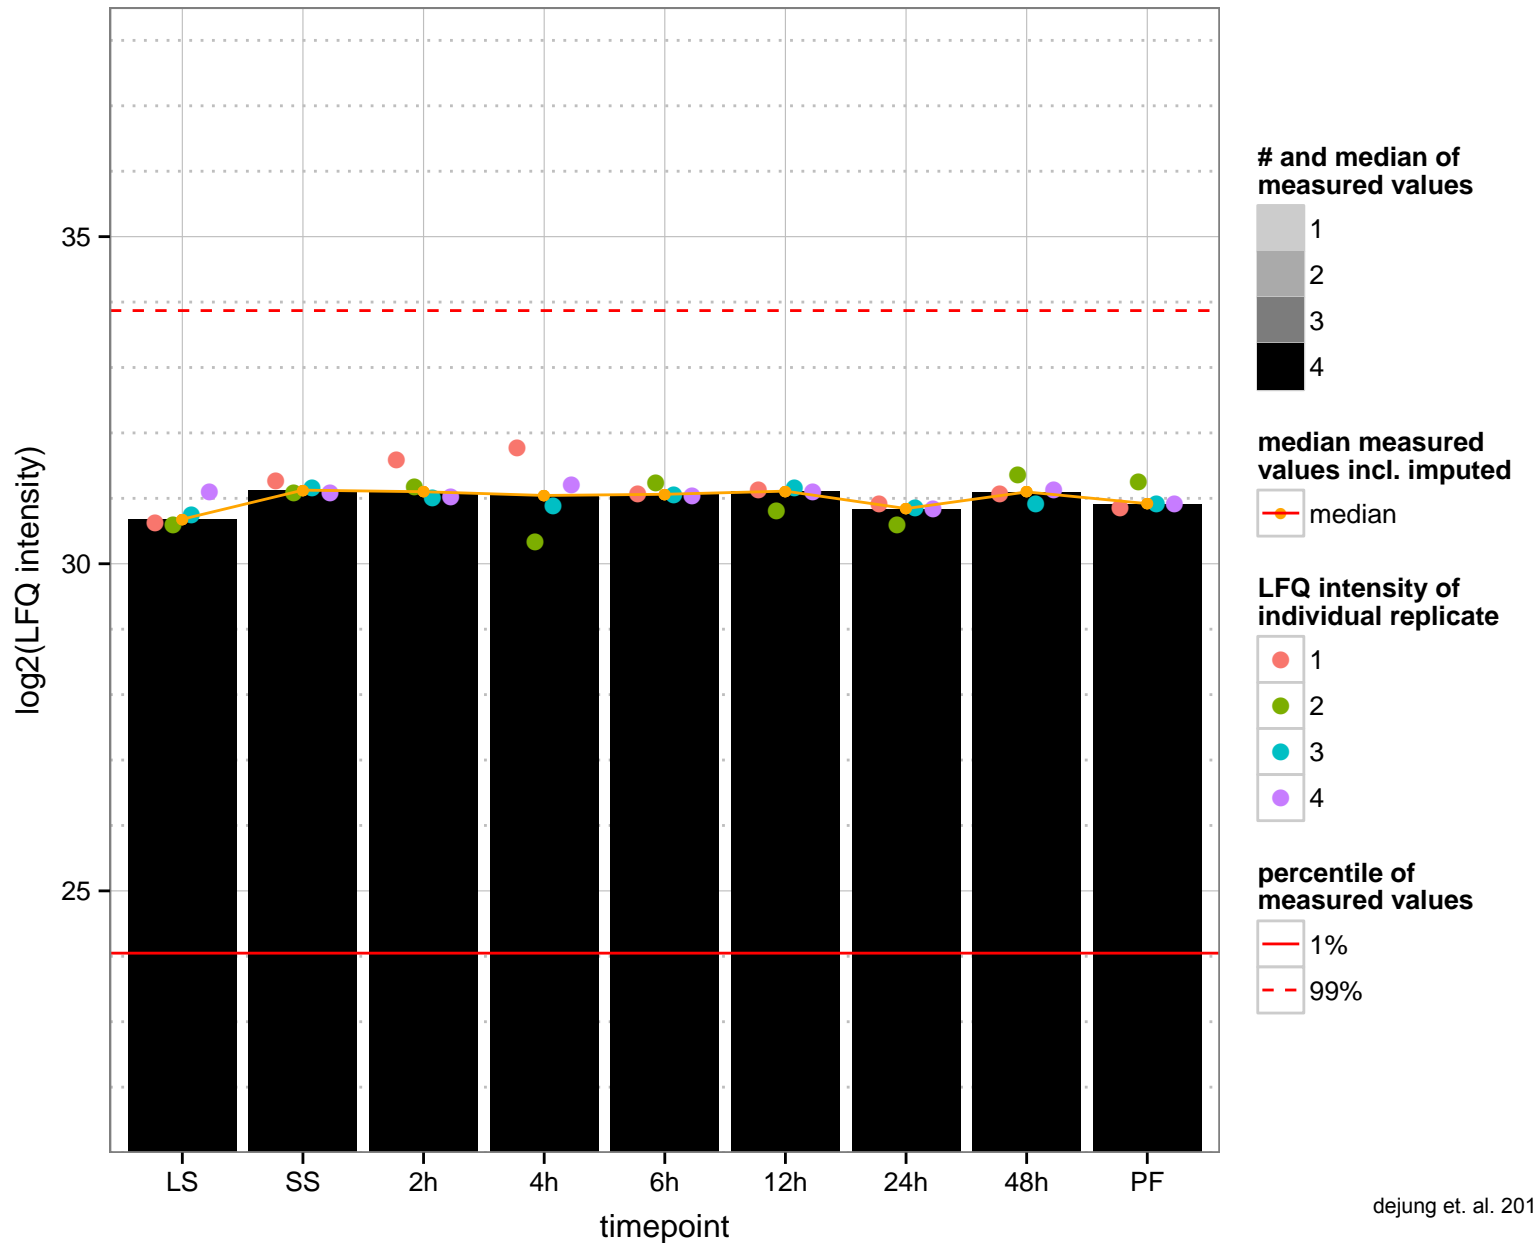

ubiquitin carboxyl-terminal hydrolase, putative, cysteine peptidase, Clan CA, family C19  
 Tb927.4.3790  
 AGOF: ubiquitin thiolesterase activity  
 AGOC: null  
 AGOP: ubiquitin-dependent protein catabolic process  
 PGOF: protein binding, ubiquitin thiolesterase activity  
 PGO: null  
 PGOP: ubiquitin-dependent protein catabolic process

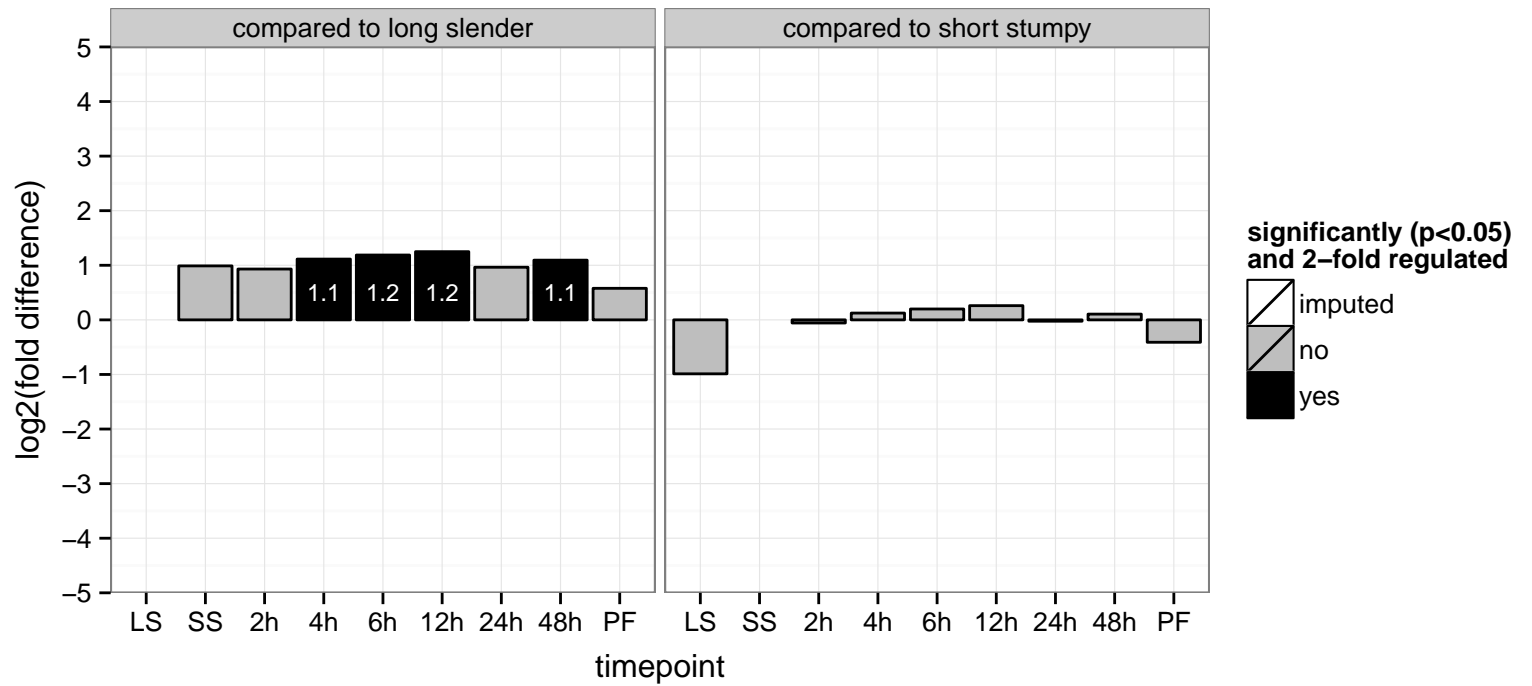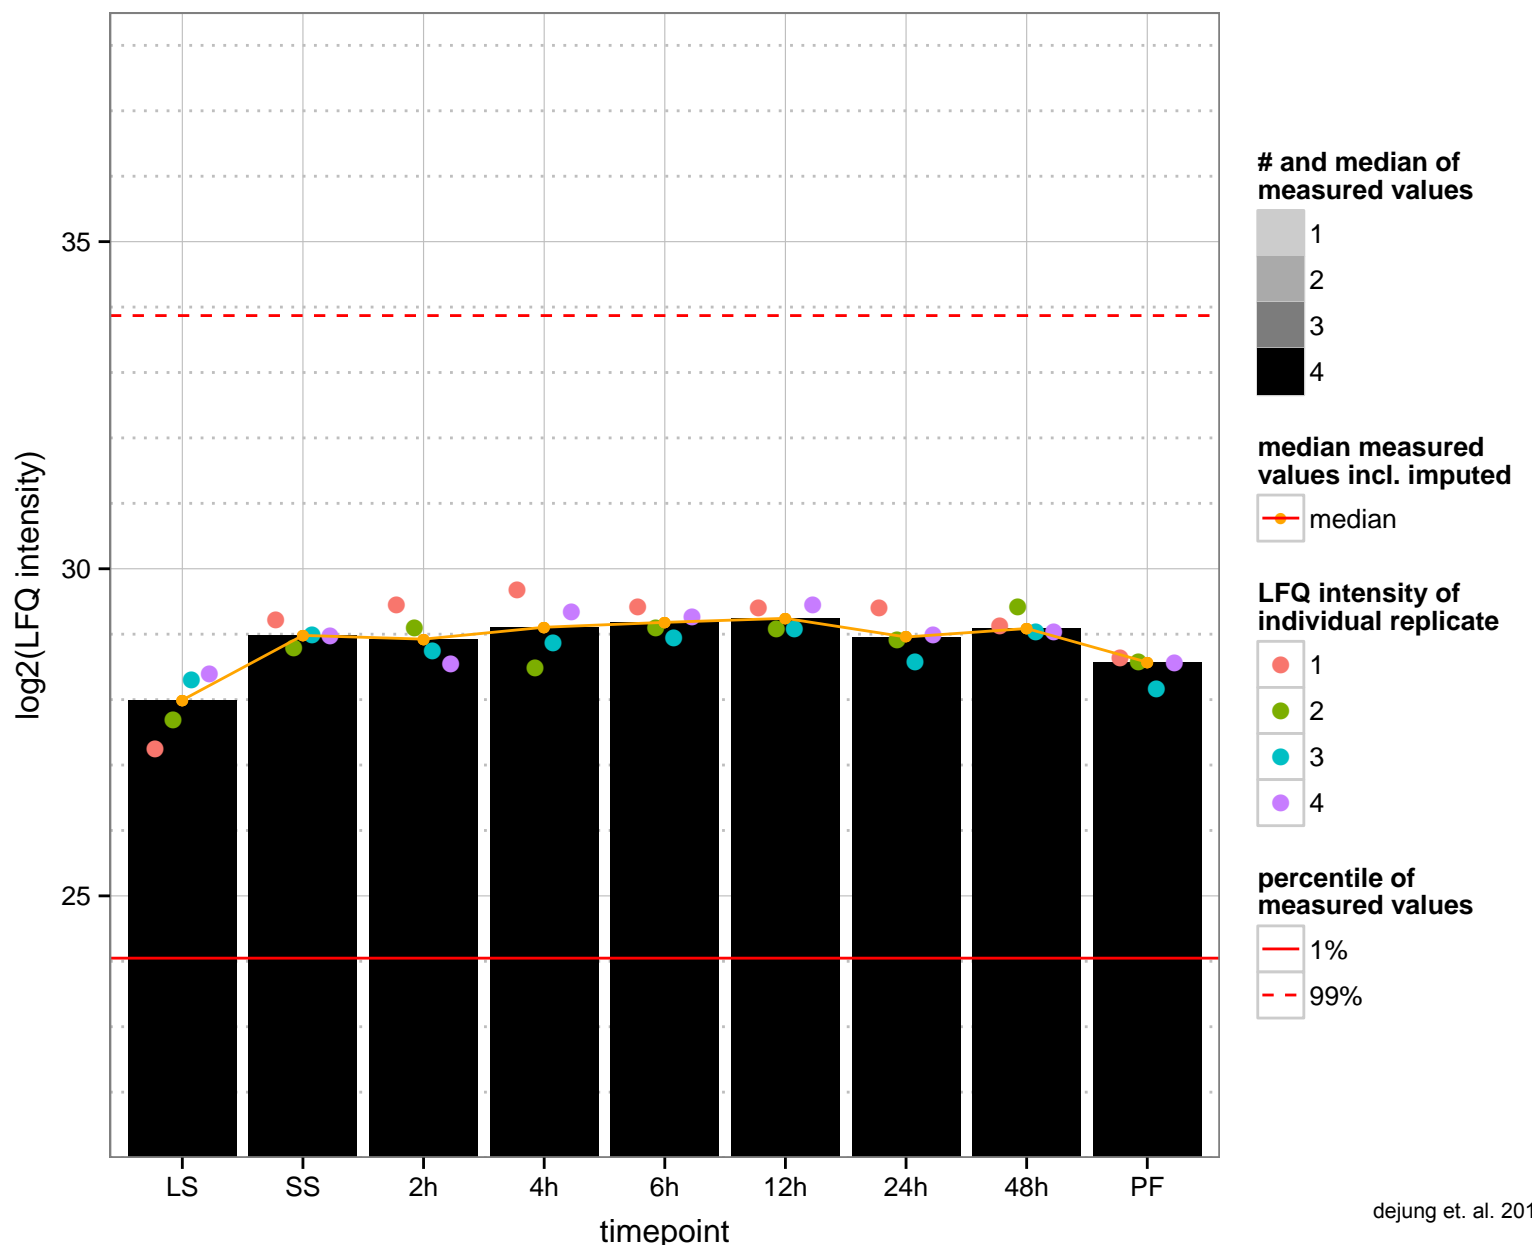

hypothetical protein, conserved  
 Tb927.4.380  
 AGOF: null  
 AGOC: null  
 AGOP: null  
 PGO: protein binding  
 PGO: null  
 PGO: null

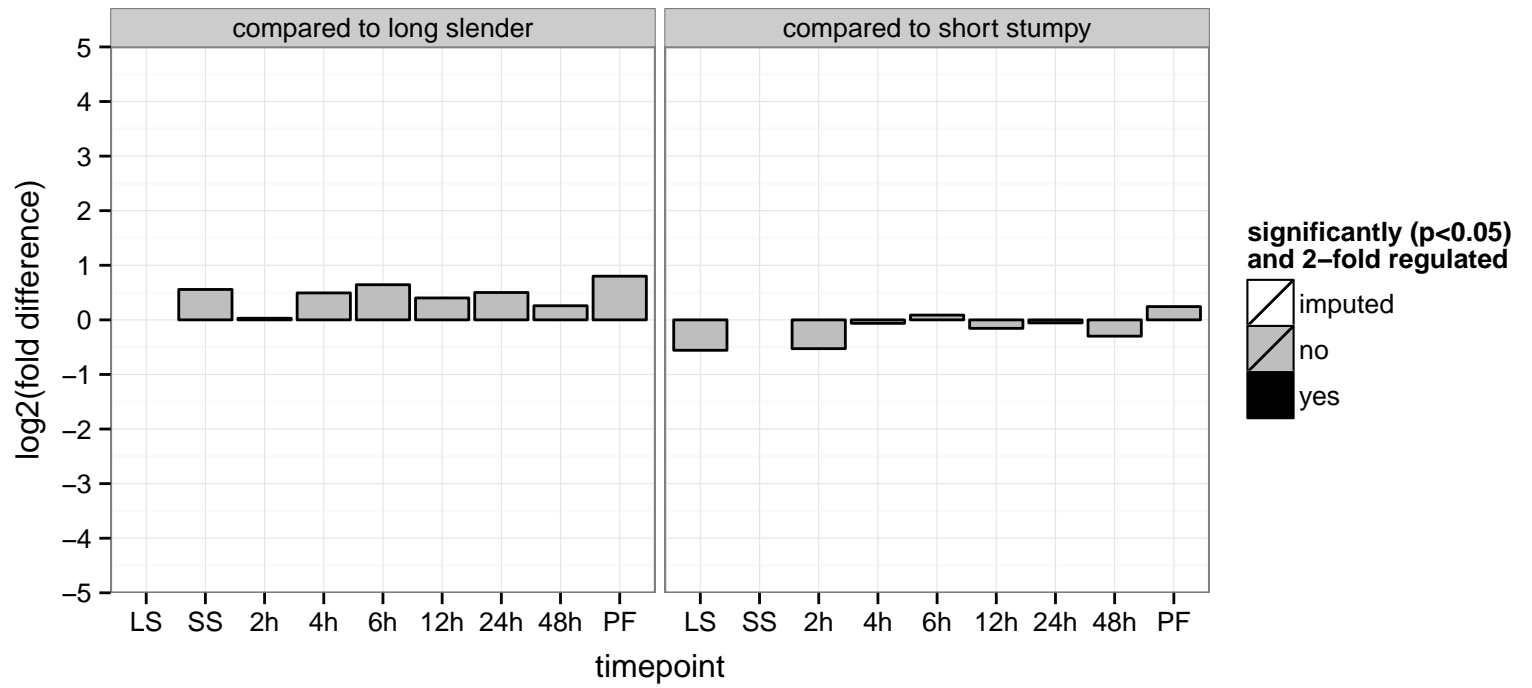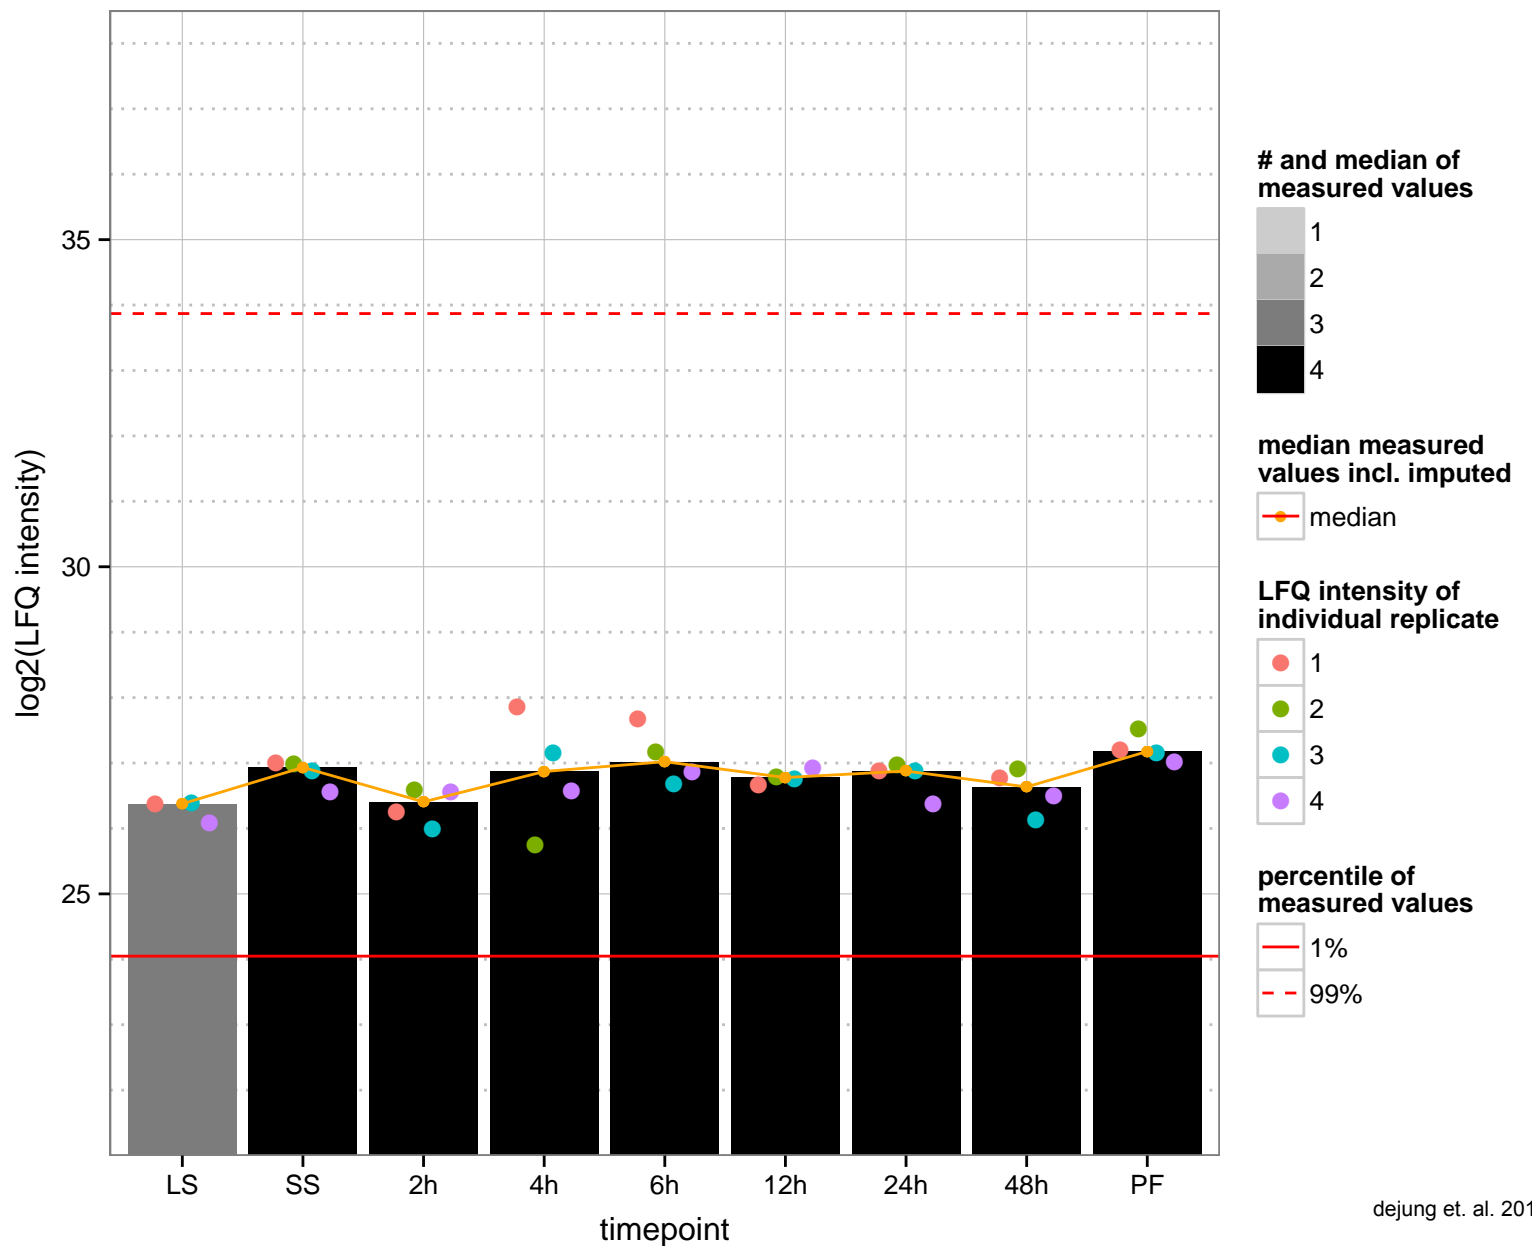

DNA-directed RNA polymerase II subunit 2, putative, RNA polymerase subunit, putative (RPB2)  
 Tb927.4.3810  
 AGOF: DNA binding, DNA-directed RNA polymerase activity, ribonucleoside binding  
 AGOC: null  
 AGOP: transcription, DNA-dependent  
 PGOF: DNA binding, DNA-directed RNA polymerase activity  
 PGO: null  
 PGOP: transcription, DNA-dependent

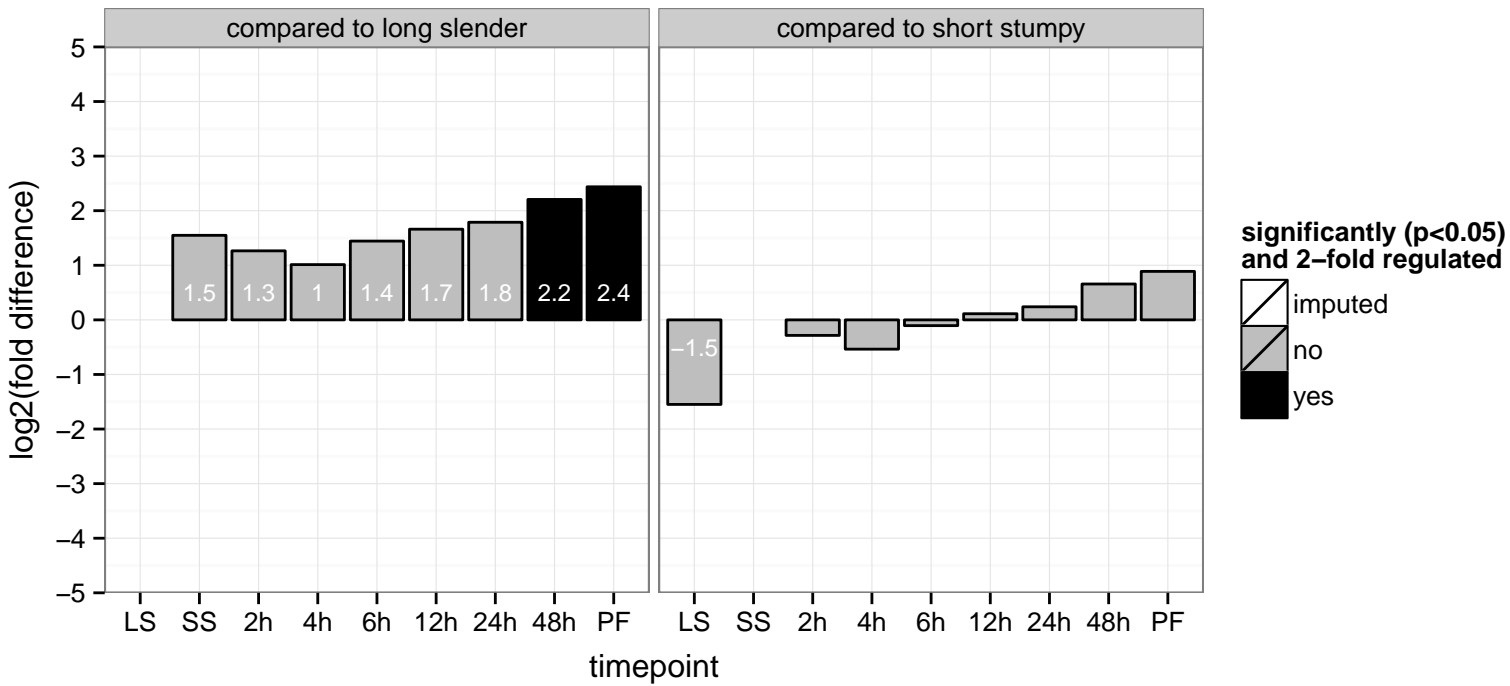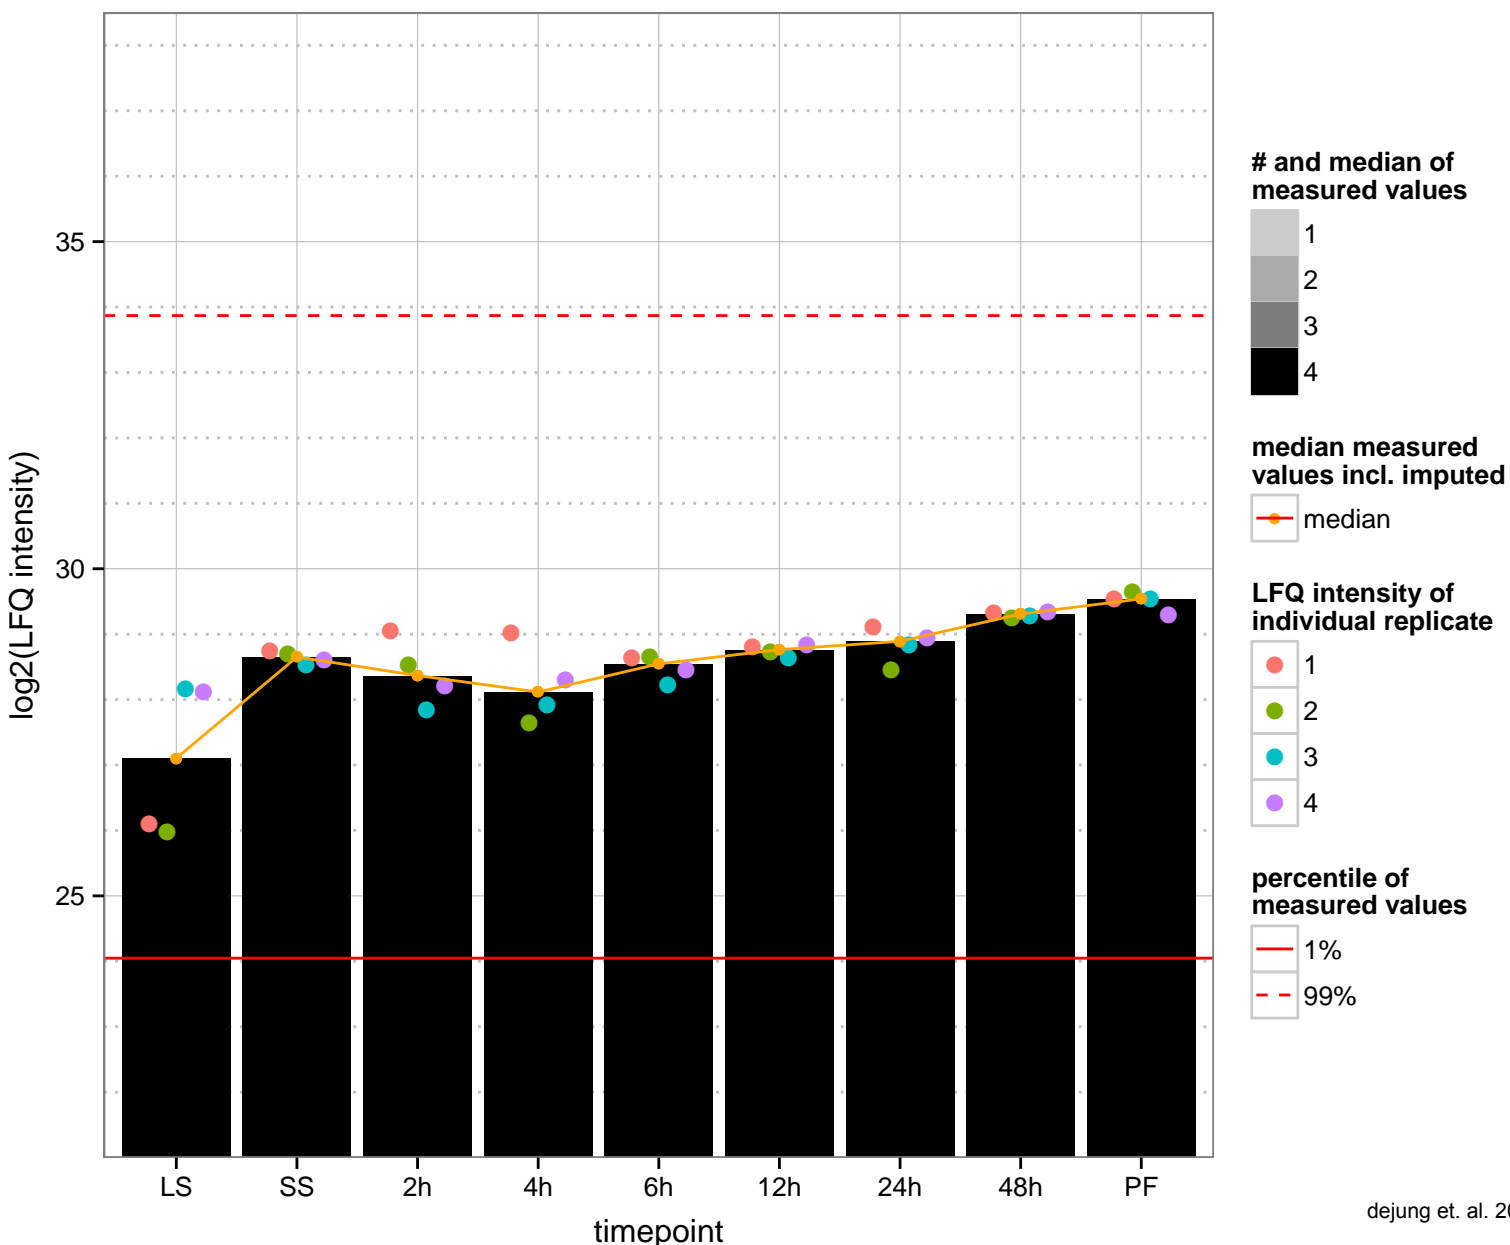

nucleolar protein, putative  
 Tb927.4.3840  
 AGOF: RNA binding, S-adenosylmethionine-dependent methyltransferase activity  
 AGOC: null  
 AGOP: rRNA processing  
 PGOF: RNA binding, S-adenosylmethionine-dependent methyltransferase activity  
 PGOC: null  
 PGOP: rRNA processing

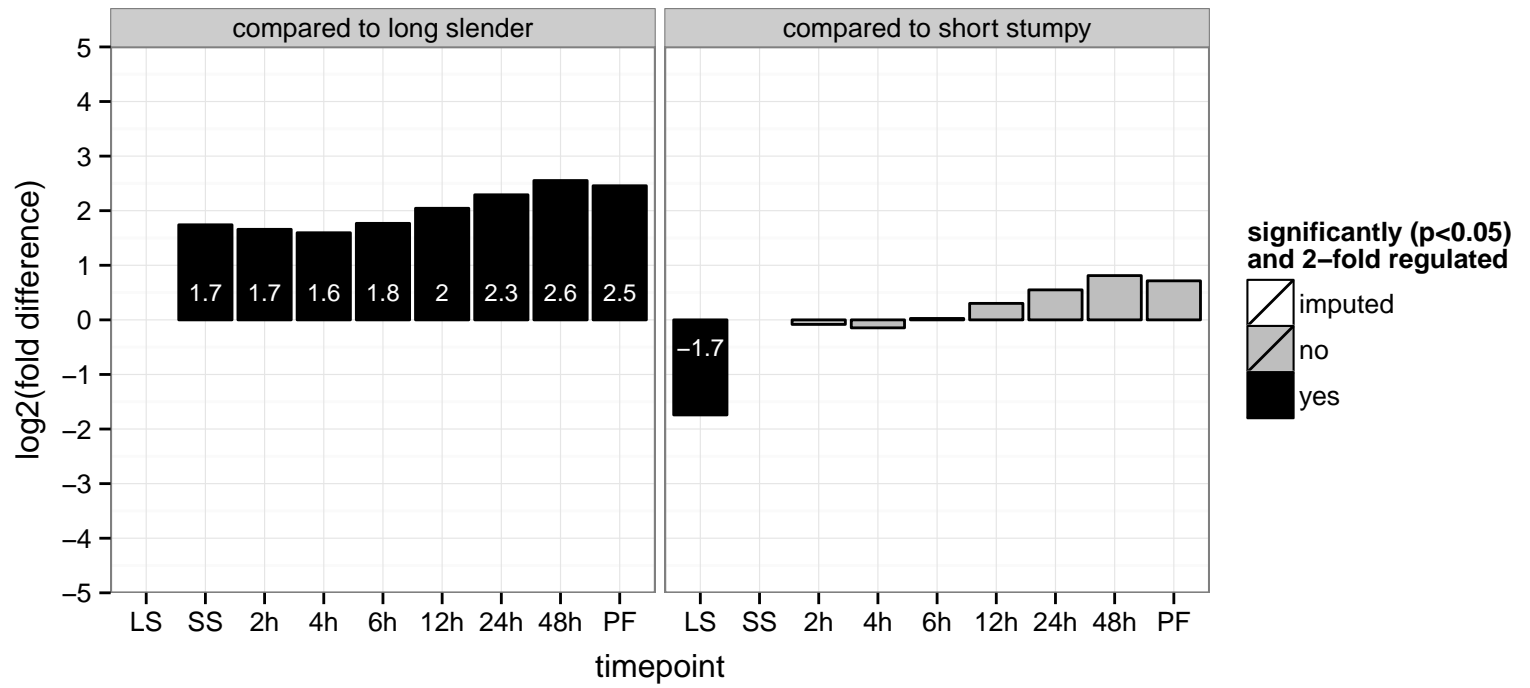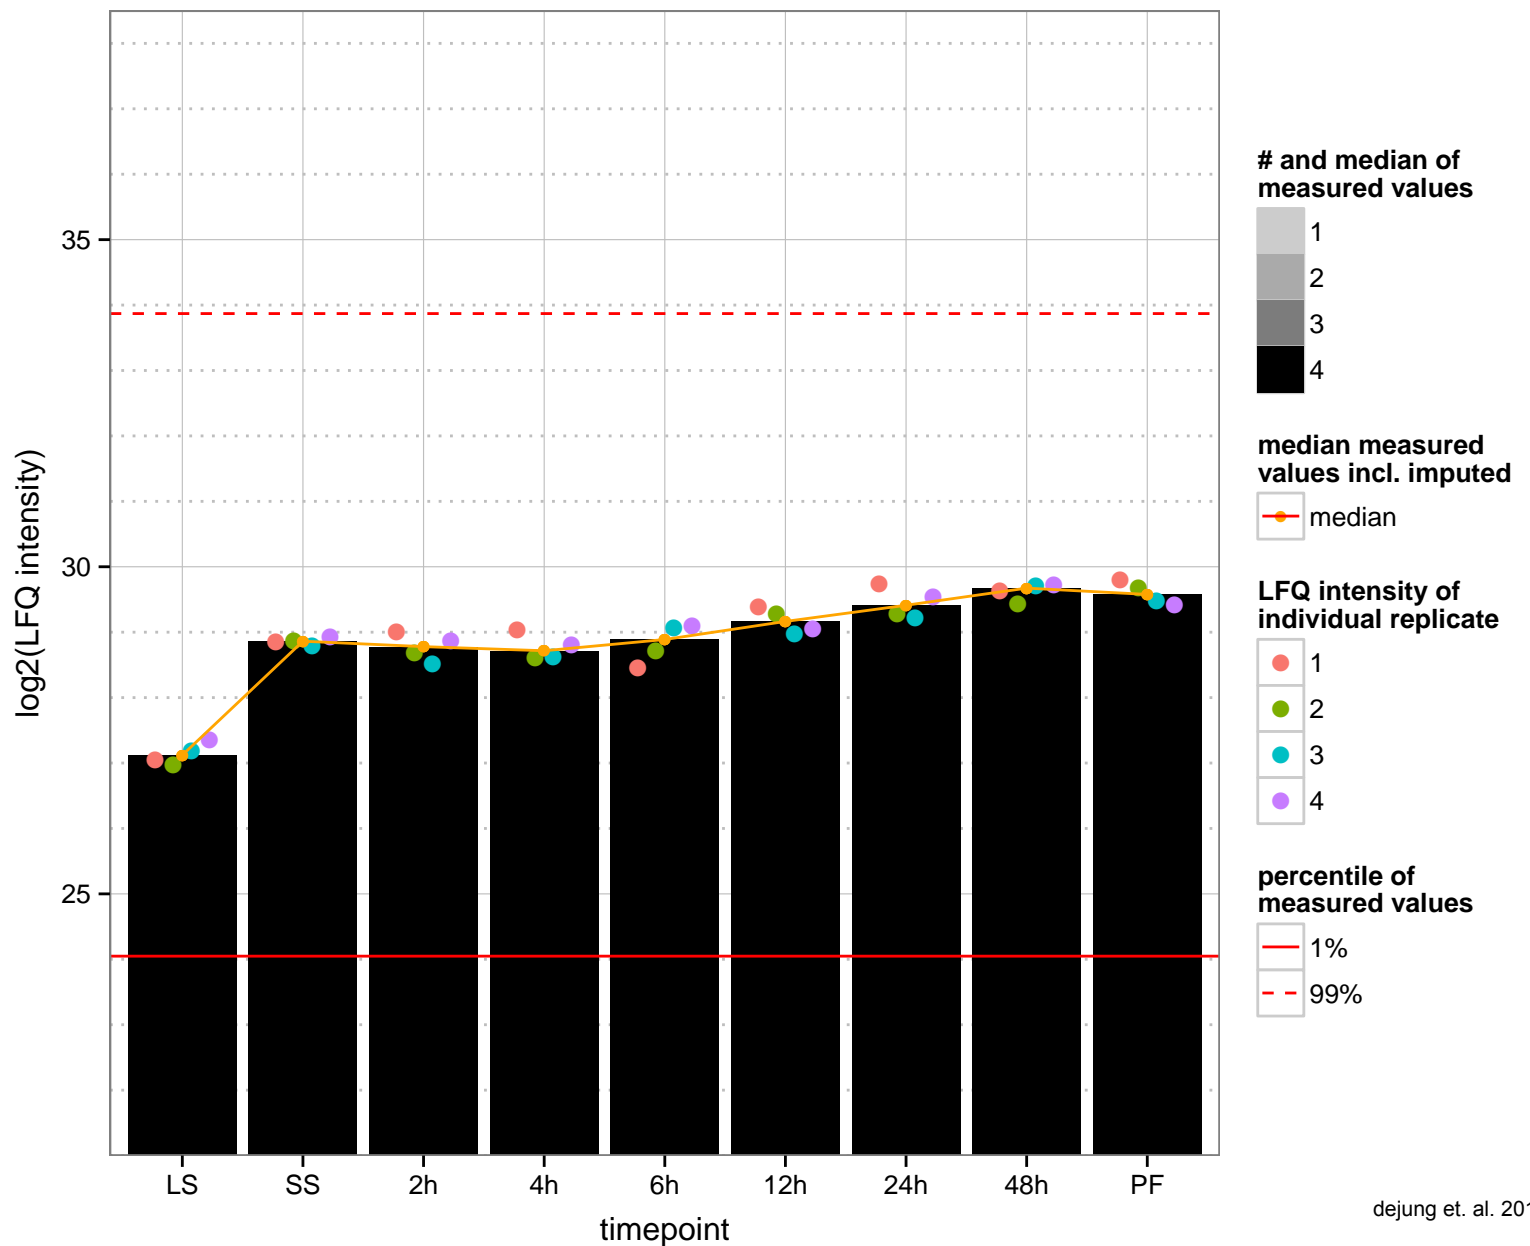

hypothetical protein, conserved  
 Tb927.4.3850  
 AGOF: null  
 AGOC: null  
 AGOP: null  
 PGO: protein binding  
 PGOC: null  
 PGOP: null

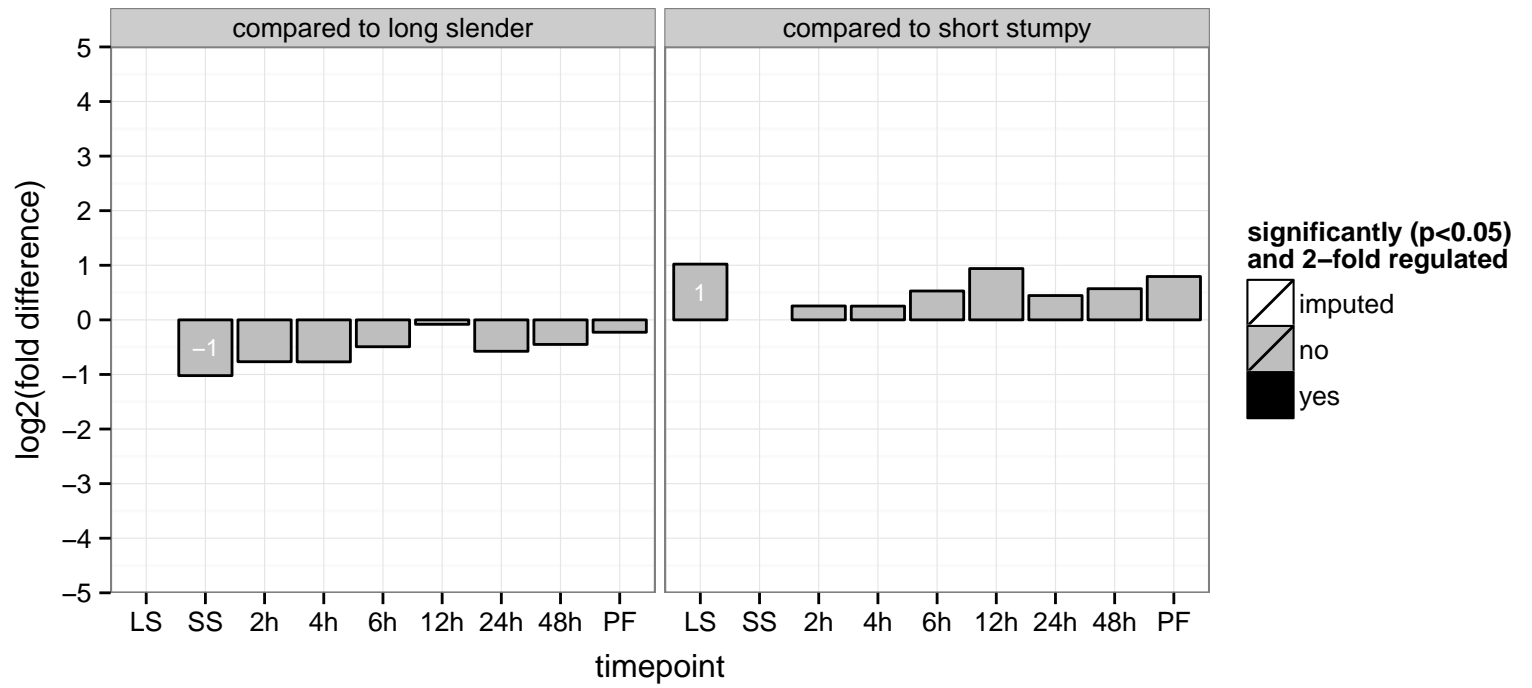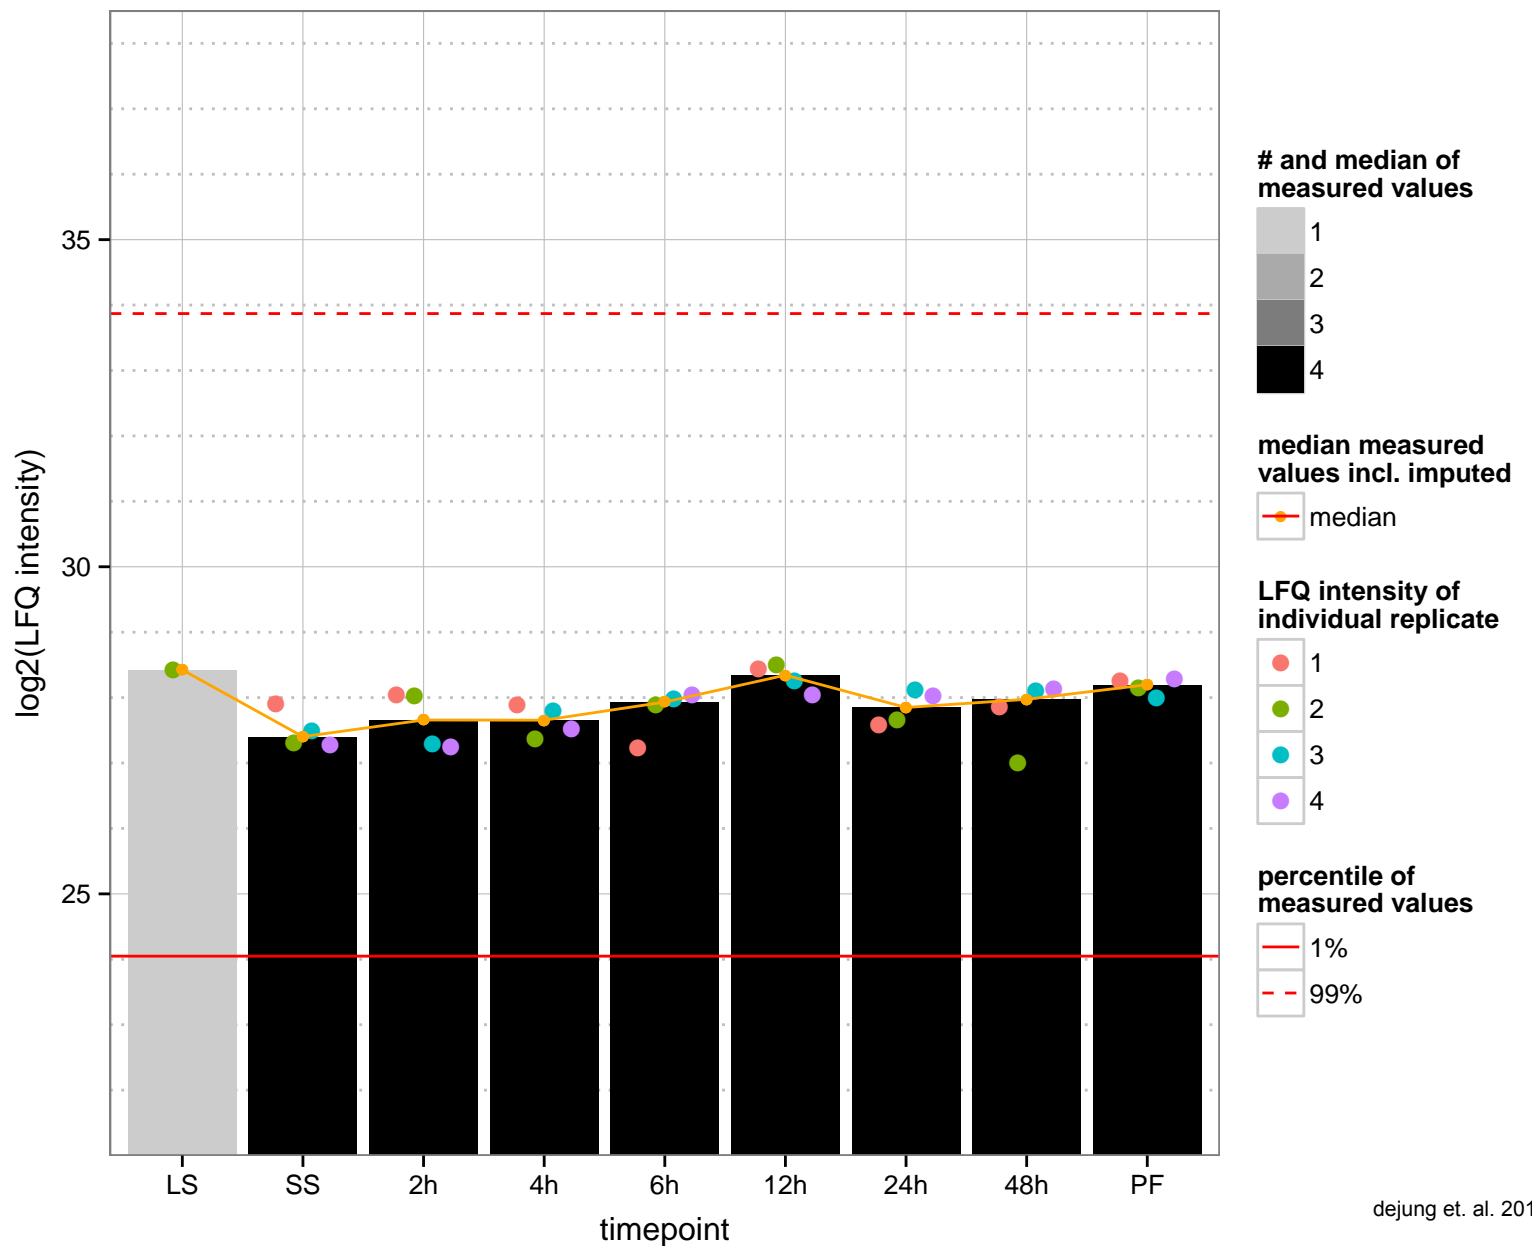



hypothetical protein, conserved  
 Tb927.4.4090  
 AGOF: null  
 AGOC: null  
 AGOP: null  
 PGOF: null  
 PGO C: null  
 PGOP: null

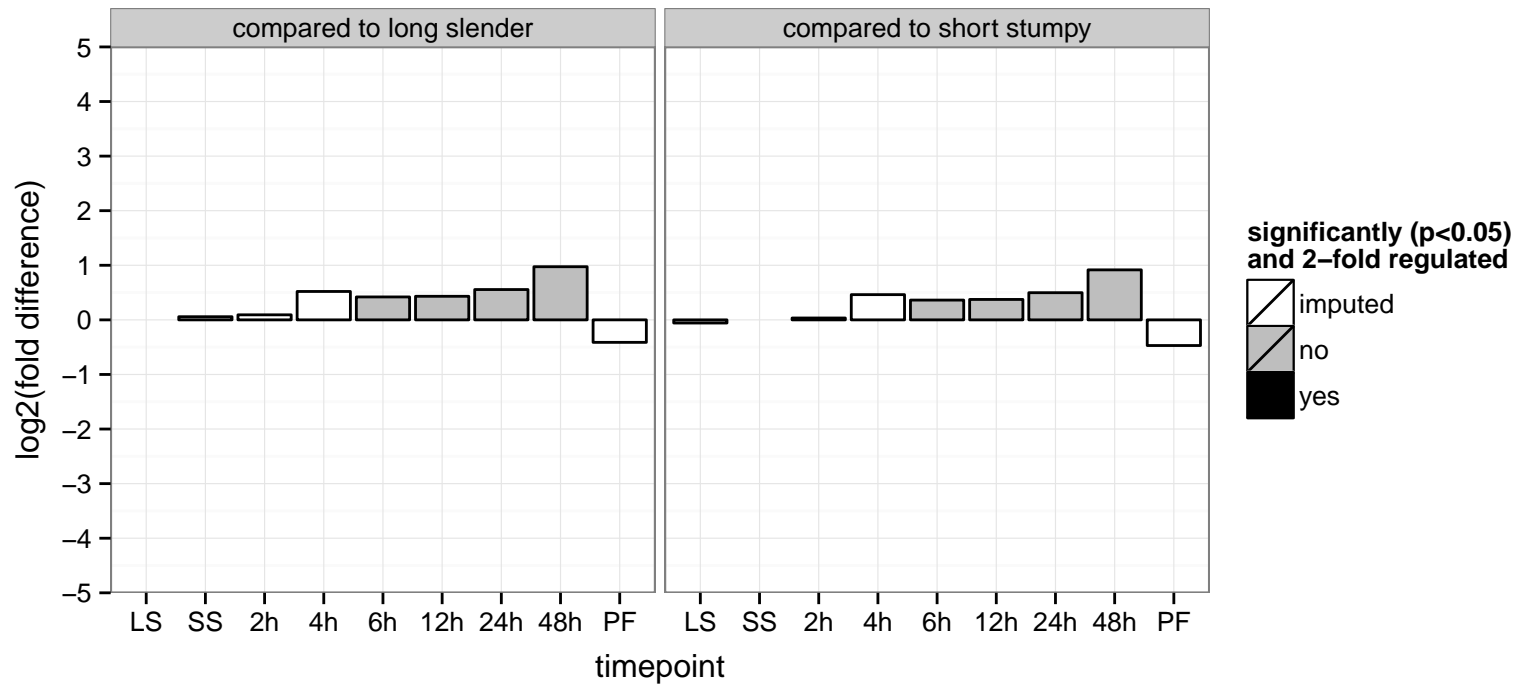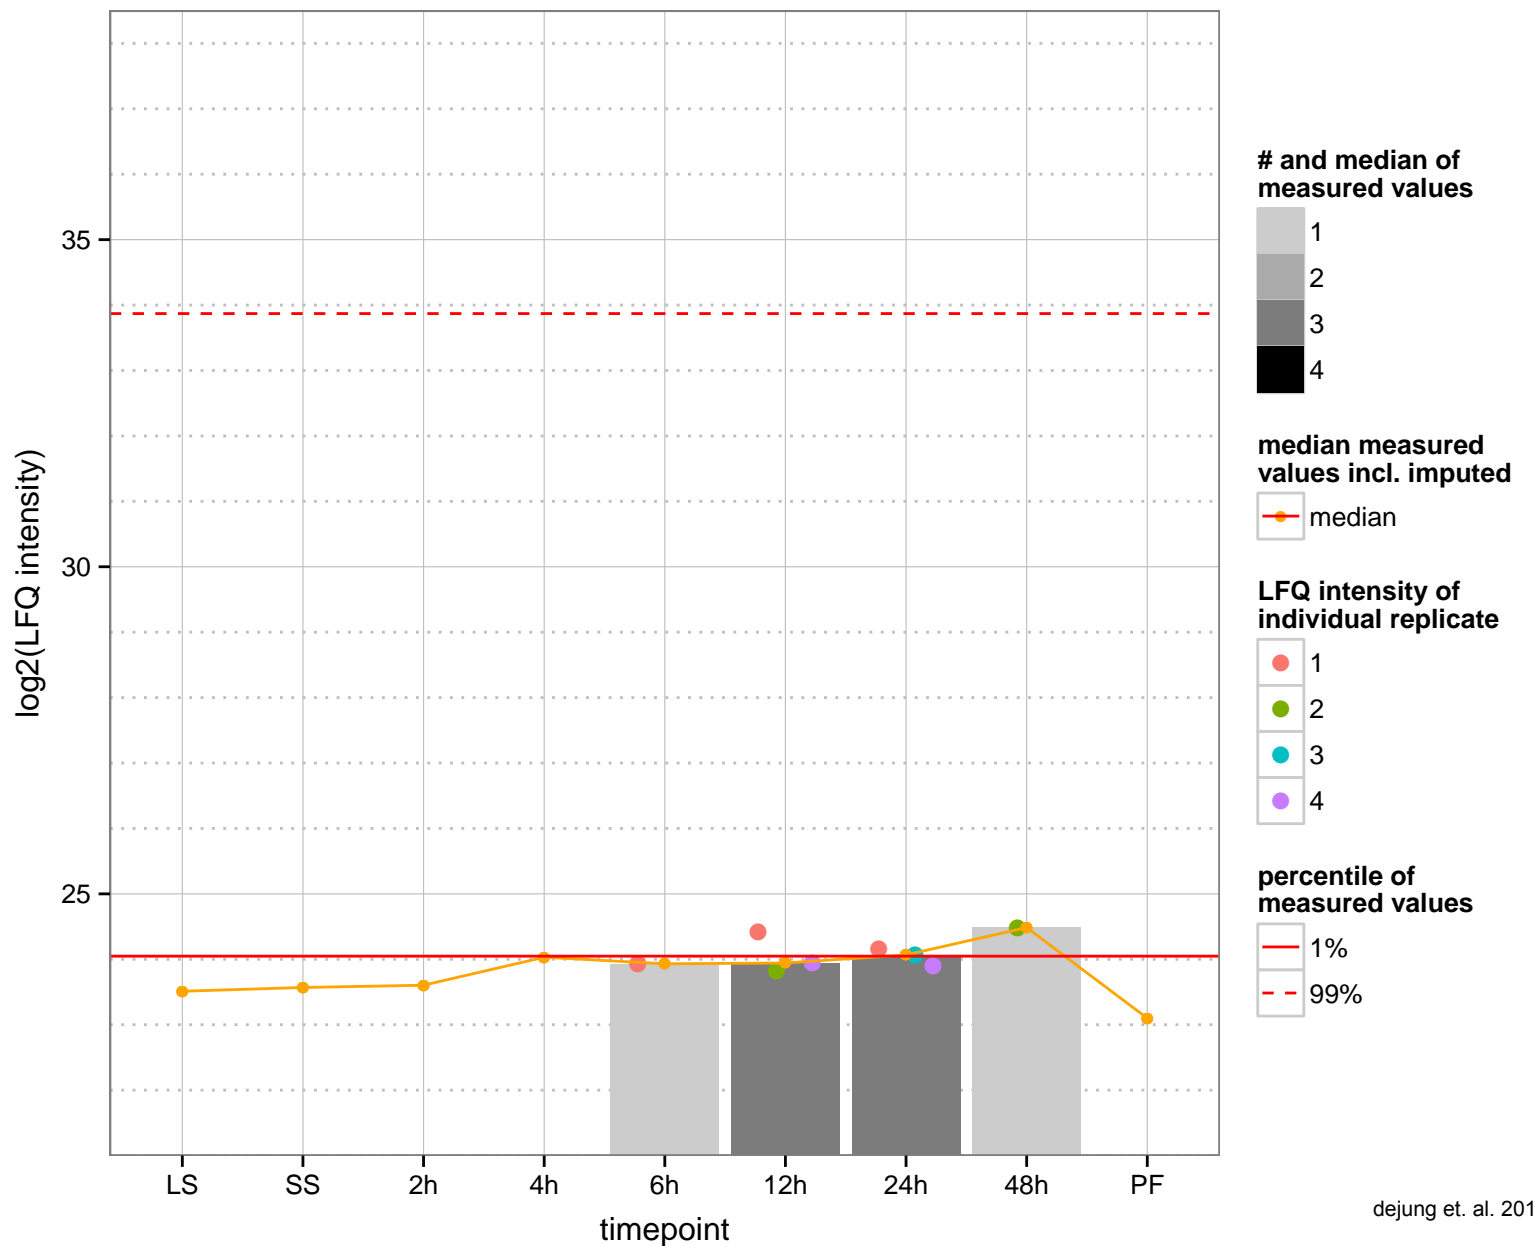

CAF 40 (CAF40)  
 Tb927.4.410  
 AGOF: null  
 AGOC: null  
 AGOP: null  
 PGOF: binding  
 PGO: null  
 PGOP: null

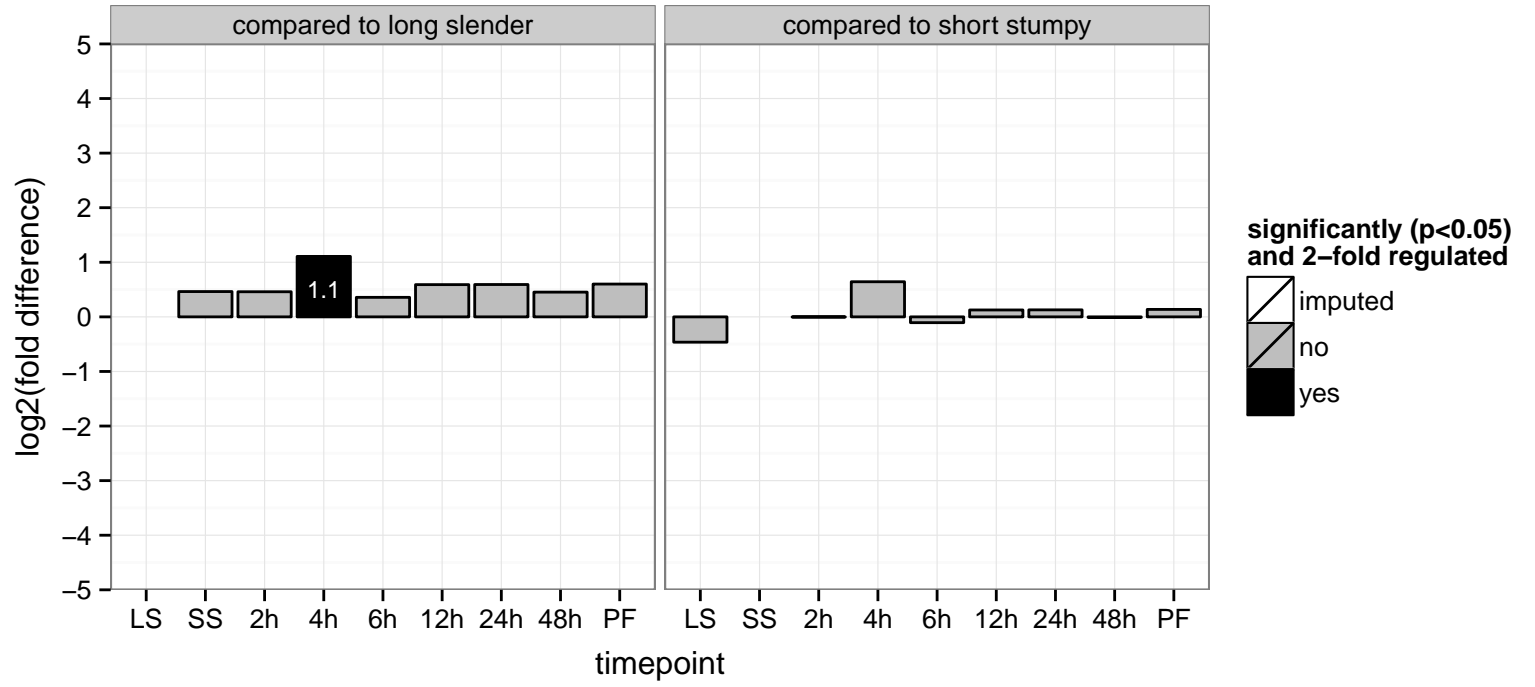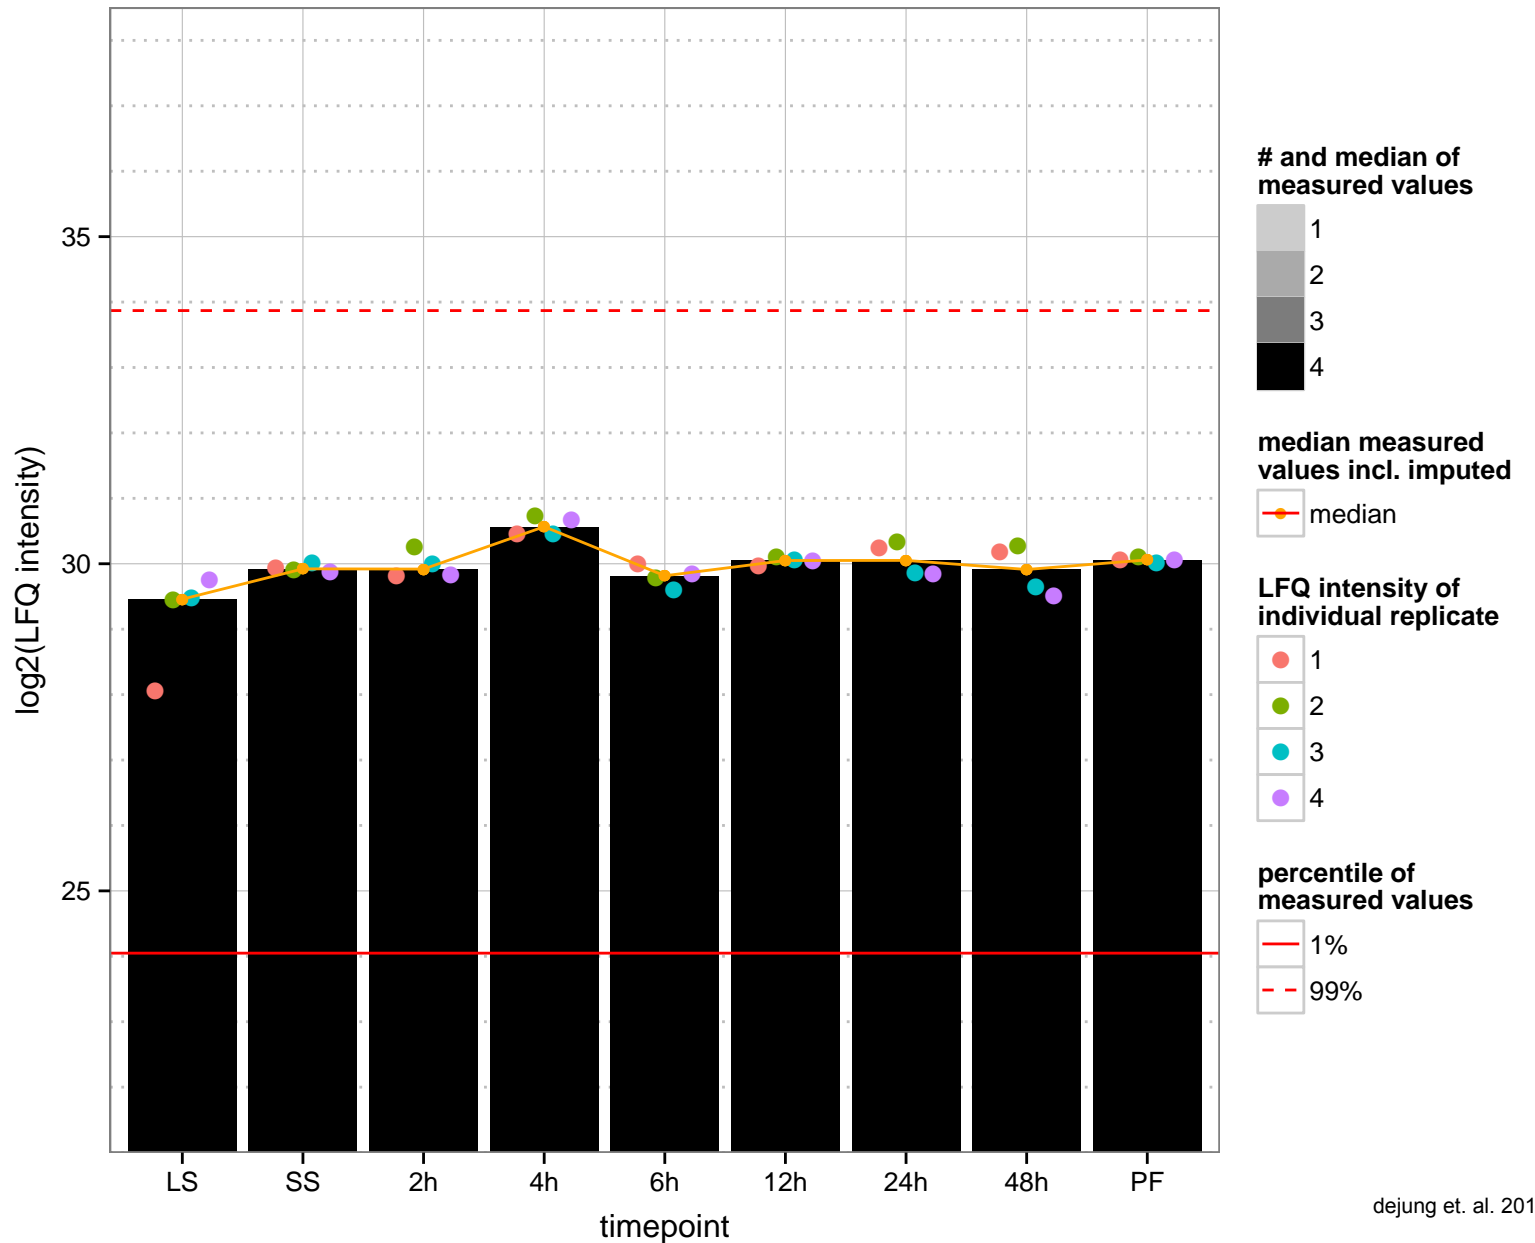

hypothetical protein, conserved  
 Tb927.4.4130  
 AGOF: null  
 AGOC: null  
 AGOP: null  
 PGO: null  
 PGO: null  
 PGO: null

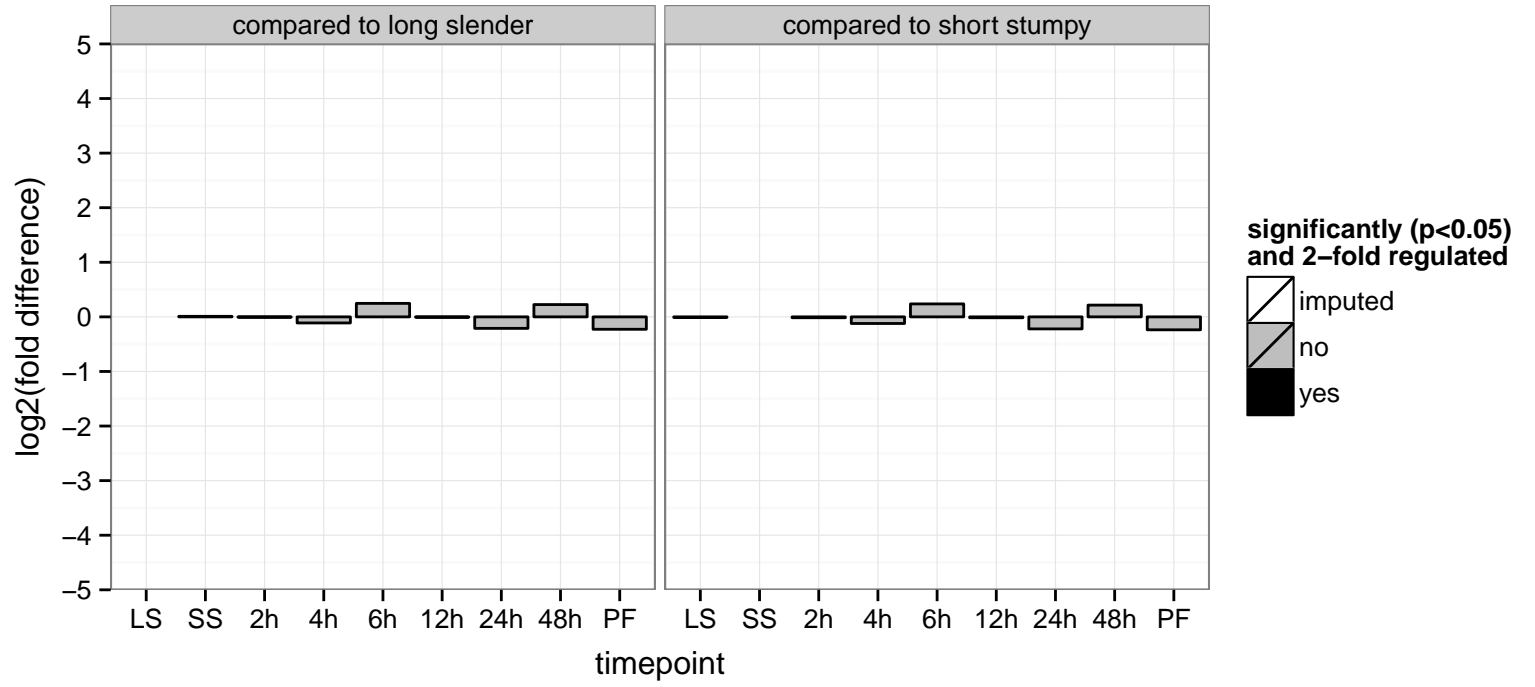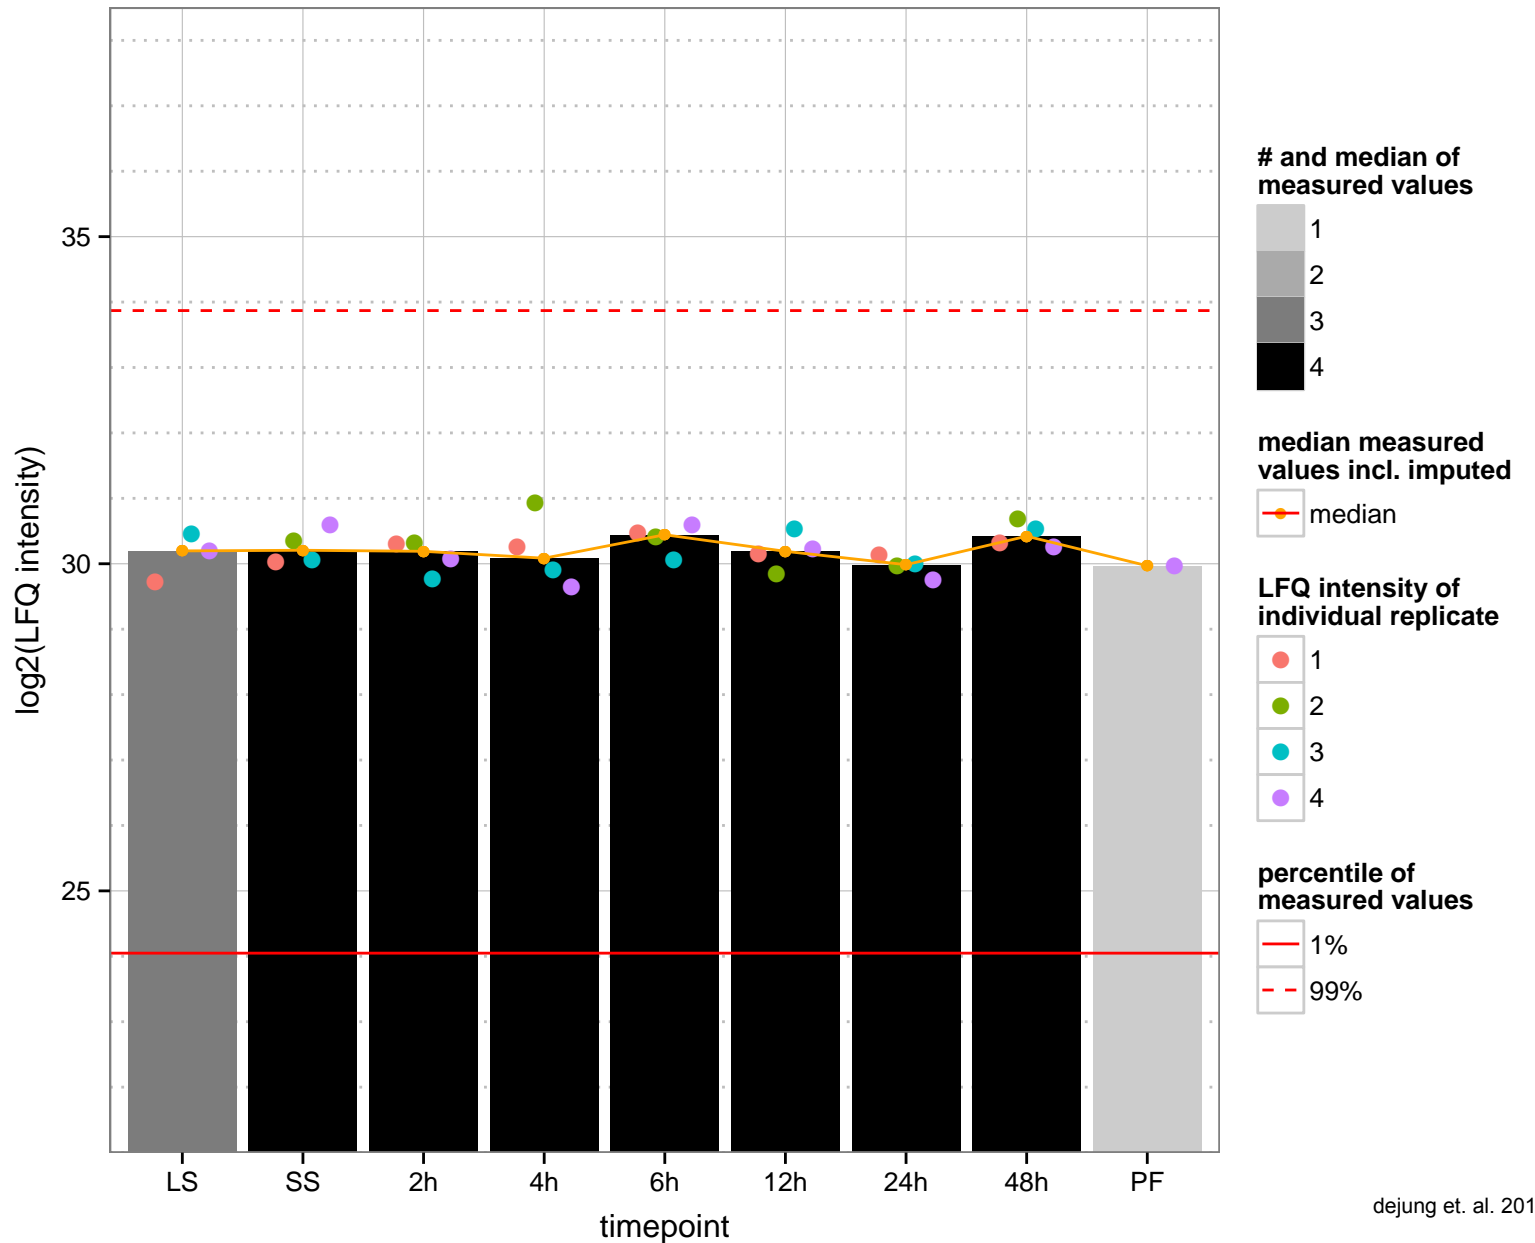

Nucleoporin (TbNup64)  
 Tb927.4.4310  
 AGOF: null  
 AGOC: nuclear pore  
 AGOP: null  
 PGO: null  
 PGO: null  
 PGO: null

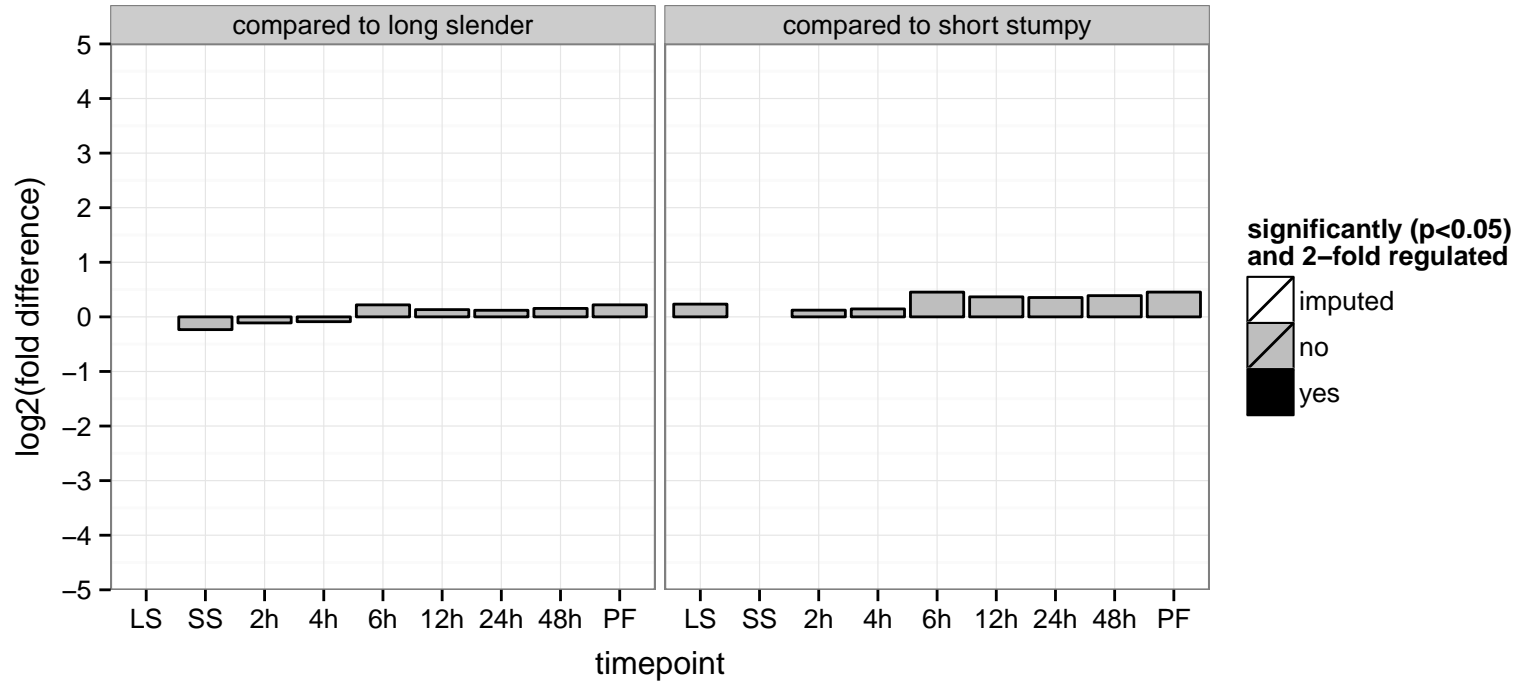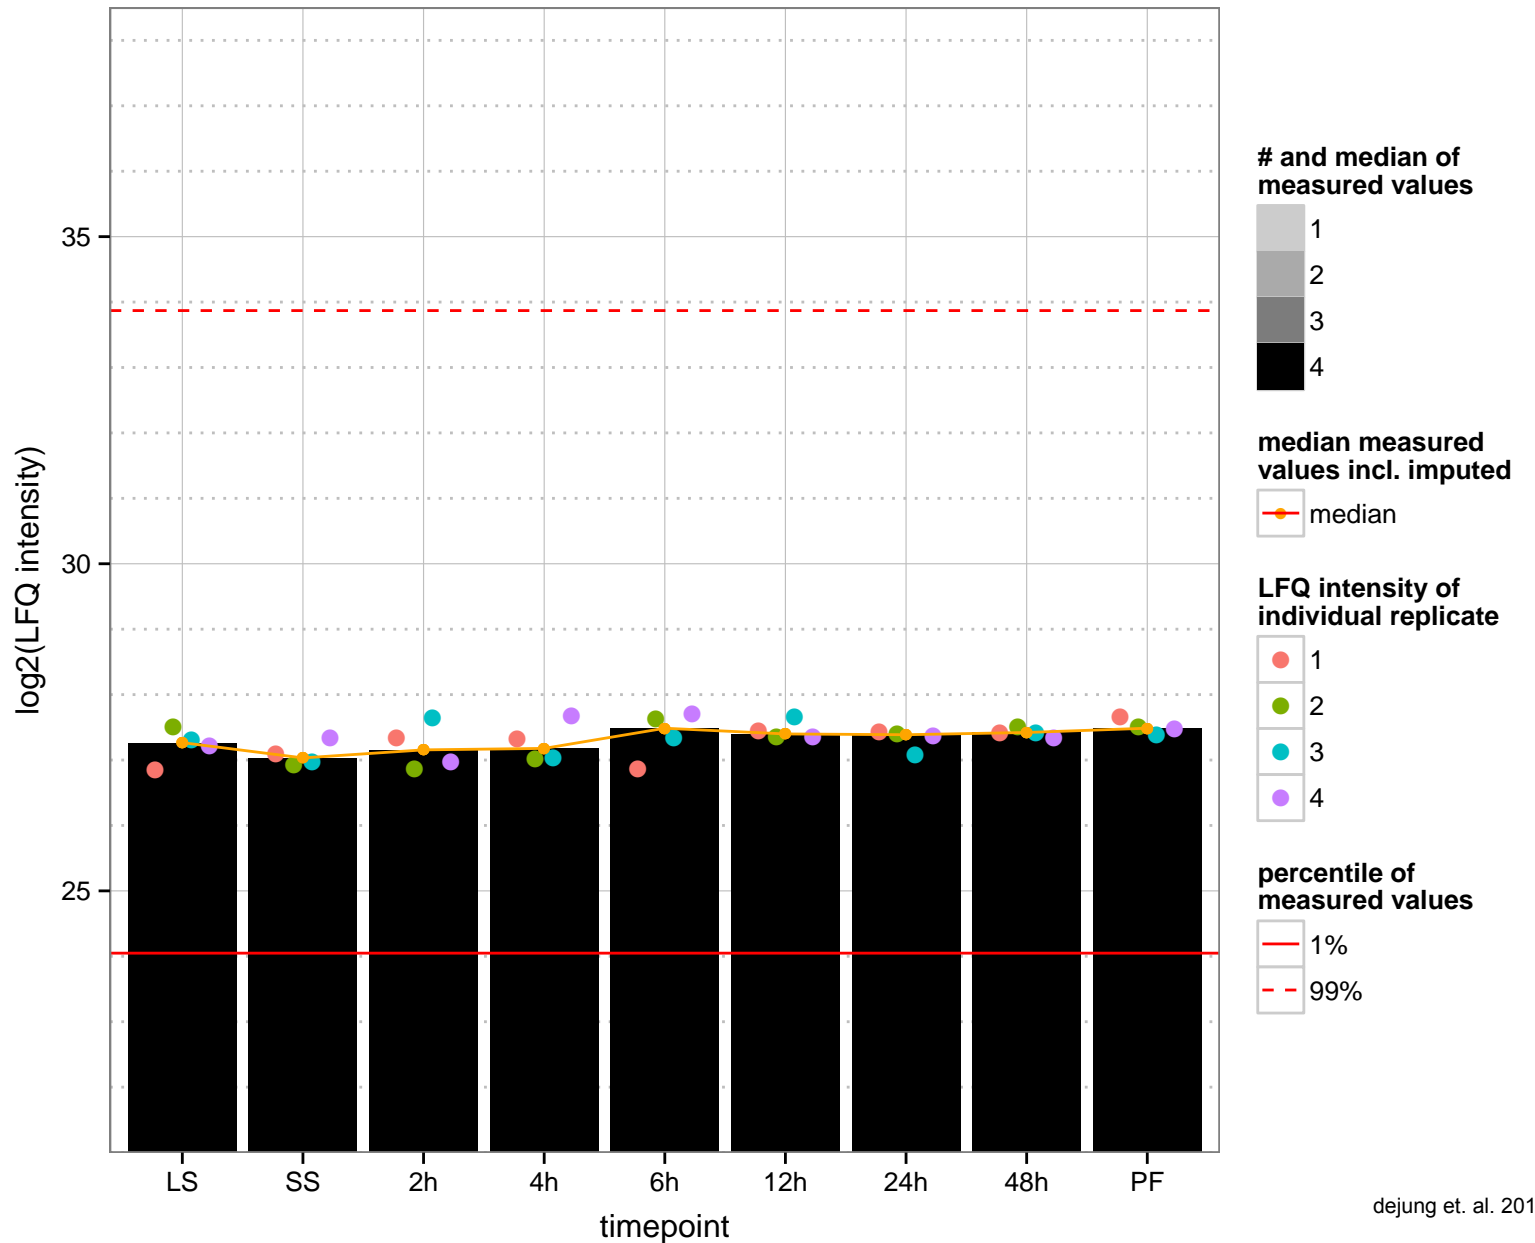

divalent cation tolerance protein, putative  
 Tb927.4.4320  
 AGOF: null  
 AGOC: null  
 AGOP: response to metal ion  
 PGOF: null  
 PGOC: null  
 PGOP: response to metal ion

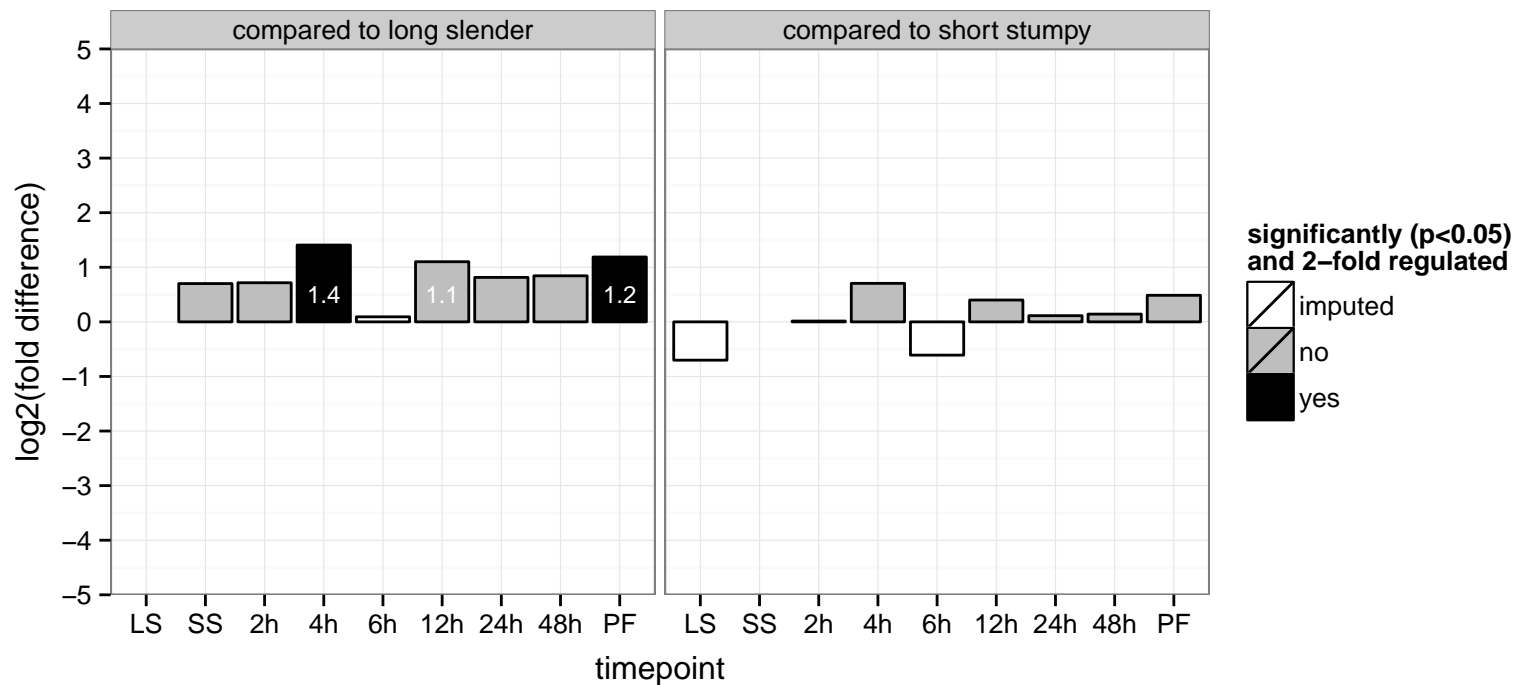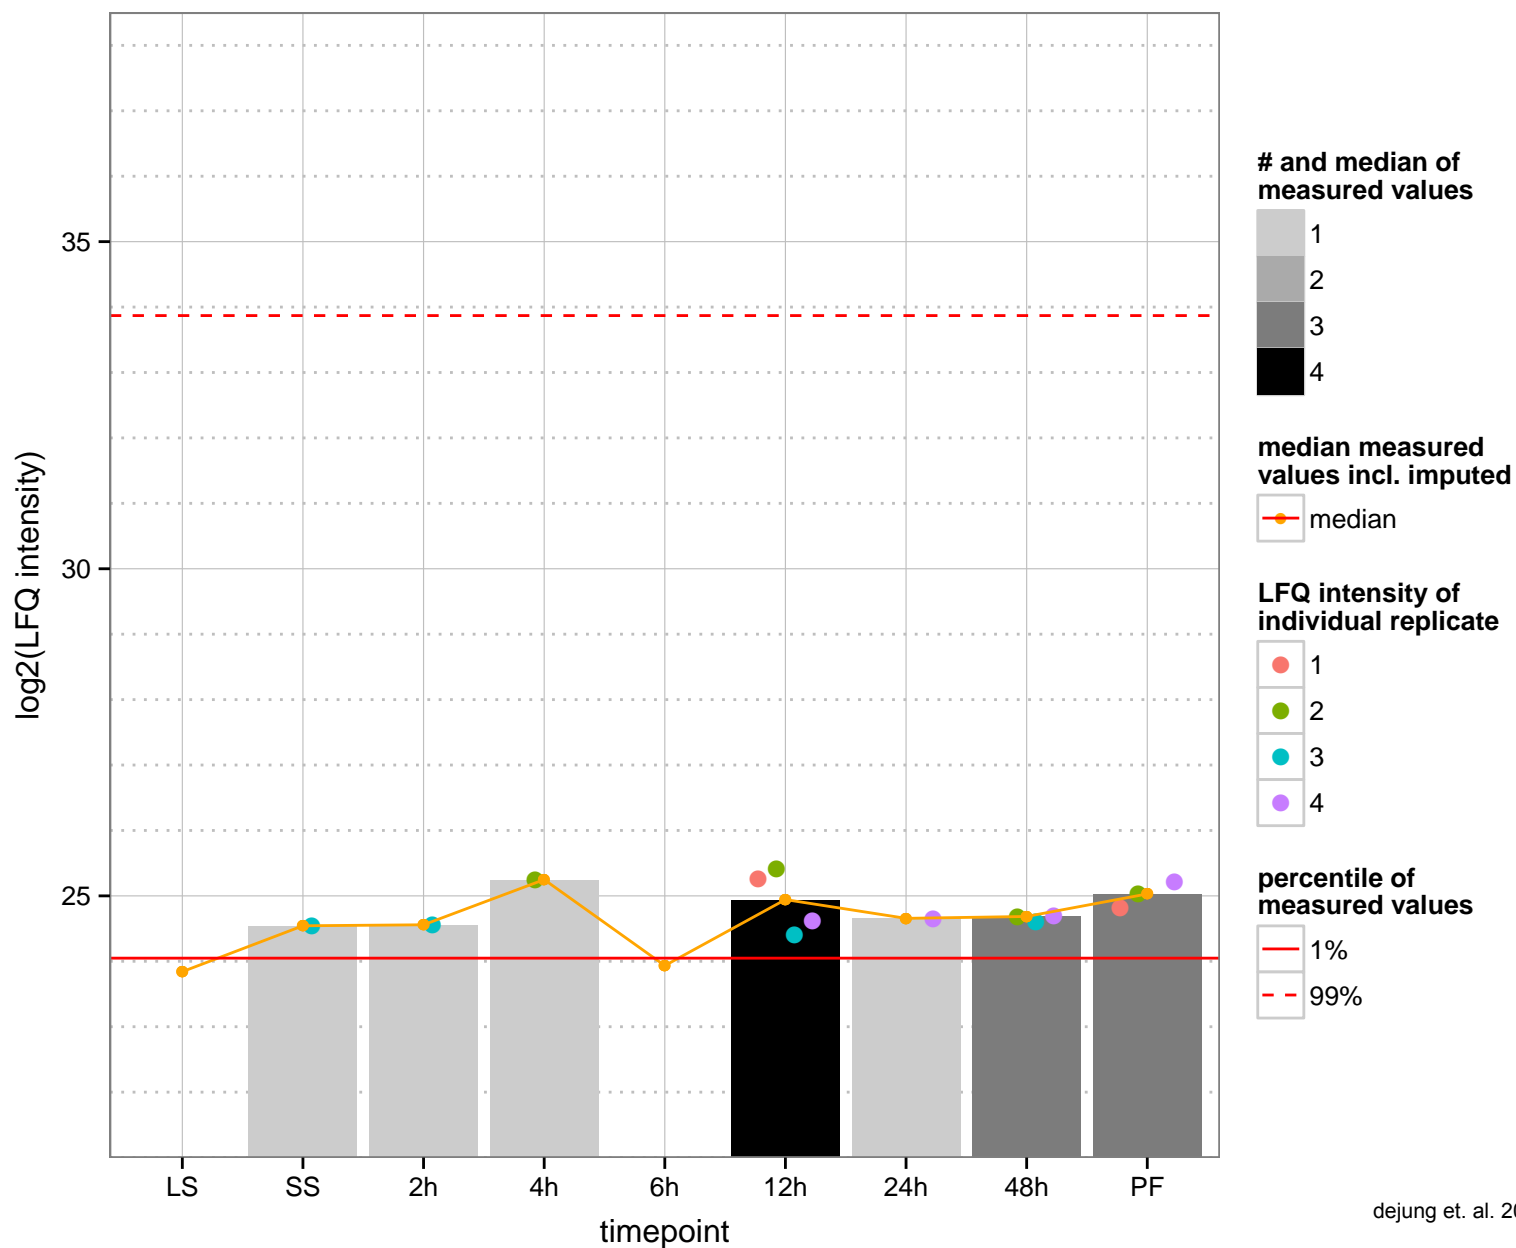

monoglyceride lipase, putative  
 Tb927.4.4360  
 AGOF: null  
 AGOC: null  
 AGOP: null  
 PGO: null  
 PGOC: null  
 PGOP: null

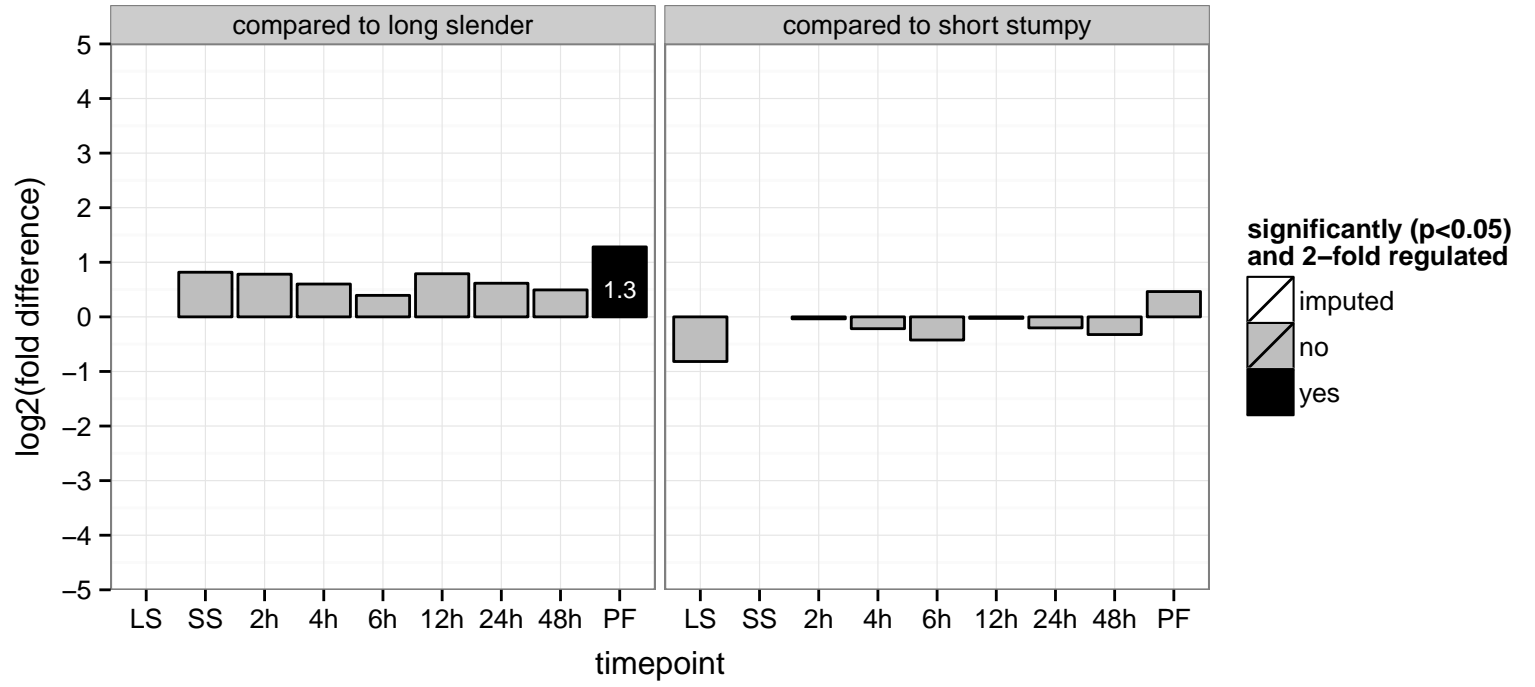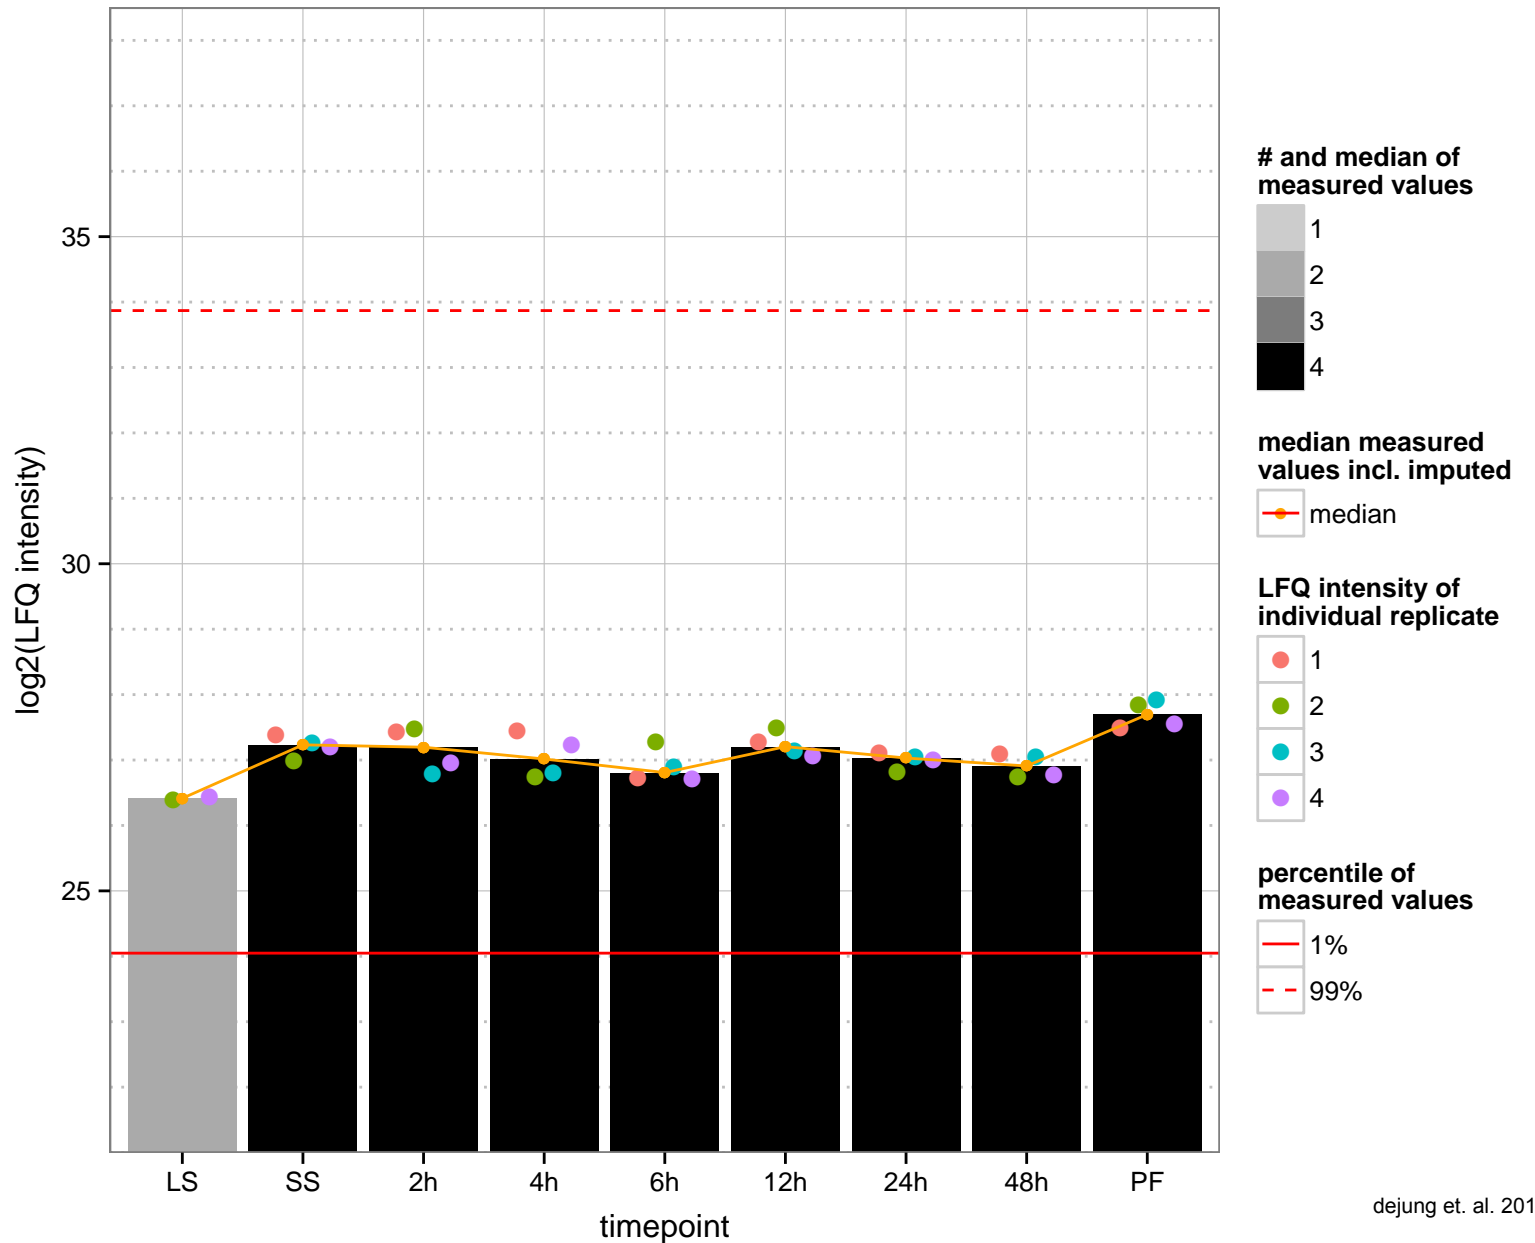

vacuolar-type proton translocating pyrophosphatase 1, putative (PPase1), vacuolar-type proton translocating pyrophosphatase 1, putative (PPase1)  
 Tb927.8.7980;Tb927.4.4380  
 AGOF: hydrogen-translocating pyrophosphatase activity, inorganic diphosphatase activity  
 AGOC: Golgi membrane, acidocalcisome, contractile vacuole, integral to membrane  
 AGOP: proton transport  
 PGO: hydrogen-translocating pyrophosphatase activity, inorganic diphosphatase activity  
 PGOC: membrane  
 PGOP: proton transport

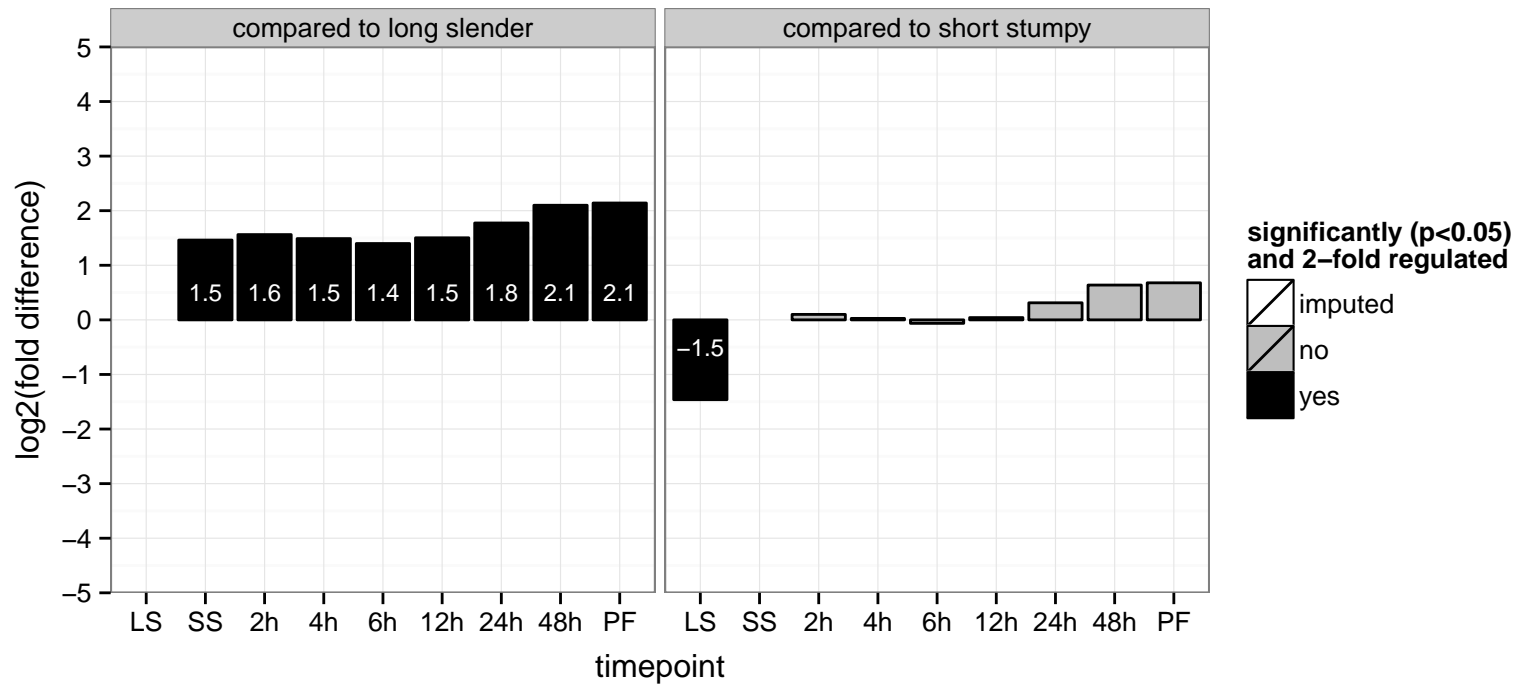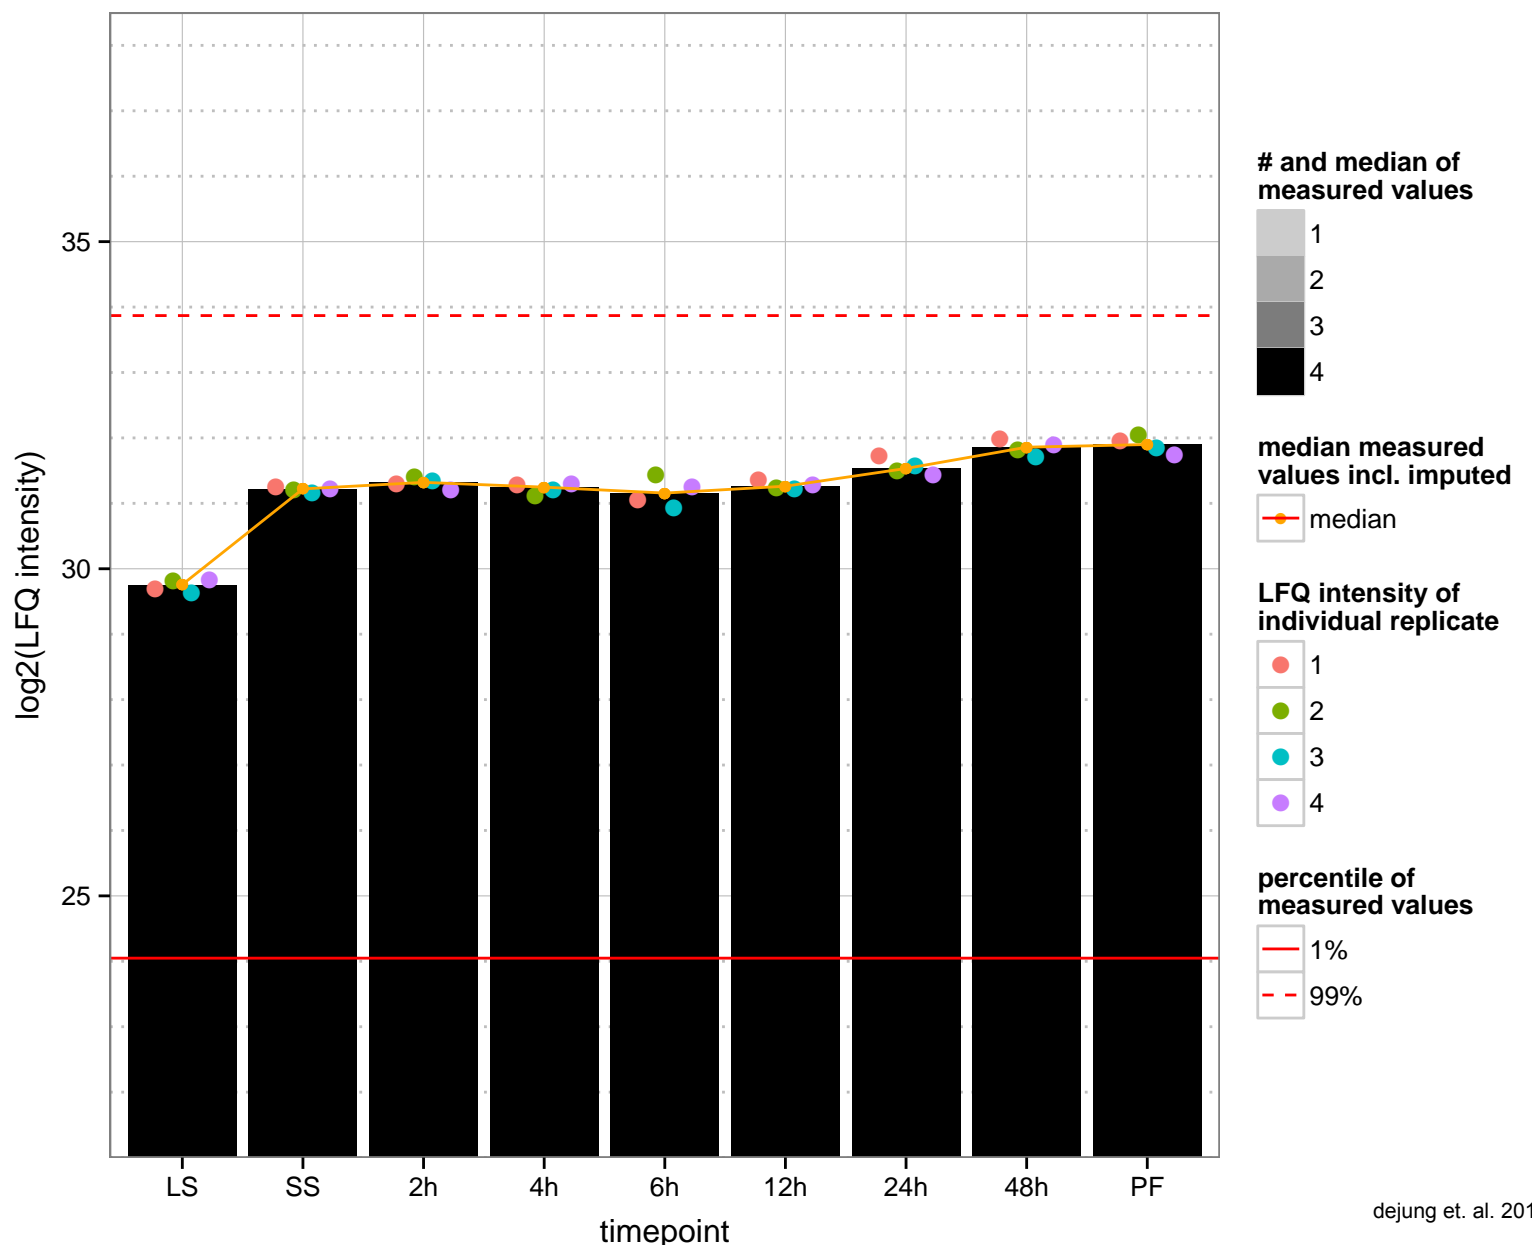

multidrug resistance protein E, p-glycoprotein (MRPE)

Tb927.4.4490

AGOF: ATP binding, ATPase activity, coupled to transmembrane movement of substances

AGOC: ATP-binding cassette (ABC) transporter complex, integral to membrane

AGOP: response to drug, transport

PGOF: ATP binding, ATPase activity, coupled to transmembrane movement of substances, nucleoside-triphosphatase activity

PGOC: integral to membrane

PGOP: transmembrane transport, transport

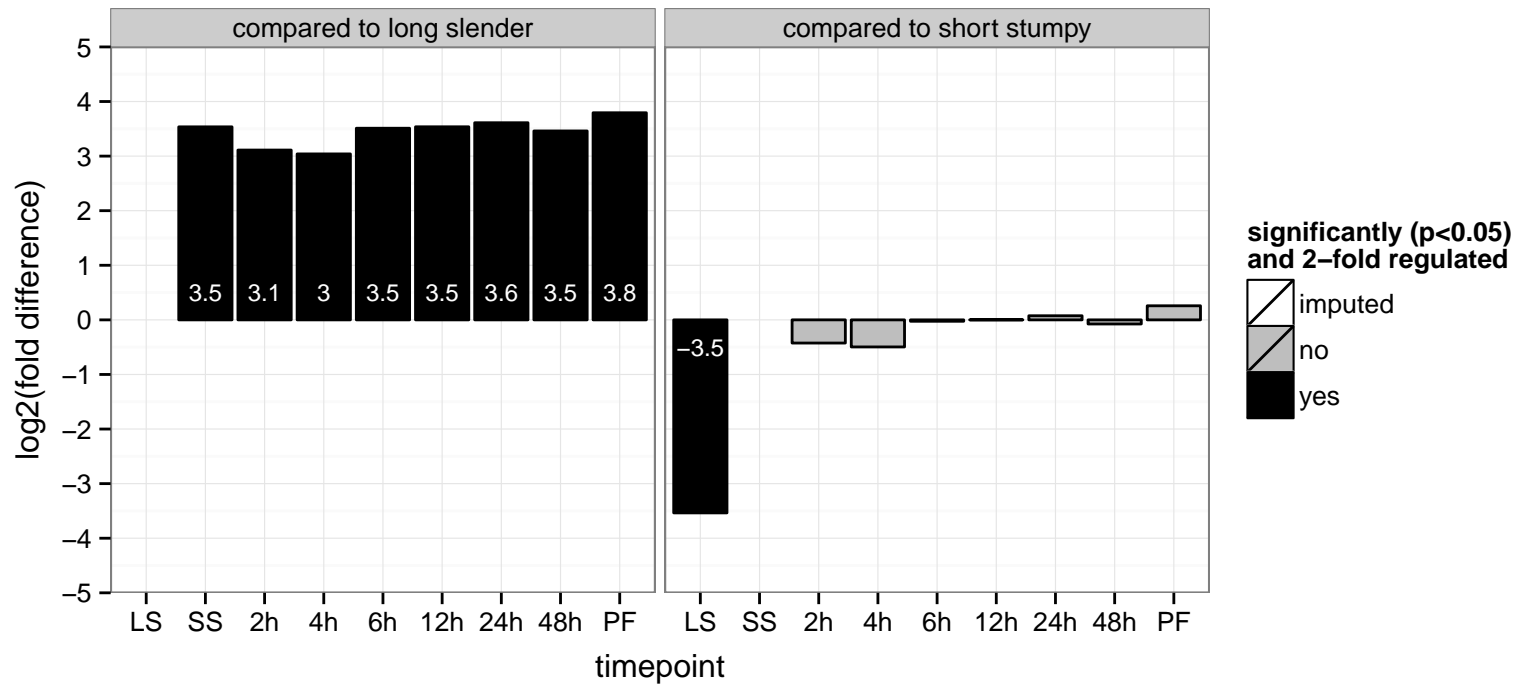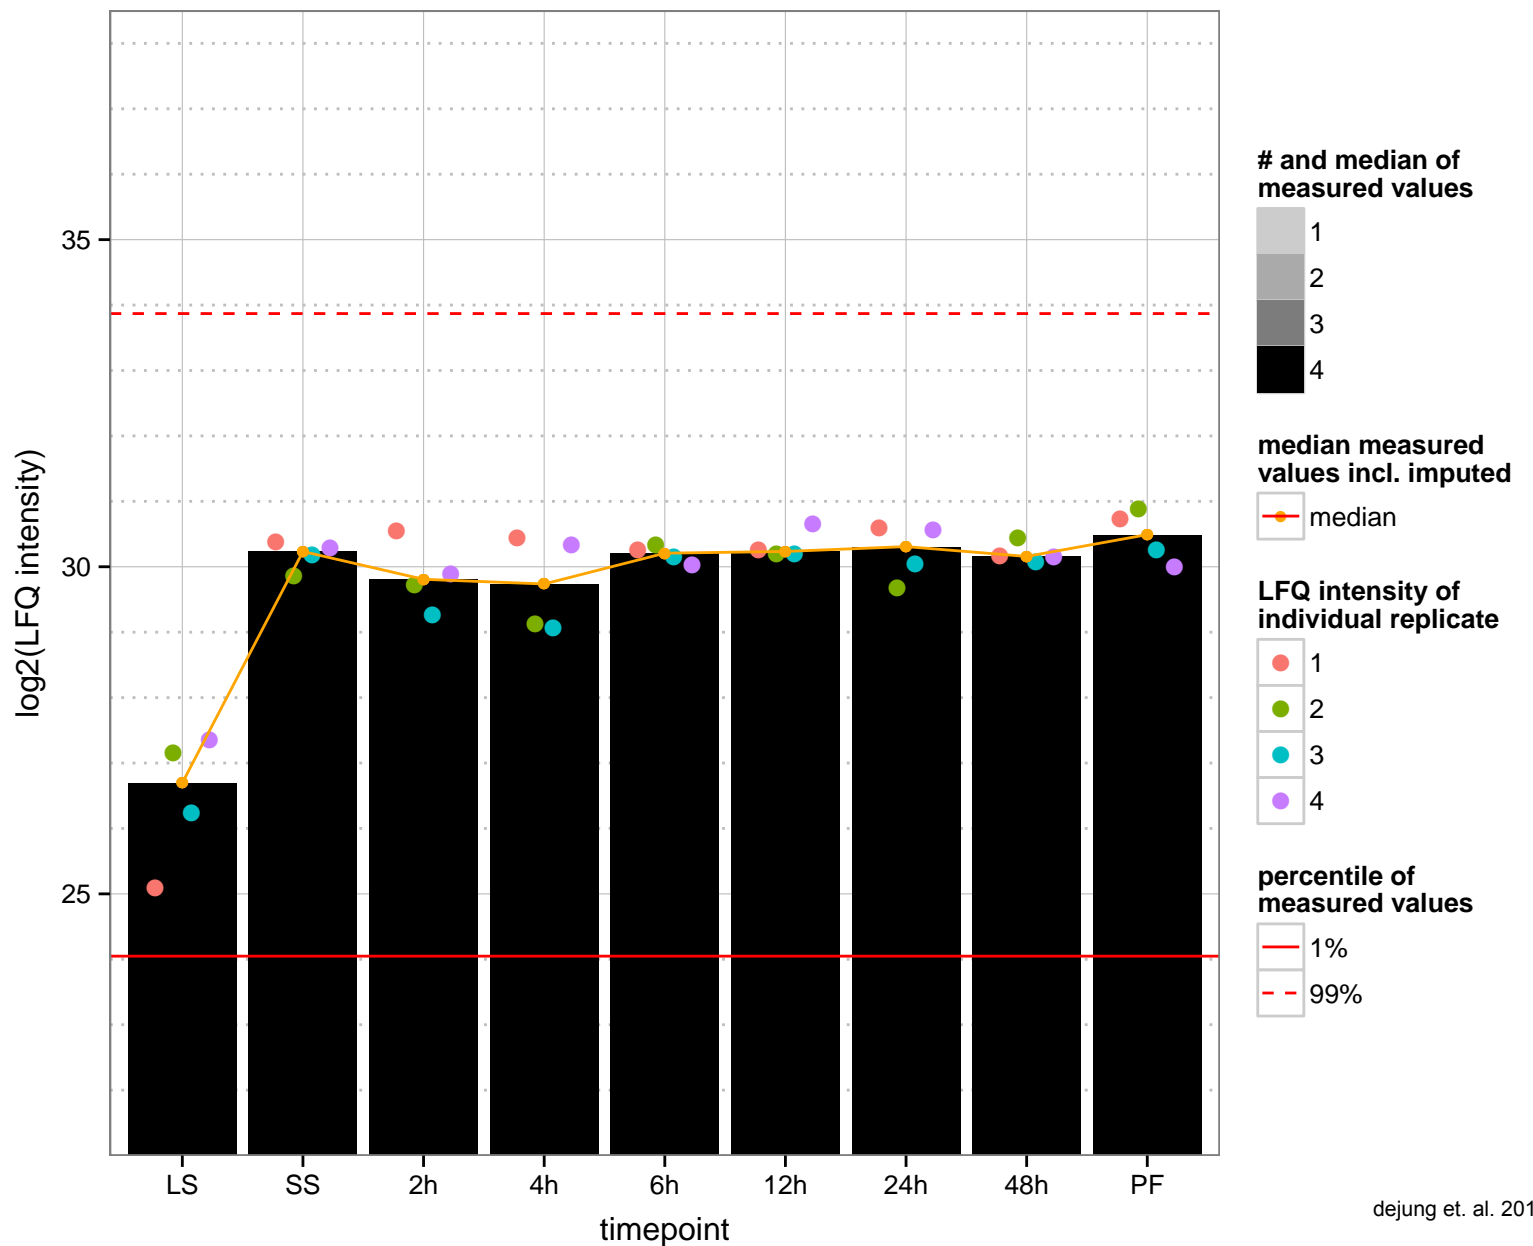



coatomer alpha subunit, putative (TbCoatomerAlpha)  
 Tb927.4.450  
 AGOF: structural molecule activity, transporter activity  
 AGOC: COPI vesicle coat  
 AGOP: ER to Golgi vesicle-mediated transport, intracellular protein transport  
 PGOF: protein binding, structural molecule activity  
 PGO: COPI vesicle coat, membrane coat  
 PGOP: intracellular protein transport, vesicle-mediated transport

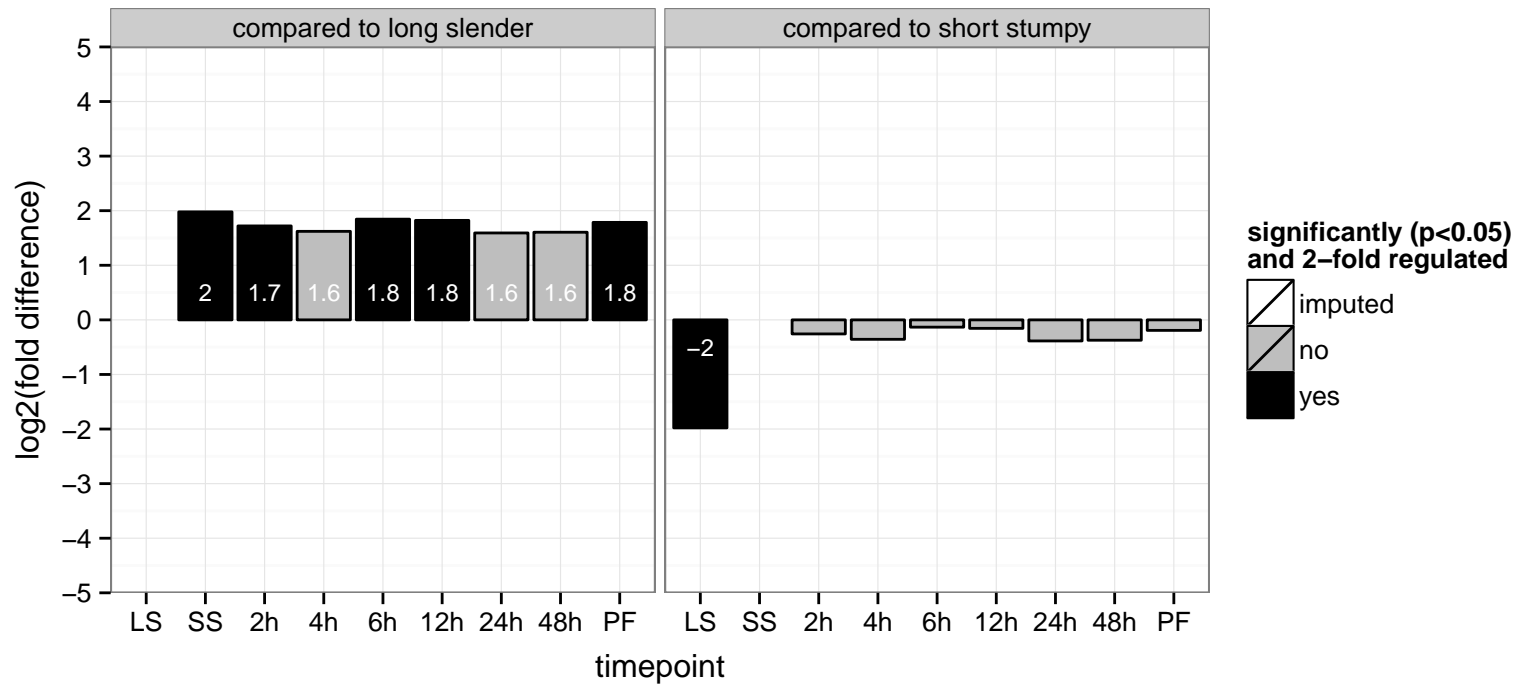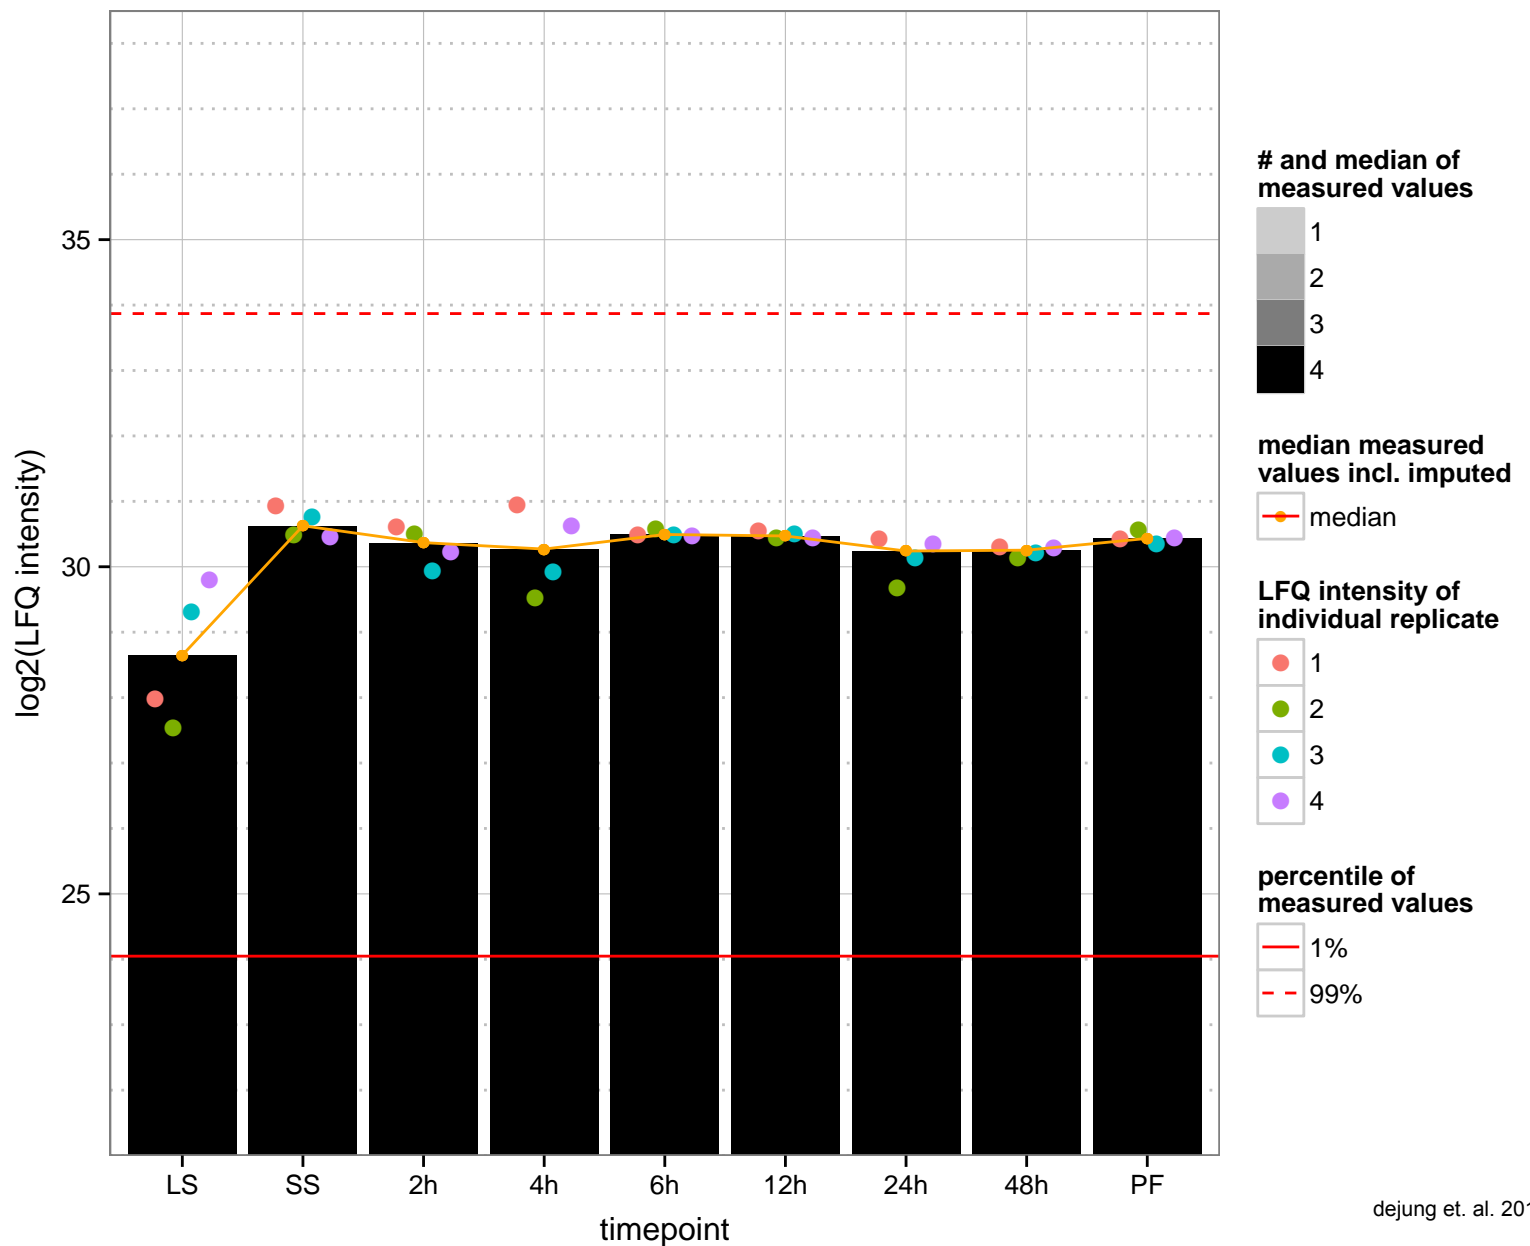

hypothetical protein, conserved  
 Tb927.4.4550  
 AGOF: null  
 AGOC: null  
 AGOP: null  
 PGO: null  
 PGOC: null  
 PGOP: null

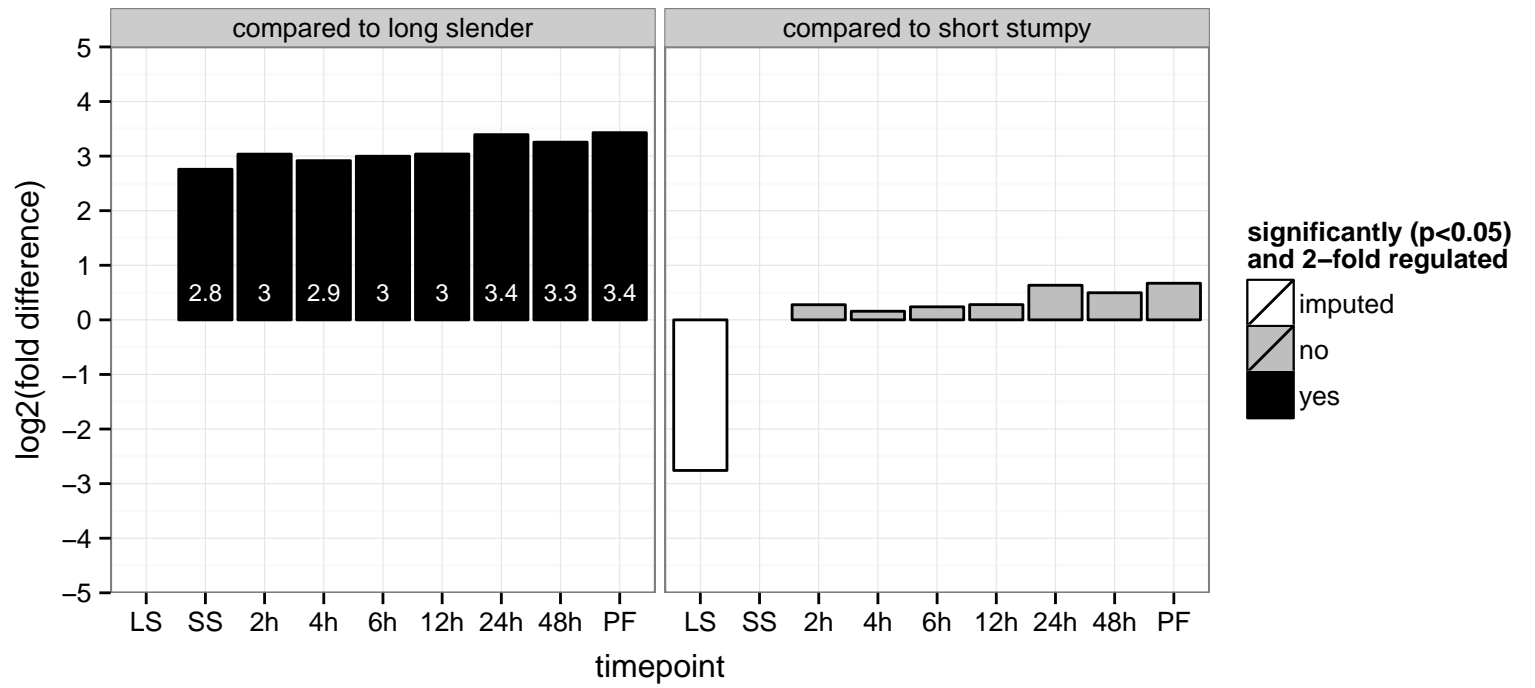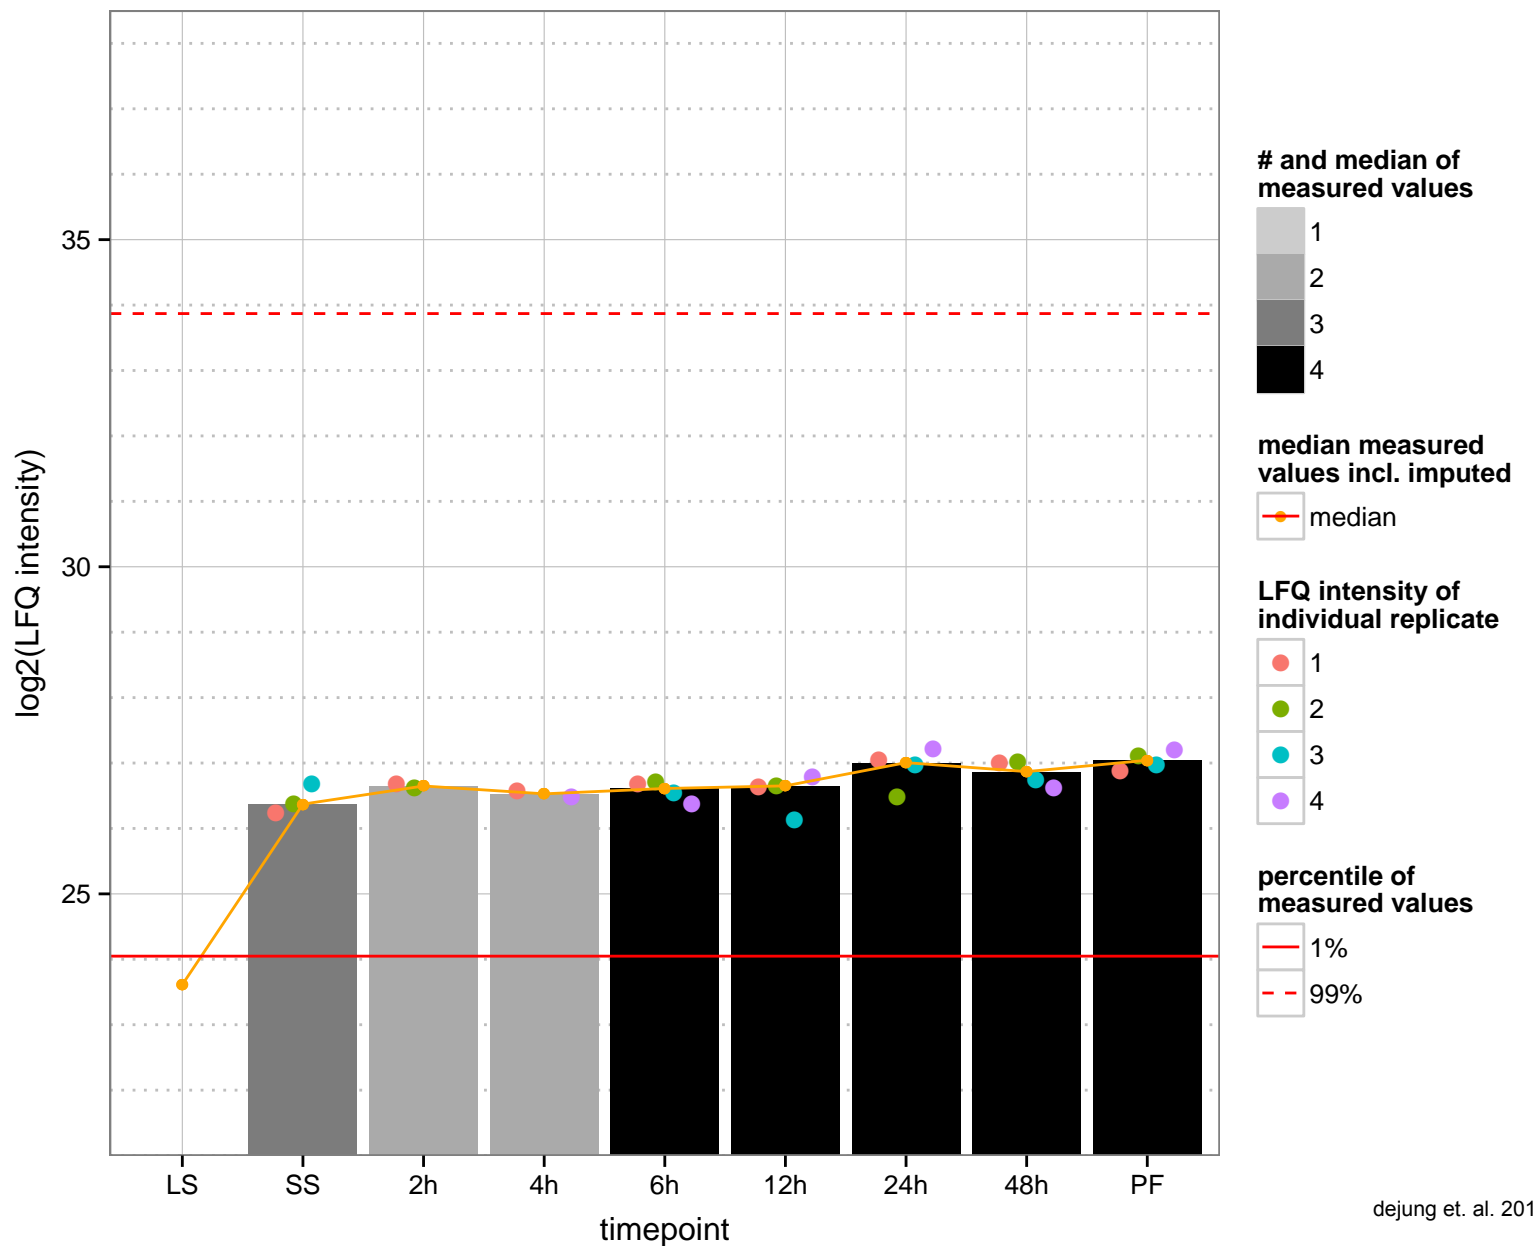

diphthine synthase, putative  
 Tb927.4.4650  
 AGOF: diphthine synthase activity  
 AGOC: null  
 AGOP: peptidyl-diphthamide biosynthetic process from peptidyl-histidine  
 PGOF: diphthine synthase activity, methyltransferase activity  
 PGOC: null  
 PGOP: metabolic process, peptidyl-diphthamide biosynthetic process from peptidyl-histidine

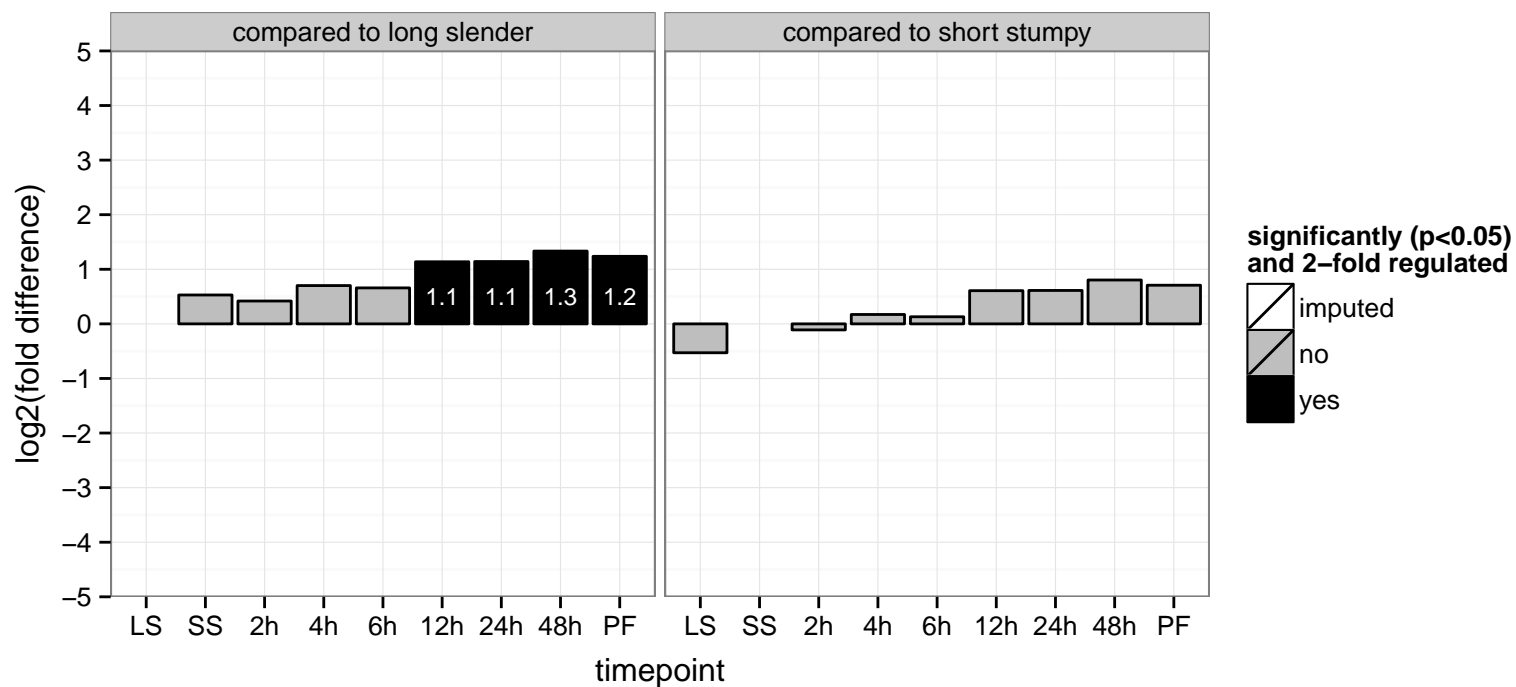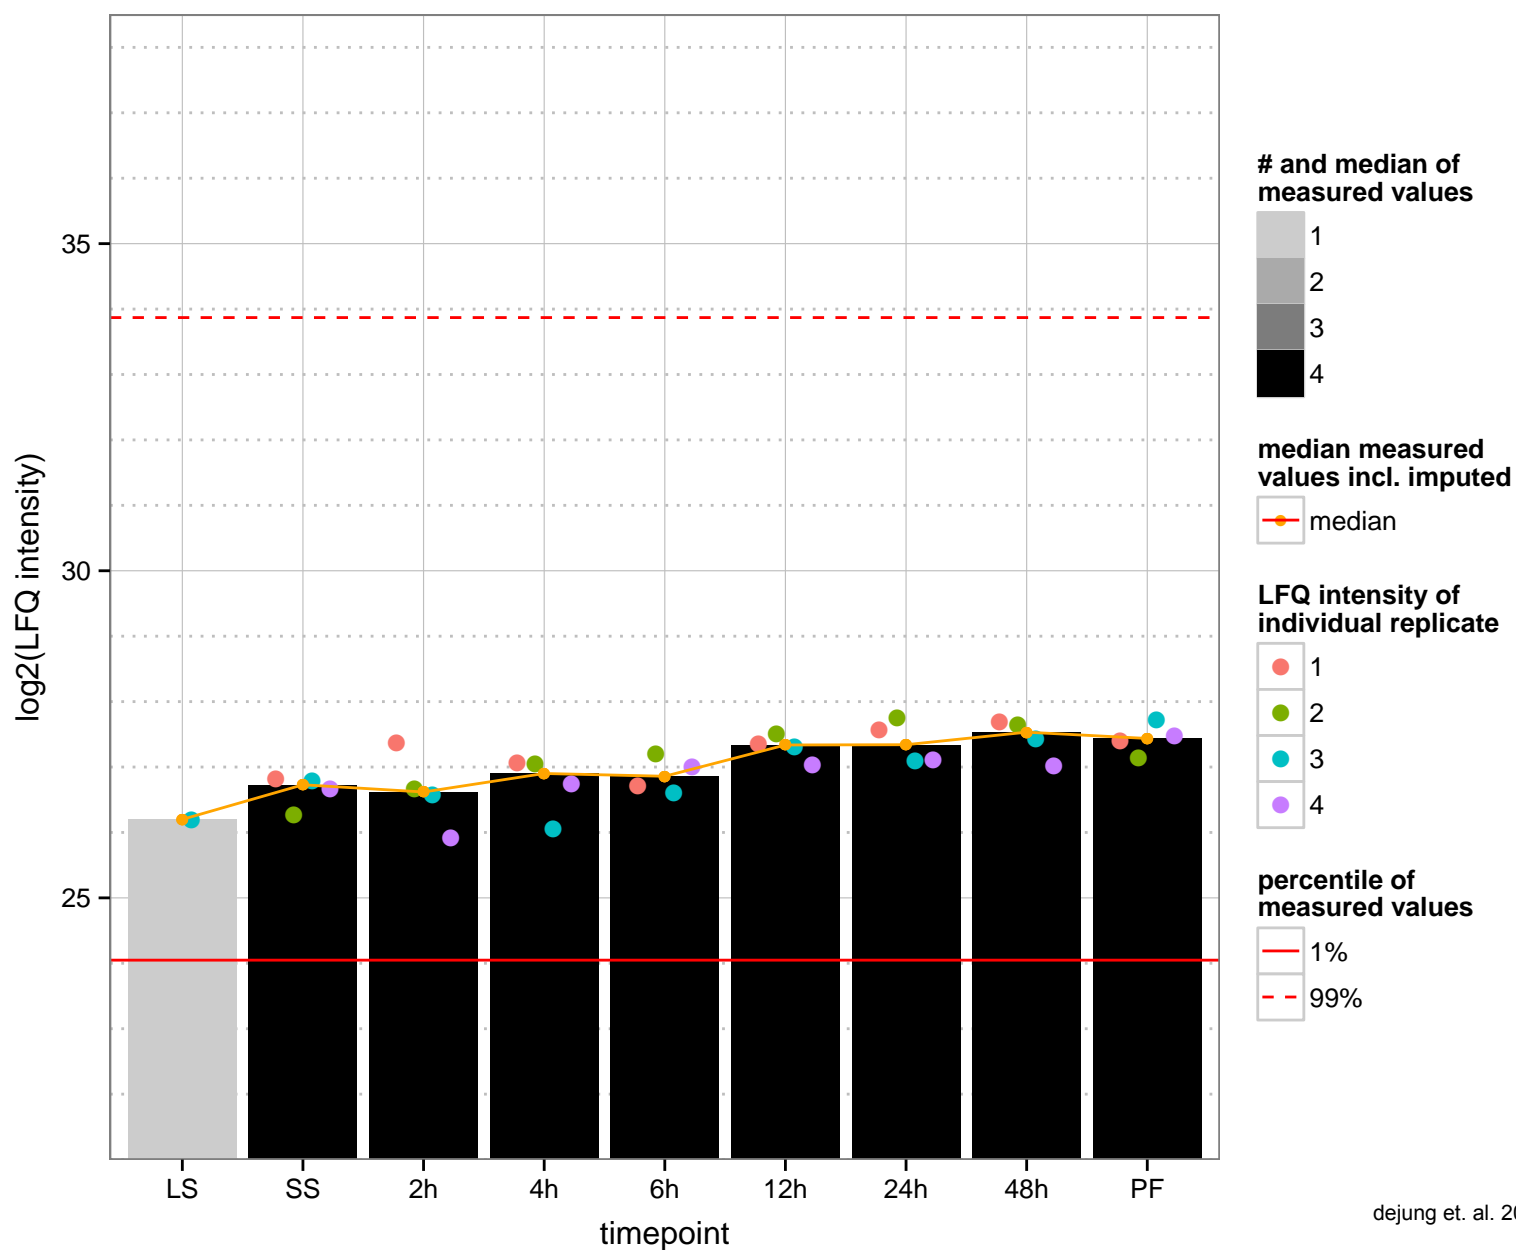

hypothetical protein, conserved  
 Tb927.4.4660  
 AGOF: null  
 AGOC: null  
 AGOP: null  
 PGO: null  
 PGOC: null  
 PGOP: null

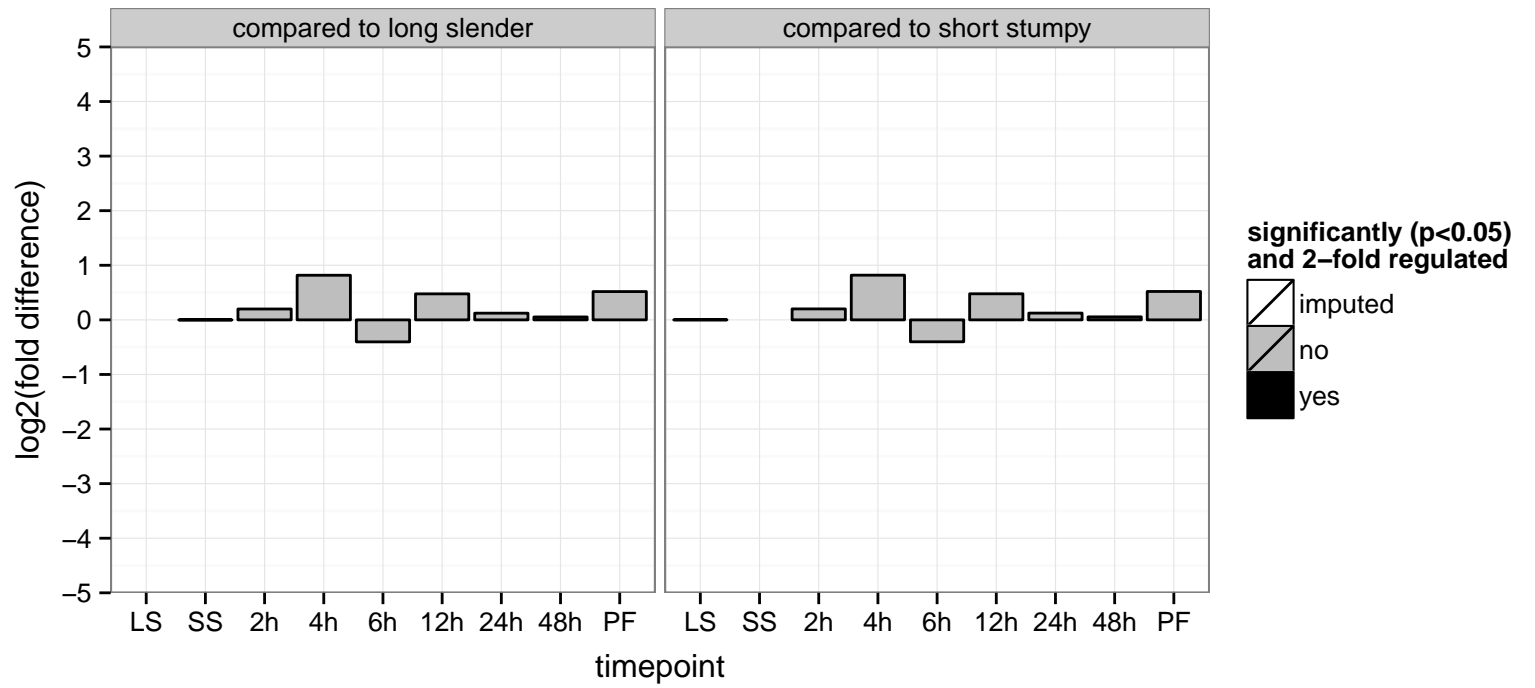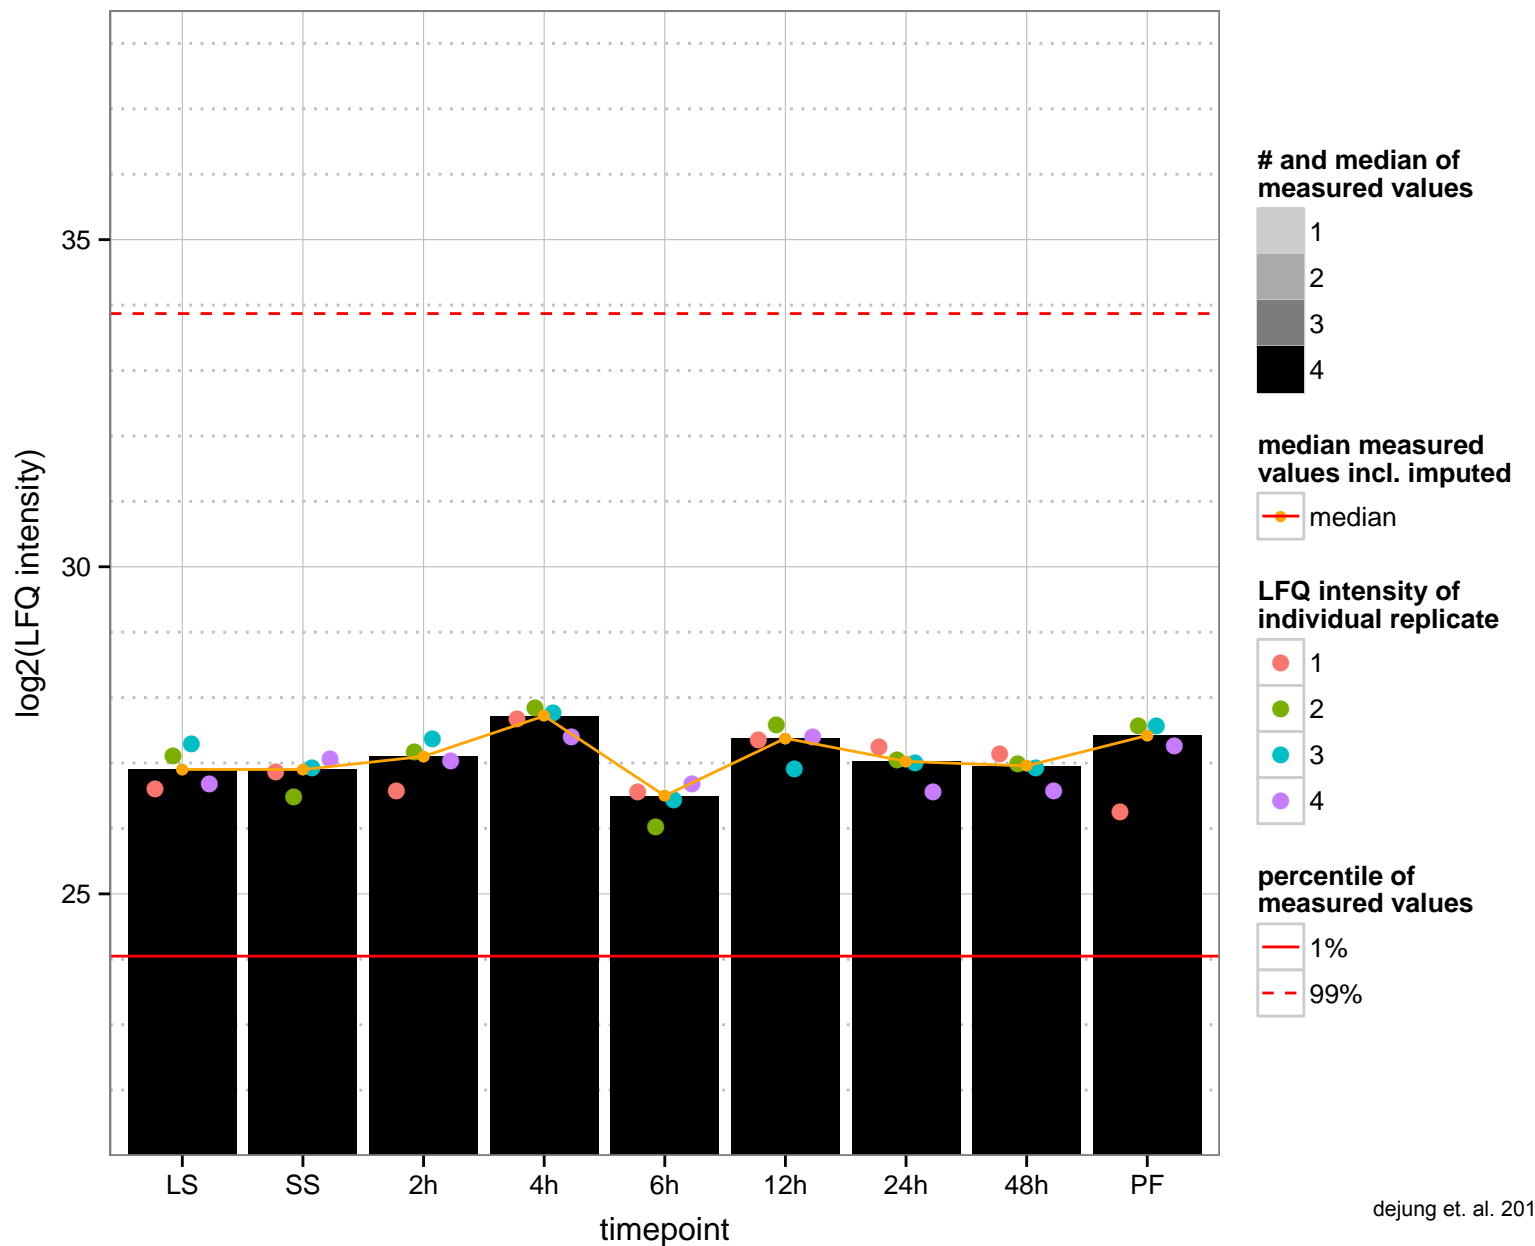

hypothetical protein, conserved  
 Tb927.4.4670  
 AGOF: zinc ion binding  
 AGOC: null  
 AGOP: null  
 PGOF: zinc ion binding  
 PGOC: null  
 PGOP: null

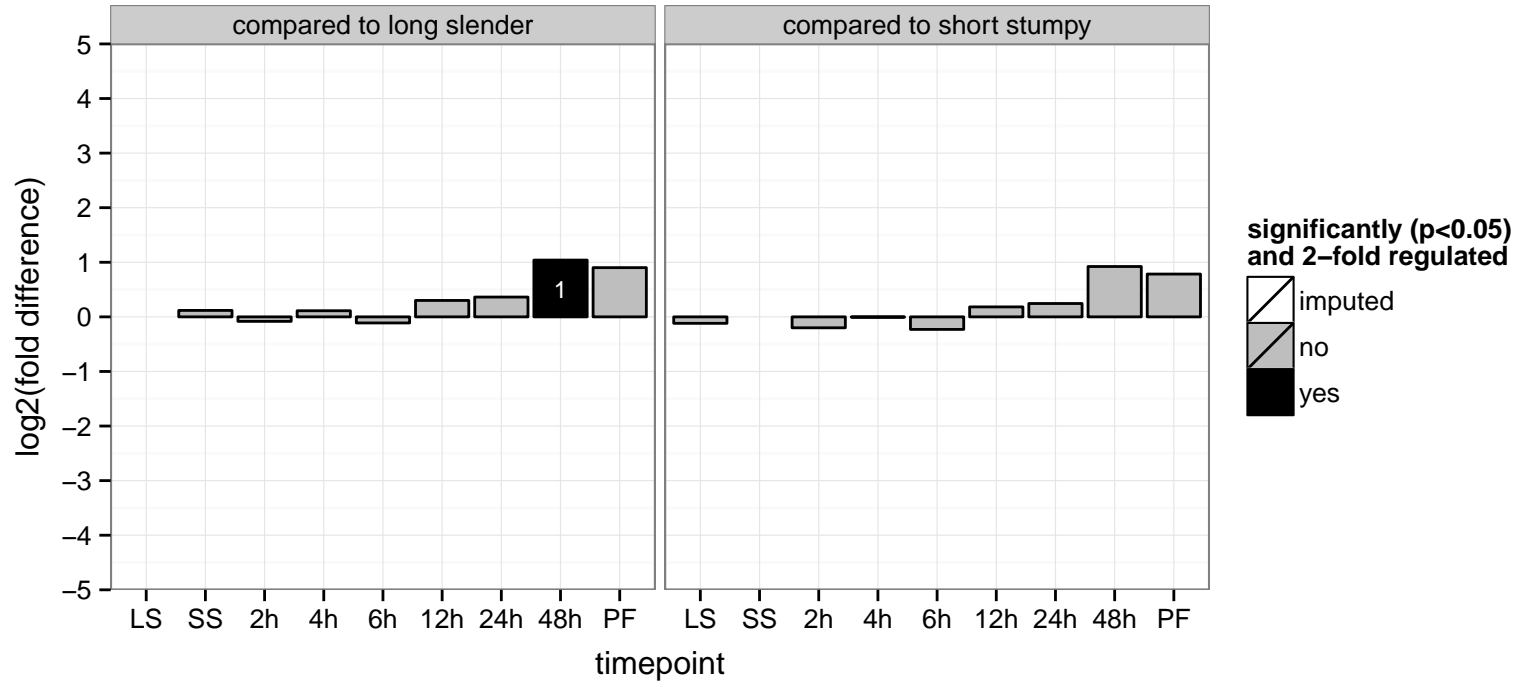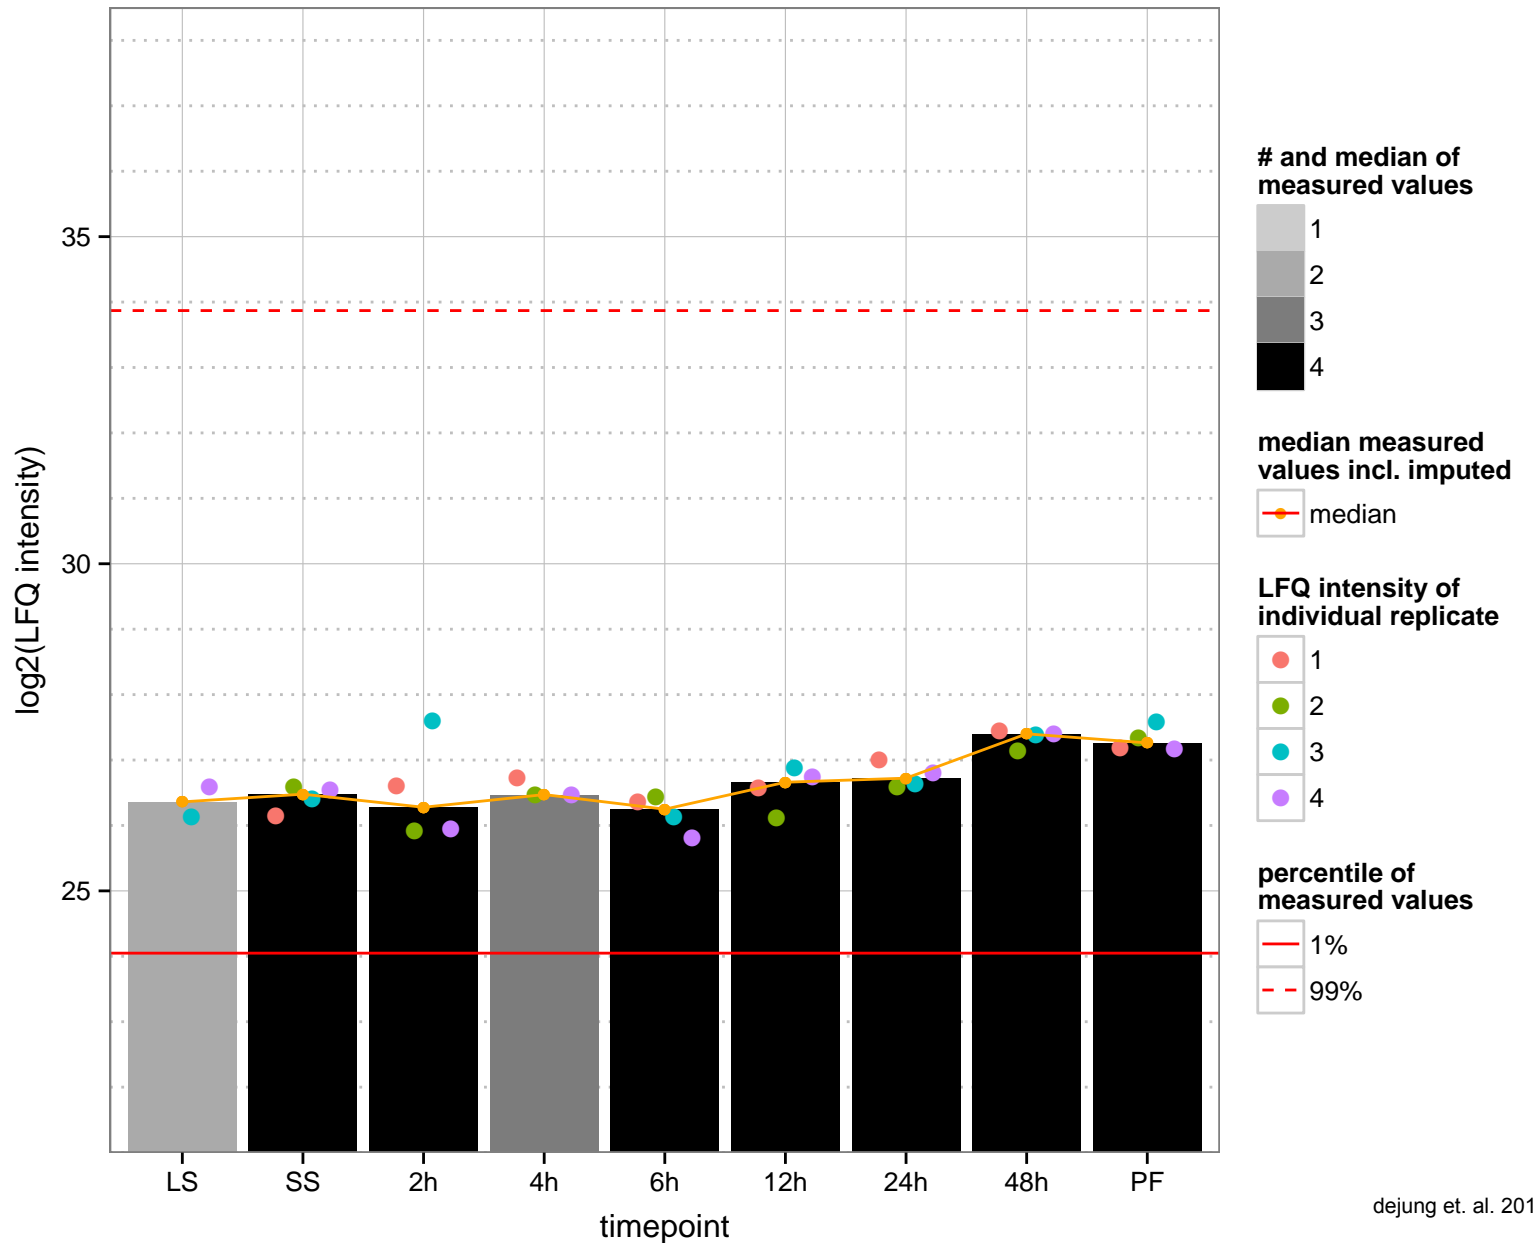

hypothetical protein, conserved  
 Tb927.4.4690  
 AGOF: null  
 AGOC: null  
 AGOP: null  
 PGO: null  
 PGOC: null  
 PGOP: null

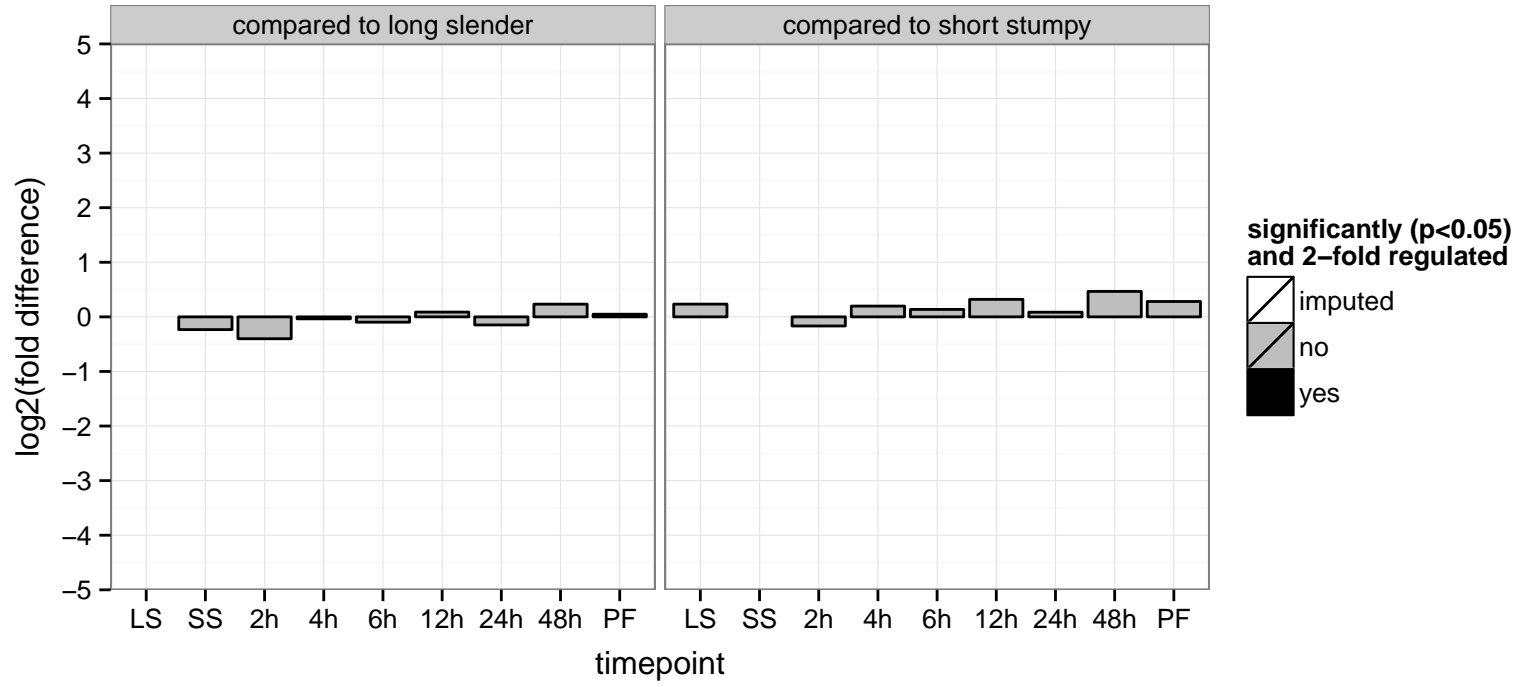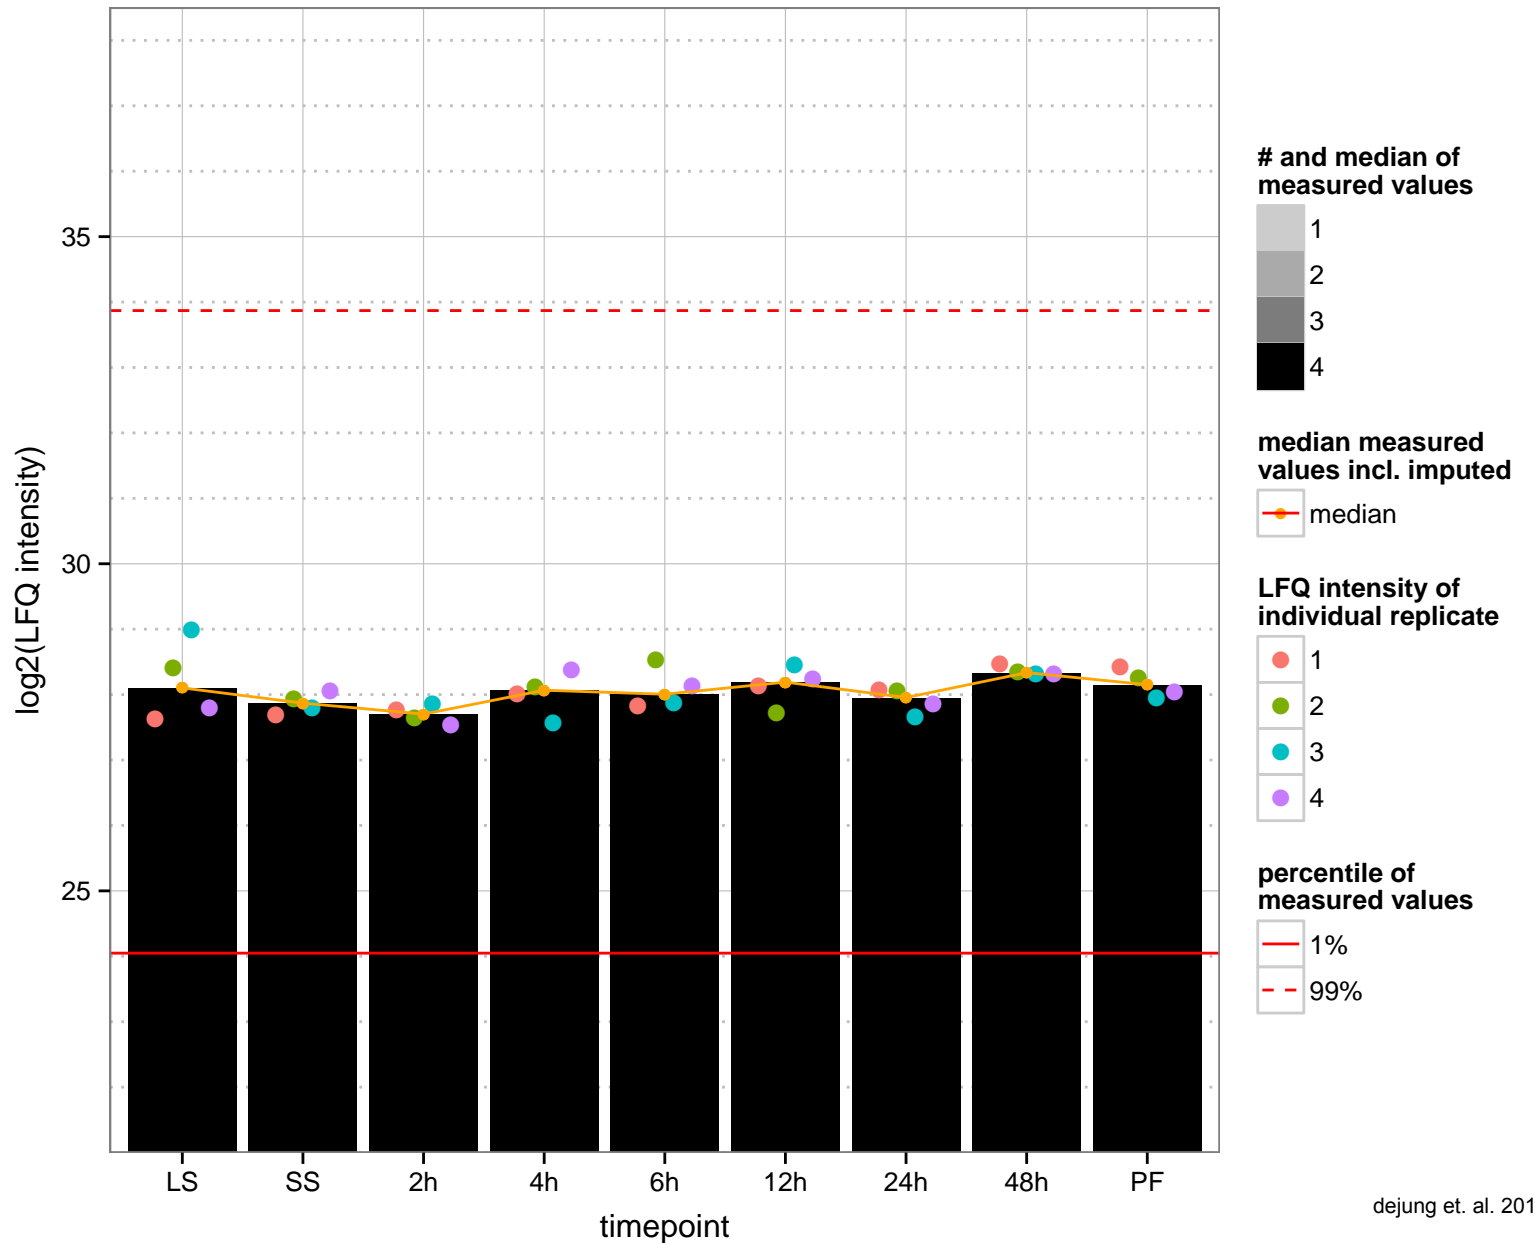

snoRNP protein GAR1, putative  
 Tb927.4.470  
 AGOF: rRNA binding  
 AGOC: small nucleolar ribonucleoprotein complex  
 AGOP: rRNA processing  
 PGOF: pseudouridine synthase activity, snoRNA binding  
 PGO: box H/ACA snoRNP complex  
 PGOP: ribosome biogenesis, snRNA pseudouridine synthesis

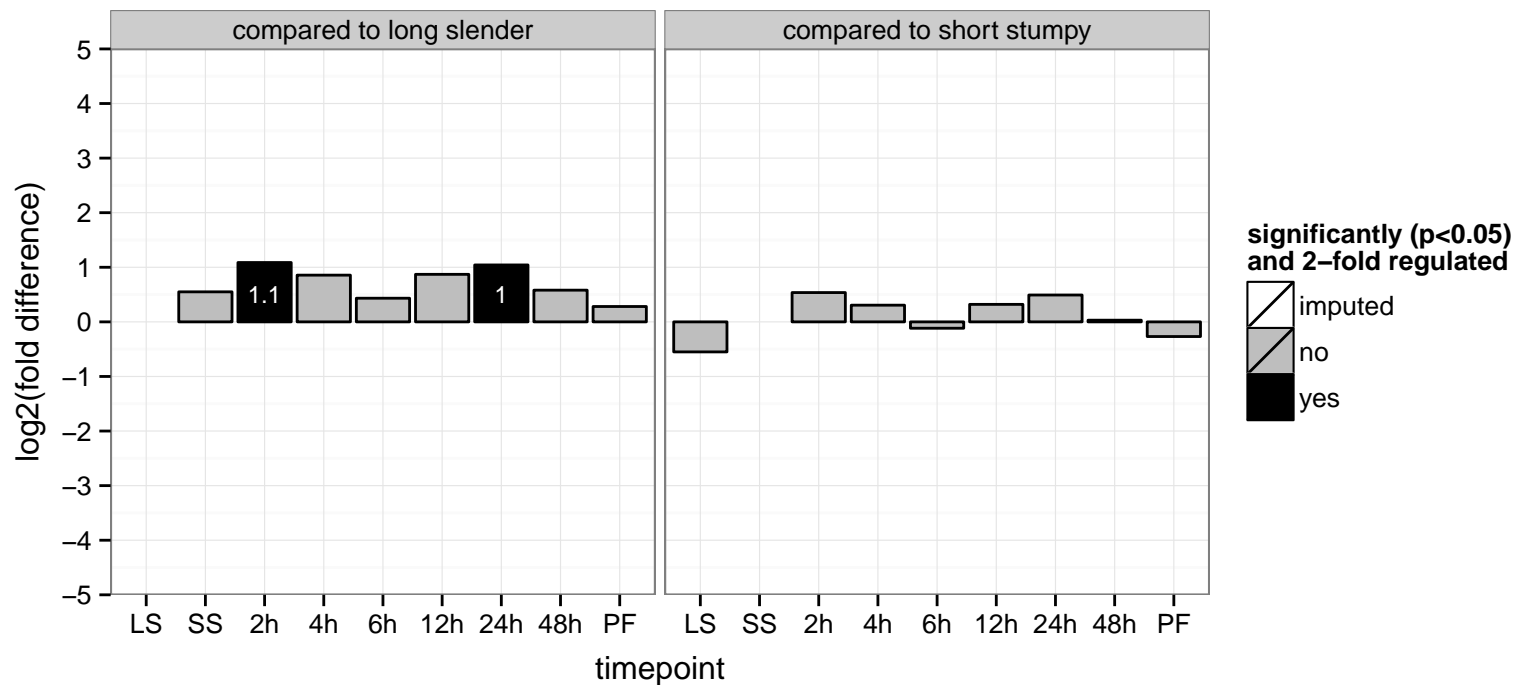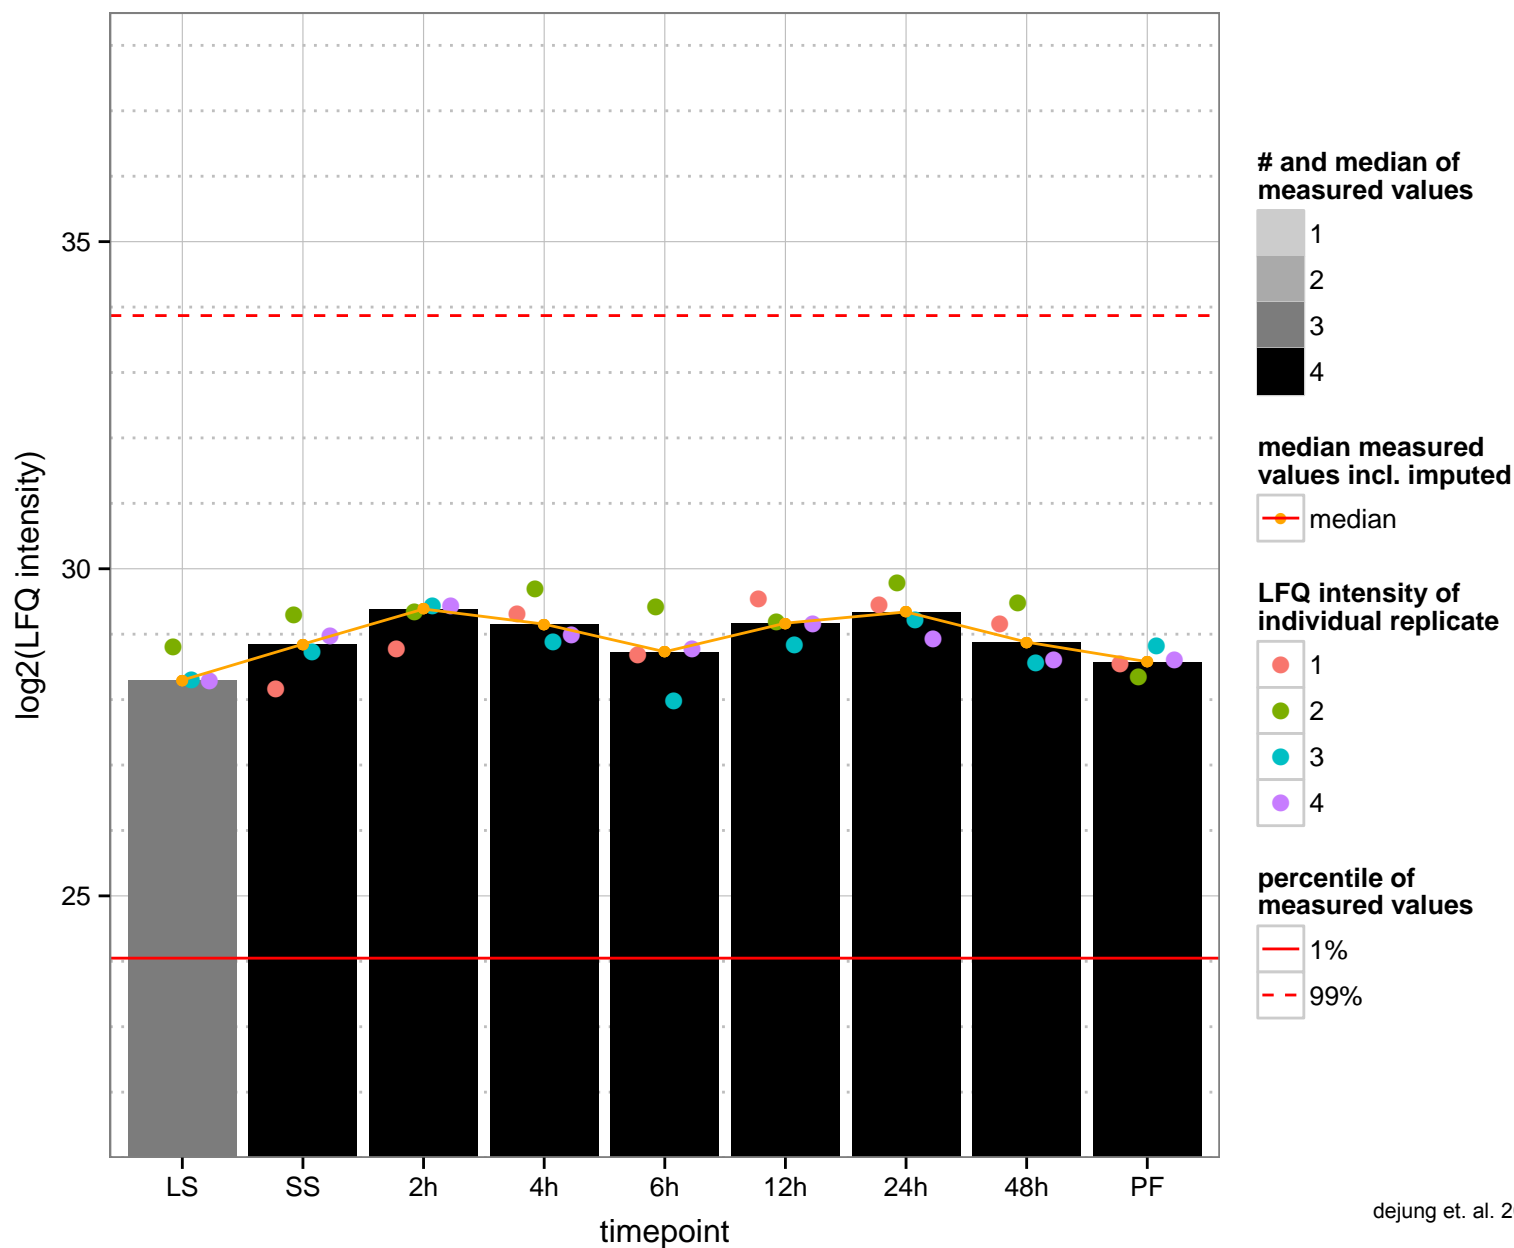

hypothetical protein, conserved  
 Tb927.4.4700  
 AGOF: null  
 AGOC: null  
 AGOP: null  
 PGO: null  
 PGOC: null  
 PGOP: null

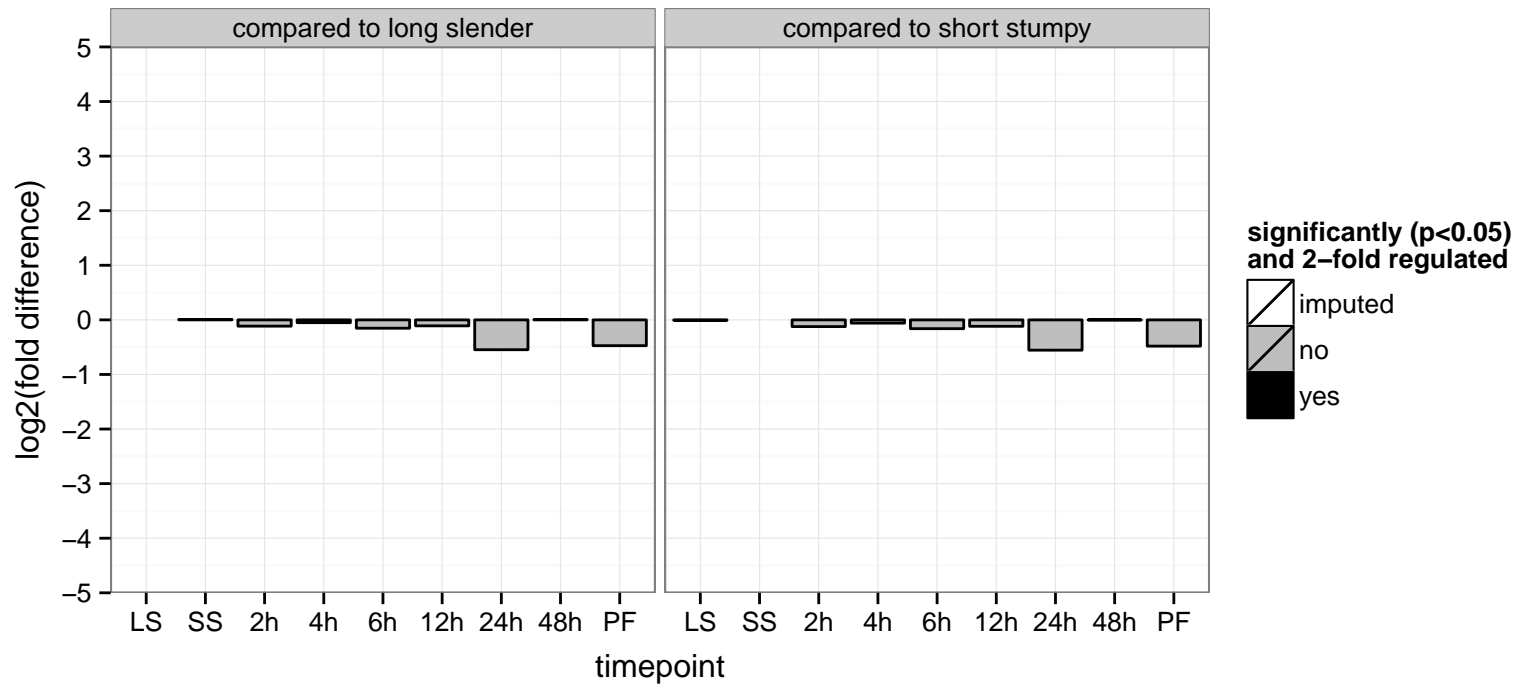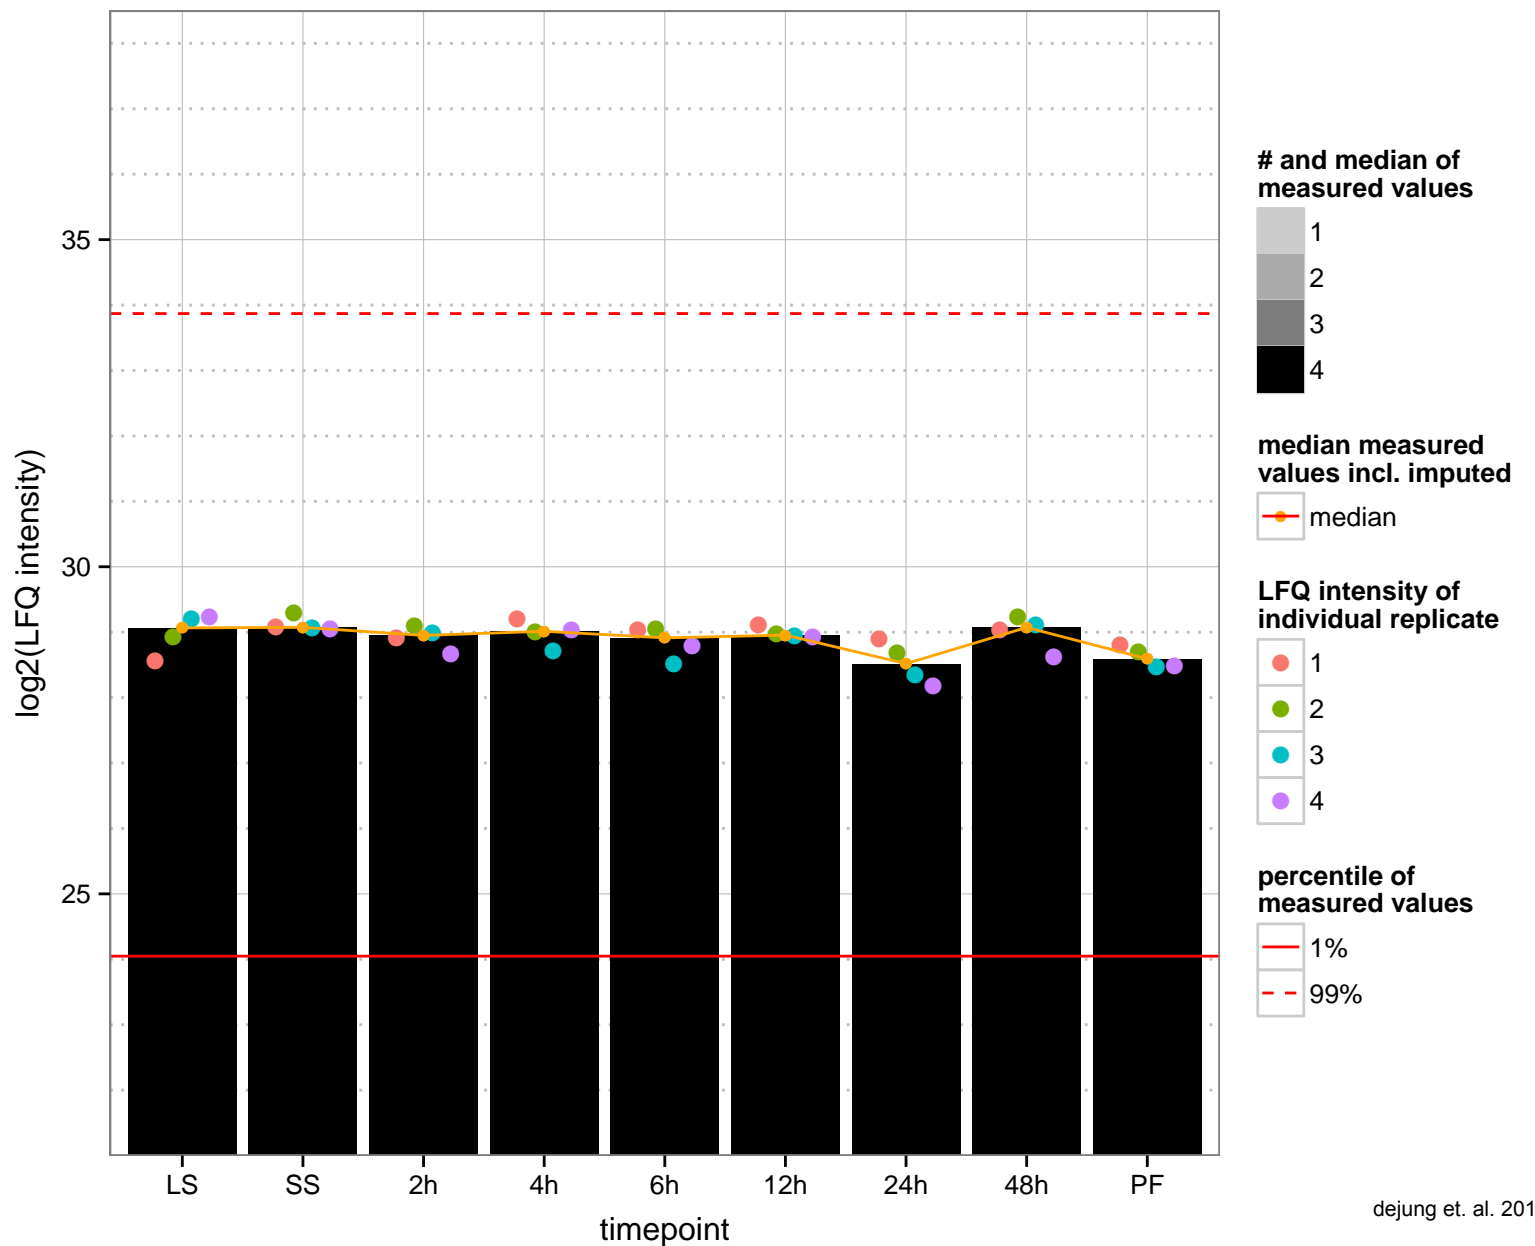



hypothetical protein, conserved  
 Tb927.4.4950;Tb927.8.7470  
 AGOF: null  
 AGOC: null  
 AGOP: null  
 PGO: protein binding  
 PGOC: null  
 PGOP: null

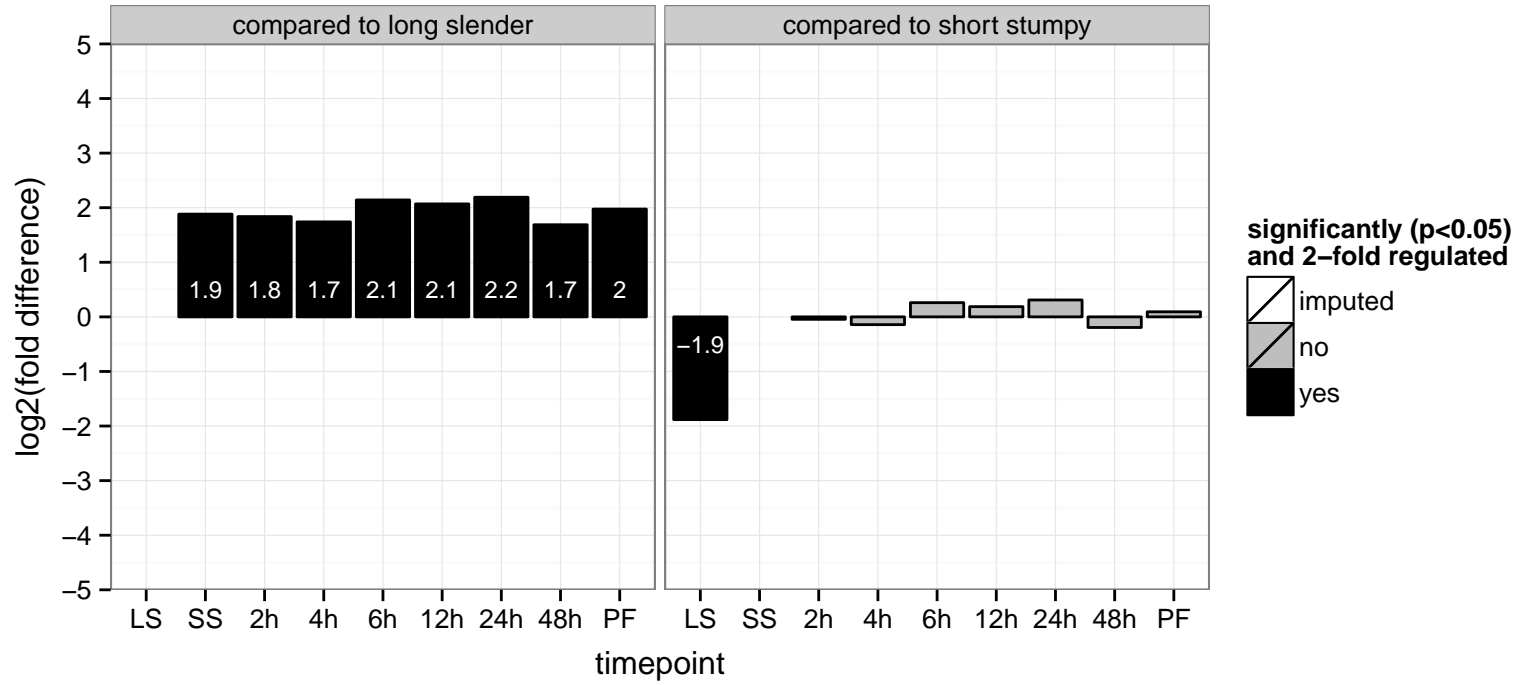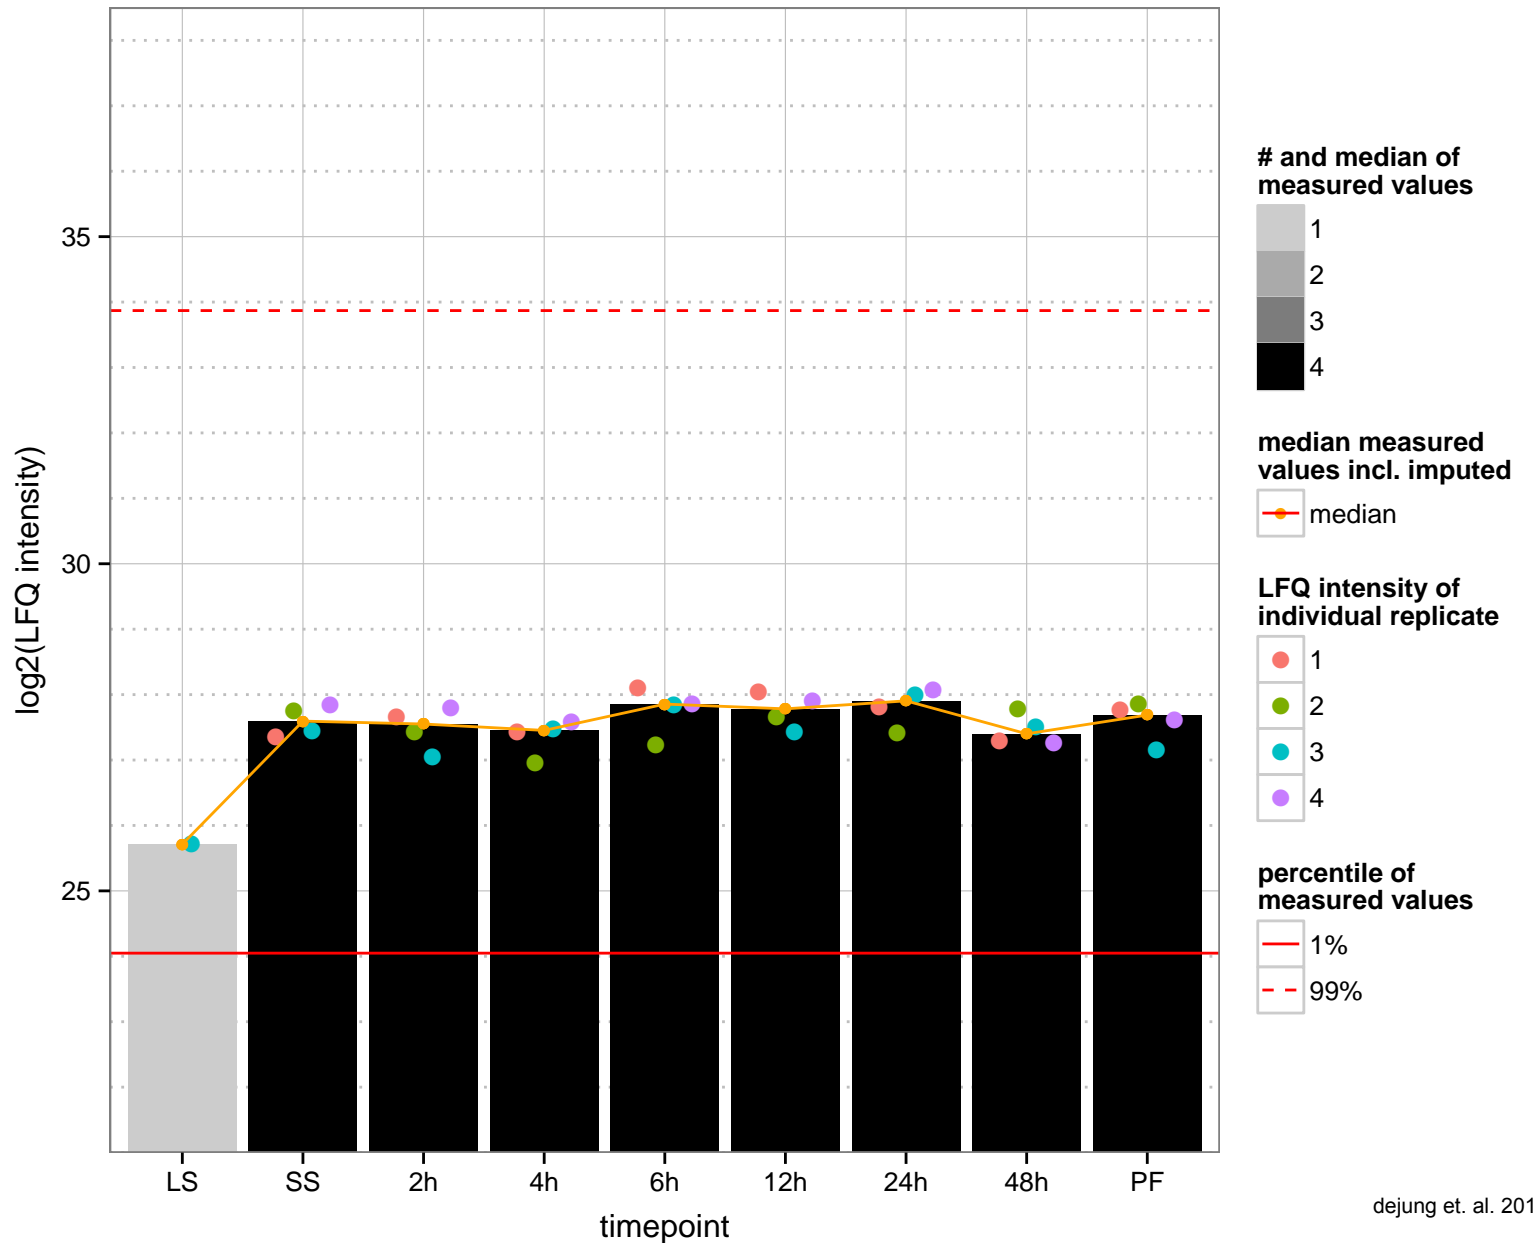

hypothetical protein, conserved  
 Tb927.4.5000;Tb927.8.7420  
 AGOF: null  
 AGOC: null  
 AGOP: null  
 PGO: null  
 PGOC: null  
 PGOP: null

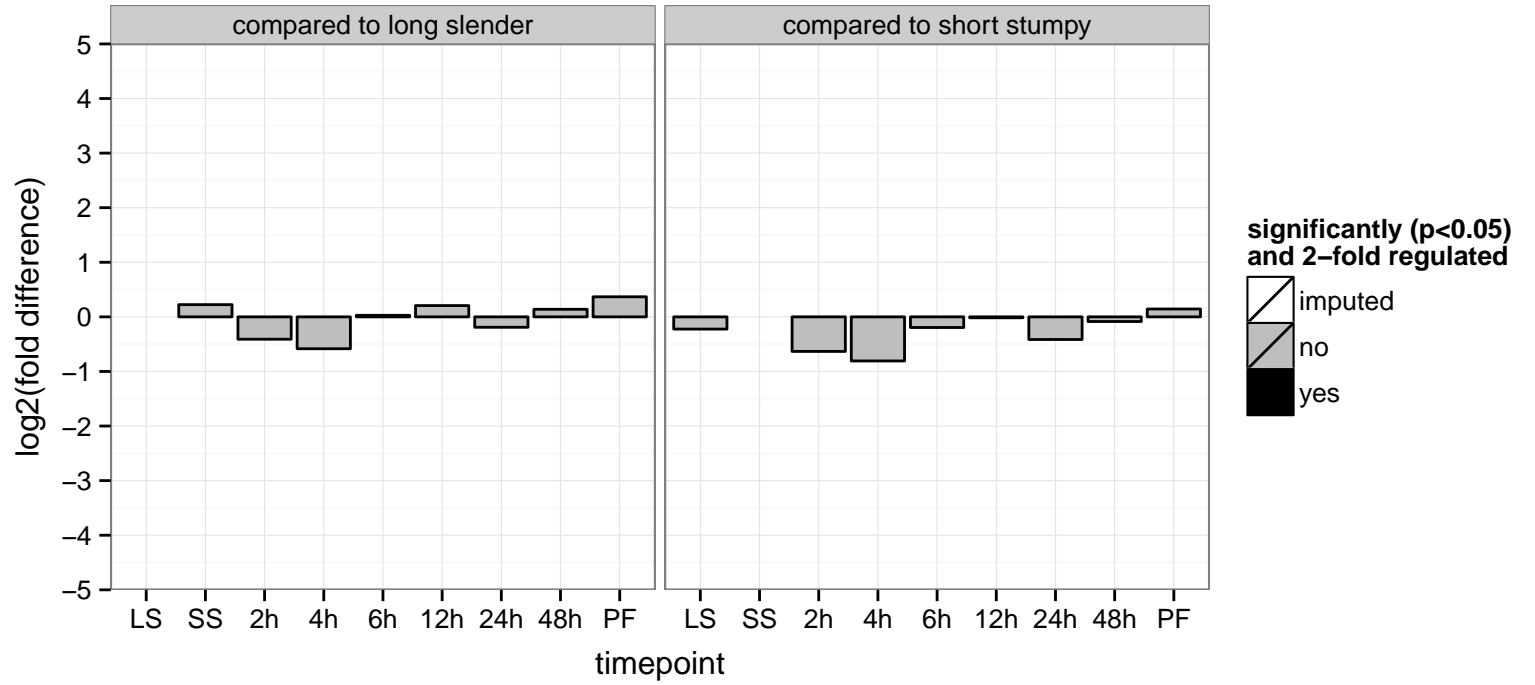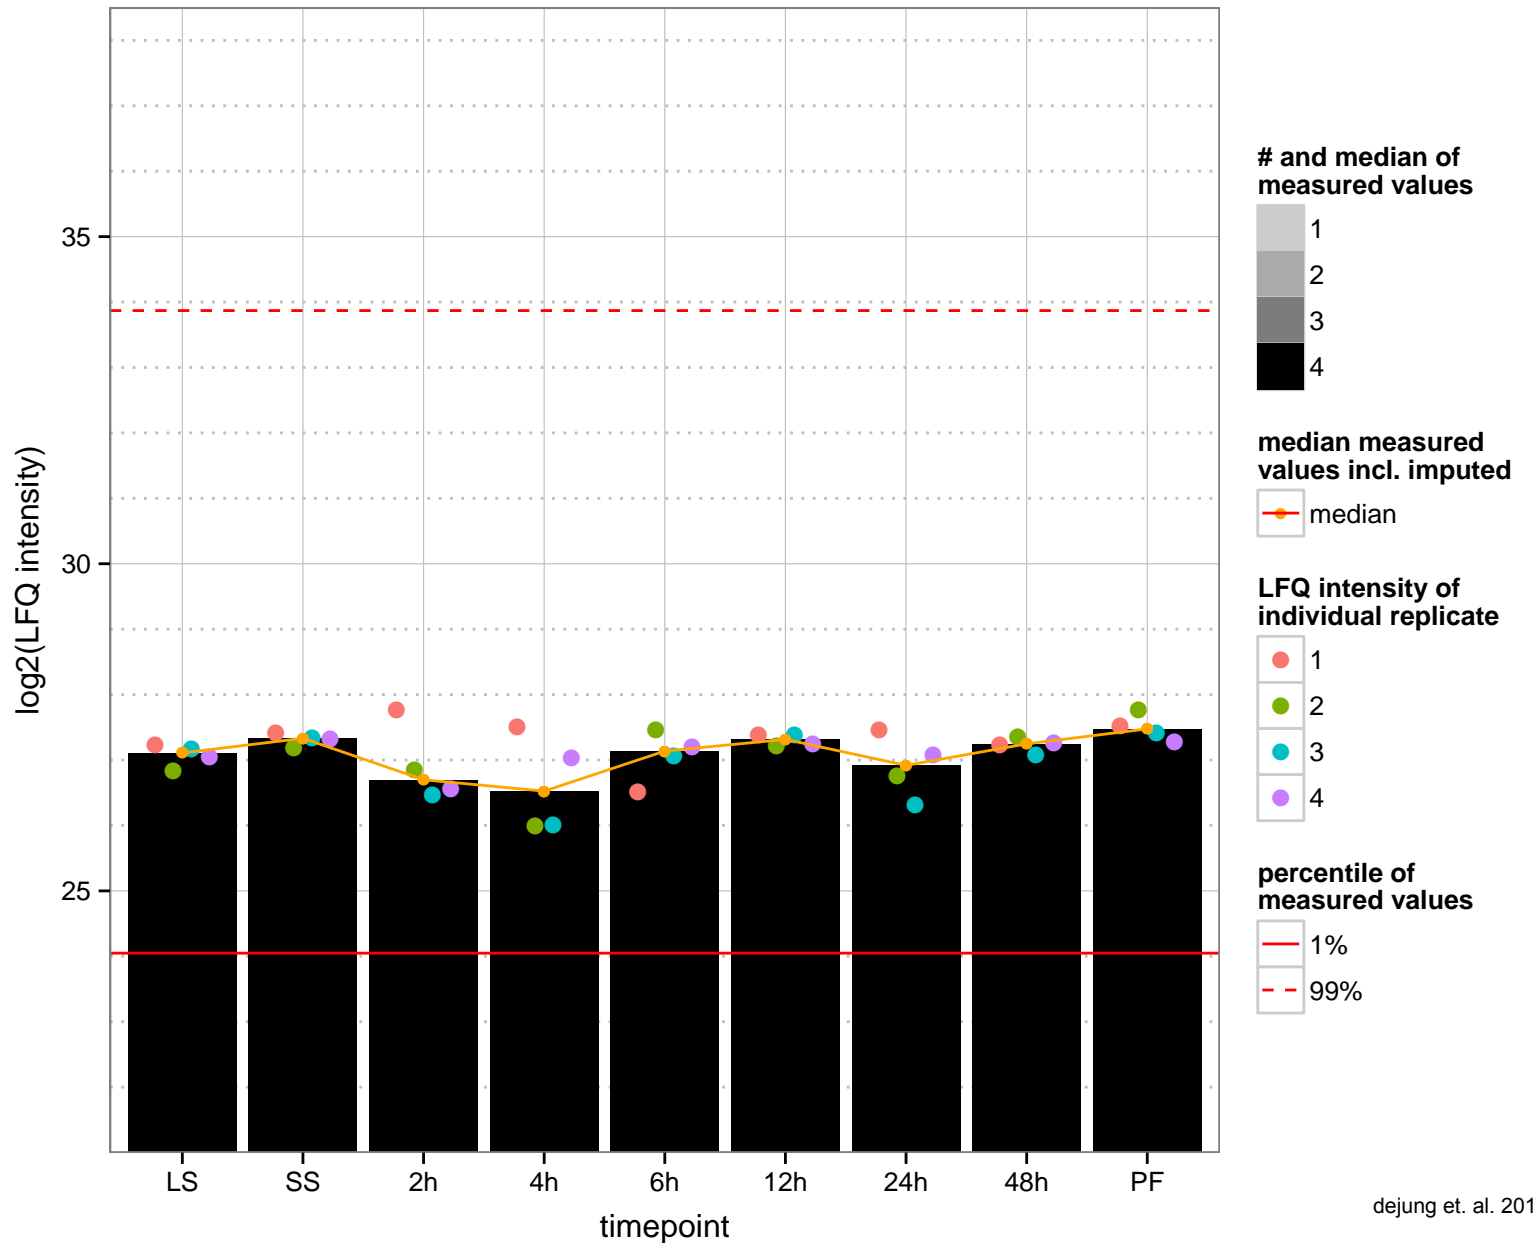

dihydrolipoamide dehydrogenase, putative  
 Tb927.4.5040  
 AGOF: dihydrolipoyl dehydrogenase activity, flavin adenine dinucleotide binding  
 AGOC: cytoplasm  
 AGOP: cell redox homeostasis  
 PGOF: flavin adenine dinucleotide binding, oxidoreductase activity  
 PGO: cytoplasm  
 PGO: cell redox homeostasis, oxidation–reduction process

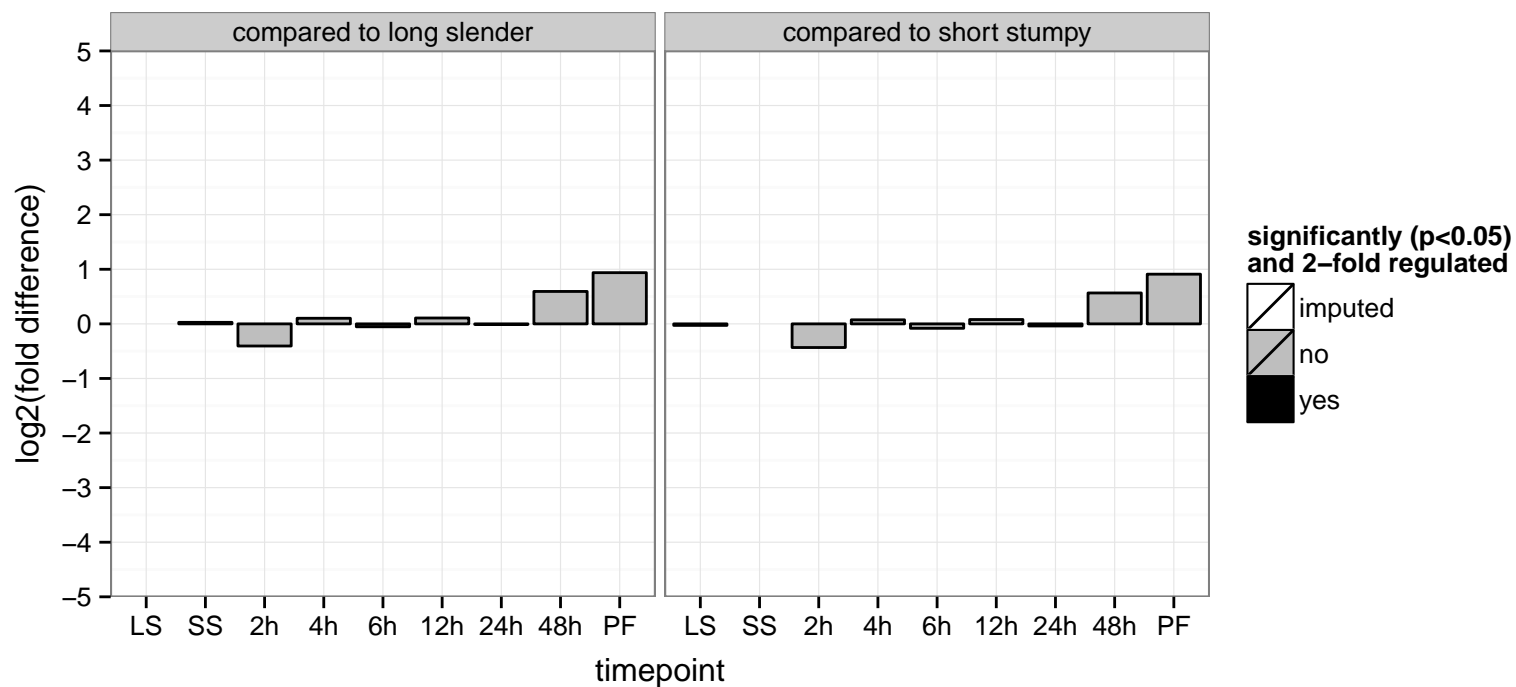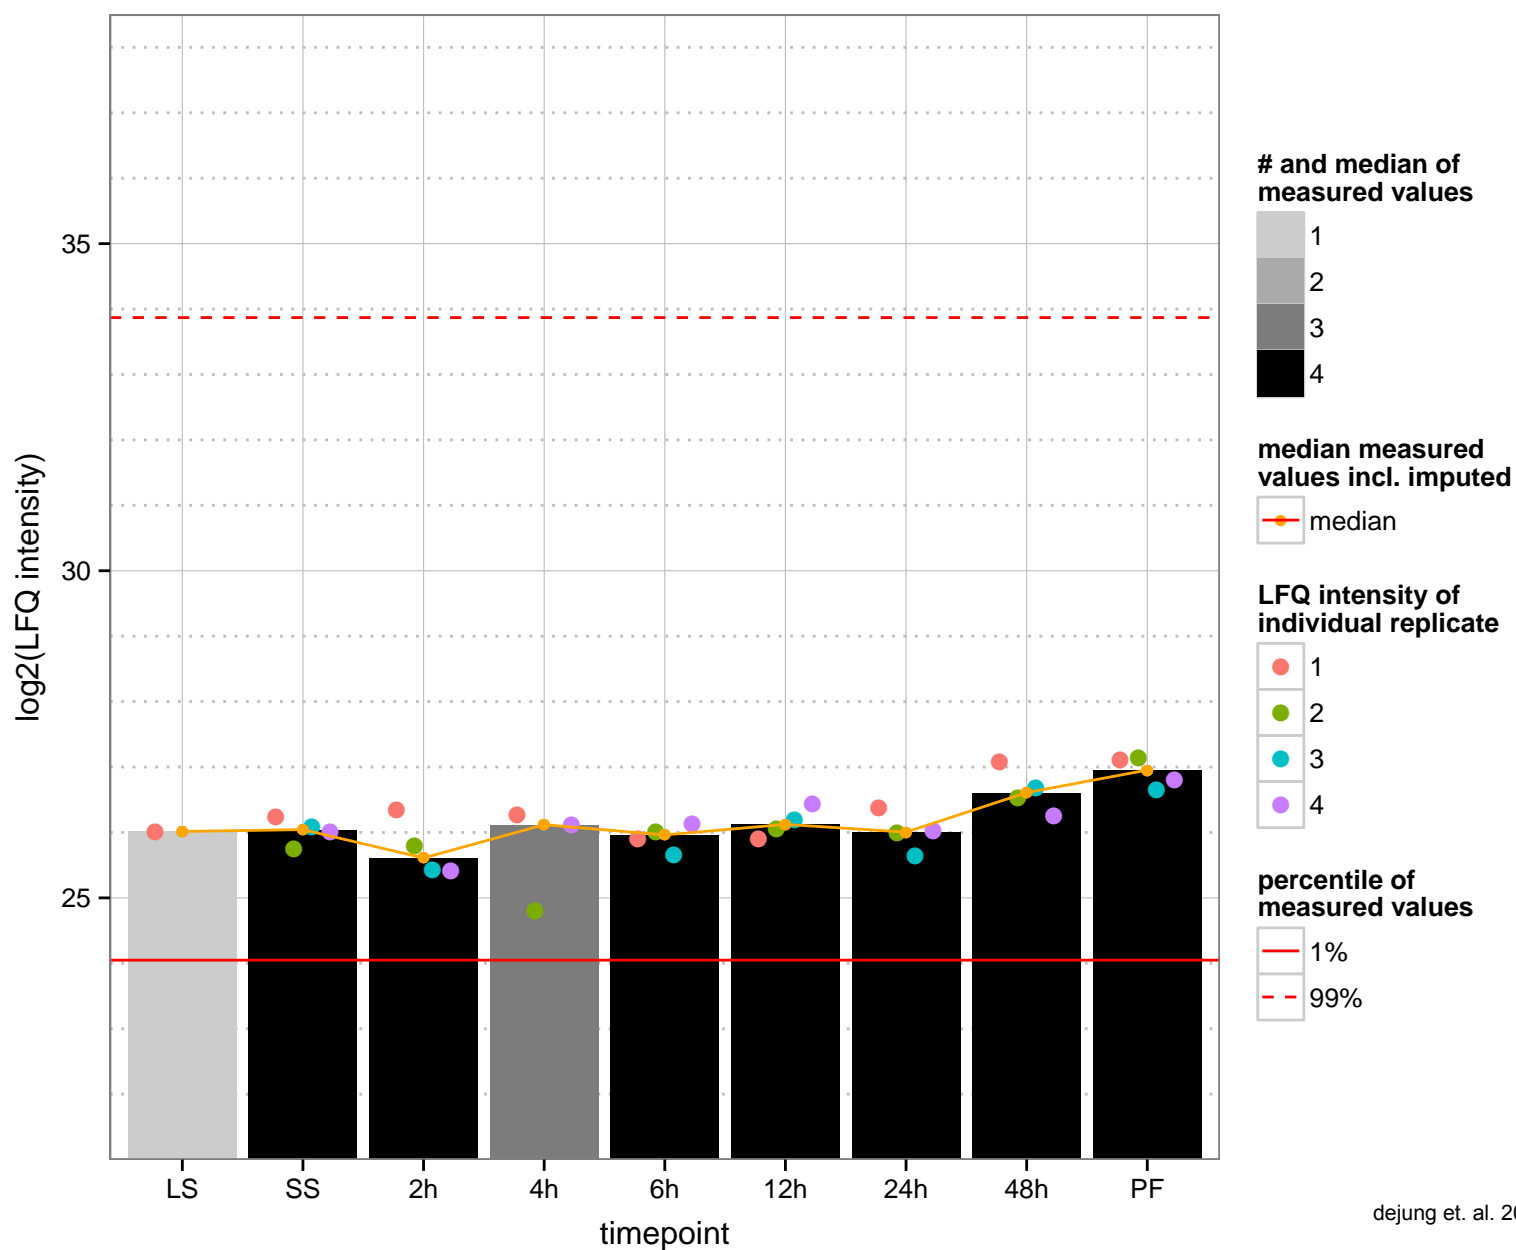

hypothetical protein, conserved  
 Tb927.4.5130  
 AGOF: RNA binding  
 AGOC: null  
 AGOP: null  
 PGOF: RNA binding  
 PGOC: null  
 PGOP: null

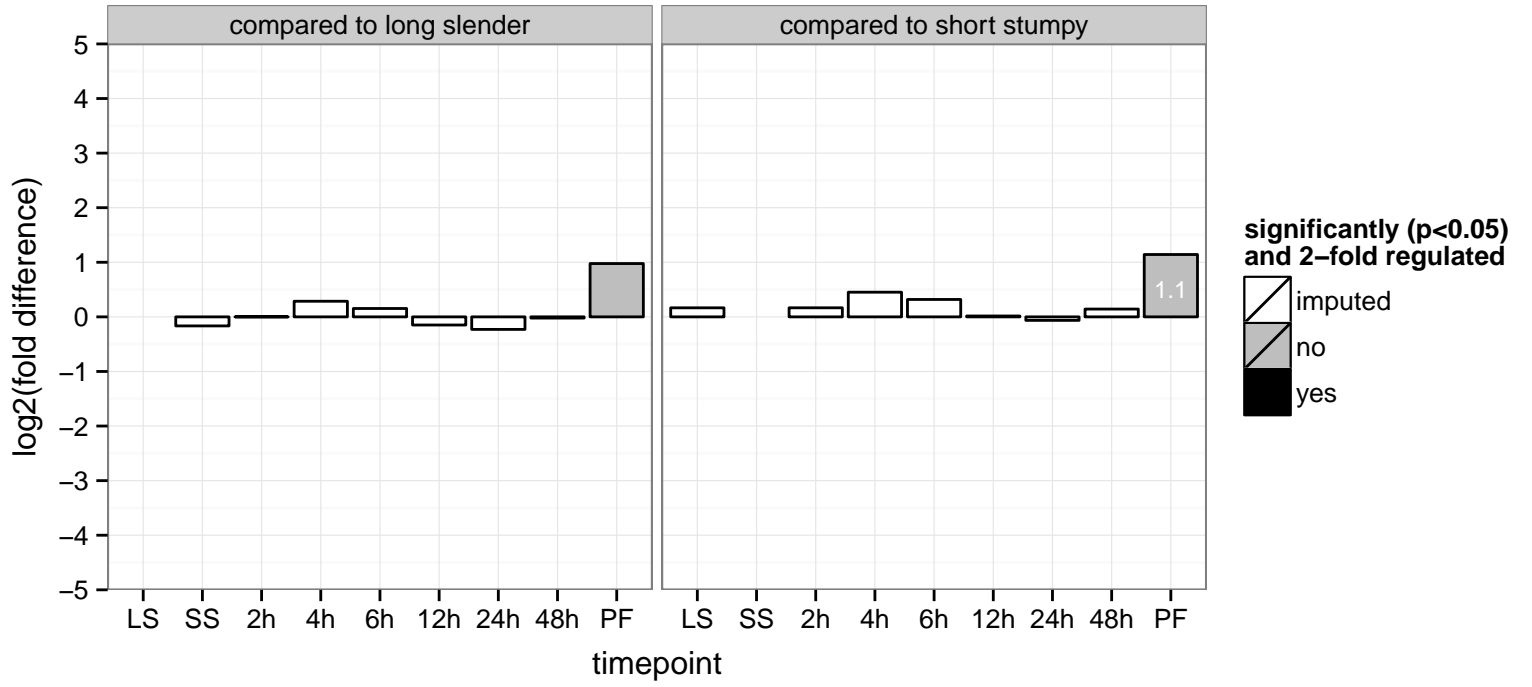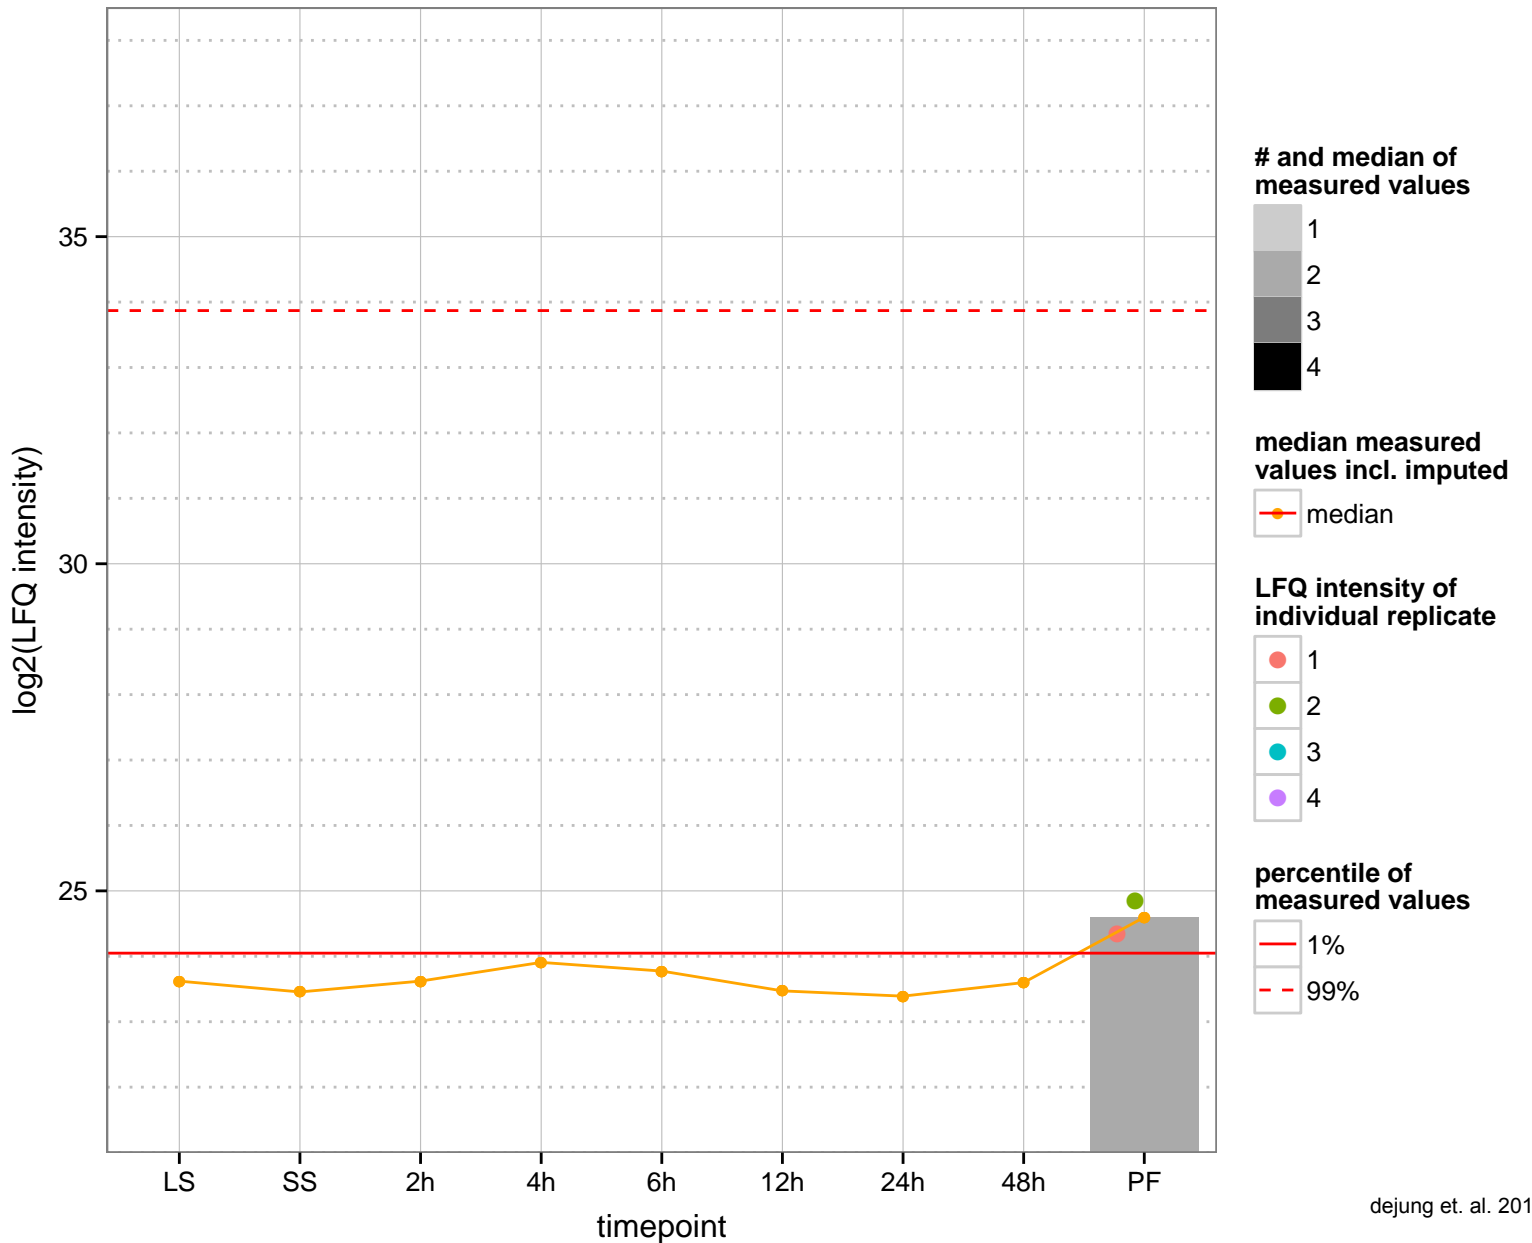

hypothetical protein, conserved  
 Tb927.4.520  
 AGOF: null  
 AGOC: null  
 AGOP: null  
 PGOF: null  
 PGO C: null  
 PGOP: null

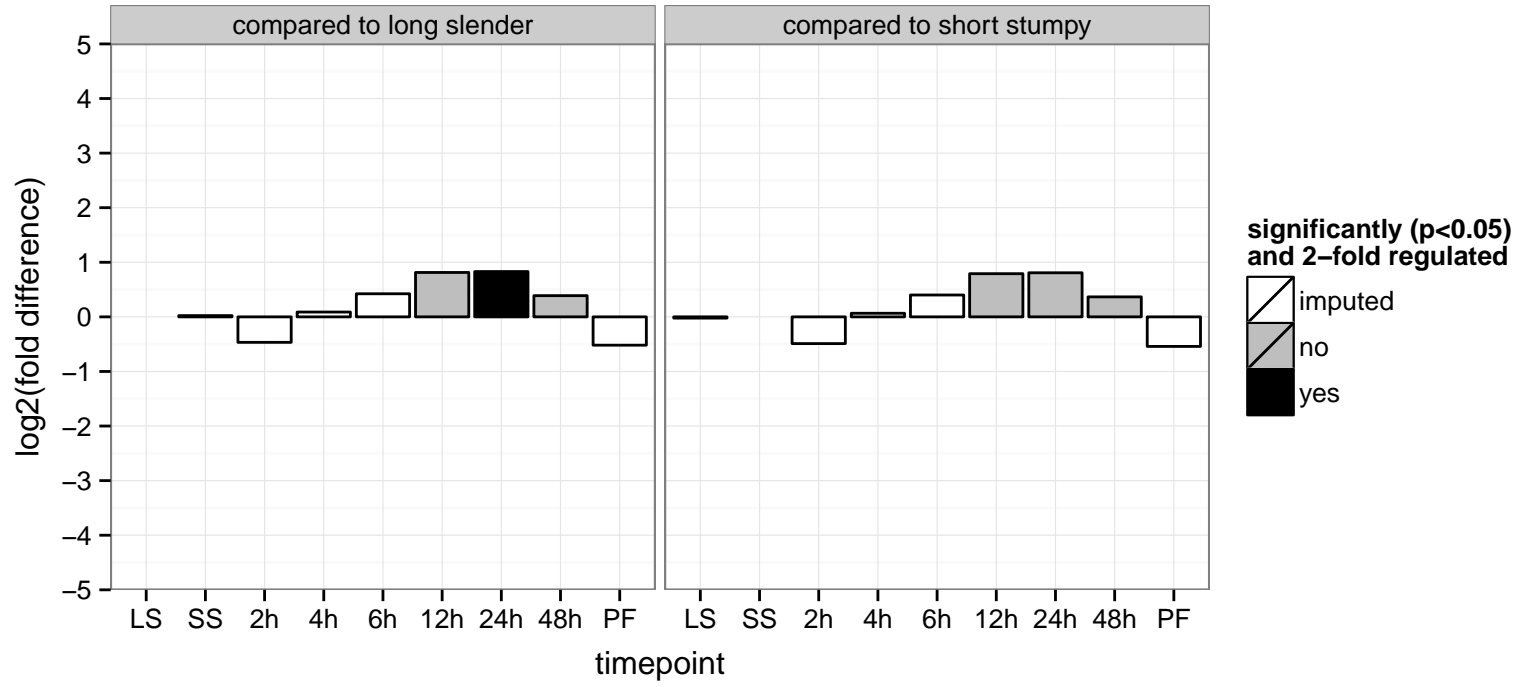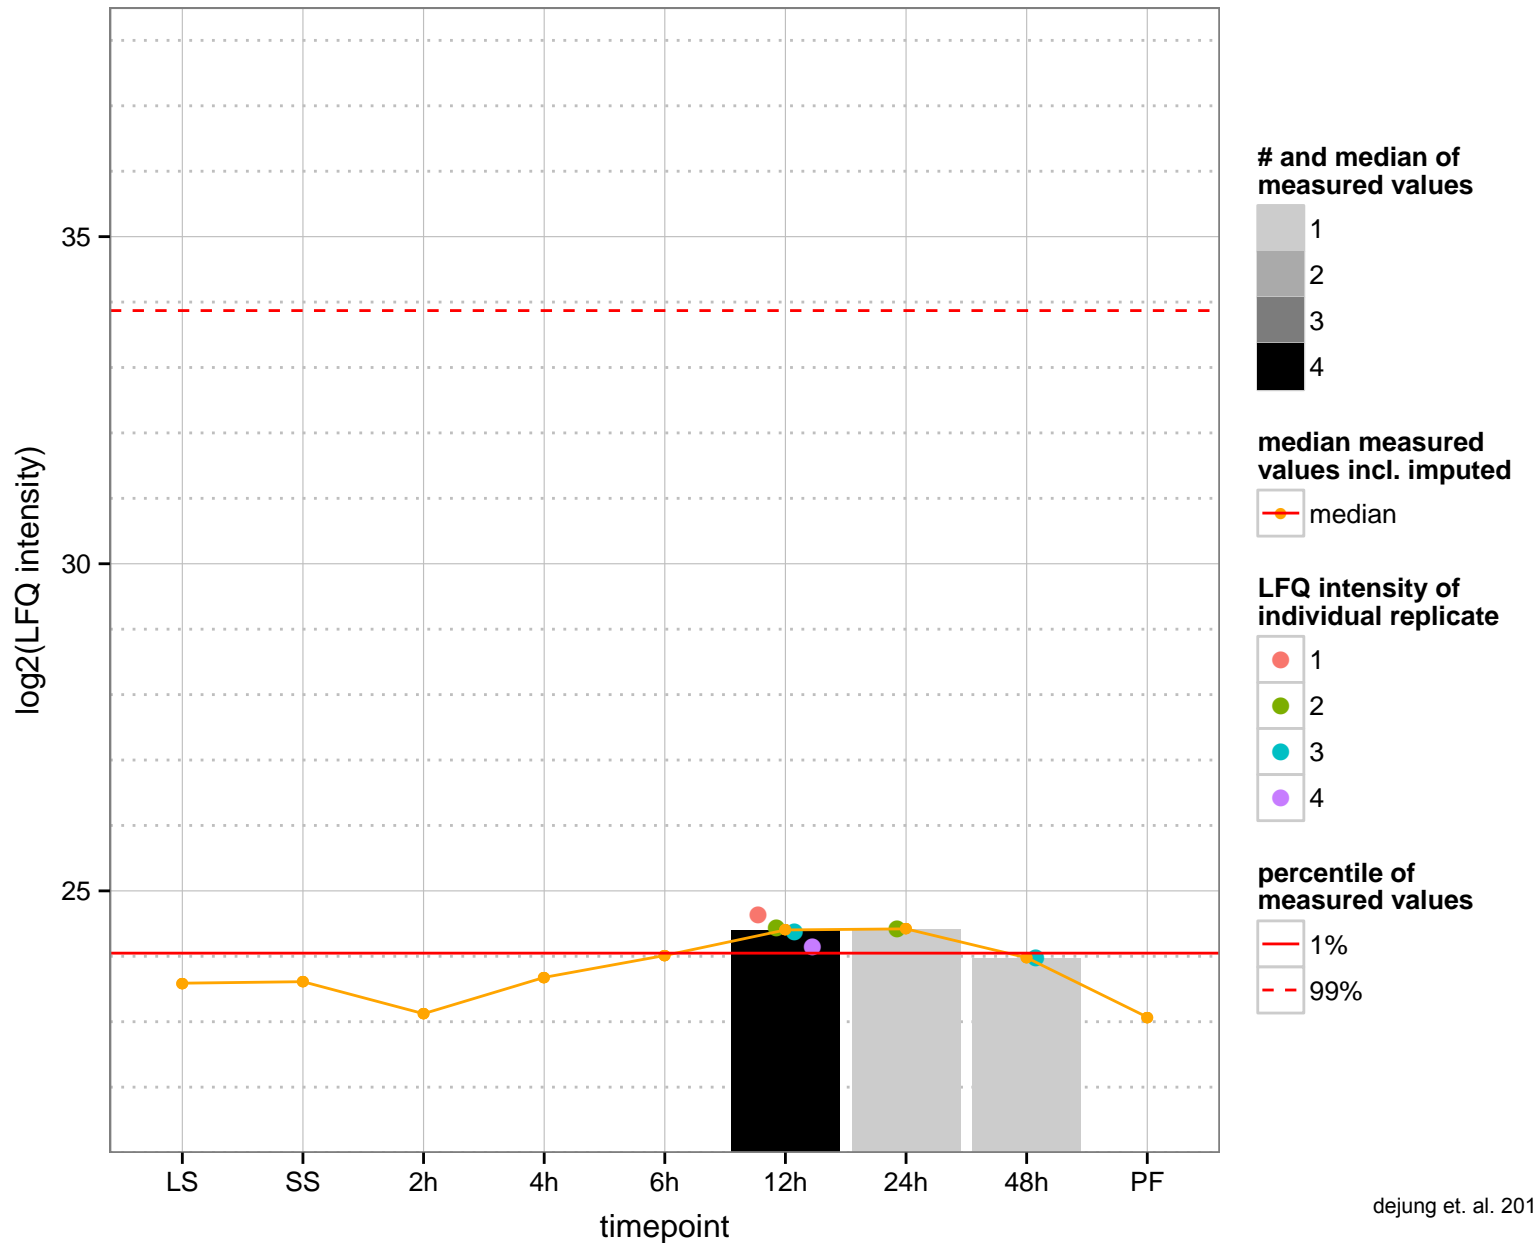

nucleoporin (NUP54/57), putative (TbNup62)  
 Tb927.4.5200  
 AGOF: null  
 AGOC: null  
 AGOP: null  
 PGOF: null  
 PGO: null  
 PGOP: null

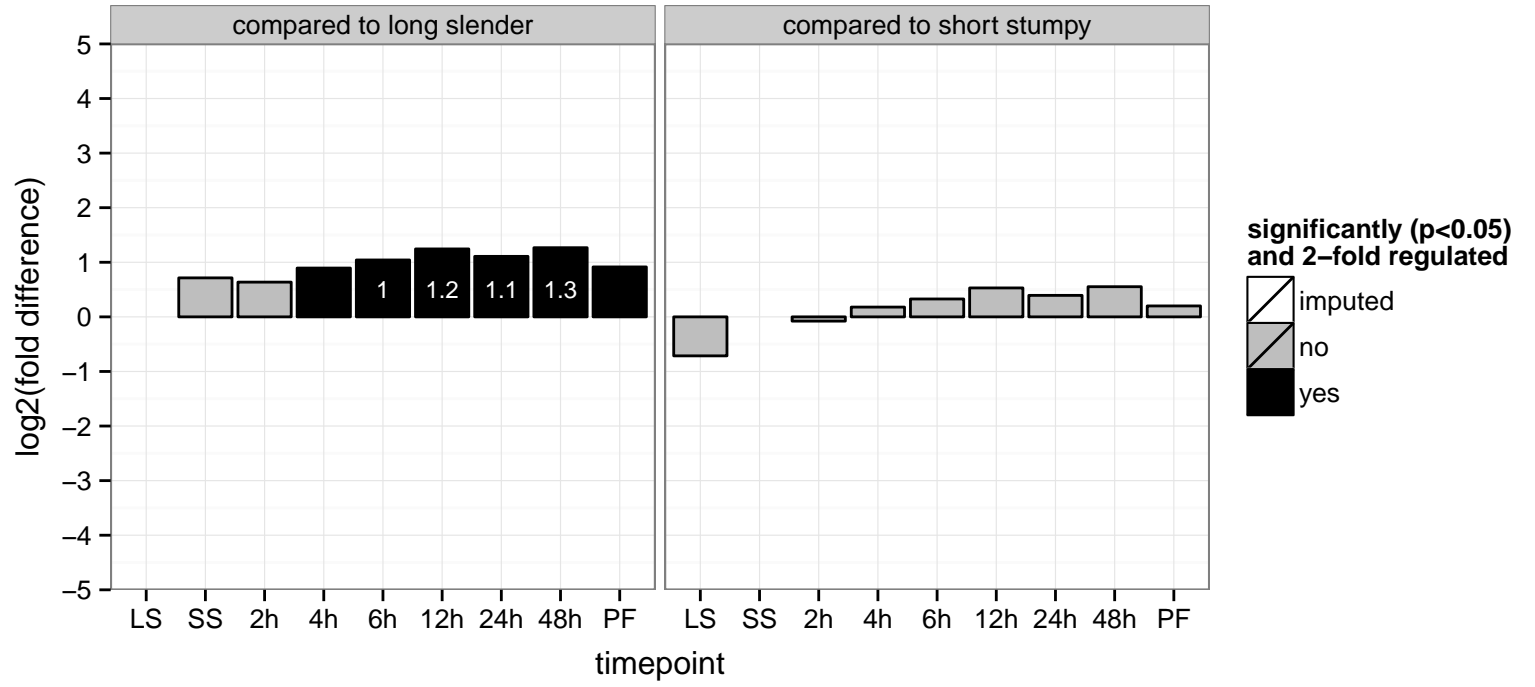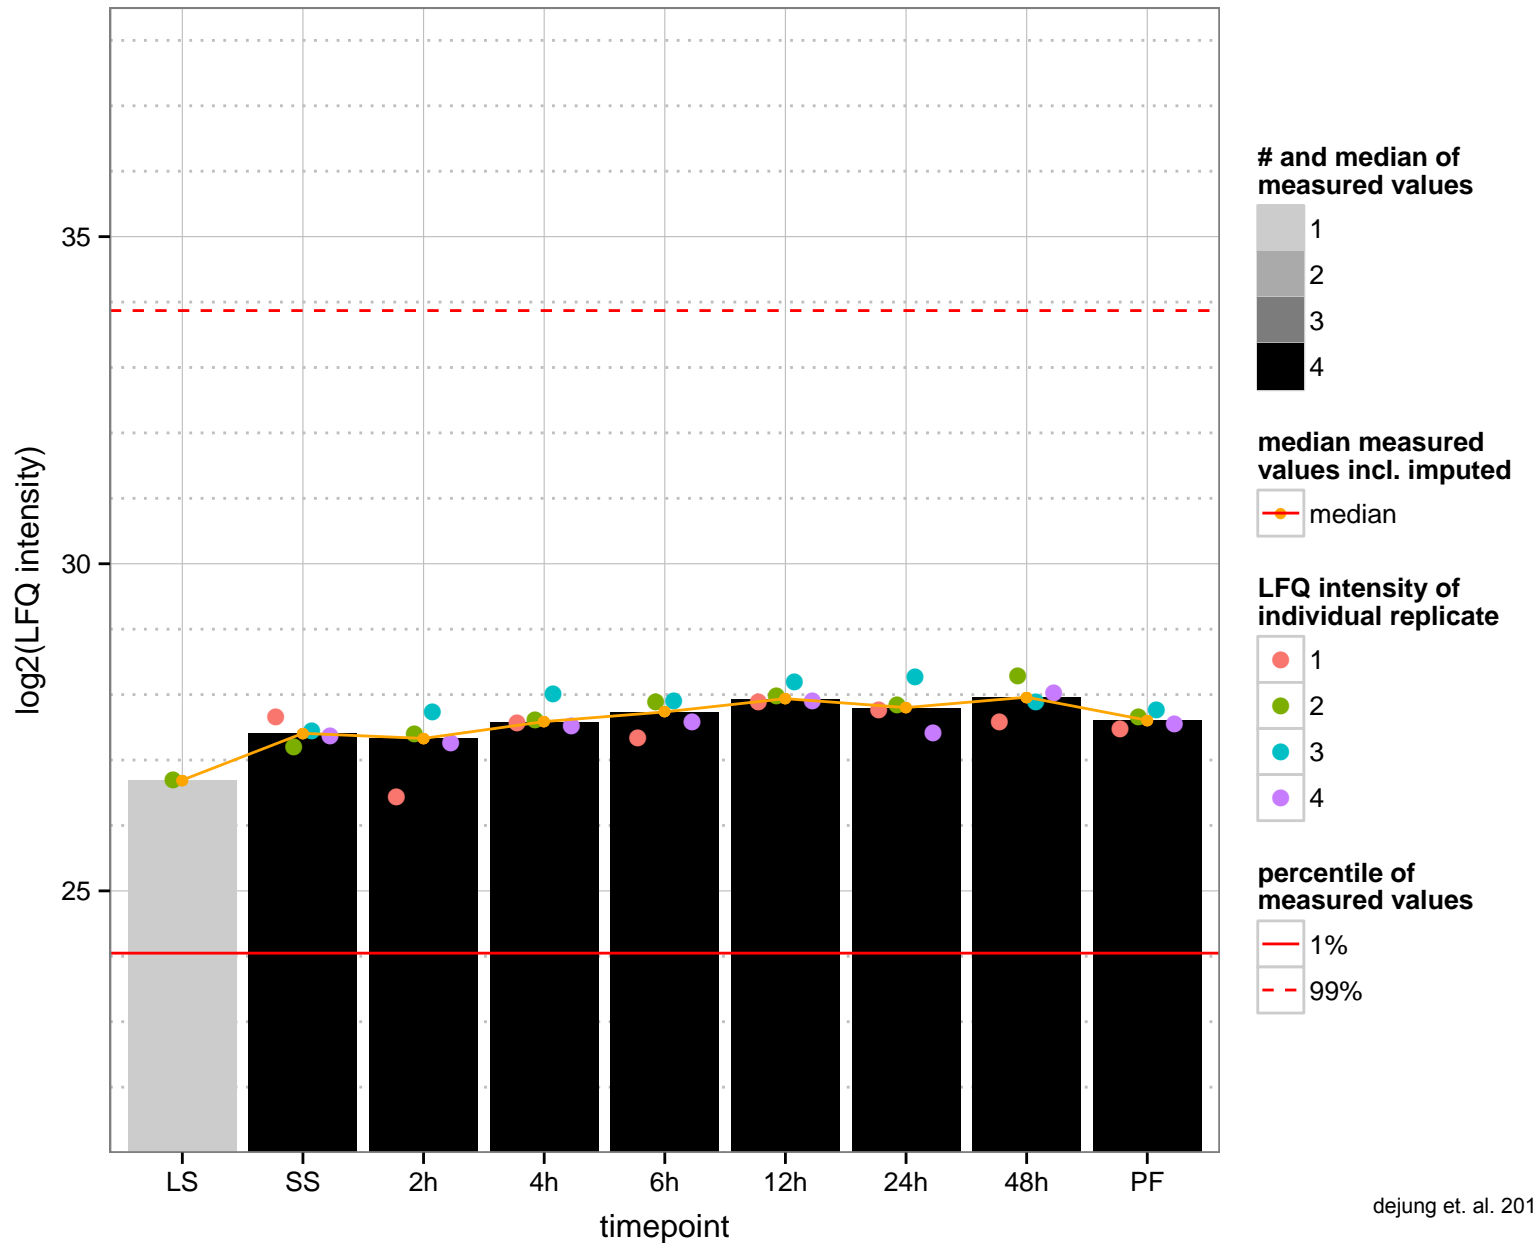

hypothetical protein  
 Tb927.4.5220  
 AGOF: null  
 AGOC: null  
 AGOP: null  
 PGO: null  
 PGOC: null  
 PGOP: null

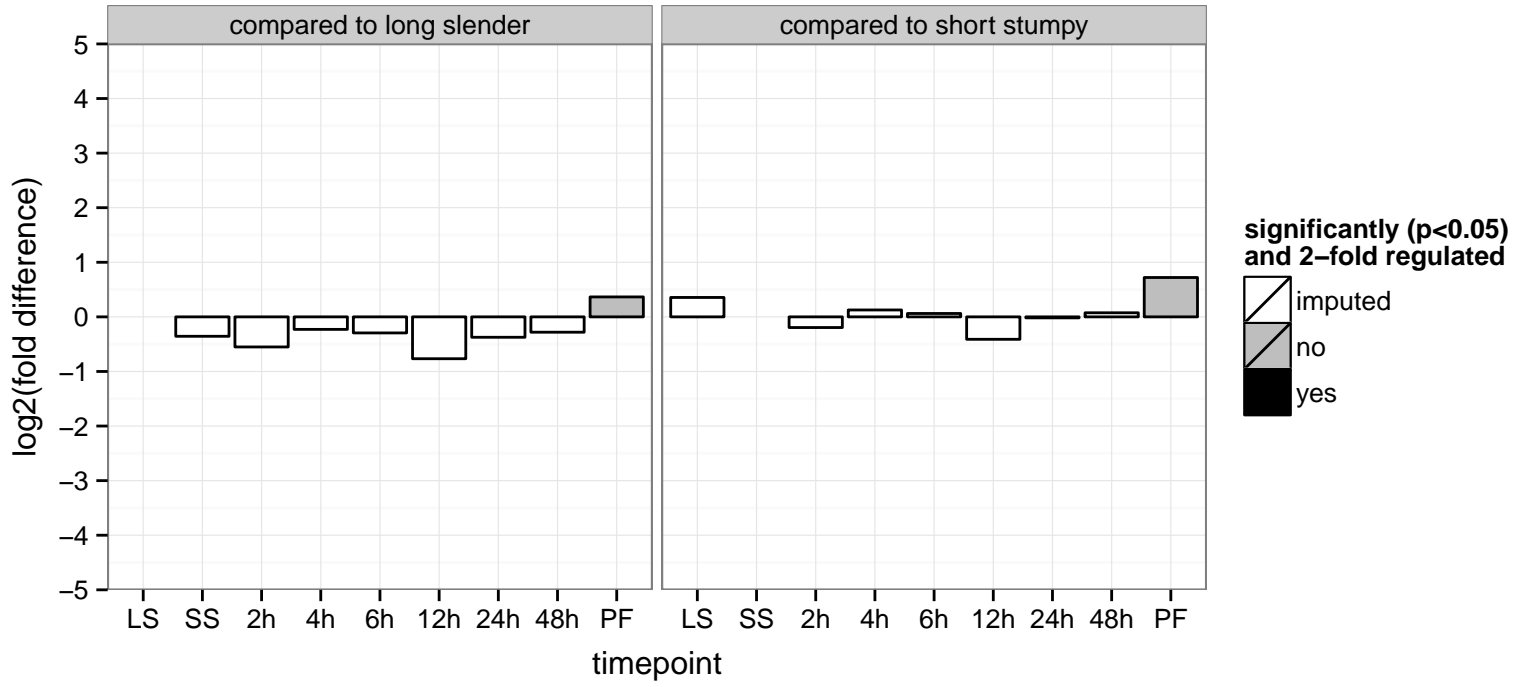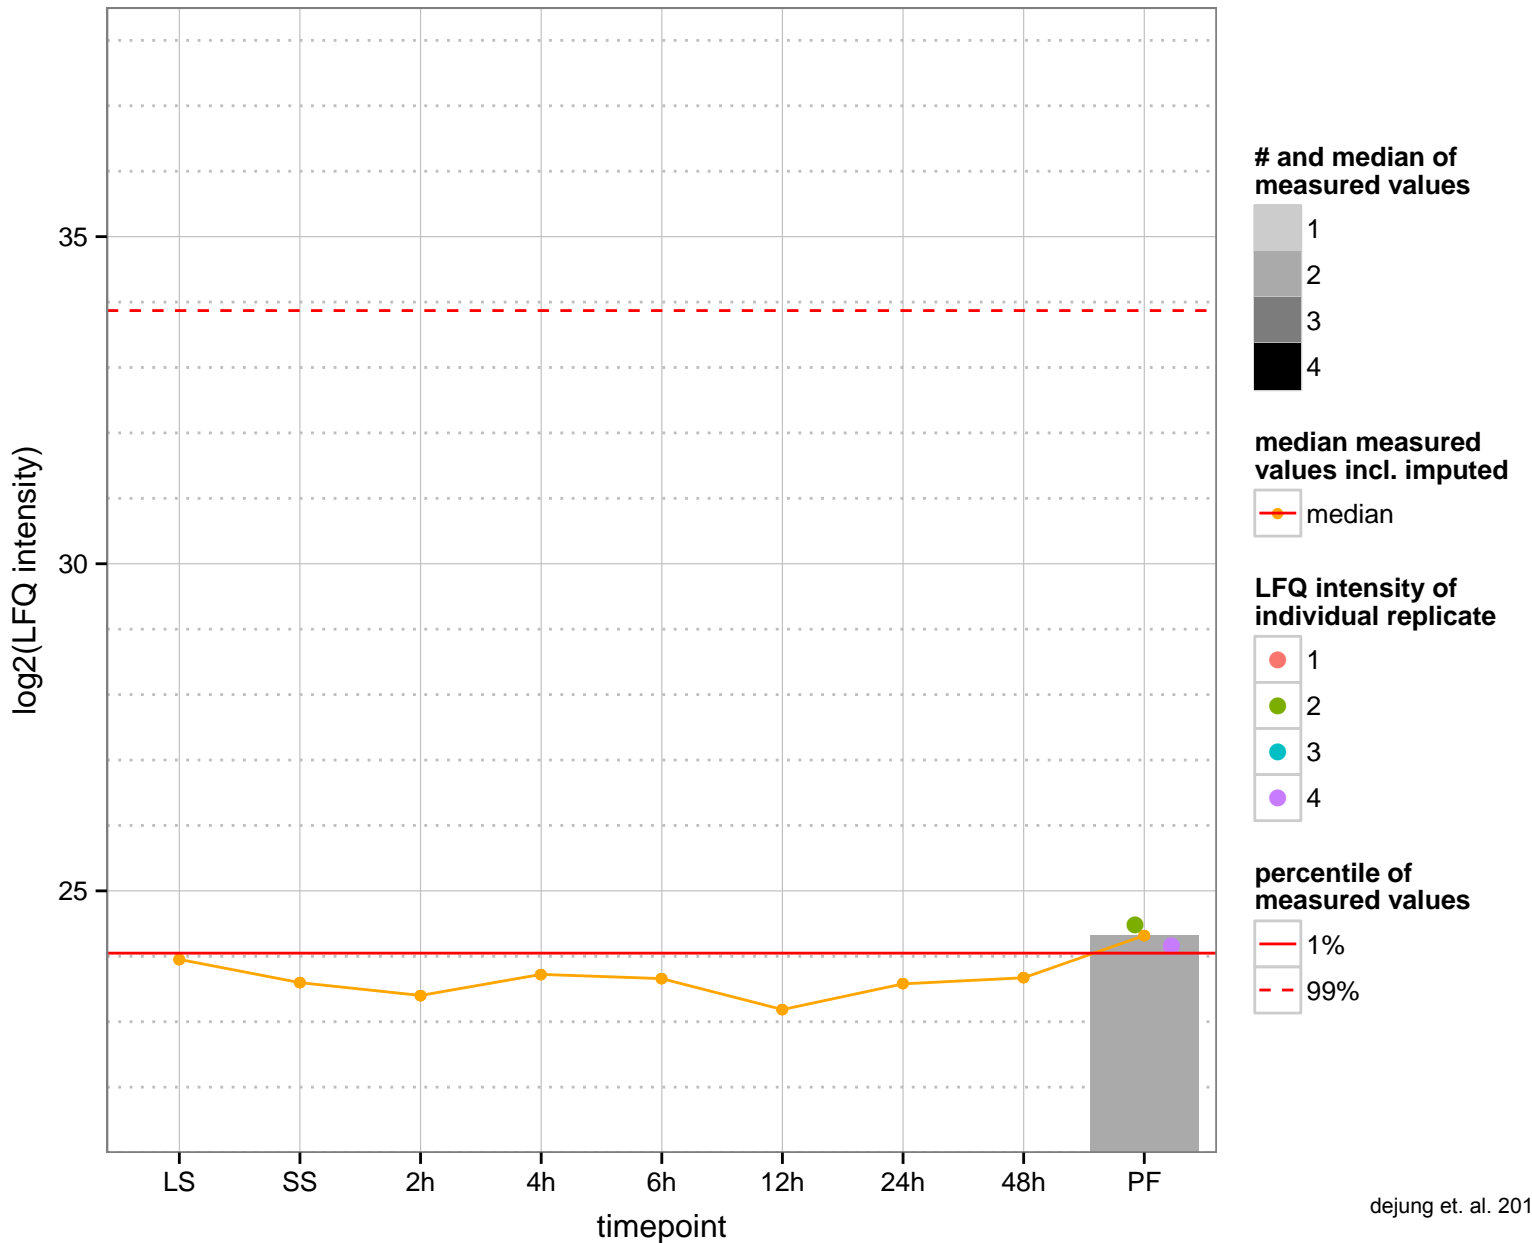

hypothetical protein, conserved  
 Tb927.4.5320  
 AGOF: null  
 AGOC: null  
 AGOP: null  
 PGO: null  
 PGOC: null  
 PGOP: null

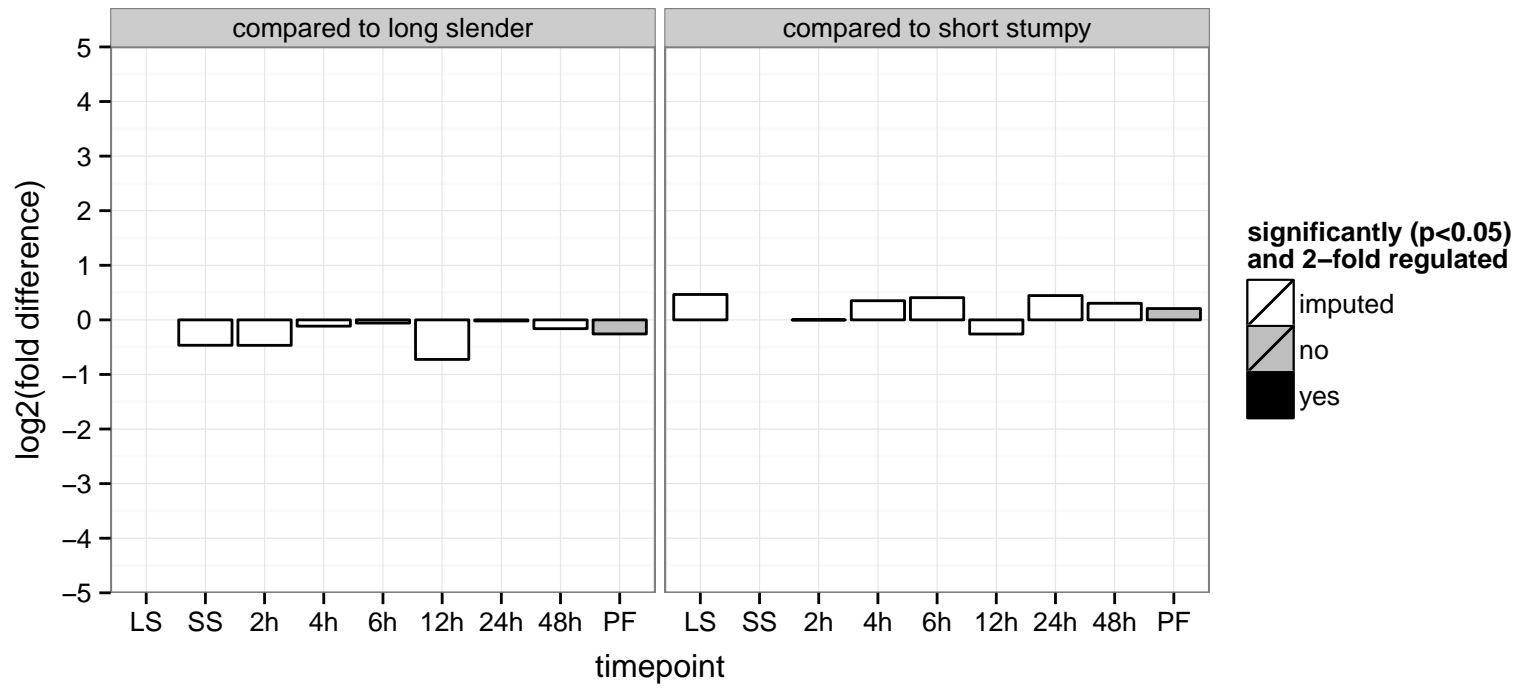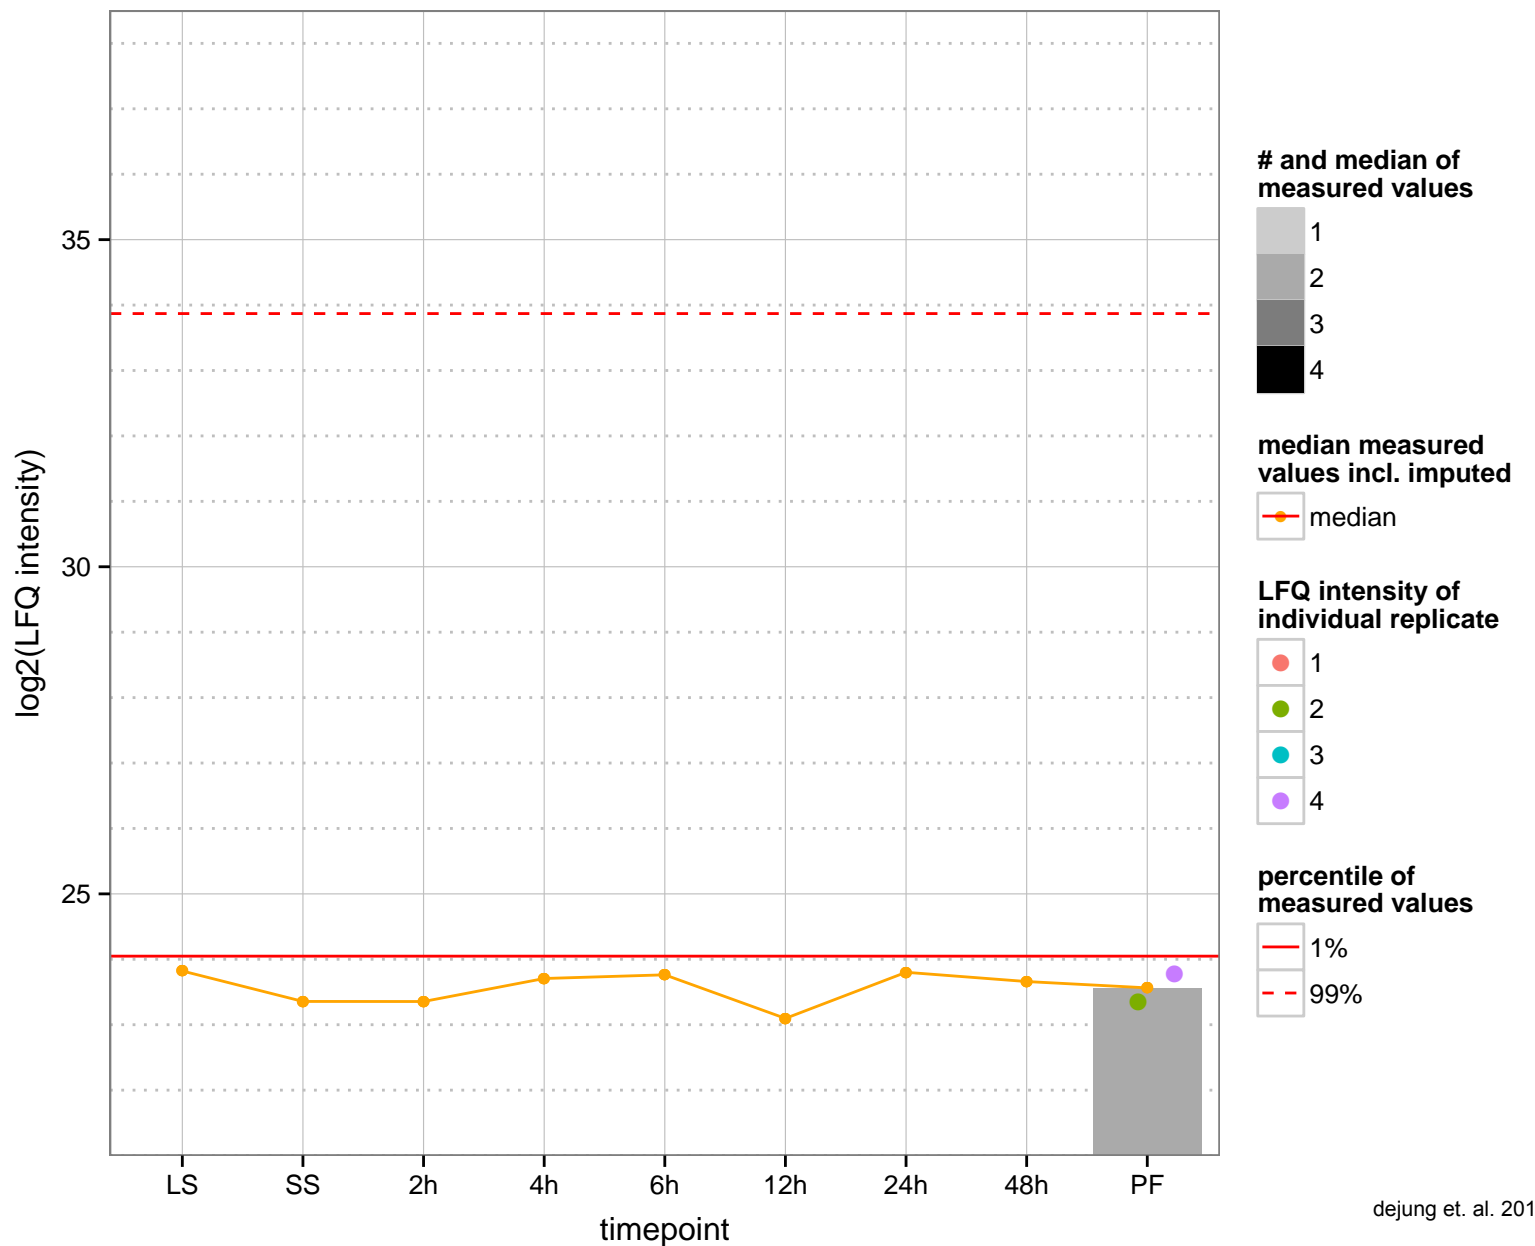



hypothetical protein, conserved  
 Tb927.4.5380;Tb927.8.6940  
 AGOF: null  
 AGOC: null  
 AGOP: null  
 PGO: protein binding  
 PGOC: null  
 PGOP: null

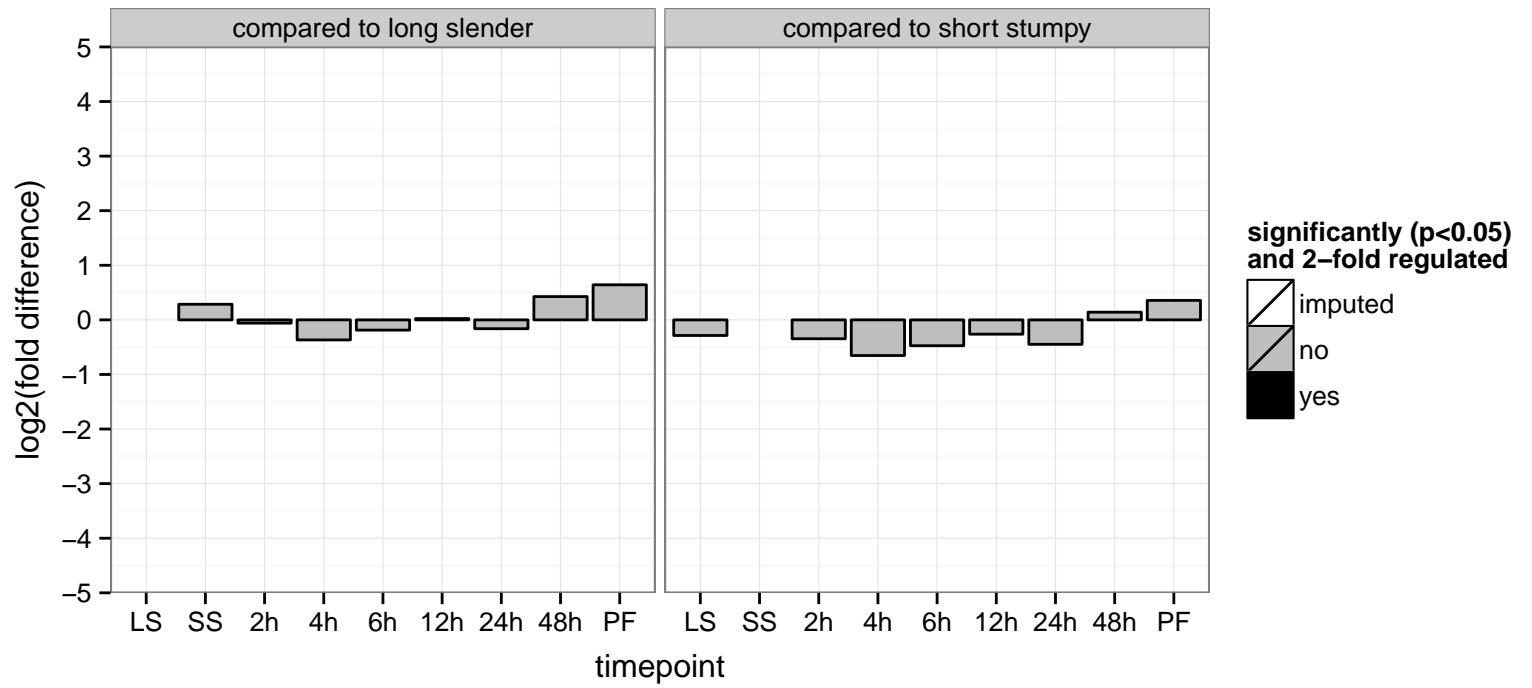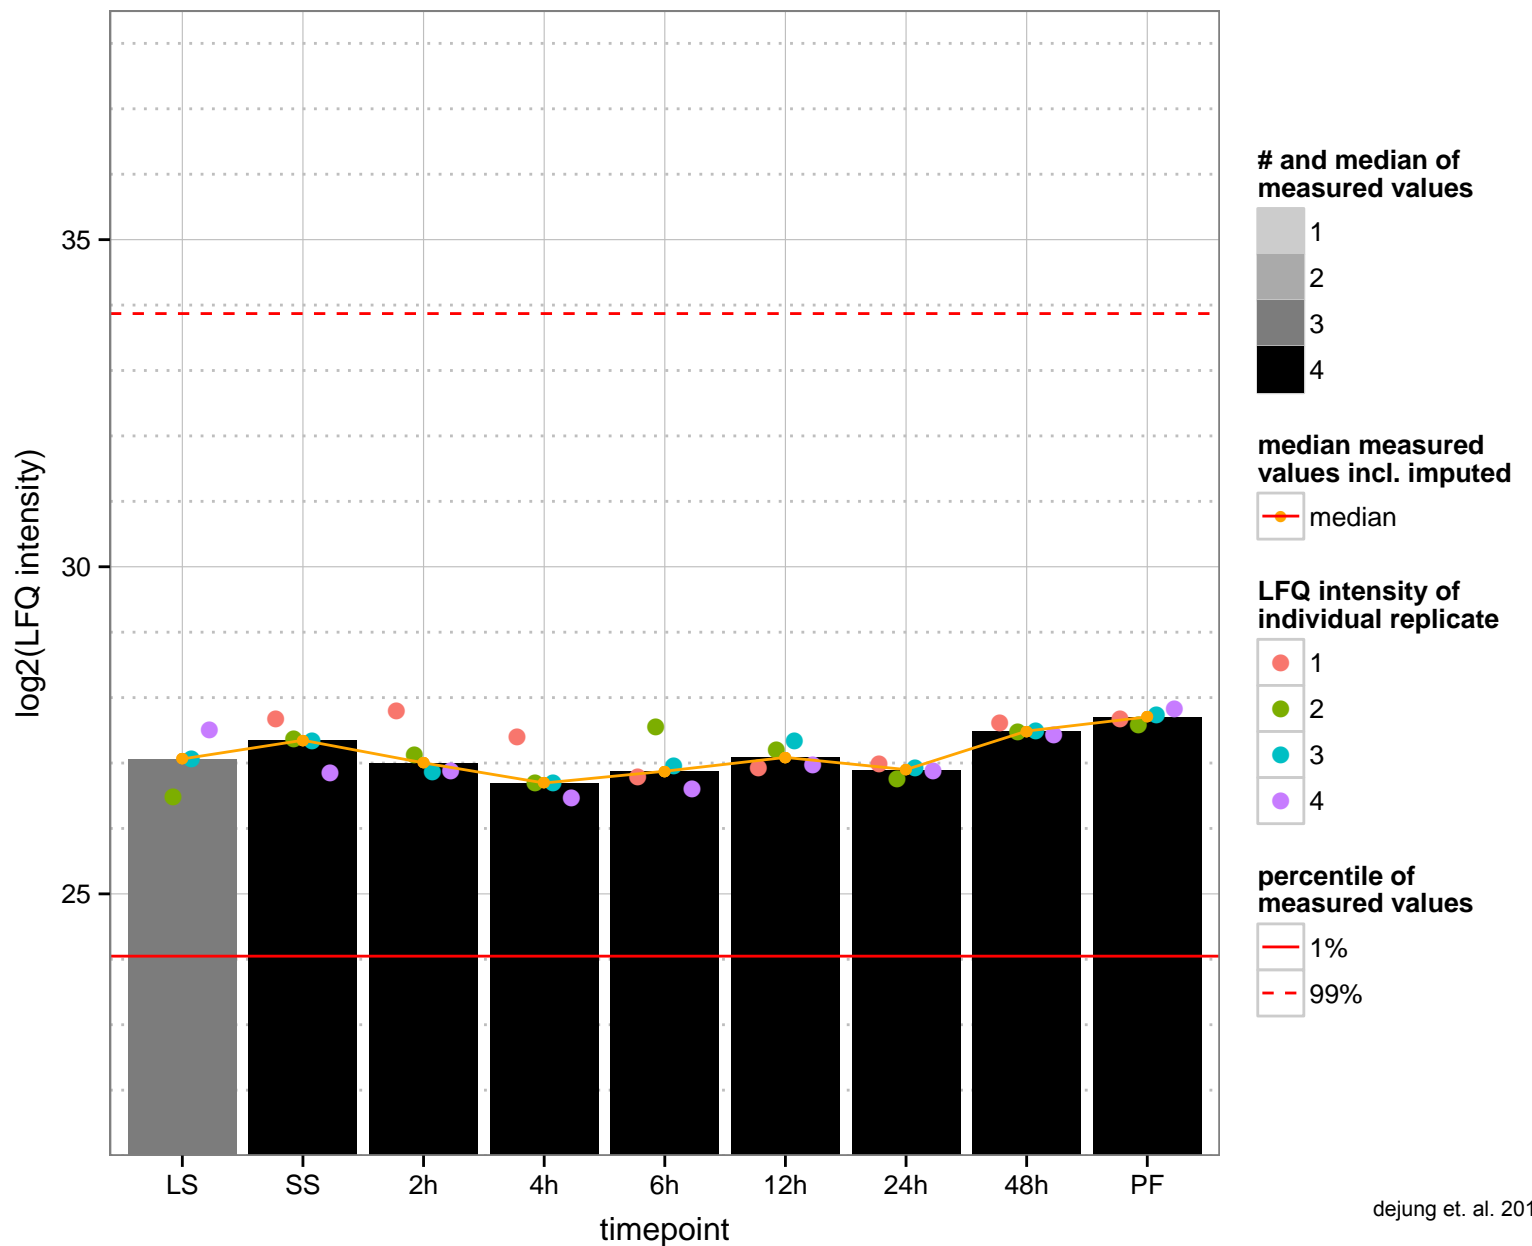

hypothetical protein, conserved  
 Tb927.4.600  
 AGOF: null  
 AGOC: mitochondrion  
 AGOP: null  
 PGO: null  
 PGO: null  
 PGO: null

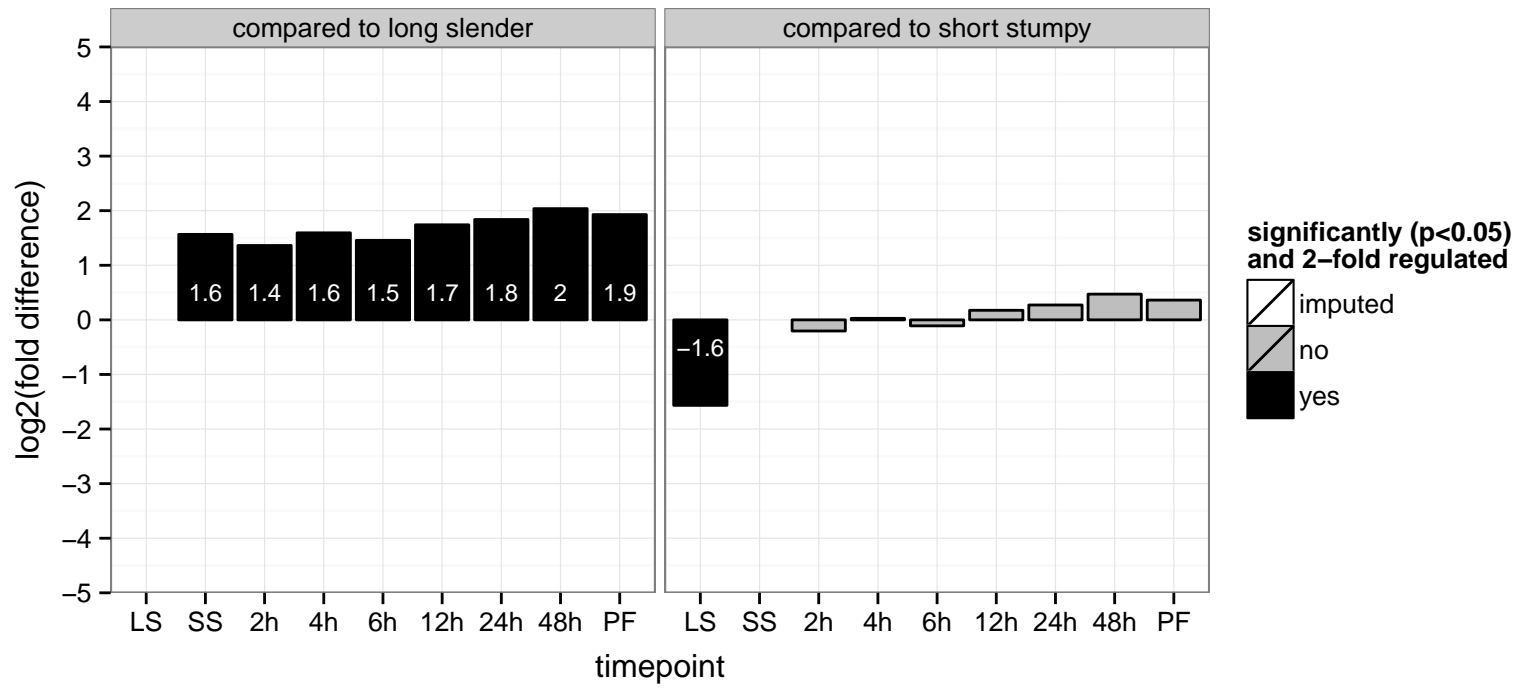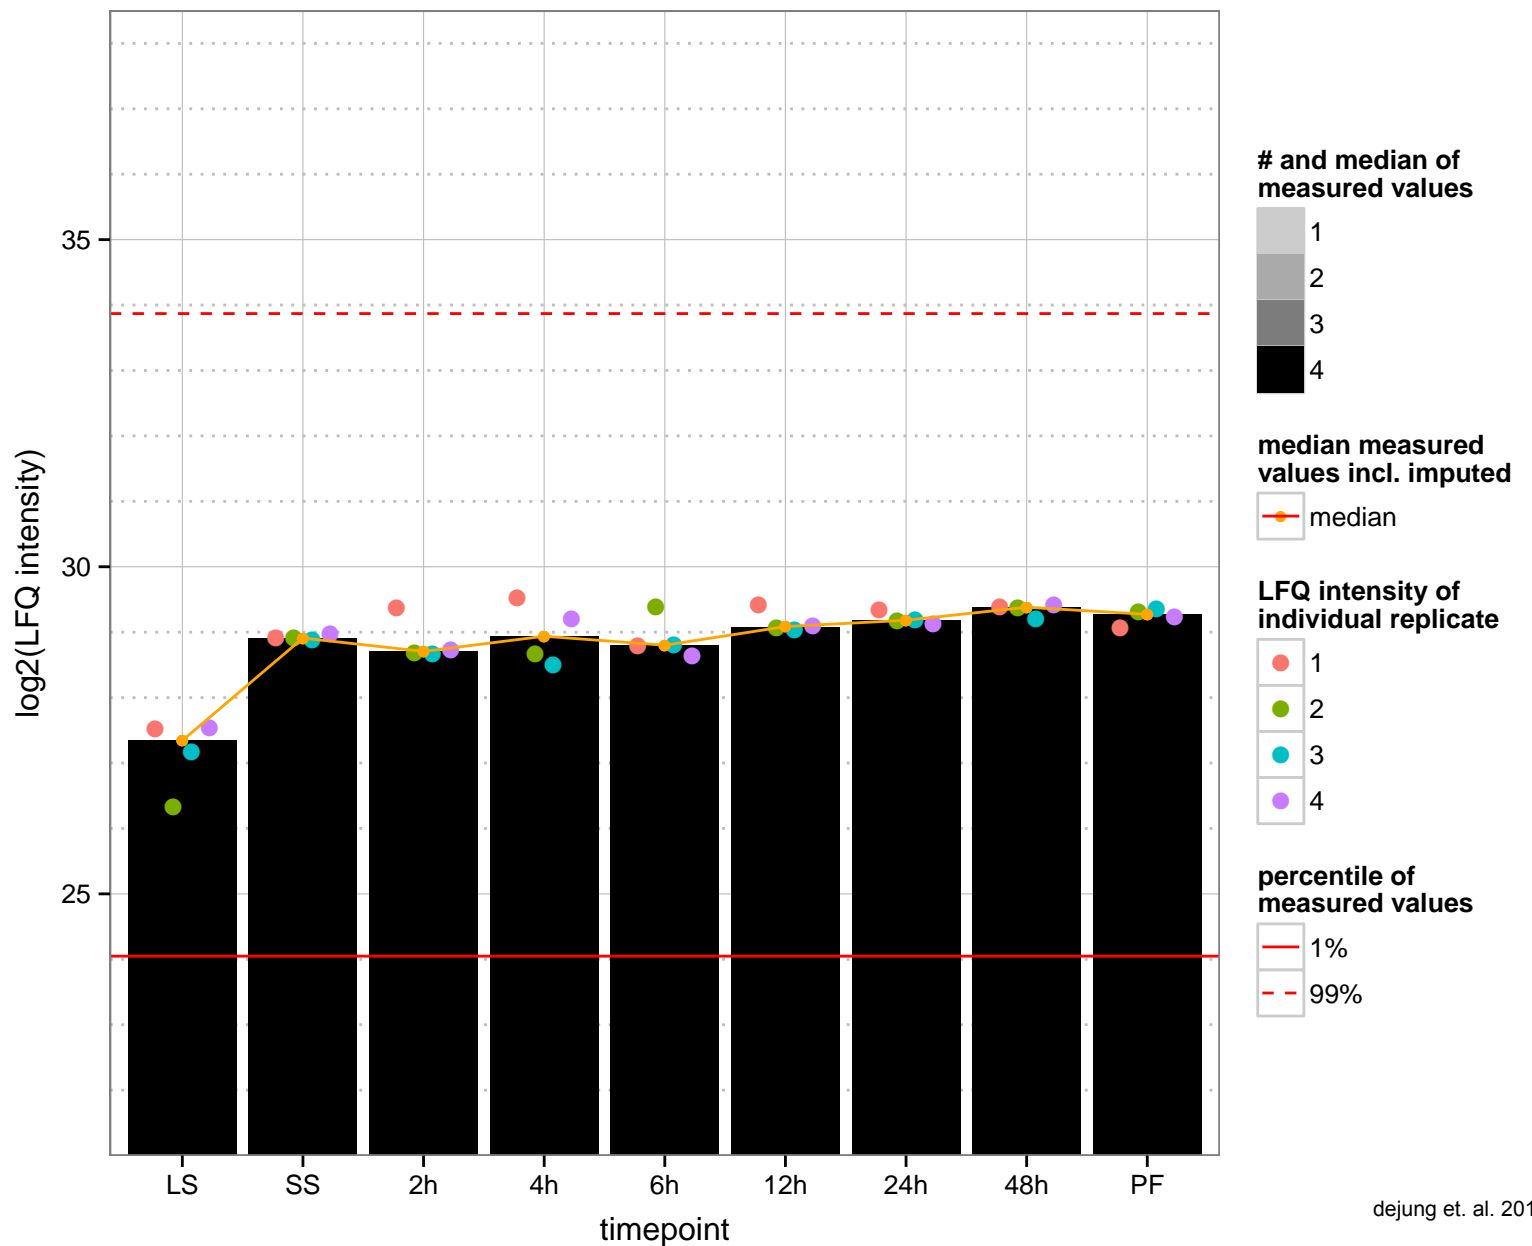

hypothetical protein, conserved  
 Tb927.4.620  
 AGOF: null  
 AGOC: null  
 AGOP: null  
 PGOF: null  
 PGO C: null  
 PGO P: null

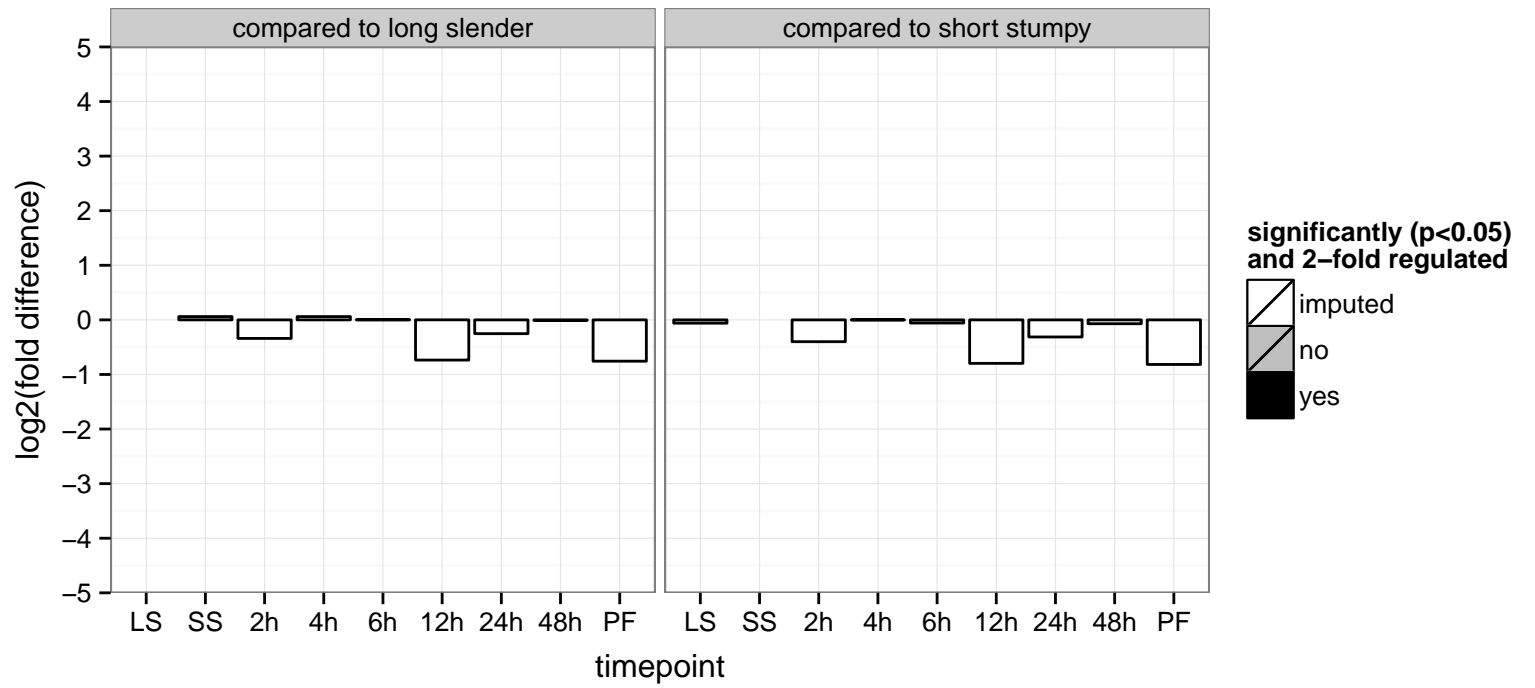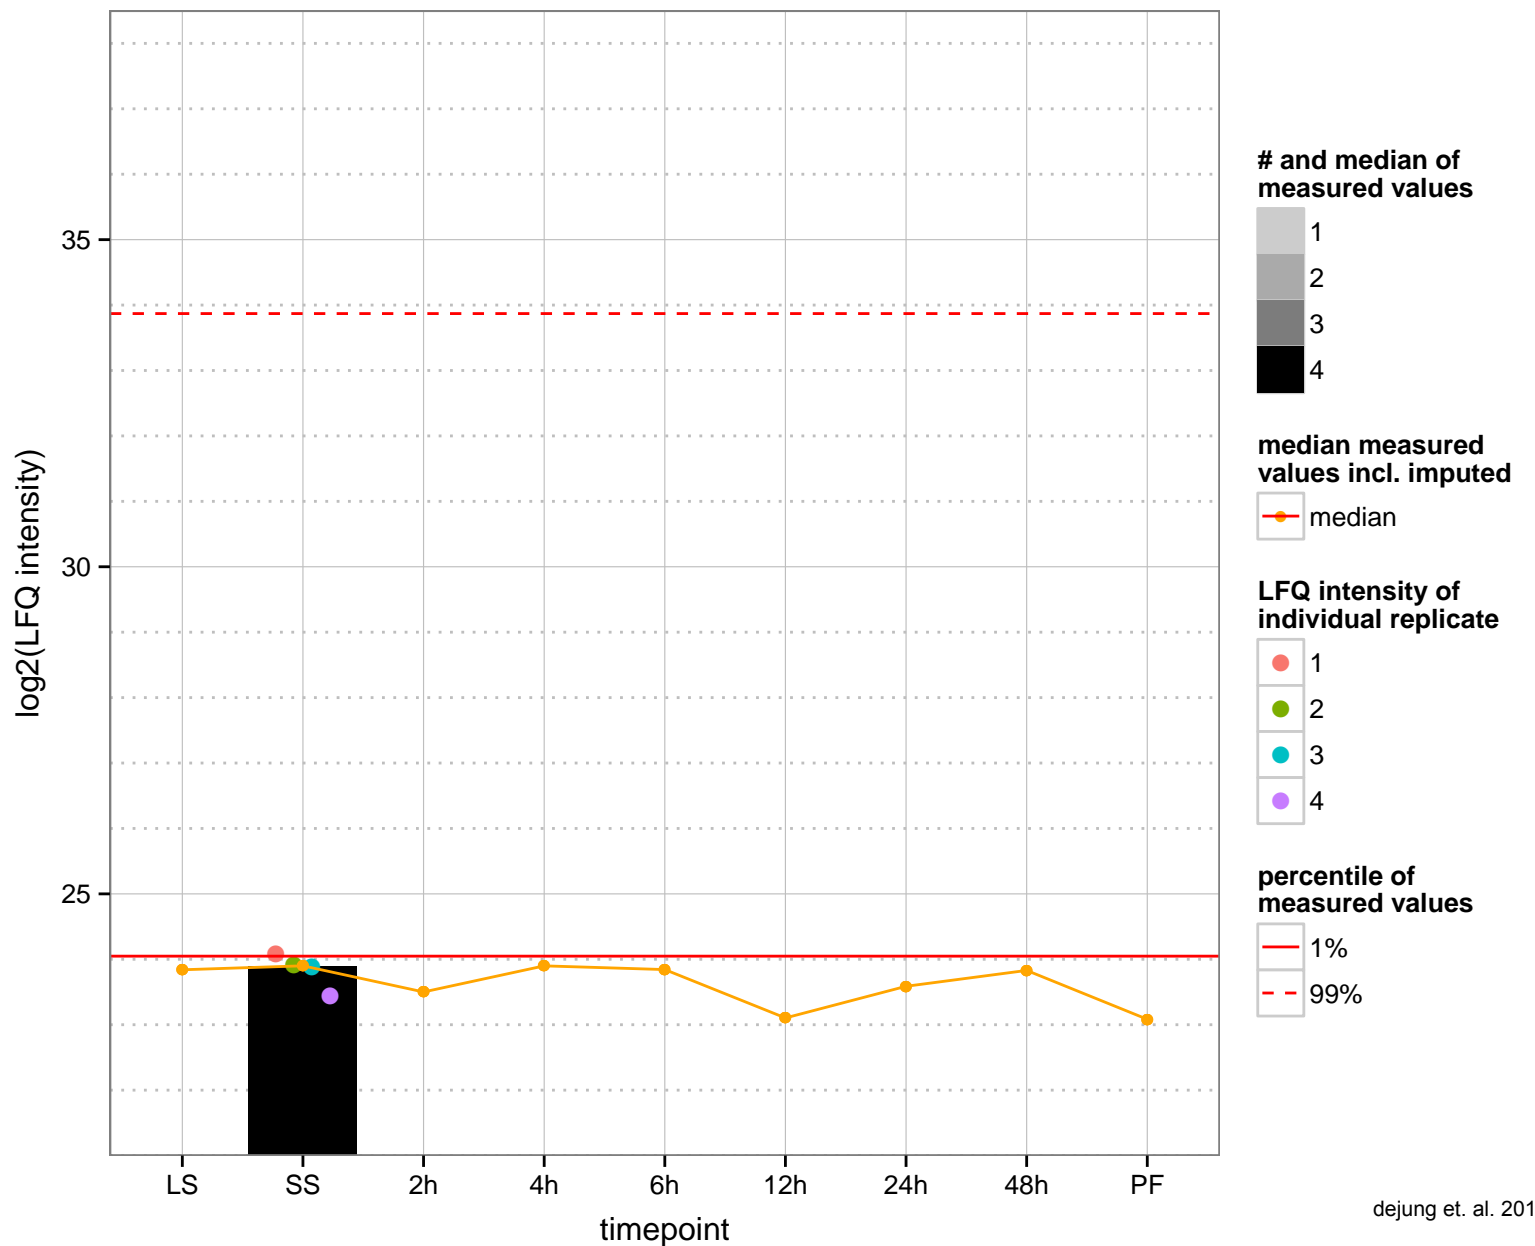

hypothetical protein, conserved  
 Tb927.4.630  
 AGOF: null  
 AGOC: mitochondrion  
 AGOP: null  
 PGO: null  
 PGO: null  
 PGO: null

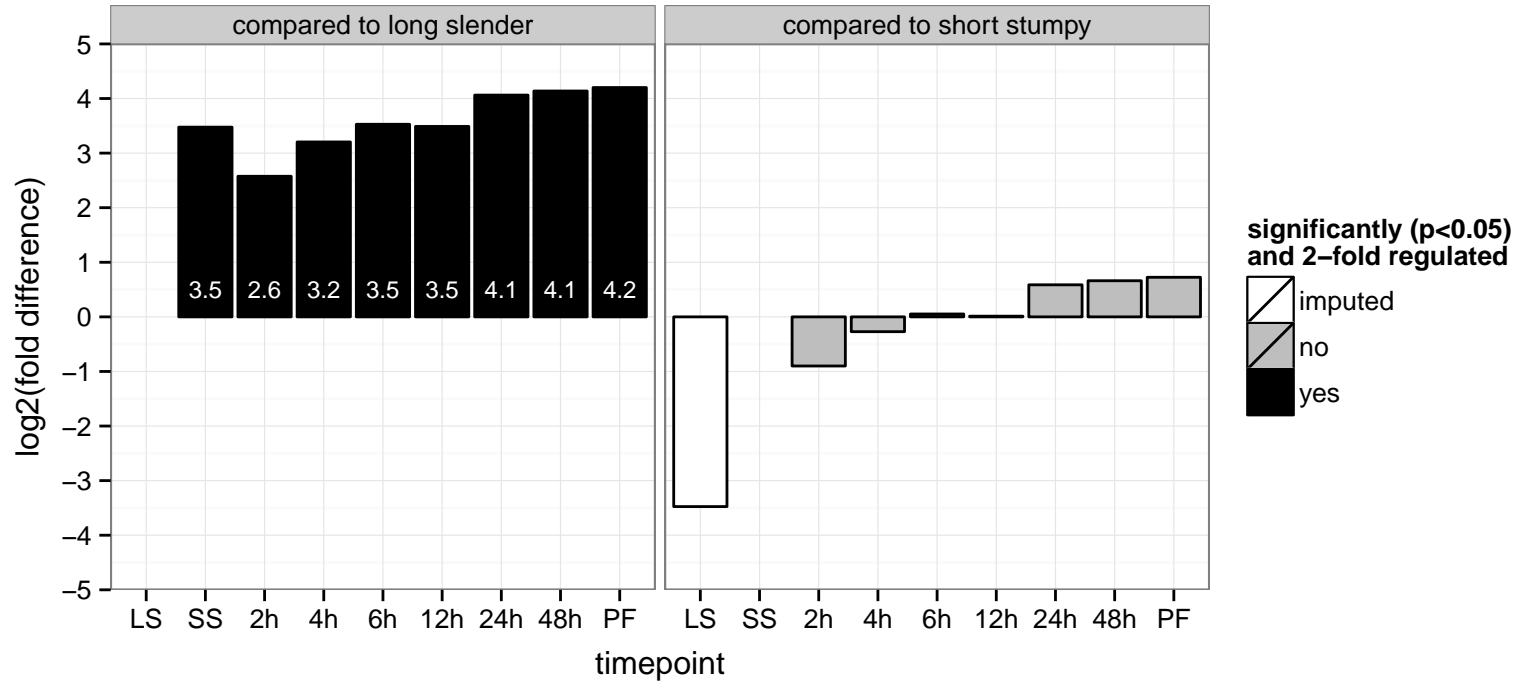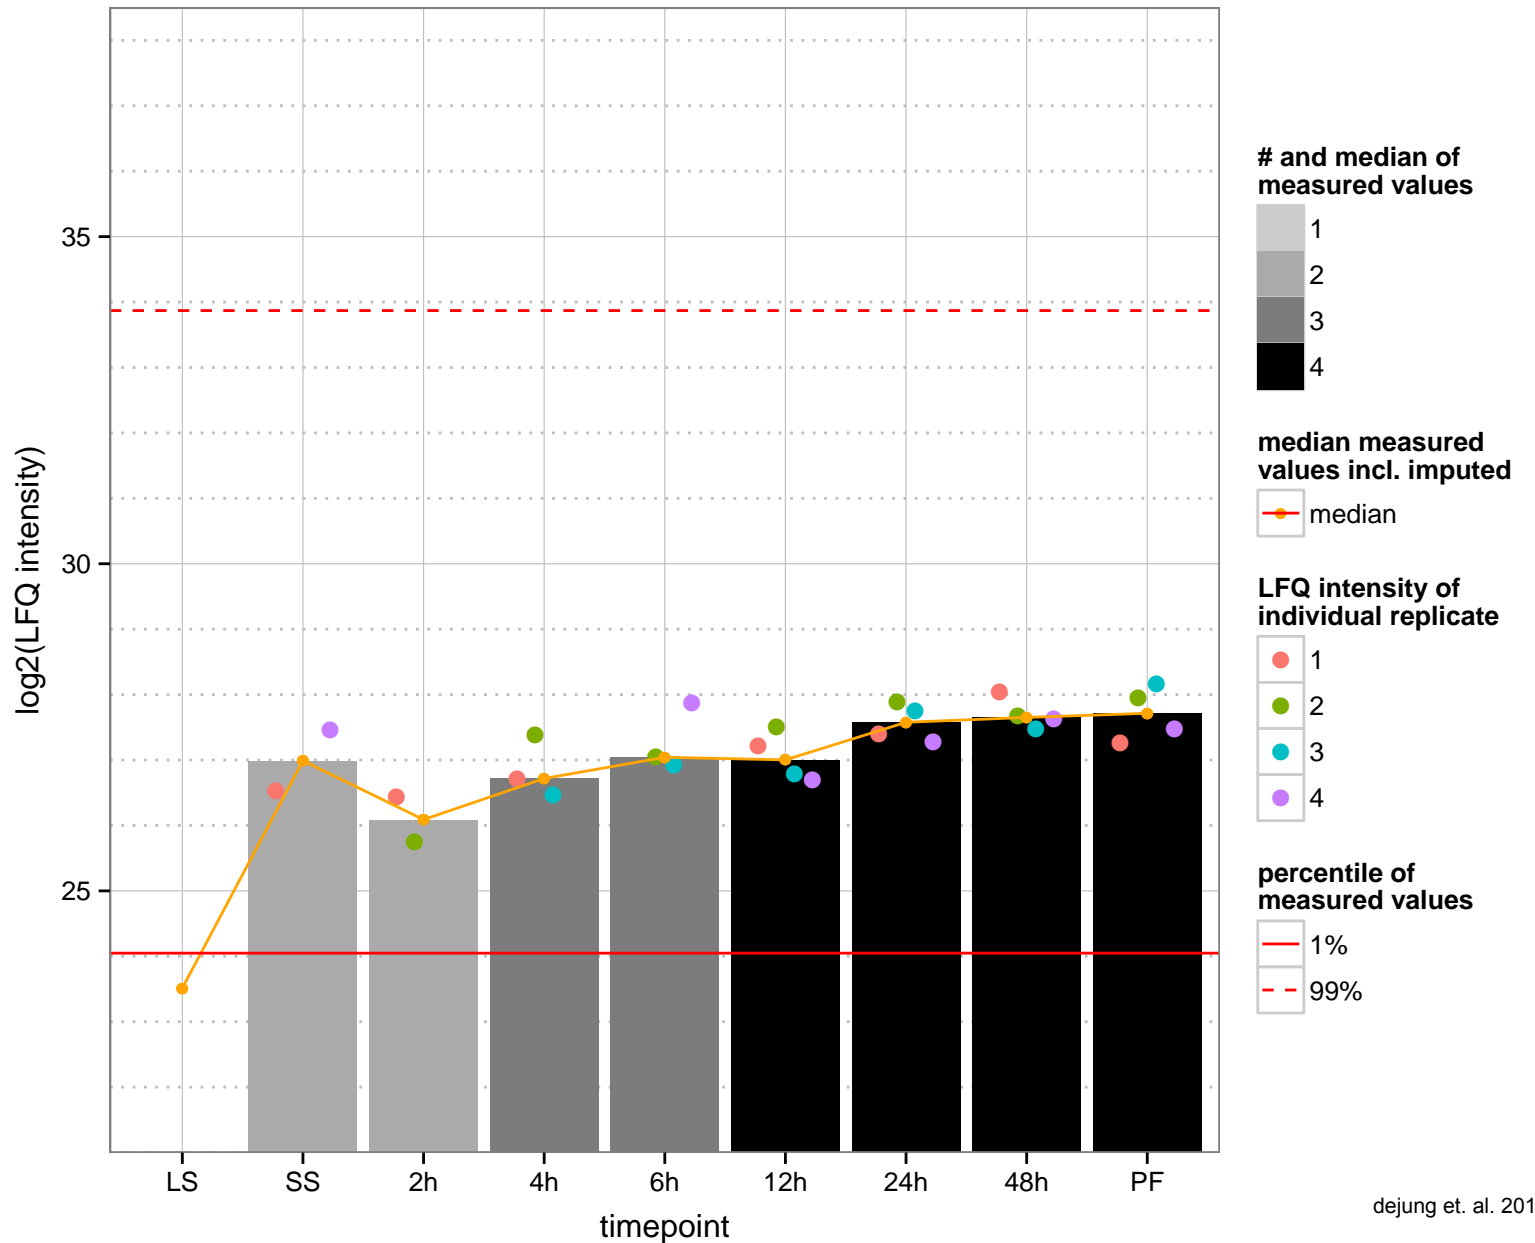

hypothetical protein, conserved  
 Tb927.4.660  
 AGOF: null  
 AGOC: null  
 AGOP: null  
 PGO: null  
 PGOC: null  
 PGOP: null

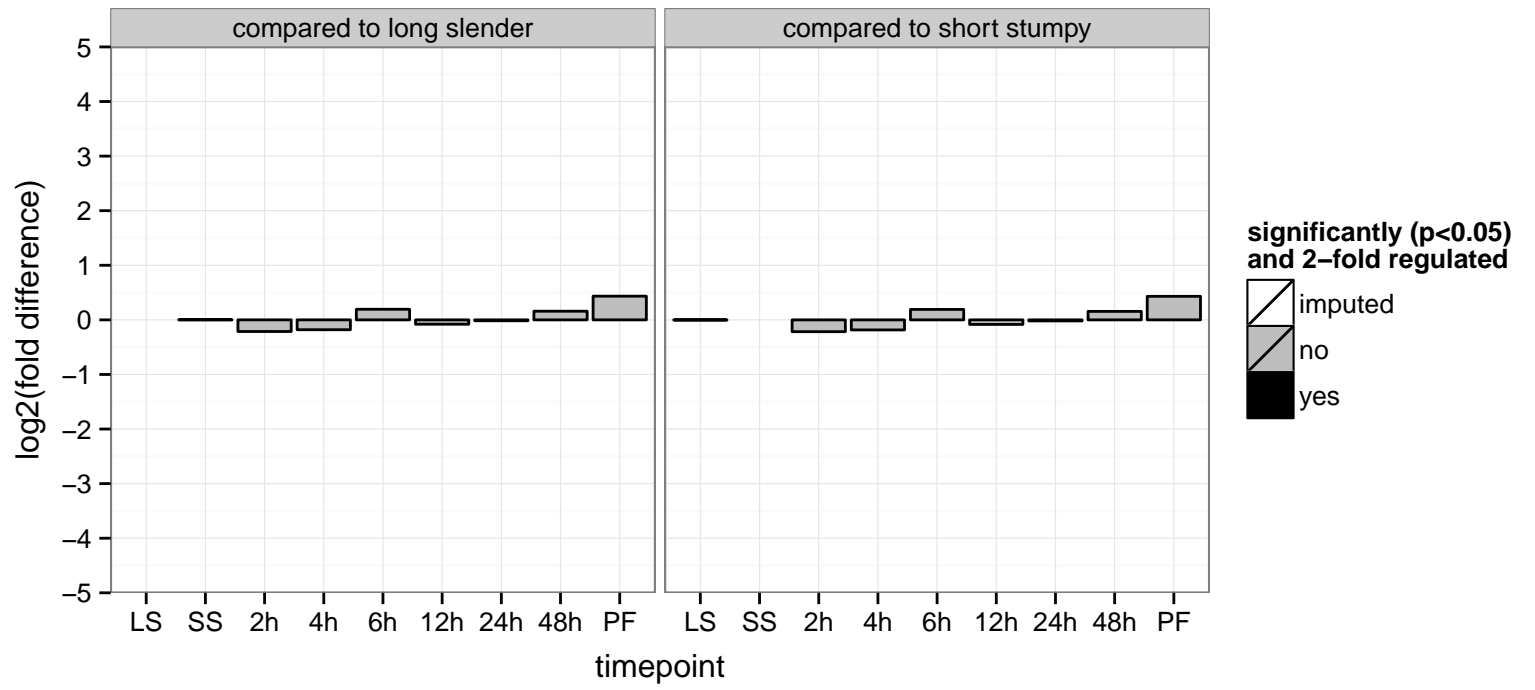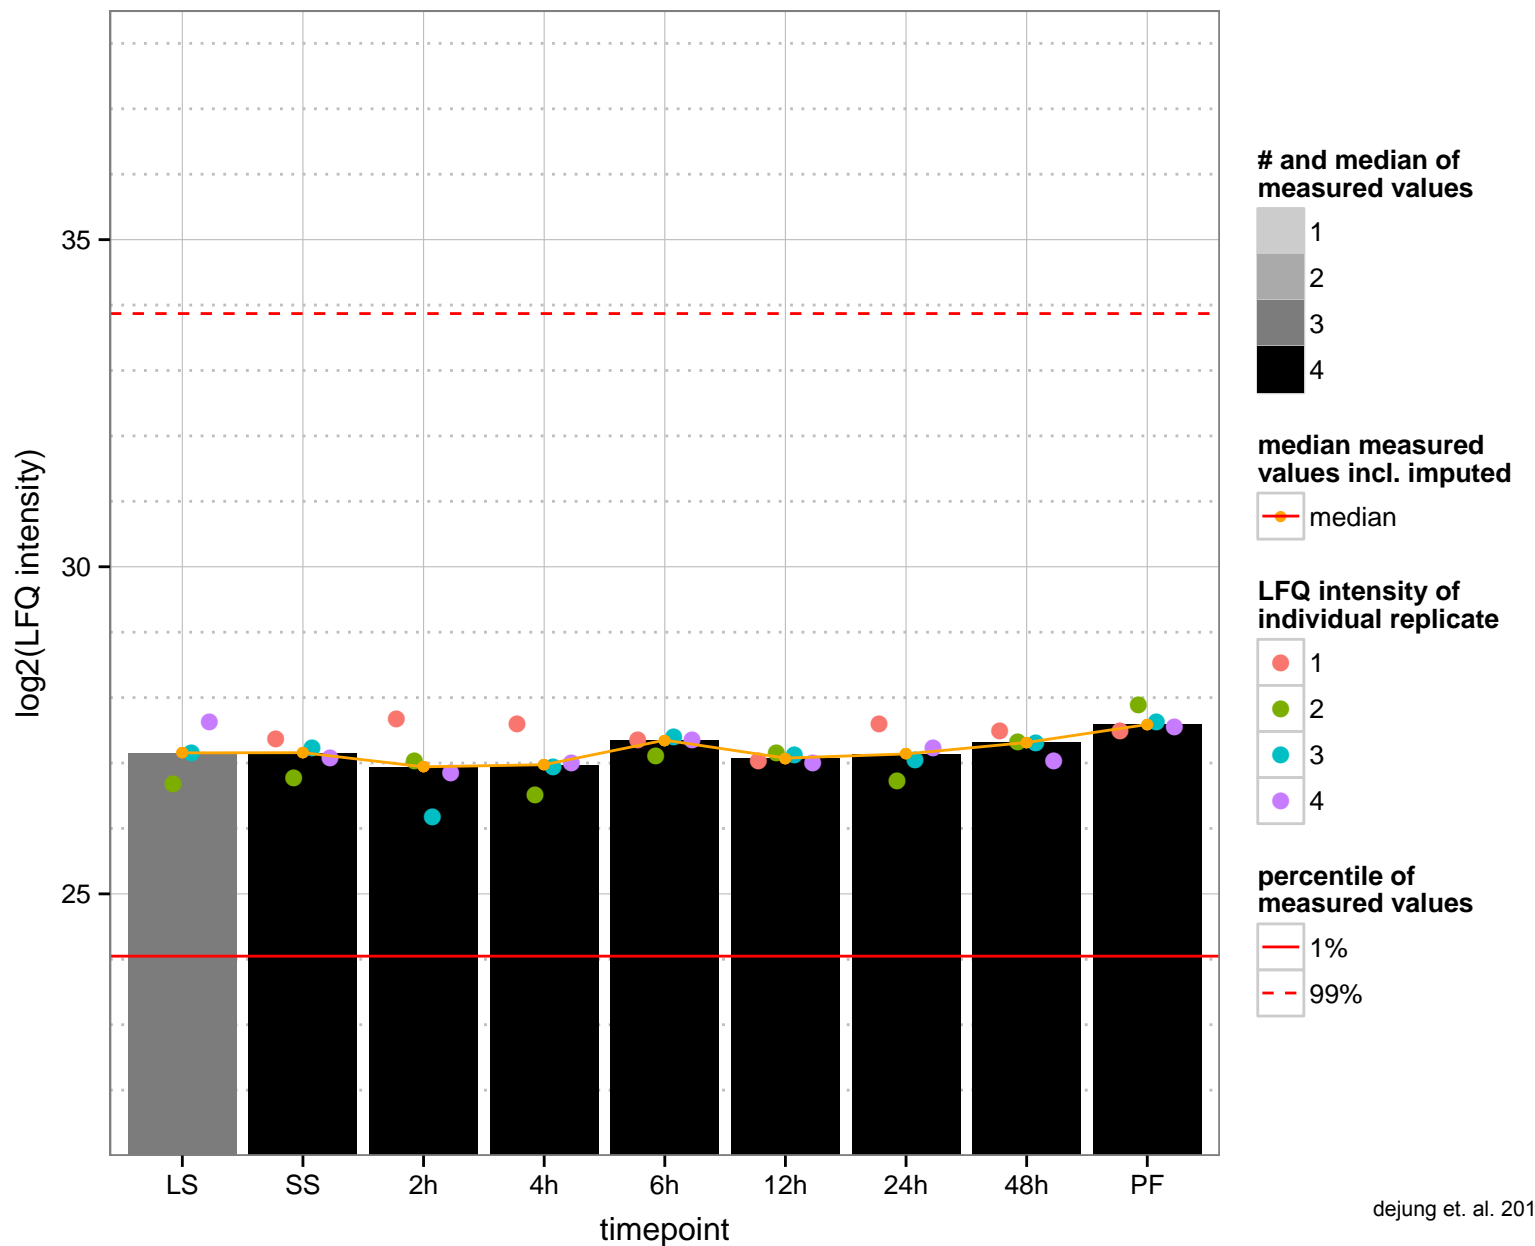

50S ribosomal protein L7Ae, putative  
 Tb927.4.750  
 AGOF: null  
 AGOC: null  
 AGOP: null  
 PGO: null  
 PGOC: null  
 PGOP: null

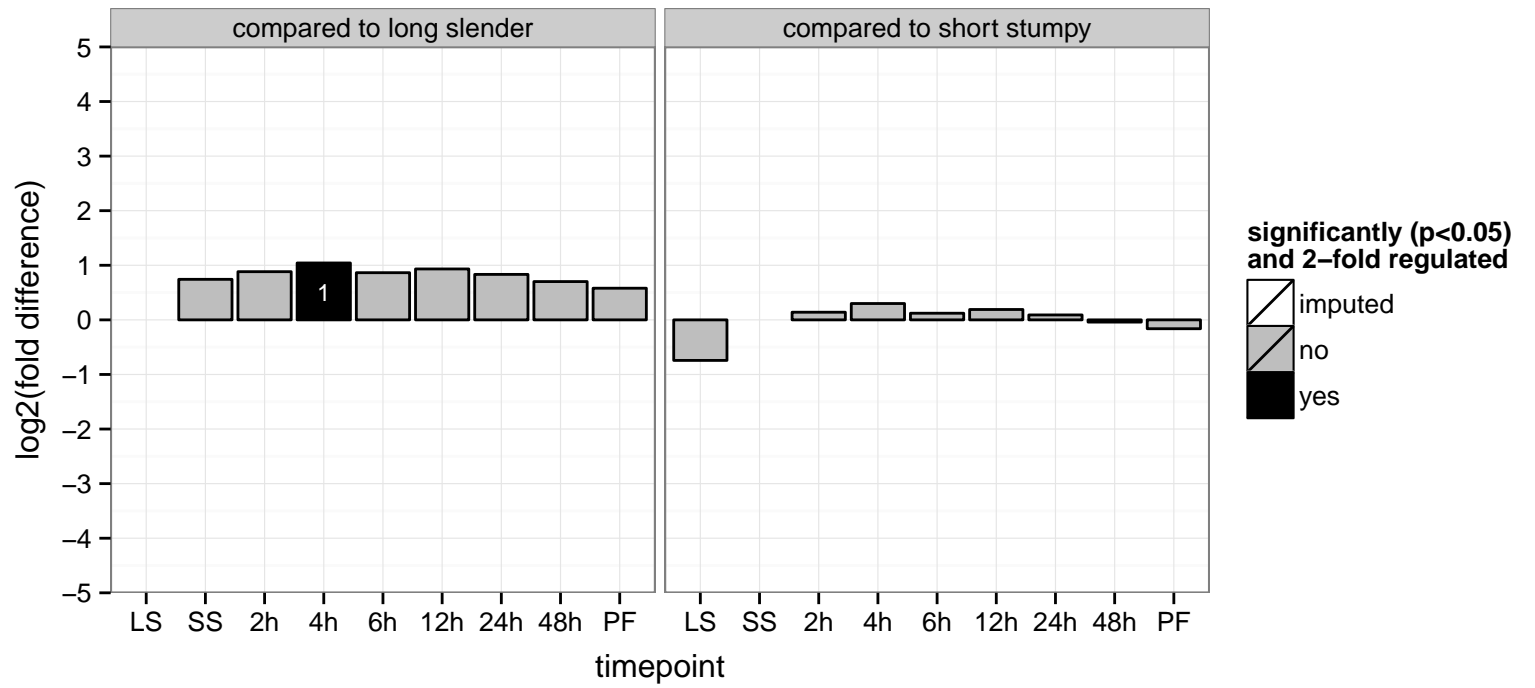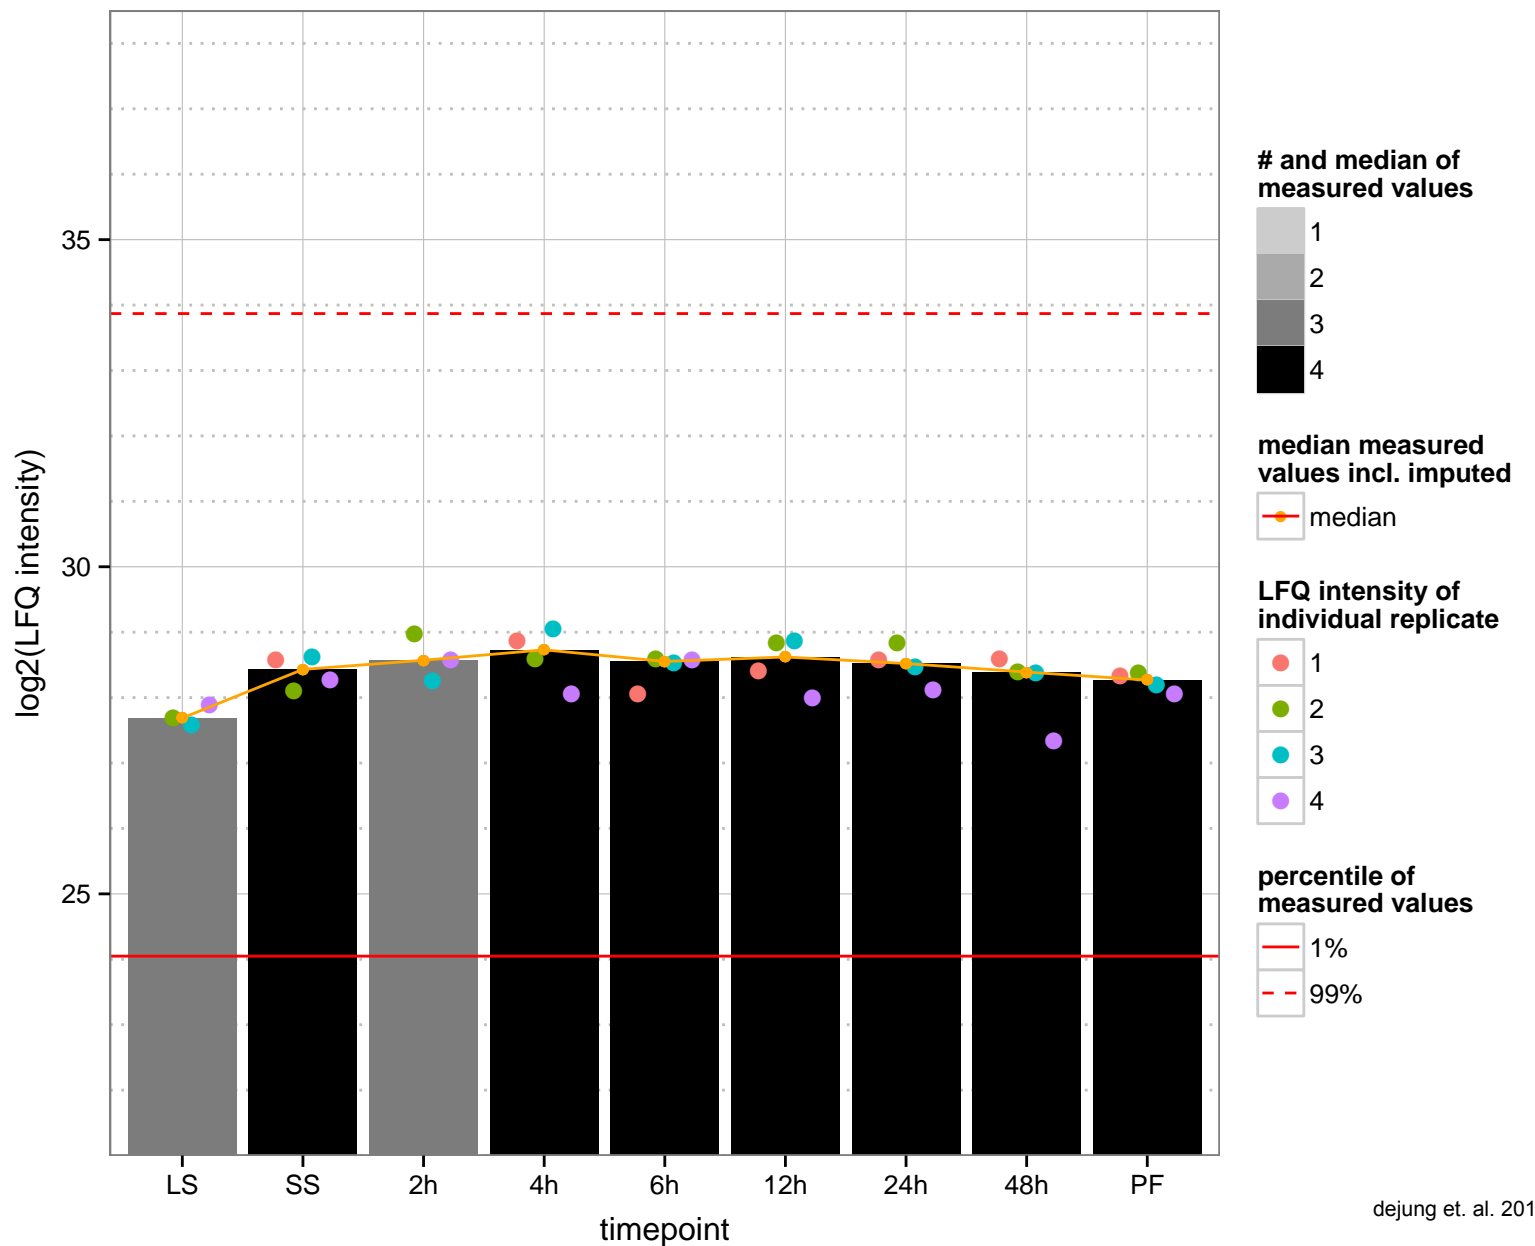

hypothetical protein, conserved

Tb927.4.840

AGOF: ATP binding, two-component sensor activity

AGOC: null

AGOP: peptidyl-histidine phosphorylation, signal transduction

PGOF: ATP binding, protein histidine kinase activity, two-component sensor activity

PGOC: null

PGOP: peptidyl-histidine phosphorylation, signal transduction

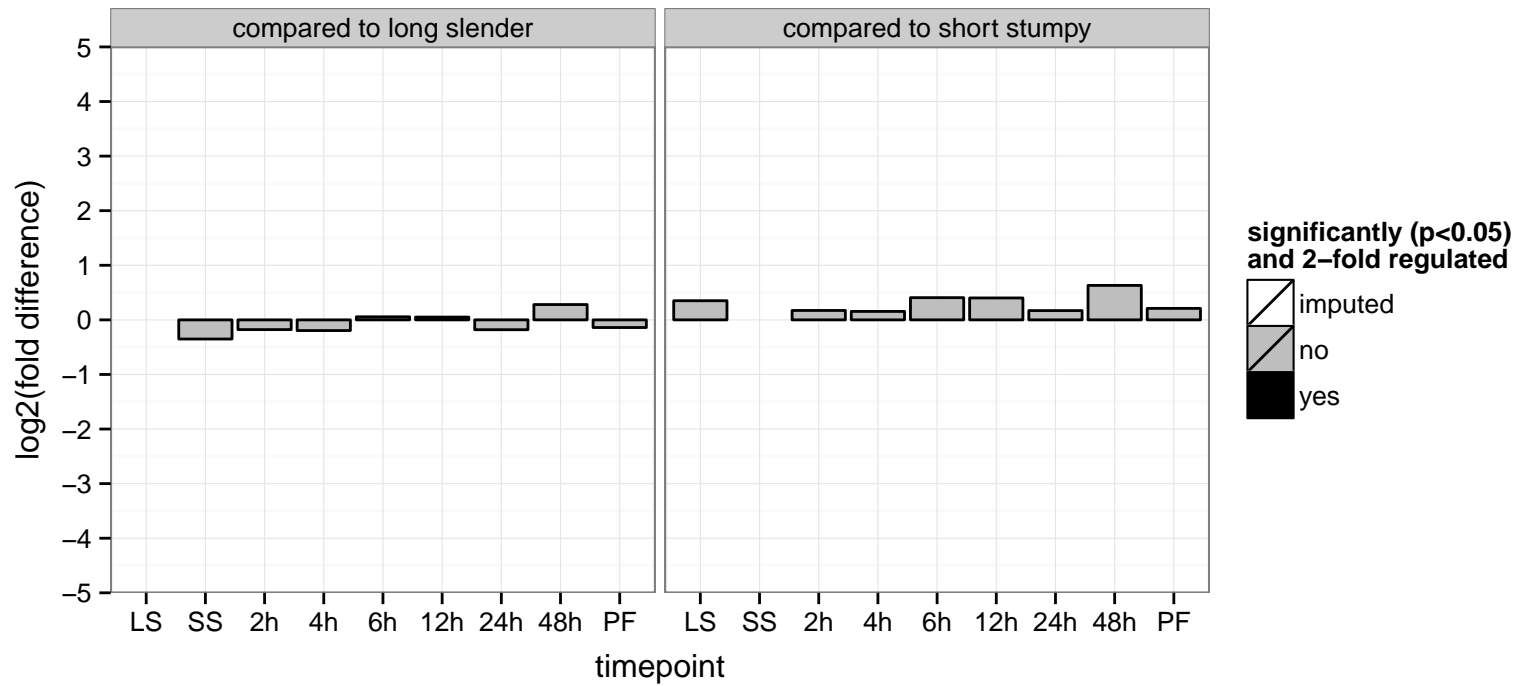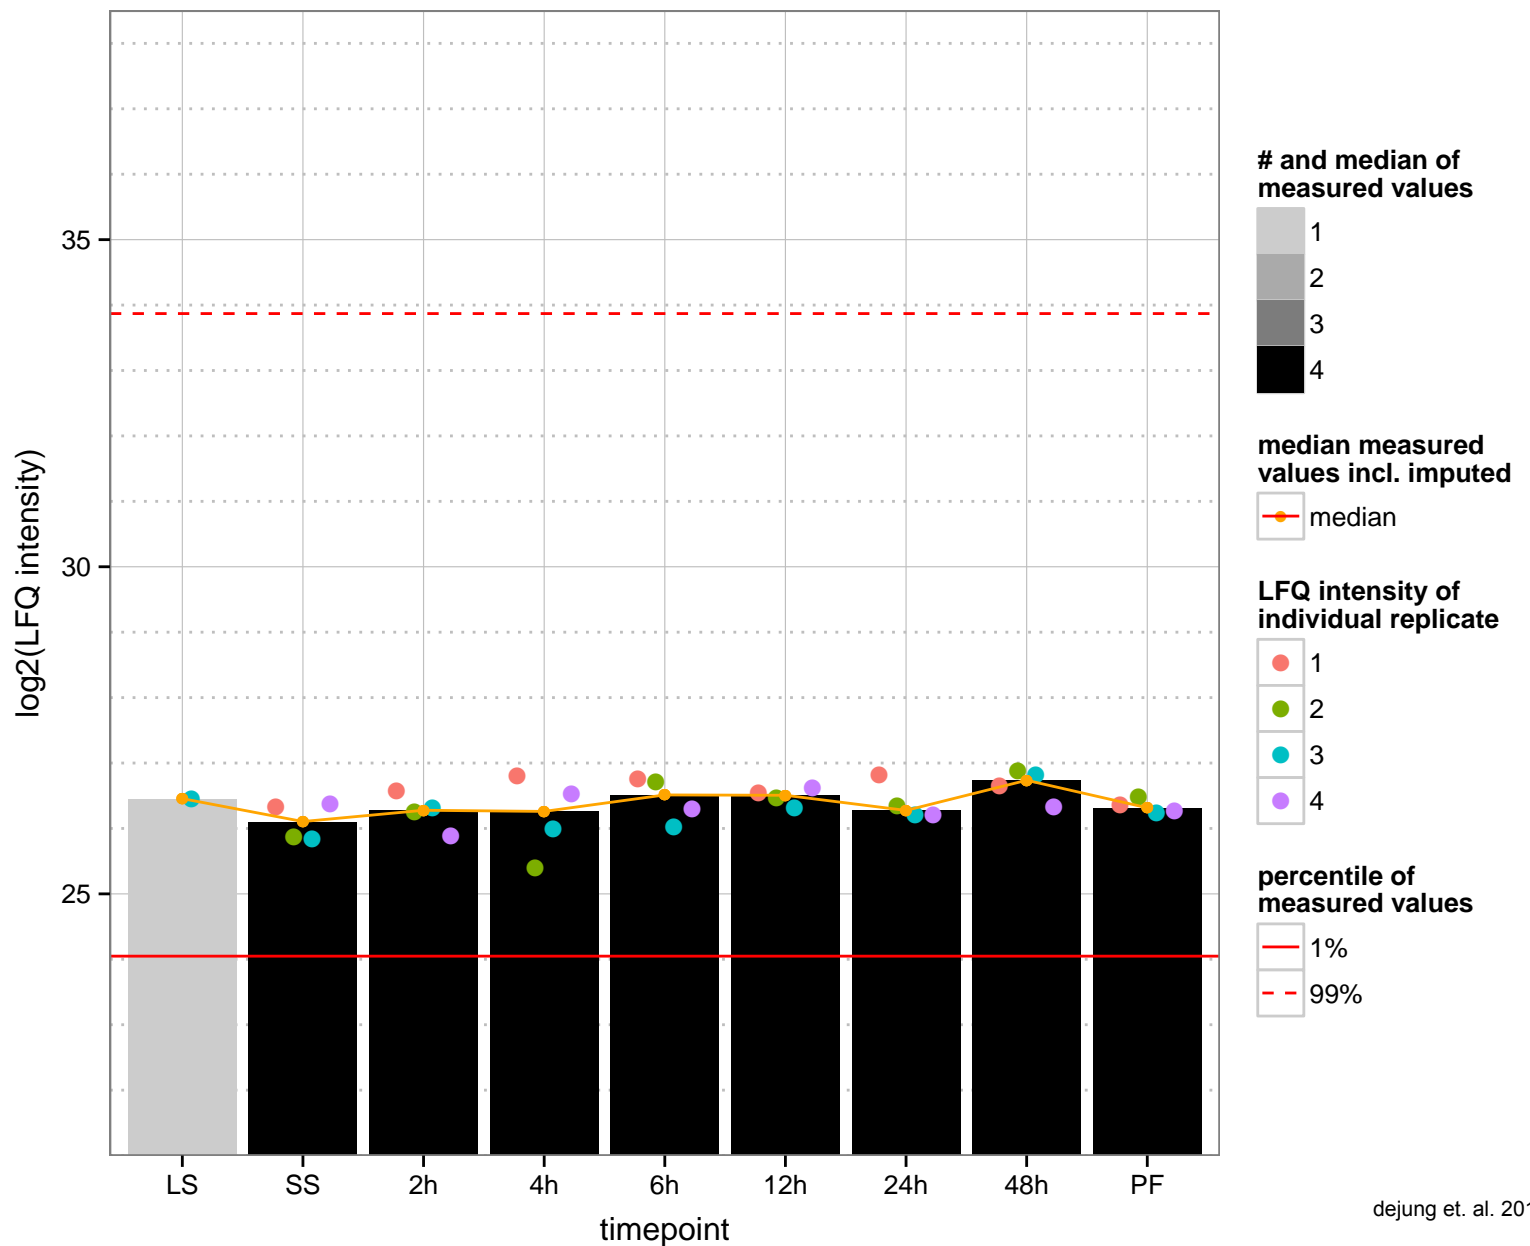

hypothetical protein, conserved  
 Tb927.4.860  
 AGOF: null  
 AGOC: null  
 AGOP: null  
 PGO: null  
 PGOC: null  
 PGOP: null

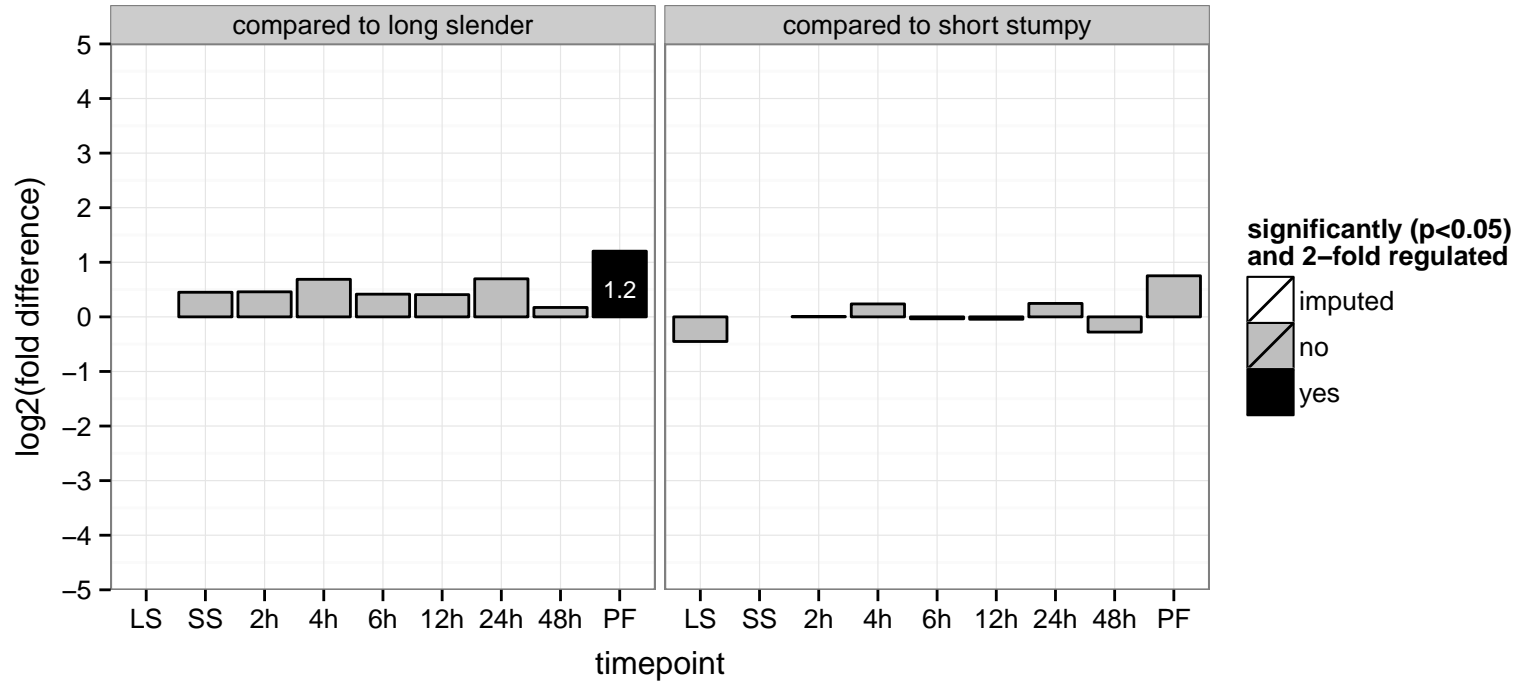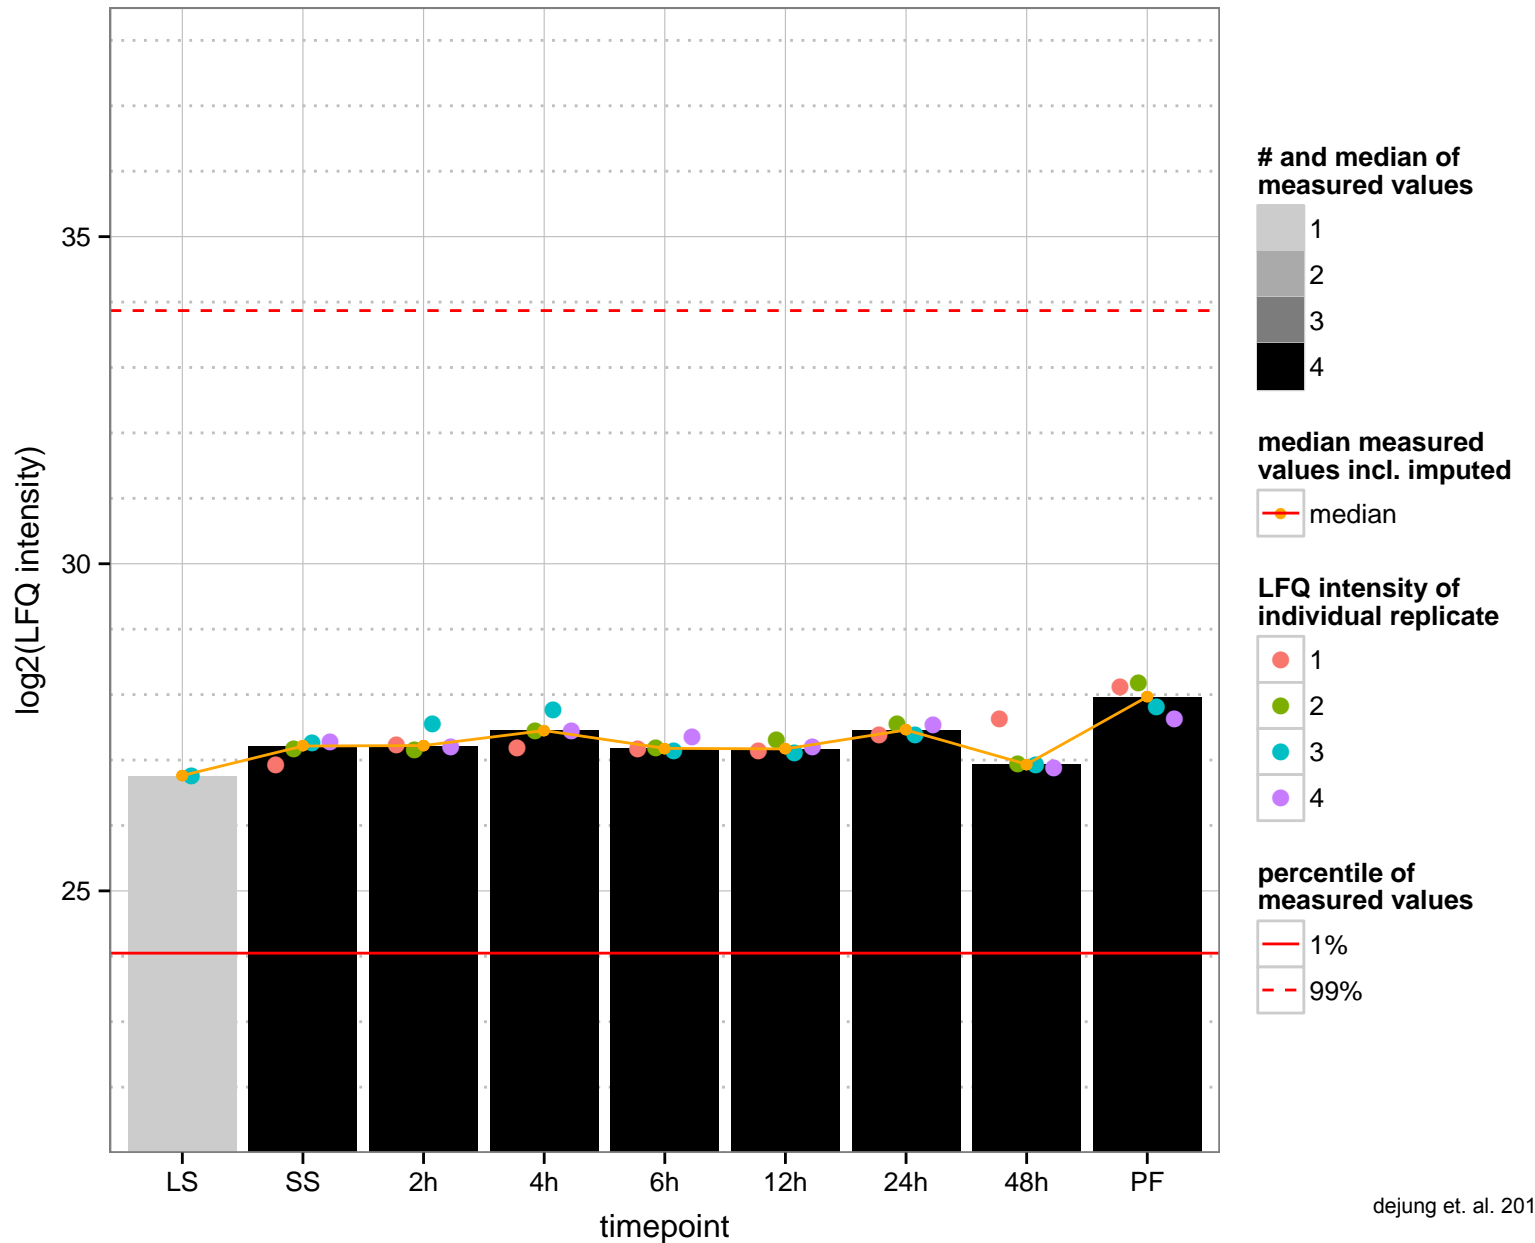



dynein heavy chain, putative

Tb927.4.870

AGOF: ATP binding, ATPase activity, microtubule motor activity

AGOC: axonemal dynein complex

AGOP: microtubule-based movement

PGOF: ATP binding, ATPase activity, microtubule motor activity, nucleoside-triphosphatase activity, nucleotide binding

PGOC: dynein complex

PGOP: microtubule-based movement

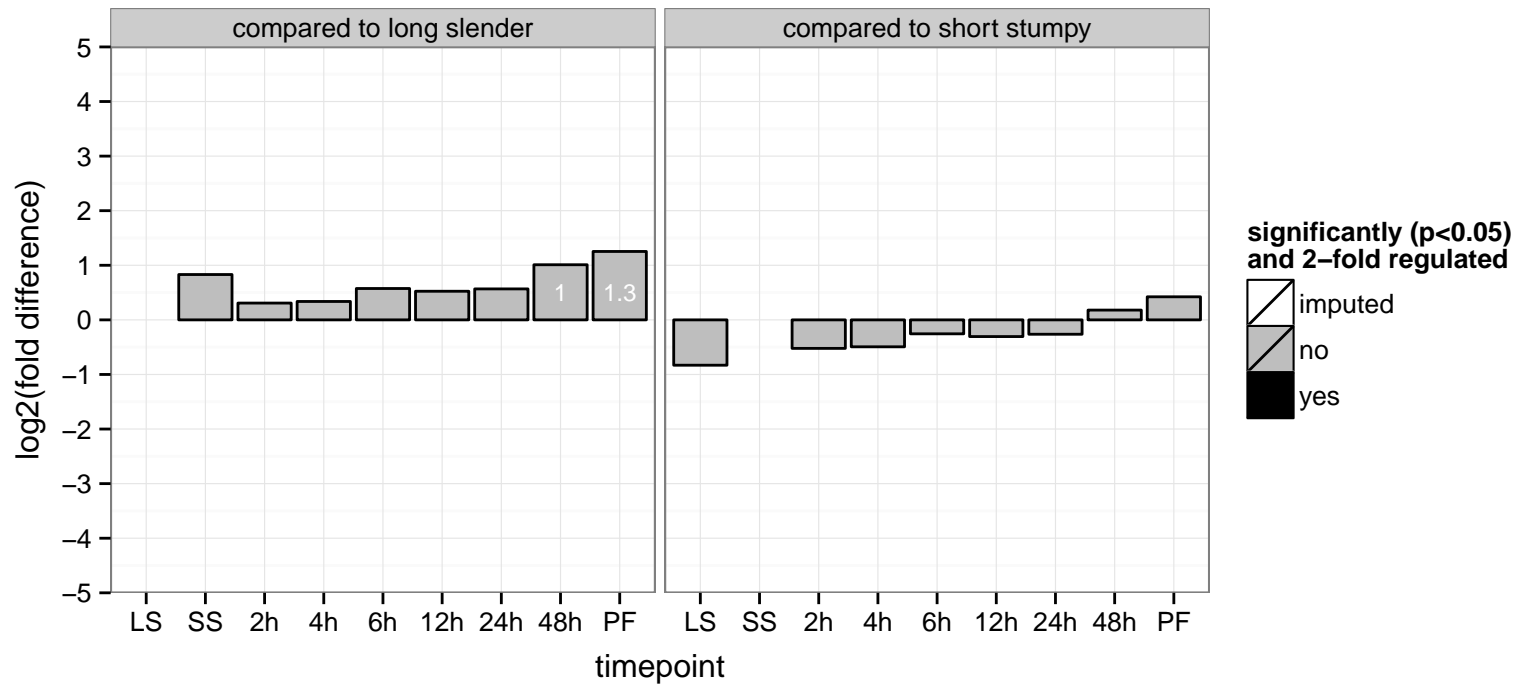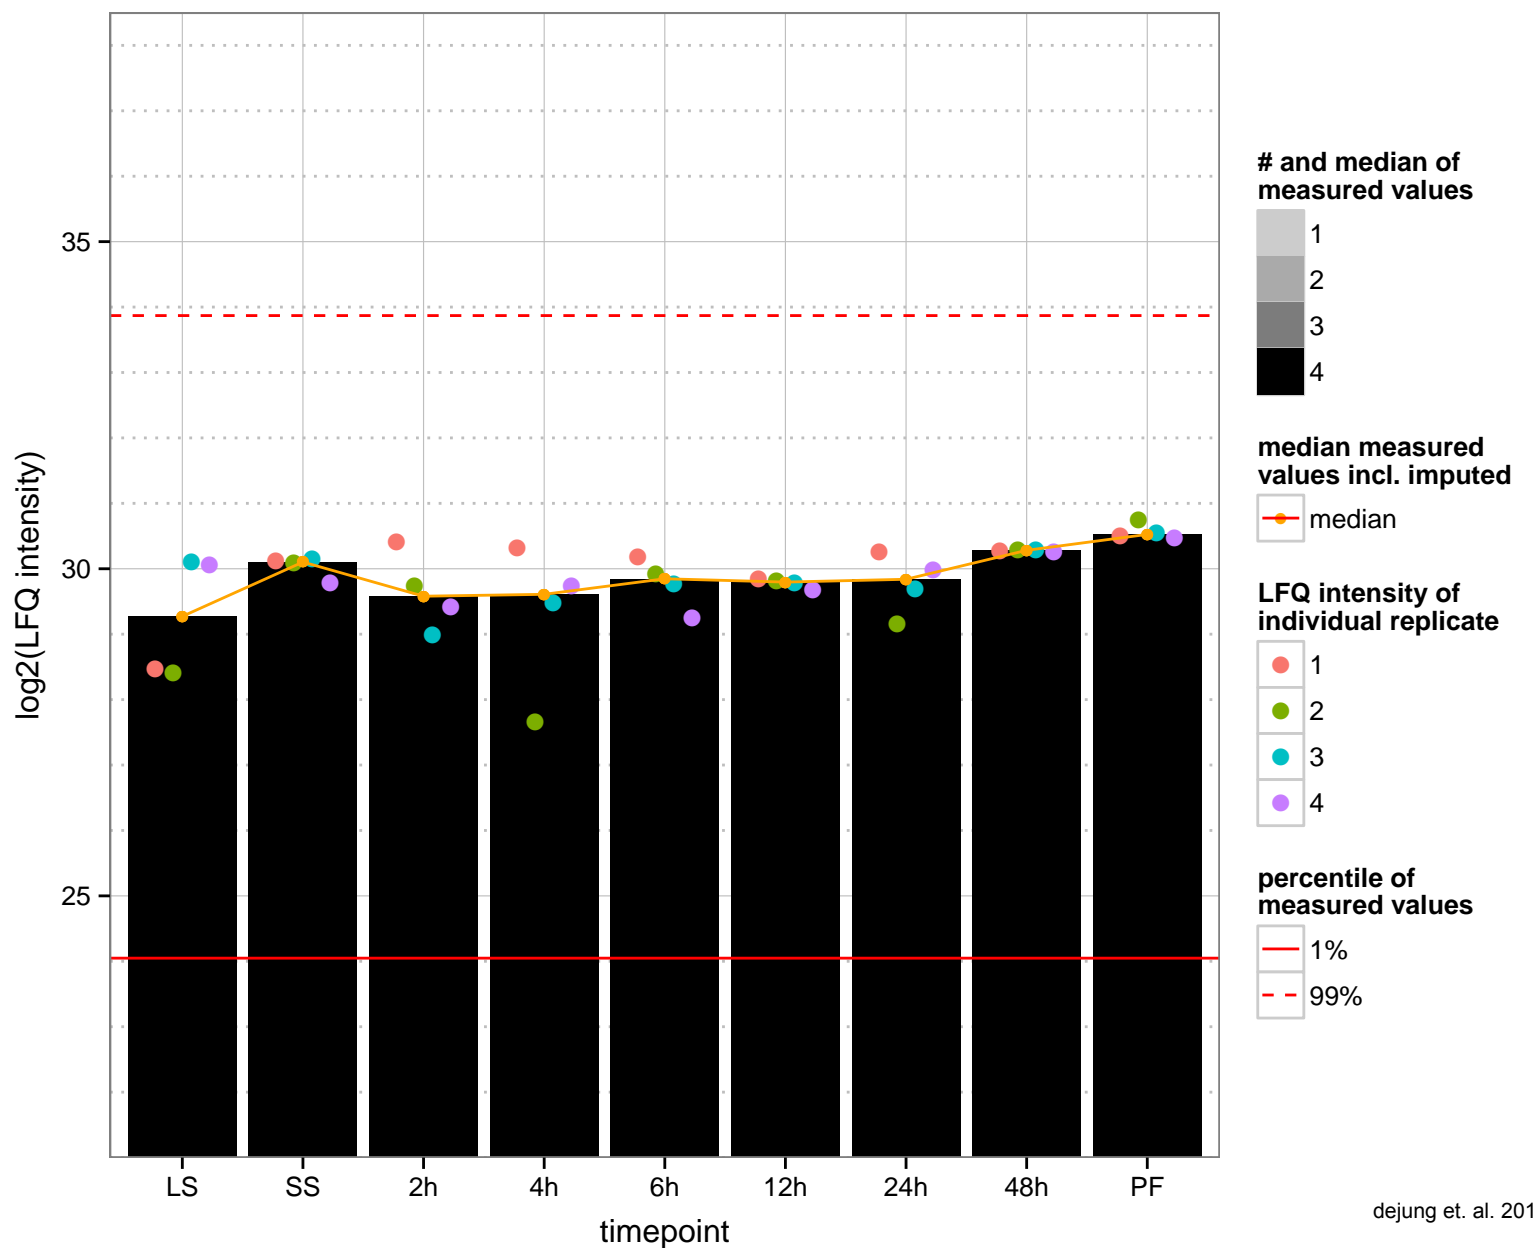

small nuclear ribonucleoprotein SmD3, putative (SmD3)

Tb927.4.890

AGOF: null

AGOC: nucleus, small nuclear ribonucleoprotein complex

AGOP: RNA splicing, RNA splicing, via transesterification reactions, mRNA processing

PGOF: null

PGOC: null

PGOP: null

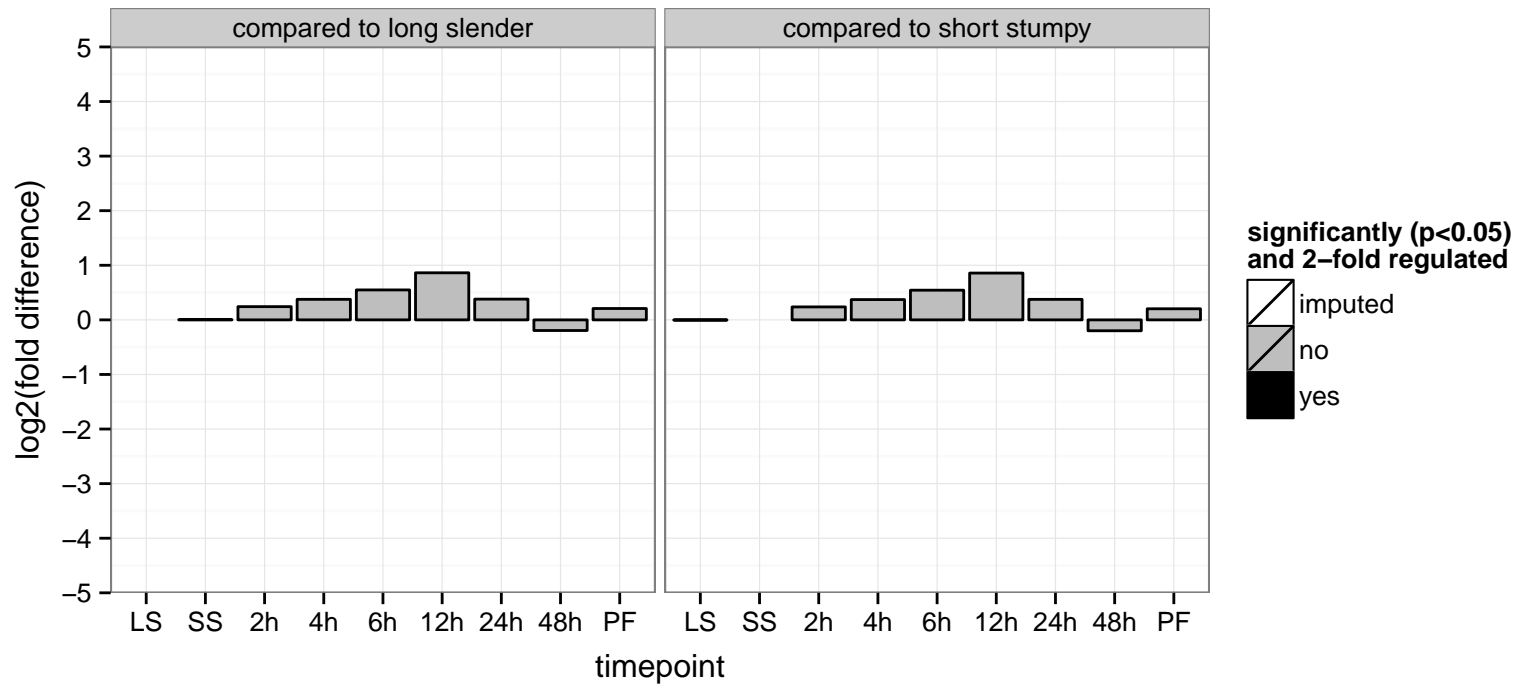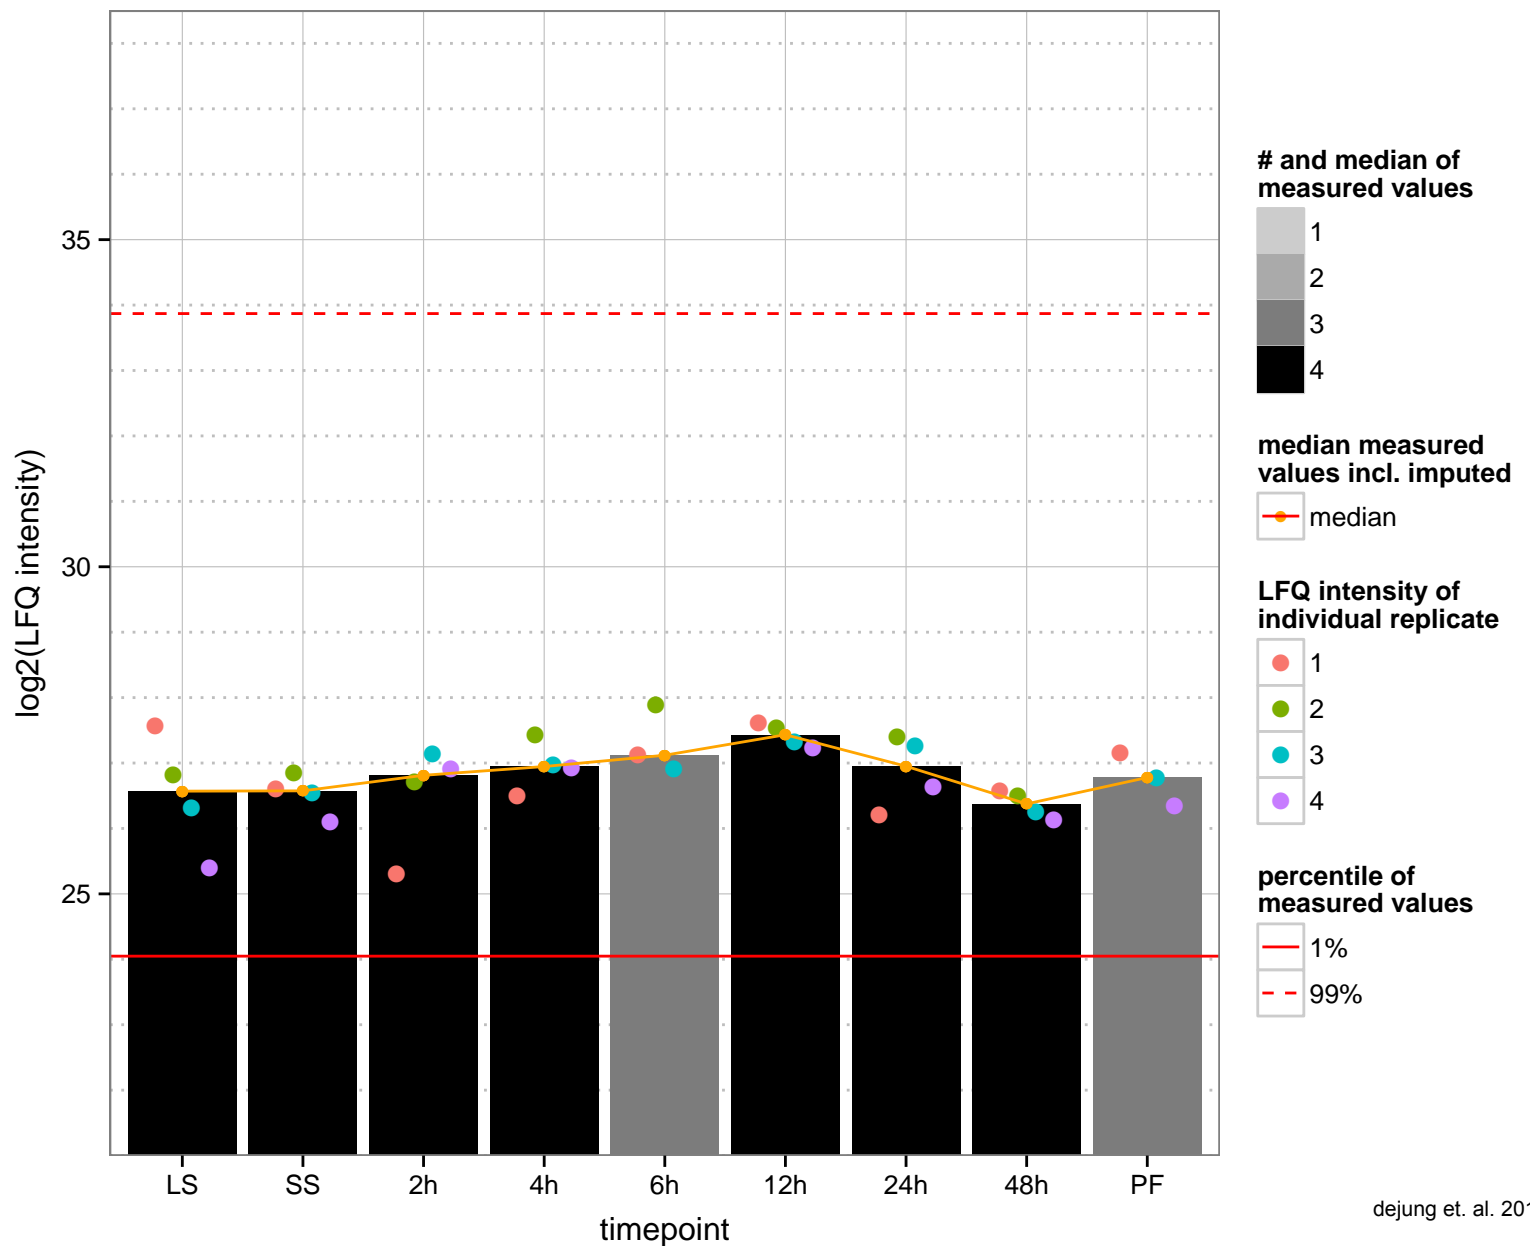

hypothetical protein, conserved  
 Tb927.4.920  
 AGOF: null  
 AGOC: null  
 AGOP: null  
 PGO: protein binding  
 PGOC: null  
 PGOP: null

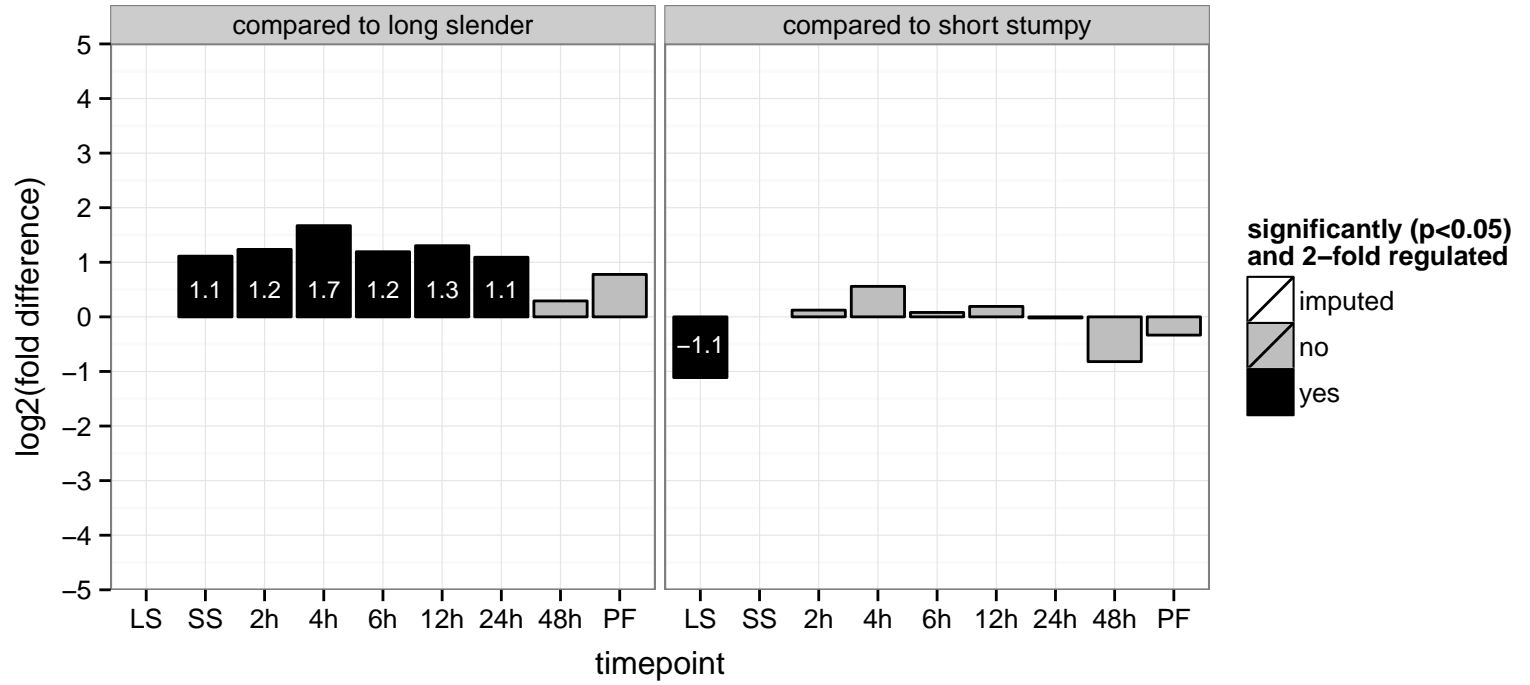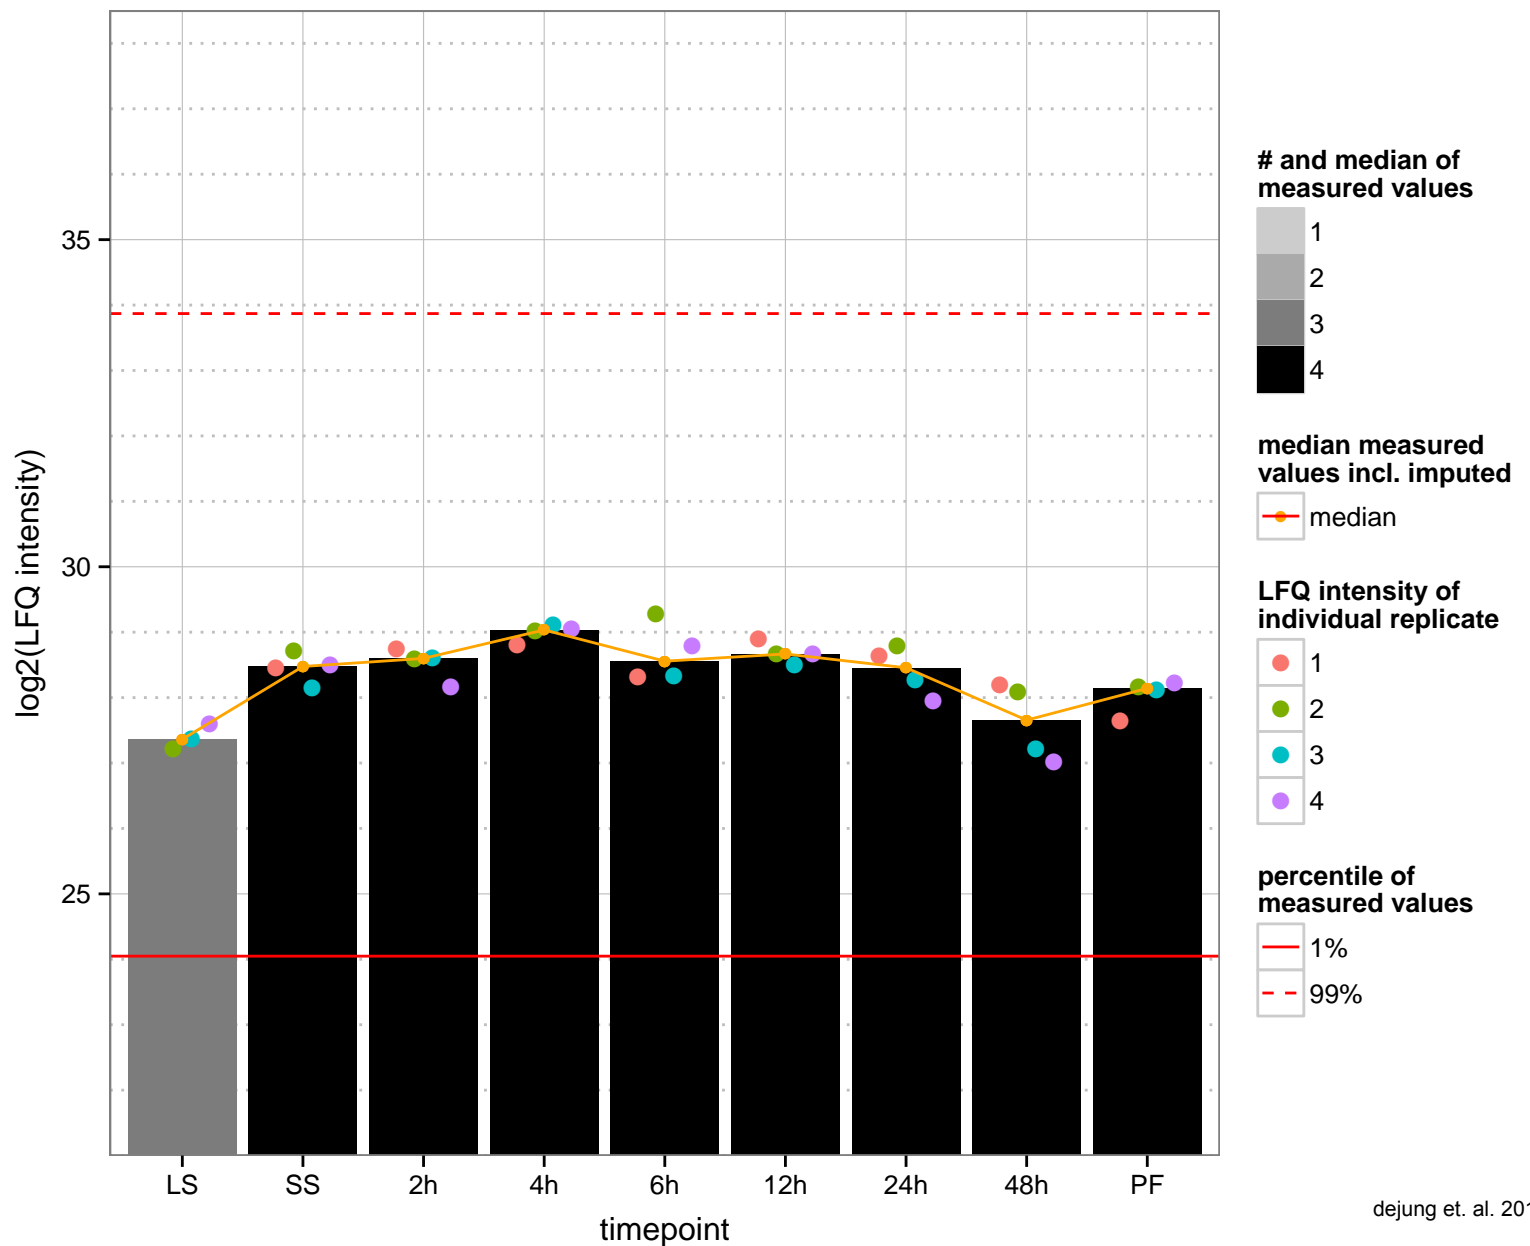

hypothetical protein, conserved  
 Tb927.4.970  
 AGOF: null  
 AGOC: null  
 AGOP: null  
 PGOF: null  
 PGO C: null  
 PGOP: null

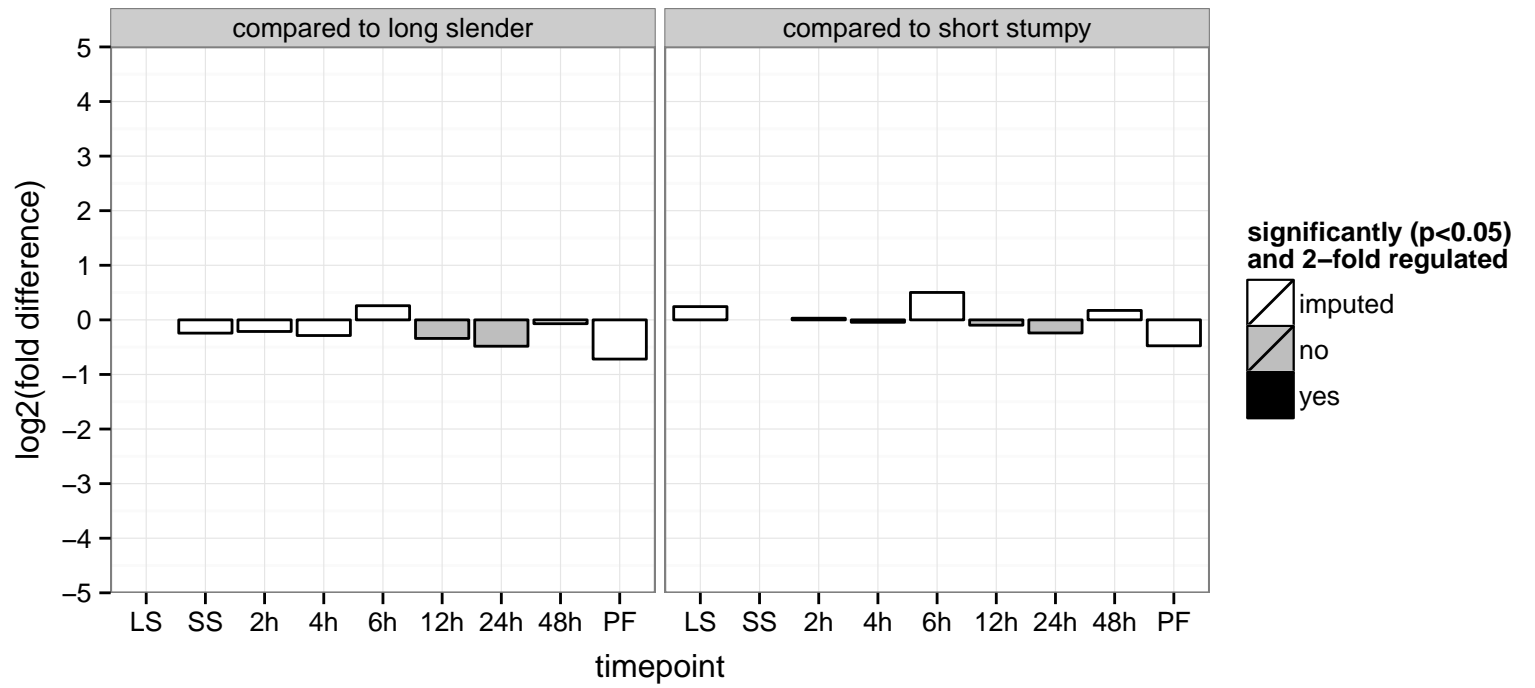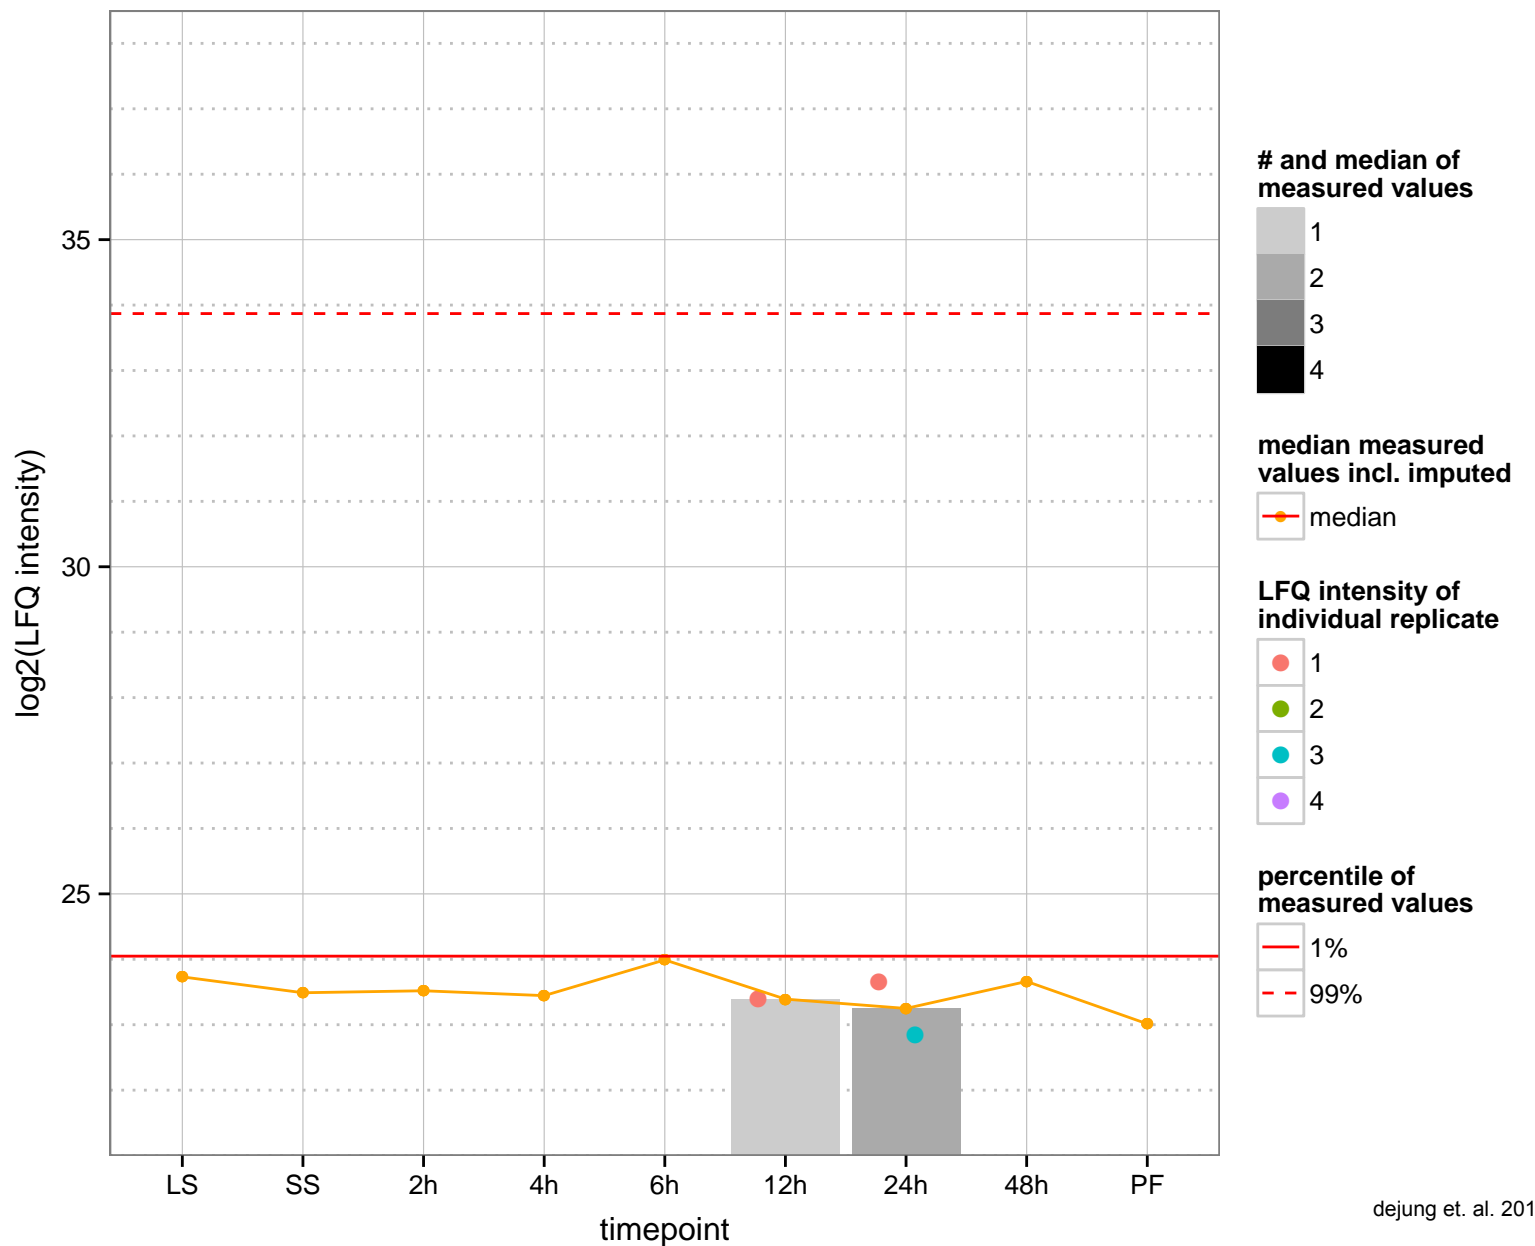

ubiquitin-conjugating enzyme E2, putative, ubiquitin carrier protein, ubiquitin-protein ligase

Tb927.5.1000

AGOF: ubiquitin-protein ligase activity

AGOC: null

AGOP: cellular protein modification process, post-translational protein modification, regulation of protein metabolic process

PGOF: acid-amino acid ligase activity

PGOC: null

PGOP: null

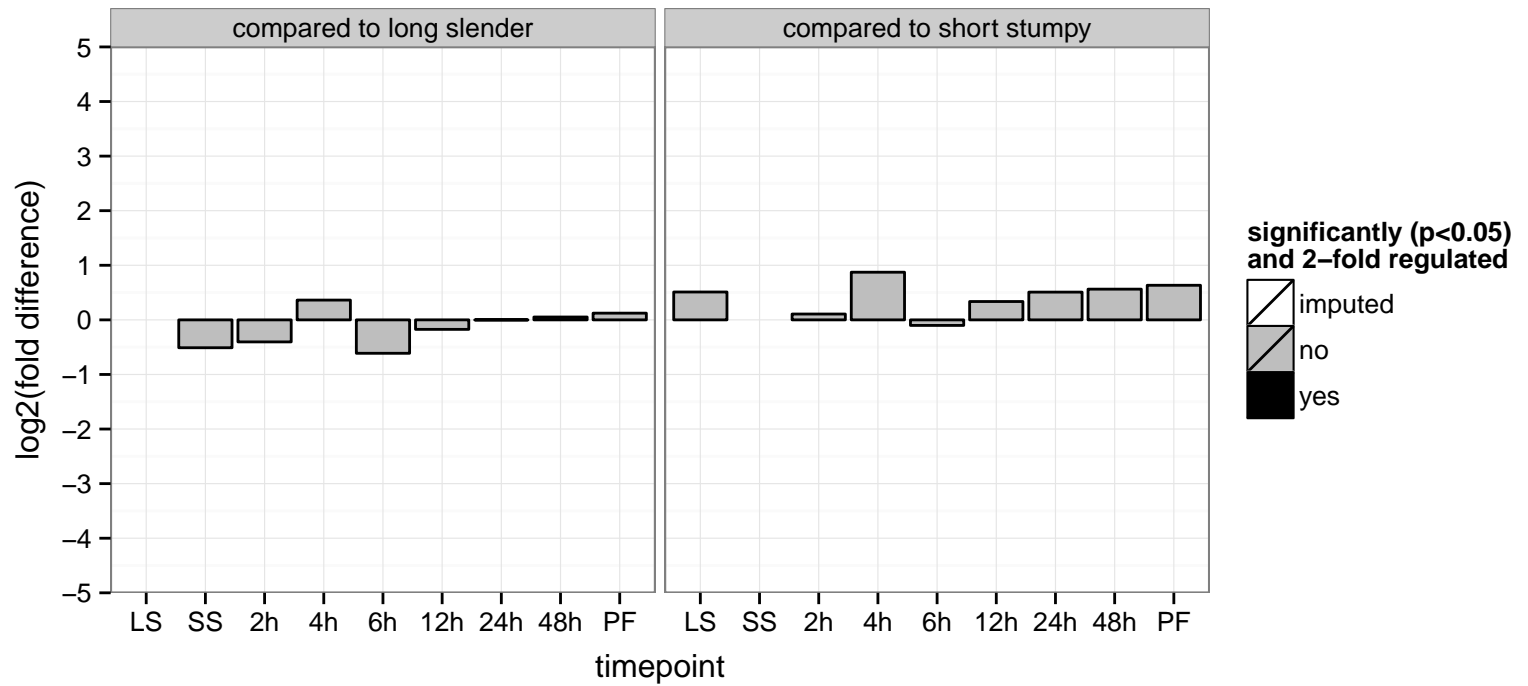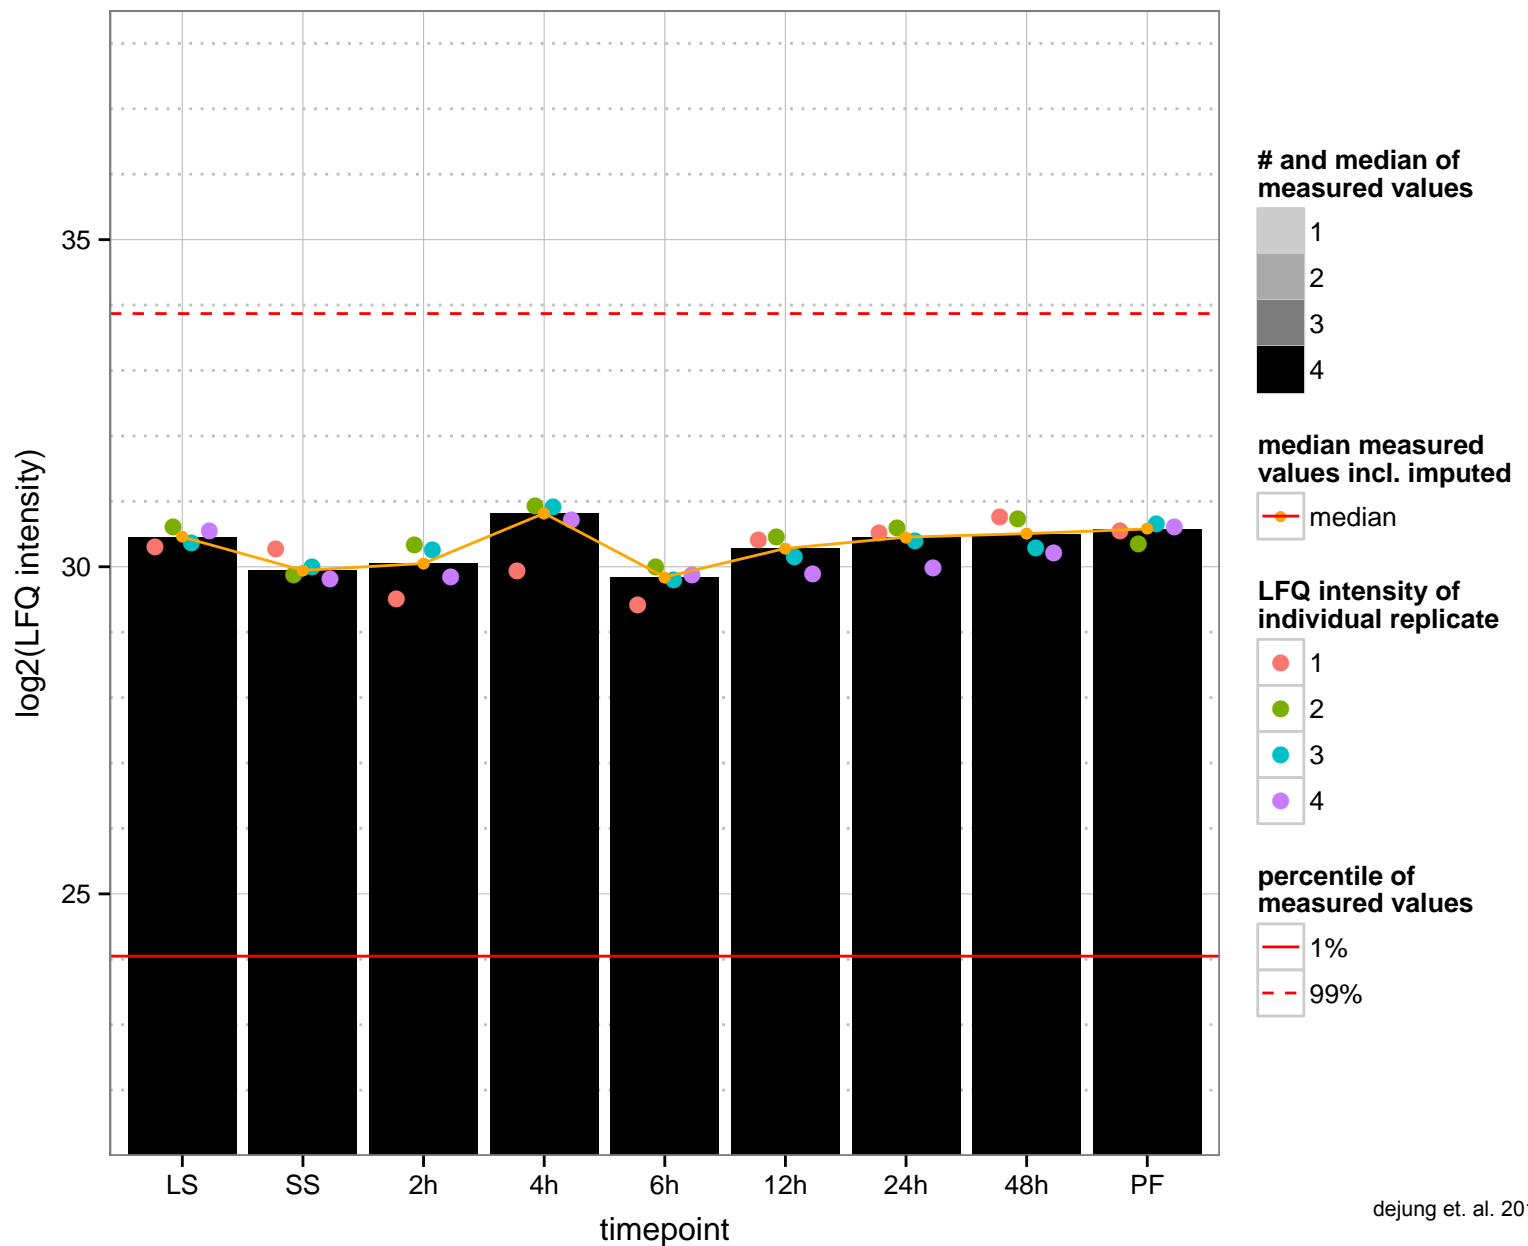

hypothetical protein, conserved  
 Tb927.5.1010  
 AGOF: null  
 AGOC: null  
 AGOP: null  
 PGOF: null  
 PGOC: null  
 PGOP: null

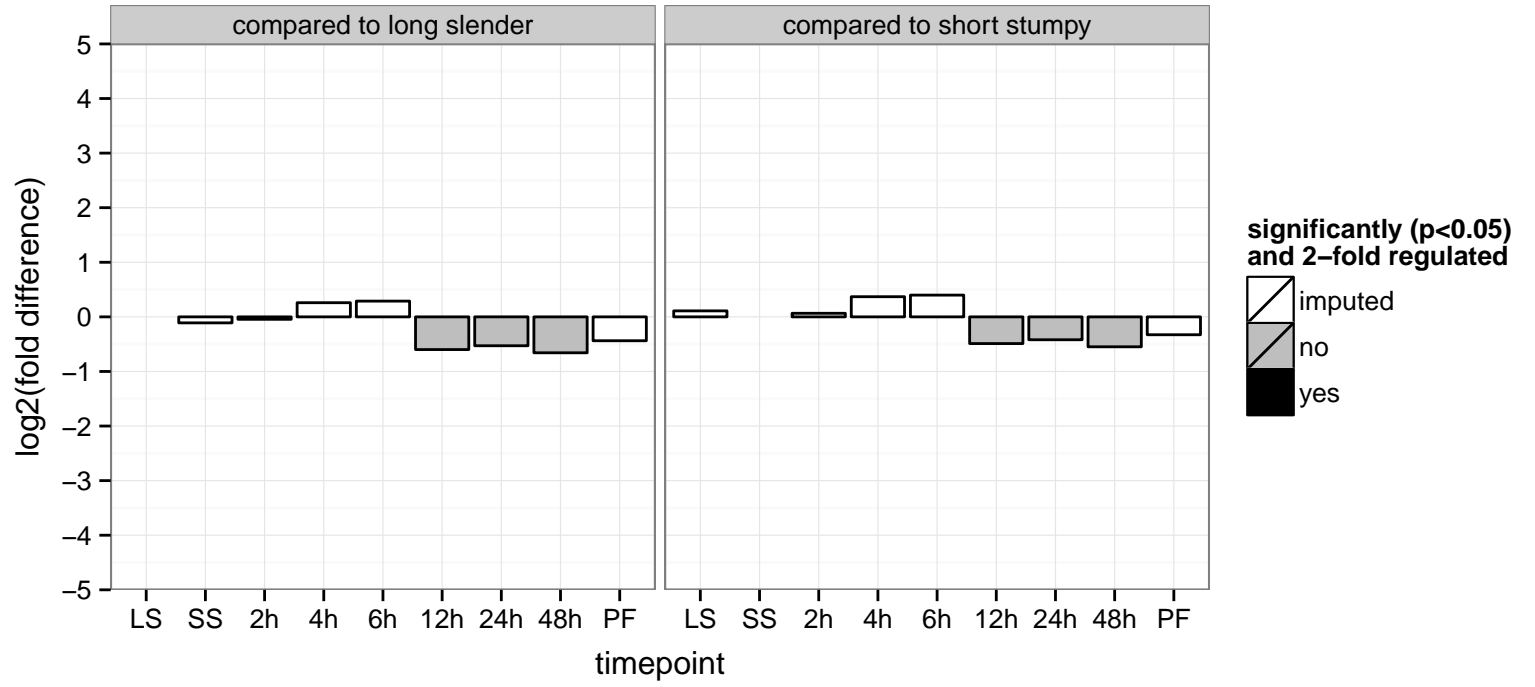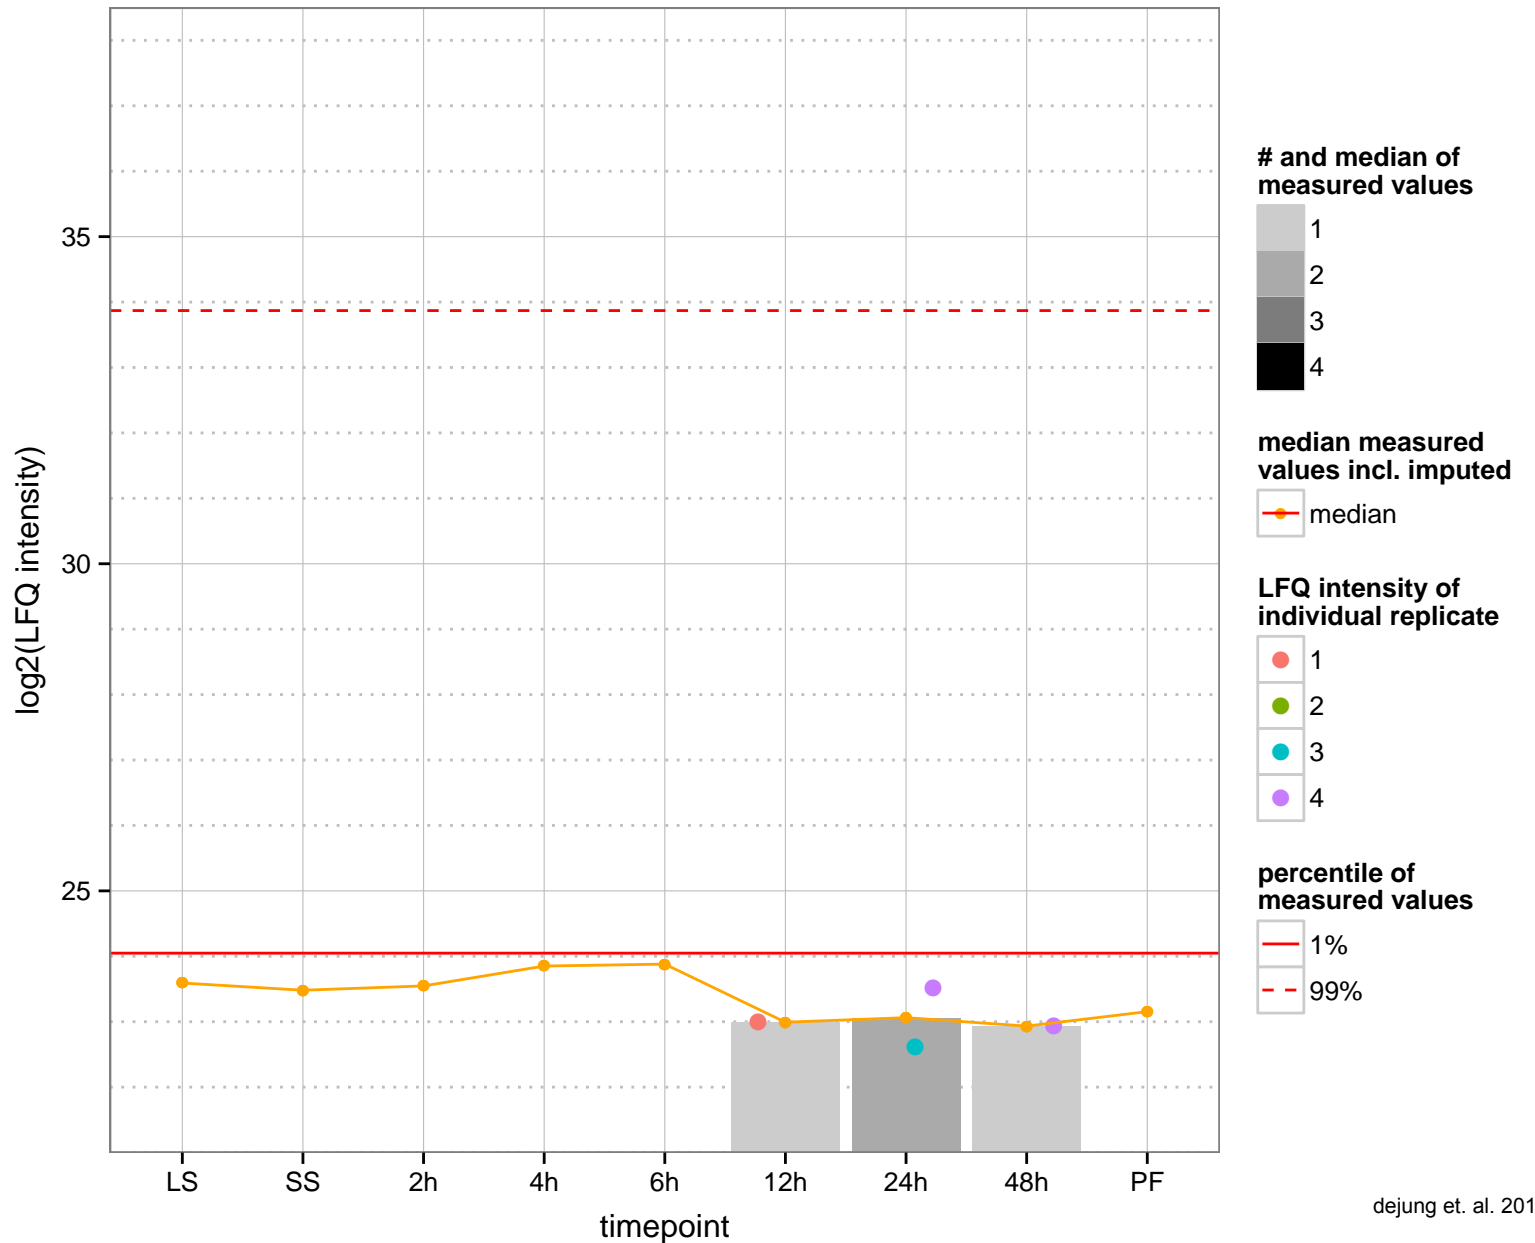

RNA-binding protein, putative (RBP22)  
 Tb927.5.1080  
 AGOF: RNA binding  
 AGOC: null  
 AGOP: RNA processing  
 PGO: nucleic acid binding  
 PGO: null  
 PGO: null

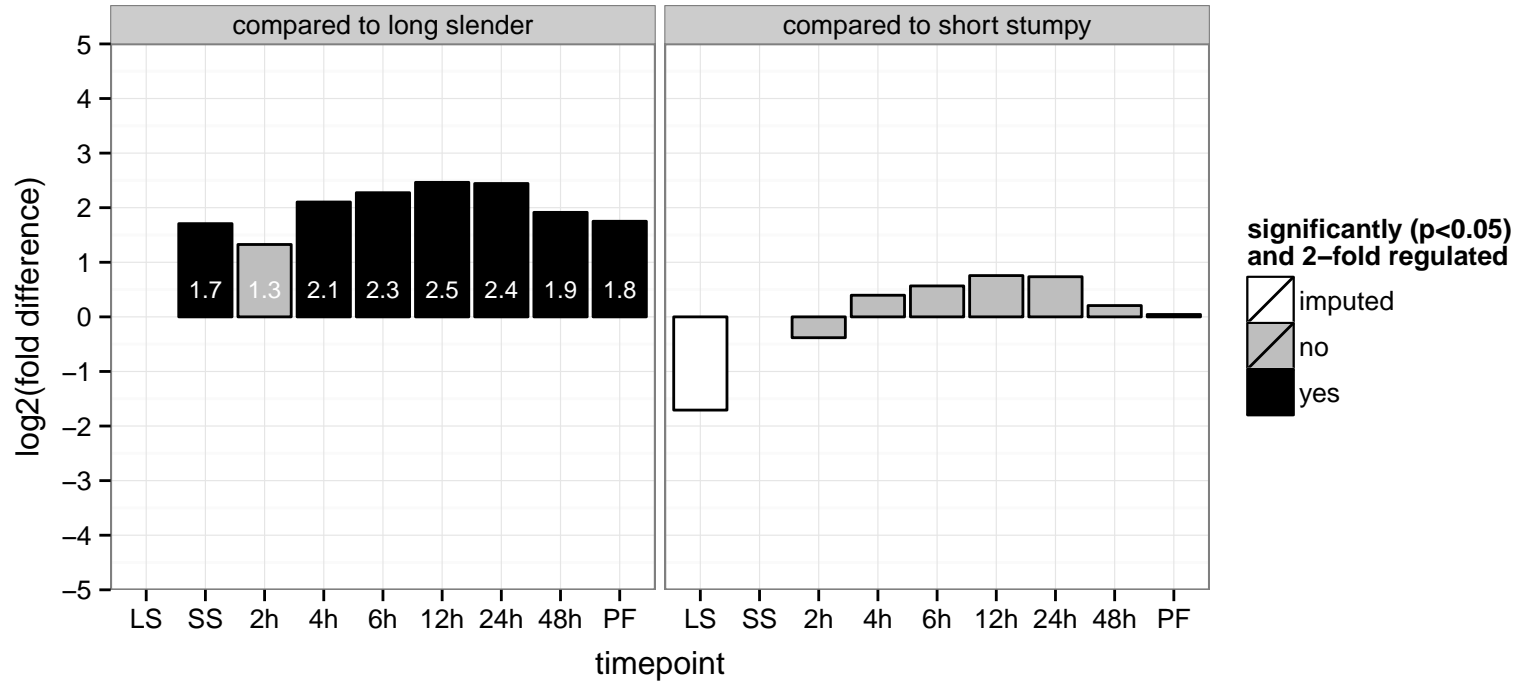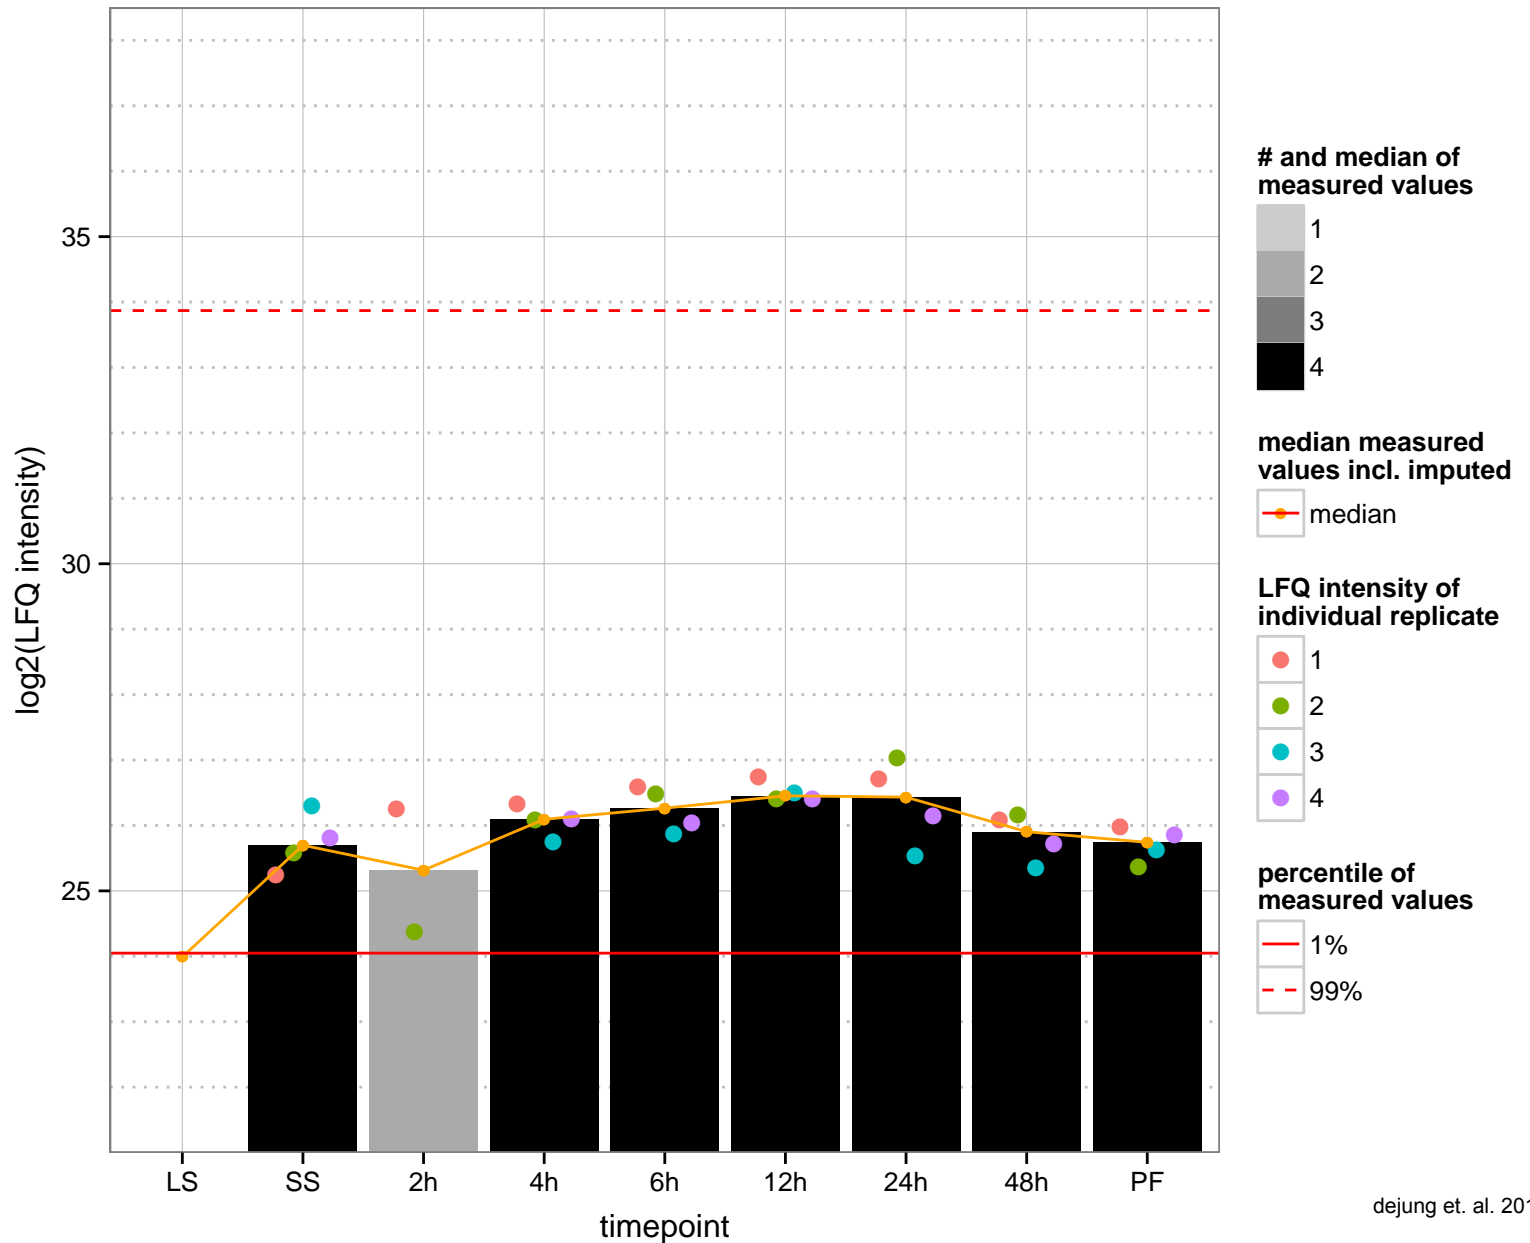

hypothetical protein, conserved  
 Tb927.5.1130  
 AGOF: null  
 AGOC: mitochondrion  
 AGOP: null  
 PGO: null  
 PGO: null  
 PGO: null

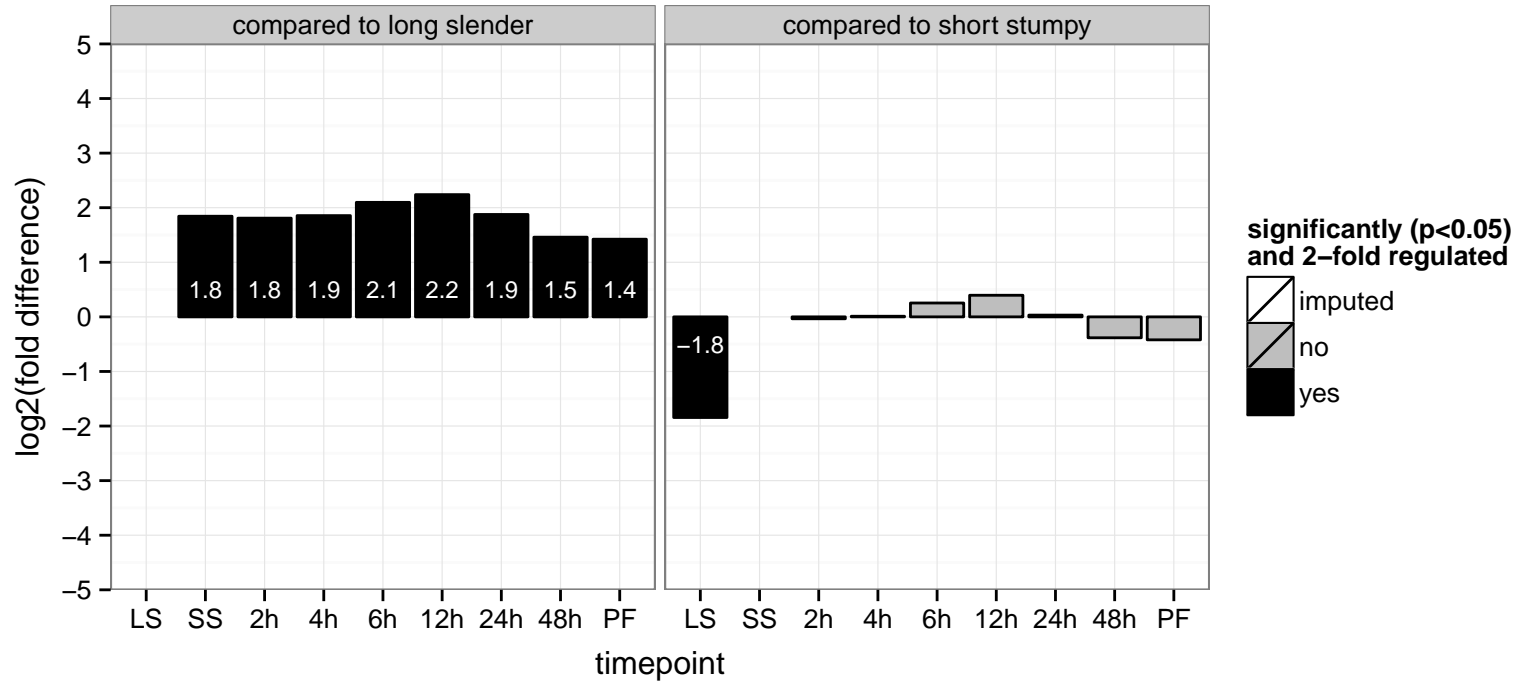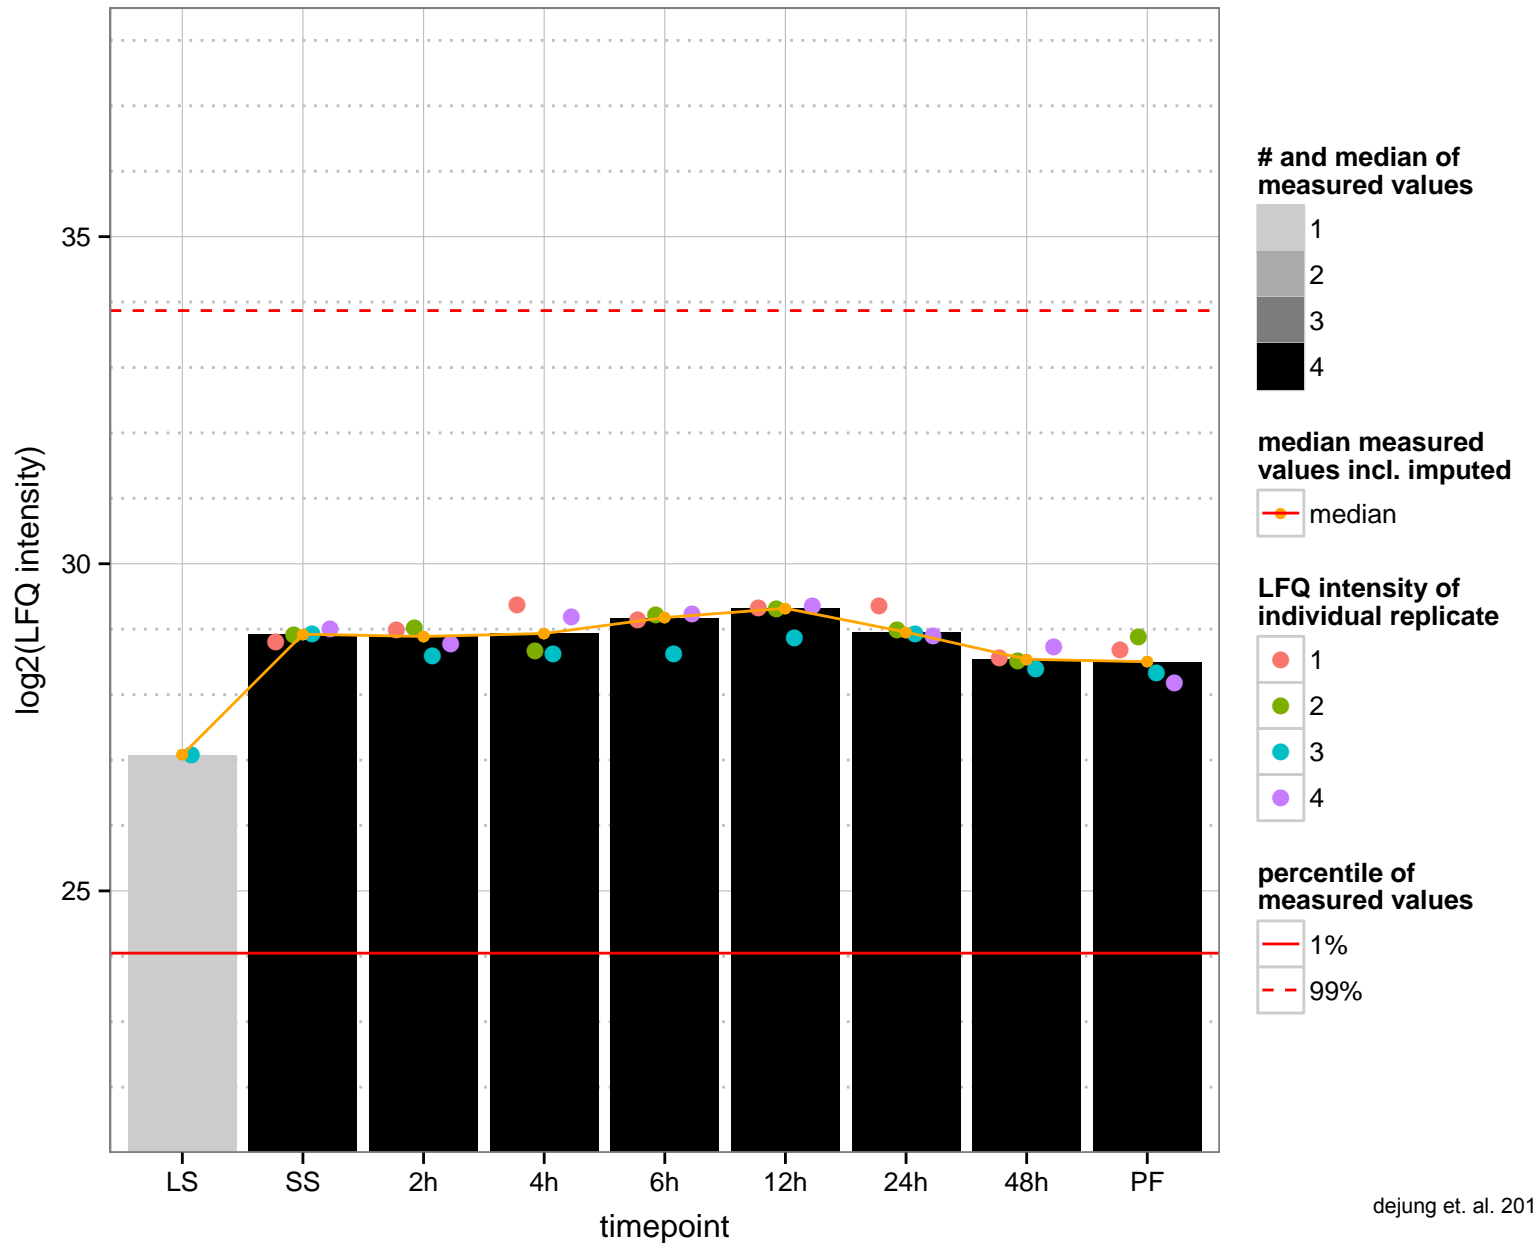



exosome component CSL4, Csl4p homologue (CSL4)

Tb927.5.1200

AGOF: null

AGOC: null

AGOP: null

PGOF: null

PGOC: null

PGOP: null

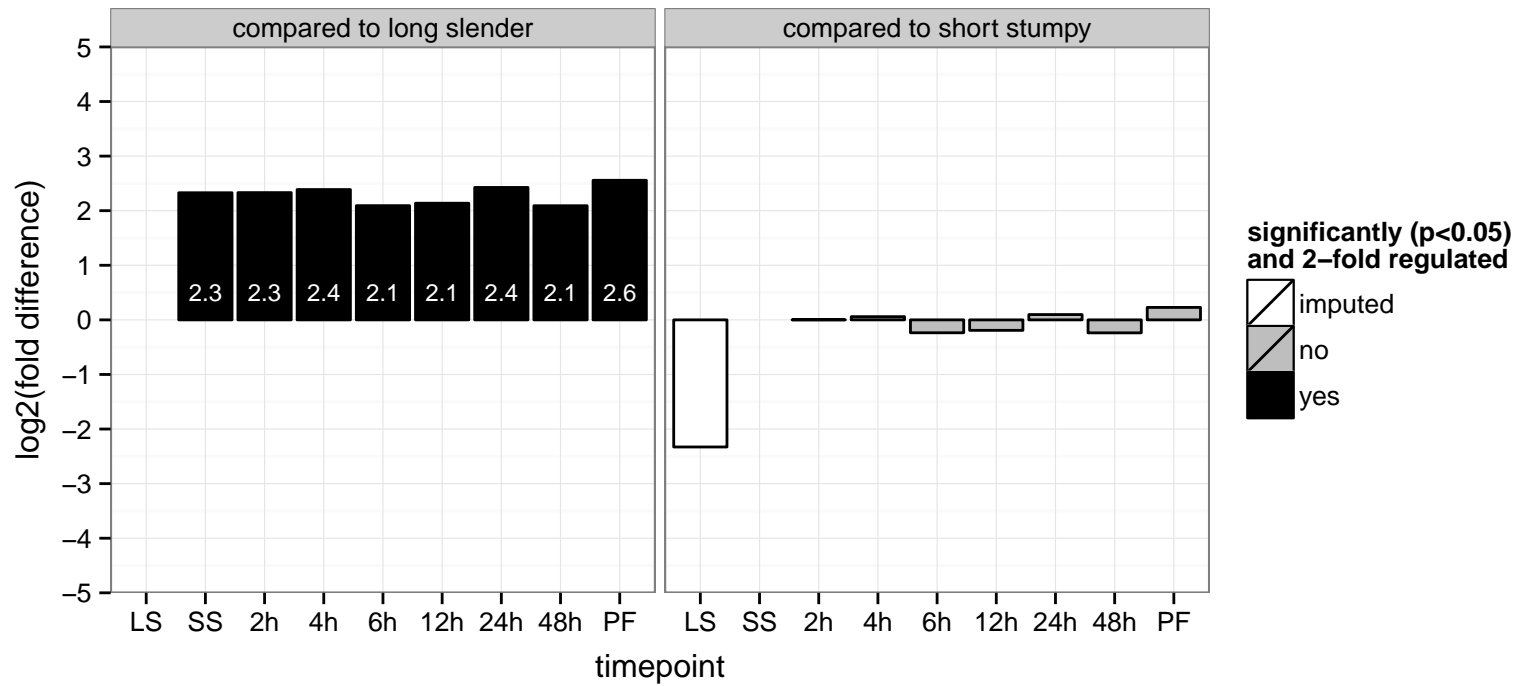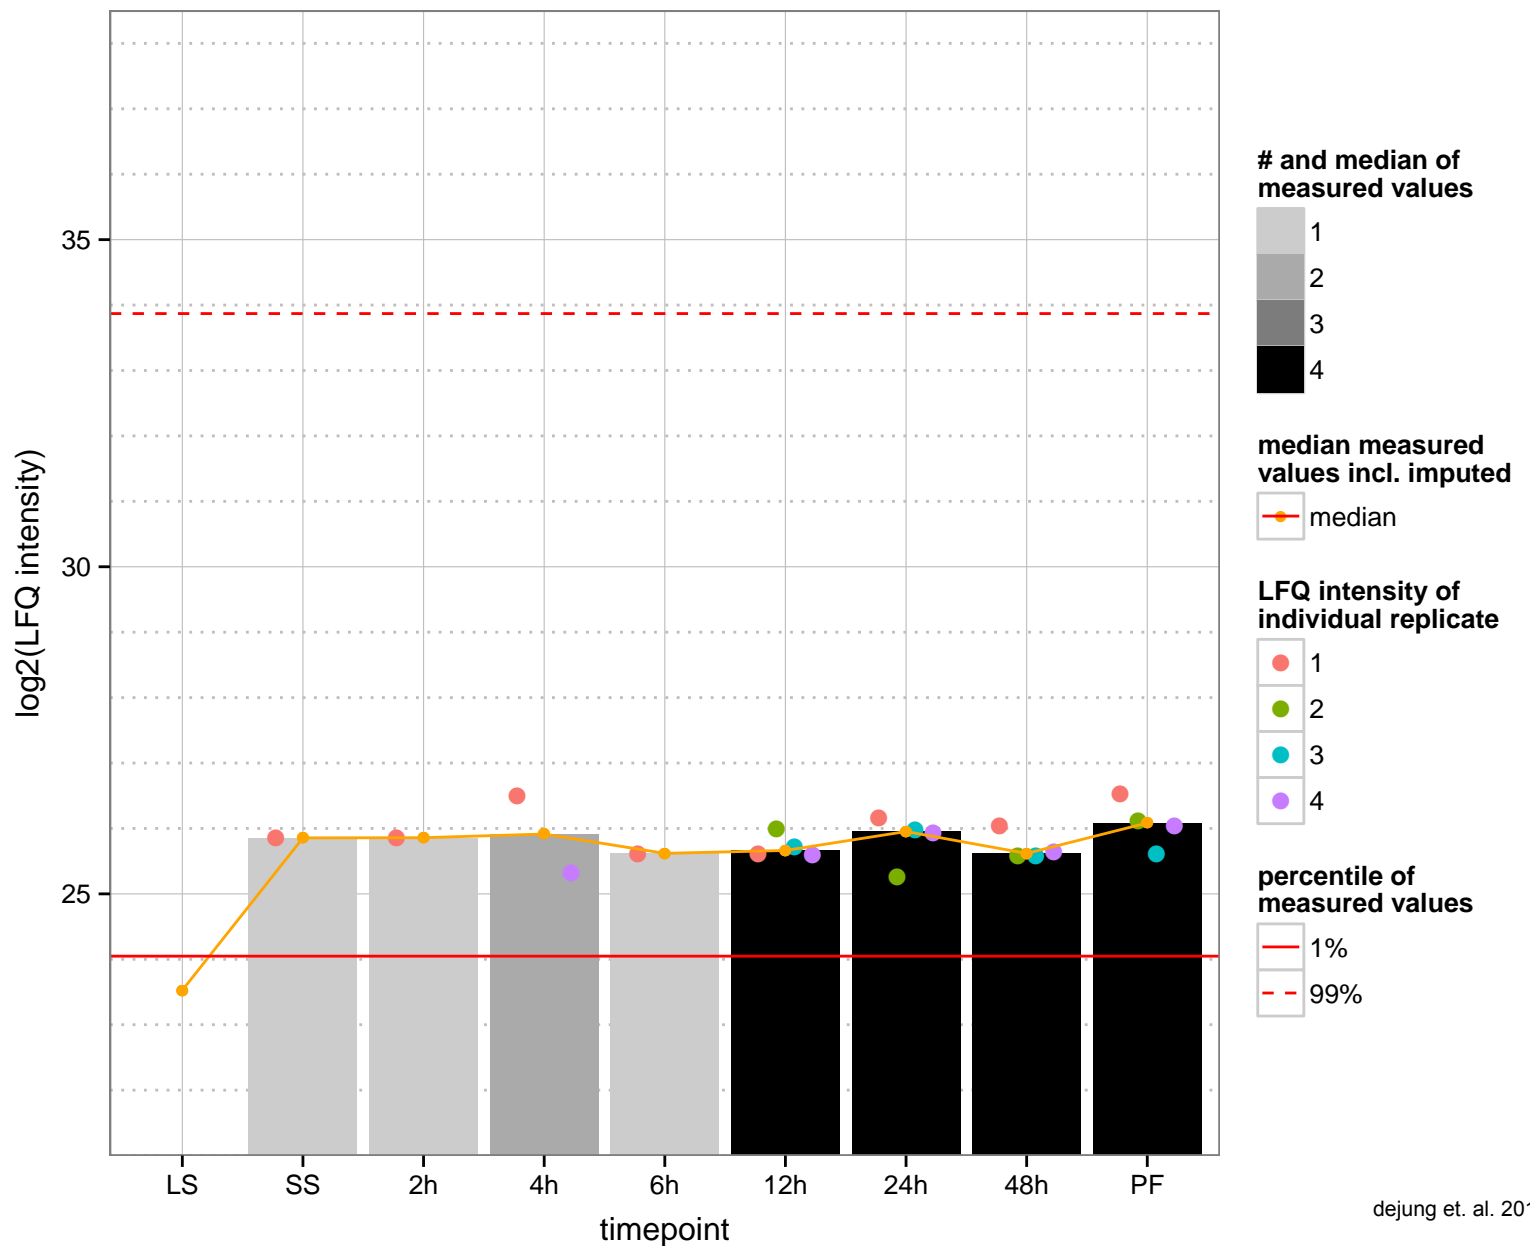

hypothetical protein, conserved  
 Tb927.5.1250  
 AGOF: null  
 AGOC: null  
 AGOP: null  
 PGO: protein binding  
 PGOC: null  
 PGOP: null

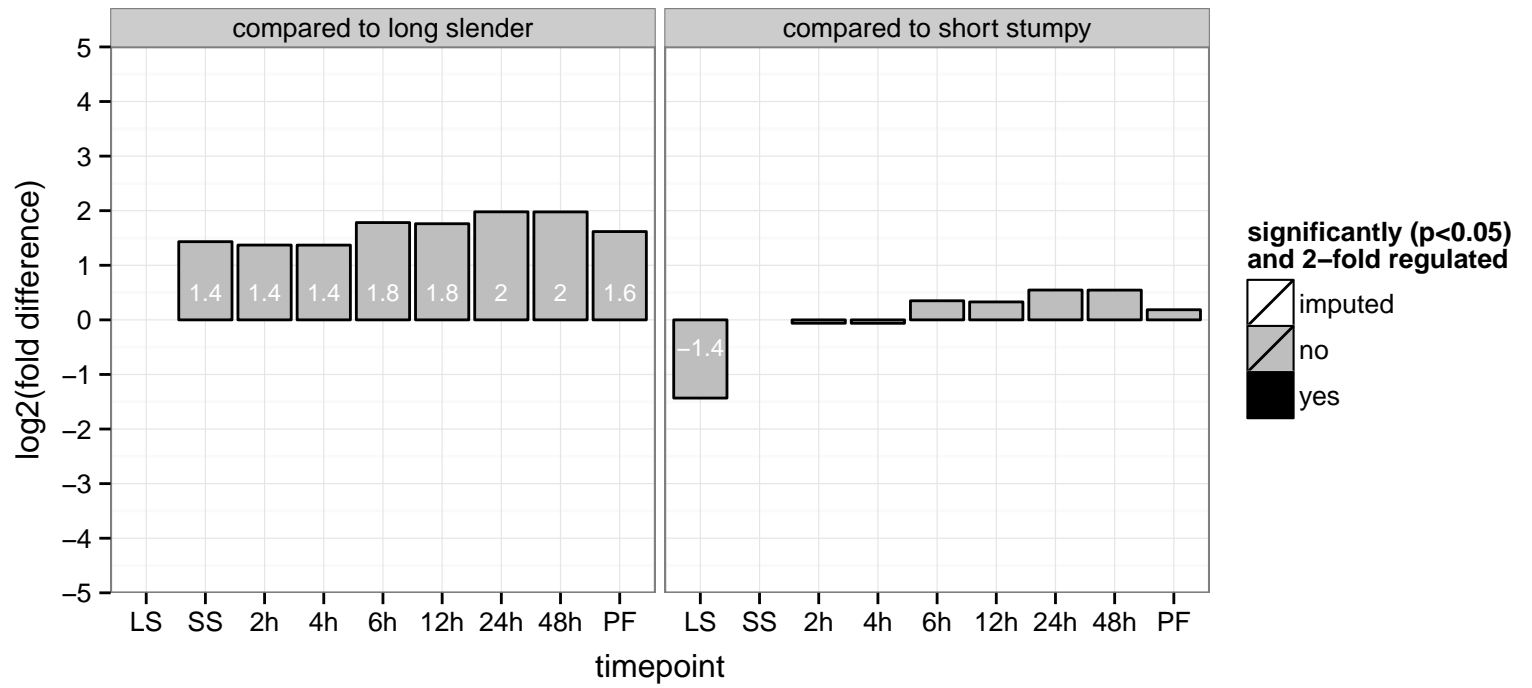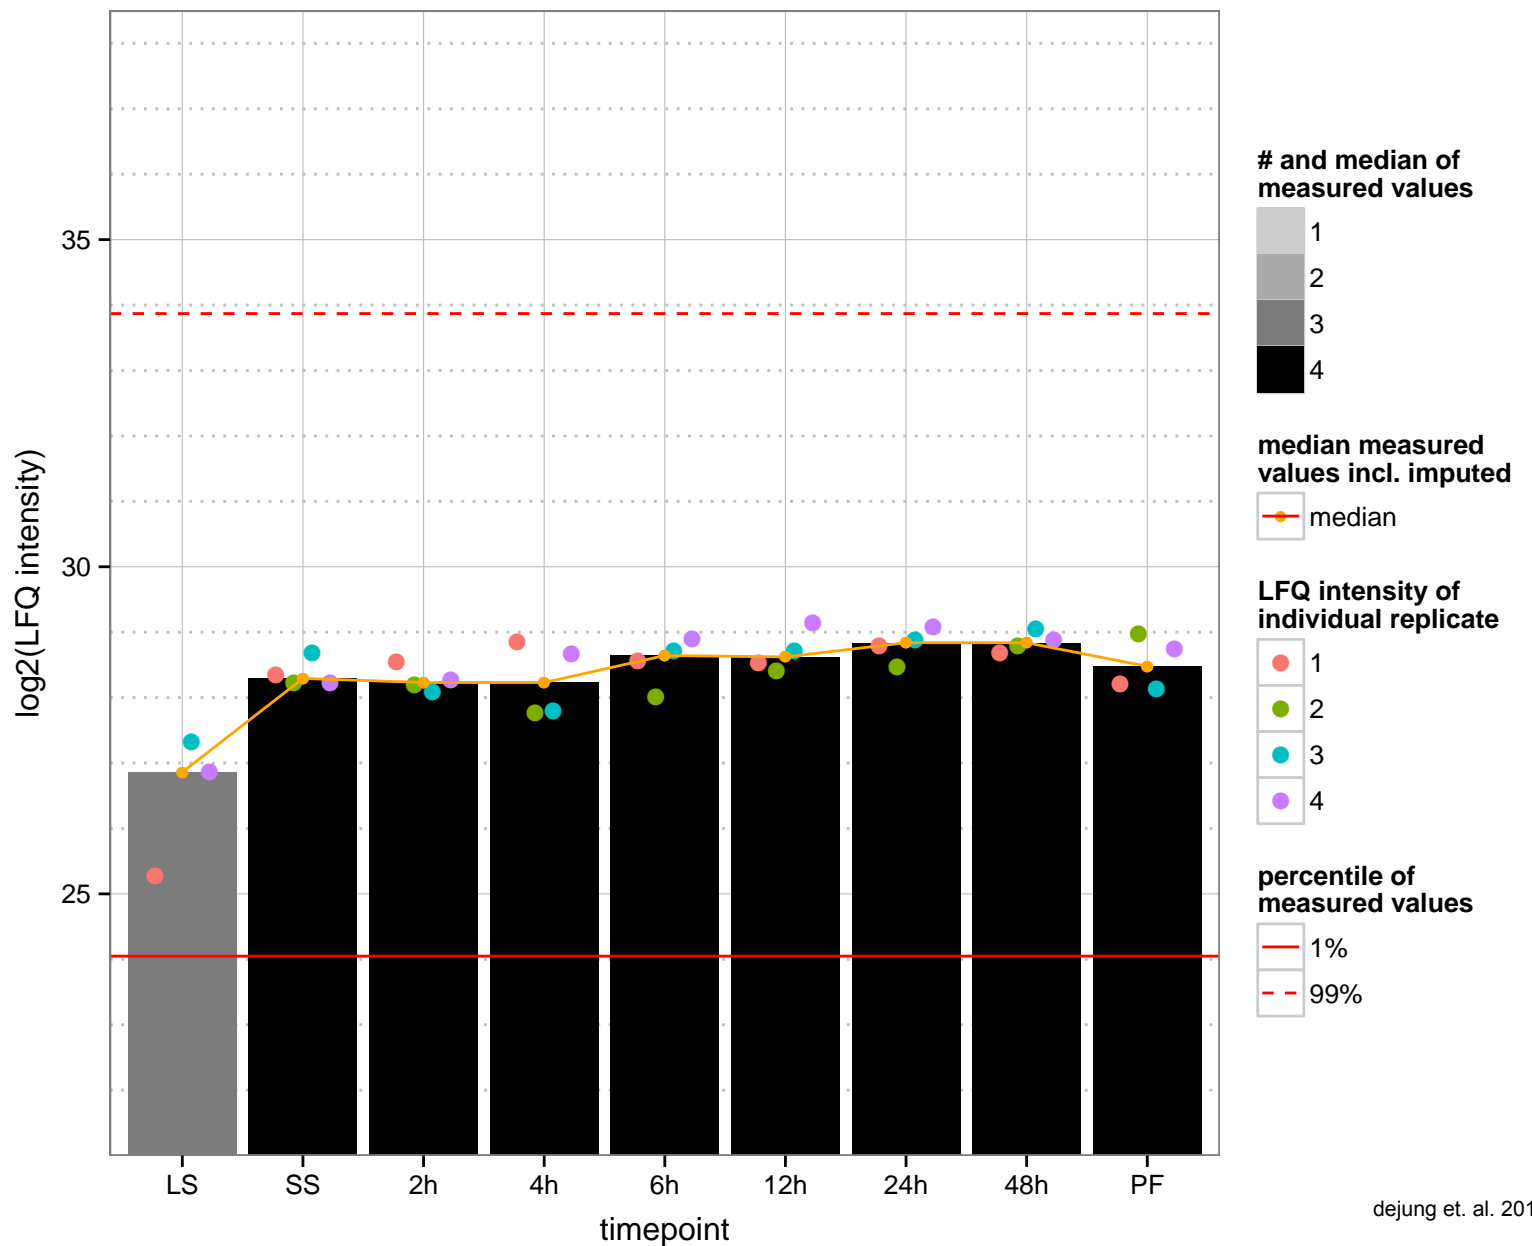

hypothetical protein, conserved  
 Tb927.5.1270  
 AGOF: null  
 AGOC: null  
 AGOP: null  
 PGO: null  
 PGOC: null  
 PGOP: null

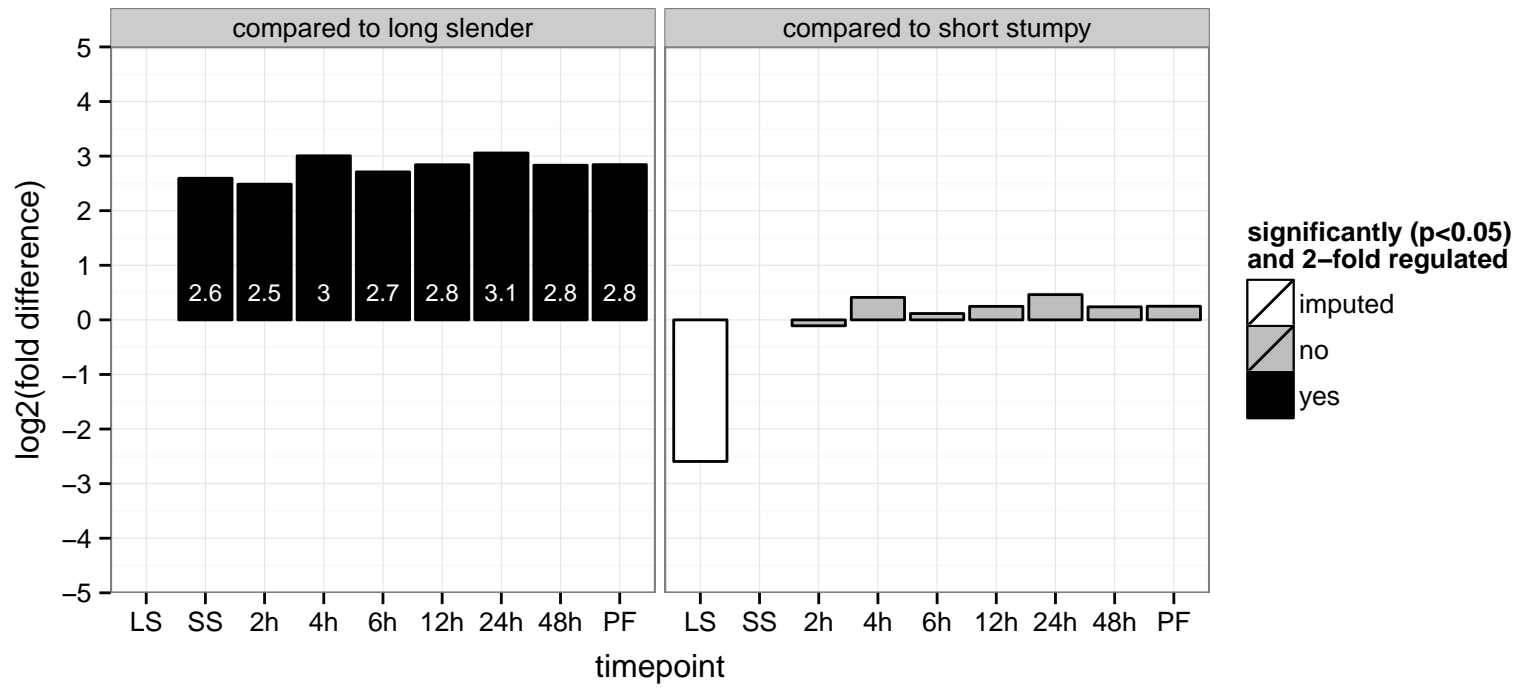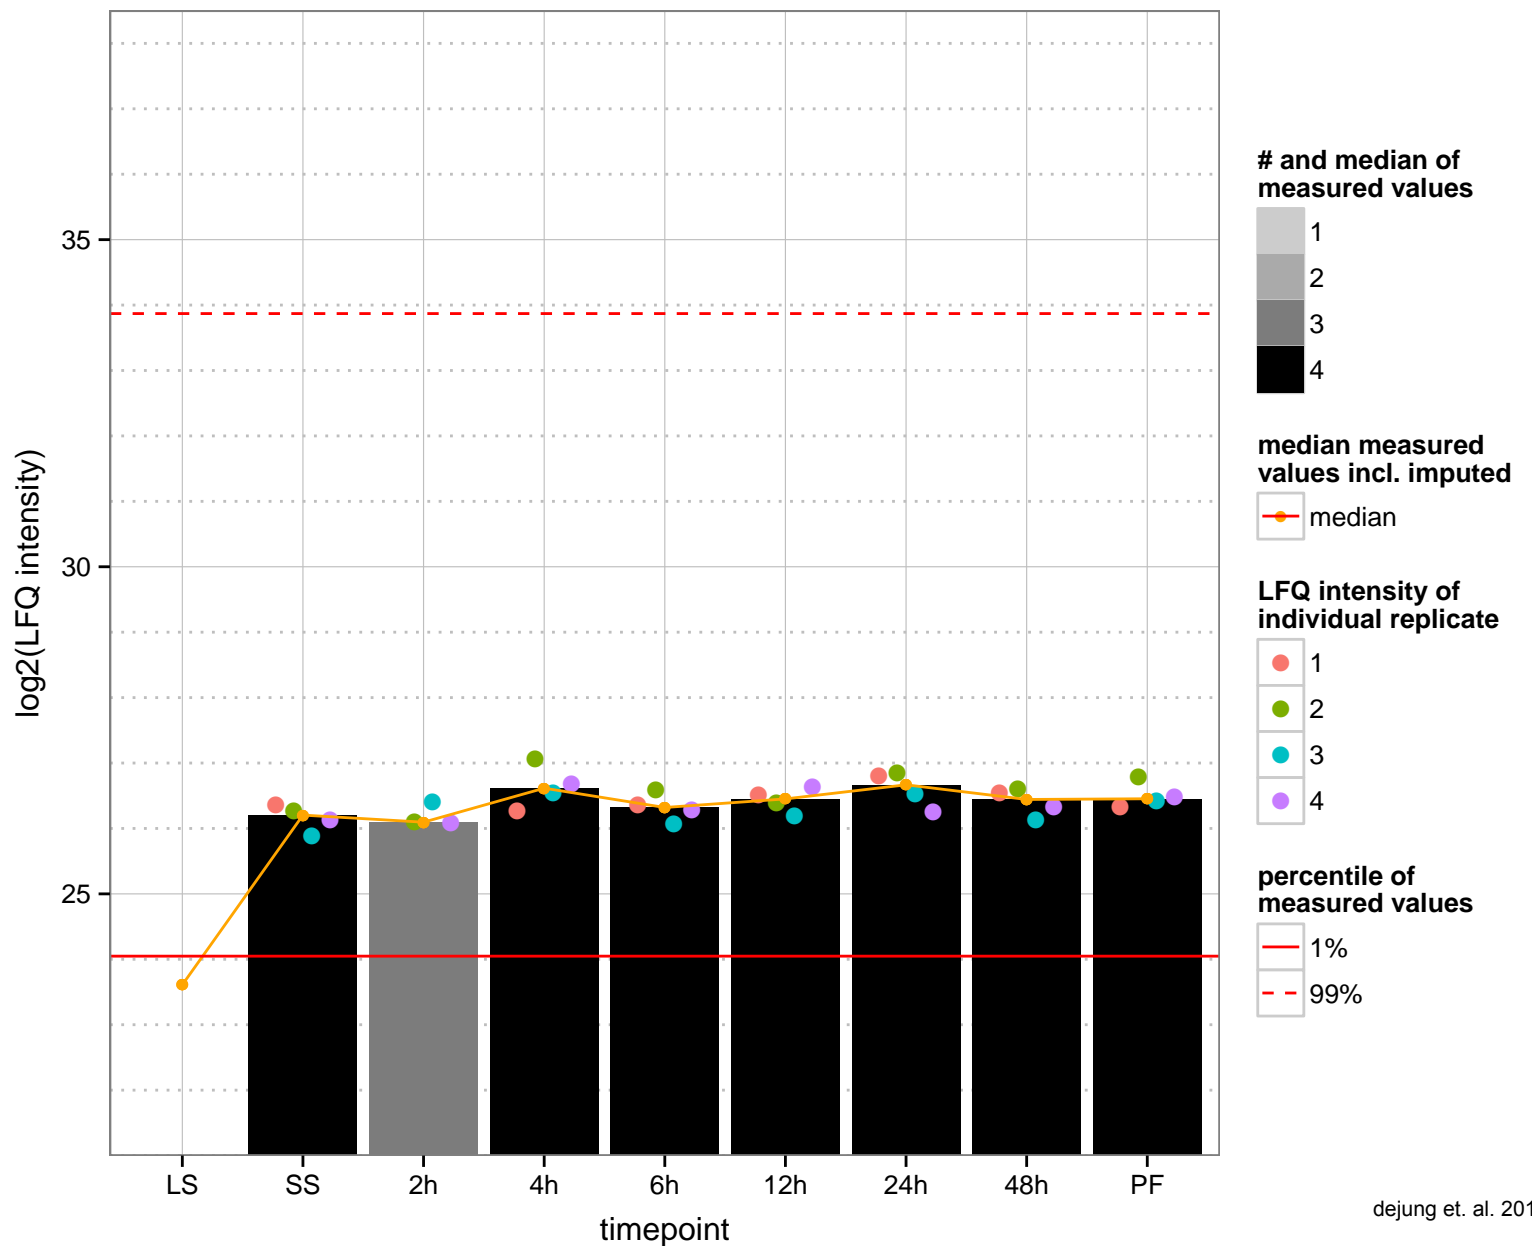

nucleoside 2-deoxyribosyltransferase (NDRT)

Tb927.5.1360

AGOF: null

AGOC: null

AGOP: null

PGOF: deoxyribonucleoside 5'-monophosphate N-glycosidase activity, nucleoside deoxyribosyltransferase activity

PGOC: null

PGOP: deoxyribonucleoside monophosphate catabolic process

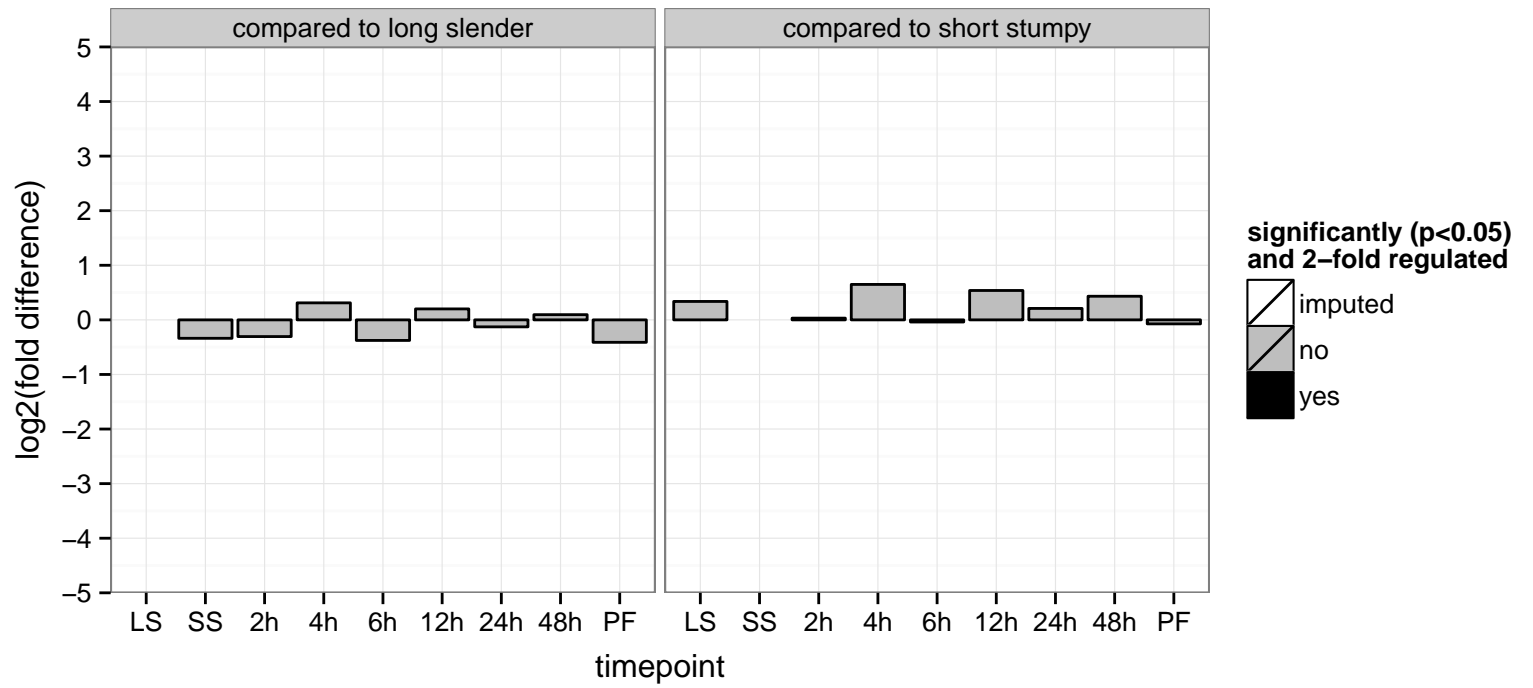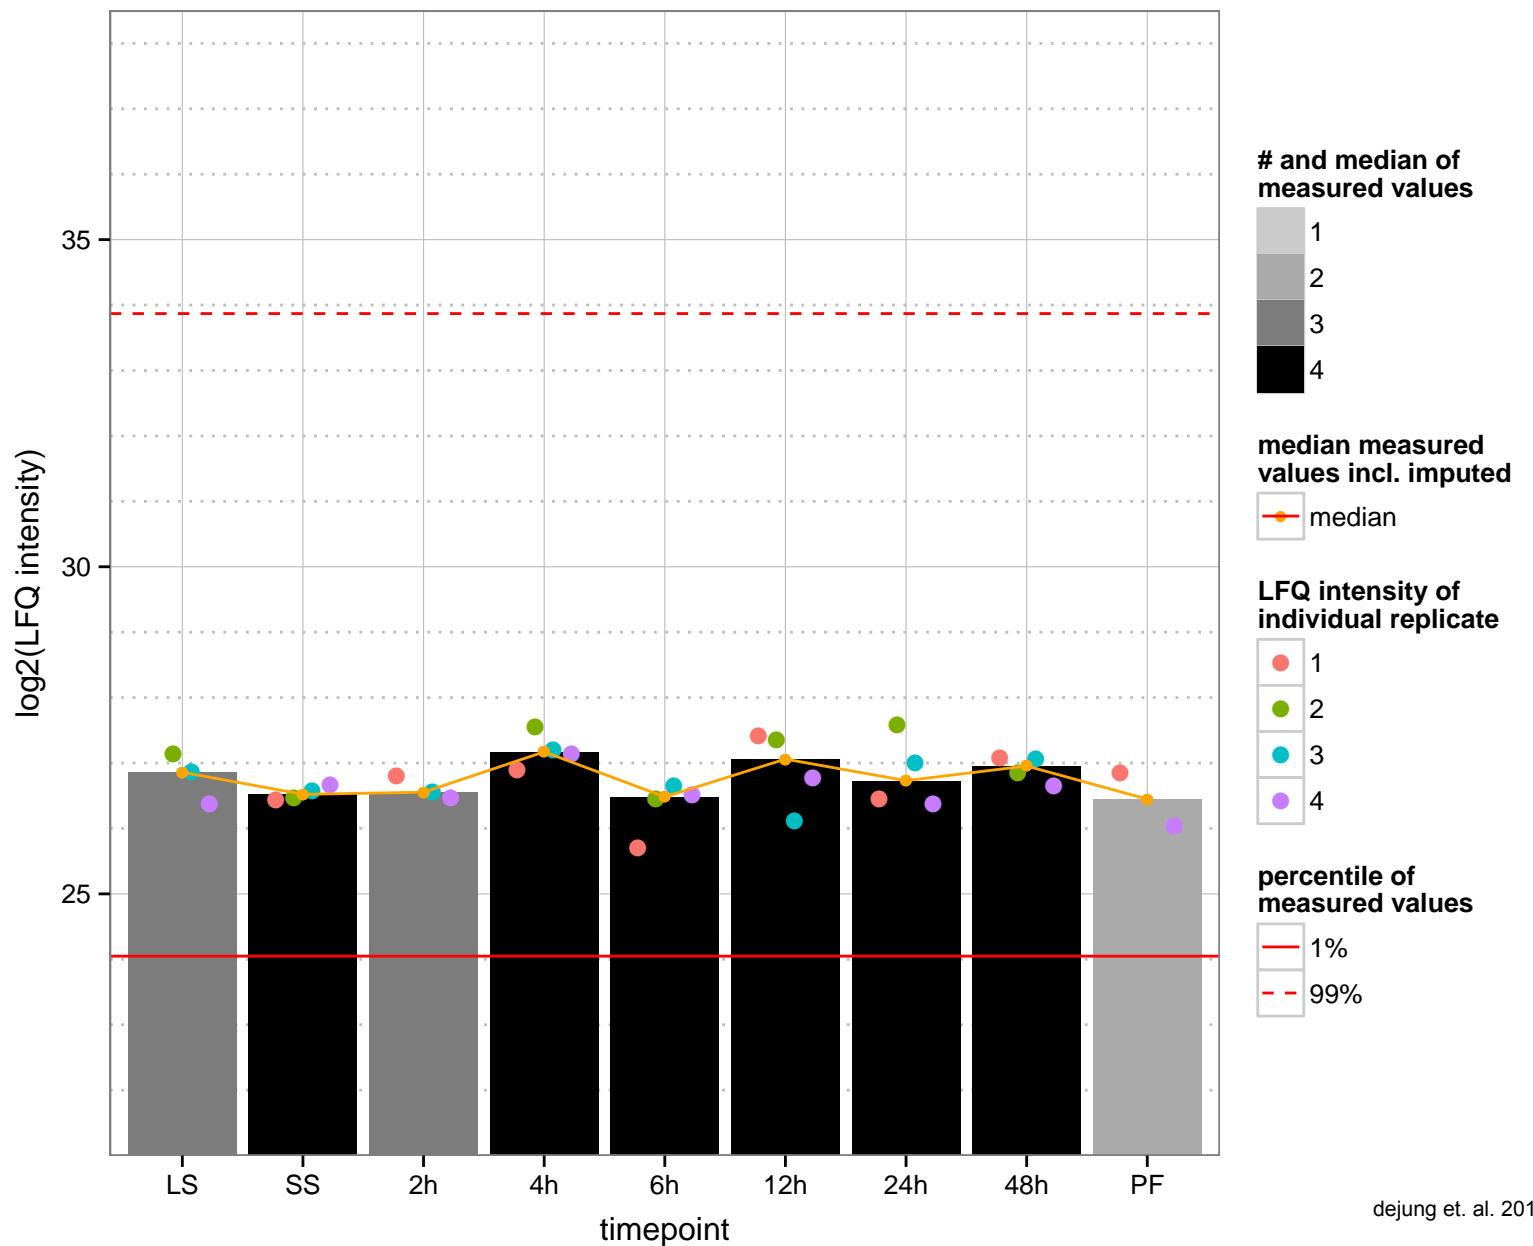

NADH-cytochrome b5 reductase, putative (B5R)  
 Tb927.5.1470  
 AGOF: electron carrier activity, oxidoreductase activity  
 AGOC: null  
 AGOP: null  
 PGOF: oxidoreductase activity  
 PGOC: null  
 PGOP: oxidation-reduction process

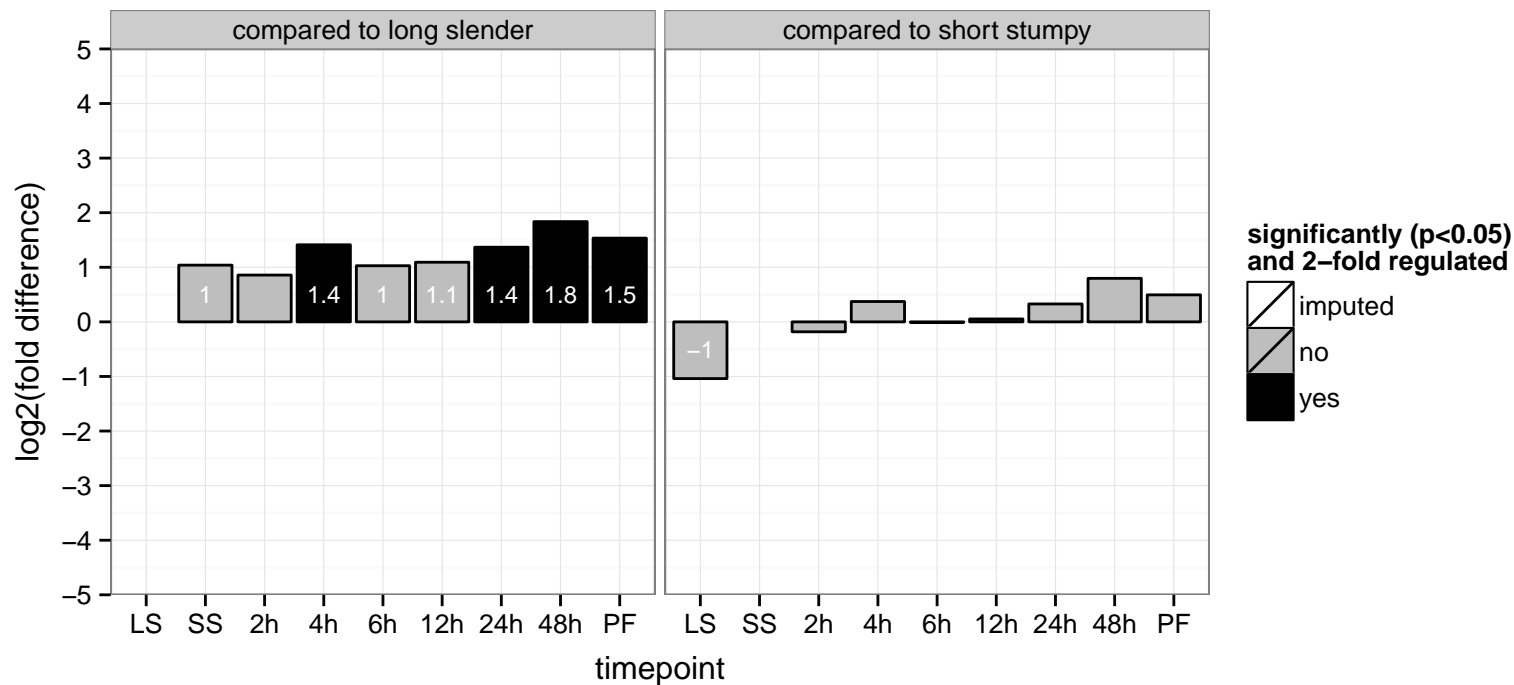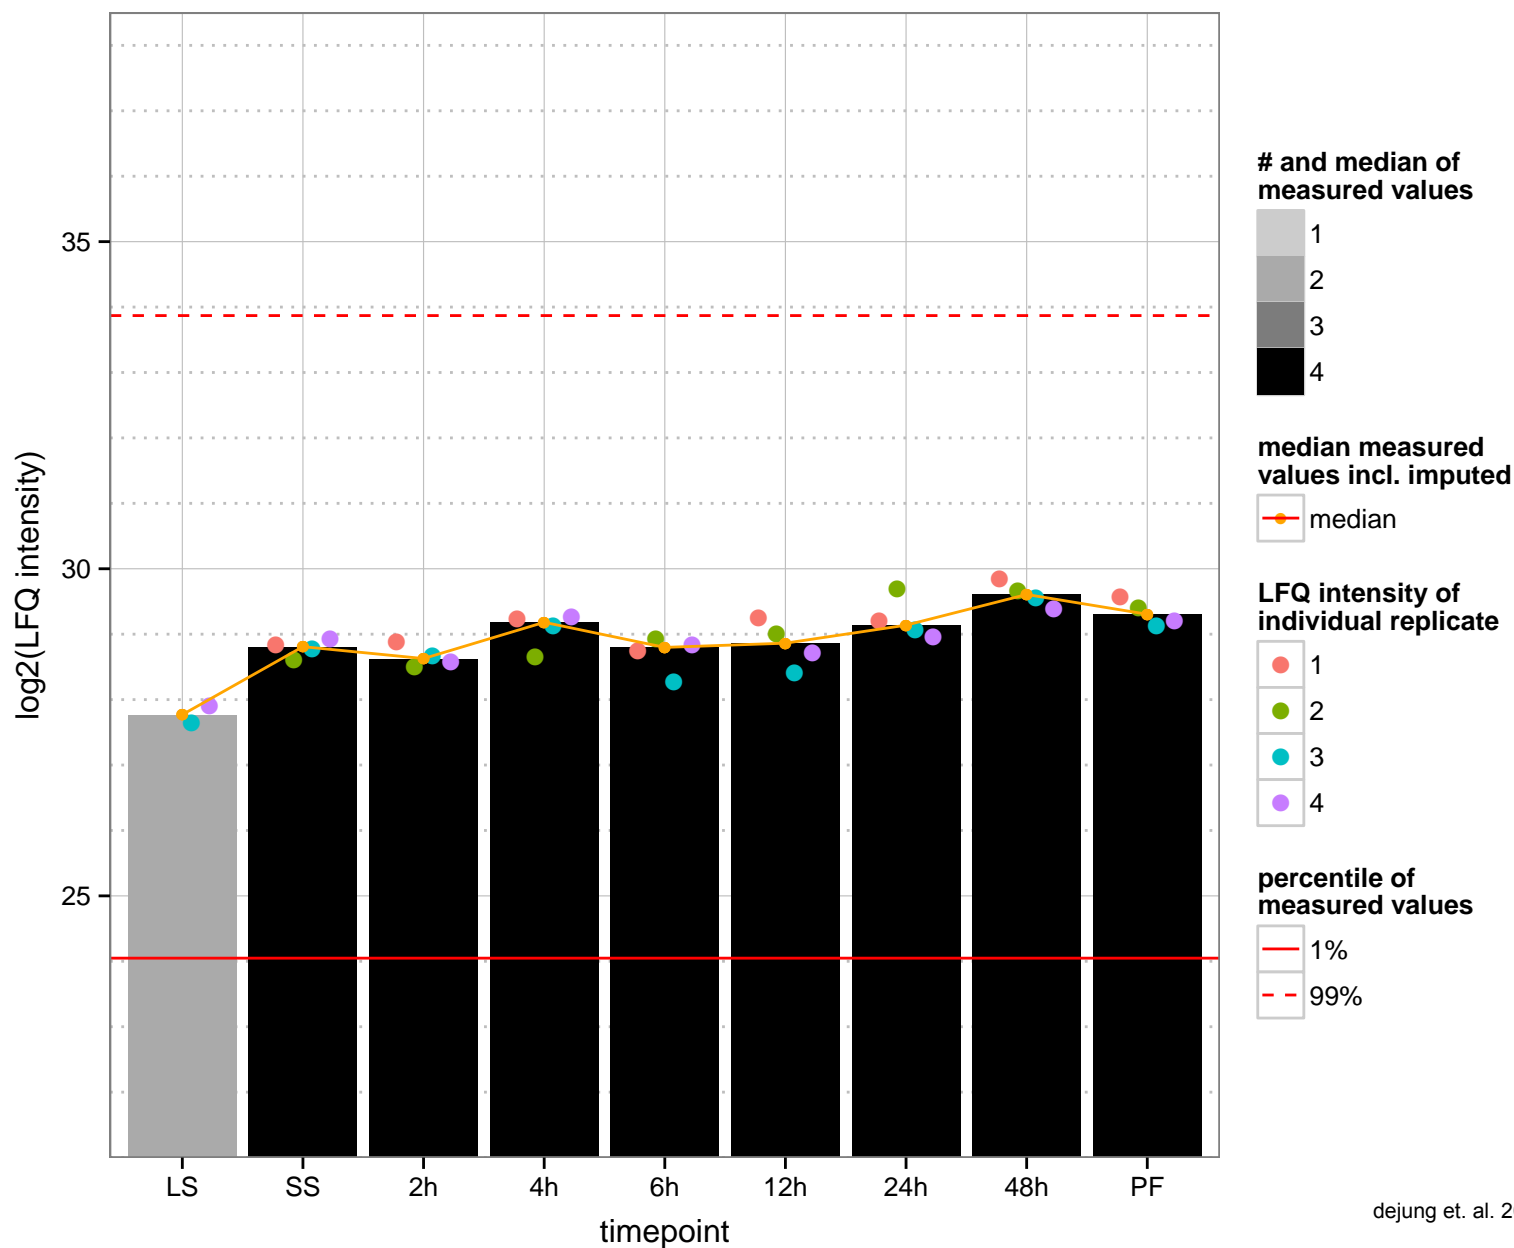

hypothetical protein, conserved

Tb927.5.1530

AGOF: N, N-dimethylaniline monooxygenase activity, NADP binding, flavin adenine dinucleotide binding

AGOC: mitochondrion

AGOP: null

PGOF: N, N-dimethylaniline monooxygenase activity, NADP binding, flavin adenine dinucleotide binding

PGOC: null

PGOP: oxidation-reduction process

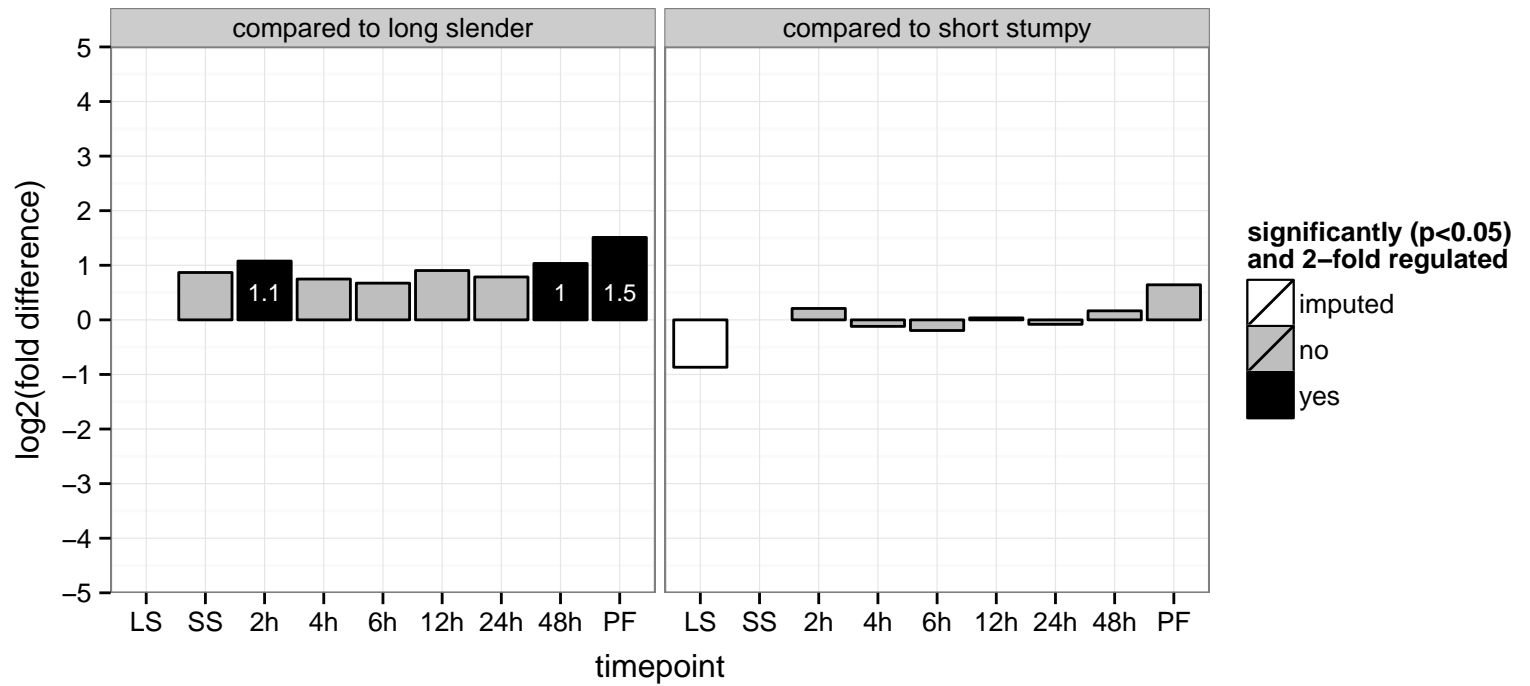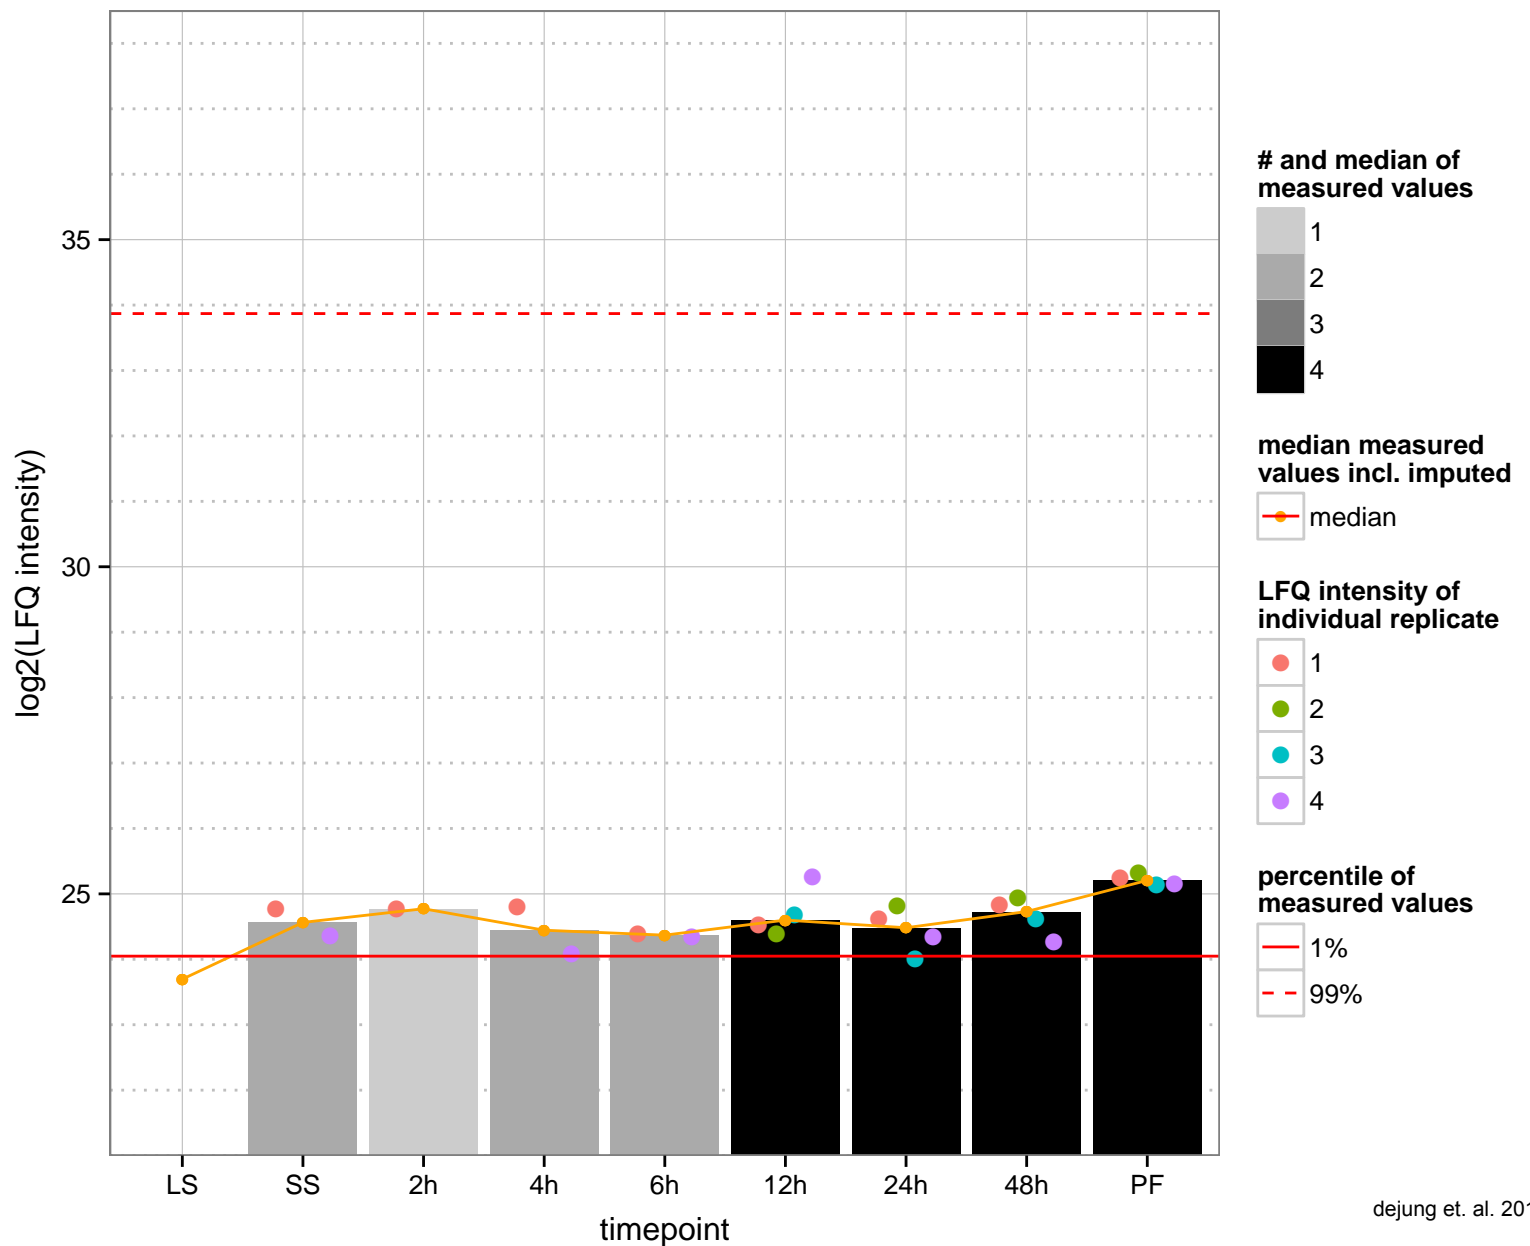

hypothetical protein, conserved  
 Tb927.5.1630  
 AGOF: heme binding  
 AGOC: null  
 AGOP: null  
 PGOF: heme binding  
 PGOC: null  
 PGOP: null

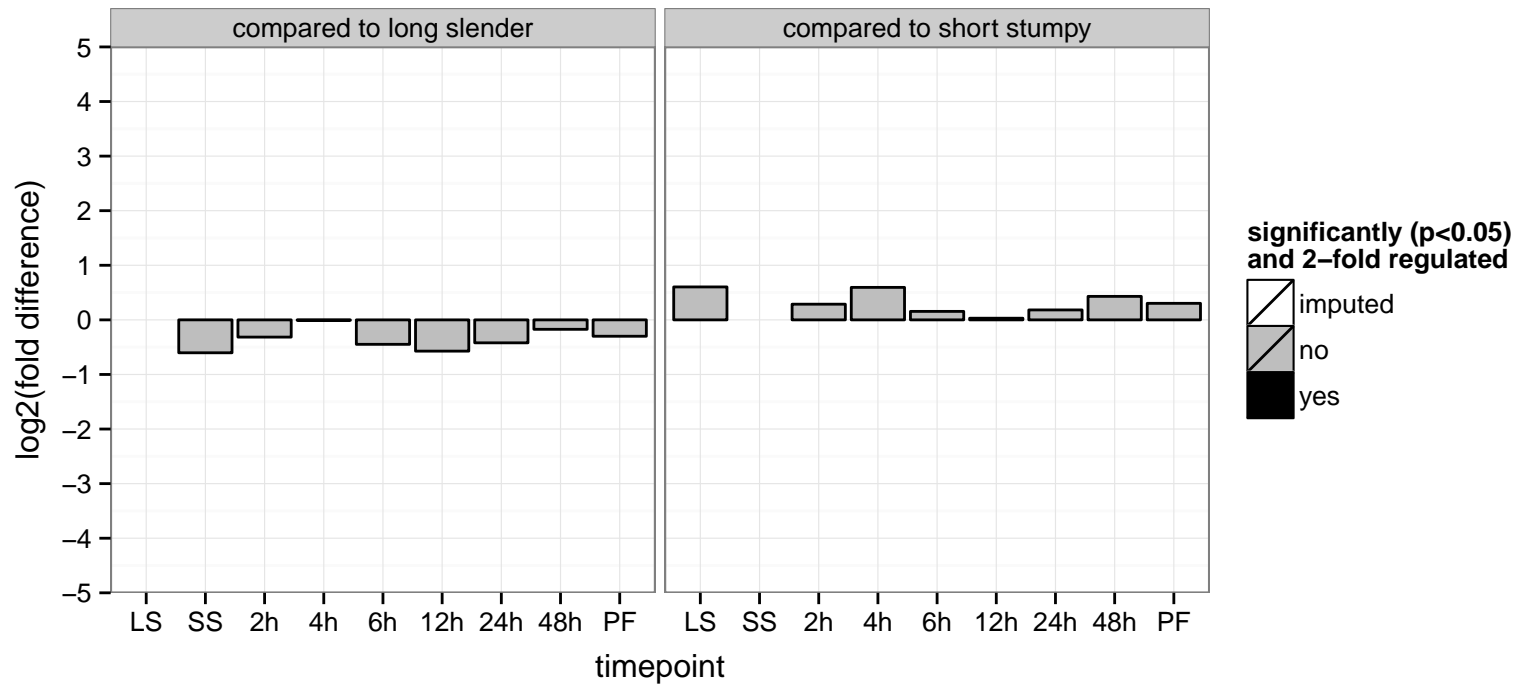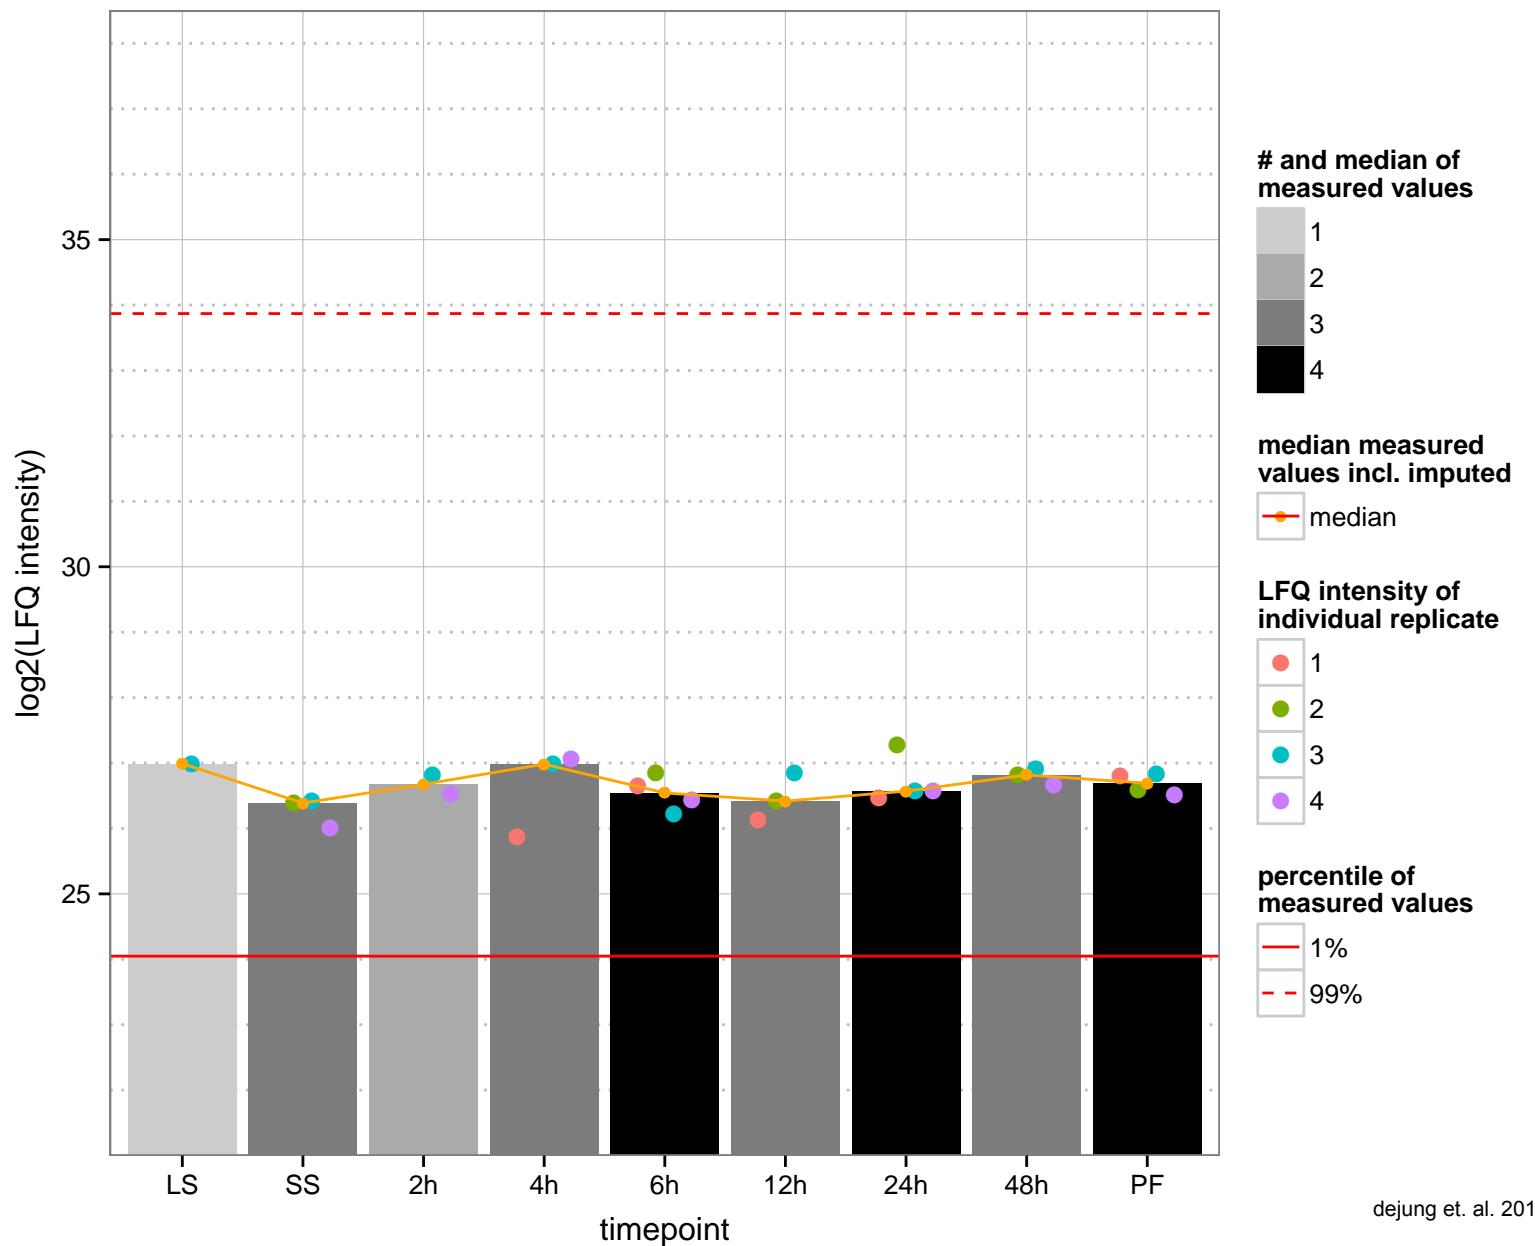

hypothetical protein, conserved  
 Tb927.5.1680  
 AGOF: null  
 AGOC: null  
 AGOP: null  
 PGO: null  
 PGOC: null  
 PGOP: null

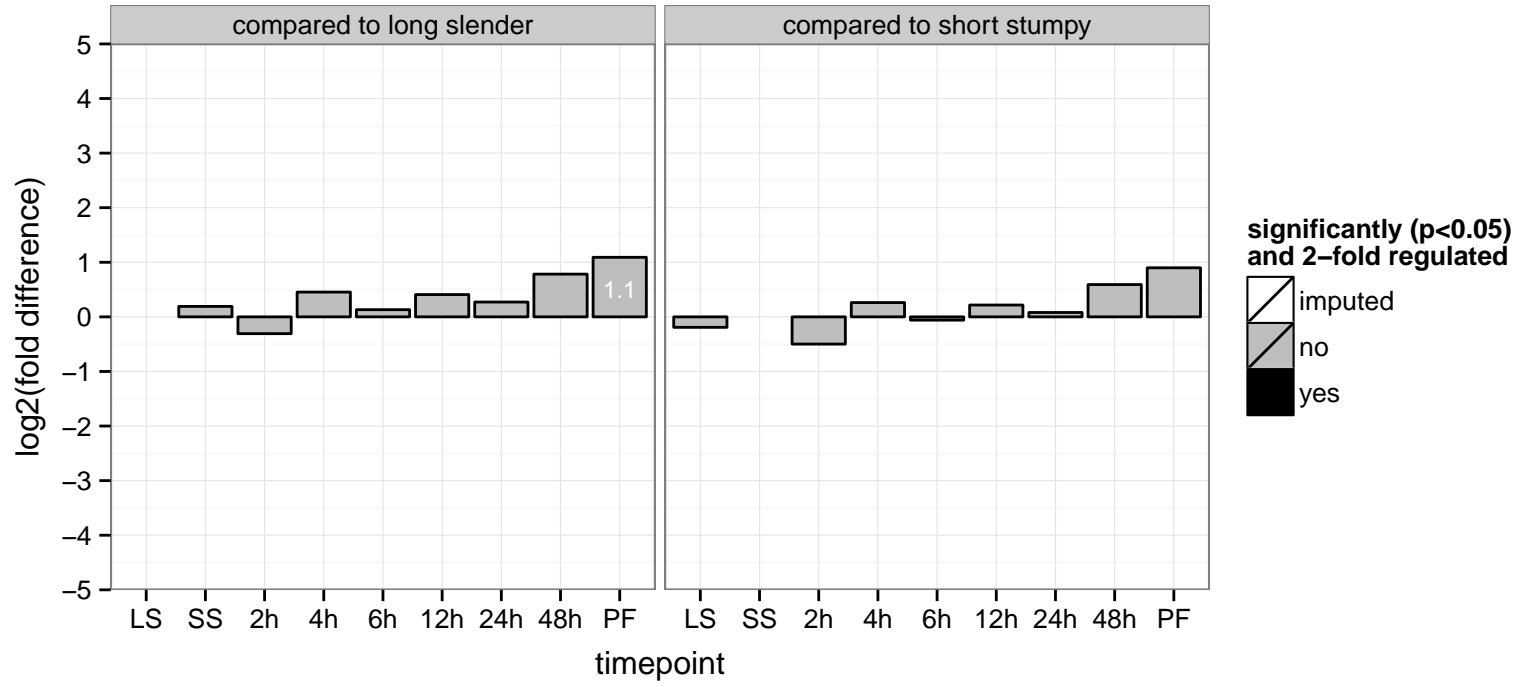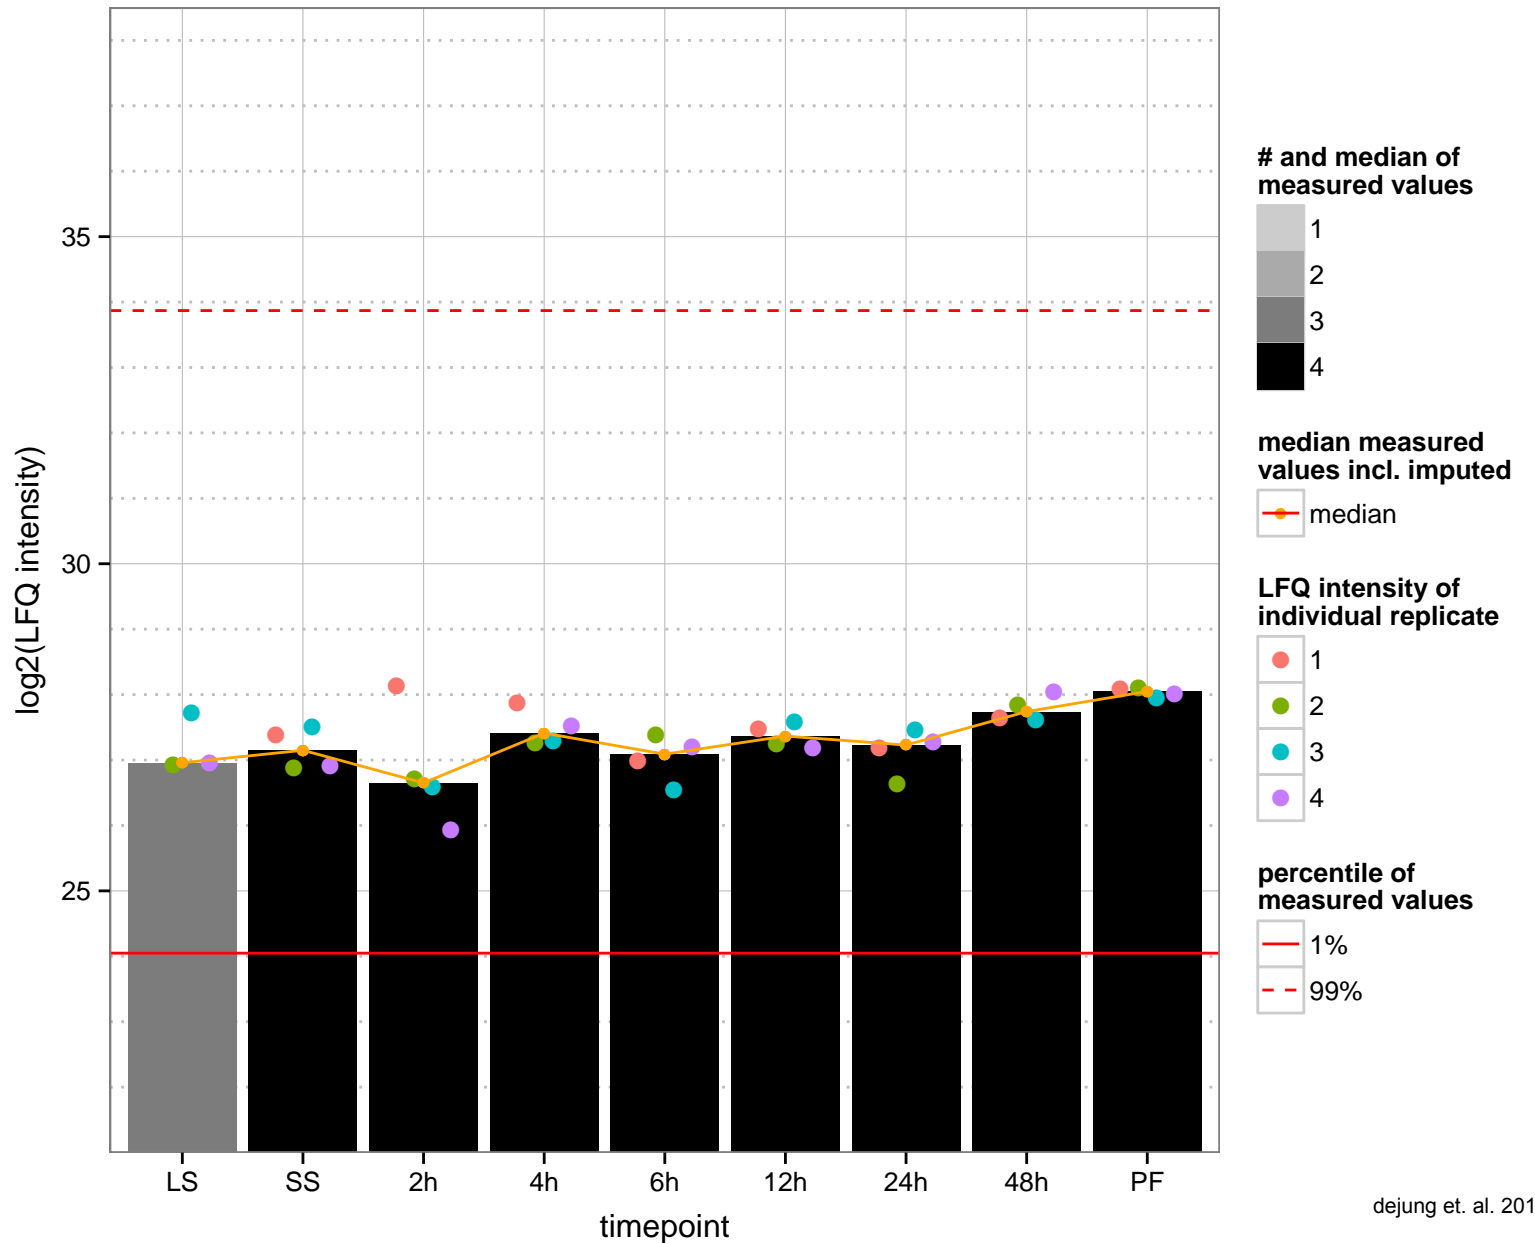



hypothetical protein, conserved  
 Tb927.5.1690  
 AGOF: null  
 AGOC: null  
 AGOP: null  
 PGO: null  
 PGOC: null  
 PGOP: null

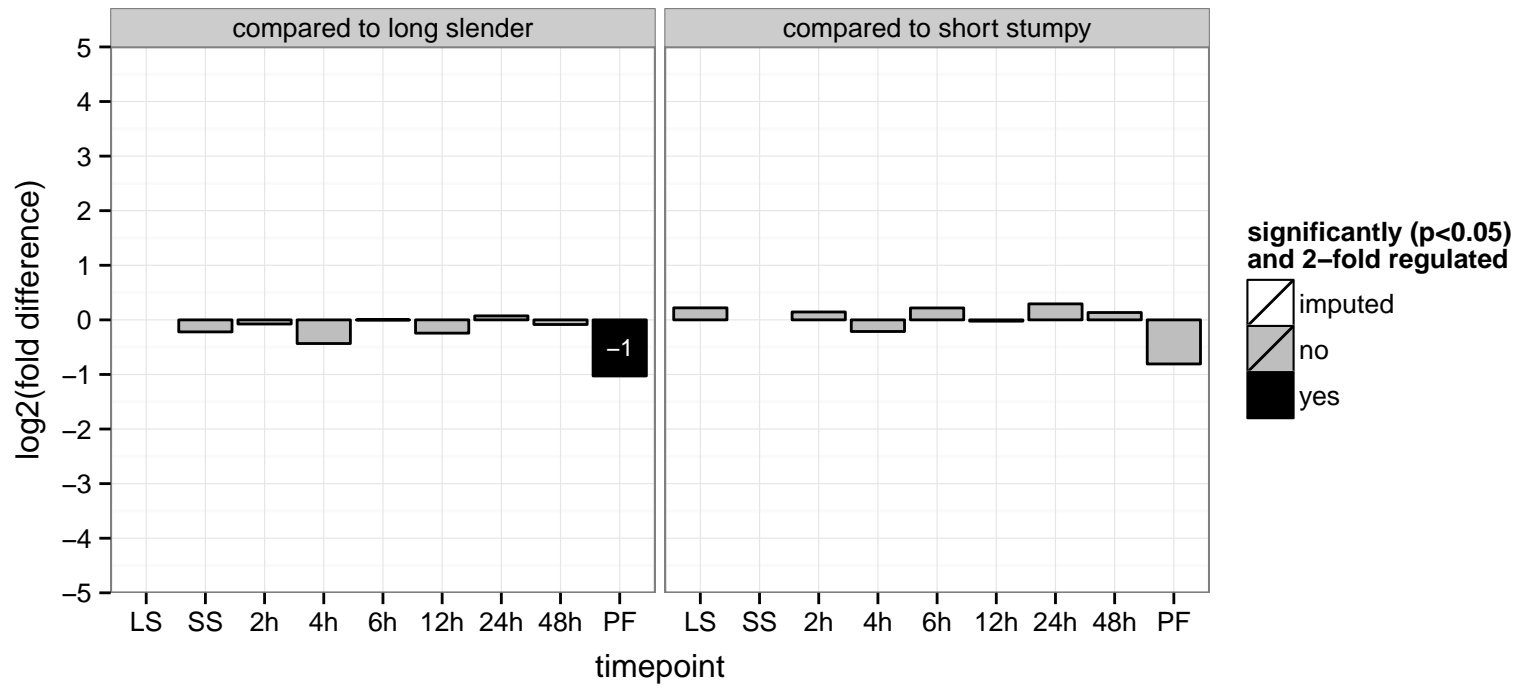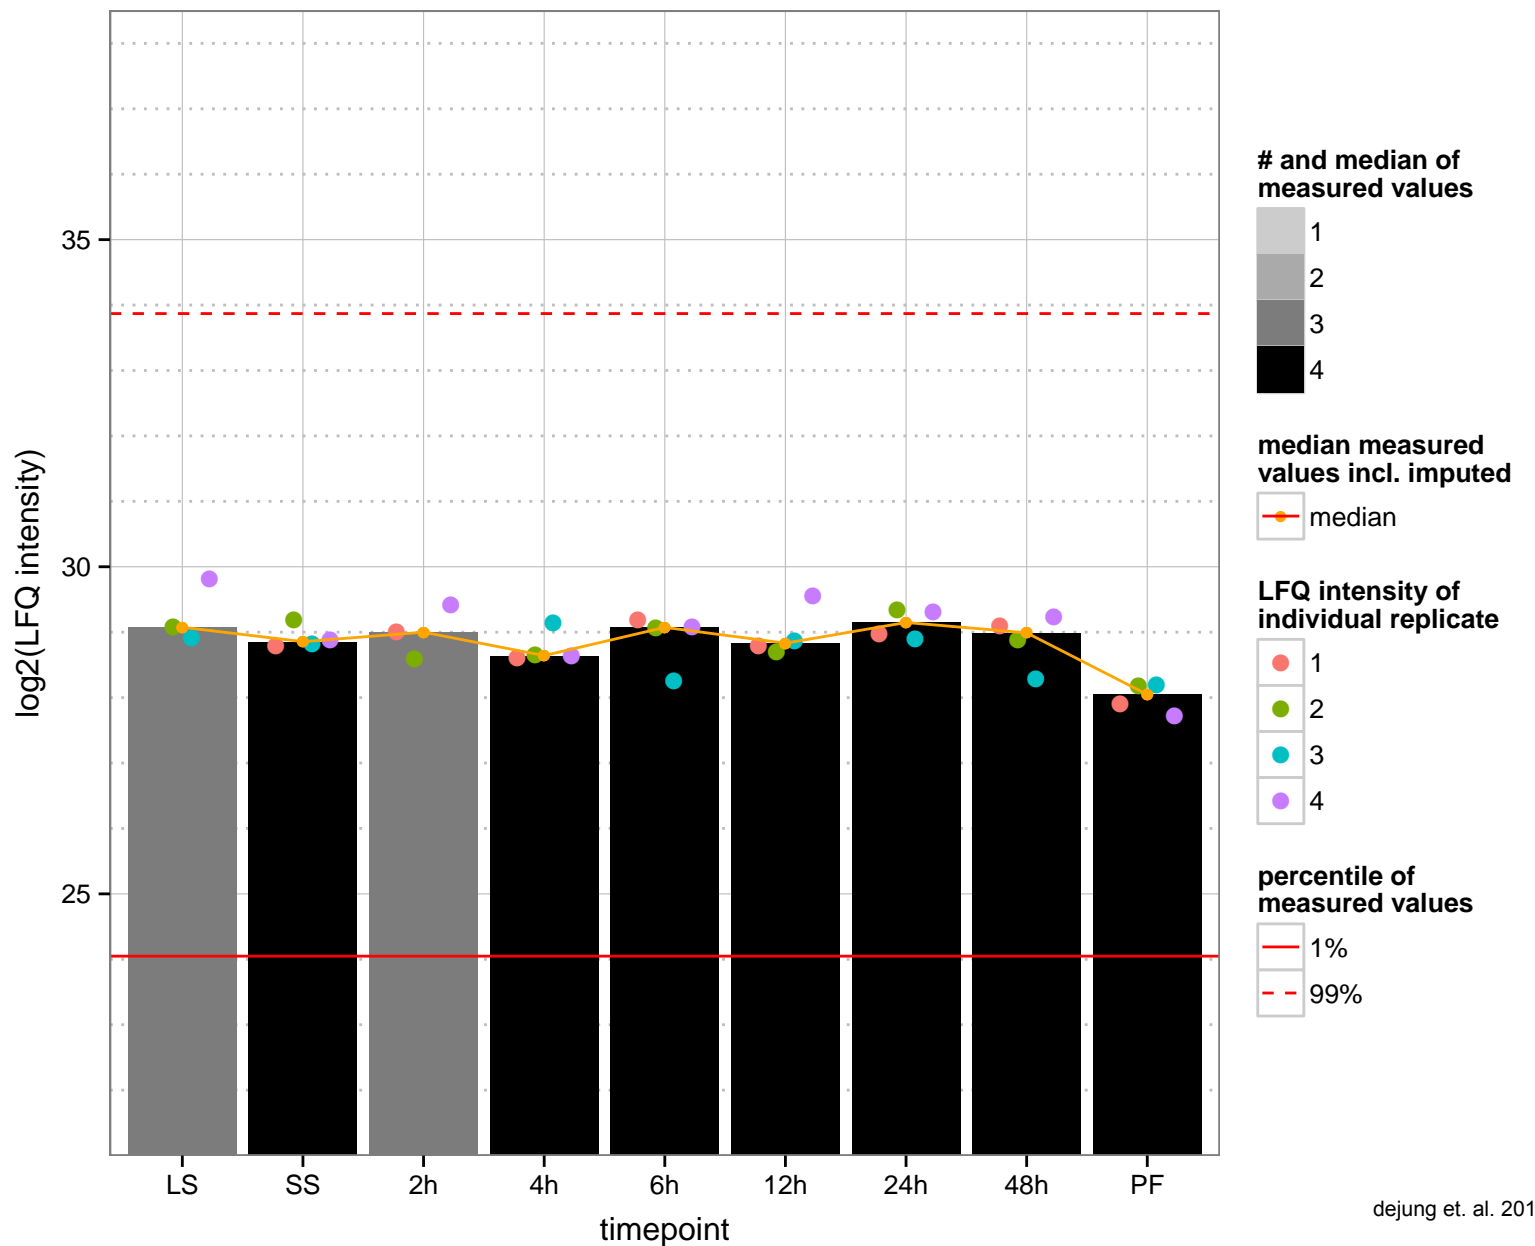

replication Factor A 28 kDa subunit, putative  
 Tb927.5.1700  
 AGOF: nucleic acid binding  
 AGOC: null  
 AGOP: null  
 PGO: nucleic acid binding  
 PGOC: null  
 PGOP: null

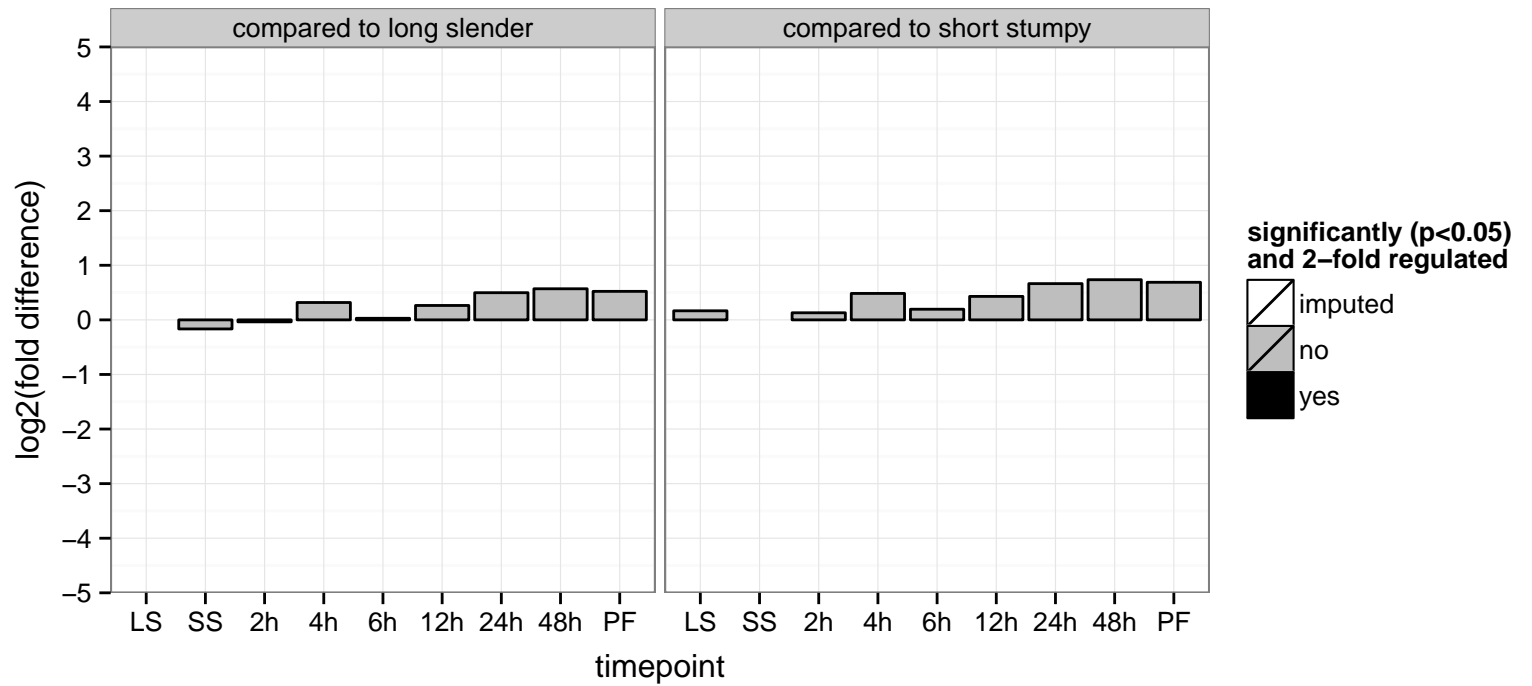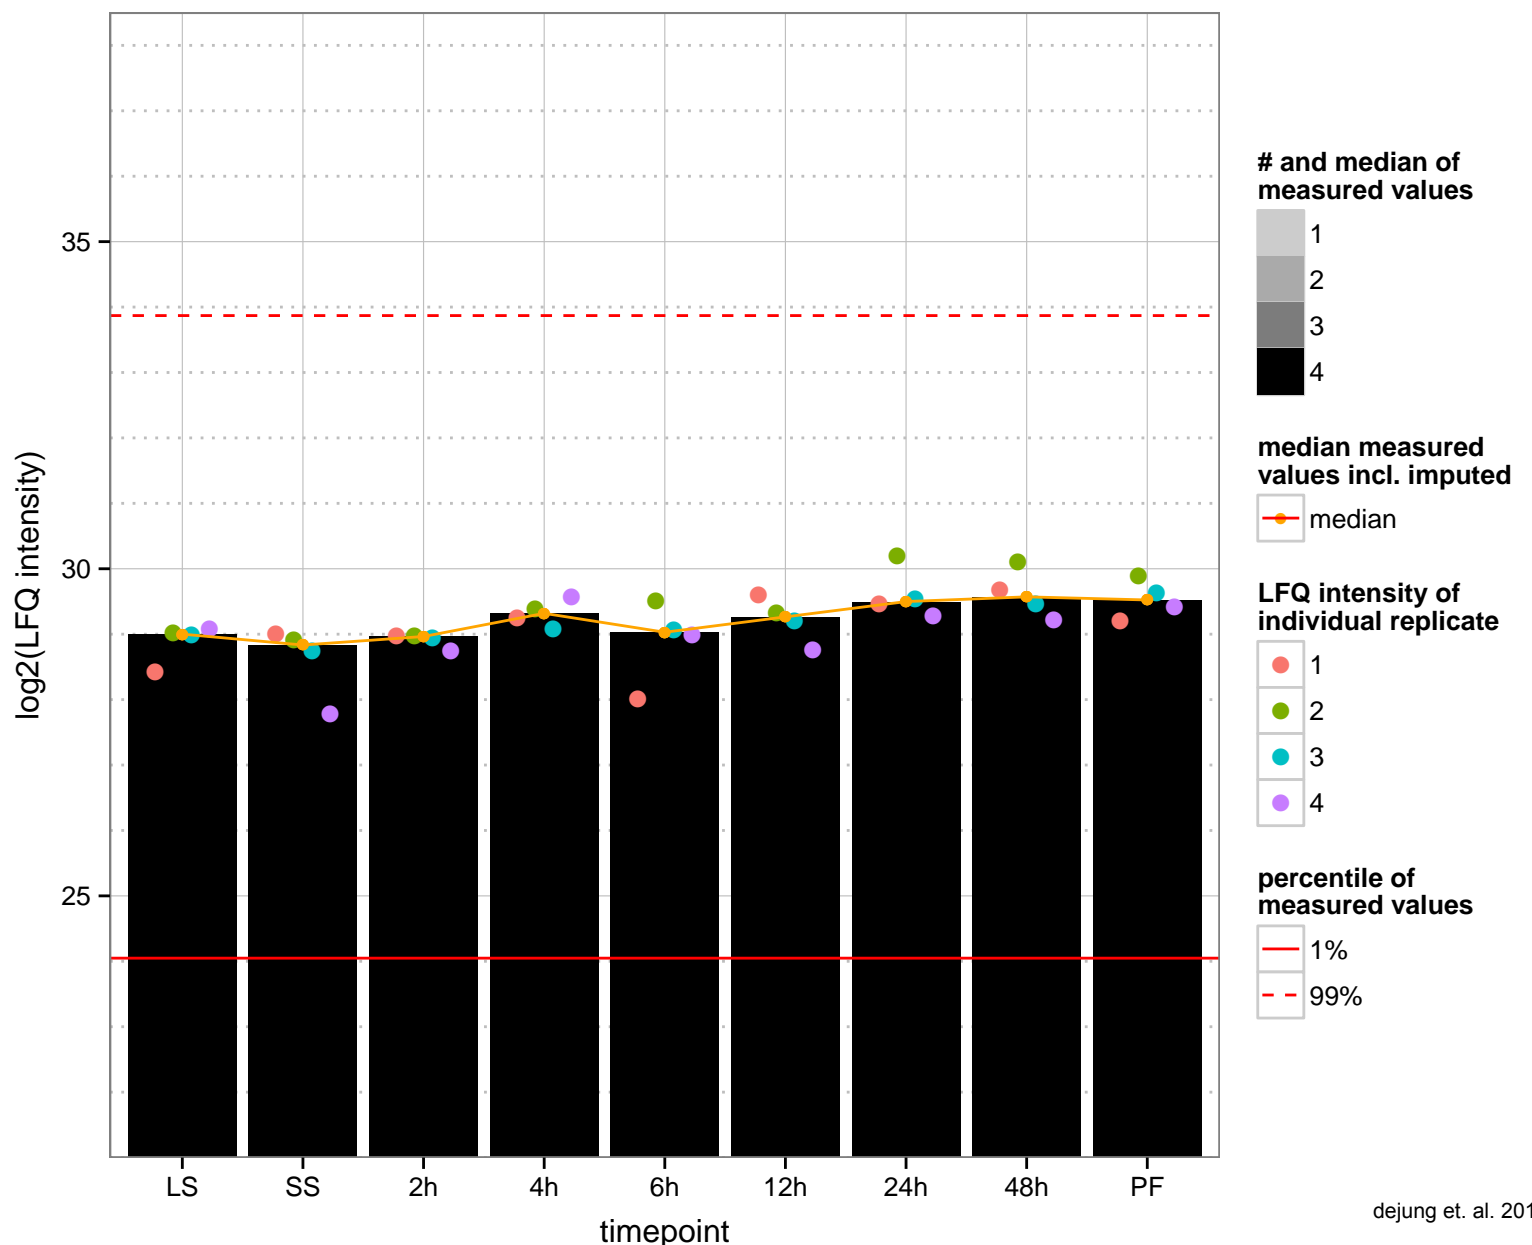

ecotin family (I11), putative, inhibitor of serine peptidase (ISP), putative (ISP)  
 Tb927.5.1730  
 AGOF: null  
 AGOC: null  
 AGOP: null  
 PGO: null  
 PGOC: null  
 PGOP: null

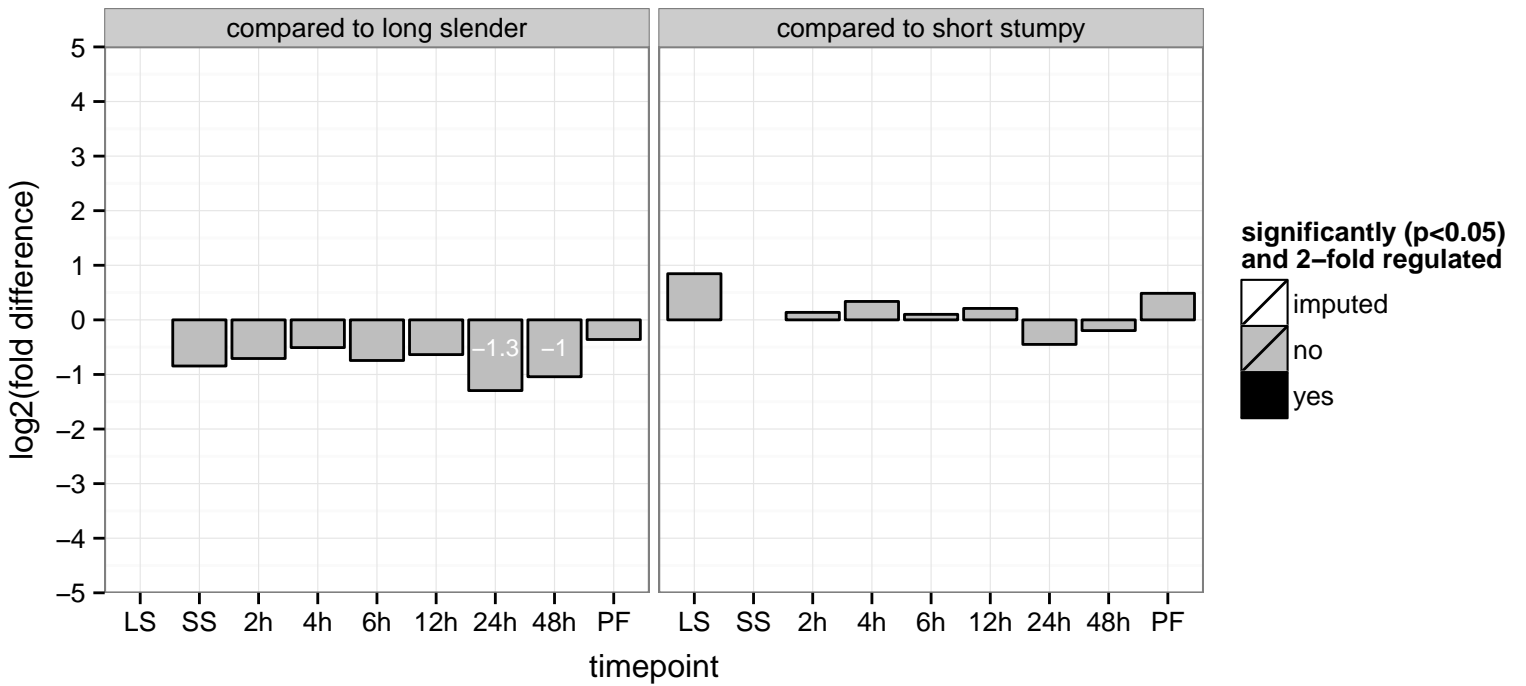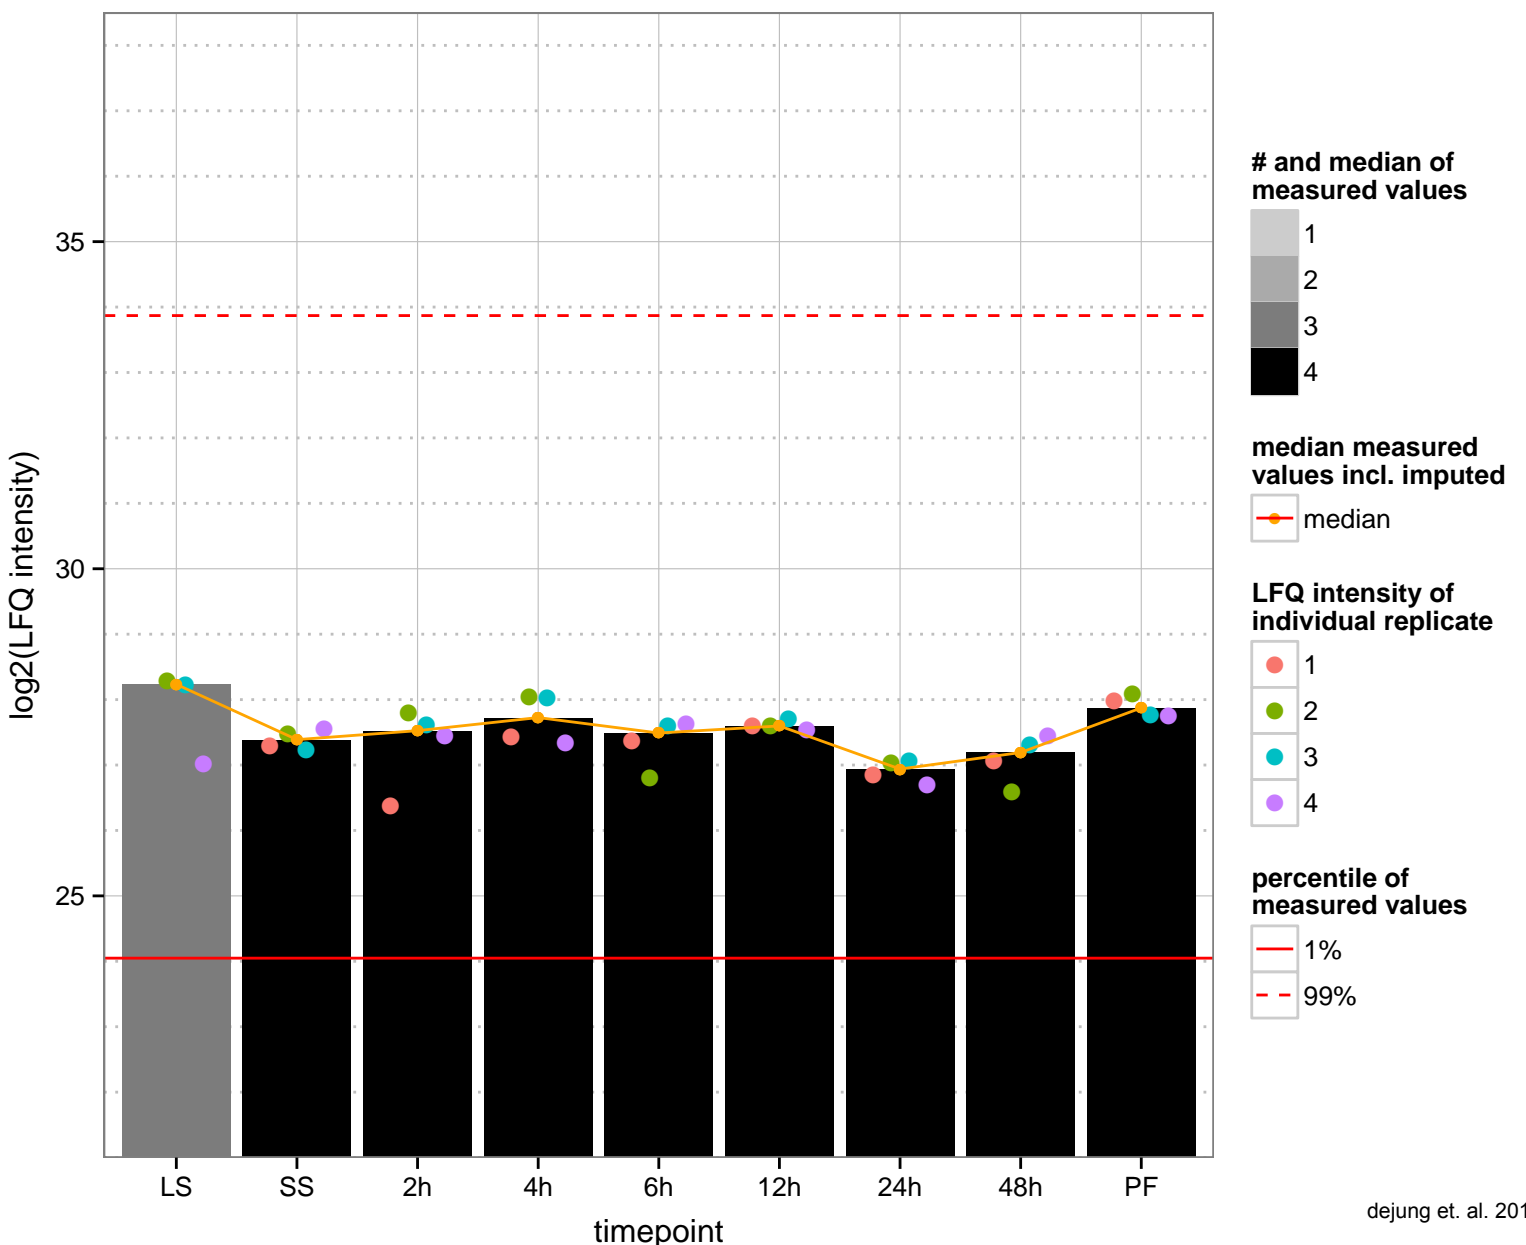

lysosomal/endosomal membrane protein p67 (p67), lysosomal/endosomal membrane protein p67, lysosomal membrane glyco  
 Tb927.5.1810;Tb927.5.1830  
 AGOF: null  
 AGOC: null  
 AGOP: null  
 PGO: null  
 PGOC: null  
 PGOP: null

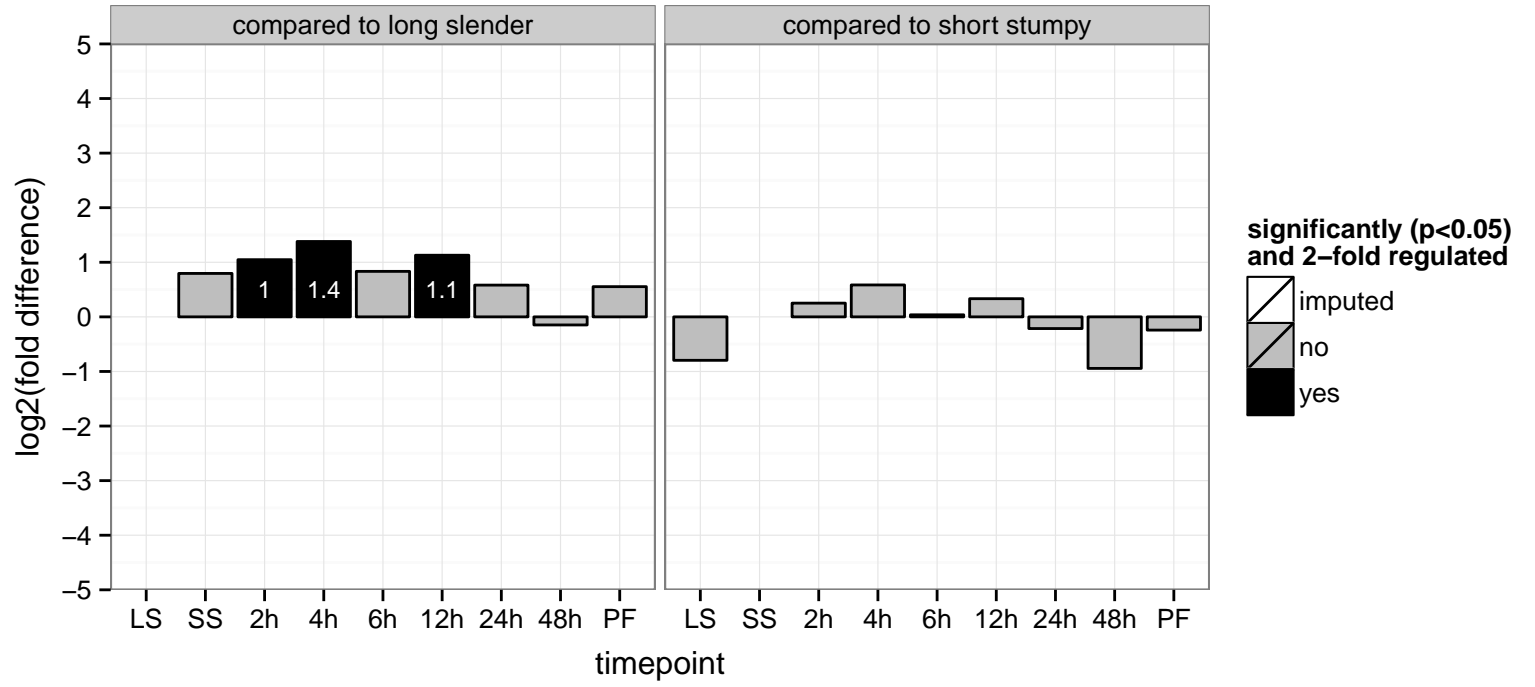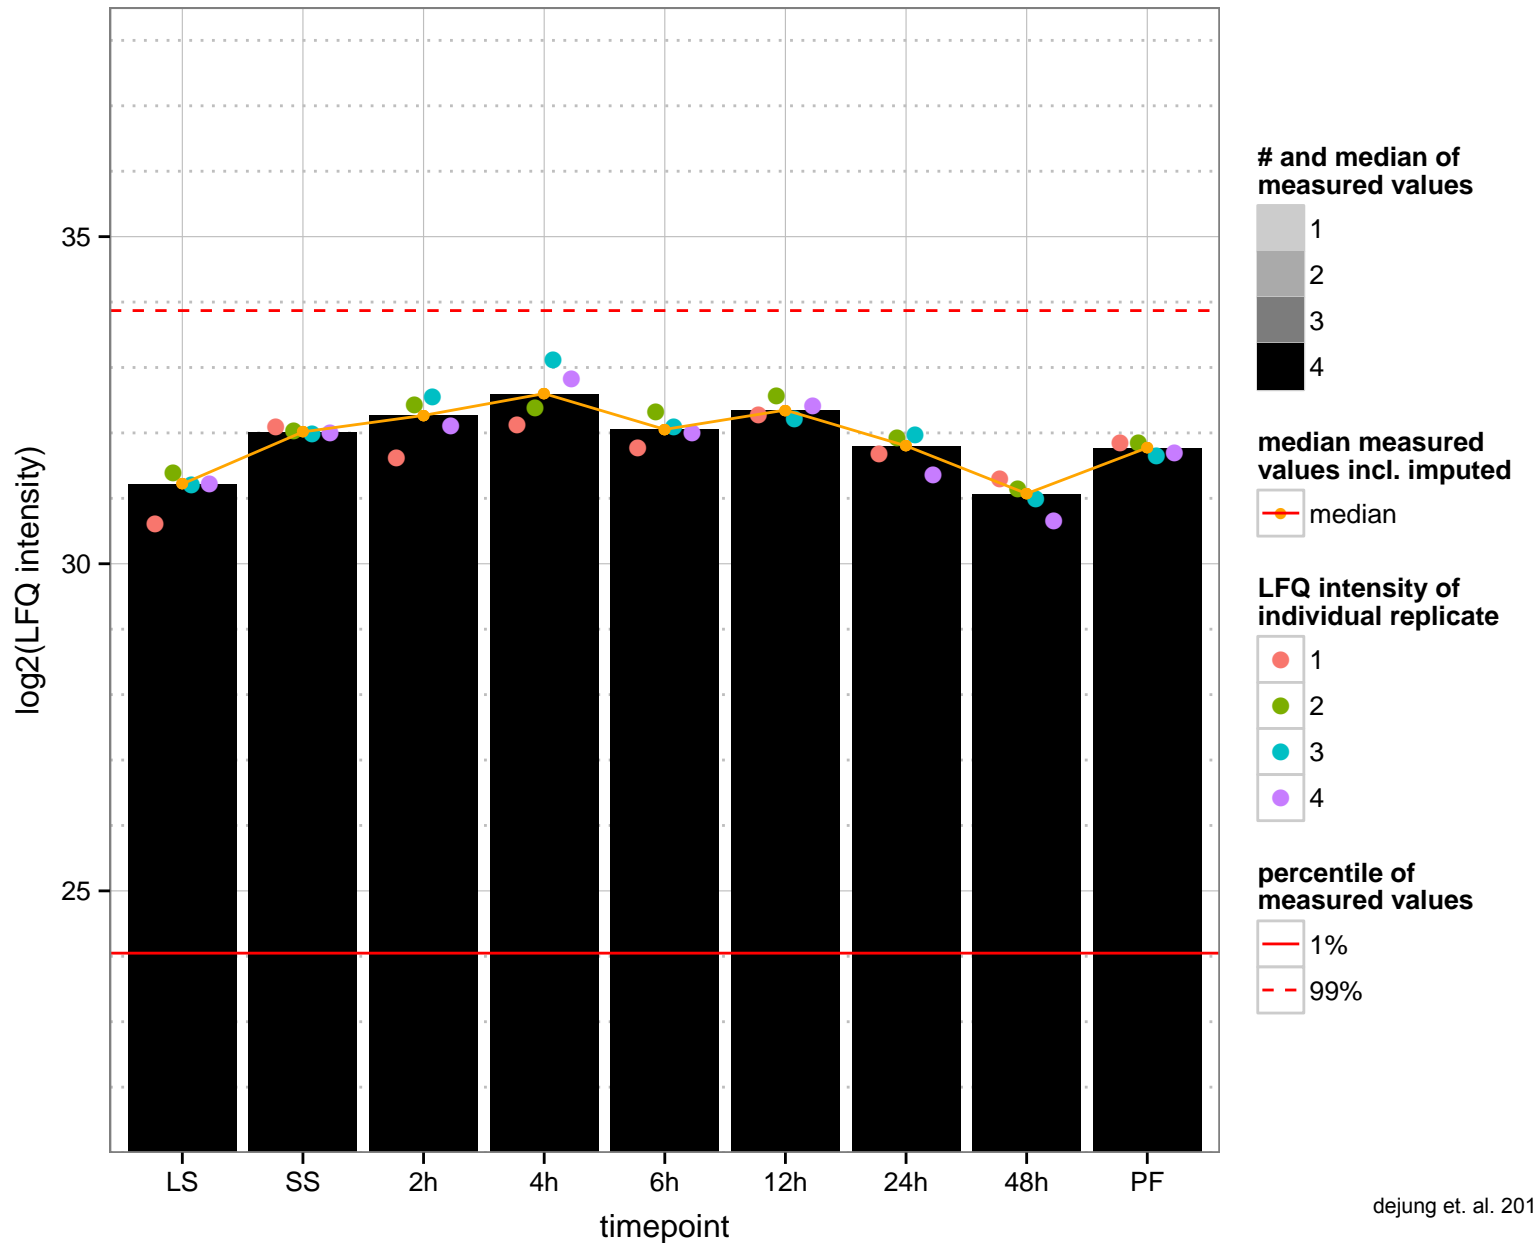

ecotin family (I11), putative, inhibitor of serine peptidase (ISP), putative (ISP2)

Tb927.5.1880

AGOF: null

AGOC: null

AGOP: active evasion of host immune response via regulation of host complement system, modulation by symbiont of host phagosome

PGOF: null

PGOC: null

PGOP: null

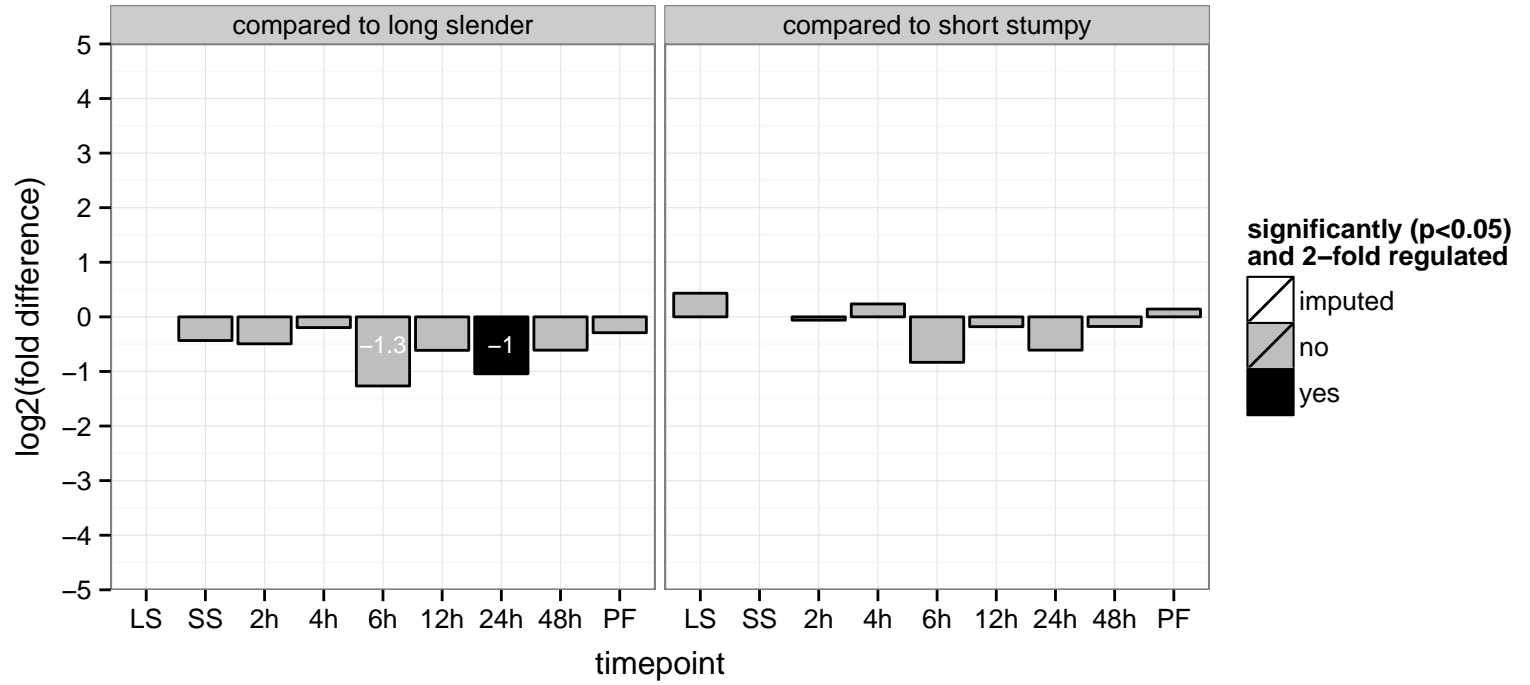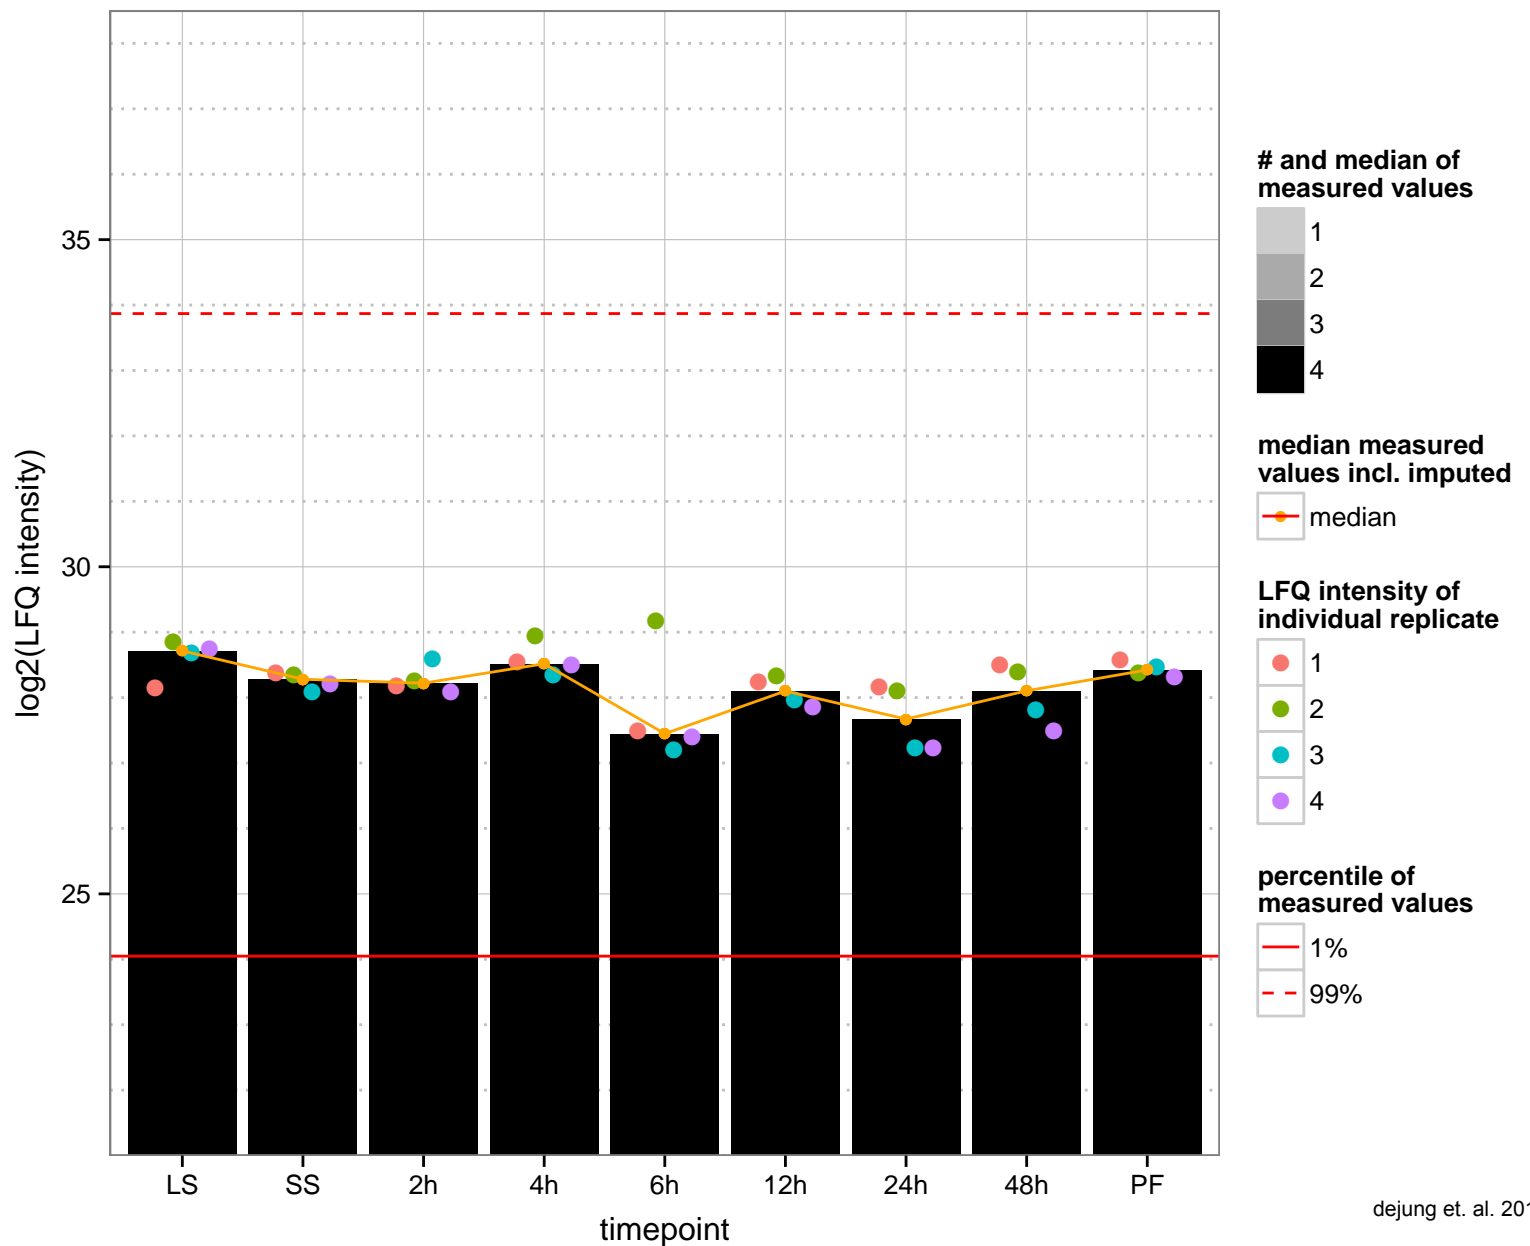

hypothetical protein, conserved  
 Tb927.5.1900  
 AGOF: null  
 AGOC: null  
 AGOP: null  
 PGOF: null  
 PGO: null  
 PGOP: null

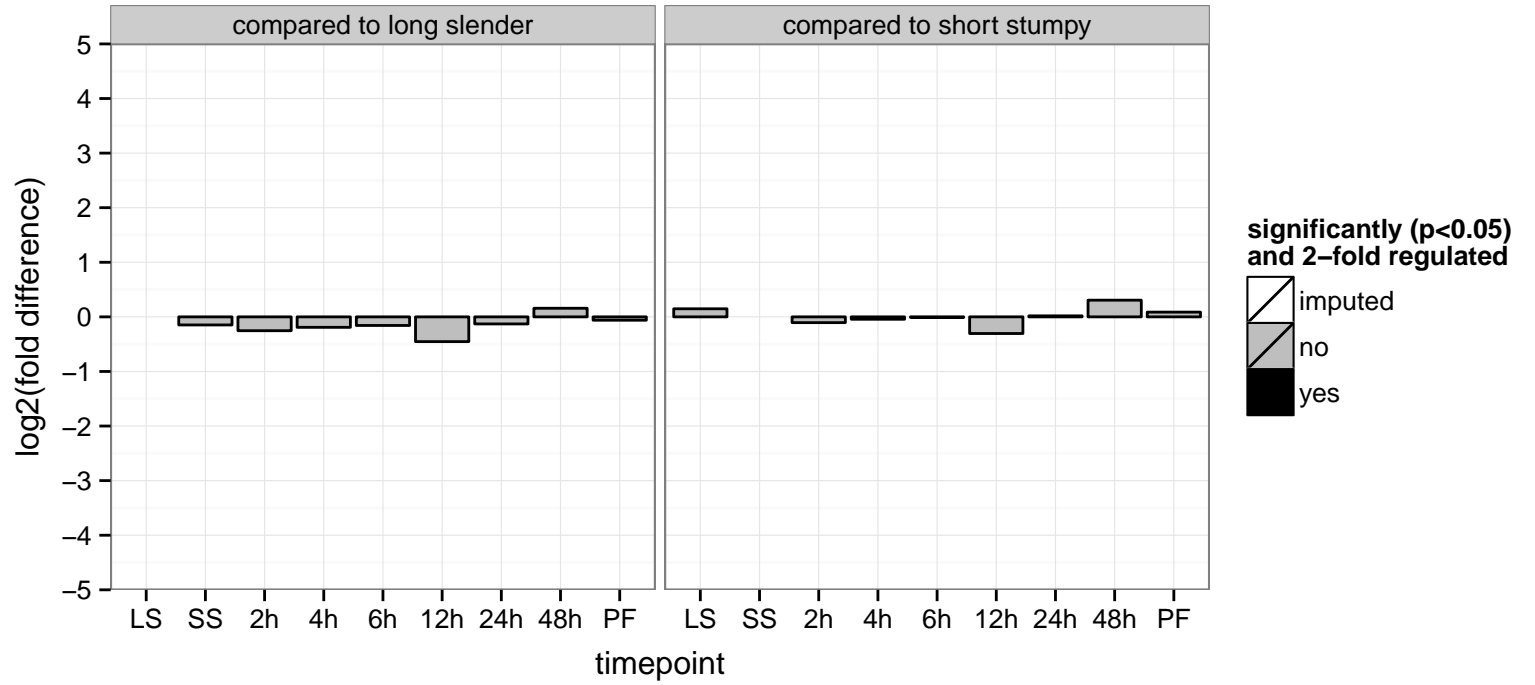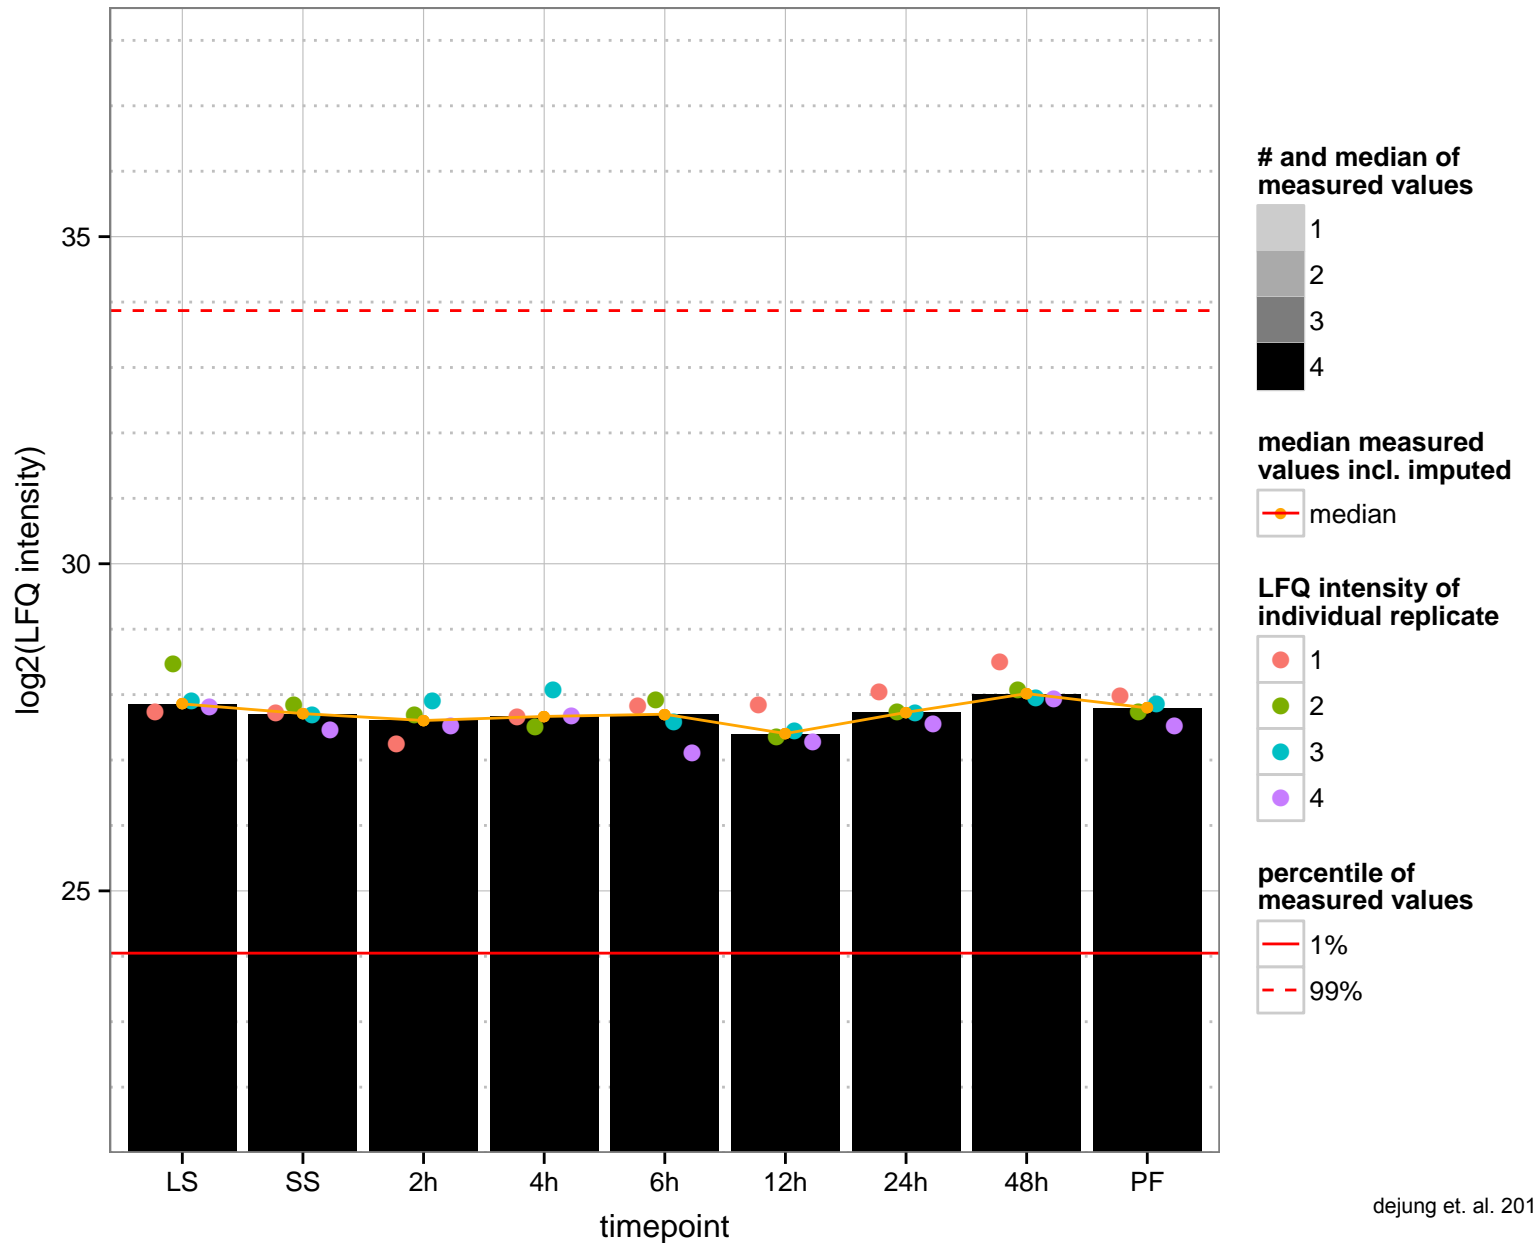

hypothetical protein, conserved  
 Tb927.5.1930  
 AGOF: peptidase activity  
 AGOC: integral to membrane, signal peptidase complex  
 AGOP: signal peptide processing  
 PGOF: peptidase activity  
 PGOC: integral to membrane, signal peptidase complex  
 PGOP: signal peptide processing

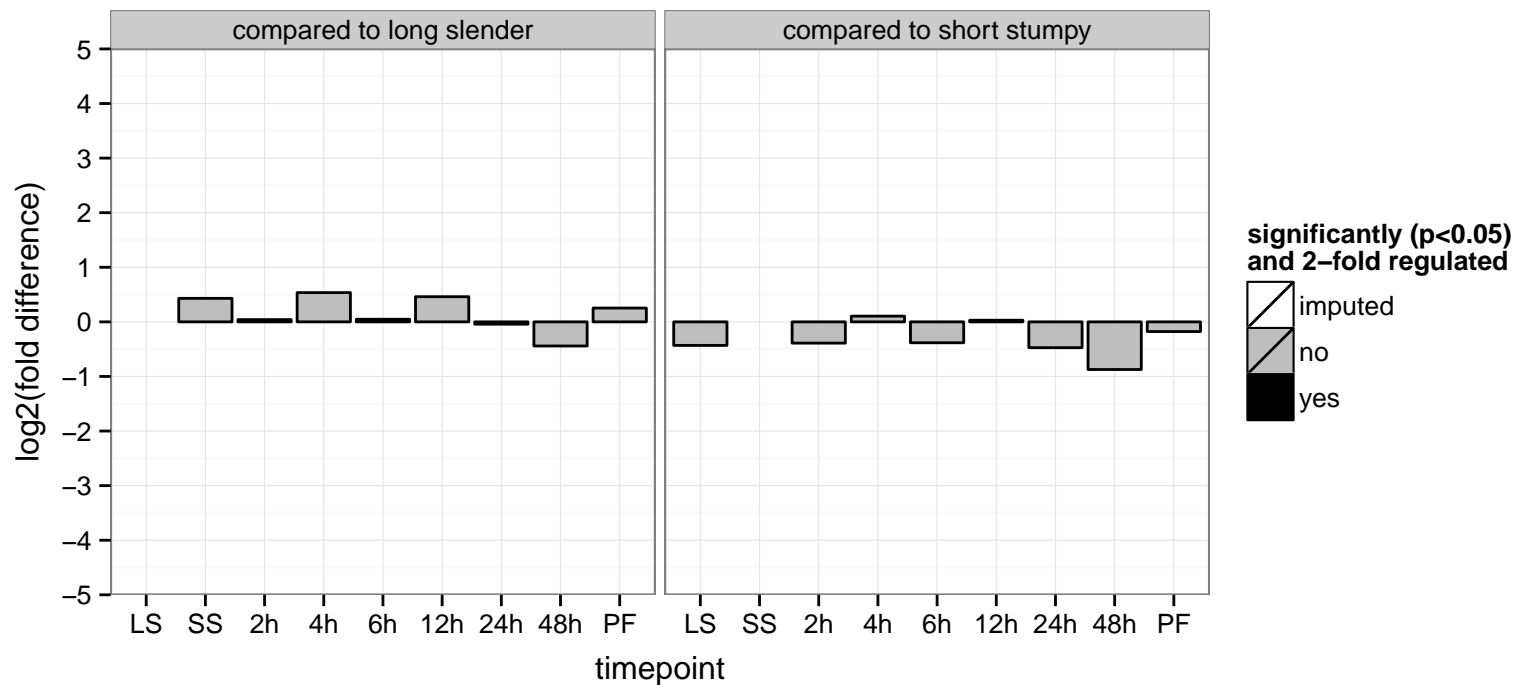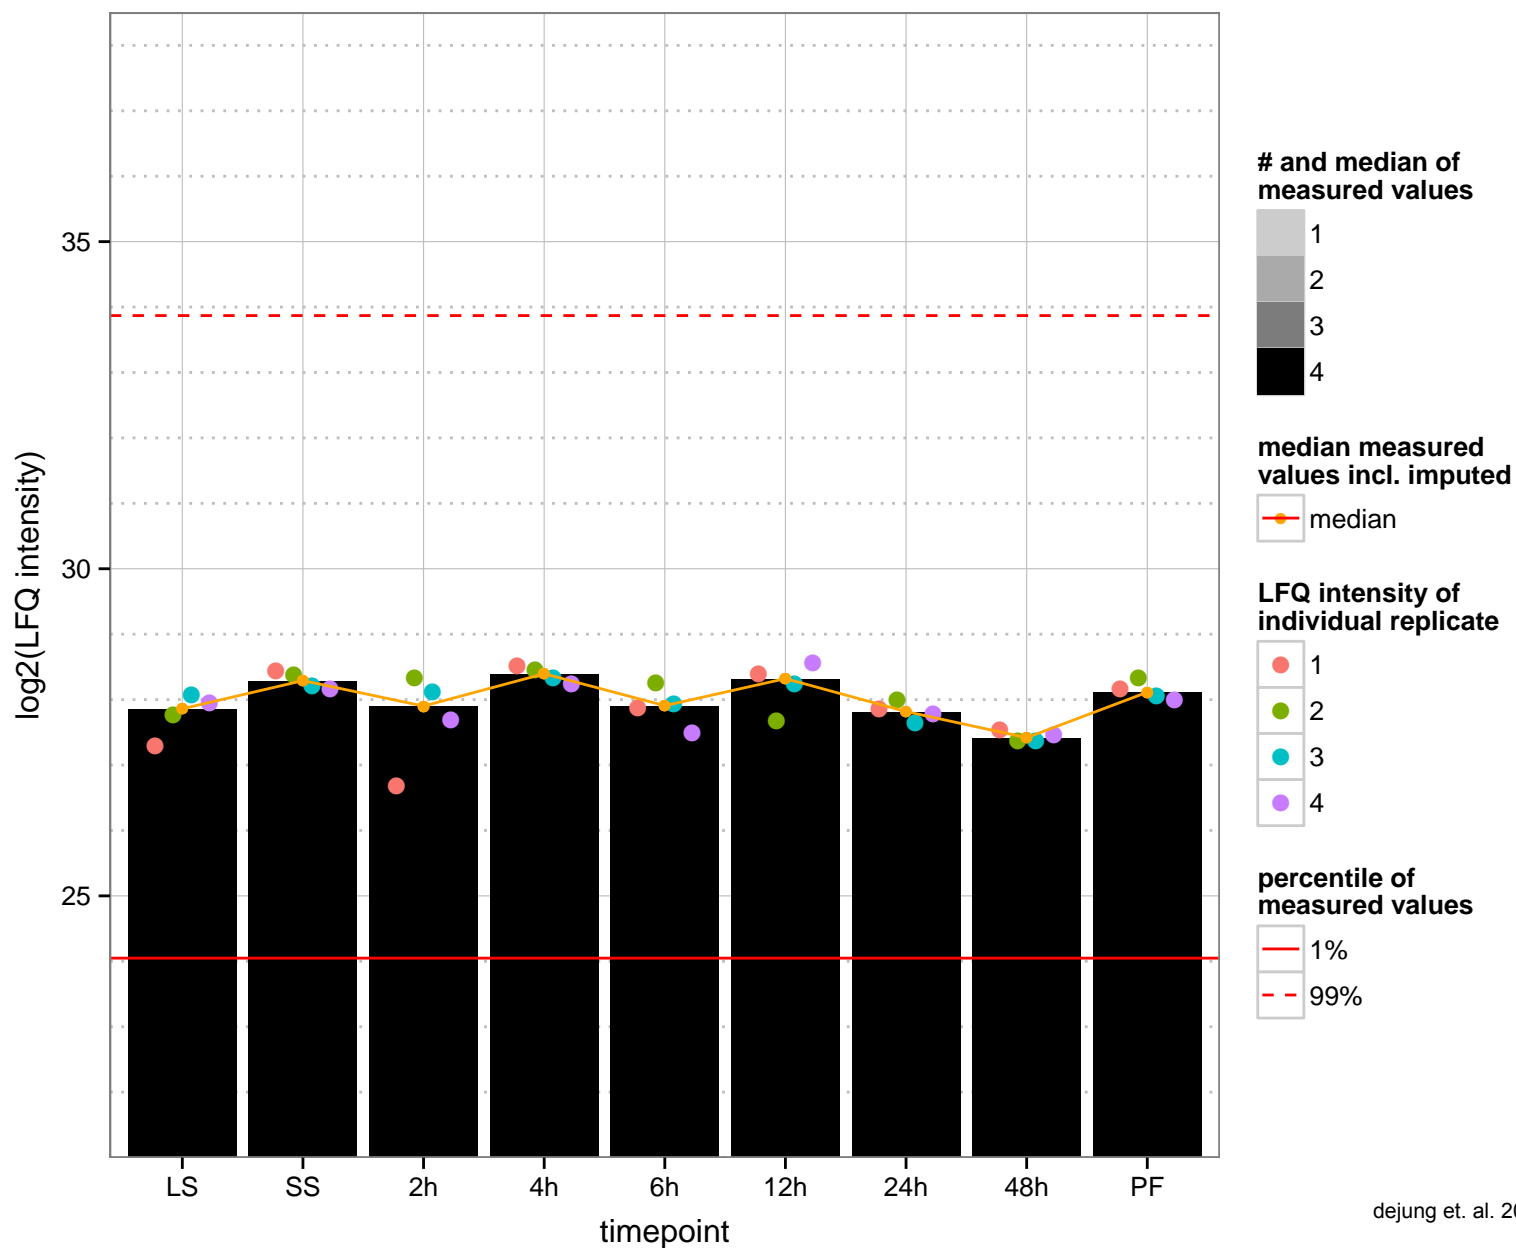

hypothetical protein, conserved  
 Tb927.5.2050  
 AGOF: null  
 AGOC: null  
 AGOP: null  
 PGOF: null  
 PGOC: null  
 PGOP: null

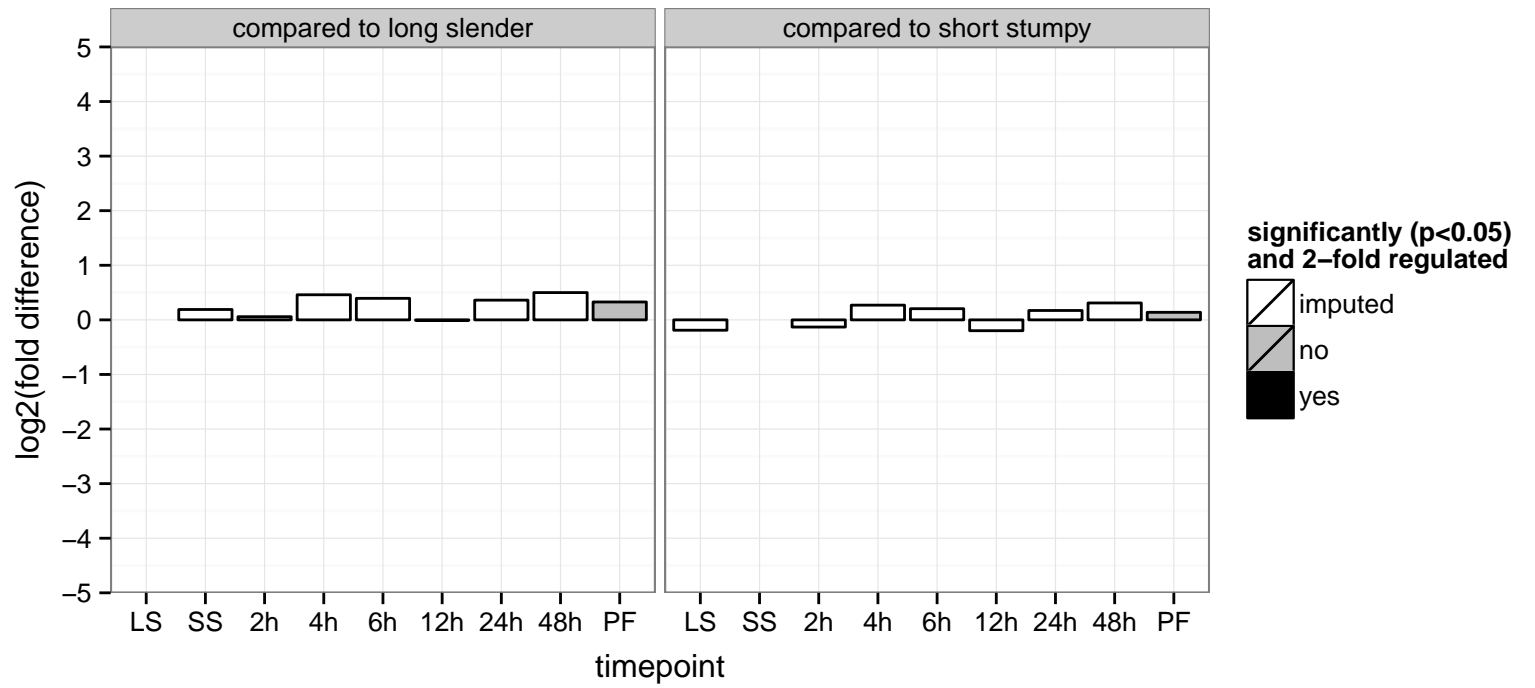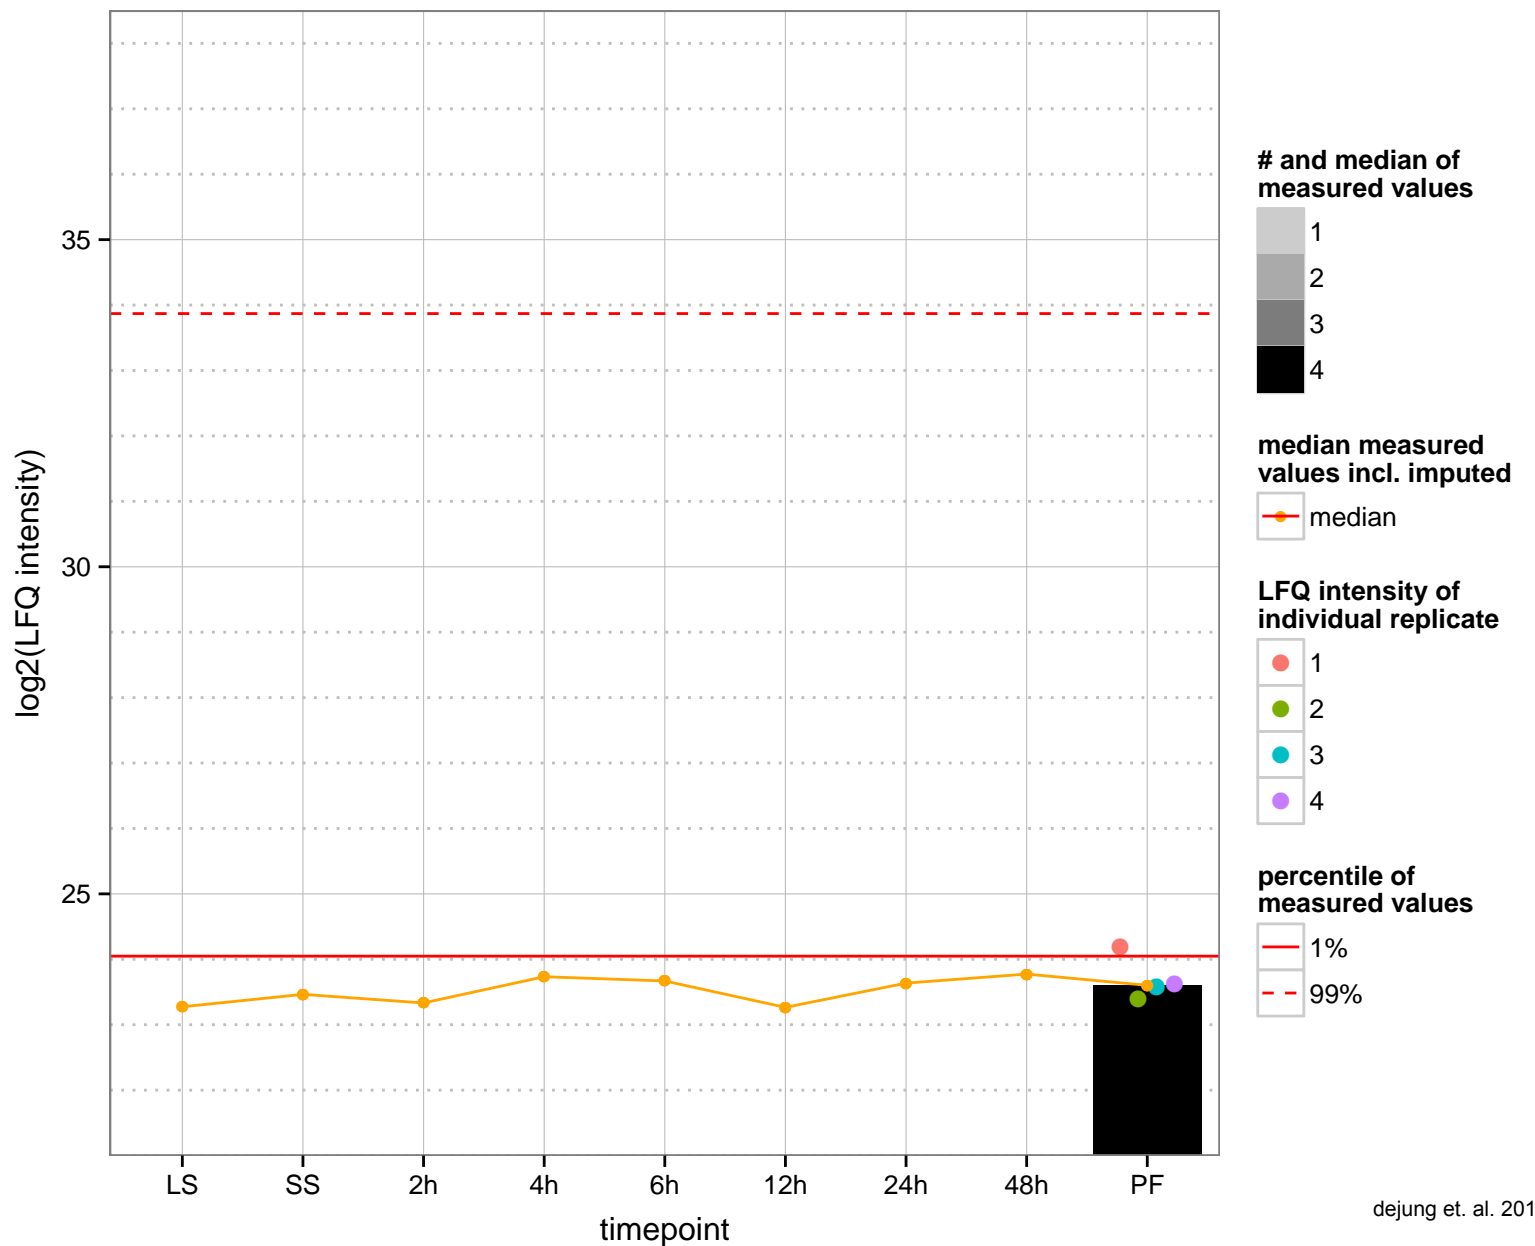



guanosine monophosphate reductase, putative  
 Tb927.5.2080  
 AGOF: IMP dehydrogenase activity, guanosine deaminase activity  
 AGOC: null  
 AGOP: null  
 PGOF: IMP dehydrogenase activity, catalytic activity, protein binding  
 PGOC: null  
 PGO: oxidation–reduction process

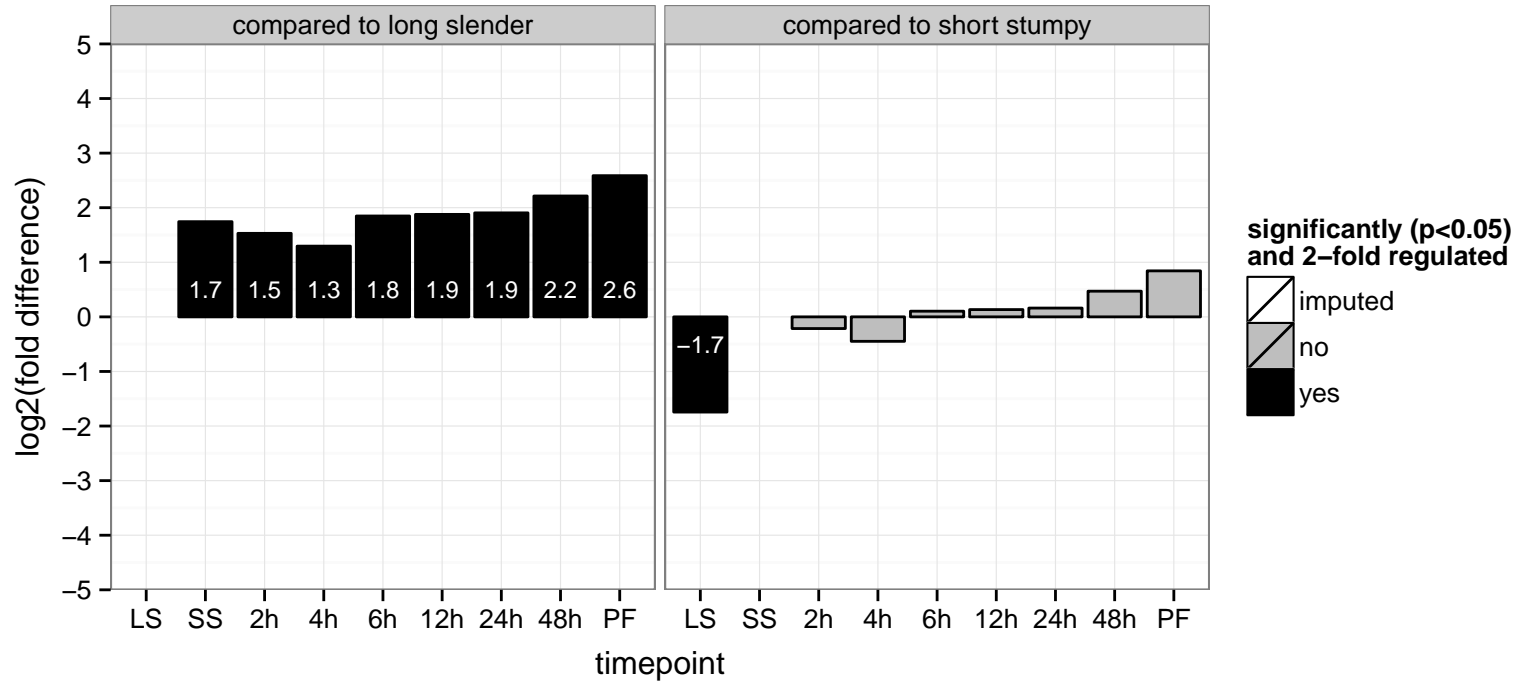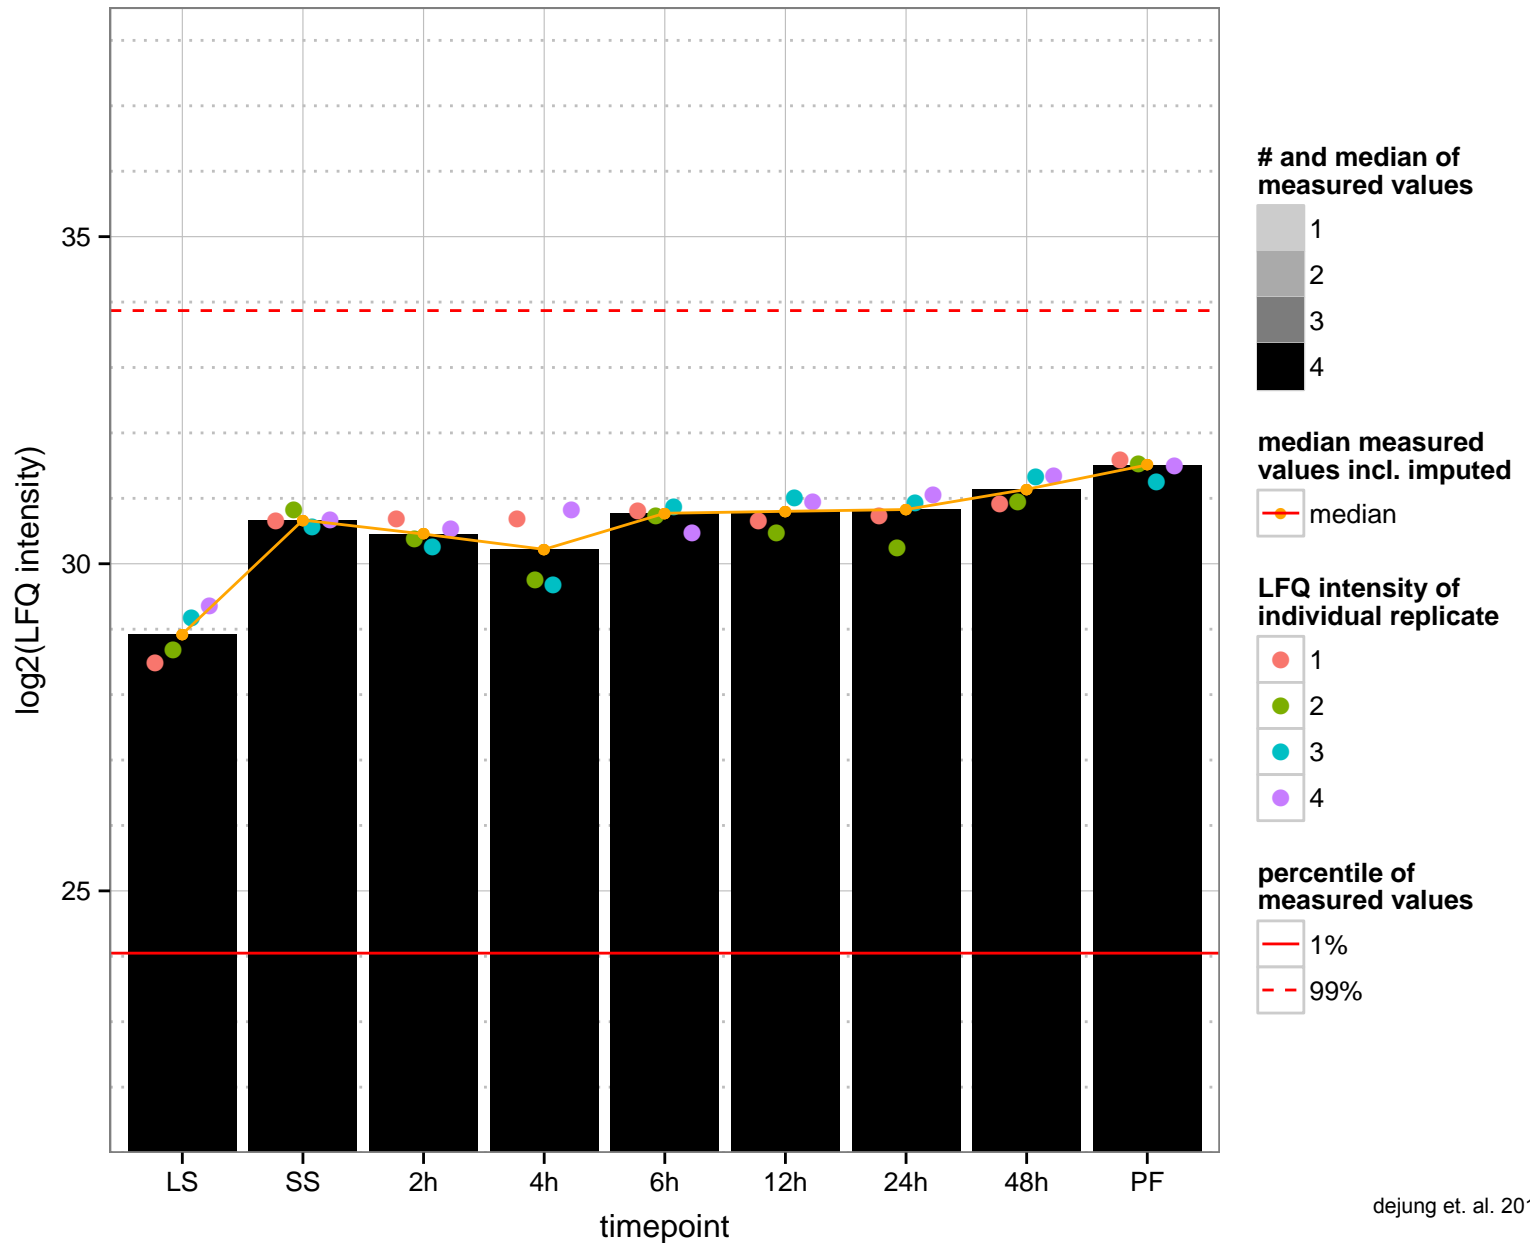

RNA-binding protein, putative (RBP30)  
 Tb927.5.2100  
 AGOF: RNA binding  
 AGOC: mitochondrion  
 AGOP: null  
 PGO: nucleic acid binding  
 PGOC: null  
 PGOP: null

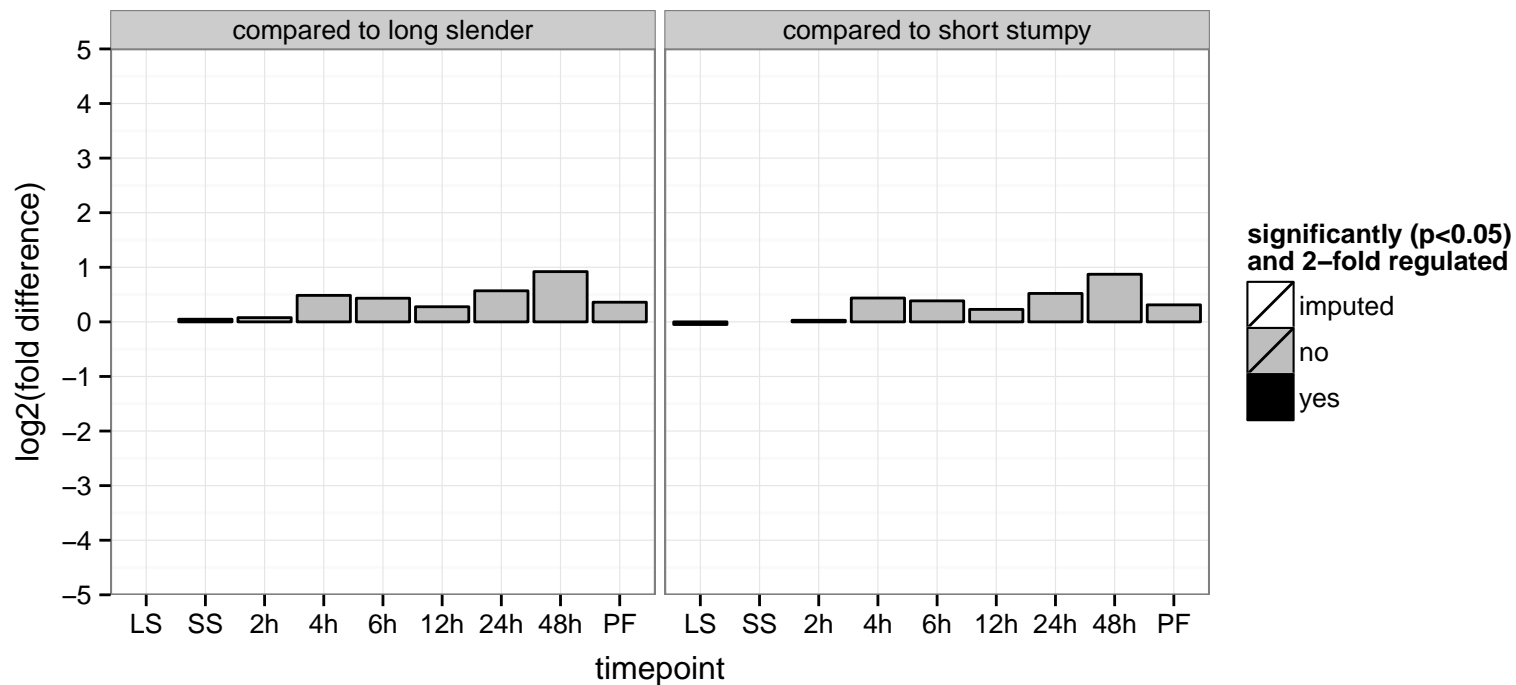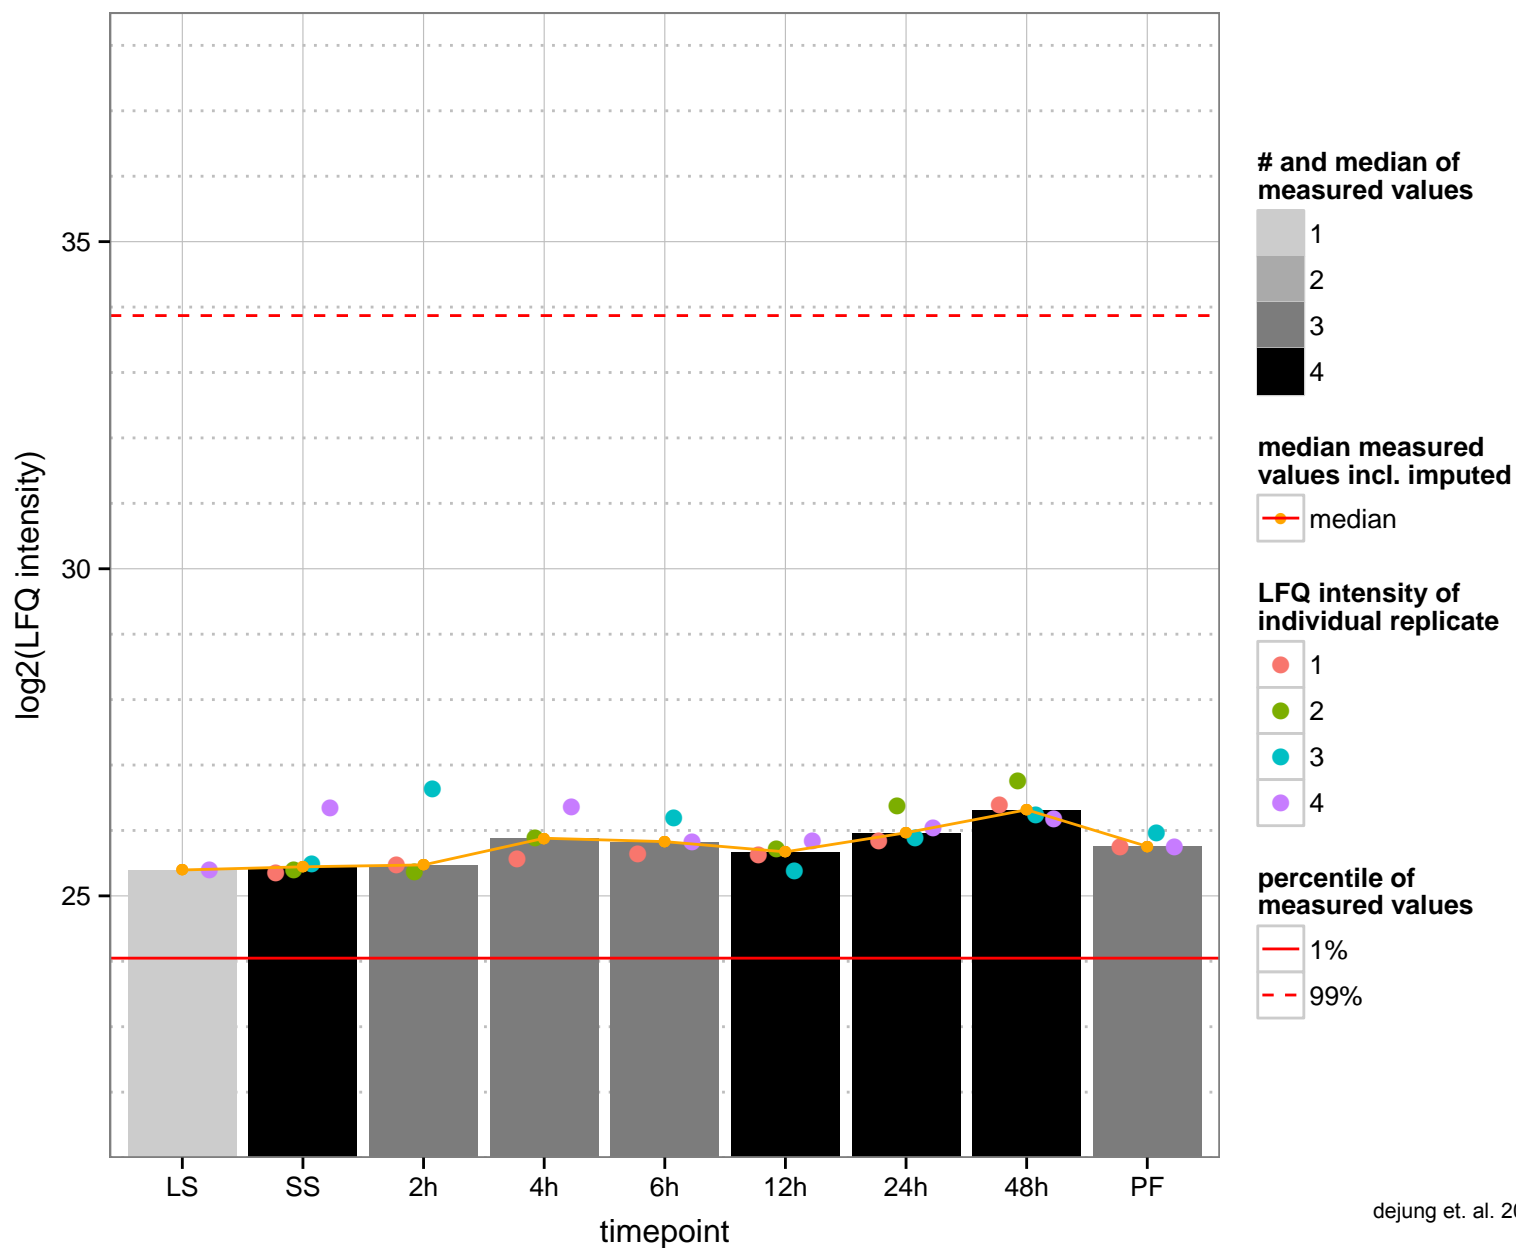

hypothetical protein, conserved  
 Tb927.5.2270  
 AGOF: null  
 AGOC: null  
 AGOP: ciliary or flagellar motility  
 PGO: null  
 PGOC: null  
 PGOP: null

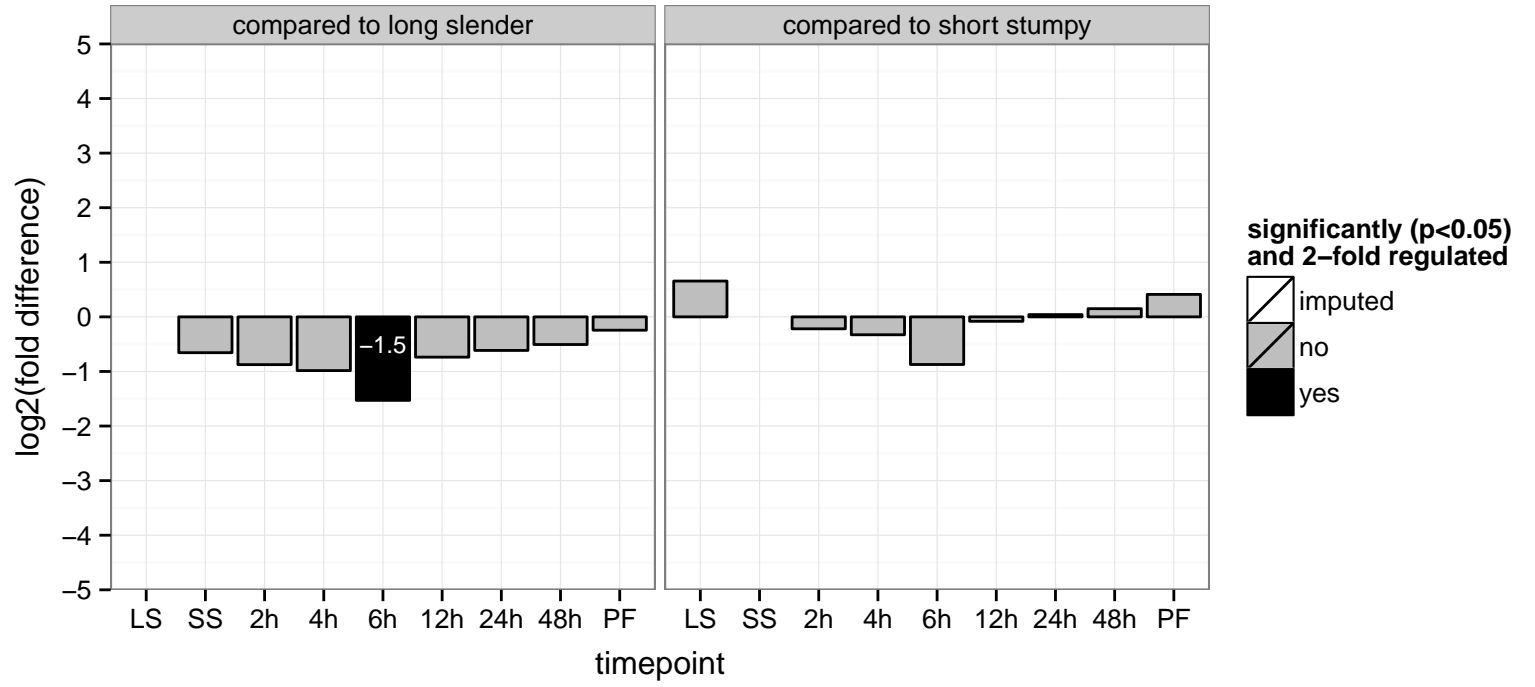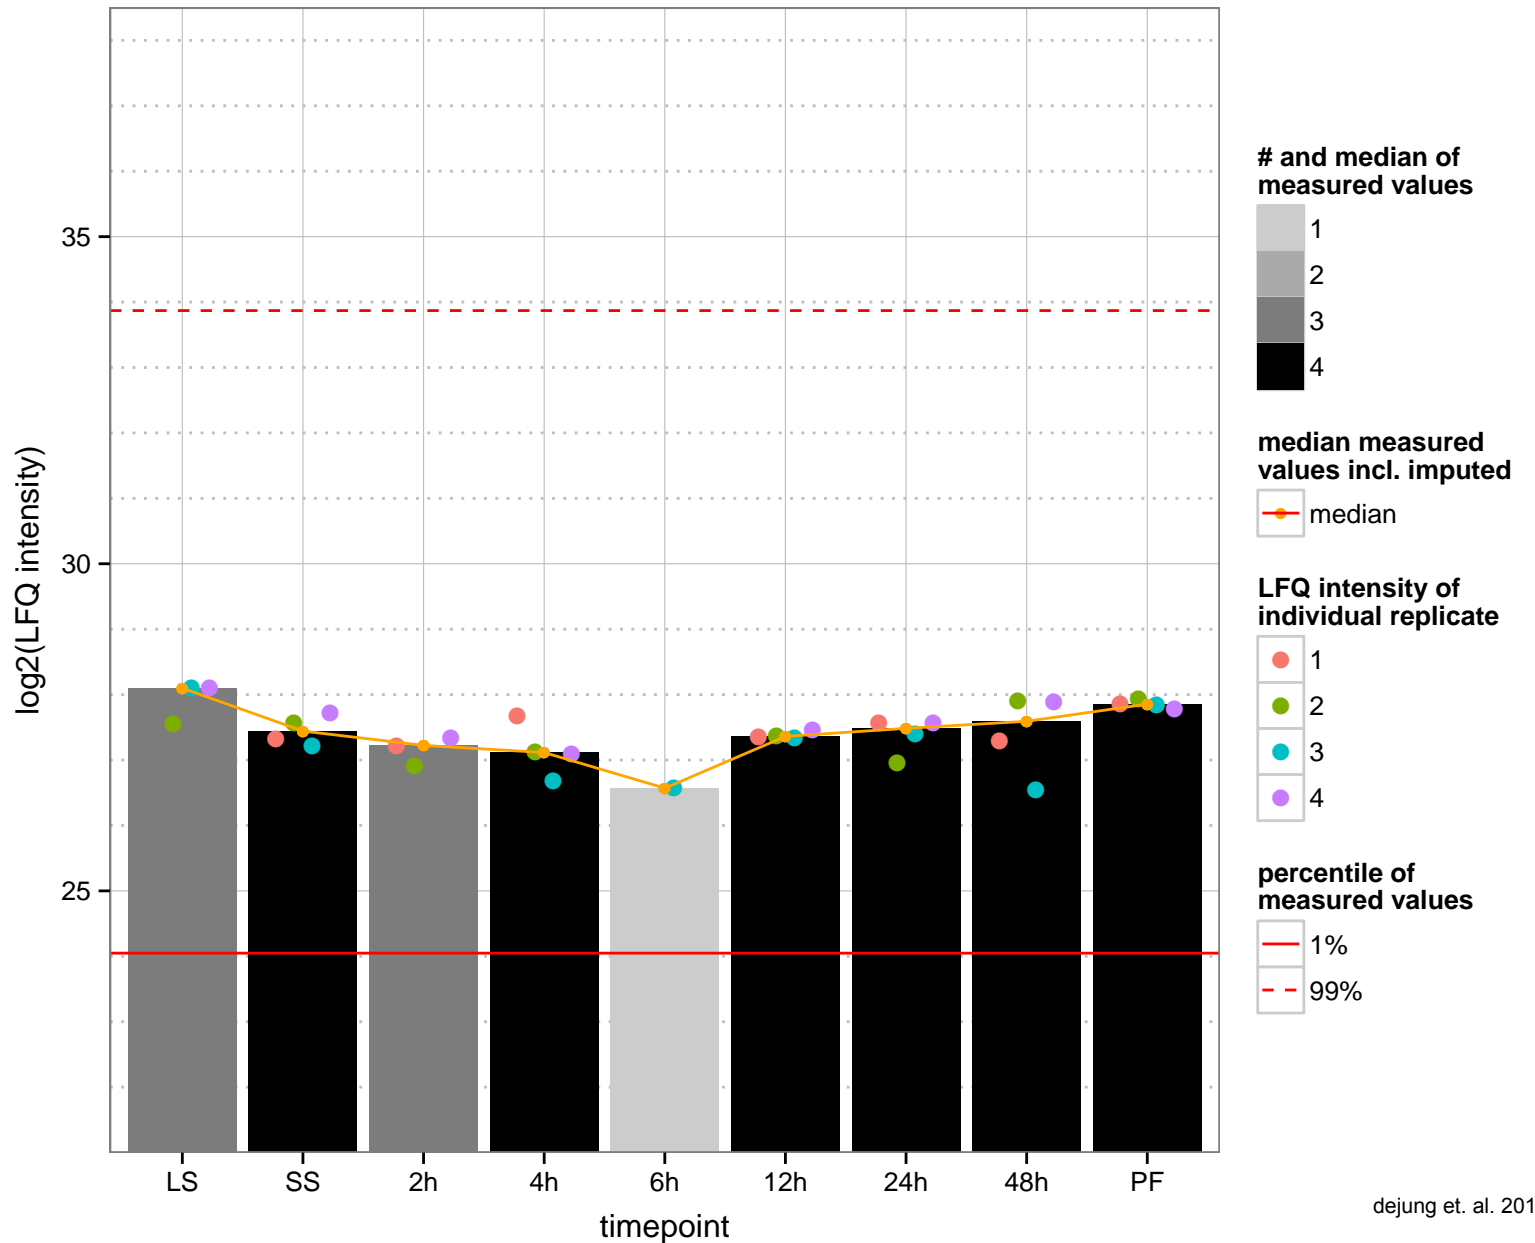

hypothetical protein, conserved  
 Tb927.5.2310  
 AGOF: null  
 AGOC: null  
 AGOP: null  
 PGO: null  
 PGOC: null  
 PGOP: null

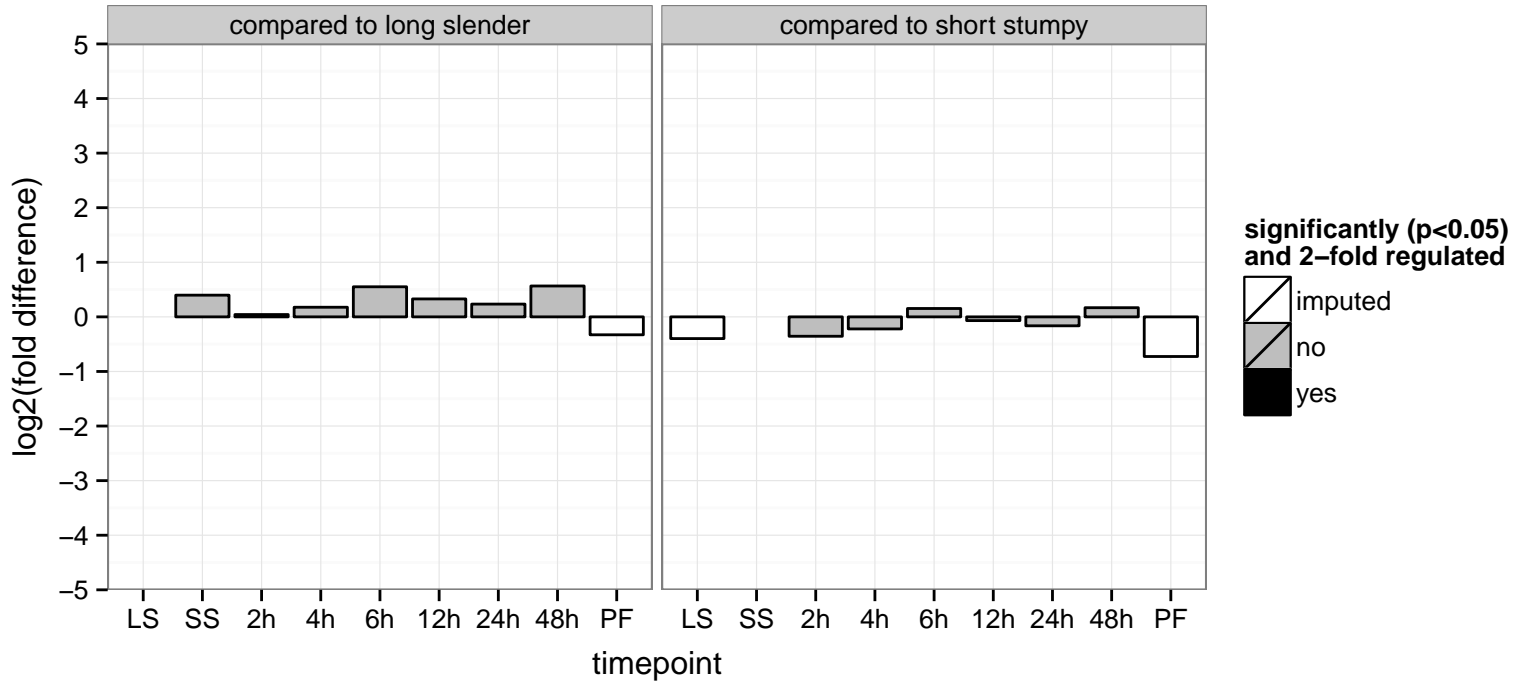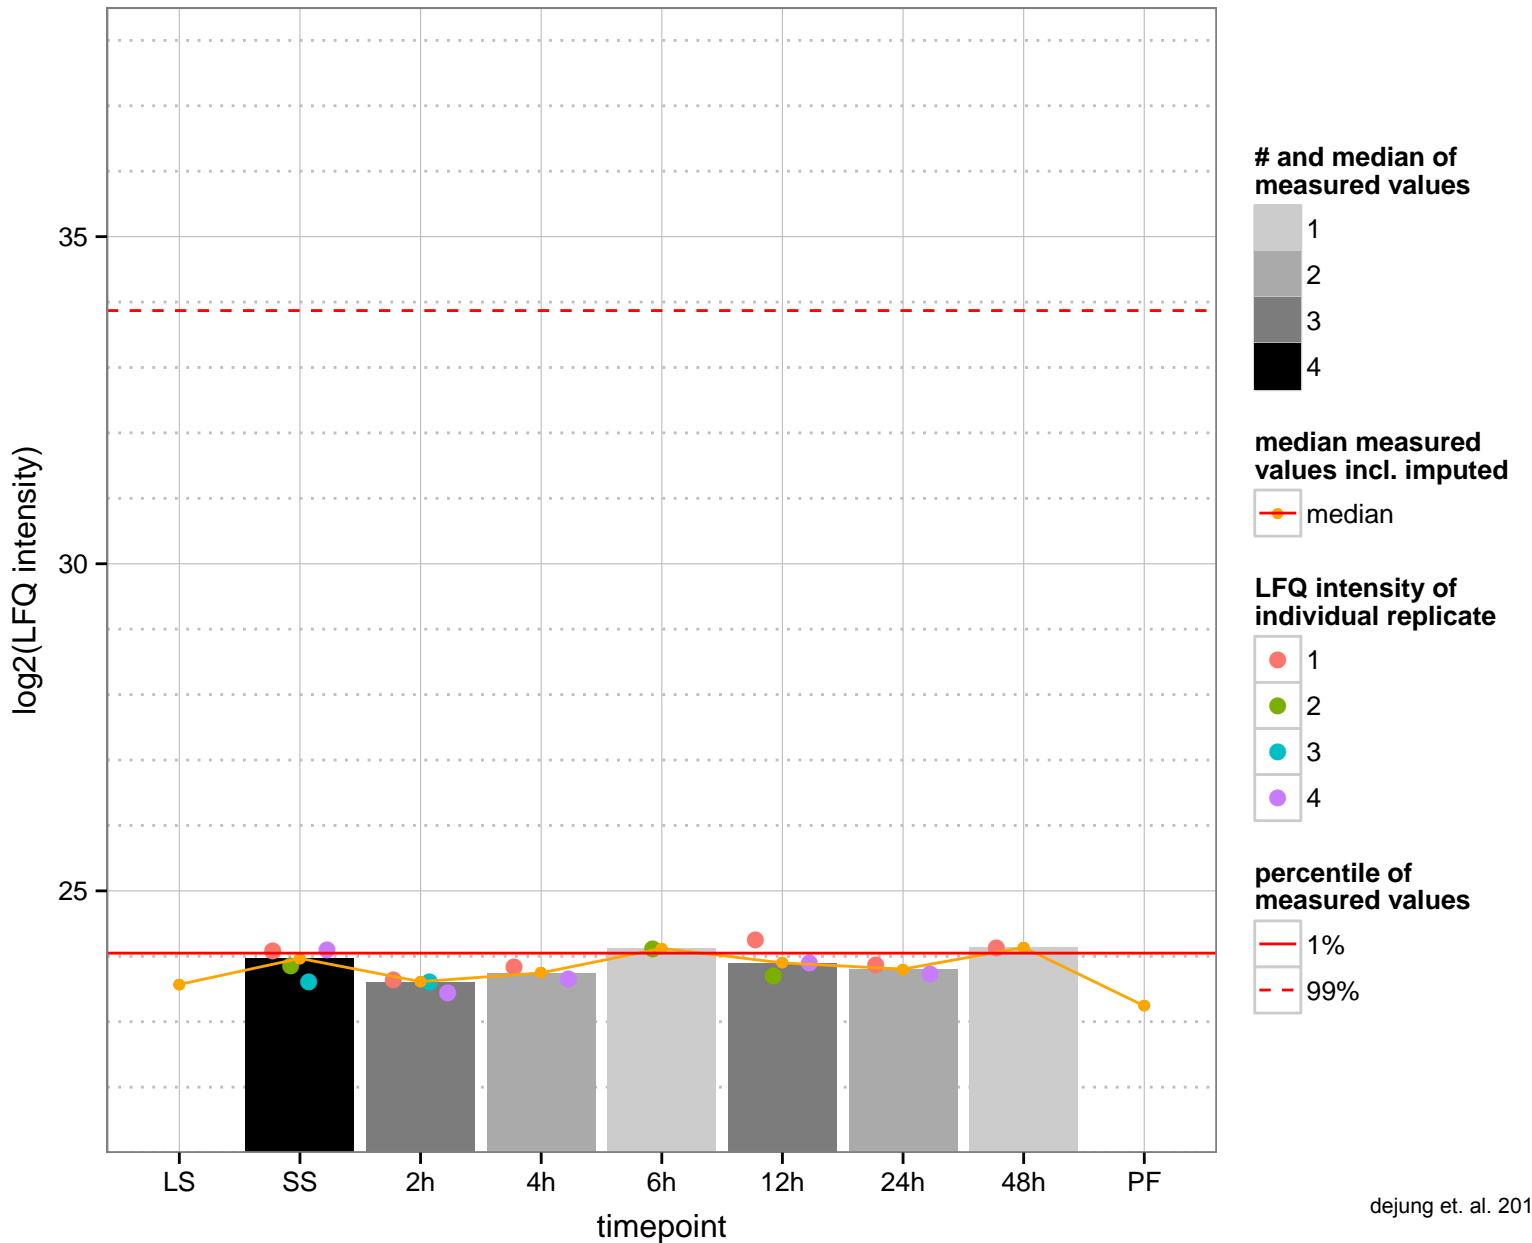

hydrolase, alpha/beta fold family, putative  
 Tb927.5.2380  
 AGOF: null  
 AGOC: null  
 AGOP: null  
 PGOF: null  
 PGO: null  
 PGOP: null

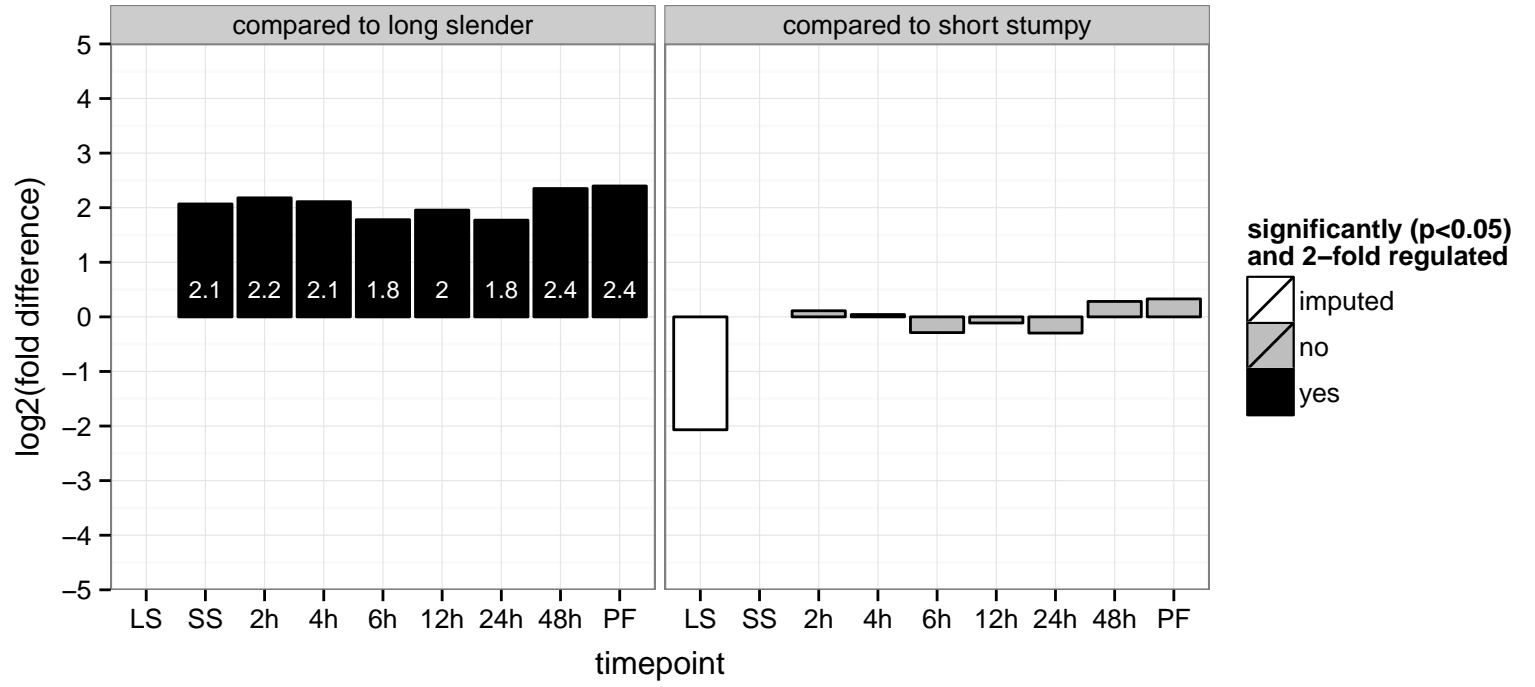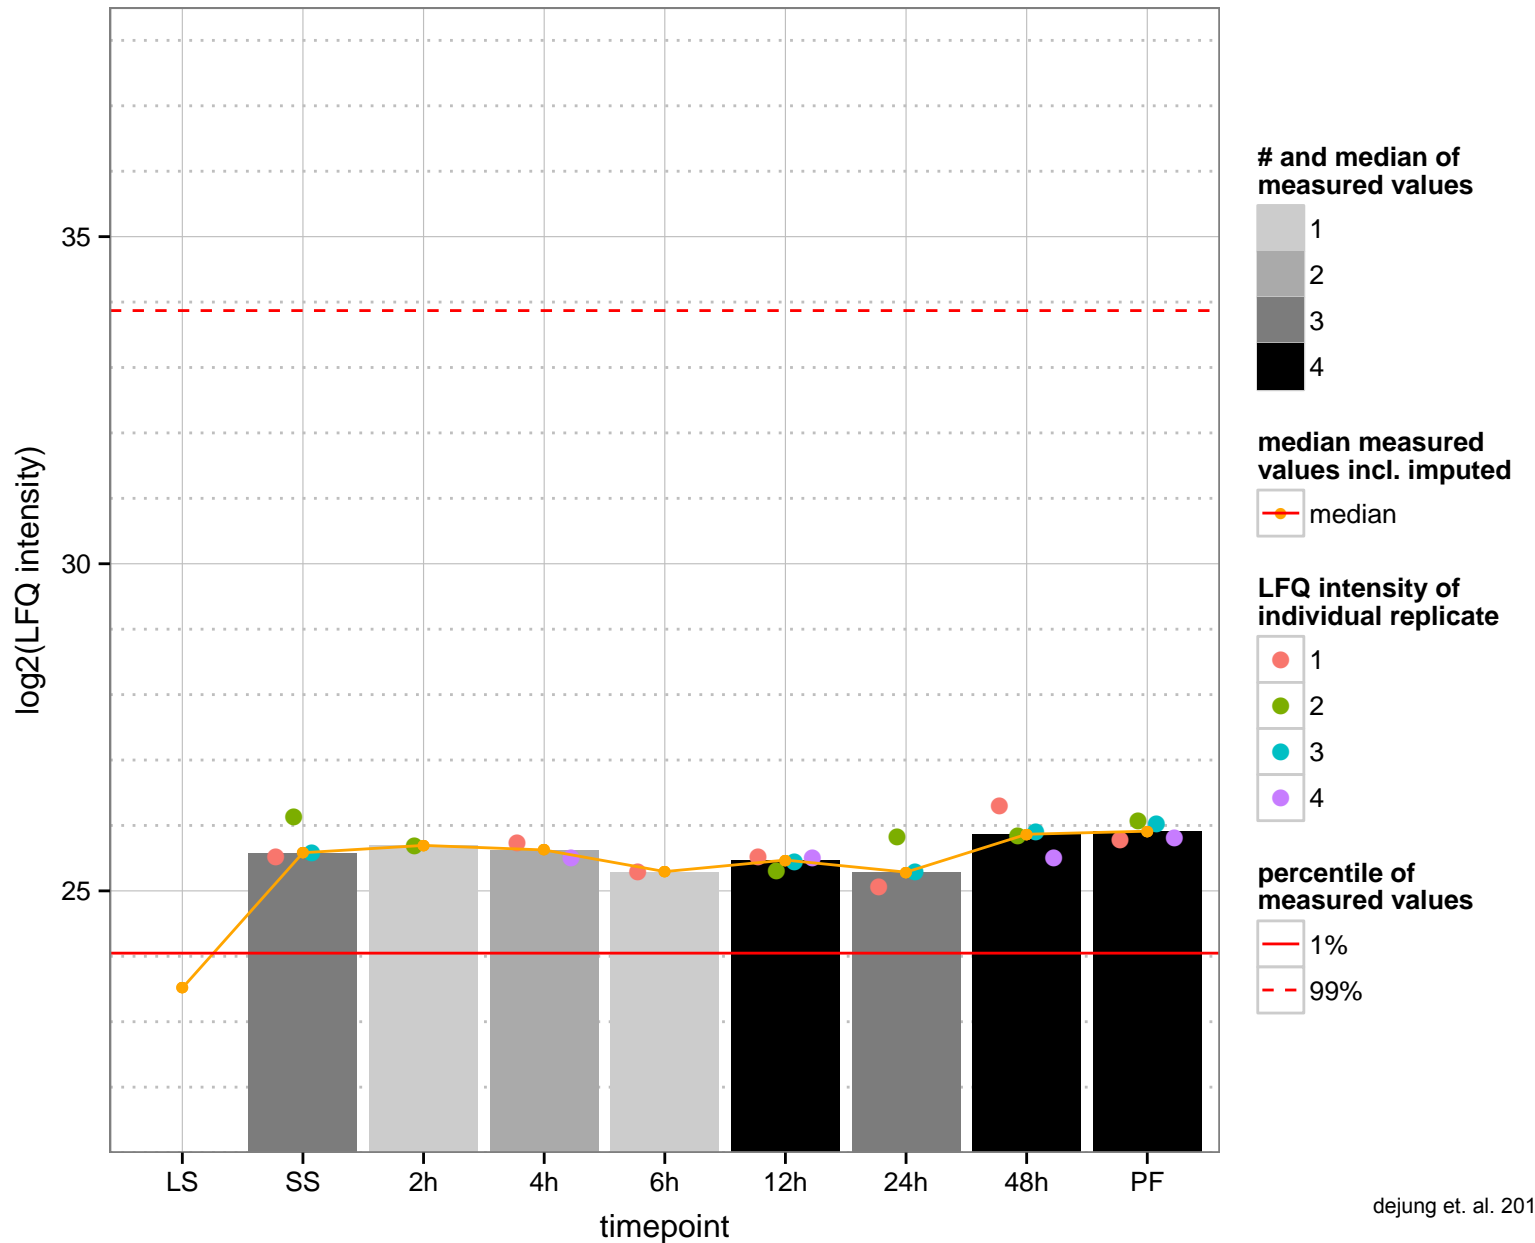

kinesin, putative

Tb927.5.2410

AGOF: ATP binding, calcium-dependent cysteine-type endopeptidase activity, microtubule motor activity

AGOC: intracellular

AGOP: microtubule-based movement, proteolysis

PGOF: ATP binding, binding, microtubule motor activity, protein binding

PGOC: null

PGOP: microtubule-based movement

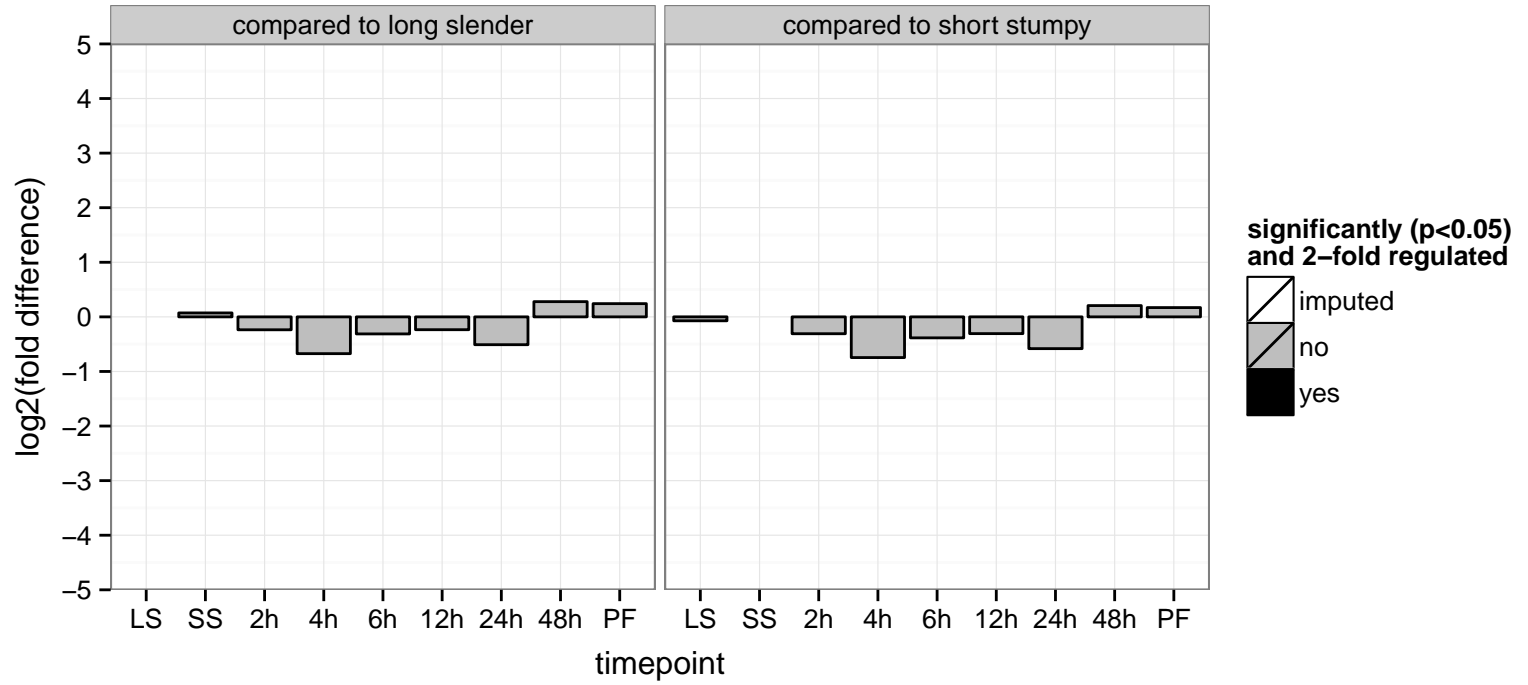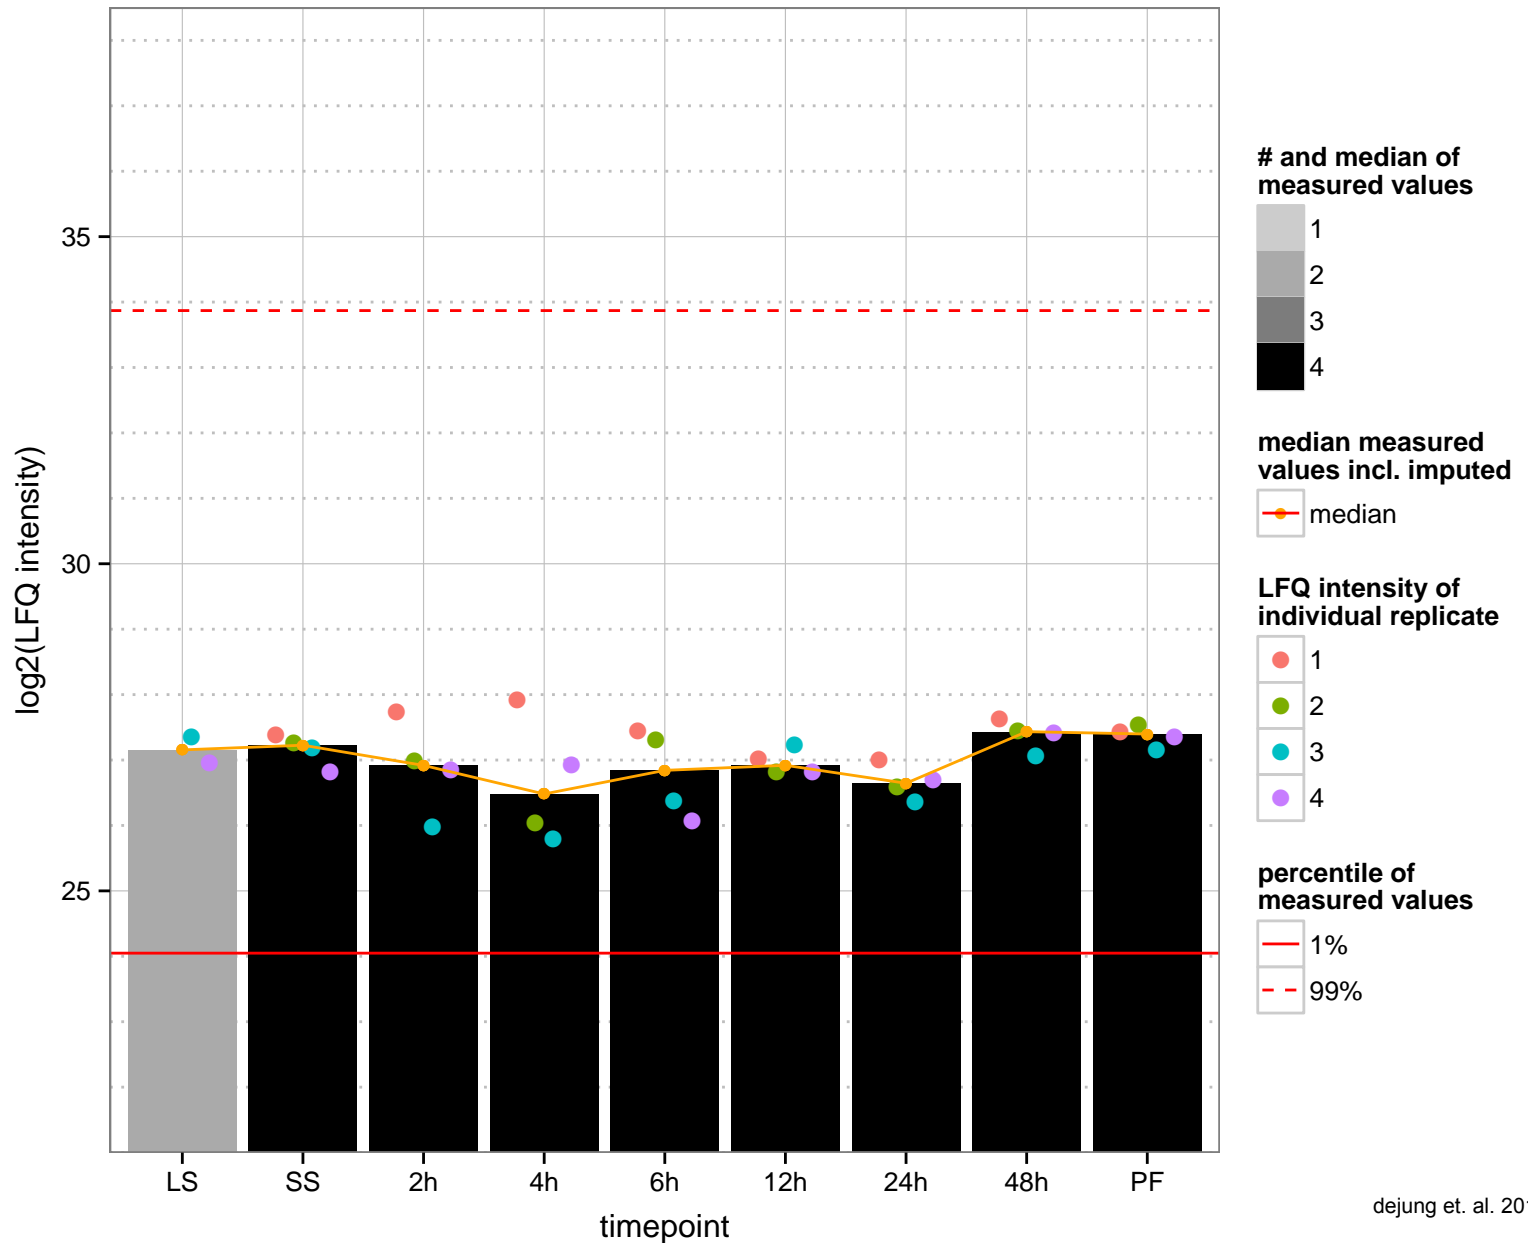

hypothetical protein, conserved  
 Tb927.5.2500  
 AGOF: null  
 AGOC: null  
 AGOP: null  
 PGOF: null  
 PGO: null  
 PGOP: null

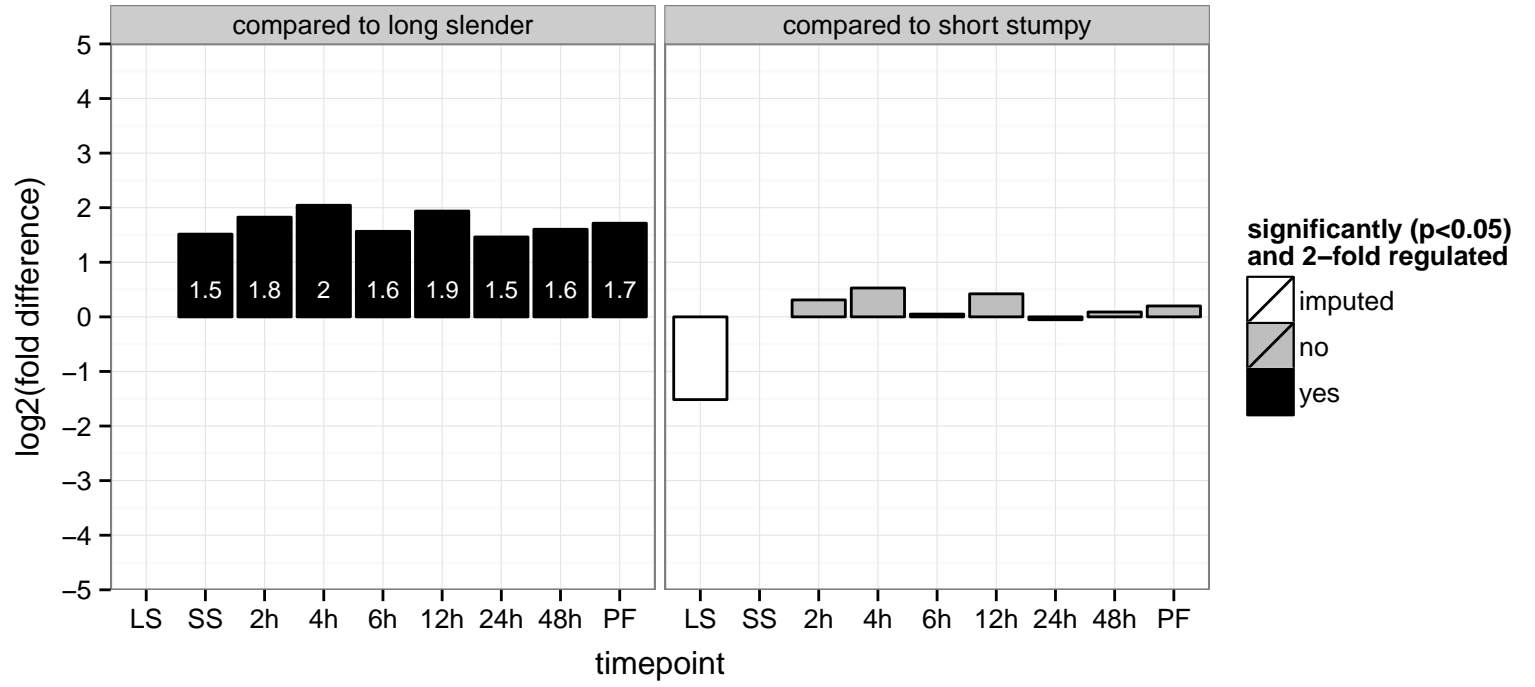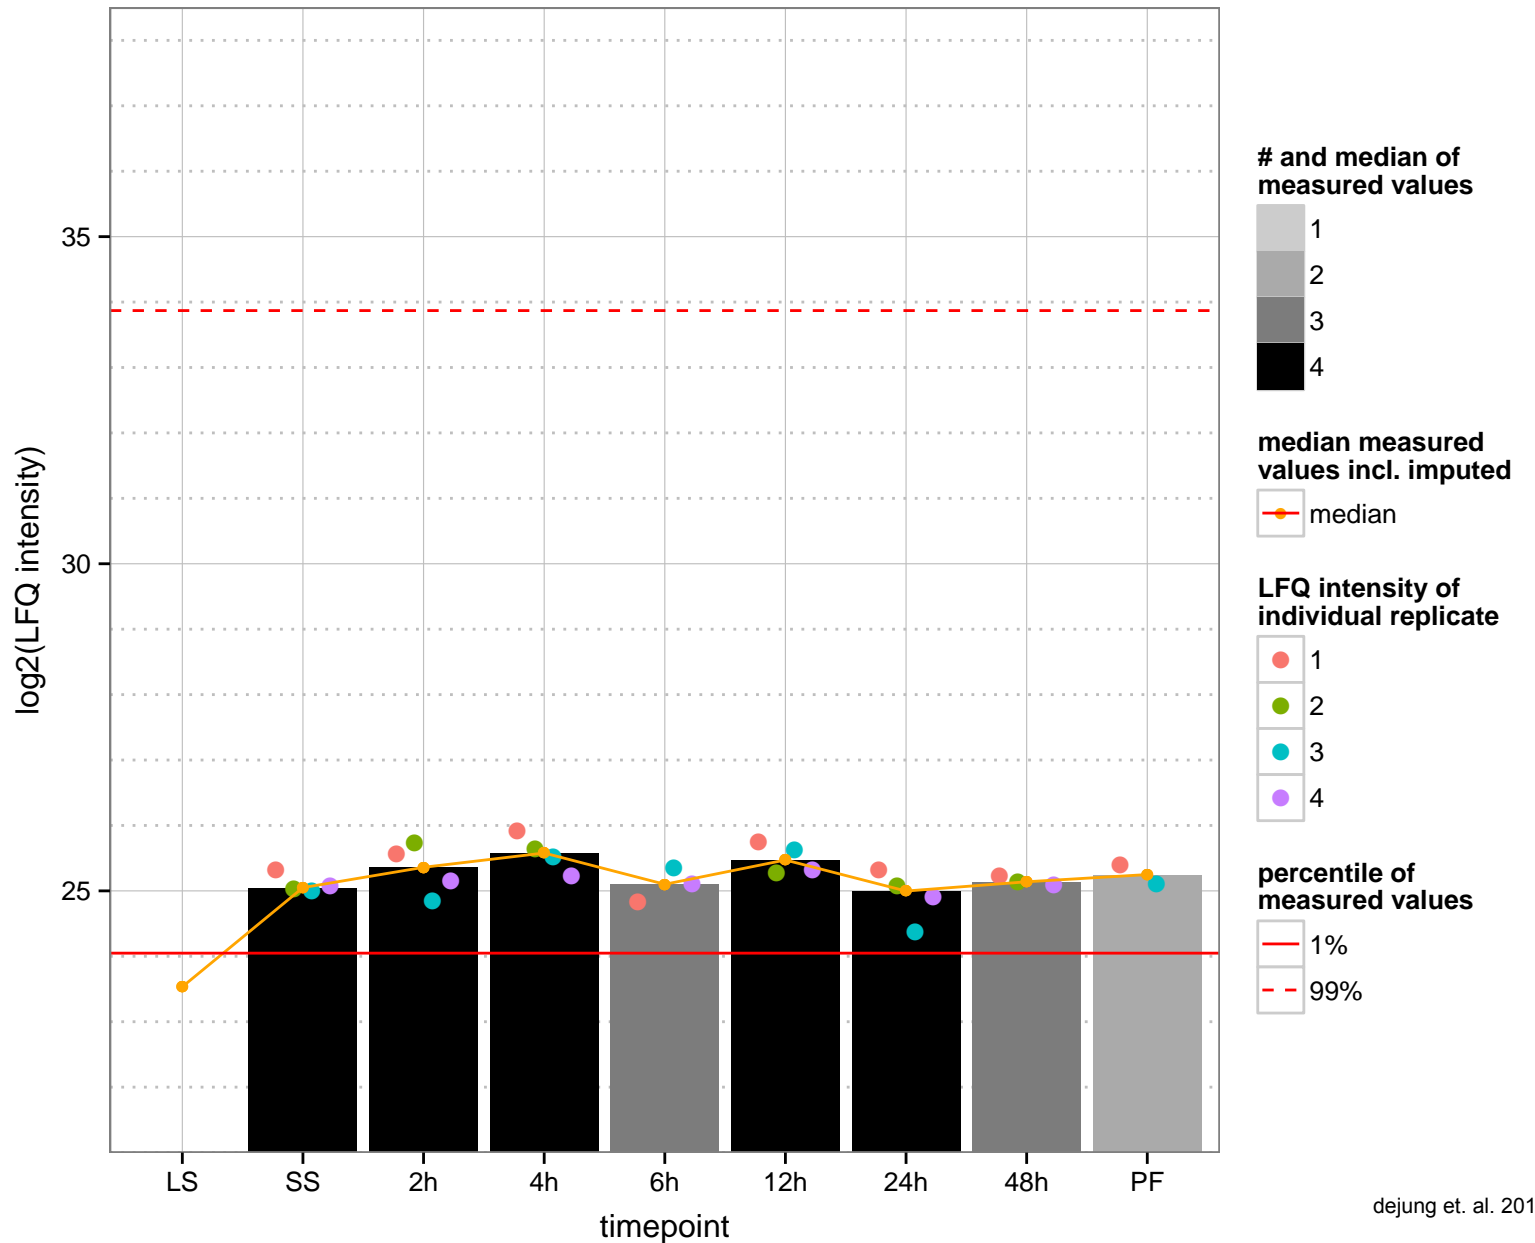

translation initiation factor, putative (EIF3B)  
 Tb927.5.2570  
 AGOF: RNA binding, translation initiation factor activity  
 AGOC: null  
 AGOP: translational initiation  
 PGO: null  
 PGOC: null  
 PGOP: null

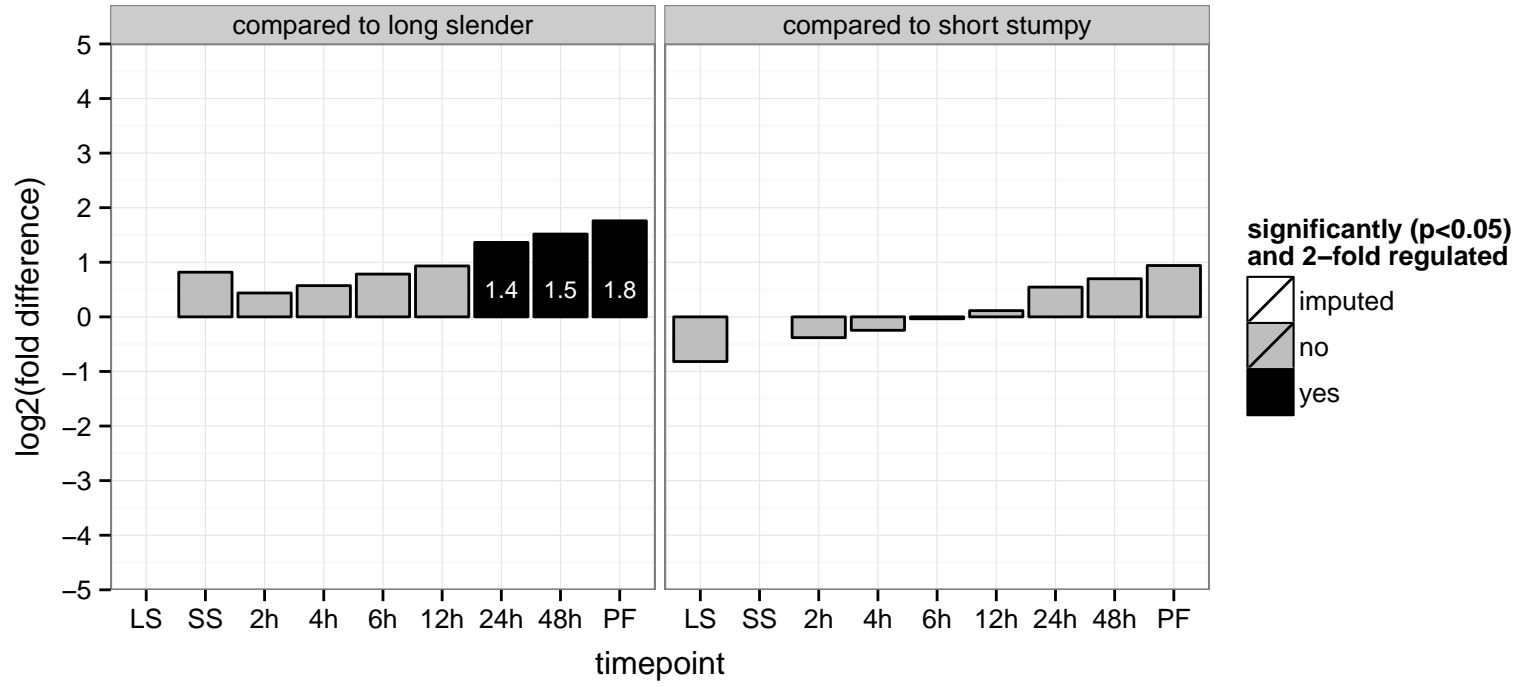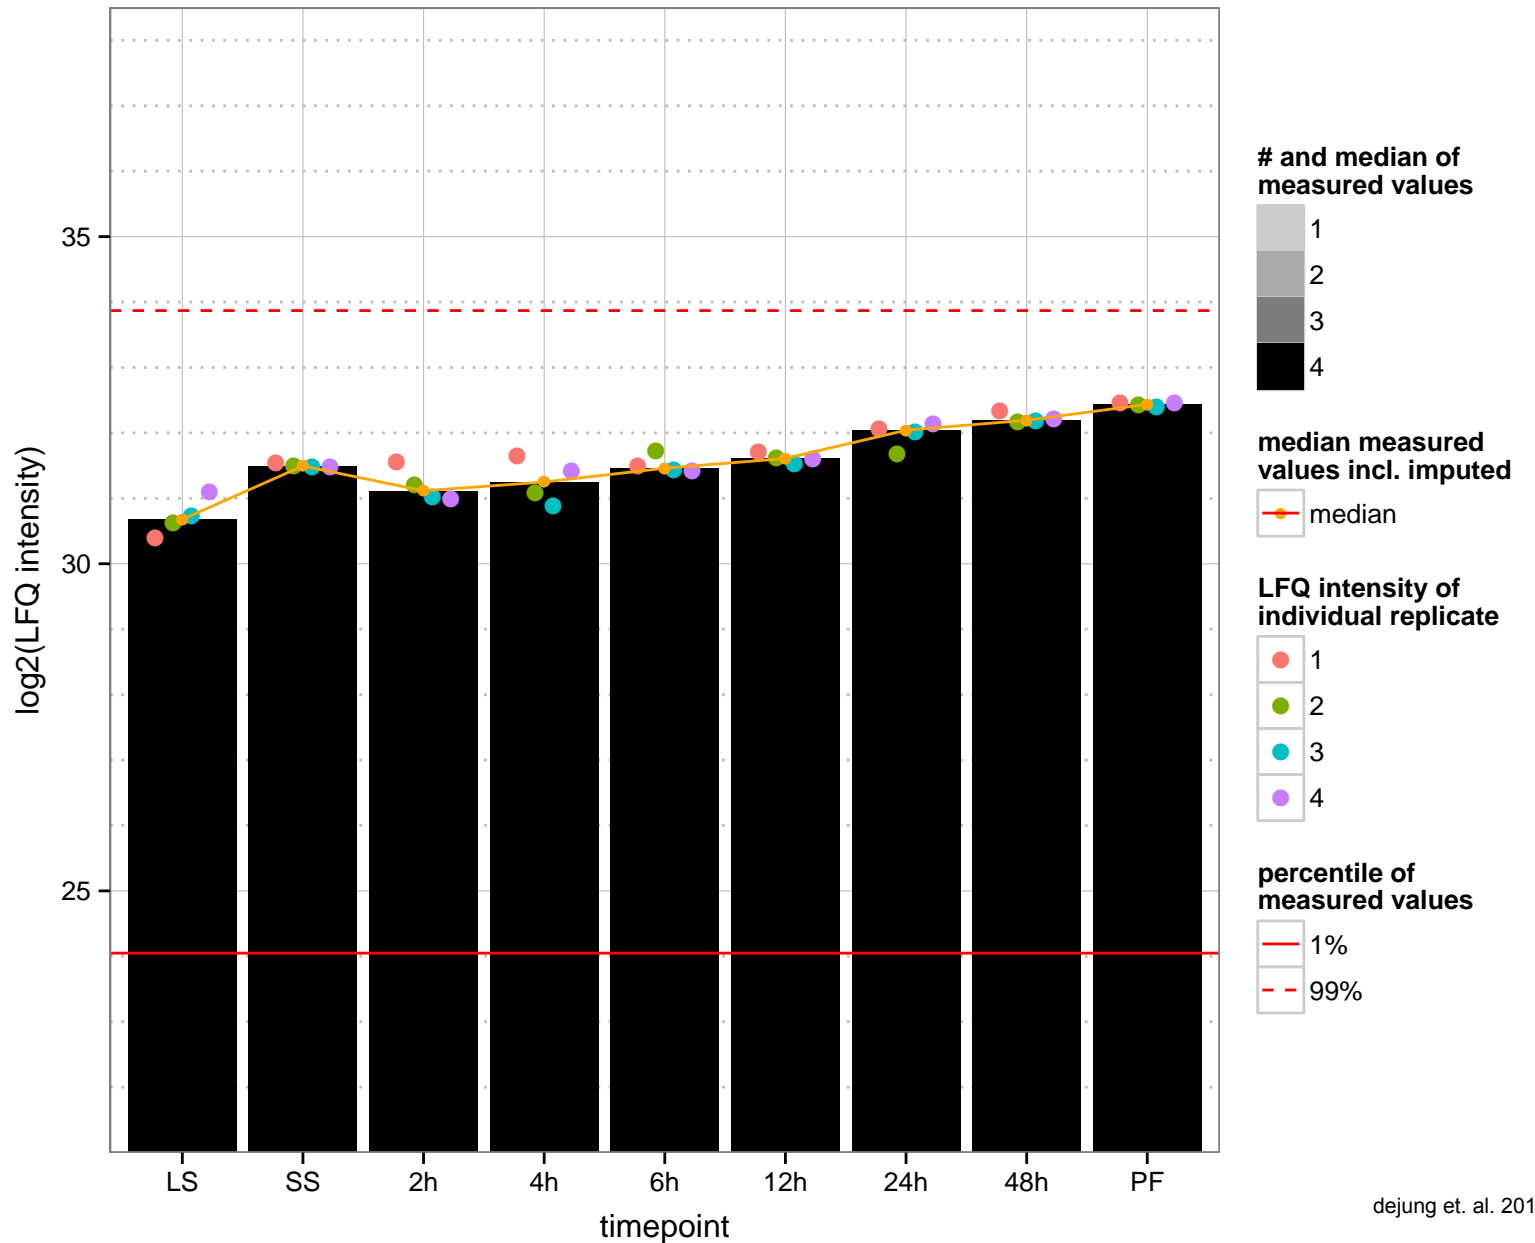



hypothetical protein, conserved  
 Tb927.5.2590  
 AGOF: null  
 AGOC: null  
 AGOP: null  
 PGOF: null  
 PGO: null  
 PGOP: null

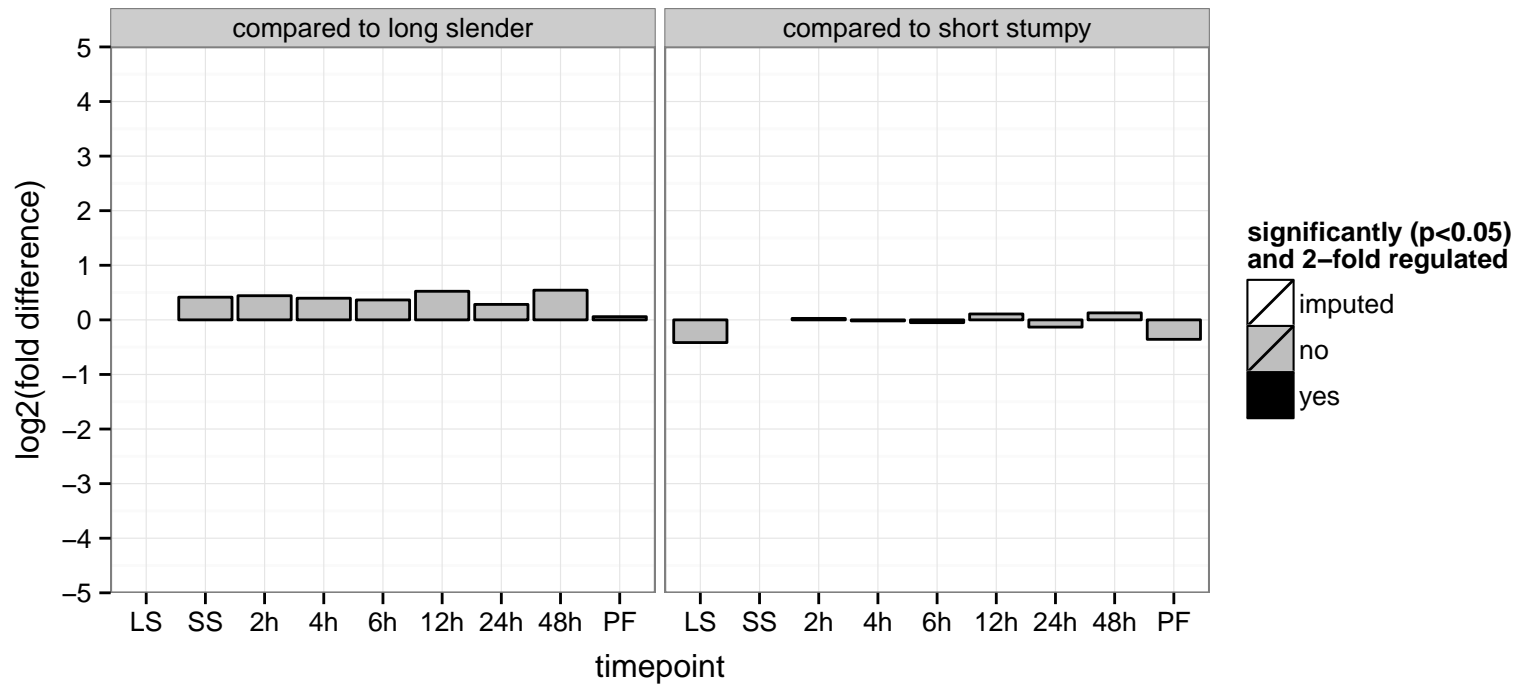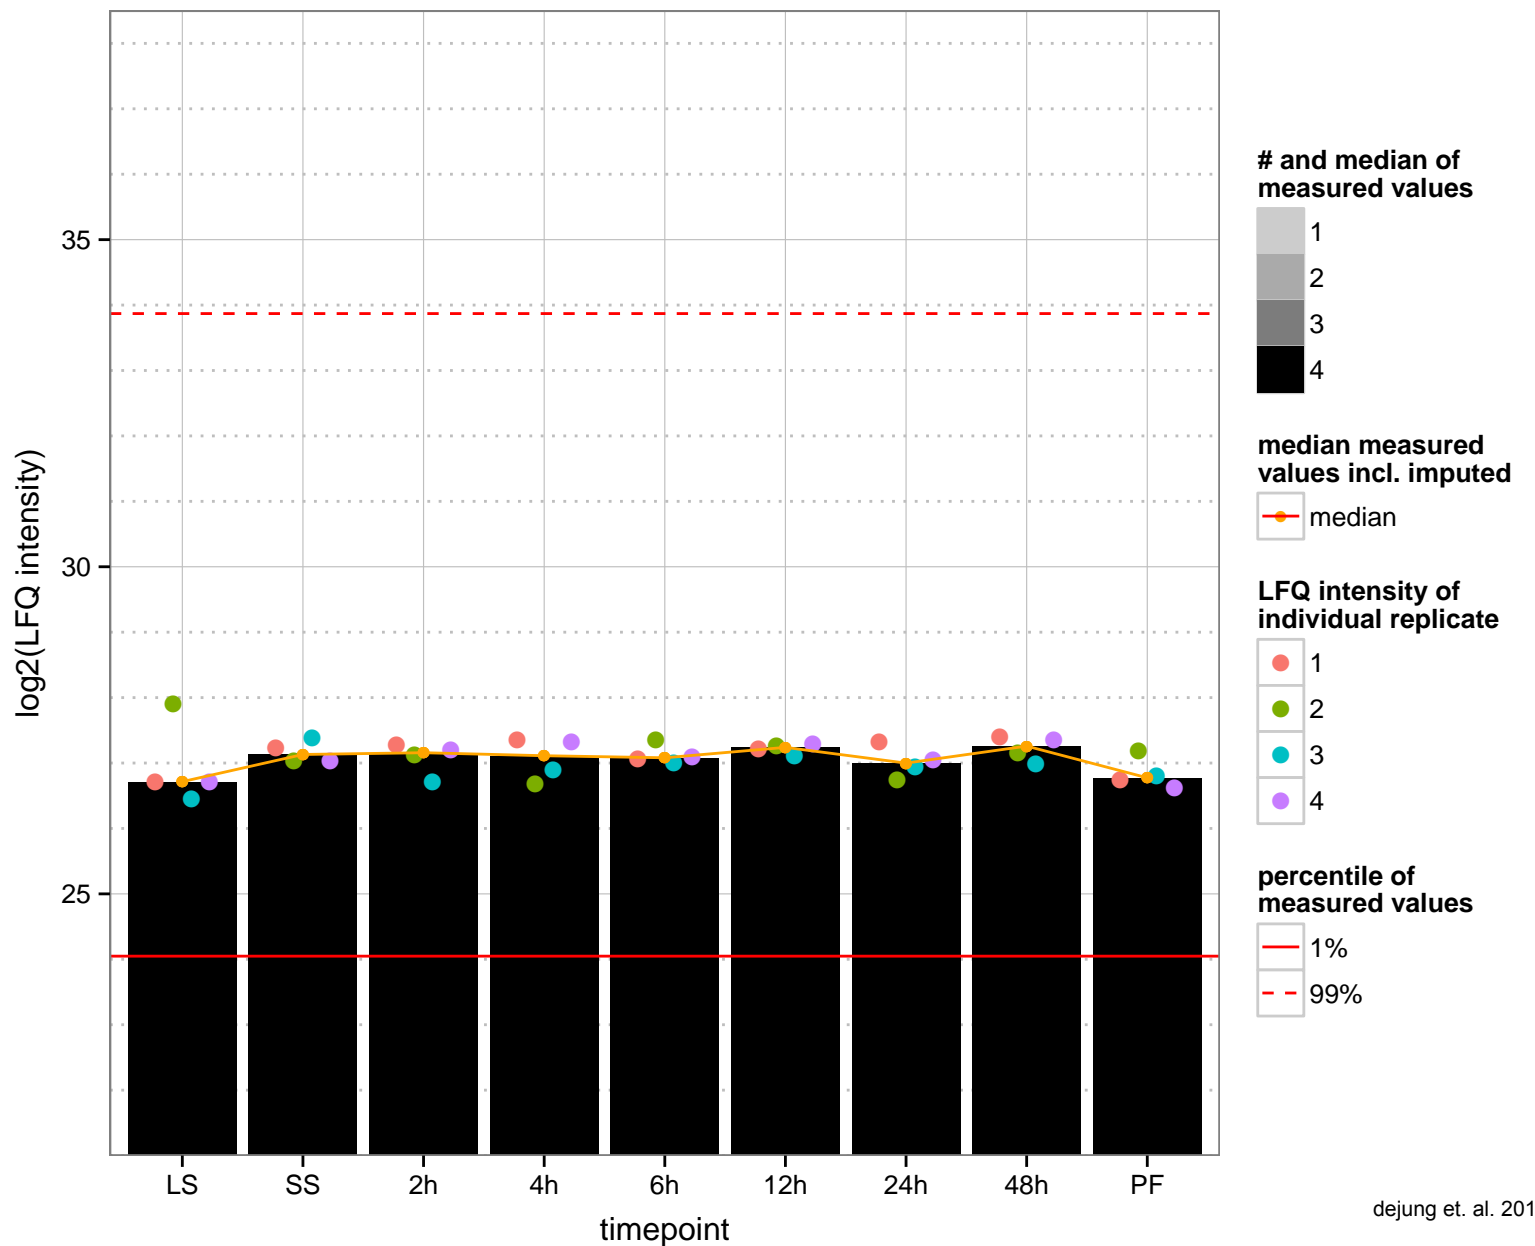

hypothetical protein, conserved  
 Tb927.5.2640  
 AGOF: nucleotidyltransferase activity  
 AGOC: null  
 AGOP: NAD biosynthetic process  
 PGOF: nucleotidyltransferase activity  
 PGOC: null  
 PGOP: biosynthetic process

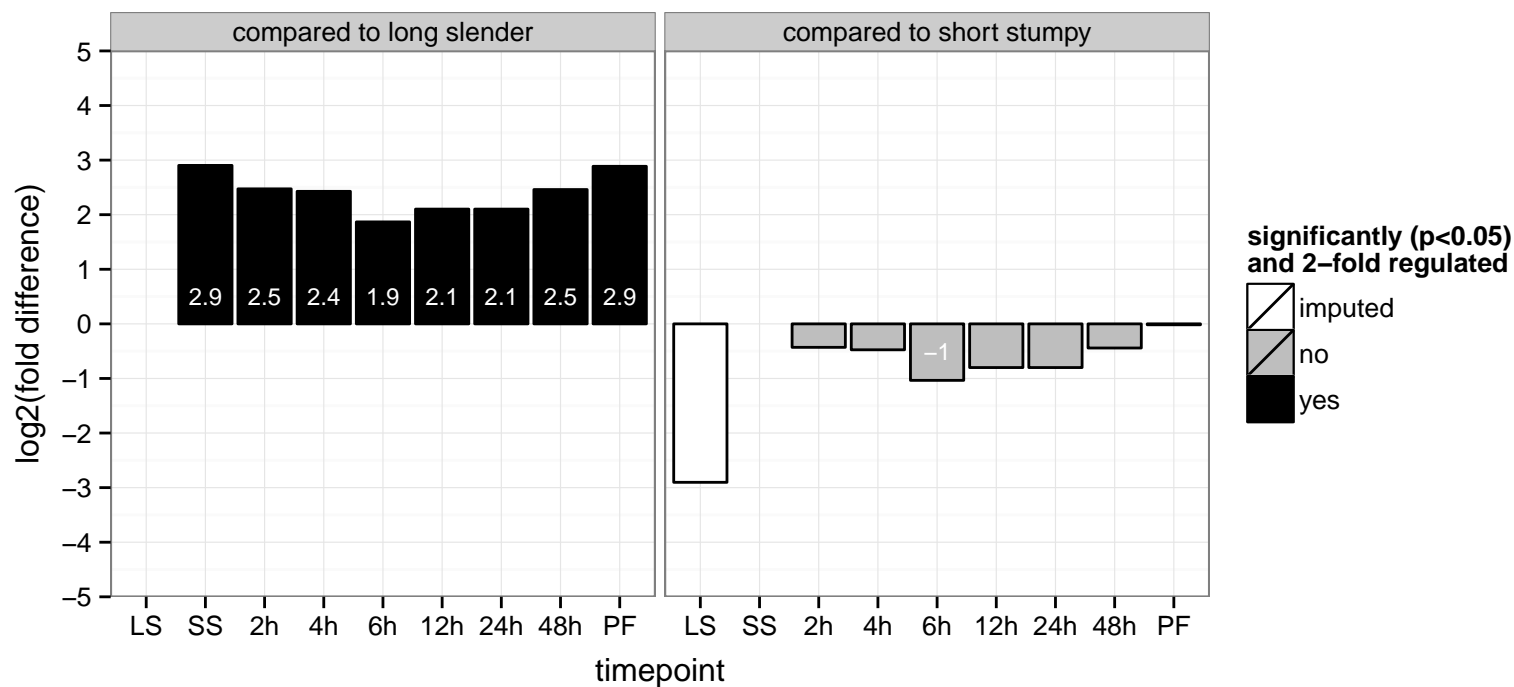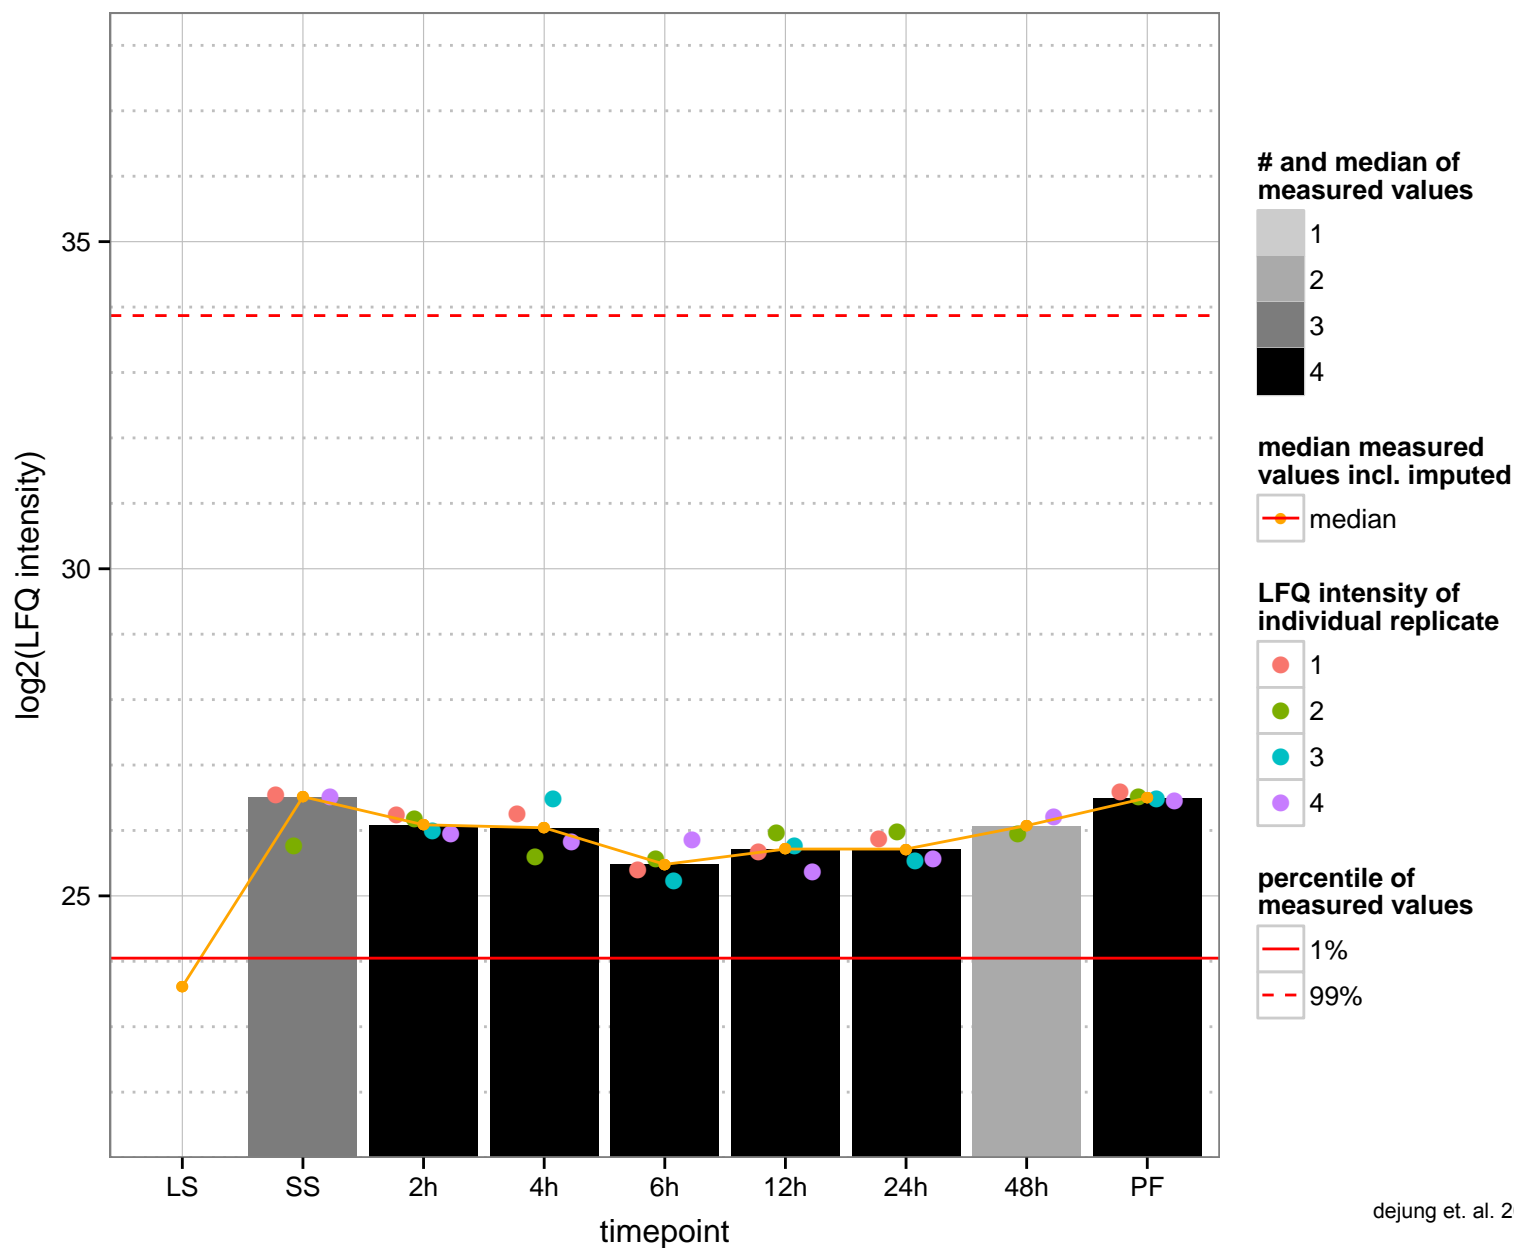

hypothetical protein, conserved  
 Tb927.5.2660  
 AGOF: null  
 AGOC: null  
 AGOP: null  
 PGOF: binding  
 PGO: null  
 PGOP: null

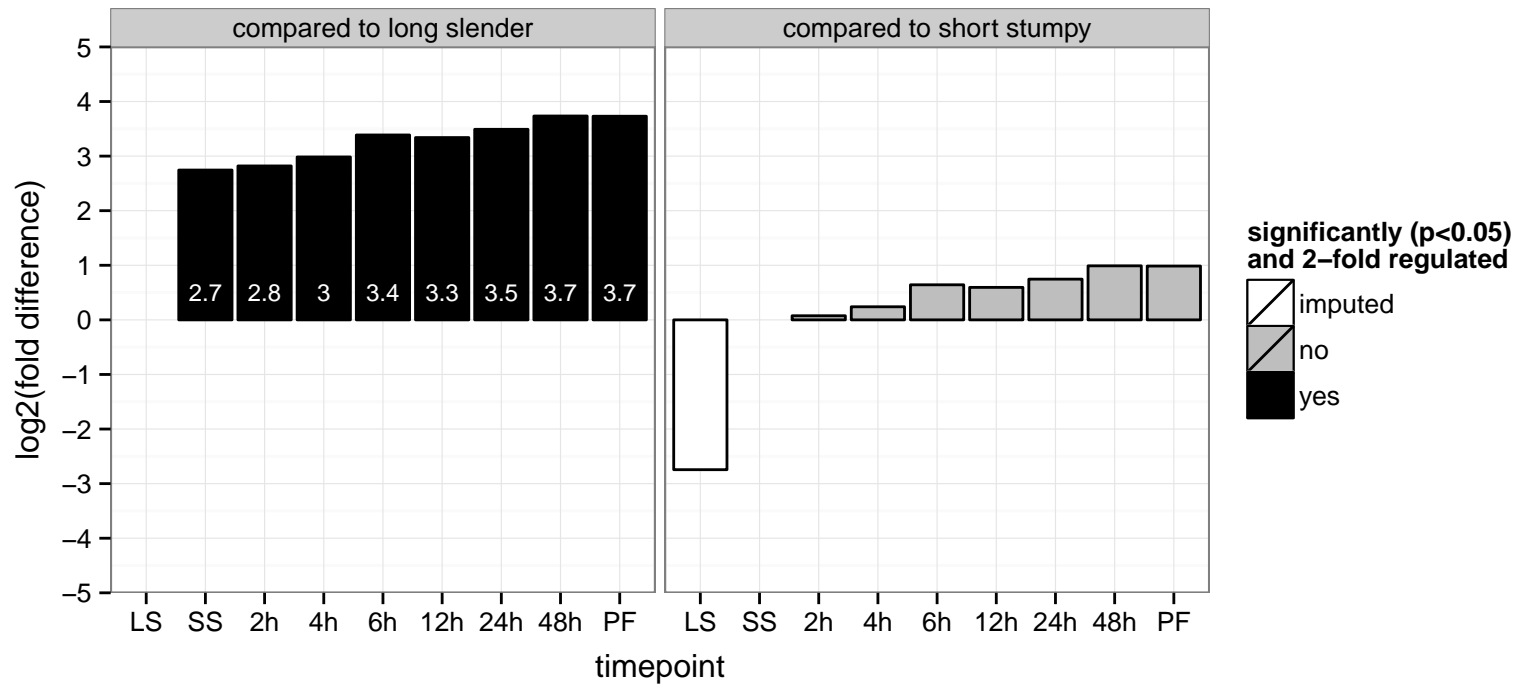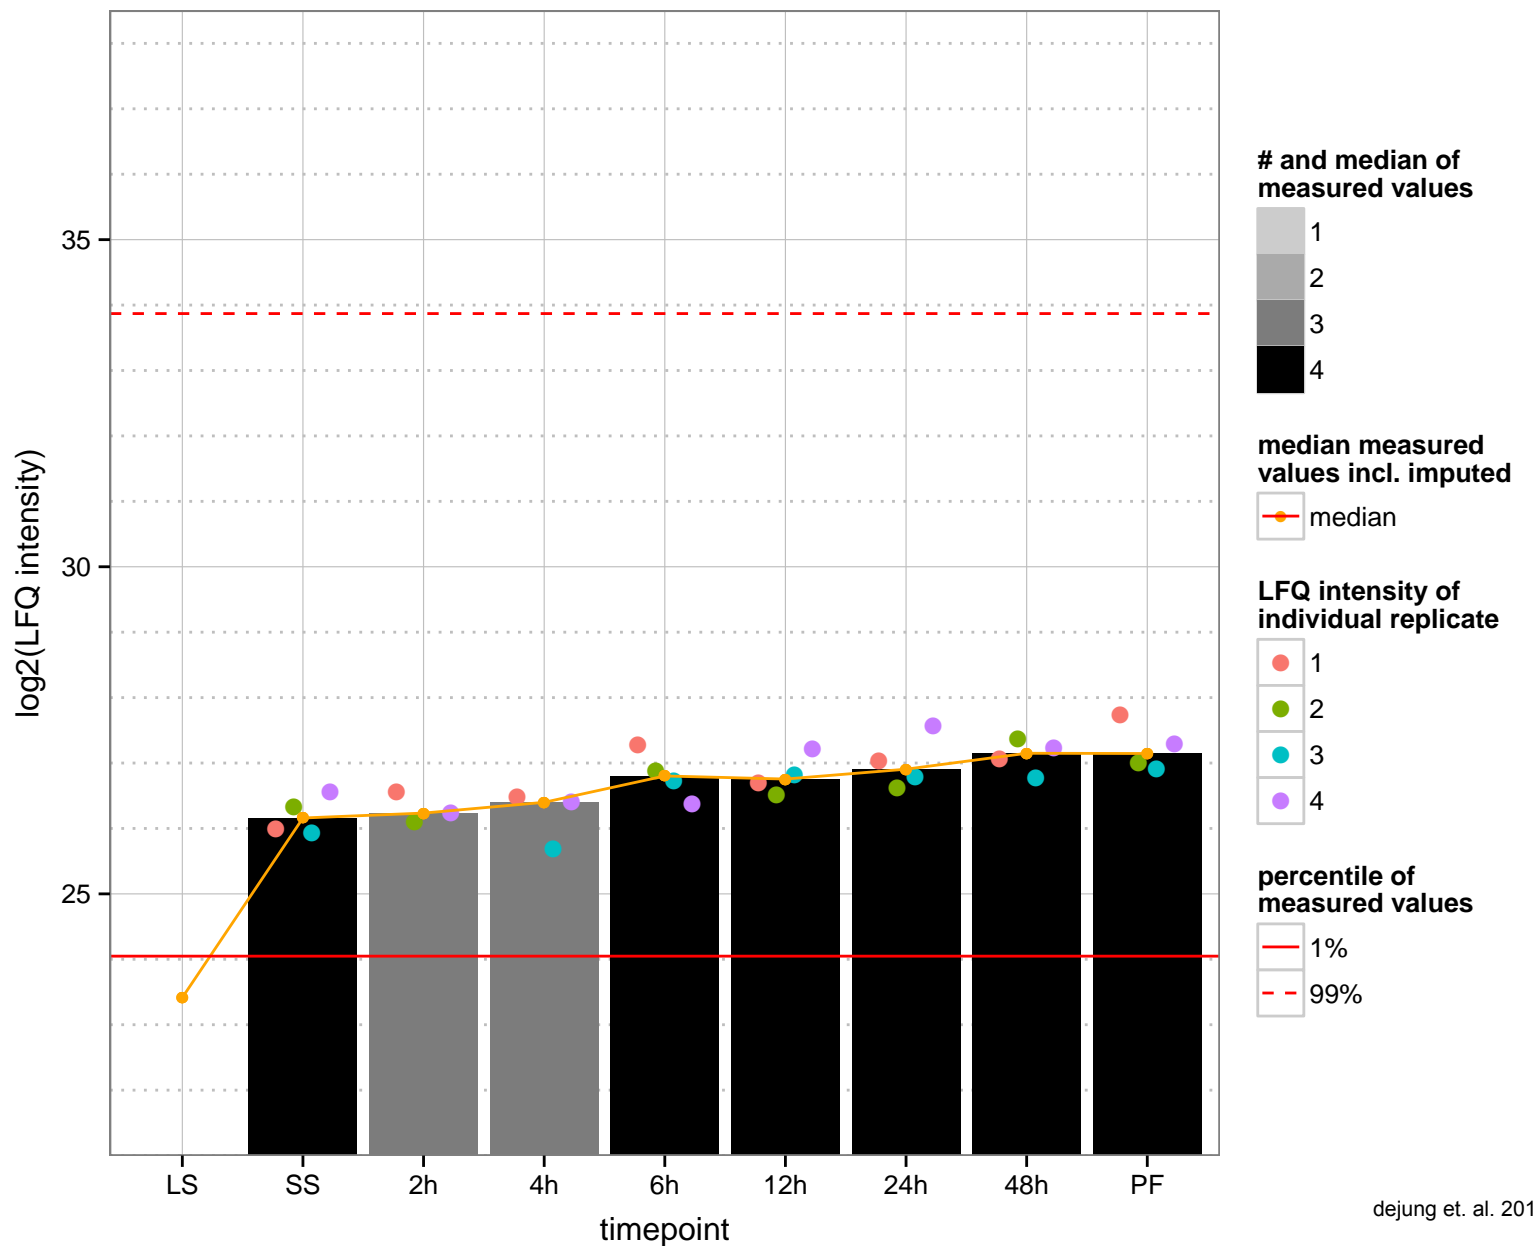

otubain, putative, otubain cysteine peptidase, Clan CA, family C65  
 Tb927.5.2700  
 AGOF: null  
 AGOC: null  
 AGOP: null  
 PGOF: omega peptidase activity  
 PGO: null  
 PGO: null  
 PGO: protein metabolic process

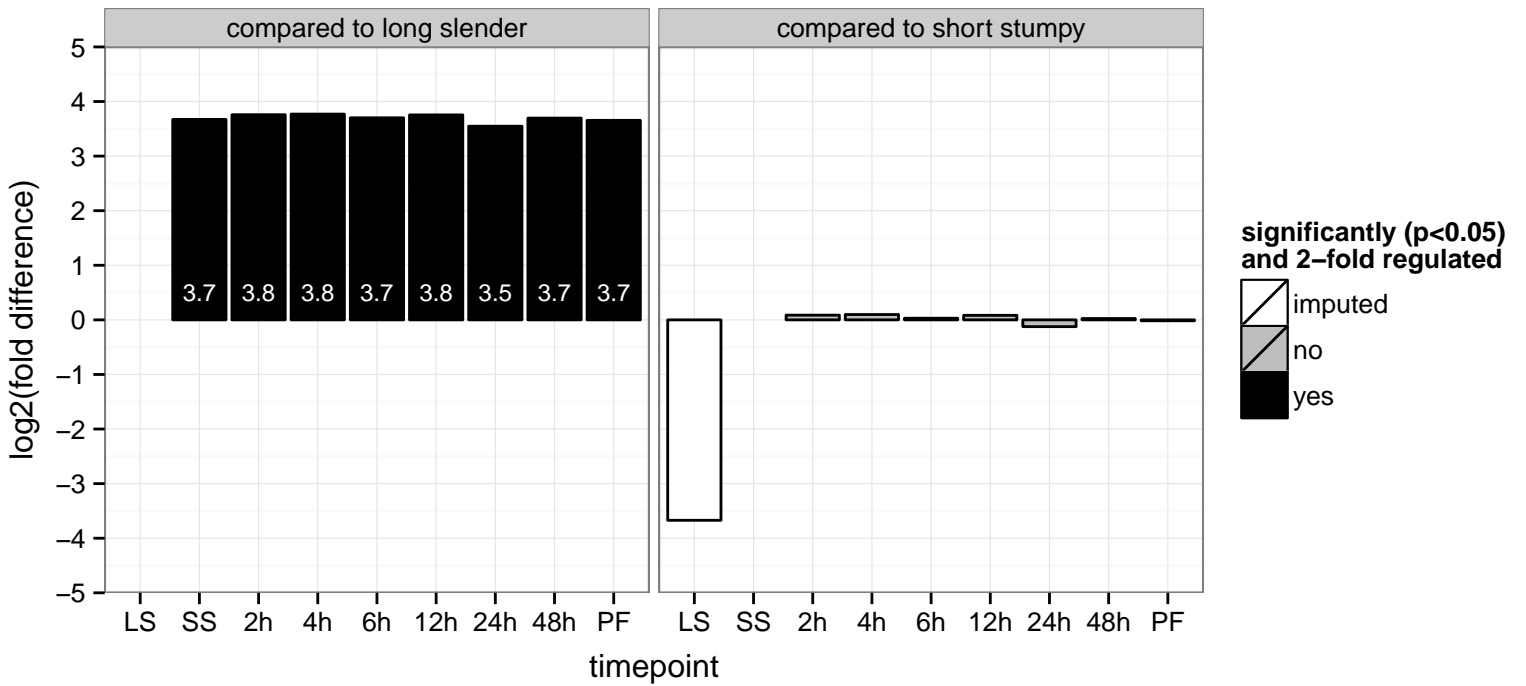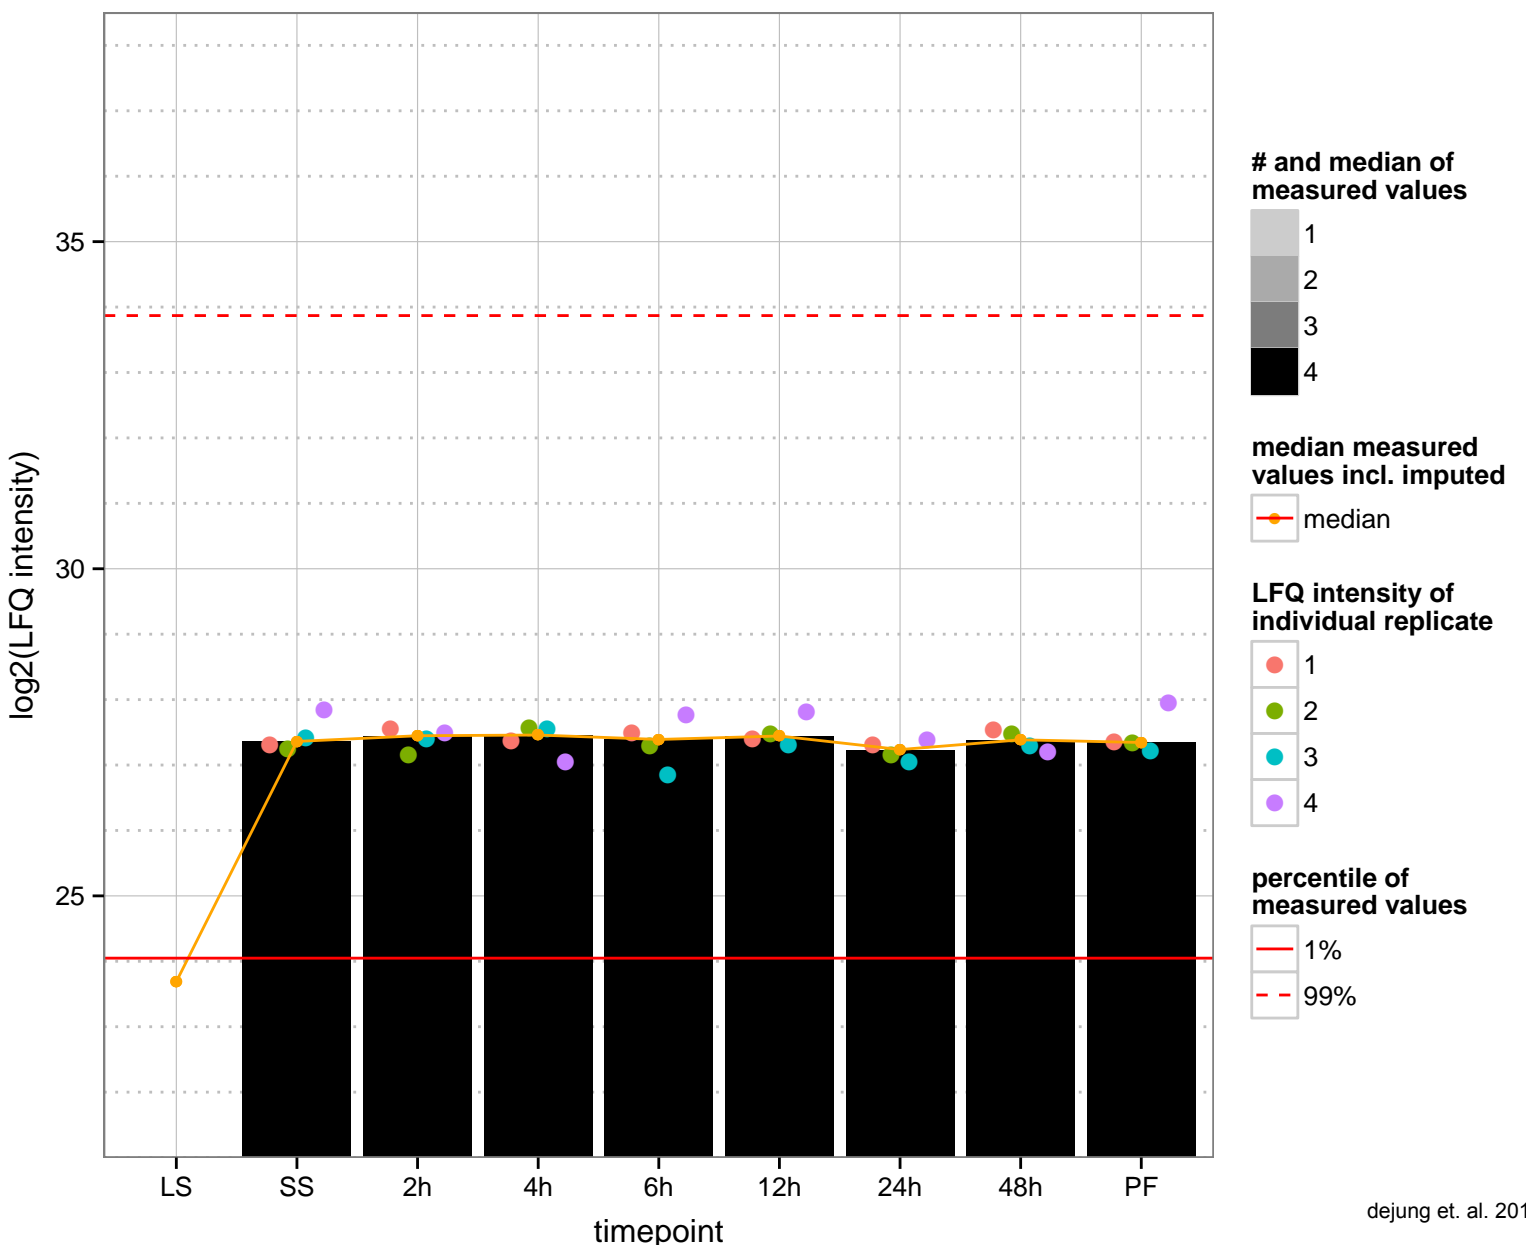

hypothetical protein, conserved  
 Tb927.5.2770  
 AGOF: null  
 AGOC: null  
 AGOP: null  
 PGO: protein binding  
 PGOC: null  
 PGOP: null

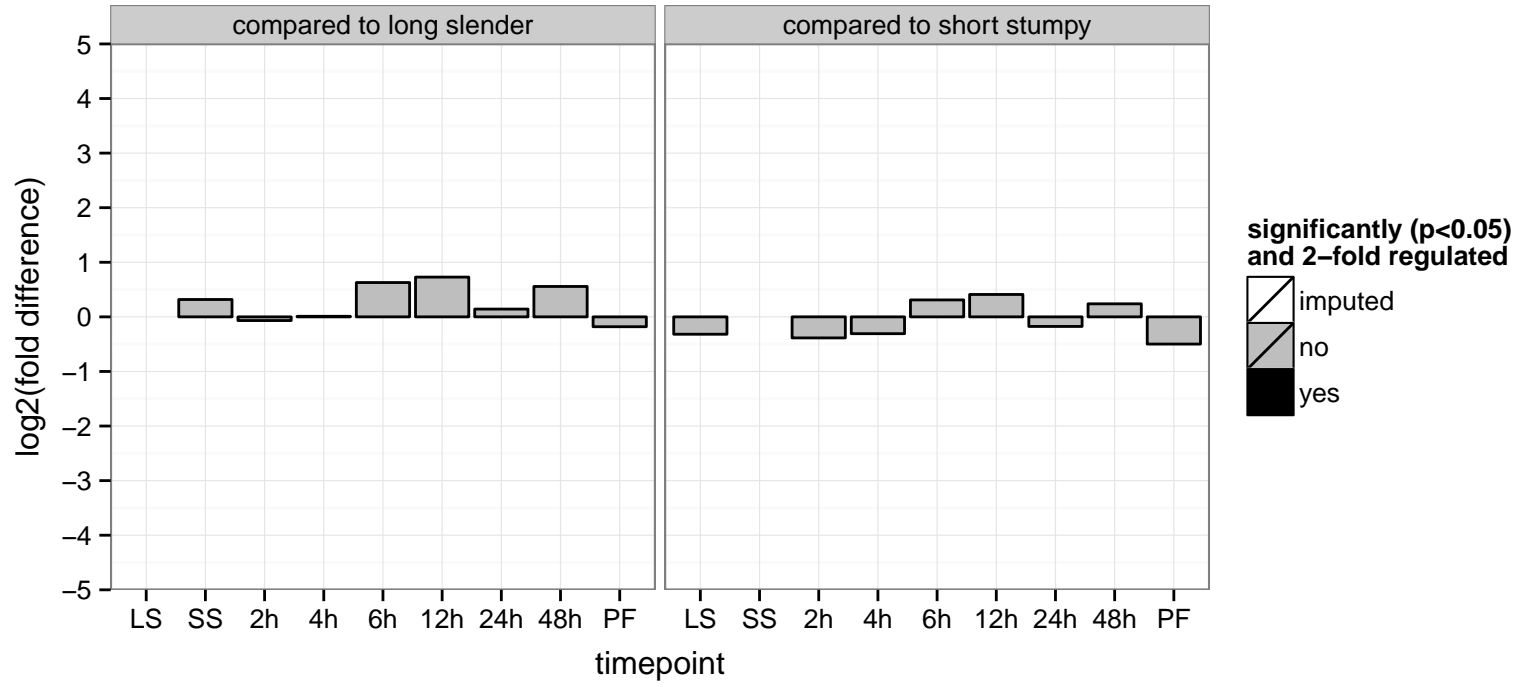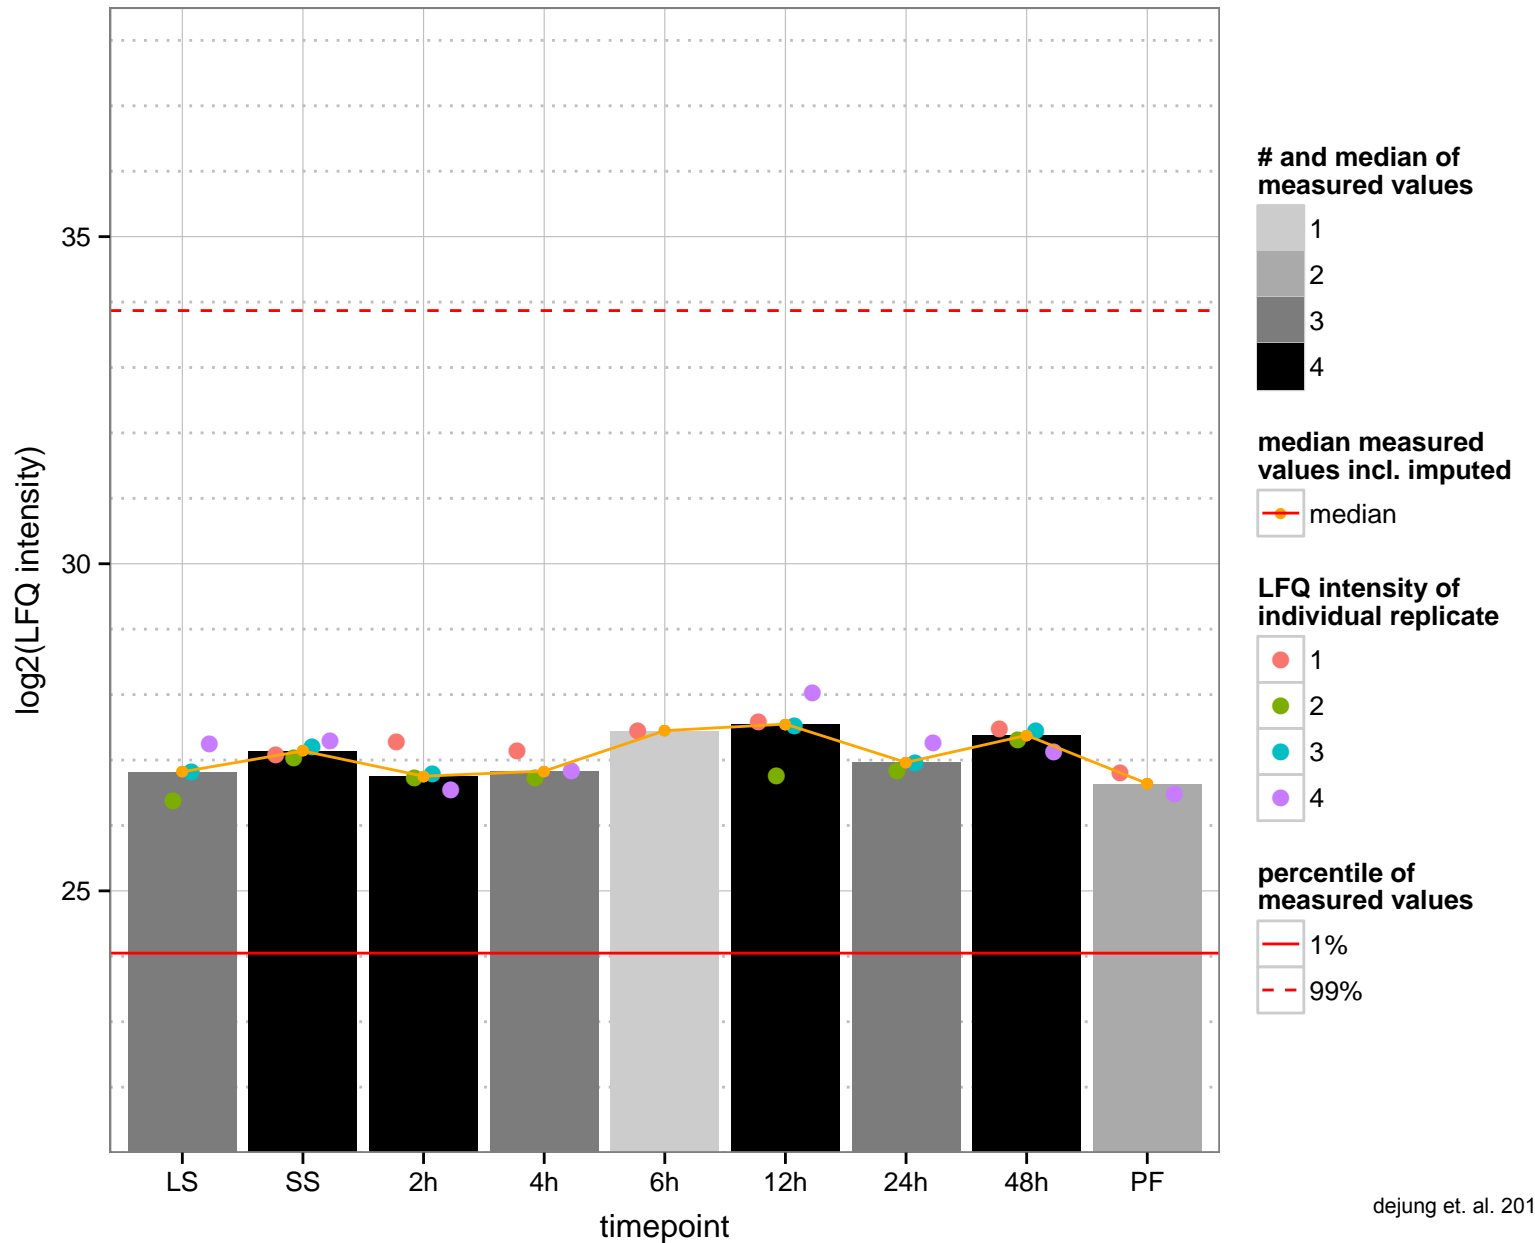

radial spoke protein RSP2, putative  
 Tb927.5.2850  
 AGOF: null  
 AGOC: null  
 AGOP: null  
 PGOF: null  
 PGO C: null  
 PGOP: null

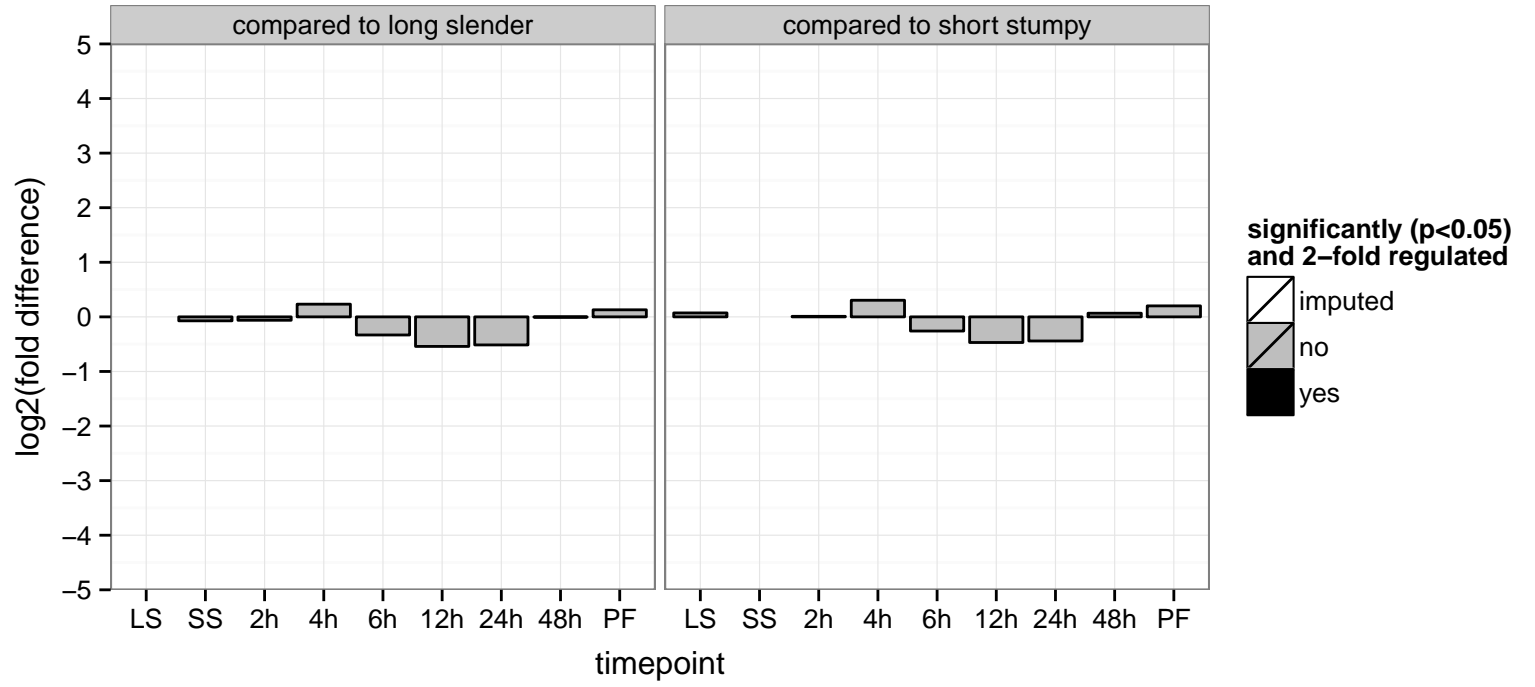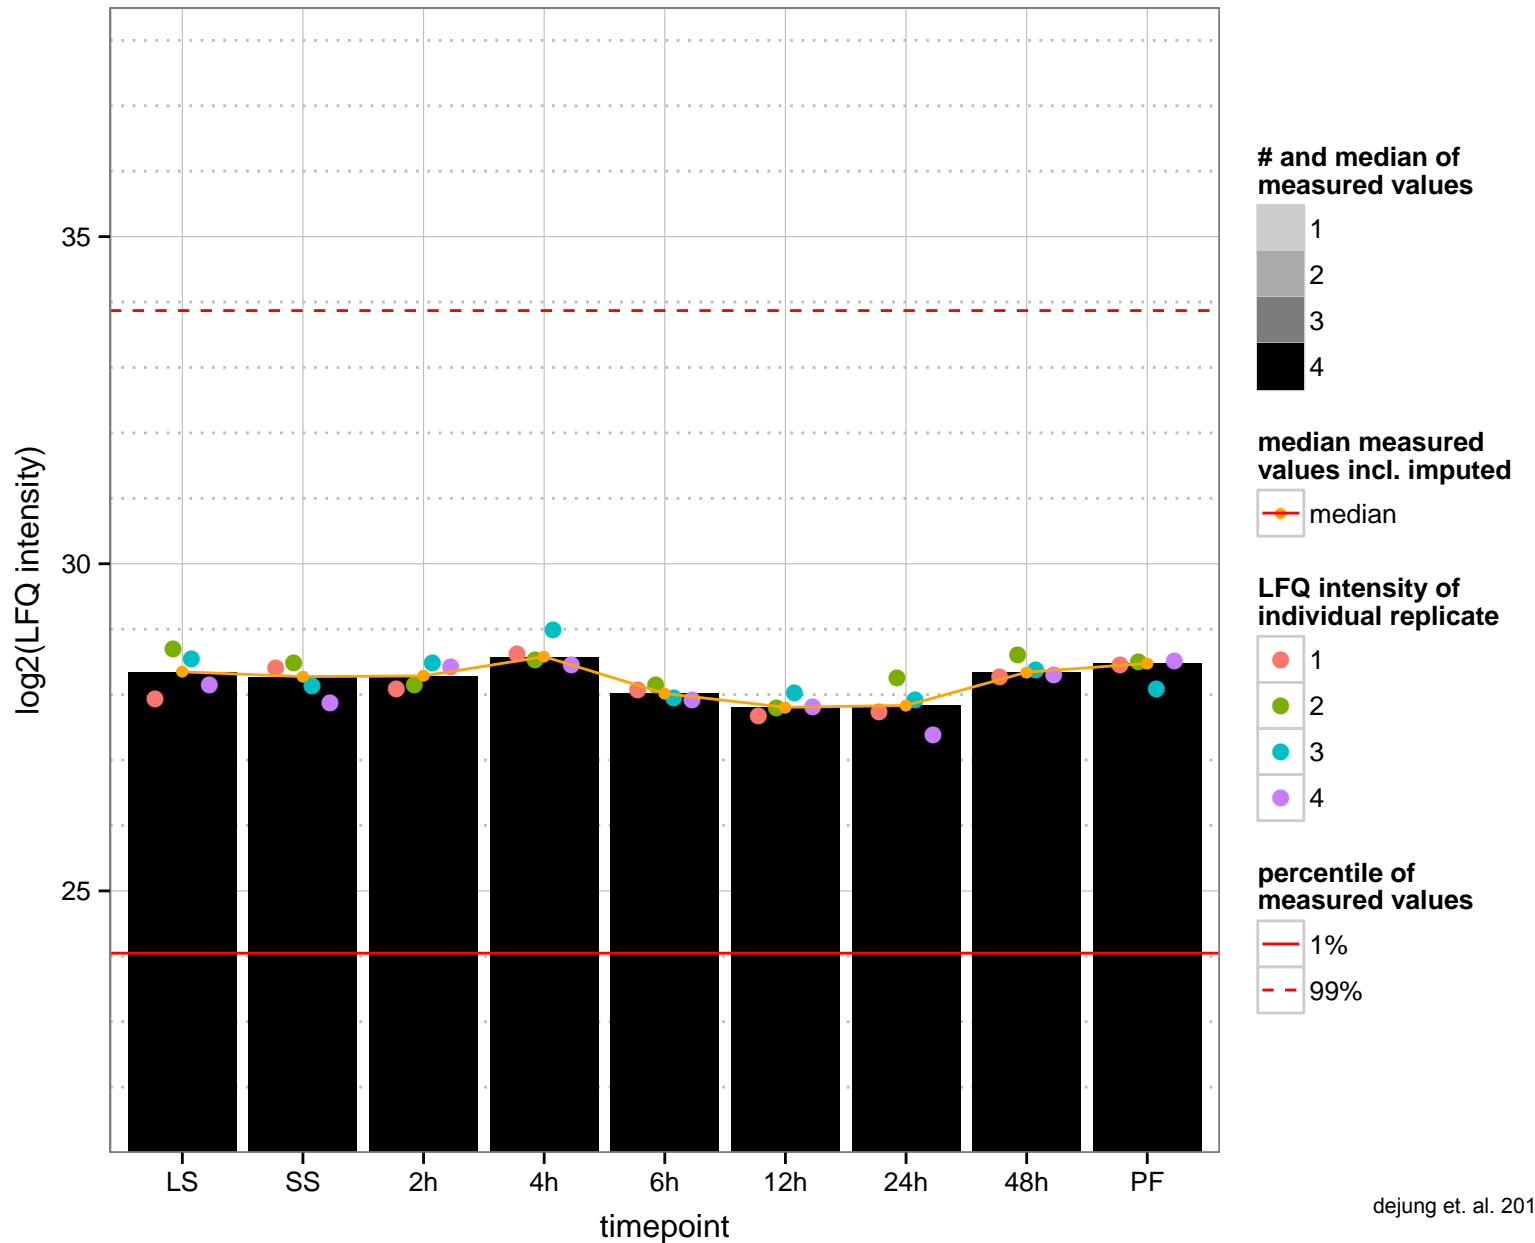

stress-induced protein sti1, putative  
 Tb927.5.2940  
 AGOF: null  
 AGOC: null  
 AGOP: null  
 PGO: protein binding  
 PGOC: null  
 PGOP: null

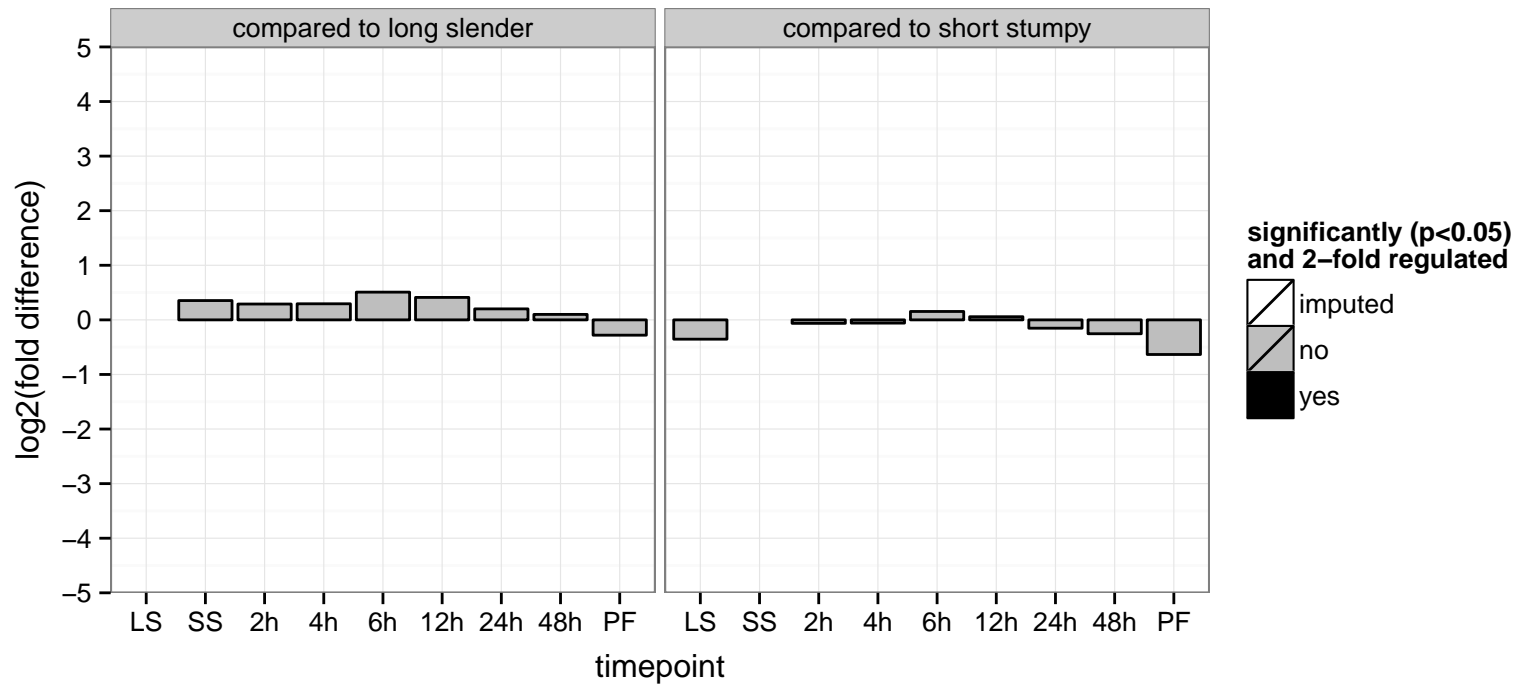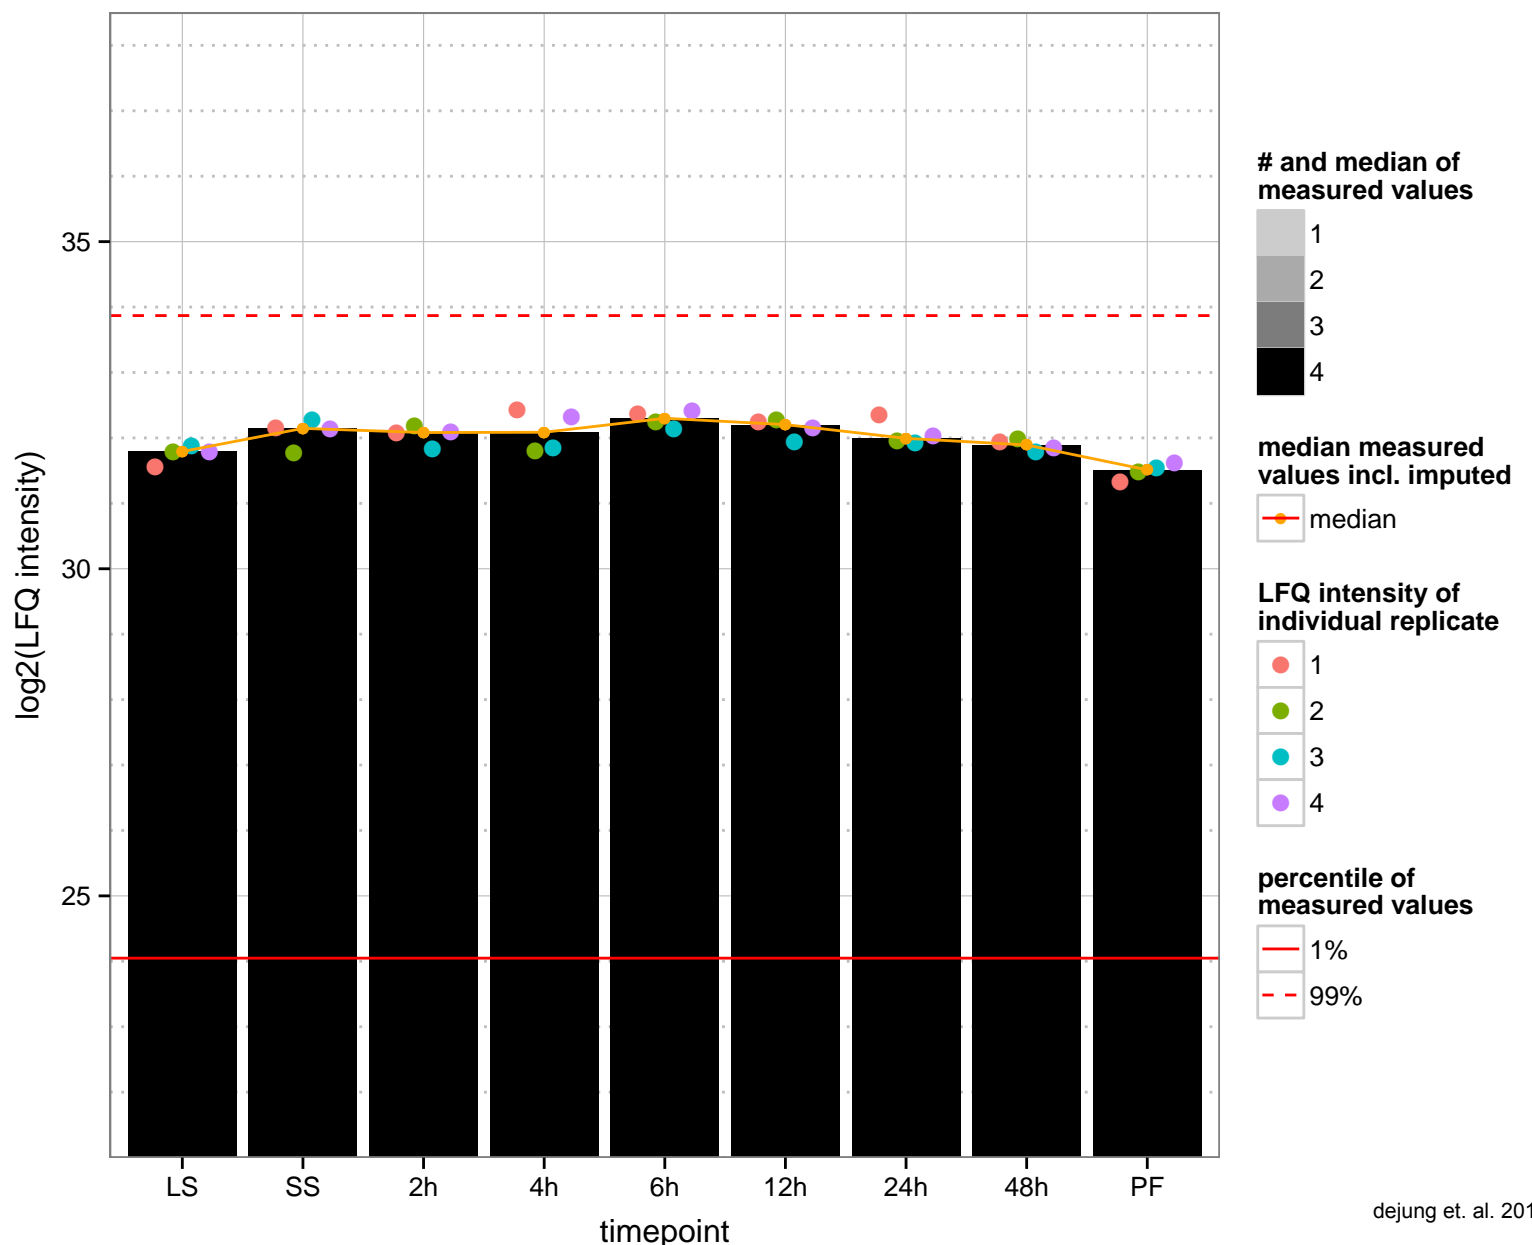

hypothetical protein, conserved  
 Tb927.5.2950  
 AGOF: null  
 AGOC: null  
 AGOP: ciliary or flagellar motility  
 PGO: null  
 PGOC: null  
 PGOP: null

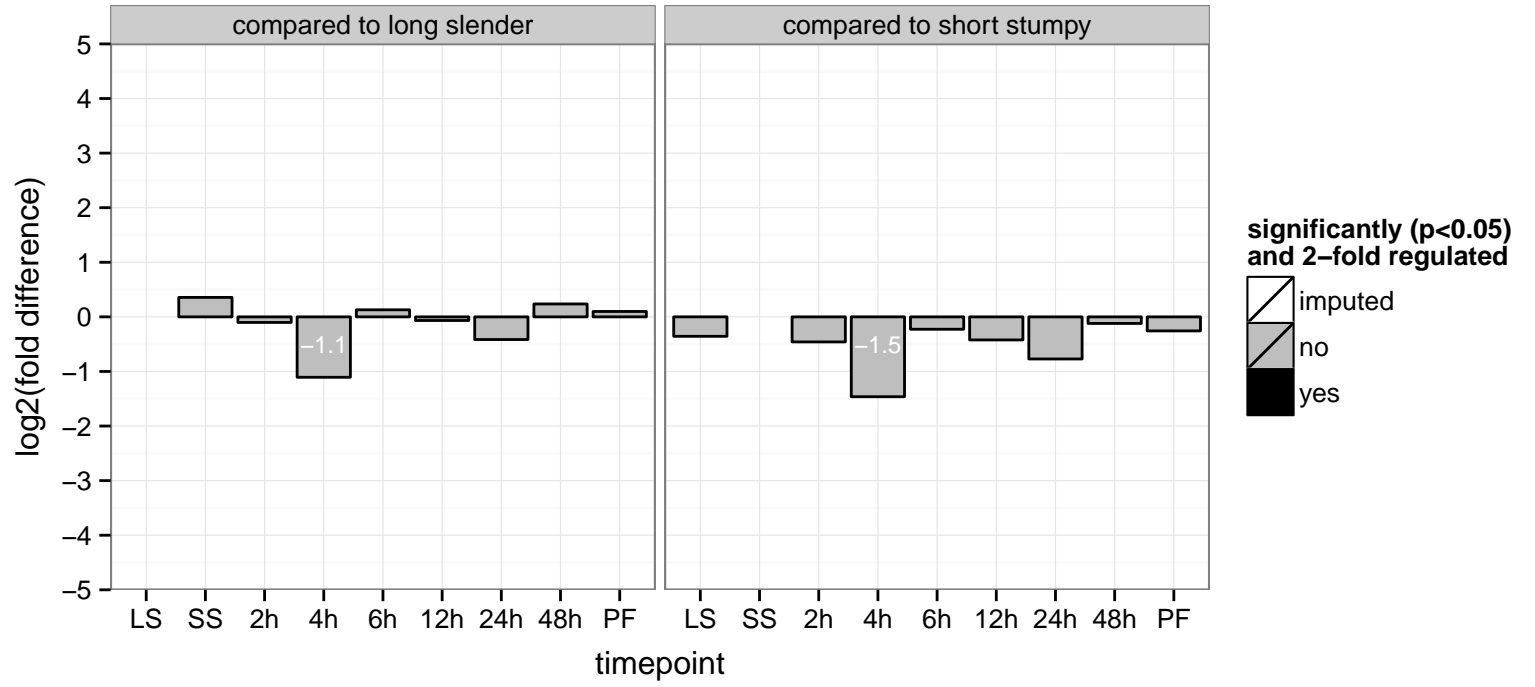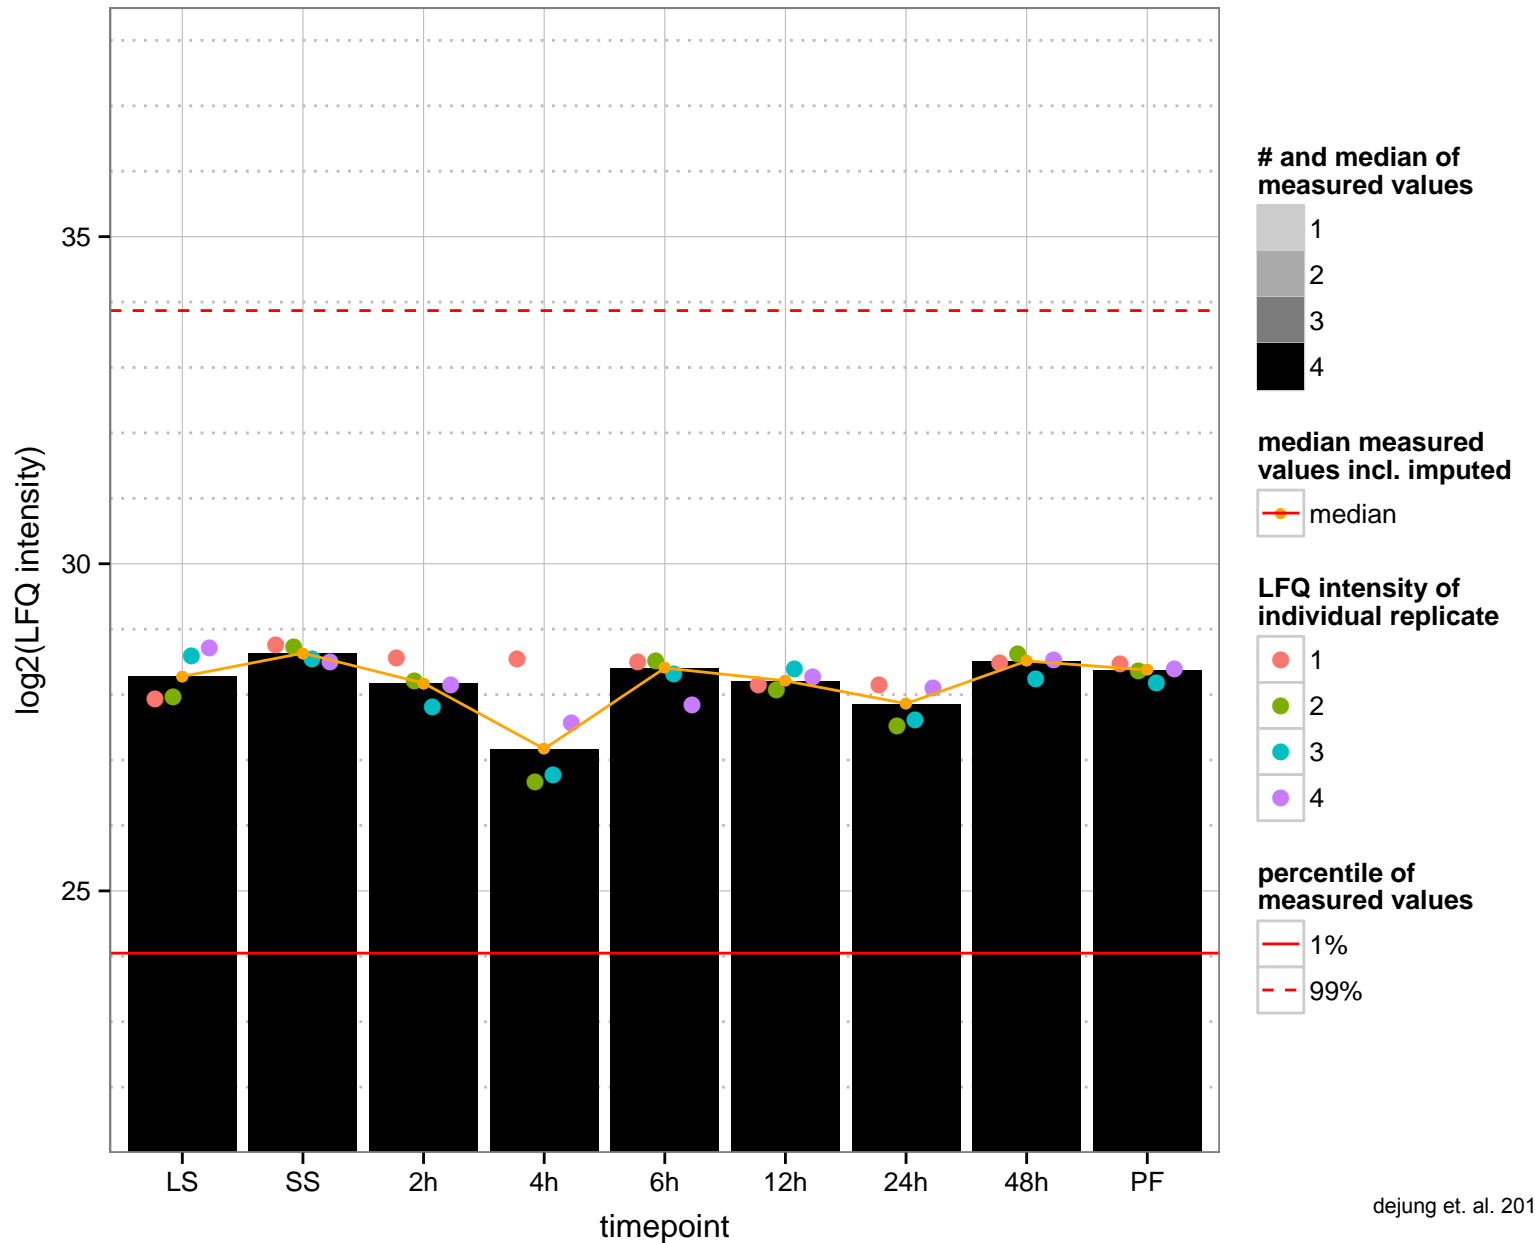



phosphoribosylpyrophosphate synthetase, putative (PRS)  
 Tb927.5.2960  
 AGOF: magnesium ion binding, ribose phosphate diphosphokinase activity  
 AGOC: null  
 AGOP: nucleoside metabolic process, nucleotide biosynthetic process  
 PGOF: magnesium ion binding, ribose phosphate diphosphokinase activity  
 PGO: null  
 PGO: null  
 PGO: nucleotide biosynthetic process

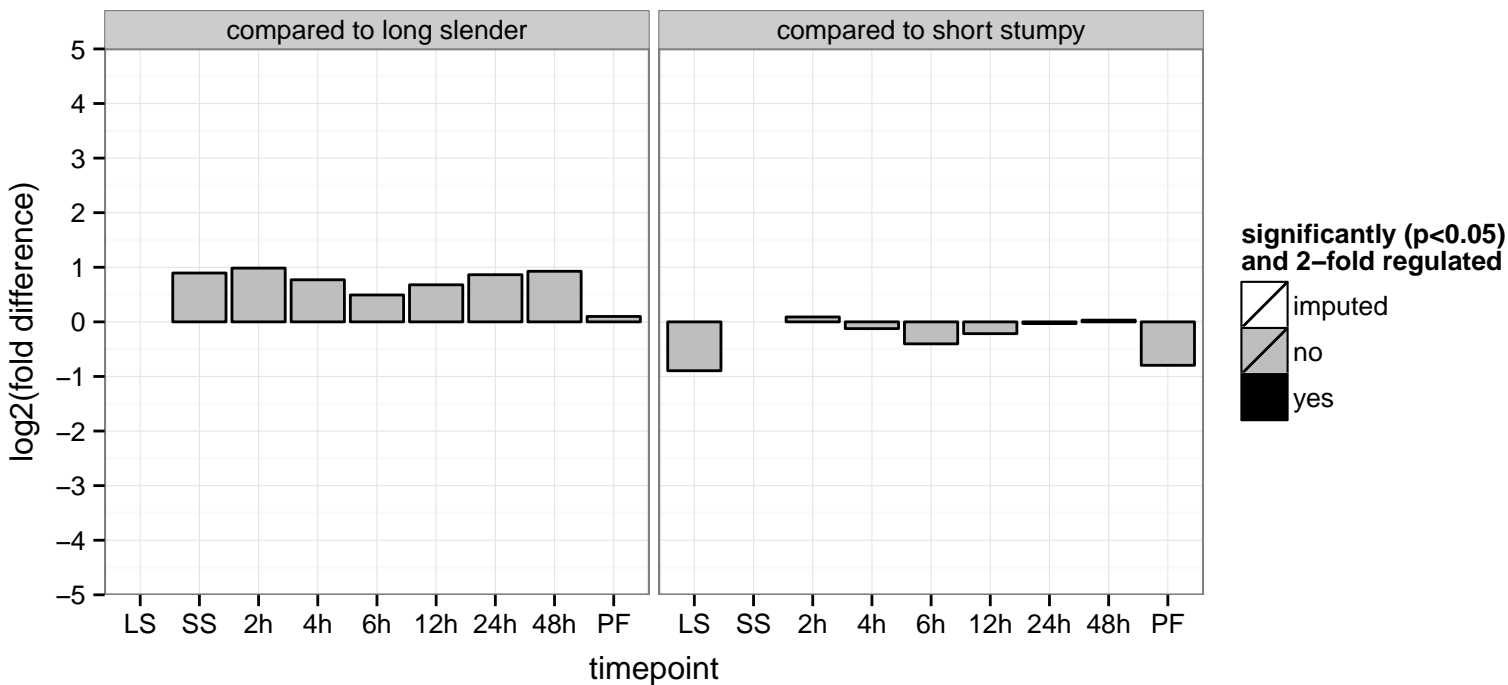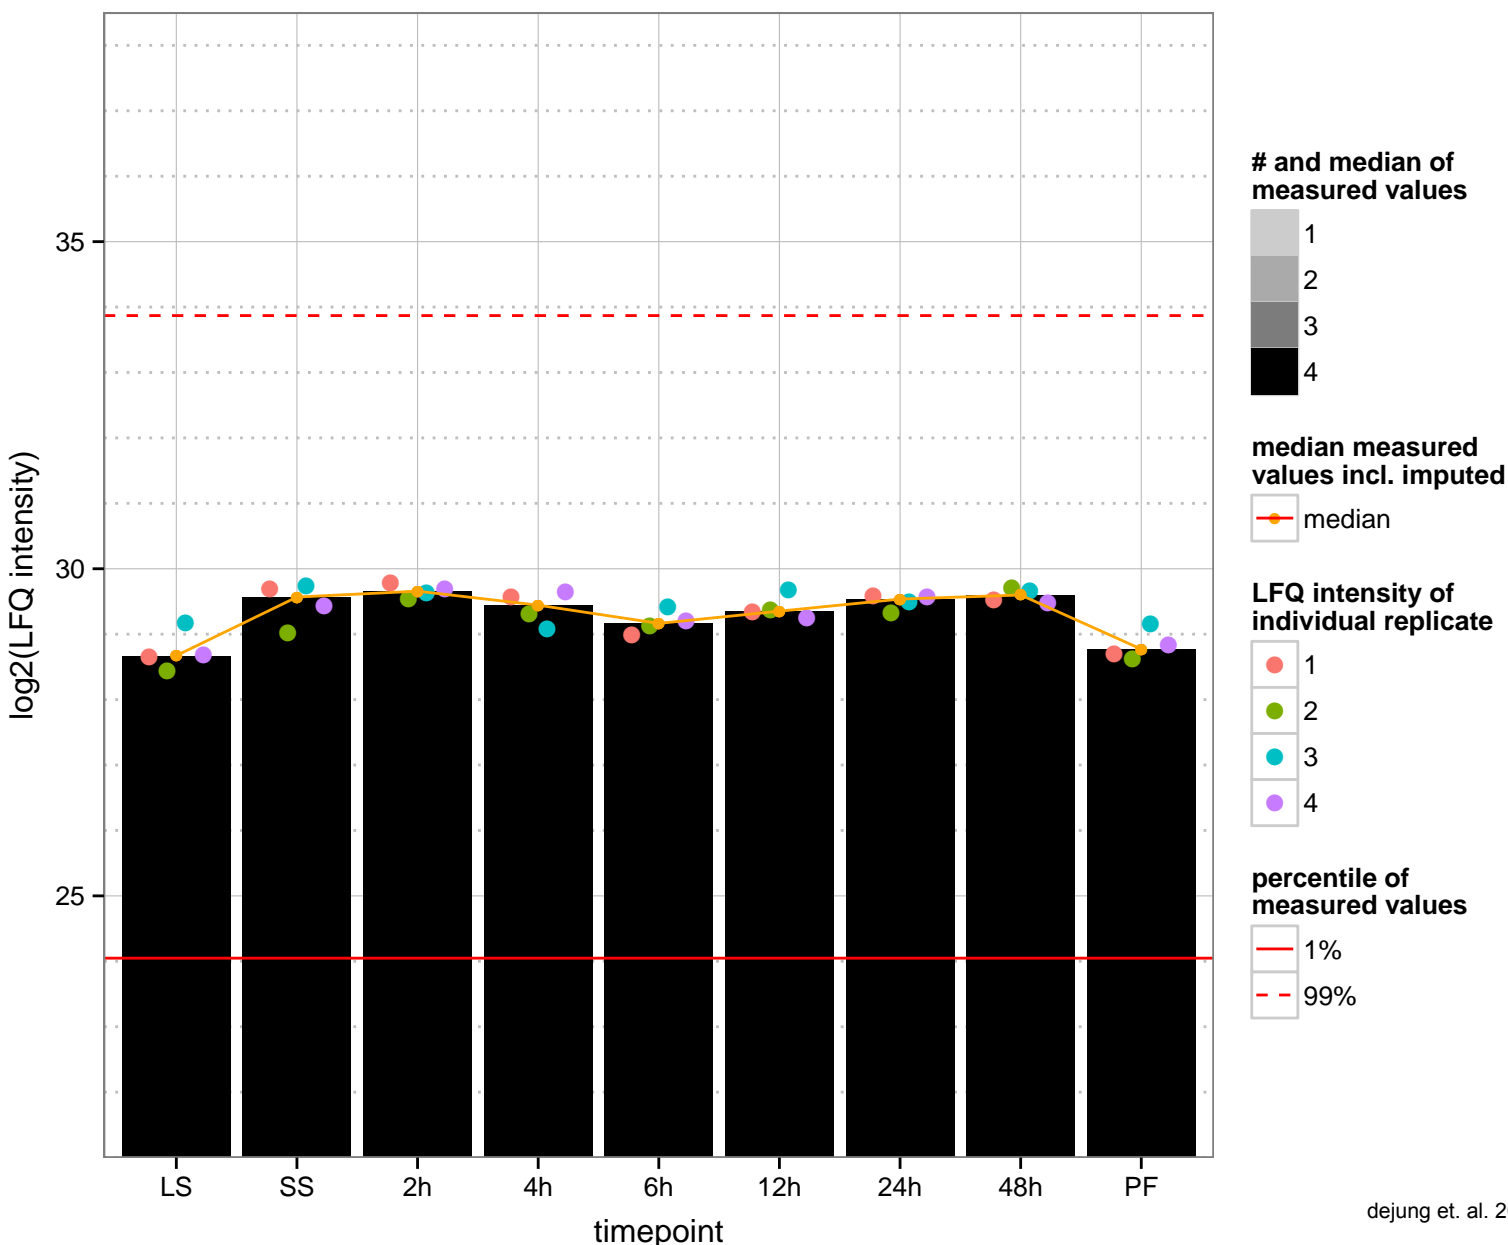

hypothetical protein, conserved, MRB1-associated protein, putative, guide RNA binding protein, putative (mrb3010)  
 Tb927.5.3010;Tb11.v5.0691  
 AGOF: null, mRNA binding  
 AGOC: null, mitochondrion  
 AGOP: null, RNA processing  
 PGO: null  
 PGO: null  
 PGO: null

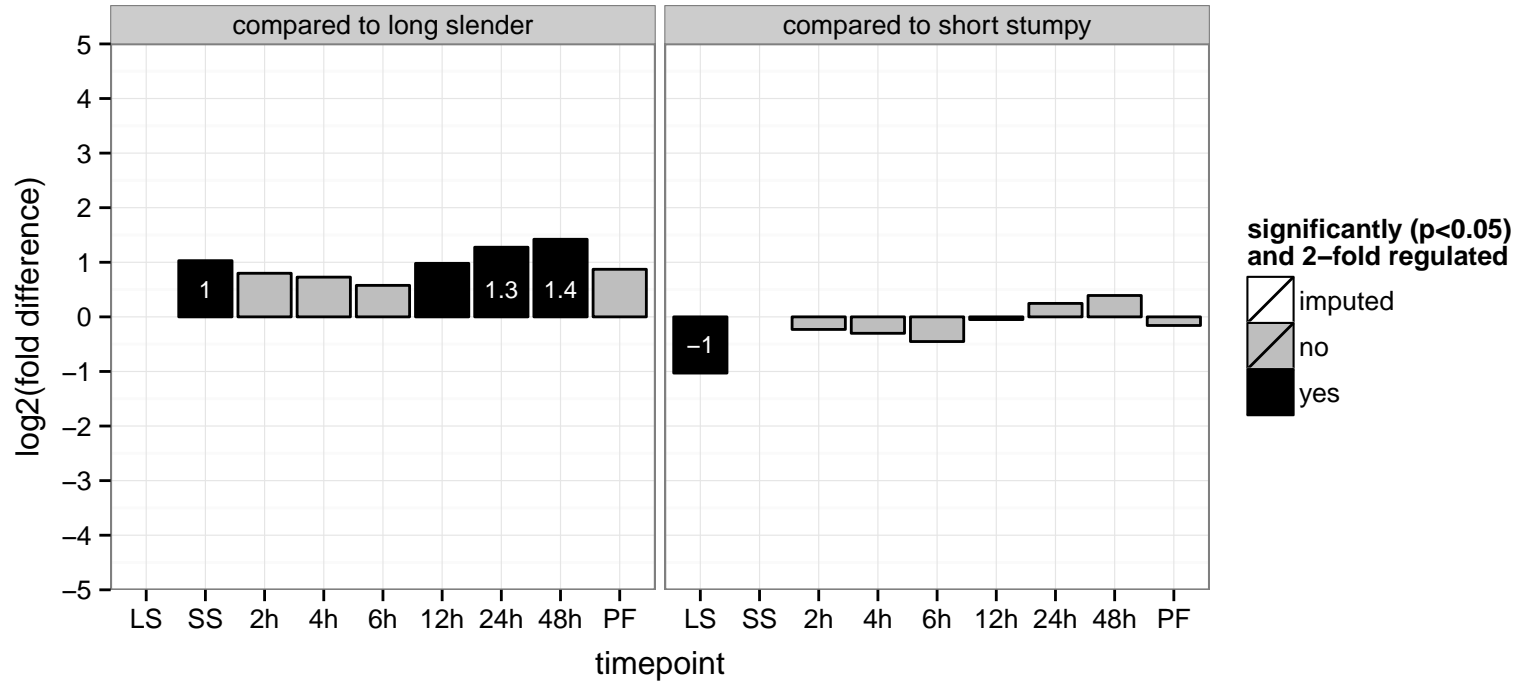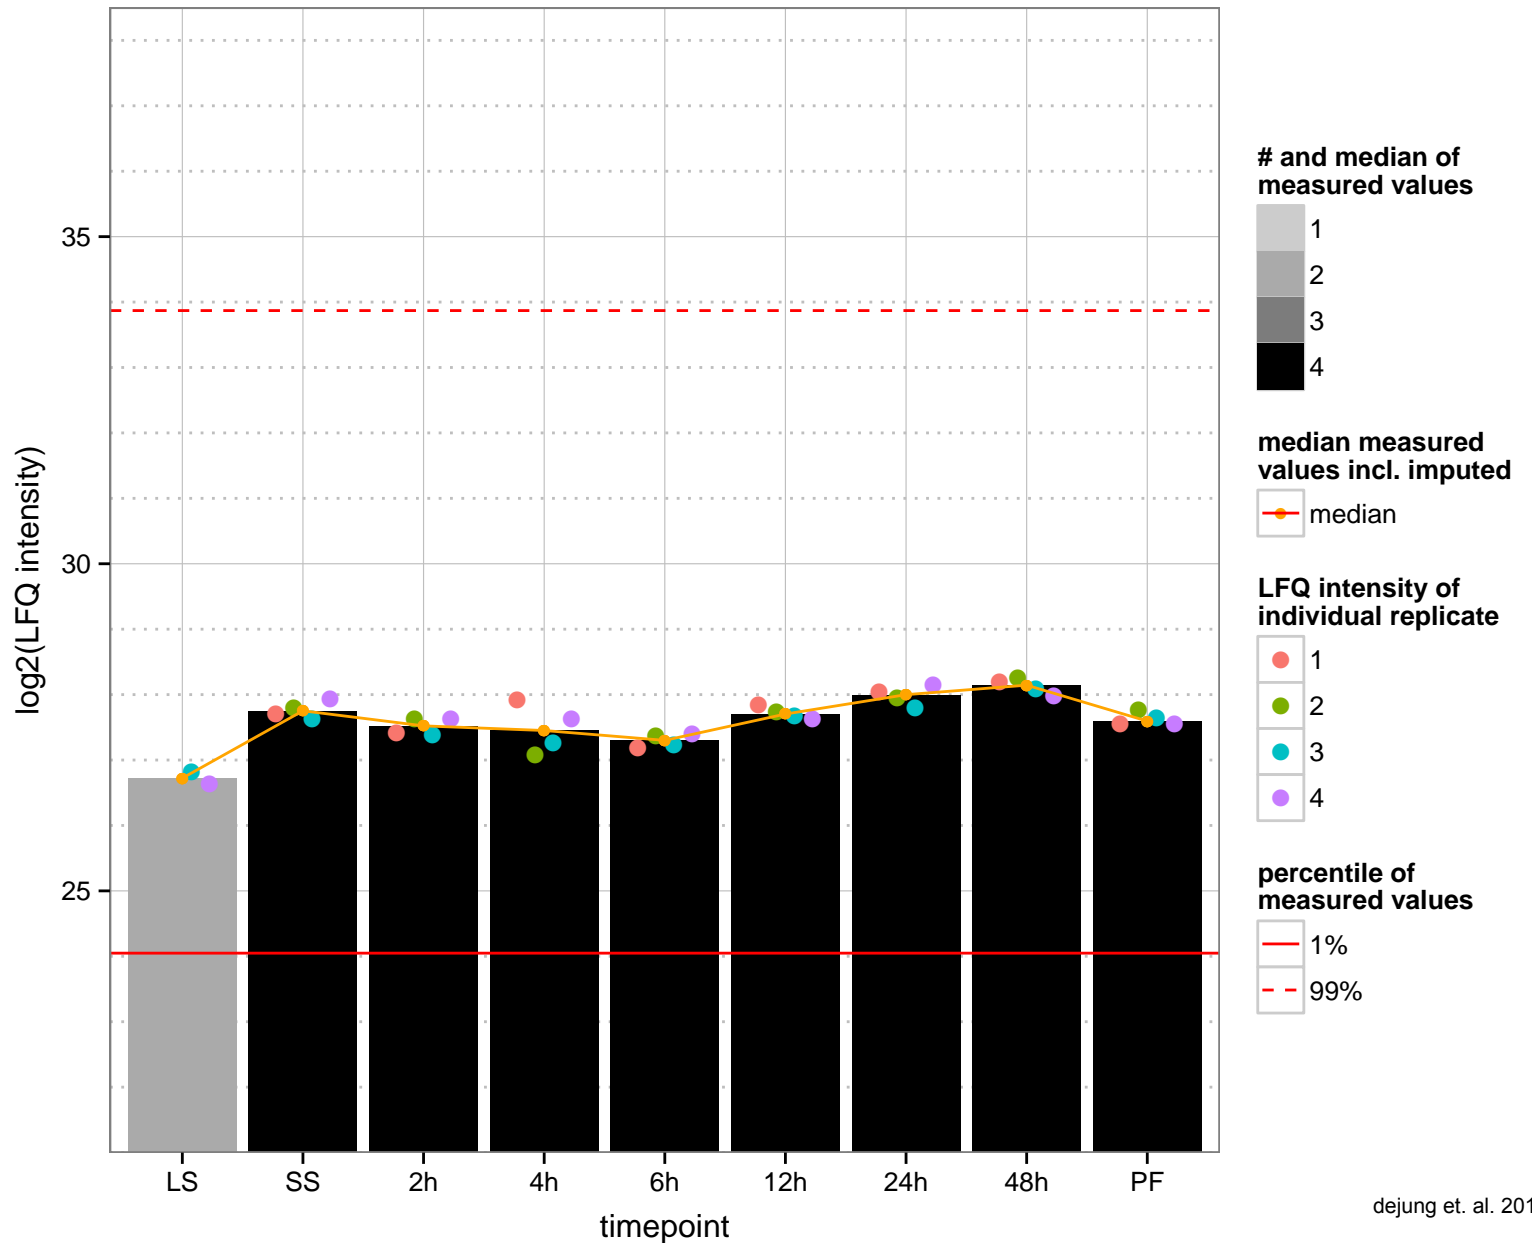

intraflagellar transport protein IFT122, putative (IFT122B)  
 Tb927.5.3030  
 AGOF: null  
 AGOC: bacterial-type flagellum basal body  
 AGOP: intraflagellar transport  
 PGO: protein binding  
 PGOC: null  
 PGOP: null

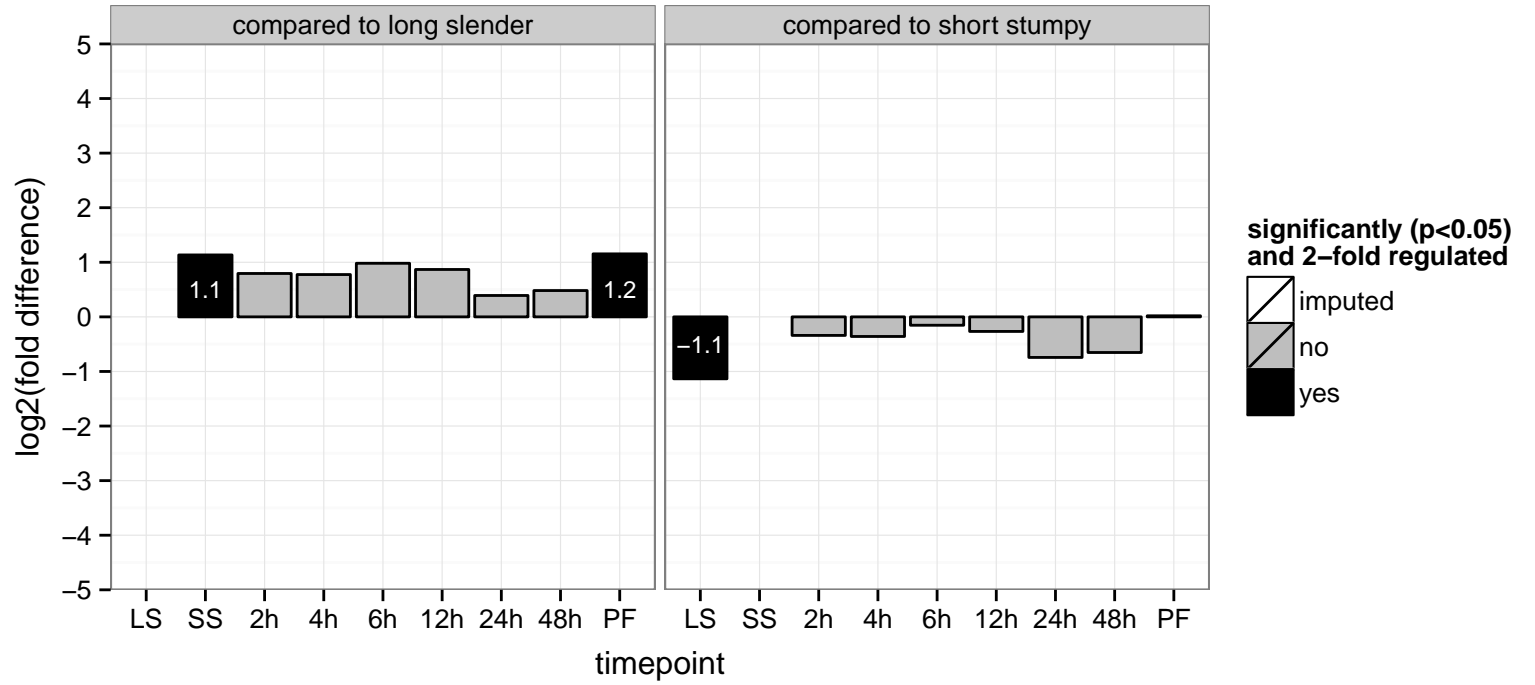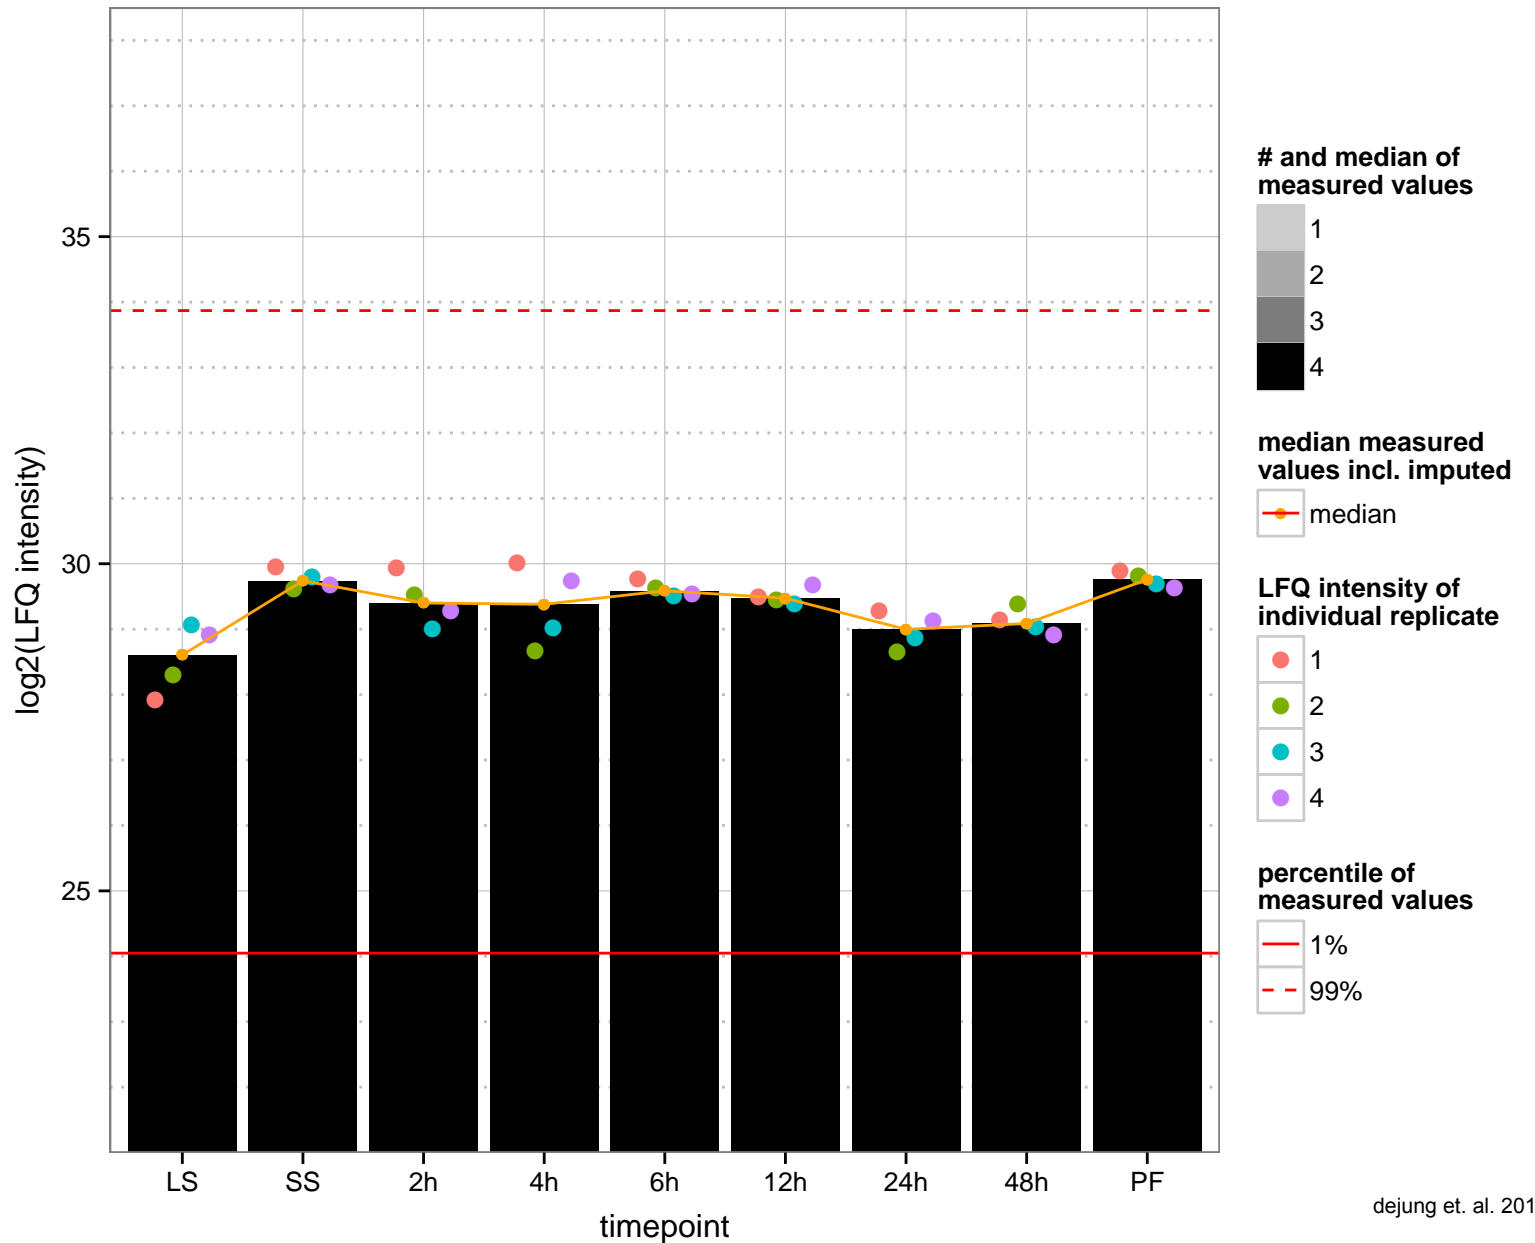

ribose-phosphate pyrophosphokinase, putative (PRPS5)  
 Tb927.5.3170  
 AGOF: magnesium ion binding, ribose phosphate diphosphokinase activity  
 AGOC: null  
 AGOP: nucleotide biosynthetic process  
 PGO: null  
 PGO: null  
 PGO: null

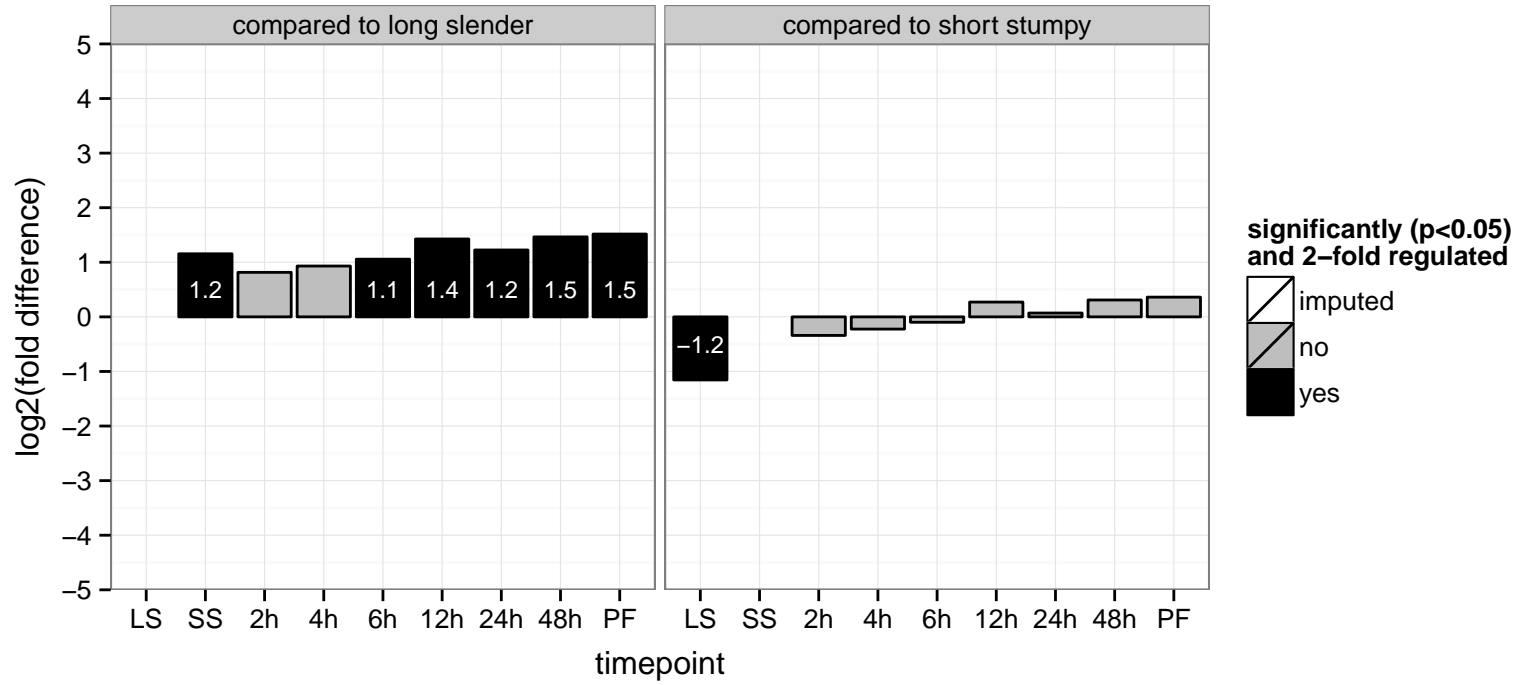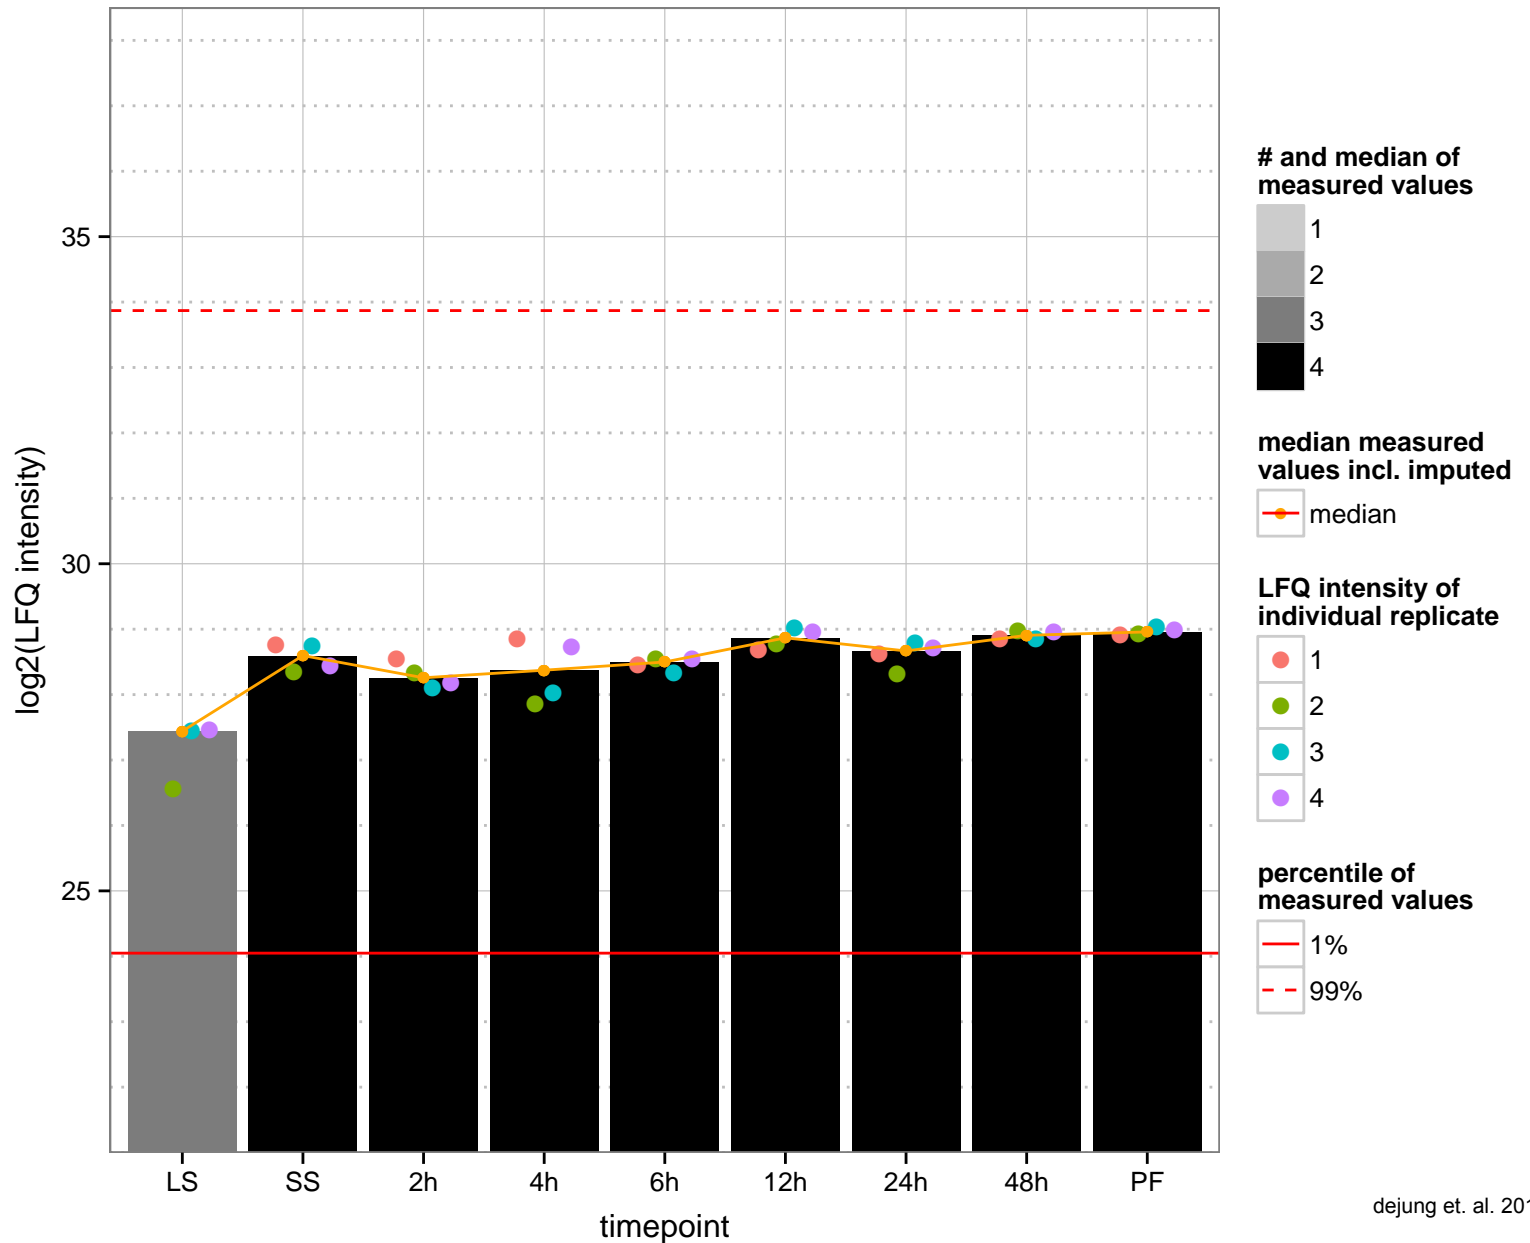

small ubiquitin-related modifier (SUMO)  
 Tb927.5.3210  
 AGOF: null  
 AGOC: nucleus  
 AGOP: null  
 PGO: protein binding  
 PGOC: null  
 PGOP: null

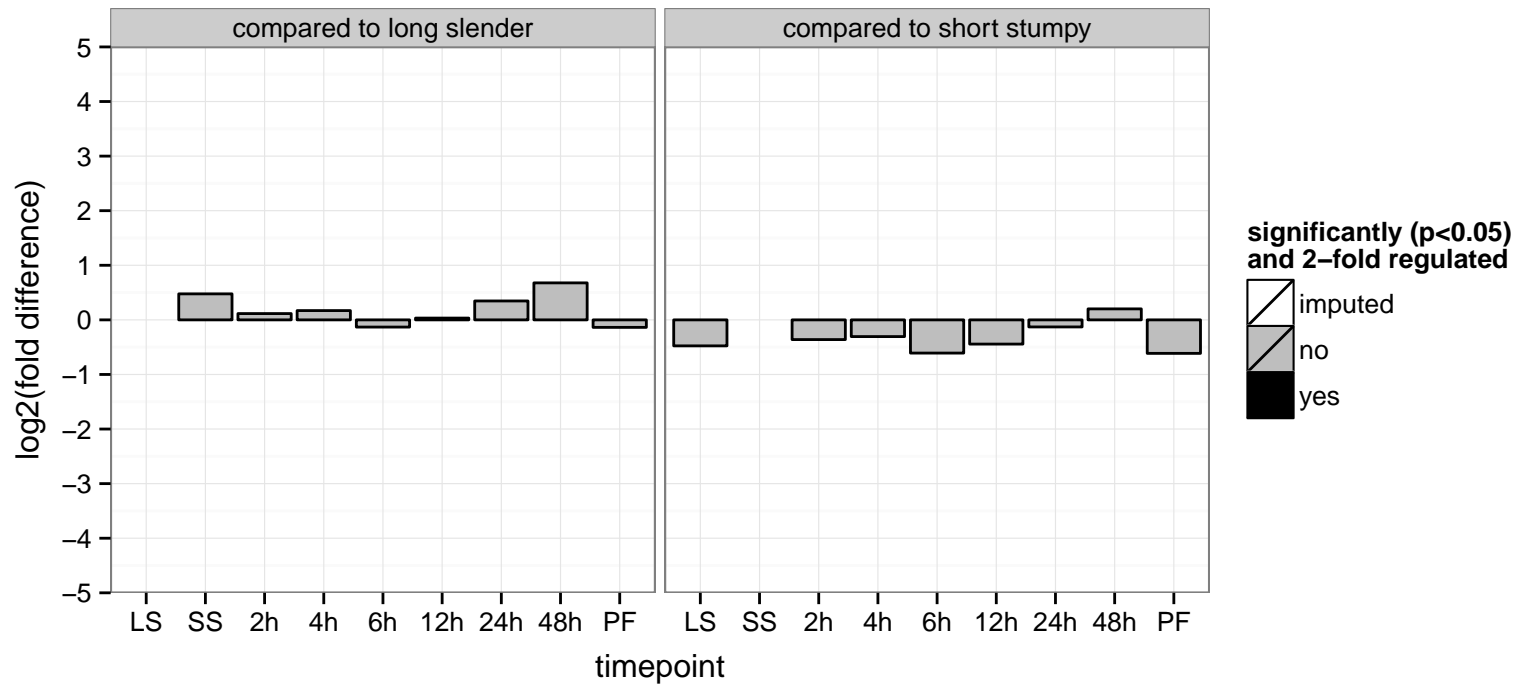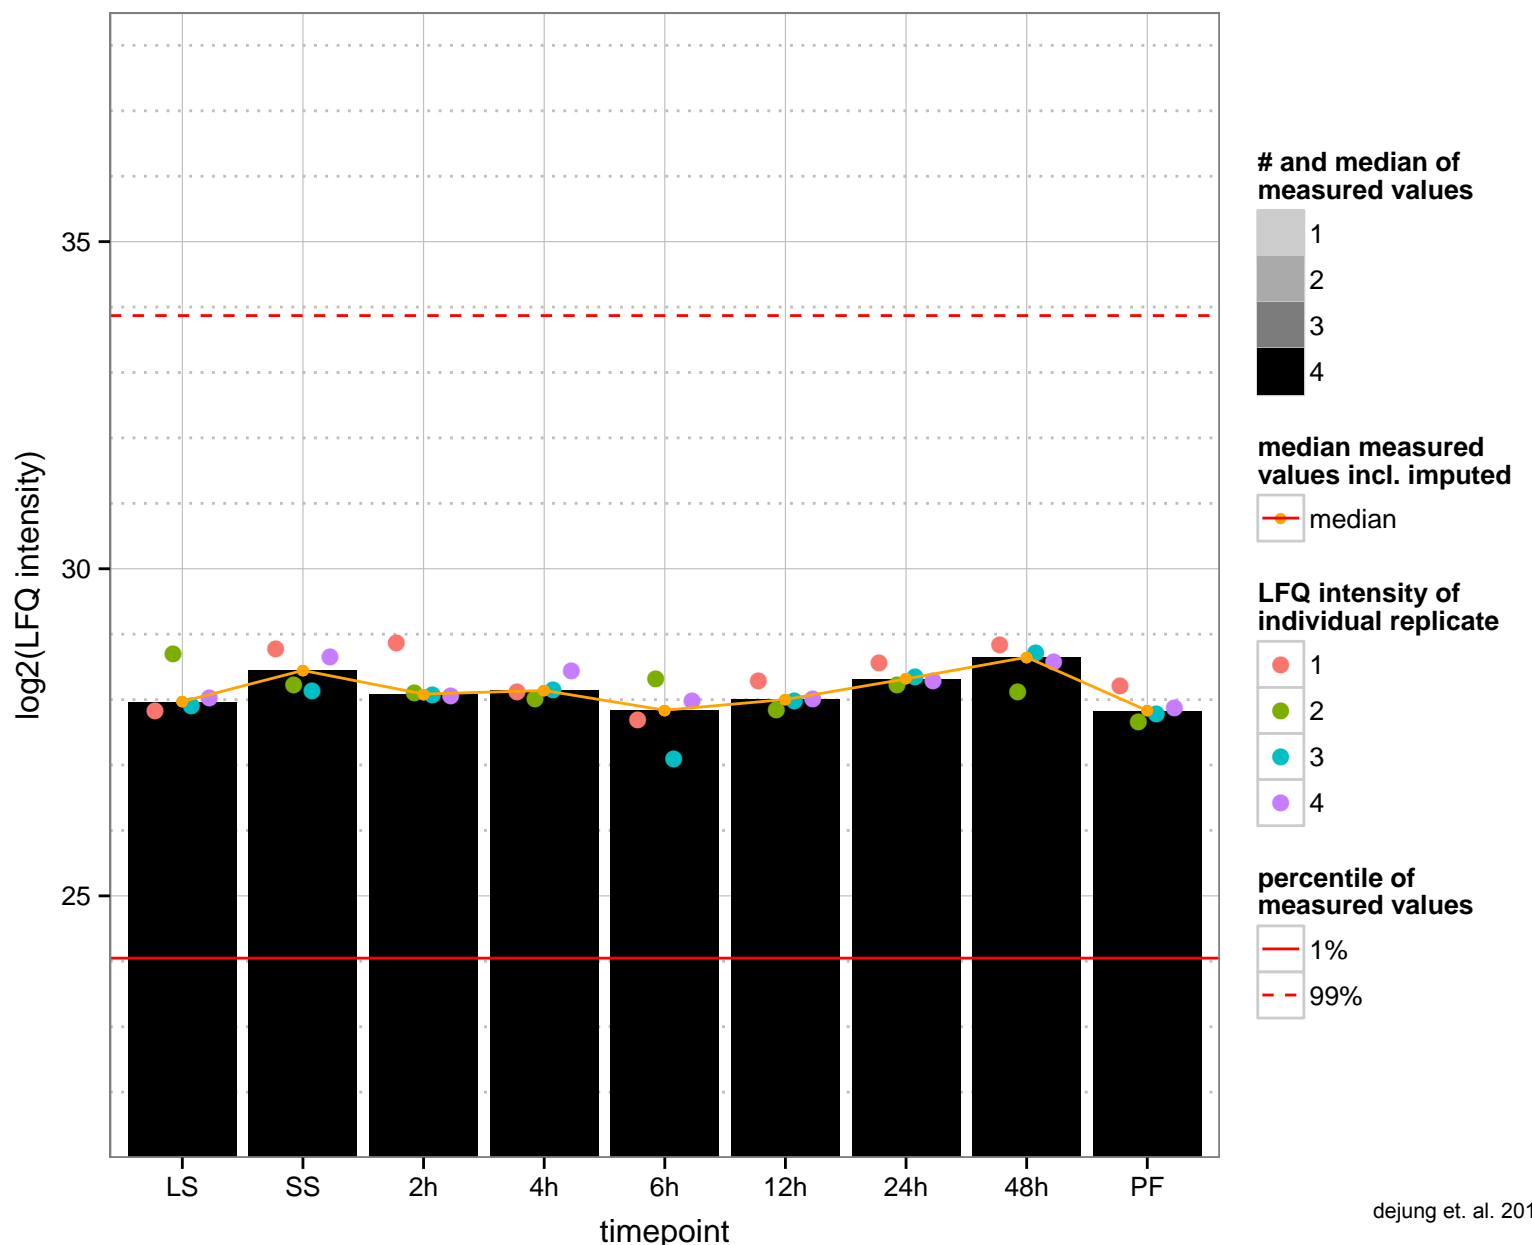

hypothetical protein, conserved  
 Tb927.5.3250  
 AGOF: null  
 AGOC: null  
 AGOP: null  
 PGO: protein binding  
 PGOC: null  
 PGOP: null

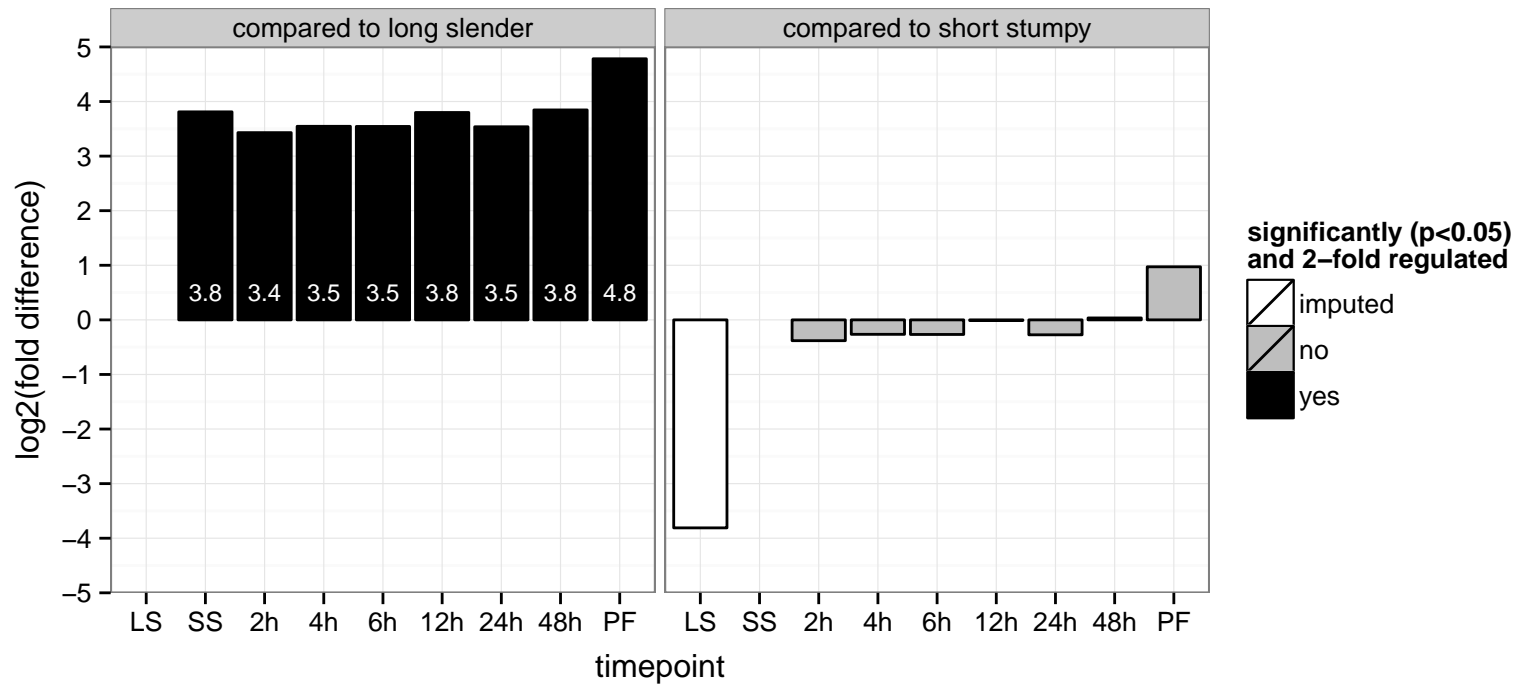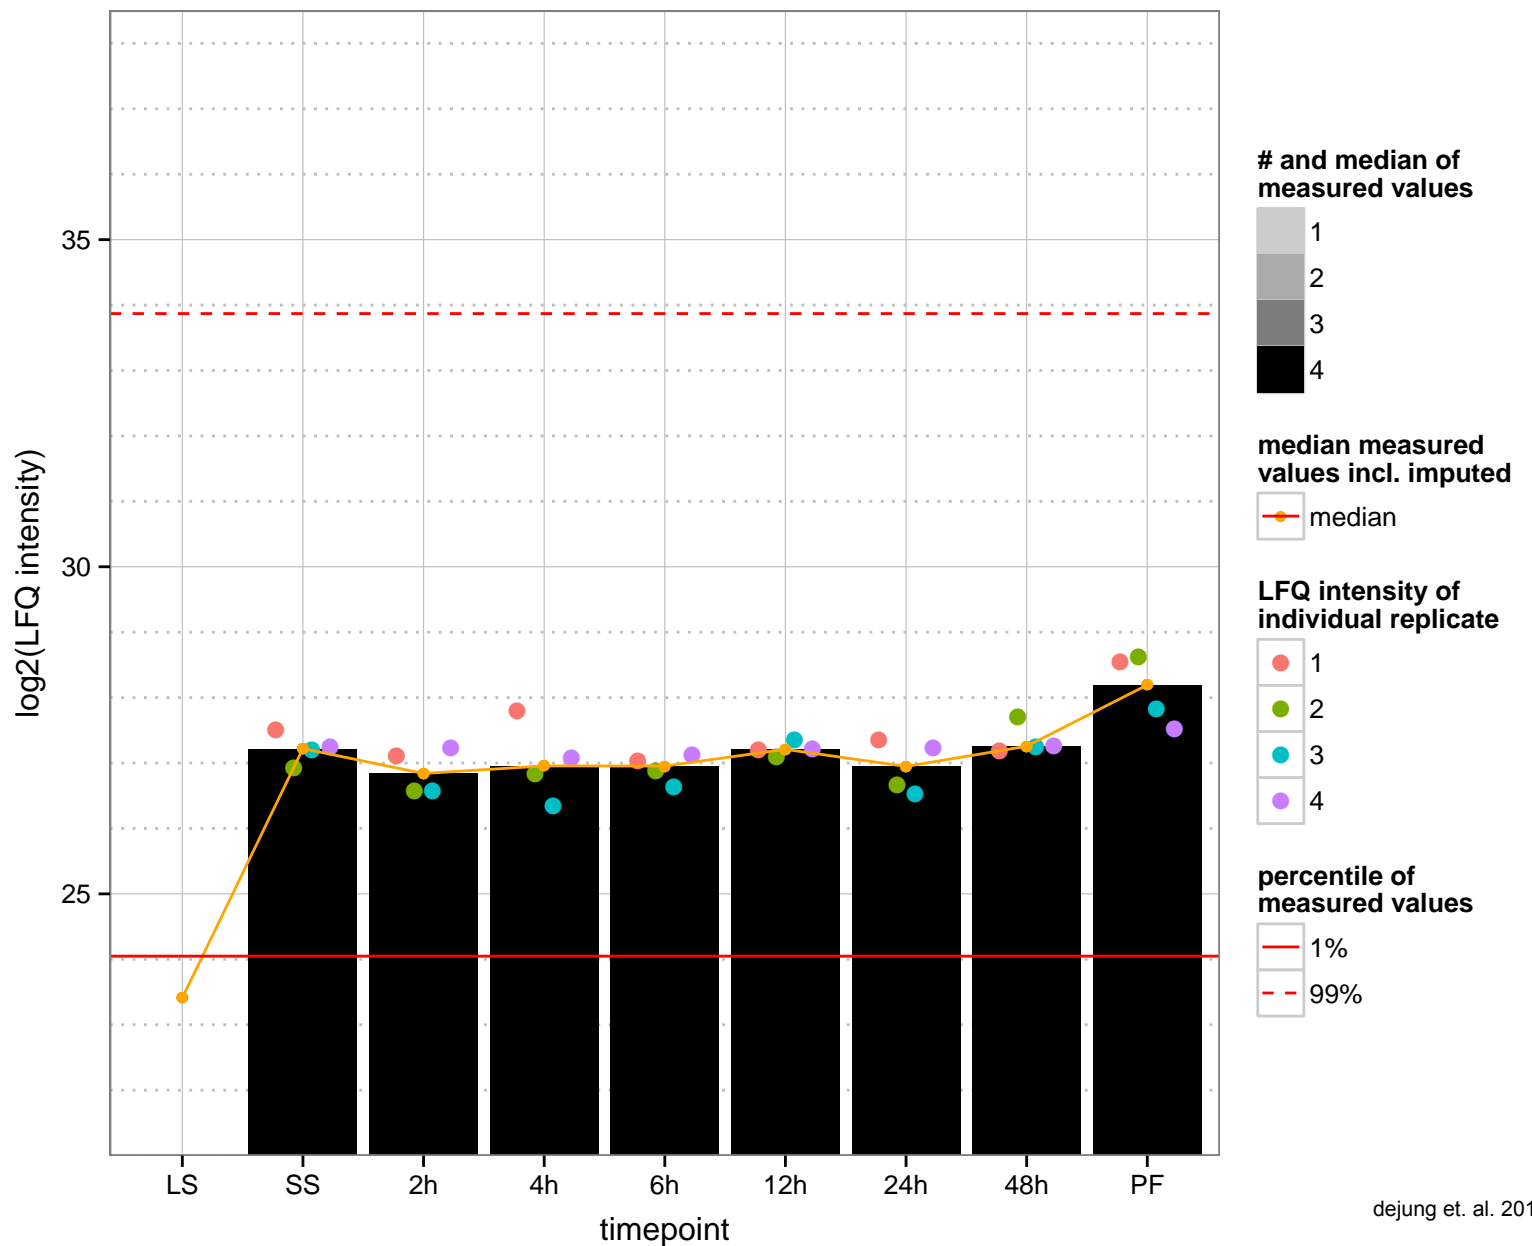

hypothetical protein, conserved  
 Tb927.5.3260  
 AGOF: null  
 AGOC: null  
 AGOP: null  
 PGOF: protein binding  
 PGO: null  
 PGOP: null

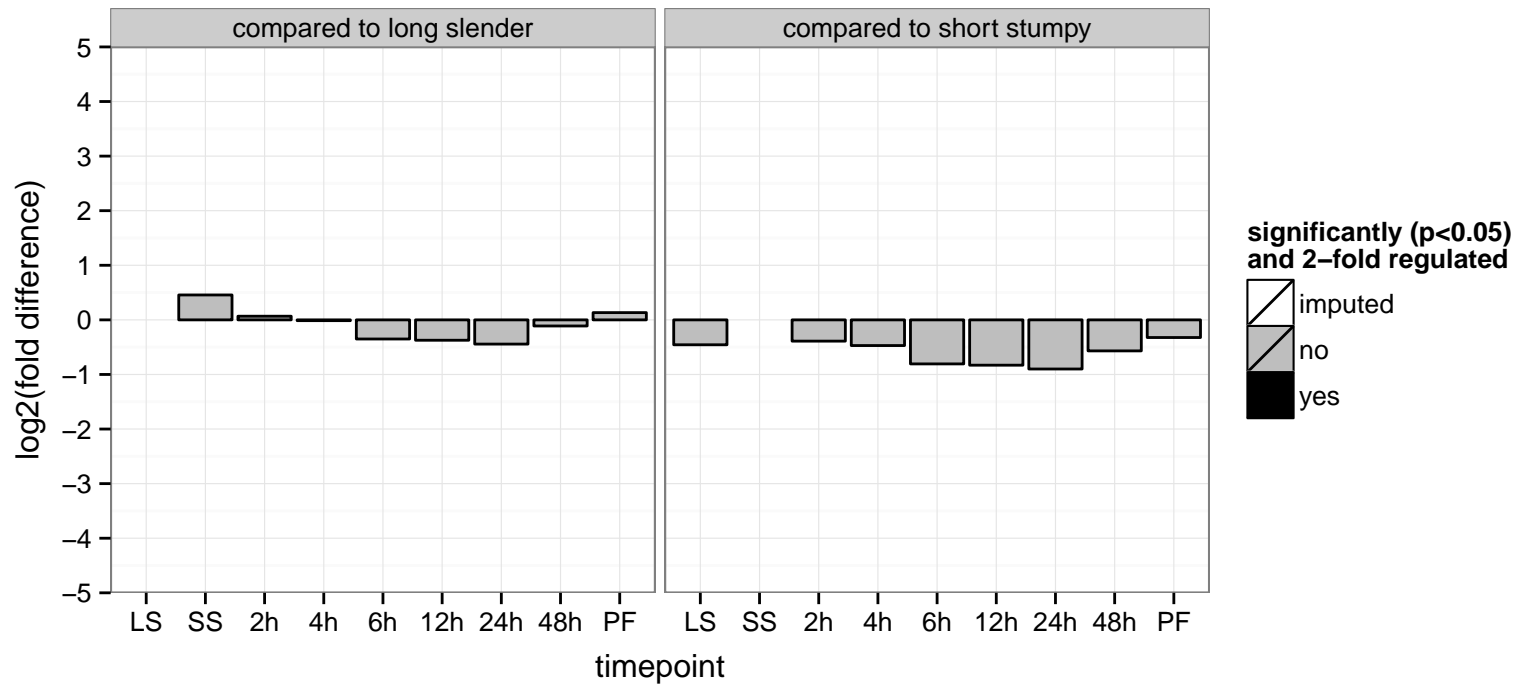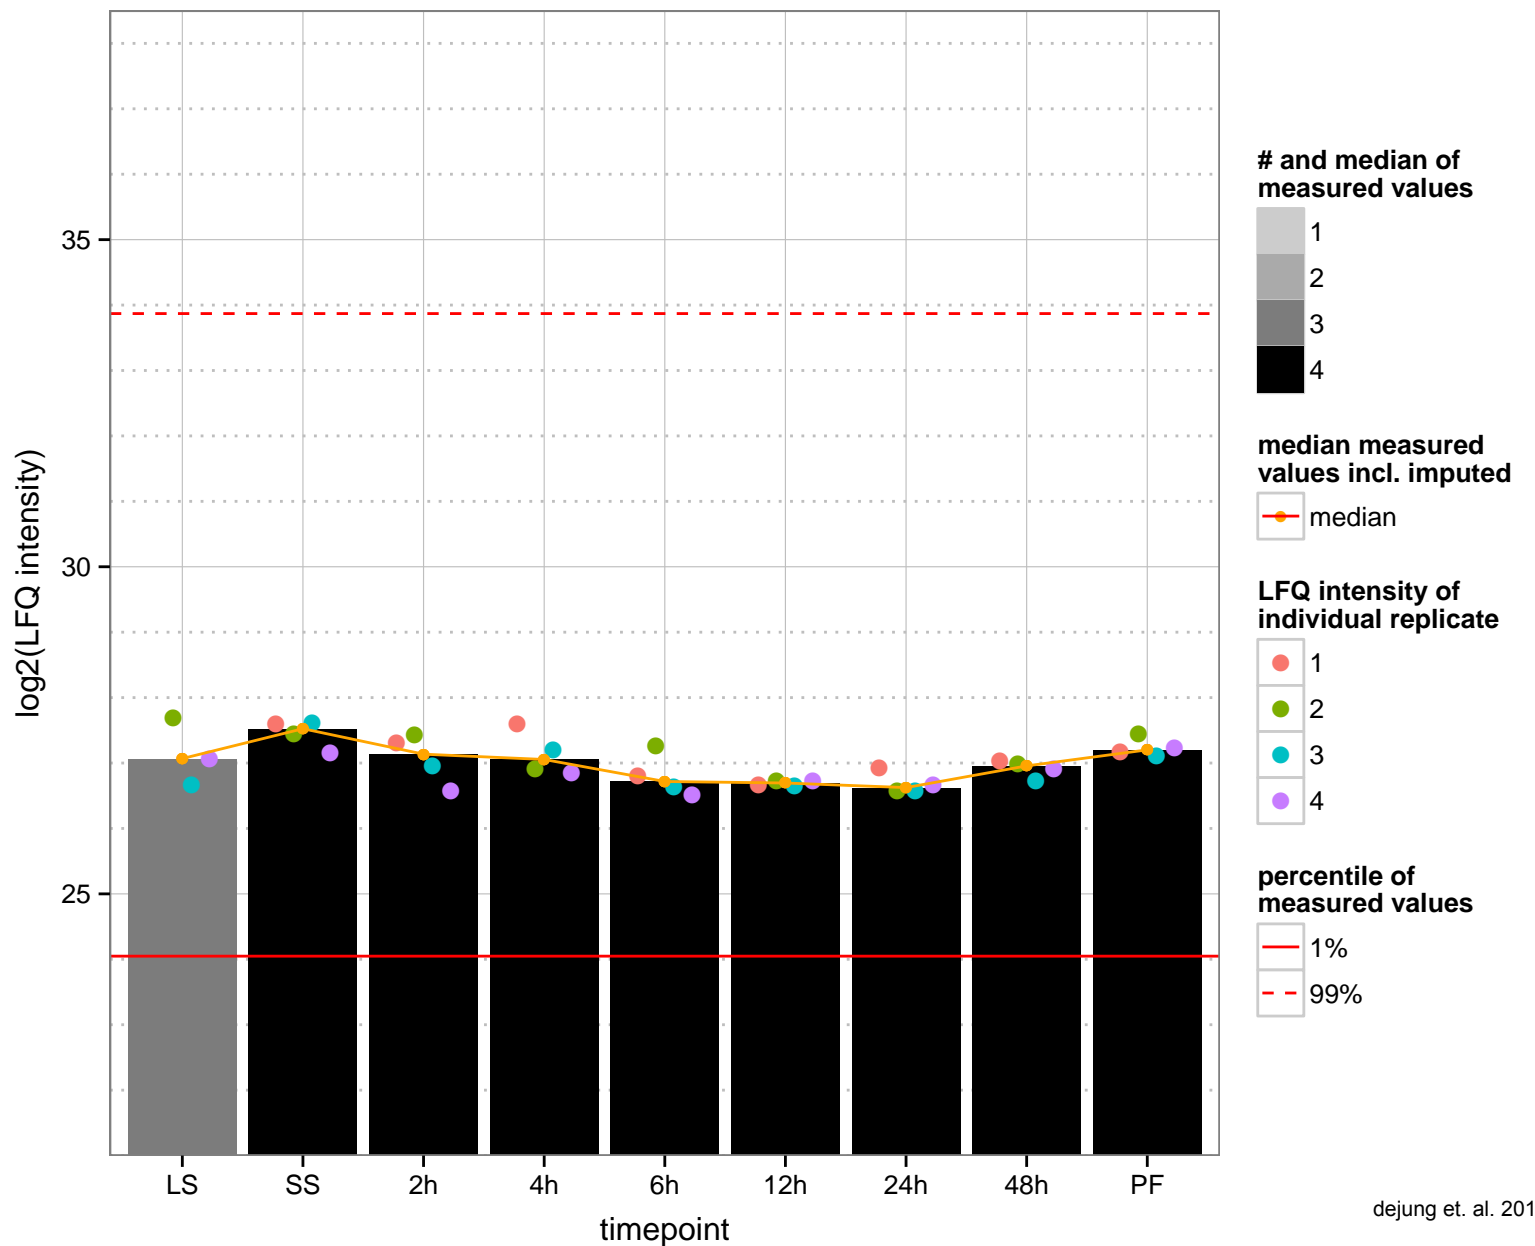

iron superoxide dismutase, putative  
 Tb927.5.3350  
 AGOF: metal ion binding, superoxide dismutase activity  
 AGOC: mitochondrion  
 AGOP: oxidation–reduction process, superoxide metabolic process  
 PGO: metal ion binding, superoxide dismutase activity  
 PGO: null  
 PGO: oxidation–reduction process, superoxide metabolic process

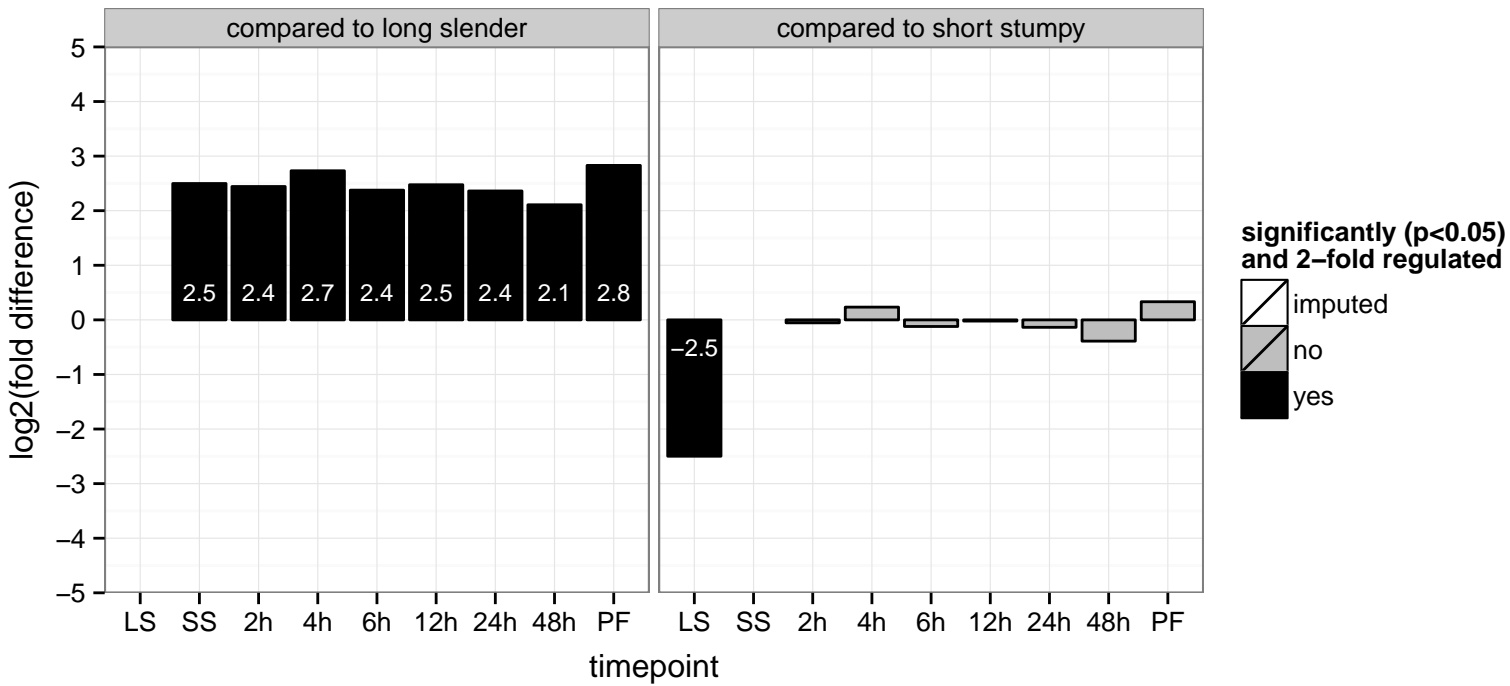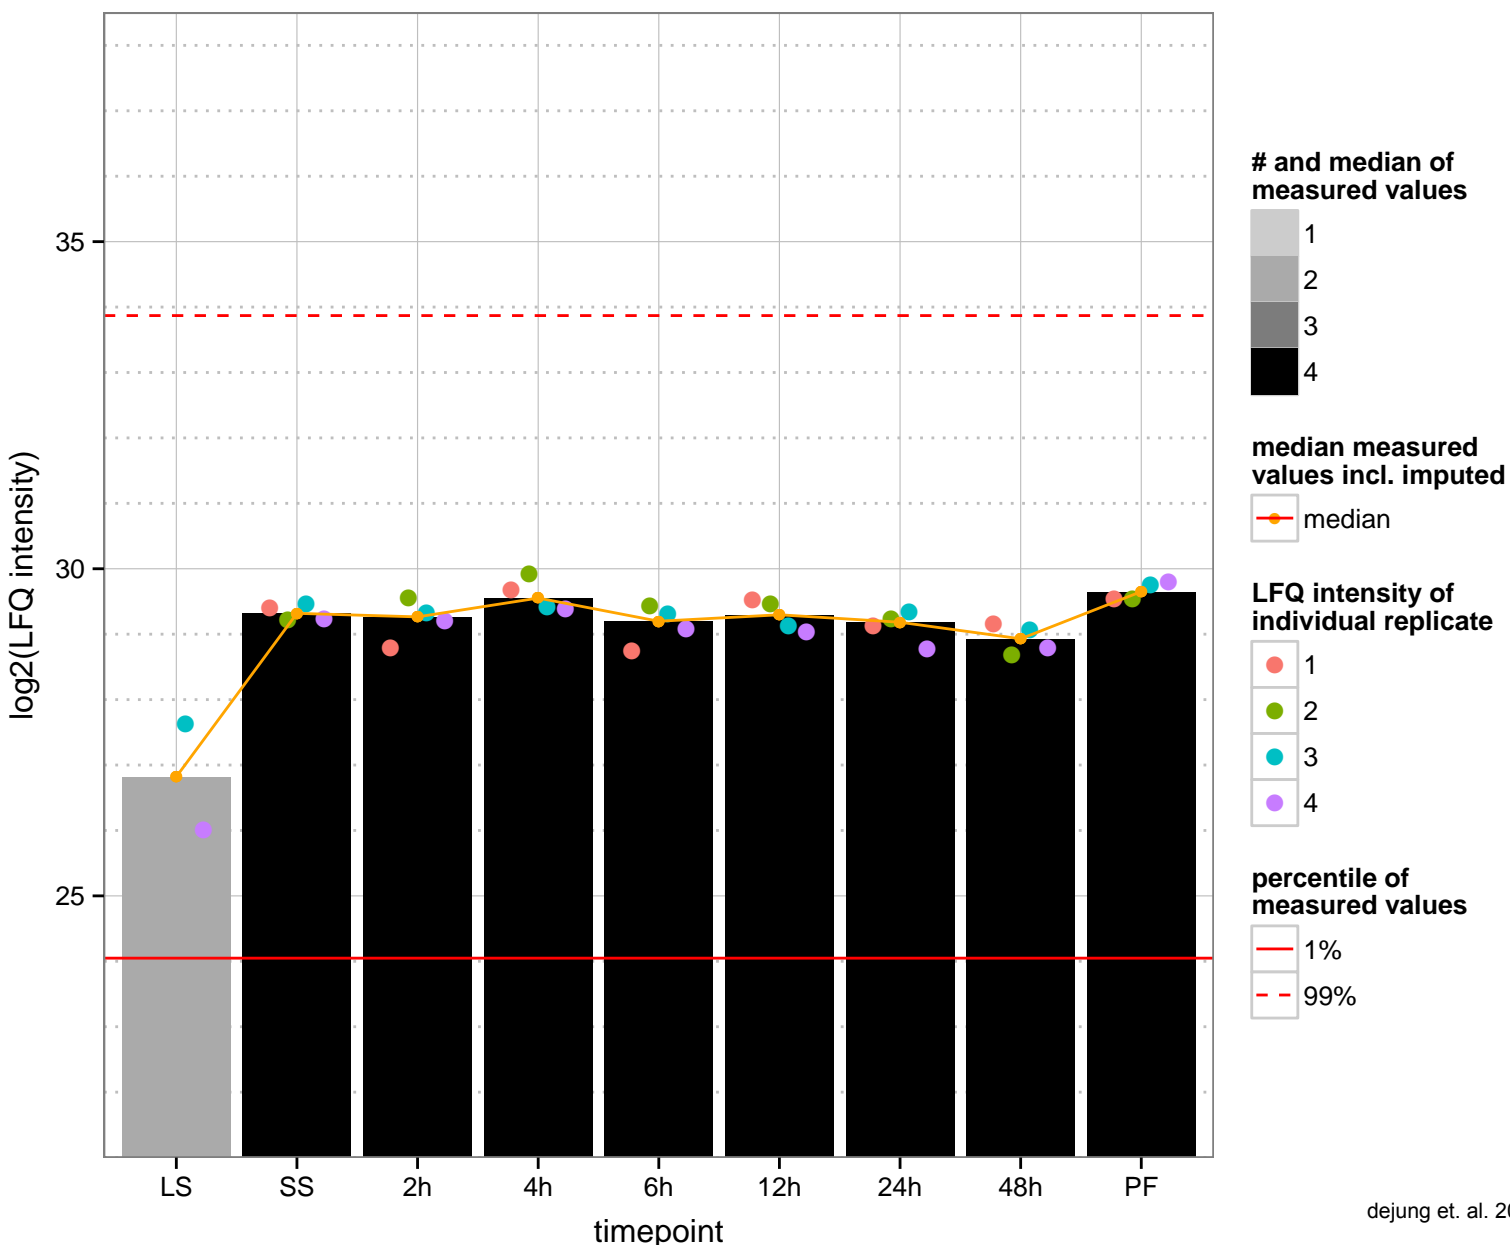



50S ribosomal protein L2, putative  
 Tb927.5.3360  
 AGOF: structural constituent of ribosome  
 AGOC: intracellular, mitochondrion, ribosome  
 AGOP: translation  
 PGOF: structural constituent of ribosome  
 PGO: intracellular, ribosome  
 PGOP: translation

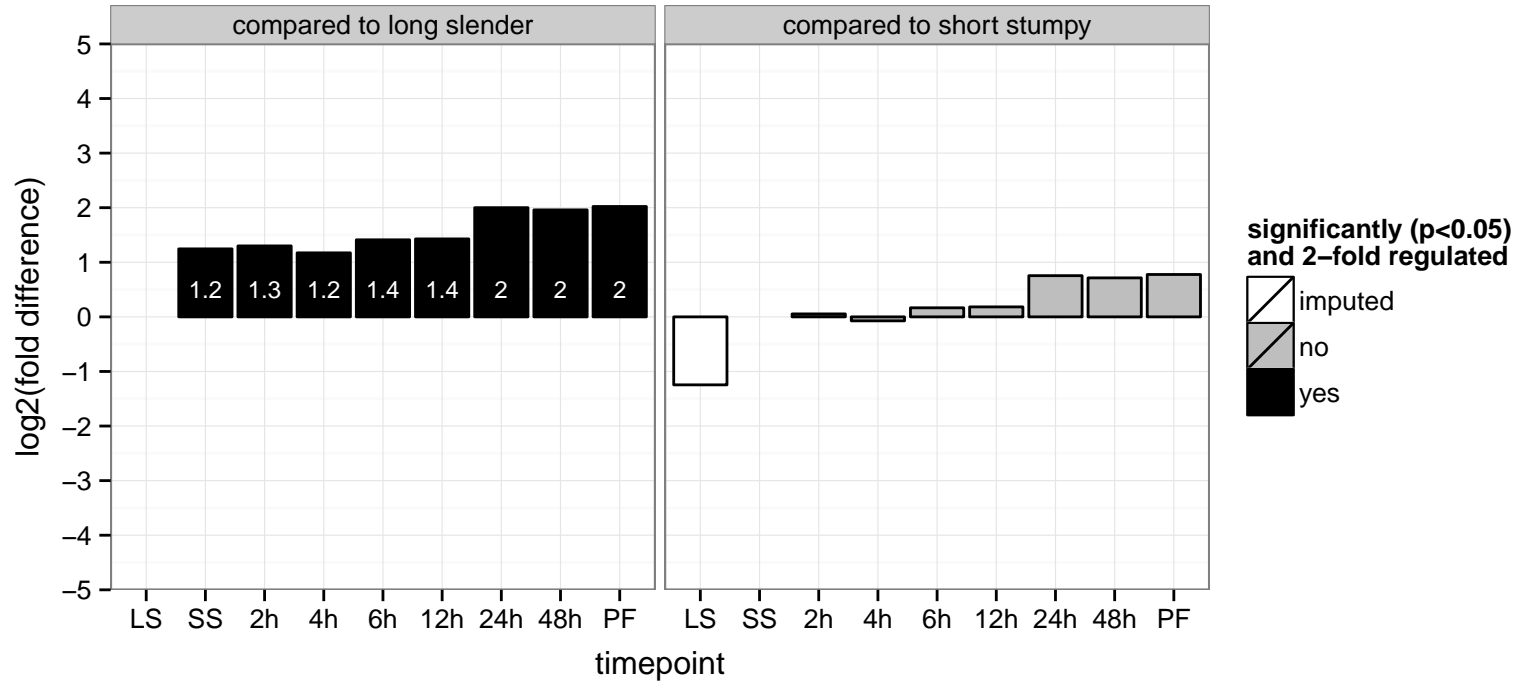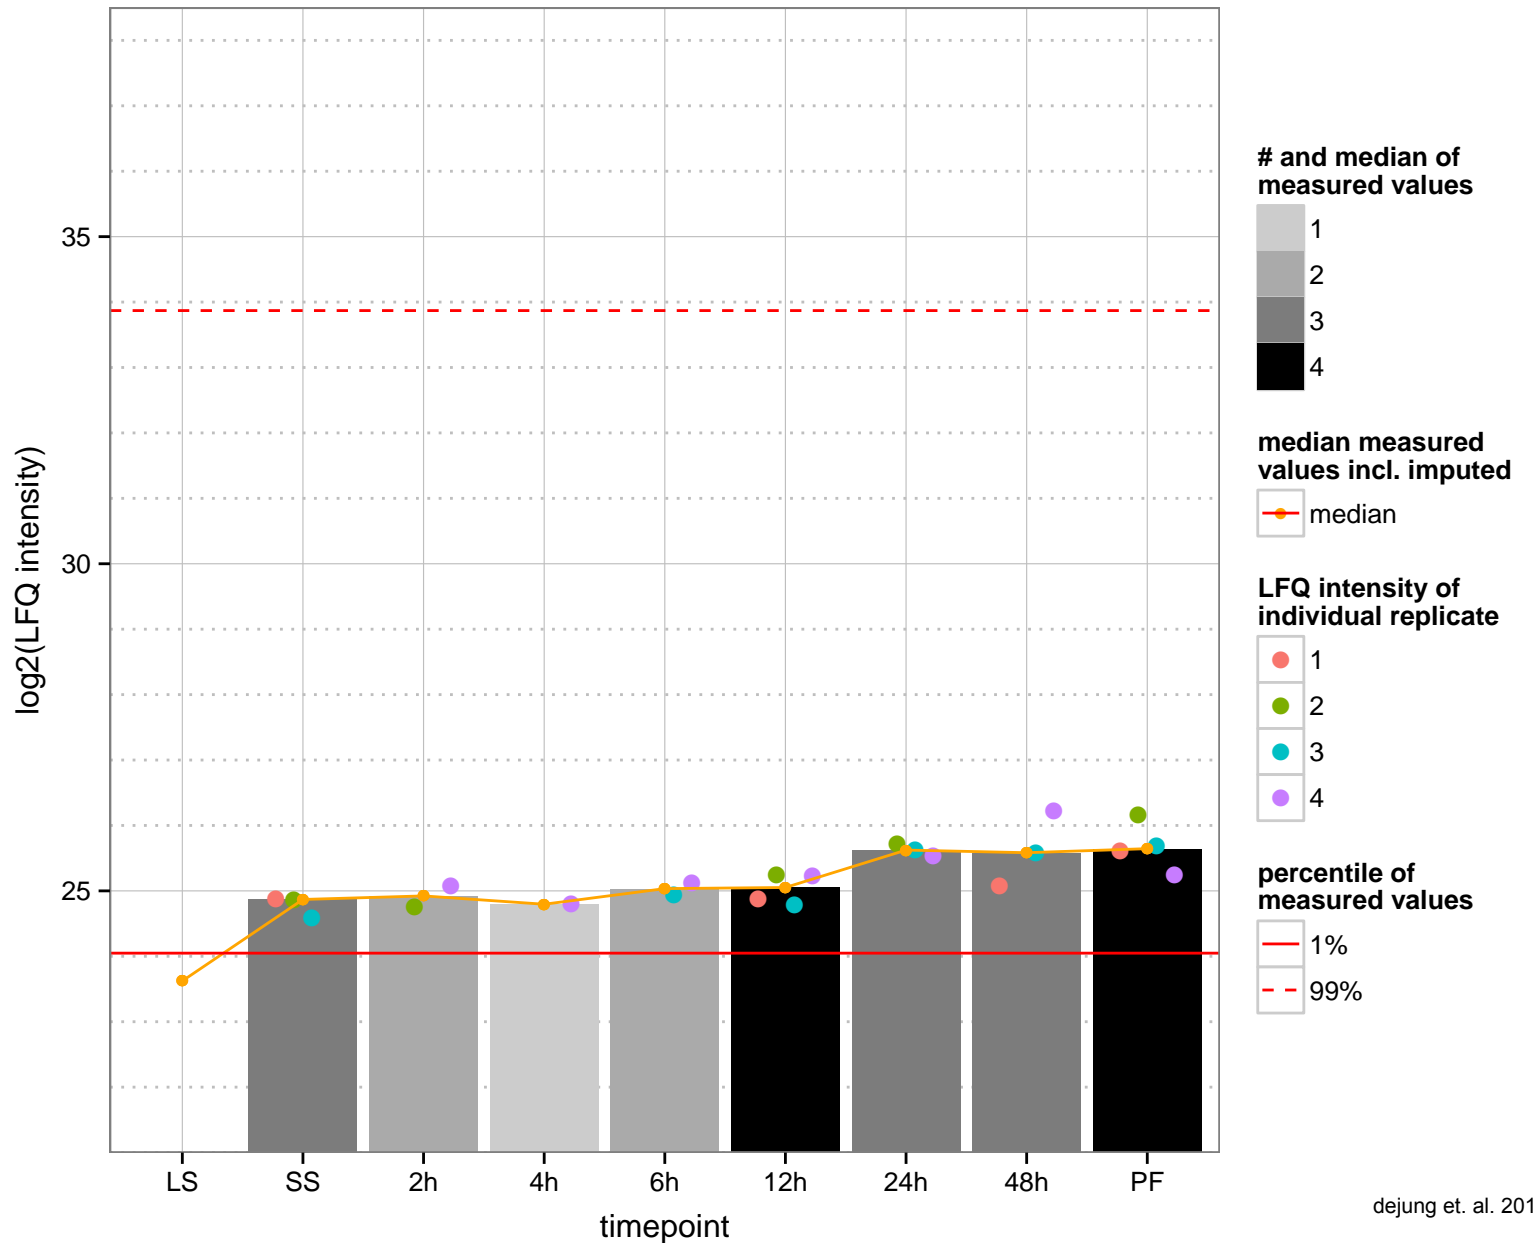

calcium-translocating P-type ATPase, calcium pump

Tb927.5.3400

AGOF: ATP binding, calcium-transporting ATPase activity

AGOC: integral to membrane, mitochondrial inner membrane

AGOP: ATP biosynthetic process, calcium ion transport, metabolic process

PGOF: ATP binding, ATPase activity, coupled to transmembrane movement of ions, phosphorylative mechanism, calcium-transport

PGOC: integral to membrane, membrane

PGOP: ATP biosynthetic process, calcium ion transport, cation transport, metabolic process

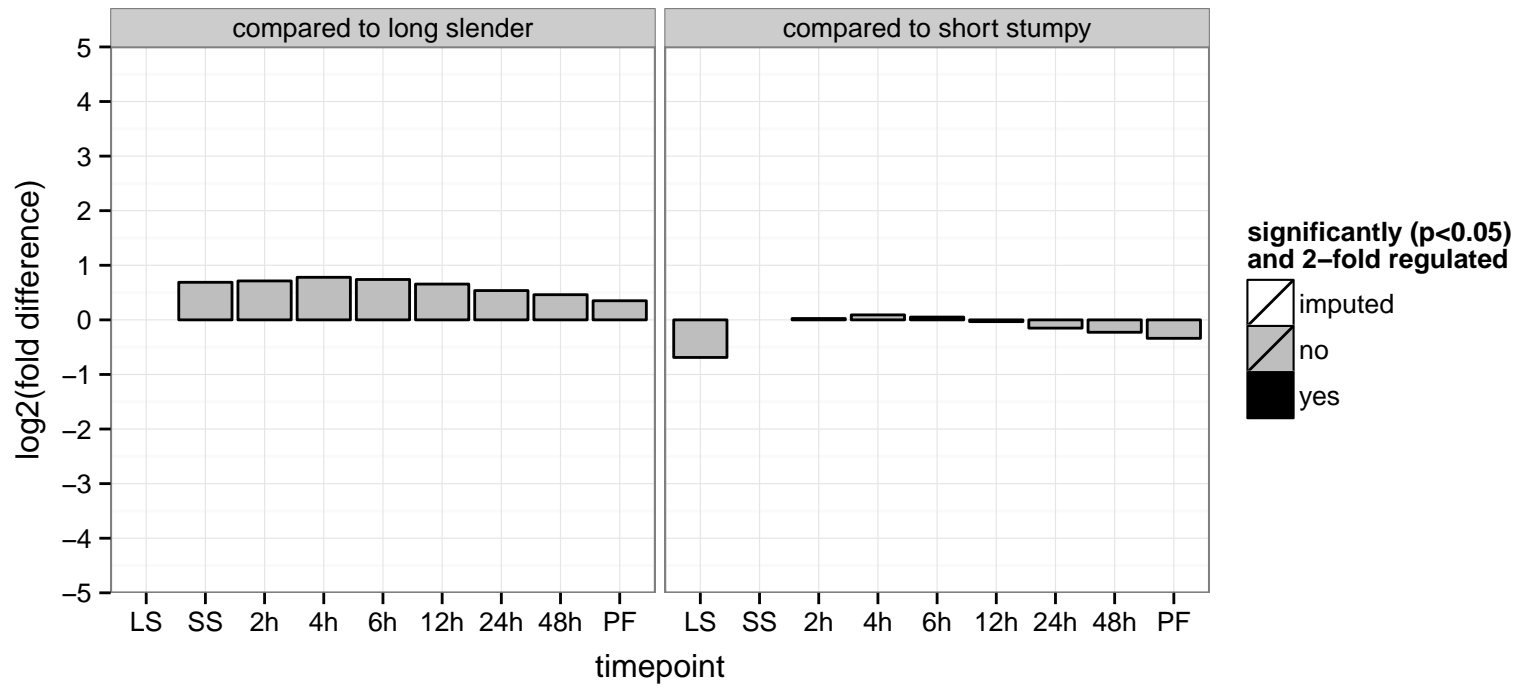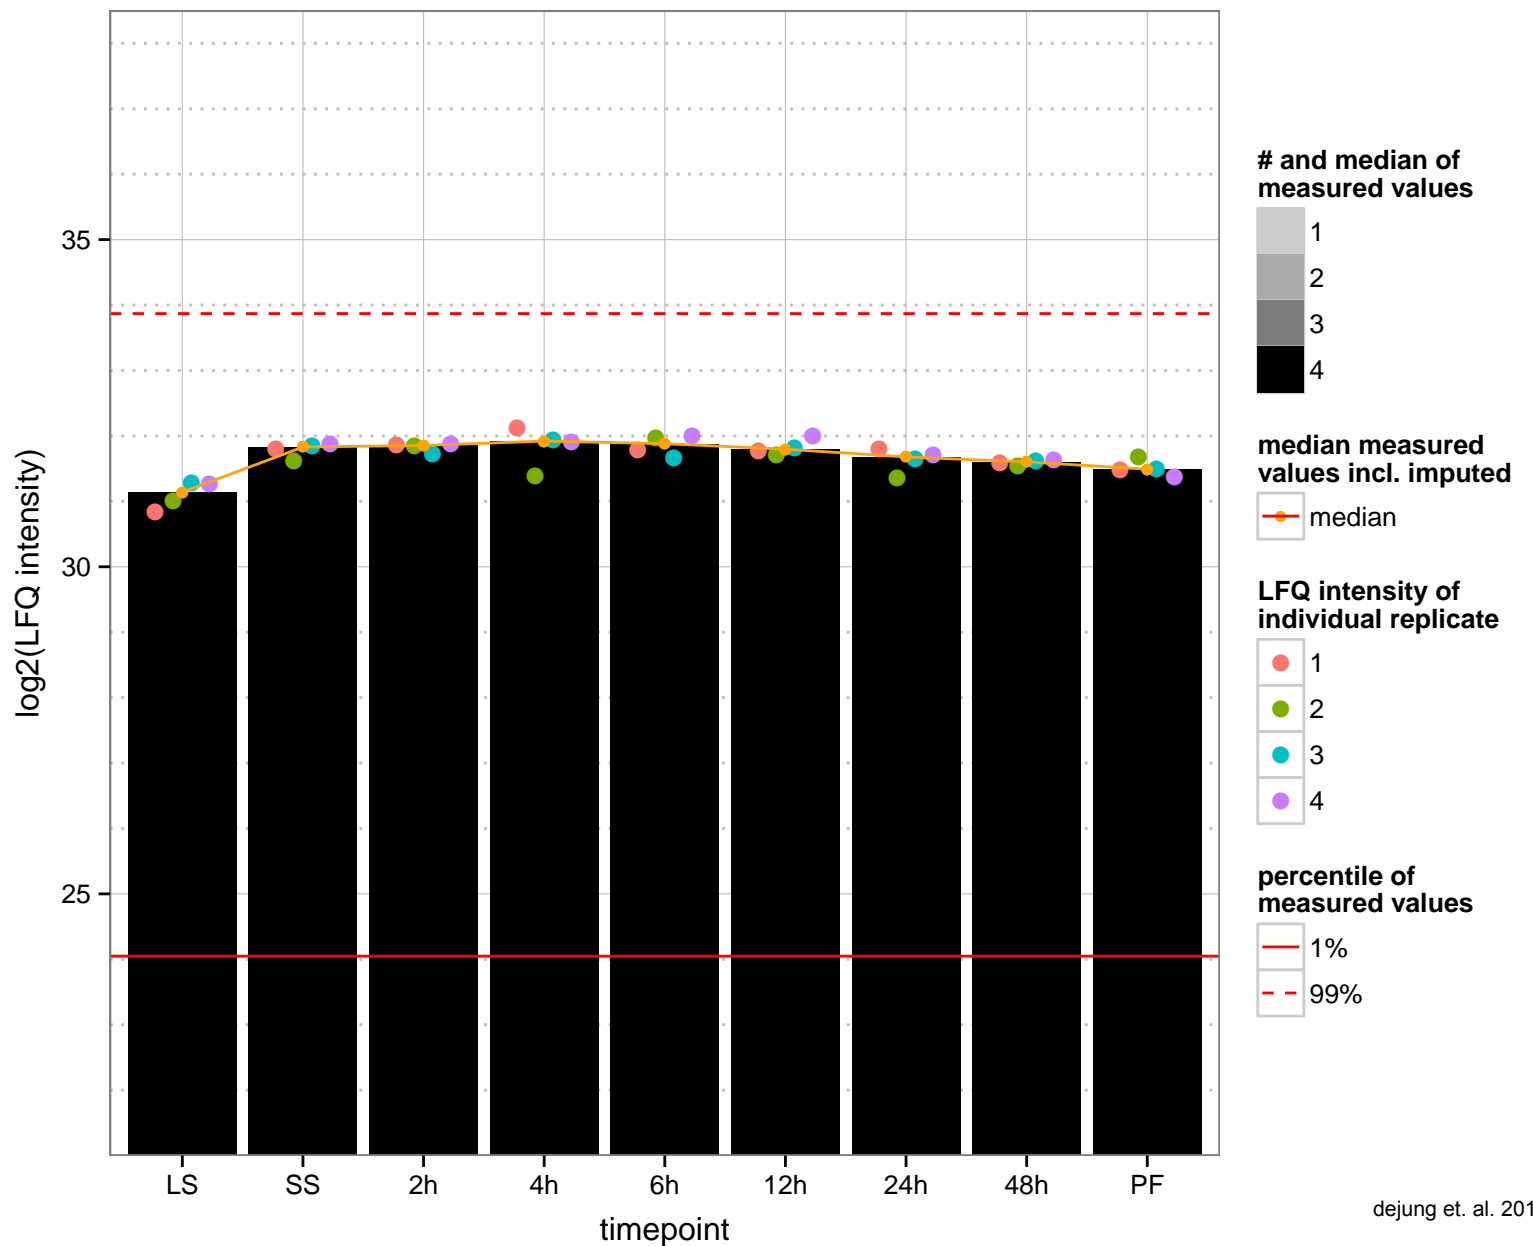

ubiquitin-activating enzyme E1, putative  
 Tb927.5.3430  
 AGOF: ATP binding, small protein activating enzyme activity  
 AGOC: null  
 AGOP: cellular protein modification process  
 PGOF: ATP binding, catalytic activity, small protein activating enzyme activity  
 PGO: null  
 PGOP: cellular protein modification process

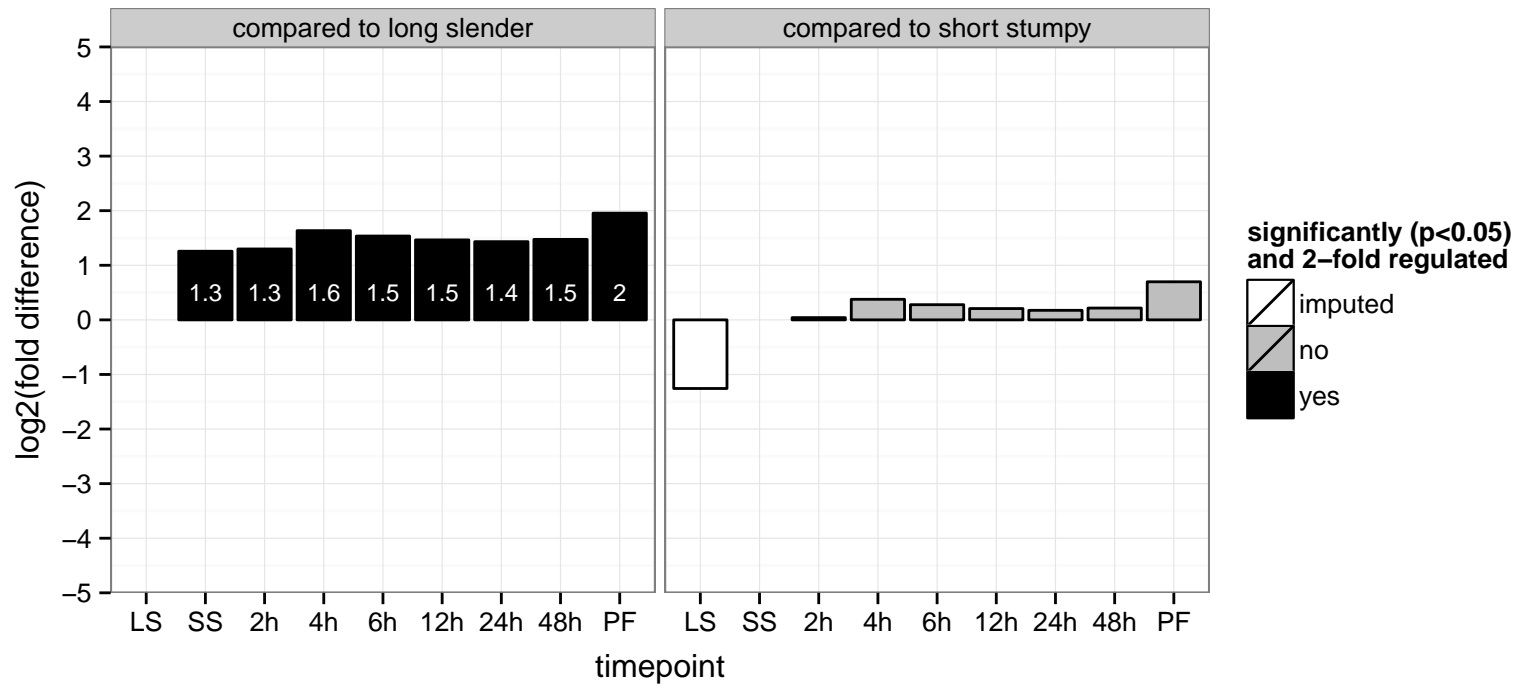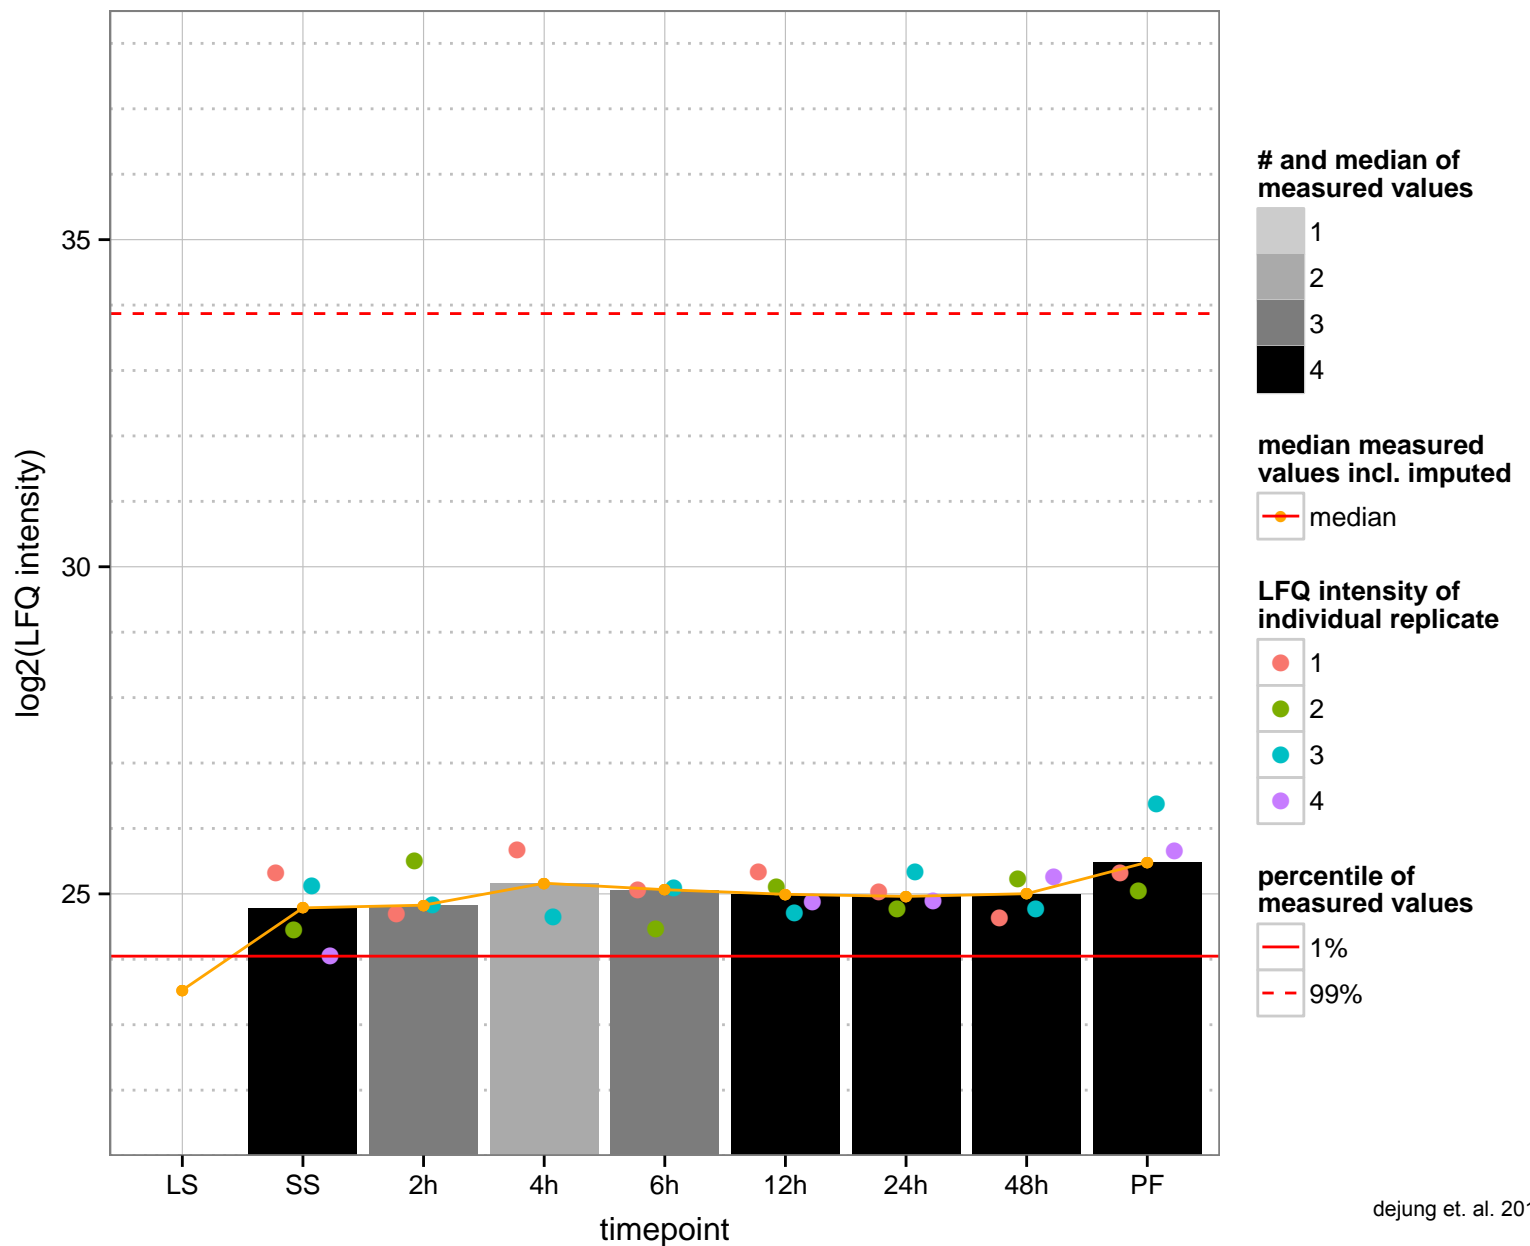

hypothetical protein, conserved  
 Tb927.5.3450  
 AGOF: null  
 AGOC: null  
 AGOP: null  
 PGO: null  
 PGOC: null  
 PGOP: null

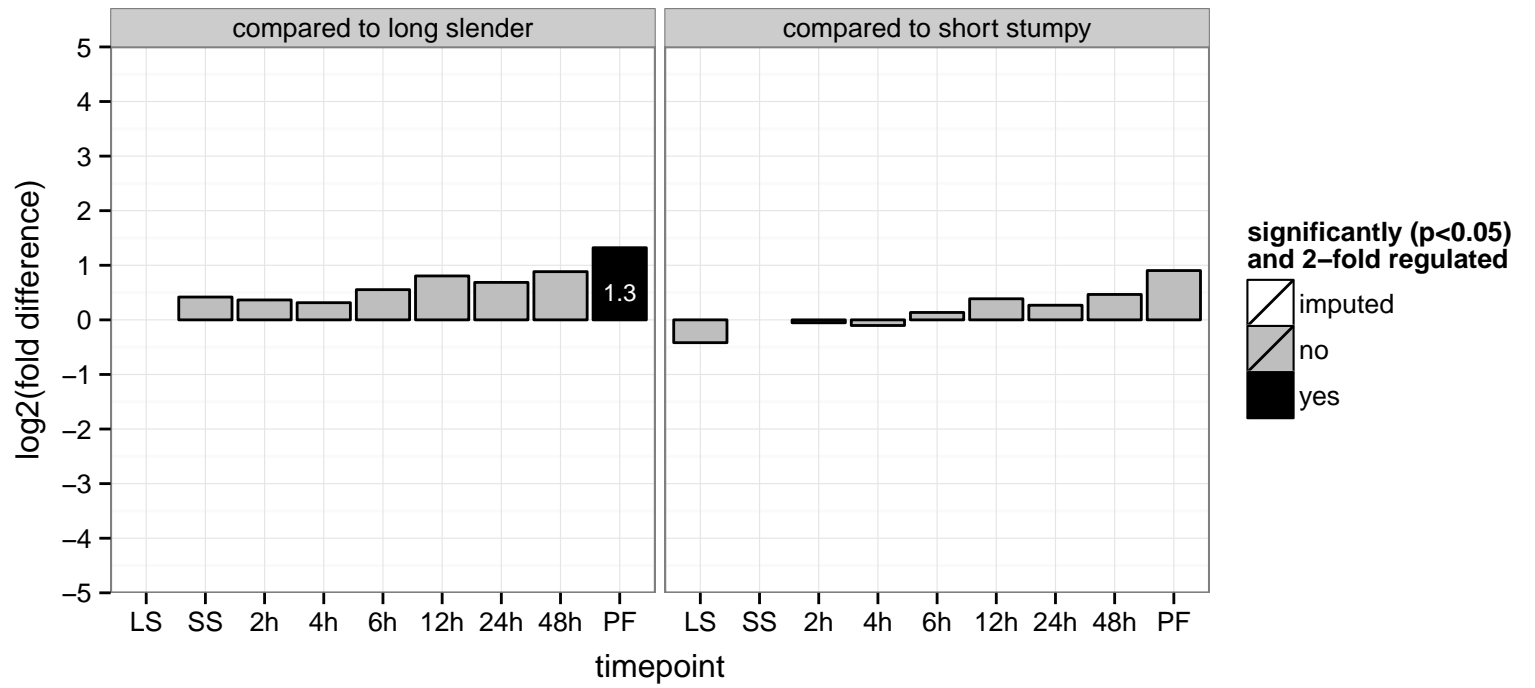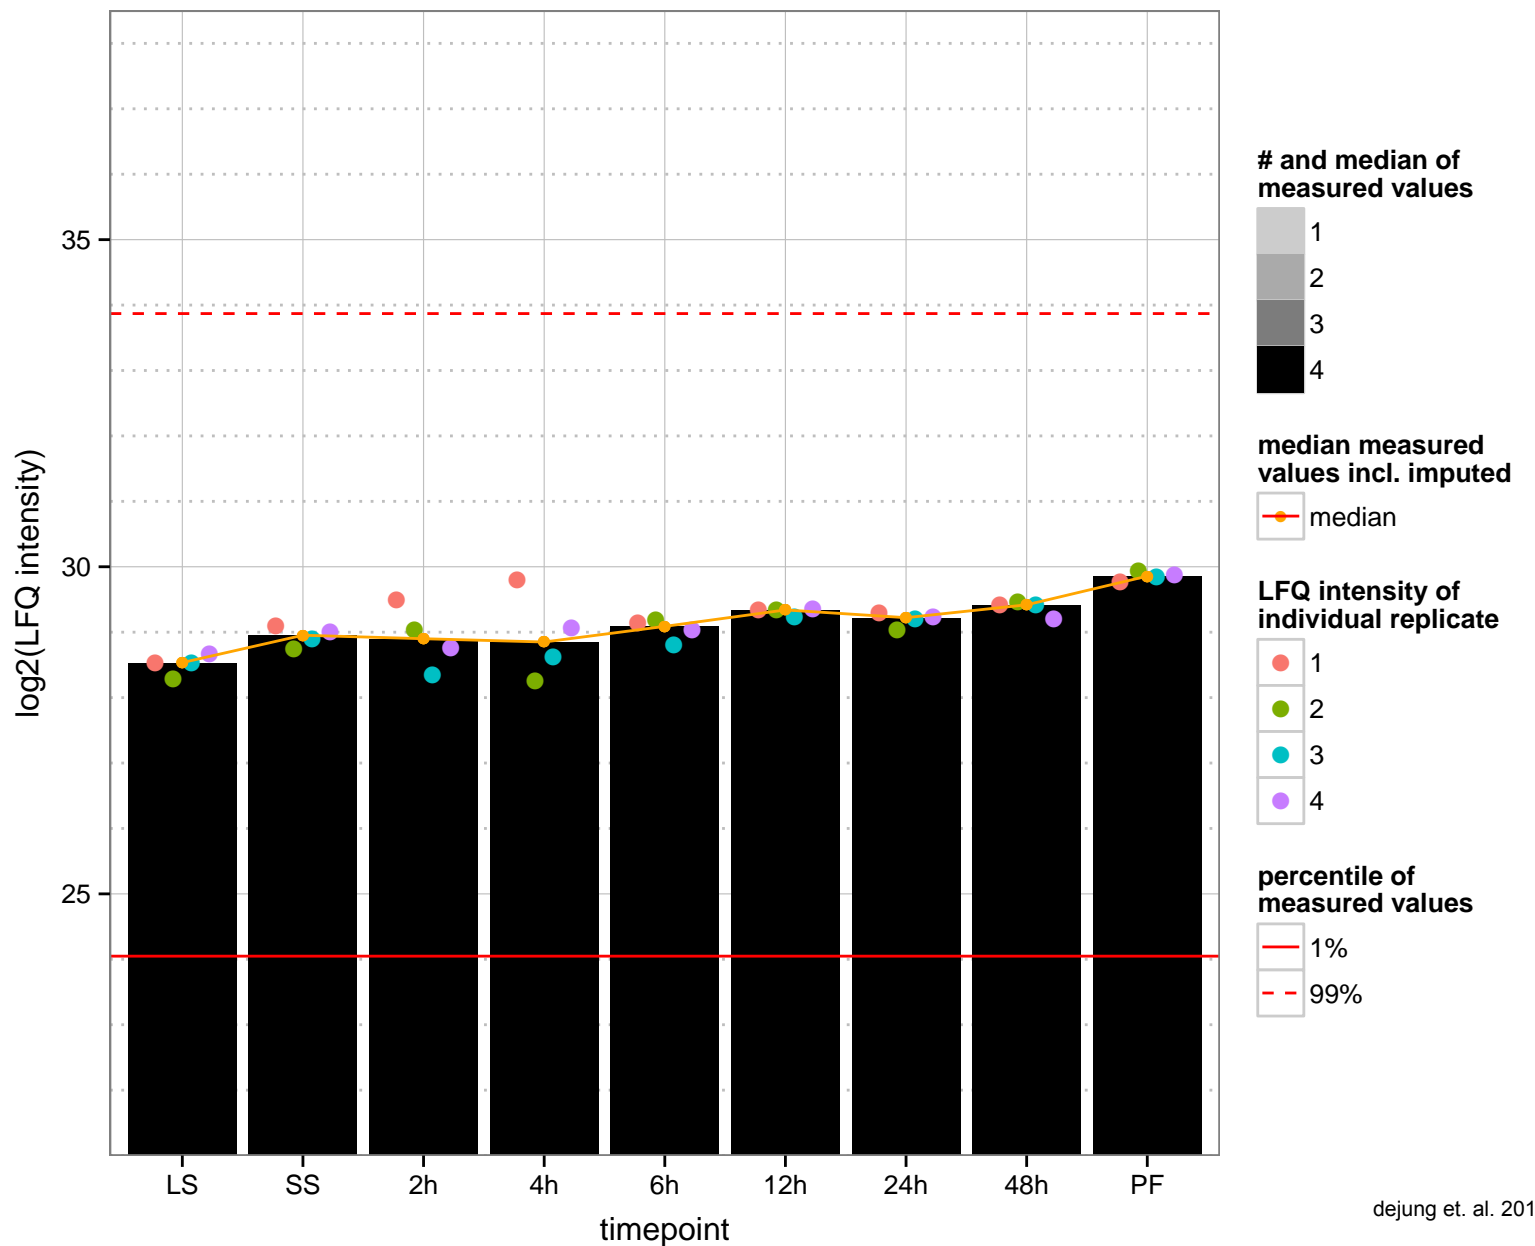

structural maintenance of chromosome 3, putative (SMC3)

Tb927.5.3510

AGOF: ATP binding

AGOC: chromosome

AGOP: chromosome organization

PGOF: ATP binding, protein binding

PGOC: chromosome

PGOP: chromosome organization

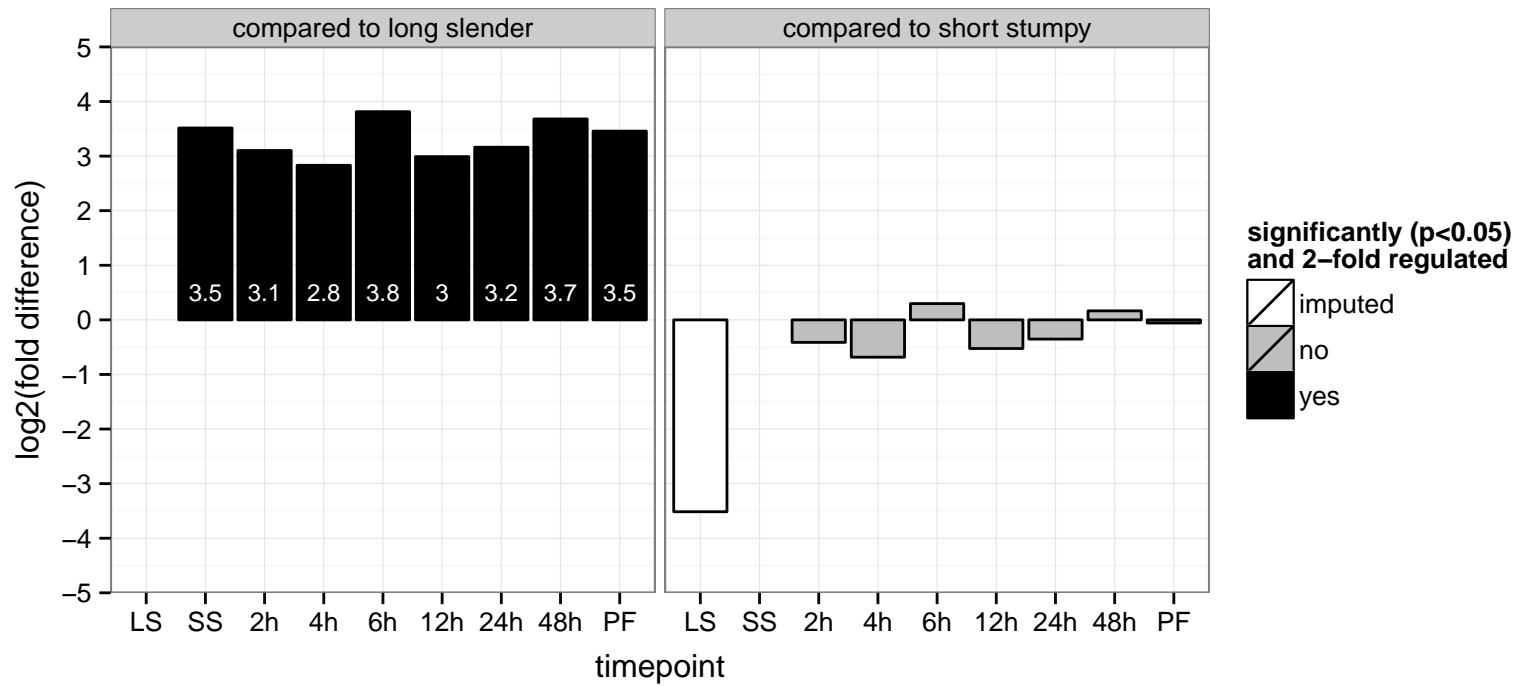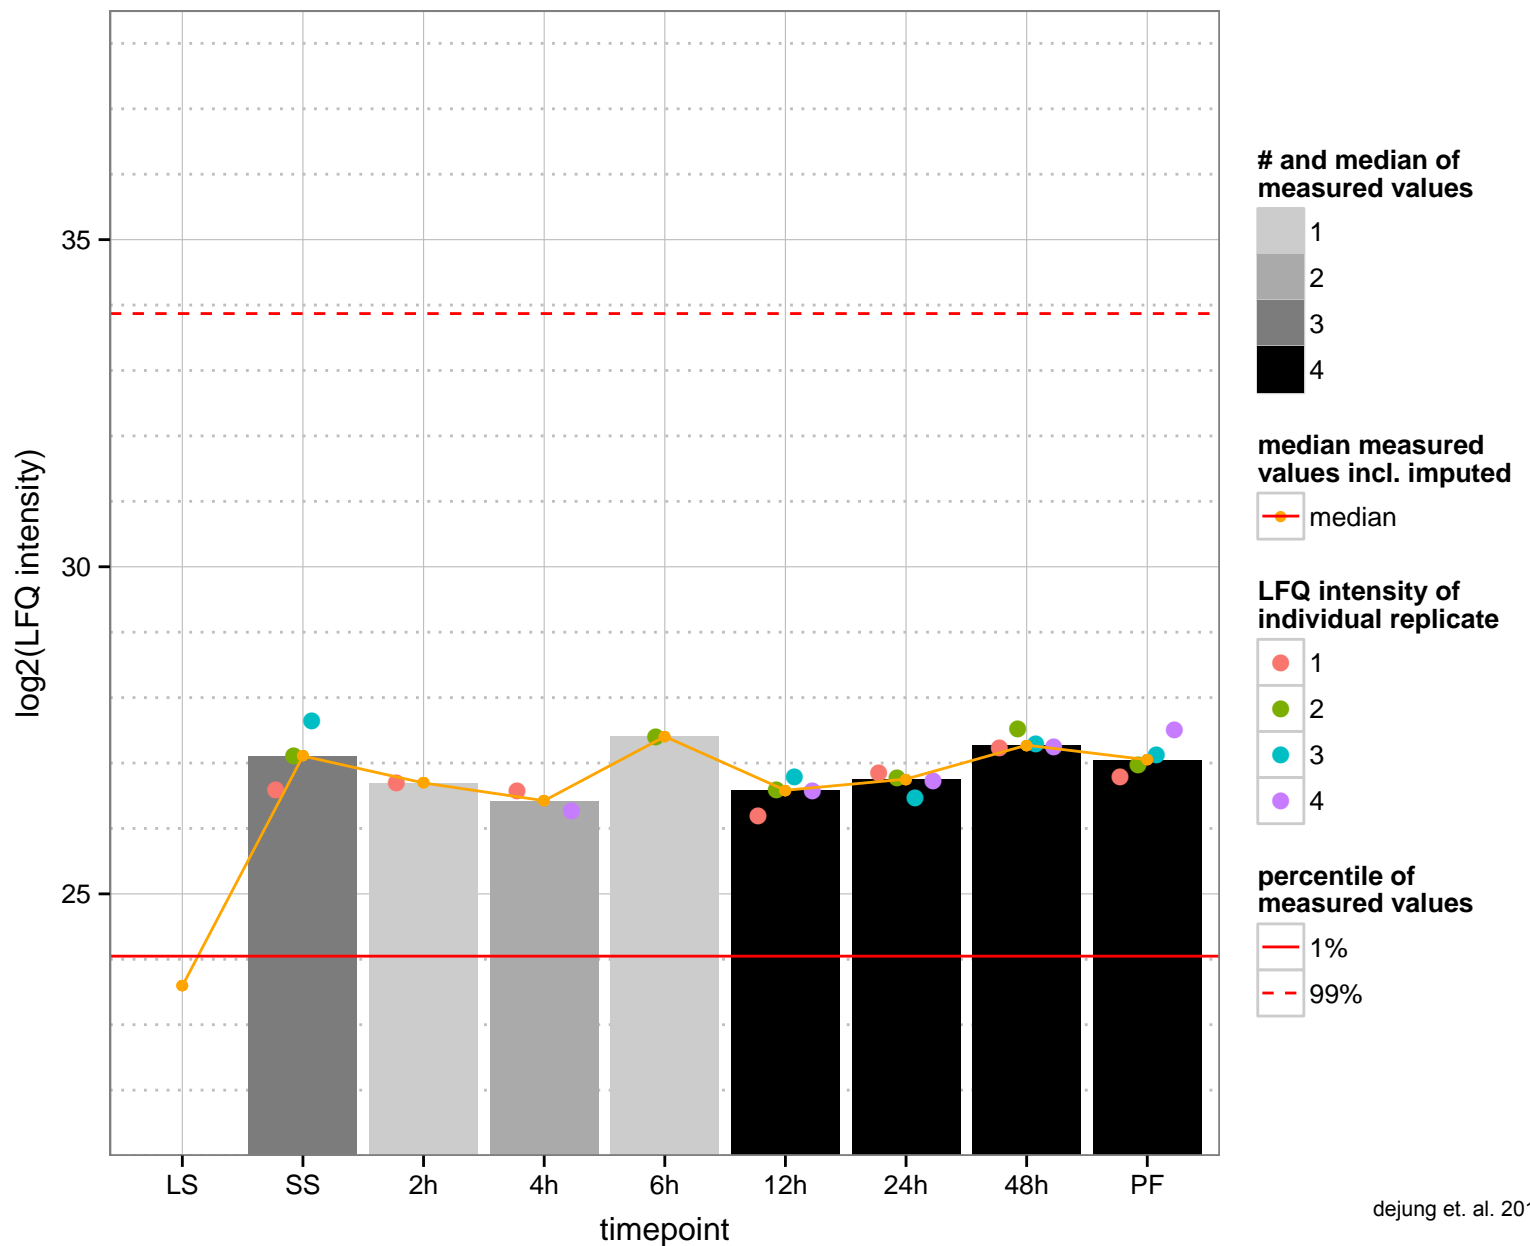

adaptor complex protein (AP) 3 delta subunit 1, putative  
 Tb927.5.3610  
 AGOF: protein transporter activity  
 AGOC: Golgi apparatus, membrane coat  
 AGOP: intracellular protein transport, vesicle-mediated transport  
 PGO: binding, protein transporter activity  
 PGOC: Golgi apparatus, membrane coat  
 PGOP: intracellular protein transport, protein transport, vesicle-mediated transport

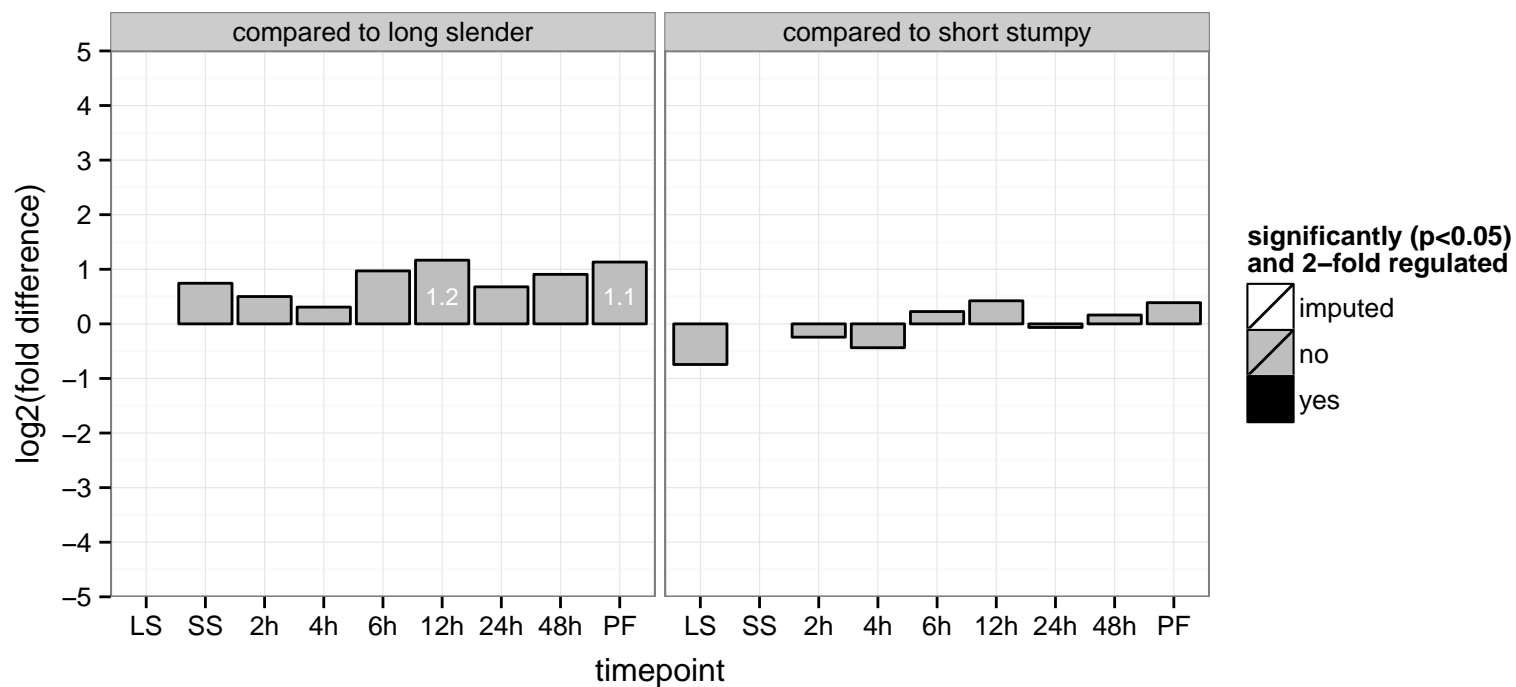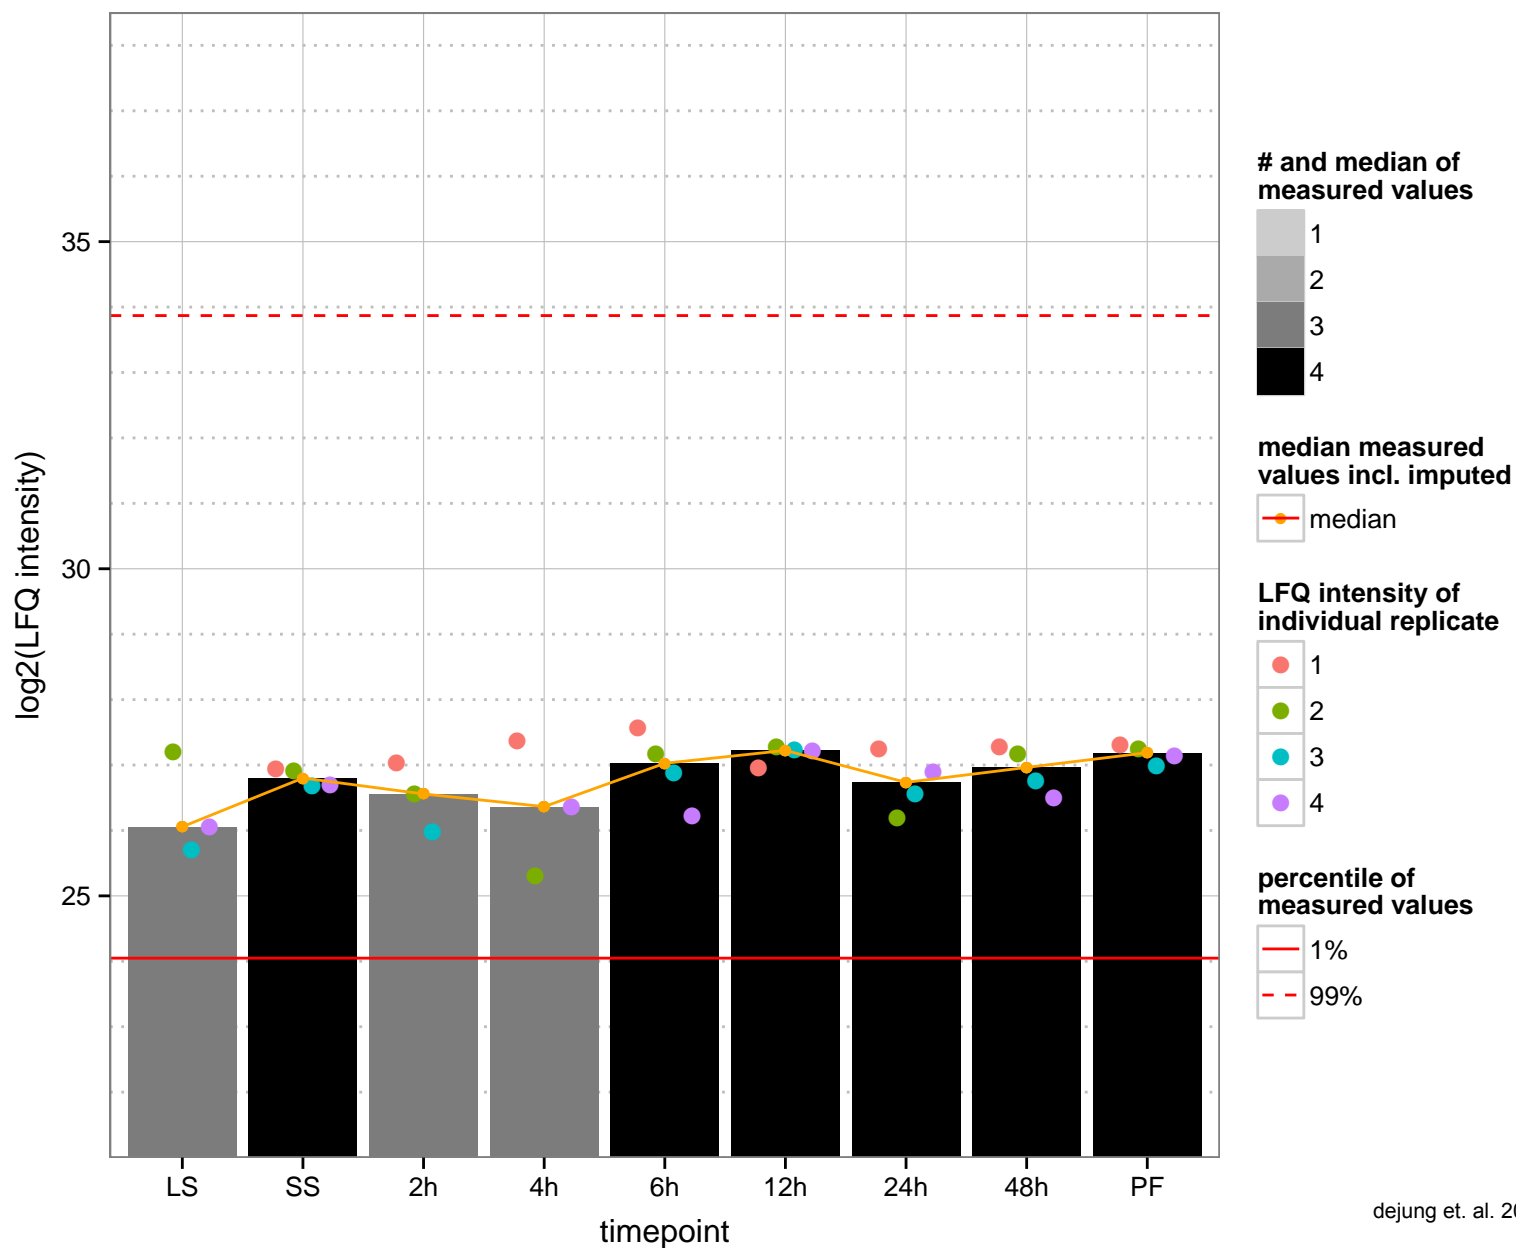

hypothetical protein, conserved  
 Tb927.5.3640  
 AGOF: null  
 AGOC: mitochondrion  
 AGOP: null  
 PGO: null  
 PGO: null  
 PGO: null

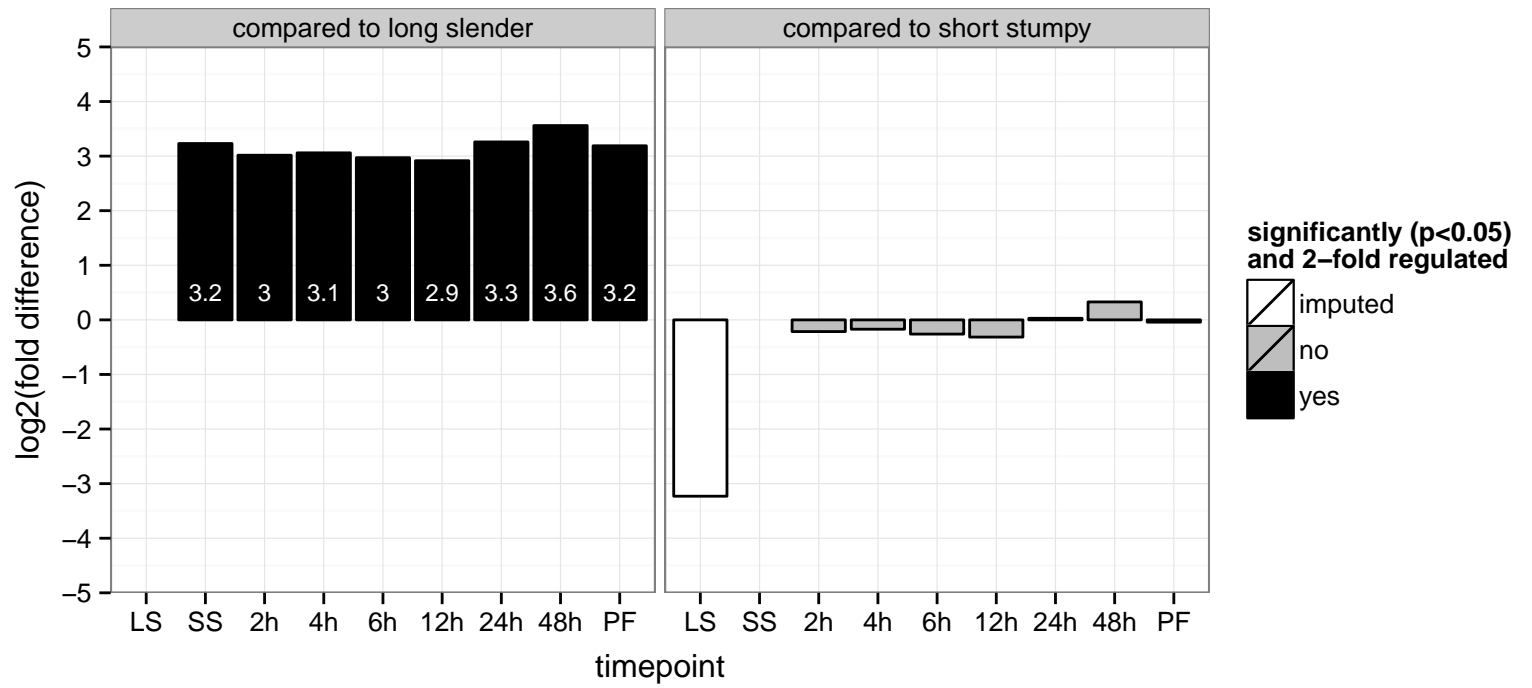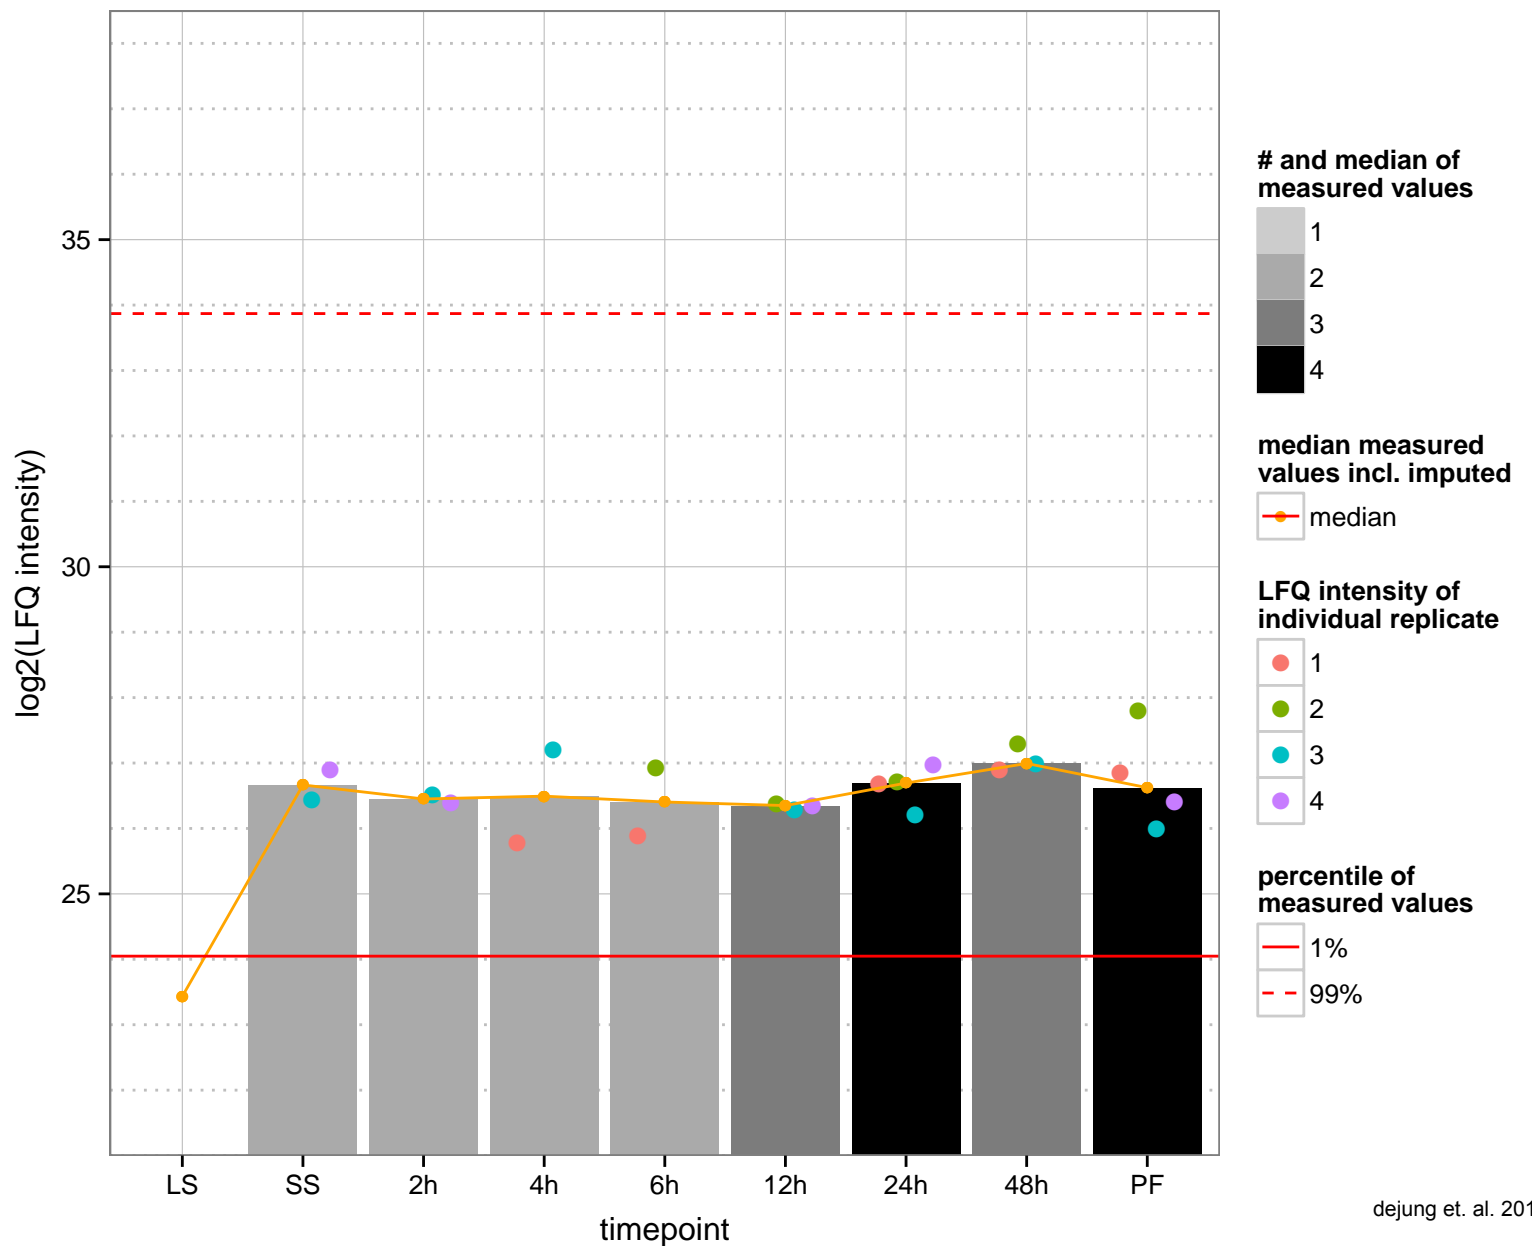

hypothetical protein, conserved  
 Tb927.5.3650  
 AGOF: zinc ion binding  
 AGOC: null  
 AGOP: null  
 PGO: null  
 PGOC: null  
 PGOP: null

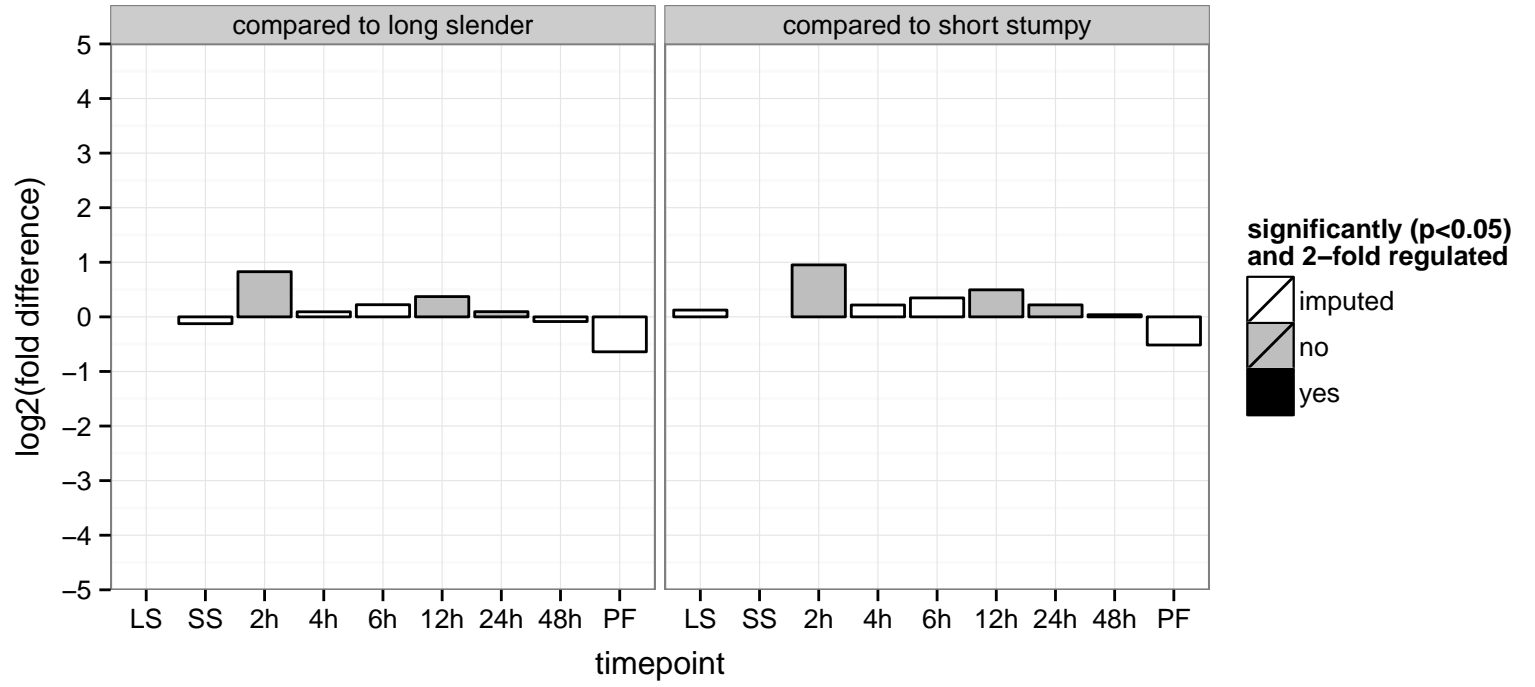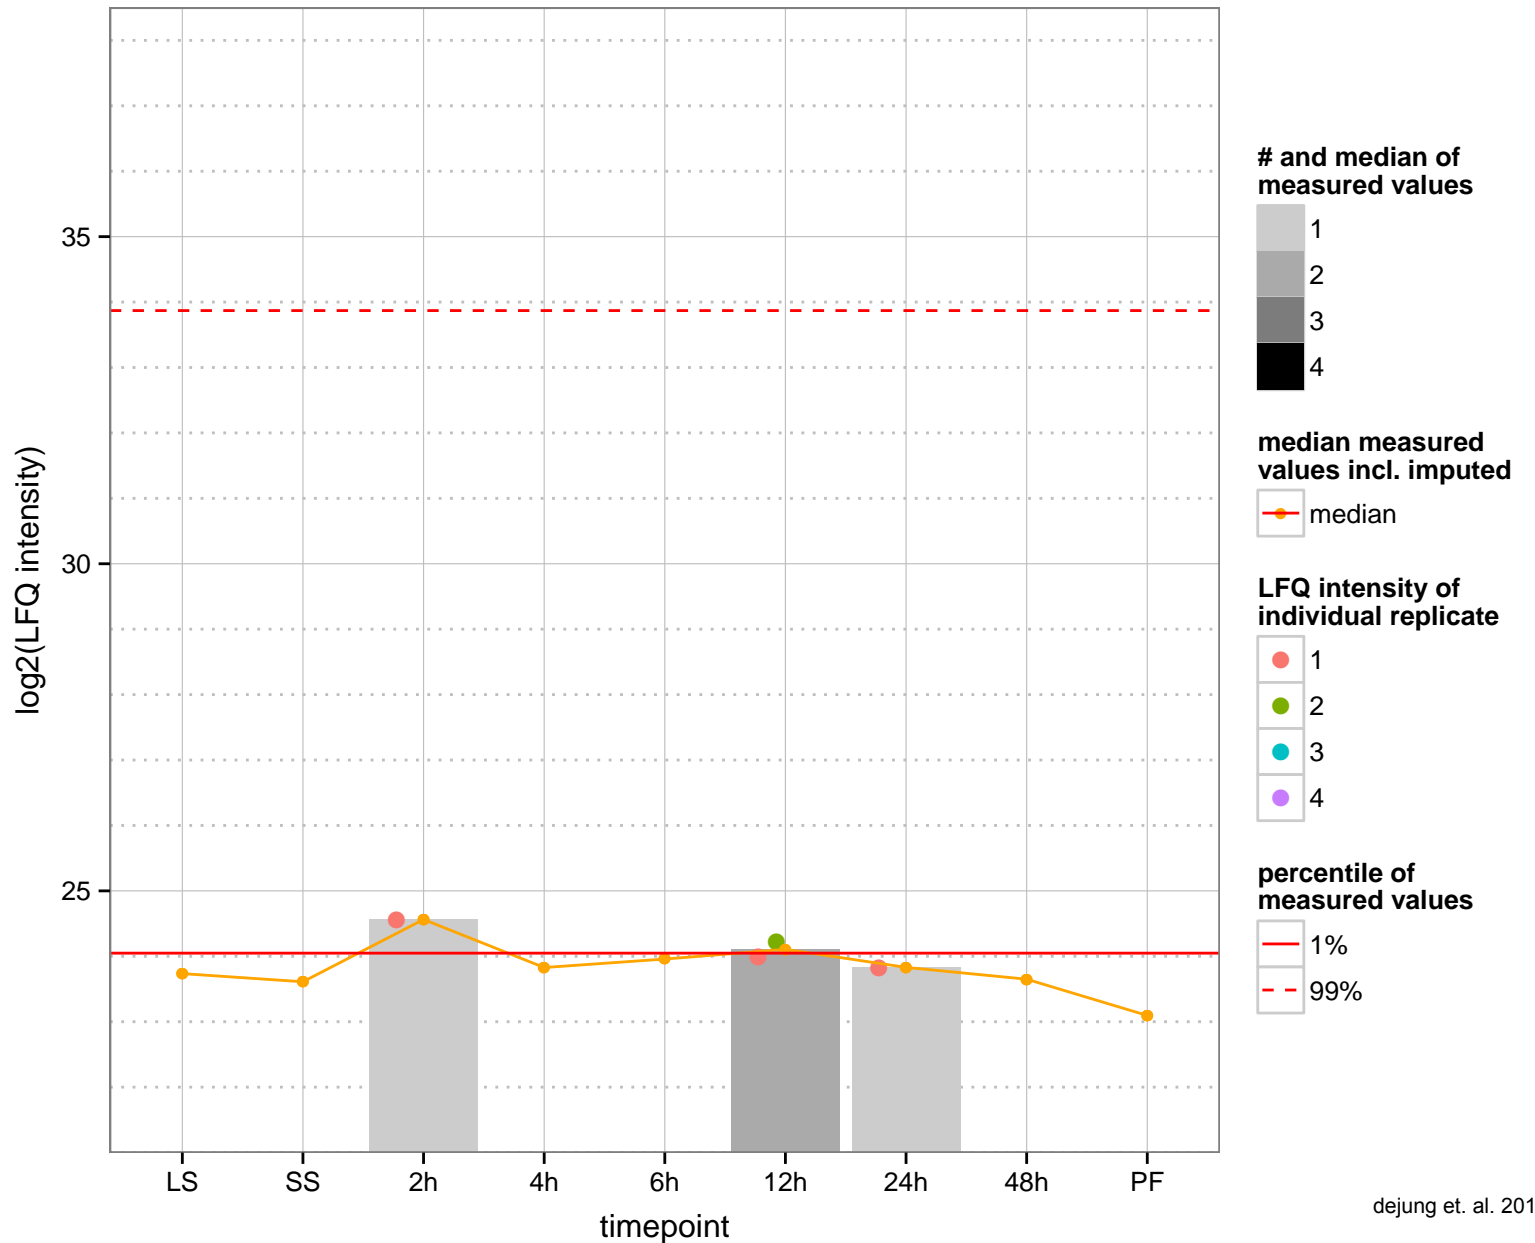



essential neutral sphingomyelinase (TbnSMase)  
 Tb927.5.3710  
 AGOF: sphingomyelin phosphodiesterase activity  
 AGOC: endoplasmic reticulum  
 AGOP: ceramide biosynthetic process, sphingomyelin catabolic process  
 PGO: null  
 PGOC: null  
 PGOP: null

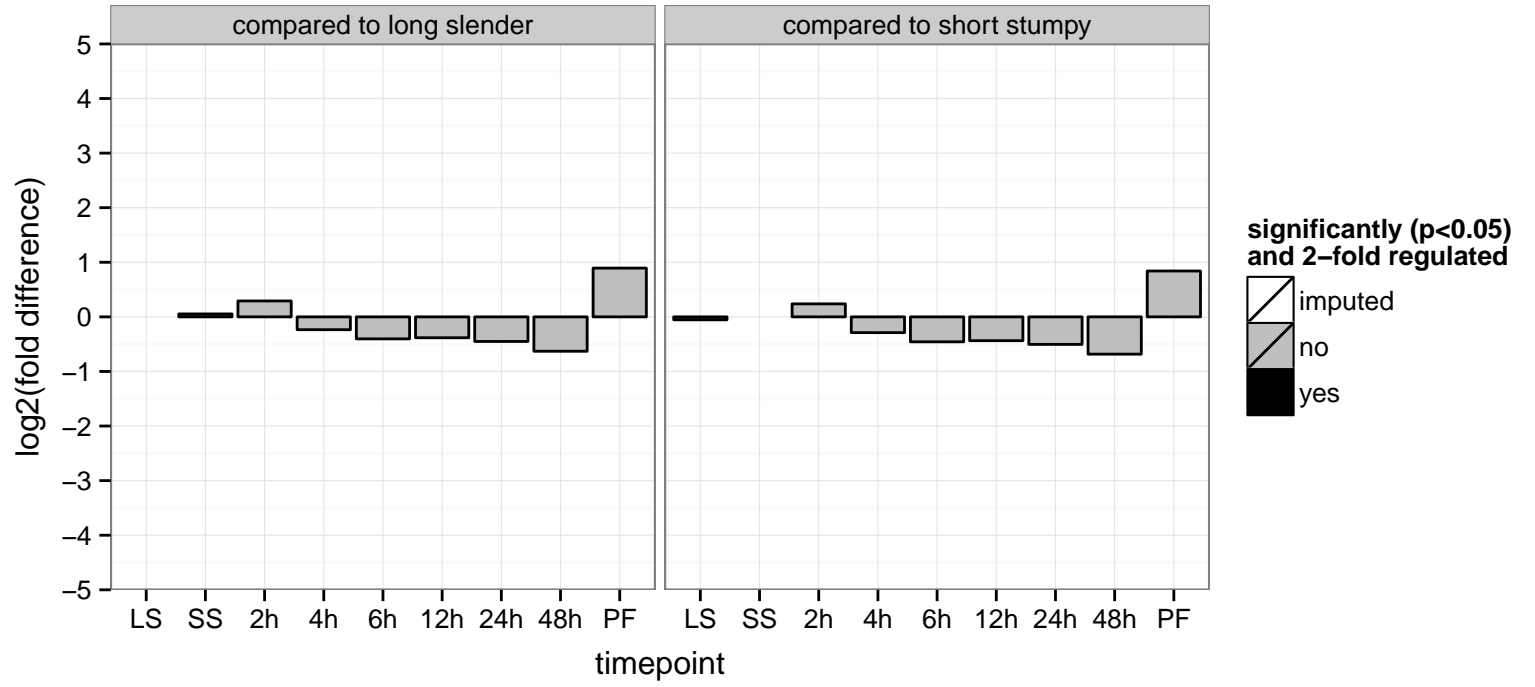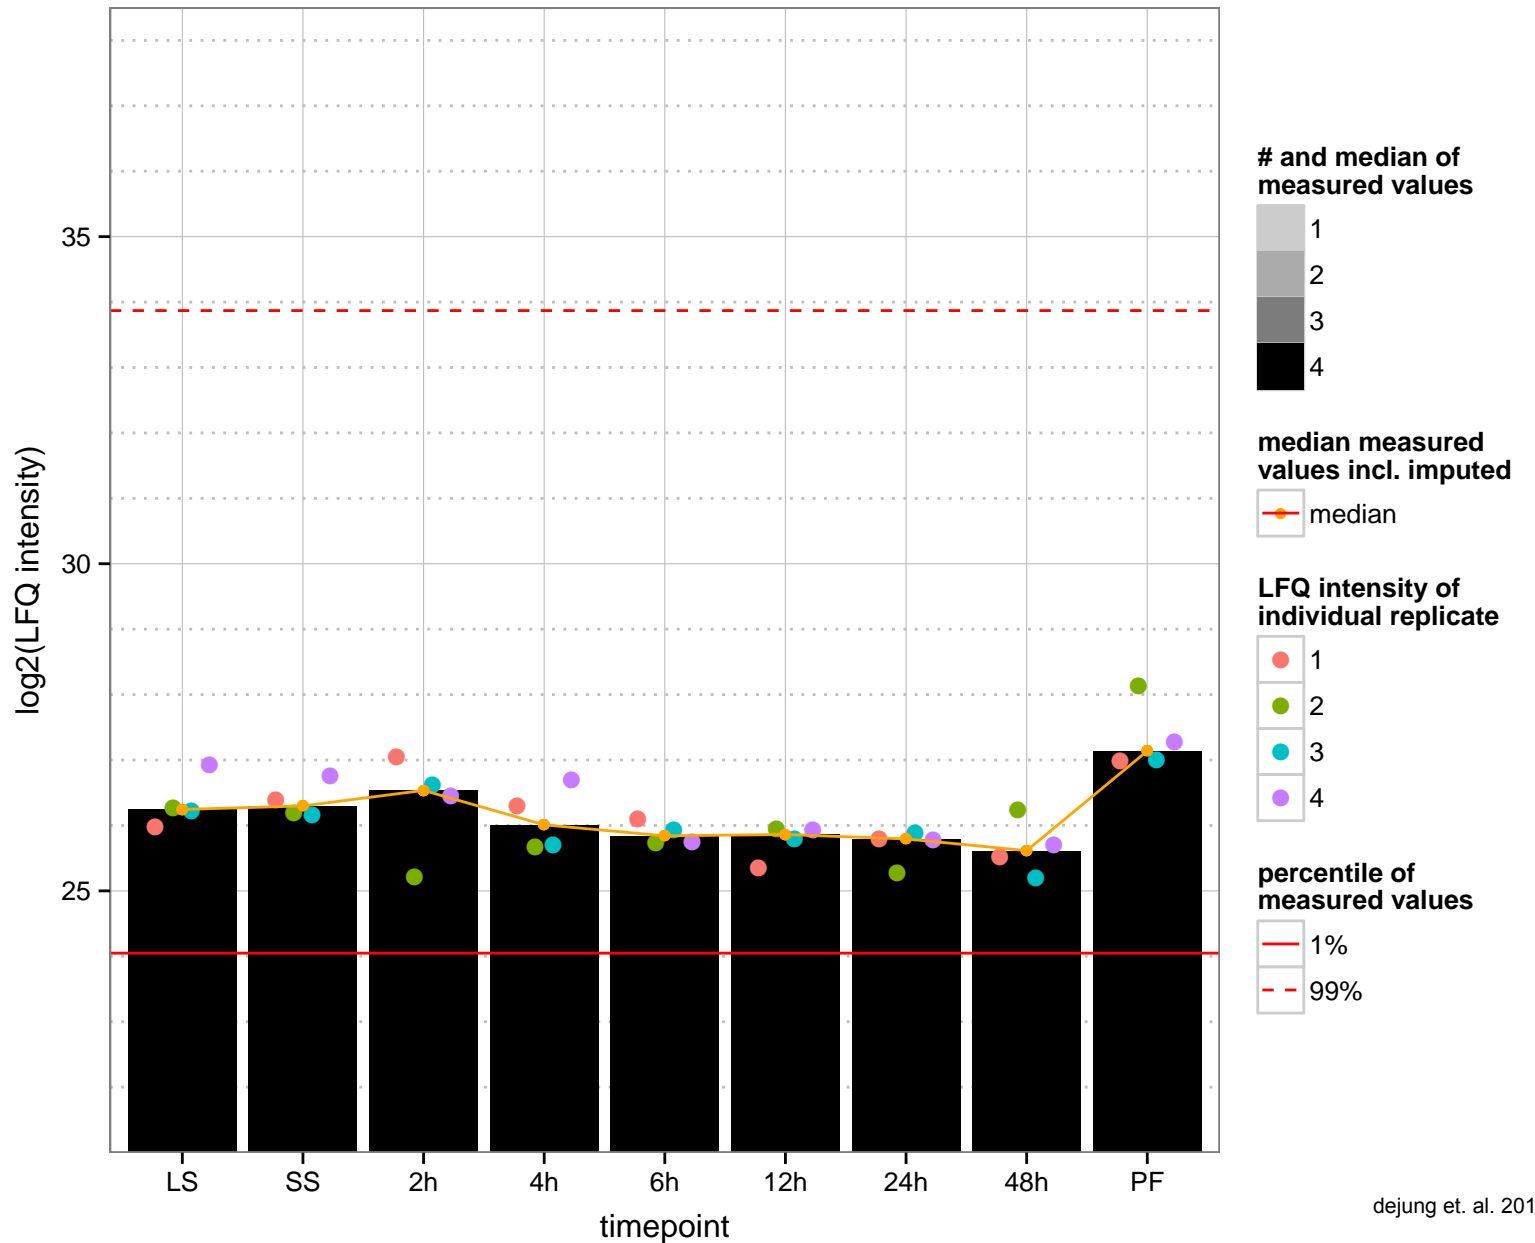

orotidine-5-phosphate decarboxylase/rostate phosphoribosyltransferase, putative, OMPDCase-OPRTase  
Tb927.5.3810

AGOF: orotate phosphoribosyltransferase activity, orotidine-5'-phosphate decarboxylase activity

AGOC: glycosome

AGOP: 'de novo' pyrimidine nucleobase biosynthetic process, nucleoside metabolic process, pyrimidine ribonucleotide biosynthetic process

PGOF: catalytic activity, orotate phosphoribosyltransferase activity, orotidine-5'-phosphate decarboxylase activity

PGOC: null

PGOP: 'de novo' pyrimidine nucleobase biosynthetic process, metabolic process, nucleoside metabolic process, pyrimidine nucleoside biosynthetic process

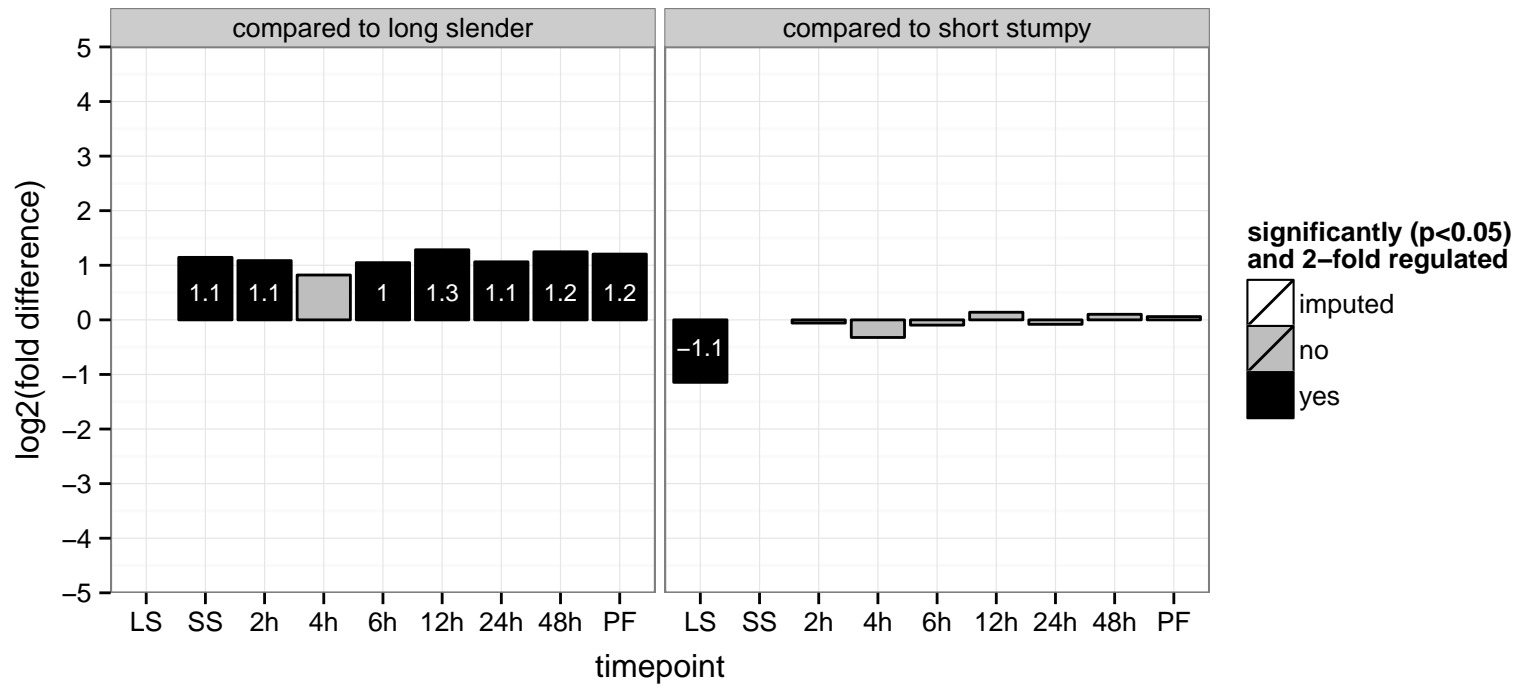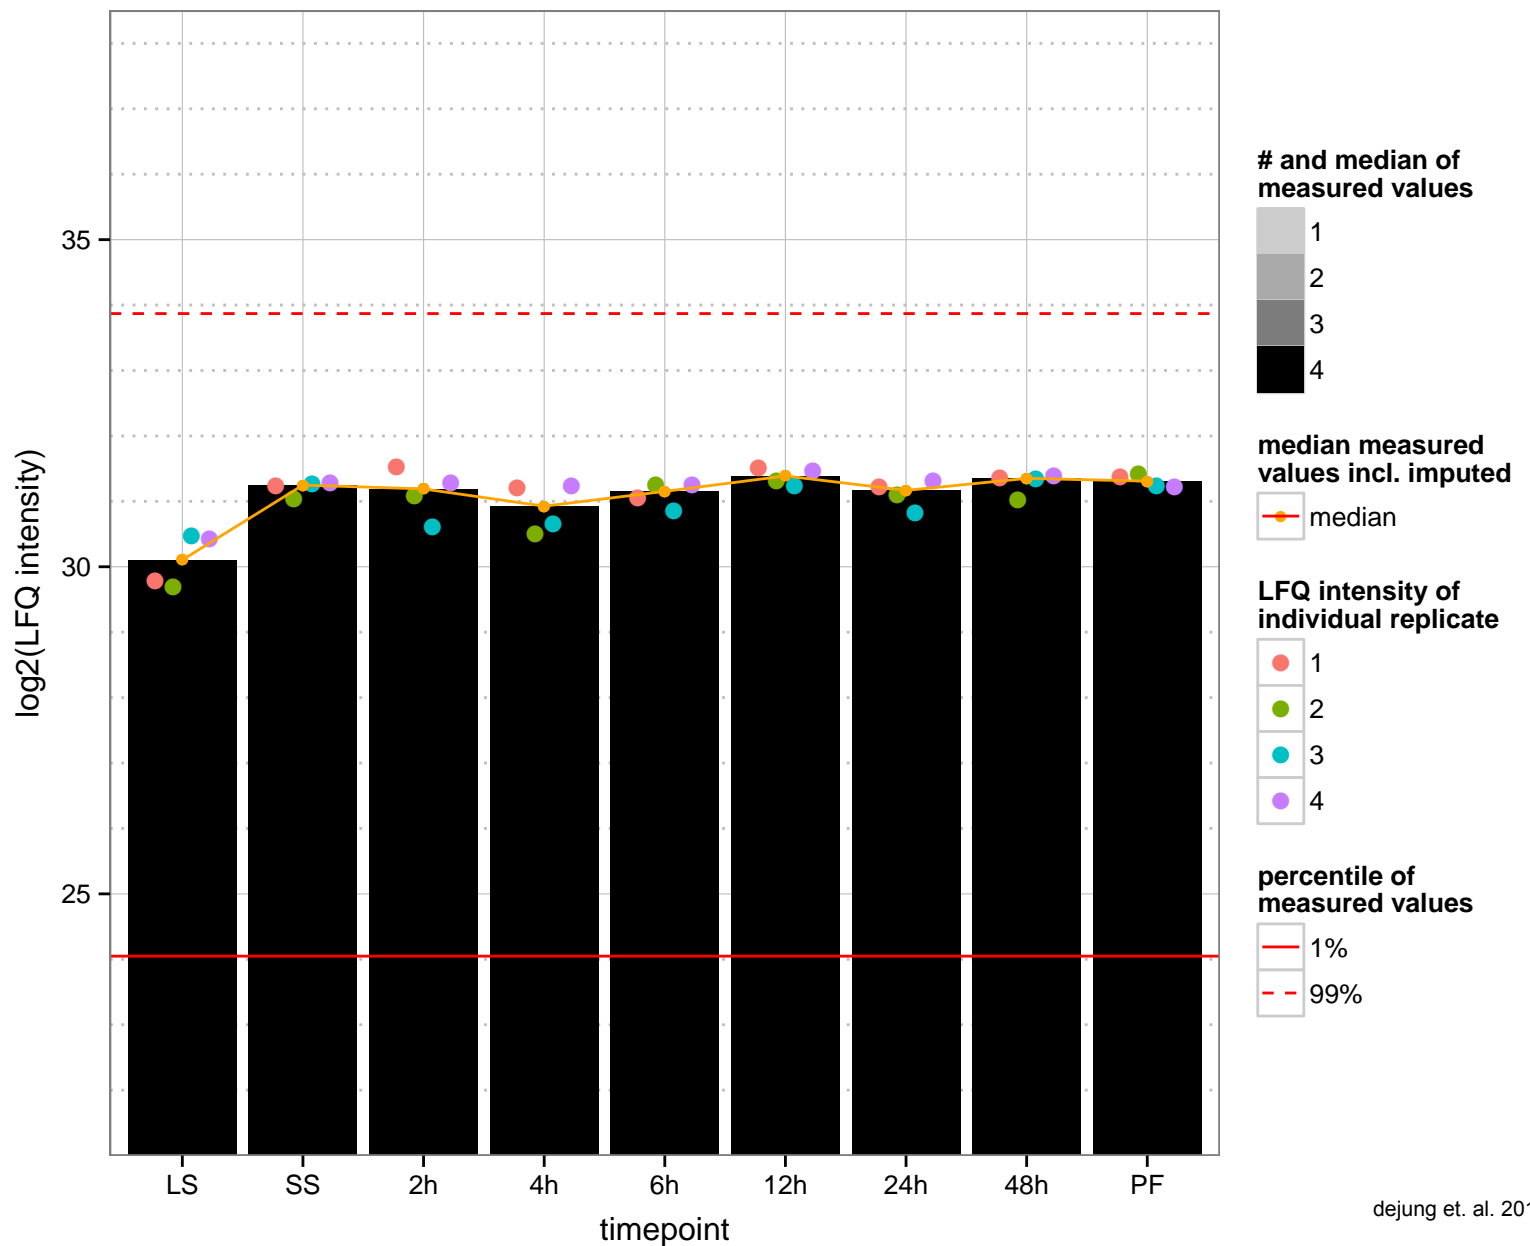

aspartate carbamoyltransferase, putative

Tb927.5.3820

AGOF: amino acid binding, aspartate carbamoyltransferase activity

AGOC: null

AGOP: 'de novo' pyrimidine nucleobase biosynthetic process, cellular amino acid metabolic process

PGOF: amino acid binding, aspartate carbamoyltransferase activity, carboxyl- or carbamoyltransferase activity

PGOC: null

PGOP: 'de novo' pyrimidine nucleobase biosynthetic process, cellular amino acid metabolic process

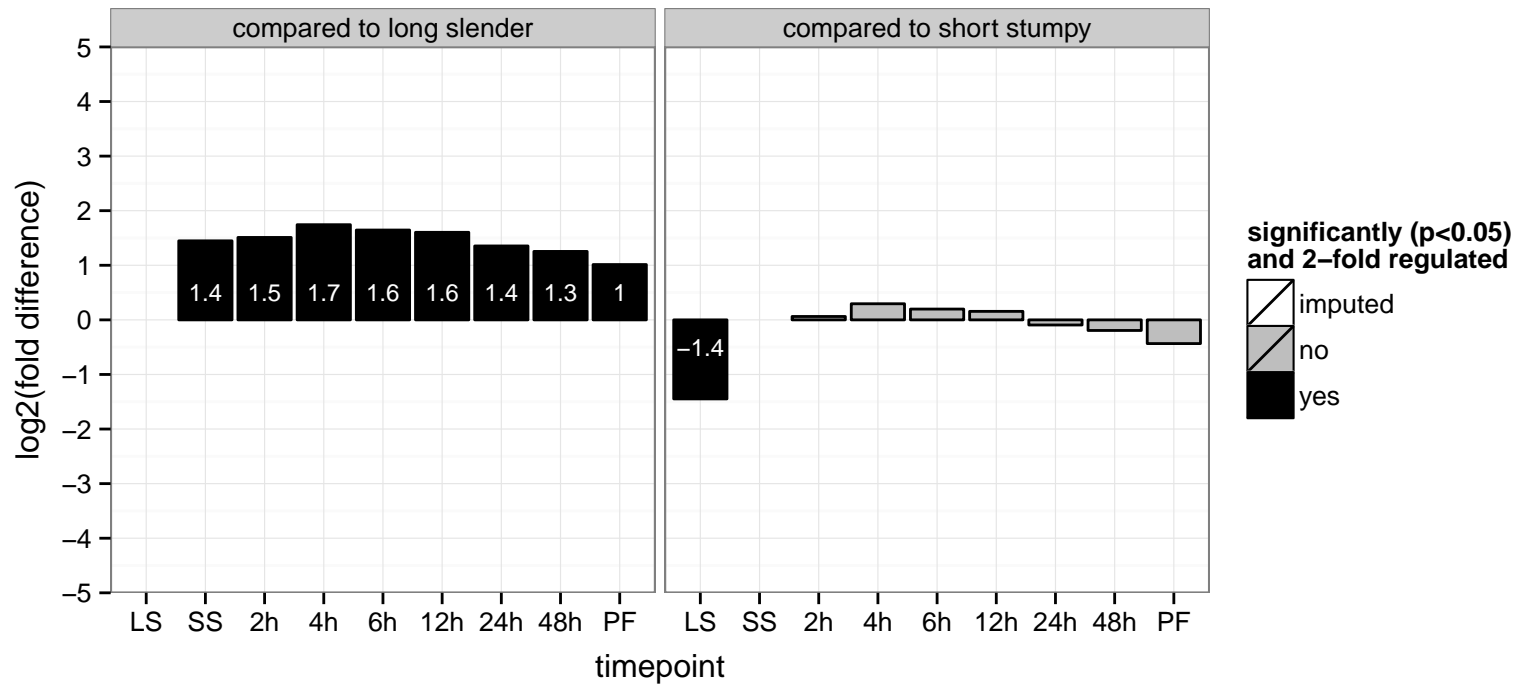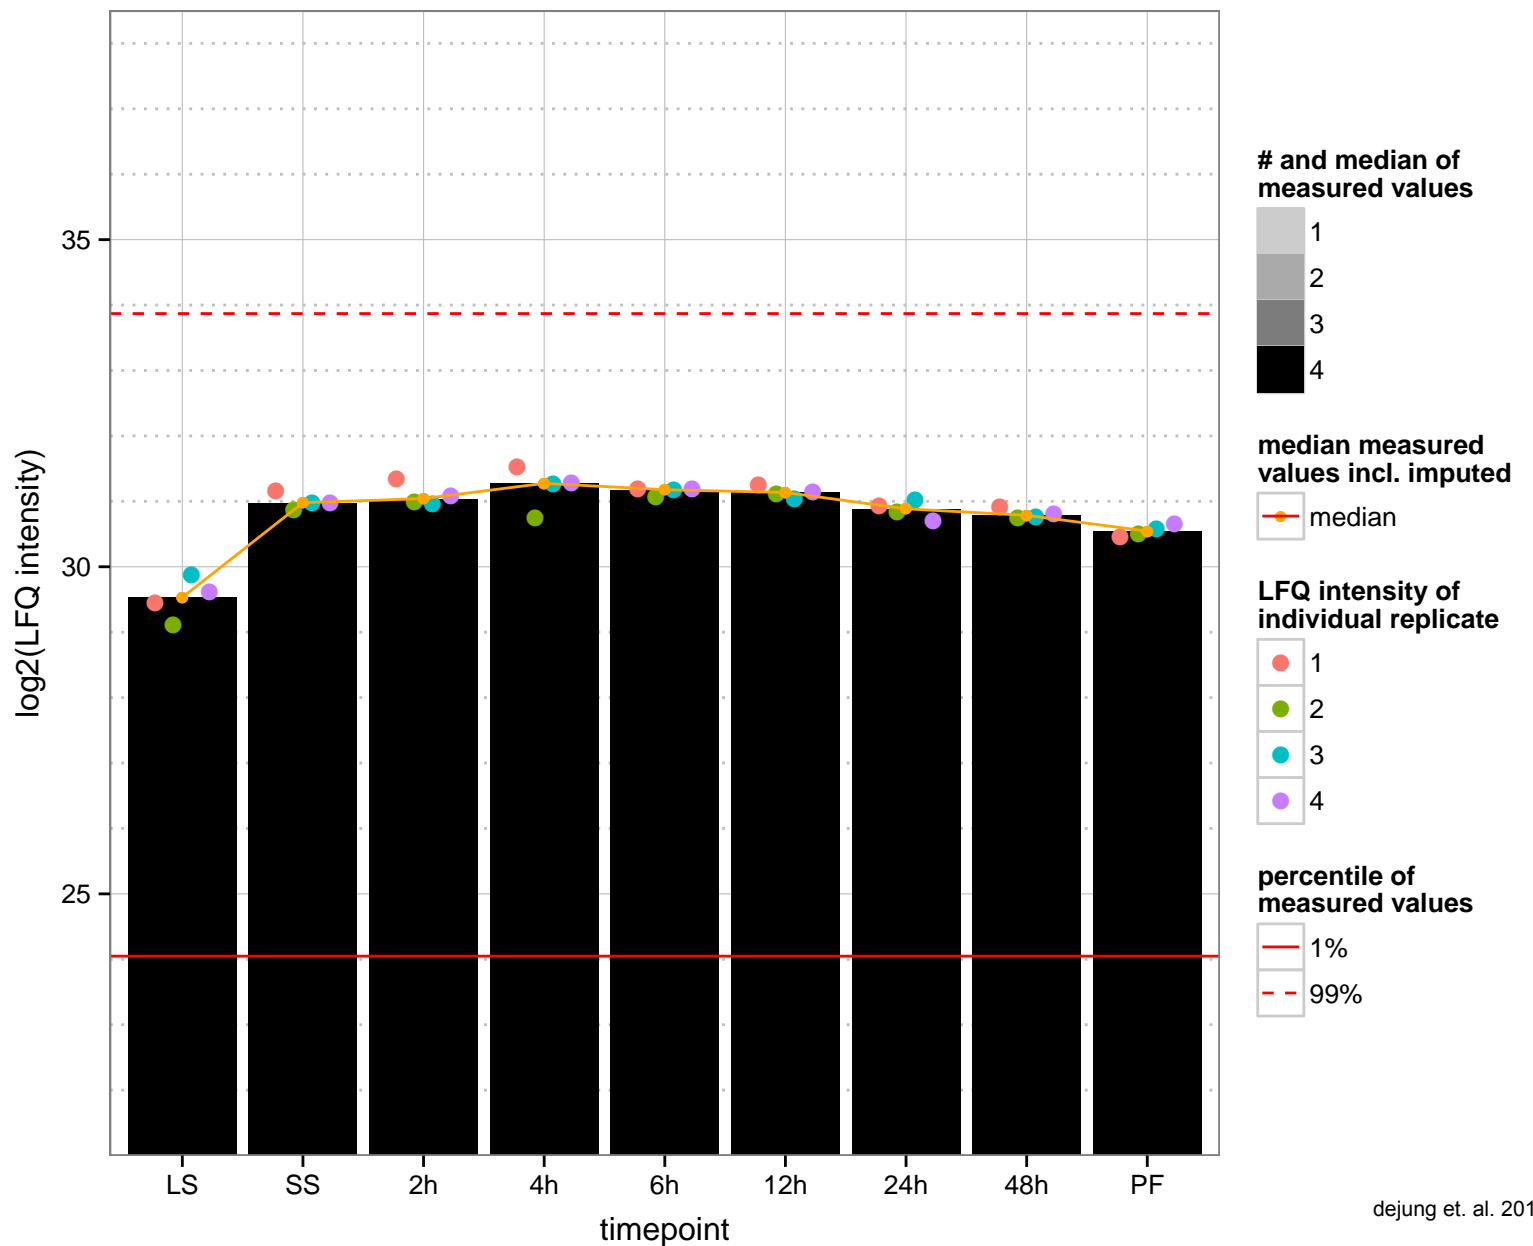

dihydroorotate oxidase

Tb927.5.3830

AGOF: FMN binding, dihydroorotate dehydrogenase activity, dihydroorotate oxidase activity

AGOC: cytoplasm, glycosome

AGOP: 'de novo' pyrimidine nucleobase biosynthetic process, UMP biosynthetic process, fumarate metabolic process

PGOF: dihydroorotate dehydrogenase activity, dihydroorotate oxidase activity

PGOC: cytoplasm

PGOP: UMP biosynthetic process, oxidation-reduction process

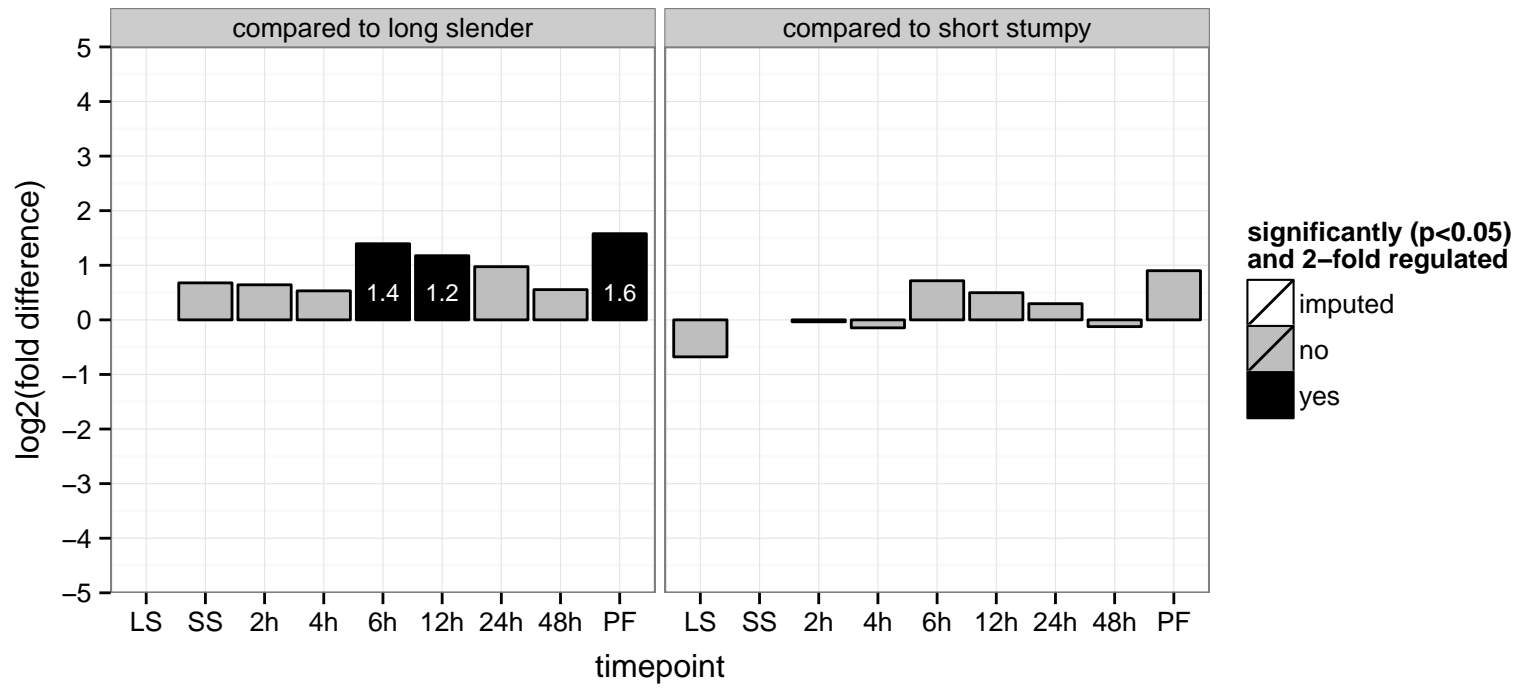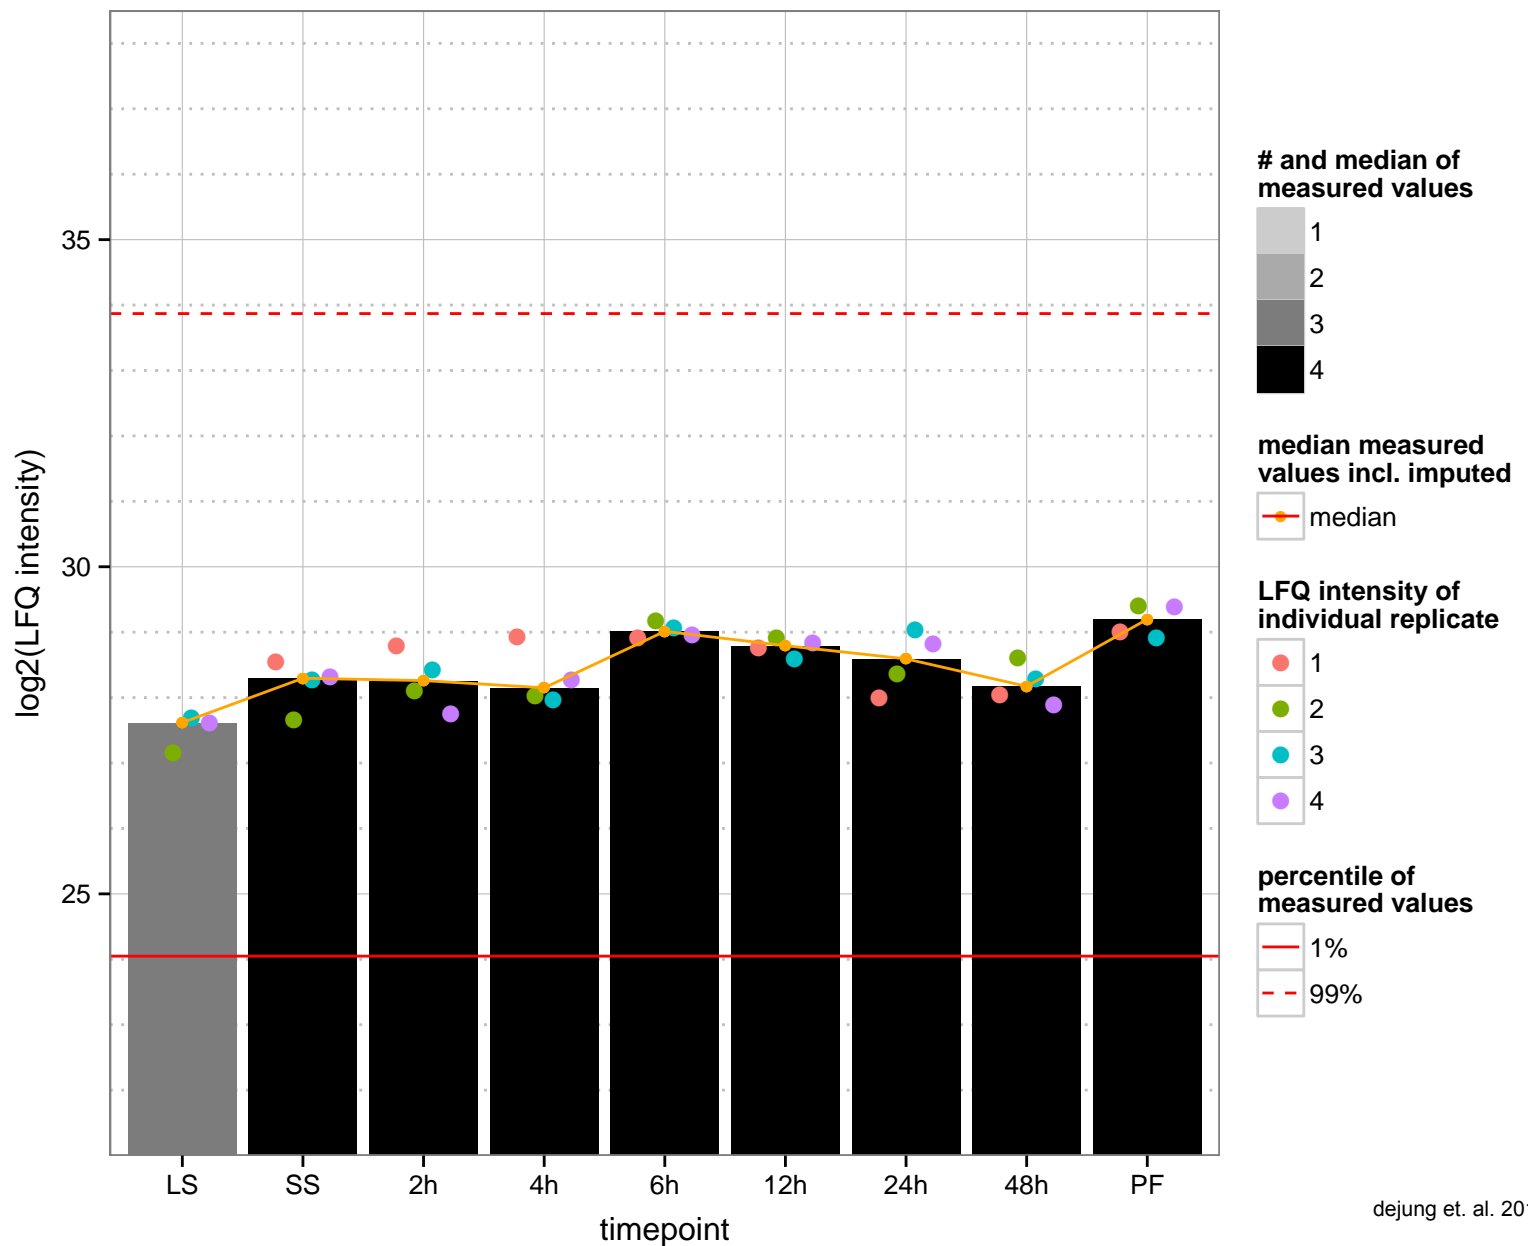

hypothetical protein, conserved  
 Tb927.5.3850  
 AGOF: null  
 AGOC: null  
 AGOP: null  
 PGOF: exonuclease activity, nucleic acid binding  
 PGO: intracellular  
 PGOP: null

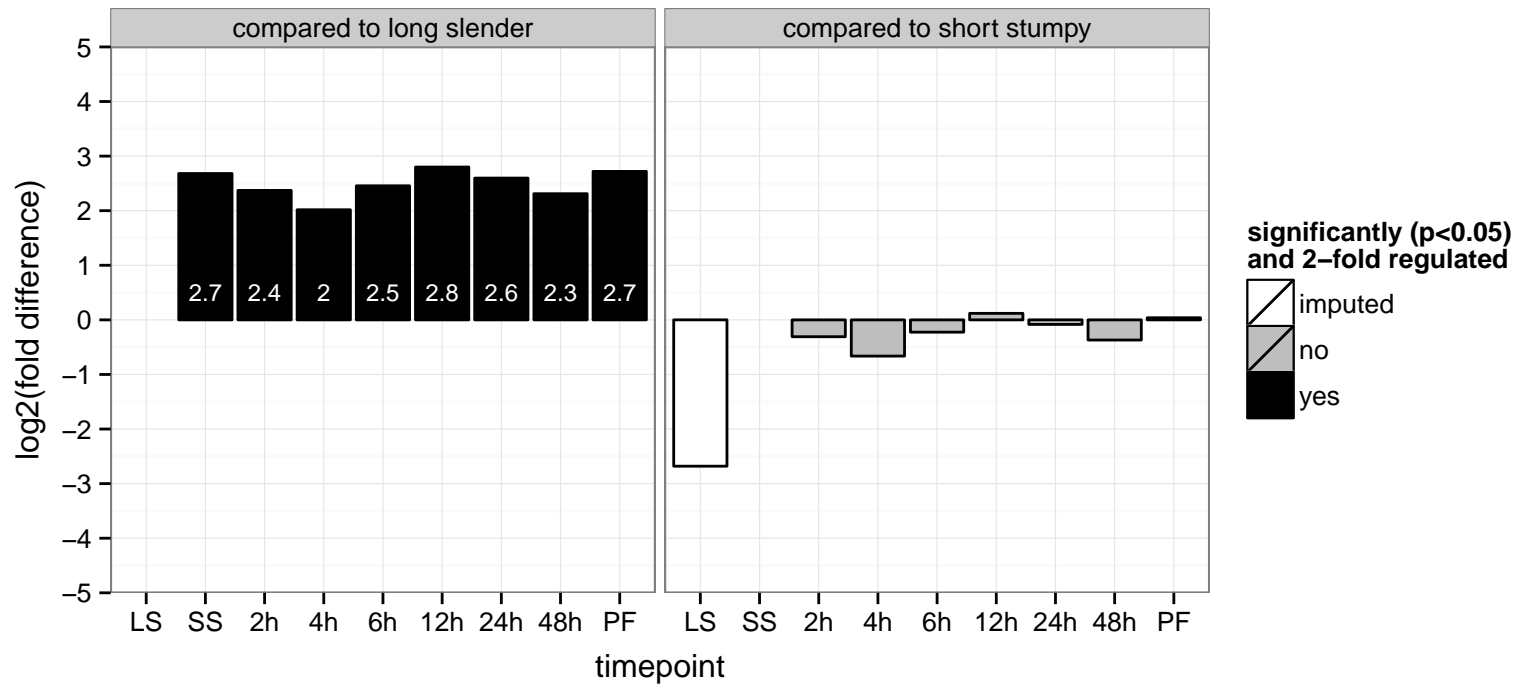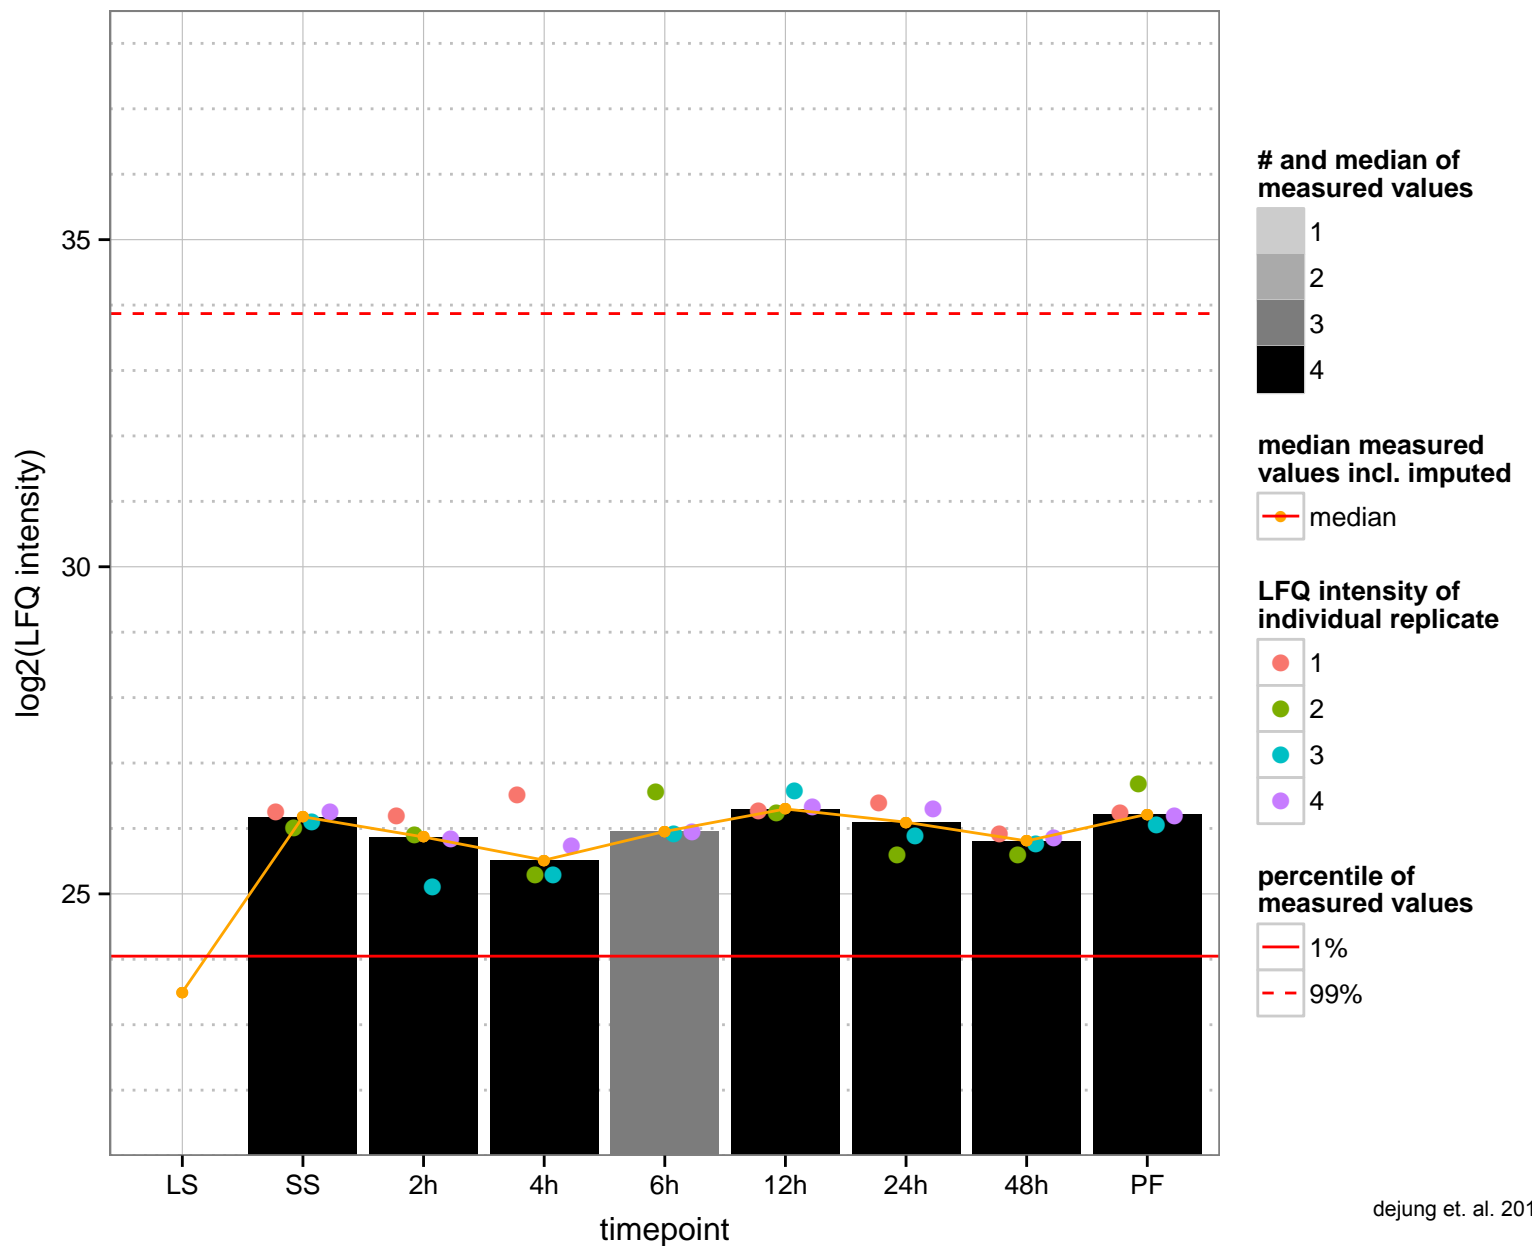

hypothetical protein, conserved  
 Tb927.5.3900  
 AGOF: null  
 AGOC: null  
 AGOP: null  
 PGO: null  
 PGOC: null  
 PGOP: null

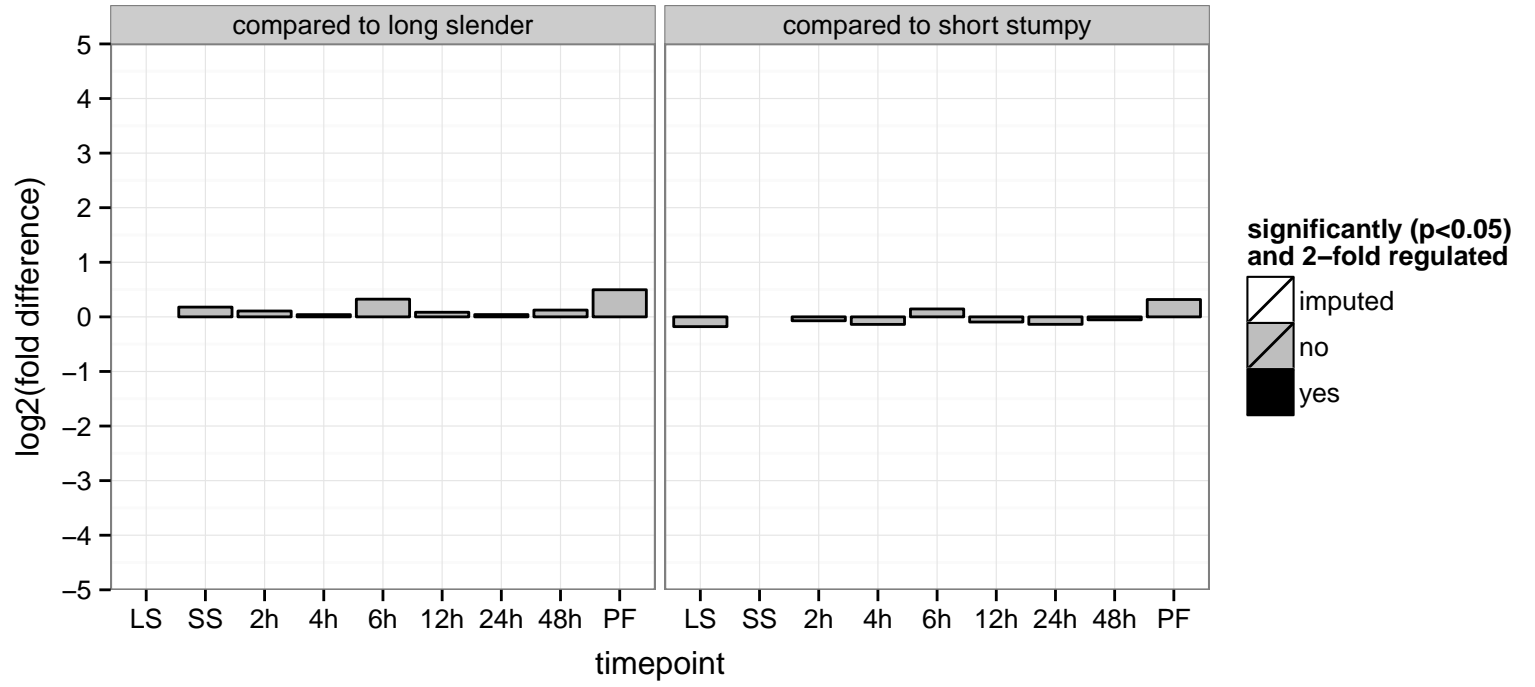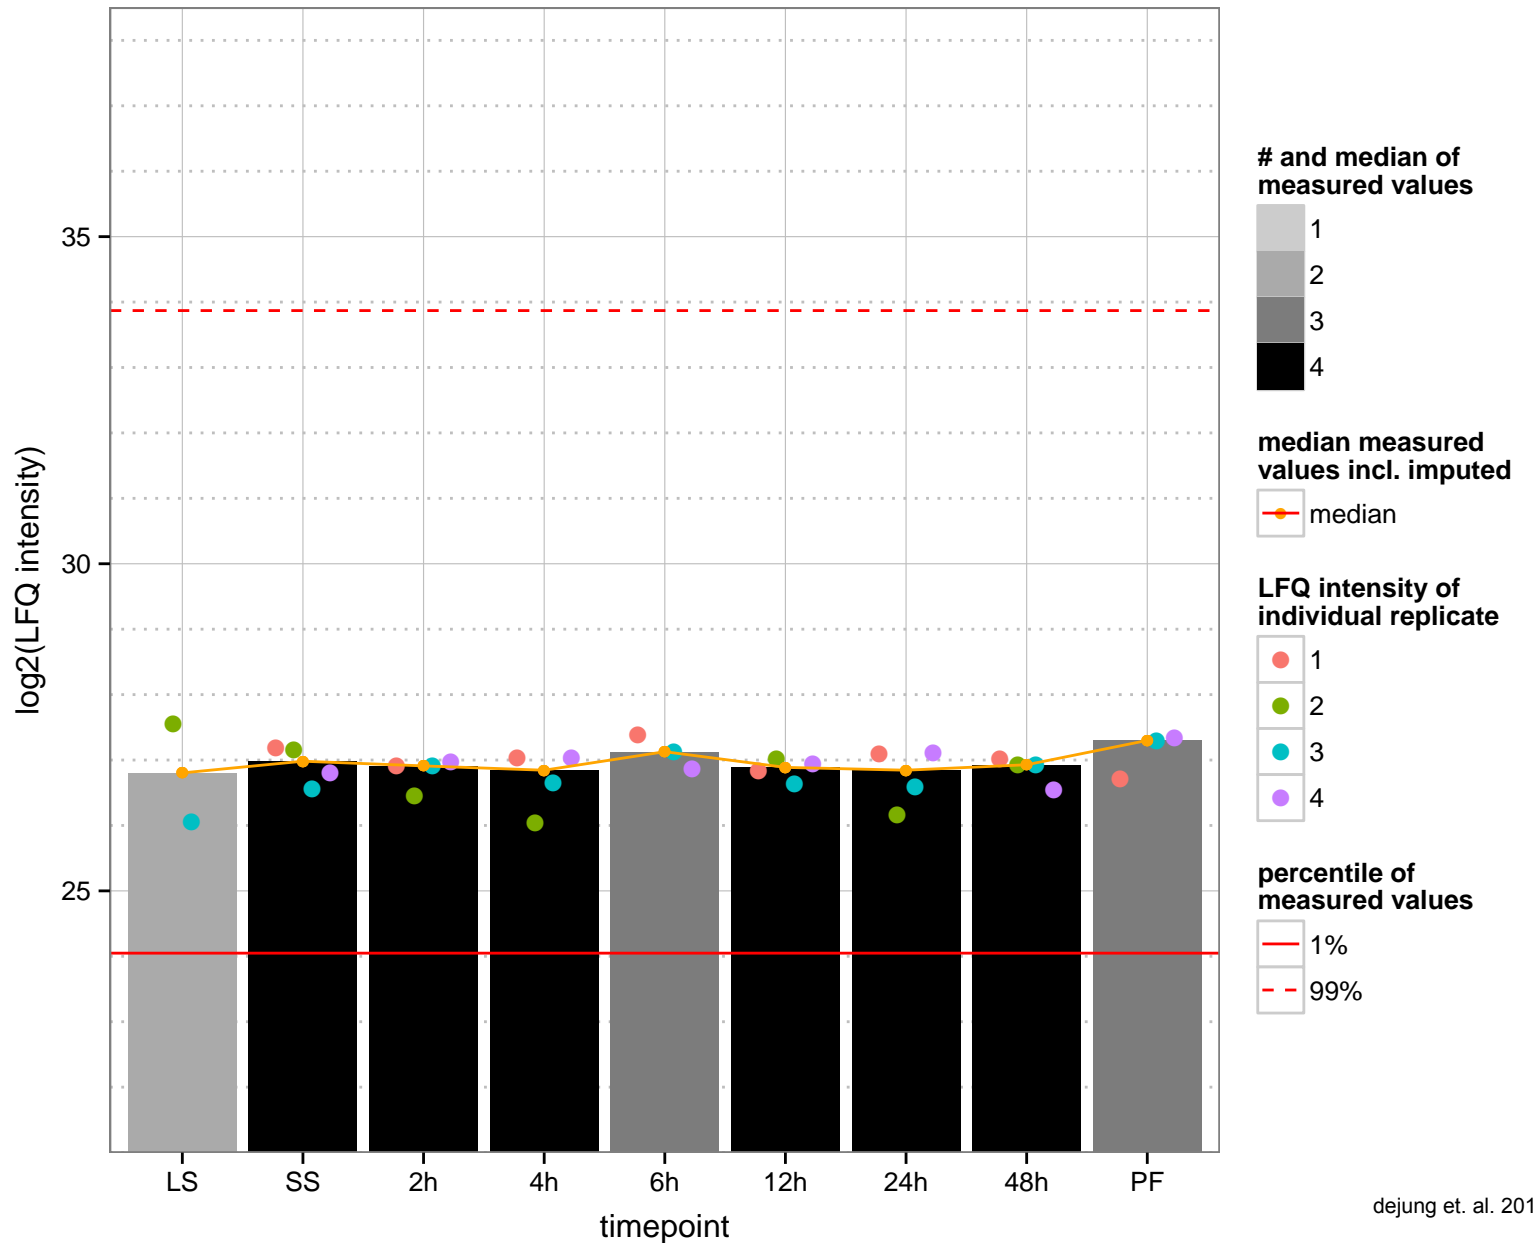

peroxisome assembly protein, putative

Tb927.5.3920

AGOF: ATP binding, ATPase activity

AGOC: null

AGOP: peroxisome organization

PGOF: ATP binding, nucleoside-triphosphatase activity, nucleotide binding

PGOC: null

PGOP: null

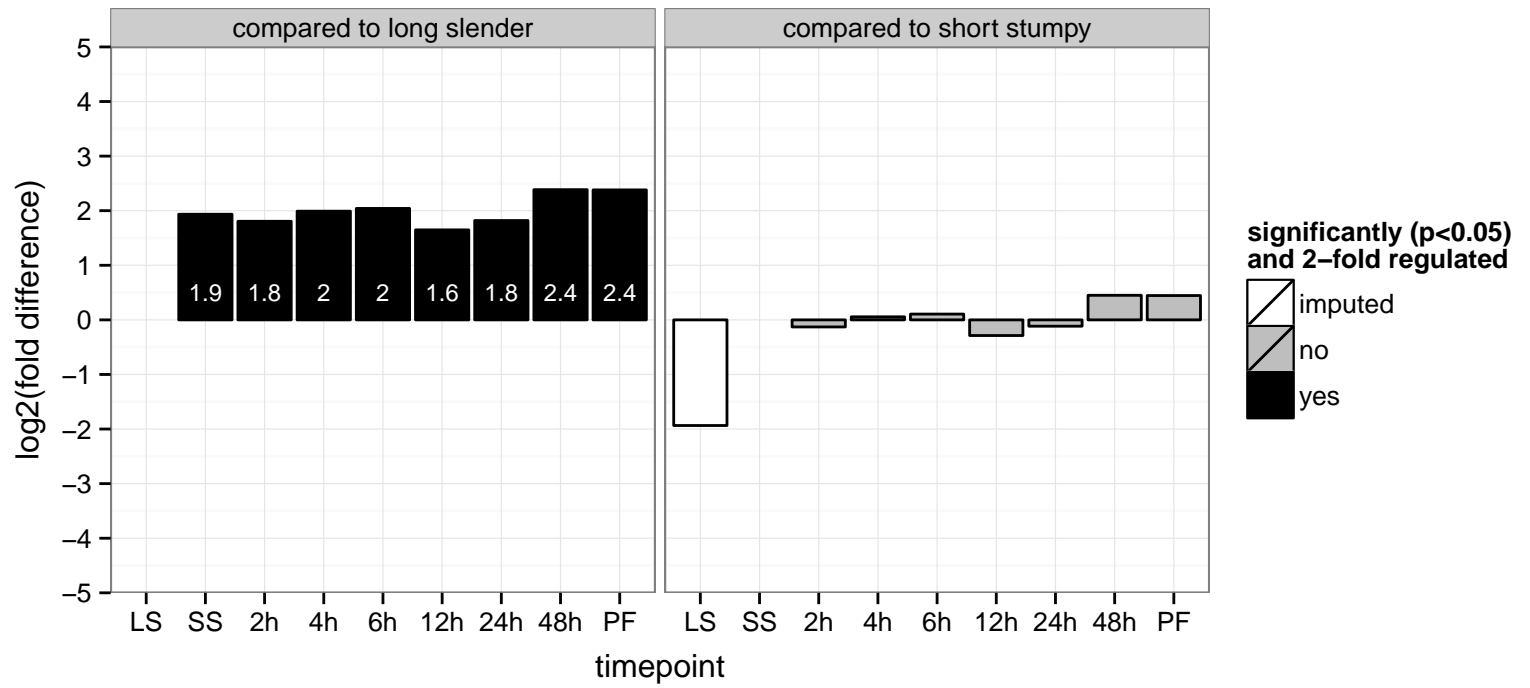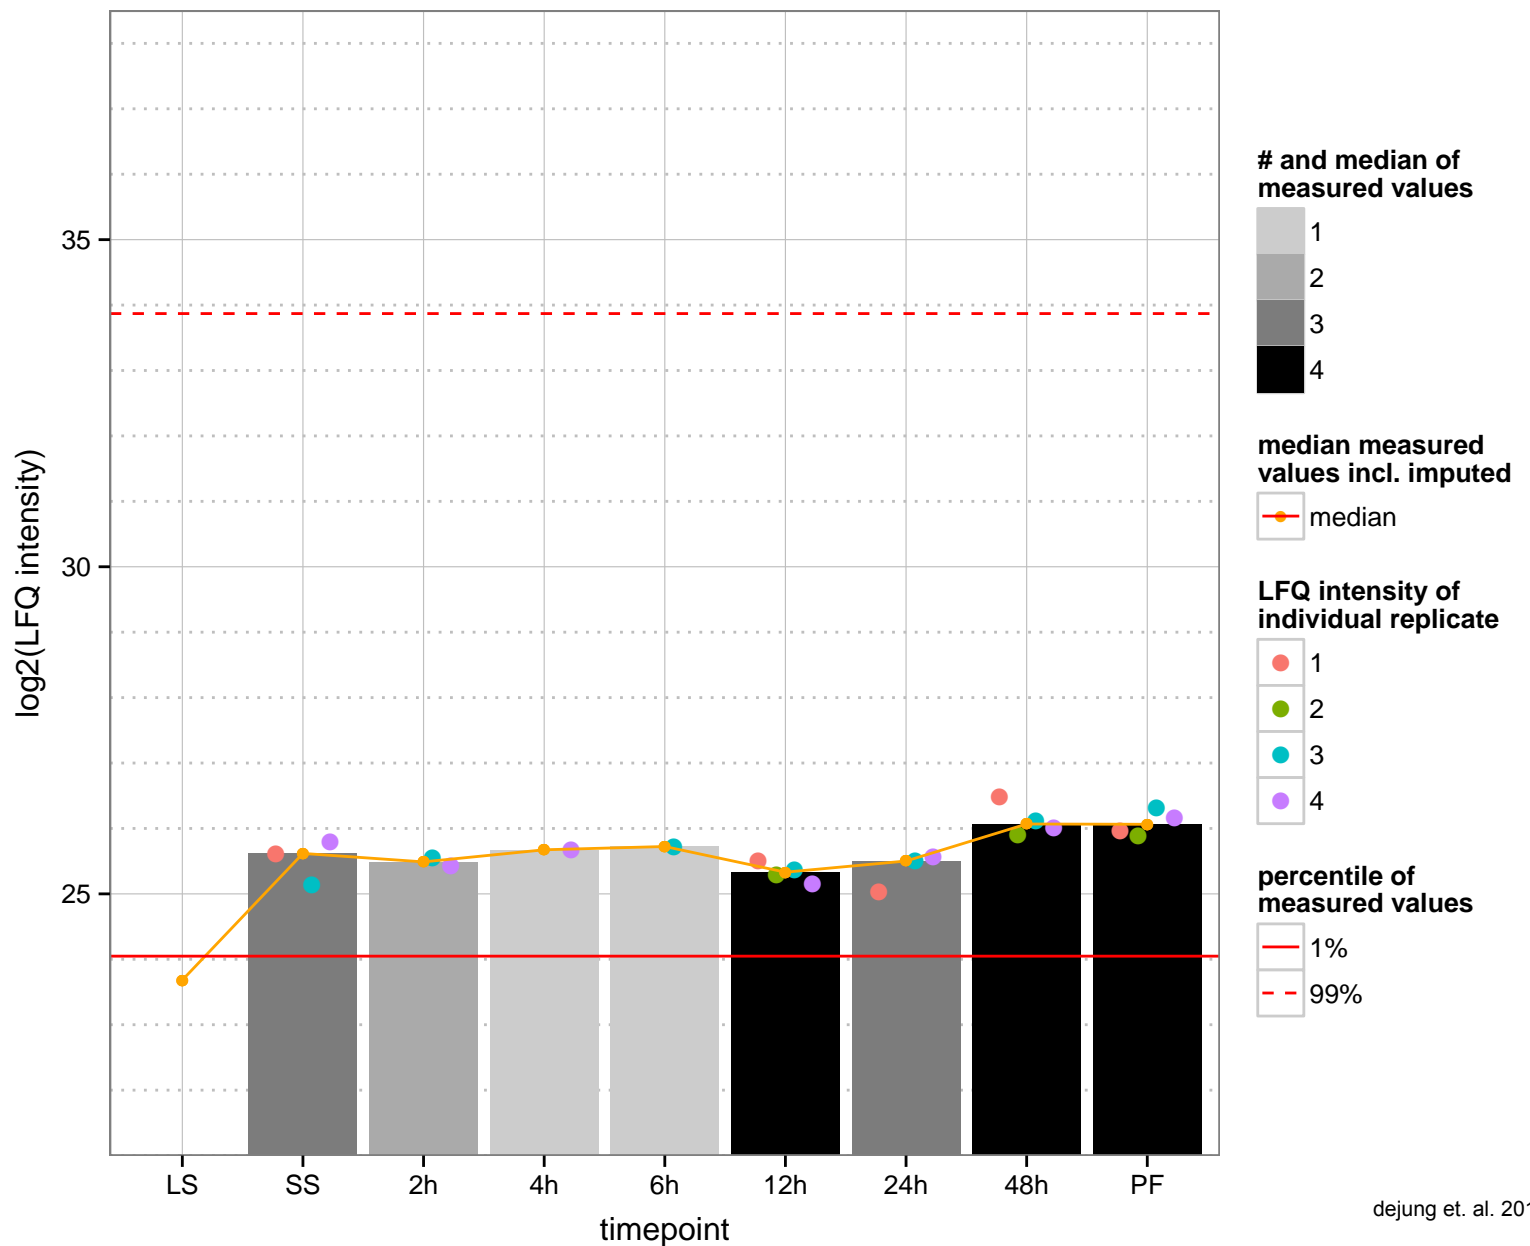

helicase, putative

Tb927.5.3940

AGOF: ATP binding, ATP-dependent helicase activity, helicase activity, nucleic acid binding

AGOC: null

AGOP: null

PGOF: ATP binding, ATP-dependent helicase activity, helicase activity, nucleic acid binding

PGOC: null

PGOP: null

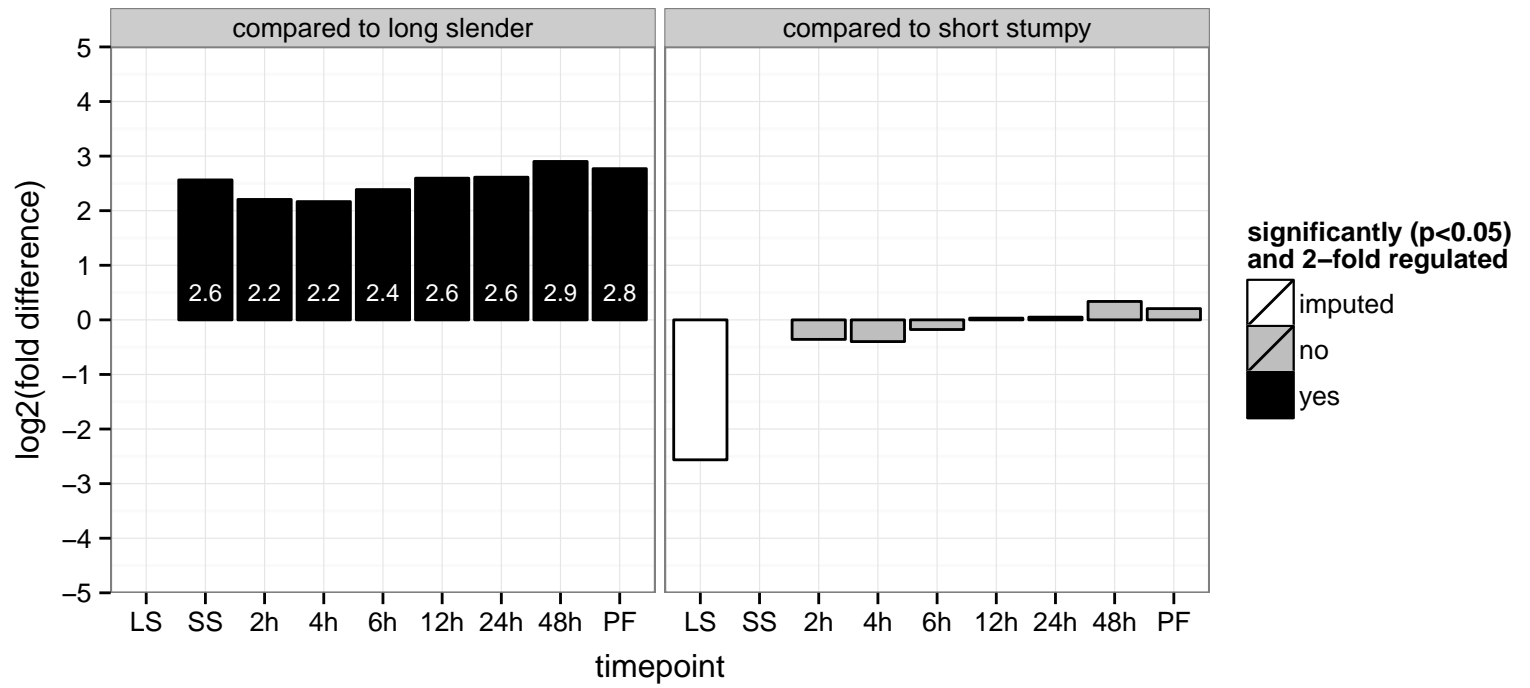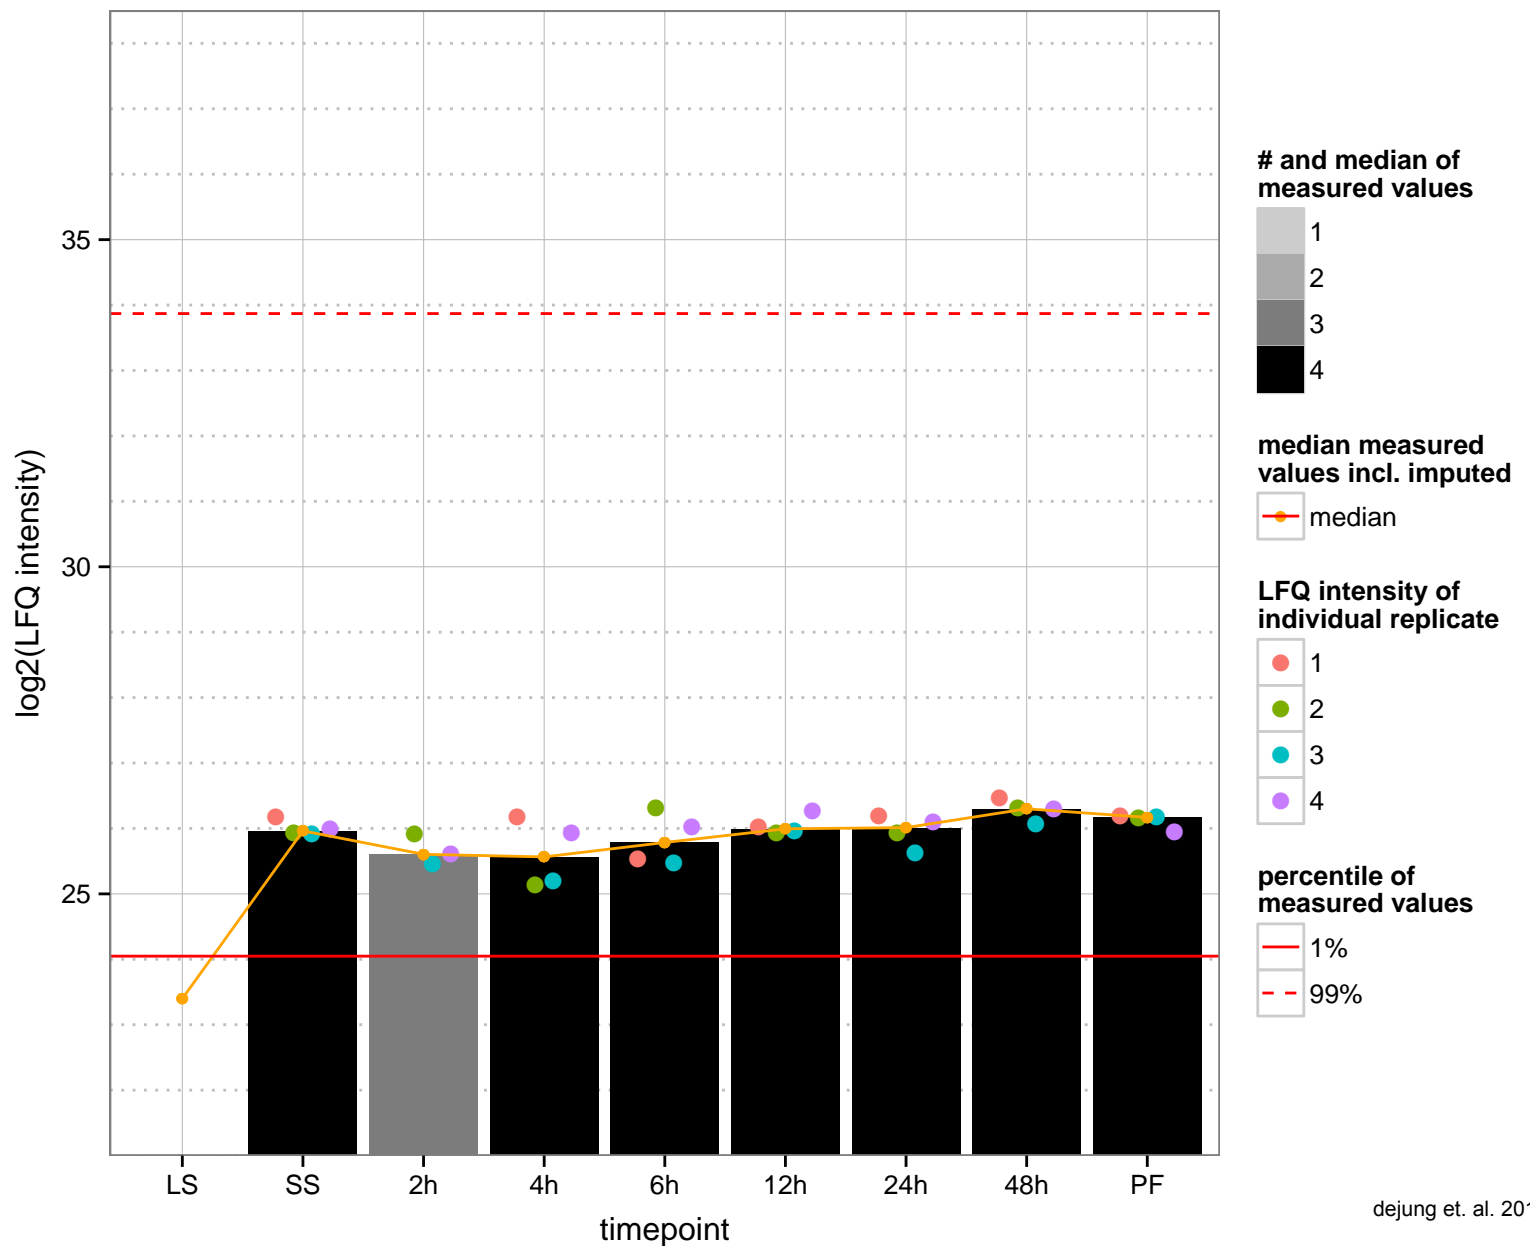



adenylate kinase, putative (ADKE)

Tb927.5.3970

AGOF: ATP binding, adenylate kinase activity

AGOC: axoneme

AGOP: nucleobase-containing compound metabolic process, nucleobase-containing small molecule interconversion

PGOF: ATP binding, cAMP-dependent protein kinase regulator activity, nucleobase-containing compound kinase activity

PGOC: null

PGOP: nucleobase-containing compound metabolic process, signal transduction

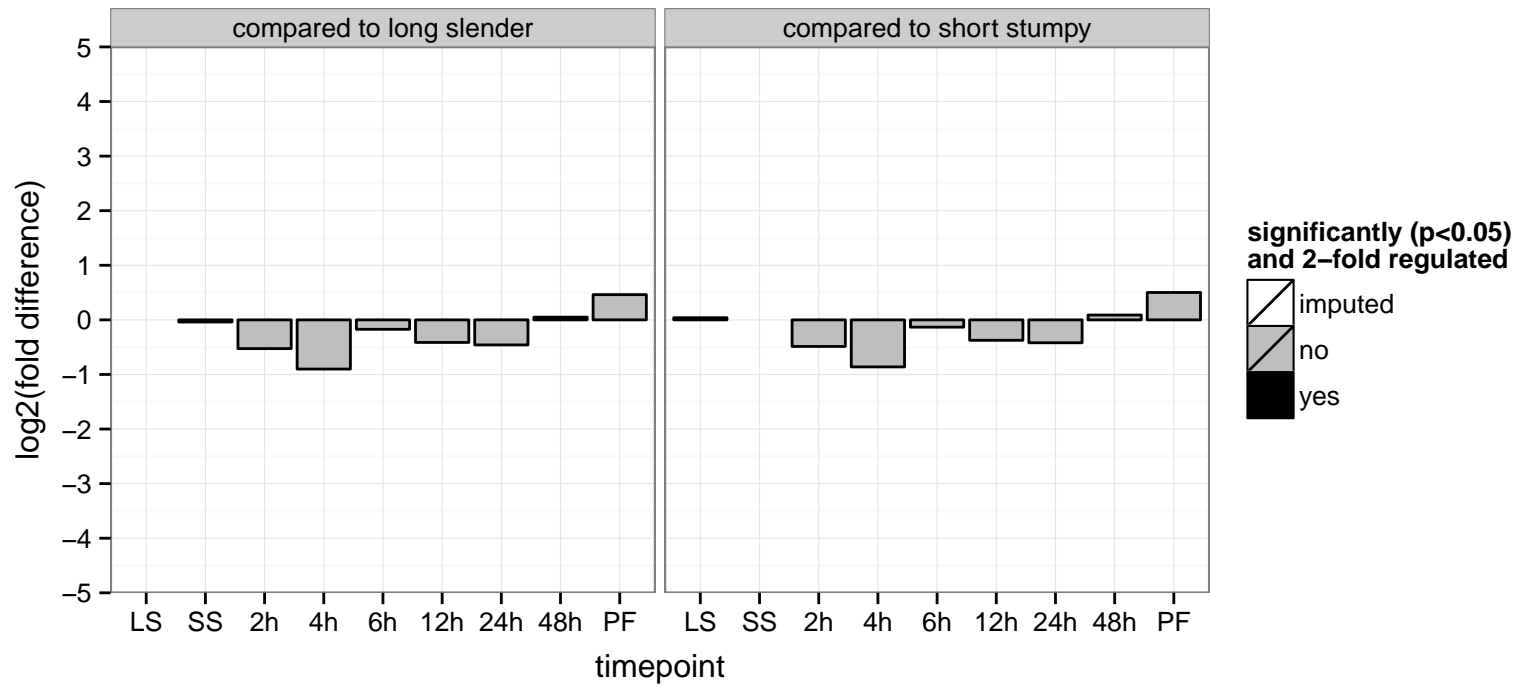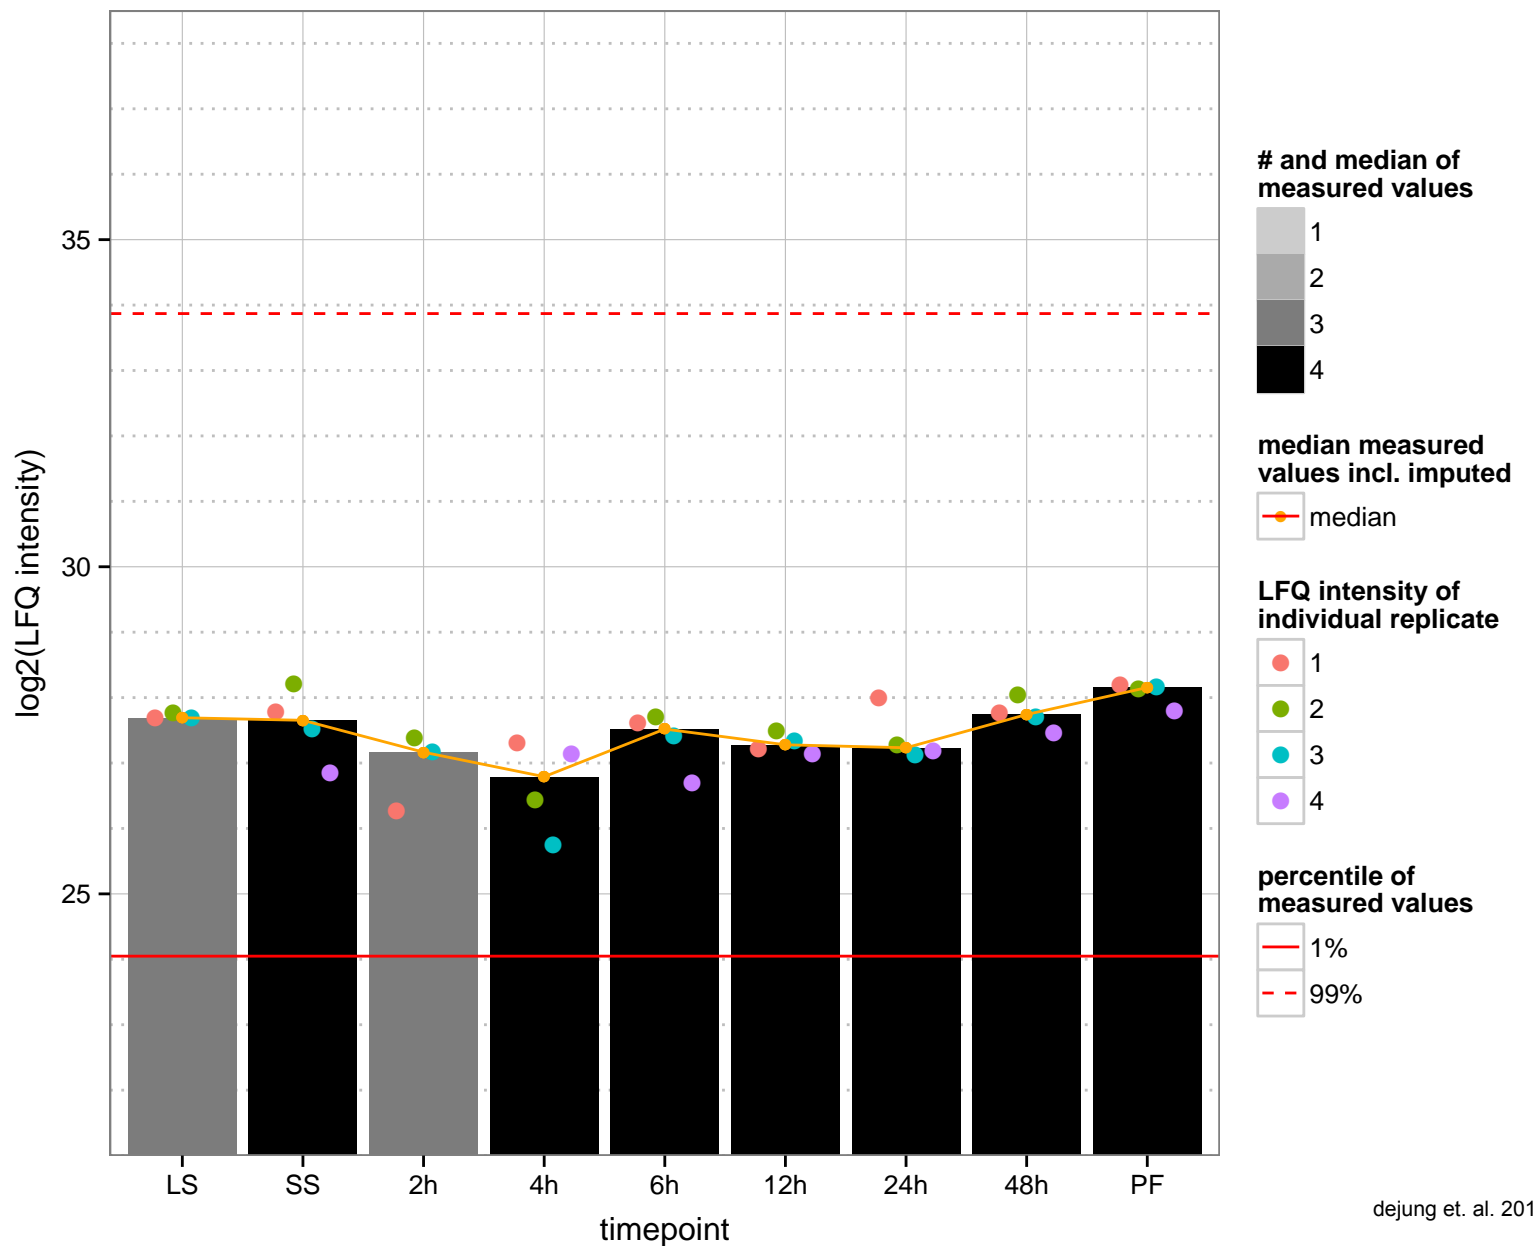

hypothetical protein, conserved  
 Tb927.5.4100  
 AGOF: null  
 AGOC: null  
 AGOP: null  
 PGOF: protein binding  
 PGO: null  
 PGOP: null

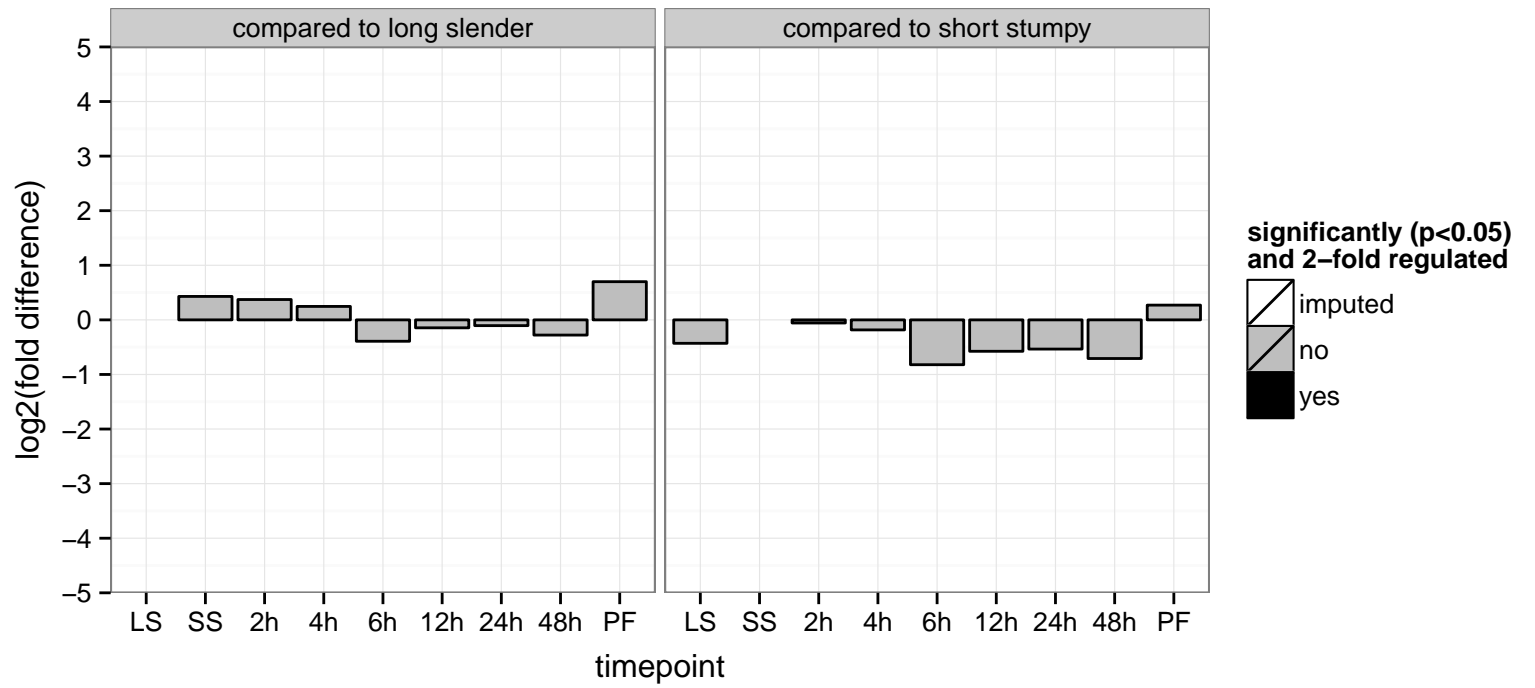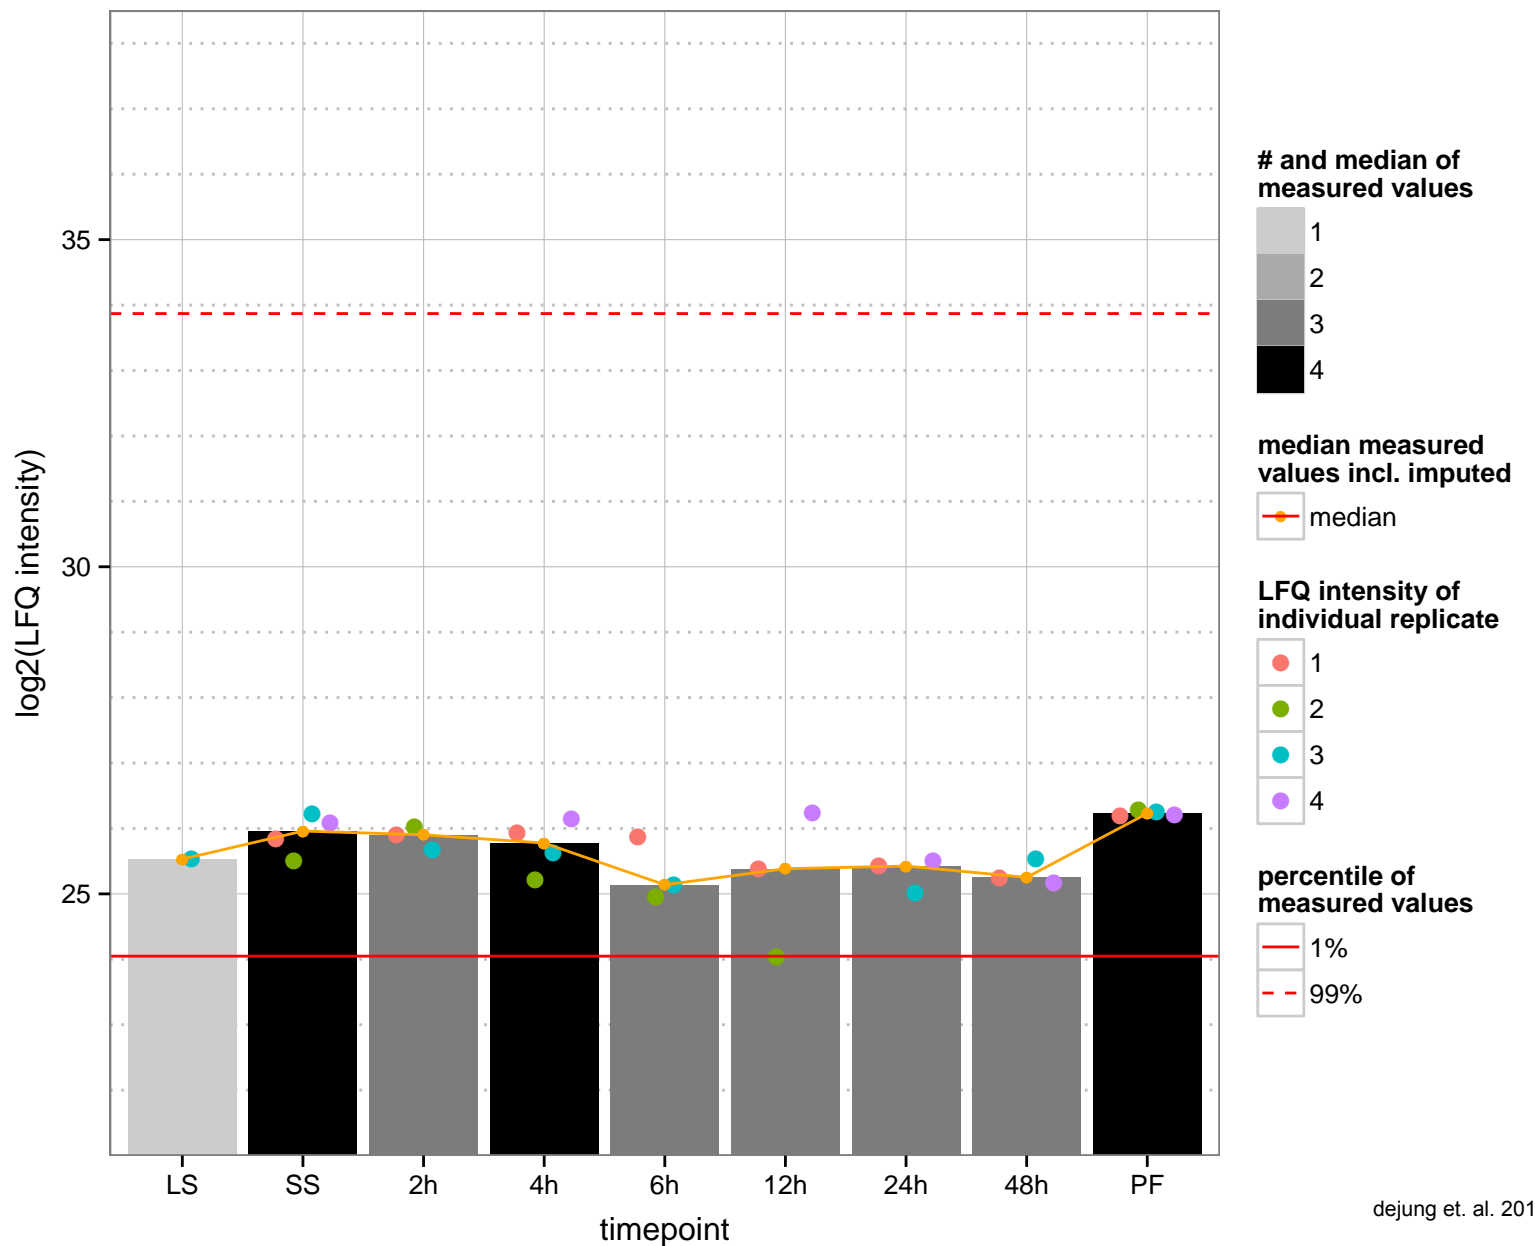

hypothetical protein, conserved  
 Tb927.5.4150  
 AGOF: null  
 AGOC: null  
 AGOP: null  
 PGO: null  
 PGOC: null  
 PGOP: null

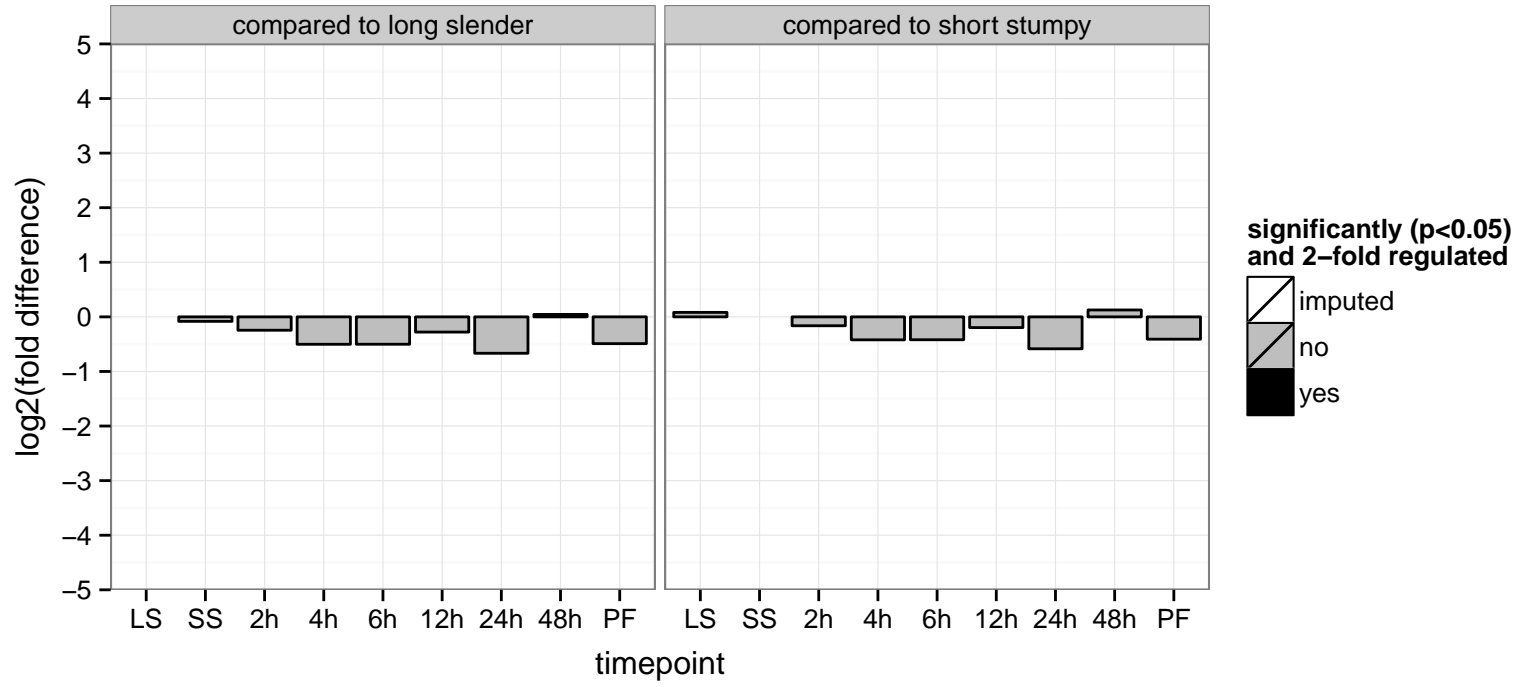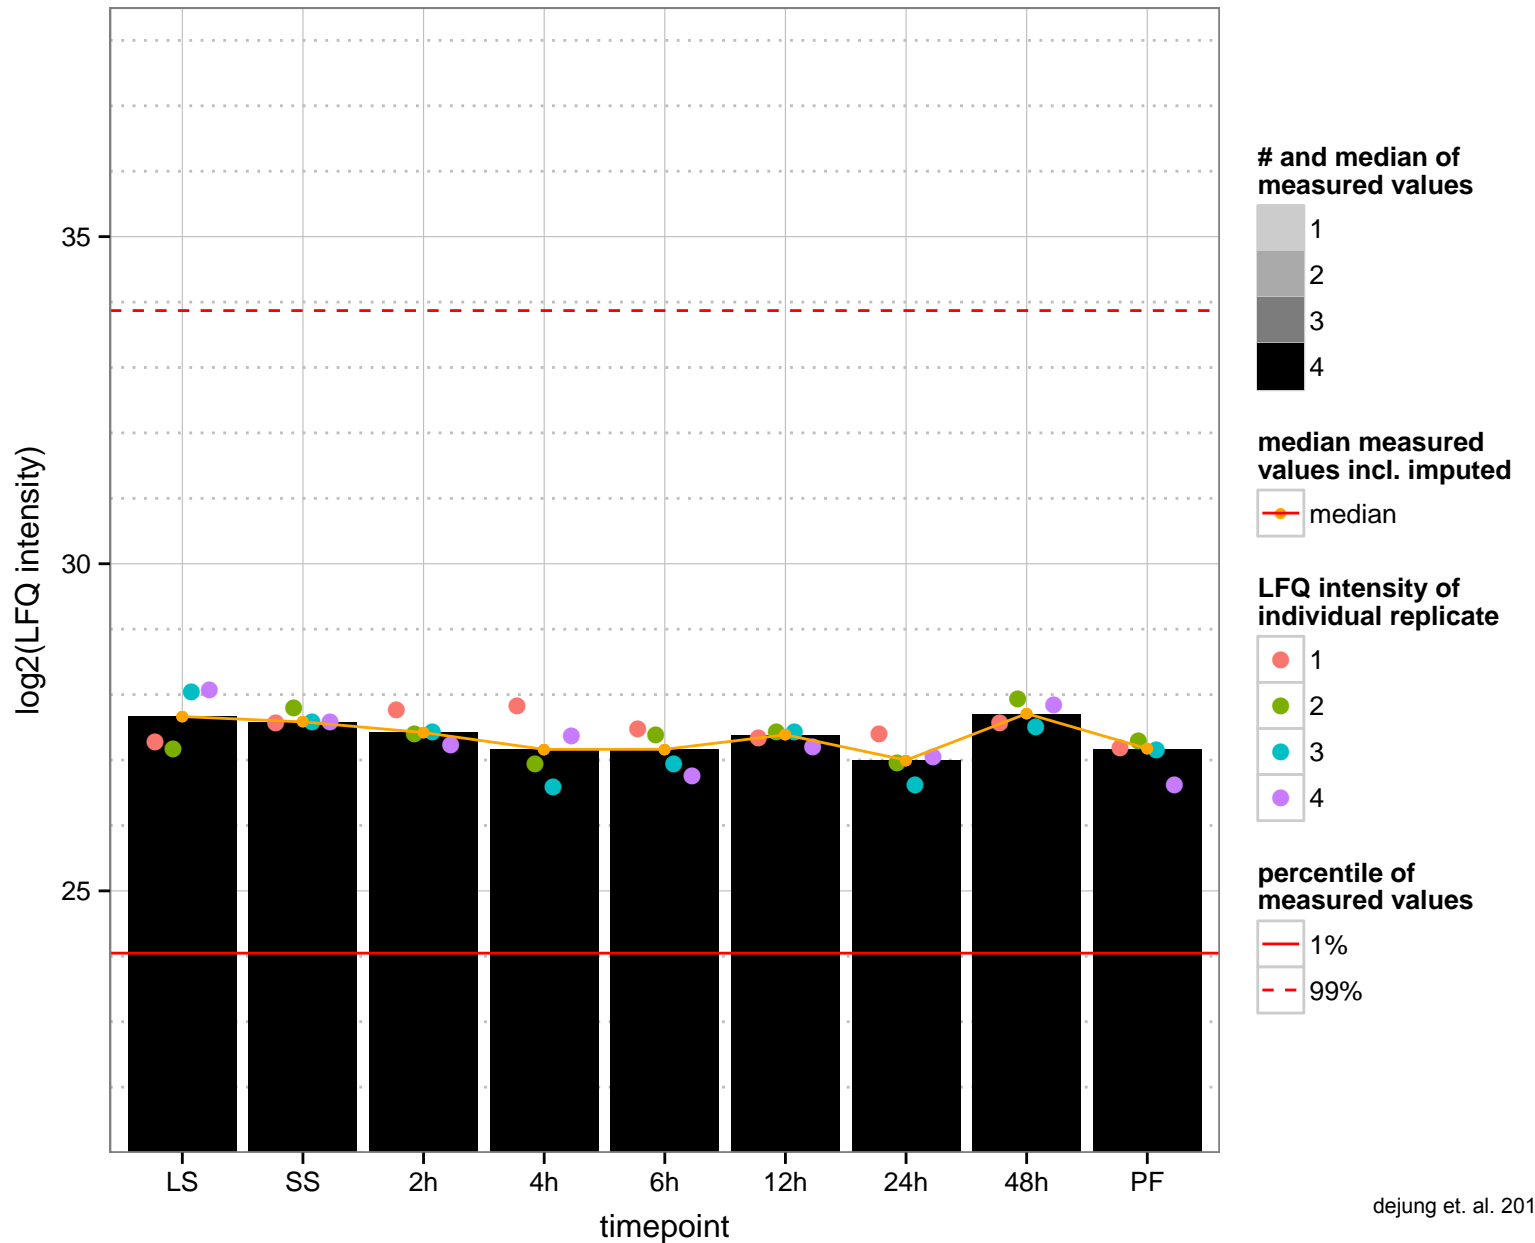

histone H4, putative  
 Tb927.5.4260;Tb927.5.4250;Tb927.5.4240;Tb927.5.4230;Tb927.5.4220;Tb927.5.4210;Tb927.5.4200;Tb927.5.4190;Tb927.5.  
 AGOF: DNA binding  
 AGOC: nucleosome, nucleus  
 AGOP: nucleosome assembly  
 PGO: null, DNA binding  
 PGO: null, nucleosome, nucleus  
 PGO: null, nucleosome assembly

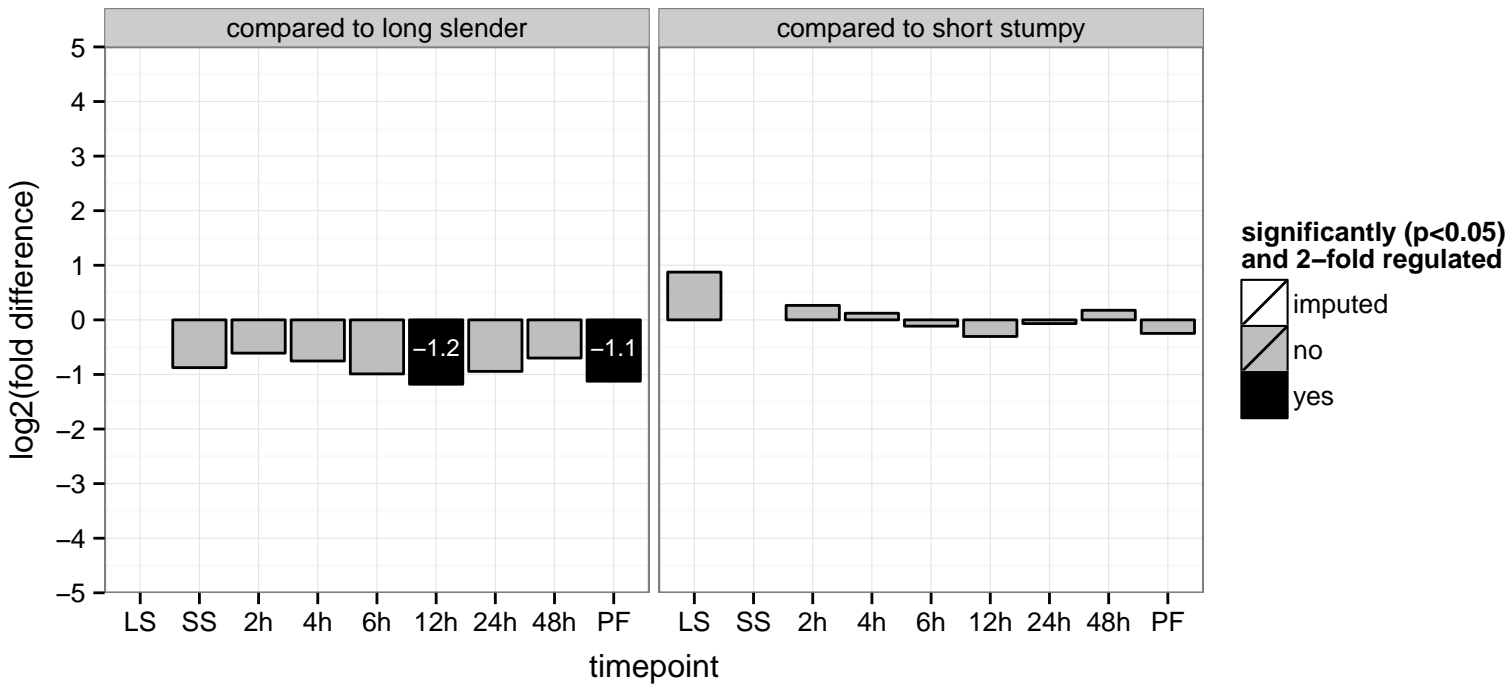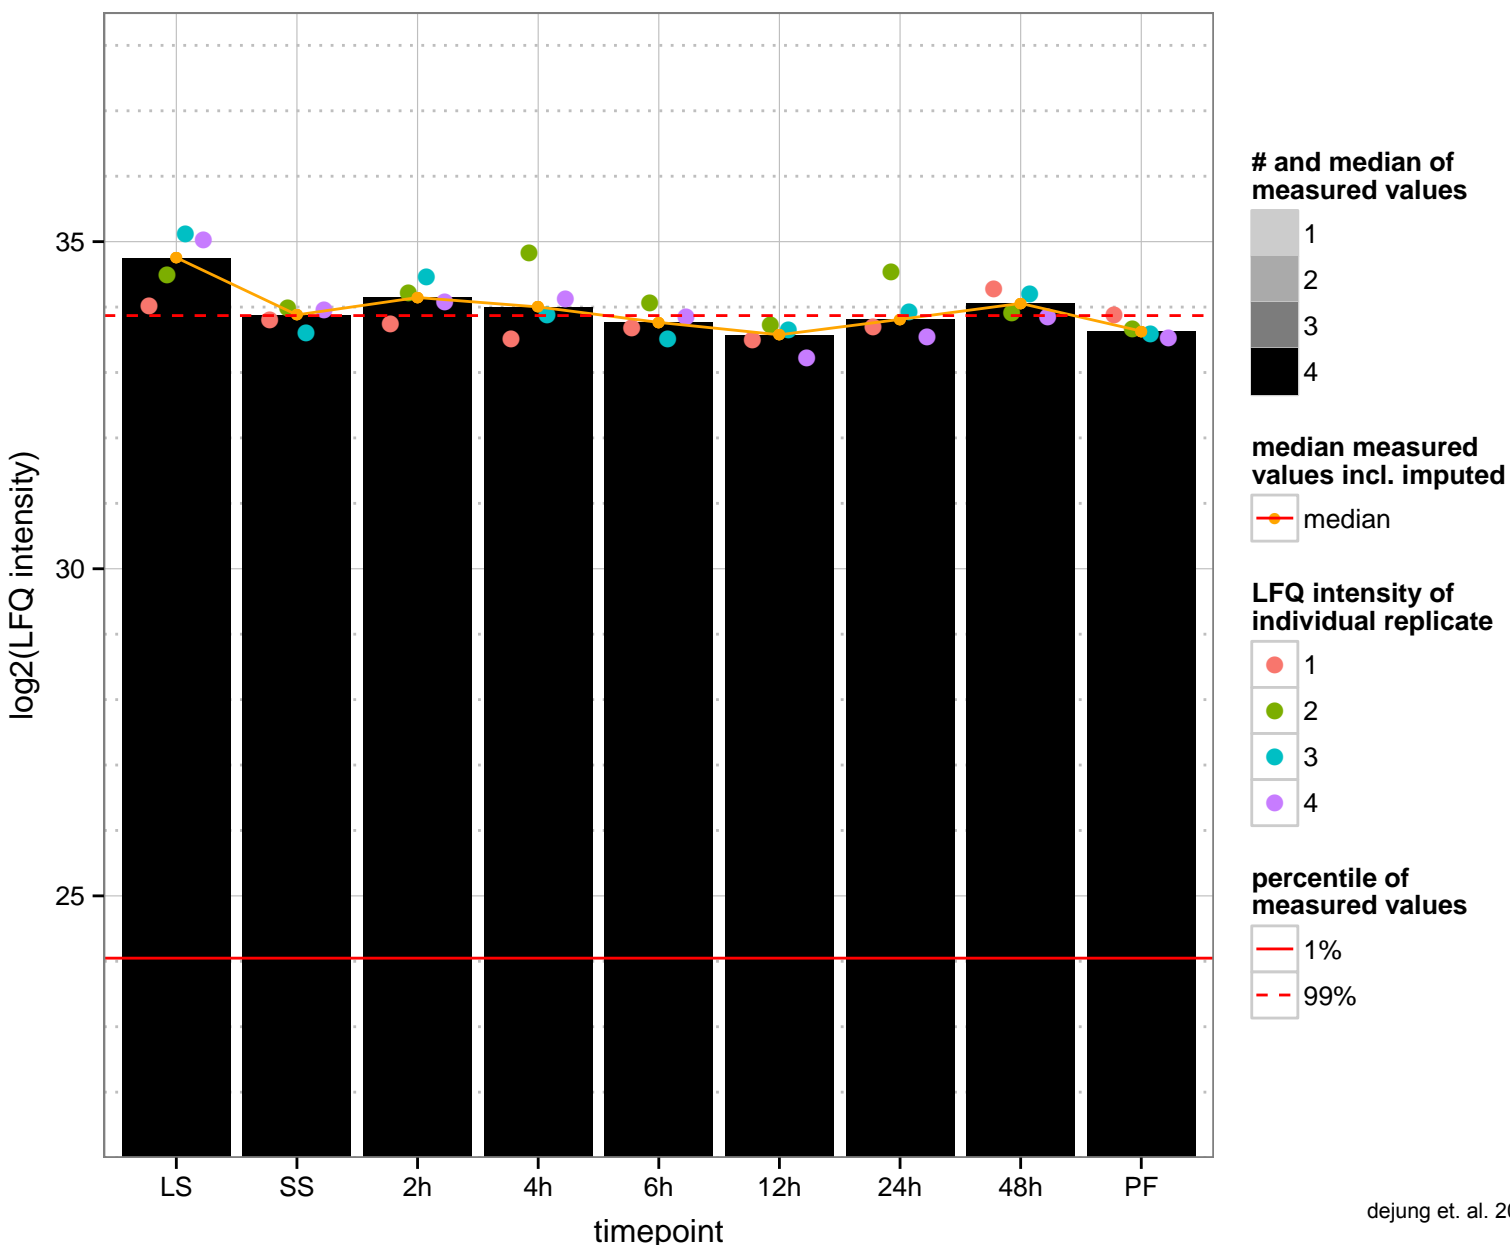

ATP-dependent DEAD/H RNA helicase, putative

Tb927.5.4270

AGOF: ATP binding, ATP-dependent helicase activity, helicase activity, nucleic acid binding

AGOC: null

AGOP: nucleobase-containing compound metabolic process

PGOF: ATP binding, ATP-dependent helicase activity, helicase activity, nucleic acid binding

PGOC: null

PGOP: null

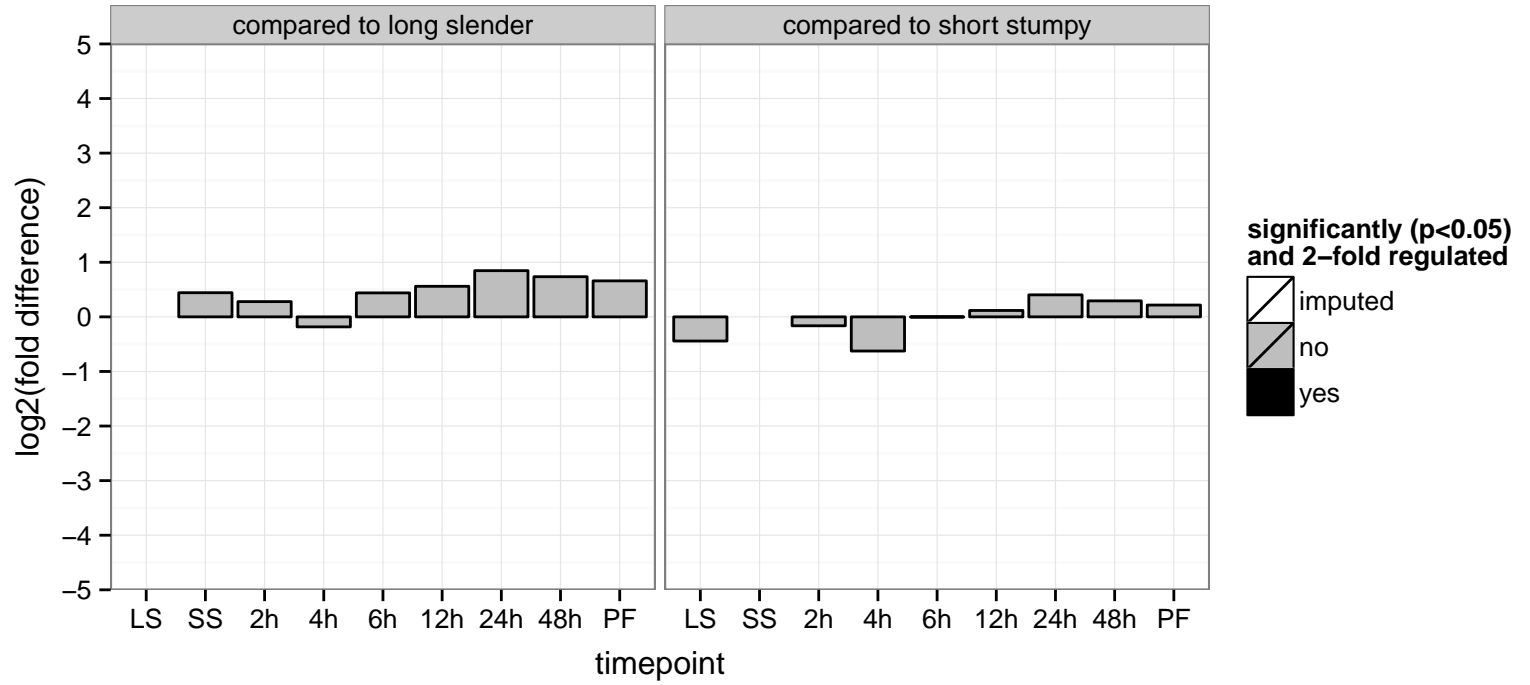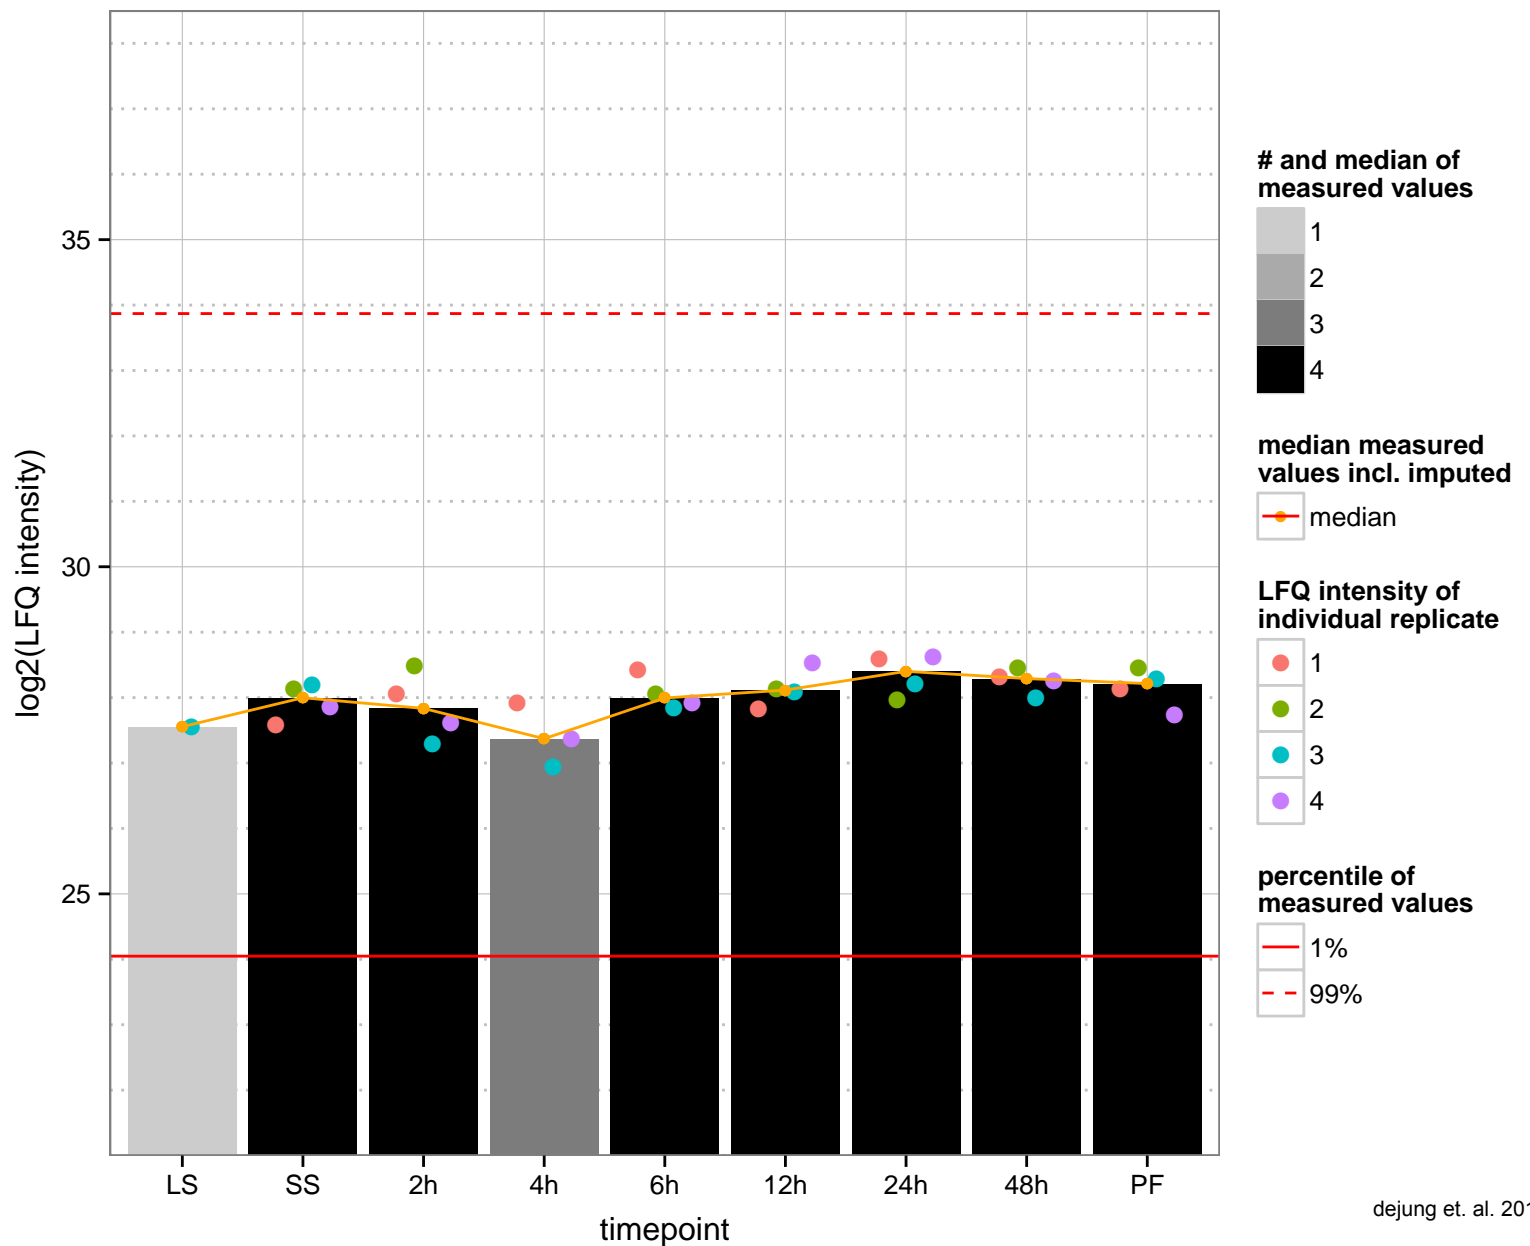

NUDIX hydrolase, putative  
 Tb927.5.4350  
 AGOF: hydrolase activity  
 AGOC: null  
 AGOP: null  
 PGO: hydrolase activity  
 PGOC: null  
 PGOP: null

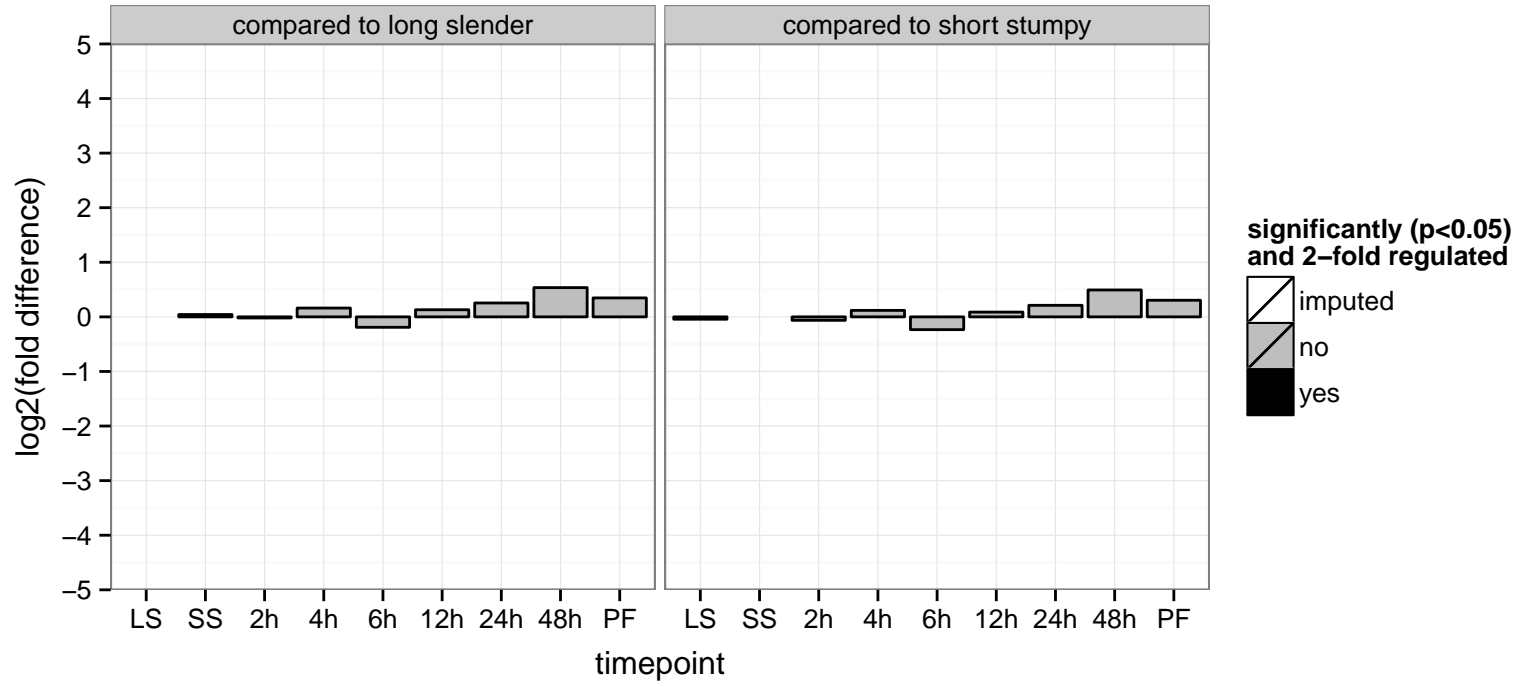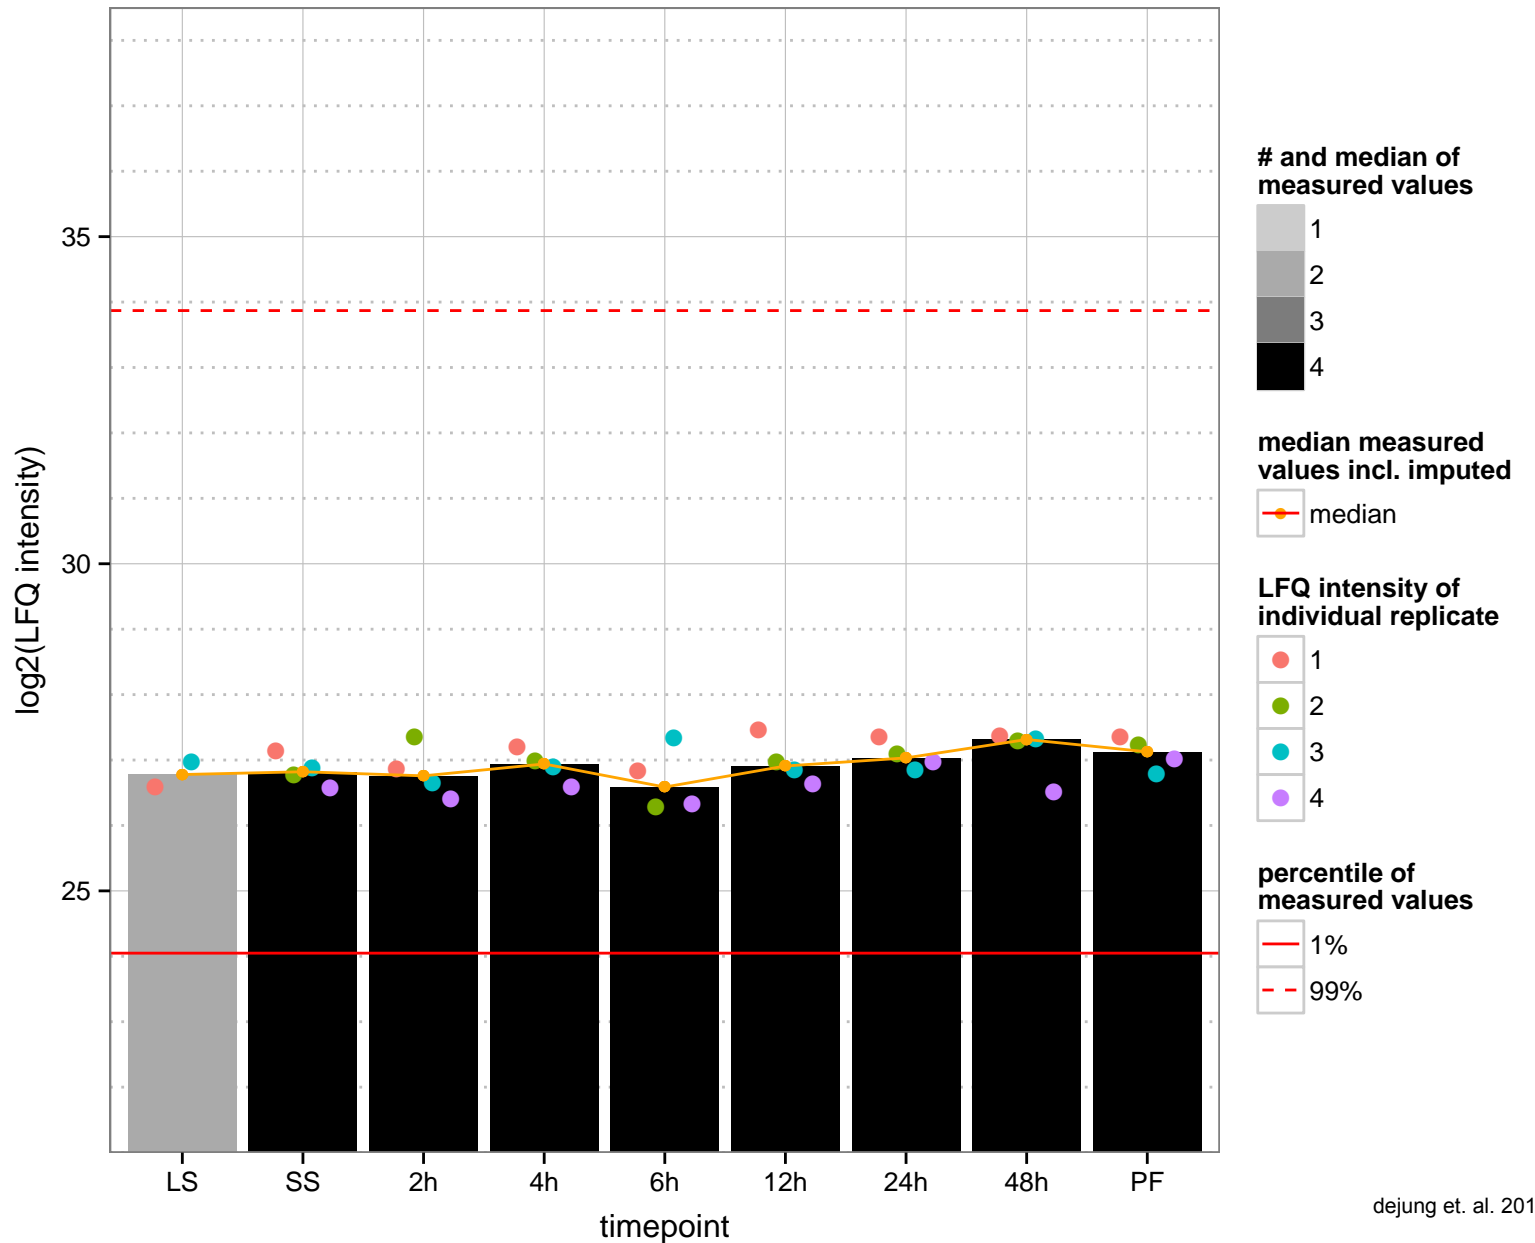

Variant Surface Glycoprotein, putative  
 Tb927.5.5370  
 AGOF: null  
 AGOC: null  
 AGOP: null  
 PGOF: null  
 PGOC: null  
 PGOP: null

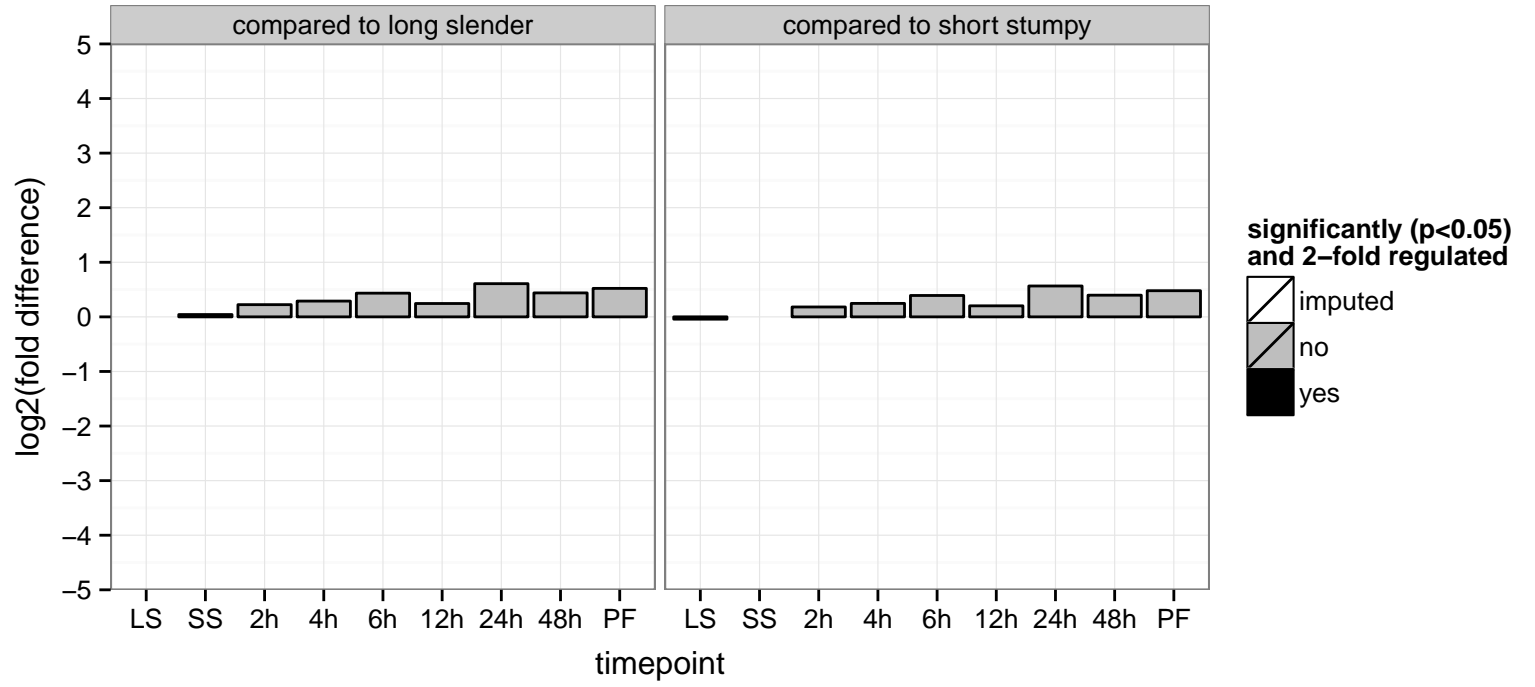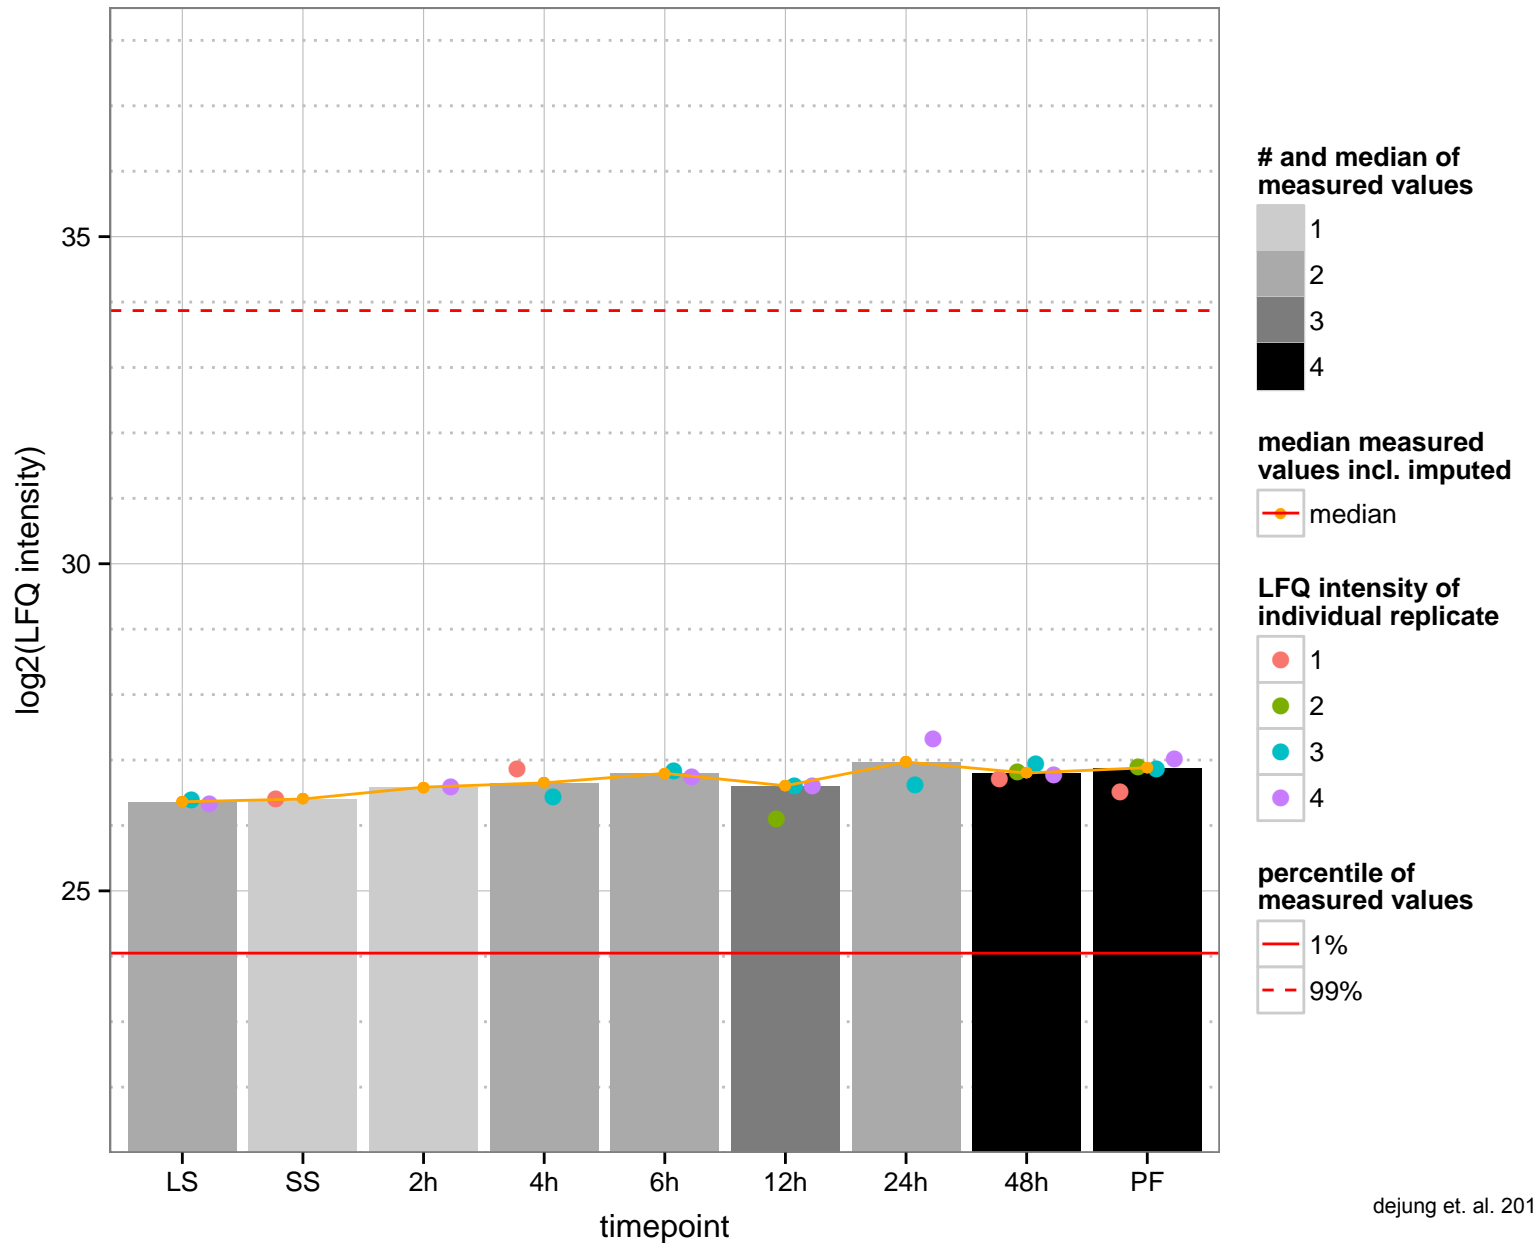

hypothetical protein, conserved  
 Tb927.5.570  
 AGOF: null  
 AGOC: null  
 AGOP: null  
 PGOF: null  
 PGOC: null  
 PGOP: null

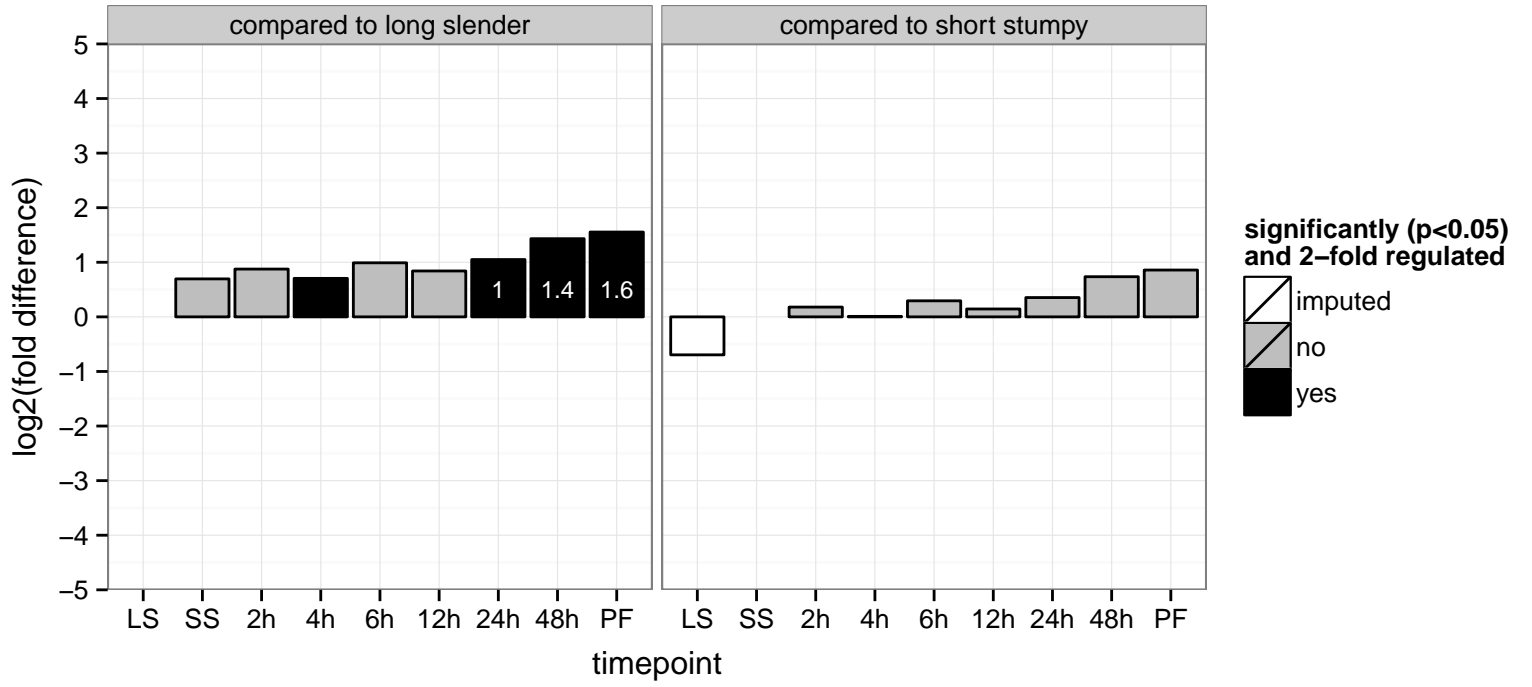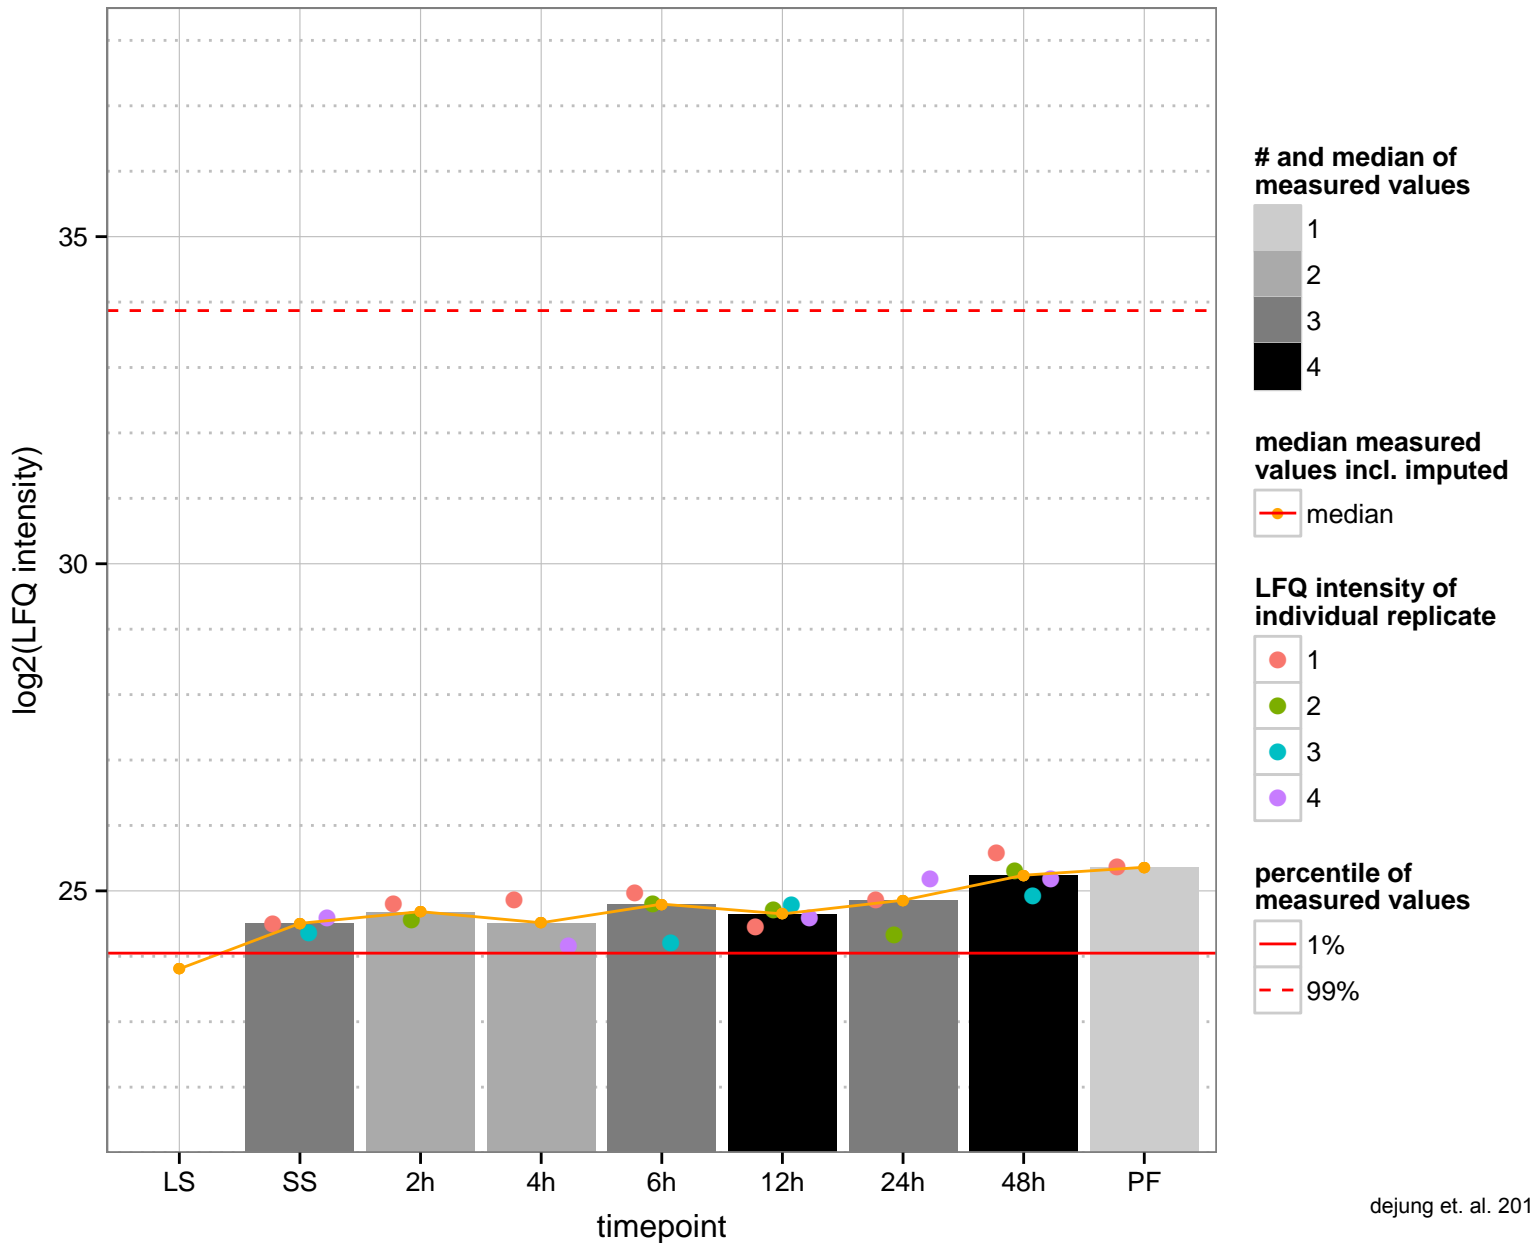



acidic phosphatase, putative  
 Tb927.5.610  
 AGOF: null  
 AGOC: null  
 AGOP: null  
 PGO: null  
 PGOC: null  
 PGOP: null

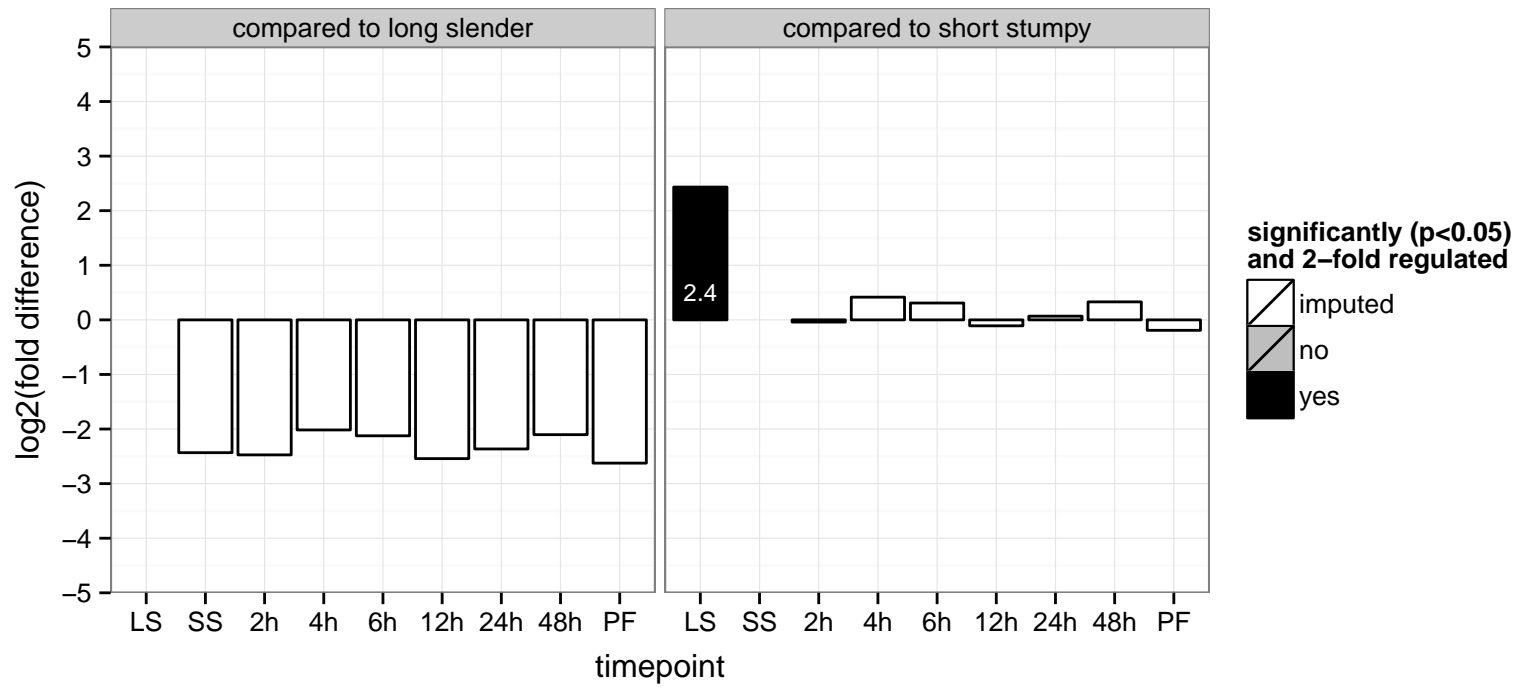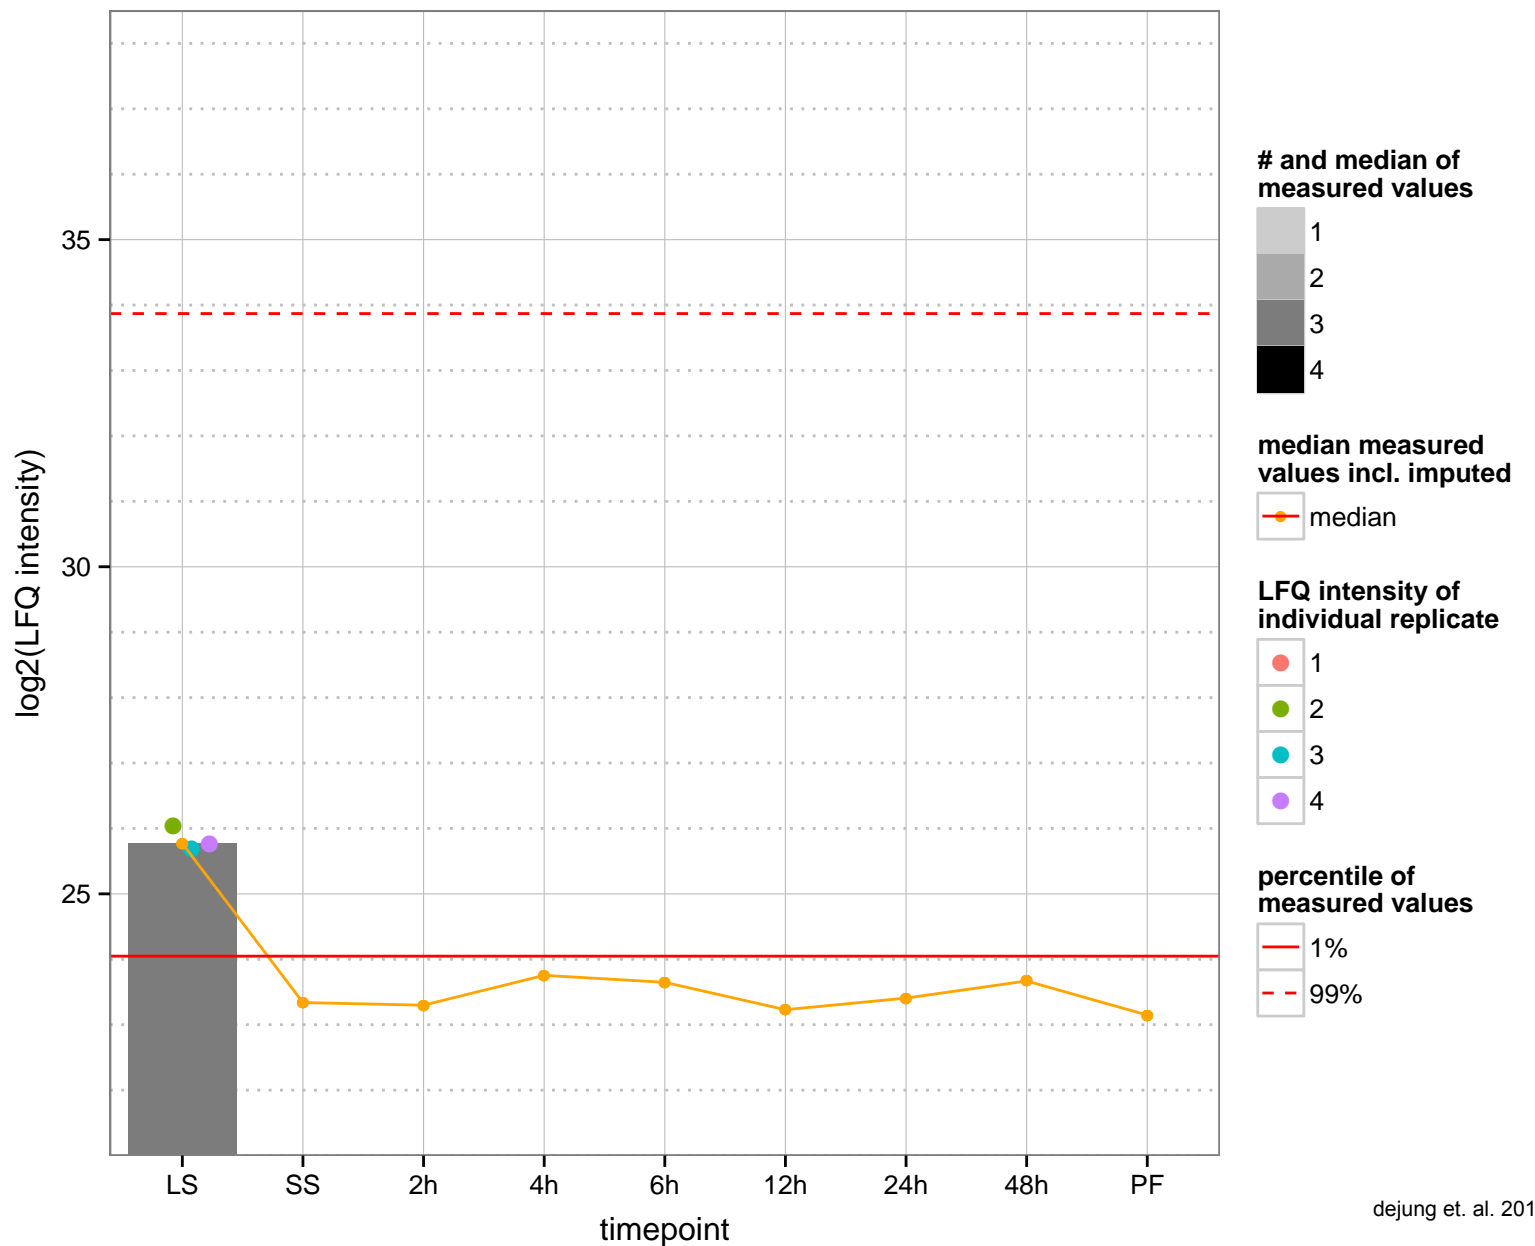

hypothetical protein, conserved  
 Tb927.5.740  
 AGOF: null  
 AGOC: mitochondrion  
 AGOP: null  
 PGO: null  
 PGO: null  
 PGO: null

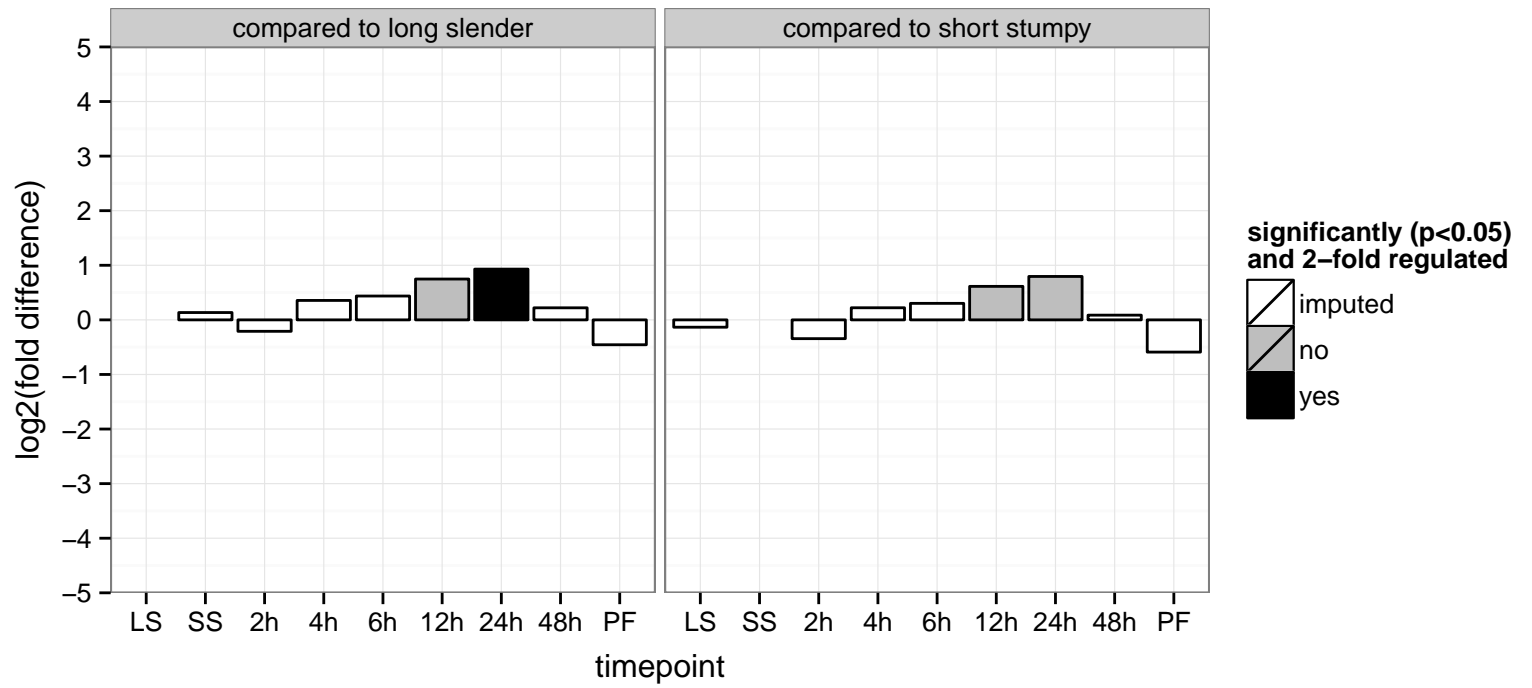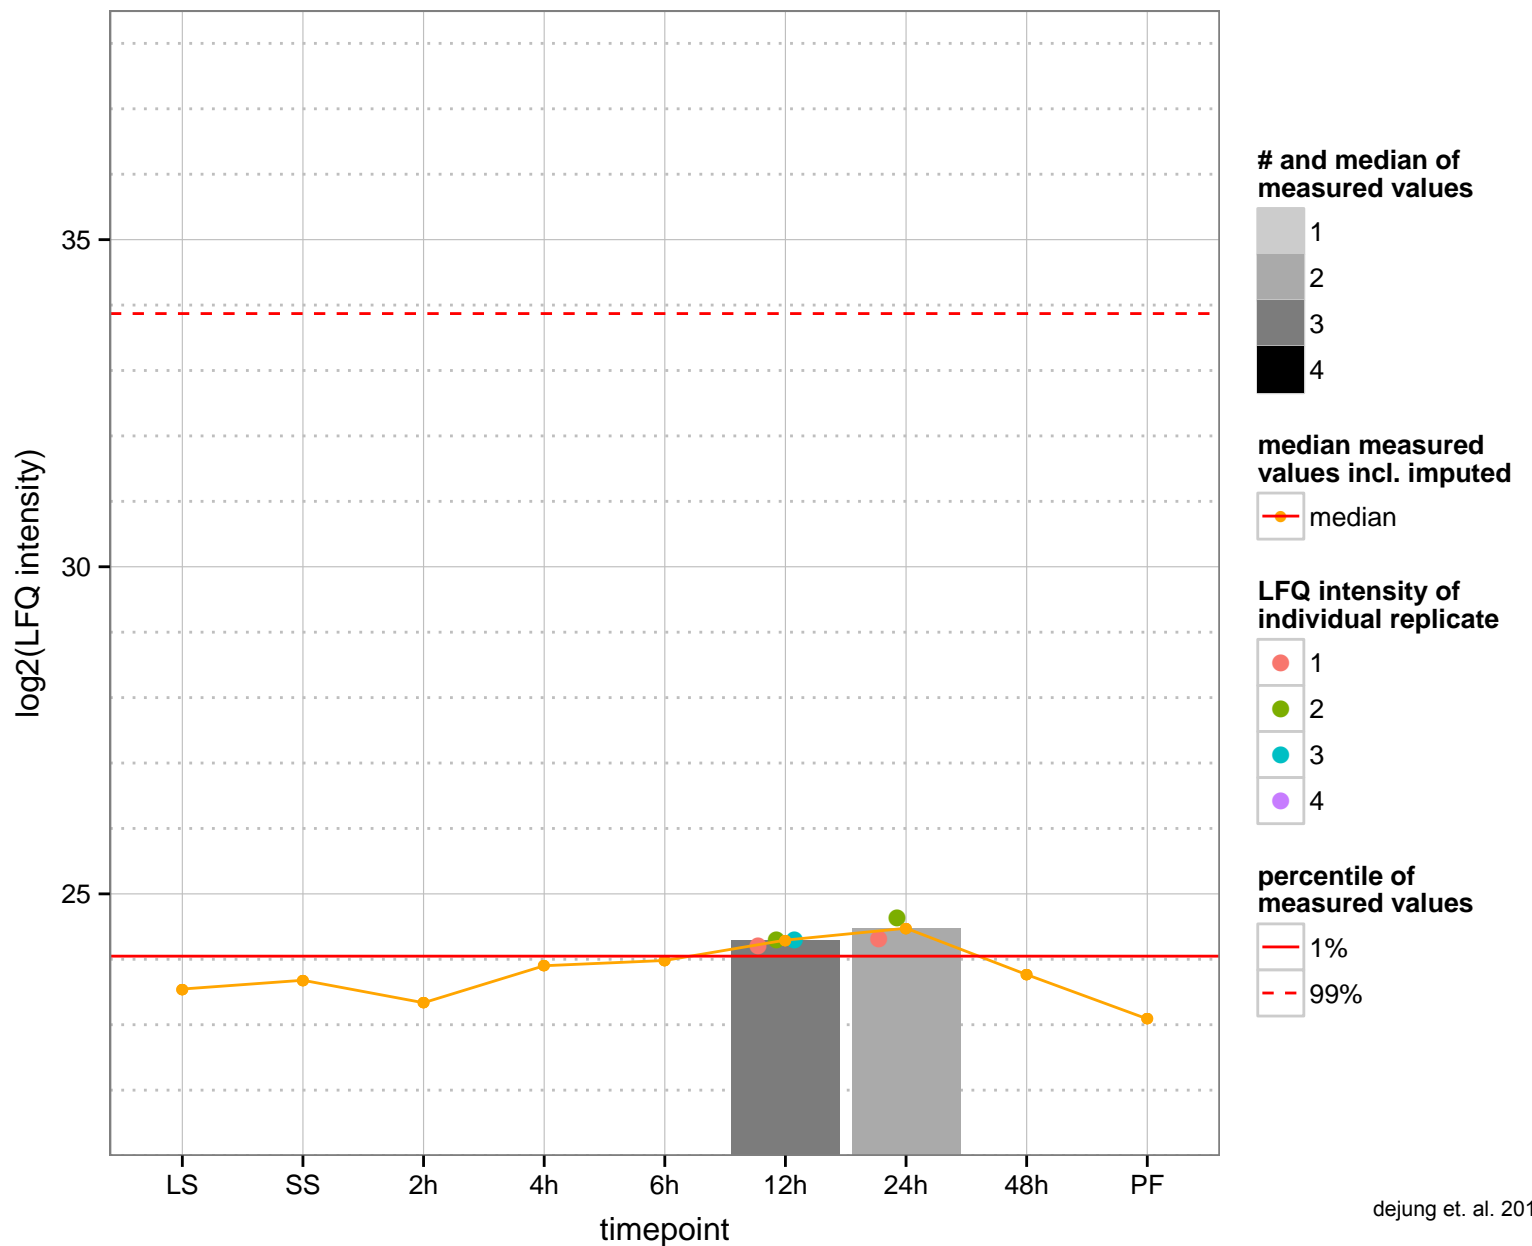

hypothetical protein, conserved  
 Tb927.5.780  
 AGOF: null  
 AGOC: null  
 AGOP: null  
 PGO: null  
 PGOC: null  
 PGOP: null

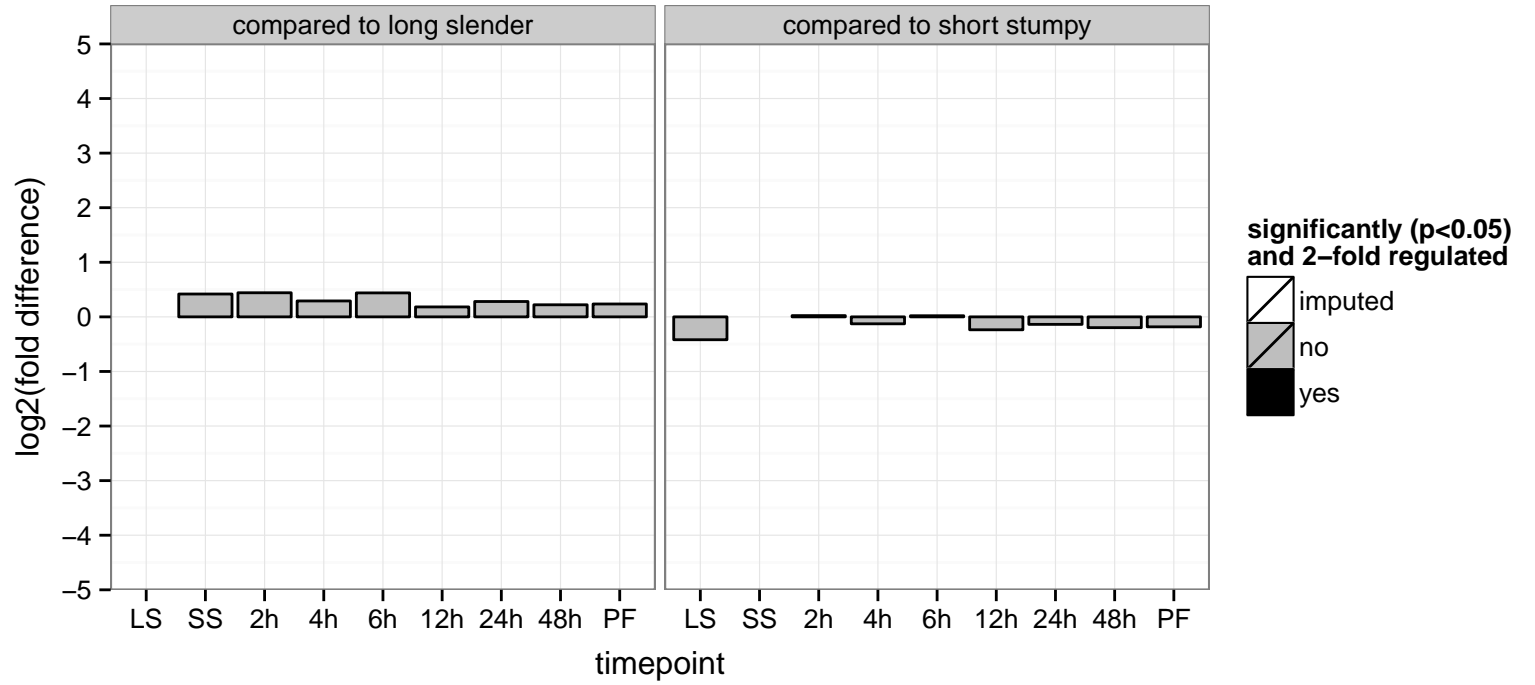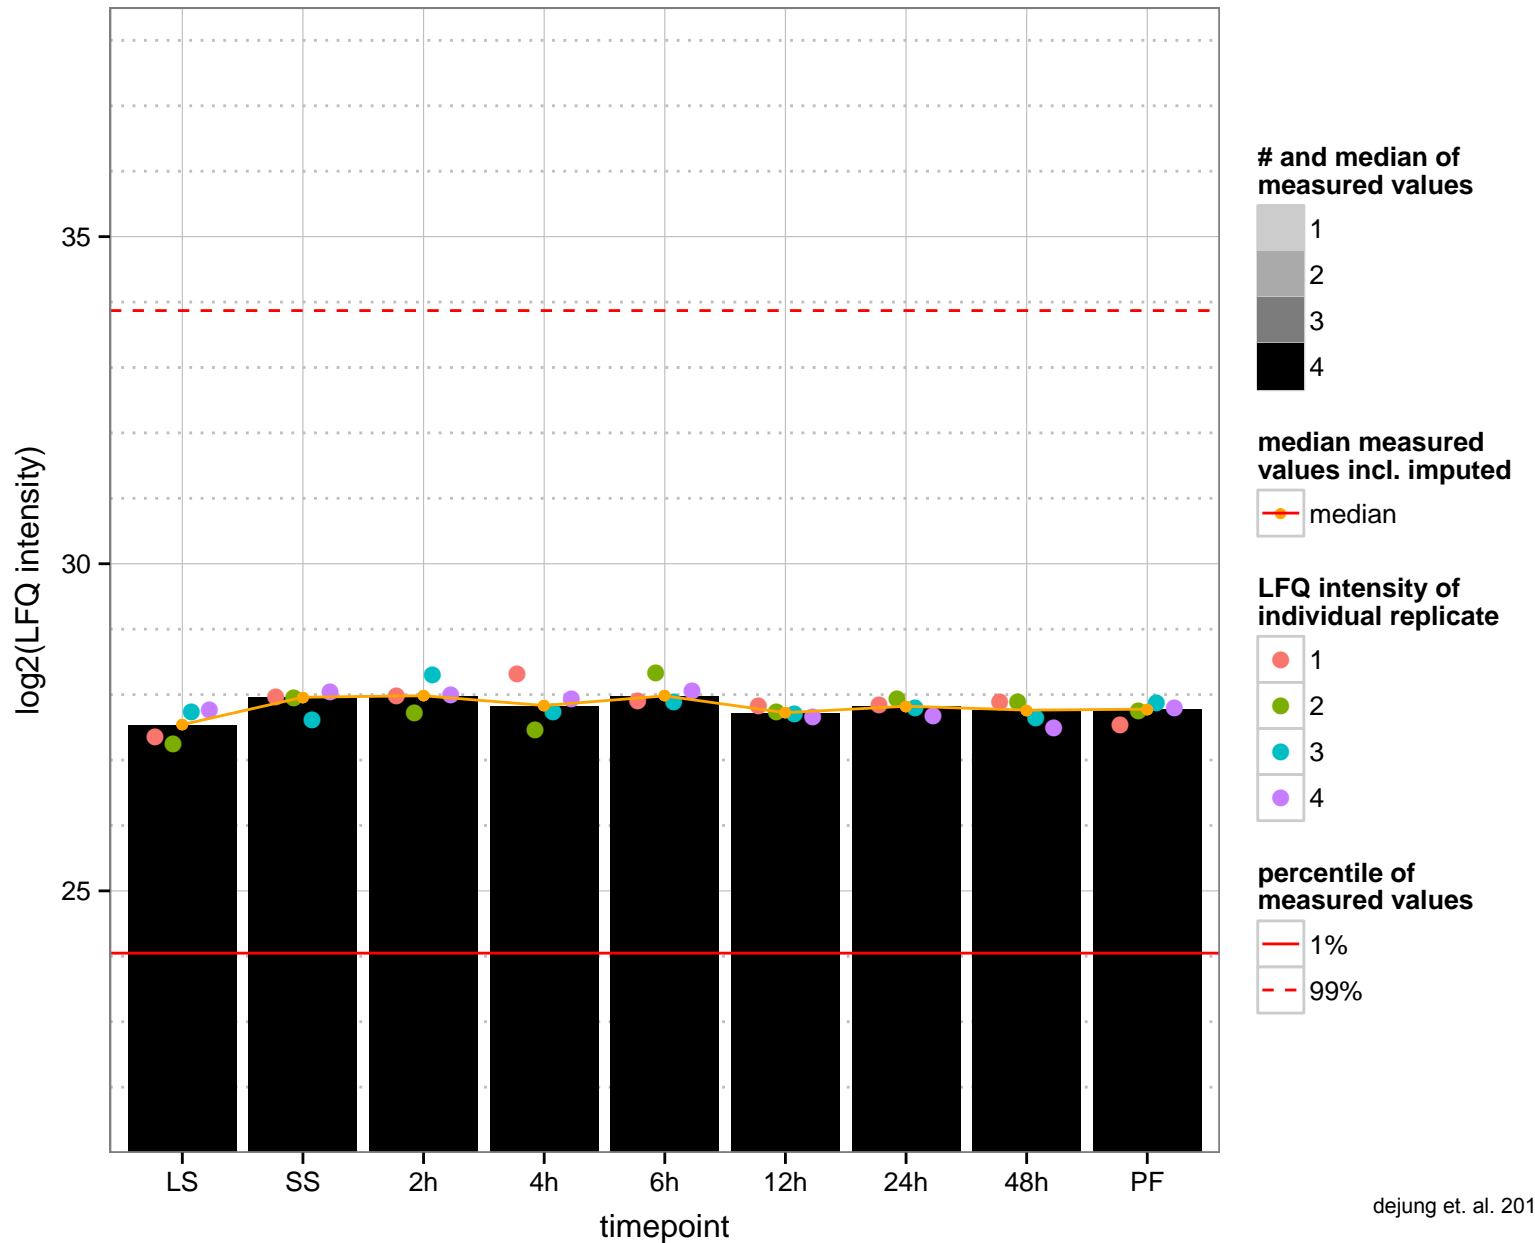

casein kinase I isoform 1 (CK1.1), casein kinase I, isoform 2 (CK1.2)

Tb927.5.800

AGOF: ATP binding, protein serine/threonine kinase activity, protein tyrosine kinase activity

AGOC: null

AGOP: protein phosphorylation

PGOF: ATP binding, protein kinase activity, transferase activity, transferring phosphorus-containing groups

PGOC: null

PGOP: protein phosphorylation

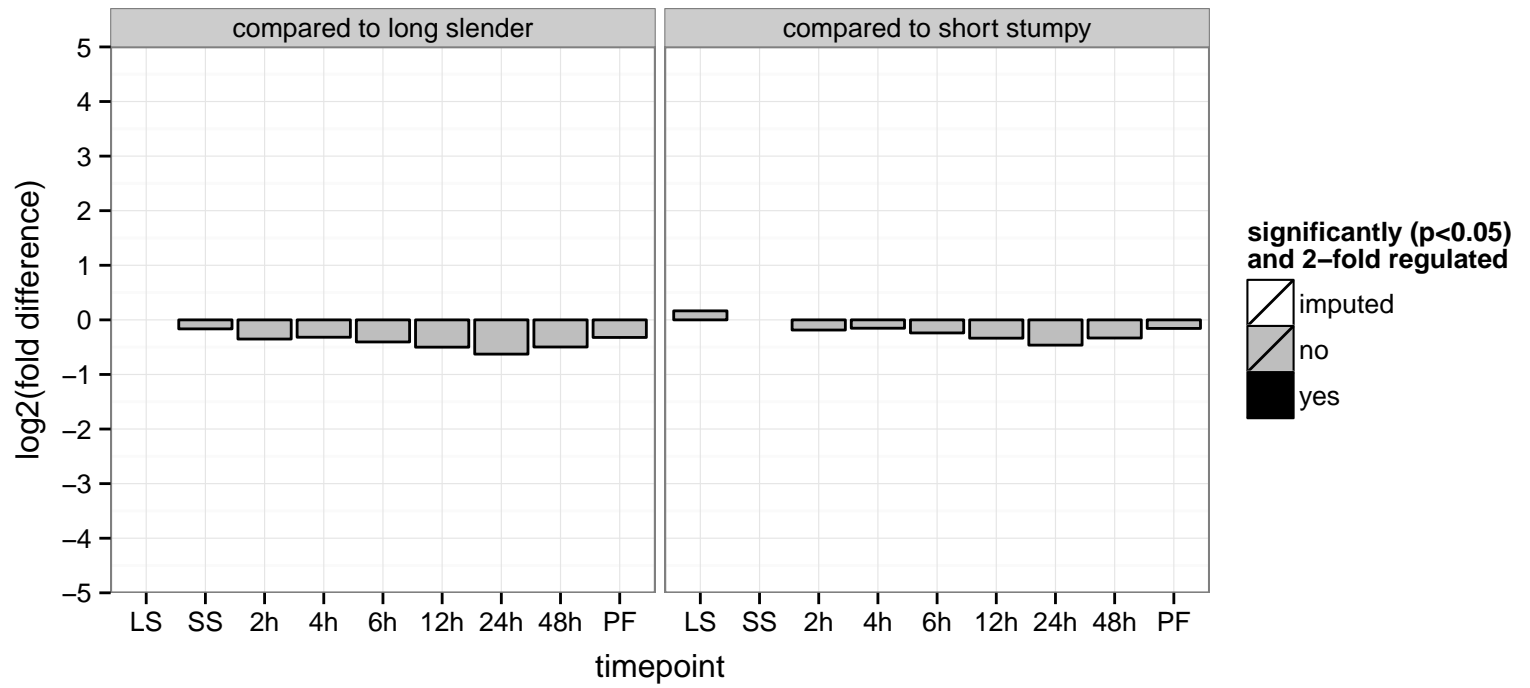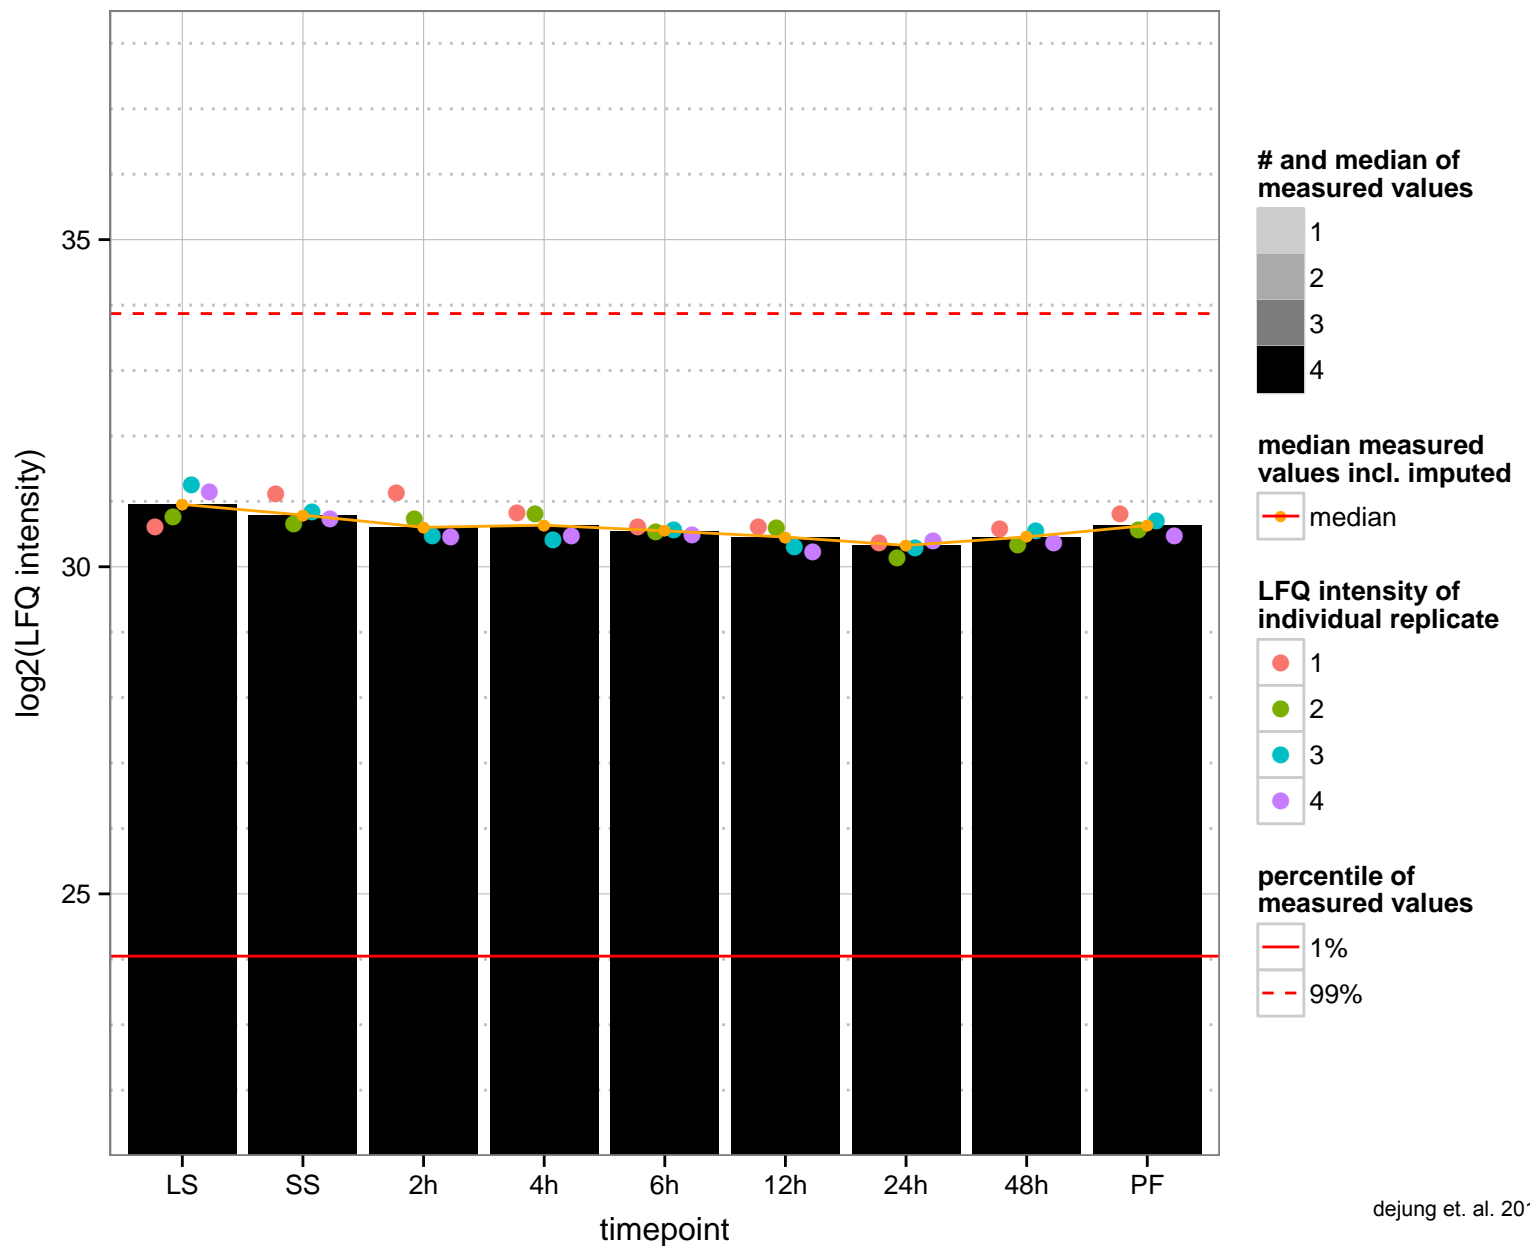

hypothetical protein, conserved  
 Tb927.5.830  
 AGOF: null  
 AGOC: null  
 AGOP: null  
 PGOF: null  
 PGOC: null  
 PGOP: null

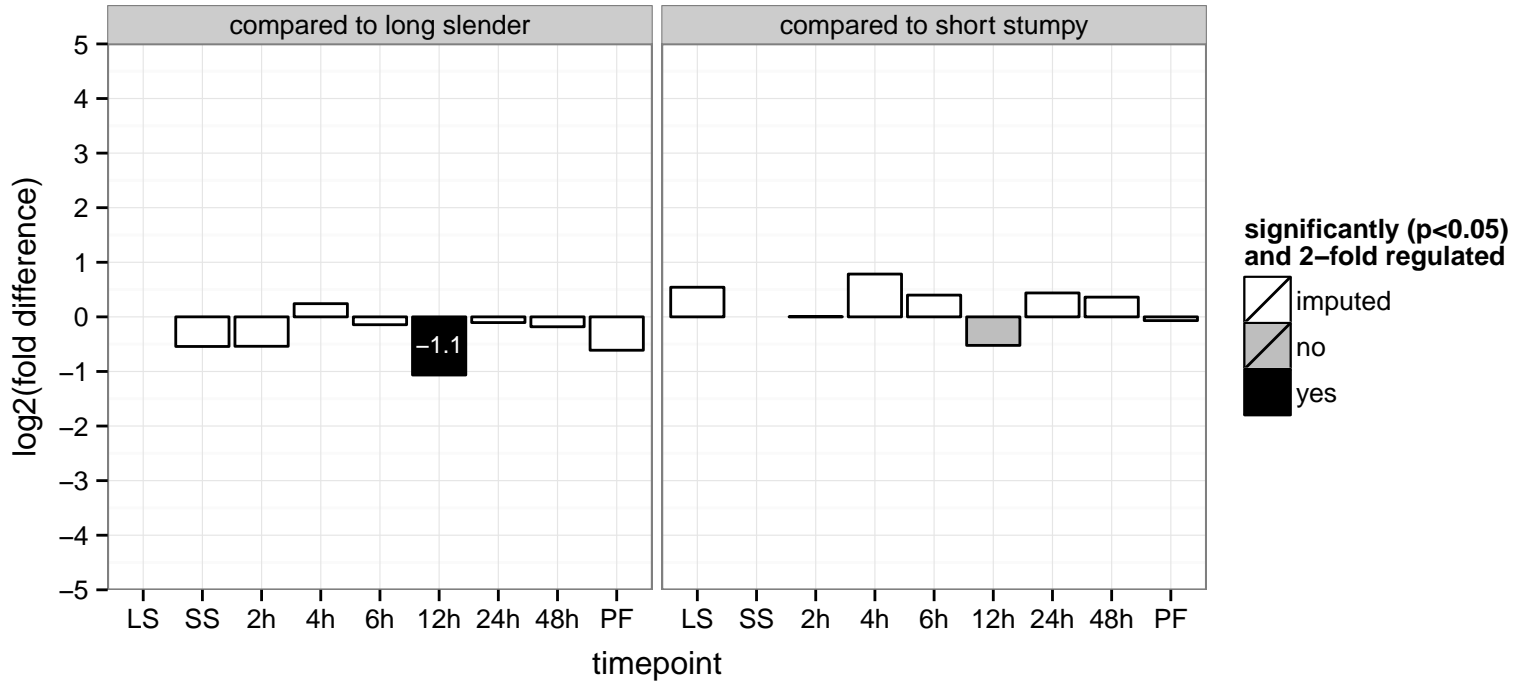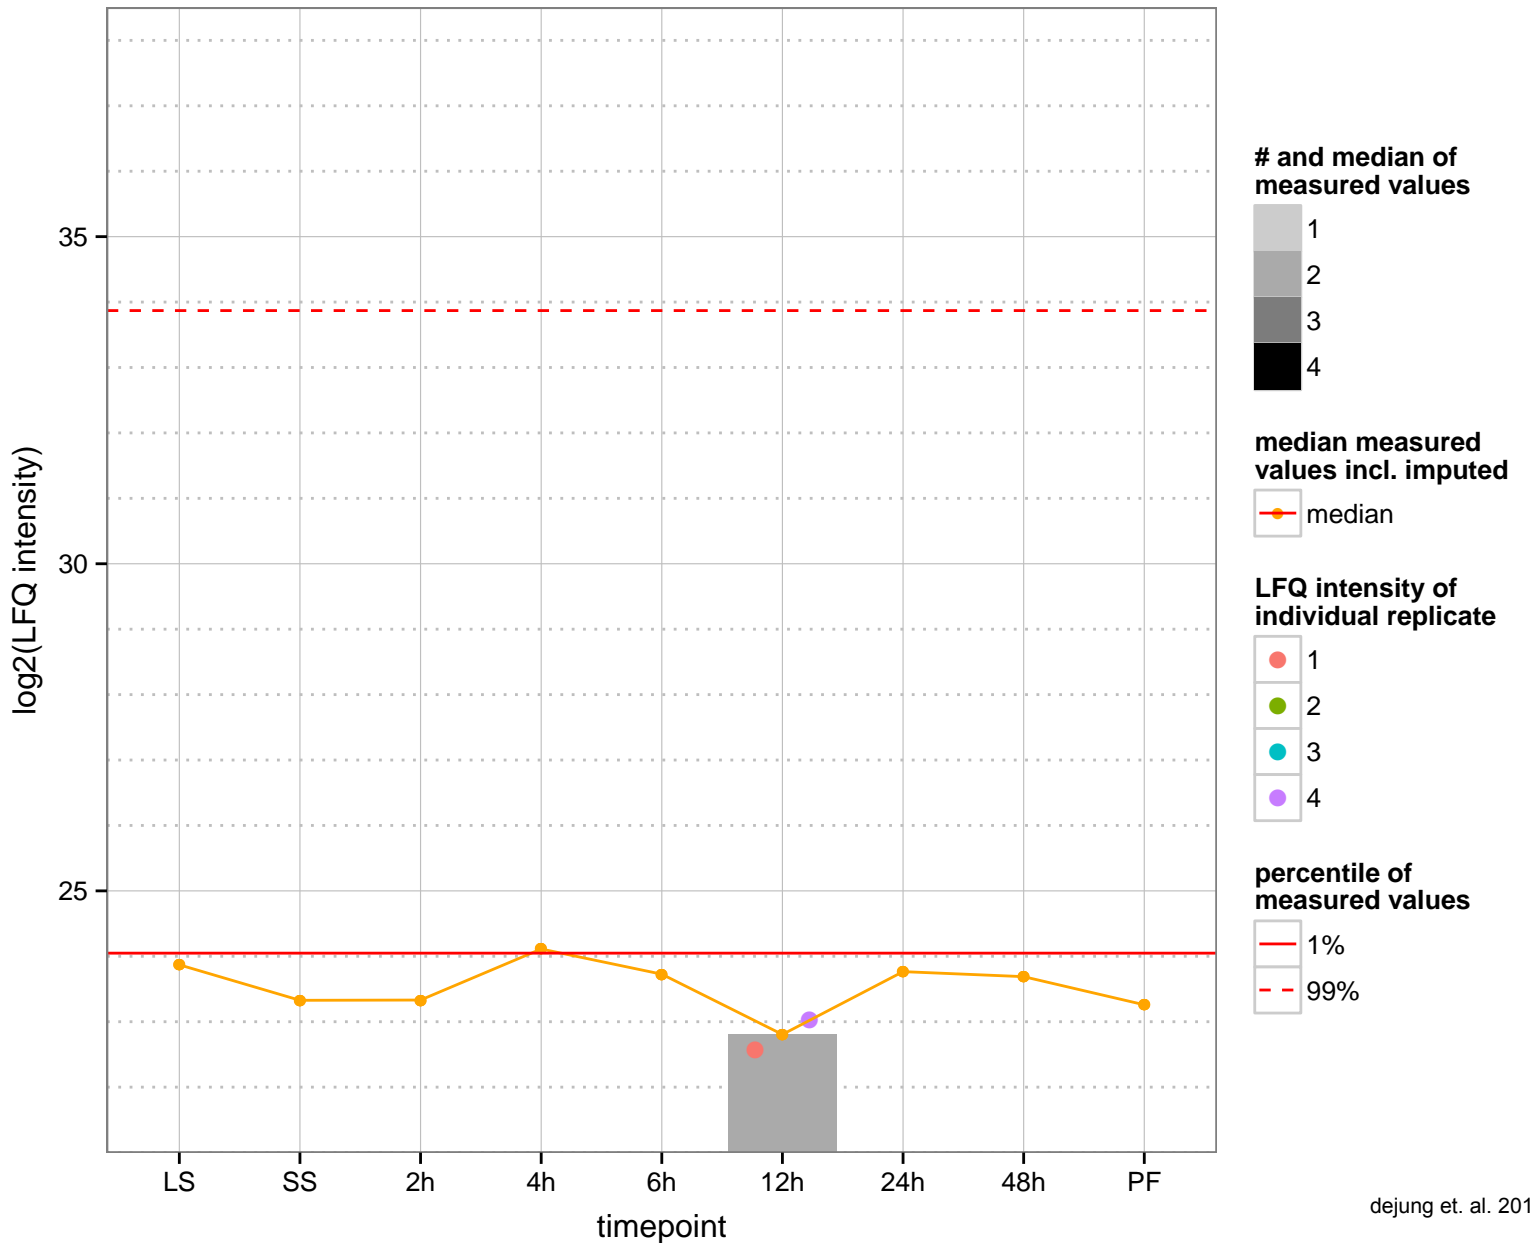

oligosaccharyl transferase subunit, putative  
 Tb927.5.900;Tb11.v5.0559  
 AGOF: null, oligosaccharyl transferase activity  
 AGOC: null, membrane  
 AGOP: null, protein glycosylation  
 PGO: oligosaccharyl transferase activity  
 PGOC: membrane  
 PGOP: protein glycosylation

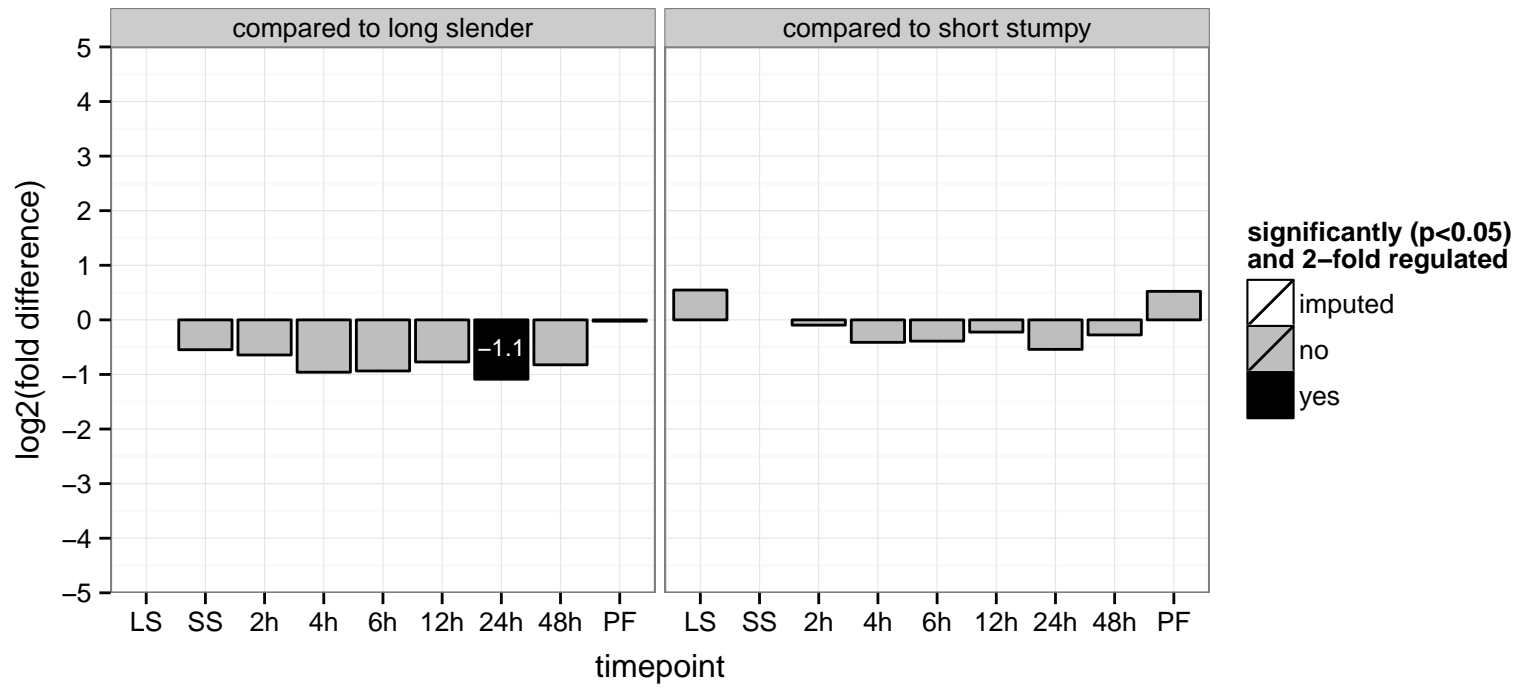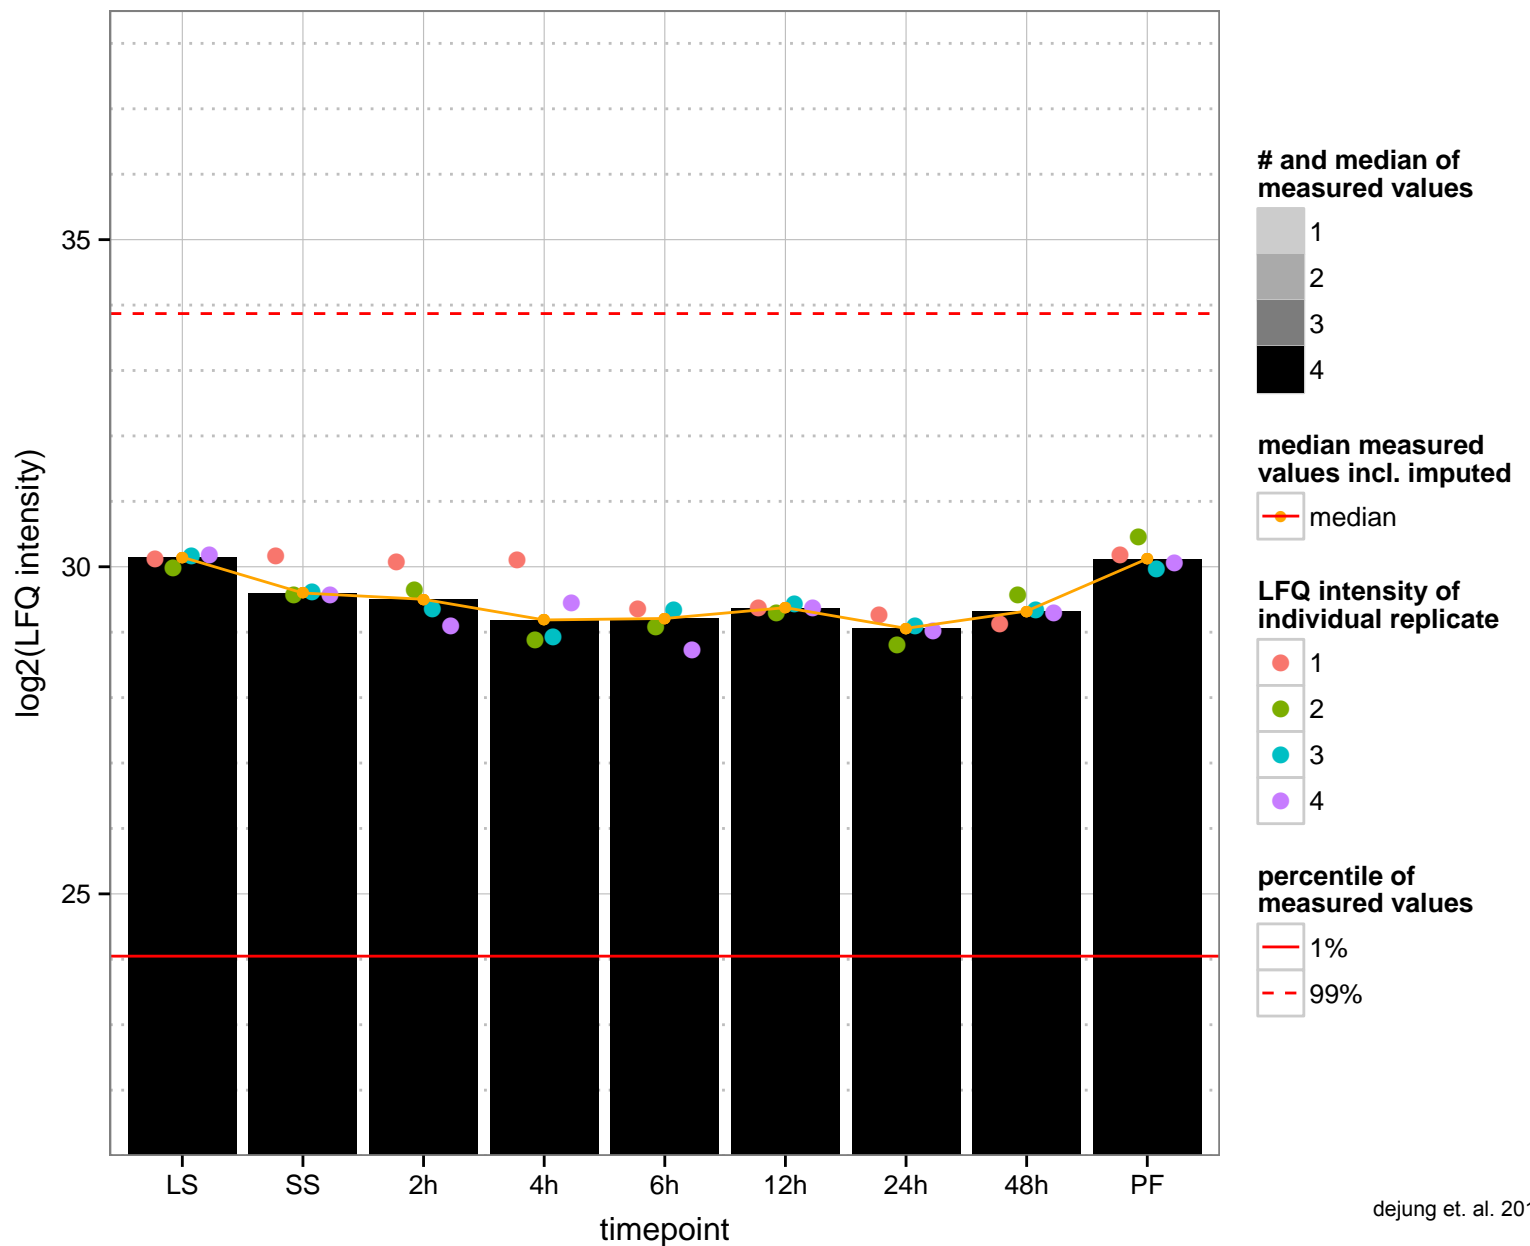

hypothetical protein, conserved  
 Tb927.5.960  
 AGOF: ATP binding, nucleoside-triphosphatase activity  
 AGOC: null  
 AGOP: null  
 PGOF: ATP binding, nucleoside-triphosphatase activity, nucleotide binding  
 PGOC: null  
 PGOP: null

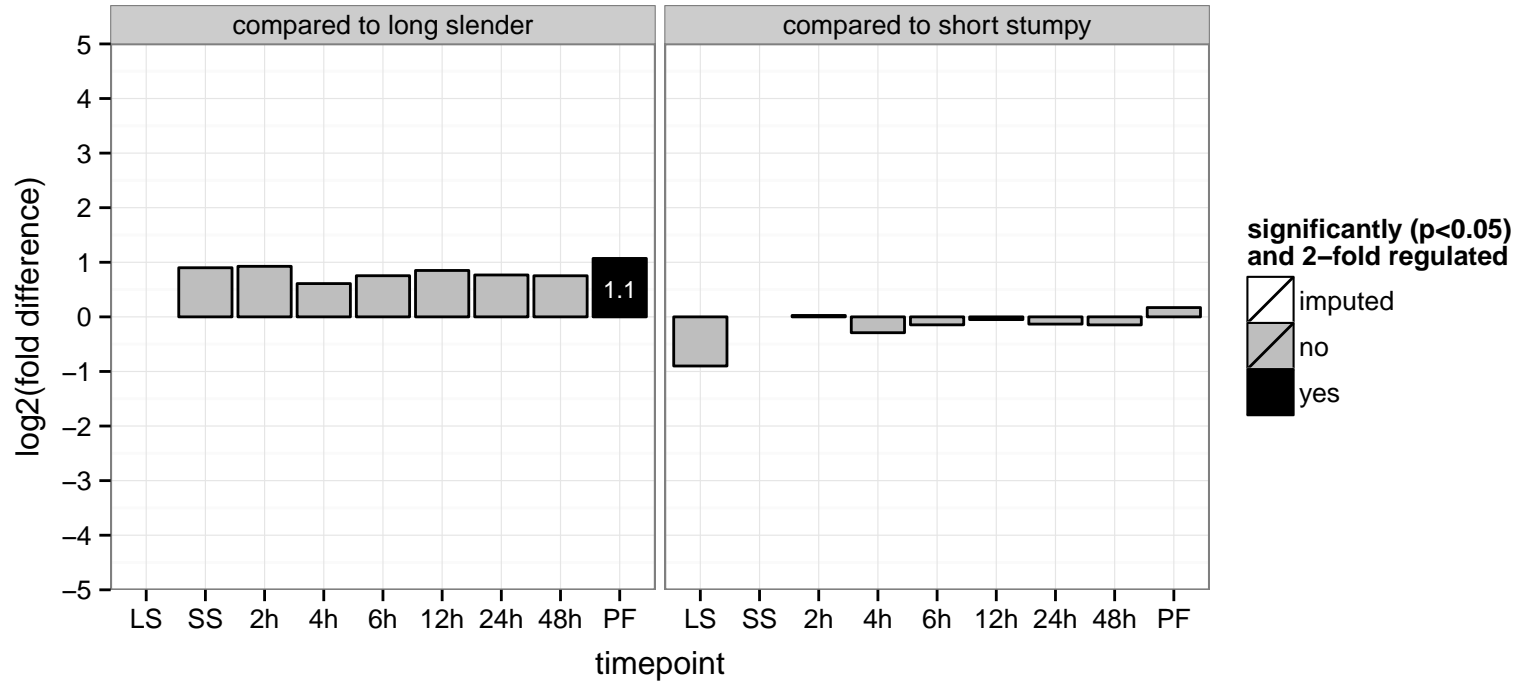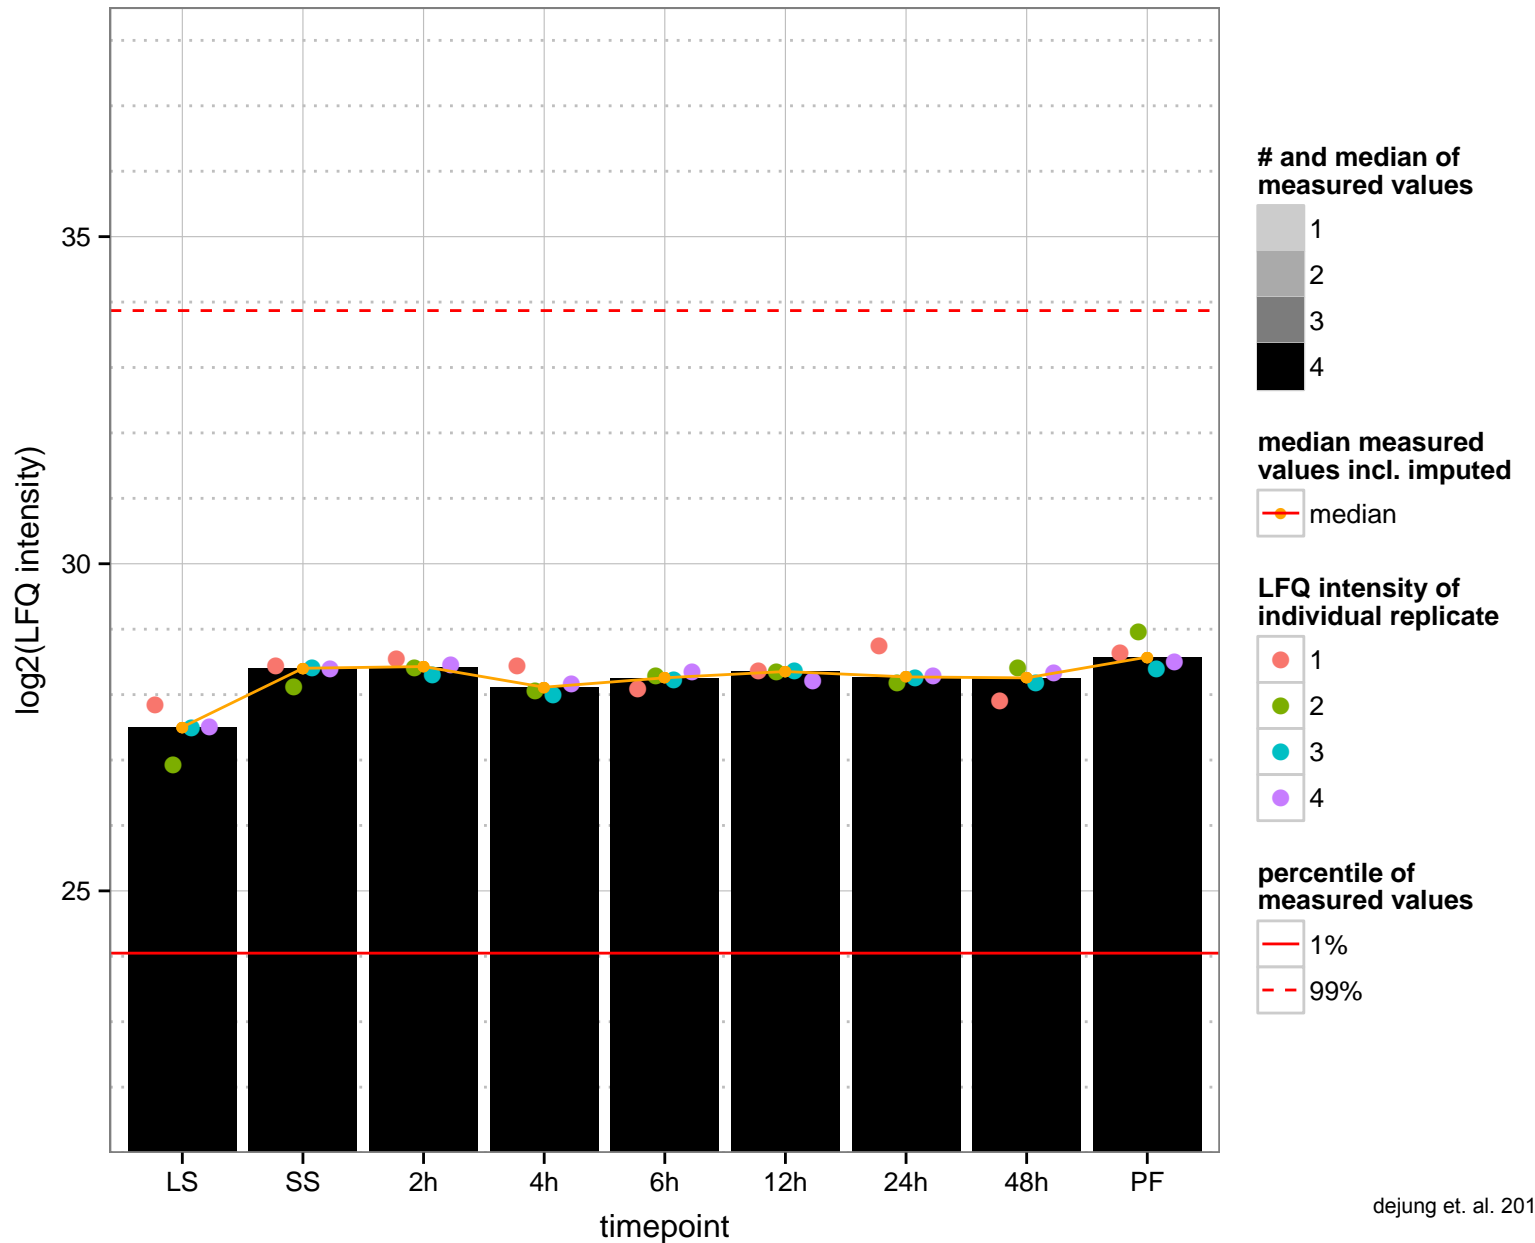

glyoxalase II, hydroxyacylglutathione hydrolase, putative (glxII)  
 Tb927.6.1080  
 AGOF: hydrolase activity  
 AGOC: null  
 AGOP: null  
 PGO: hydrolase activity  
 PGOC: null  
 PGOP: null

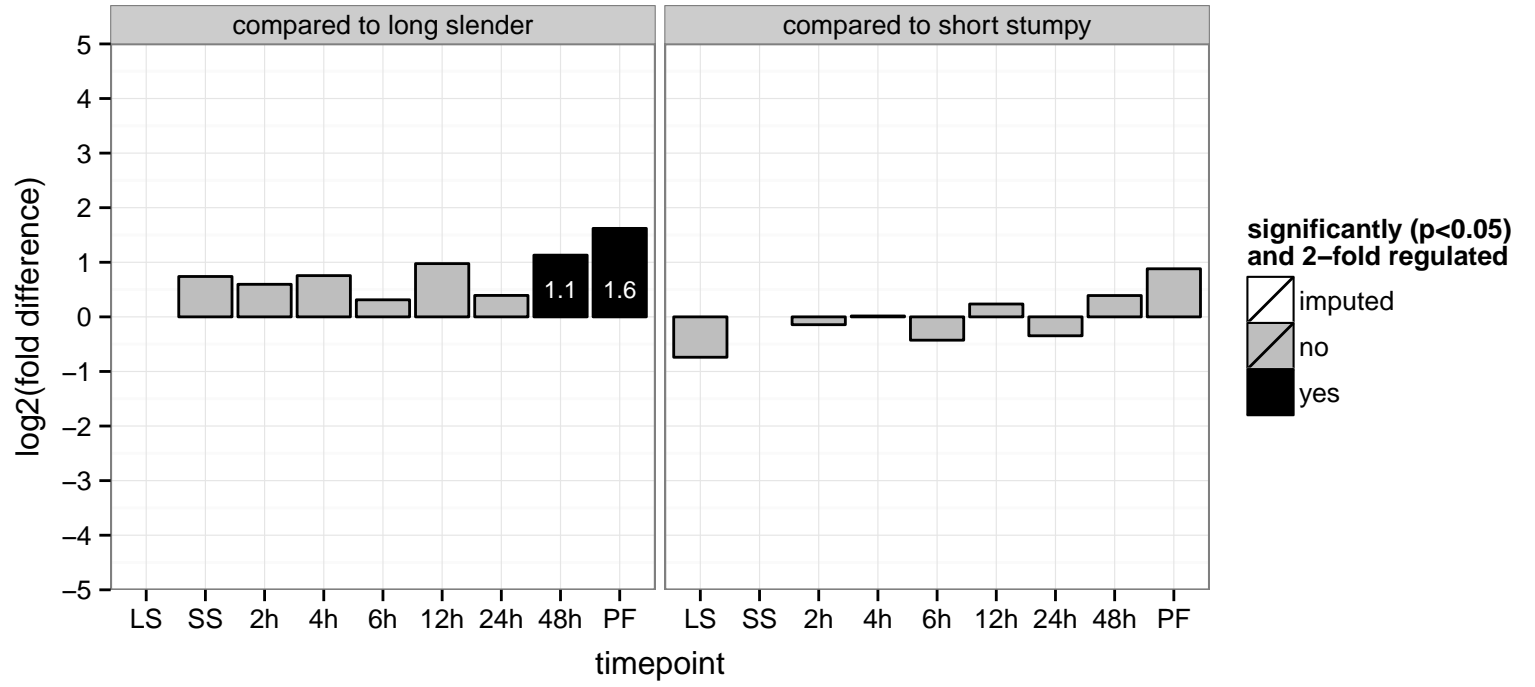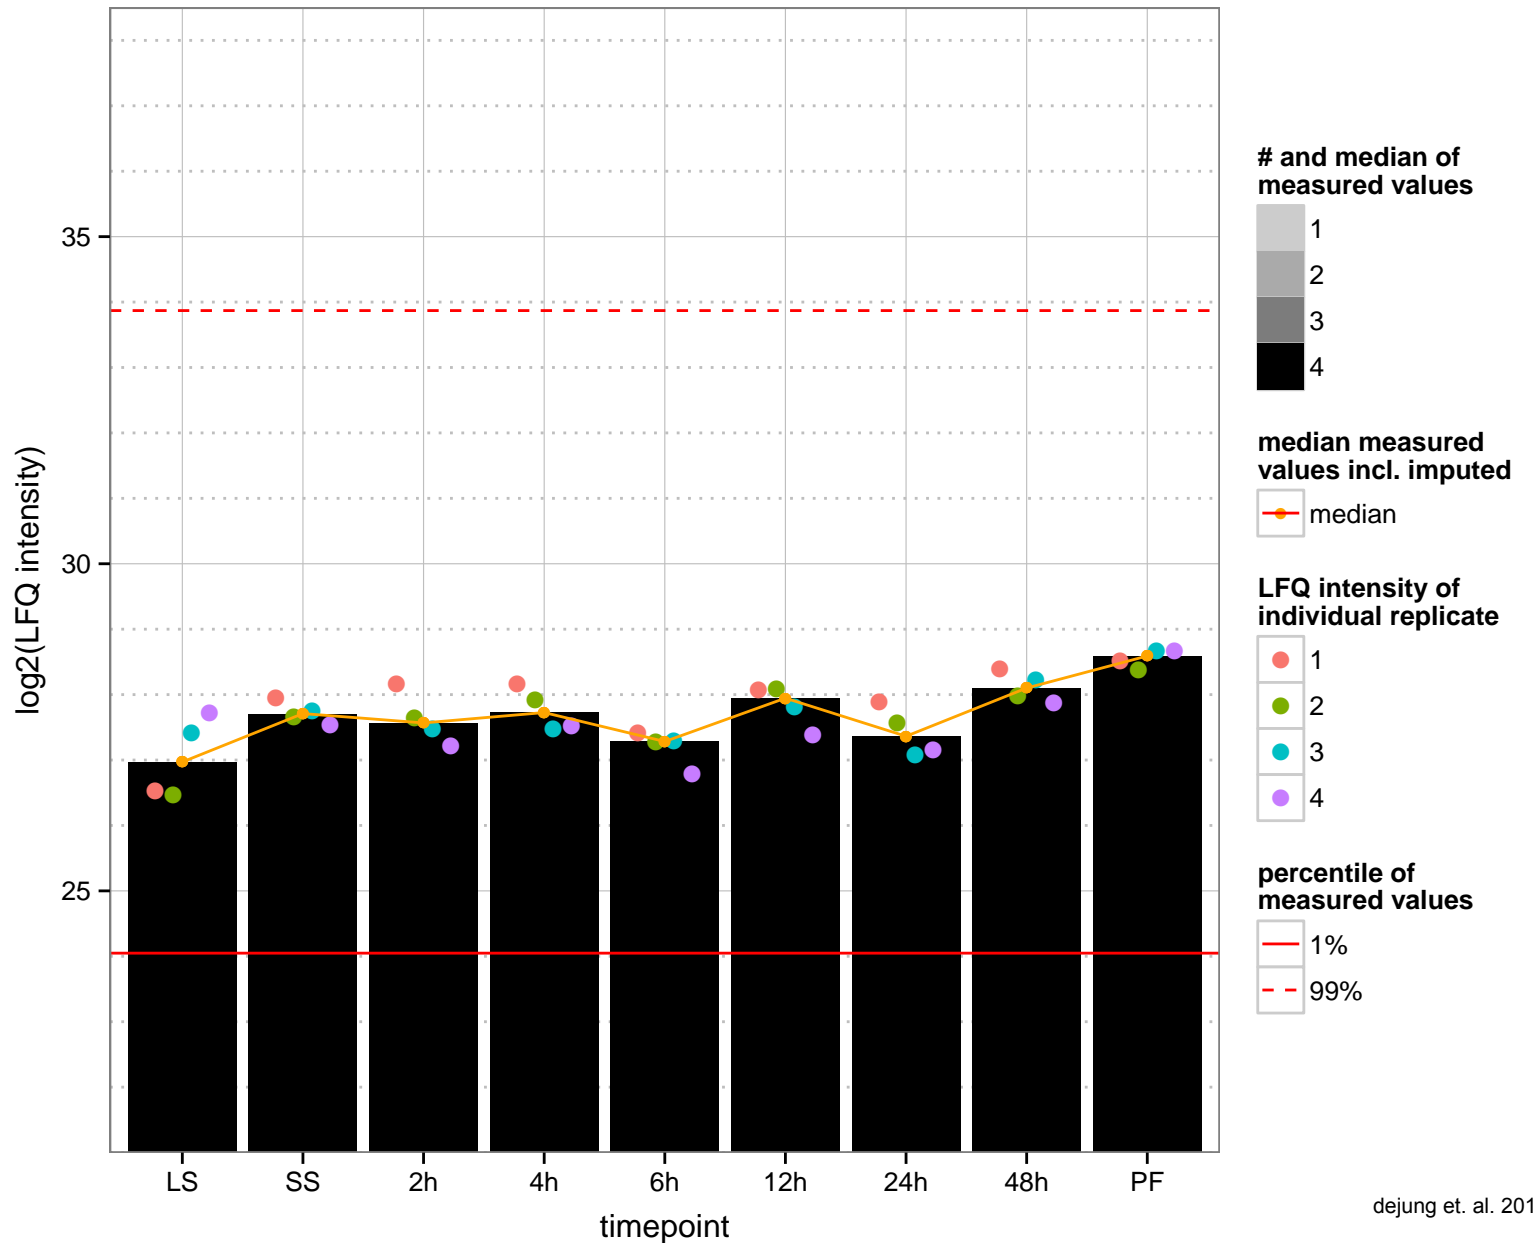



proteasome regulatory ATPase subunit 3 (RPT3)

Tb927.6.1090

AGOF: ATP binding, ATPase activity

AGOC: cytoplasm, nucleus, proteasome regulatory particle

AGOP: ubiquitin-dependent protein catabolic process

PGOF: ATP binding, hydrolase activity, nucleoside-triphosphatase activity, nucleotide binding

PGOC: cytoplasm

PGOP: protein catabolic process

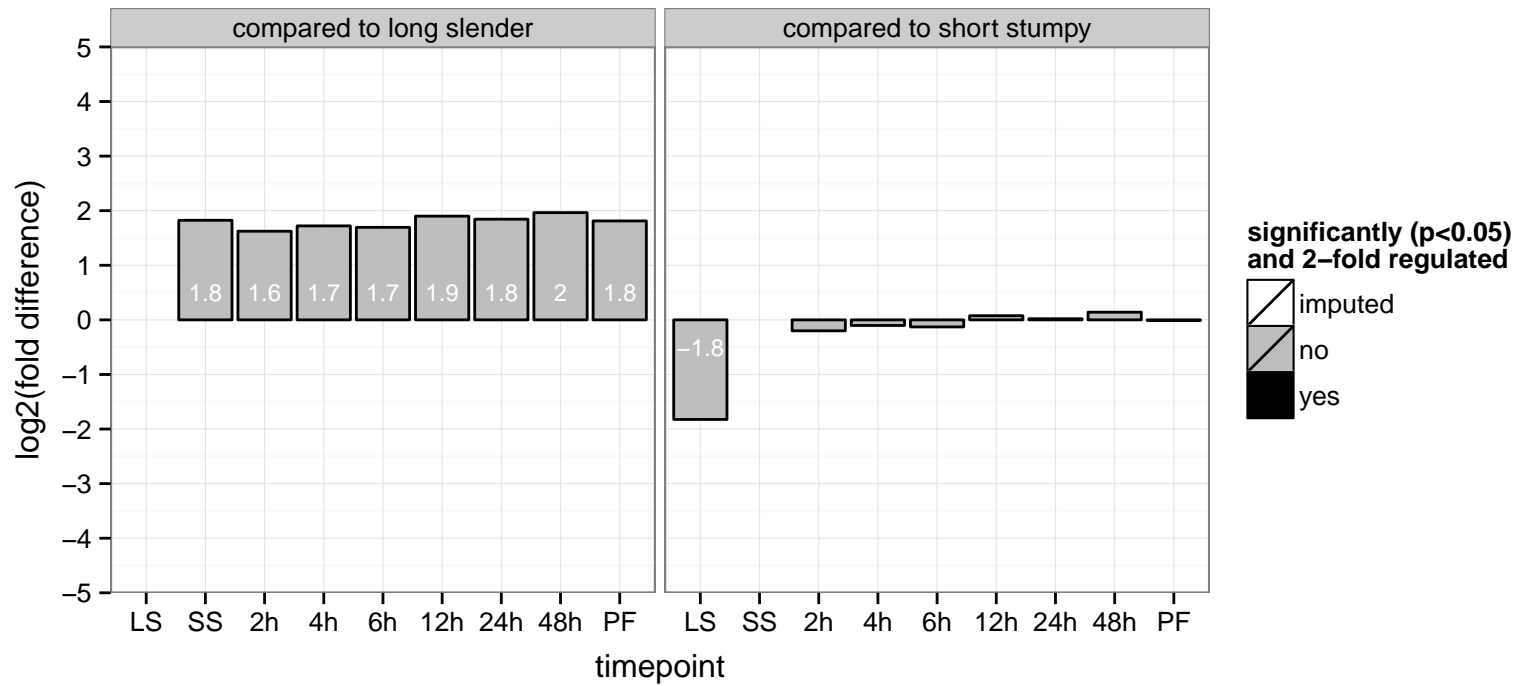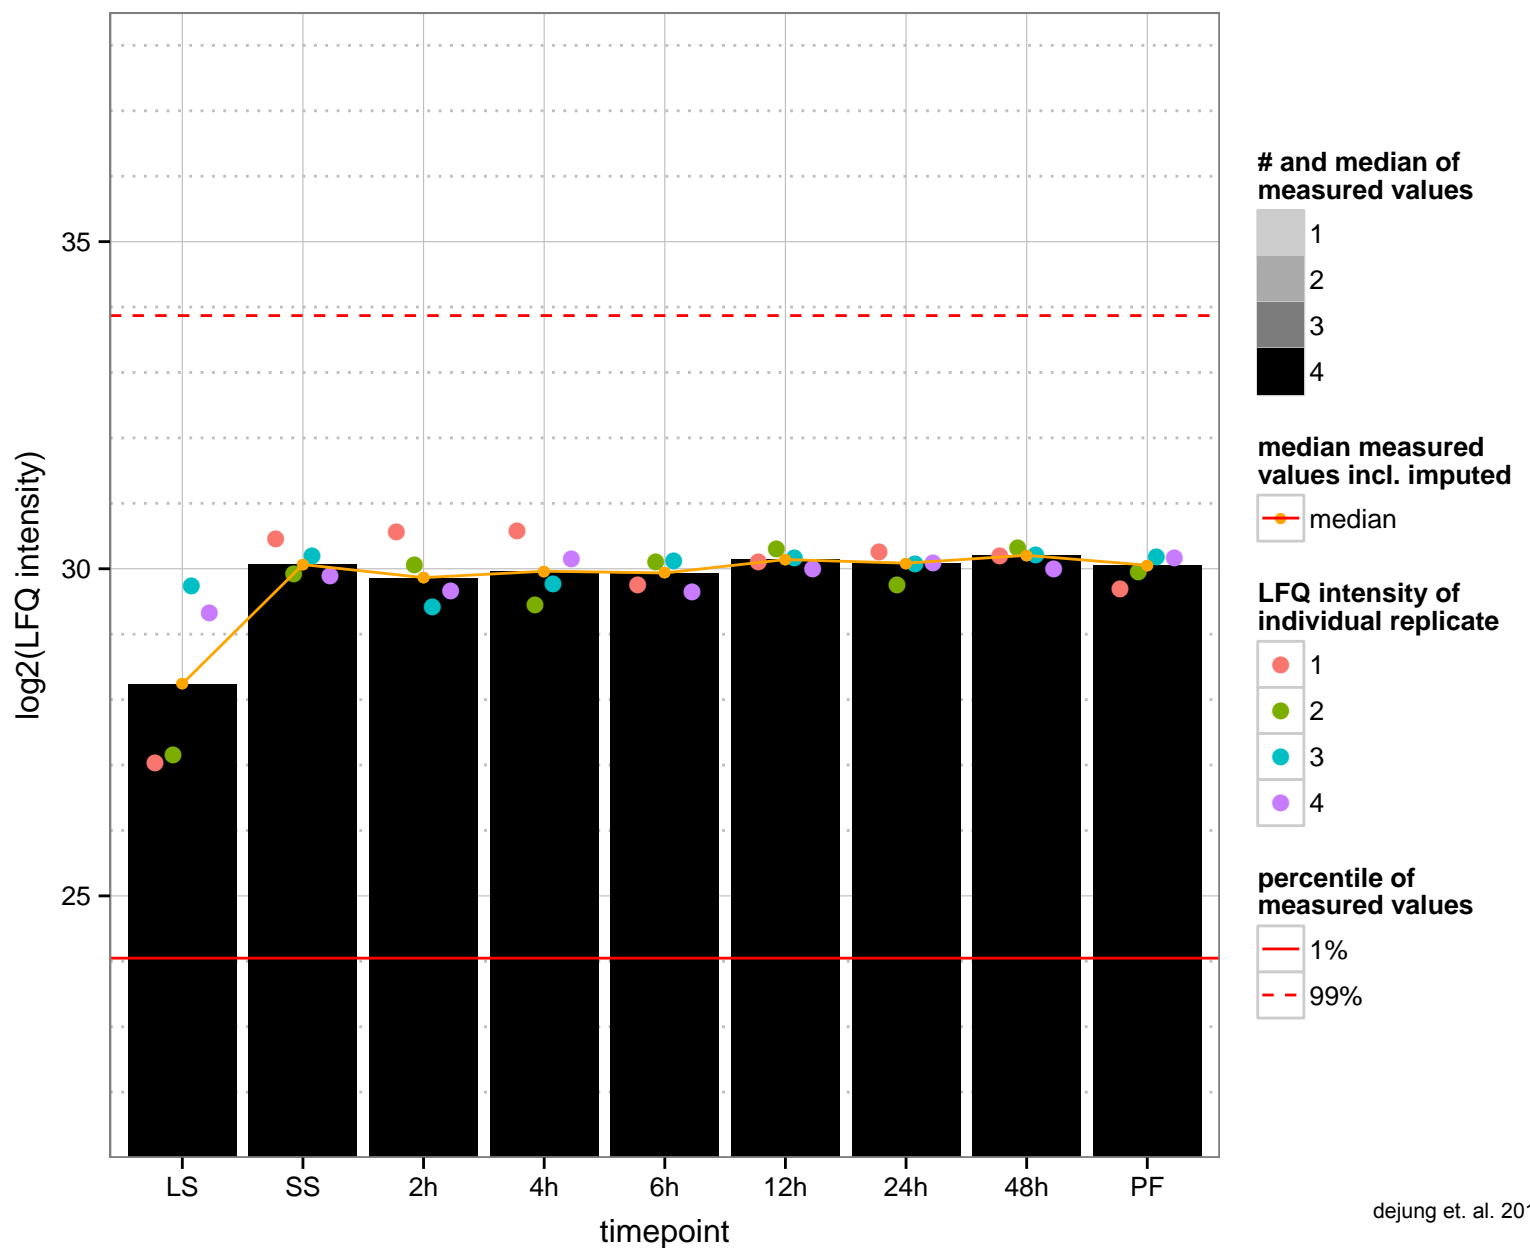

dolichyl-P-Man:GDP-Man5GlcNAc2-PP-dolichyl alpha-1, 2-mannosyltransferase, putative, Asparagine-linked glycosylation Tb927.6.1140

AGOF: alpha-1, 2-mannosyltransferase activity

AGOC: intrinsic to endoplasmic reticulum membrane

AGOP: GPI anchor biosynthetic process, dolichol-linked oligosaccharide biosynthetic process

PGOF: transferase activity, transferring glycosyl groups

PGOC: intrinsic to endoplasmic reticulum membrane

PGOP: GPI anchor biosynthetic process

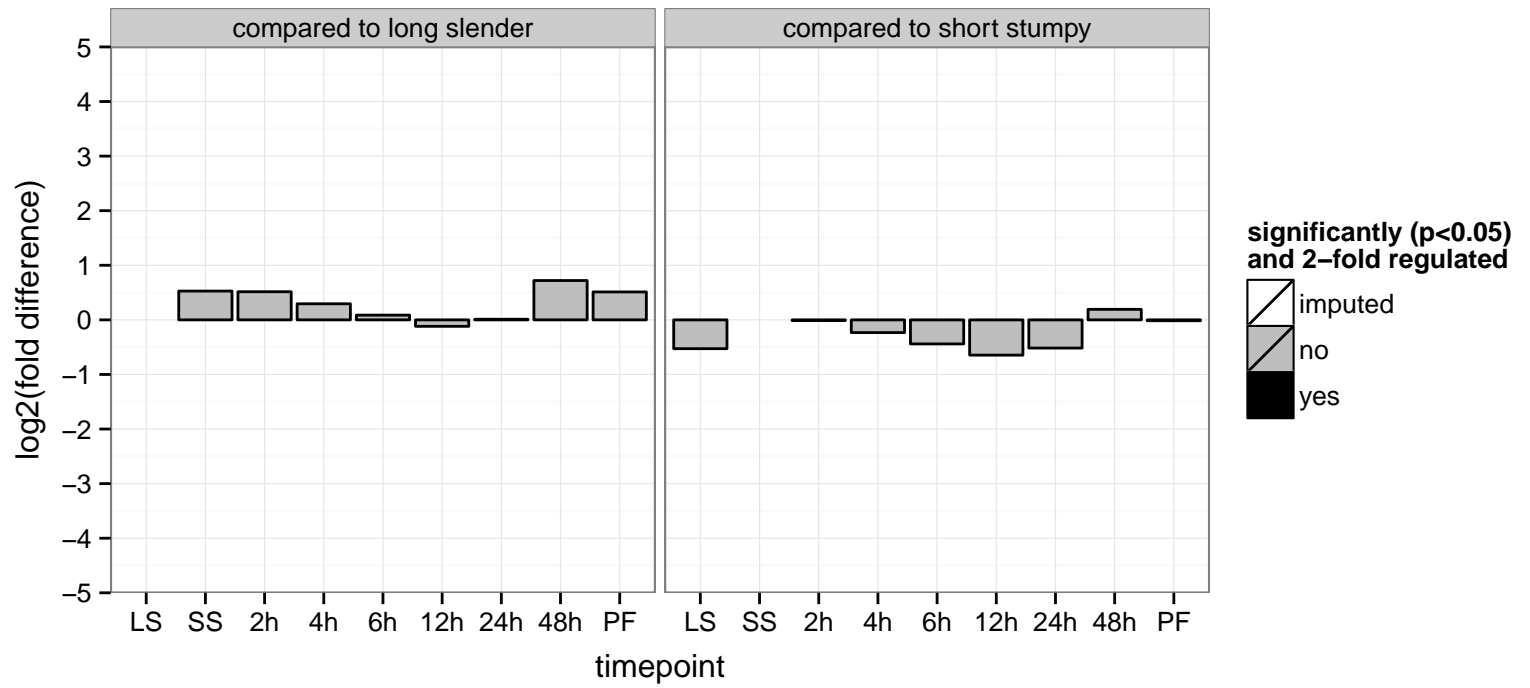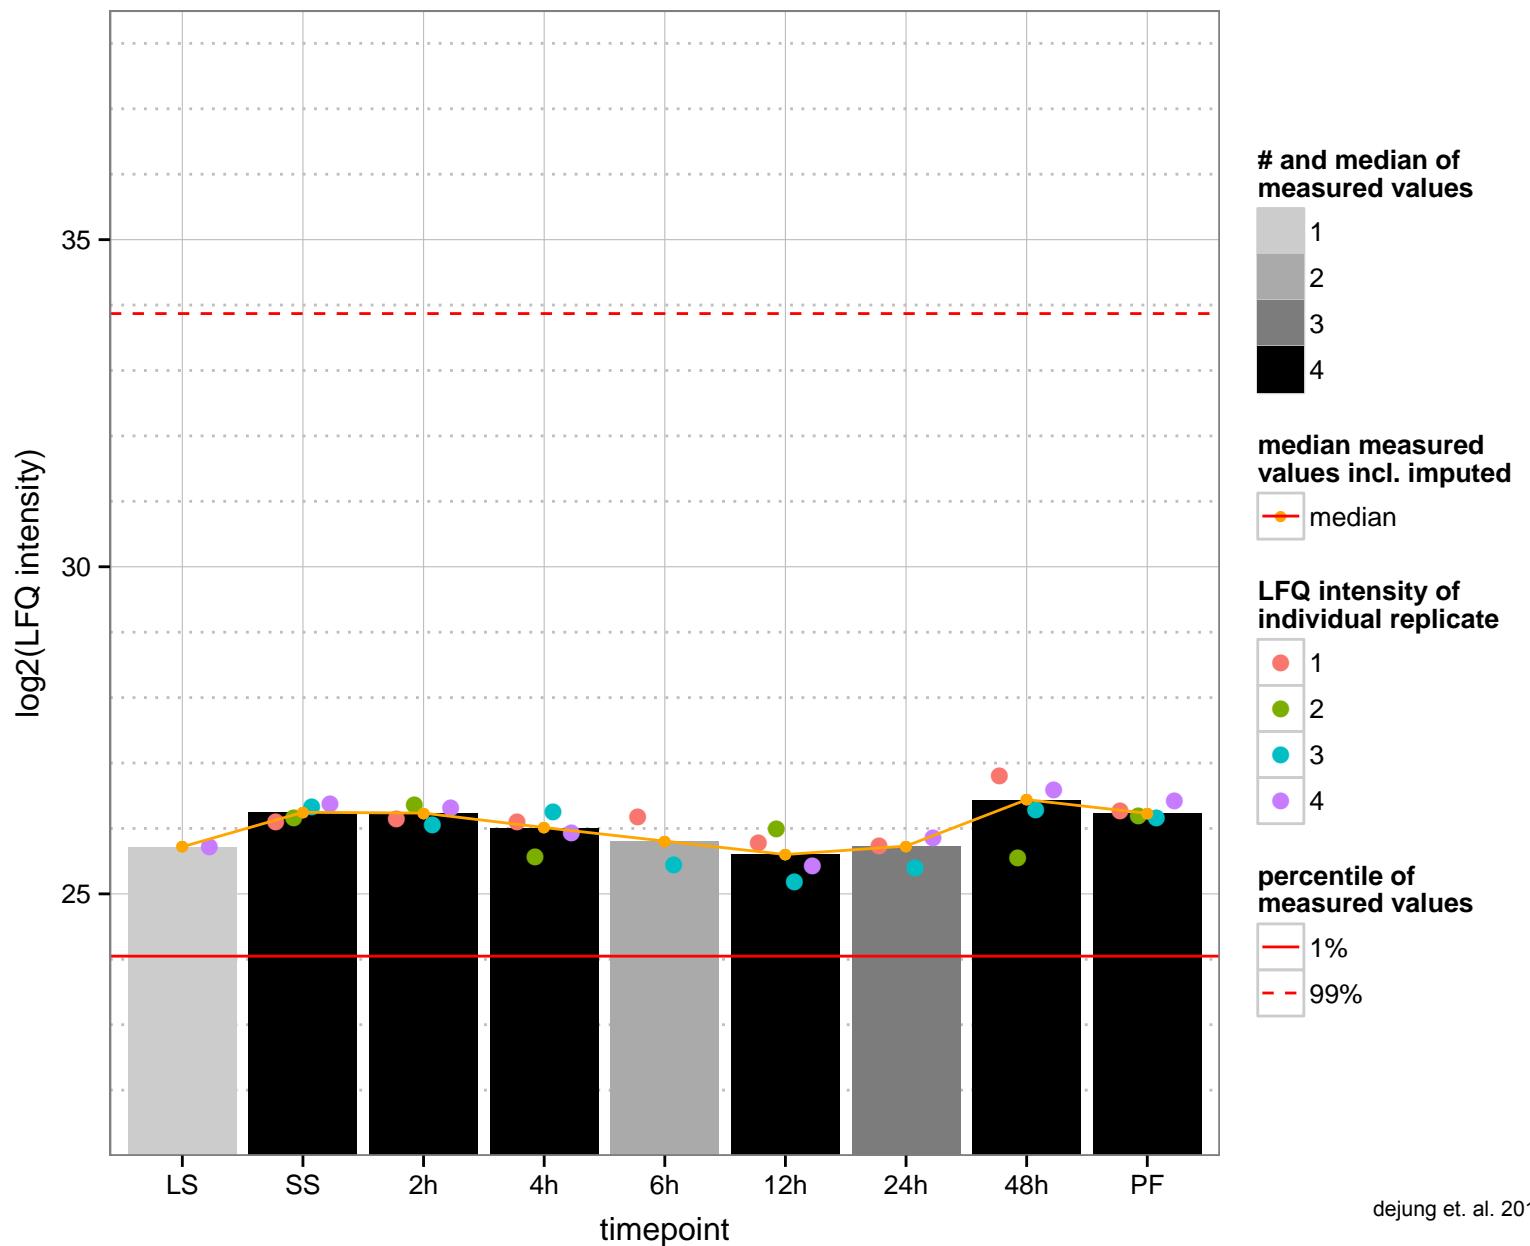

hypothetical protein, conserved  
 Tb927.6.1190  
 AGOF: DNA binding  
 AGOC: nucleus  
 AGOP: DNA-dependent transcription, initiation, histone modification  
 PGO: DNA binding  
 PGO: nucleus  
 PGOP: DNA-dependent transcription, initiation, histone modification

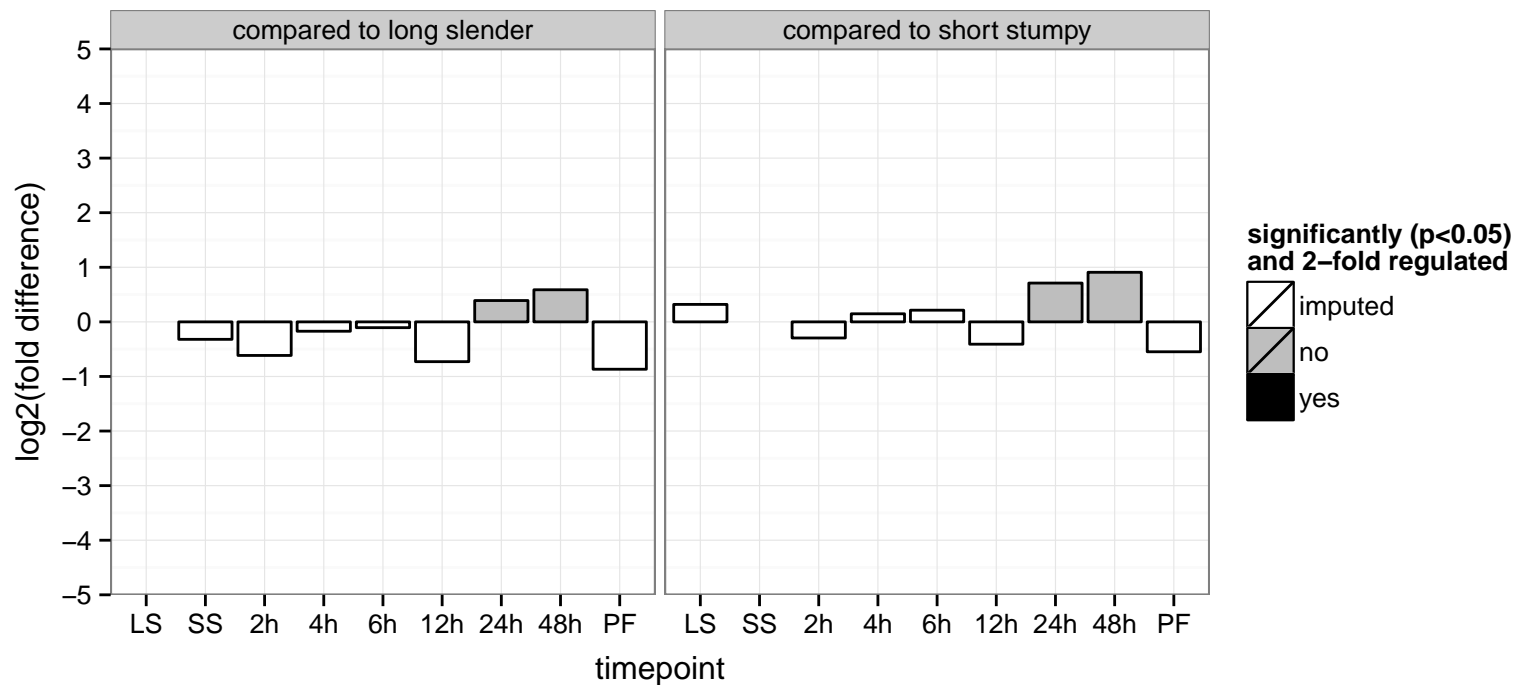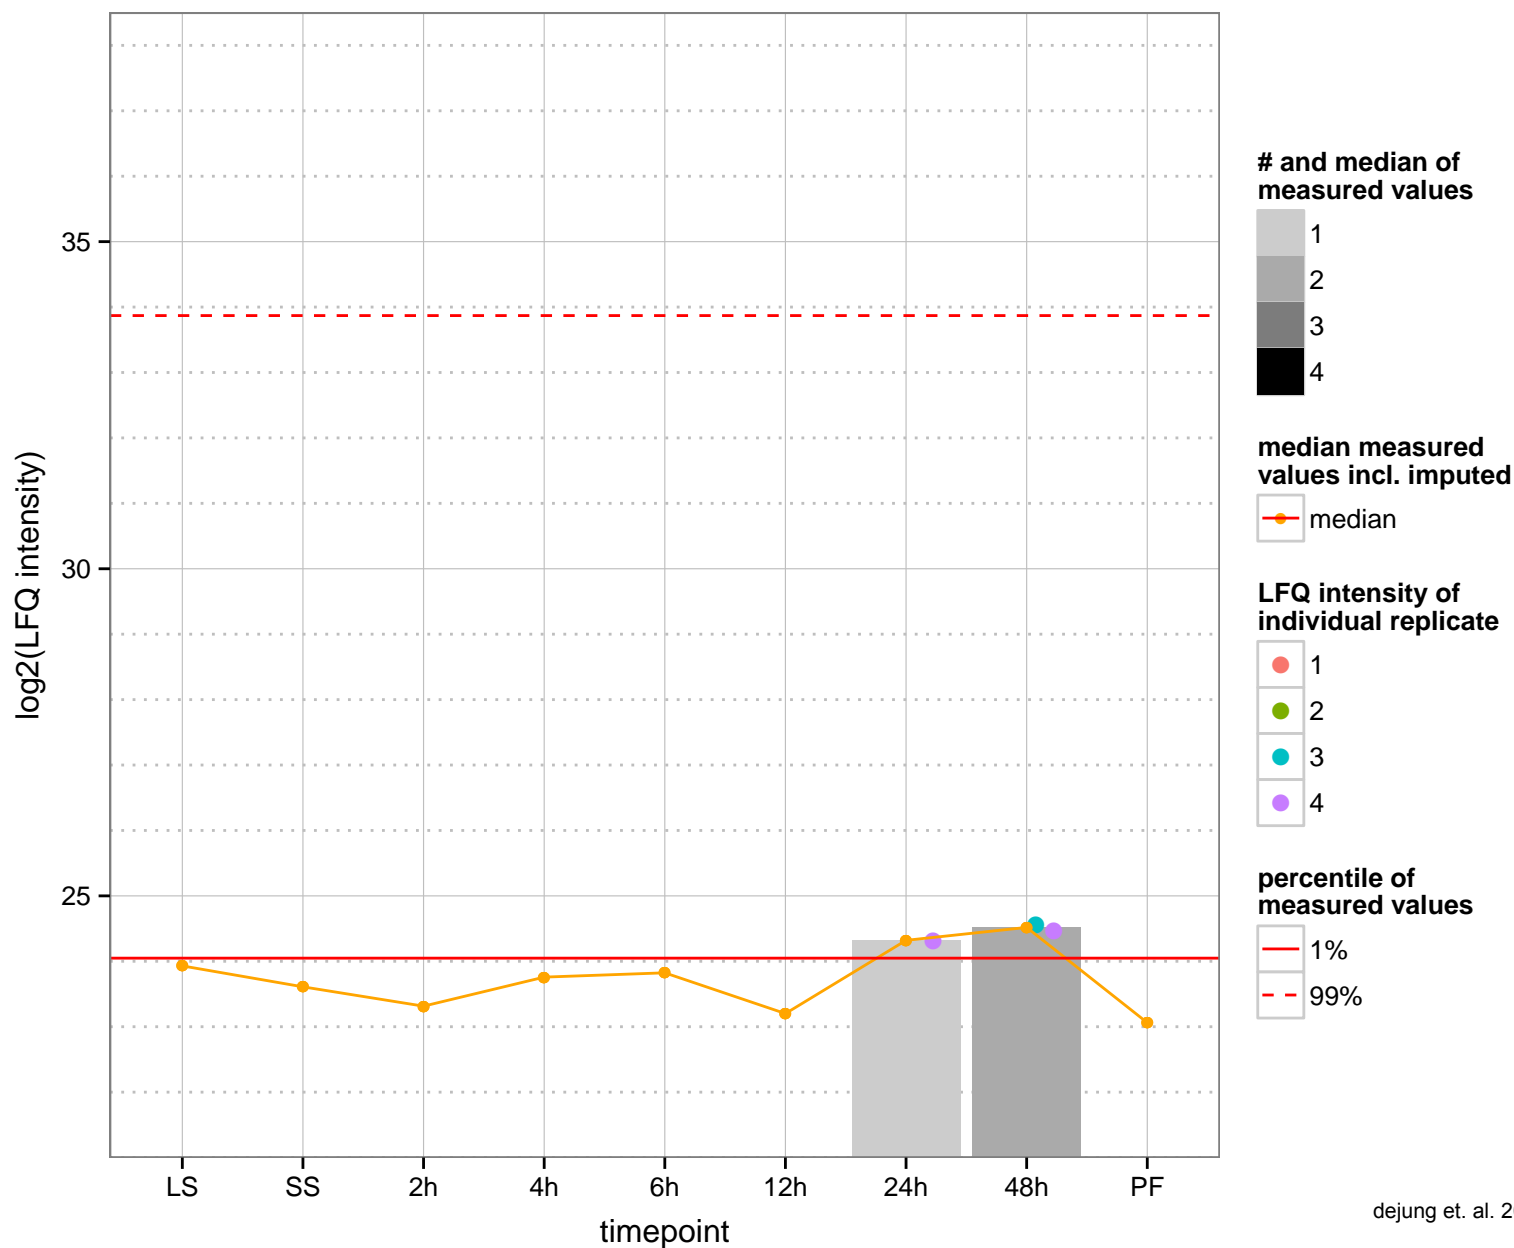

translation initiation factor EIF-2b alpha subunit, putative, eIF-2B GDP-GTP exchange factor  
 Tb927.6.1280  
 AGOF: null  
 AGOC: null  
 AGOP: cellular metabolic process  
 PGO: null  
 PGO: null  
 PGO: null  
 PGO: cellular metabolic process

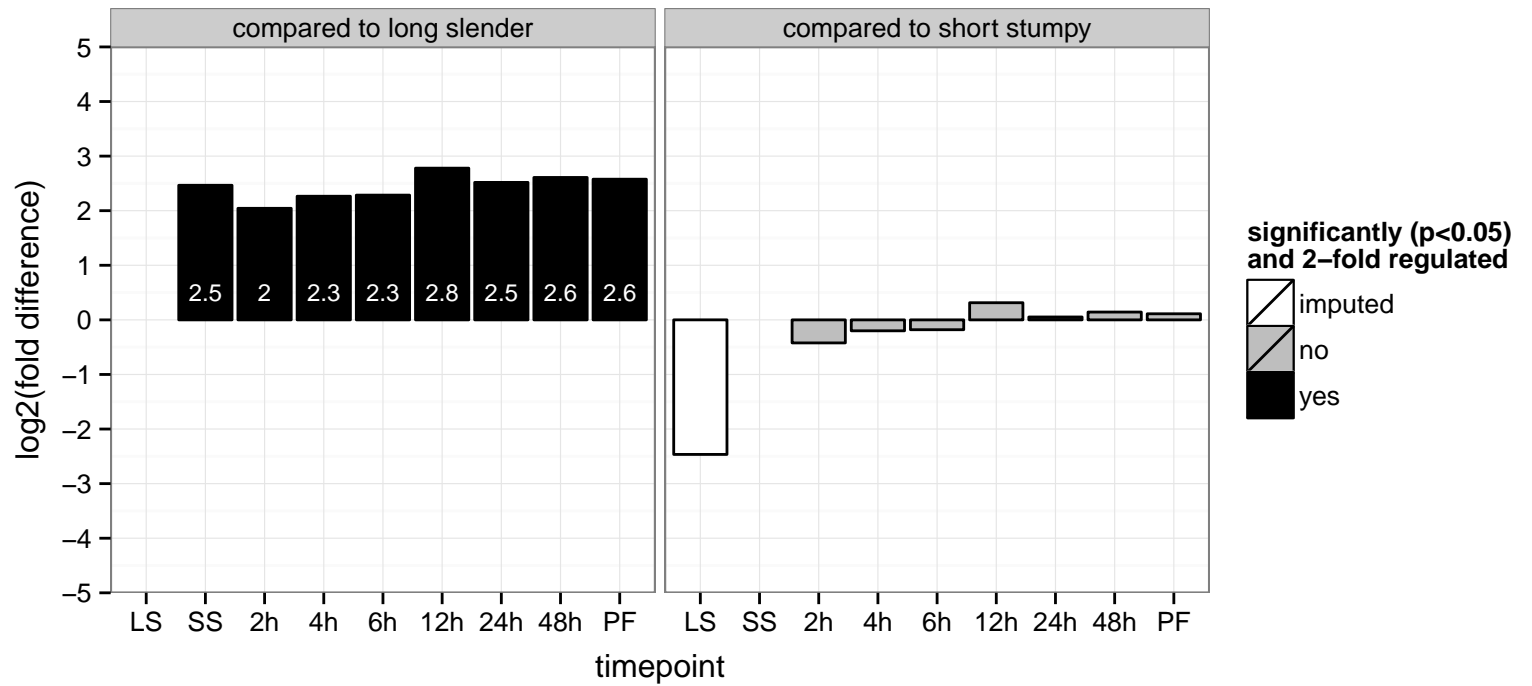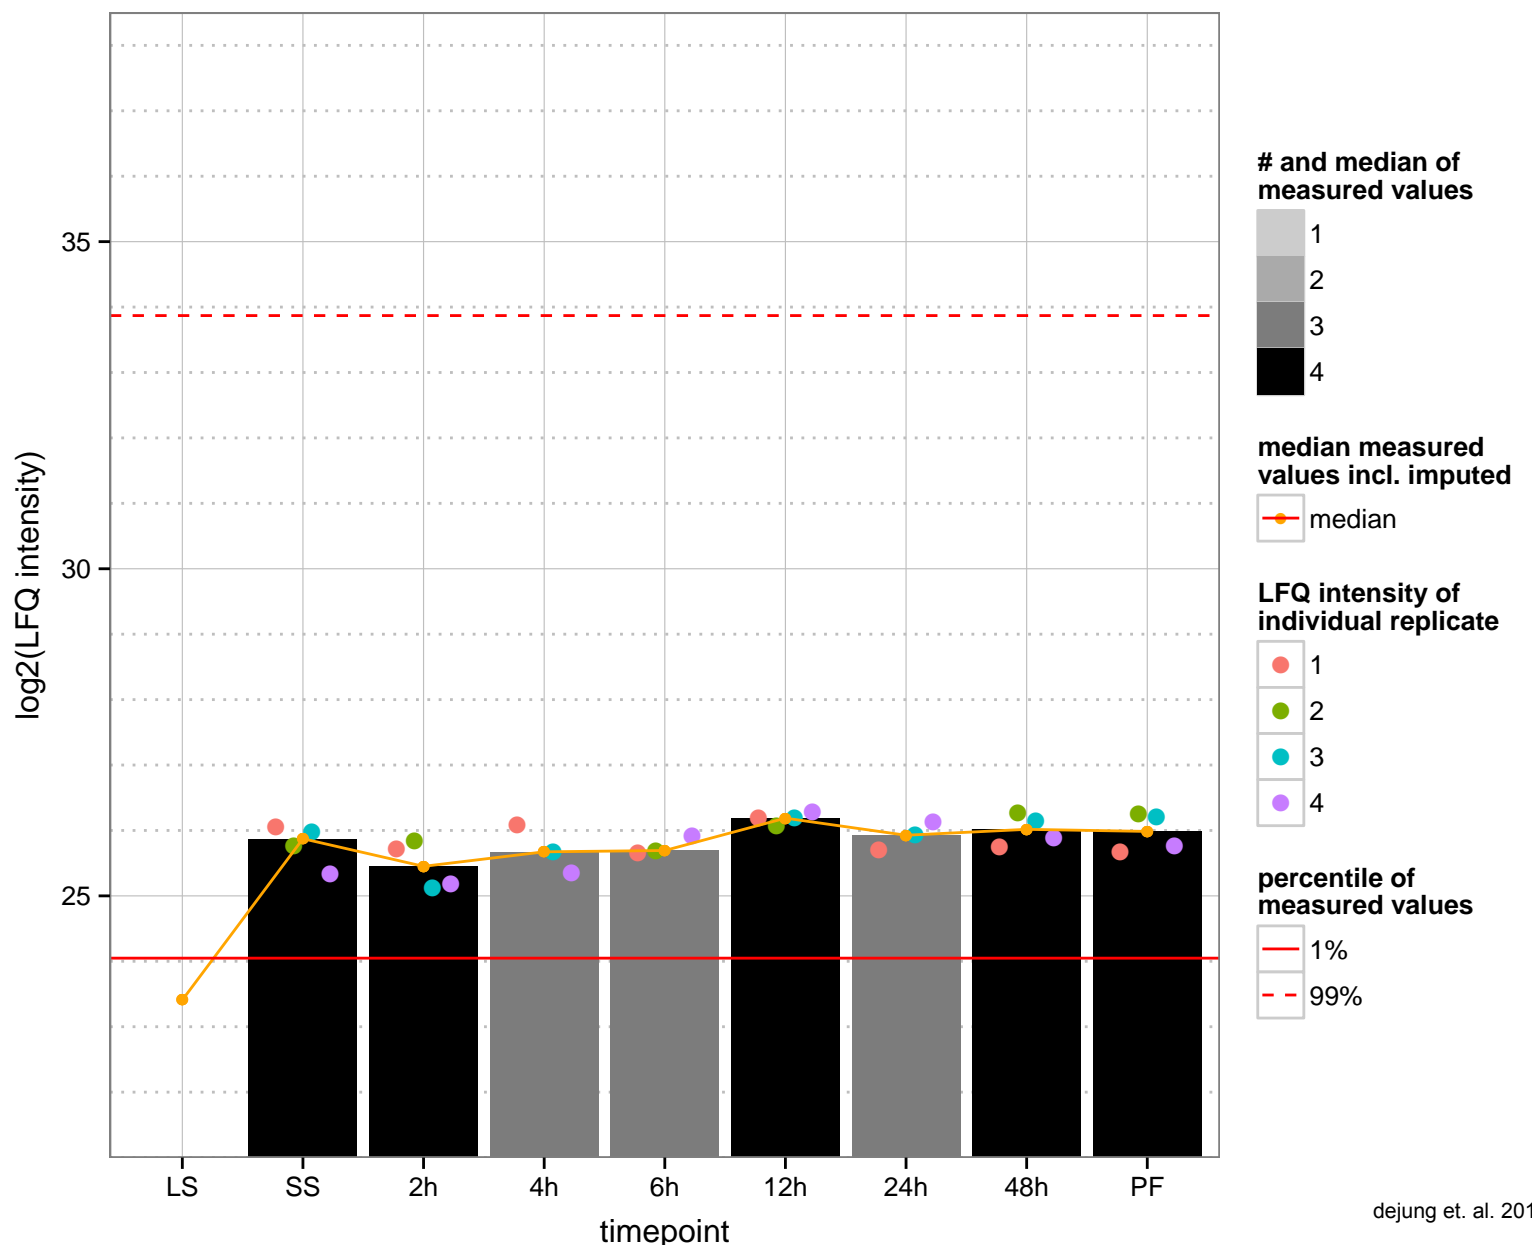

2-hydroxy-3-oxopropionate reductase, putative  
Tb927.6.1570  
AGOF: phosphogluconate dehydrogenase (decarboxylating) activity  
AGOC: null  
AGOP: pentose-phosphate shunt  
PGOF: oxidoreductase activity, phosphogluconate dehydrogenase (decarboxylating) activity  
PGOC: null  
PGOP: oxidation-reduction process, pentose-phosphate shunt

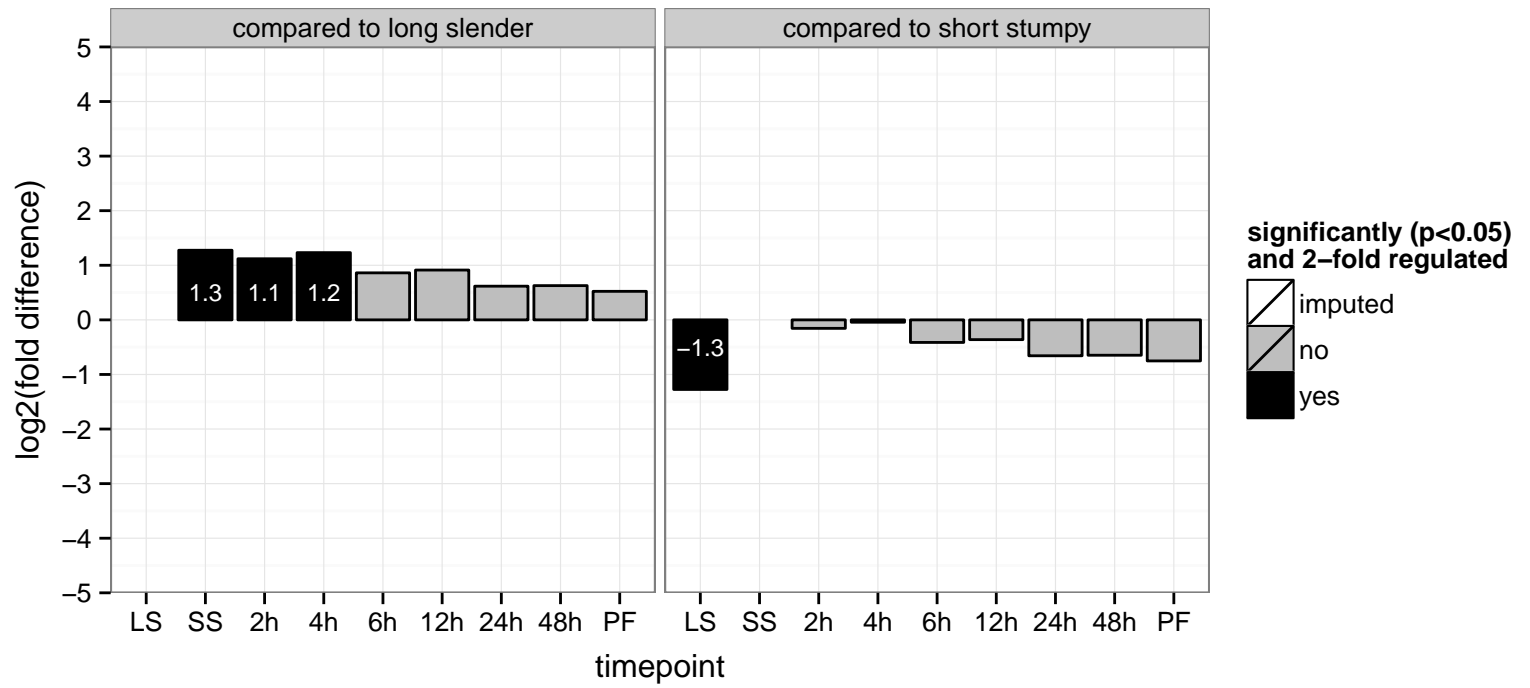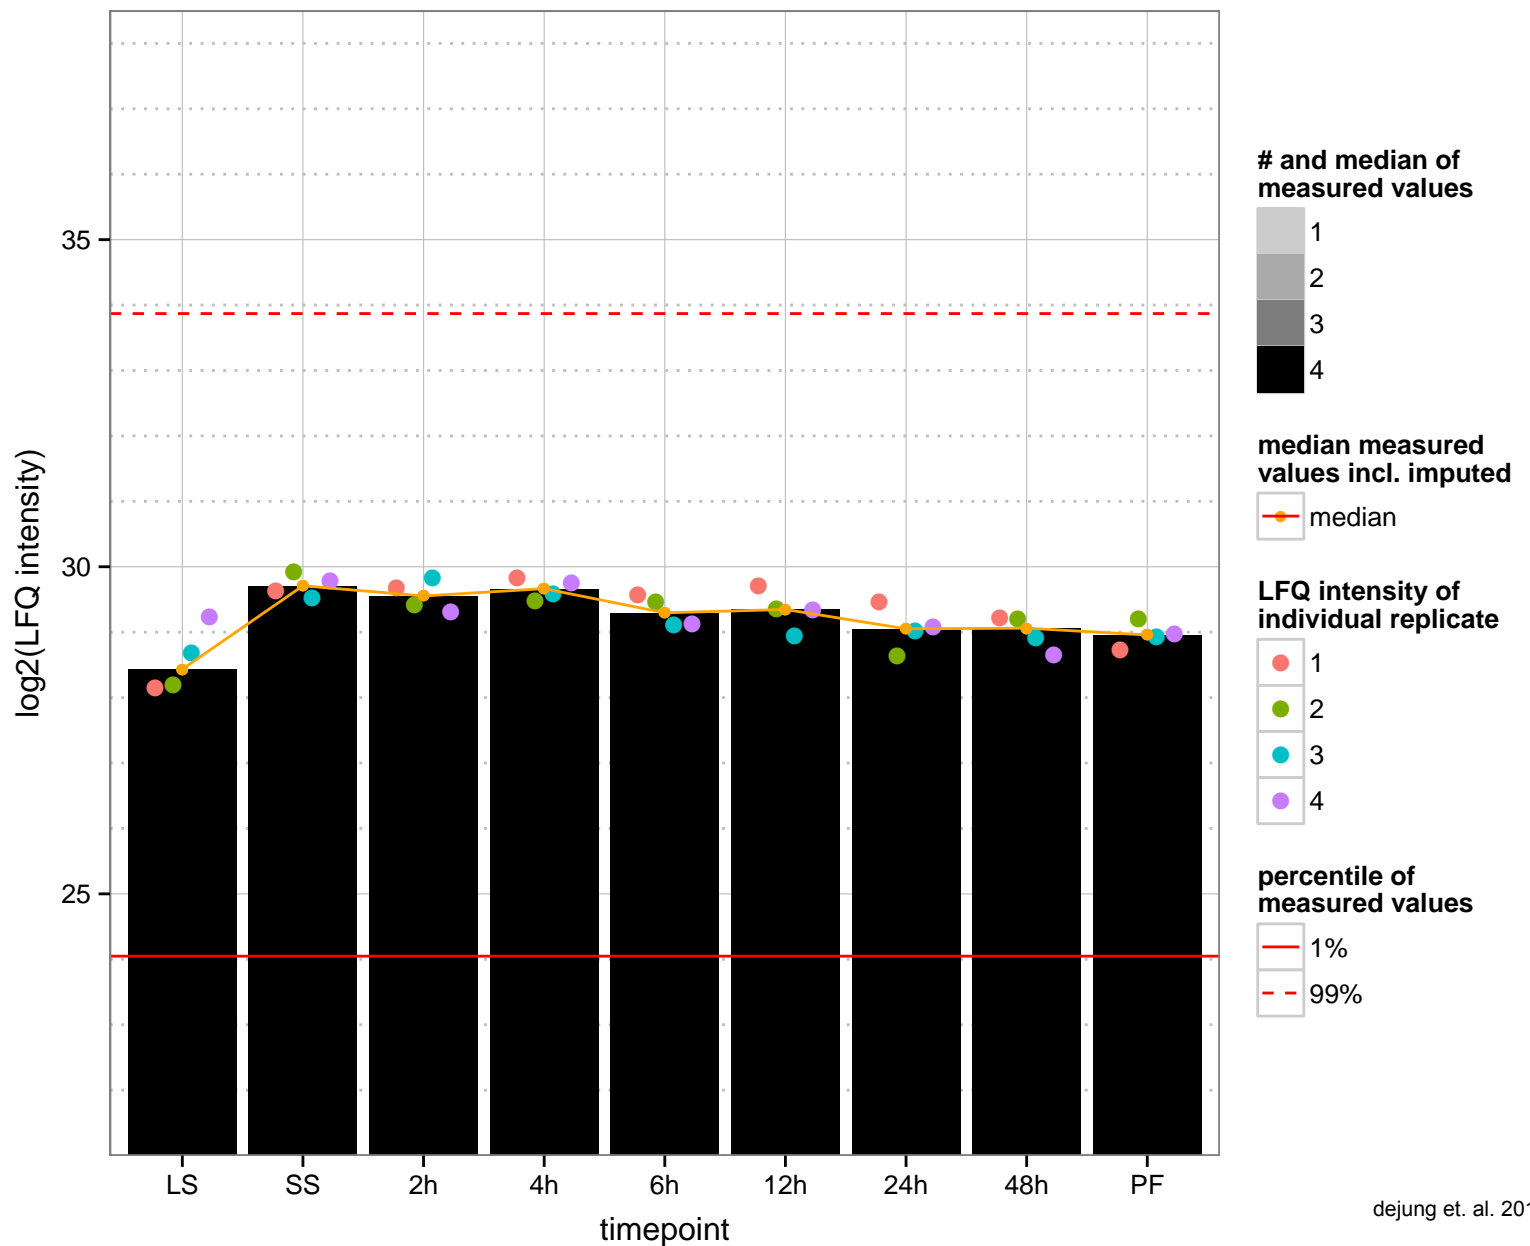

hypothetical protein, conserved  
 Tb927.6.1660  
 AGOF: null  
 AGOC: null  
 AGOP: null  
 PGO: null  
 PGOC: null  
 PGOP: null

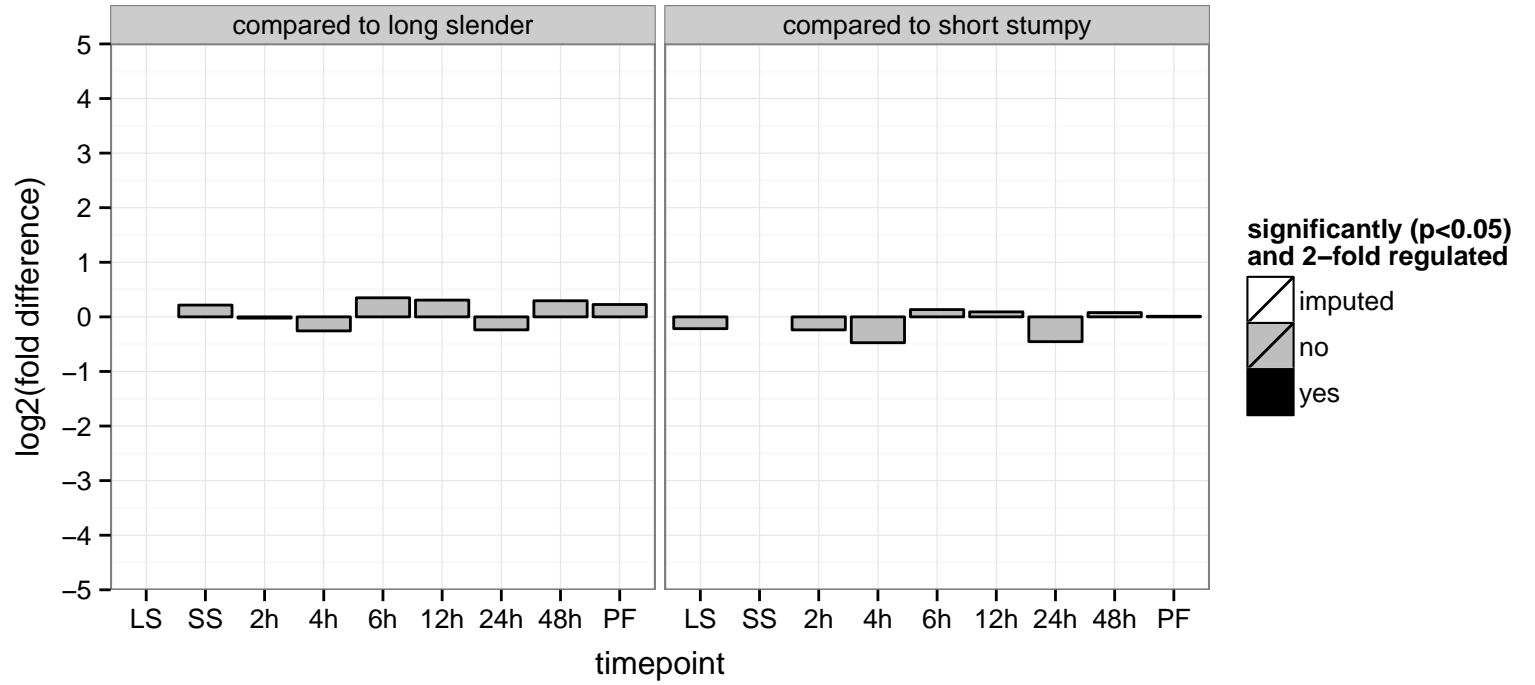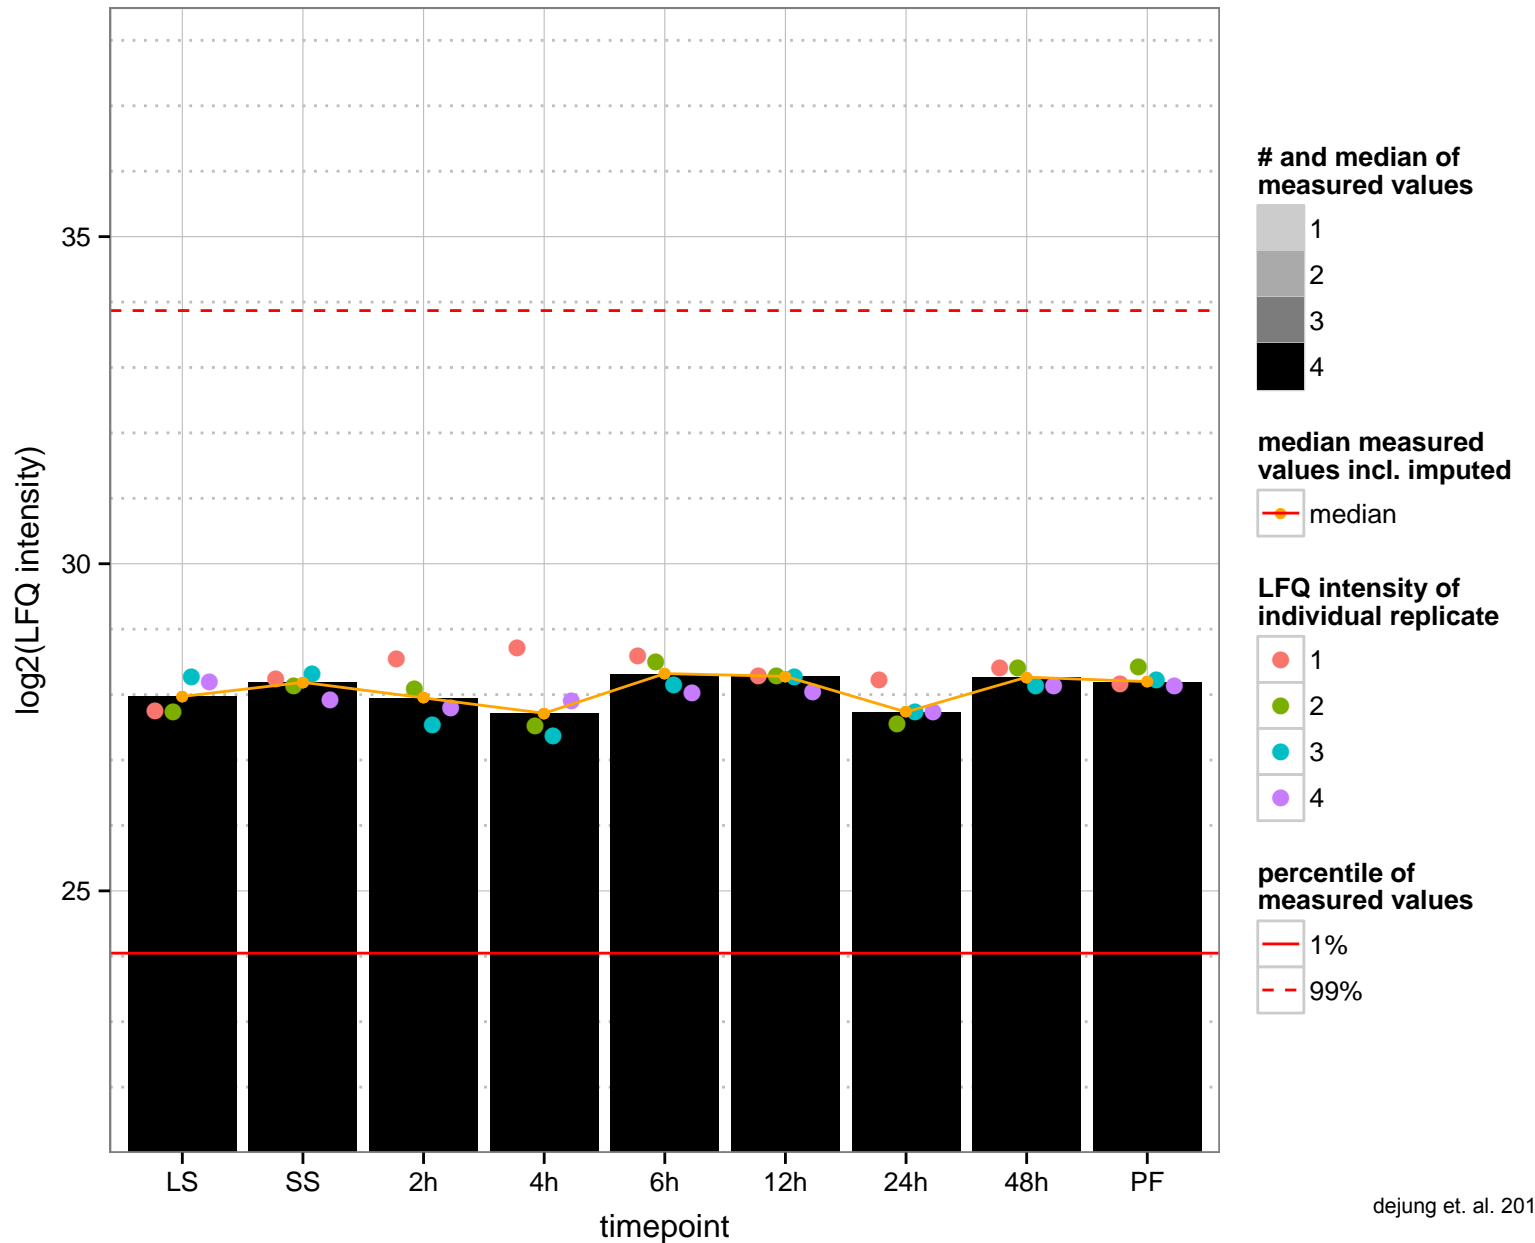

aspartyl-tRNA synthetase, putative

Tb927.6.1880

AGOF: ATP binding, aspartate-tRNA ligase activity, nucleic acid binding

AGOC: cytoplasm

AGOP: aspartyl-tRNA aminoacylation, translation

PGOF: ATP binding, aminoacyl-tRNA ligase activity, aspartate-tRNA ligase activity, nucleic acid binding, nucleotide binding

PGOC: cytoplasm

PGOP: aspartyl-tRNA aminoacylation, tRNA aminoacylation for protein translation

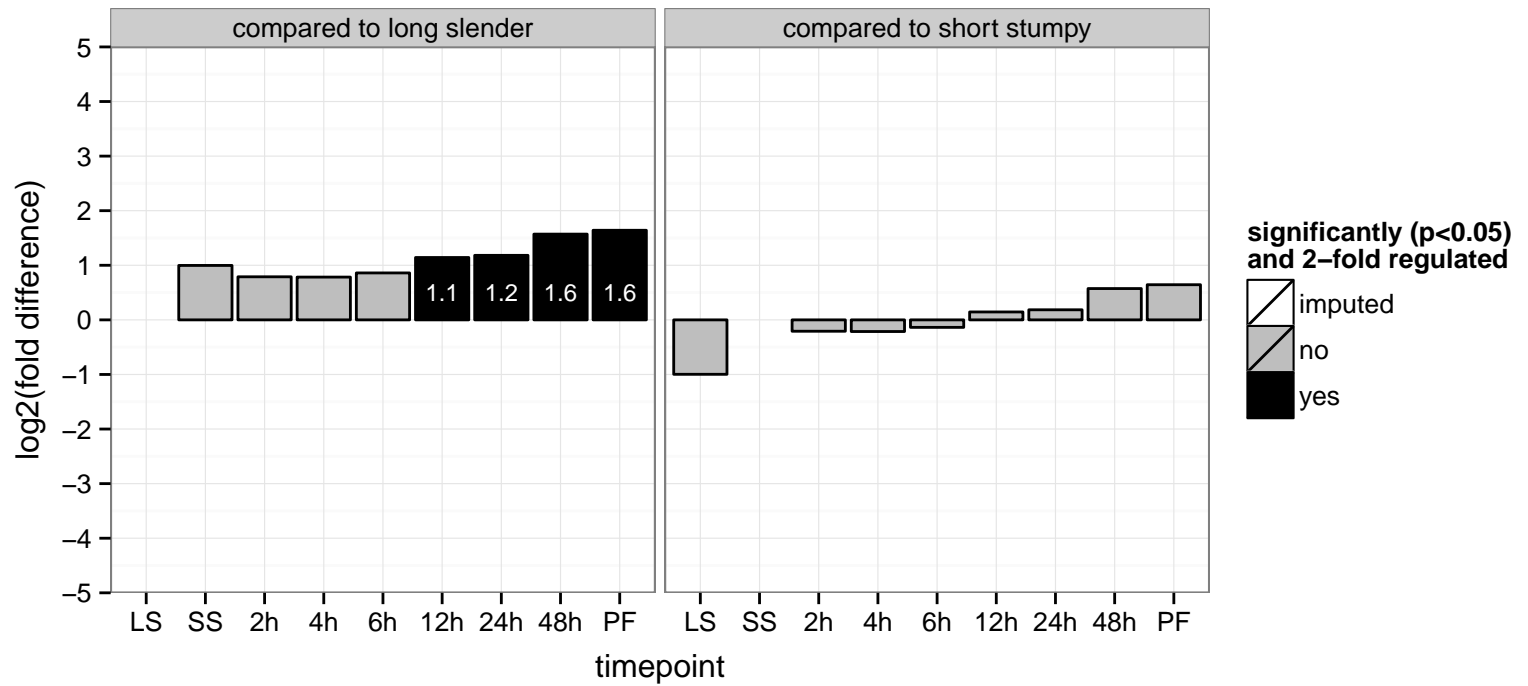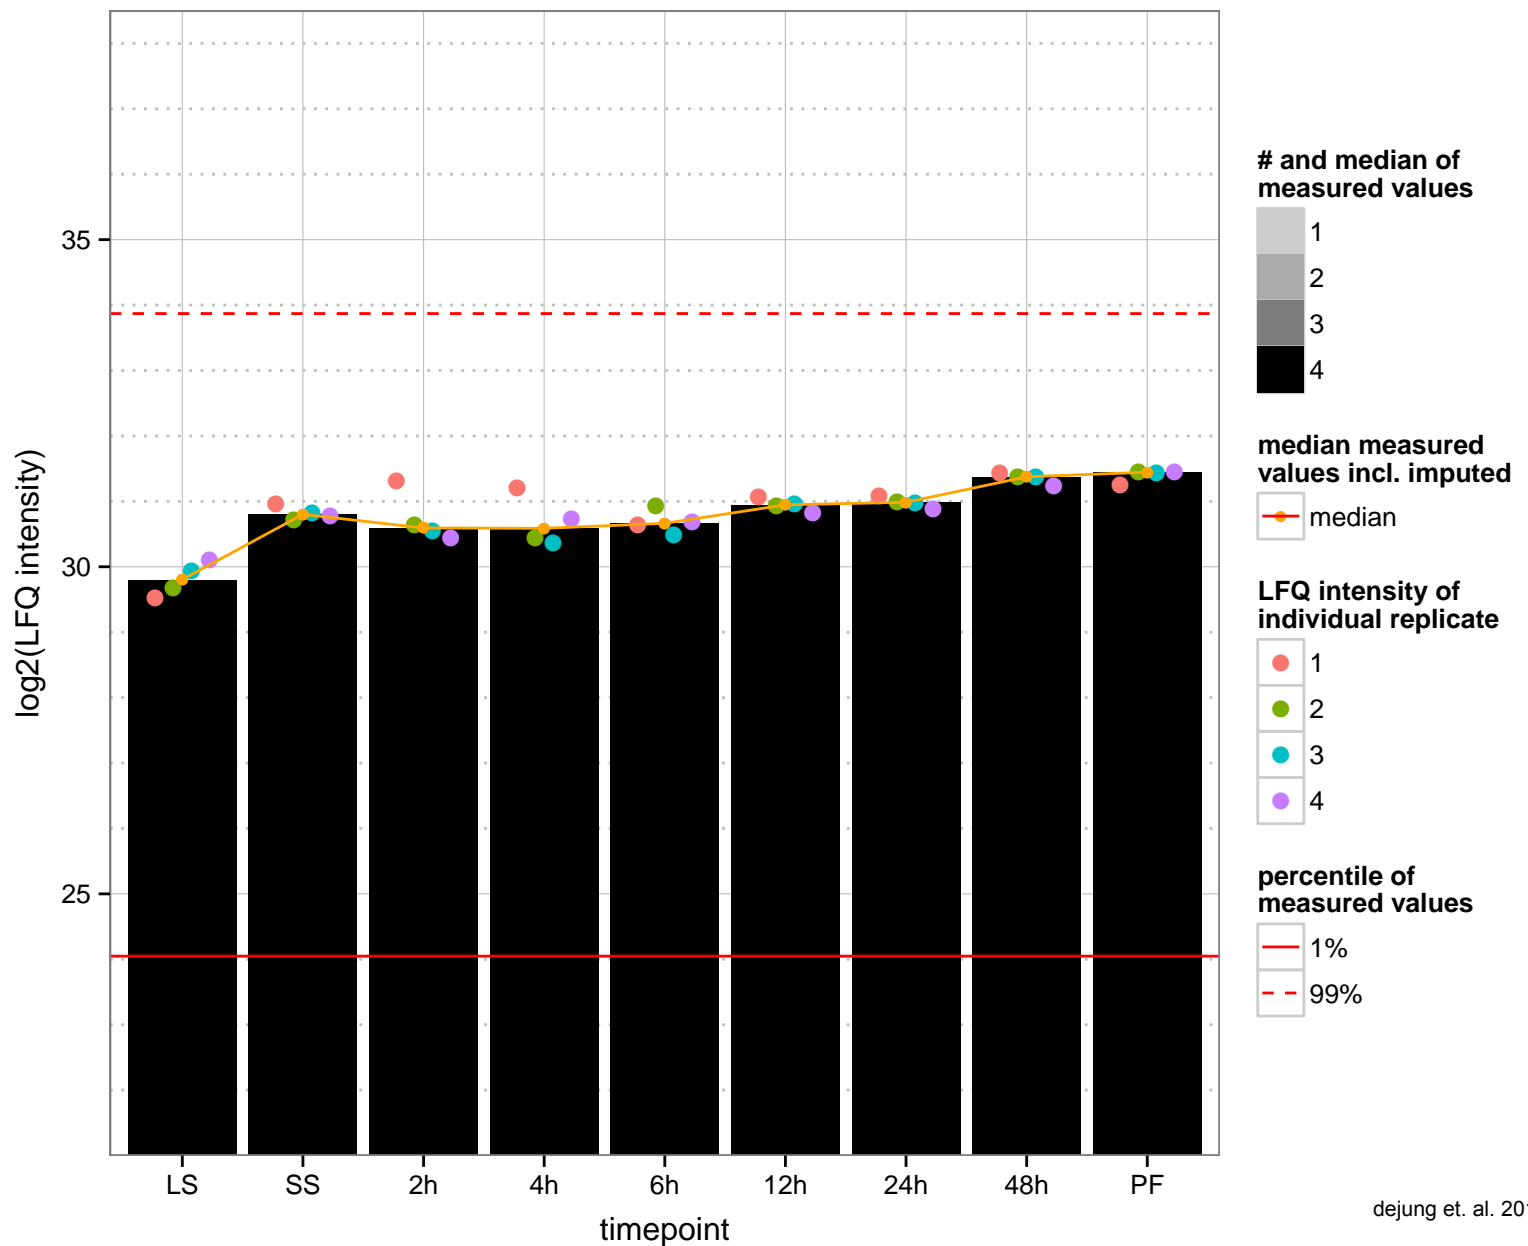

Essential nuclear protein 1, putative (enp1)

Tb927.6.1900

AGOF: snoRNA binding

AGOC: nucleolus

AGOP: maturation of SSU-rRNA from tricistronic rRNA transcript (SSU-rRNA, 5.8S rRNA, LSU-rRNA), rRNA processing

PGOF: null

PGOC: null

PGOP: null

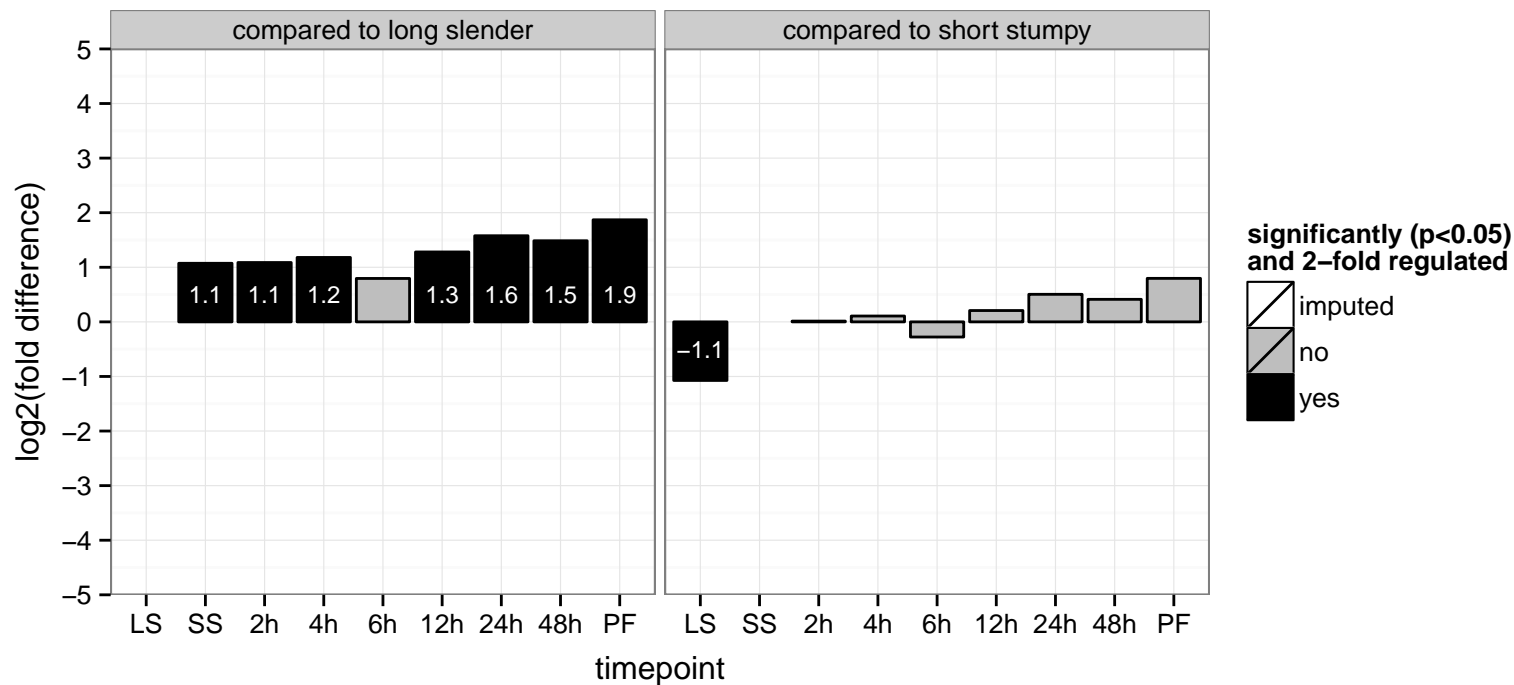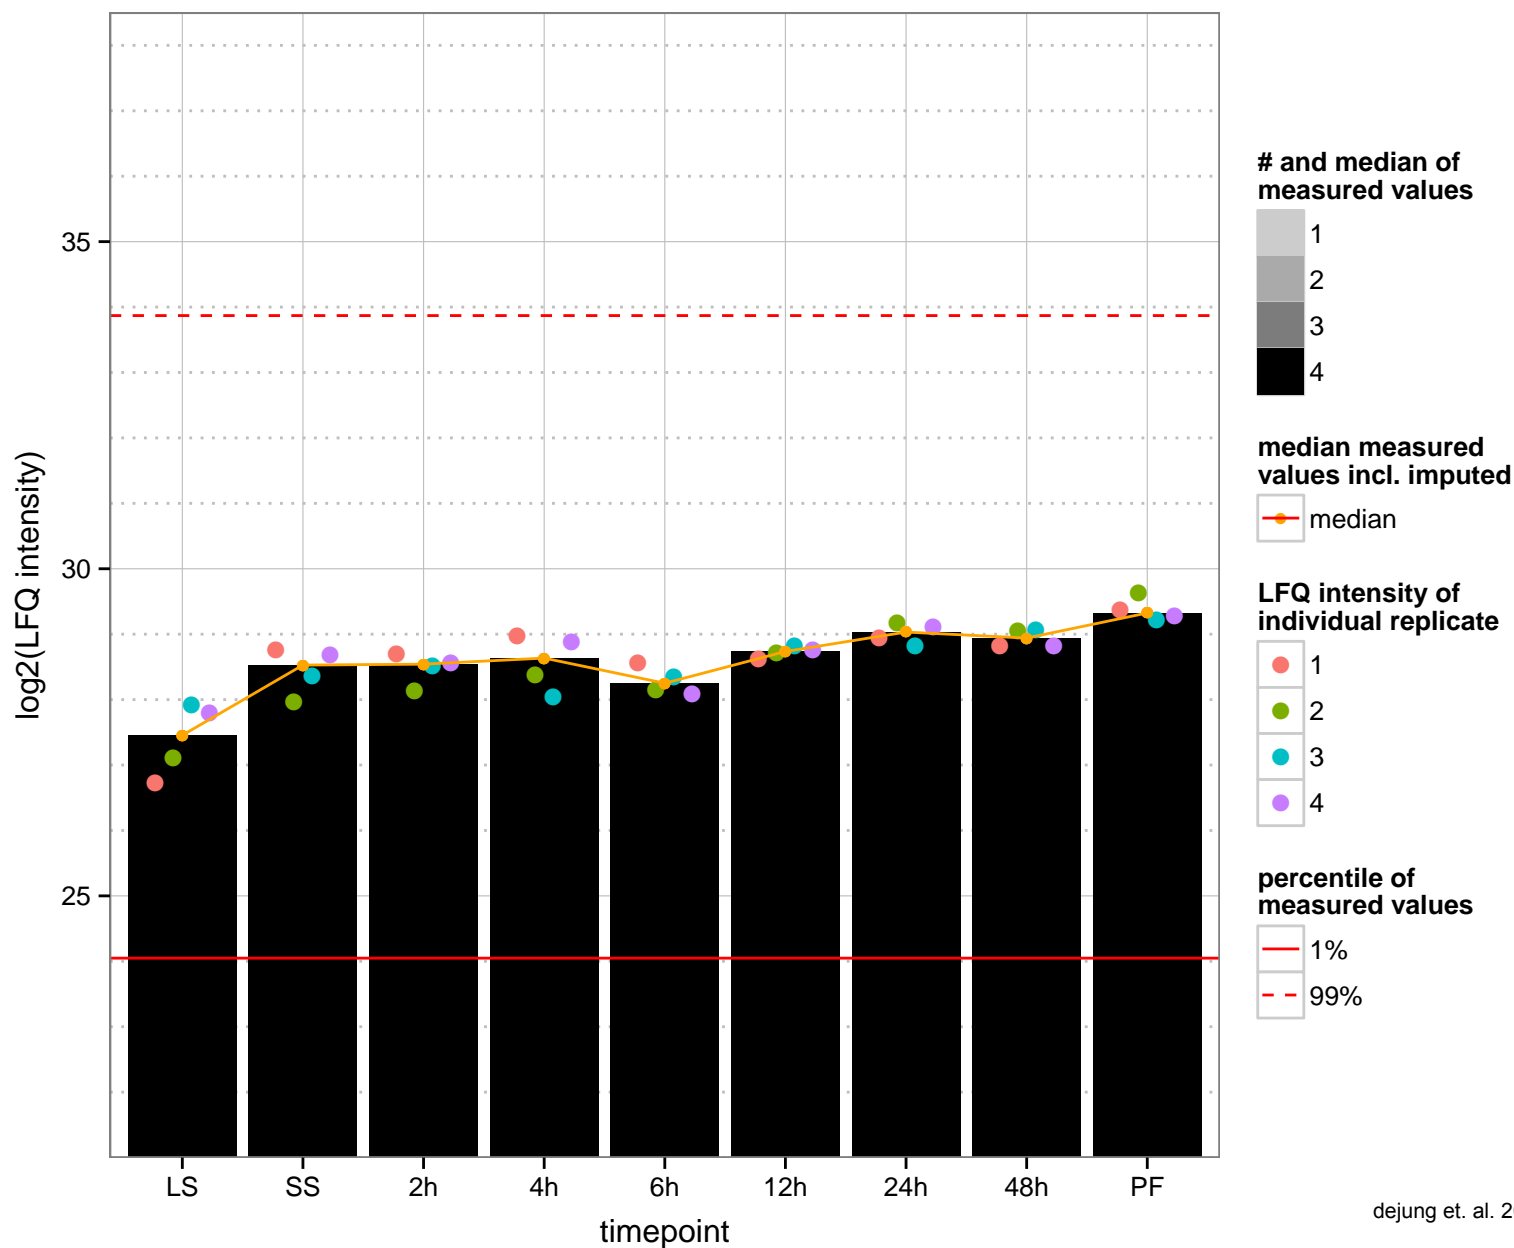



hypothetical protein, conserved  
 Tb927.6.1920  
 AGOF: null  
 AGOC: null  
 AGOP: null  
 PGO: null  
 PGOC: null  
 PGOP: null

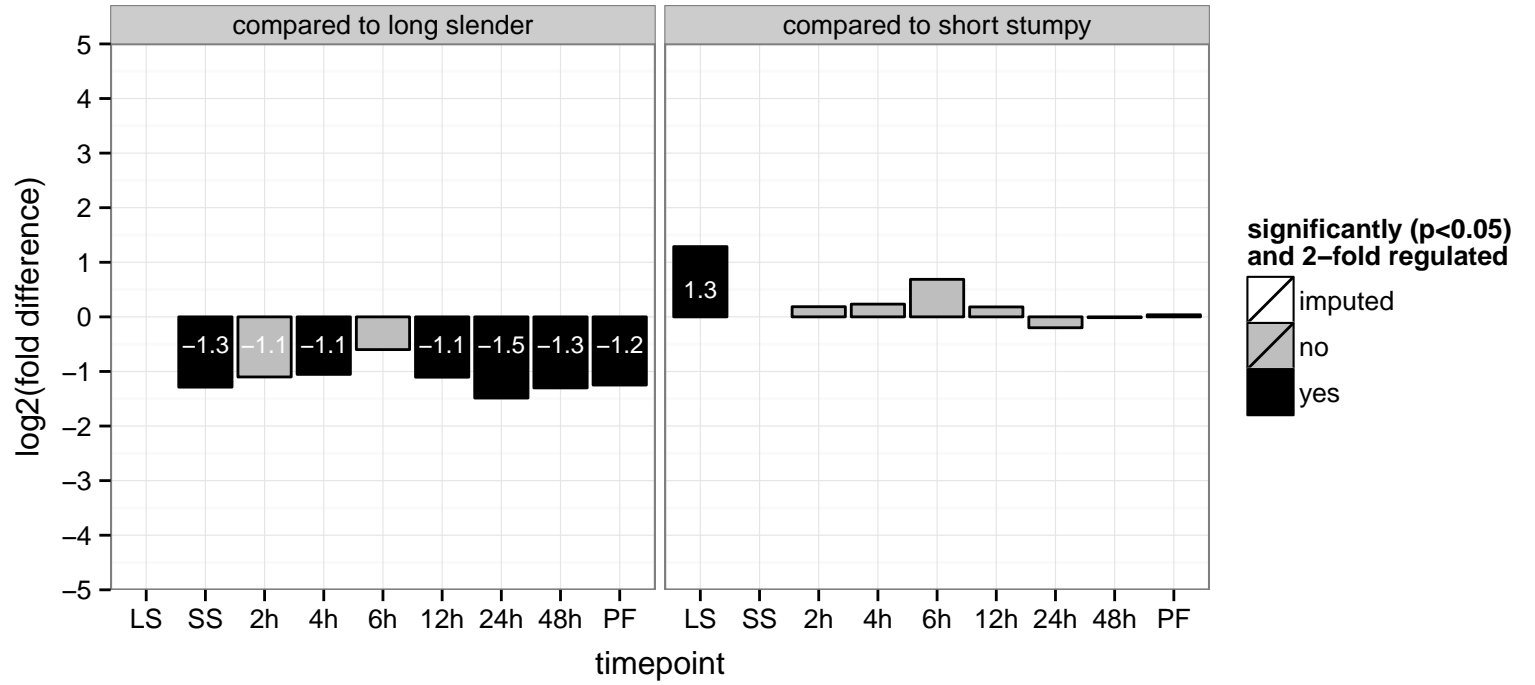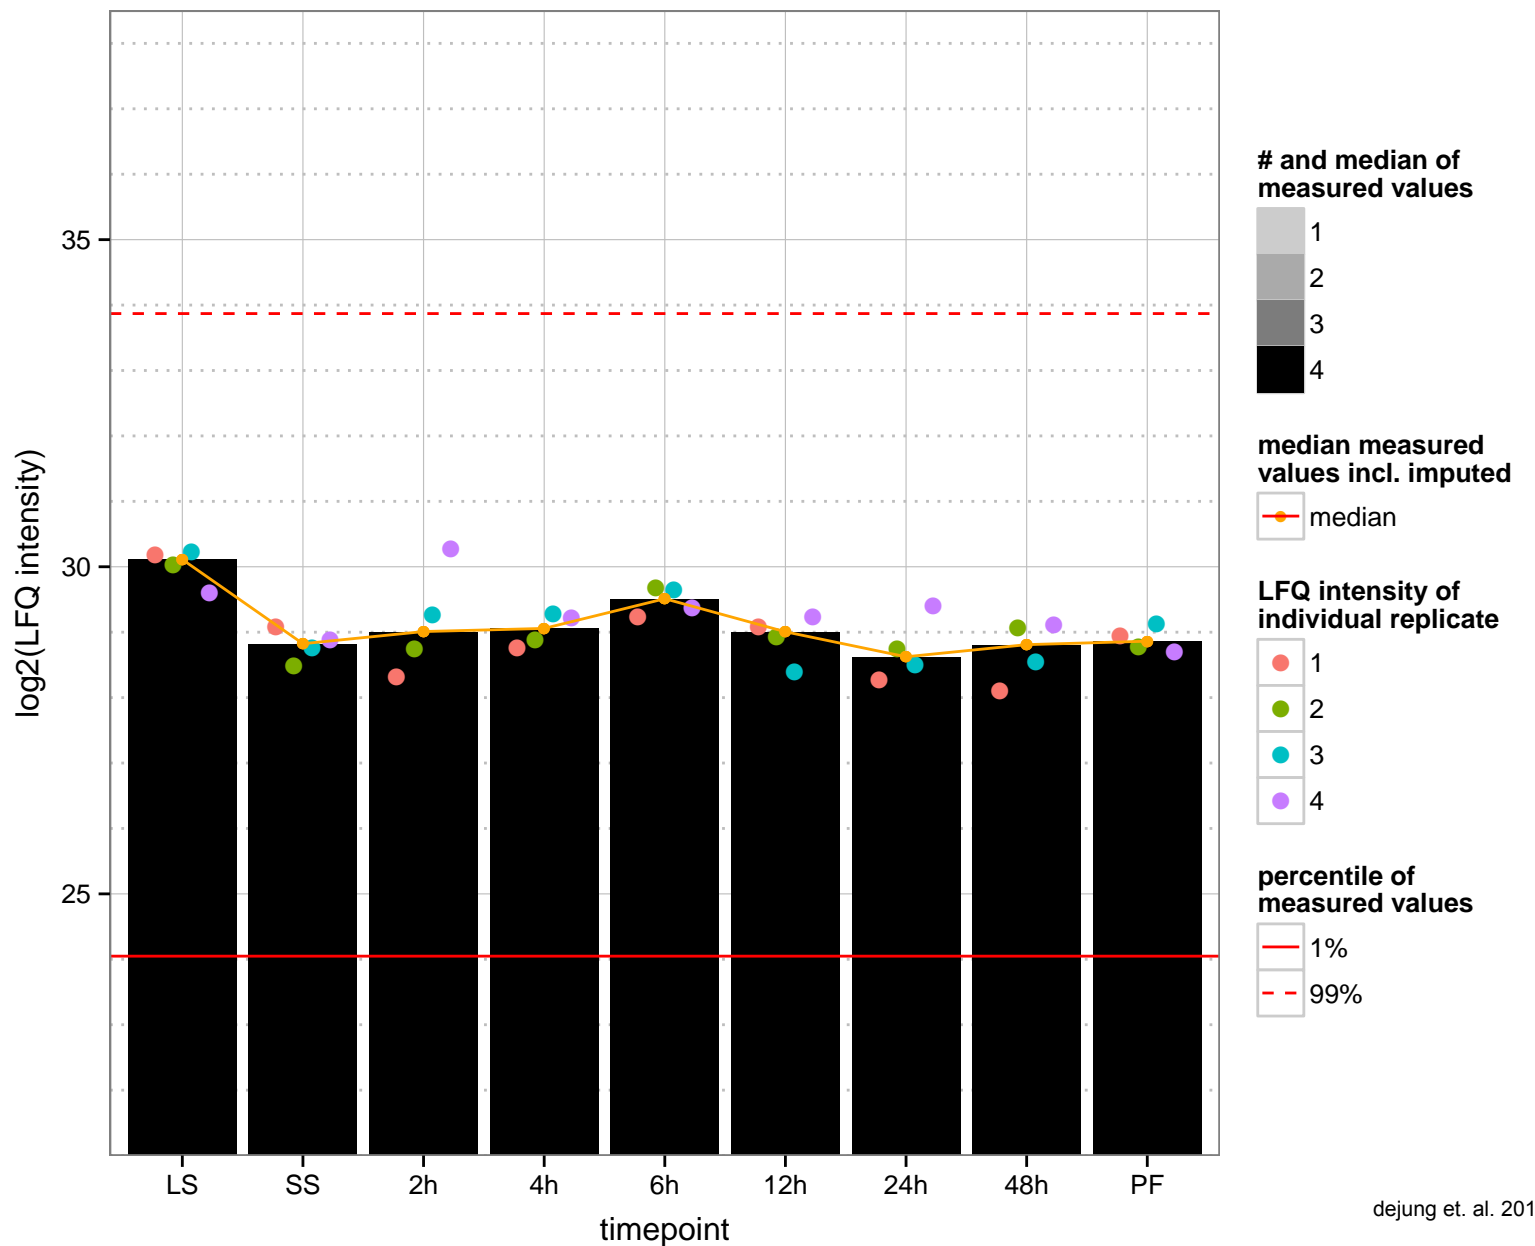

hypothetical protein, conserved  
 Tb927.6.1950  
 AGOF: null  
 AGOC: null  
 AGOP: null  
 PGO: null  
 PGOC: null  
 PGOP: null

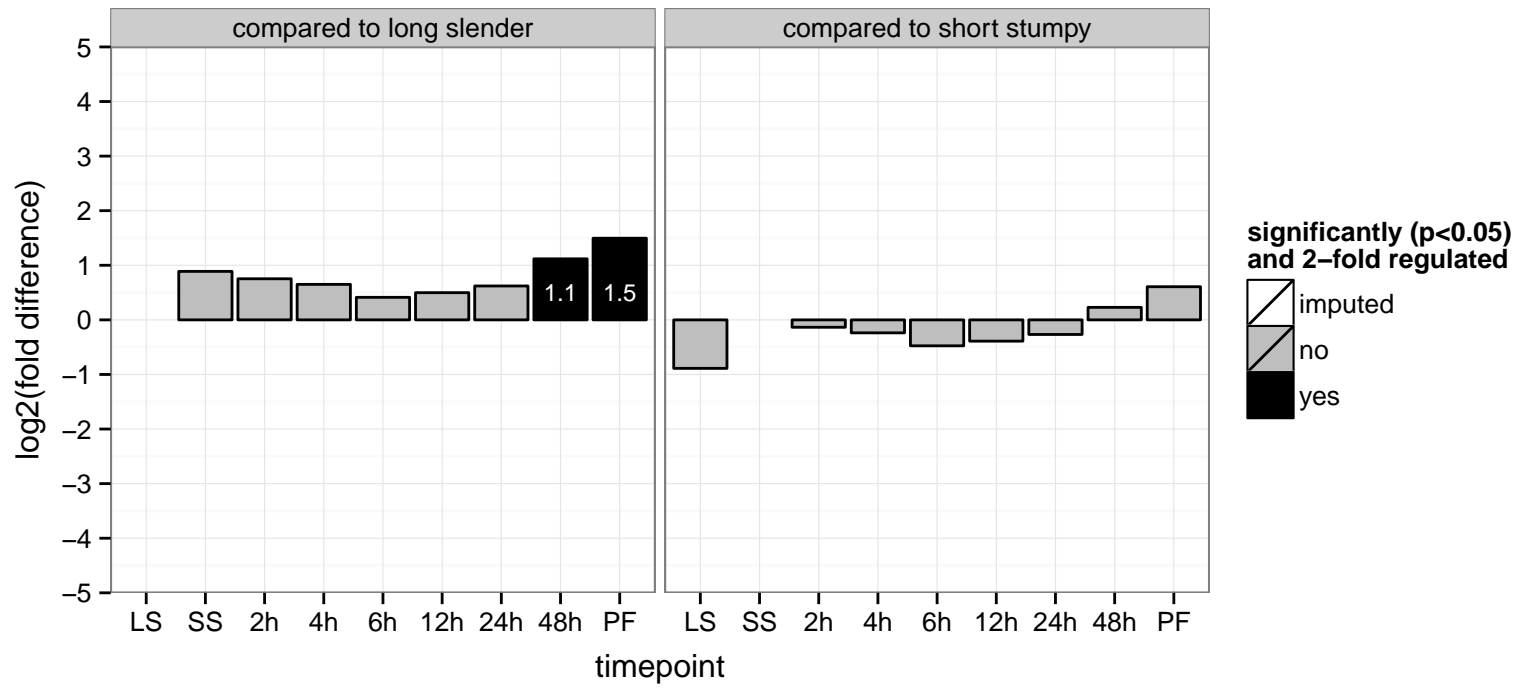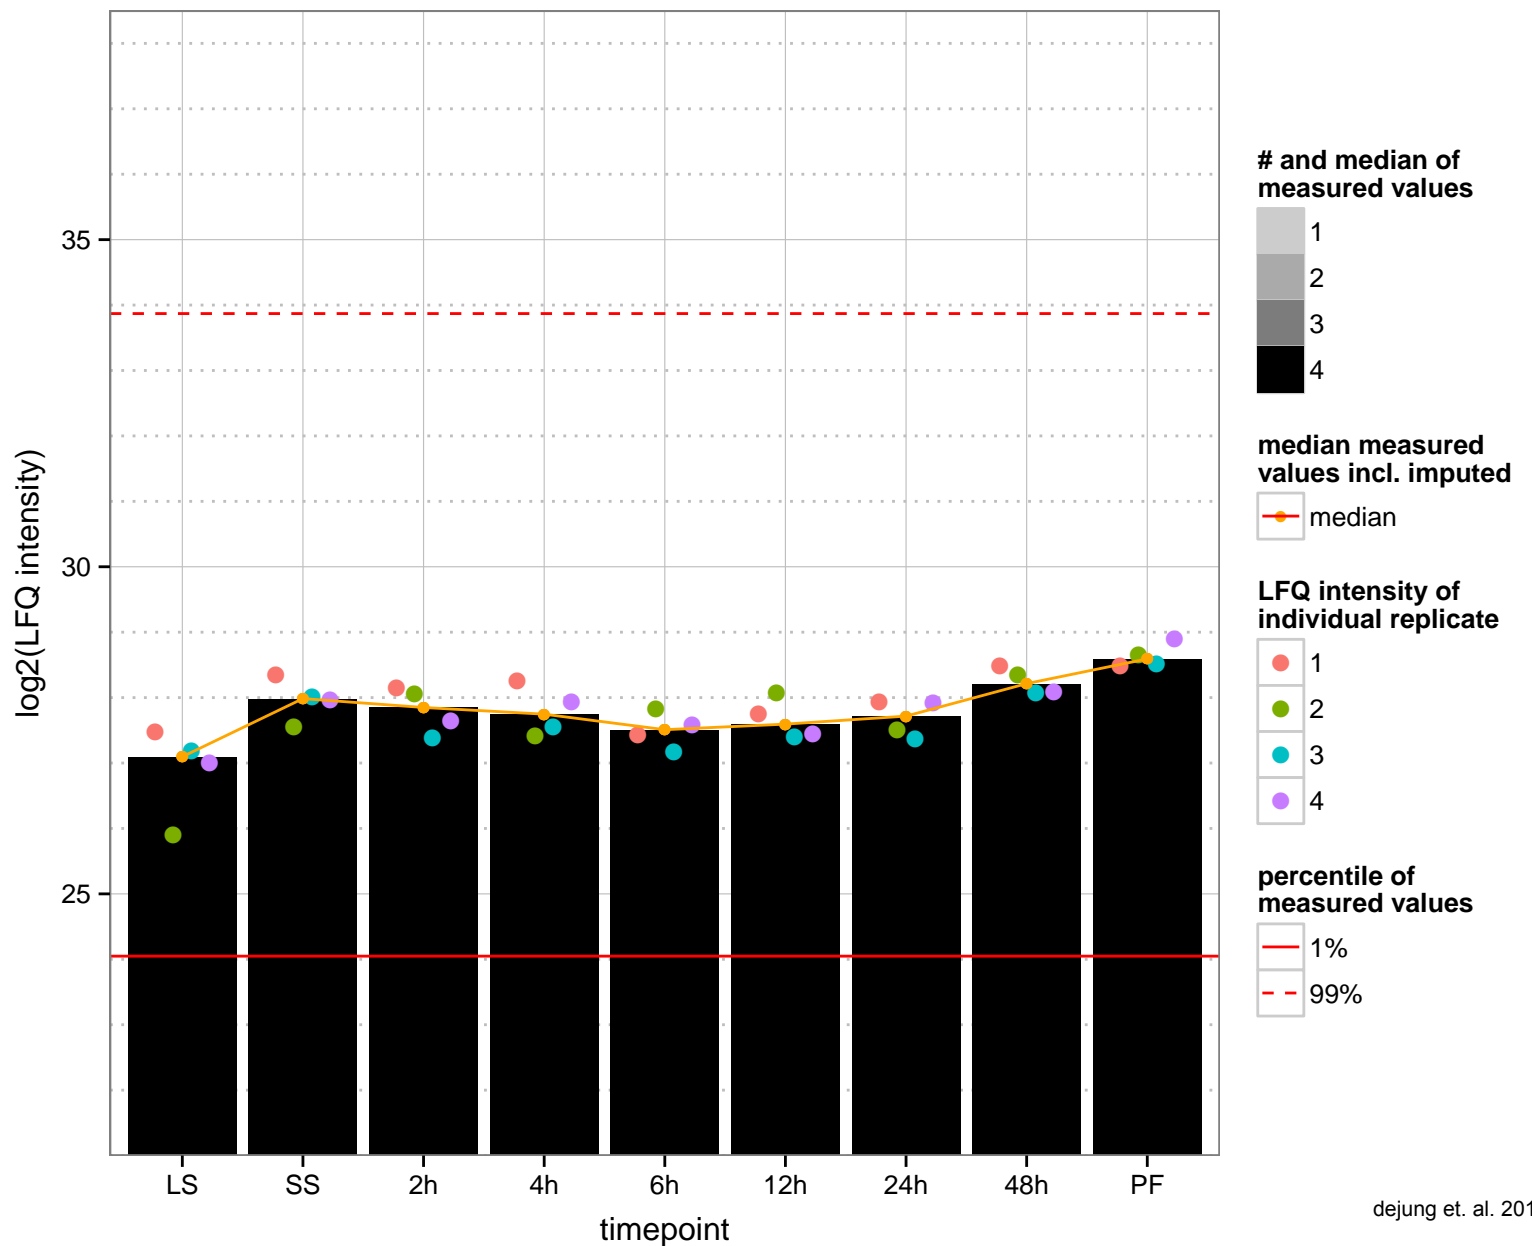

NA, hypothetical protein, conserved  
 Tb927.6.1990  
 AGOF: NA, null  
 AGOC: NA, null  
 AGOP: NA, null  
 PGO: NA, null  
 PGOC: NA, null  
 PGOP: NA, null

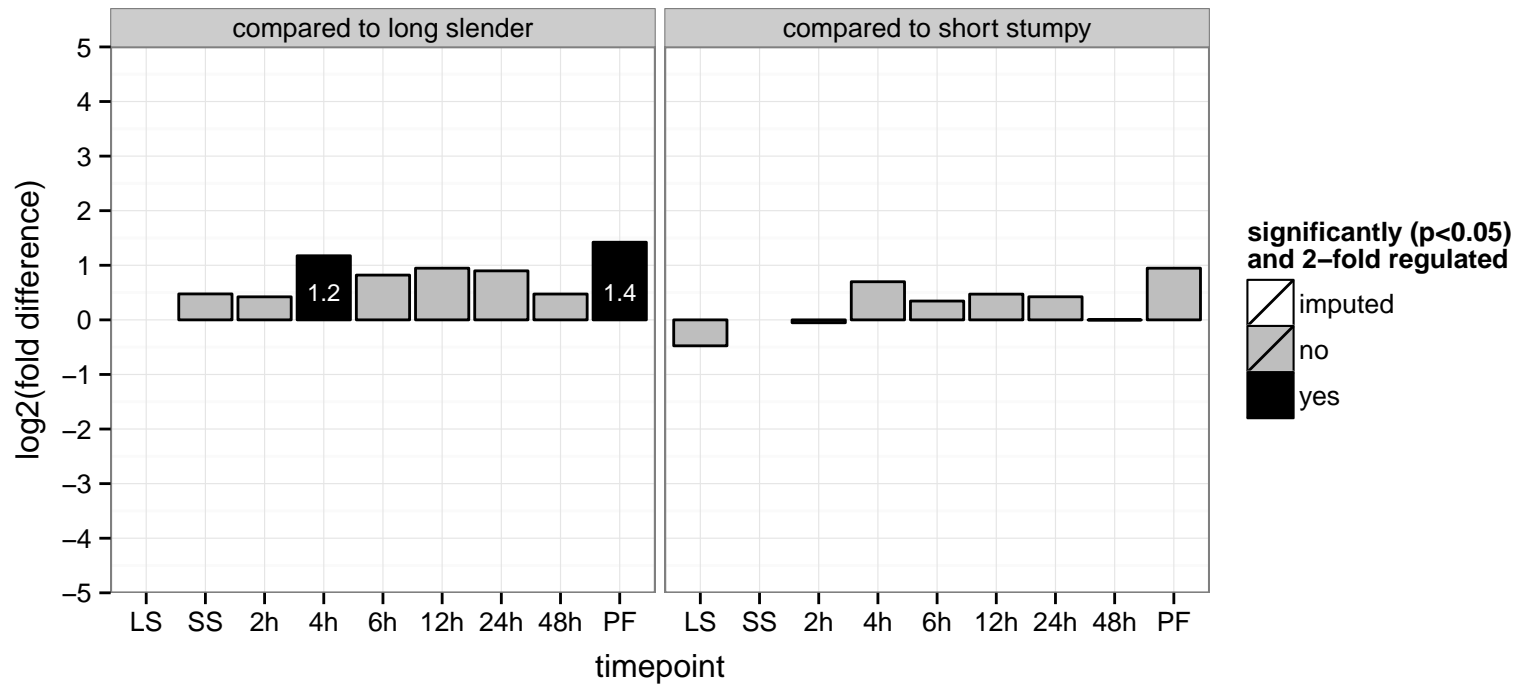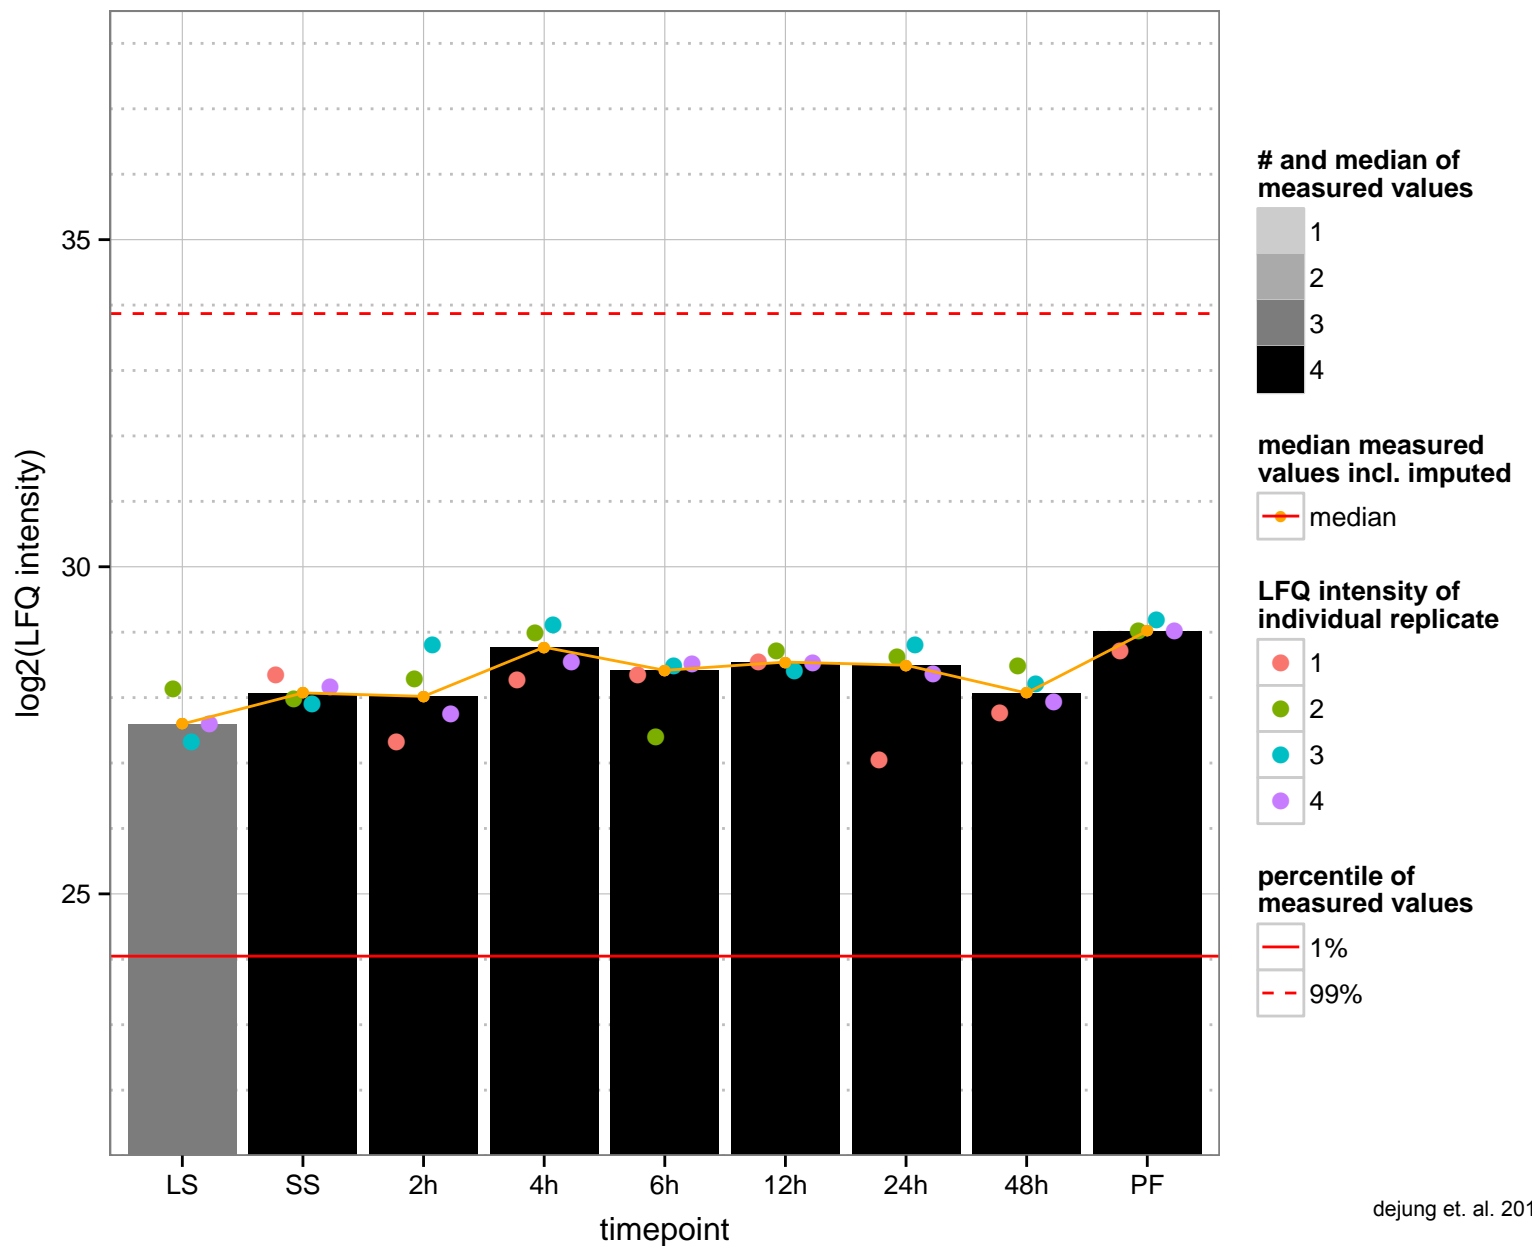

spliceosome-associated protein, putative  
 Tb927.6.2000  
 AGOF: null  
 AGOC: nucleus  
 AGOP: mRNA processing  
 PGO: null  
 PGO: nucleus  
 PGO: null

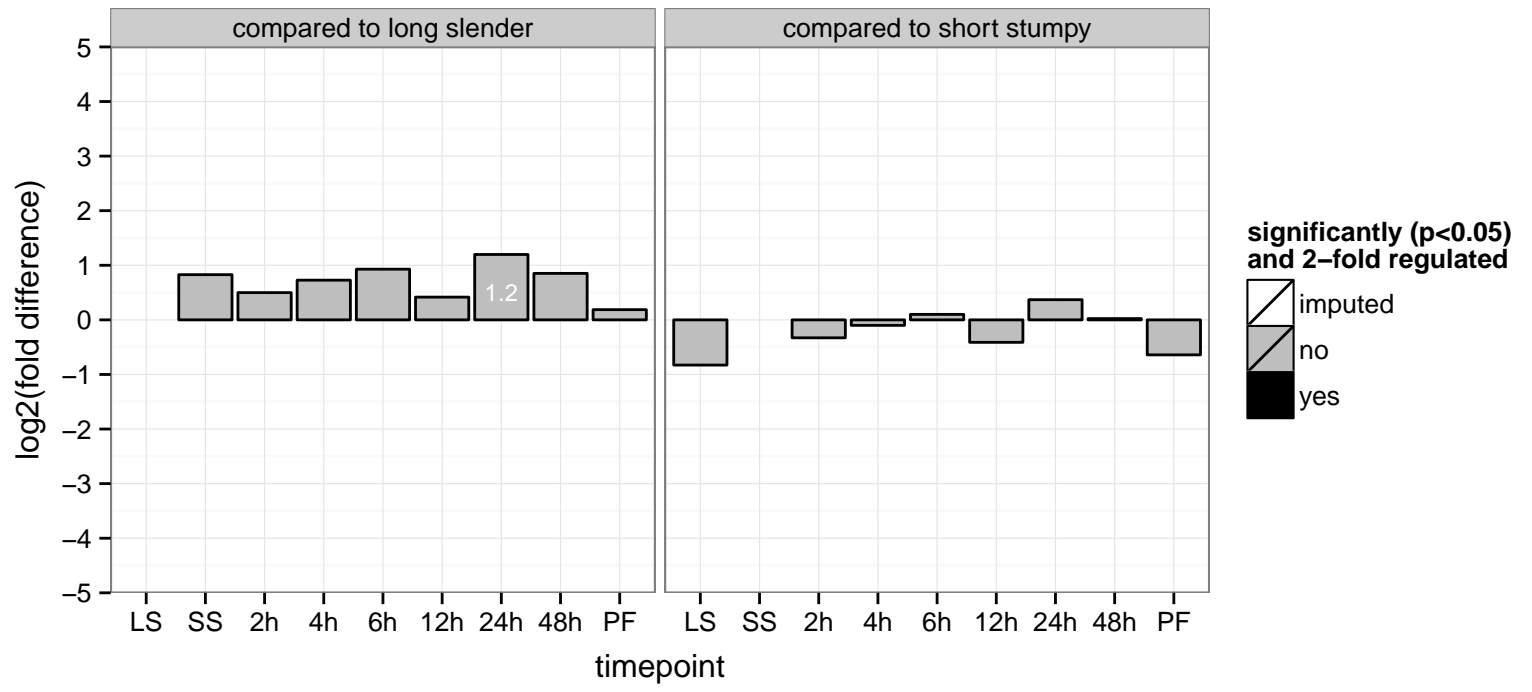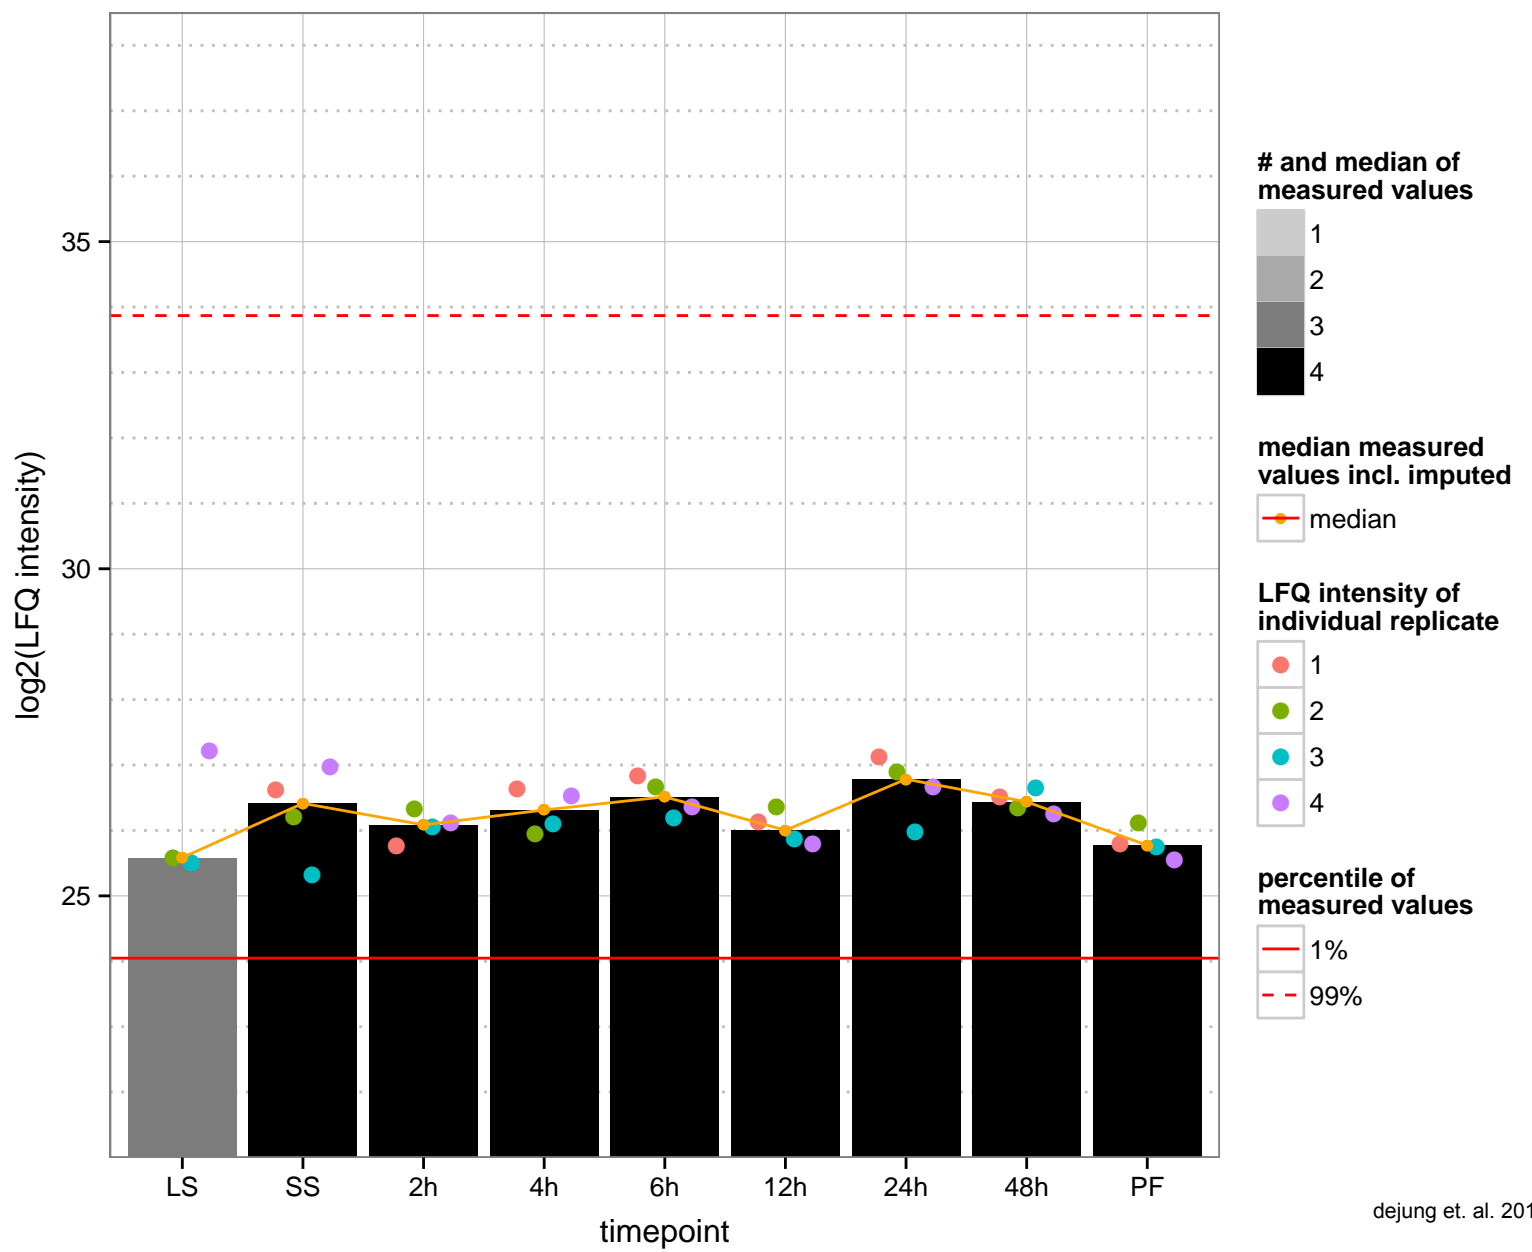

ribosome biogenesis regulatory protein (RRS1), putative  
 Tb927.6.2050  
 AGOF: null  
 AGOC: nucleus  
 AGOP: ribosome biogenesis  
 PGO: null  
 PGO: nucleus  
 PGO: ribosome biogenesis

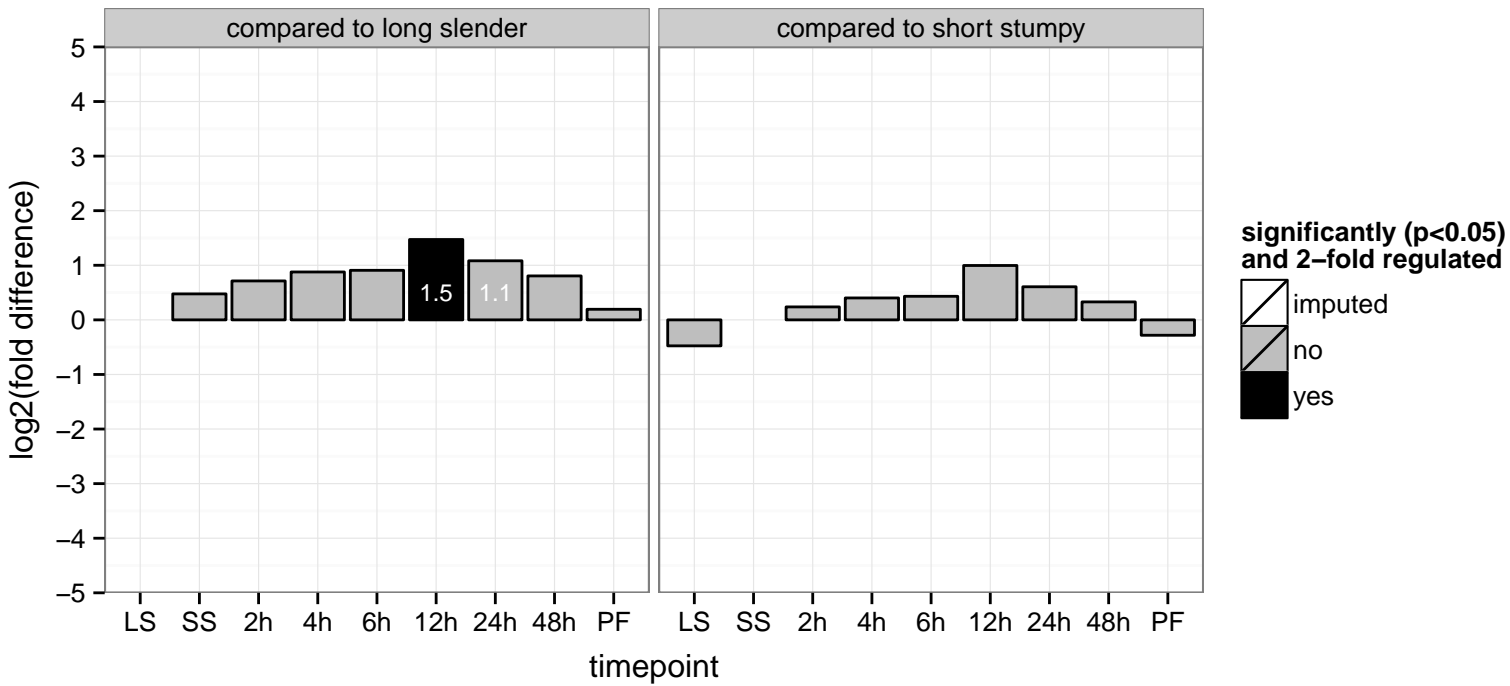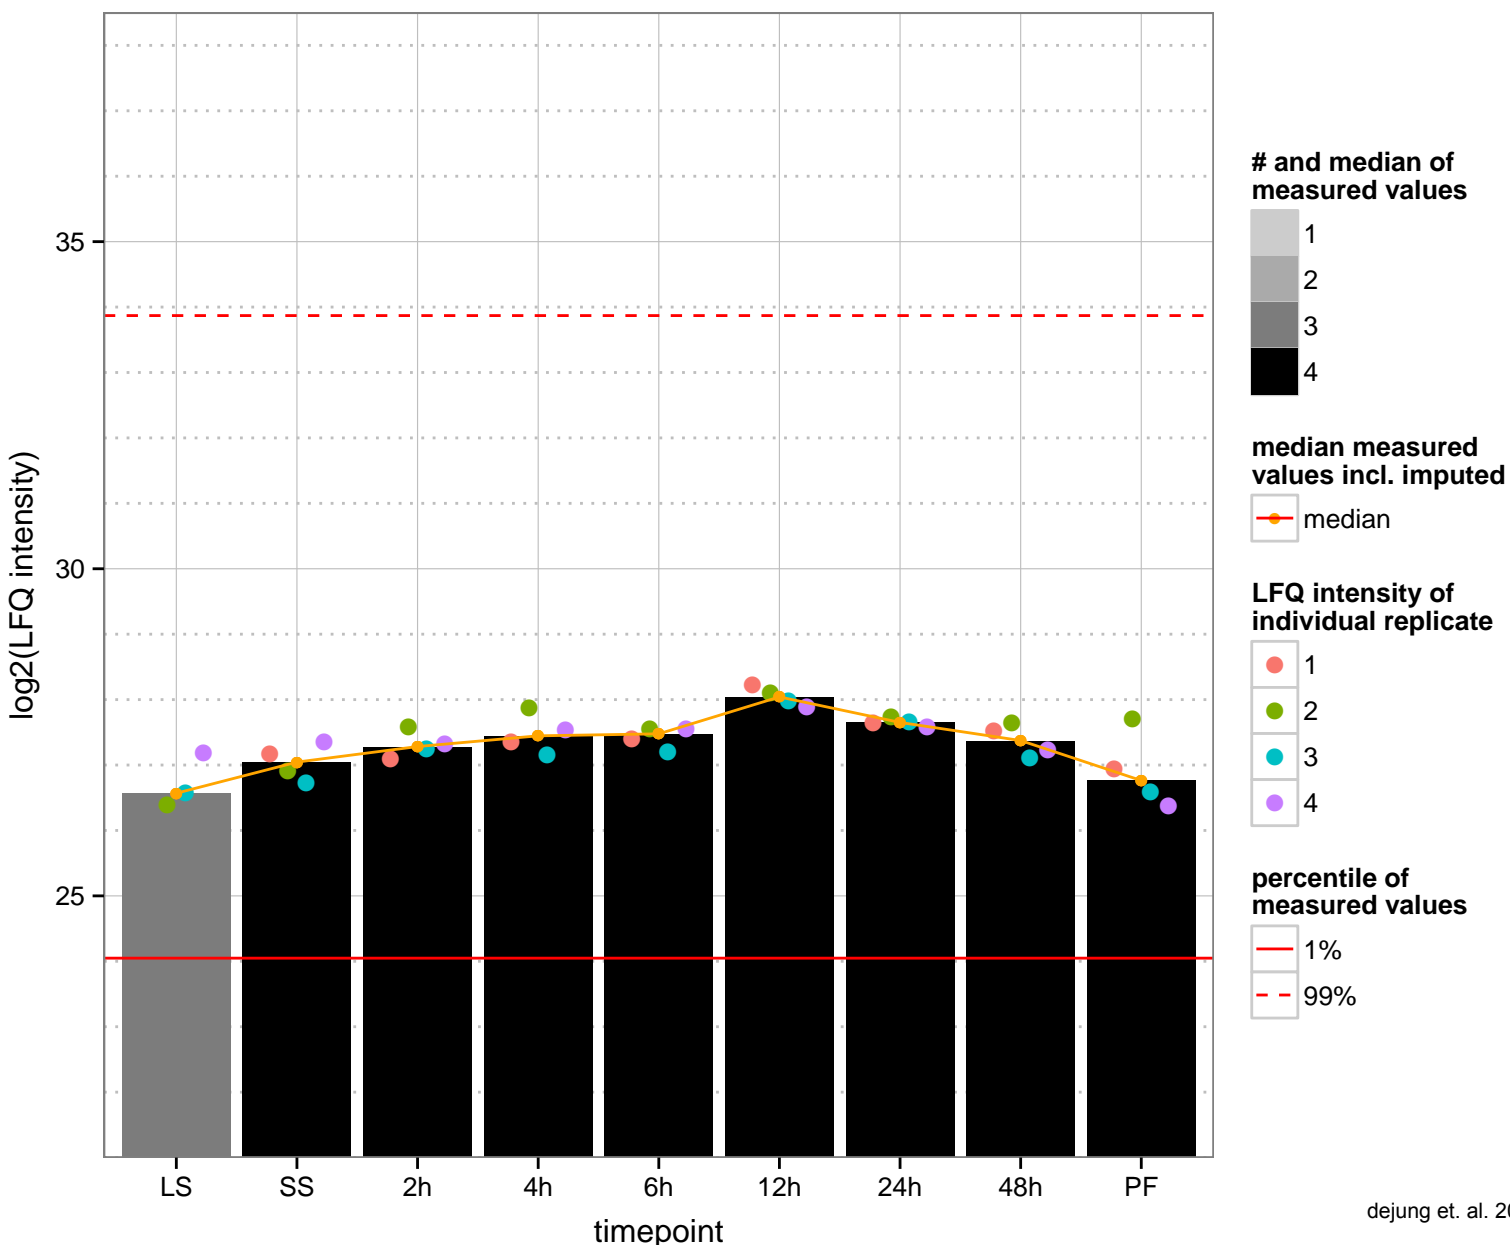

histidyl-tRNA synthetase

Tb927.6.2060

AGOF: null

AGOC: cytoplasm

AGOP: translation

PGOF: ATP binding, aminoacyl-tRNA ligase activity, histidine-tRNA ligase activity, nucleotide binding

PGOC: cytoplasm

PGOP: histidyl-tRNA aminoacylation, tRNA aminoacylation for protein translation

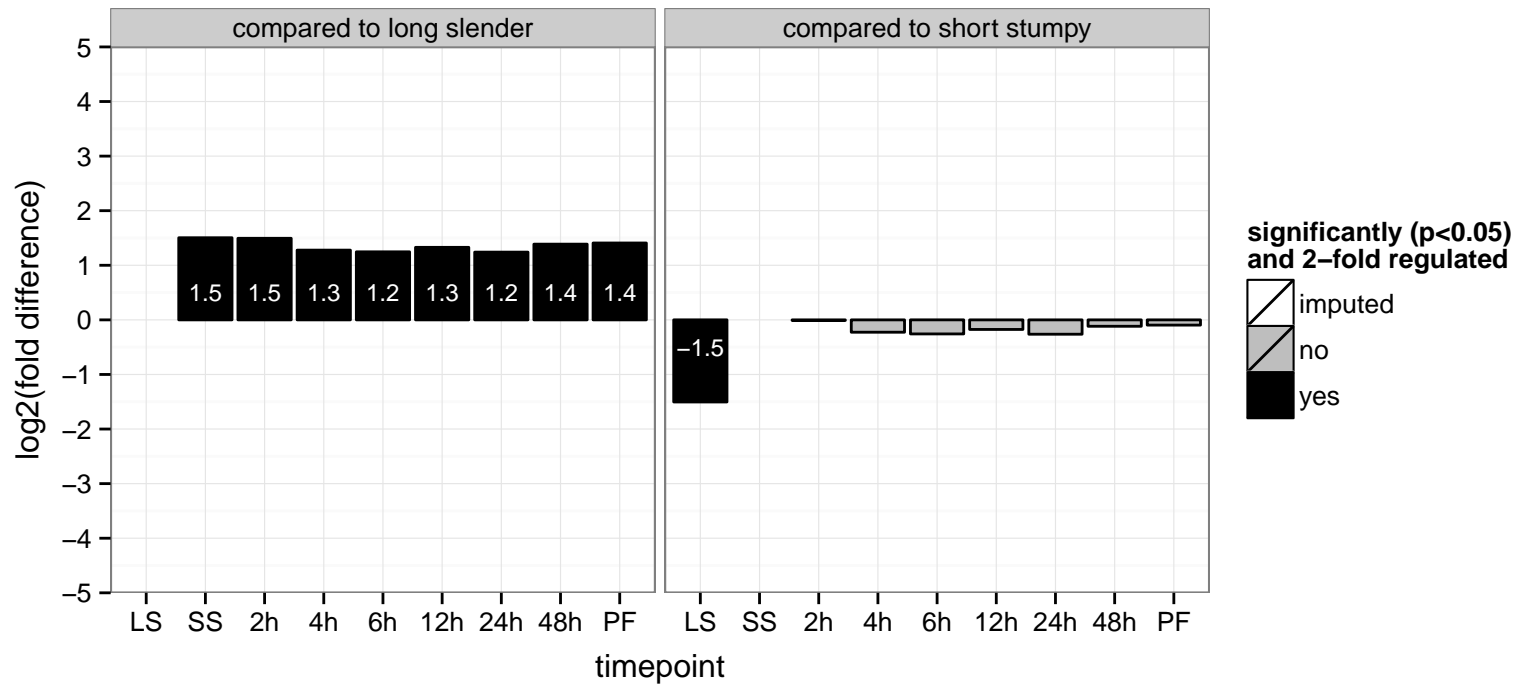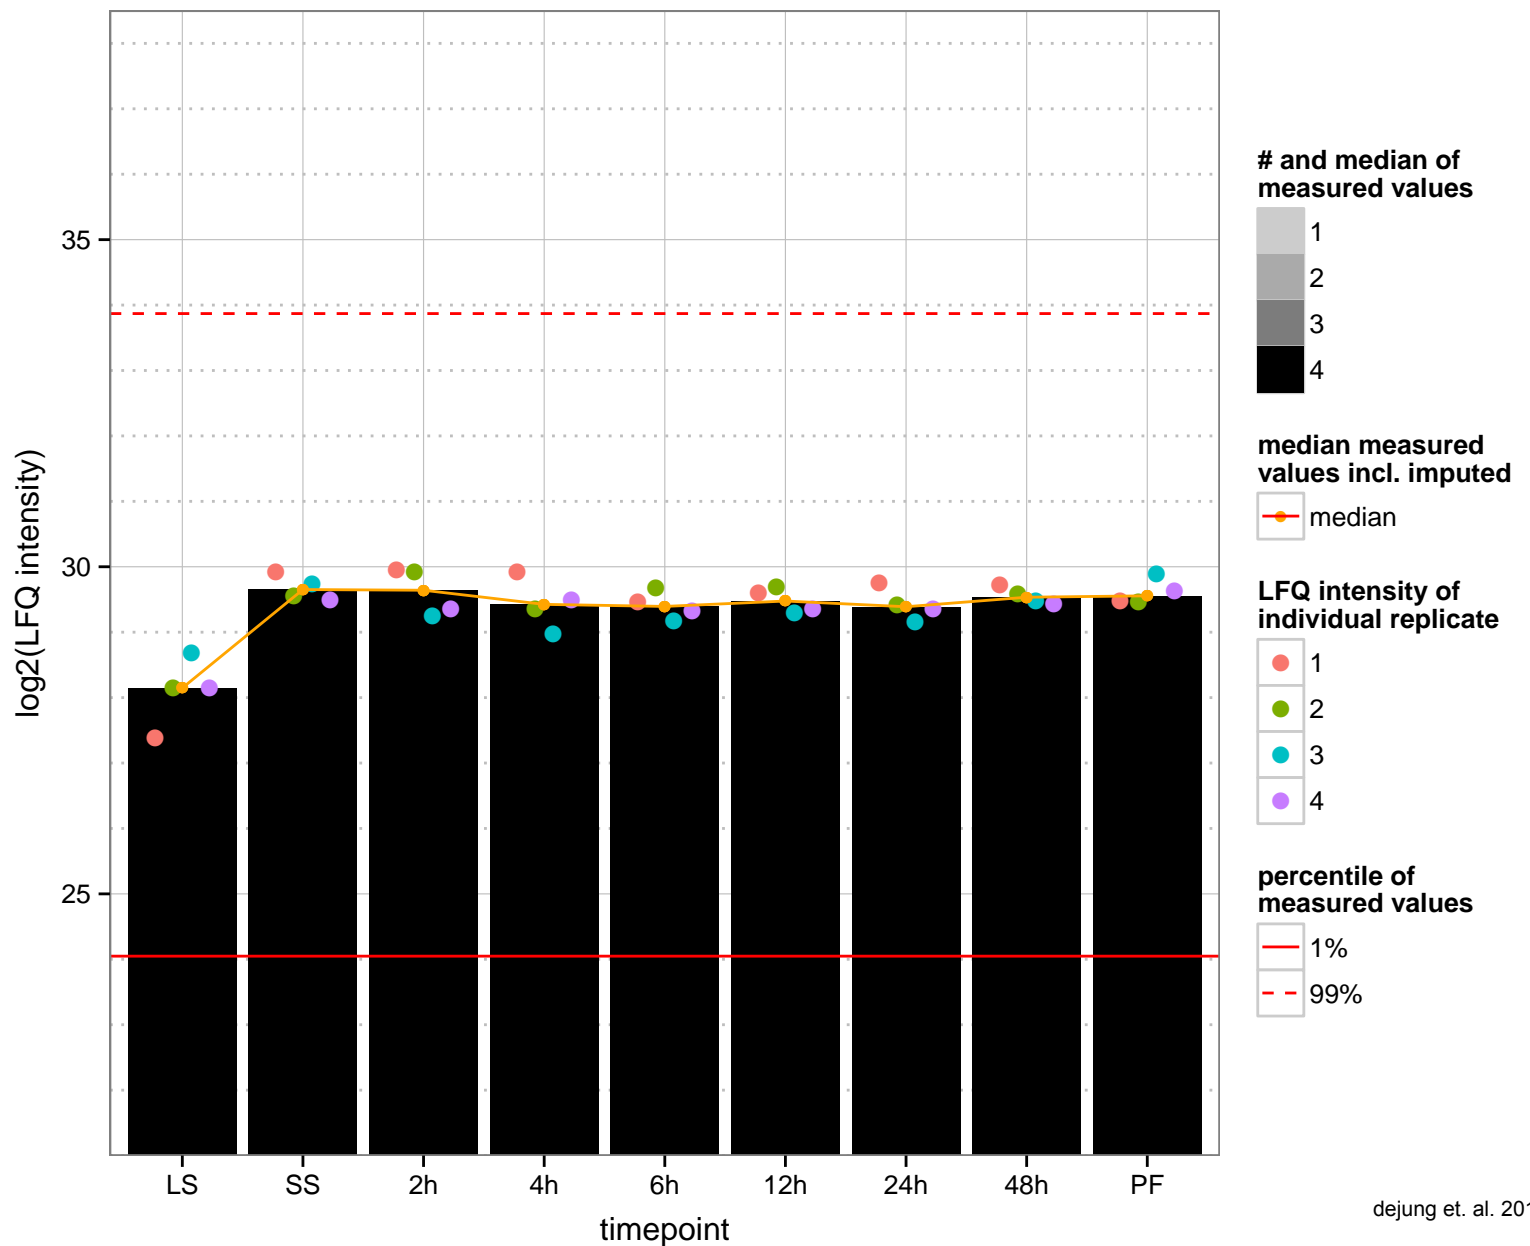

hypothetical protein, conserved  
 Tb927.6.2090  
 AGOF: phospholipase C activity  
 AGOC: null  
 AGOP: intracellular signal transduction, lipid metabolic process  
 PGOF: phospholipase C activity, phosphoric diester hydrolase activity  
 PGOC: null  
 PGOP: intracellular signal transduction, lipid metabolic process

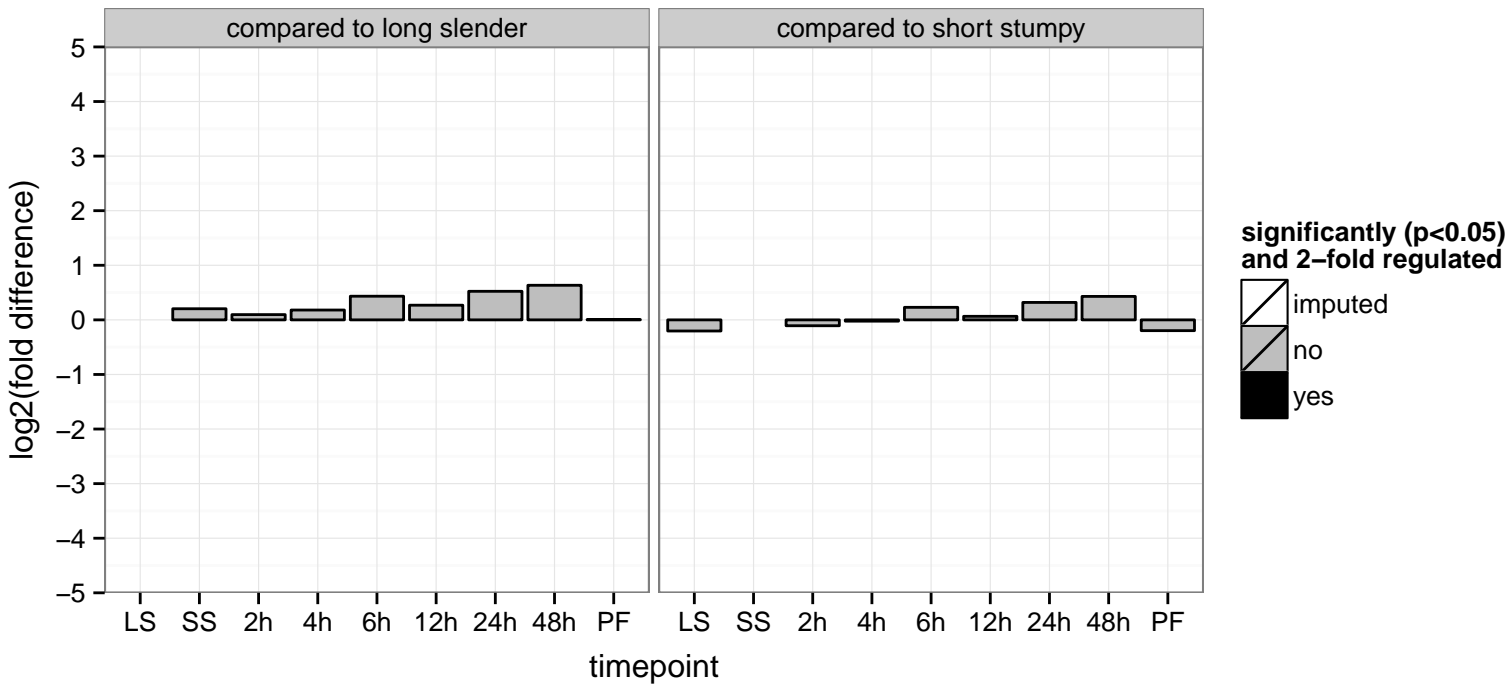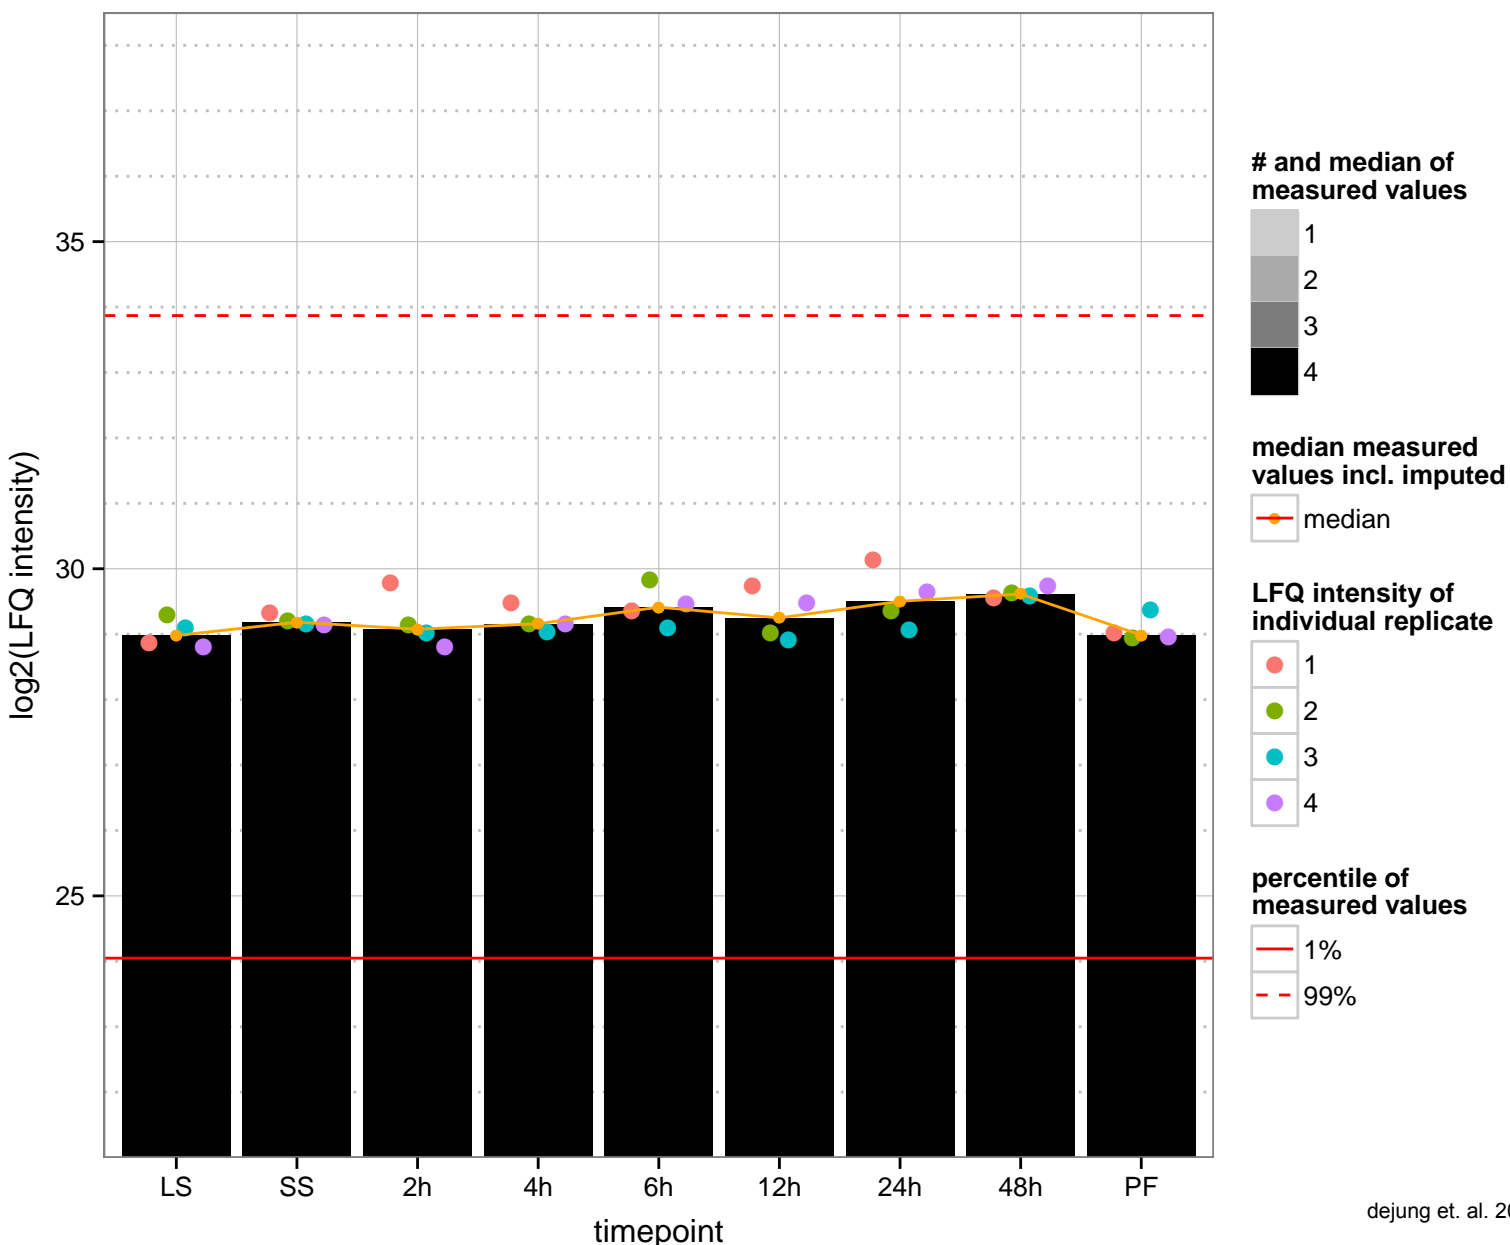

nuclear movement protein, putative, NUDC-like protein  
 Tb927.6.2130  
 AGOF: null  
 AGOC: null  
 AGOP: null  
 PGO: null  
 PGOC: null  
 PGOP: null

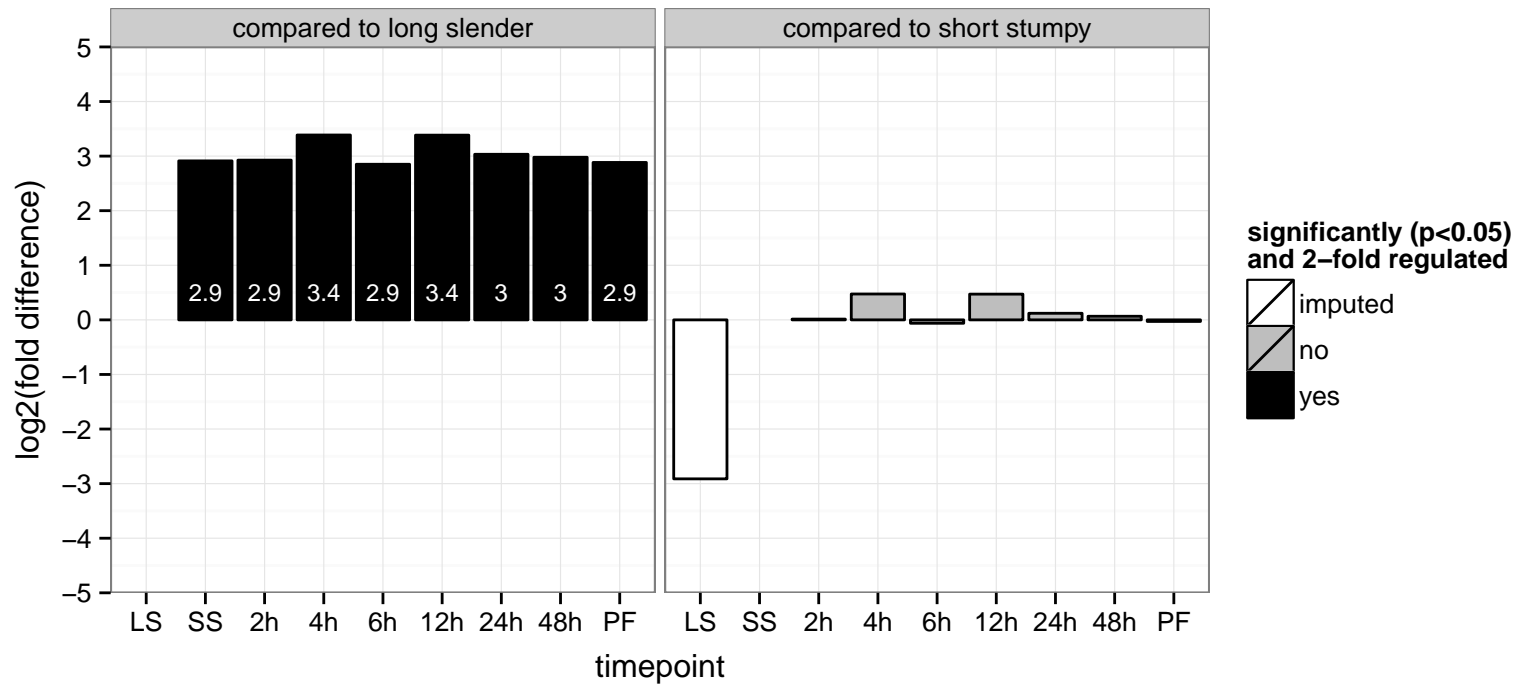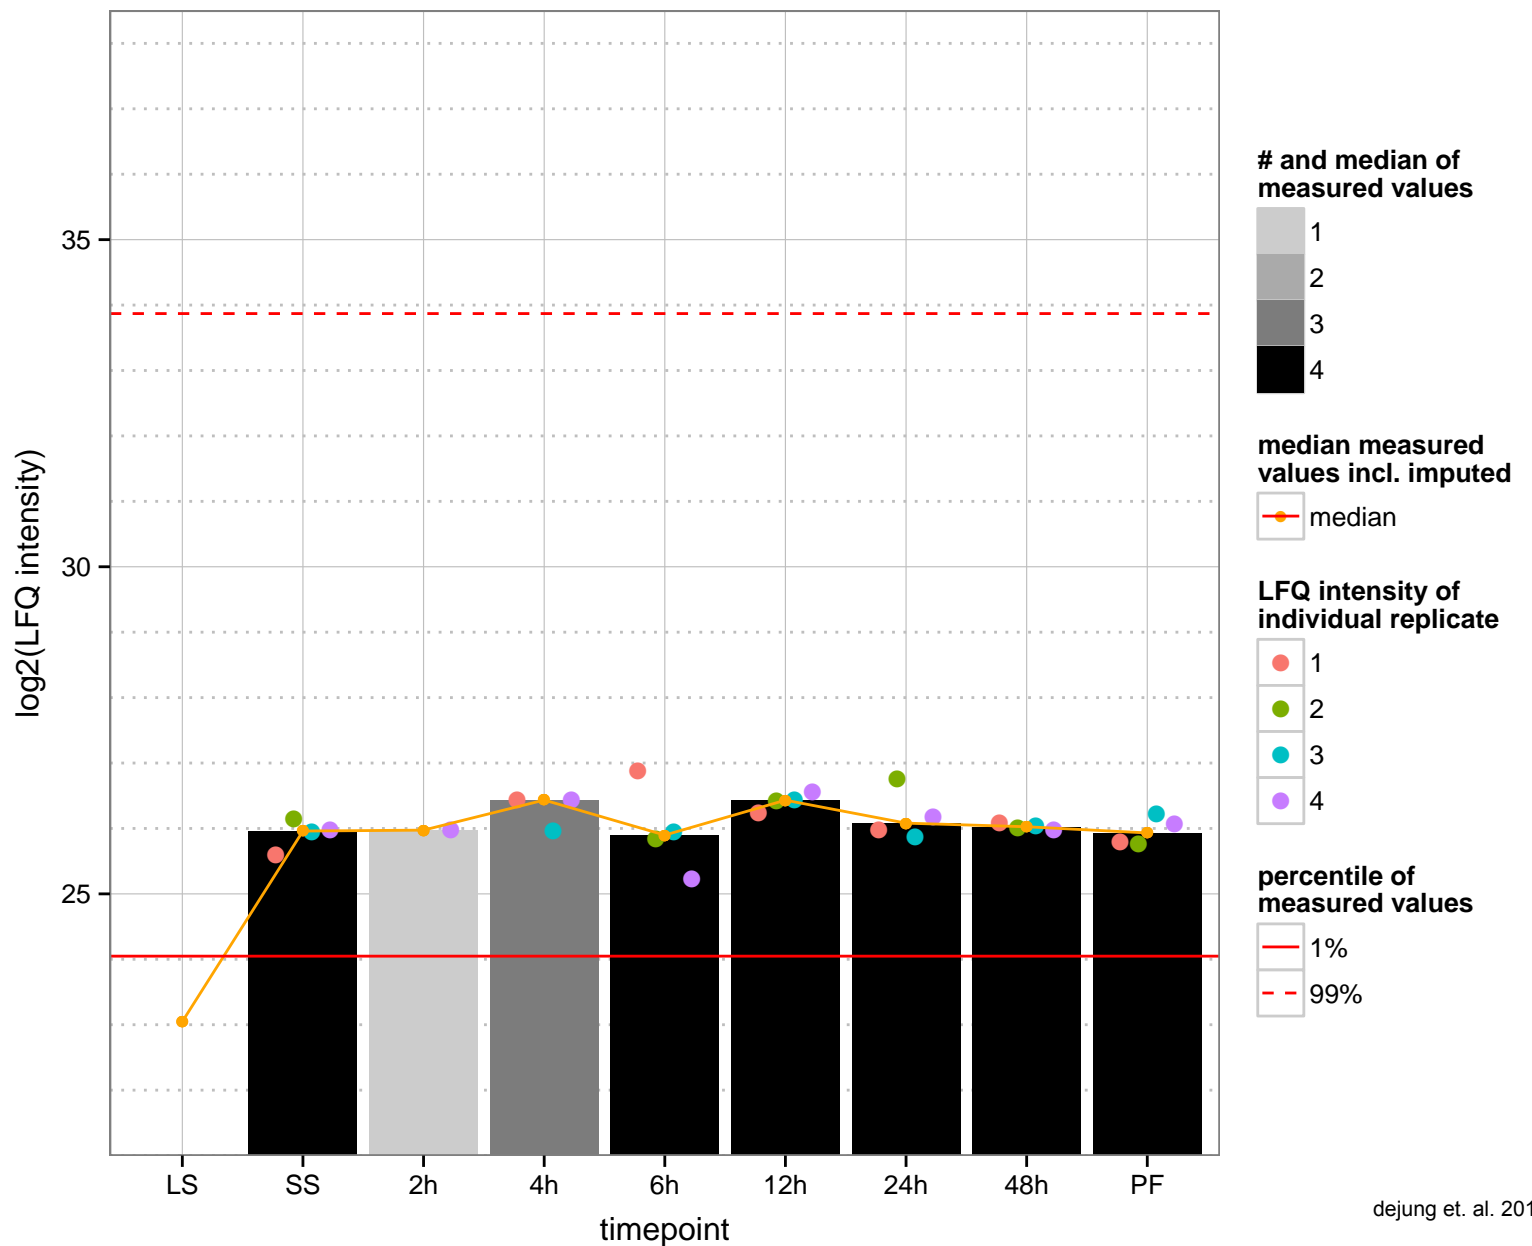



hypothetical protein, conserved  
 Tb927.6.2210  
 AGOF: null  
 AGOC: null  
 AGOP: null  
 PGOF: binding, protein binding  
 PGO: null  
 PGOP: null

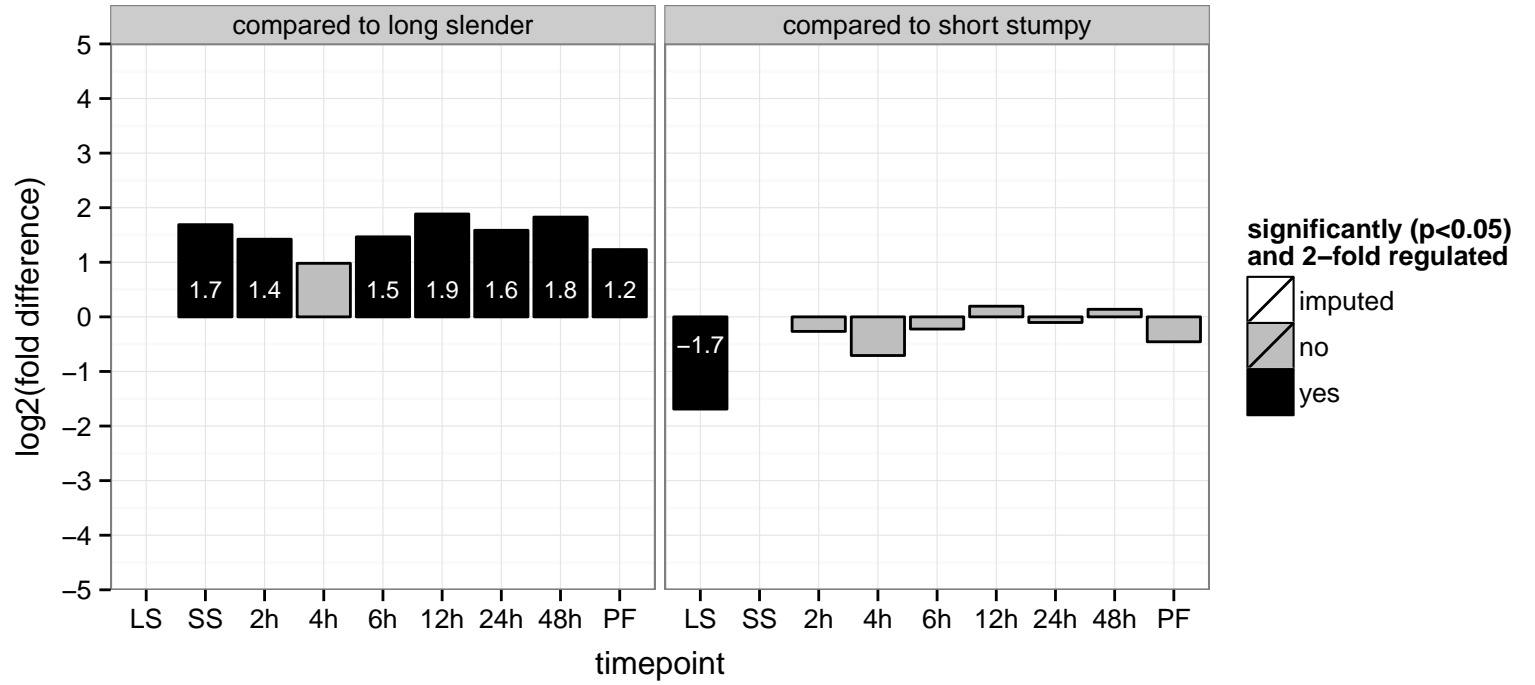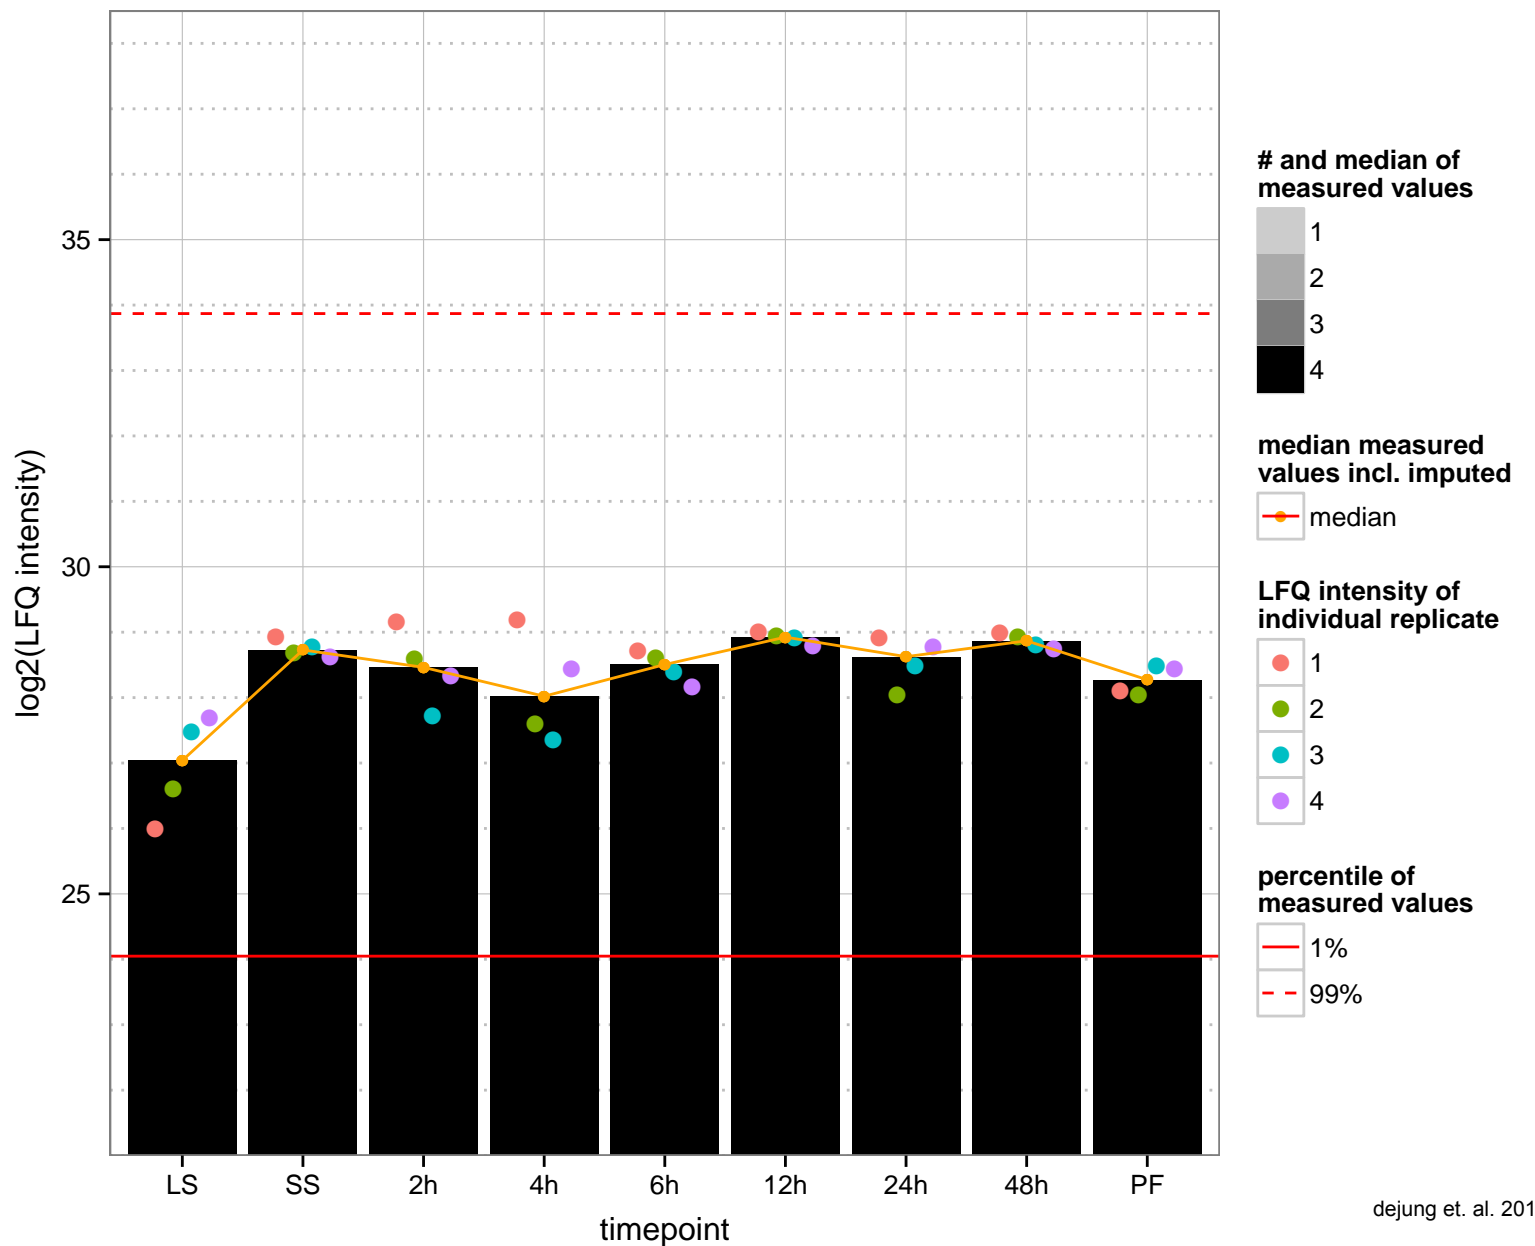

RGG protein  
 Tb927.6.2230  
 AGOF: RNA binding  
 AGOC: mitochondrion  
 AGOP: RNA biosynthetic process  
 PGO: null  
 PGO: null  
 PGO: null

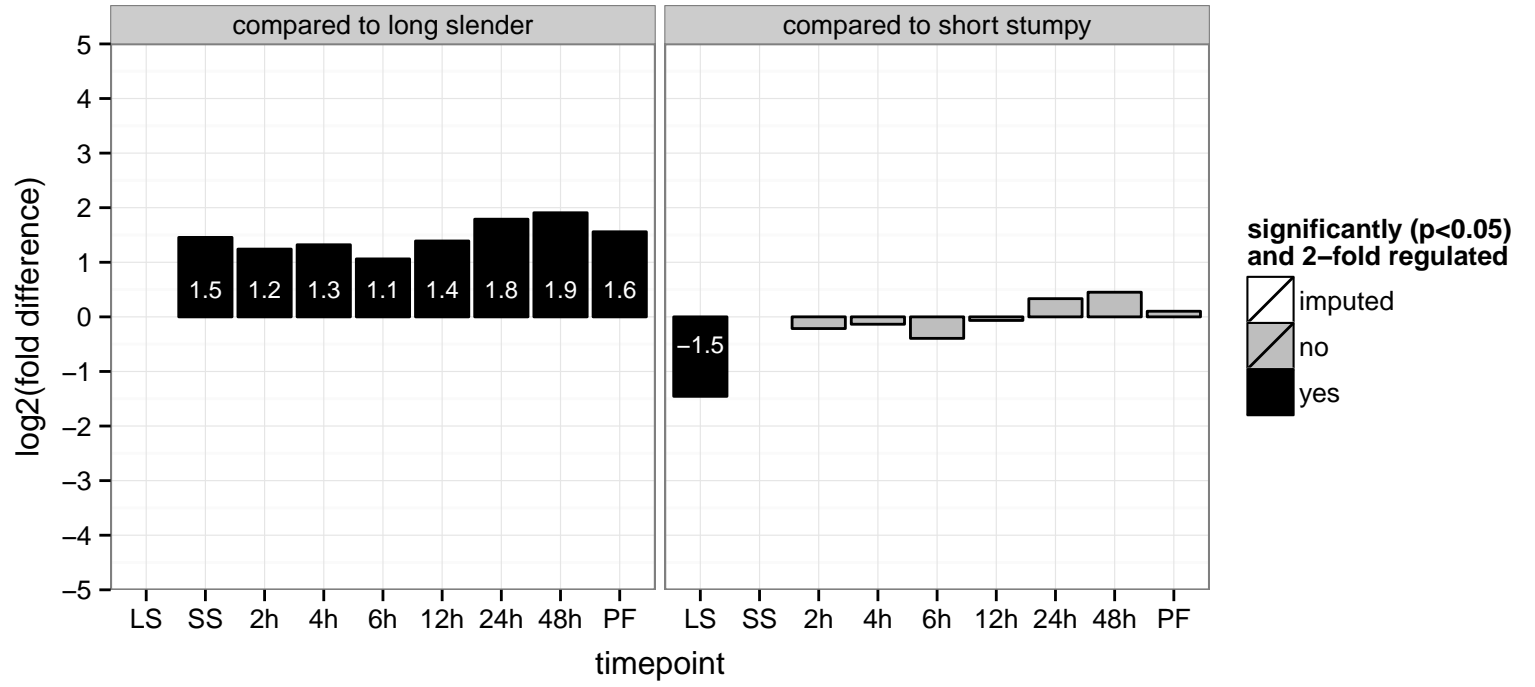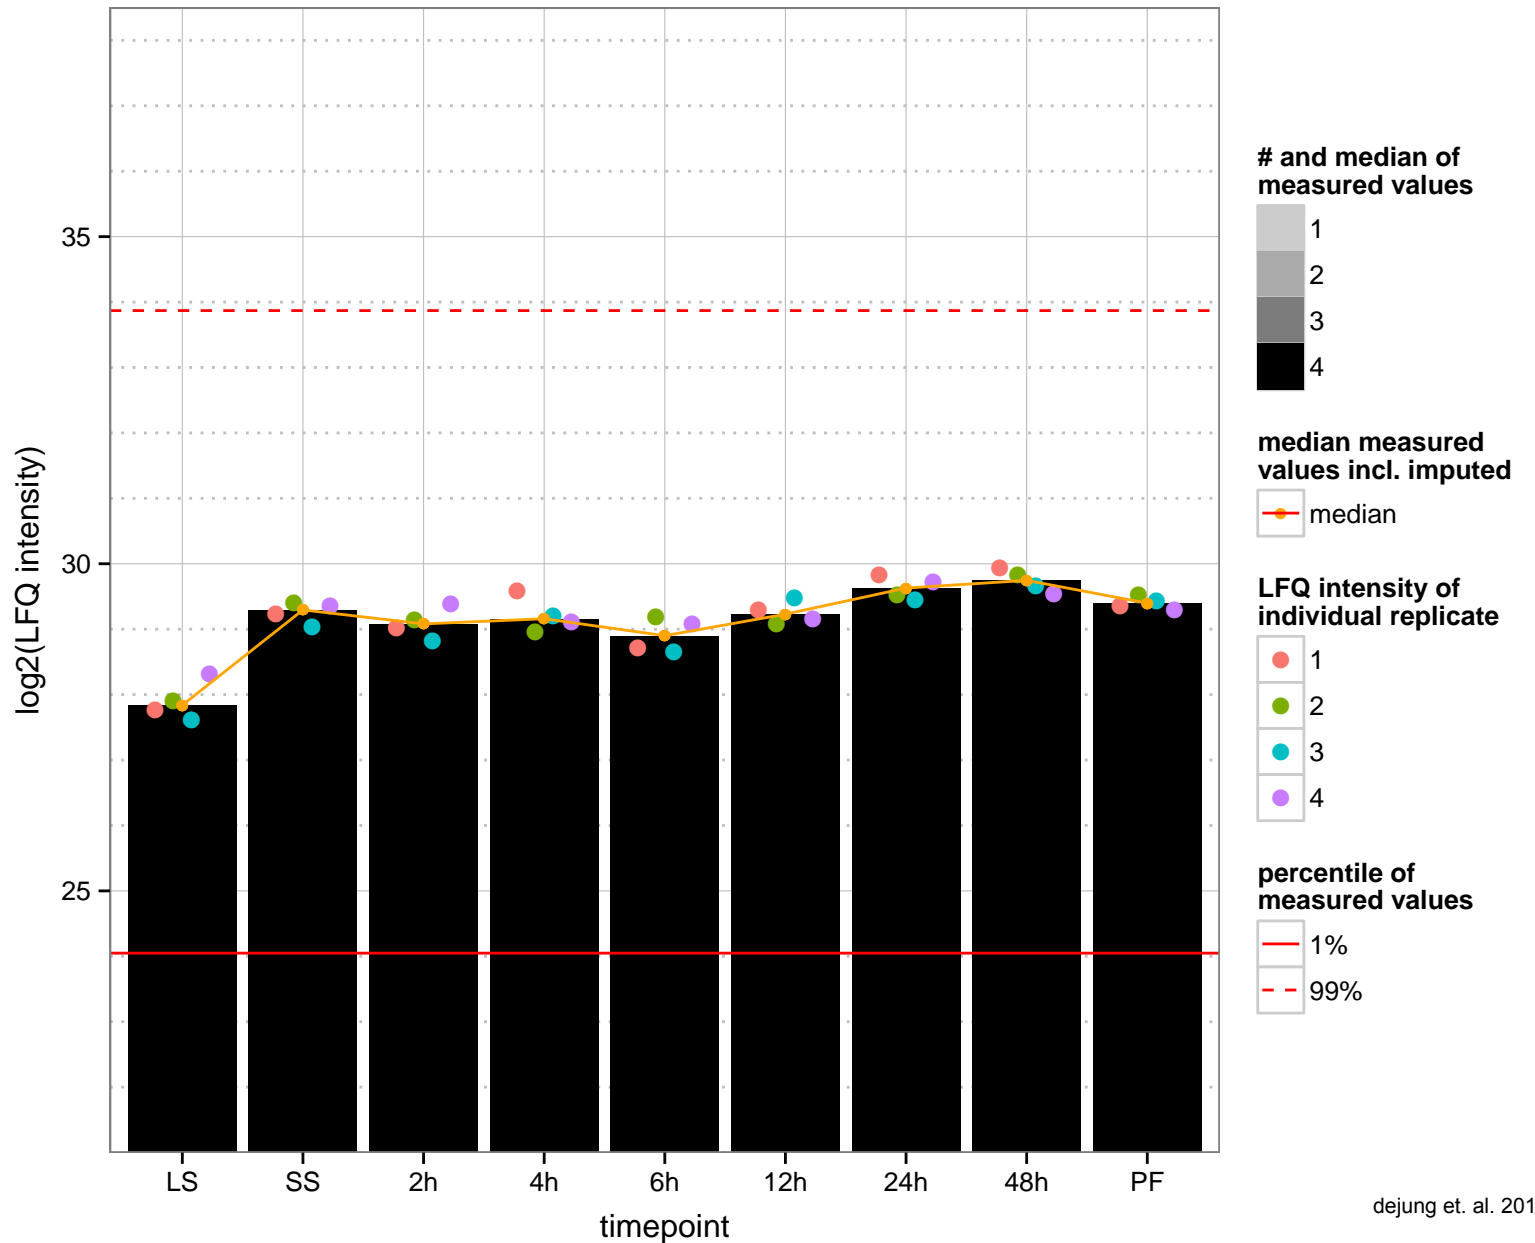

hypothetical protein, conserved  
 Tb927.6.2350;Tb927.6.2290  
 AGOF: null  
 AGOC: mitochondrion, null  
 AGOP: null  
 PGOF: GTP binding, null  
 PGOC: null  
 PGOP: null

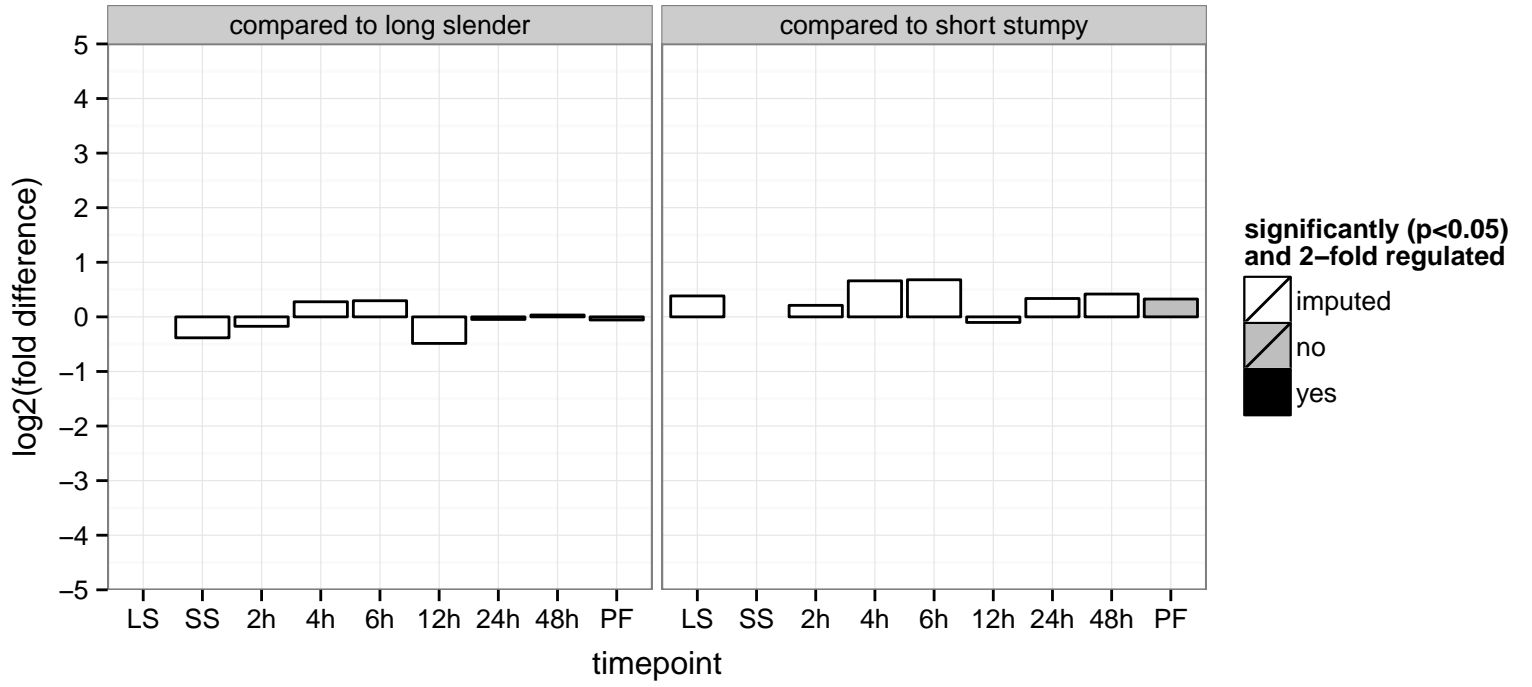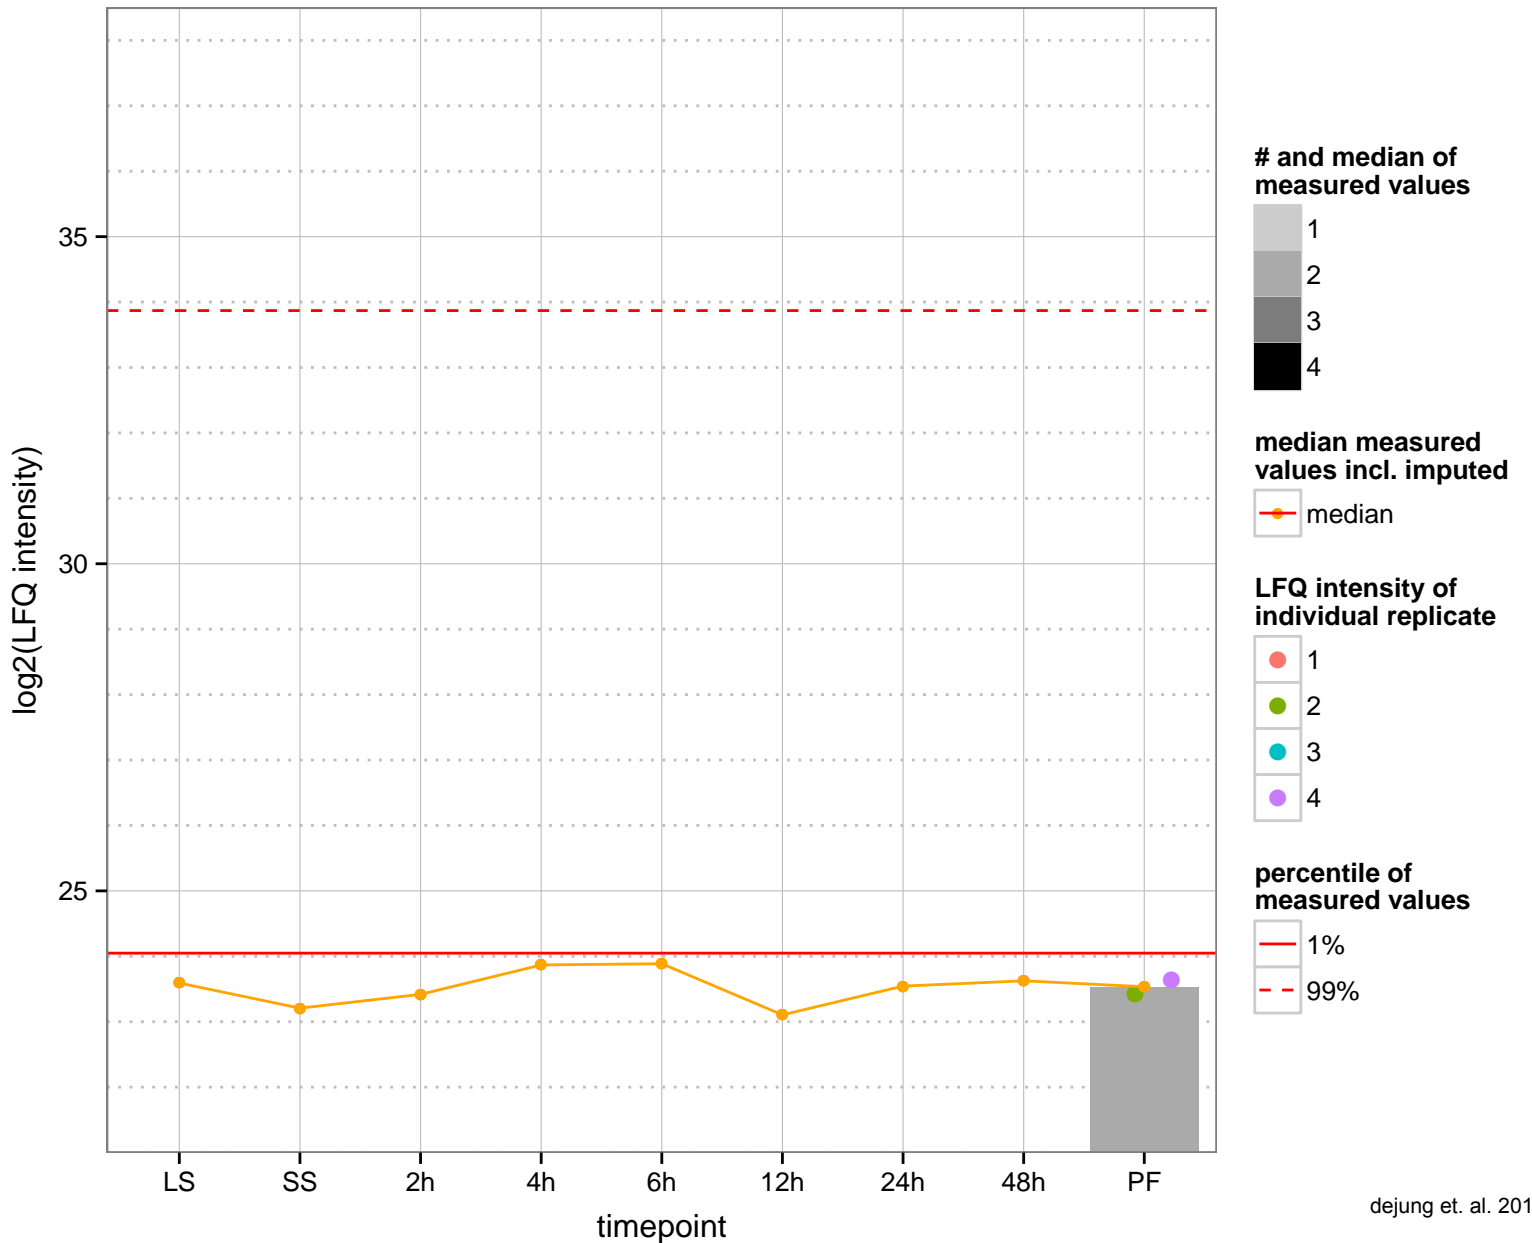

adenosine kinase, putative  
 Tb927.6.2360;Tb927.6.2300  
 AGOF: adenosine kinase activity  
 AGOC: null  
 AGOP: purine ribonucleoside salvage, purine ribonucleotide biosynthetic process  
 PGO: null  
 PGOC: null  
 PGOP: null

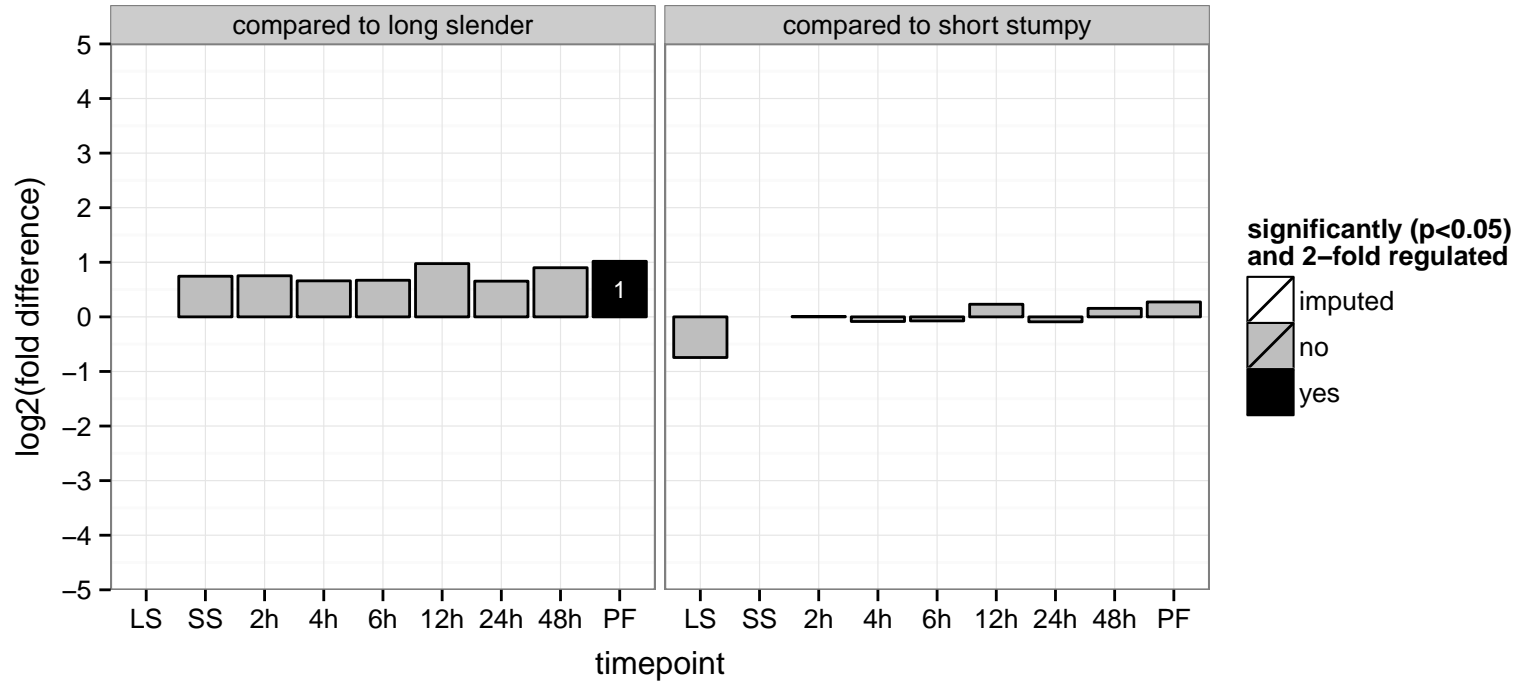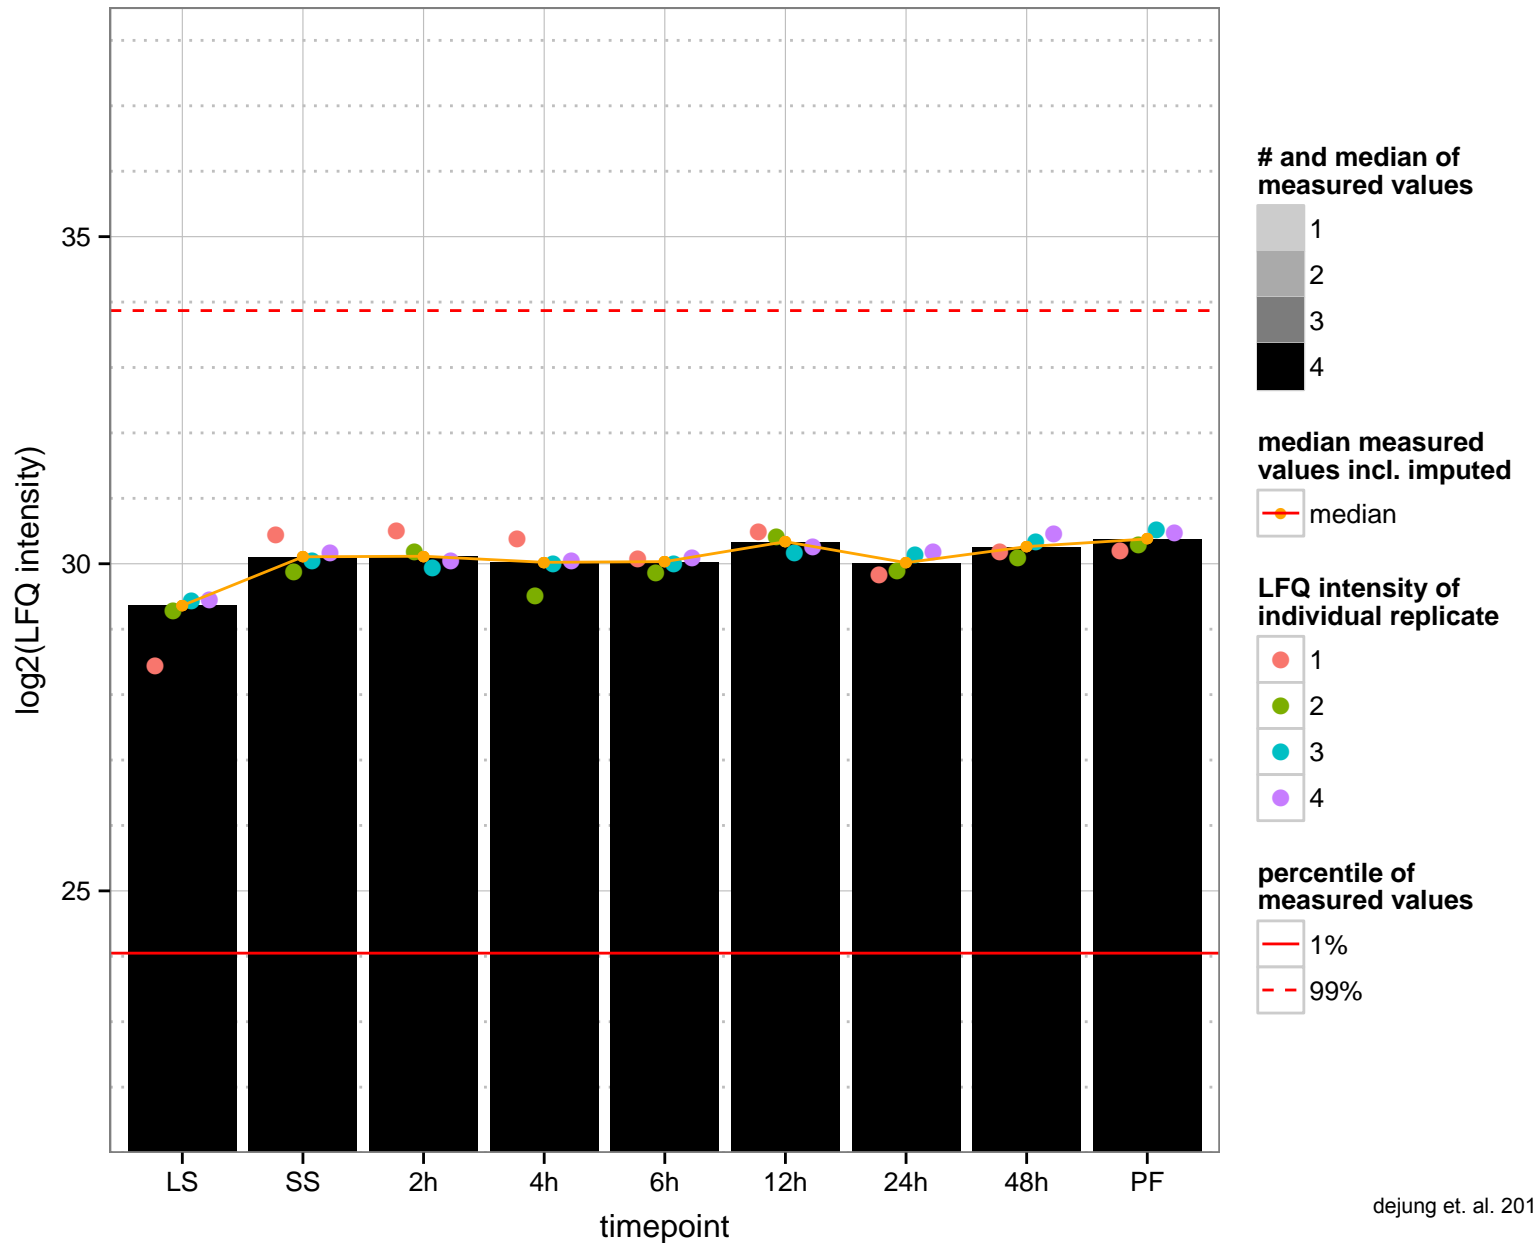

ubiquitin–protein ligase, putative  
 Tb927.6.2370  
 AGOF: acid–amino acid ligase activity  
 AGOC: intracellular  
 AGOP: cellular protein modification process  
 PGOF: acid–amino acid ligase activity, protein binding  
 PGO: intracellular  
 PGOP: cellular protein modification process

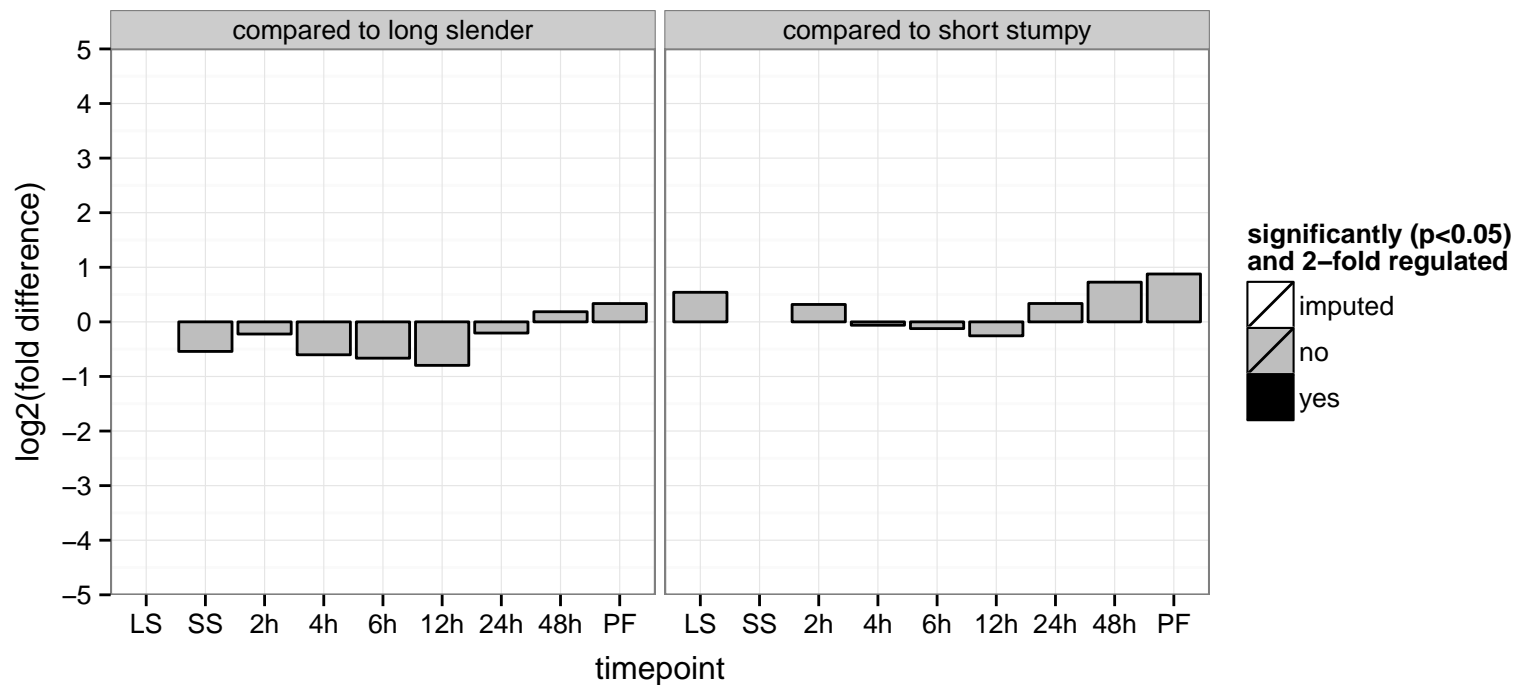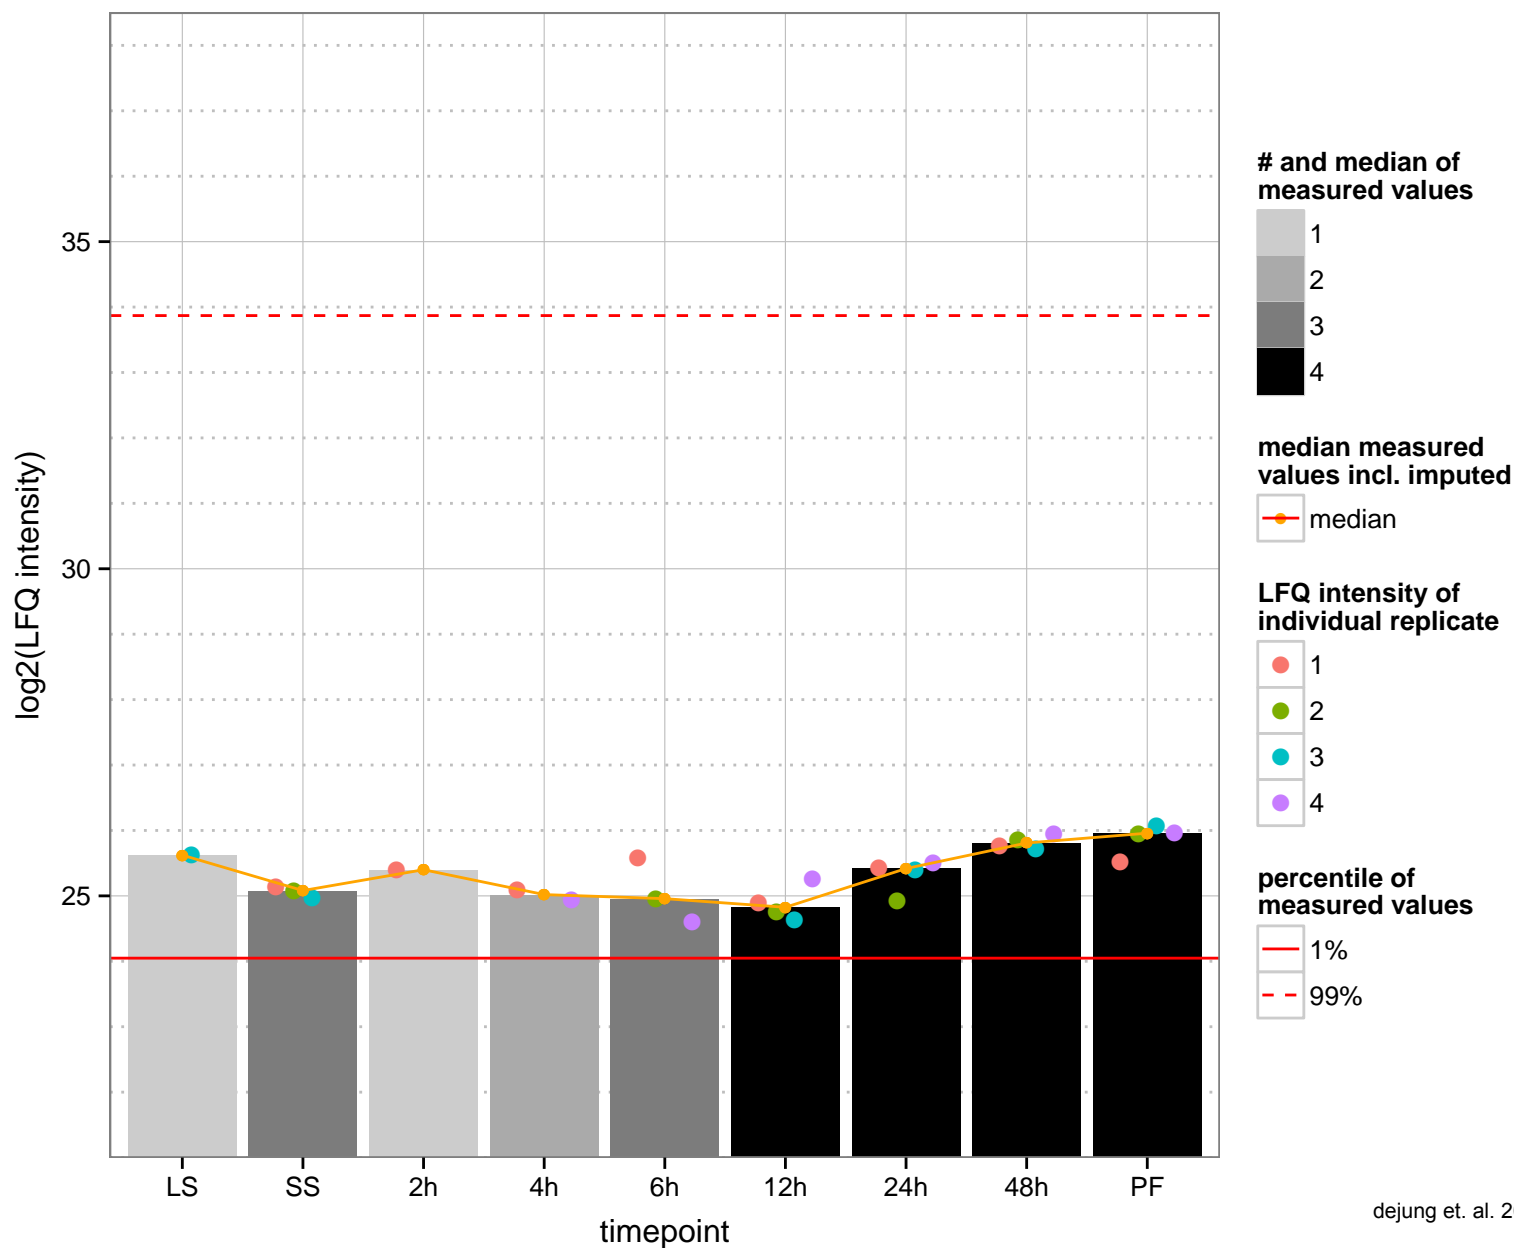

hypothetical protein, conserved  
 Tb927.6.2400  
 AGOF: null  
 AGOC: microtubule organizing center, spindle pole  
 AGOP: microtubule cytoskeleton organization  
 PGO: null  
 PGOC: microtubule organizing center, spindle pole  
 PGOP: microtubule cytoskeleton organization

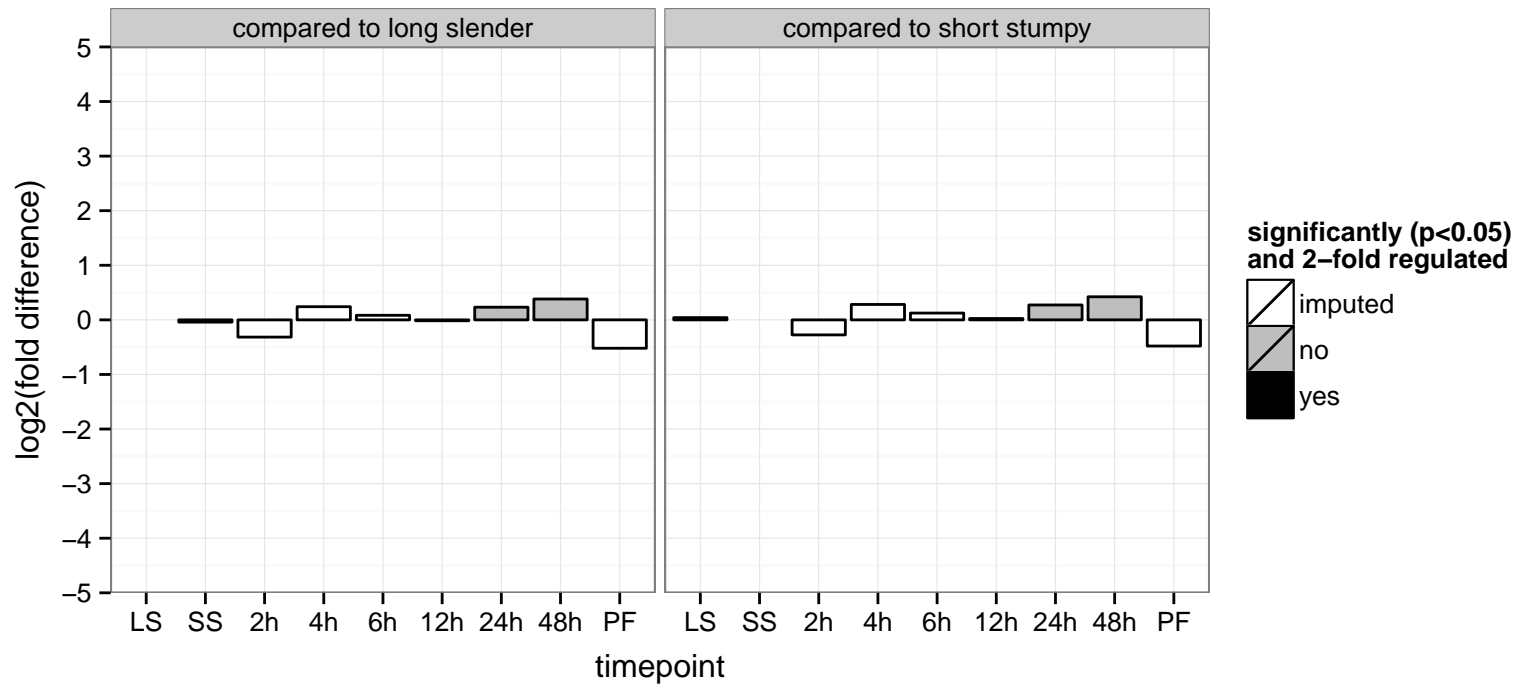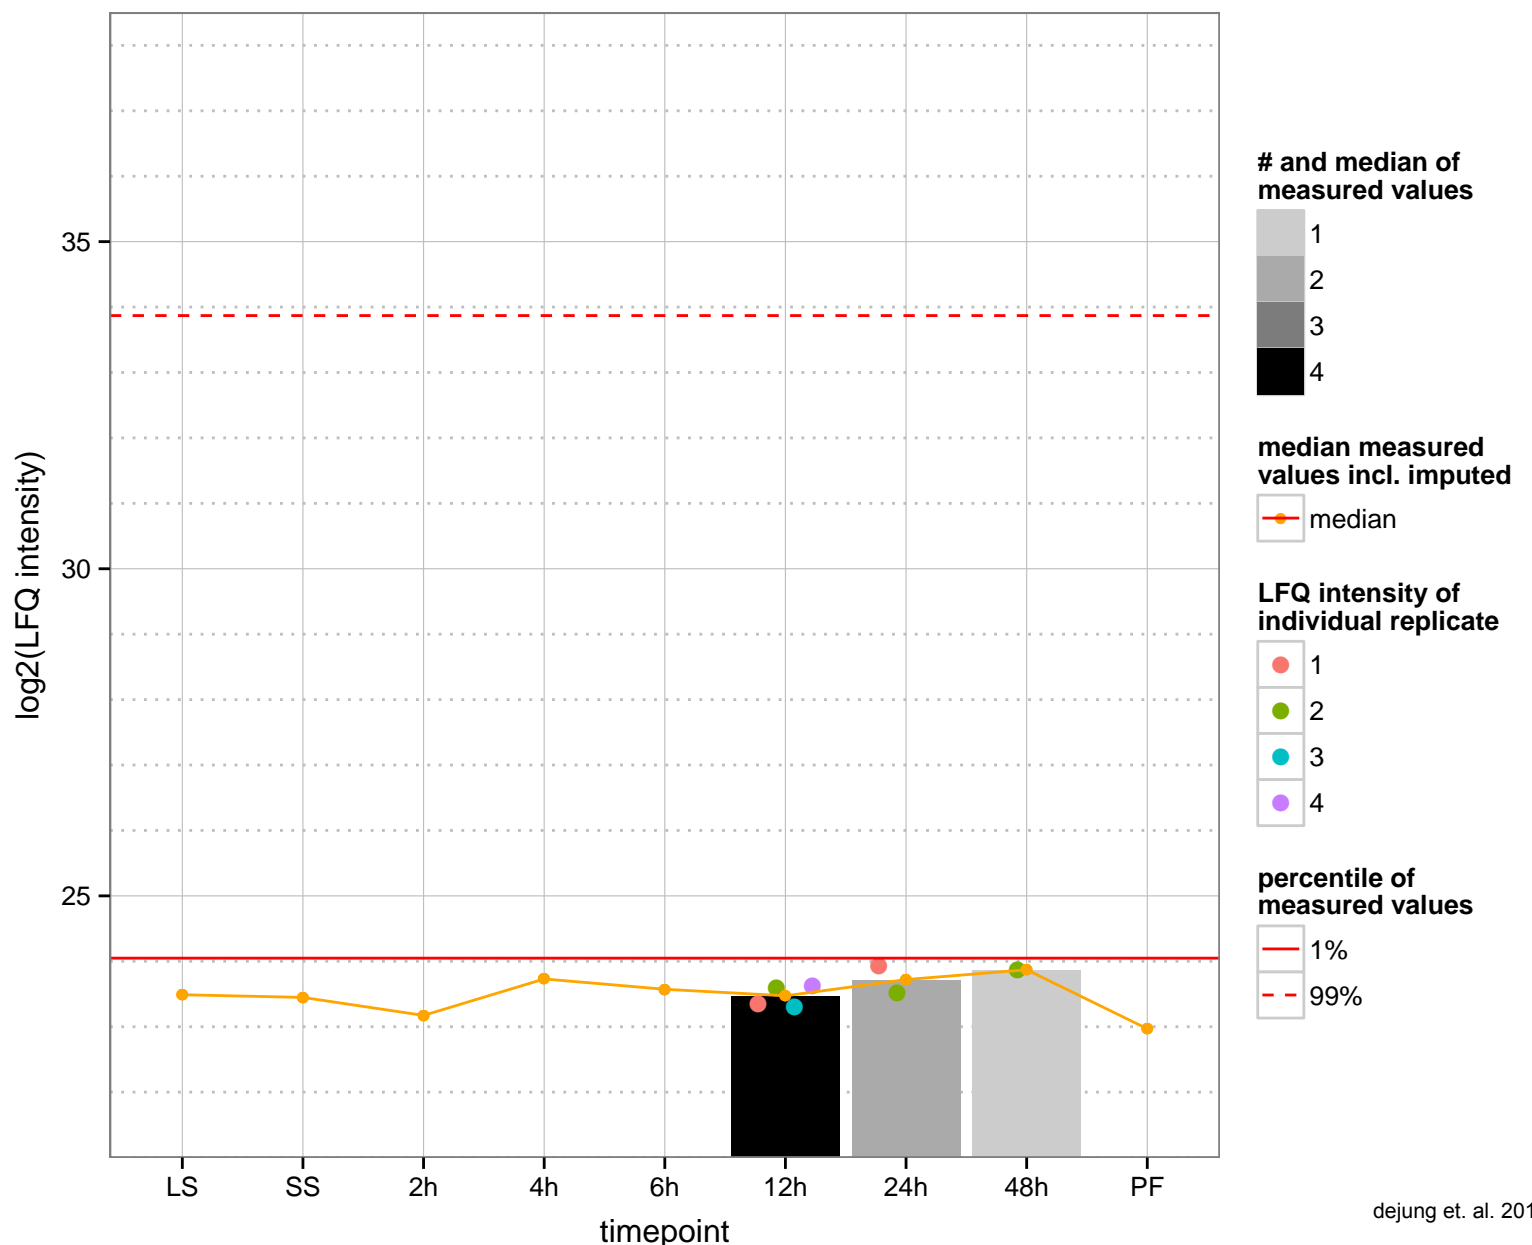

p22 protein precursor  
 Tb927.6.2420  
 AGOF: protein binding  
 AGOC: mitochondrial matrix, mitochondrion  
 AGOP: RNA modification  
 PGO: null  
 PGO: mitochondrial matrix  
 PGO: null

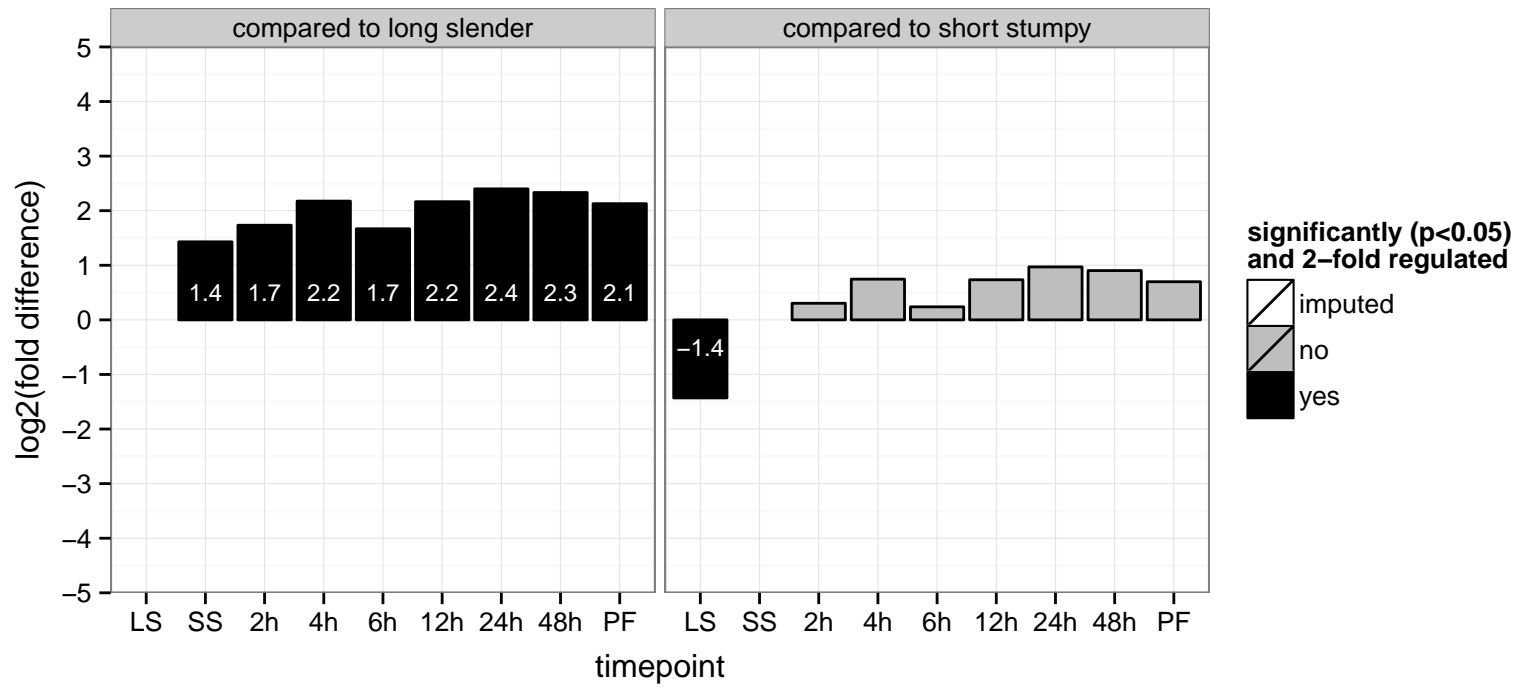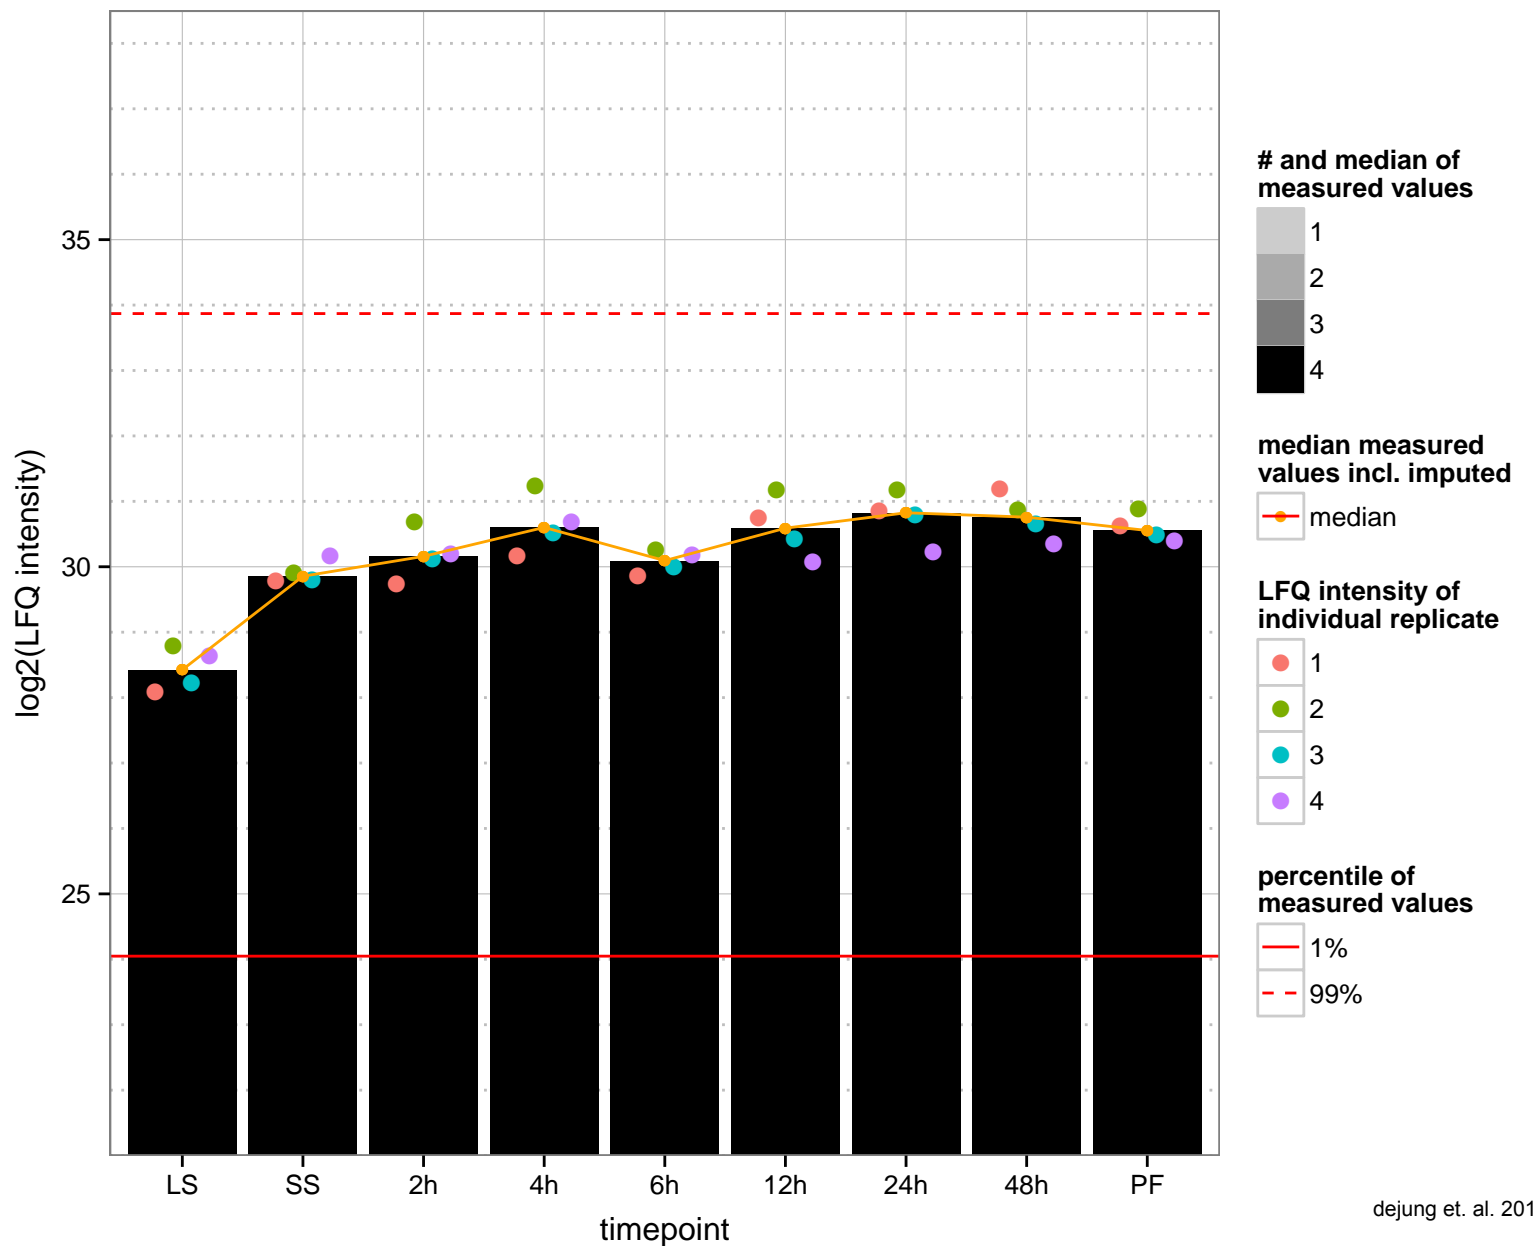

hypothetical protein, conserved  
 Tb927.6.2440  
 AGOF: null  
 AGOC: null  
 AGOP: null  
 PGOF: binding  
 PGO: null  
 PGOP: null

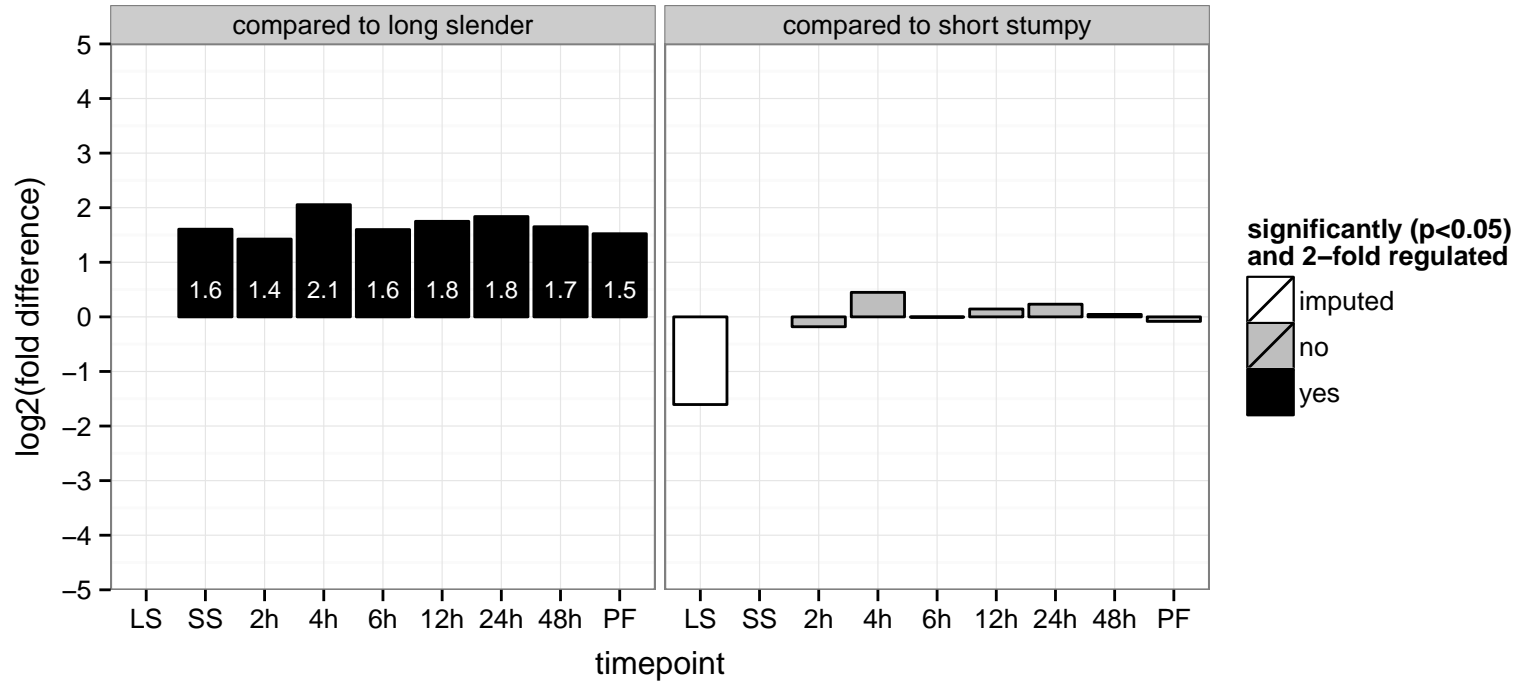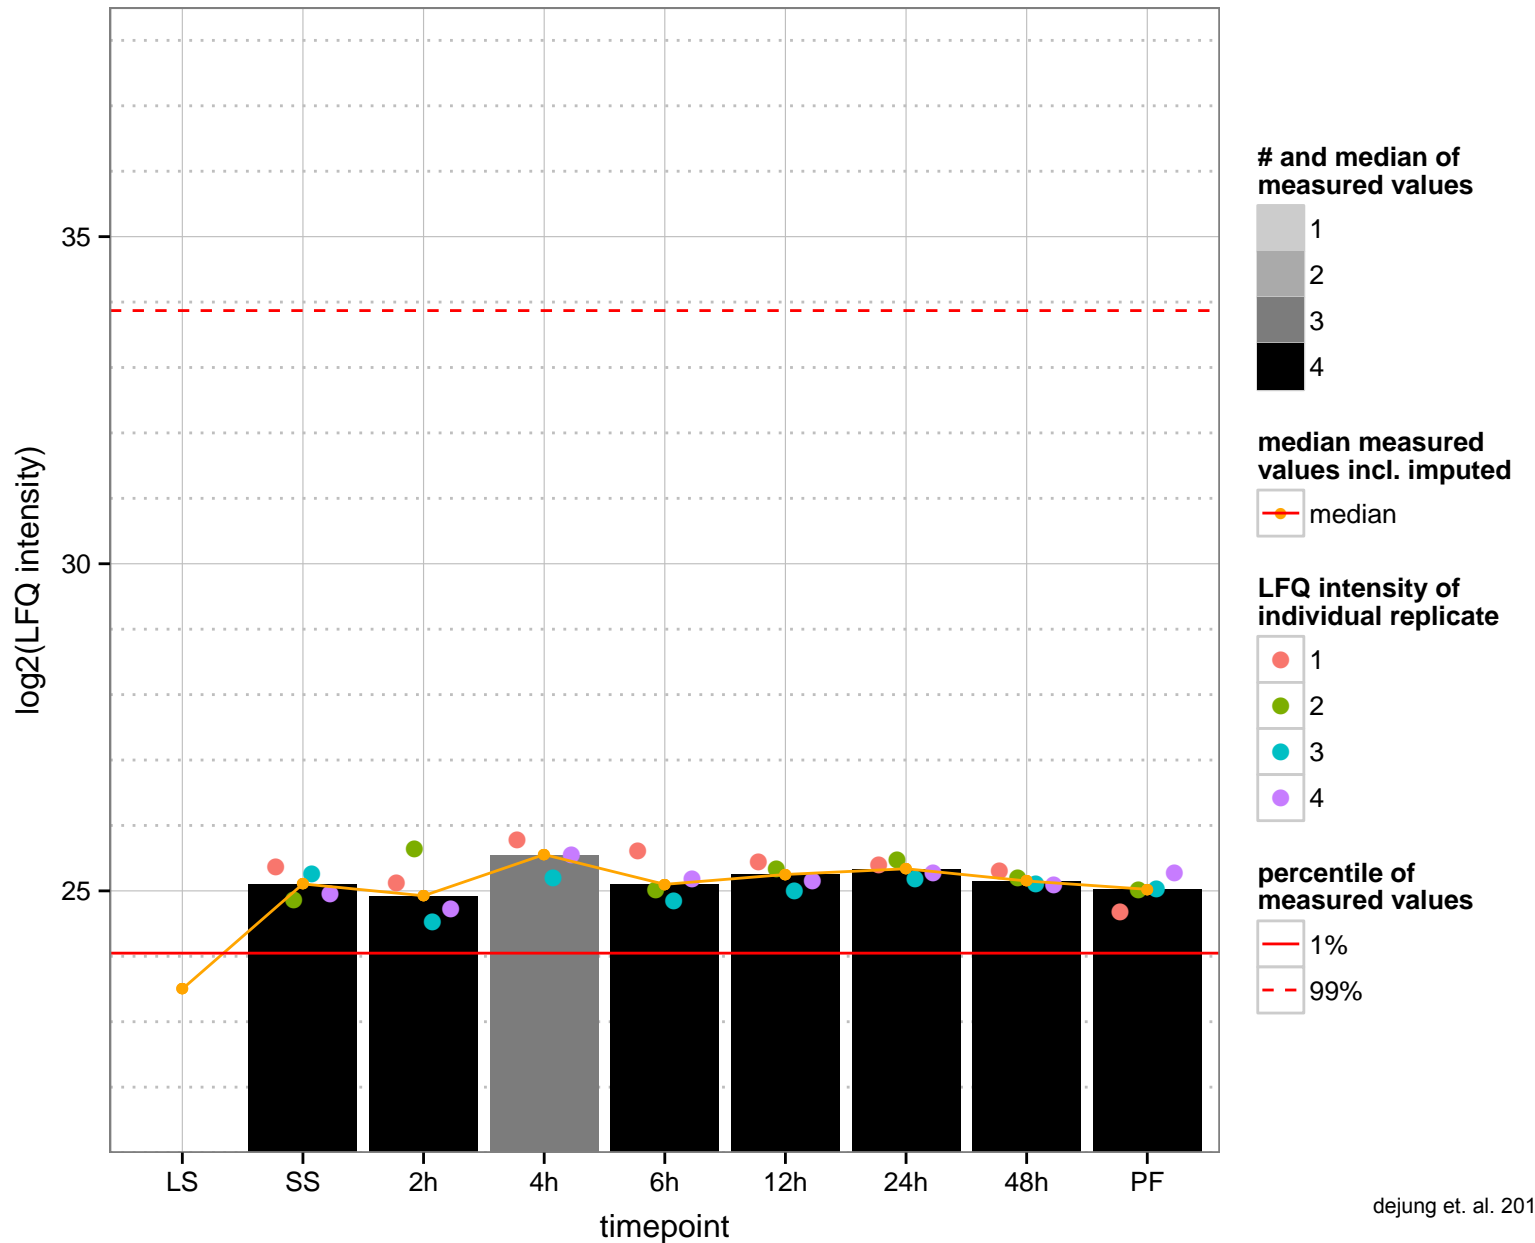



ubiquitin fusion degradation protein 2, putative, ubiquitin conjugation factor E4 B

Tb927.6.2460

AGOF: ubiquitin-ubiquitin ligase activity

AGOC: ubiquitin ligase complex

AGOP: cell redox homeostasis, protein ubiquitination, ubiquitin-dependent protein catabolic process

PGOF: ubiquitin-ubiquitin ligase activity

PGOC: ubiquitin ligase complex

PGOP: cell redox homeostasis, protein ubiquitination, ubiquitin-dependent protein catabolic process

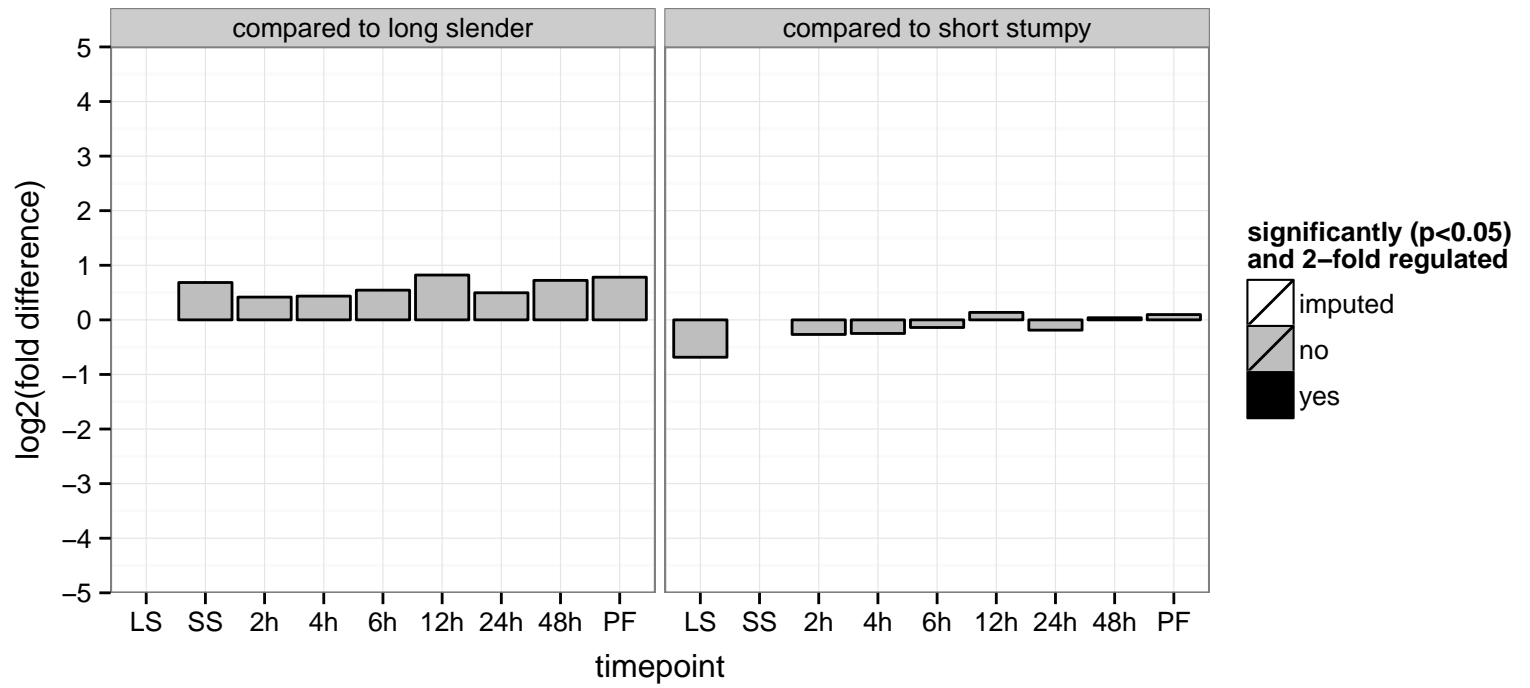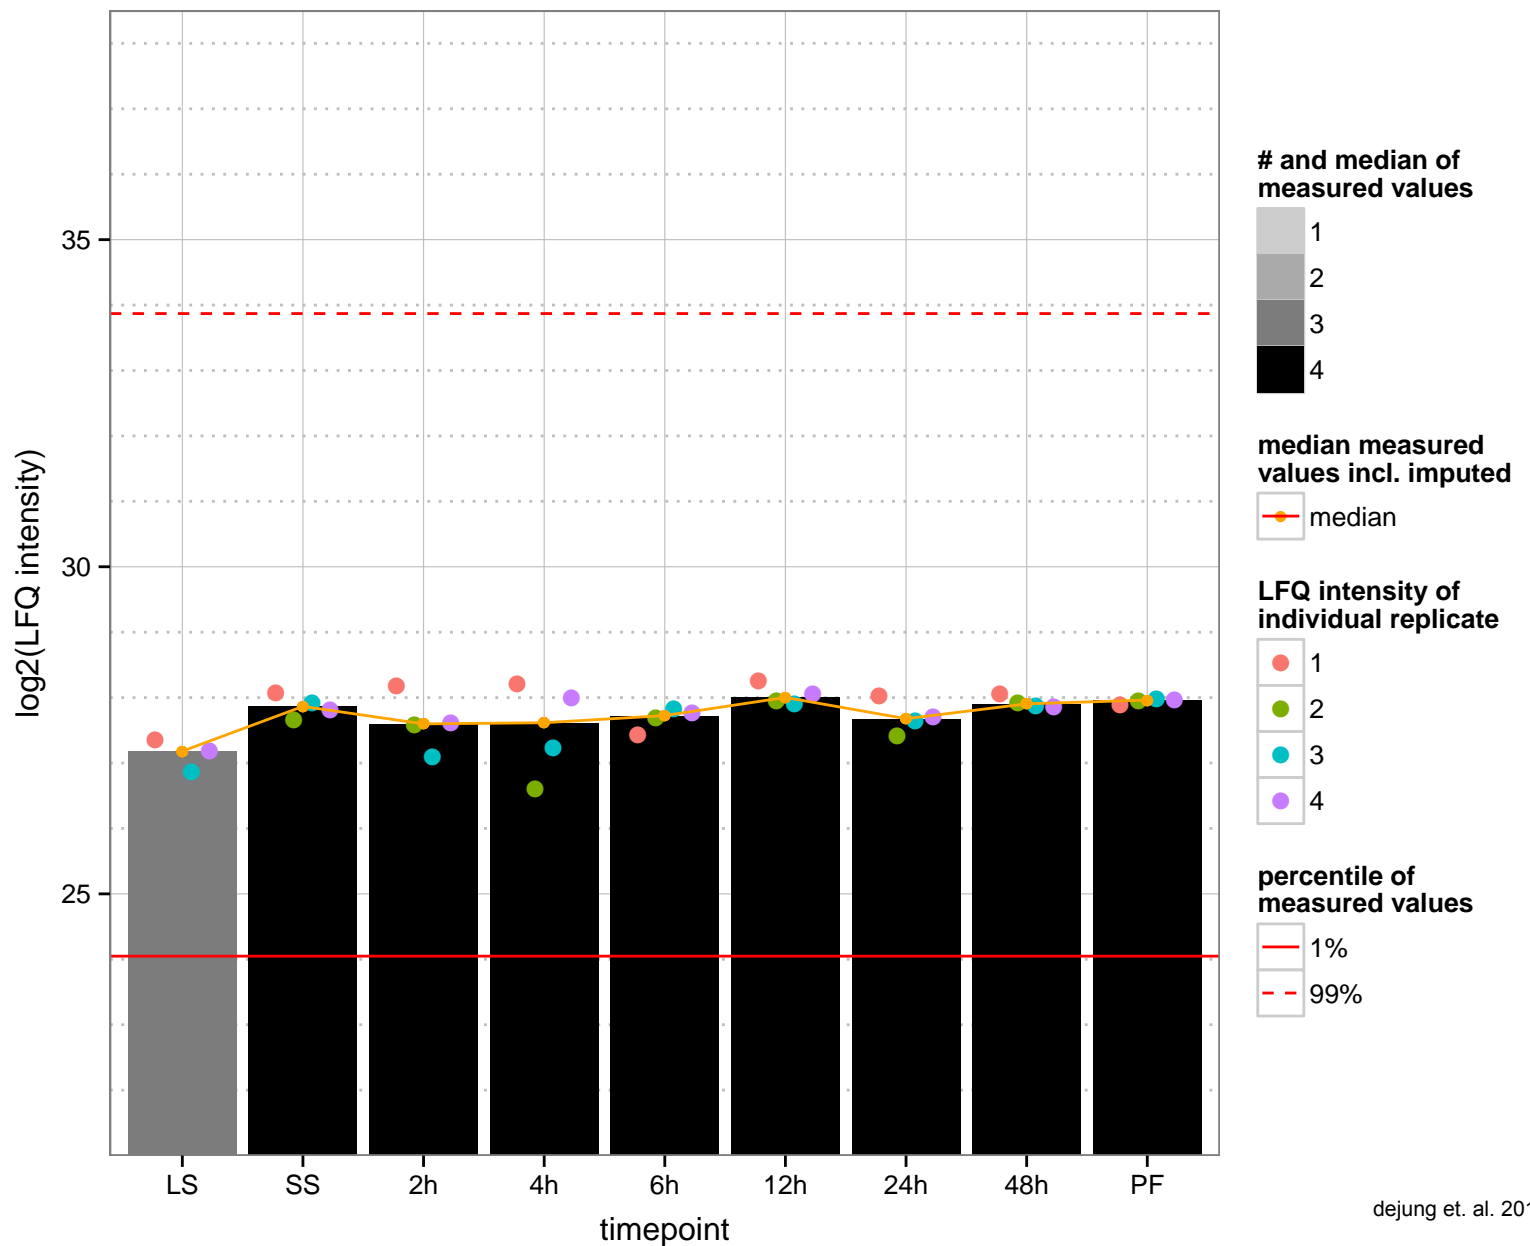

hypothetical protein, conserved  
 Tb927.6.2520  
 AGOF: null  
 AGOC: null  
 AGOP: null  
 PGOF: null  
 PGO: null  
 PGOP: null

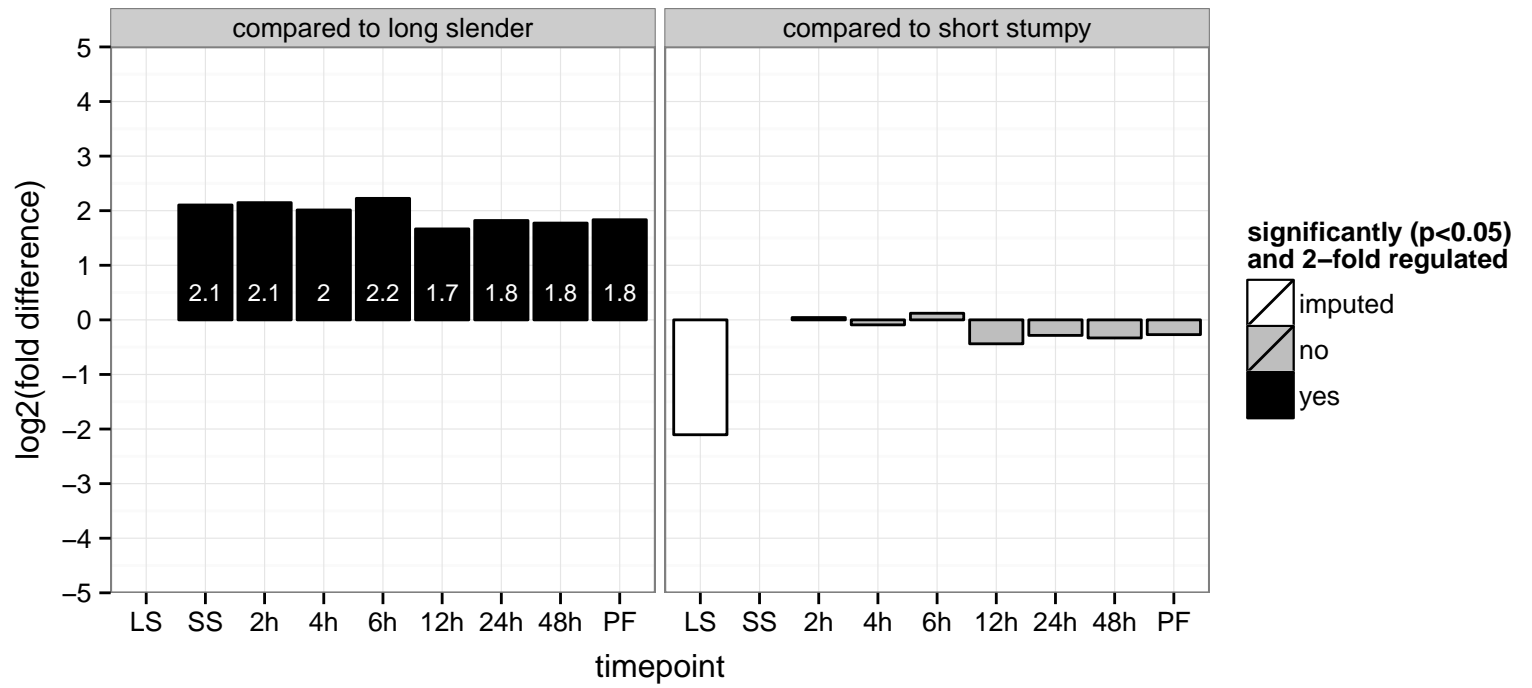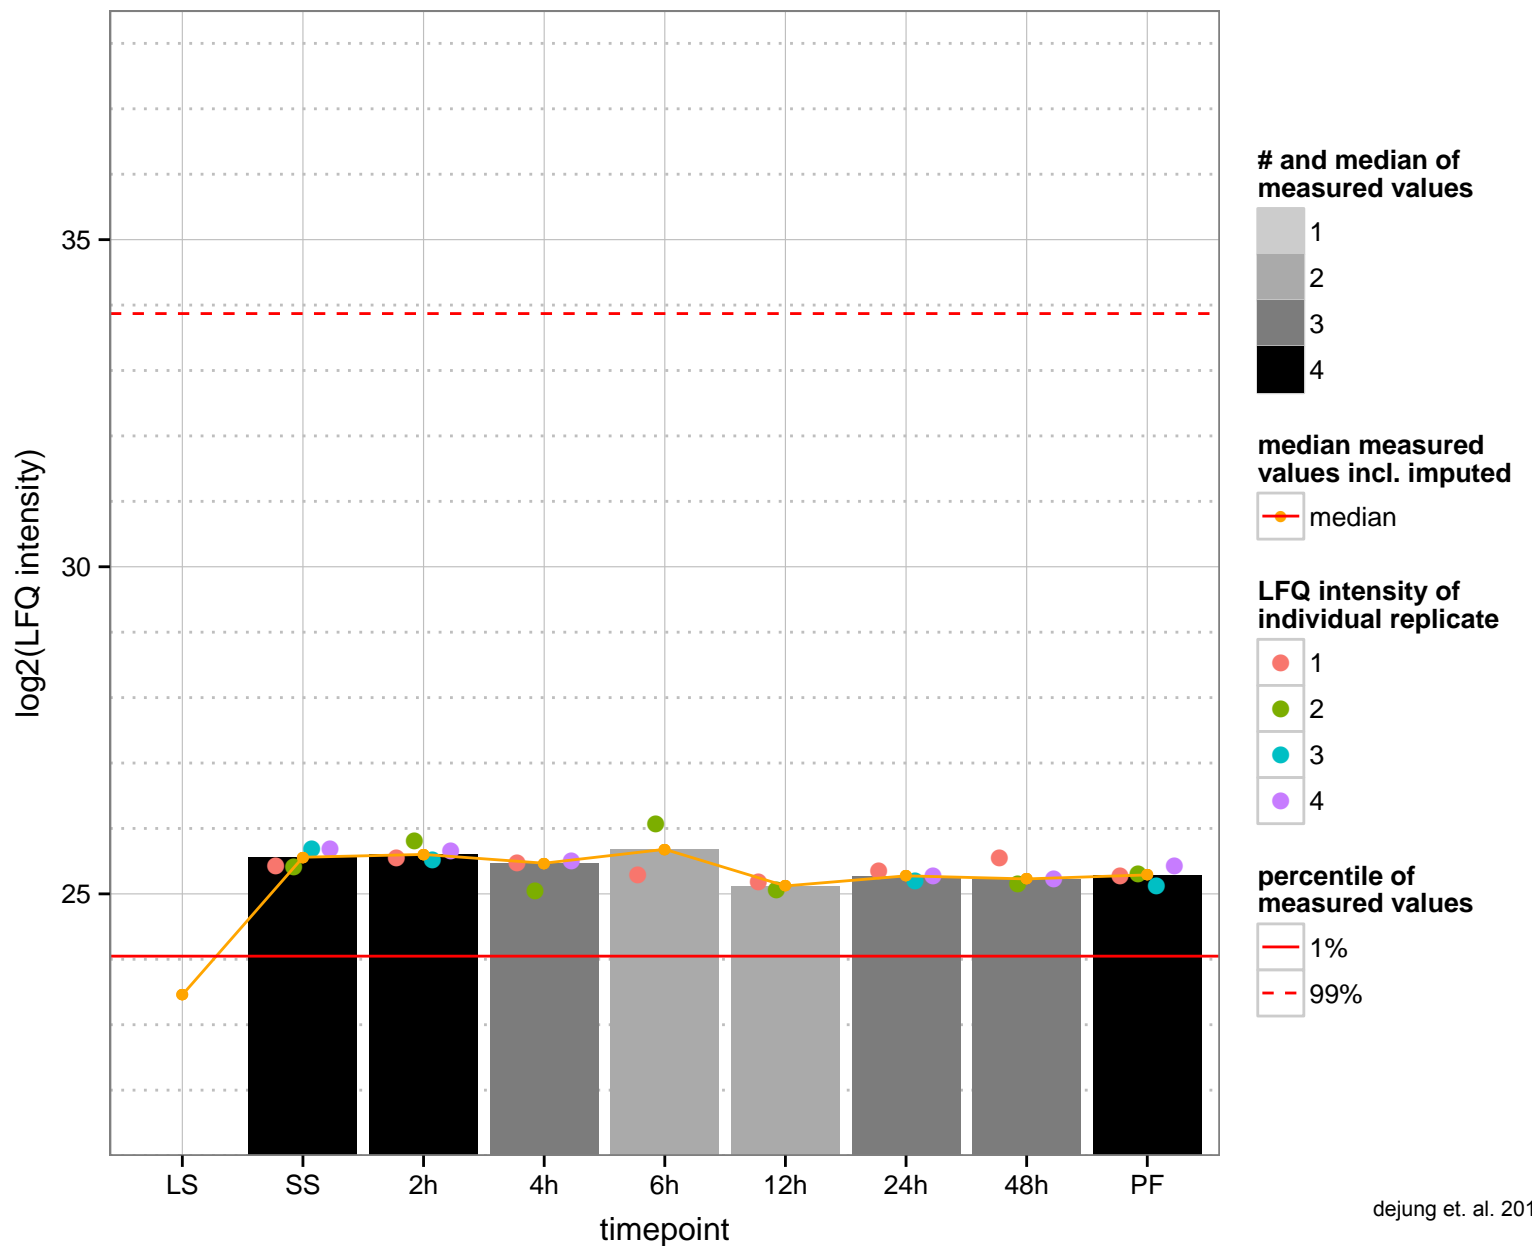

RNA-binding protein, putative (TRRM2)  
 Tb927.6.2550  
 AGOF: RNA binding  
 AGOC: null  
 AGOP: RNA processing  
 PGO: nucleic acid binding  
 PGO: null  
 PGOP: null

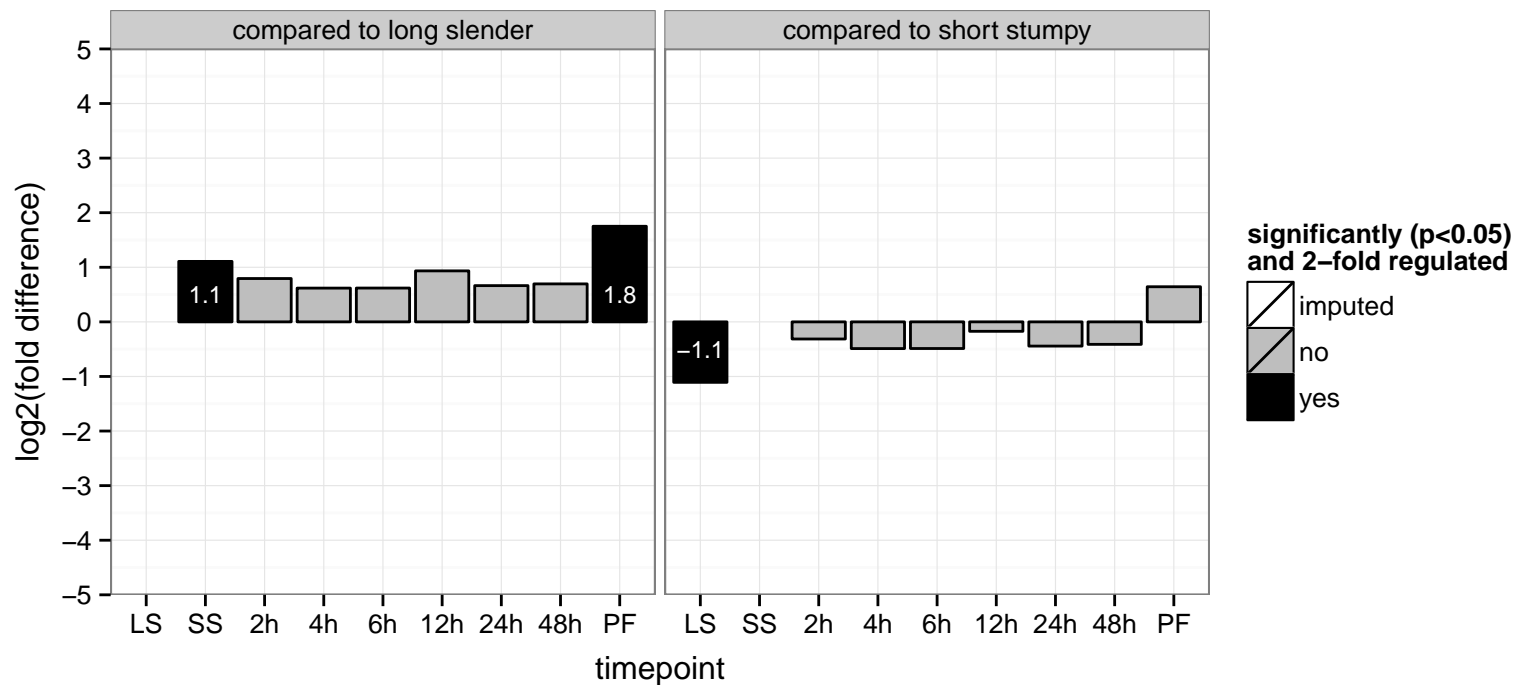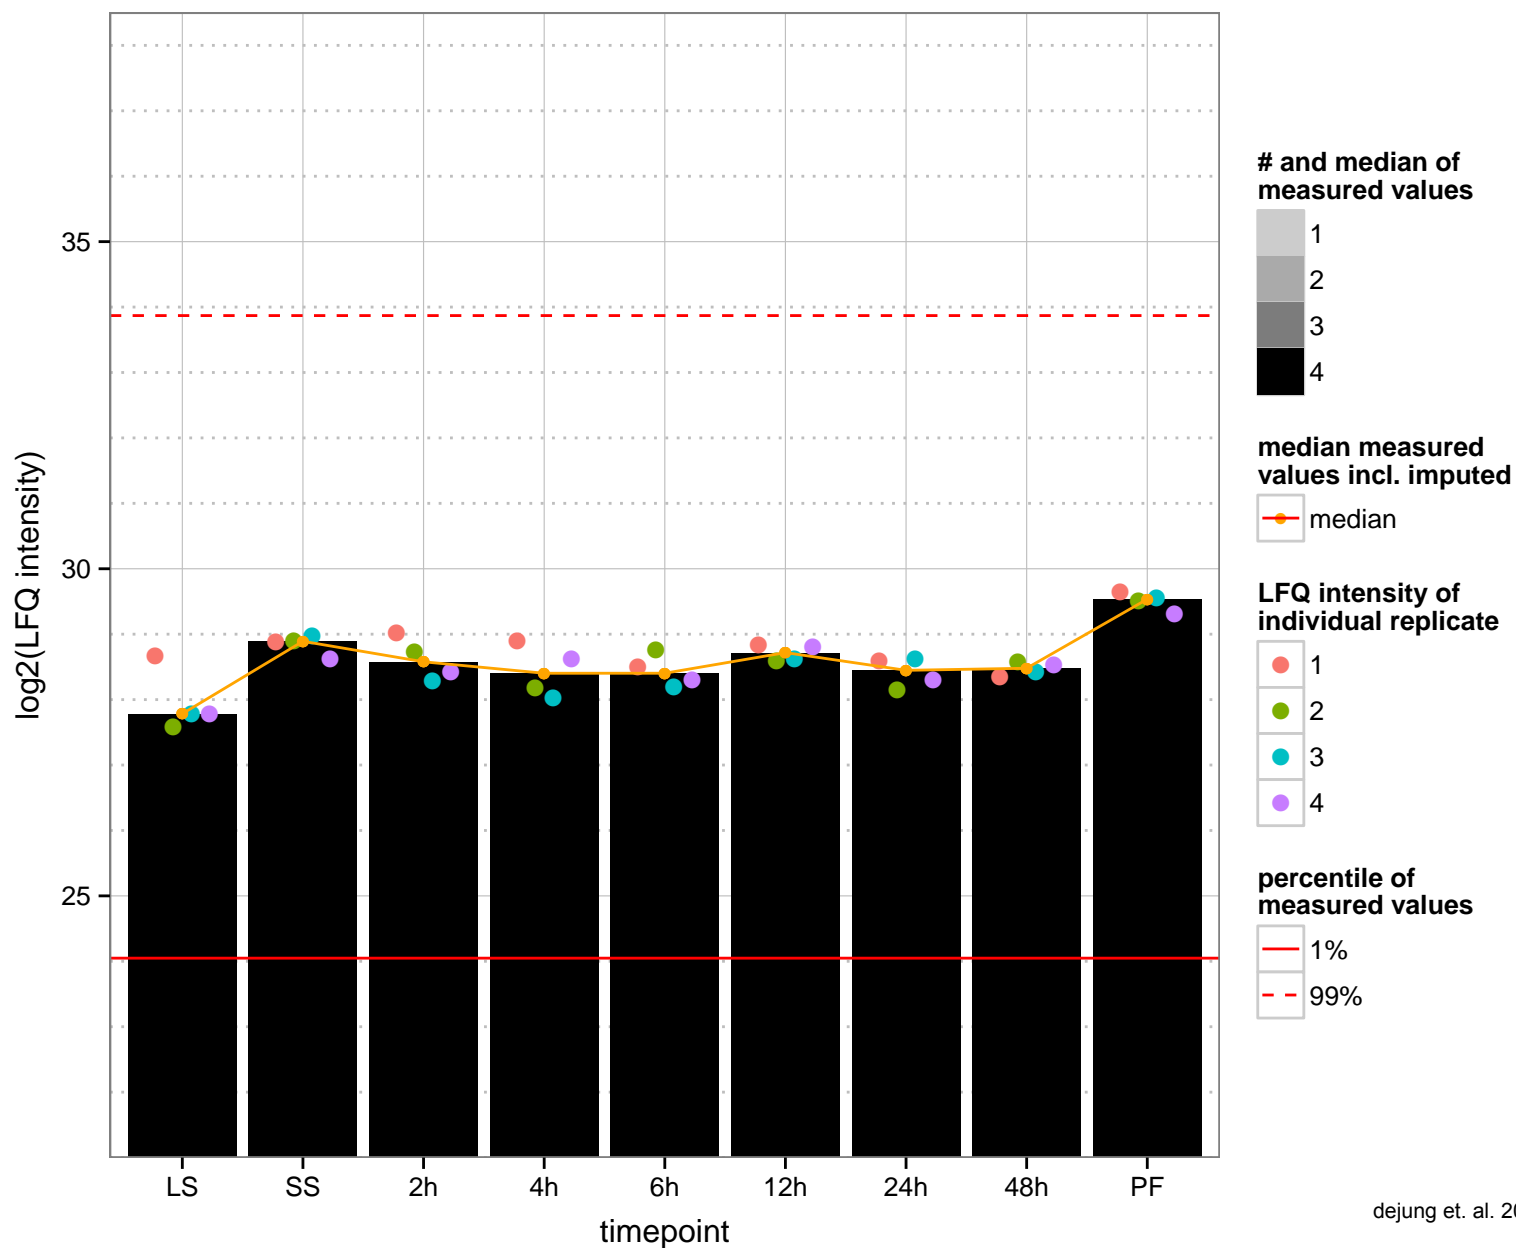

importin alpha subunit, putative (TbKap60)  
 Tb927.6.2640  
 AGOF: null  
 AGOC: null  
 AGOP: null  
 PGOF: binding, protein binding, protein transporter activity  
 PGO: cytoplasm, nucleus  
 PPOP: protein import into nucleus

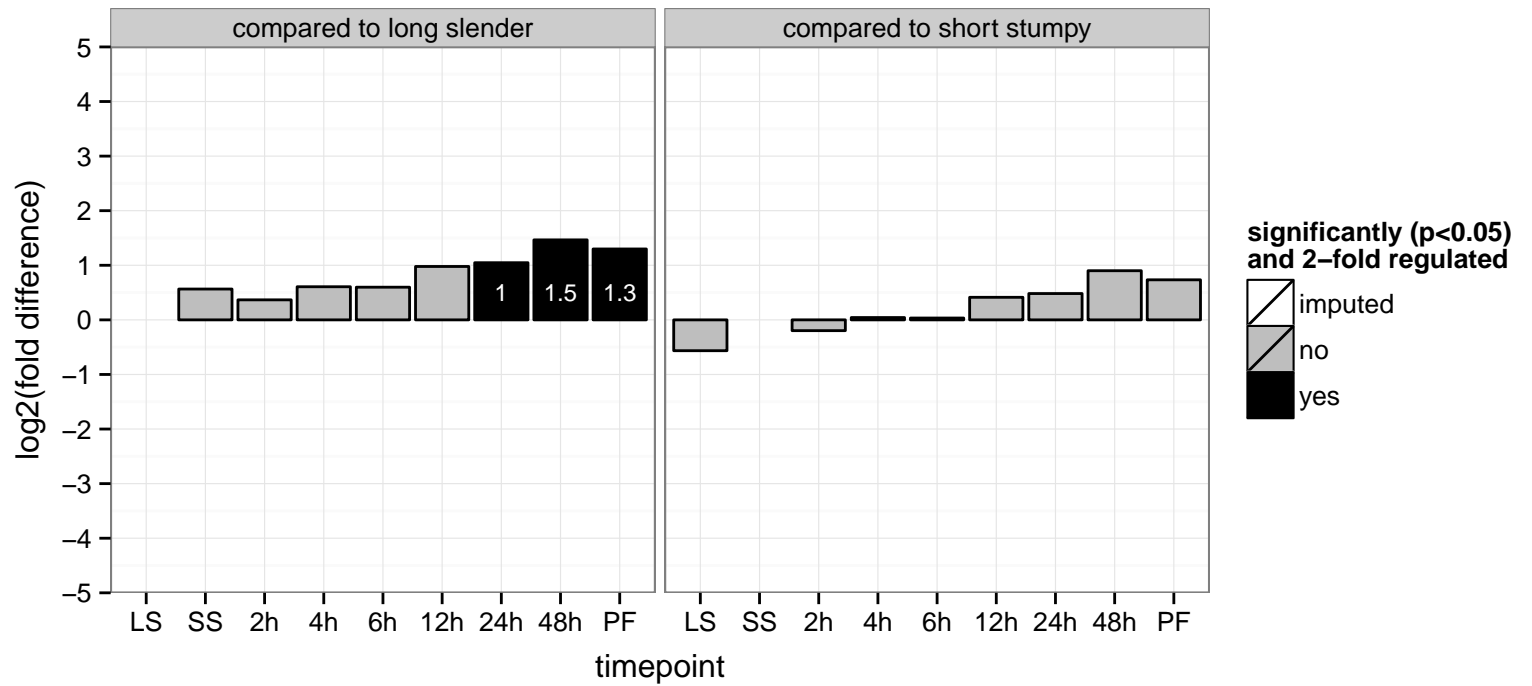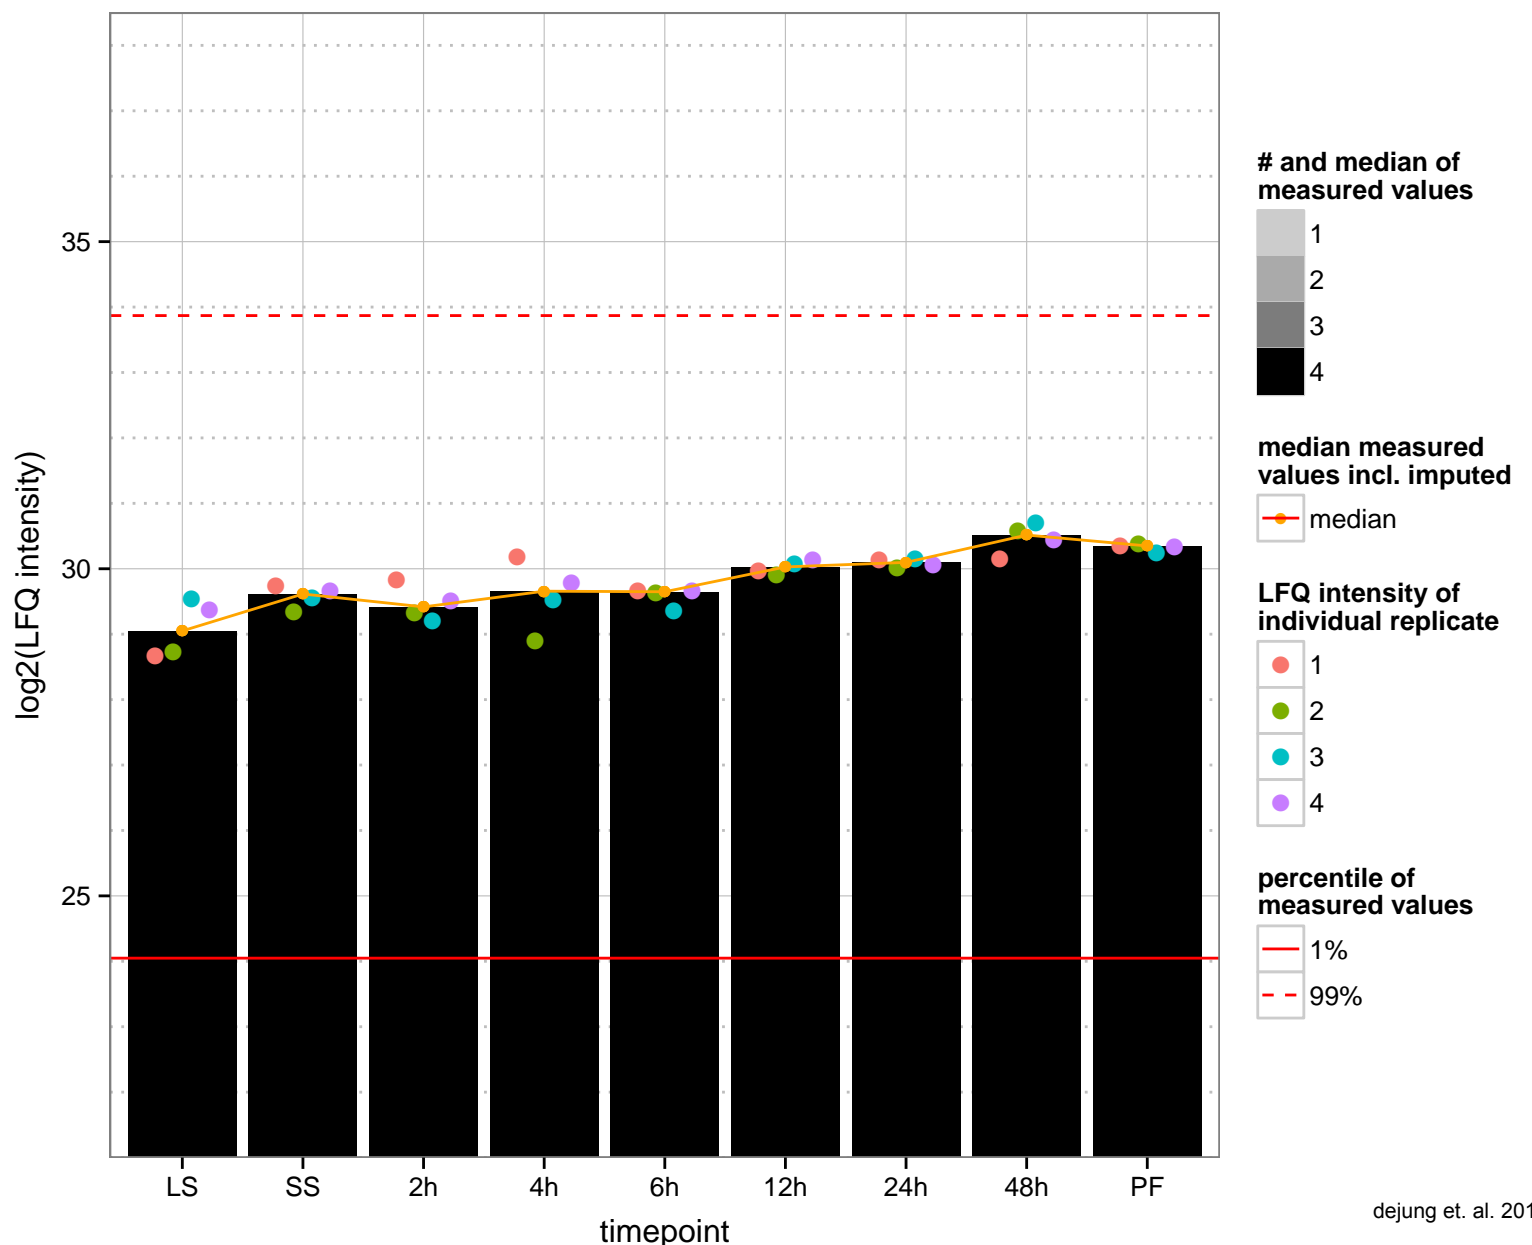

hypothetical protein, conserved  
 Tb927.6.2650  
 AGOF: null  
 AGOC: null  
 AGOP: null  
 PGO: null  
 PGOC: null  
 PGOP: null

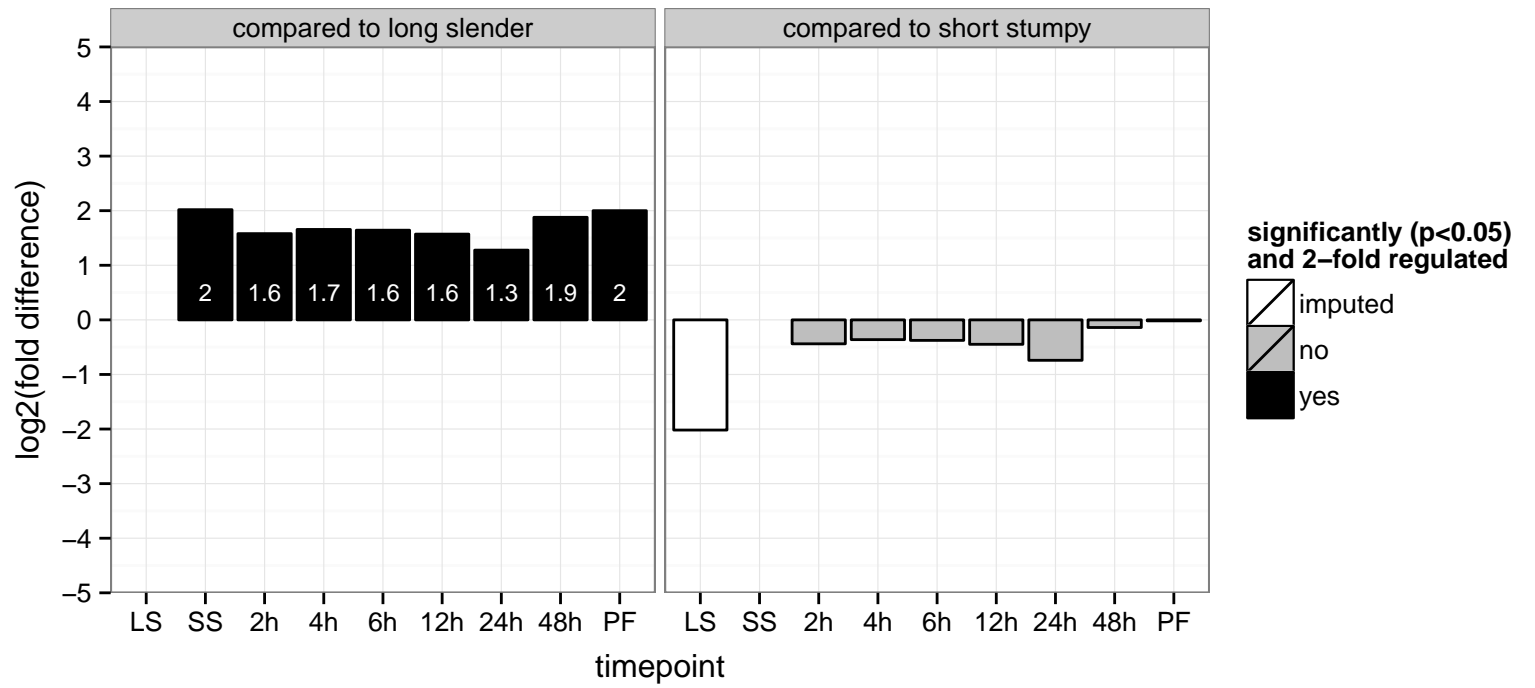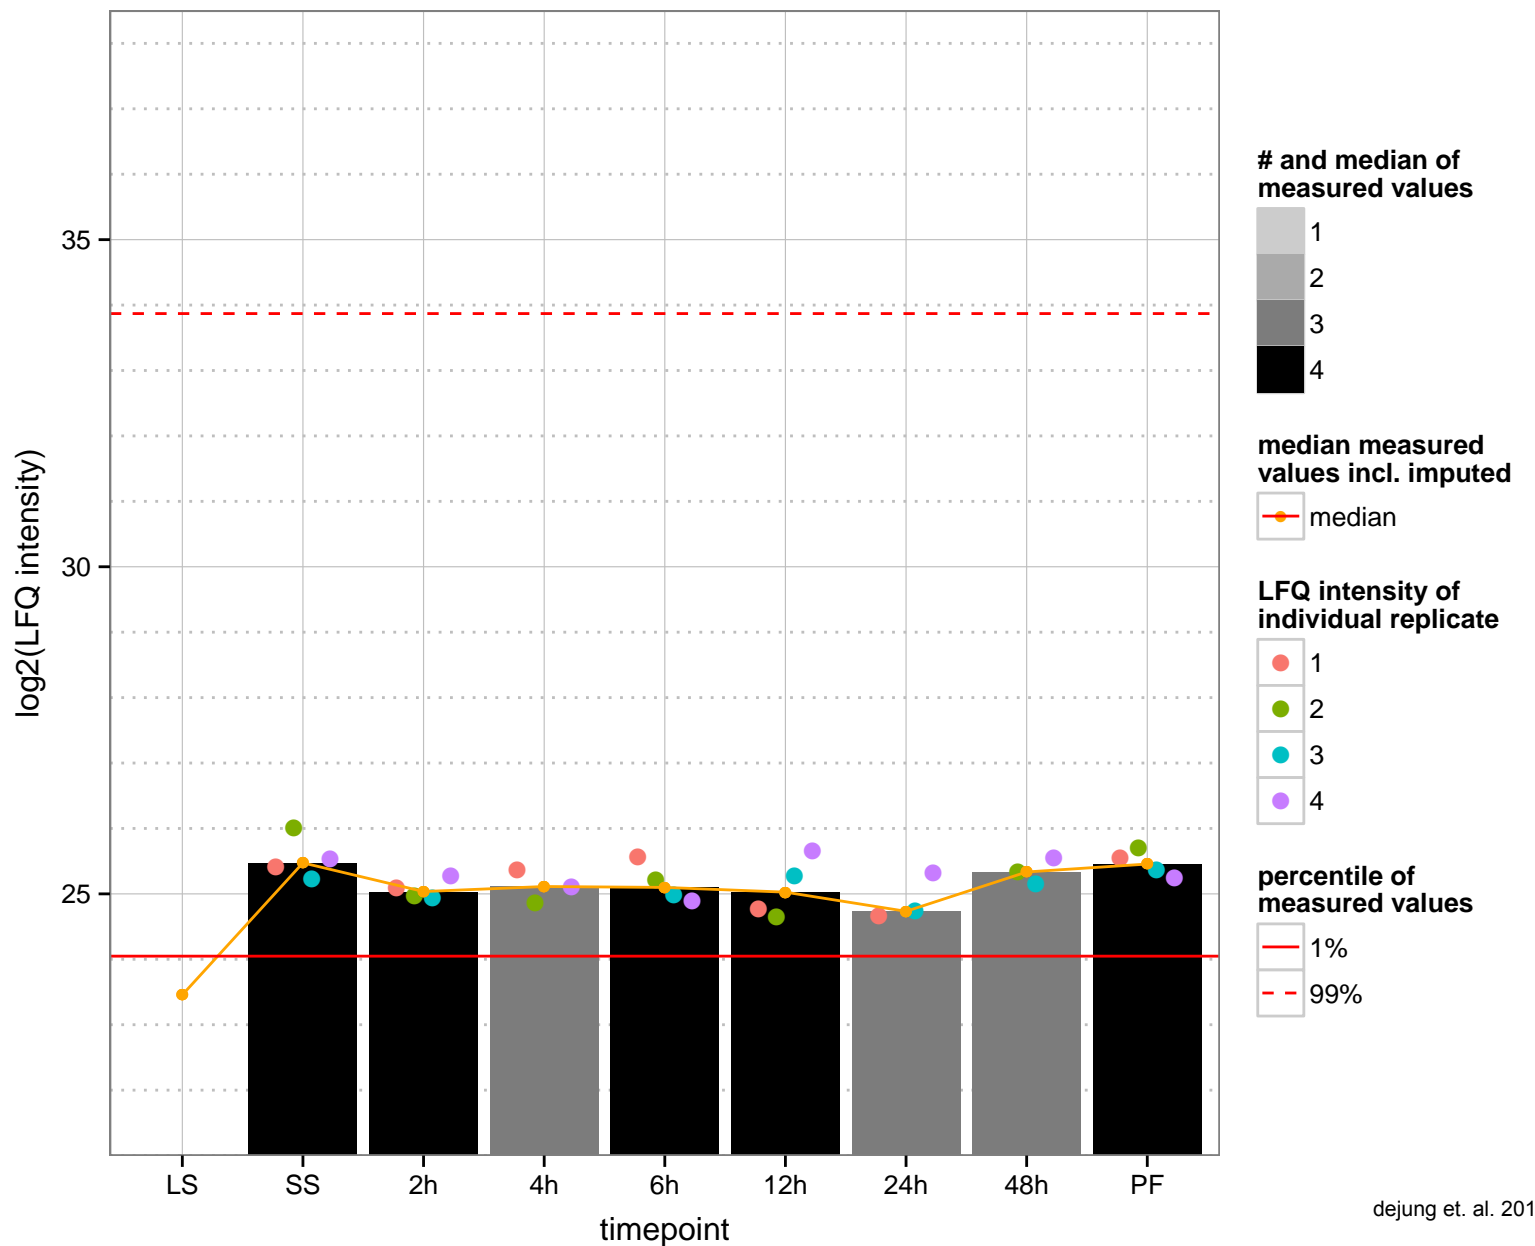

ubiquitin carboxyl-terminal hydrolase, putative, cysteine peptidase, Clan CA, family C19  
 Tb927.6.2690  
 AGOF: ubiquitin thiolesterase activity  
 AGOC: null  
 AGOP: ubiquitin-dependent protein catabolic process  
 PGOF: ubiquitin thiolesterase activity  
 PGO: null  
 PGOP: ubiquitin-dependent protein catabolic process

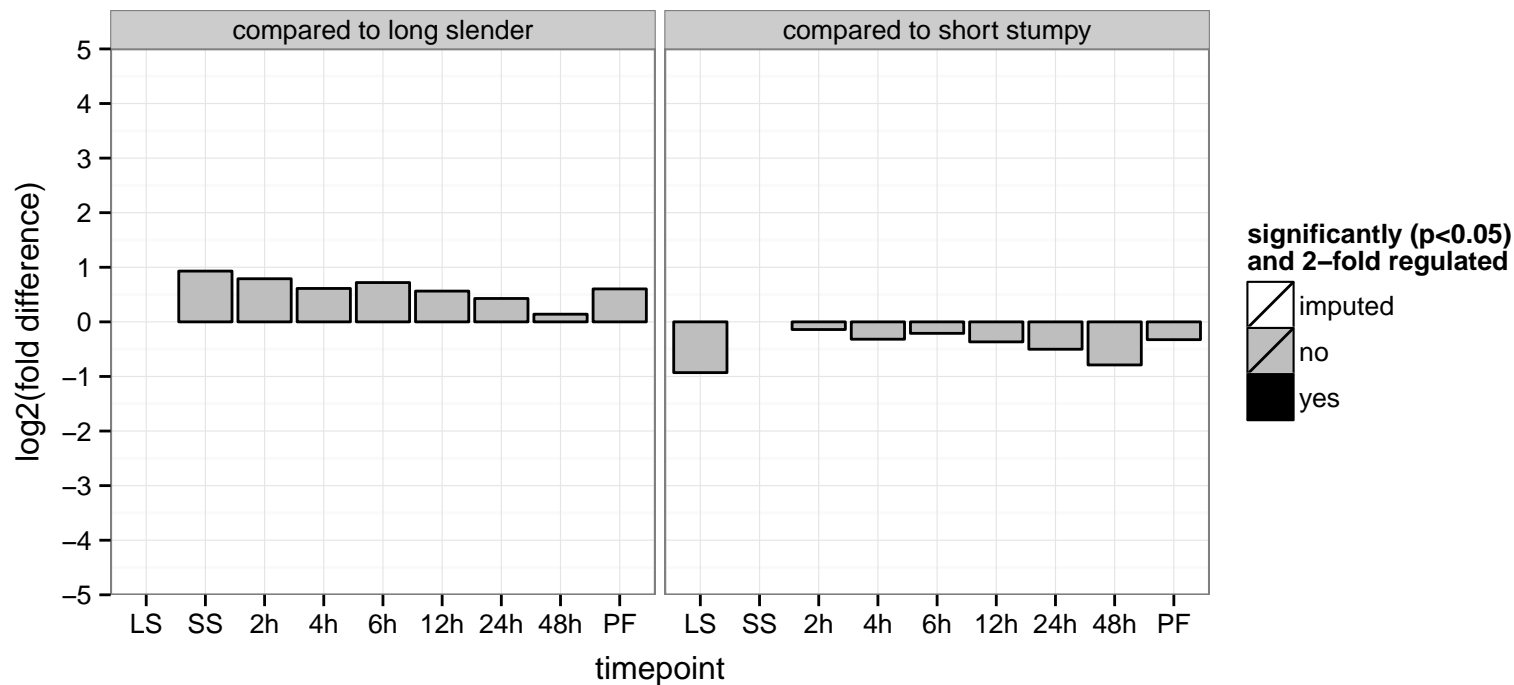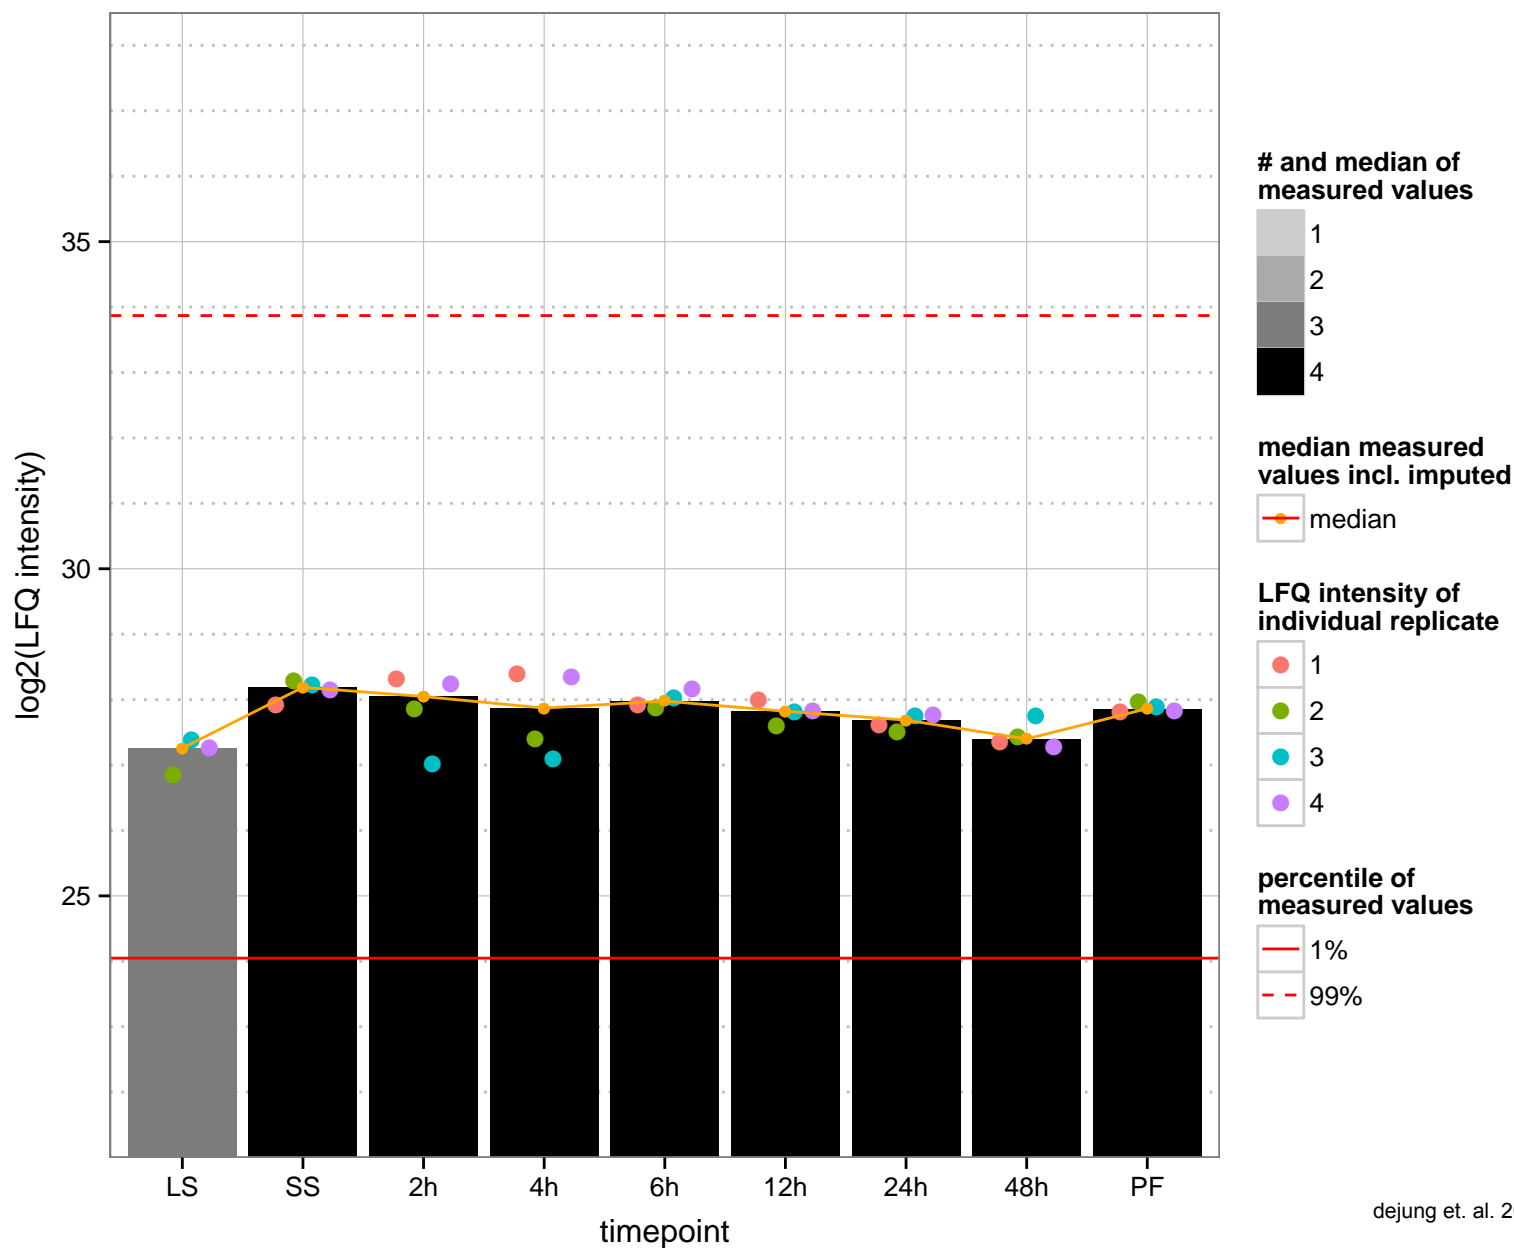

small nuclear ribonucleoprotein Sm-E (Sm-E)

Tb927.6.2700

AGOF: null

AGOC: nucleus, small nucleolar ribonucleoprotein complex

AGOP: RNA splicing, RNA splicing, via transesterification reactions, nuclear mRNA trans splicing, SL addition

PGOF: null

PGOC: null

PGOP: null

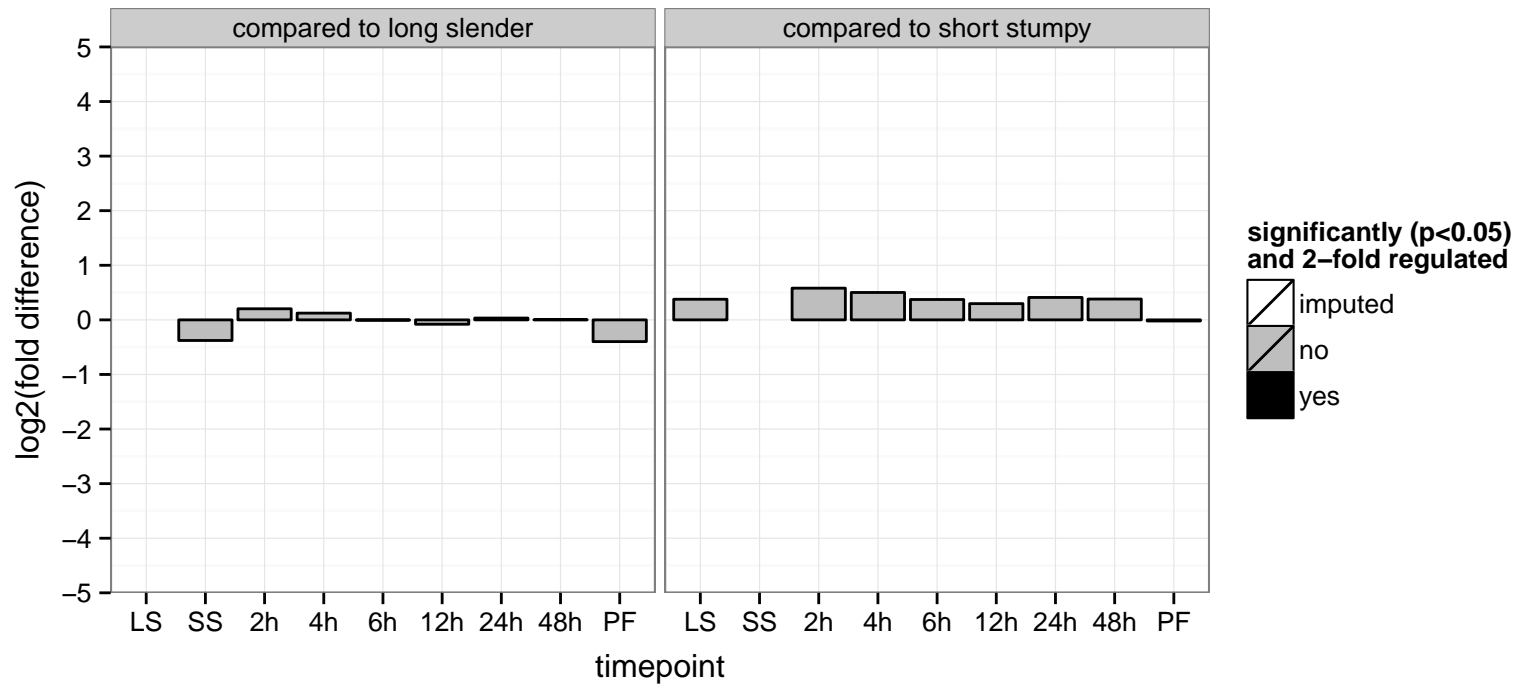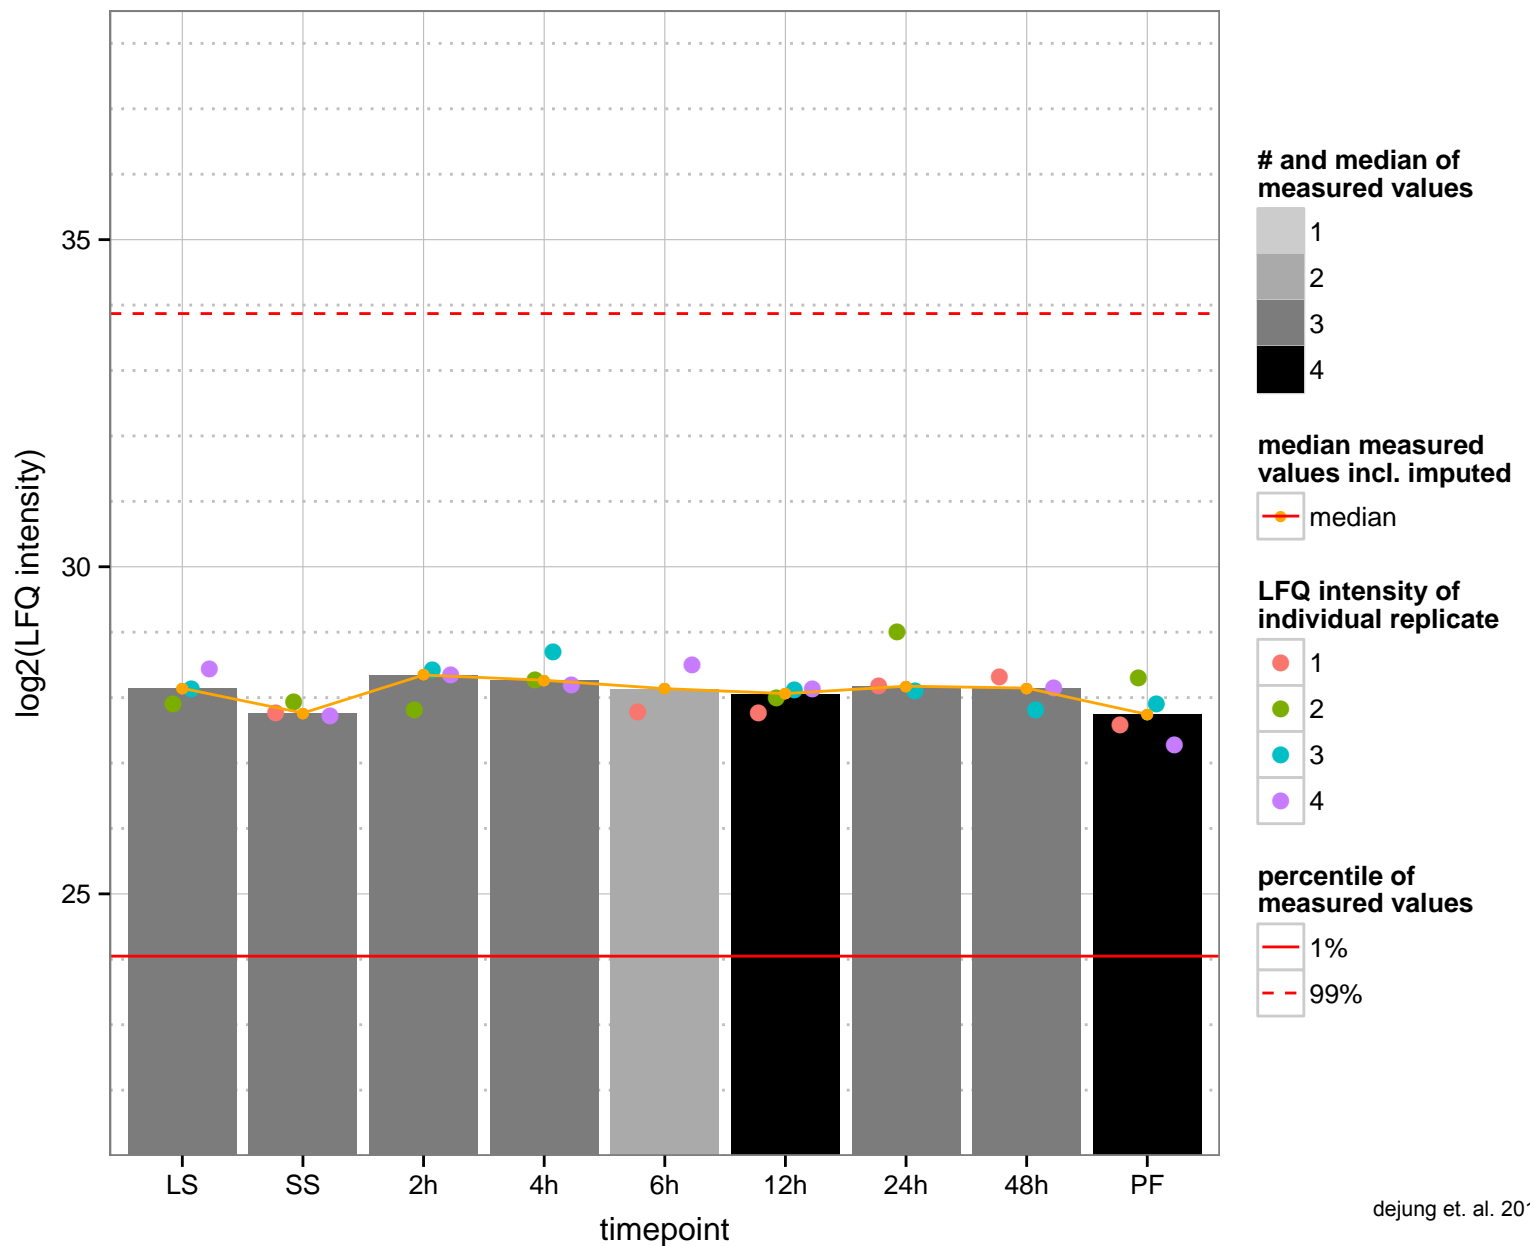

calcium-binding protein, putative  
 Tb927.6.2720  
 AGOF: null  
 AGOC: null  
 AGOP: null  
 PGO: null  
 PGOC: null  
 PGOP: null

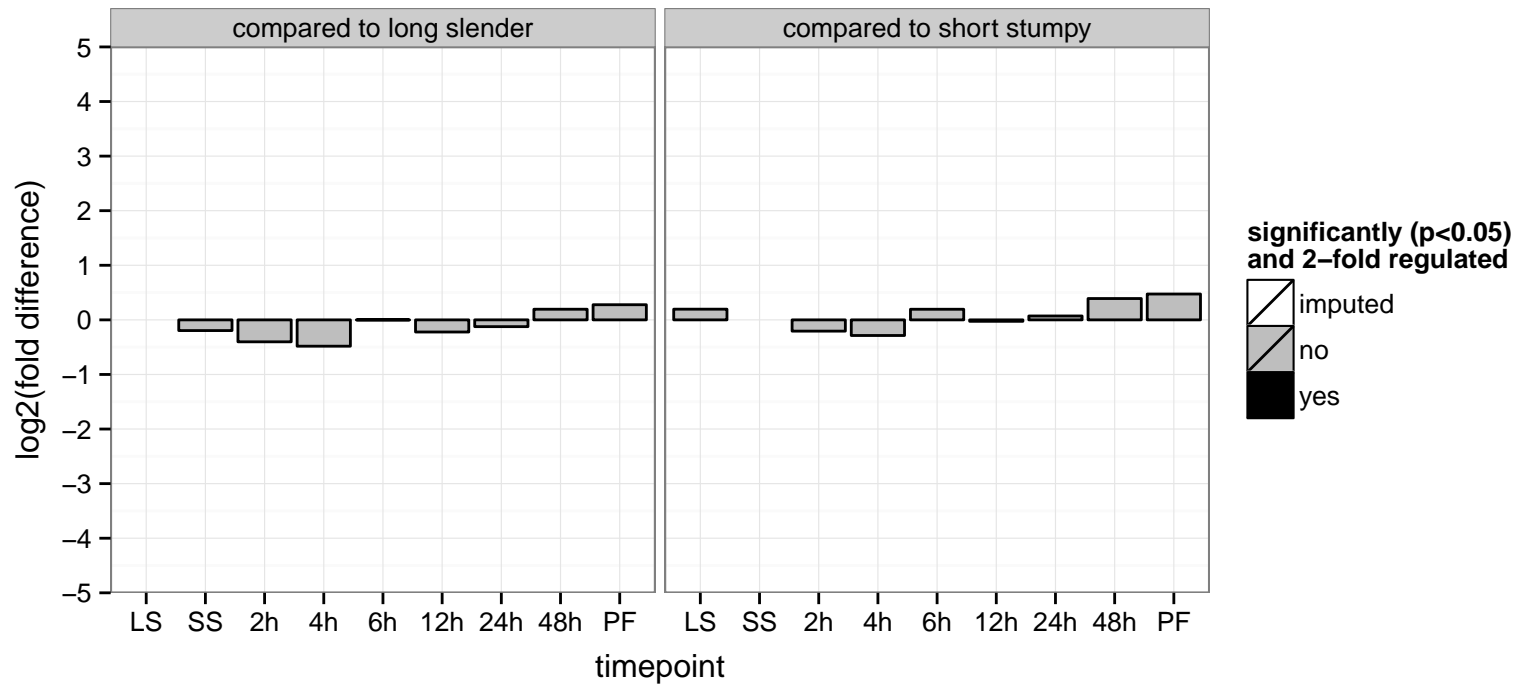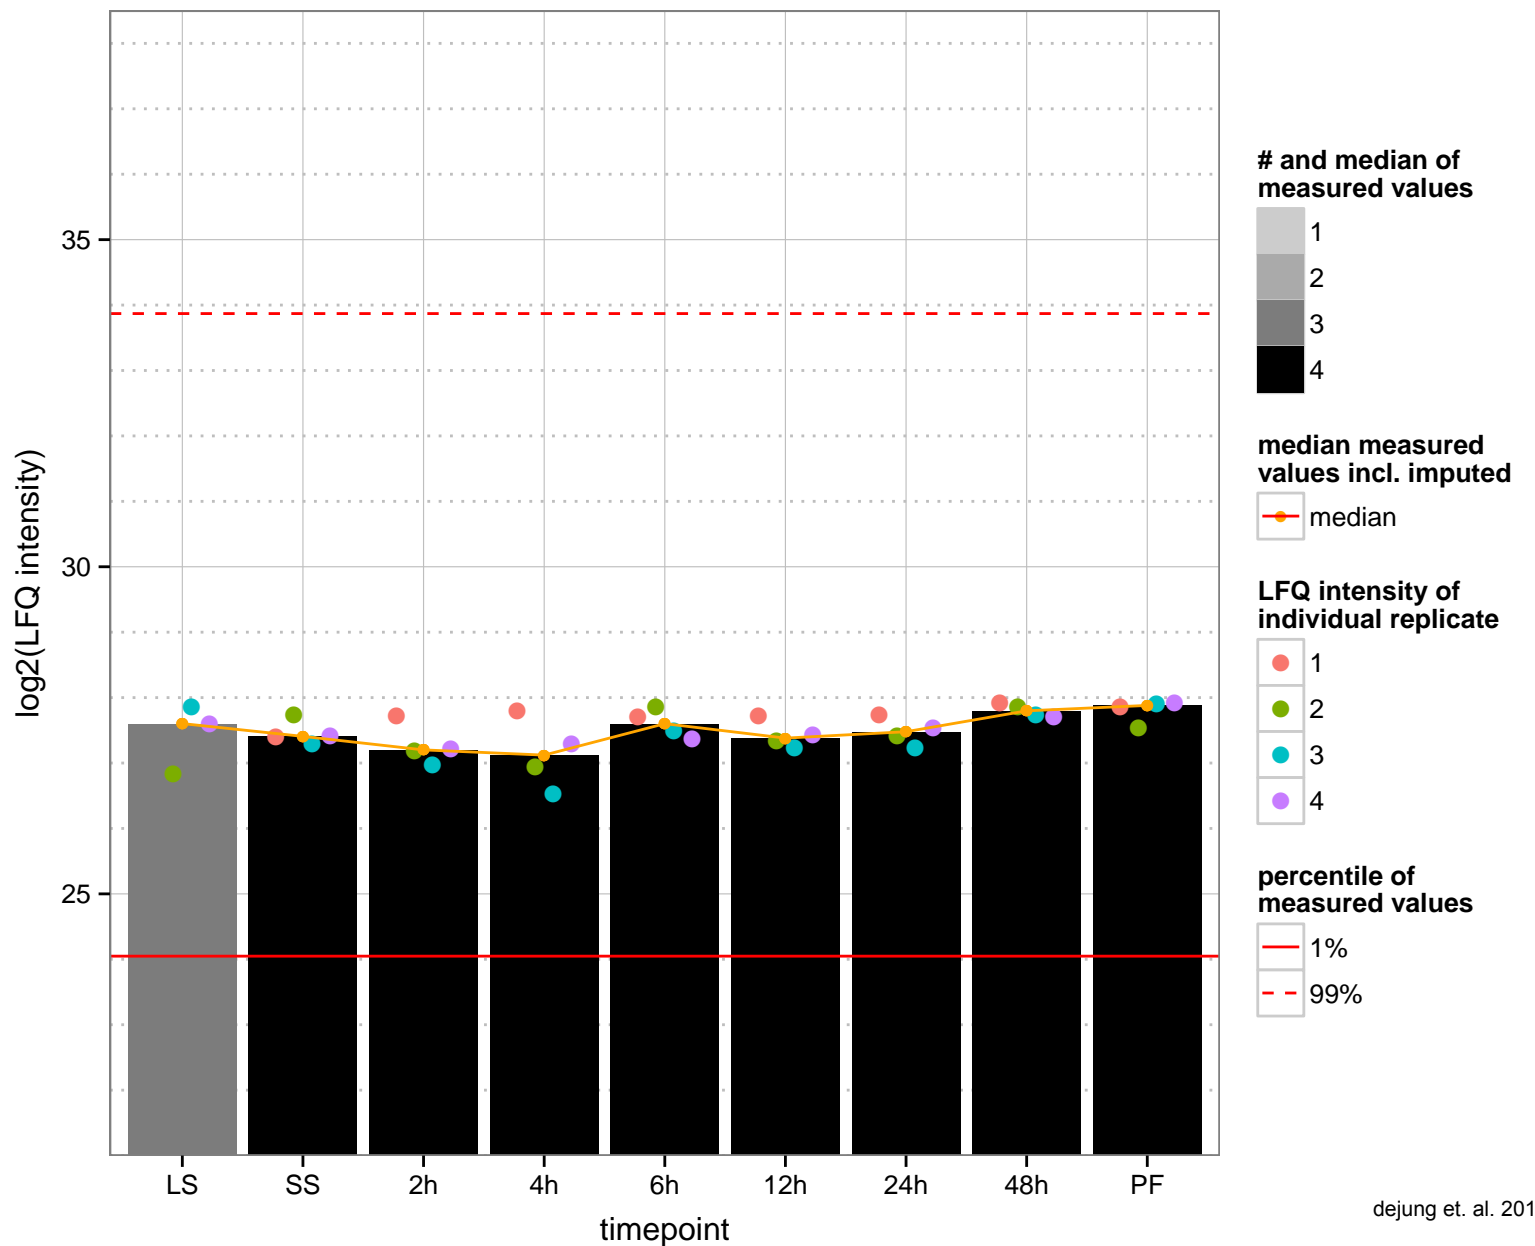



pyridoxal kinase (pdxK)  
 Tb927.6.2740  
 AGOF: pyridoxal kinase activity  
 AGOC: null  
 AGOP: pyridoxine biosynthetic process  
 PGOF: pyridoxal kinase activity  
 PGO: null  
 PGOP: pyridoxal 5'-phosphate salvage

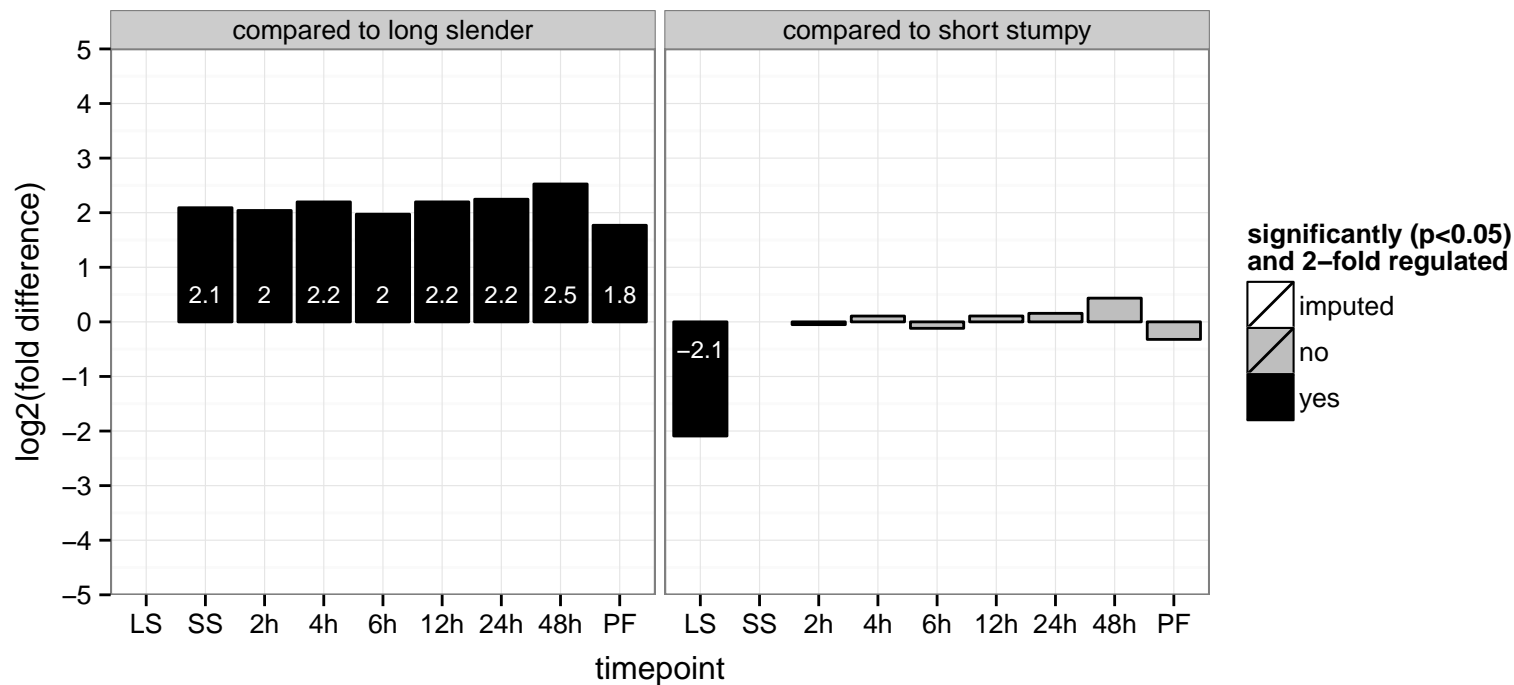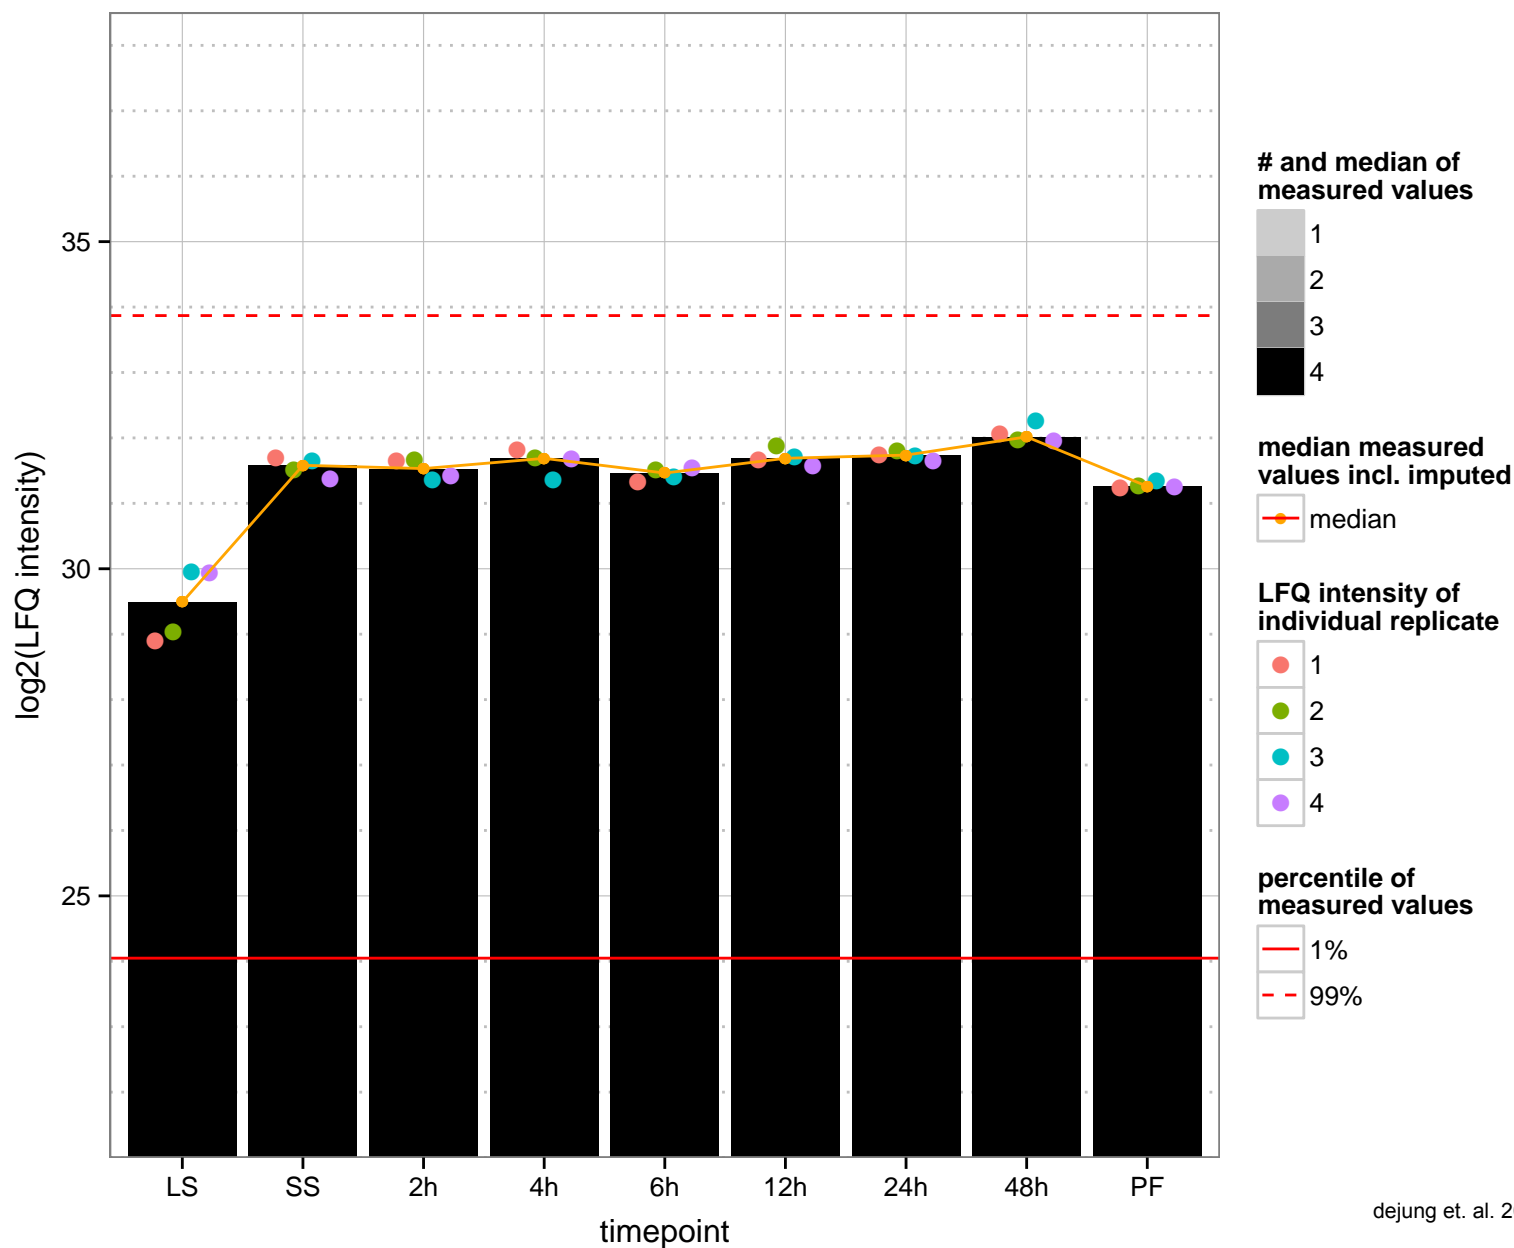

U3 small nuclear ribonucleoprotein (snRNP), putative  
 Tb927.6.2780  
 AGOF: null  
 AGOC: null  
 AGOP: null  
 PGO: null  
 PGOC: null  
 PGOP: null

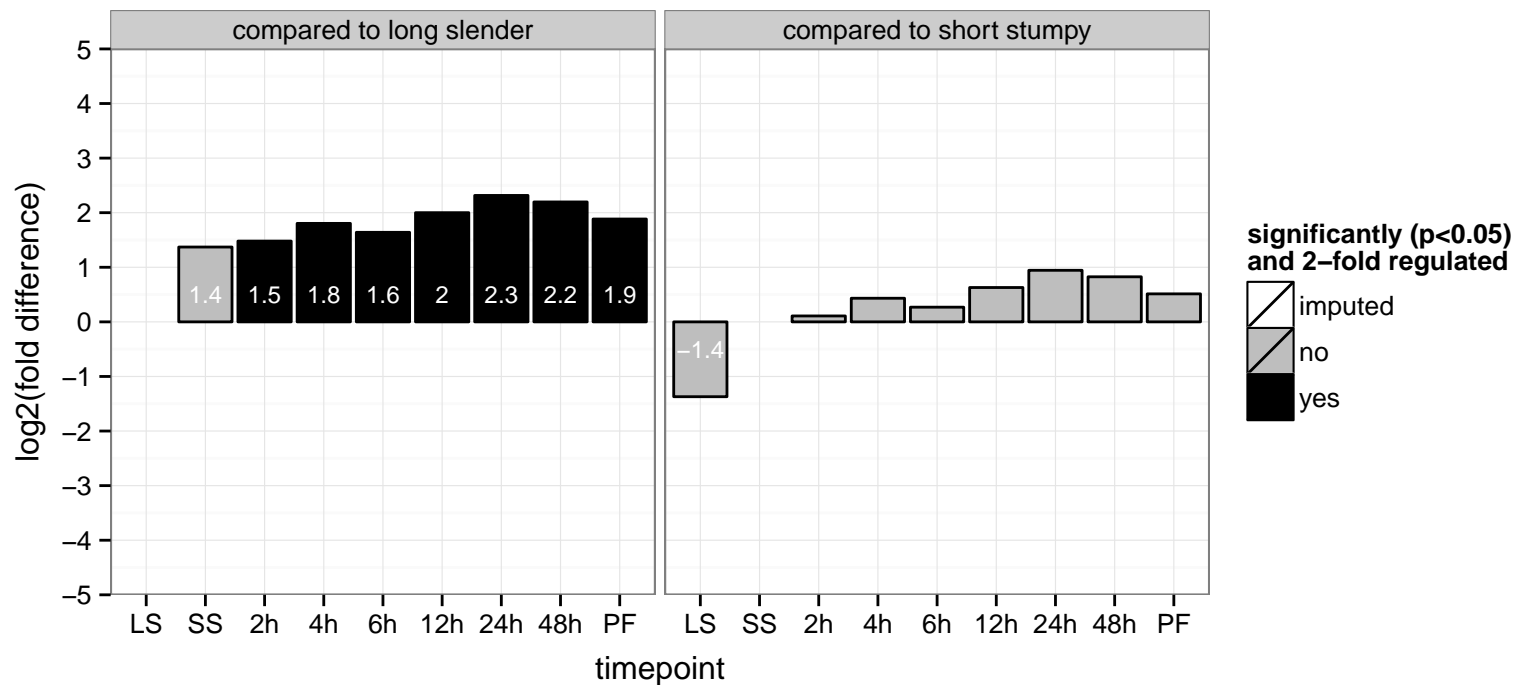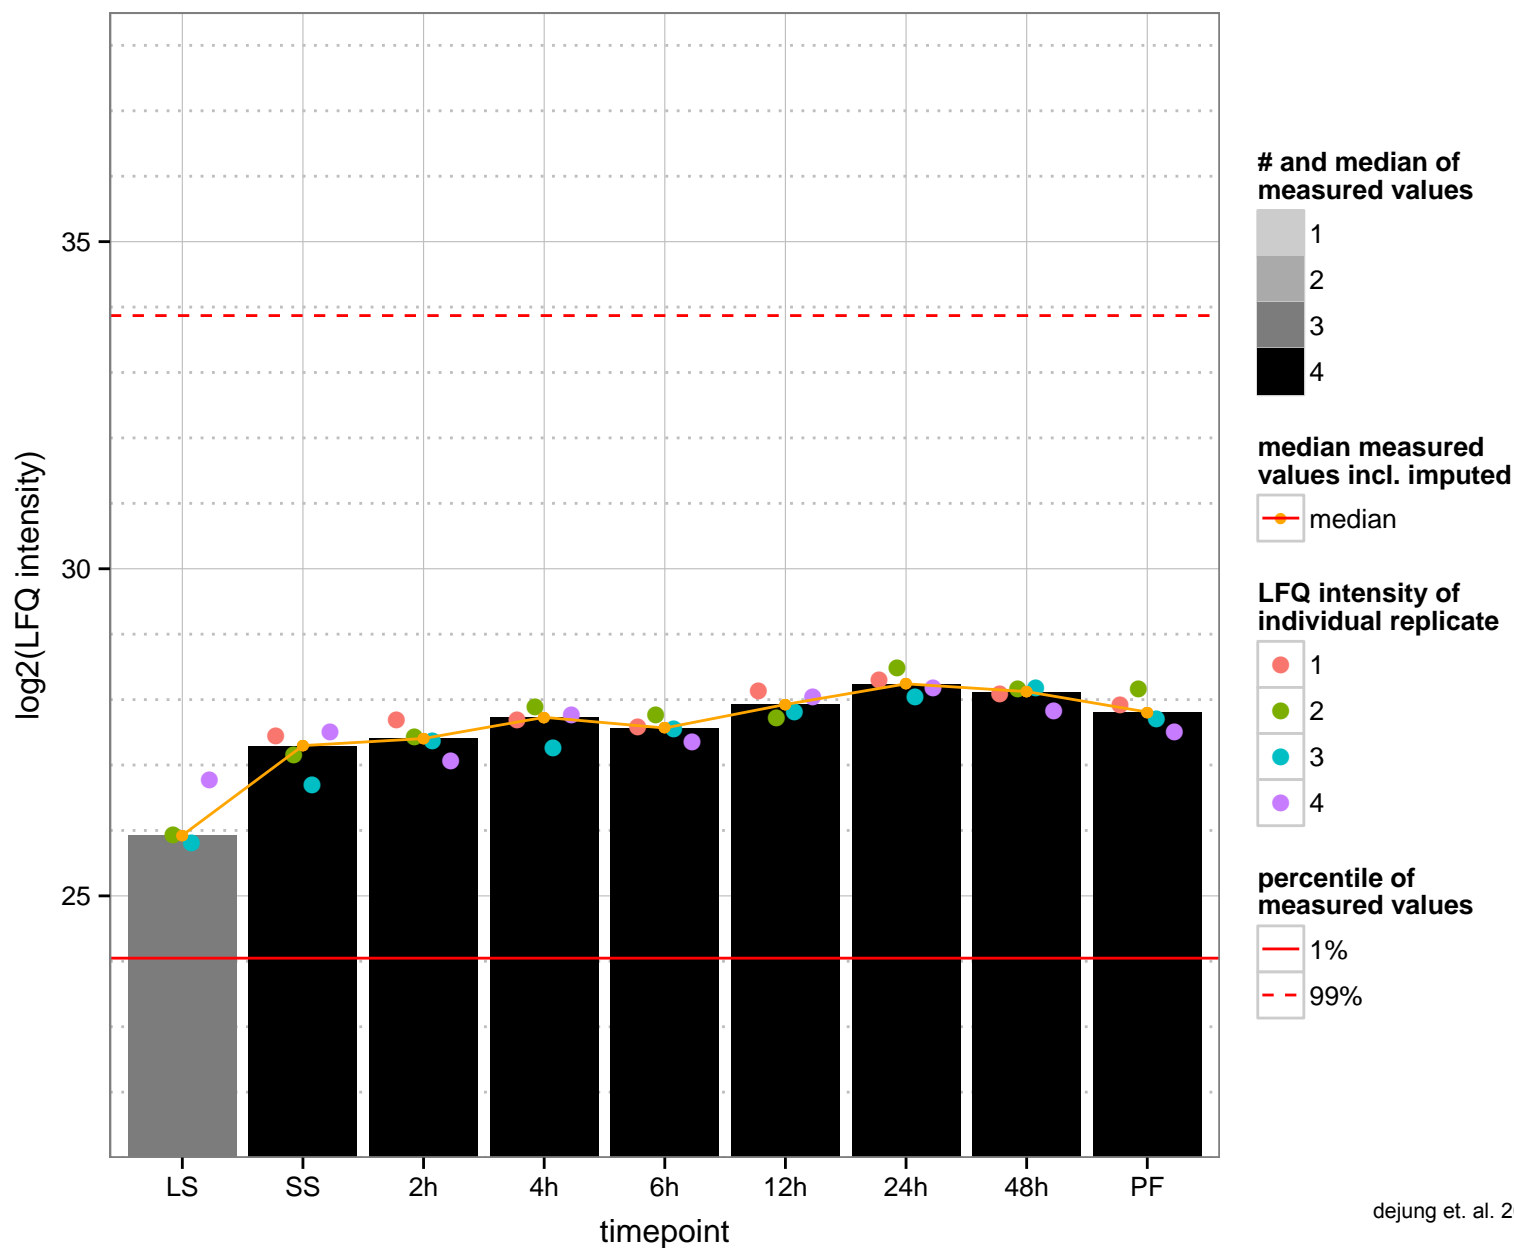

NA, L-threonine 3-dehydrogenase, putative  
 Tb927.6.2790  
 AGOF: NA, catalytic activity, coenzyme binding  
 AGOC: NA, mitochondrion  
 AGOP: NA, cellular metabolic process  
 PGOF: NA, catalytic activity, coenzyme binding  
 PGO: NA, null  
 PGOP: NA, cellular metabolic process

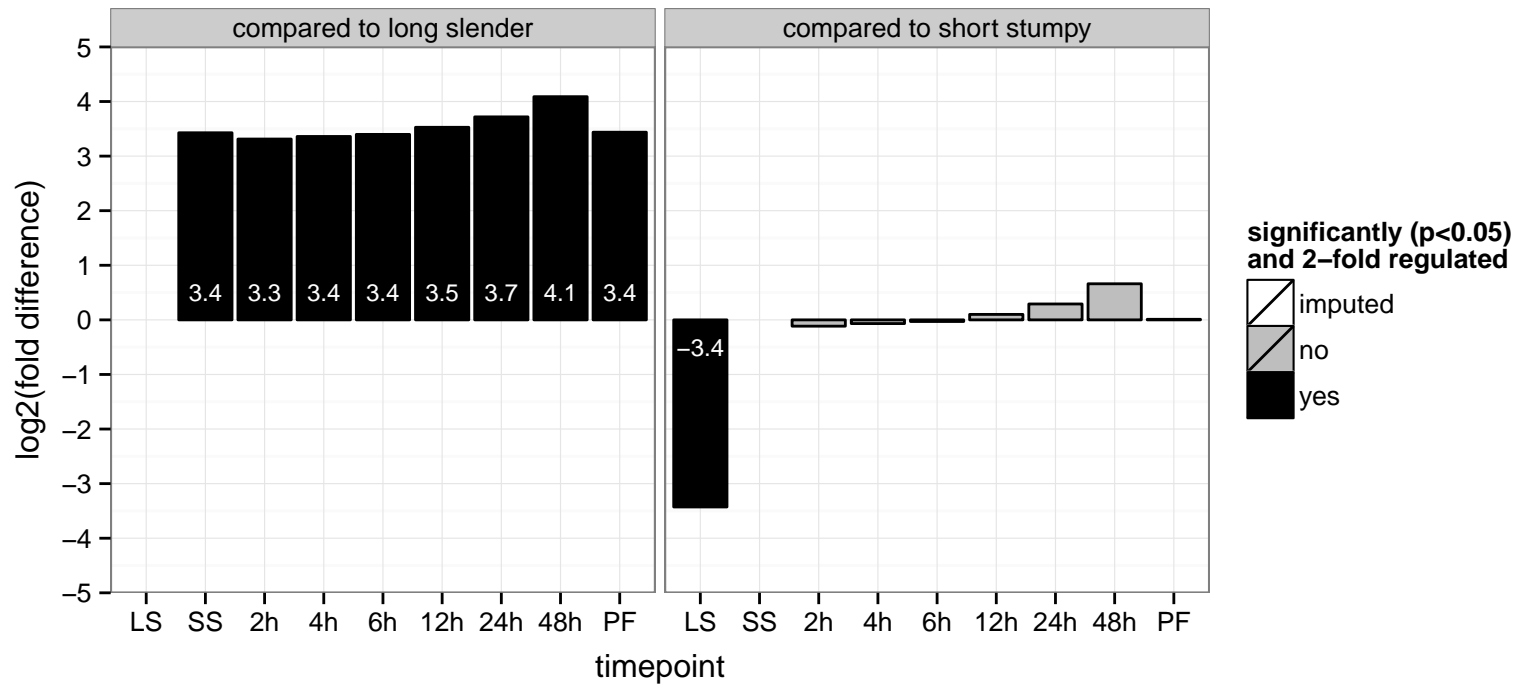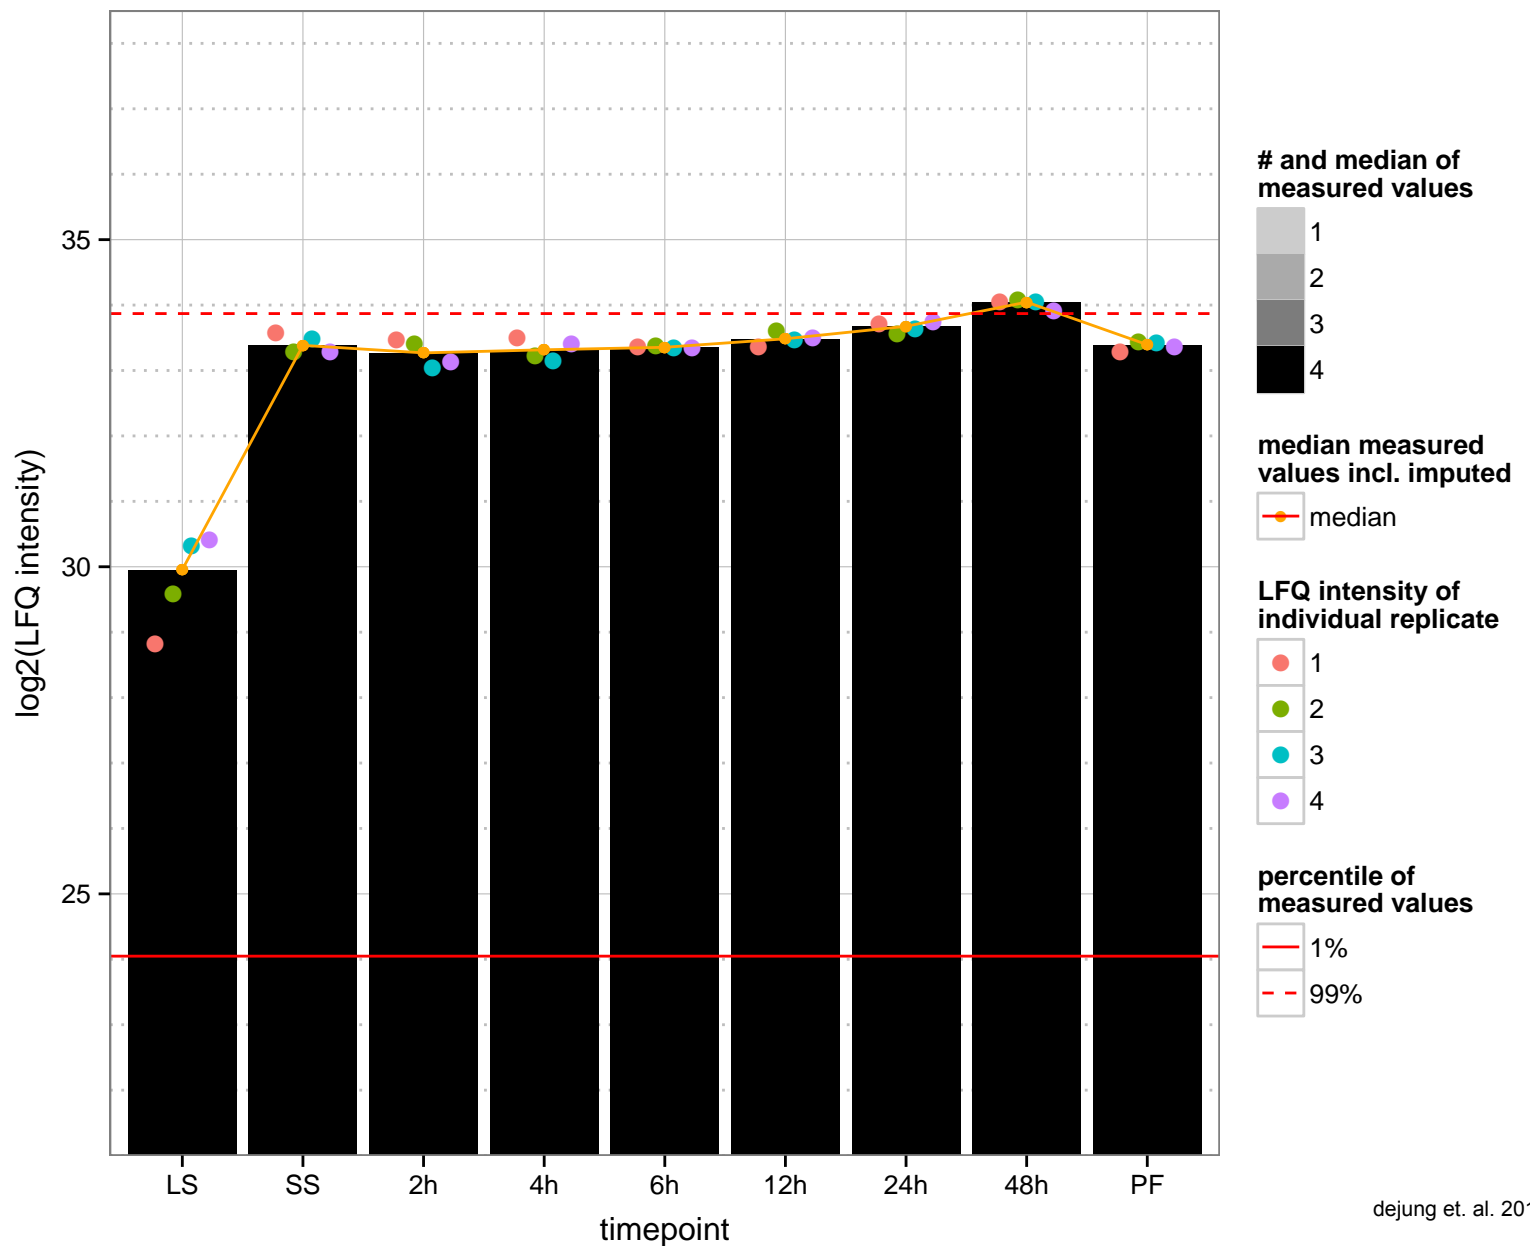

hypothetical protein, conserved

Tb927.6.2840

AGOF: ATP binding, protein serine/threonine kinase activity

AGOC: null

AGOP: growth, protein phosphorylation

PGOF: ATP binding, catalytic activity, protein serine/threonine kinase activity, transferase activity, transferring phosphorus-con

PGOC: null

PGOP: protein phosphorylation

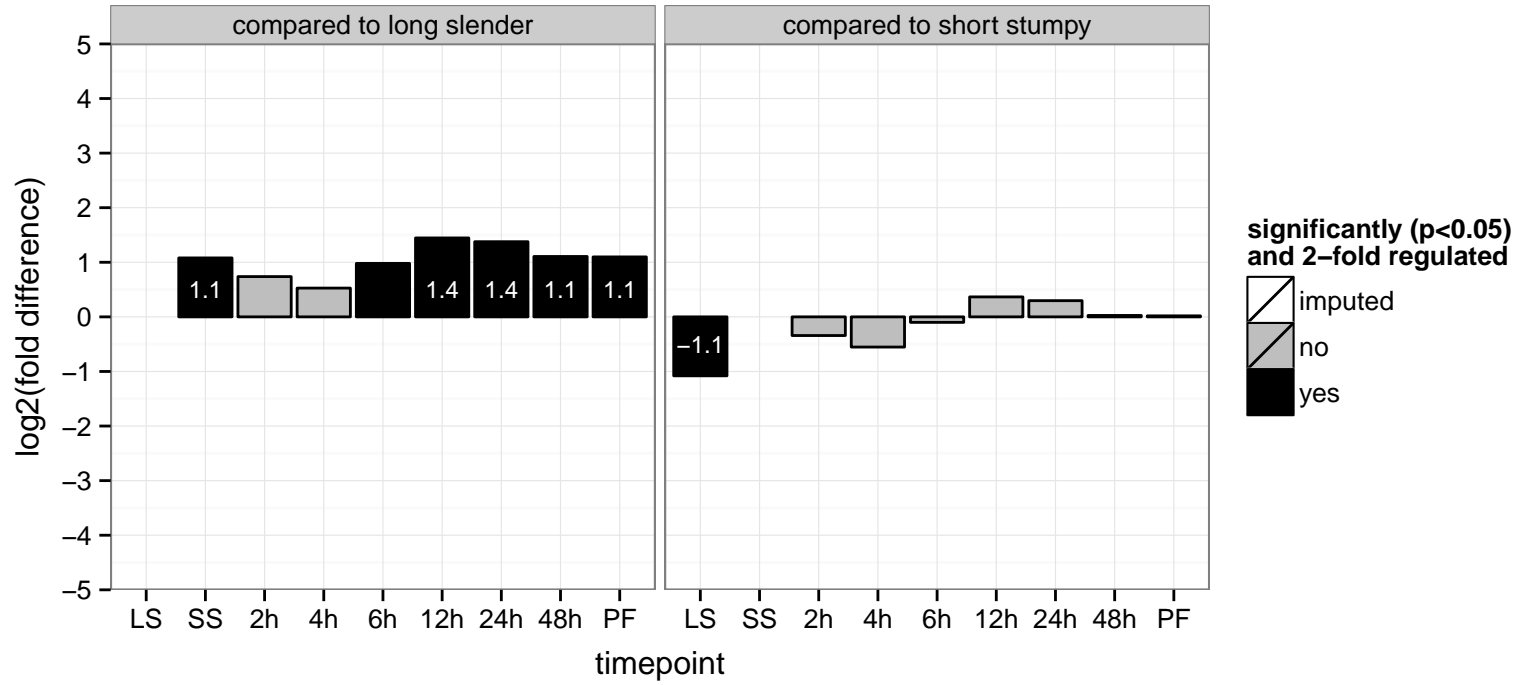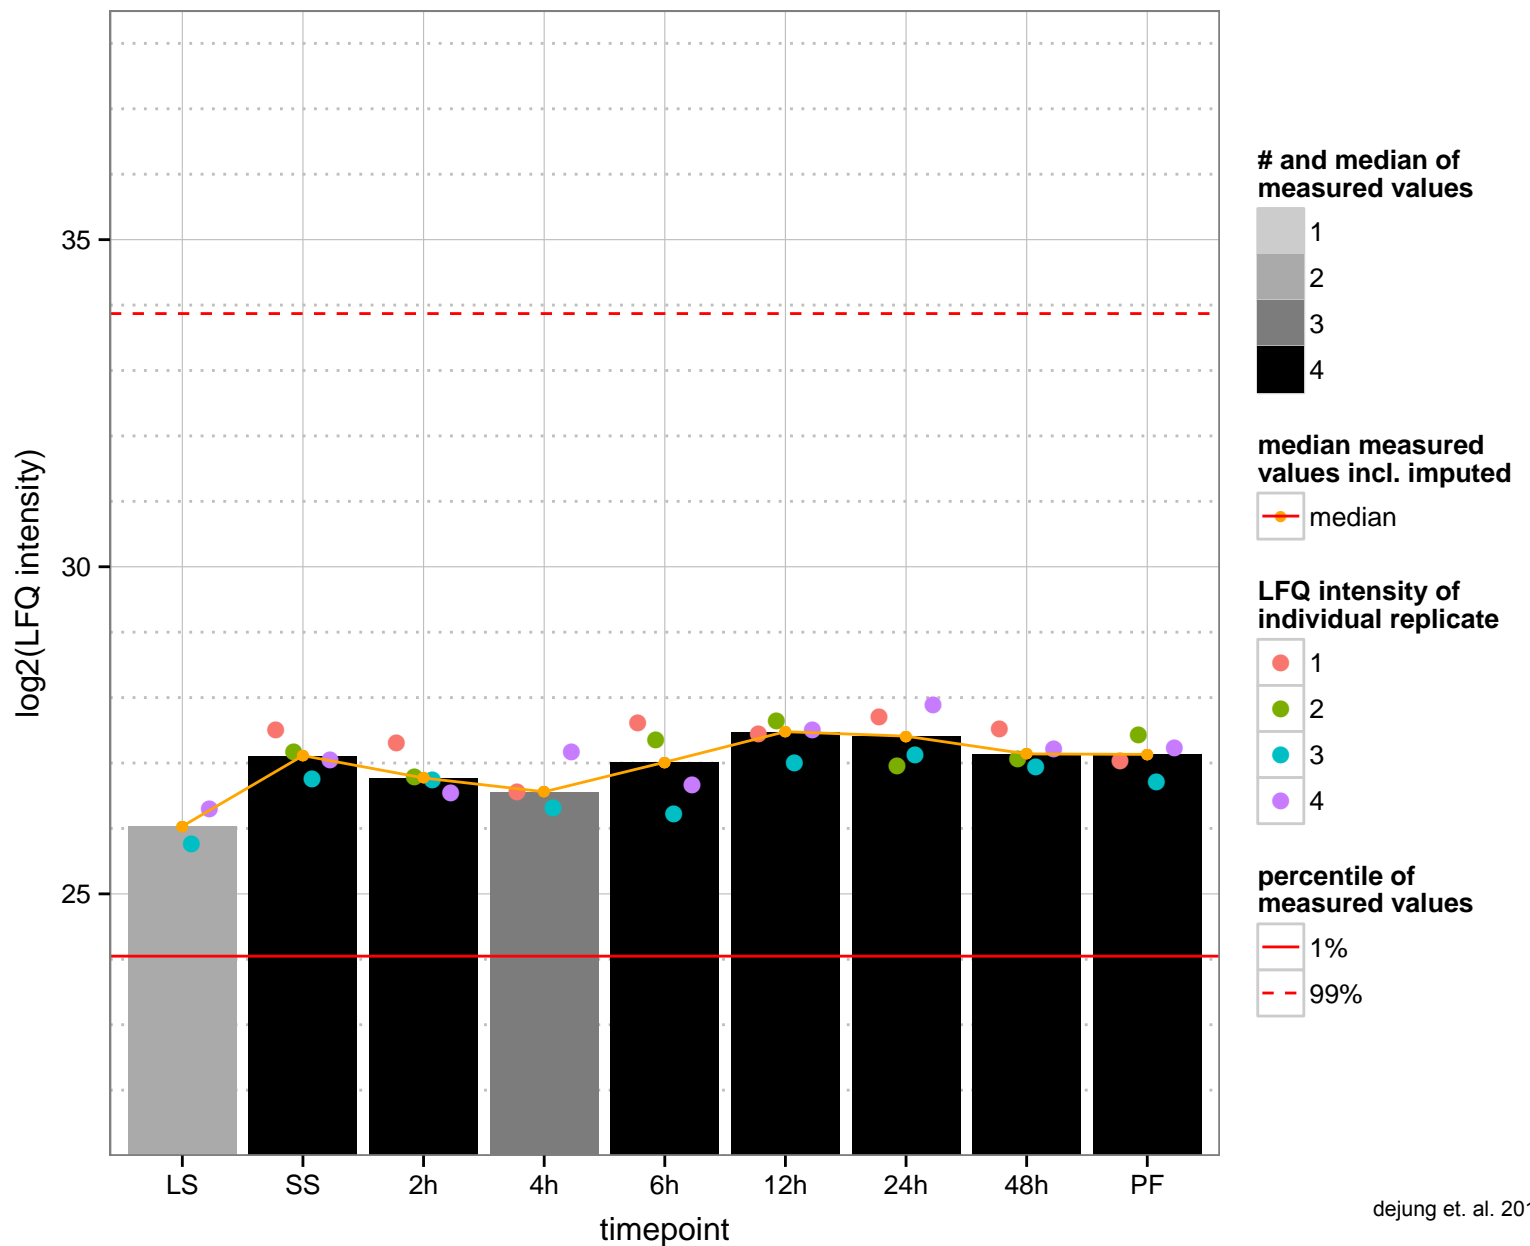

hypothetical protein, conserved  
 Tb927.6.2860  
 AGOF: null  
 AGOC: null  
 AGOP: null  
 PGO: protein binding  
 PGO: null  
 PGO: null

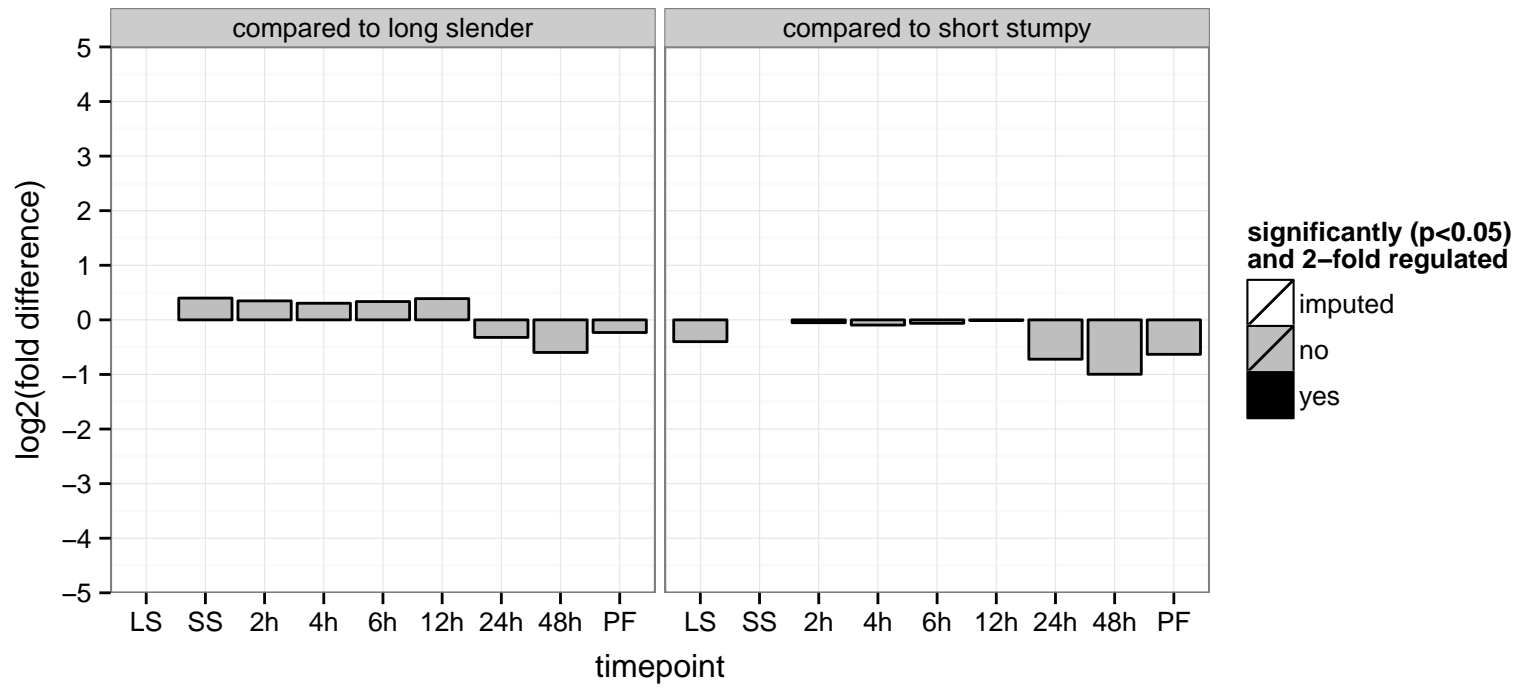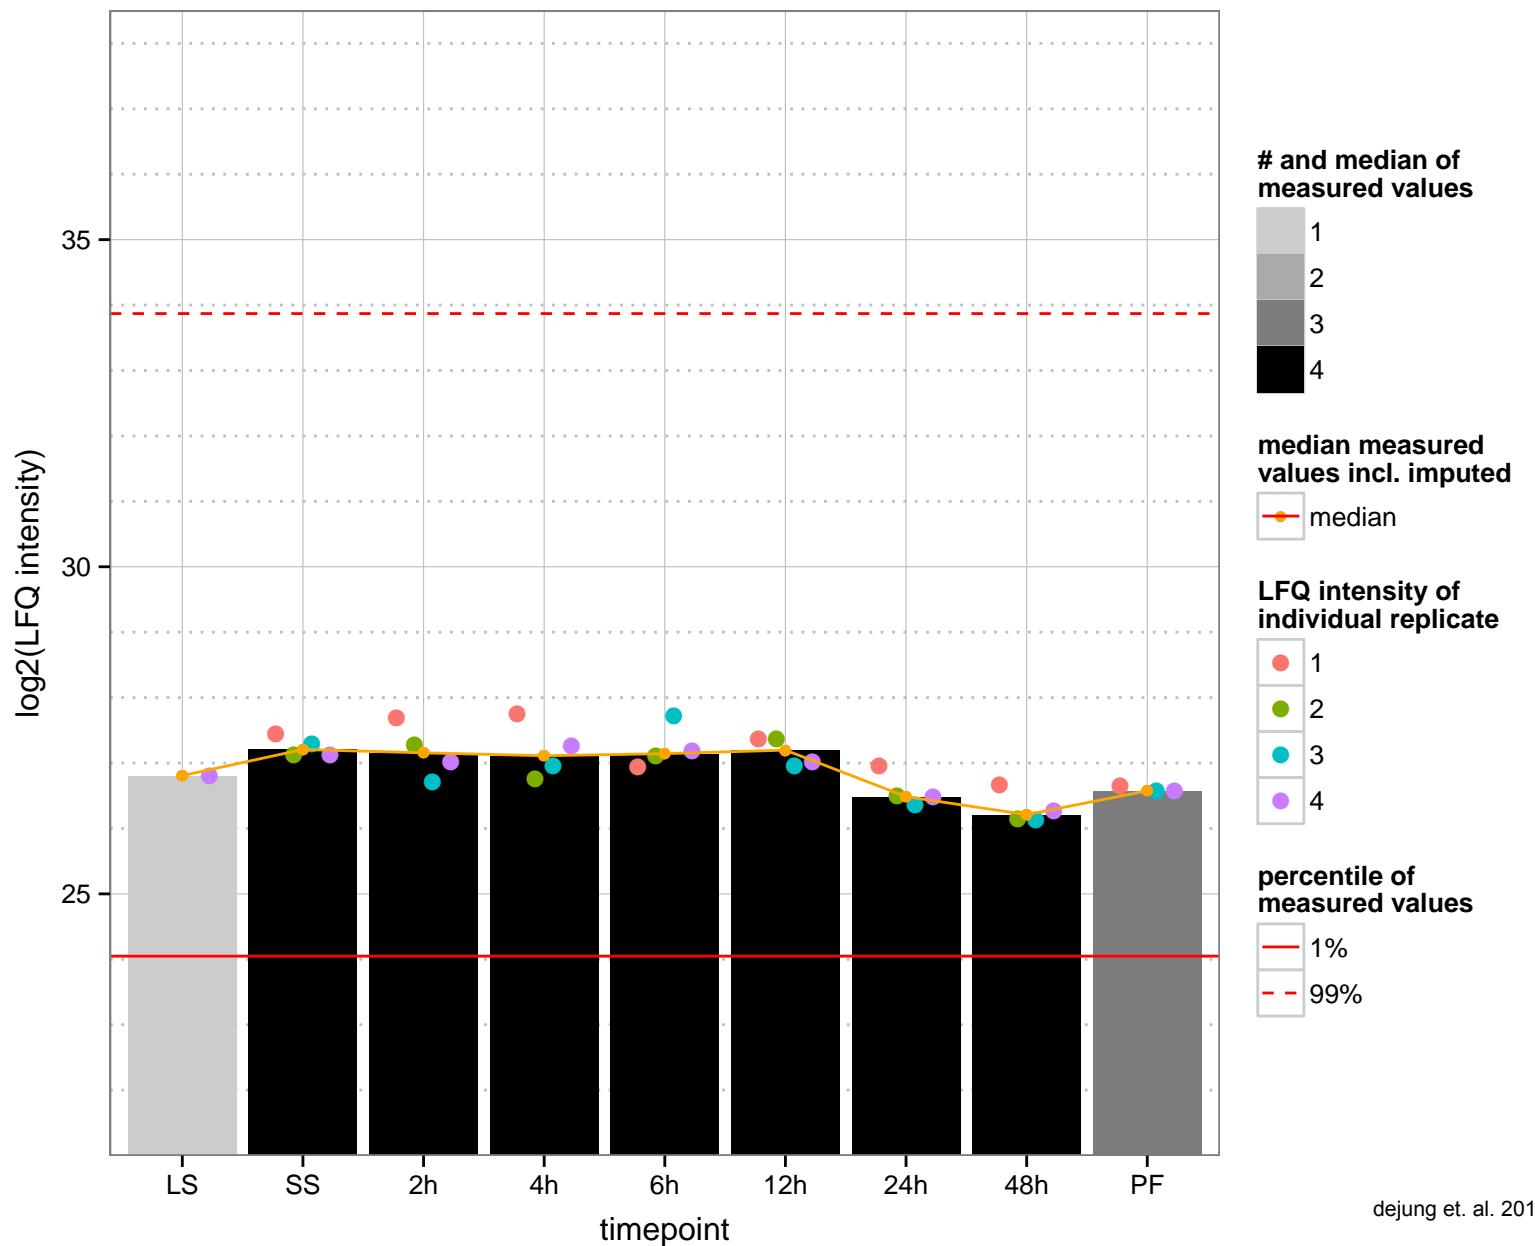

phosphopantothenoylcysteine decarboxylase, putative (PPCDC)  
 Tb927.6.2940  
 AGOF: phosphopantothenoylcysteine decarboxylase activity  
 AGOC: null  
 AGOP: coenzyme A biosynthetic process  
 PGO: catalytic activity  
 PGOC: null  
 PGOP: null

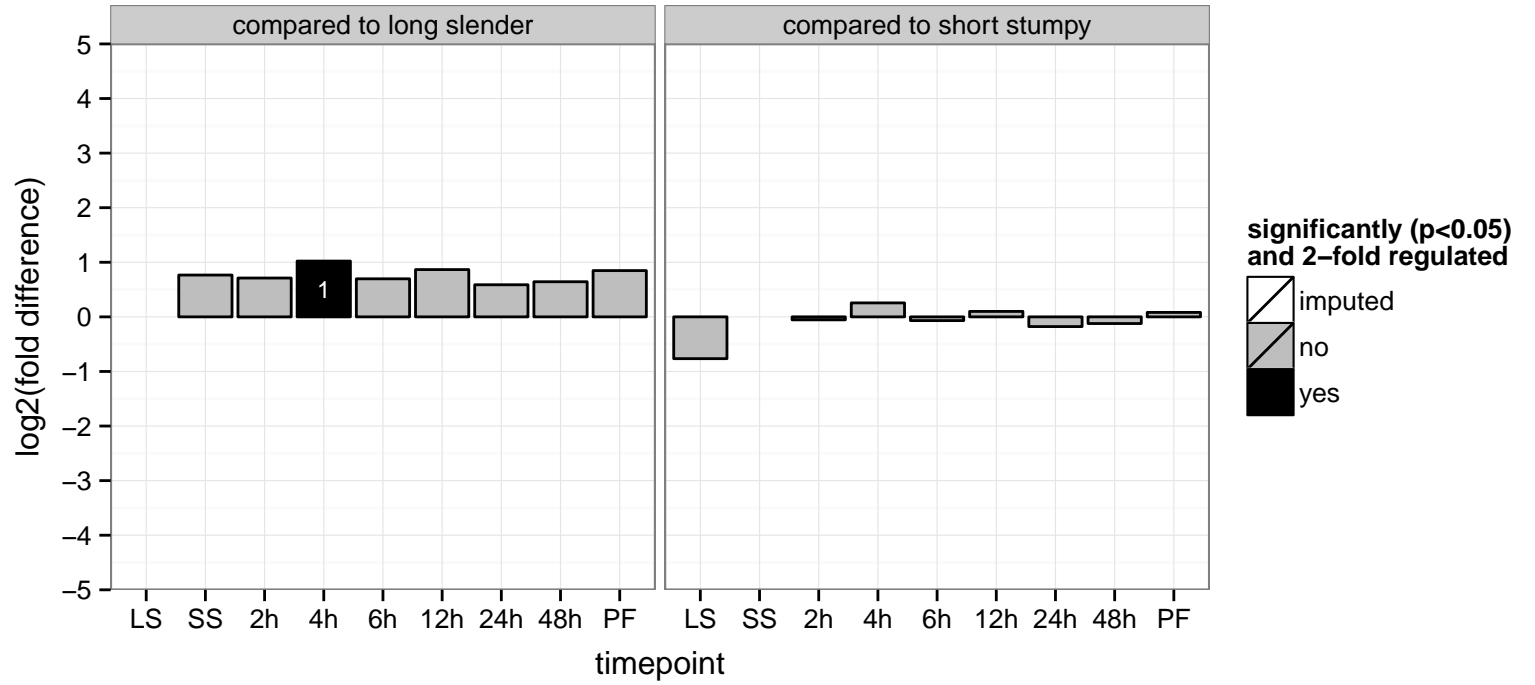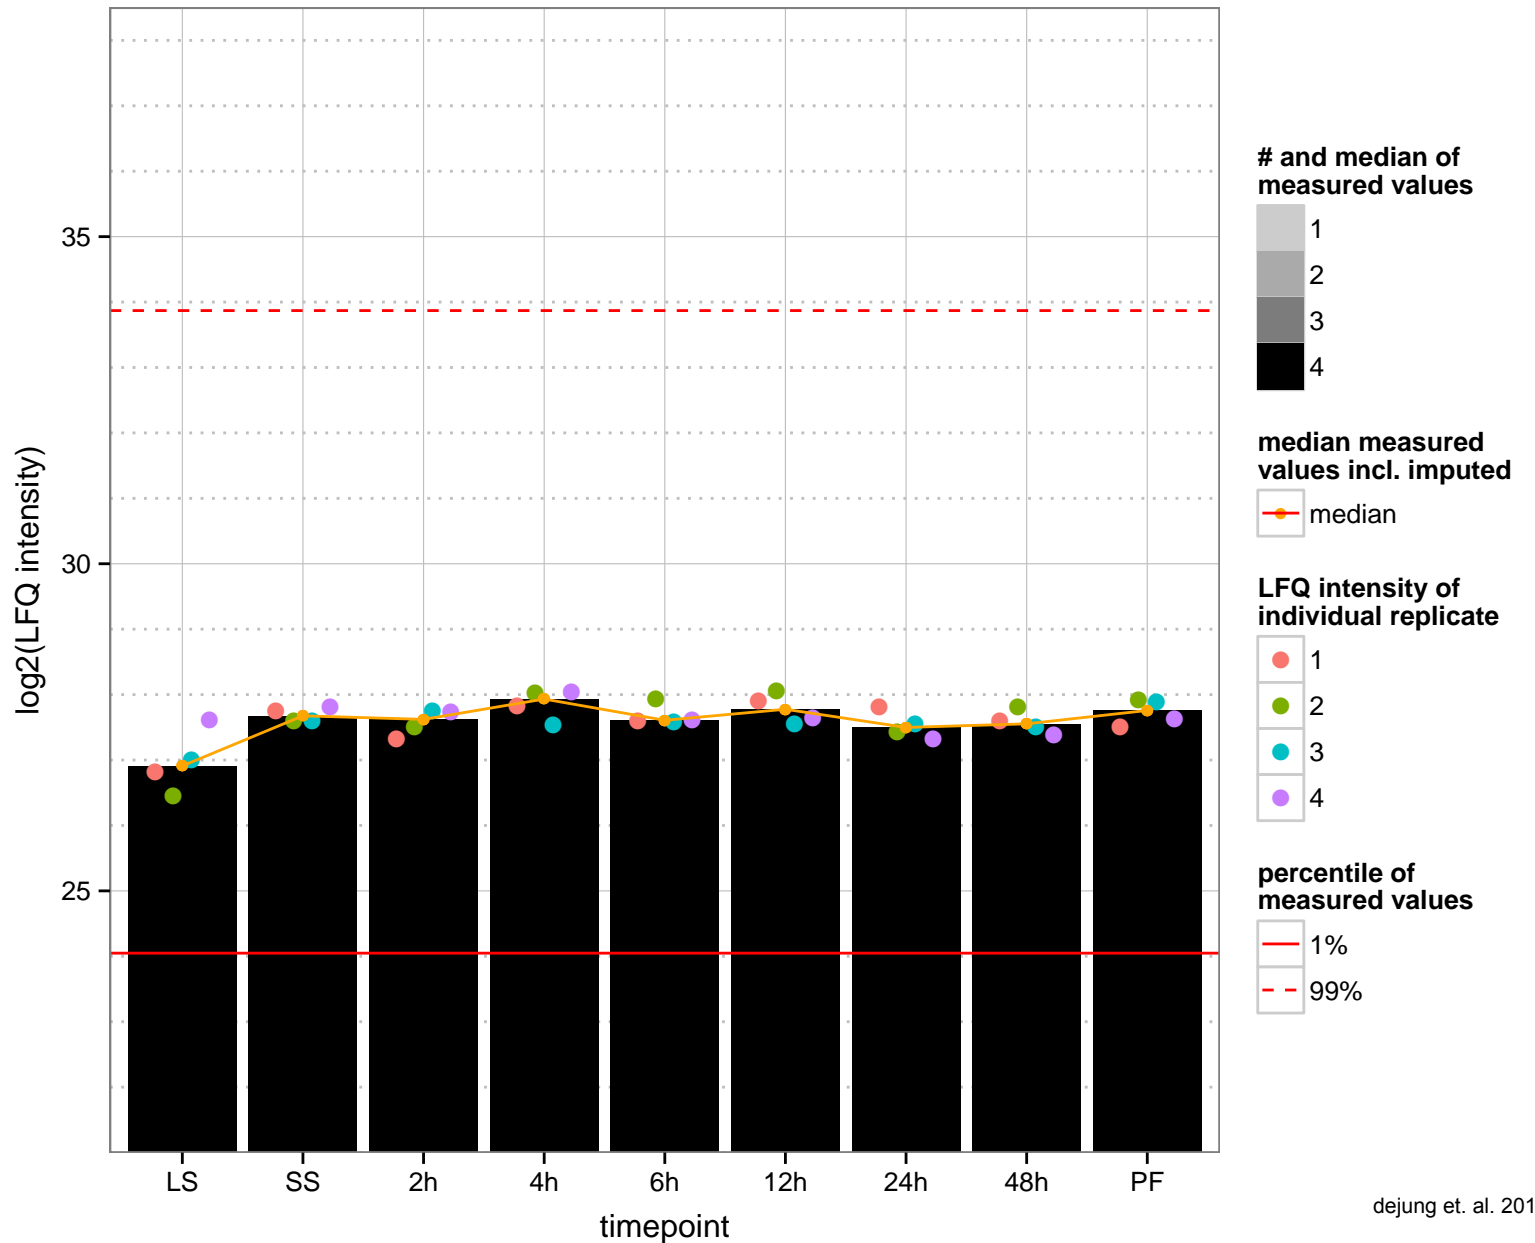

hypothetical protein, conserved  
 Tb927.6.3020  
 AGOF: null  
 AGOC: null  
 AGOP: null  
 PGO: null  
 PGOC: null  
 PGOP: null

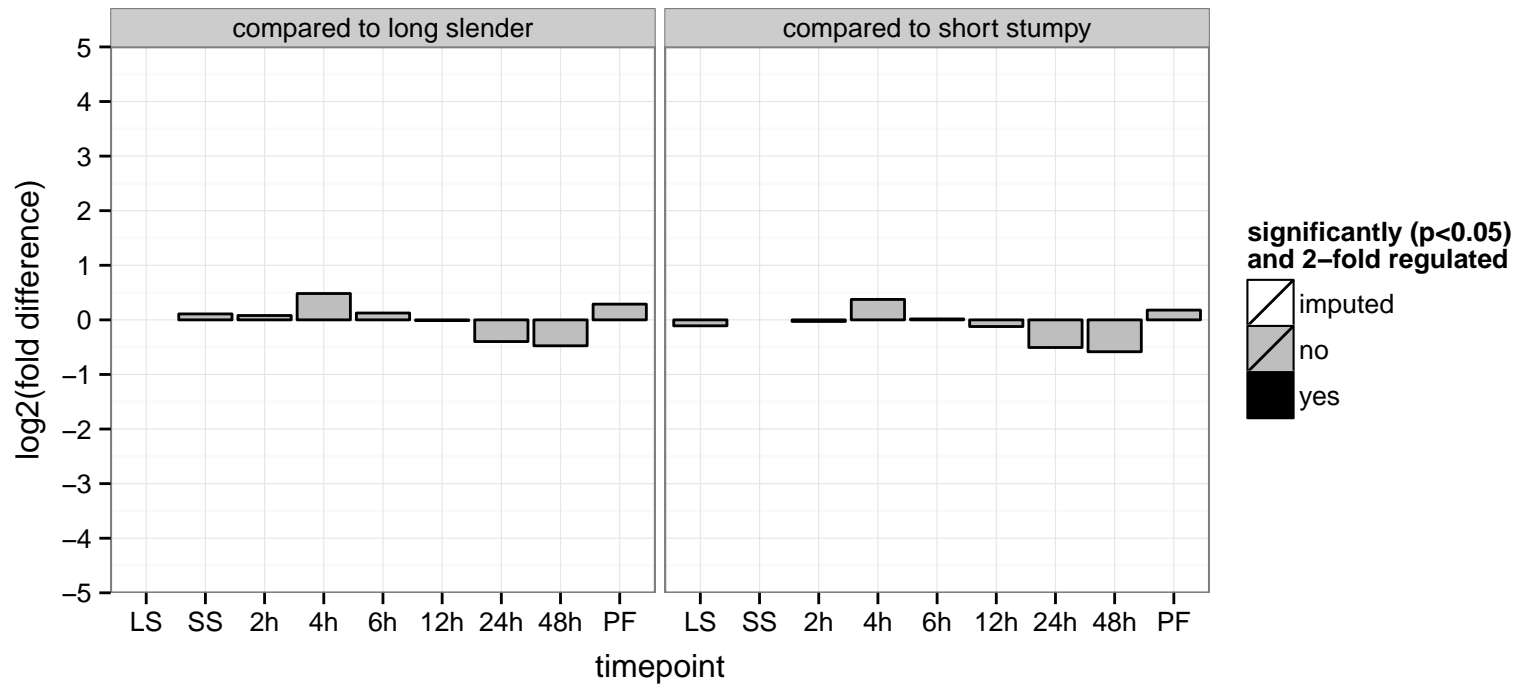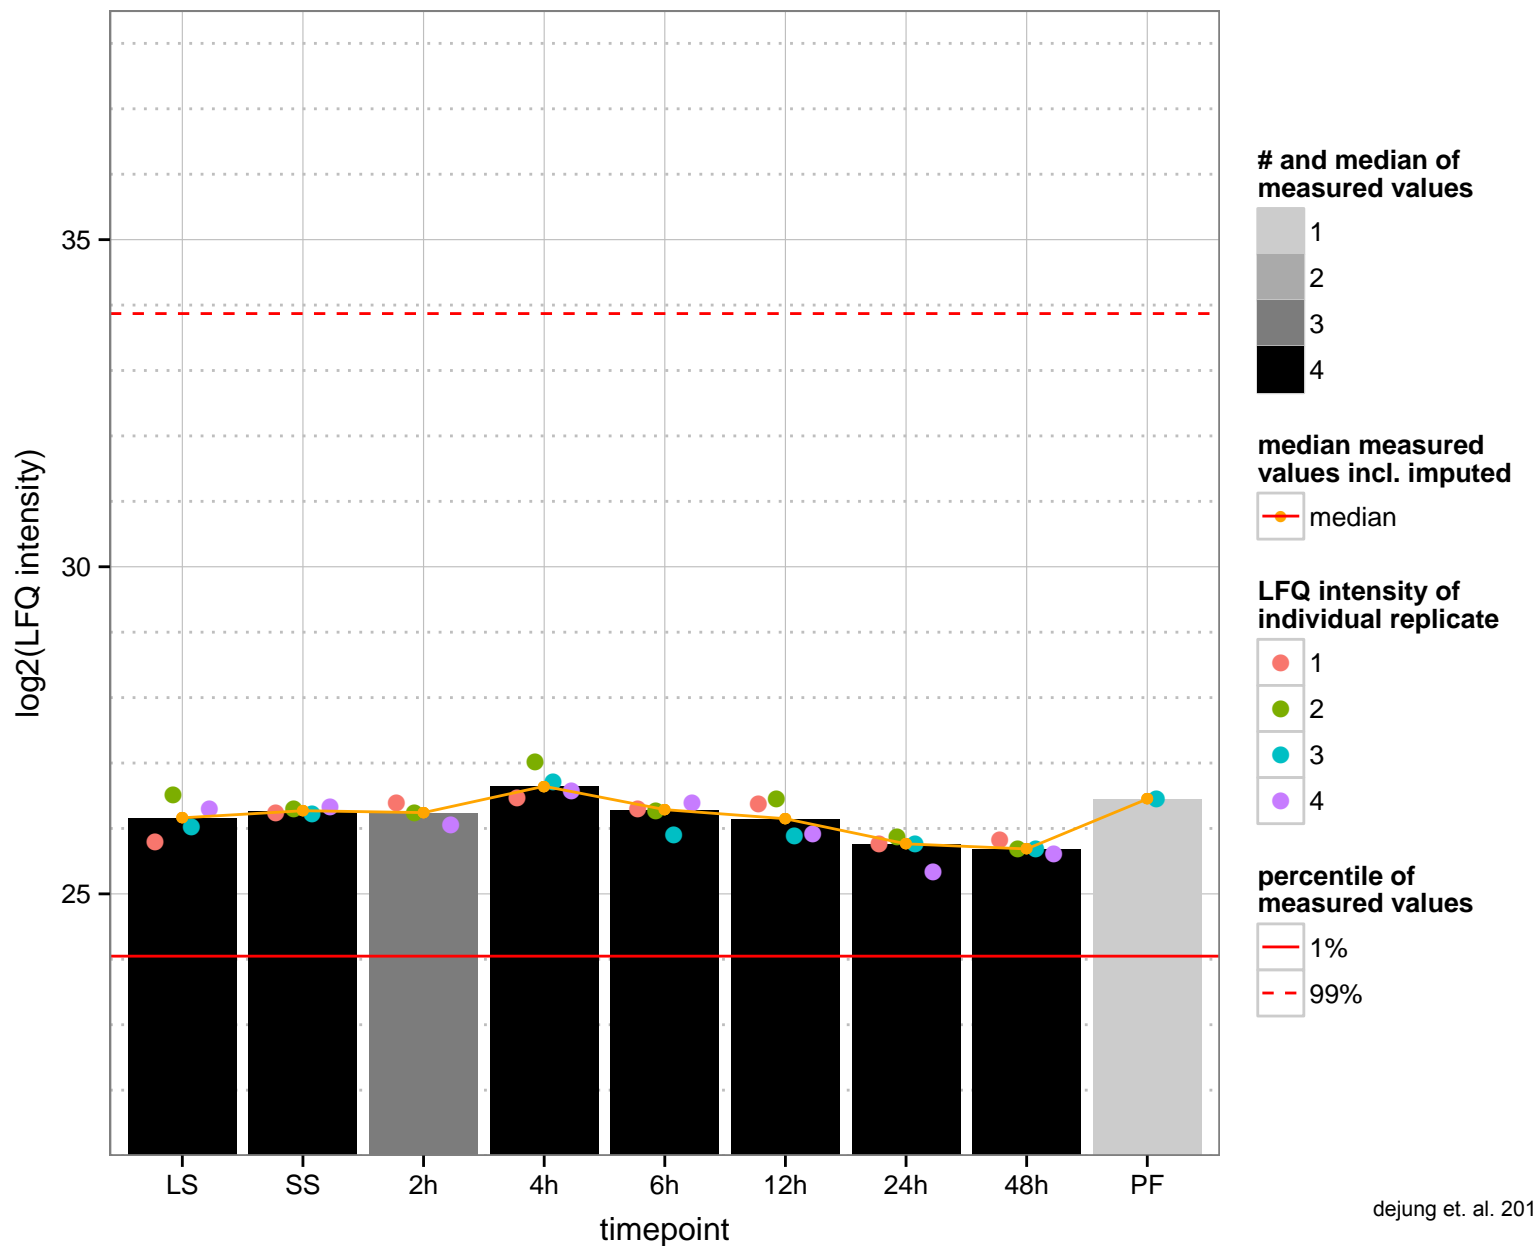

small GTP-binding protein Rab28, putative, Ras-related protein Rab-26 (Rab26)

Tb927.6.3040

AGOF: GTP binding, GTPase activity

AGOC: intracellular

AGOP: intracellular protein transport, nucleocytoplasmic transport, small GTPase mediated signal transduction

PGOF: GTP binding, GTPase activity

PGOC: intracellular, membrane

PGOP: GTP catabolic process, intracellular protein transport, nucleocytoplasmic transport, protein transport, signal transduction

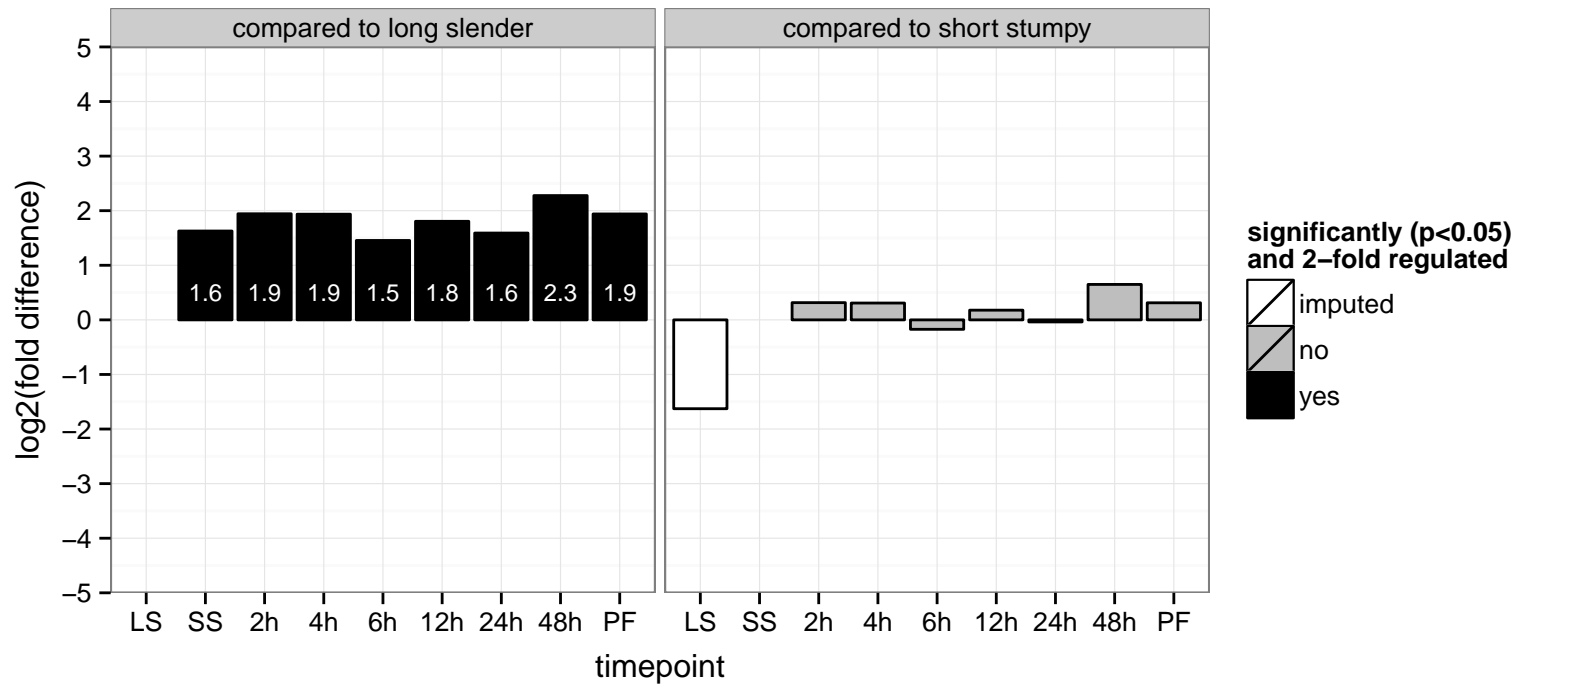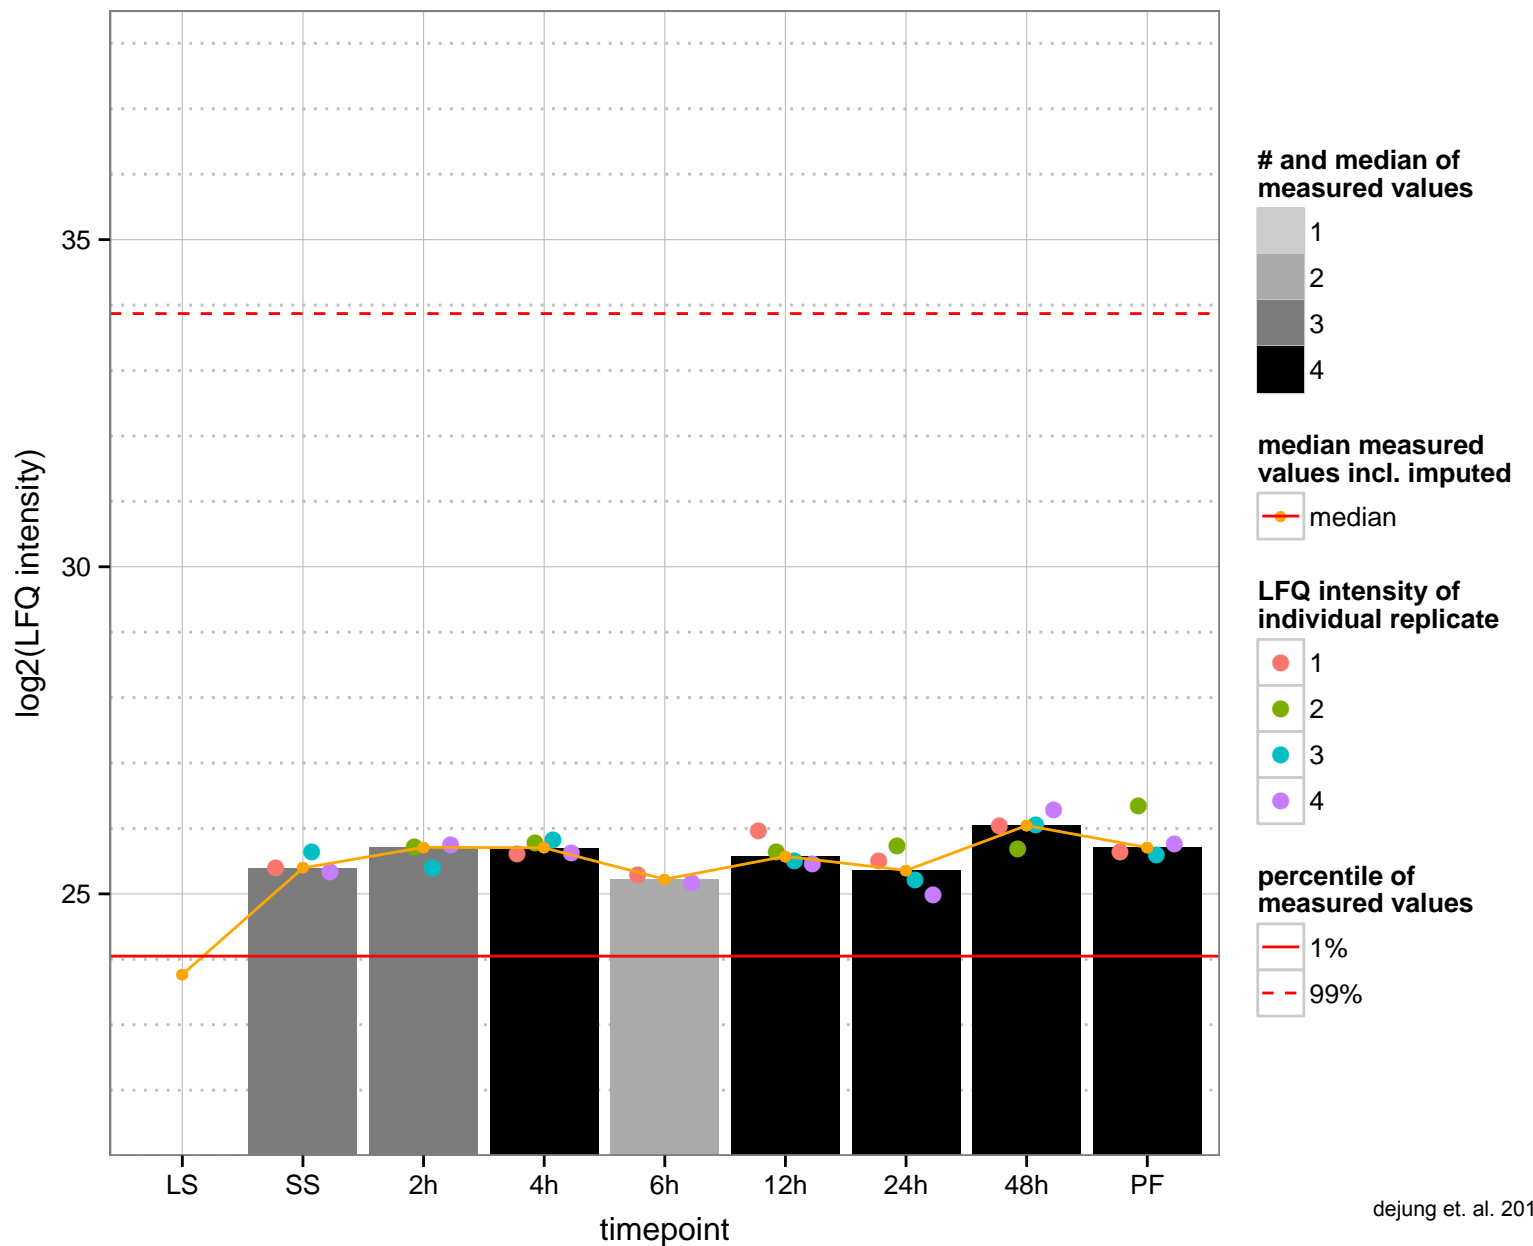



aldehyde dehydrogenase family, putative  
 Tb927.6.3050  
 AGOF: aldehyde dehydrogenase [NAD(P)+] activity  
 AGOC: null  
 AGOP: cellular aldehyde metabolic process, oxidation–reduction process  
 PGOF: aldehyde dehydrogenase [NAD(P)+] activity, oxidoreductase activity  
 PGOC: null  
 PGO: cellular aldehyde metabolic process, metabolic process, oxidation–reduction process

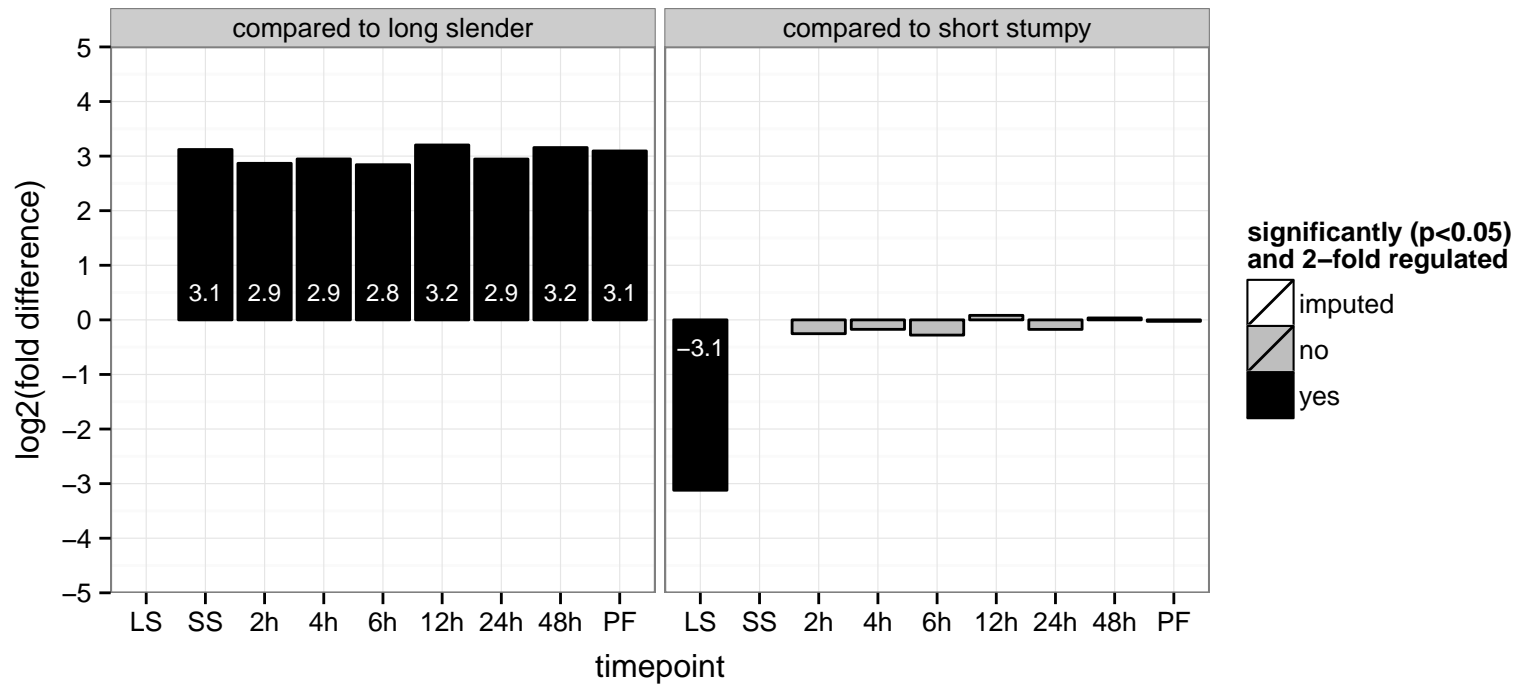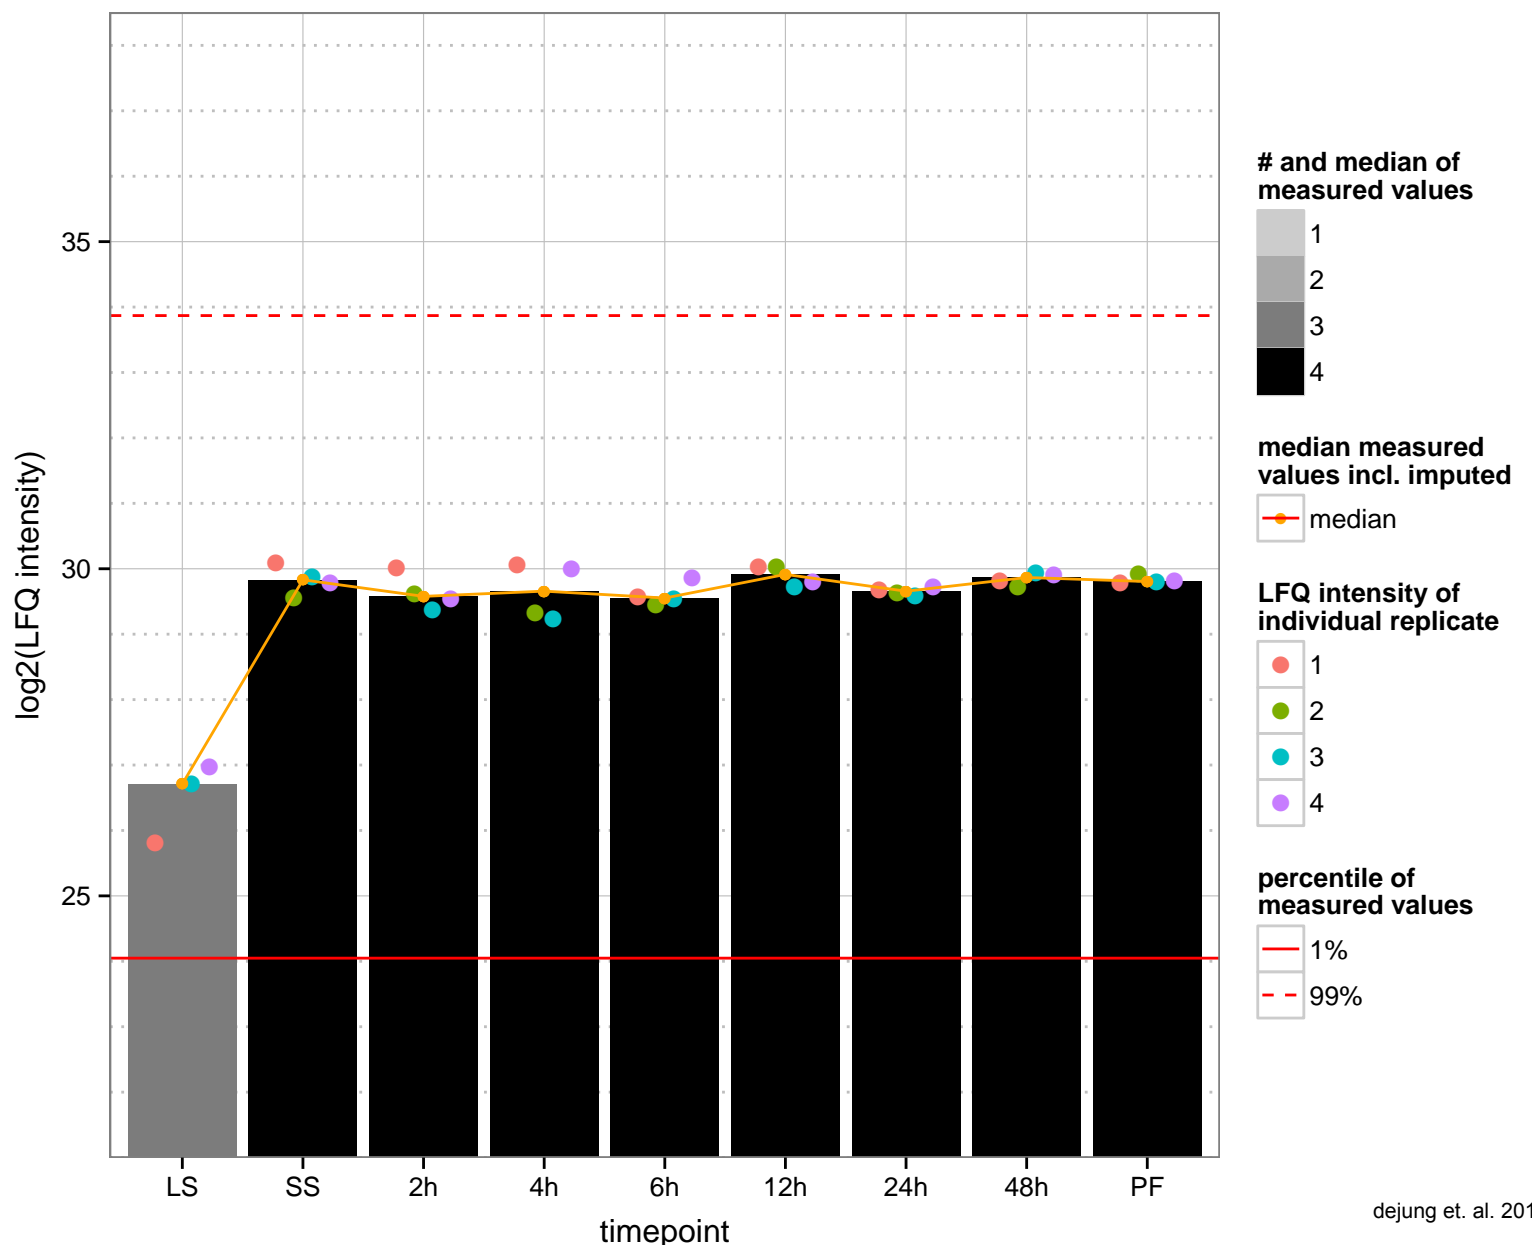

cytoskeleton-associated protein, putative  
 Tb927.6.3090  
 AGOF: null  
 AGOC: null  
 AGOP: null  
 PGO: binding  
 PGO: null  
 PGO: null

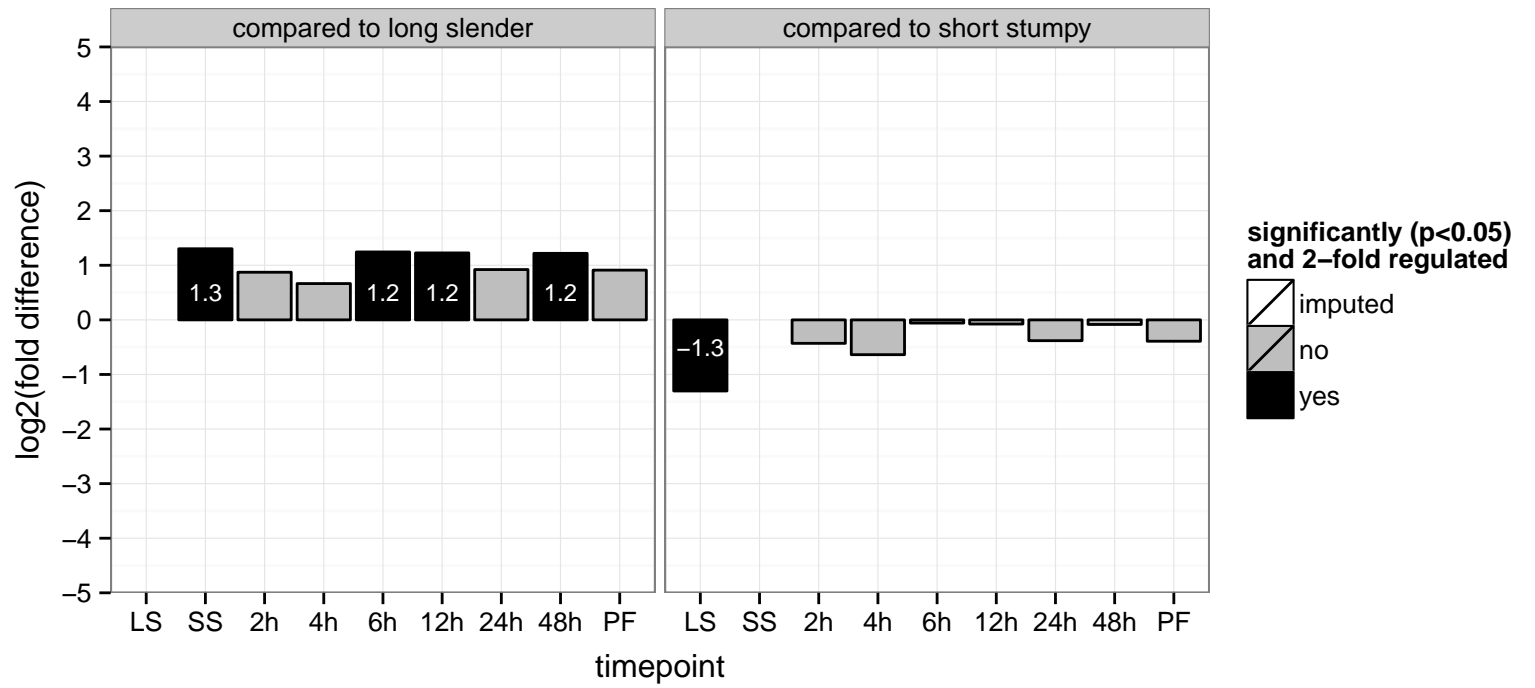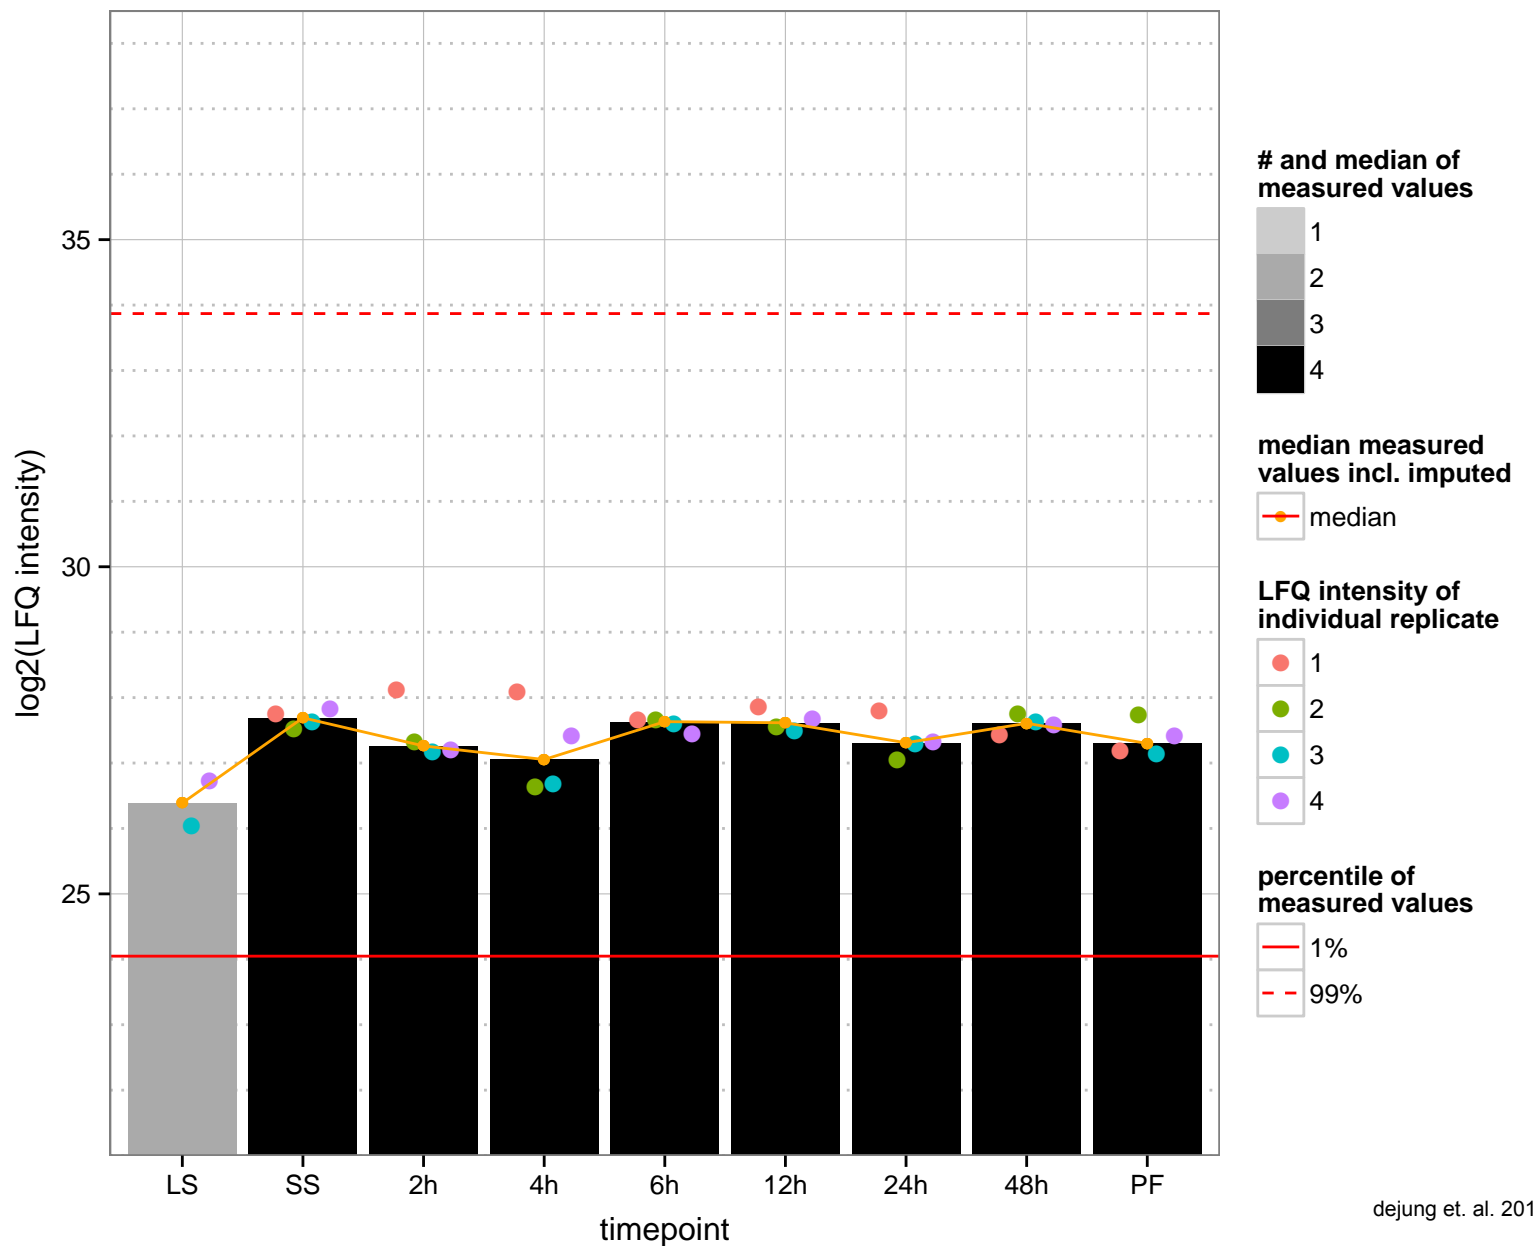

hypothetical protein, conserved  
 Tb927.6.3100  
 AGOF: null  
 AGOC: null  
 AGOP: null  
 PGOF: null  
 PGOC: null  
 PGOP: intraflagellar transport

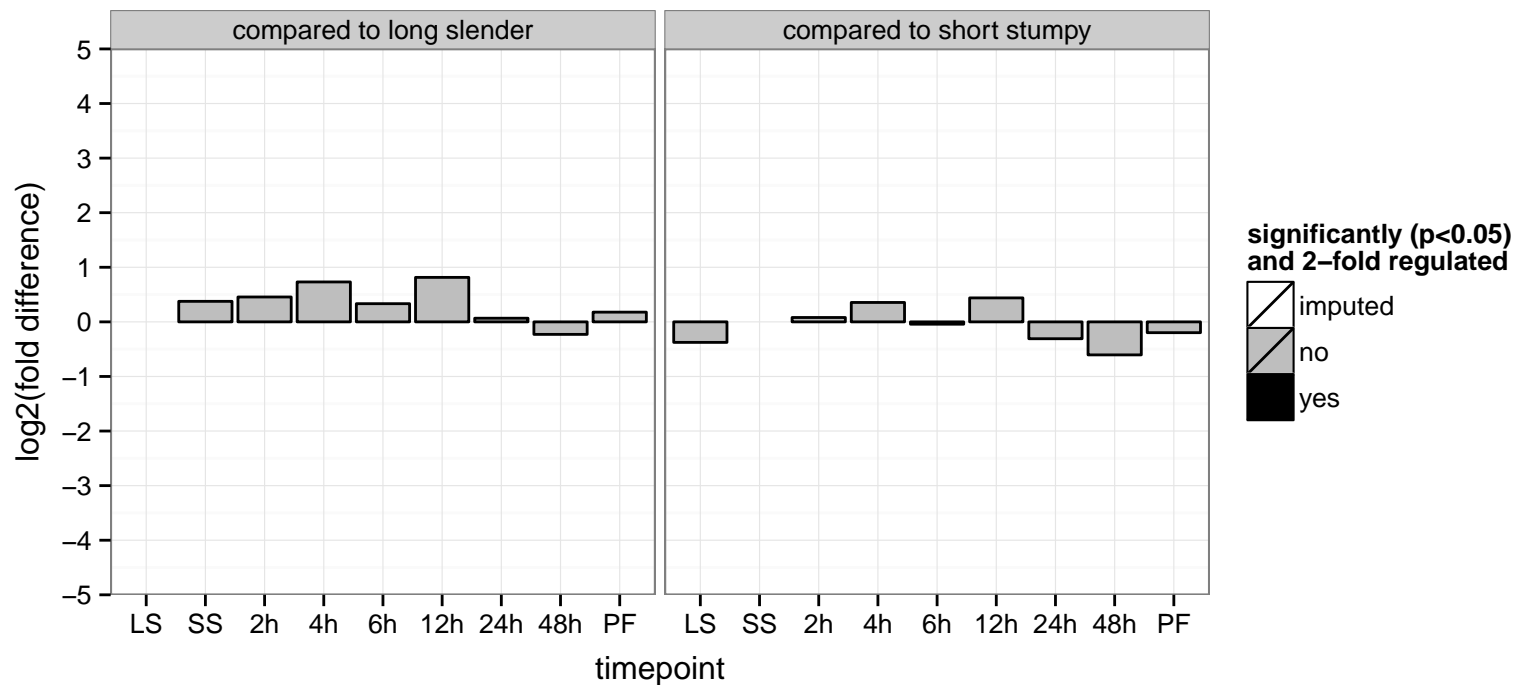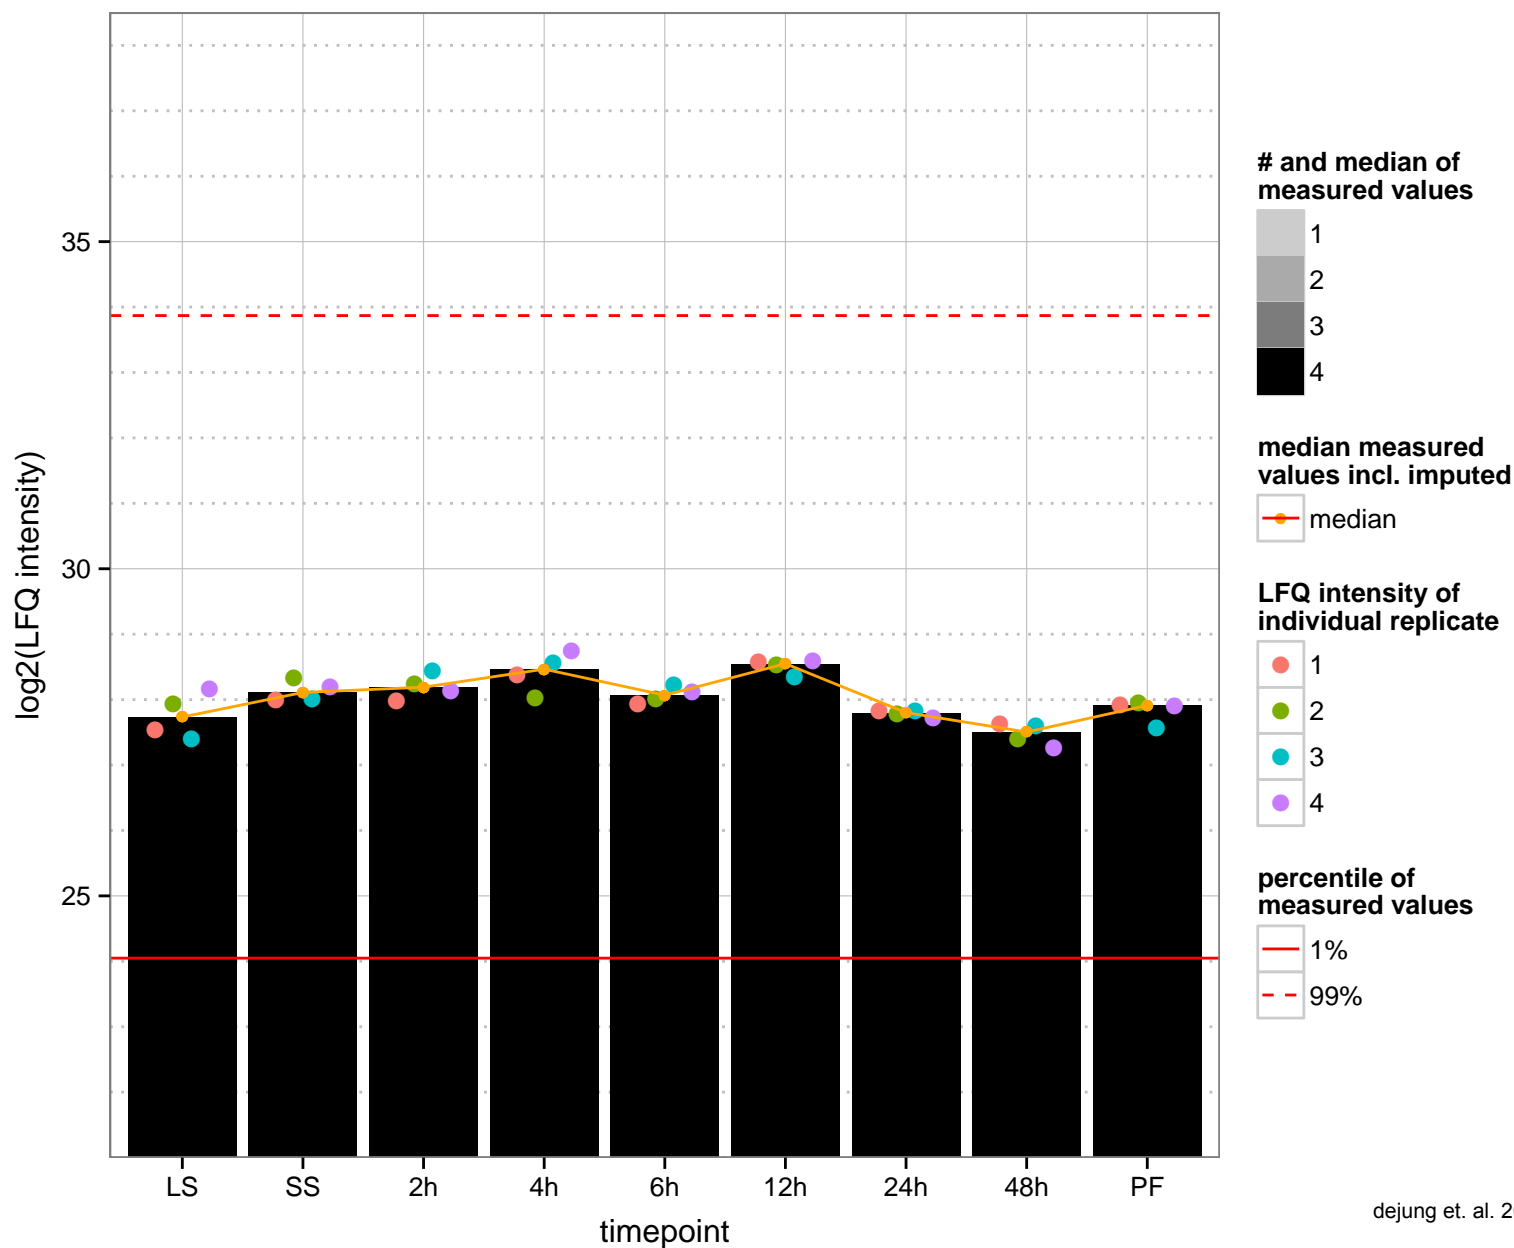

queuine tRNA-ribosyltransferase, putative  
 Tb927.6.3130  
 AGOF: queuine tRNA-ribosyltransferase activity  
 AGOC: null  
 AGOP: queuosine biosynthetic process  
 PGOF: queuine tRNA-ribosyltransferase activity  
 PGO: null  
 PGO: queuosine biosynthetic process, tRNA modification

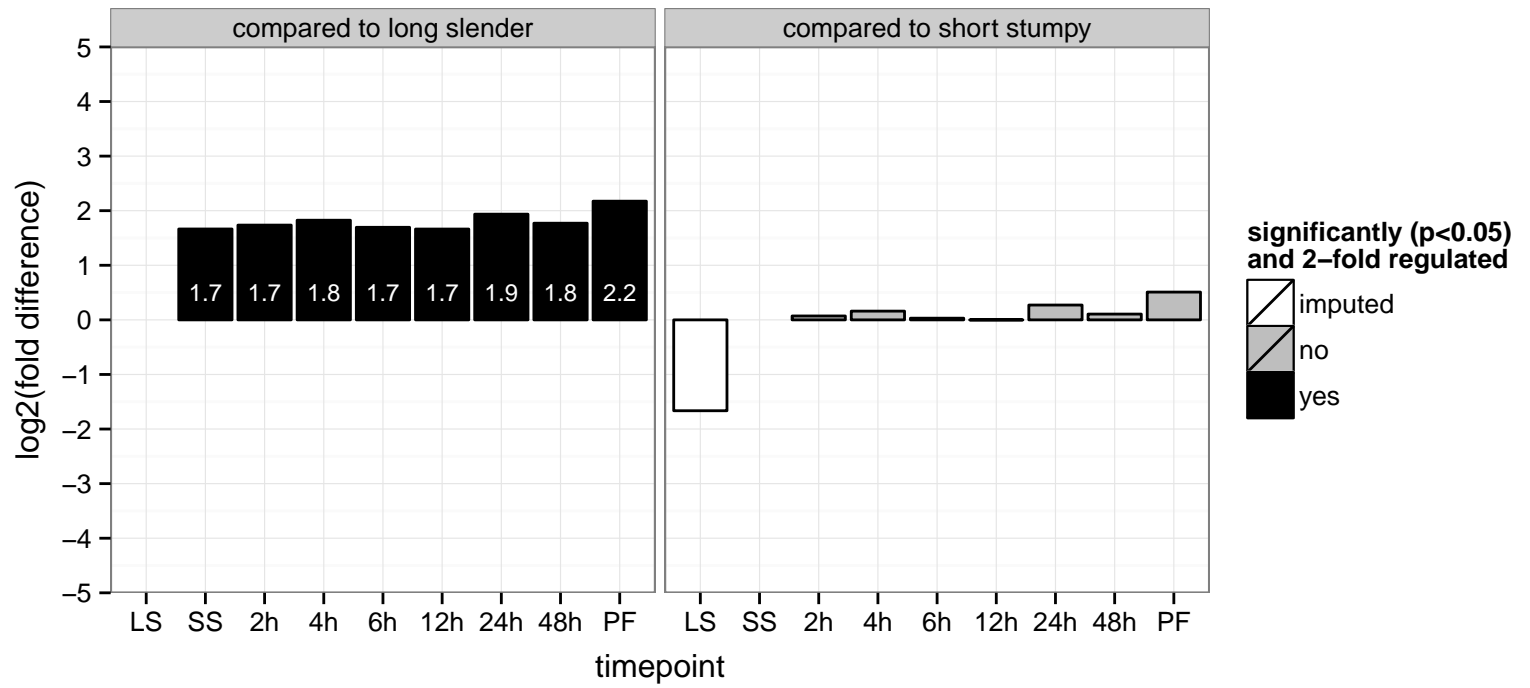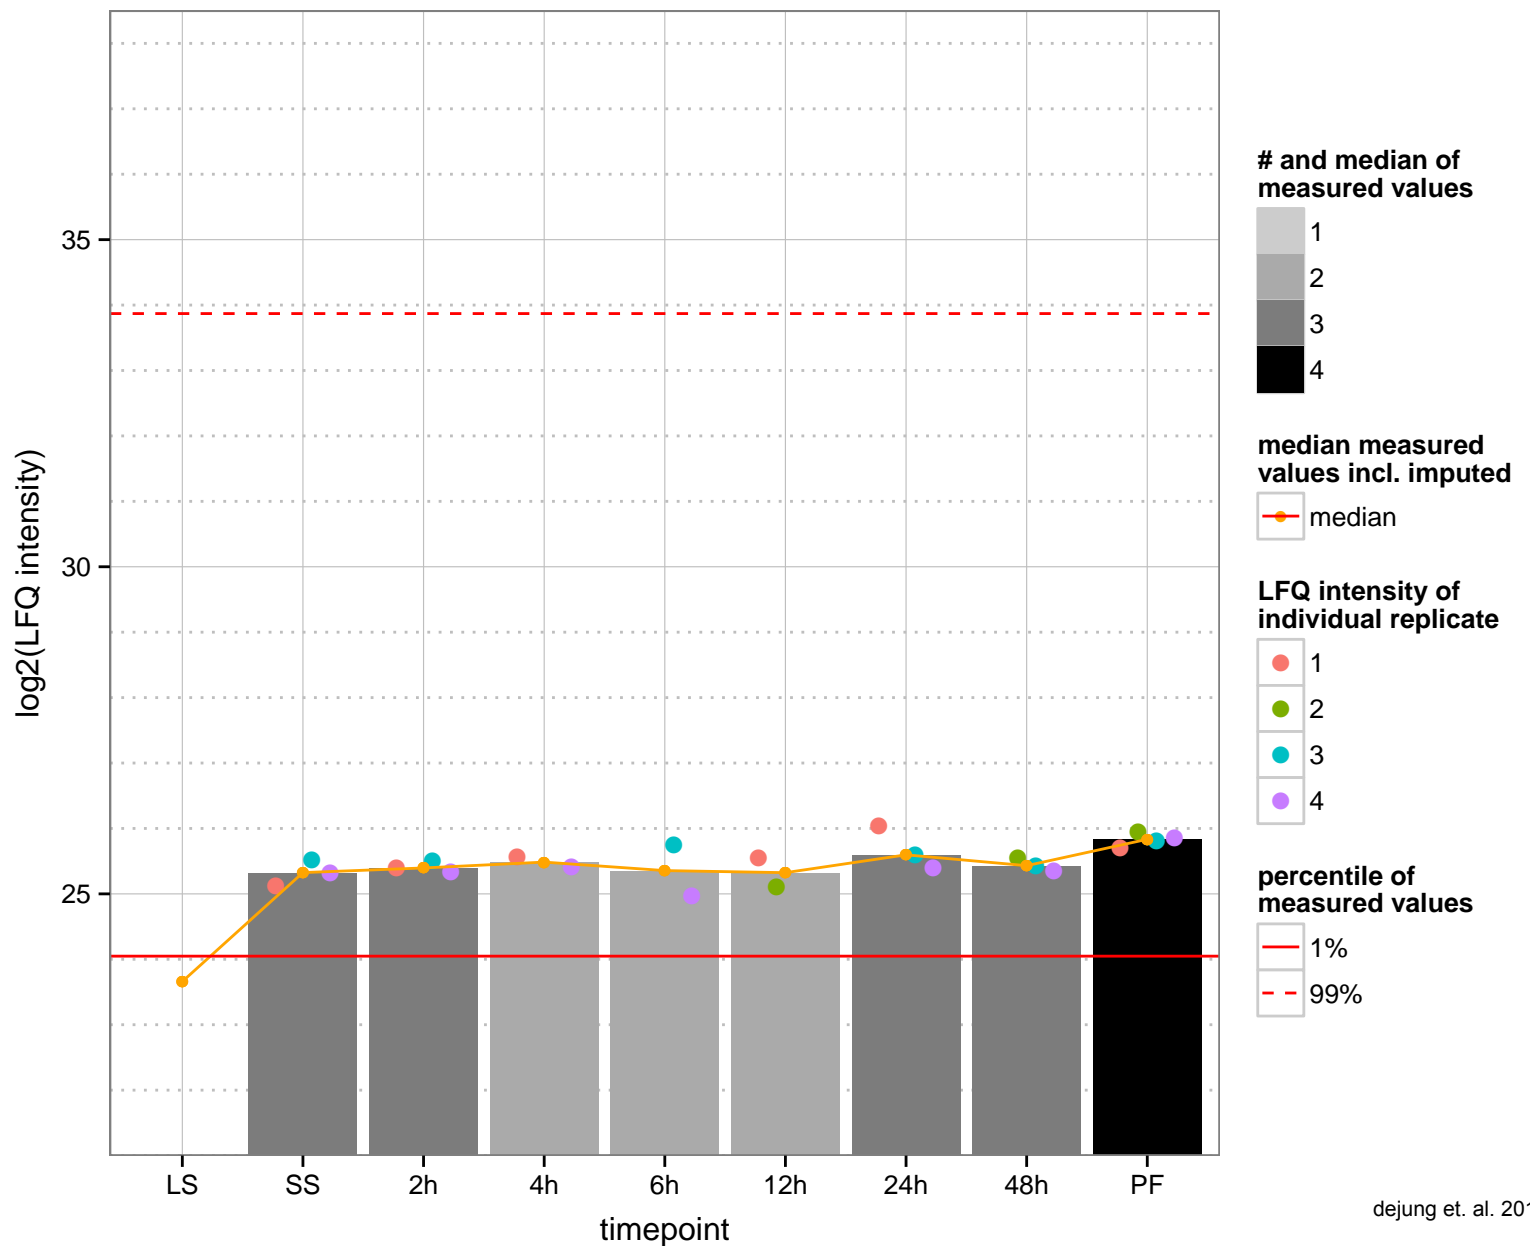

Hydin, flagellar component  
 Tb927.6.3150  
 AGOF: null  
 AGOC: null  
 AGOP: null  
 PGO: null  
 PGOC: null  
 PGOP: null

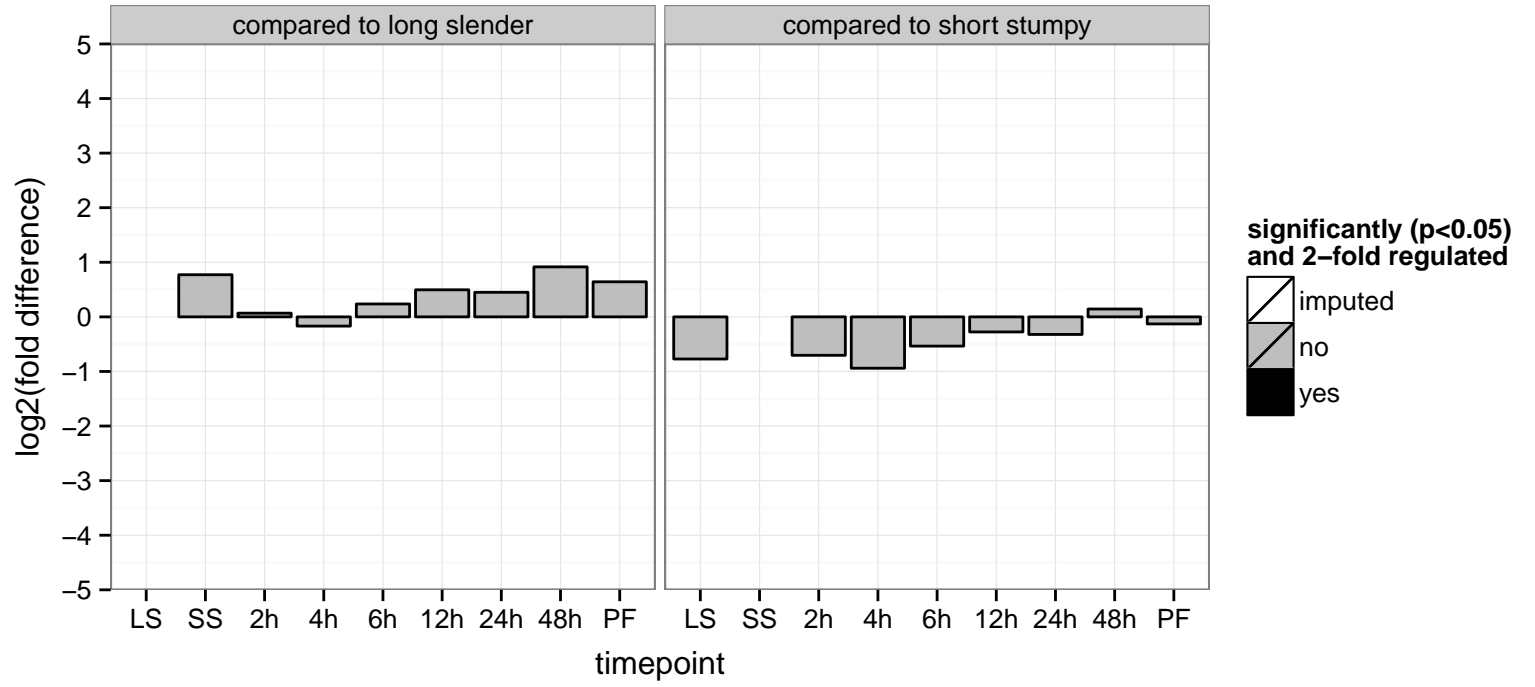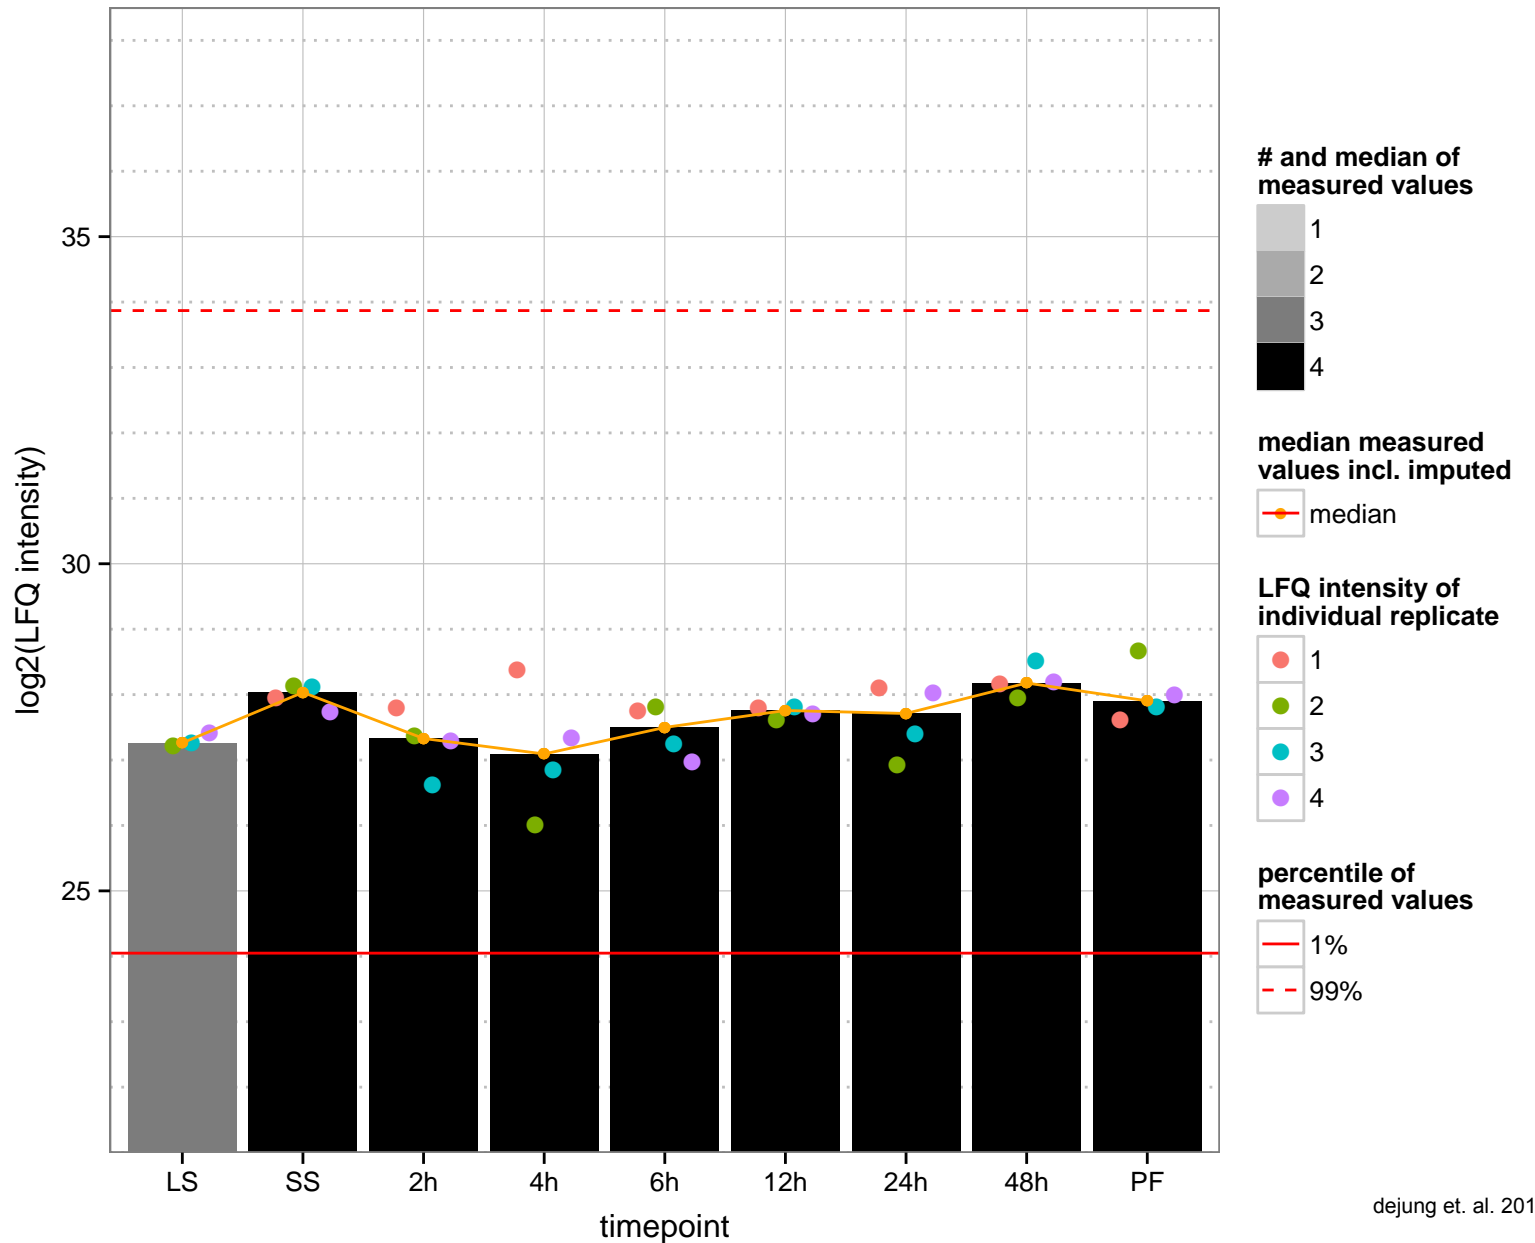

splicing factor 3a, putative  
 Tb927.6.3160  
 AGOF: nucleic acid binding, zinc ion binding  
 AGOC: nucleus  
 AGOP: null  
 PGOF: nucleic acid binding, zinc ion binding  
 PGO: nucleus  
 PGOP: null

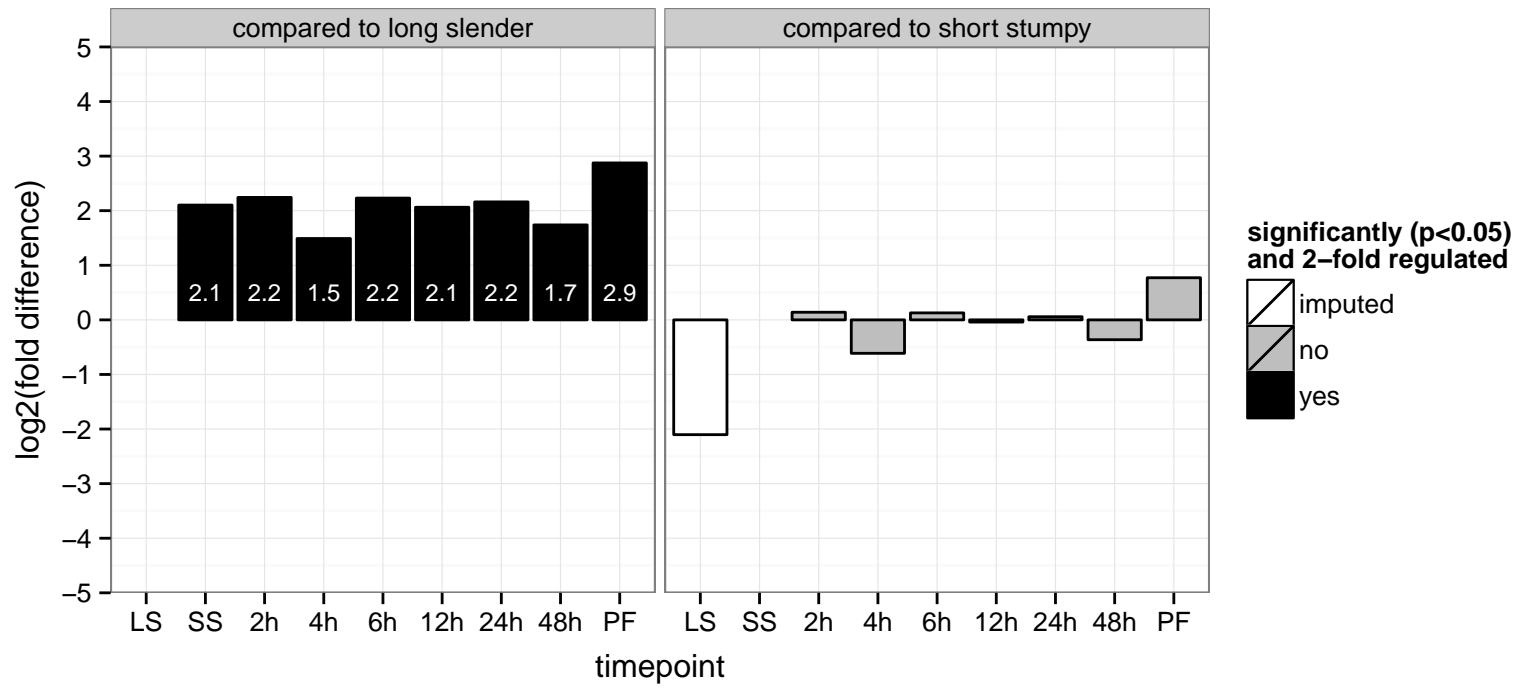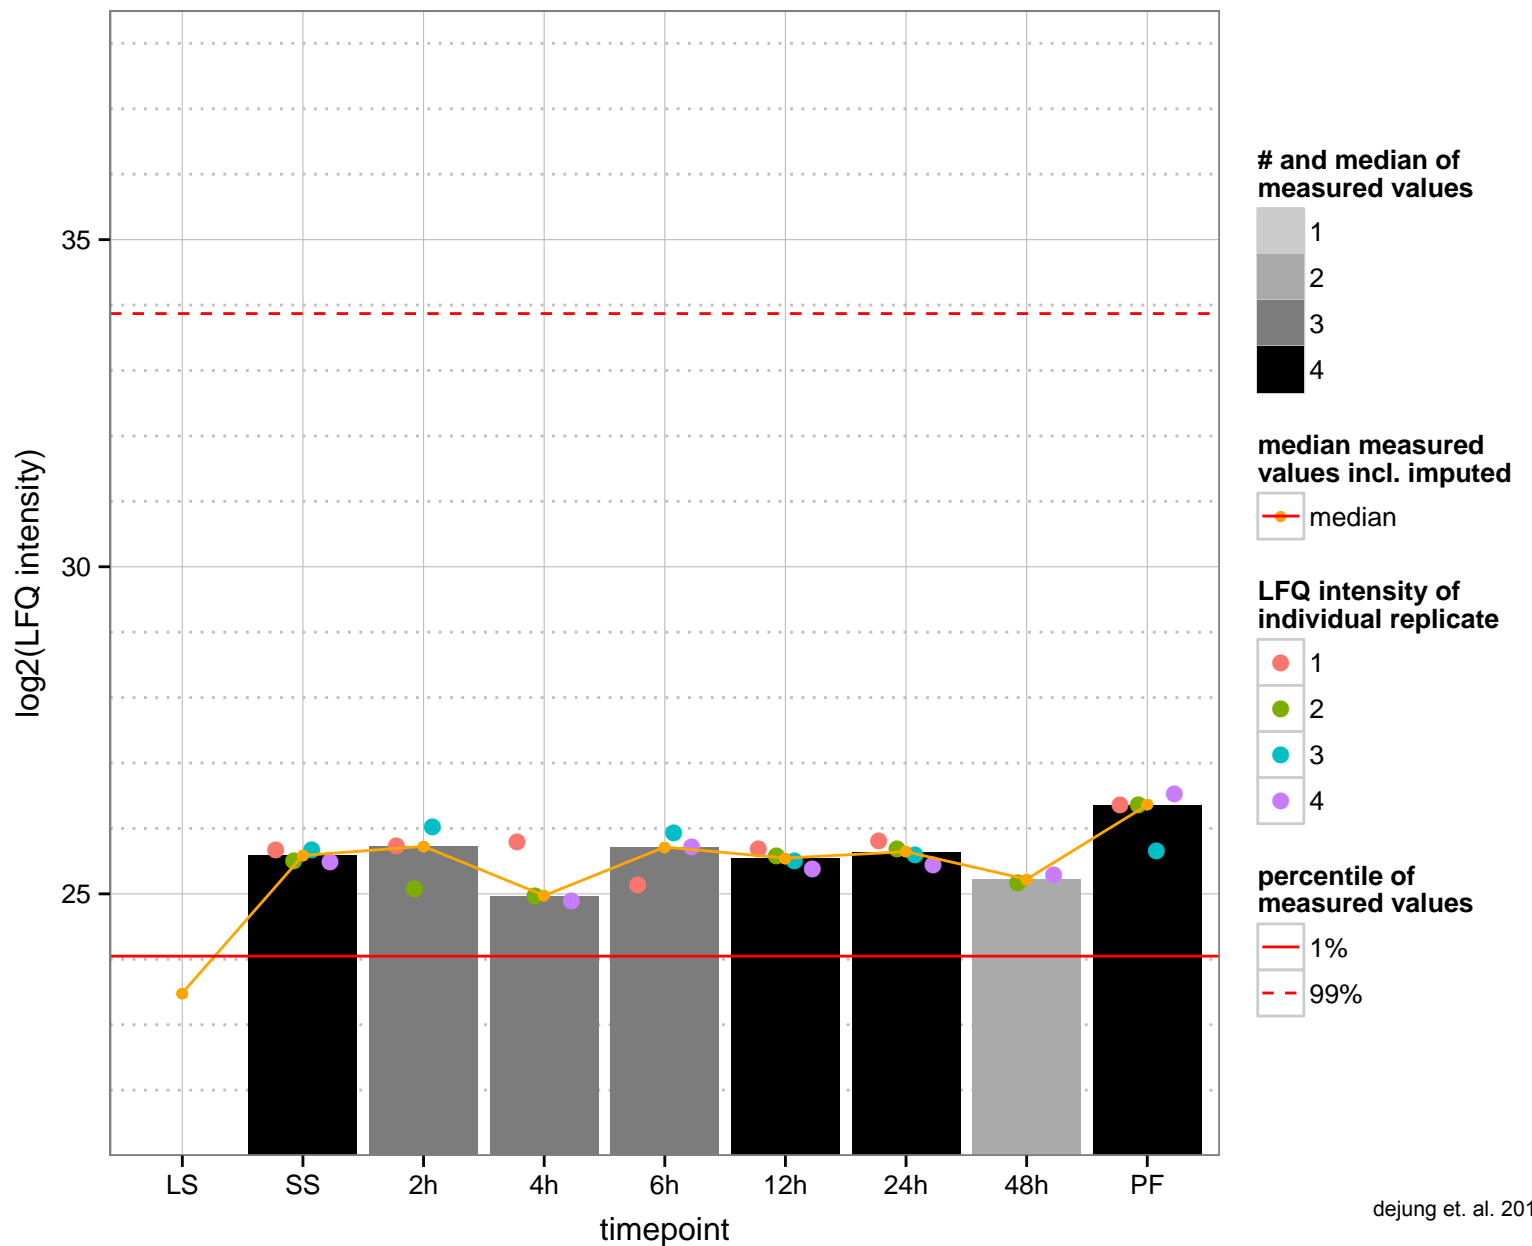

hypothetical protein, conserved  
 Tb927.6.3210  
 AGOF: null  
 AGOC: null  
 AGOP: null  
 PGO: null  
 PGOC: null  
 PGOP: null

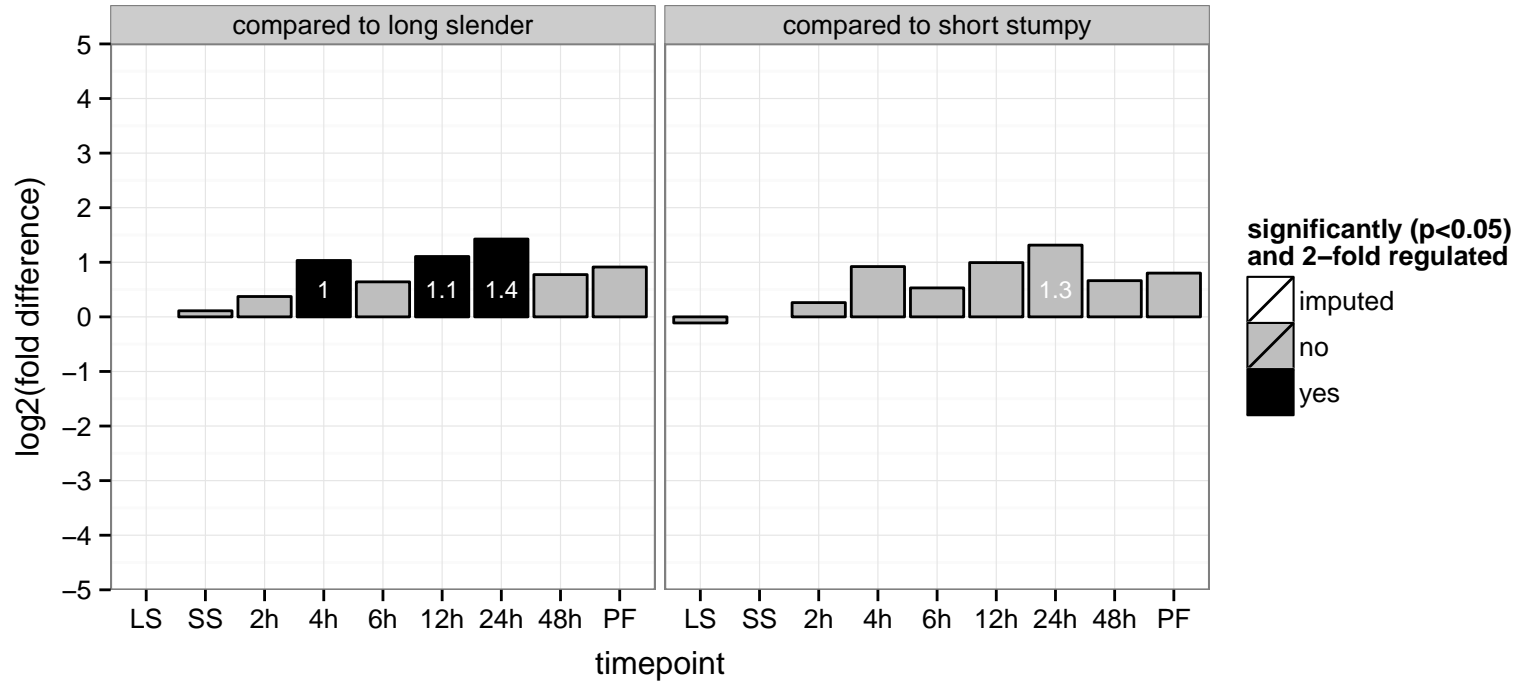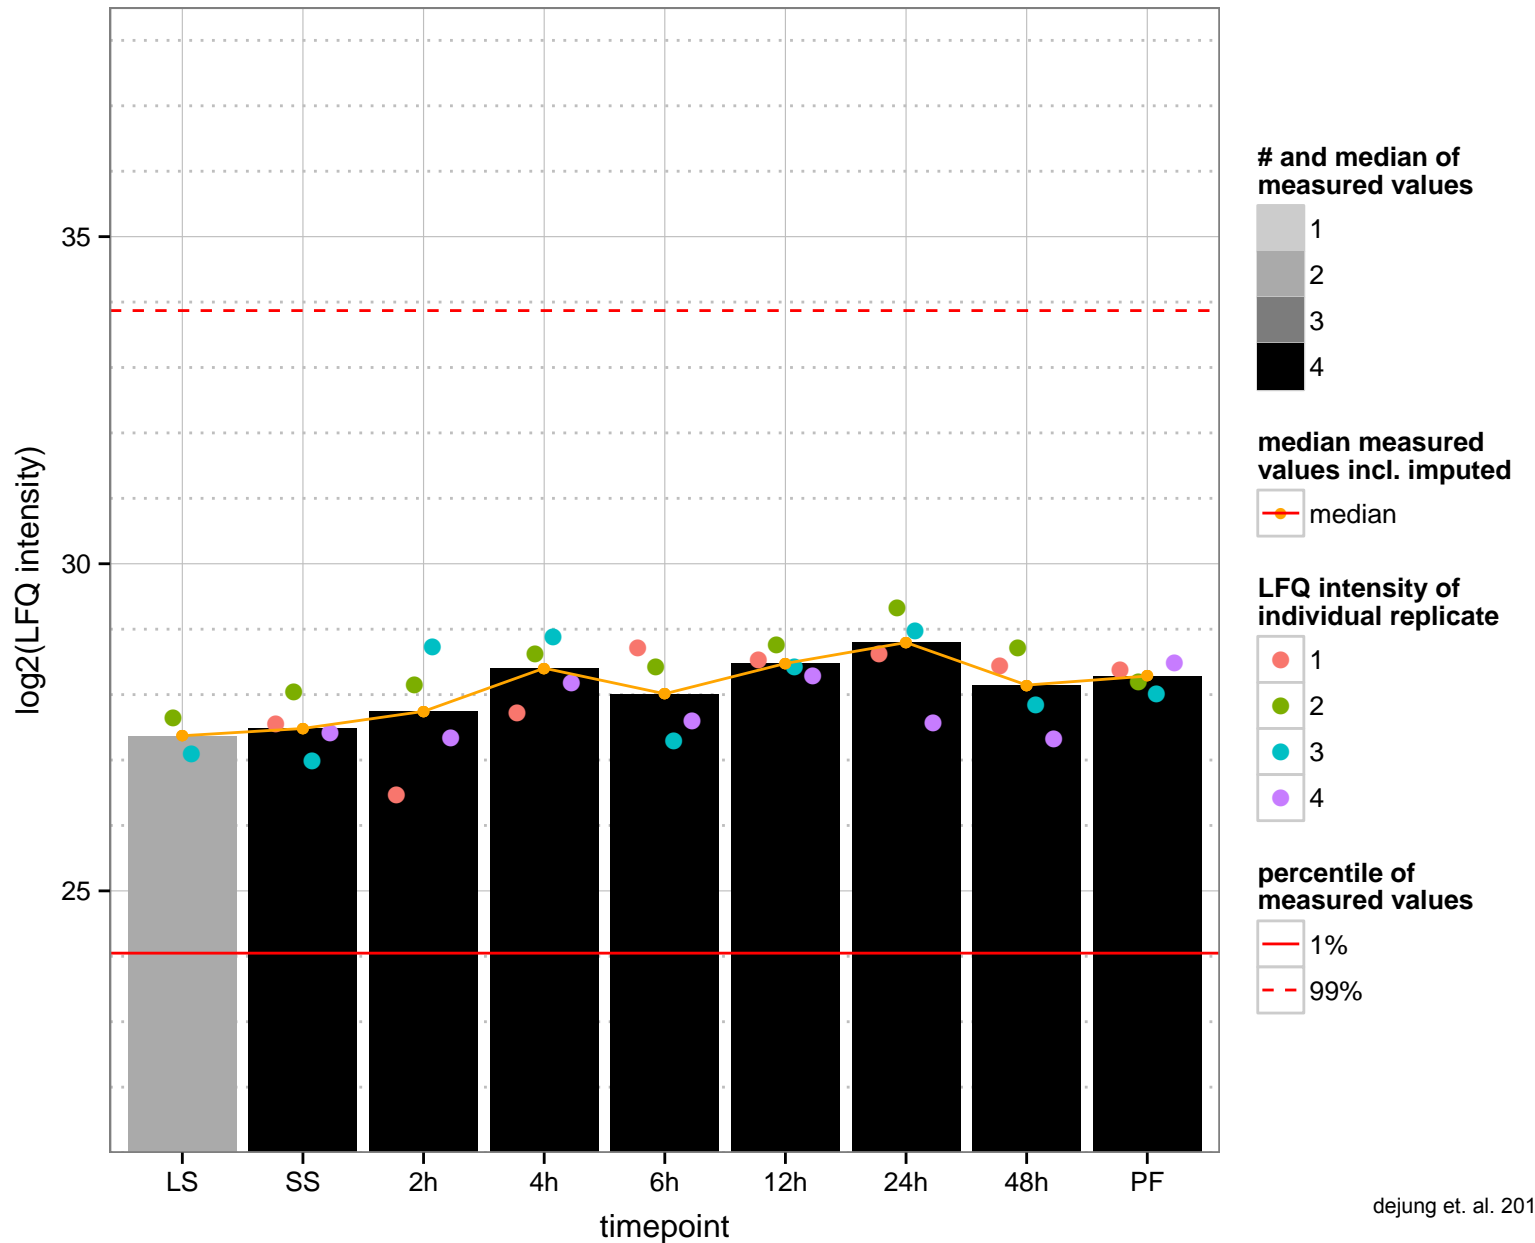

intraflagellar transport protein 20, putative (IFT20)  
 Tb927.6.3290  
 AGOF: null  
 AGOC: bacterial-type flagellum basal body  
 AGOP: null  
 PGO: null  
 PGOC: null  
 PGOP: null

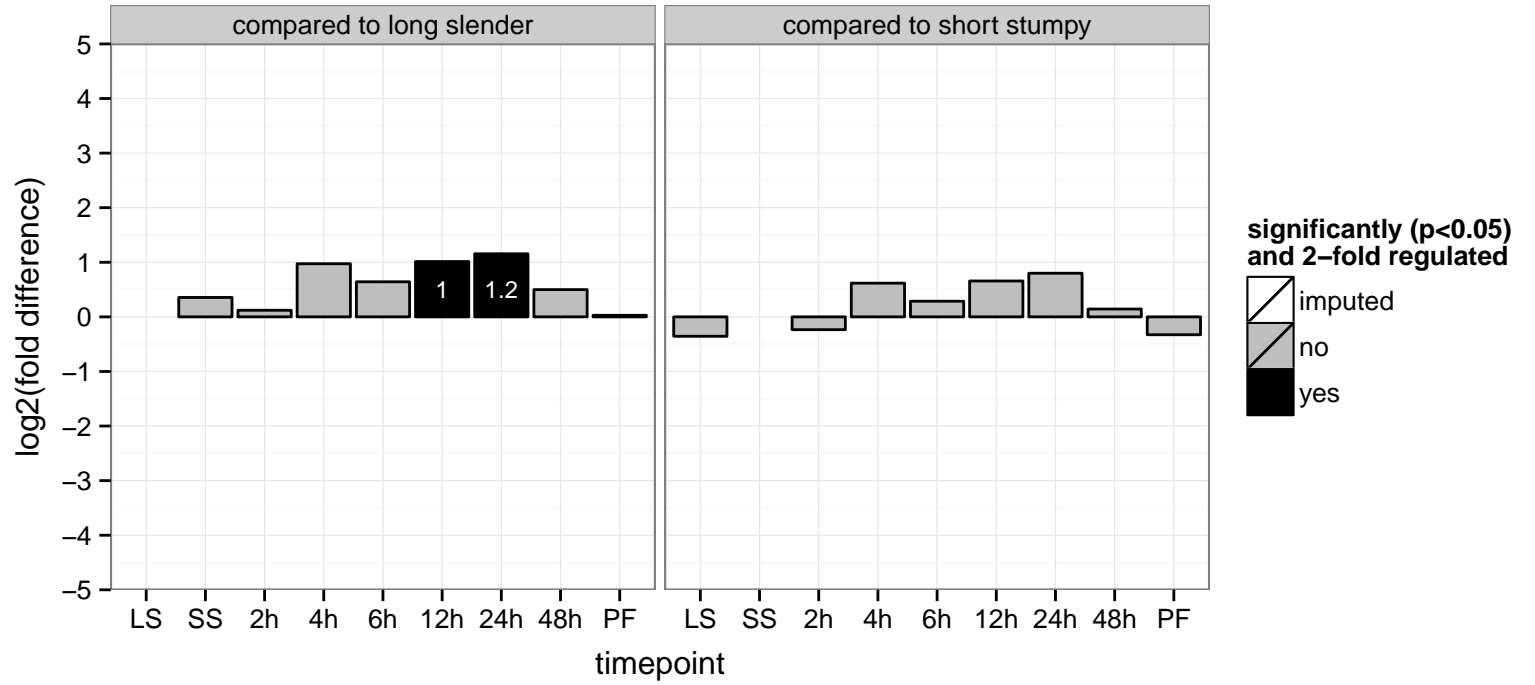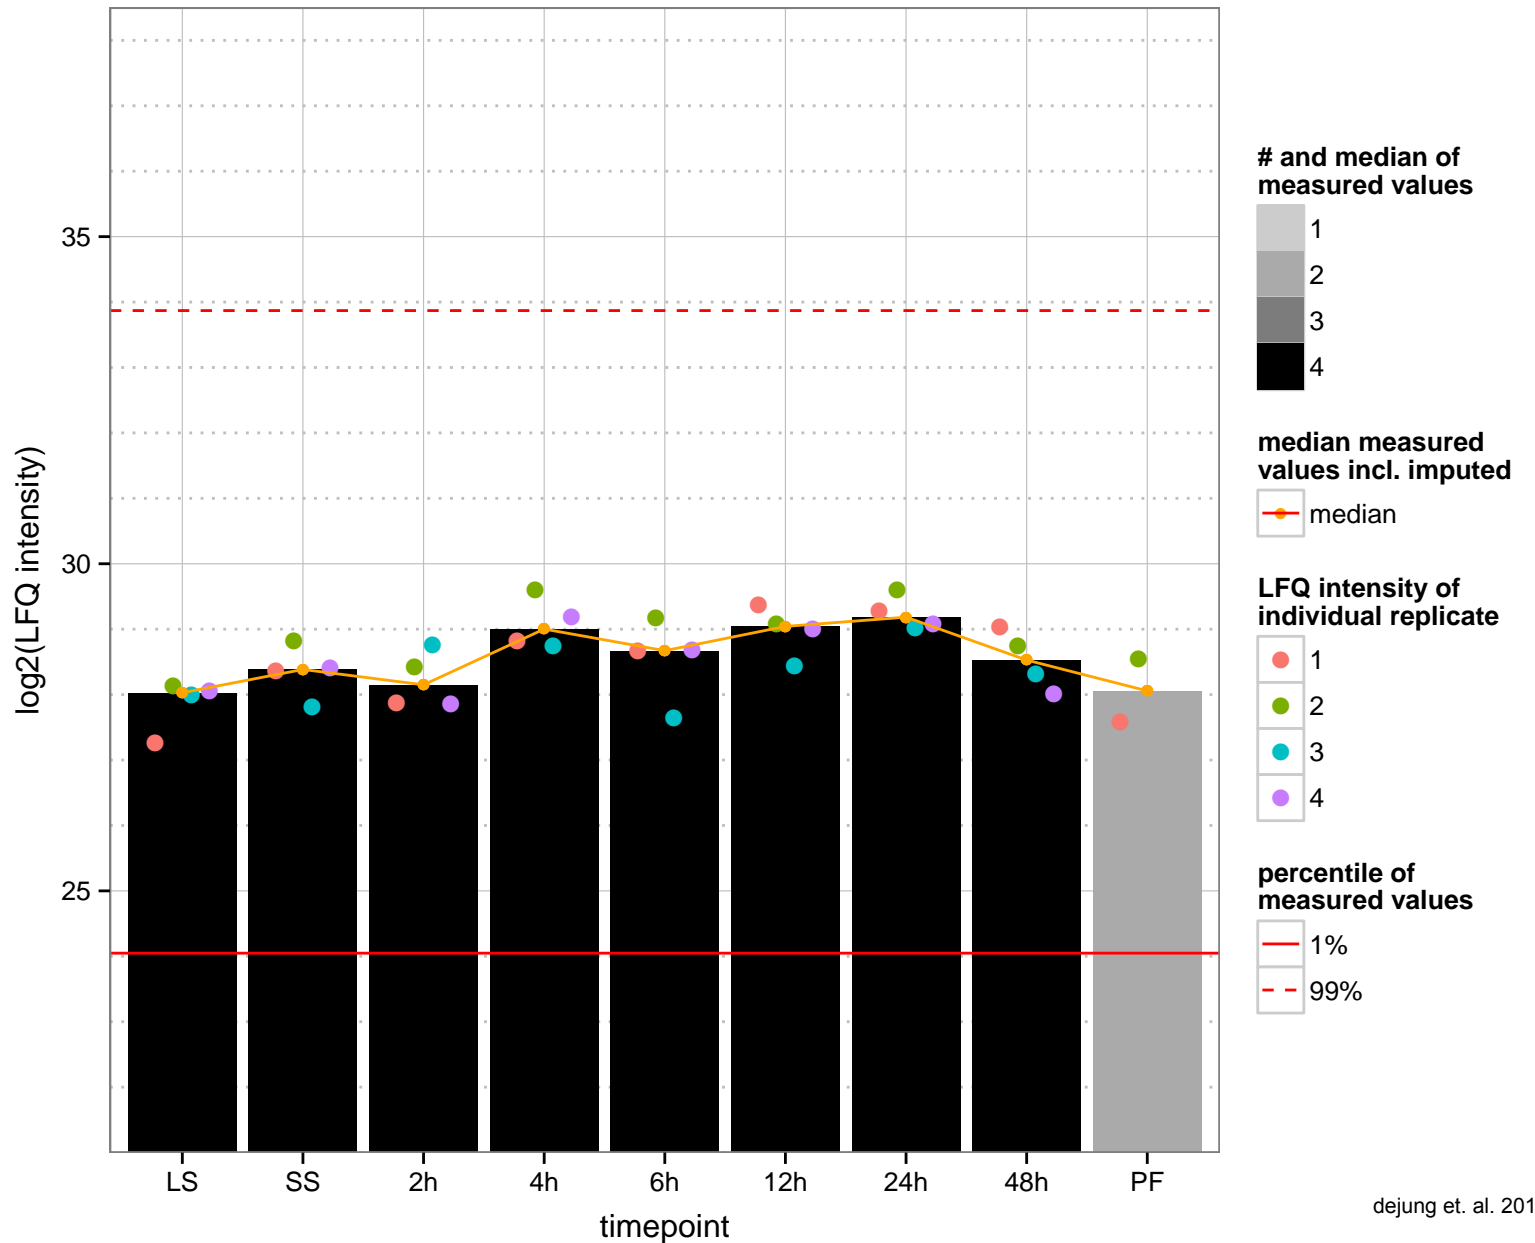



calpain-like cysteine peptidase, putative, cysteine peptidase, Clan CA, family C2  
 Tb927.6.3310  
 AGOF: calcium-dependent cysteine-type endopeptidase activity  
 AGOC: intracellular  
 AGOP: proteolysis  
 PGOF: calcium-dependent cysteine-type endopeptidase activity  
 PGOC: intracellular  
 PGOP: proteolysis

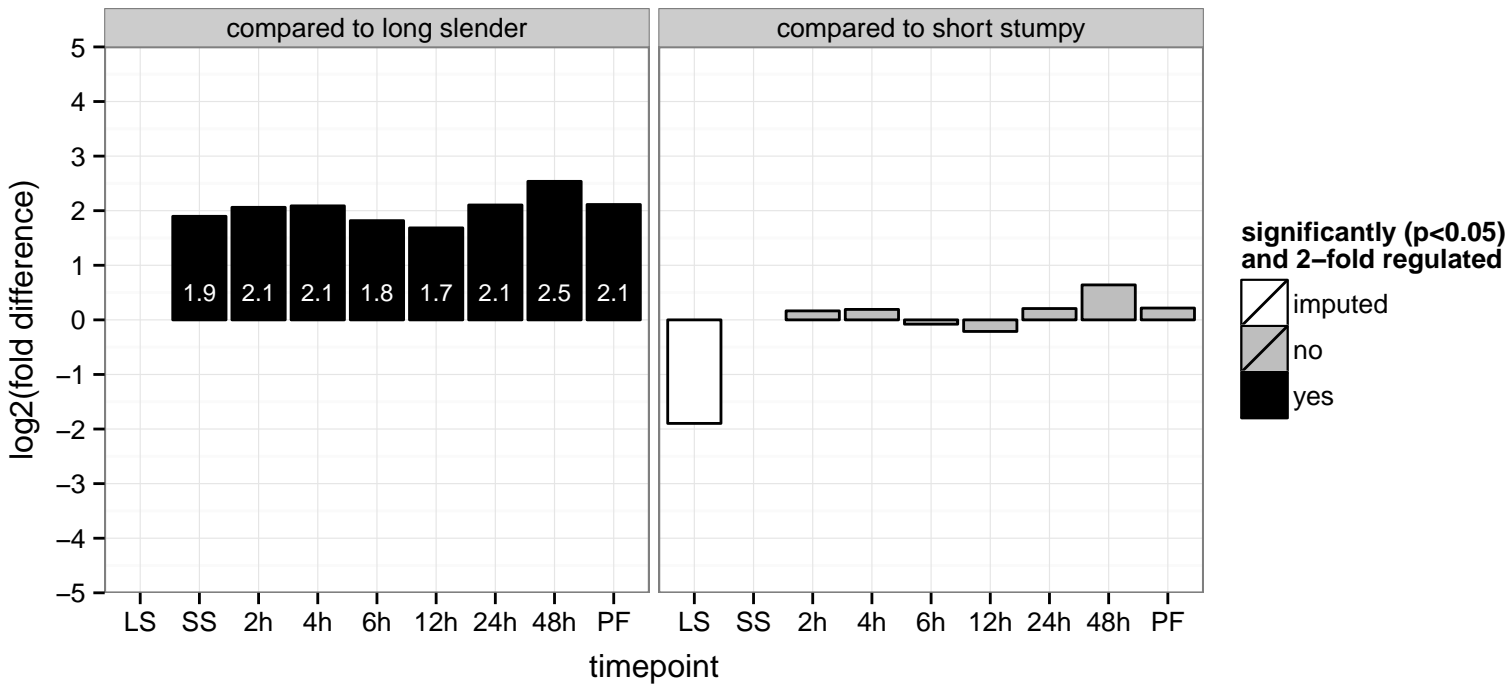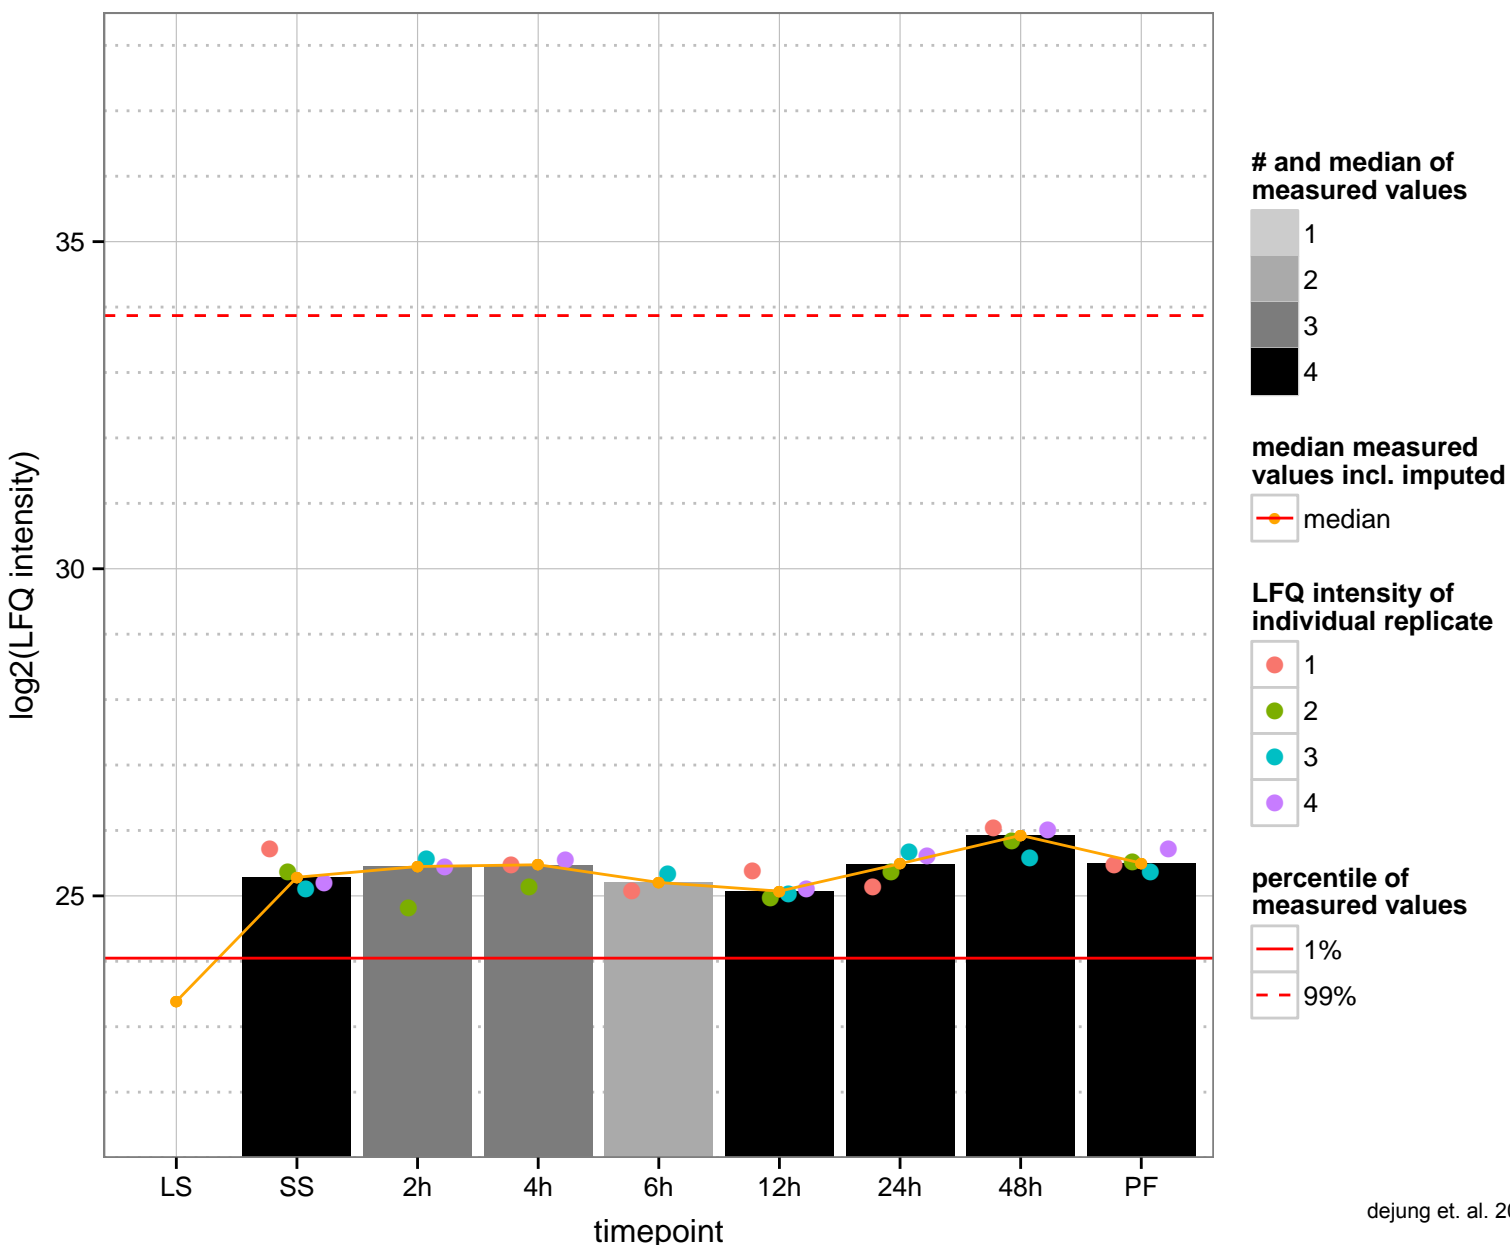

hypothetical protein, conserved  
 Tb927.6.3340  
 AGOF: null  
 AGOC: null  
 AGOP: null  
 PGOF: null  
 PGO: null  
 PGOP: null

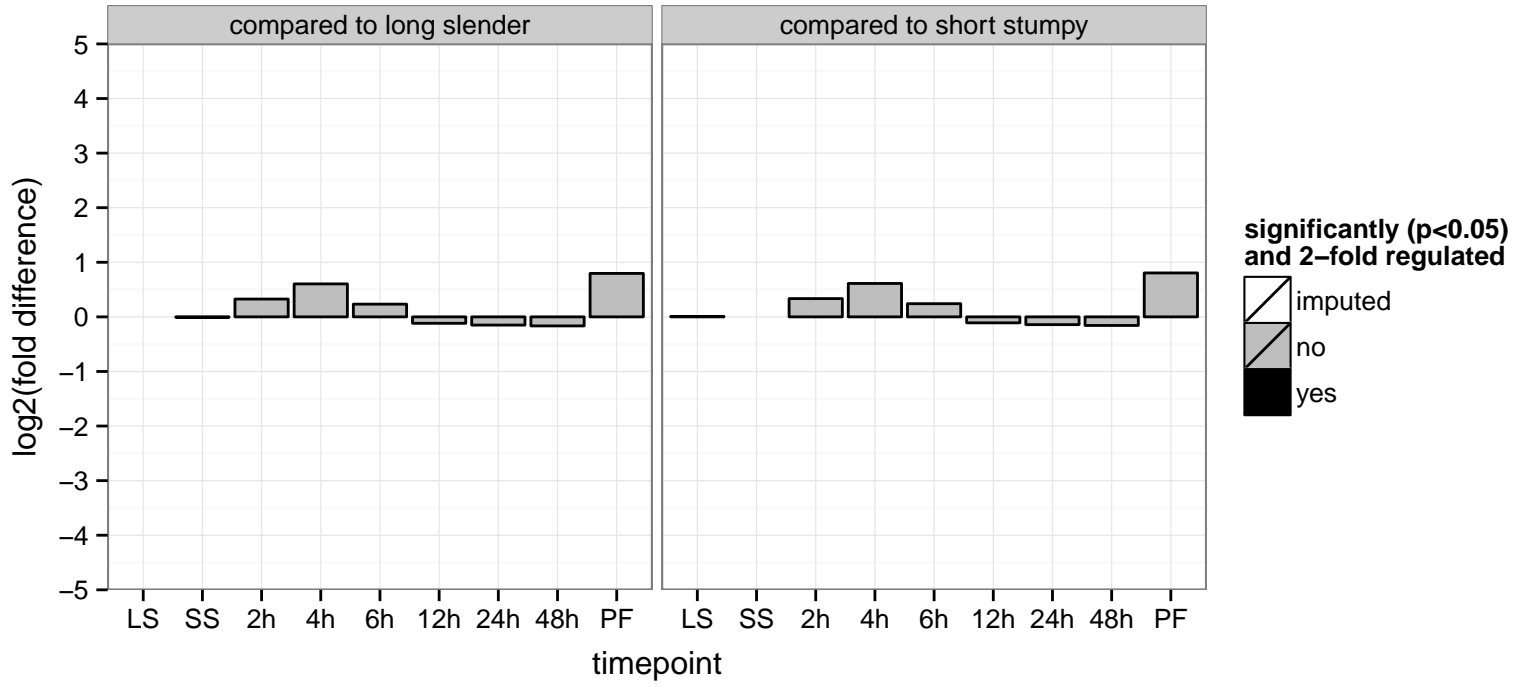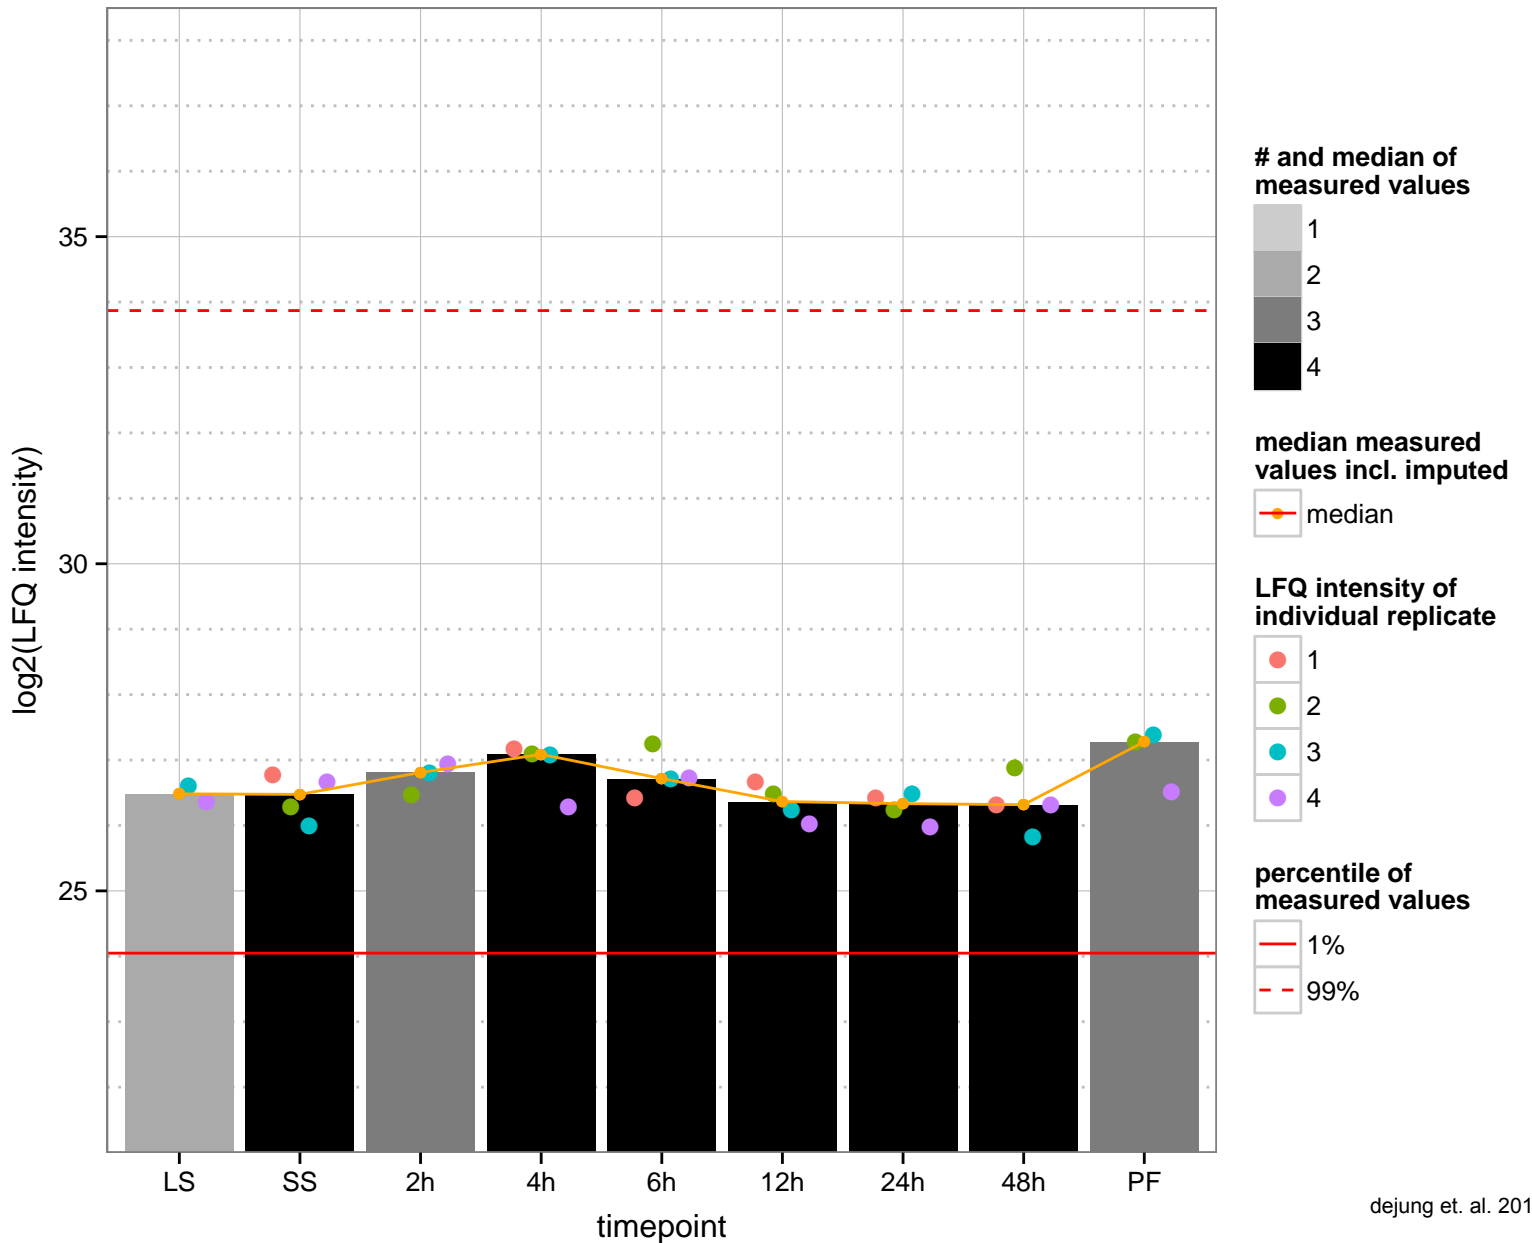

hypothetical protein, conserved  
 Tb927.6.3520;Tb11.v5.0634  
 AGOF: null  
 AGOC: null  
 AGOP: null  
 PGOF: null  
 PGOC: null  
 PGOP: null

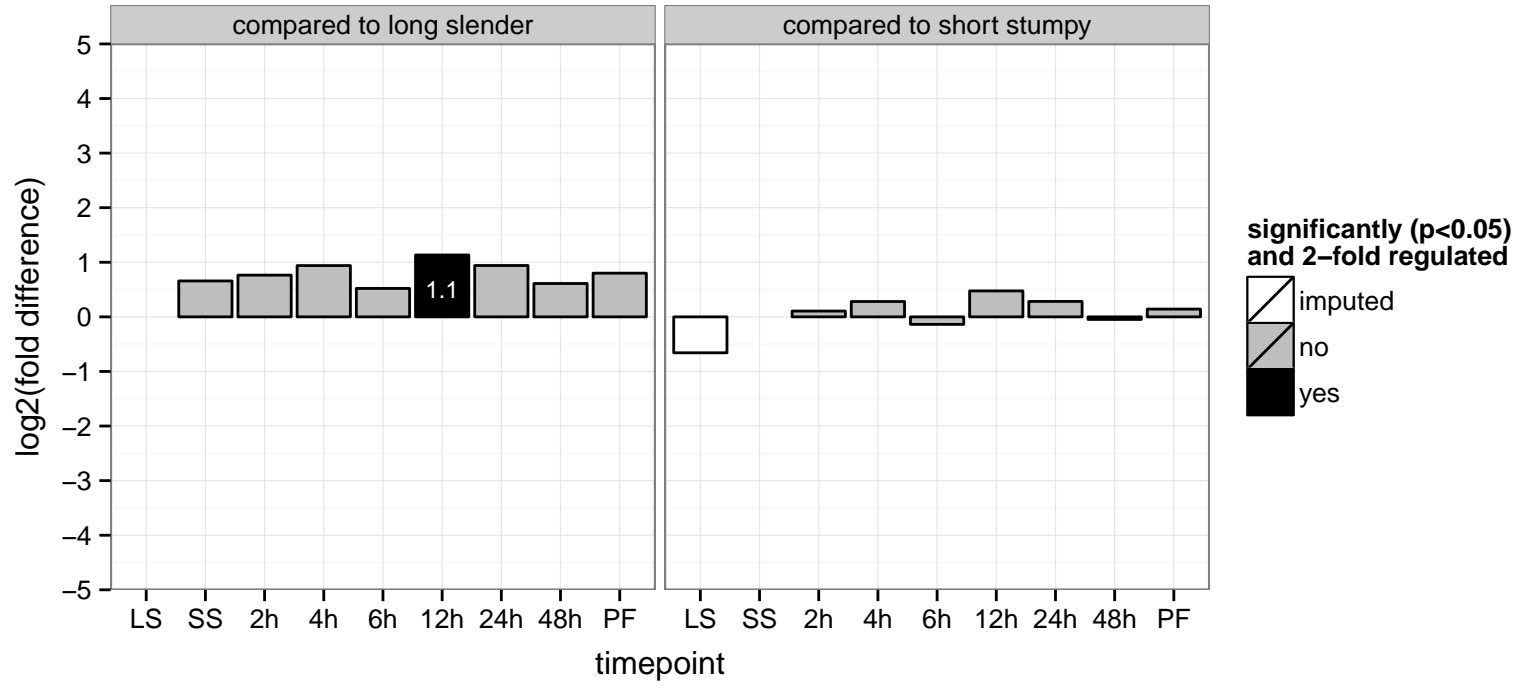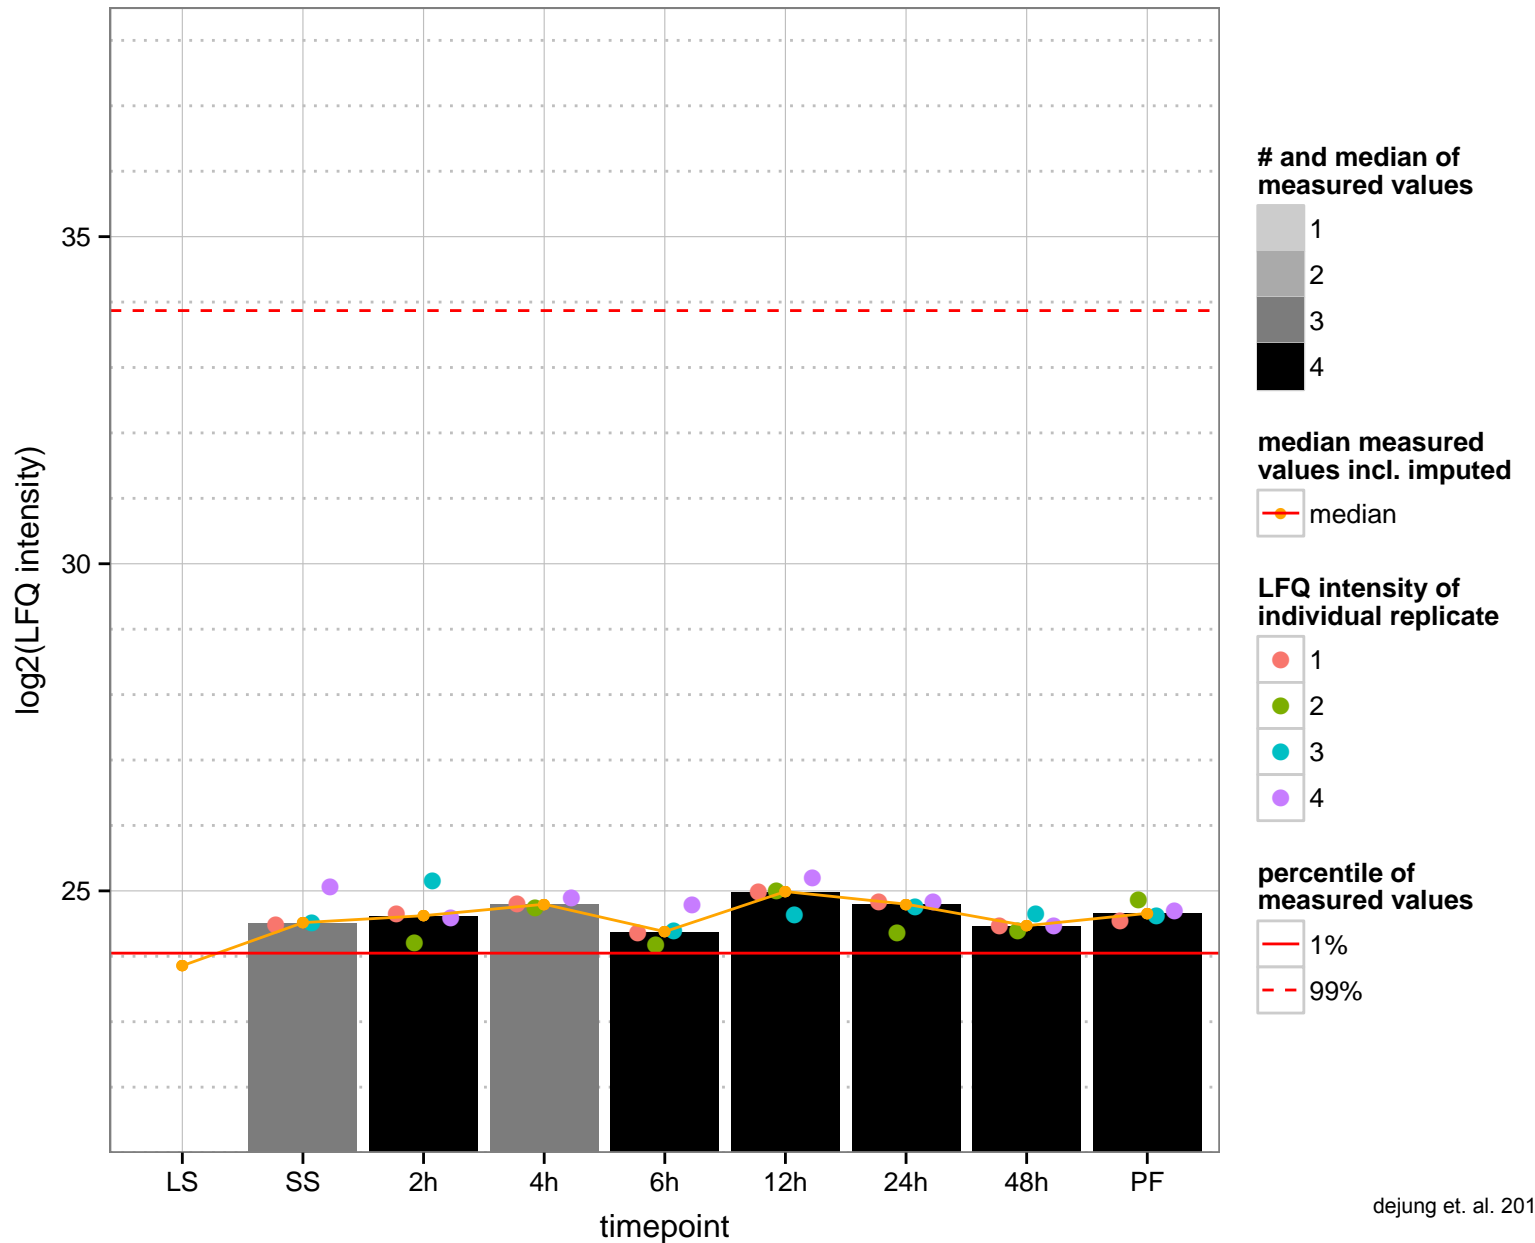

ADP-ribosylation factor, putative  
 Tb927.6.3650  
 AGOF: GTP binding  
 AGOC: intracellular  
 AGOP: intracellular protein transport, small GTPase mediated signal transduction  
 PGO: GTP binding  
 PGO: intracellular  
 PGO: intracellular protein transport, small GTPase mediated signal transduction

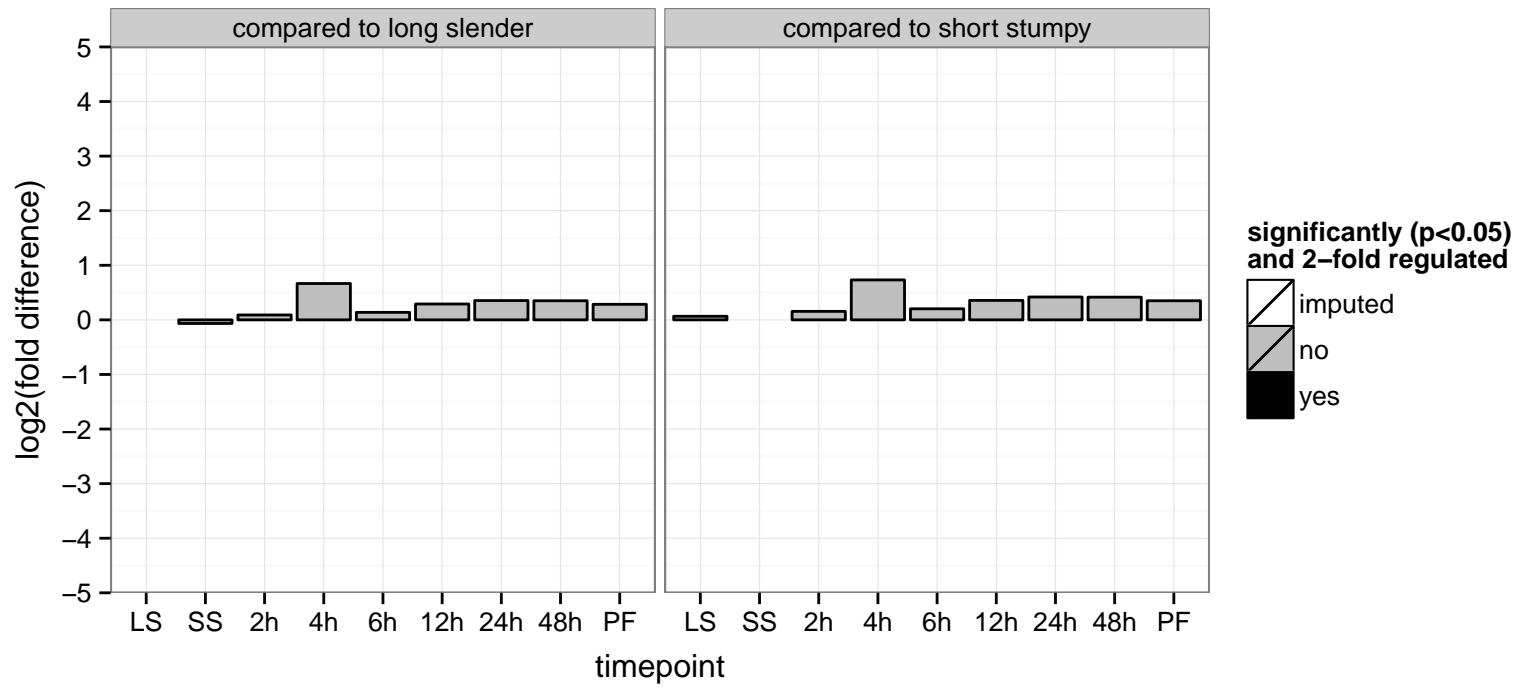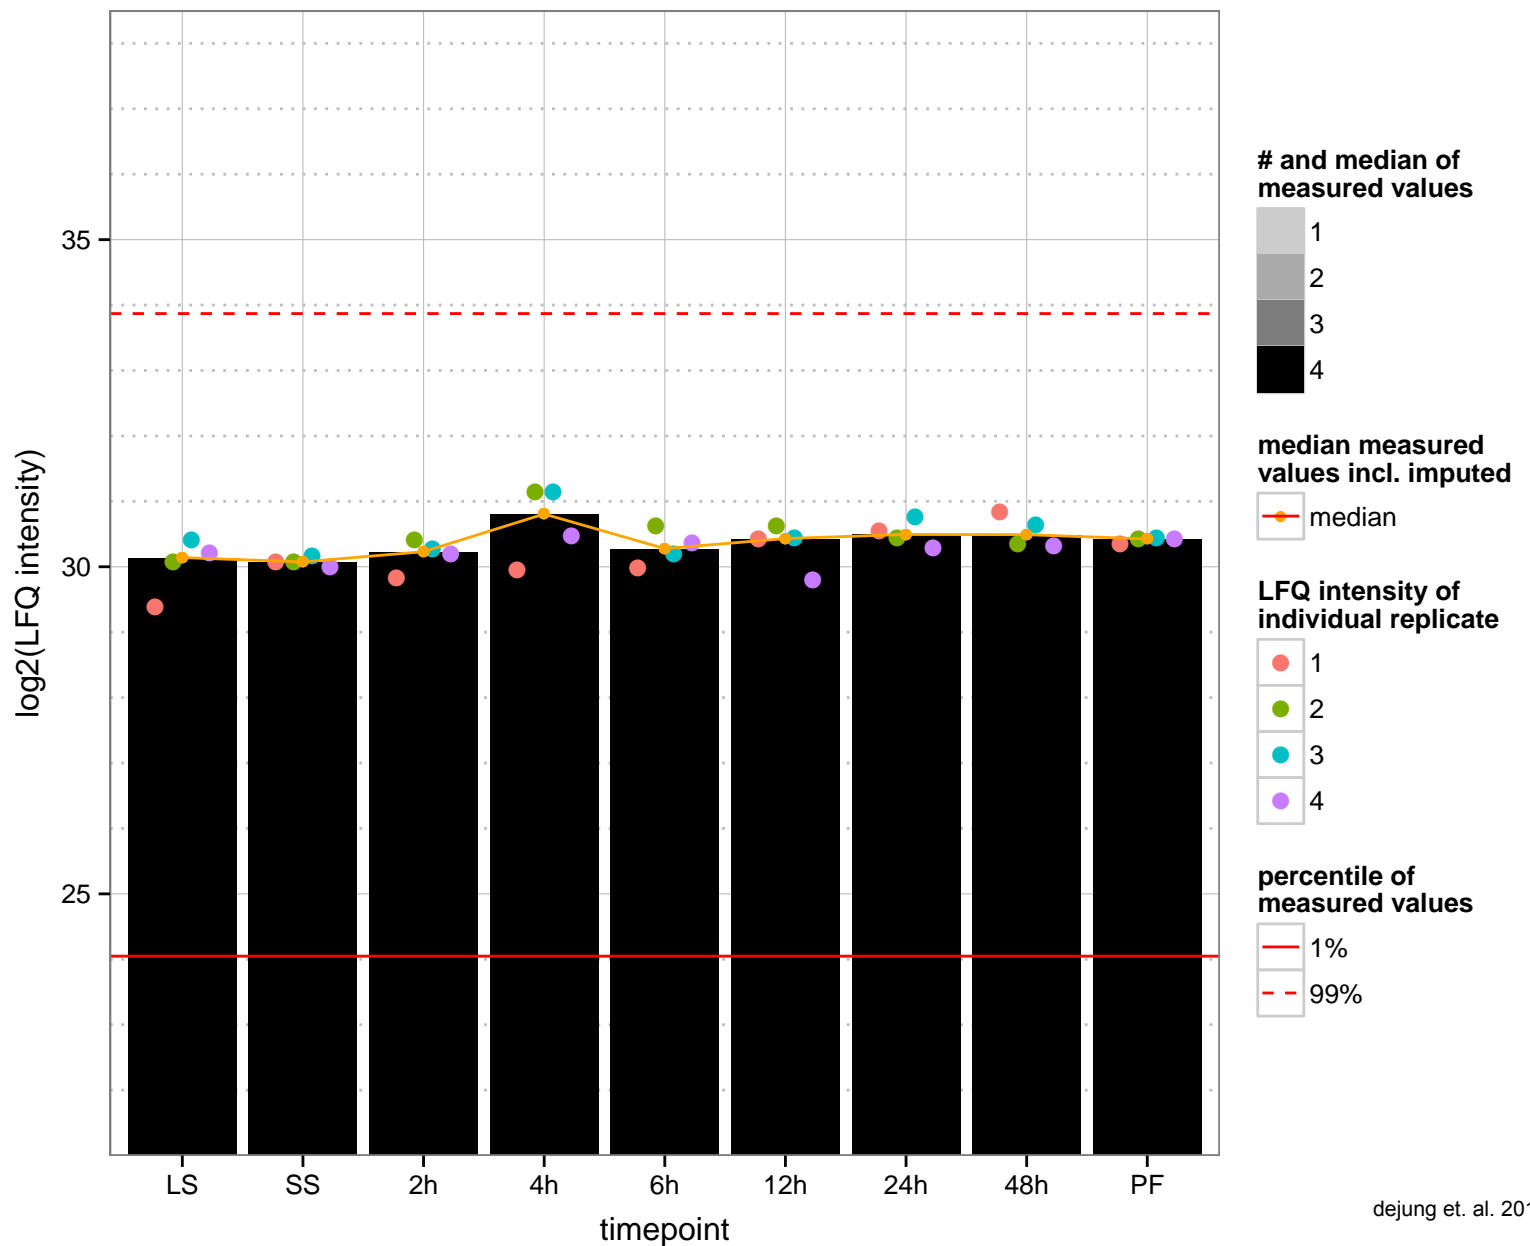

paraflagellar rod component, putative (PFC8)  
 Tb927.6.3670  
 AGOF: null  
 AGOC: null  
 AGOP: null  
 PGO: null  
 PGOC: null  
 PGOP: null

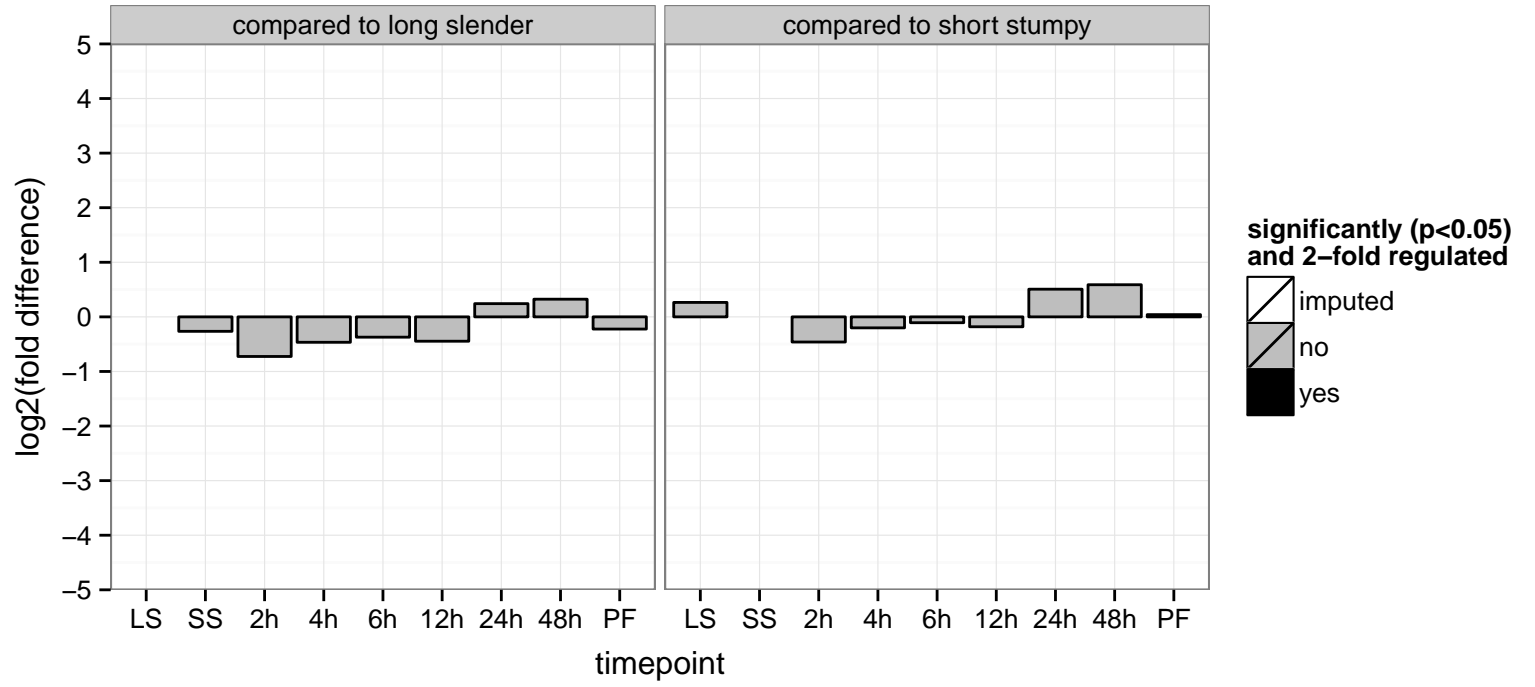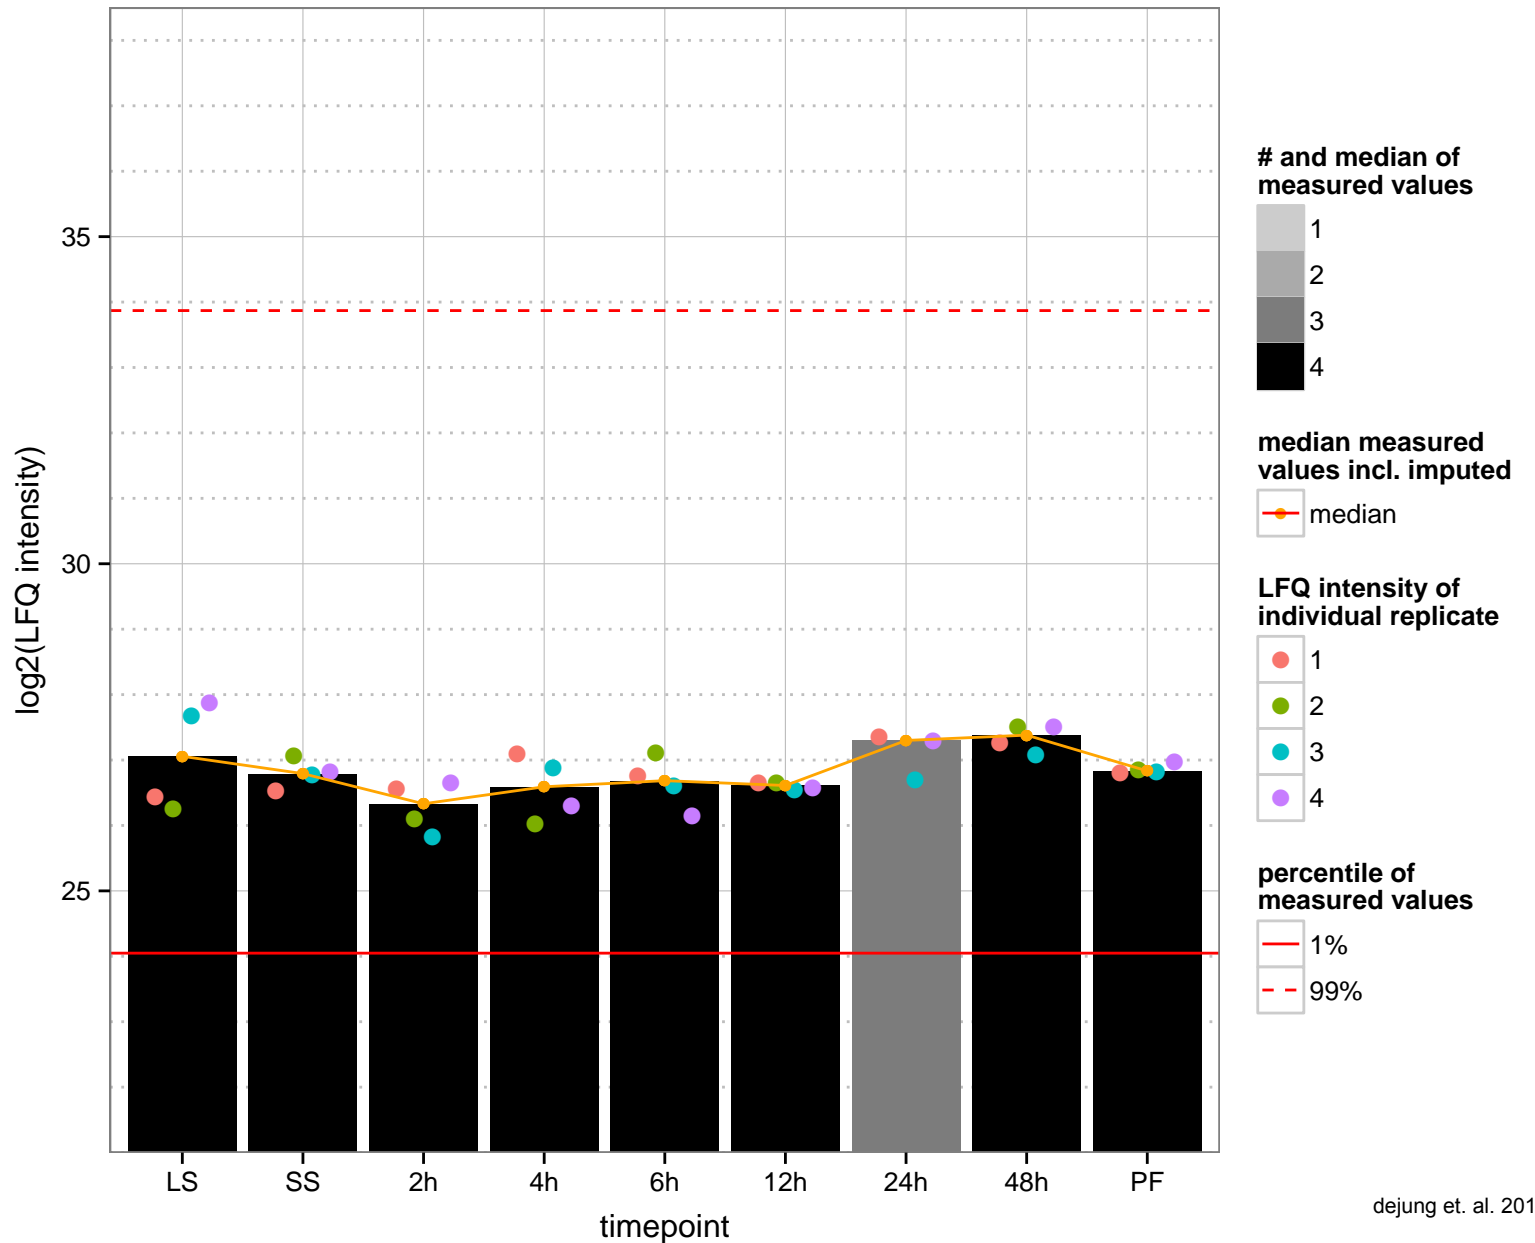

hypothetical protein, conserved  
 Tb927.6.3680  
 AGOF: null  
 AGOC: null  
 AGOP: null  
 PGO: null  
 PGOC: null  
 PGOP: null

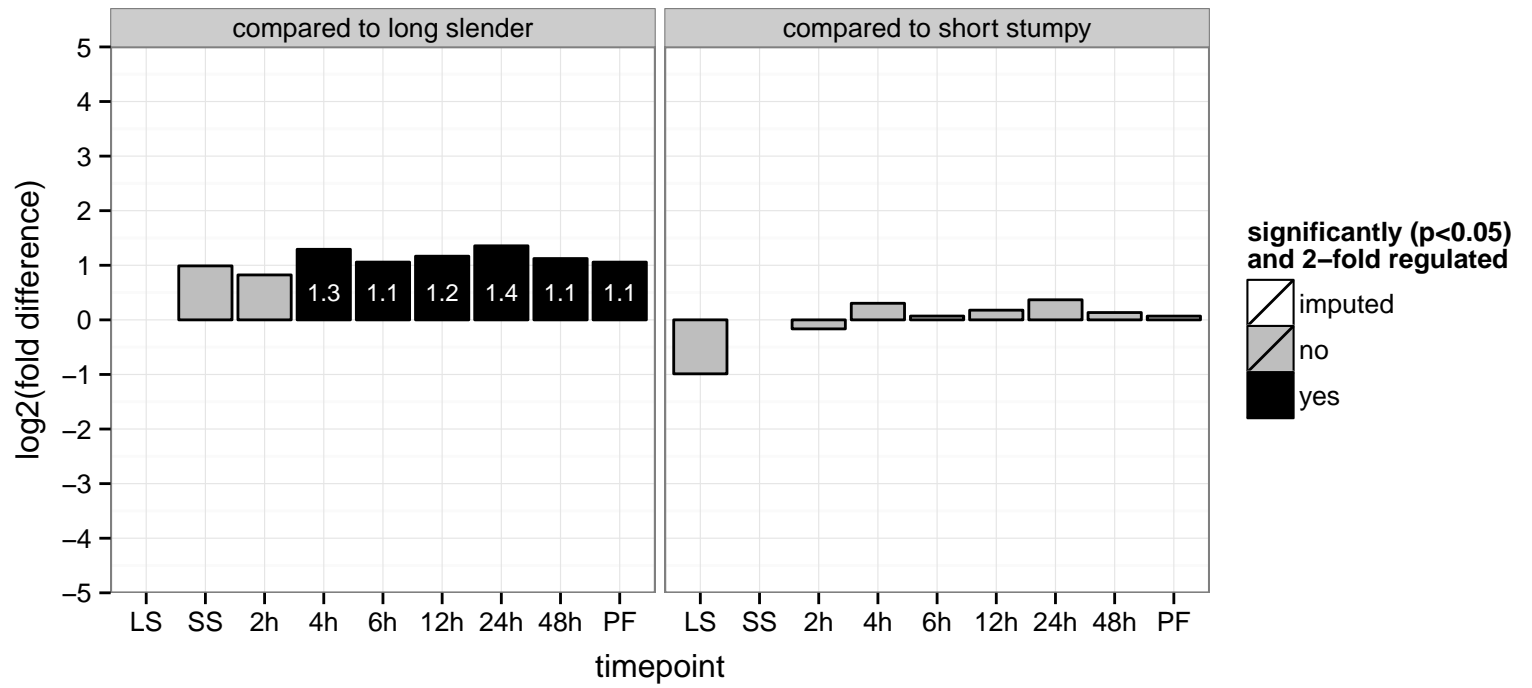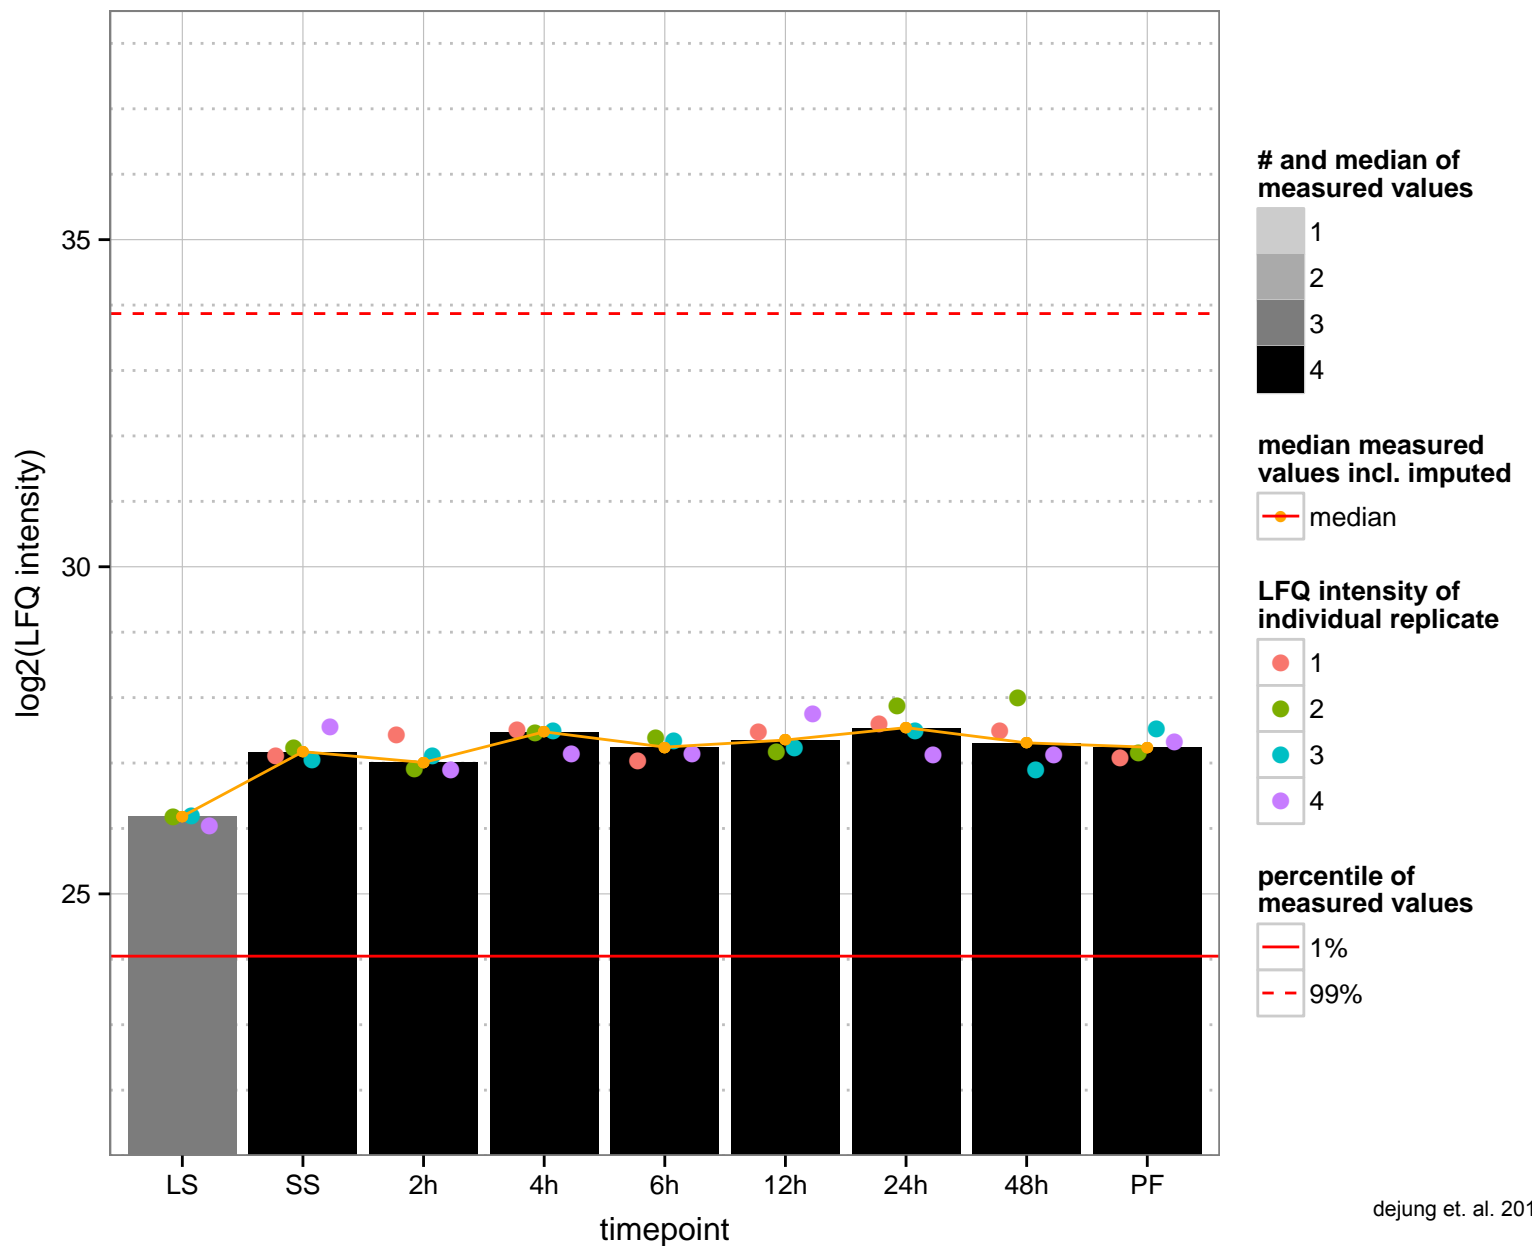

pre-mRNA cleavage complex II Clp1-like, conserved

Tb927.6.3690

AGOF: ATP-dependent polyribonucleotide 5'-hydroxyl-kinase activity

AGOC: tRNA-intron endonuclease complex

AGOP: tRNA splicing, via endonucleolytic cleavage and ligation, targeting of mRNA for destruction involved in RNA interference

PGOF: null

PGOC: null

PGOP: null

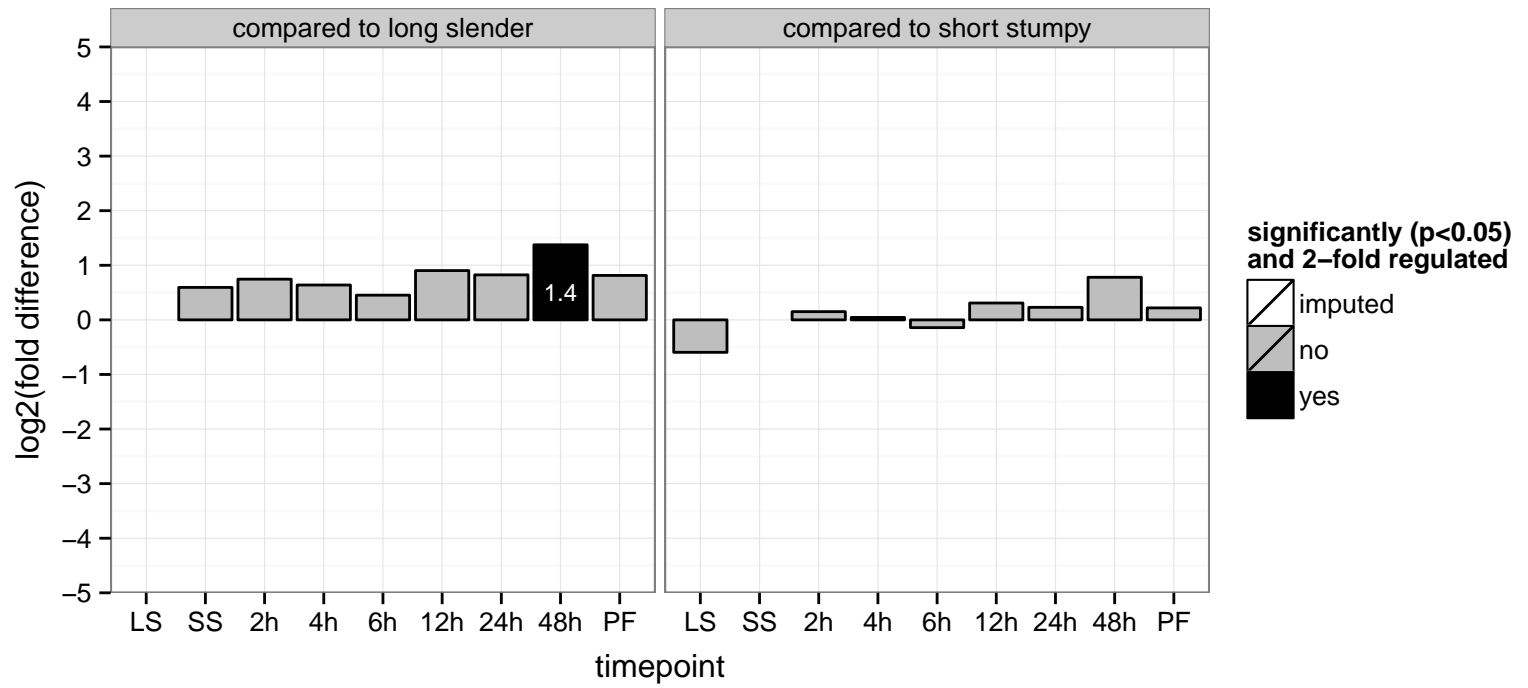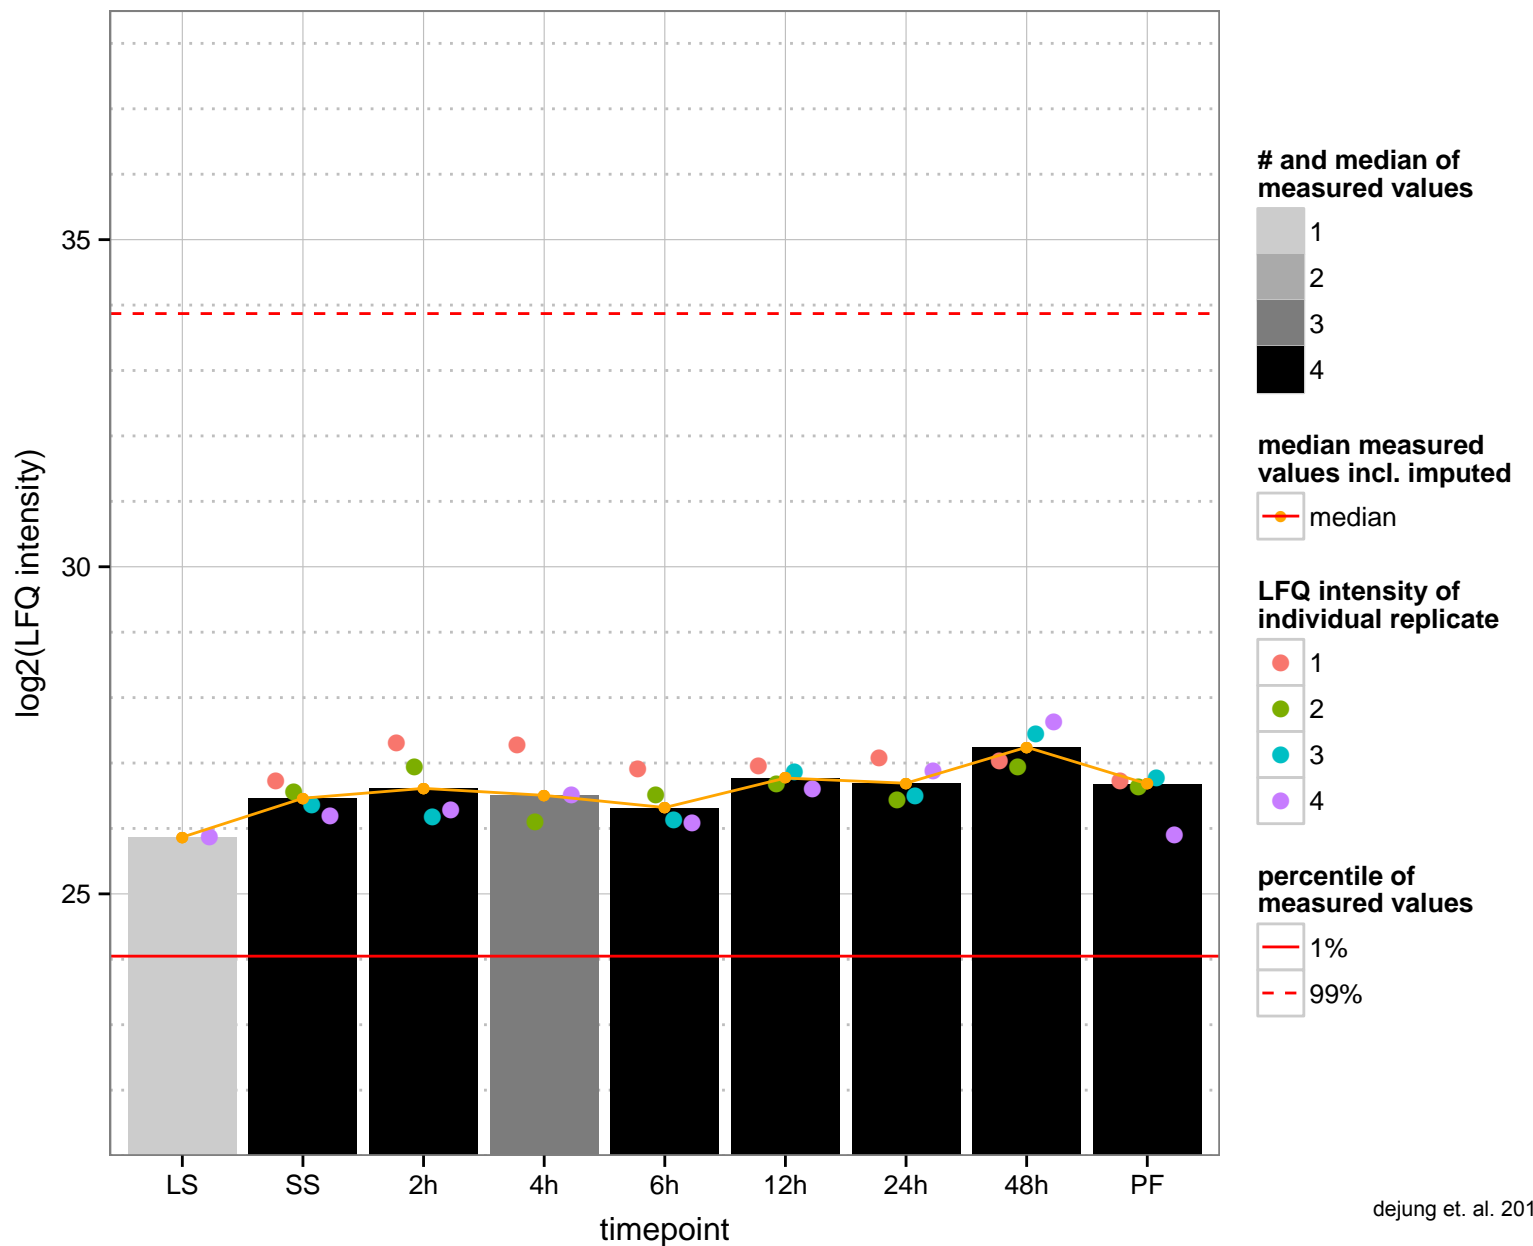

heat shock 70 kDa protein, mitochondrial precursor, putative  
 Tb927.6.3800;Tb927.6.3750;Tb927.6.3740  
 AGOF: ATP binding, unfolded protein binding  
 AGOC: mitochondrion, null  
 AGOP: protein folding  
 PGO: ATP binding, unfolded protein binding  
 PGO: null  
 PGO: protein folding

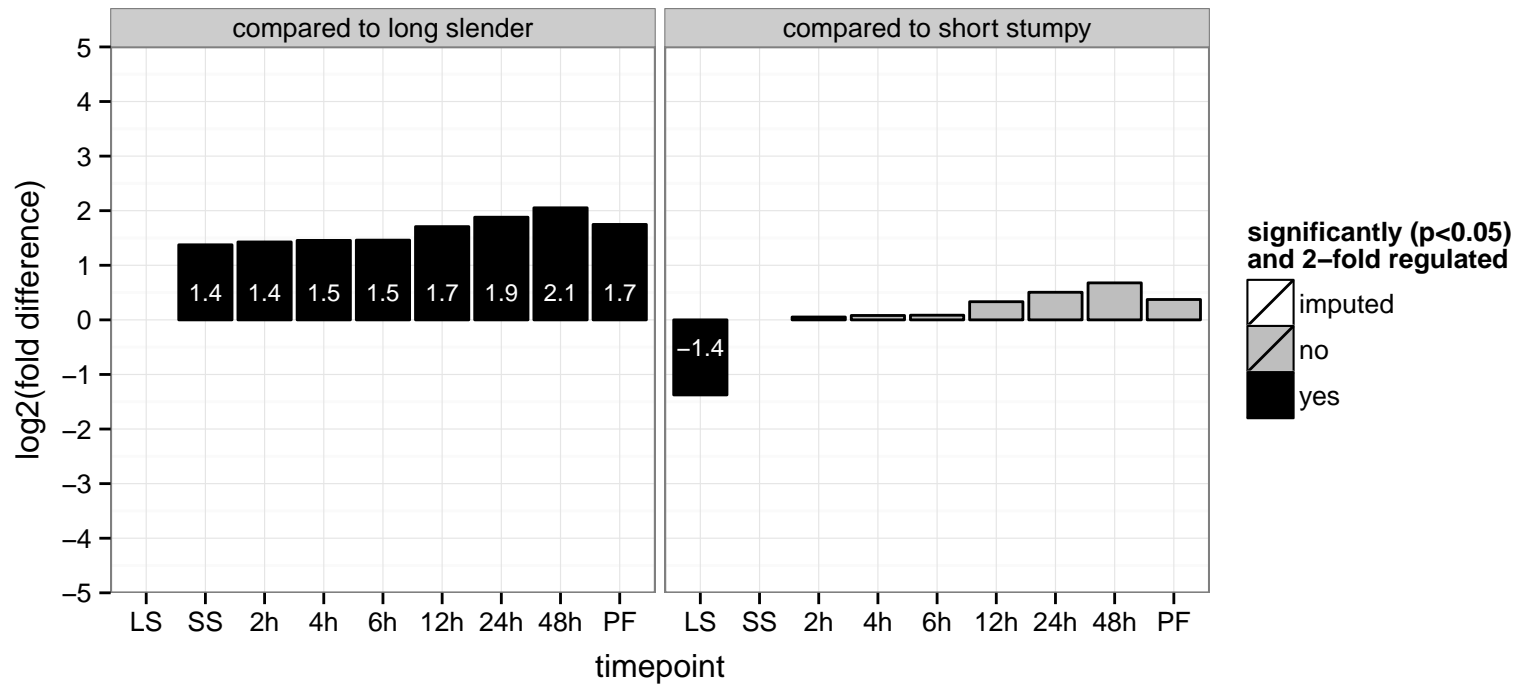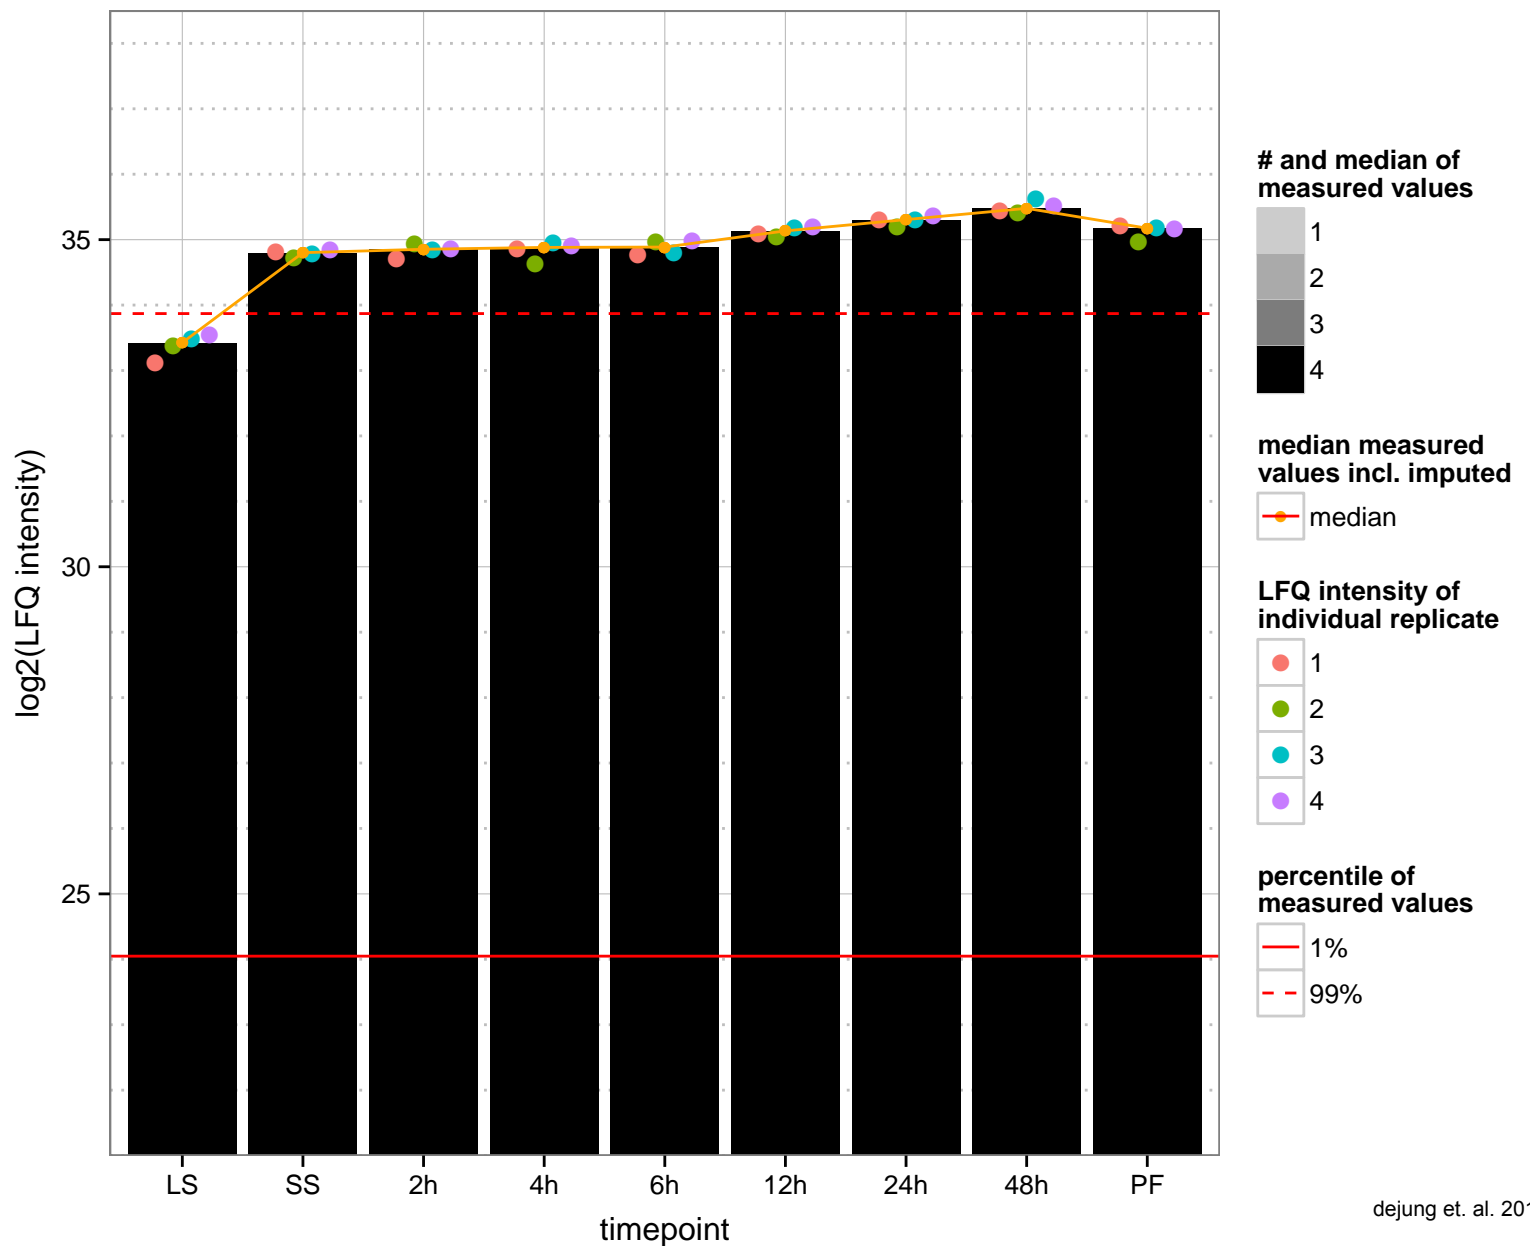



hypothetical protein, conserved  
 Tb927.6.3810  
 AGOF: null  
 AGOC: null  
 AGOP: null  
 PGO: null  
 PGOC: null  
 PGOP: null

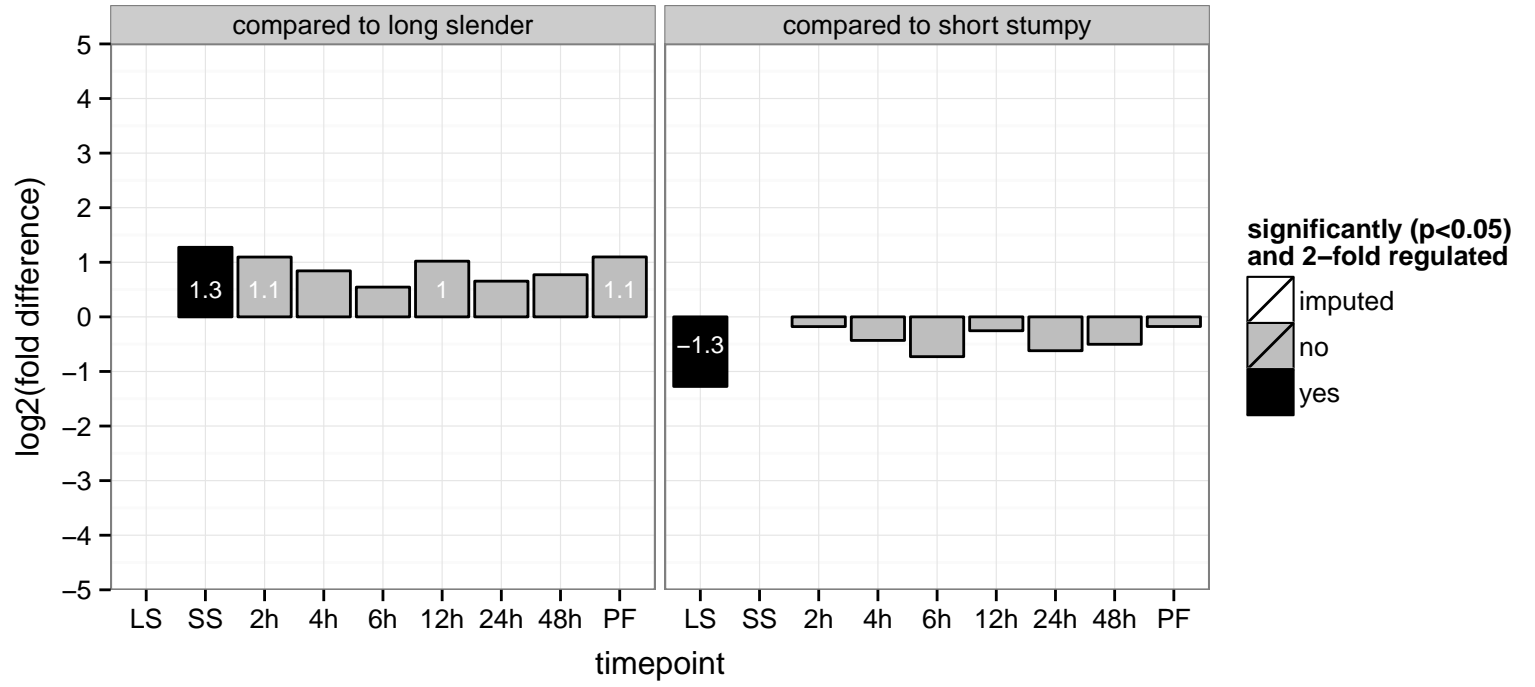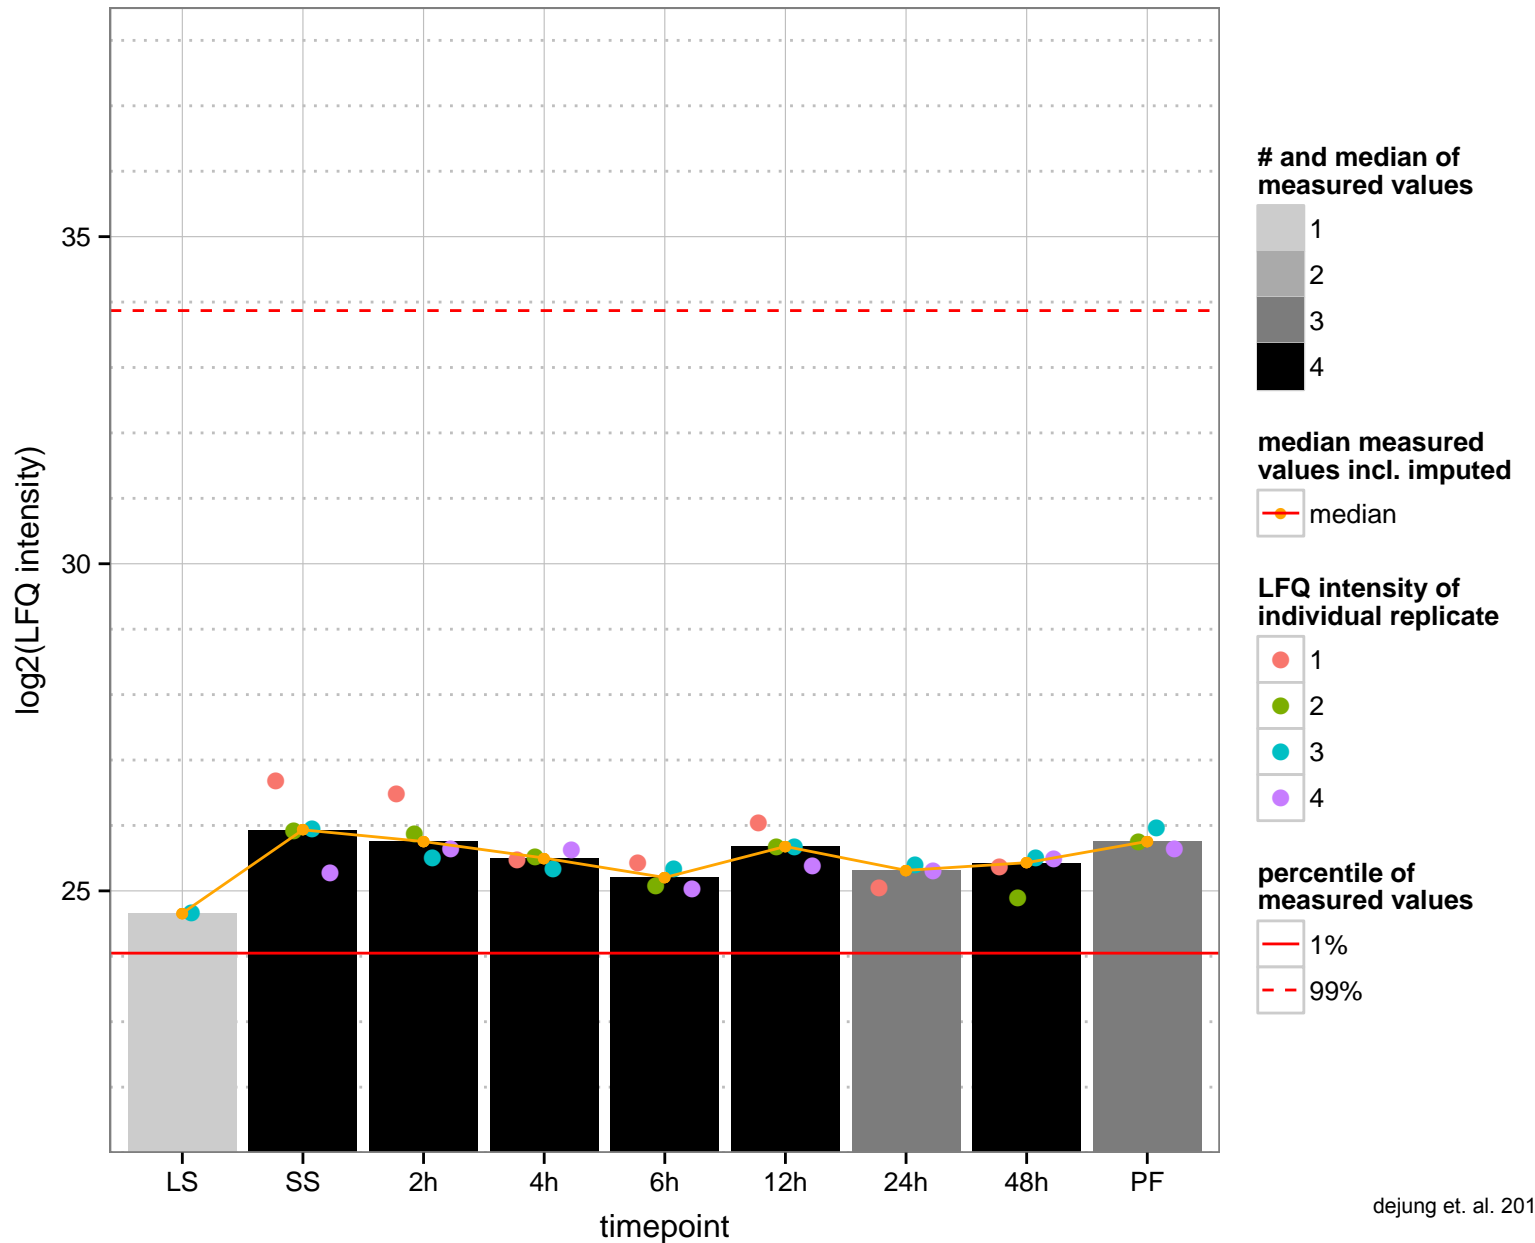

reticulation domain protein  
 Tb927.6.3840  
 AGOF: null  
 AGOC: endoplasmic reticulum  
 AGOP: null  
 PGO: null  
 PGO: endoplasmic reticulum  
 PGO: null

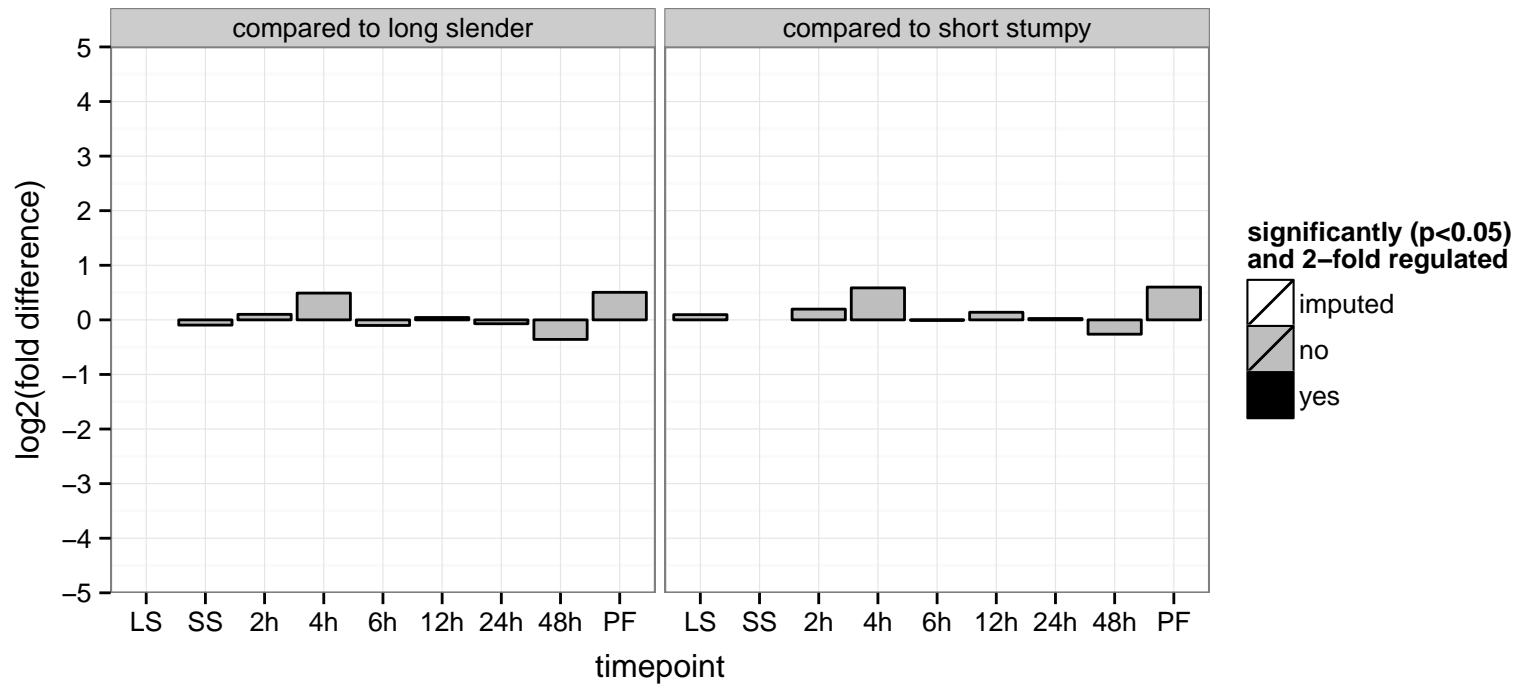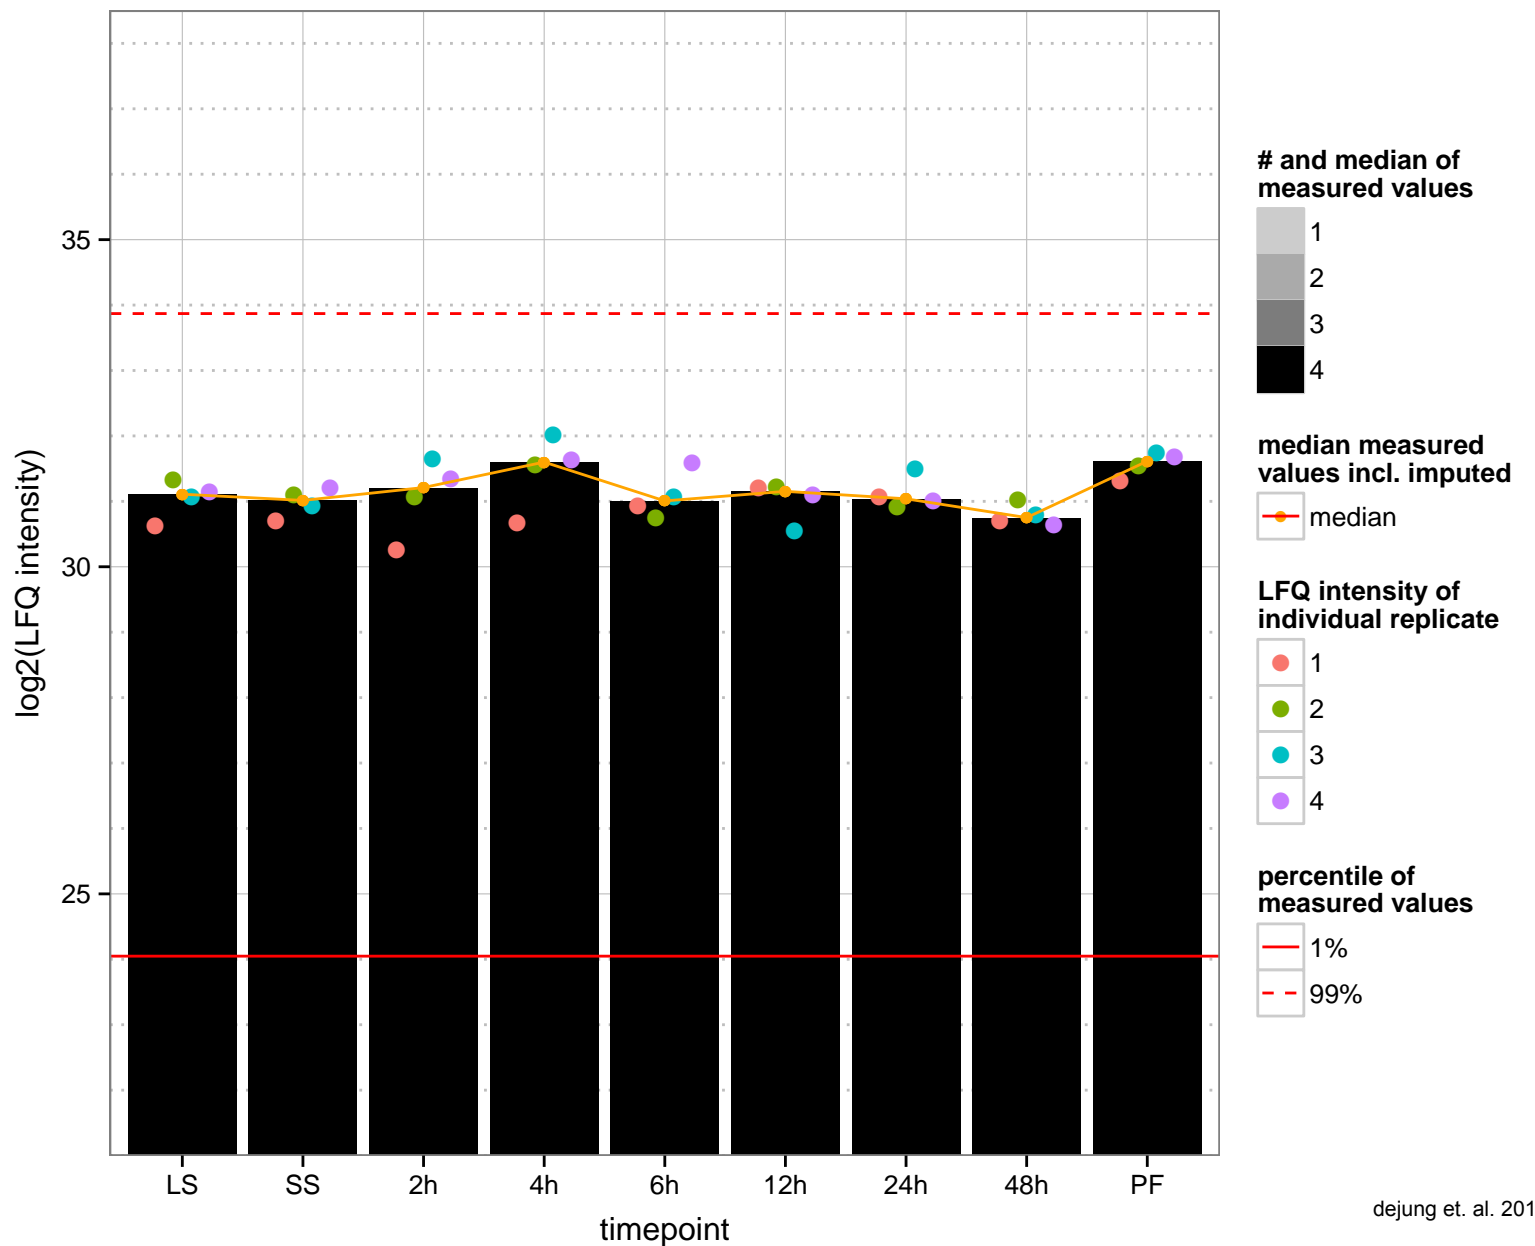

RNA-binding protein, putative (SGN1)  
 Tb927.6.3870  
 AGOF: RNA binding  
 AGOC: null  
 AGOP: RNA processing  
 PGOF: nucleic acid binding  
 PGO: null  
 PGOP: null

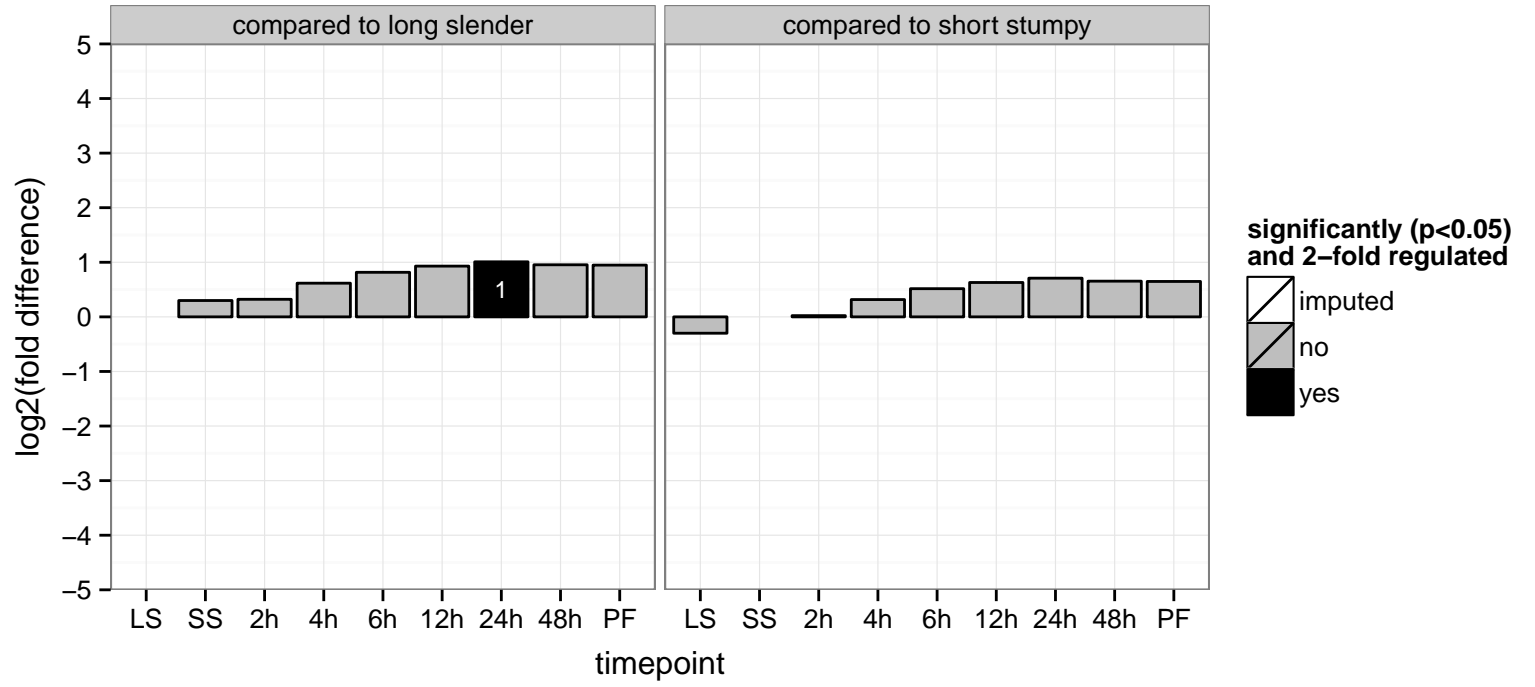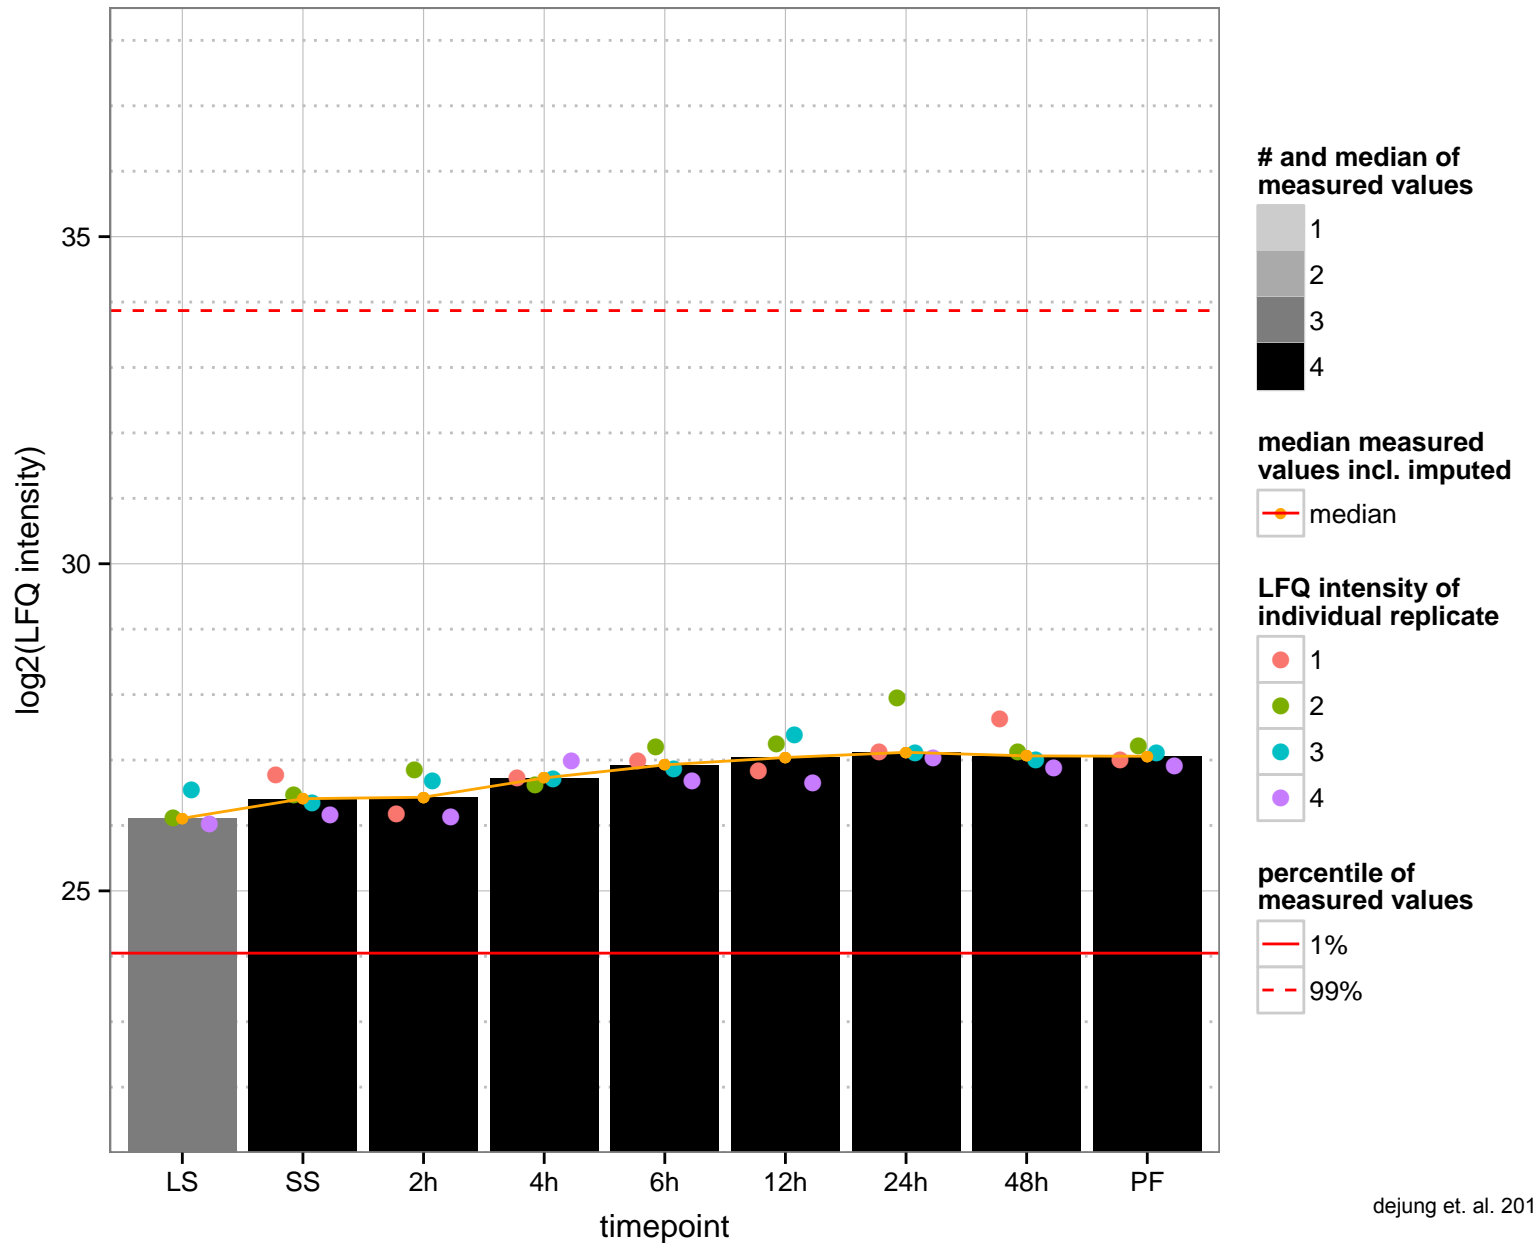

replication factor C, subunit 2, putative

Tb927.6.3890

AGOF: ATP binding, DNA binding, DNA clamp loader activity

AGOC: DNA replication factor C complex

AGOP: DNA replication

PGOF: ATP binding, DNA binding, nucleoside-triphosphatase activity, nucleotide binding

PGOC: null

PGOP: DNA replication

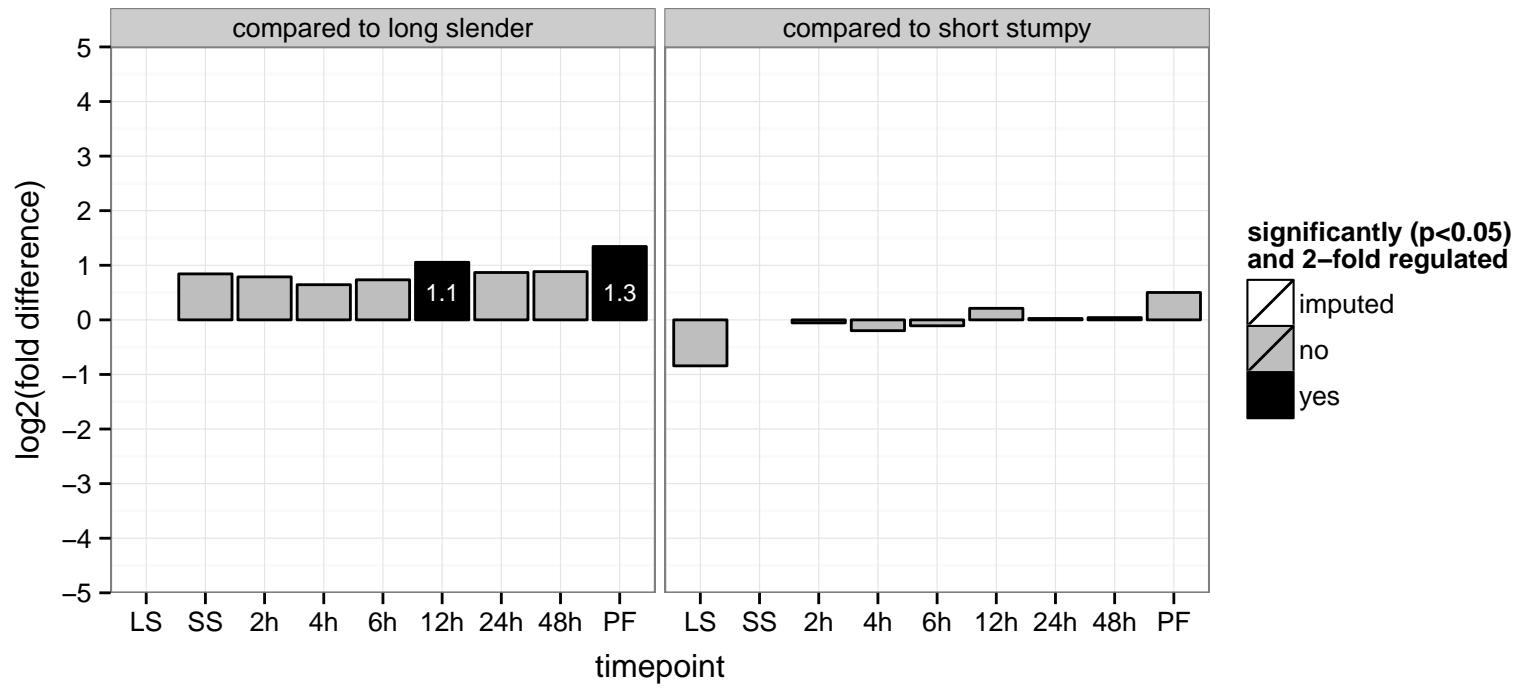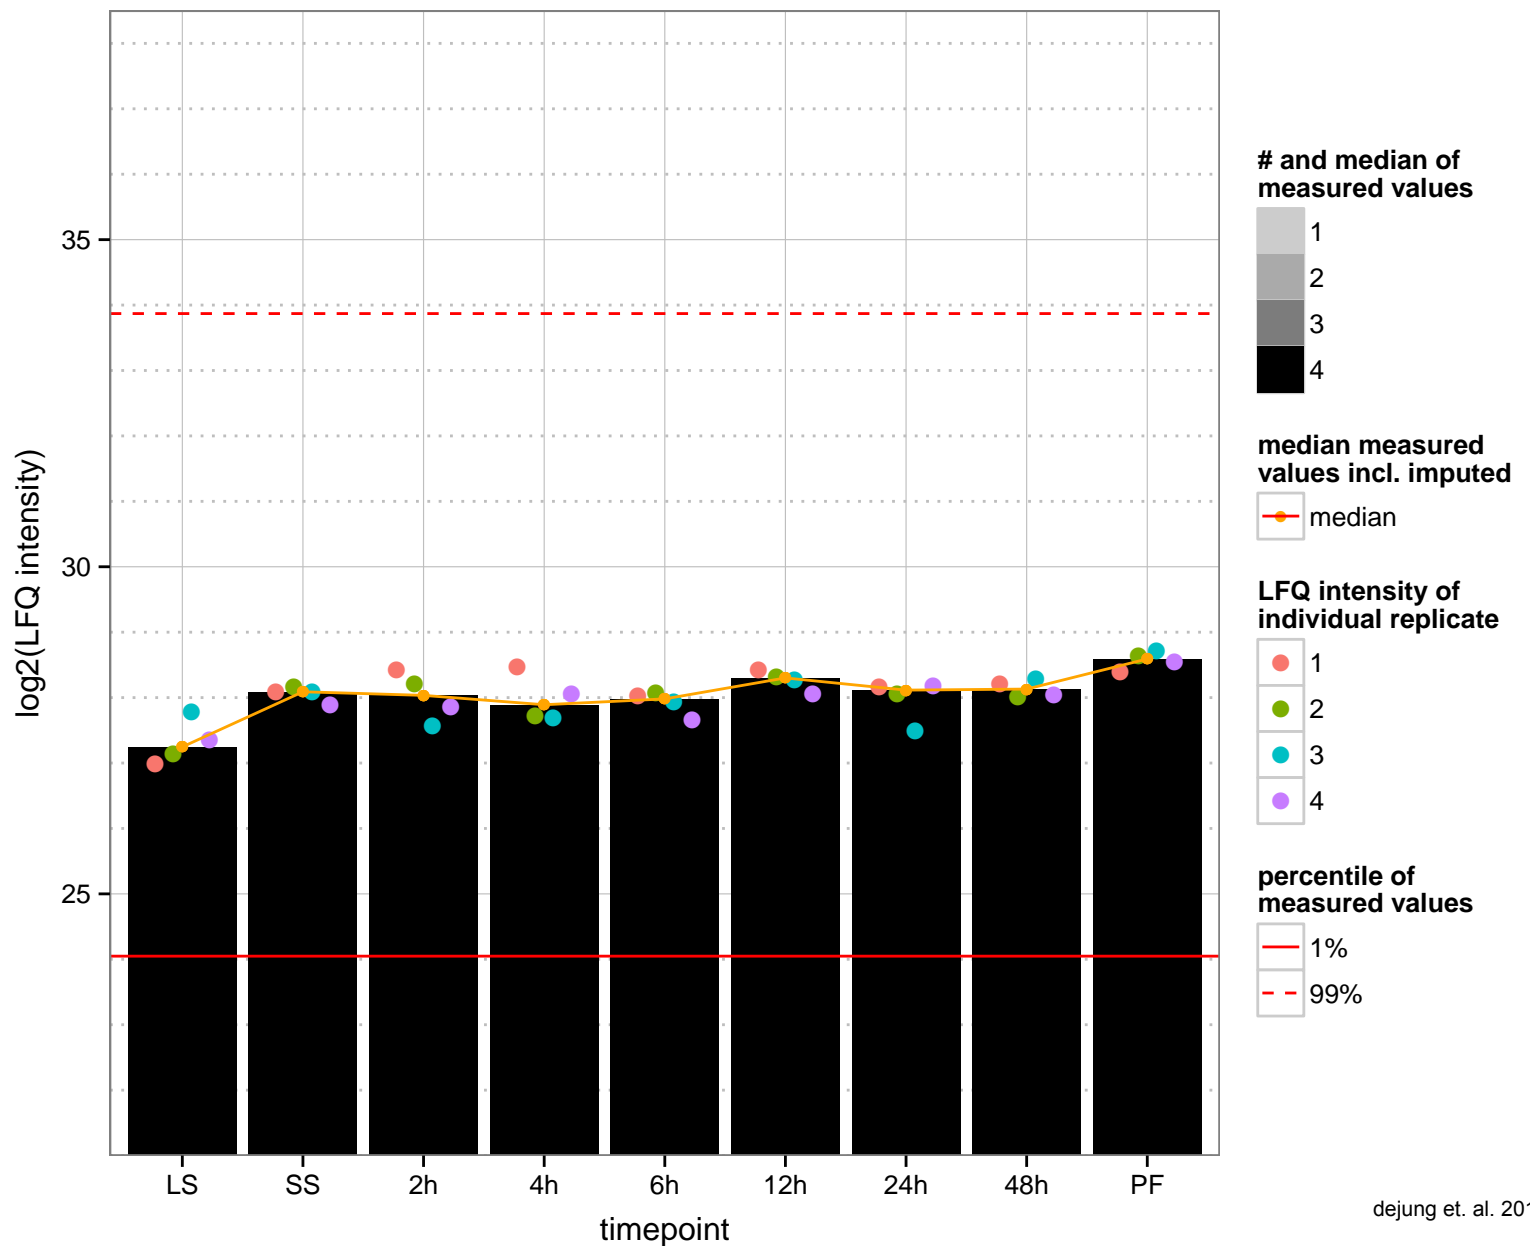

small glutamine-rich tetratricopeptide repeat protein, putative, putative (SGT)

Tb927.6.4000

AGOF: chaperone binding

AGOC: cytosol

AGOP: null

PGOF: protein binding

PGOC: null

PGOP: null

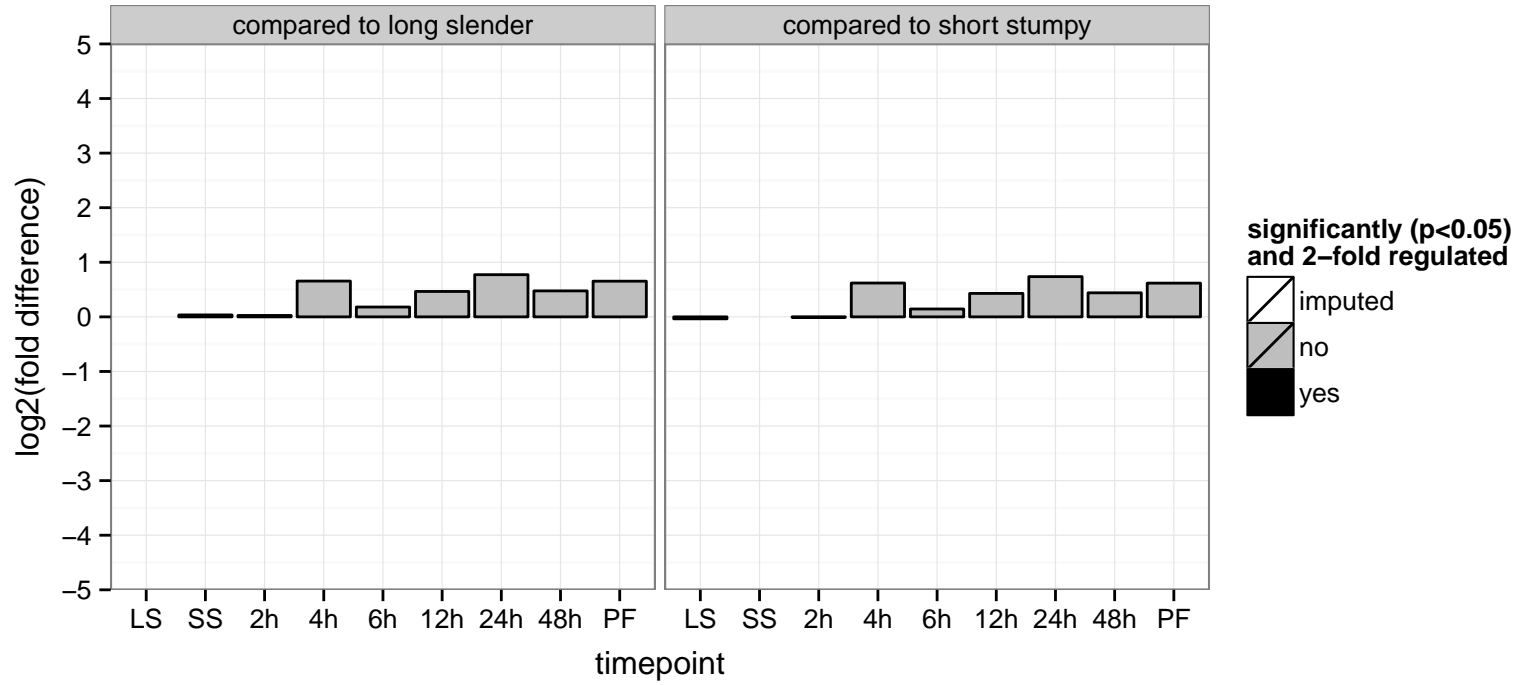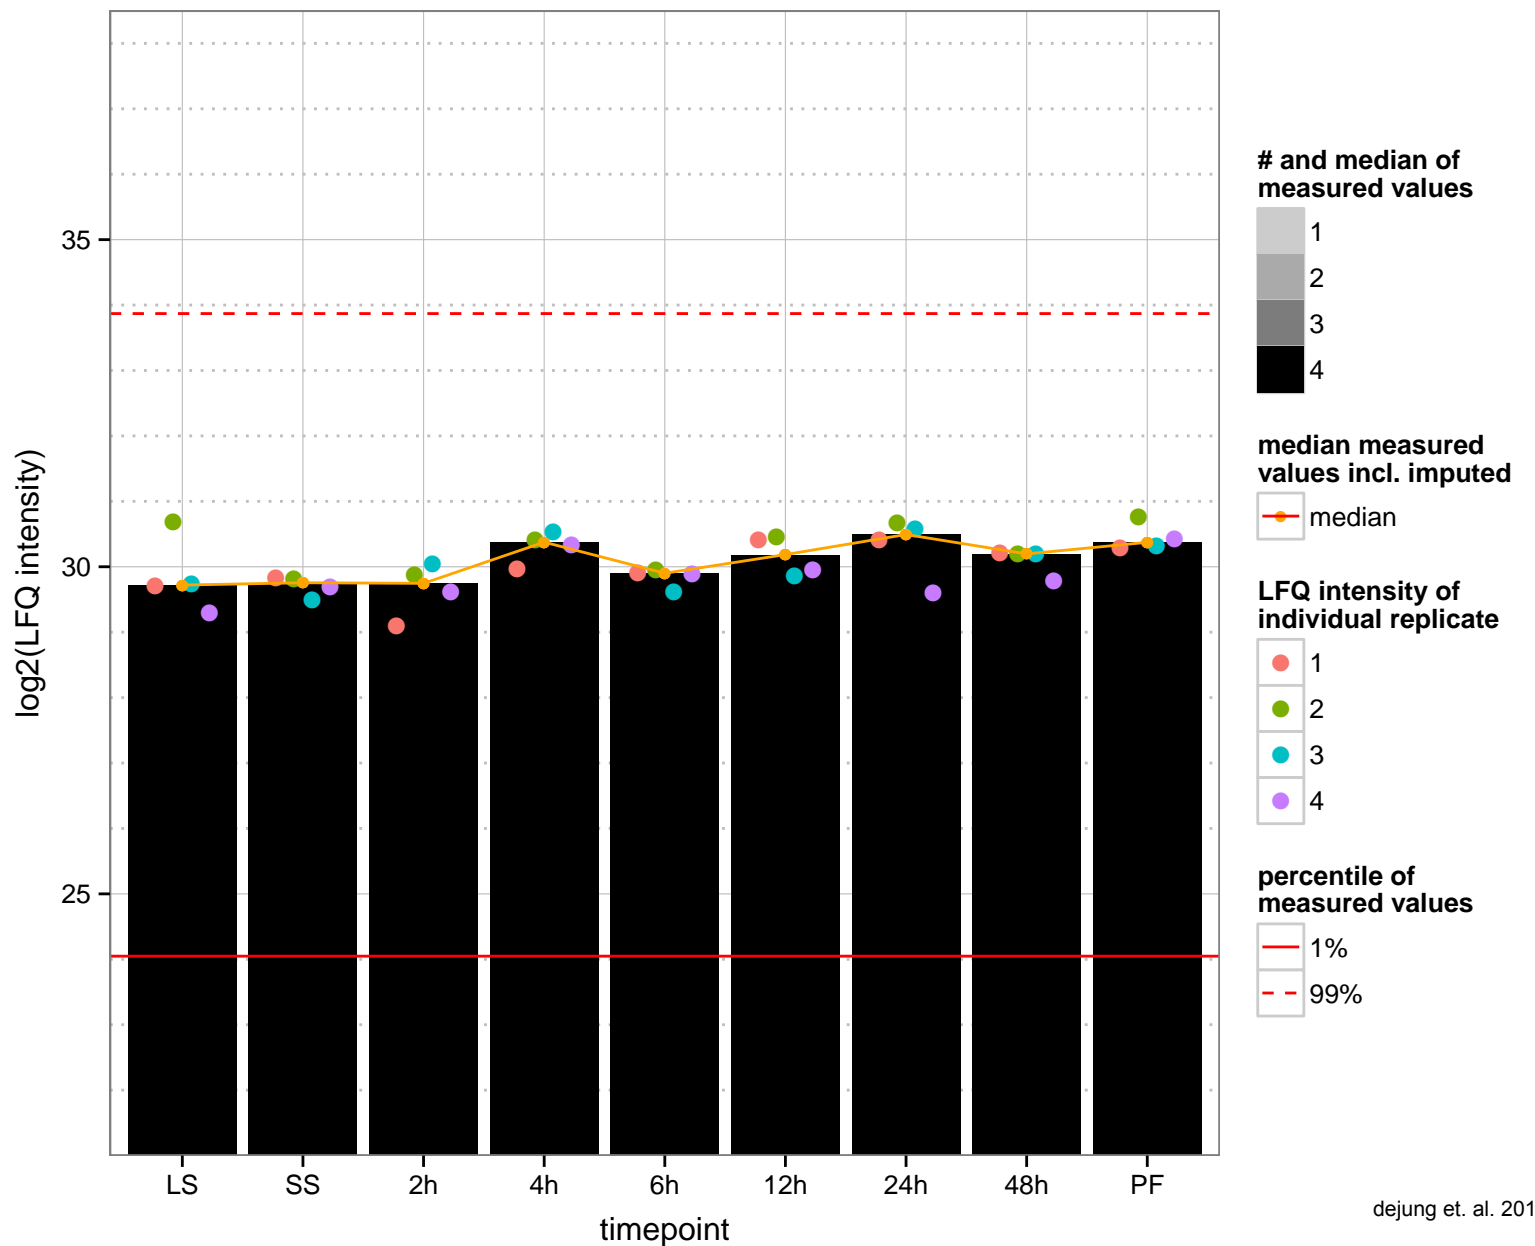

hypothetical protein, conserved  
 Tb927.6.4020  
 AGOF: null  
 AGOC: null  
 AGOP: null  
 PGO: null  
 PGOC: null  
 PGOP: null

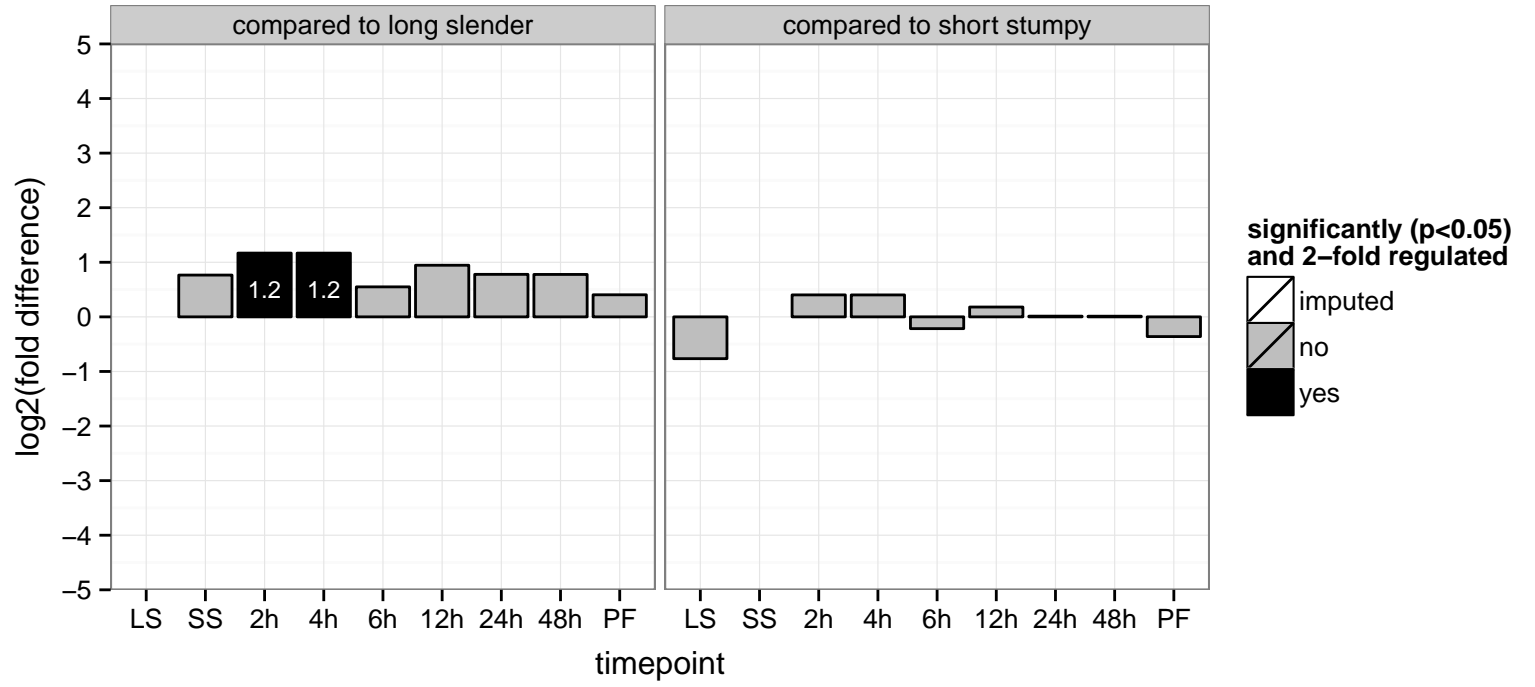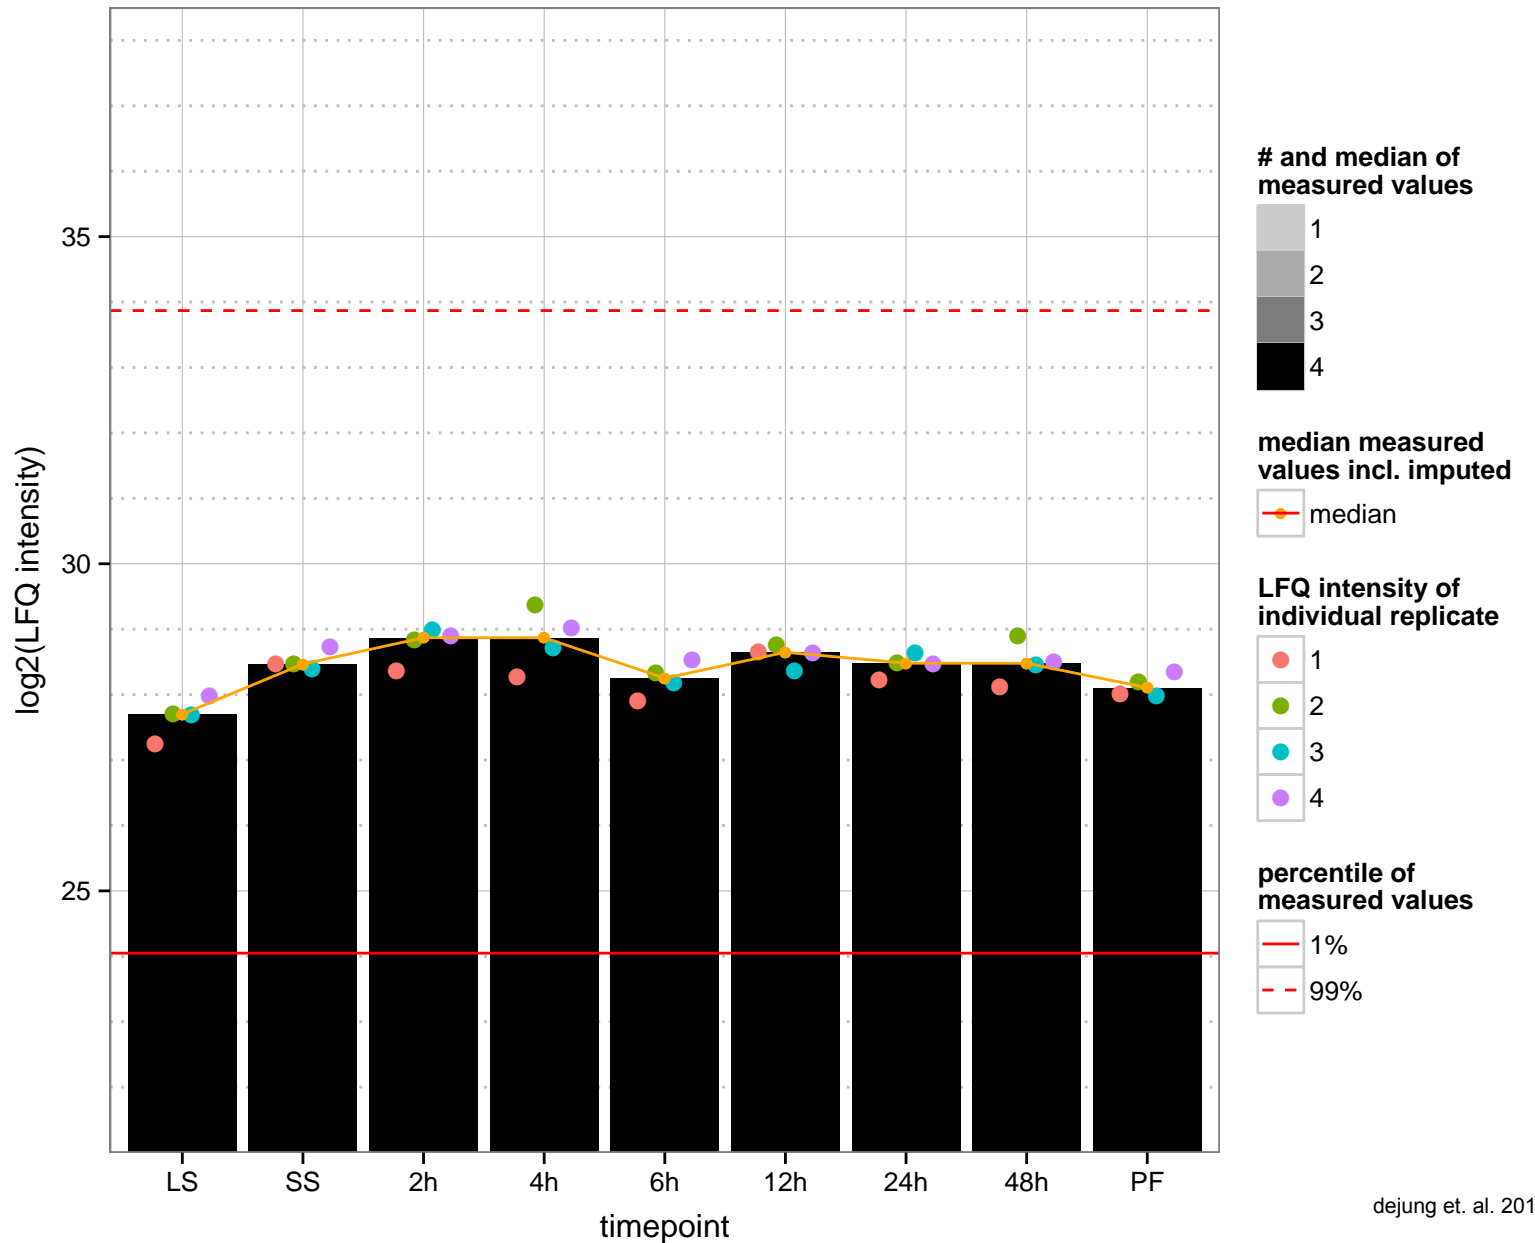

chaperonin HSP60, mitochondrial precursor, putative (HSP60)  
 Tb927.6.4090  
 AGOF: ATP binding  
 AGOC: null  
 AGOP: cellular protein metabolic process  
 PGOF: ATP binding  
 PGO: null  
 PGOP: cellular protein metabolic process

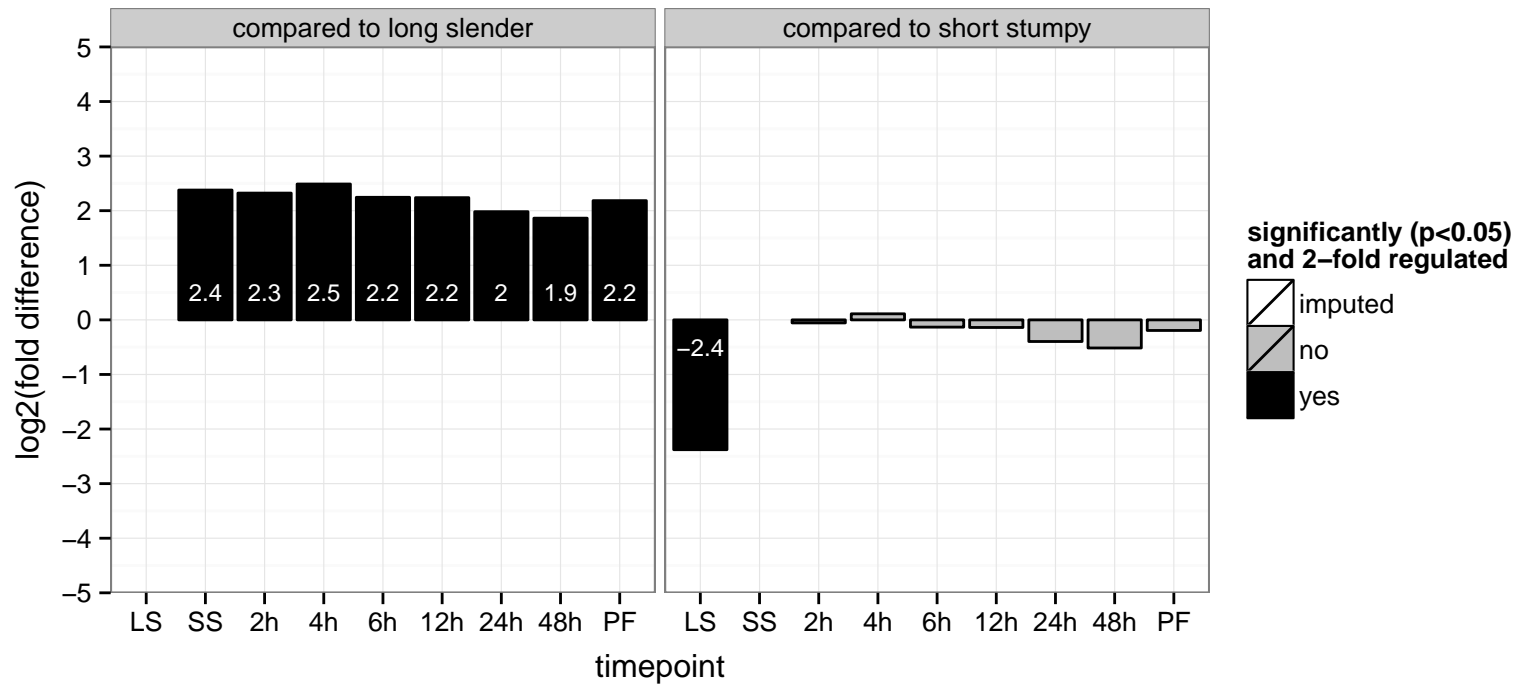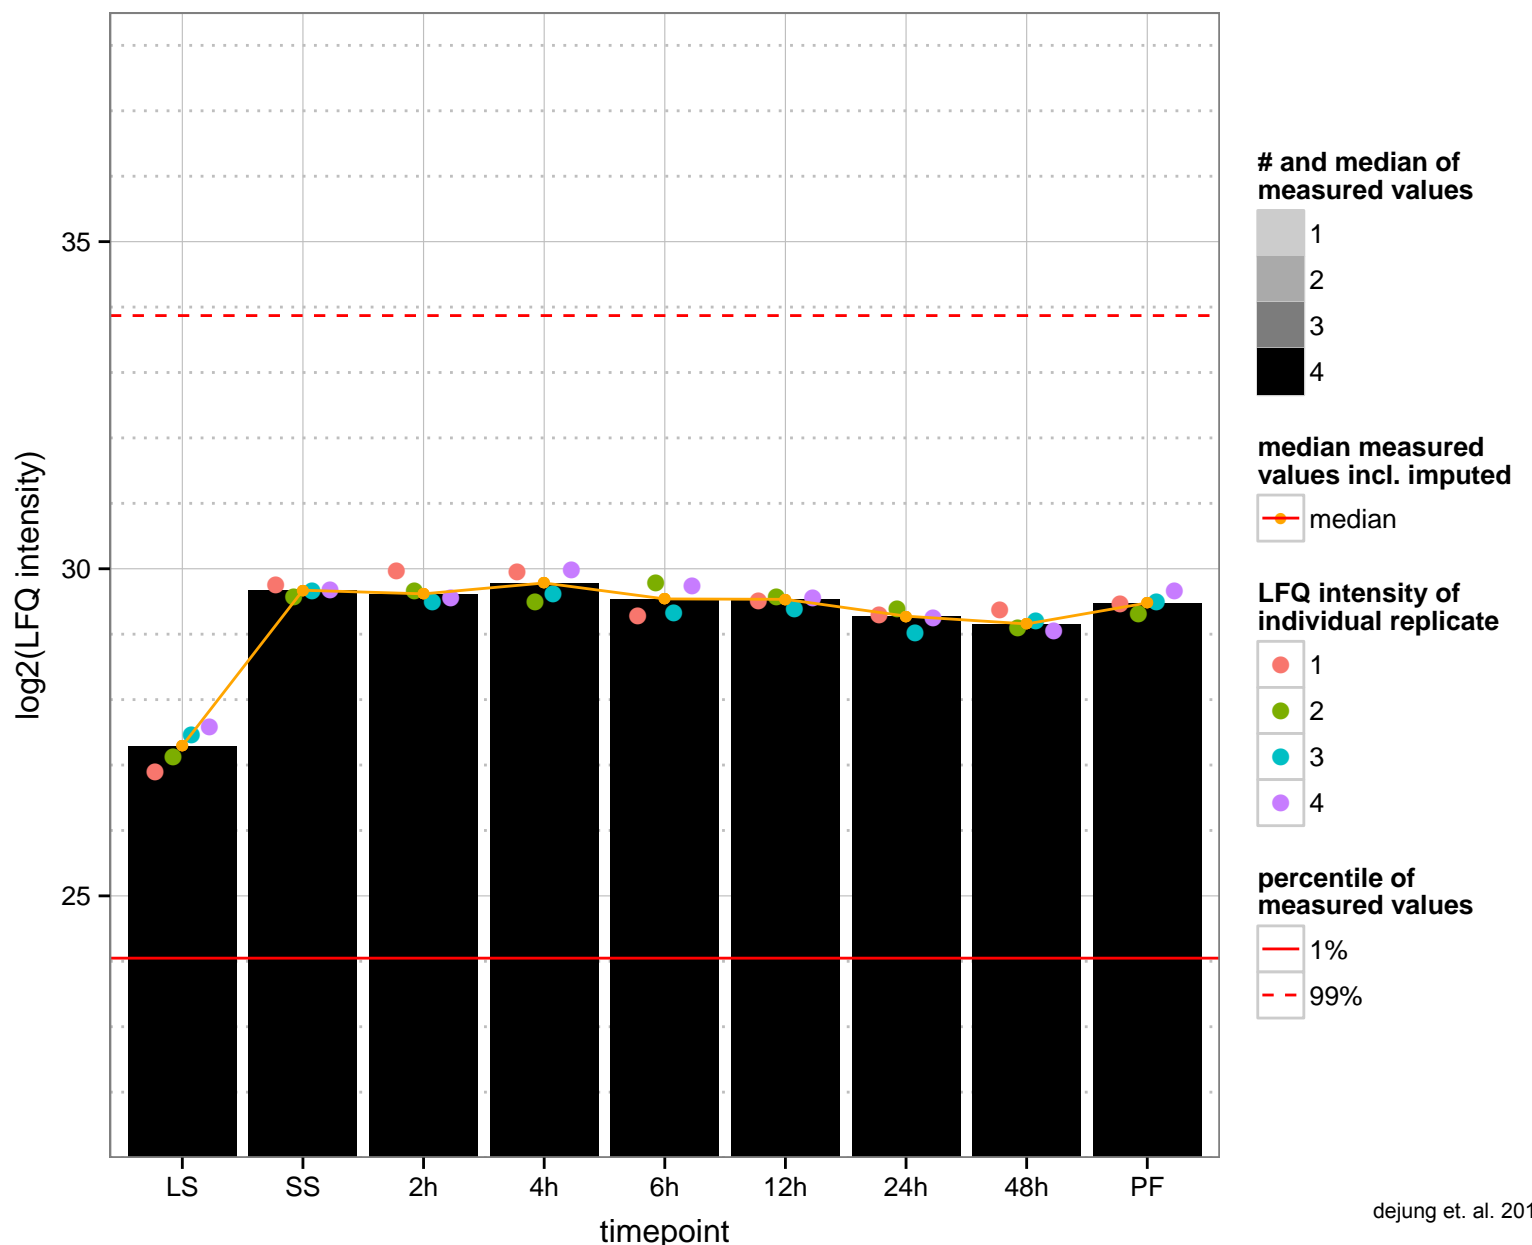

GTPase activating protein, putative  
 Tb927.6.4120  
 AGOF: Rab GTPase activator activity  
 AGOC: intracellular  
 AGOP: regulation of Rab GTPase activity  
 PGO: Rab GTPase activator activity  
 PGO: intracellular  
 PGO: regulation of Rab GTPase activity

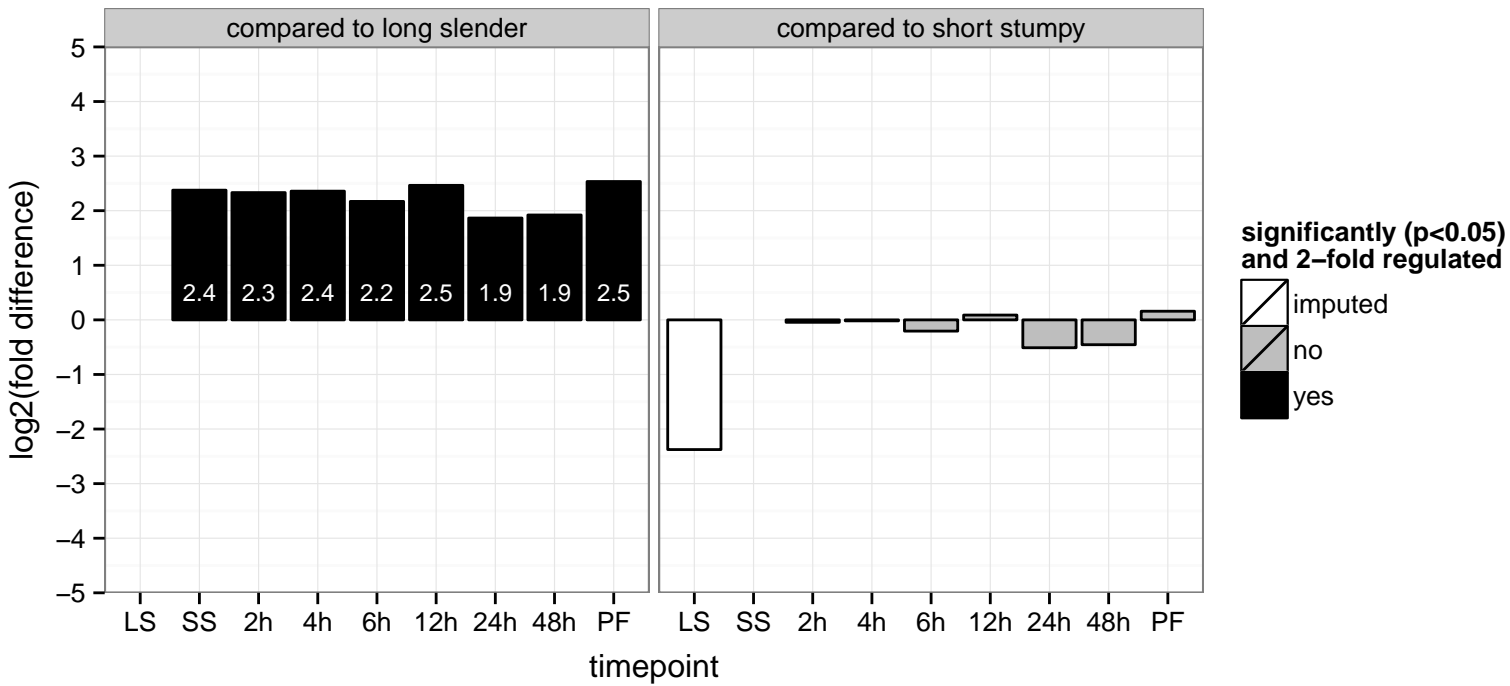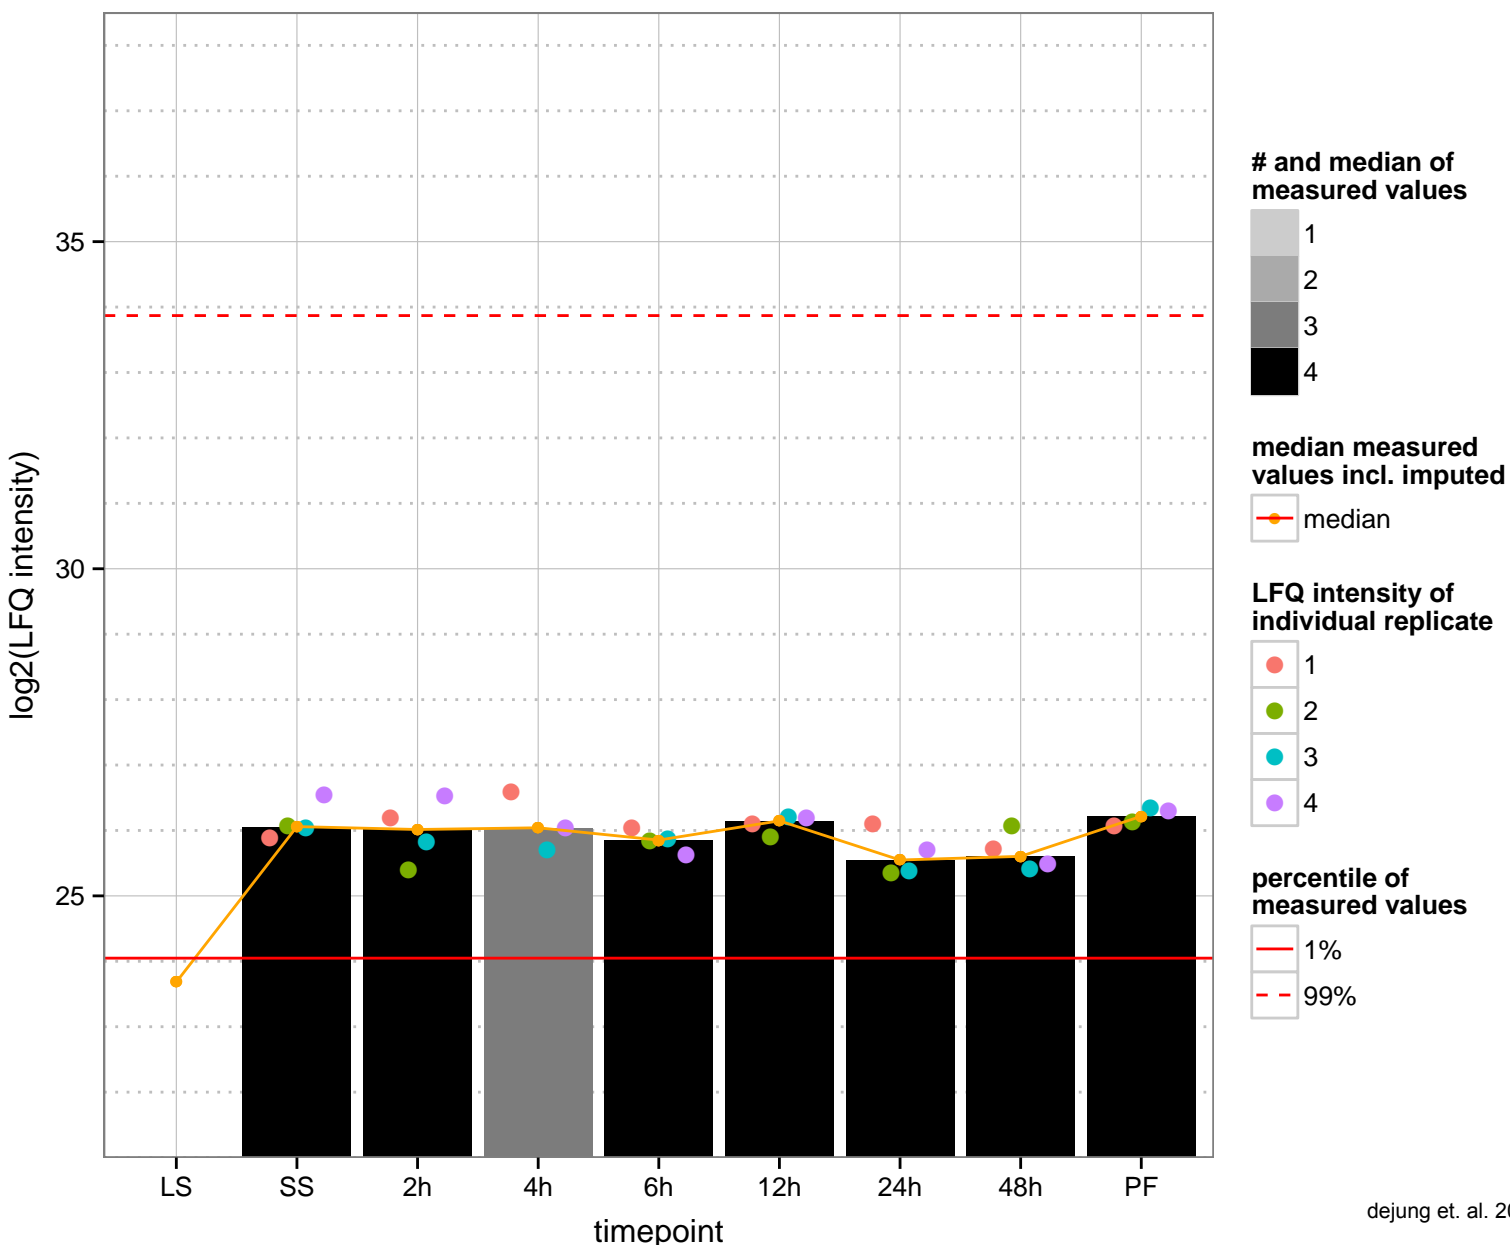



paraflagellar rod component, putative (PFC4)  
 Tb927.6.4140  
 AGOF: null  
 AGOC: null  
 AGOP: null  
 PGO: null  
 PGOC: null  
 PGOP: null

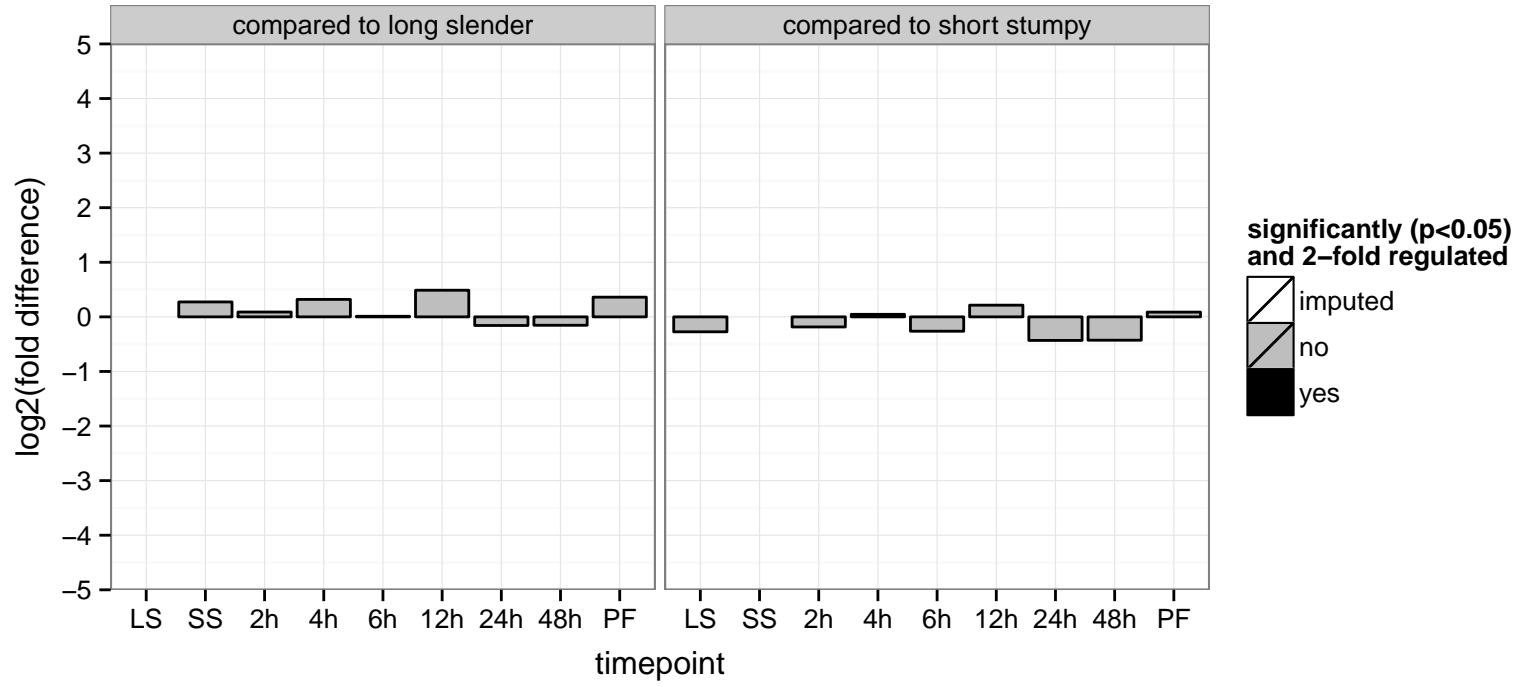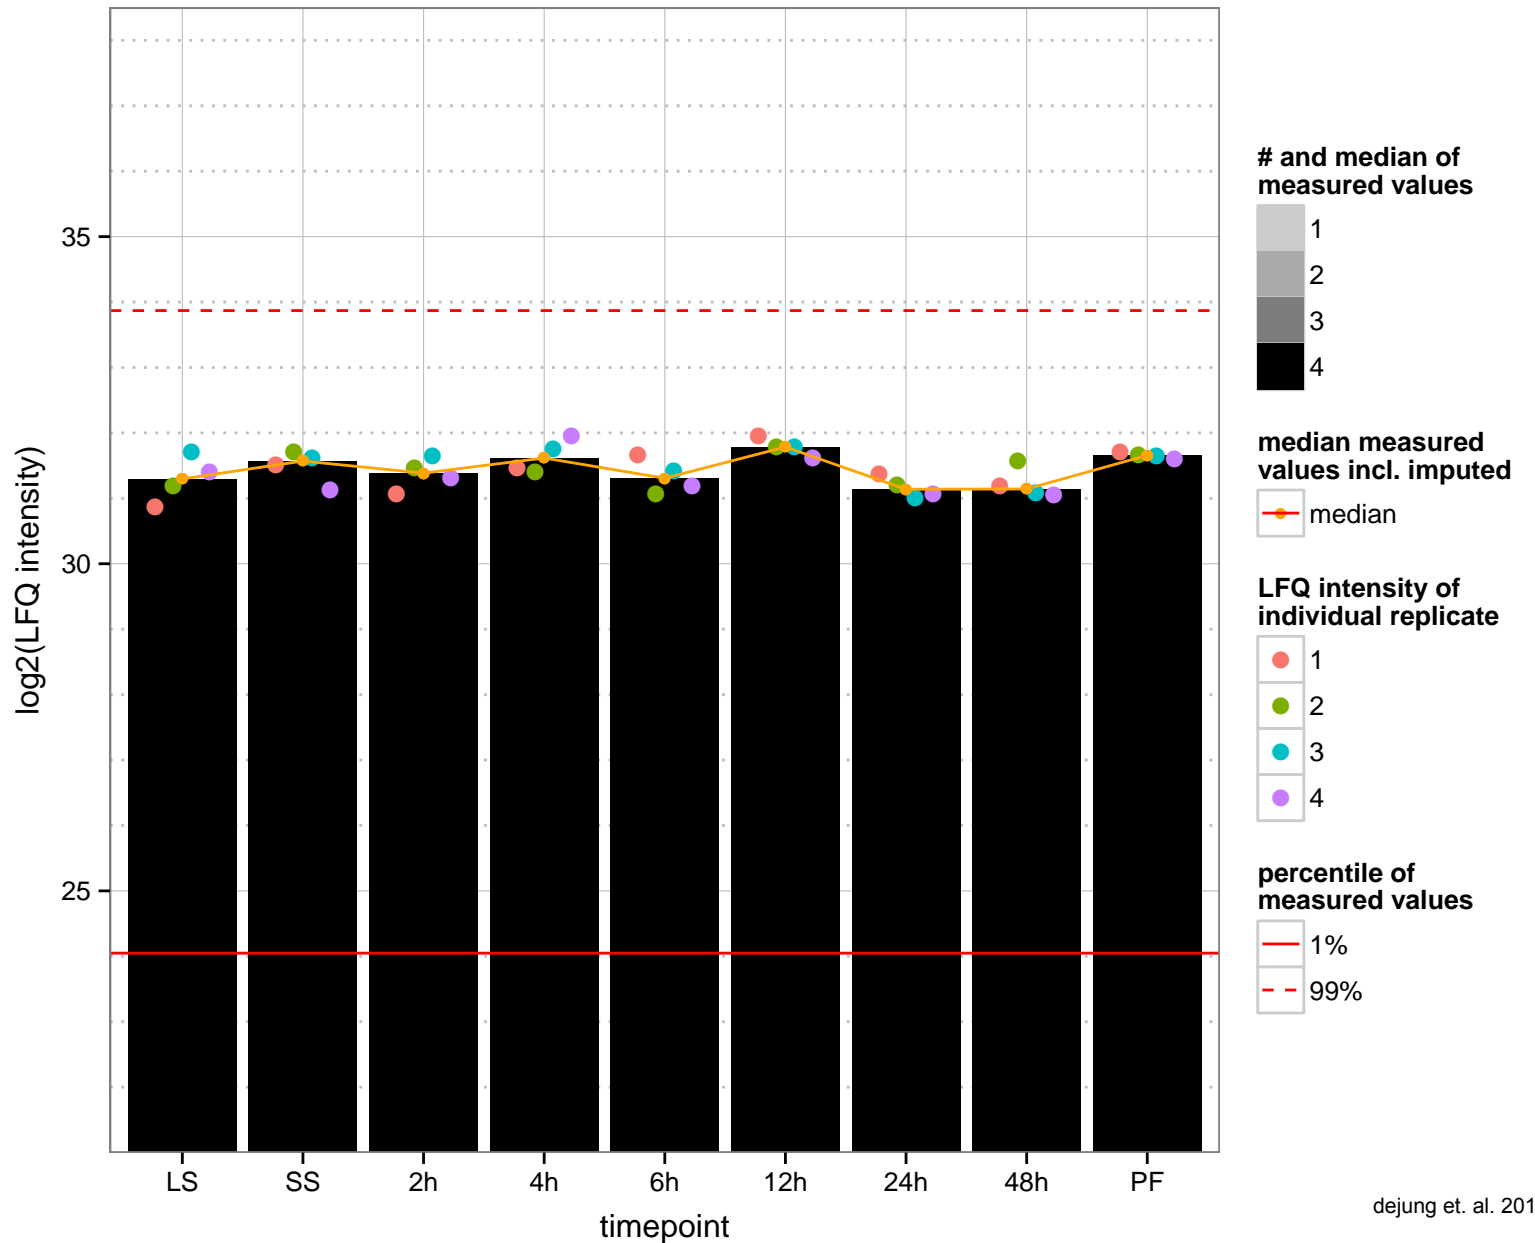

aldehyde dehydrogenase, putative (ALDH)  
 Tb927.6.4210  
 AGOF: oxidoreductase activity  
 AGOC: mitochondrial inner membrane  
 AGOP: metabolic process  
 PGO: oxidoreductase activity  
 PGO: null  
 PGOP: metabolic process, oxidation-reduction process

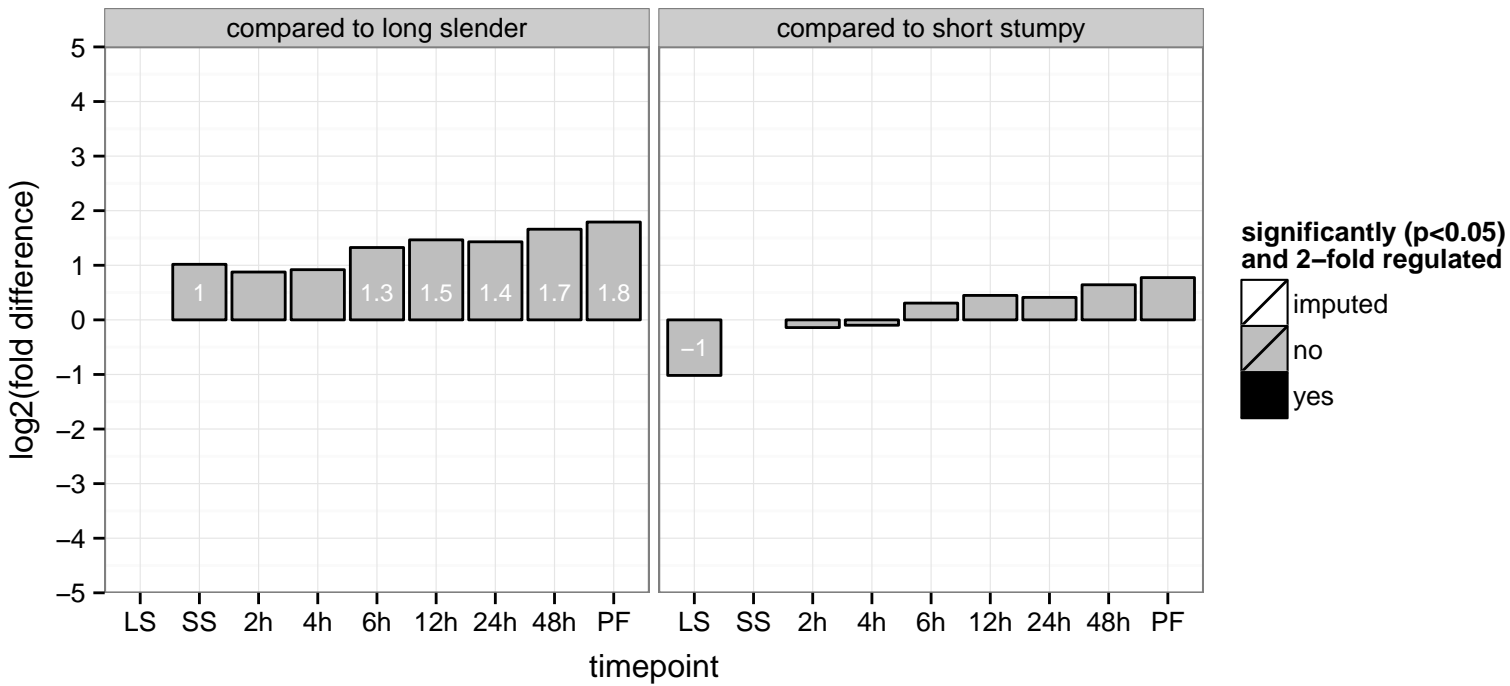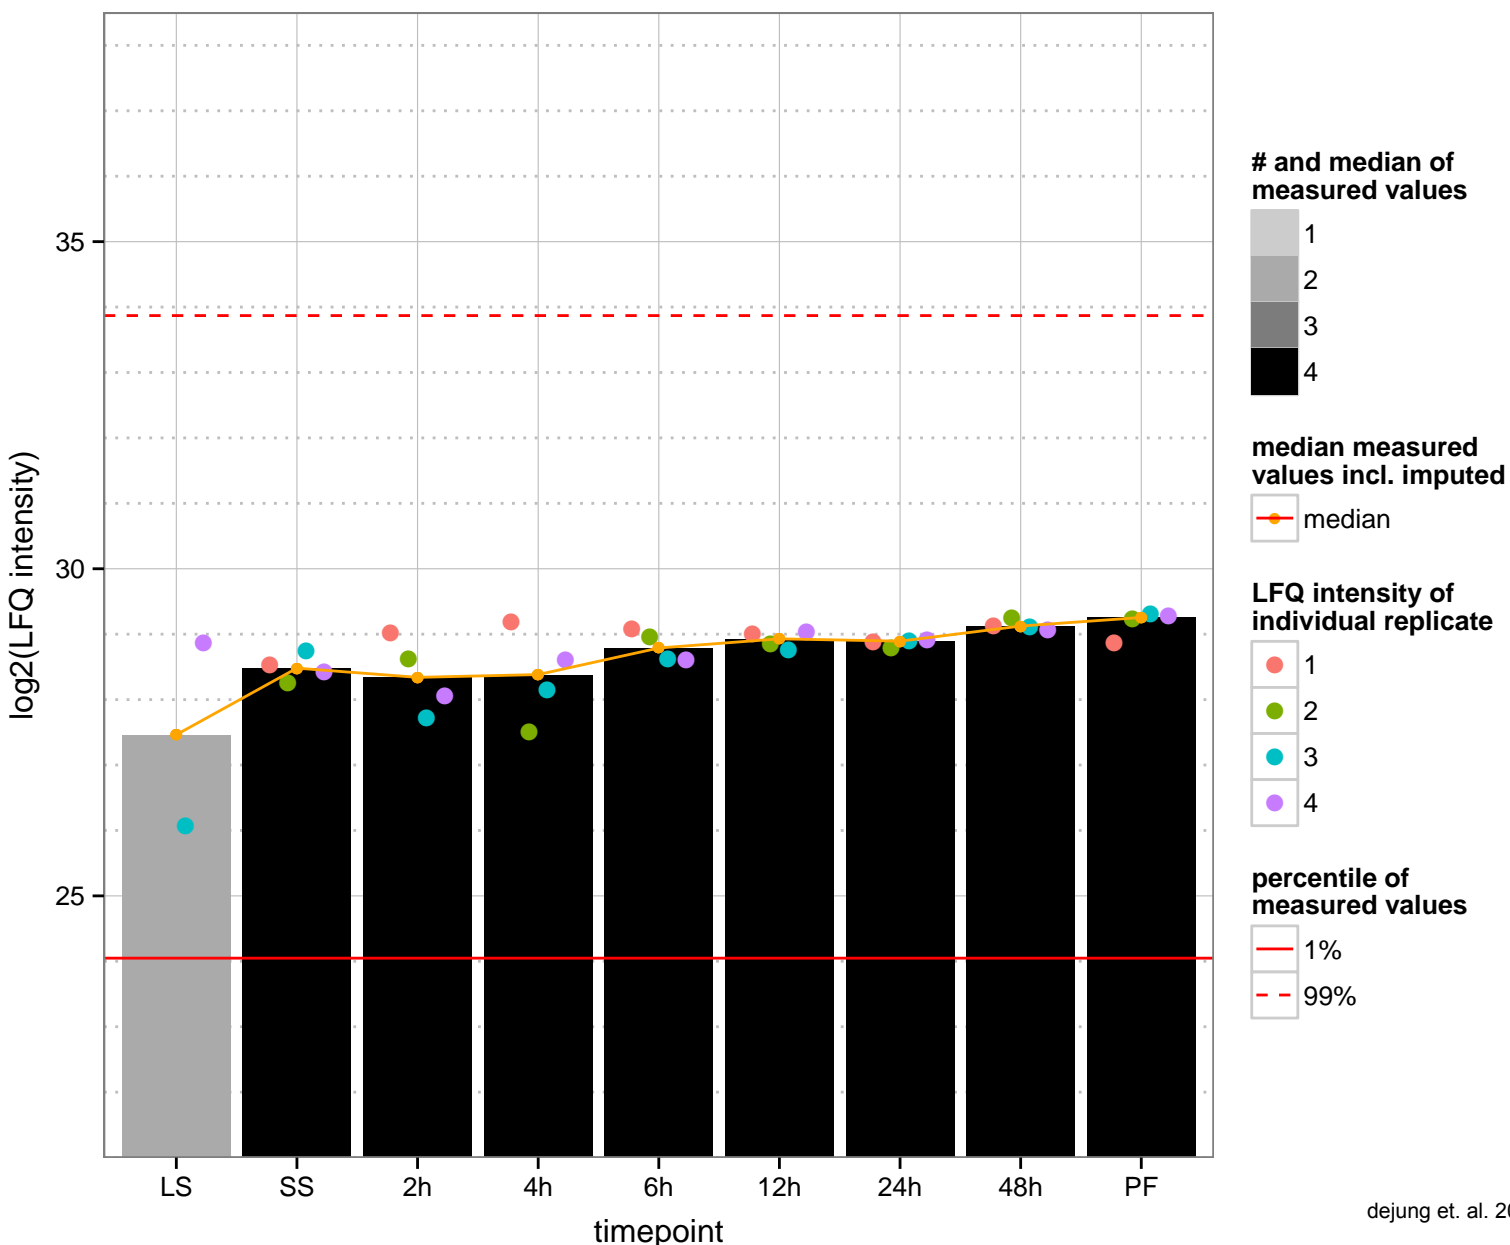

hypothetical protein, conserved  
 Tb927.6.4260  
 AGOF: null  
 AGOC: null  
 AGOP: null  
 PGOF: null  
 PGO: null  
 PGOP: null

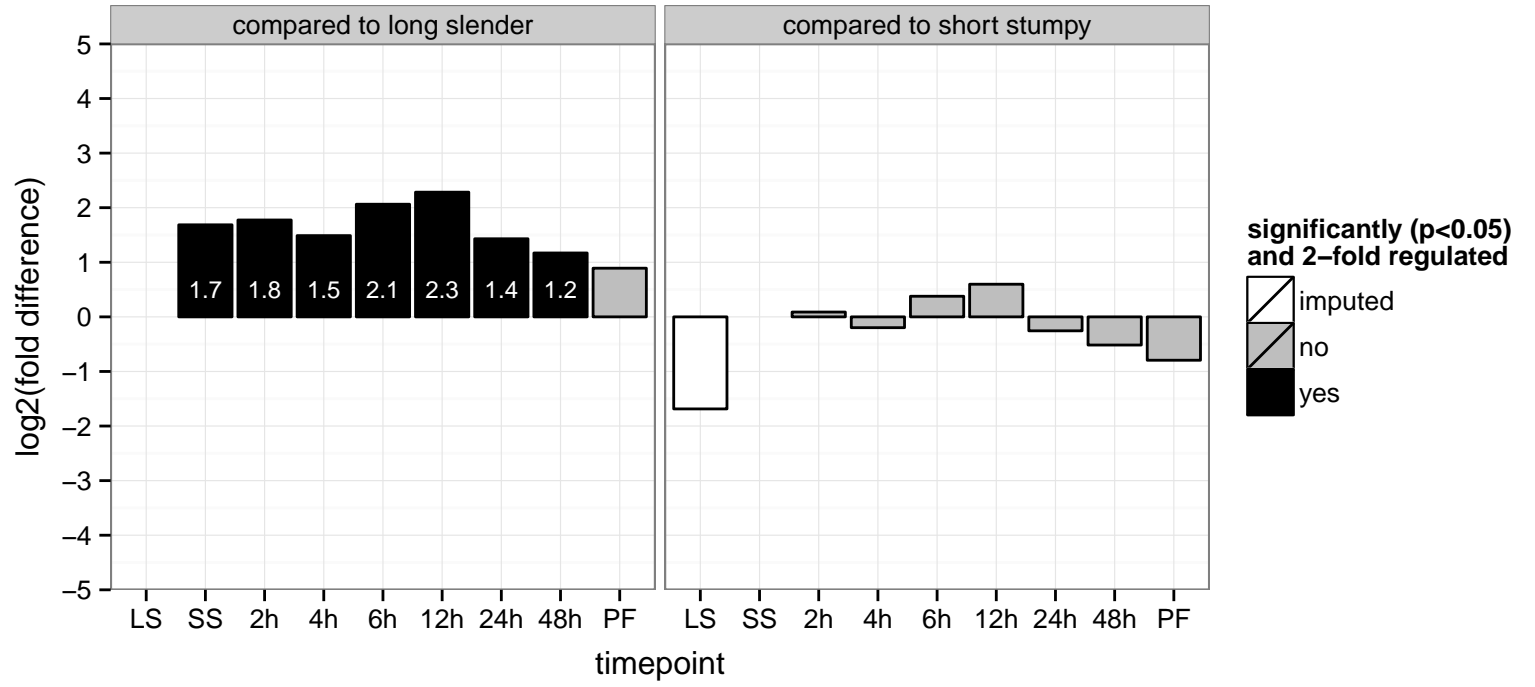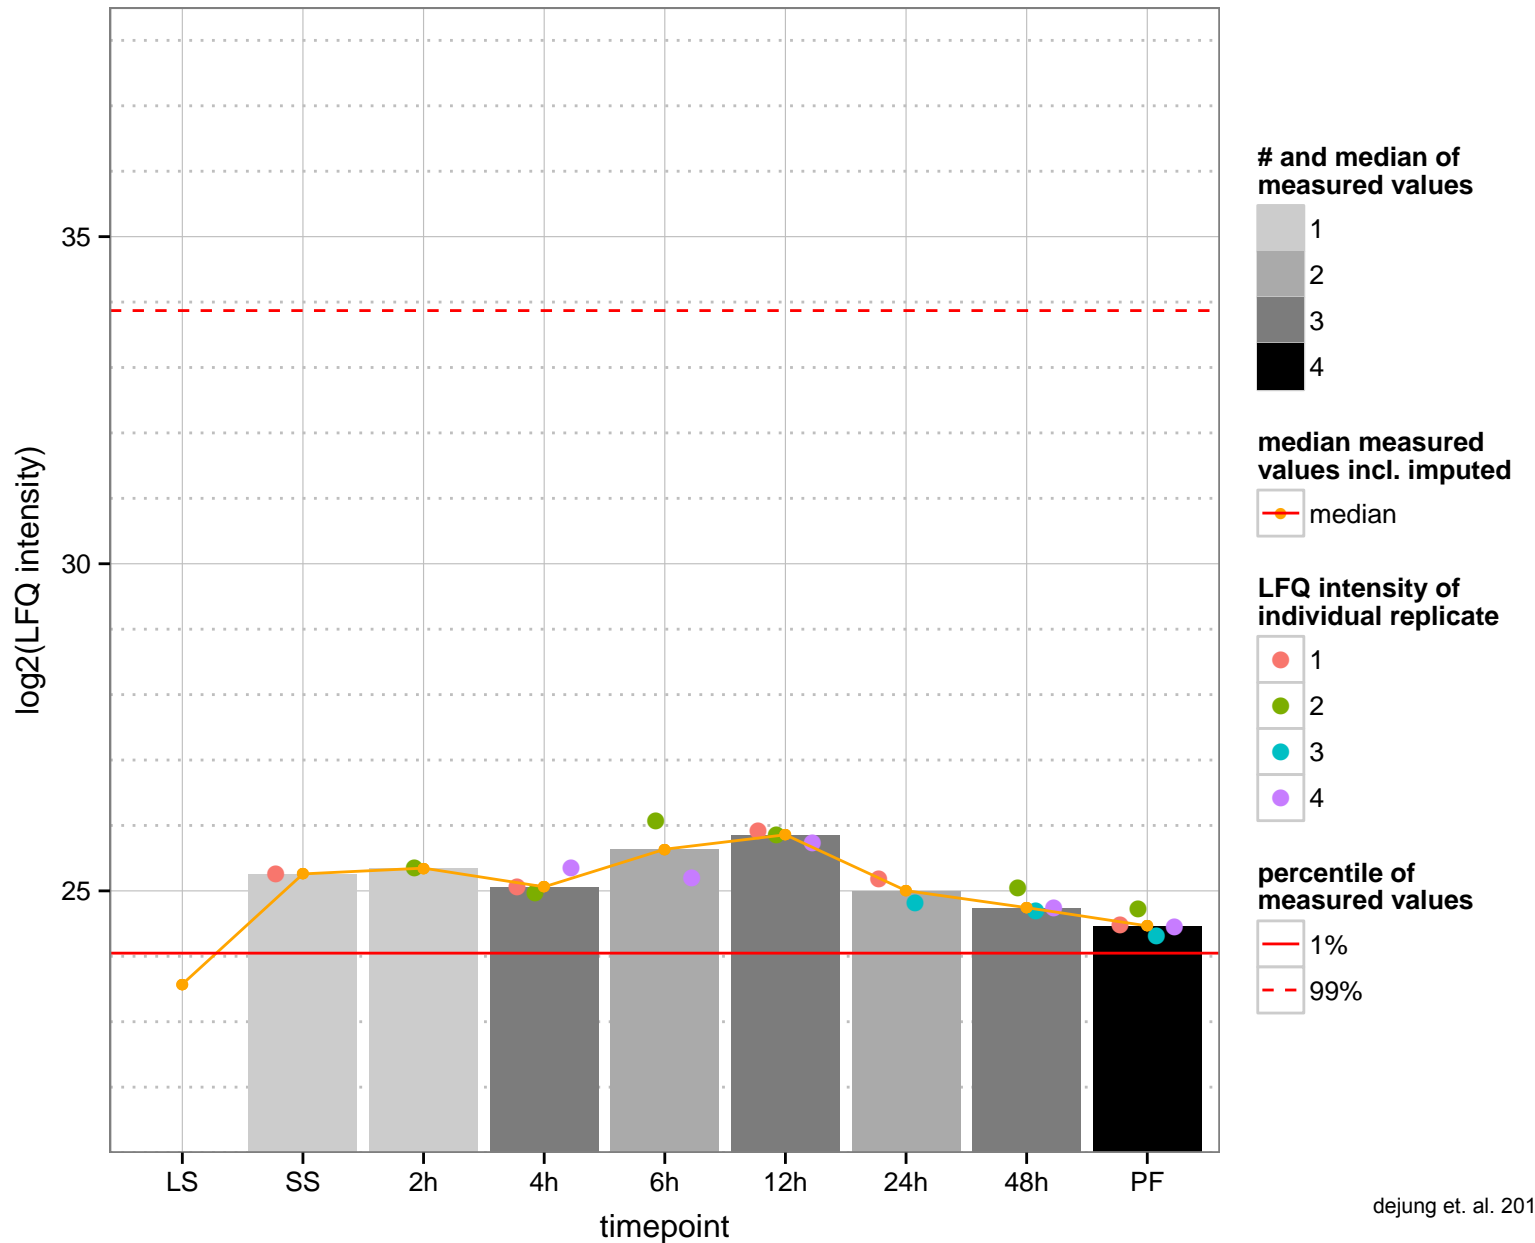

hypothetical protein, conserved  
 Tb927.6.4320  
 AGOF: null  
 AGOC: null  
 AGOP: null  
 PGO: null  
 PGOC: null  
 PGOP: null

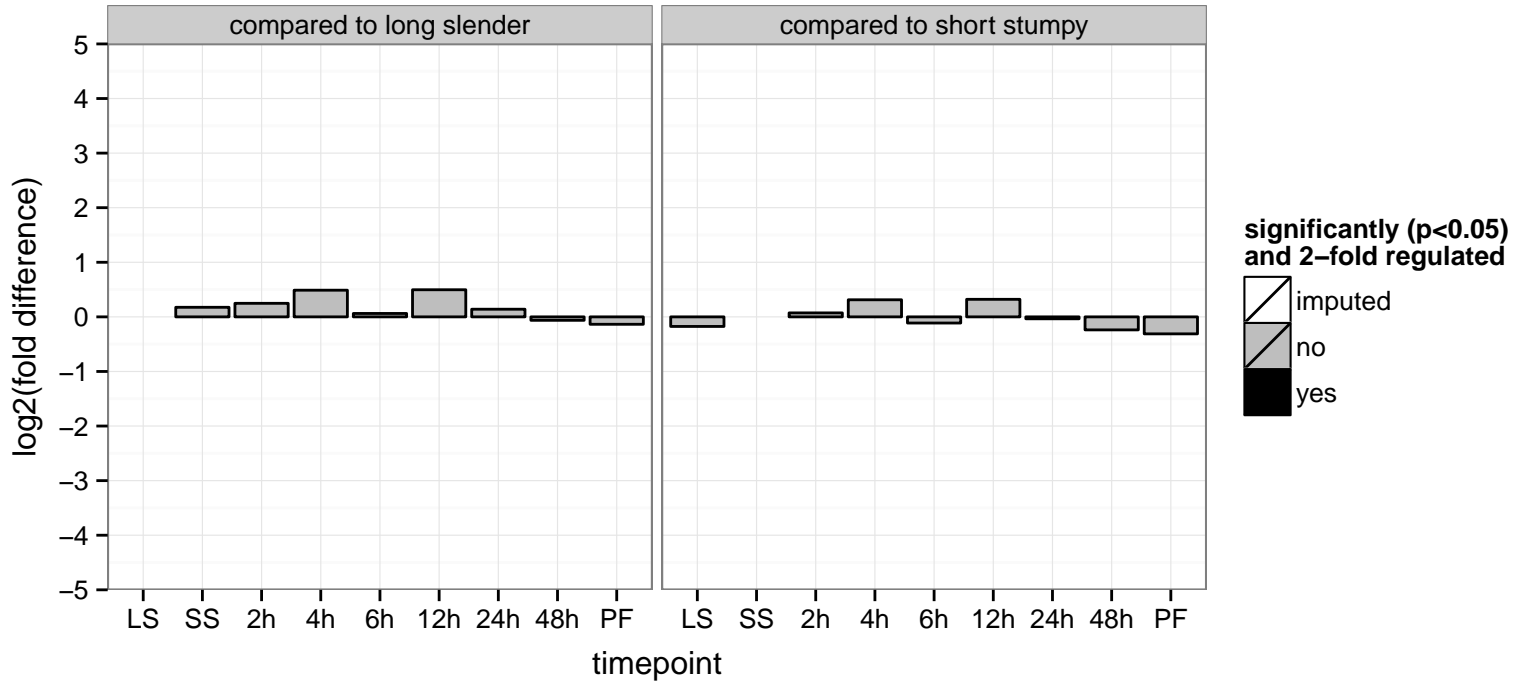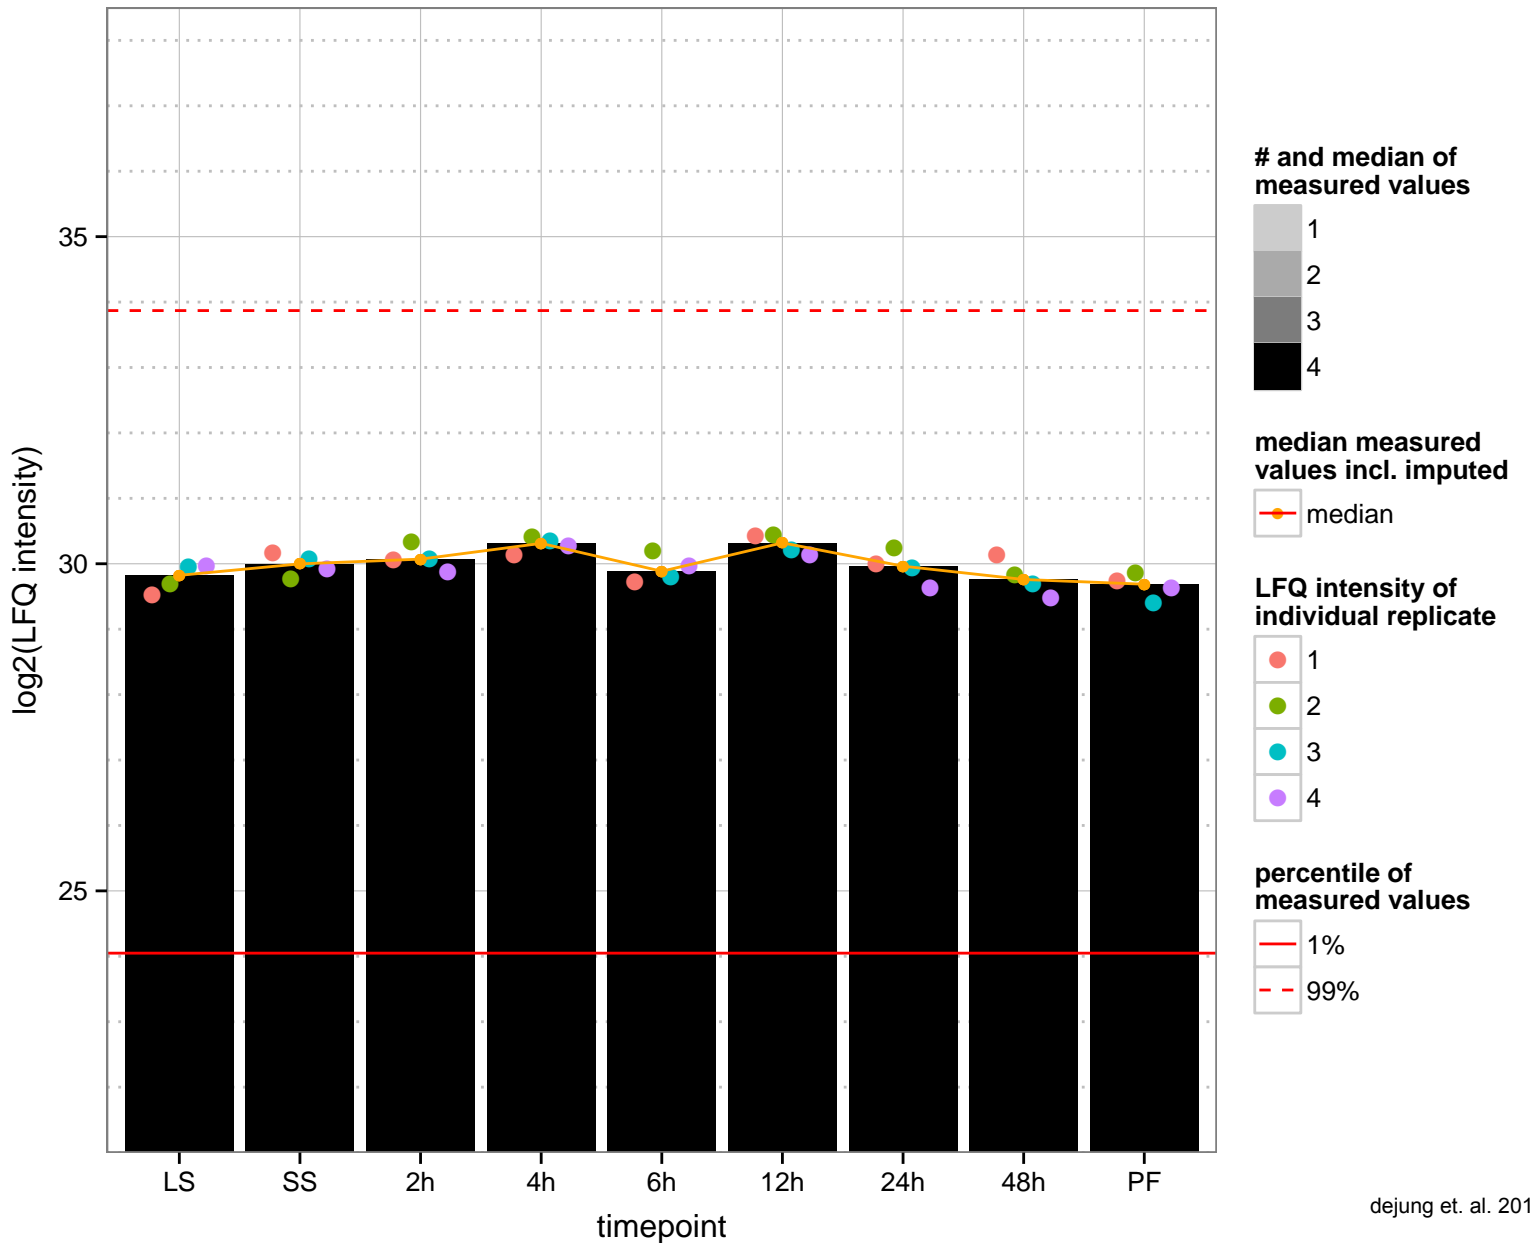

U6 snRNA-associated Sm-like protein LSm5p (TbLSm5)  
 Tb927.6.4340  
 AGOF: U6 snRNA 3'-end binding  
 AGOC: nucleus  
 AGOP: nuclear mRNA splicing, via spliceosome  
 PGO: null  
 PGOC: null  
 PGOP: null

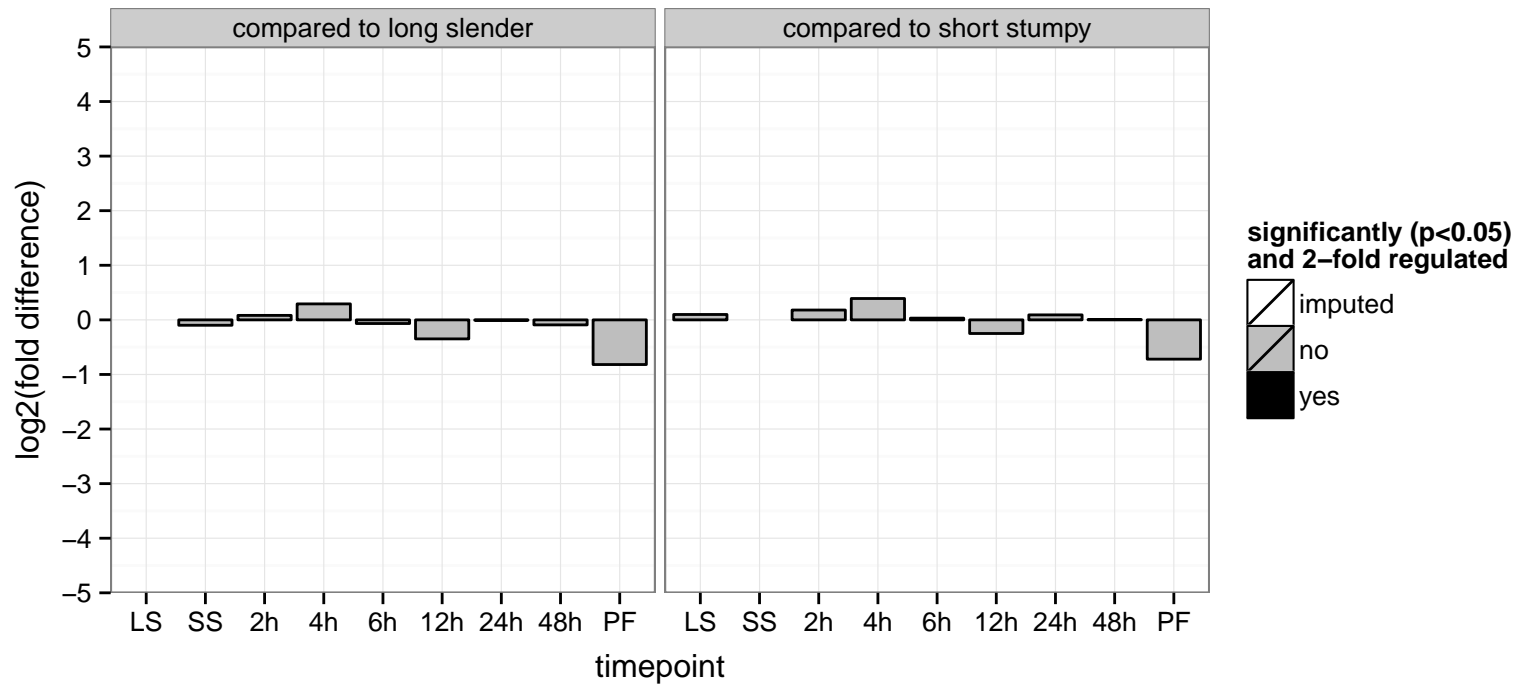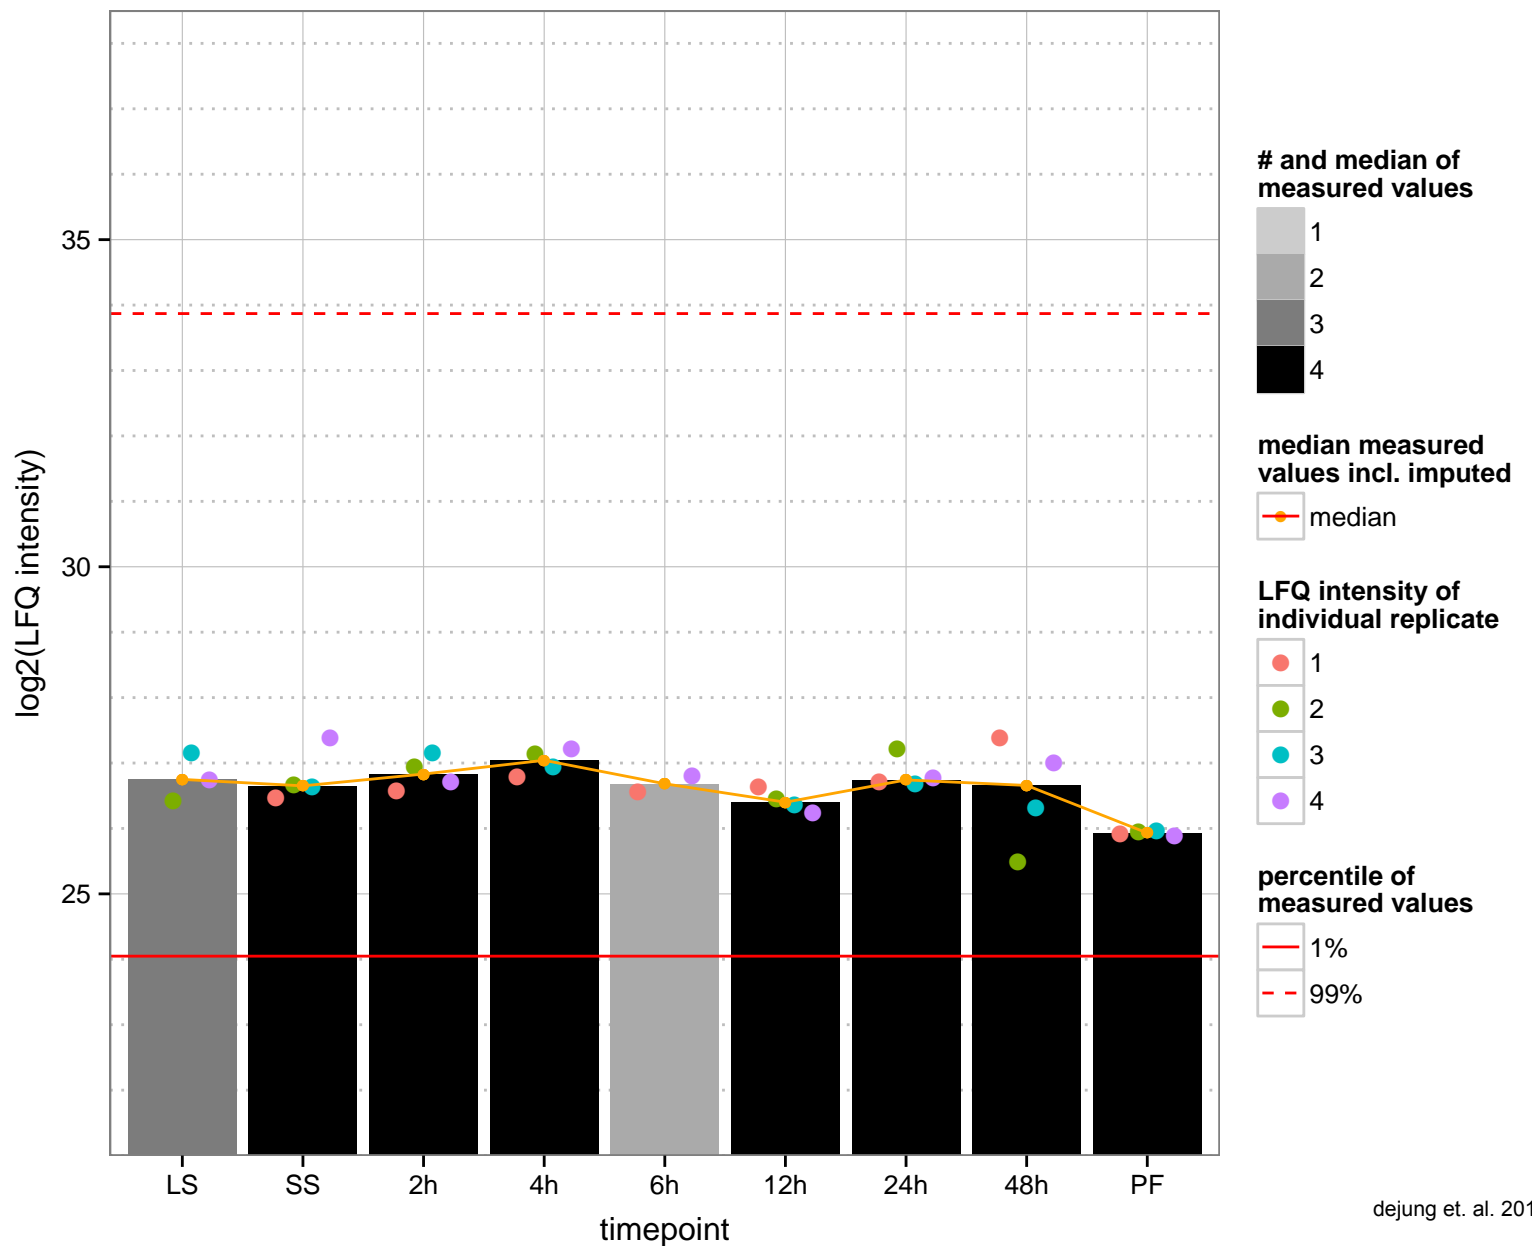

ribosomal RNA assembly protein, putative  
 Tb927.6.4350  
 AGOF: null  
 AGOC: null  
 AGOP: null  
 PGO: null  
 PGOC: null  
 PGOP: null

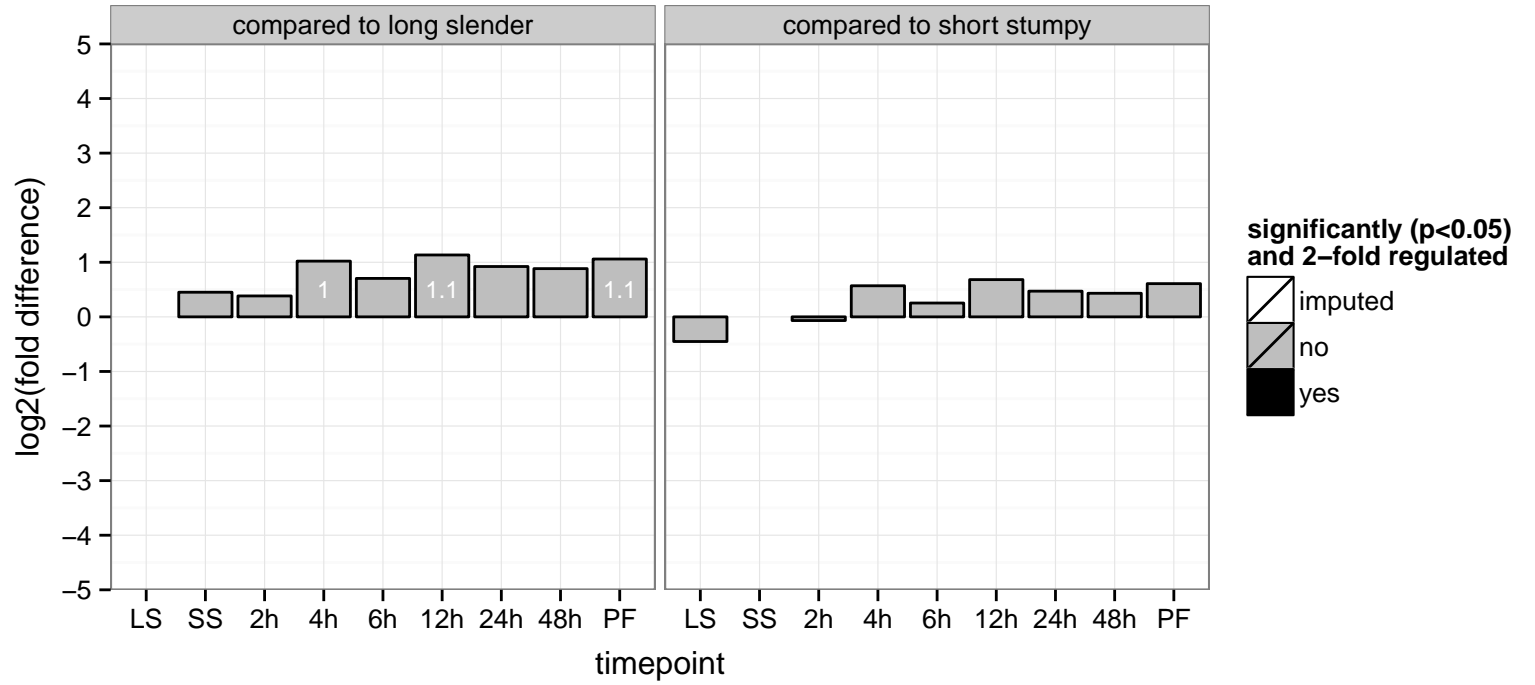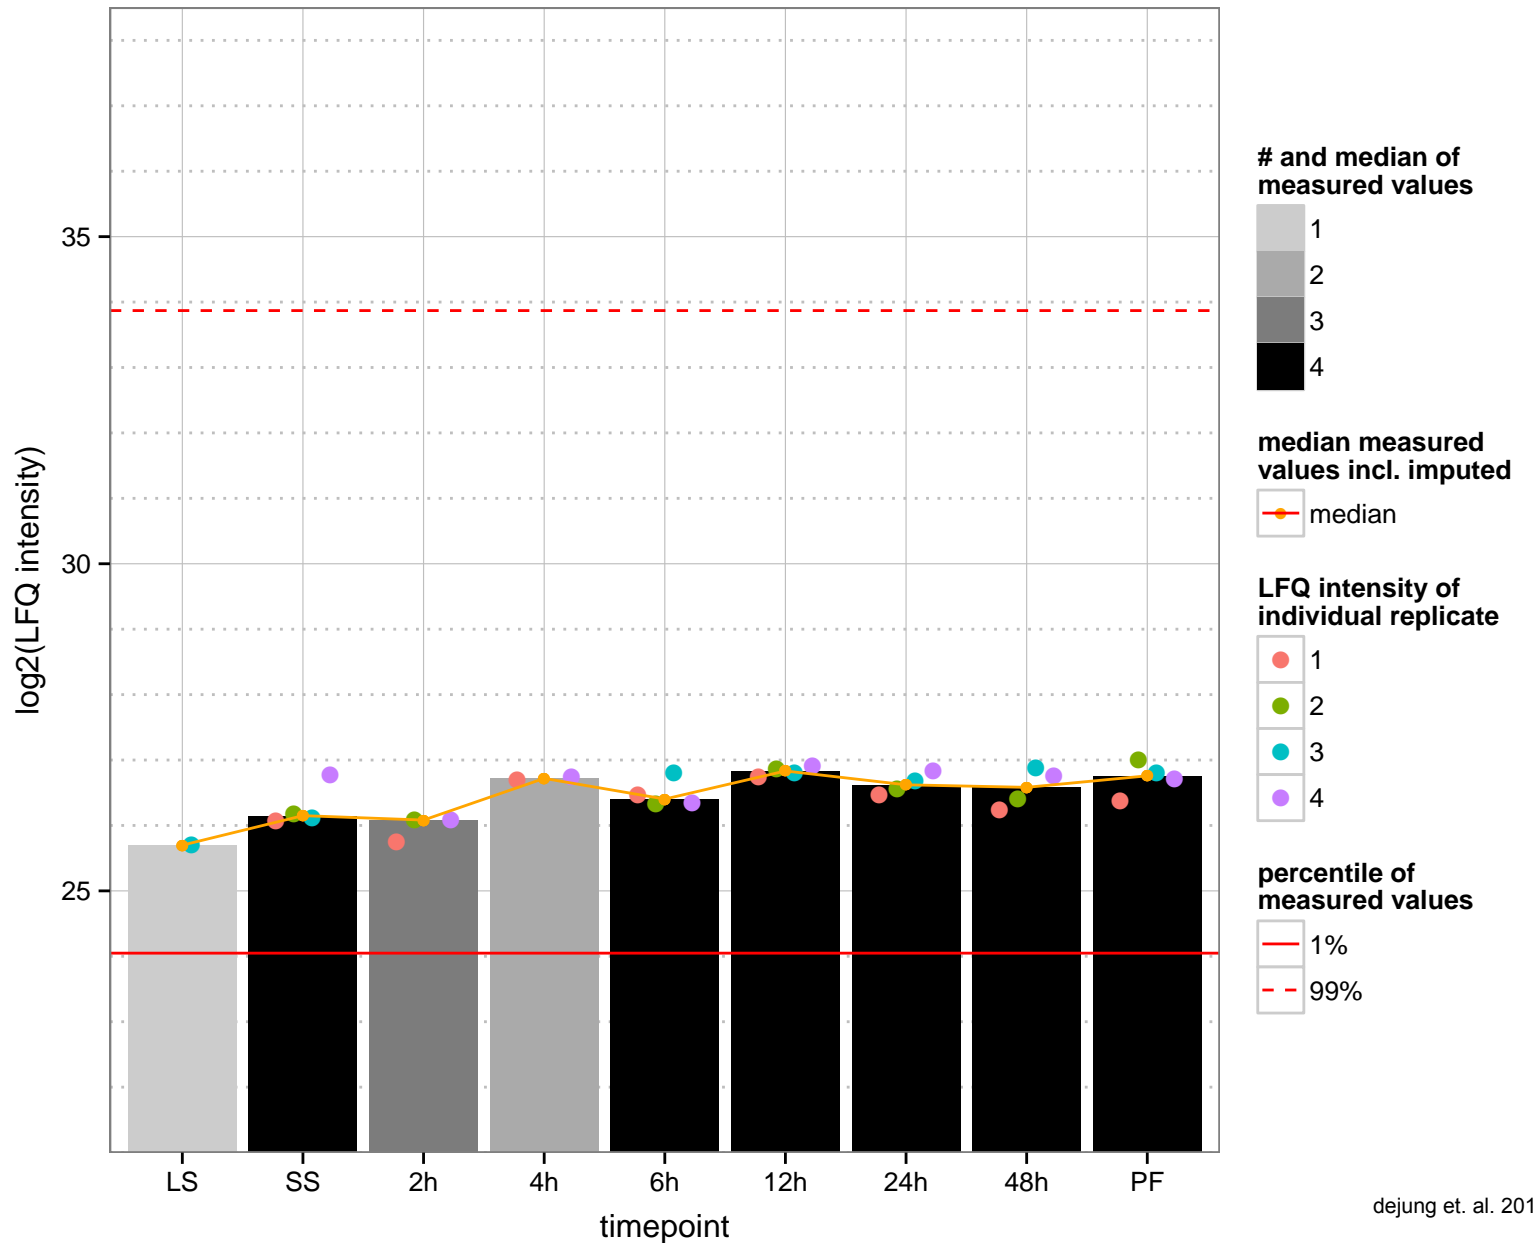

eukaryotic translation initiation factor 3 subunit 7-like protein  
 Tb927.6.4370  
 AGOF: translation initiation factor activity  
 AGOC: null  
 AGOP: translational initiation  
 PGO: translation initiation factor activity  
 PGOC: null  
 PGOP: translational initiation

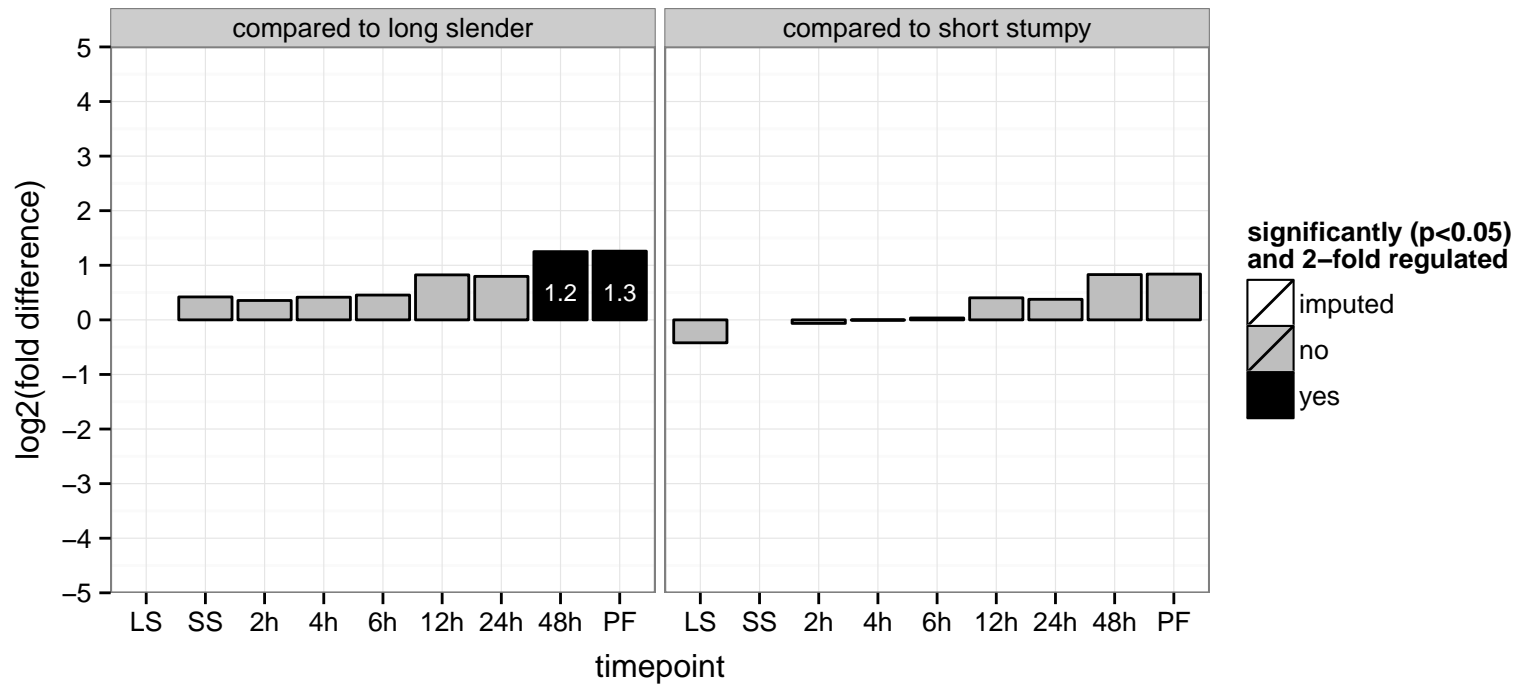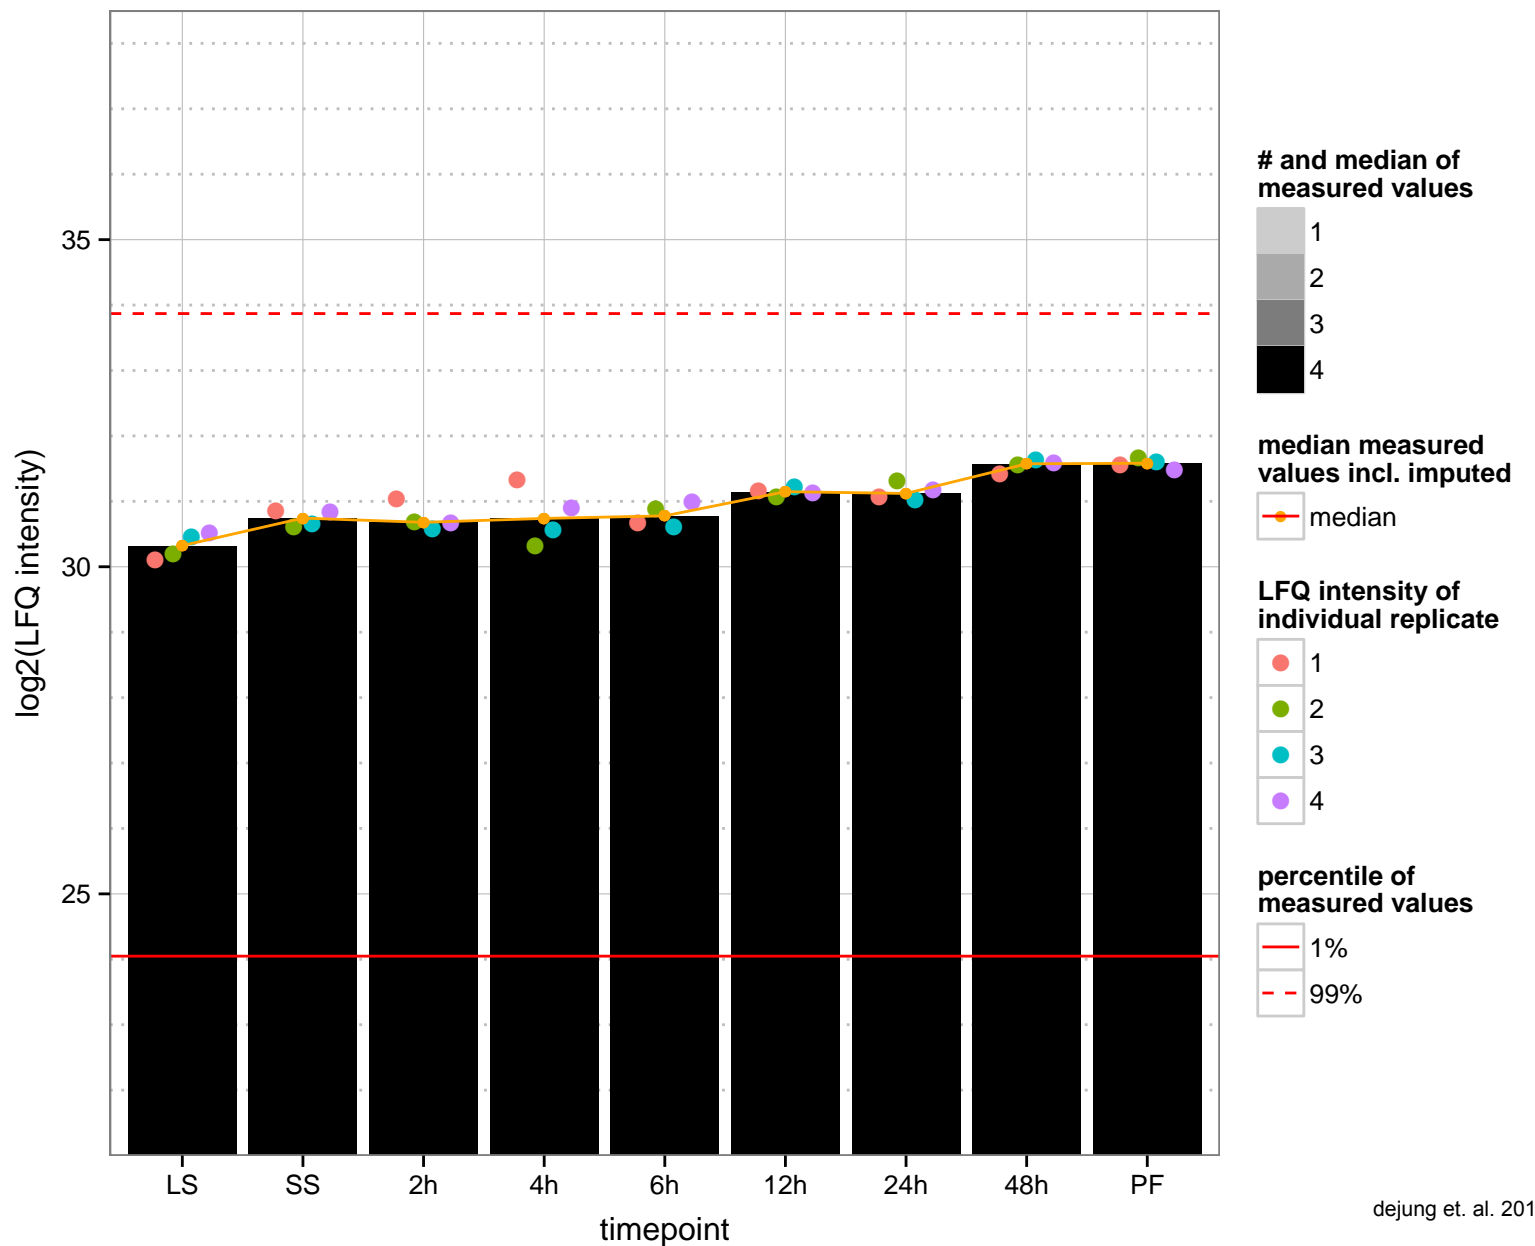

S-adenosylmethionine decarboxylase proenzyme, putative, S-adenosylmethionine decarboxylase (AdoMetDC)  
 Tb927.6.4460;Tb927.6.4410;Tb11.v5.0903  
 AGOF: null, adenosylmethionine decarboxylase activity  
 AGOC: null  
 AGOP: null, spermidine biosynthetic process, spermine biosynthetic process  
 PGO: adenosylmethionine decarboxylase activity  
 PGOC: null  
 PGOP: spermidine biosynthetic process, spermine biosynthetic process

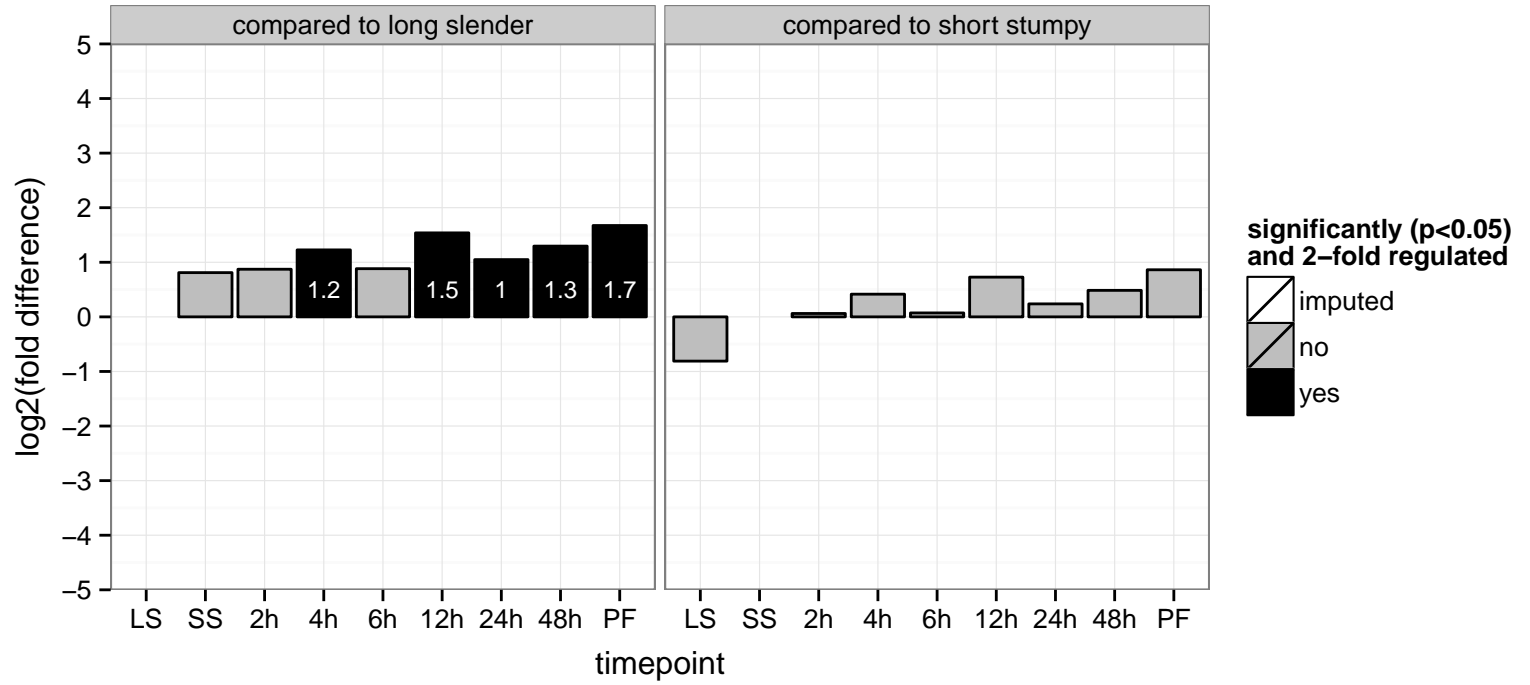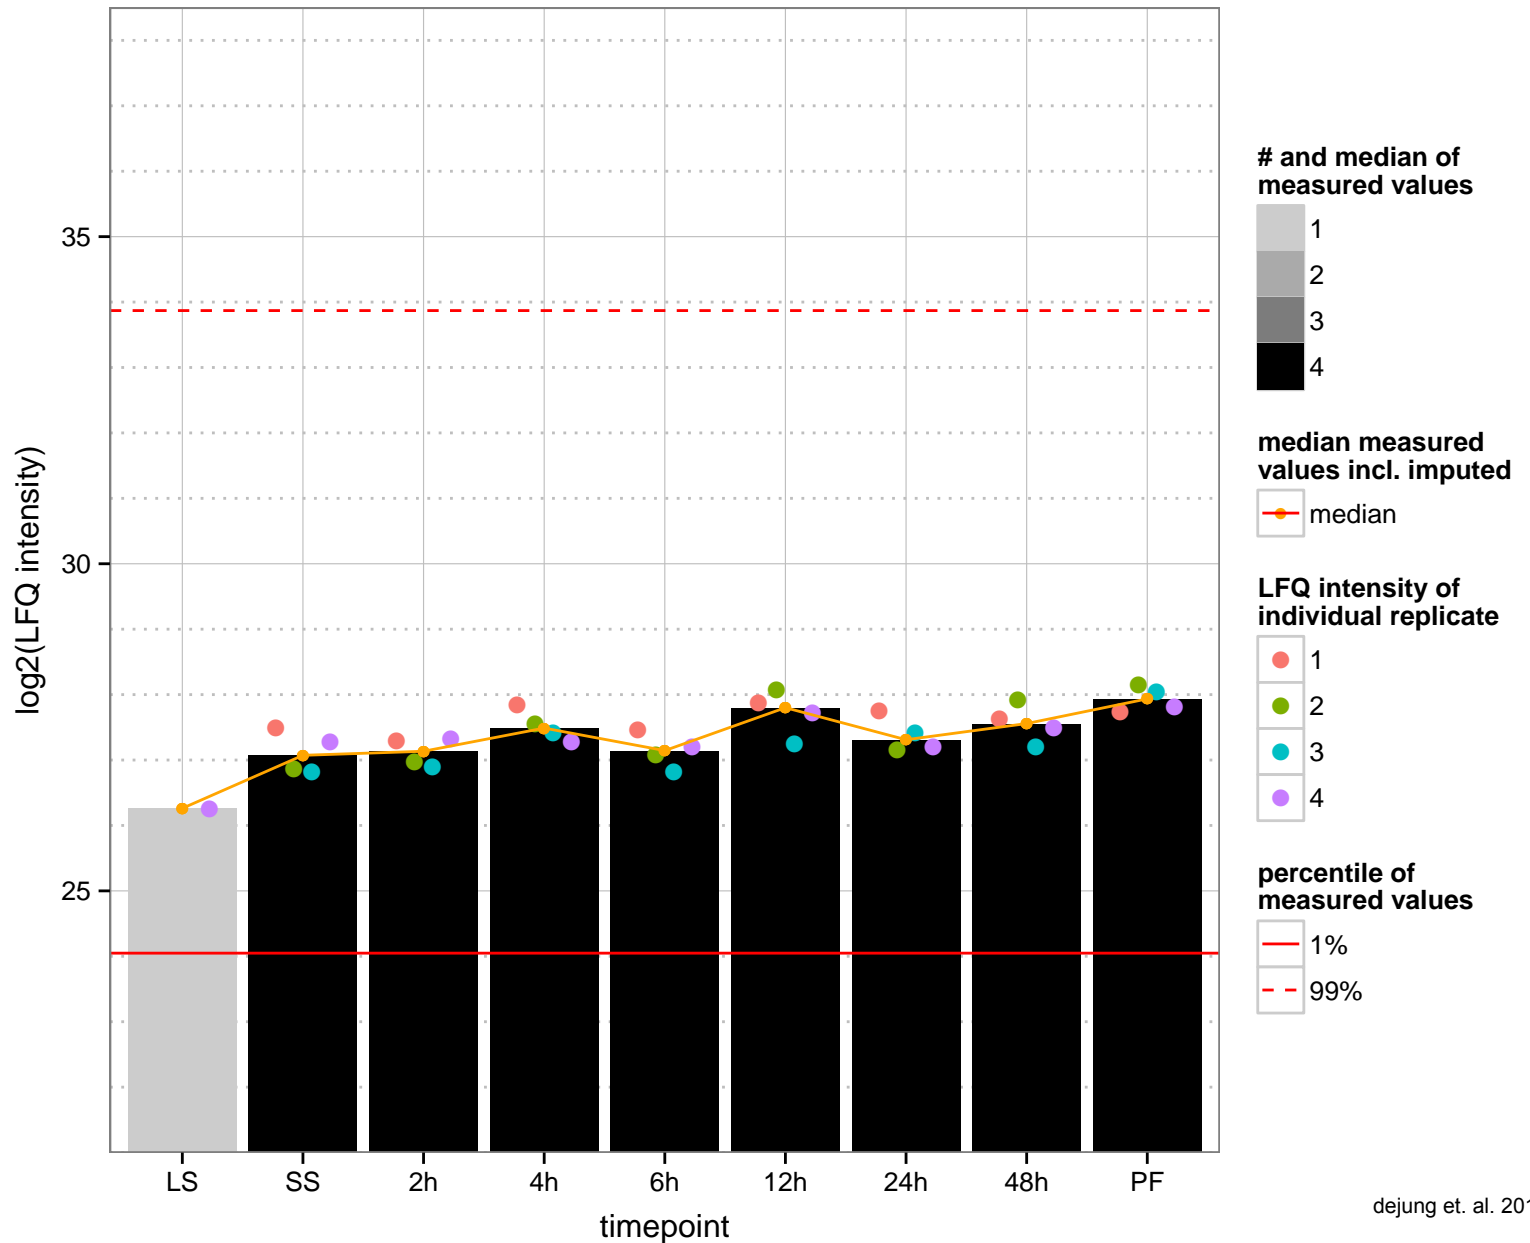



hypothetical protein, conserved

Tb927.6.4500

AGOF: null

AGOC: extrachromosomal circular DNA

AGOP: null

PGOF: null

PGOC: endoplasmic reticulum, extrachromosomal circular DNA, integral to membrane

PGOP: null

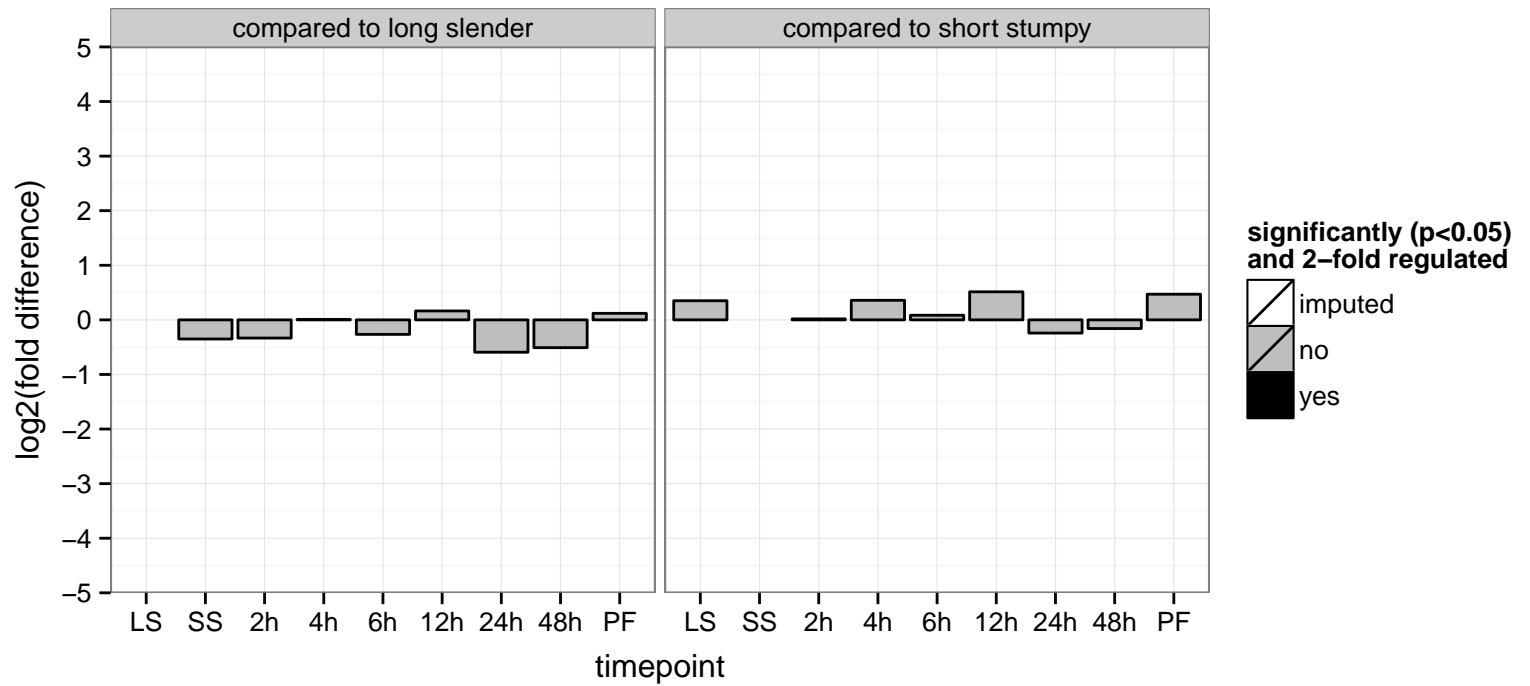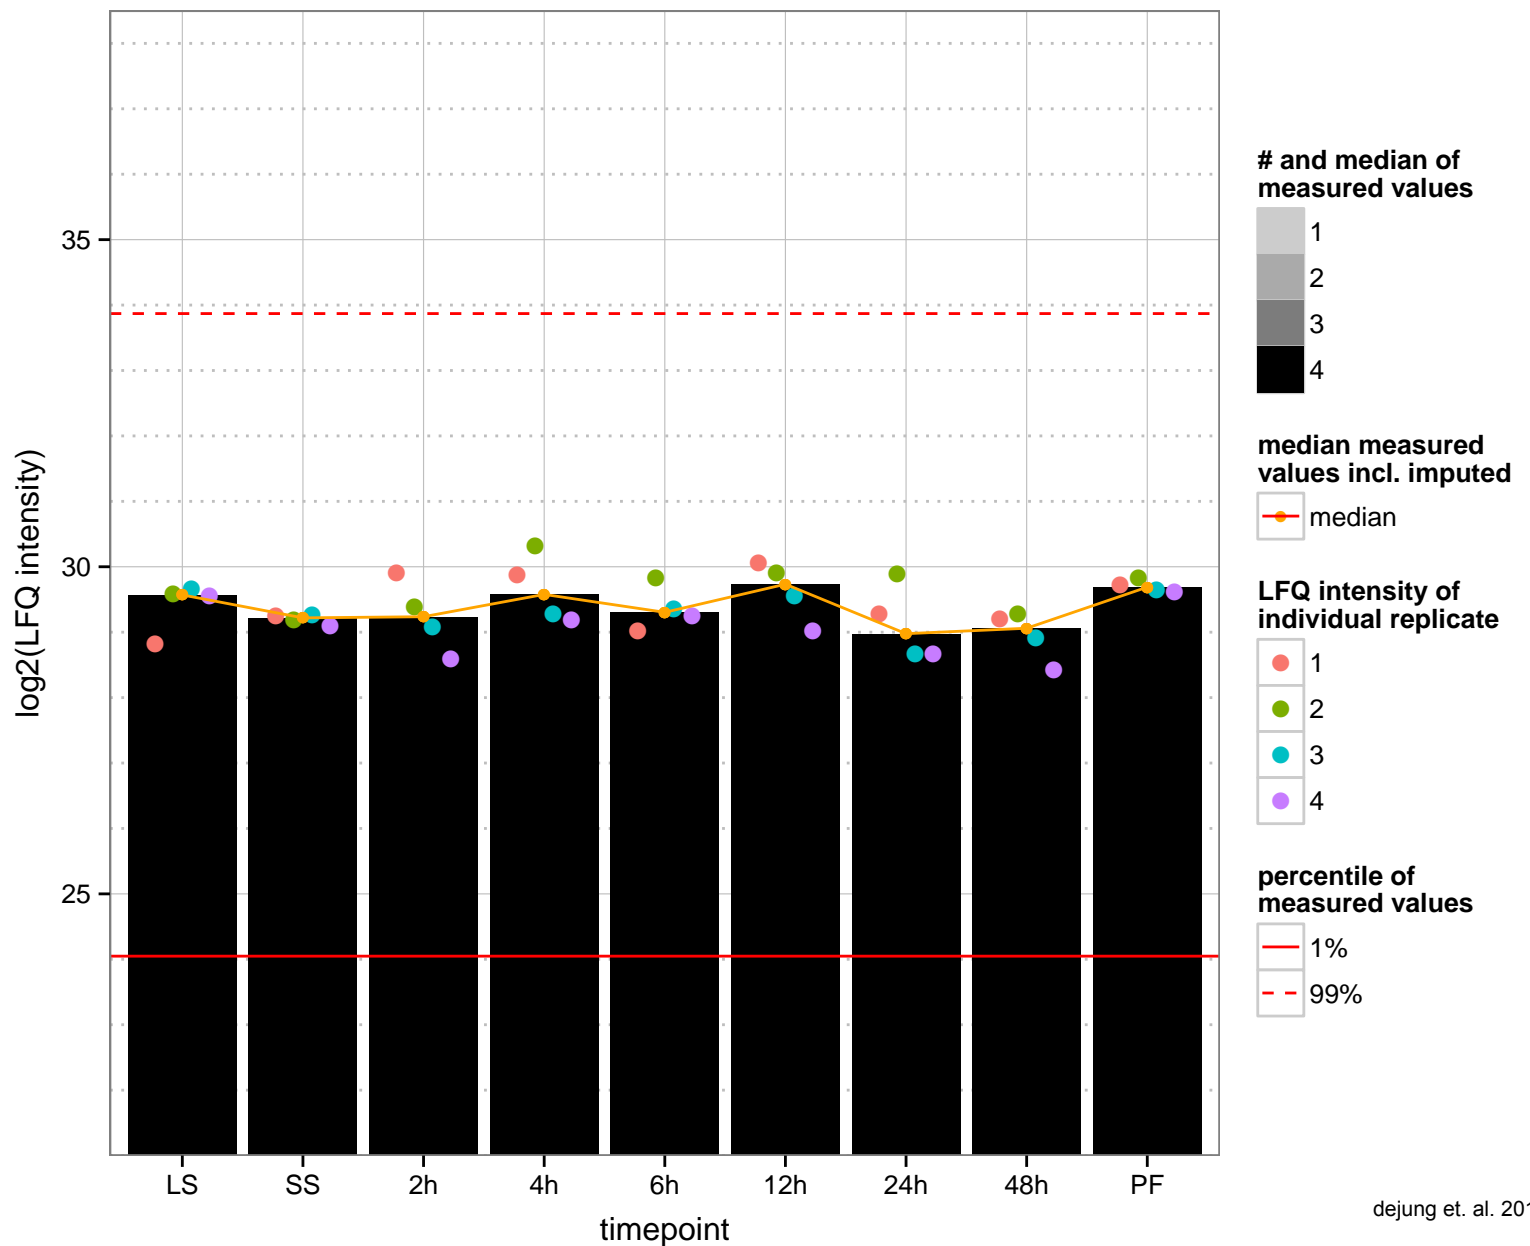

hypothetical protein, conserved  
 Tb927.6.4520  
 AGOF: null  
 AGOC: null  
 AGOP: null  
 PGO: null  
 PGOC: null  
 PGOP: null

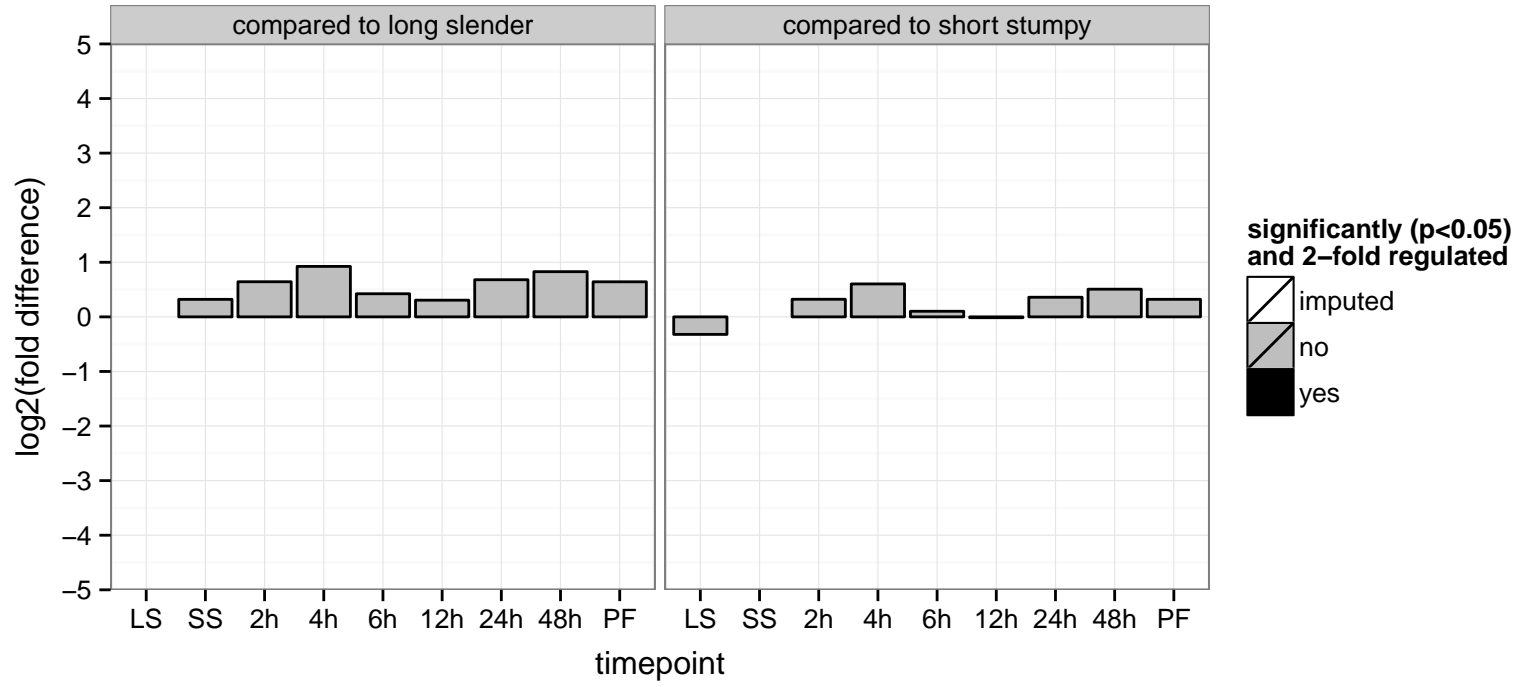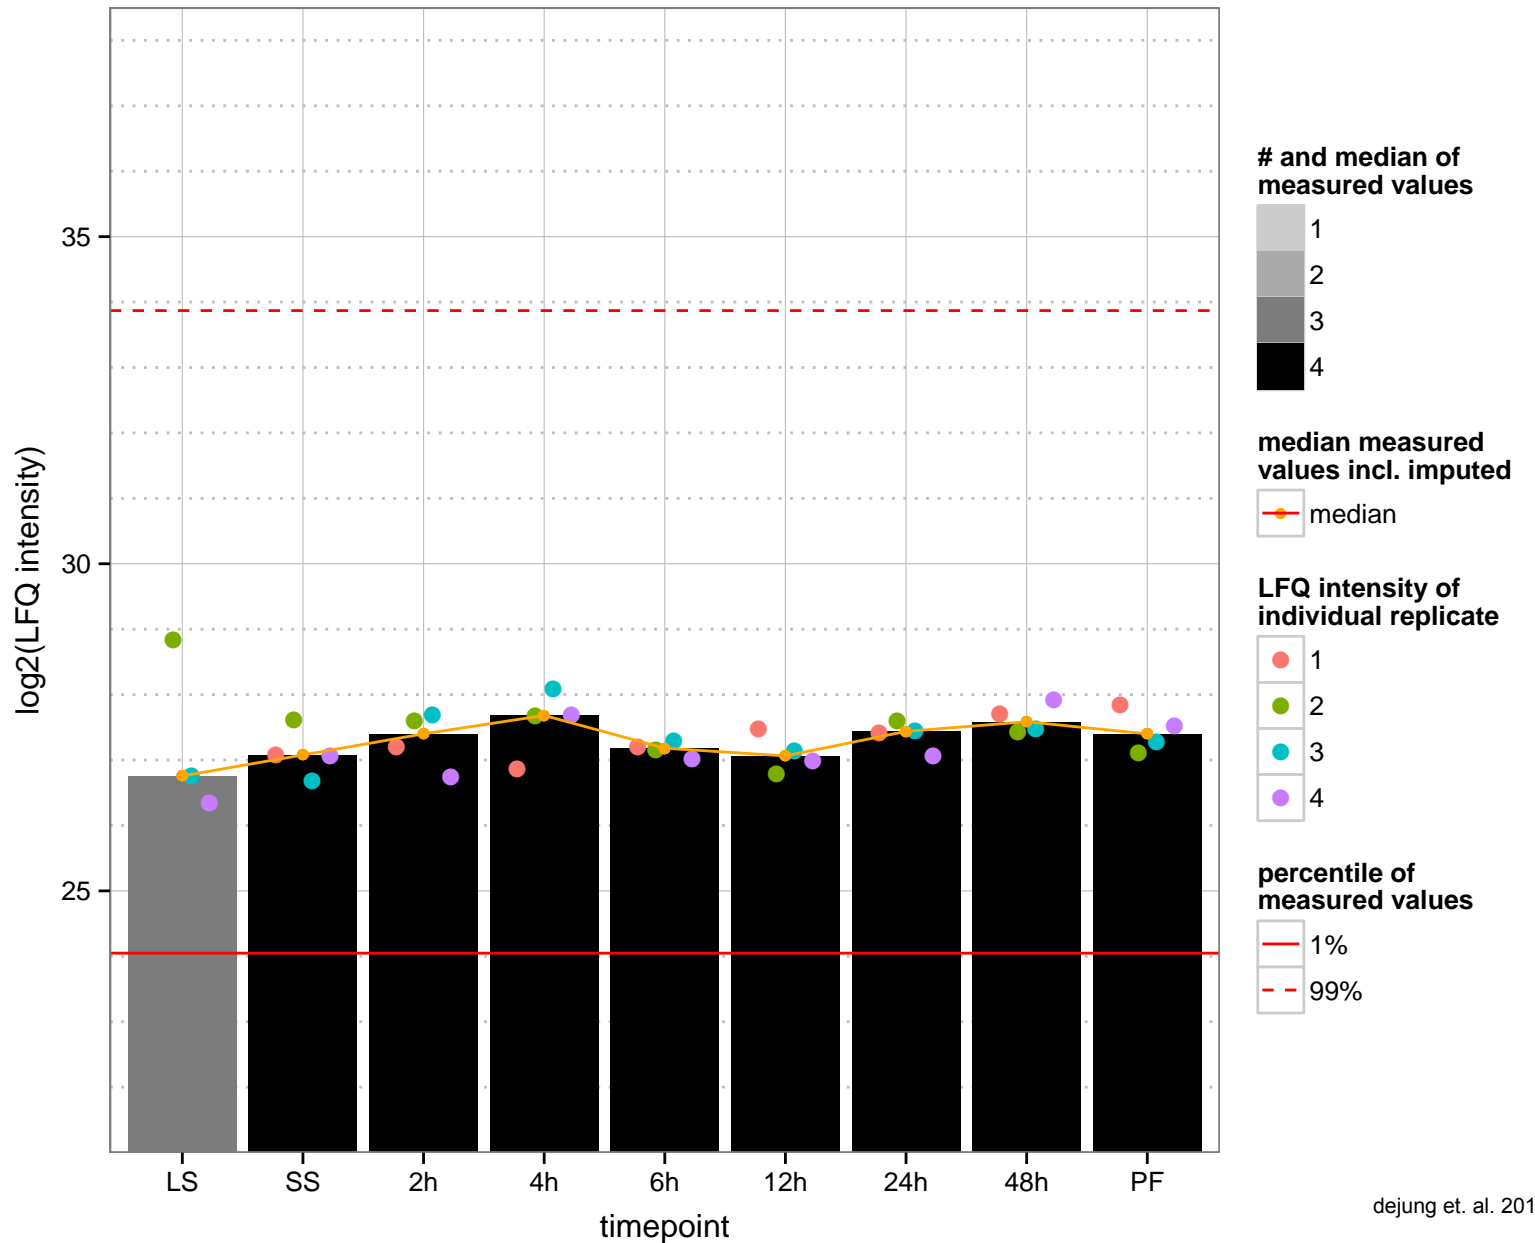

glutamyl-tRNA synthetase, putative

Tb927.6.4590;Tb11.v5.0810

AGOF: null, ATP binding, glutamate-tRNA ligase activity

AGOC: null, cytoplasm

AGOP: null, glutamyl-tRNA aminoacylation, translation

PGOF: ATP binding, aminoacyl-tRNA ligase activity, ligase activity, forming aminoacyl-tRNA and related compounds, nucleotidyl transferase activity

PGOC: cytoplasm

PGOP: tRNA aminoacylation, tRNA aminoacylation for protein translation, translation, glutamyl-tRNA aminoacylation, tRNA aminoacylation

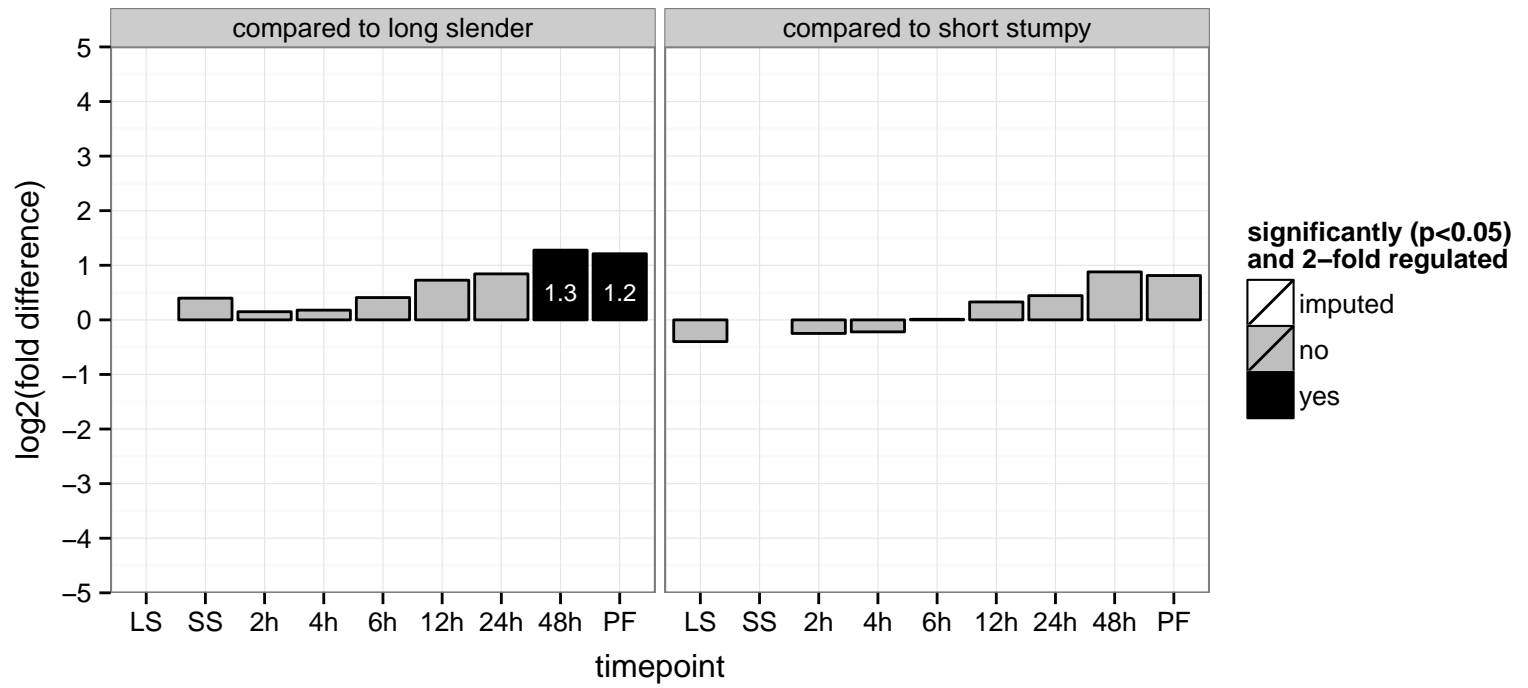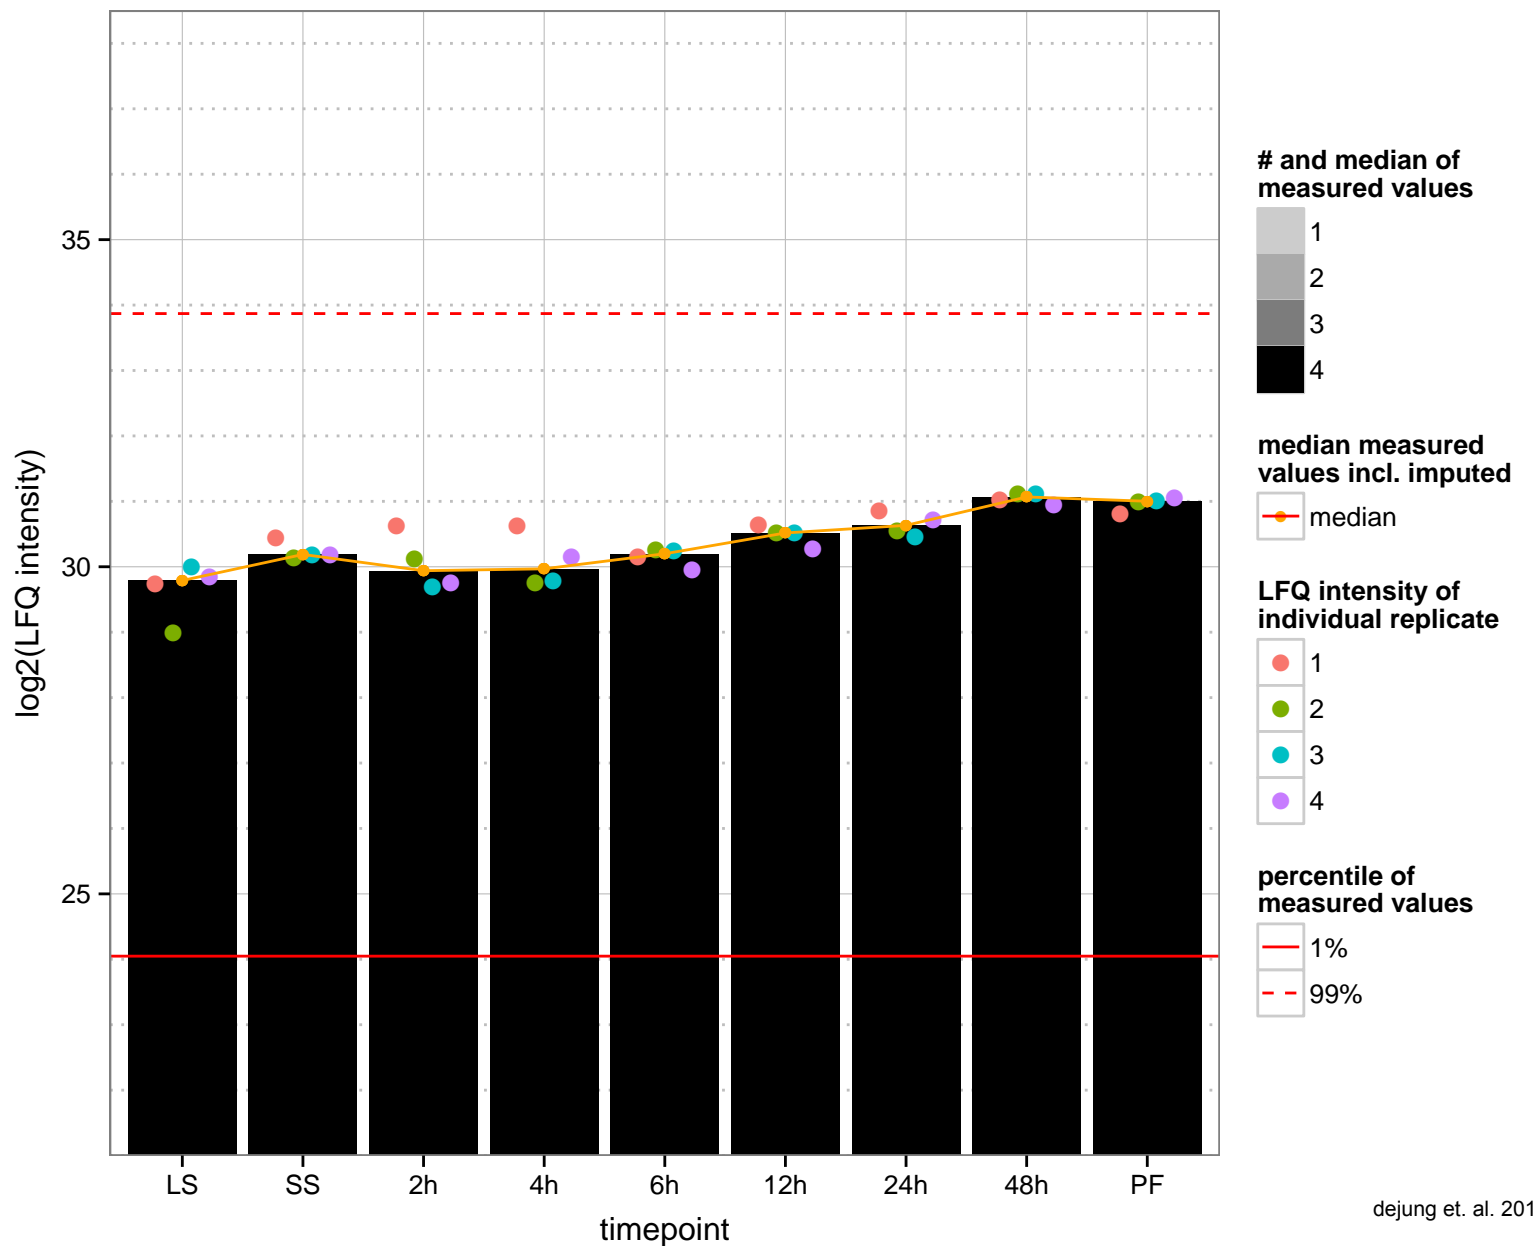

hypothetical protein, conserved  
 Tb927.6.4610  
 AGOF: null  
 AGOC: null  
 AGOP: null  
 PGOF: protein binding  
 PGO: null  
 PGOP: null

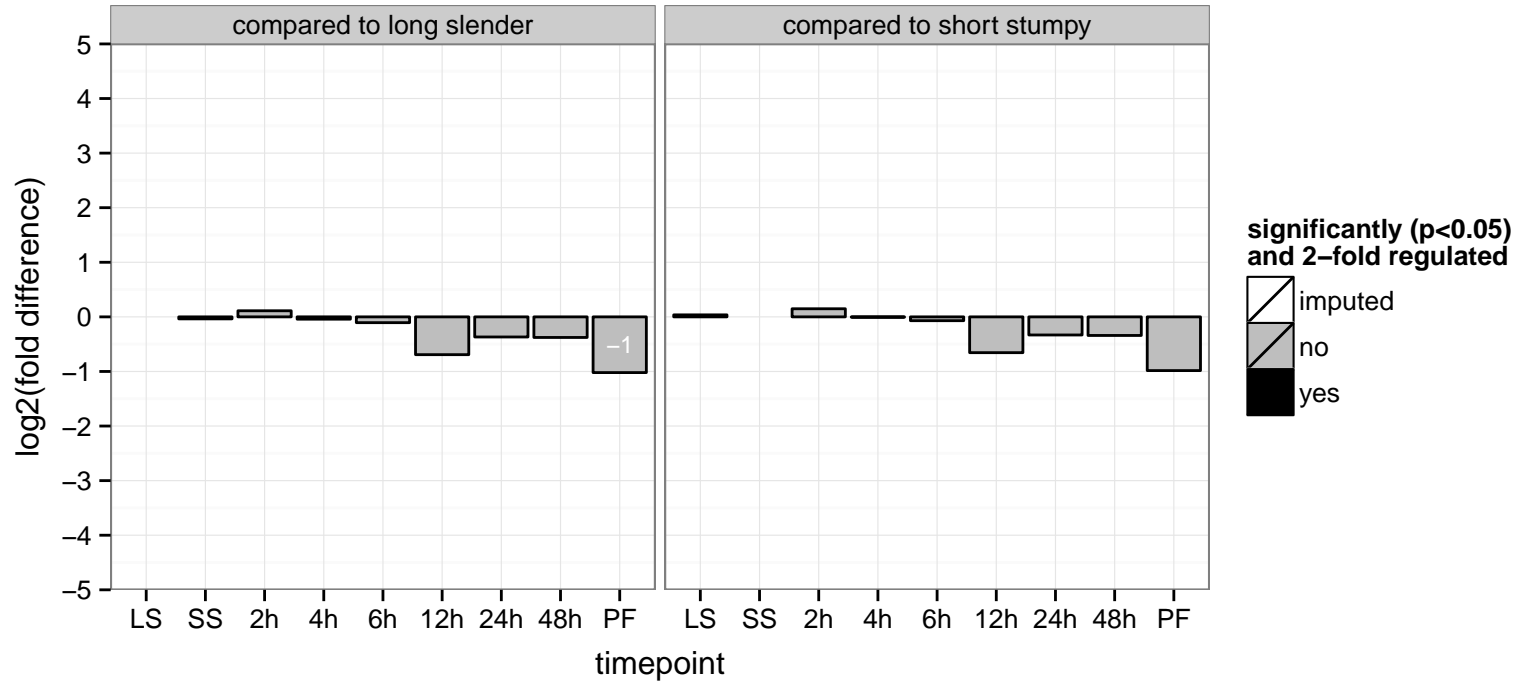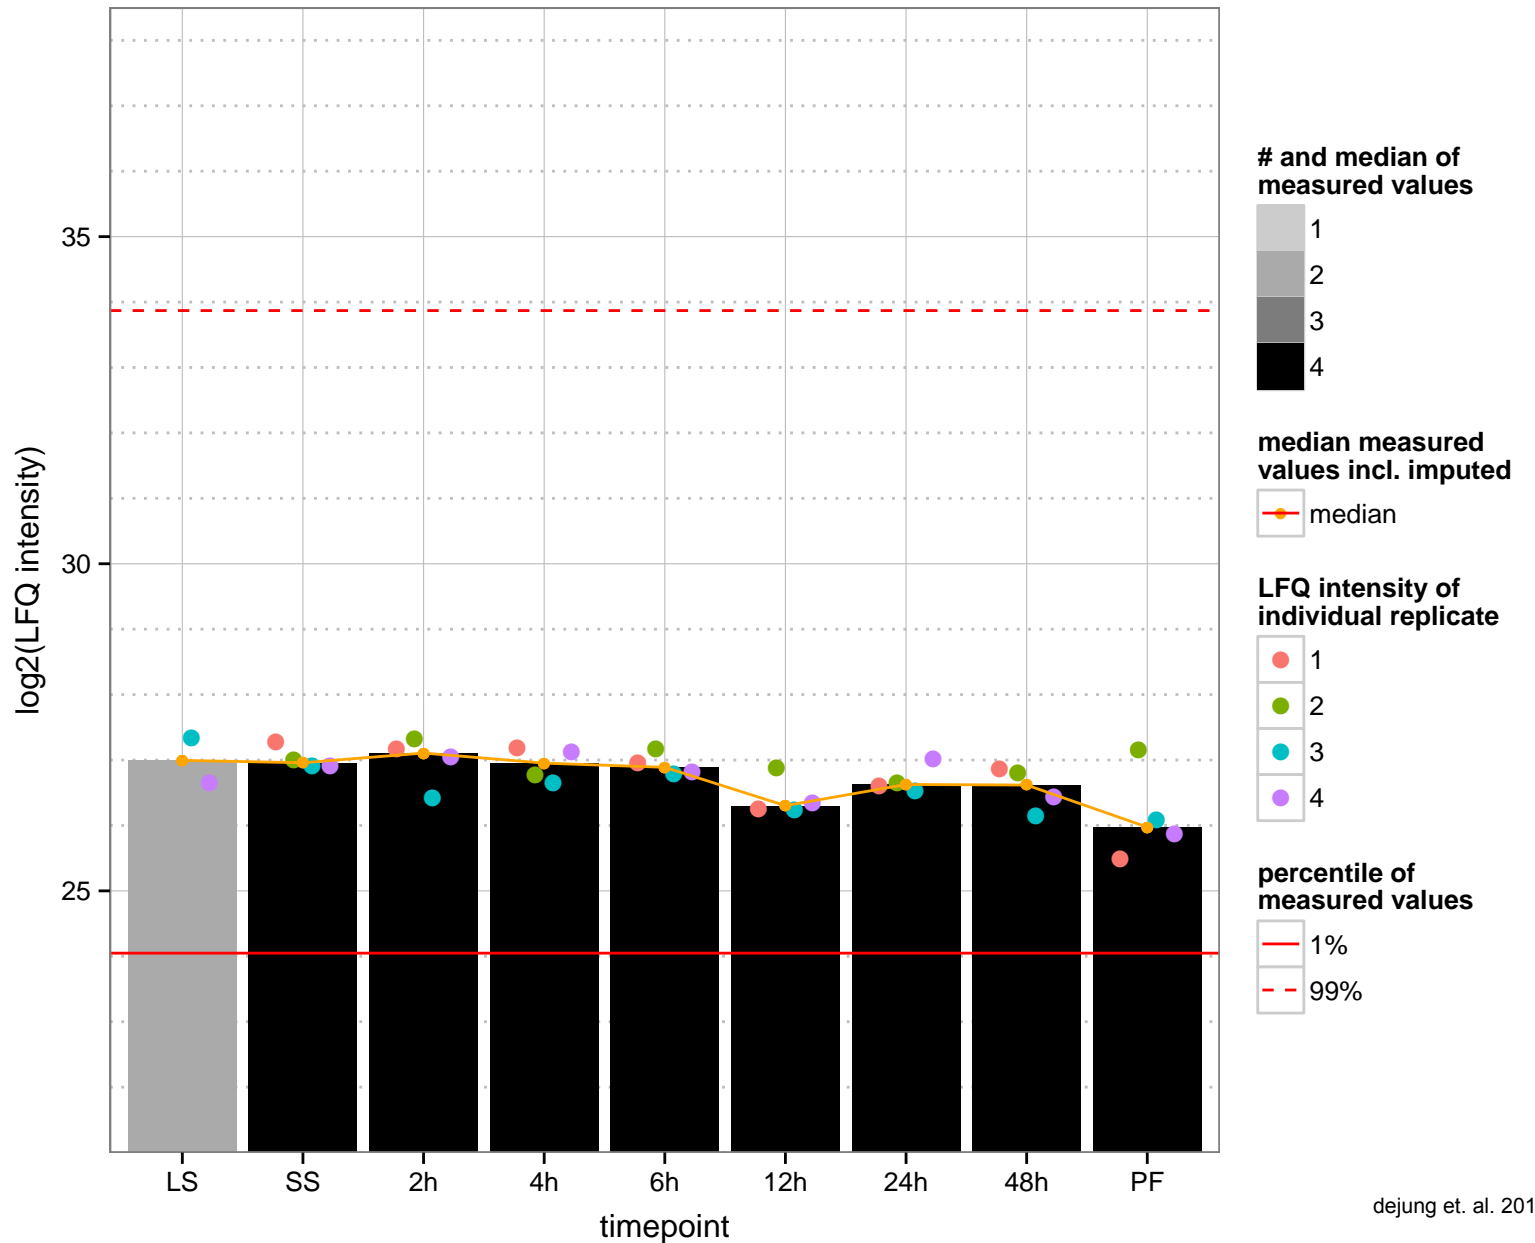

hypothetical protein, conserved  
 Tb927.6.4640  
 AGOF: null  
 AGOC: null  
 AGOP: null  
 PGOF: null  
 PGOC: null  
 PGOP: null

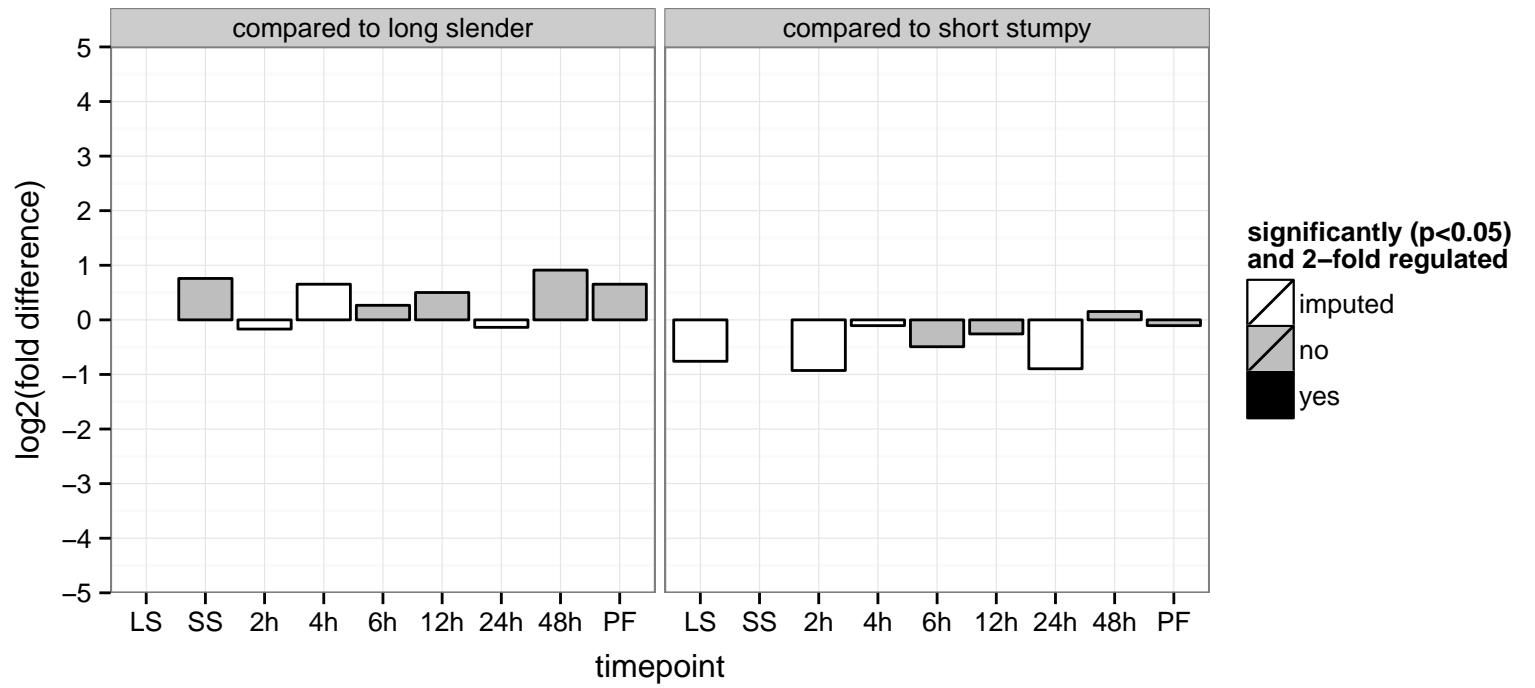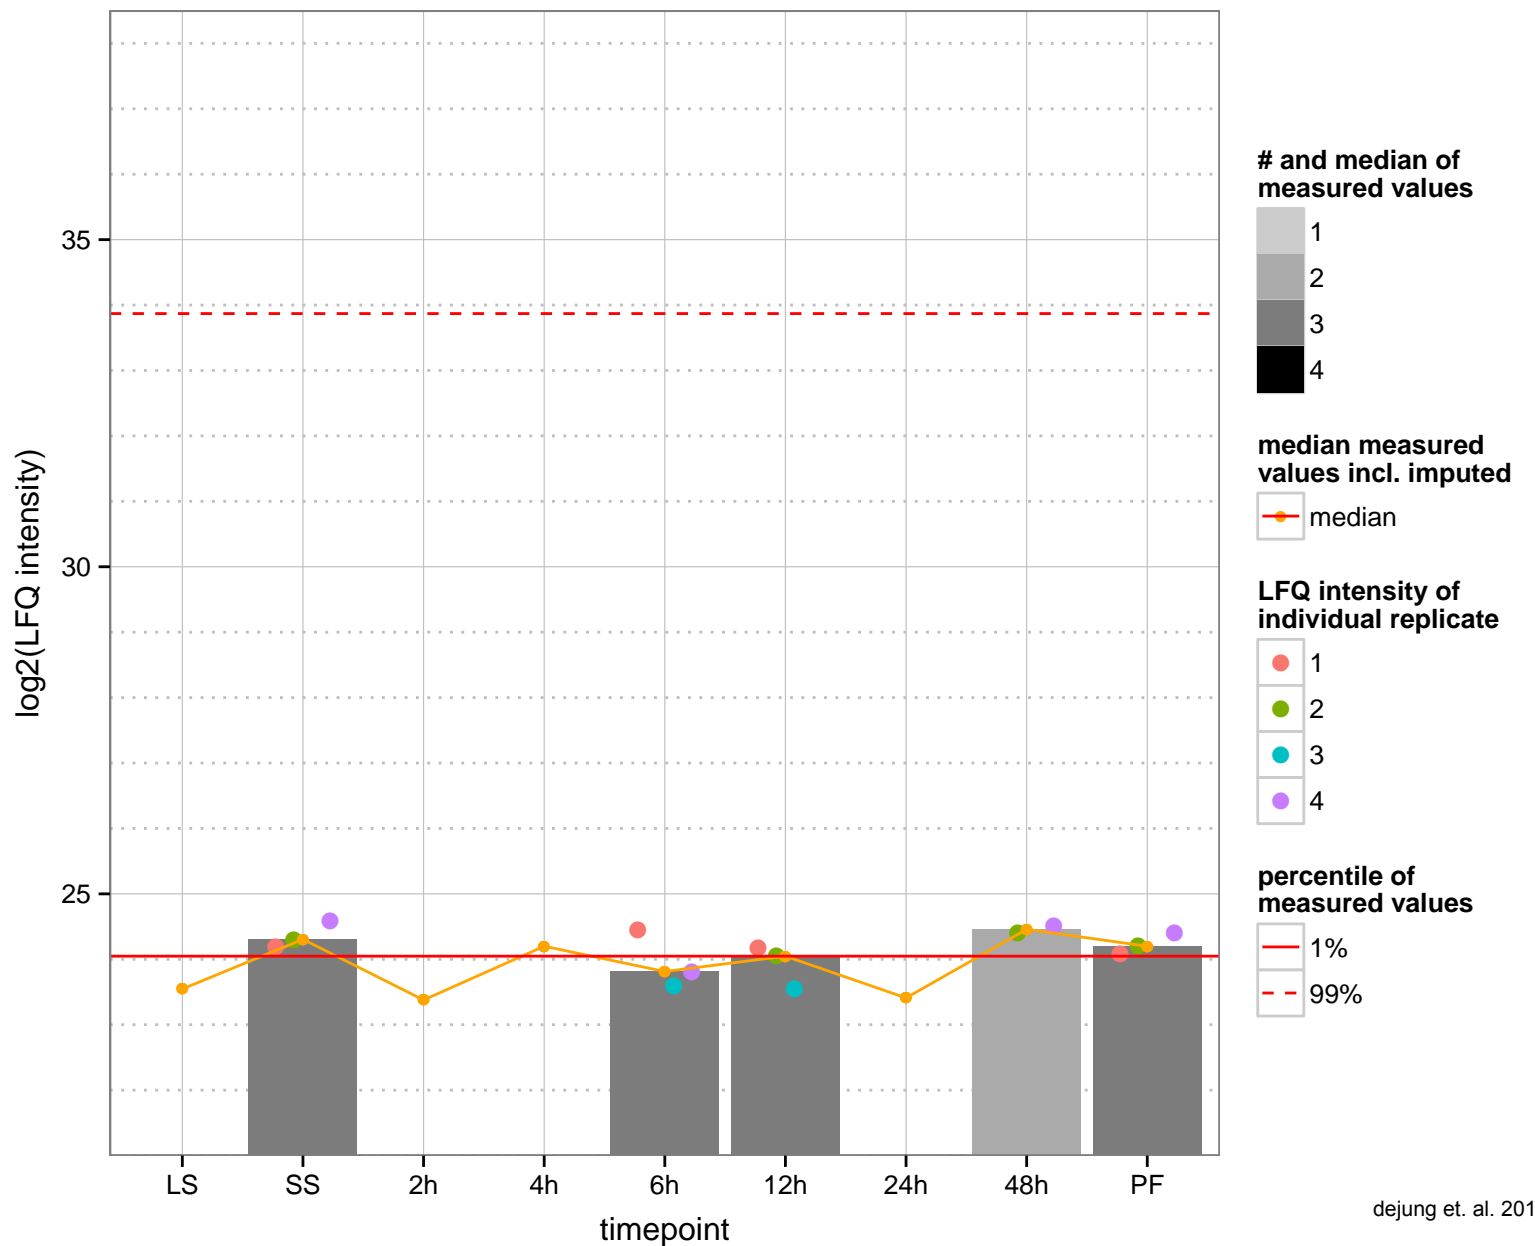

MORN repeat-containing protein, CMRP, flagellar component (TbMORN1)

Tb927.6.4670

AGOF: null

AGOC: null

AGOP: null

PGOF: null

PGOC: null

PGOP: null

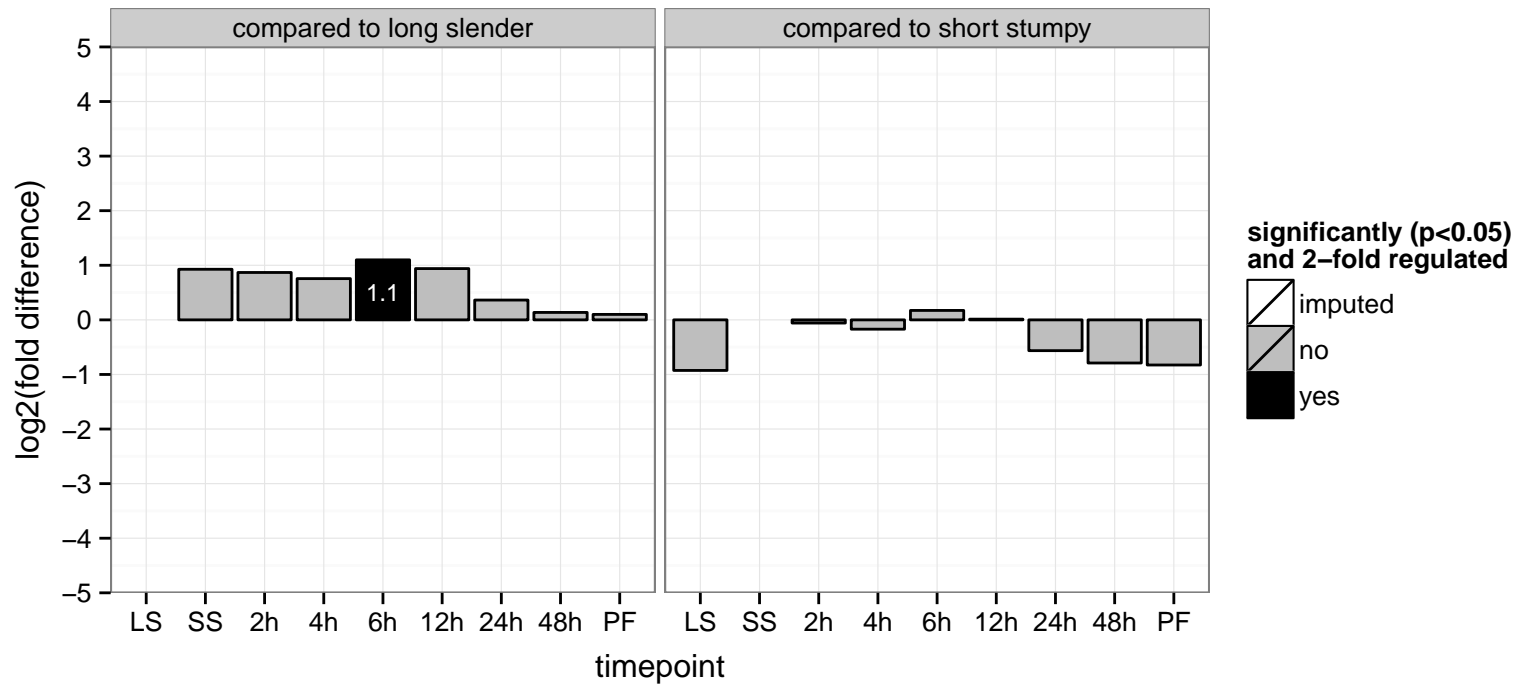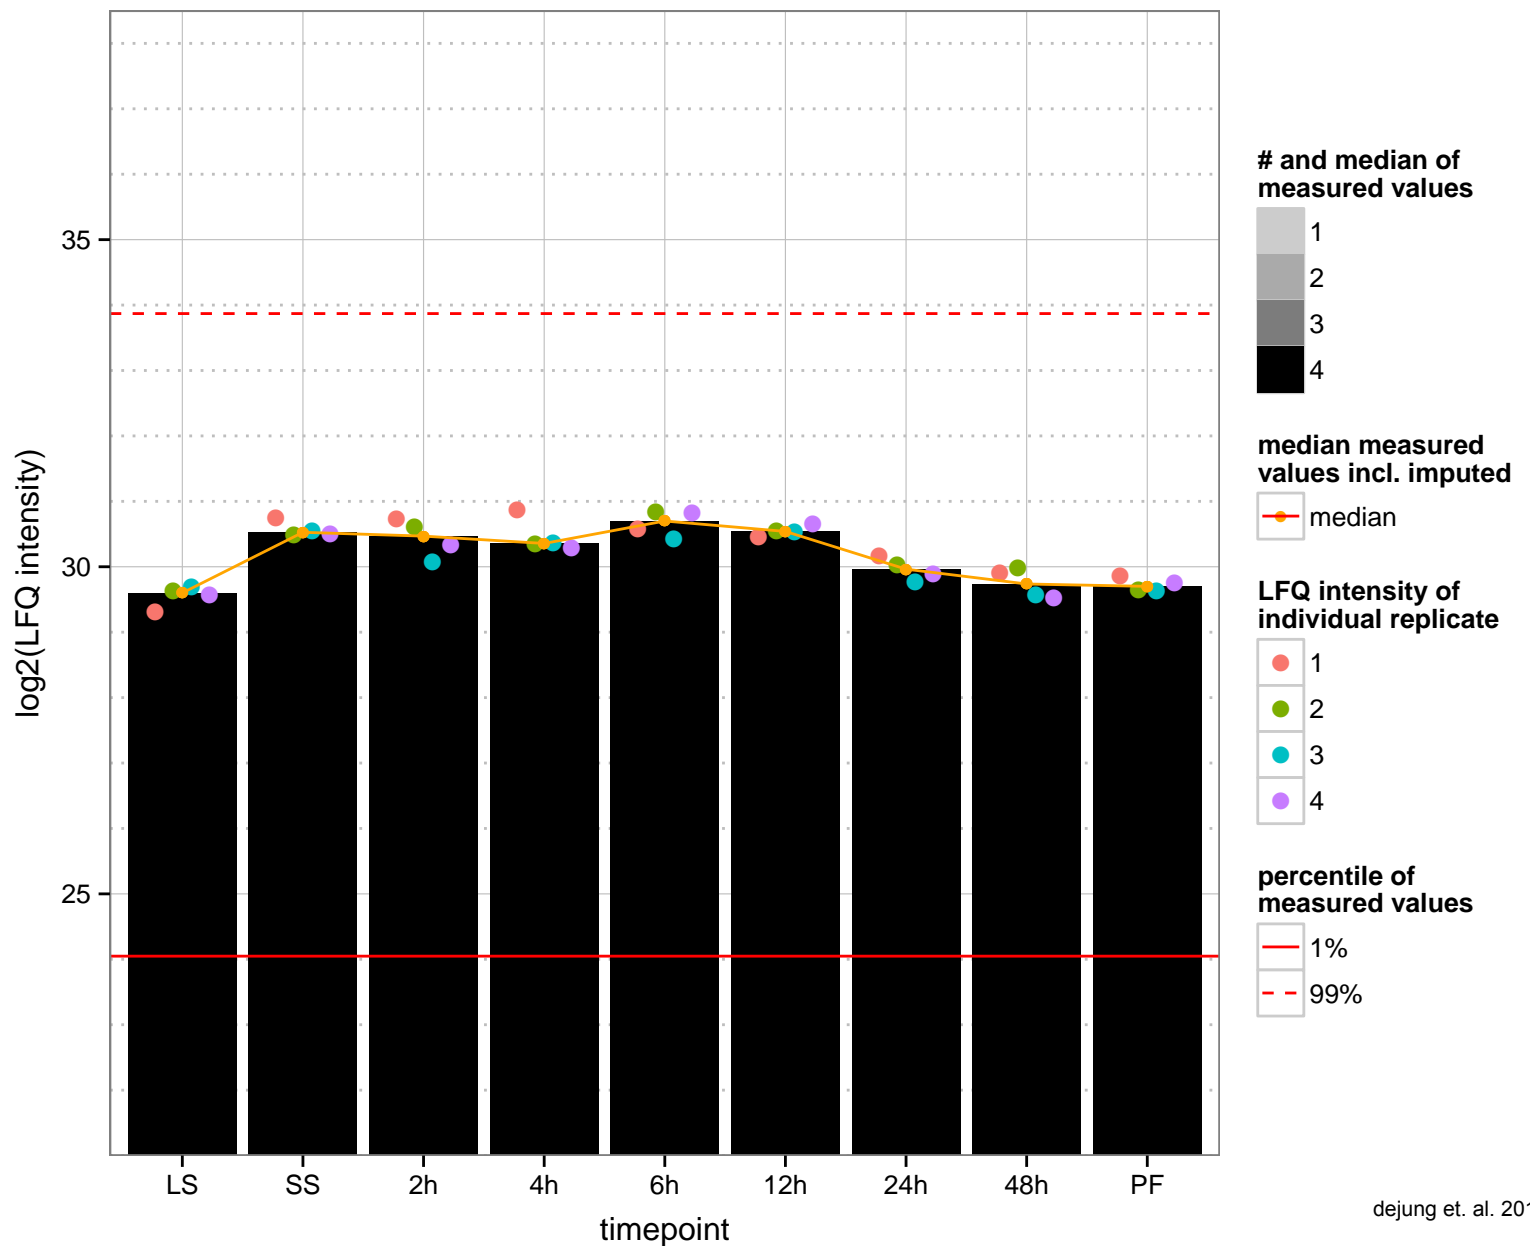

hypothetical protein, conserved  
 Tb927.6.4680  
 AGOF: null  
 AGOC: null  
 AGOP: null  
 PGOF: null  
 PGOC: null  
 PGOP: null

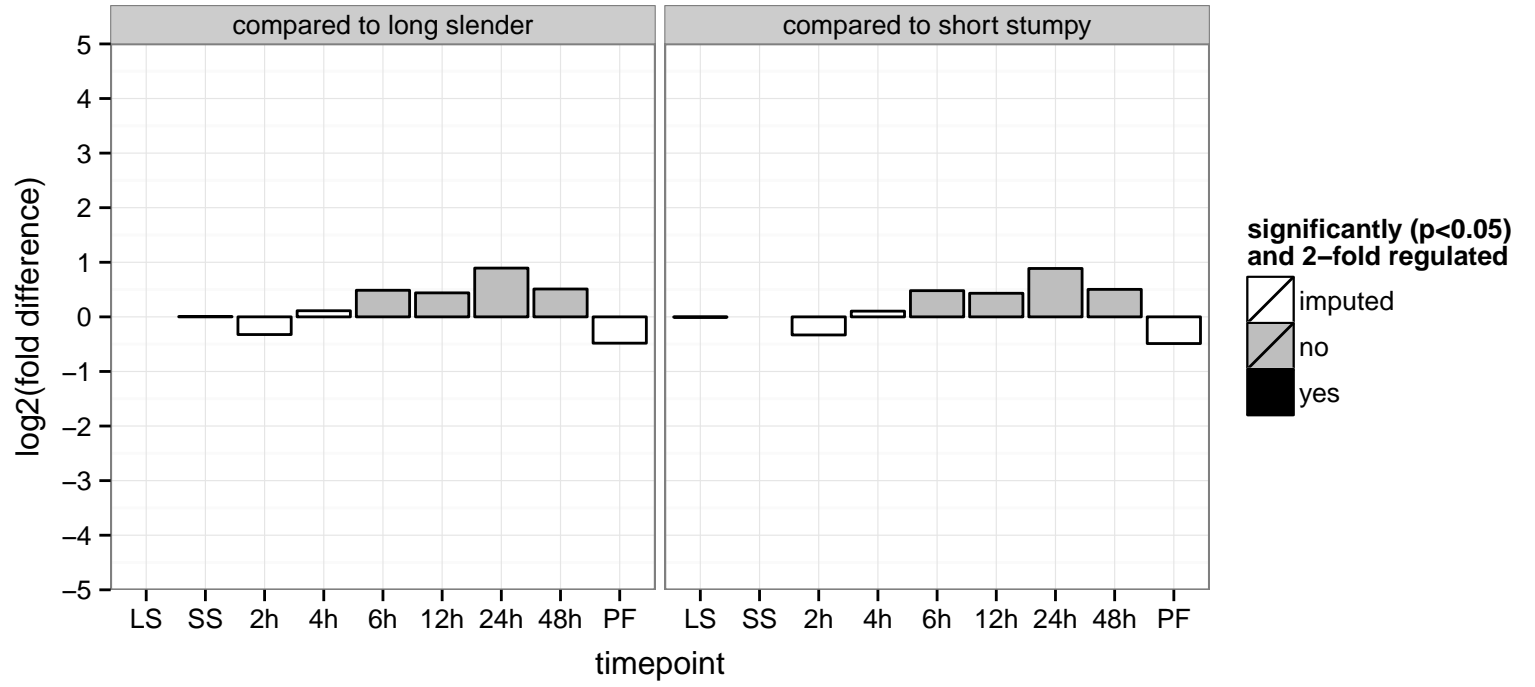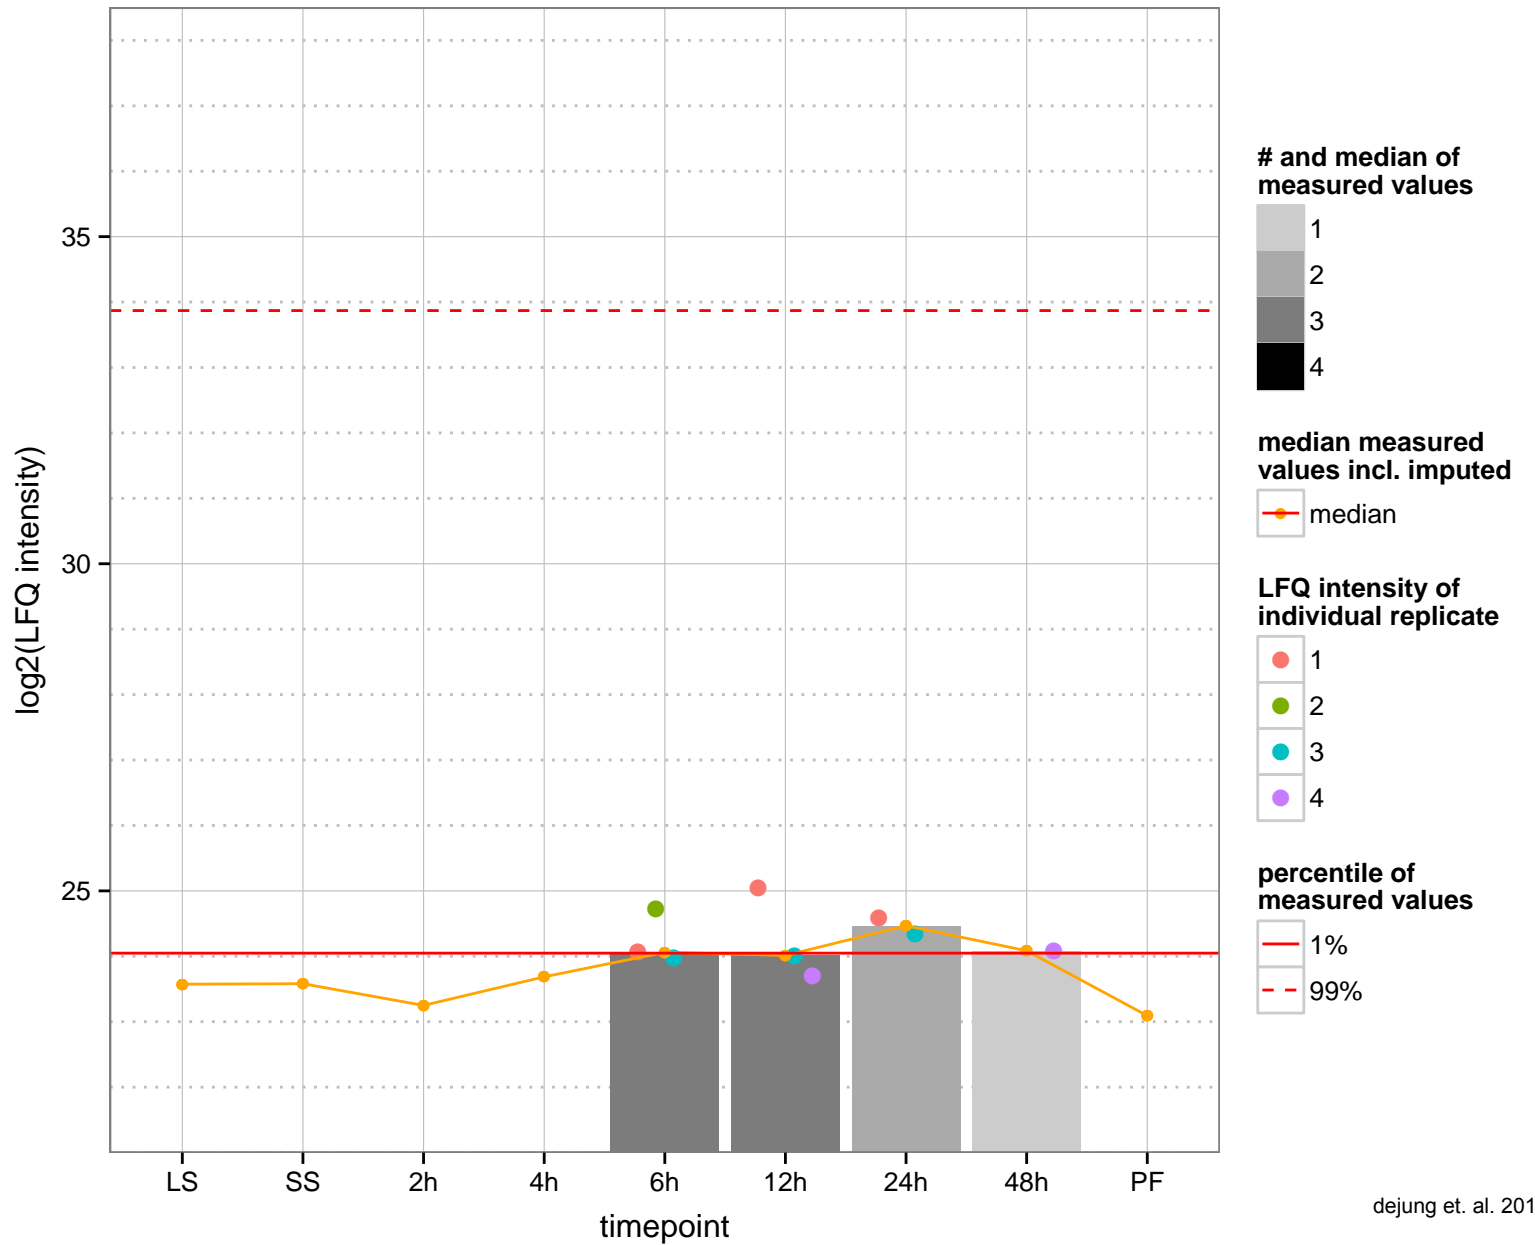

calmodulin, putative  
 Tb927.6.4710  
 AGOF: calcium ion binding  
 AGOC: null  
 AGOP: null  
 PGO: calcium ion binding  
 PGOC: null  
 PGOP: null

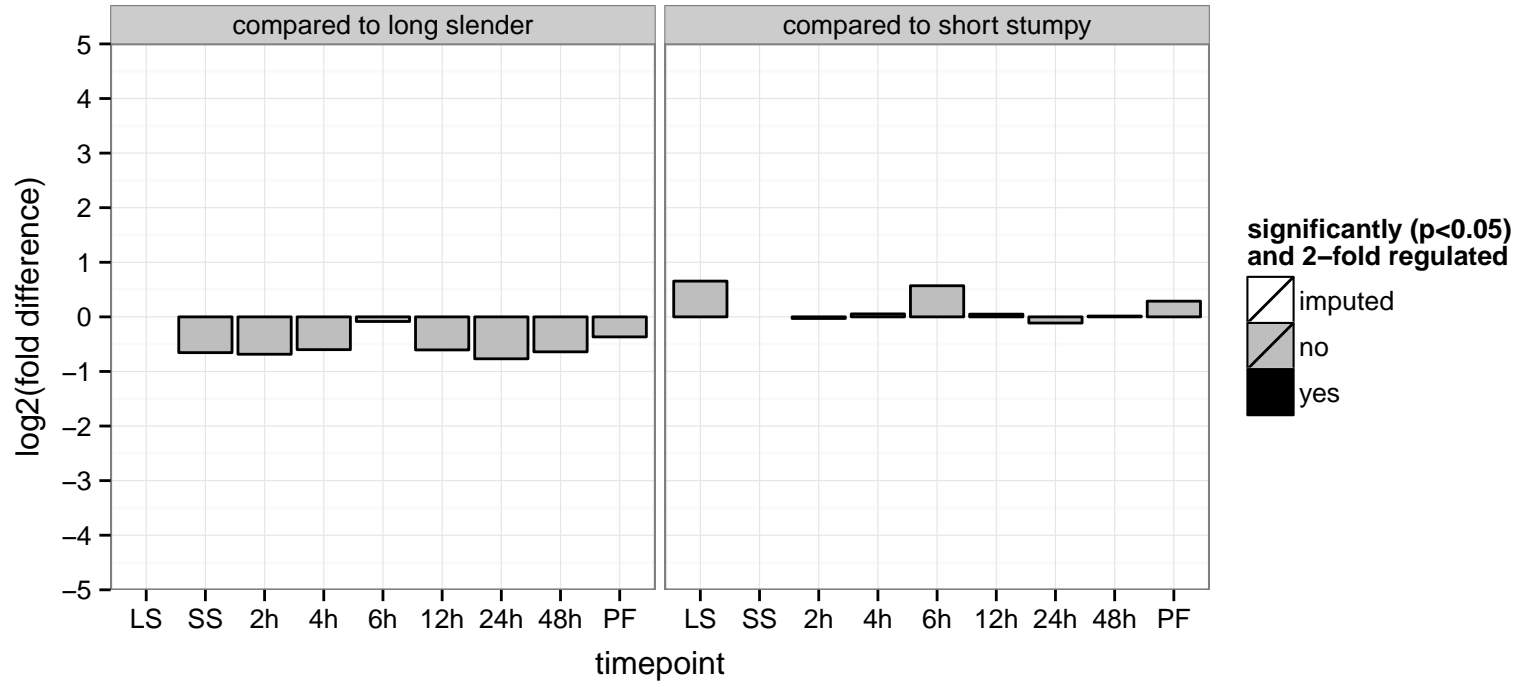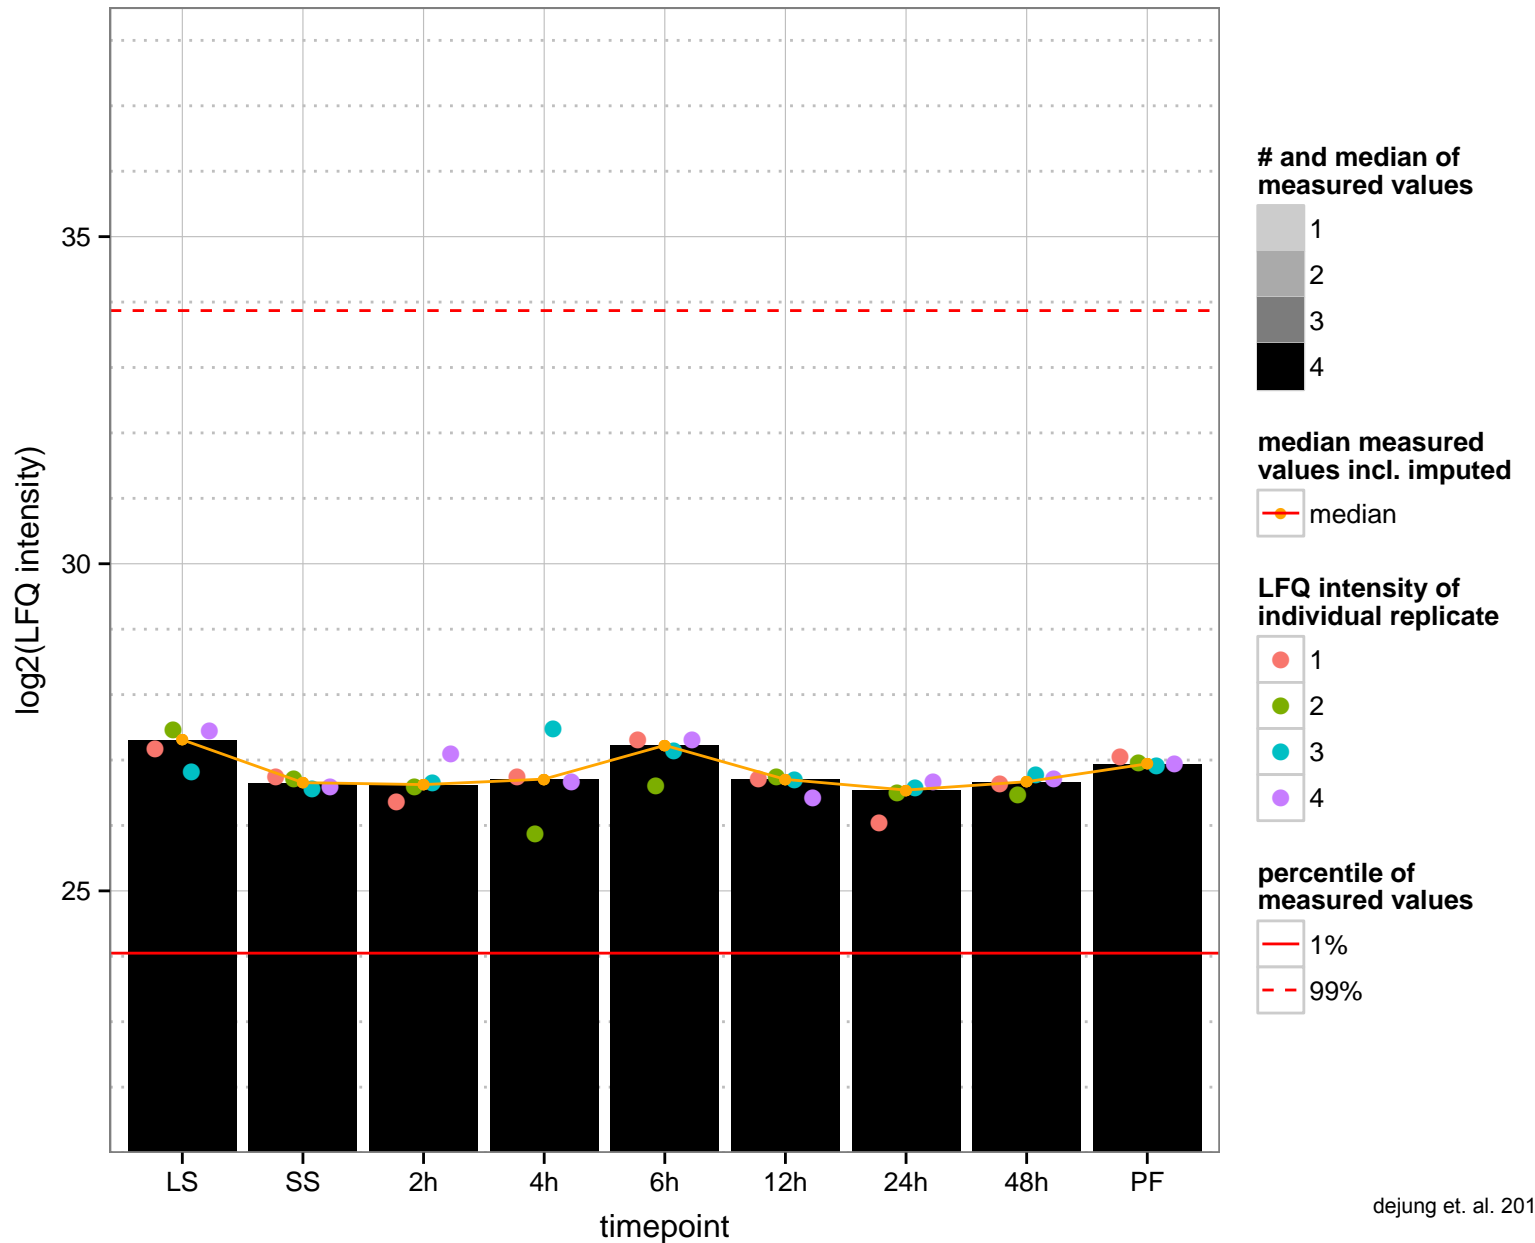



importin- $\alpha$  re-exporter protein, putative, cellular apoptosis susceptibility protein  
 Tb927.6.4740  
 AGOF: importin- $\alpha$  export receptor activity, protein transporter activity  
 AGOC: cytoplasm, nuclear pore, nucleus  
 AGOP: cell proliferation, intracellular protein transport, protein import into nucleus, docking  
 PGO: binding, protein binding, protein transporter activity  
 PGO: null  
 PGO: intracellular protein transport

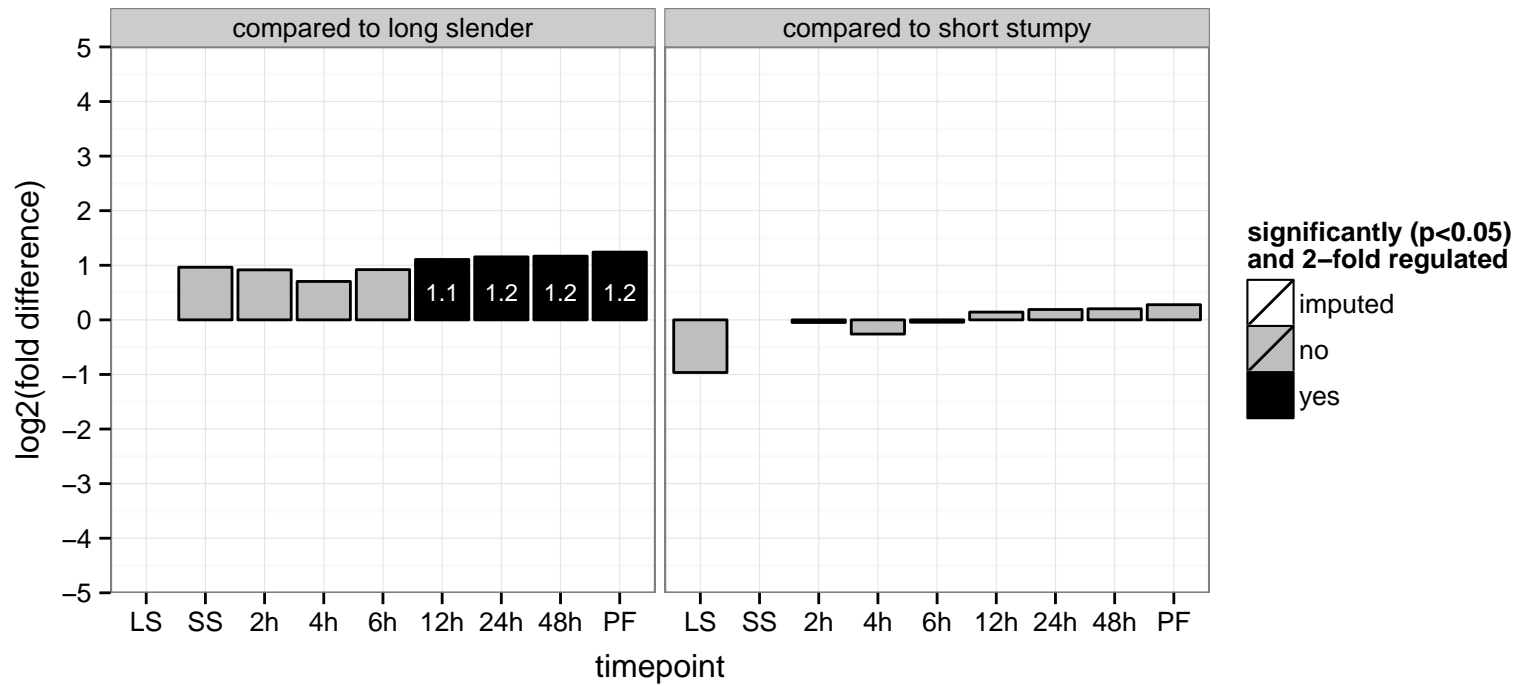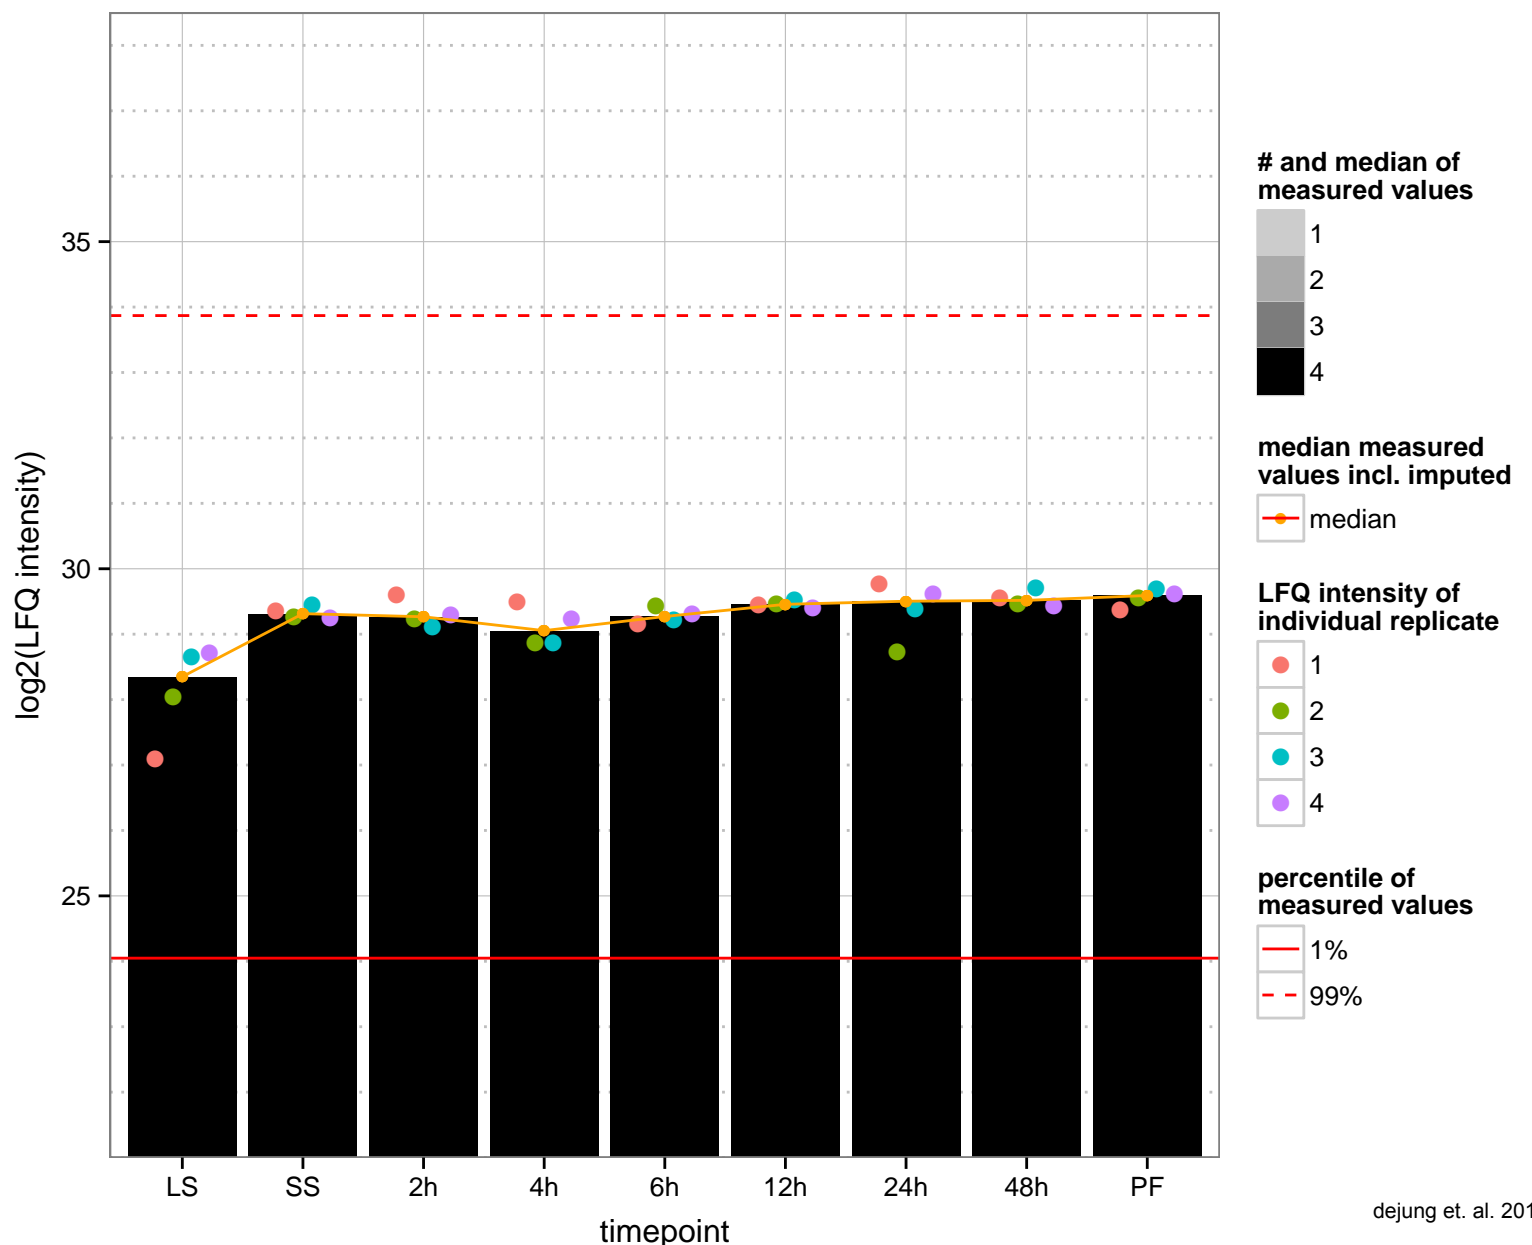

hypothetical protein, conserved  
 Tb927.6.4760  
 AGOF: null  
 AGOC: null  
 AGOP: null  
 PGOF: null  
 PGO: null  
 PGOP: null

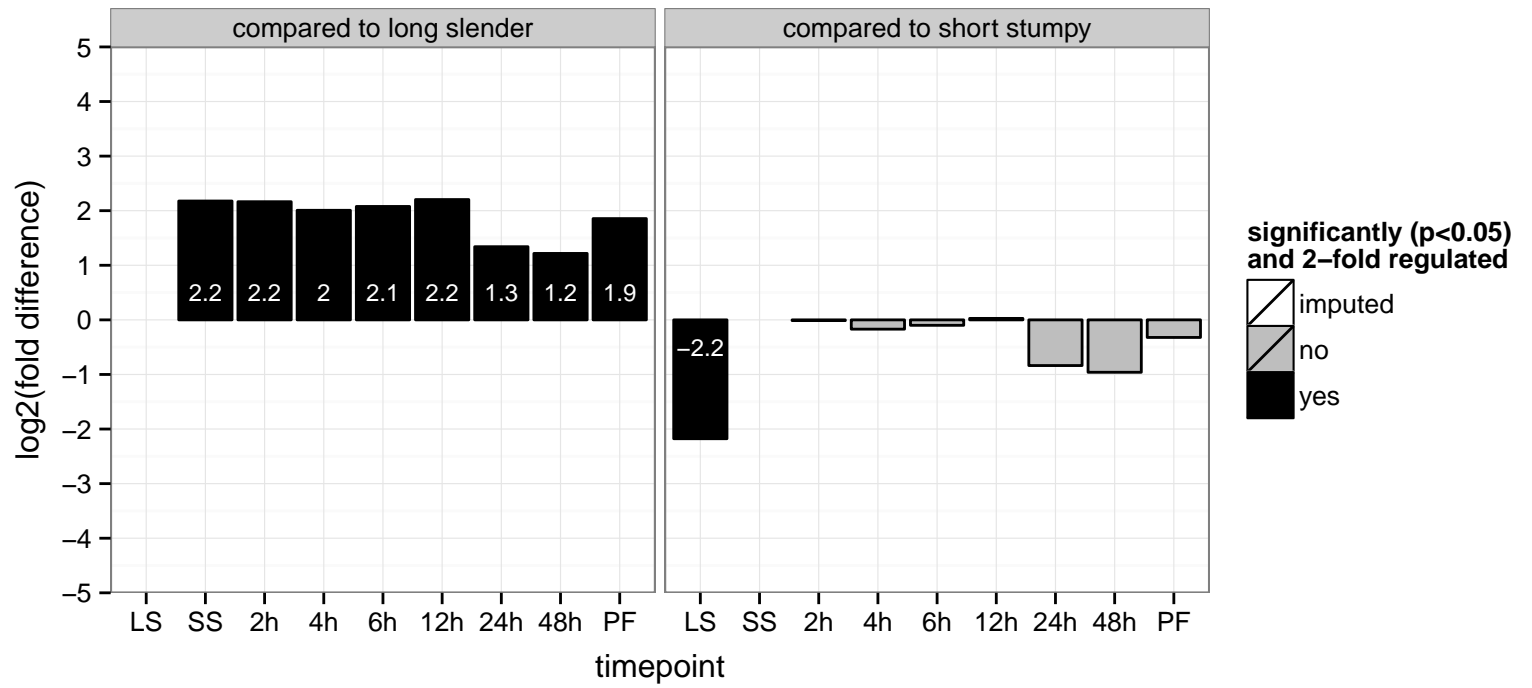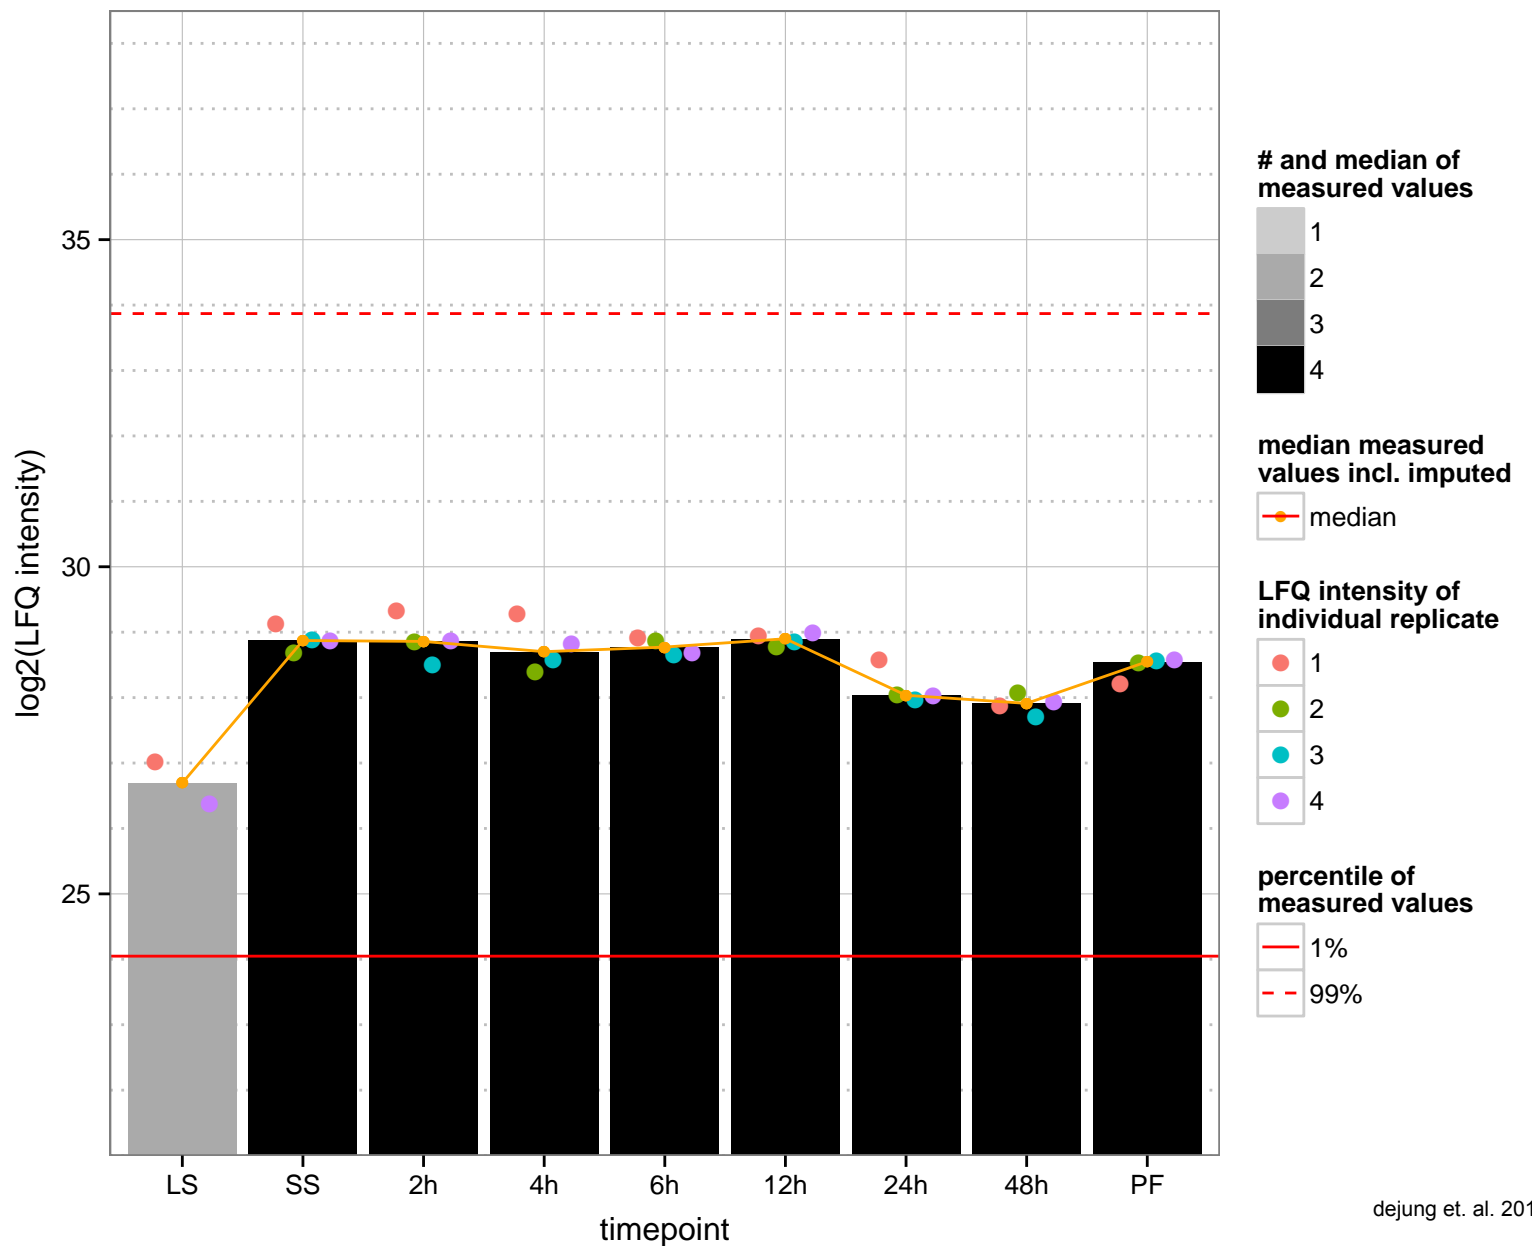

protein mkt1, putative (MKT1)  
 Tb927.6.4770  
 AGOF: null  
 AGOC: polysome  
 AGOP: response to DNA damage stimulus  
 PGO: null  
 PGOC: null  
 PGOP: null

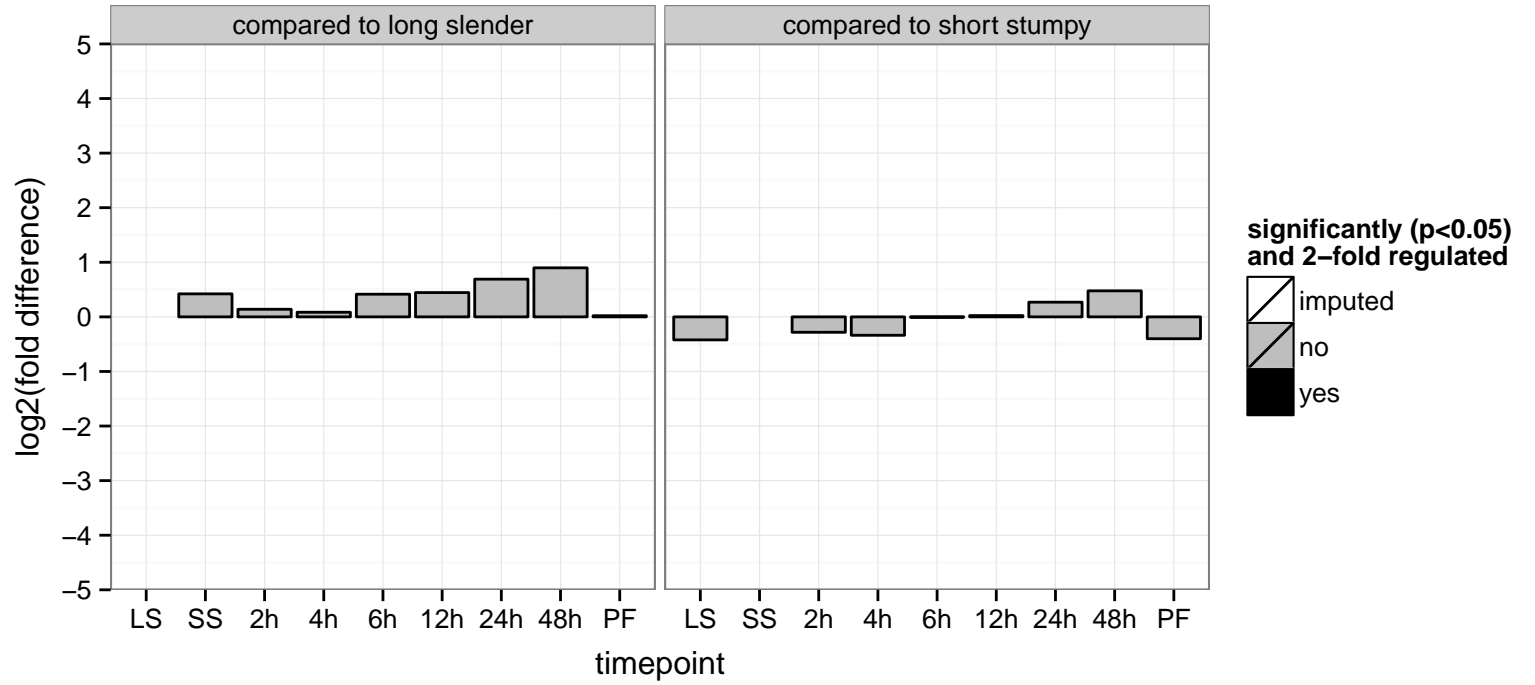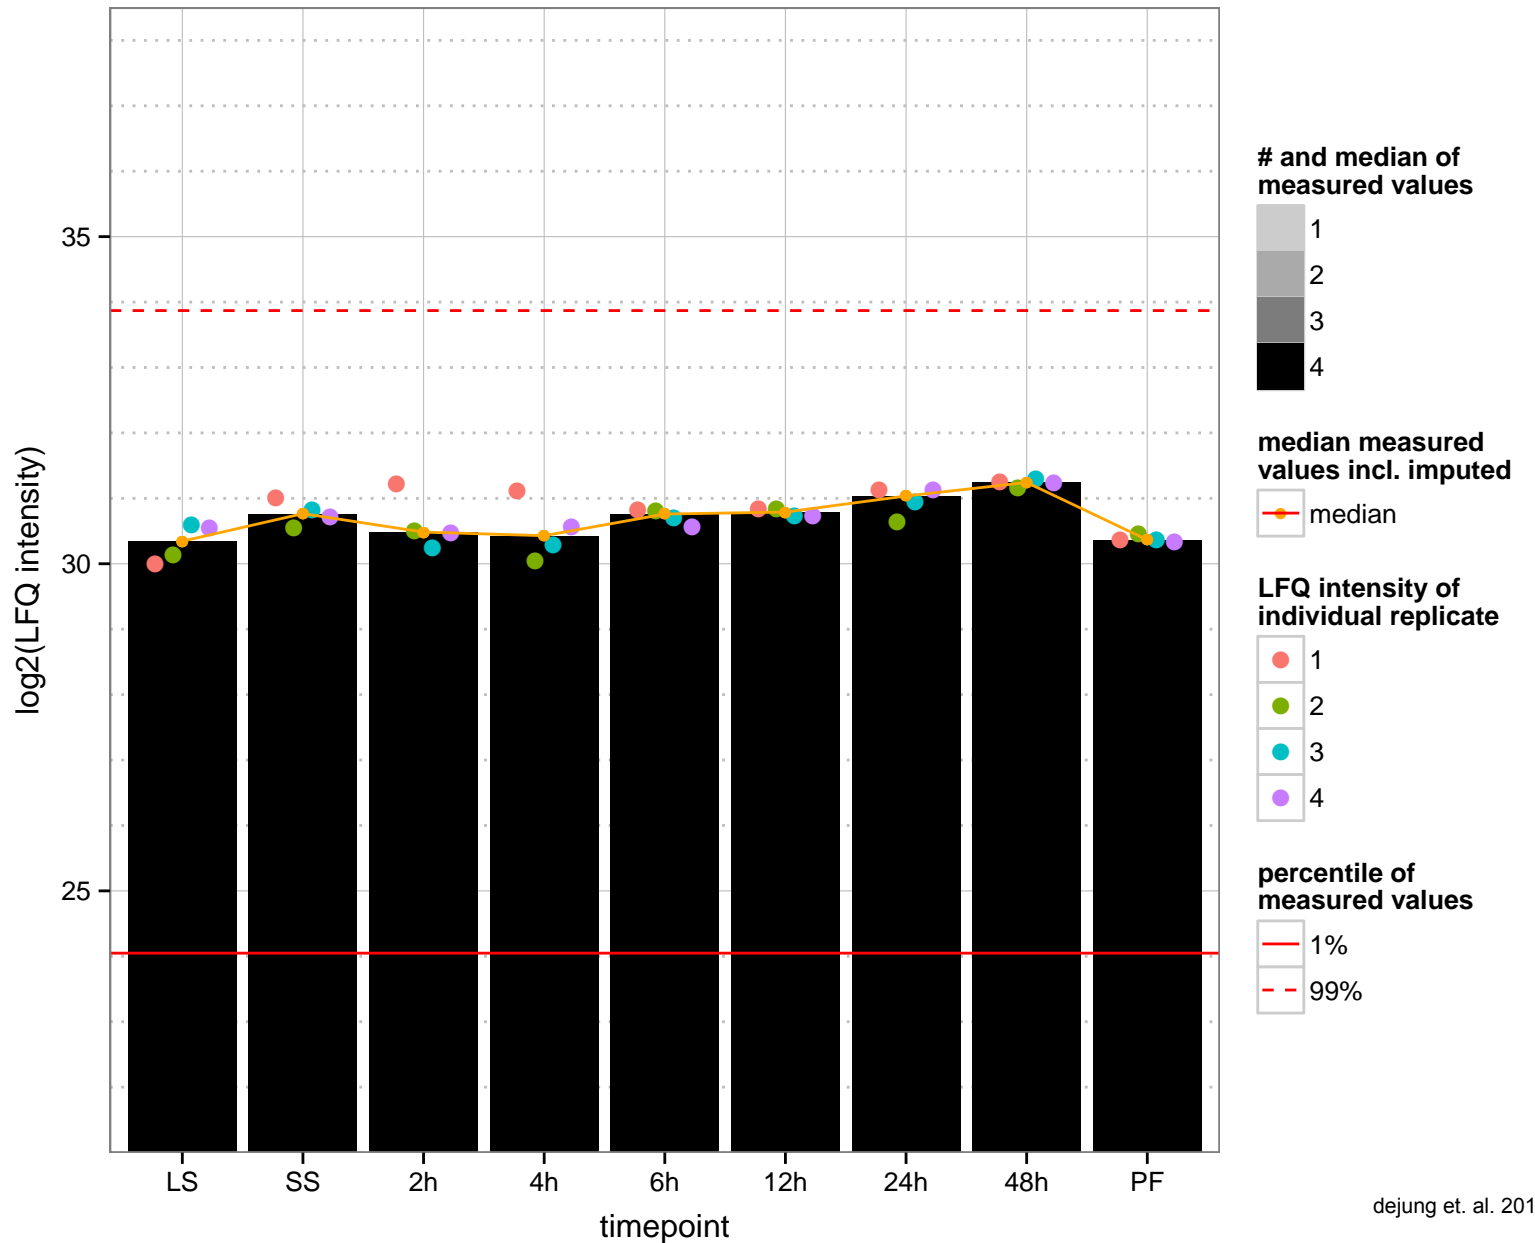

DNA ligase I, putative  
 Tb927.6.4780  
 AGOF: ATP binding, DNA binding, DNA ligase (ATP) activity  
 AGOC: null  
 AGOP: DNA recombination, DNA repair, DNA replication  
 PGOF: ATP binding, DNA binding, DNA ligase (ATP) activity  
 PGOC: null  
 PGOP: DNA recombination, DNA repair, DNA replication

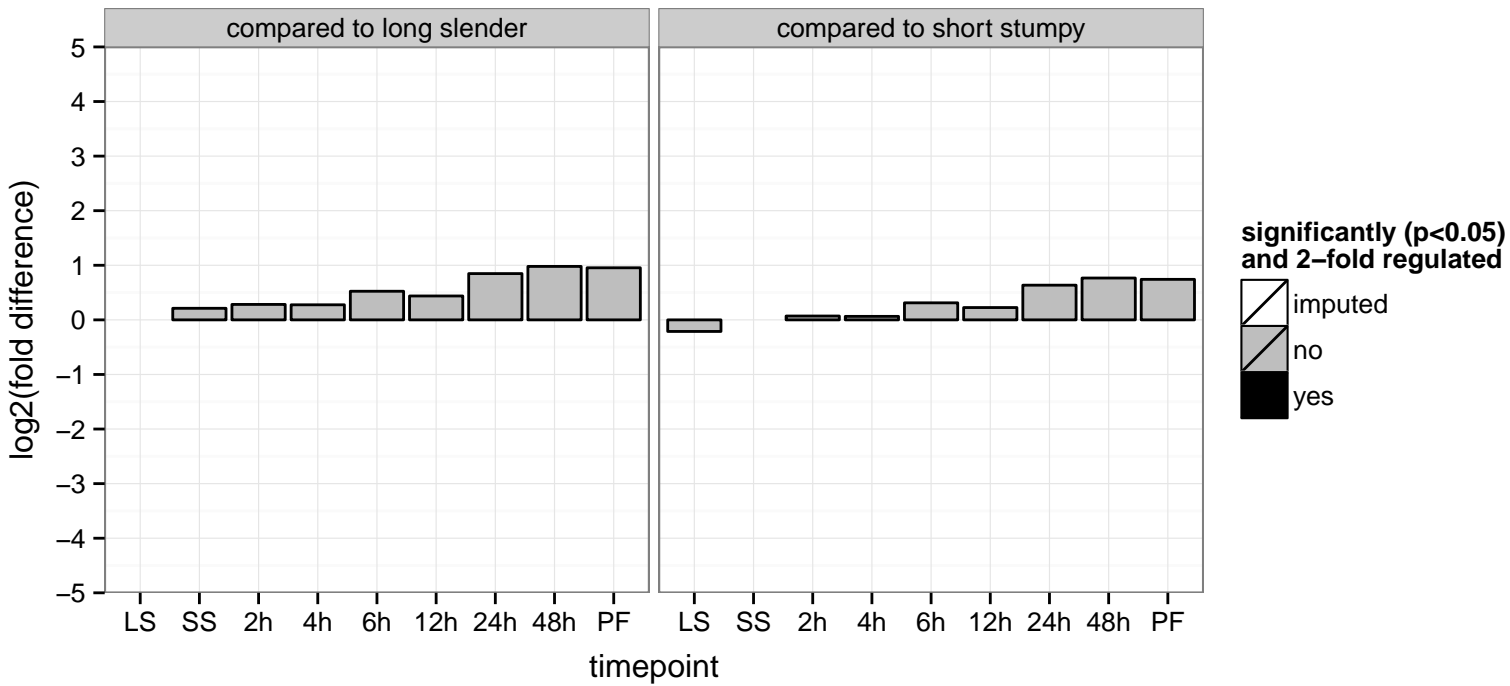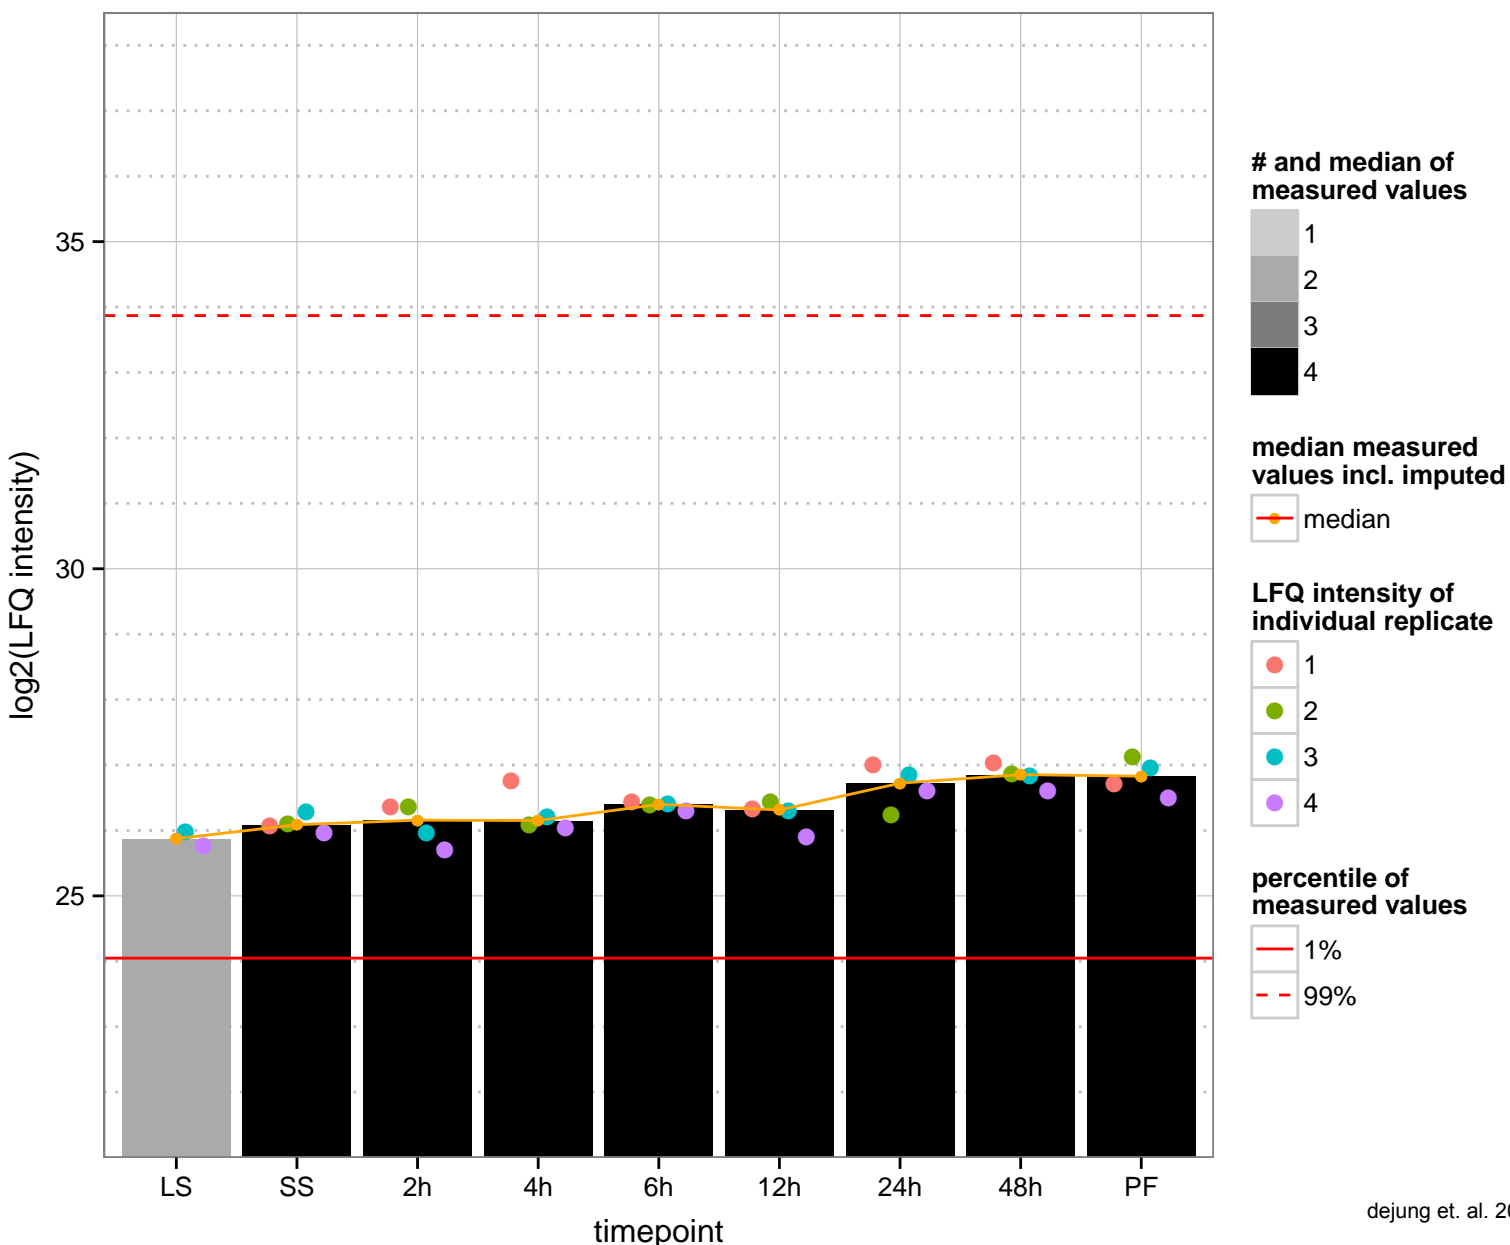

mago nashi-like protein, putative  
 Tb927.6.4950  
 AGOF: null  
 AGOC: nucleus  
 AGOP: null  
 PGO: null  
 PGO: nucleus  
 PGOP: null

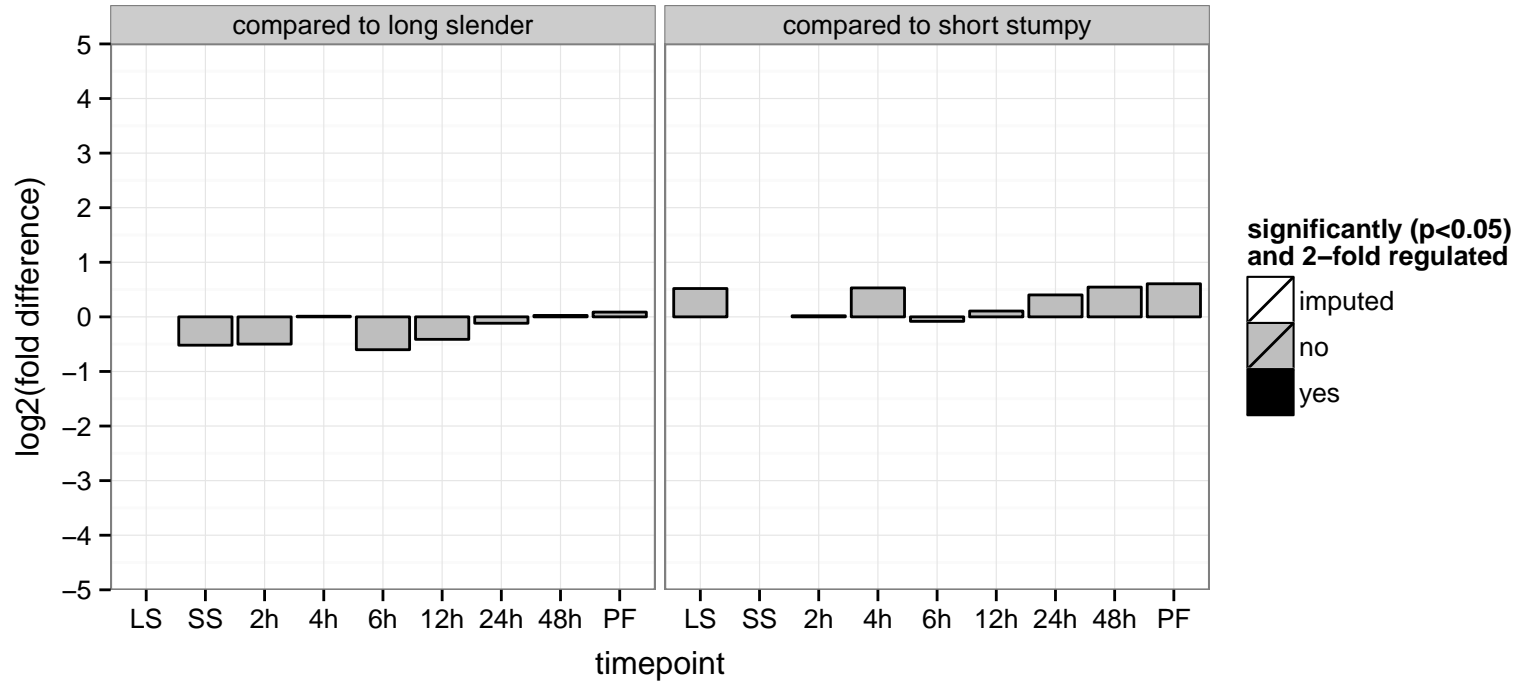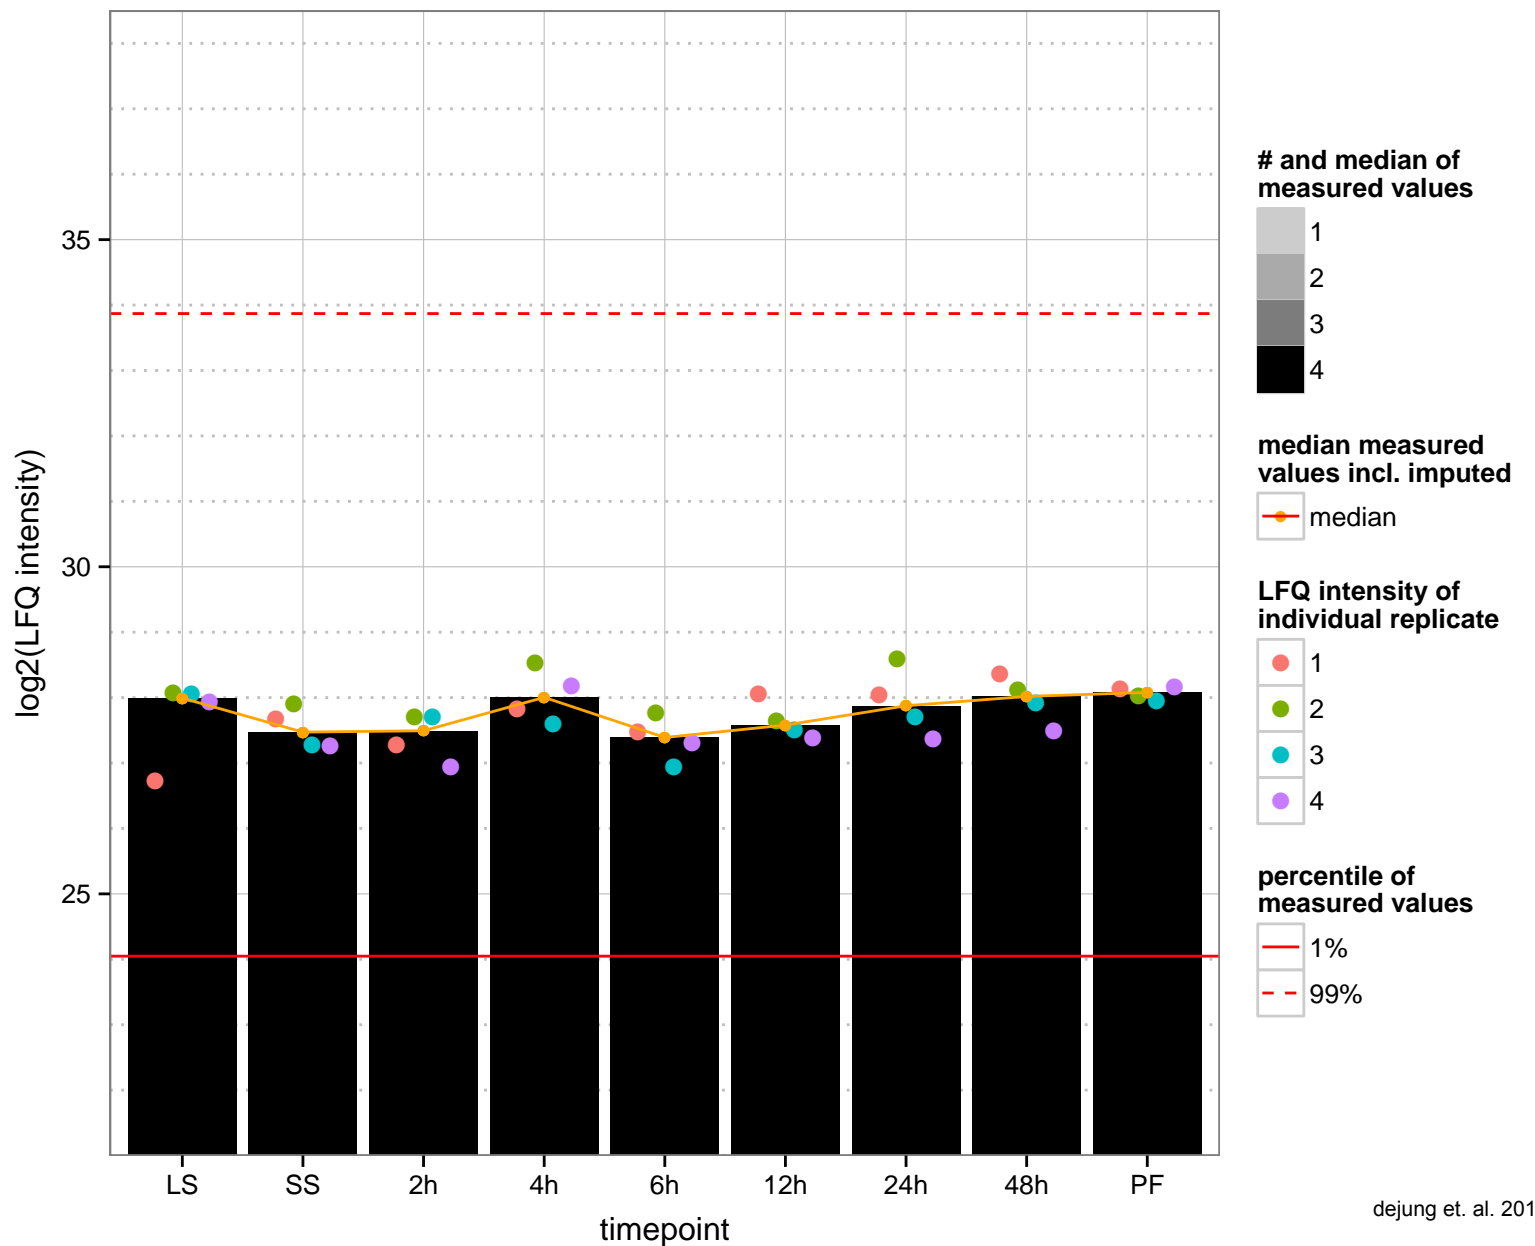

hypothetical protein, conserved  
 Tb927.6.5000  
 AGOF: null  
 AGOC: null  
 AGOP: null  
 PGO: null  
 PGOC: null  
 PGOP: null

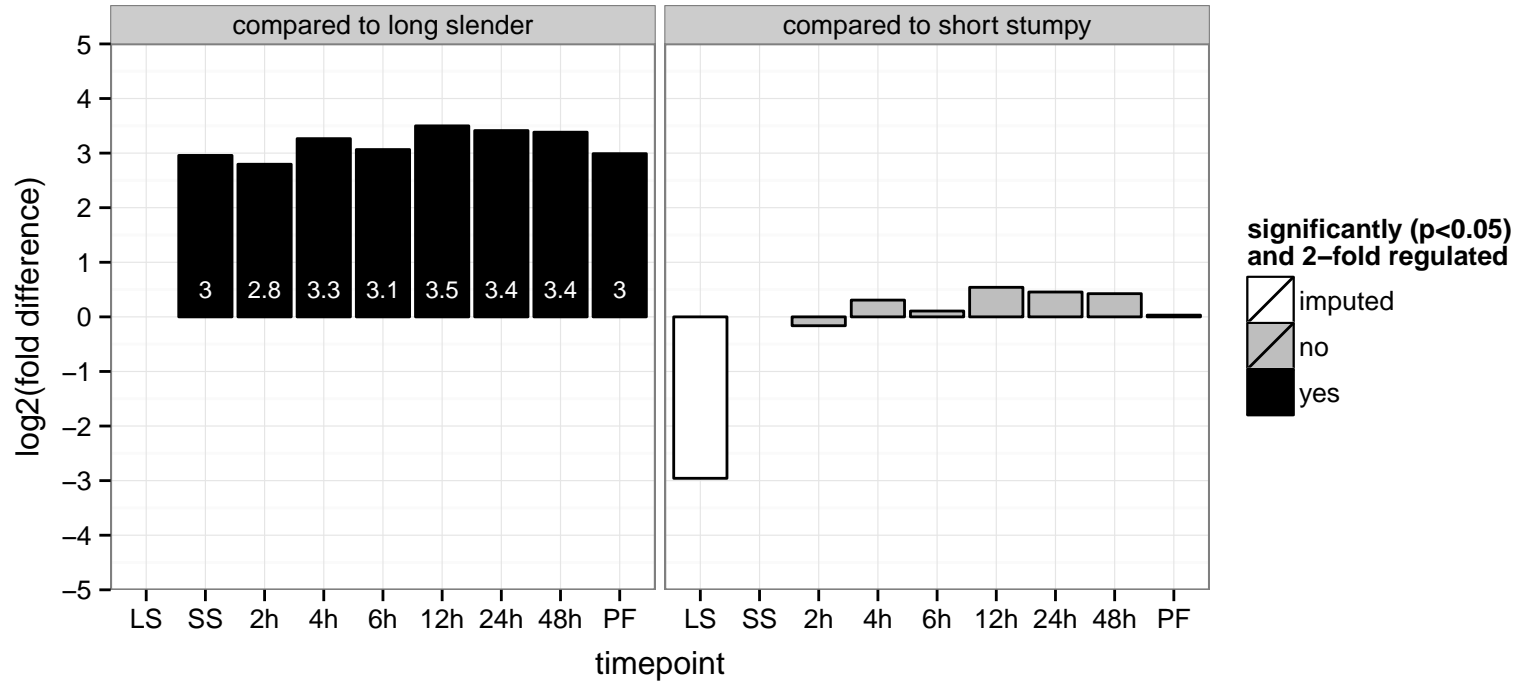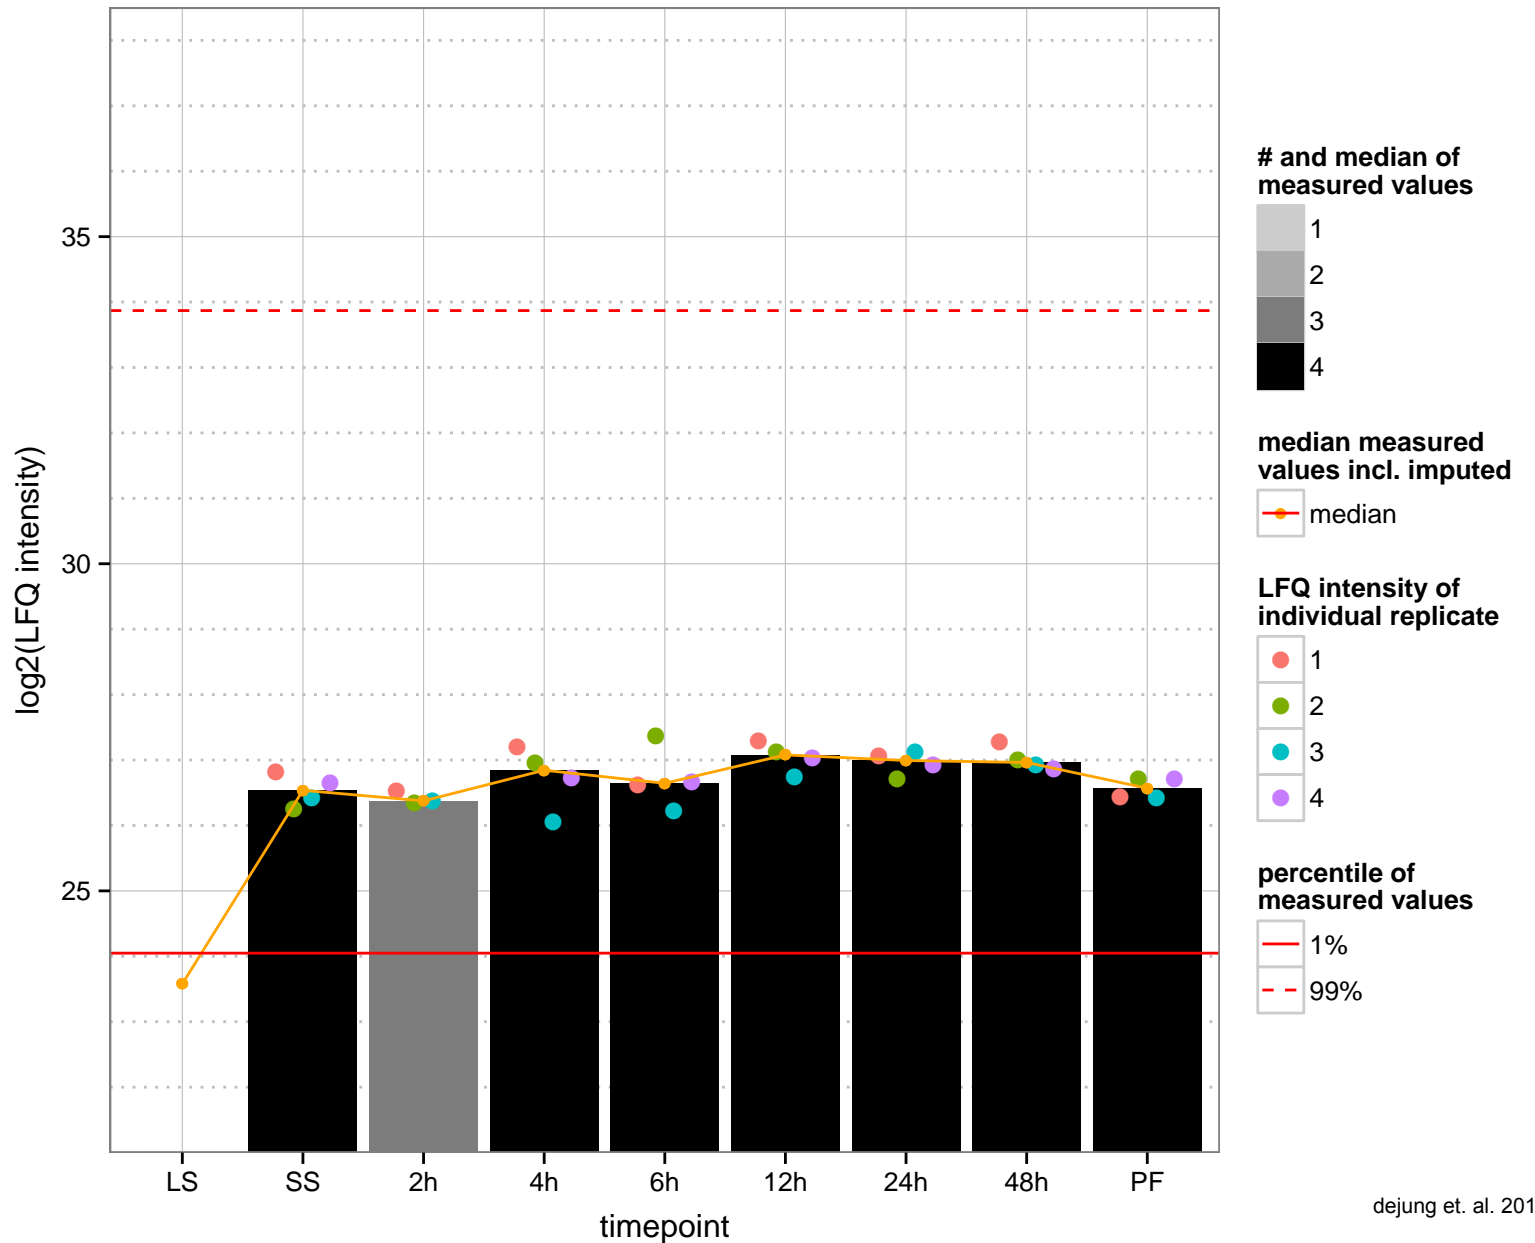

leucine-rich repeat protein (LRRP), putative  
 Tb927.6.5030  
 AGOF: null  
 AGOC: null  
 AGOP: ciliary or flagellar motility  
 PGO: protein binding  
 PGOC: null  
 PGOP: null

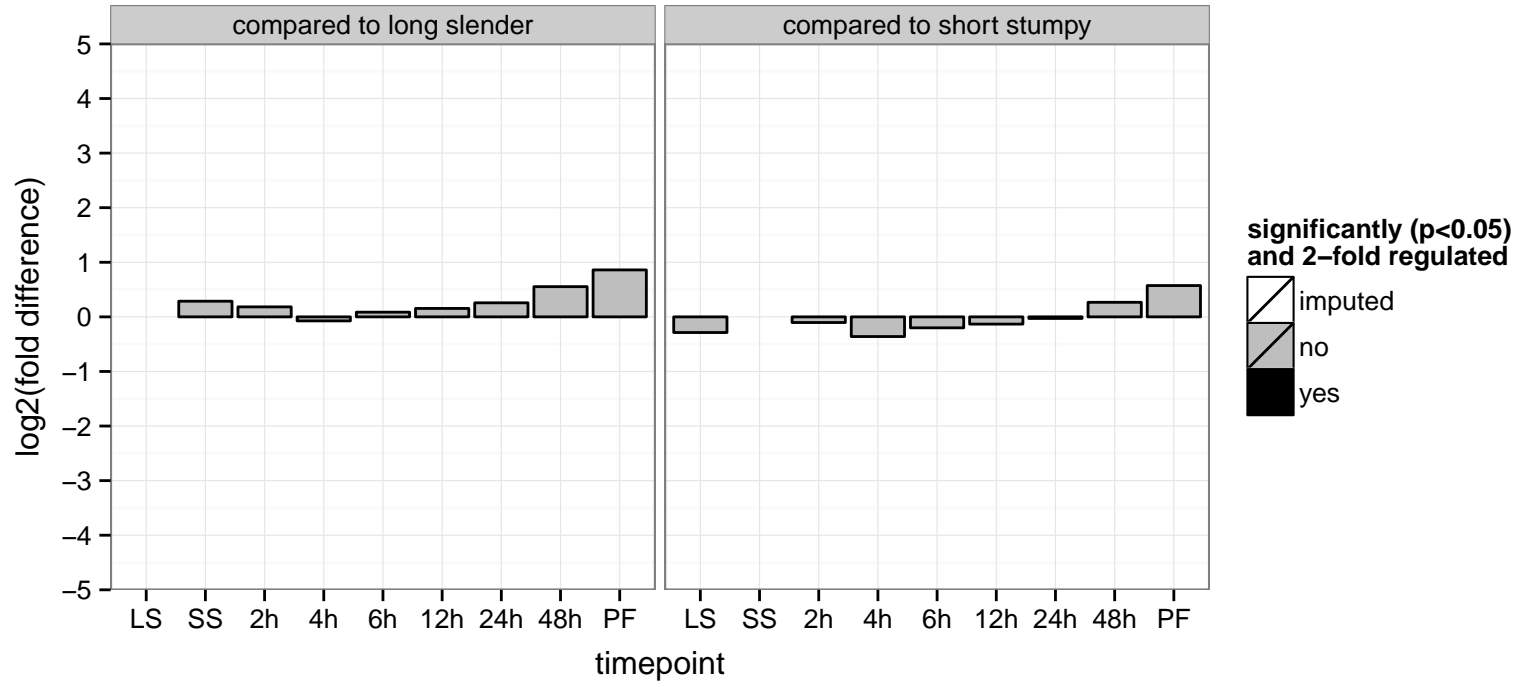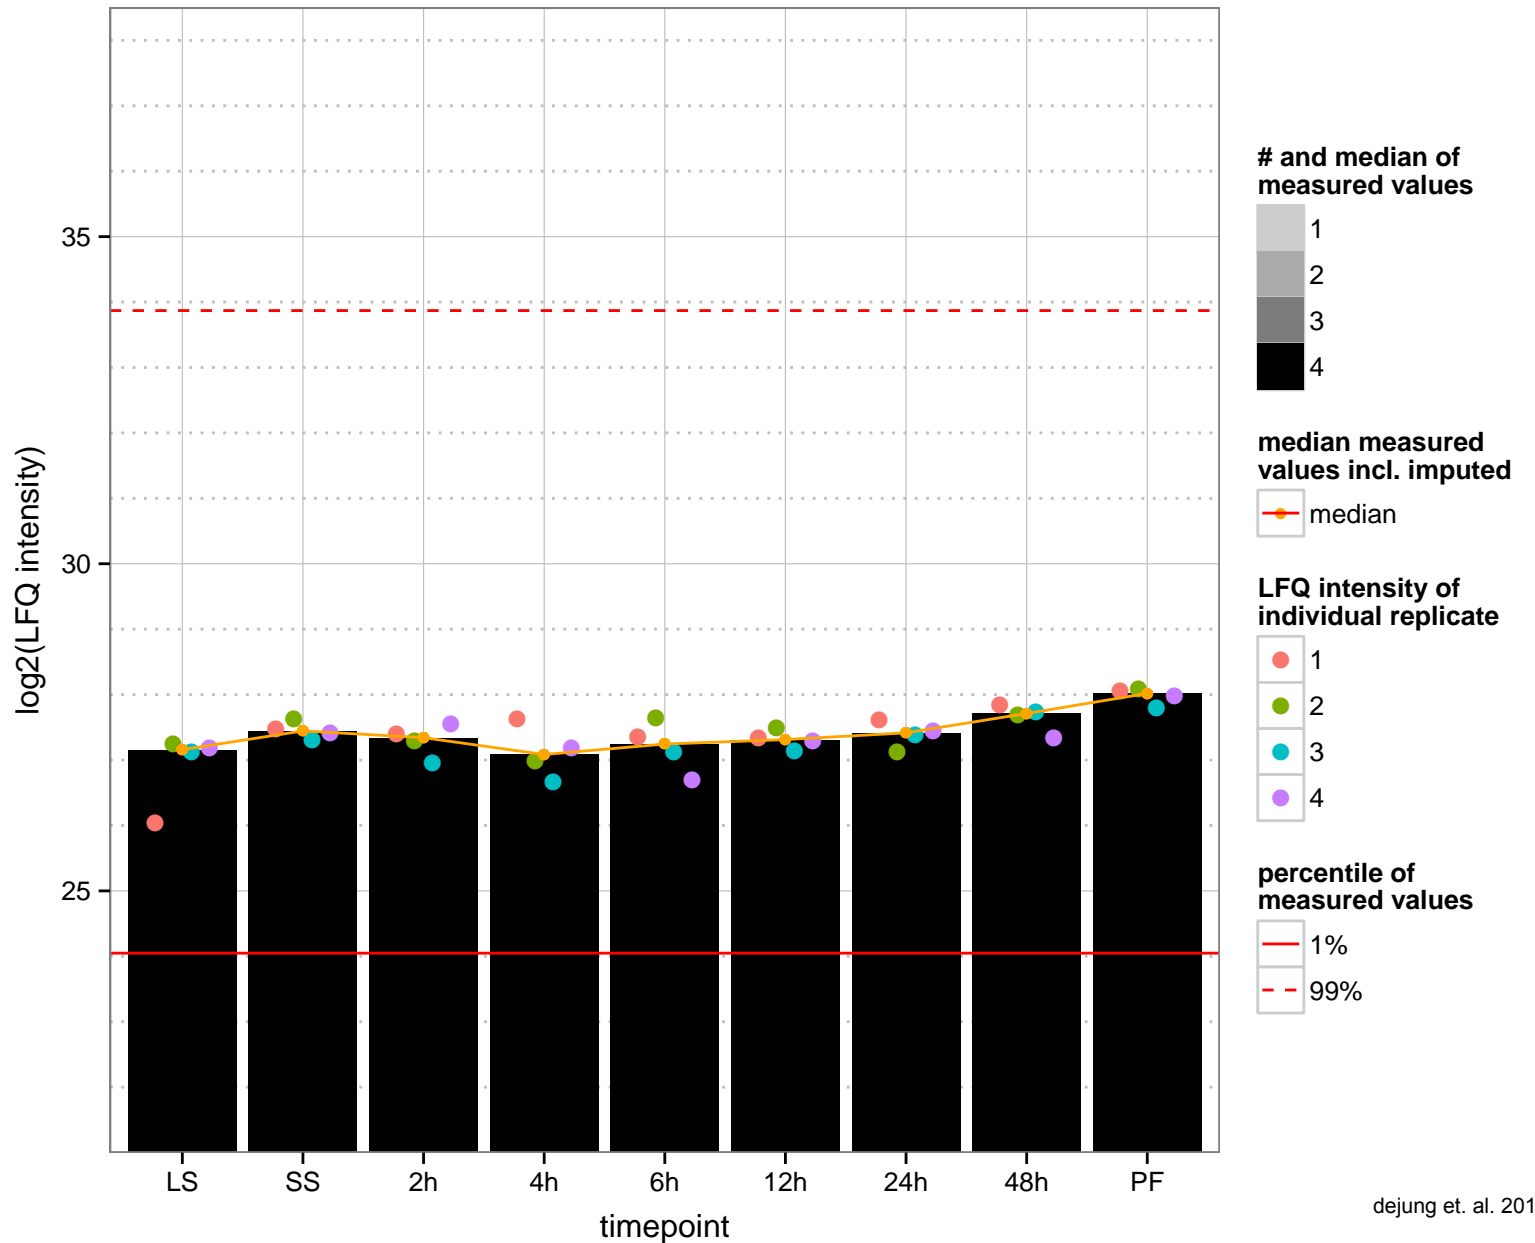

V-type ATPase, C subunit, putative

Tb927.6.5050

AGOF: hydrogen ion transmembrane transporter activity

AGOC: proton-transporting V-type ATPase, V0 domain

AGOP: ATP synthesis coupled proton transport

PGOF: hydrogen ion transmembrane transporter activity

PGOC: proton-transporting two-sector ATPase complex, proton-transporting domain

PGOP: ATP hydrolysis coupled proton transport

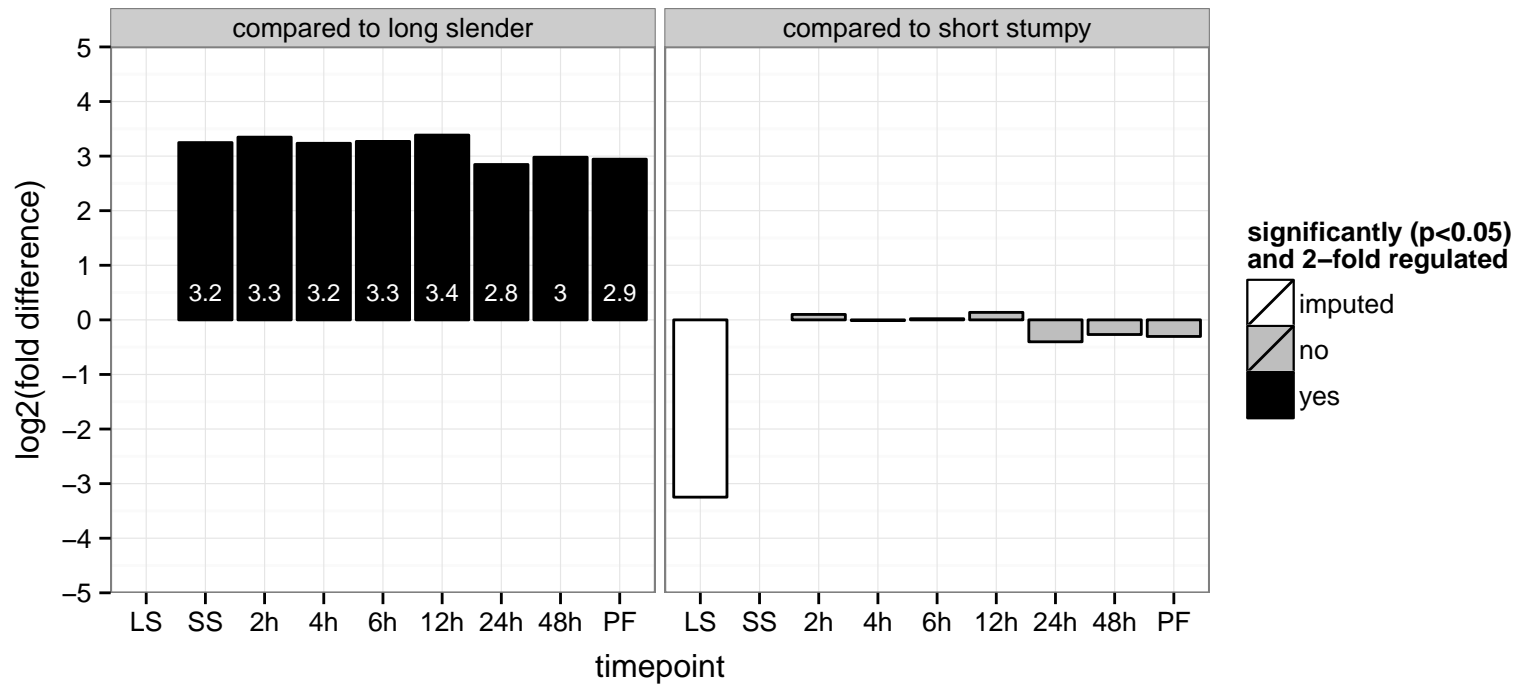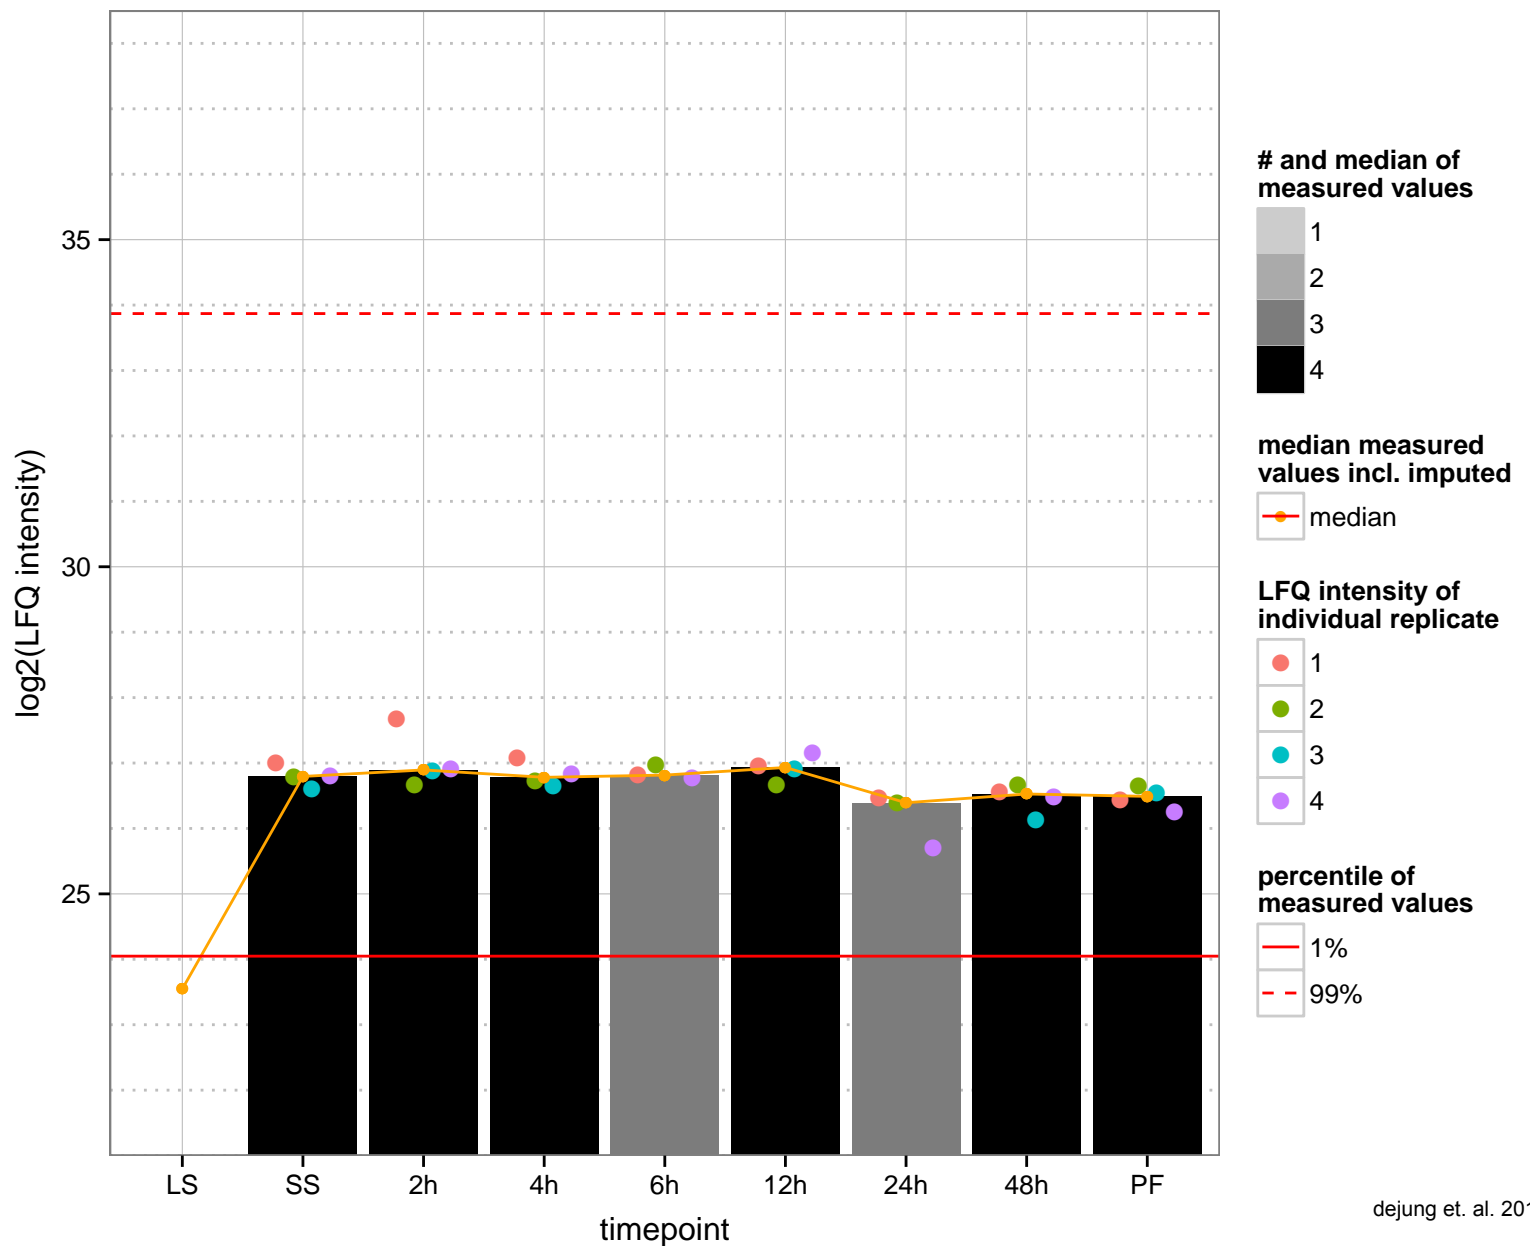



NA, hypothetical protein, conserved  
 Tb927.6.5070  
 AGOF: NA, null  
 AGOC: NA, null  
 AGOP: NA, null  
 PGO: NA, null  
 PGO: NA, null  
 PGO: NA, null

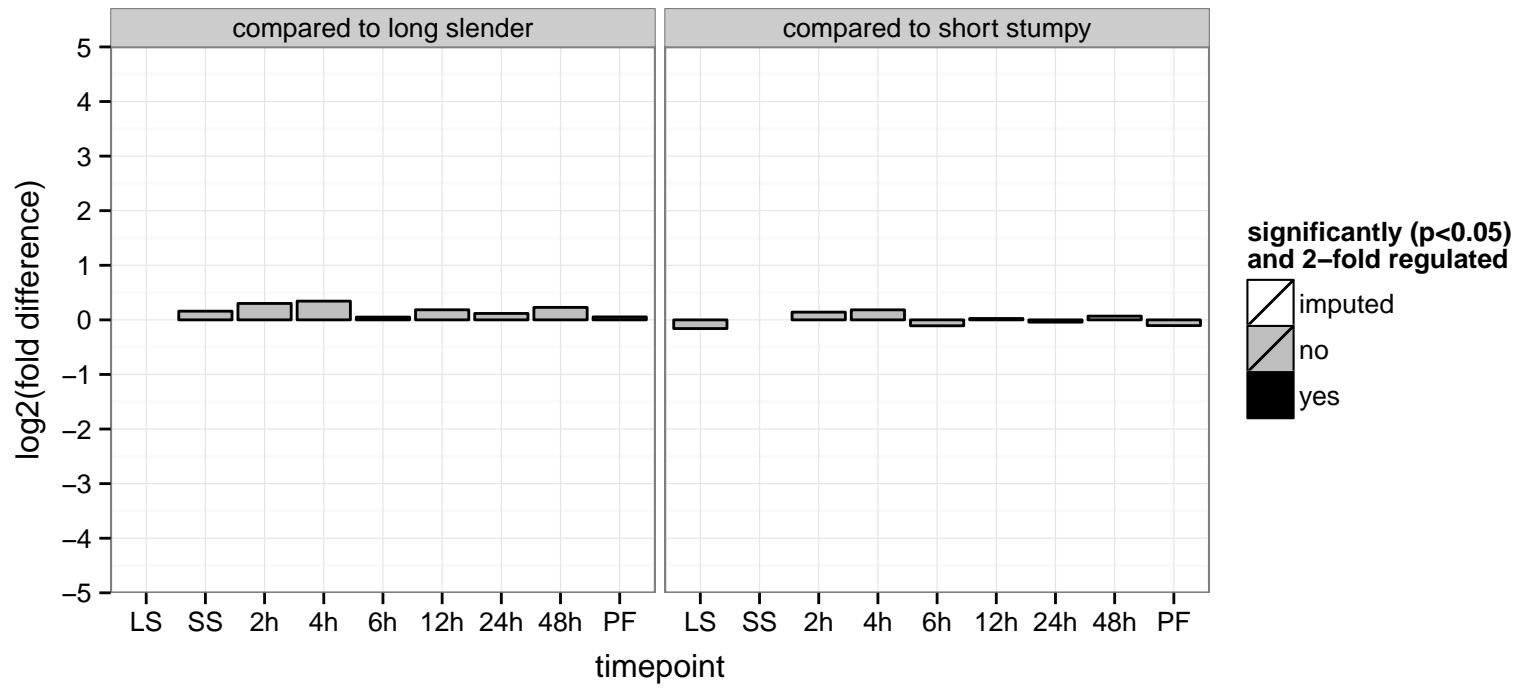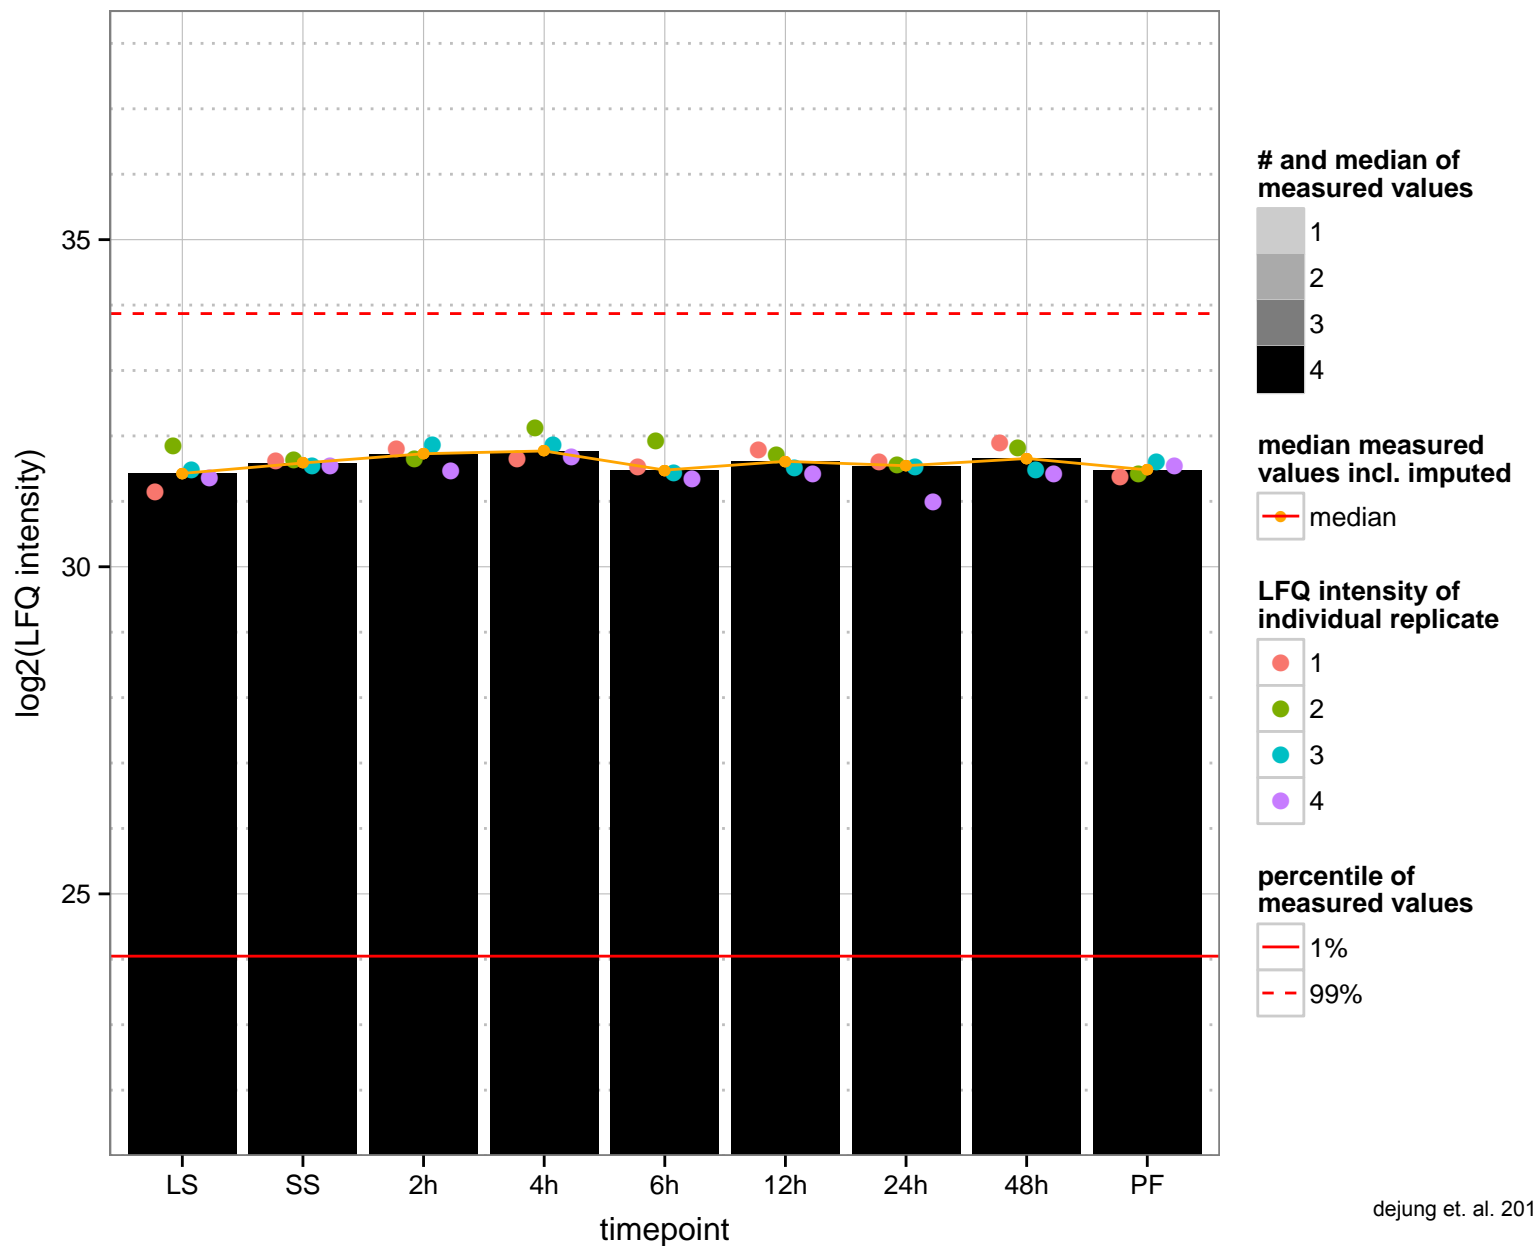

hypothetical protein, conserved  
 Tb927.6.5080  
 AGOF: null  
 AGOC: null  
 AGOP: null  
 PGO: null  
 PGOC: null  
 PGOP: null

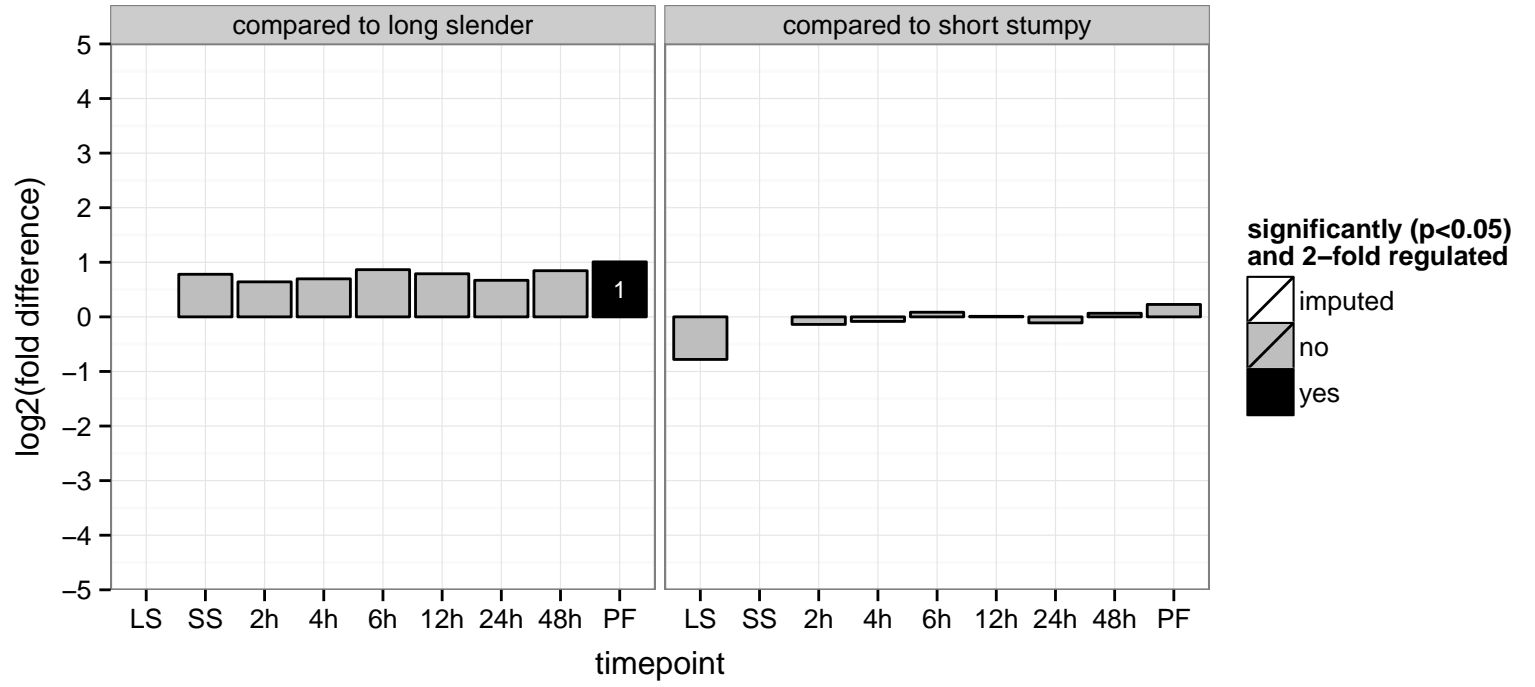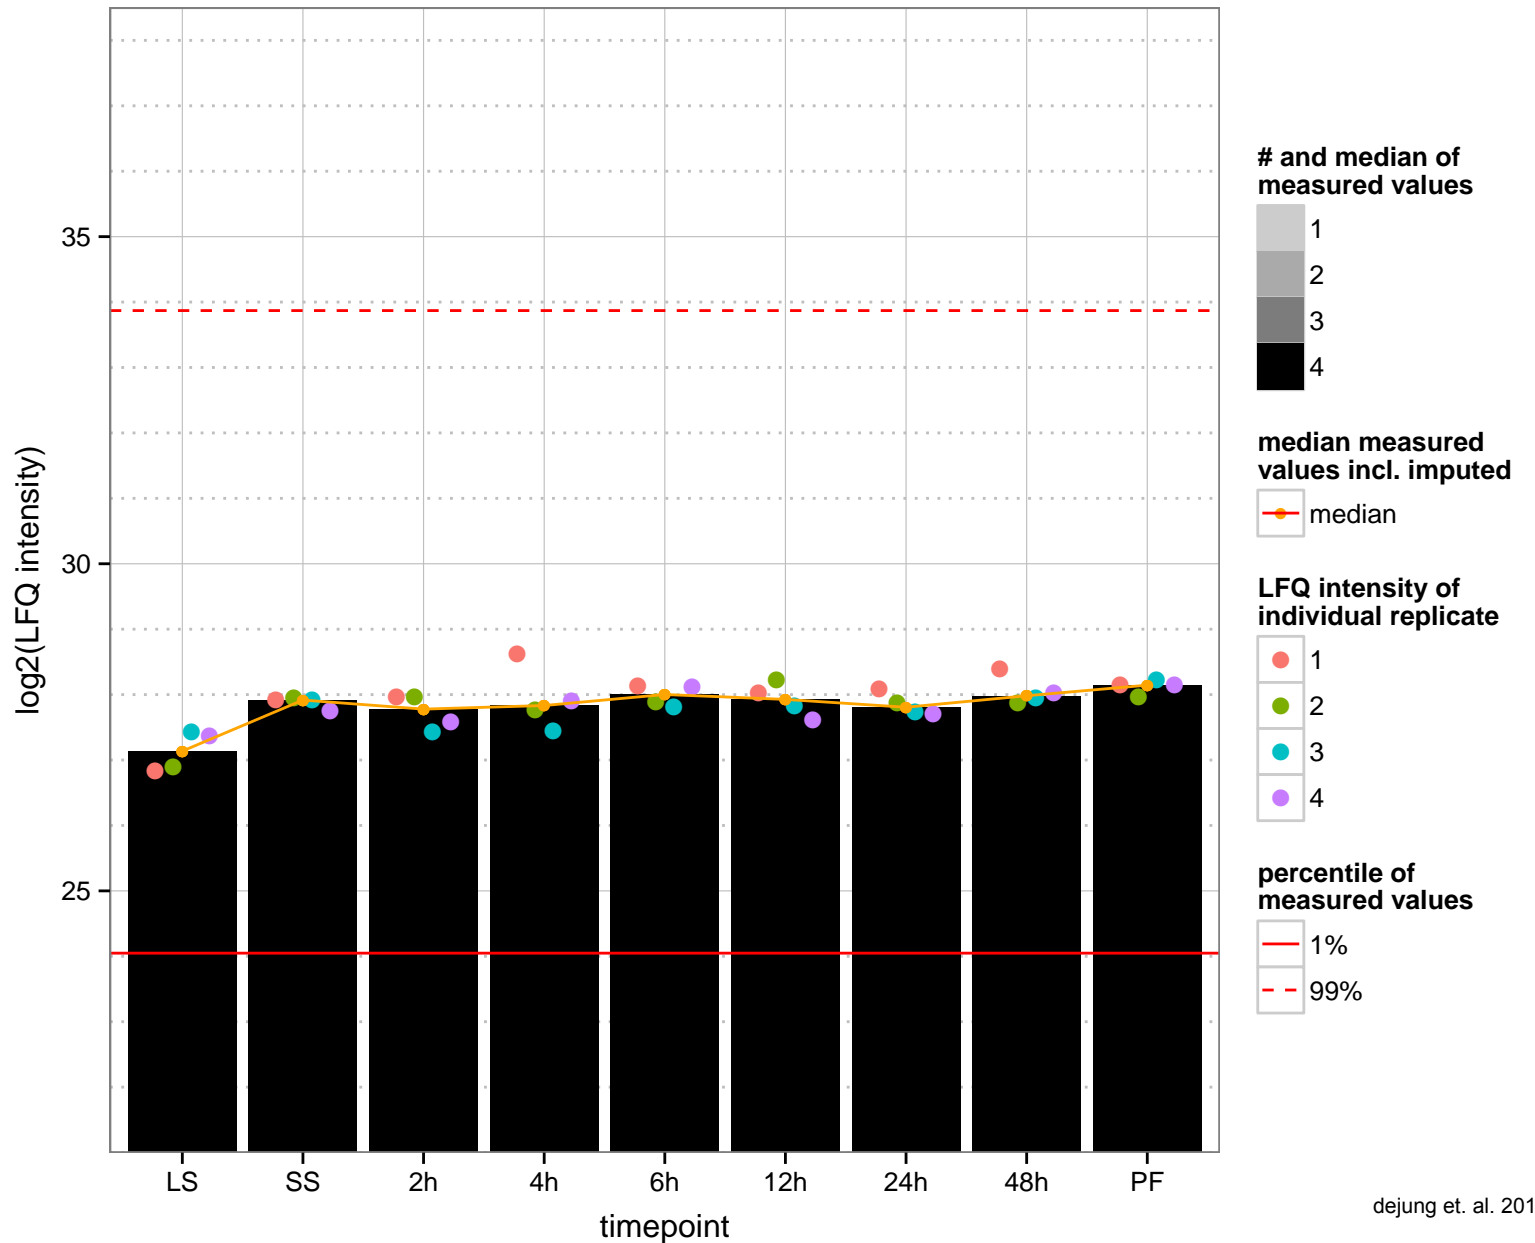

damage-specific DNA binding protein, putative  
 Tb927.6.5110  
 AGOF: nucleic acid binding  
 AGOC: nucleus  
 AGOP: null  
 PGOF: nucleic acid binding  
 PGO: nucleus  
 PGOP: null

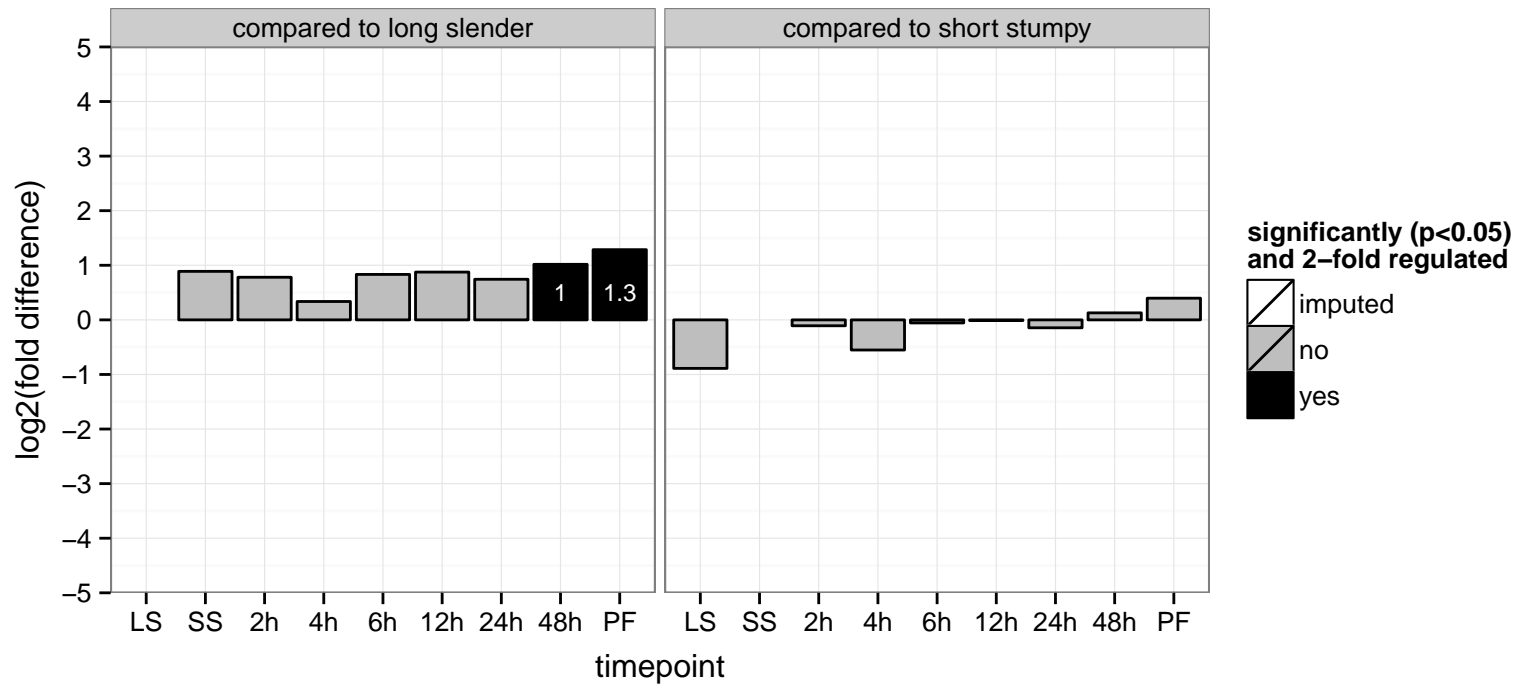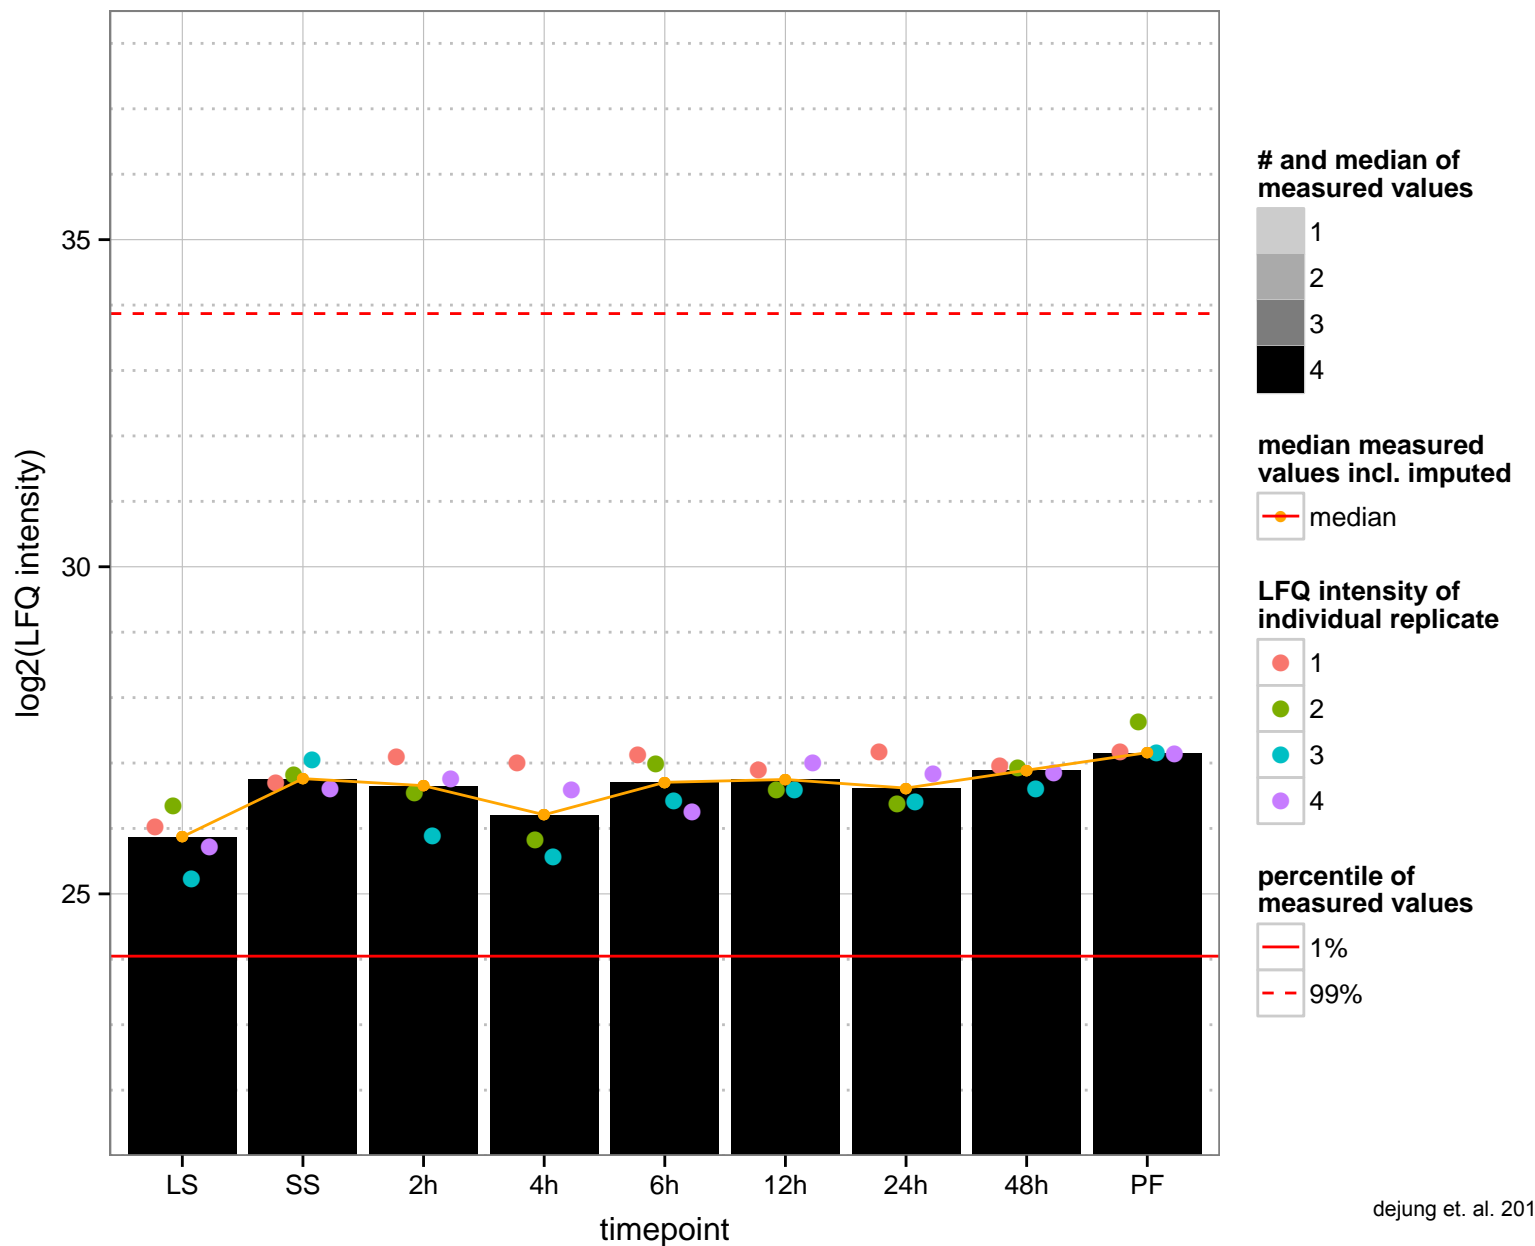

60S acidic ribosomal protein P2, putative  
 Tb927.6.5130;Tb927.6.5120  
 AGOF: structural constituent of ribosome  
 AGOC: intracellular, ribosome  
 AGOP: translation, translational elongation  
 PGOF: structural constituent of ribosome, null  
 PGOC: intracellular, ribosome, null  
 PGOP: translational elongation, null

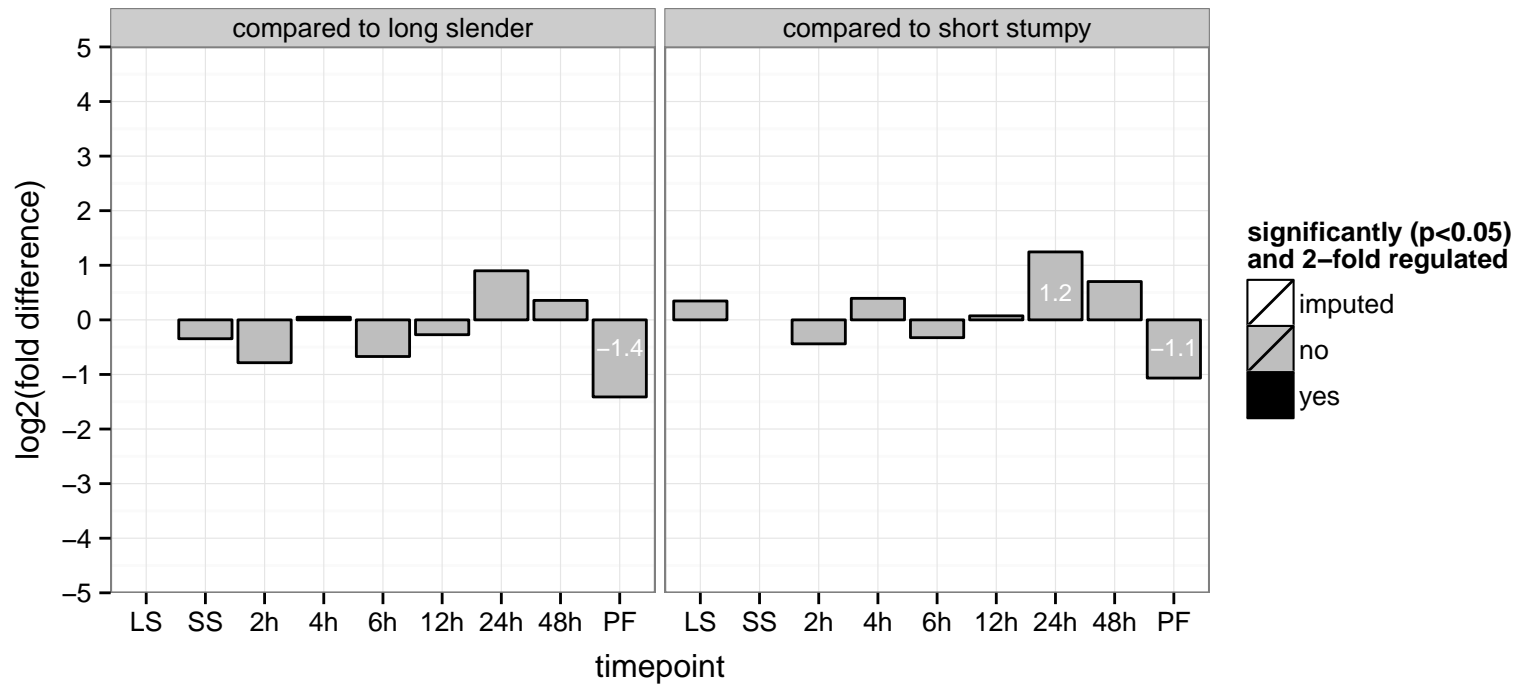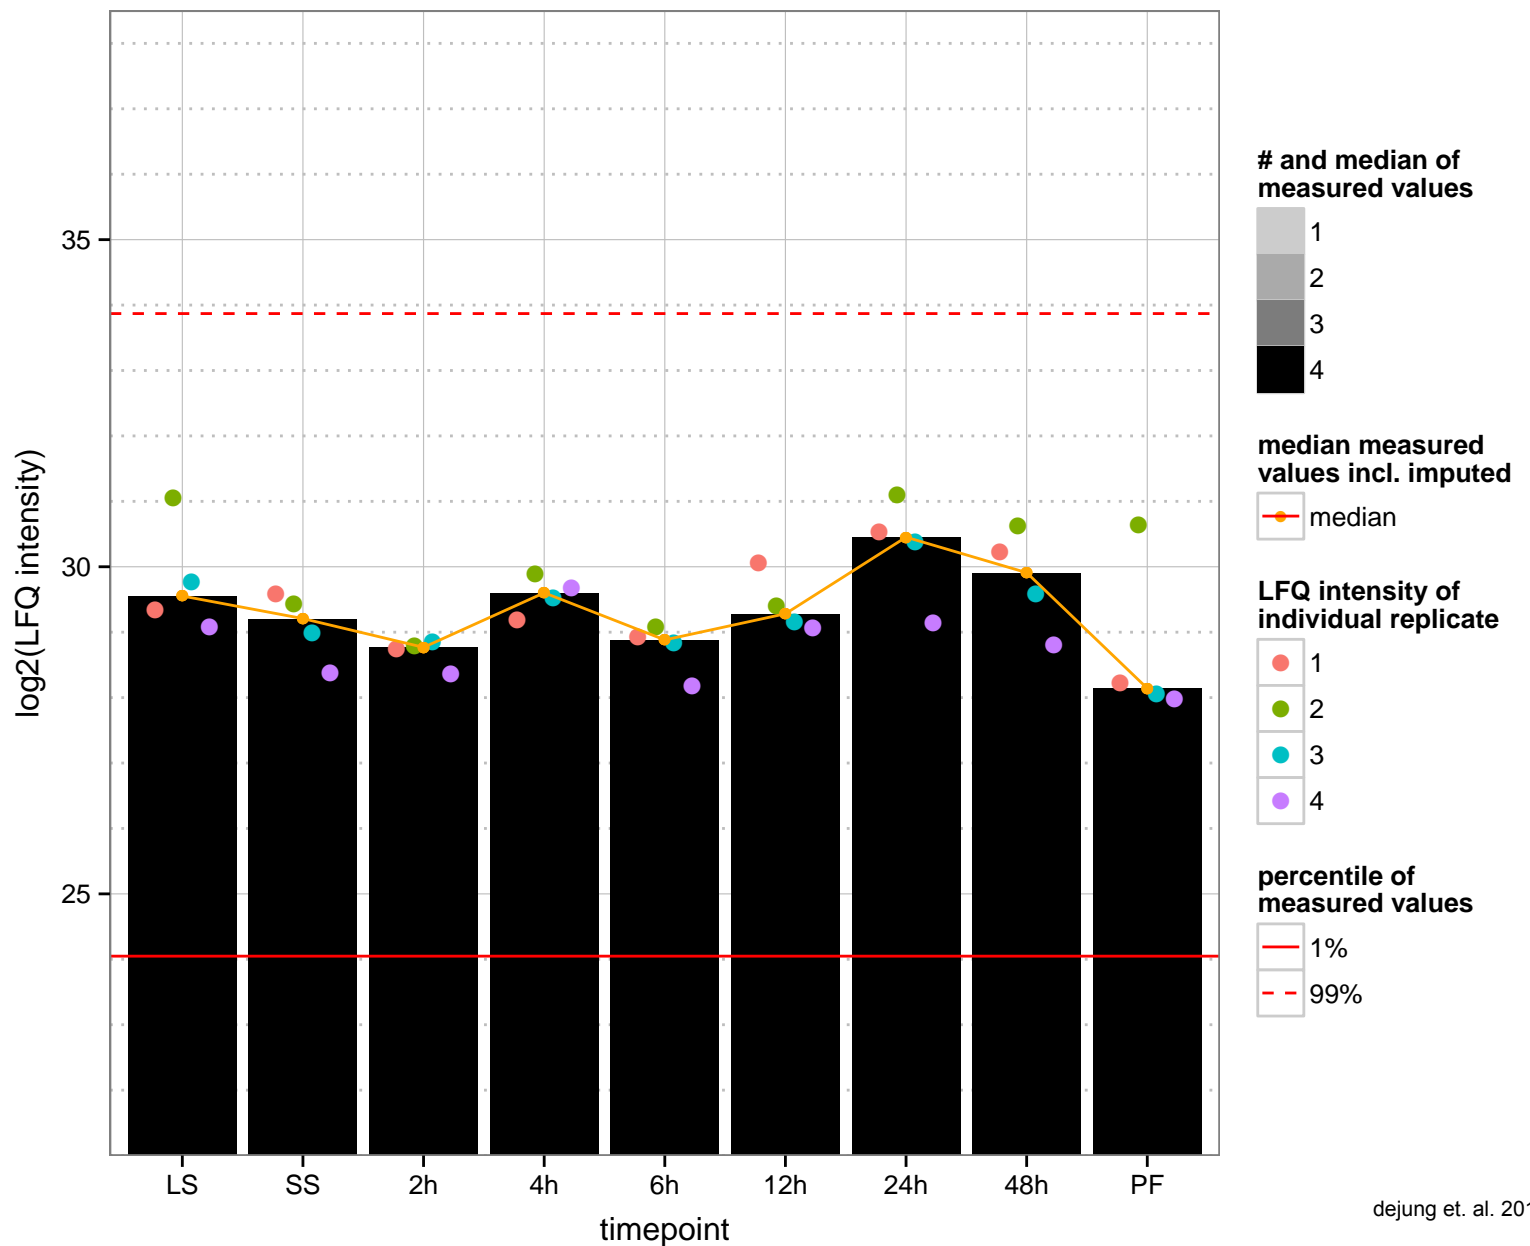

ribosomal P protein AGP2beta-1, putative  
 Tb927.6.5140  
 AGOF: null  
 AGOC: null  
 AGOP: null  
 PGO: null  
 PGOC: null  
 PGOP: null

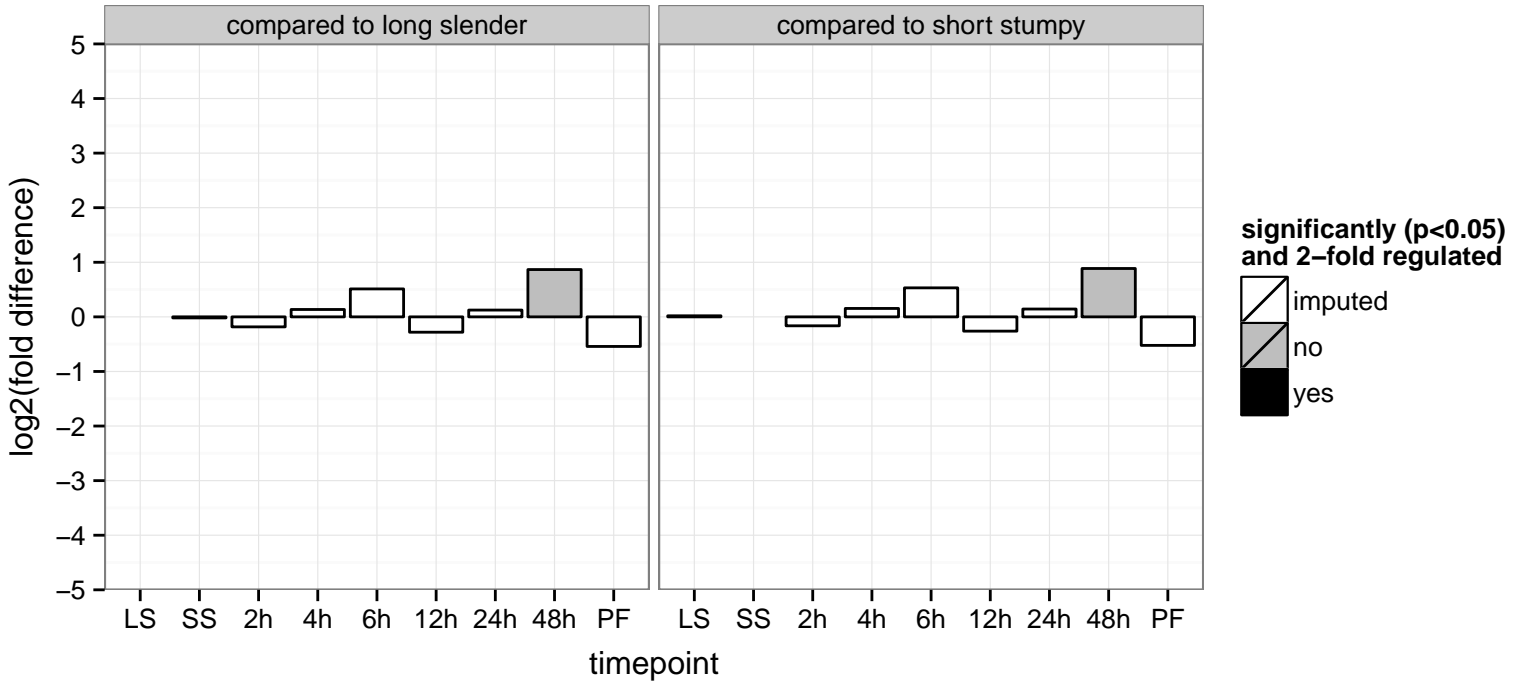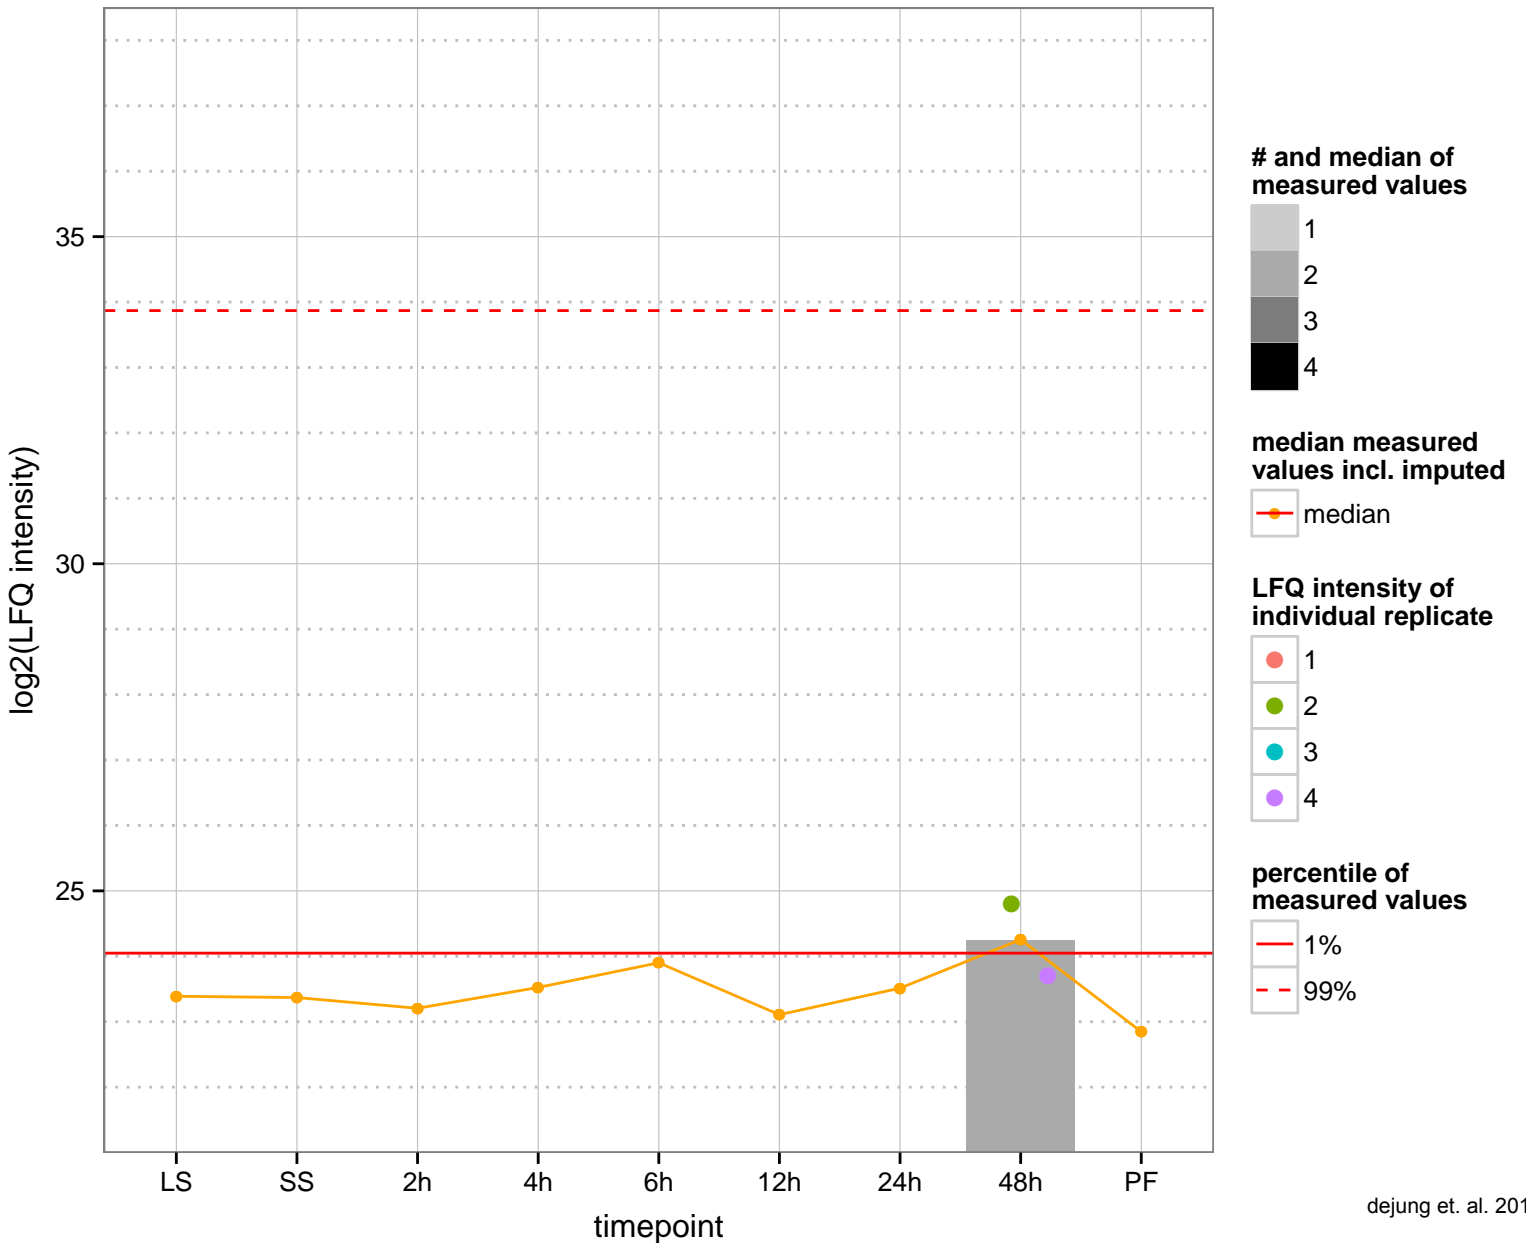

hypothetical protein, conserved  
 Tb927.6.610  
 AGOF: null  
 AGOC: mitochondrion  
 AGOP: null  
 PGO: null  
 PGOC: null  
 PGOP: null

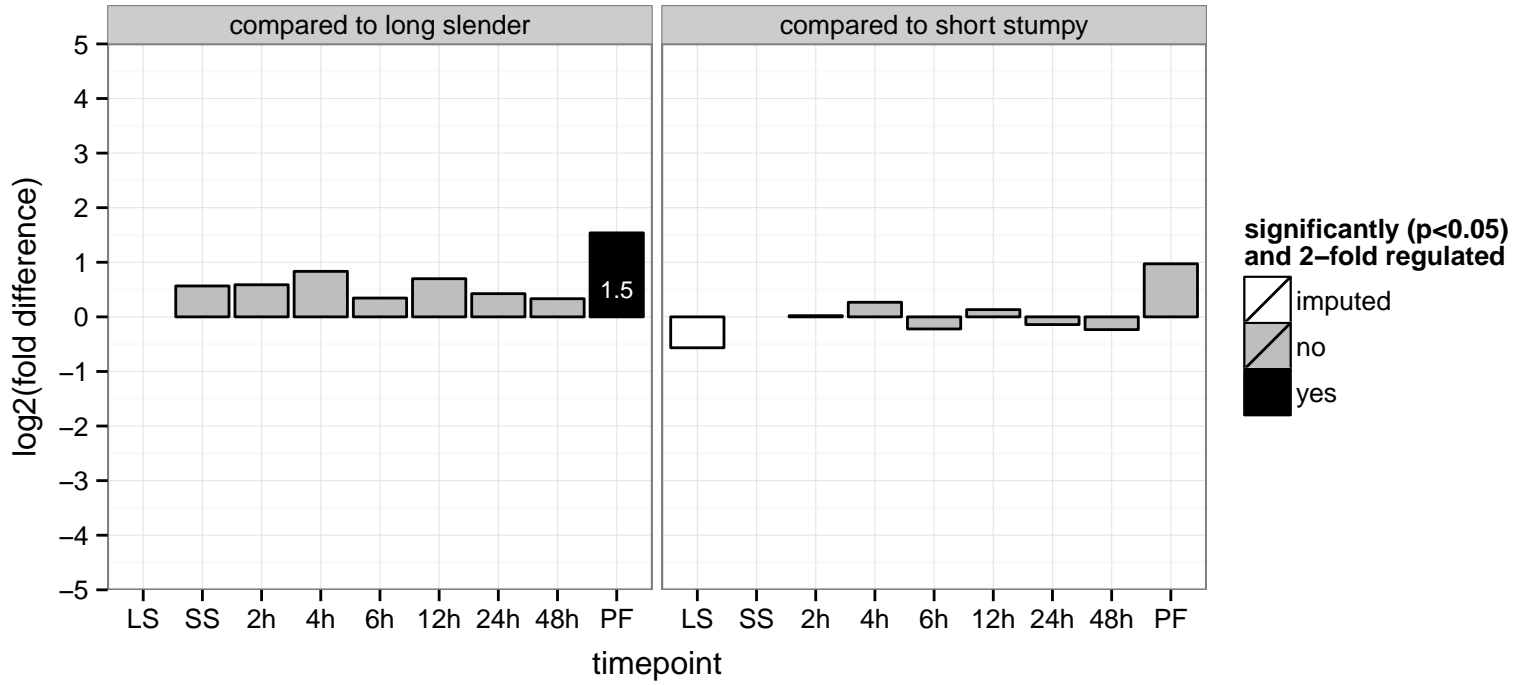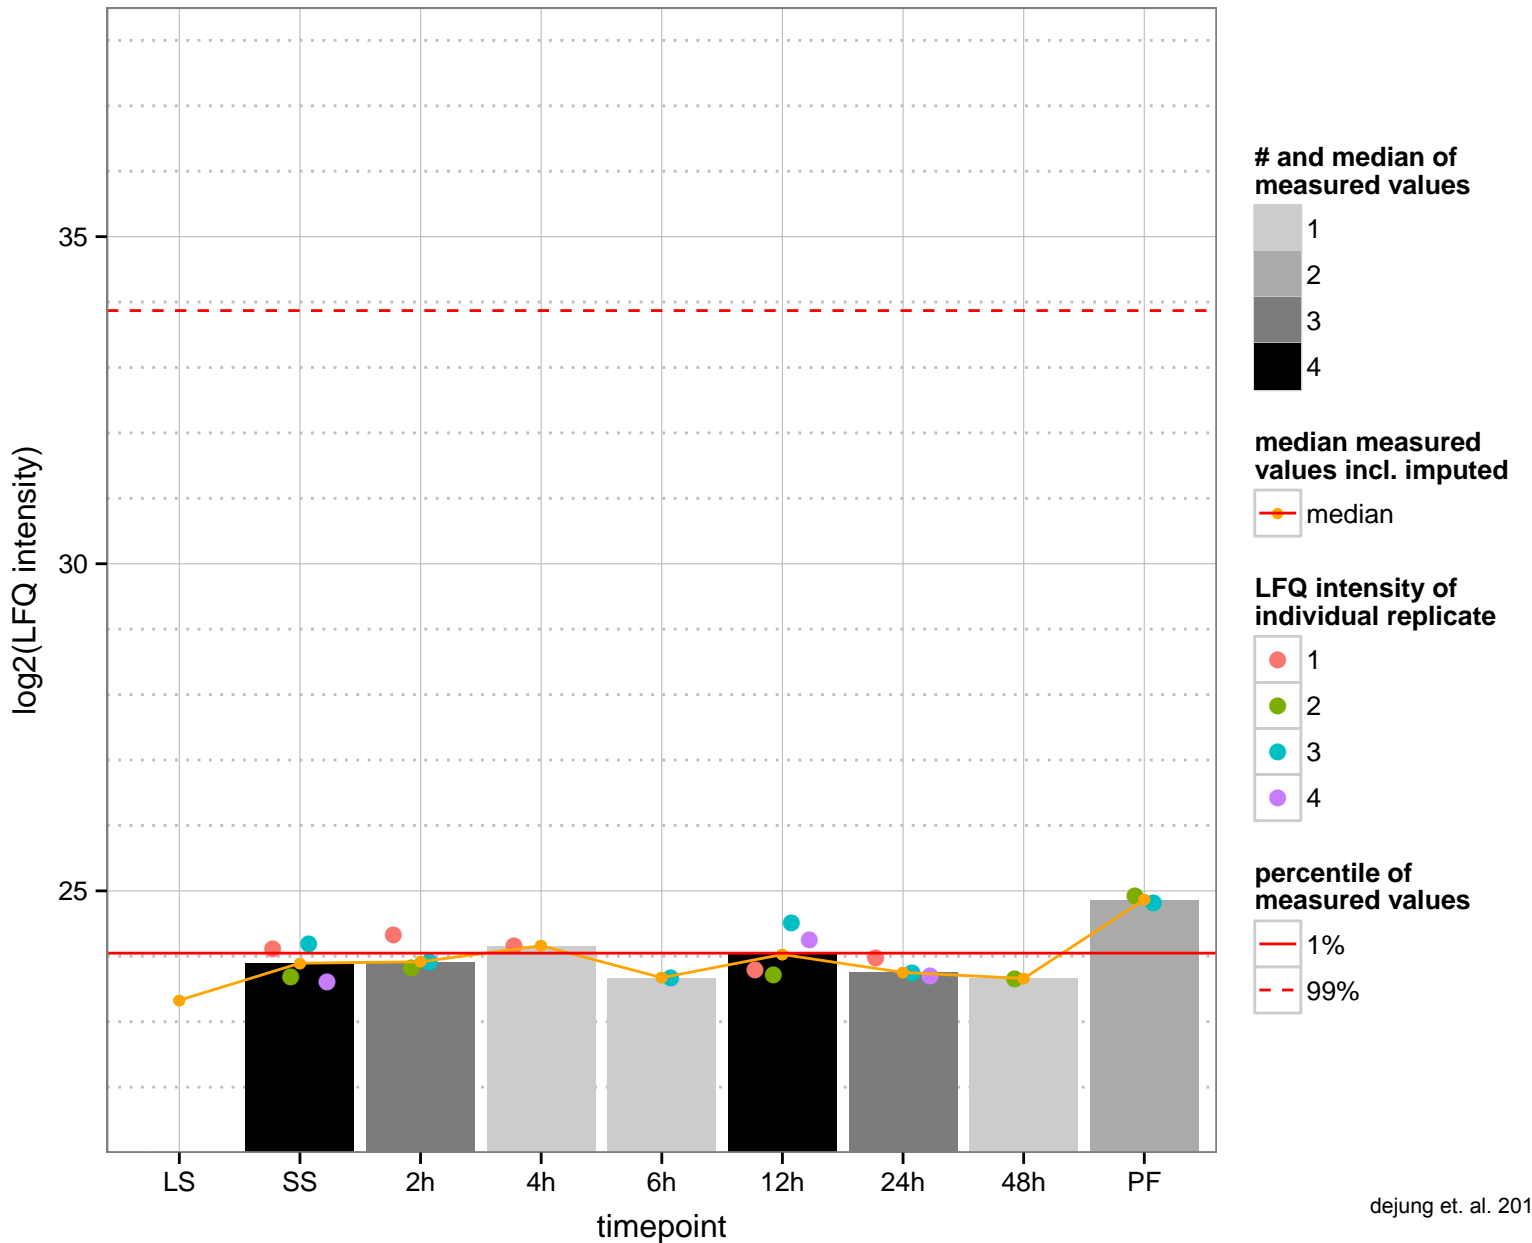

hypothetical protein, conserved  
 Tb927.6.620  
 AGOF: null  
 AGOC: null  
 AGOP: null  
 PGOF: null  
 PGO: null  
 PGOP: null

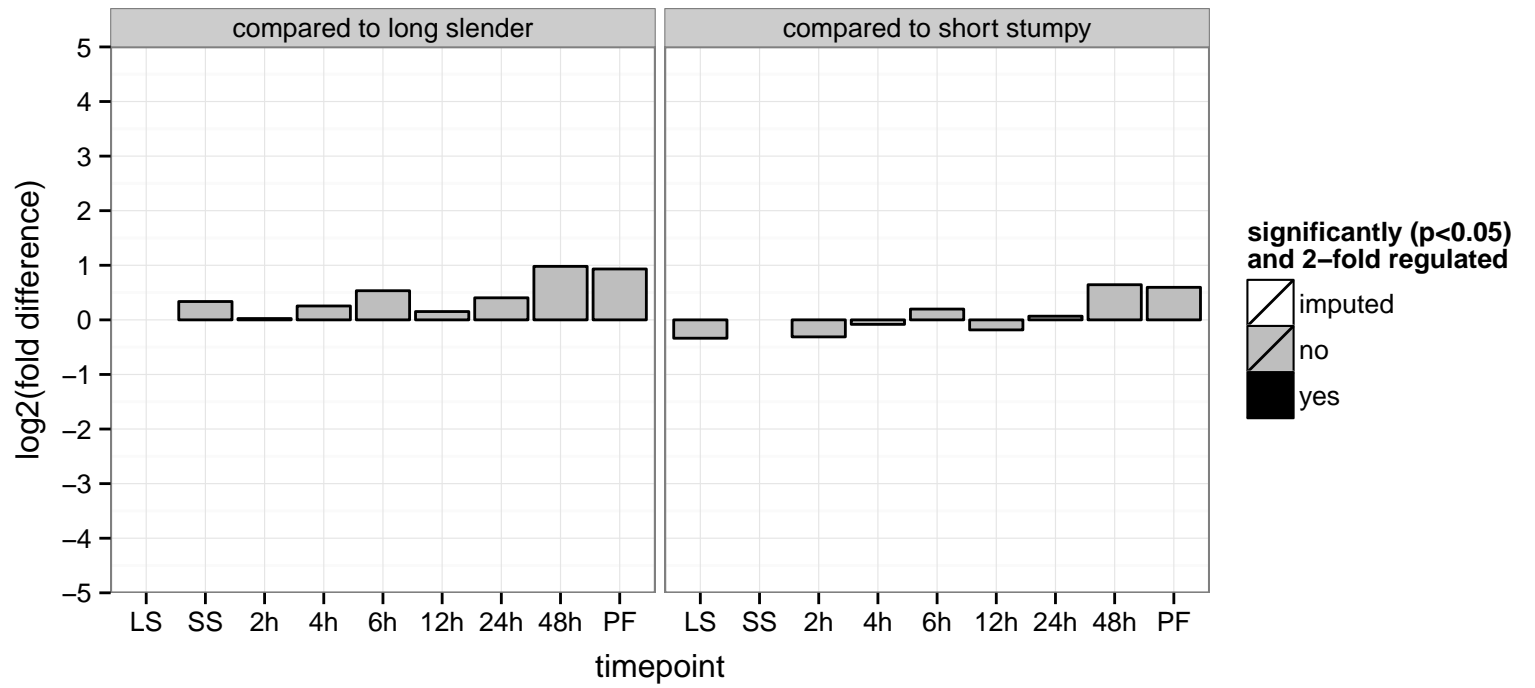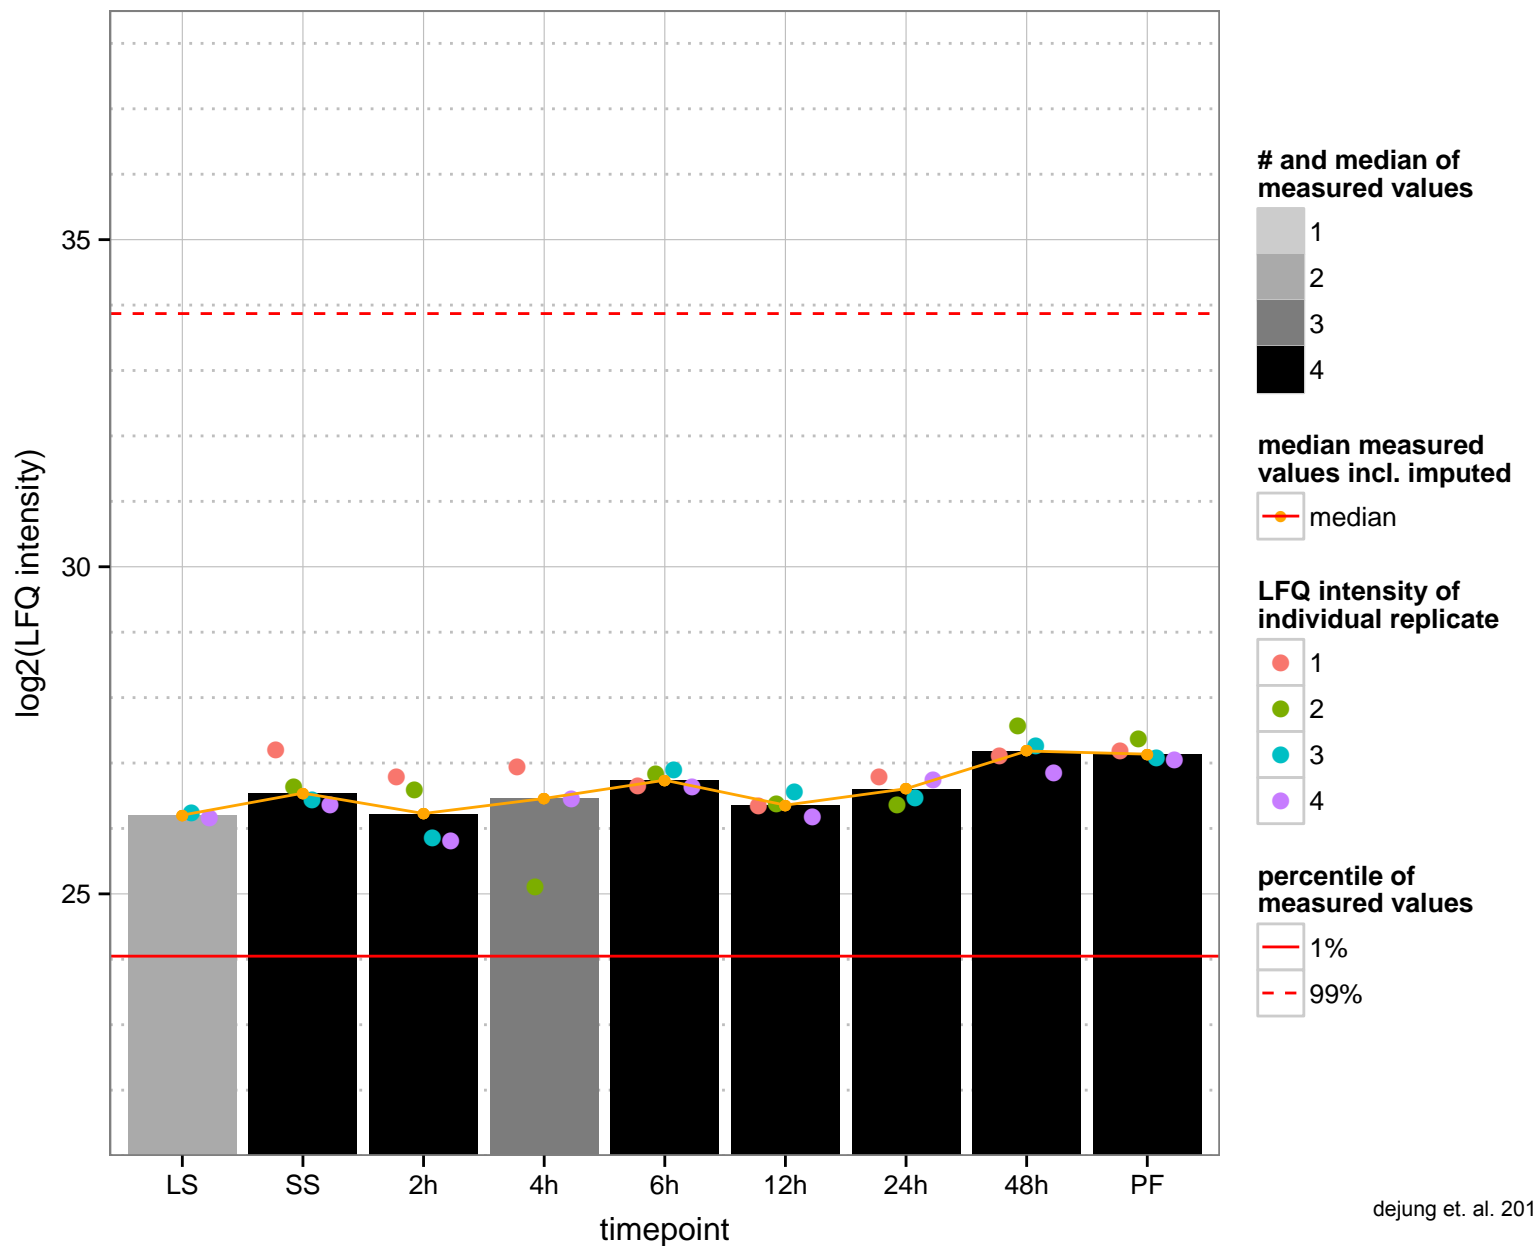

kinetoplastid-specific phospho-protein phosphatase, putative  
 Tb927.6.640  
 AGOF: protein serine/threonine phosphatase activity  
 AGOC: null  
 AGOP: protein dephosphorylation  
 PGO: hydrolase activity  
 PGOC: null  
 PGOP: null

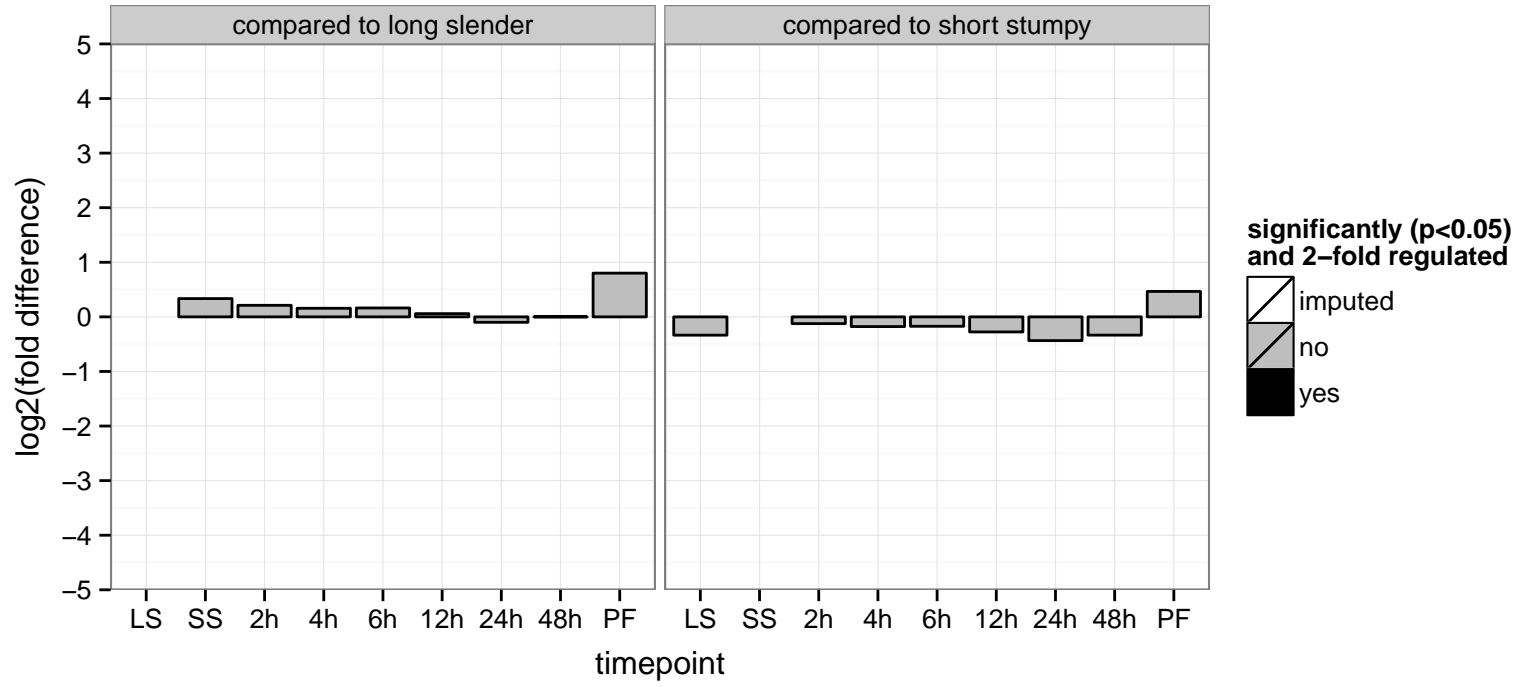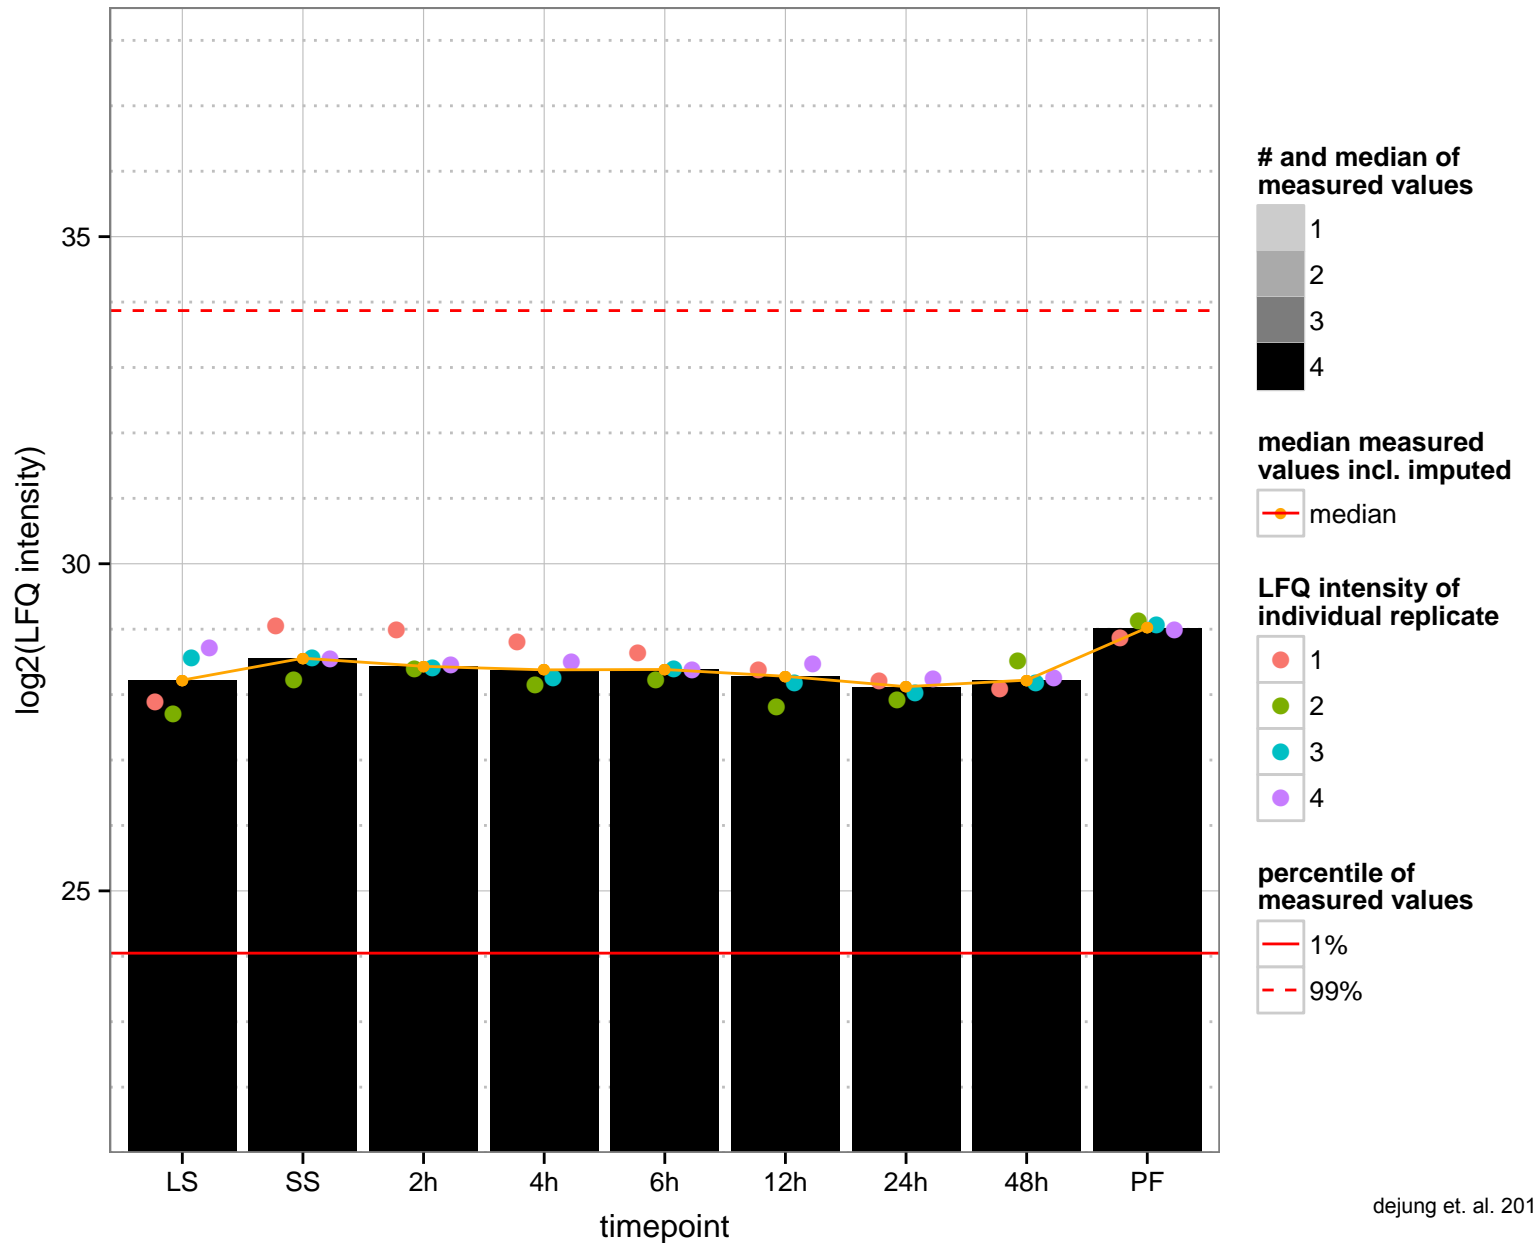



ribosomal RNA processing protein 45, exosome complex exonuclease (RRP45)

Tb927.6.670

AGOF: 3'-5'-exoribonuclease activity, RNA binding

AGOC: null

AGOP: RNA processing

PGOF: null

PGOC: null

PGOP: null

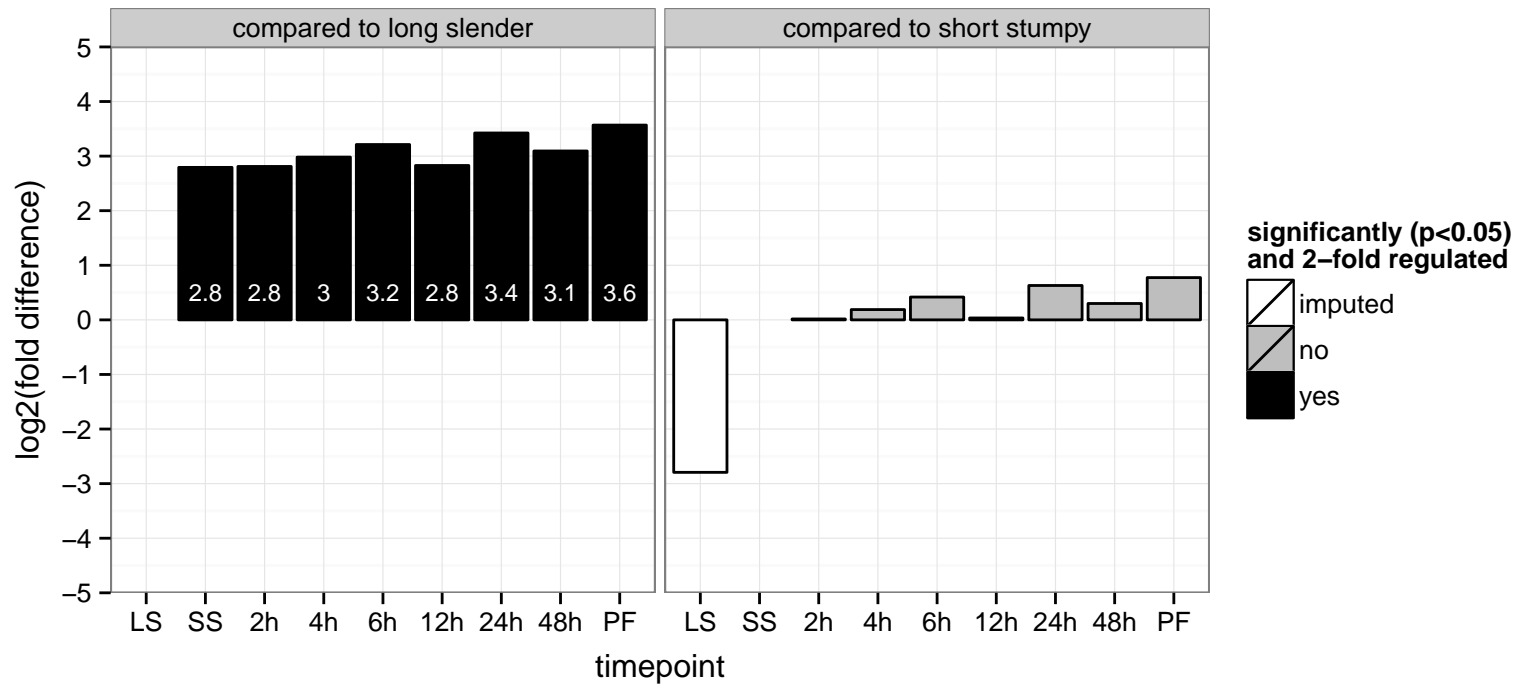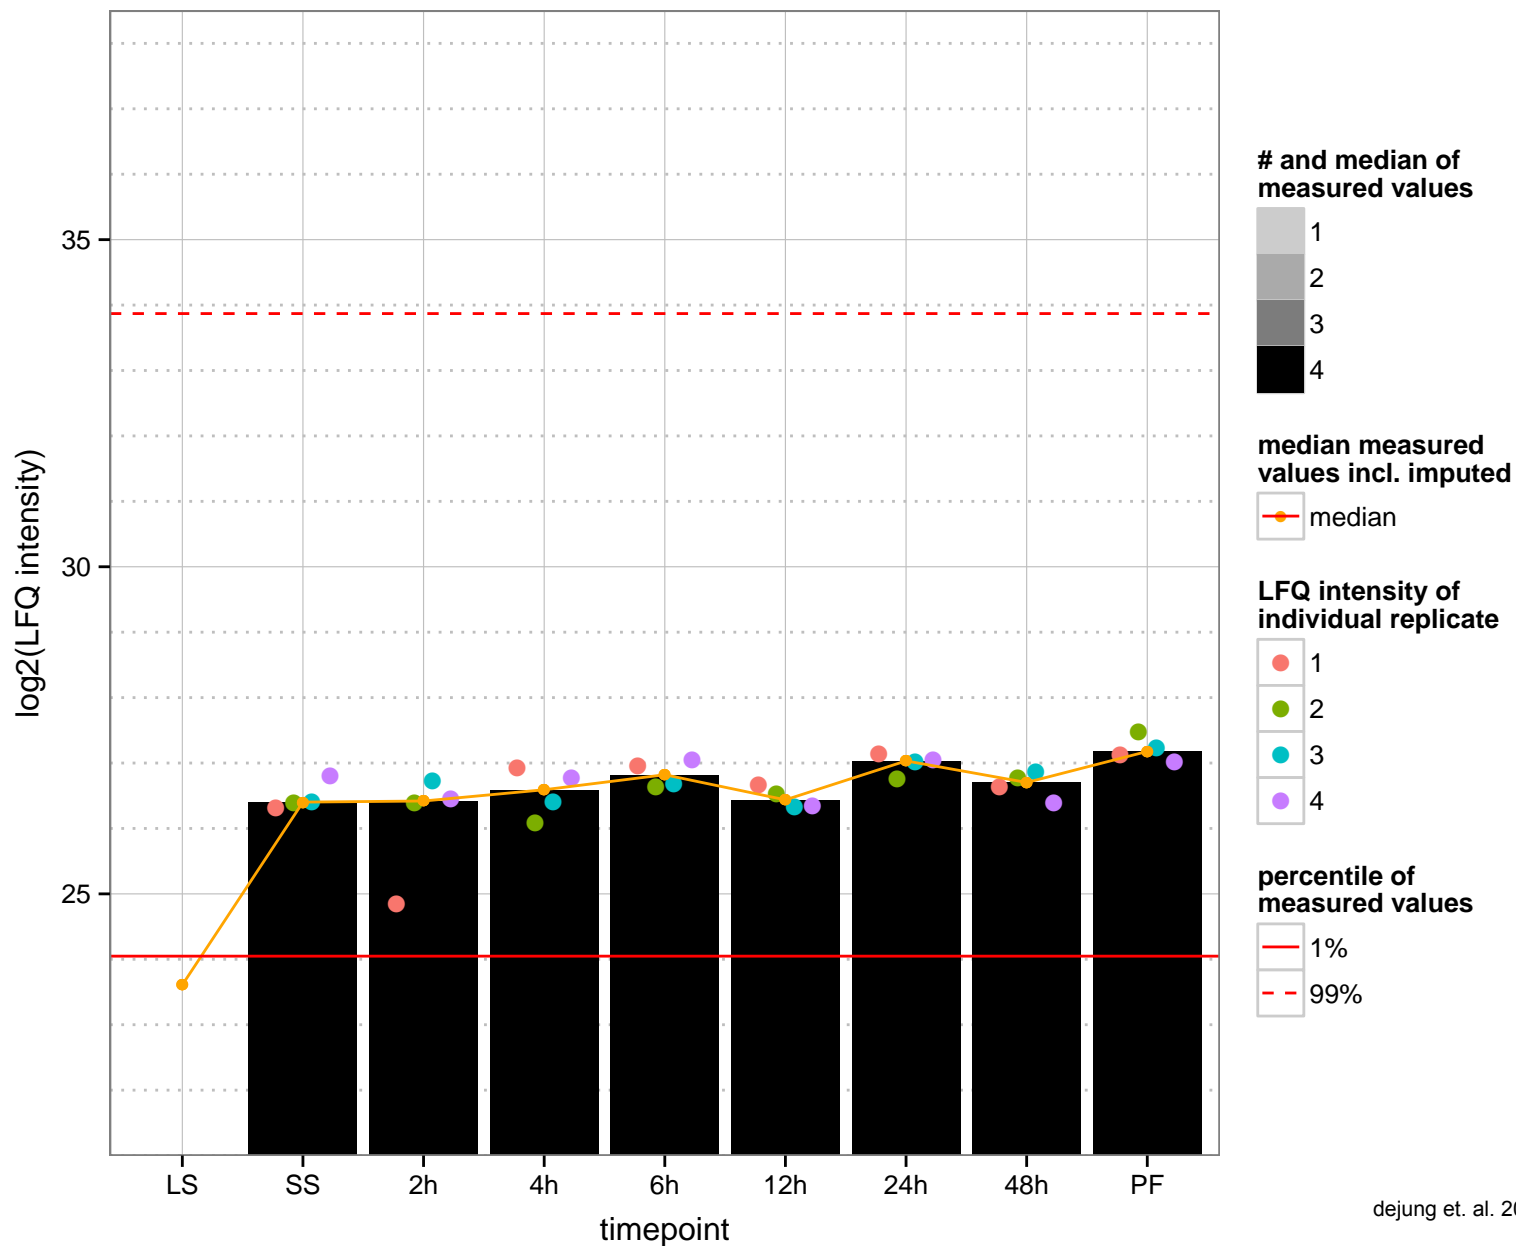

alanyl-tRNA synthetase, putative

Tb927.6.700

AGOF: ATP binding, alanine-tRNA ligase activity, nucleic acid binding

AGOC: cytoplasm

AGOP: alanyl-tRNA aminoacylation, translation

PGOF: ATP binding, alanine-tRNA ligase activity, ligase activity, forming aminoacyl-tRNA and related compounds, nucleic acid binding

PGOC: cytoplasm

PGOP: alanyl-tRNA aminoacylation, tRNA aminoacylation

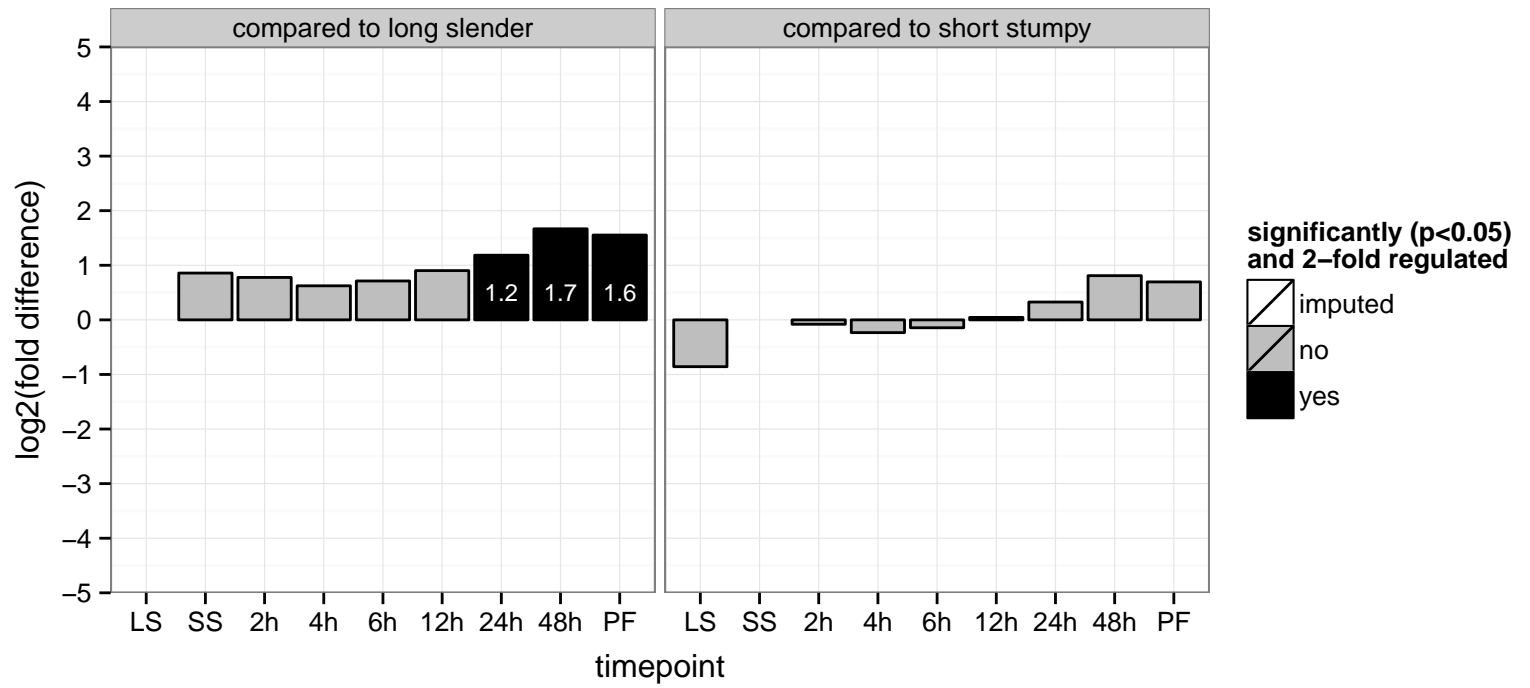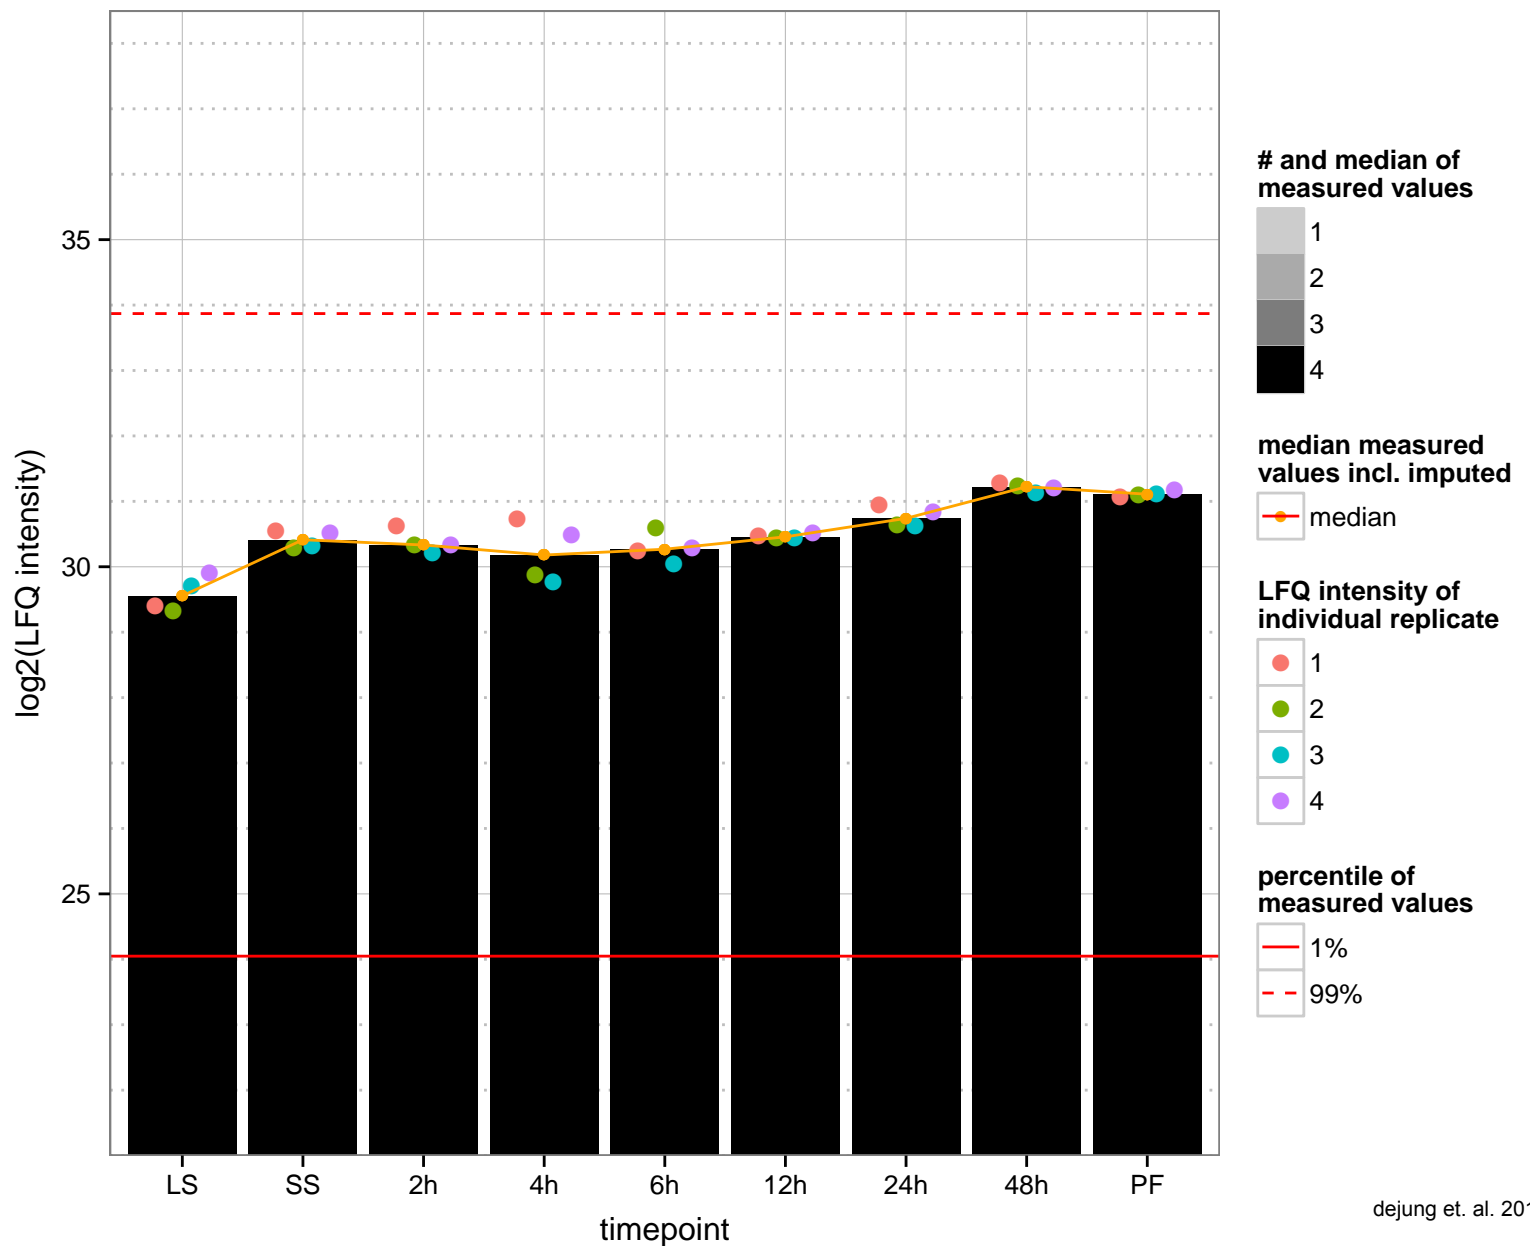

60S ribosomal protein L14, putative, 40S ribosomal protein L14  
 Tb927.6.720;Tb927.11.11230  
 AGOF: structural constituent of ribosome  
 AGOC: intracellular, ribosome  
 AGOP: translation  
 PGOF: structural constituent of ribosome  
 PGO: intracellular, ribosome  
 PGOP: translation

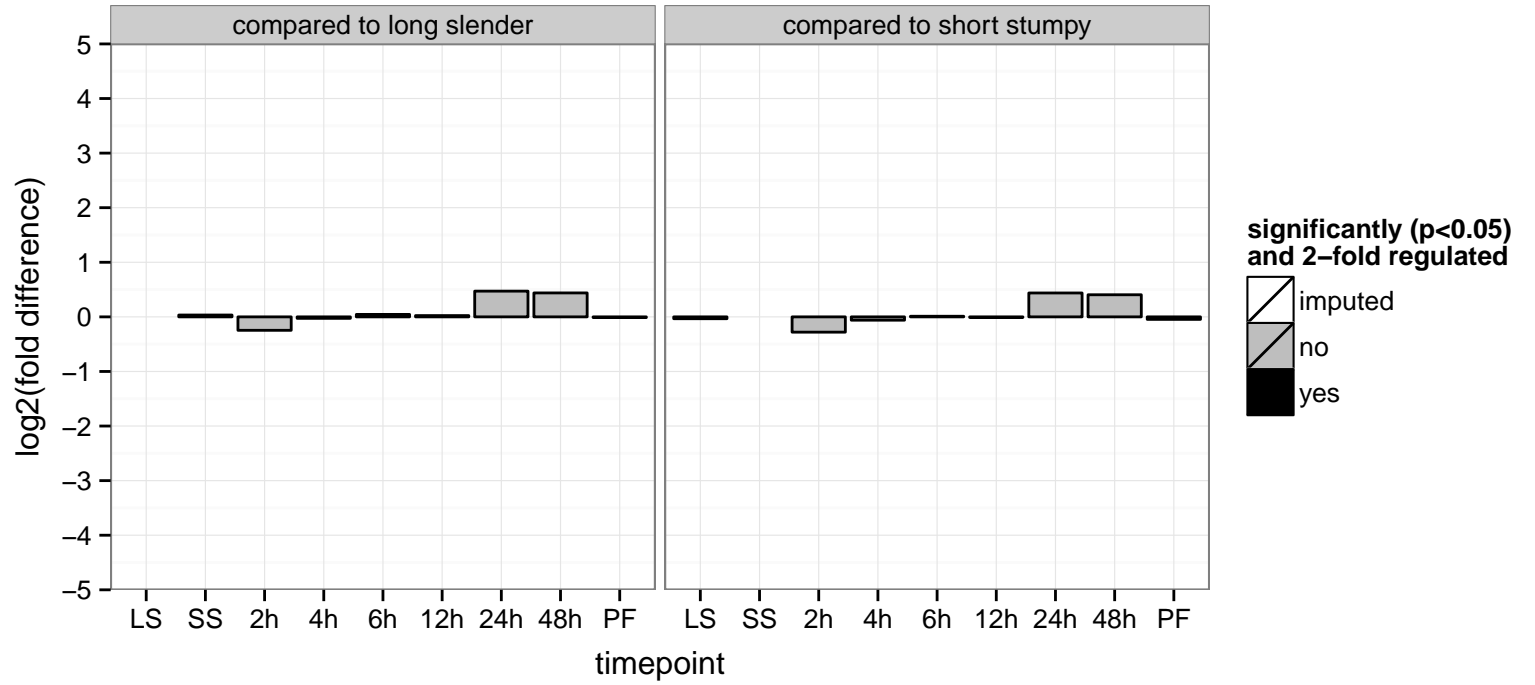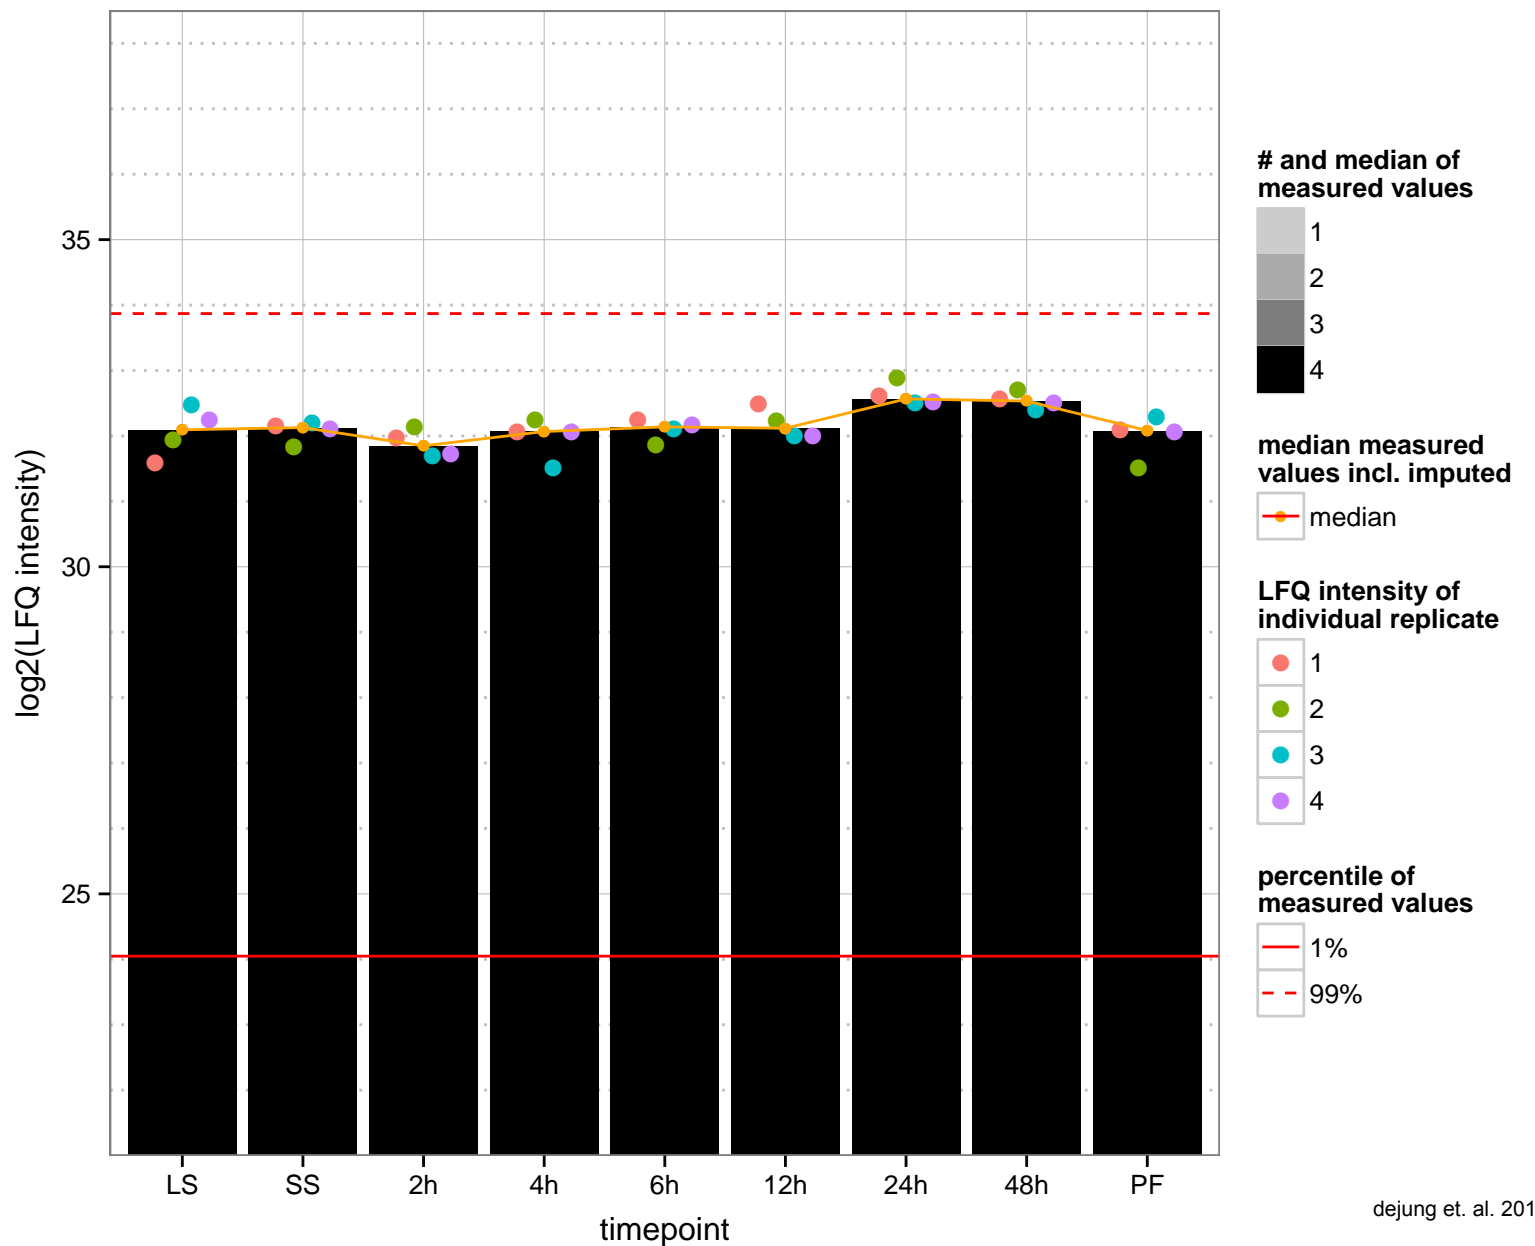

ATP-dependent DEAH-box RNA helicase, putative

Tb927.6.740

AGOF: ATP binding, ATP-dependent helicase activity, helicase activity, nucleic acid binding

AGOC: null

AGOP: null

PGOF: ATP binding, ATP-dependent helicase activity, helicase activity, nucleic acid binding

PGOC: null

PGOP: null

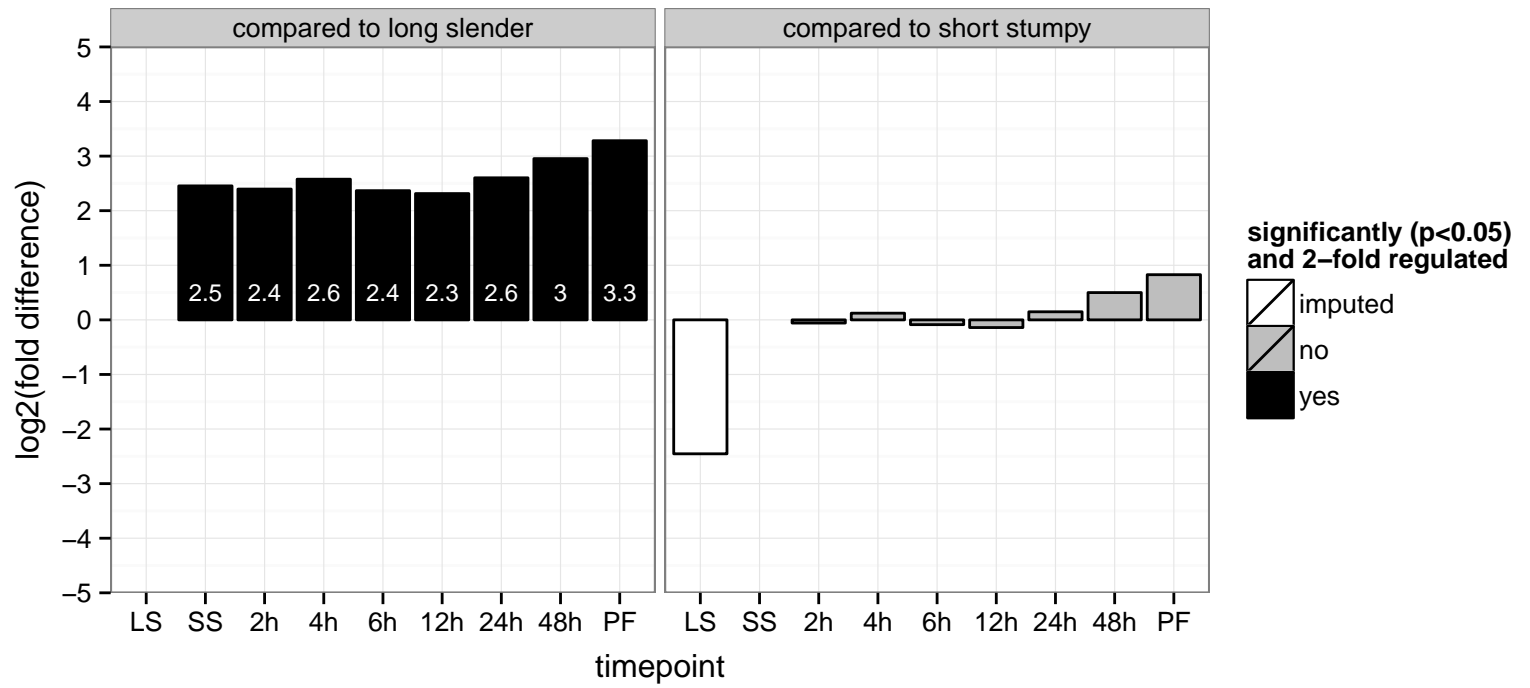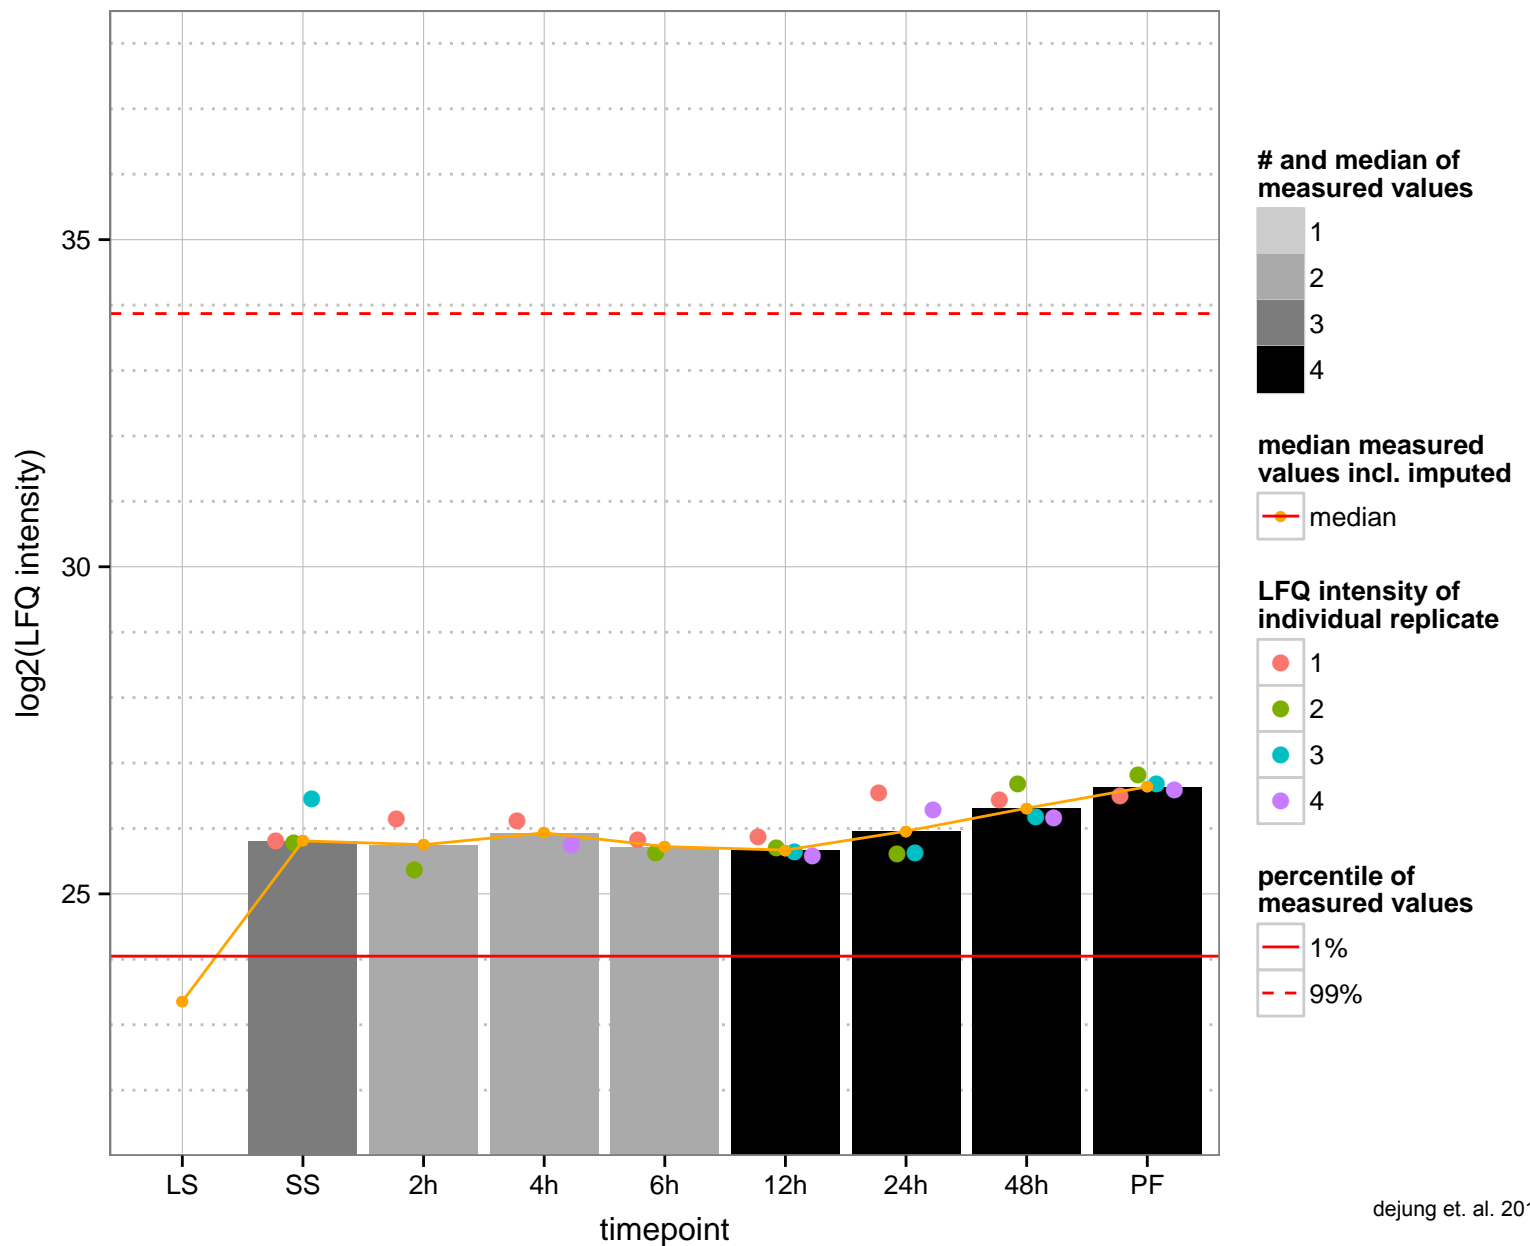

kinetoplastid-specific phospho-protein phosphatase, putative  
 Tb927.6.750  
 AGOF: protein serine/threonine phosphatase activity  
 AGOC: null  
 AGOP: protein dephosphorylation  
 PGO: hydrolase activity  
 PGOC: null  
 PGOP: null

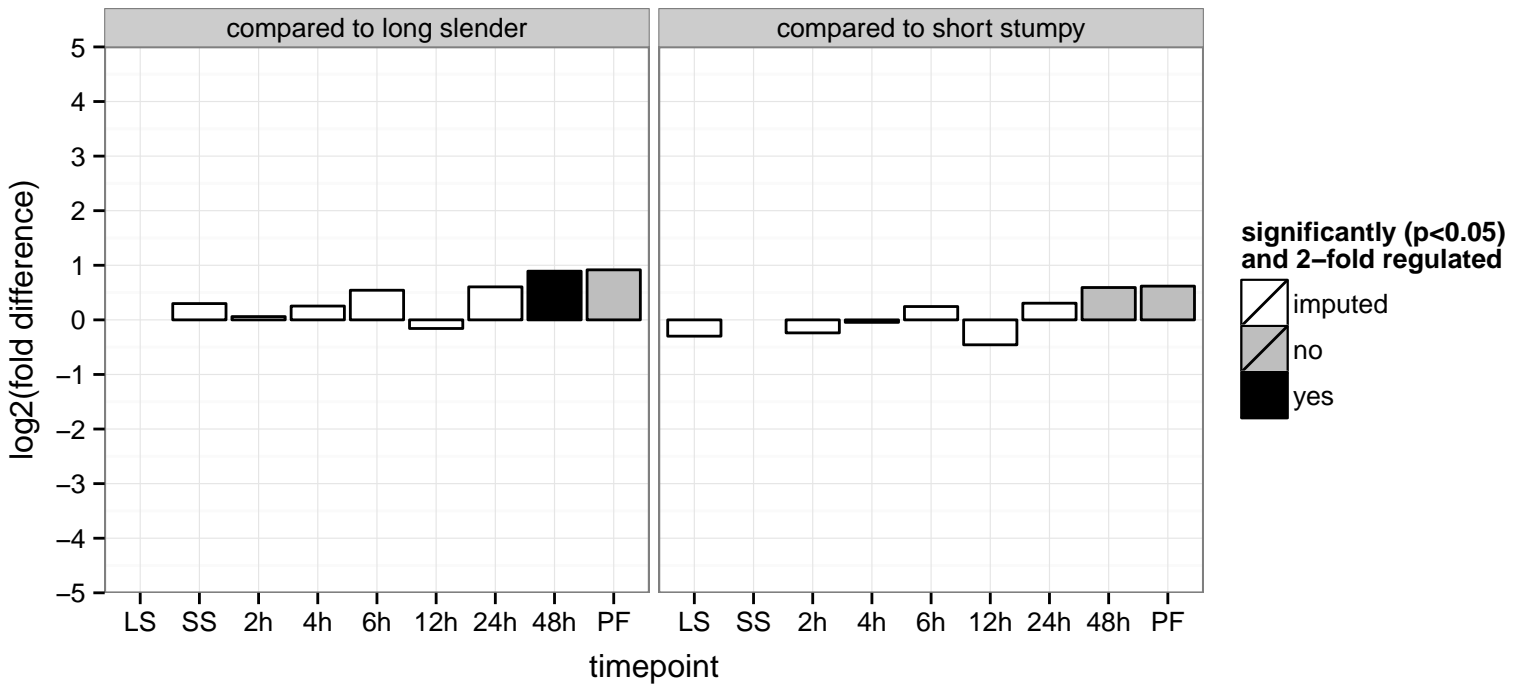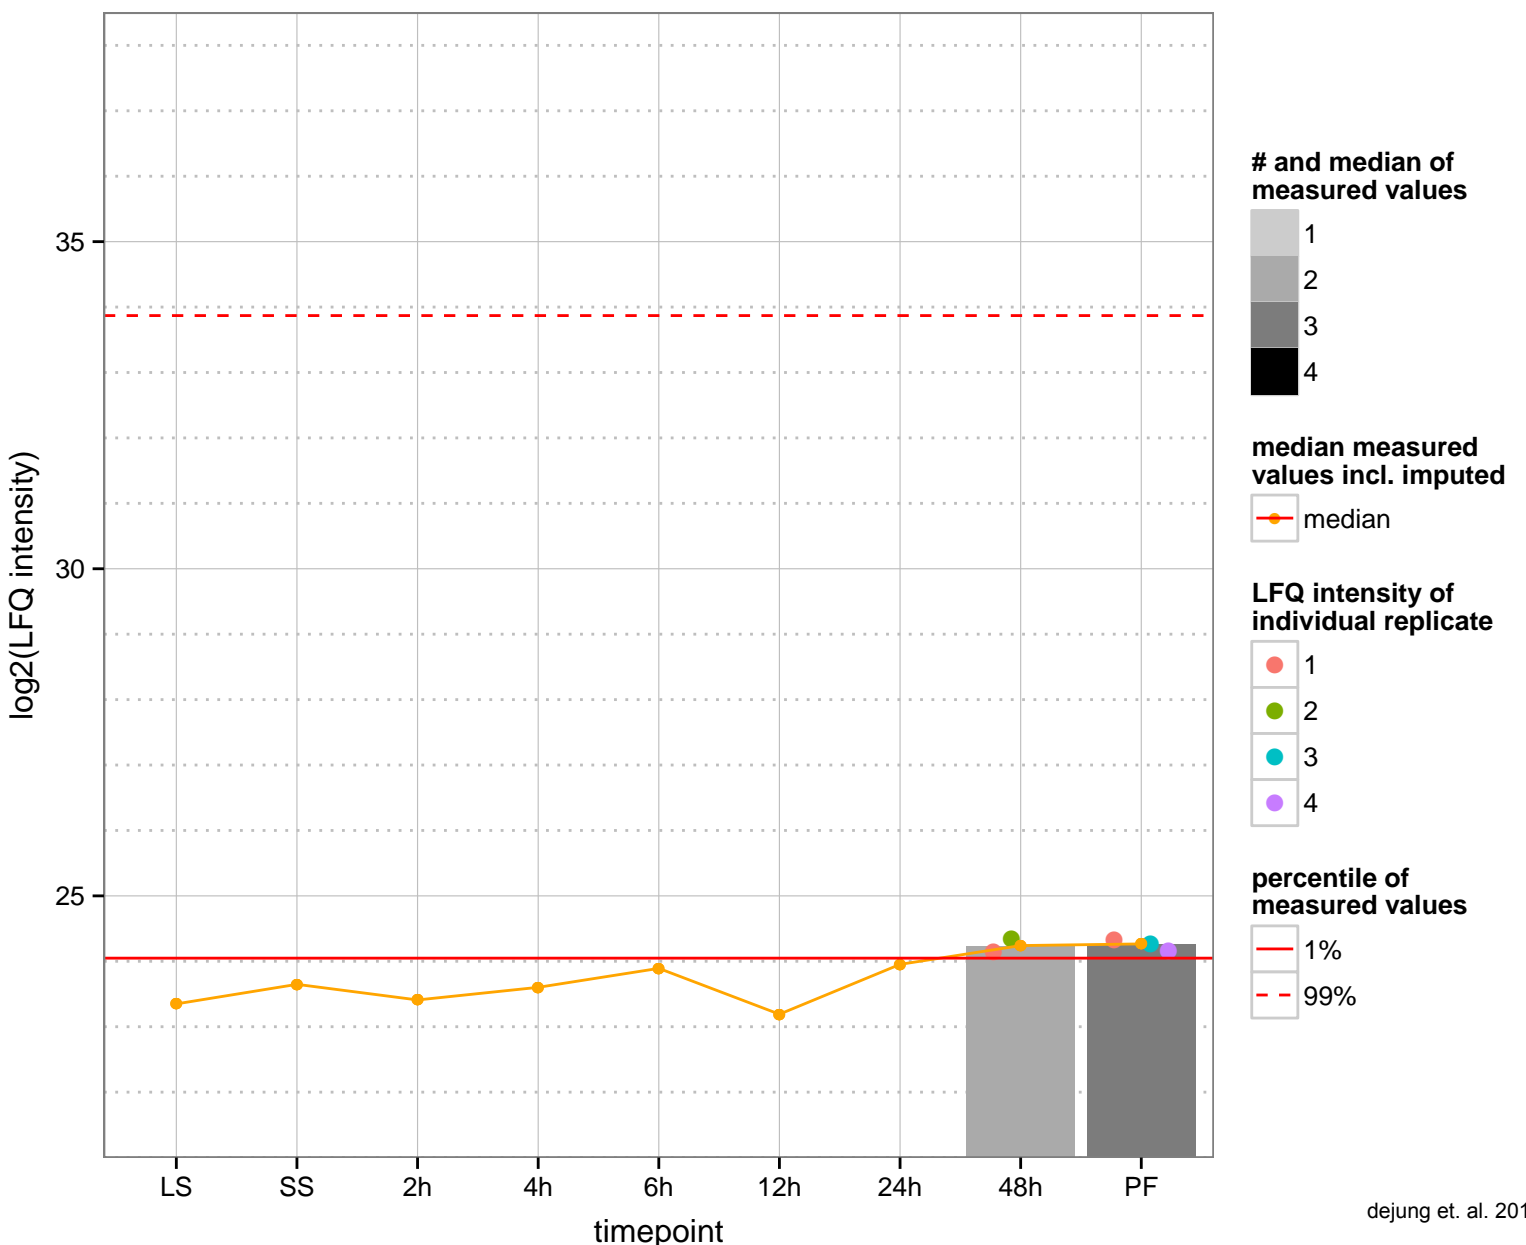

hypothetical protein, conserved, ccr4-not transcription complex subunit 2 (NOT2)  
 Tb927.6.850;Tb11.v5.0689  
 AGOF: null, RNA polymerase II transcription cofactor activity  
 AGOC: null, nucleus  
 AGOP: null, negative regulation of transcription from RNA polymerase II promoter  
 PGO: null  
 PGO: null  
 PGO: nucleus  
 PGO: regulation of transcription, DNA-dependent

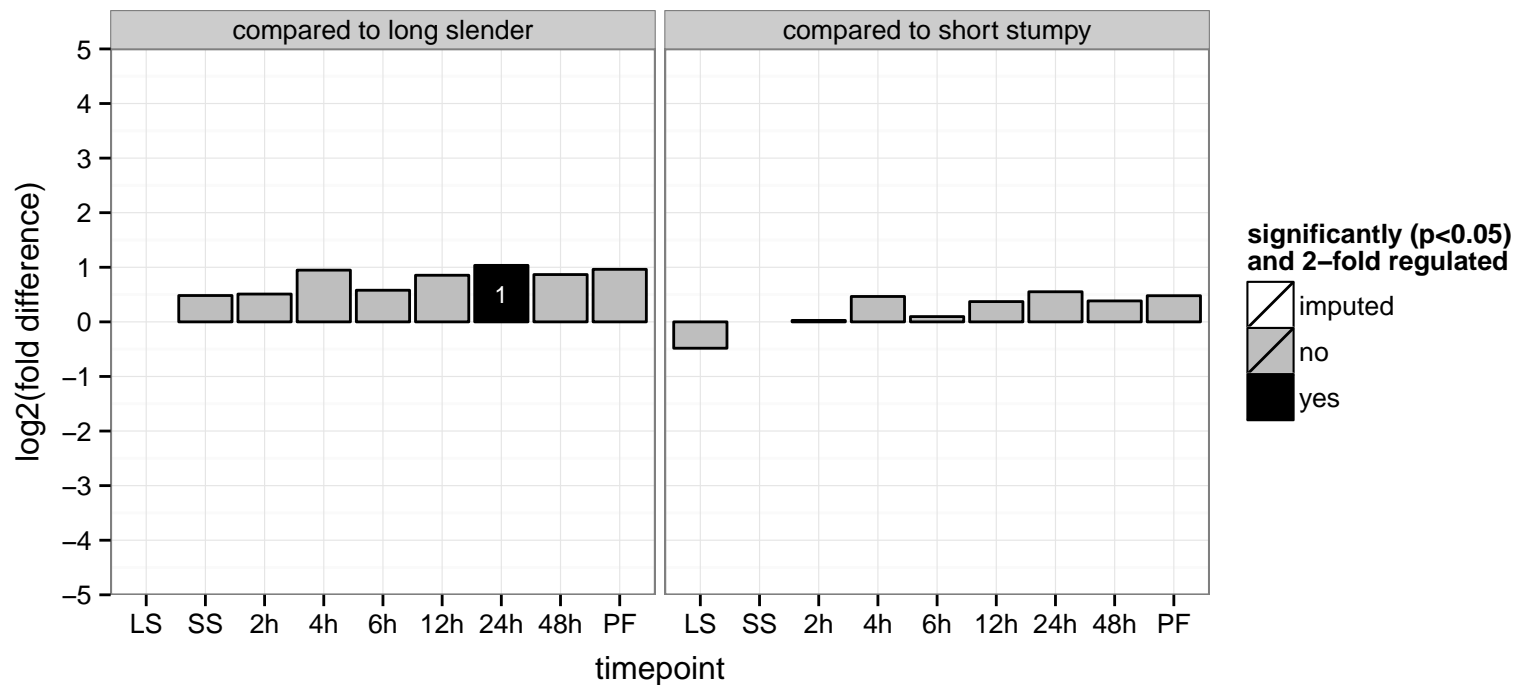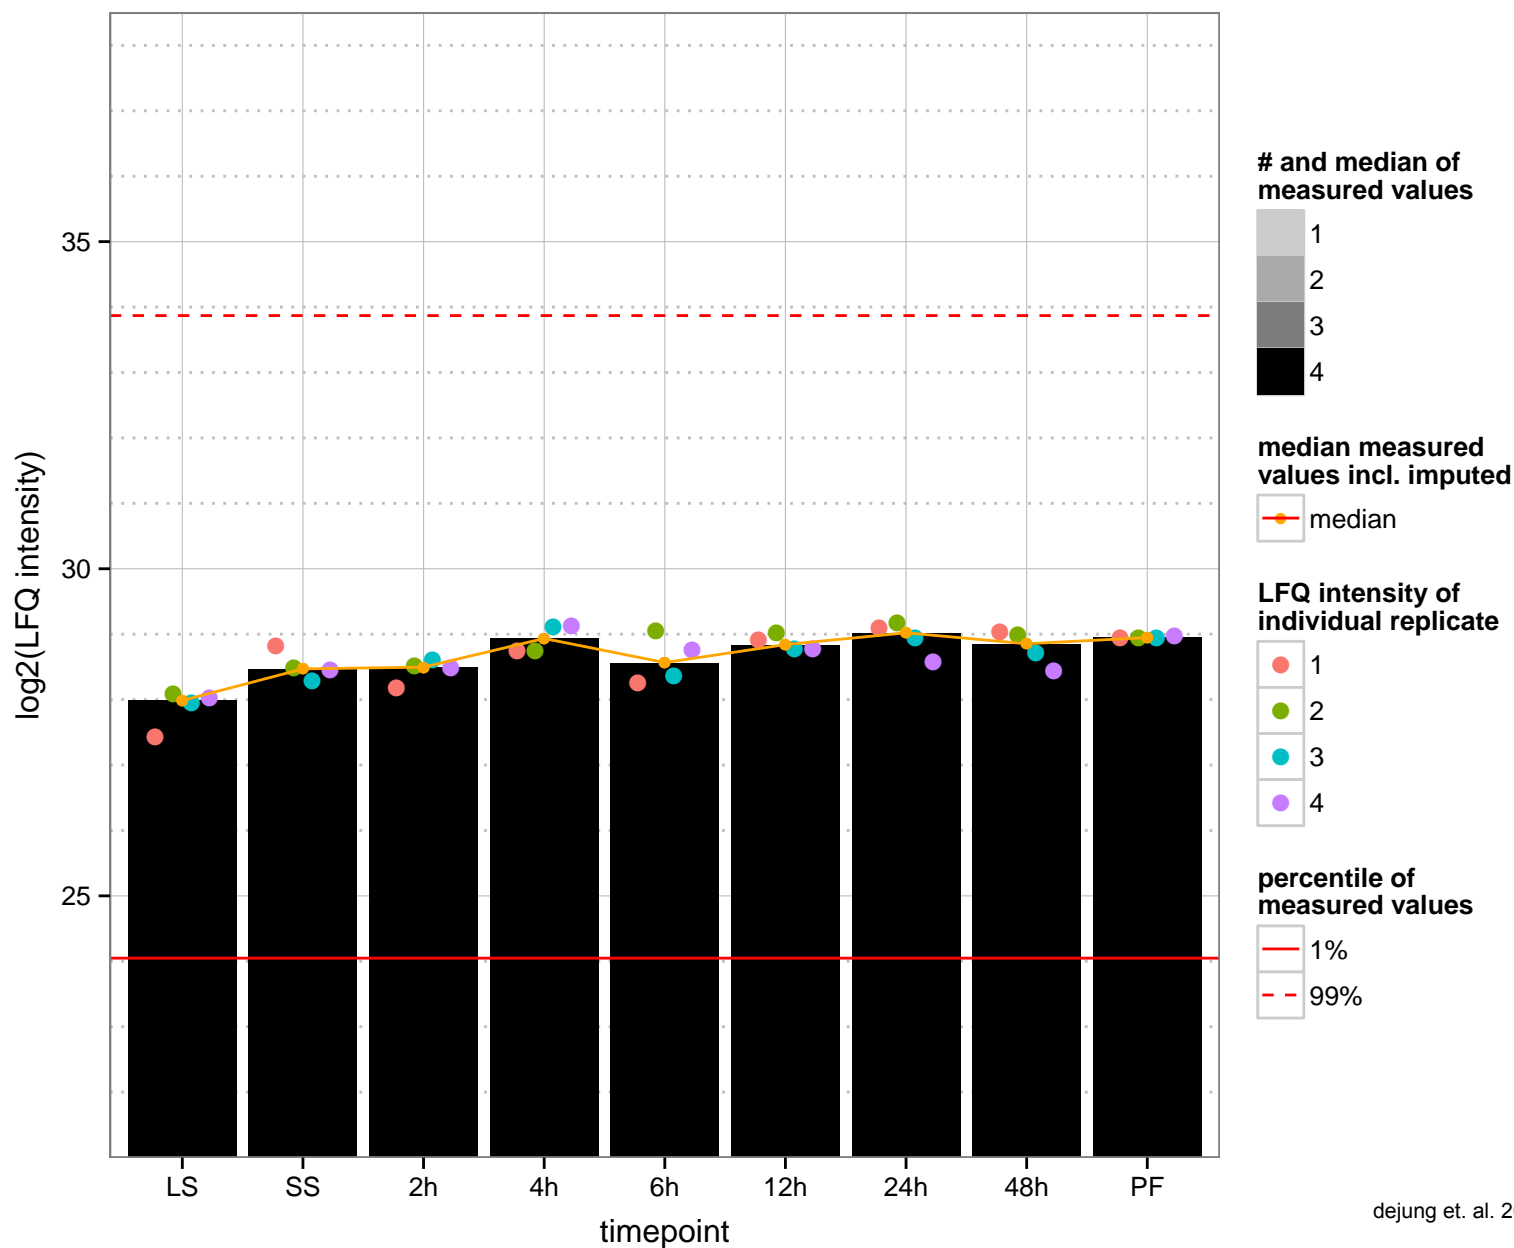

hypothetical protein, conserved  
 Tb927.7.1010  
 AGOF: null  
 AGOC: mitochondrion  
 AGOP: null  
 PGO: null  
 PGOC: null  
 PGOP: null

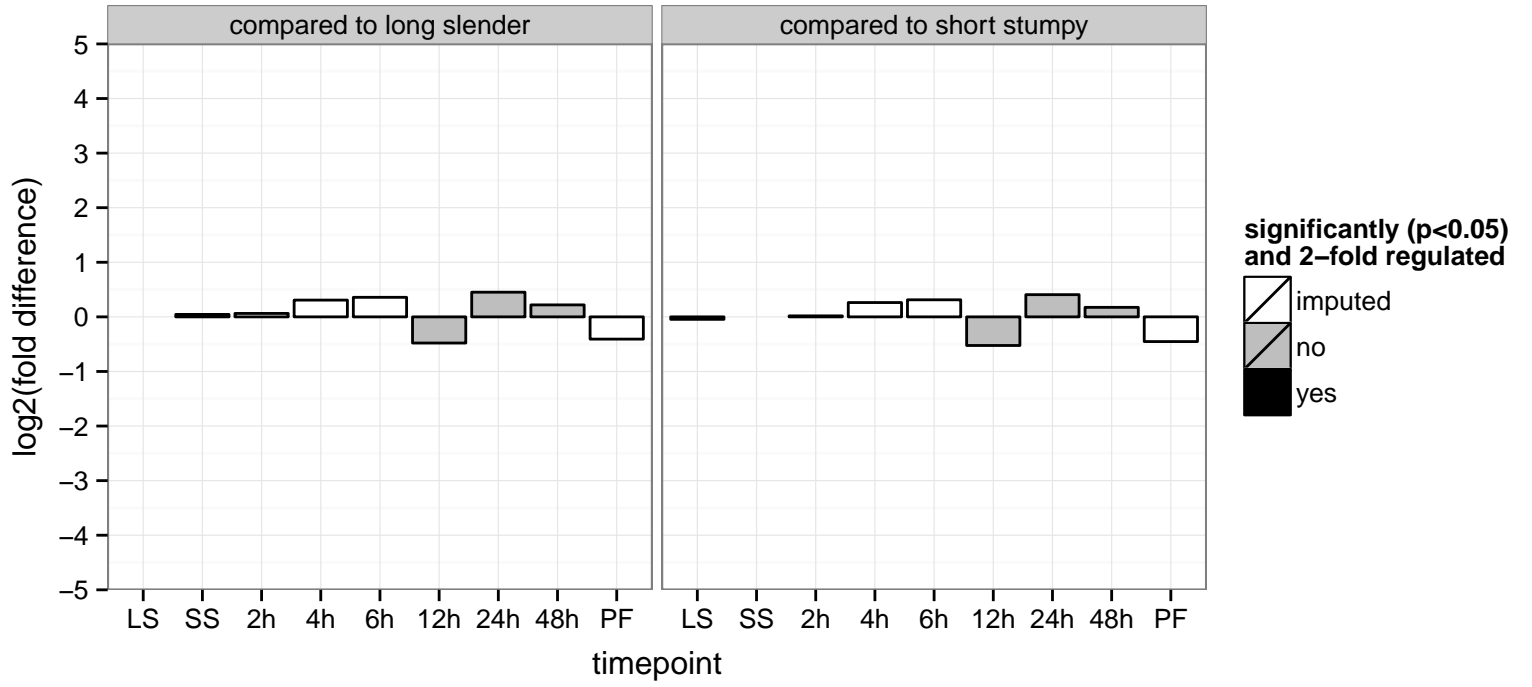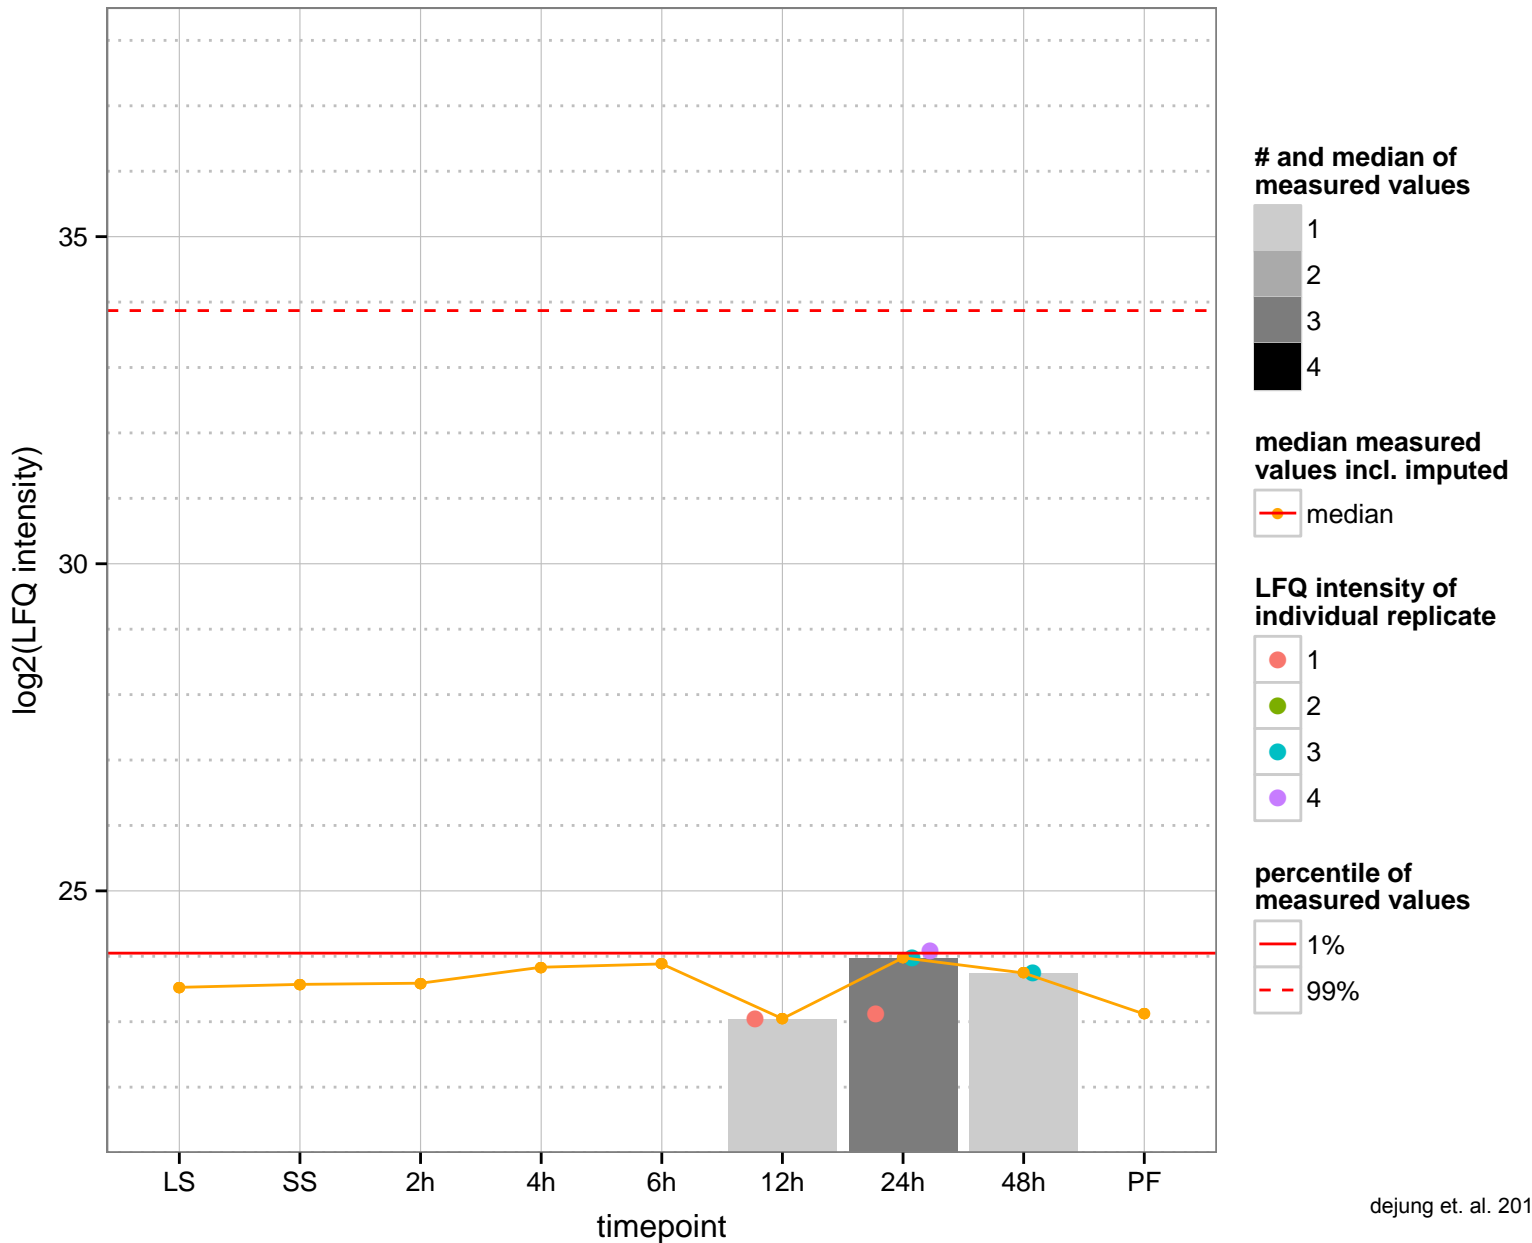

40S ribosomal protein S16, putative  
 Tb927.7.1050;Tb927.7.1040  
 AGOF: structural constituent of ribosome  
 AGOC: intracellular, ribosome  
 AGOP: translation  
 PGOF: structural constituent of ribosome, null  
 PGOC: intracellular, ribosome, null  
 PGOP: translation, null

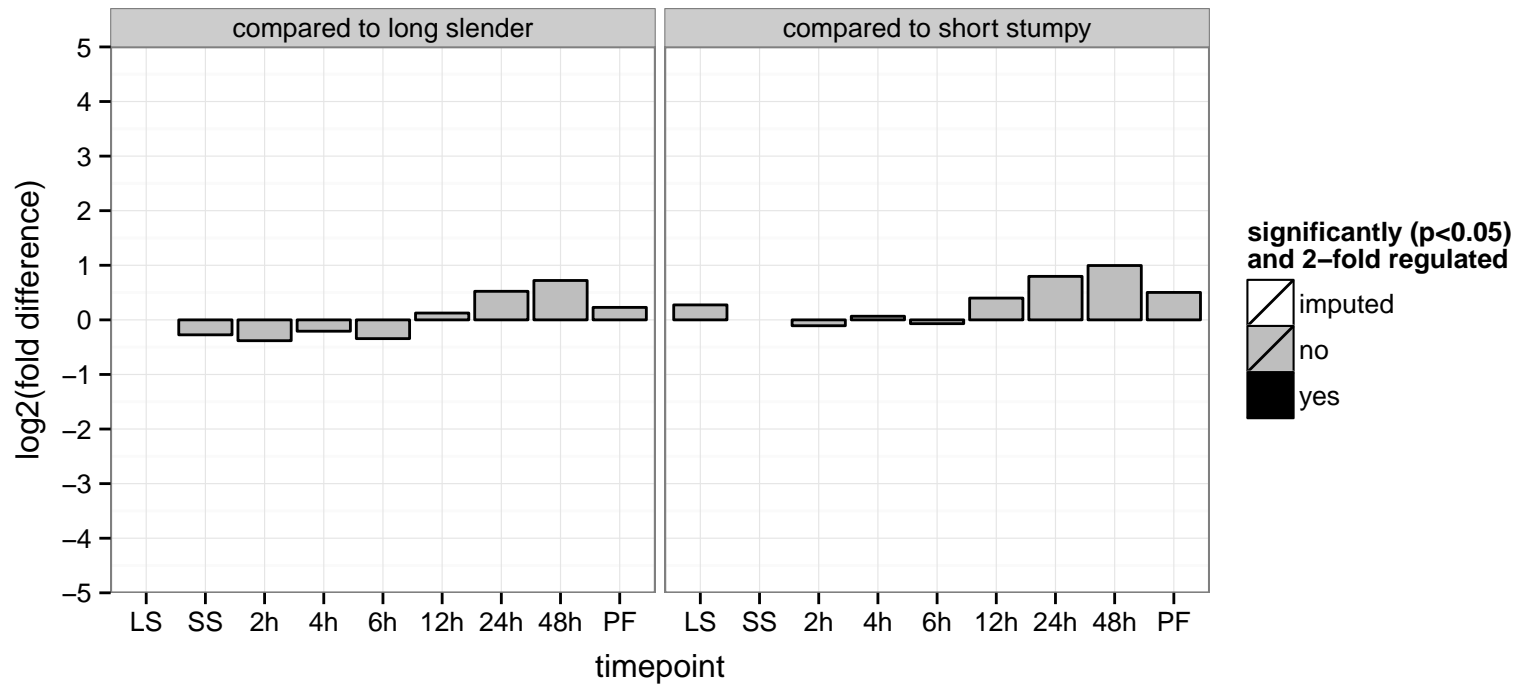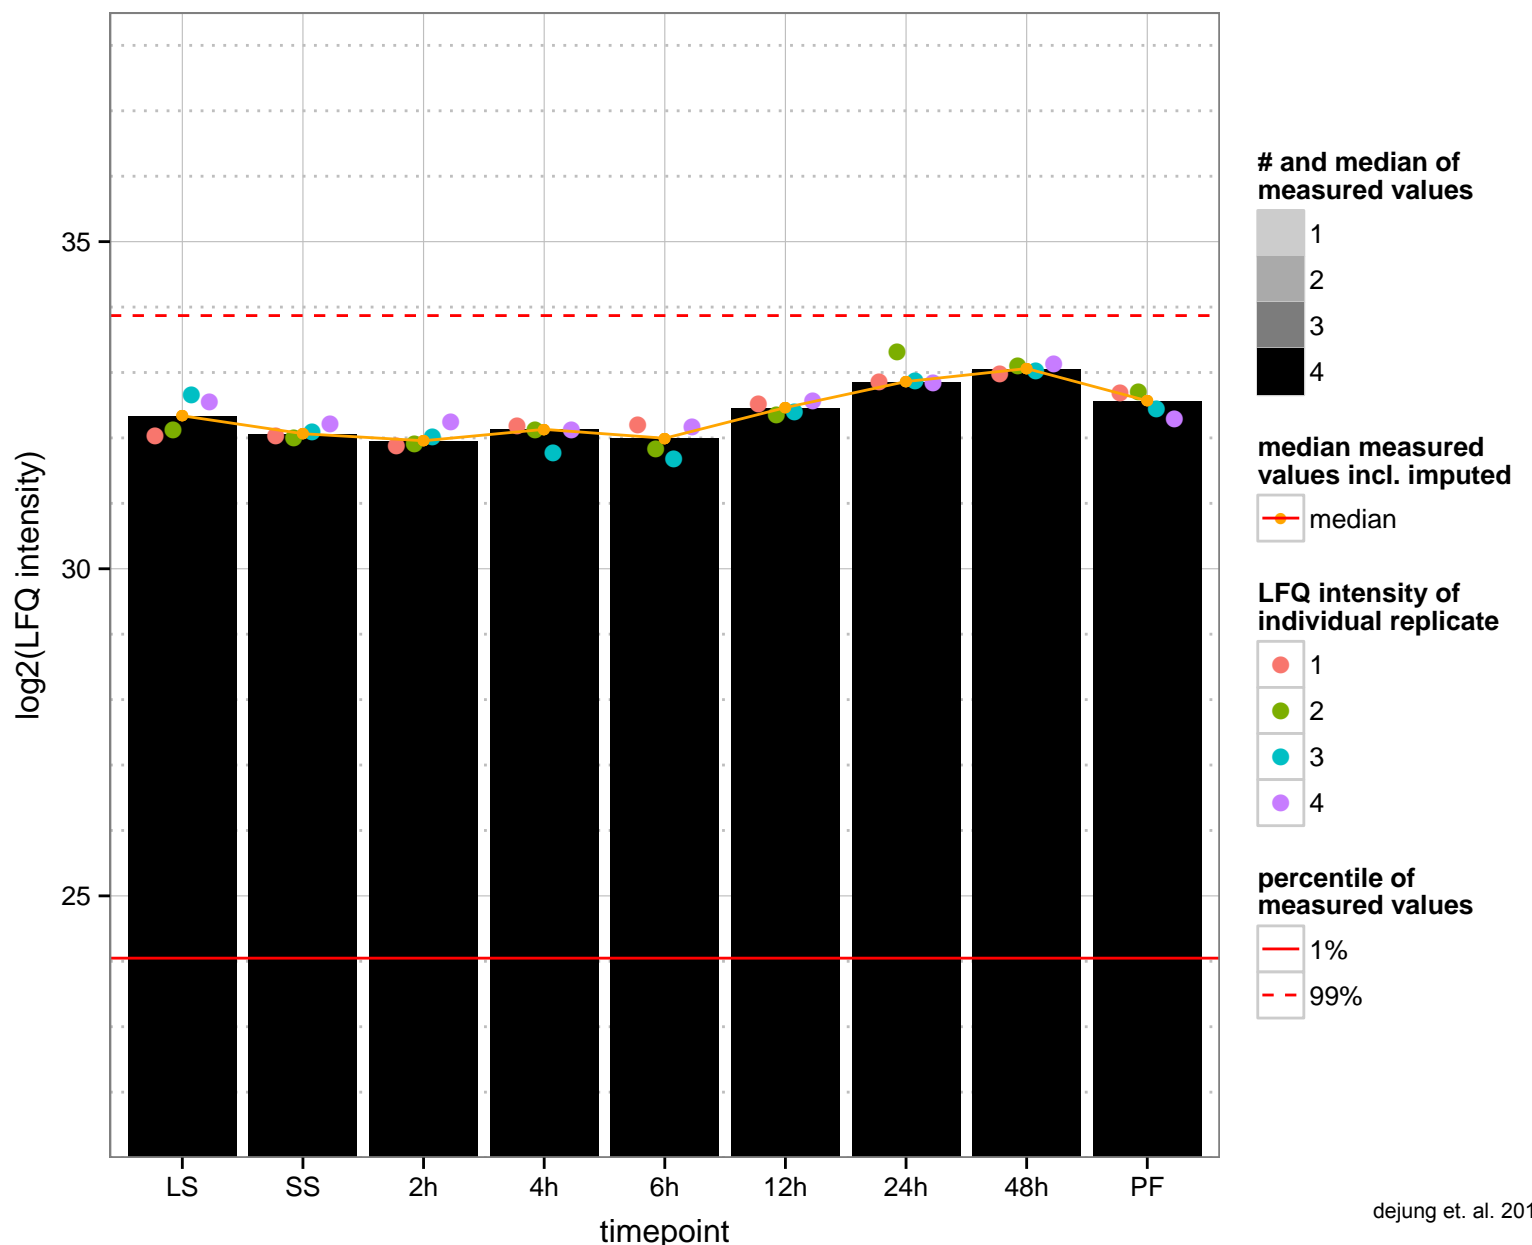



hypothetical protein, conserved  
 Tb927.7.1060  
 AGOF: null  
 AGOC: null  
 AGOP: null  
 PGO: null  
 PGO: nucleus  
 PGO: null

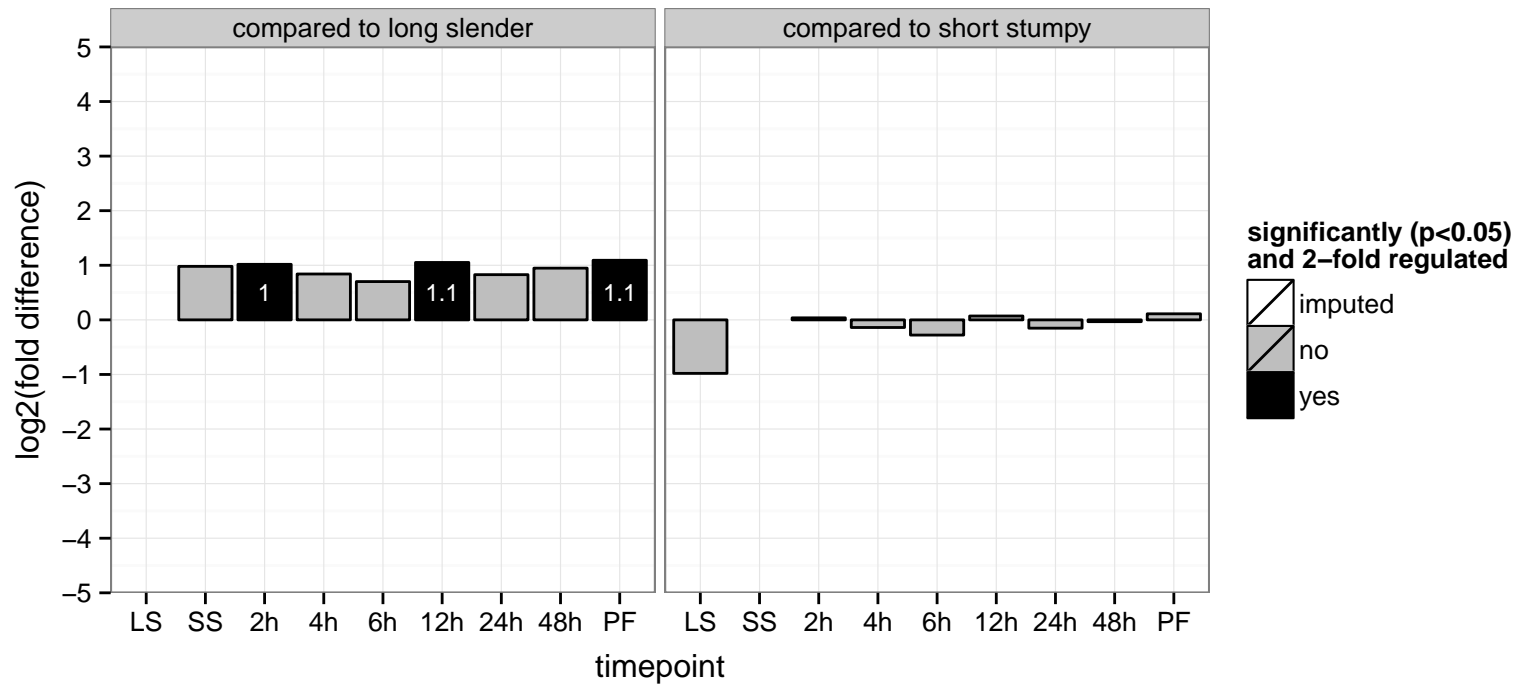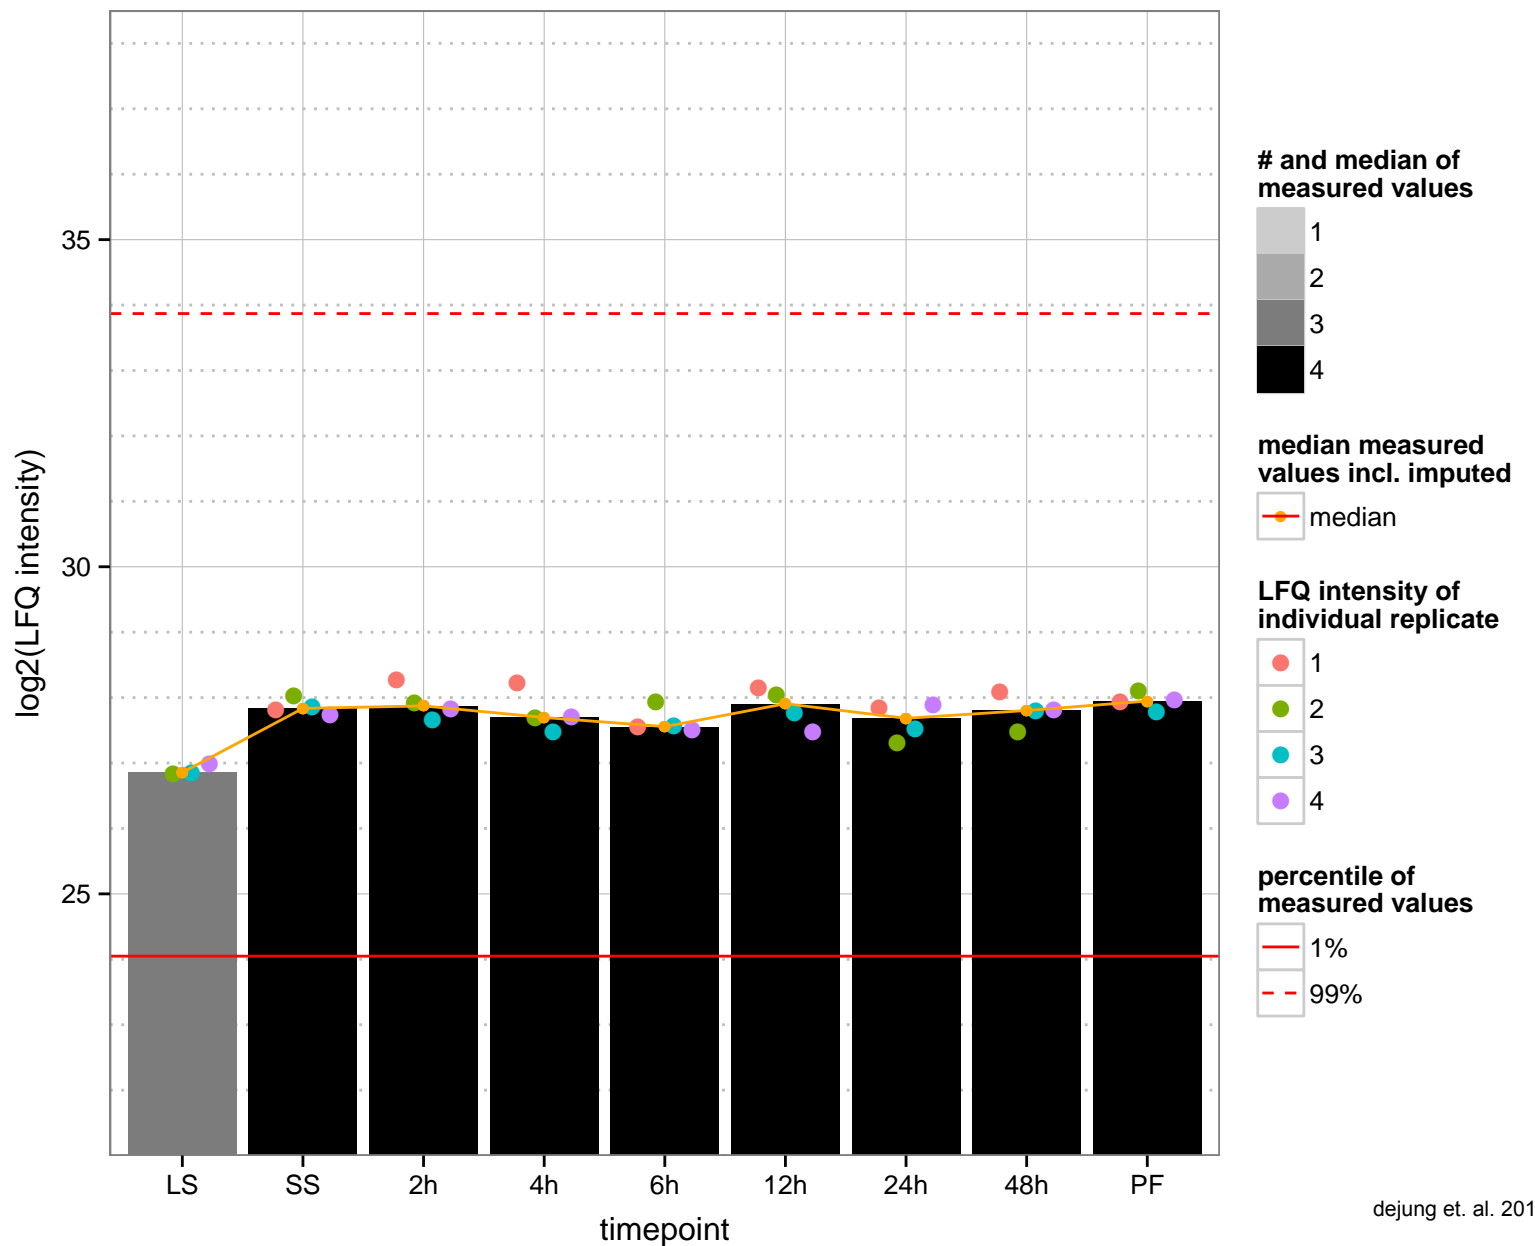

hypothetical protein, conserved  
 Tb927.7.1080  
 AGOF: null  
 AGOC: mitochondrion  
 AGOP: null  
 PGO: null  
 PGO: null  
 PGO: null

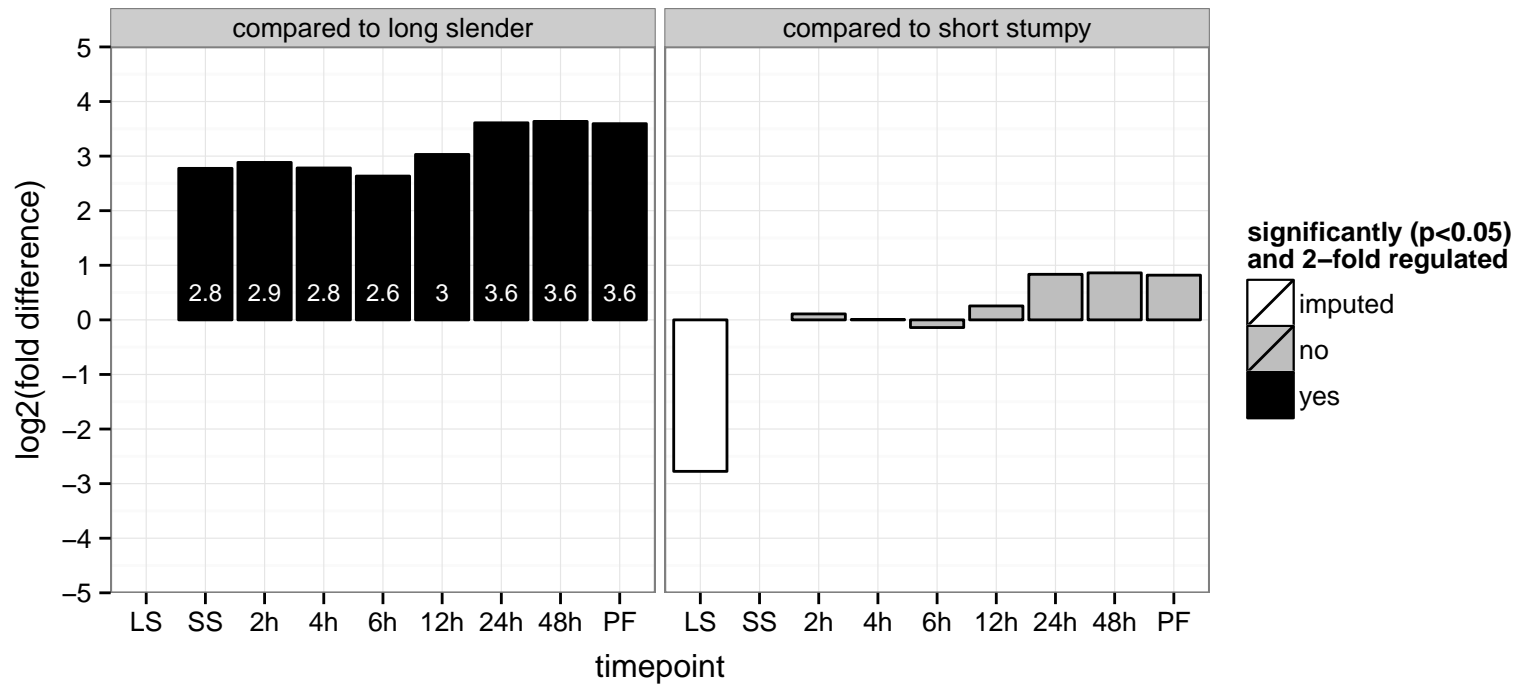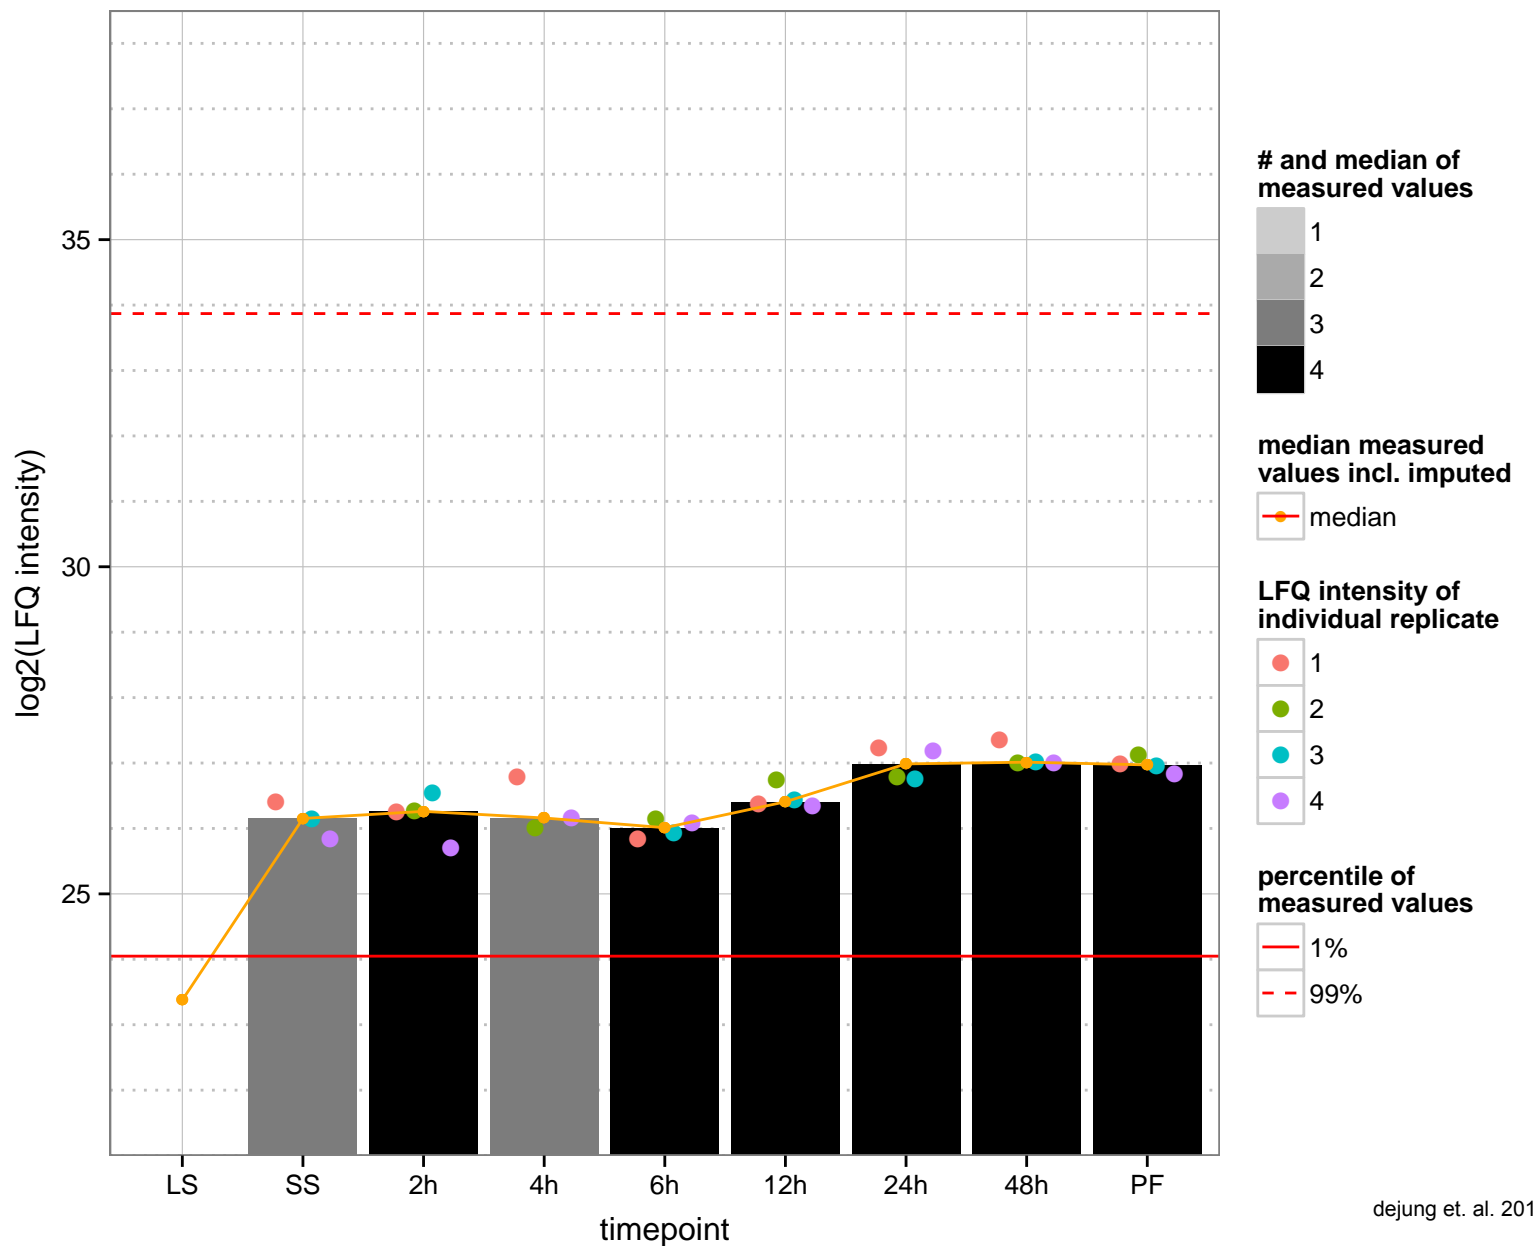

hypothetical protein, conserved  
 Tb927.7.1100  
 AGOF: null  
 AGOC: null  
 AGOP: null  
 PGO: null  
 PGOC: null  
 PGOP: null

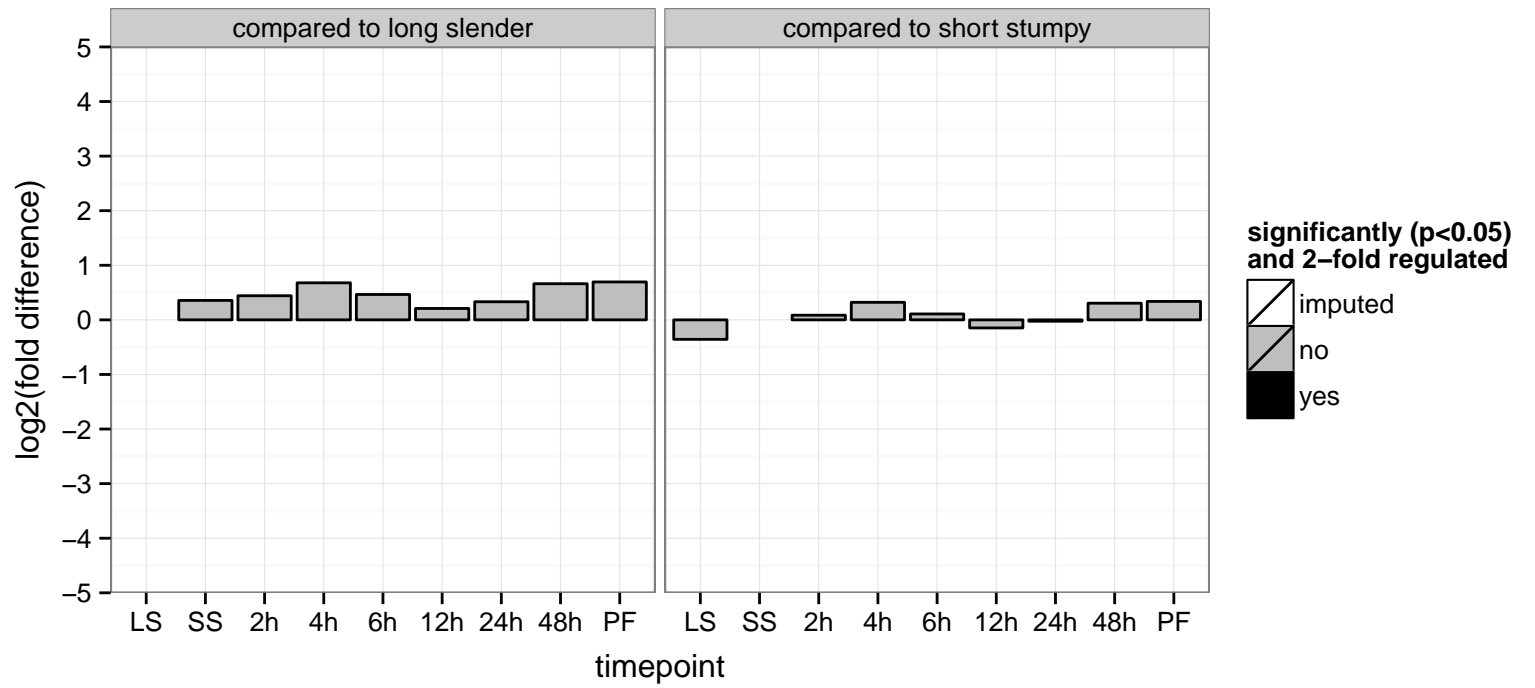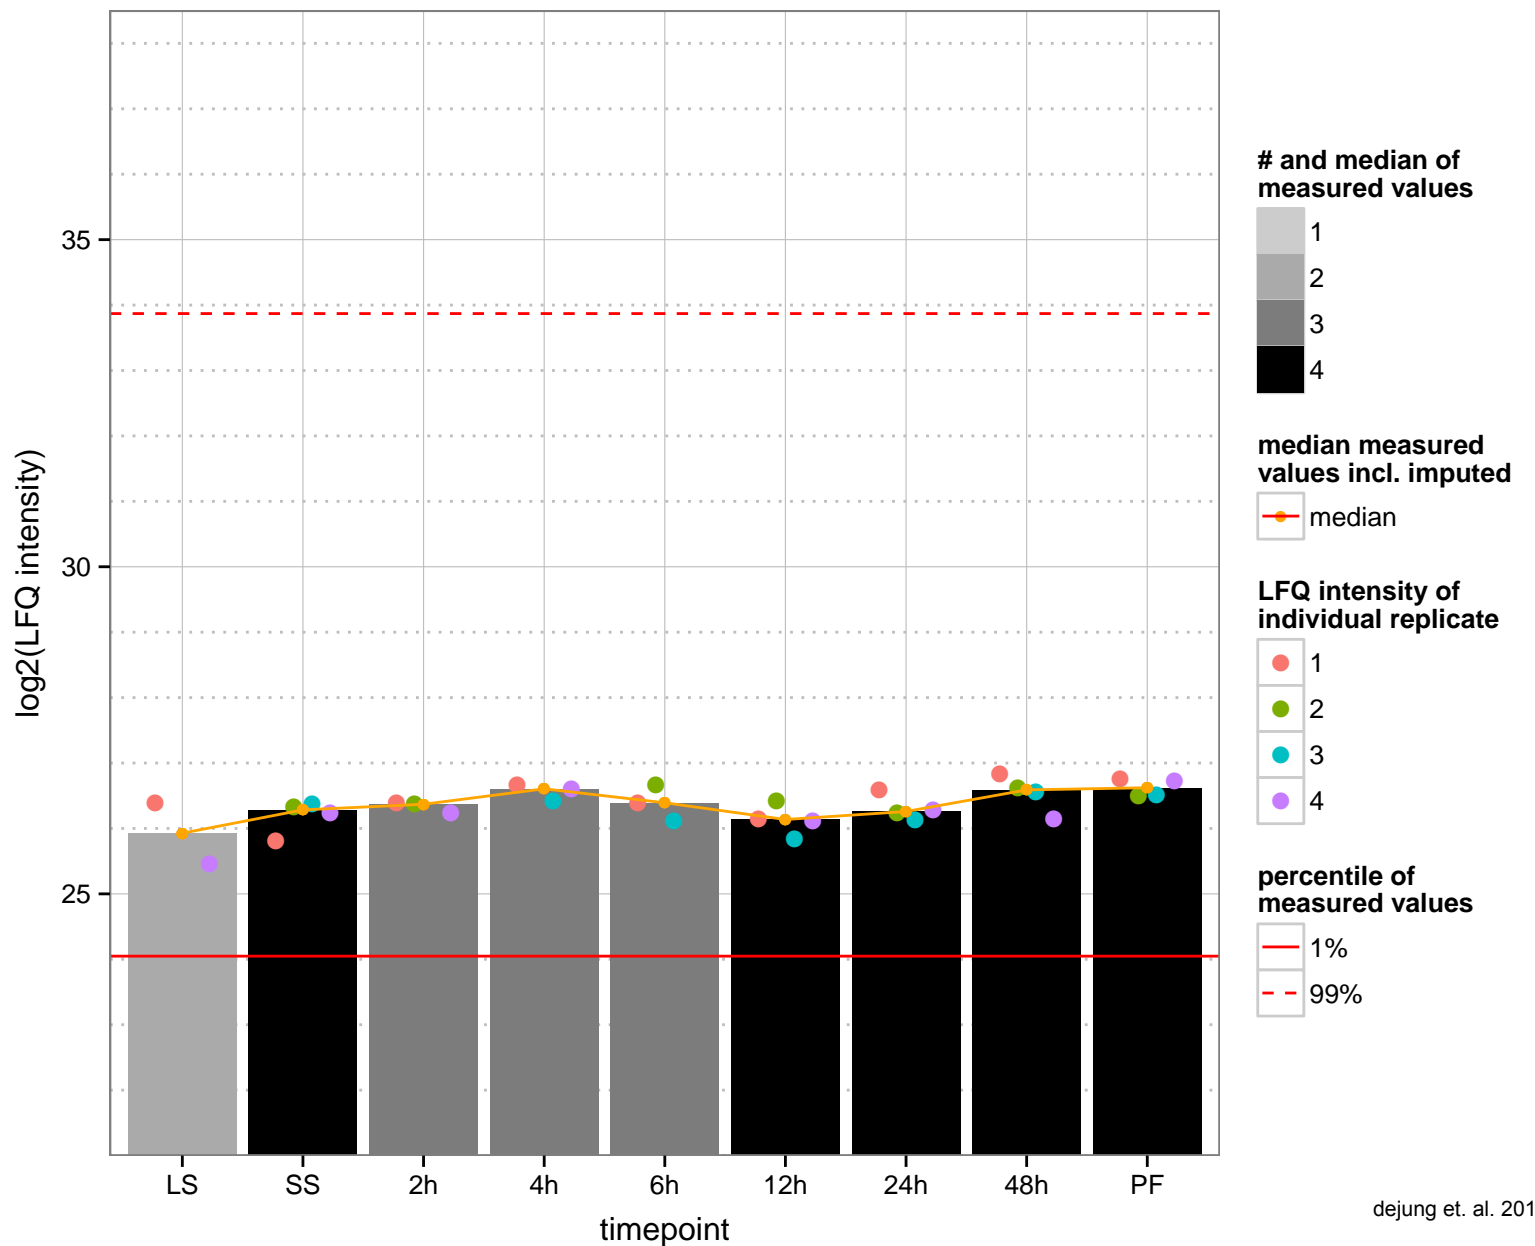

trypanothione/tryparedoxin dependent peroxidase 2, glutathione peroxidase-like 2 (TDPX2)  
 Tb927.7.1130  
 AGOF: glutathione peroxidase activity  
 AGOC: null  
 AGOP: response to oxidative stress  
 PGO: glutathione peroxidase activity  
 PGO: null  
 PGO: null  
 PGO: oxidation-reduction process, response to oxidative stress

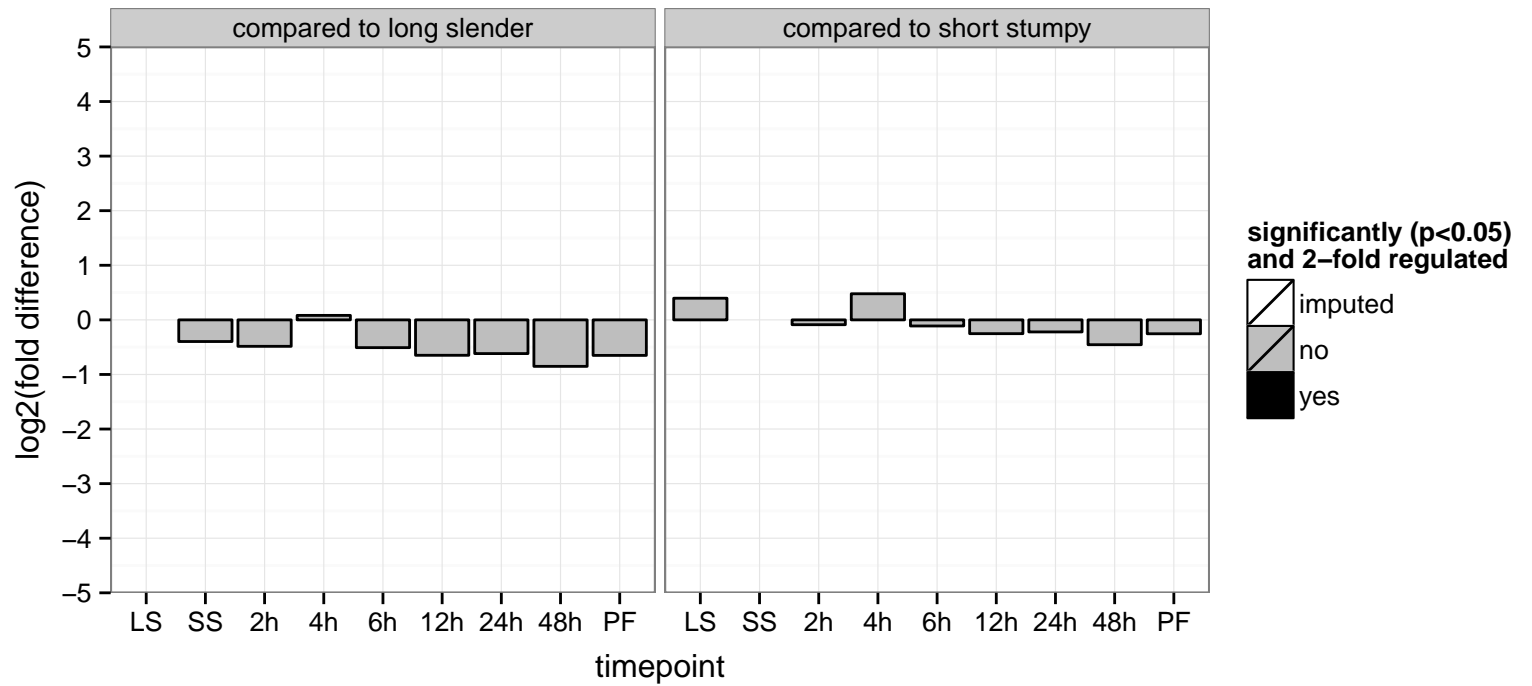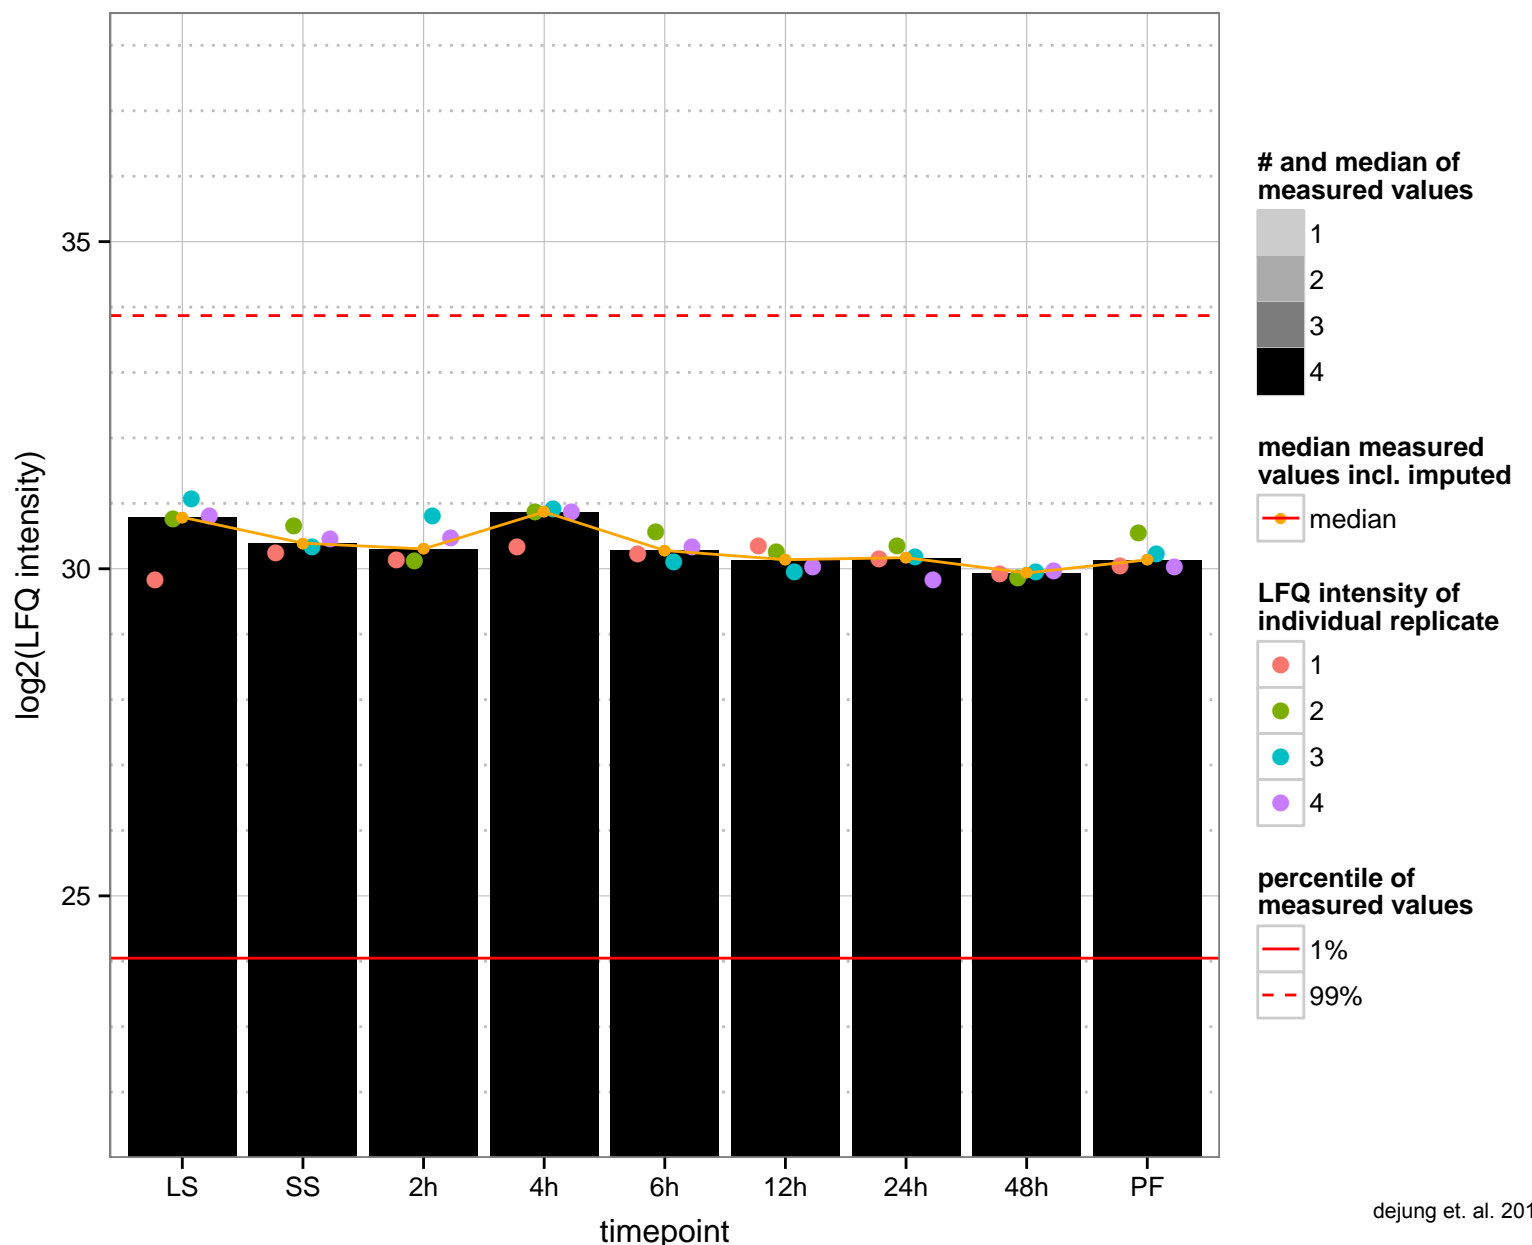

regulator of chromosome condensation, putative  
 Tb927.7.1210  
 AGOF: null  
 AGOC: null  
 AGOP: null  
 PGOF: null  
 PGO C: null  
 PGOP: null

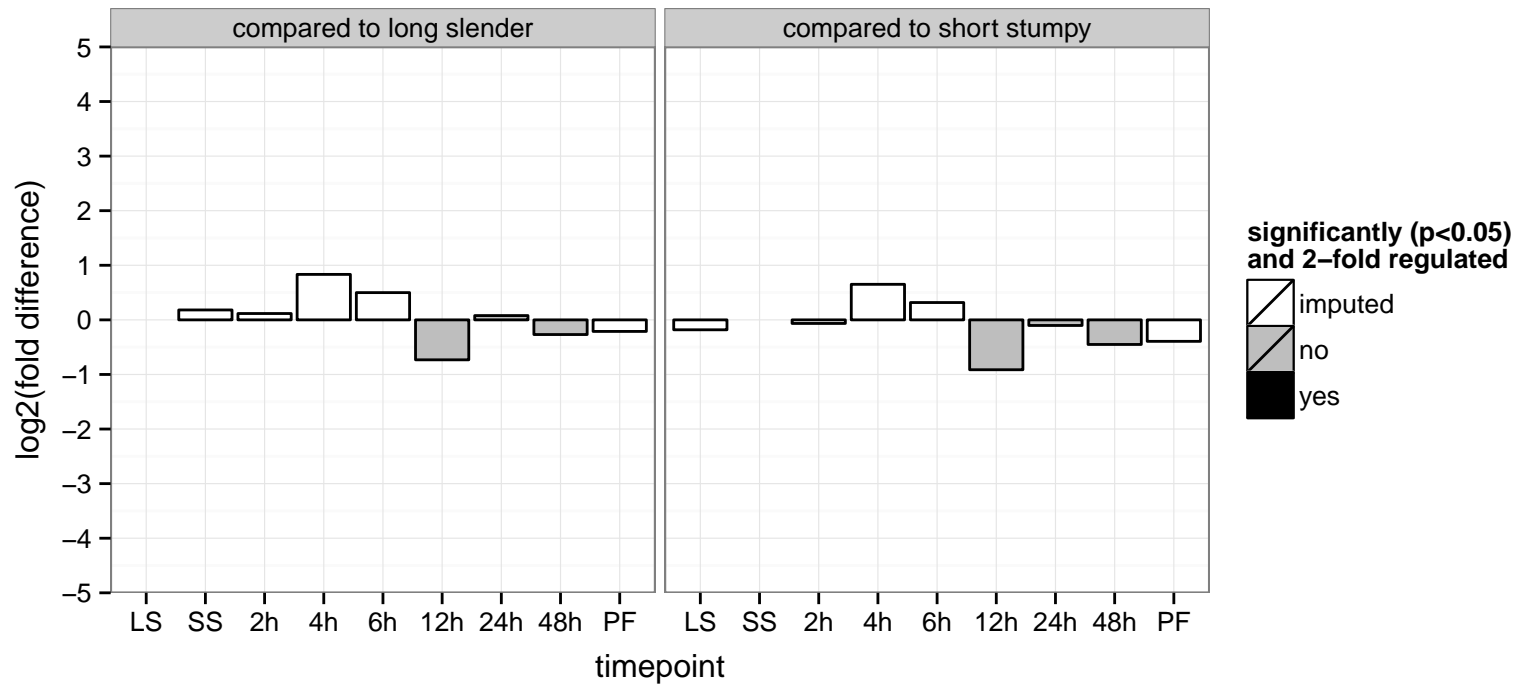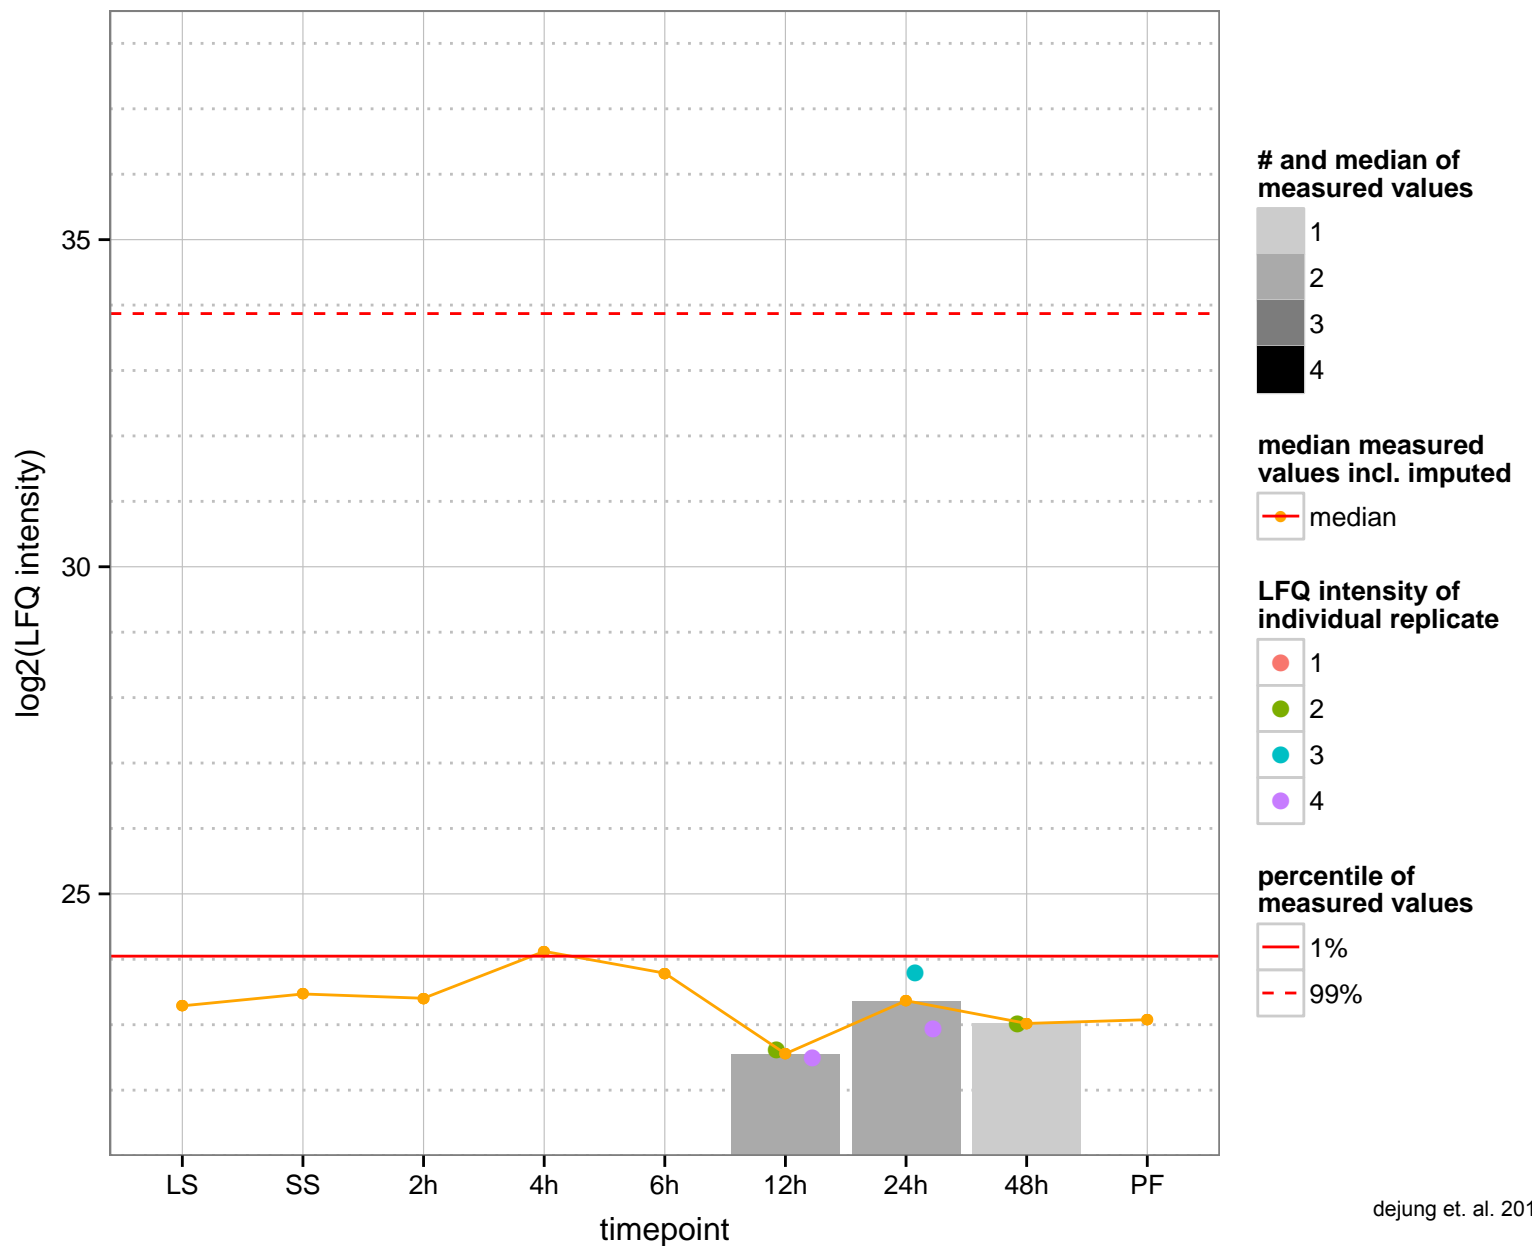

sphingosine kinase A, B, putative

Tb927.7.1240

AGOF: diacylglycerol kinase activity, sphinganine kinase activity

AGOC: cytosol

AGOP: protein kinase C-activating G-protein coupled receptor signaling pathway, sphinganine metabolic process

PGOF: NAD+ kinase activity, diacylglycerol kinase activity

PGOC: null

PGOP: metabolic process, protein kinase C-activating G-protein coupled receptor signaling pathway

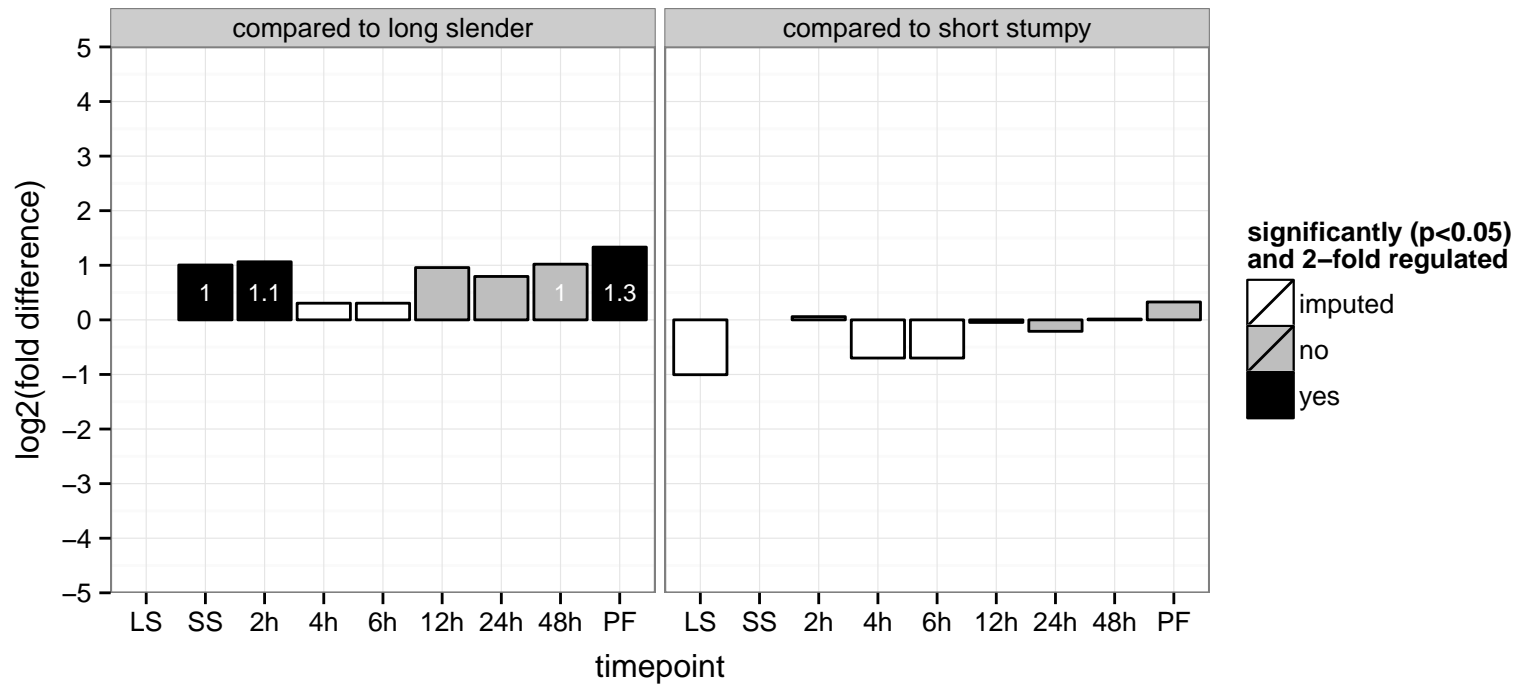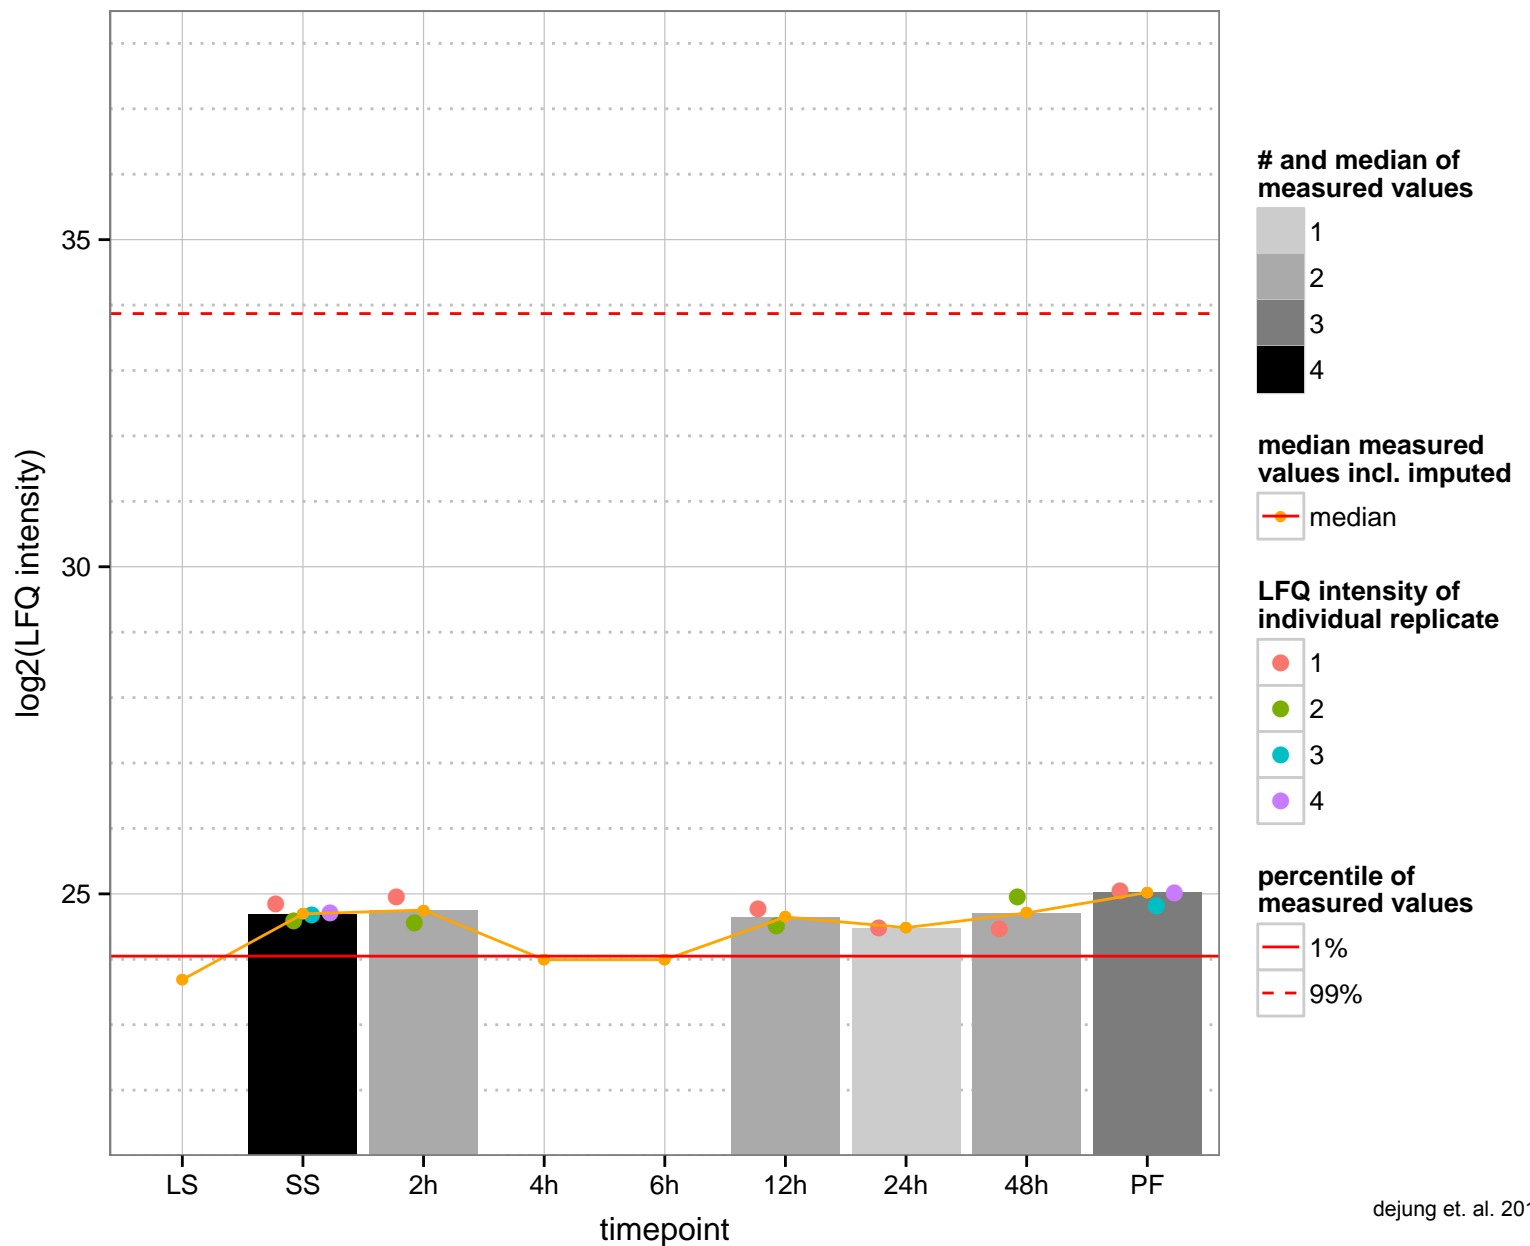

hypothetical protein, conserved  
 Tb927.7.1290  
 AGOF: null  
 AGOC: null  
 AGOP: null  
 PGO: carbohydrate binding  
 PGOC: null  
 PGOP: null

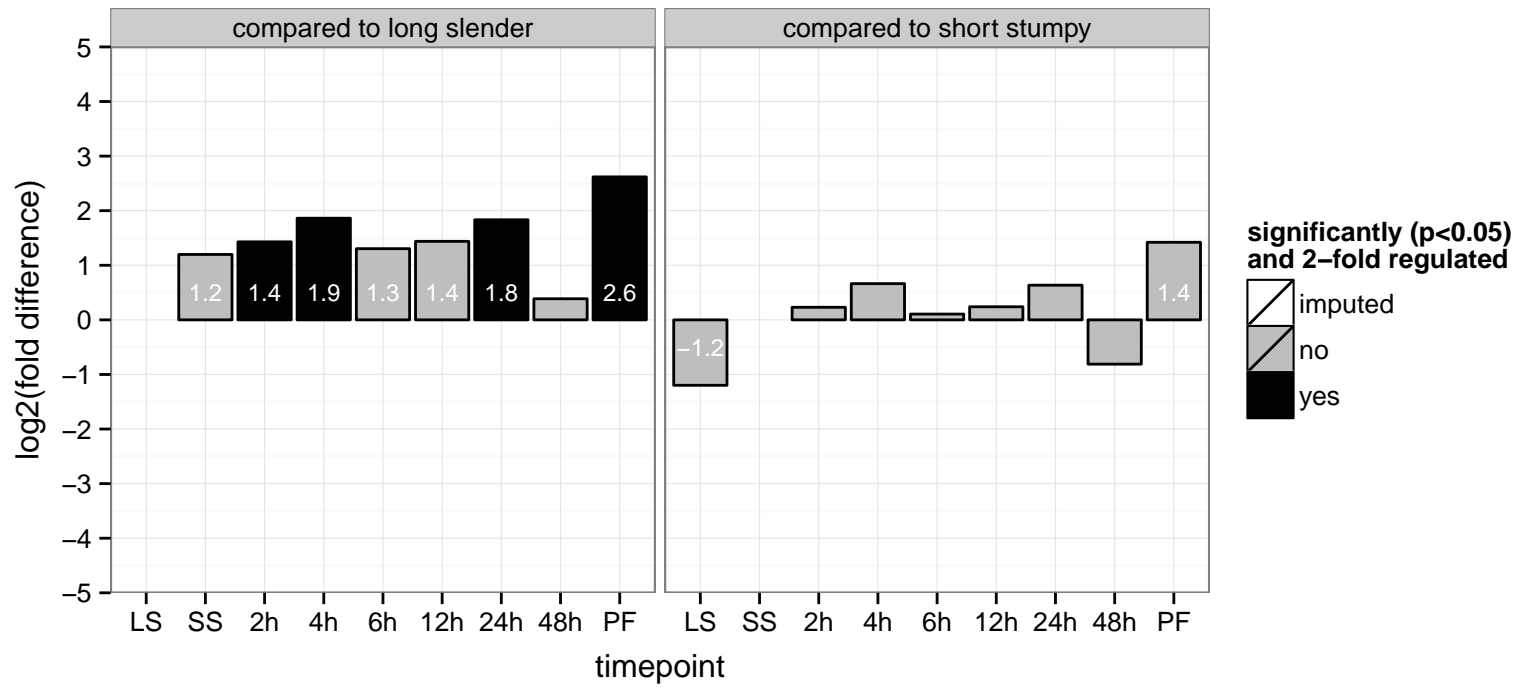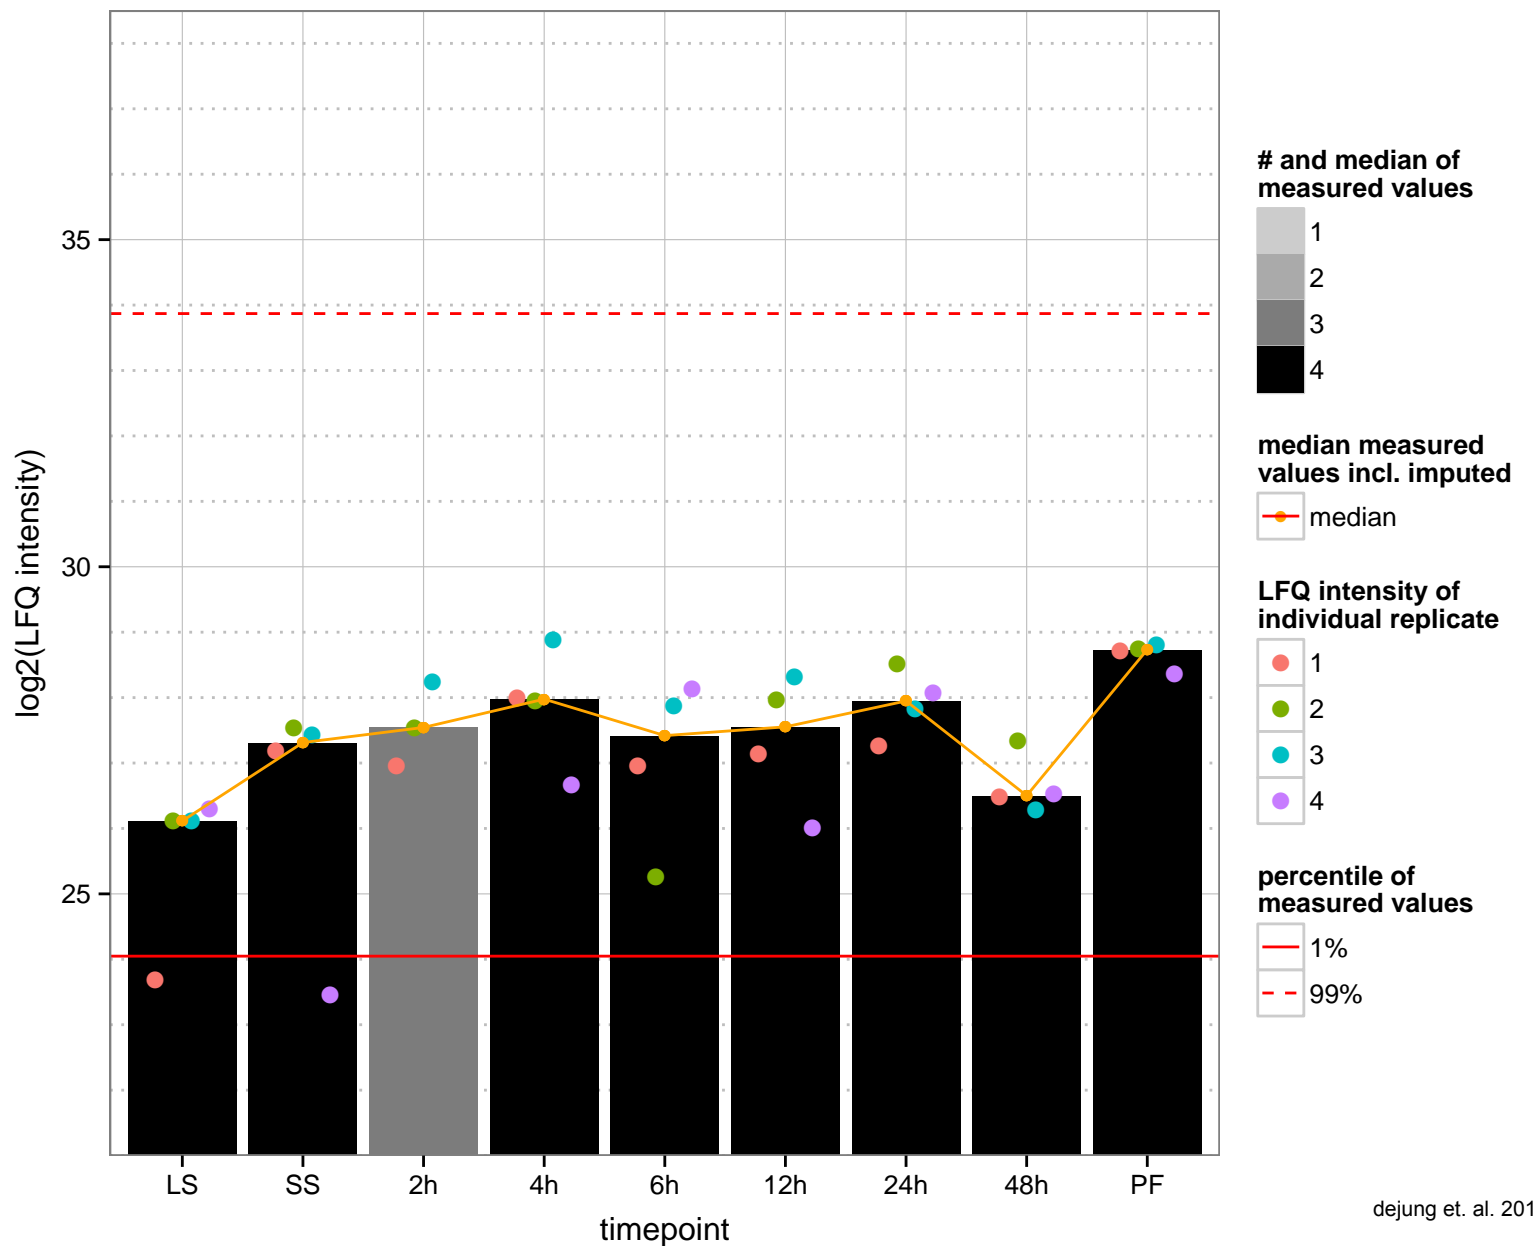

protein disulfide isomerase, putative  
 Tb927.7.1300  
 AGOF: isomerase activity  
 AGOC: endoplasmic reticulum  
 AGOP: cell redox homeostasis  
 PGOF: isomerase activity  
 PGOC: endoplasmic reticulum  
 PGOP: cell redox homeostasis

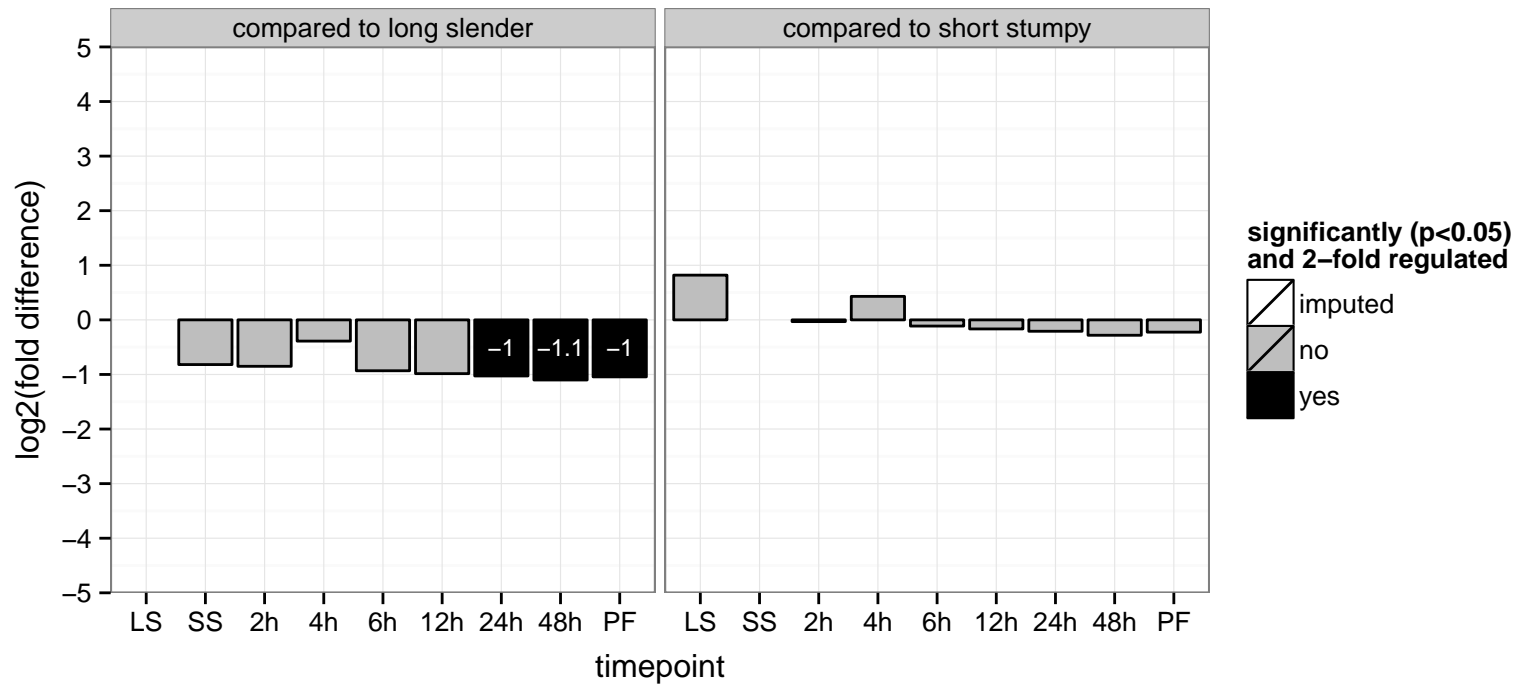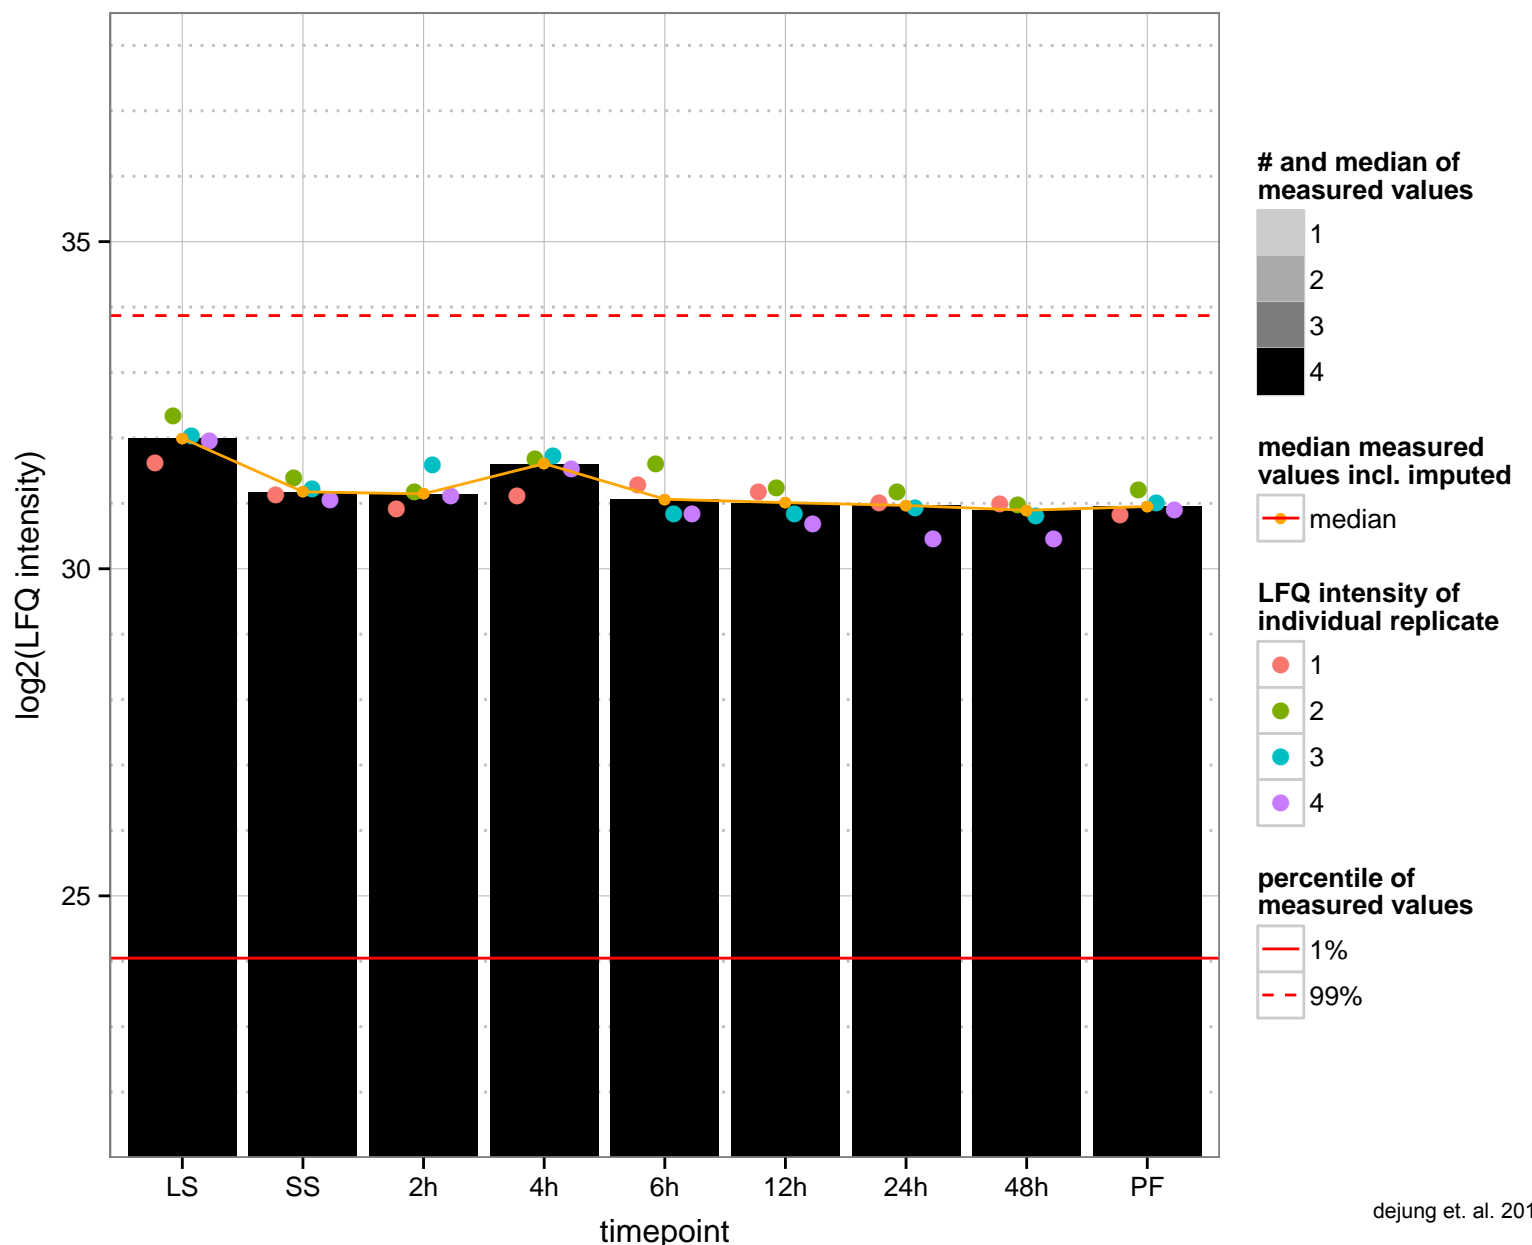



hypothetical protein, conserved  
 Tb927.7.1310  
 AGOF: null  
 AGOC: null  
 AGOP: null  
 PGO: null  
 PGOC: null  
 PGOP: null

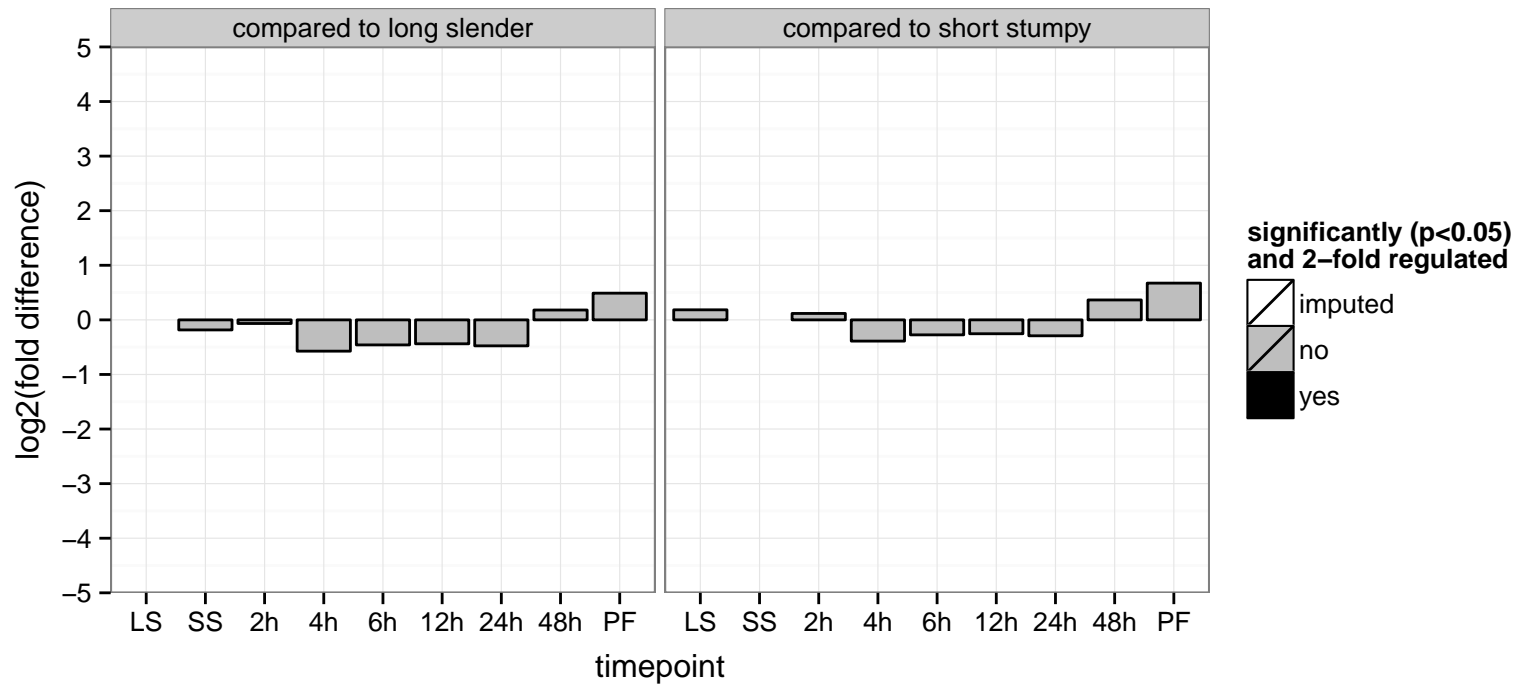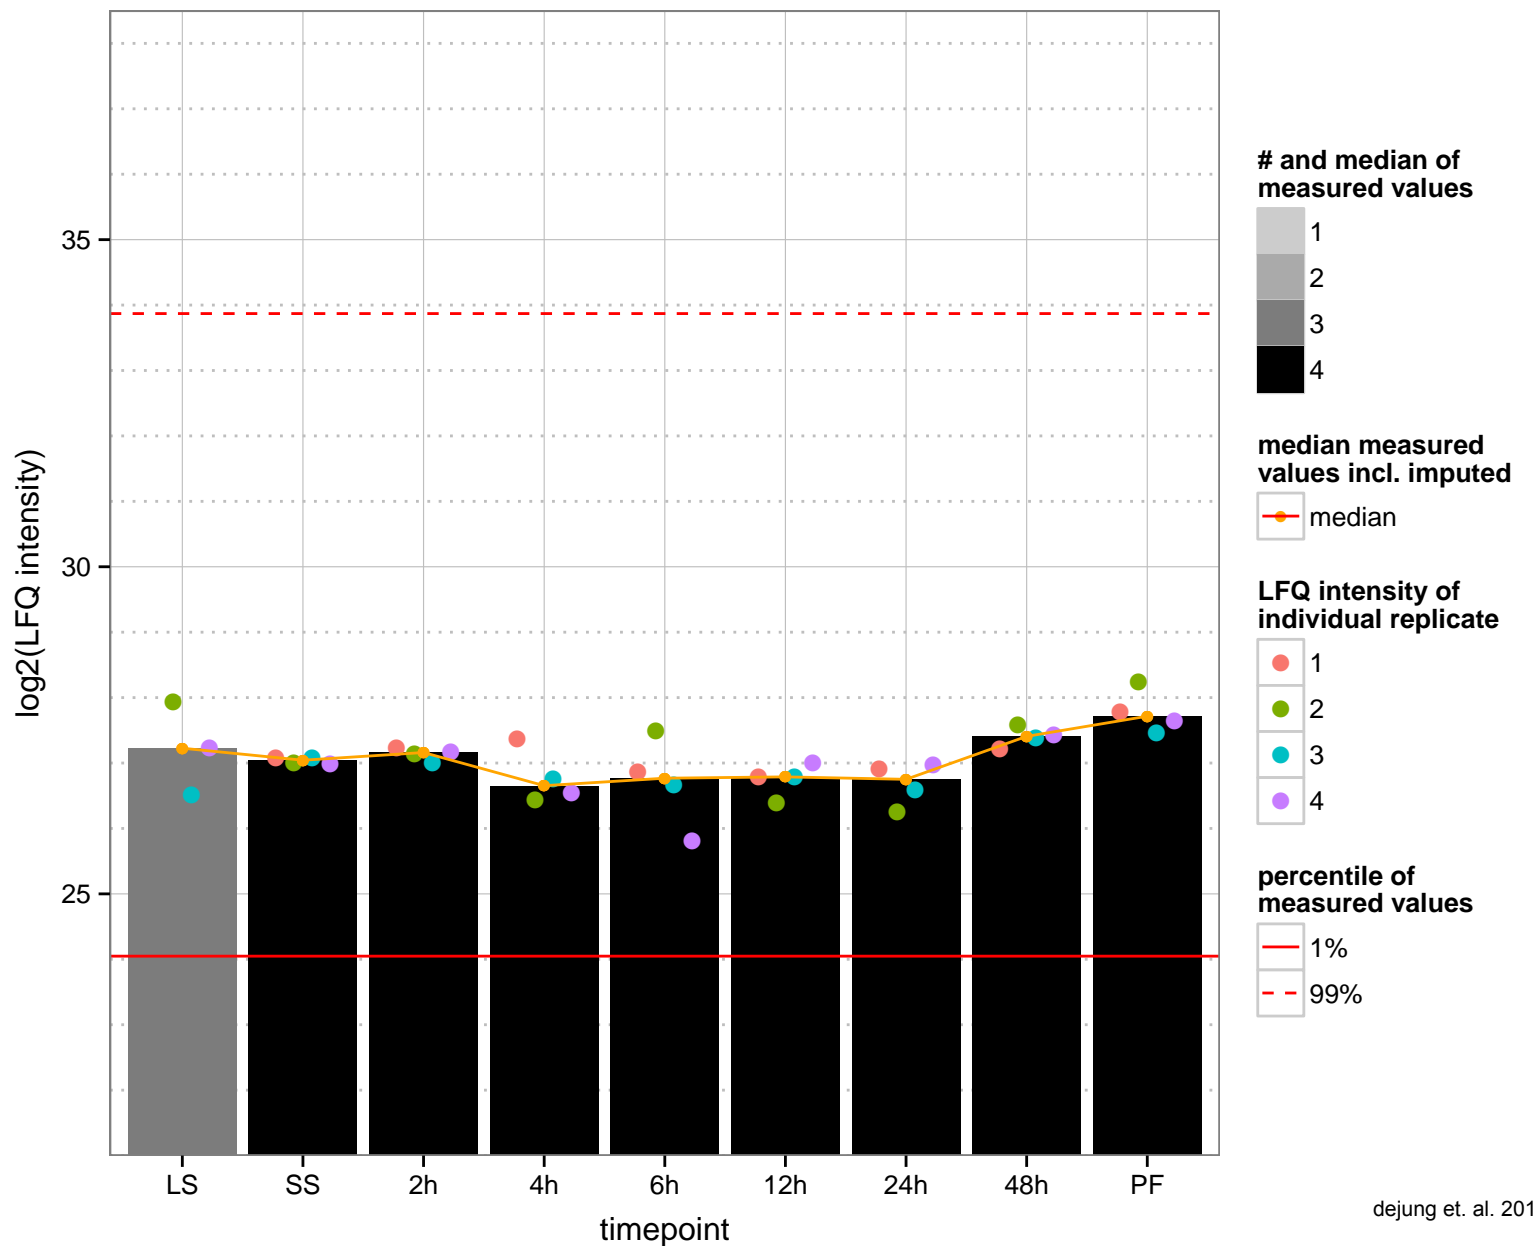

10 kDa heat shock protein, putative (HSP10)  
 Tb927.7.1340;Tb927.7.1320  
 AGOF: ATP binding, unfolded protein binding  
 AGOC: mitochondrial matrix, mitochondrial membrane, mitochondrion  
 AGOP: protein folding  
 PGO: null  
 PGO: cytoplasm  
 PGO: protein folding

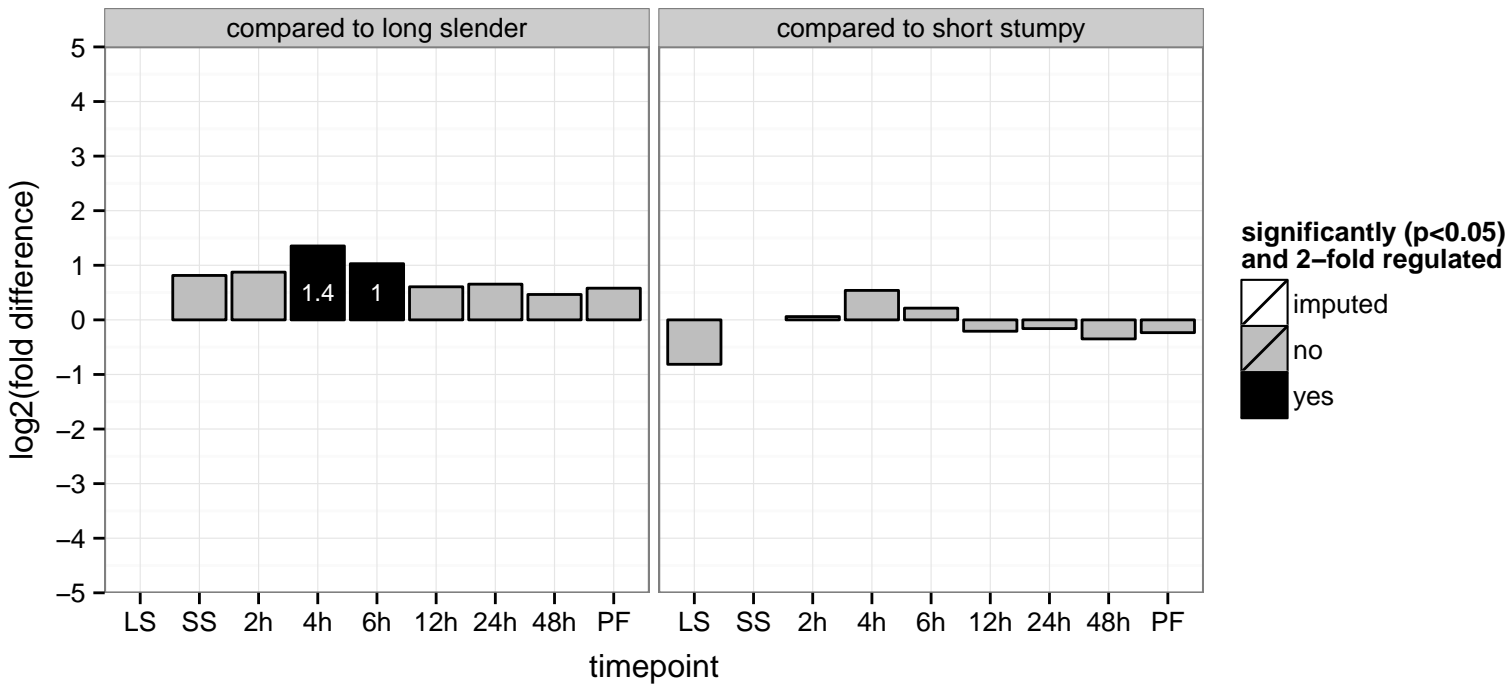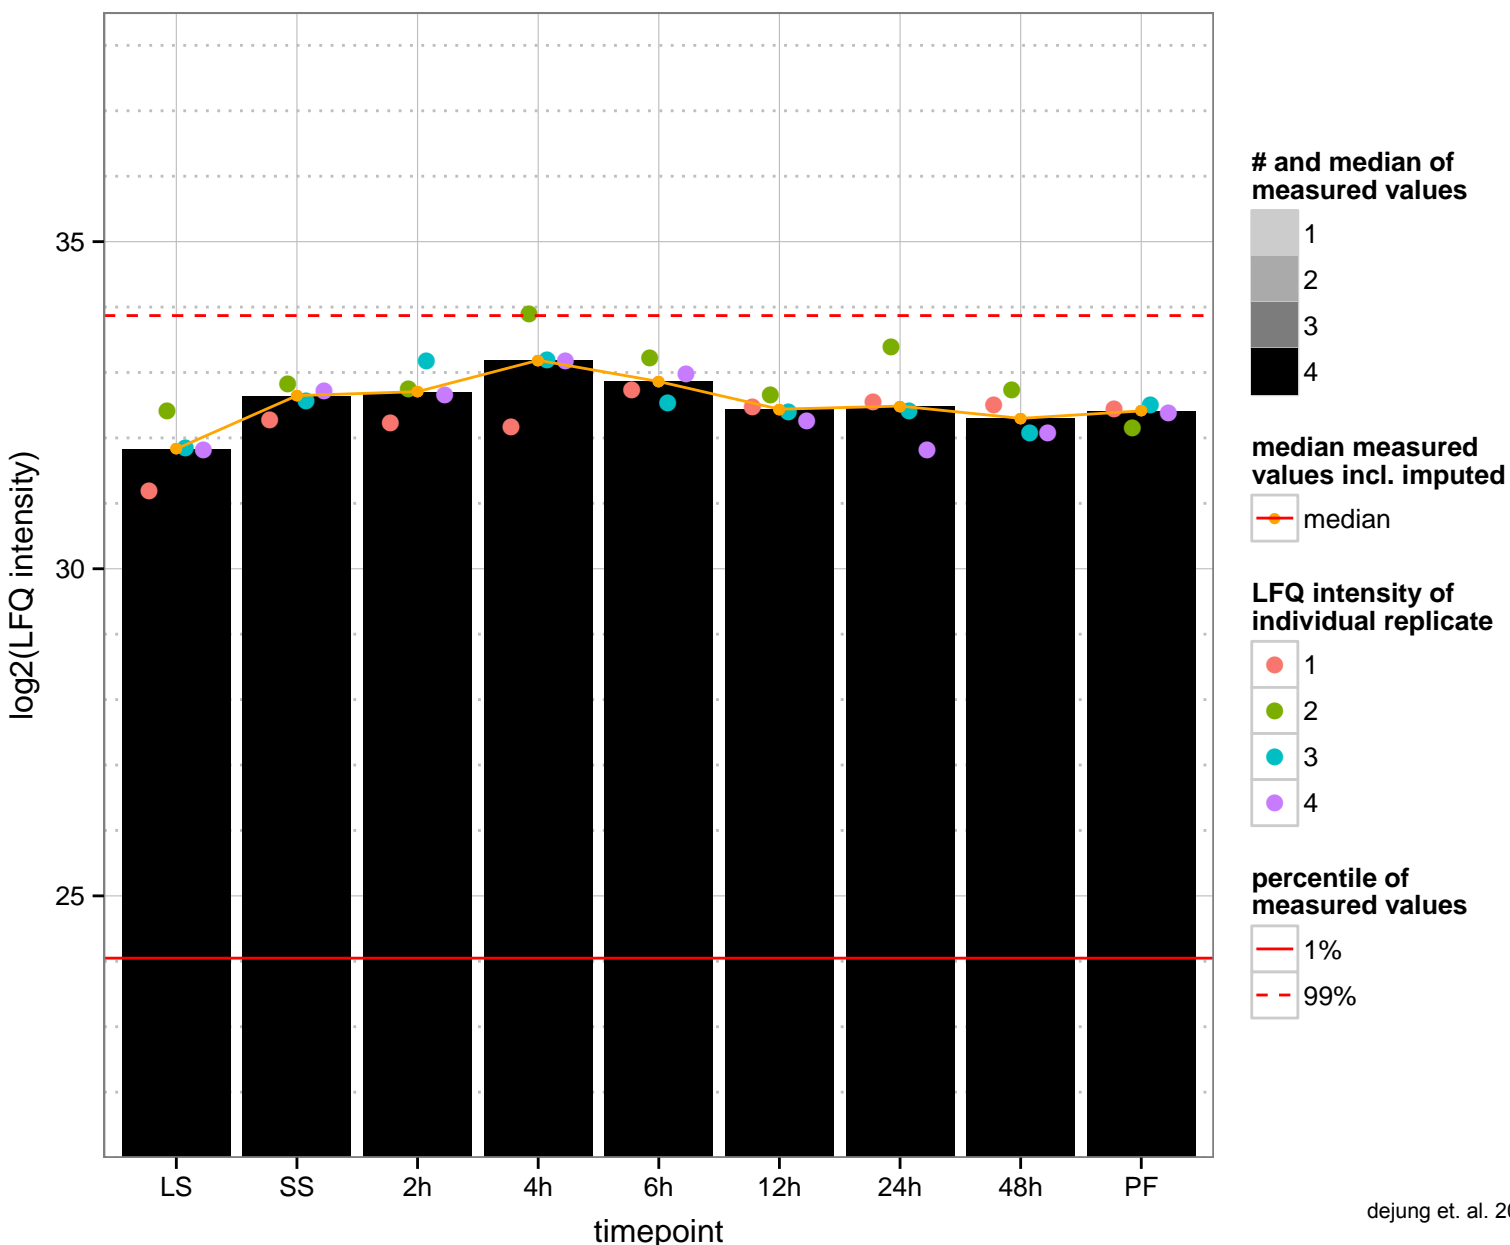

hypothetical protein, conserved  
 Tb927.7.1350  
 AGOF: null  
 AGOC: mitochondrion  
 AGOP: null  
 PGO: null  
 PGOC: null  
 PGOP: null

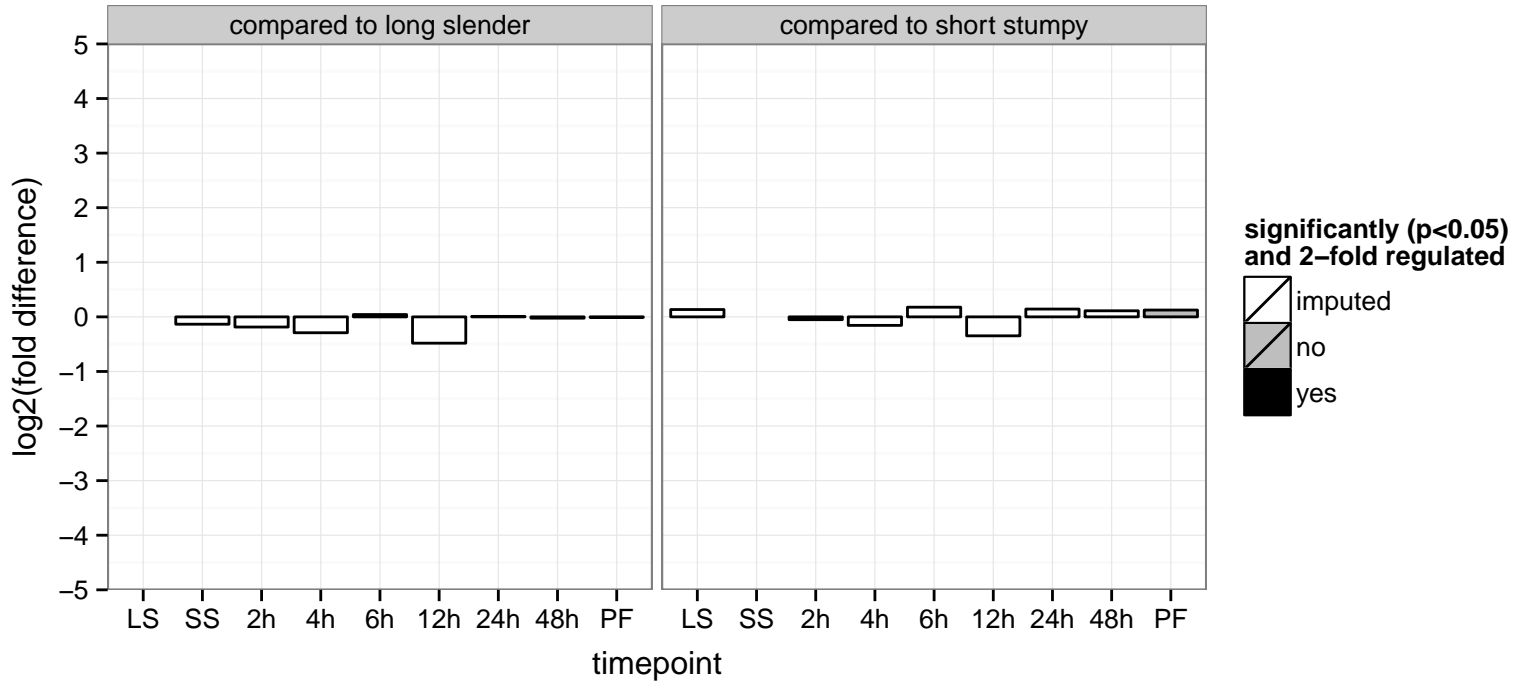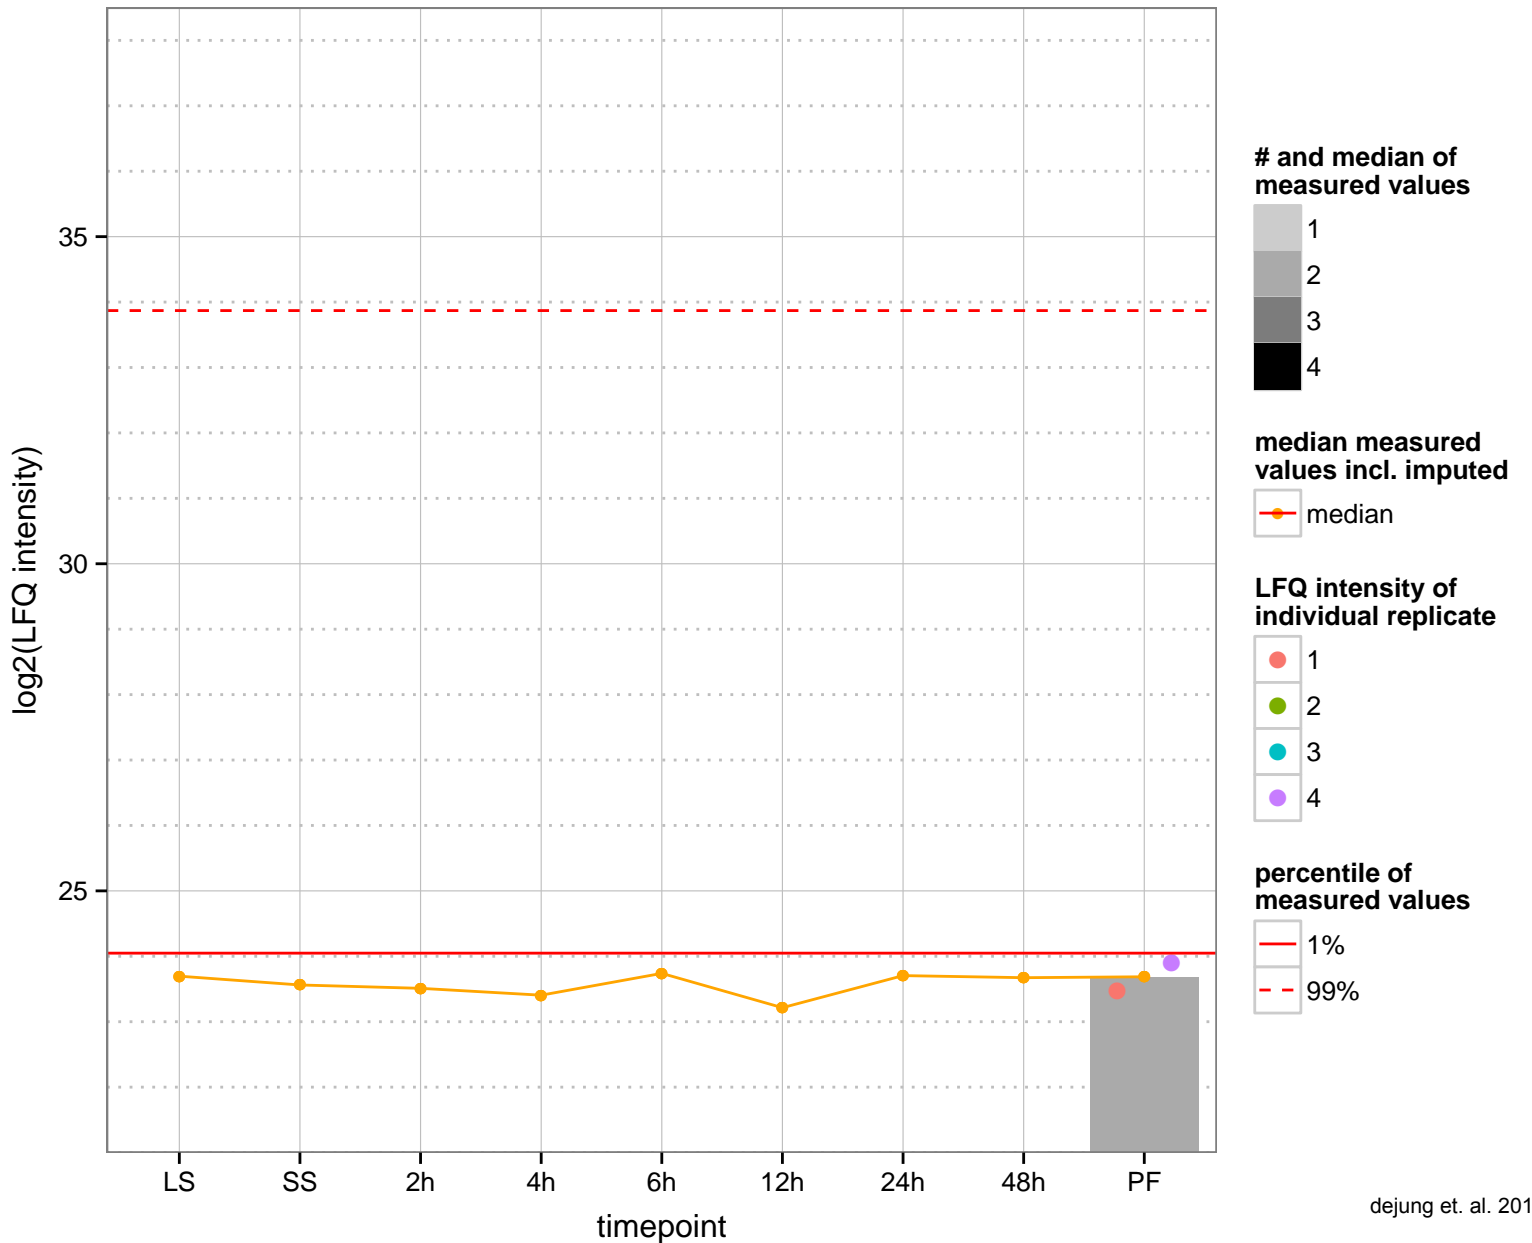

hypothetical protein, conserved  
 Tb927.7.1380  
 AGOF: null  
 AGOC: null  
 AGOP: null  
 PGO: null  
 PGOC: null  
 PGOP: null

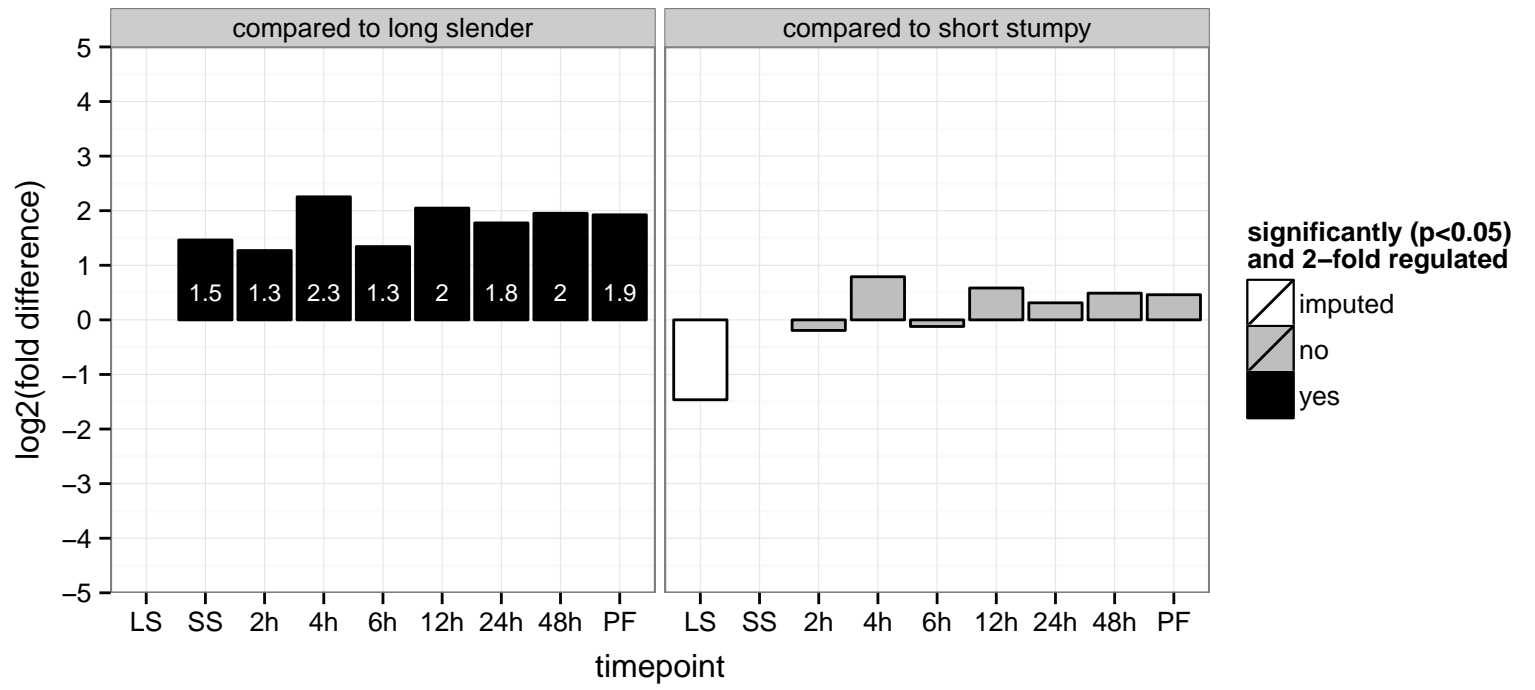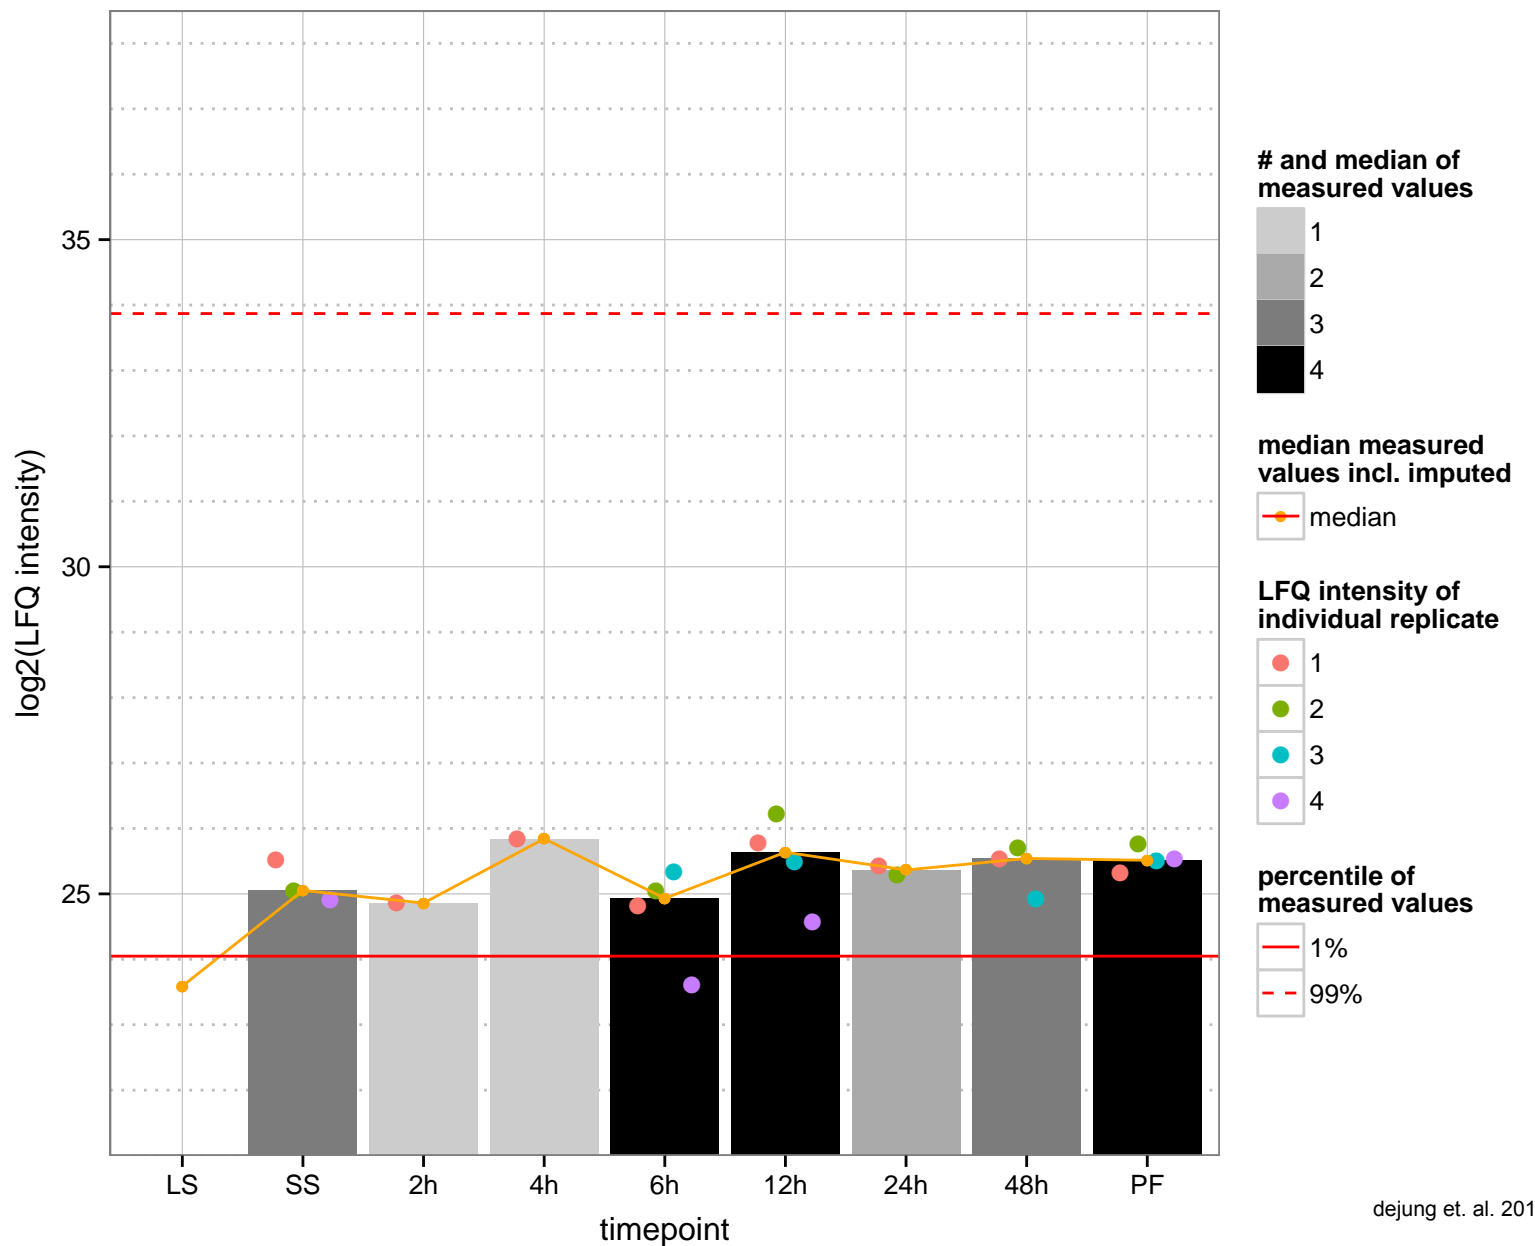

leucine-rich repeat protein (LRRP), putative  
 Tb927.7.1430  
 AGOF: null  
 AGOC: null  
 AGOP: null  
 PGOF: null  
 PGO: null  
 PGOP: null

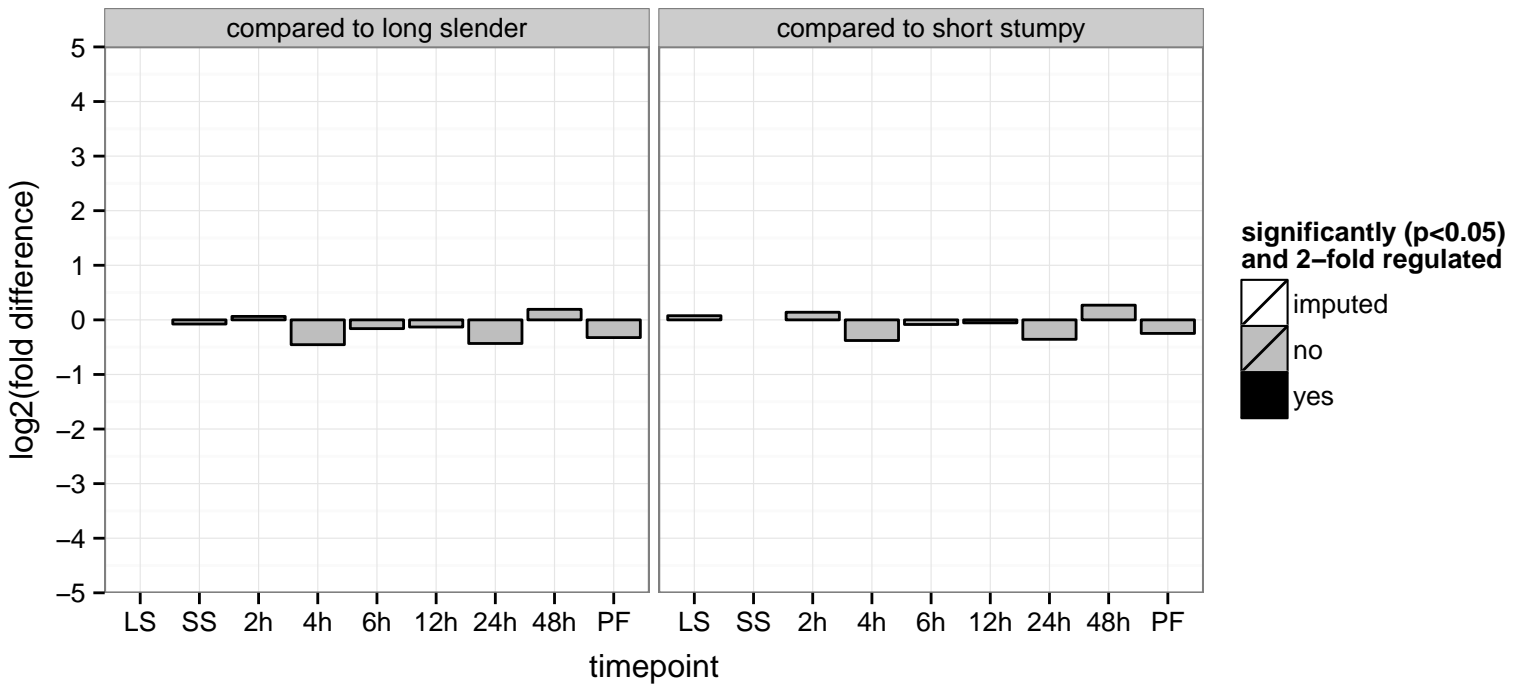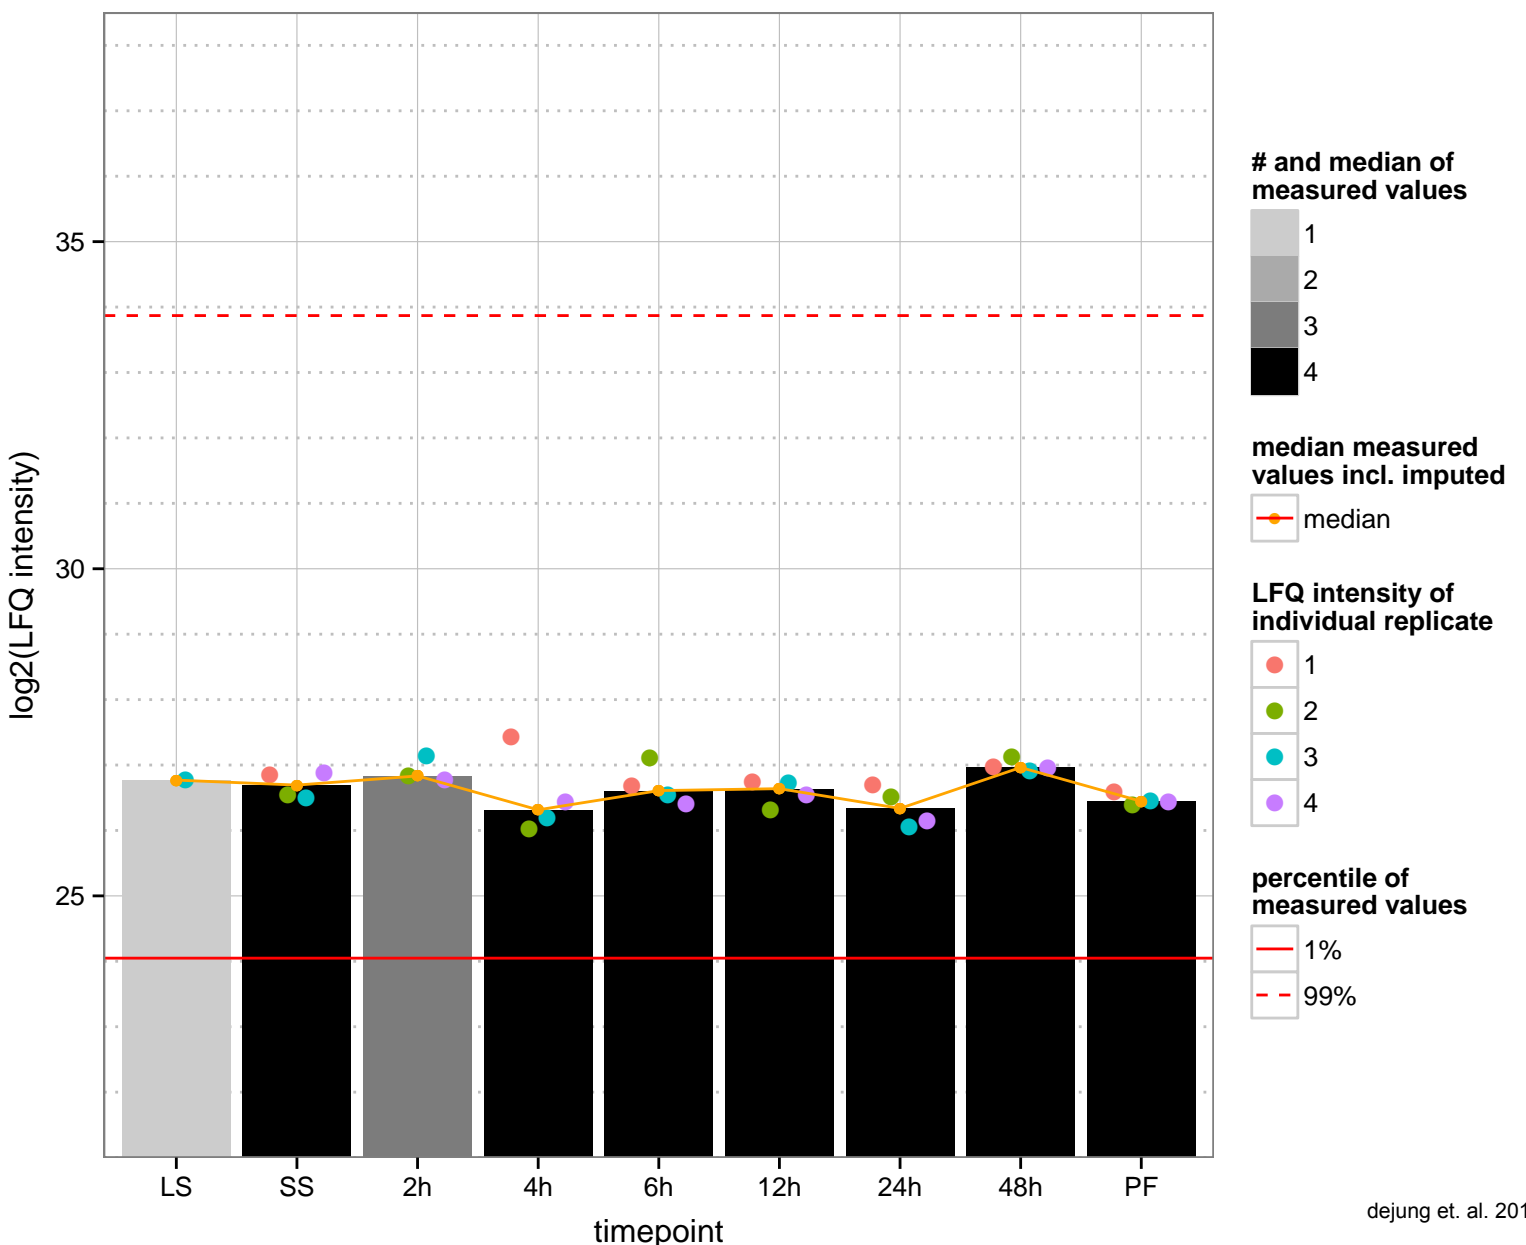

nucleotide binding protein, putative (NBP 2)  
 Tb927.7.1500  
 AGOF: nucleotide binding  
 AGOC: cytosol  
 AGOP: null  
 PGO: null  
 PGOC: null  
 PGOP: null

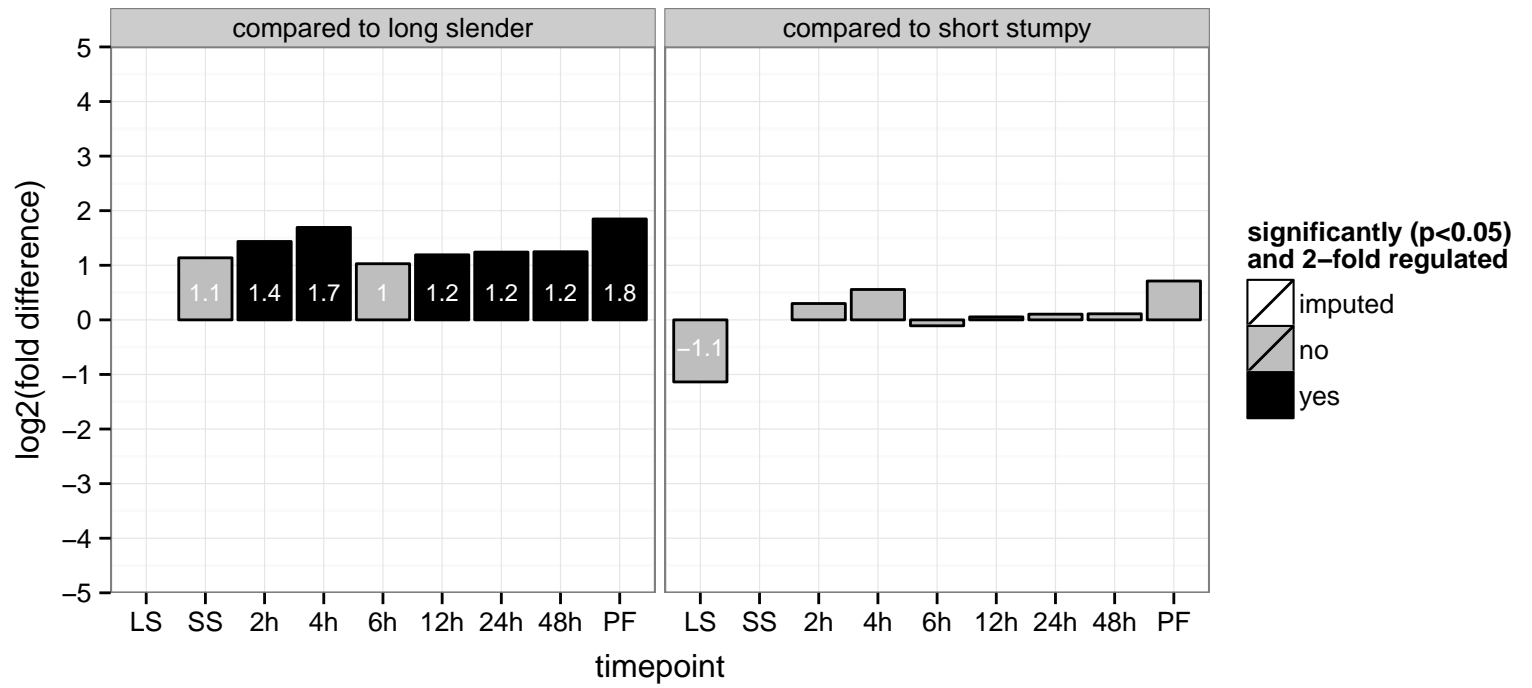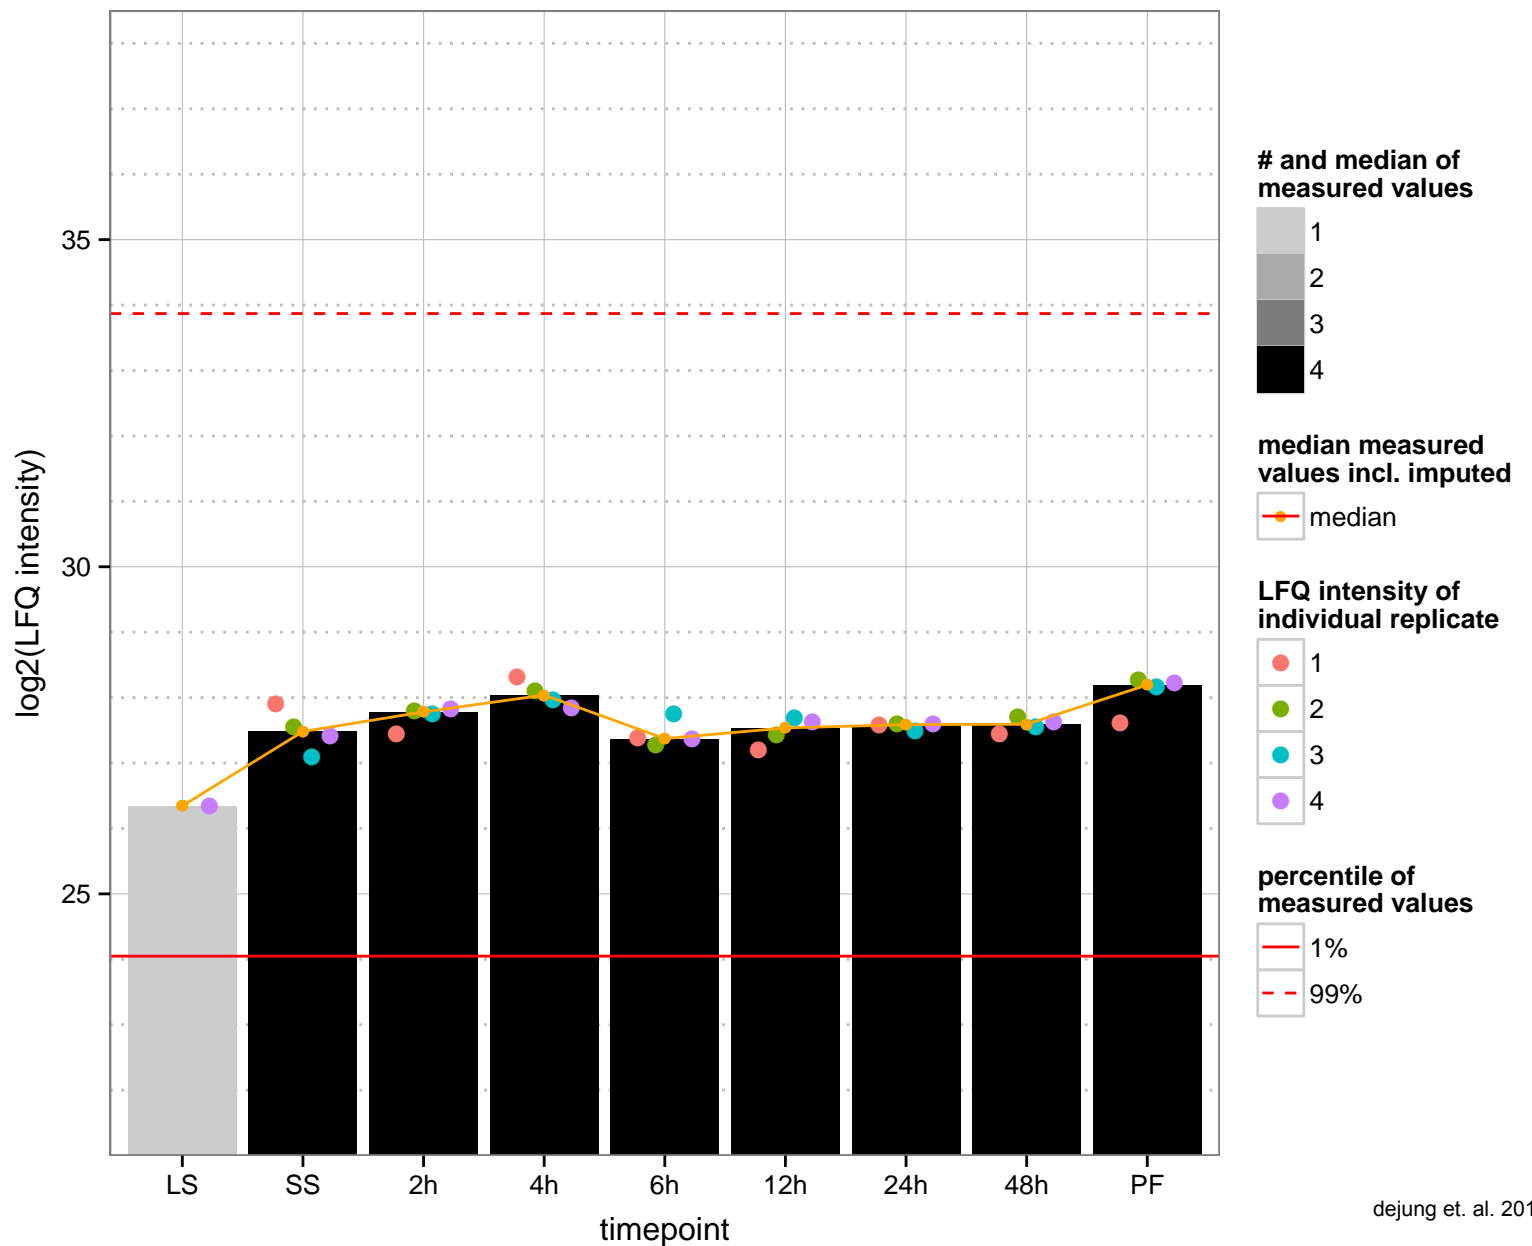

pseudouridylate synthase I, putative  
 Tb927.7.1510  
 AGOF: RNA binding, pseudouridine synthase activity  
 AGOC: null  
 AGOP: pseudouridine synthesis  
 PGOF: RNA binding, pseudouridine synthase activity  
 PGOC: null  
 PGOP: RNA modification, pseudouridine synthesis

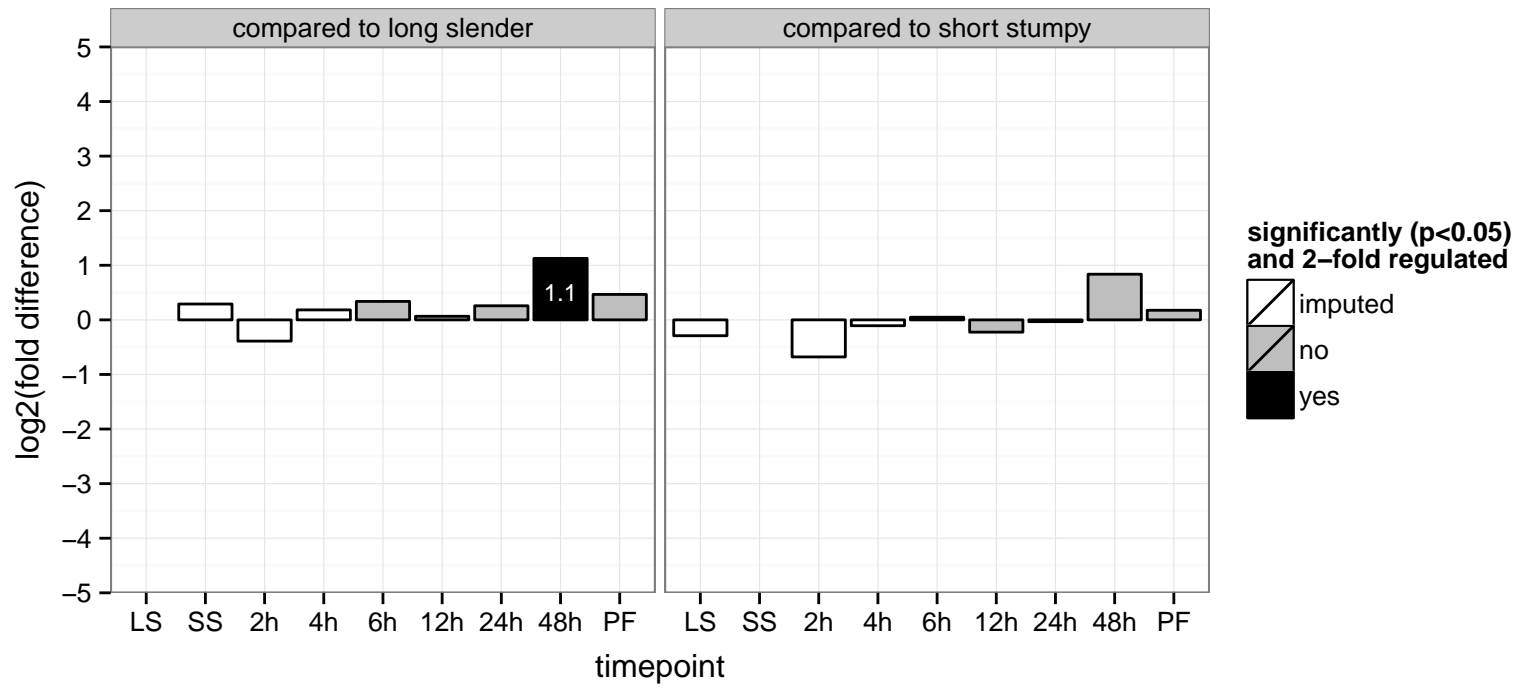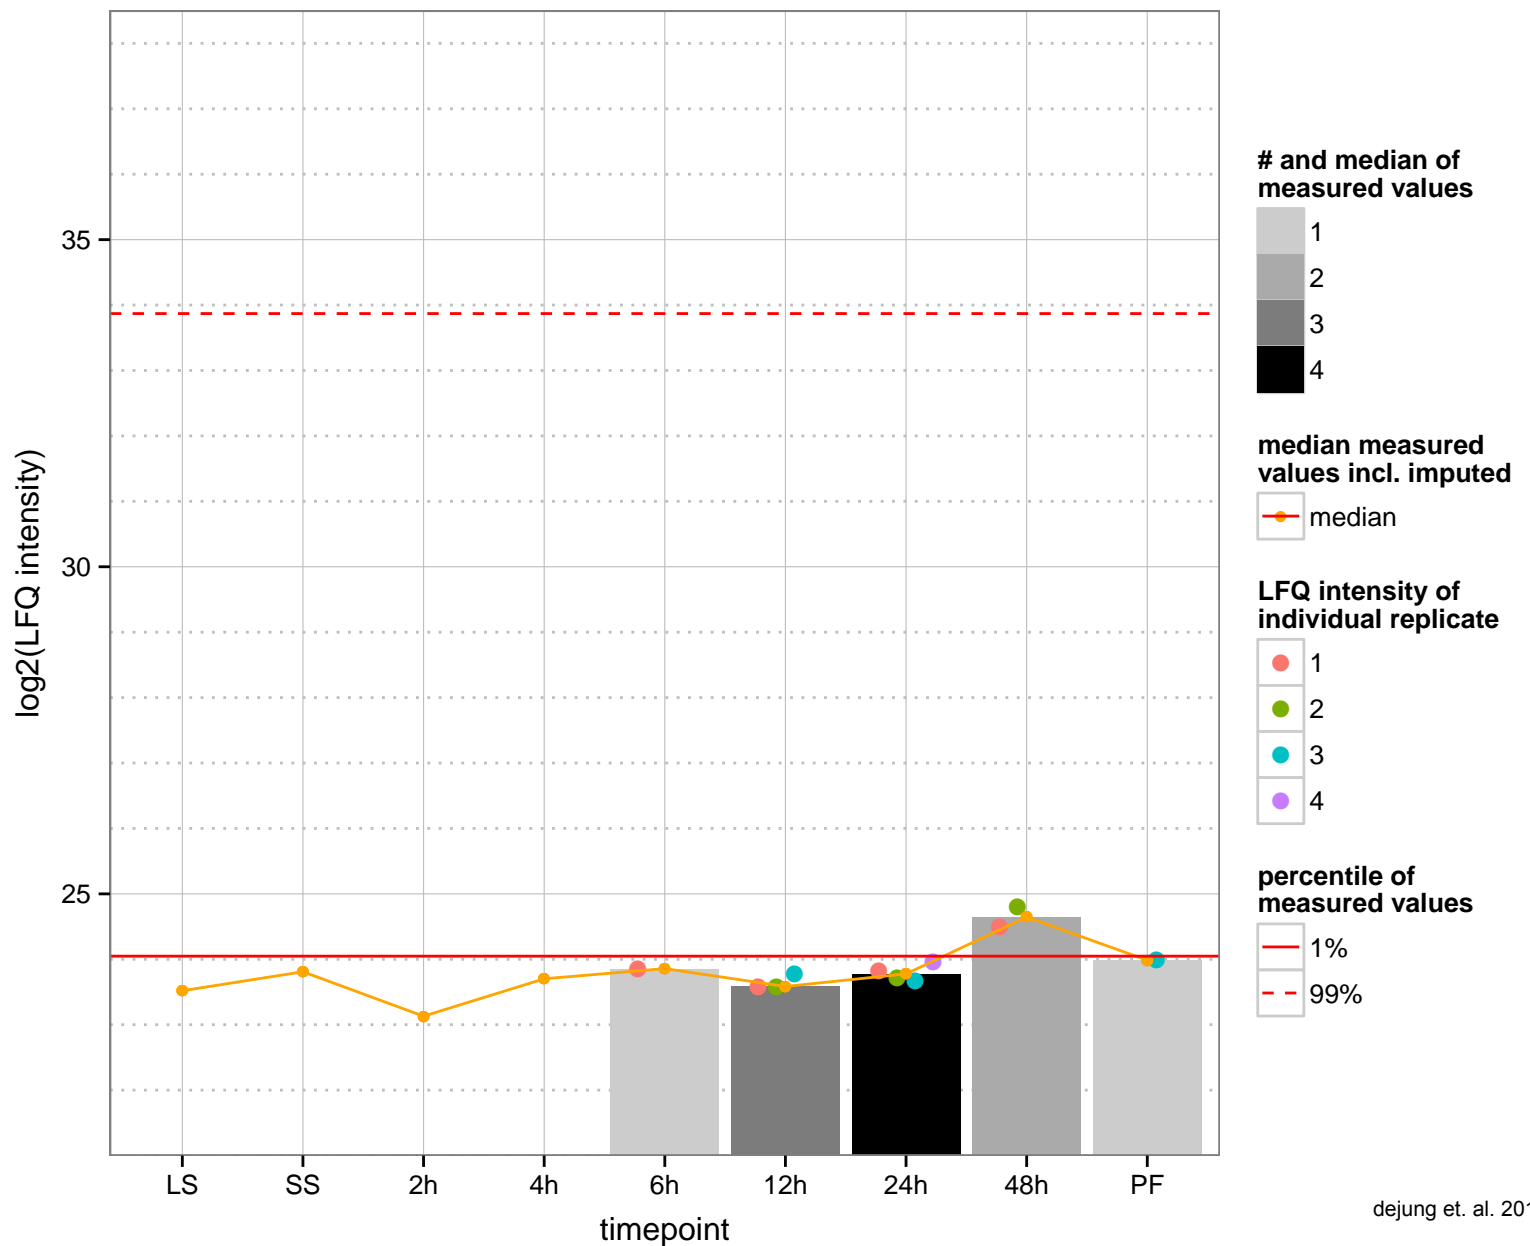

hypothetical protein, conserved  
 Tb927.7.1630  
 AGOF: null  
 AGOC: null  
 AGOP: null  
 PGO: null  
 PGOC: null  
 PGOP: null

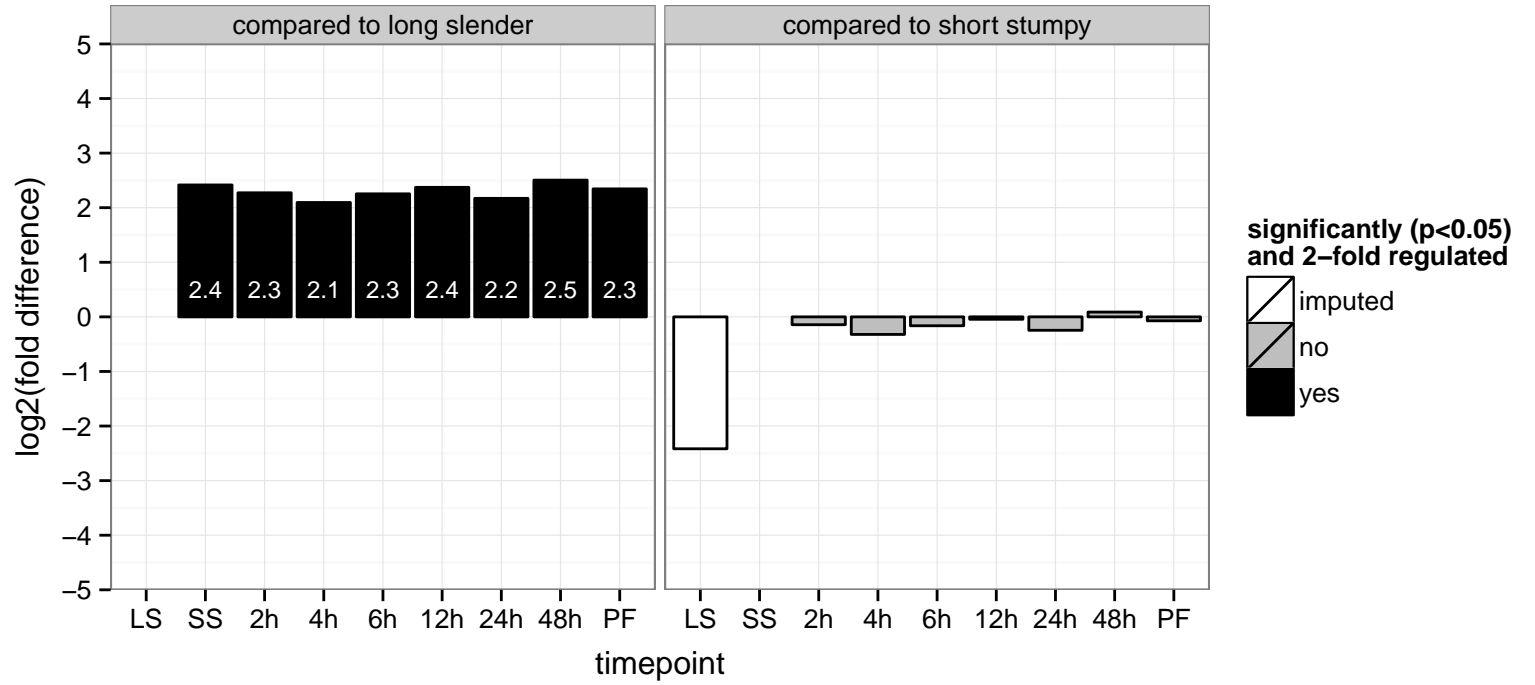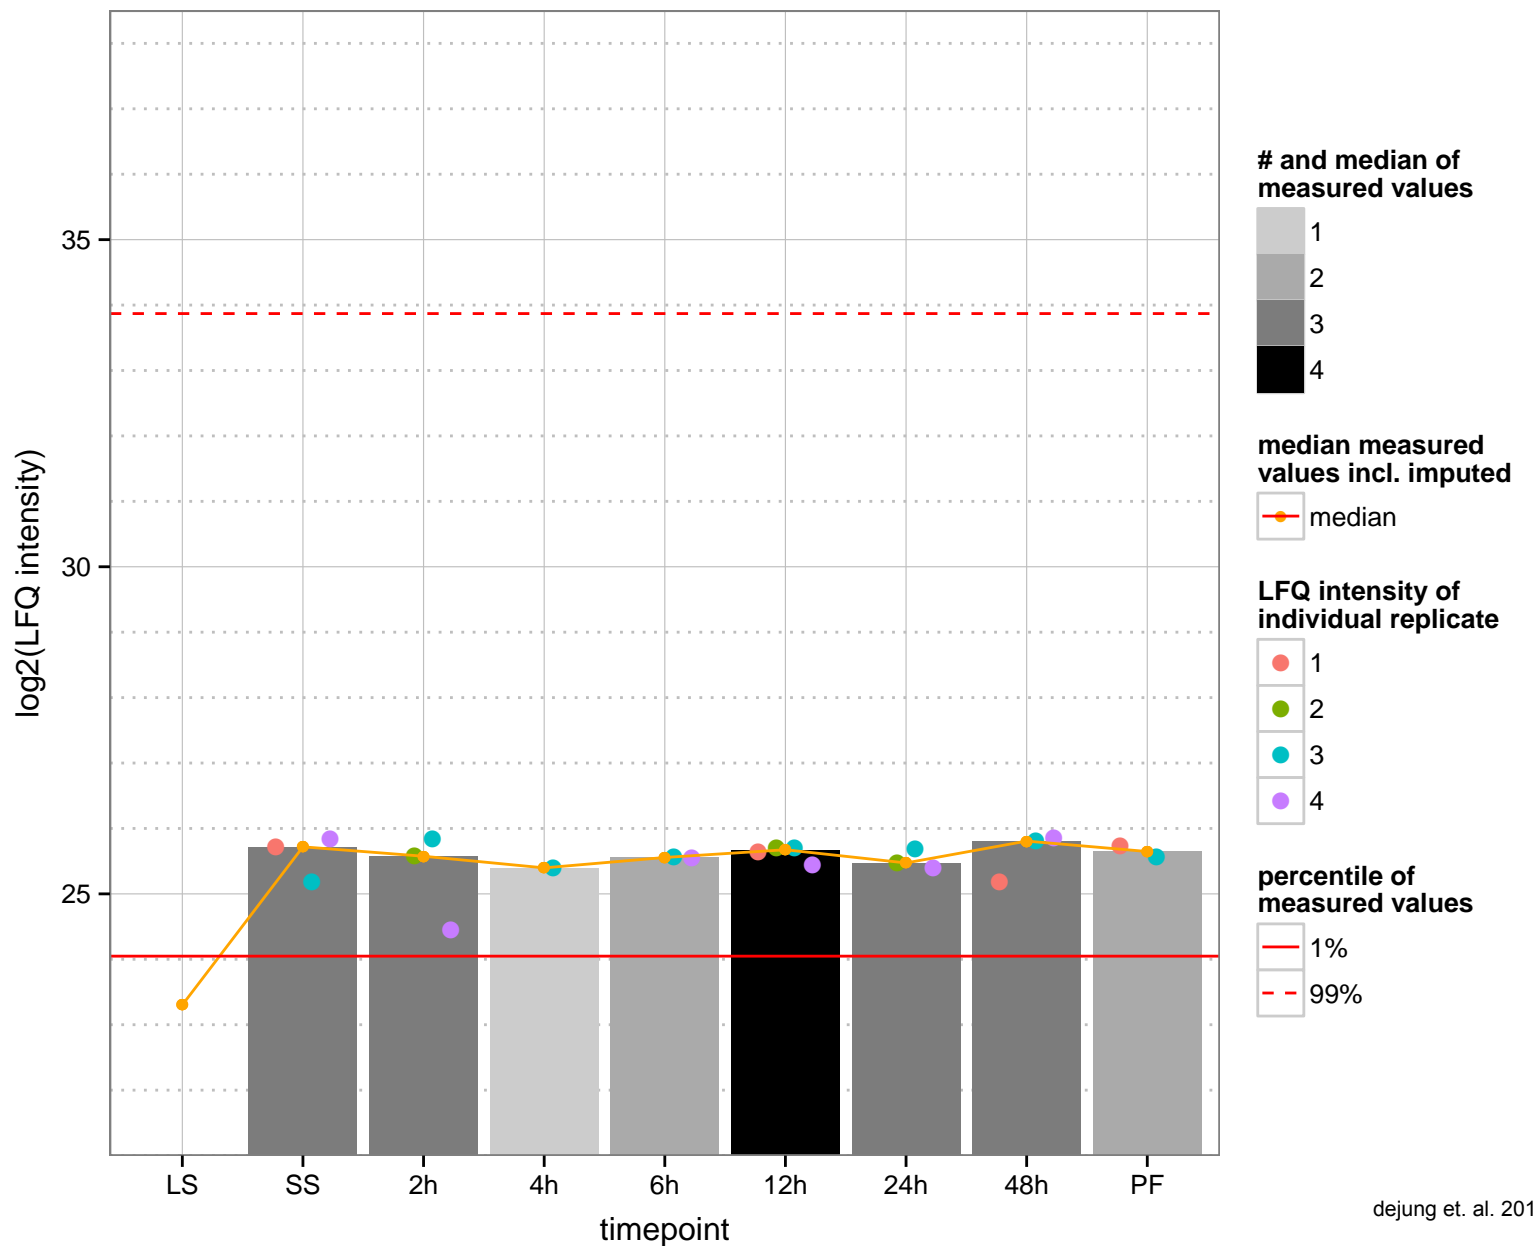



hypothetical protein, conserved  
 Tb927.7.1650  
 AGOF: null  
 AGOC: null  
 AGOP: null  
 PGOF: null  
 PGOC: null  
 PGOP: null

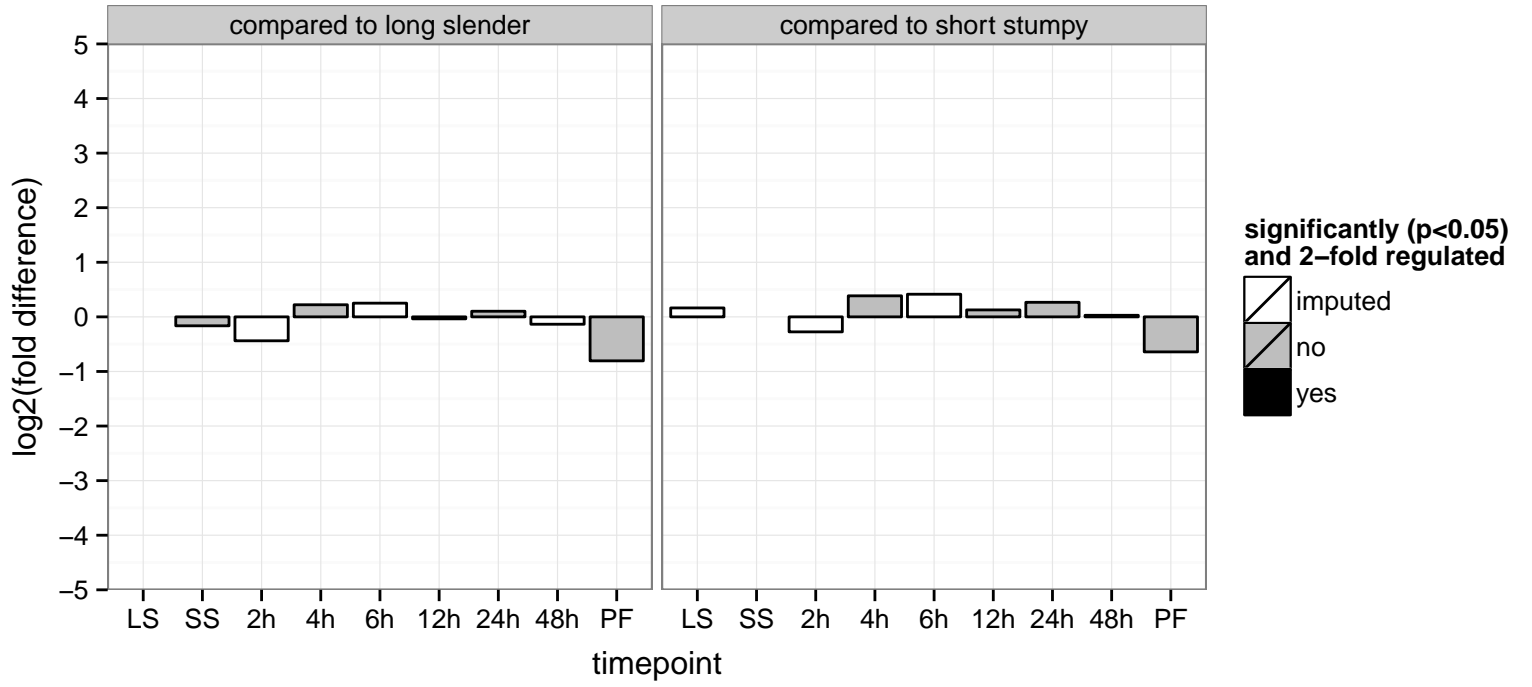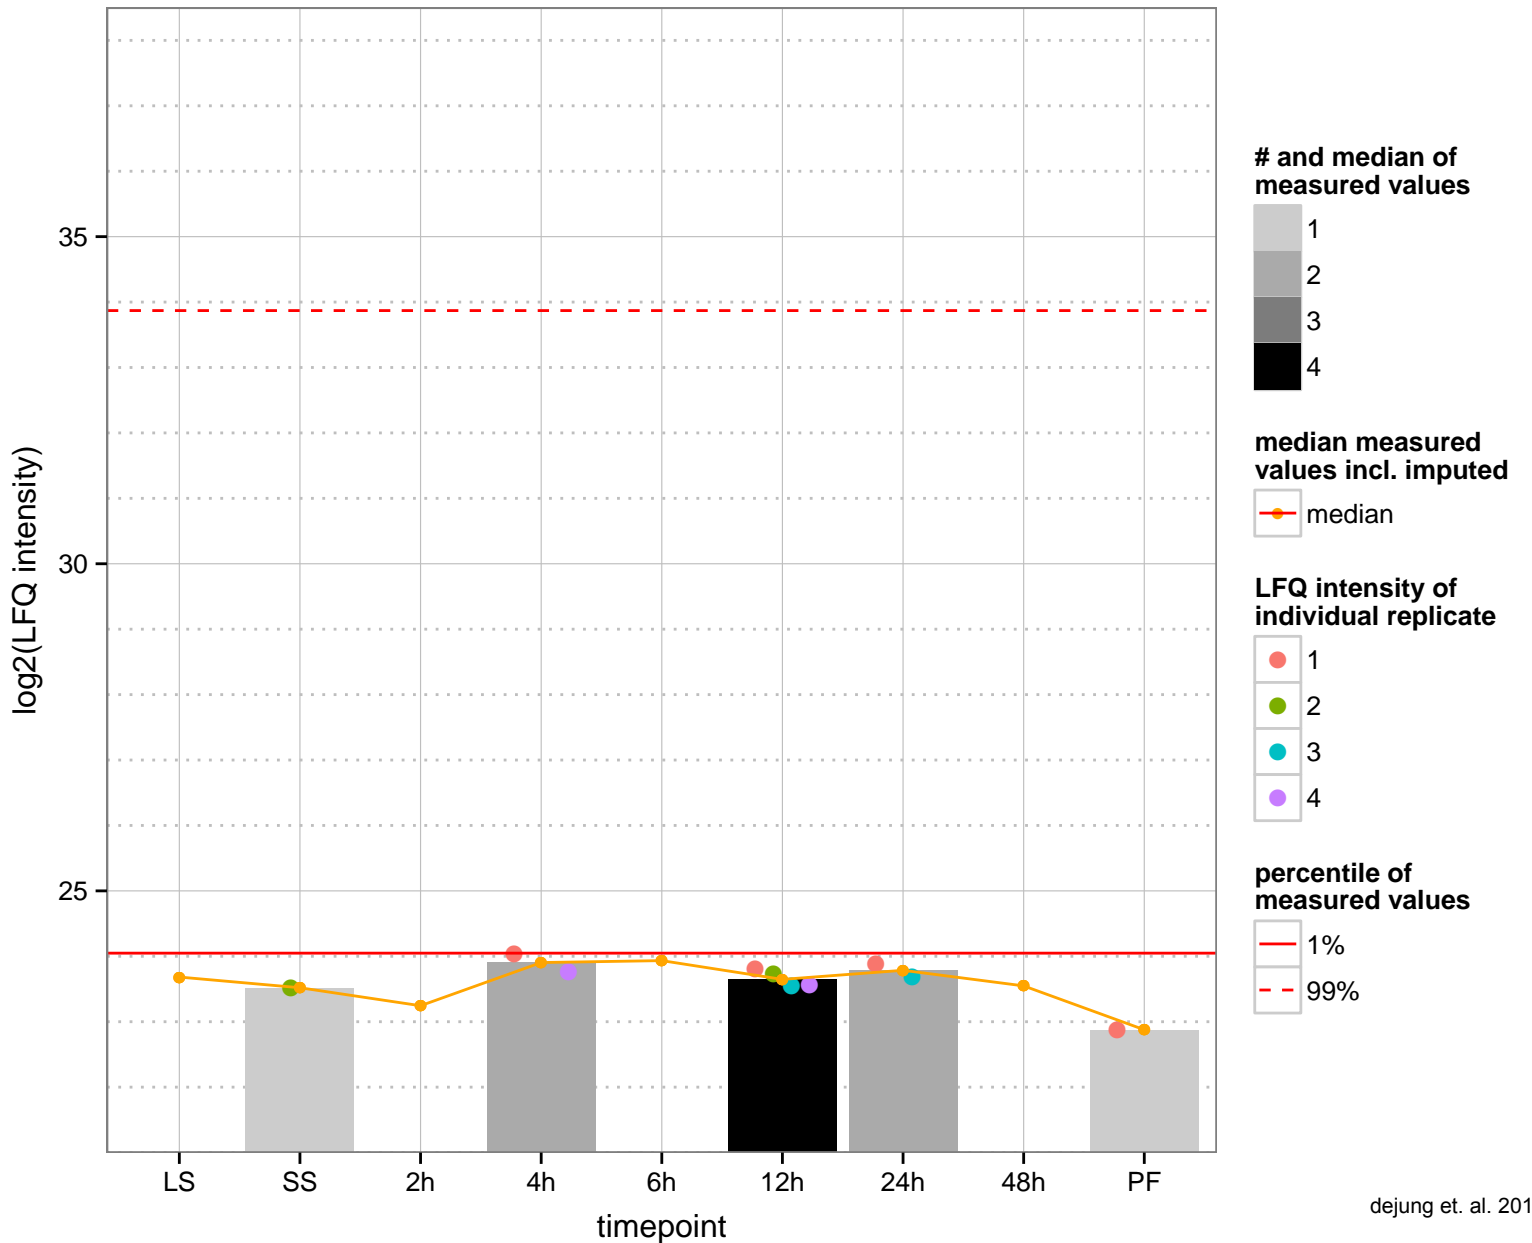

hypothetical protein, conserved  
 Tb927.7.1770  
 AGOF: null  
 AGOC: null  
 AGOP: null  
 PGO: null  
 PGOC: null  
 PGOP: null

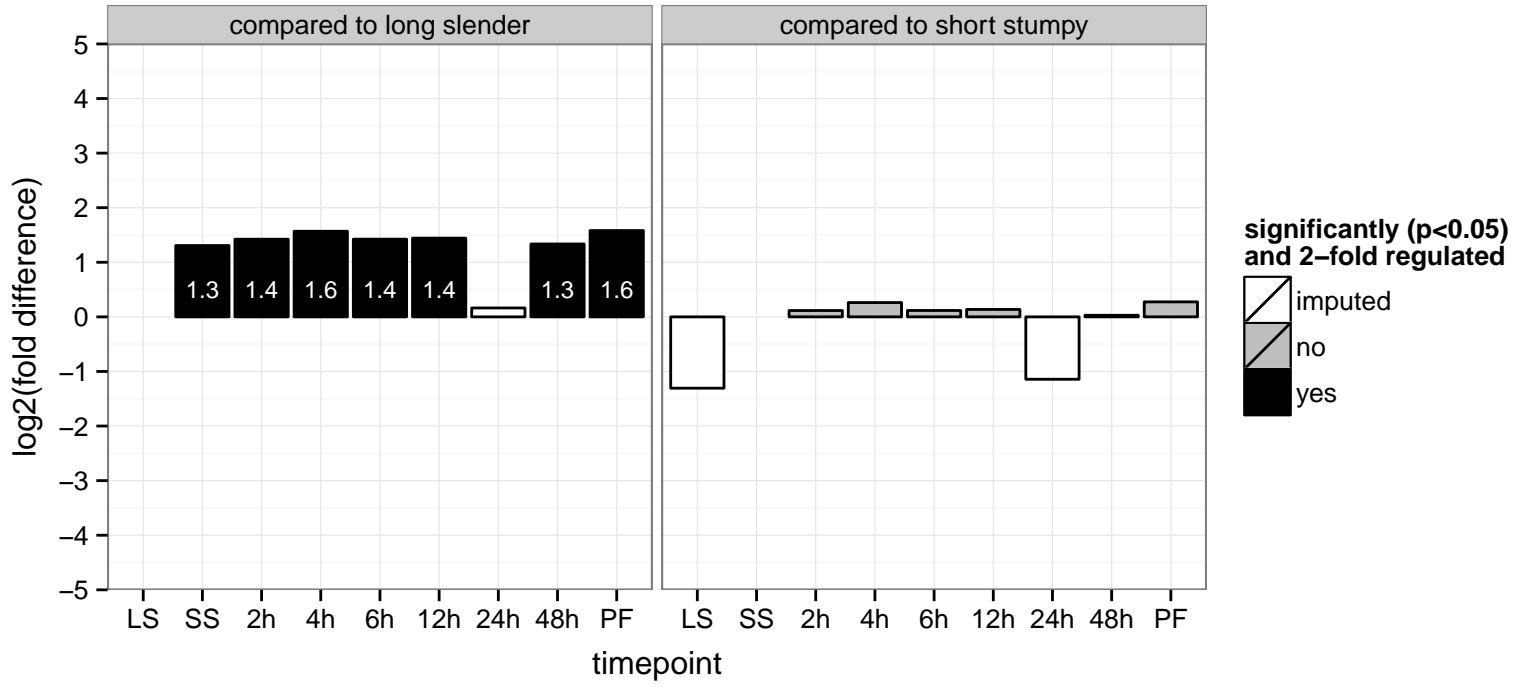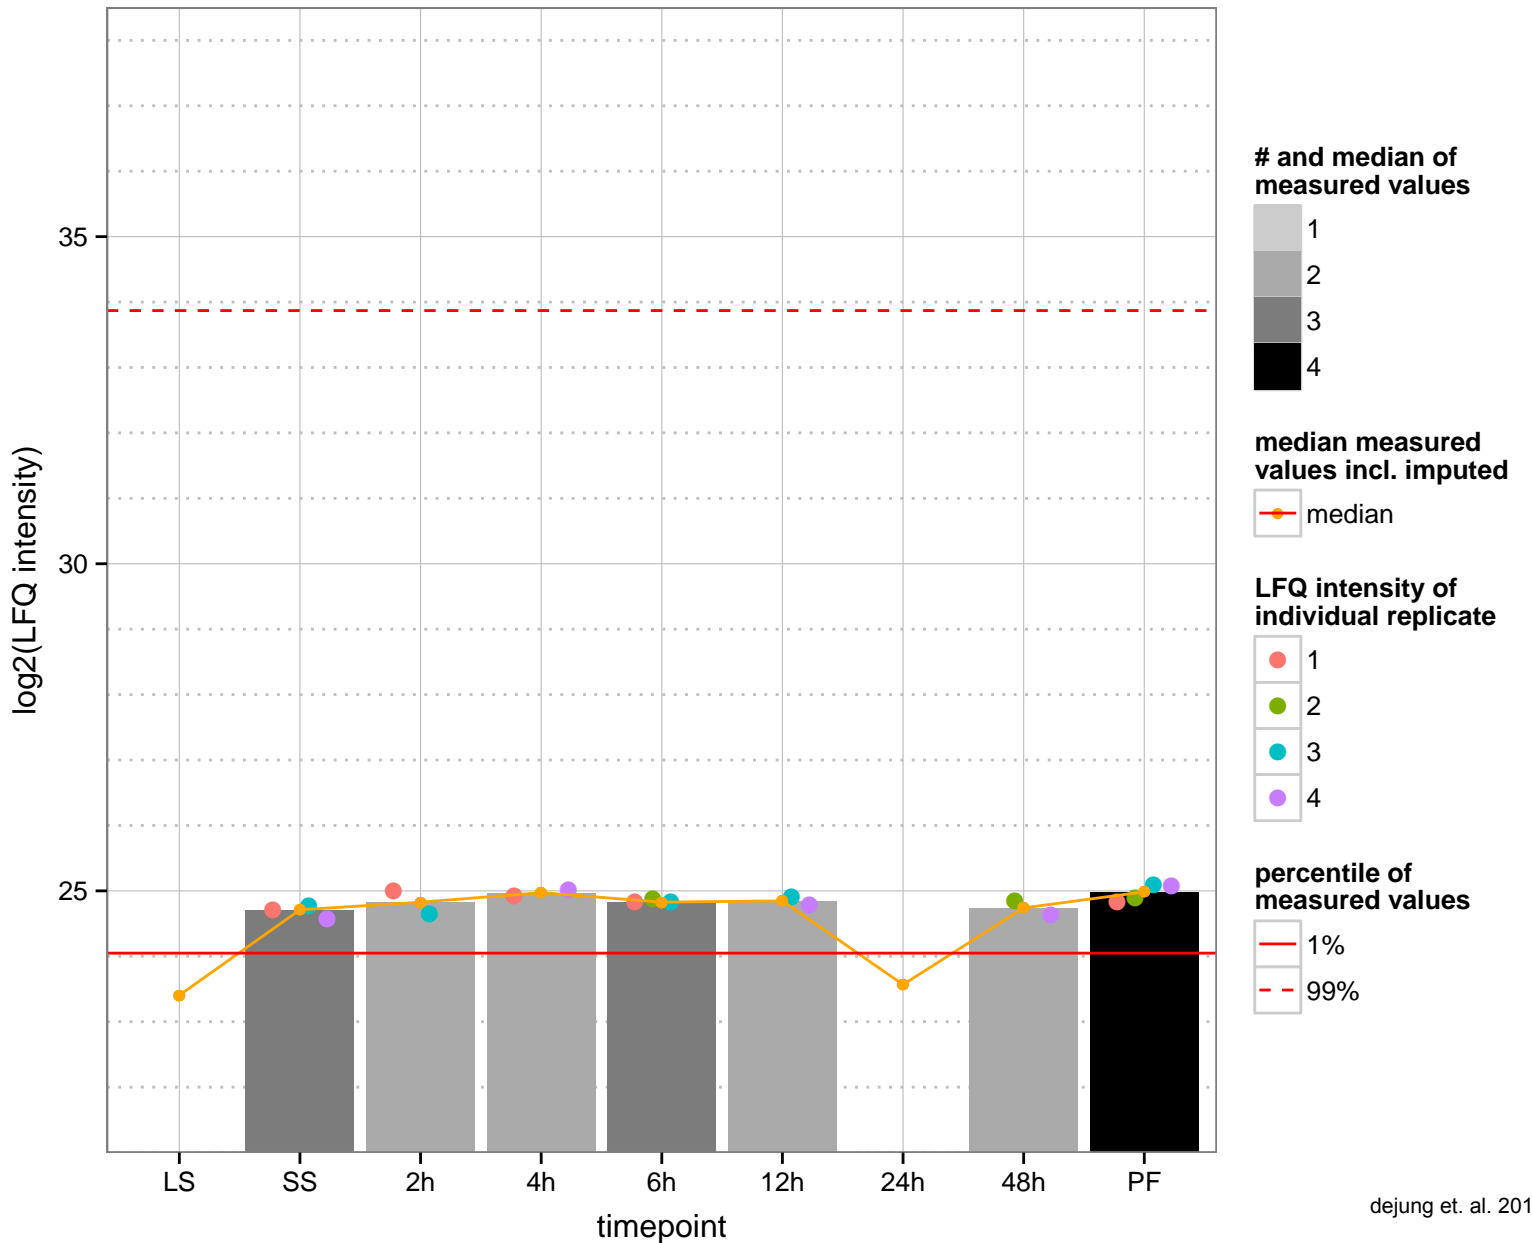

Adenine phosphoribosyltransferase, putative  
 Tb927.7.1790  
 AGOF: adenine phosphoribosyltransferase activity  
 AGOC: null  
 AGOP: purine ribonucleoside salvage  
 PGO: null  
 PGO: null  
 PGO: null  
 PGO: nucleoside metabolic process

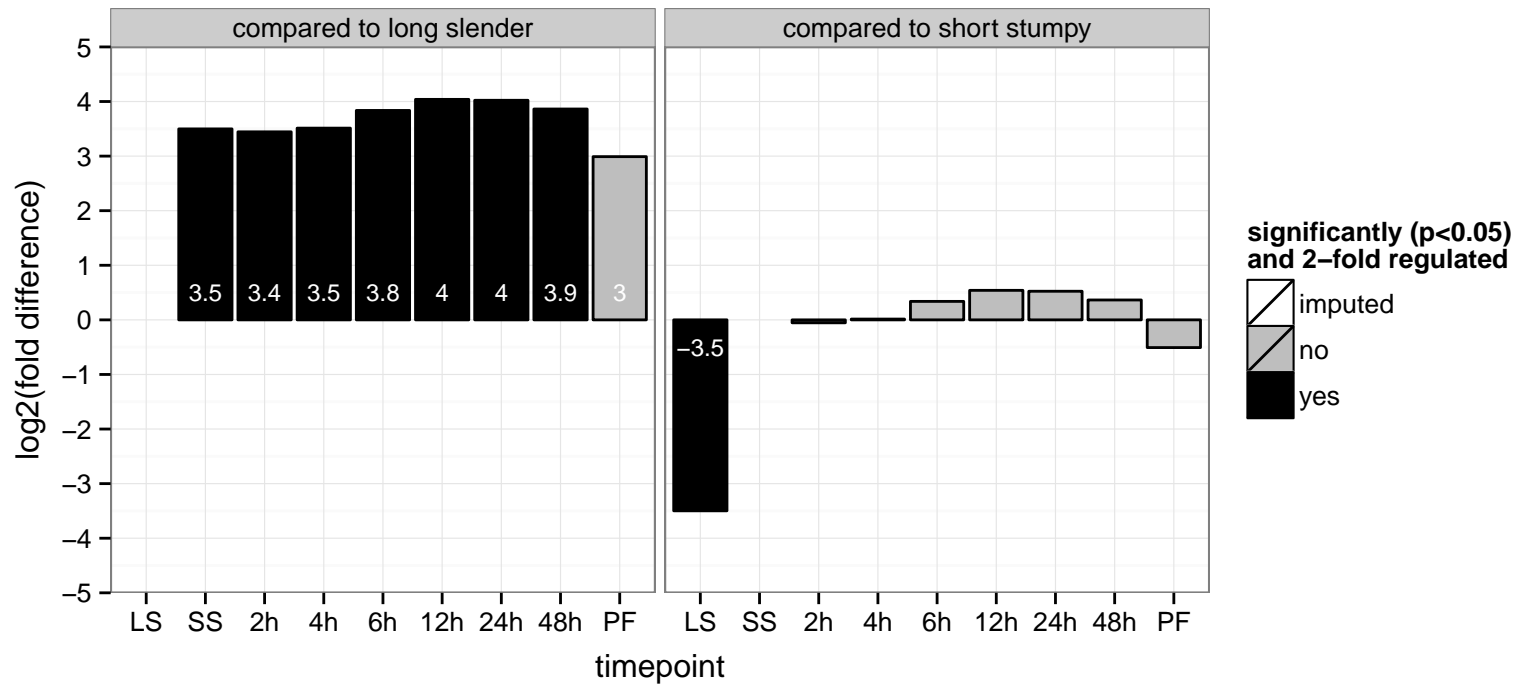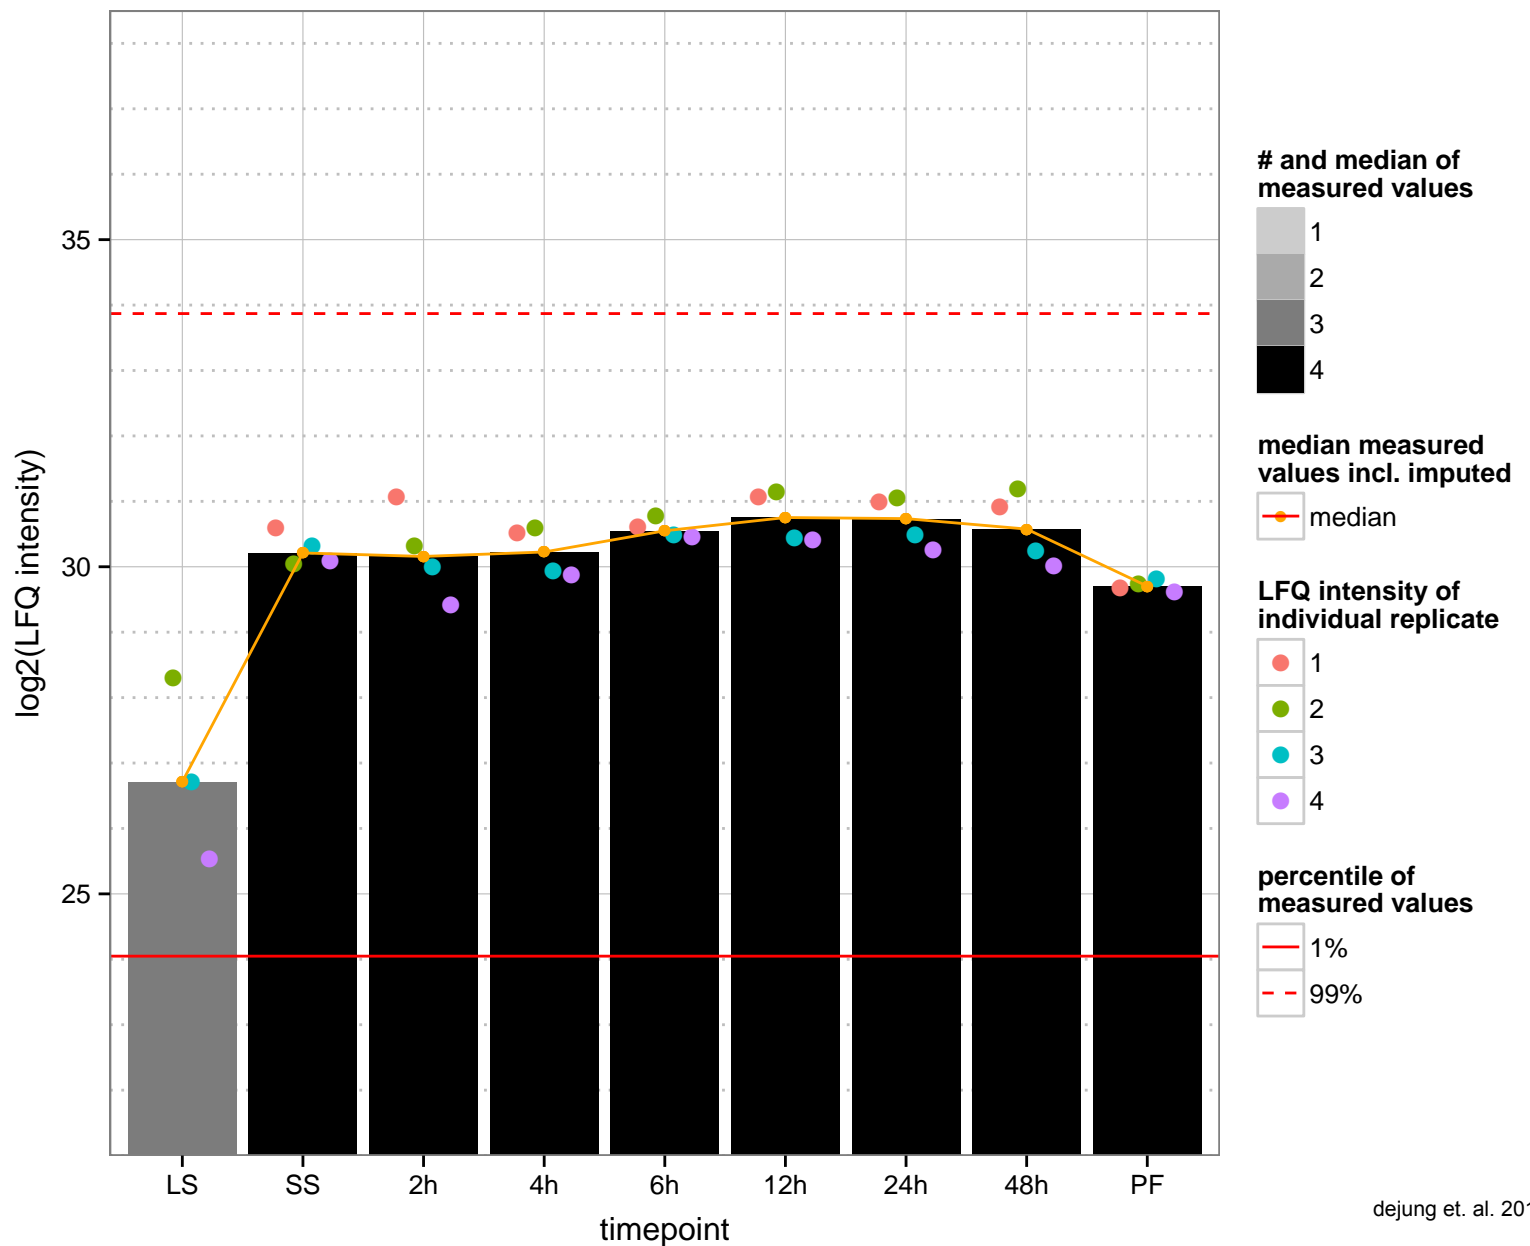

paraflagellar rod component, putative (PFC5)  
 Tb927.7.1920  
 AGOF: null  
 AGOC: null  
 AGOP: null  
 PGOF: null  
 PGO: null  
 PGOP: null

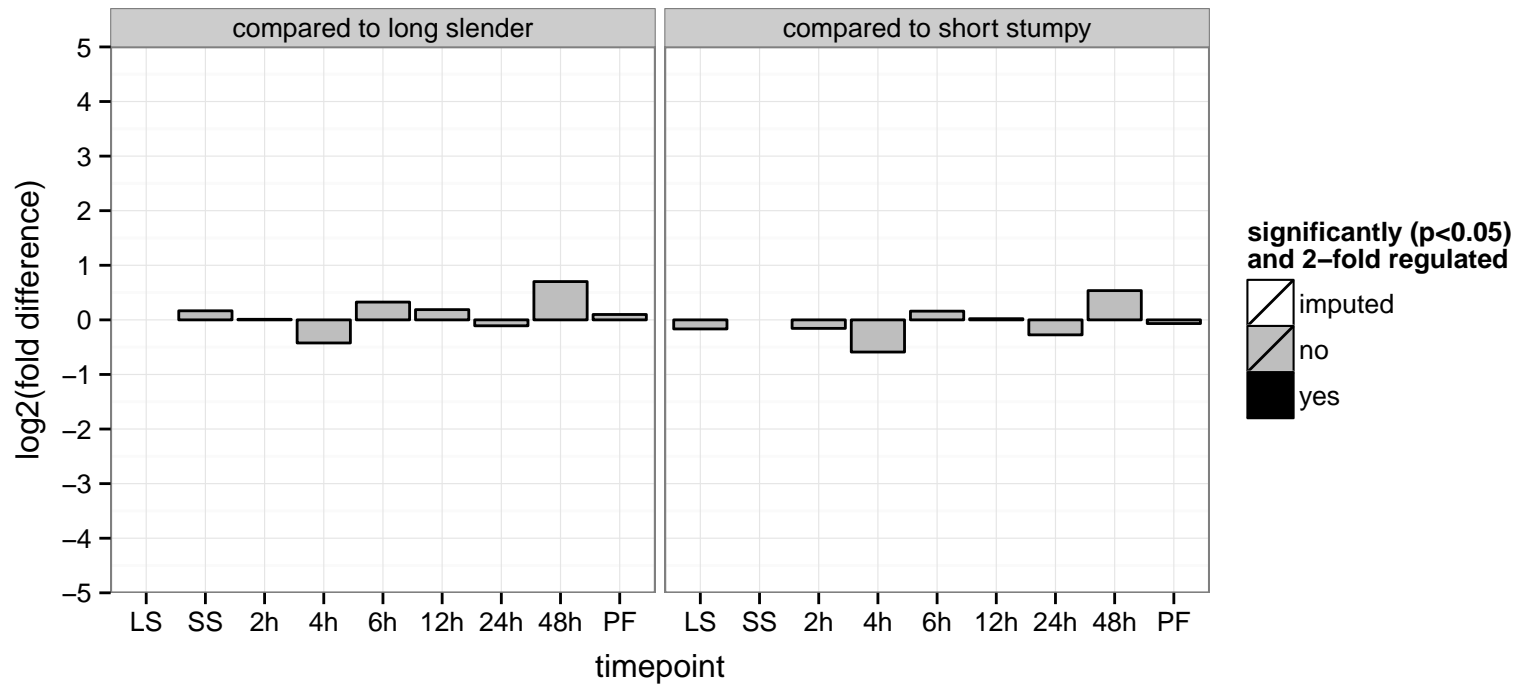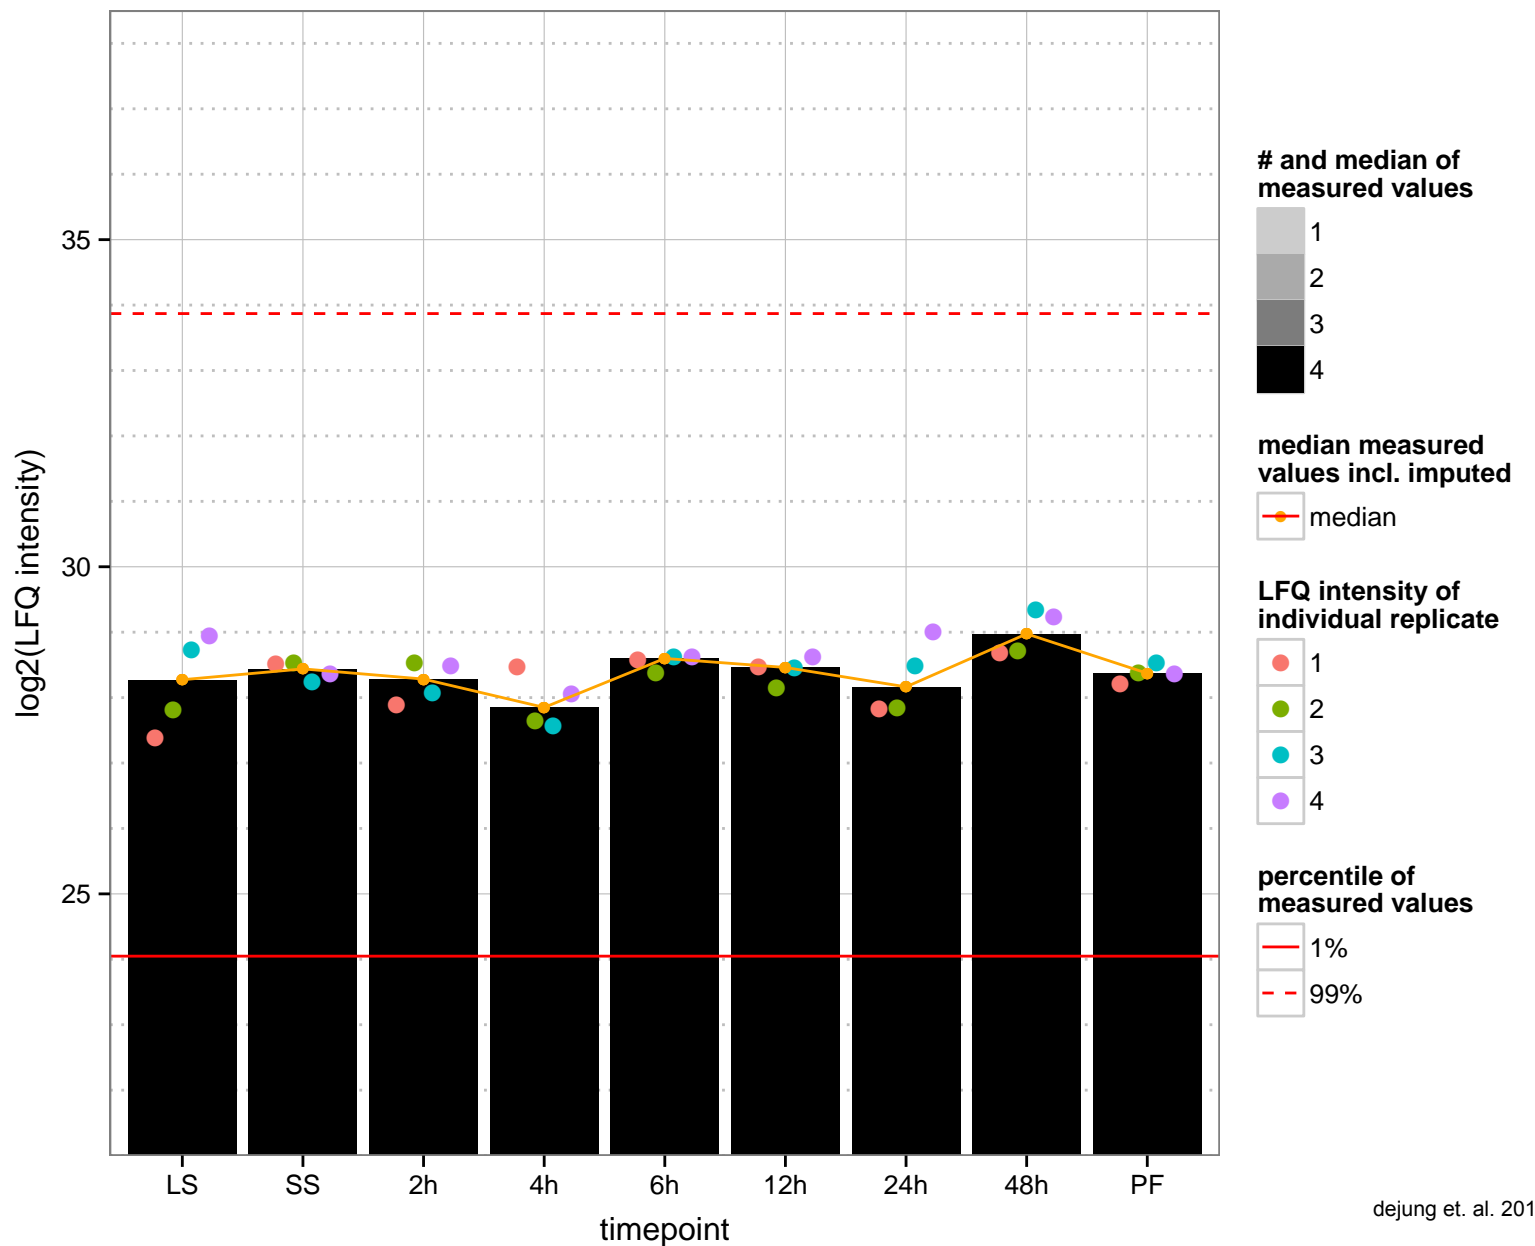

heat shock protein DNAJ, putative  
 Tb927.7.2070  
 AGOF: heat shock protein binding, unfolded protein binding  
 AGOC: null  
 AGOP: protein folding  
 PGOF: heat shock protein binding, unfolded protein binding  
 PGO: null  
 PGOP: protein folding

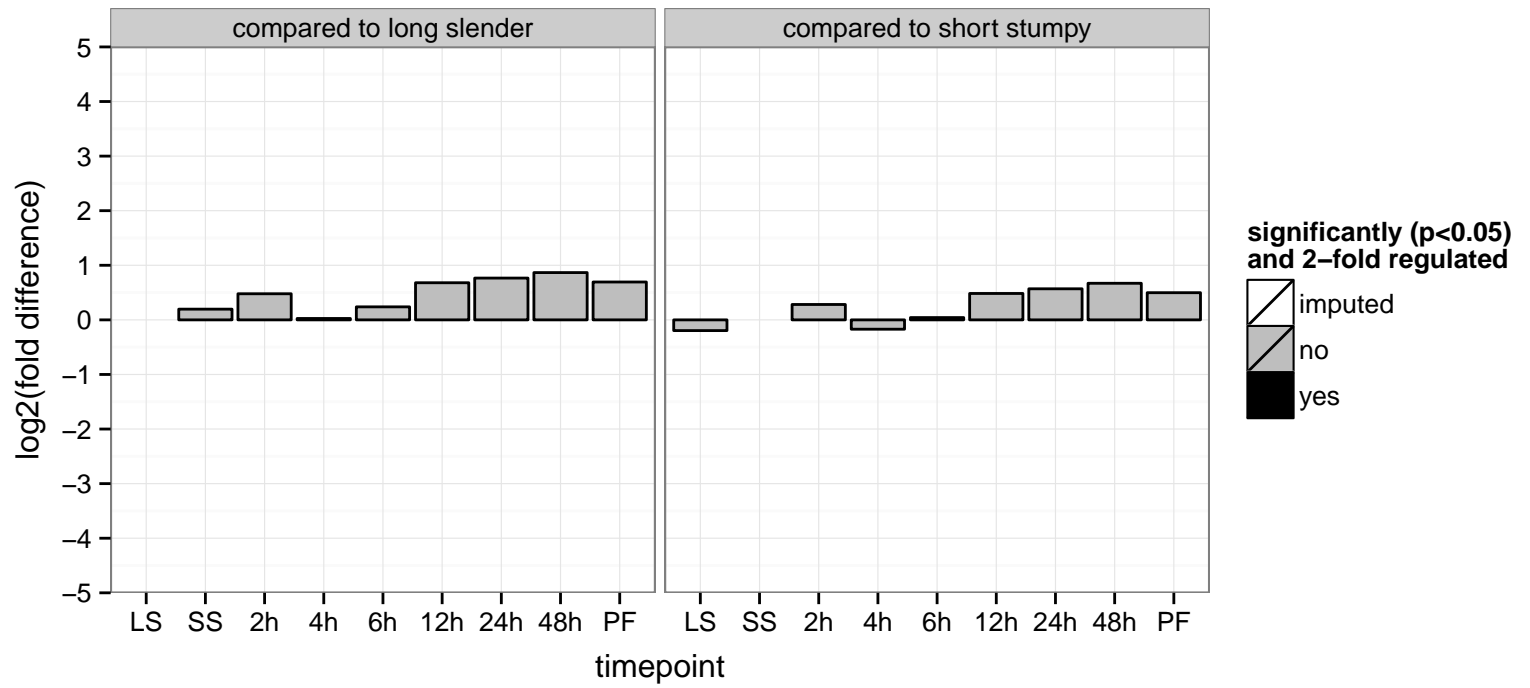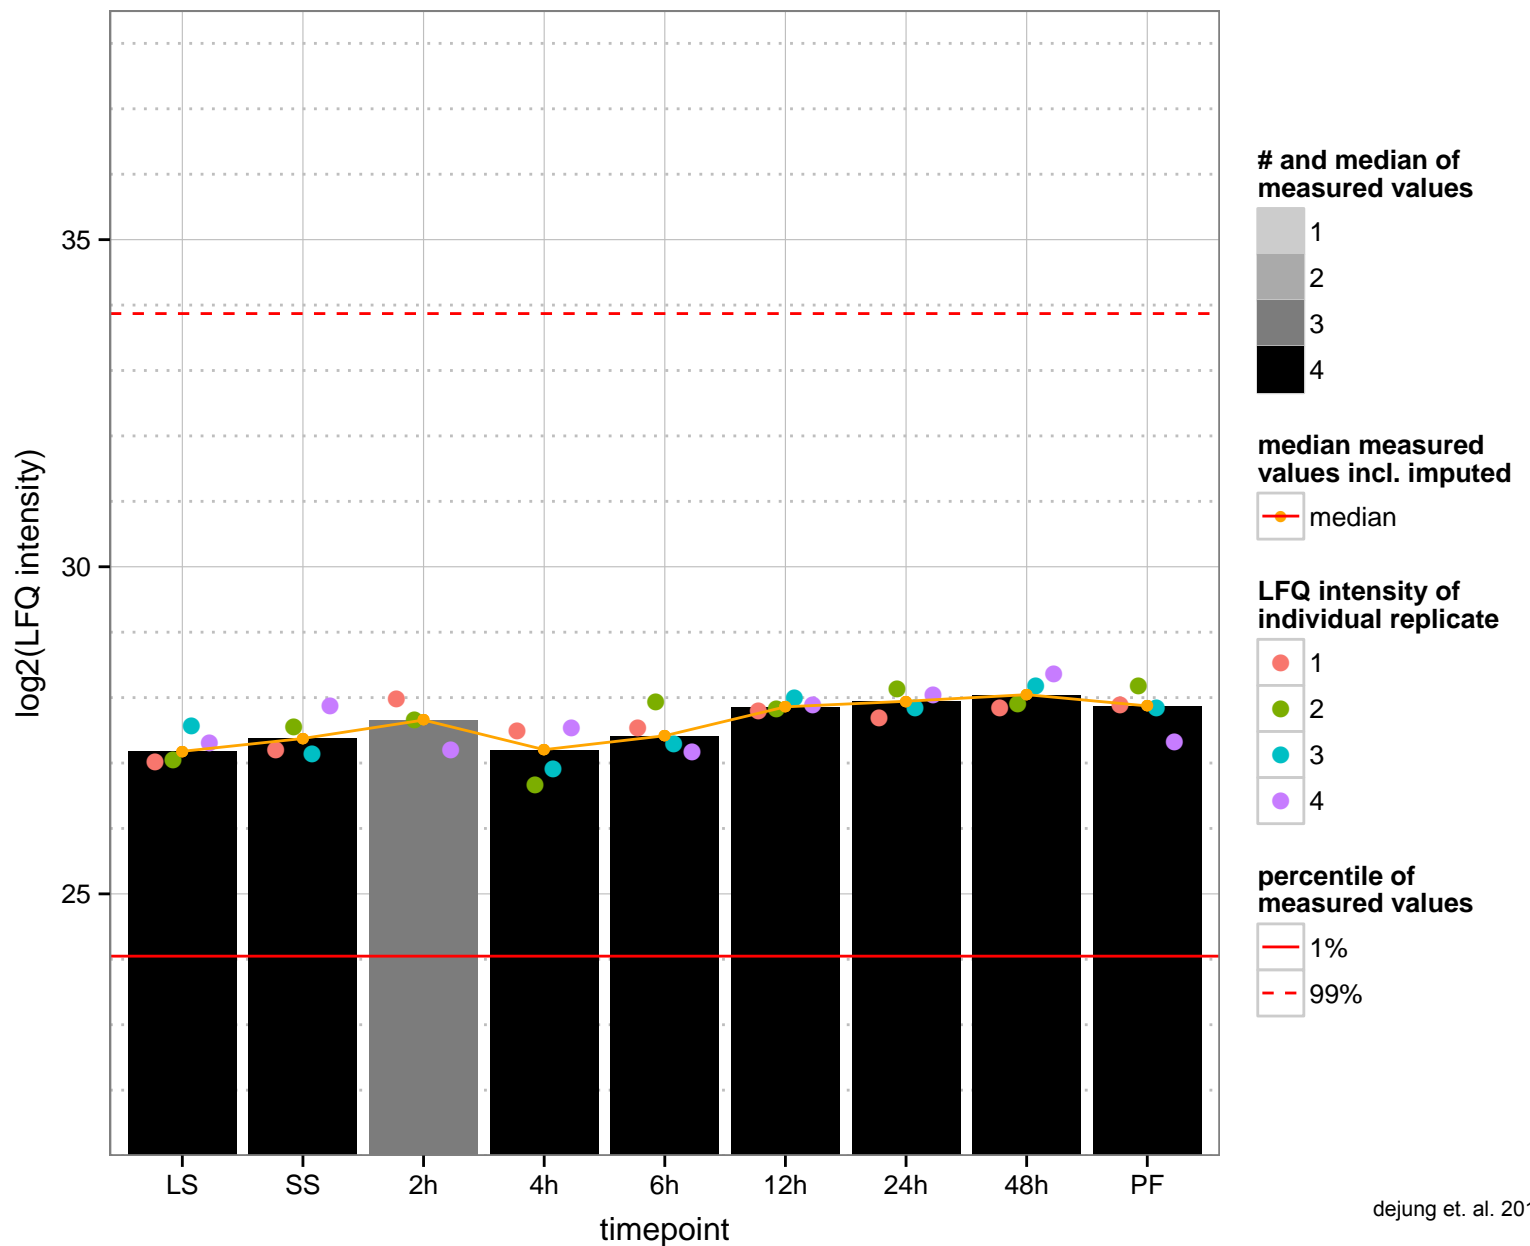

methyltransferase, putative, mRNA cap methyltransferase-like protein  
 Tb927.7.2080  
 AGOF: null  
 AGOC: null  
 AGOP: 7-methylguanosine mRNA capping  
 PGO: mRNA guanylyltransferase activity  
 PGOC: null  
 PGOP: 7-methylguanosine mRNA capping

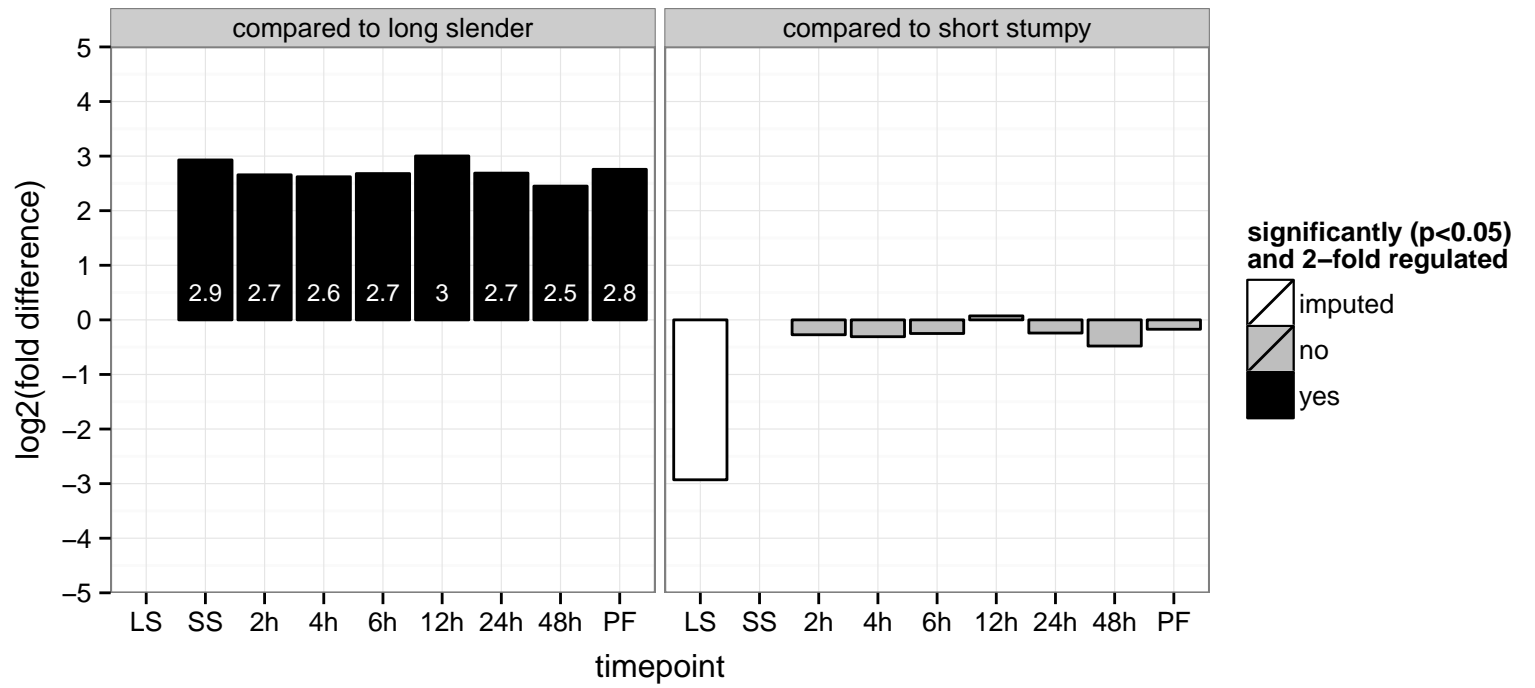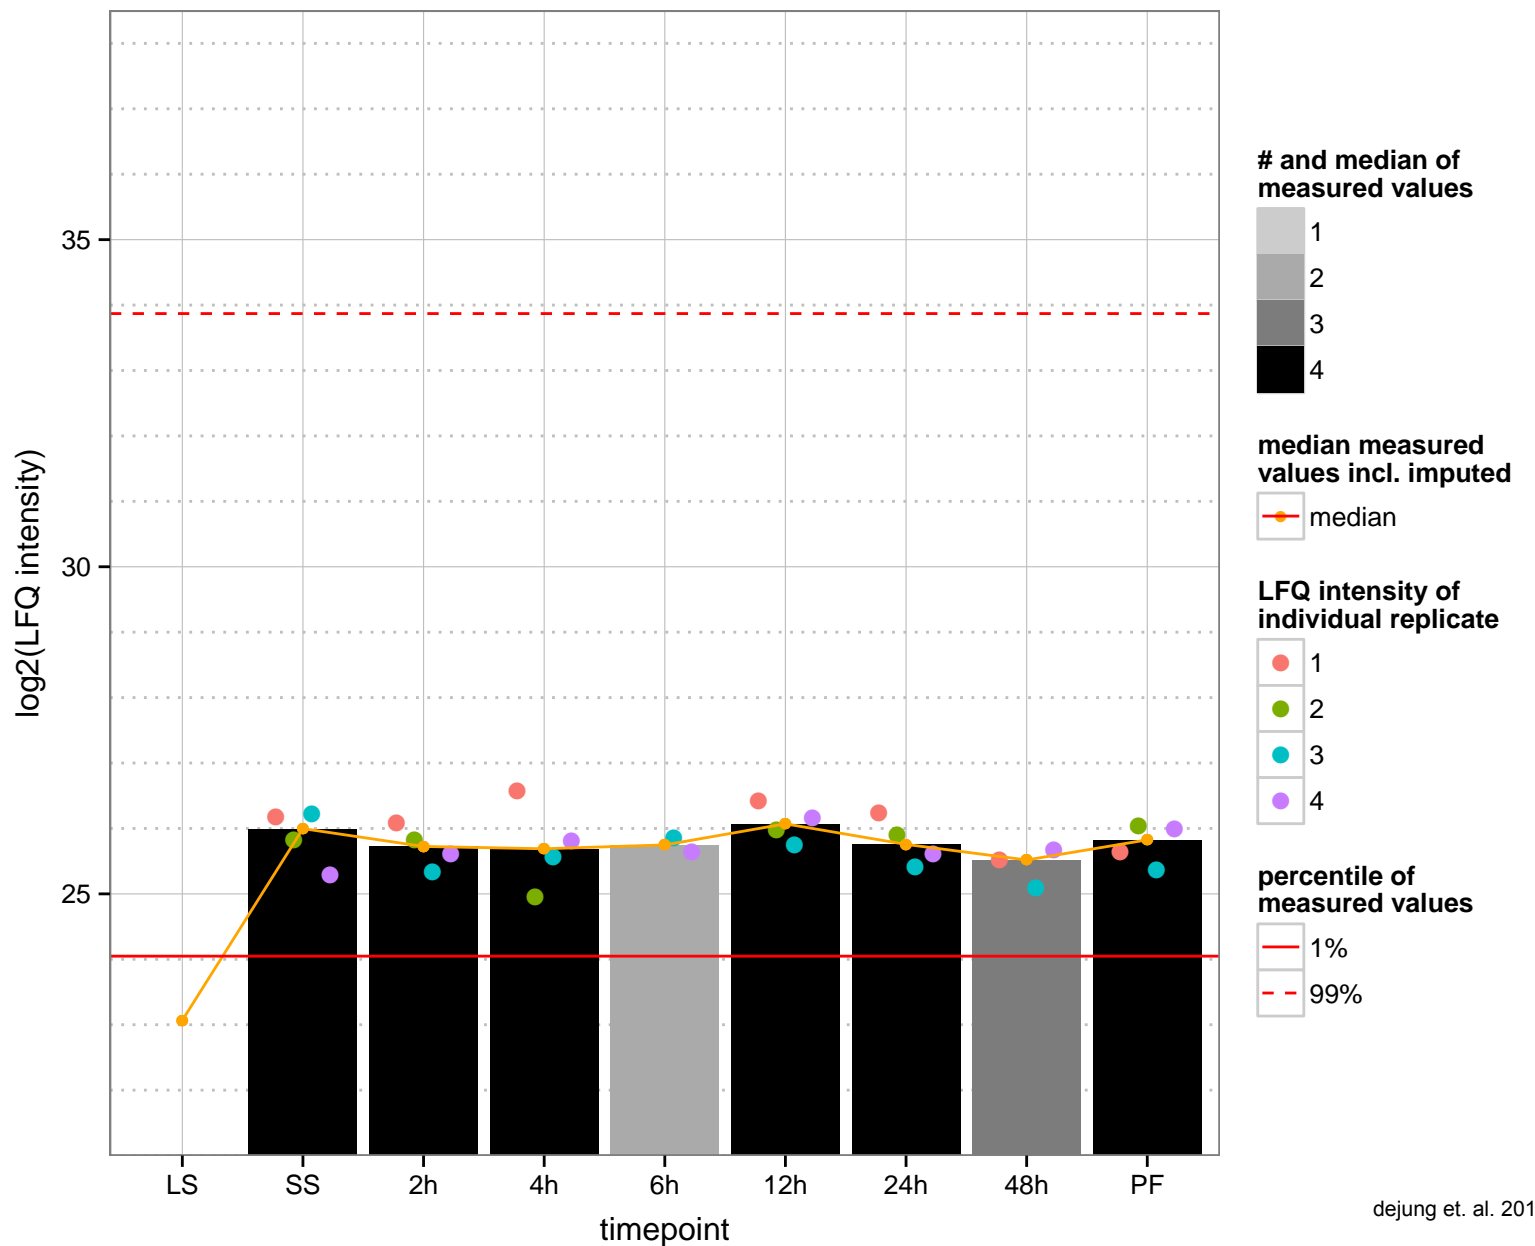

proline dehydrogenase  
 Tb927.7.210  
 AGOF: proline dehydrogenase activity  
 AGOC: null  
 AGOP: glutamate biosynthetic process, proline catabolic process  
 PGOF: proline dehydrogenase activity  
 PGOC: null  
 PGOP: glutamate biosynthetic process, oxidation–reduction process, proline catabolic process

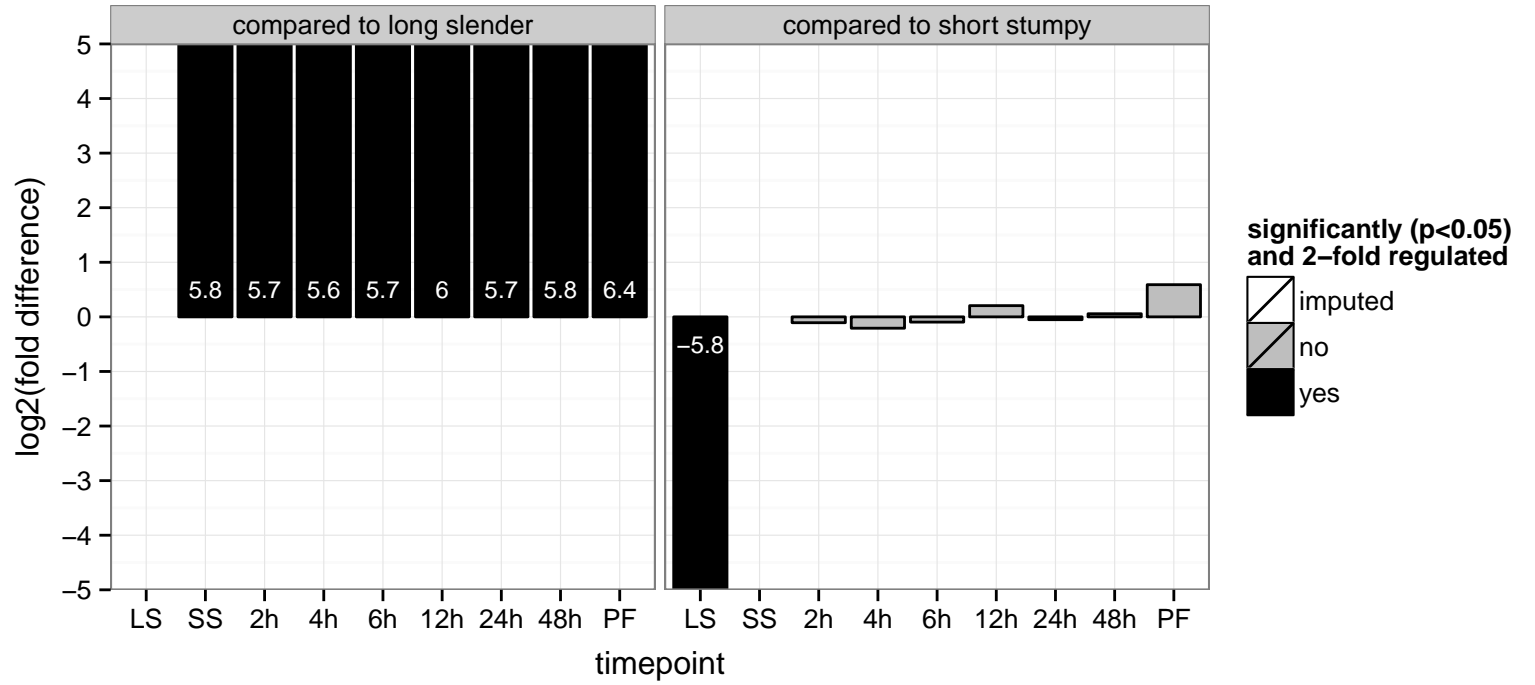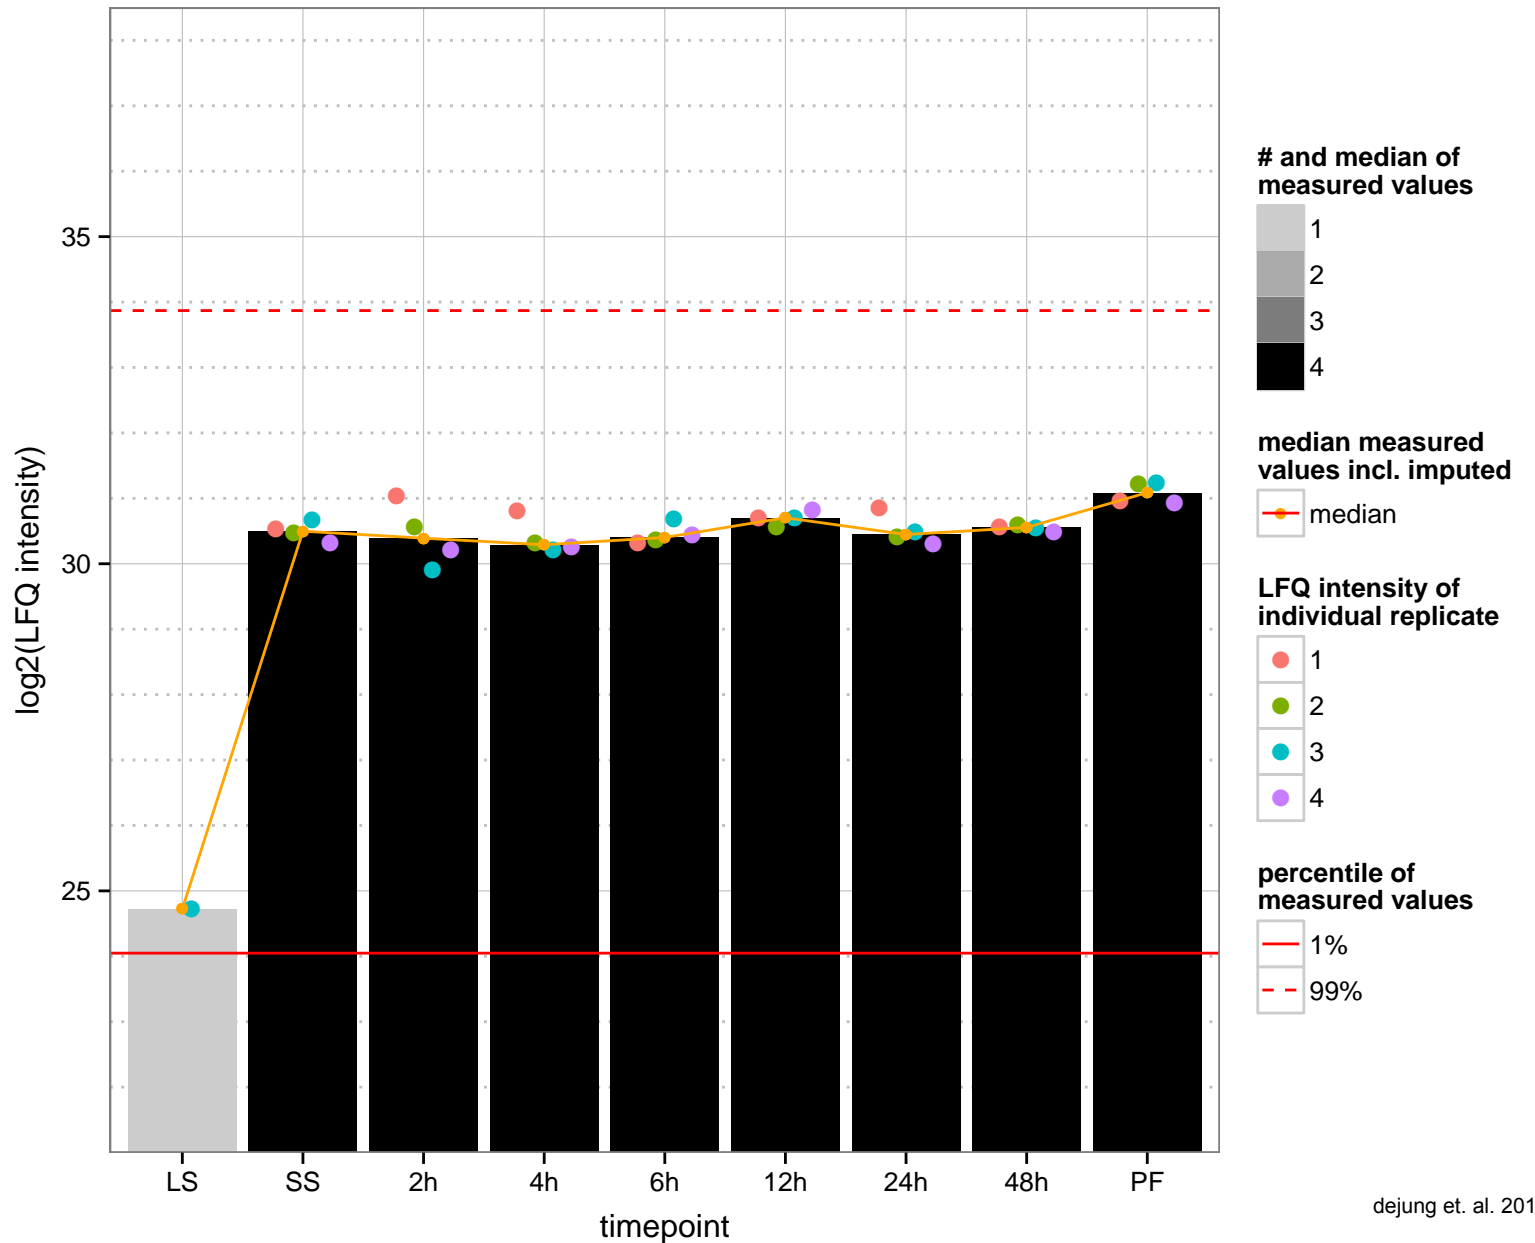

GMP synthase, putative, glutamine amidotransferase

Tb927.7.2100

AGOF: ATP binding, GMP synthase (glutamine-hydrolyzing) activity

AGOC: null

AGOP: GMP biosynthetic process, biosynthetic process, glutamine metabolic process, purine ribonucleotide biosynthetic process

PGOF: ATP binding, GMP synthase (glutamine-hydrolyzing) activity, pyrophosphatase activity

PGOC: null

PGOP: GMP biosynthetic process, purine nucleotide biosynthetic process

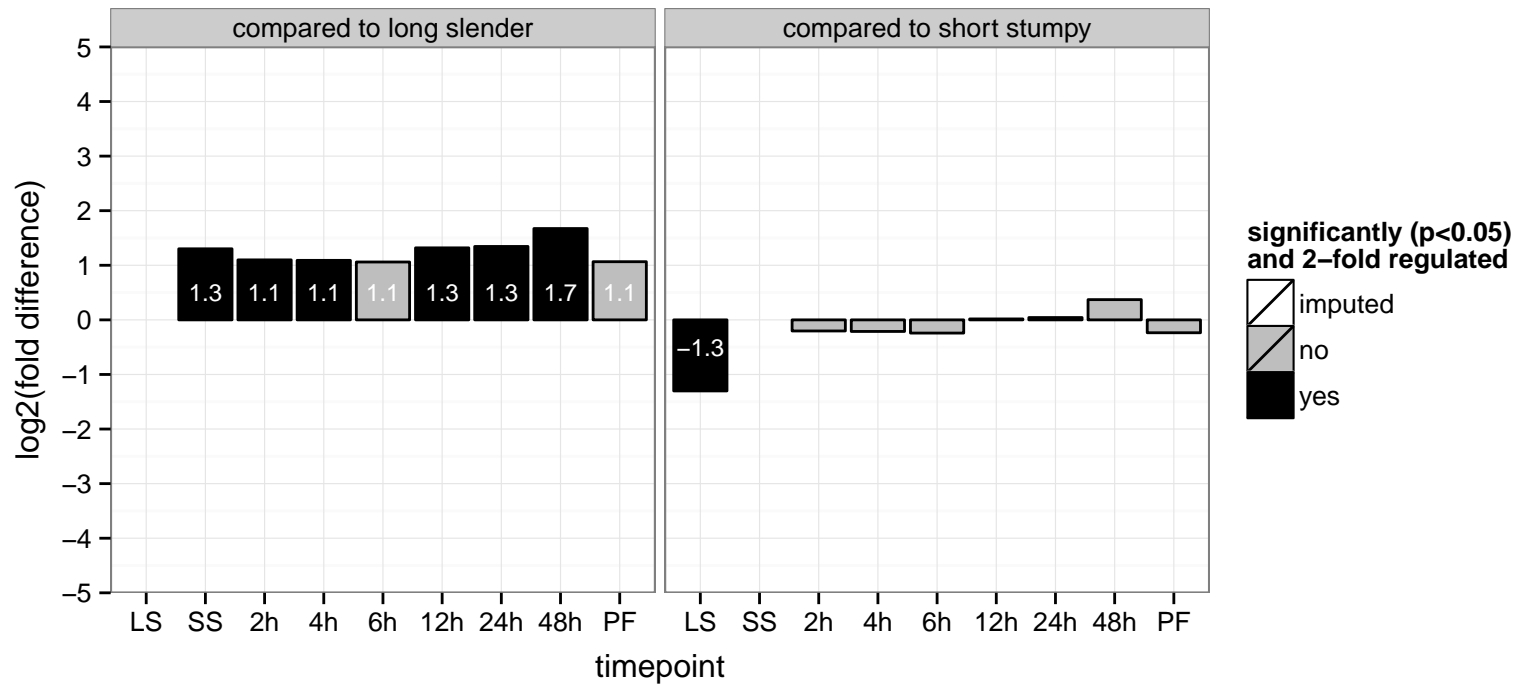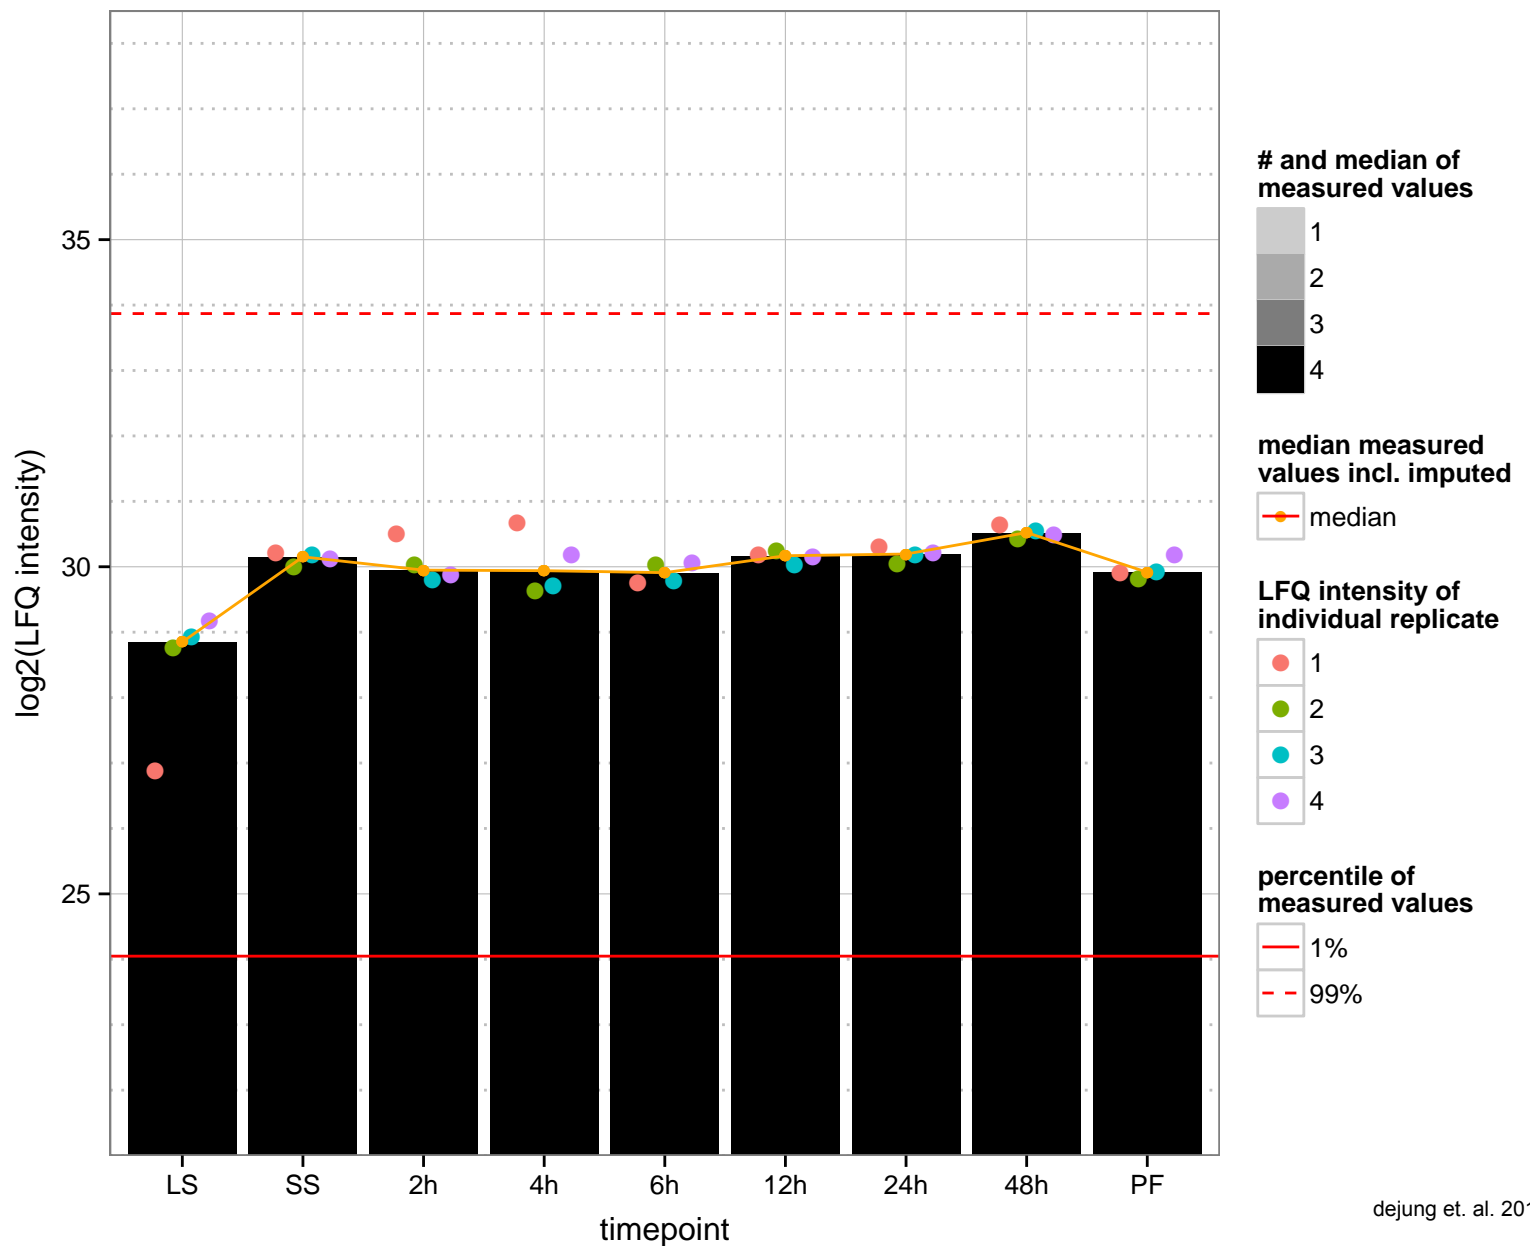



hypothetical protein, conserved  
 Tb927.7.2120  
 AGOF: null  
 AGOC: null  
 AGOP: null  
 PGO: null  
 PGOC: null  
 PGOP: null

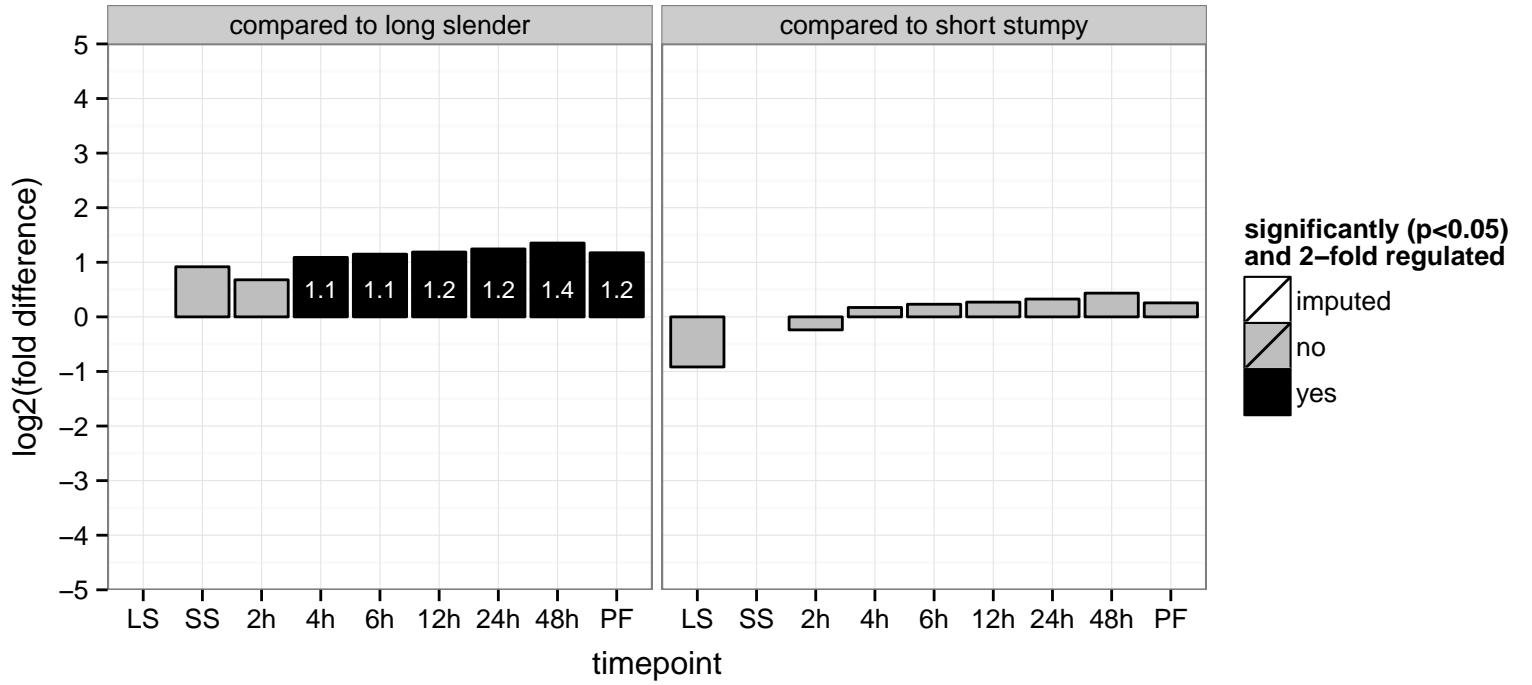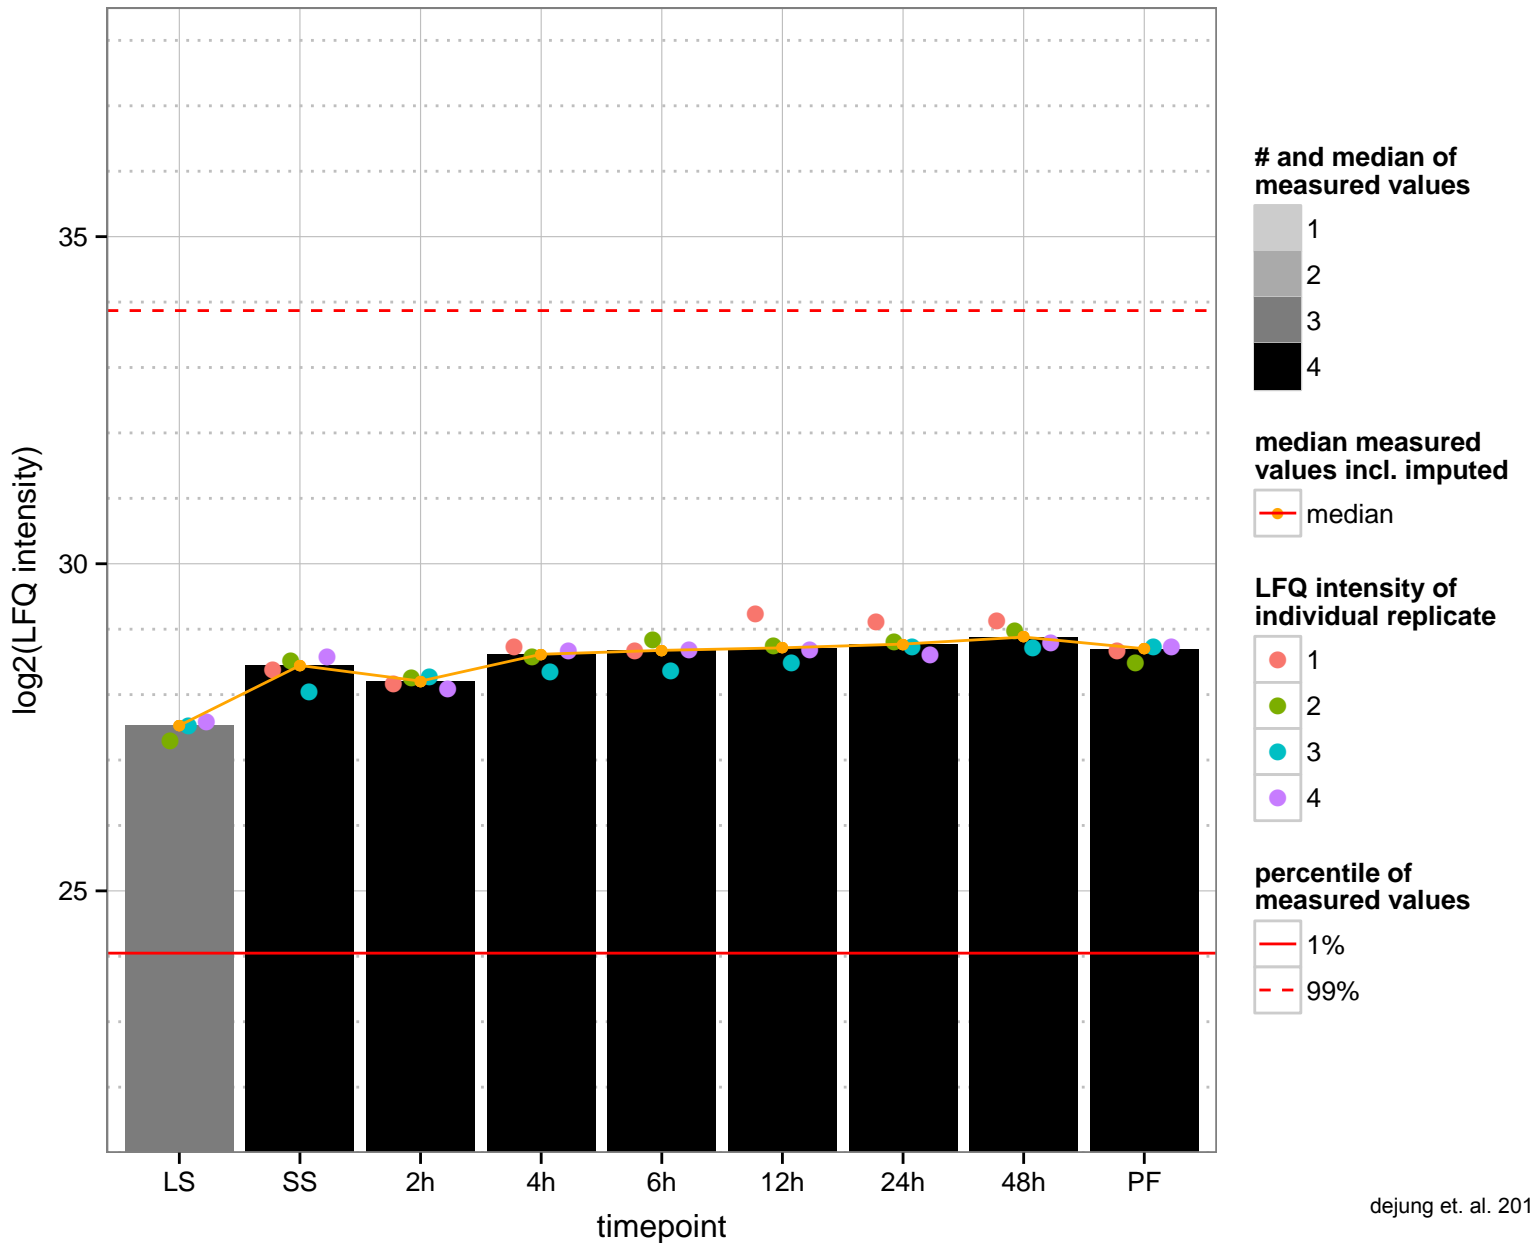

hypothetical protein, conserved  
 Tb927.7.2130  
 AGOF: null  
 AGOC: null  
 AGOP: null  
 PGO: null  
 PGOC: null  
 PGOP: null

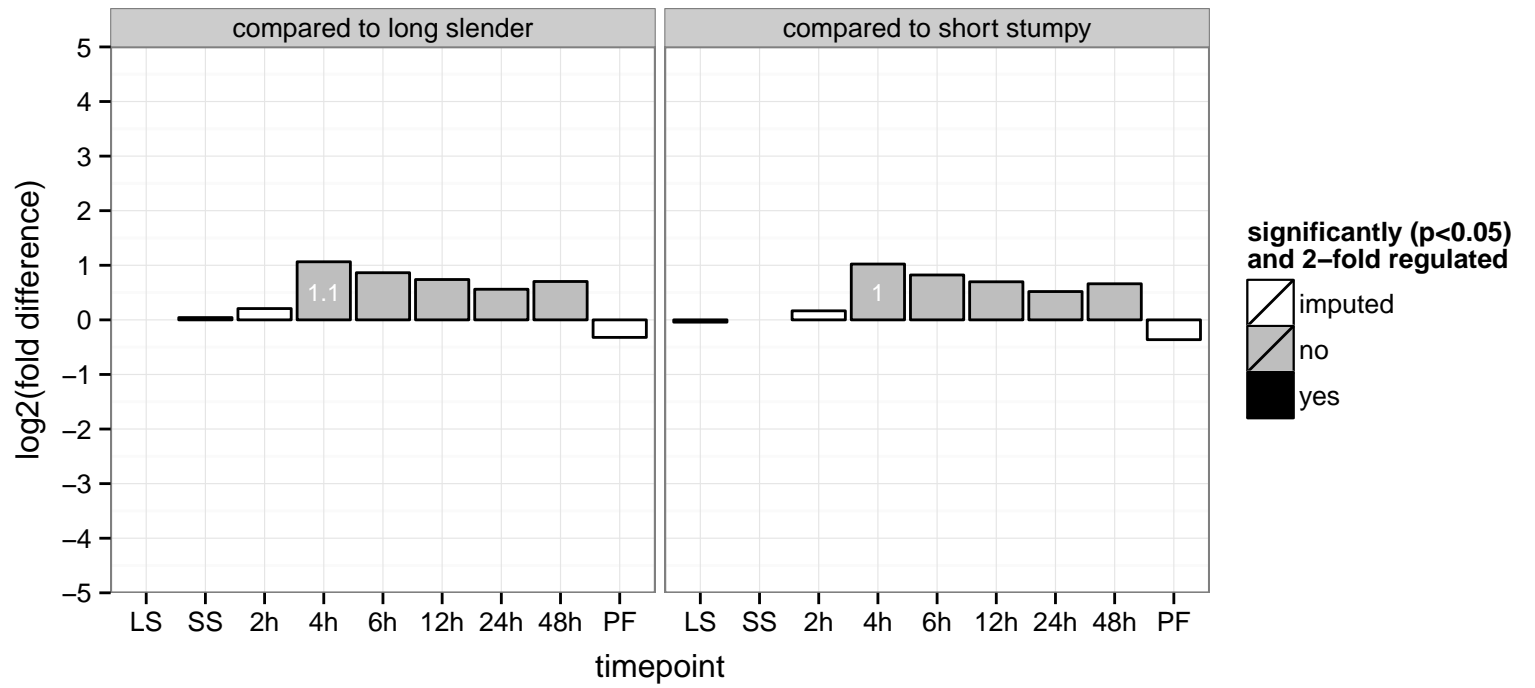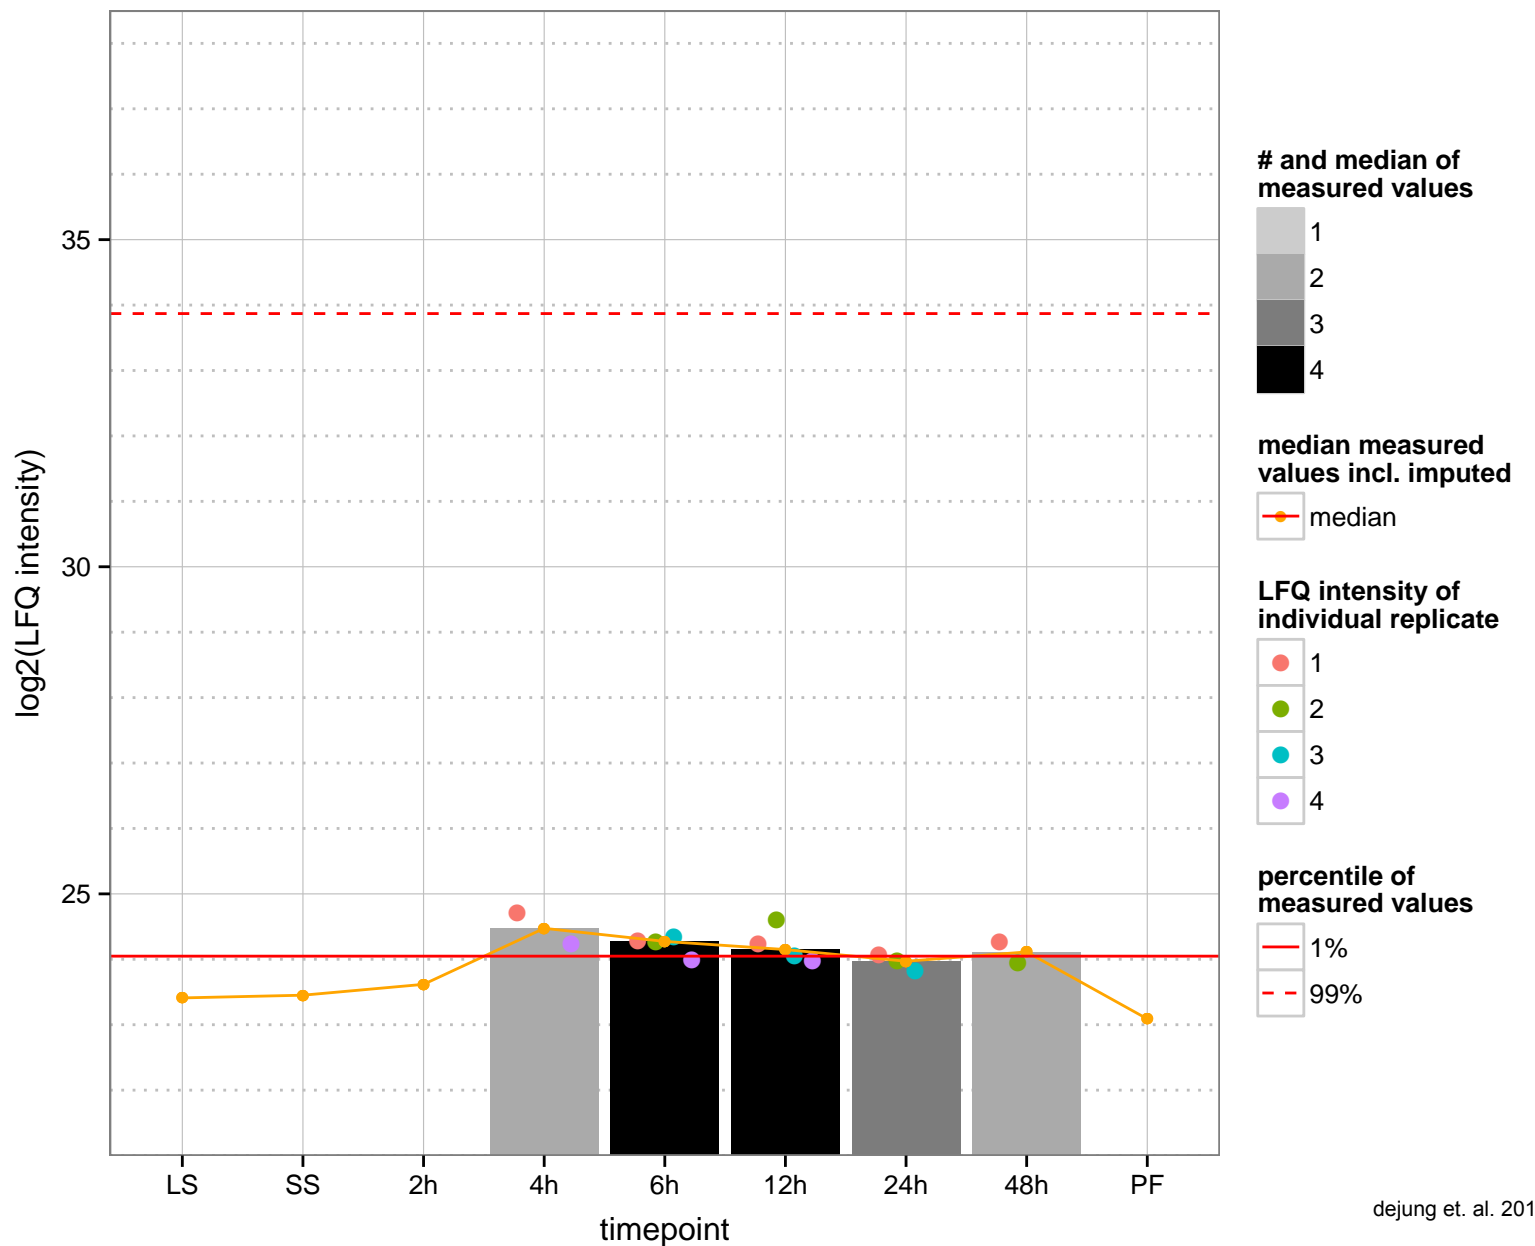

hypothetical protein, conserved  
 Tb927.7.2190  
 AGOF: null  
 AGOC: null  
 AGOP: null  
 PGO: null  
 PGO: endoplasmic reticulum  
 PGO: null

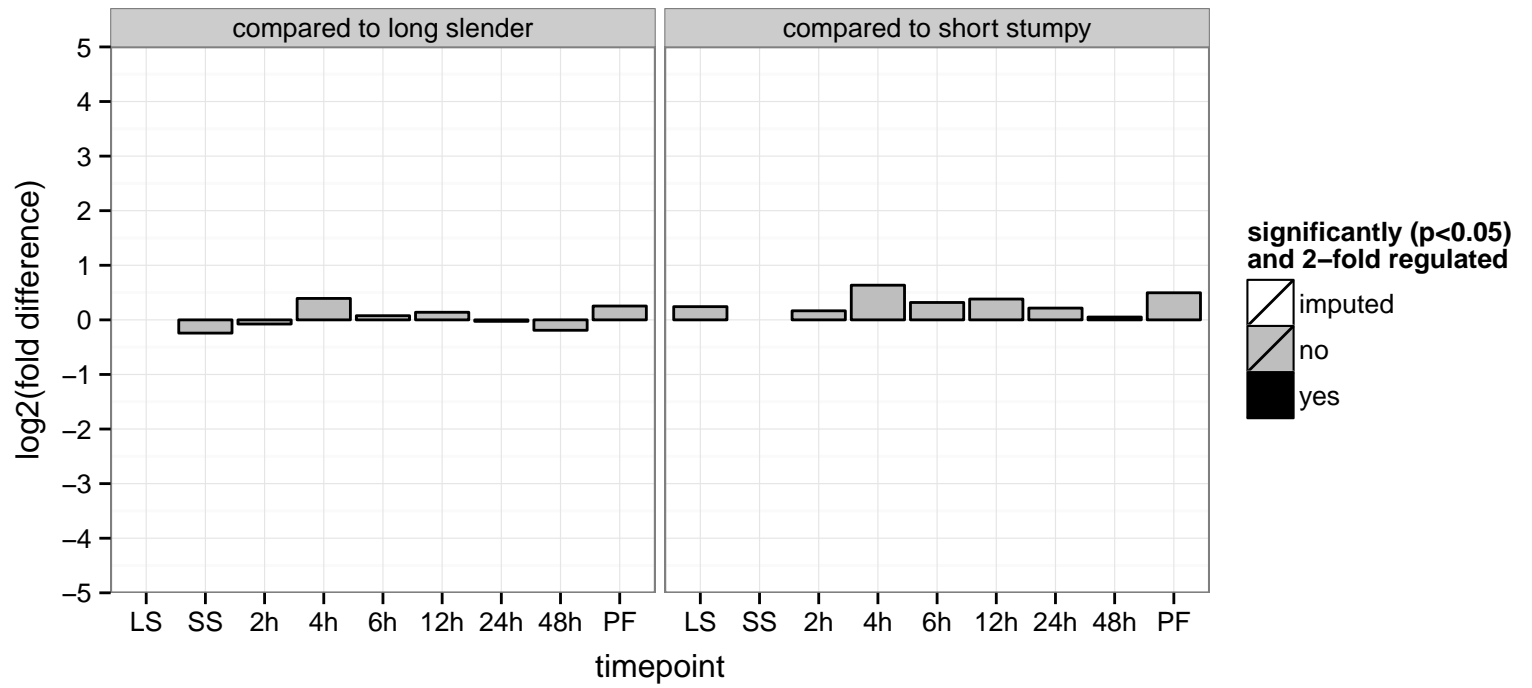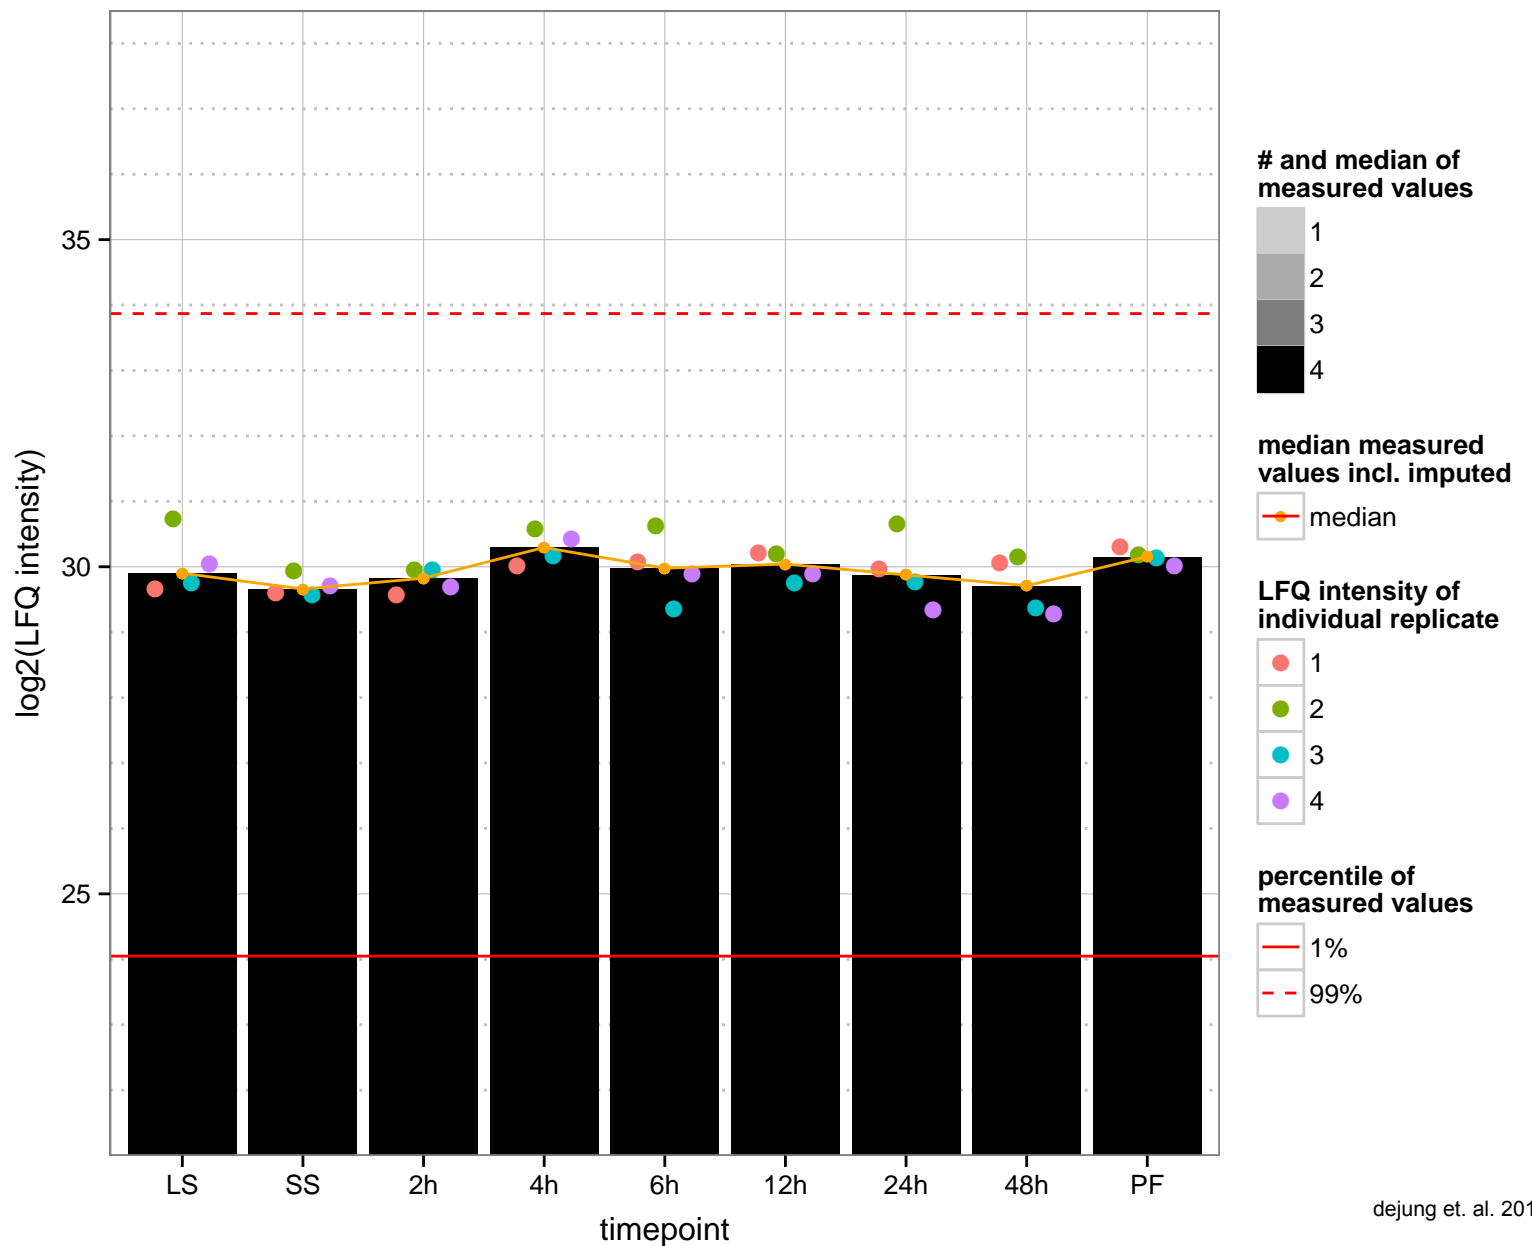

CDP-DAG synthase (CDS)

Tb927.7.220

AGOF: phosphatidate cytidyltransferase activity, transferase activity, transferring phosphorus-containing groups

AGOC: endoplasmic reticulum membrane, integral to Golgi membrane

AGOP: CDP-diacylglycerol biosynthetic process, phosphatidylglycerol biosynthetic process, phosphatidylinositol metabolic process

PGOF: phosphatidate cytidyltransferase activity, transferase activity, transferring phosphorus-containing groups

PGOC: membrane

PGOP: null

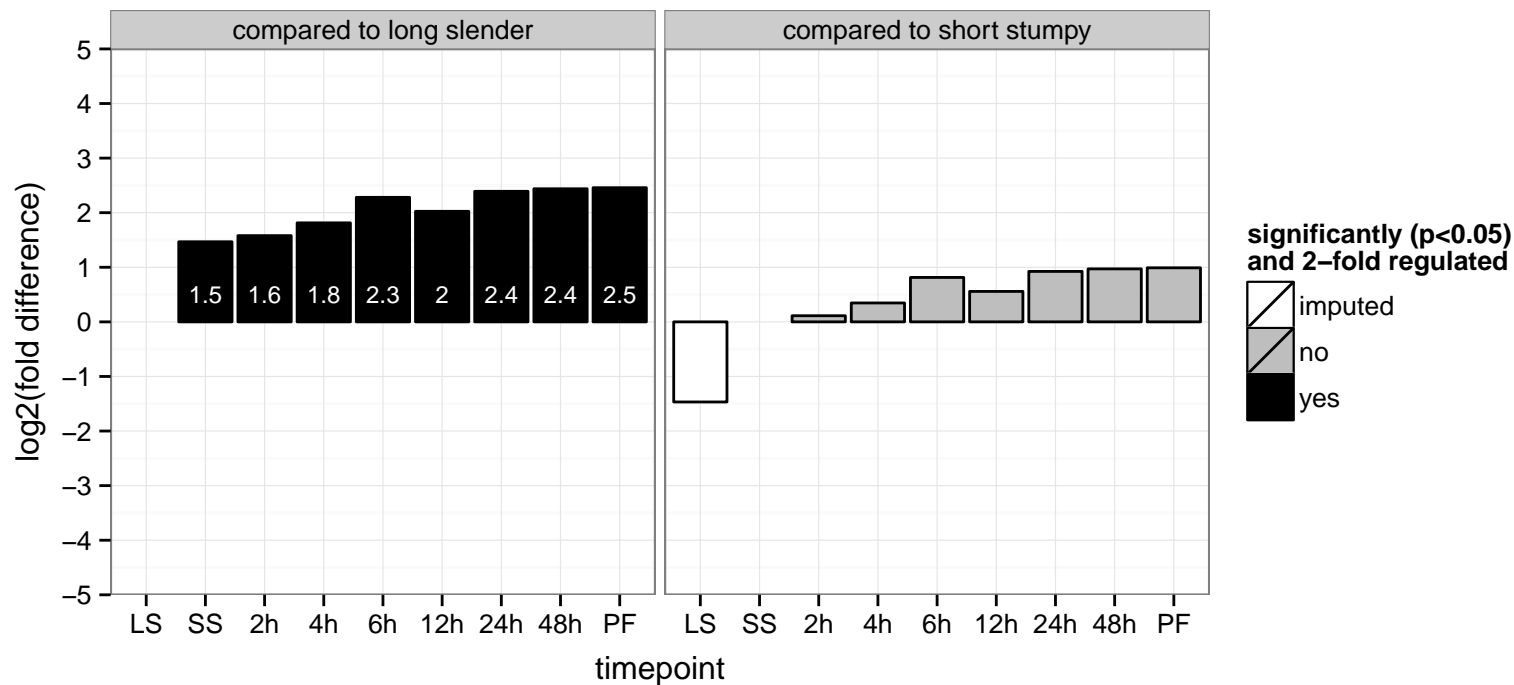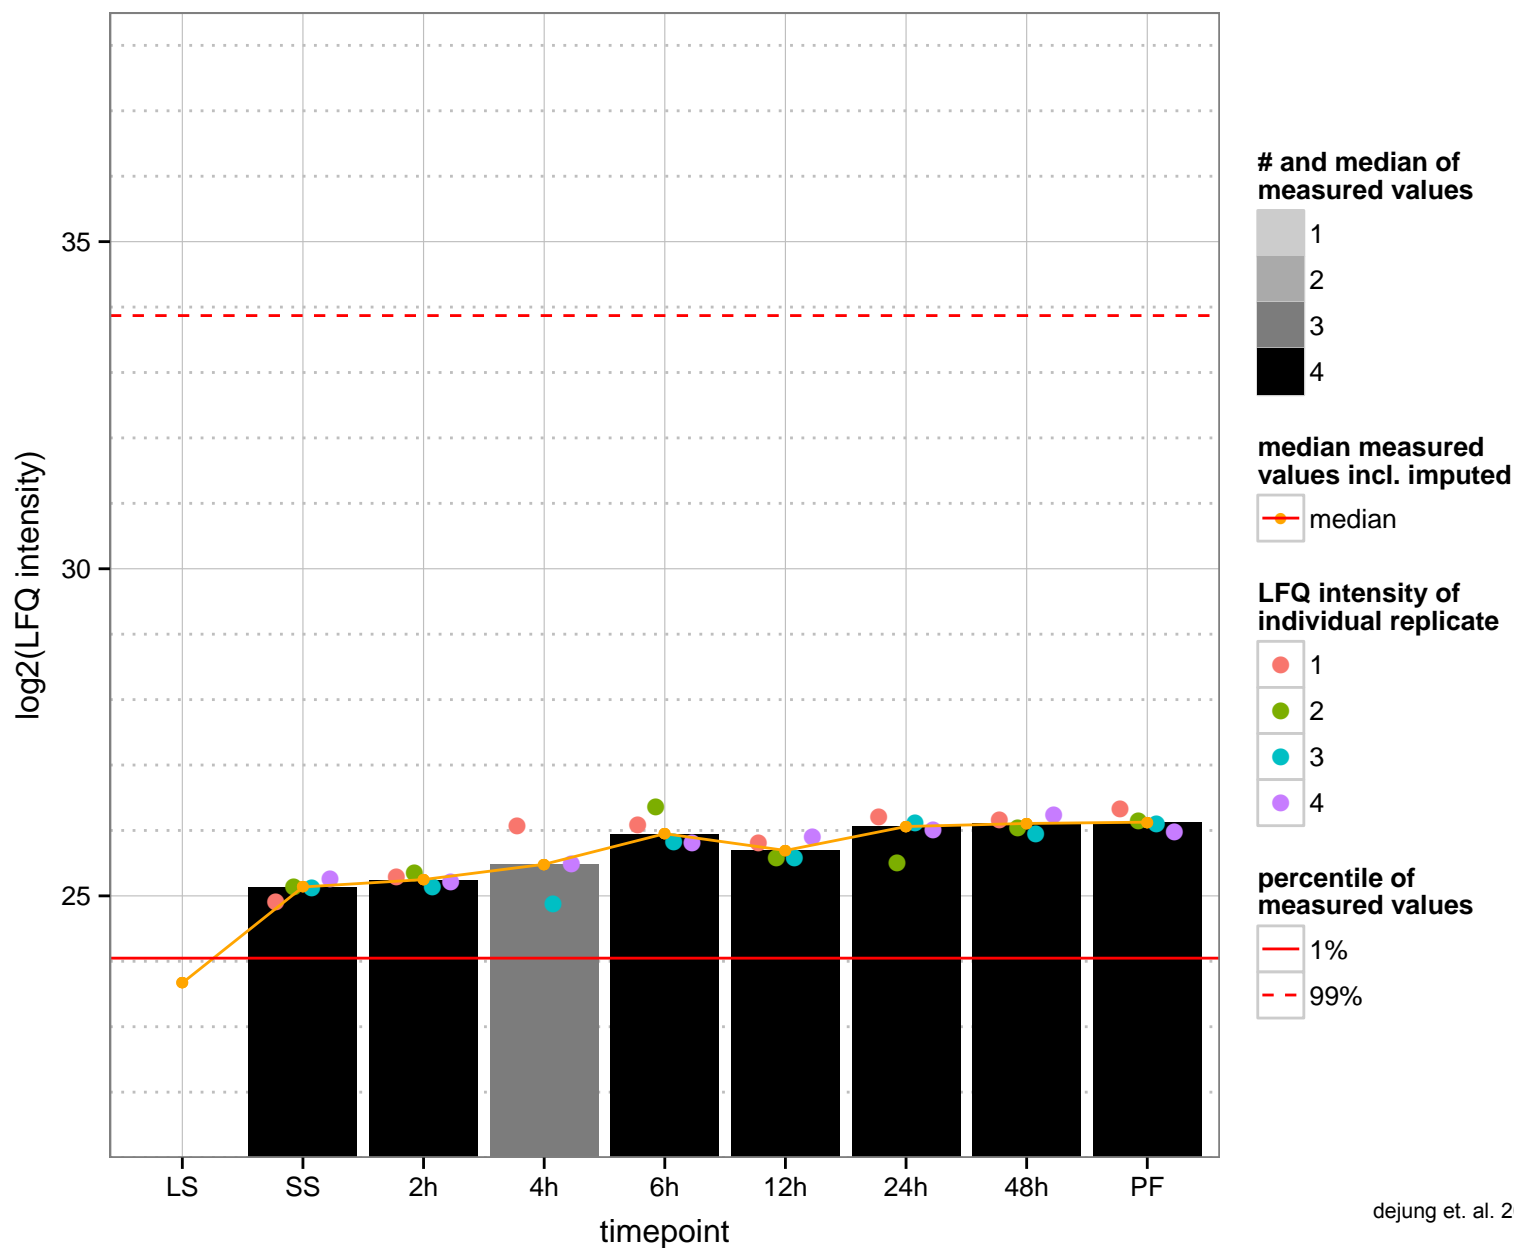

hypothetical protein, conserved  
 Tb927.7.2230  
 AGOF: null  
 AGOC: integral to membrane, membrane  
 AGOP: transport  
 PGO: null  
 PGOC: null  
 PGOP: null

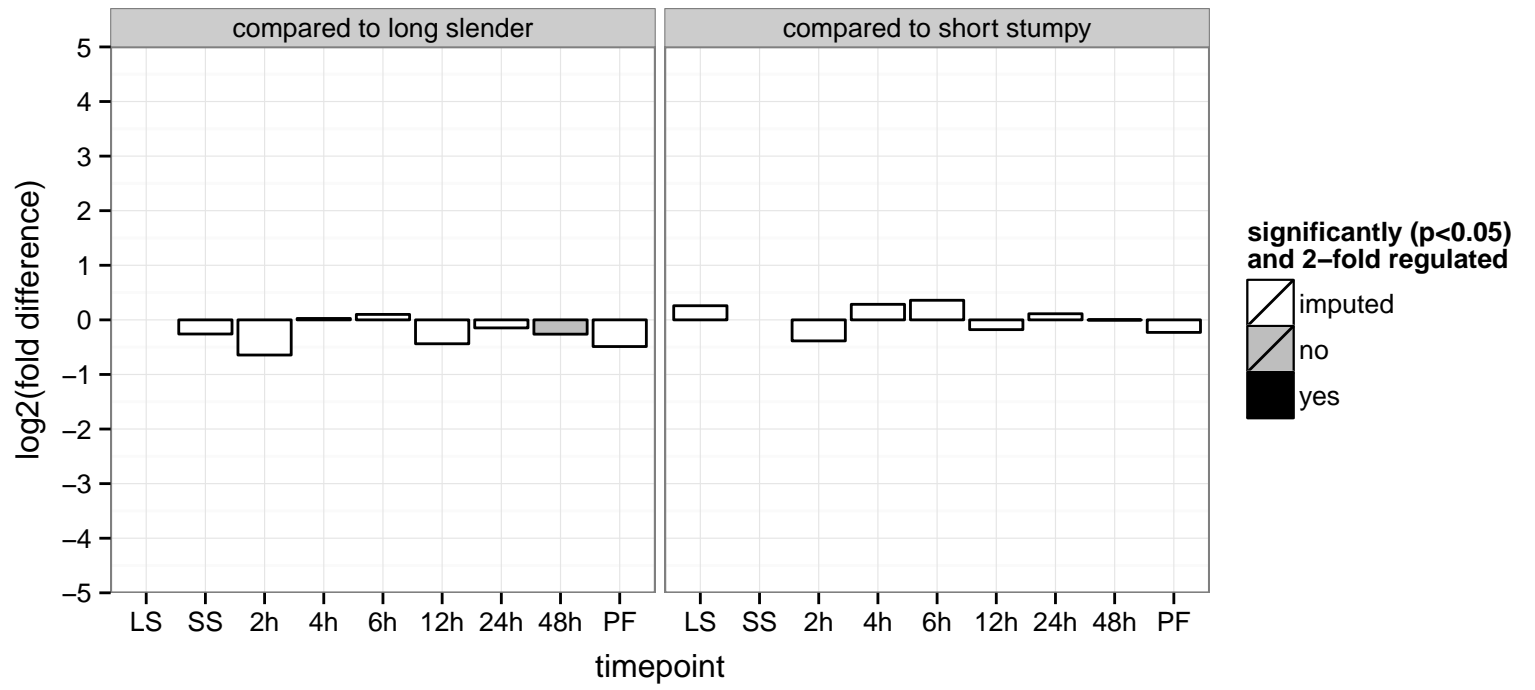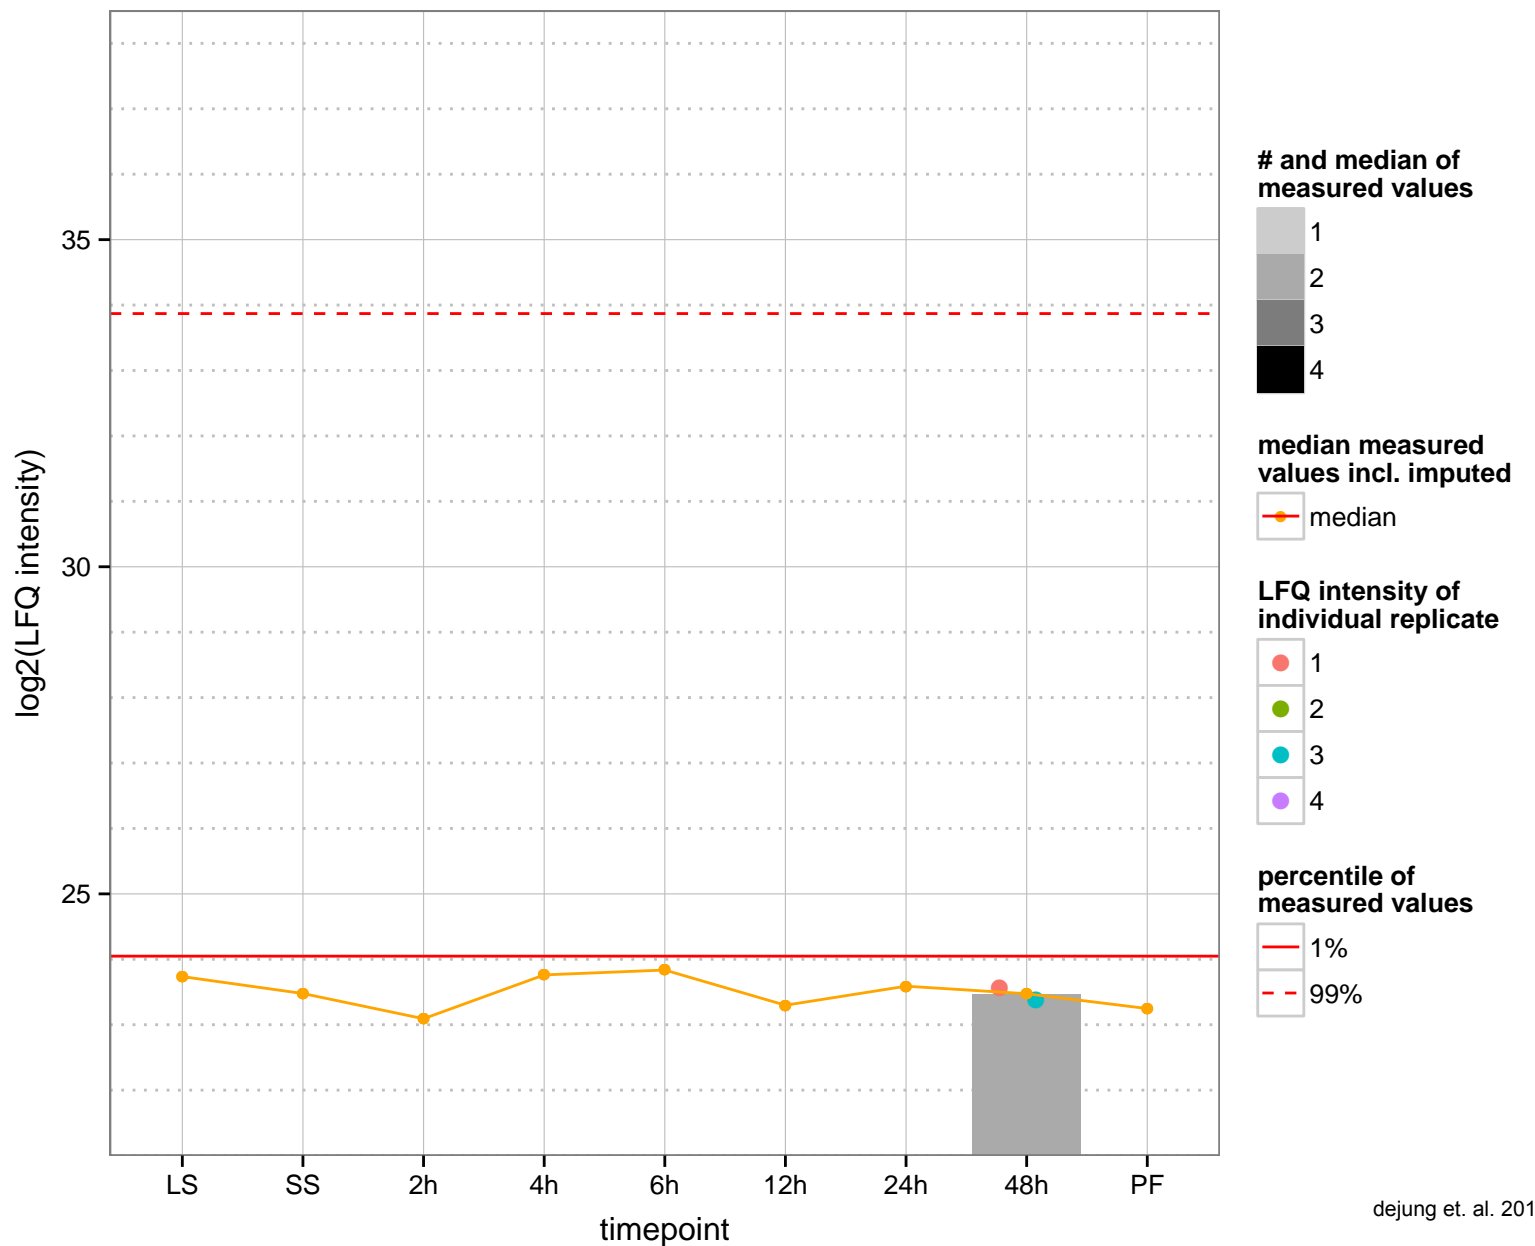

hypothetical protein, conserved  
 Tb927.7.2240  
 AGOF: null  
 AGOC: null  
 AGOP: null  
 PGOF: binding  
 PGO: null  
 PGOP: null

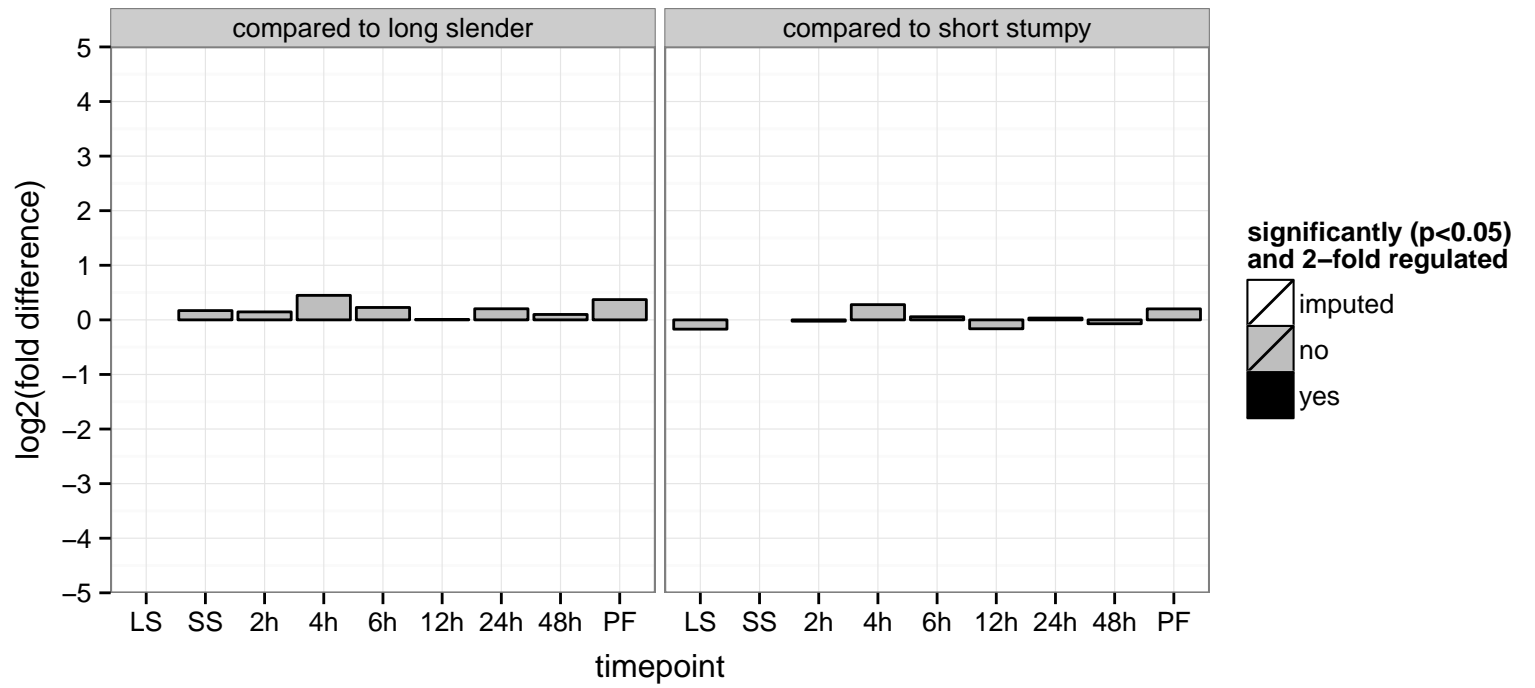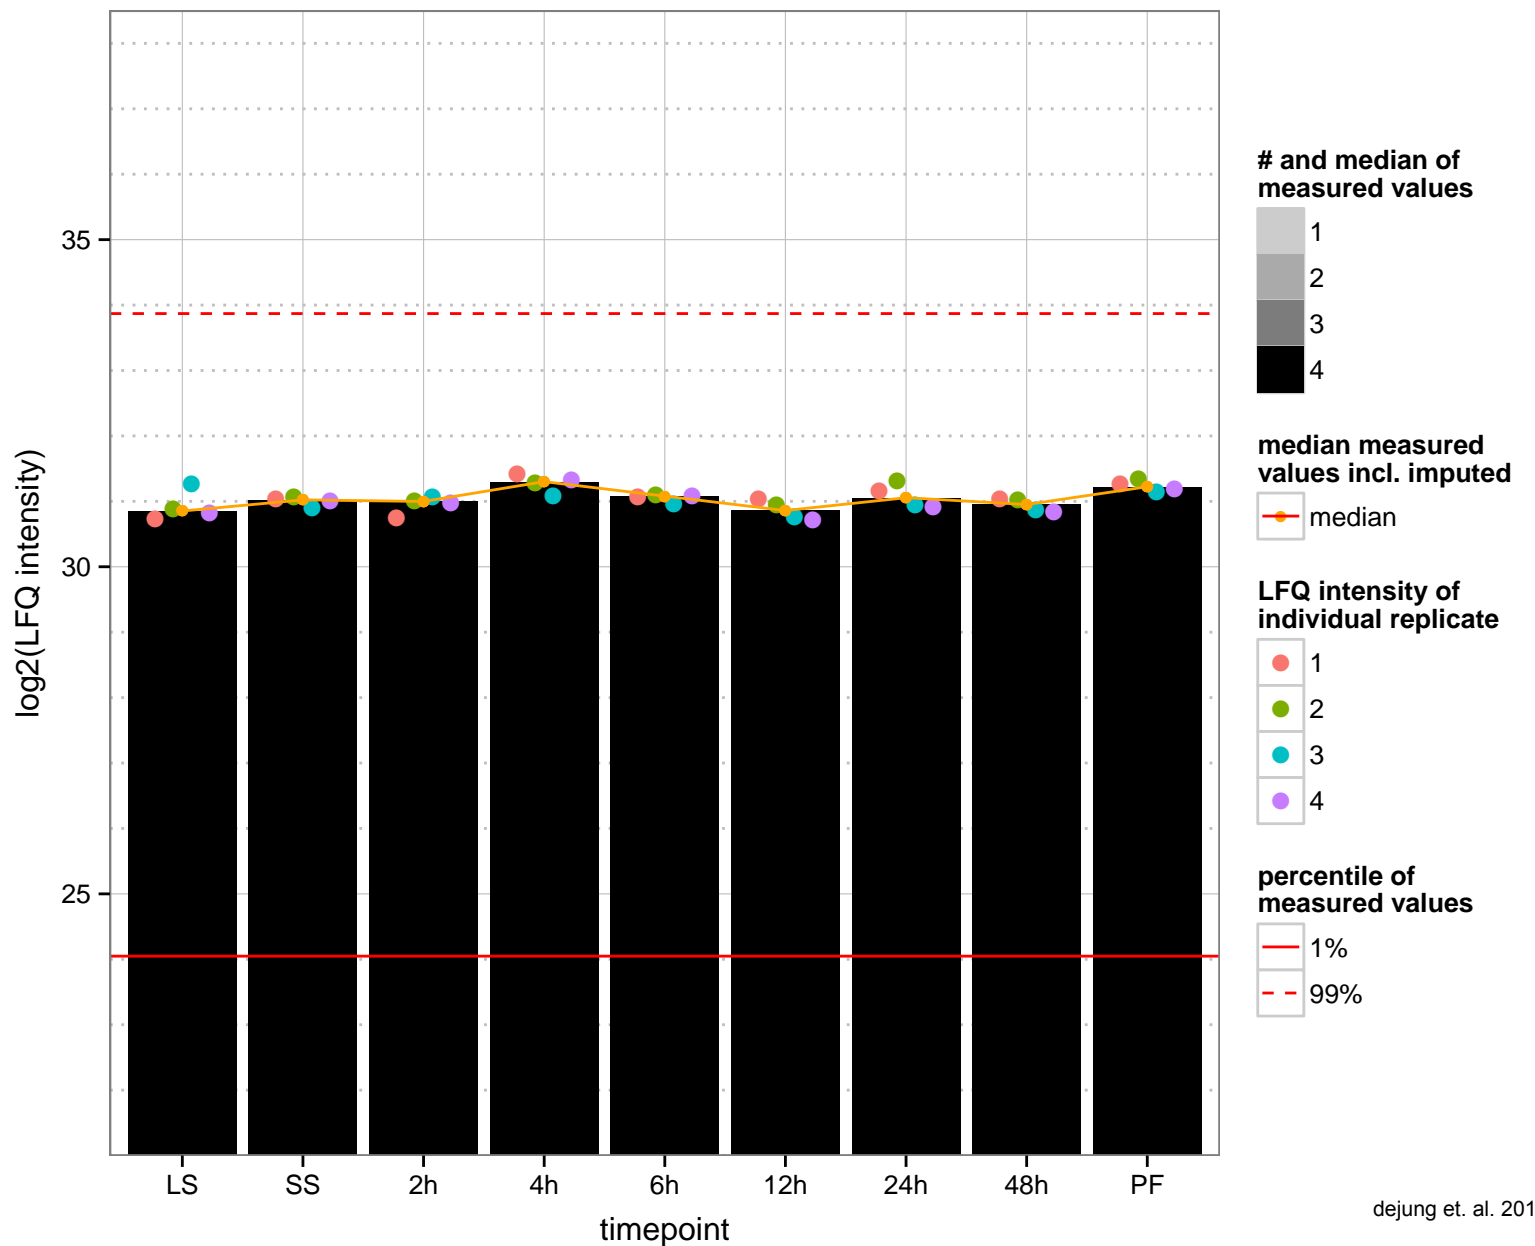

hypothetical protein, conserved  
 Tb927.7.2260  
 AGOF: null  
 AGOC: null  
 AGOP: null  
 PGO: null  
 PGOC: null  
 PGOP: null

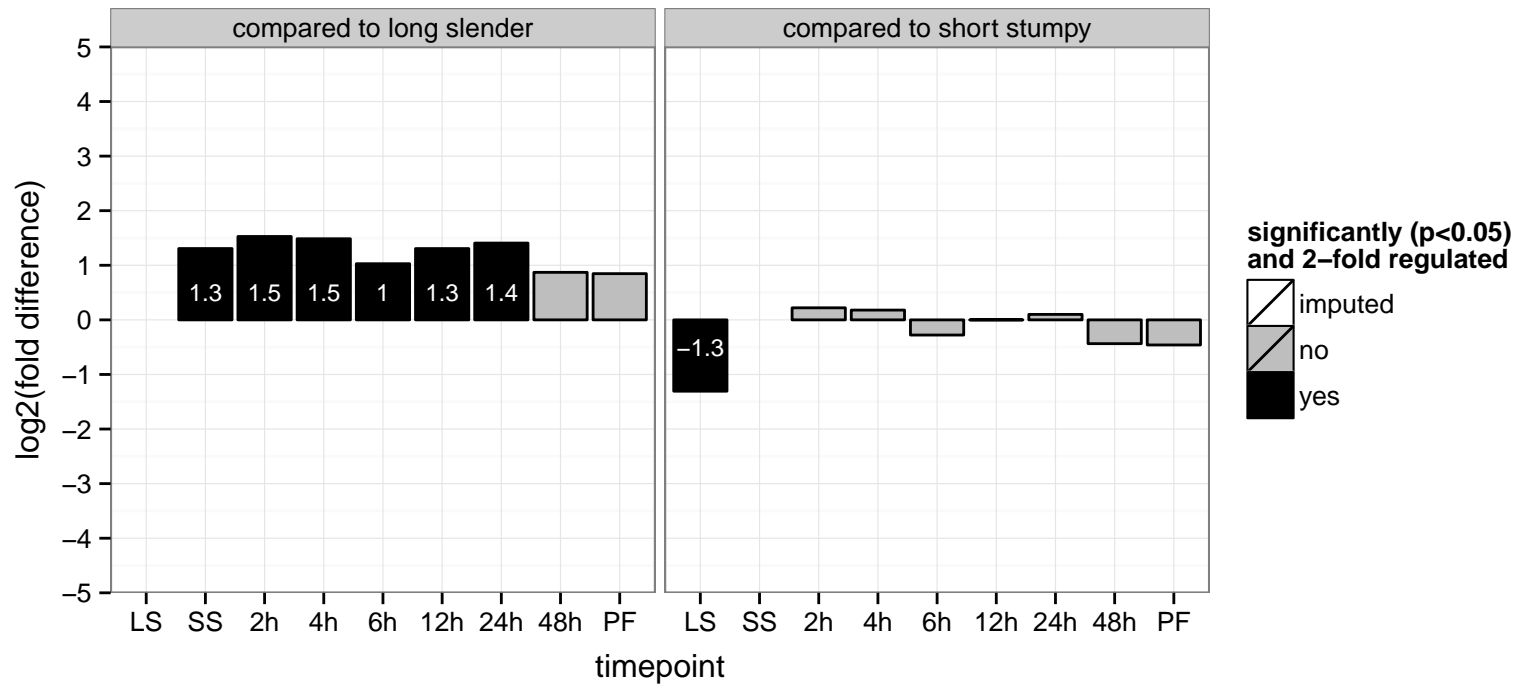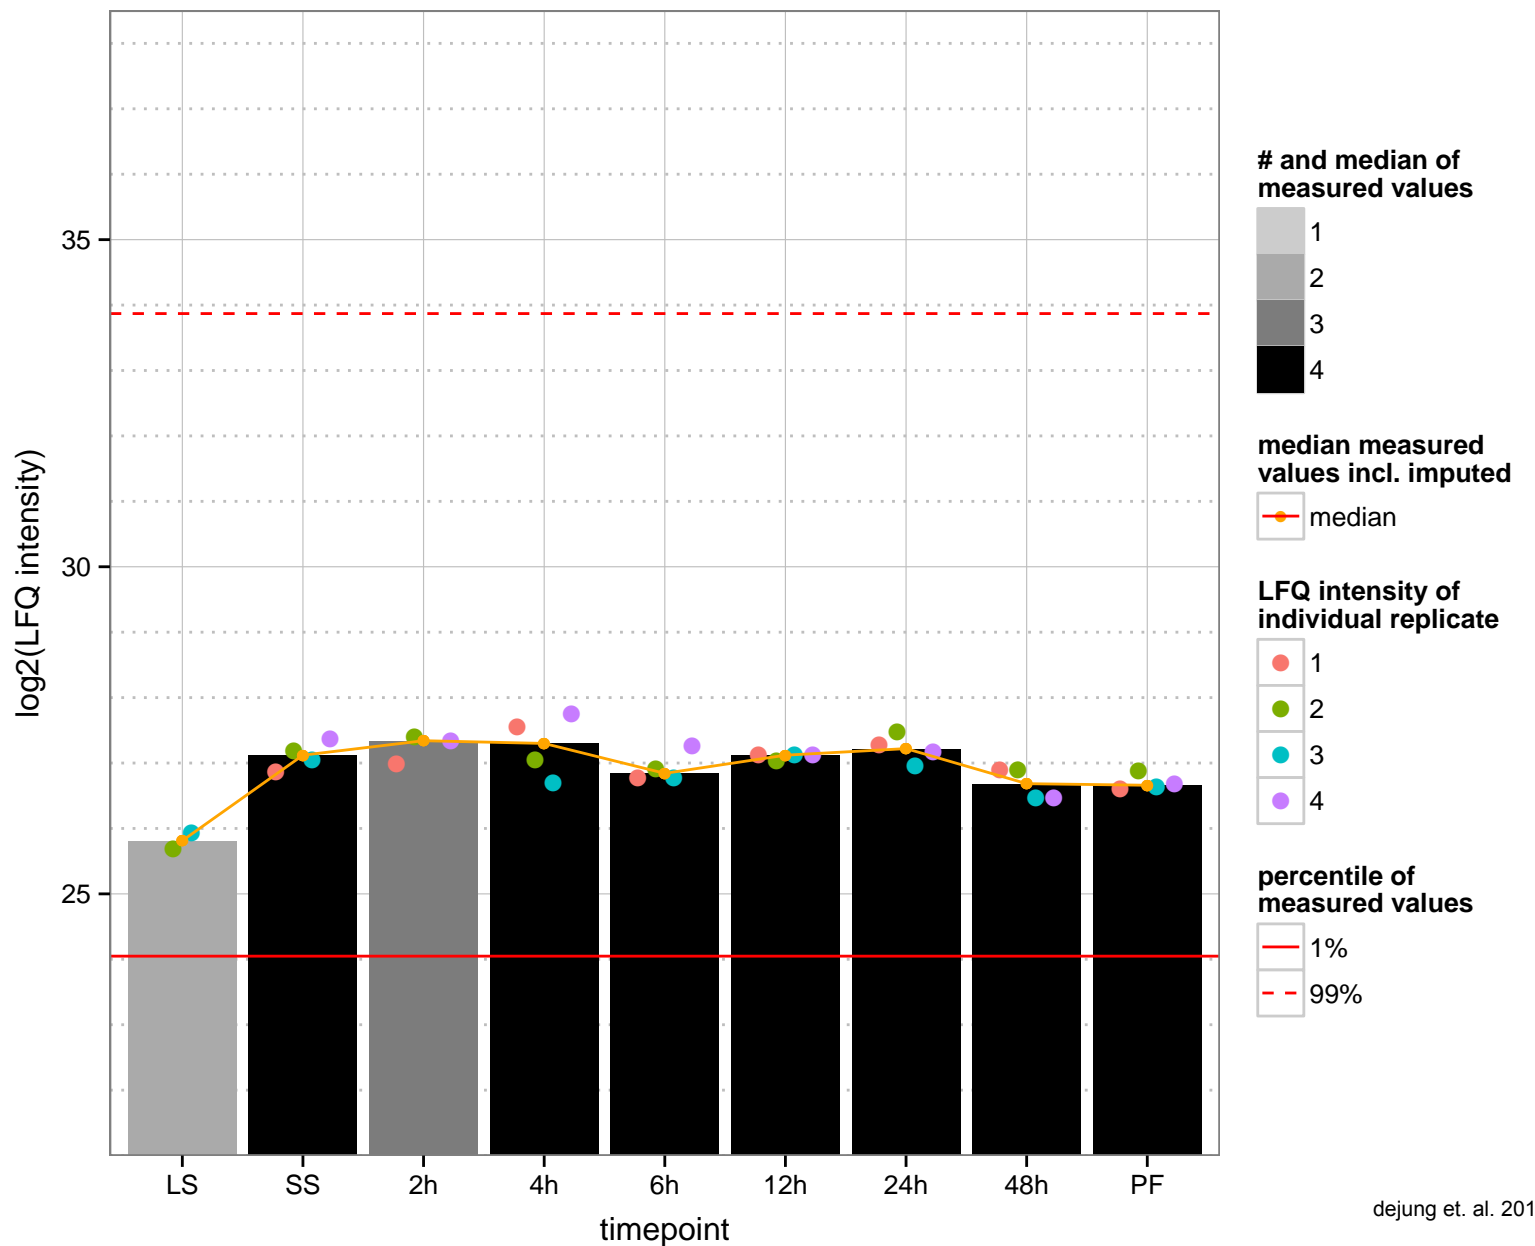

Nucleoporin (TbNup132)  
 Tb927.7.2300  
 AGOF: null  
 AGOC: nuclear pore  
 AGOP: null  
 PGO: null  
 PGO: null  
 PGO: null

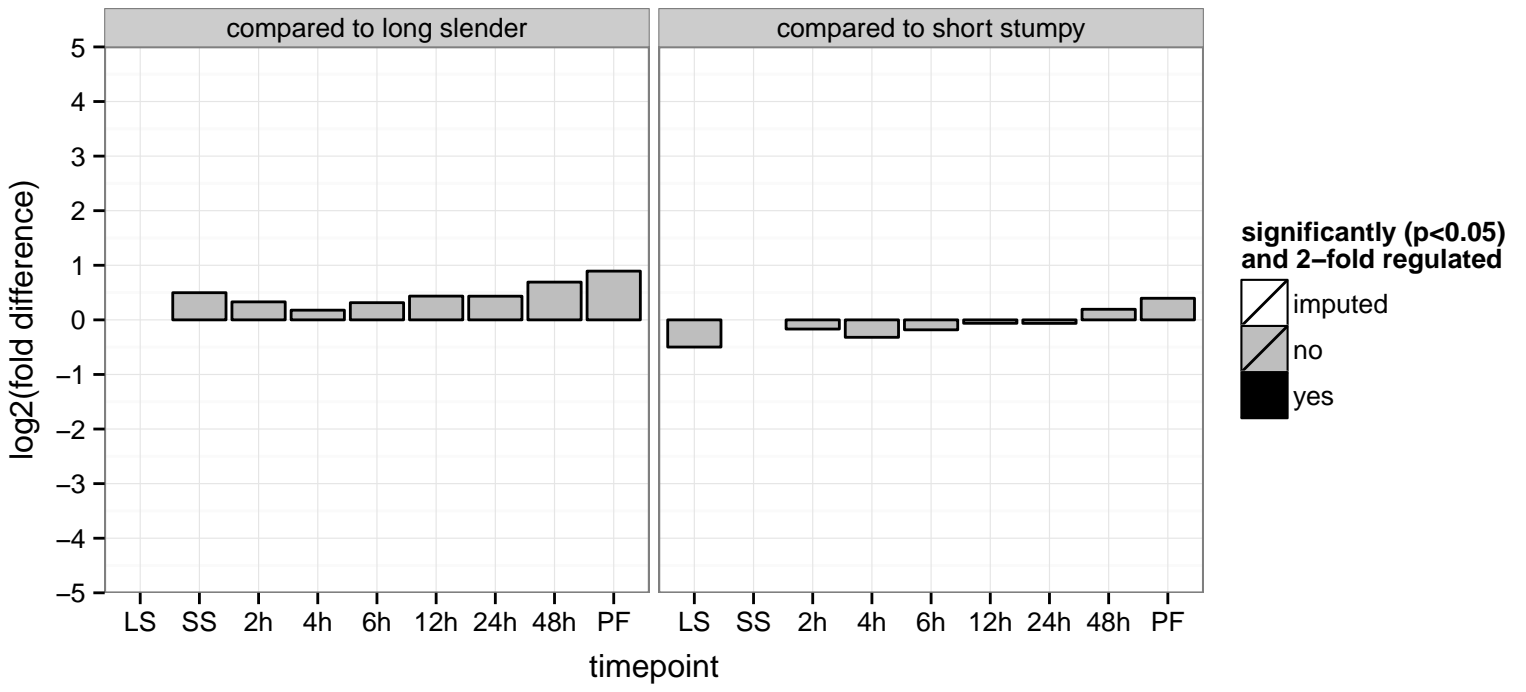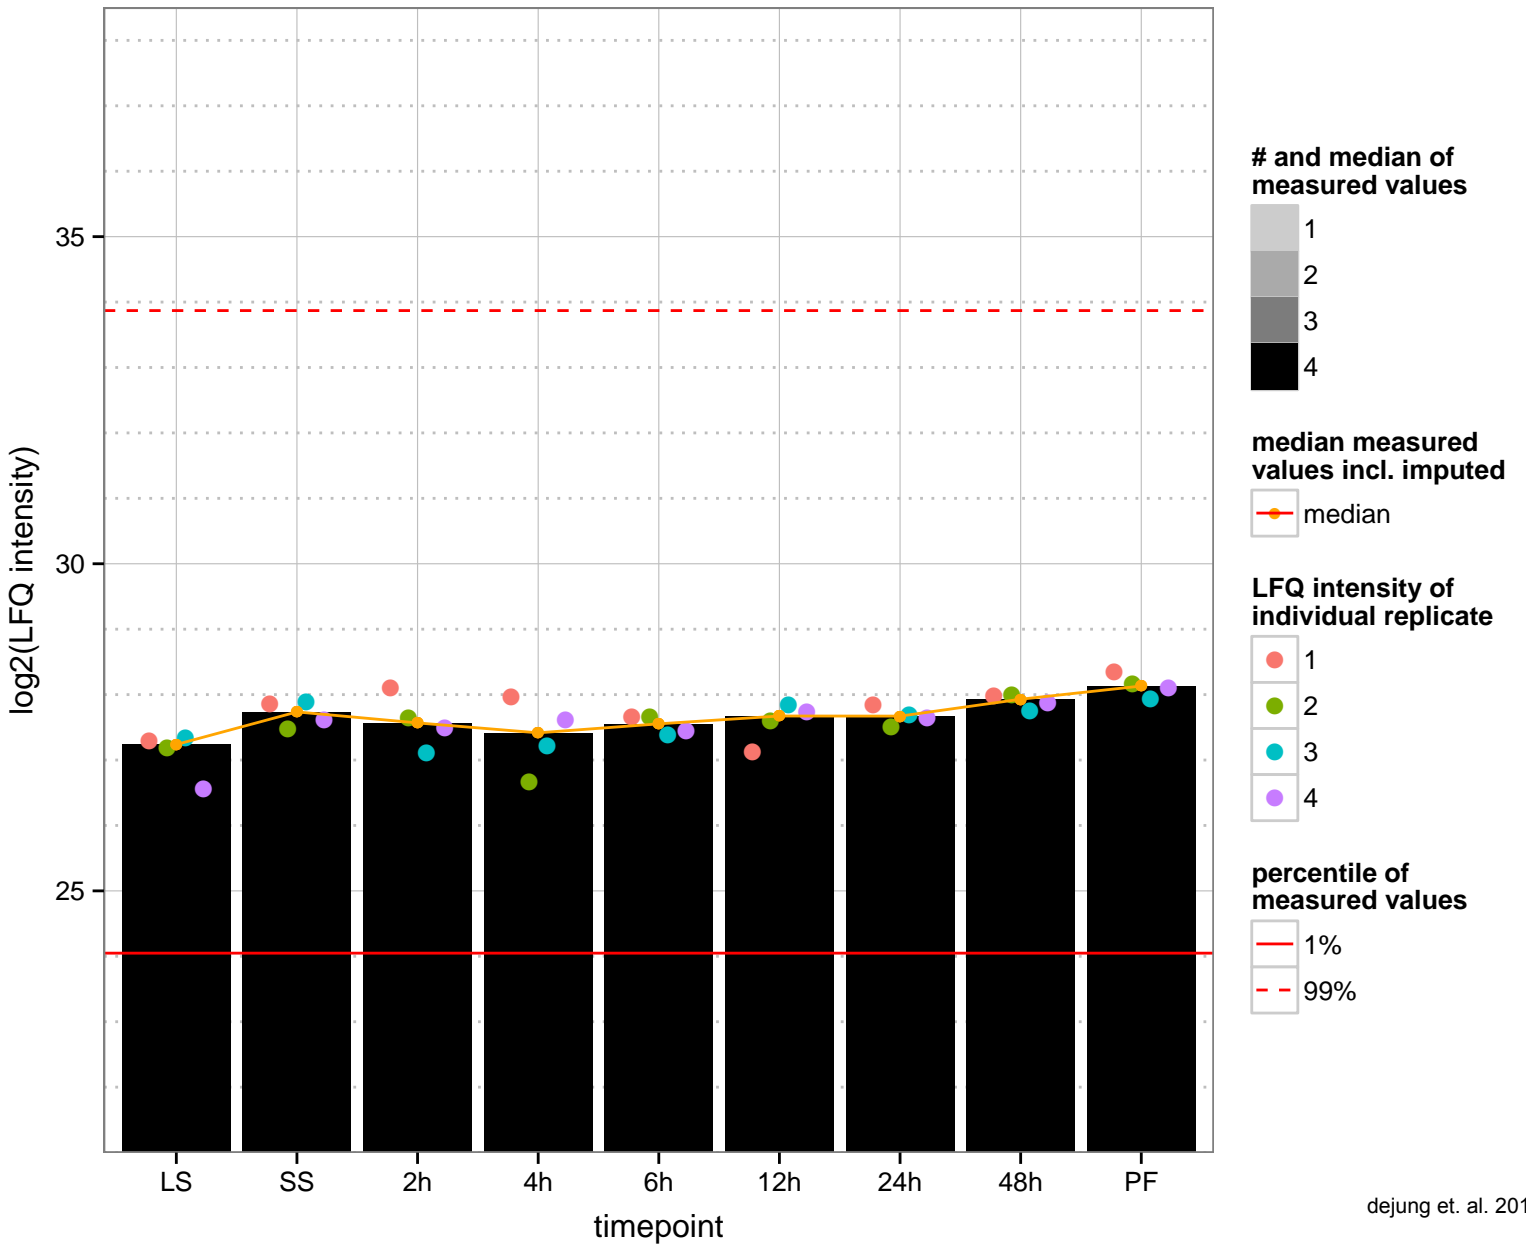



pyrroline-5-carboxylate reductase, putative (P5CR)  
 Tb927.7.2440  
 AGOF: pyrroline-5-carboxylate reductase activity  
 AGOC: null  
 AGOP: proline biosynthetic process  
 PGOF: oxidoreductase activity, pyrroline-5-carboxylate reductase activity  
 PGOC: null  
 PGOP: oxidation-reduction process, proline biosynthetic process

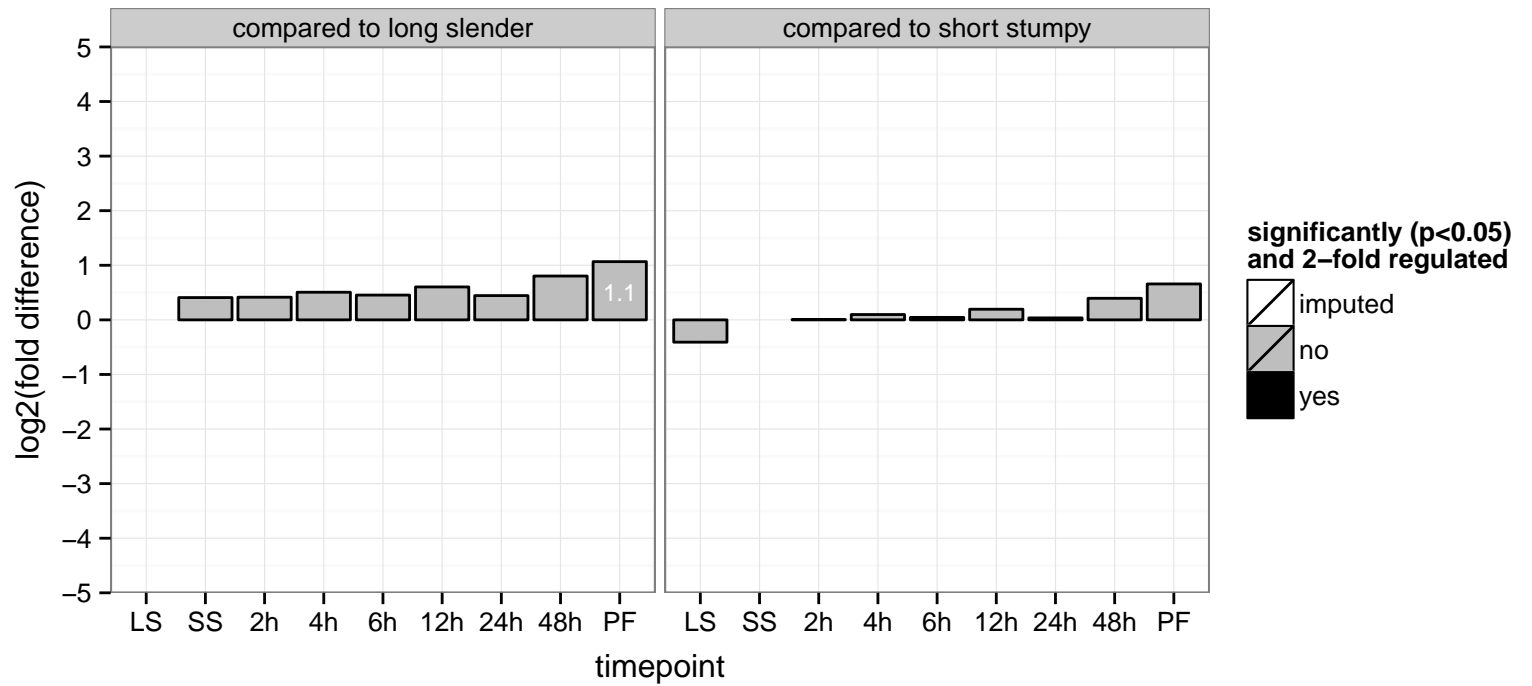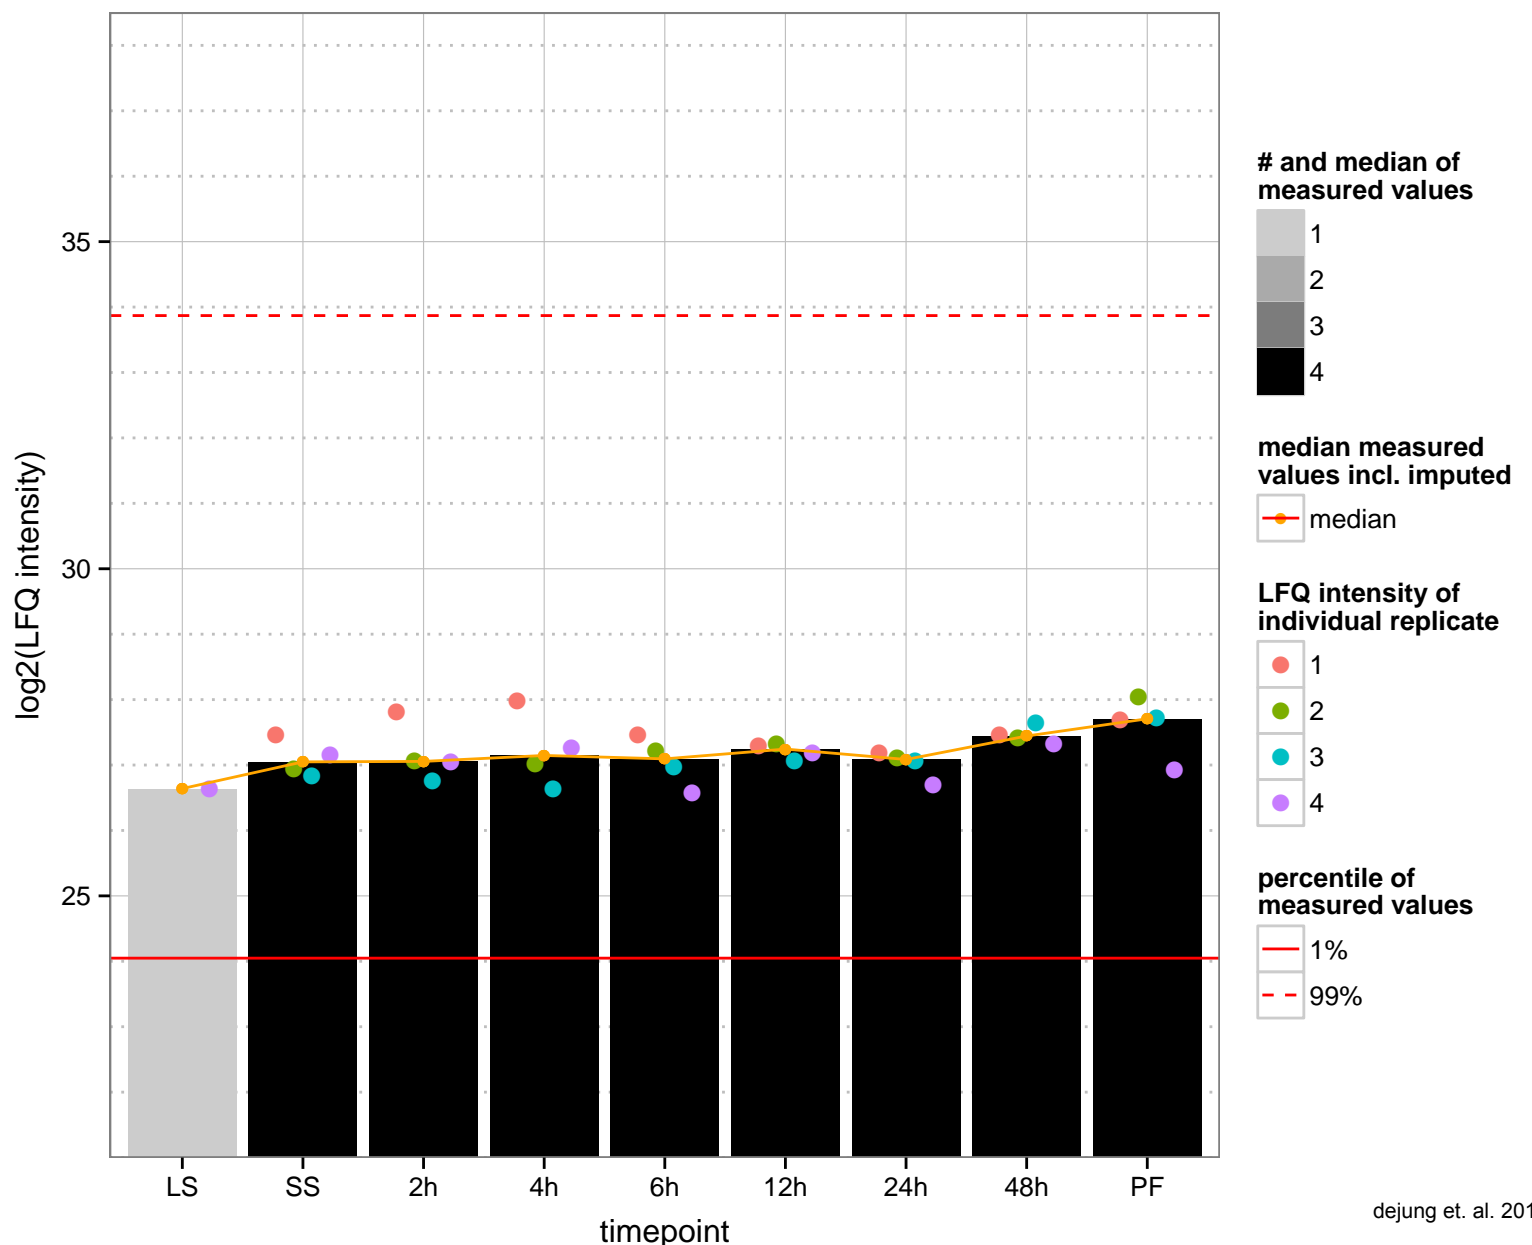

hypothetical protein, conserved  
 Tb927.7.2450  
 AGOF: null  
 AGOC: null  
 AGOP: null  
 PGO: null  
 PGOC: null  
 PGOP: null

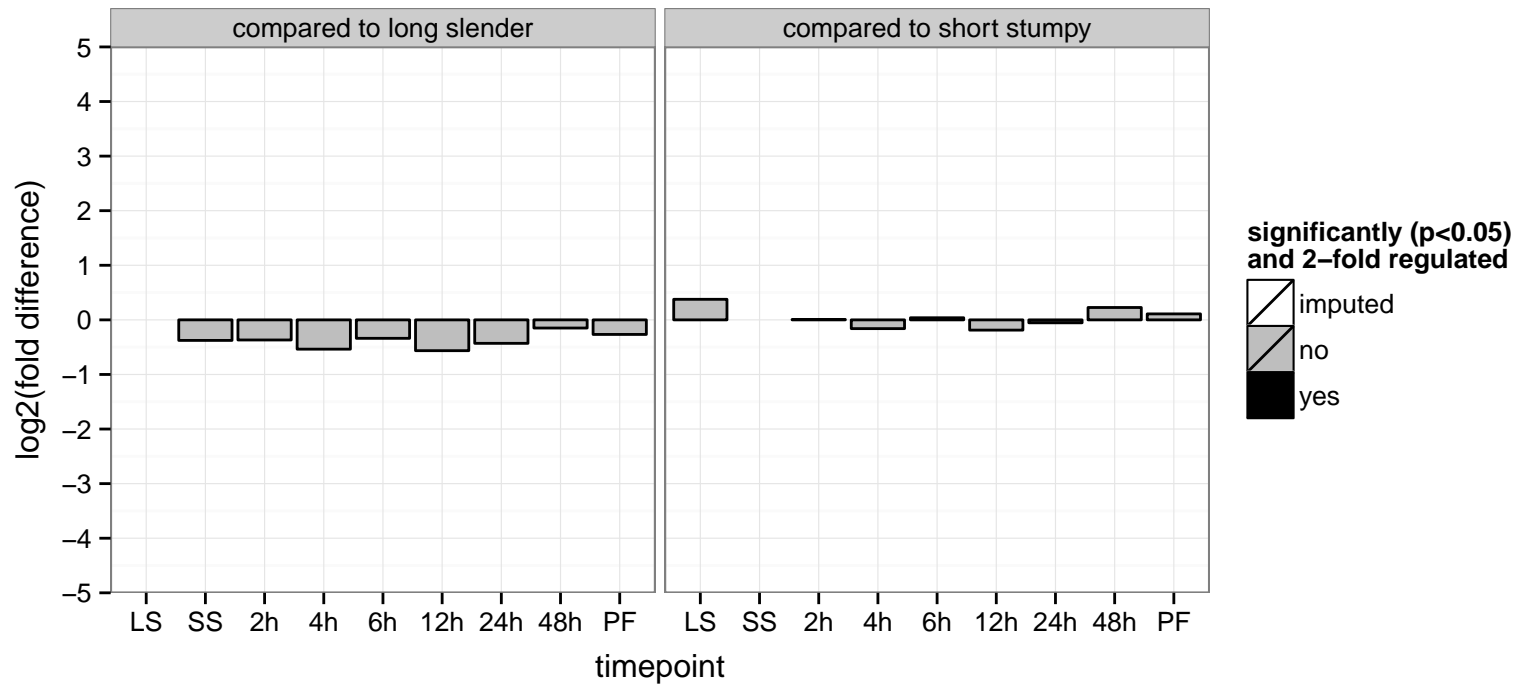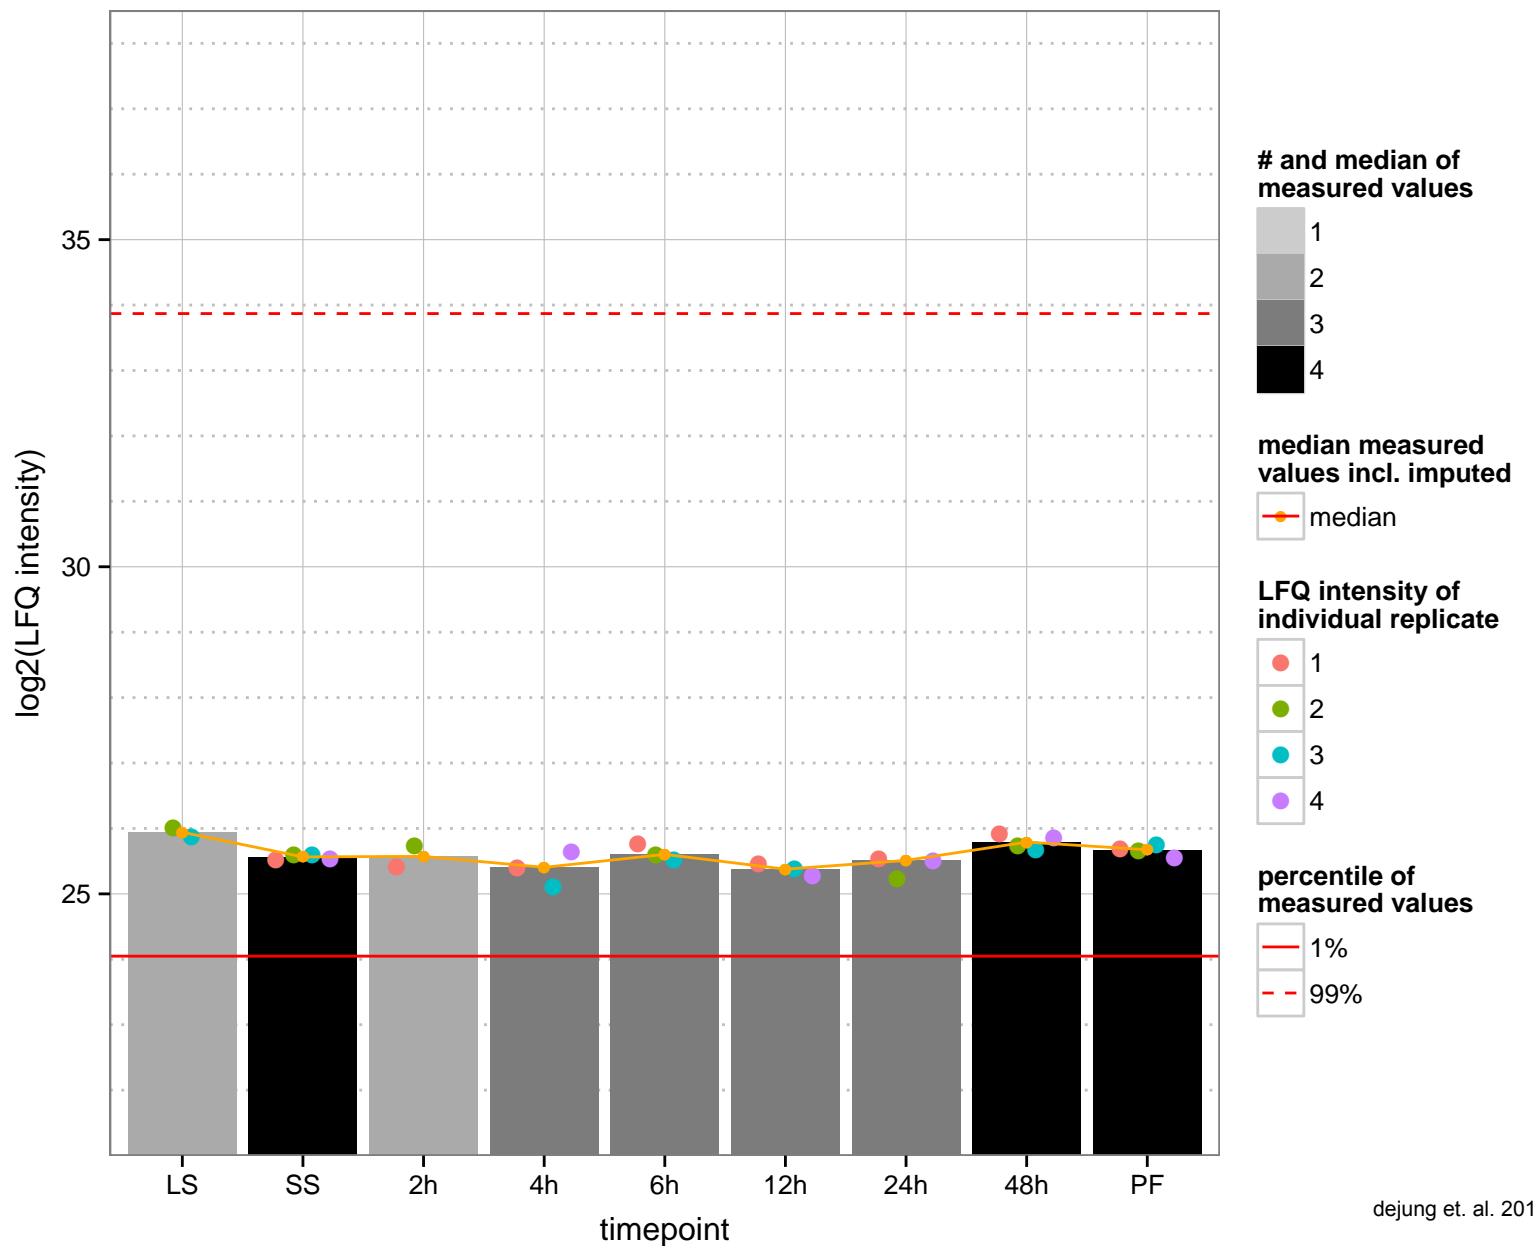

proteasome regulatory ATPase subunit 1

Tb927.7.2500

AGOF: ATP binding, nucleoside-triphosphatase activity

AGOC: cytoplasm, nucleus

AGOP: protein catabolic process

PGOF: ATP binding, hydrolase activity, nucleoside-triphosphatase activity, nucleotide binding

PGOC: cytoplasm

PGOP: protein catabolic process

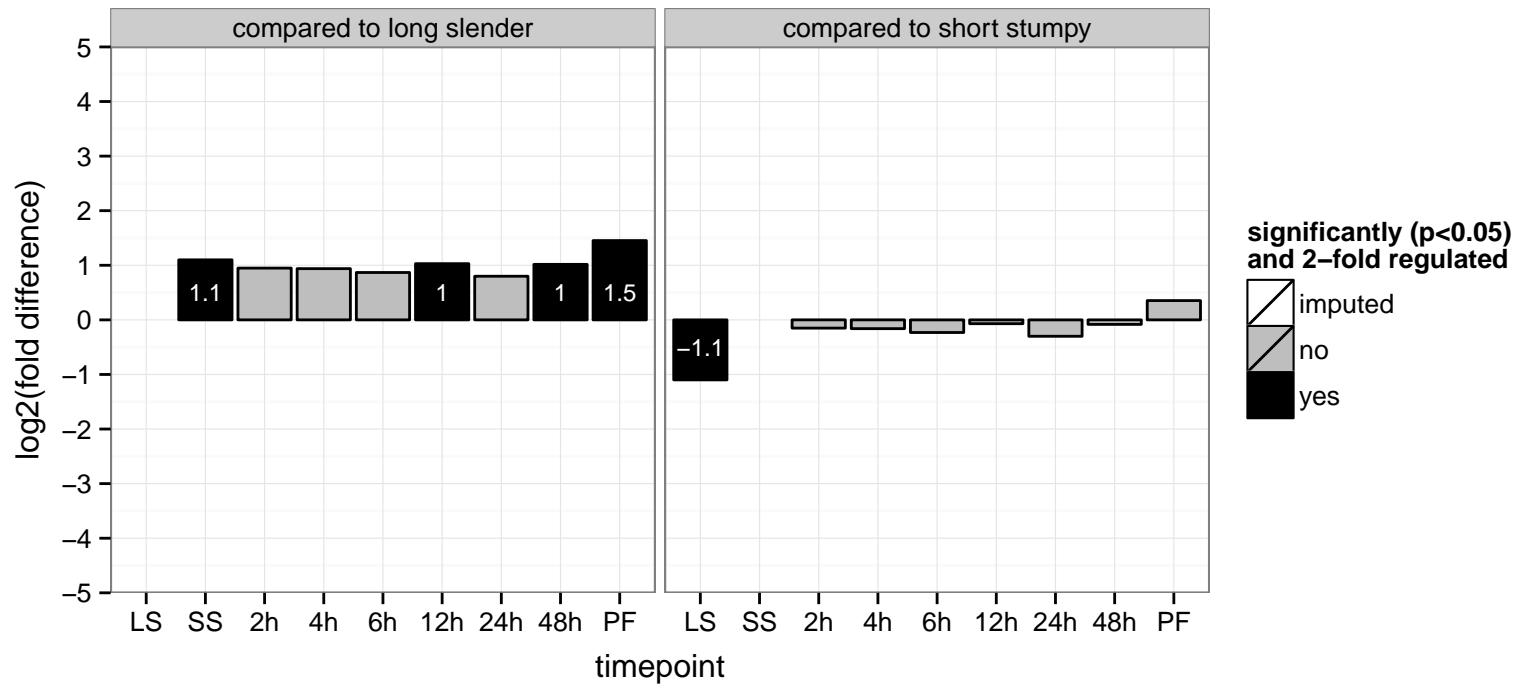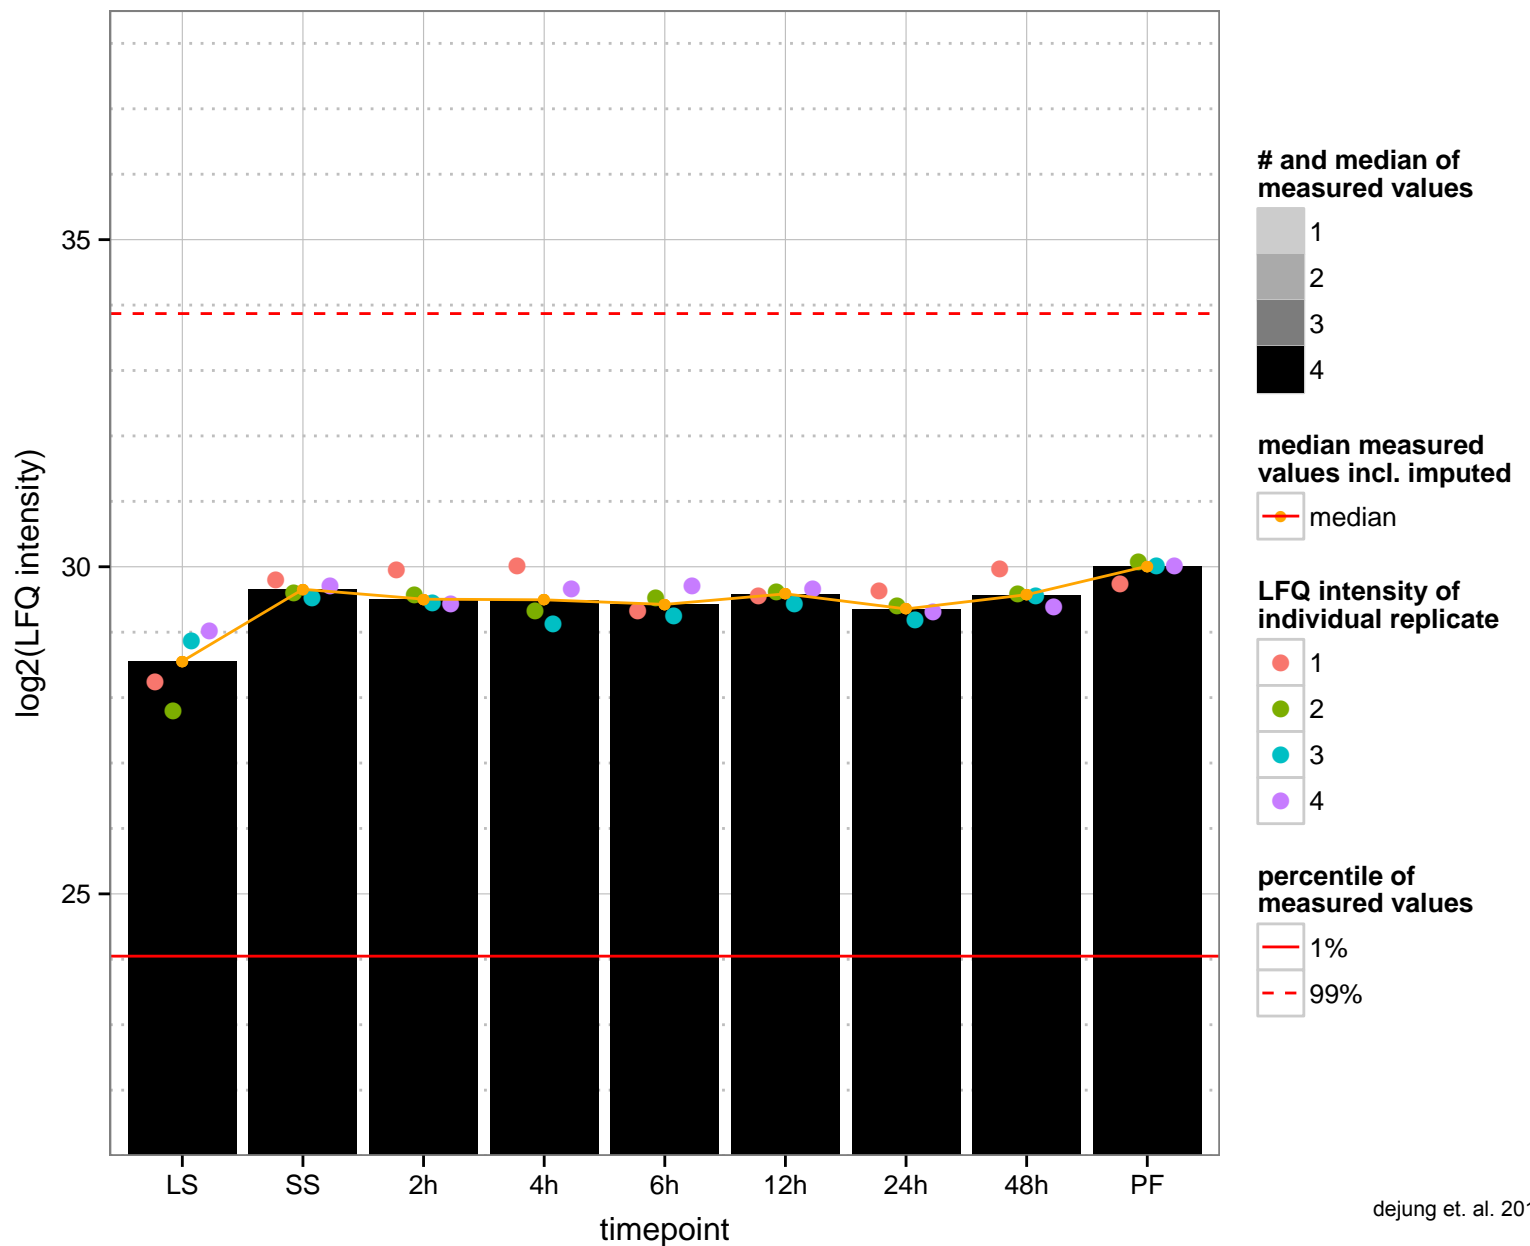

proteasome regulatory ATPase subunit 5 (RPT5)

Tb927.7.2550

AGOF: ATP binding, nucleoside-triphosphatase activity

AGOC: cytoplasm, nucleus

AGOP: protein catabolic process

PGOF: ATP binding, hydrolase activity, nucleoside-triphosphatase activity, nucleotide binding

PGOC: cytoplasm

PGOP: protein catabolic process

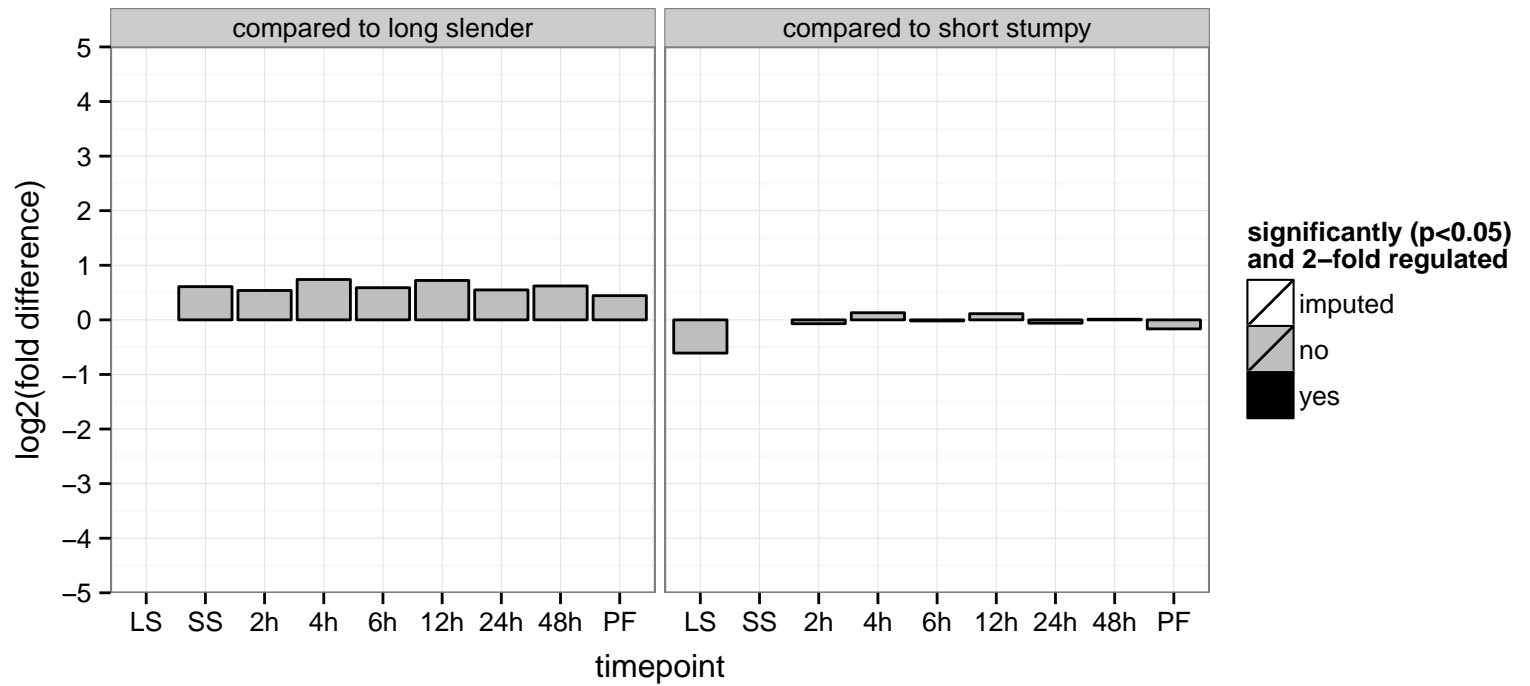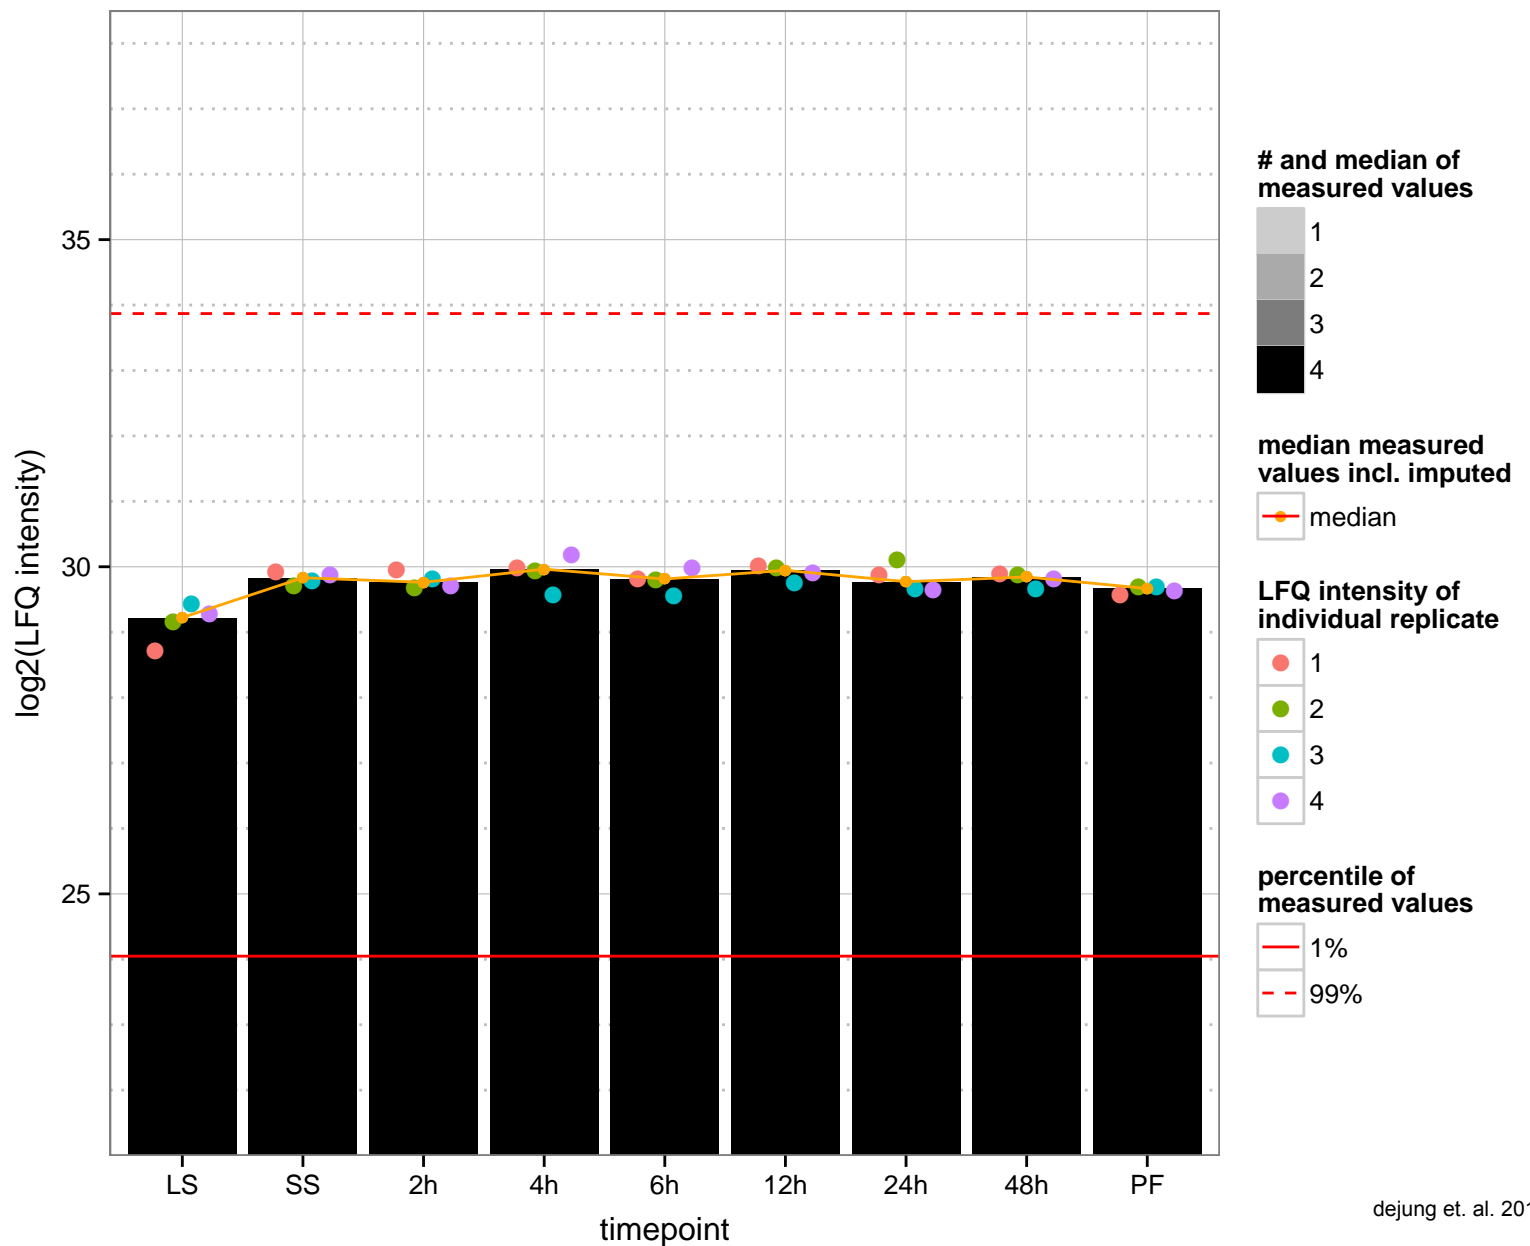

ribosome biogenesis protein, putative  
 Tb927.7.270  
 AGOF: null  
 AGOC: null  
 AGOP: null  
 PGOF: null  
 PGO: null  
 PGOP: null

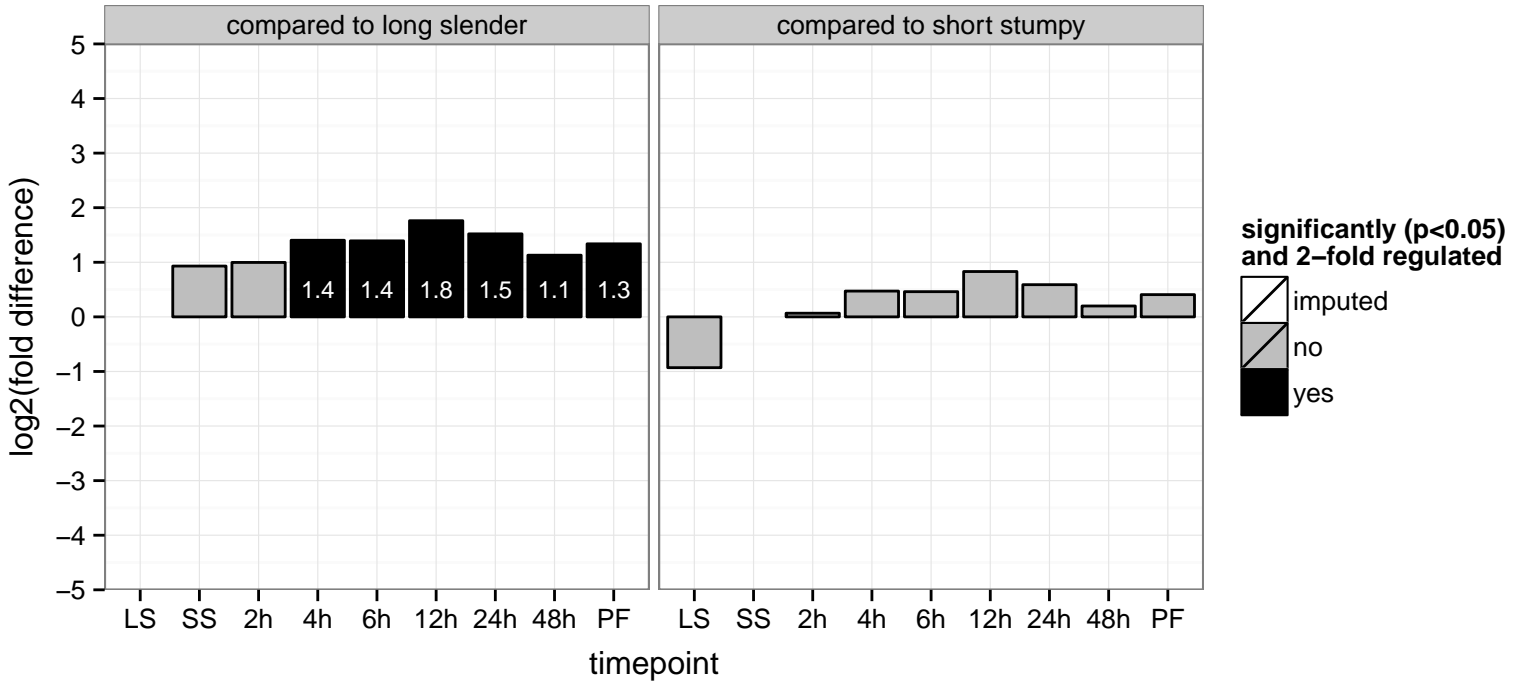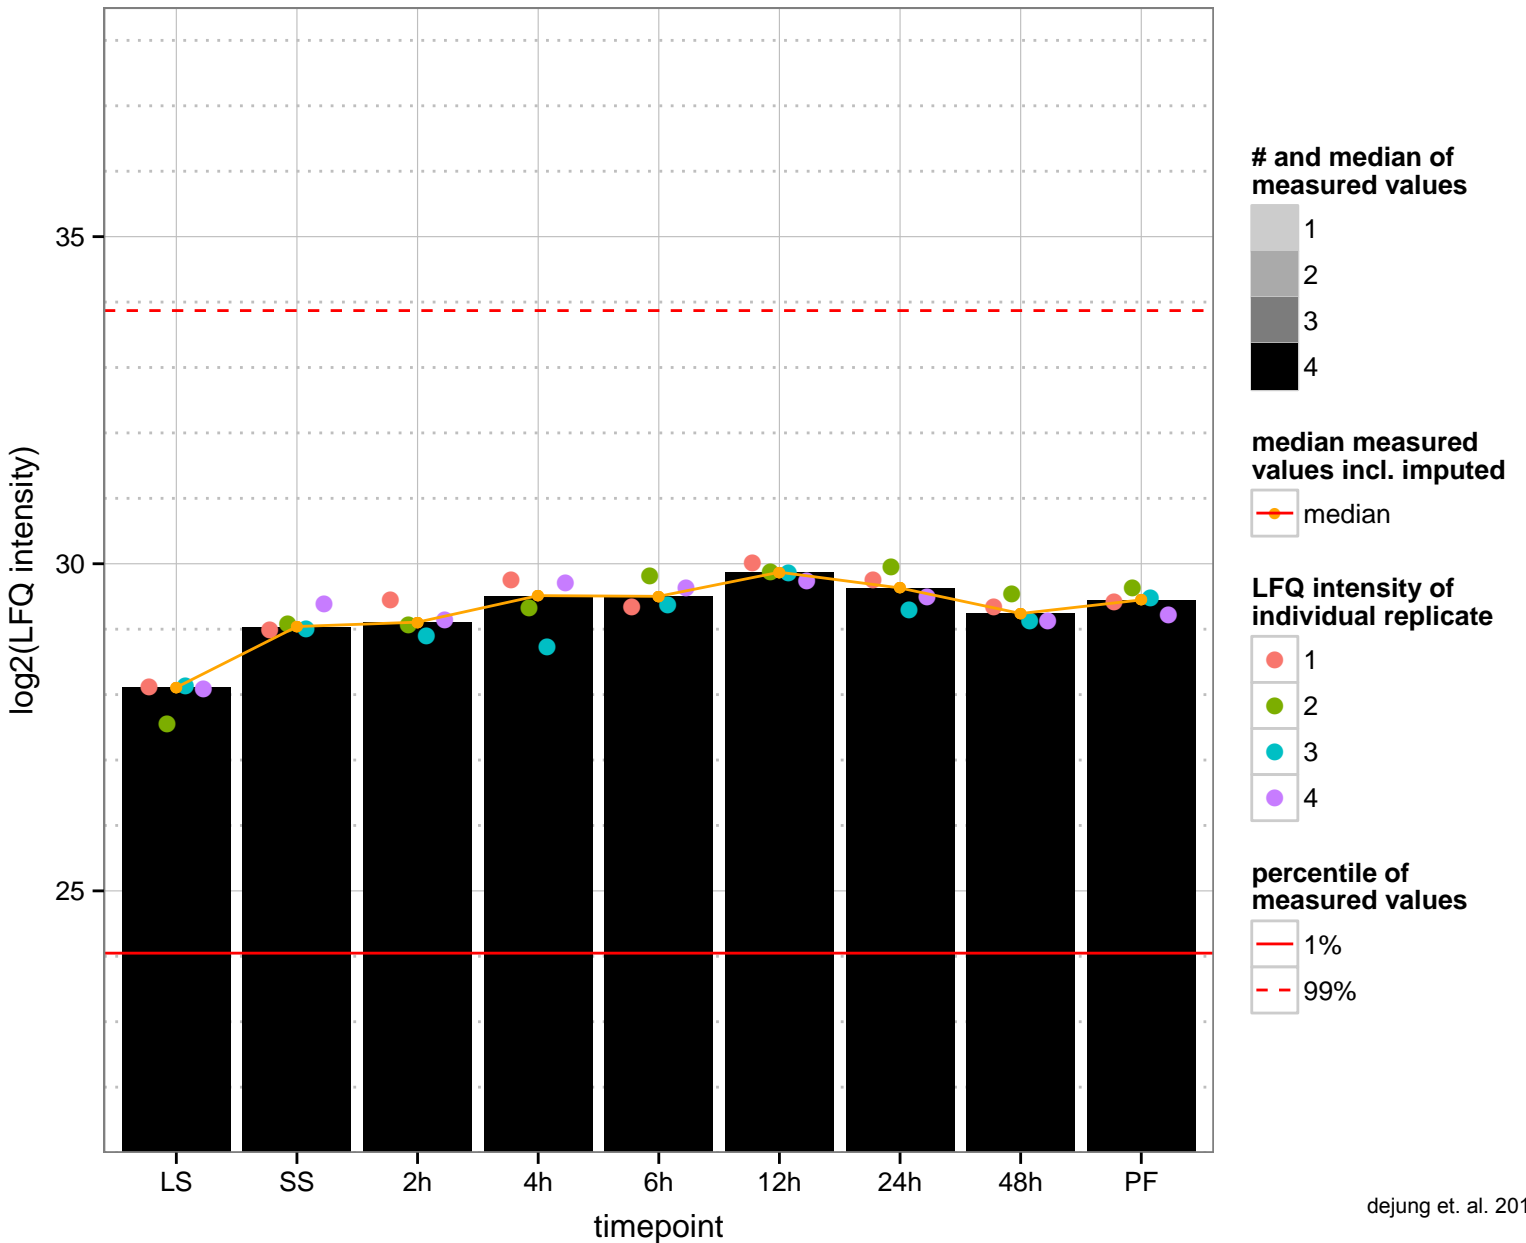

hypothetical protein, conserved  
 Tb927.7.2720  
 AGOF: RNA binding, translation initiation factor activity  
 AGOC: null  
 AGOP: translational initiation  
 PGO: RNA binding, translation initiation factor activity  
 PGOC: null  
 PGOP: translational initiation

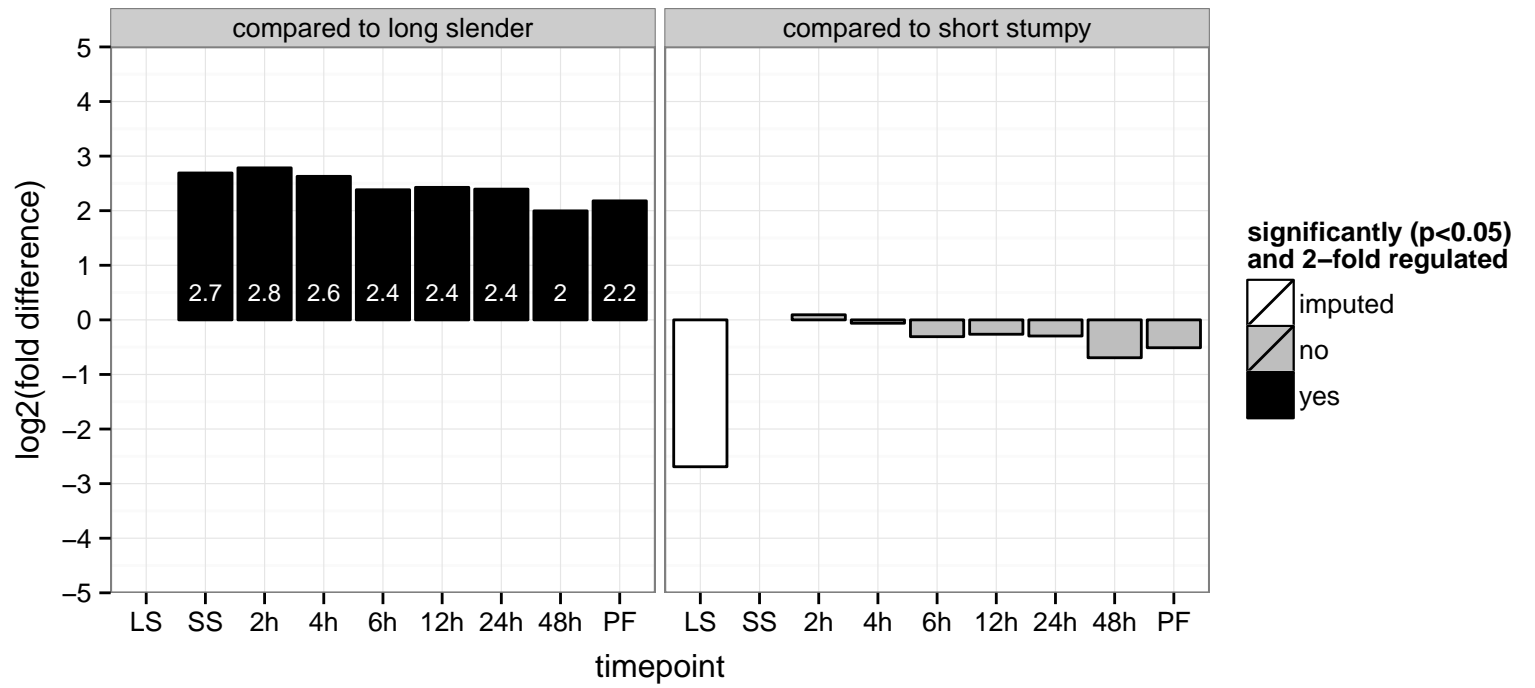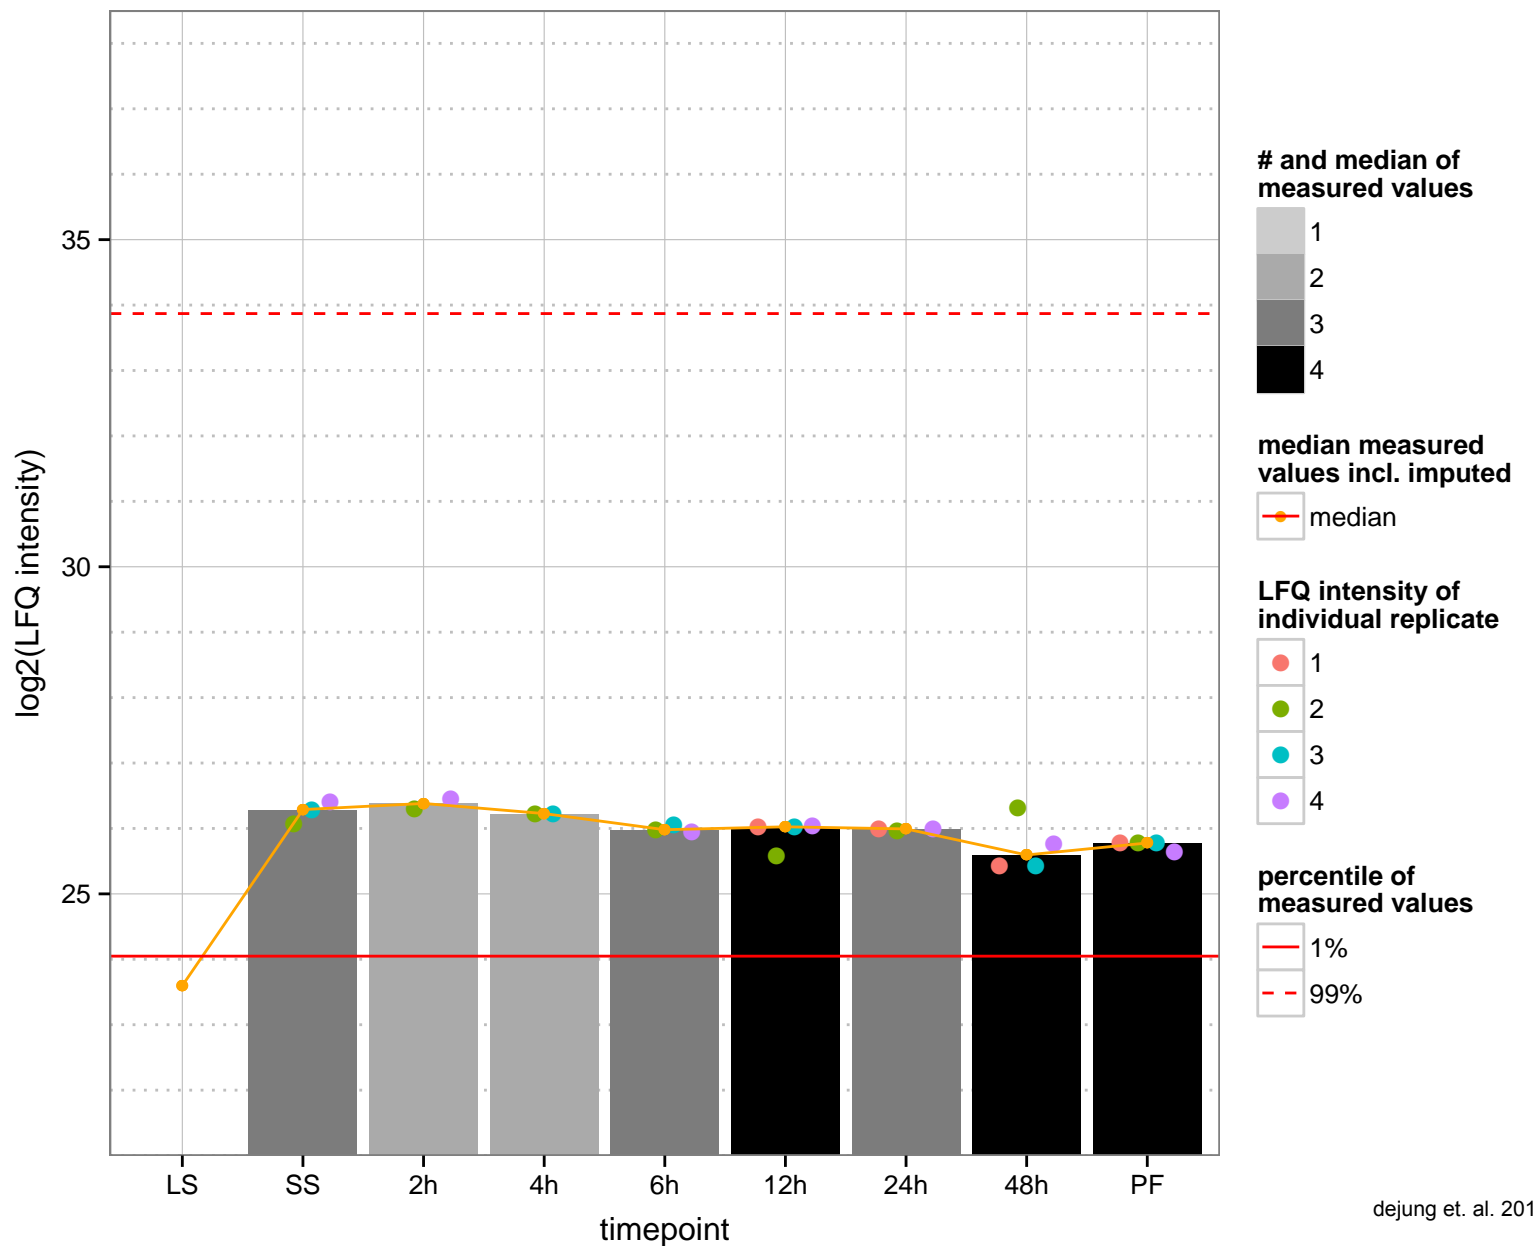

leucine-rich repeat protein (LRRP), putative  
 Tb927.7.2730  
 AGOF: null  
 AGOC: null  
 AGOP: null  
 PGO: protein binding  
 PGOC: null  
 PGOP: null

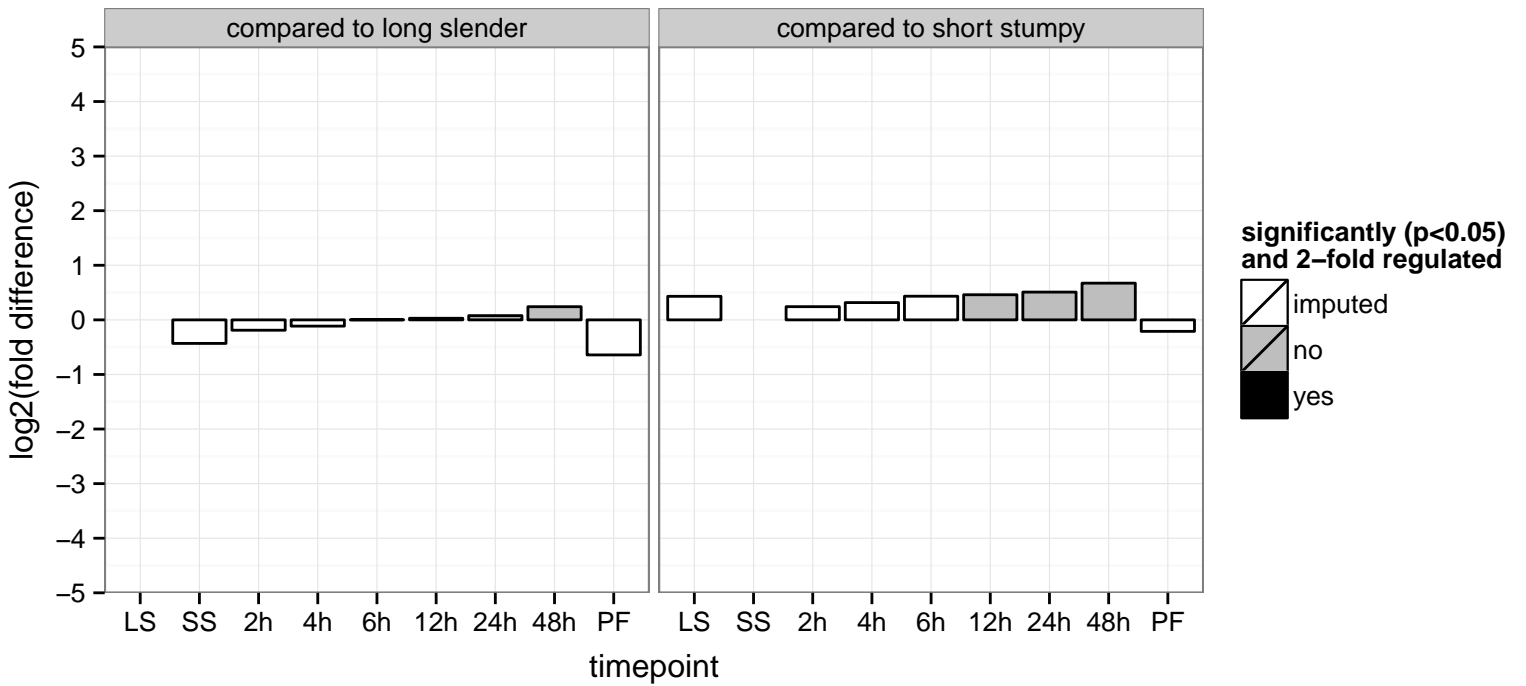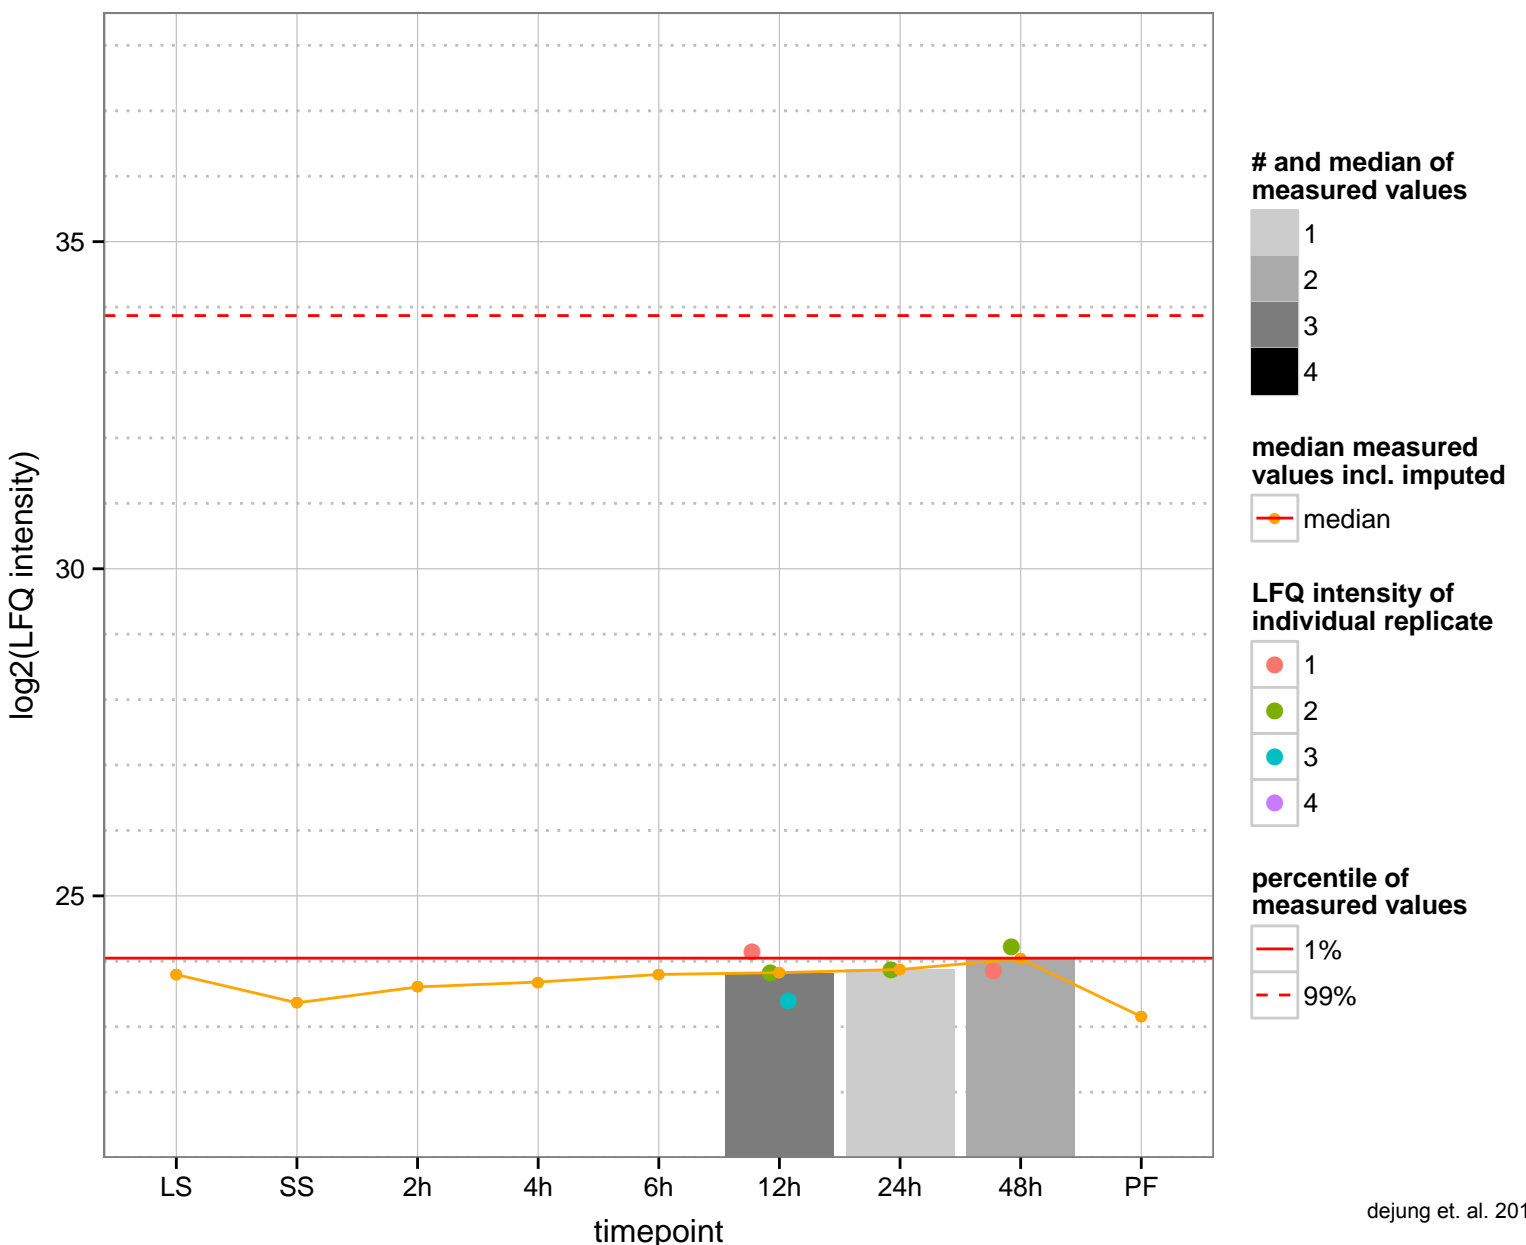

protein kinase, putative

Tb927.7.2750

AGOF: ATP binding, protein serine/threonine kinase activity, protein tyrosine kinase activity

AGOC: null

AGOP: growth, protein phosphorylation

PGOF: ATP binding, protein kinase activity, transferase activity, transferring phosphorus-containing groups

PGOC: null

PGOP: protein phosphorylation

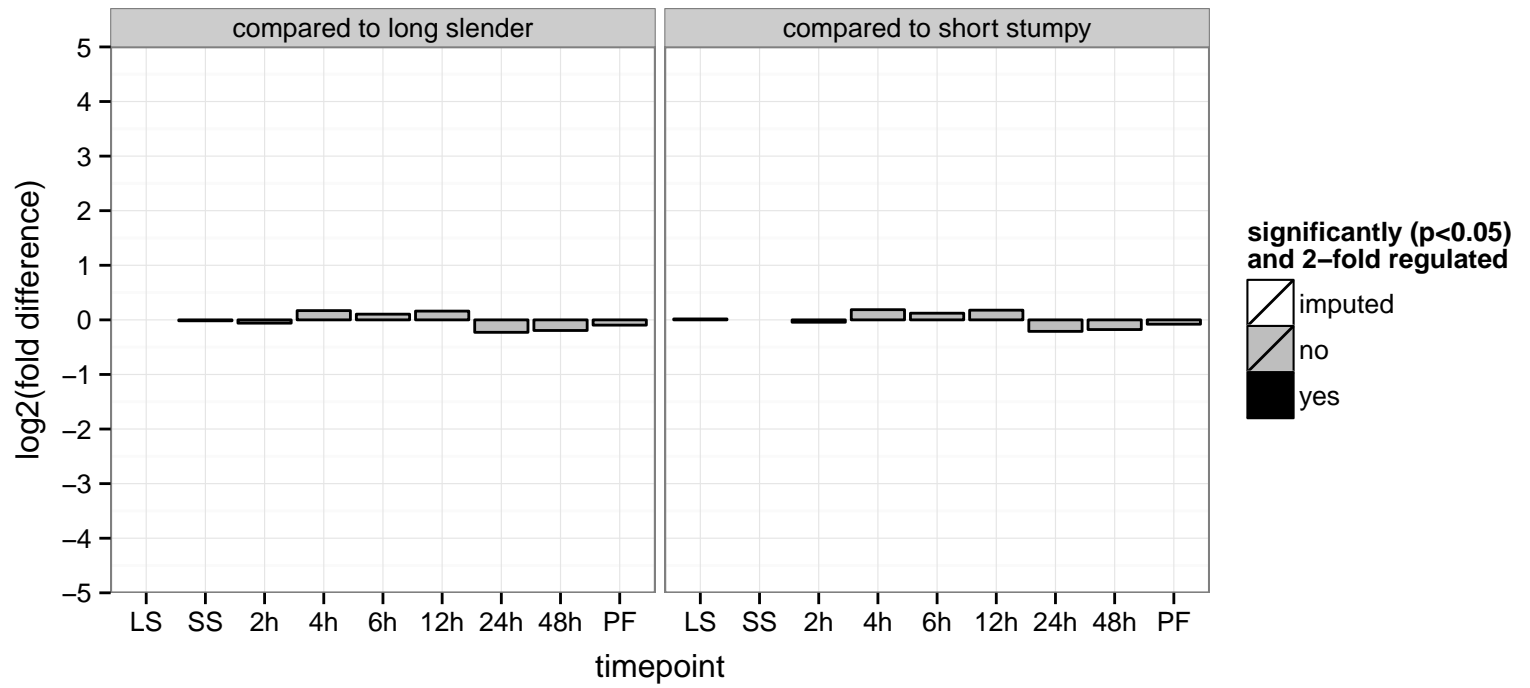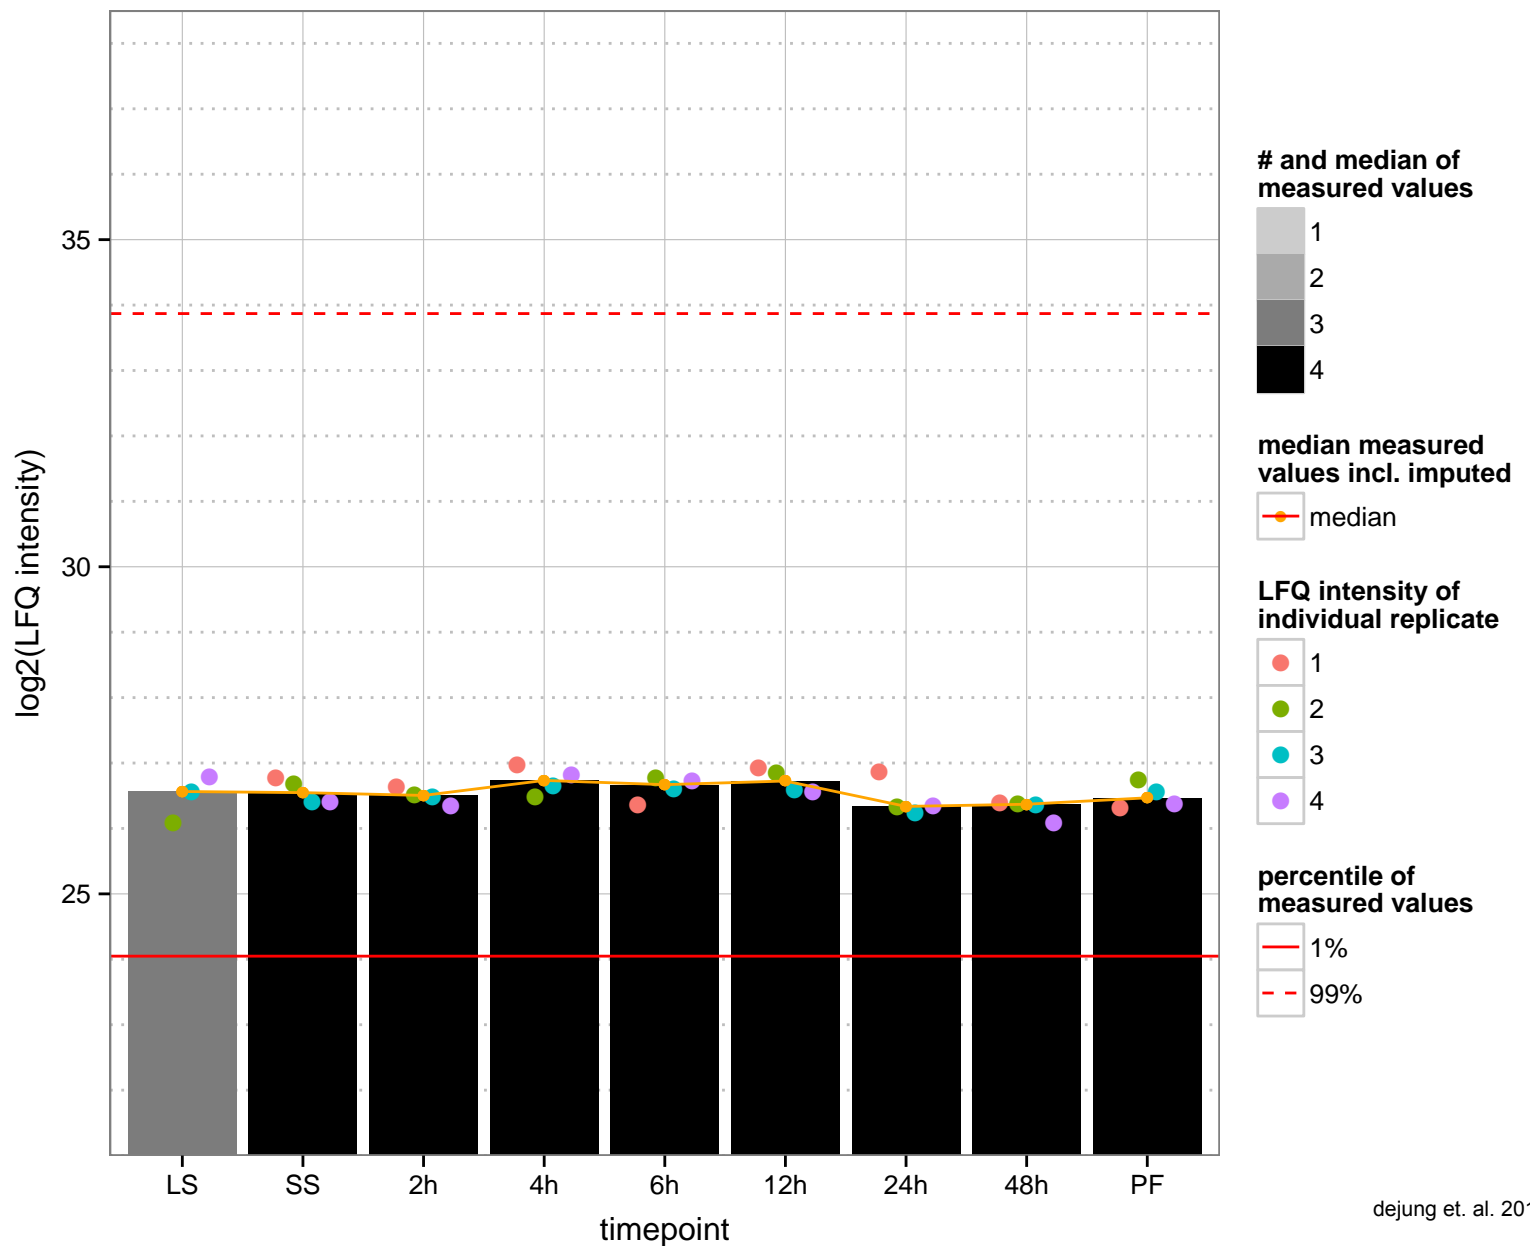



hypothetical protein, conserved  
 Tb927.7.2780  
 AGOF: null  
 AGOC: null  
 AGOP: null  
 PGO: null  
 PGOC: null  
 PGOP: null

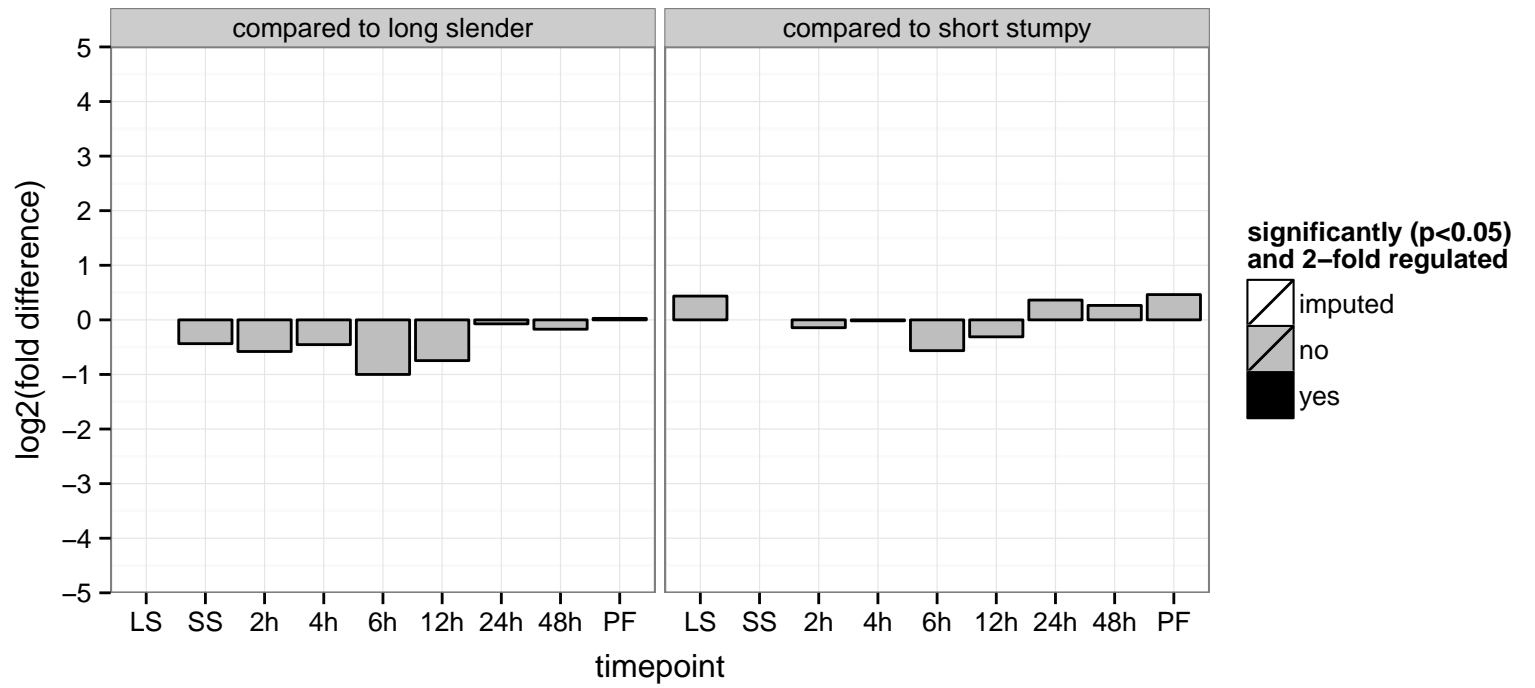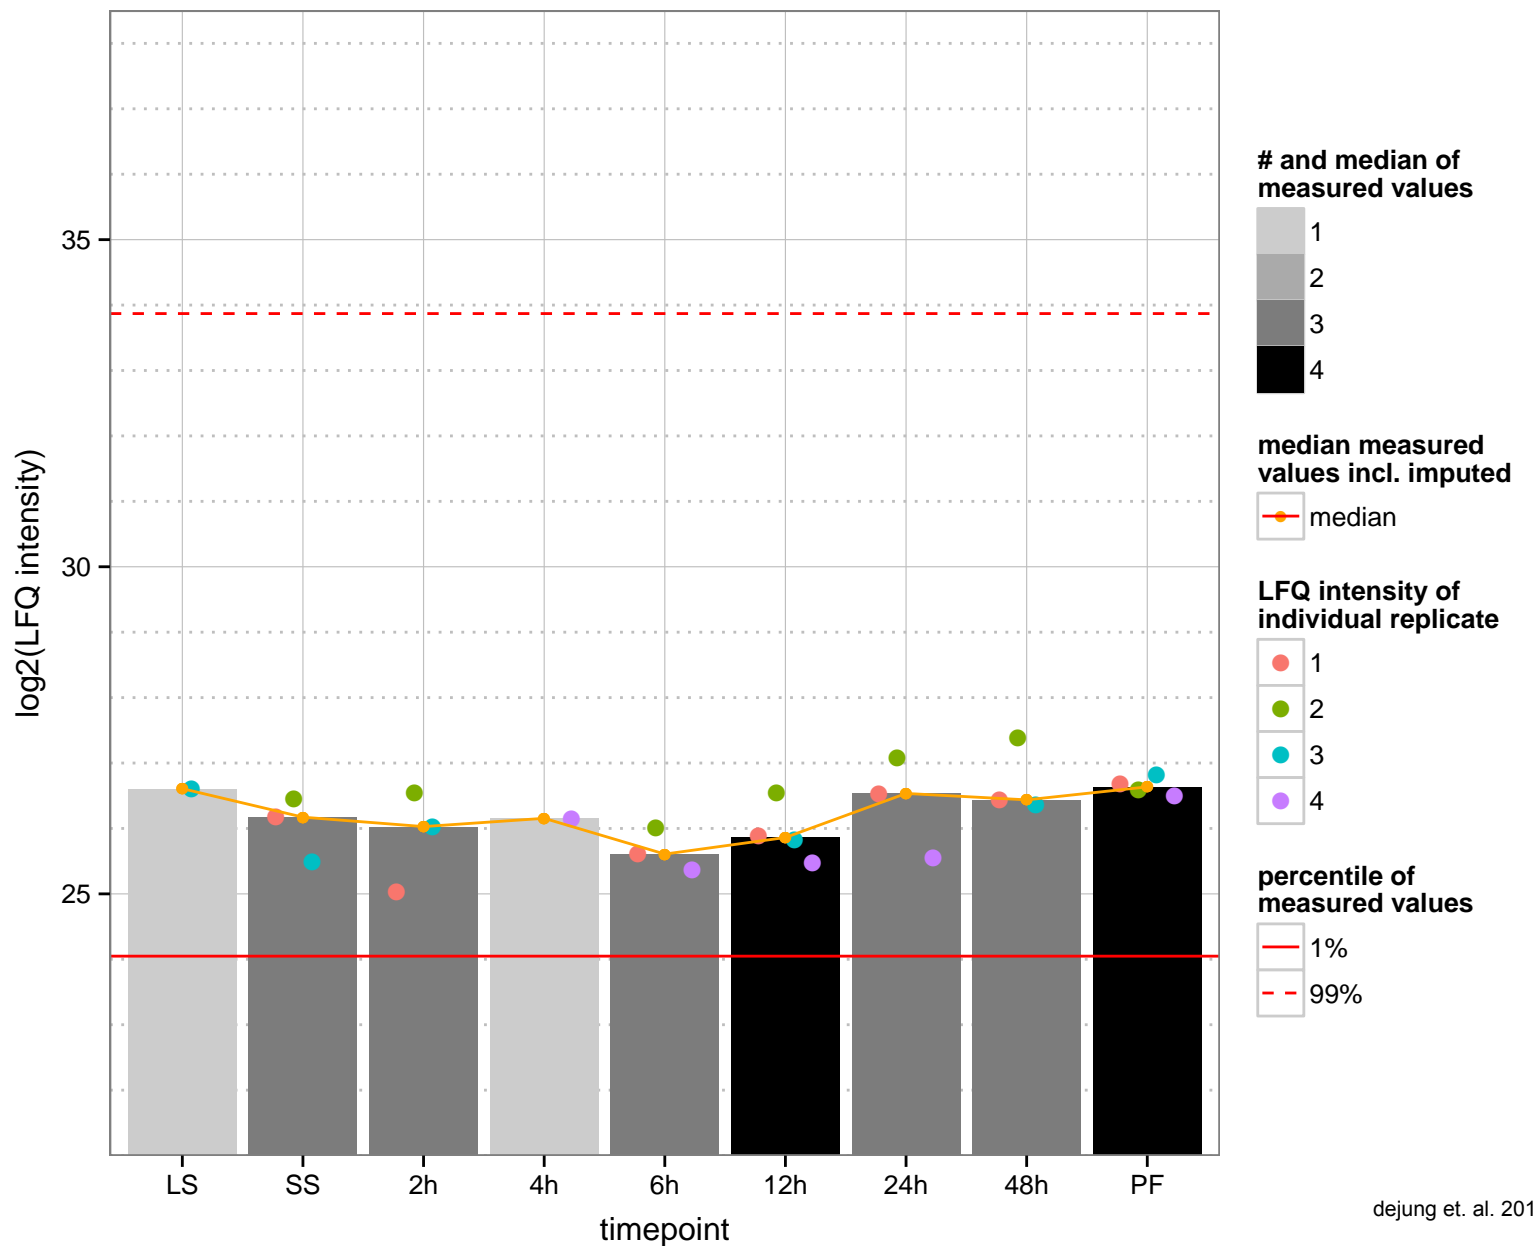

hypothetical protein, conserved  
 Tb927.7.2790  
 AGOF: null  
 AGOC: null  
 AGOP: ciliary or flagellar motility  
 PGO: protein binding  
 PGOC: null  
 PGOP: null

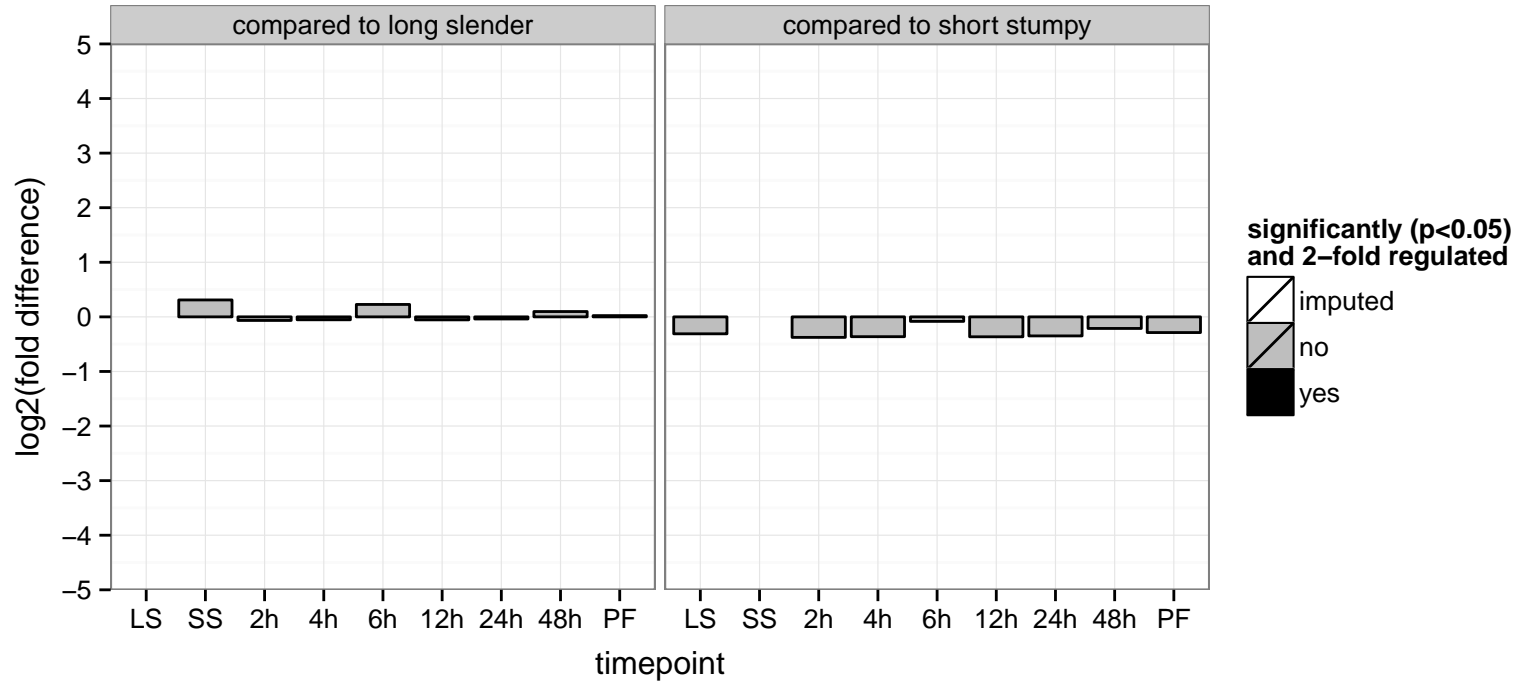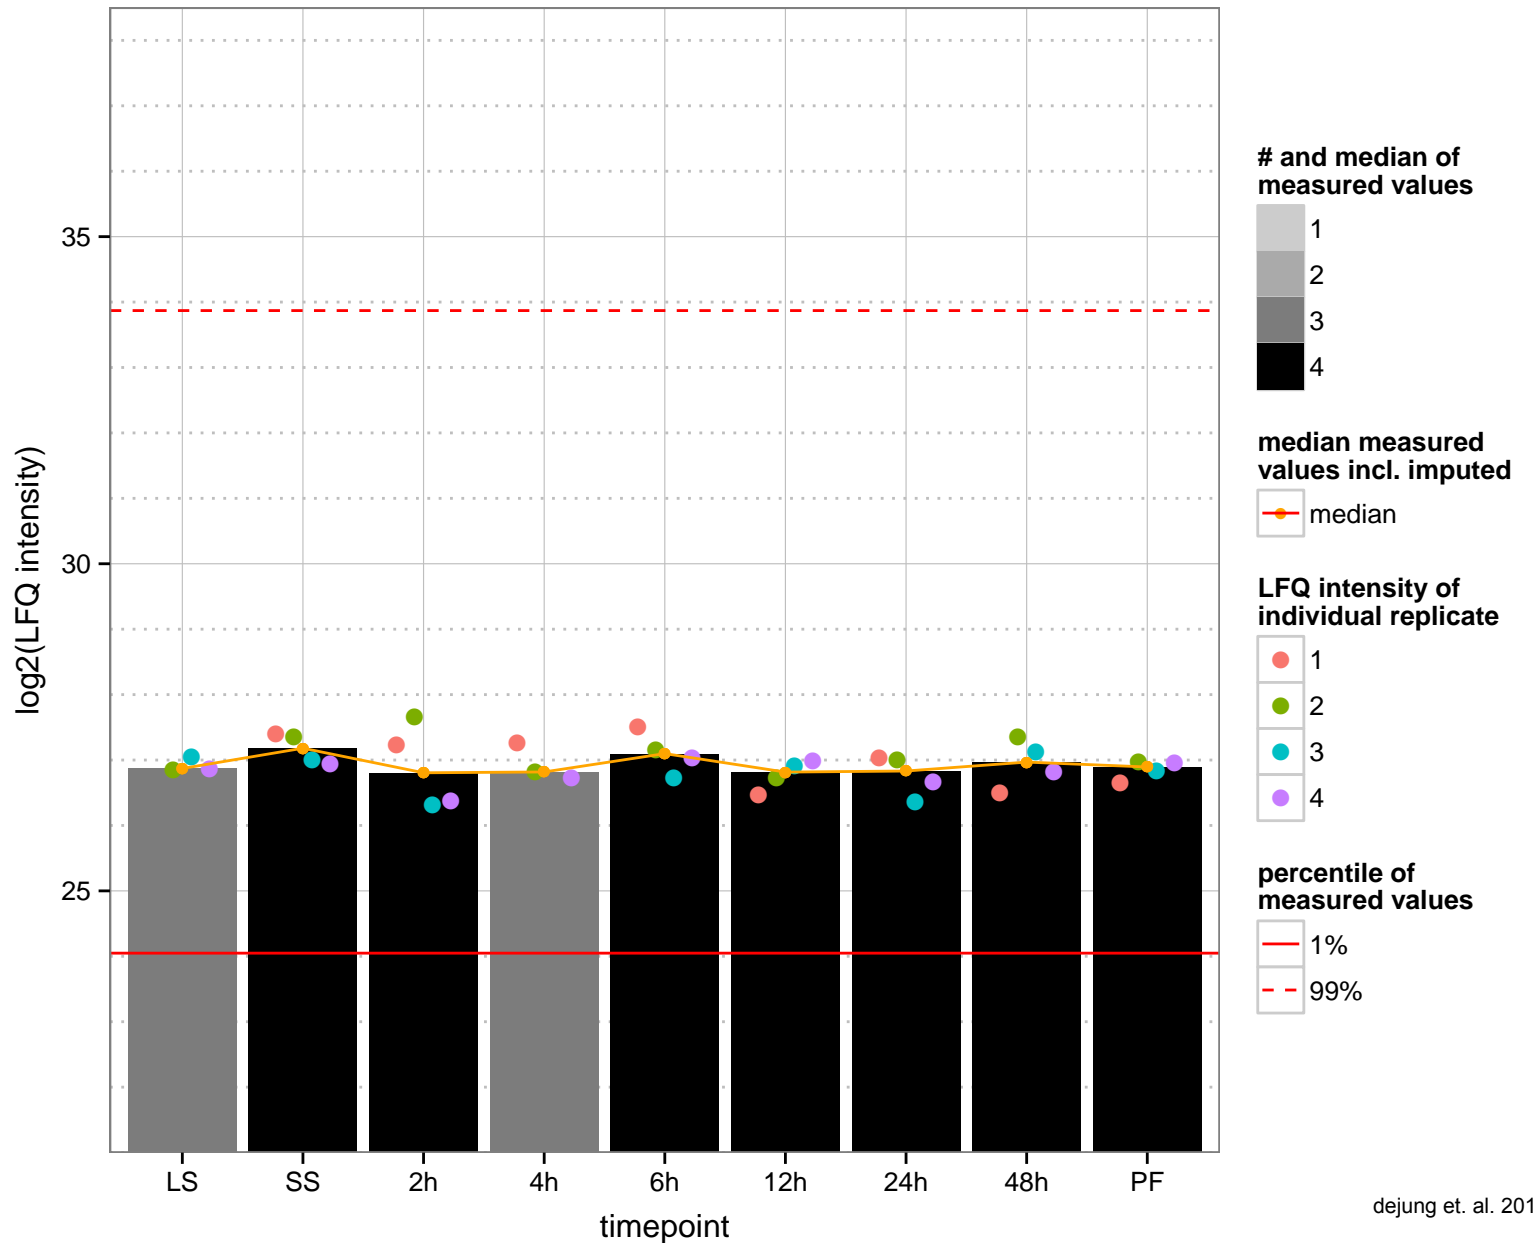

histone H2A, putative  
 Tb927.7.2940;Tb927.7.2930;Tb927.7.2920;Tb927.7.2910;Tb927.7.2900;Tb927.7.2890;Tb927.7.2880;Tb927.7.2870;Tb927.7.2860;Tb927.7.2850;Tb927.7.2840;Tb927.7.2830;Tb927.7.2820;Tb927.7.2810;Tb927.7.2800;Tb927.7.2790;Tb927.7.2780;Tb927.7.2770;Tb927.7.2760;Tb927.7.2750;Tb927.7.2740;Tb927.7.2730;Tb927.7.2720;Tb927.7.2710;Tb927.7.2700;Tb927.7.2690;Tb927.7.2680;Tb927.7.2670;Tb927.7.2660;Tb927.7.2650;Tb927.7.2640;Tb927.7.2630;Tb927.7.2620;Tb927.7.2610;Tb927.7.2600;Tb927.7.2590;Tb927.7.2580;Tb927.7.2570;Tb927.7.2560;Tb927.7.2550;Tb927.7.2540;Tb927.7.2530;Tb927.7.2520;Tb927.7.2510;Tb927.7.2500;Tb927.7.2490;Tb927.7.2480;Tb927.7.2470;Tb927.7.2460;Tb927.7.2450;Tb927.7.2440;Tb927.7.2430;Tb927.7.2420;Tb927.7.2410;Tb927.7.2400;Tb927.7.2390;Tb927.7.2380;Tb927.7.2370;Tb927.7.2360;Tb927.7.2350;Tb927.7.2340;Tb927.7.2330;Tb927.7.2320;Tb927.7.2310;Tb927.7.2300;Tb927.7.2290;Tb927.7.2280;Tb927.7.2270;Tb927.7.2260;Tb927.7.2250;Tb927.7.2240;Tb927.7.2230;Tb927.7.2220;Tb927.7.2210;Tb927.7.2200;Tb927.7.2190;Tb927.7.2180;Tb927.7.2170;Tb927.7.2160;Tb927.7.2150;Tb927.7.2140;Tb927.7.2130;Tb927.7.2120;Tb927.7.2110;Tb927.7.2100;Tb927.7.2090;Tb927.7.2080;Tb927.7.2070;Tb927.7.2060;Tb927.7.2050;Tb927.7.2040;Tb927.7.2030;Tb927.7.2020;Tb927.7.2010;Tb927.7.2000;Tb927.7.1990;Tb927.7.1980;Tb927.7.1970;Tb927.7.1960;Tb927.7.1950;Tb927.7.1940;Tb927.7.1930;Tb927.7.1920;Tb927.7.1910;Tb927.7.1900;Tb927.7.1890;Tb927.7.1880;Tb927.7.1870;Tb927.7.1860;Tb927.7.1850;Tb927.7.1840;Tb927.7.1830;Tb927.7.1820;Tb927.7.1810;Tb927.7.1800;Tb927.7.1790;Tb927.7.1780;Tb927.7.1770;Tb927.7.1760;Tb927.7.1750;Tb927.7.1740;Tb927.7.1730;Tb927.7.1720;Tb927.7.1710;Tb927.7.1700;Tb927.7.1690;Tb927.7.1680;Tb927.7.1670;Tb927.7.1660;Tb927.7.1650;Tb927.7.1640;Tb927.7.1630;Tb927.7.1620;Tb927.7.1610;Tb927.7.1600;Tb927.7.1590;Tb927.7.1580;Tb927.7.1570;Tb927.7.1560;Tb927.7.1550;Tb927.7.1540;Tb927.7.1530;Tb927.7.1520;Tb927.7.1510;Tb927.7.1500;Tb927.7.1490;Tb927.7.1480;Tb927.7.1470;Tb927.7.1460;Tb927.7.1450;Tb927.7.1440;Tb927.7.1430;Tb927.7.1420;Tb927.7.1410;Tb927.7.1400;Tb927.7.1390;Tb927.7.1380;Tb927.7.1370;Tb927.7.1360;Tb927.7.1350;Tb927.7.1340;Tb927.7.1330;Tb927.7.1320;Tb927.7.1310;Tb927.7.1300;Tb927.7.1290;Tb927.7.1280;Tb927.7.1270;Tb927.7.1260;Tb927.7.1250;Tb927.7.1240;Tb927.7.1230;Tb927.7.1220;Tb927.7.1210;Tb927.7.1200;Tb927.7.1190;Tb927.7.1180;Tb927.7.1170;Tb927.7.1160;Tb927.7.1150;Tb927.7.1140;Tb927.7.1130;Tb927.7.1120;Tb927.7.1110;Tb927.7.1100;Tb927.7.1090;Tb927.7.1080;Tb927.7.1070;Tb927.7.1060;Tb927.7.1050;Tb927.7.1040;Tb927.7.1030;Tb927.7.1020;Tb927.7.1010;Tb927.7.1000;Tb927.7.990;Tb927.7.980;Tb927.7.970;Tb927.7.960;Tb927.7.950;Tb927.7.940;Tb927.7.930;Tb927.7.920;Tb927.7.910;Tb927.7.900;Tb927.7.890;Tb927.7.880;Tb927.7.870;Tb927.7.860;Tb927.7.850;Tb927.7.840;Tb927.7.830;Tb927.7.820;Tb927.7.810;Tb927.7.800;Tb927.7.790;Tb927.7.780;Tb927.7.770;Tb927.7.760;Tb927.7.750;Tb927.7.740;Tb927.7.730;Tb927.7.720;Tb927.7.710;Tb927.7.700;Tb927.7.690;Tb927.7.680;Tb927.7.670;Tb927.7.660;Tb927.7.650;Tb927.7.640;Tb927.7.630;Tb927.7.620;Tb927.7.610;Tb927.7.600;Tb927.7.590;Tb927.7.580;Tb927.7.570;Tb927.7.560;Tb927.7.550;Tb927.7.540;Tb927.7.530;Tb927.7.520;Tb927.7.510;Tb927.7.500;Tb927.7.490;Tb927.7.480;Tb927.7.470;Tb927.7.460;Tb927.7.450;Tb927.7.440;Tb927.7.430;Tb927.7.420;Tb927.7.410;Tb927.7.400;Tb927.7.390;Tb927.7.380;Tb927.7.370;Tb927.7.360;Tb927.7.350;Tb927.7.340;Tb927.7.330;Tb927.7.320;Tb927.7.310;Tb927.7.300;Tb927.7.290;Tb927.7.280;Tb927.7.270;Tb927.7.260;Tb927.7.250;Tb927.7.240;Tb927.7.230;Tb927.7.220;Tb927.7.210;Tb927.7.200;Tb927.7.190;Tb927.7.180;Tb927.7.170;Tb927.7.160;Tb927.7.150;Tb927.7.140;Tb927.7.130;Tb927.7.120;Tb927.7.110;Tb927.7.100;Tb927.7.90;Tb927.7.80;Tb927.7.70;Tb927.7.60;Tb927.7.50;Tb927.7.40;Tb927.7.30;Tb927.7.20;Tb927.7.10;Tb927.7.0

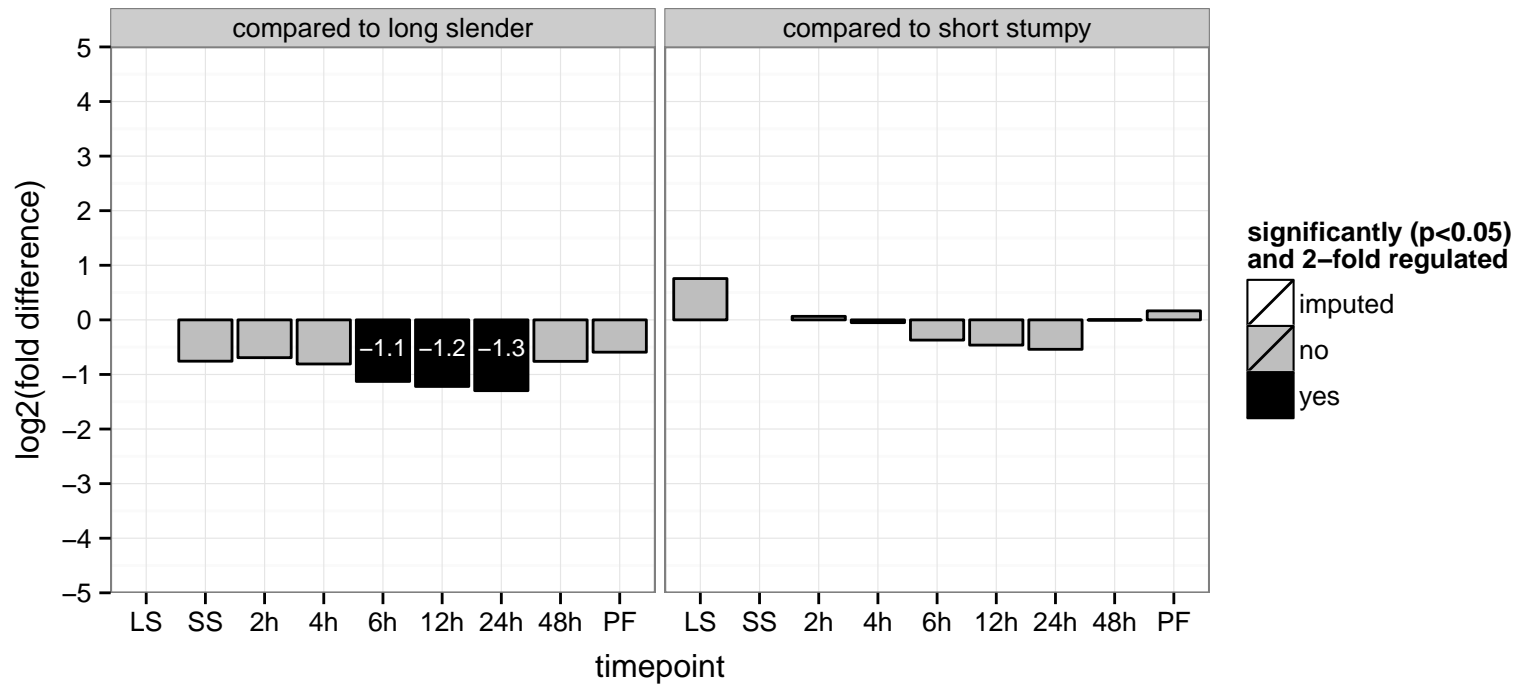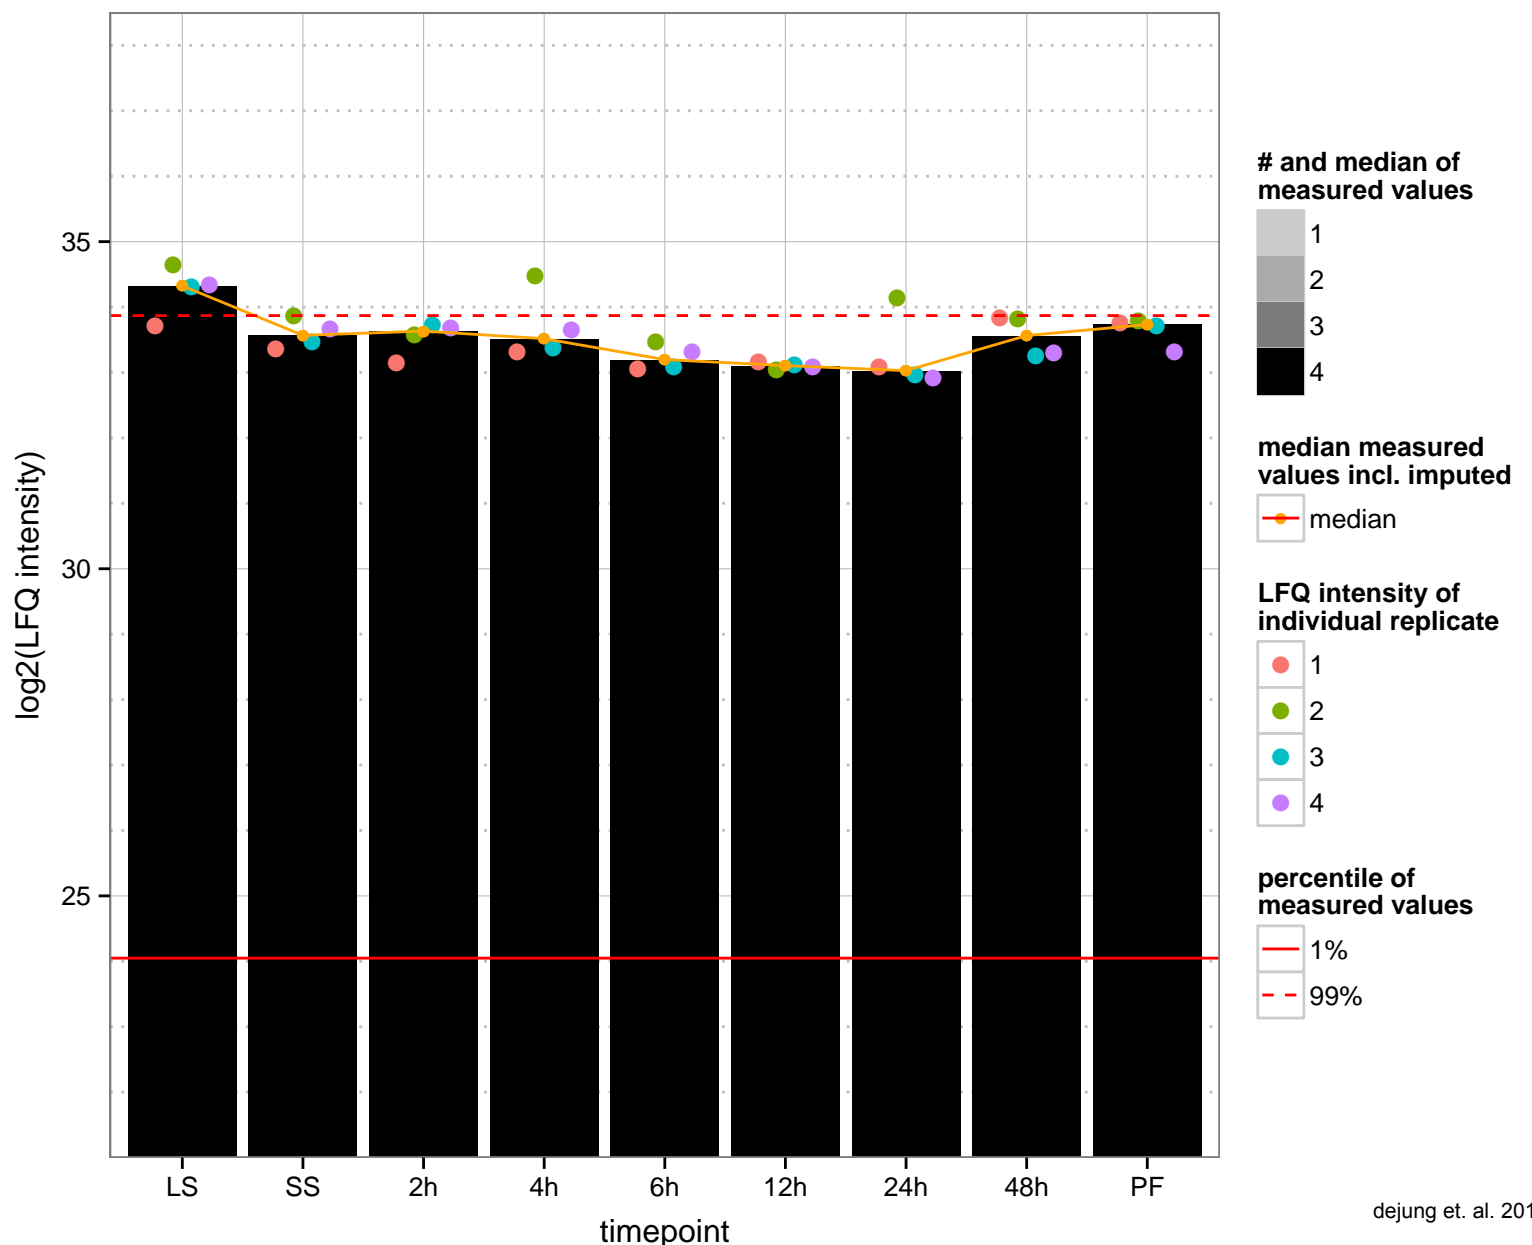

hypothetical protein, conserved  
 Tb927.7.3080  
 AGOF: null  
 AGOC: null  
 AGOP: null  
 PGO: null  
 PGOC: null  
 PGOP: null

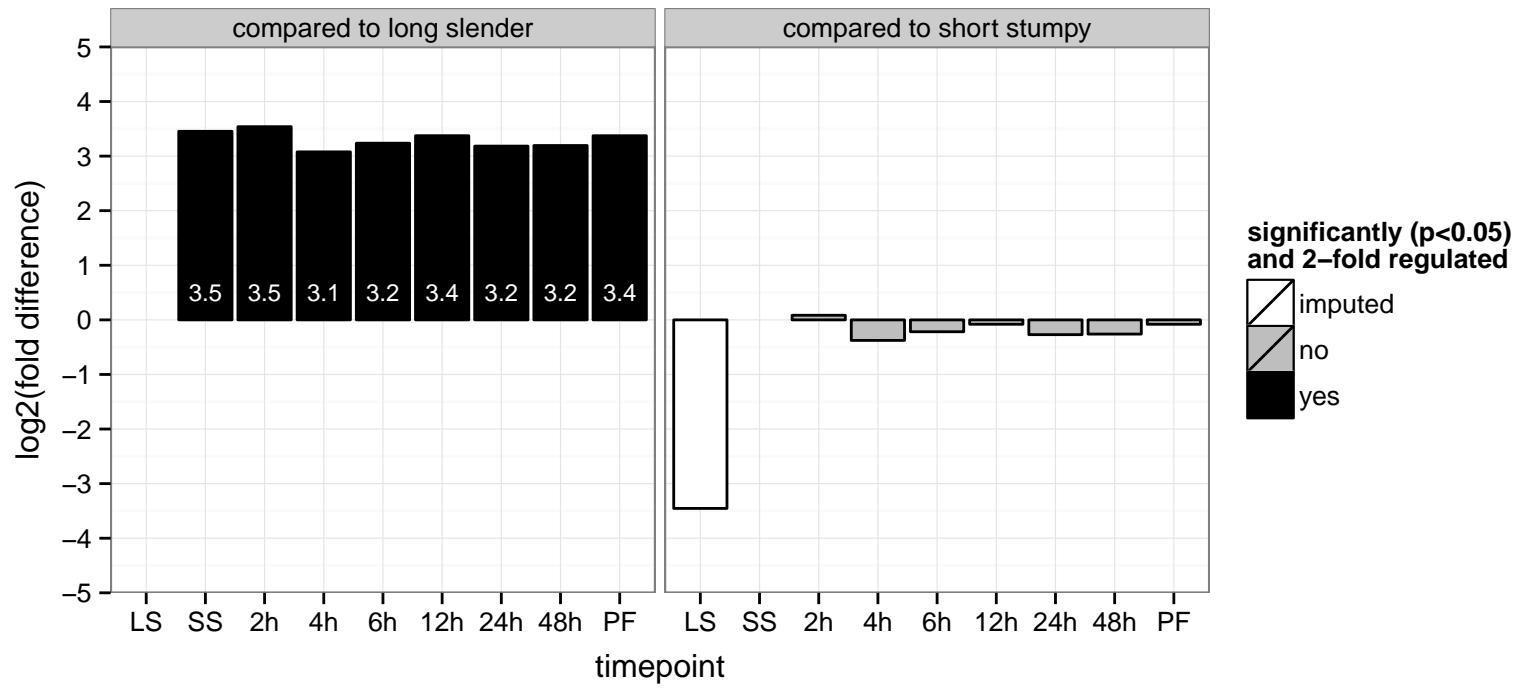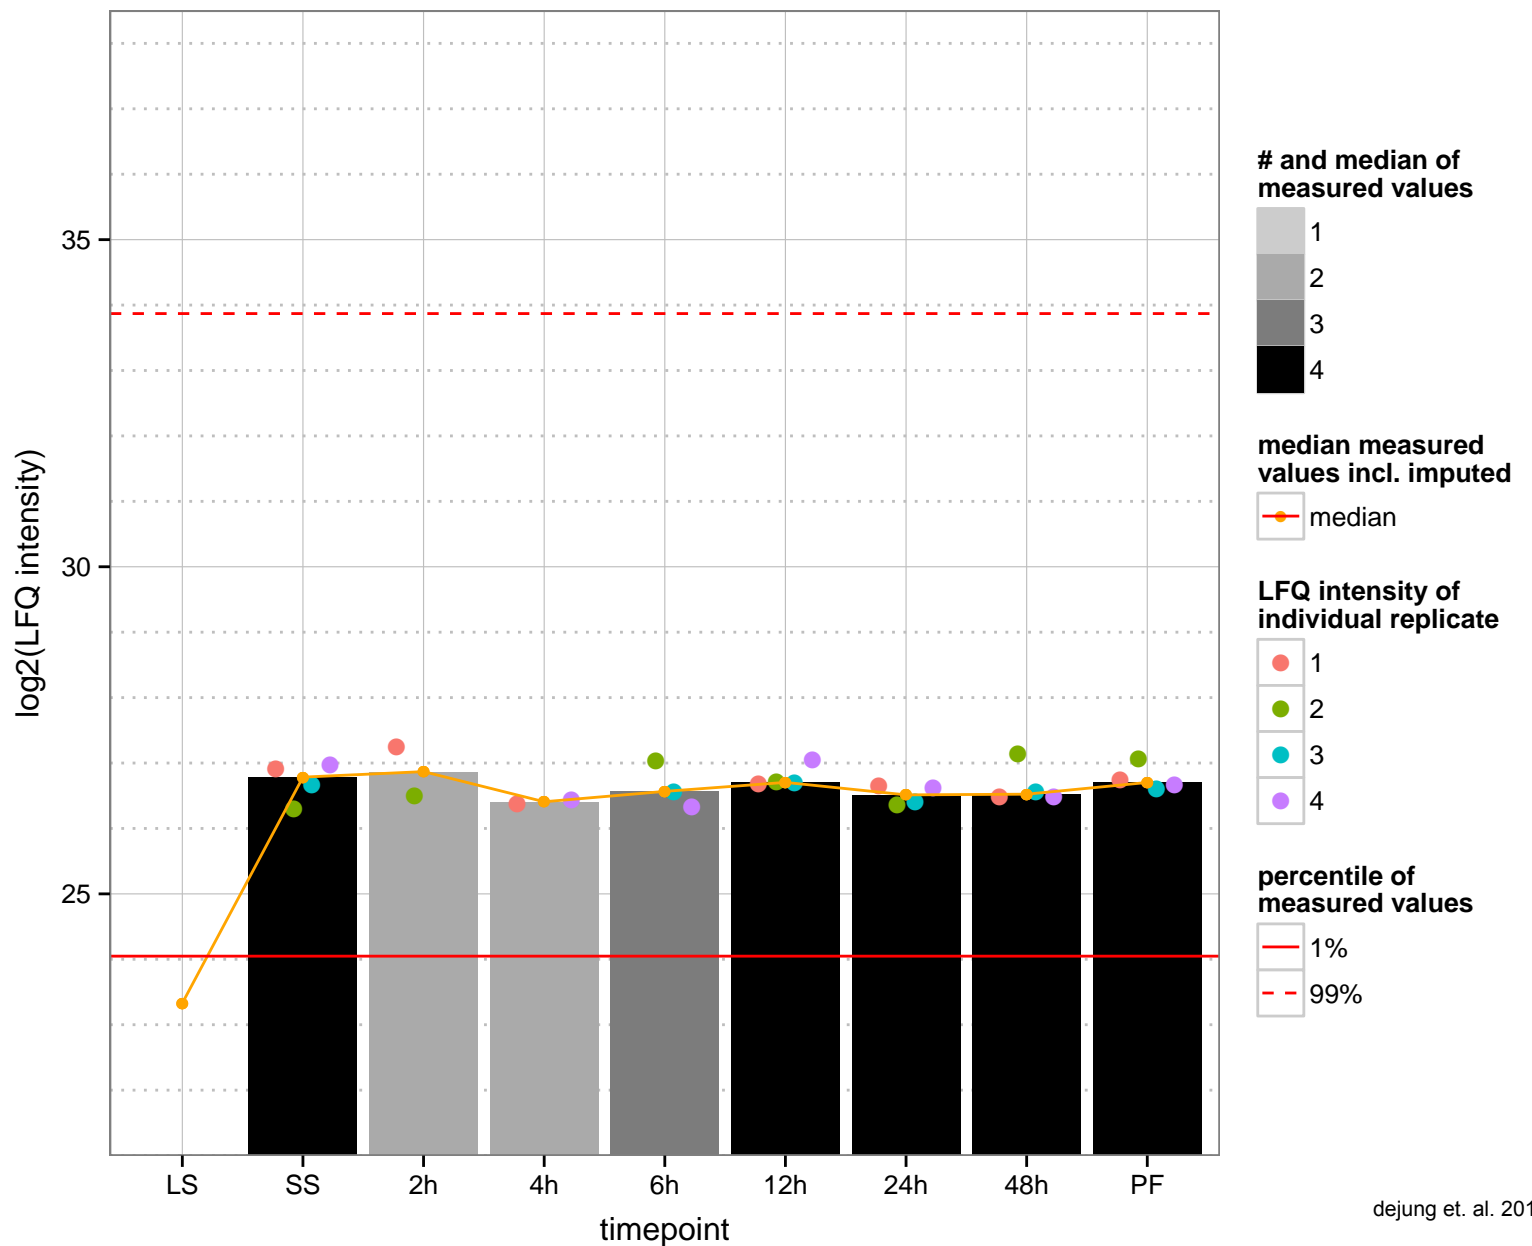

hypothetical protein, conserved  
 Tb927.7.310  
 AGOF: null  
 AGOC: null  
 AGOP: null  
 PGO: null  
 PGOC: null  
 PGOP: null

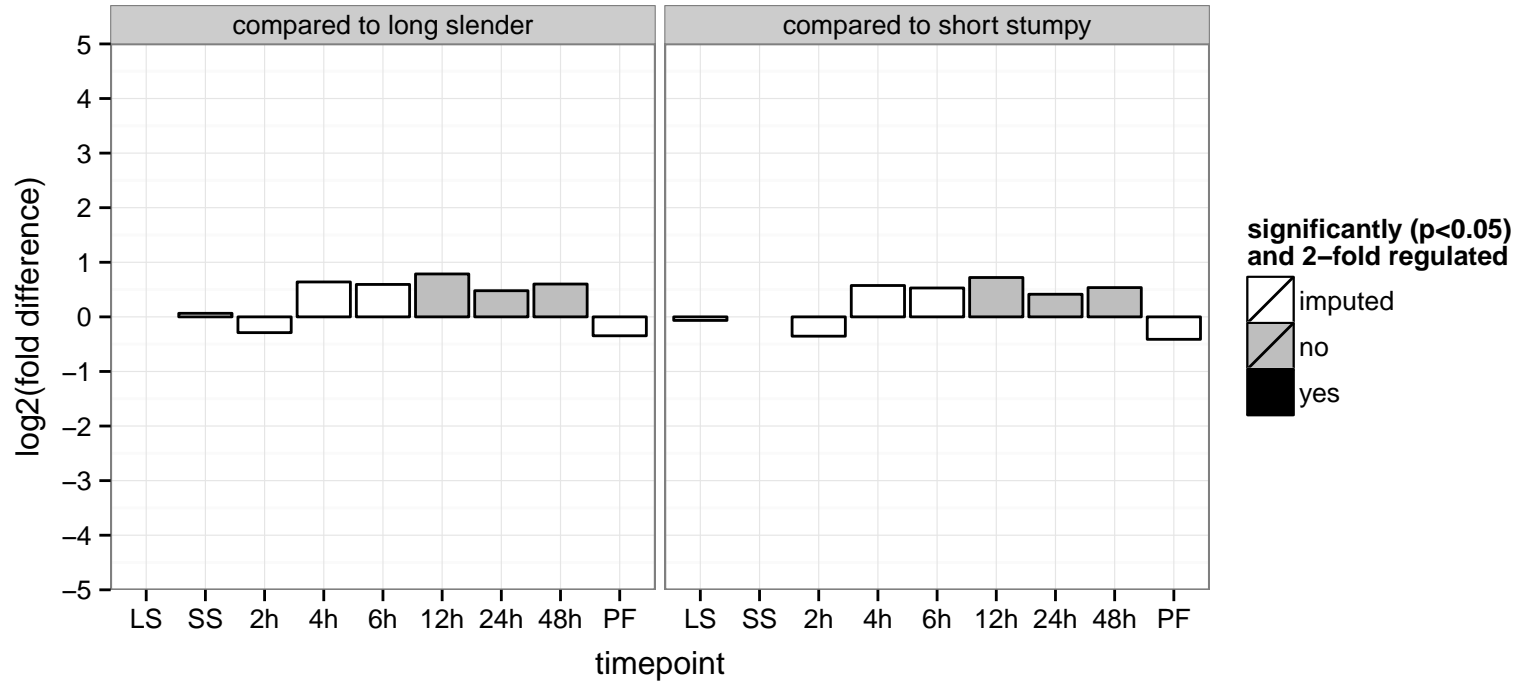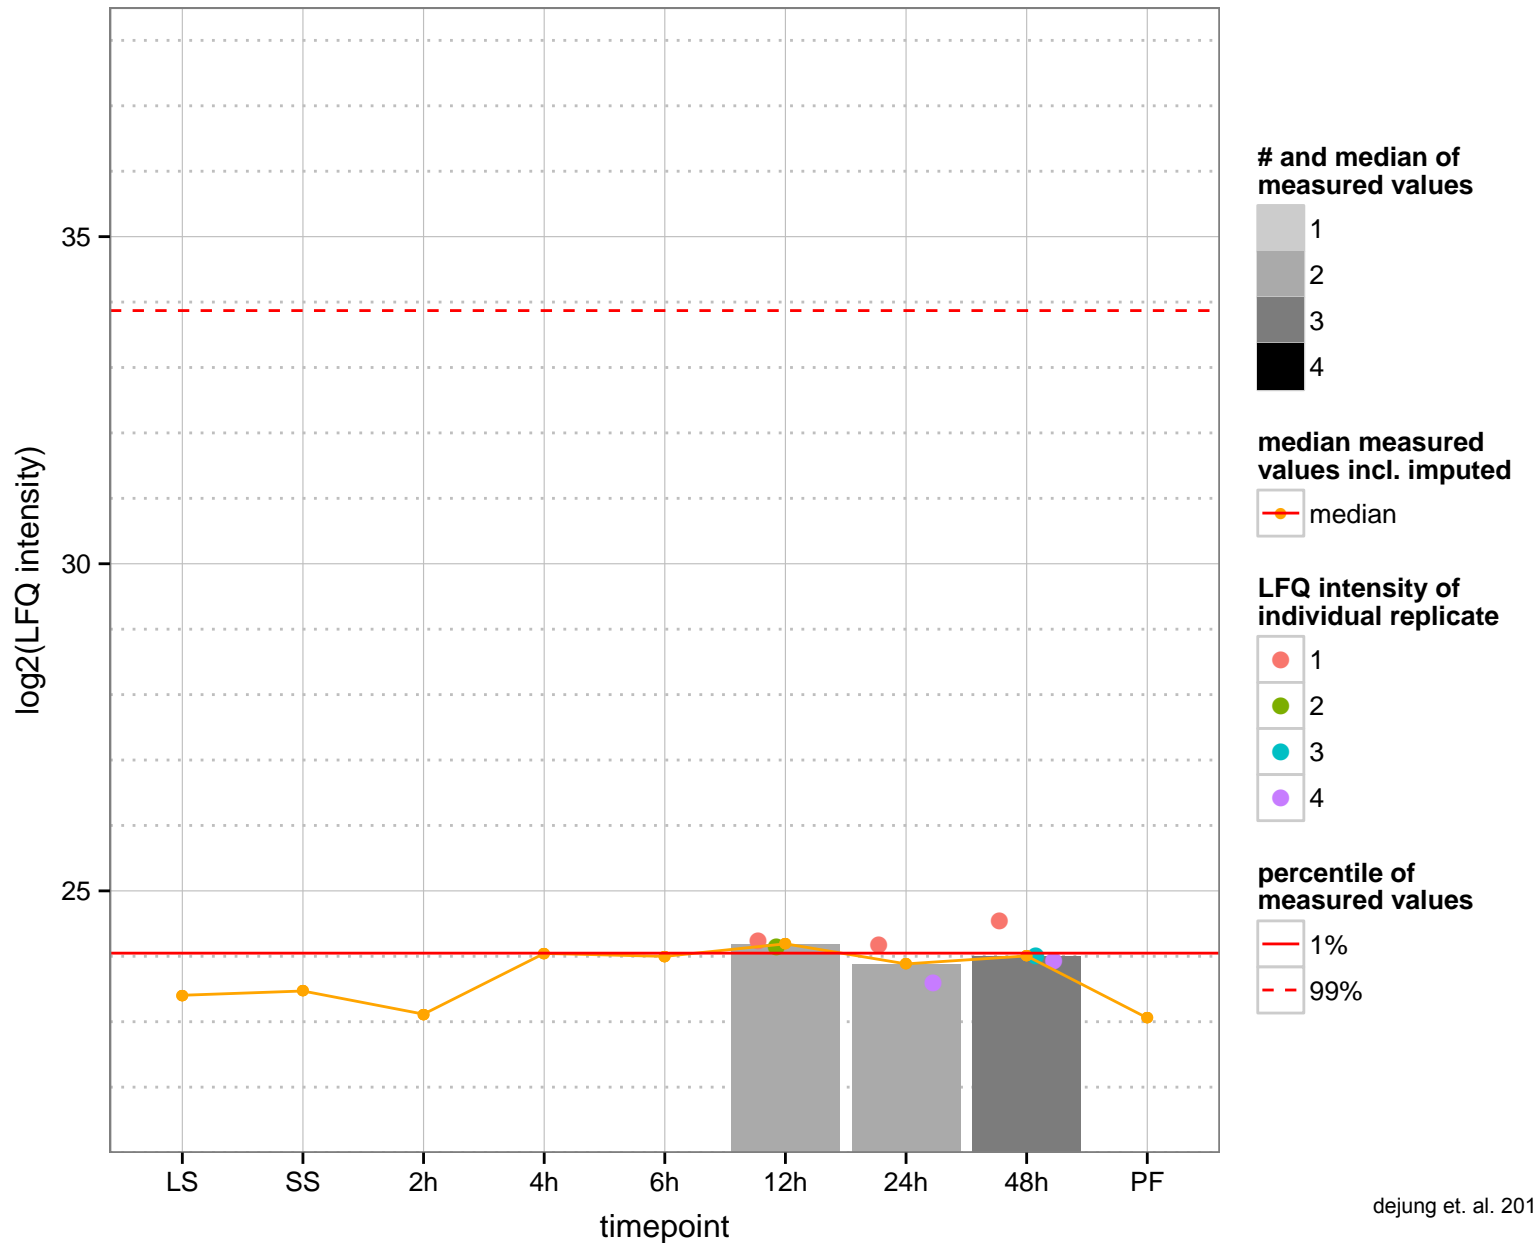

small nuclear ribonucleoprotein SmD1, SmD-1 like small nuclear ribonucleoprotein (Sm-D1)  
 Tb927.7.3120  
 AGOF: snRNA binding  
 AGOC: nucleus, small nuclear ribonucleoprotein complex  
 AGOP: nuclear mRNA trans splicing, SL addition  
 PGO: null  
 PGOC: null  
 PGOP: null

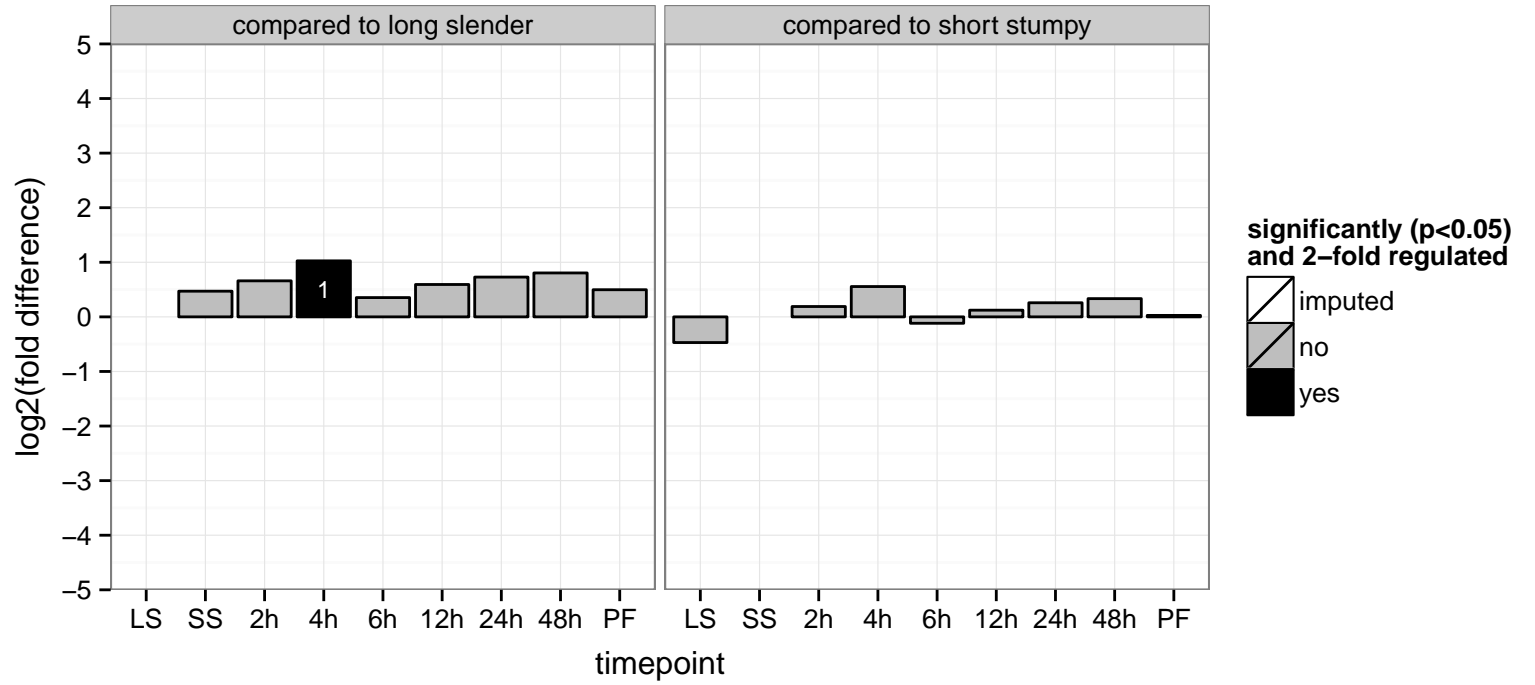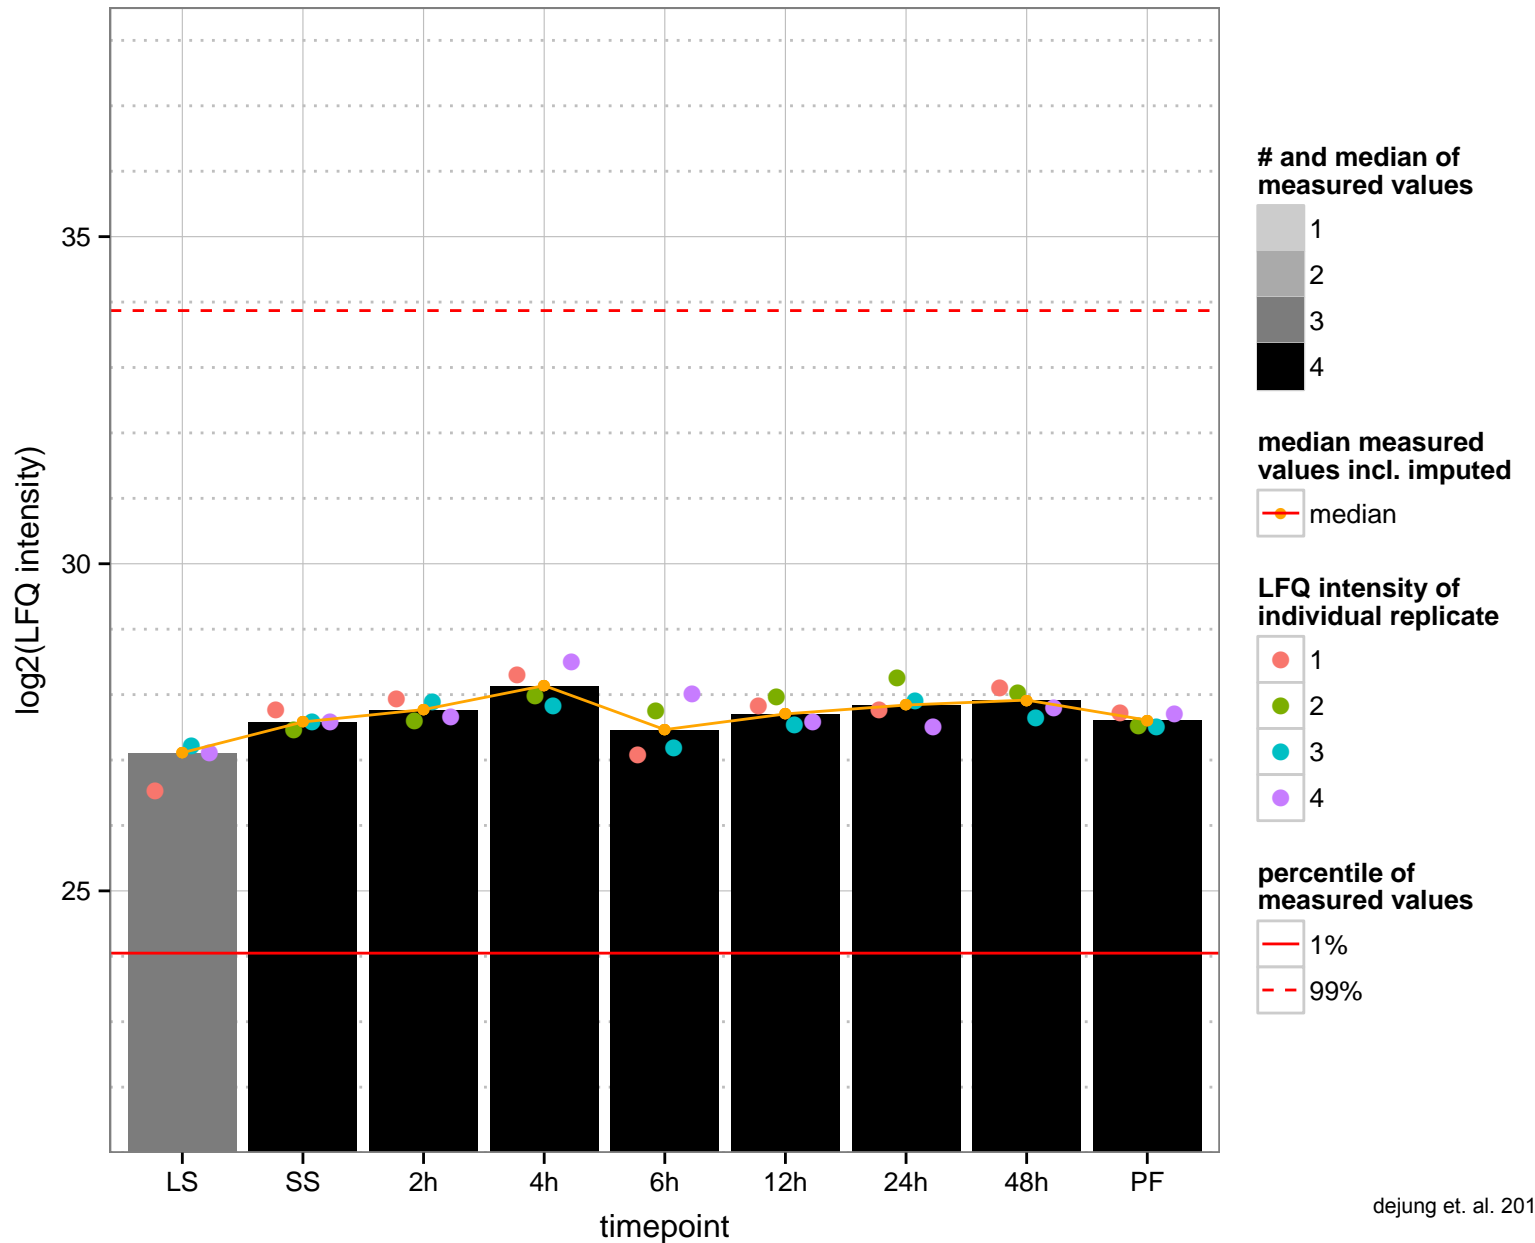

hypothetical protein, conserved  
 Tb927.7.3170  
 AGOF: null  
 AGOC: null  
 AGOP: null  
 PGO: null  
 PGOC: null  
 PGOP: null

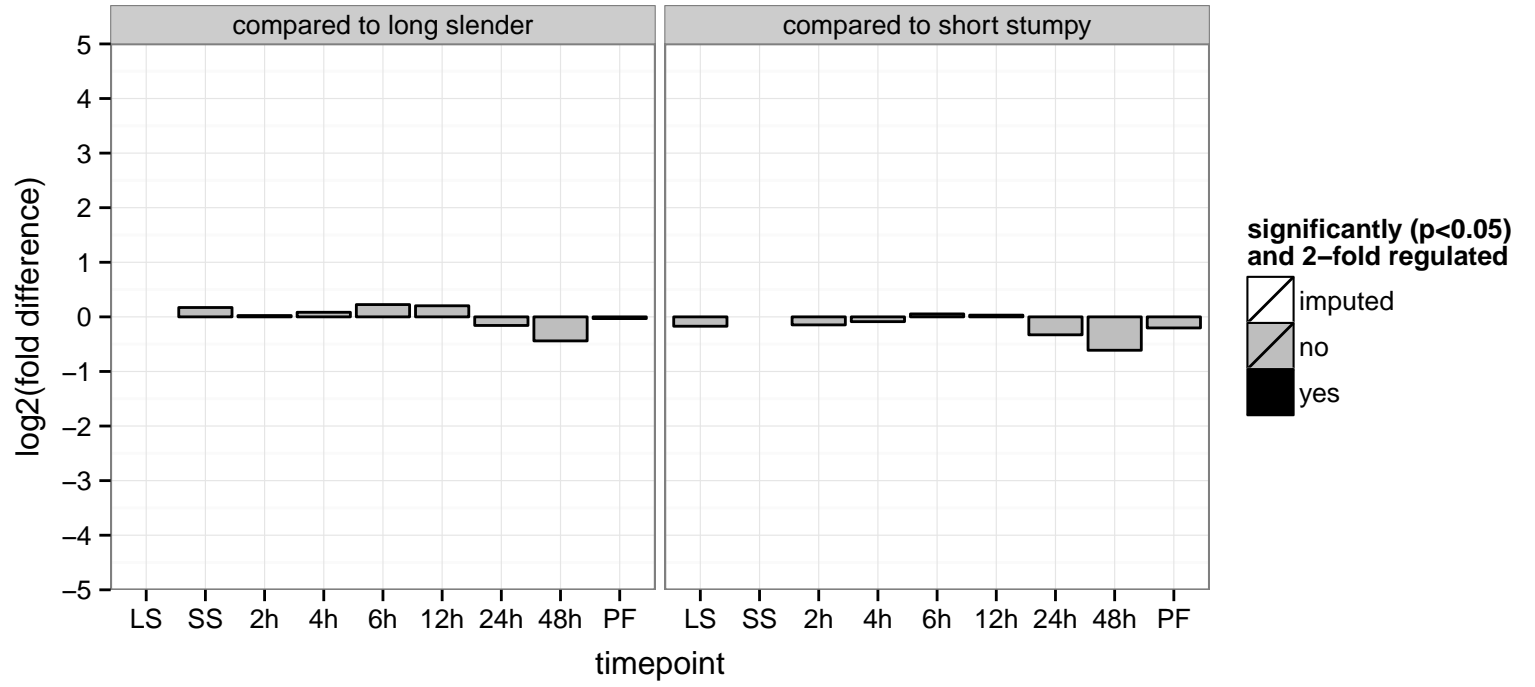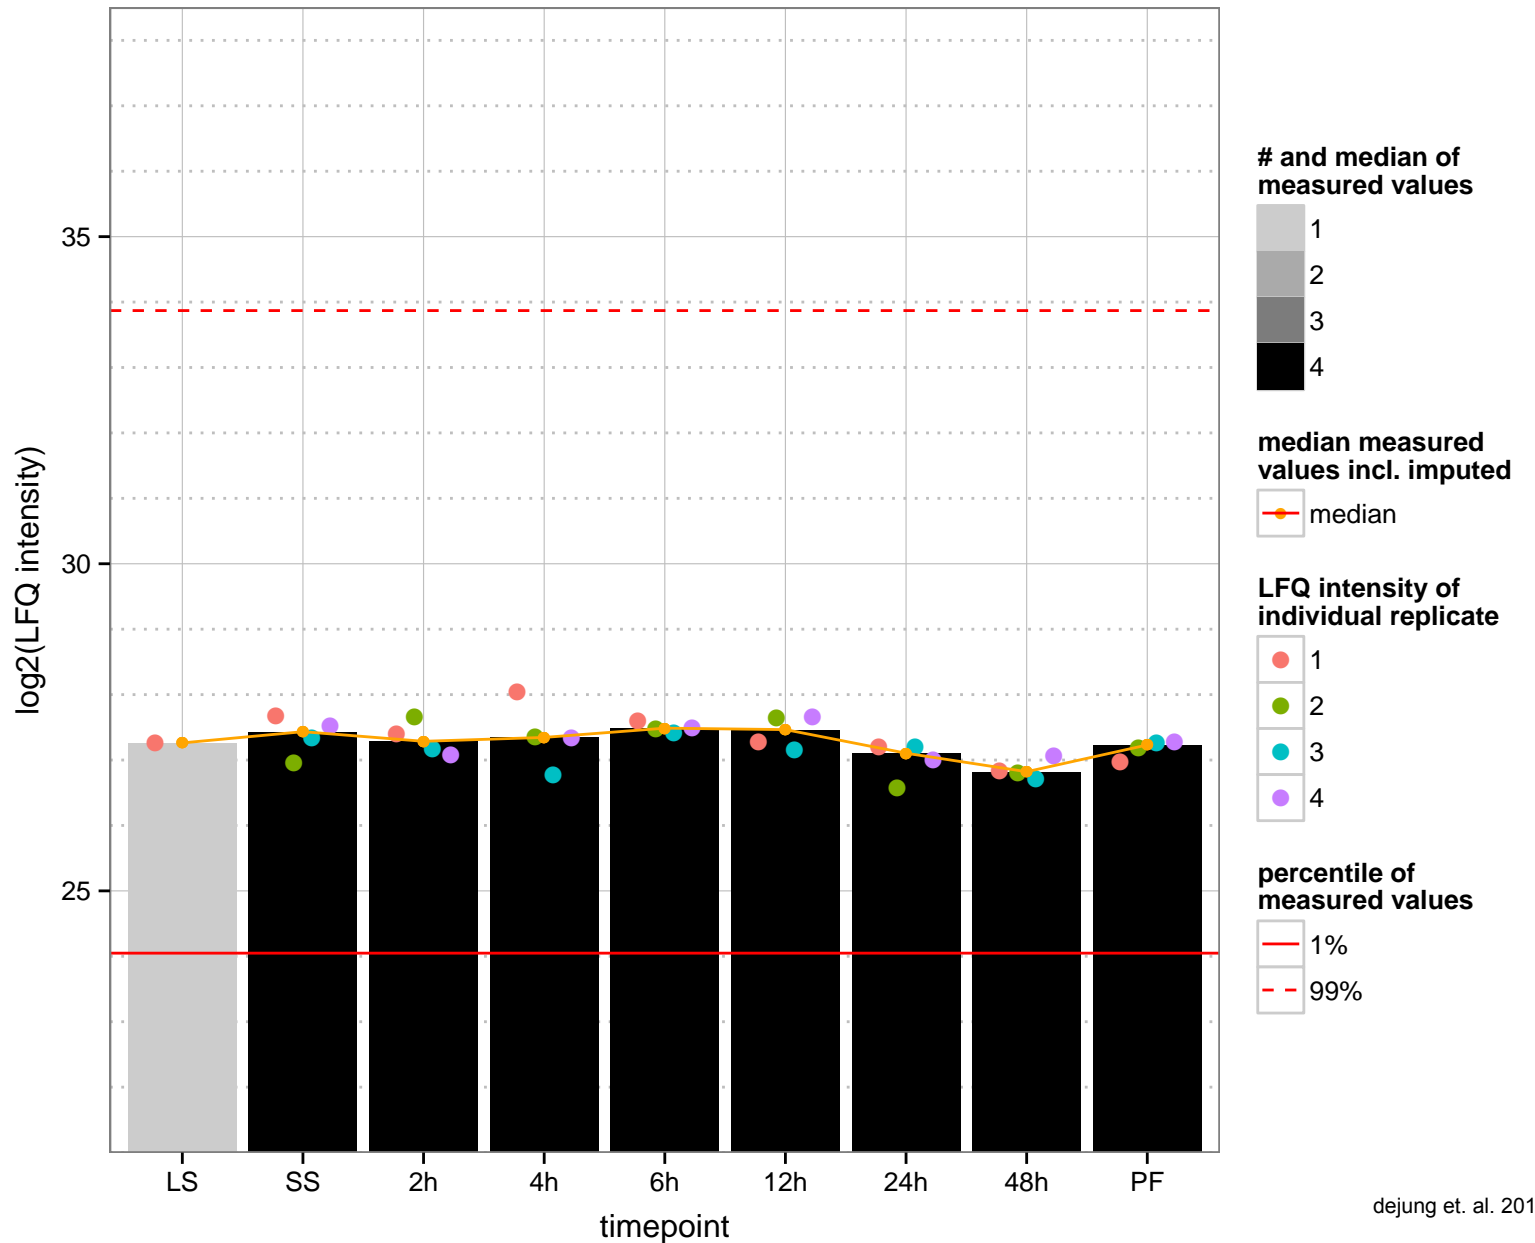

hypothetical protein, conserved  
 Tb927.7.3290  
 AGOF: null  
 AGOC: null  
 AGOP: null  
 PGO: protein binding  
 PGOC: null  
 PGOP: null

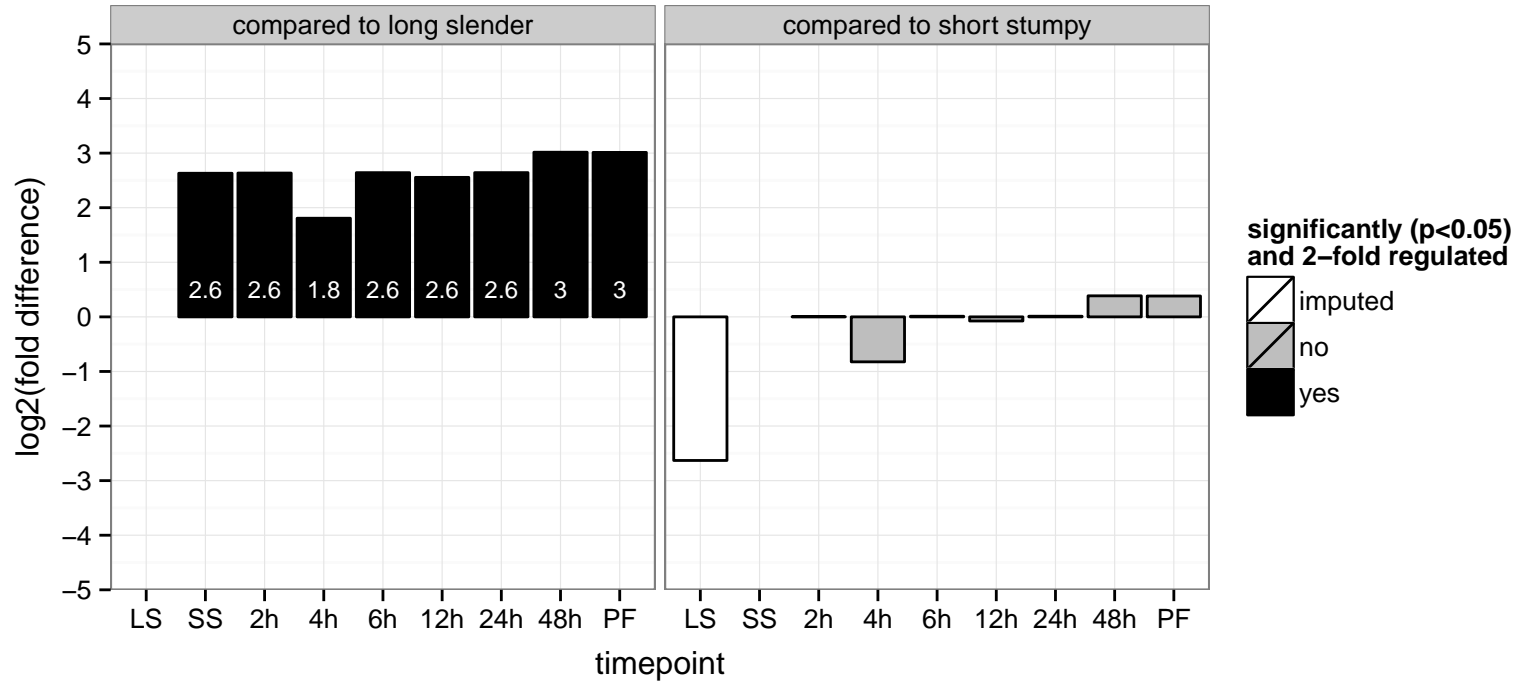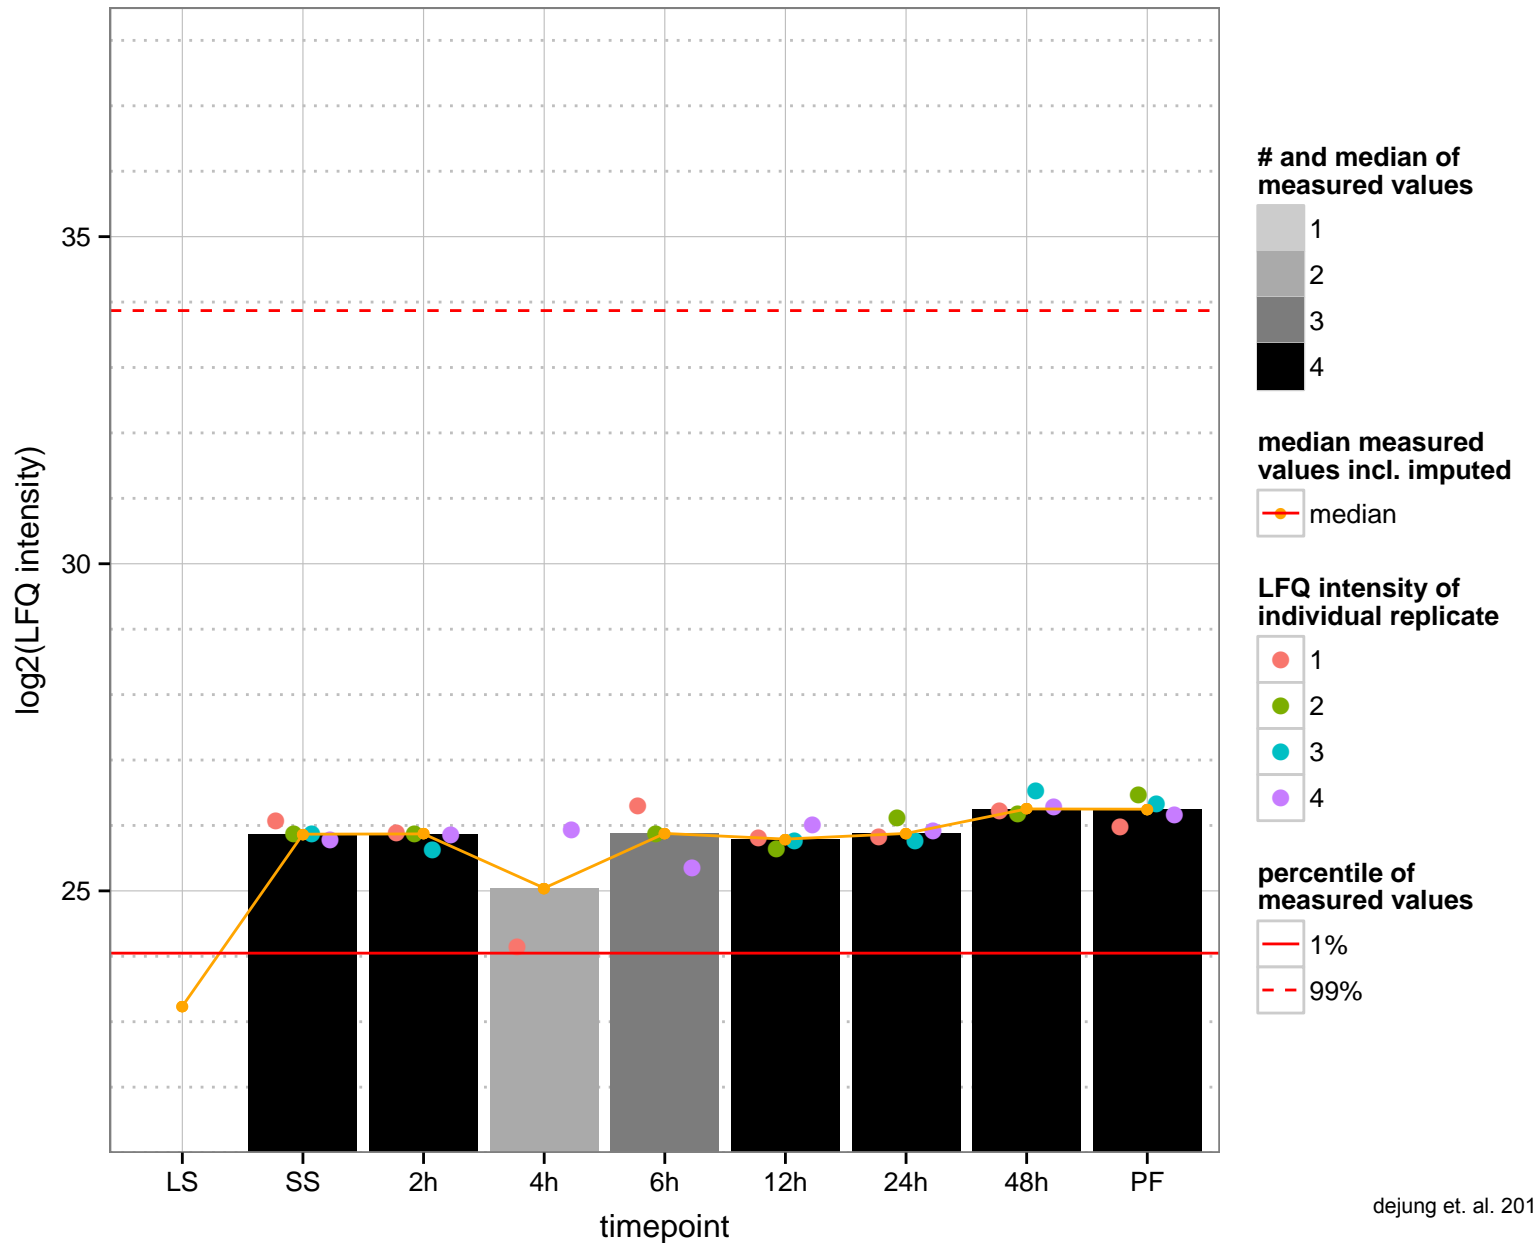



hypothetical protein, conserved  
 Tb927.7.3310  
 AGOF: null  
 AGOC: null  
 AGOP: null  
 PGOF: null  
 PGO: null  
 PGOP: null

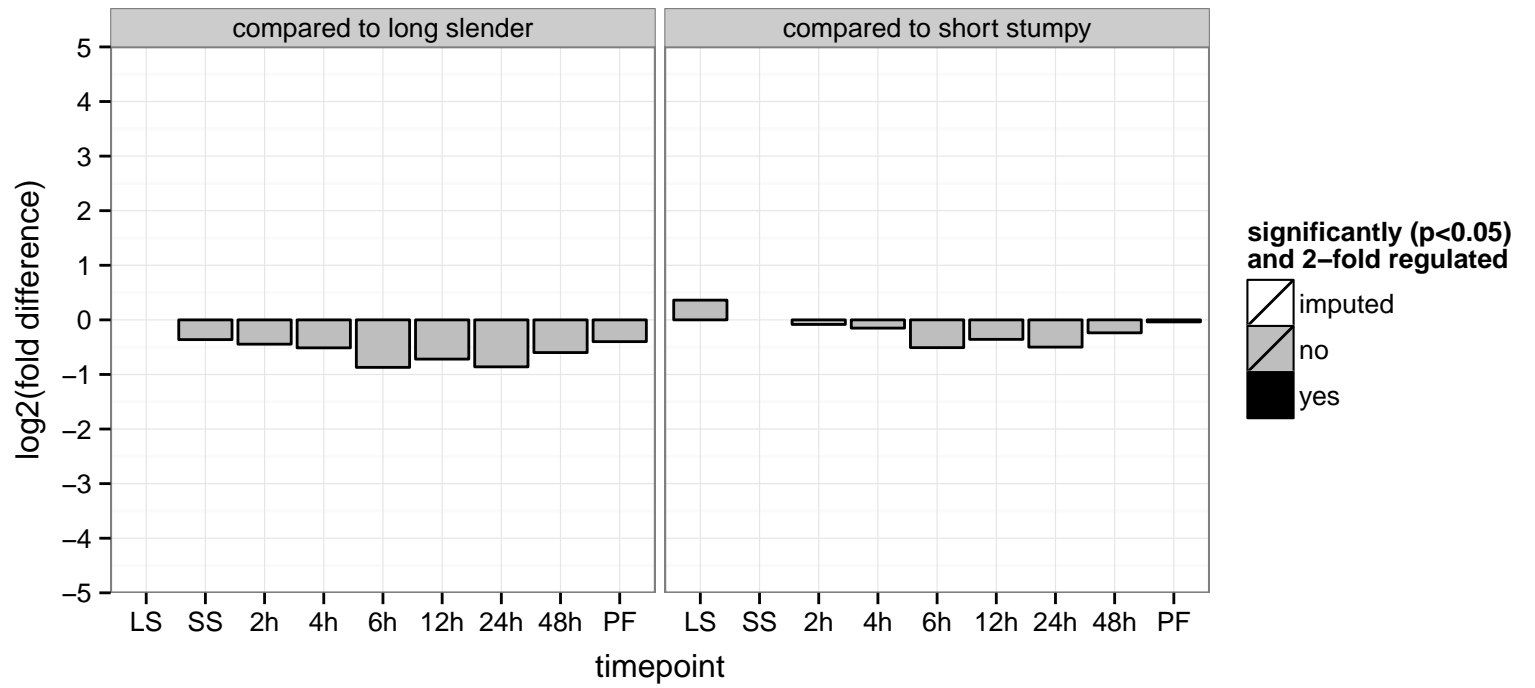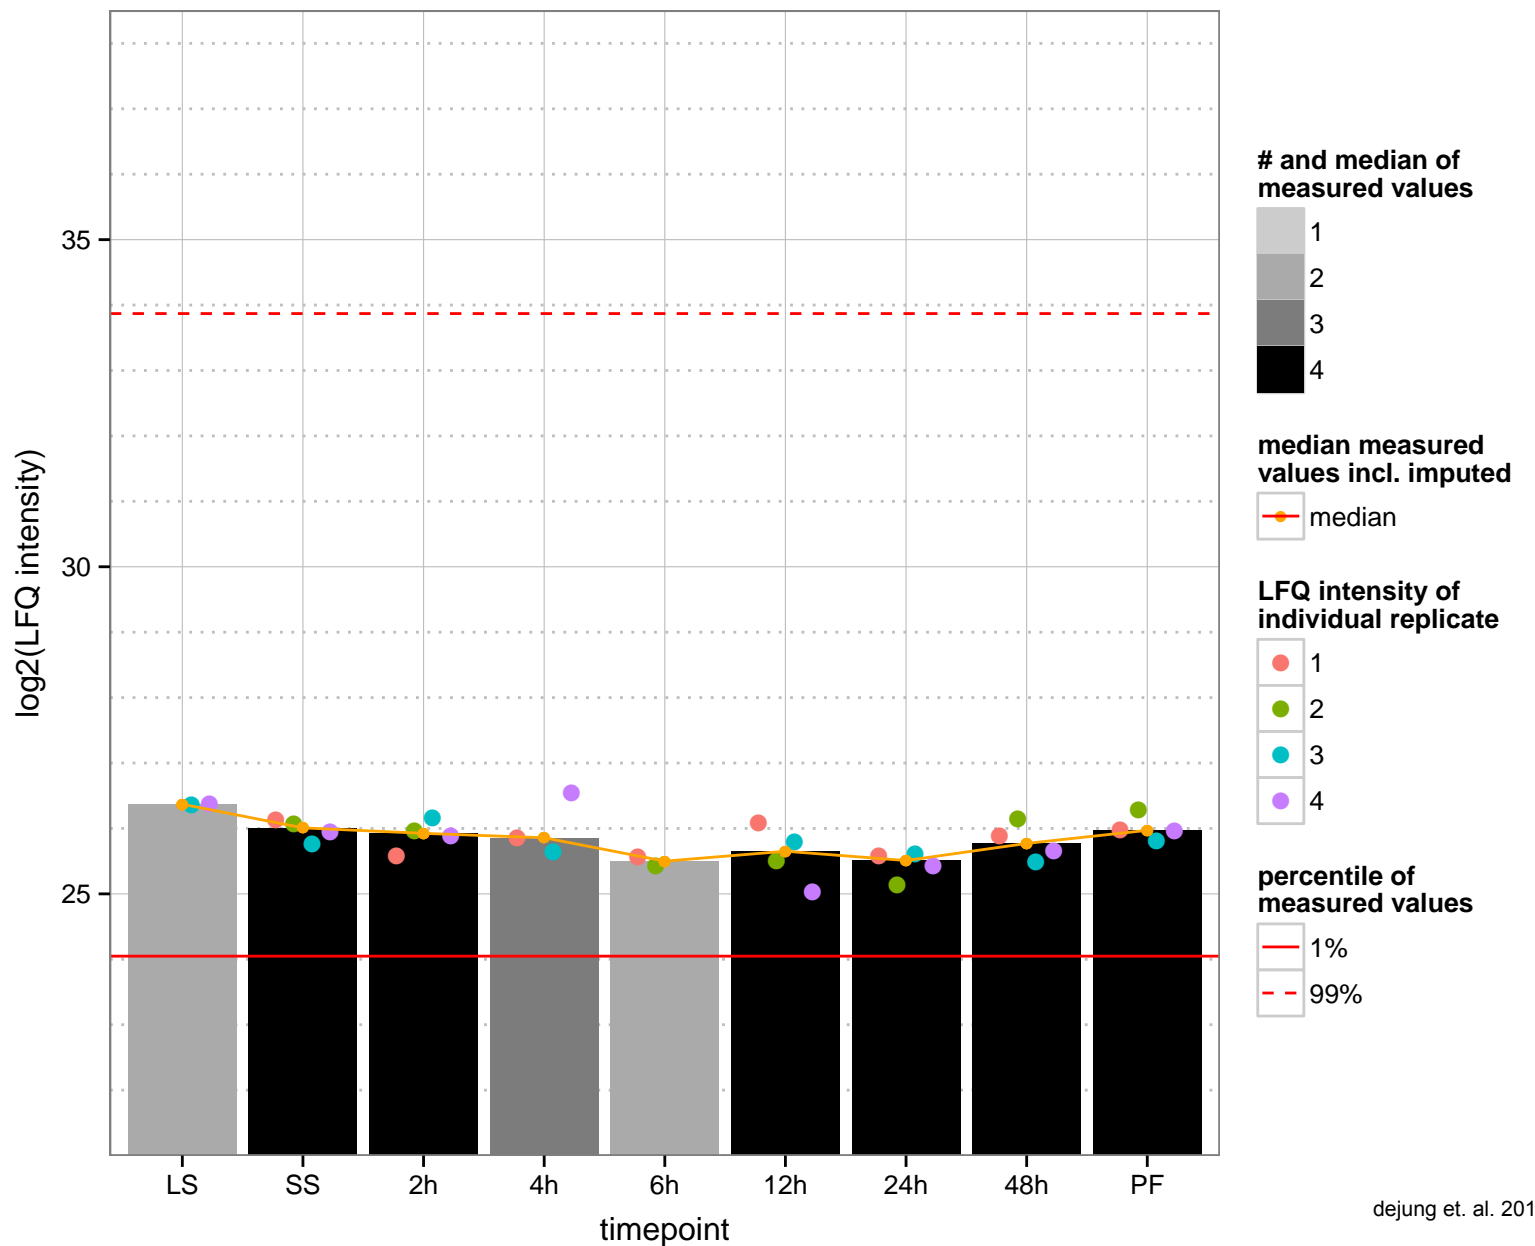

hypothetical protein, conserved  
 Tb927.7.3330  
 AGOF: null  
 AGOC: membrane, nucleus  
 AGOP: regulation of transcription, DNA-dependent, vesicle-mediated transport  
 PGO: null  
 PGOC: null  
 PGOP: null

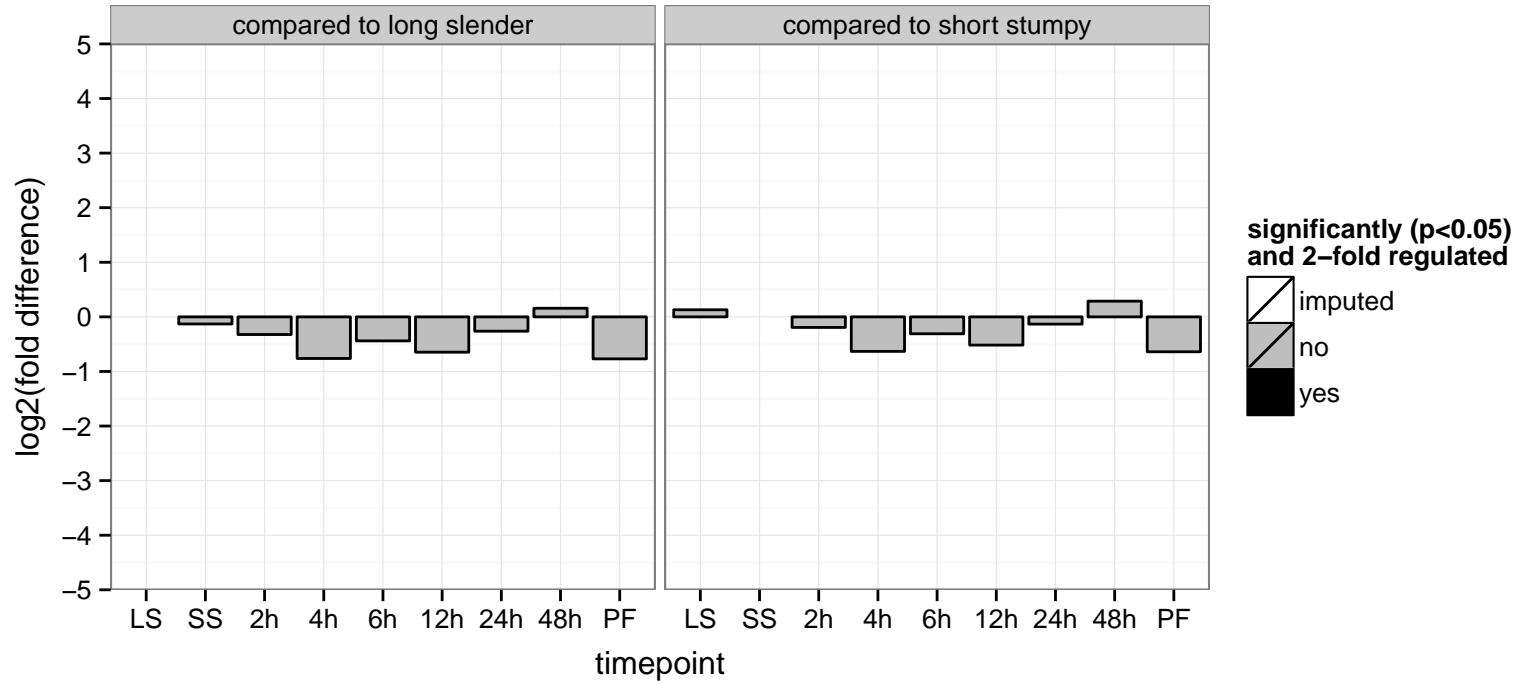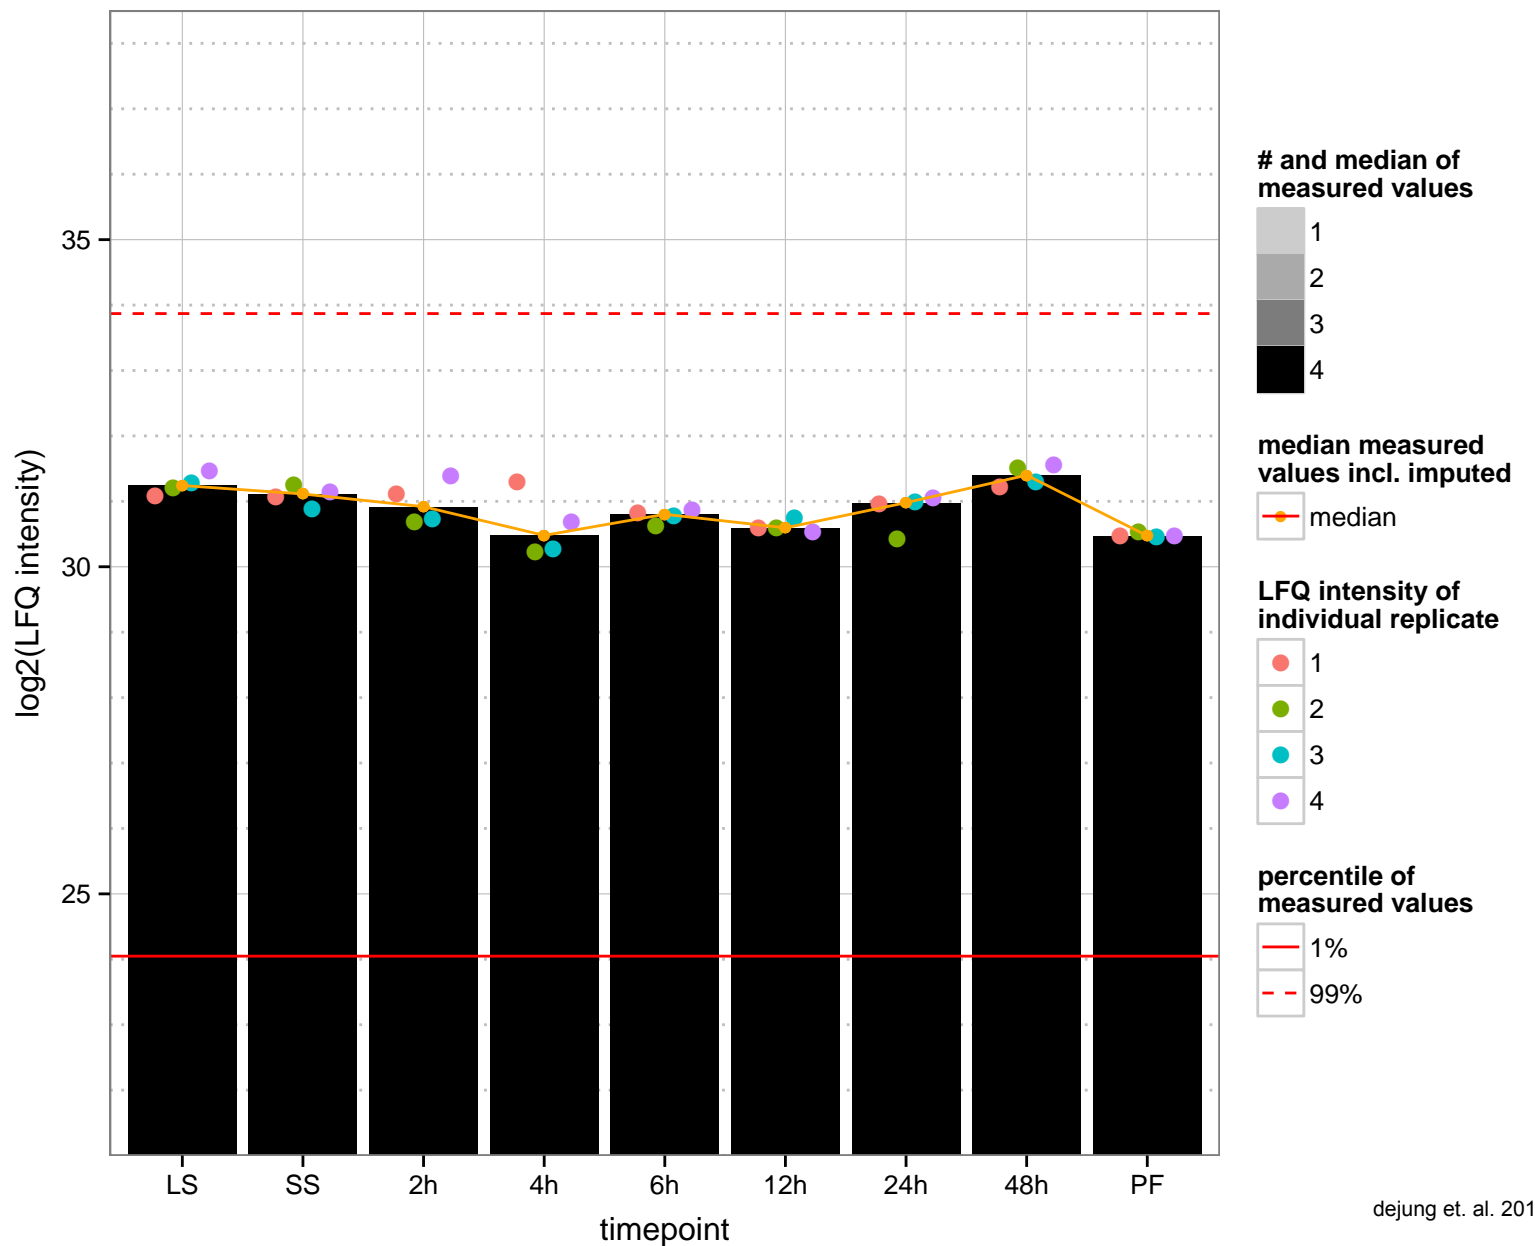

hypothetical protein, conserved  
 Tb927.7.3370  
 AGOF: null  
 AGOC: null  
 AGOP: null  
 PGOF: null  
 PGO: null  
 PGOP: null

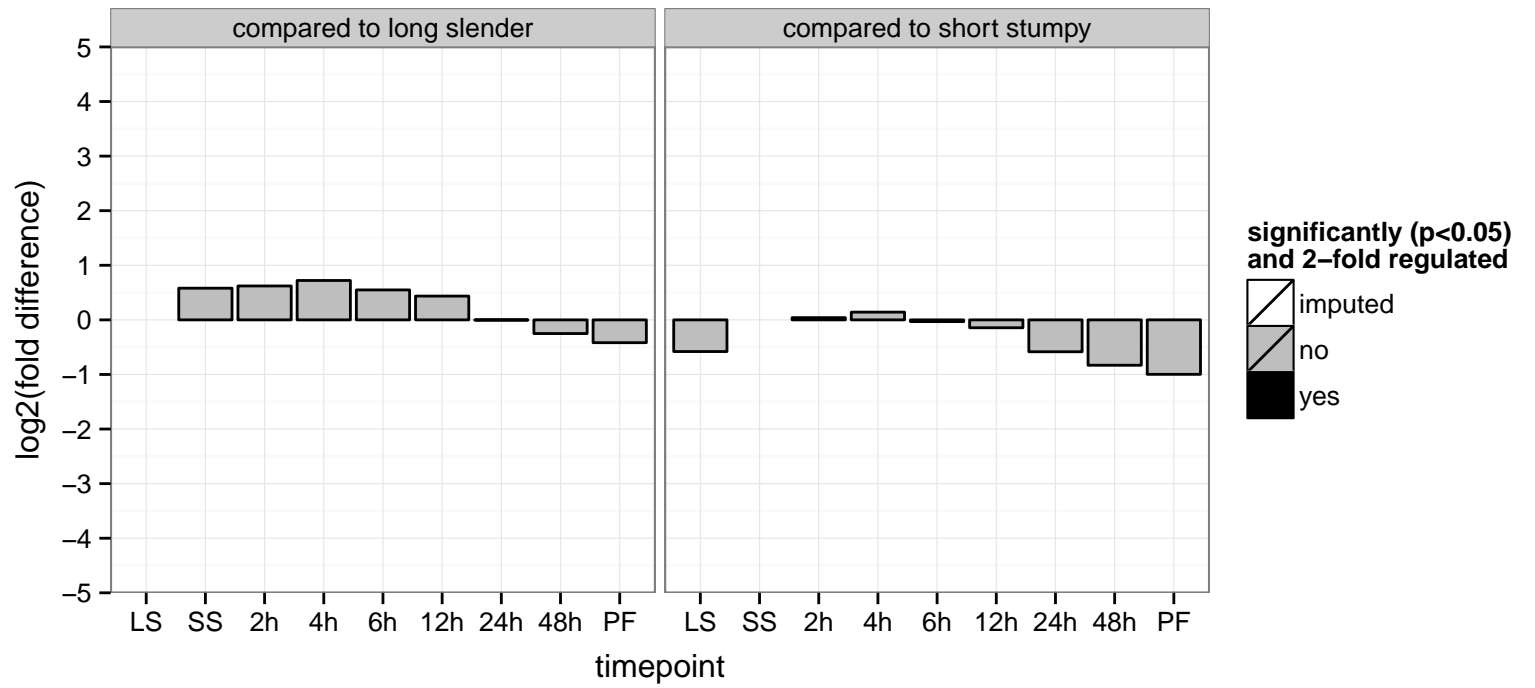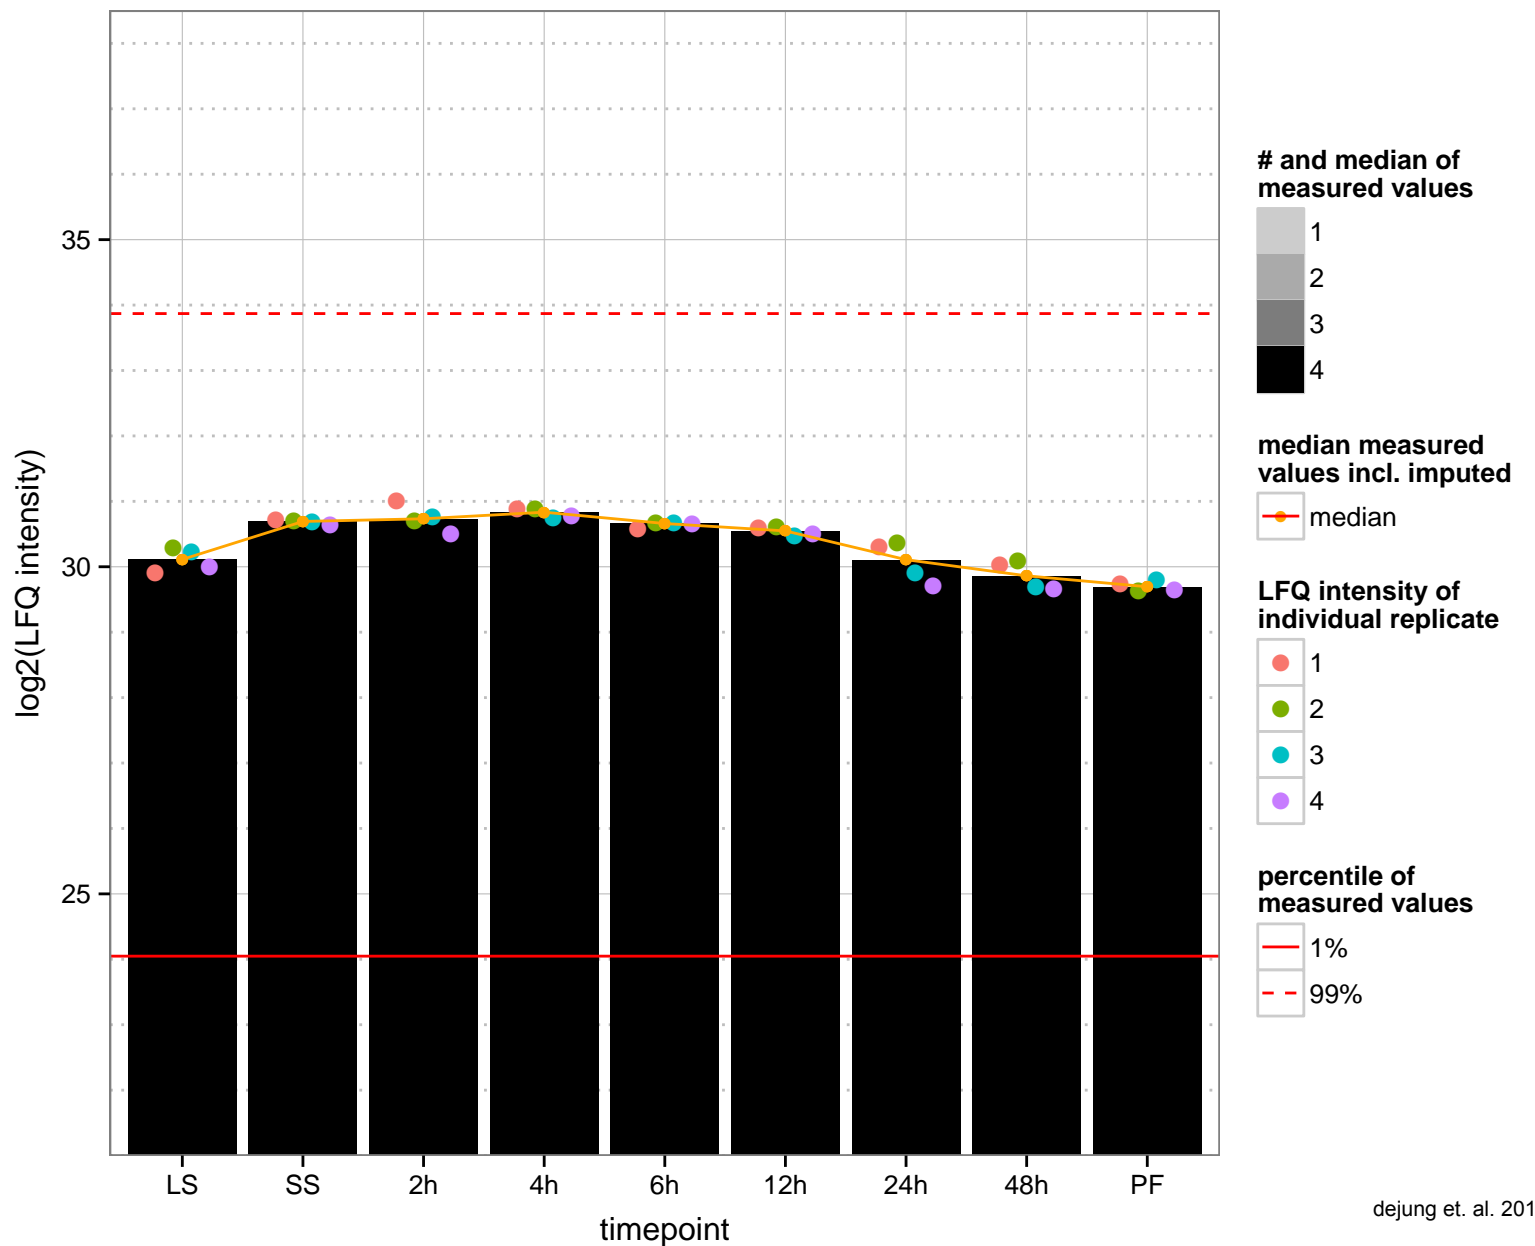

I/6 autoantigen  
 Tb927.7.3440  
 AGOF: calcium ion binding, structural constituent of cytoskeleton  
 AGOC: microtubule cytoskeleton  
 AGOP: null  
 PGO: null  
 PGO: null  
 PGO: null

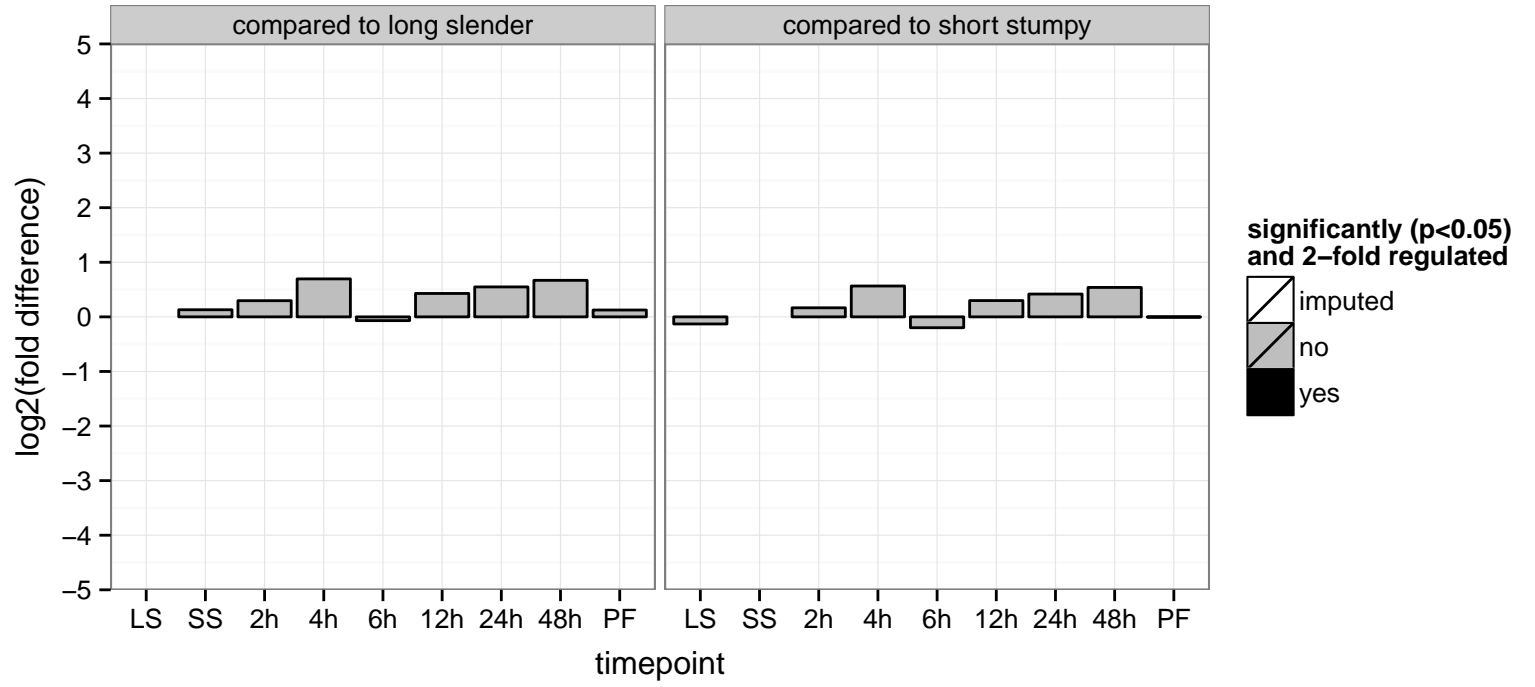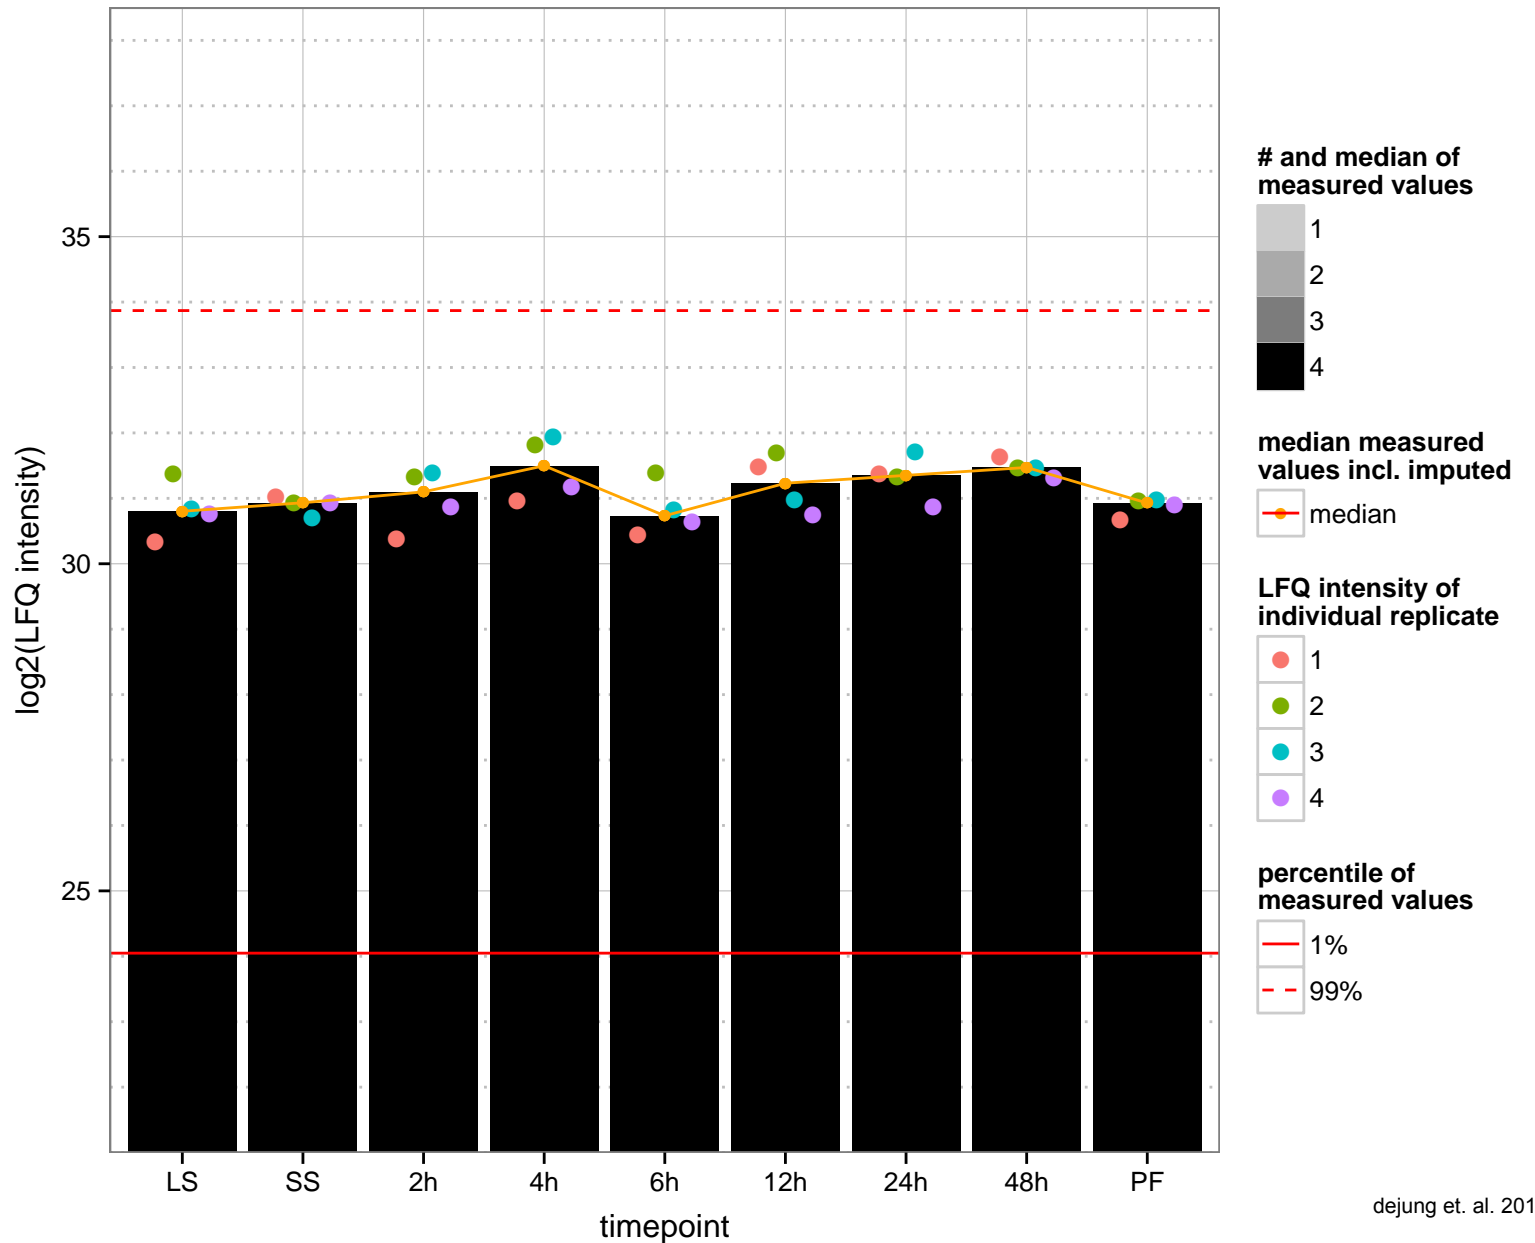

mitochondrial pyruvate carrier protein 2, putative  
 Tb927.7.3520  
 AGOF: pyruvate transmembrane transporter activity  
 AGOC: mitochondrial membrane, mitochondrion  
 AGOP: pyruvate transport  
 PGO: null  
 PGO: null  
 PGO: null

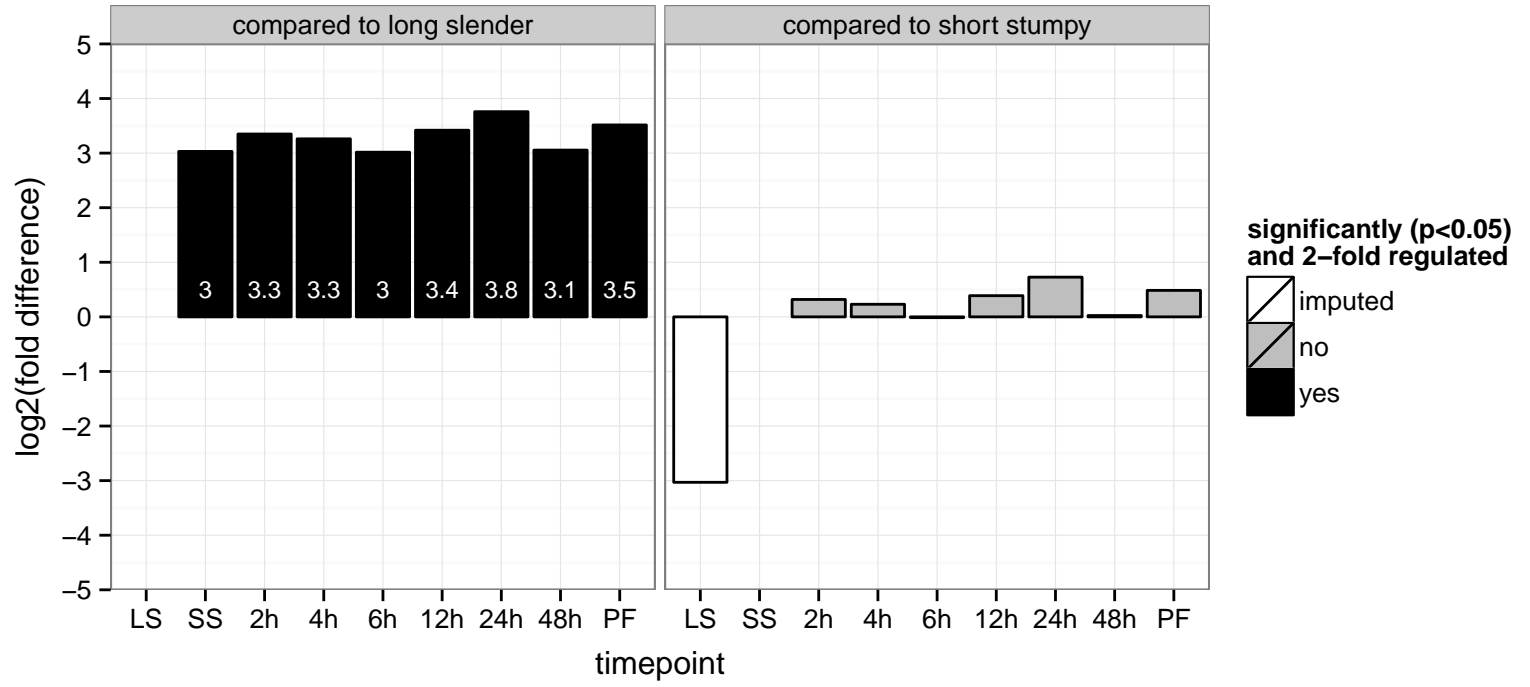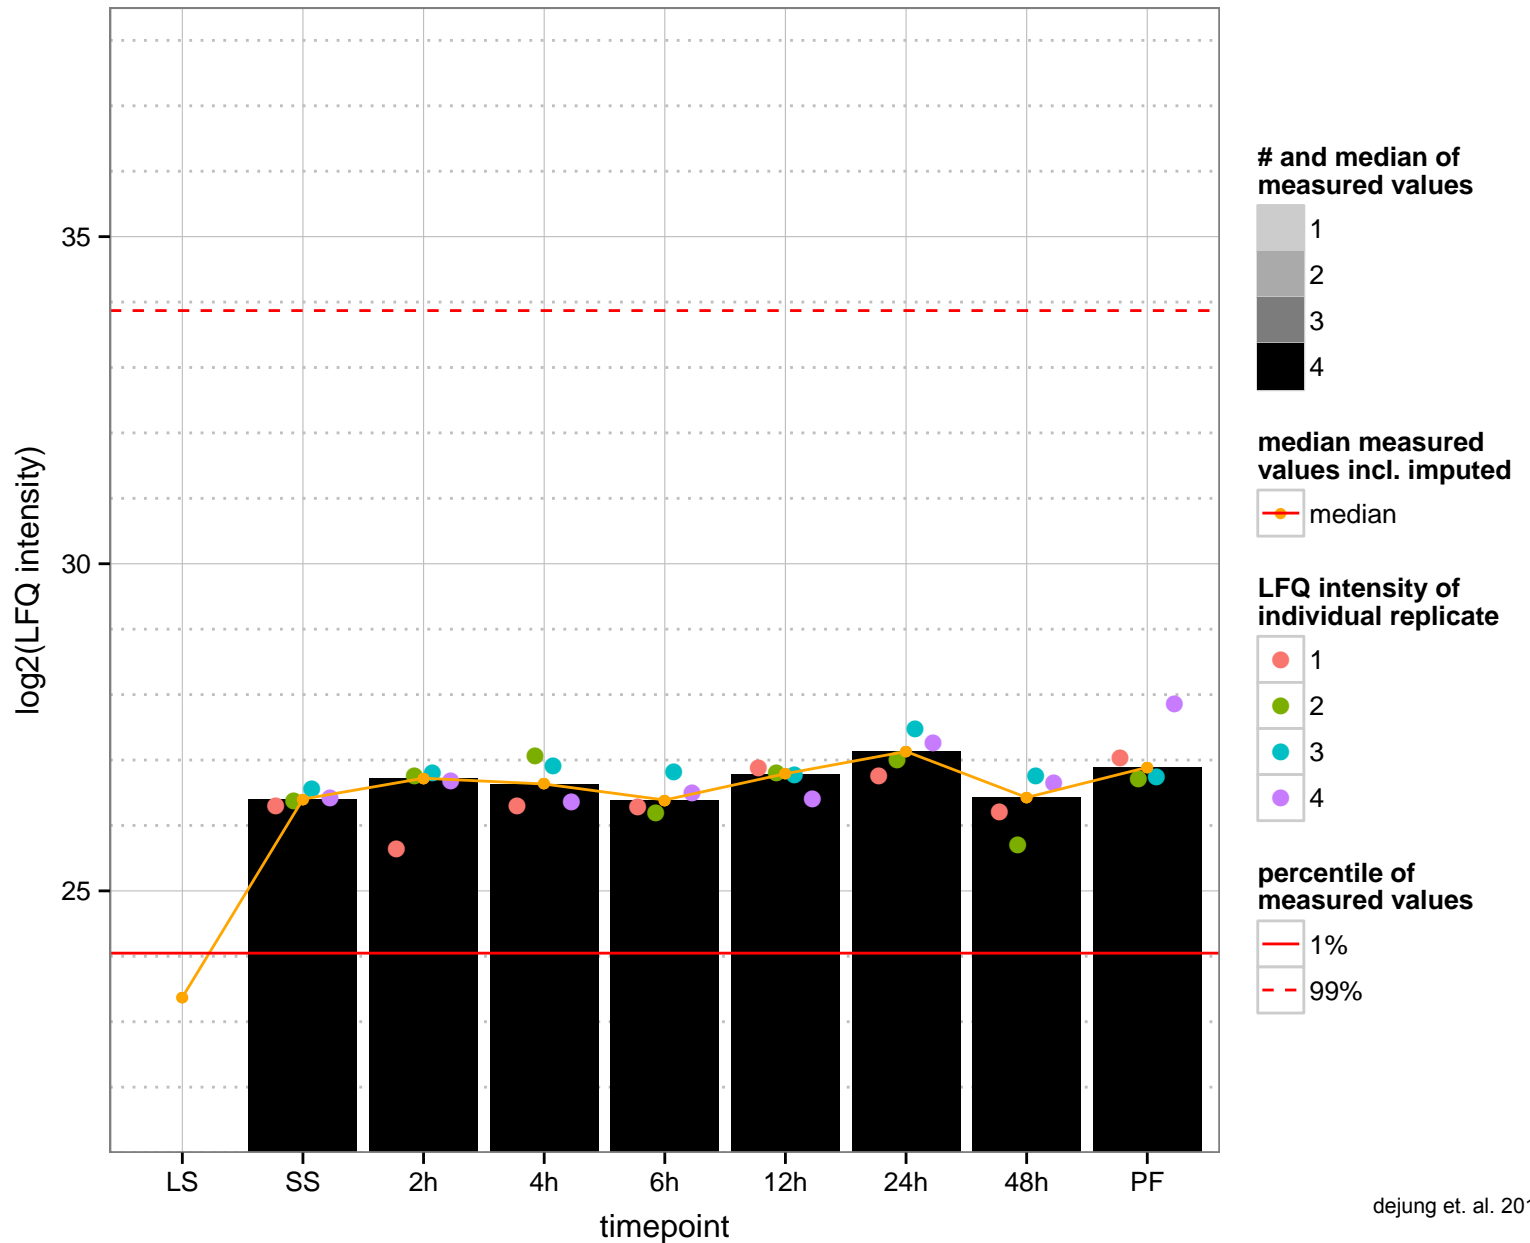

hypothetical protein, conserved  
 Tb927.7.3540  
 AGOF: null  
 AGOC: null  
 AGOP: null  
 PGO: null  
 PGOC: null  
 PGOP: null

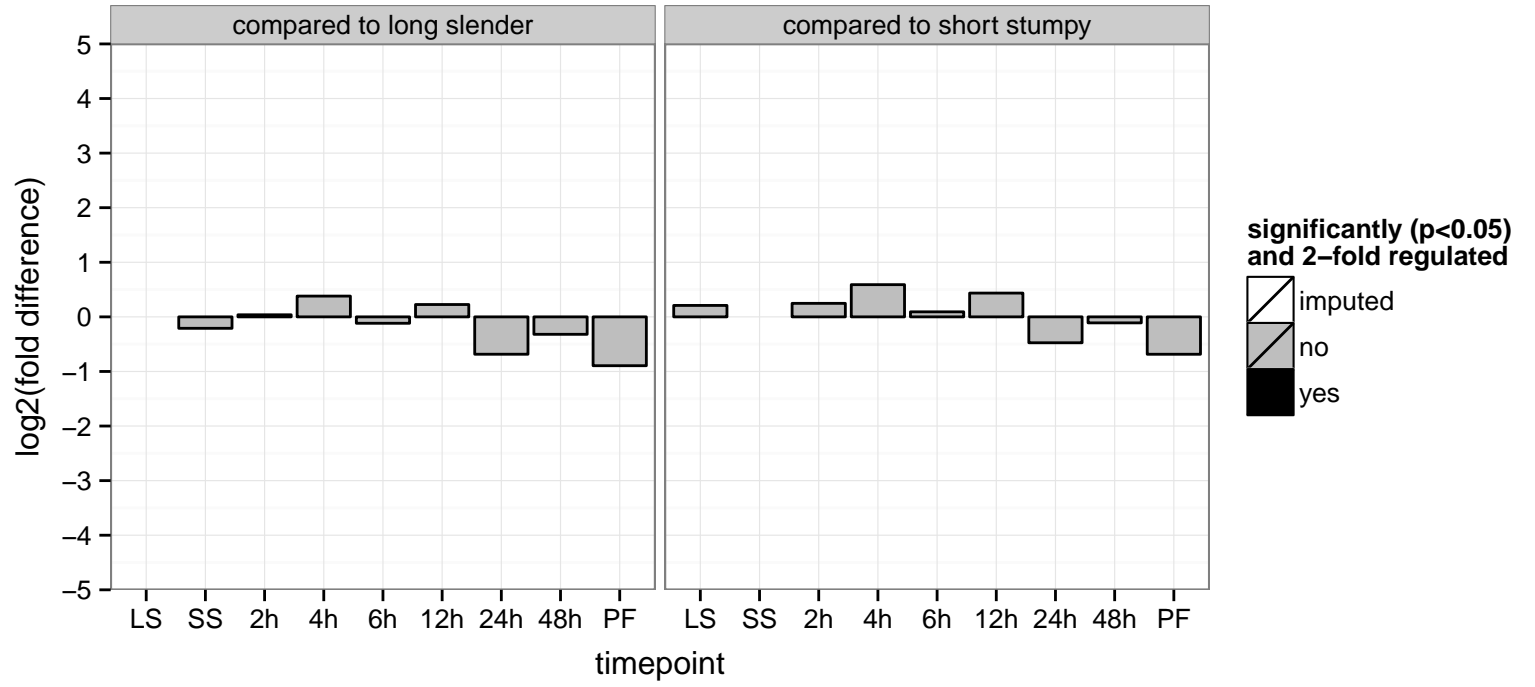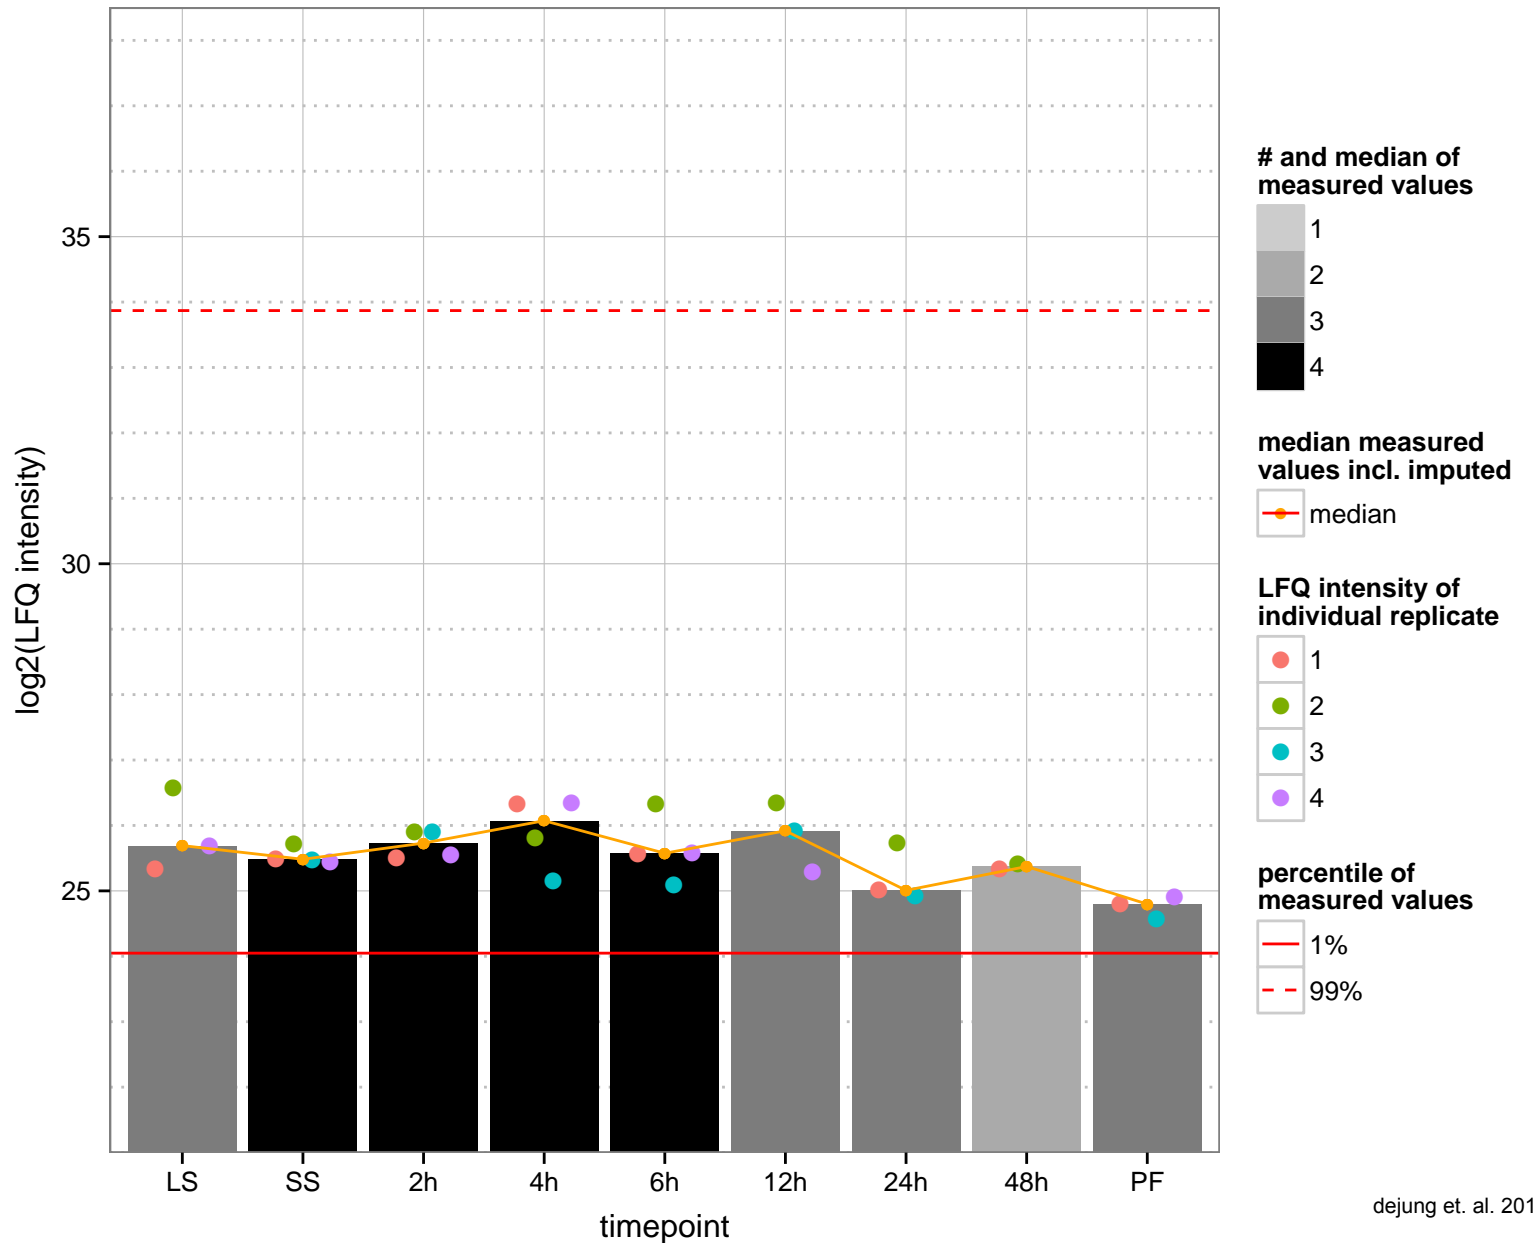

hypothetical protein, conserved  
 Tb927.7.3550  
 AGOF: null  
 AGOC: null  
 AGOP: null  
 PGOF: protein binding  
 PGO: null  
 PGOP: null

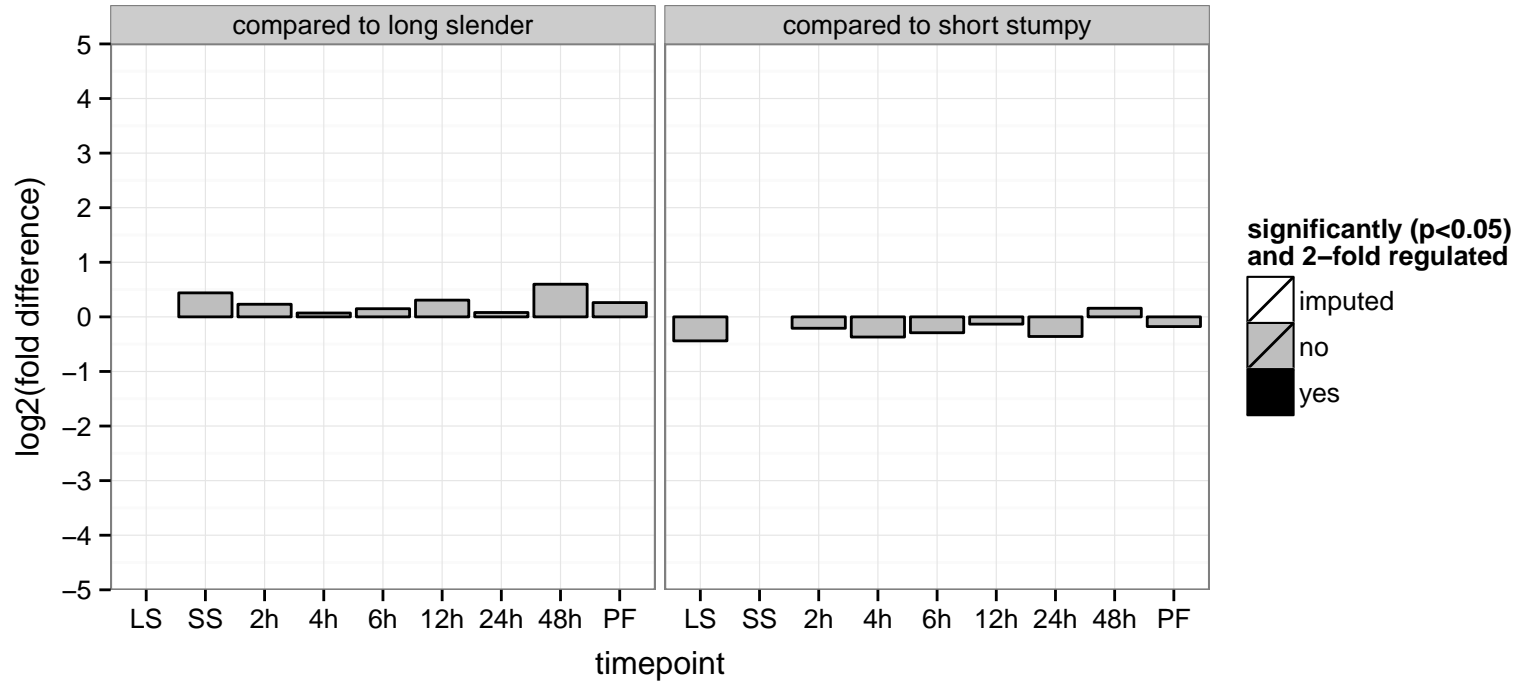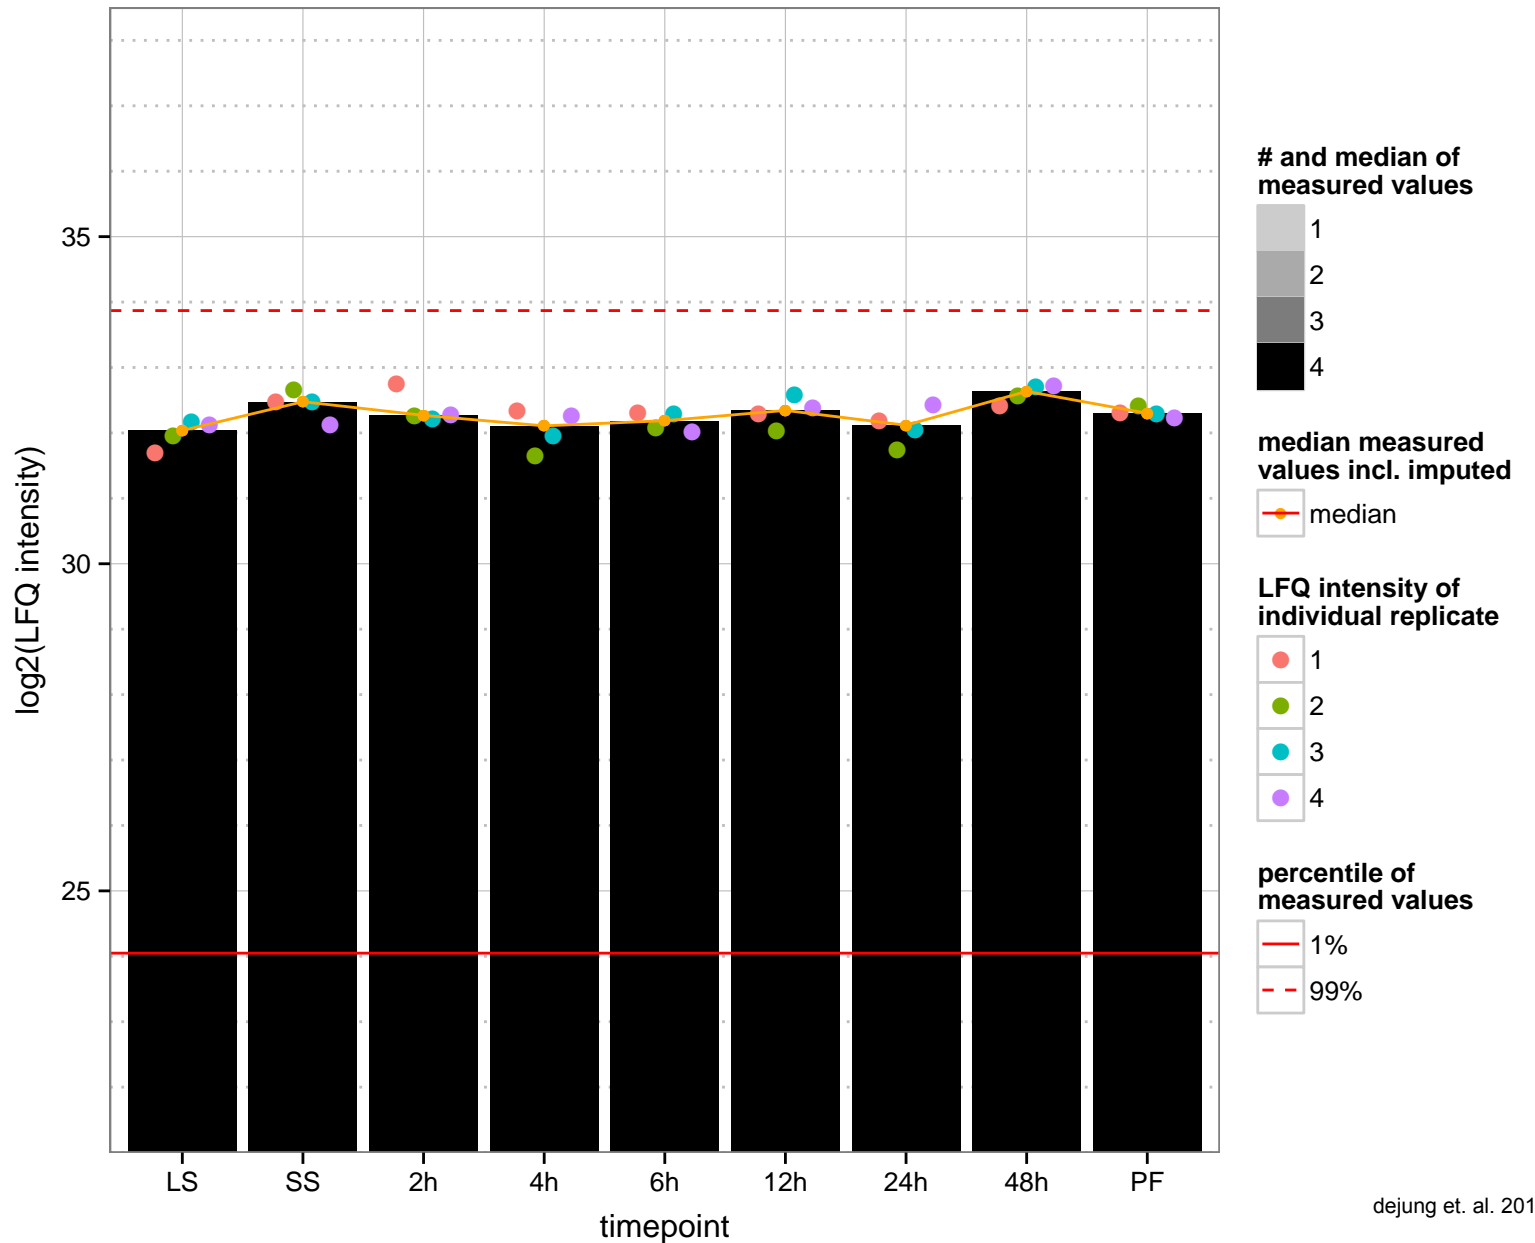

hypothetical protein, conserved  
 Tb927.7.3560  
 AGOF: null  
 AGOC: null  
 AGOP: ciliary or flagellar motility  
 PGO: protein binding  
 PGOC: null  
 PGOP: null

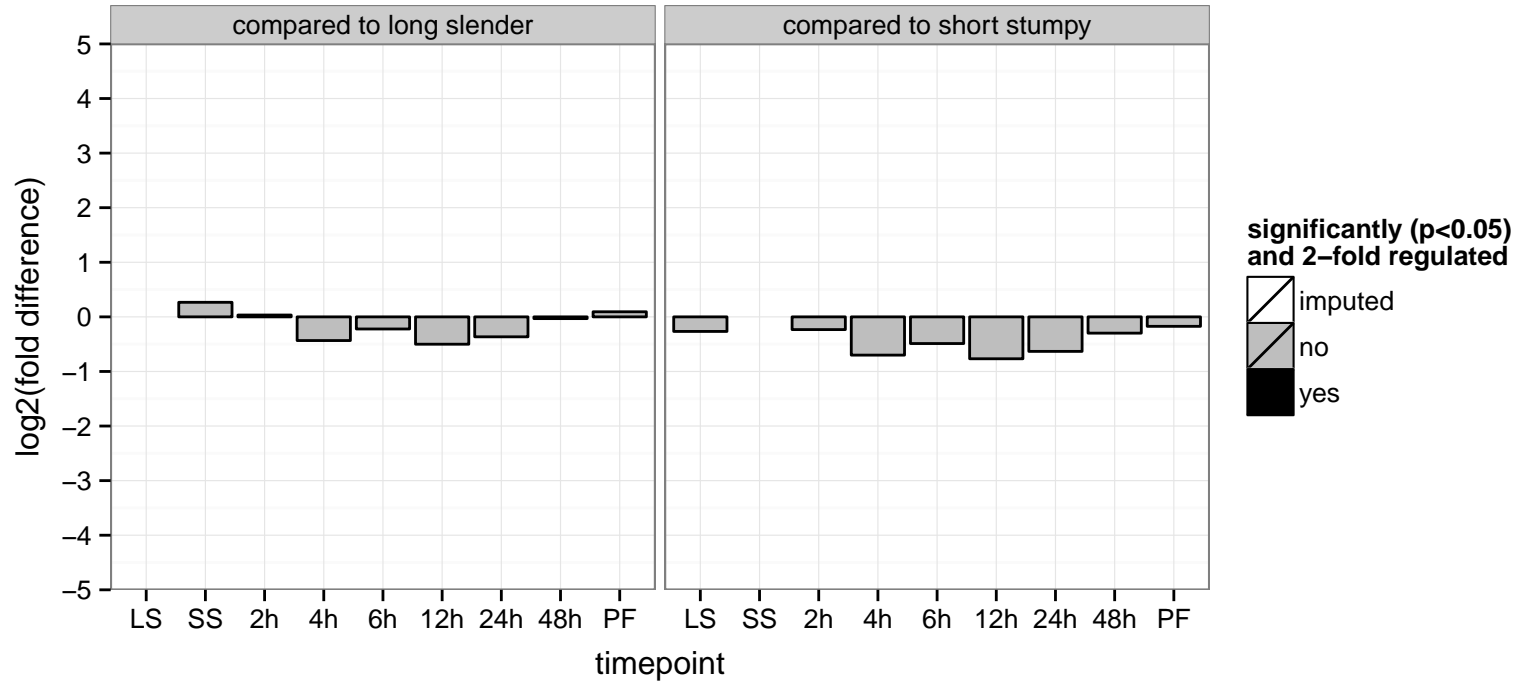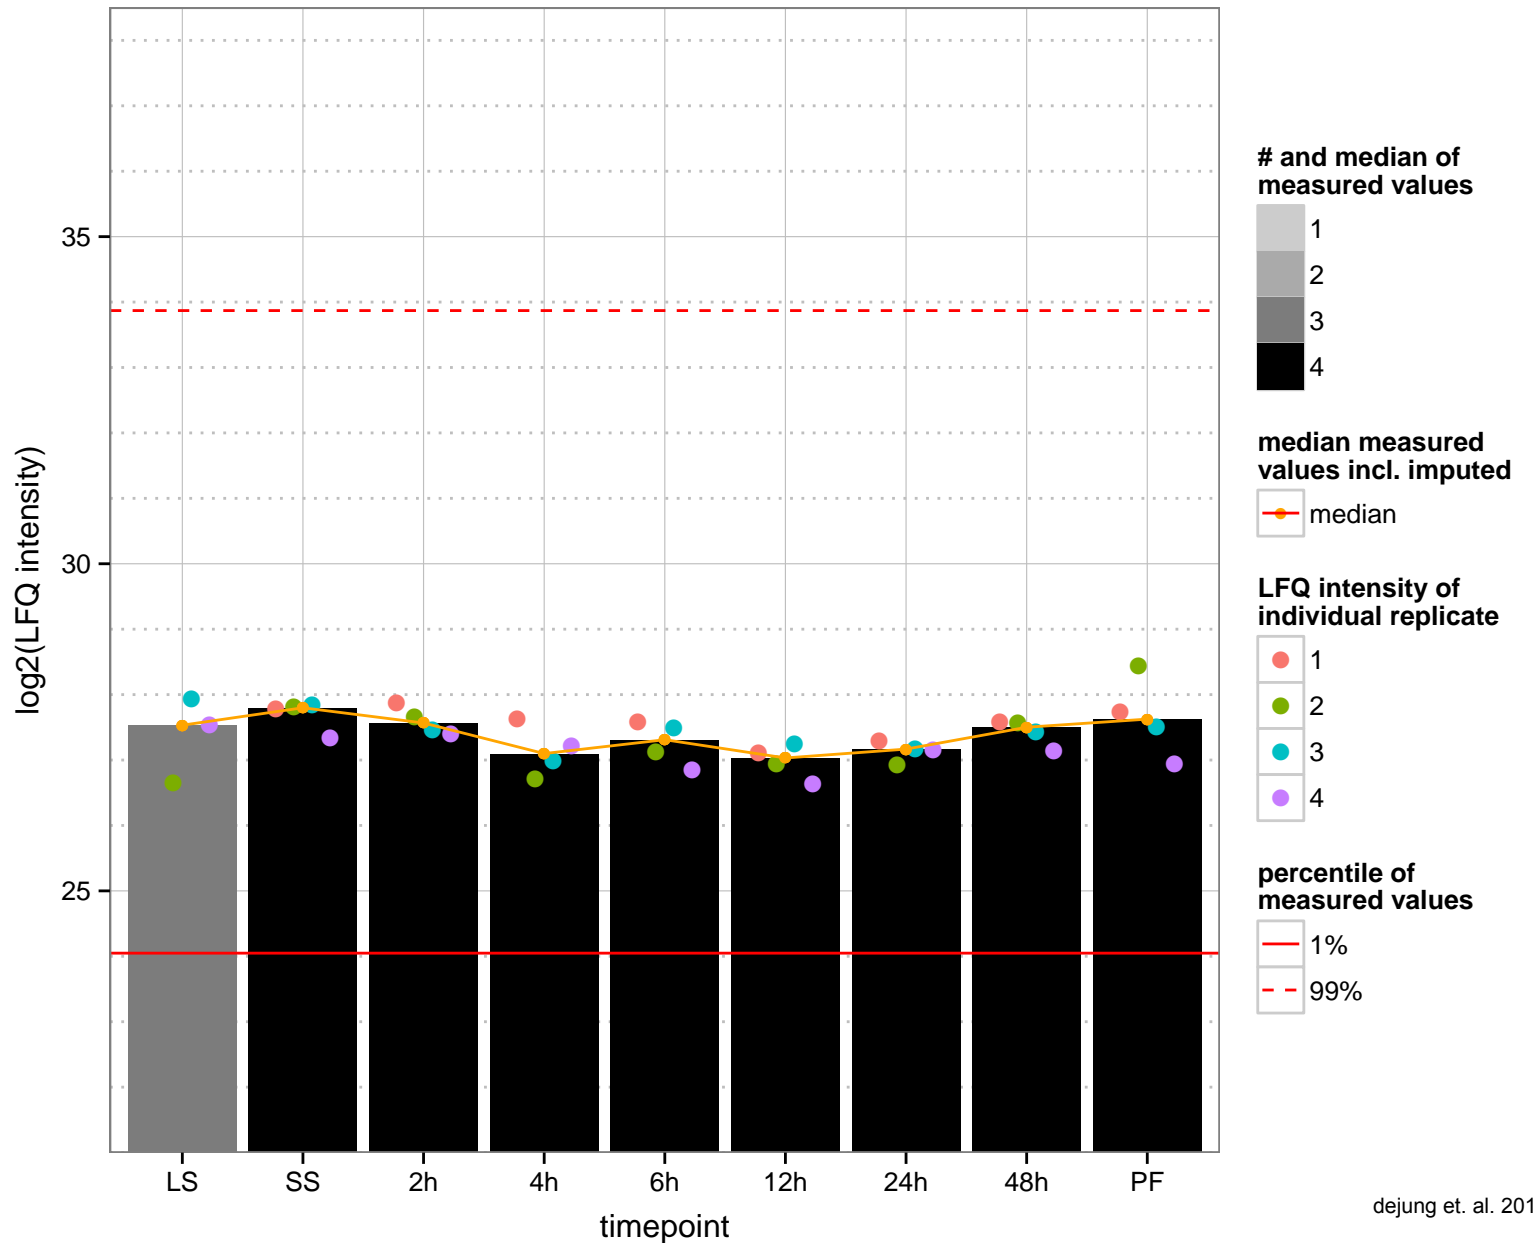



tyrosyl-tRNA synthetase, putative

Tb927.7.3620

AGOF: ATP binding, tyrosine-tRNA ligase activity

AGOC: cytoplasm

AGOP: translation, tyrosyl-tRNA aminoacylation

PGOF: ATP binding, aminoacyl-tRNA ligase activity, nucleotide binding

PGOC: cytoplasm

PGOP: tRNA aminoacylation for protein translation

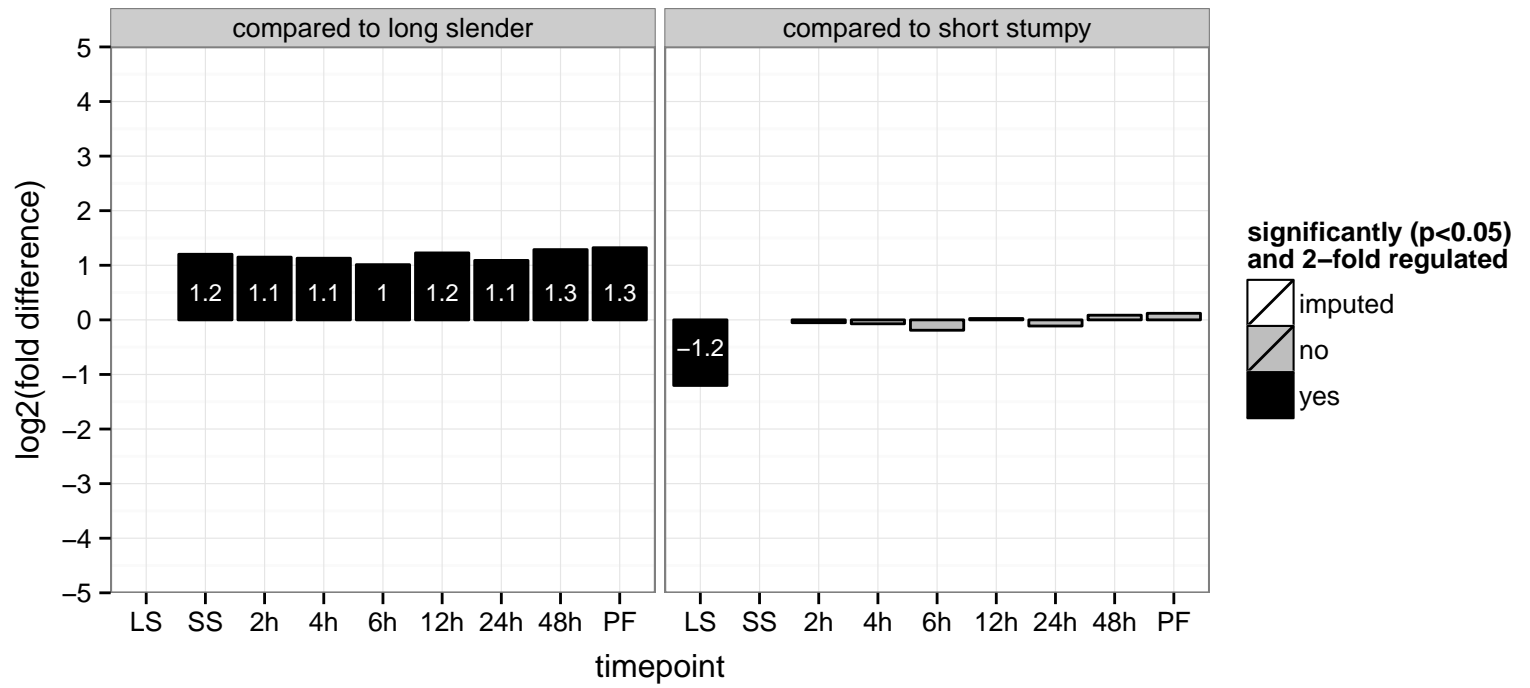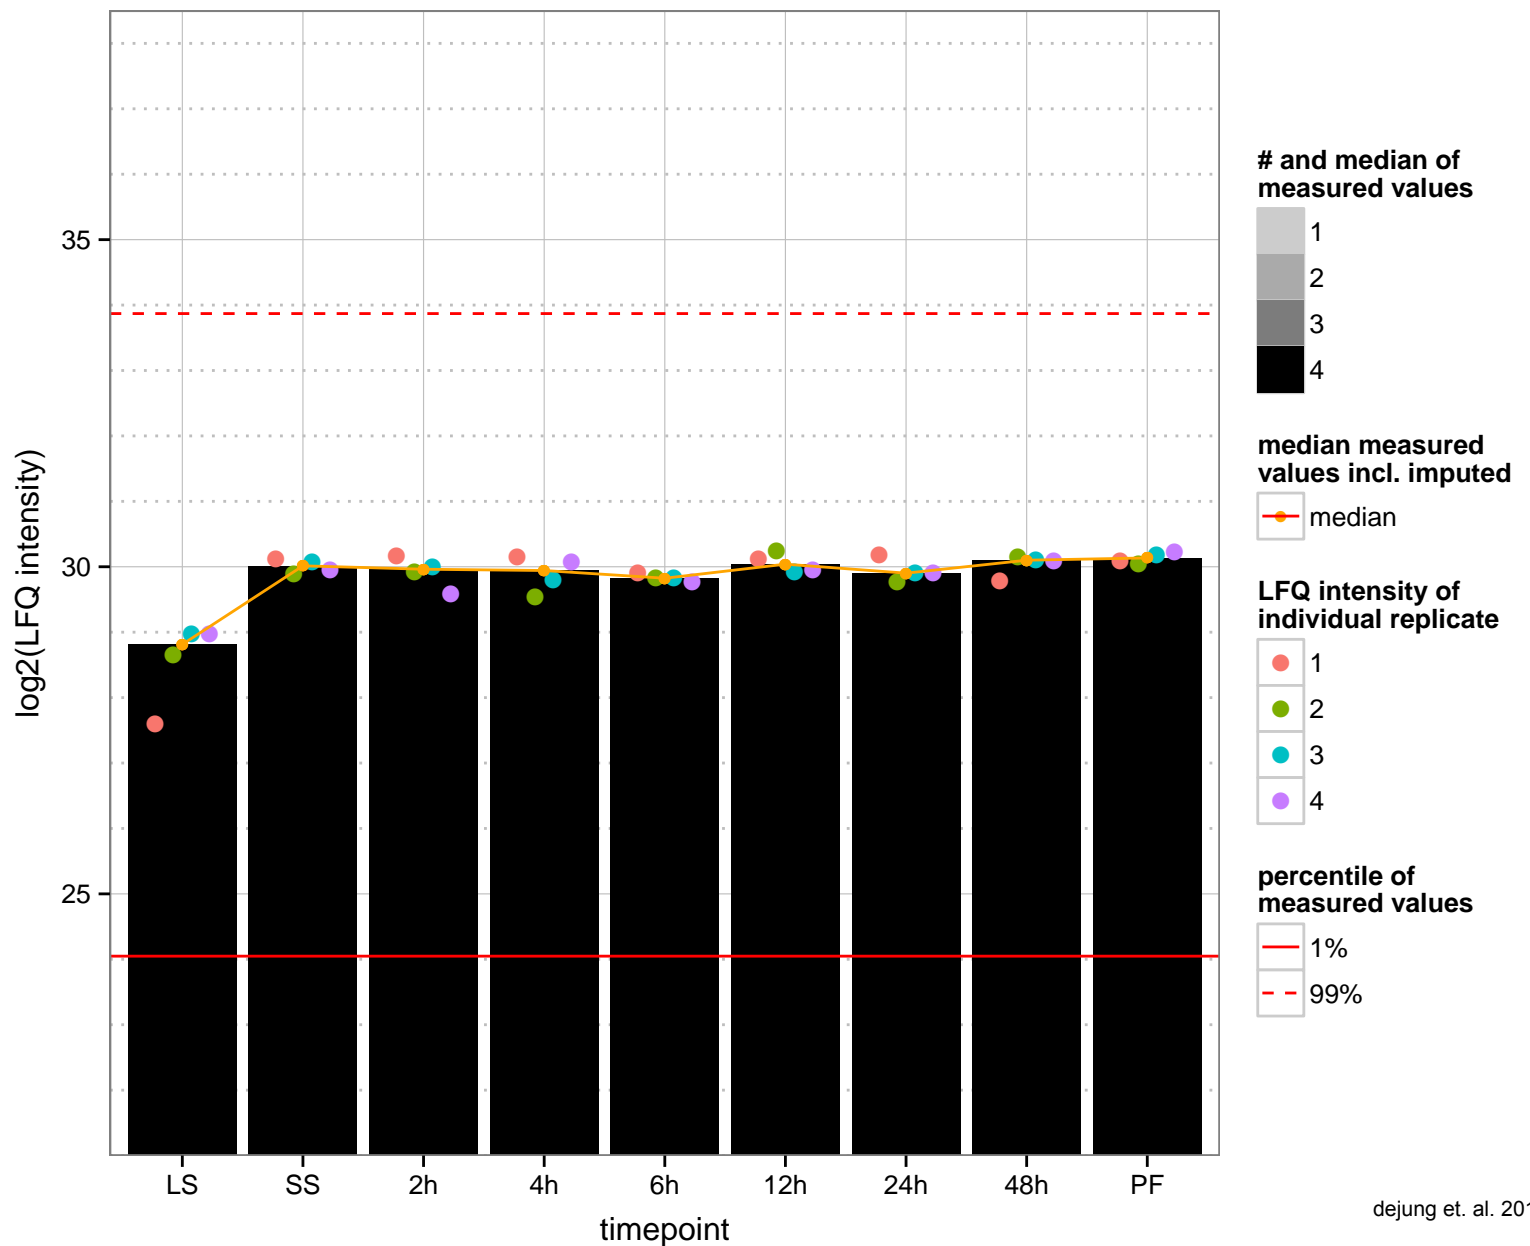

hypothetical protein, conserved  
 Tb927.7.3740  
 AGOF: null  
 AGOC: null  
 AGOP: null  
 PGOF: null  
 PGO: null  
 PGOP: null

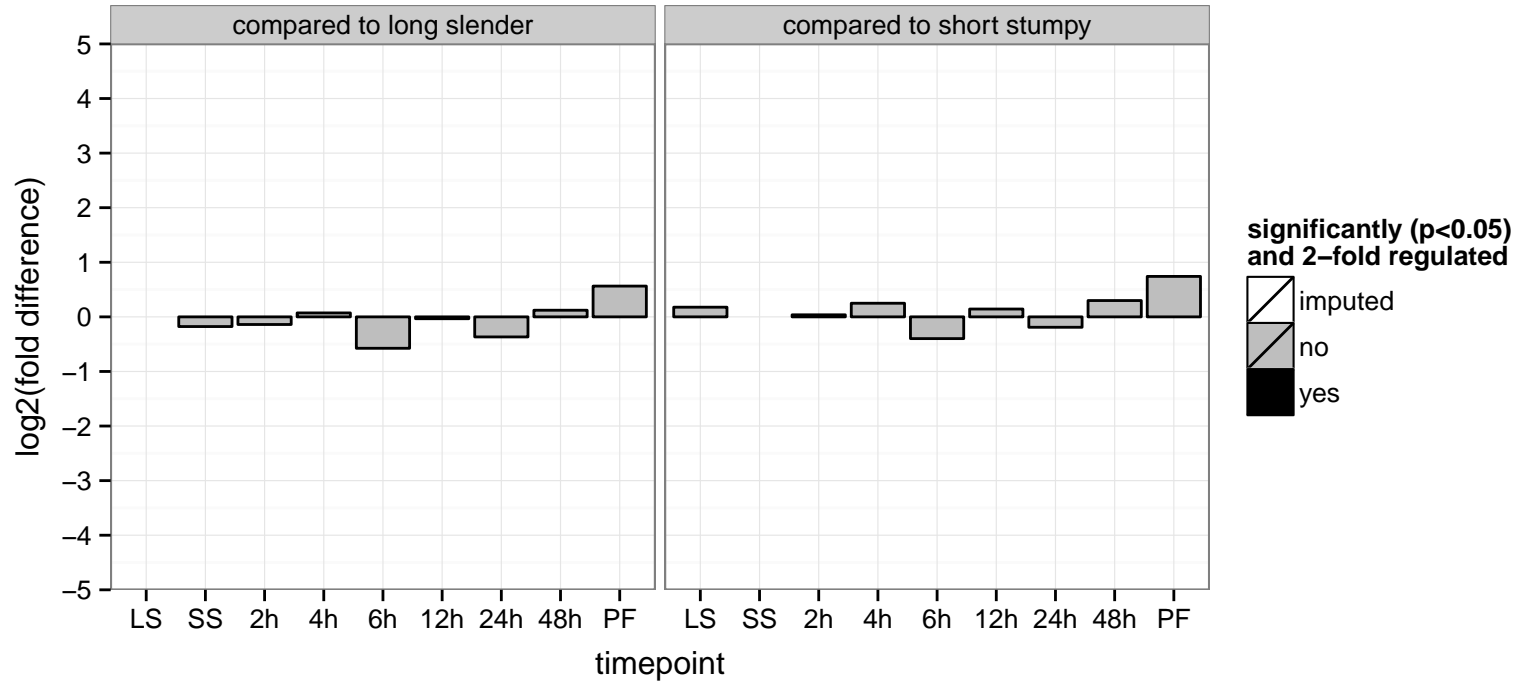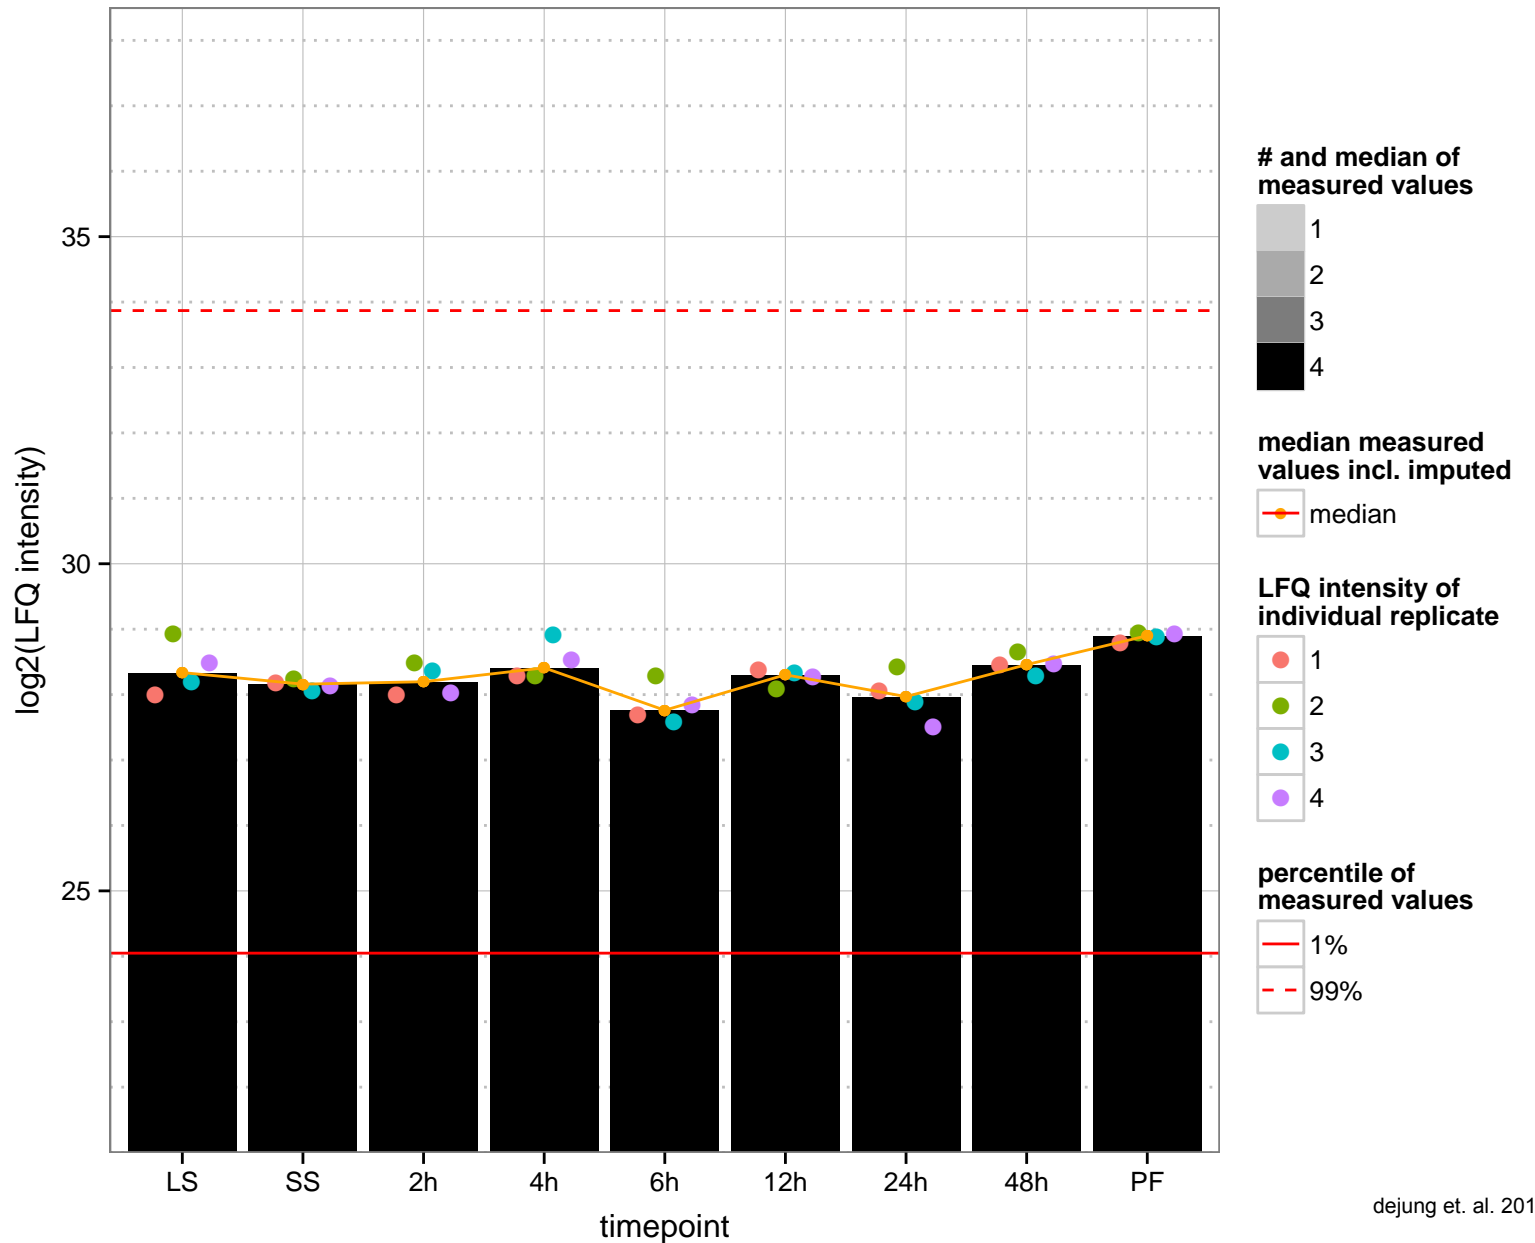

TFIIF-stimulated CTD phosphatase, putative  
 Tb927.7.3750  
 AGOF: null  
 AGOC: mitochondrion  
 AGOP: null  
 PGO: protein binding  
 PGOC: null  
 PGOP: null

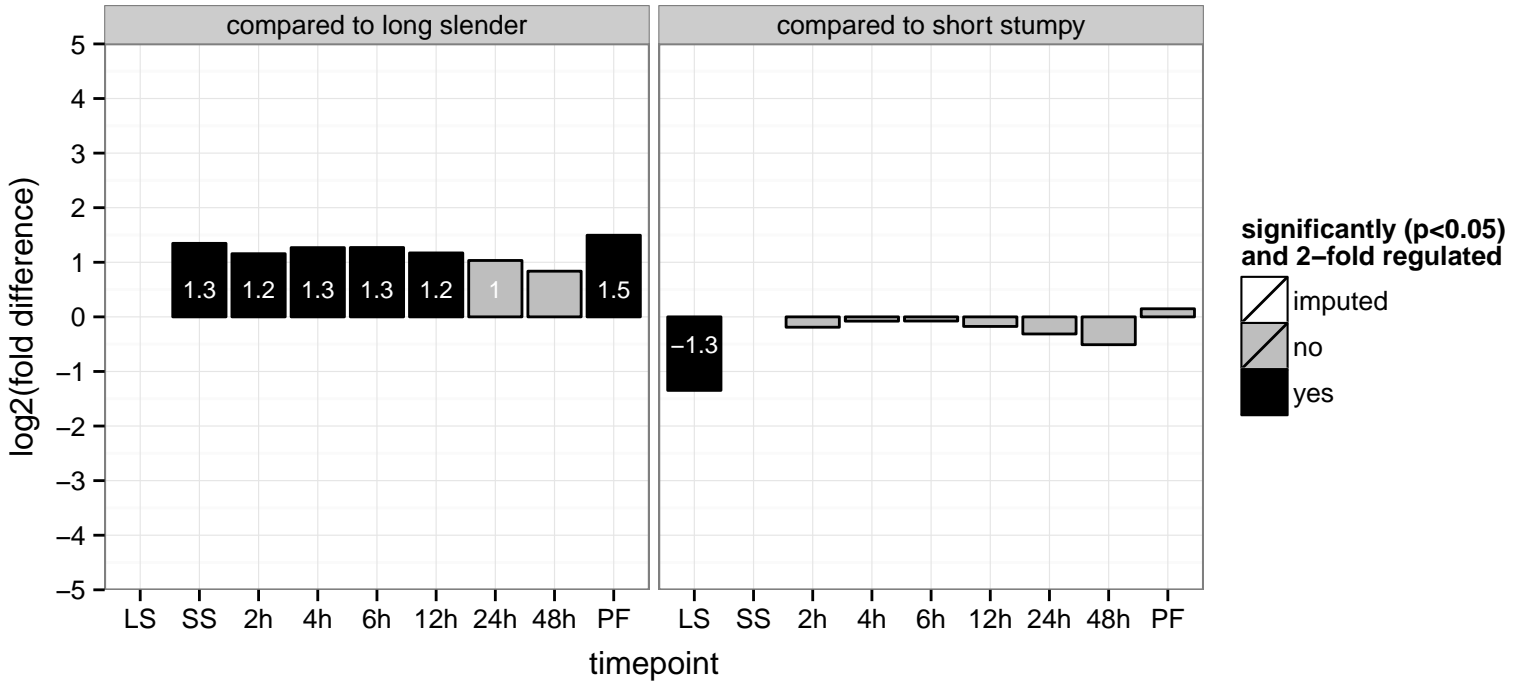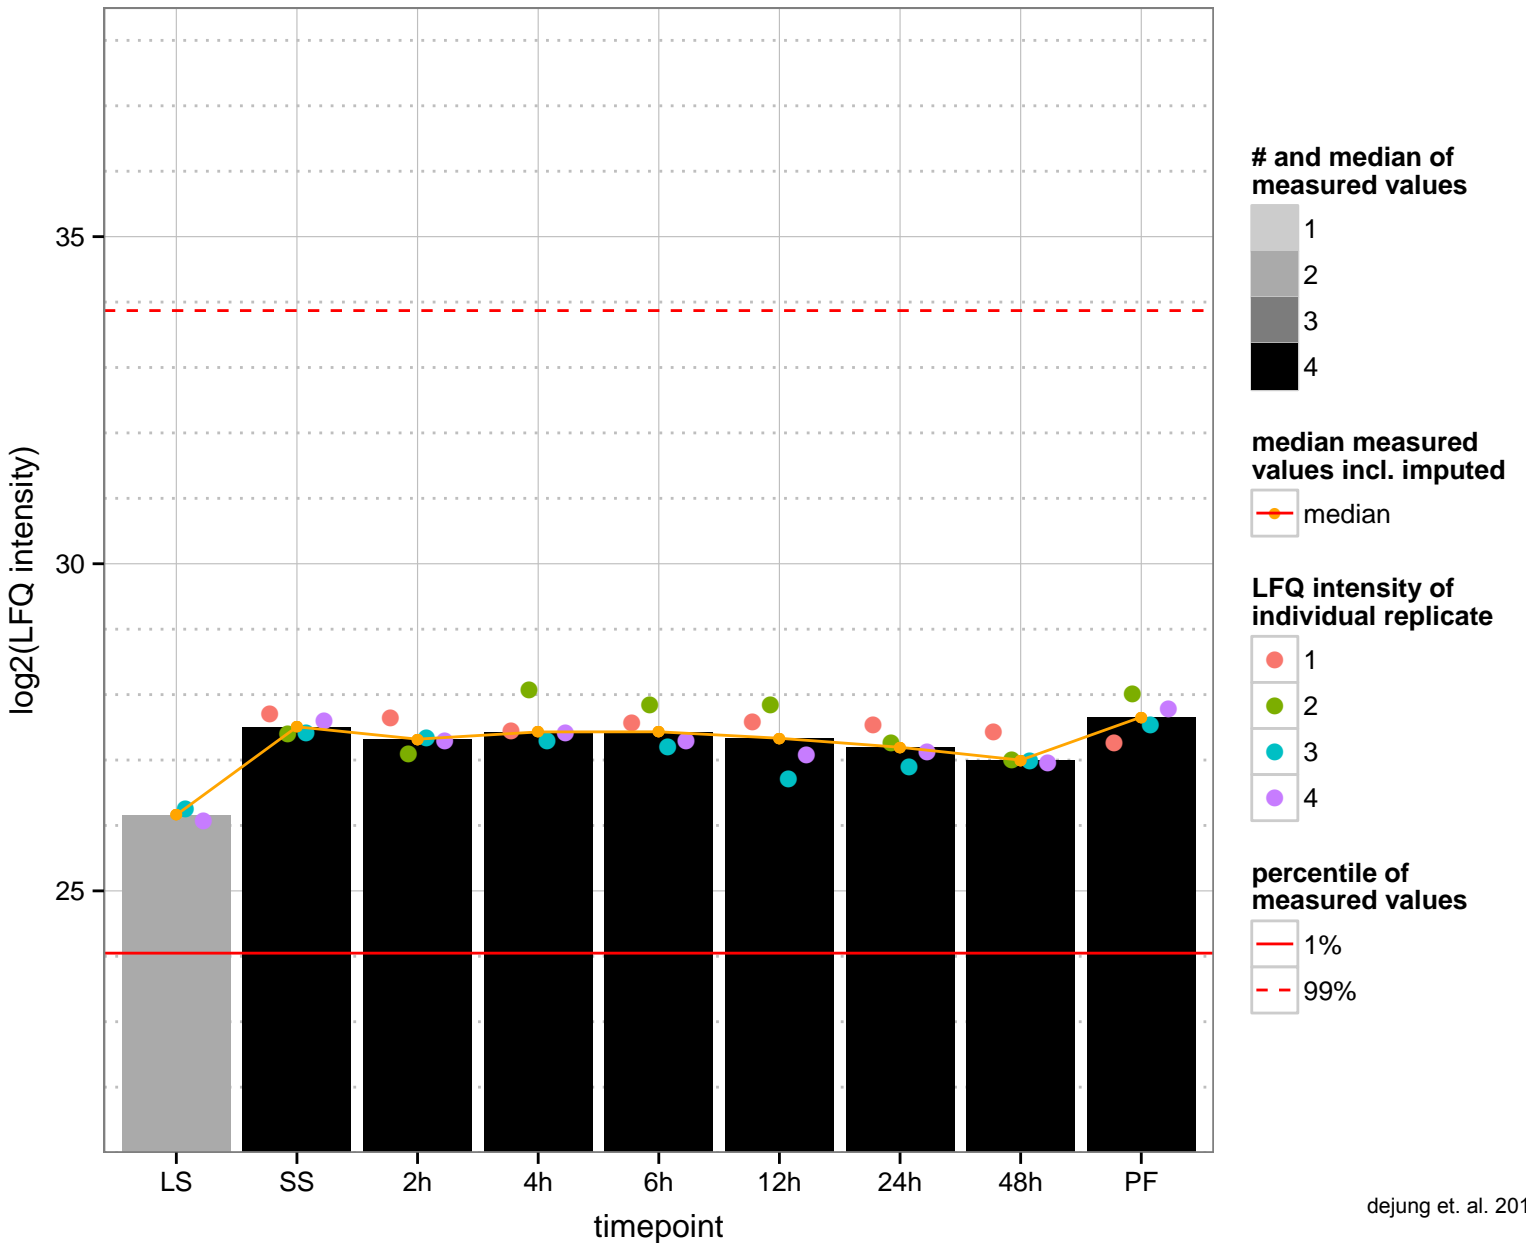

phosphatidylserine synthase, putative  
 Tb927.7.3760  
 AGOF: CDP-diacylglycerol-serine O-phosphatidyltransferase activity  
 AGOC: cellular\_component  
 AGOP: phosphatidylserine biosynthetic process  
 PGO: null  
 PGOC: null  
 PGOP: phosphatidylserine biosynthetic process

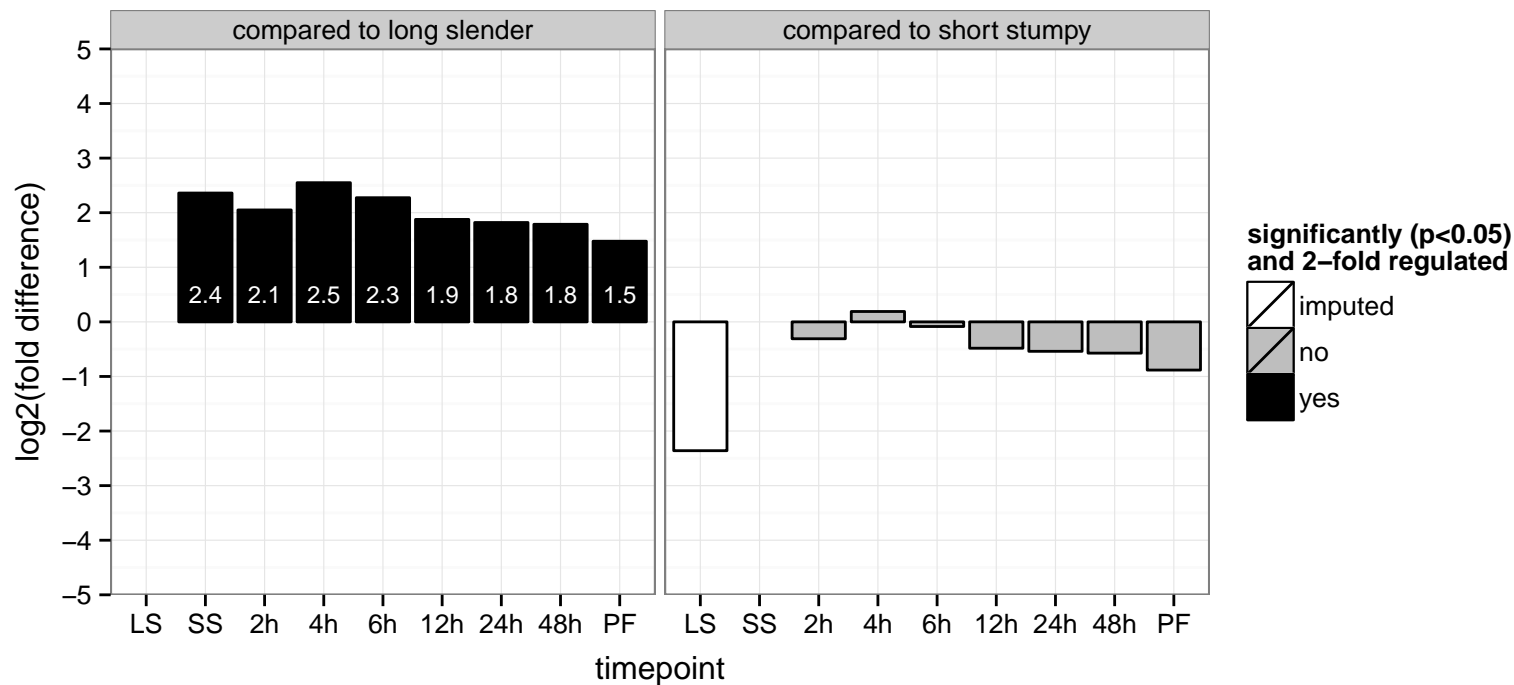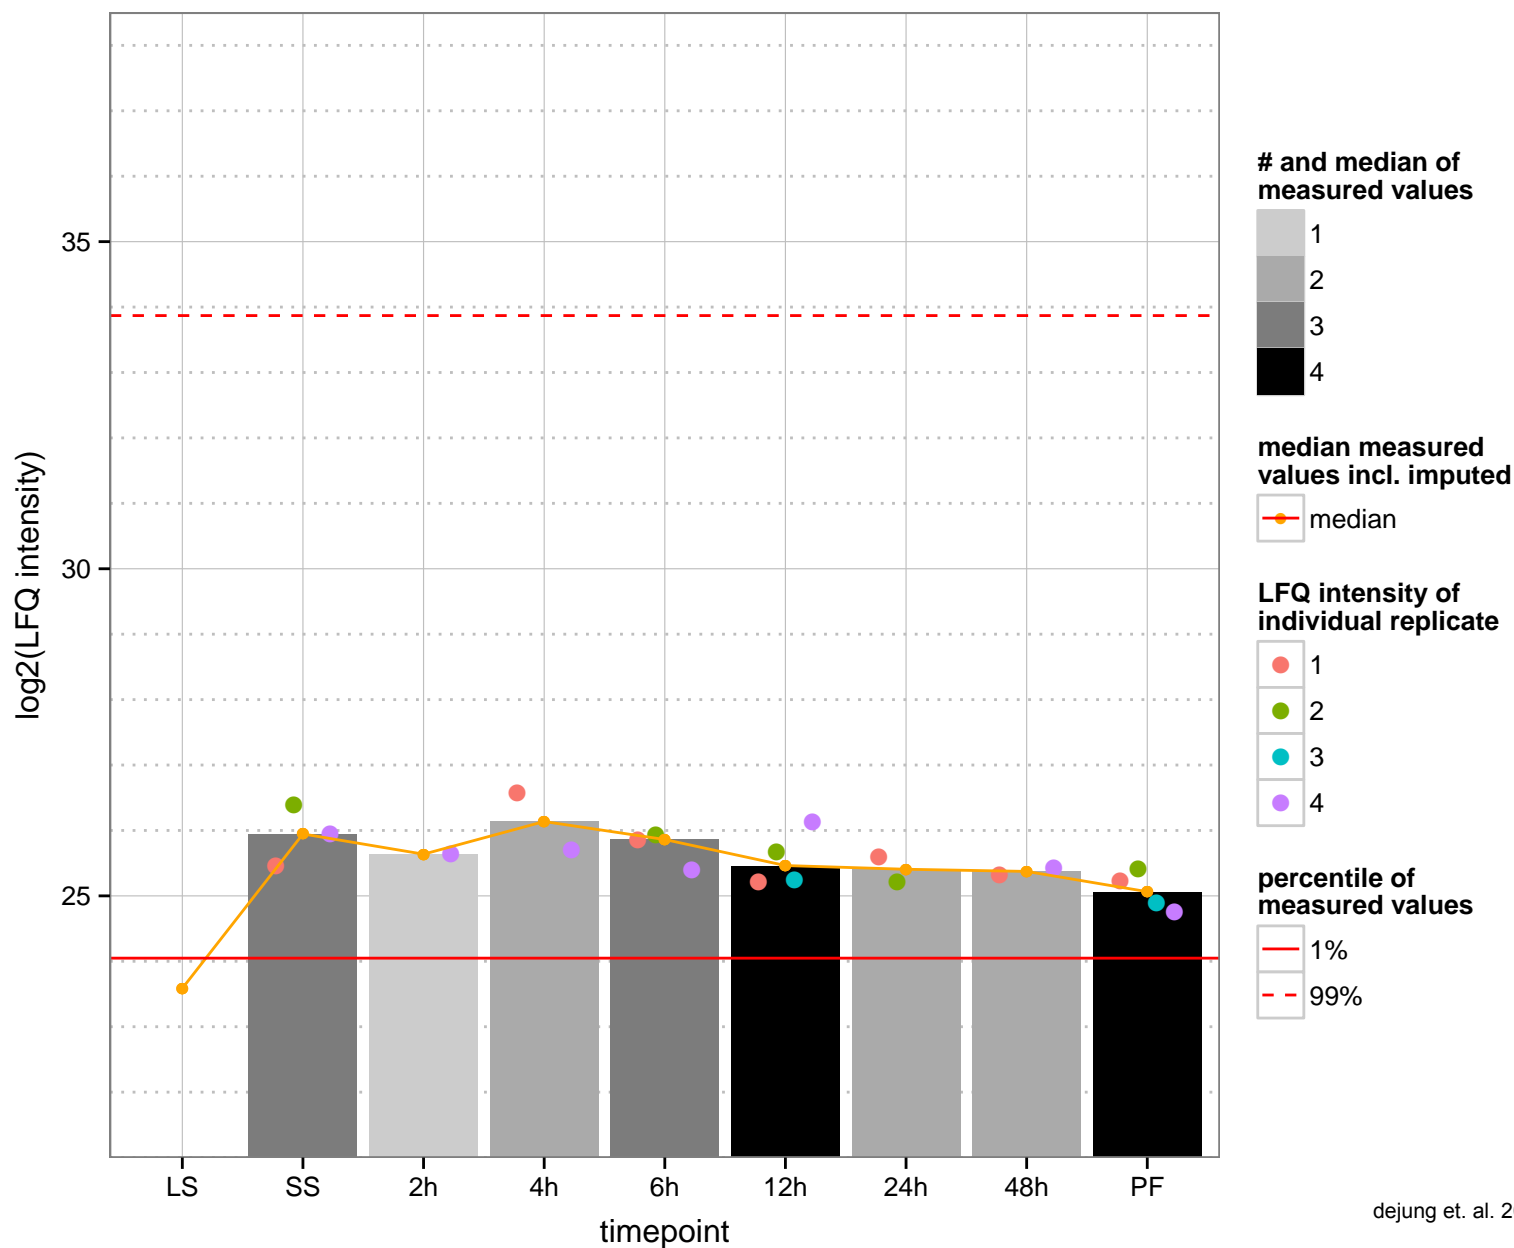

hypothetical protein, conserved  
 Tb927.7.3770  
 AGOF: null  
 AGOC: mitochondrion  
 AGOP: null  
 PGO: null  
 PGO: null  
 PGO: null

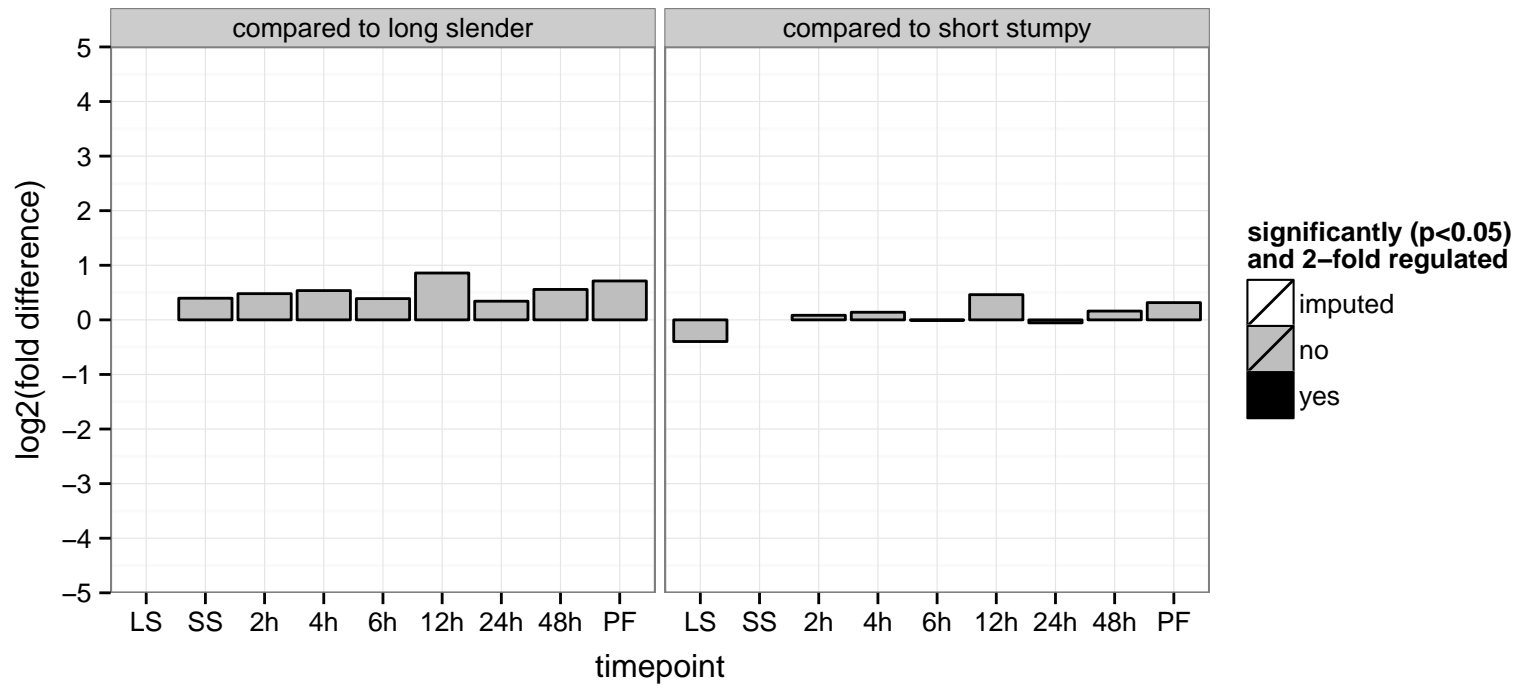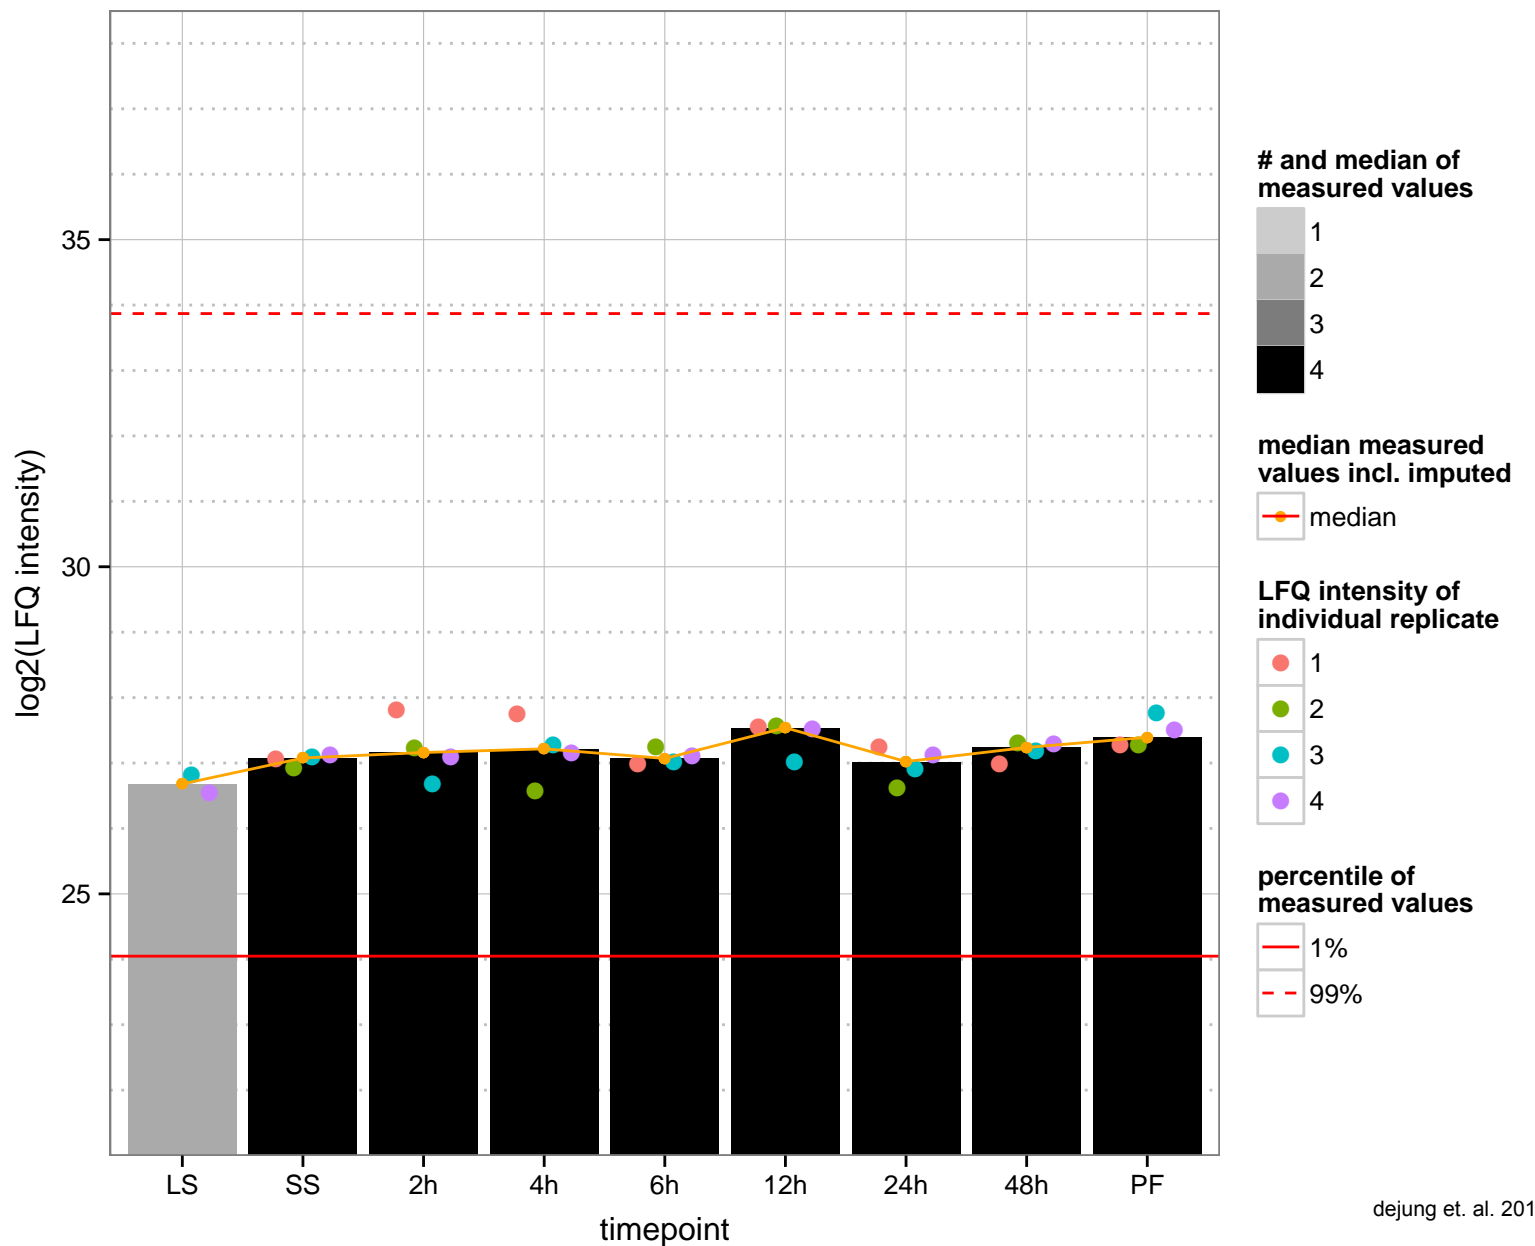

hypothetical protein, conserved  
 Tb927.7.3820  
 AGOF: null  
 AGOC: null  
 AGOP: null  
 PGO: protein binding  
 PGO: null  
 PGO: null

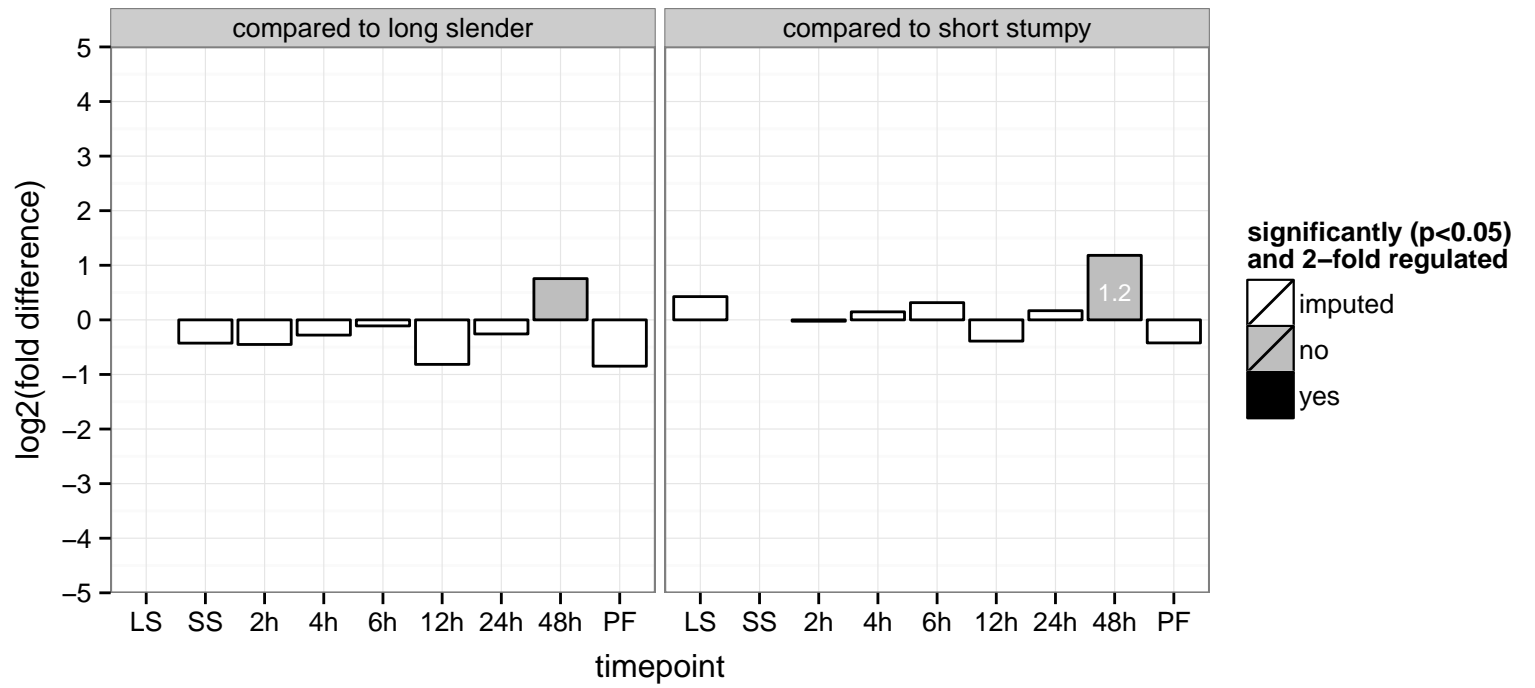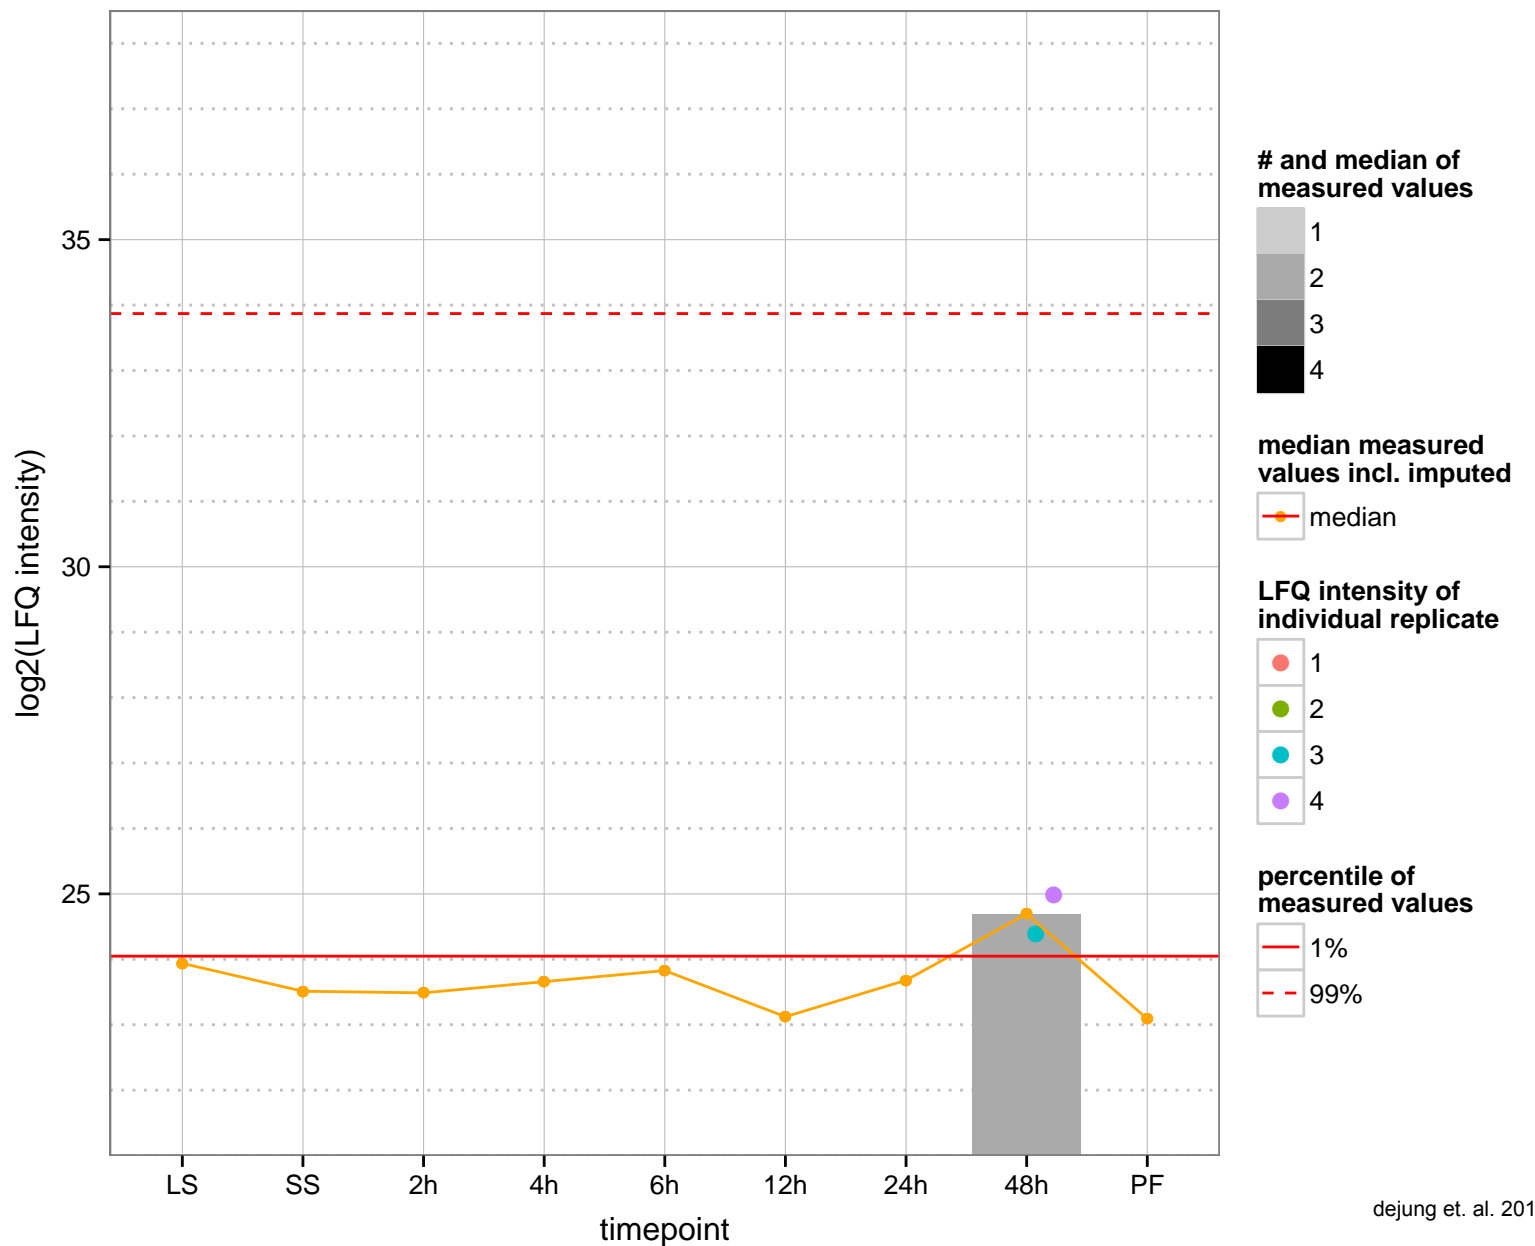

protein kinase, putative

Tb927.7.3880

AGOF: ATP binding, protein serine/threonine kinase activity, protein tyrosine kinase activity

AGOC: null

AGOP: protein phosphorylation

PGOF: ATP binding, protein kinase activity, transferase activity, transferring phosphorus-containing groups

PGOC: null

PGOP: protein phosphorylation

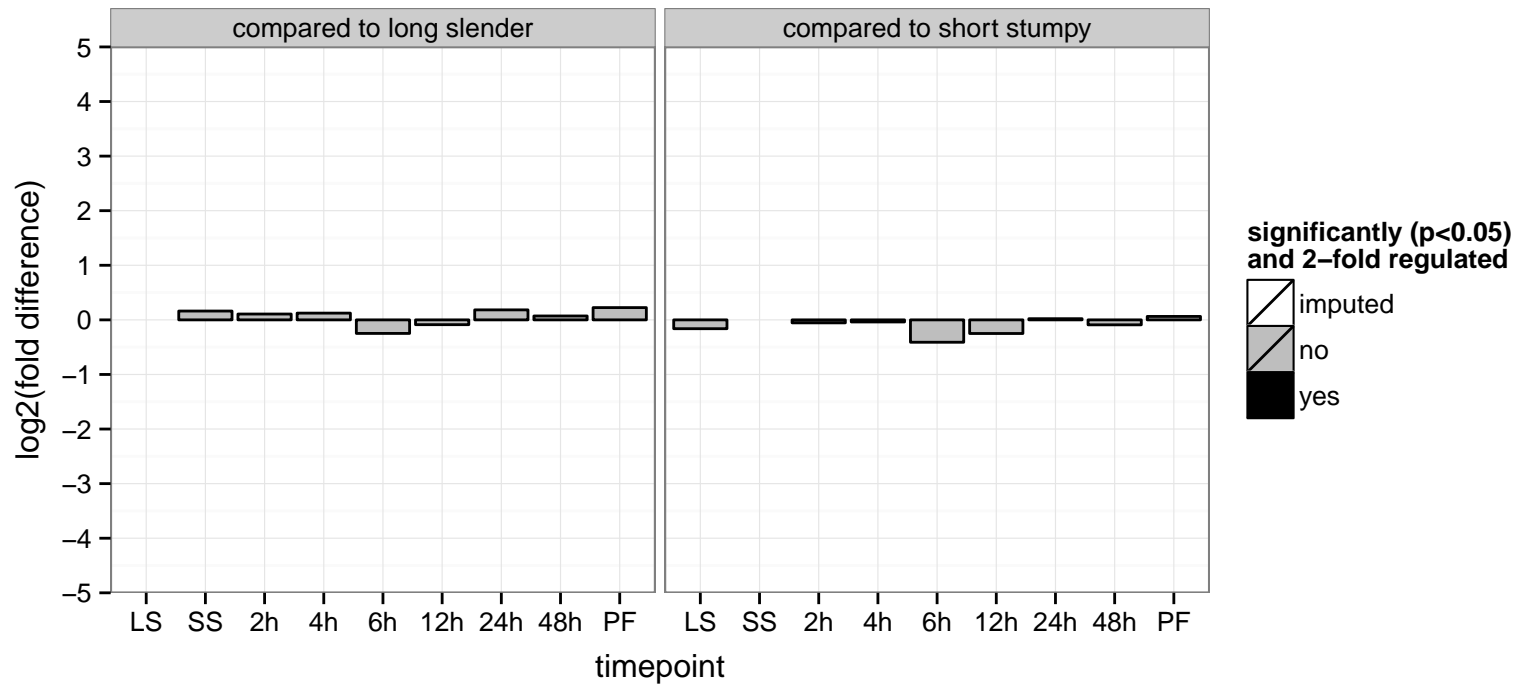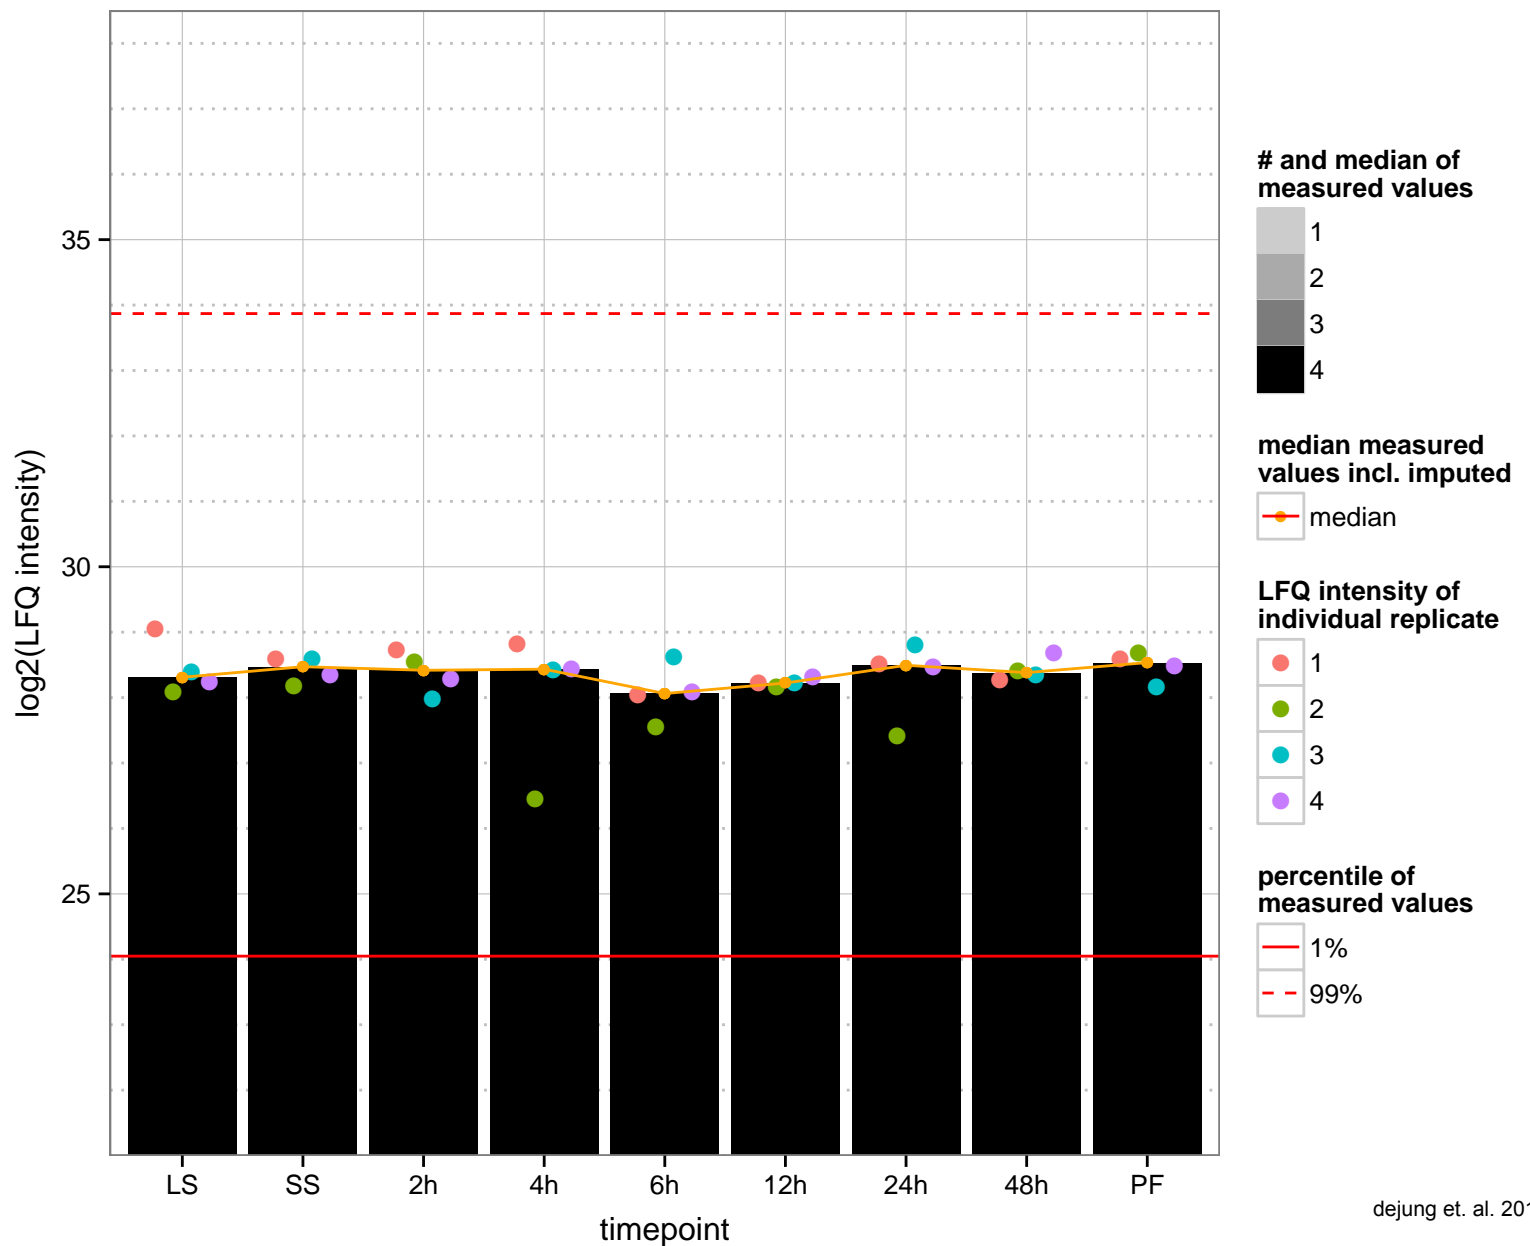

hypothetical protein, conserved  
 Tb927.7.3920  
 AGOF: null  
 AGOC: null  
 AGOP: null  
 PGO: null  
 PGOC: null  
 PGOP: null

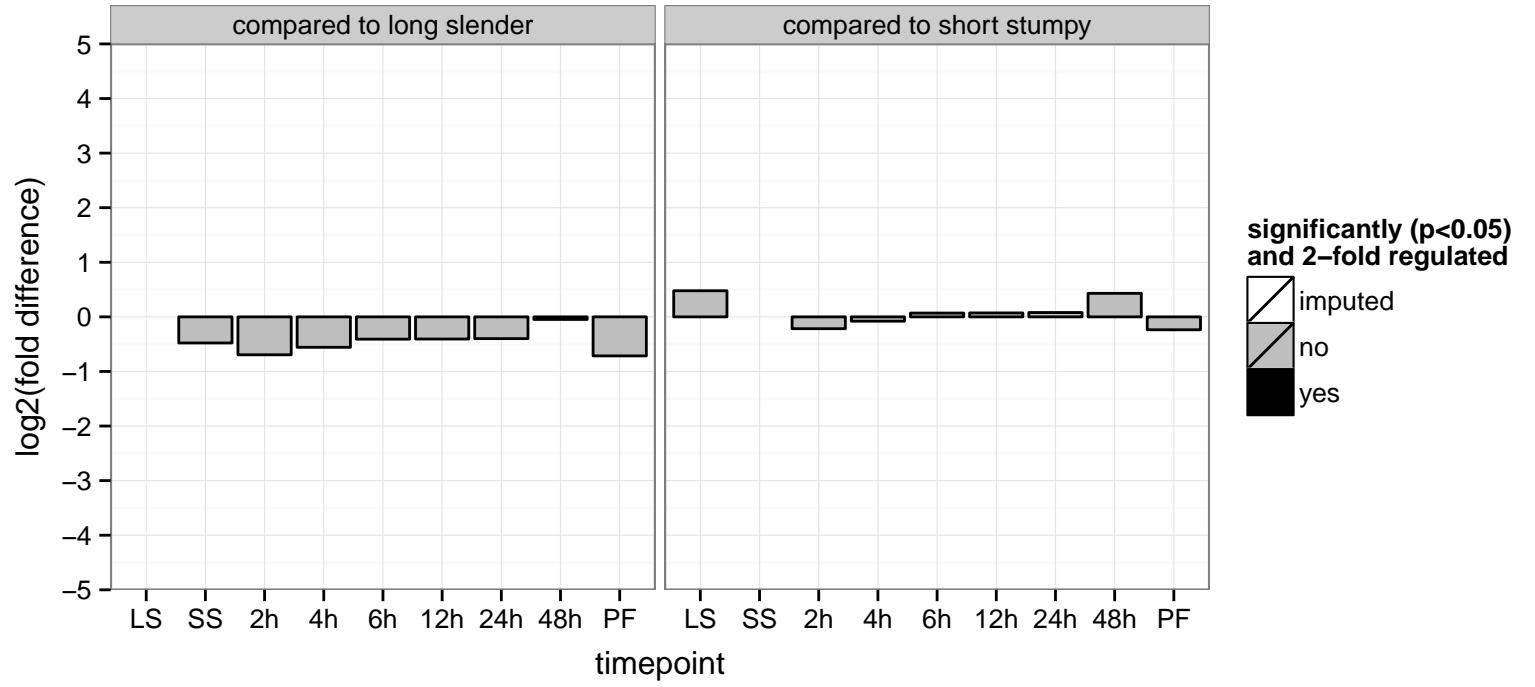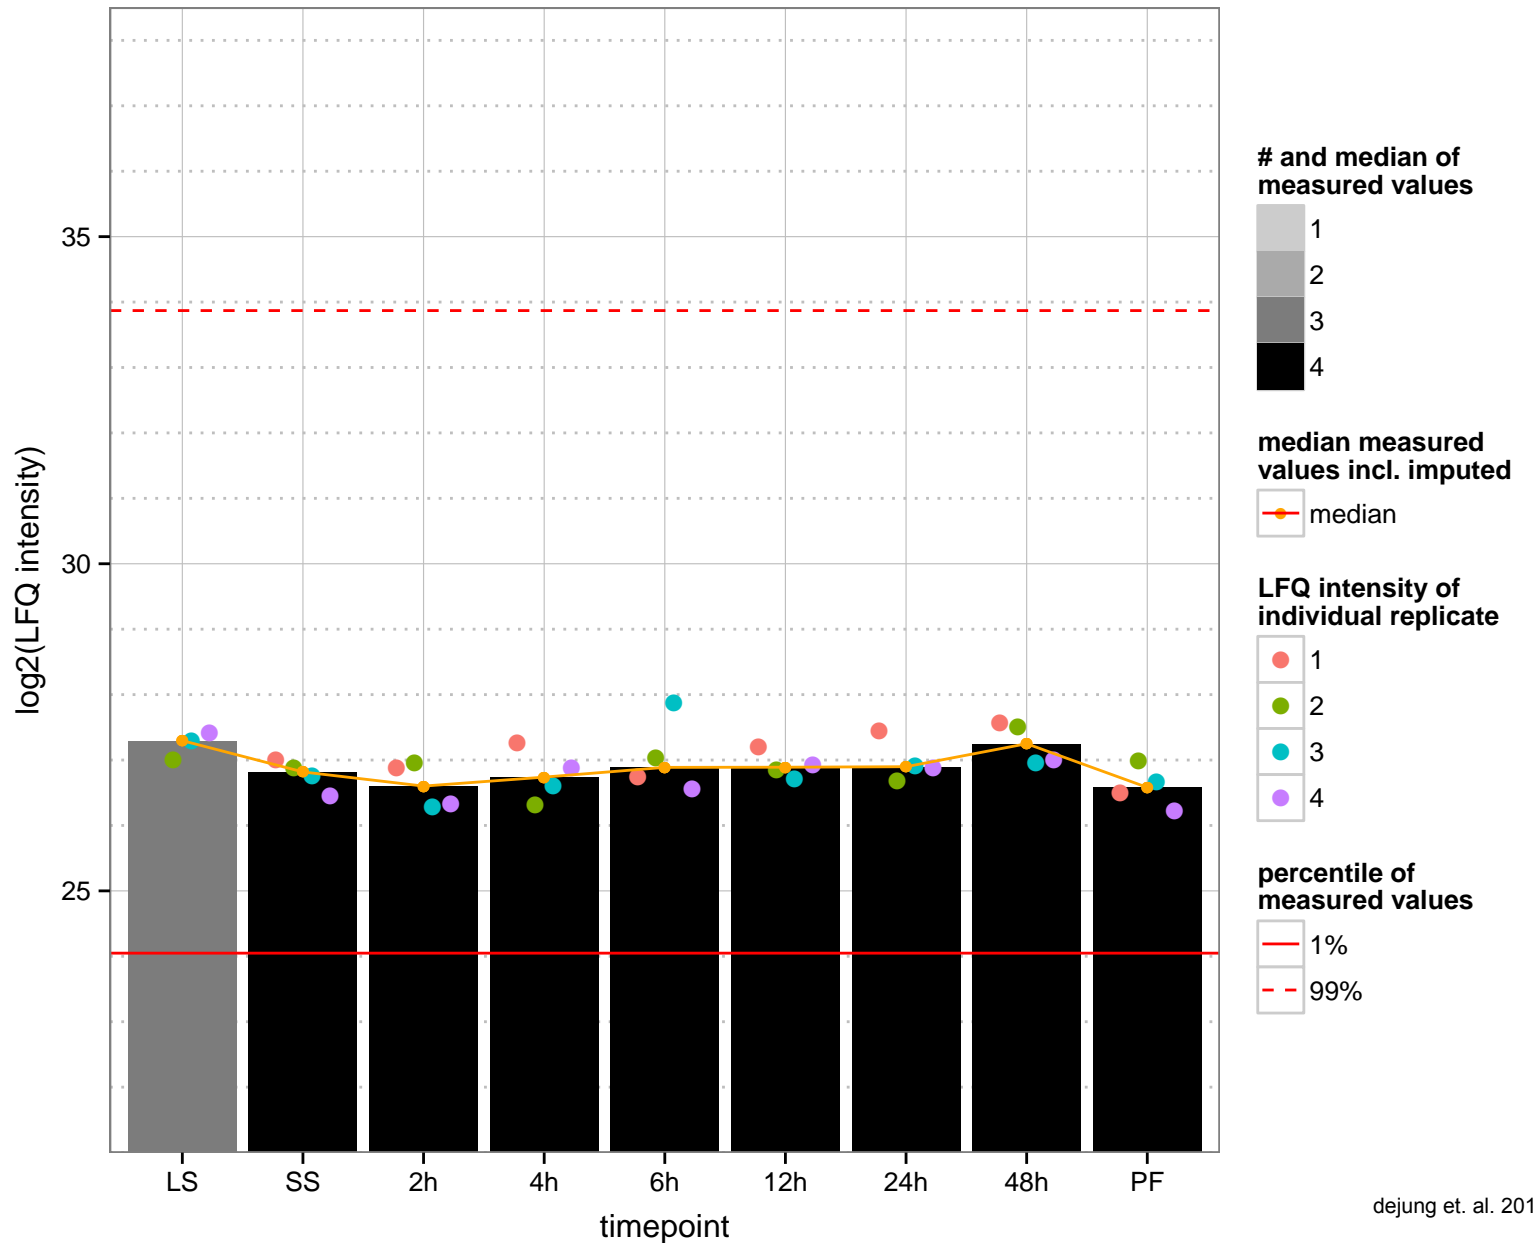



immunodominant antigen, putative, tc40 antigen-like  
 Tb927.7.3980  
 AGOF: null  
 AGOC: null  
 AGOP: null  
 PGOF: null  
 PGOC: null  
 PGOP: null

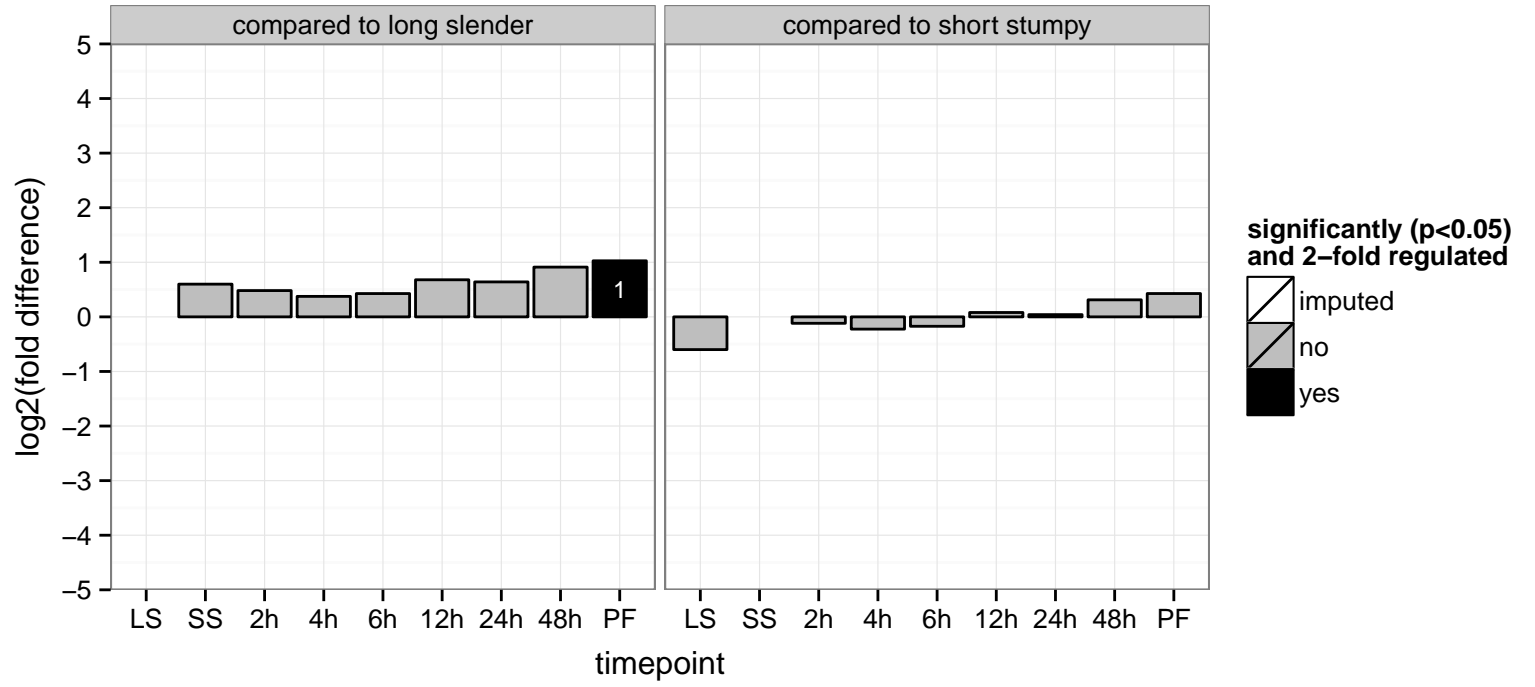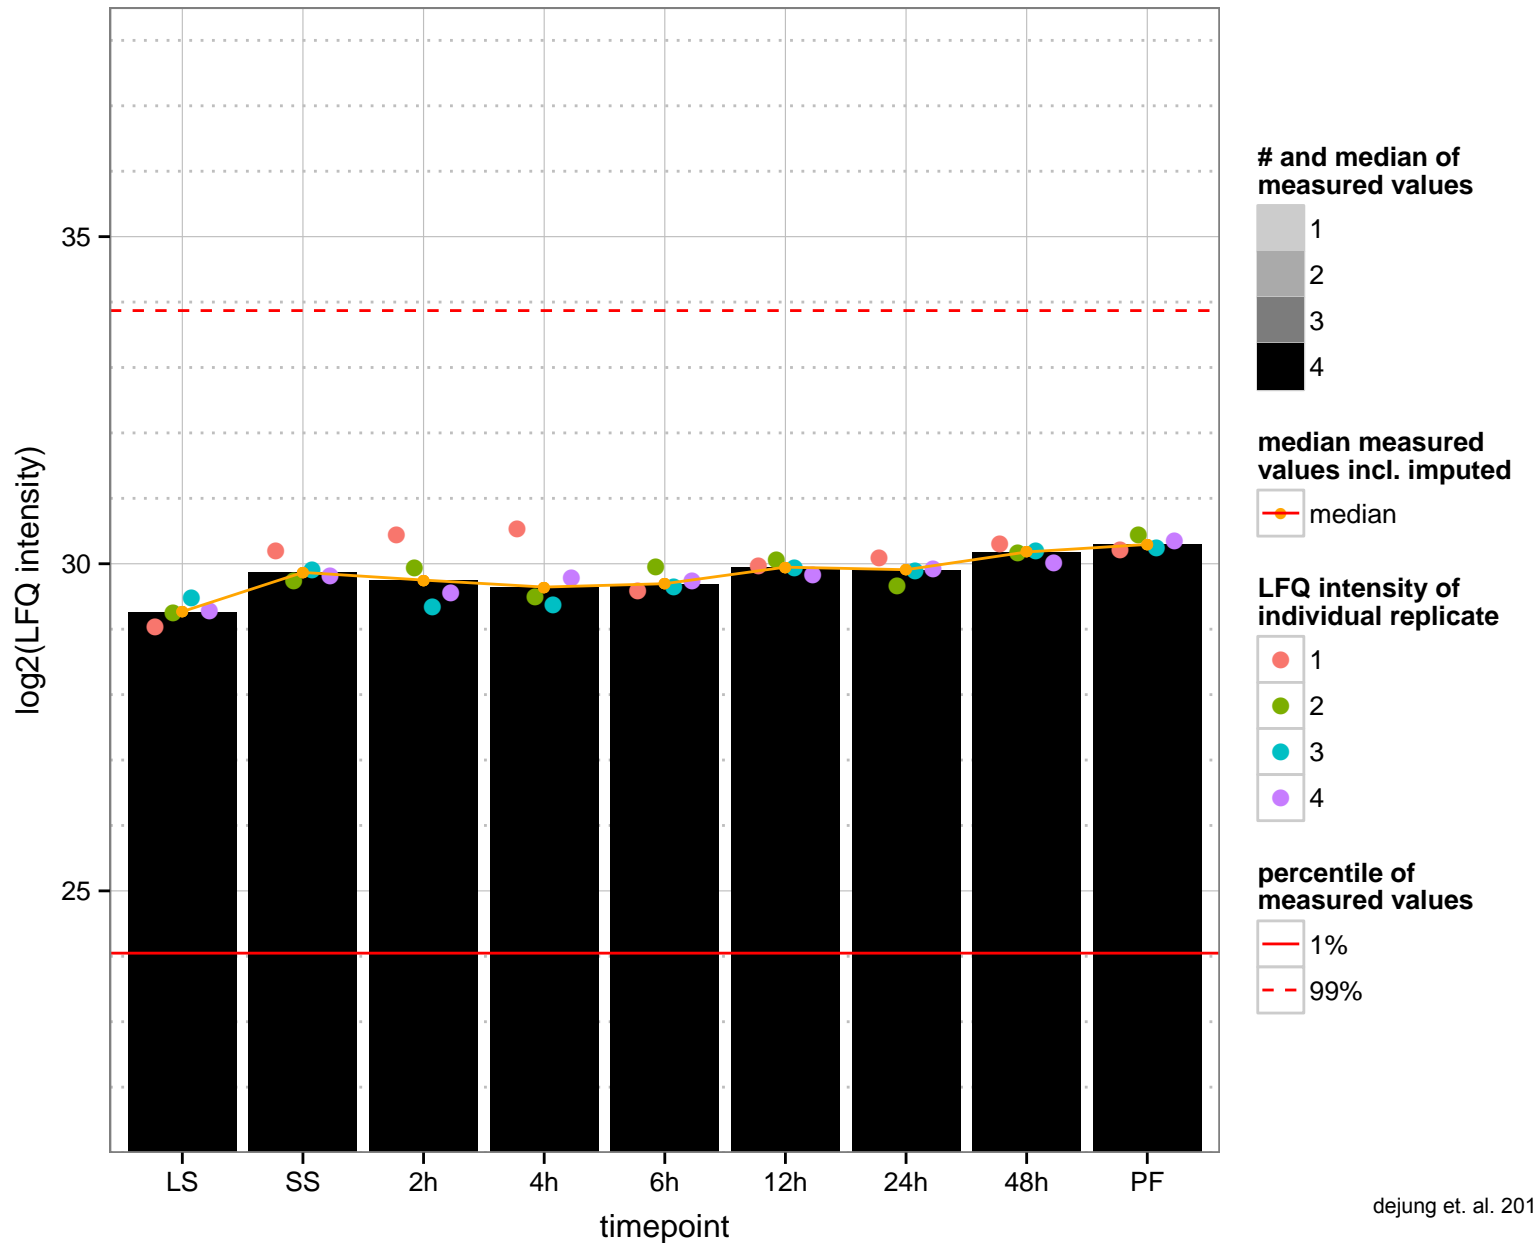

glutathione synthetase, putative  
 Tb927.7.4000  
 AGOF: ATP binding, glutathione synthase activity  
 AGOC: null  
 AGOP: glutathione biosynthetic process  
 PGO: ATP binding, glutathione synthase activity  
 PGOC: null  
 PGOP: glutathione biosynthetic process

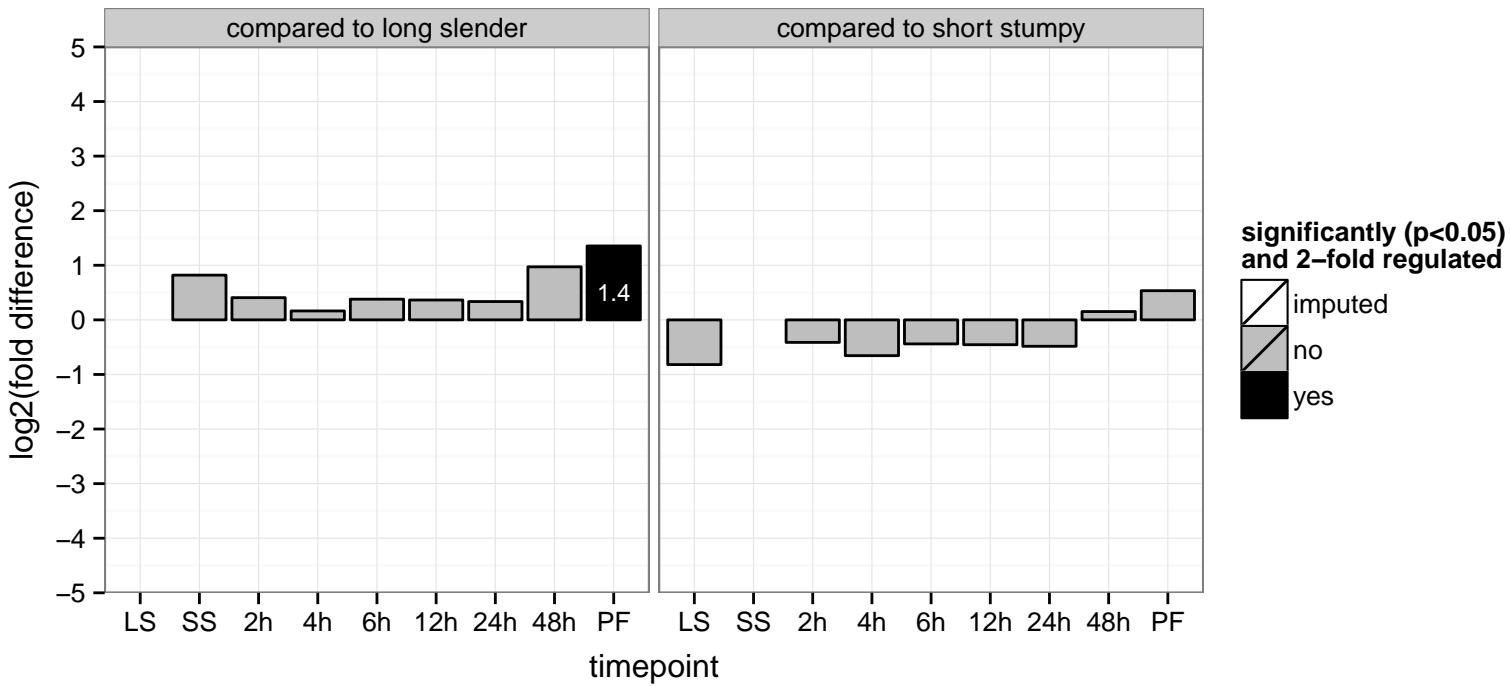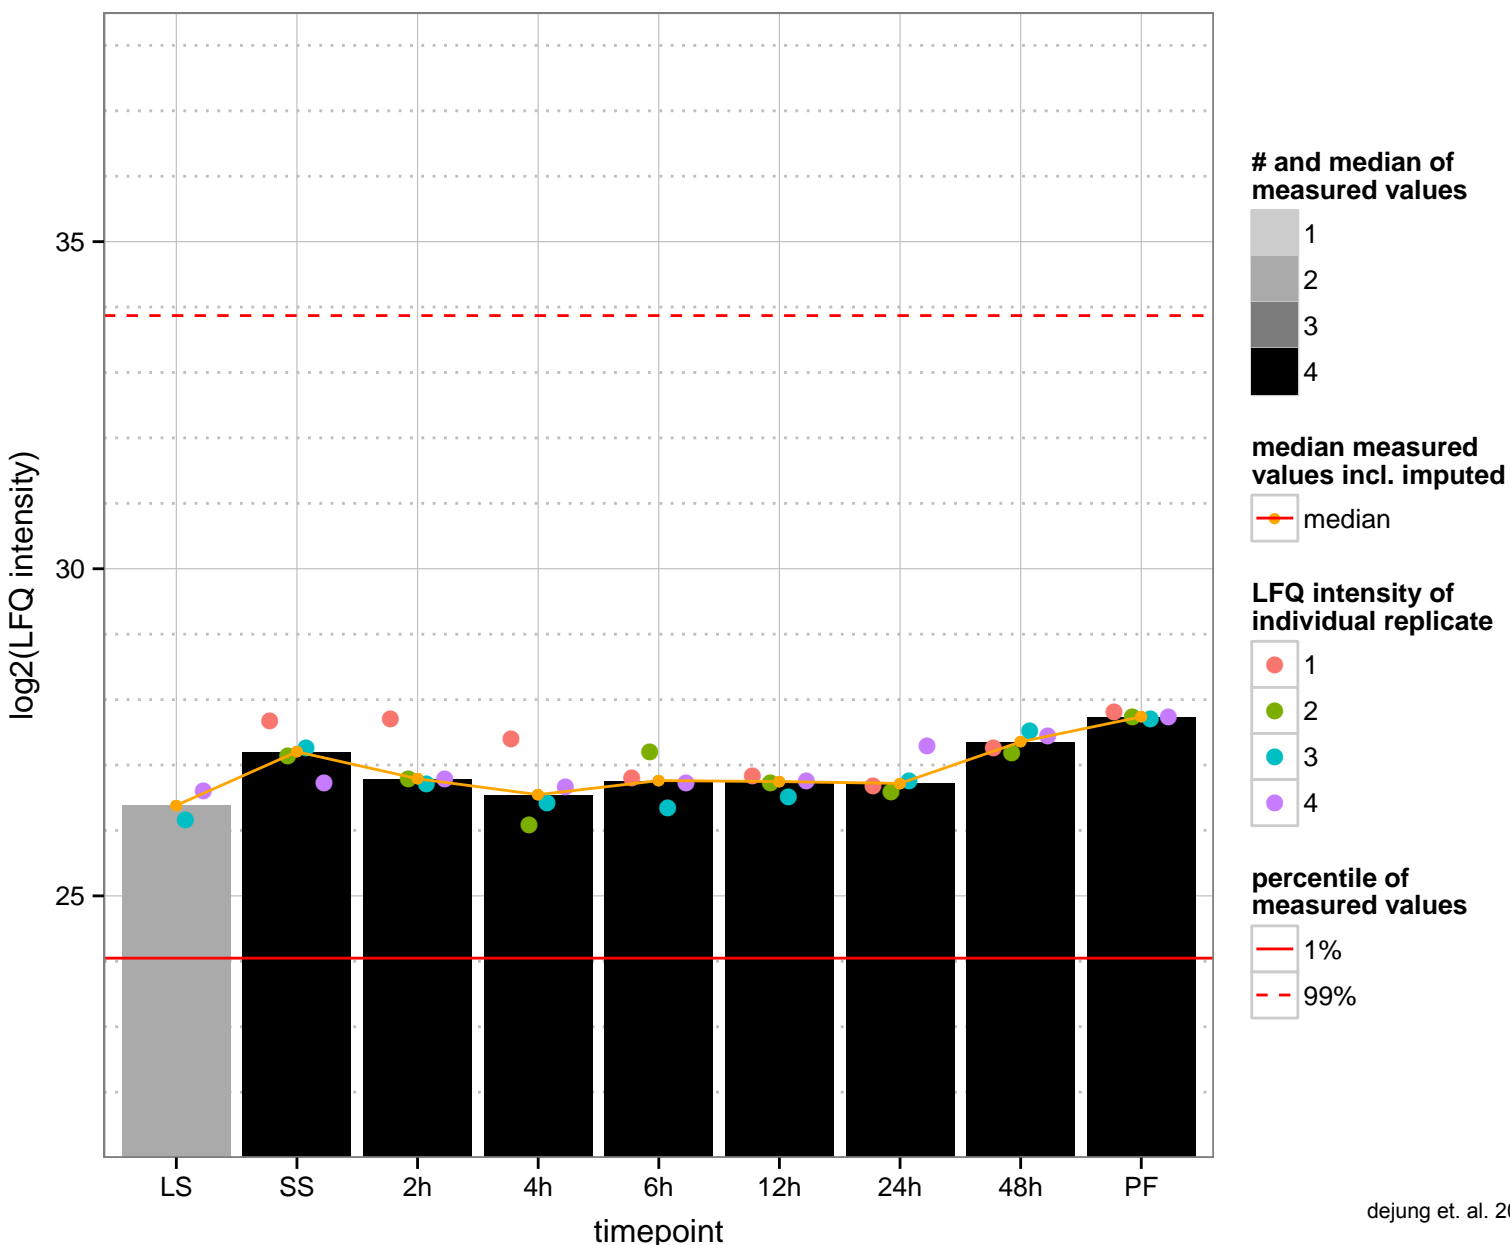

protein phosphatase 2C, putative  
 Tb927.7.4020  
 AGOF: phosphatase activity  
 AGOC: null  
 AGOP: dephosphorylation  
 PGO: catalytic activity  
 PGOC: null  
 PGOP: null

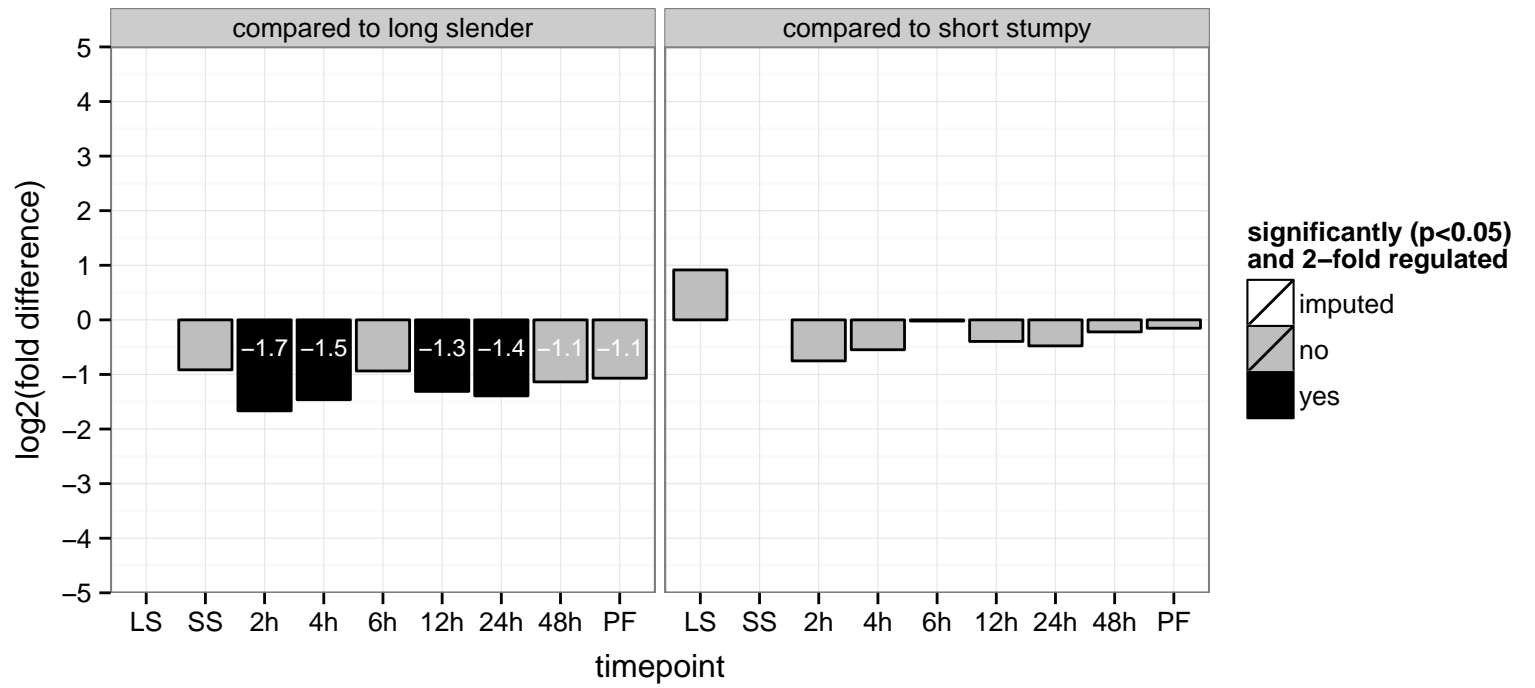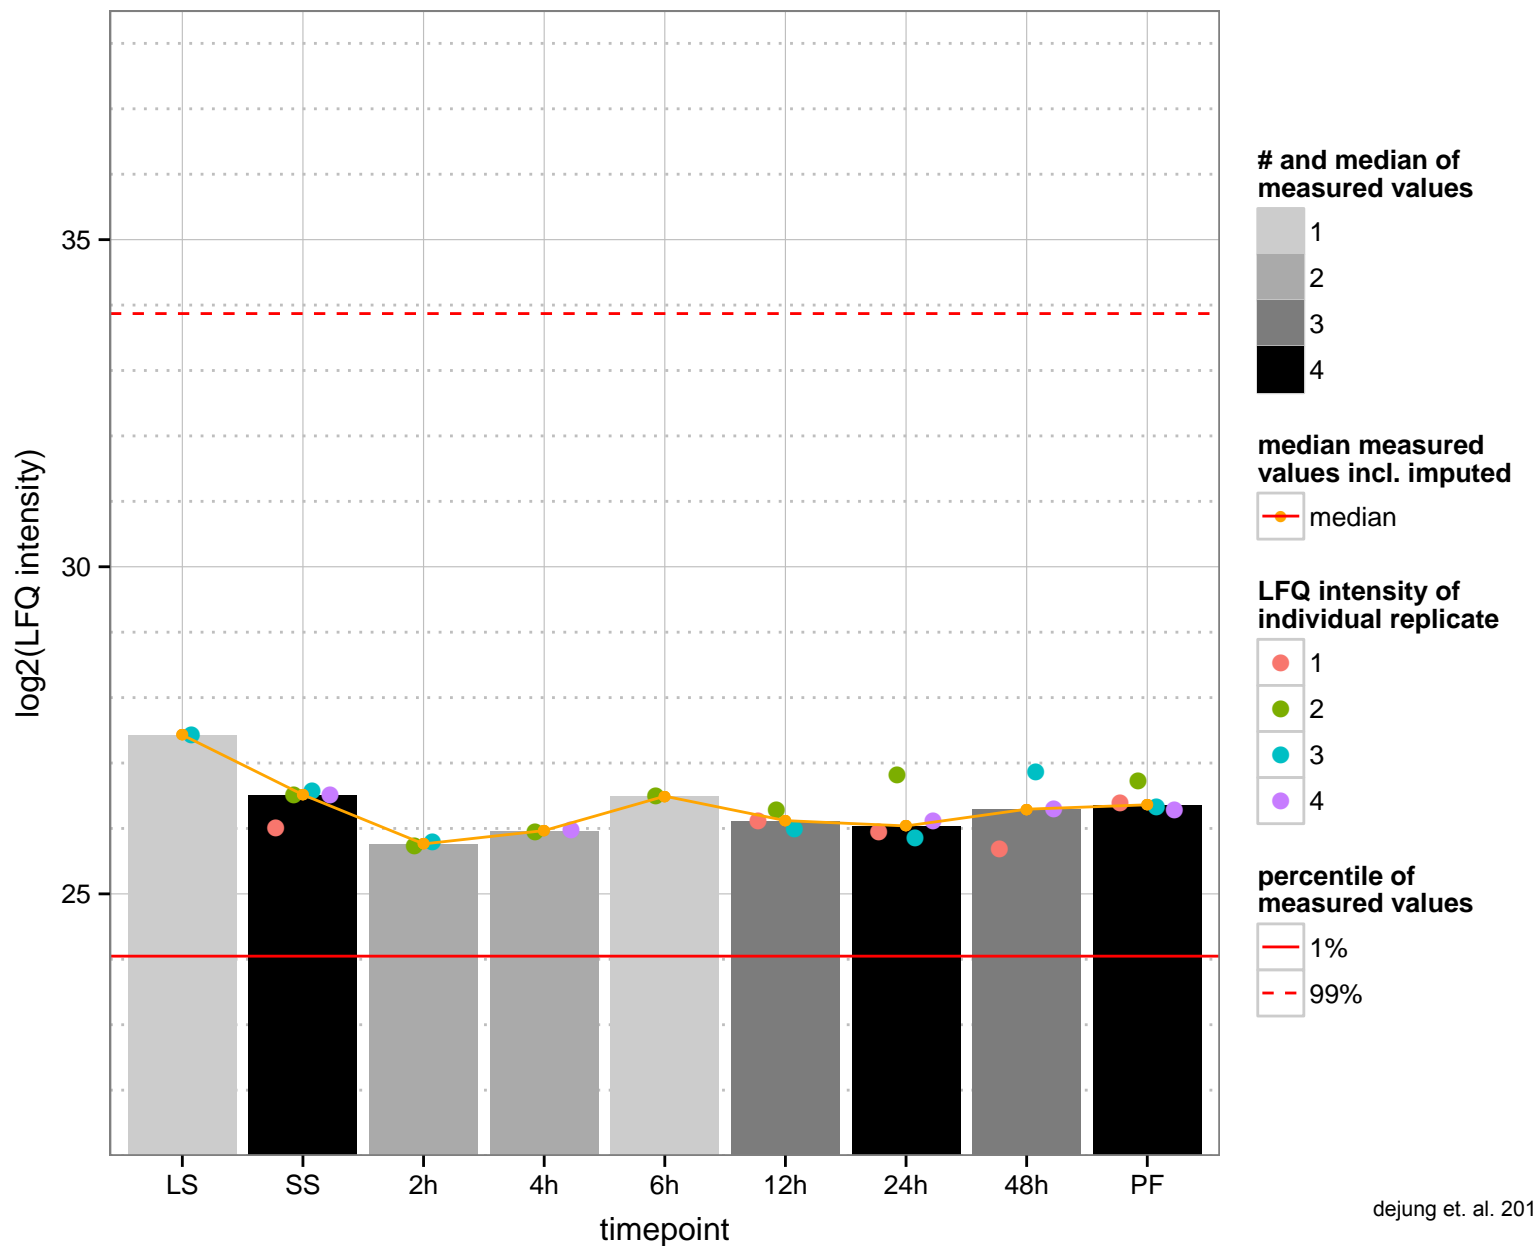

fatty acid elongase, putative  
 Tb927.7.4180  
 AGOF: fatty acid elongase activity  
 AGOC: integral to endoplasmic reticulum membrane  
 AGOP: long-chain fatty acid biosynthetic process  
 PGO: null  
 PGOC: integral to membrane  
 PGOP: null

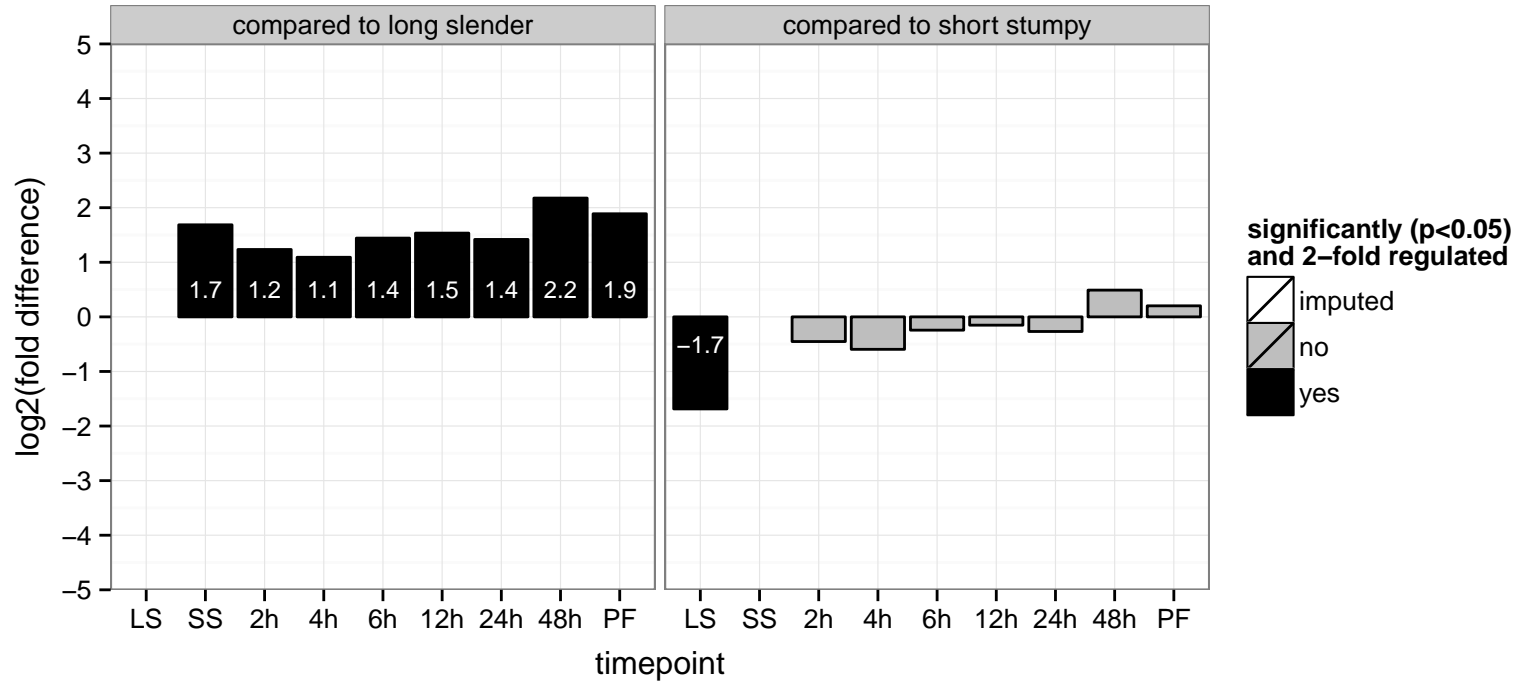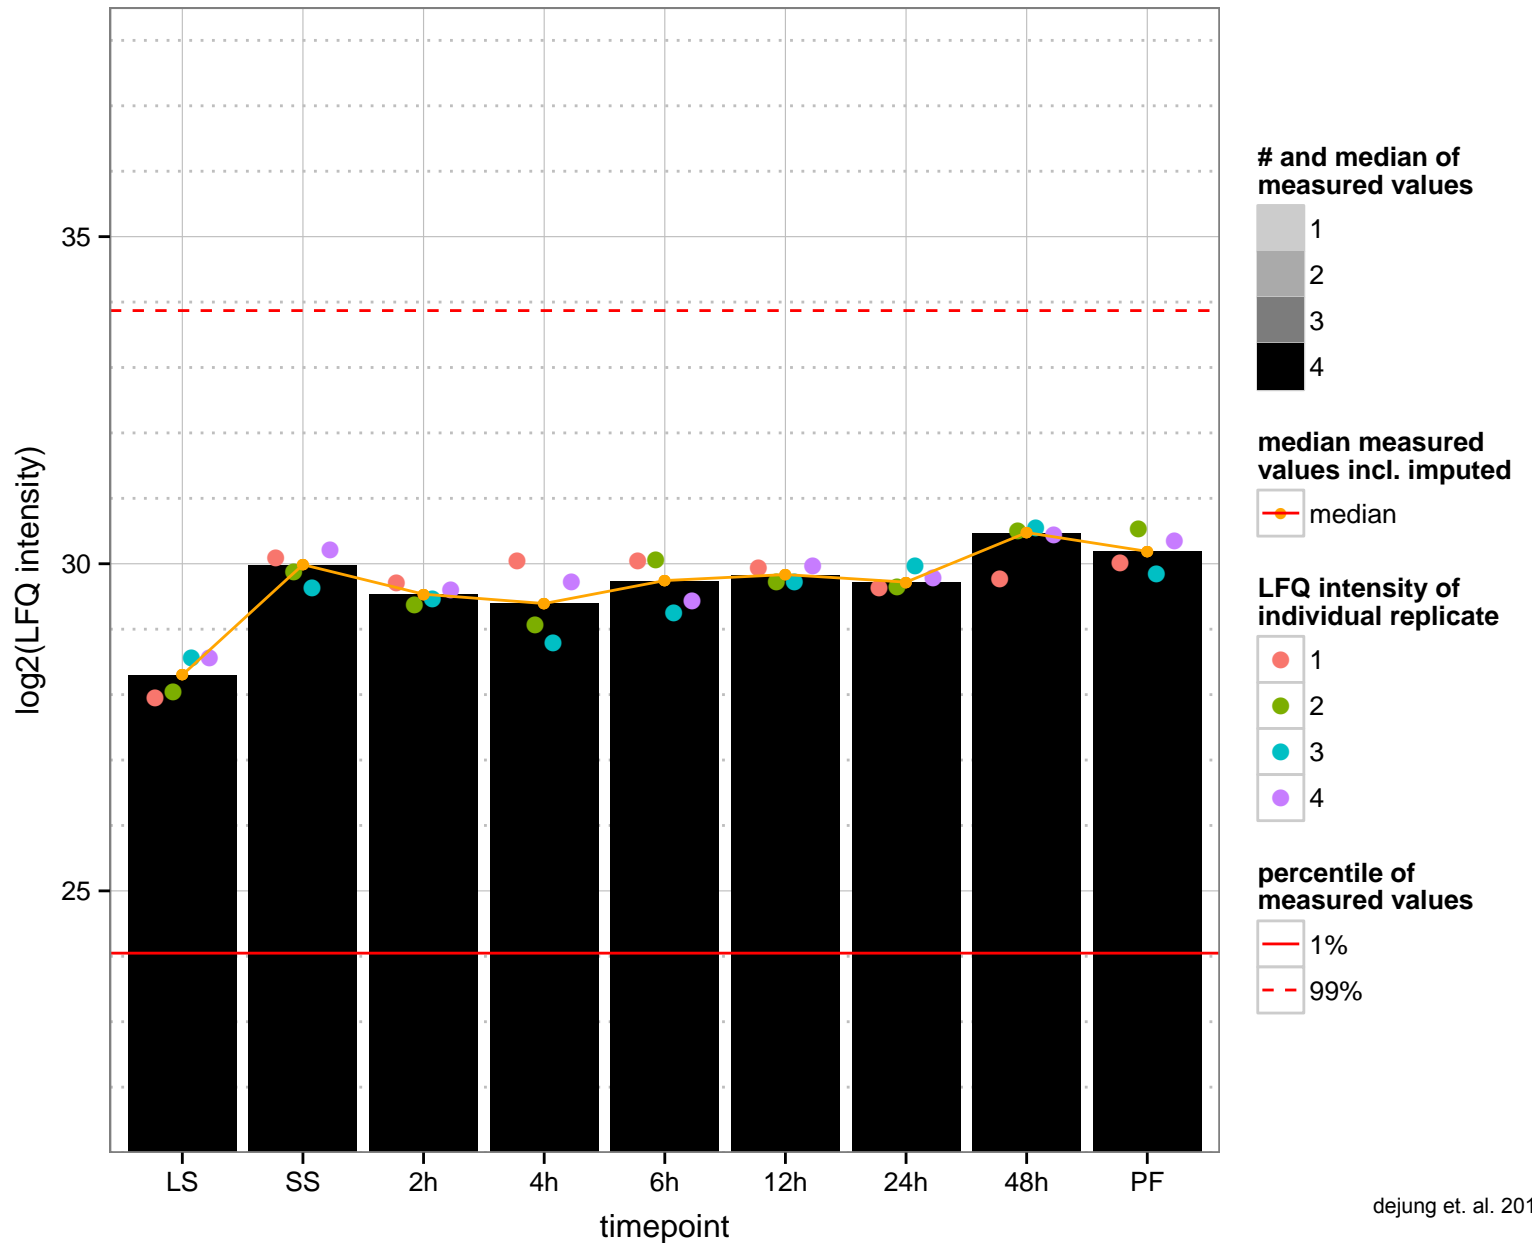

hypothetical protein, conserved  
 Tb927.7.4220  
 AGOF: null  
 AGOC: small-subunit processome  
 AGOP: rRNA processing  
 PGO: protein binding  
 PGO: null  
 PGO: null

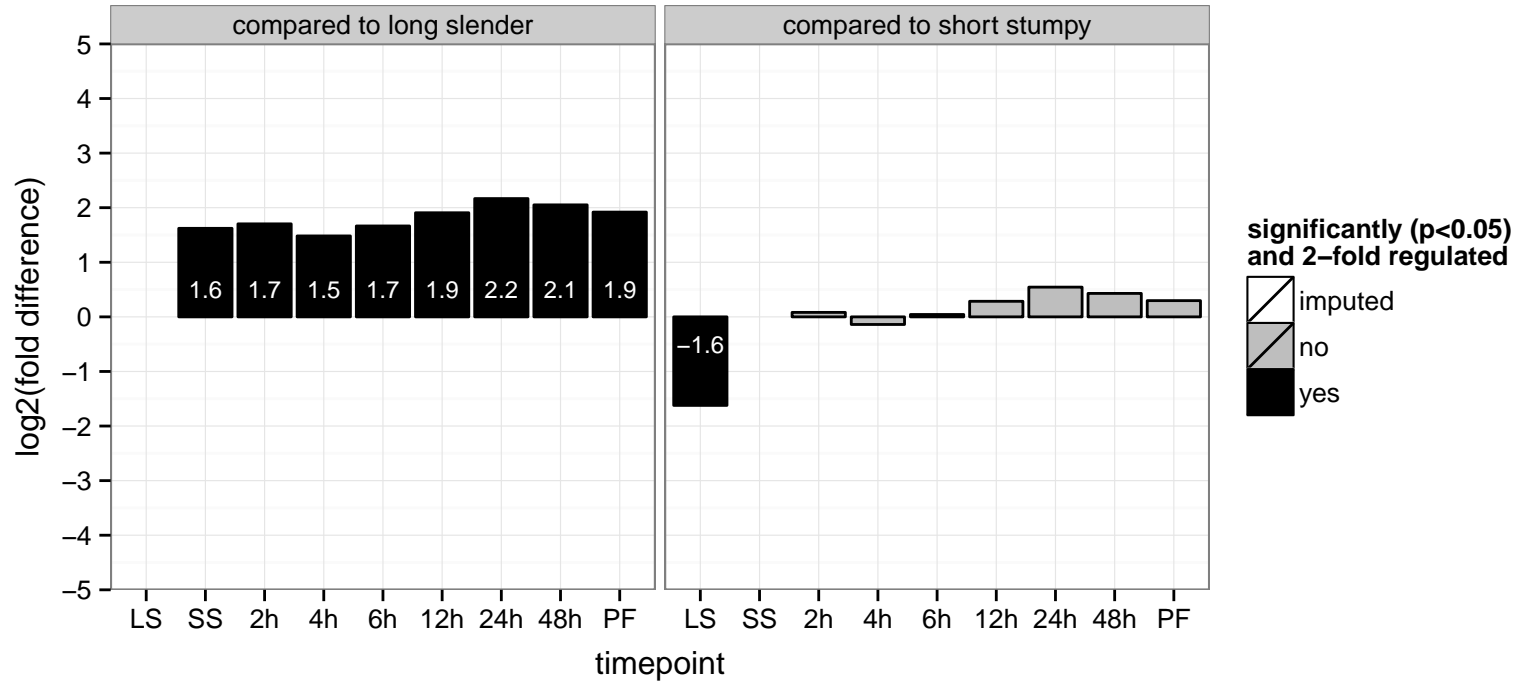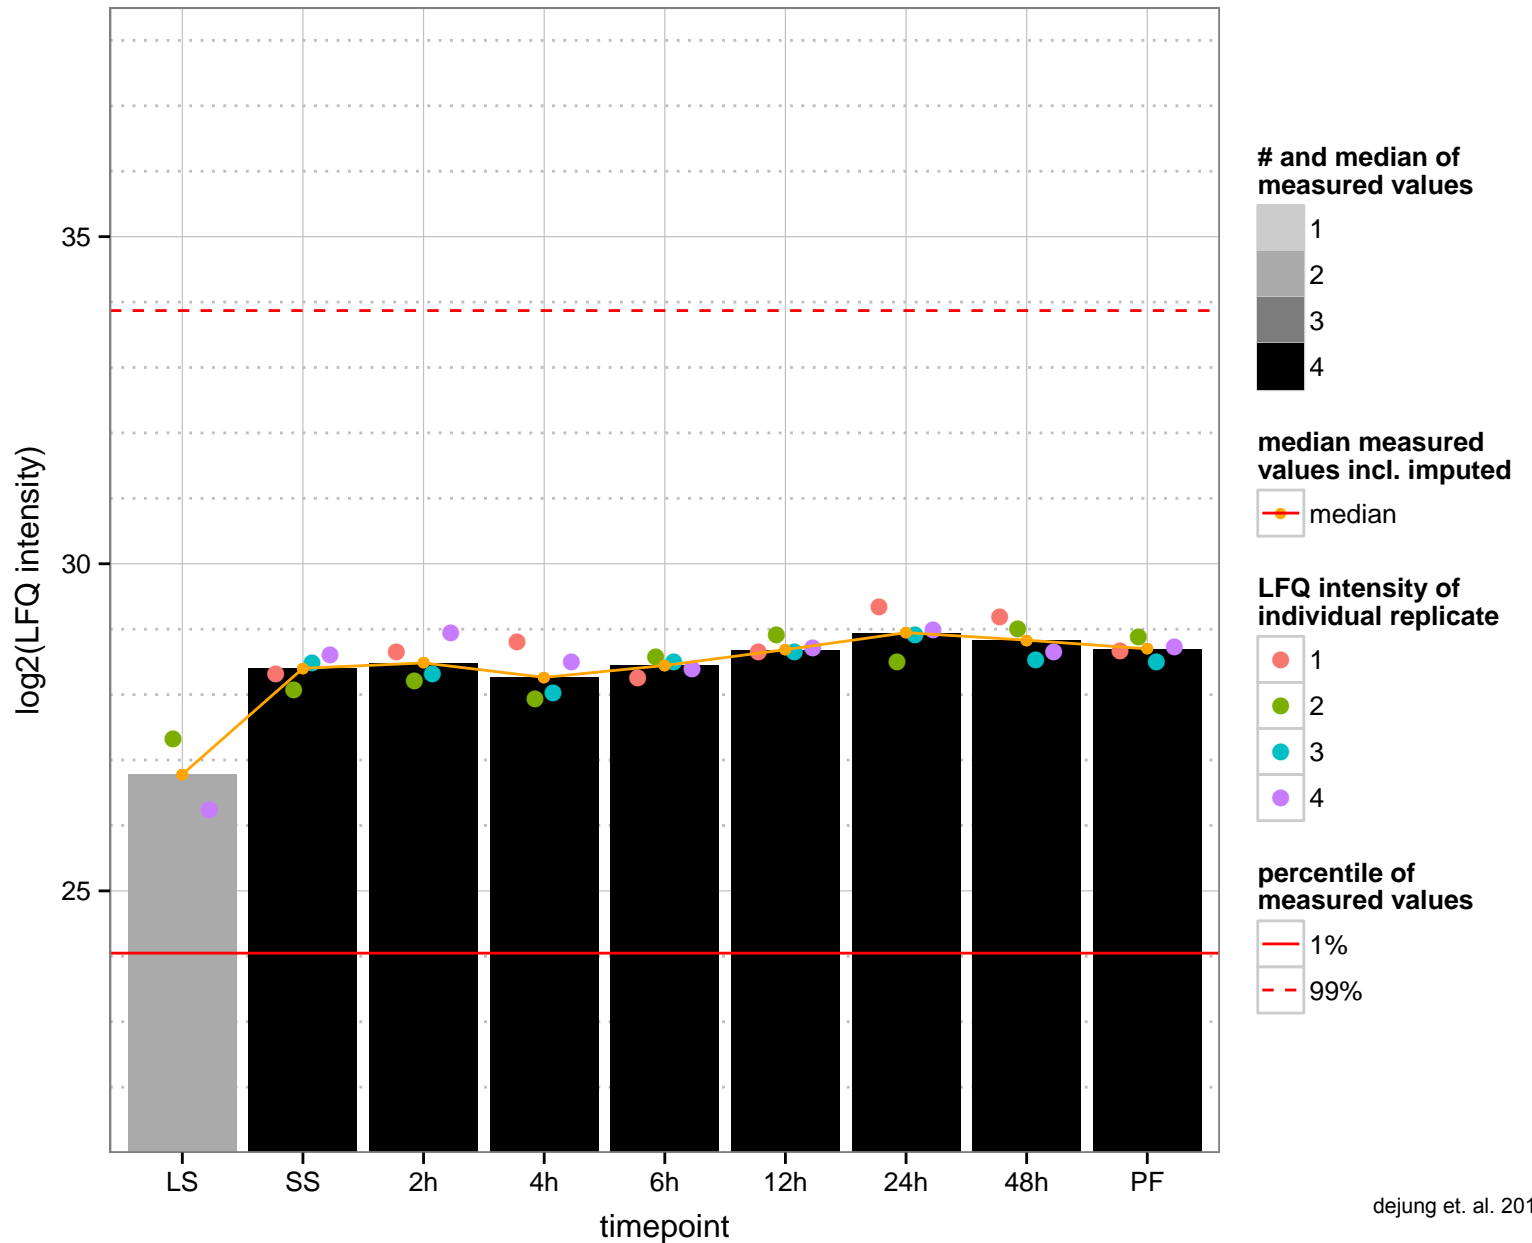

hypothetical protein, conserved  
 Tb927.7.4230  
 AGOF: null  
 AGOC: null  
 AGOP: null  
 PGO: null  
 PGO: null  
 PGO: null

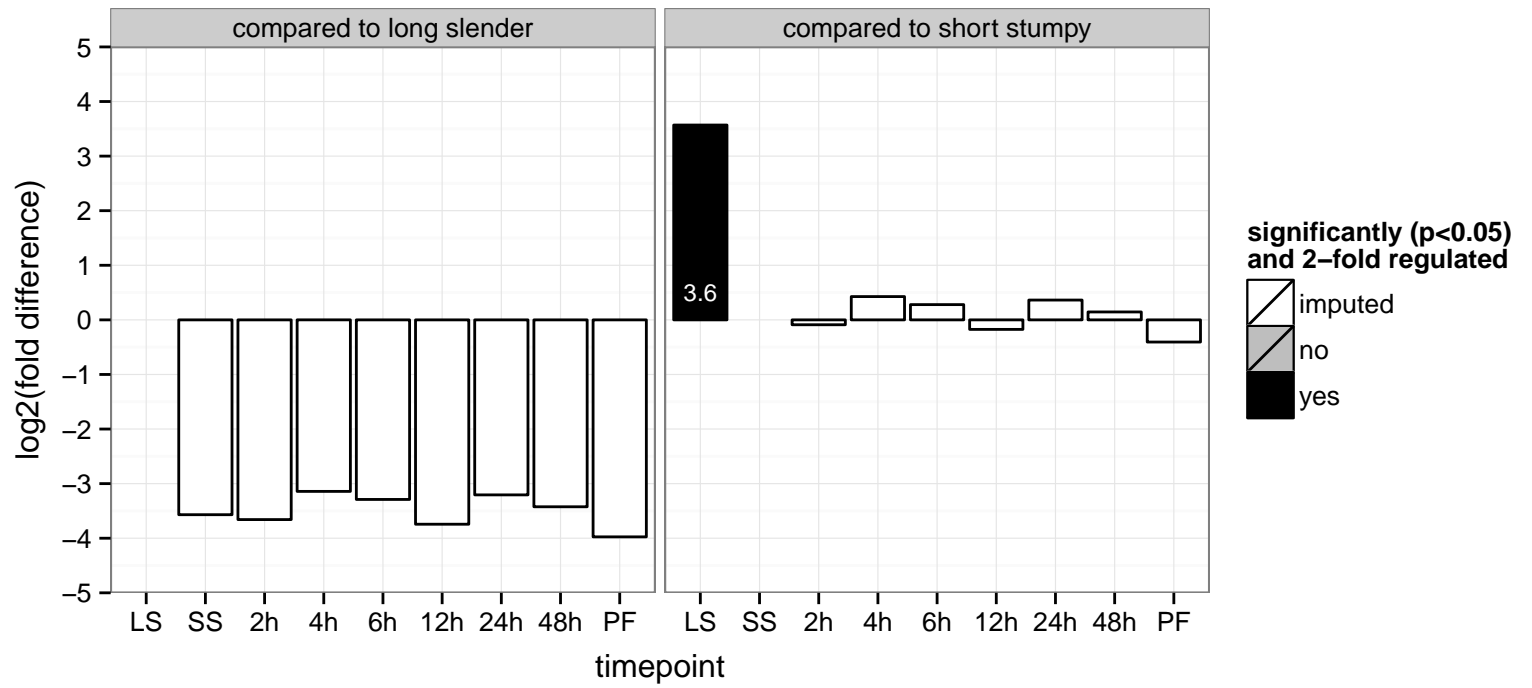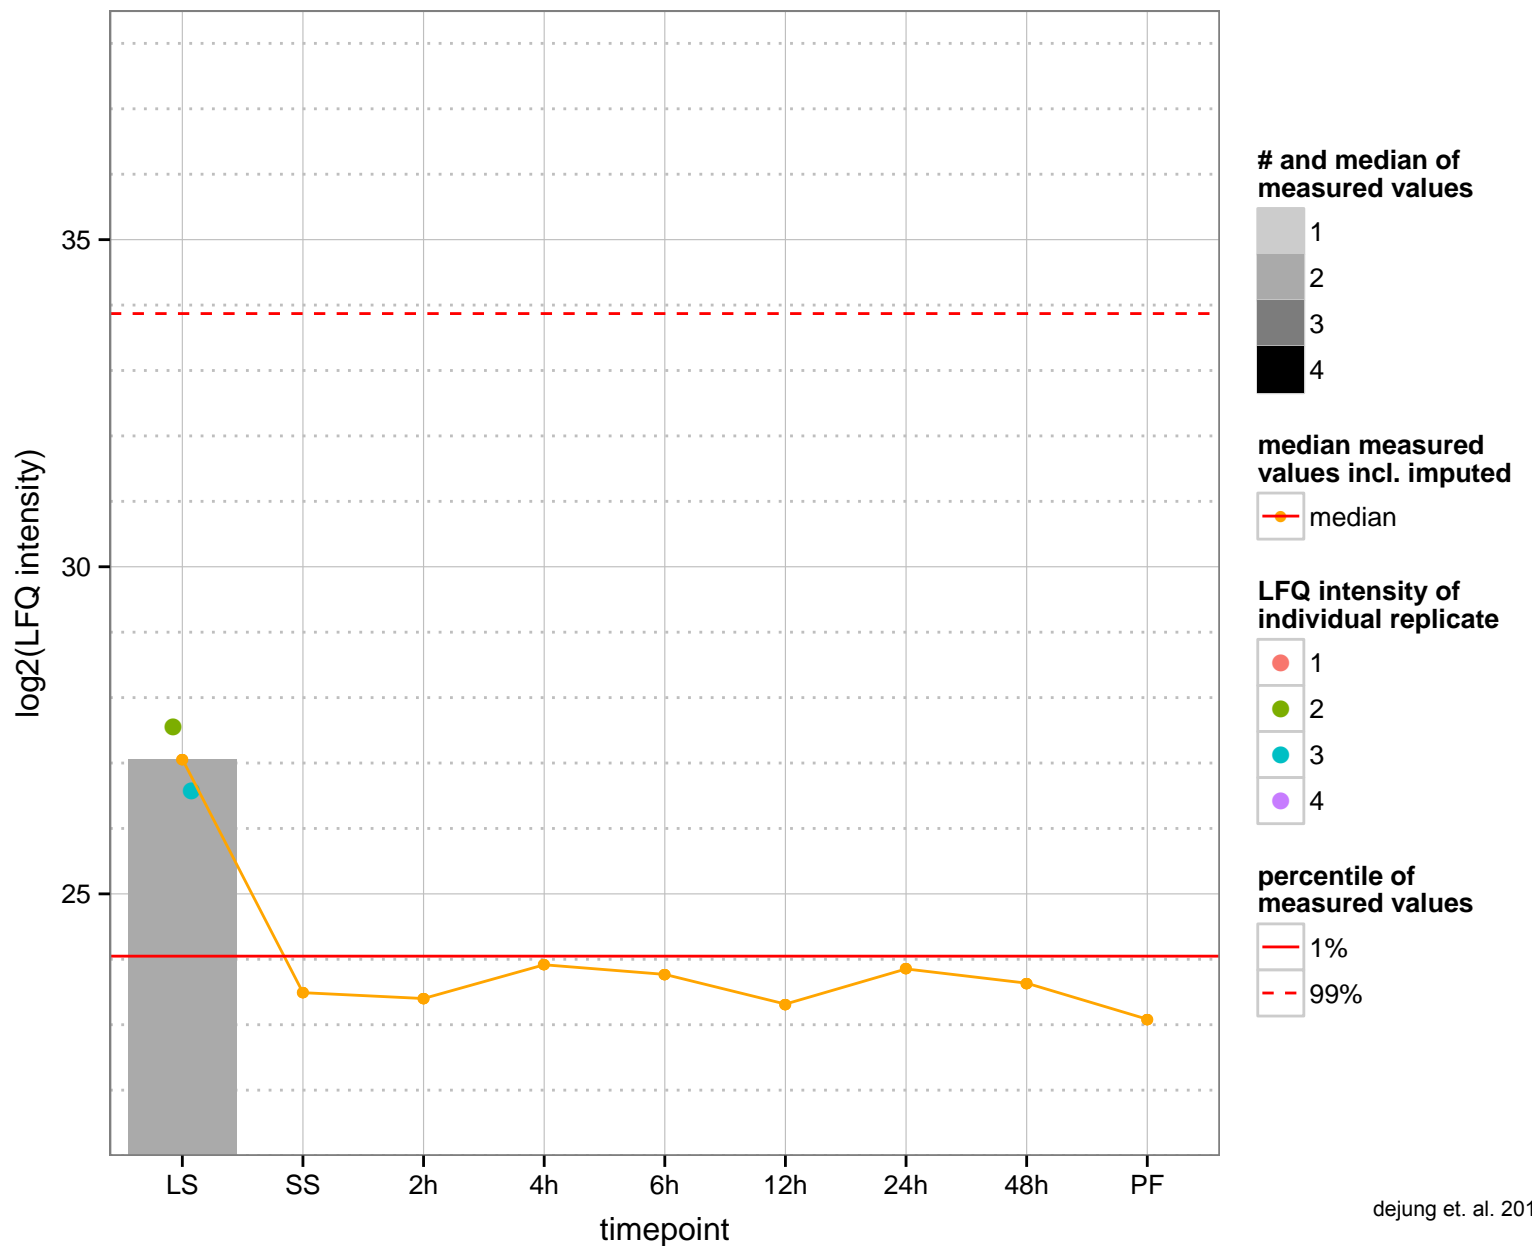

hypothetical protein, conserved  
 Tb927.7.4250;Tb927.7.4240  
 AGOF: null  
 AGOC: null  
 AGOP: null  
 PGO: null  
 PGOC: null  
 PGOP: null

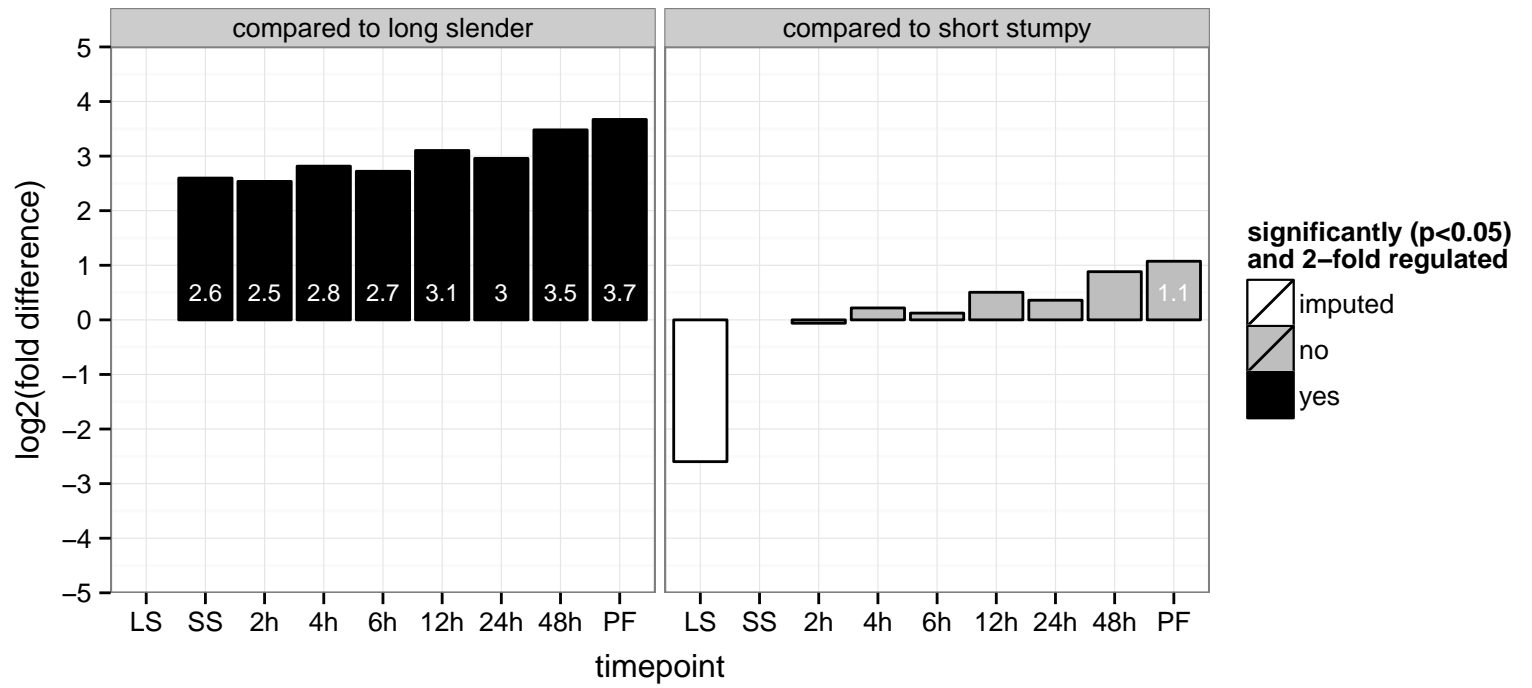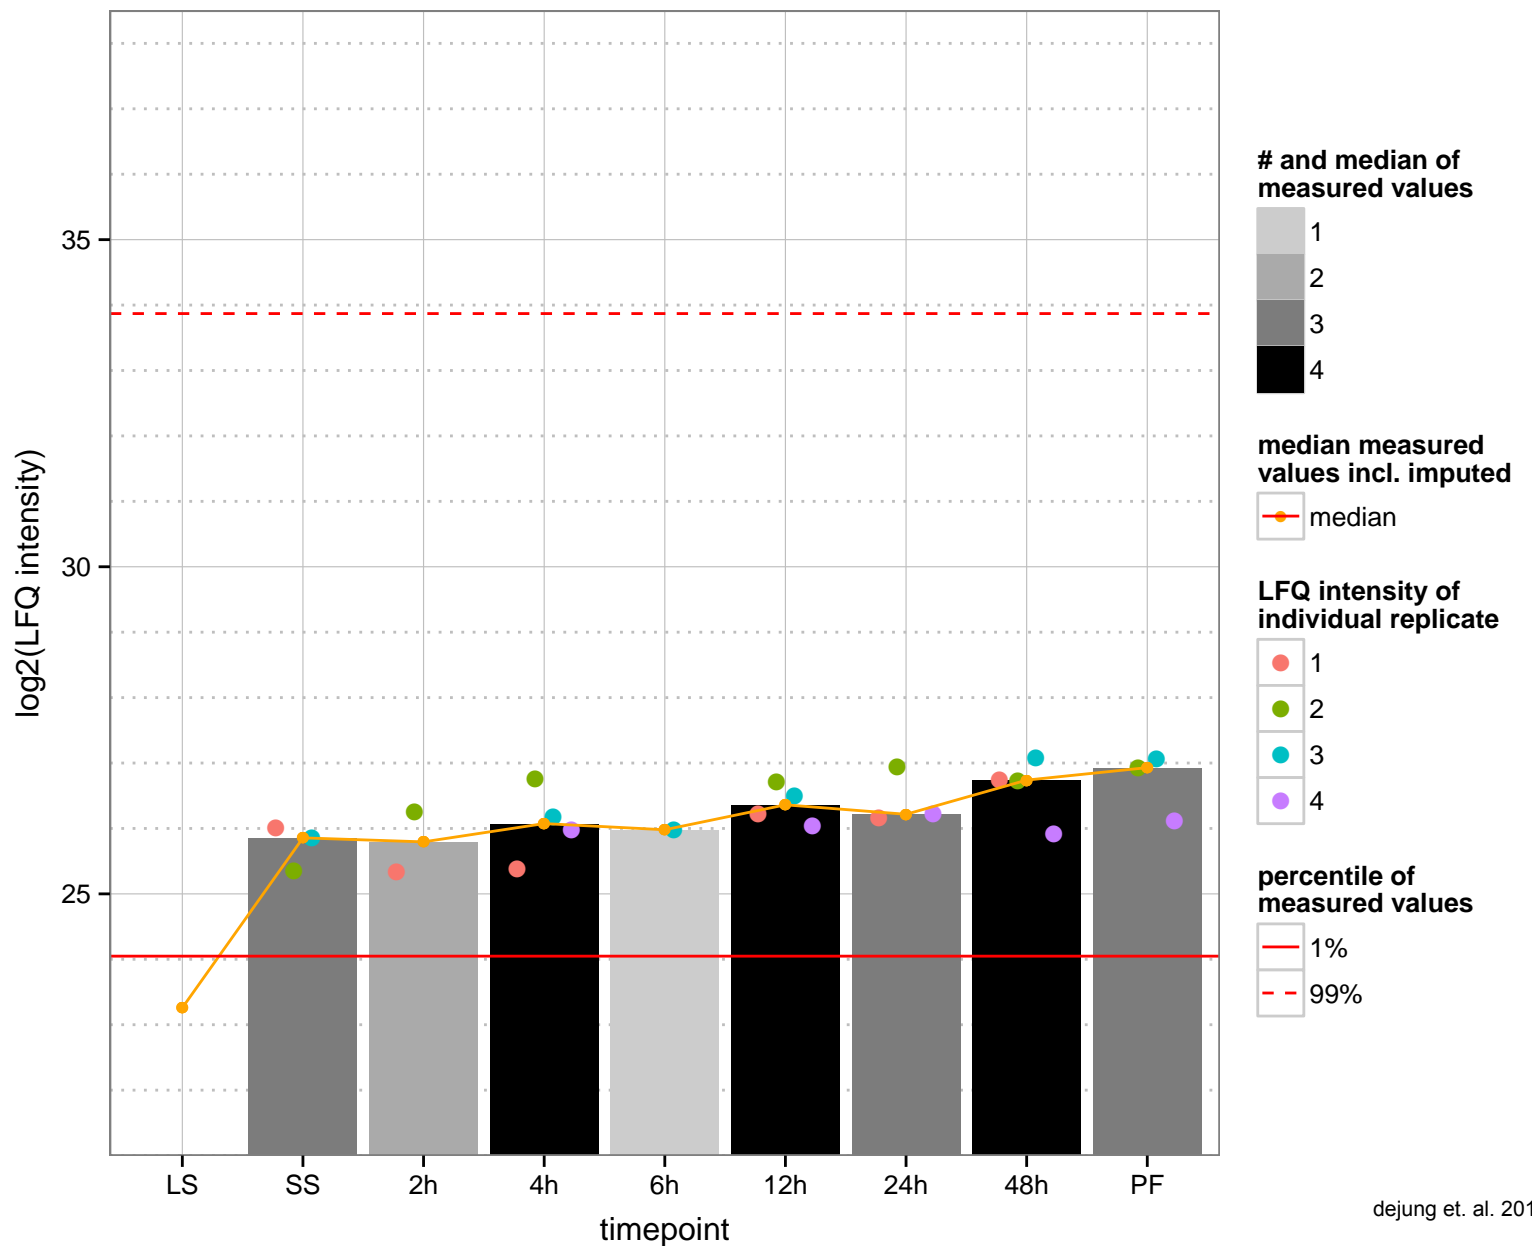

hypothetical protein, conserved  
 Tb927.7.4290  
 AGOF: null  
 AGOC: null  
 AGOP: null  
 PGO: null  
 PGOC: null  
 PGOP: null

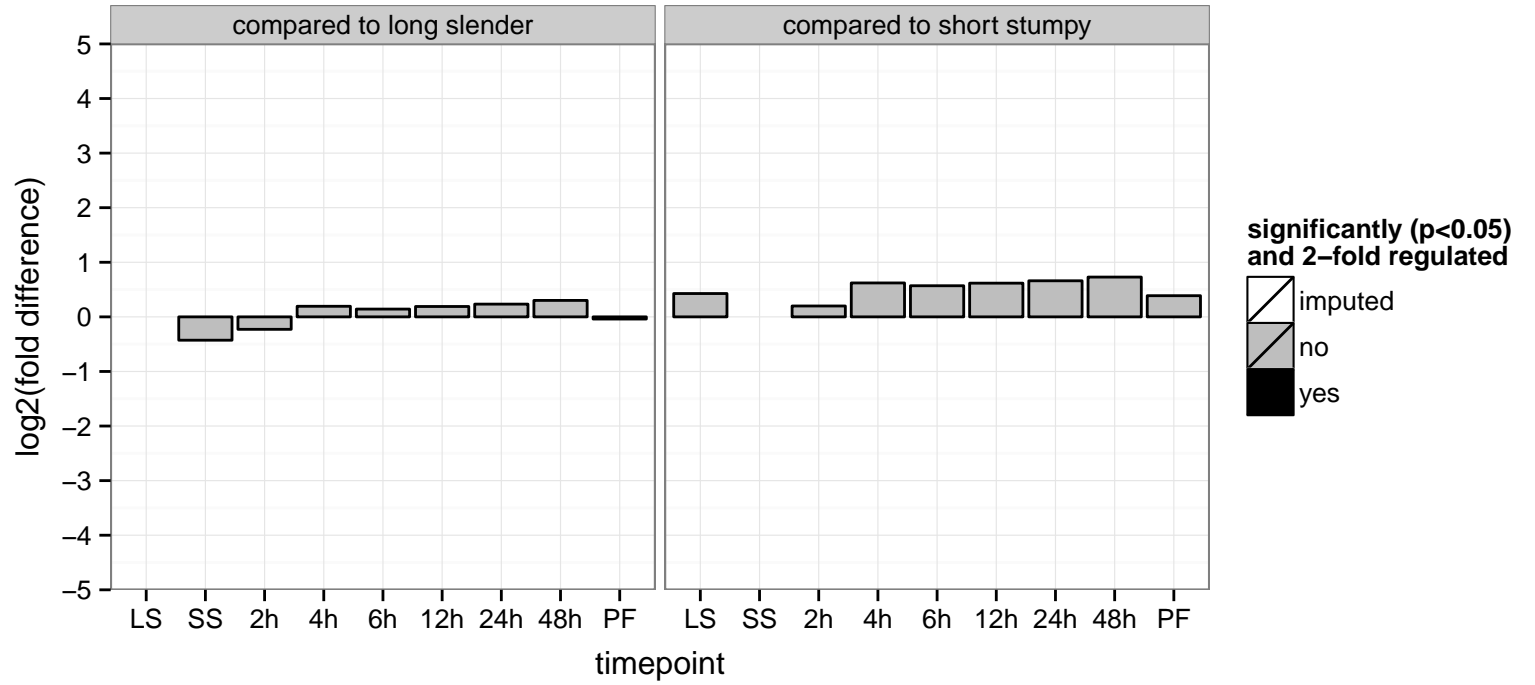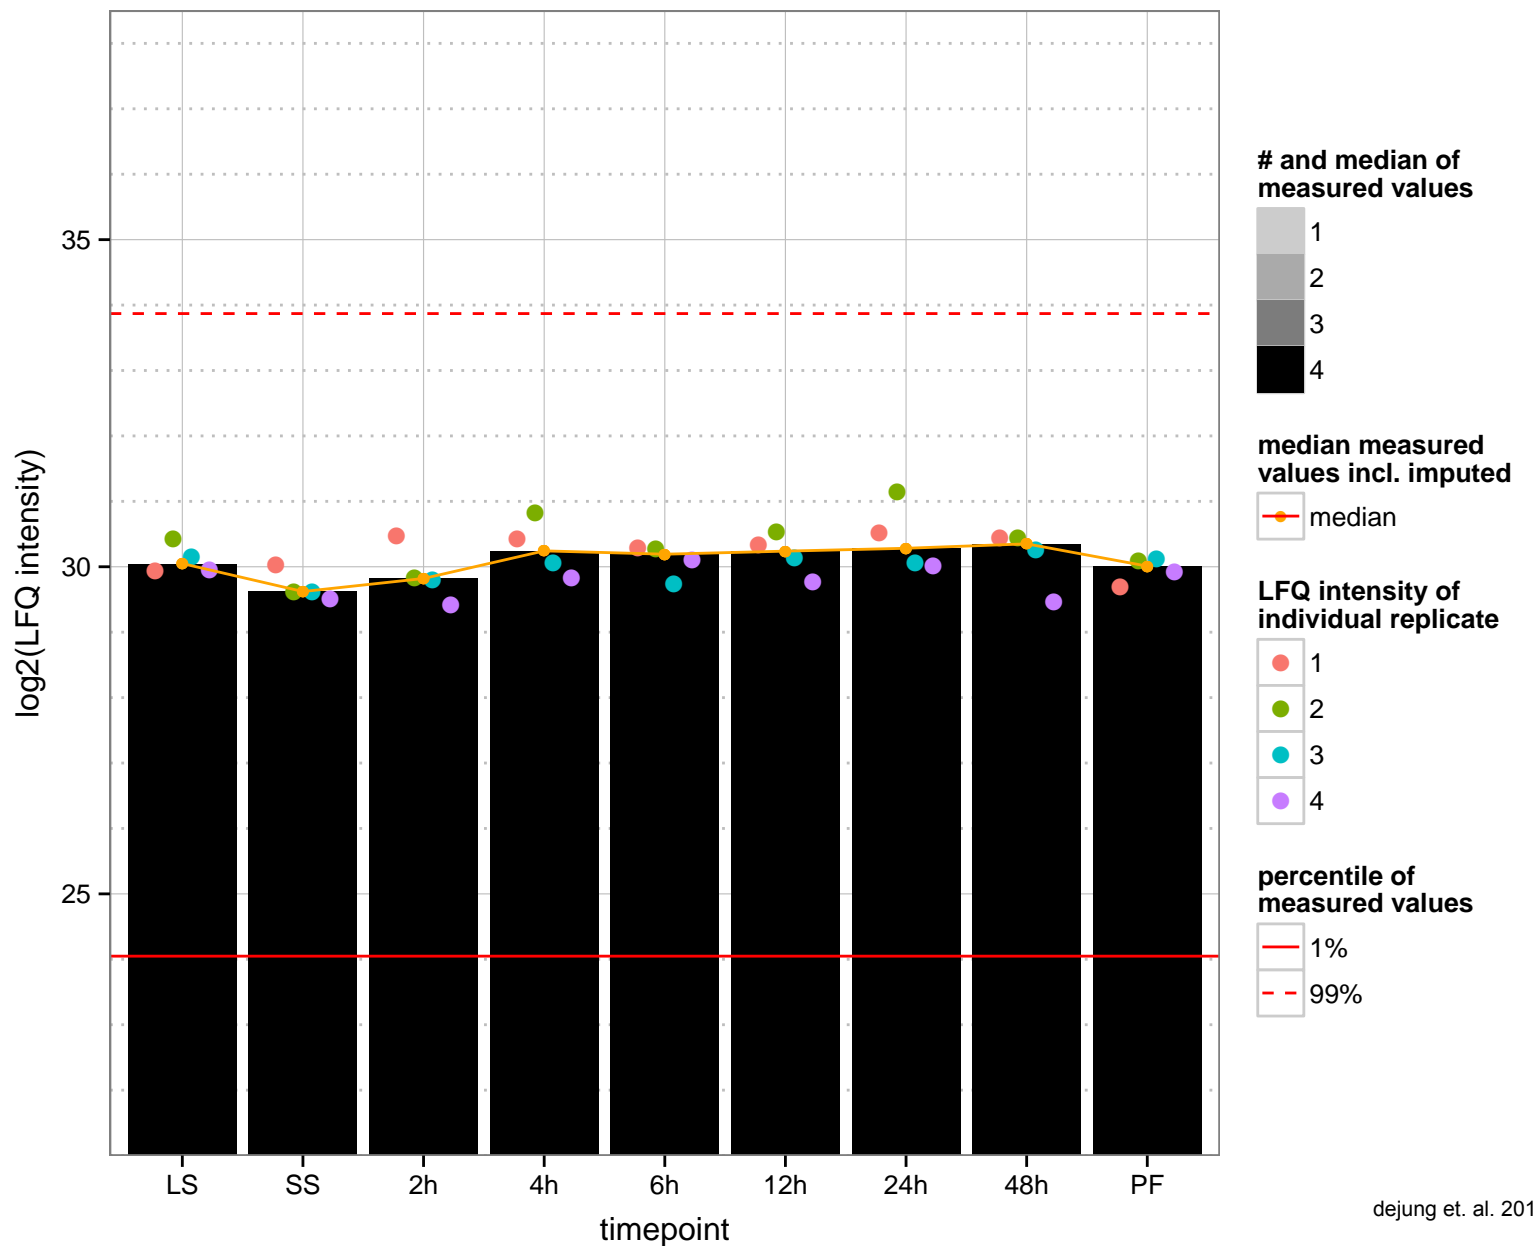



hypothetical protein, conserved  
Tb927.7.4320  
AGOF: polynucleotide 5'-phosphatase activity  
AGOC: mRNA cap methyltransferase complex  
AGOP: 7-methylguanosine mRNA capping  
PGOF: polynucleotide 5'-phosphatase activity, transferase activity  
PGOC: null  
PGOP: null

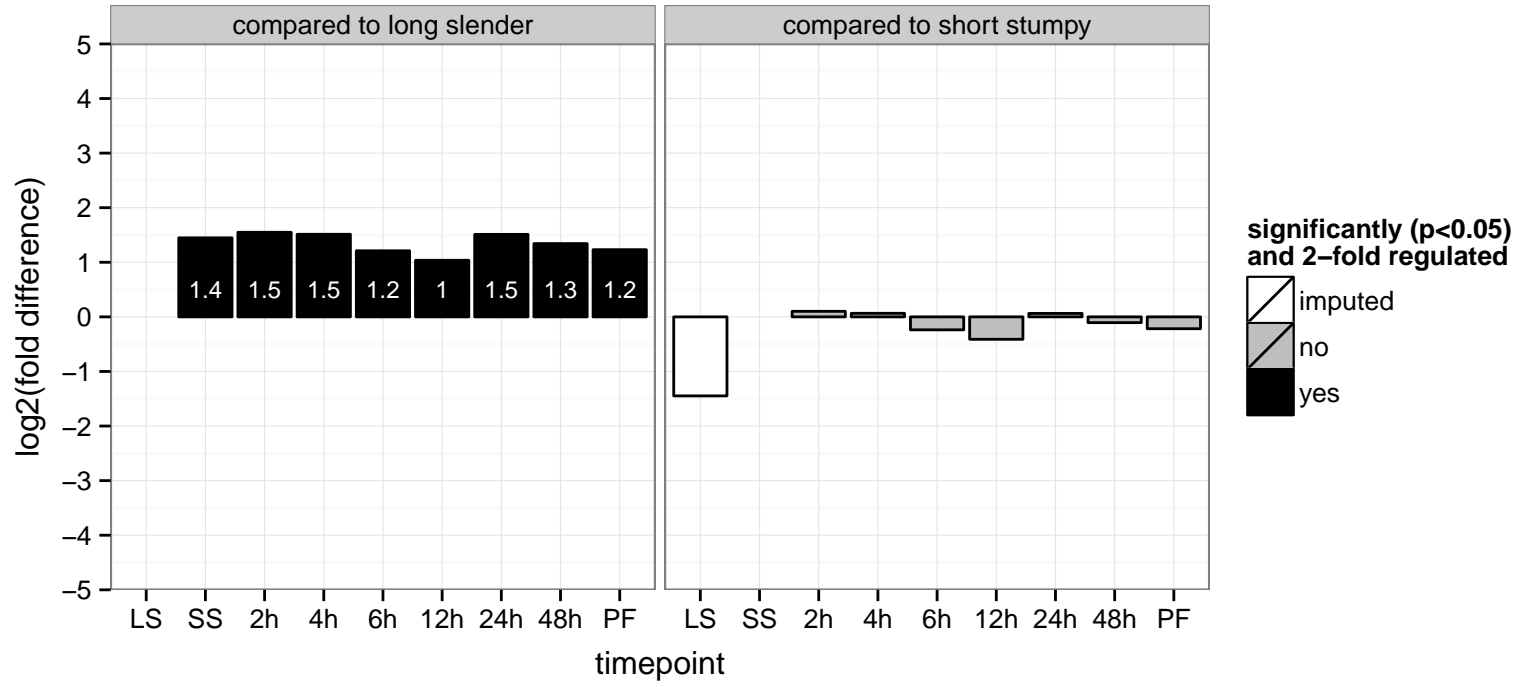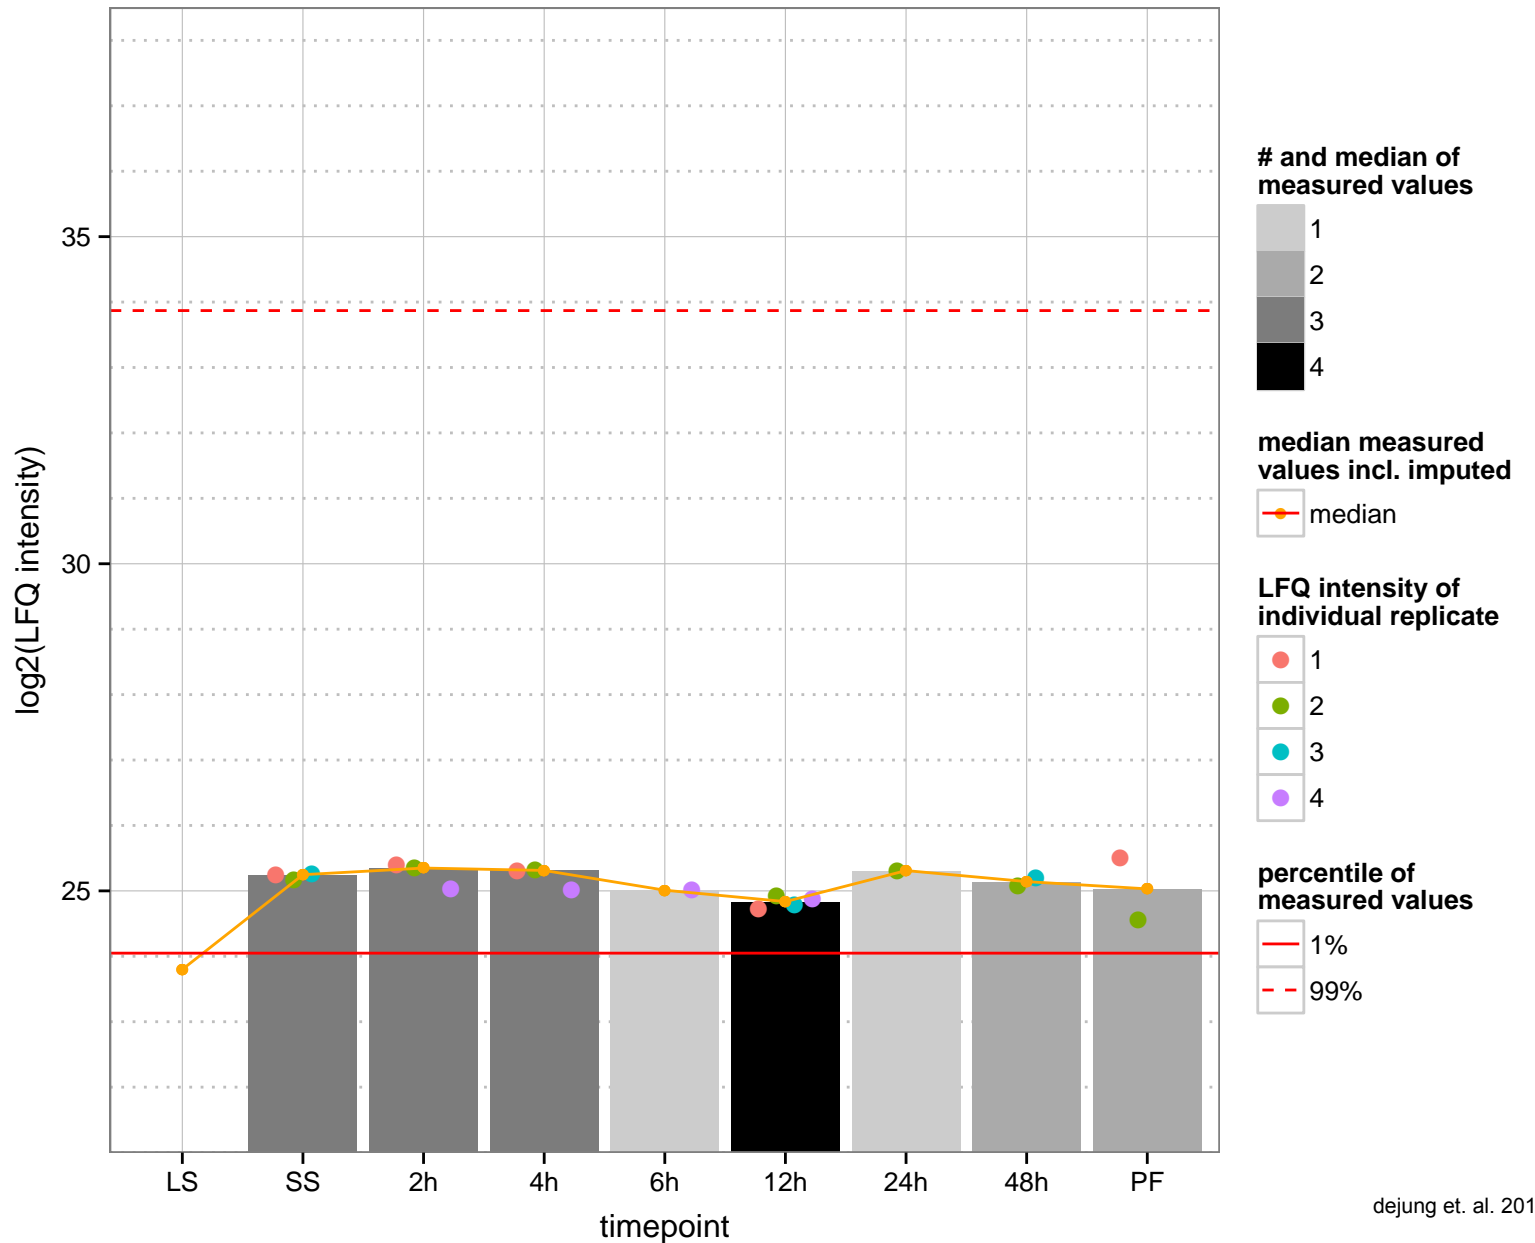

hypothetical protein, conserved  
 Tb927.7.4340  
 AGOF: null  
 AGOC: null  
 AGOP: null  
 PGOF: null  
 PGO: nucleus  
 PGOP: null

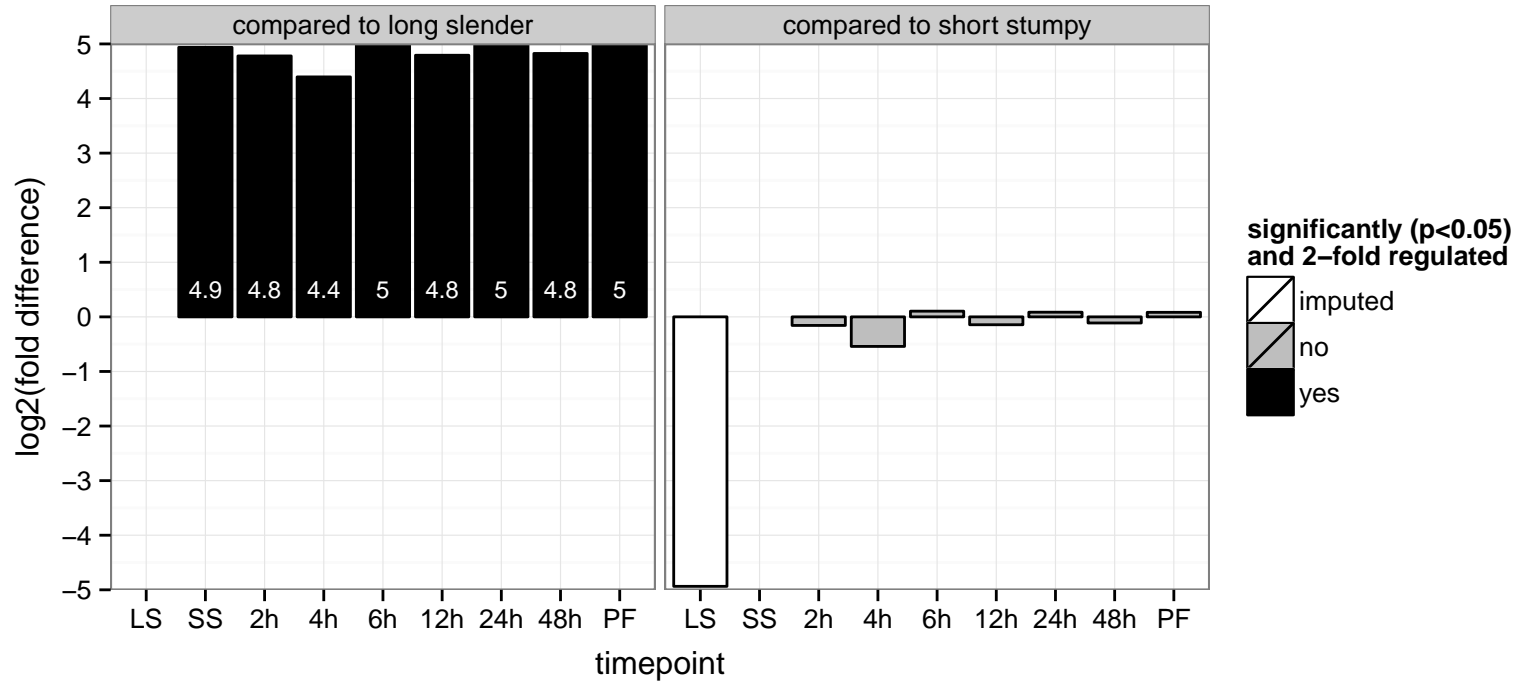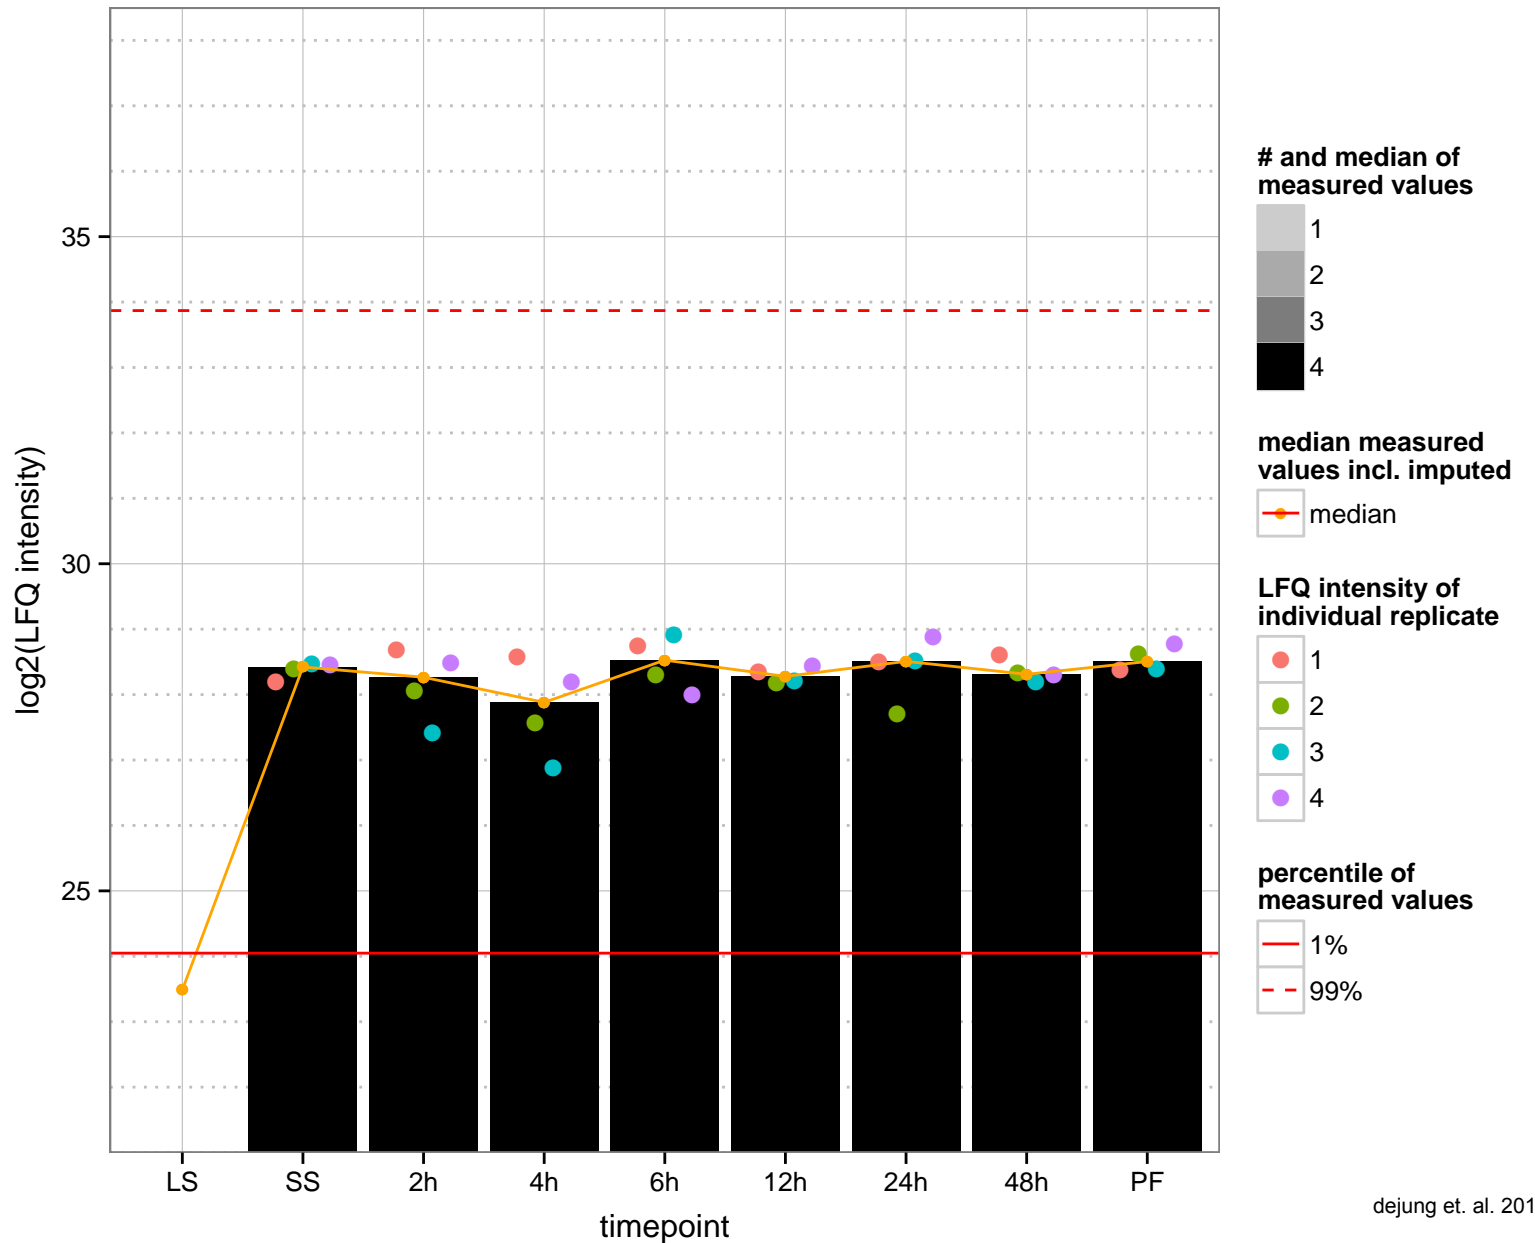

threonine synthase, putative  
 Tb927.7.4390  
 AGOF: pyridoxal phosphate binding, threonine synthase activity  
 AGOC: null  
 AGOP: threonine biosynthetic process  
 PGO: catalytic activity, pyridoxal phosphate binding, threonine synthase activity  
 PGO: null  
 PGO: metabolic process, threonine biosynthetic process

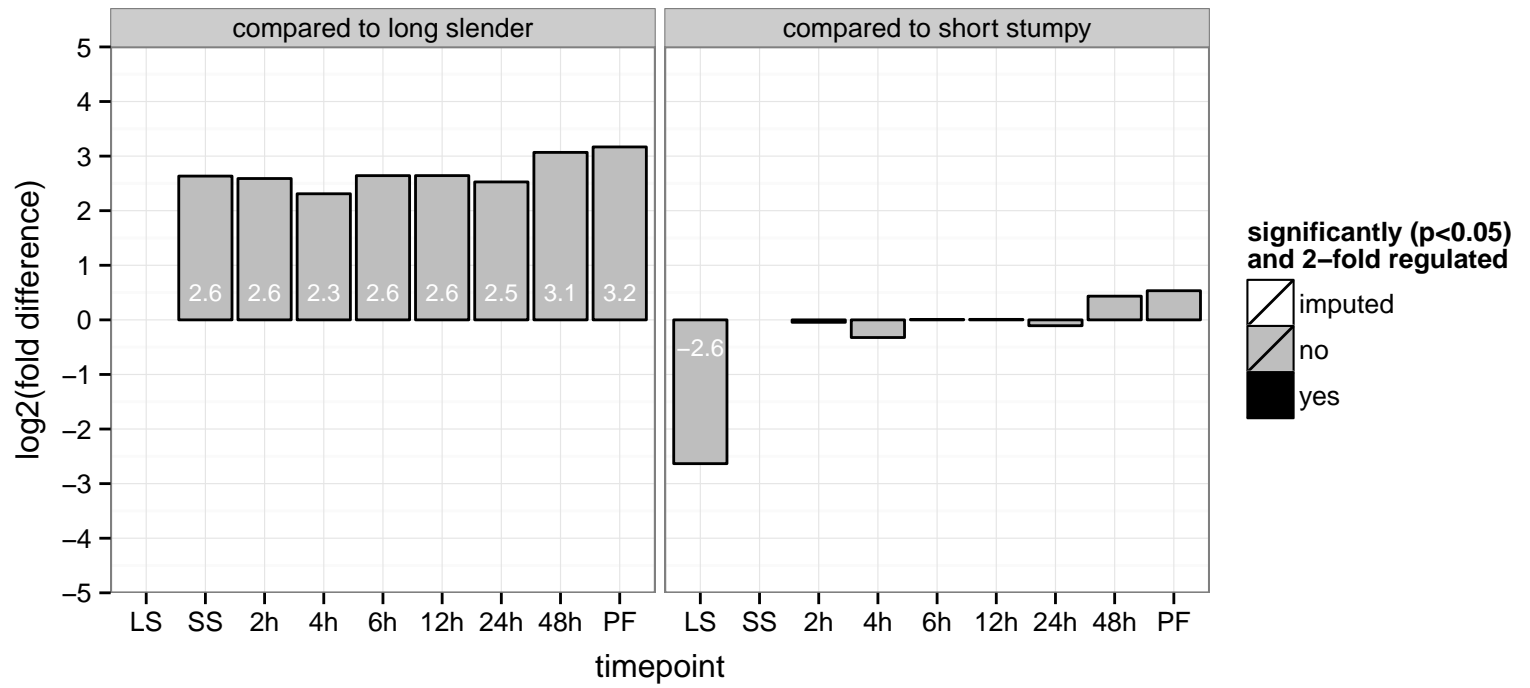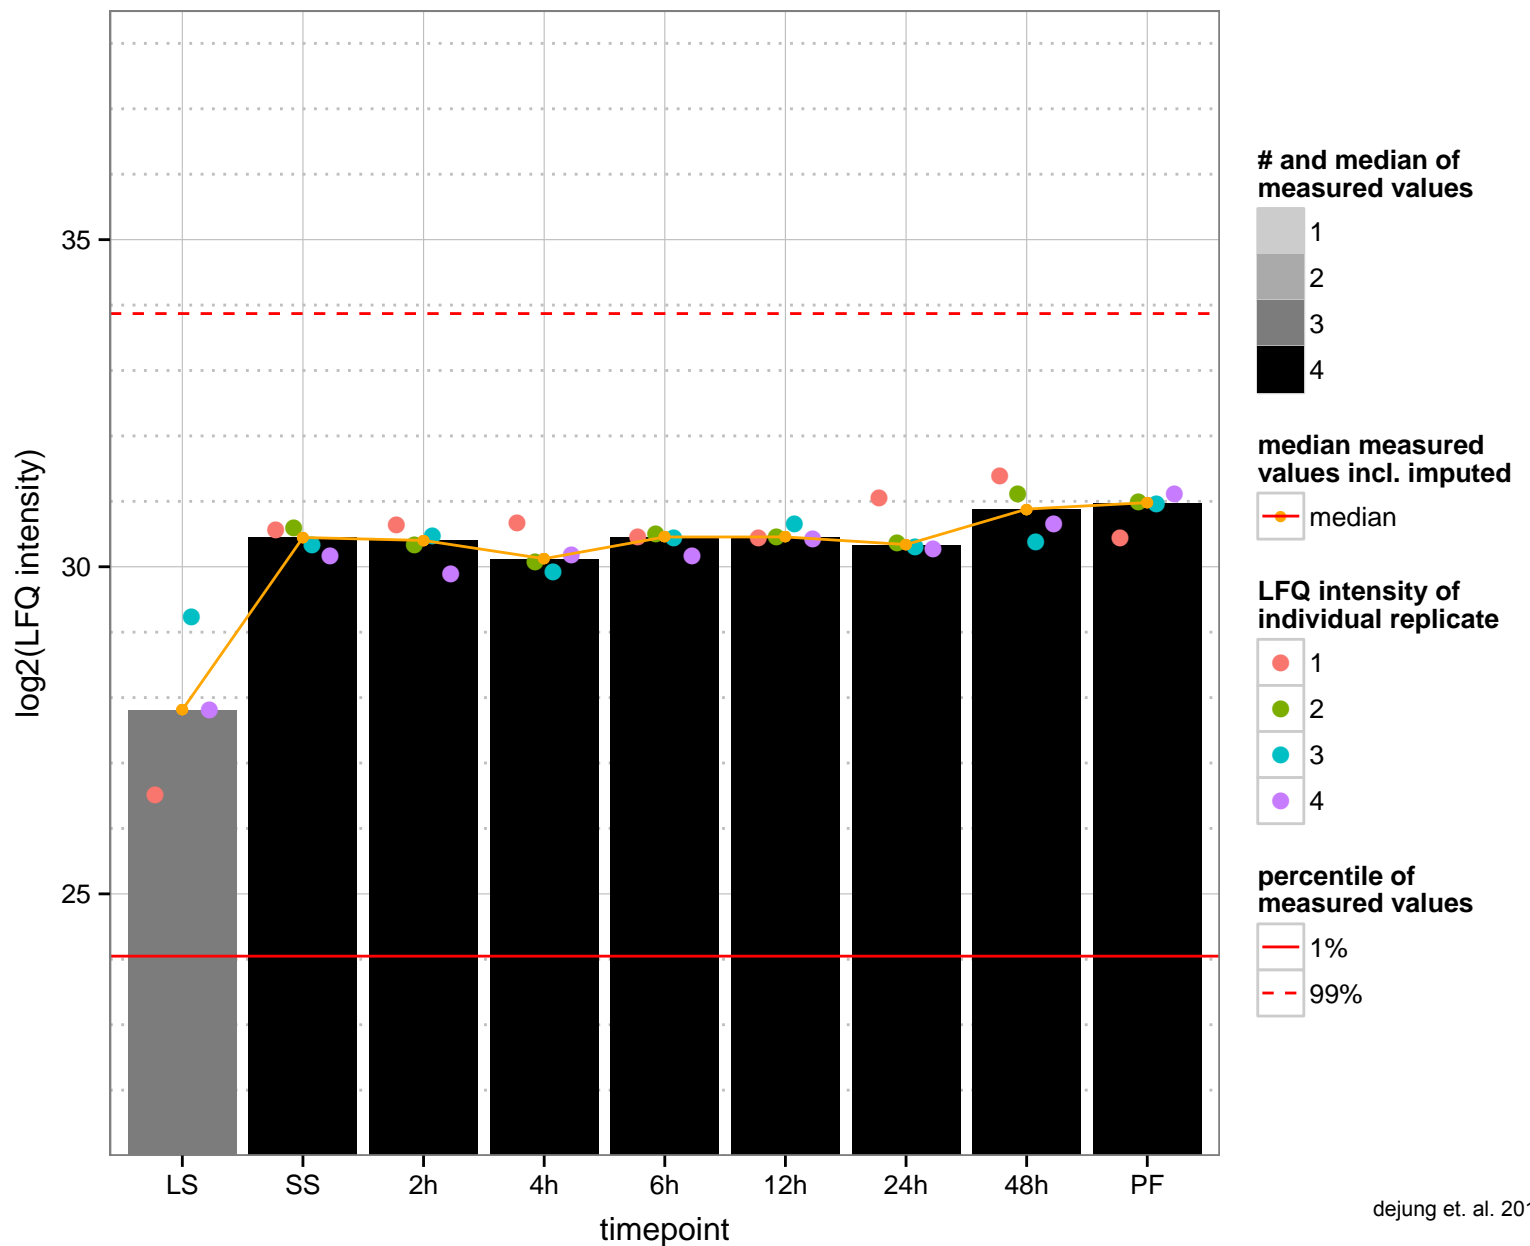

proteasome alpha 3 subunit, putative

Tb927.7.4420

AGOF: endopeptidase activity, threonine-type endopeptidase activity

AGOC: proteasome core complex, proteasome core complex, alpha-subunit complex

AGOP: protein metabolic process, ubiquitin-dependent protein catabolic process

PGOF: endopeptidase activity, threonine-type endopeptidase activity

PGOC: proteasome core complex, proteasome core complex, alpha-subunit complex

PGOP: proteolysis involved in cellular protein catabolic process, ubiquitin-dependent protein catabolic process

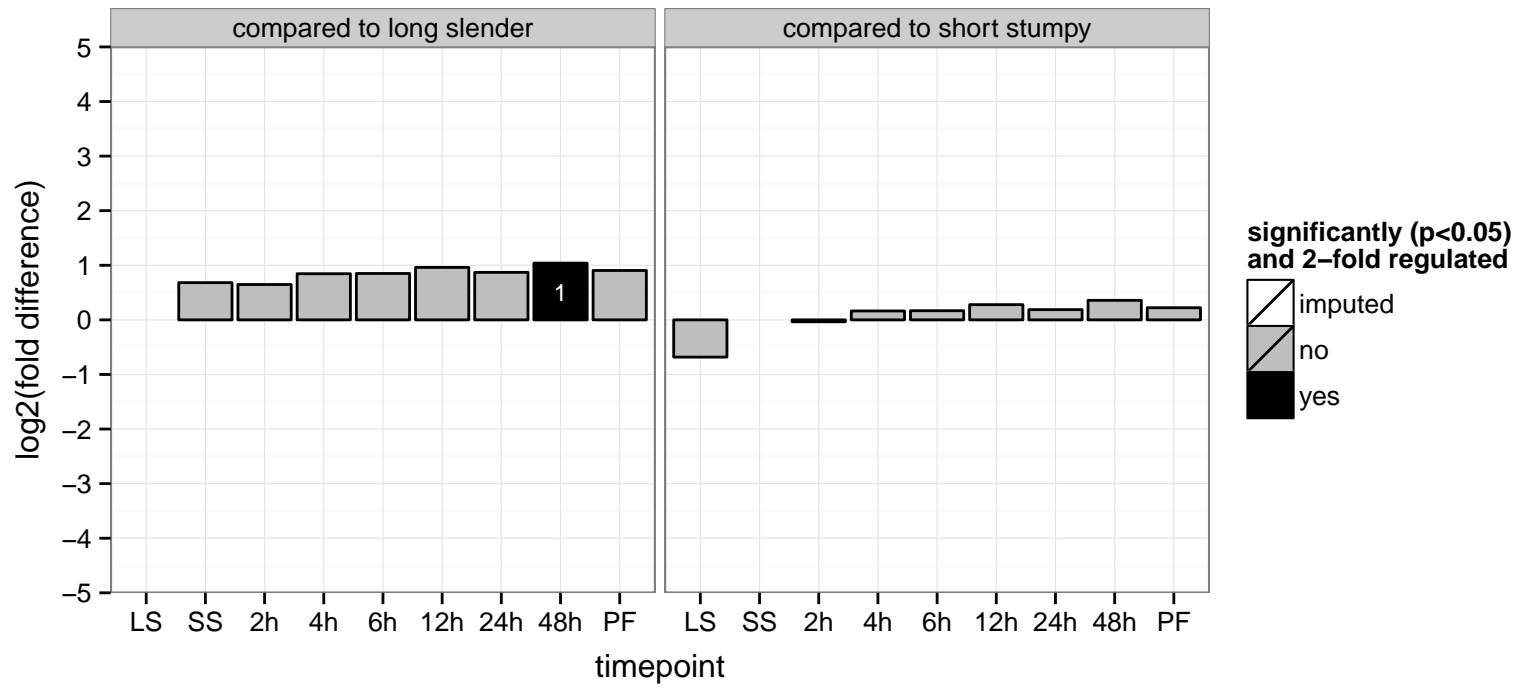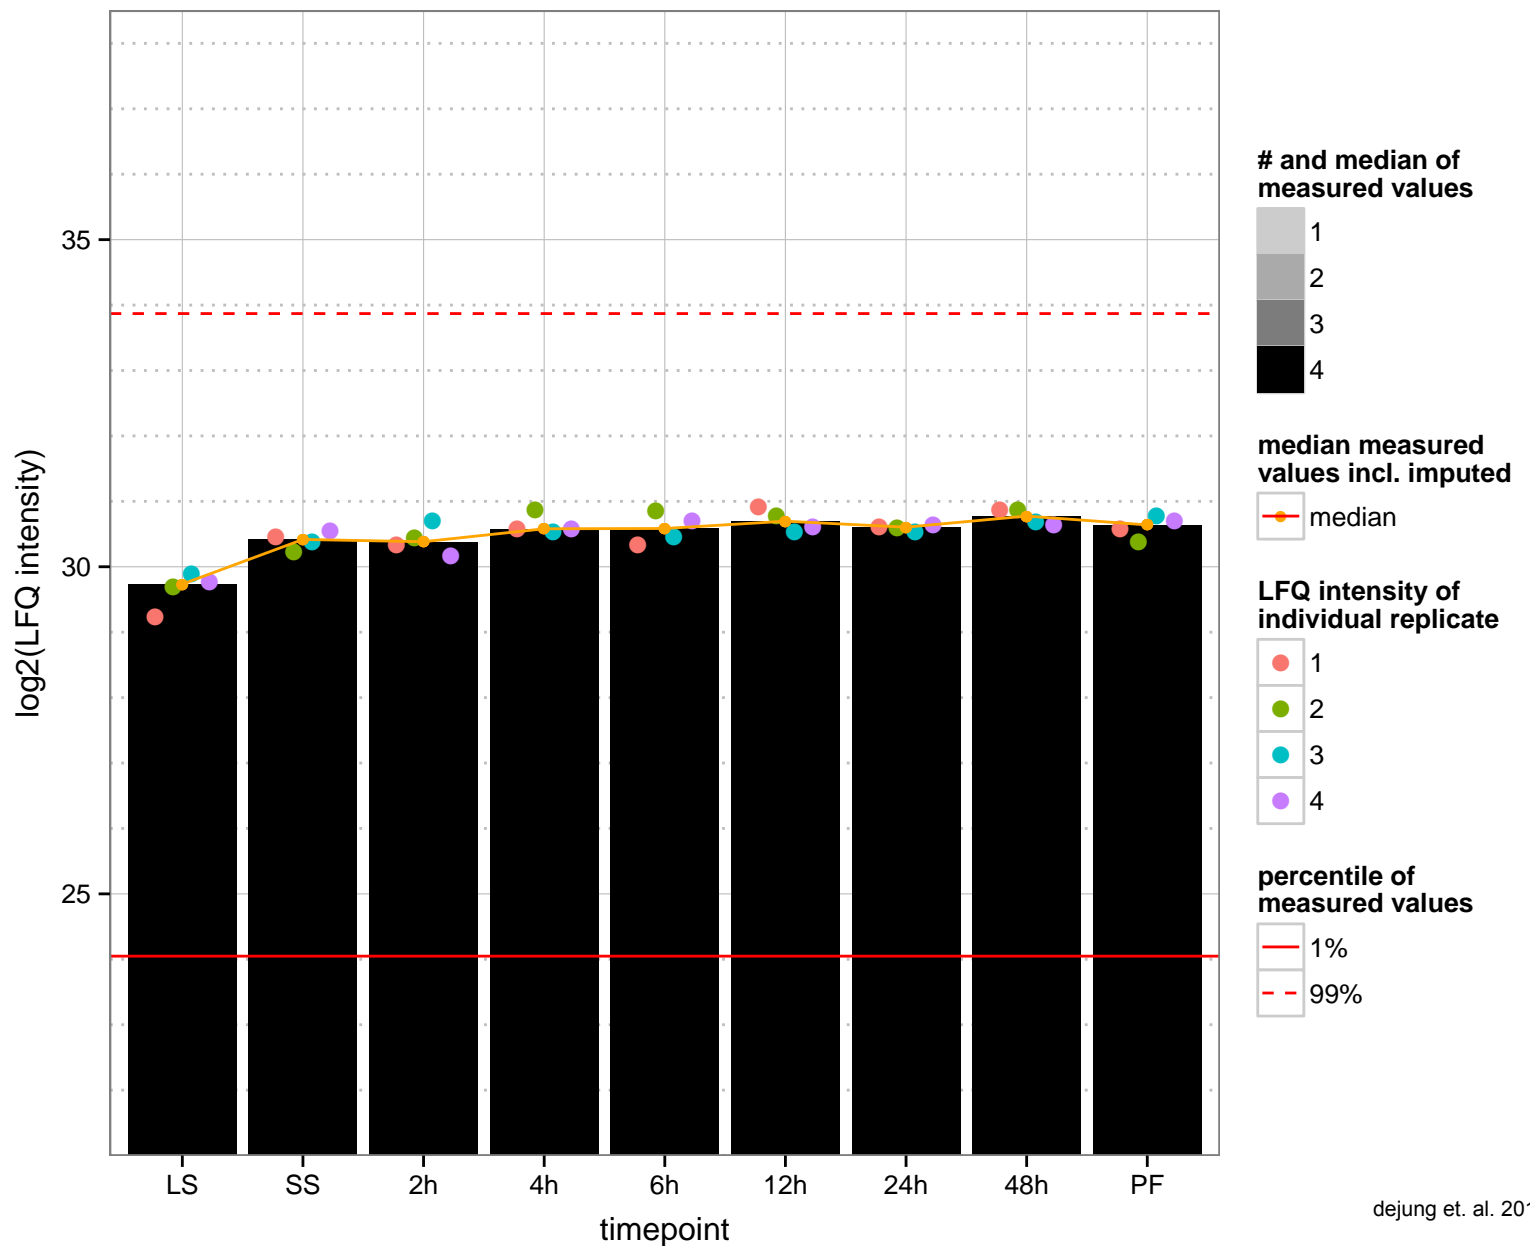

hypothetical protein, conserved  
 Tb927.7.4440  
 AGOF: catalytic activity, coenzyme binding  
 AGOC: mitochondrion  
 AGOP: cellular metabolic process  
 PGO: catalytic activity, coenzyme binding  
 PGOC: null  
 PGOP: cellular metabolic process

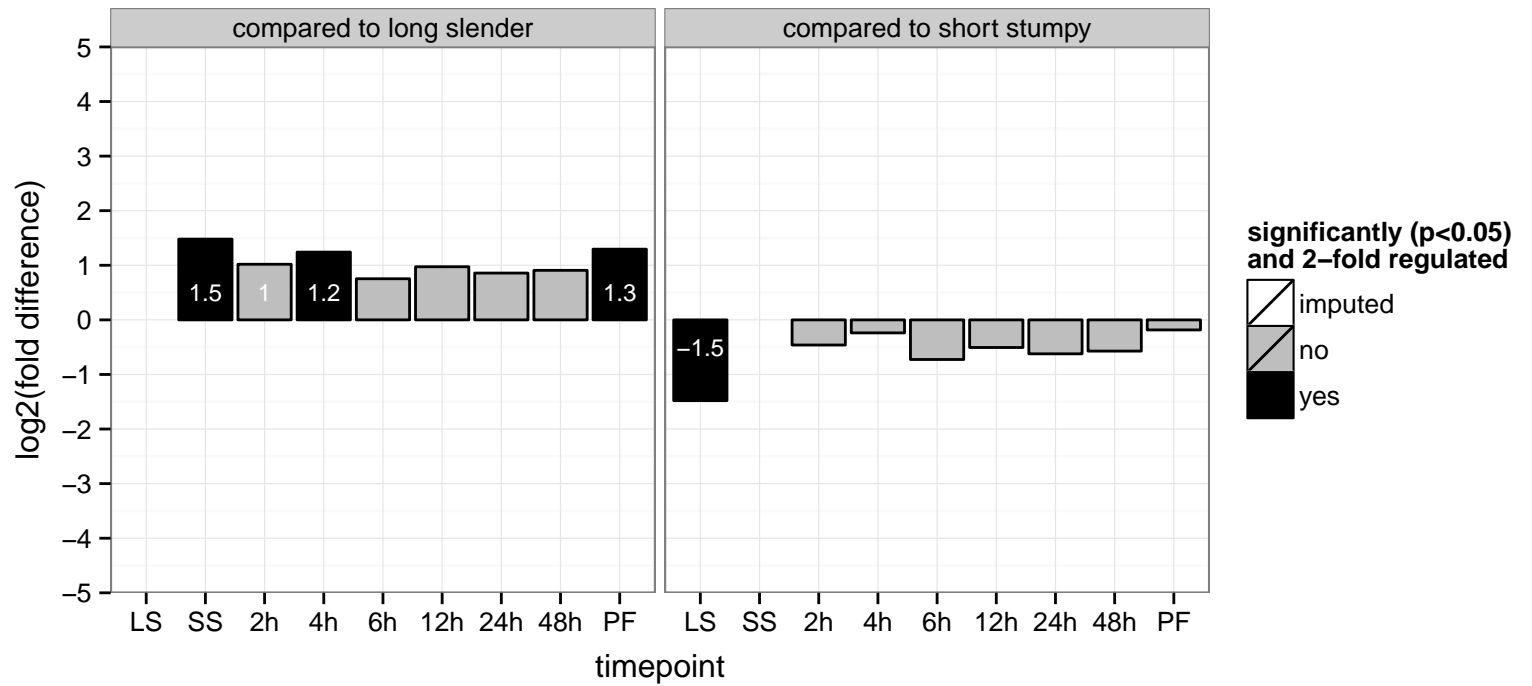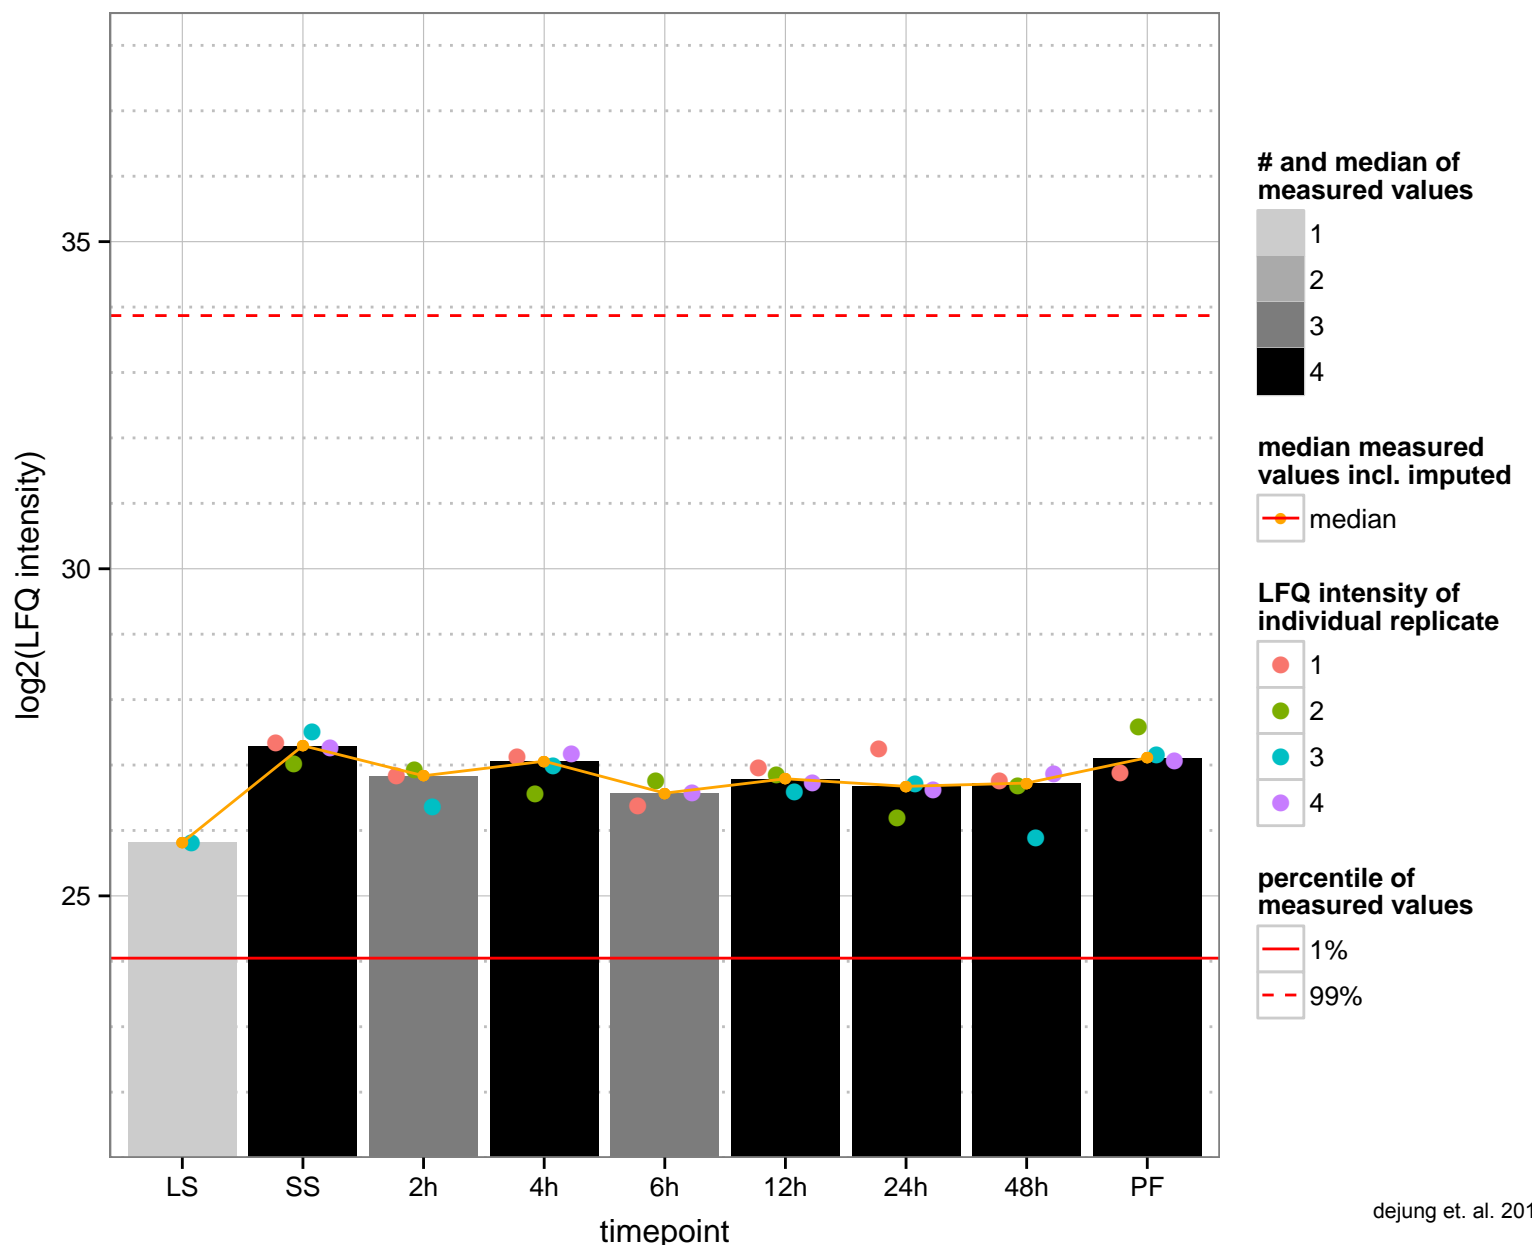

hypothetical protein, conserved  
 Tb927.7.4450  
 AGOF: null  
 AGOC: null  
 AGOP: null  
 PGO: null  
 PGOC: null  
 PGOP: null

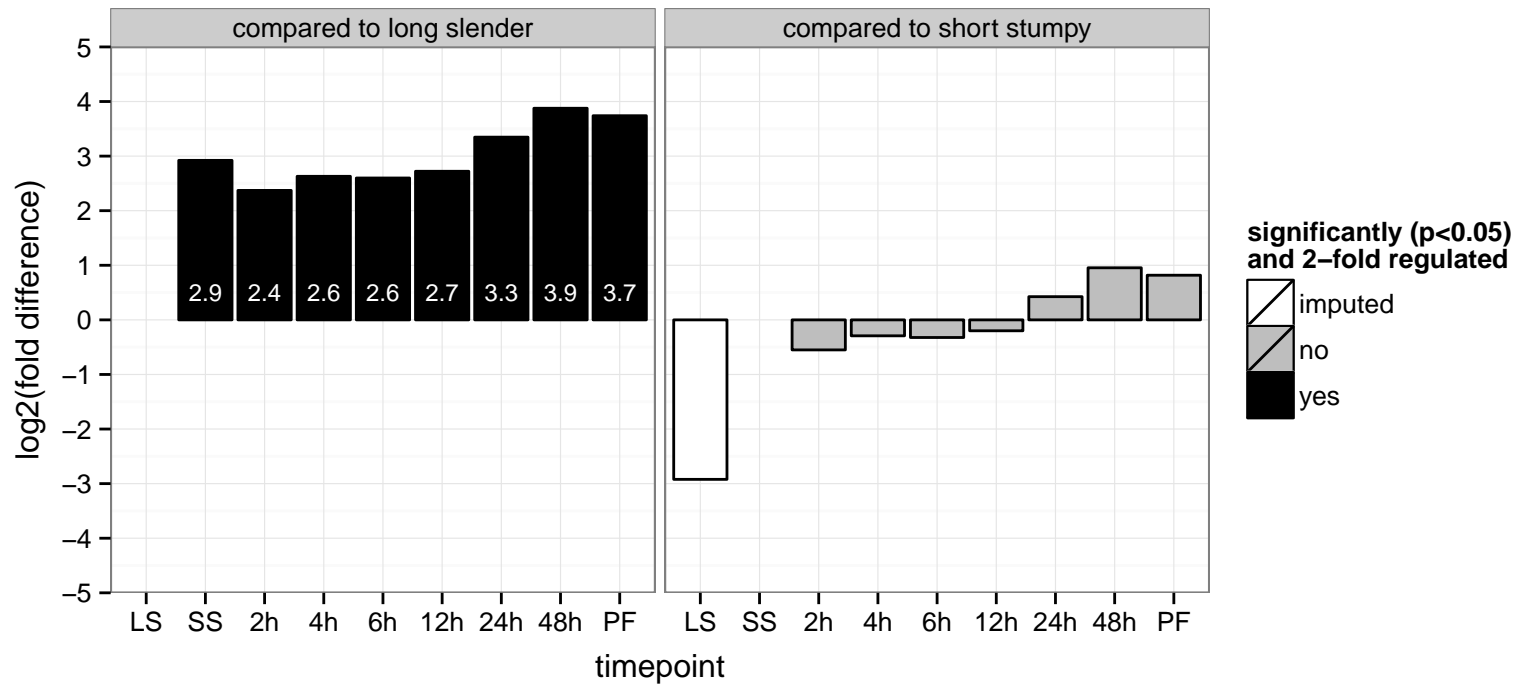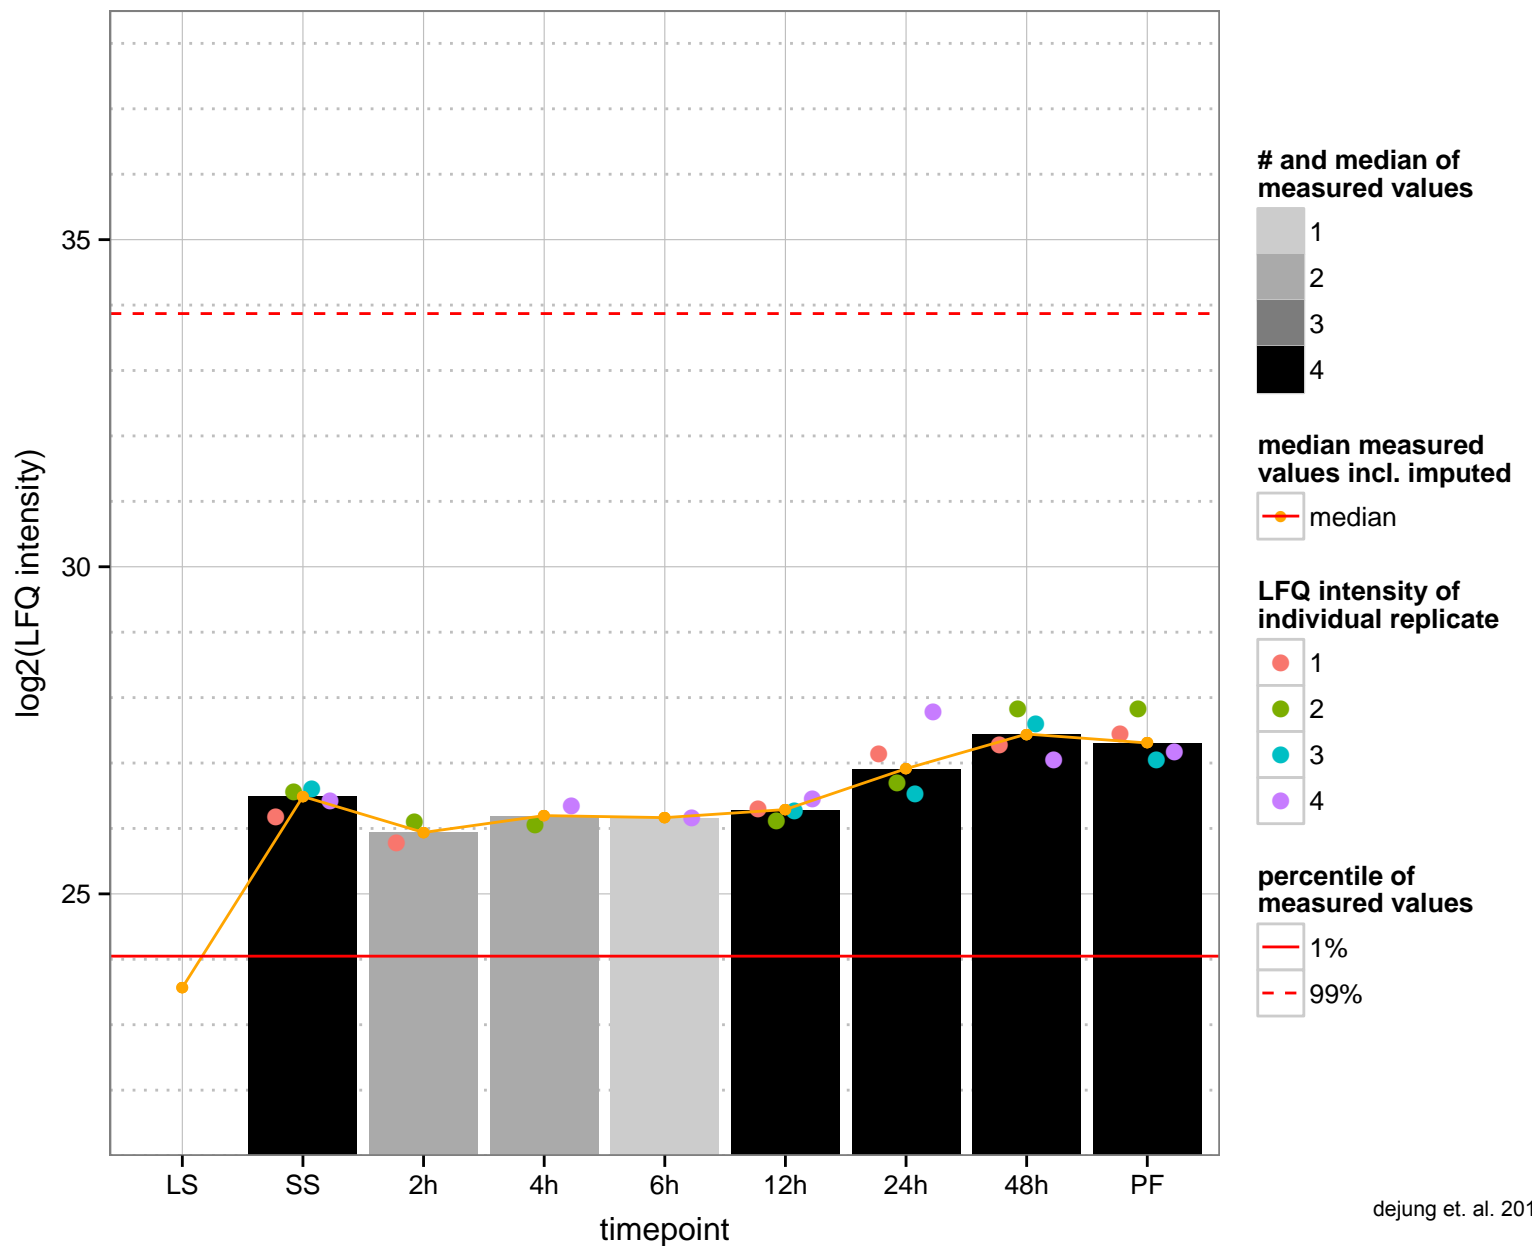

hypothetical protein, conserved  
 Tb927.7.4460  
 AGOF: null  
 AGOC: null  
 AGOP: null  
 PGO: null  
 PGOC: null  
 PGOP: null

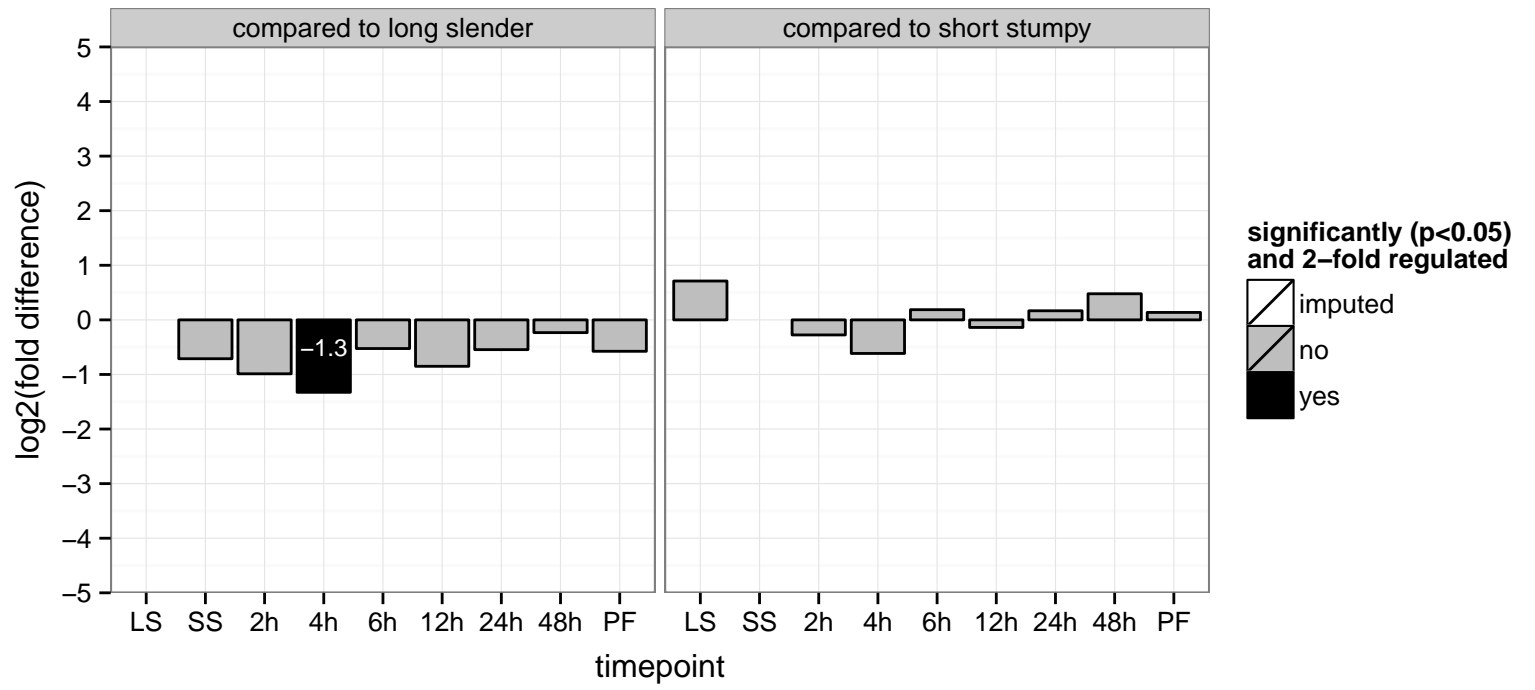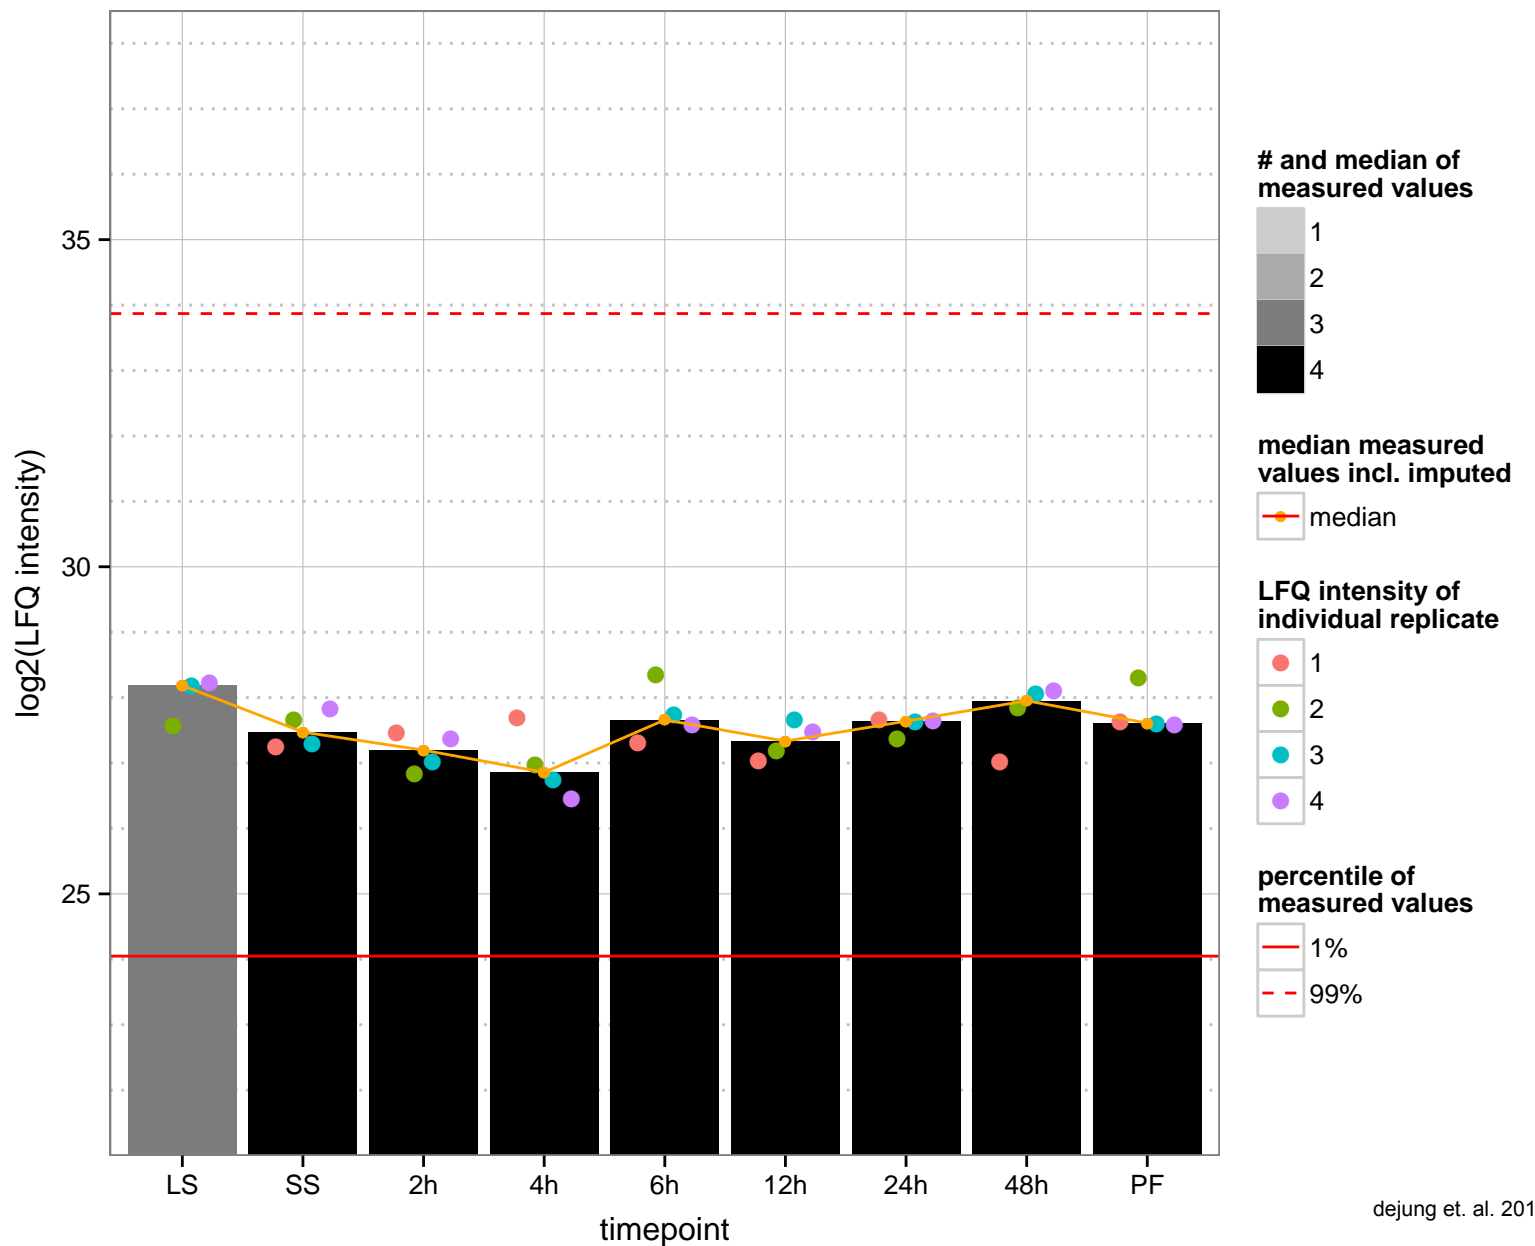

hypothetical protein, conserved  
 Tb927.7.4620  
 AGOF: null  
 AGOC: null  
 AGOP: null  
 PGO: null  
 PGOC: null  
 PGOP: null

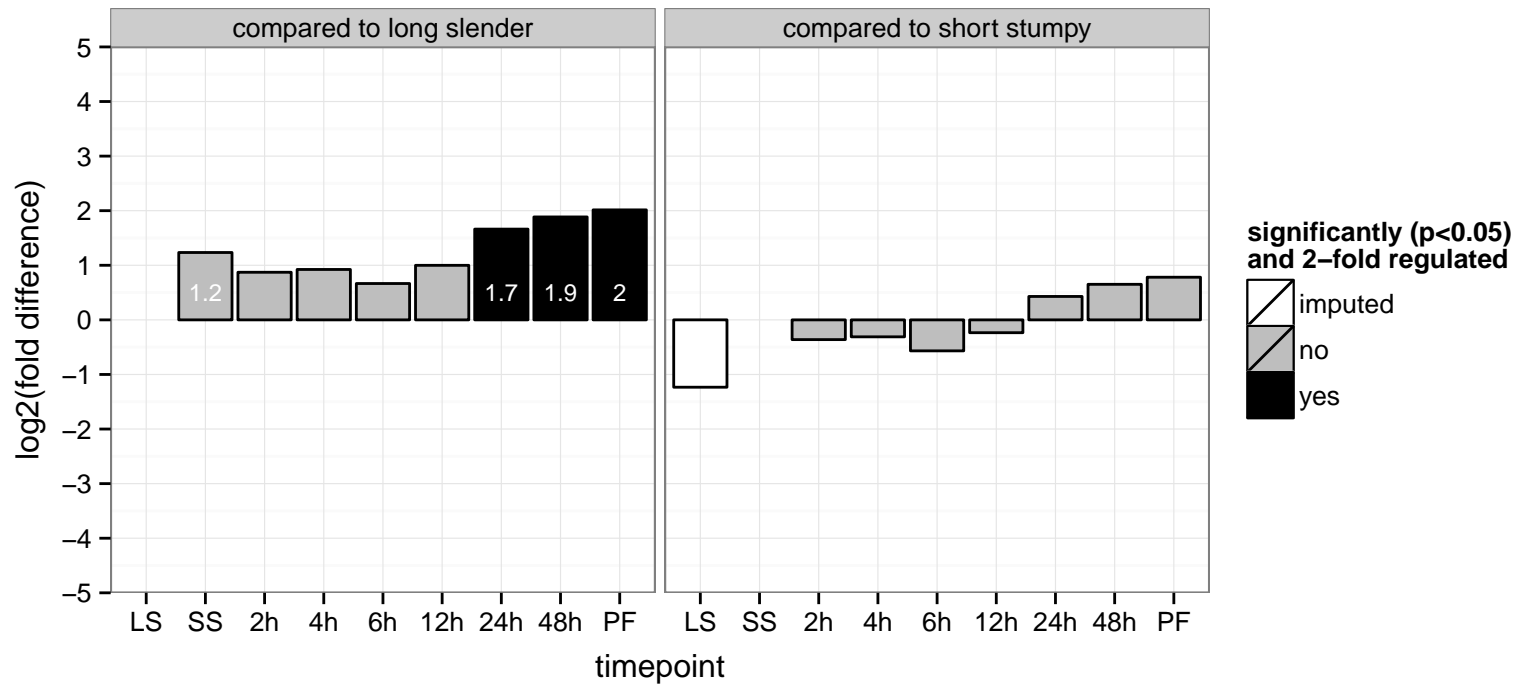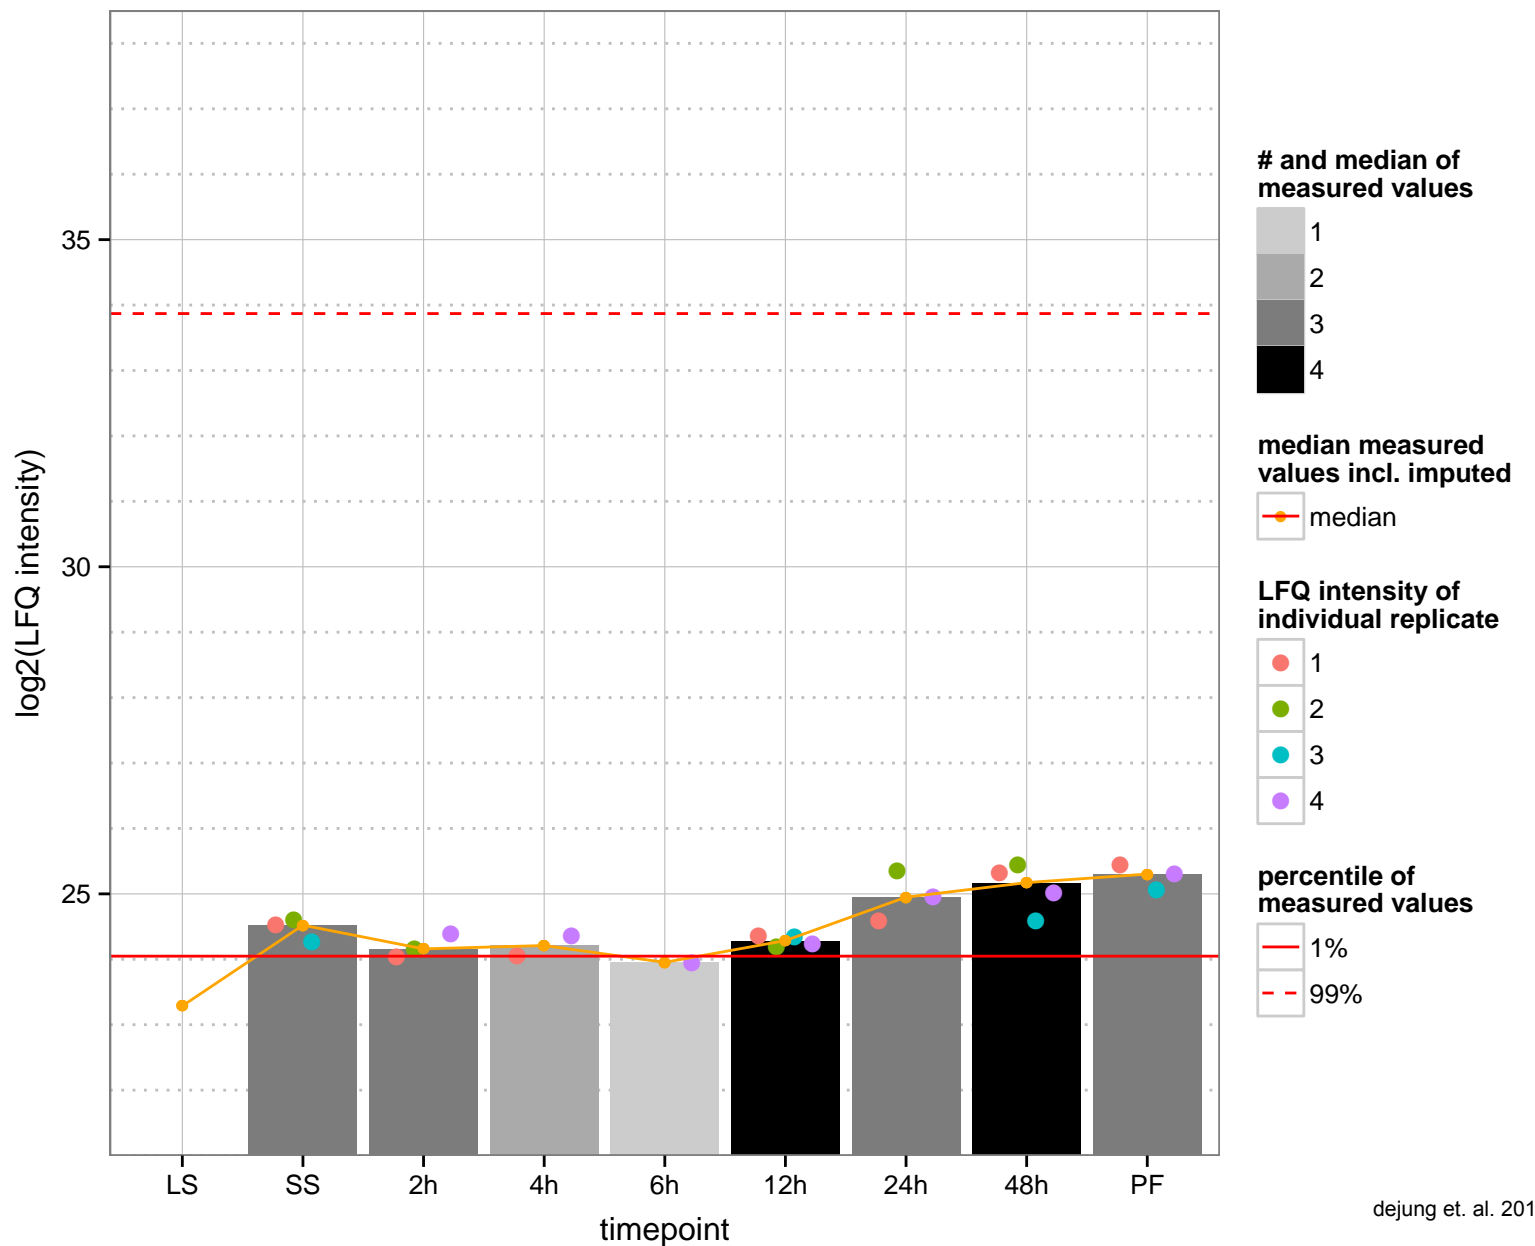



hypothetical protein, conserved  
 Tb927.7.4760;Tb11.v5.0159  
 AGOF: null  
 AGOC: null  
 AGOP: null  
 PGO: null  
 PGOC: null  
 PGOP: null

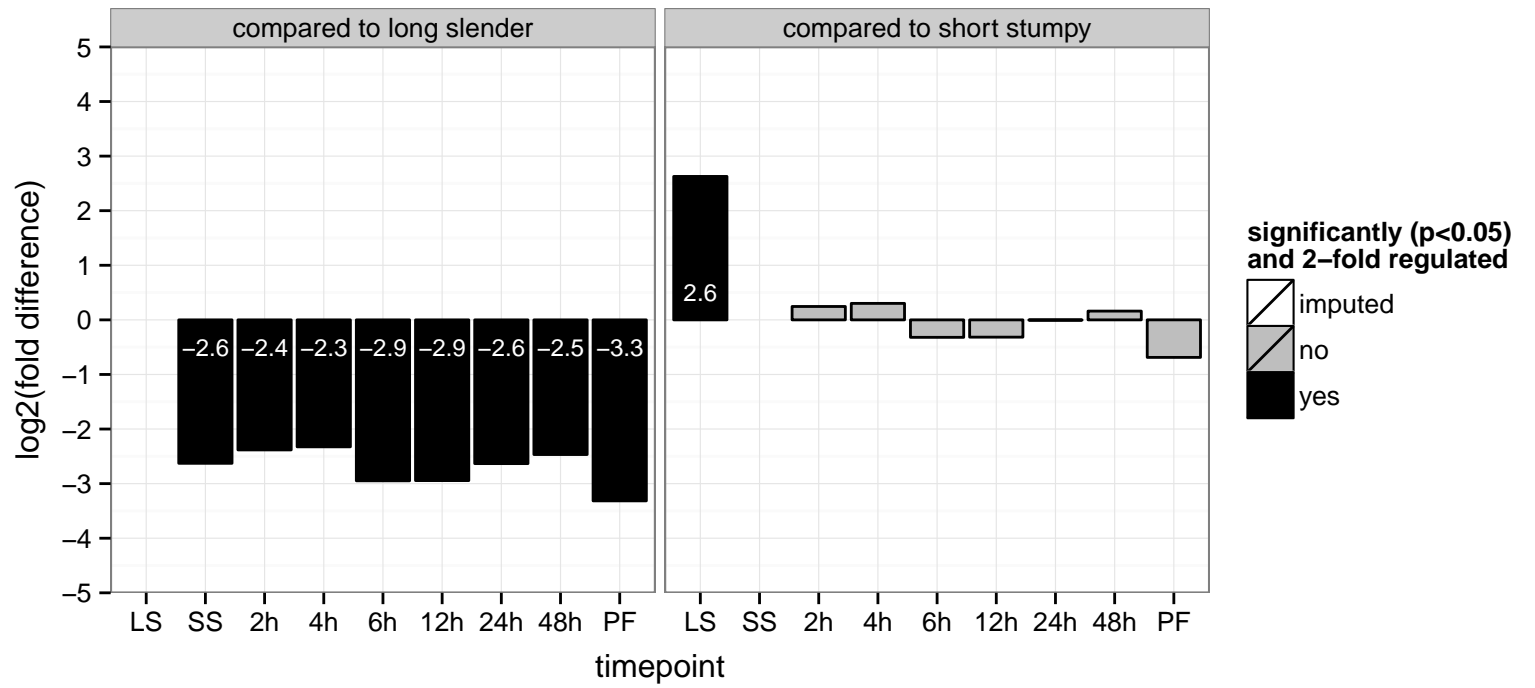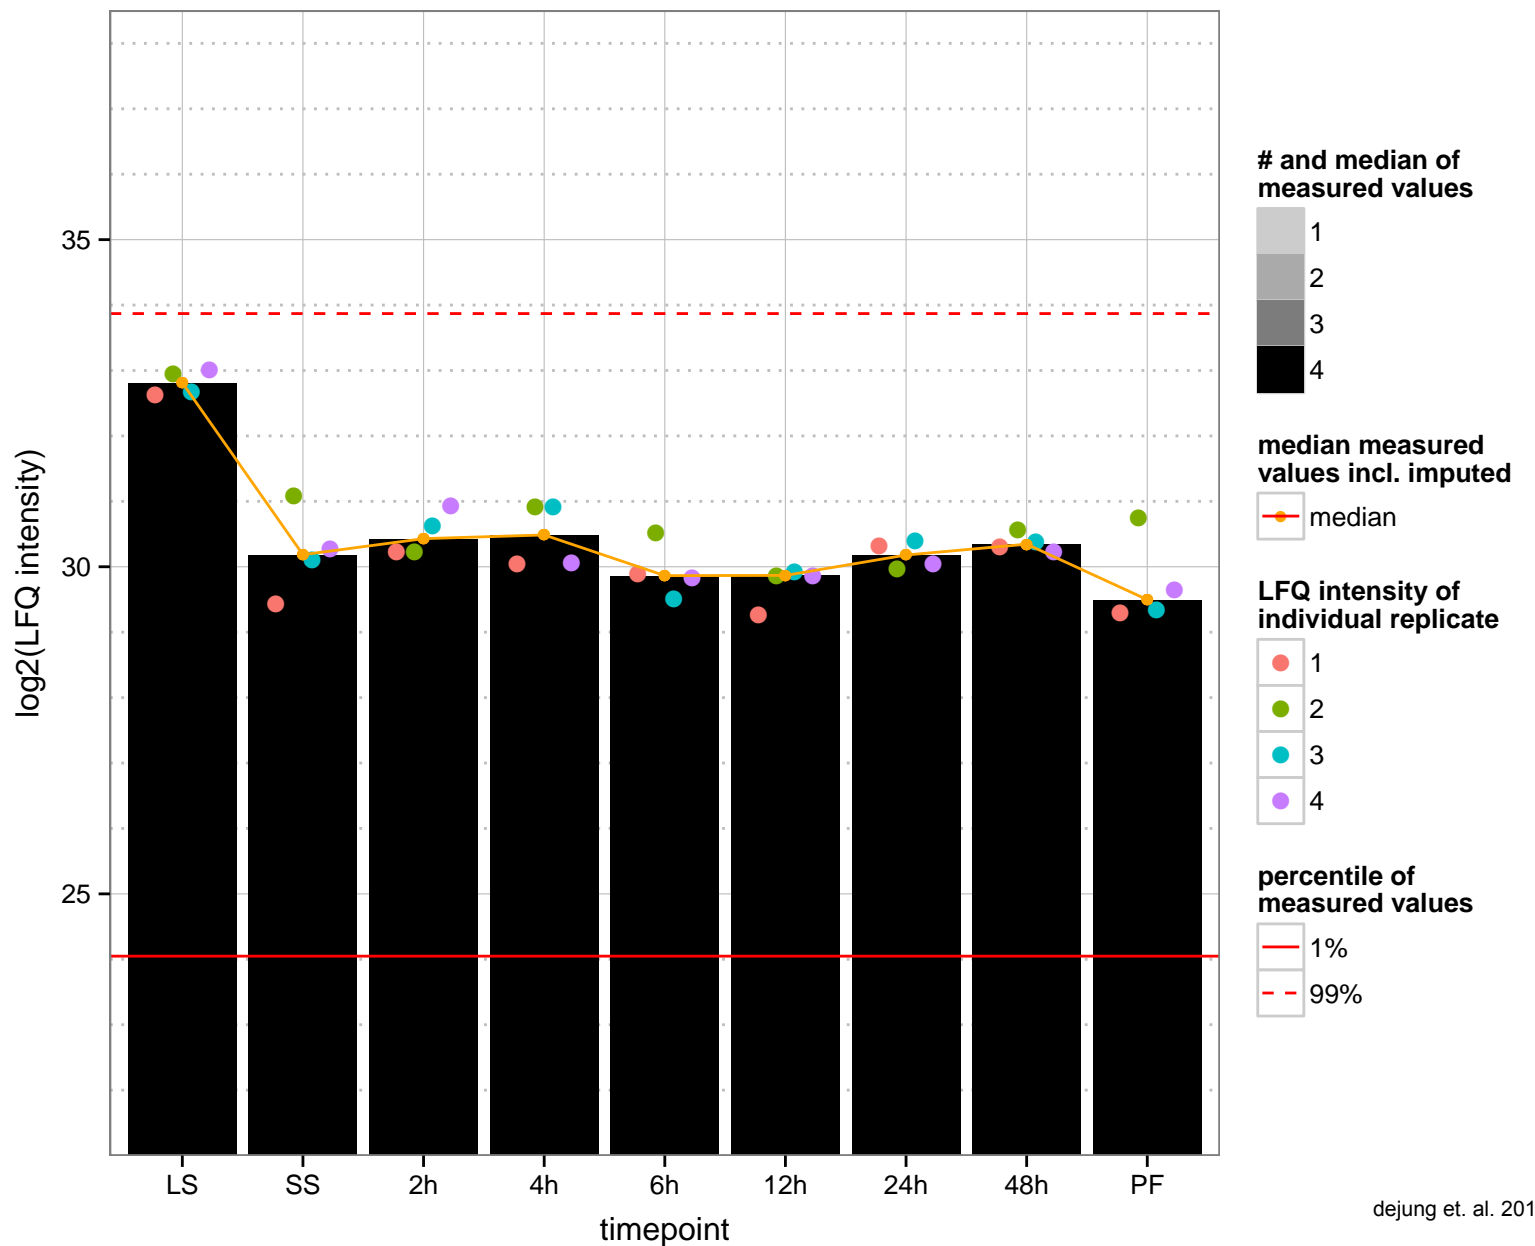

hypothetical protein, conserved  
 Tb927.7.5110  
 AGOF: null  
 AGOC: mitochondrion  
 AGOP: null  
 PGO: null  
 PGO: null  
 PGO: null

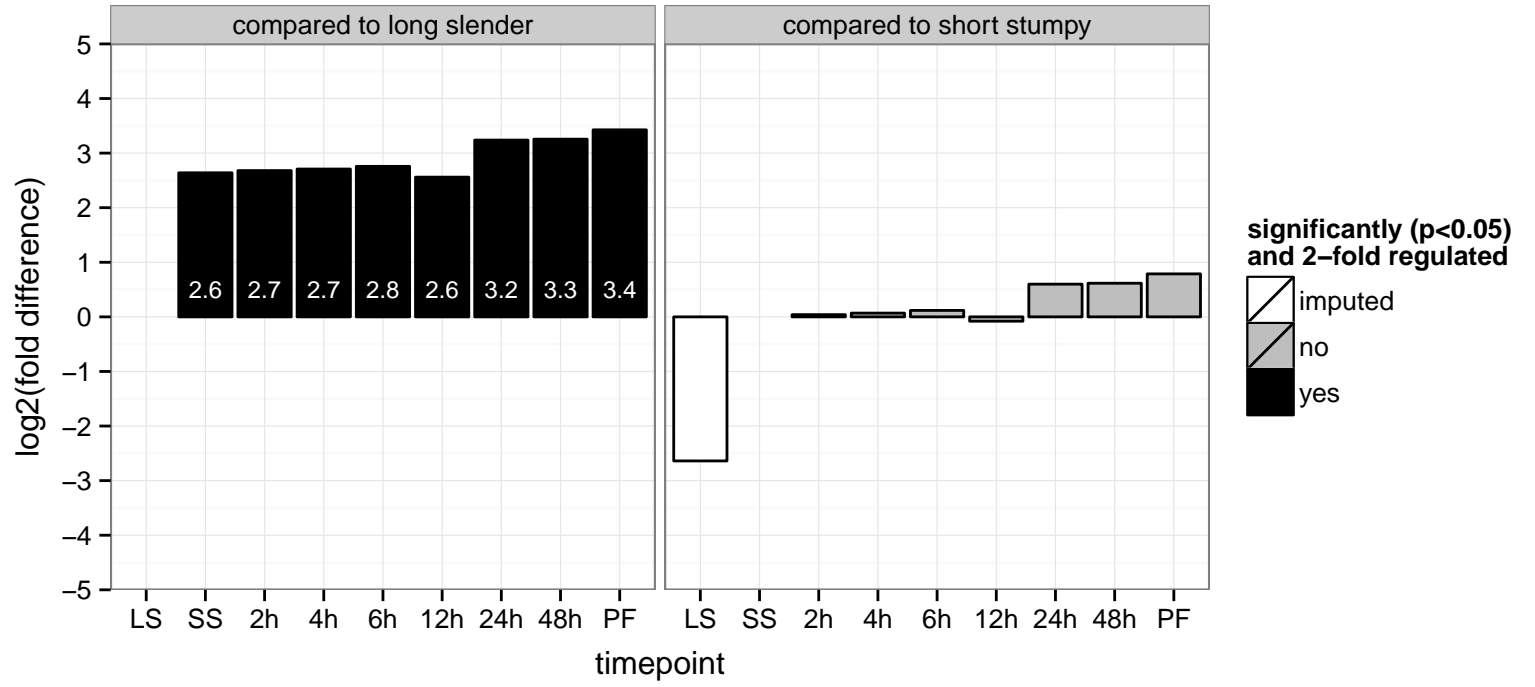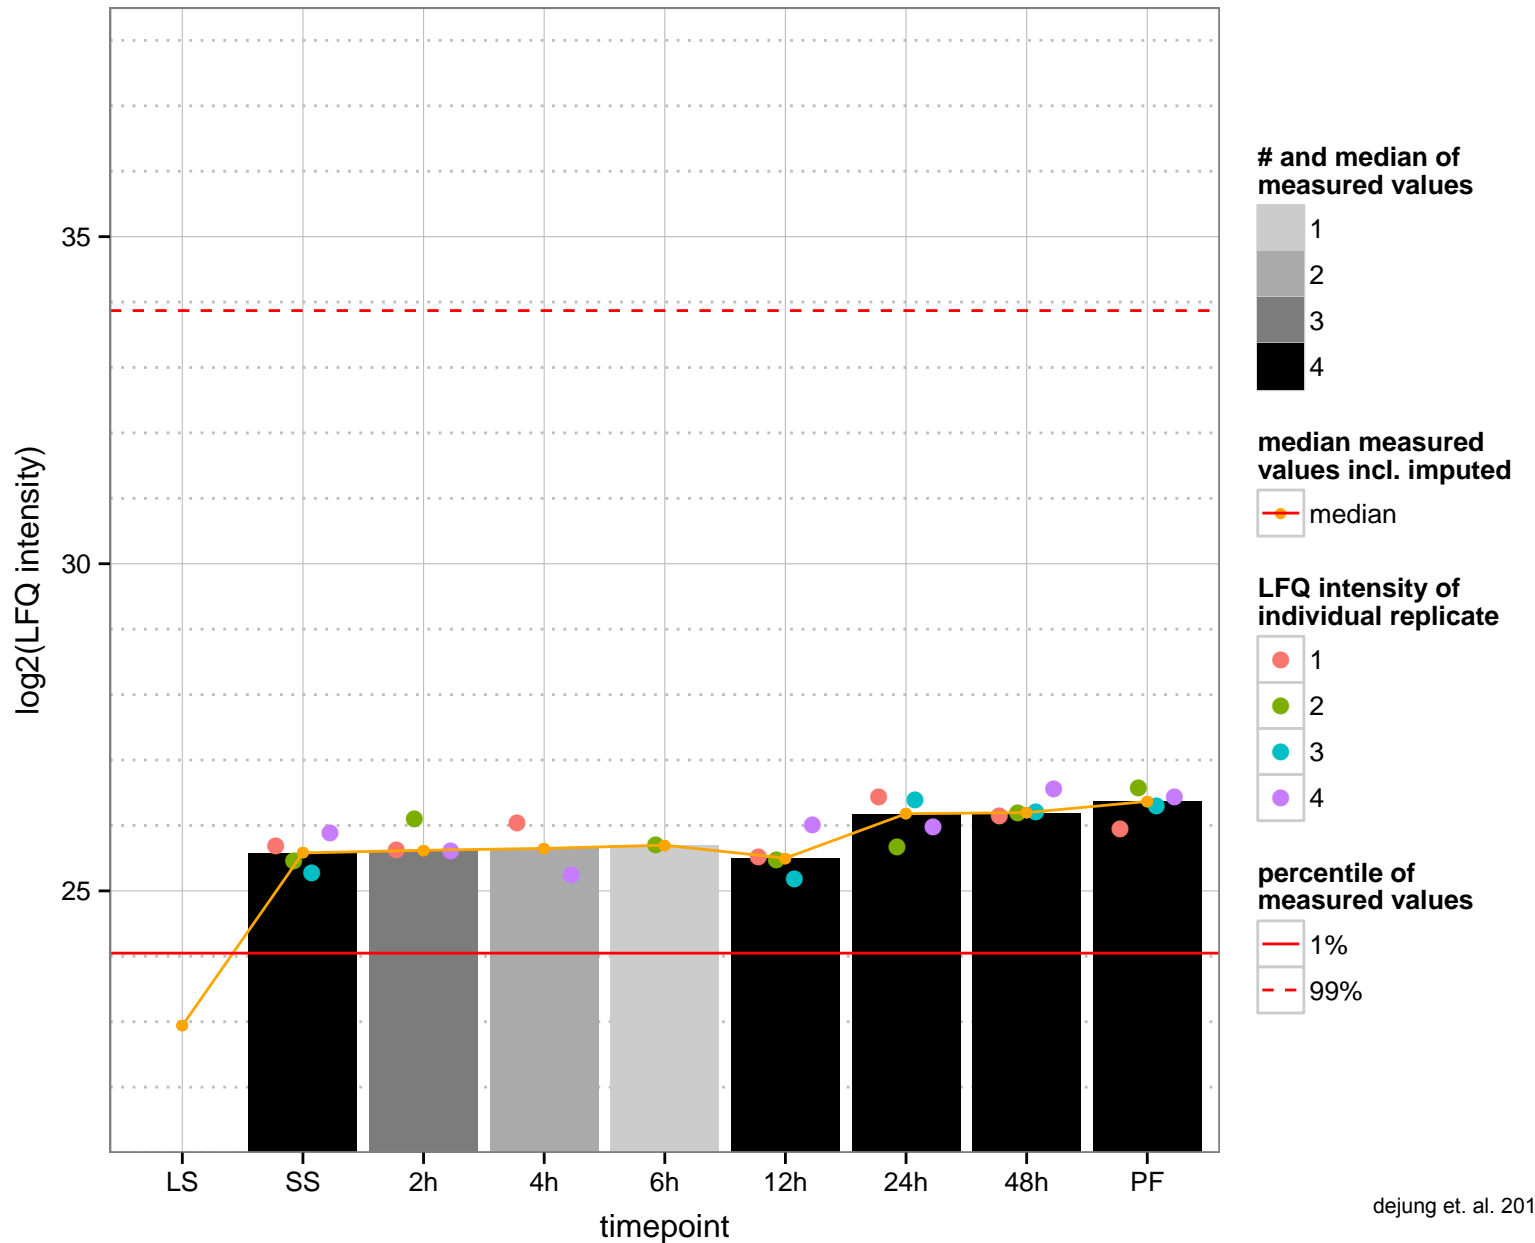

hypothetical protein, conserved  
 Tb927.7.5290  
 AGOF: null  
 AGOC: null  
 AGOP: null  
 PGOF: null  
 PGOE: null  
 PGOP: null

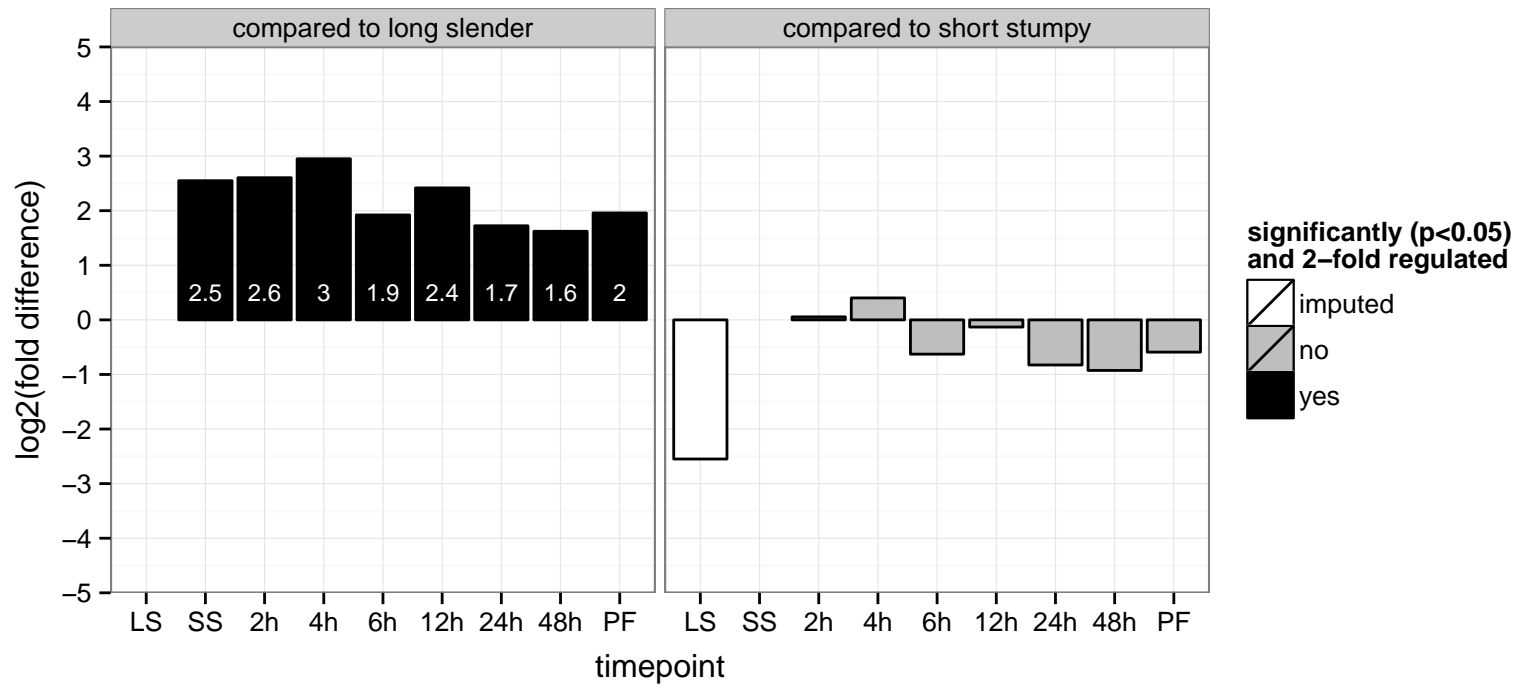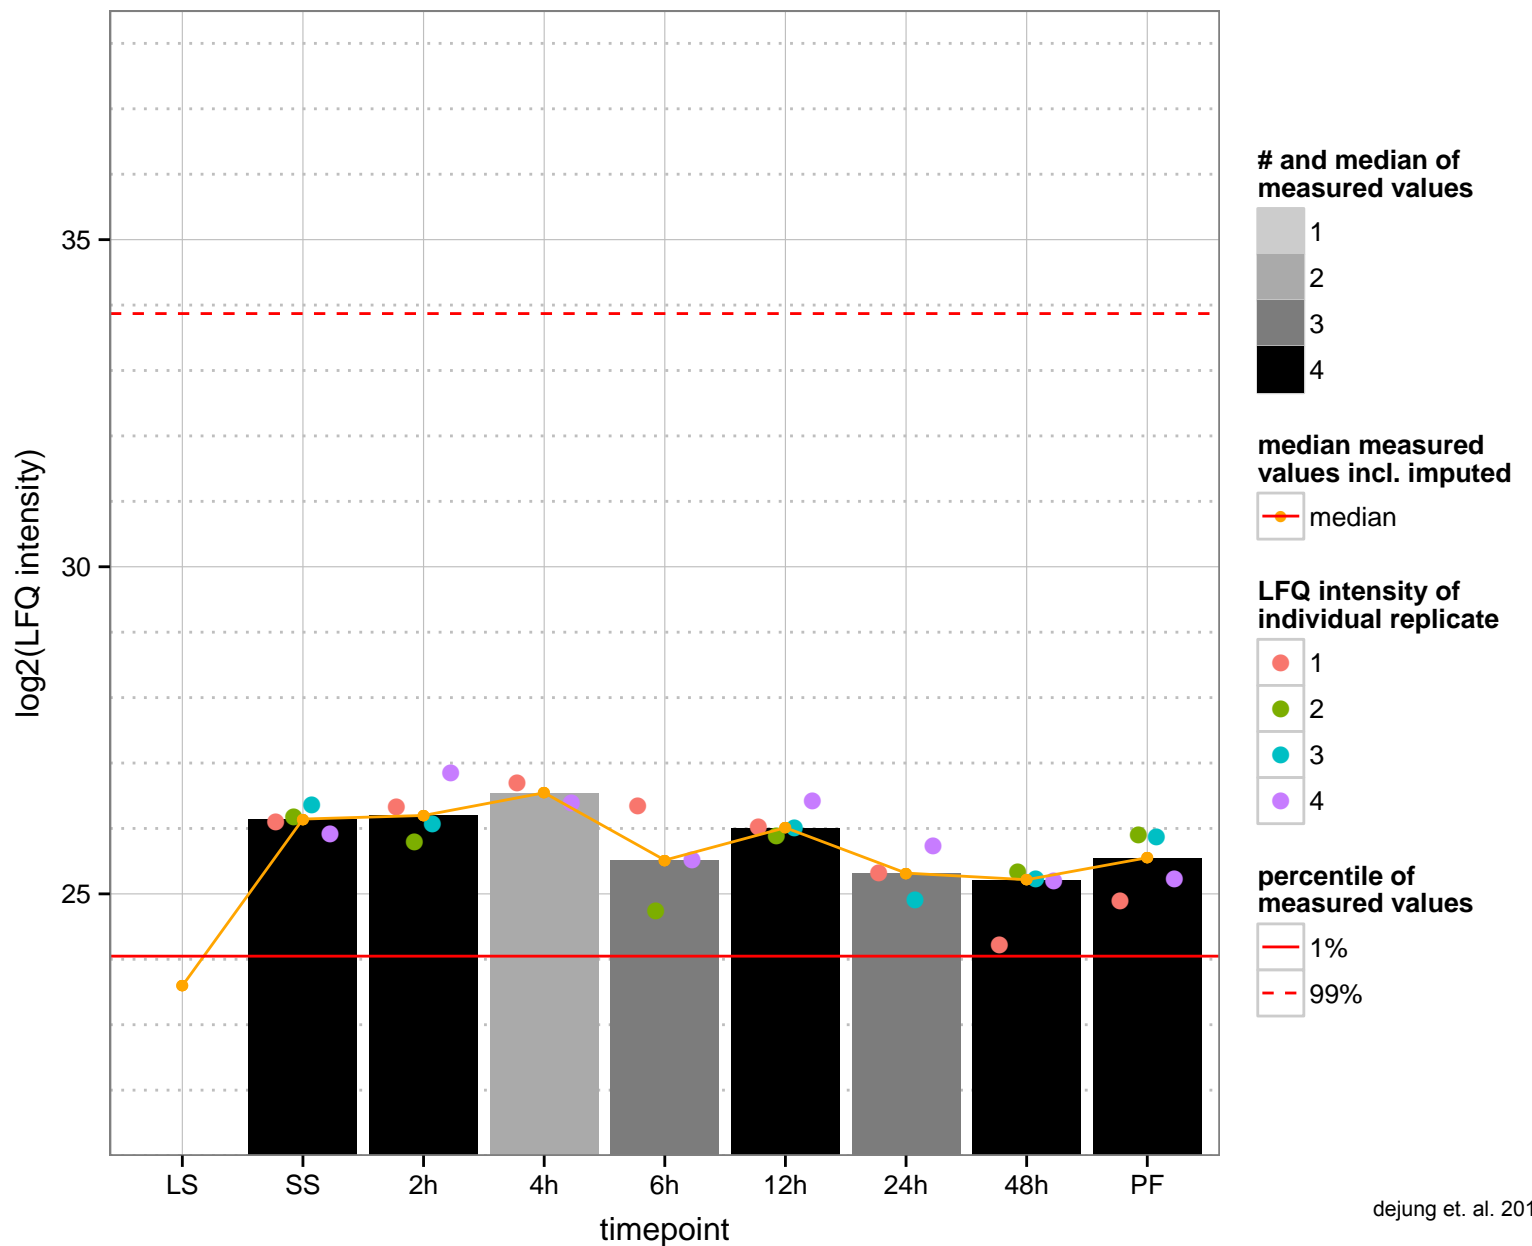

hypothetical protein, conserved  
 Tb927.7.5340  
 AGOF: null  
 AGOC: null  
 AGOP: null  
 PGO: null  
 PGOC: null  
 PGOP: null

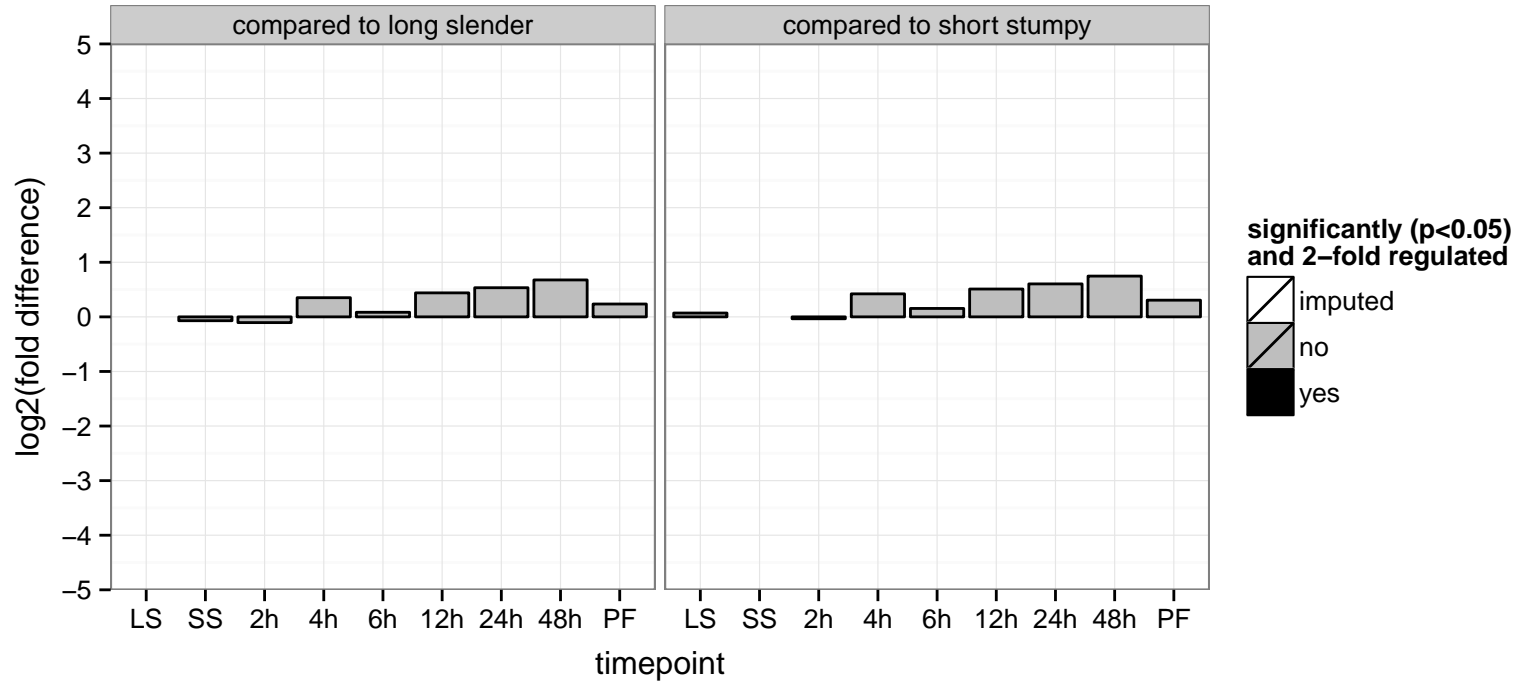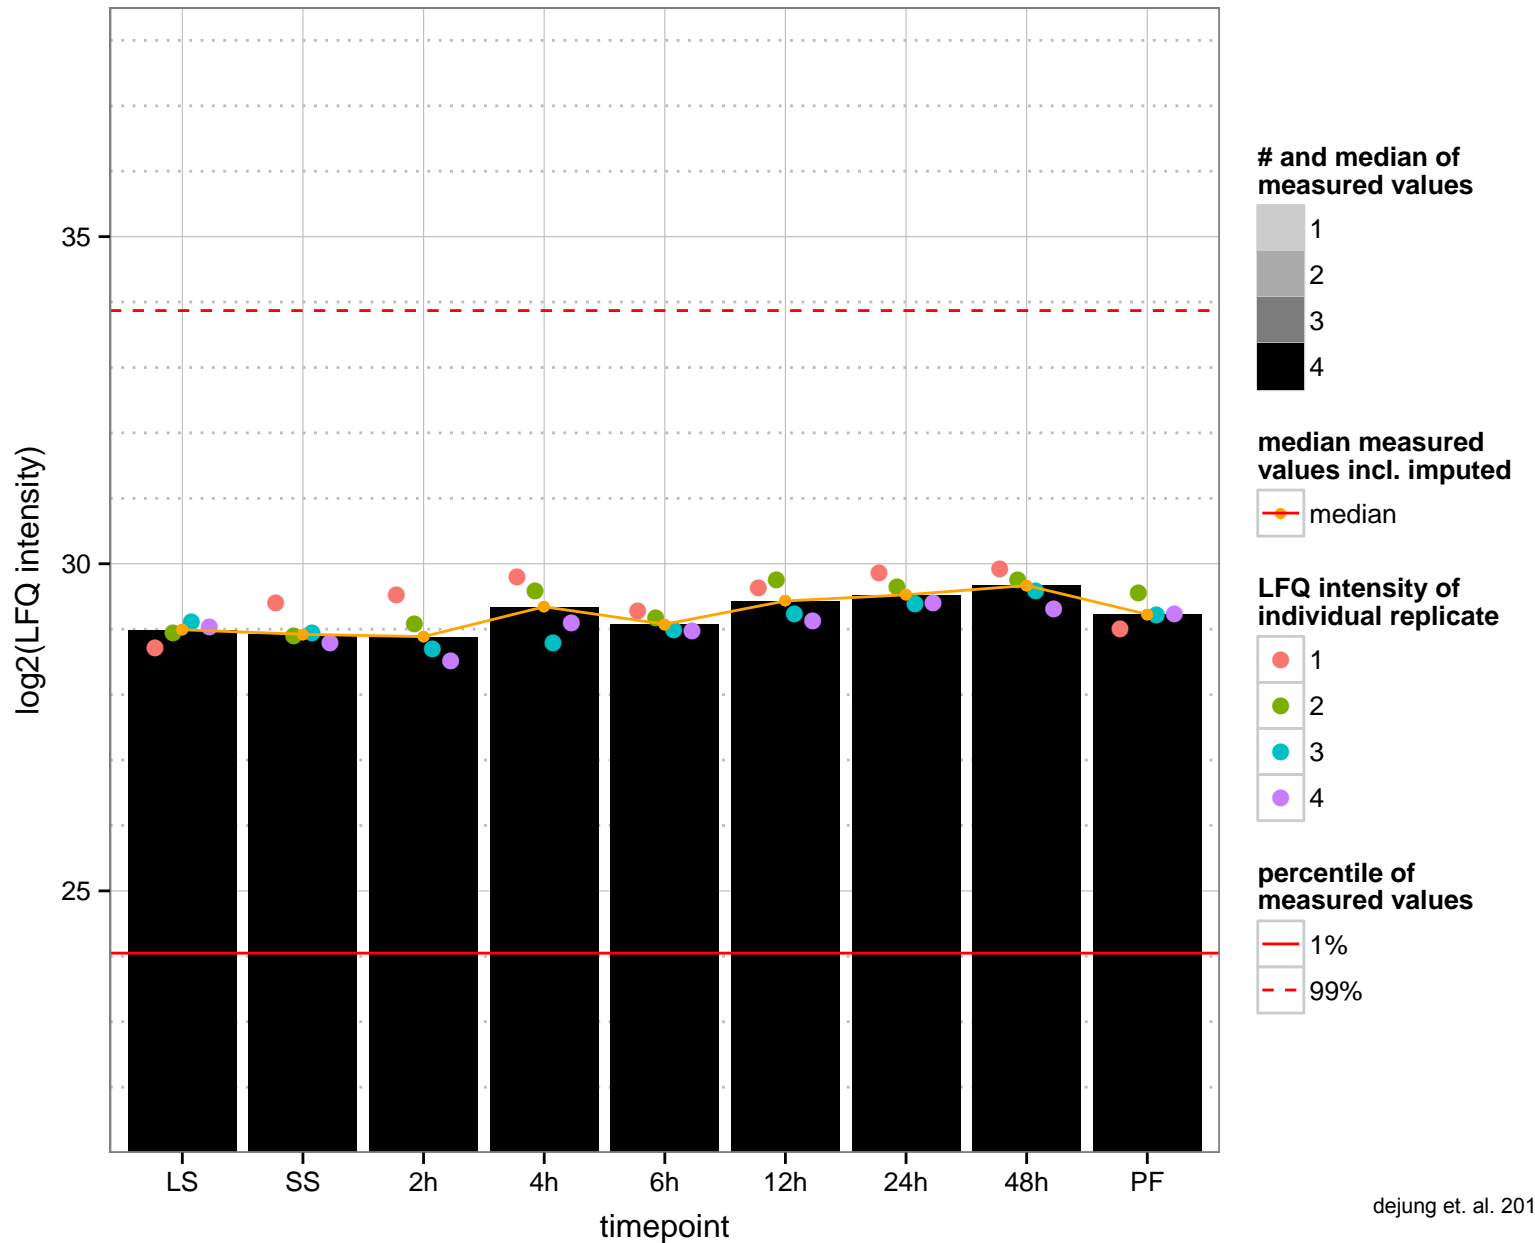

hypothetical protein, conserved  
 Tb927.7.5440  
 AGOF: null  
 AGOC: mitochondrion  
 AGOP: null  
 PGO: null  
 PGO: null  
 PGO: null

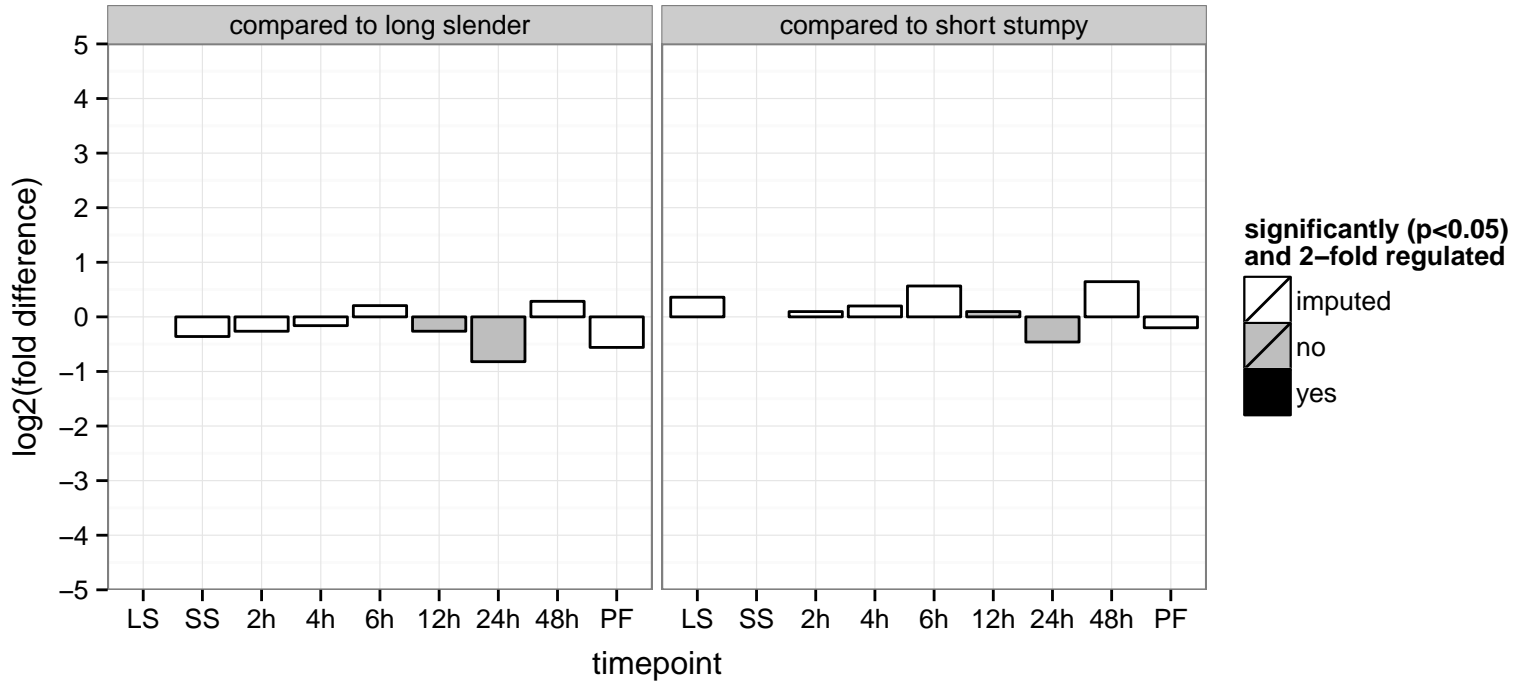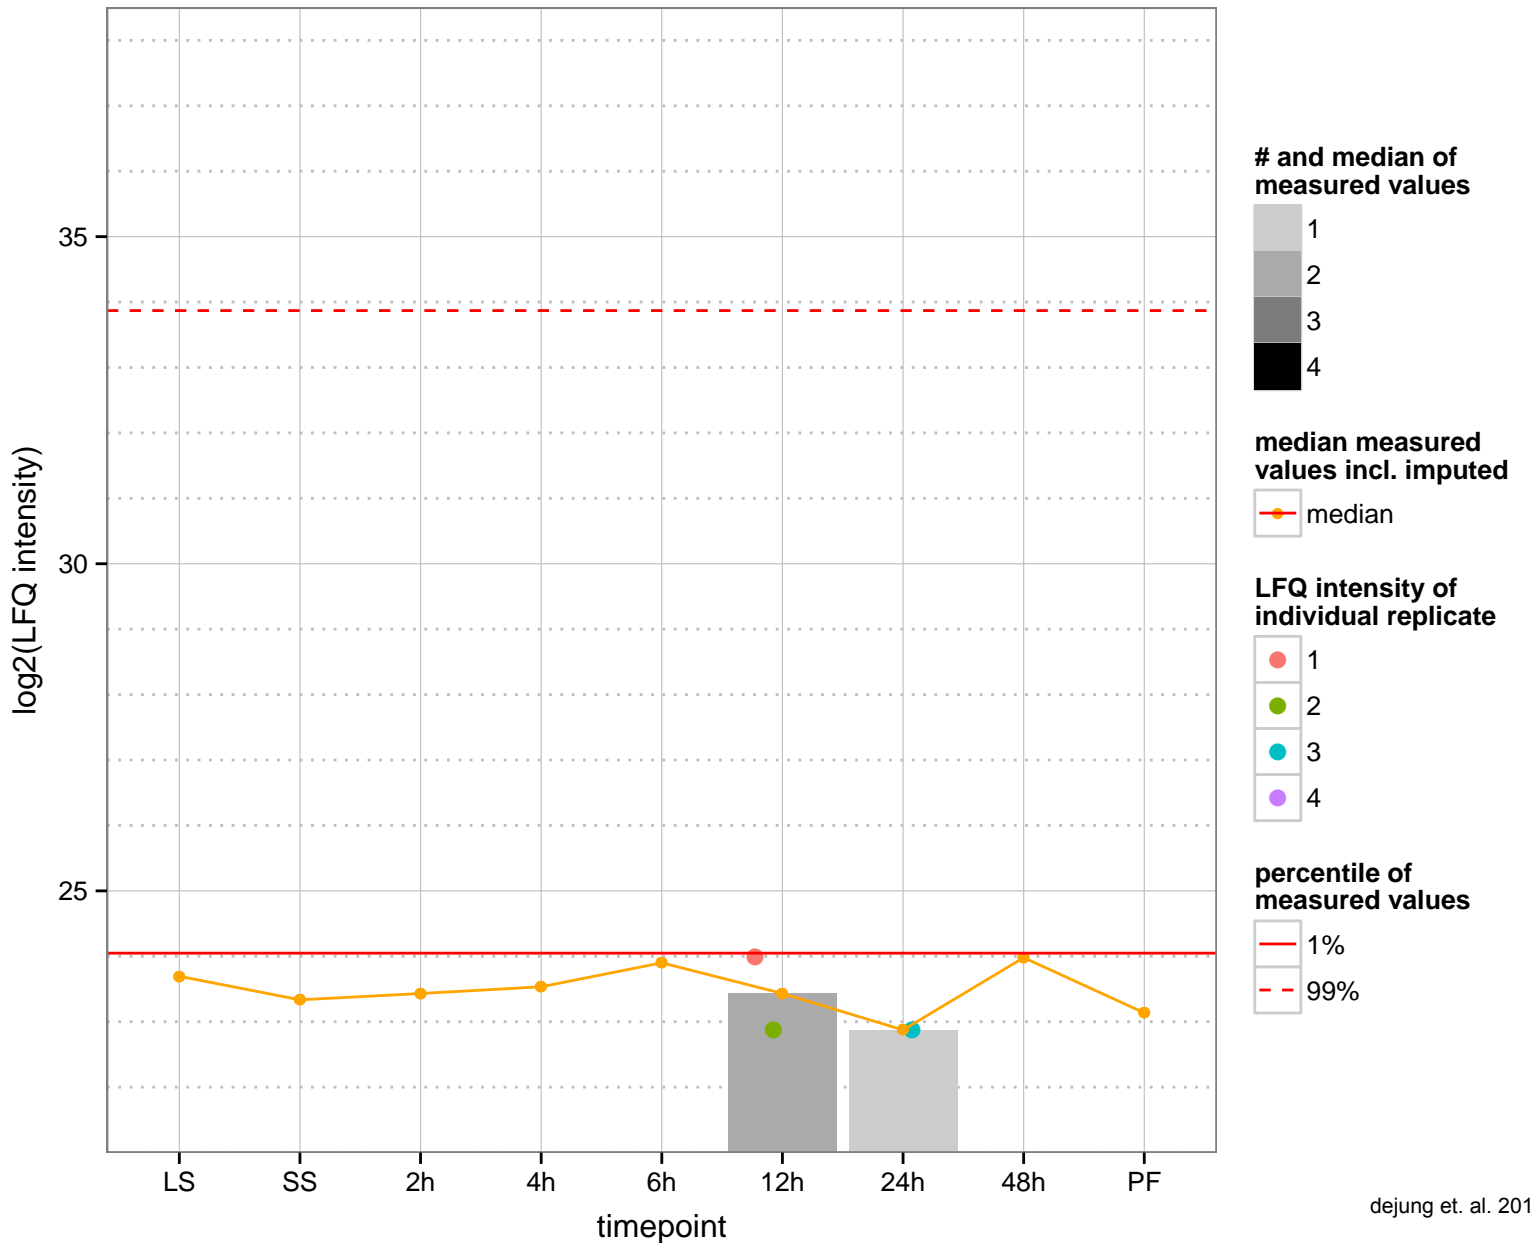

arginine N-methyltransferase, type III (PRMT7)  
 Tb927.7.5490  
 AGOF: arginine N-methyltransferase activity  
 AGOC: cytoplasm  
 AGOP: histone arginine methylation, peptidyl-arginine methylation  
 PGO: protein methyltransferase activity  
 PGOC: cytoplasm  
 PGOP: protein methylation

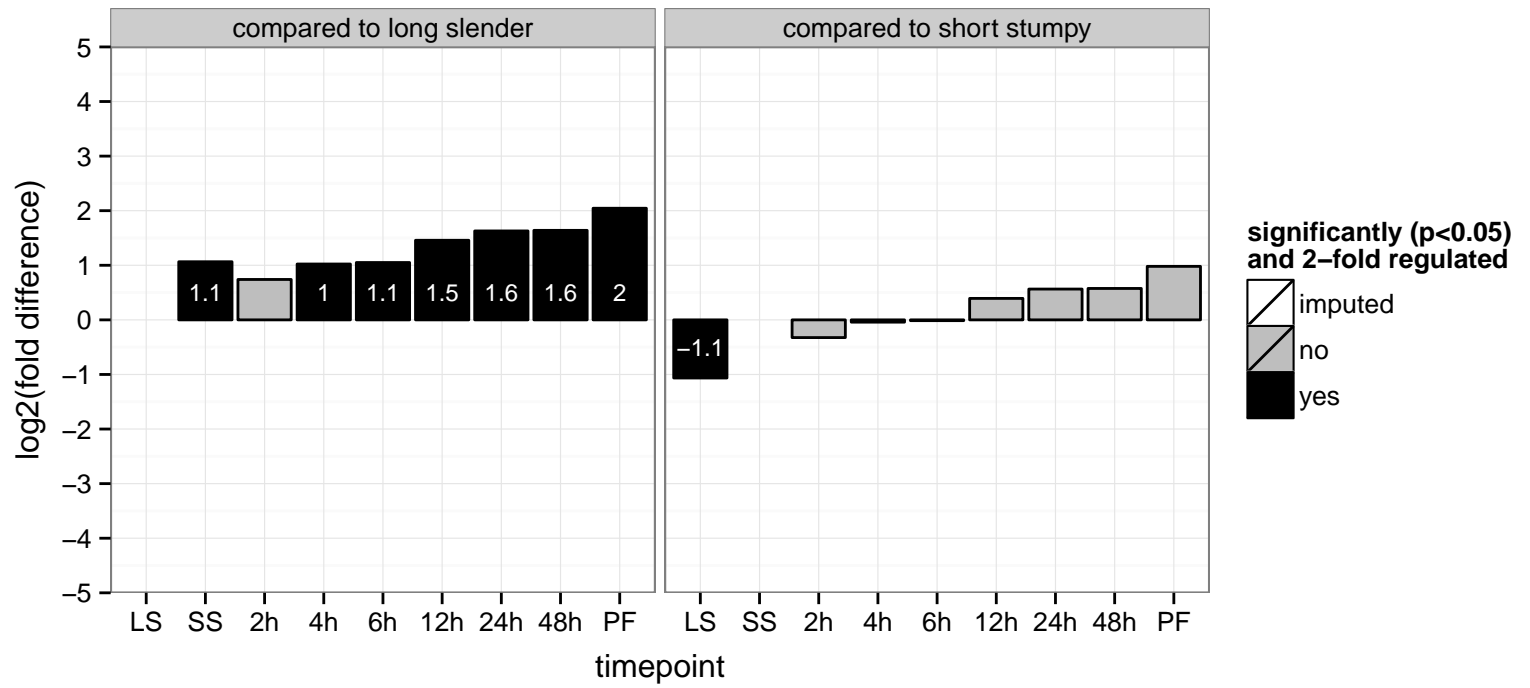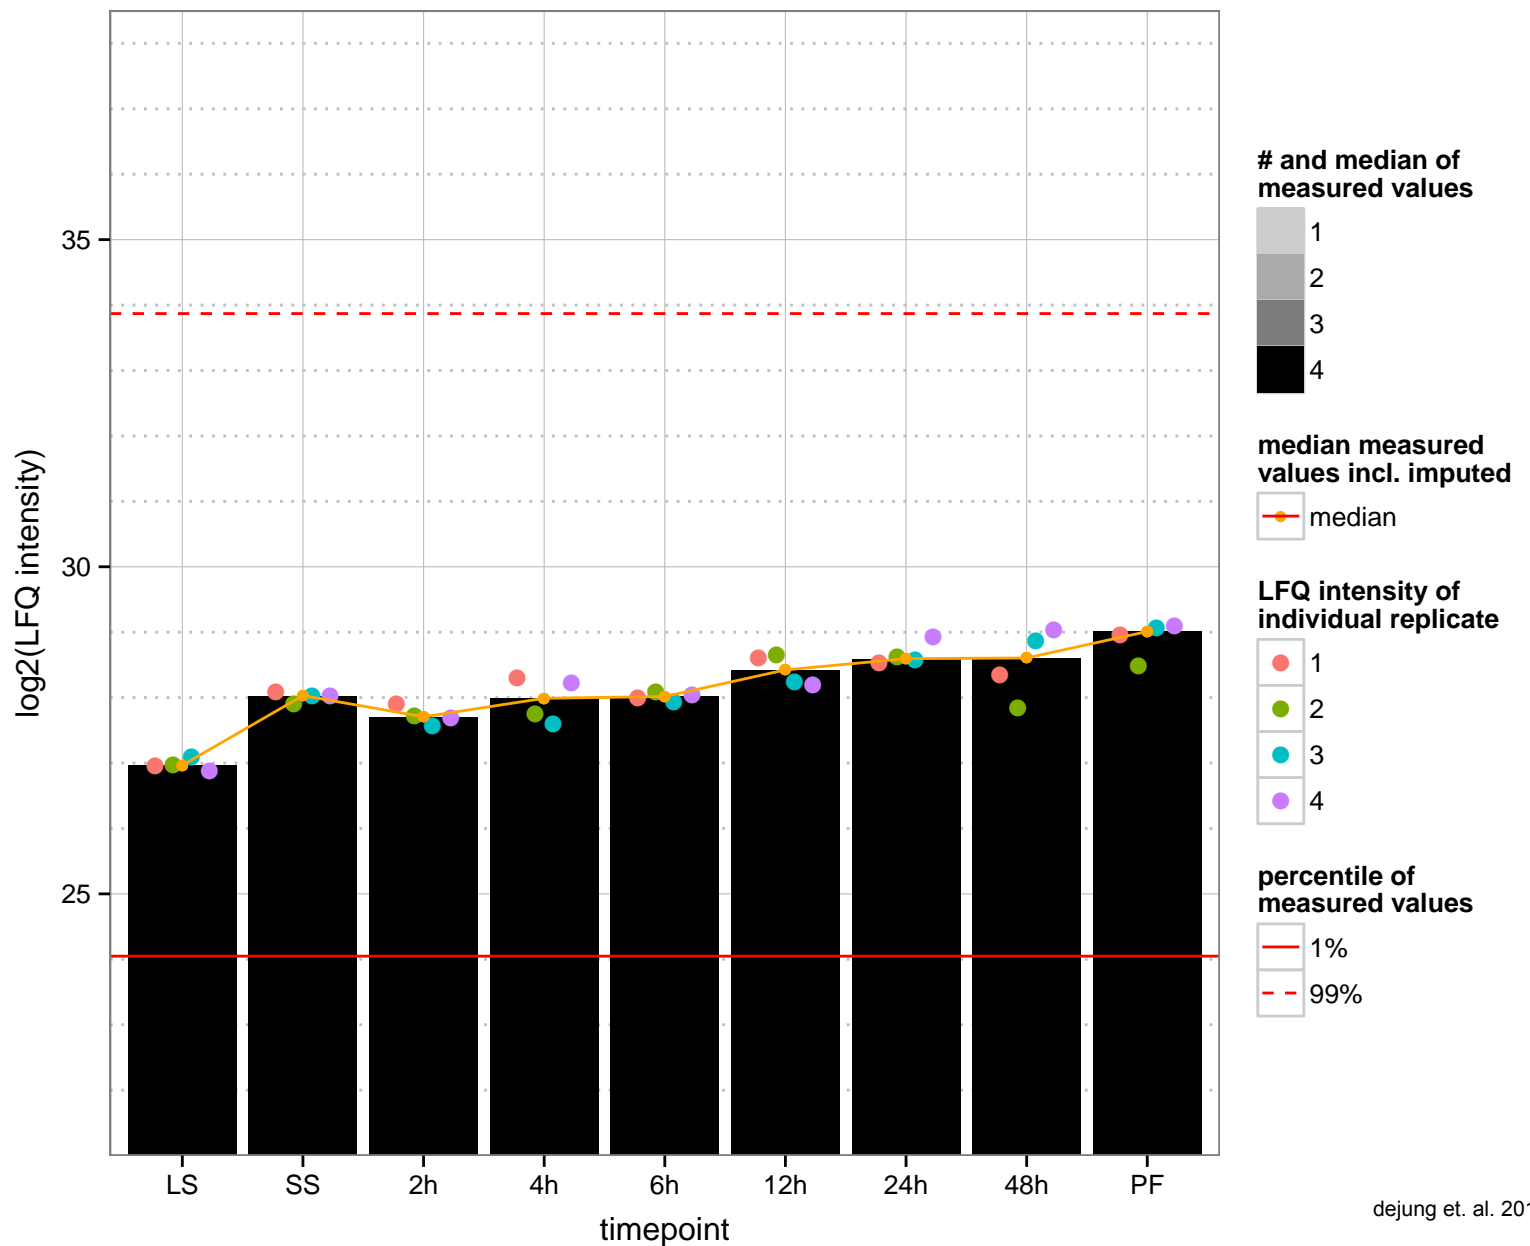

hypothetical protein, conserved  
 Tb927.7.5530  
 AGOF: null  
 AGOC: null  
 AGOP: null  
 PGOF: null  
 PGO: null  
 PGOP: null

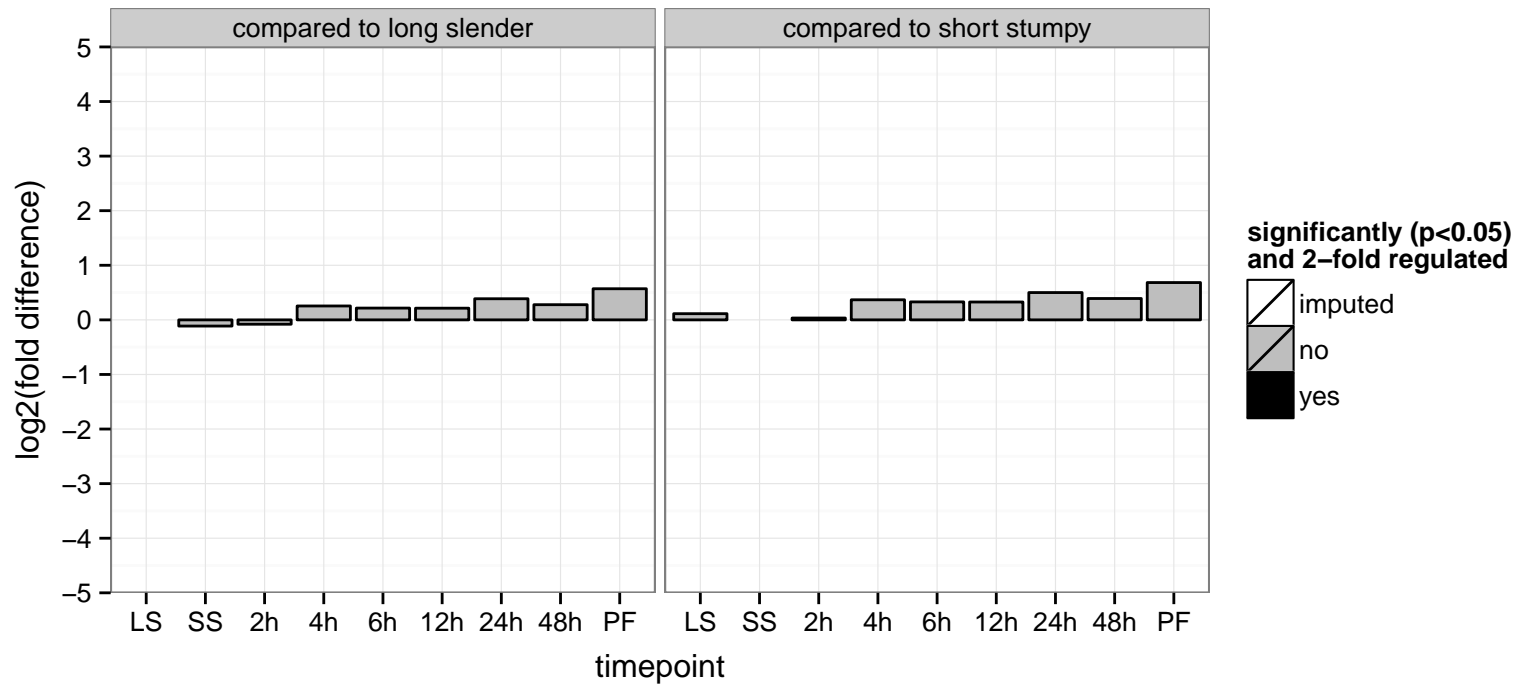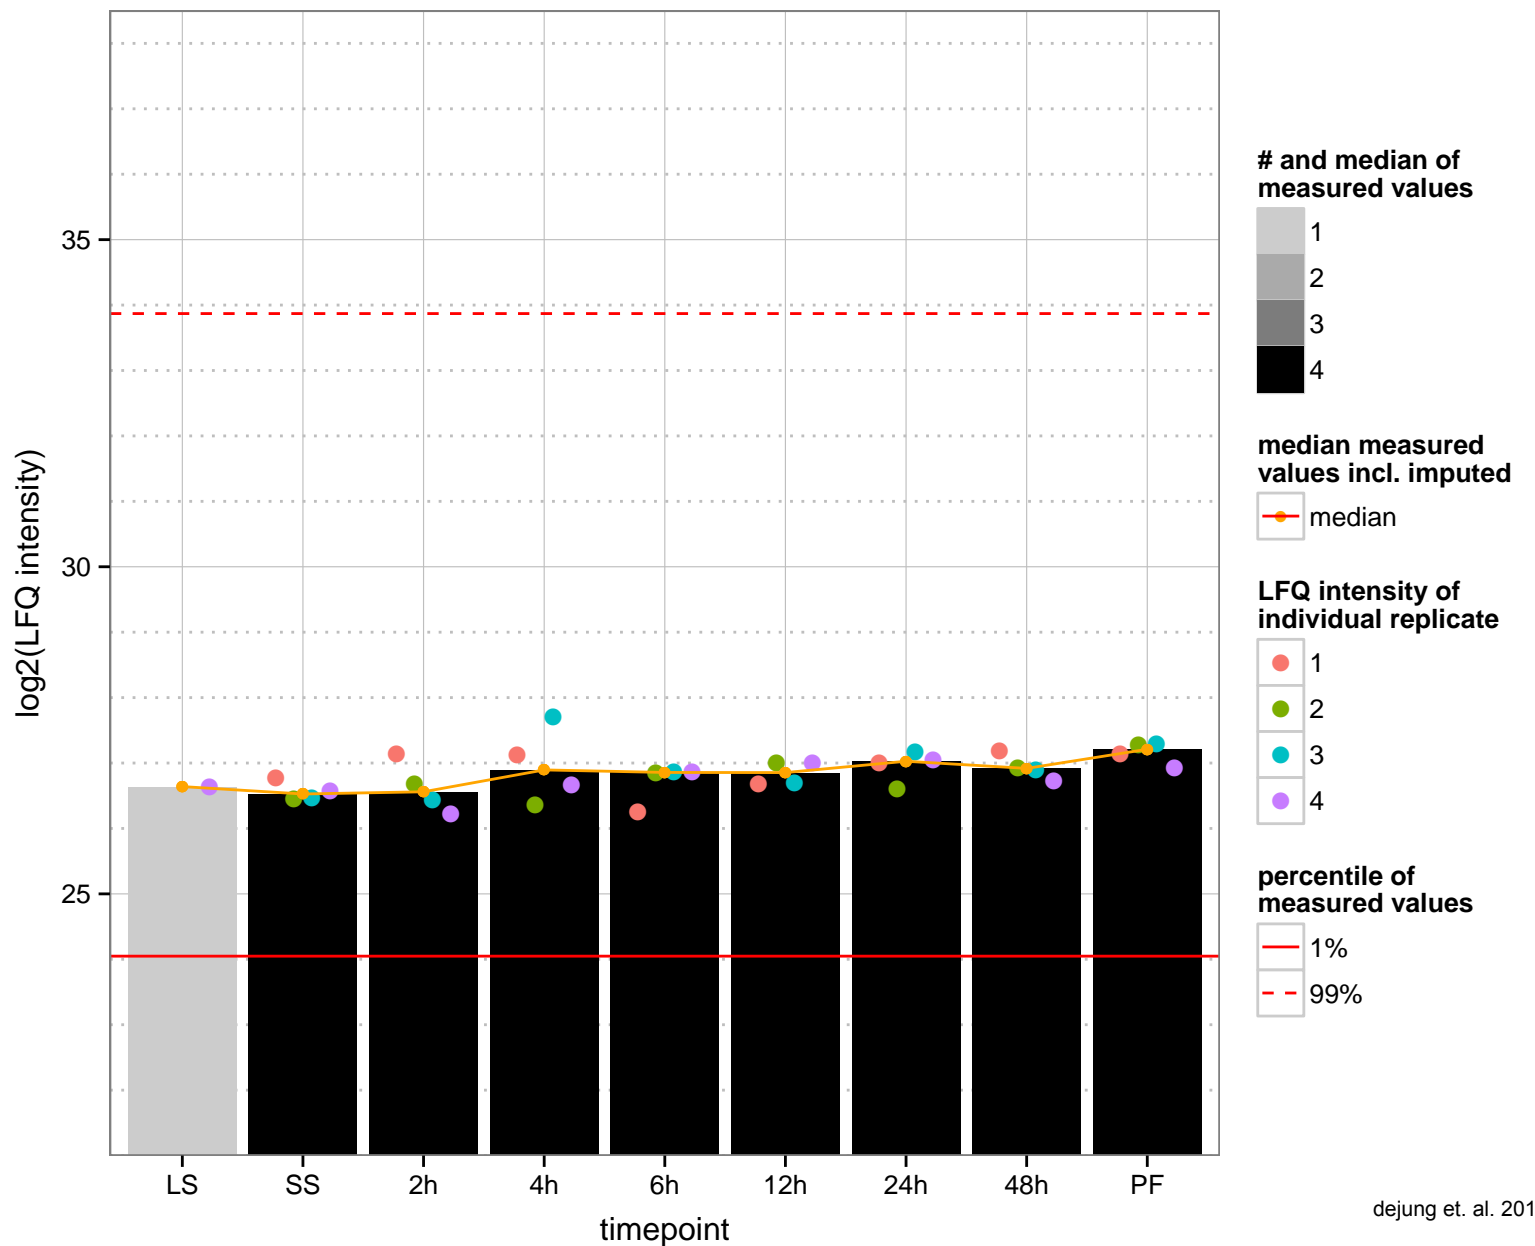

glucosamine-fructose-6-phosphate aminotransferase, putative

Tb927.7.5560

AGOF: carbohydrate binding, glutamine-fructose-6-phosphate transaminase (isomerizing) activity

AGOC: cytoplasm

AGOP: carbohydrate biosynthetic process

PGOF: carbohydrate binding, glutamine-fructose-6-phosphate transaminase (isomerizing) activity

PGOC: cytoplasm

PGOP: carbohydrate biosynthetic process, carbohydrate metabolic process, metabolic process

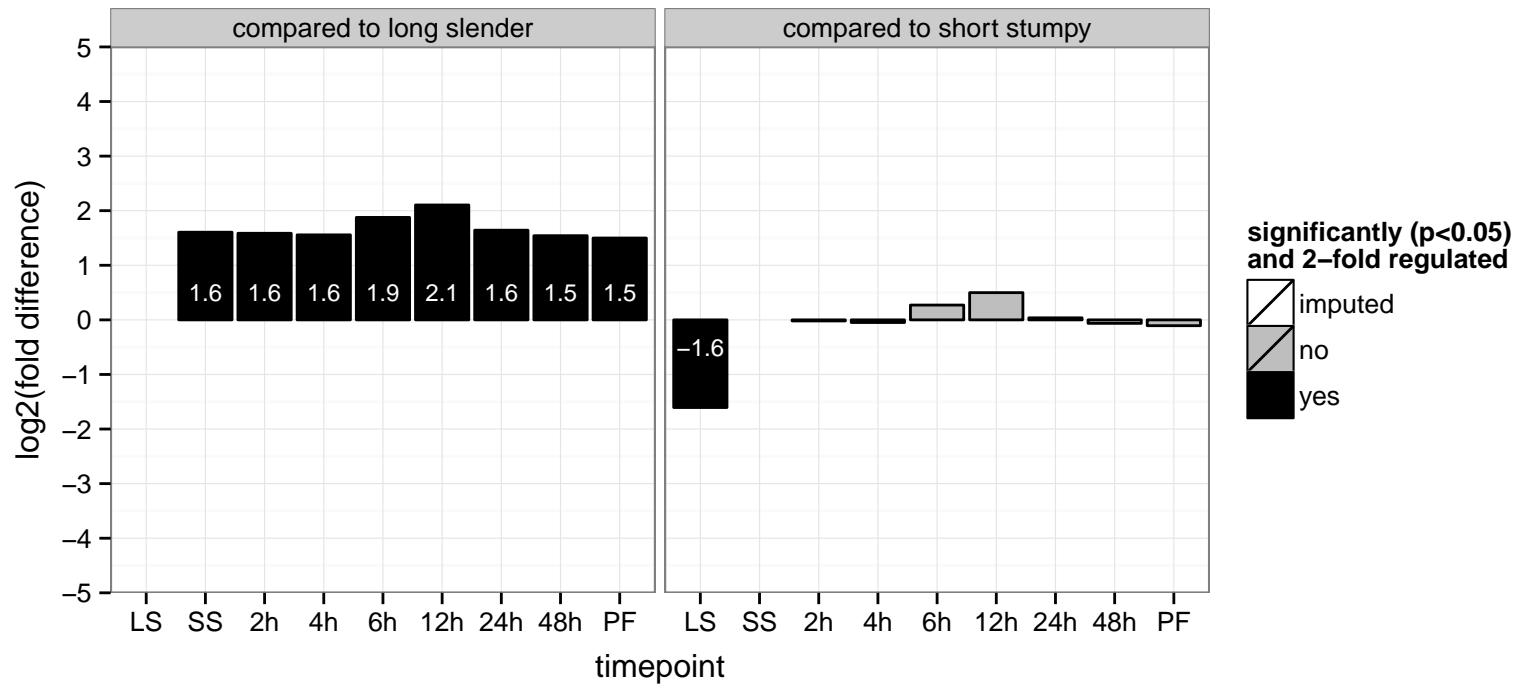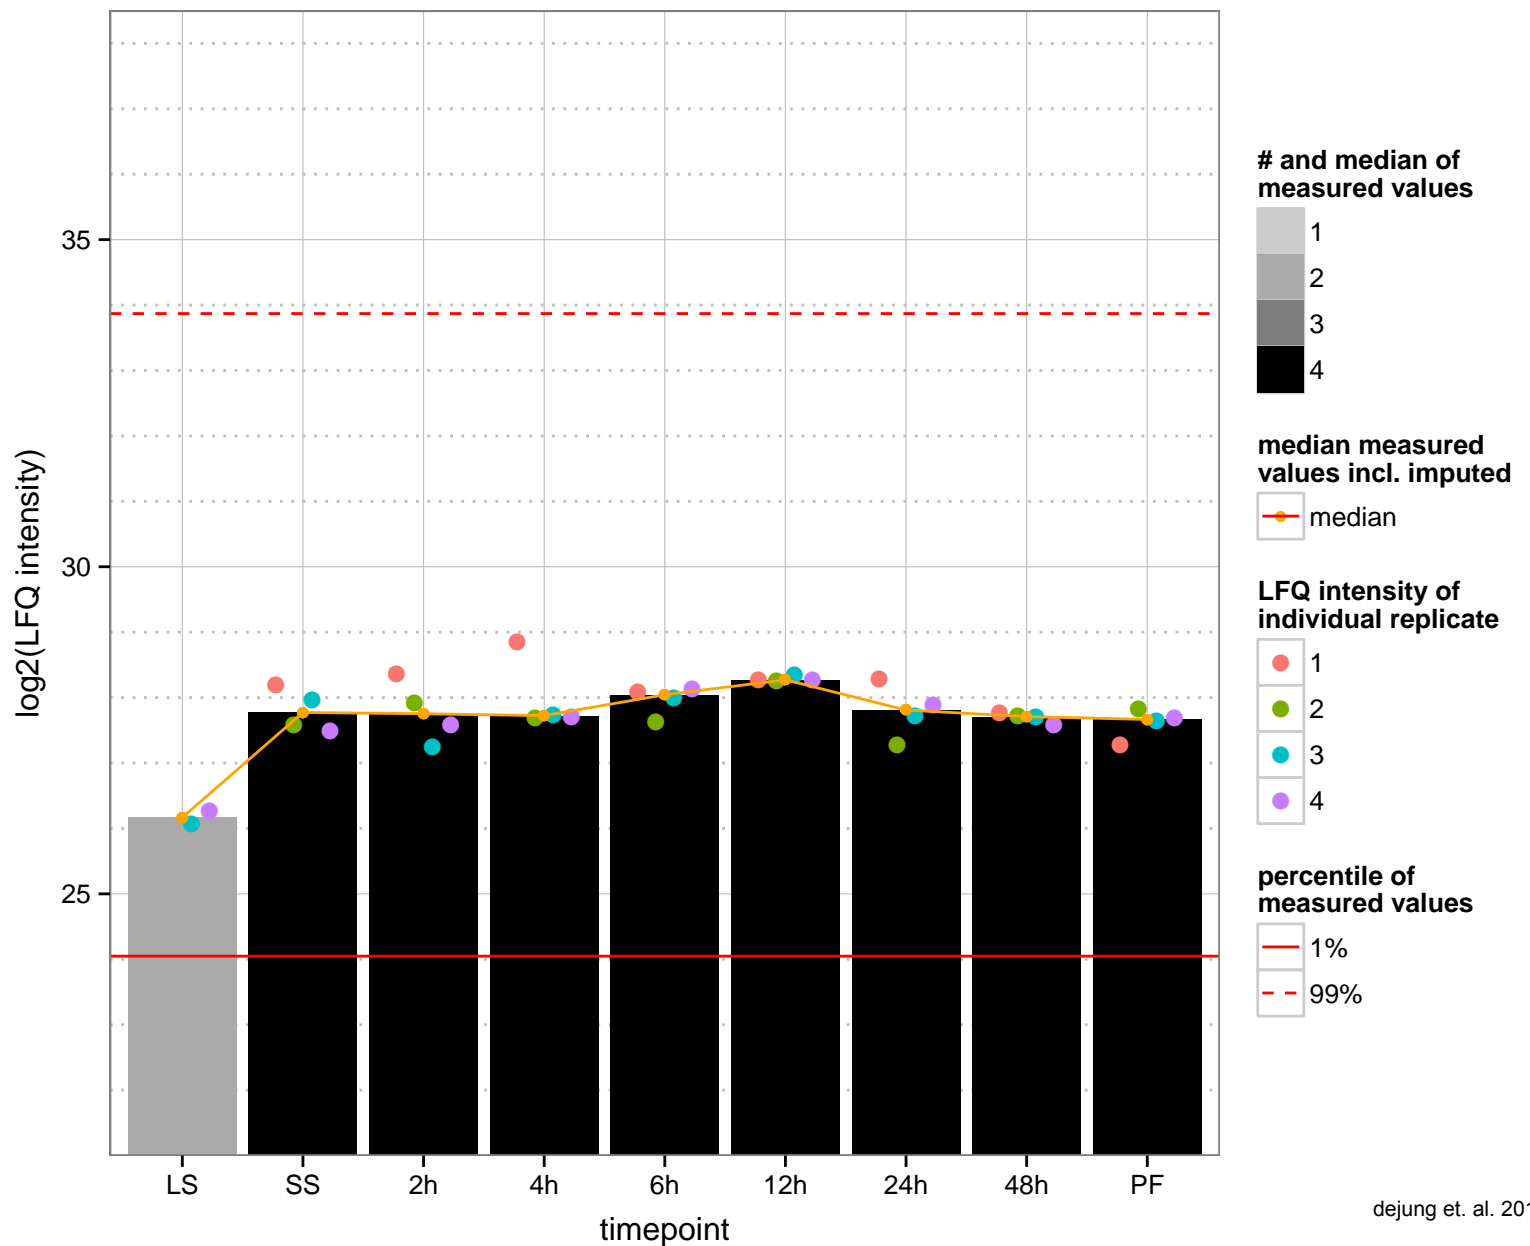



cell cycle associated protein MOB1-A (MOB1A), cell cycle associated protein MOB1-B (MOB1B)  
 Tb927.7.5570;Tb927.7.5580  
 AGOF: null  
 AGOC: cytosol, cytoplasm  
 AGOP: cell division  
 PGO: null  
 PGO: null  
 PGO: null

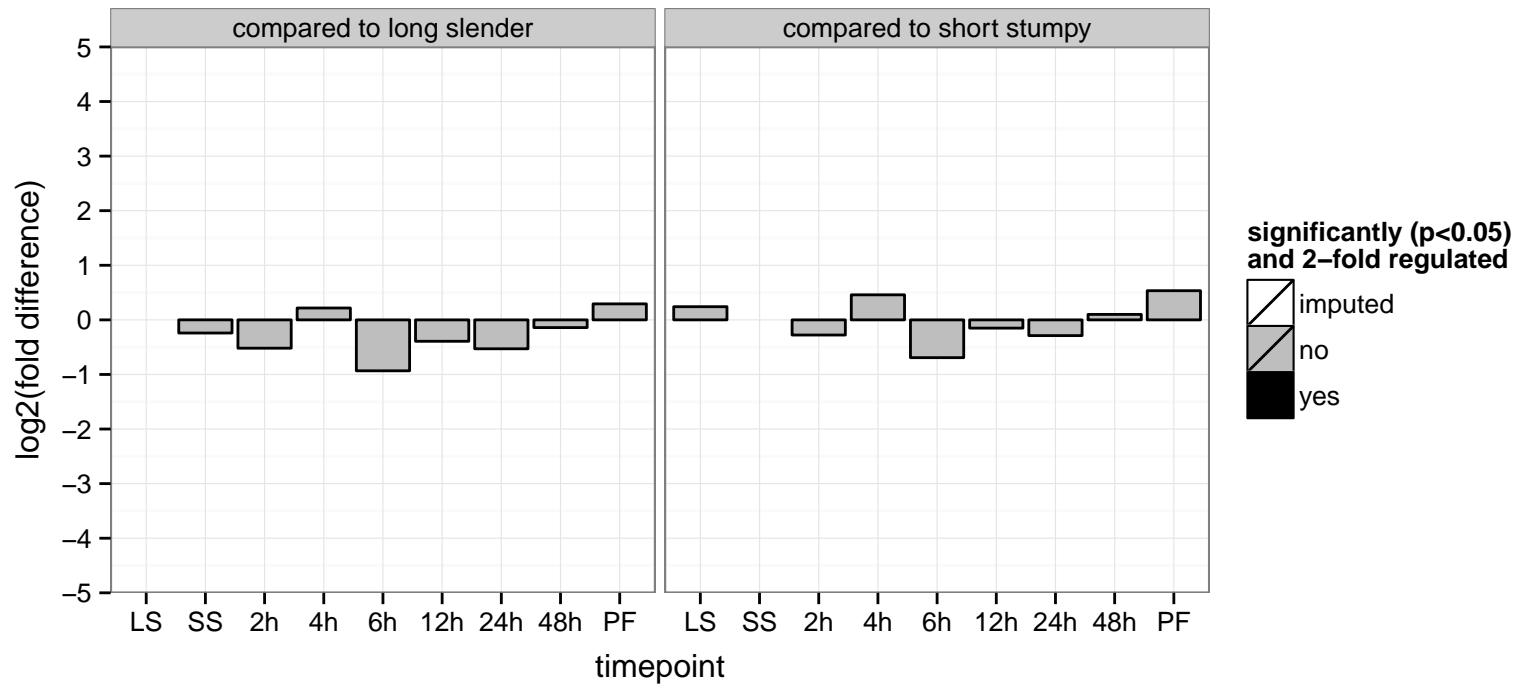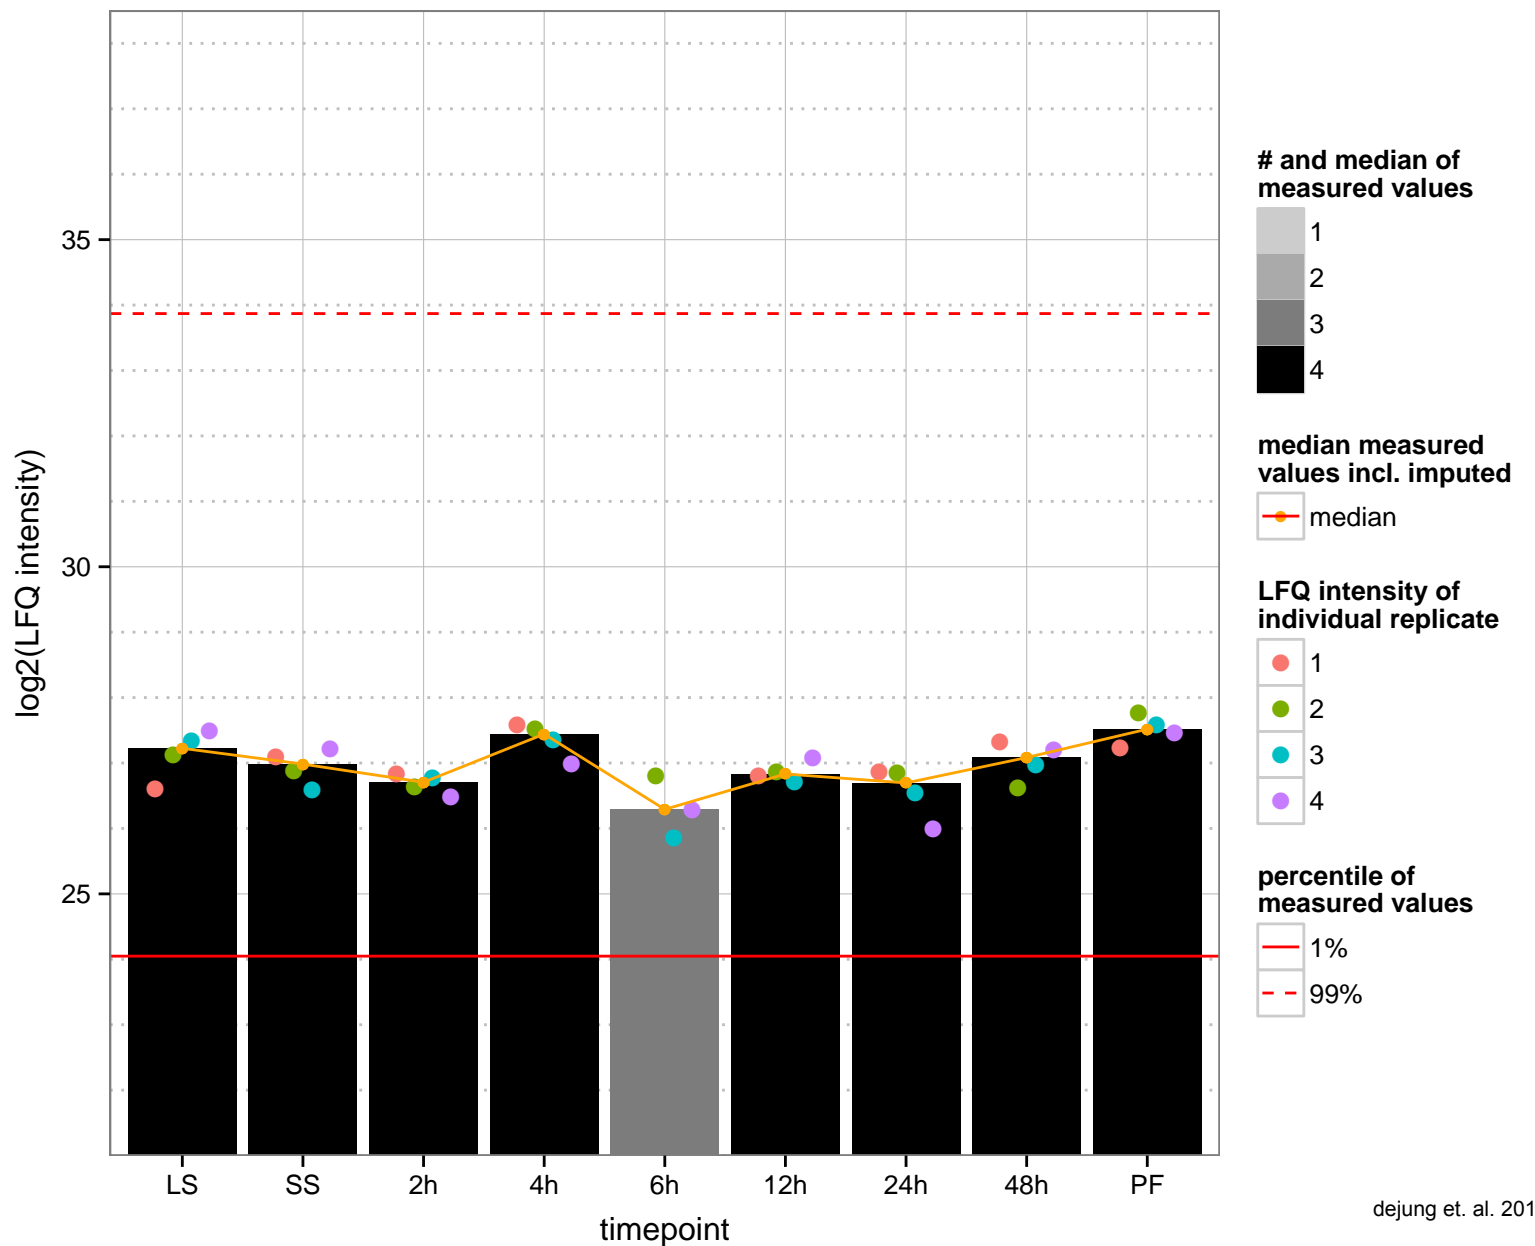

hypothetical protein, conserved  
 Tb927.7.5660  
 AGOF: null  
 AGOC: null  
 AGOP: null  
 PGO: null  
 PGOC: null  
 PGOP: null

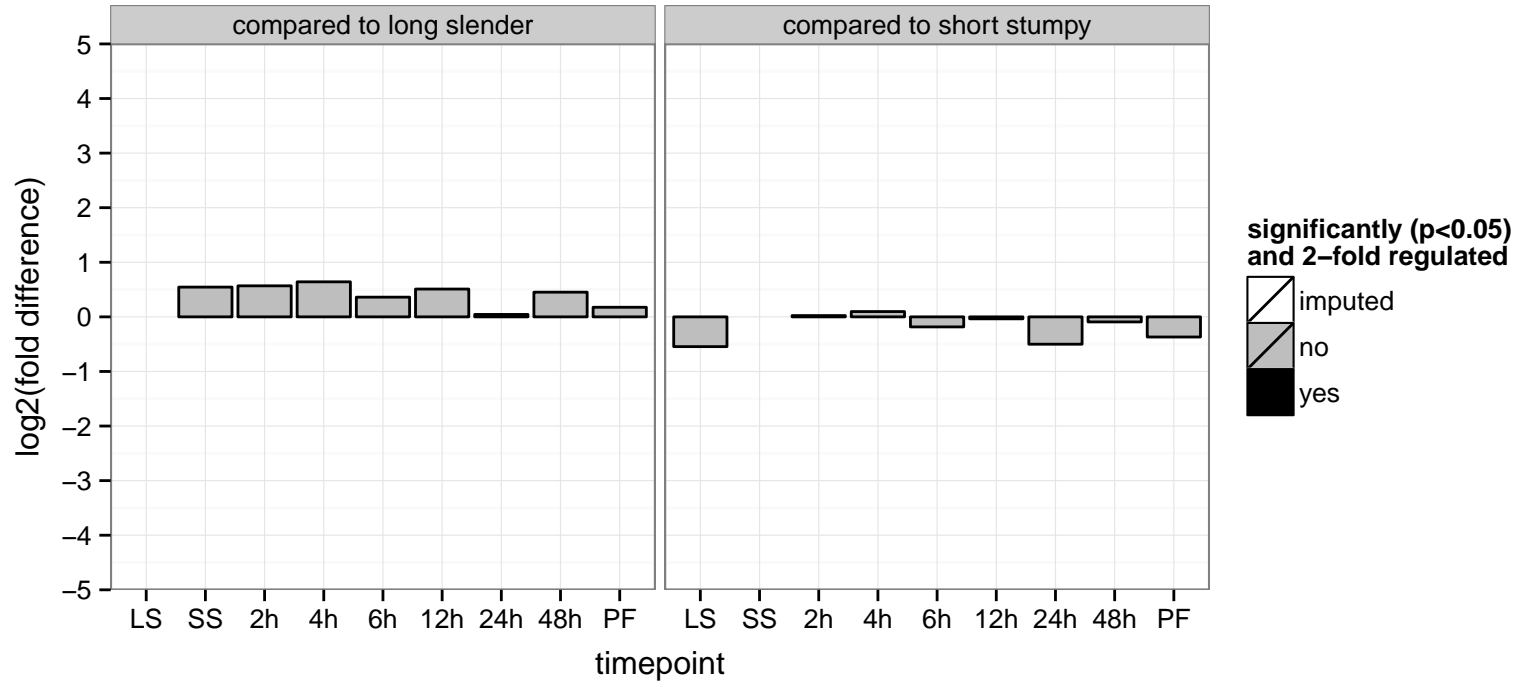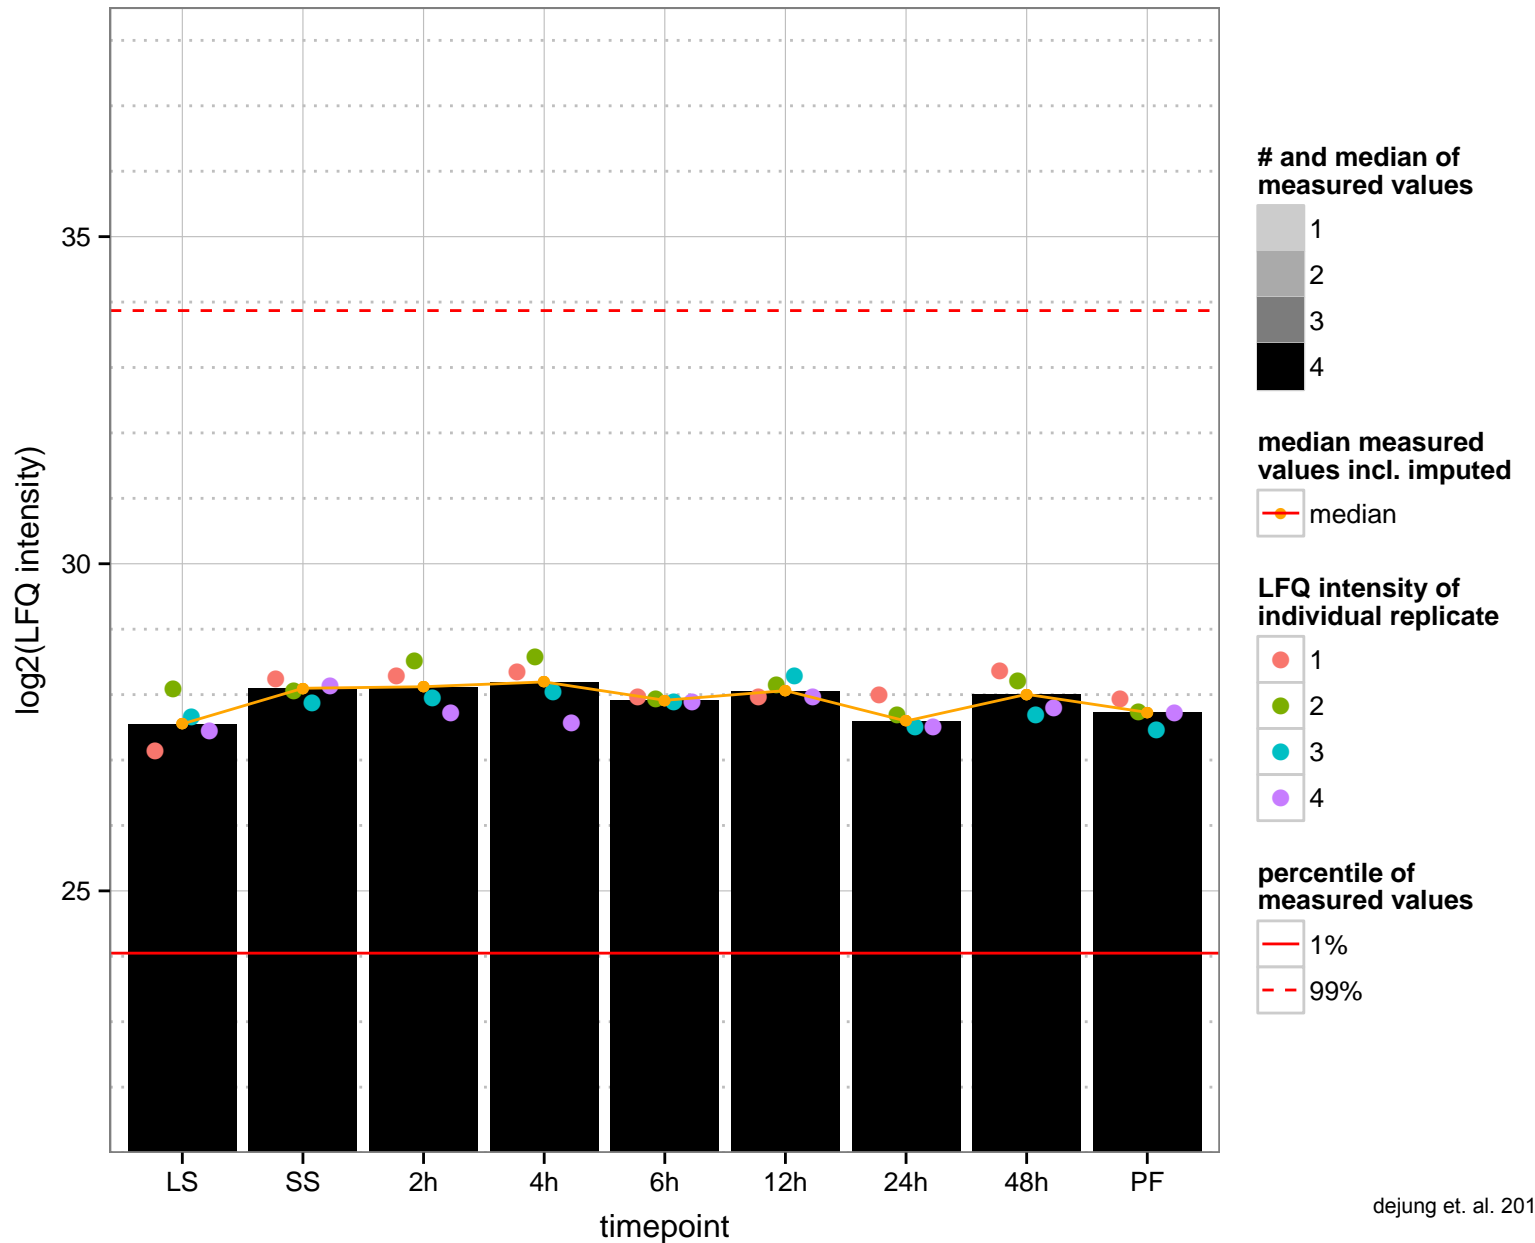

hypothetical protein, conserved  
 Tb927.7.5700  
 AGOF: null  
 AGOC: null  
 AGOP: null  
 PGO: null  
 PGOC: null  
 PGOP: null

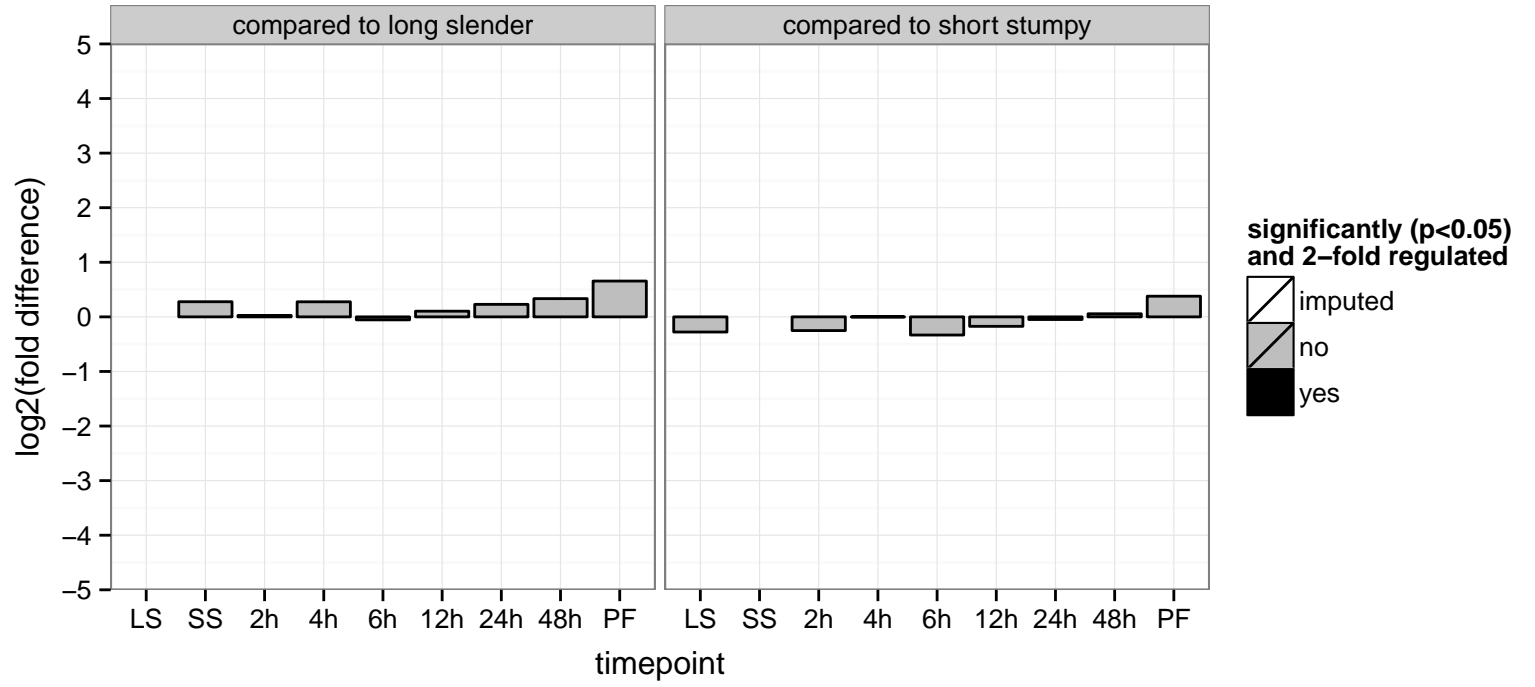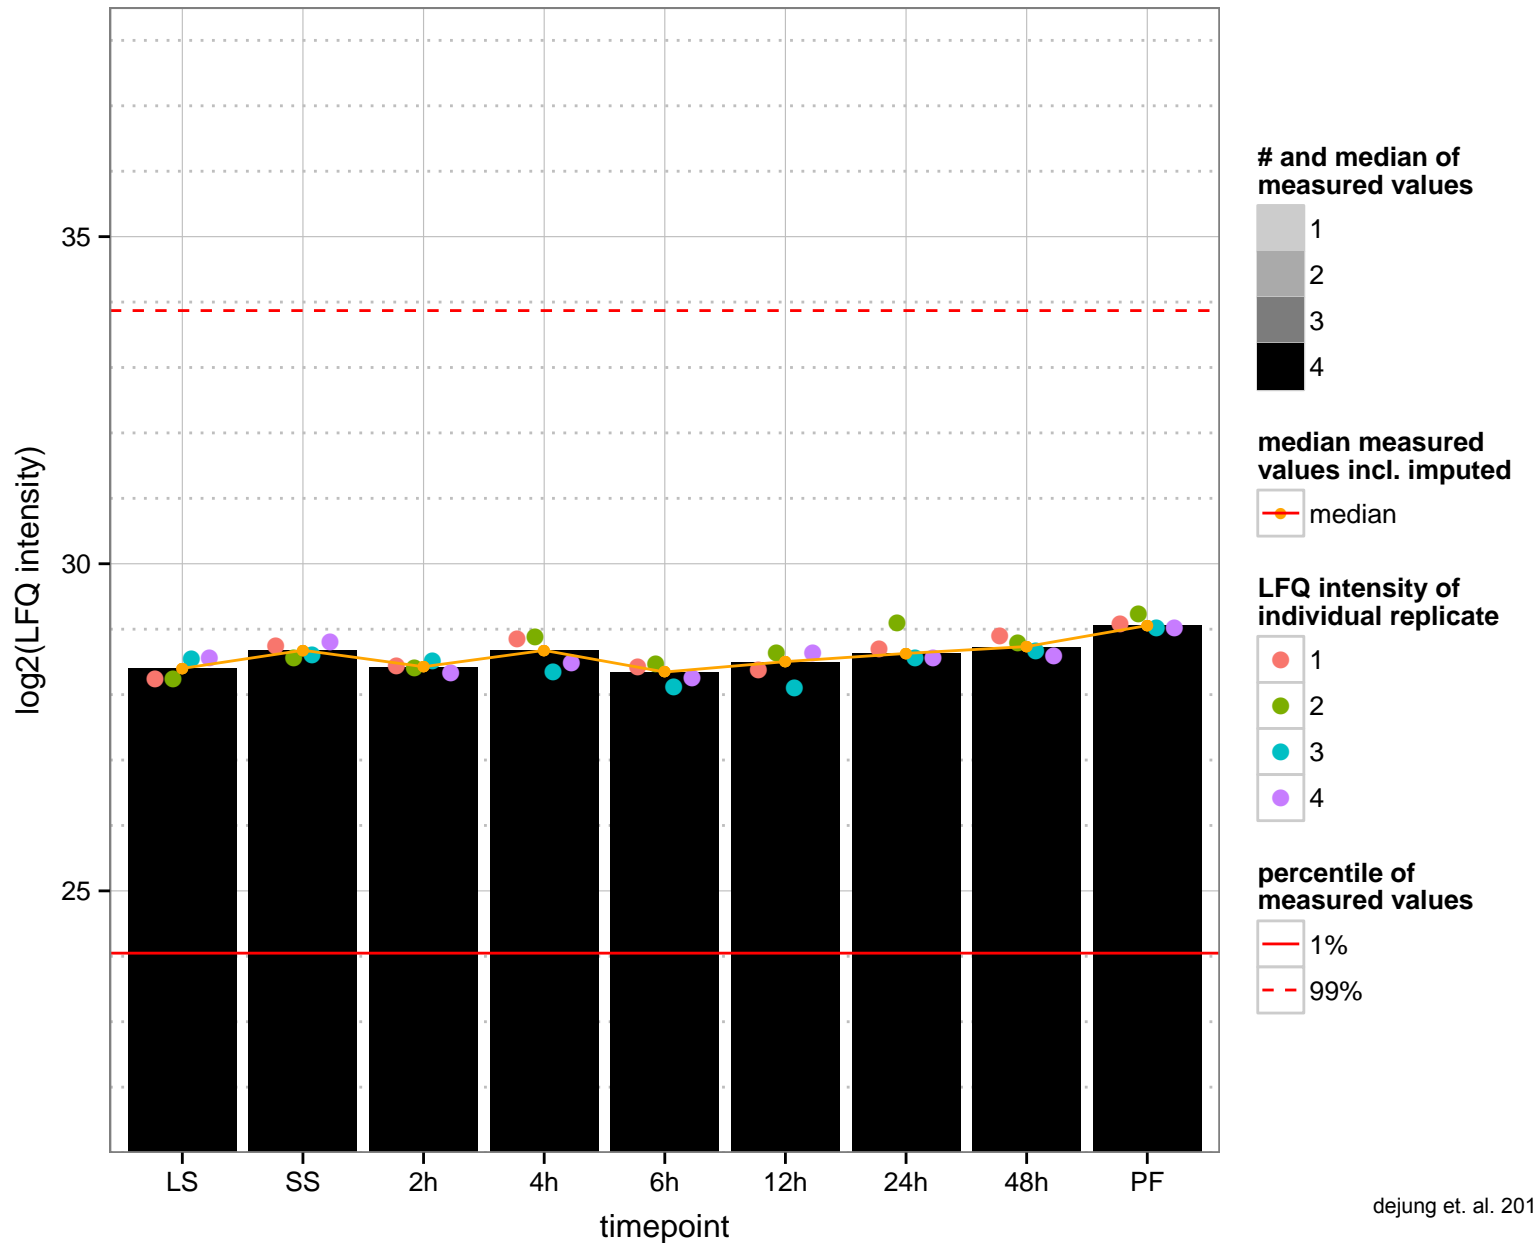

hypothetical protein, conserved  
 Tb927.7.5710  
 AGOF: null  
 AGOC: null  
 AGOP: null  
 PGOF: null  
 PGOC: null  
 PGOP: null

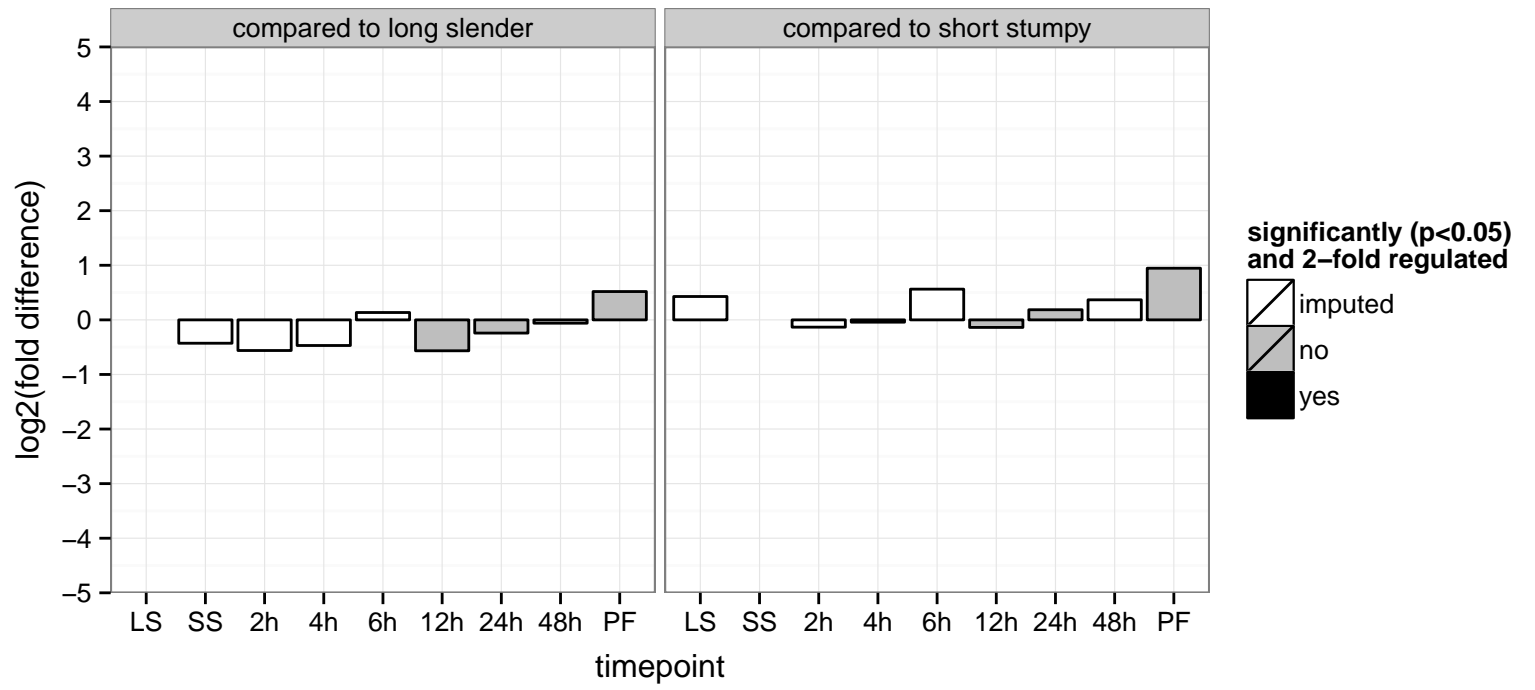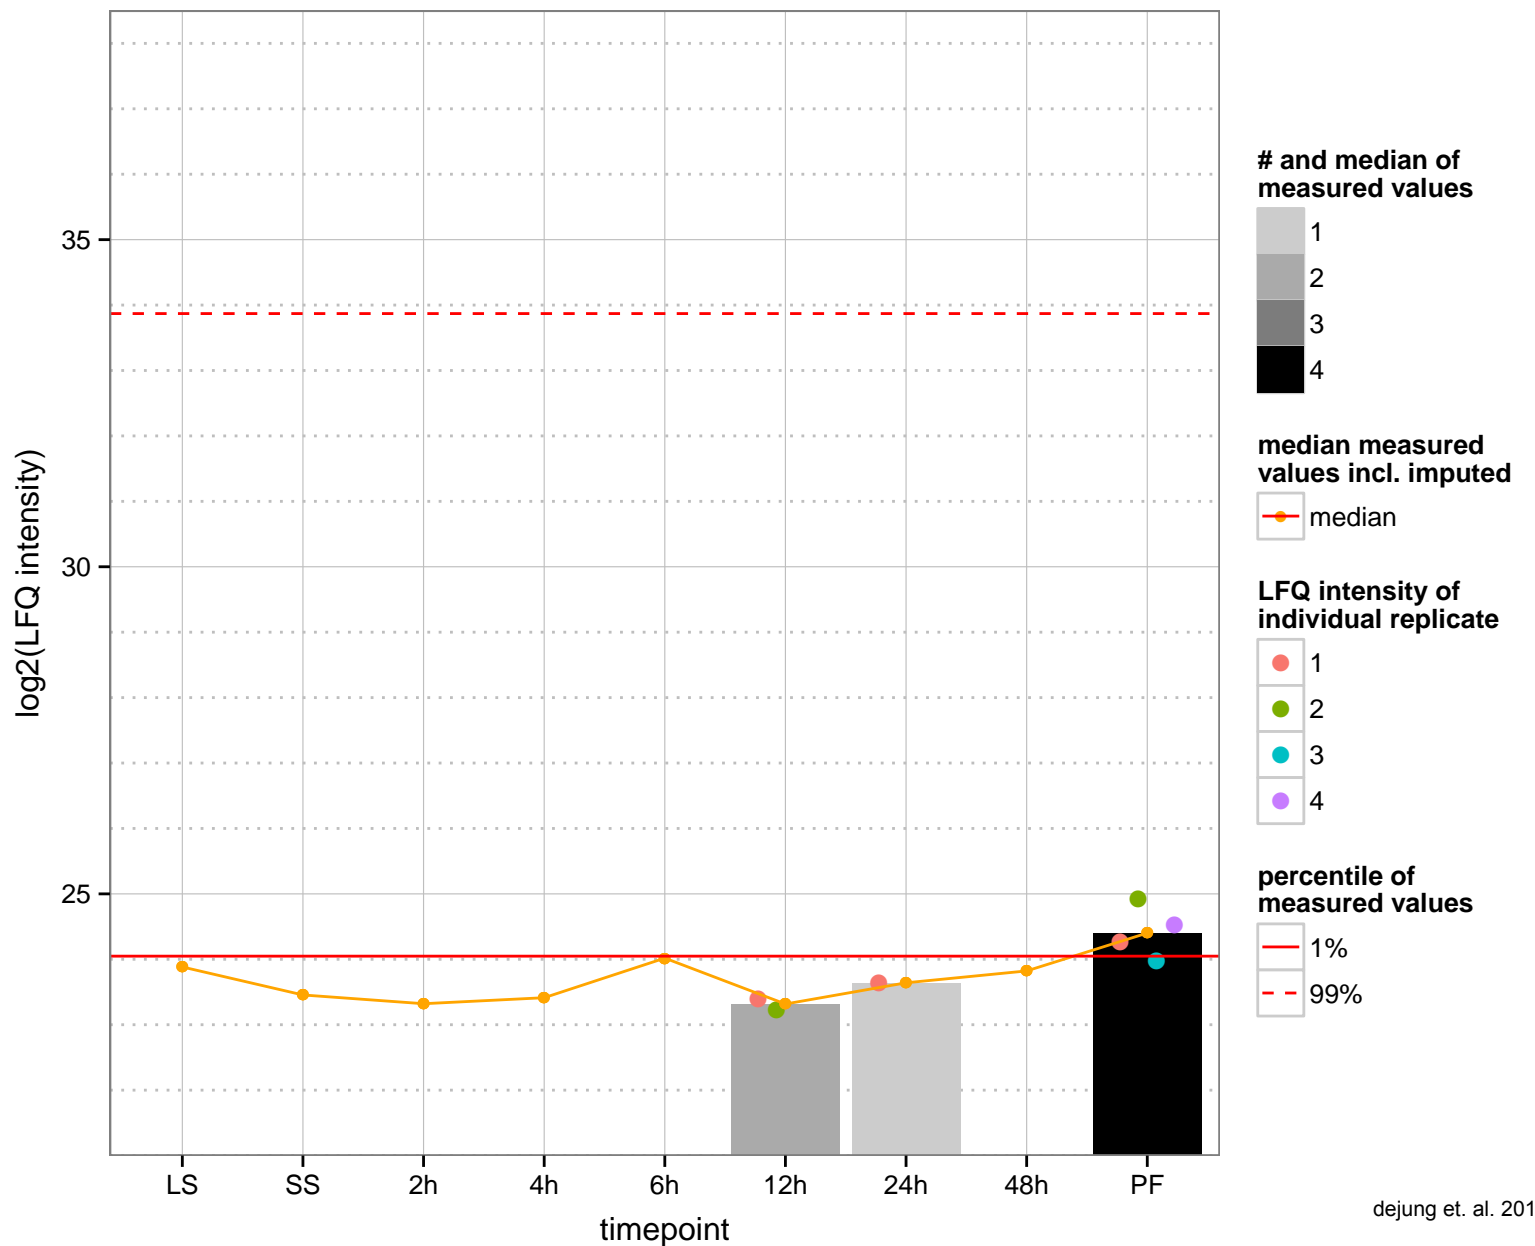

nuclear transport factor 2 protein, putative (NFT2)  
 Tb927.7.5760  
 AGOF: null  
 AGOC: intracellular  
 AGOP: transport  
 PGO: null  
 PGO: intracellular  
 PGO: transport

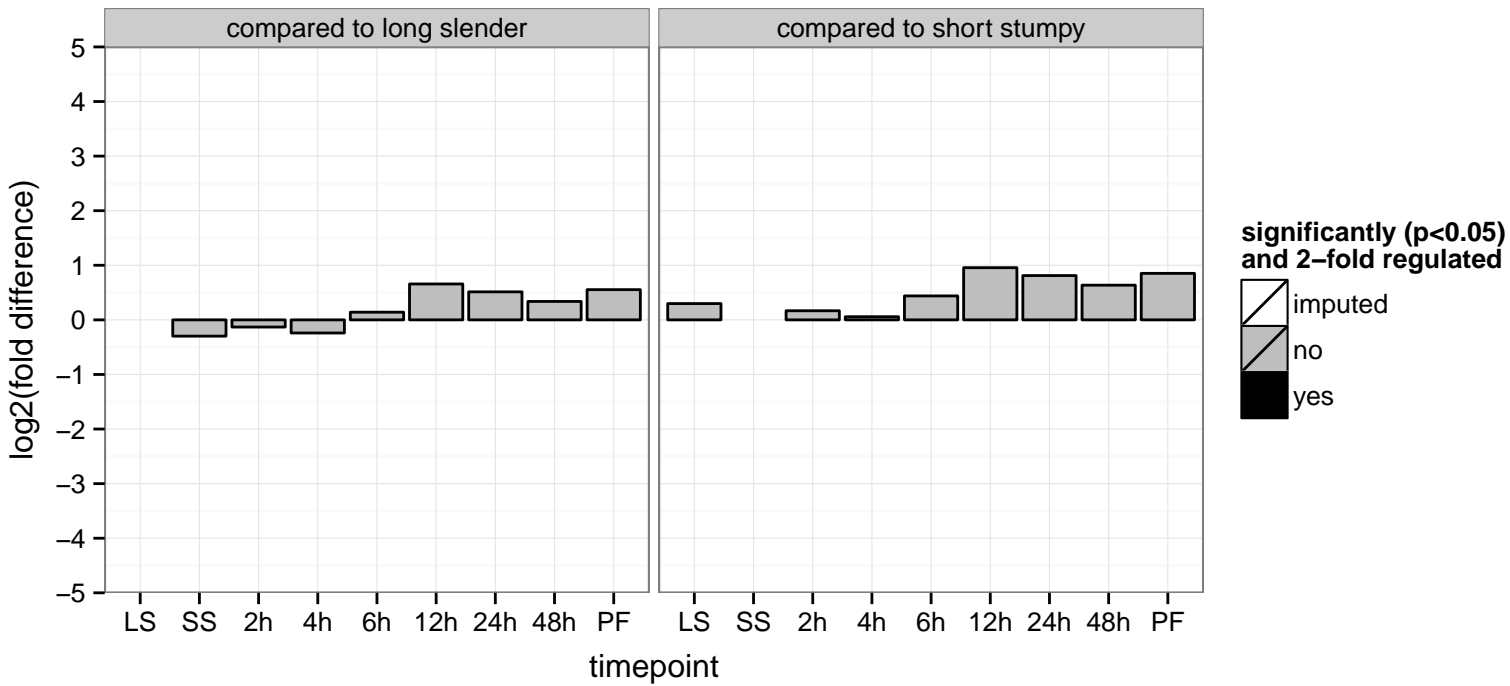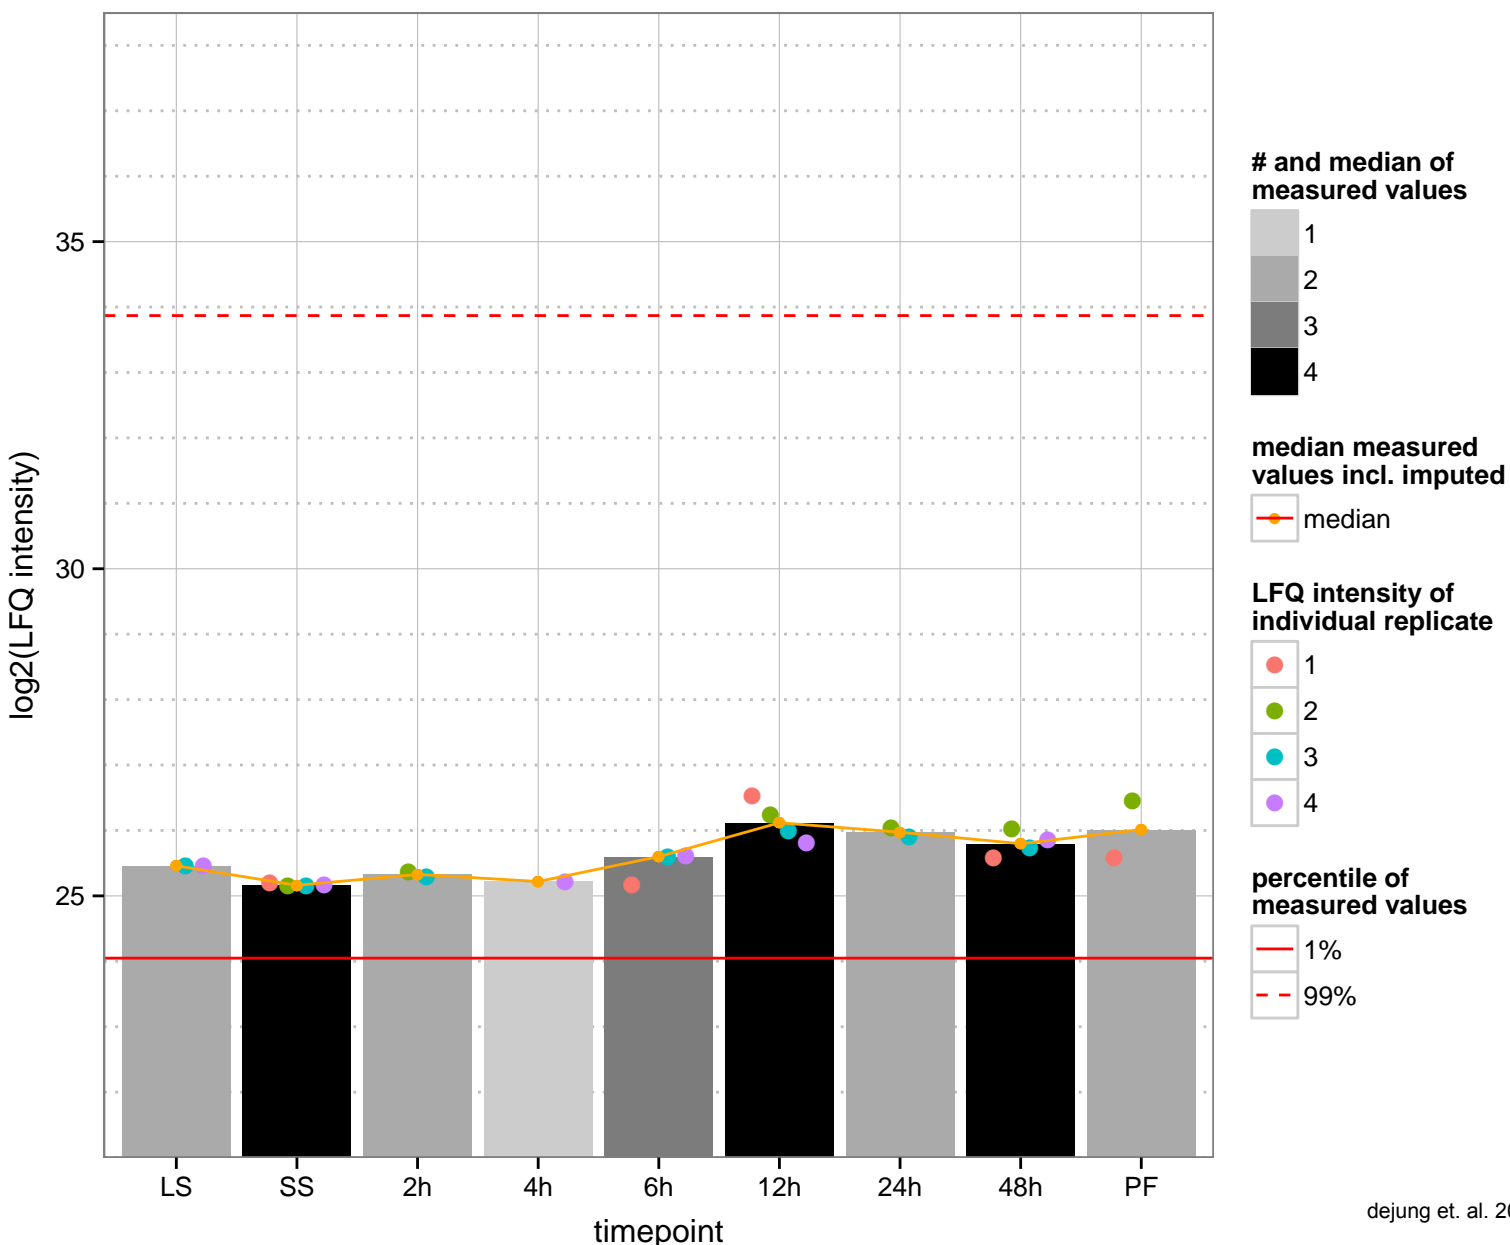

hypothetical protein, conserved  
 Tb927.7.5780  
 AGOF: null  
 AGOC: null  
 AGOP: cell redox homeostasis  
 PGO: null  
 PGO: null  
 PGO: cell redox homeostasis

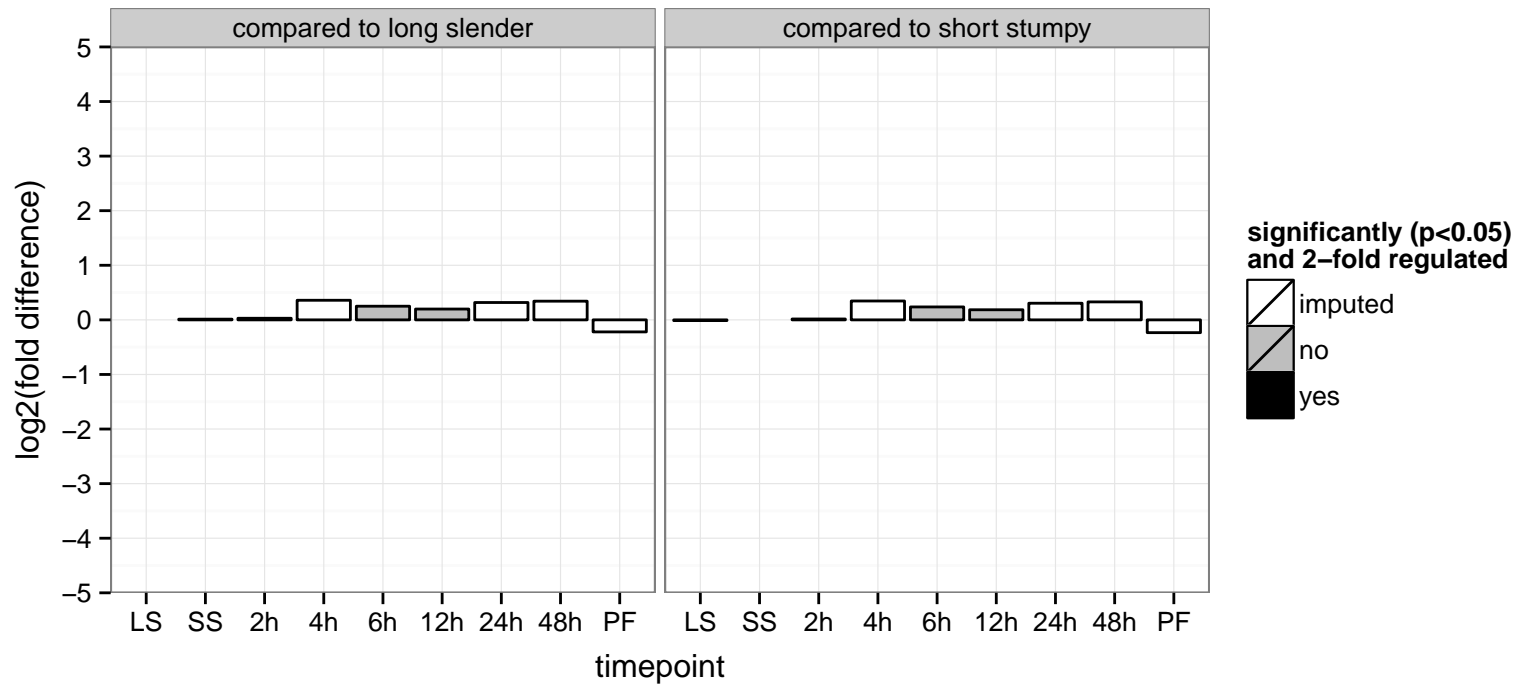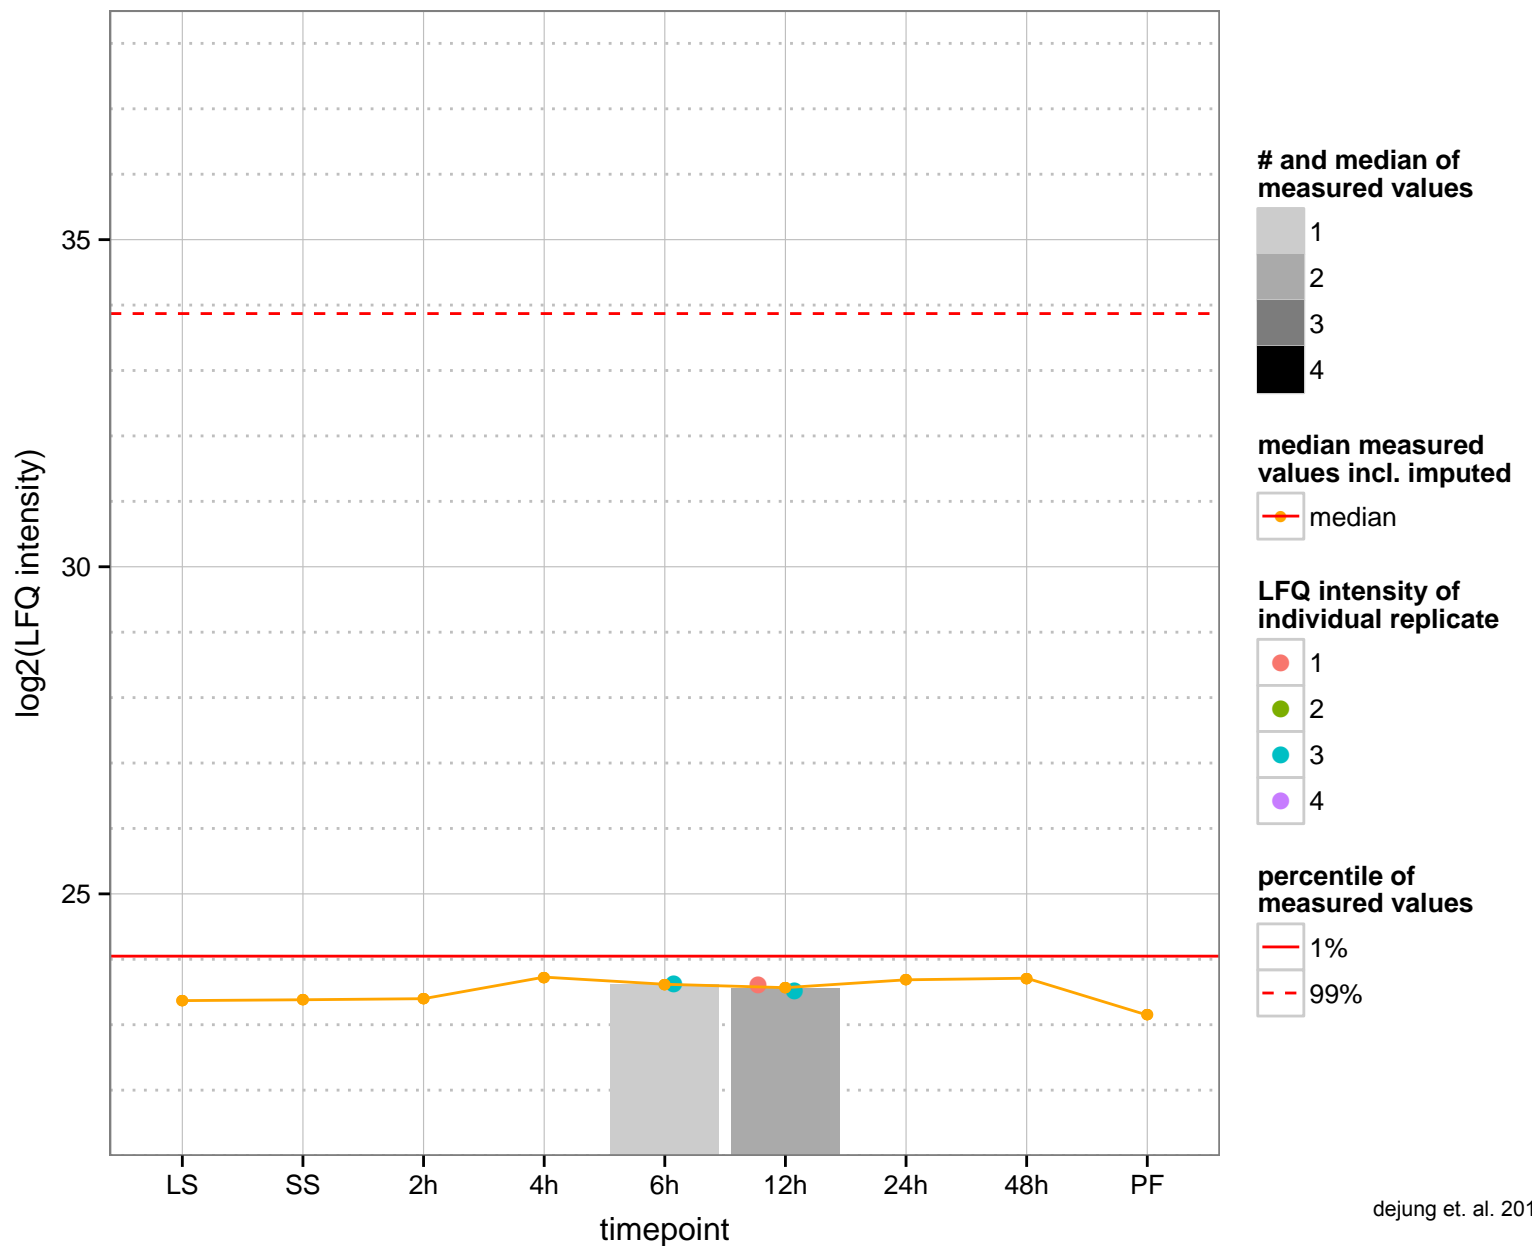

GTP-binding protein, putative  
 Tb927.7.580  
 AGOF: GTP binding  
 AGOC: intracellular  
 AGOP: null  
 PGOF: GTP binding  
 PGOC: null  
 PGOP: null

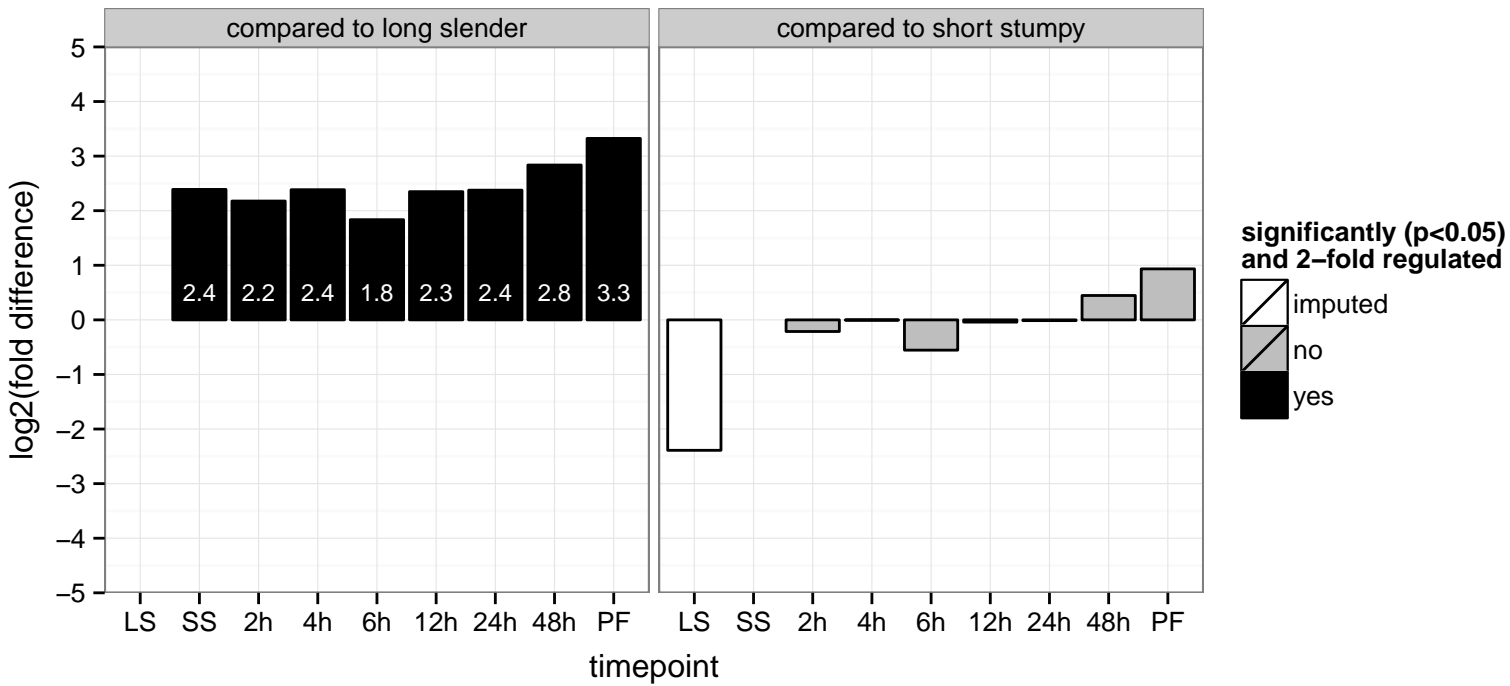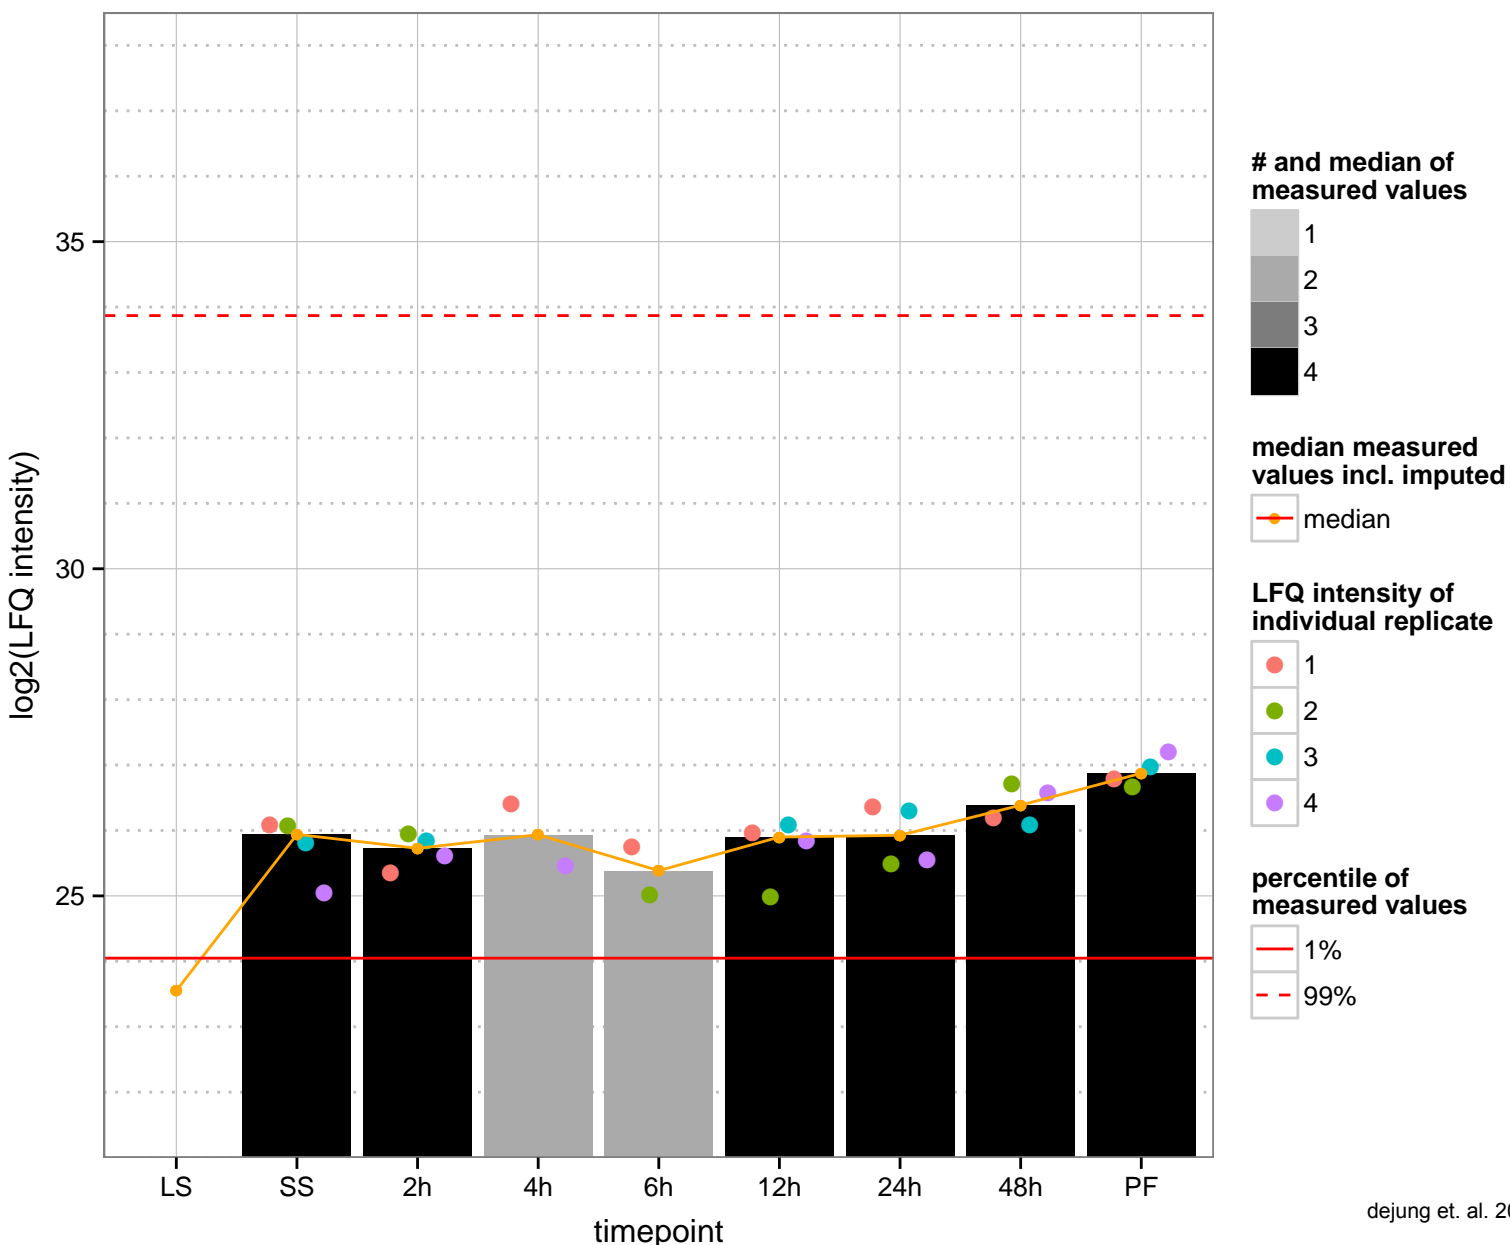

Monoxygenase, putative  
 Tb927.7.5820  
 AGOF: monoxygenase activity  
 AGOC: mitochondrial membrane, mitochondrion  
 AGOP: metabolic process  
 PGO: null  
 PGO: null  
 PGO: null

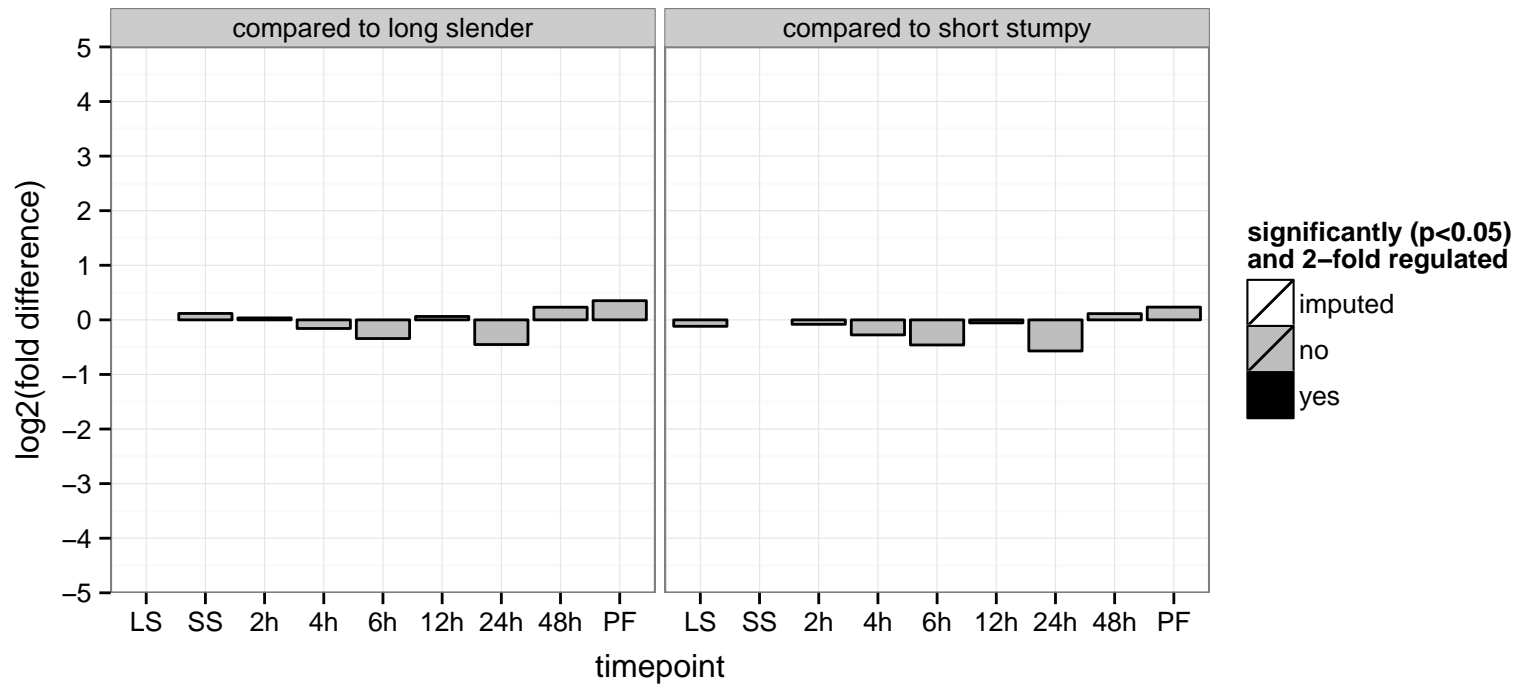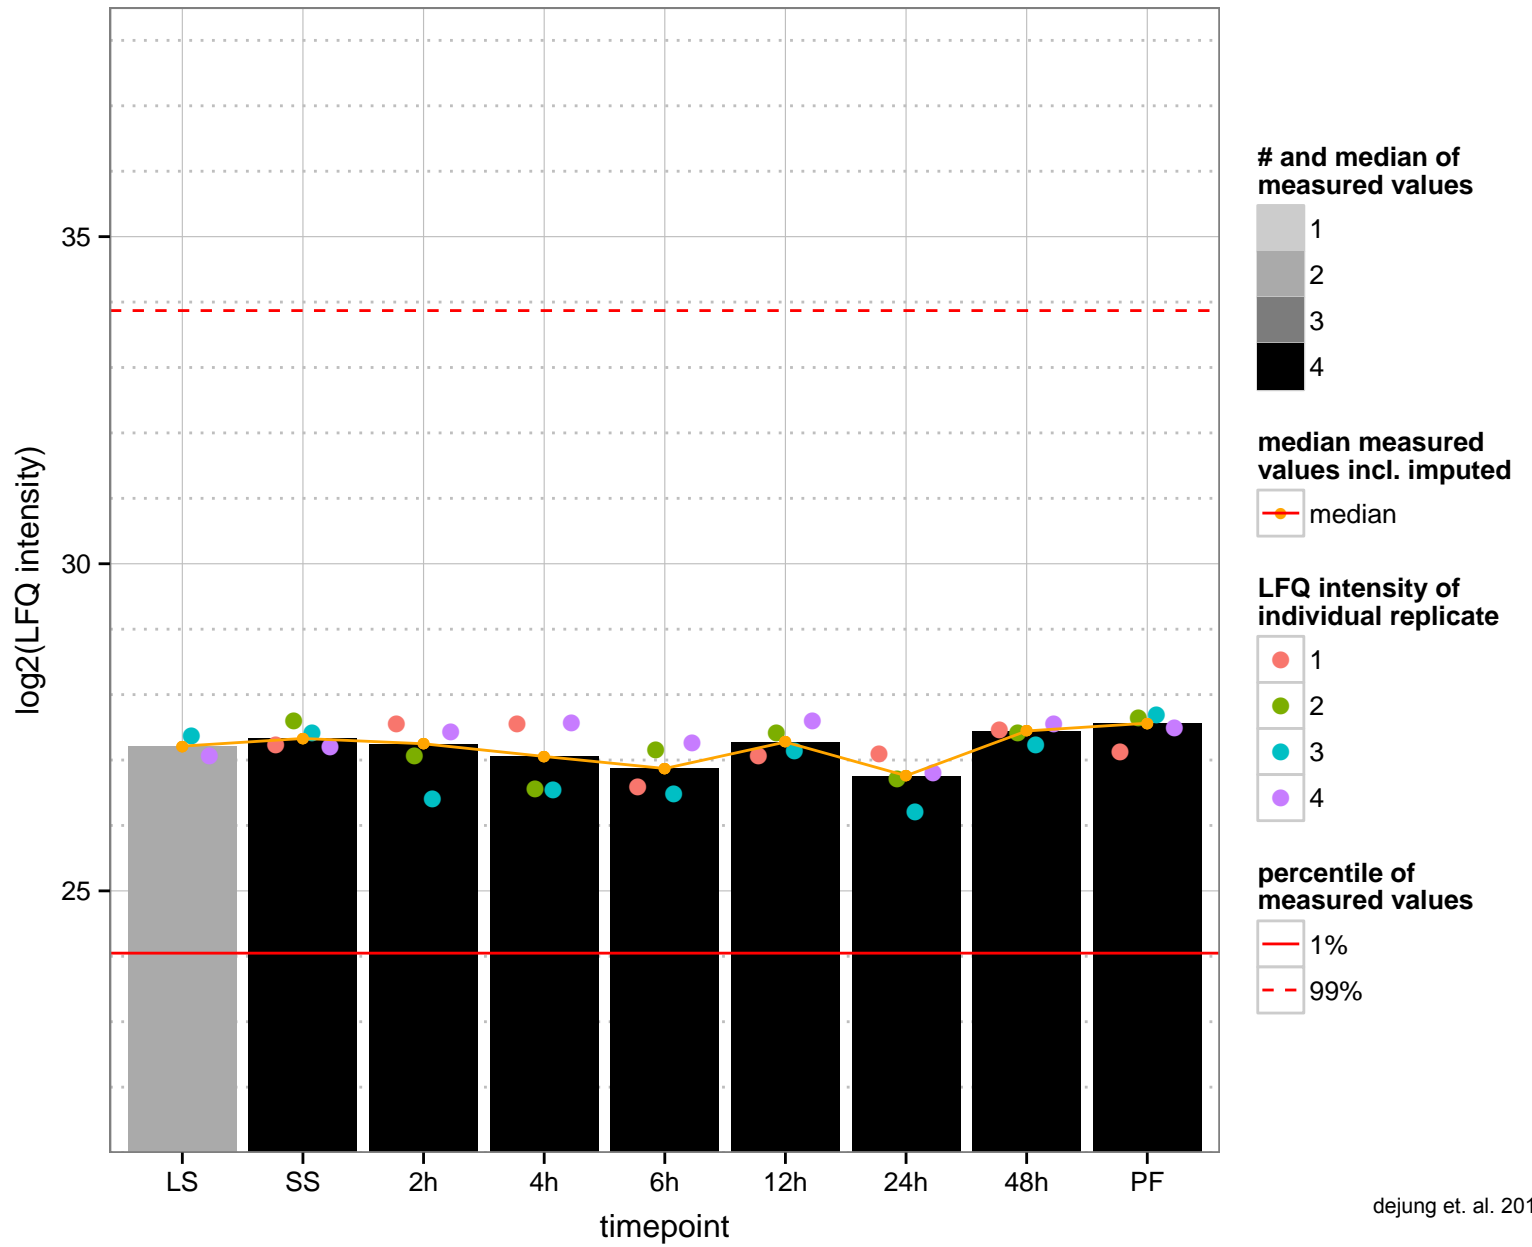



hypothetical protein, conserved  
 Tb927.7.5840  
 AGOF: null  
 AGOC: null  
 AGOP: null  
 PGO: null  
 PGOC: null  
 PGOP: null

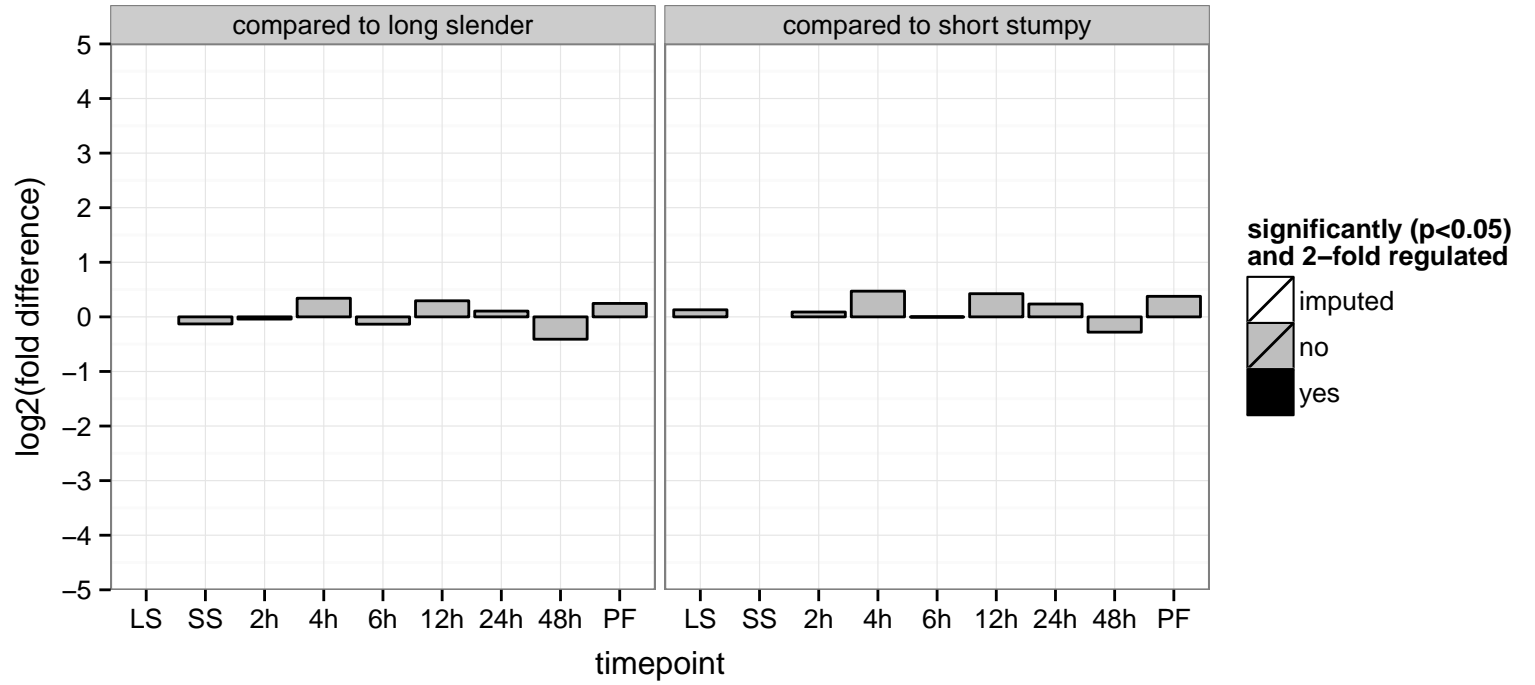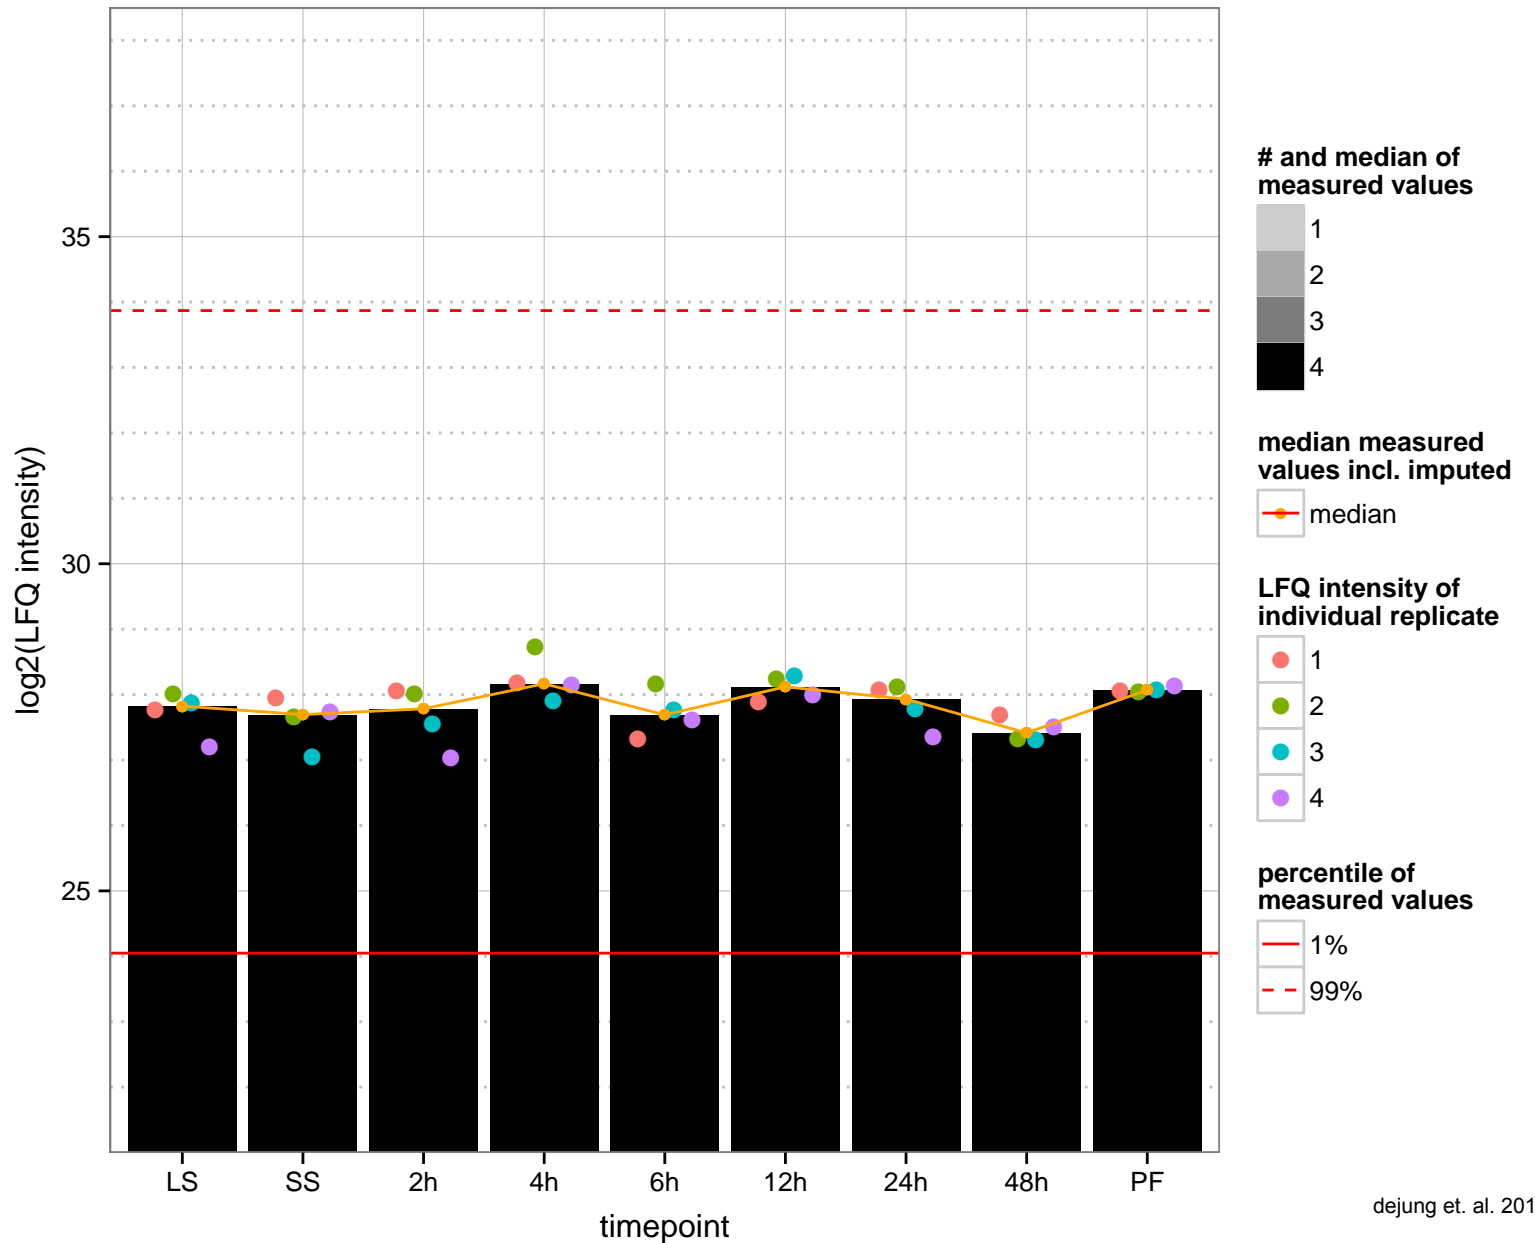

mercaptopyruvate sulfurtransferase, putative (MST)  
 Tb927.7.5920  
 AGOF: 3-mercaptopyruvate sulfurtransferase activity  
 AGOC: cytosol  
 AGOP: cyanide metabolic process, cysteine biosynthetic process via cystathionine  
 PGO: null  
 PGOC: null  
 PGOP: null

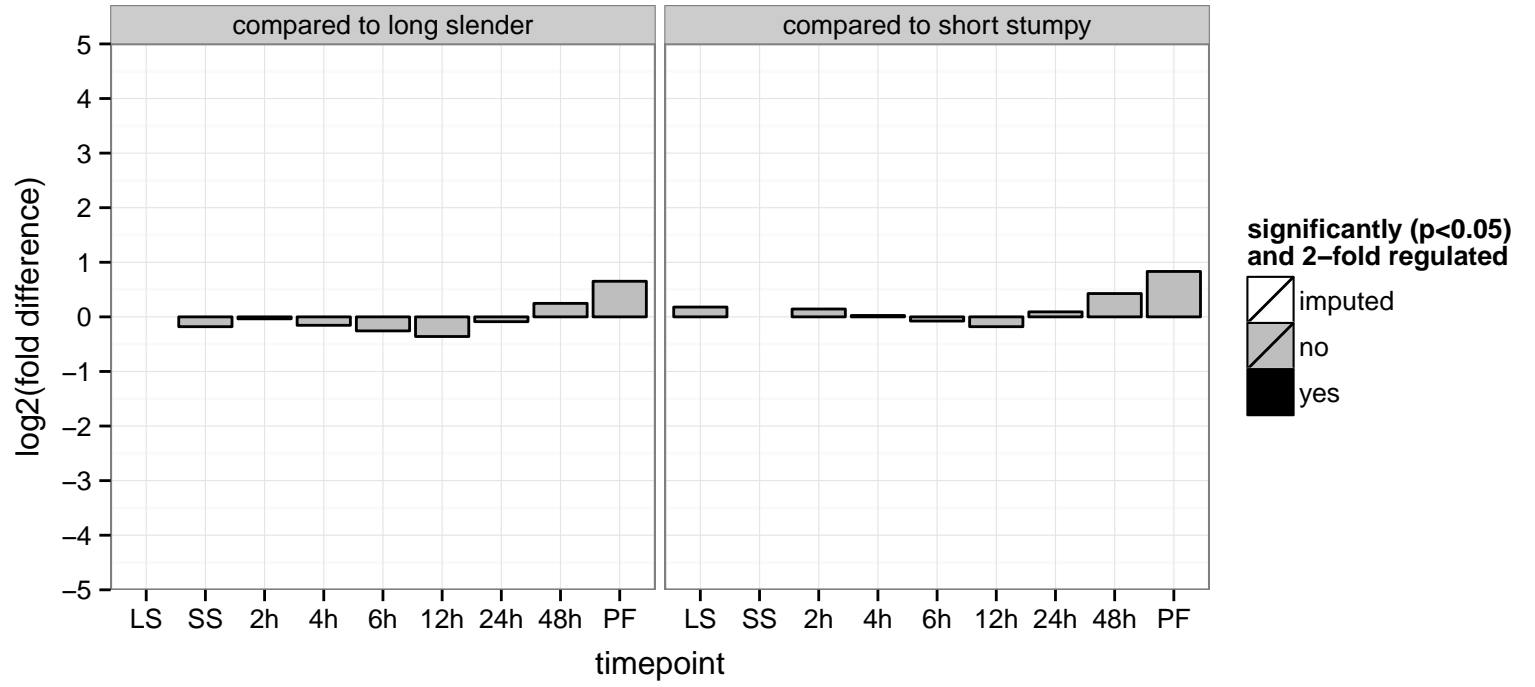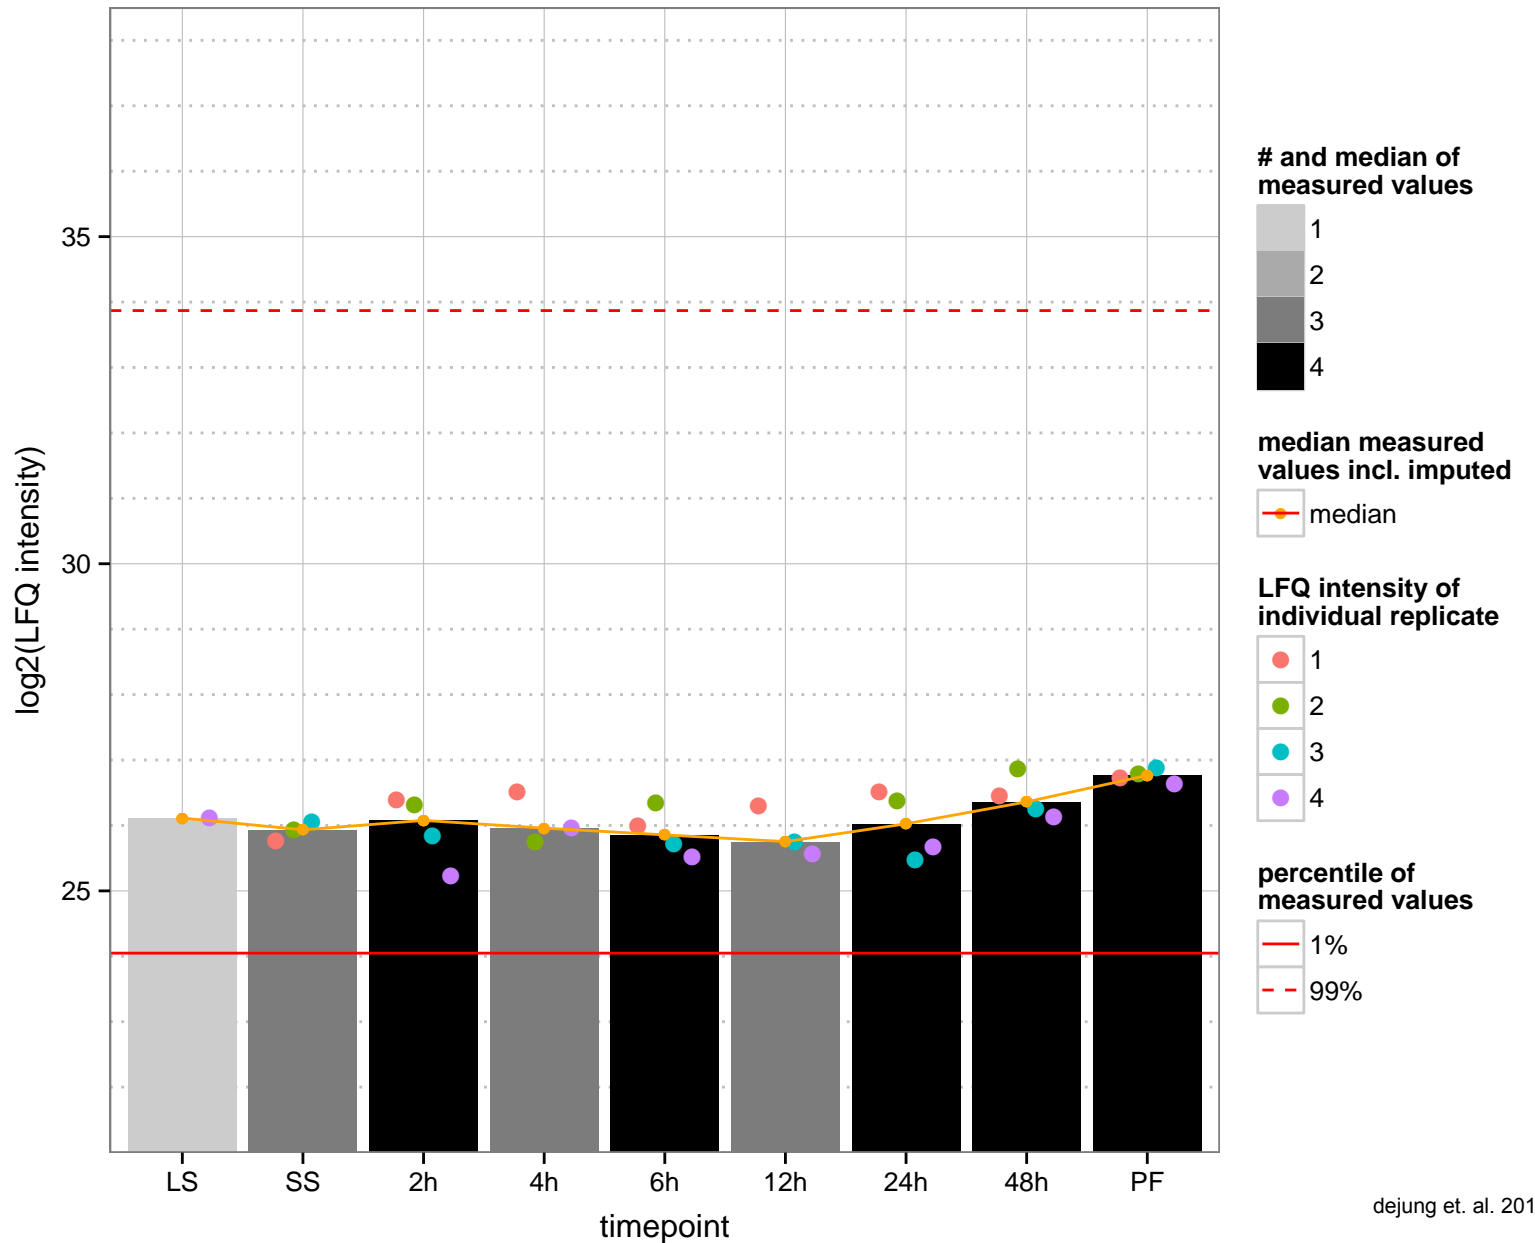

hypothetical protein, conserved  
 Tb927.7.6090  
 AGOF: null  
 AGOC: null  
 AGOP: null  
 PGO: null  
 PGOC: null  
 PGOP: null

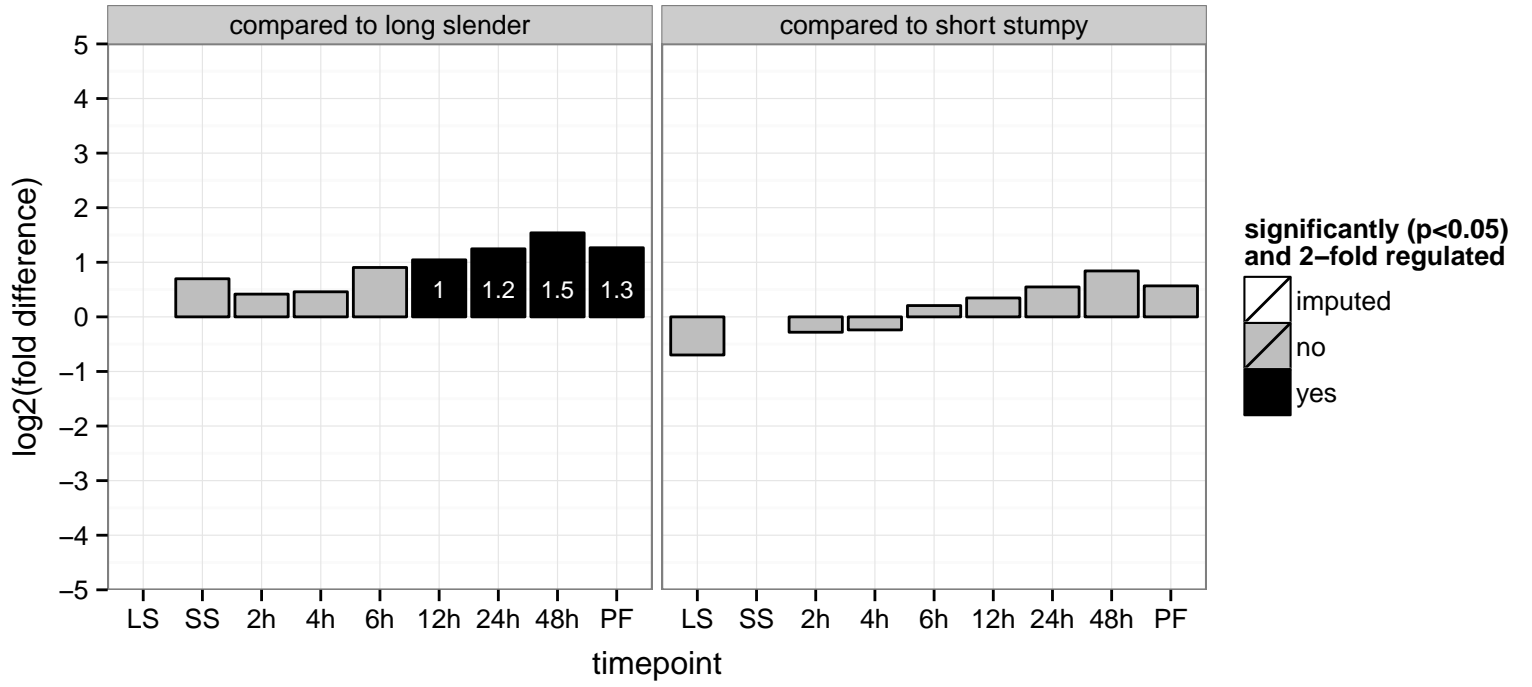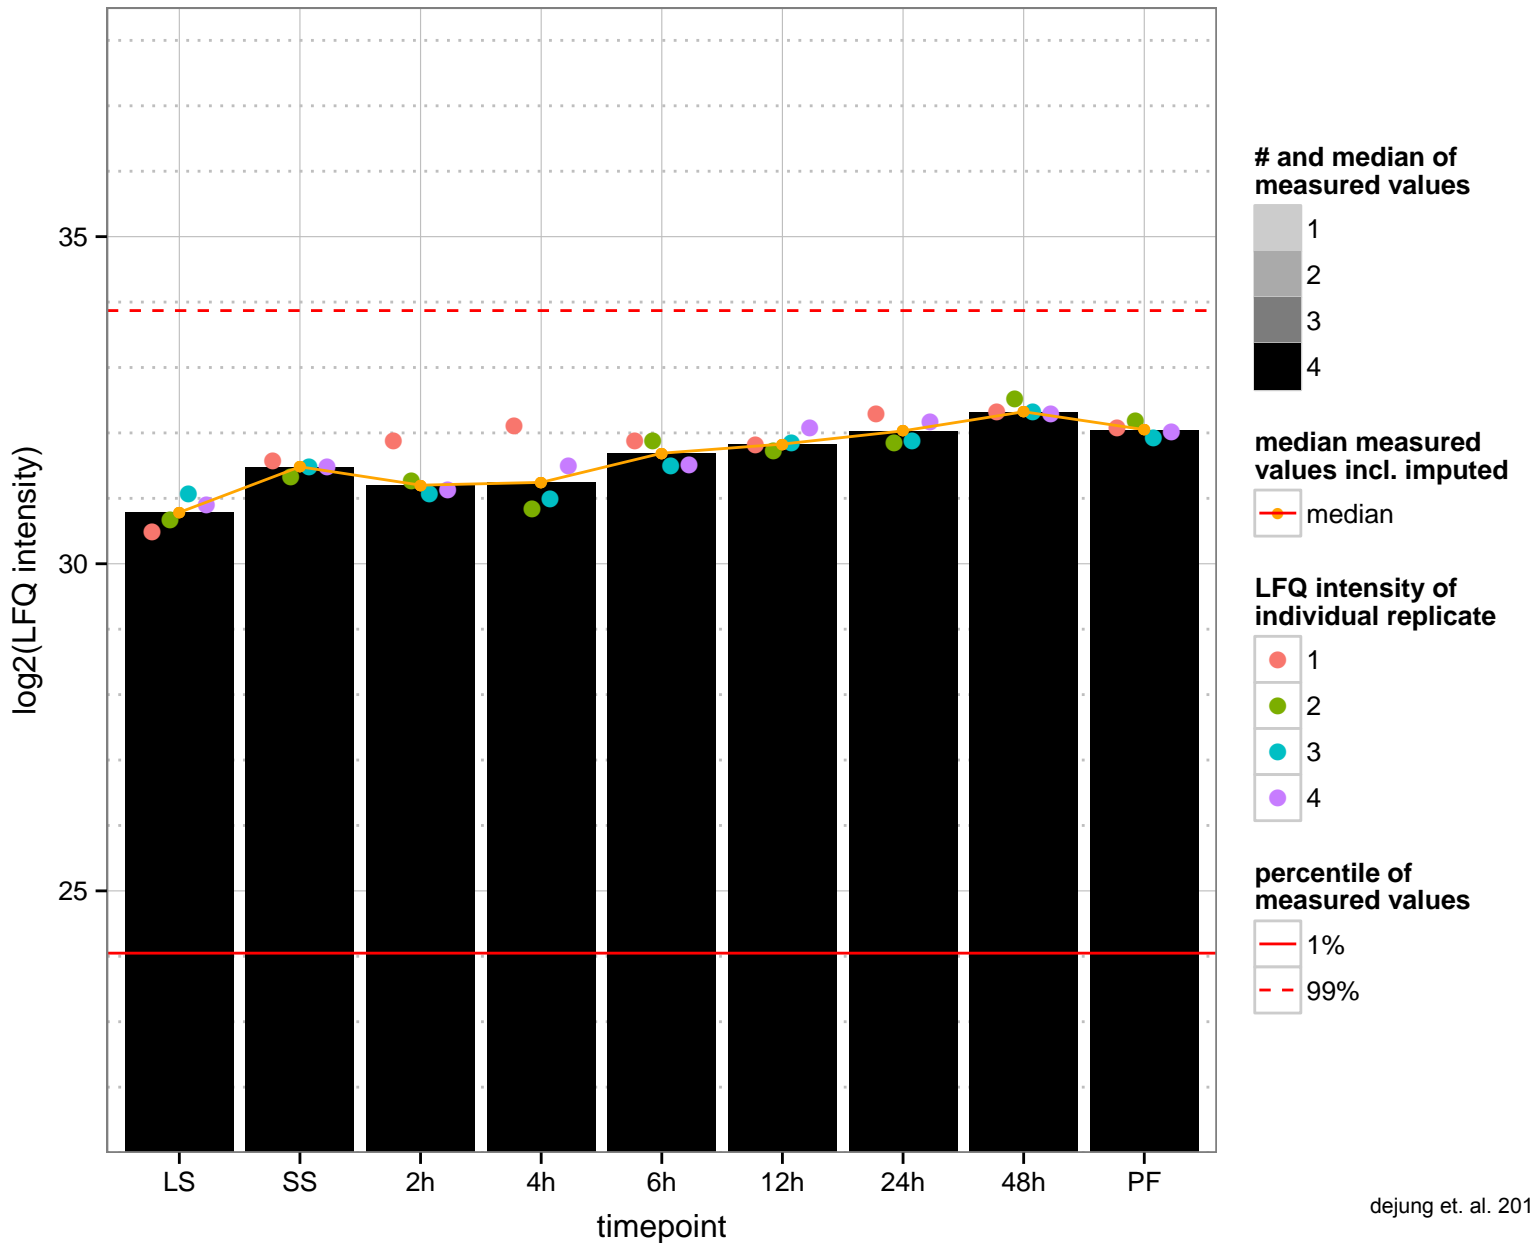

ADP-ribosylation factor, putative (ARF3)

Tb927.7.6230

AGOF: GTP binding

AGOC: intracellular

AGOP: intracellular protein transport, small GTPase mediated signal transduction

PGOF: GTP binding

PGOC: intracellular

PGOP: intracellular protein transport, small GTPase mediated signal transduction

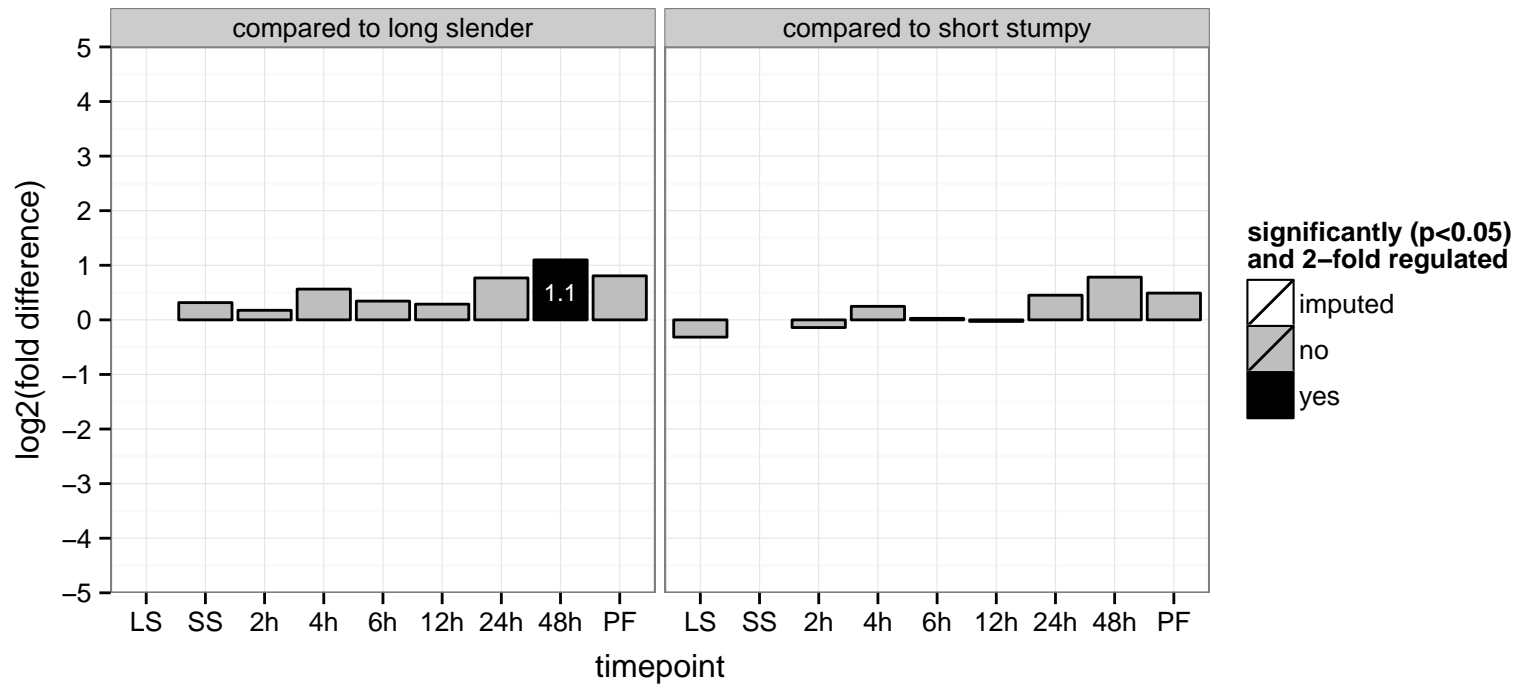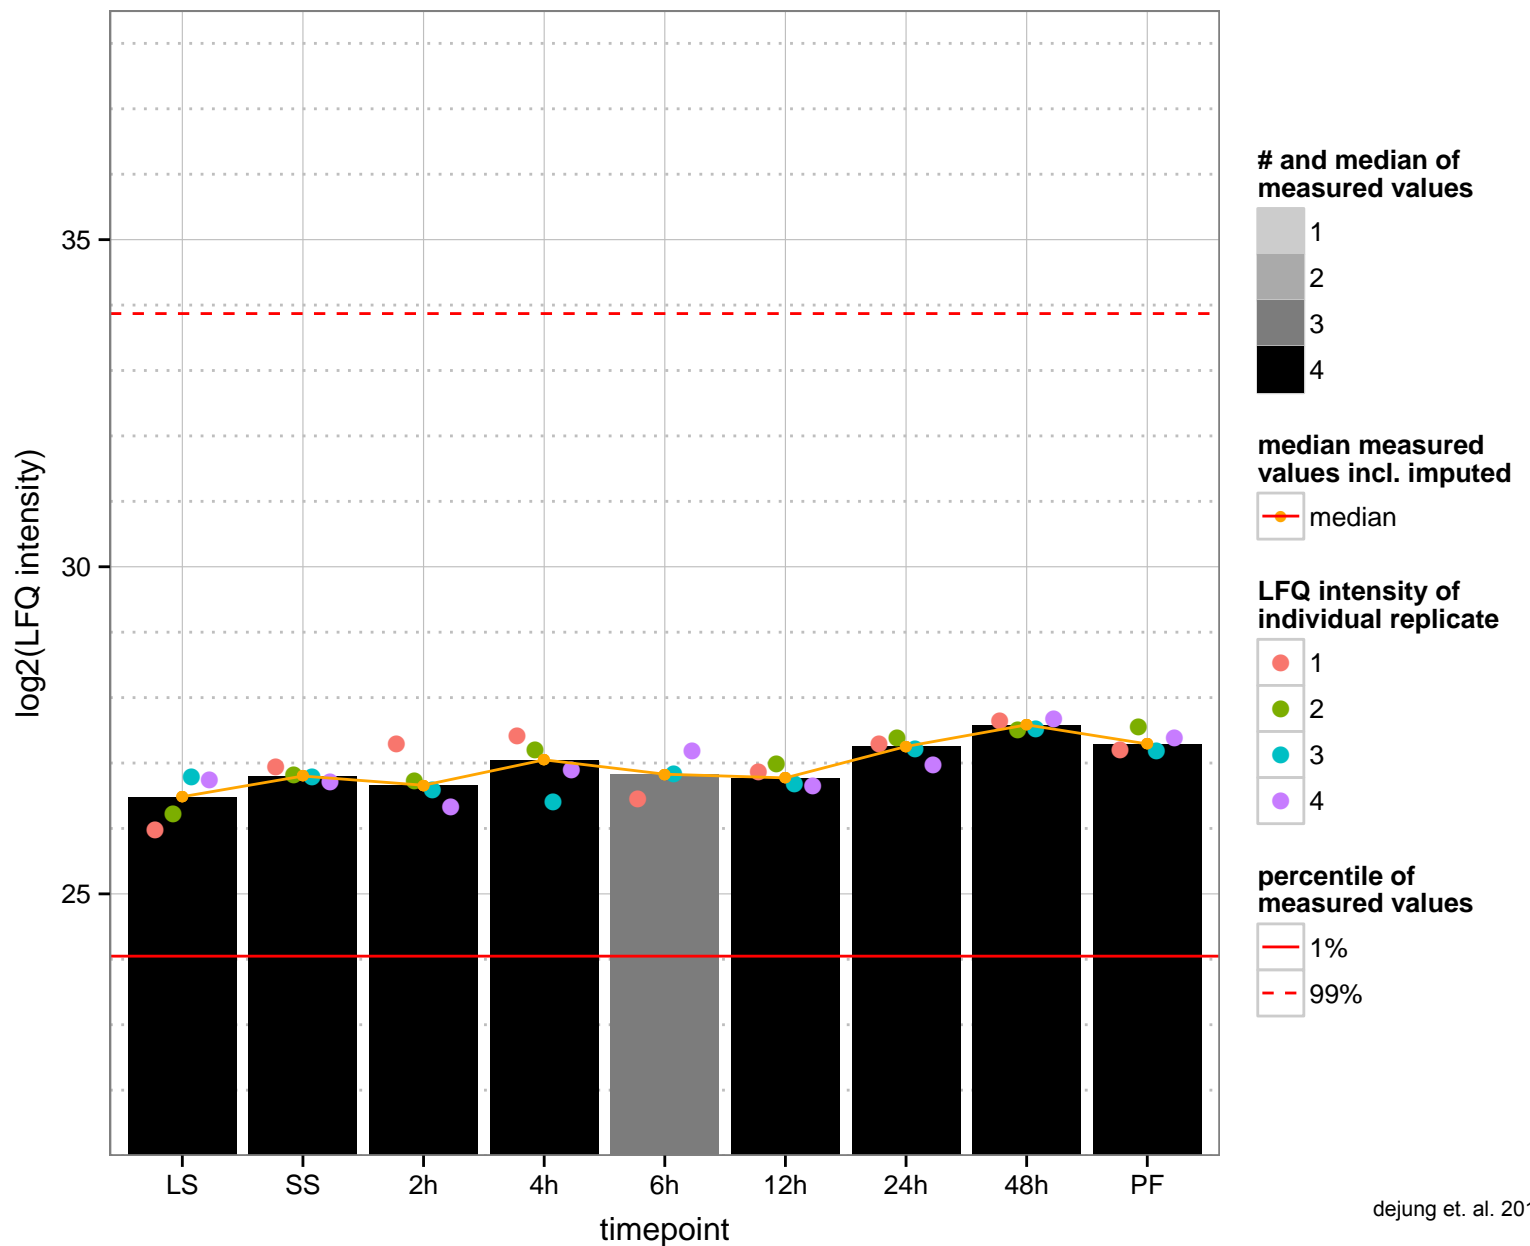

hypothetical protein, conserved  
 Tb927.7.6280  
 AGOF: null  
 AGOC: null  
 AGOP: null  
 PGOF: null  
 PGO: null  
 PGOP: null

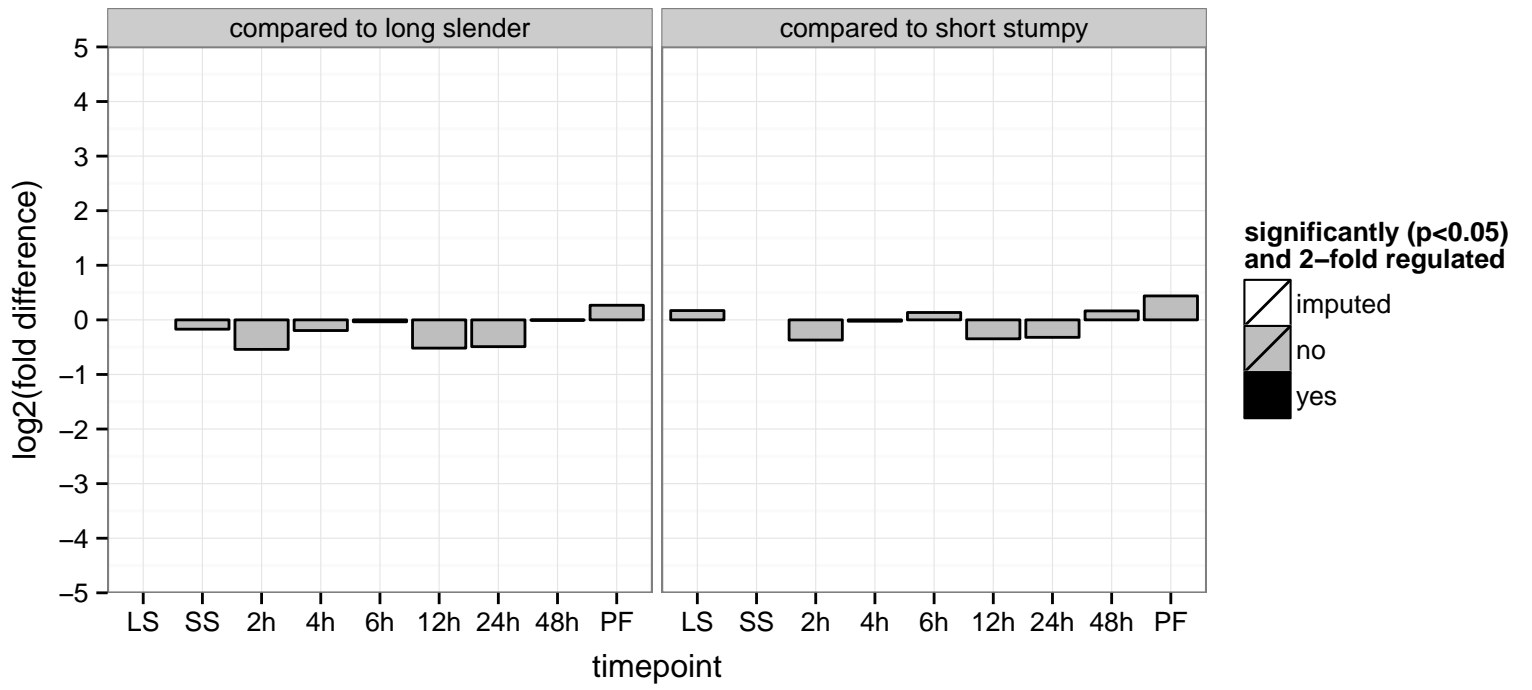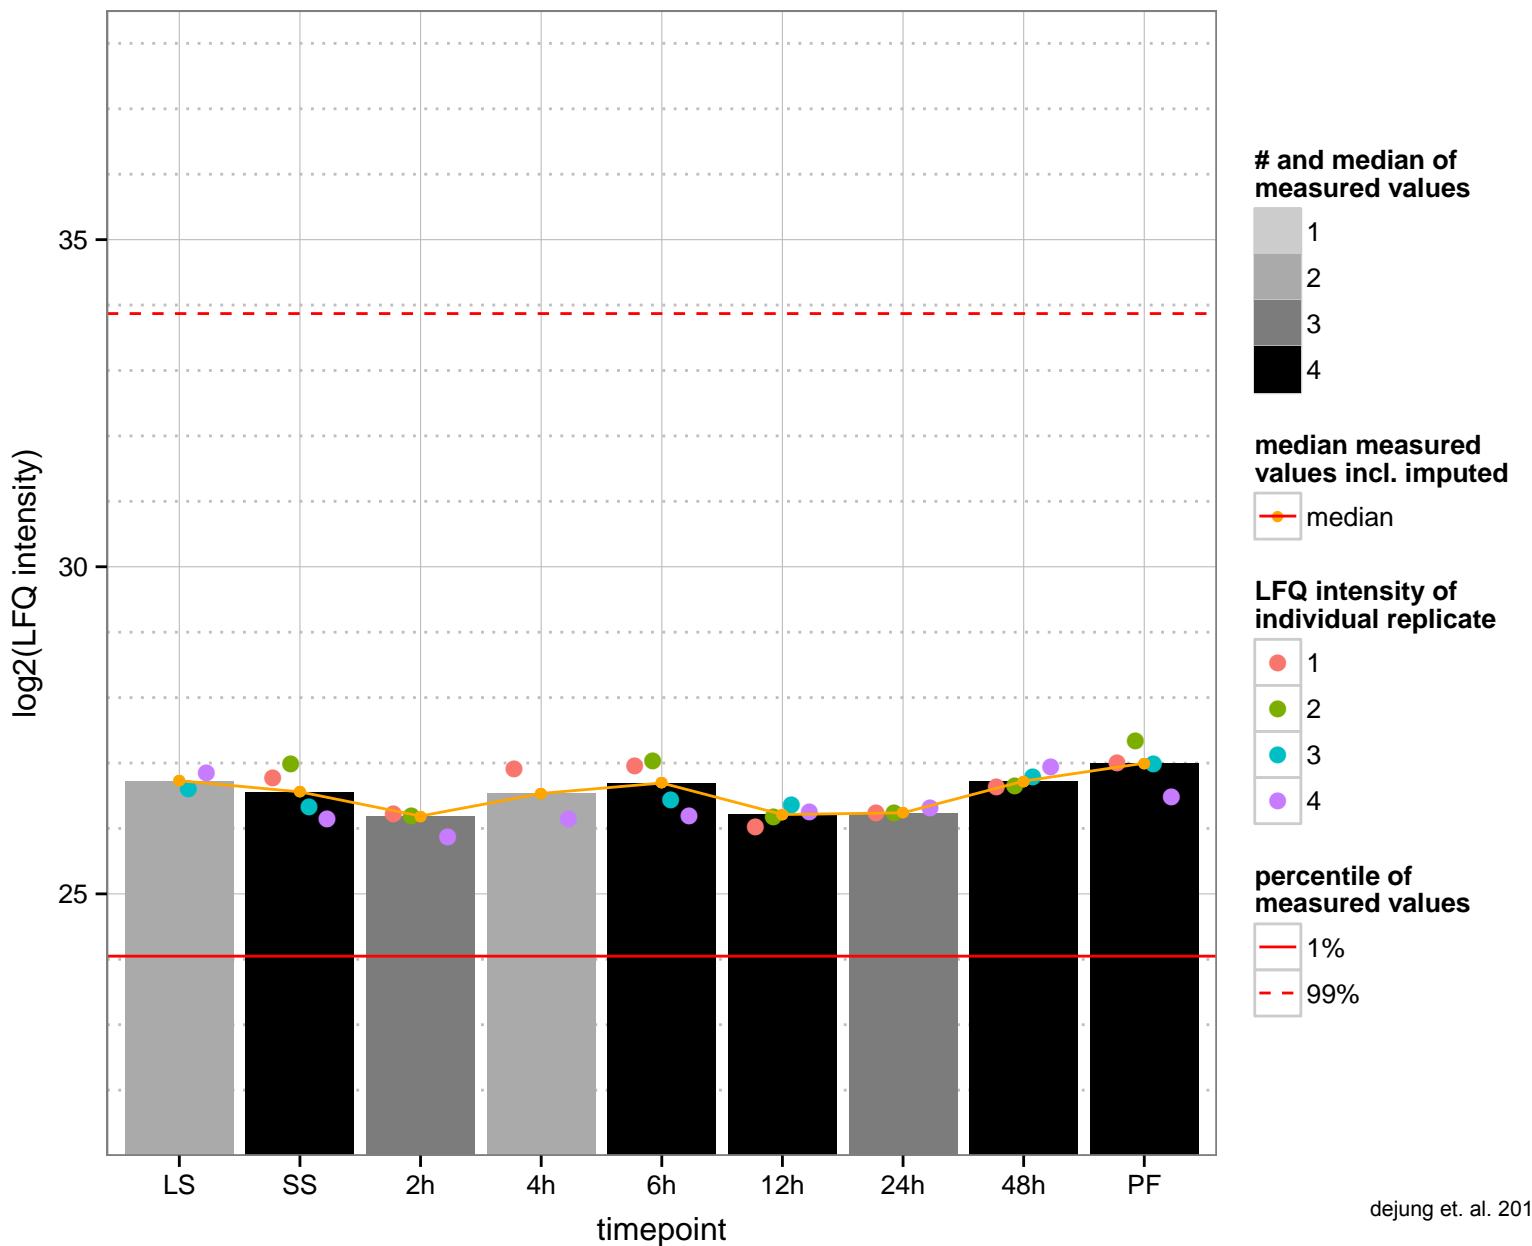

kinesin, putative (TbKIF9A)  
 Tb927.7.6290  
 AGOF: ATP binding, microtubule motor activity, motor activity  
 AGOC: axoneme, microtubule associated complex  
 AGOP: ciliary cell motility, microtubule-based movement  
 PGO: ATP binding, microtubule motor activity  
 PGO: null  
 PGO: microtubule-based movement

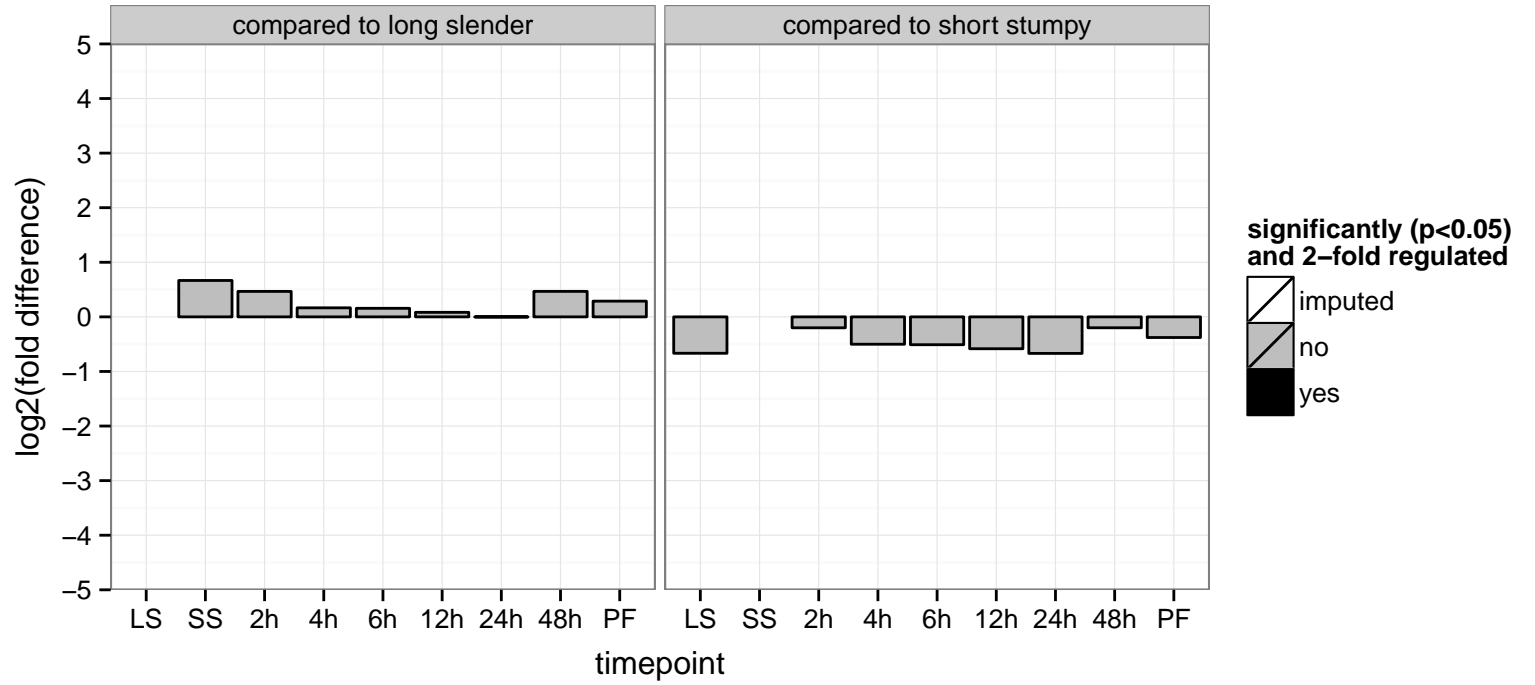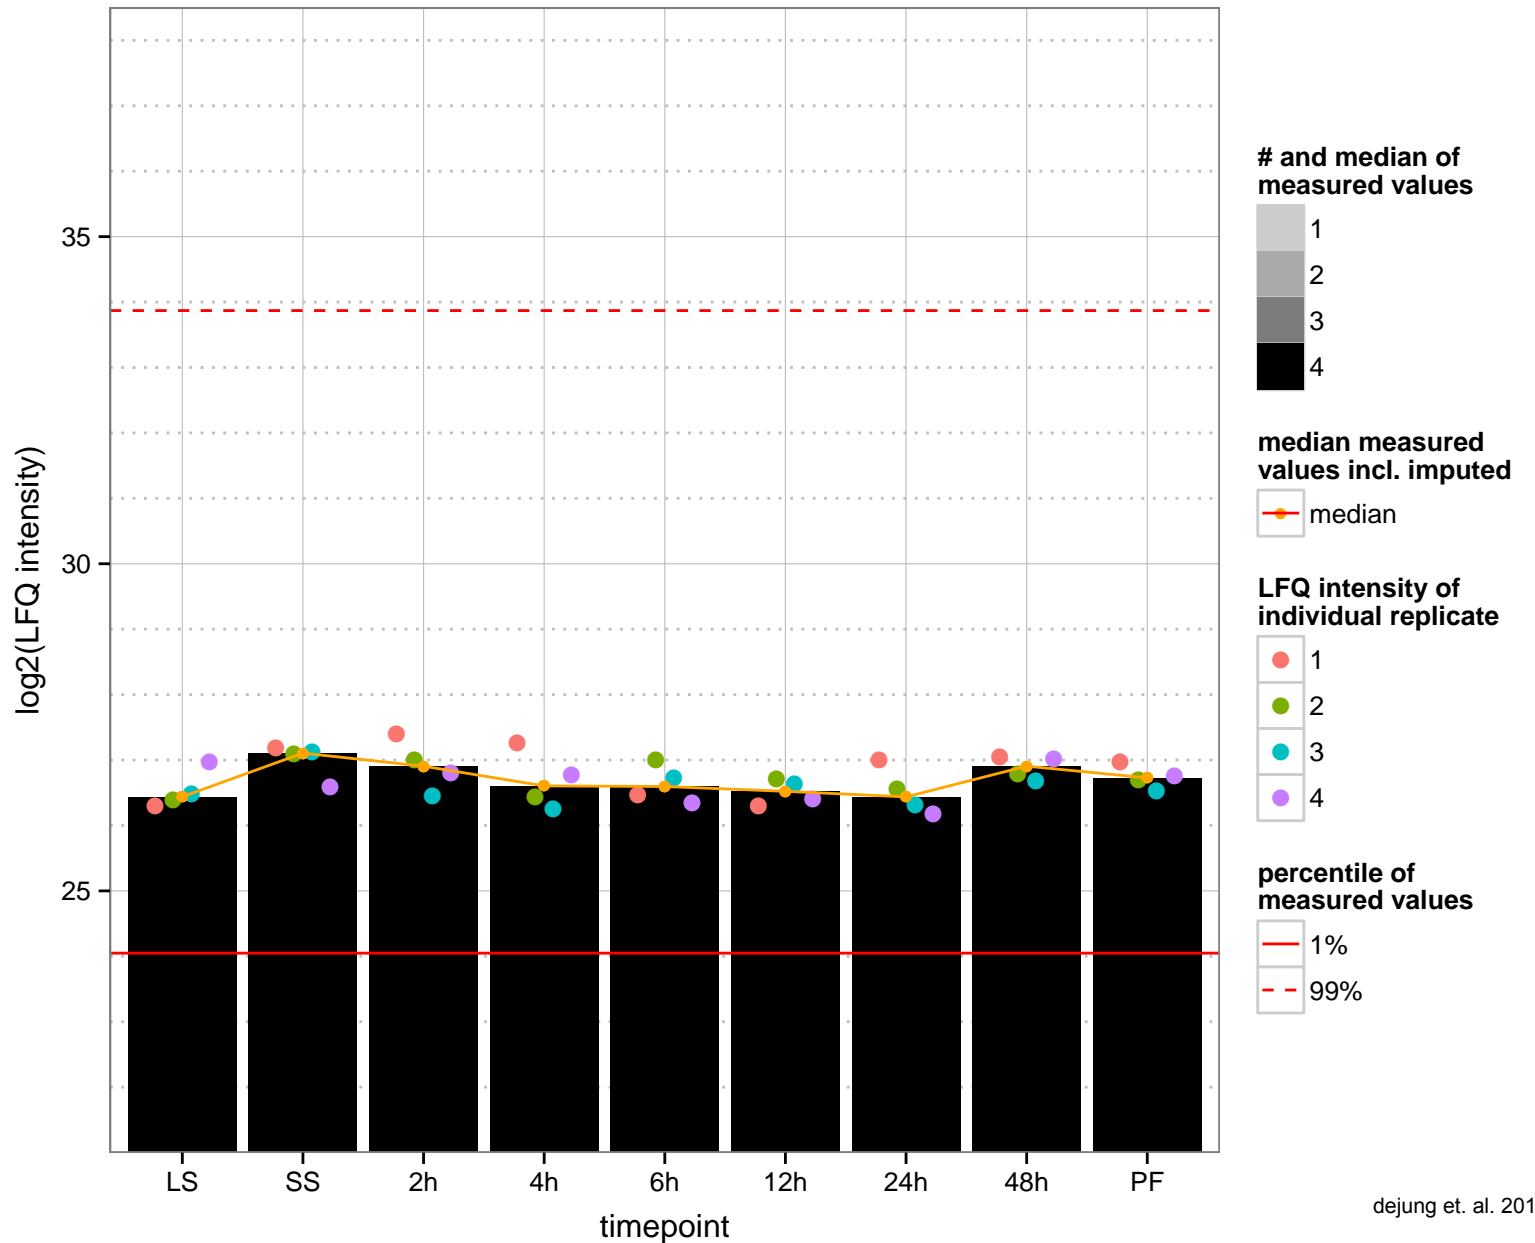

histone H2A variant, H2Az (h2aZ)

Tb927.7.6360

AGOF: DNA binding

AGOC: nucleosome, nucleus

AGOP: chromatin organization, chromosome organization, nucleosome assembly, transcription initiation from RNA polymeras

PGOF: DNA binding

PGOC: nucleosome, nucleus

PGOP: nucleosome assembly

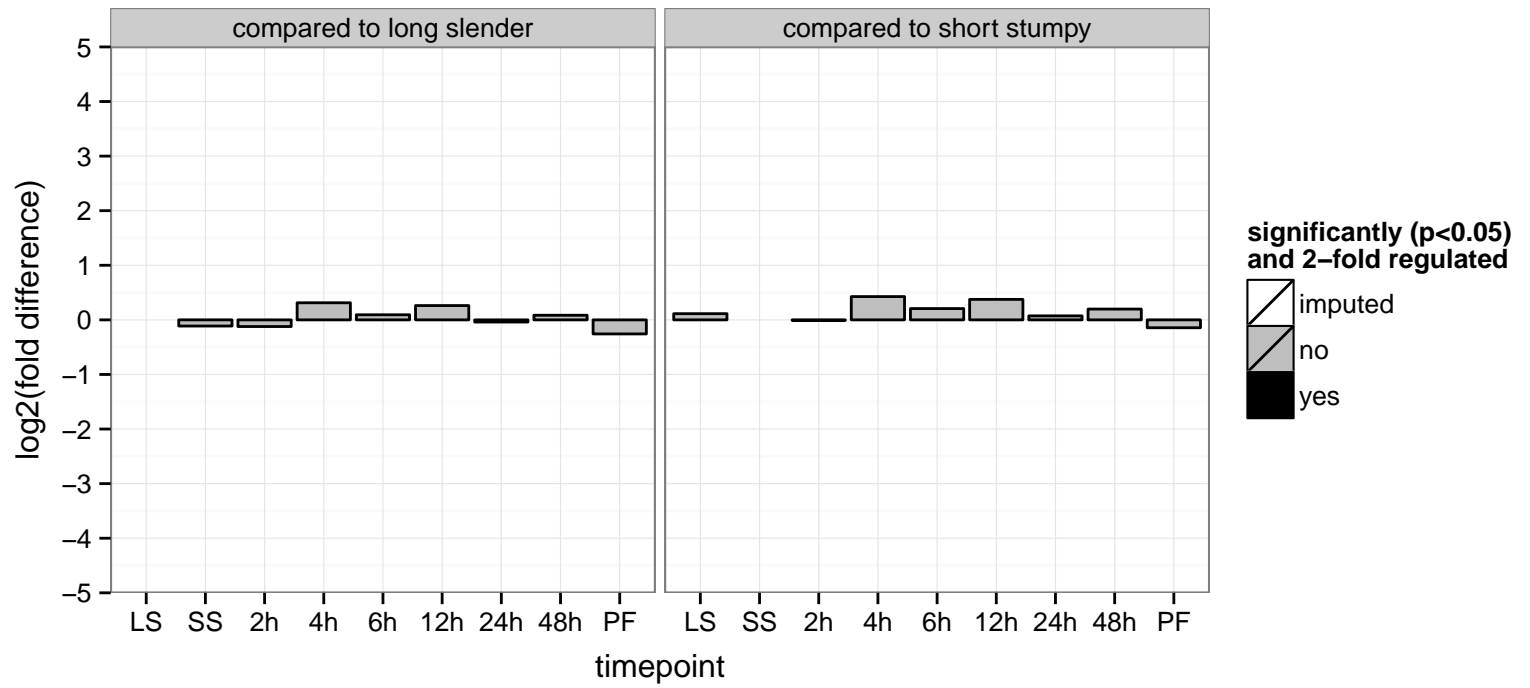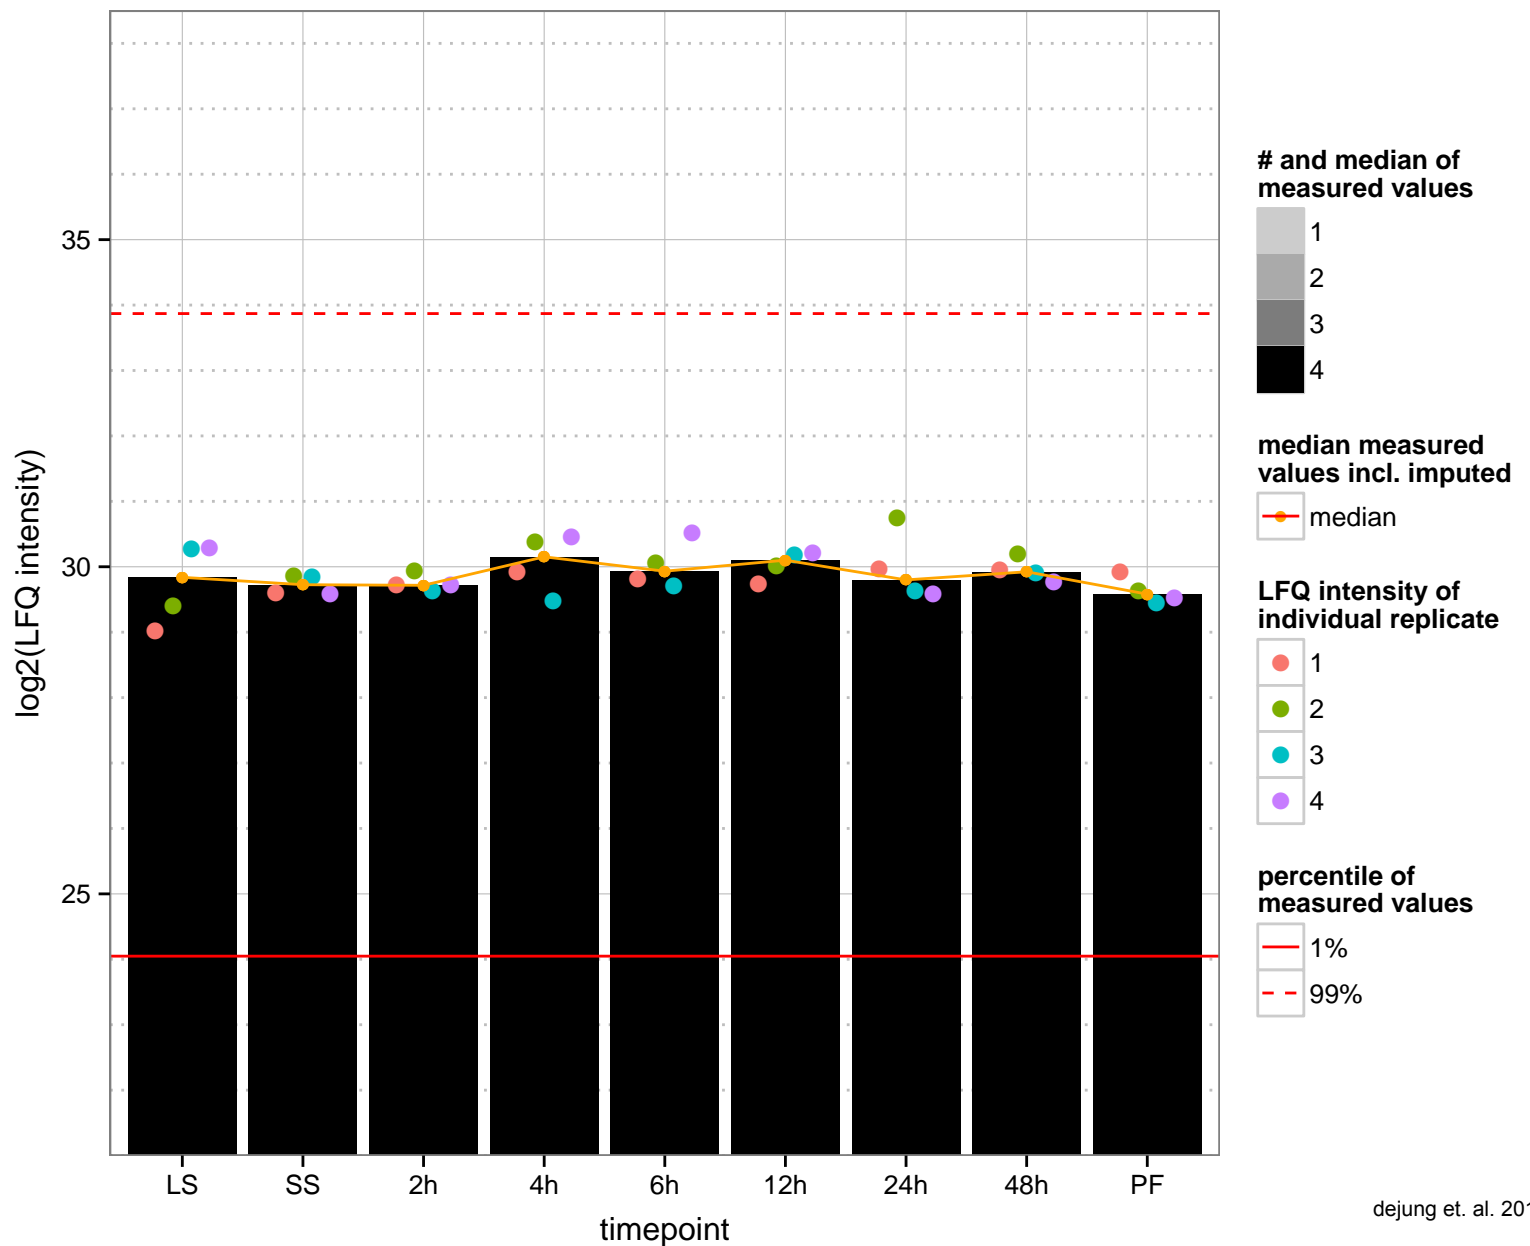

hypothetical protein, conserved  
 Tb927.7.640  
 AGOF: null  
 AGOC: mitochondrial membrane, mitochondrion  
 AGOP: null  
 PGO: null  
 PGO: null  
 PGO: null

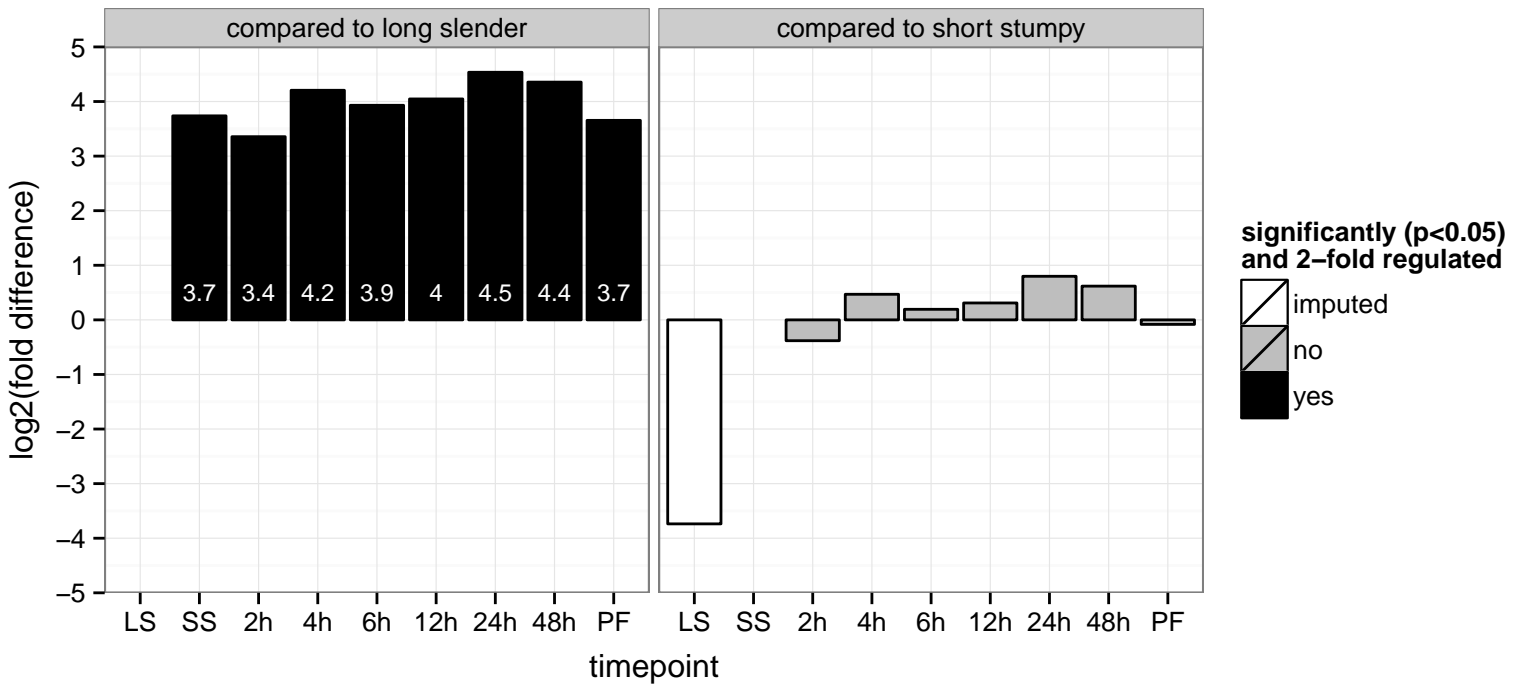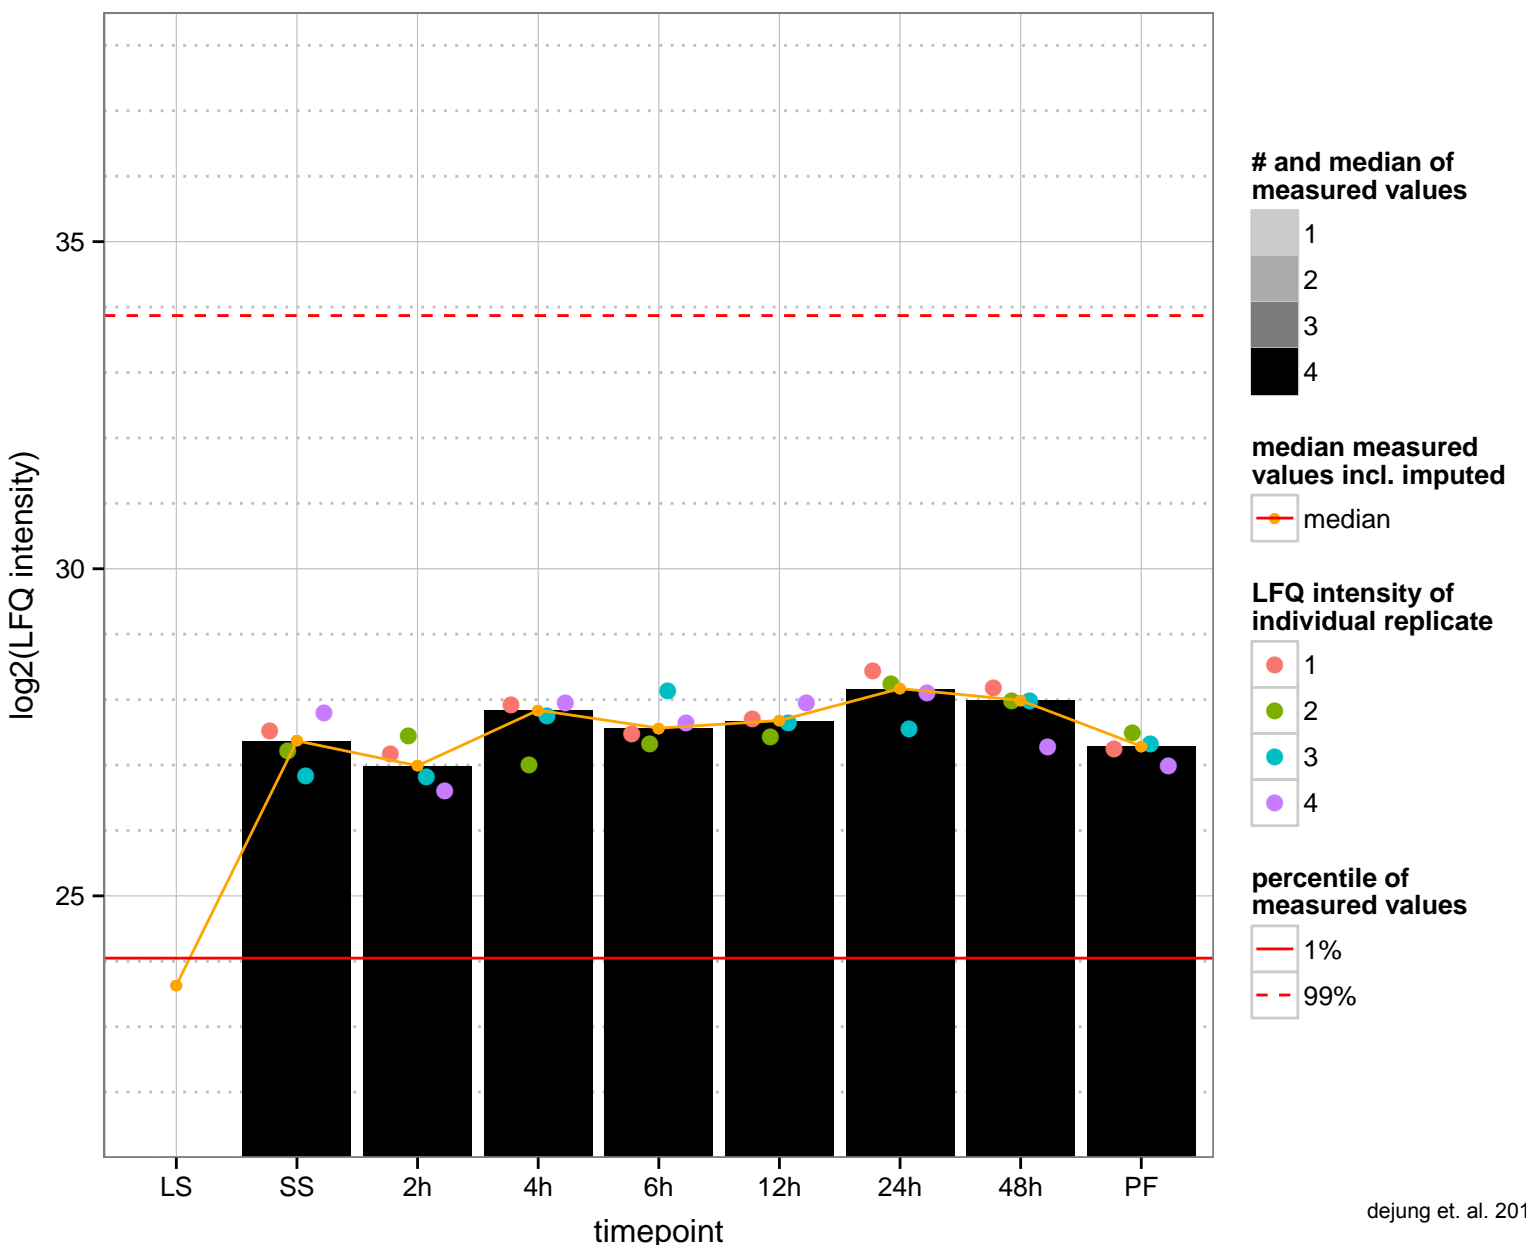



hypothetical protein, conserved  
 Tb927.7.6640  
 AGOF: null  
 AGOC: null  
 AGOP: null  
 PGO: null  
 PGO: null  
 PGO: null

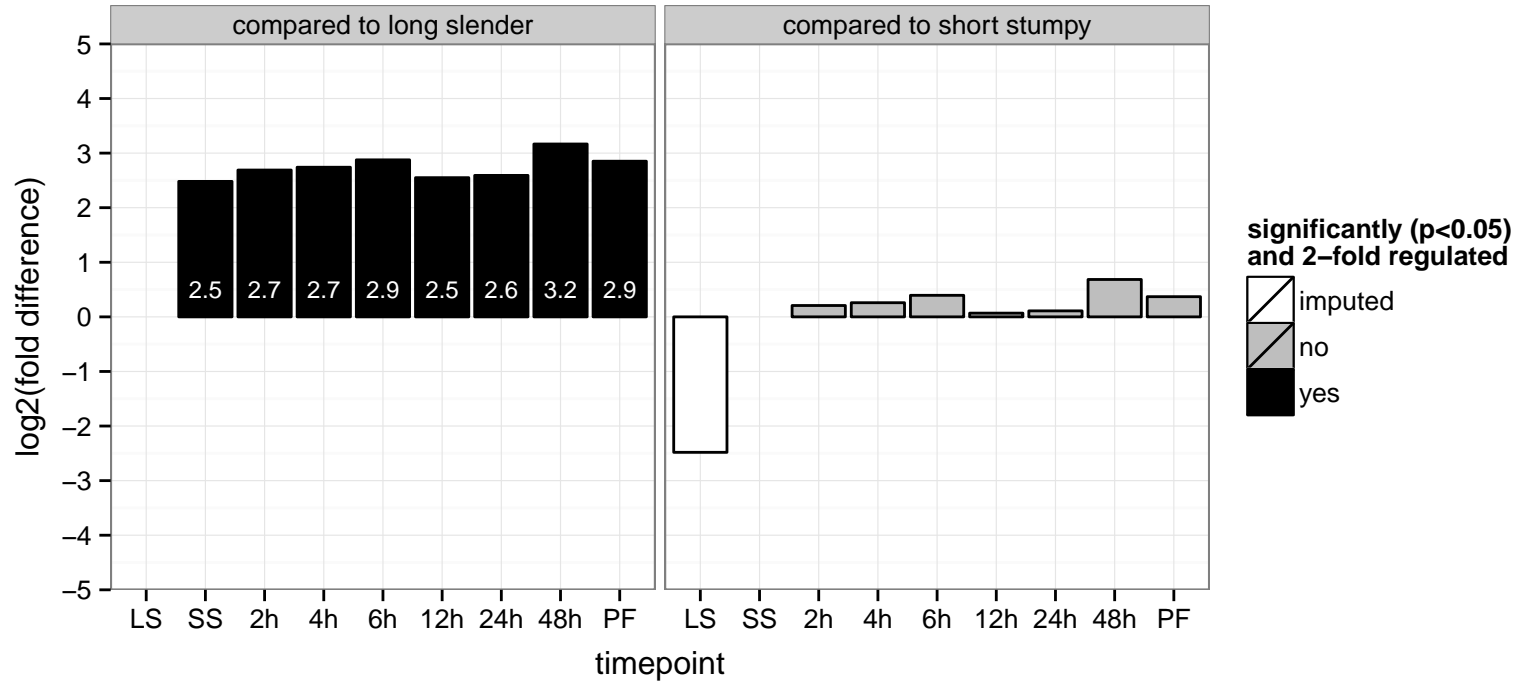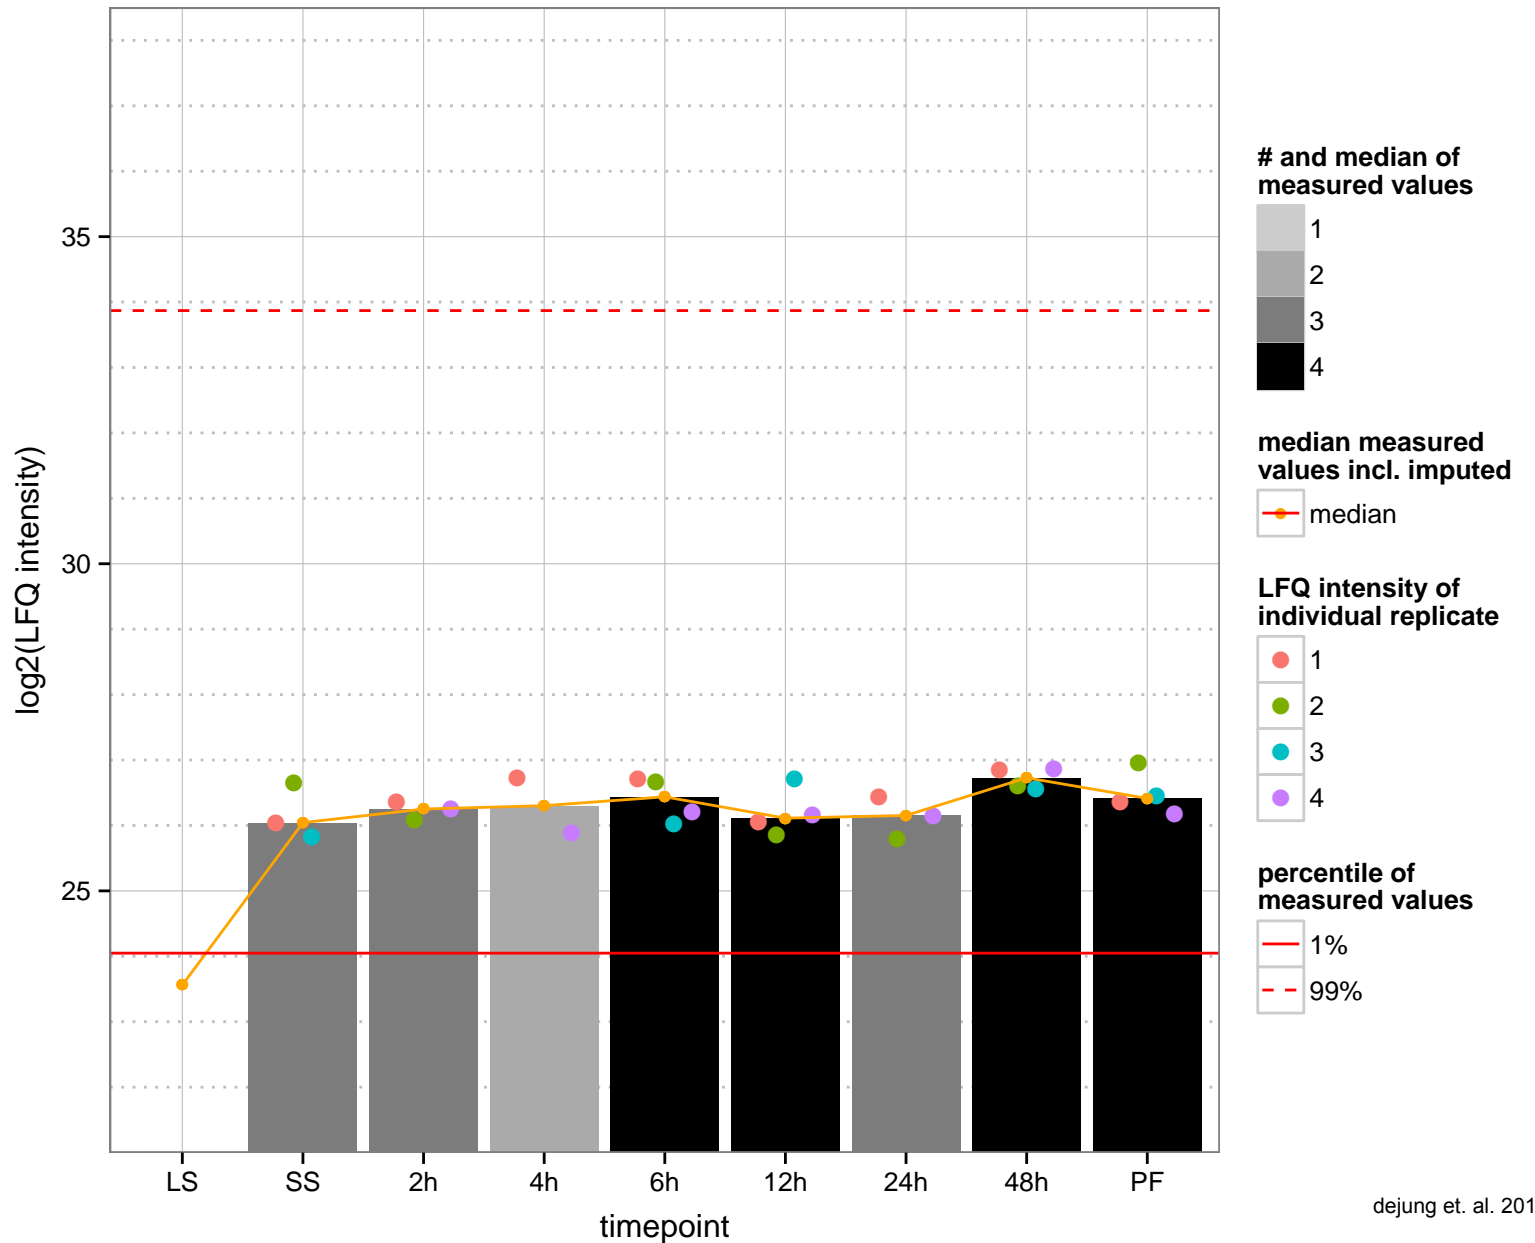

protein kinase, putative

Tb927.7.6680

AGOF: ATP binding, protein tyrosine kinase activity

AGOC: null

AGOP: protein phosphorylation

PGOF: ATP binding, protein kinase activity, transferase activity, transferring phosphorus-containing groups

PGOC: null

PGOP: protein phosphorylation

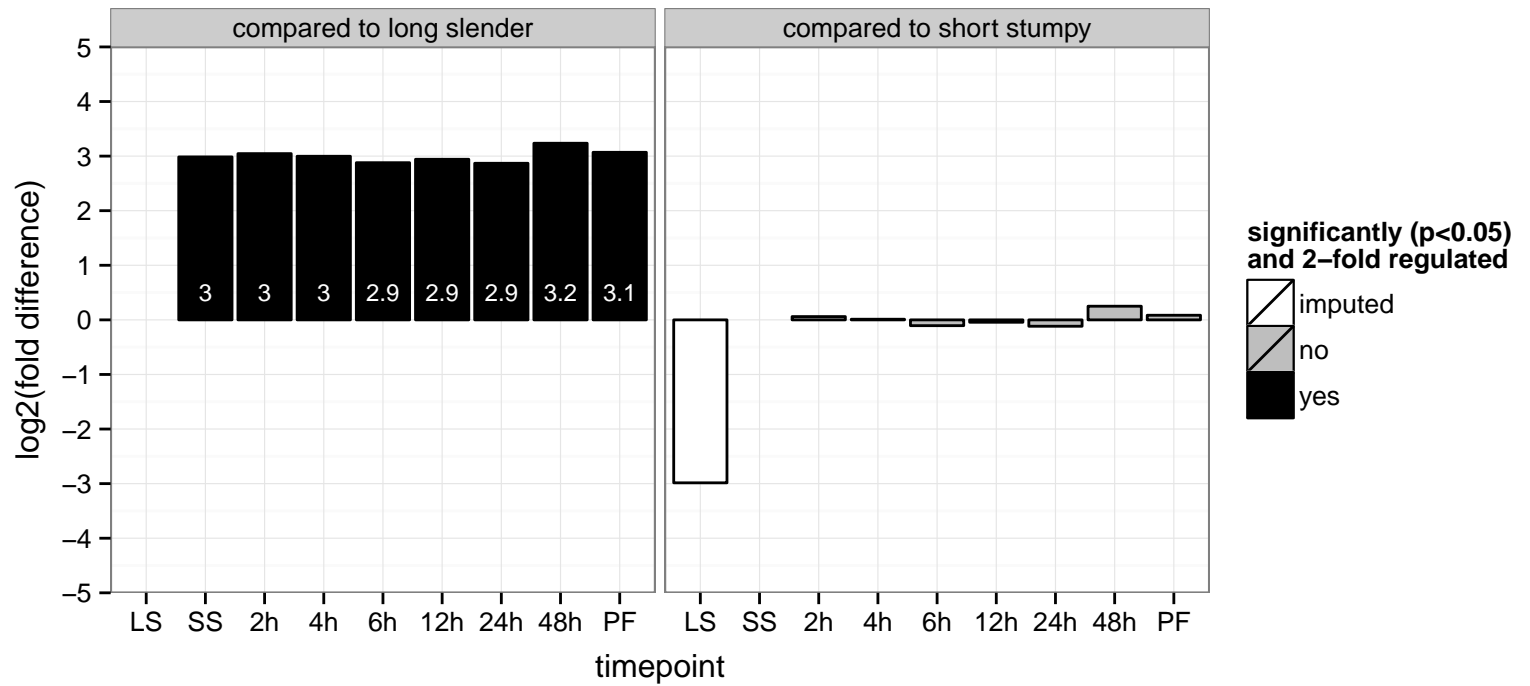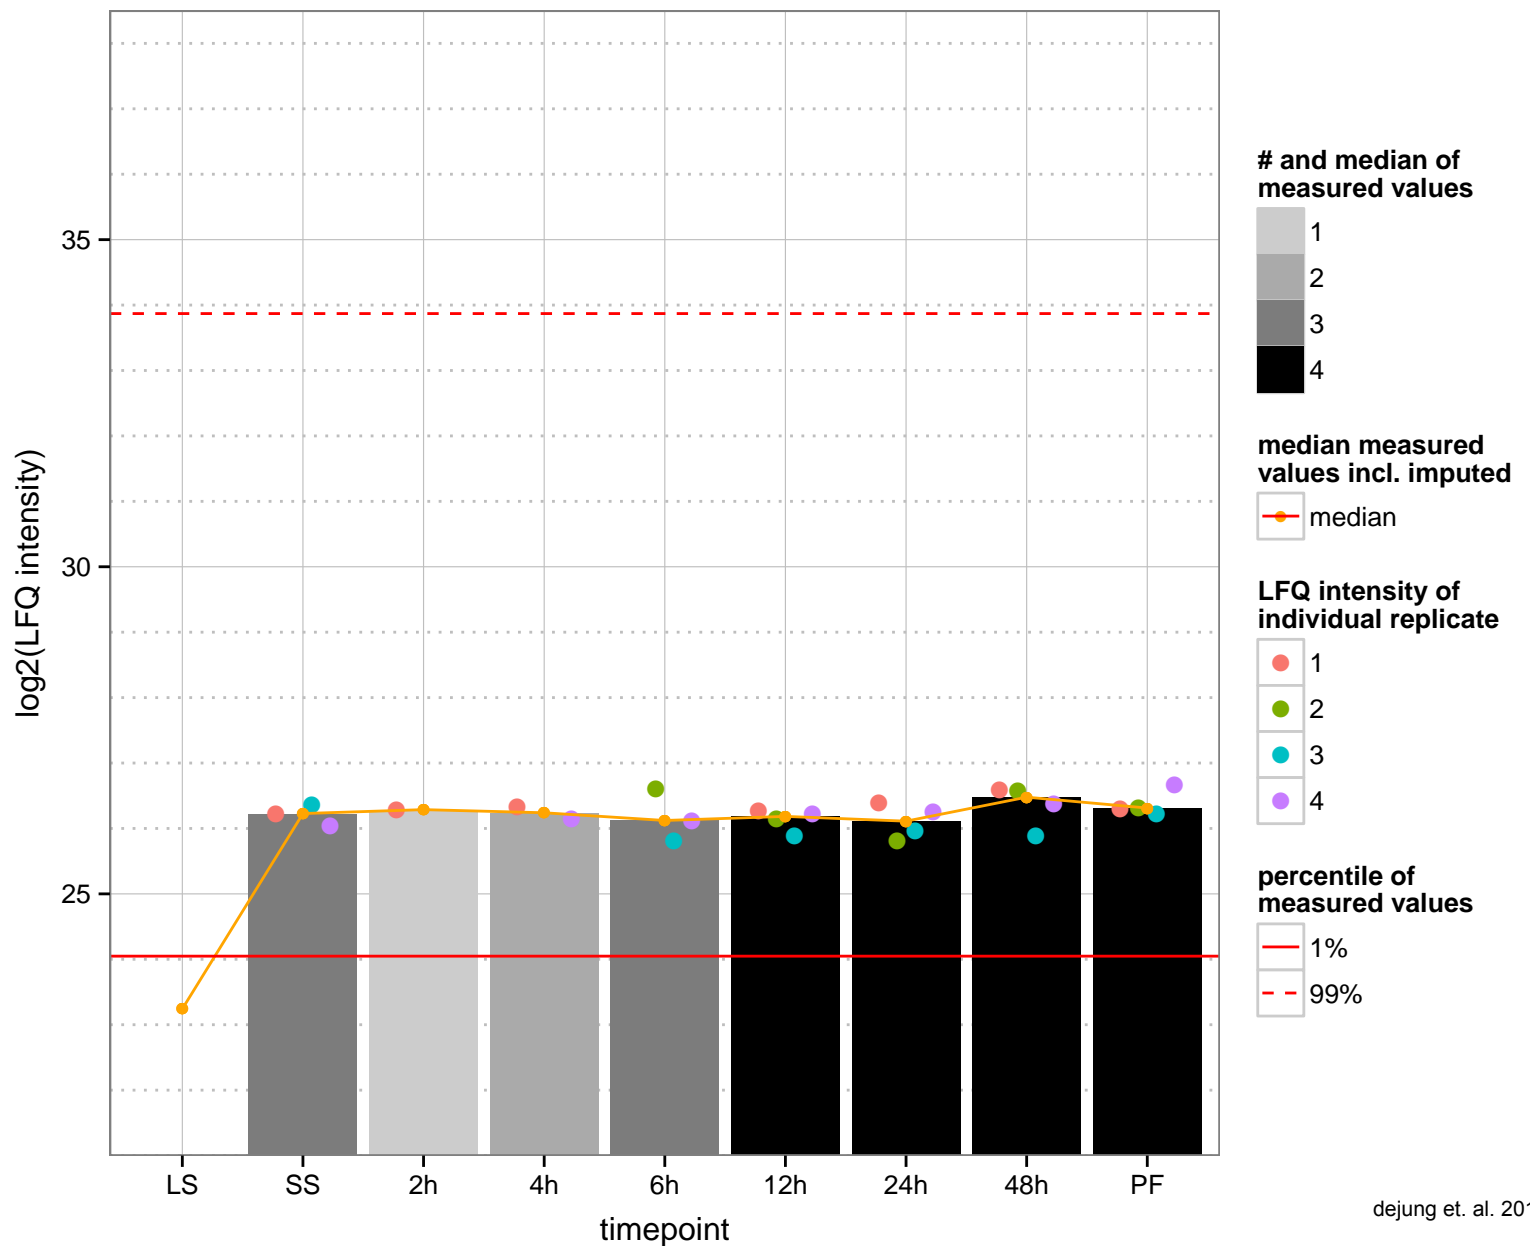

hypothetical protein, conserved  
 Tb927.7.6910  
 AGOF: null  
 AGOC: null  
 AGOP: null  
 PGOF: null  
 PGO: null  
 PGOP: null

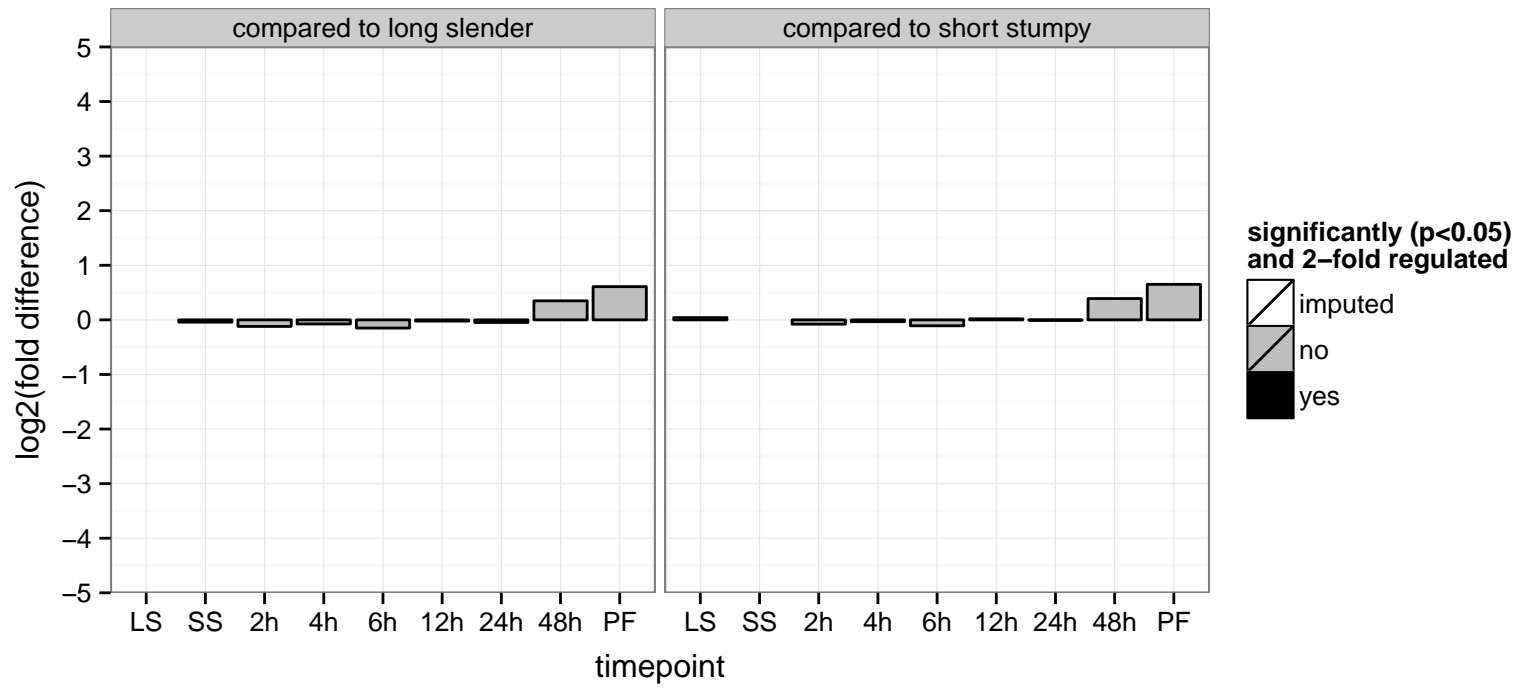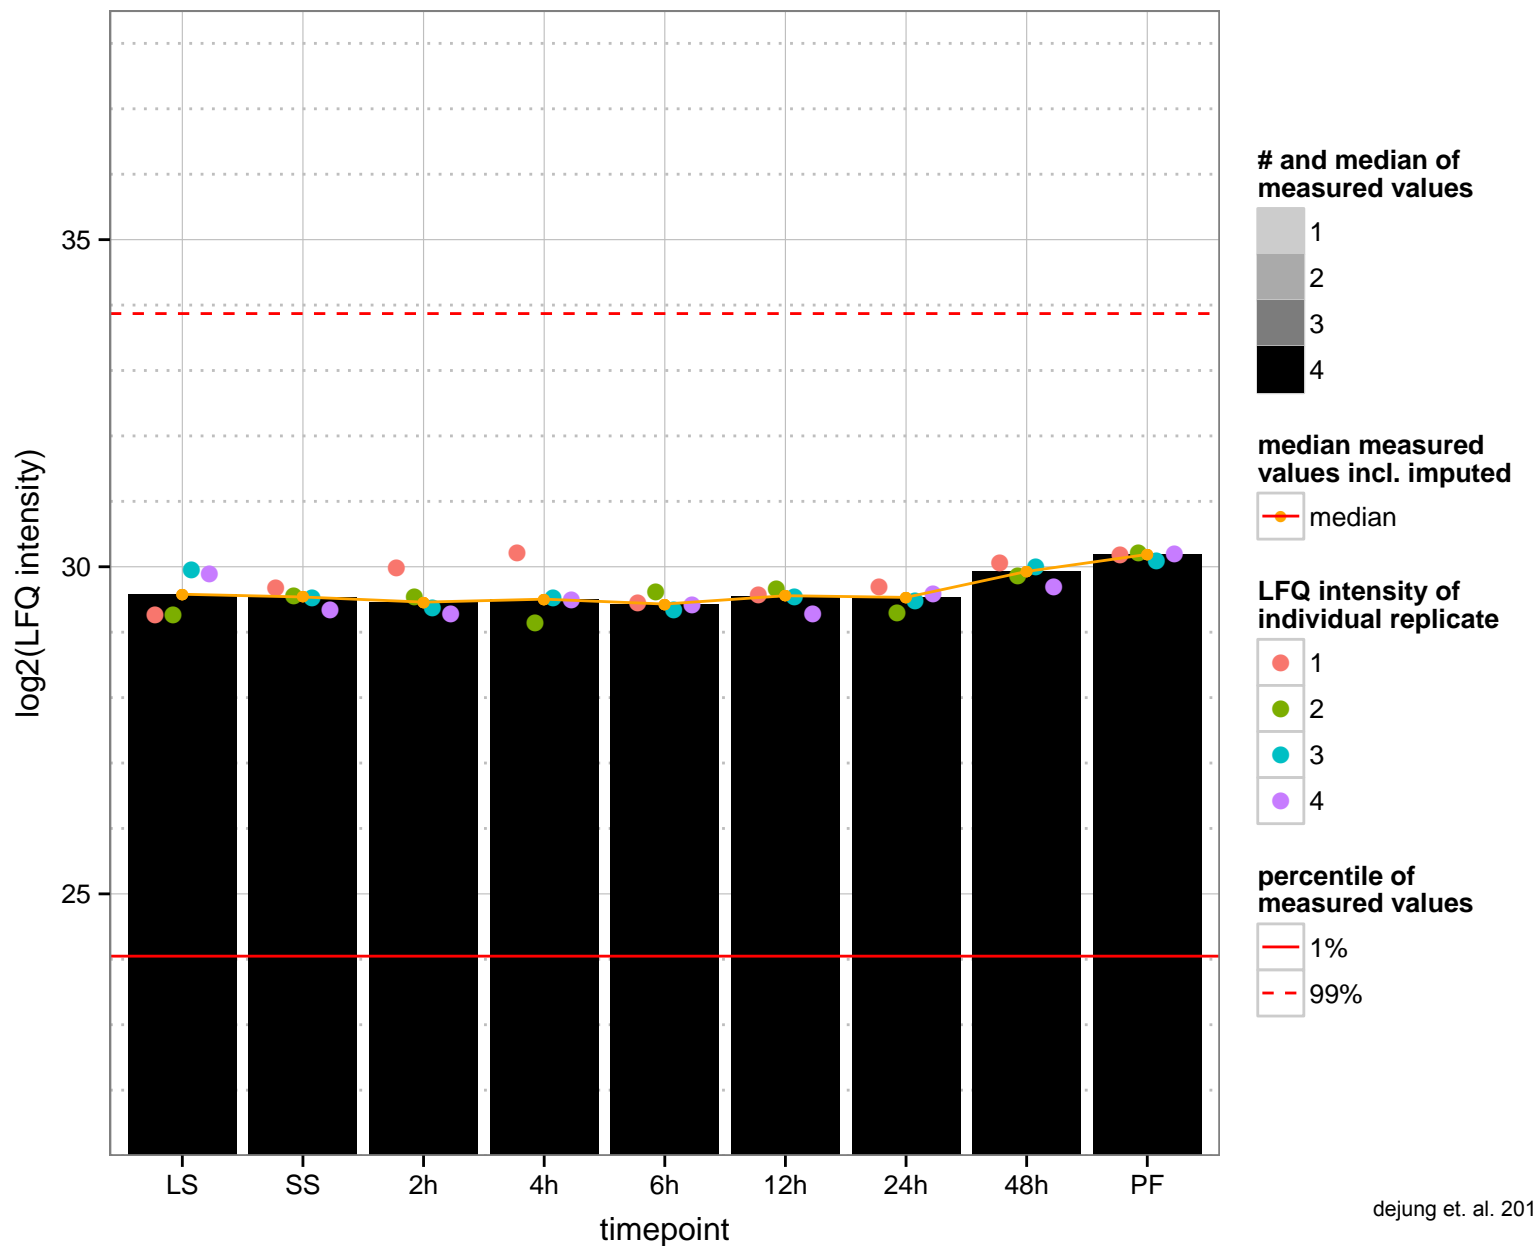

ATPase, putative  
 Tb927.7.6930  
 AGOF: ATP binding  
 AGOC: null  
 AGOP: null  
 PGO: ATP binding  
 PGOC: null  
 PGOP: null

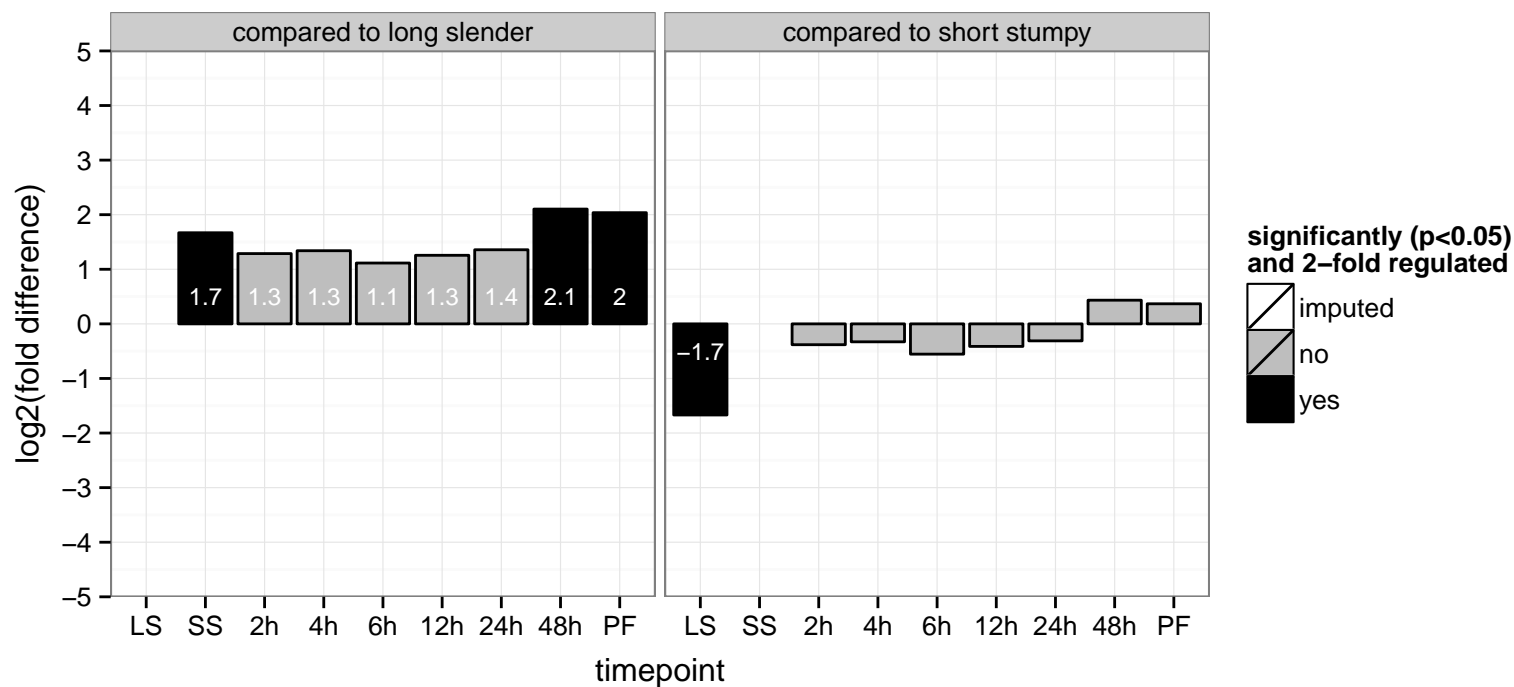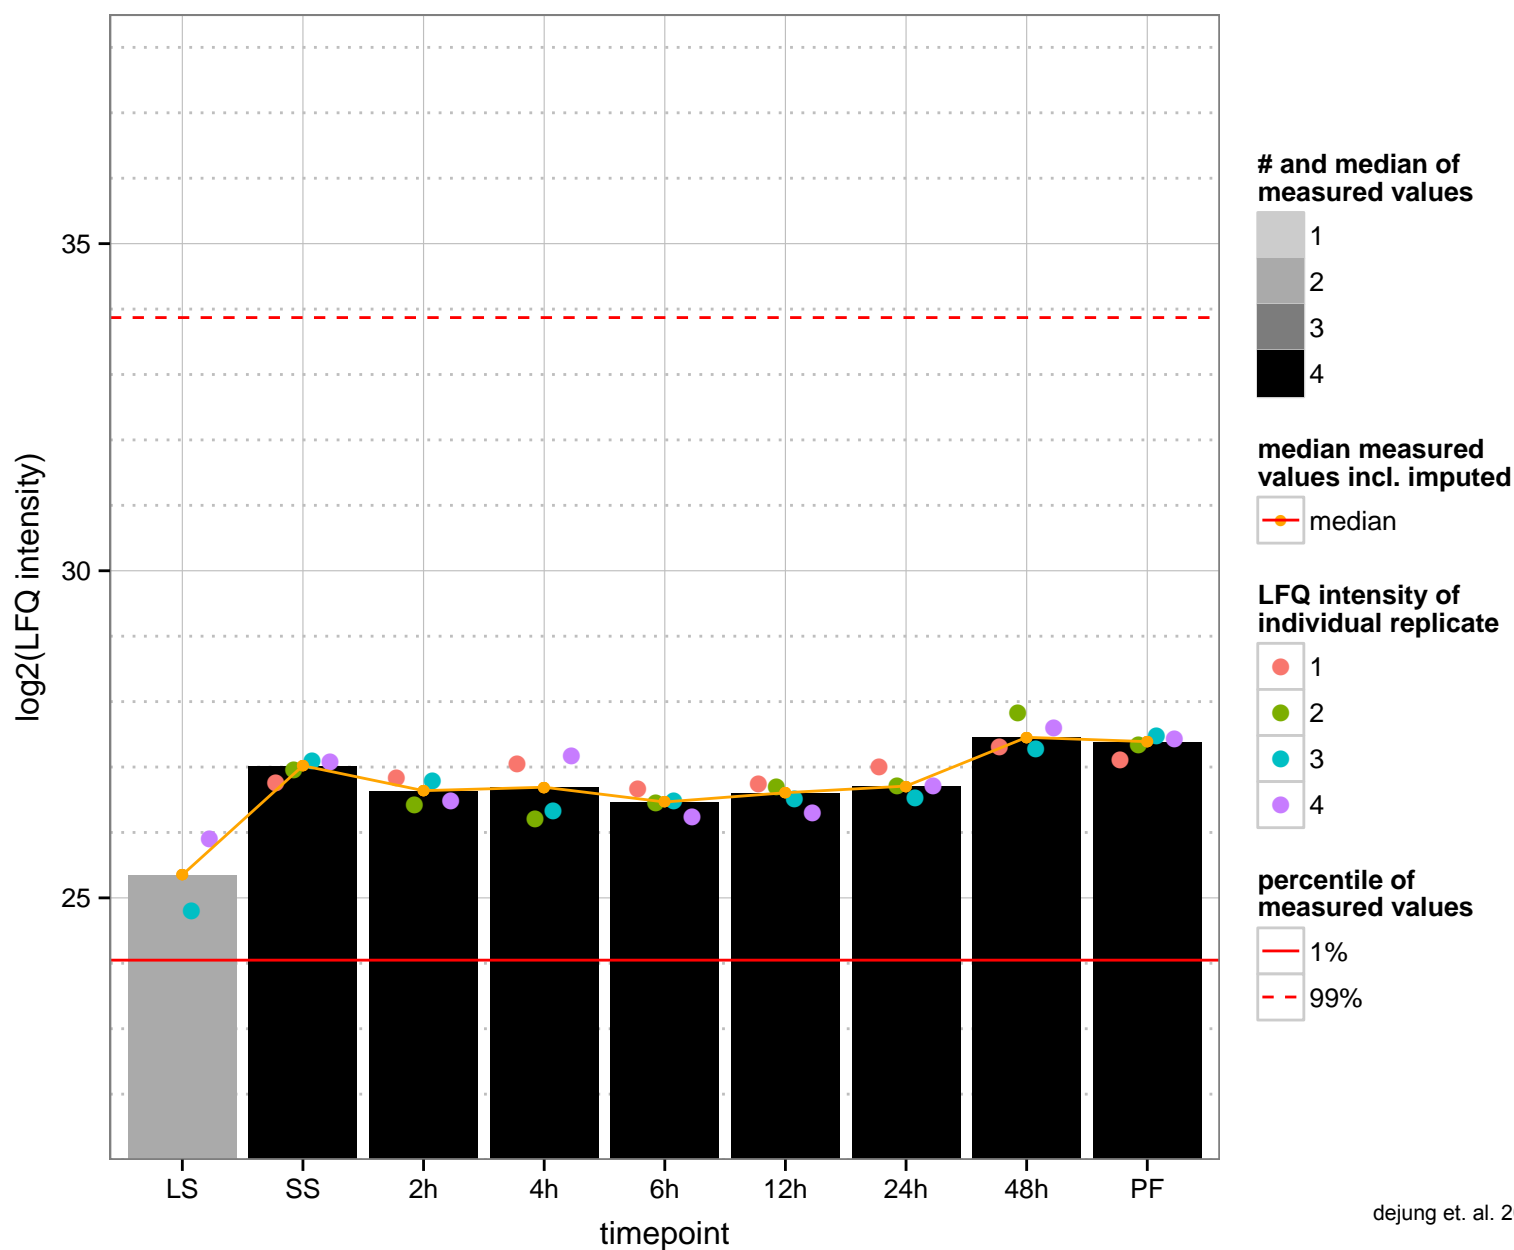

hypothetical protein, conserved  
 Tb927.7.6980  
 AGOF: null  
 AGOC: null  
 AGOP: null  
 PGO: nucleic acid binding  
 PGOC: nucleus  
 PGOP: null

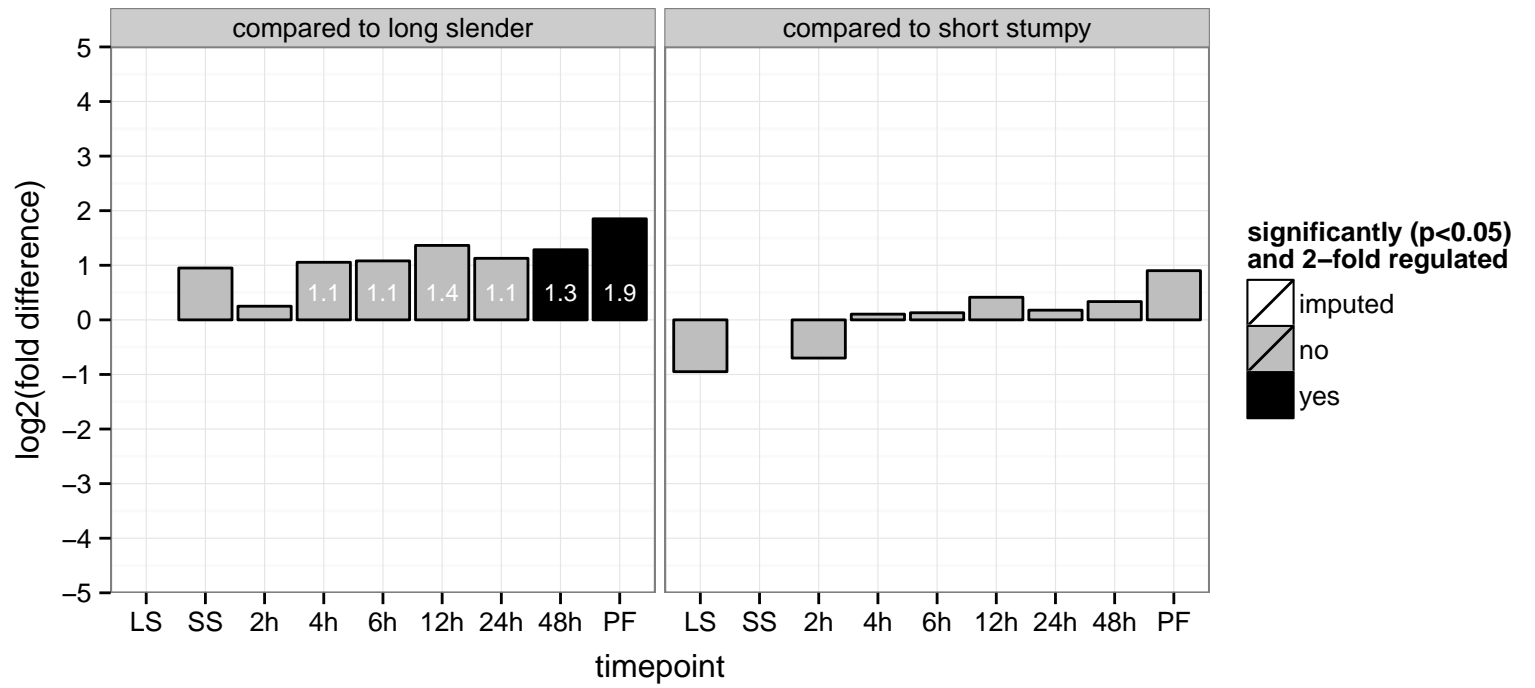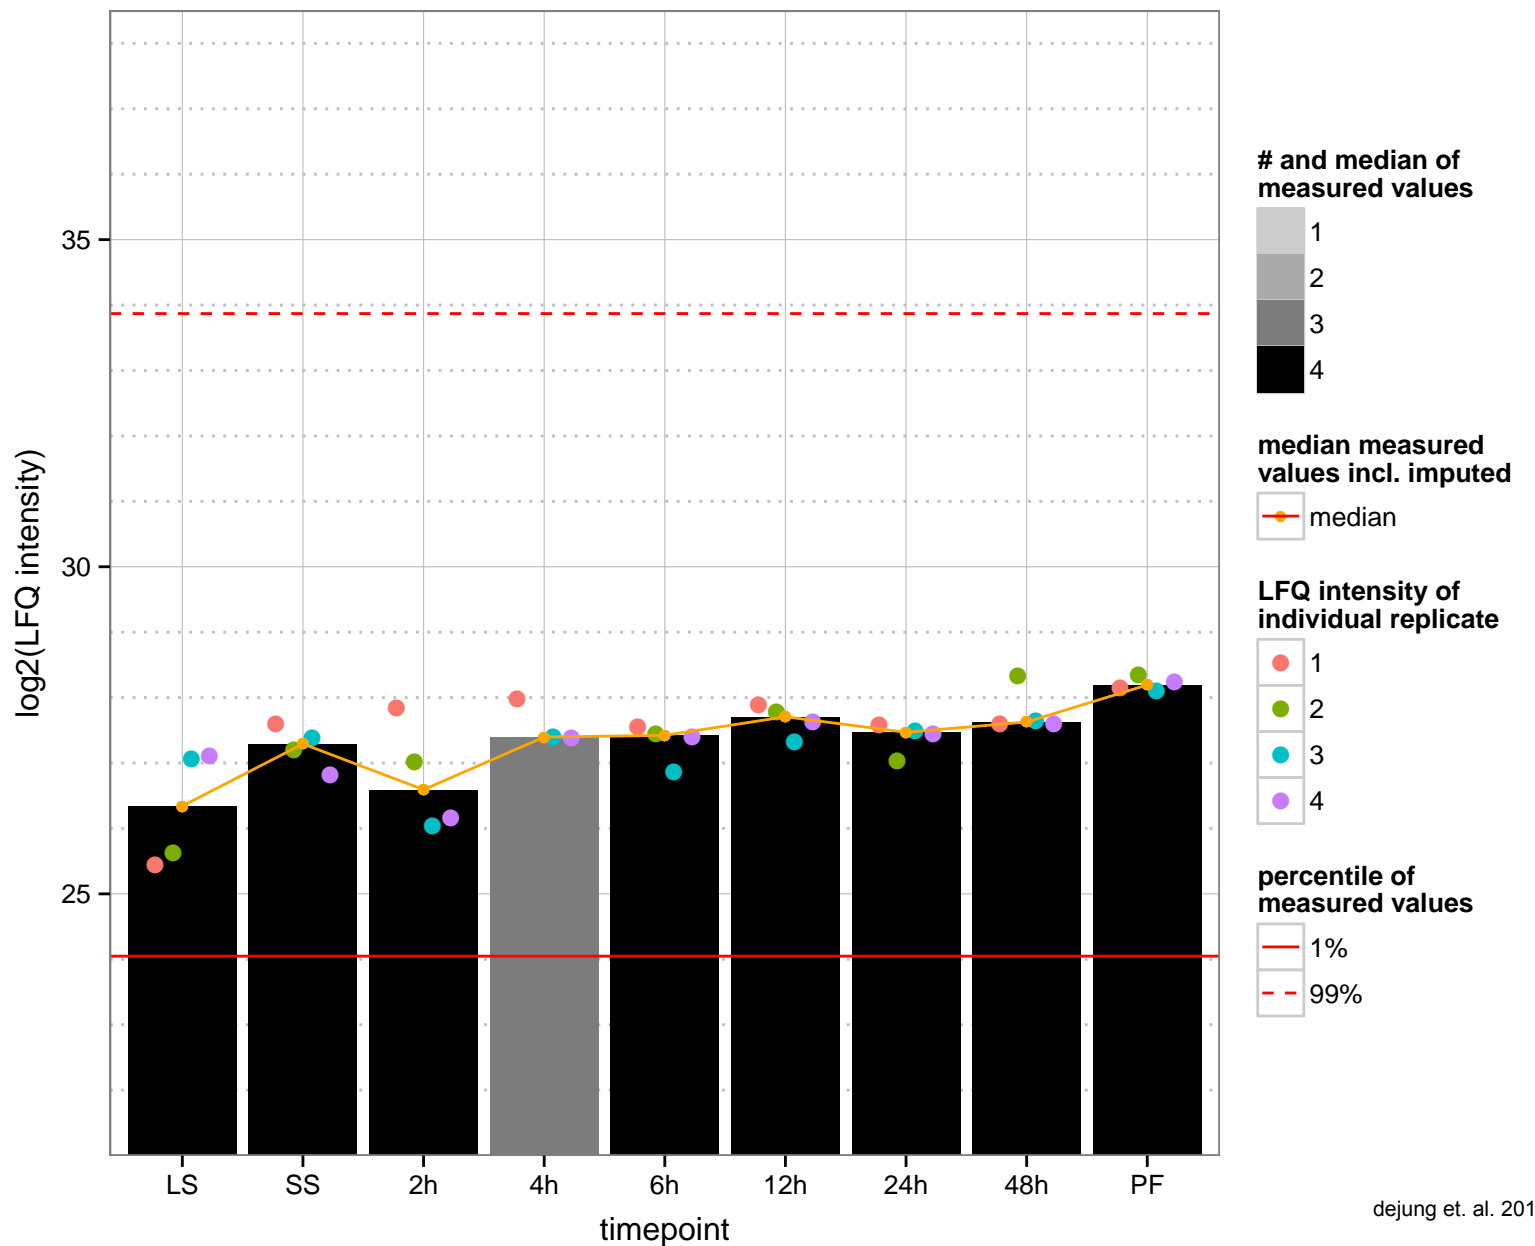

hypothetical protein, conserved  
 Tb927.7.700  
 AGOF: null  
 AGOC: null  
 AGOP: null  
 PGO: null  
 PGOC: null  
 PGOP: null

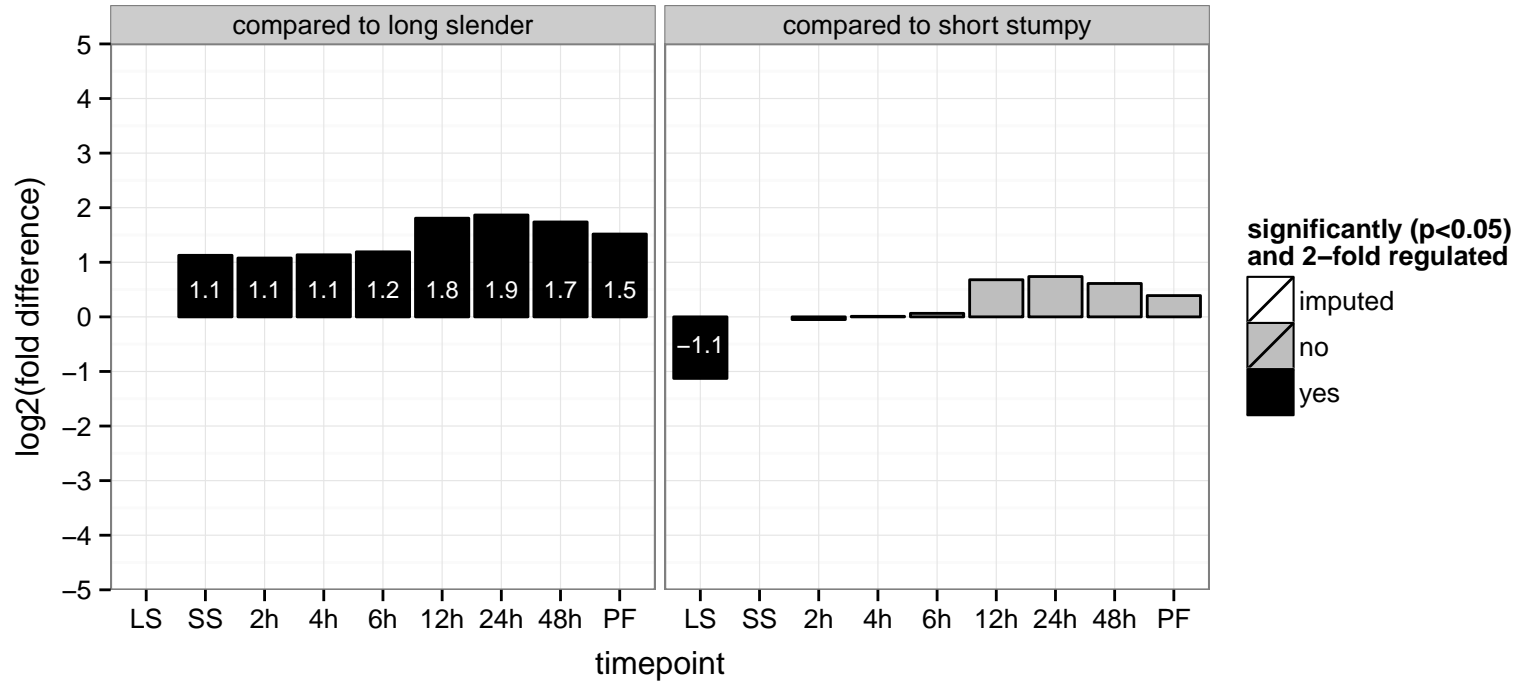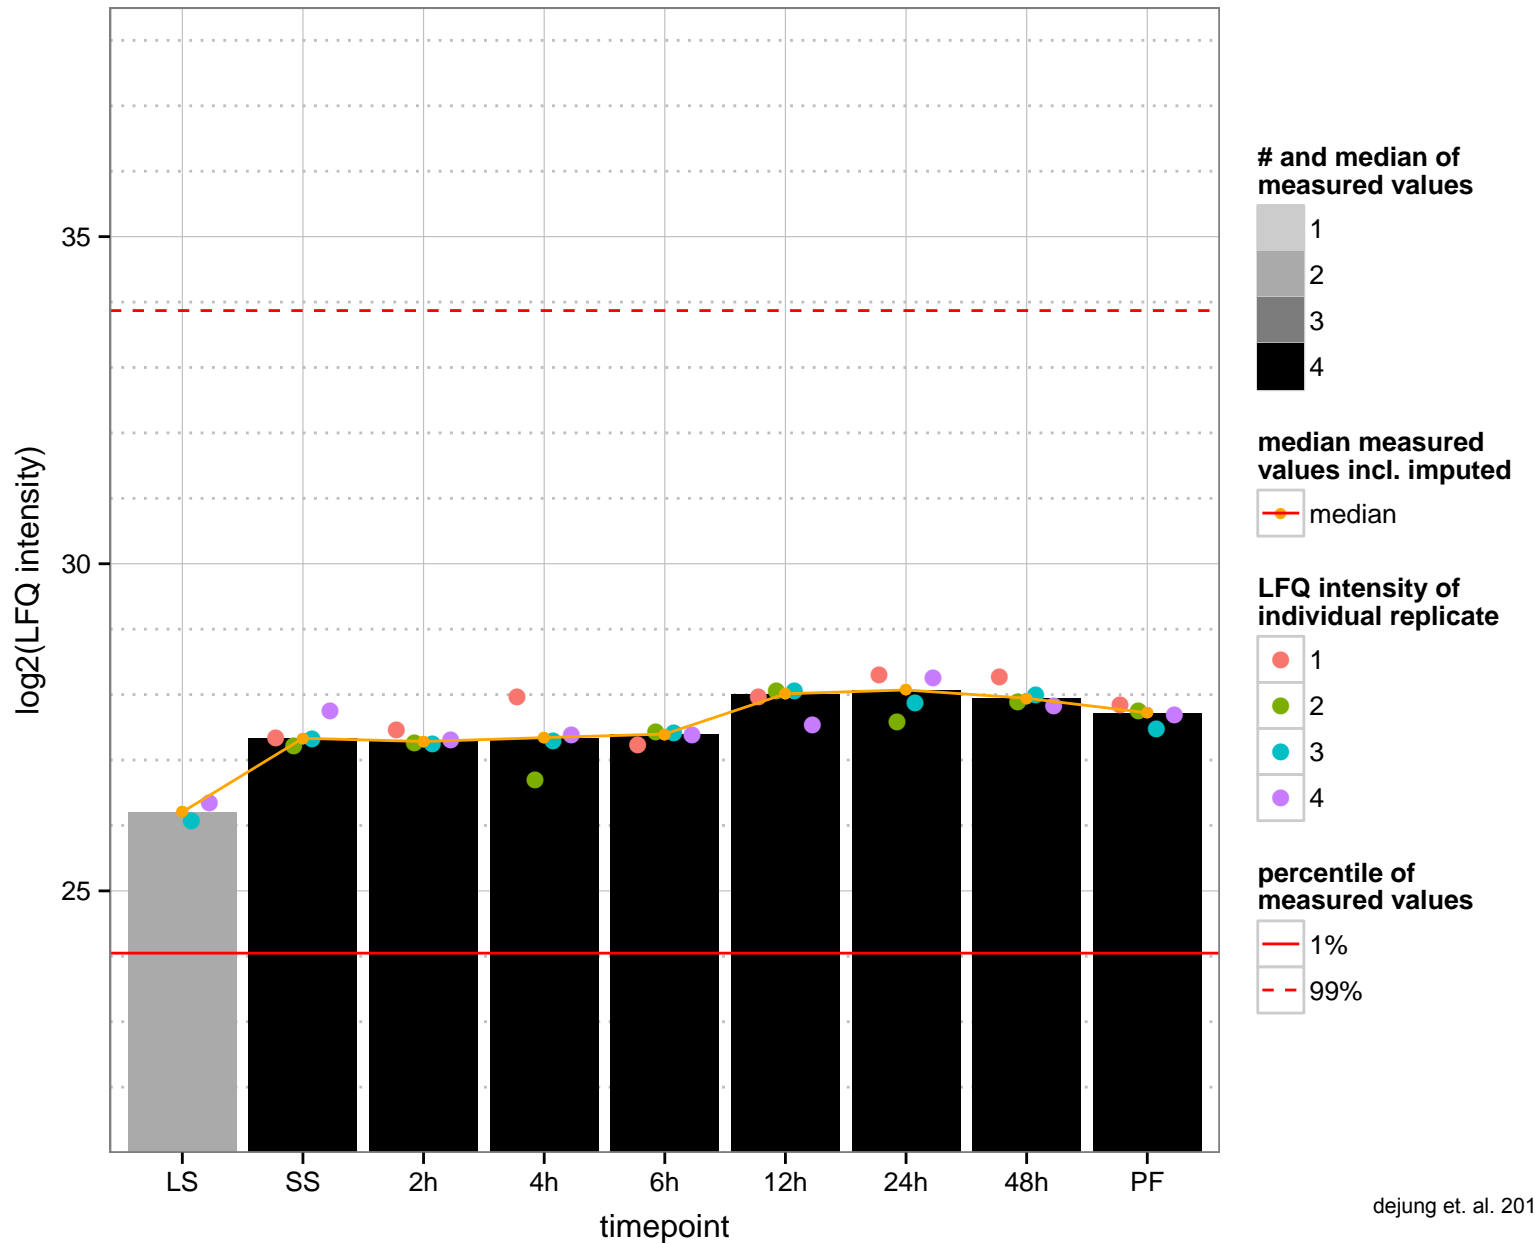

methylthioadenosine phosphorylase, putative (MTAP)  
 Tb927.7.7040  
 AGOF: transferase activity, transferring pentosyl groups  
 AGOC: null  
 AGOP: nucleoside metabolic process  
 PGOF: catalytic activity, transferase activity, transferring pentosyl groups  
 PGO: null  
 PGO: nucleoside metabolic process

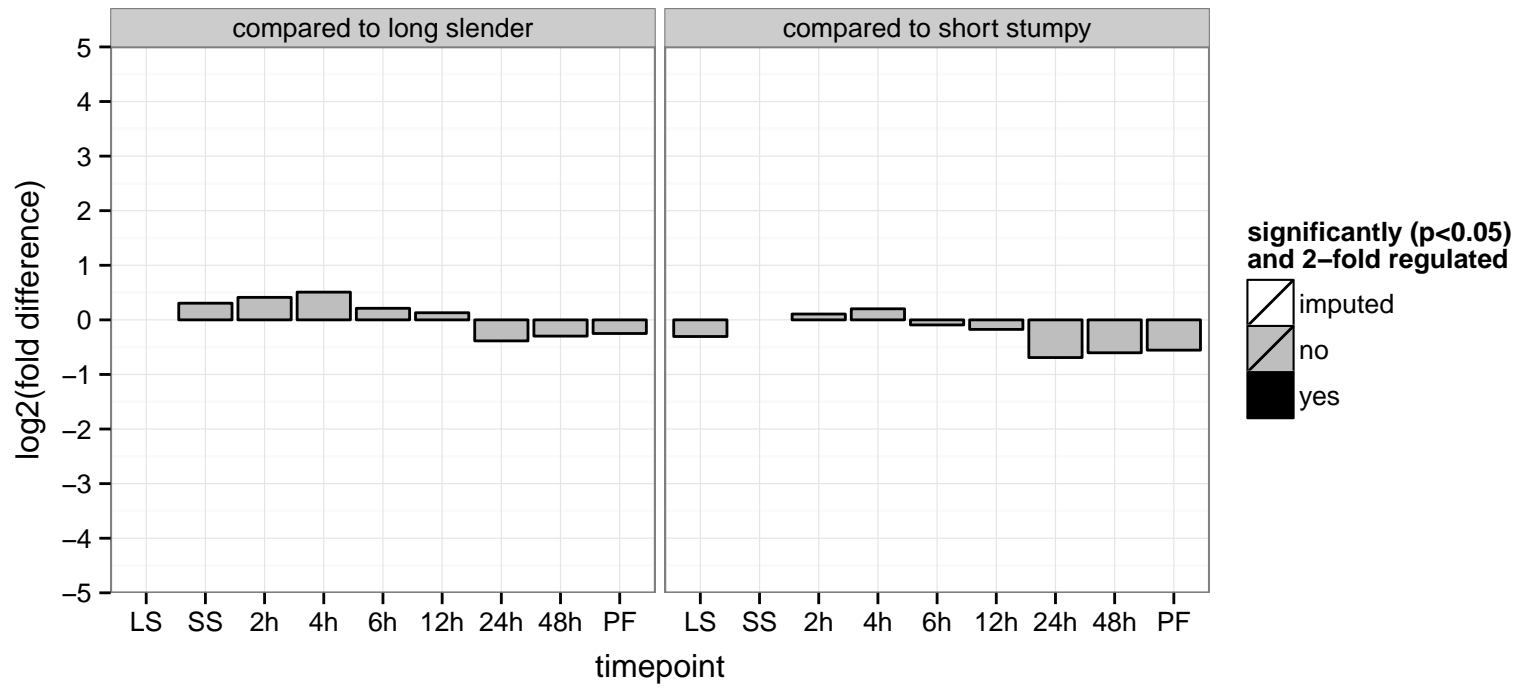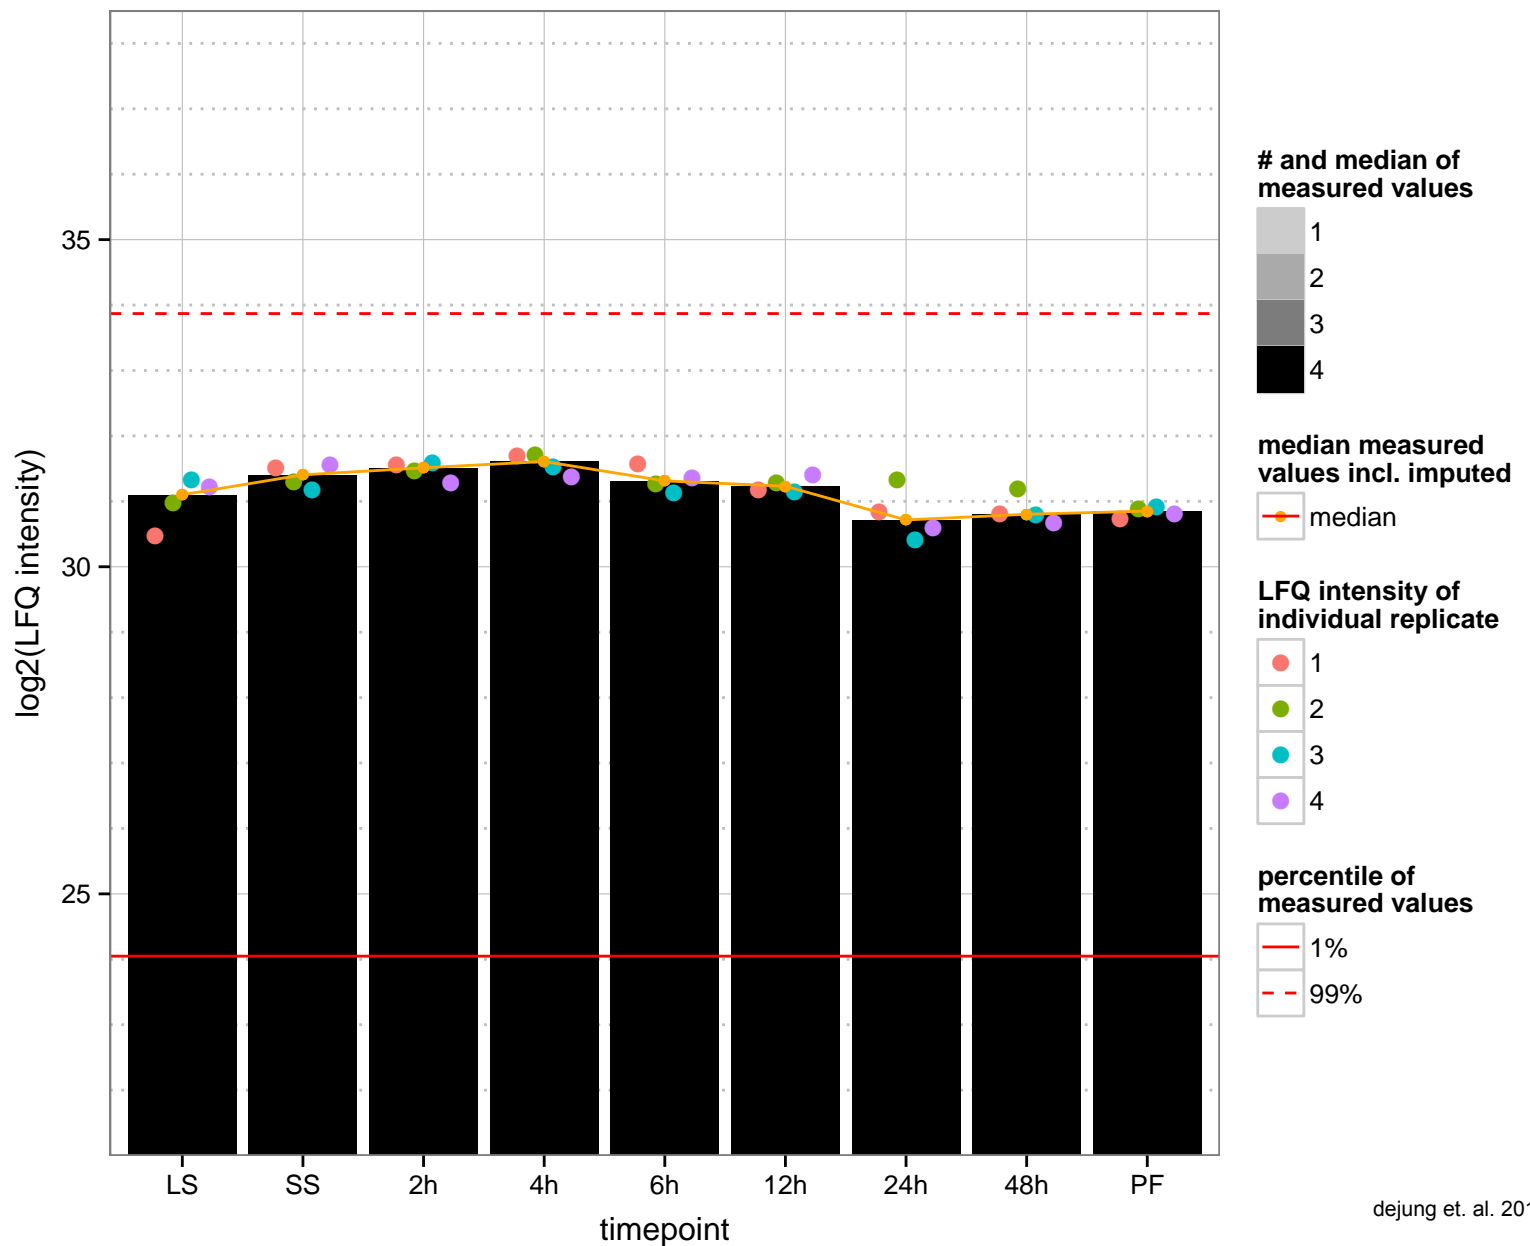

mitochondrial glycoprotein-like protein  
 Tb927.7.7080  
 AGOF: null  
 AGOC: mitochondrial matrix, mitochondrion  
 AGOP: null  
 PGO: null  
 PGO: null  
 PGO: null  
 PGO: null

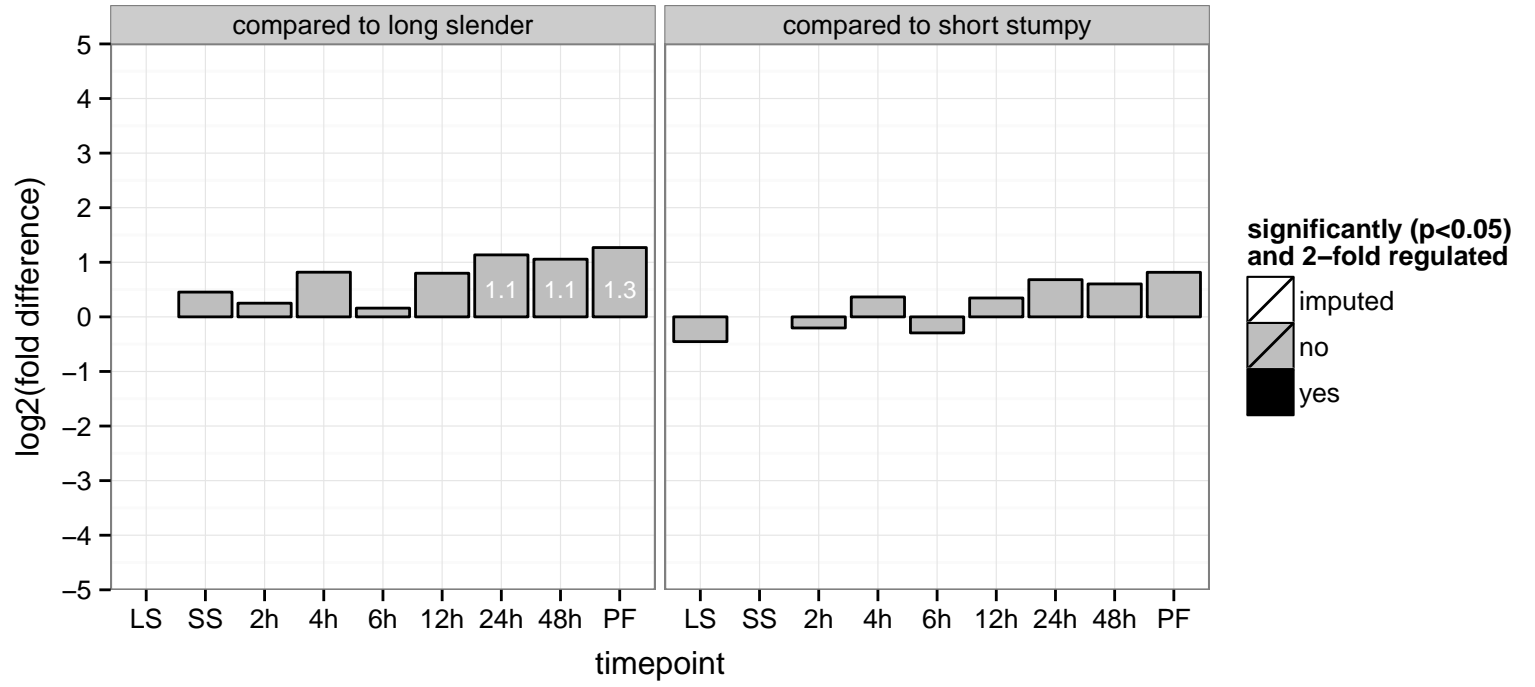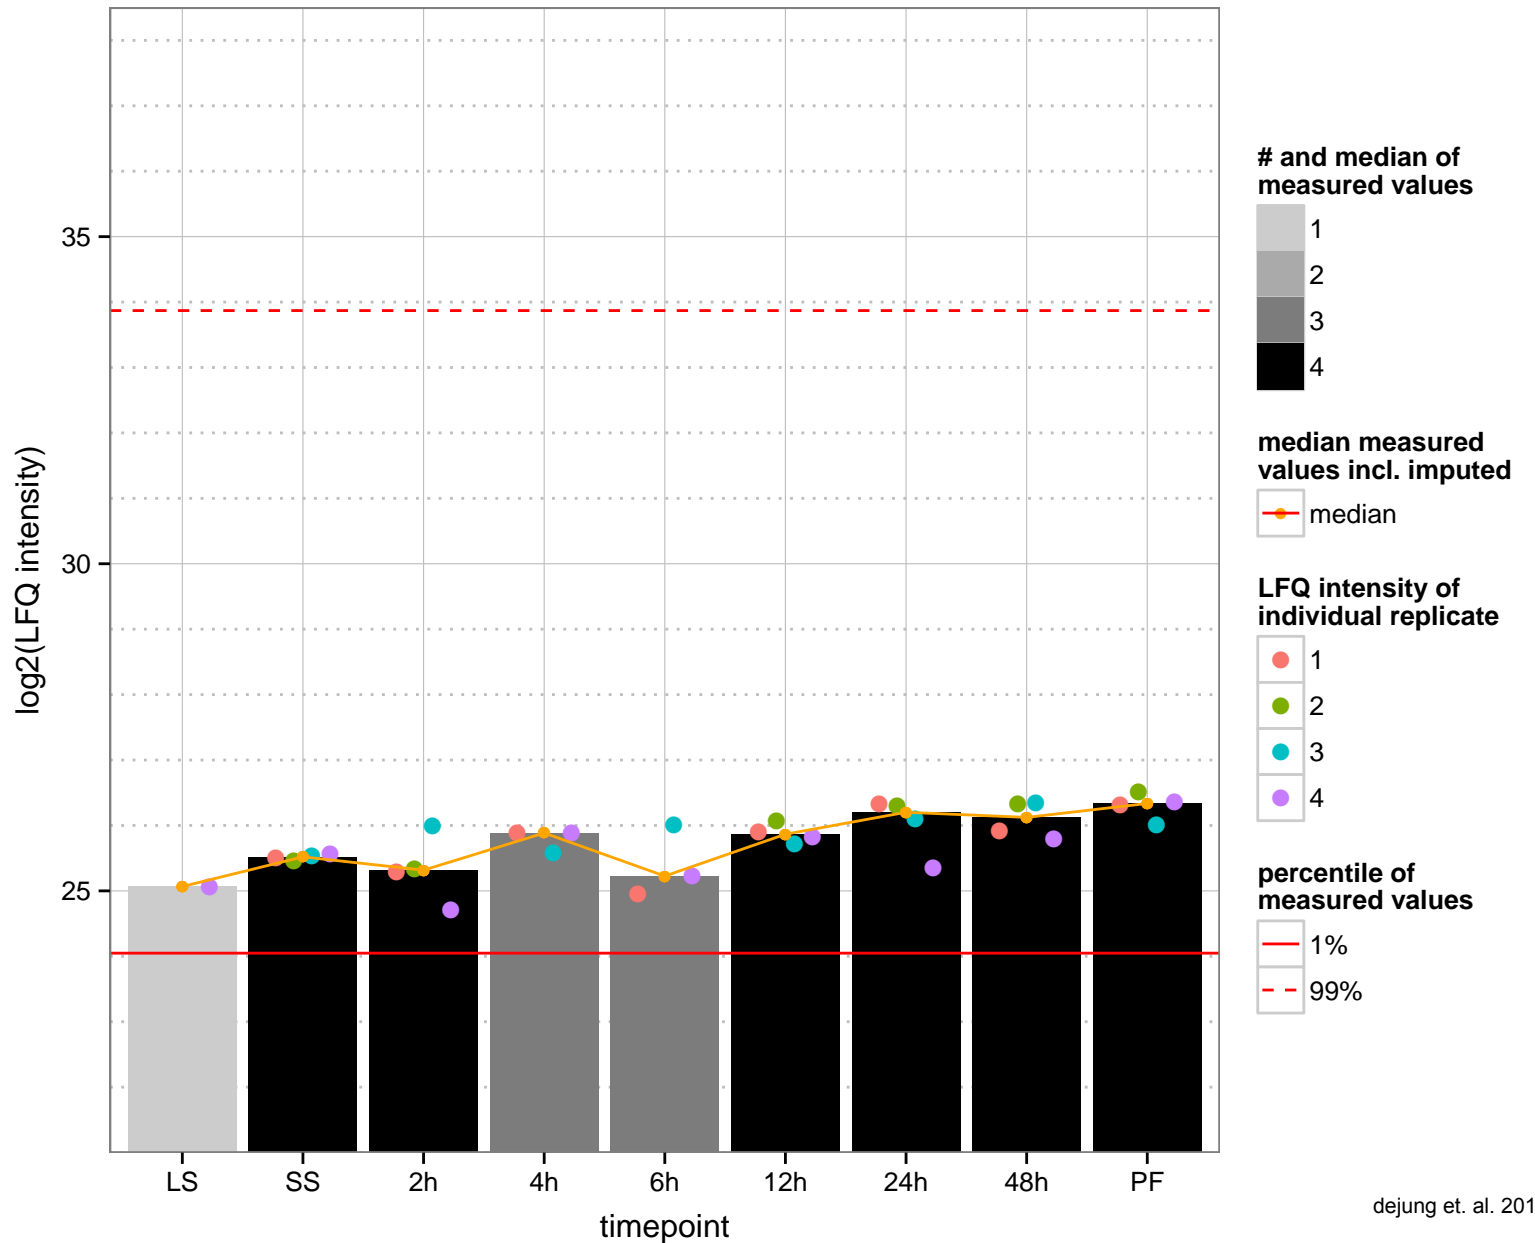



heat shock 70 kDa protein, putative (HSP70)

Tb927.7.710

AGOF: ATP binding

AGOC: null

AGOP: response to stress

PGOF: null

PGOC: null

PGOP: null

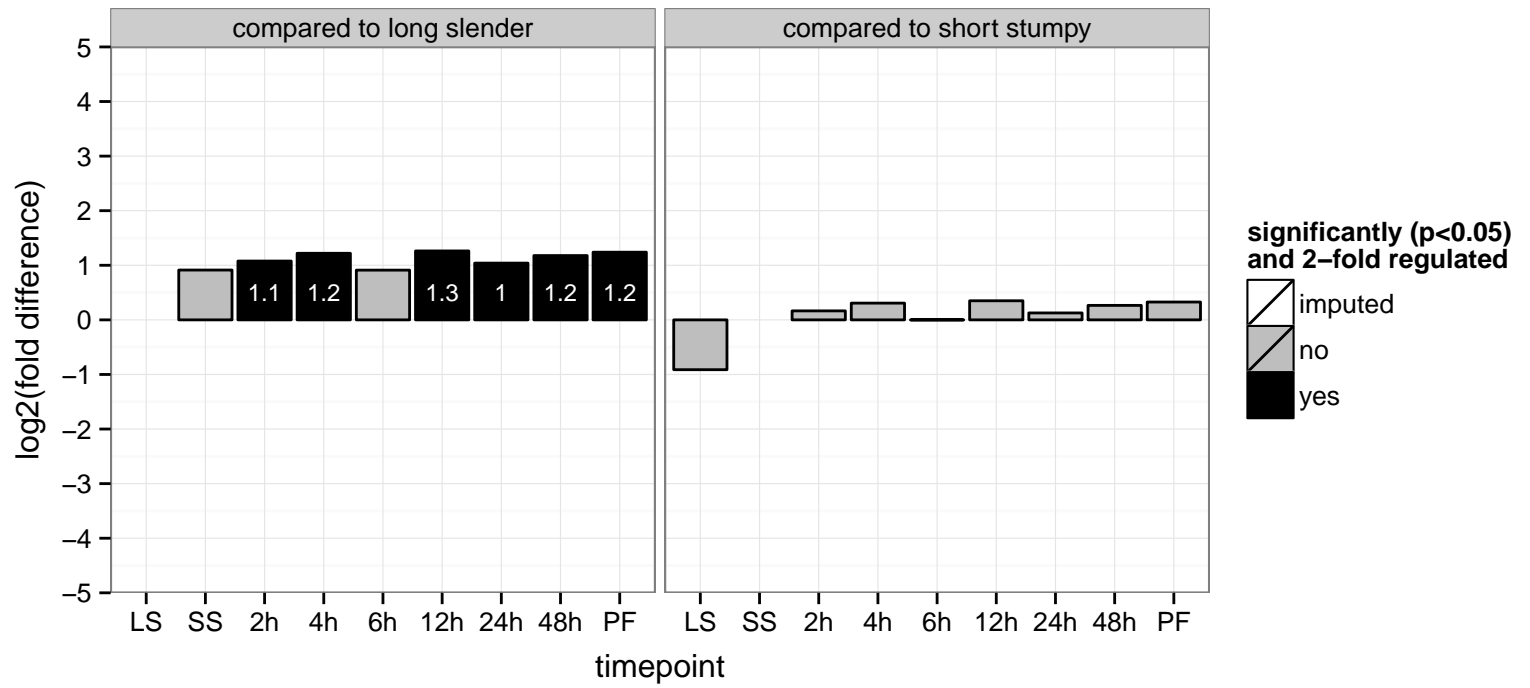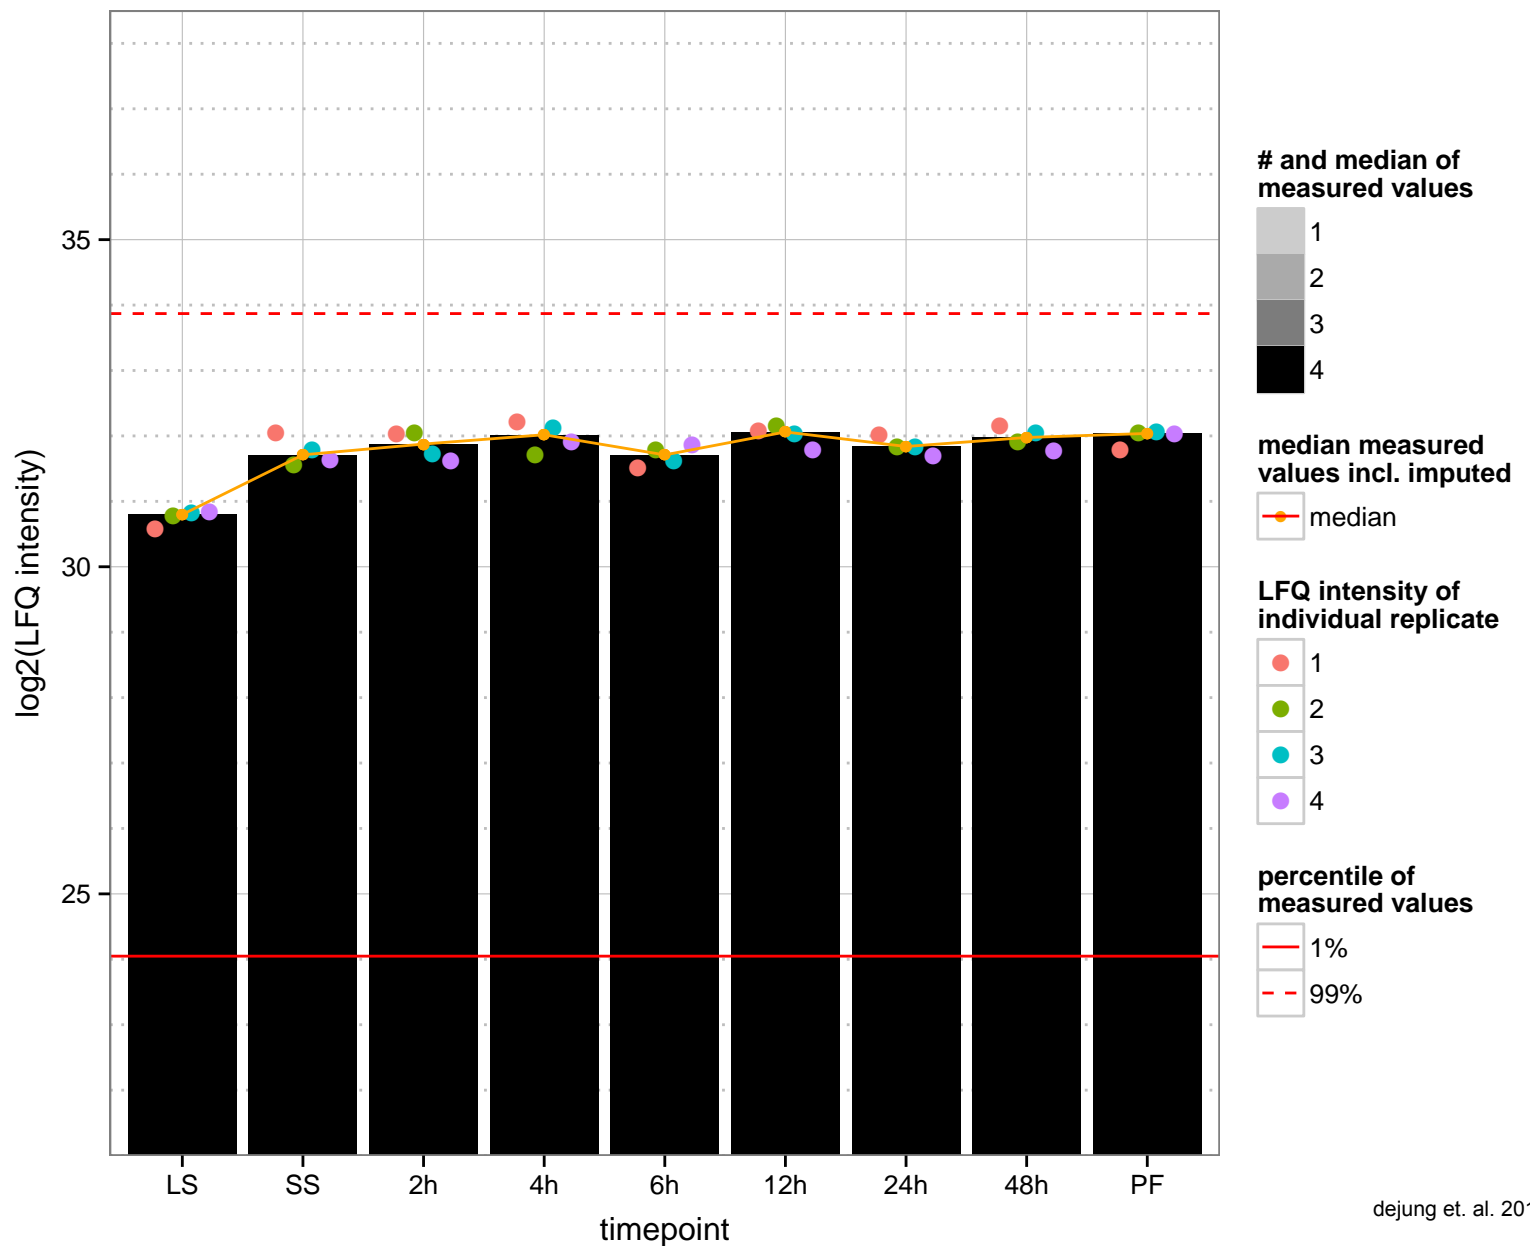

hypothetical protein, conserved  
 Tb927.7.7140  
 AGOF: null  
 AGOC: null  
 AGOP: null  
 PGO: null  
 PGOC: null  
 PGOP: null

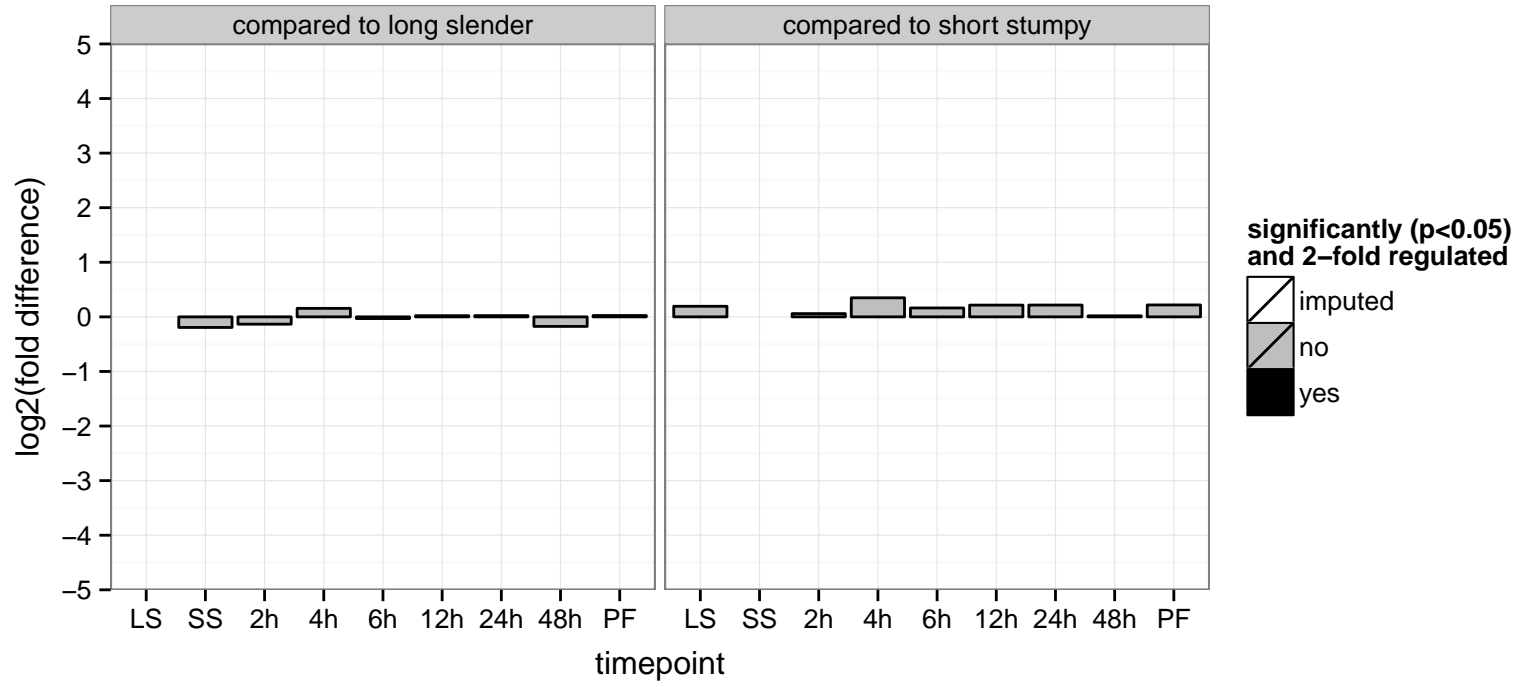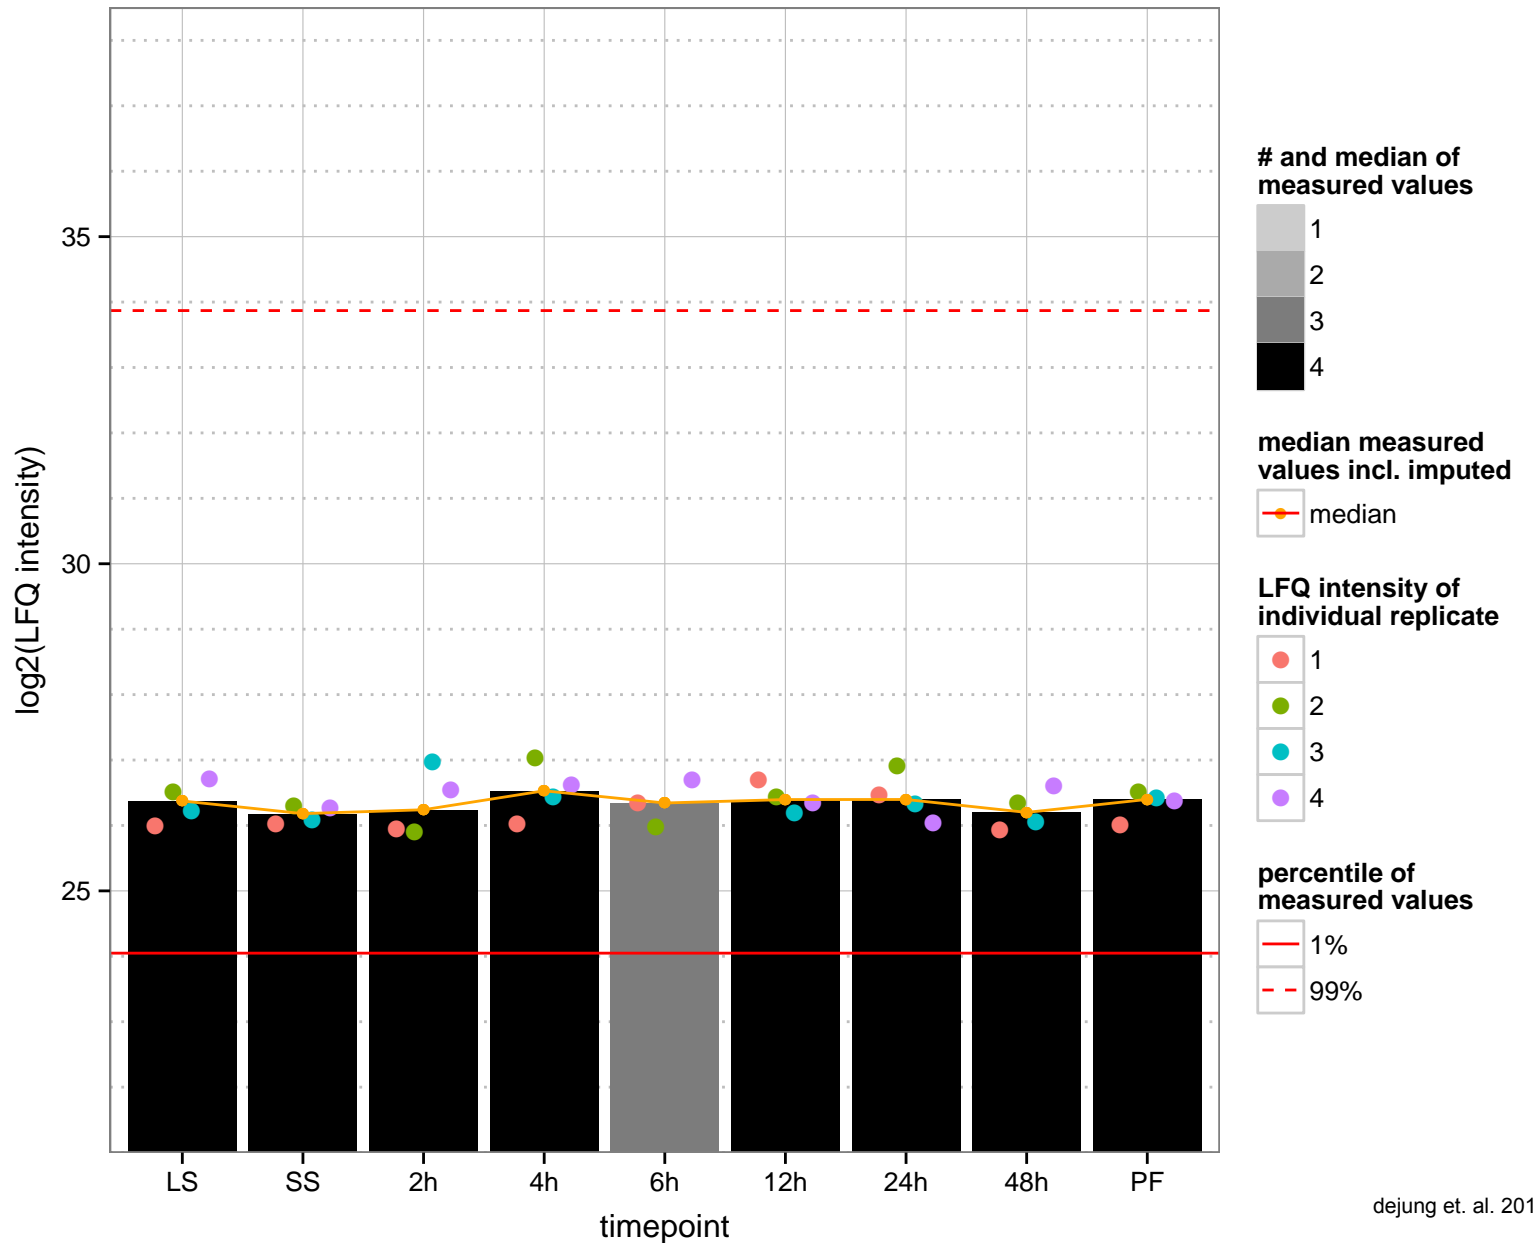

hypothetical protein, conserved  
 Tb927.7.7190  
 AGOF: null  
 AGOC: null  
 AGOP: null  
 PGOF: null  
 PGO C: null  
 PGO P: null

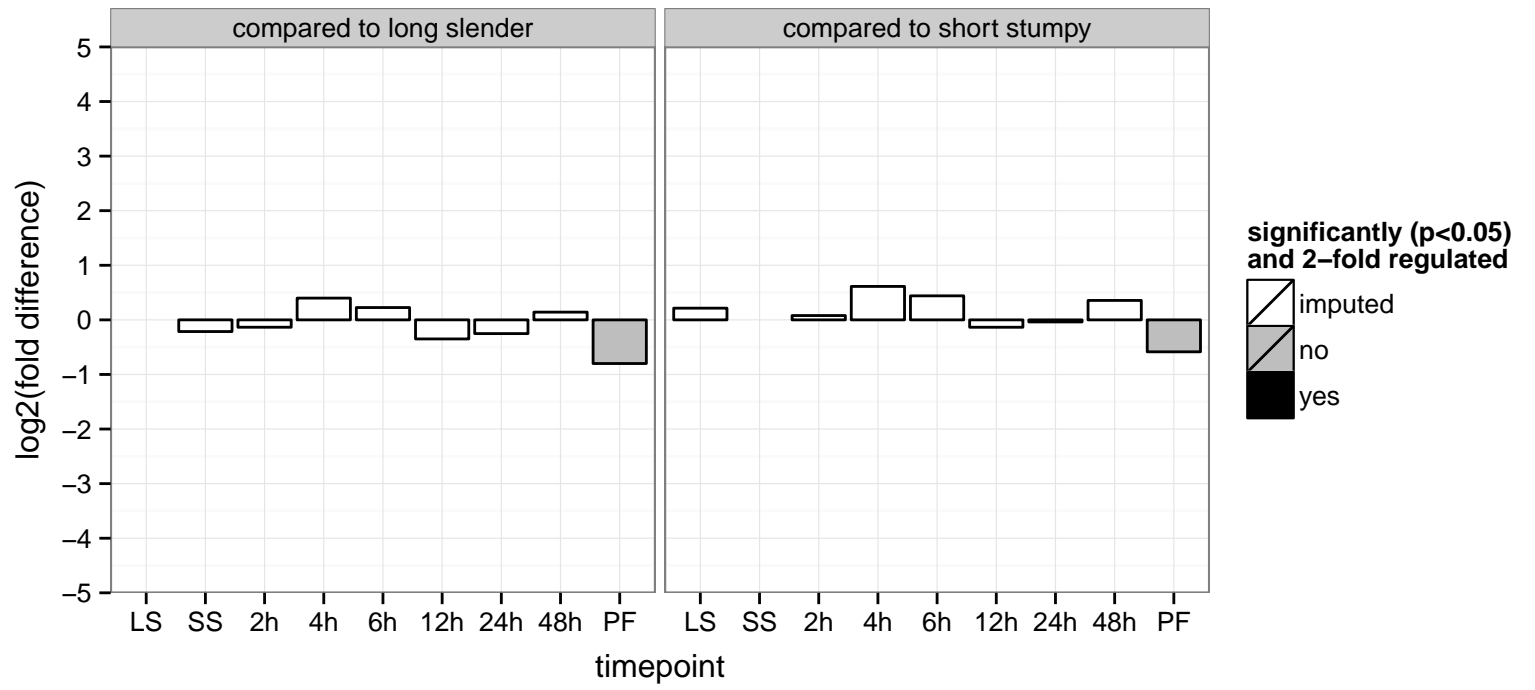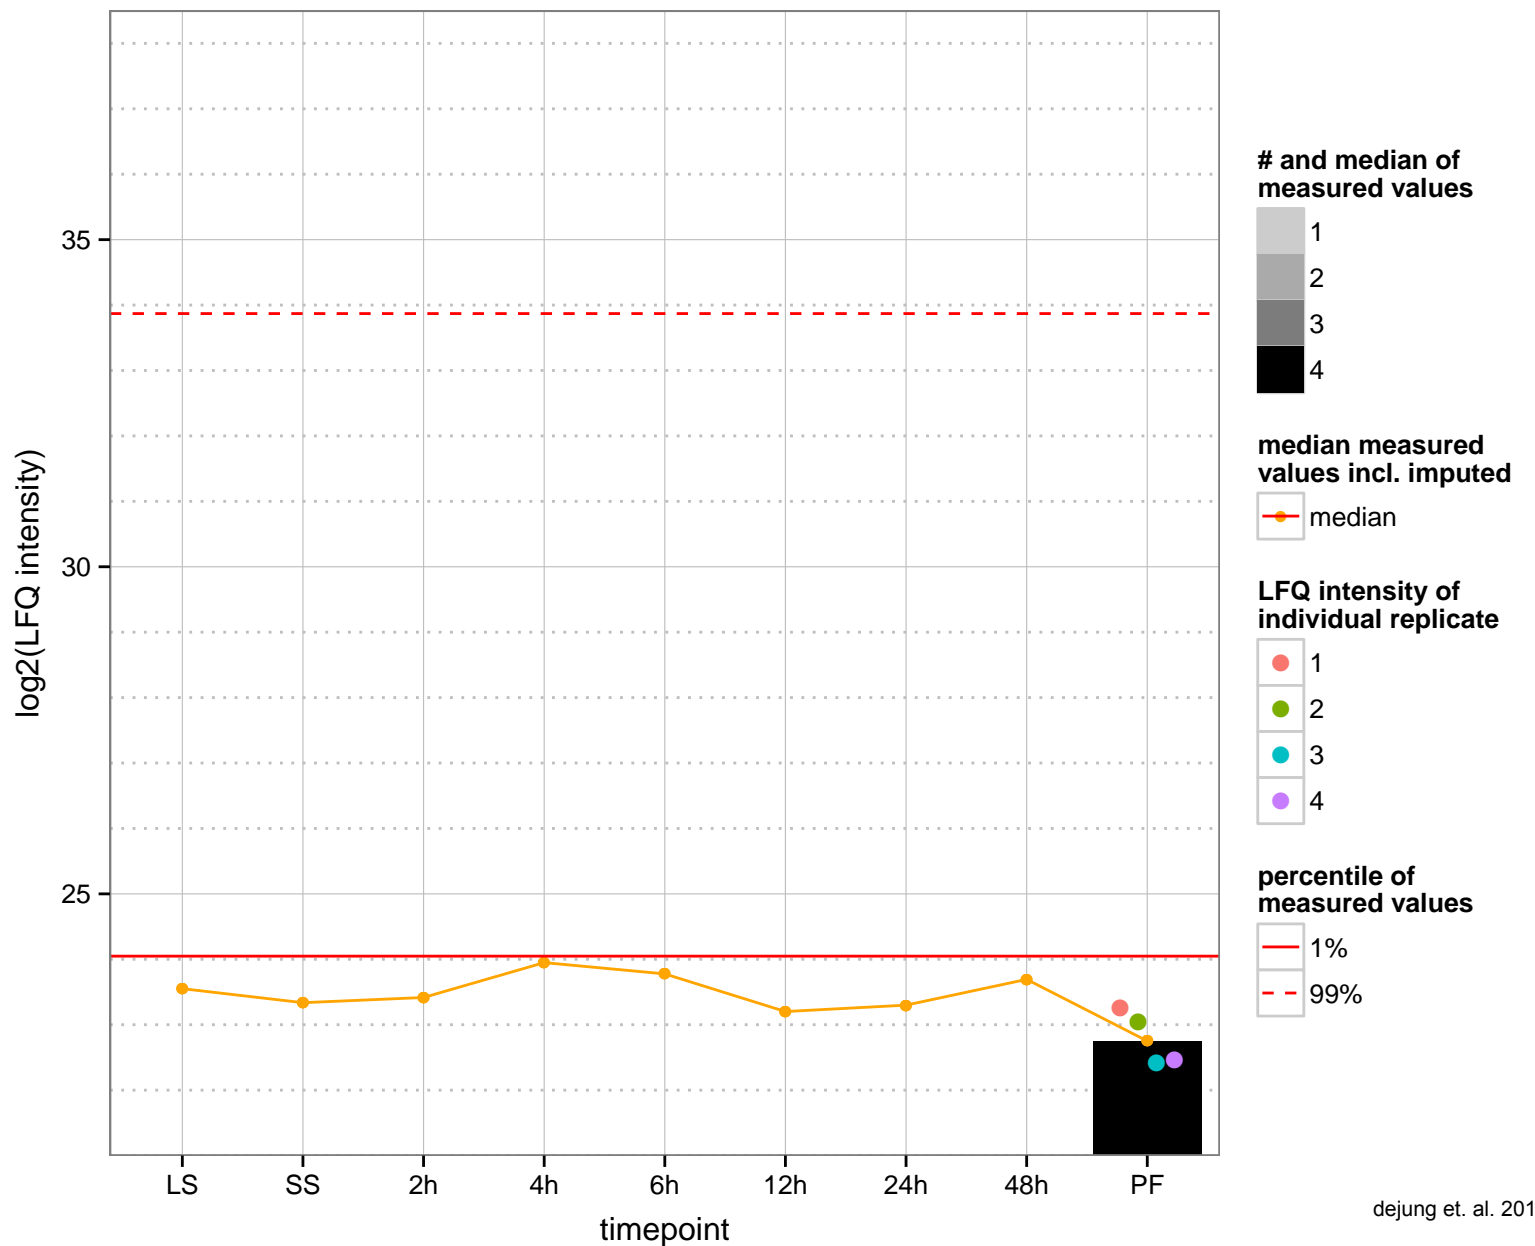

leucine-rich repeat protein (LRRP), putative  
 Tb927.7.7240  
 AGOF: null  
 AGOC: null  
 AGOP: null  
 PGO: null  
 PGOC: null  
 PGOP: null

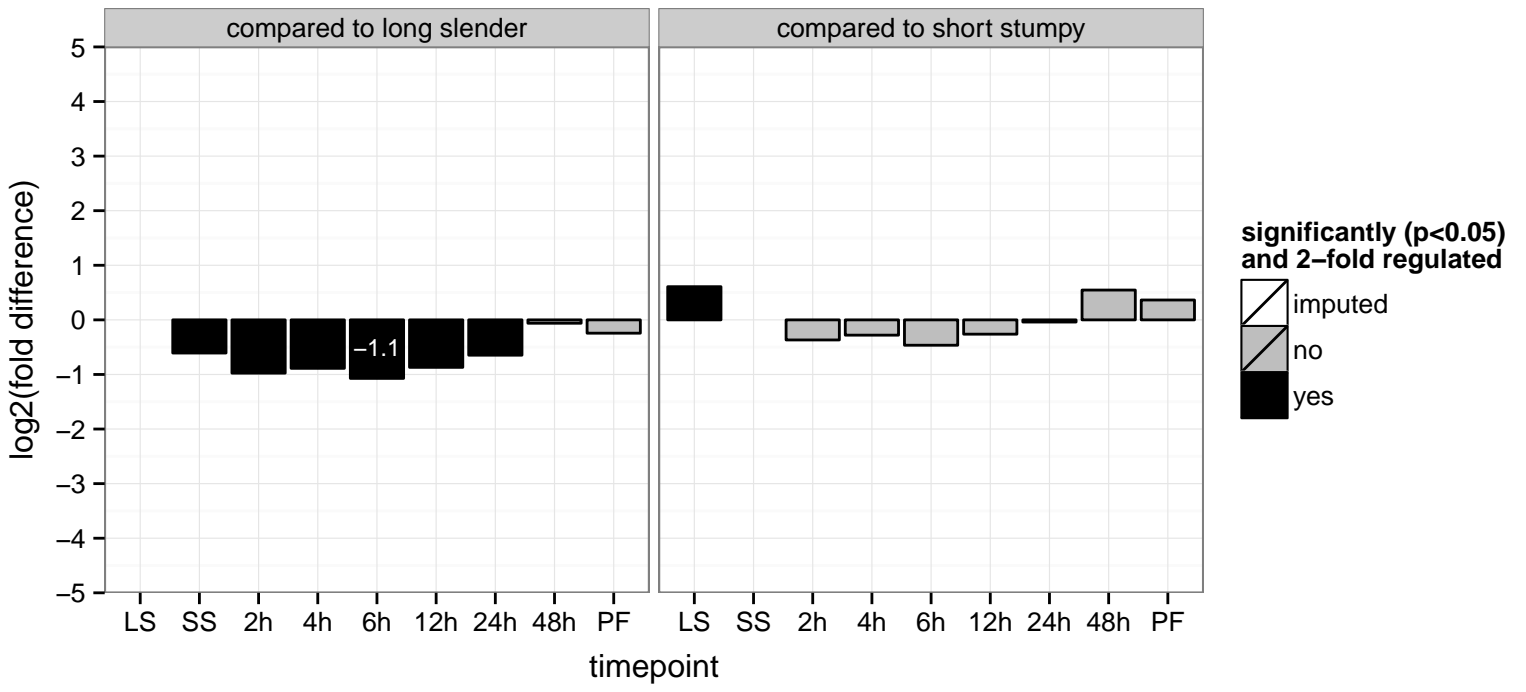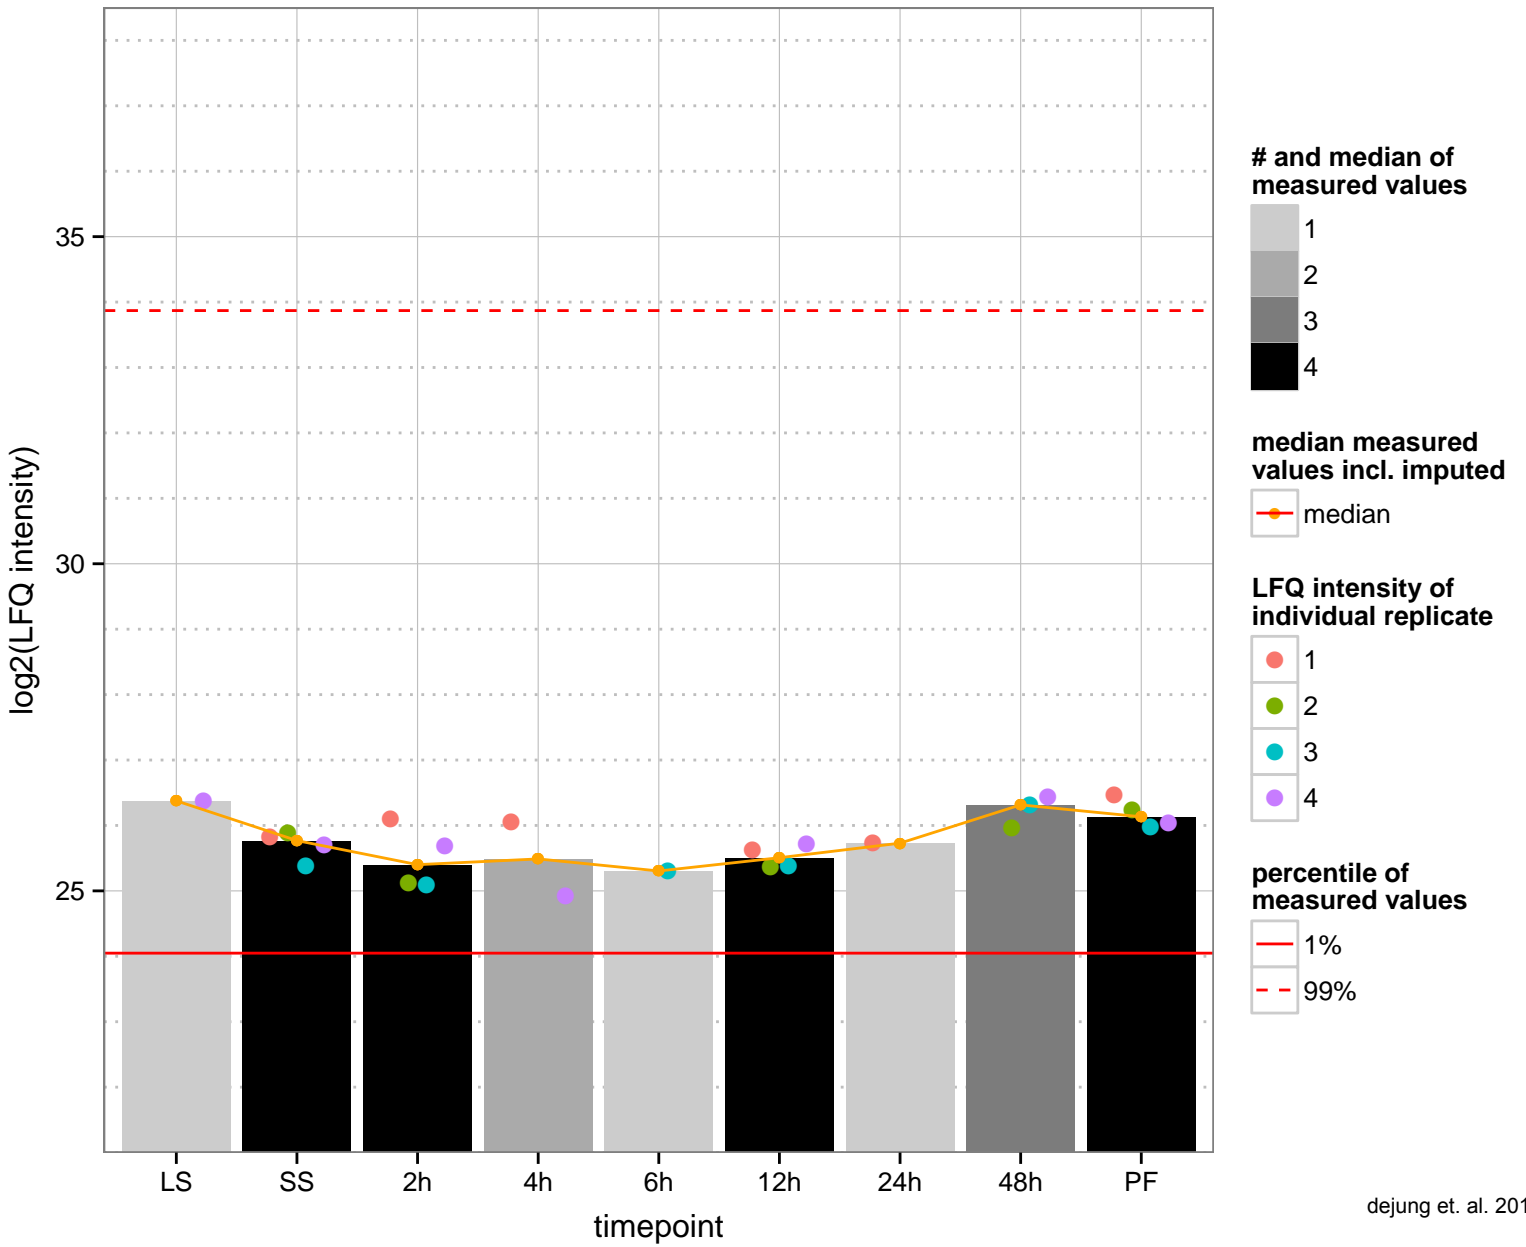

hypothetical protein, conserved  
 Tb927.7.7250  
 AGOF: null  
 AGOC: null  
 AGOP: null  
 PGO: protein binding  
 PGOC: null  
 PGOP: null

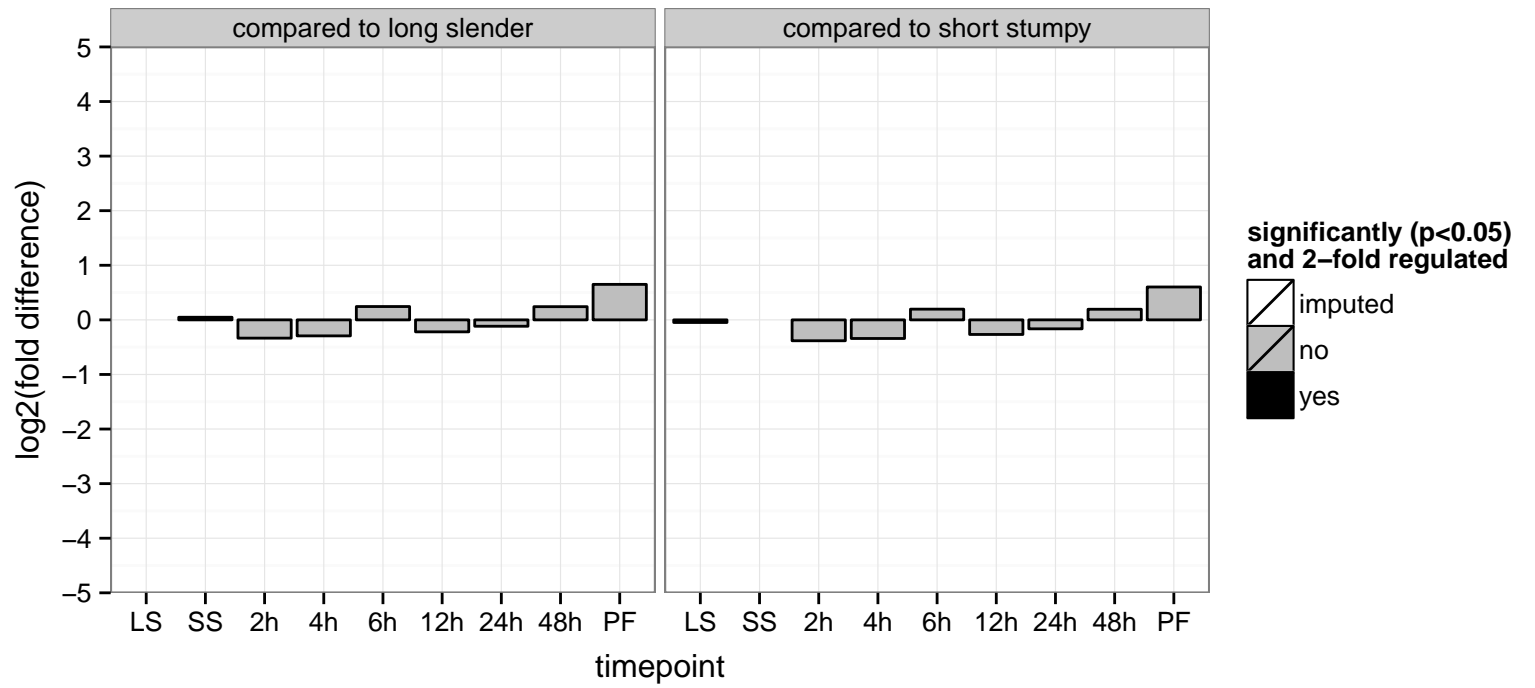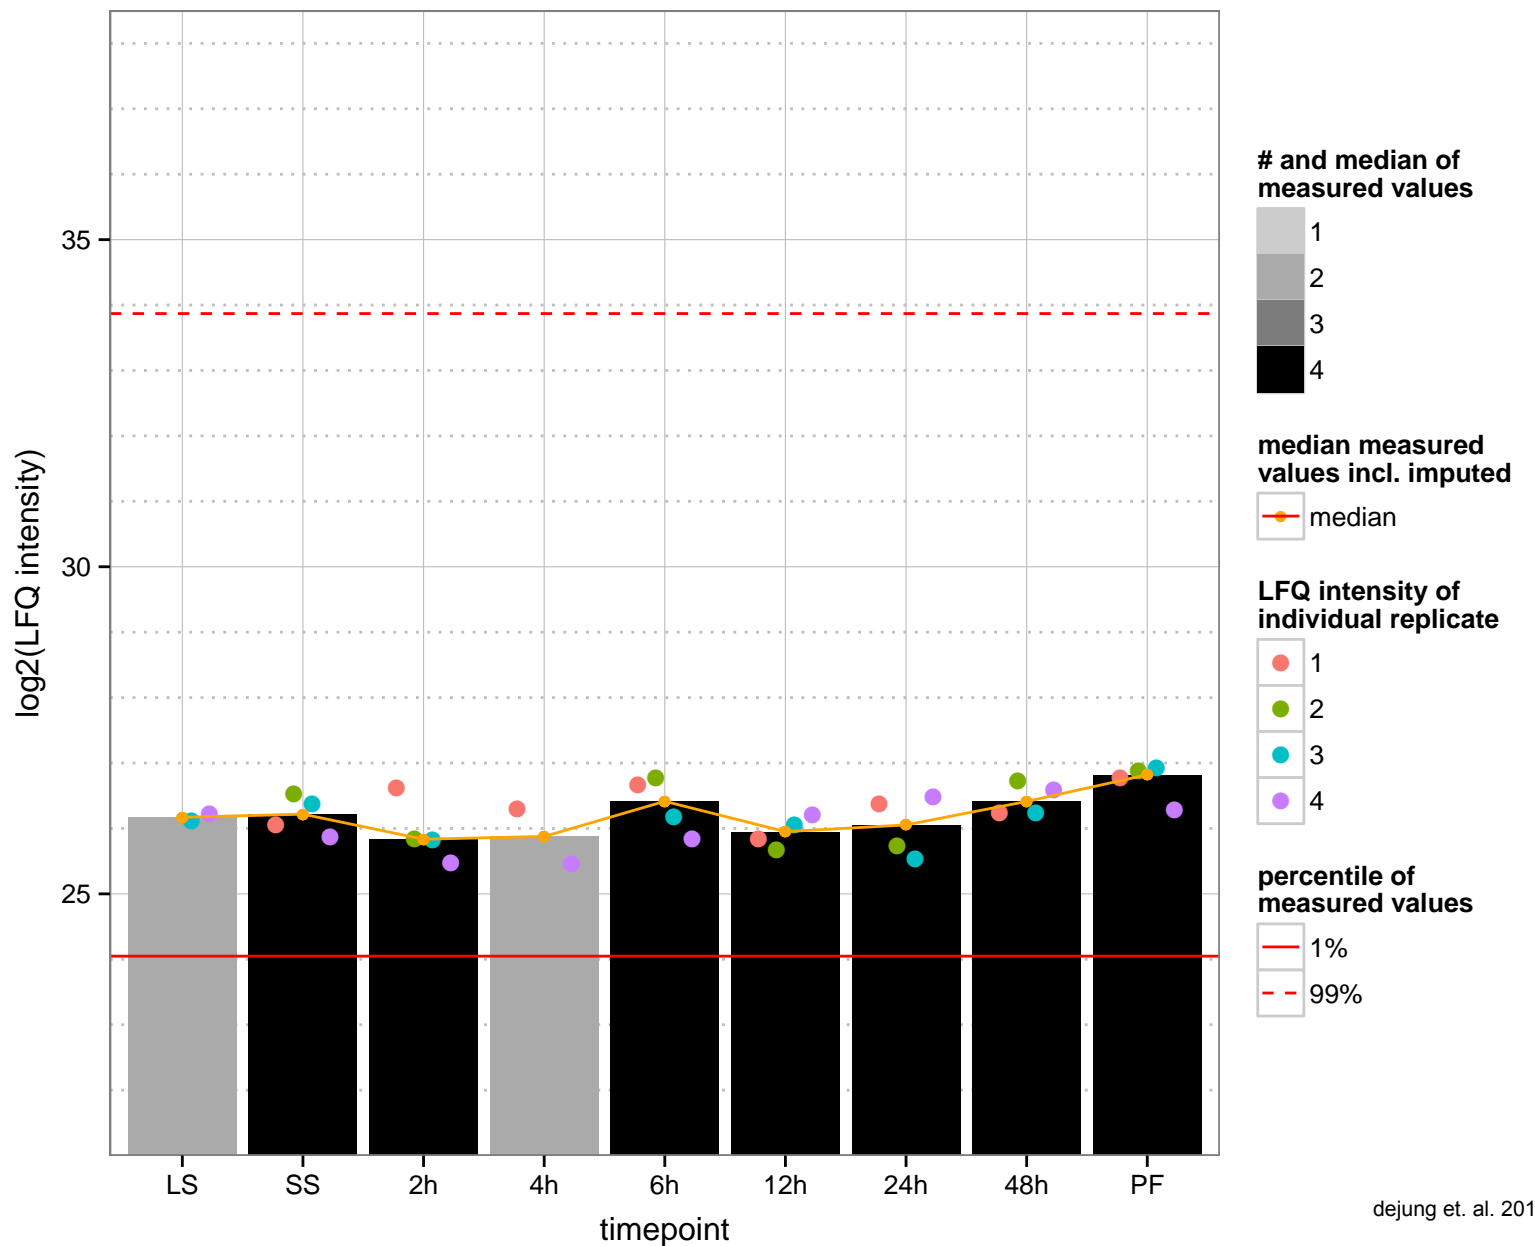

hypothetical protein, conserved  
 Tb927.7.7290  
 AGOF: null  
 AGOC: null  
 AGOP: null  
 PGOF: null  
 PGOE: null  
 PGOP: null

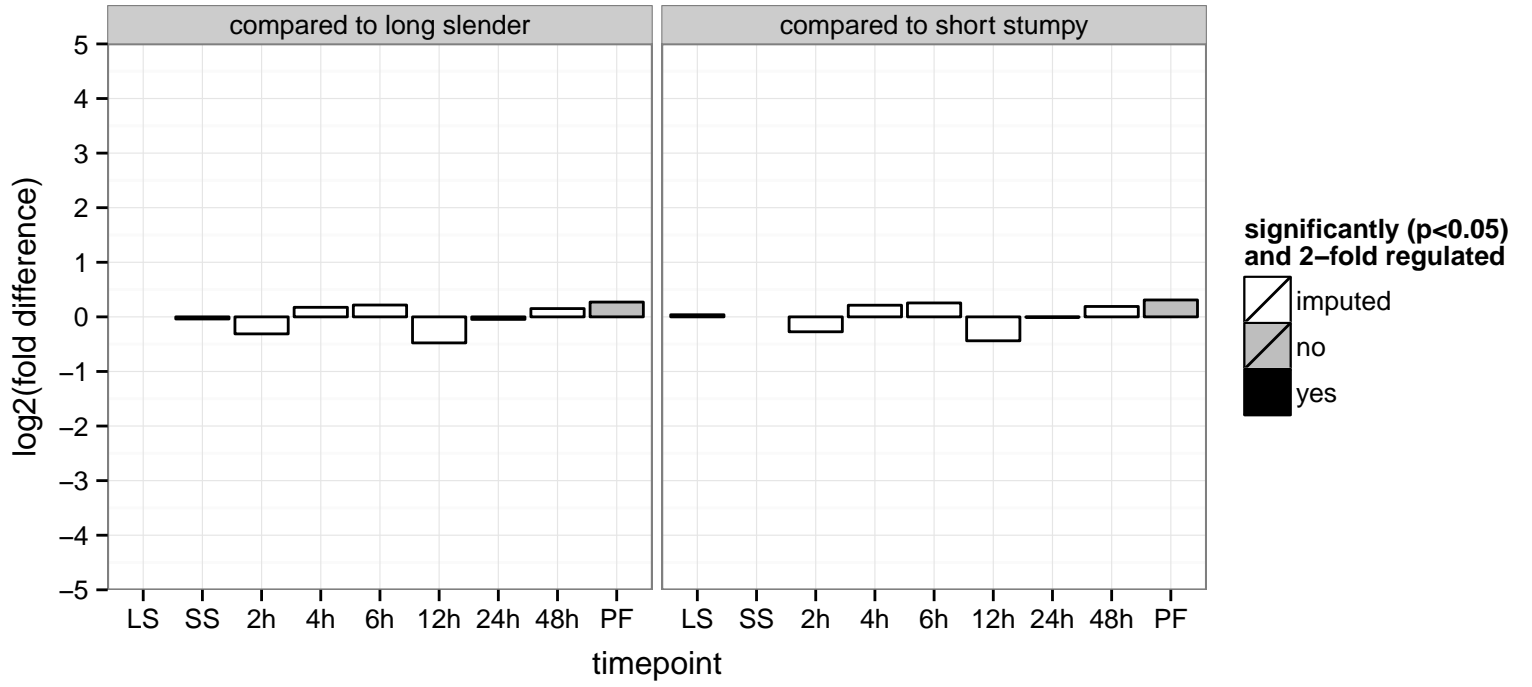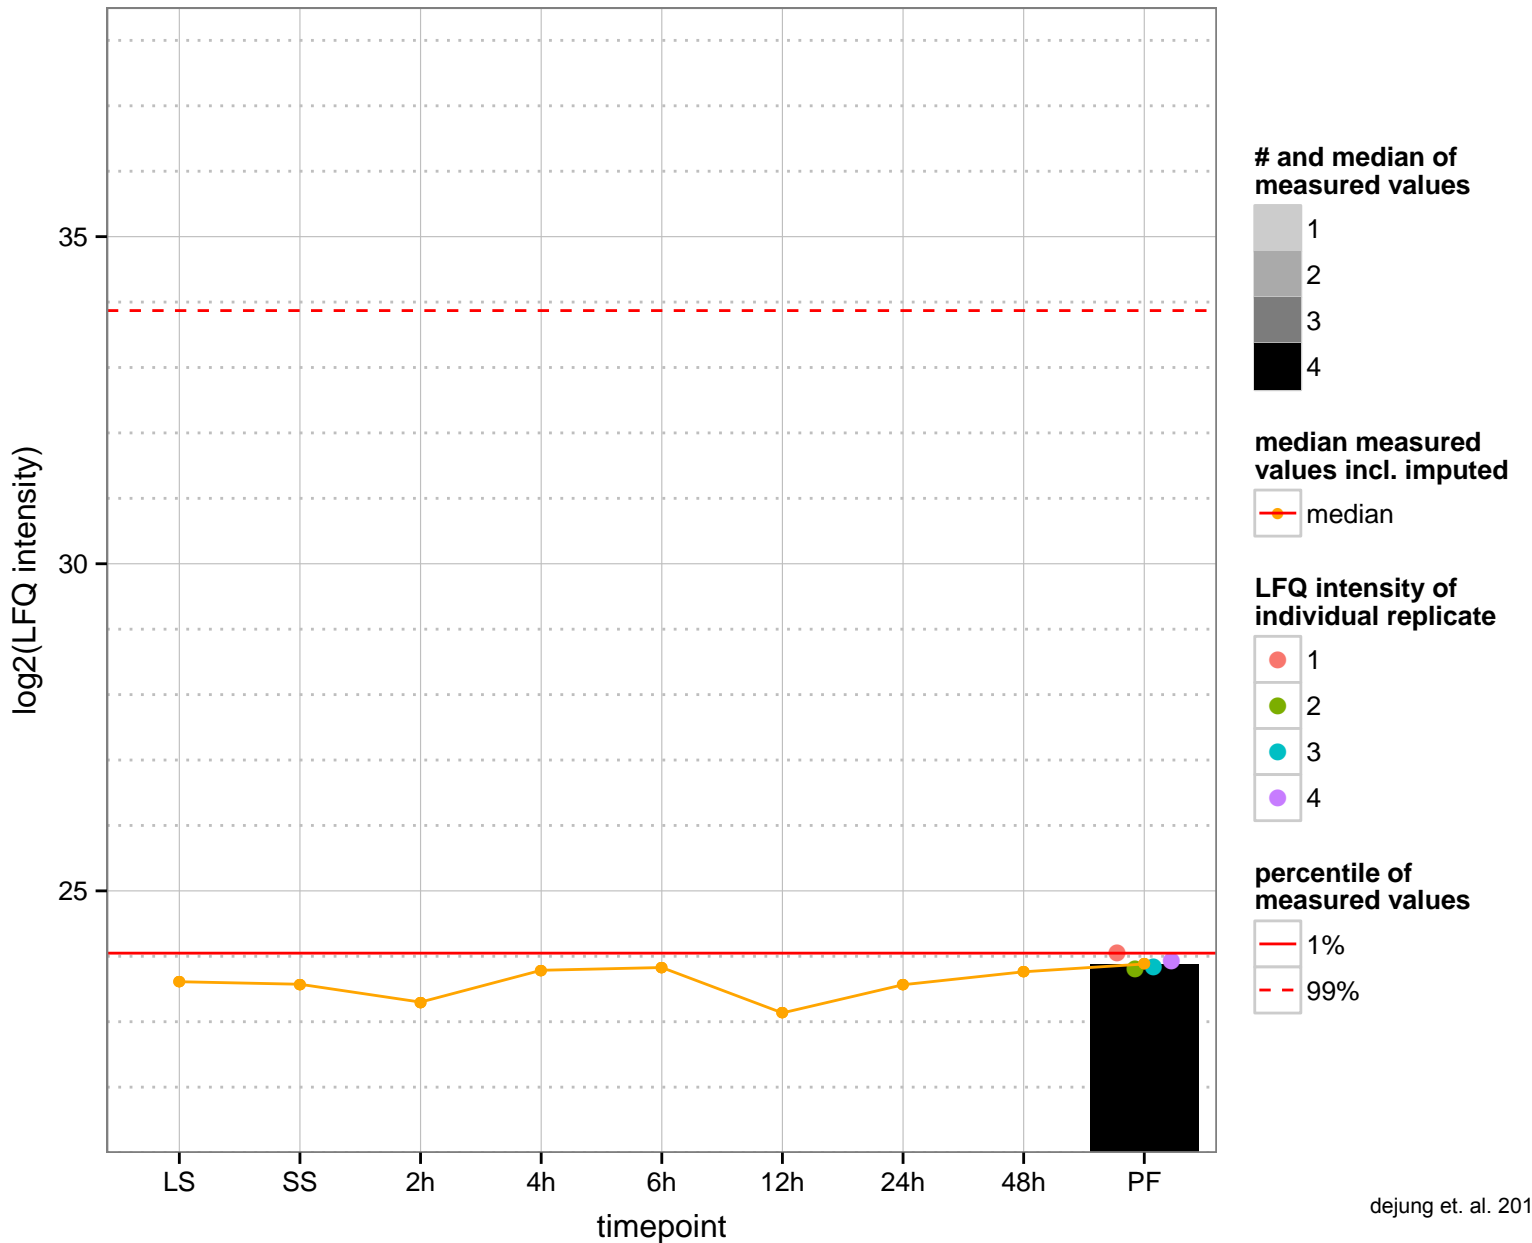

ATP-dependent DEAD/H RNA helicase, putative

Tb927.7.7300

AGOF: ATP binding, ATP-dependent helicase activity, helicase activity, nucleic acid binding

AGOC: null

AGOP: nucleobase-containing compound metabolic process

PGOF: ATP binding, ATP-dependent helicase activity, helicase activity, nucleic acid binding

PGOC: null

PGOP: null

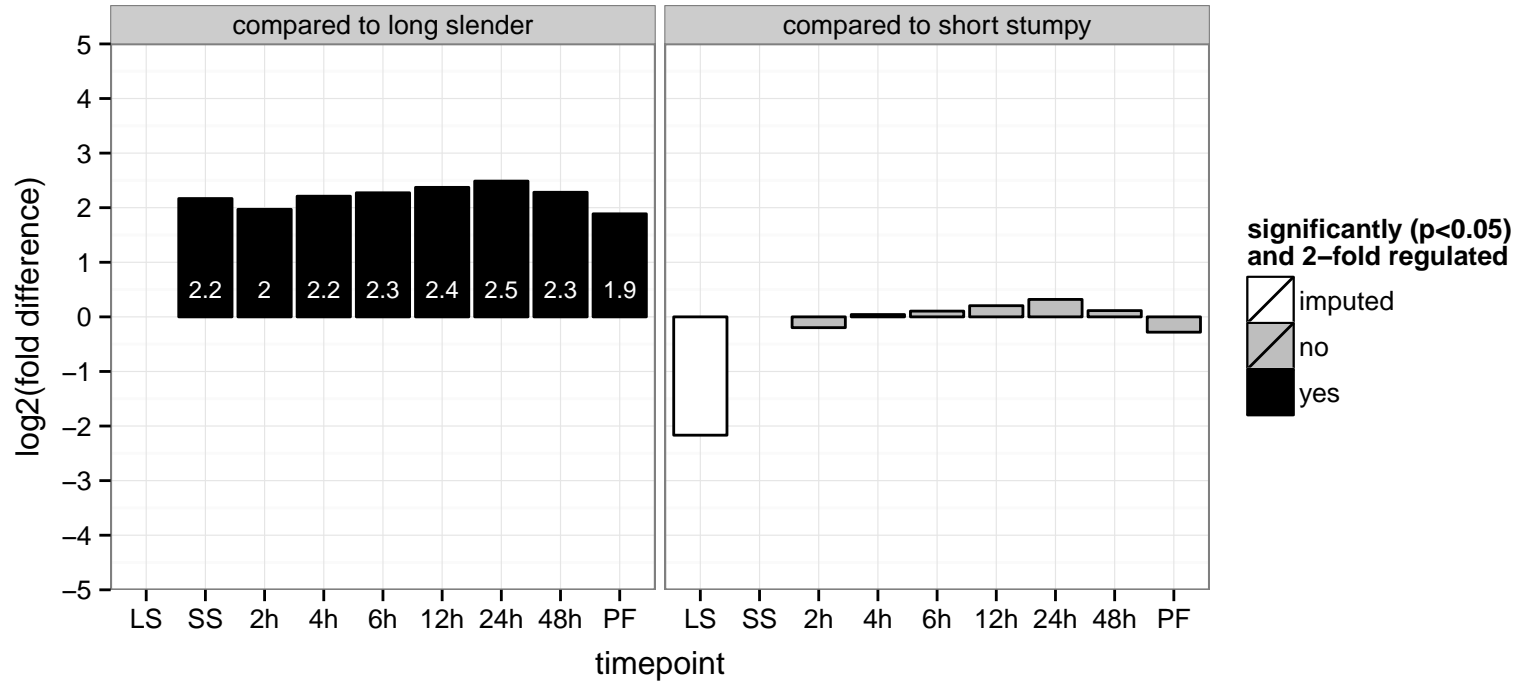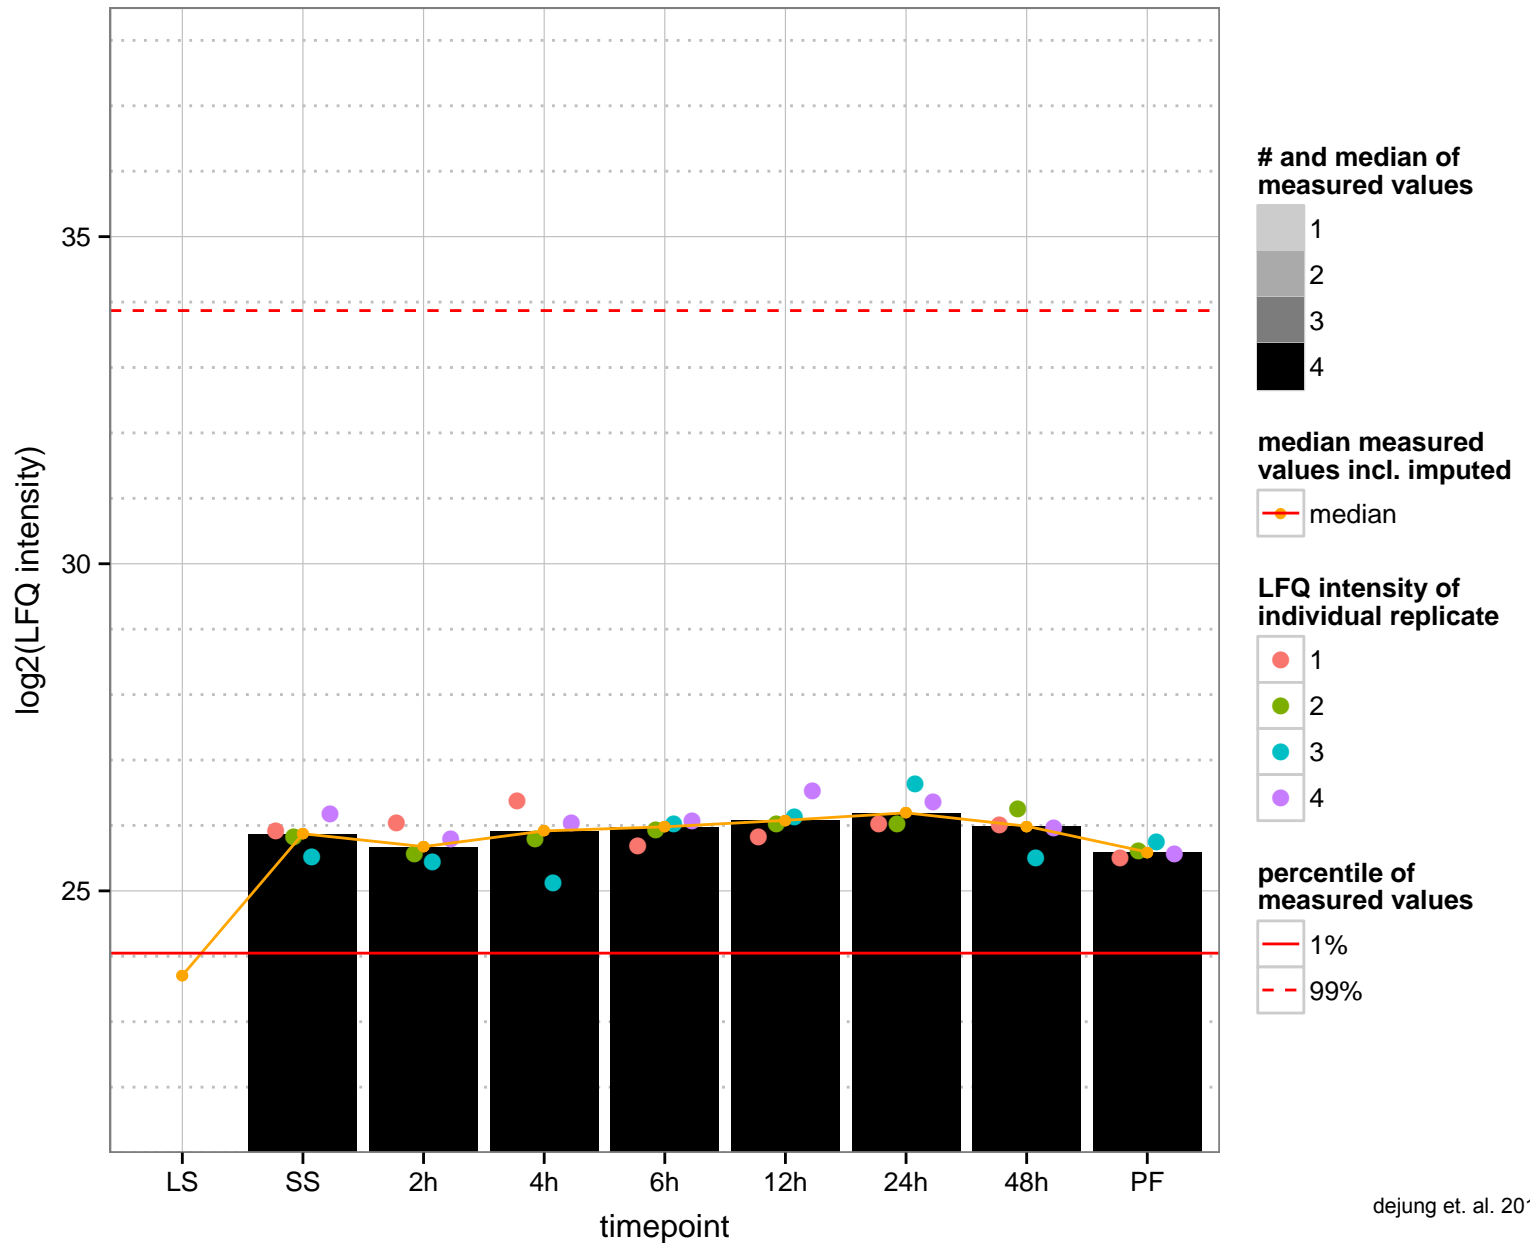

hypothetical protein, conserved  
 Tb927.7.7320  
 AGOF: null  
 AGOC: null  
 AGOP: null  
 PGO: null  
 PGOC: null  
 PGOP: null

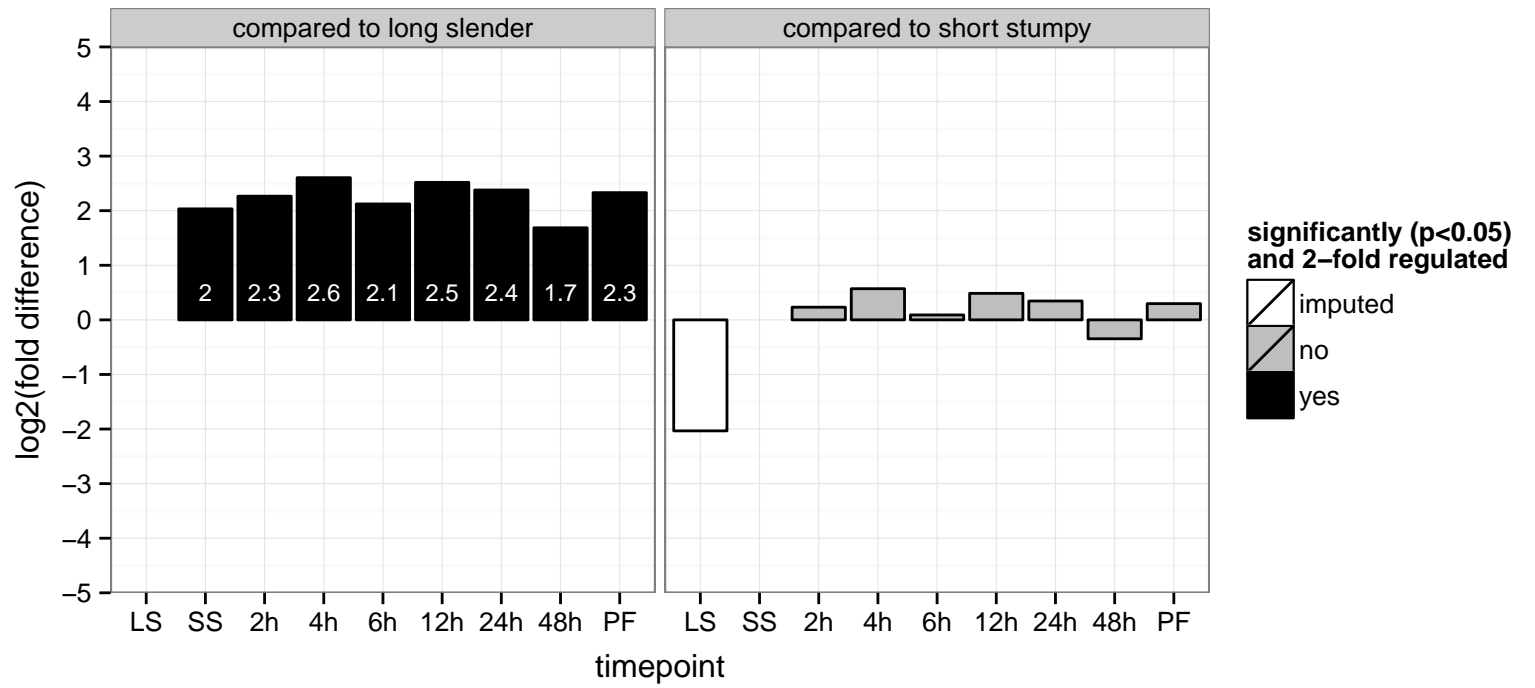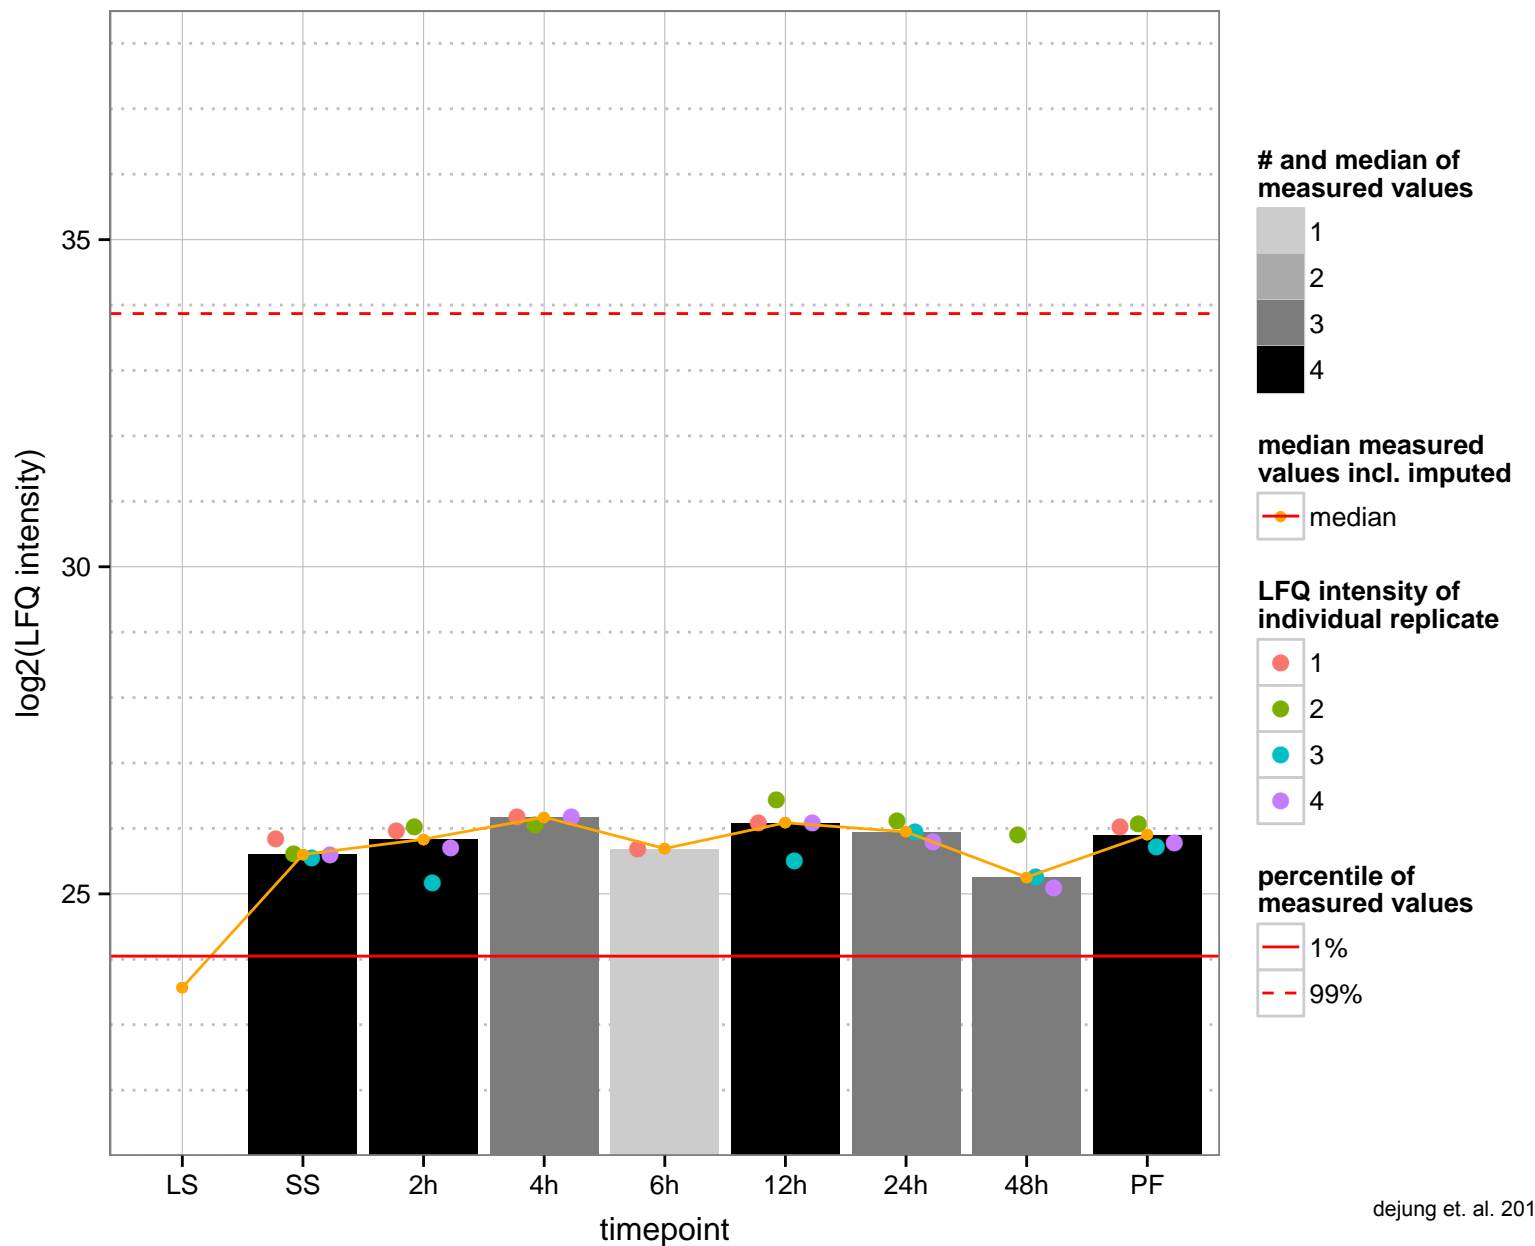



hypothetical protein, conserved  
 Tb927.7.7330  
 AGOF: null  
 AGOC: mitochondrion  
 AGOP: null  
 PGO: null  
 PGO: null  
 PGO: null

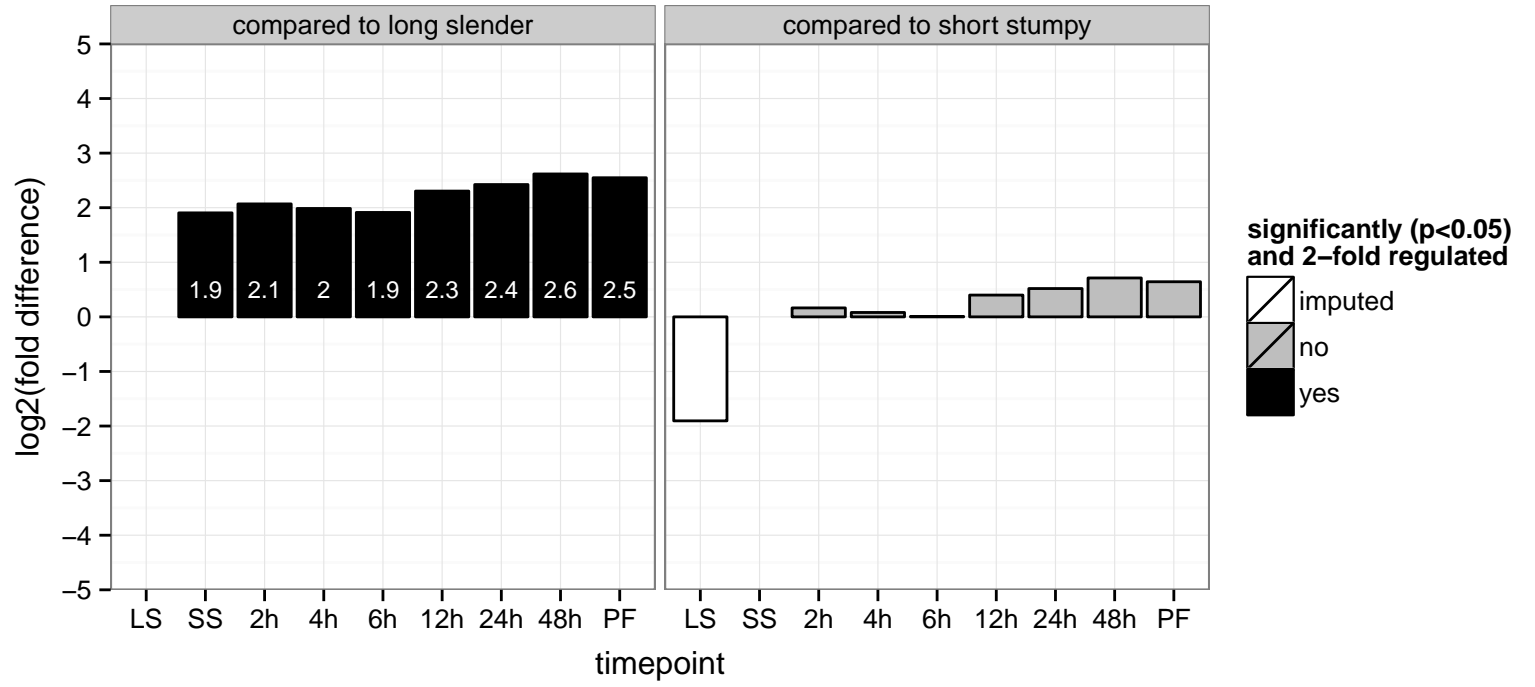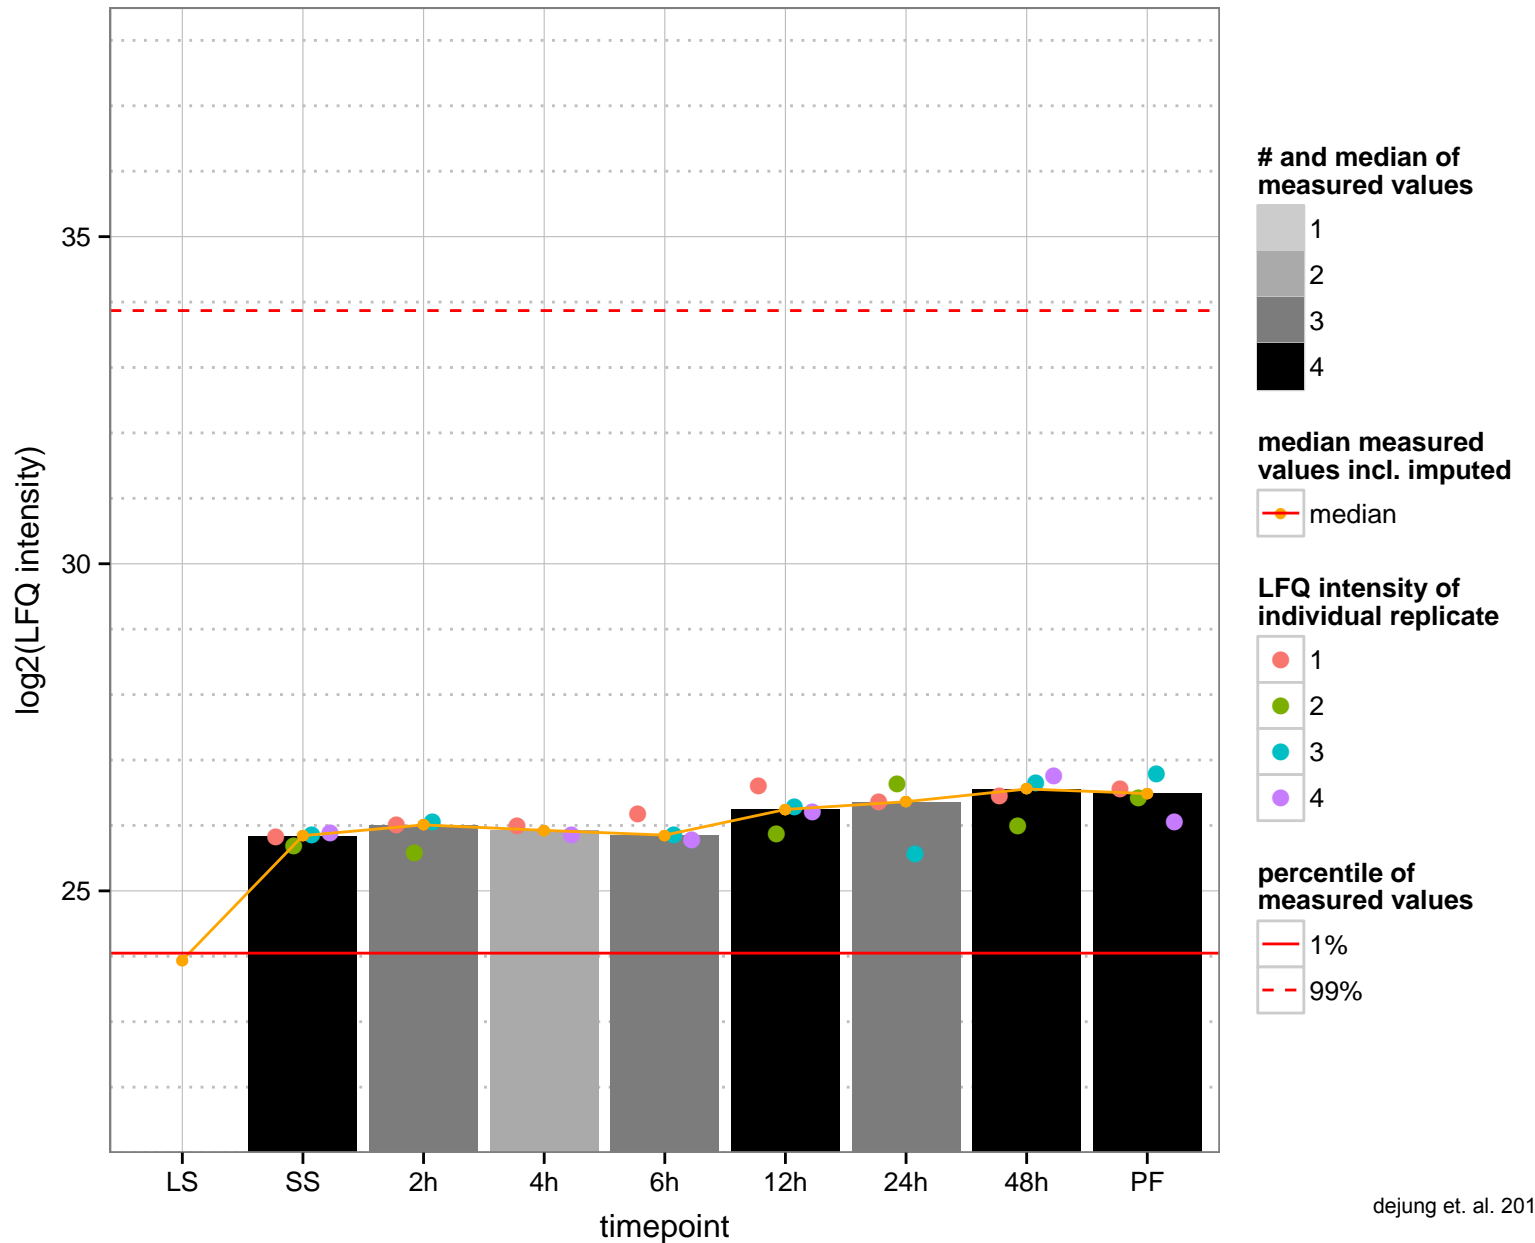

chaperone protein DNAj, putative  
 Tb927.7.740  
 AGOF: heat shock protein binding, unfolded protein binding  
 AGOC: integral to membrane, mitochondrion  
 AGOP: protein folding  
 PGOF: heat shock protein binding  
 PGO: null  
 PGOP: null

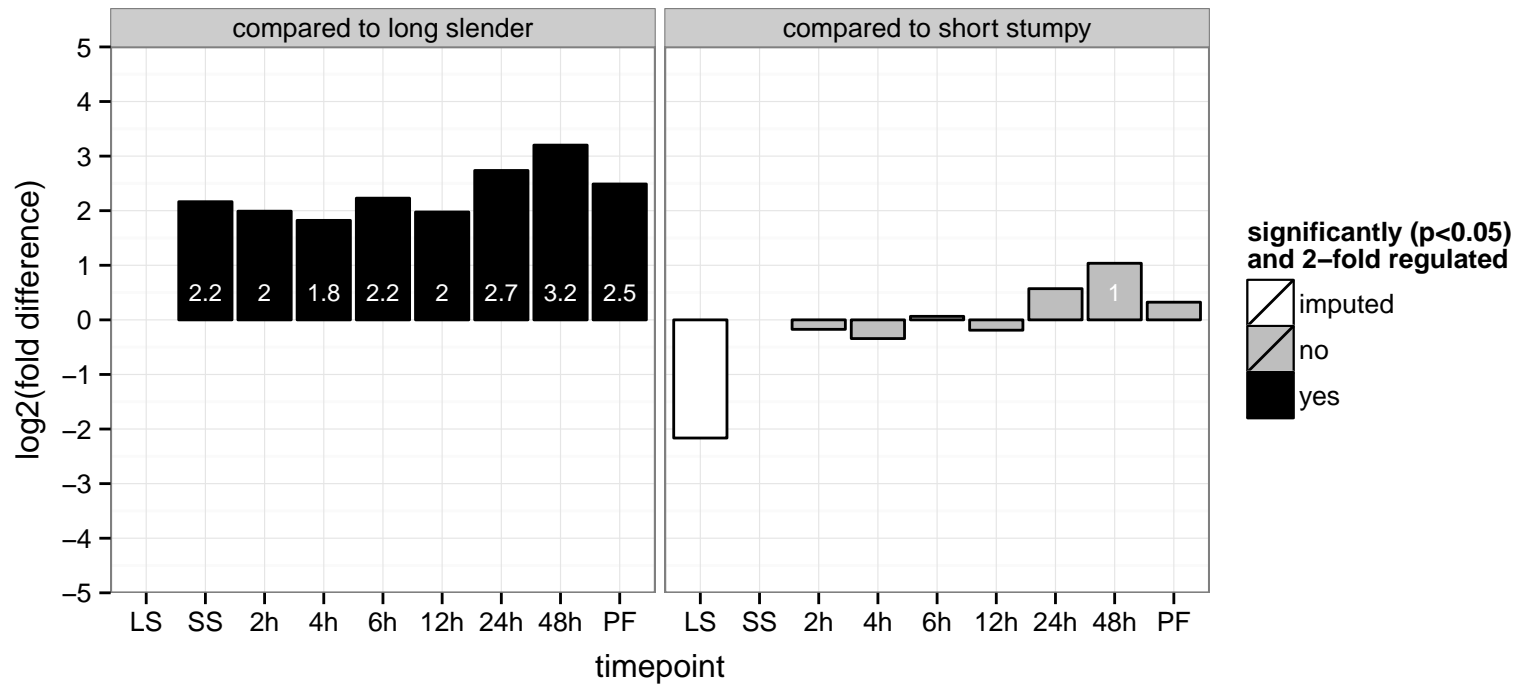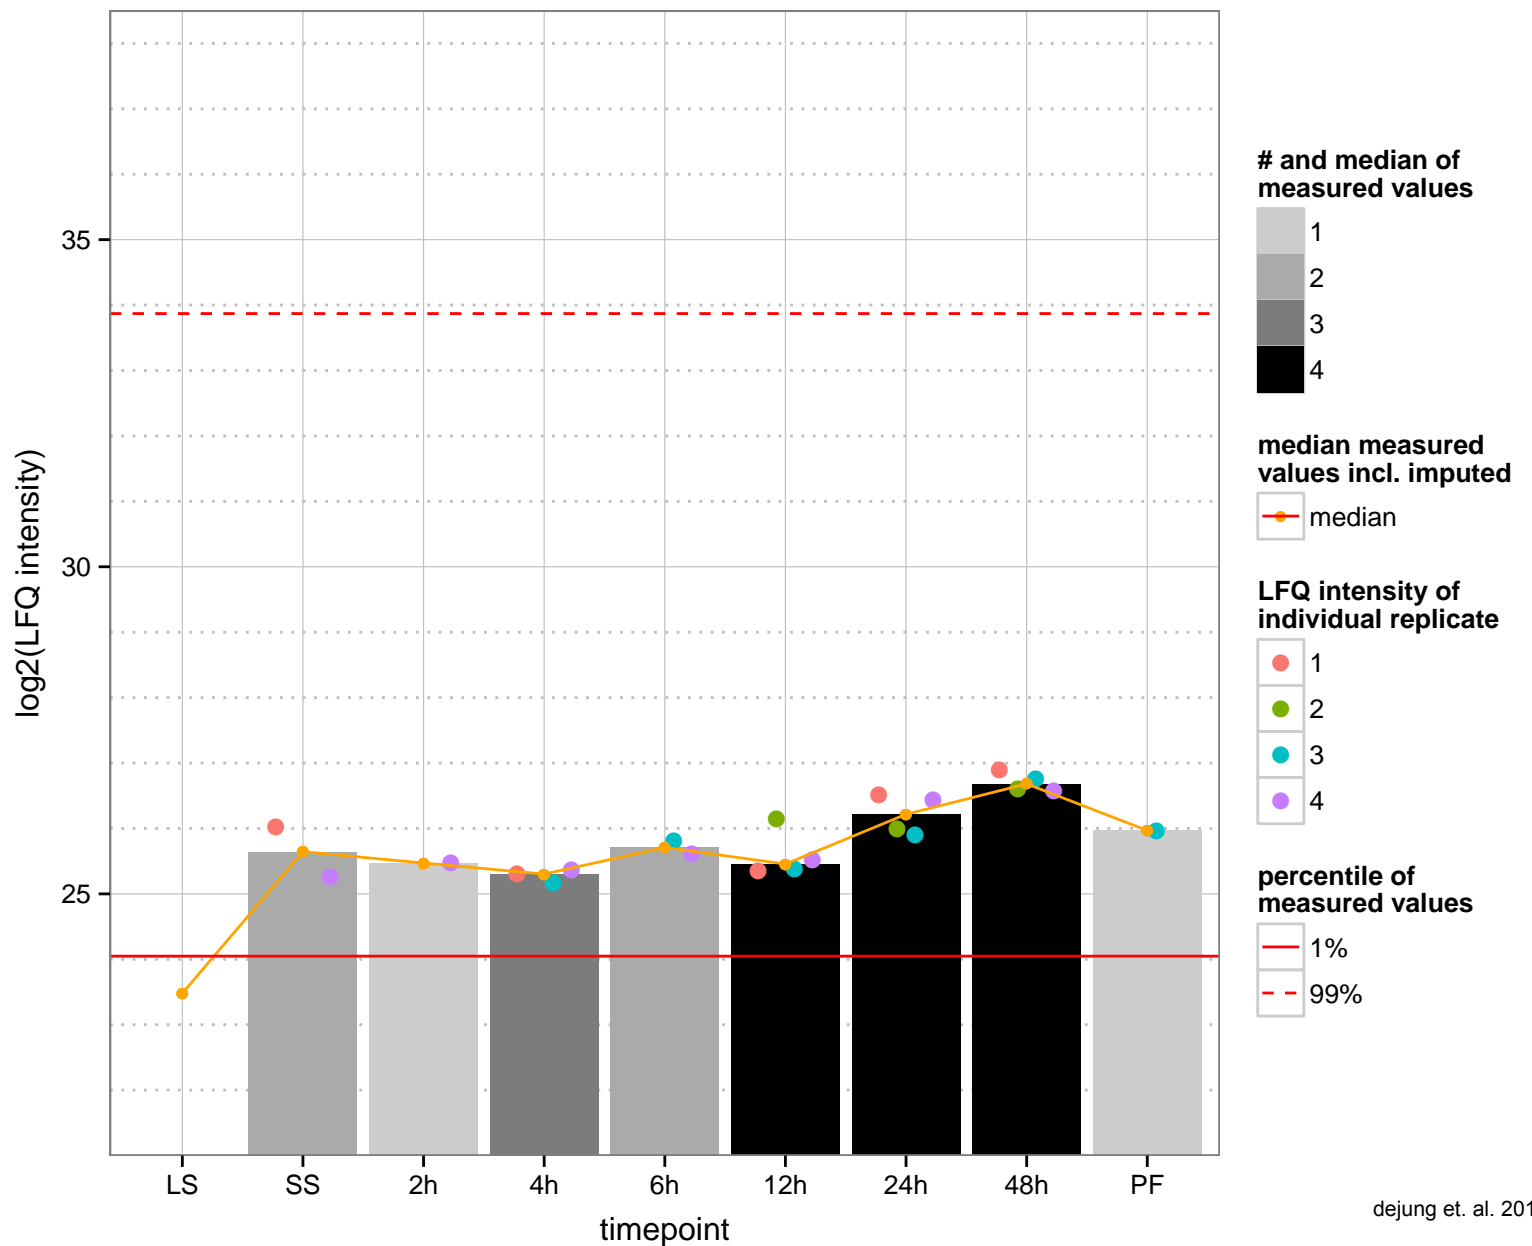

oxidoreductase, putative  
 Tb927.7.7410  
 AGOF: oxidoreductase activity, zinc ion binding  
 AGOC: mitochondrion  
 AGOP: metabolic process, oxidation–reduction process  
 PGO: null  
 PGOC: null  
 PGOP: null

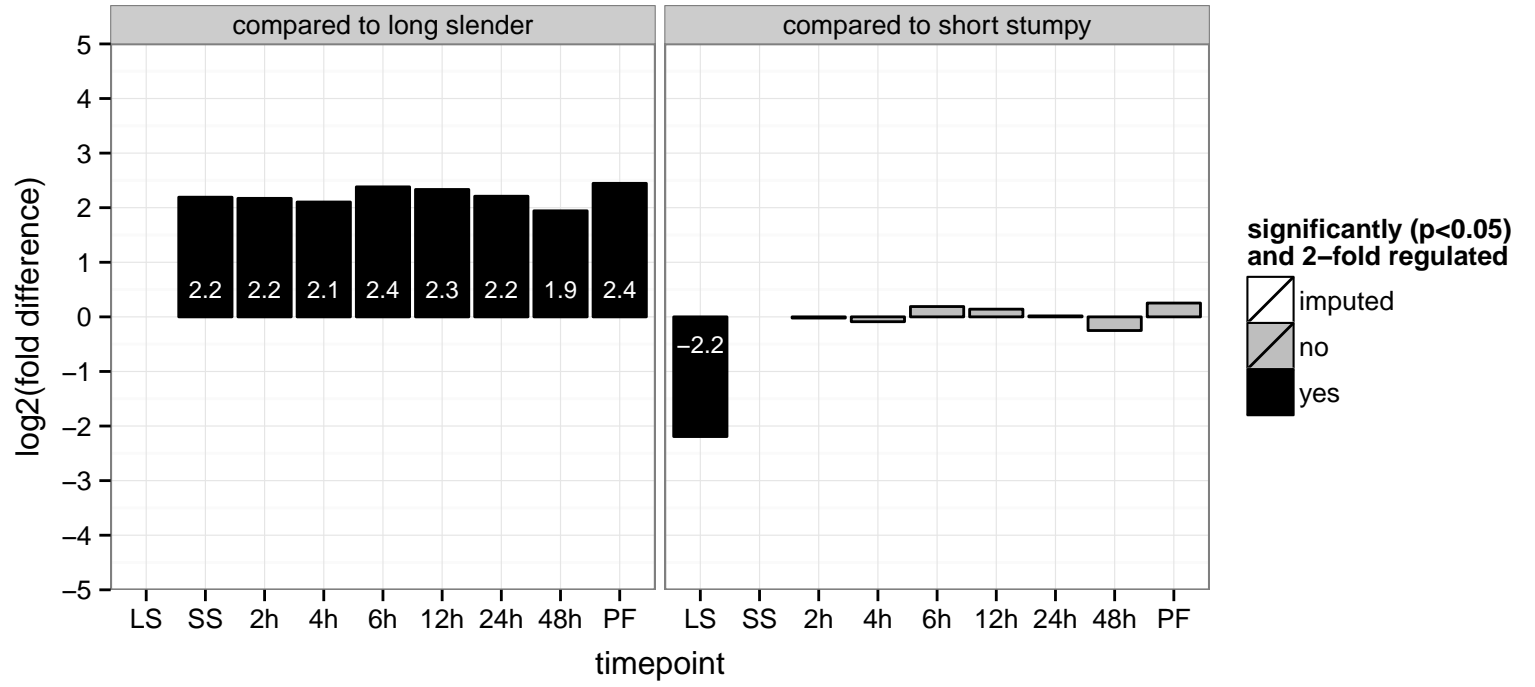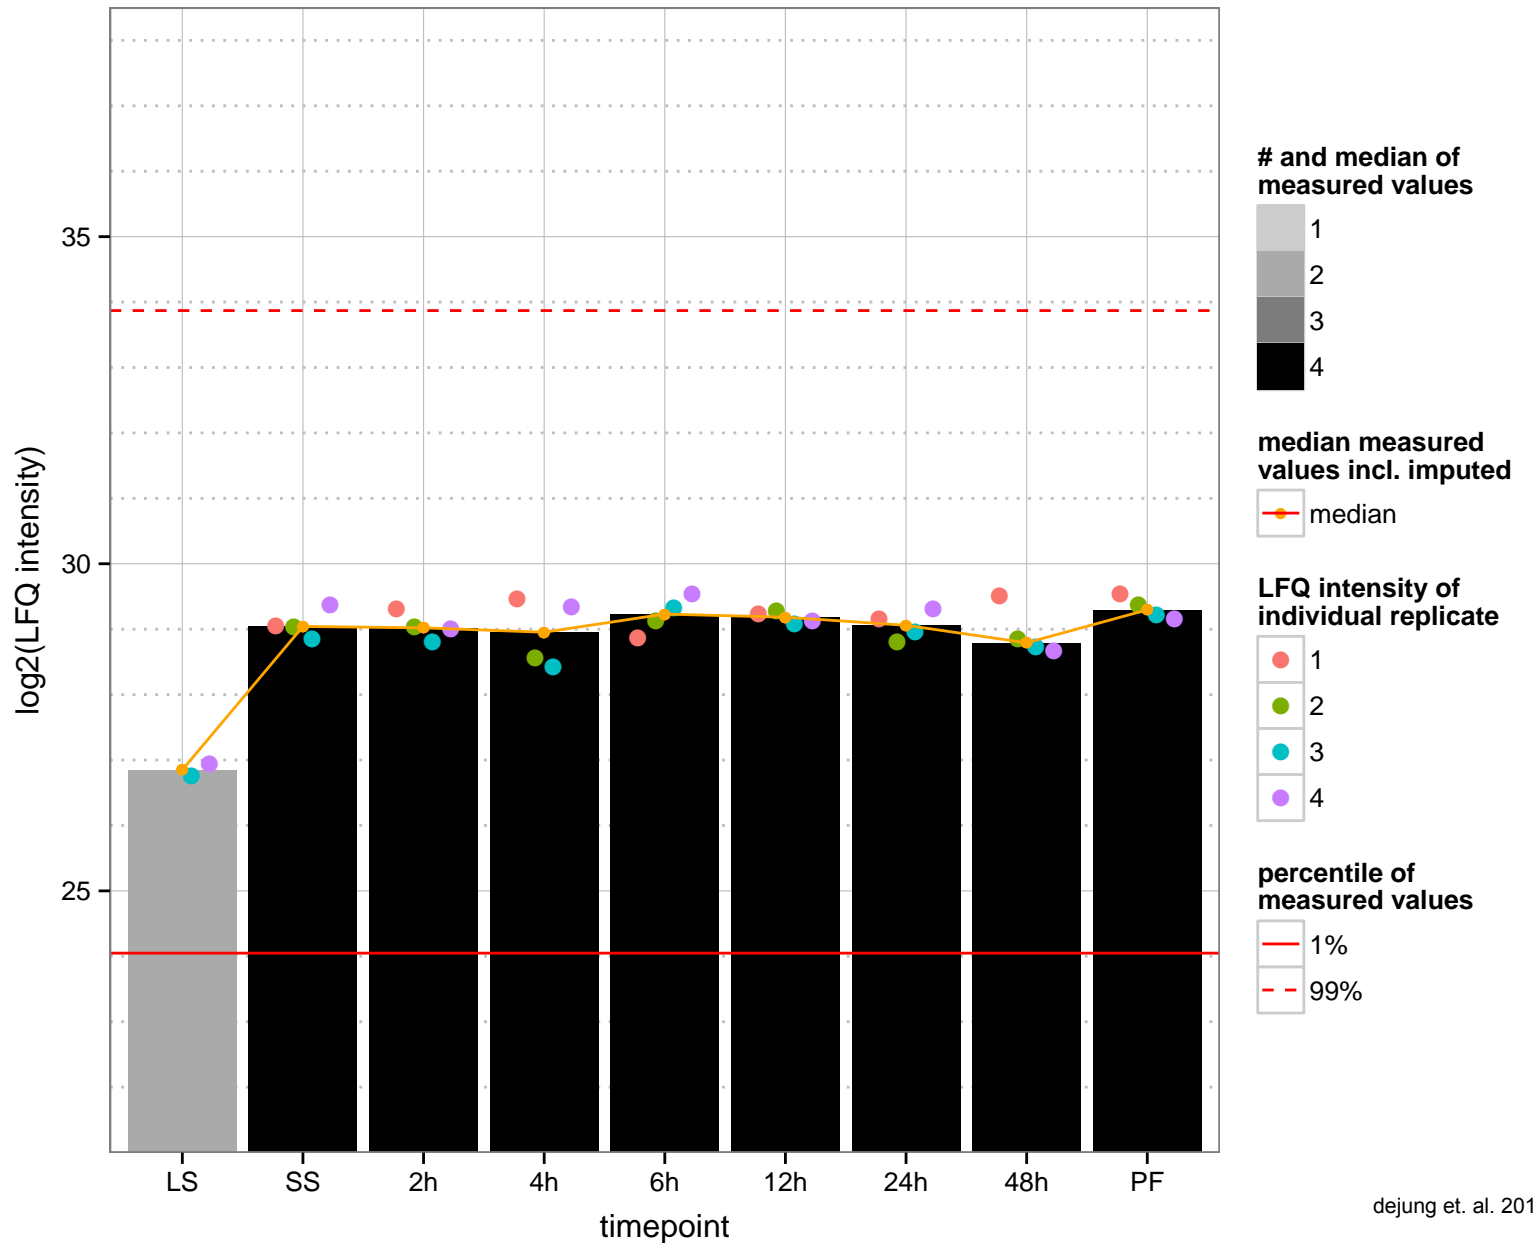

GTP-binding protein, putative  
 Tb927.7.7450  
 AGOF: GTP binding  
 AGOC: intracellular  
 AGOP: null  
 PGOF: GTP binding  
 PGO: null  
 PGOP: null

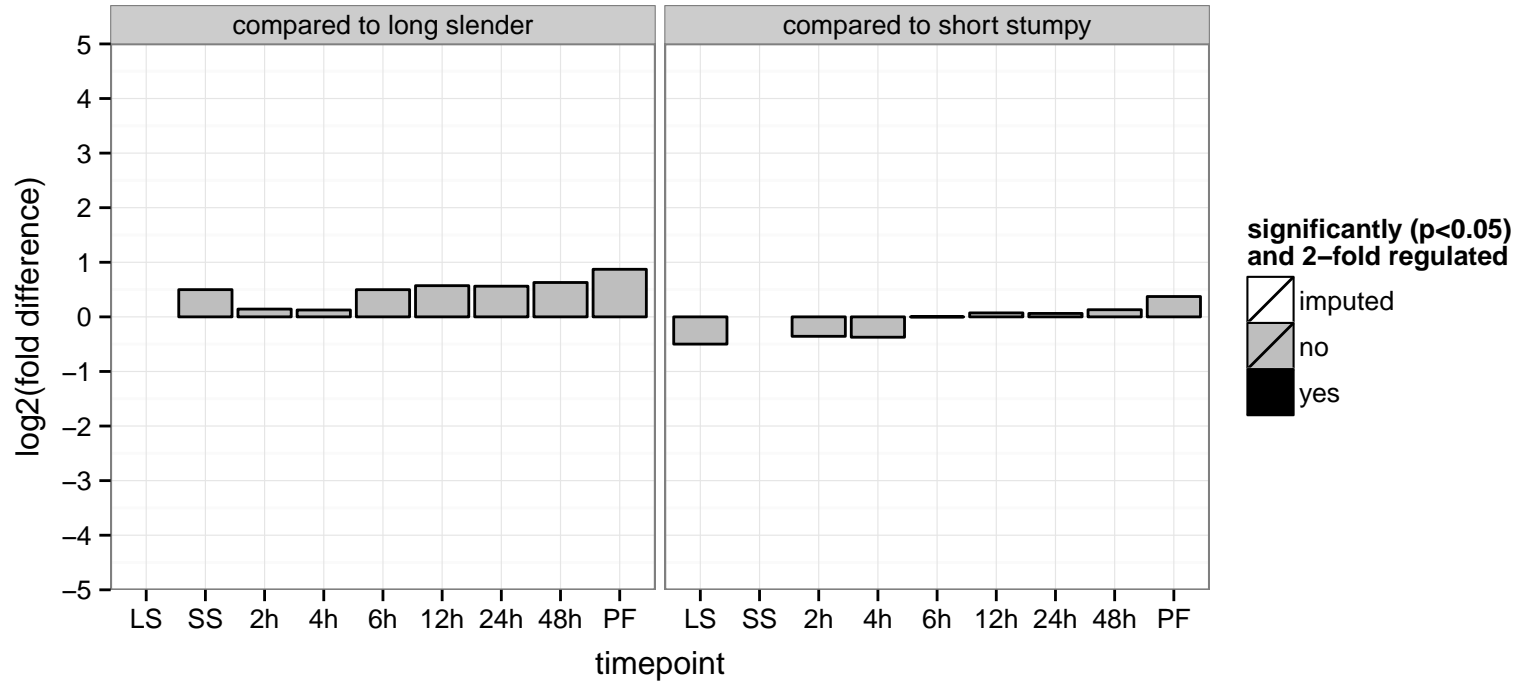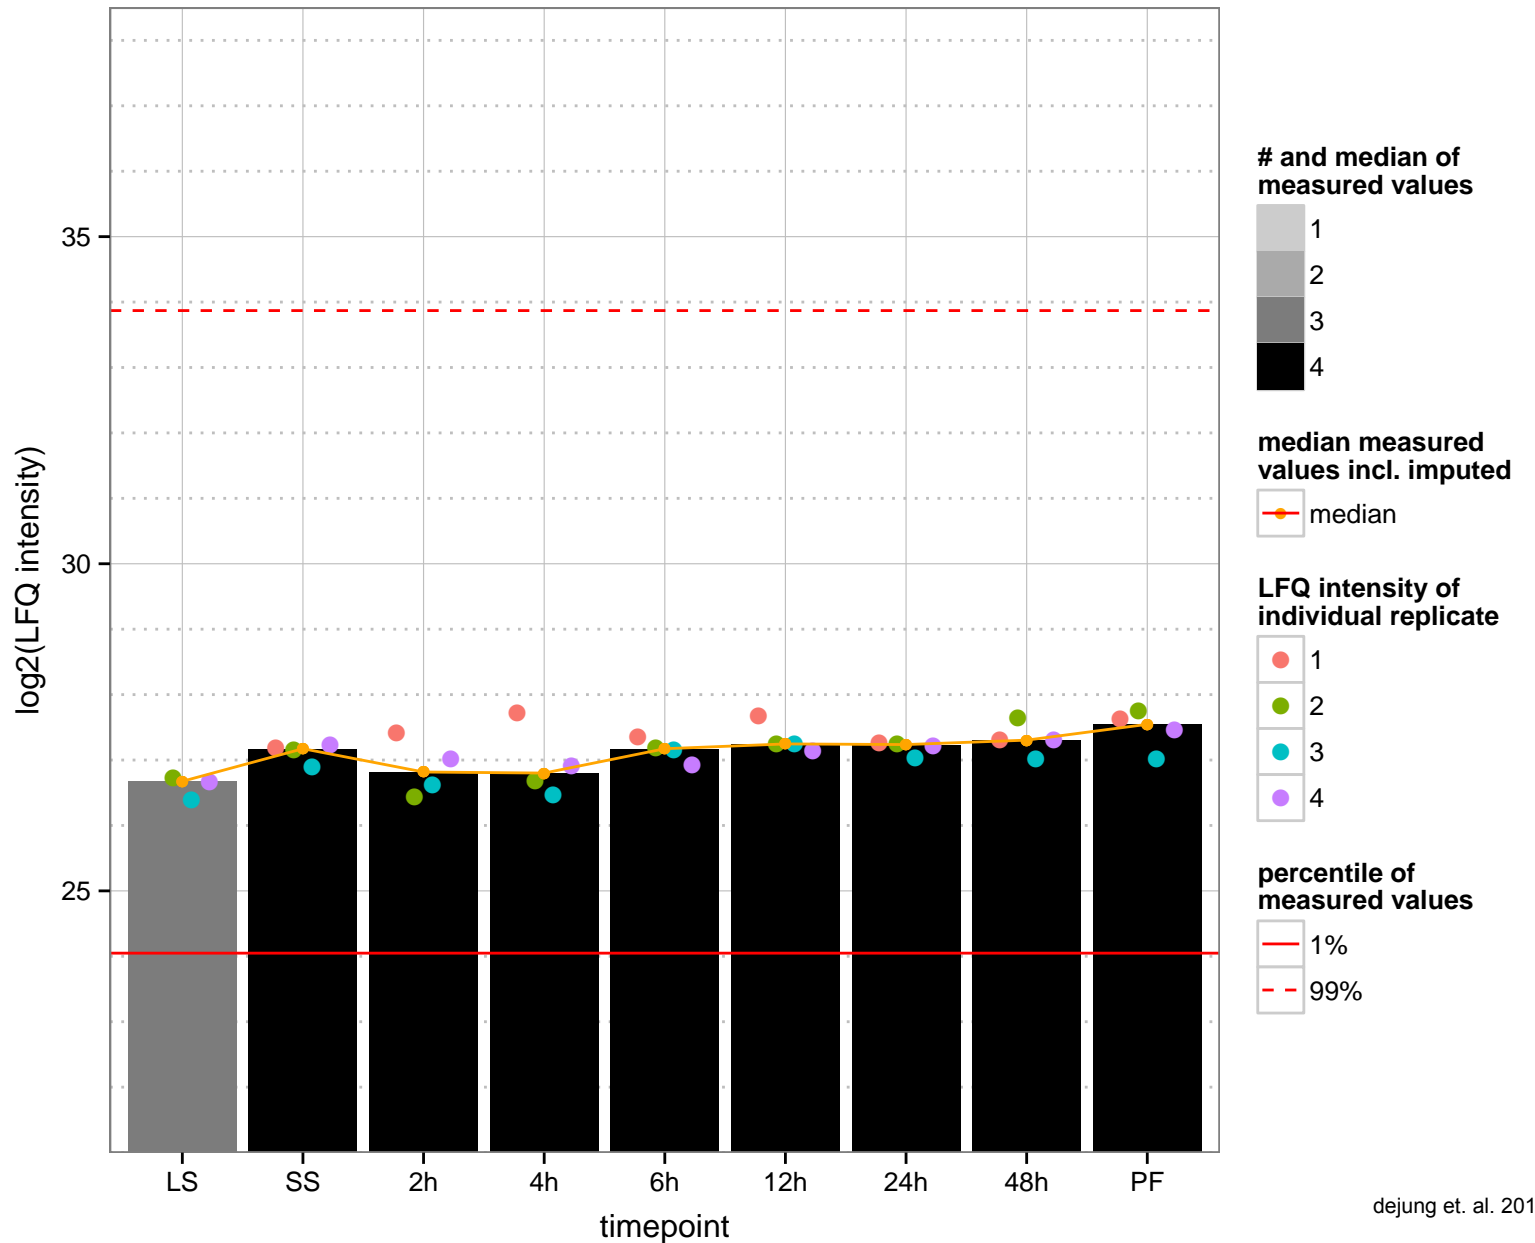

hypothetical protein, conserved  
 Tb927.7.760  
 AGOF: null  
 AGOC: null  
 AGOP: null  
 PGO: null  
 PGOC: null  
 PGOP: null

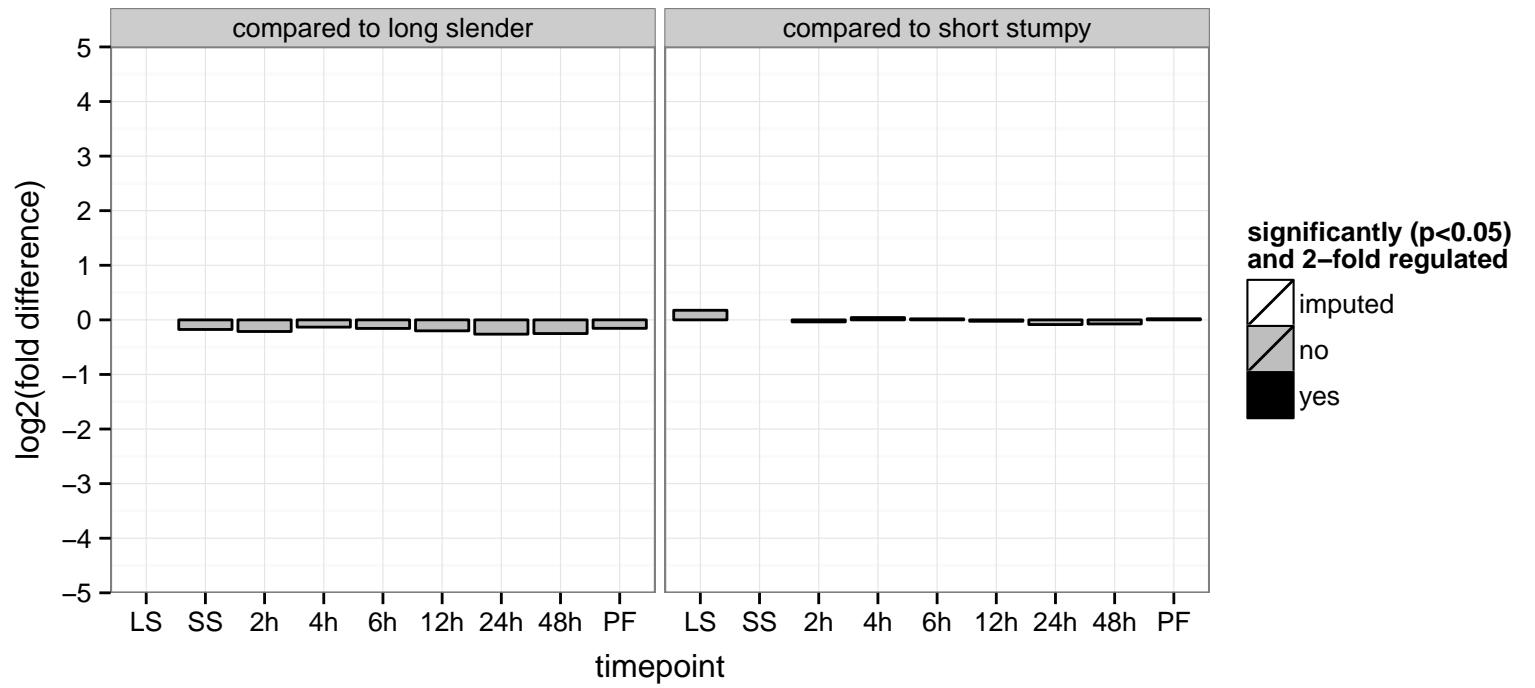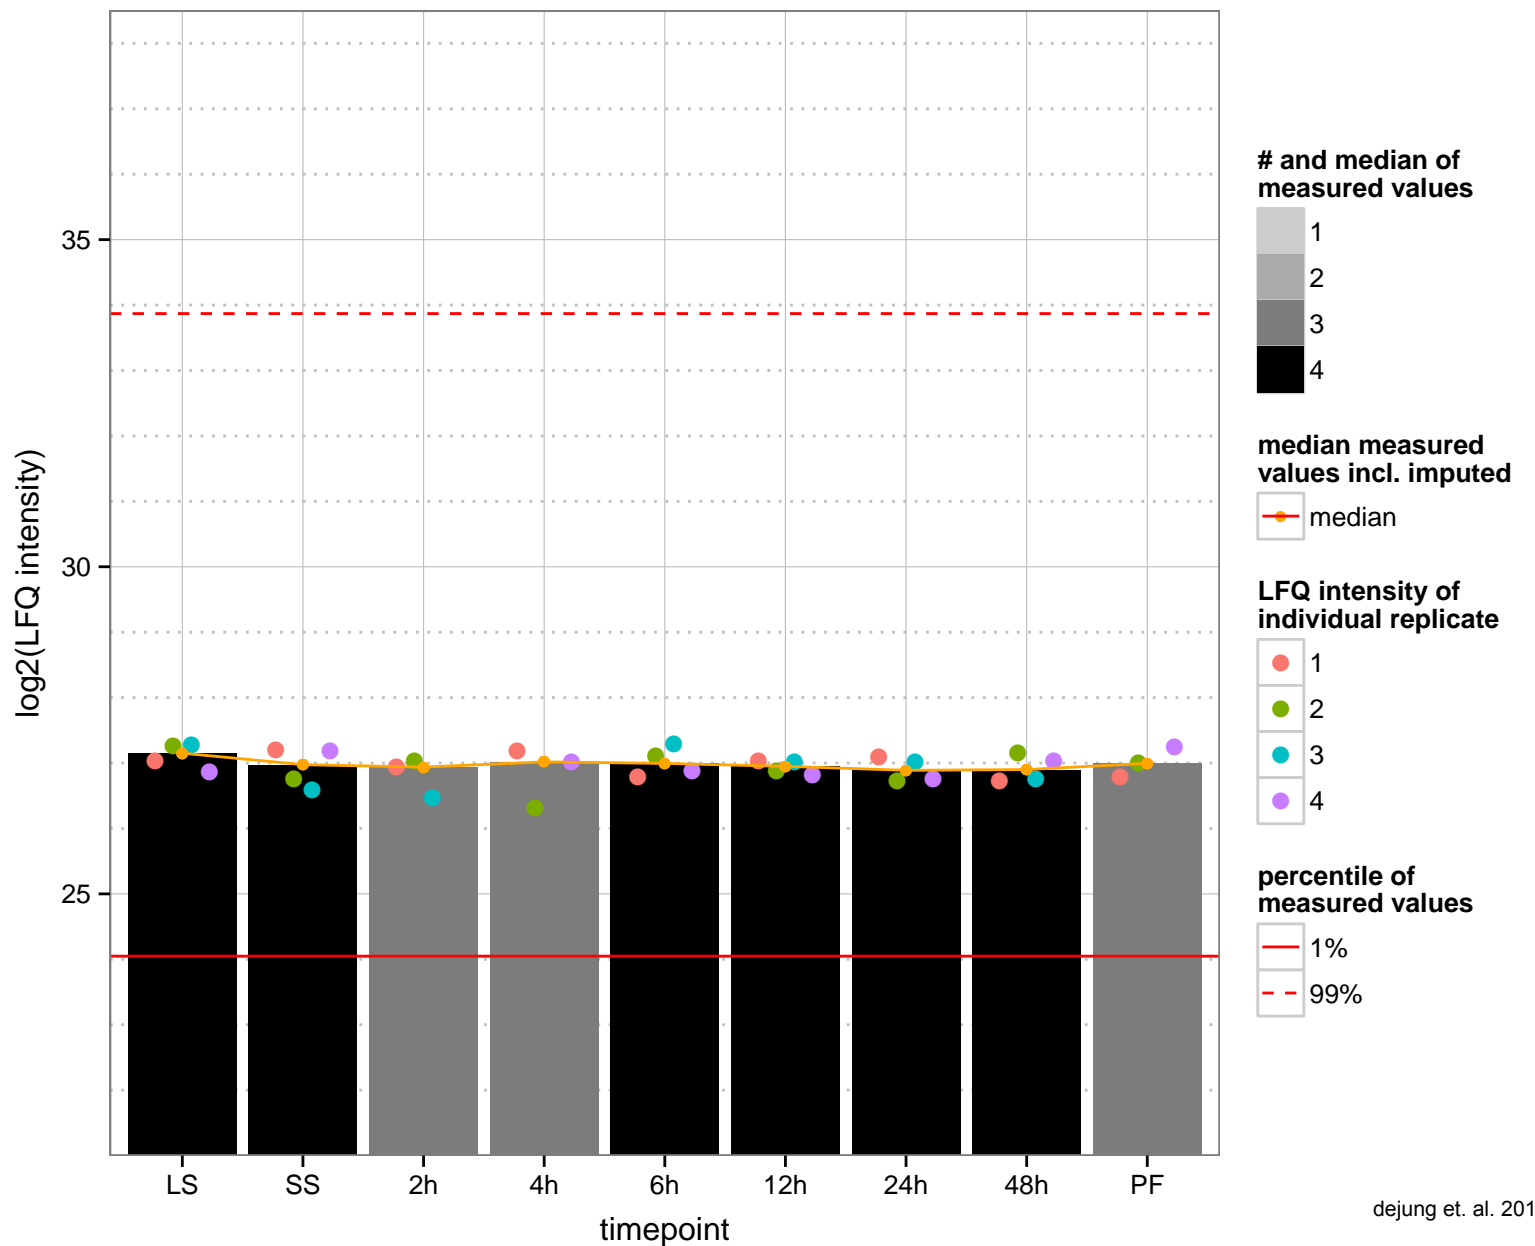

RNA-binding protein, putative (RPB25)  
 Tb927.7.880  
 AGOF: RNA binding  
 AGOC: cytosol, nucleus  
 AGOP: RNA processing  
 PGO: nucleic acid binding  
 PGO: null  
 PGOP: null

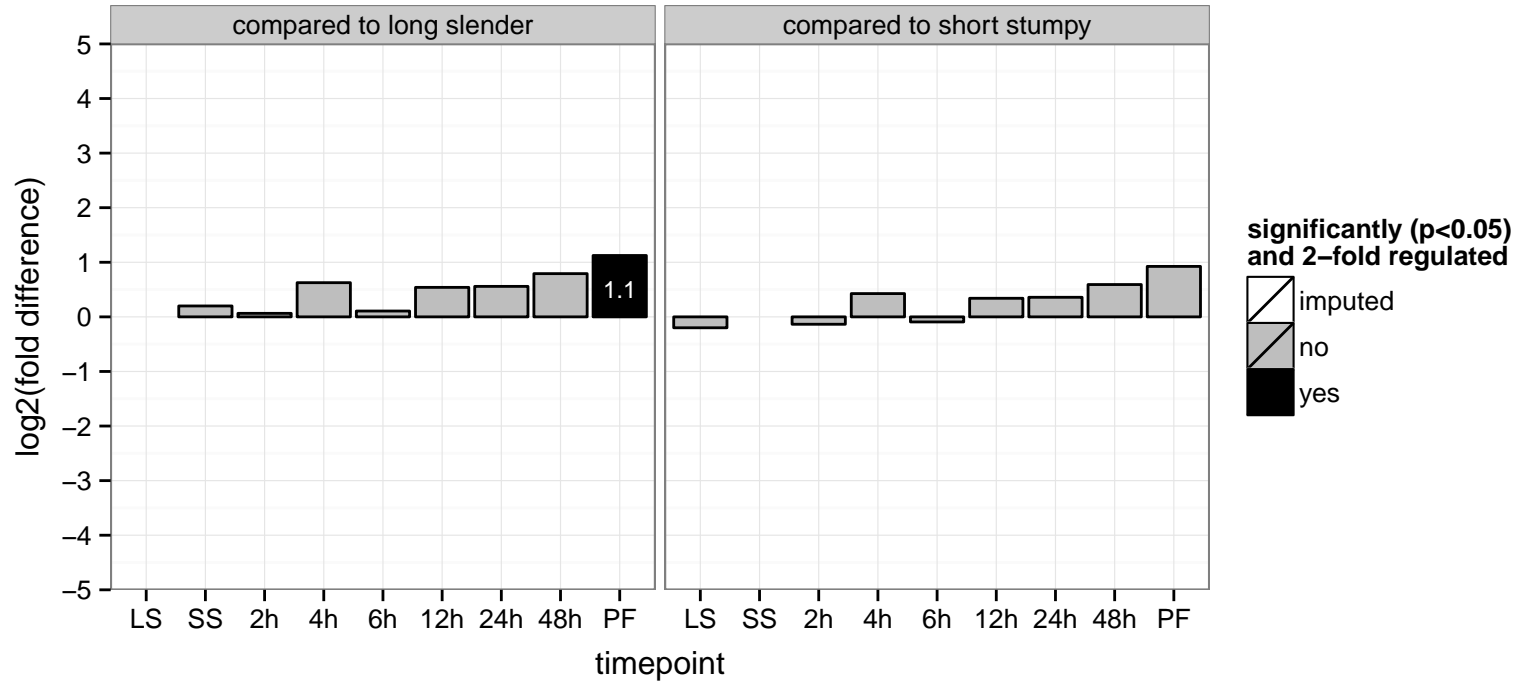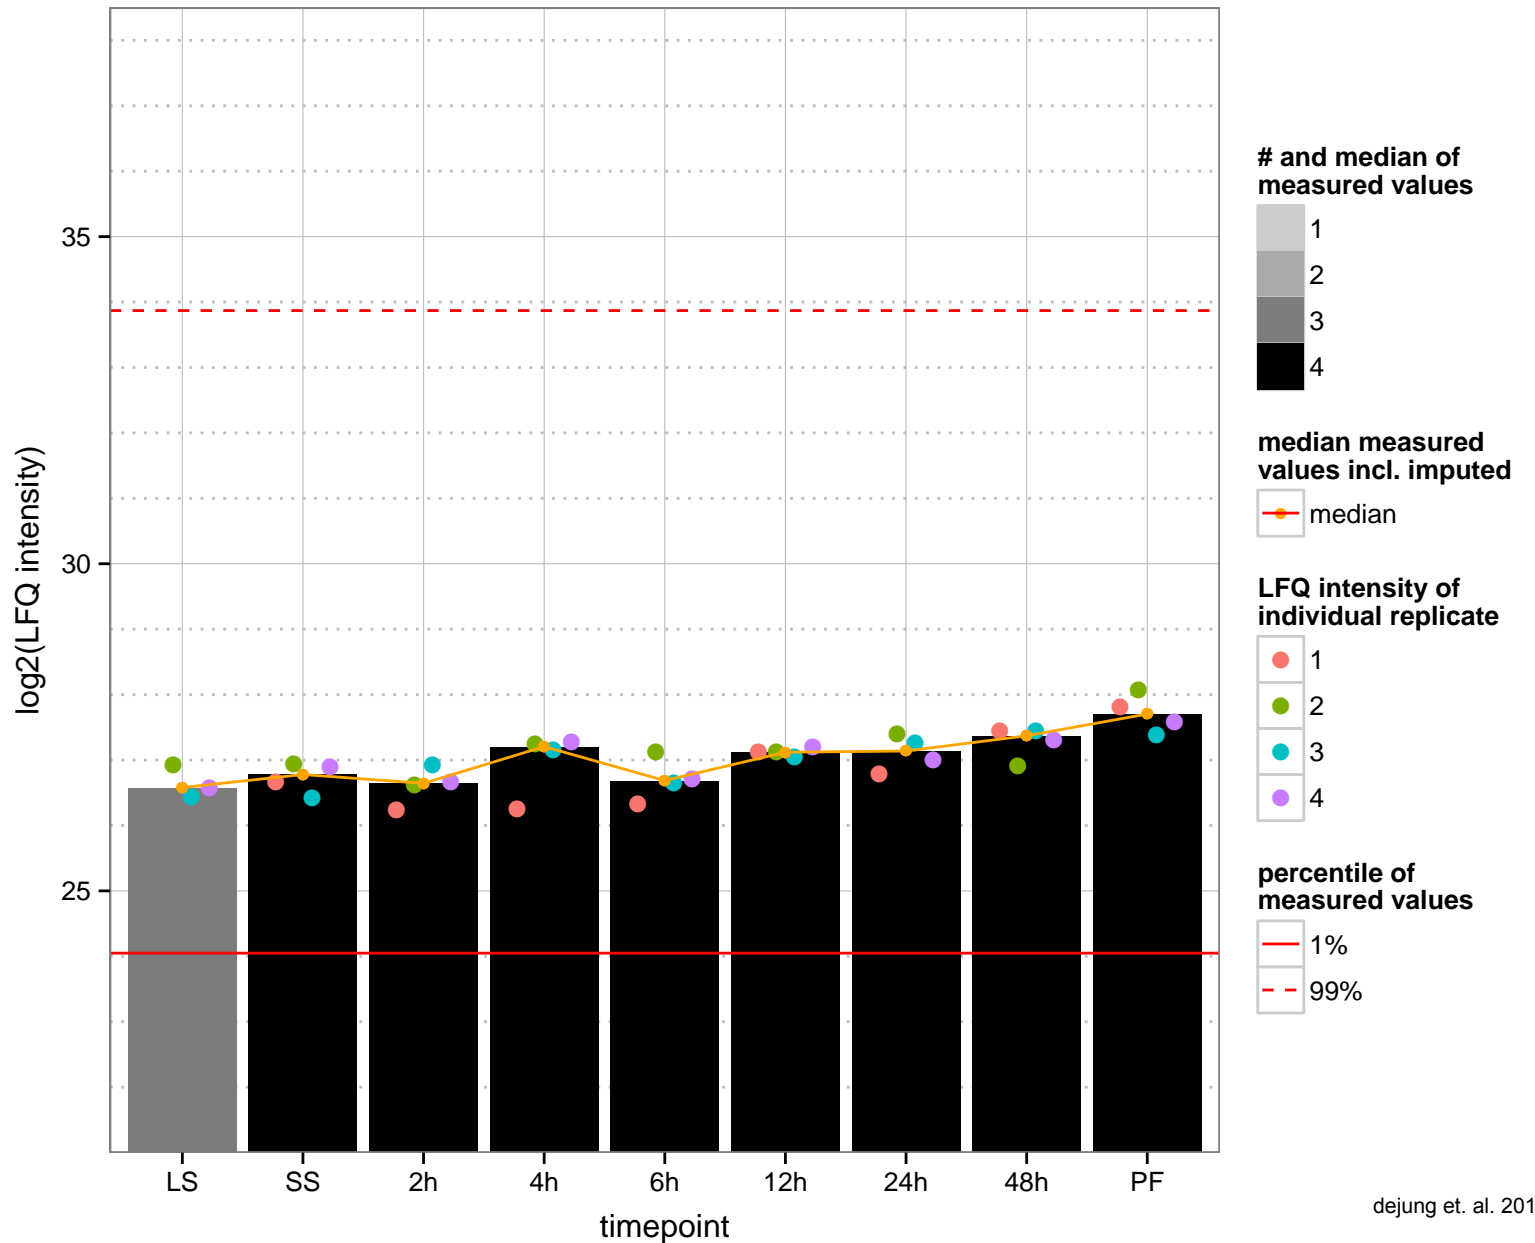

dynein heavy chain, putative  
 Tb927.7.920  
 AGOF: null, ATP binding, ATPase activity, microtubule motor activity  
 AGOC: null, dynein complex  
 AGOP: null, microtubule-based movement  
 PGOF: null, microtubule motor activity  
 PGO: null, dynein complex  
 PGOP: null, microtubule-based movement

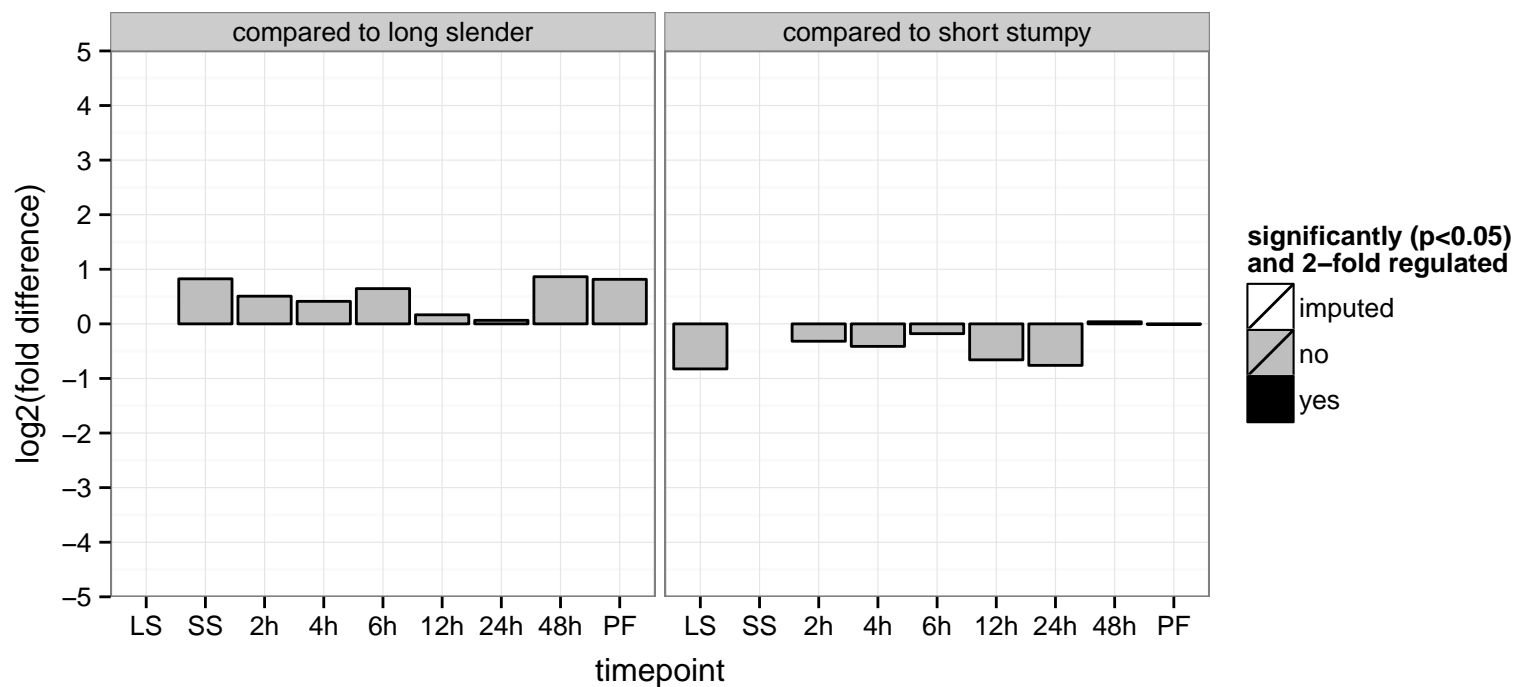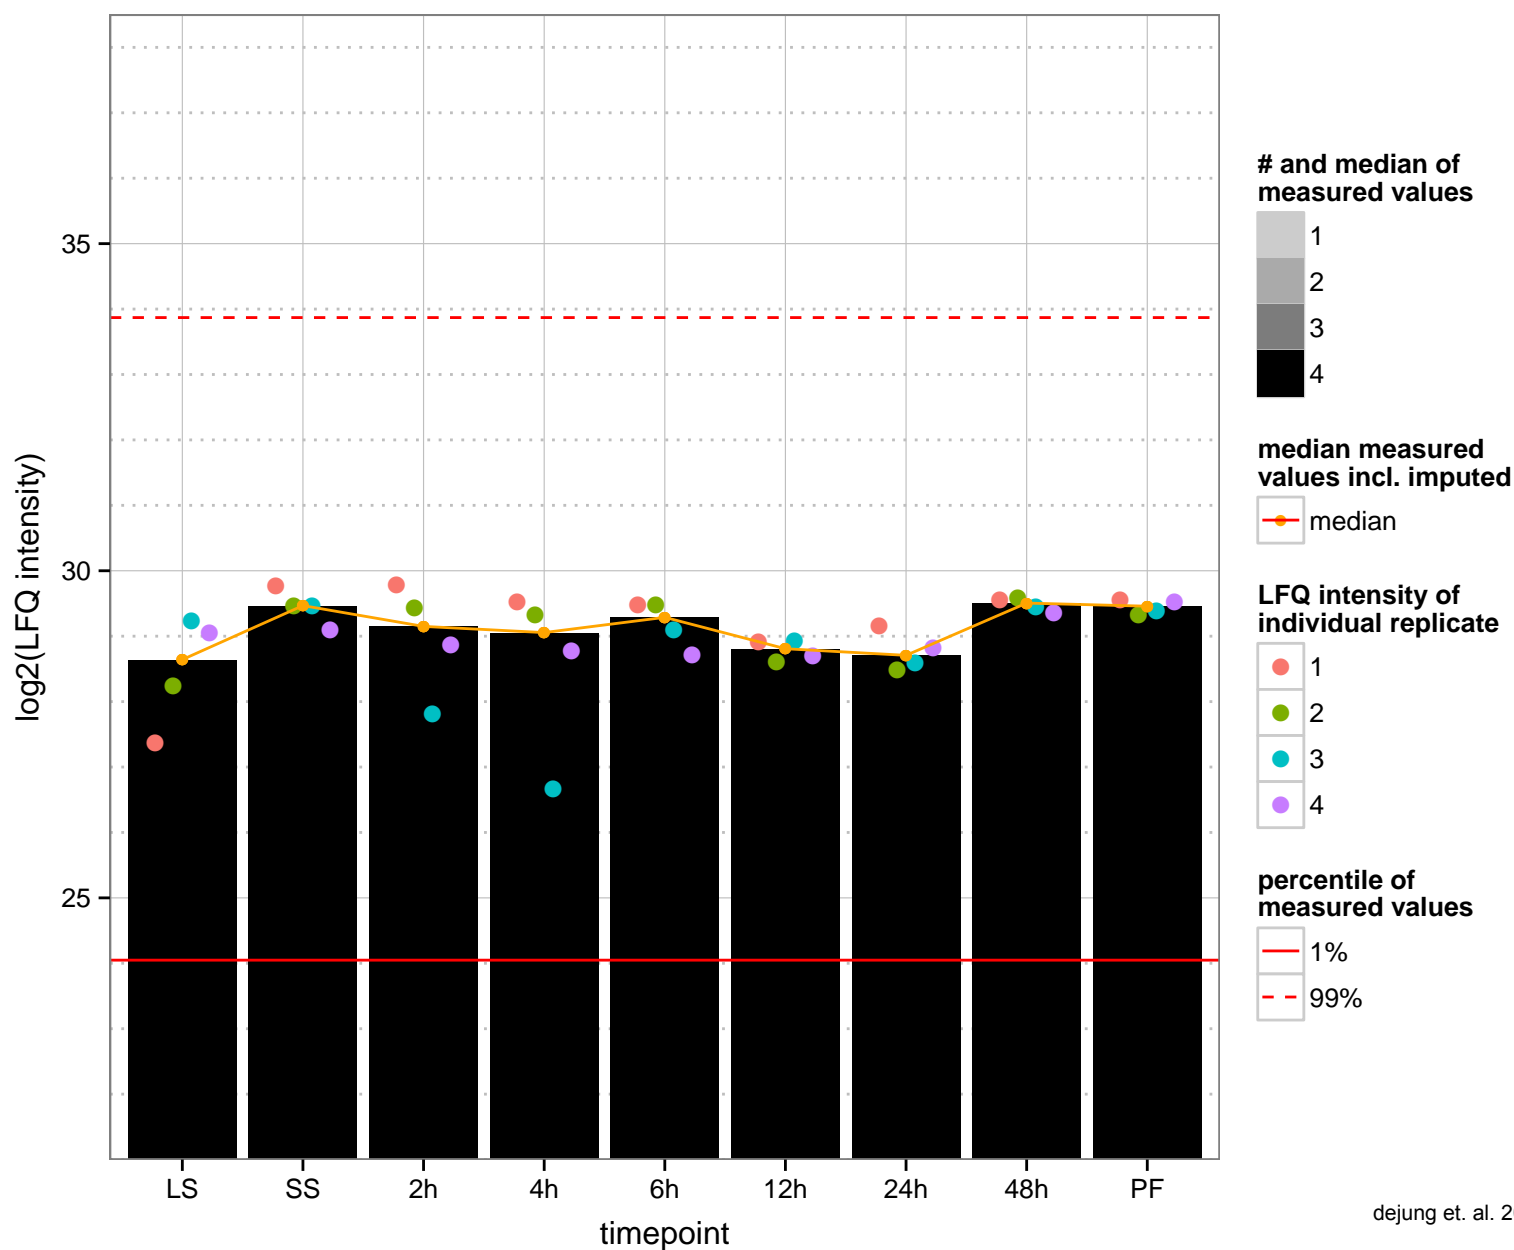

protein kinase C substrate protein, heavy chain, putative, glucosidase II beta subunit  
 Tb927.7.940  
 AGOF: null  
 AGOC: null  
 AGOP: null  
 PGOF: null  
 PGO: null  
 PGOP: null

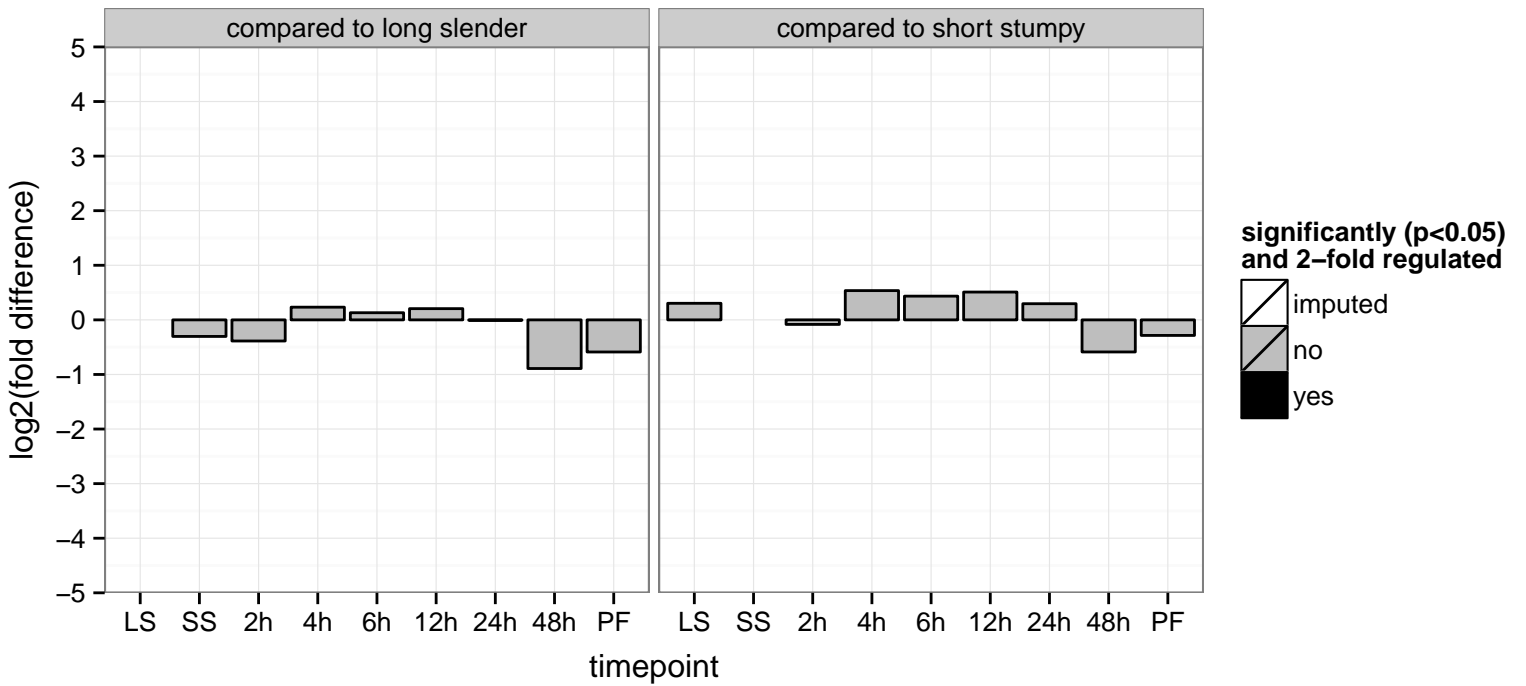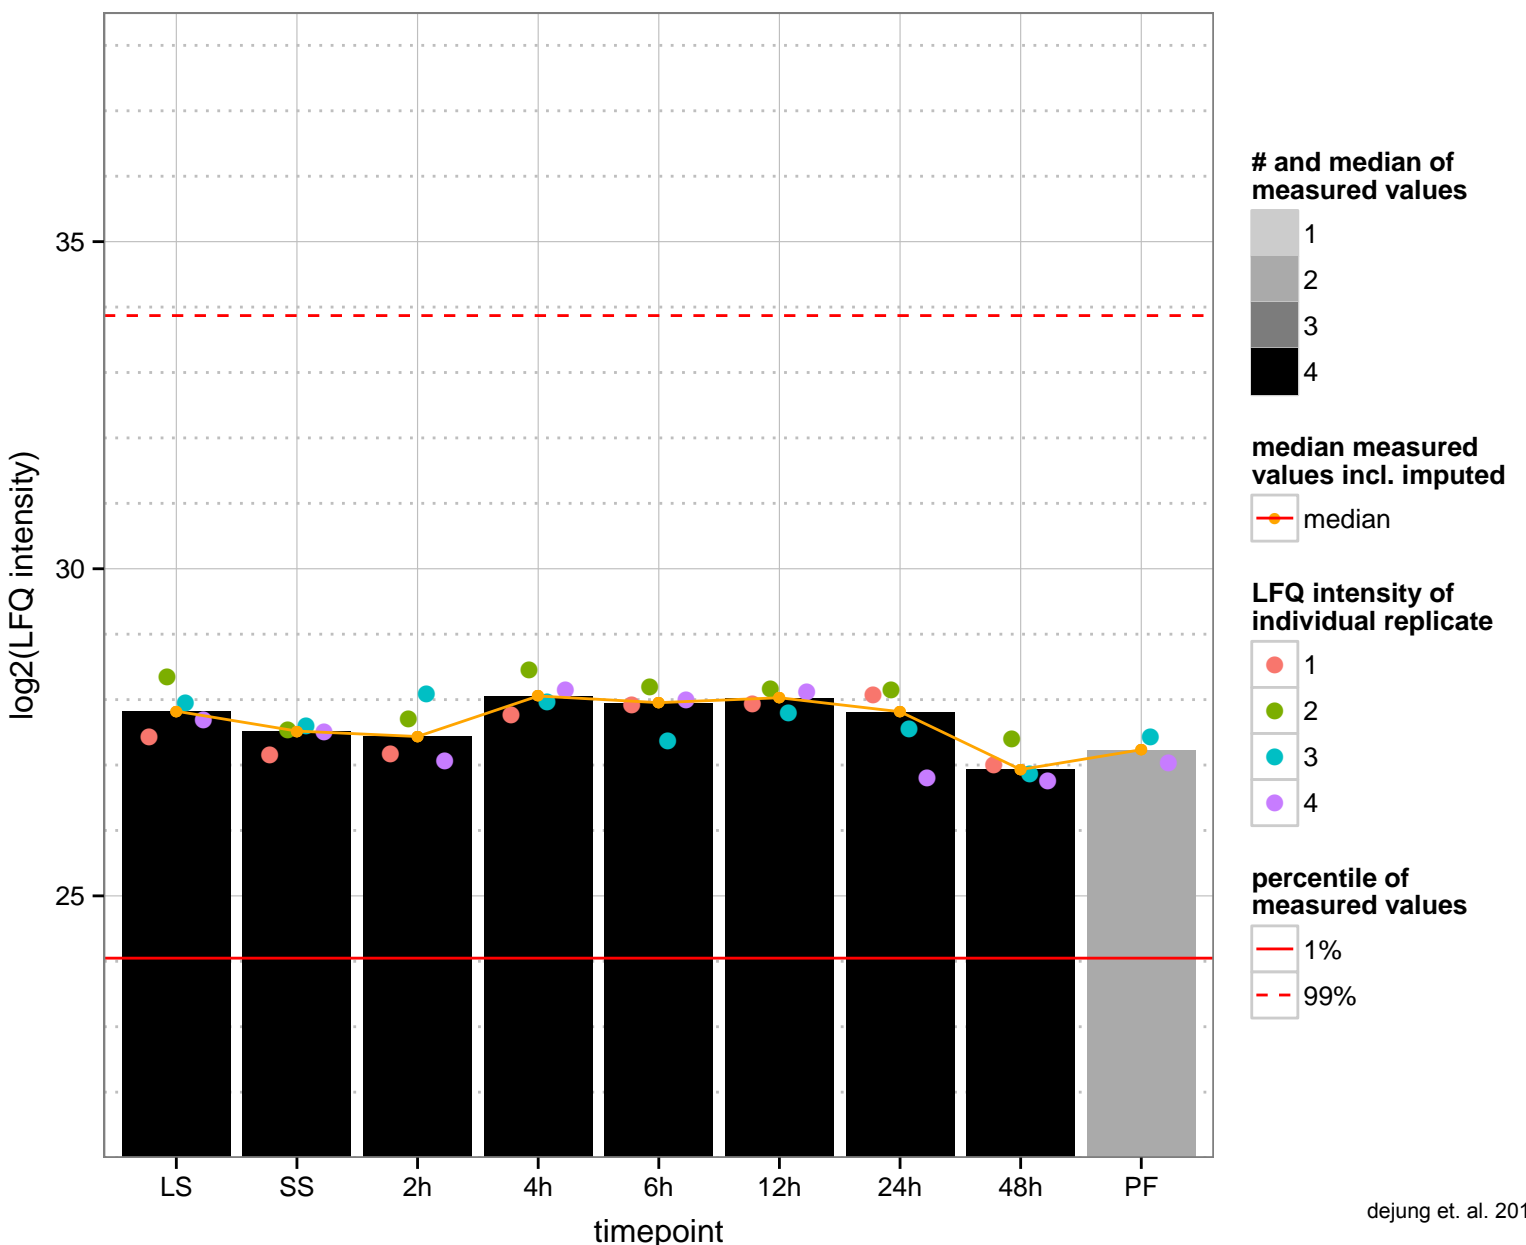



NPAPL, nuclear-poly(A)-polymerase-like (NPAPL)

Tb927.8.1090

AGOF: ATP-dependent RNA helicase activity, nucleic acid binding, nucleotidyltransferase activity

AGOC: nucleus

AGOP: null

PGOF: nucleotidyltransferase activity

PGOC: null

PGOP: null

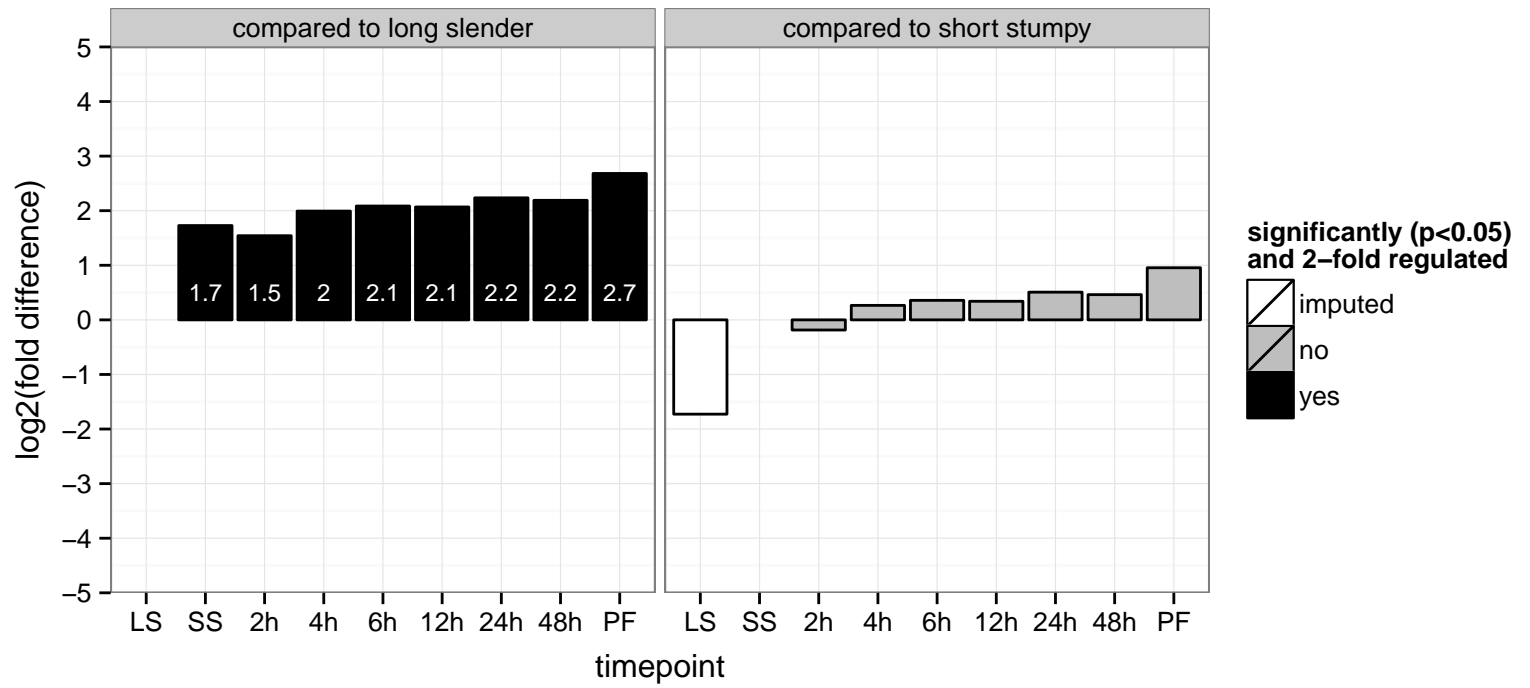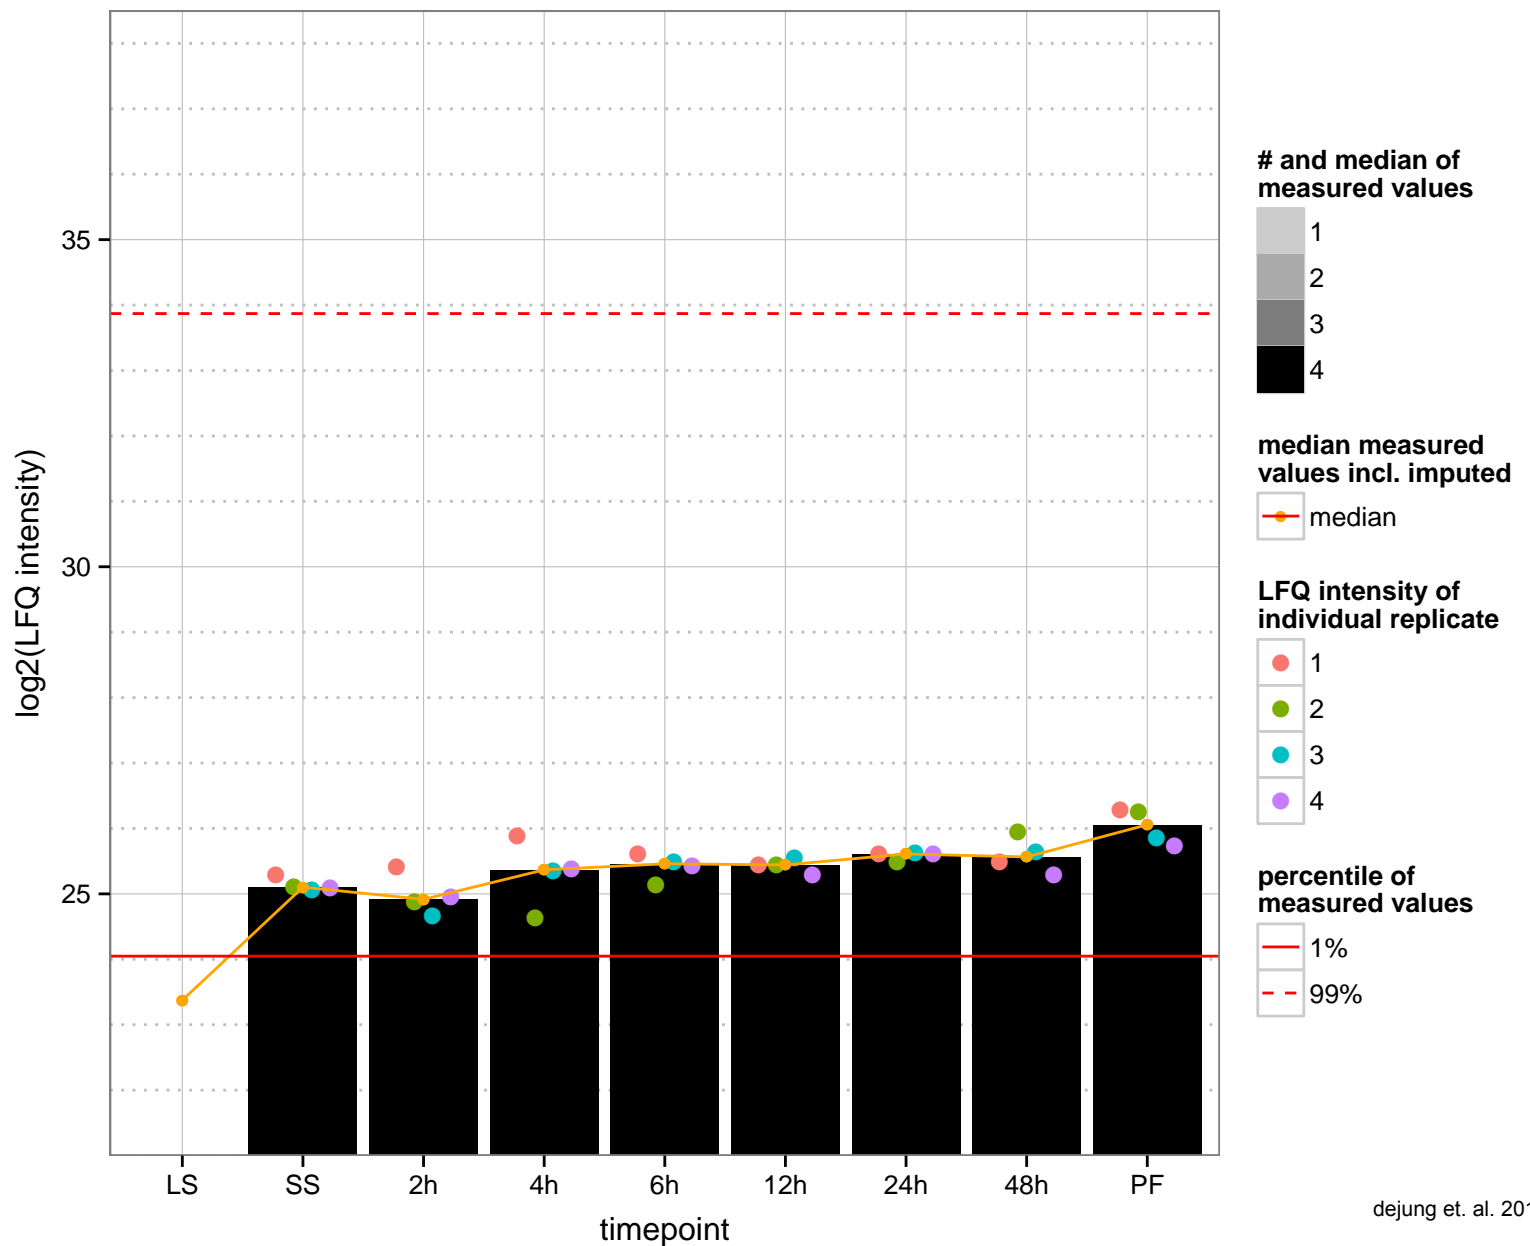

hypothetical protein, conserved  
 Tb927.8.1190;Tb927.8.1170;Tb11.v5.0871  
 AGOF: null  
 AGOC: null  
 AGOP: null  
 PGO: null  
 PGOC: null  
 PGOP: null

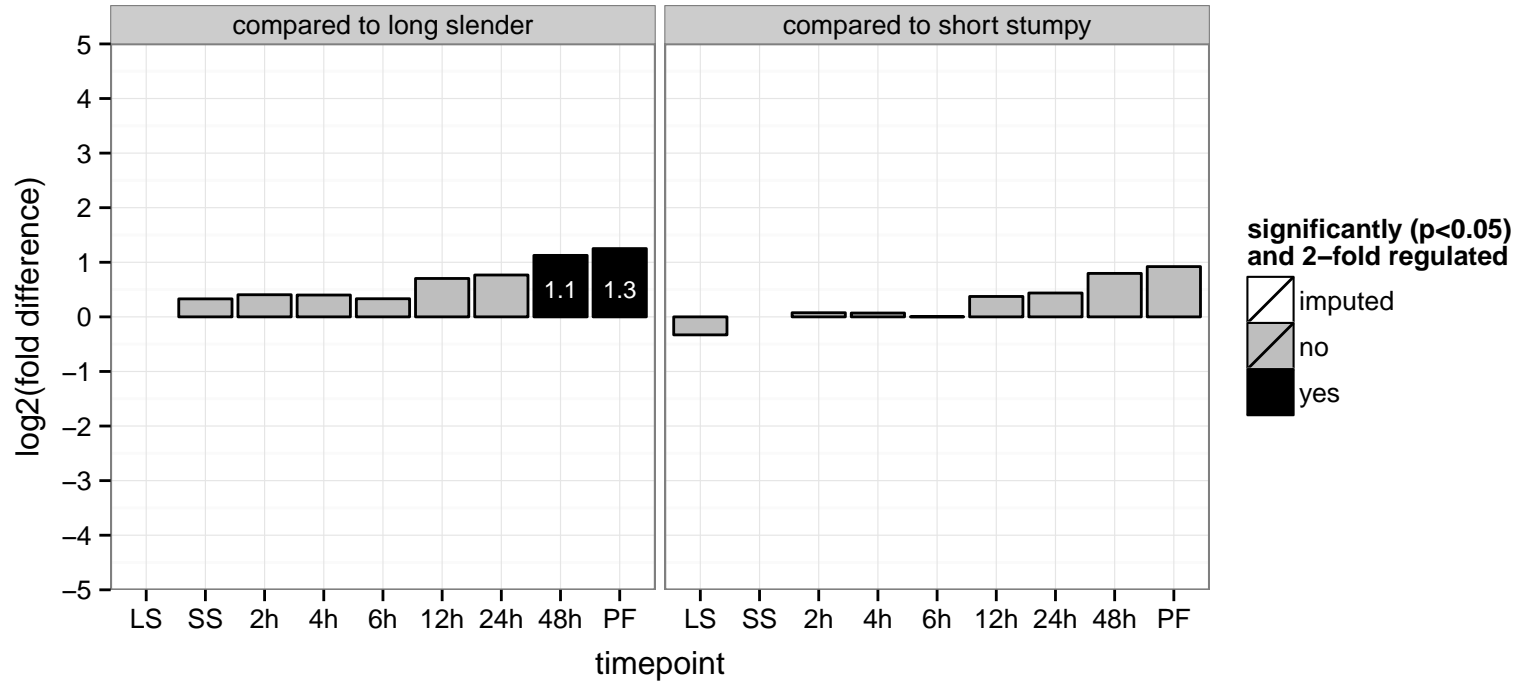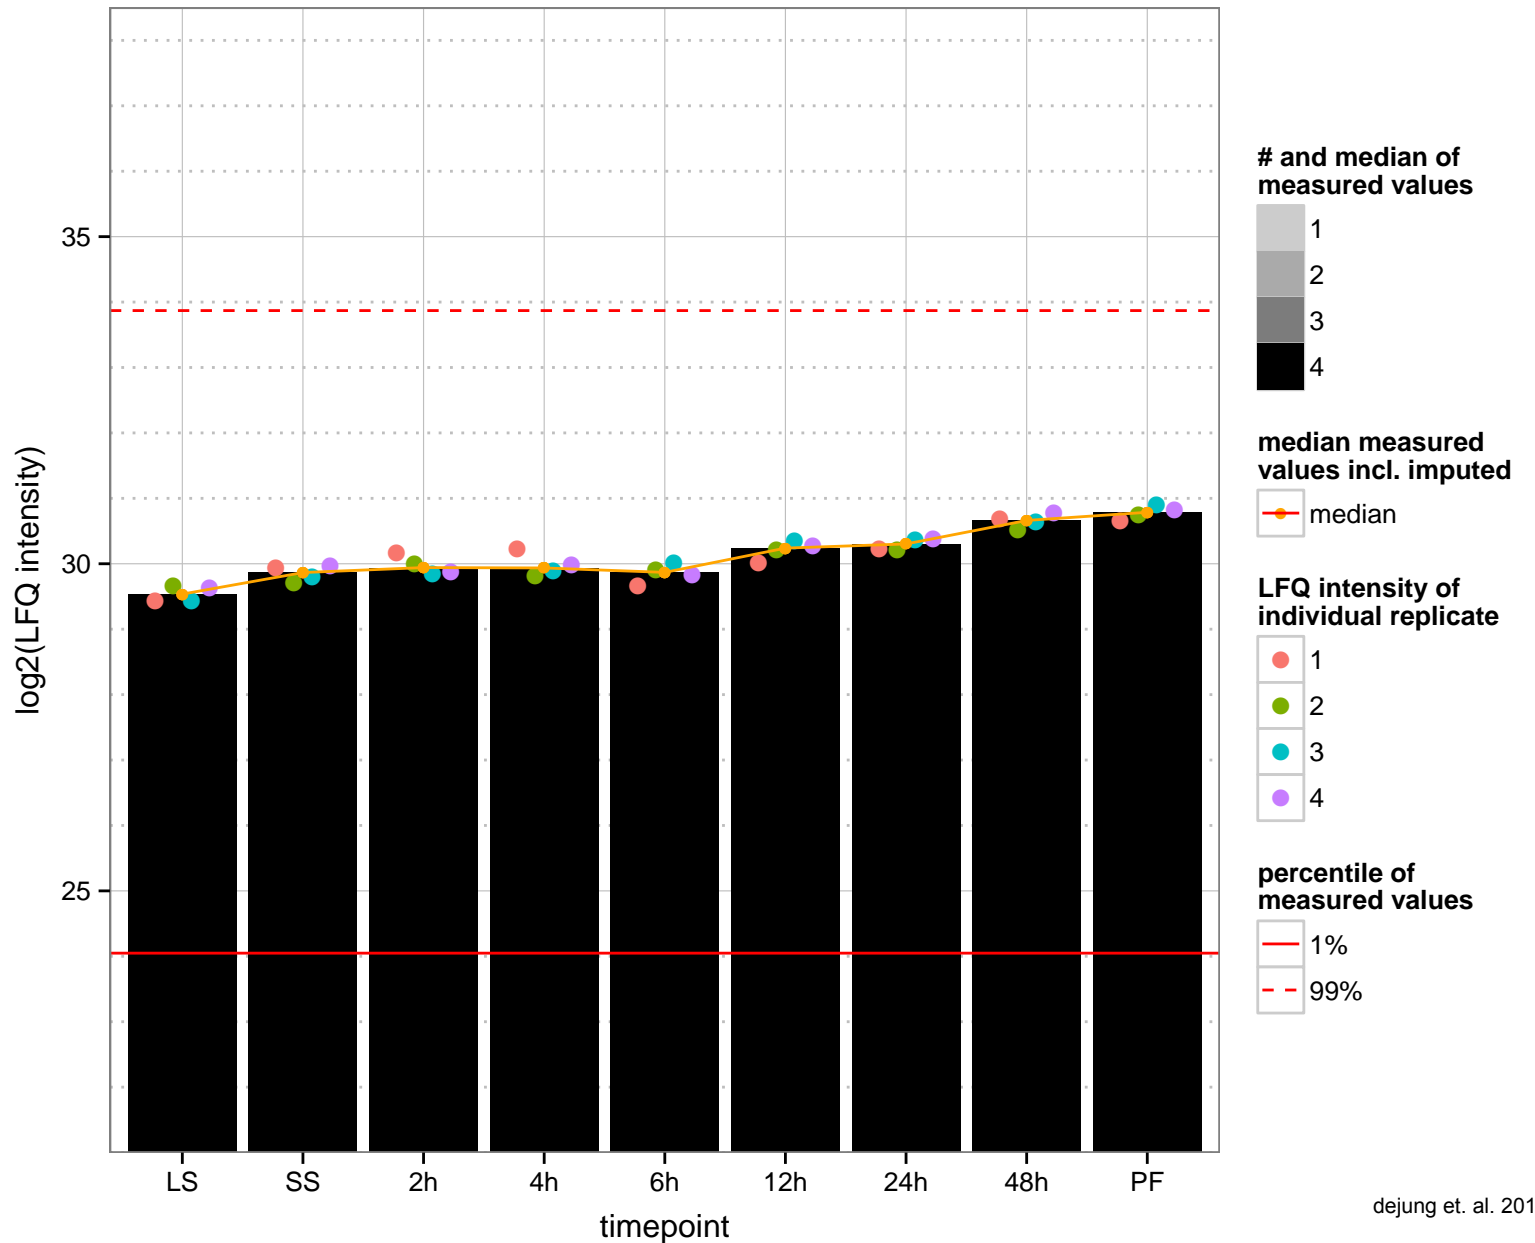

vacuolar-type Ca<sup>2+</sup>-ATPase 2 (TbA2)

Tb927.8.1200

AGOF: ATP binding, calcium-transporting ATPase activity

AGOC: plasma membrane

AGOP: ATP biosynthetic process, calcium ion transport, cell growth, cellular calcium ion homeostasis, metabolic process

PGOF: ATP binding, ATPase activity, coupled to transmembrane movement of ions, phosphorylative mechanism, calcium-transport

PGOC: membrane

PGOP: ATP biosynthetic process, calcium ion transmembrane transport, cation transport, metabolic process

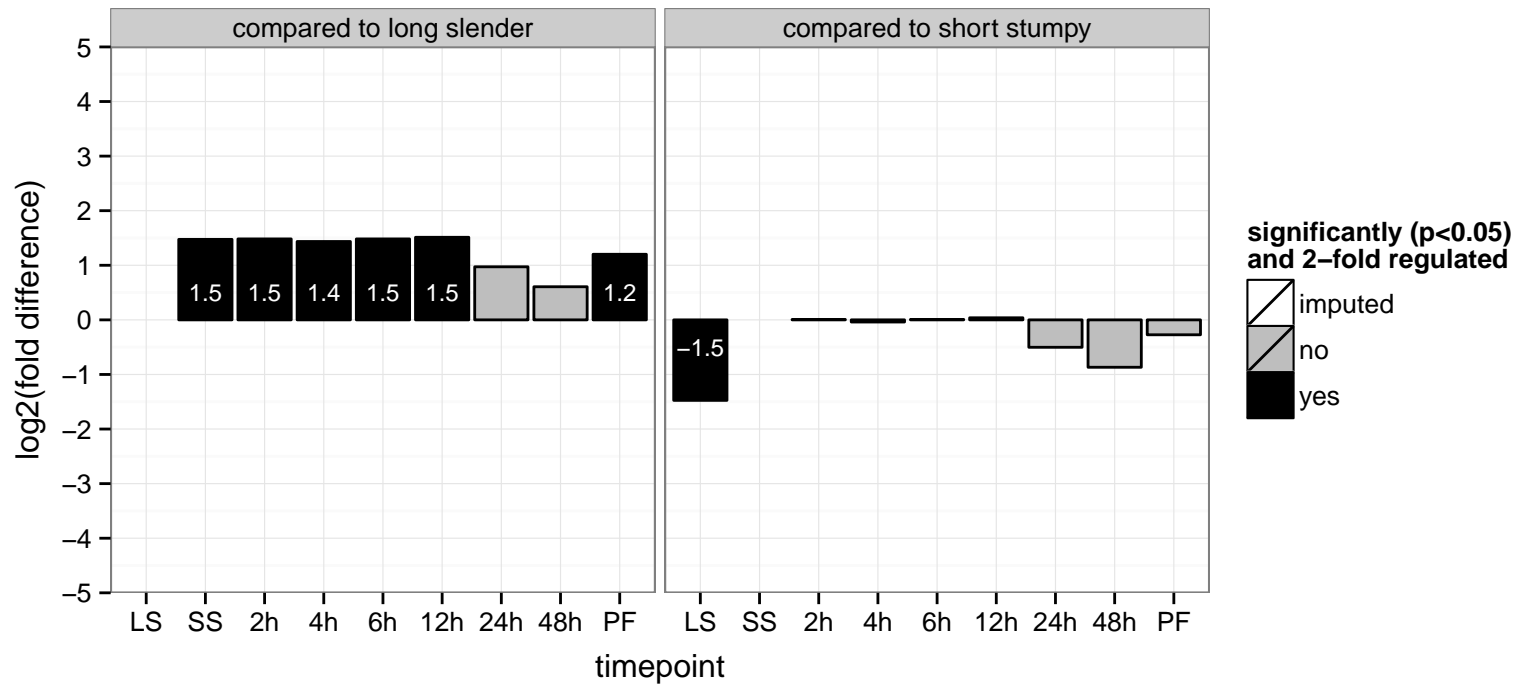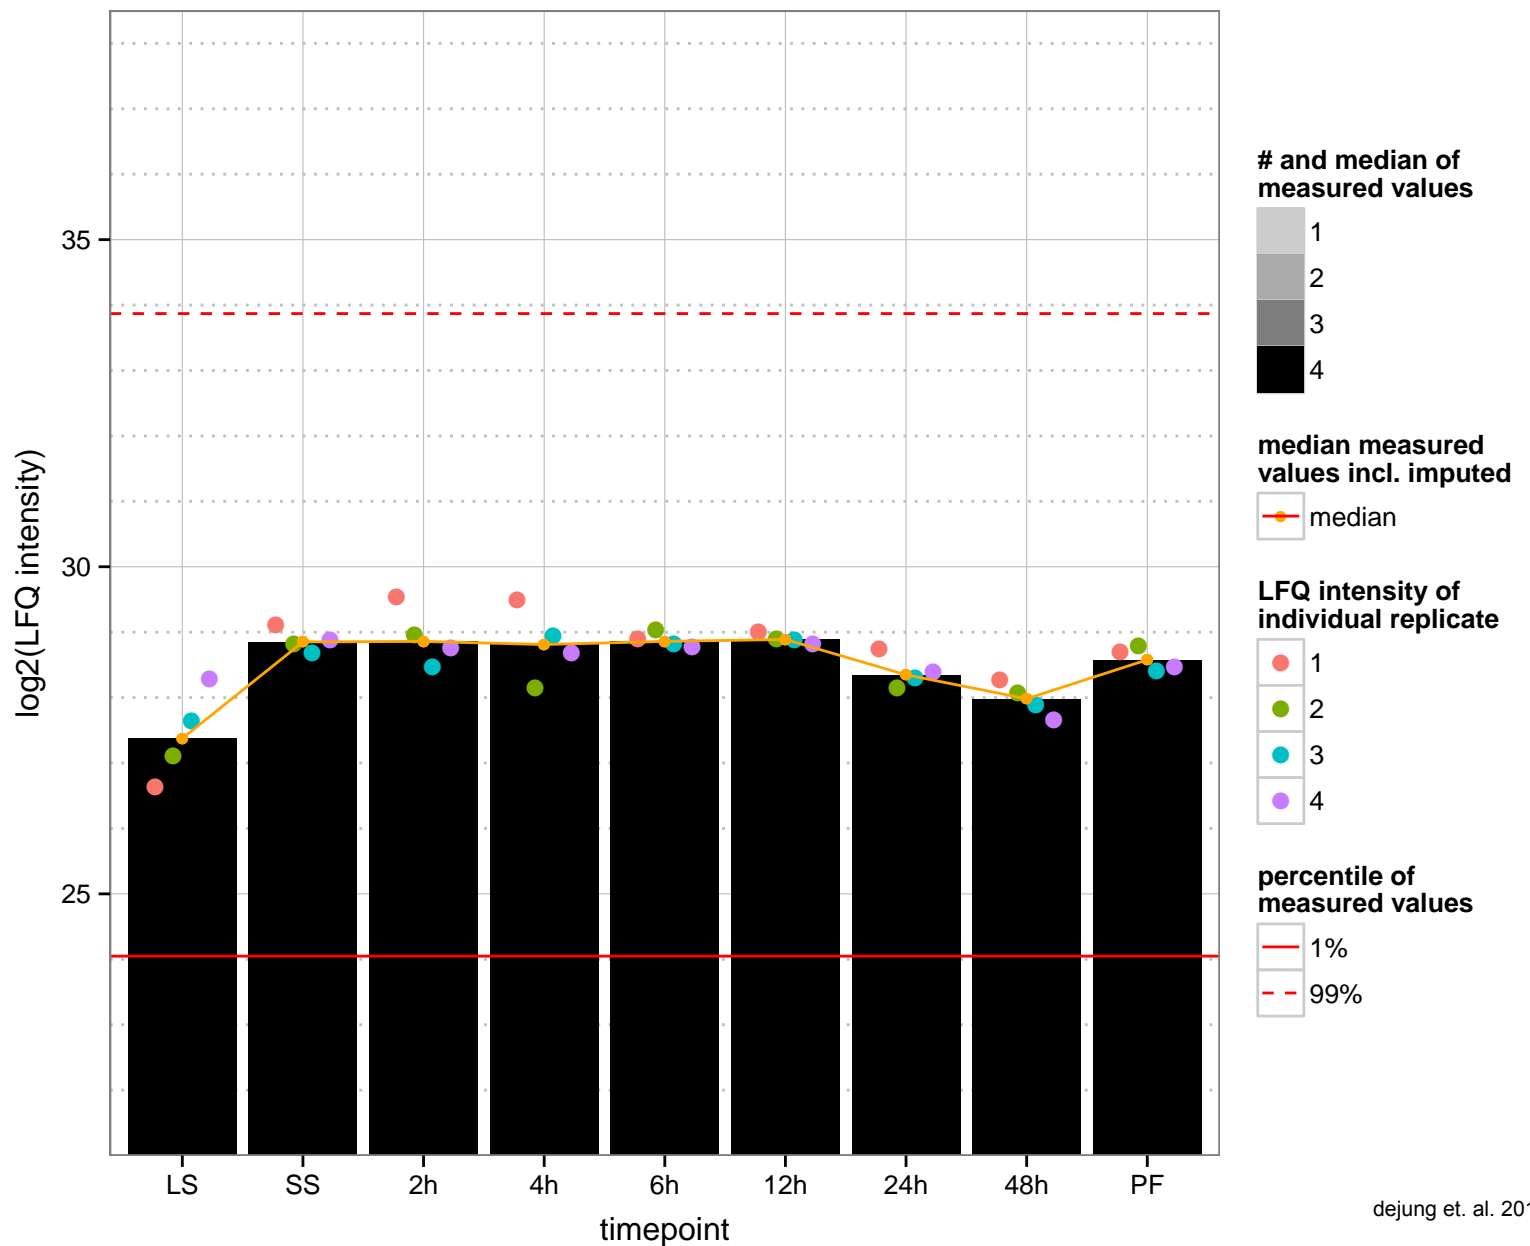

hypothetical protein, conserved (pseudogene)  
 Tb927.8.1220  
 AGOF: null  
 AGOC: null  
 AGOP: null  
 PGOF: null  
 PGO: null  
 PGOP: null

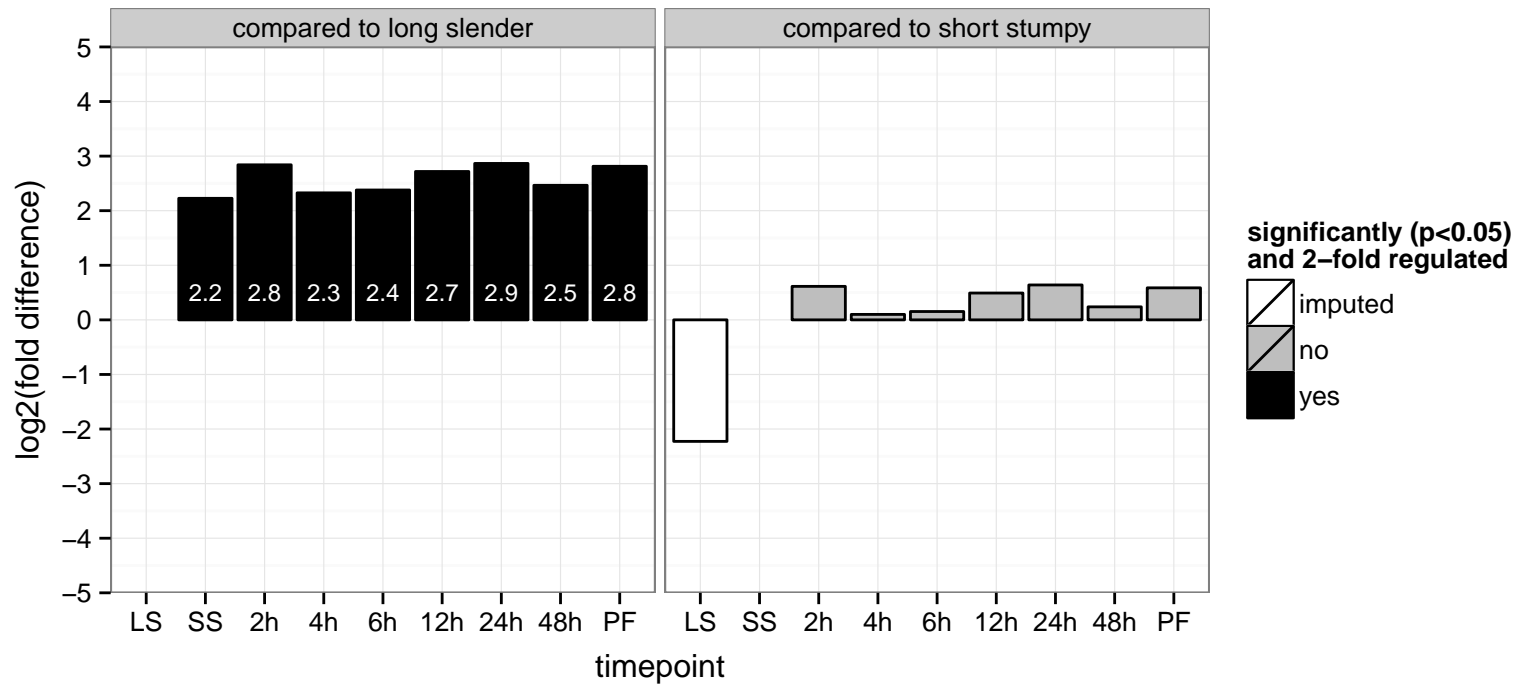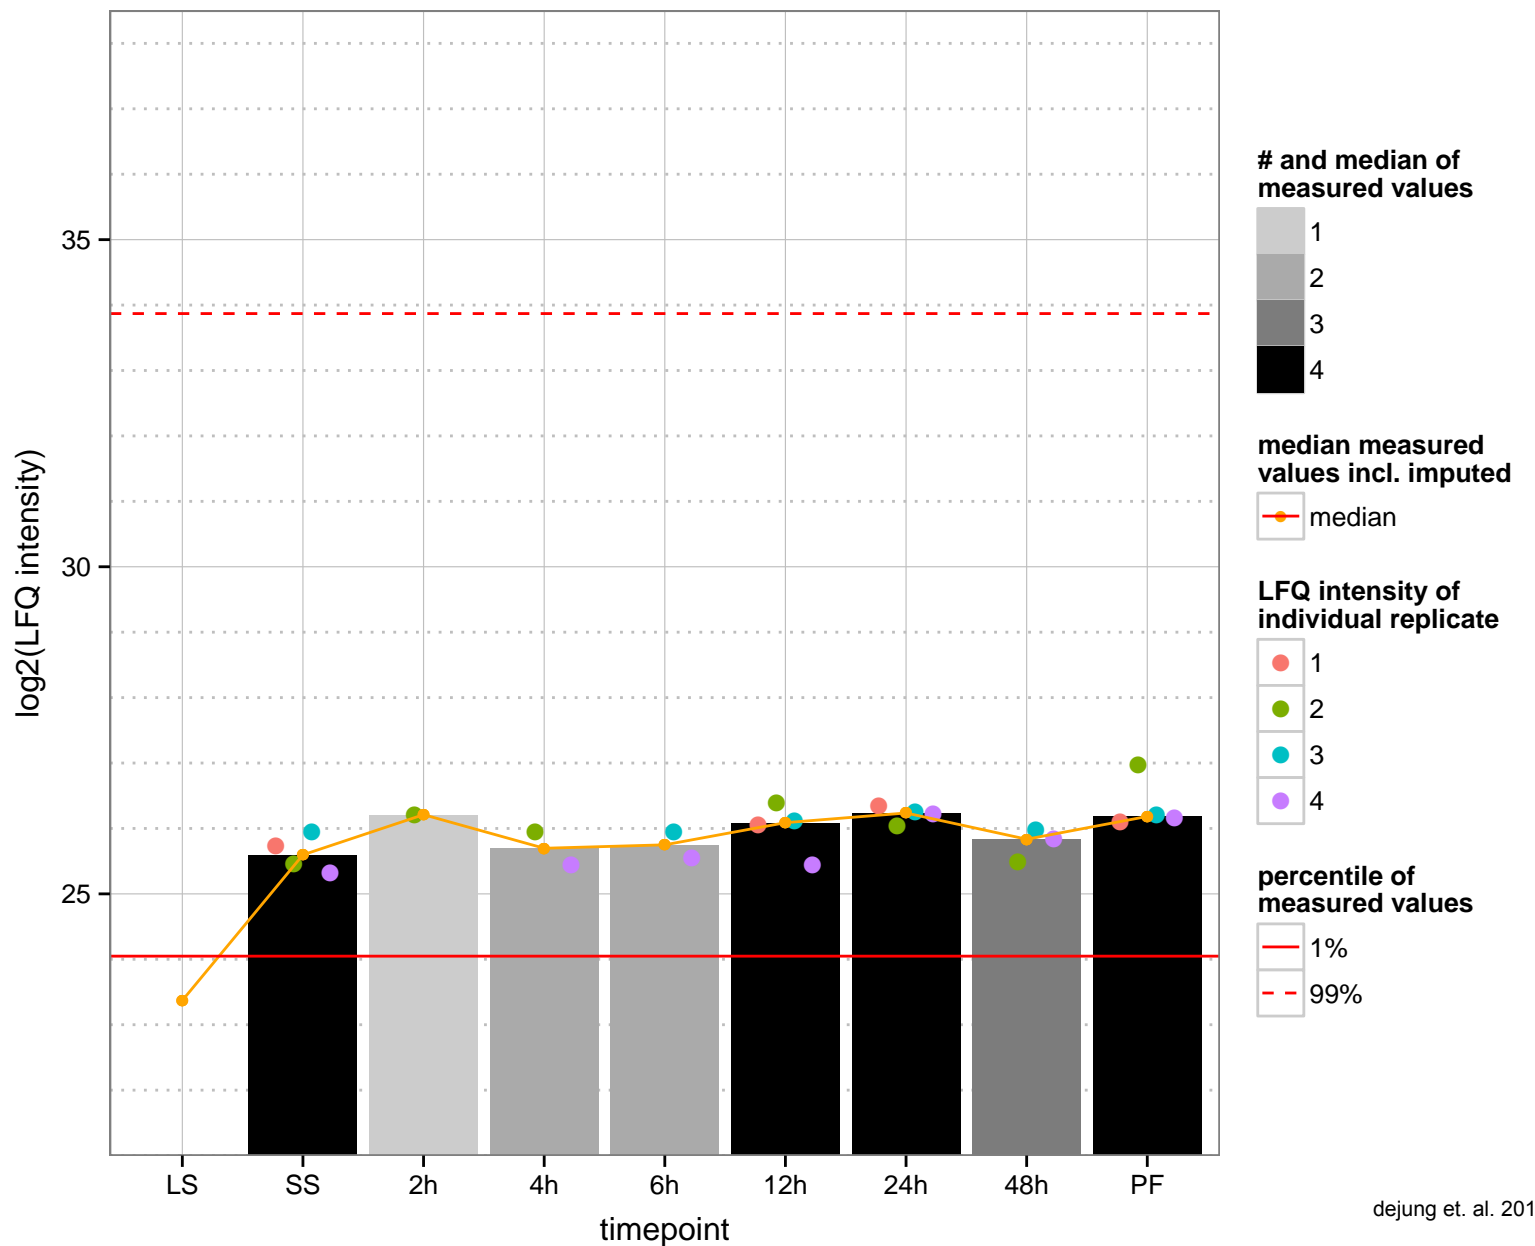

hypothetical protein, conserved, pre-rRNA-processing protein tsr1 homolog  
 Tb927.8.1410;Tb11.v5.0588  
 AGOF: null  
 AGOC: null, cytoplasm, nucleolus, nucleus  
 AGOP: null, ribosome biogenesis  
 PGO: null  
 PGOC: nucleus  
 PGOP: ribosome biogenesis

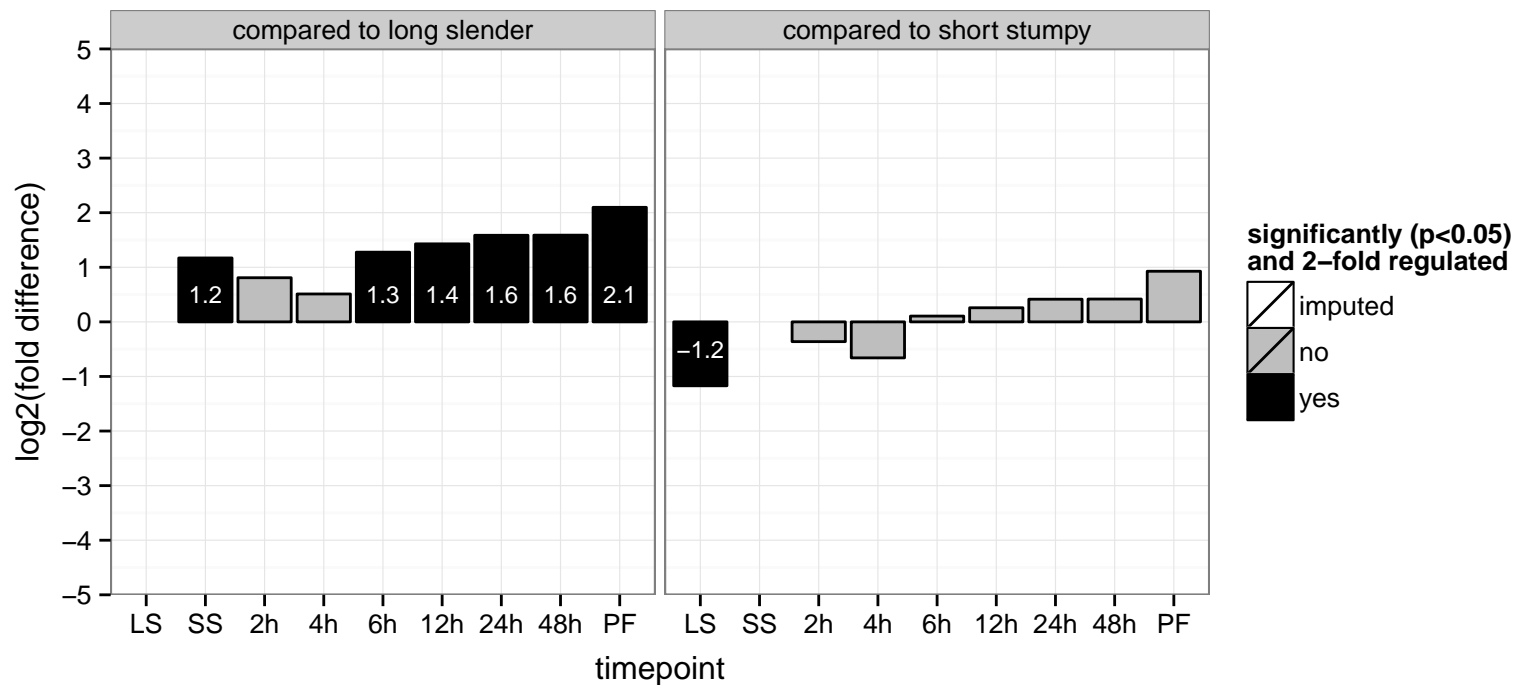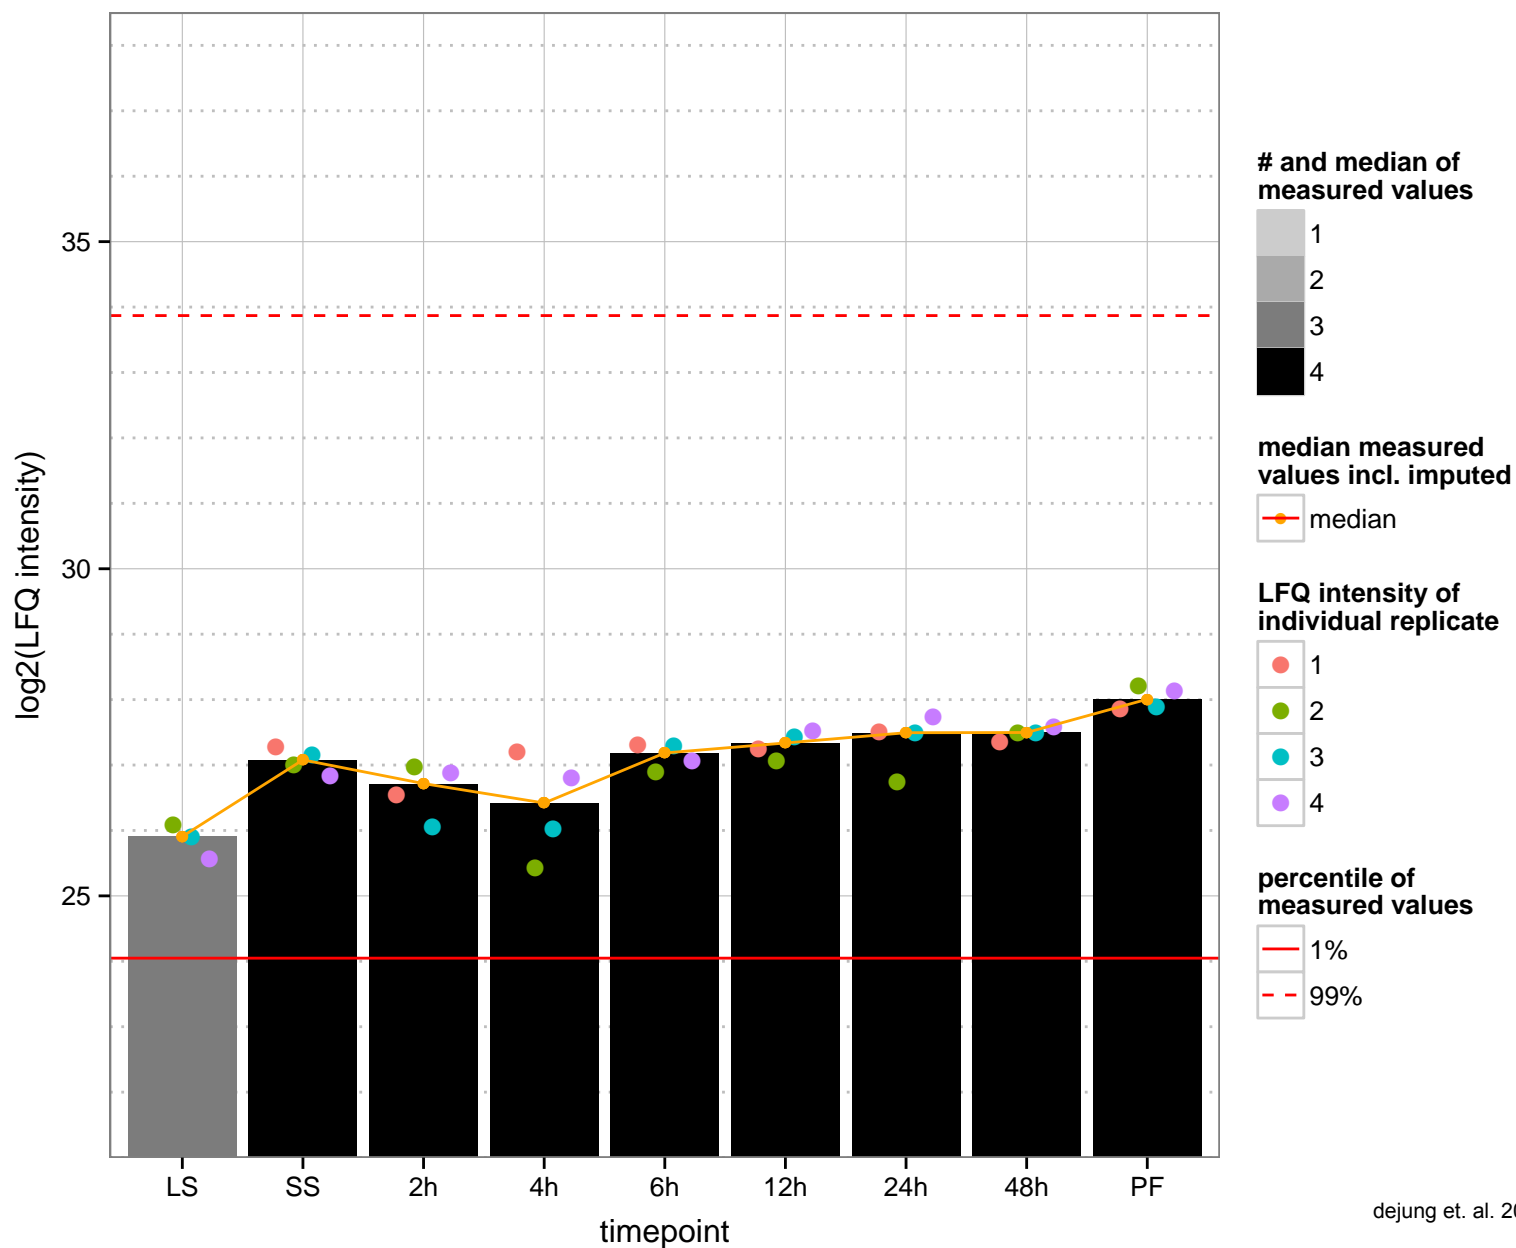

acyl-CoA dehydrogenase, mitochondrial precursor, putative

Tb927.8.1420

AGOF: acyl-CoA dehydrogenase activity

AGOC: mitochondrial membrane, mitochondrion

AGOP: metabolic process

PGOF: acyl-CoA dehydrogenase activity, oxidoreductase activity, acting on the CH-CH group of donors

PGOC: null

PGOP: metabolic process, oxidation-reduction process

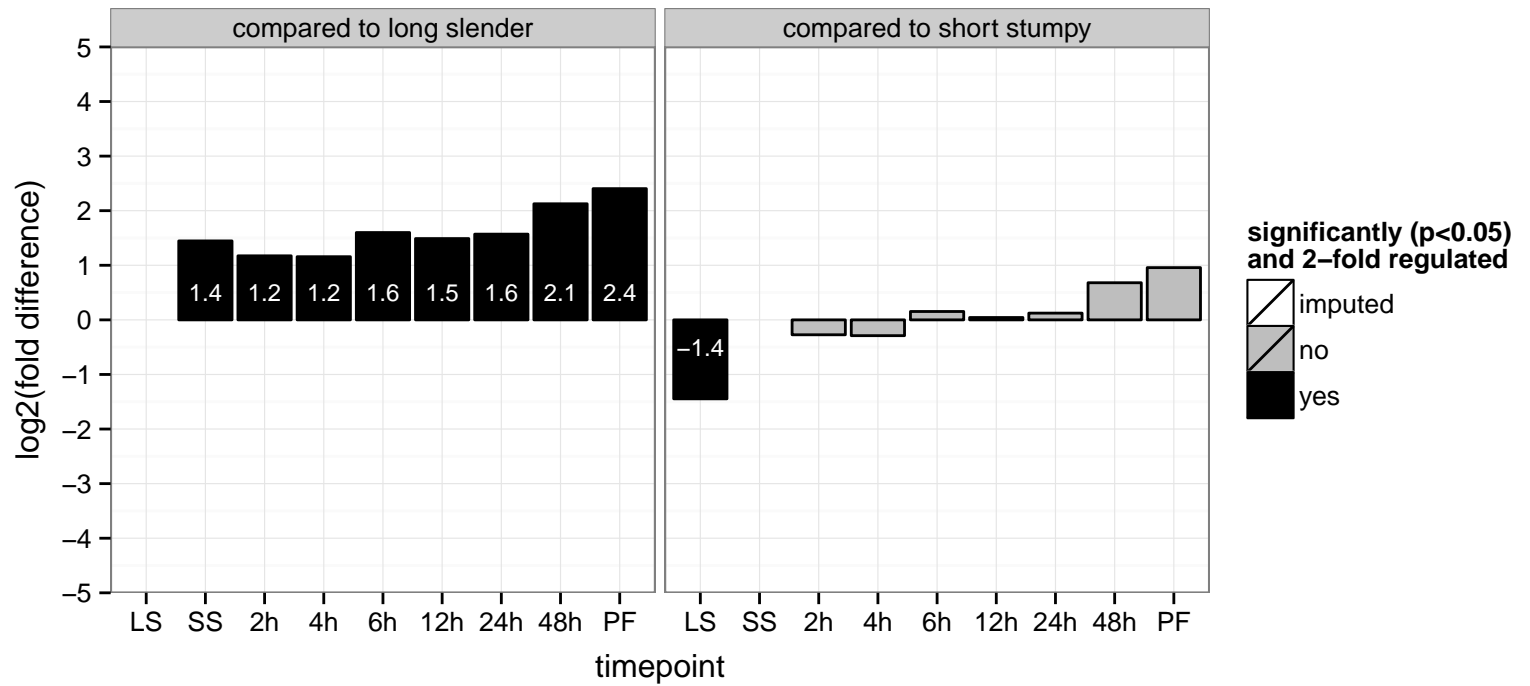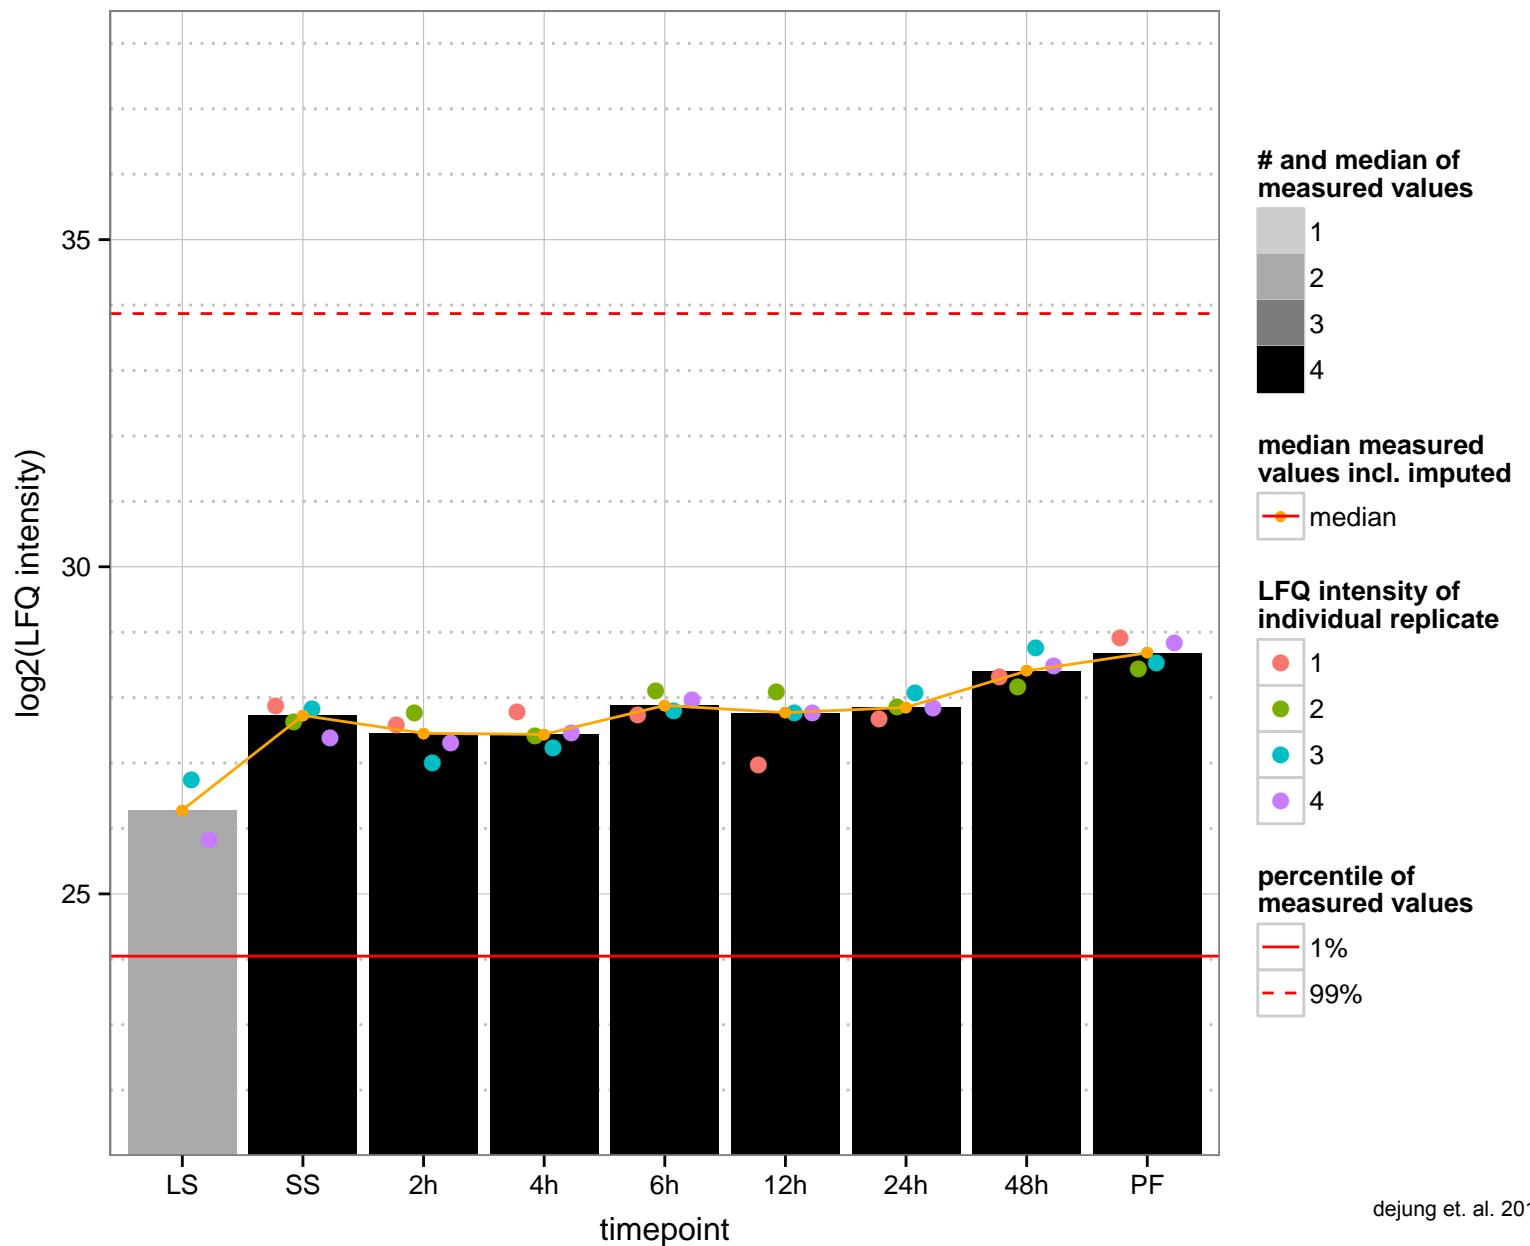

maoC-like dehydratase, putative  
 Tb927.8.1440  
 AGOF: fatty acid synthase activity, oxidoreductase activity  
 AGOC: mitochondrion  
 AGOP: fatty acid biosynthetic process  
 PGO: oxidoreductase activity  
 PGO: null  
 PGO: metabolic process

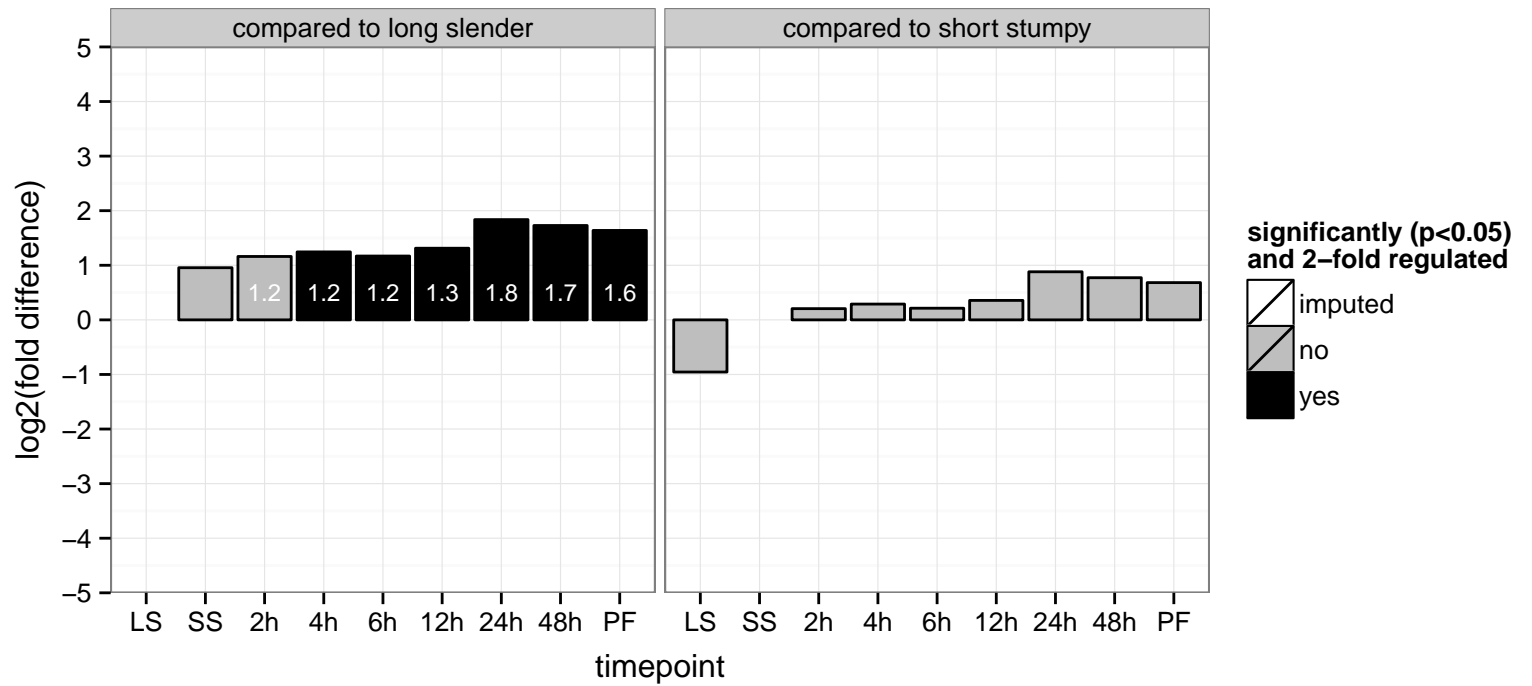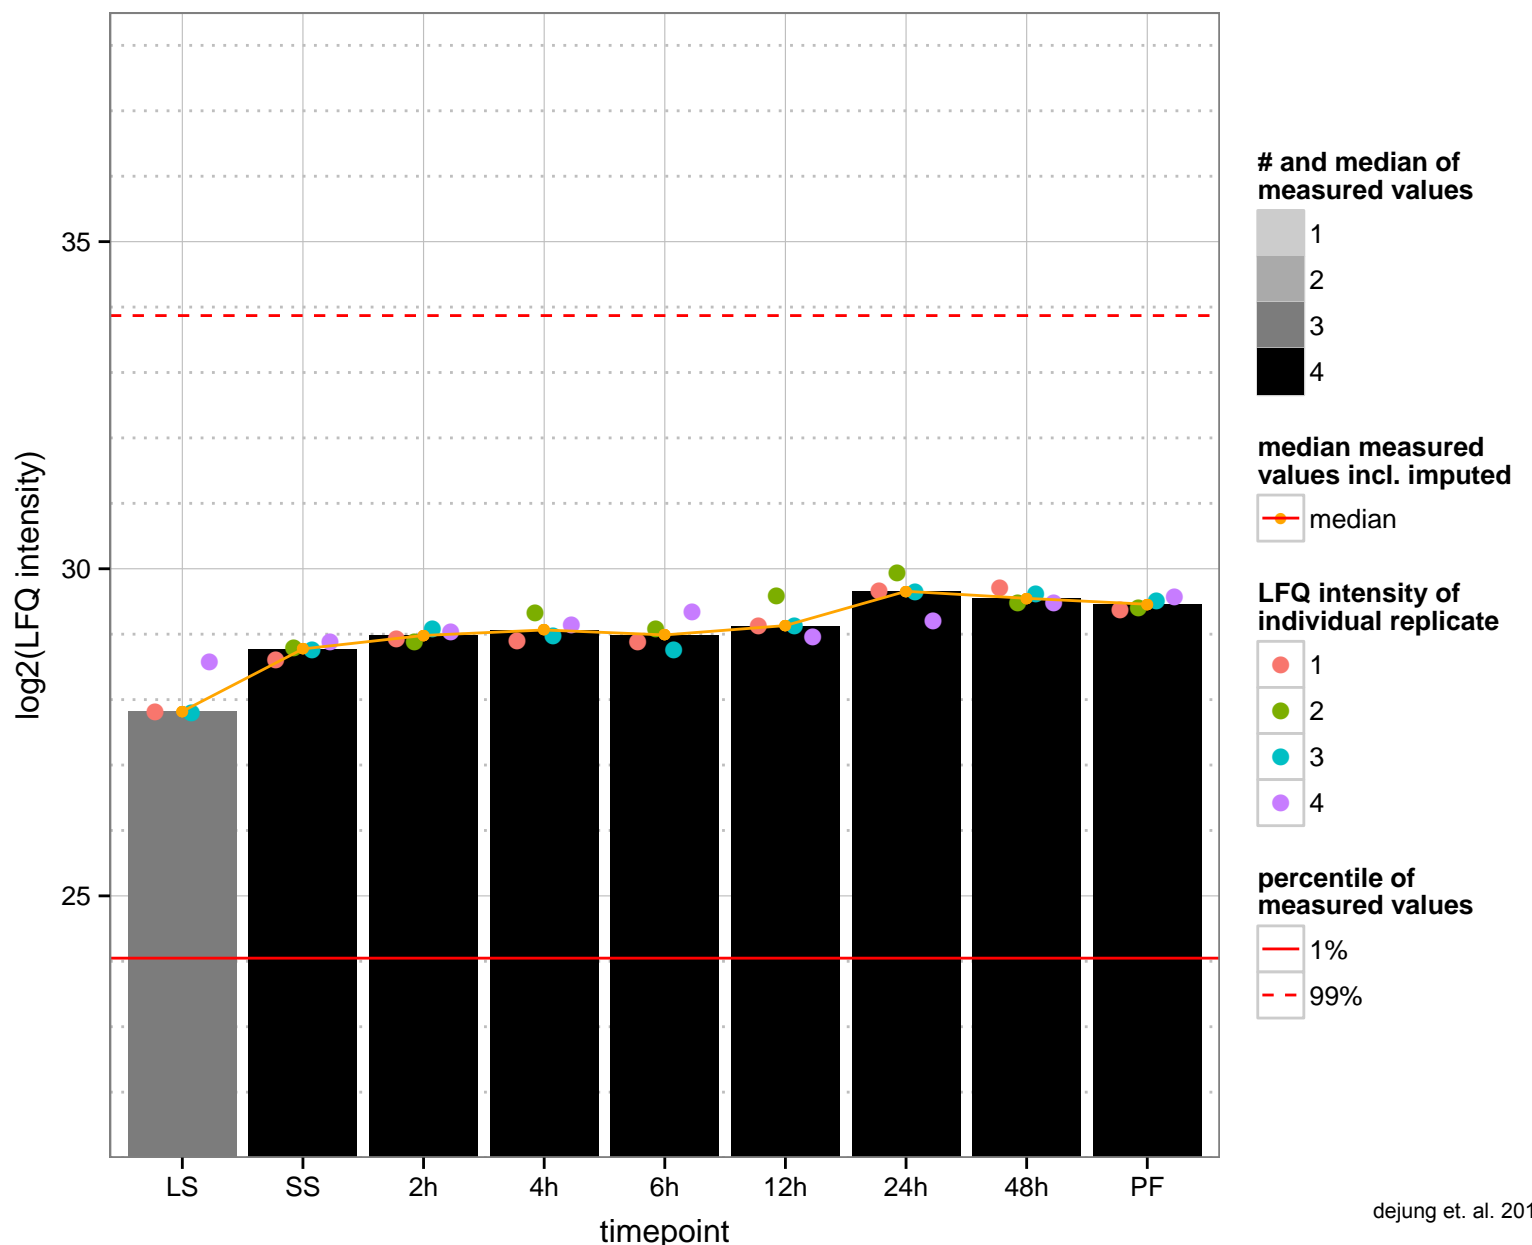

hypothetical protein, conserved  
 Tb927.8.1470  
 AGOF: null  
 AGOC: null  
 AGOP: null  
 PGOF: null  
 PGOC: null  
 PGOP: null

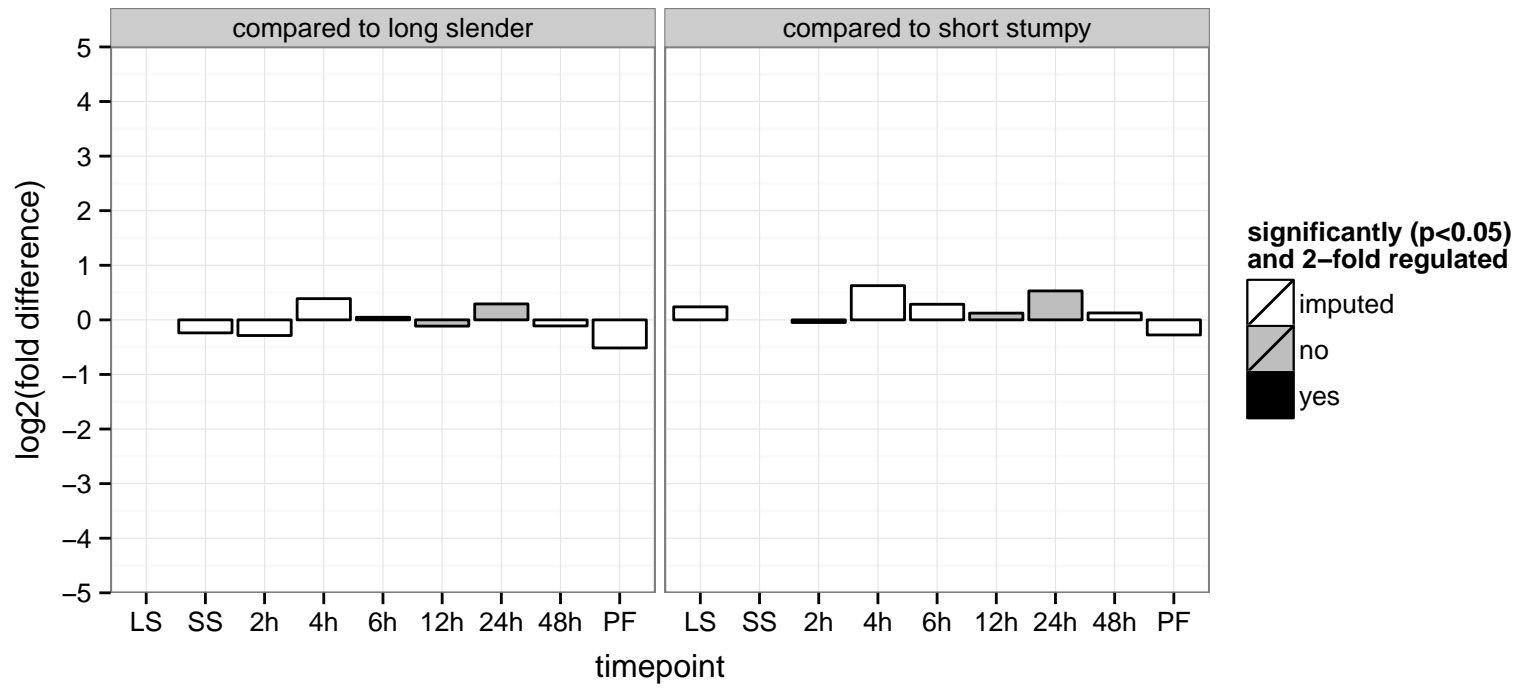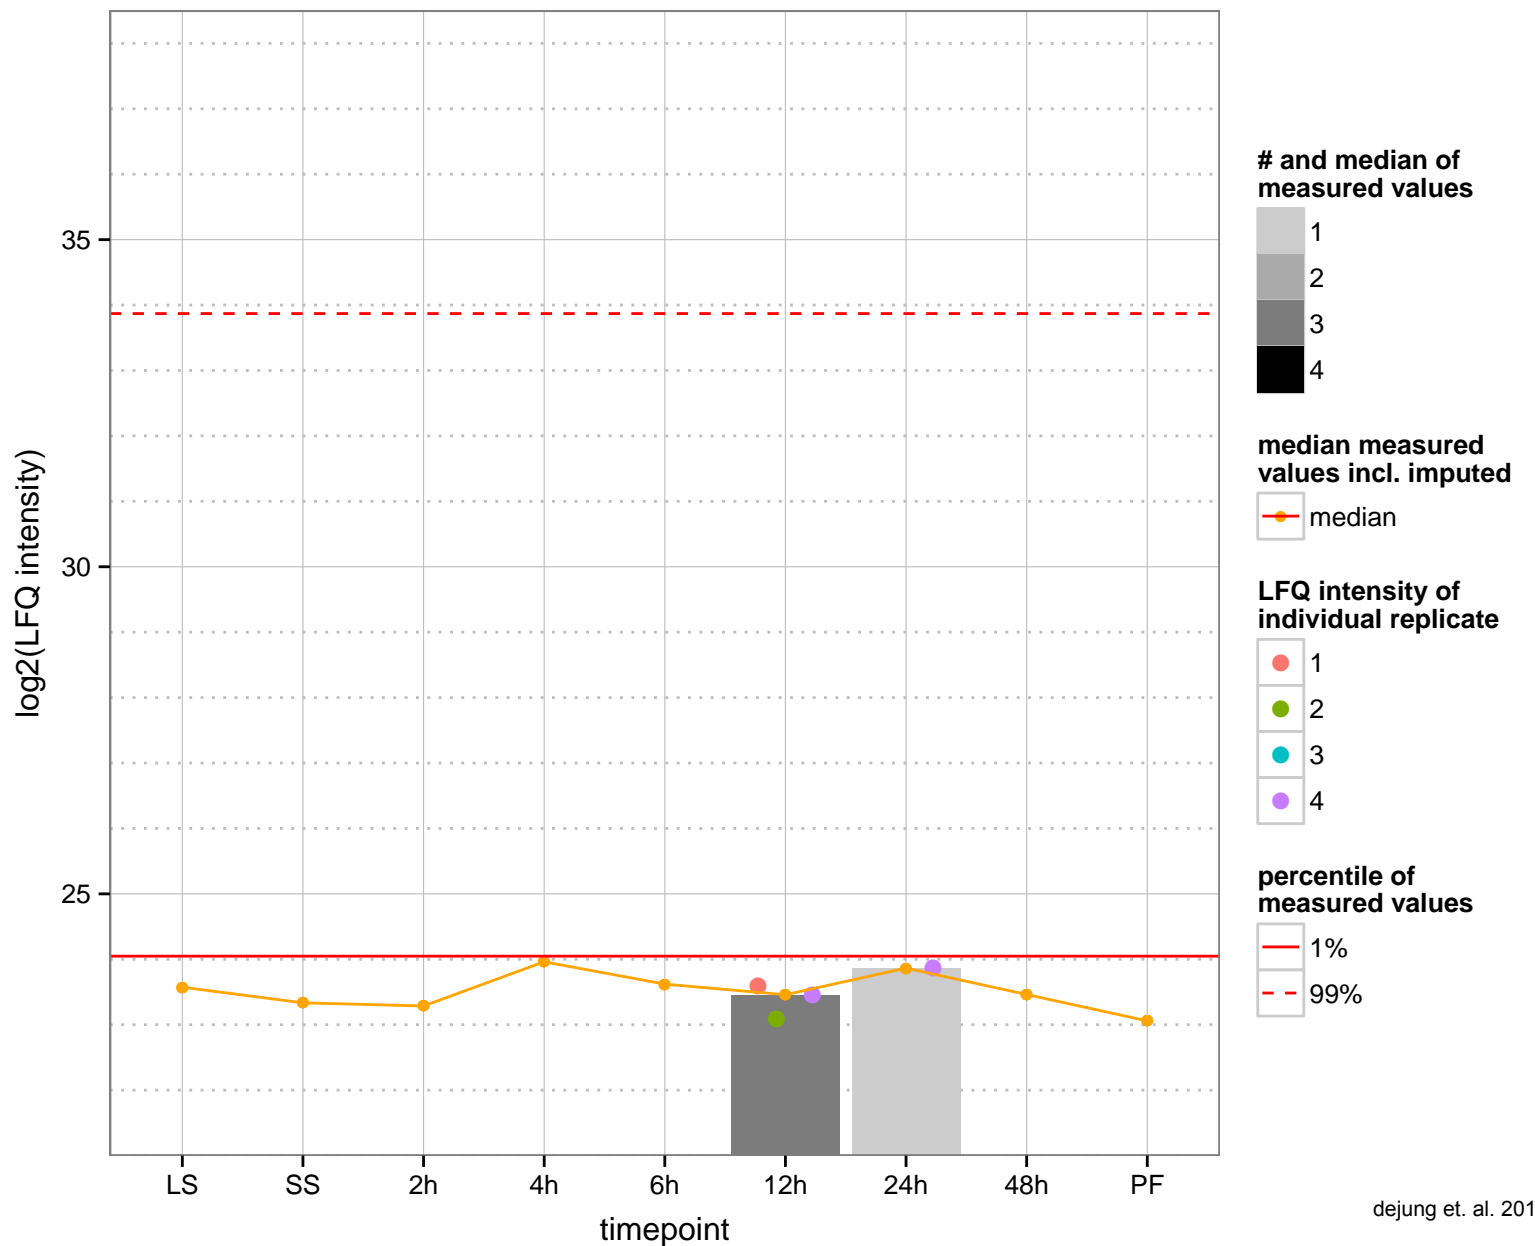



hypothetical protein, conserved  
 Tb927.8.1540  
 AGOF: null  
 AGOC: null  
 AGOP: null  
 PGO: null  
 PGOC: null  
 PGOP: null

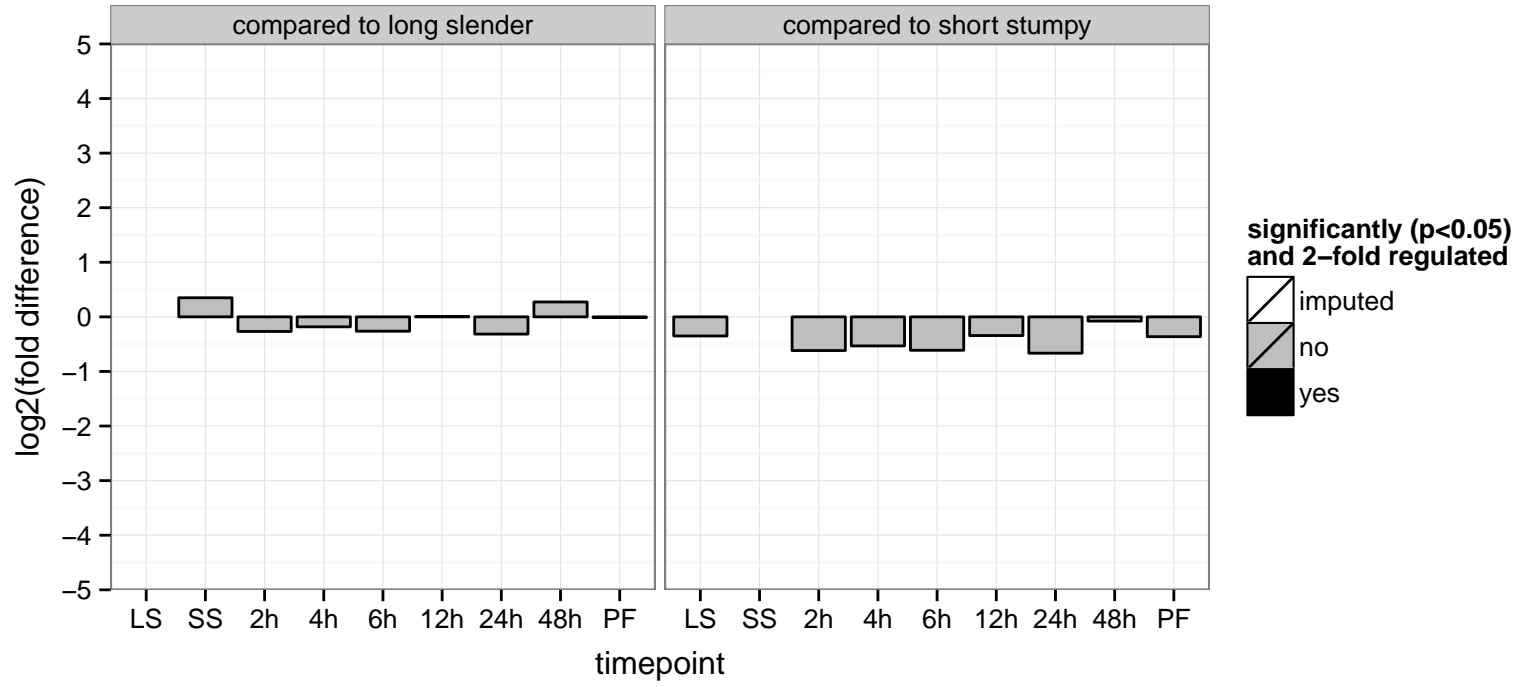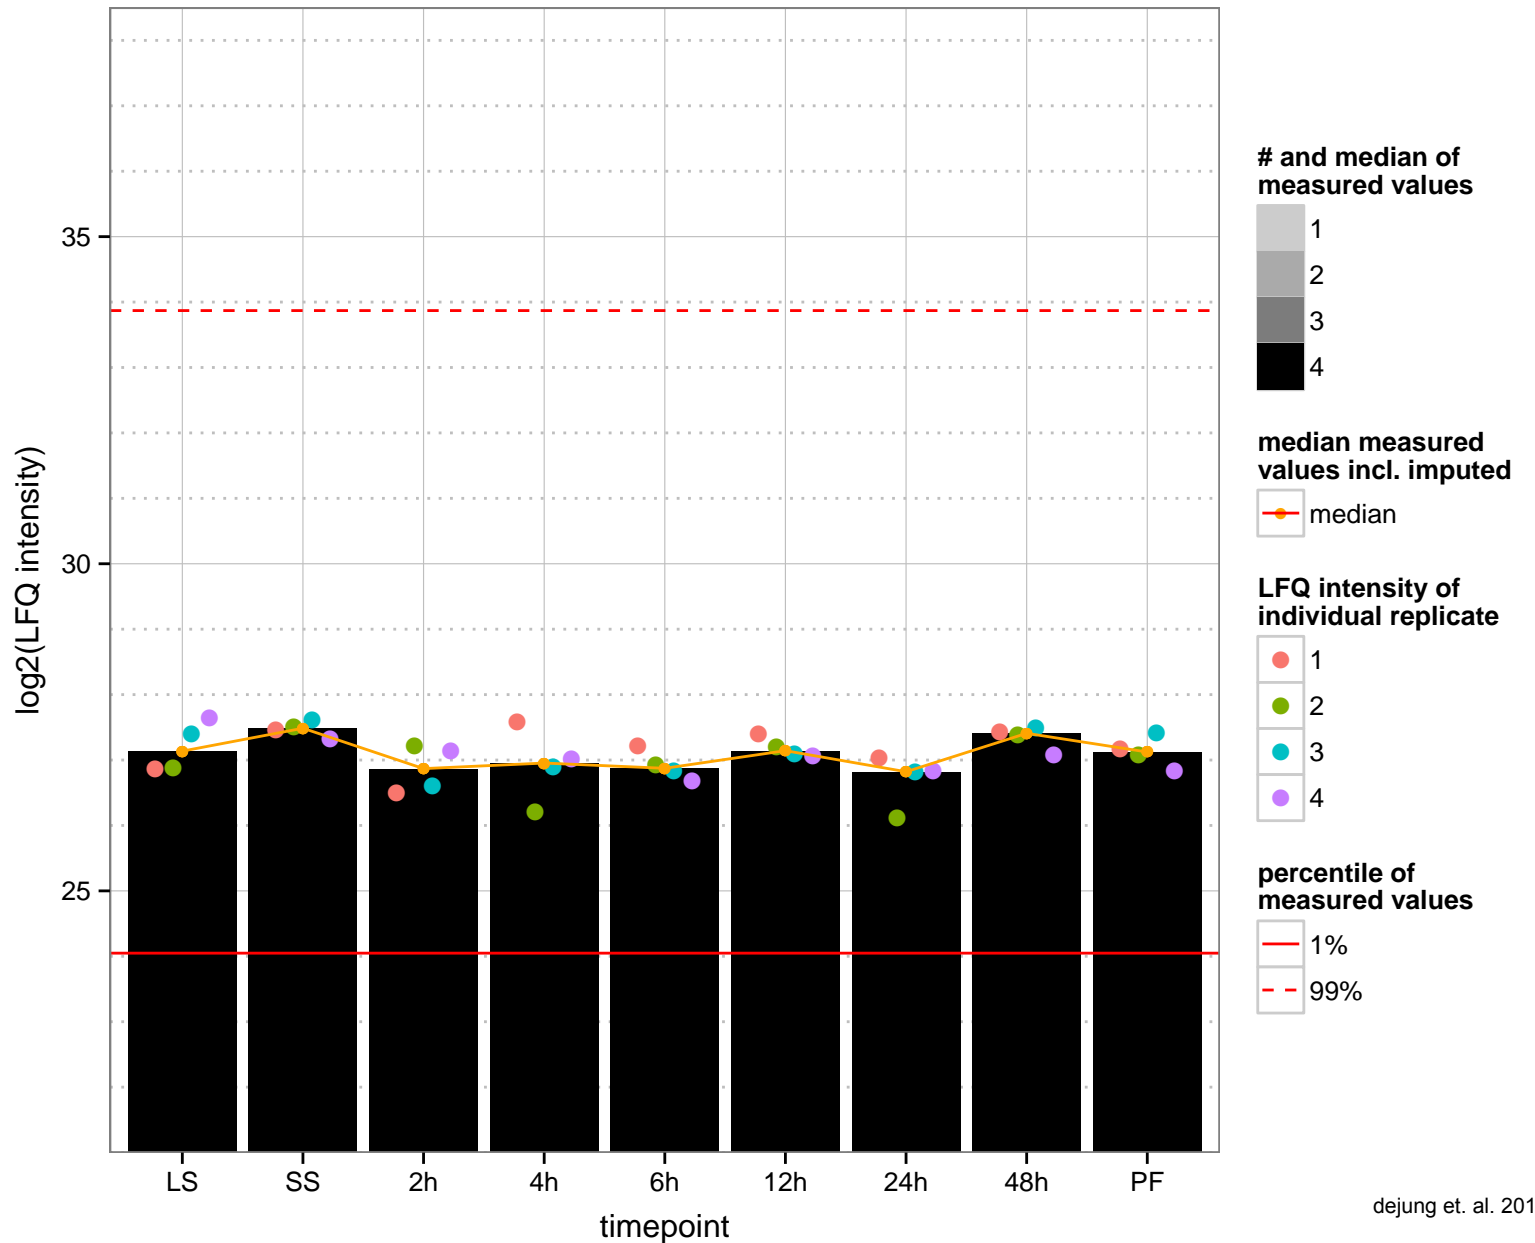

paraflagellar rod component, putative (PFC3)  
 Tb927.8.1550  
 AGOF: null  
 AGOC: null  
 AGOP: null  
 PGOF: calmodulin binding  
 PGO: microtubule-based flagellum  
 PGOP: null

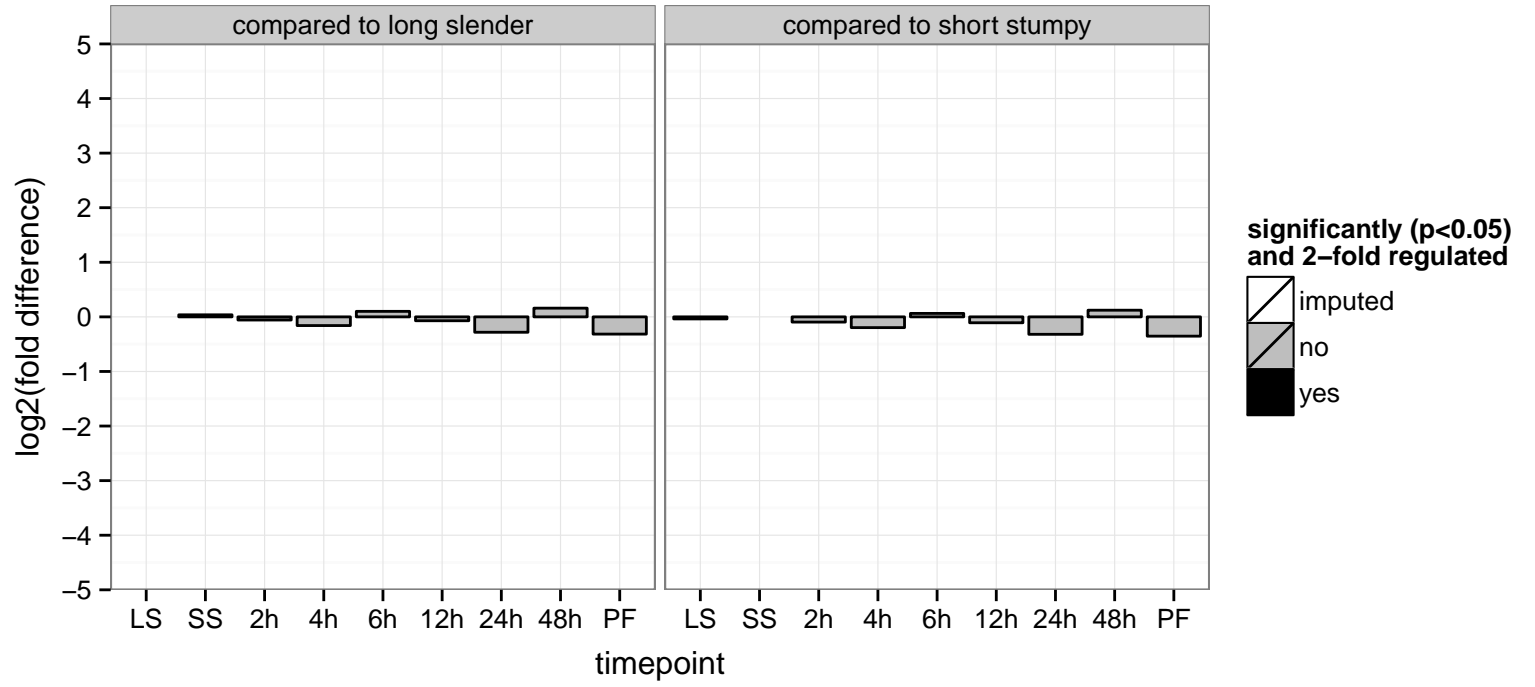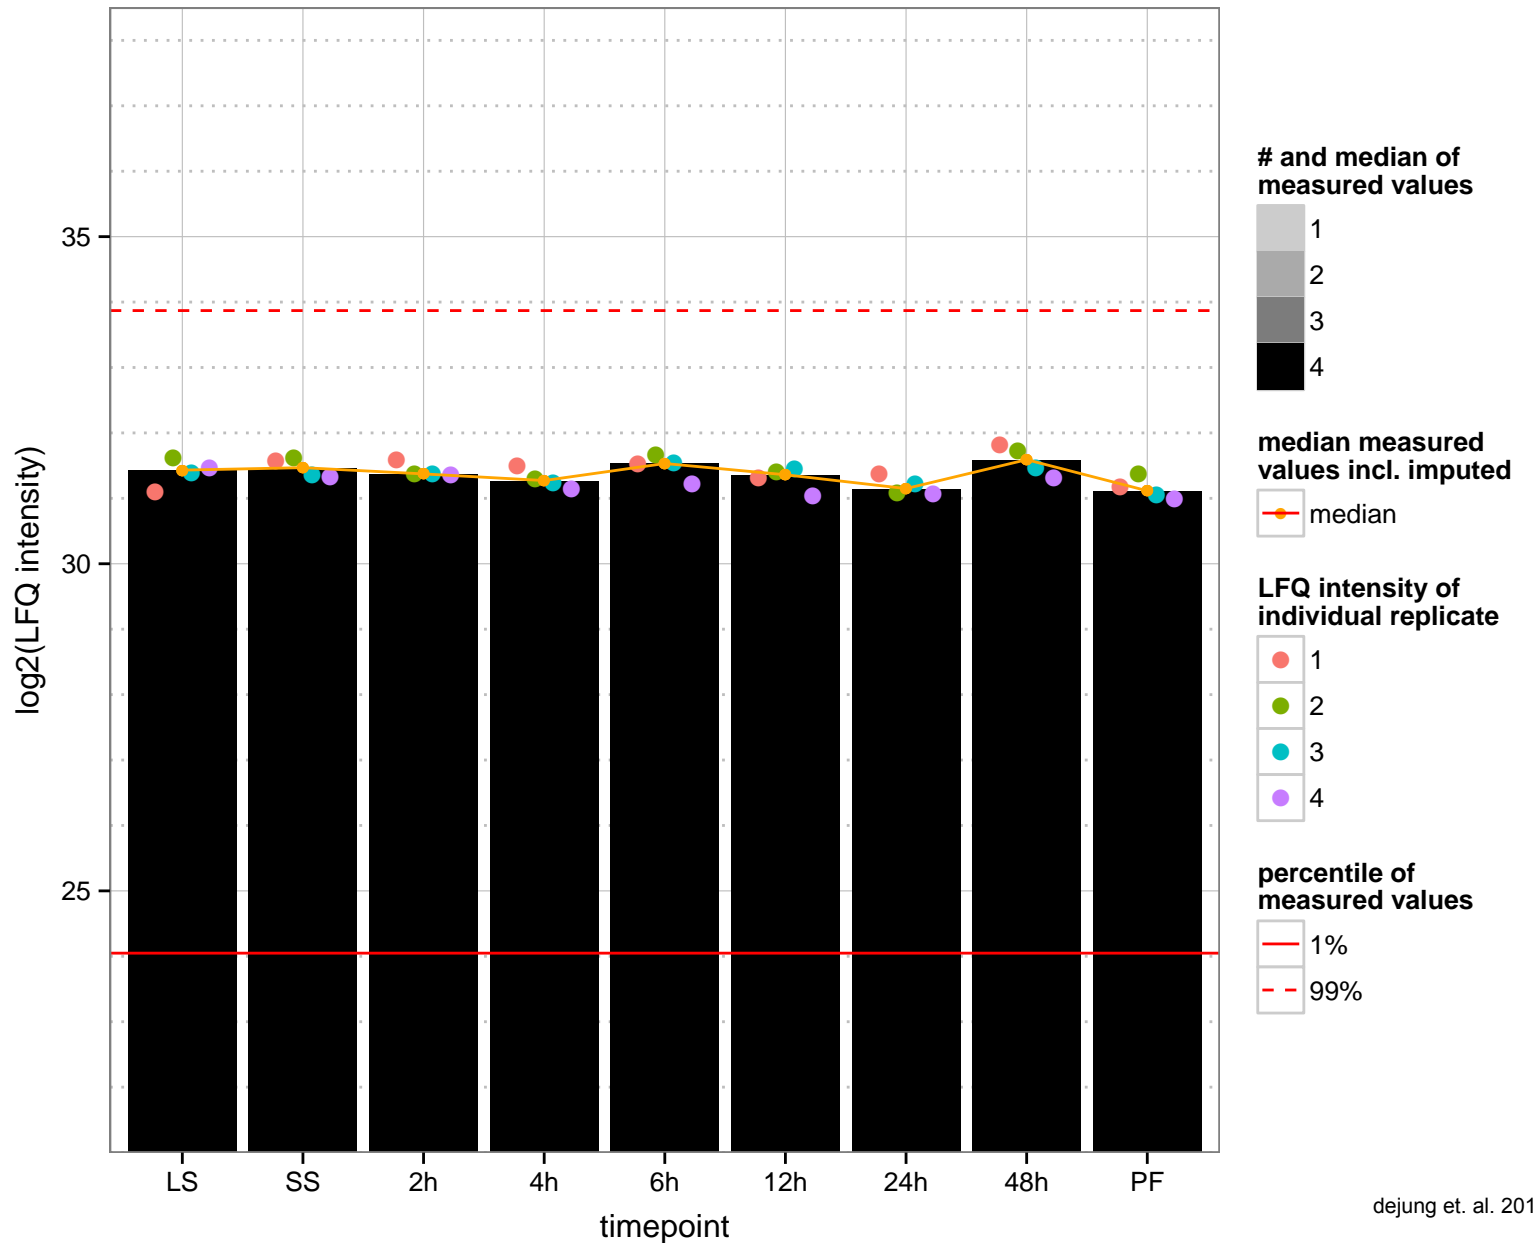

lysyl-tRNA synthetase, putative

Tb927.8.1600

AGOF: ATP binding, lysine-tRNA ligase activity, nucleic acid binding

AGOC: cytoplasm

AGOP: lysyl-tRNA aminoacylation, tRNA aminoacylation for protein translation, translation

PGOF: ATP binding, aminoacyl-tRNA ligase activity, lysine-tRNA ligase activity, nucleic acid binding, nucleotide binding

PGOC: cytoplasm

PGOP: lysyl-tRNA aminoacylation, tRNA aminoacylation for protein translation

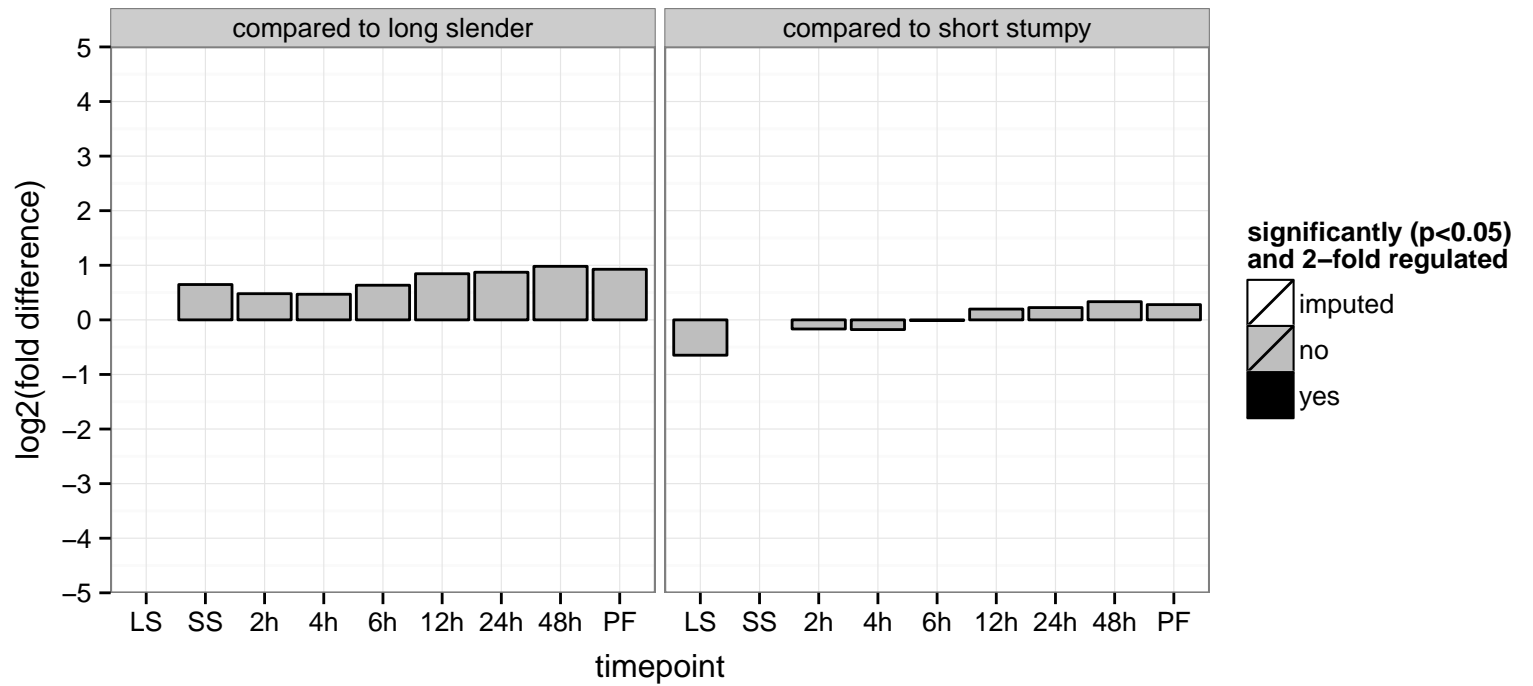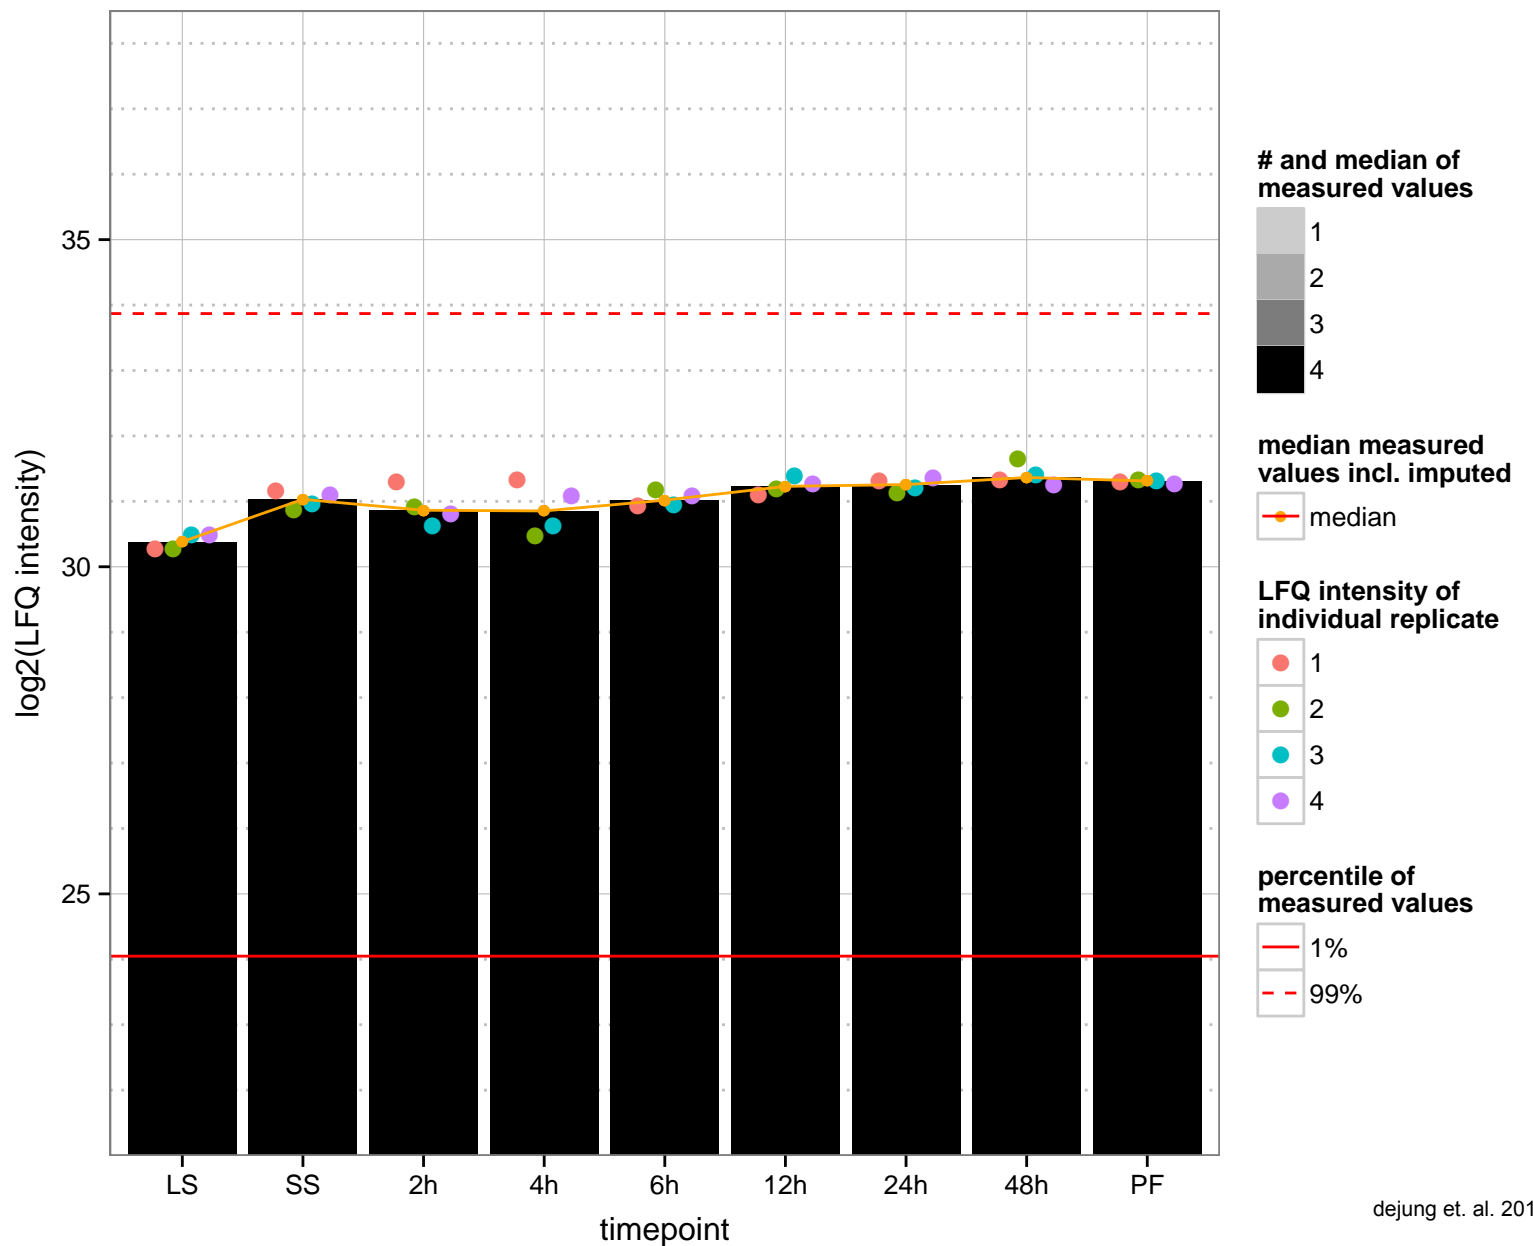

protein phosphatase 2A, regulatory subunit B, putative, phosphotyrosyl phosphate activator protein  
 Tb927.8.1710  
 AGOF: phosphatase activator activity  
 AGOC: null  
 AGOP: null  
 PGOF: phosphatase activator activity  
 PGOC: null  
 PGOP: null

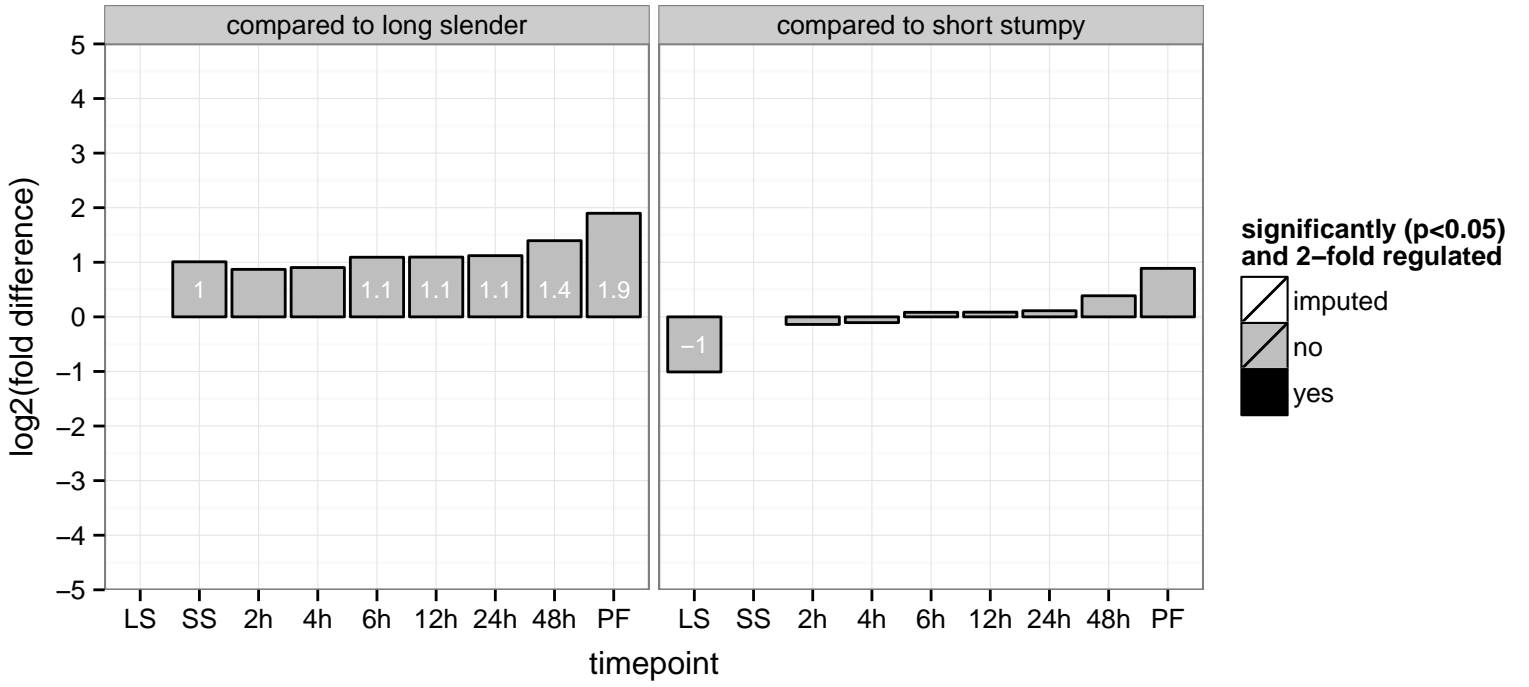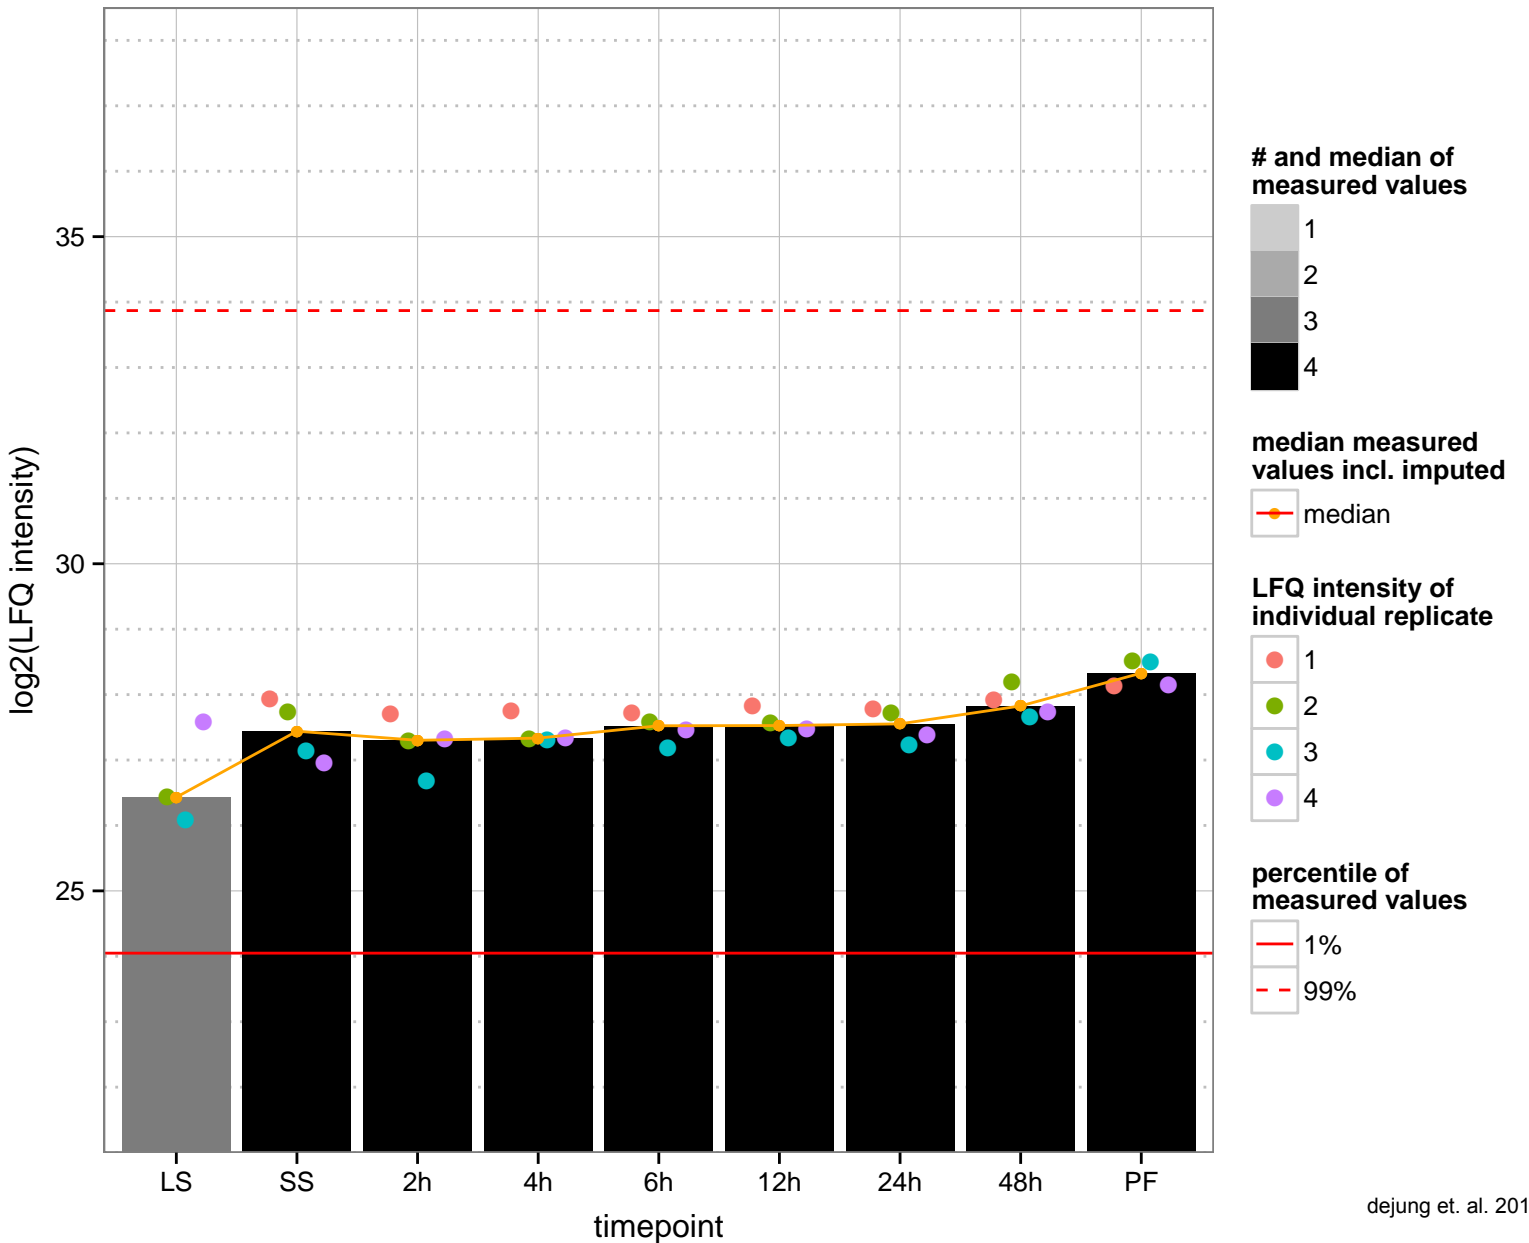

hypothetical protein, conserved  
 Tb927.8.1740  
 AGOF: null  
 AGOC: mitochondrion  
 AGOP: null  
 PGO: null  
 PGO: null  
 PGO: null

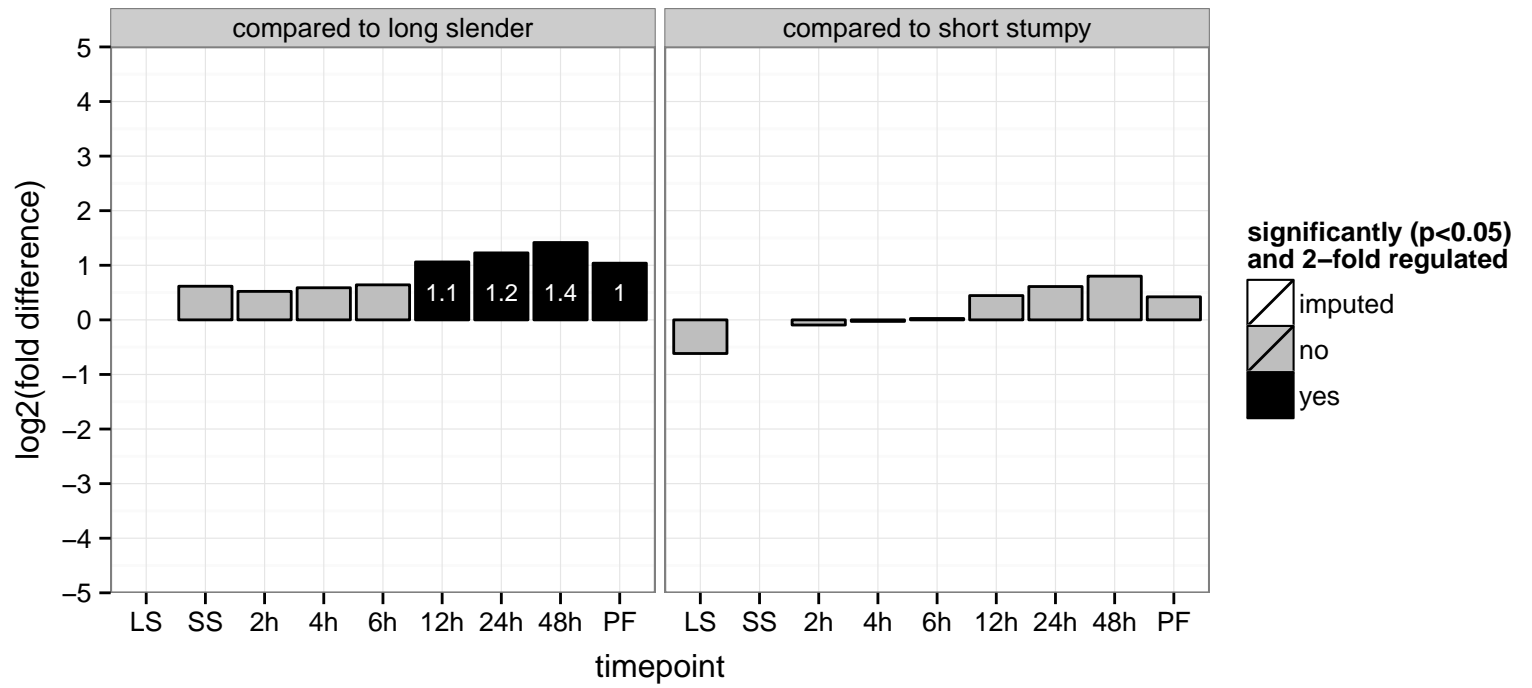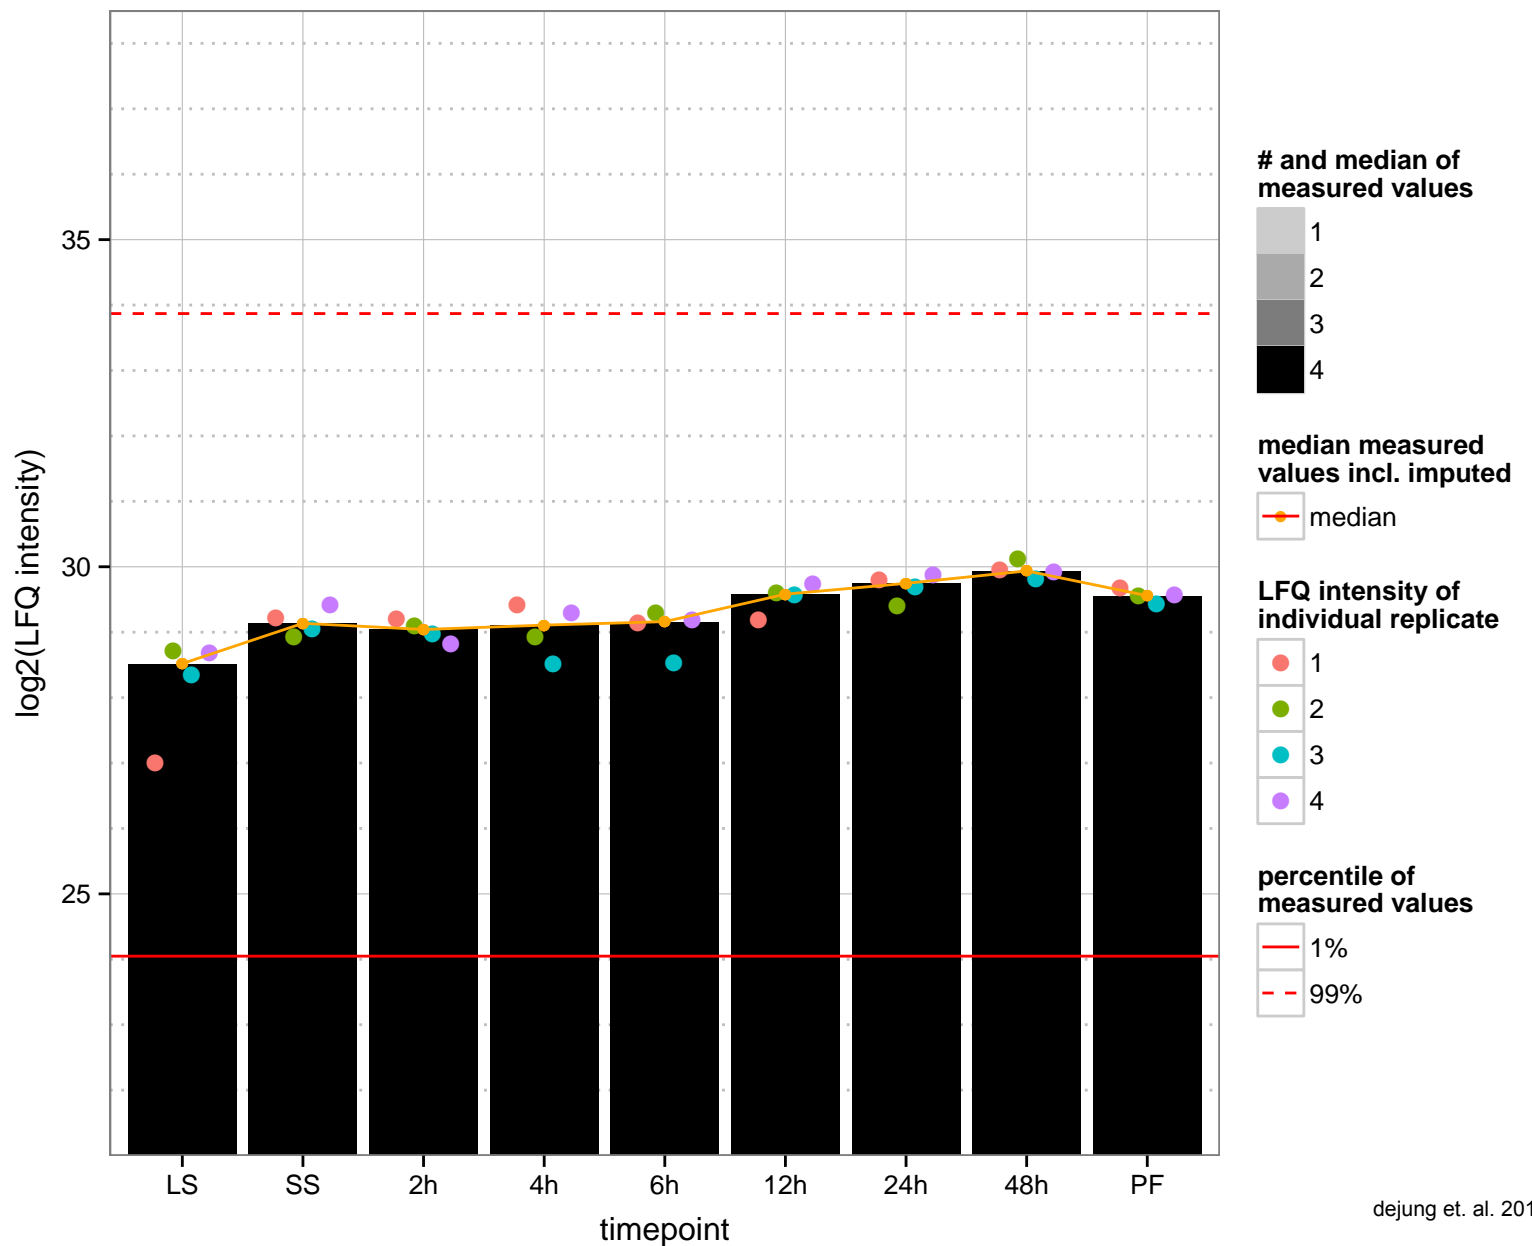

protein kinase, putative

Tb927.8.1780

AGOF: ATP binding, protein serine/threonine kinase activity, protein tyrosine kinase activity

AGOC: null

AGOP: protein phosphorylation

PGOF: ATP binding, protein kinase activity, transferase activity, transferring phosphorus-containing groups

PGOC: null

PGOP: protein phosphorylation

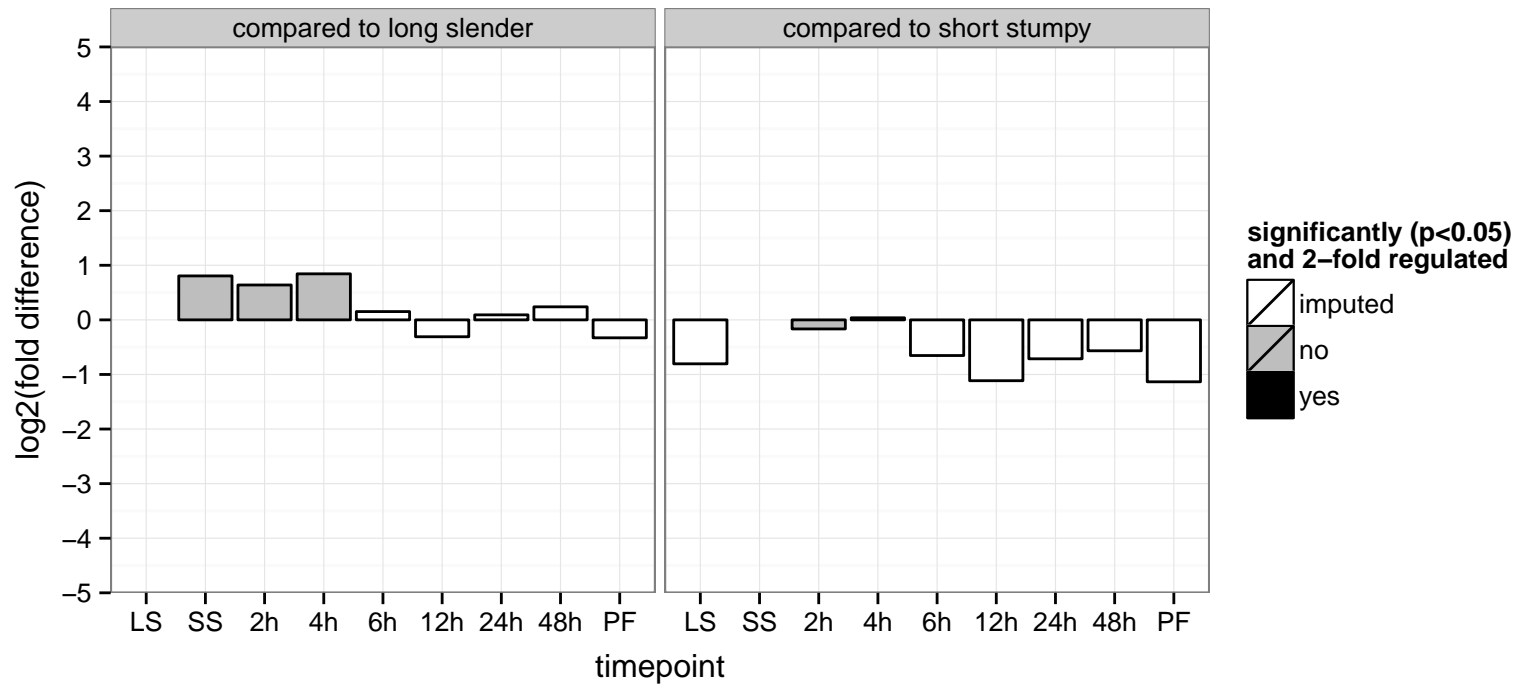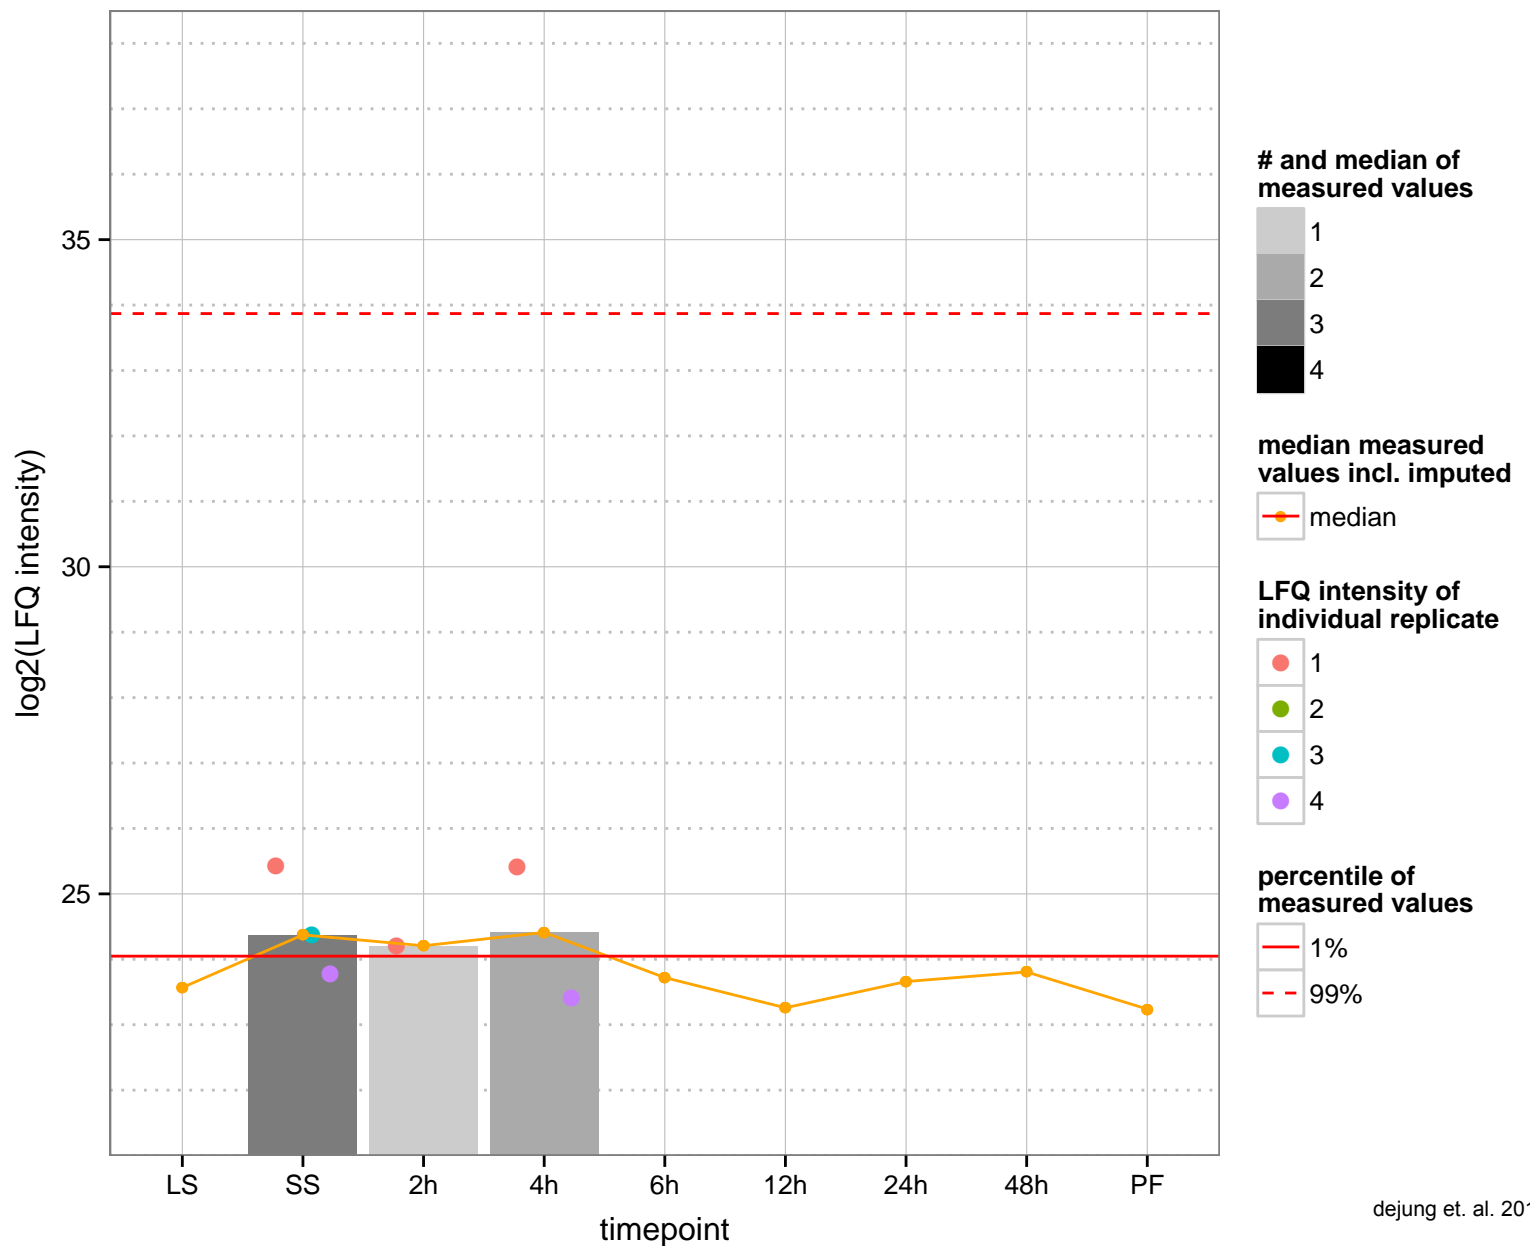

hypothetical protein, conserved  
 Tb927.8.1840  
 AGOF: ARF guanyl-nucleotide exchange factor activity  
 AGOC: intracellular  
 AGOP: regulation of ARF protein signal transduction  
 PGOF: ARF guanyl-nucleotide exchange factor activity  
 PGO: intracellular  
 PGOP: regulation of ARF protein signal transduction

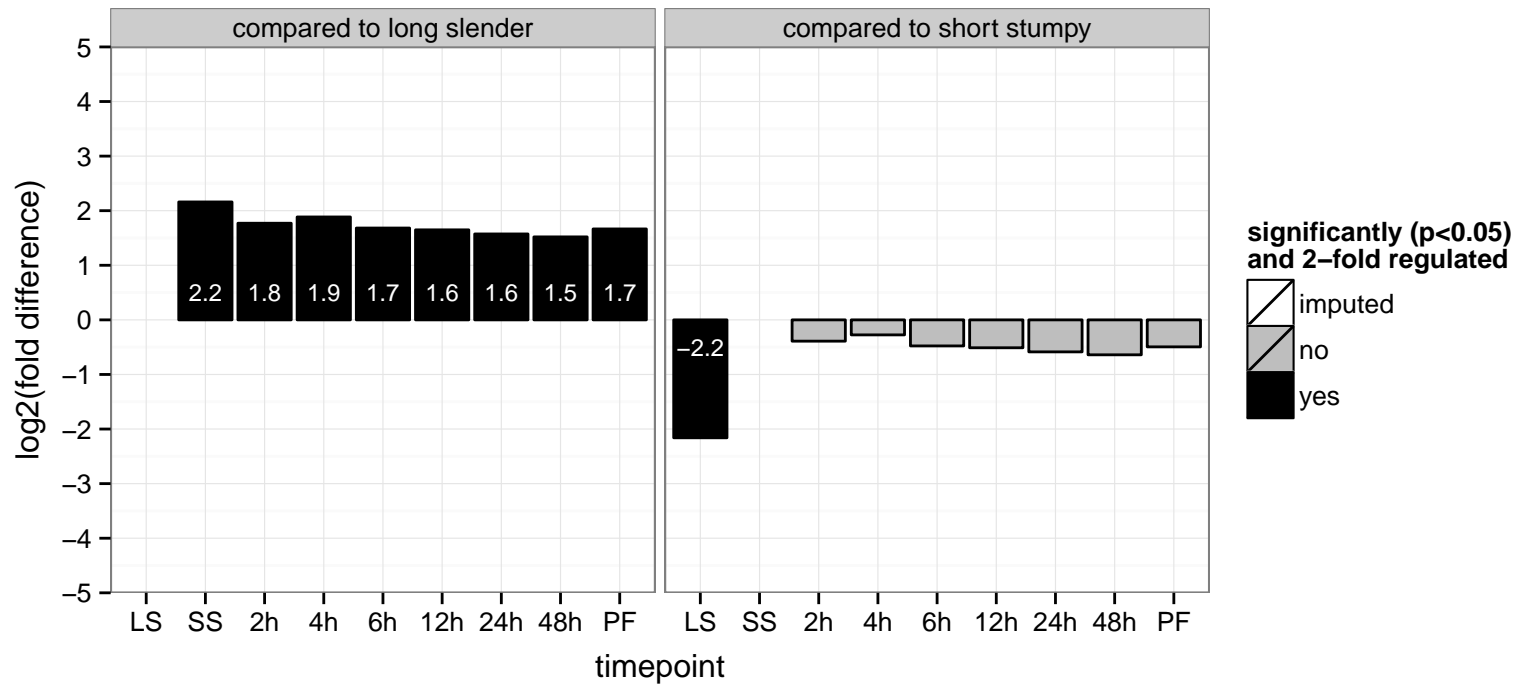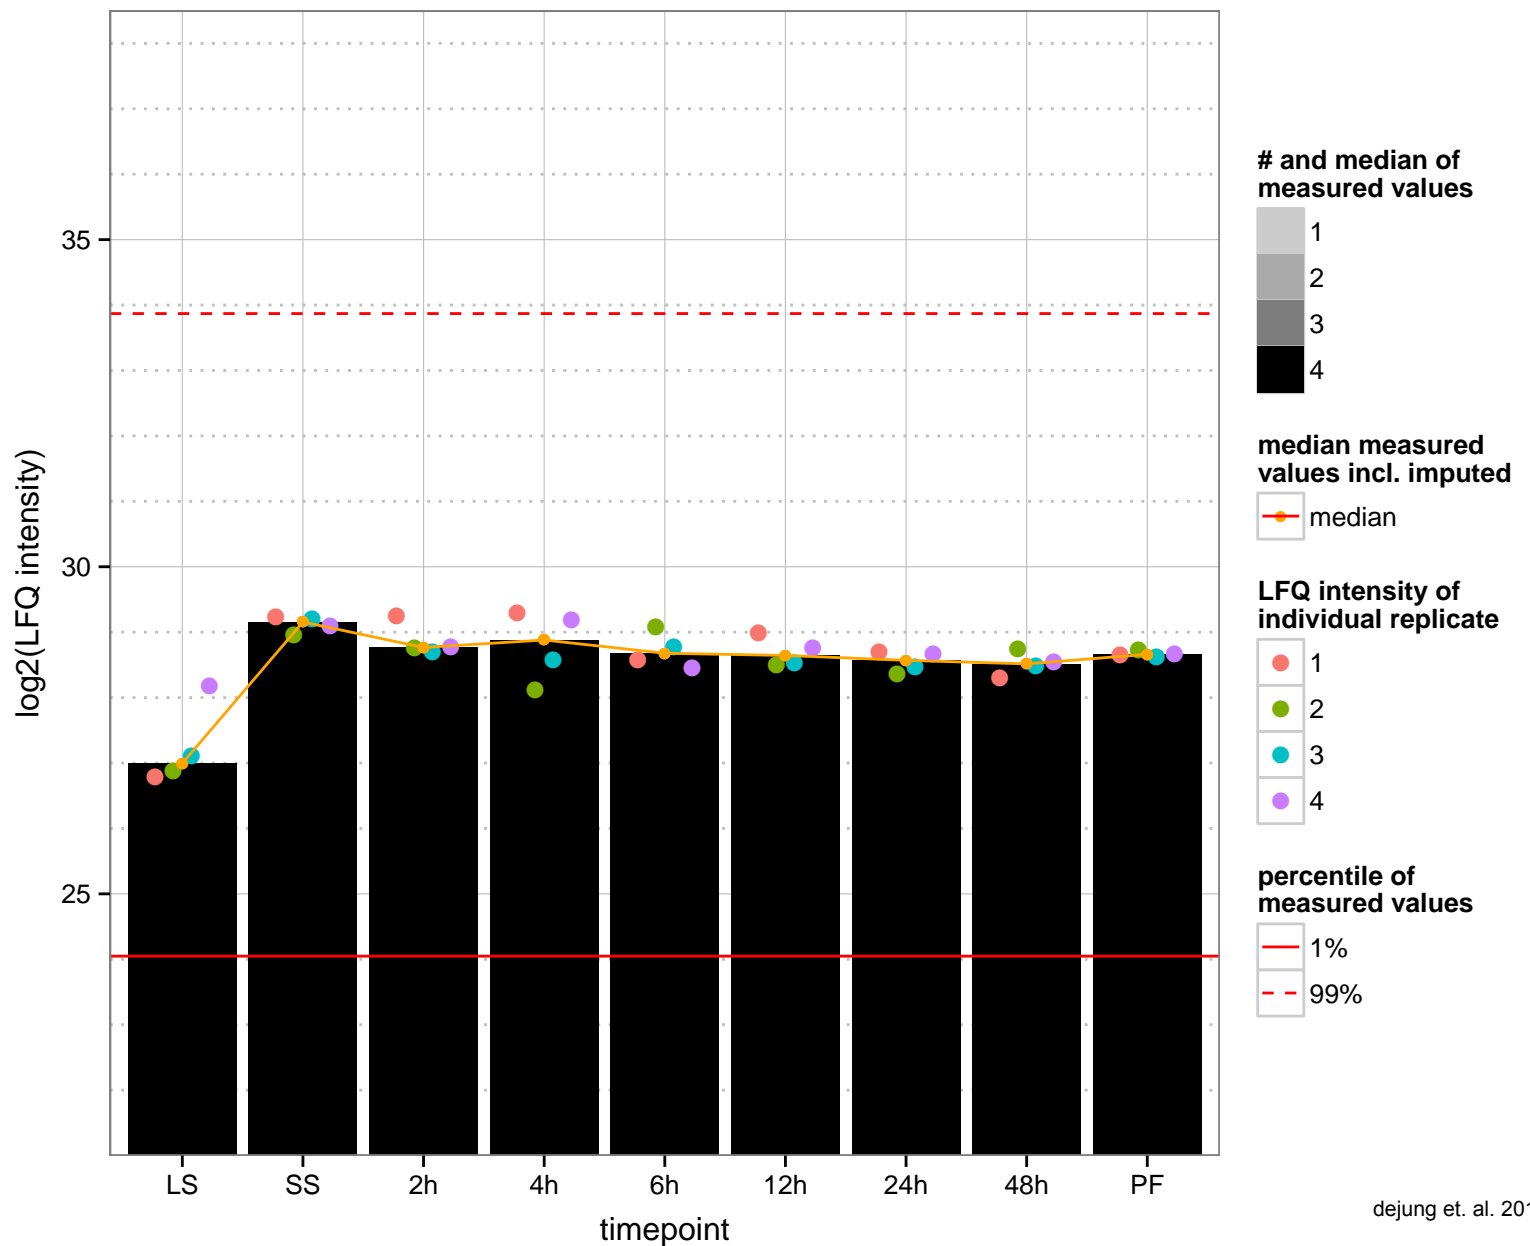

hypothetical protein, conserved  
 Tb927.8.1960  
 AGOF: null  
 AGOC: cytoplasm, nucleus  
 AGOP: null  
 PGO: null  
 PGOC: null  
 PGOP: null

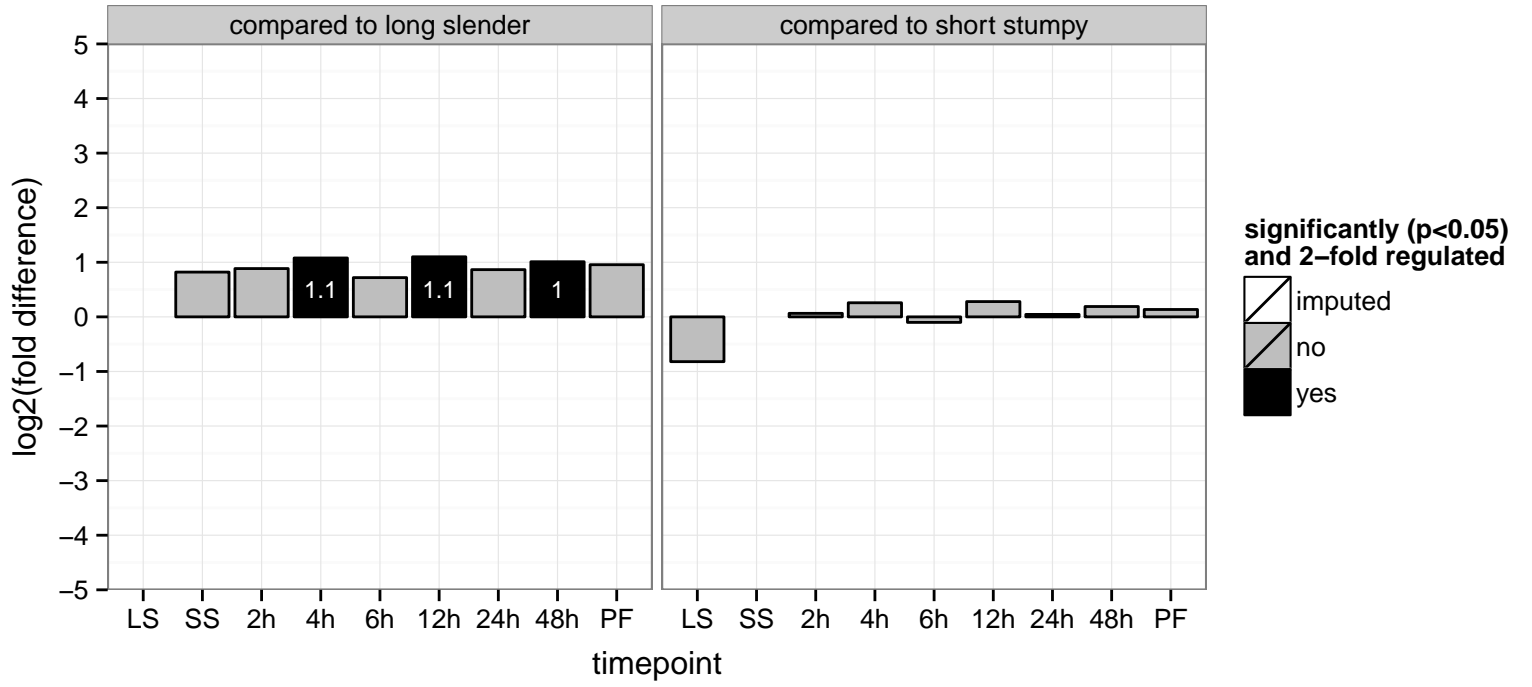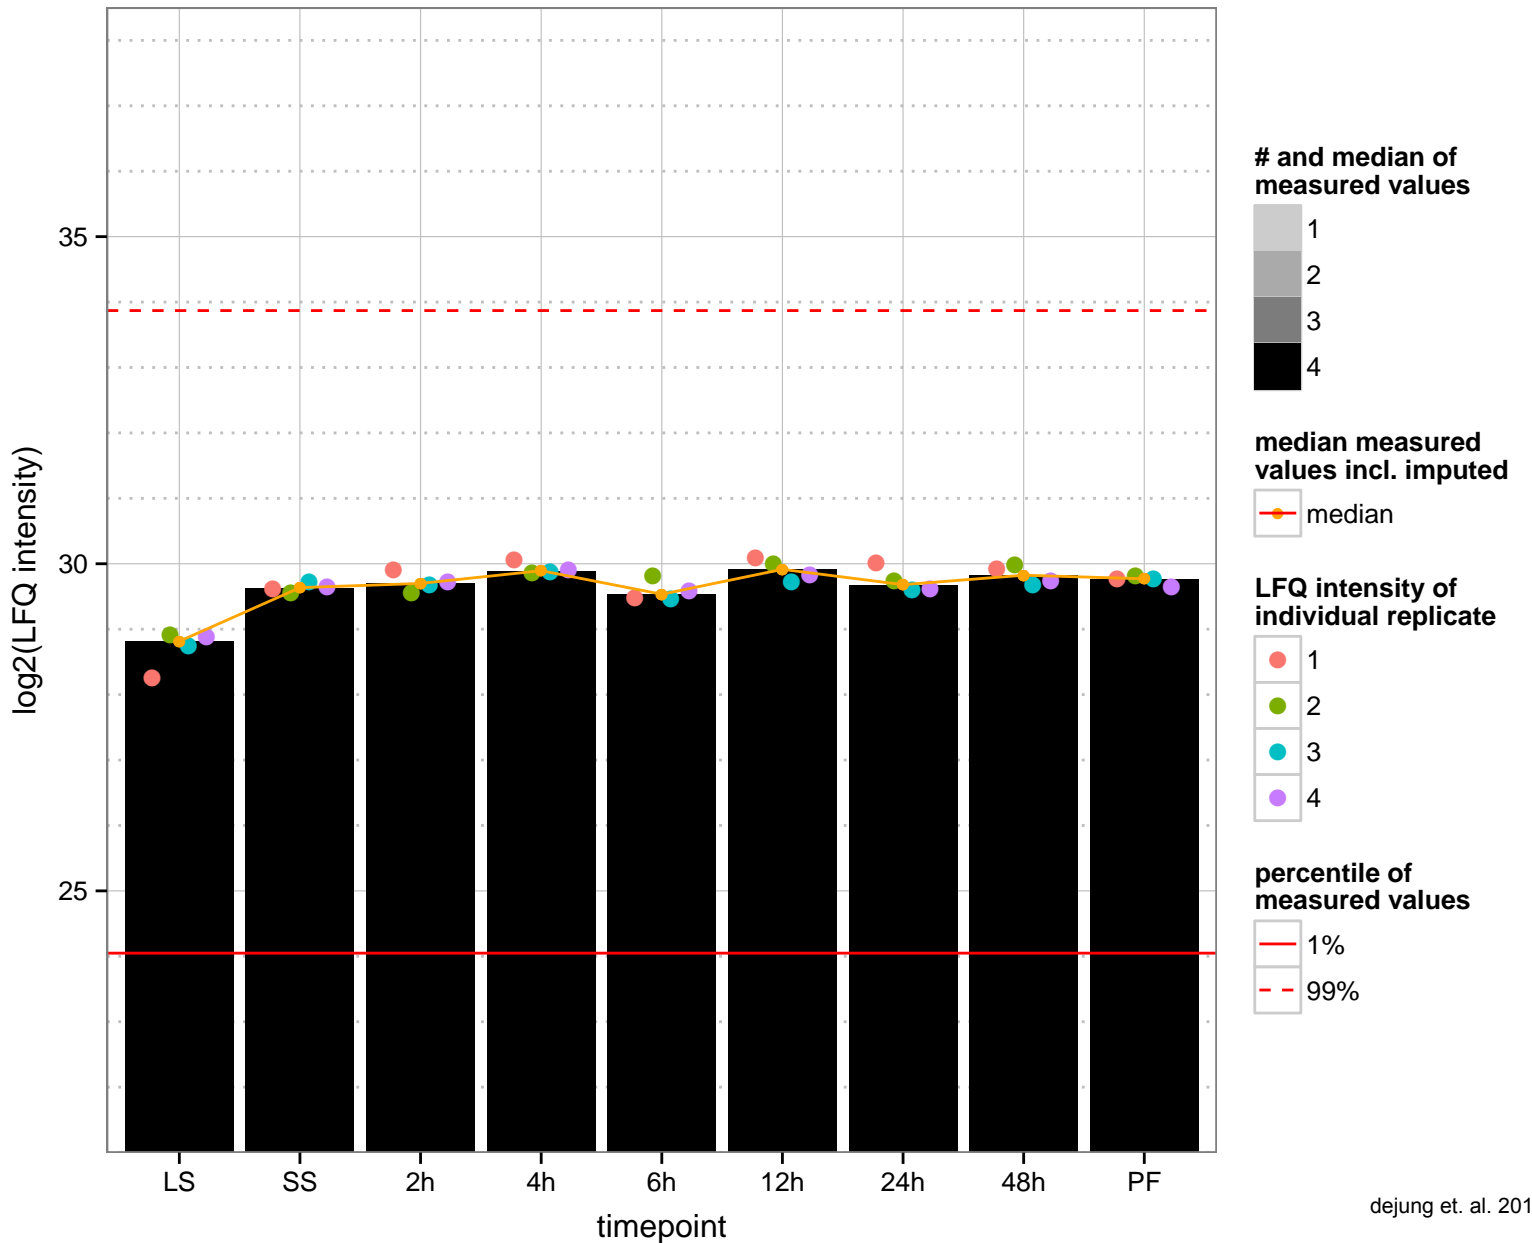



hypothetical protein, conserved  
 Tb927.8.1980  
 AGOF: null  
 AGOC: nucleolus  
 AGOP: rRNA processing  
 PGO: protein binding  
 PGO: nucleolus  
 PGO: rRNA processing

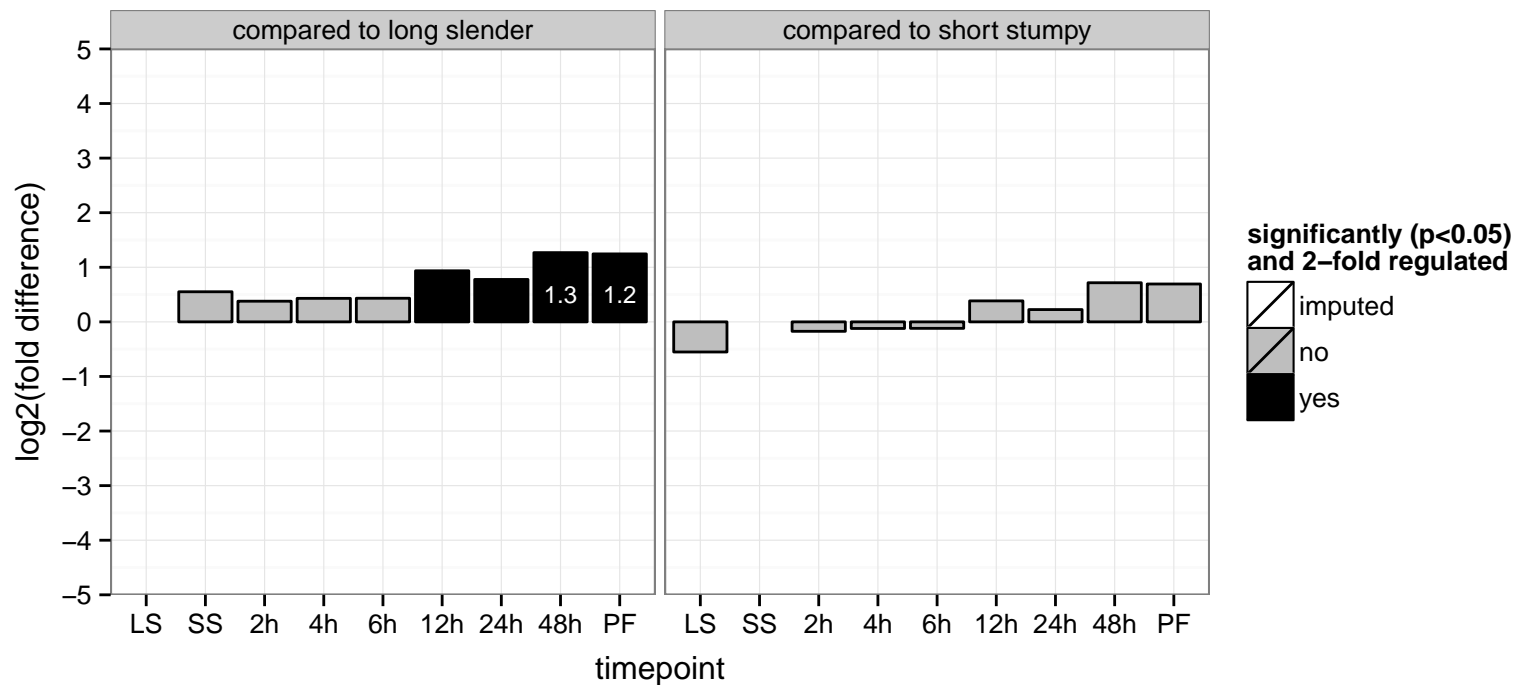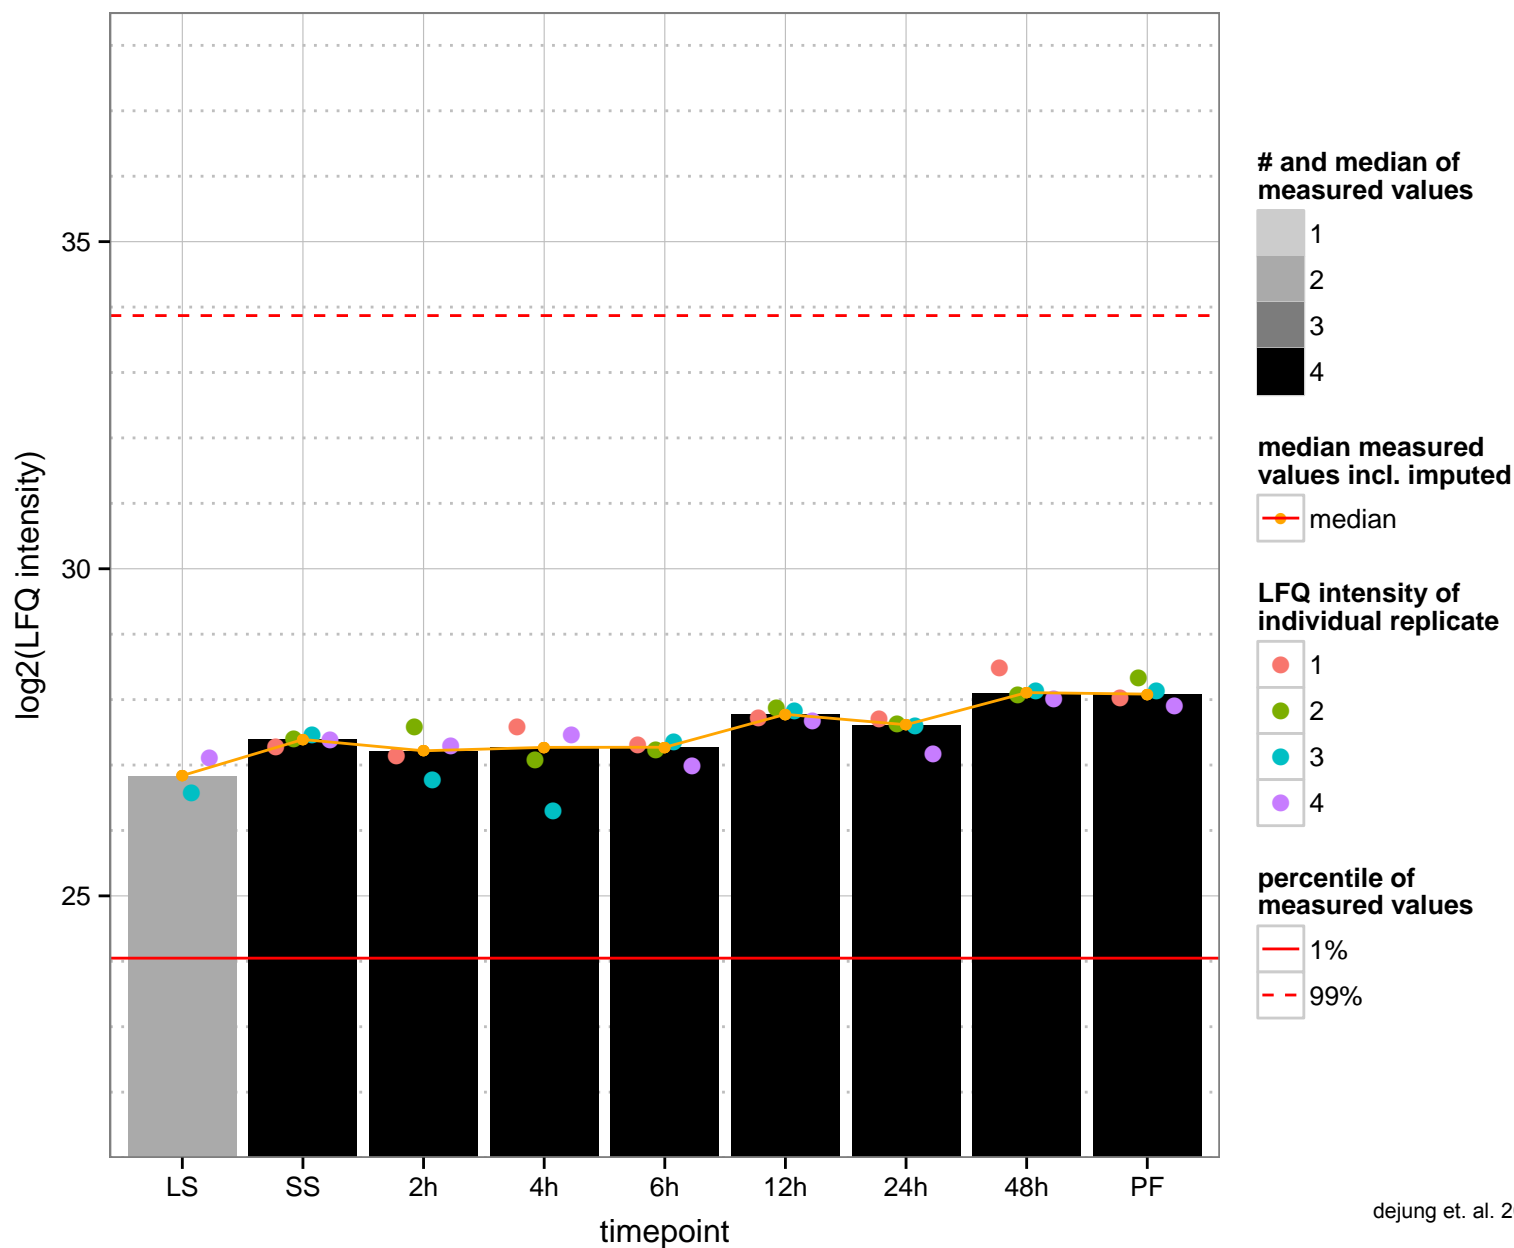

peroxidoxin, tryparedoxin peroxidase (TRYP2)  
 Tb927.8.1990  
 AGOF: antioxidant activity, trypanothione–disulfide reductase activity  
 AGOC: mitochondrion  
 AGOP: cell redox homeostasis, oxidation–reduction process  
 PGO: antioxidant activity, oxidoreductase activity, peroxiredoxin activity  
 PGO: null  
 PGO: oxidation–reduction process

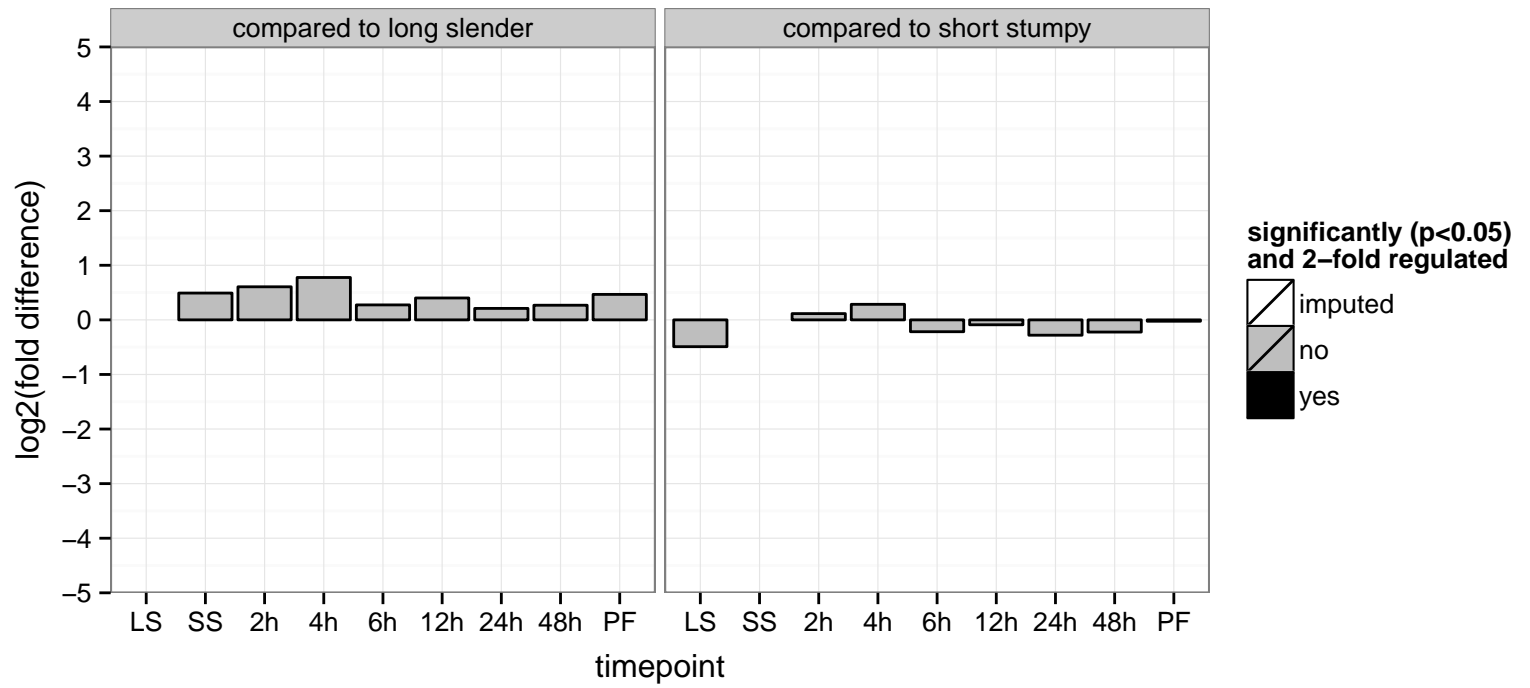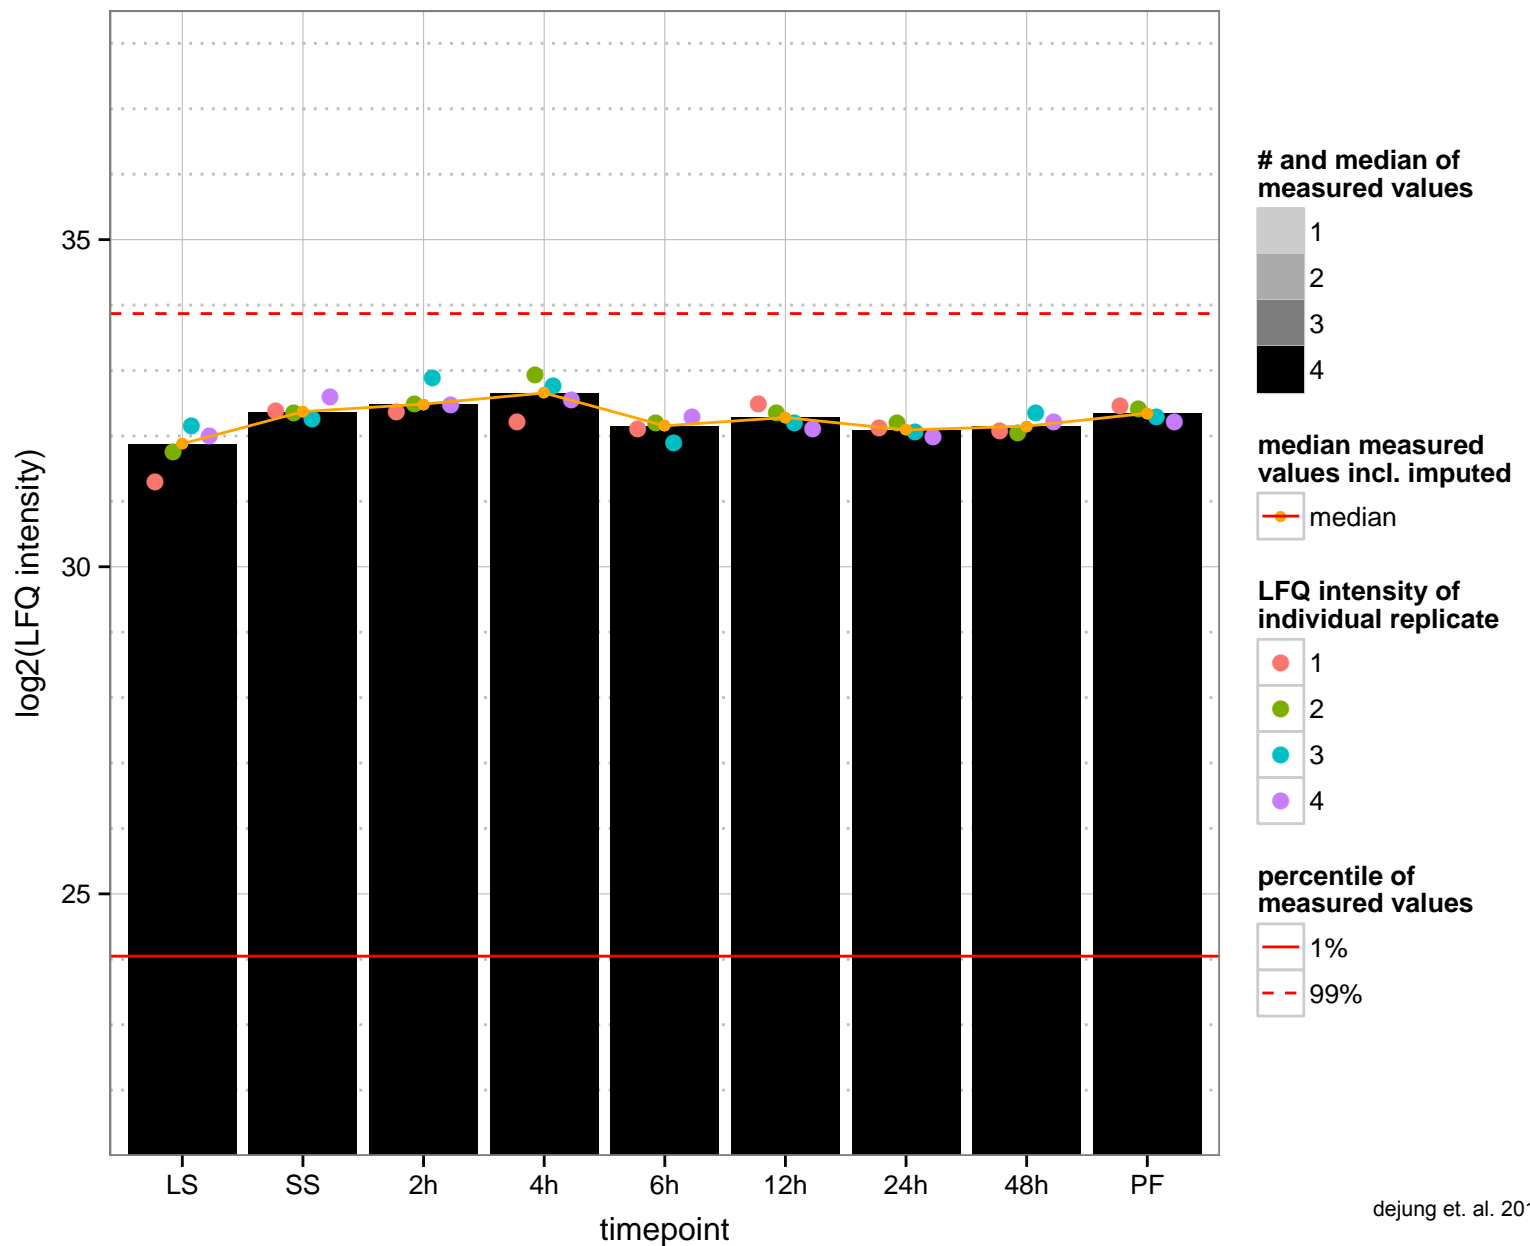

agmatinase, putative

Tb927.8.2020

AGOF: arginase activity, metal ion binding

AGOC: null

AGOP: arginine metabolic process

PGOF: hydrolase activity, acting on carbon–nitrogen (but not peptide) bonds, in linear amidines, metal ion binding

PGOC: null

PGOP: null

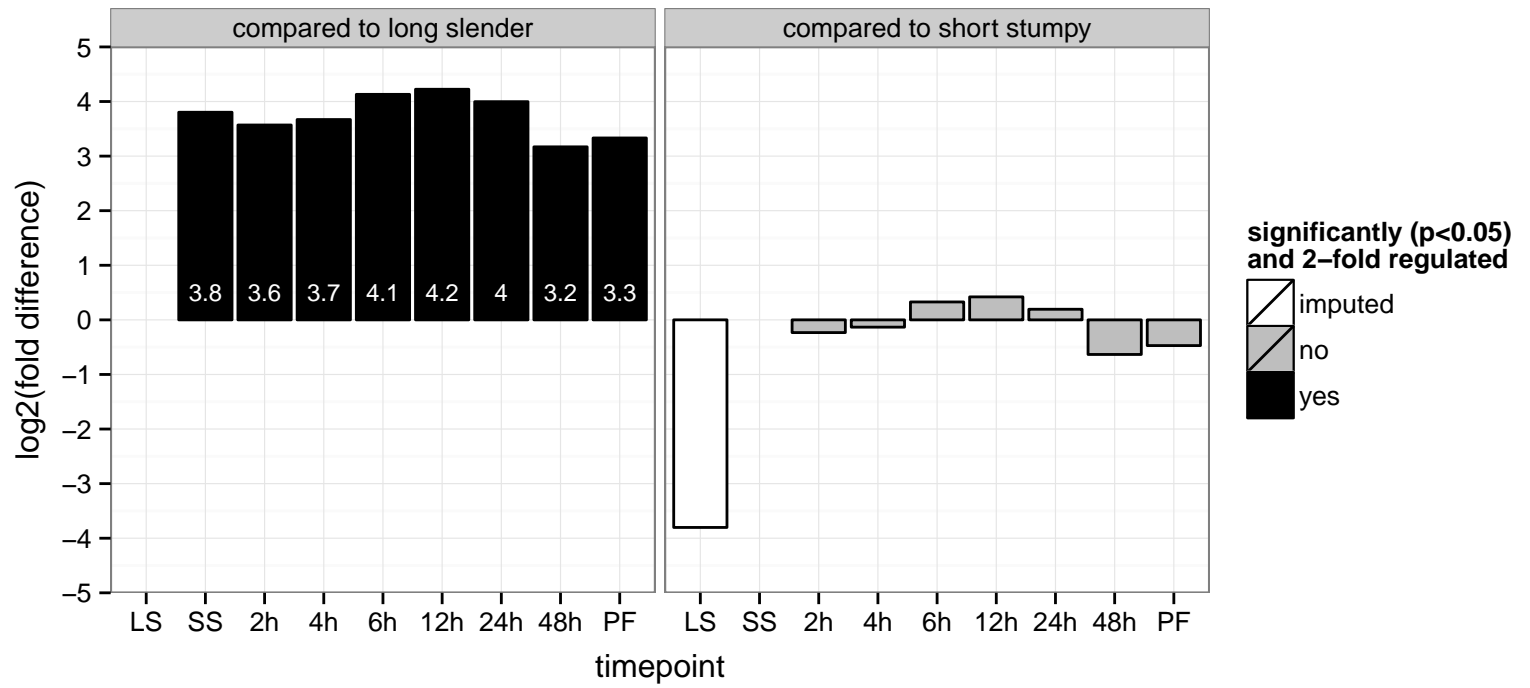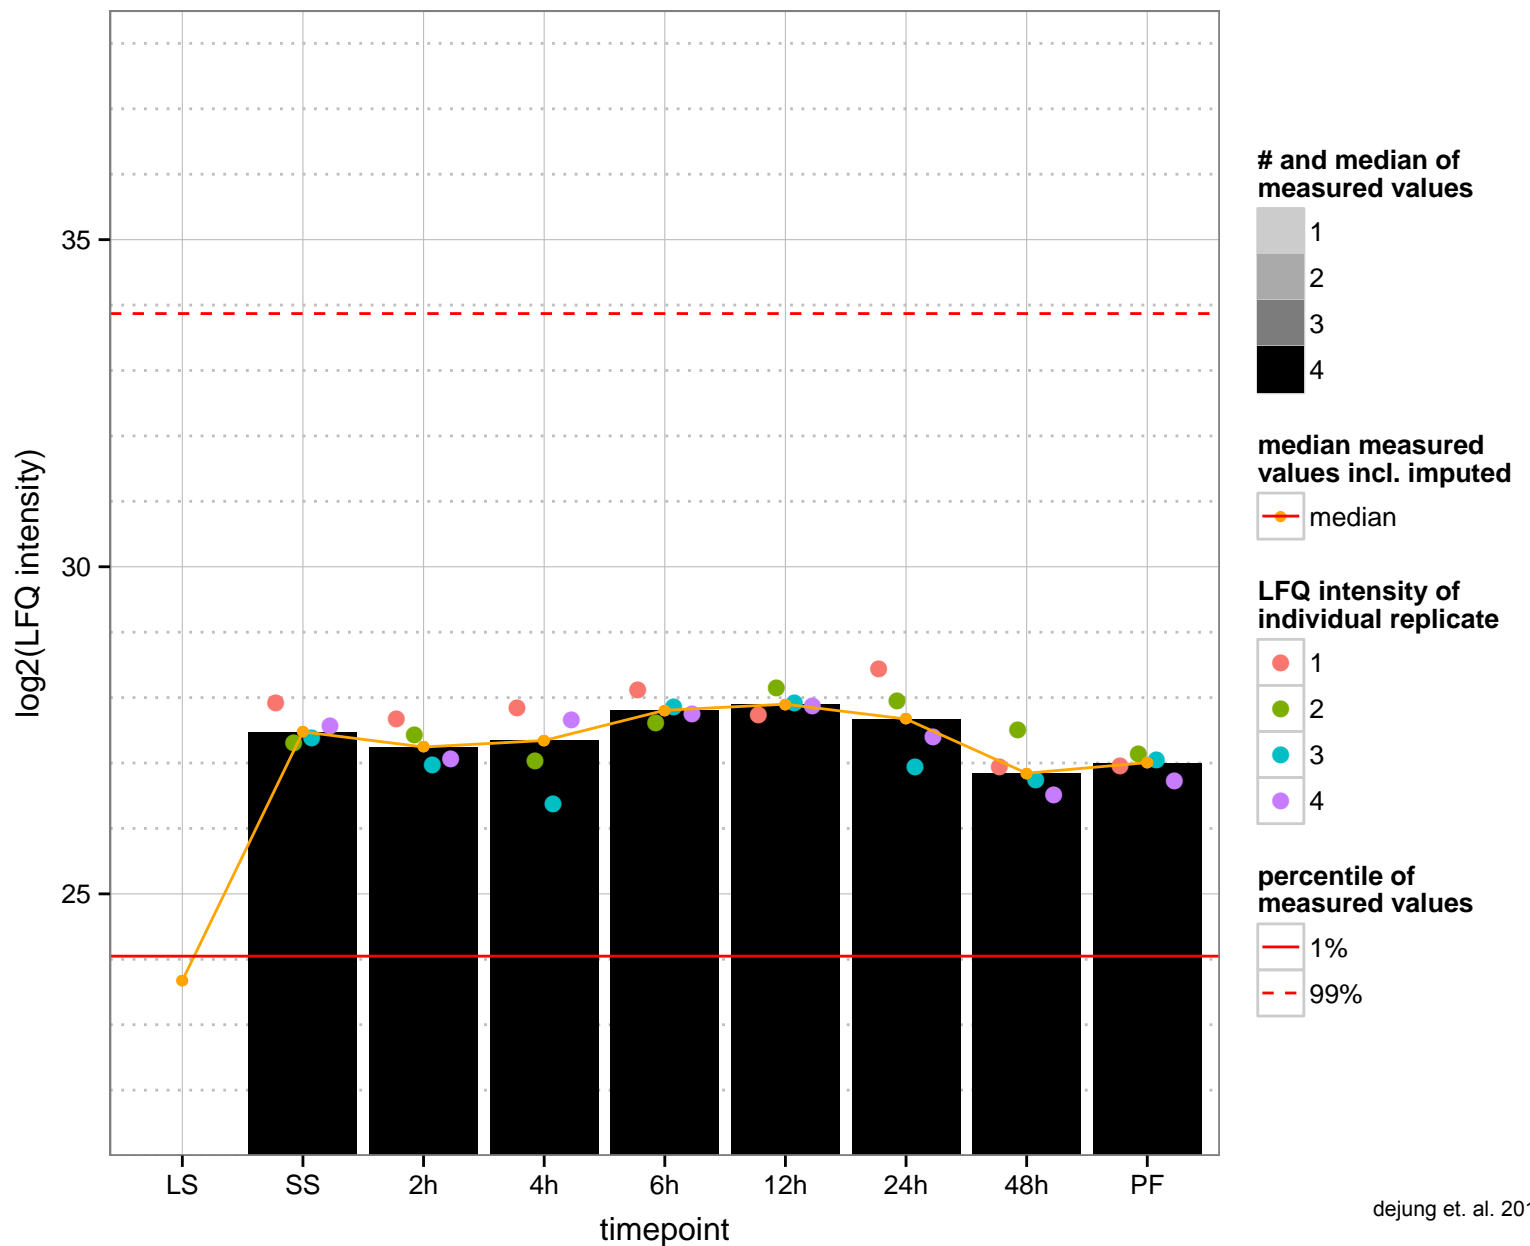

GDP-mannose pyrophosphorylase  
 Tb927.8.2050  
 AGOF: mannose-1-phosphate guanylyltransferase activity, nucleotidyltransferase activity  
 AGOC: cytoplasm  
 AGOP: GDP-mannose biosynthetic process, protein glycosylation  
 PGO: nucleotidyltransferase activity  
 PGO: null  
 PGO: biosynthetic process

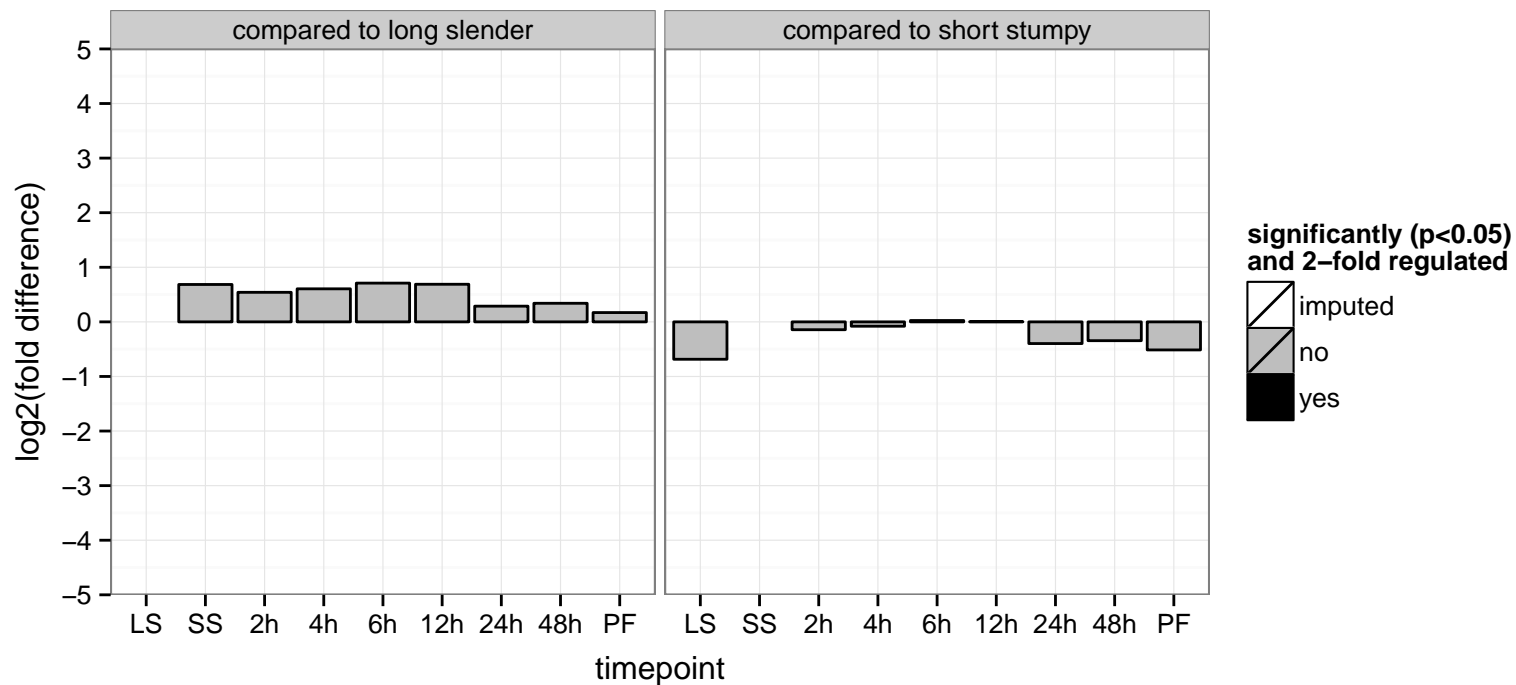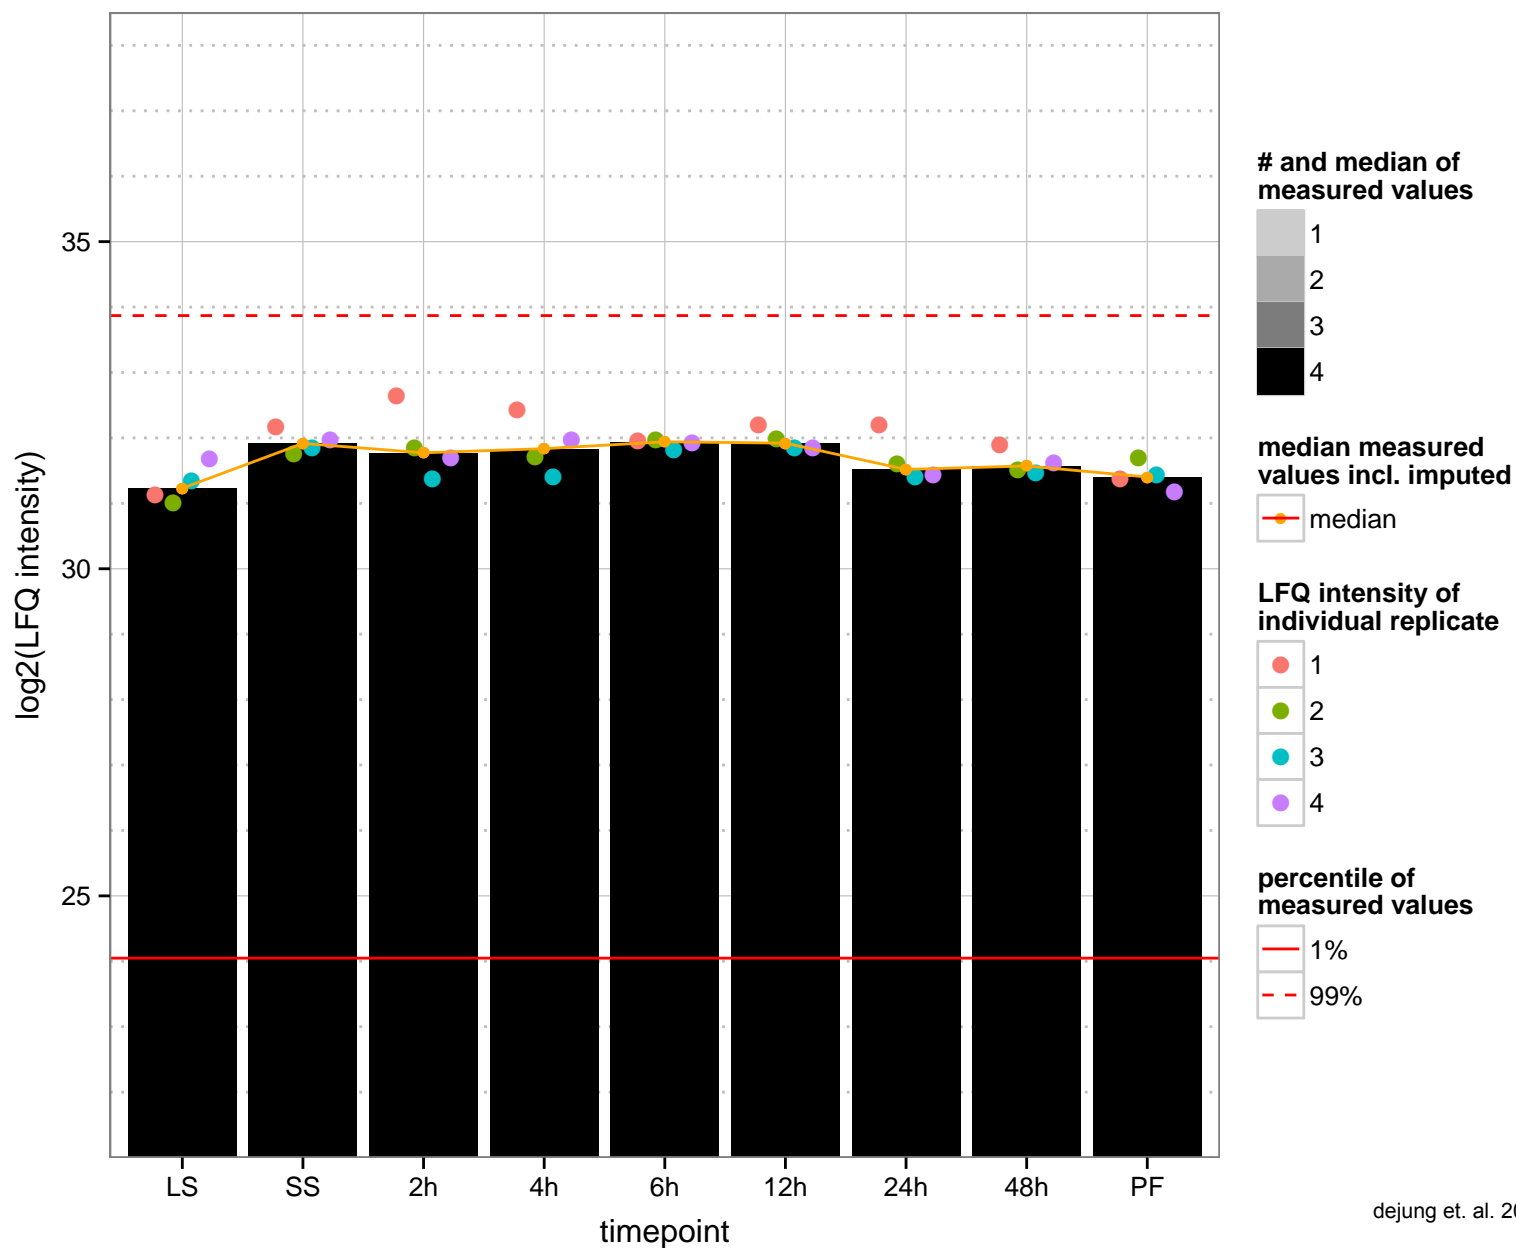

hypothetical protein, conserved  
 Tb927.8.2120  
 AGOF: null  
 AGOC: null  
 AGOP: null  
 PGO: null  
 PGOC: null  
 PGOP: null

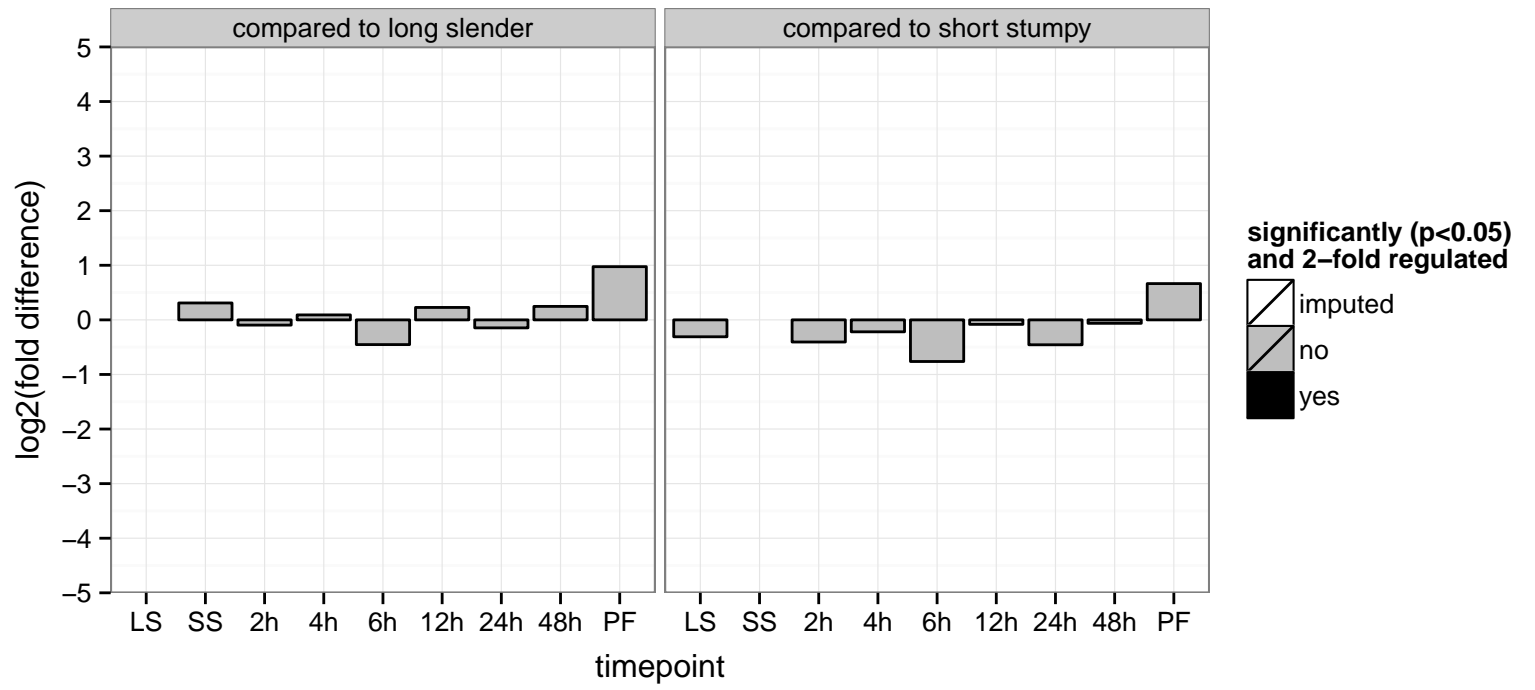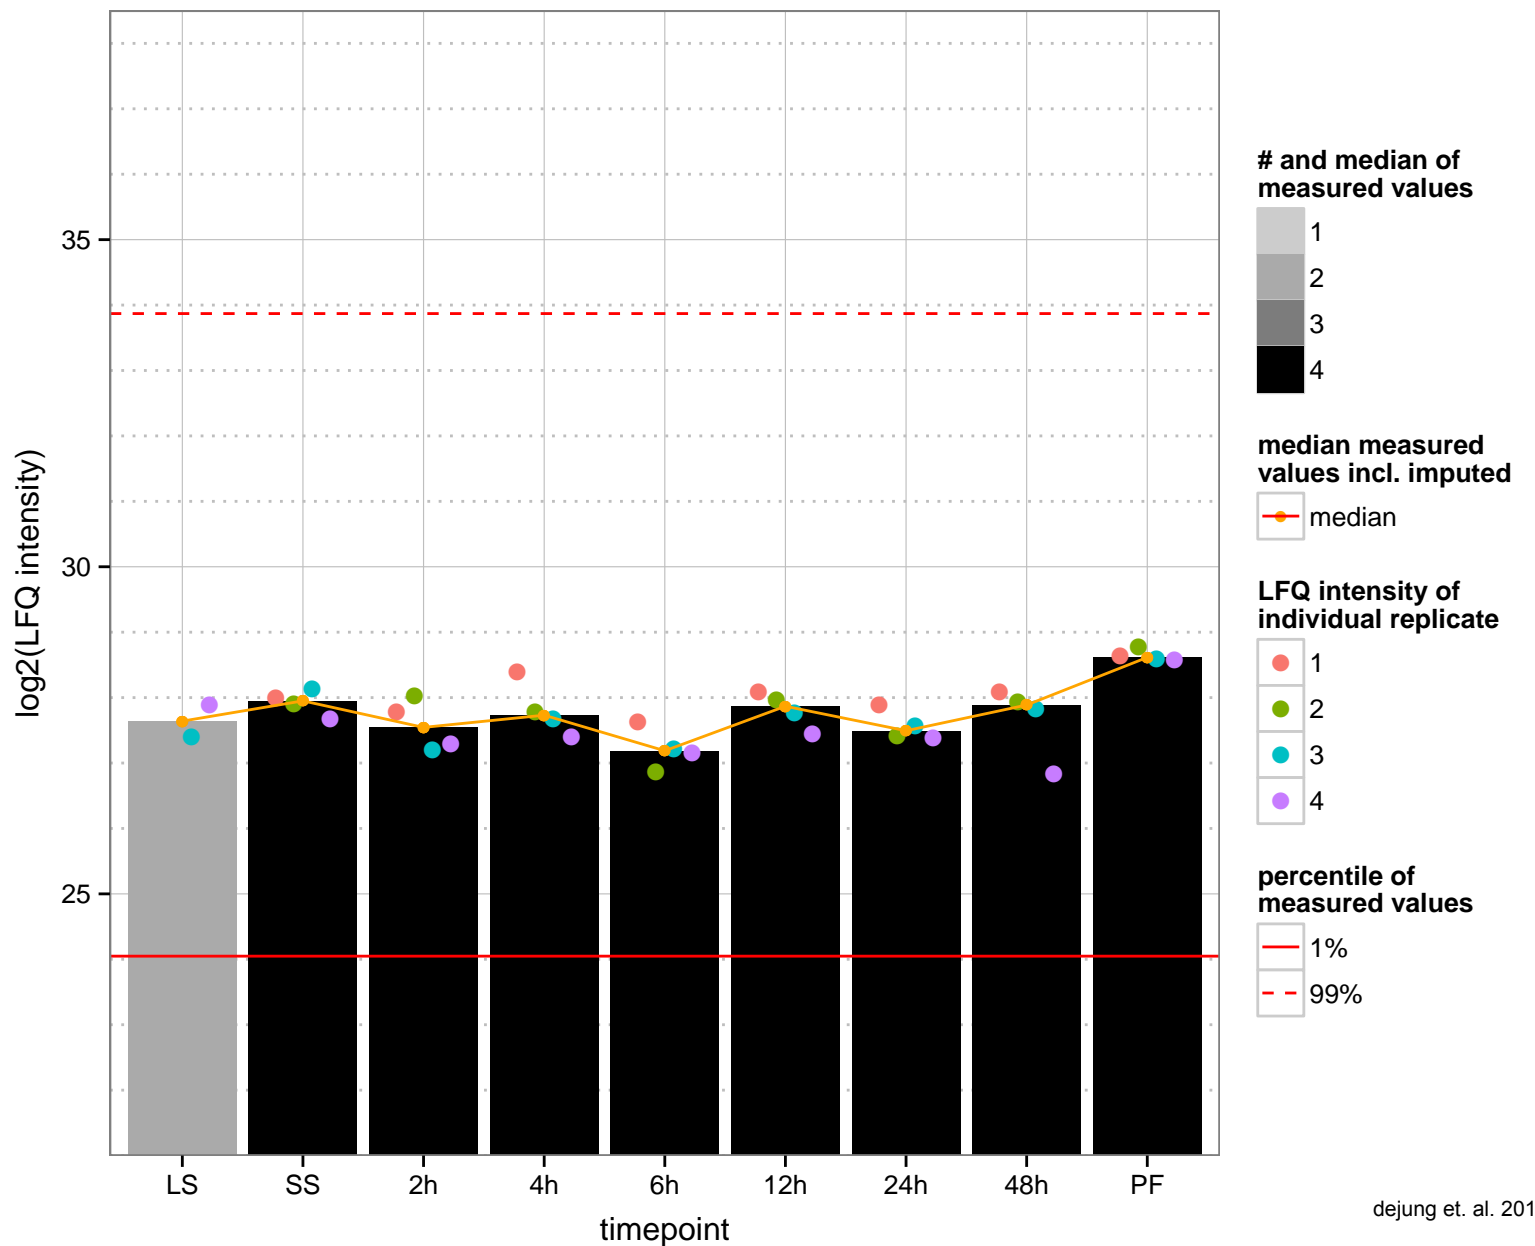

terbinafine resistance locus protein (yip1), putative  
 Tb927.8.2200  
 AGOF: null  
 AGOC: Golgi apparatus, integral to membrane  
 AGOP: response to drug, vesicle-mediated transport  
 PGO: null  
 PGOC: membrane  
 PGOP: null

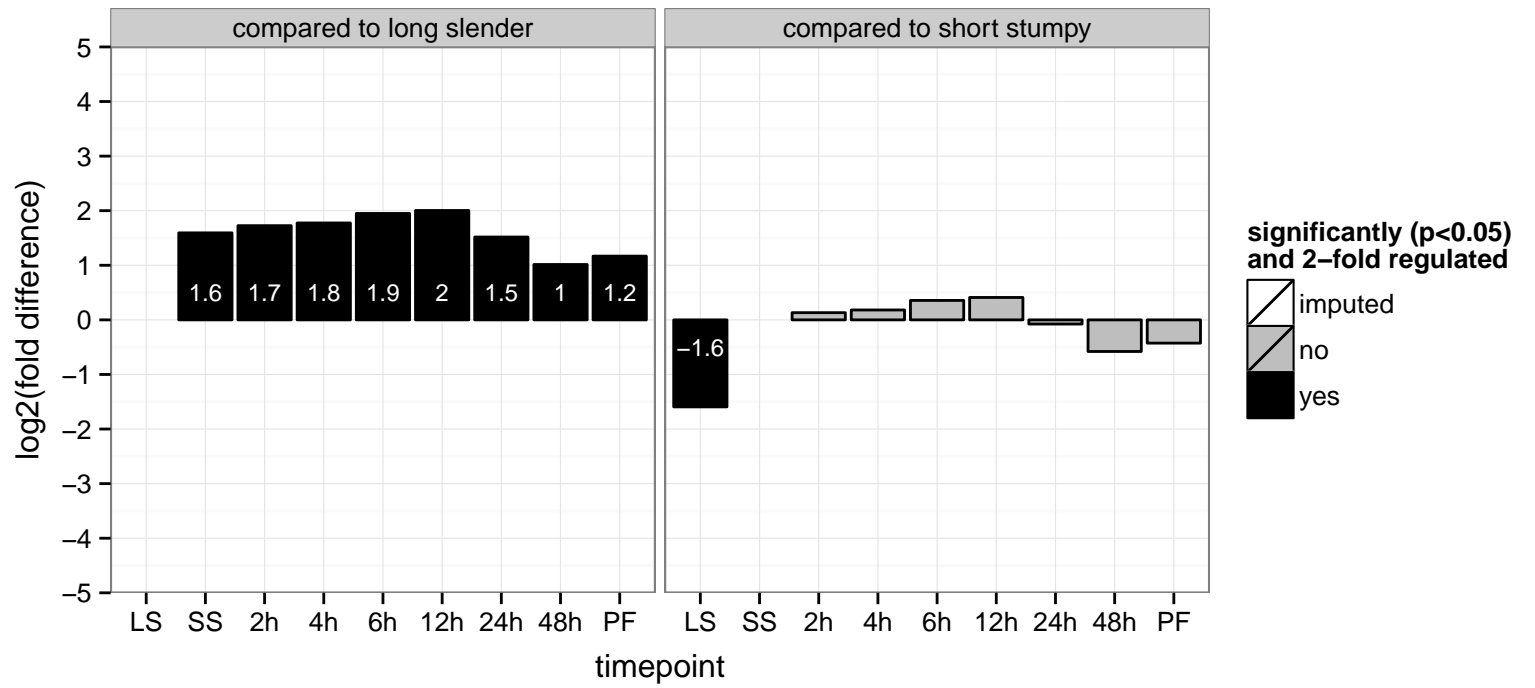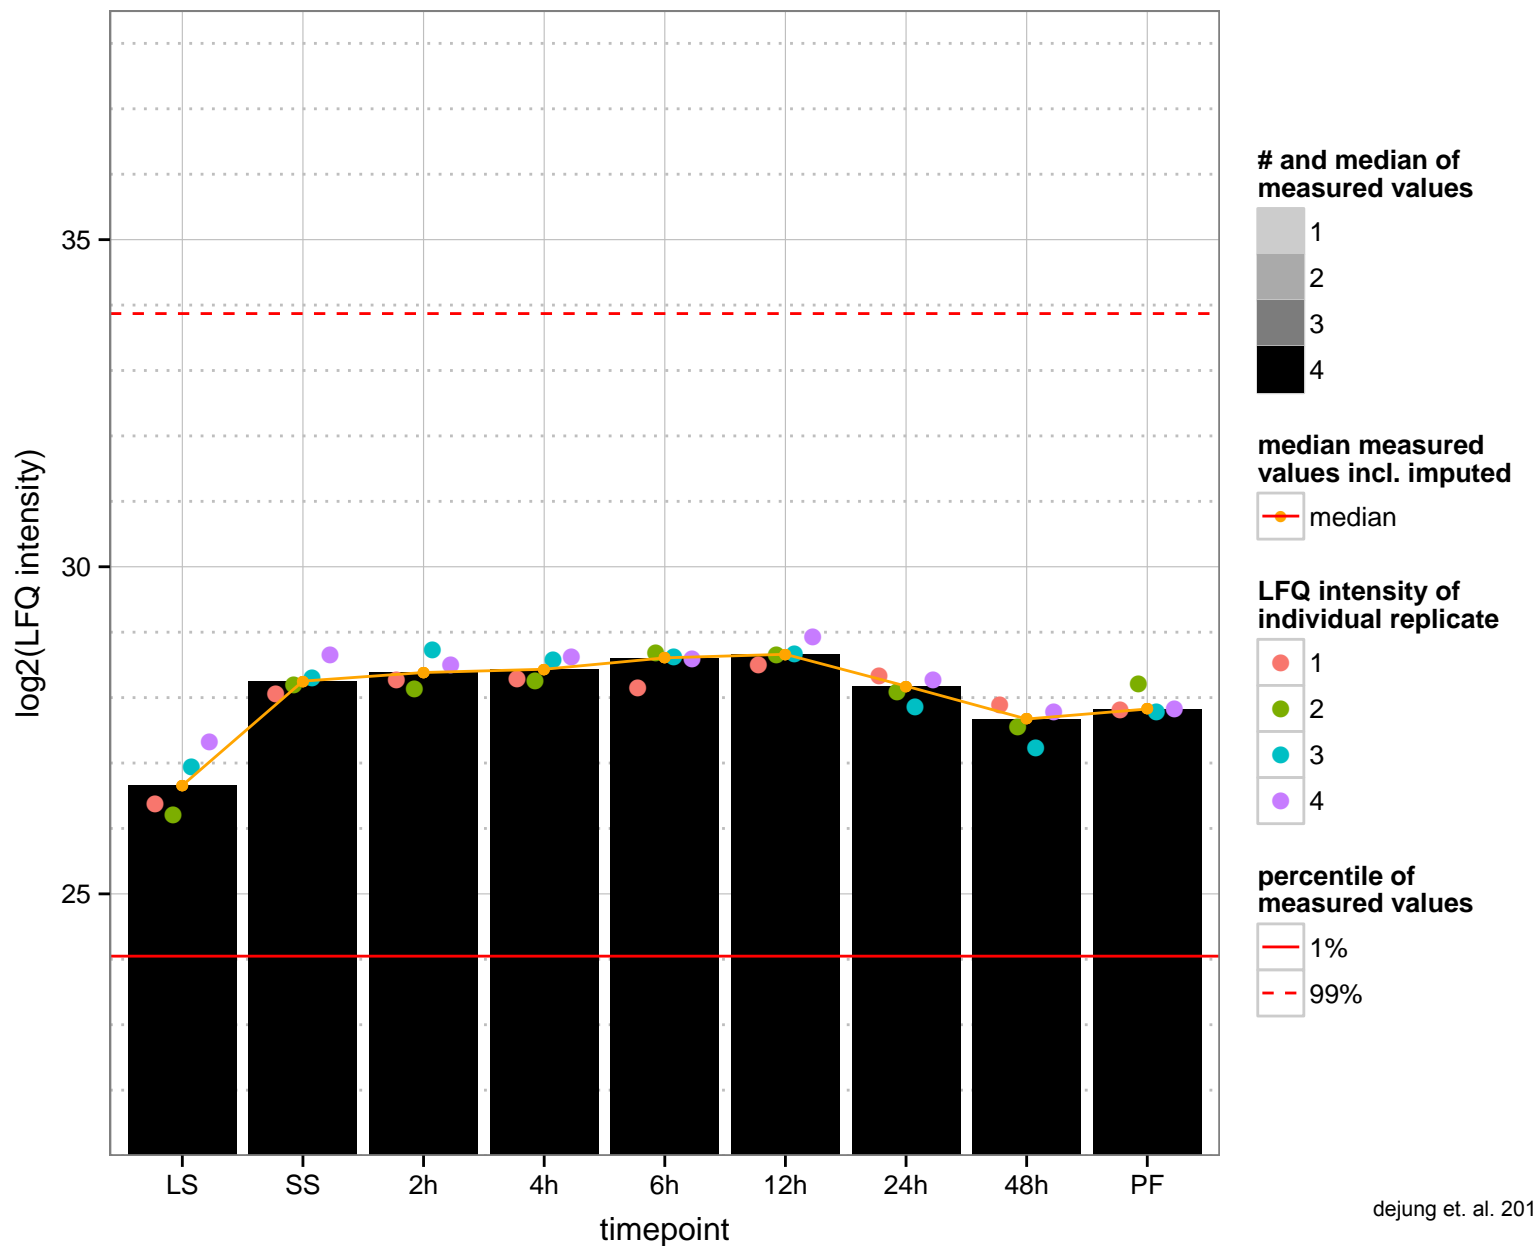

pteridine reductase (PTR1)  
 Tb927.8.2210  
 AGOF: oxidoreductase activity, pteridine reductase activity  
 AGOC: cytosol  
 AGOP: metabolic process  
 PGO: null  
 PGOC: null  
 PGOP: null

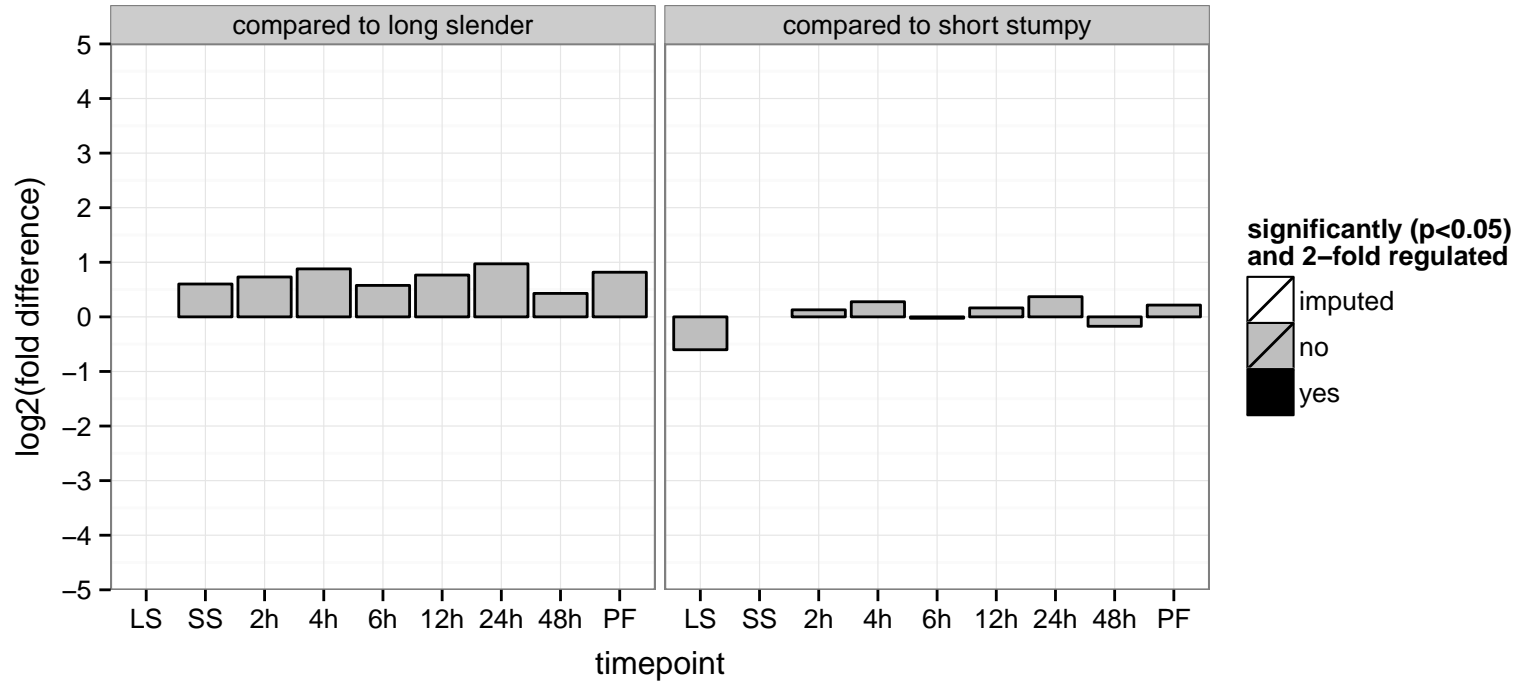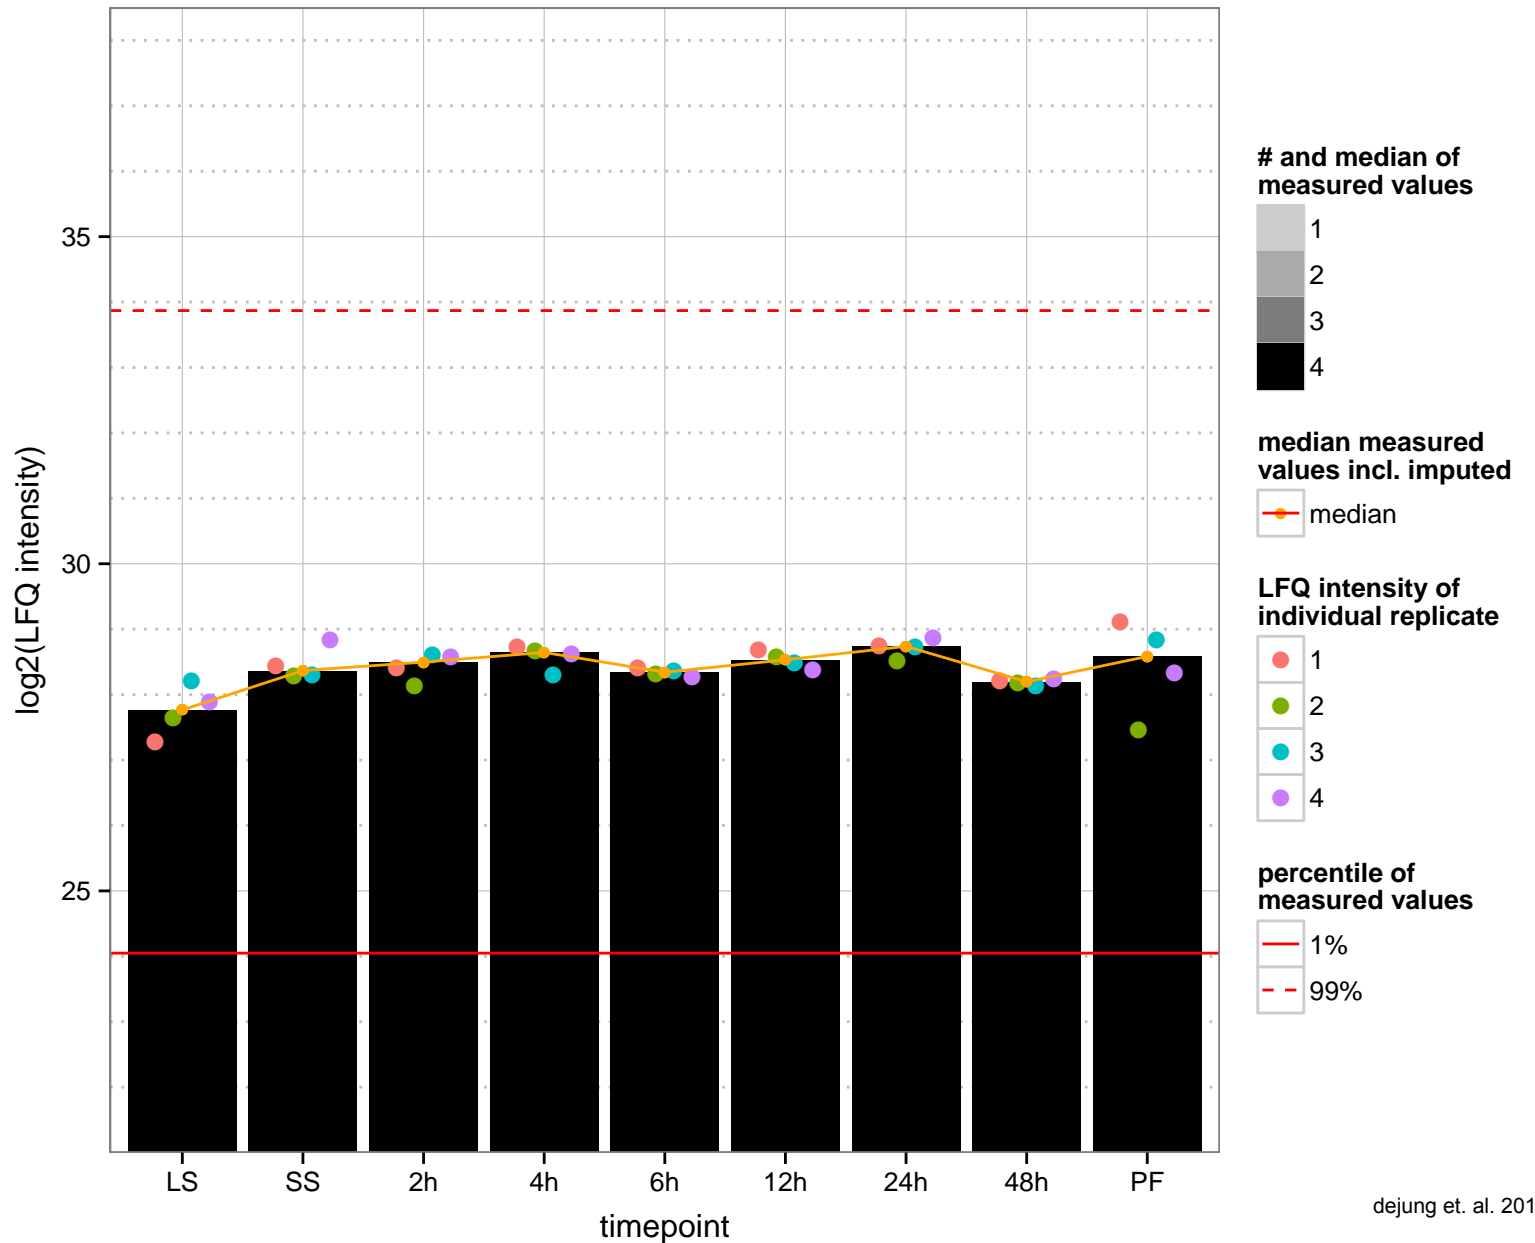

hypothetical protein, conserved  
 Tb927.8.2290  
 AGOF: null  
 AGOC: null  
 AGOP: null  
 PGO: null  
 PGOC: null  
 PGOP: null

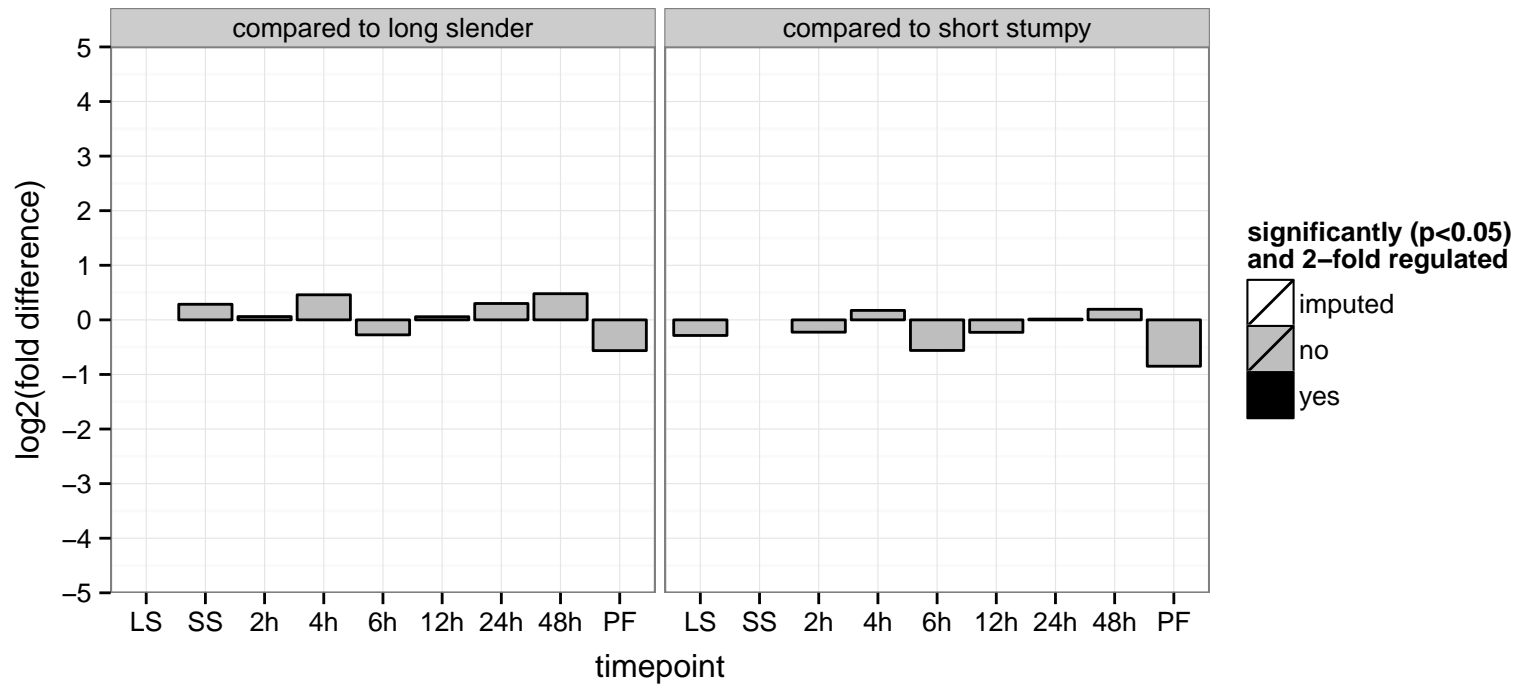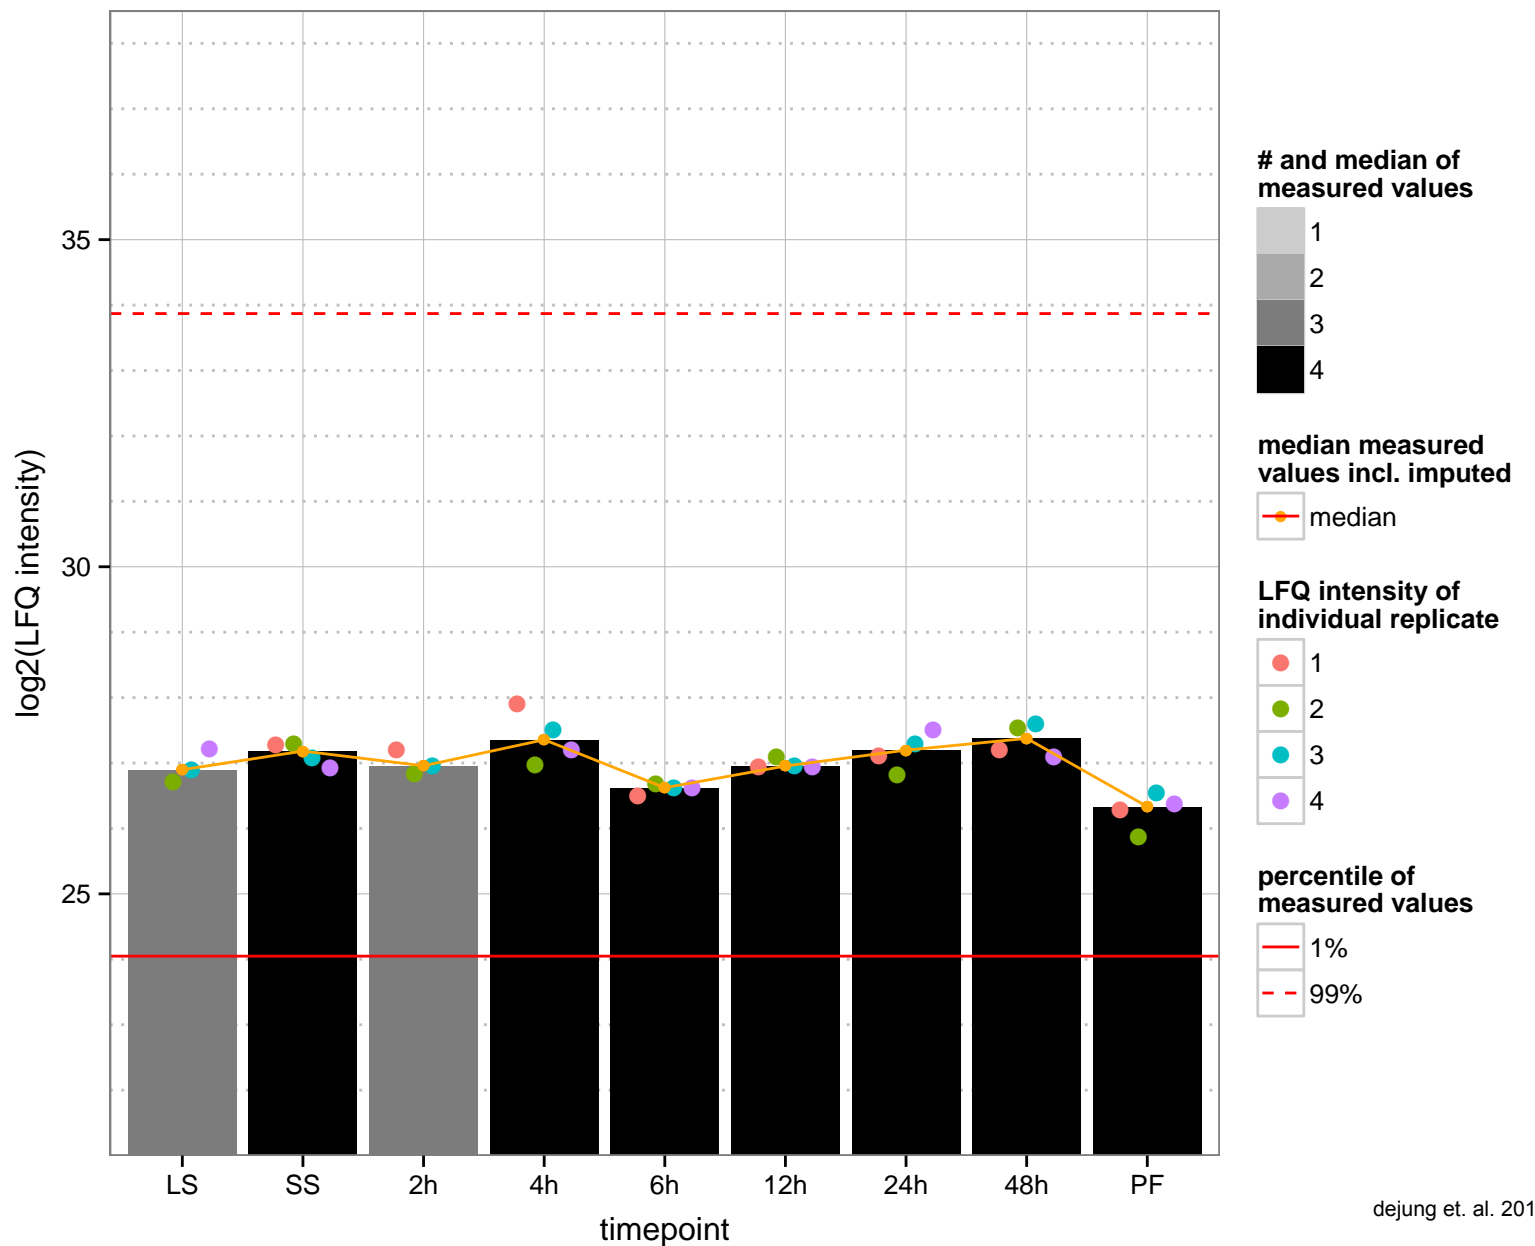



(H<sup>+</sup>)-ATPase G subunit, putative

Tb927.8.2310

AGOF: ATPase activity, hydrolase activity, acting on acid anhydrides, catalyzing transmembrane movement of substances

AGOC: myosin complex, vacuolar proton-transporting V-type ATPase complex

AGOP: proton transport, vacuolar acidification

PGOF: hydrolase activity, acting on acid anhydrides, catalyzing transmembrane movement of substances

PGOC: vacuolar proton-transporting V-type ATPase complex

PGOP: proton transport

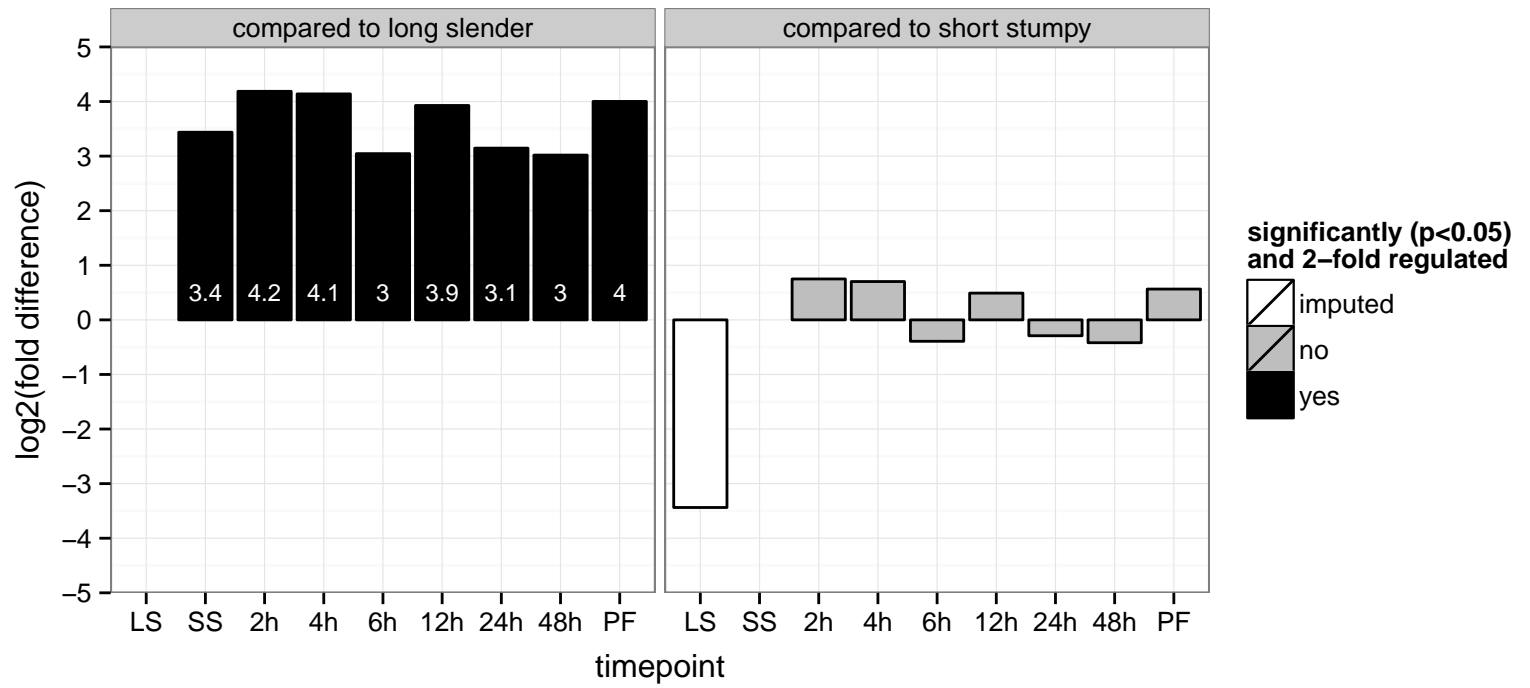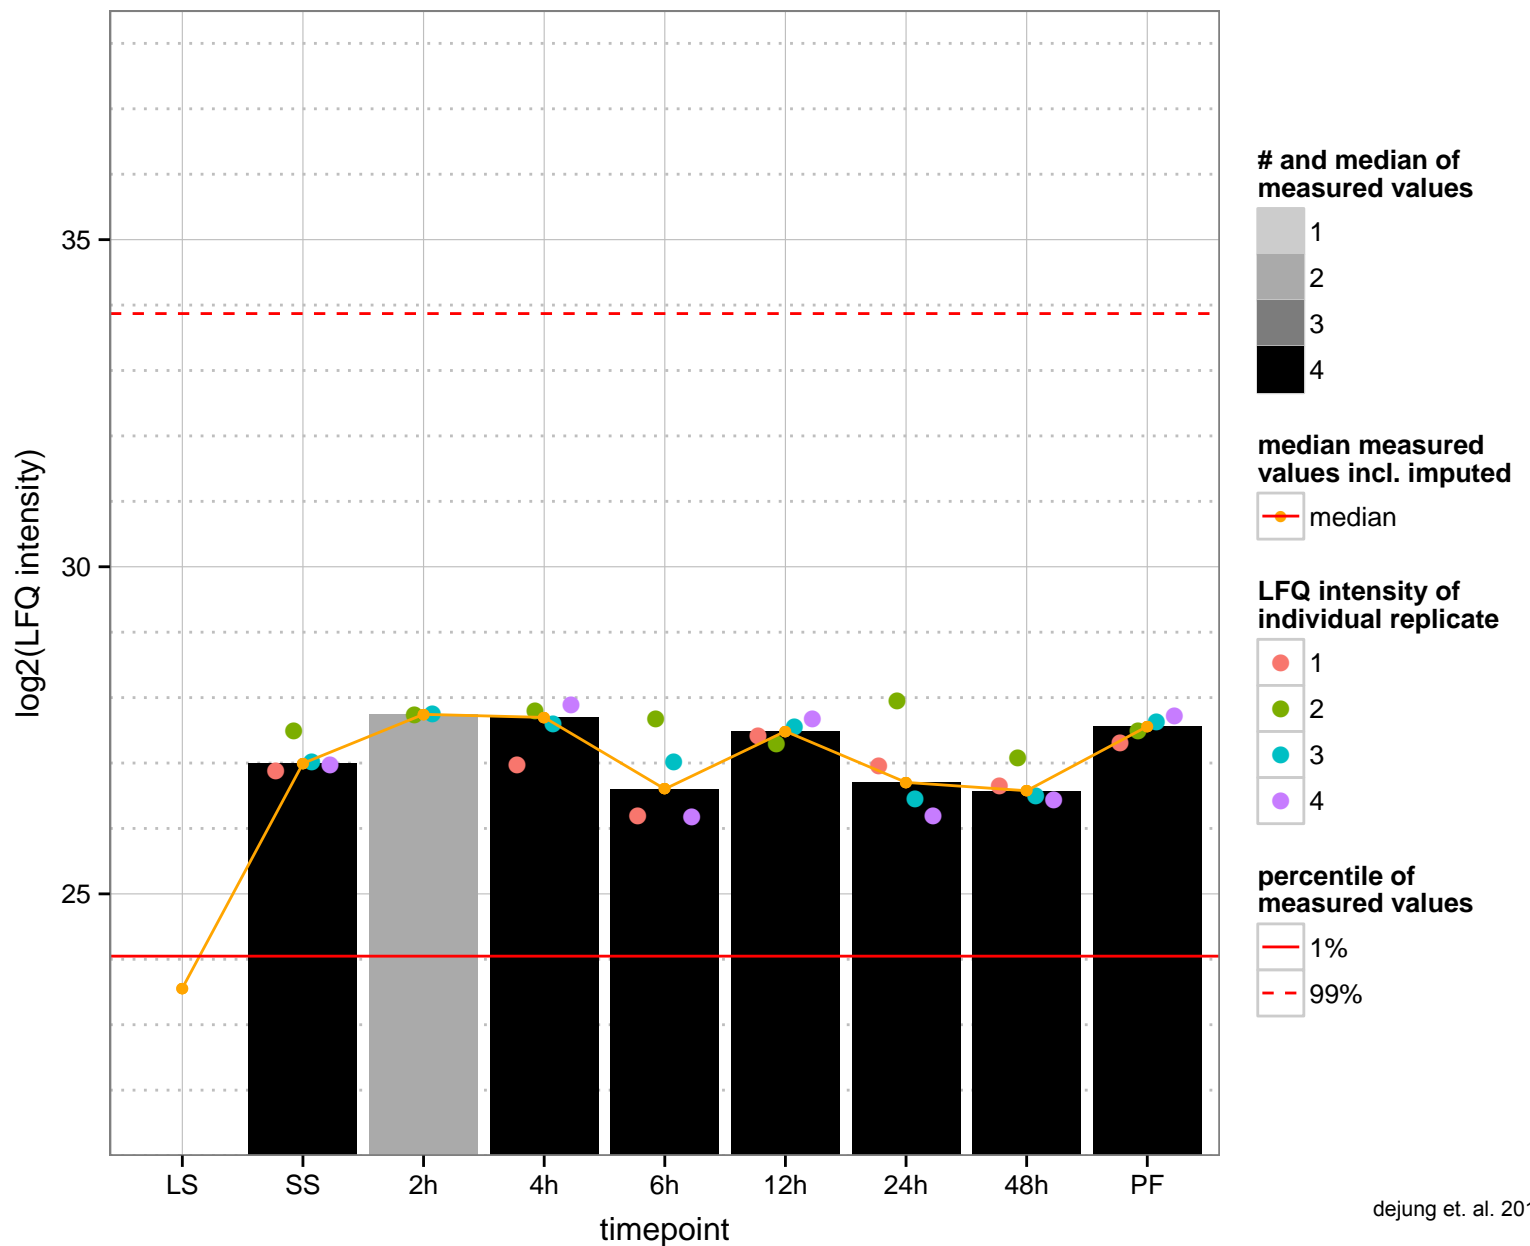

ABC transporter, putative

Tb927.8.2380

AGOF: ATP binding, ATPase activity, coupled to transmembrane movement of substances, heme binding, protein homodimeri

AGOC: flagellar pocket, integral to membrane, membrane, vesicle

AGOP: heme transport

PGOF: ATP binding, ATPase activity, nucleoside-triphosphatase activity, nucleotide binding

PGOC: membrane

PGOP: null

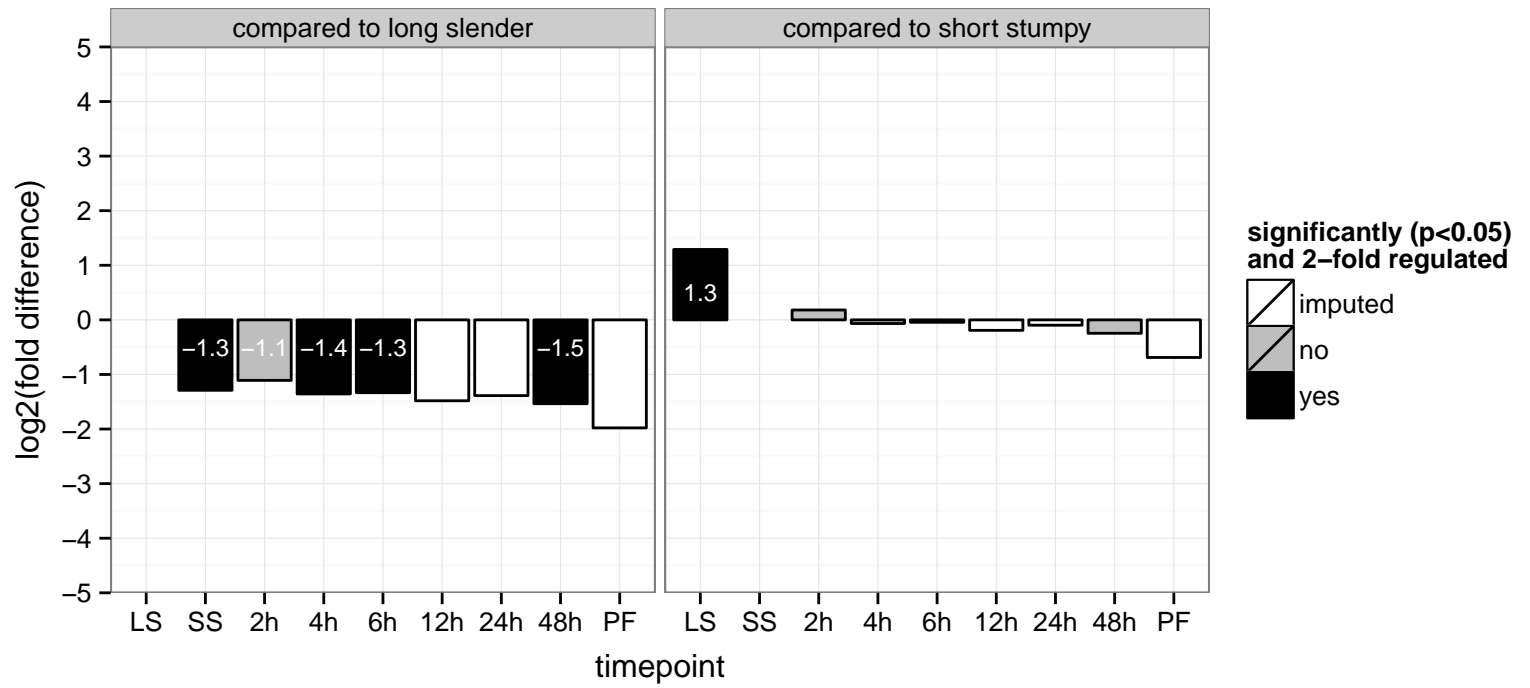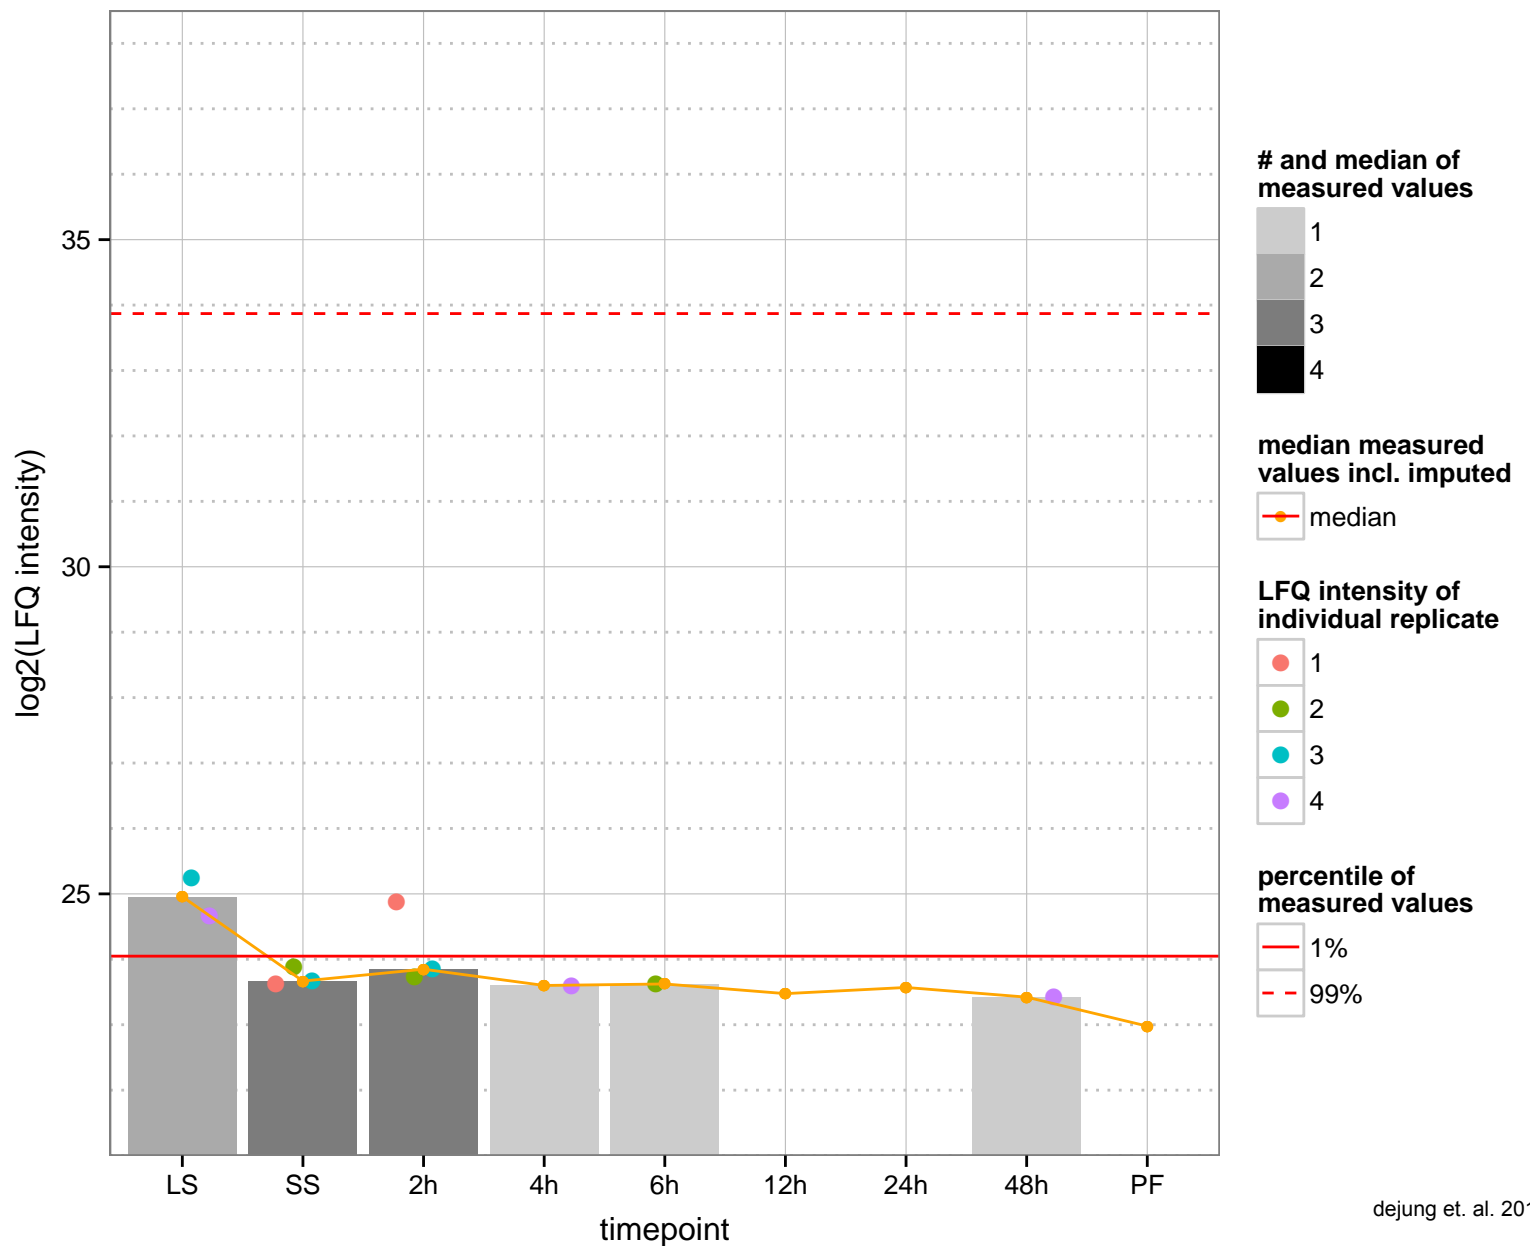

hypothetical protein, conserved  
 Tb927.8.2450  
 AGOF: null  
 AGOC: null  
 AGOP: null  
 PGO: protein binding  
 PGO: null  
 PGO: null

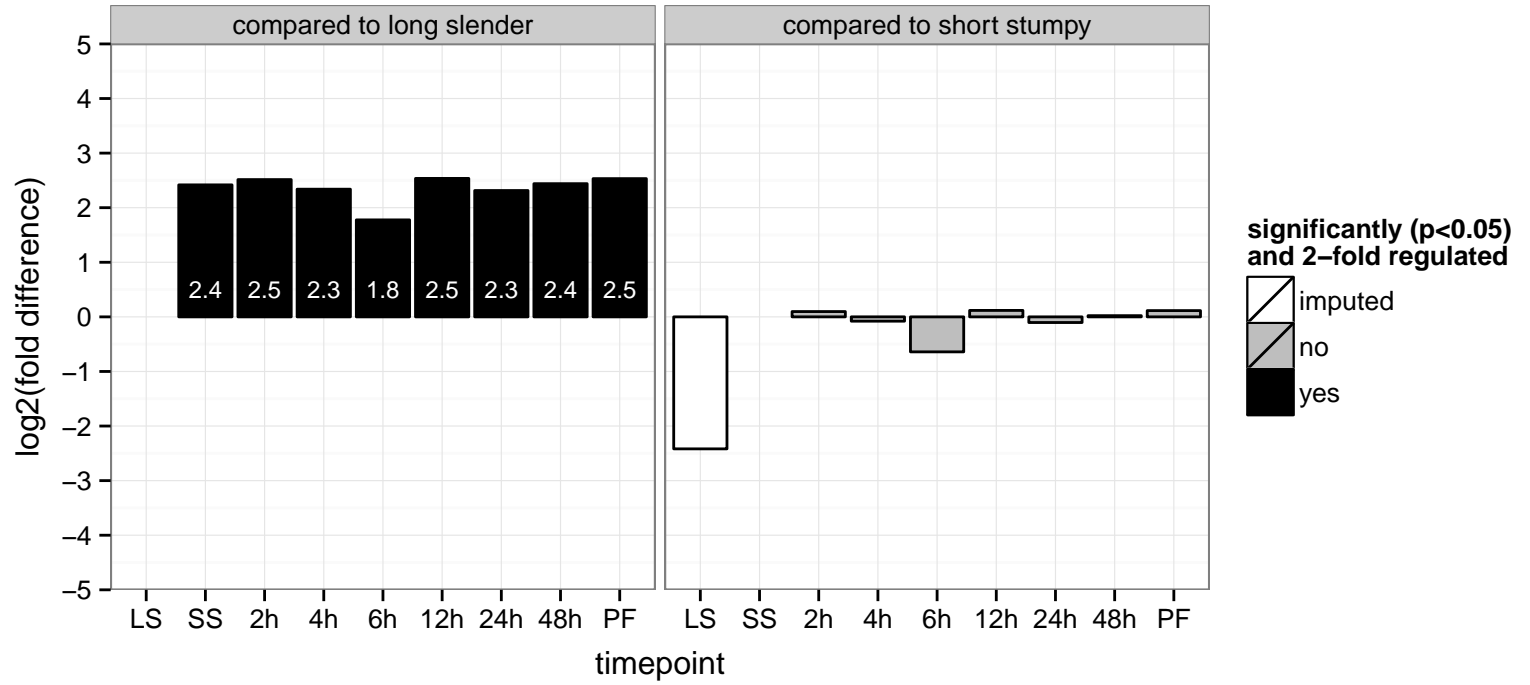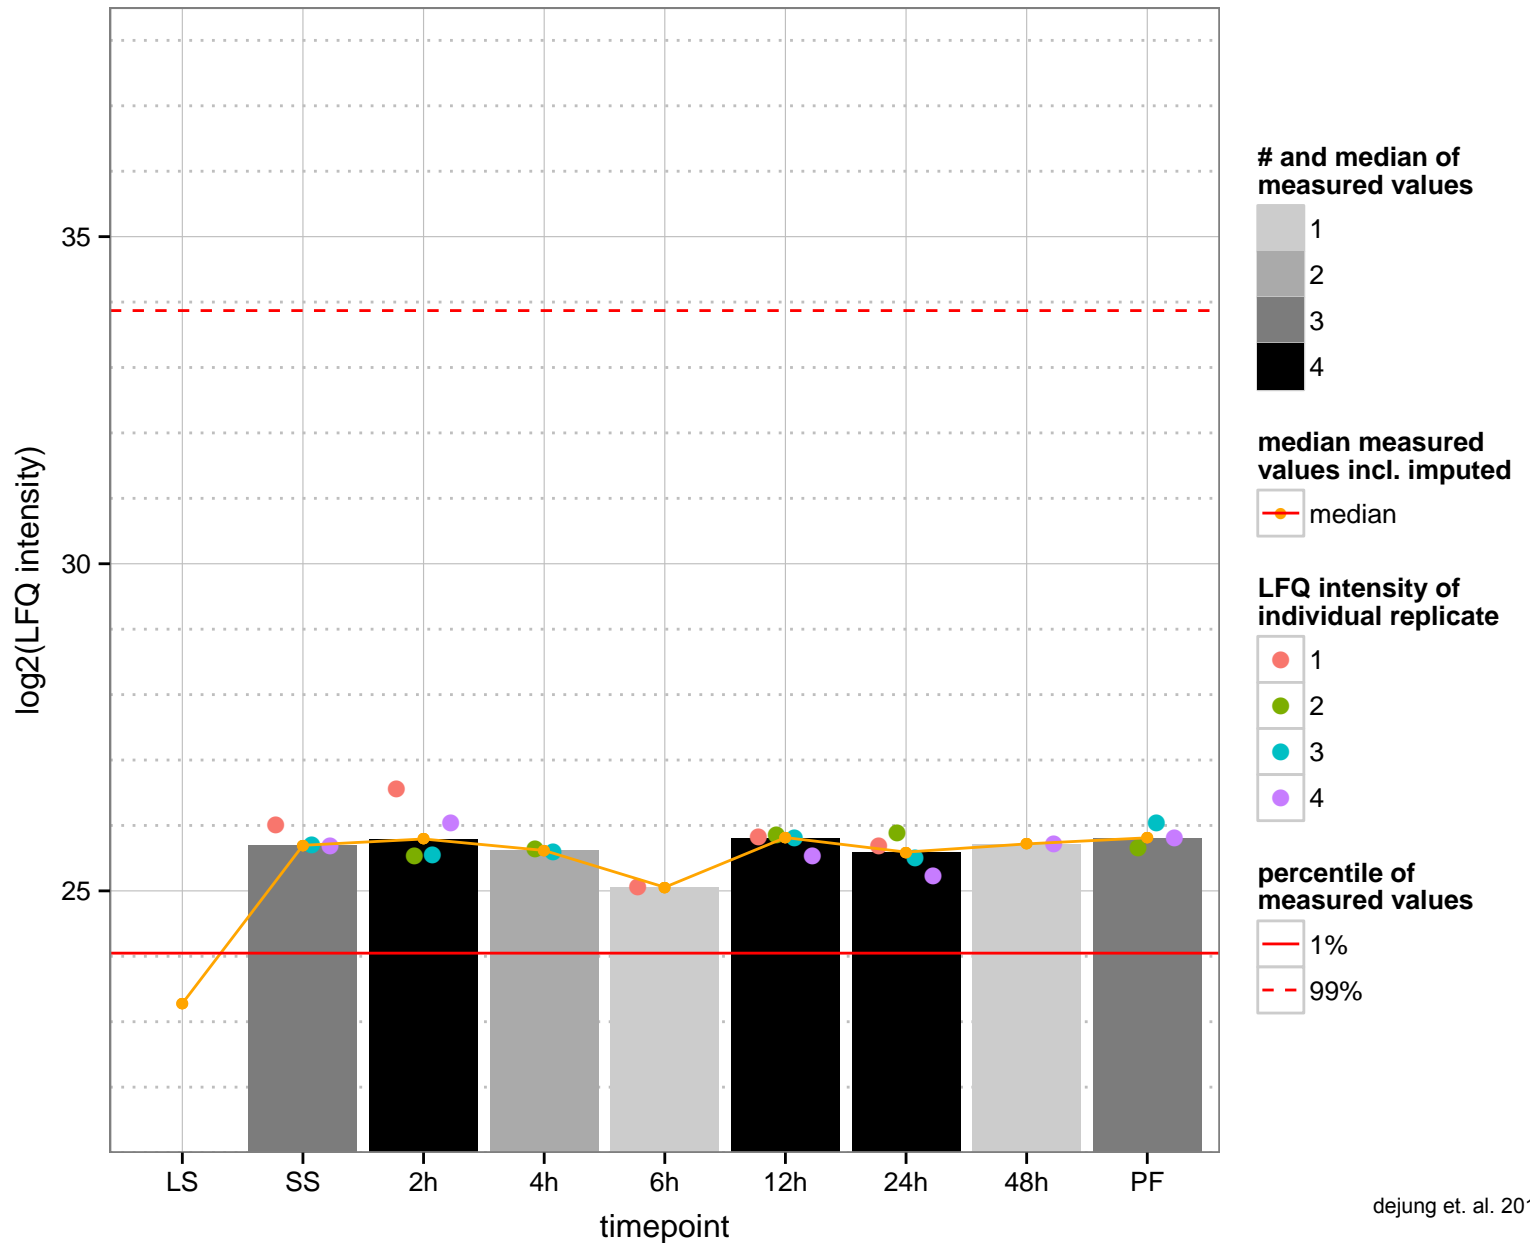

hypothetical protein, conserved  
 Tb927.8.2460  
 AGOF: null  
 AGOC: null  
 AGOP: null  
 PGOF: null  
 PGO: null  
 PGOP: null

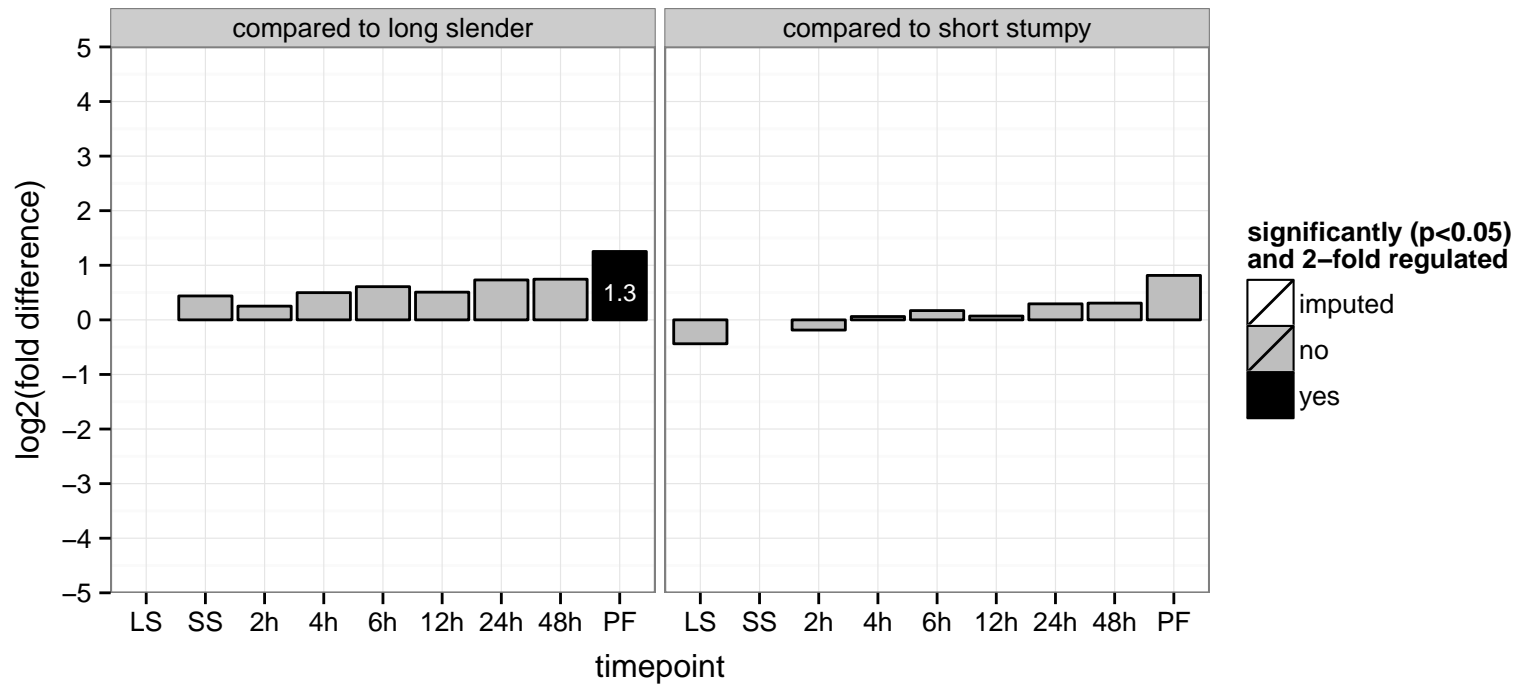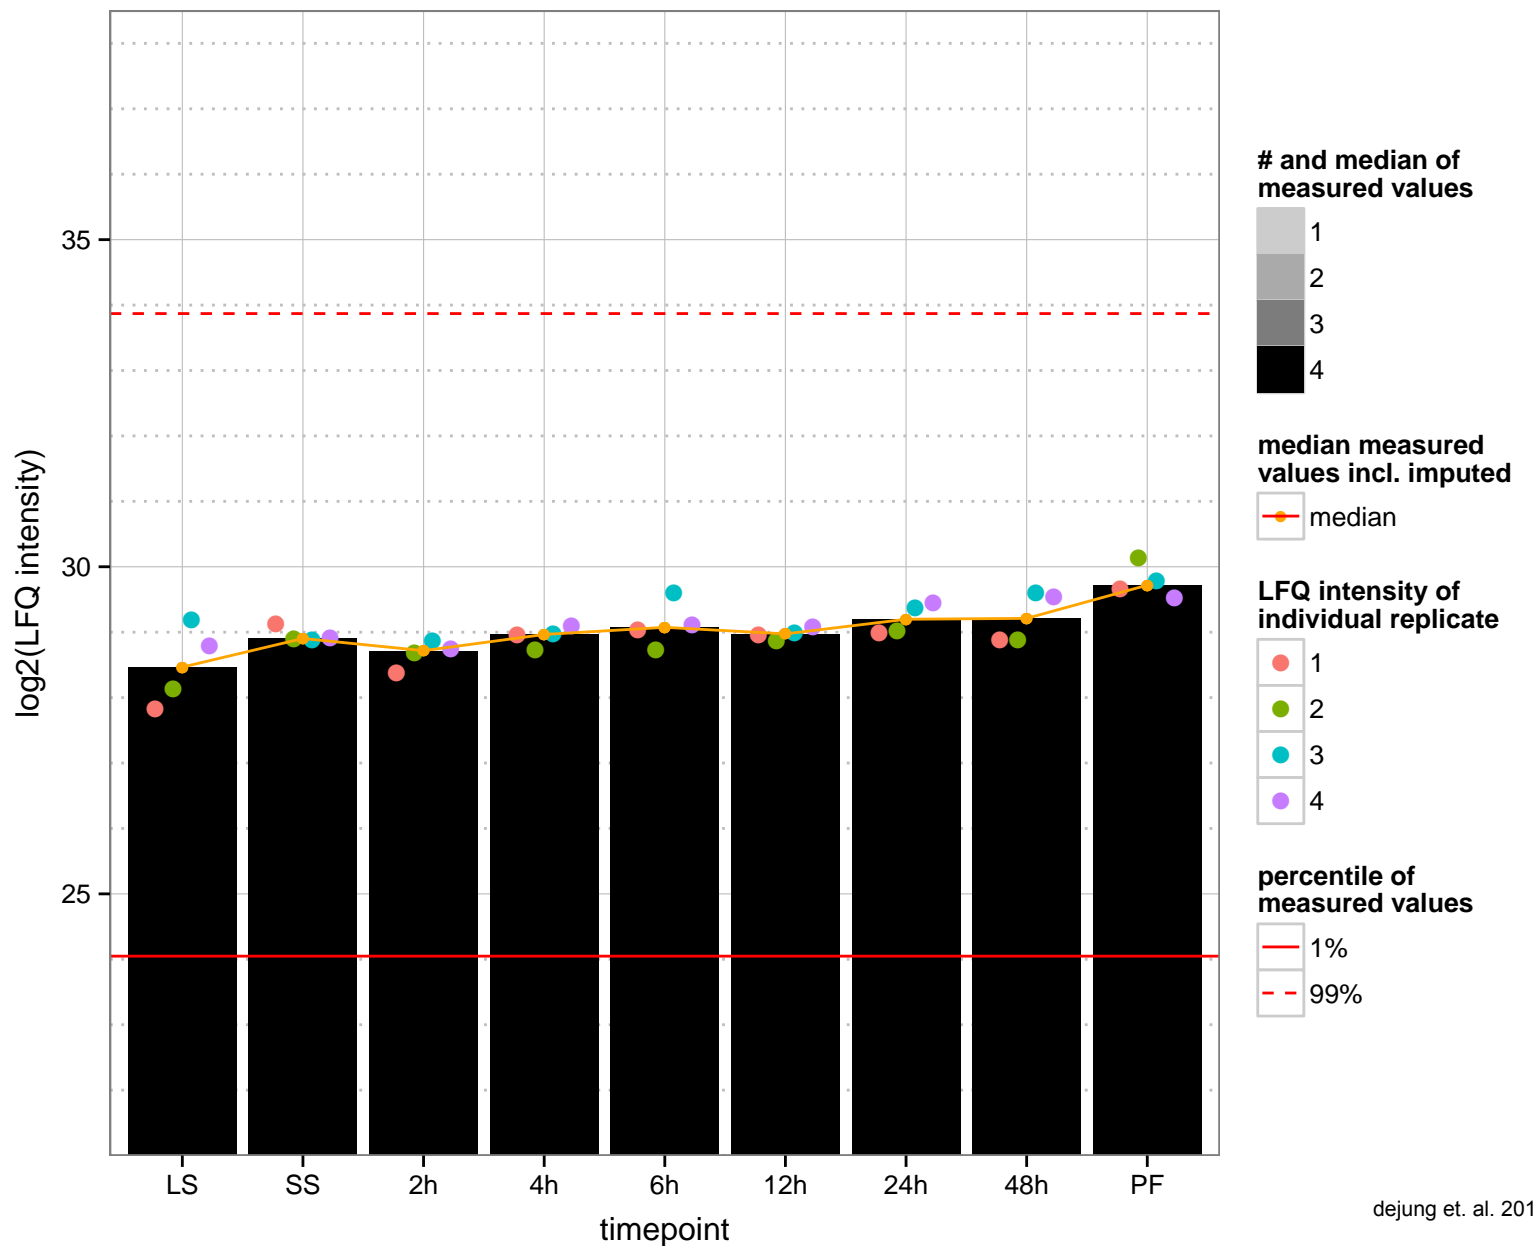

hypothetical protein, conserved  
 Tb927.8.2590  
 AGOF: null  
 AGOC: null  
 AGOP: null  
 PGOF: null  
 PGOC: null  
 PGOP: null

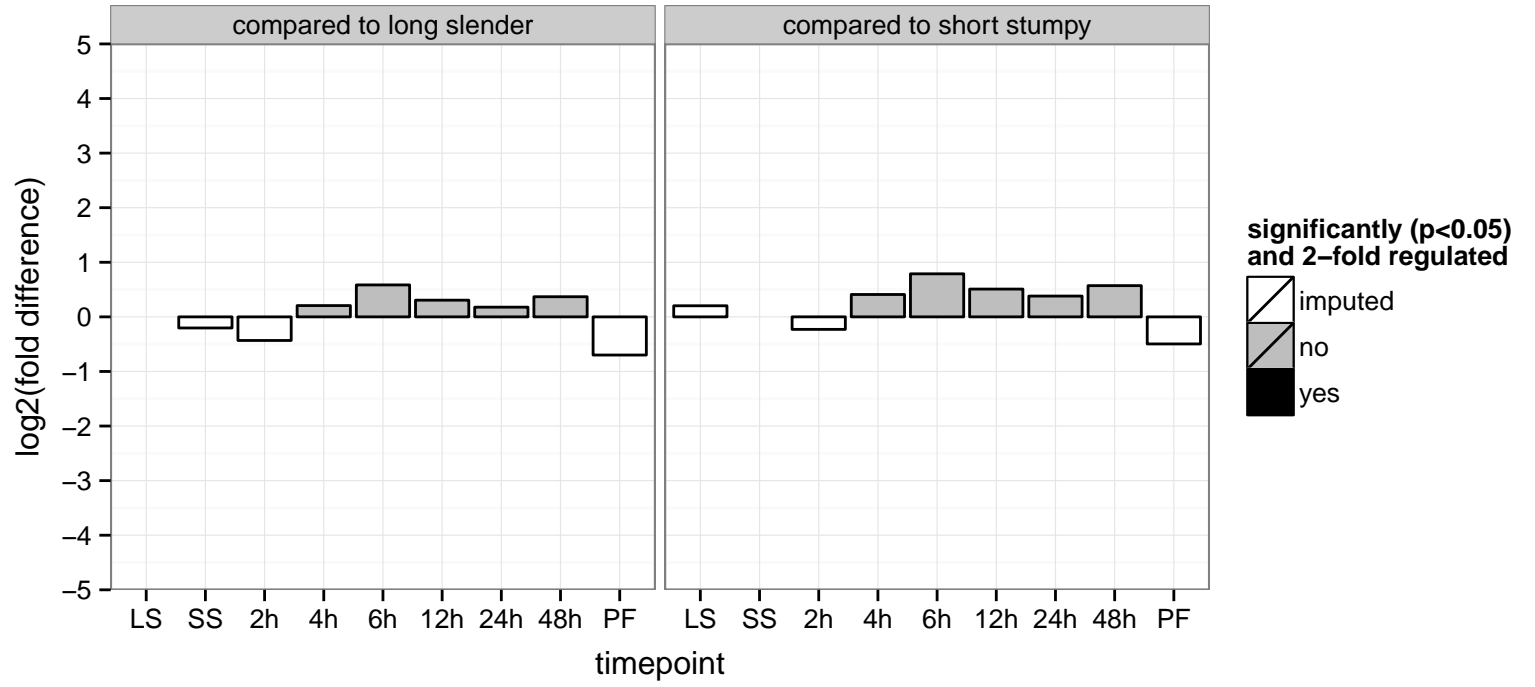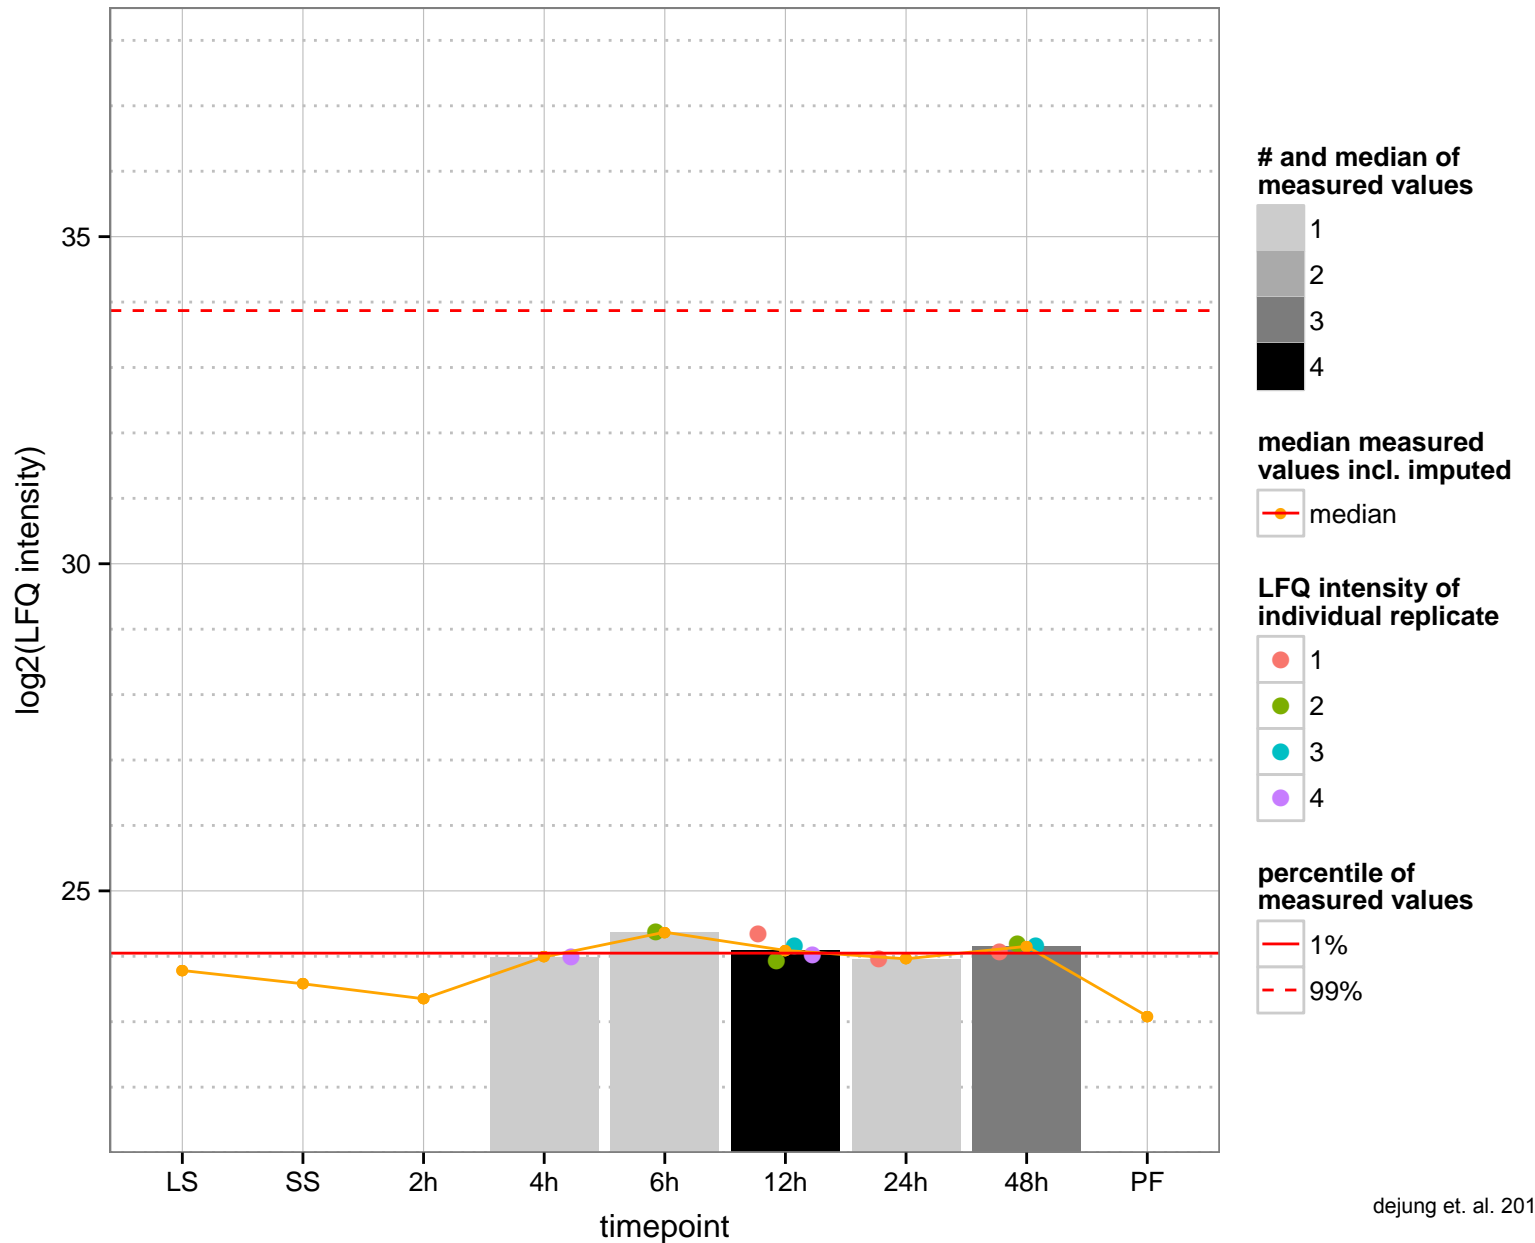

hypothetical protein, conserved  
 Tb927.8.2600  
 AGOF: null  
 AGOC: null  
 AGOP: null  
 PGO: protein binding  
 PGOC: null  
 PGOP: null

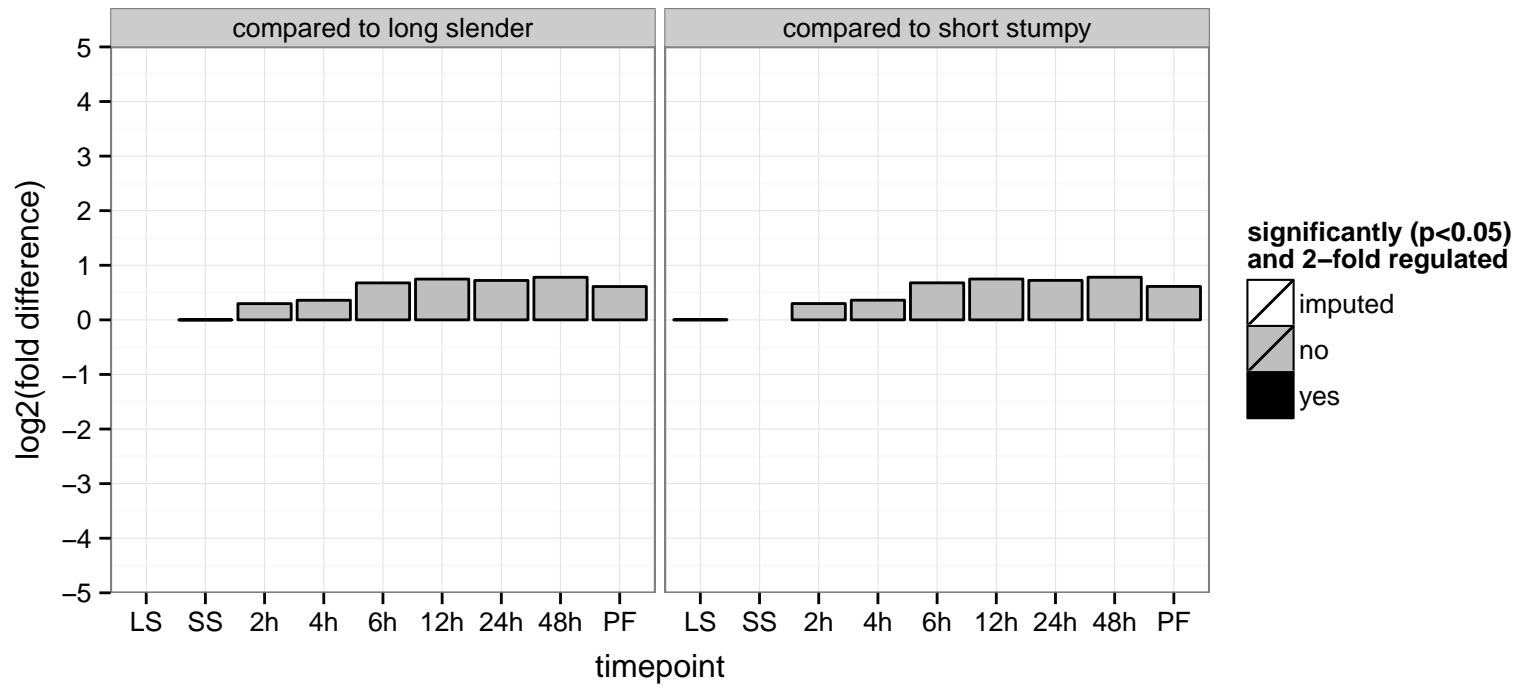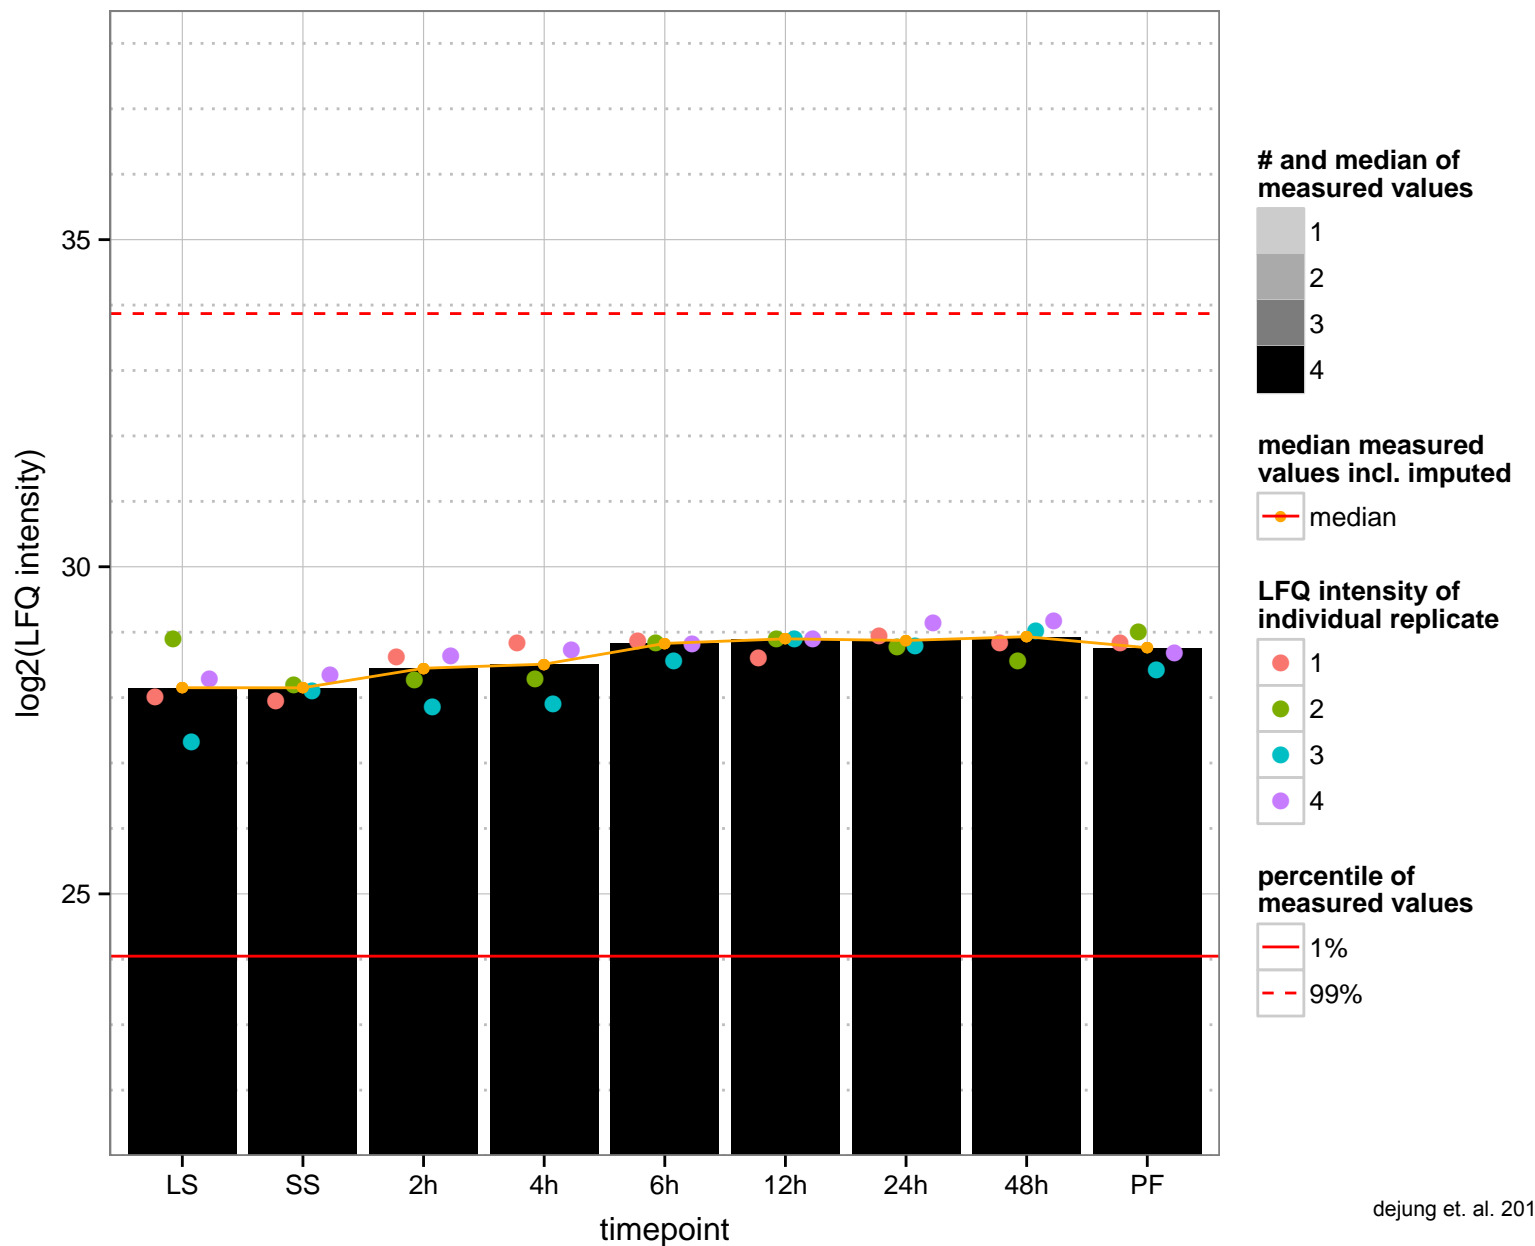

hypothetical protein, conserved  
 Tb927.8.2620  
 AGOF: null  
 AGOC: null  
 AGOP: null  
 PGO: null  
 PGOC: null  
 PGOP: null

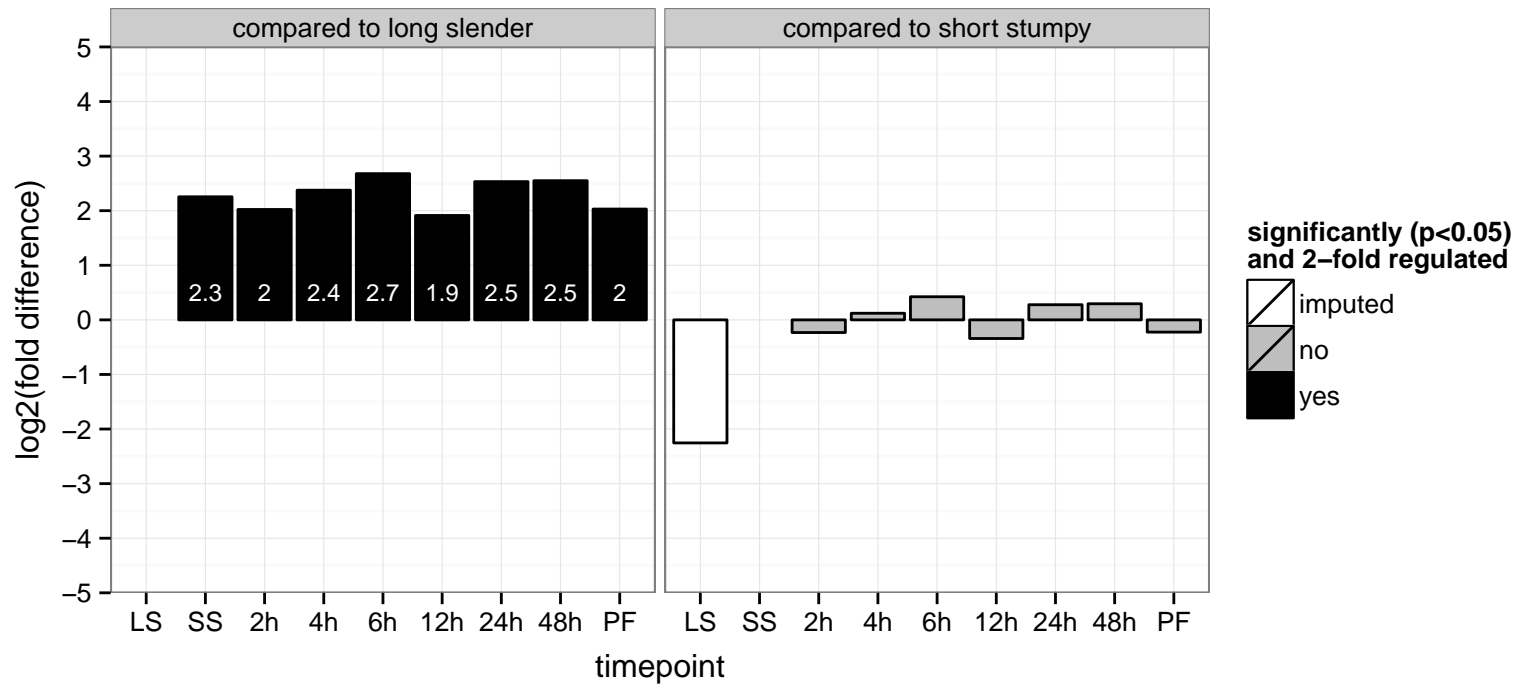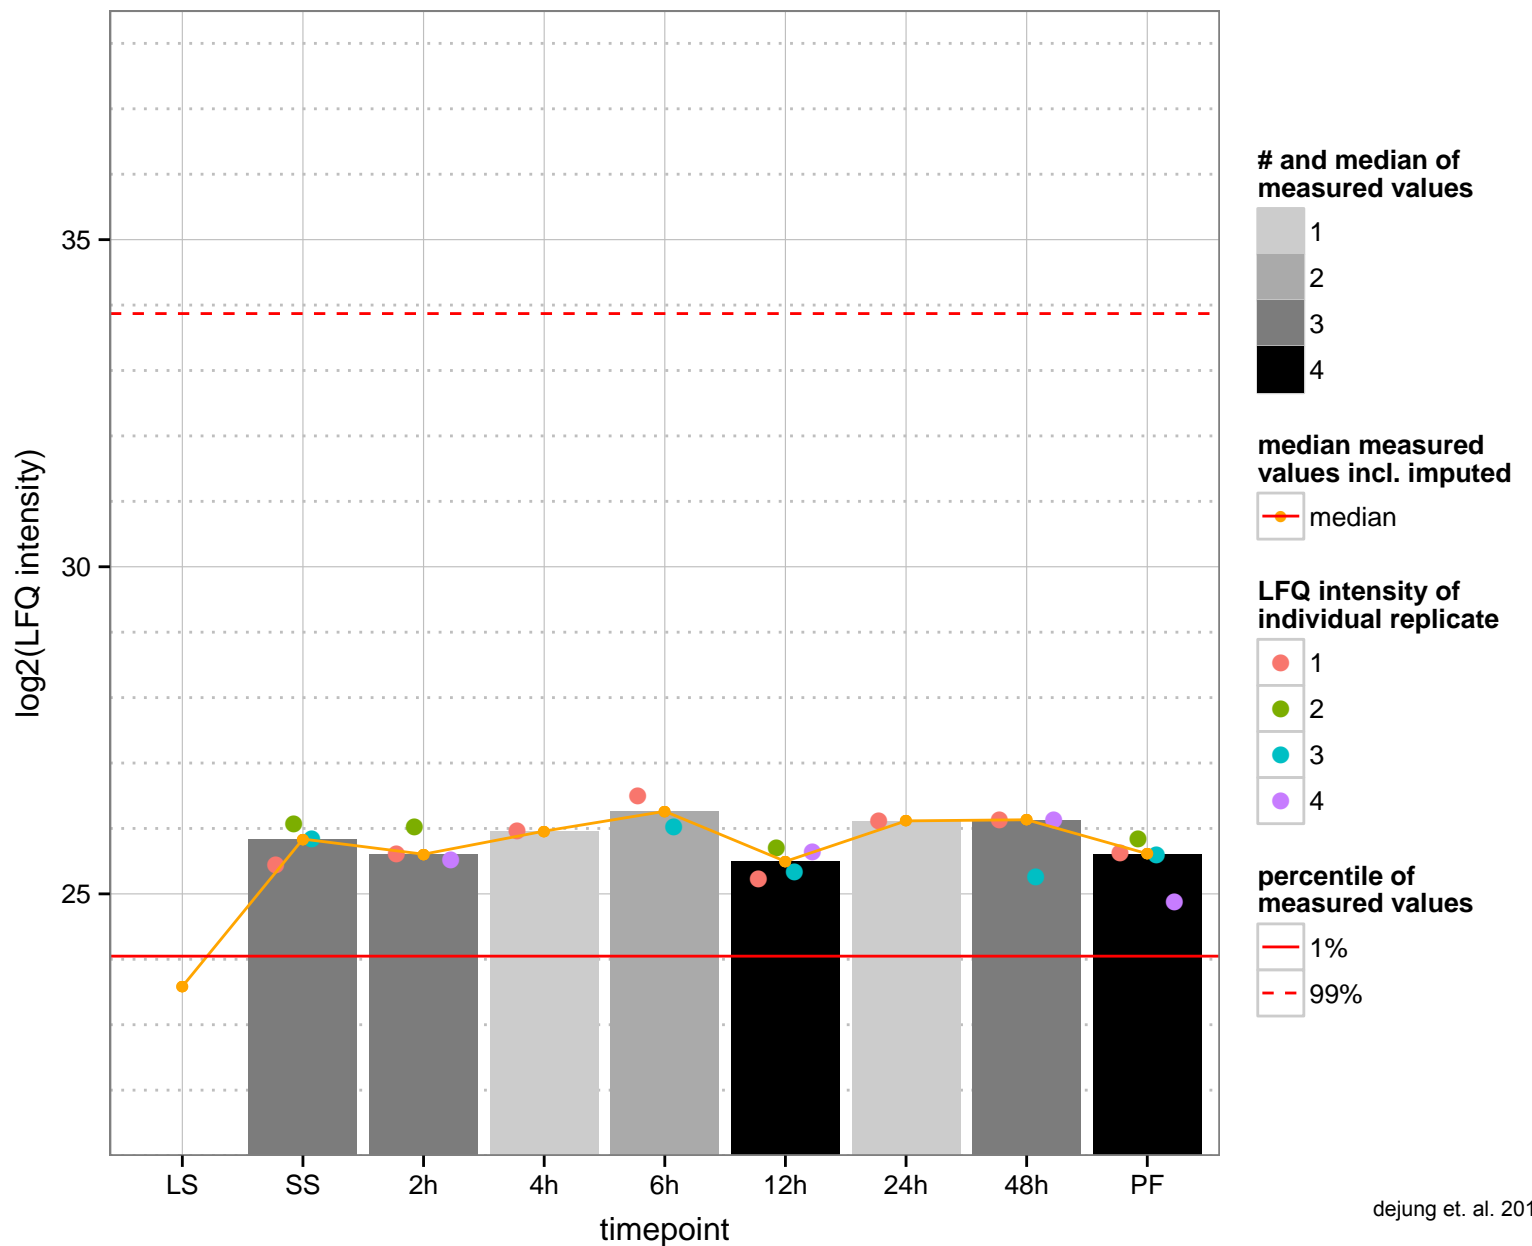

ubiquitin-activating enzyme E1, putative (UBA1)

Tb927.8.2640

AGOF: ATP binding, ubiquitin activating enzyme activity, ubiquitin-protein ligase activity

AGOC: null

AGOP: cellular protein modification process

PGOF: ATP binding, catalytic activity, small protein activating enzyme activity

PGOC: null

PGOP: cellular protein modification process

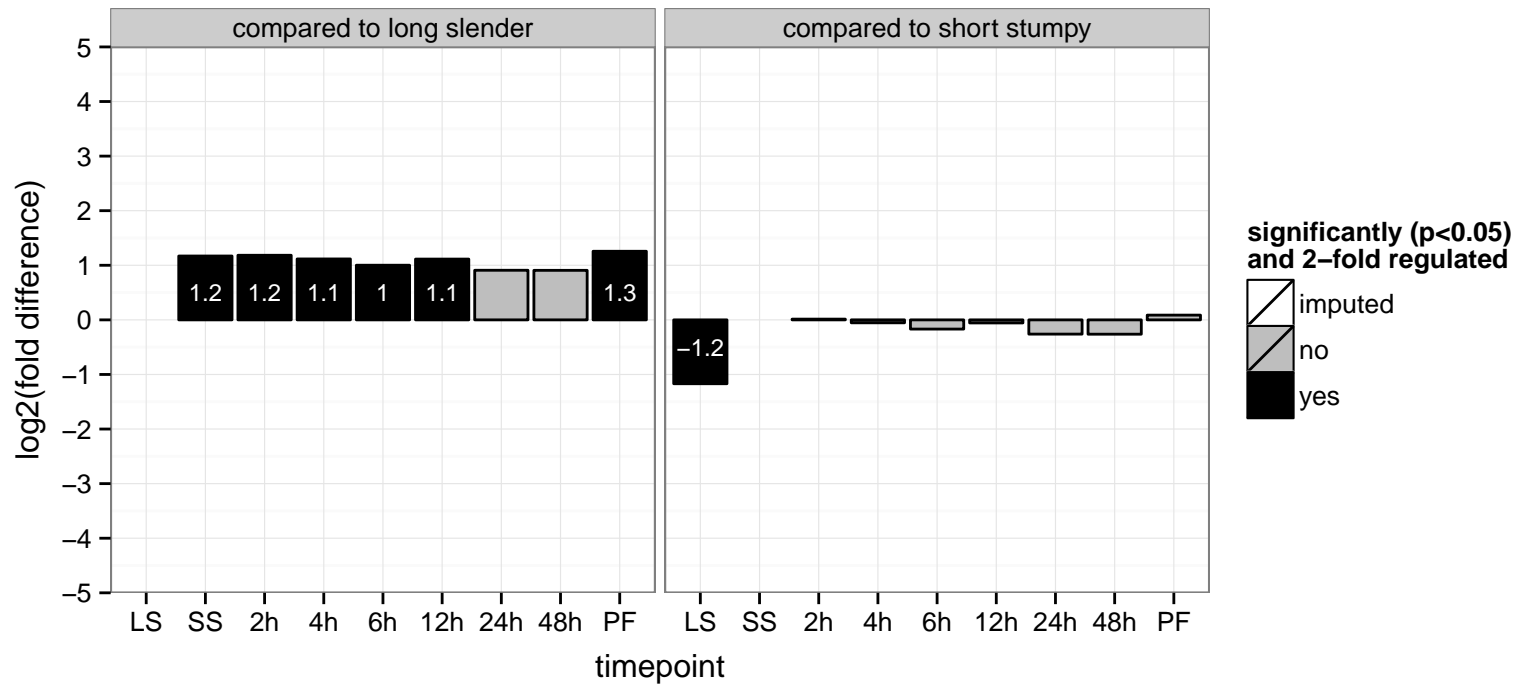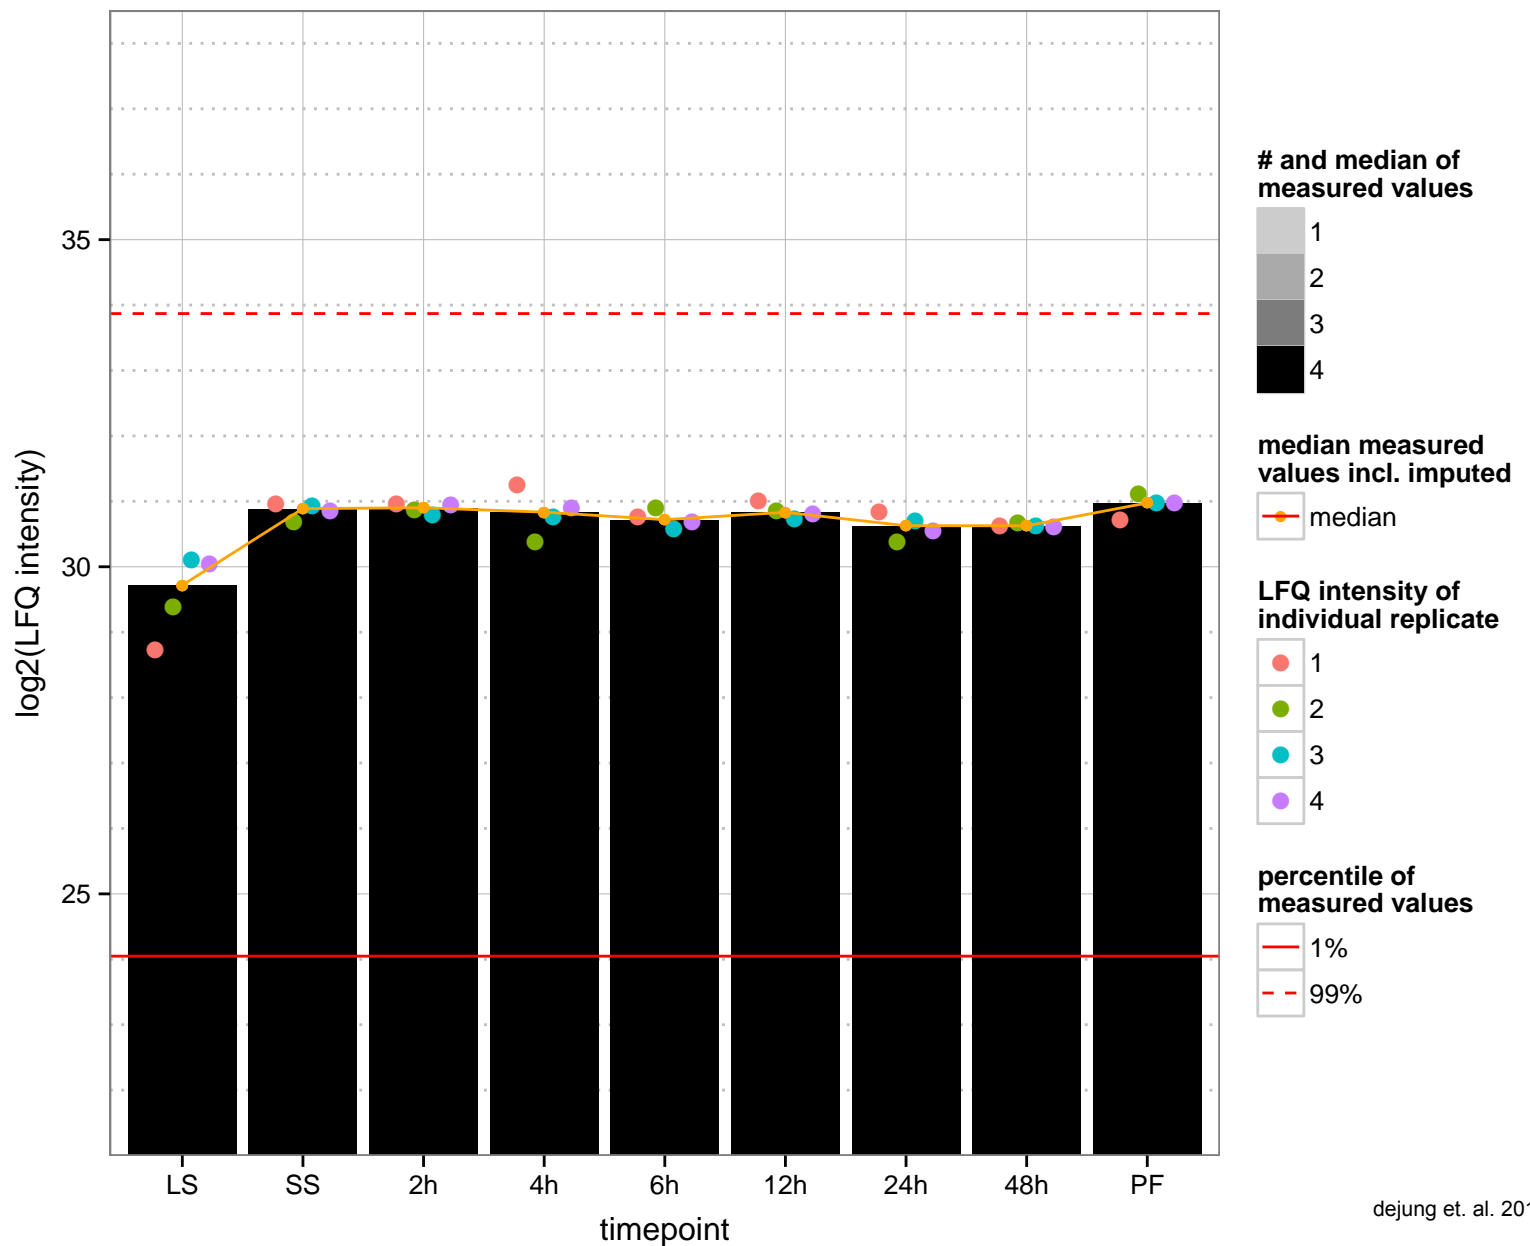



hypothetical protein, conserved  
 Tb927.8.2670  
 AGOF: null  
 AGOC: mitochondrion  
 AGOP: null  
 PGO: null  
 PGOC: null  
 PGOP: null

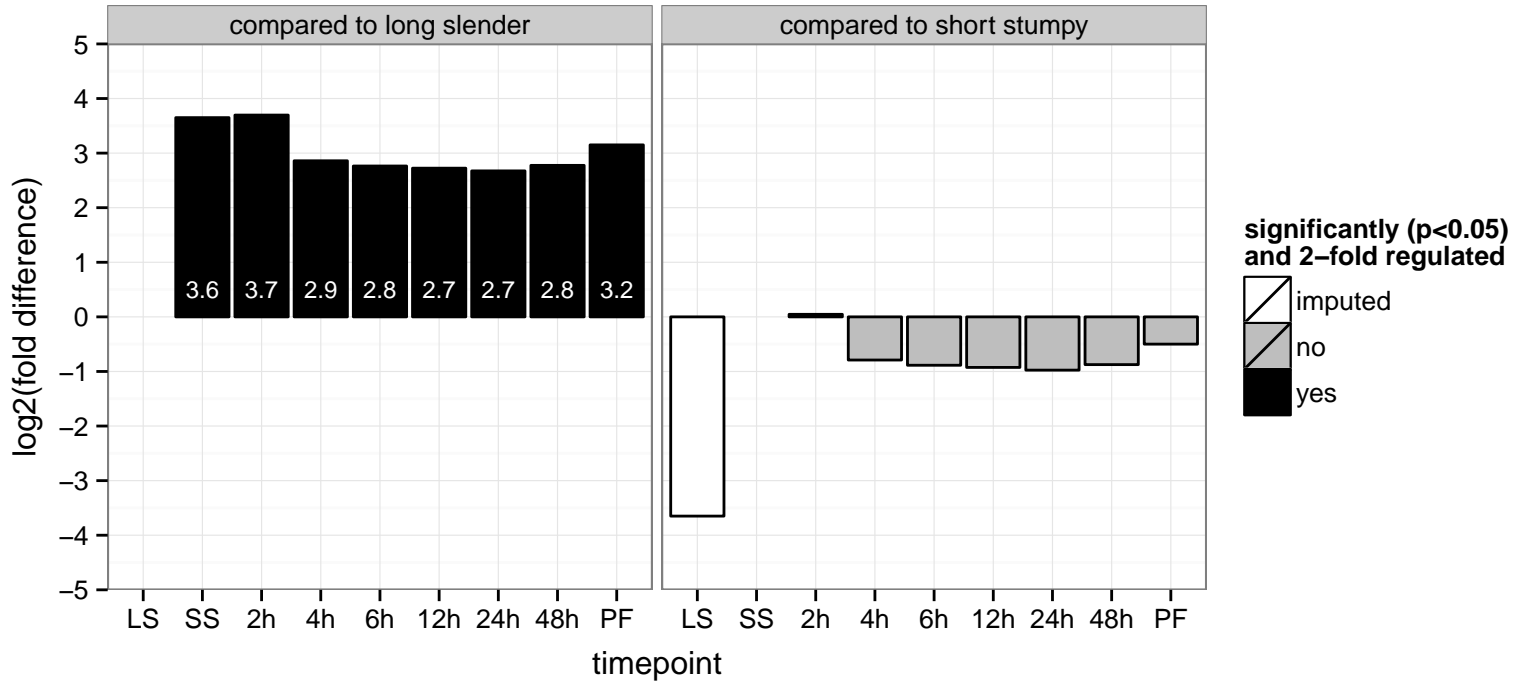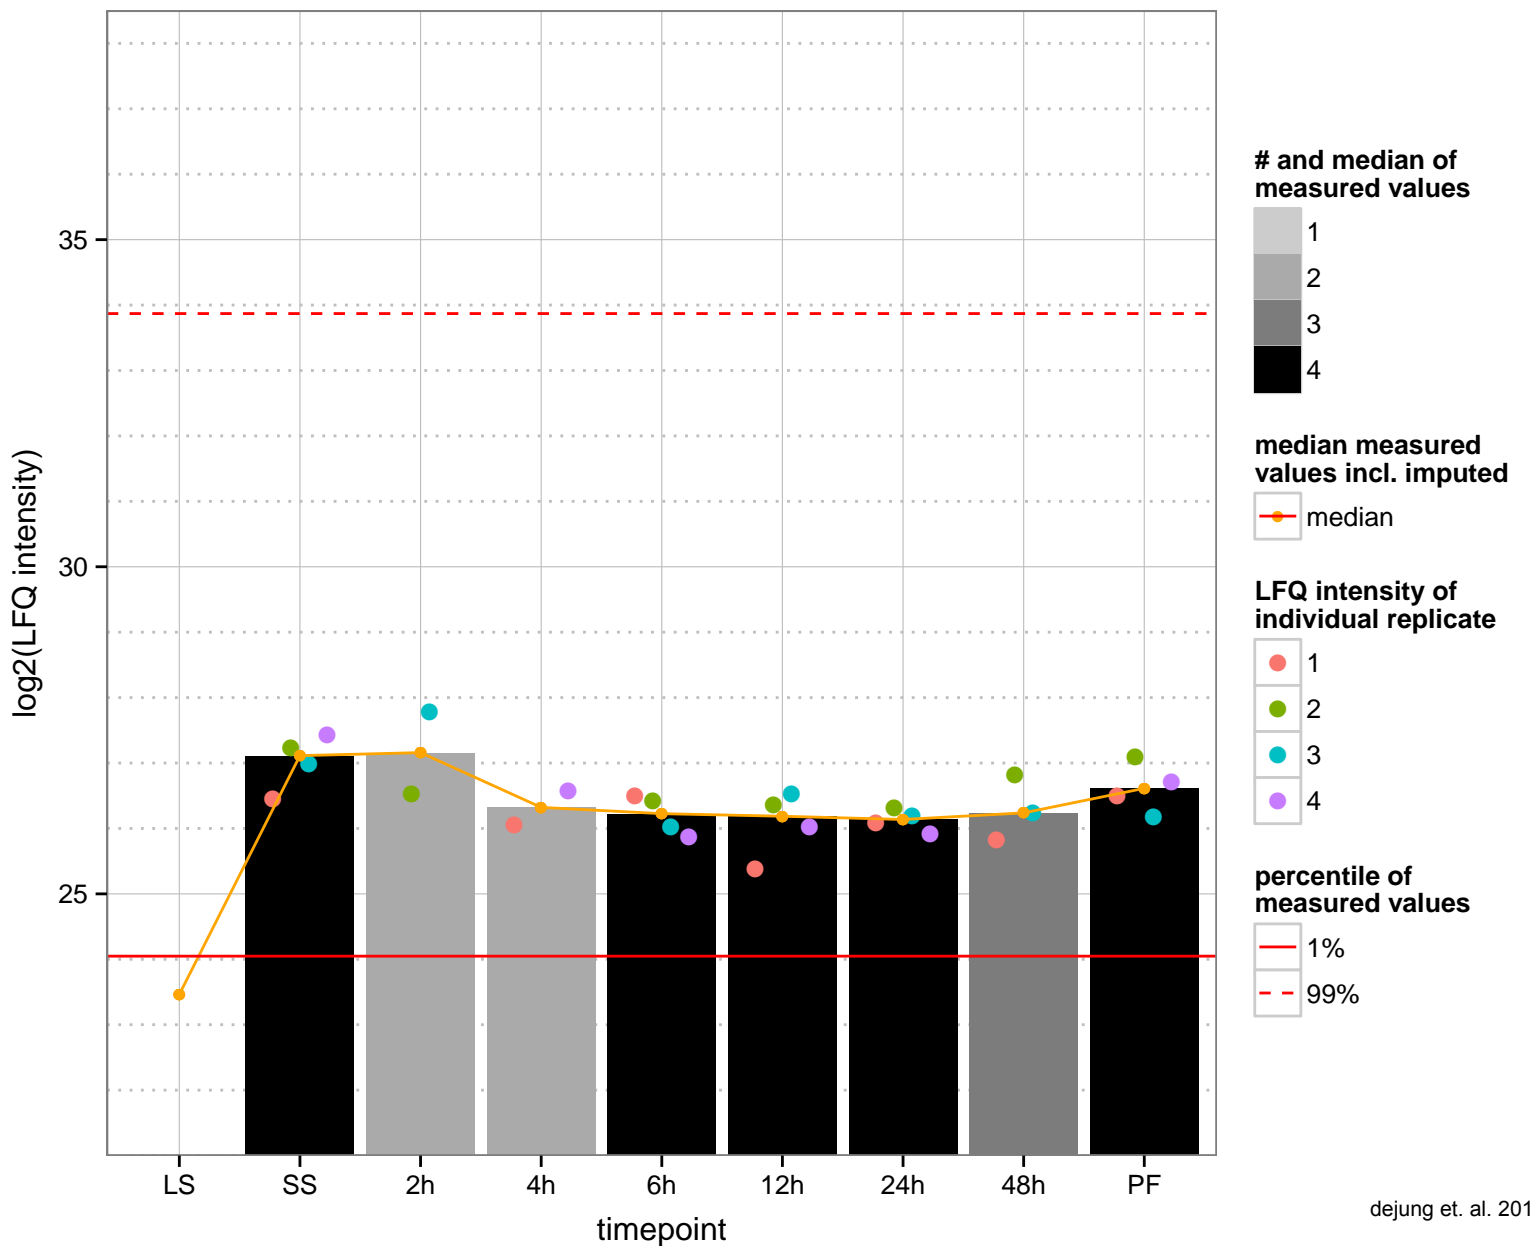

RNA-binding protein RBP10, putative (RBP10)  
 Tb927.8.2780  
 AGOF: RNA binding  
 AGOC: null  
 AGOP: RNA processing  
 PGO: nucleic acid binding  
 PGO: null  
 PGOP: null

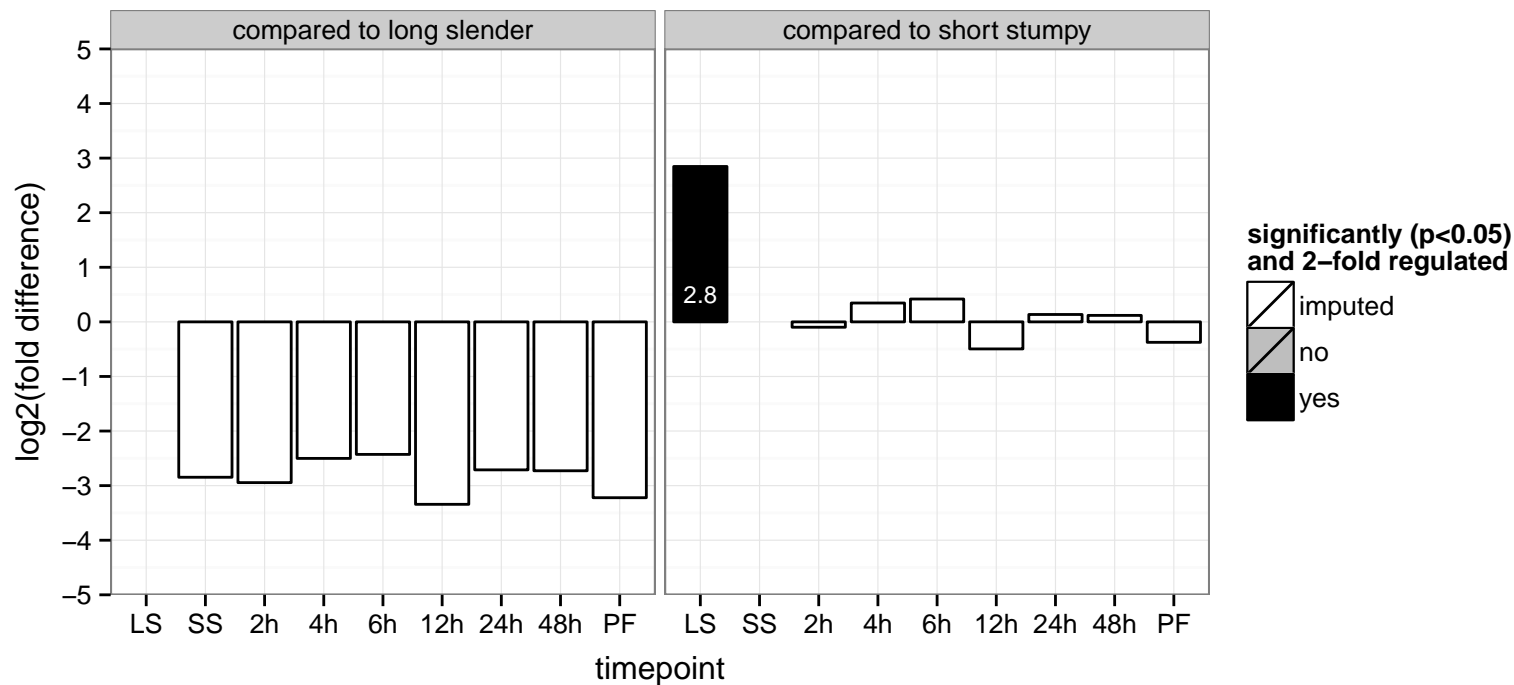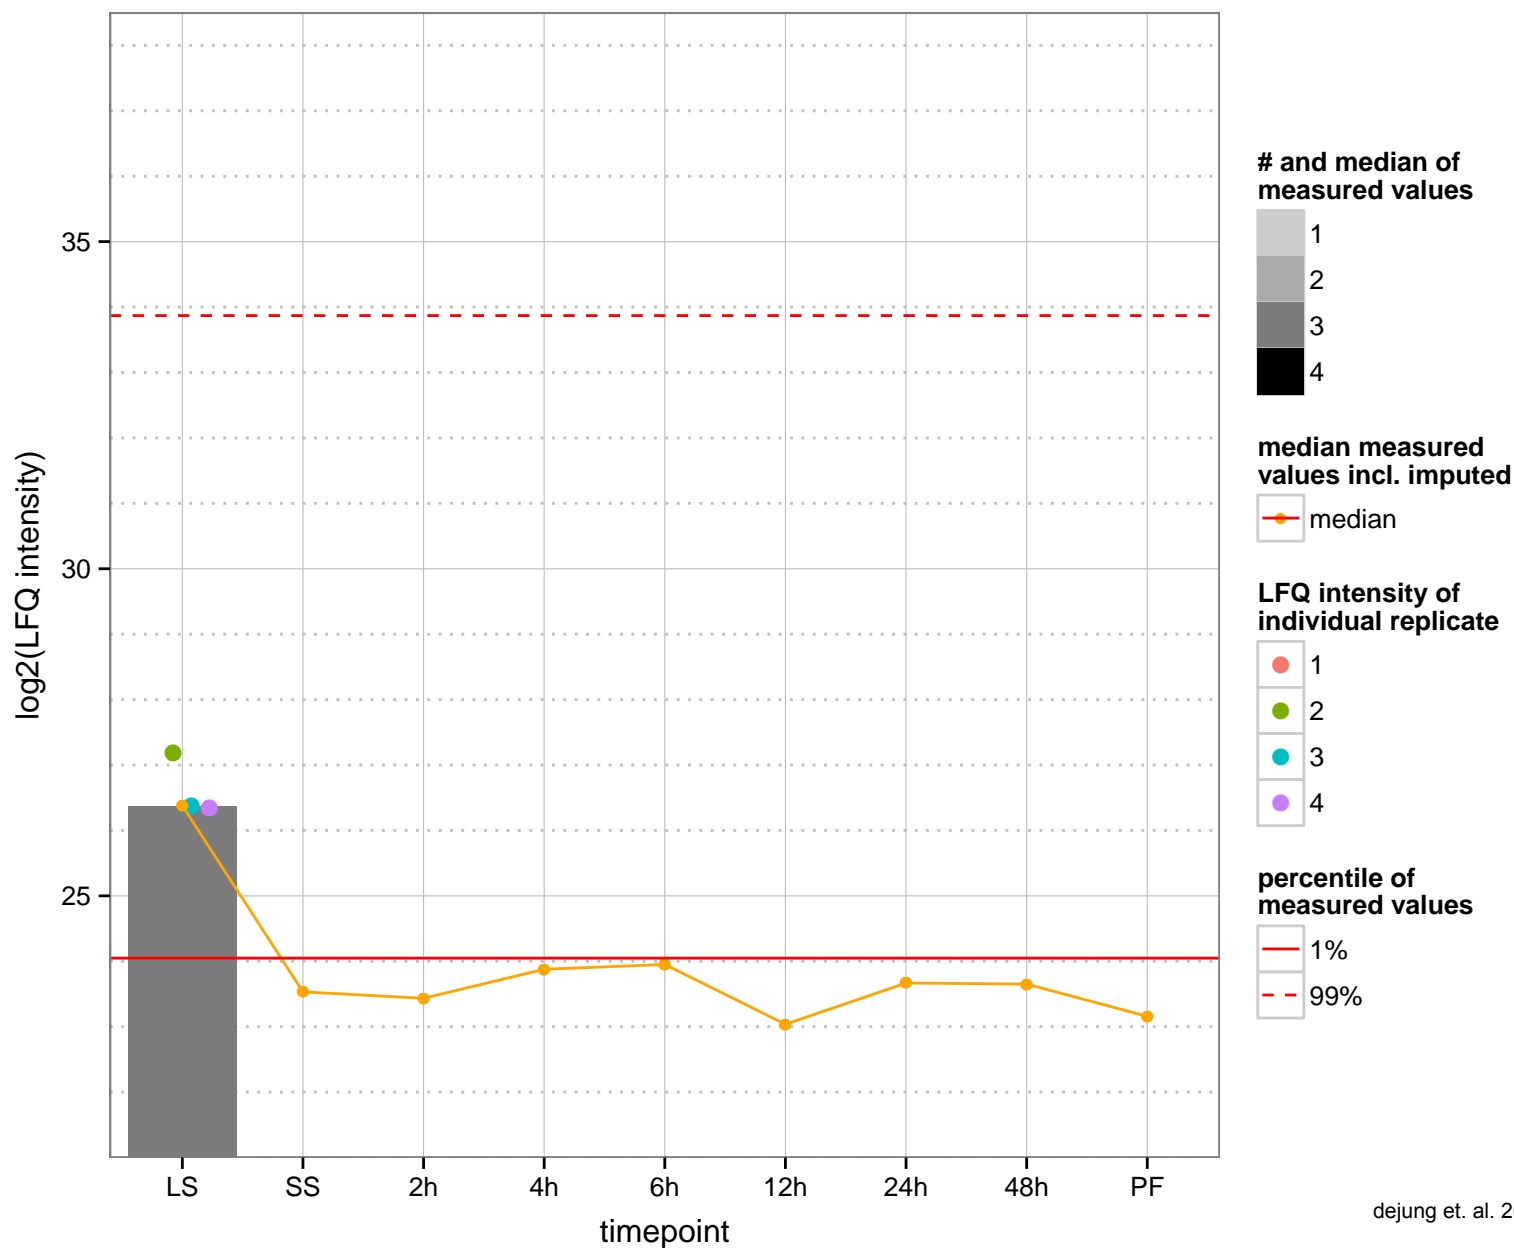

hypothetical protein, conserved  
 Tb927.8.2820  
 AGOF: null  
 AGOC: null  
 AGOP: null  
 PGO: null  
 PGOC: null  
 PGOP: null

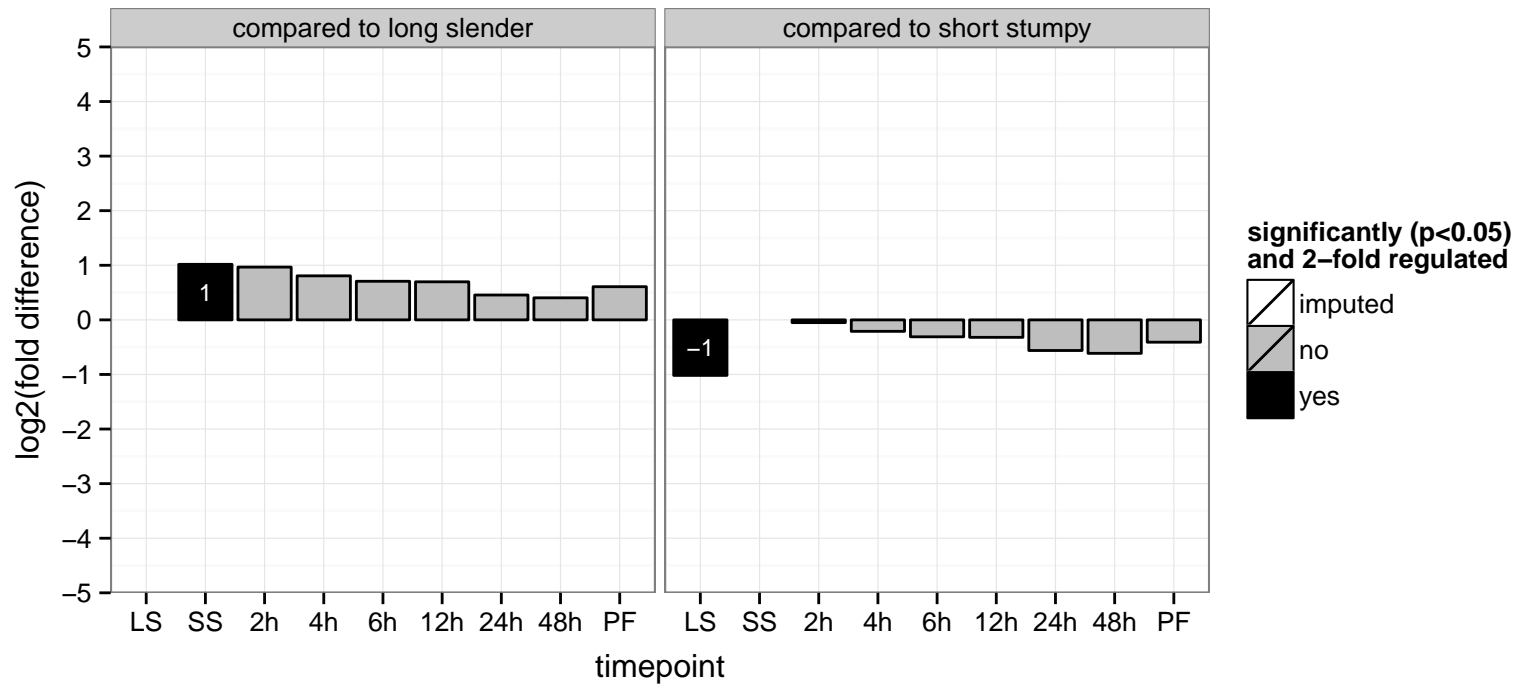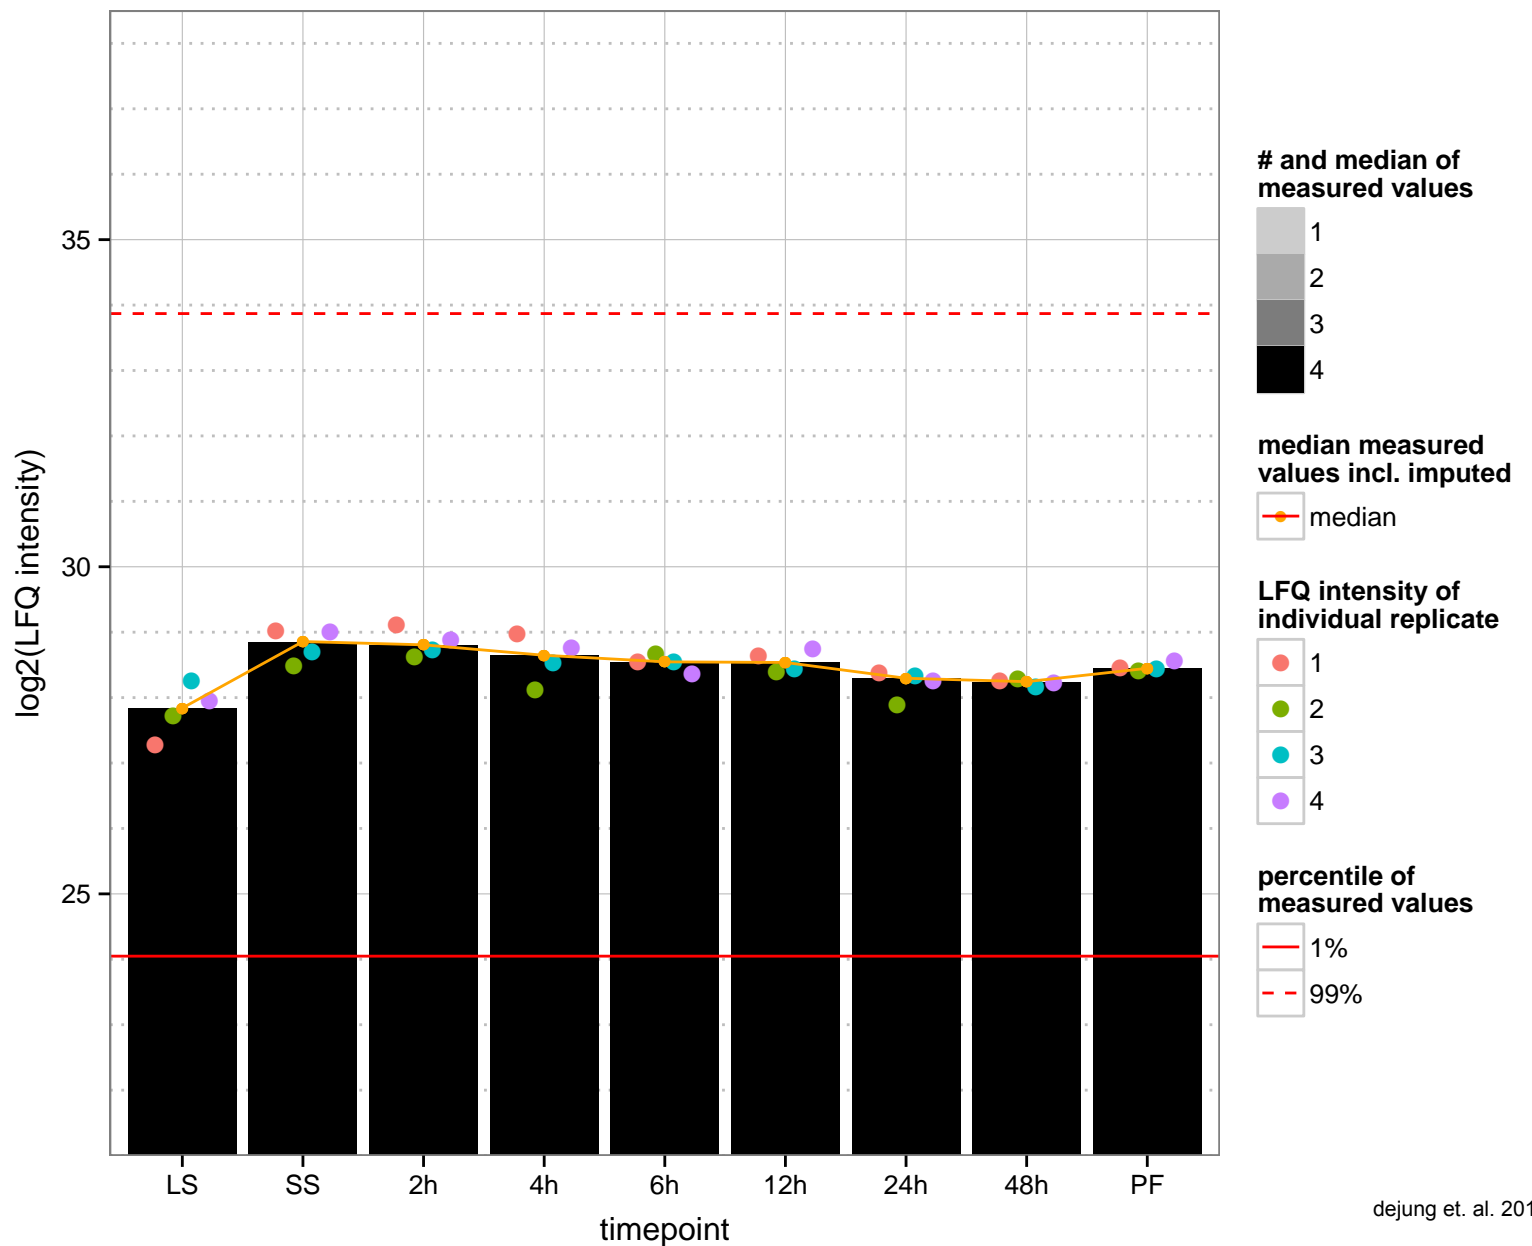

Poly(A)-specific ribonuclease PARN-1  
 Tb927.8.2850  
 AGOF: nuclease activity, nucleic acid binding  
 AGOC: cytoplasm, nucleus  
 AGOP: null  
 PGO: nucleic acid binding  
 PGO: nucleus  
 PGO: null

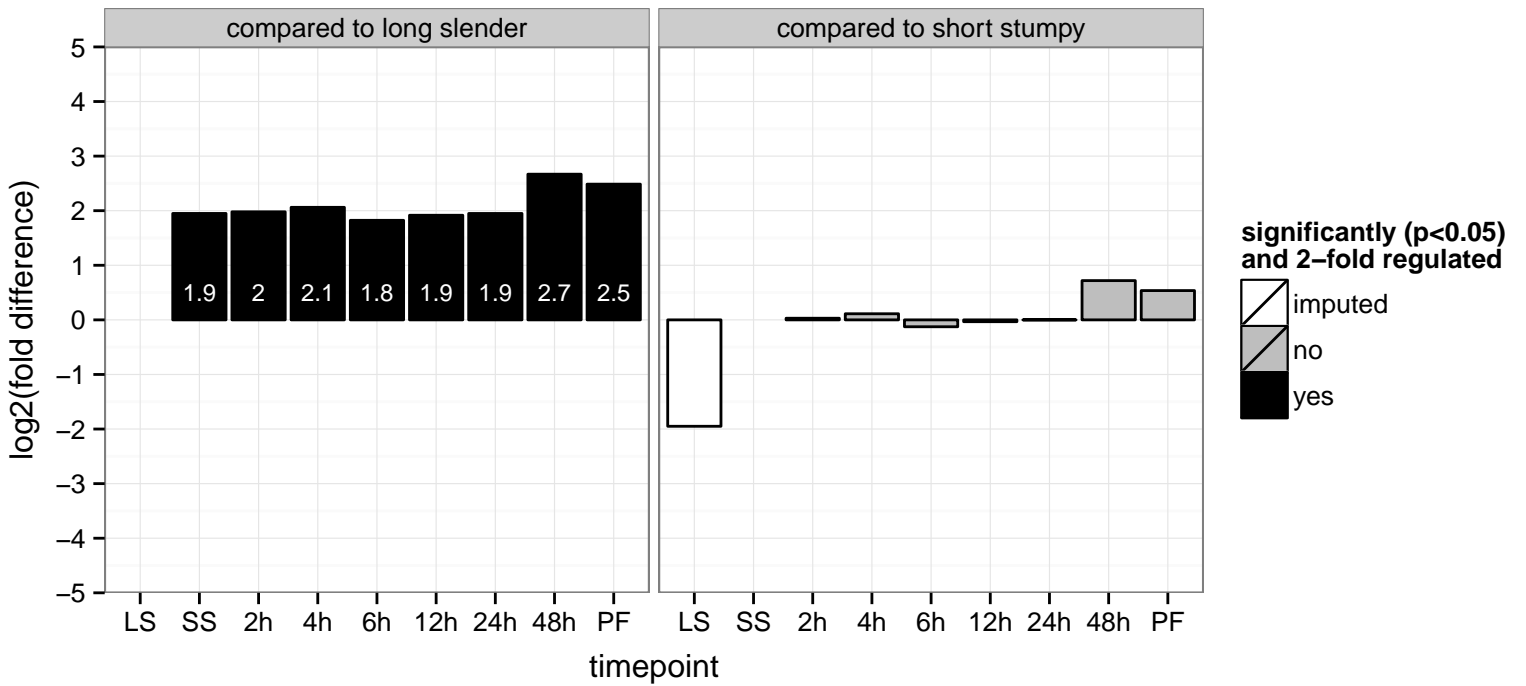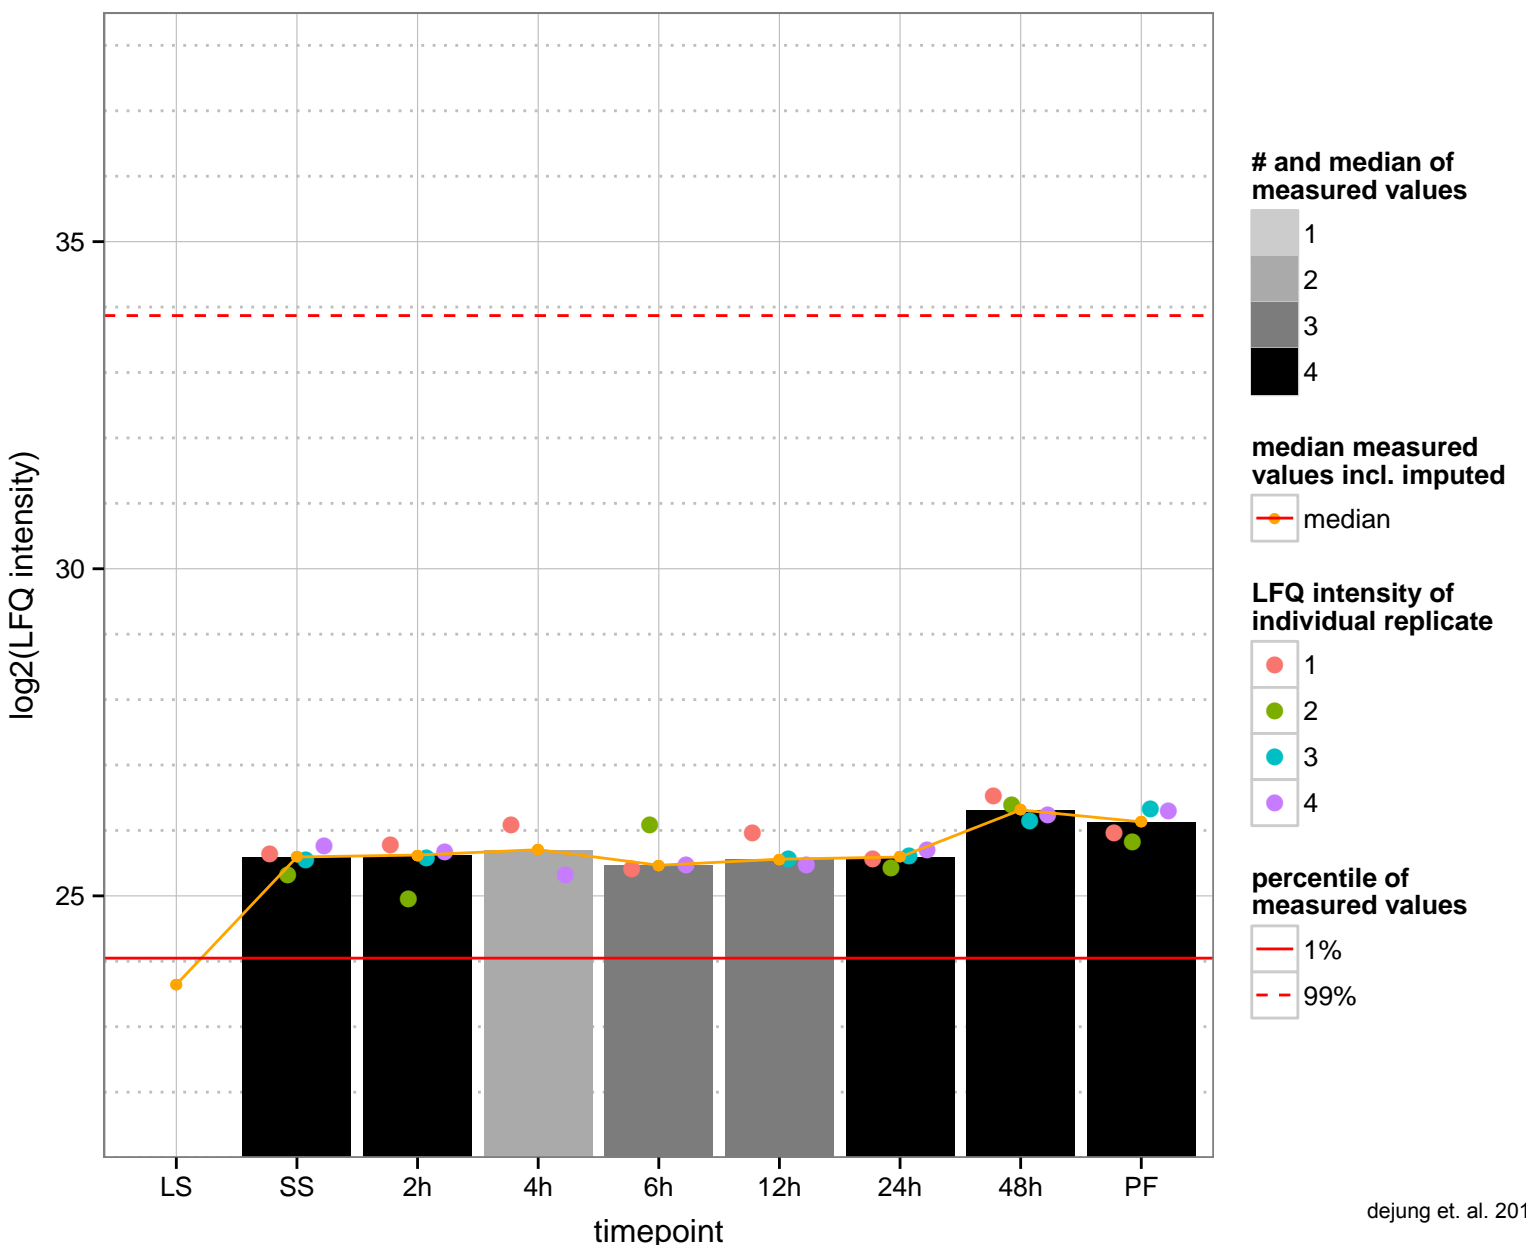

hypothetical protein, conserved  
 Tb927.8.2970  
 AGOF: null  
 AGOC: mitochondrion  
 AGOP: null  
 PGO: null  
 PGO: null  
 PGO: null

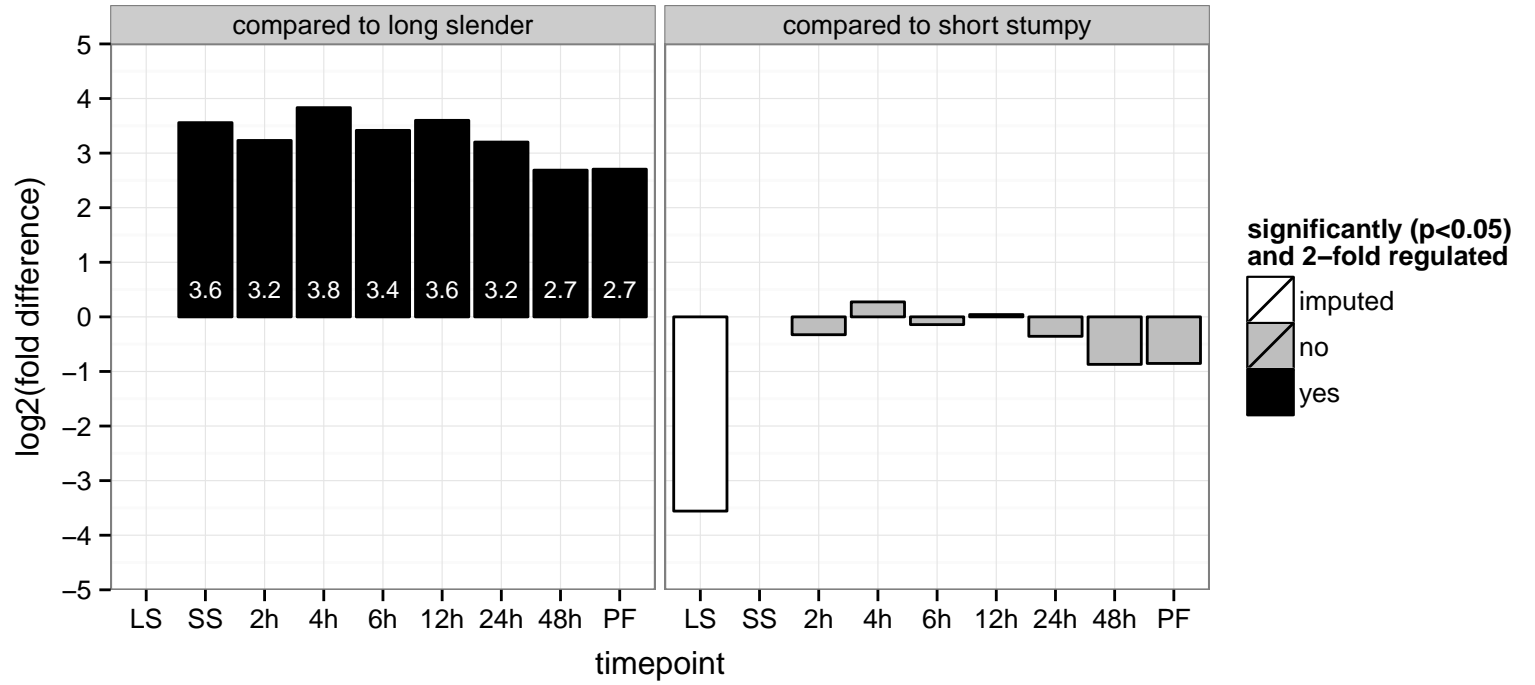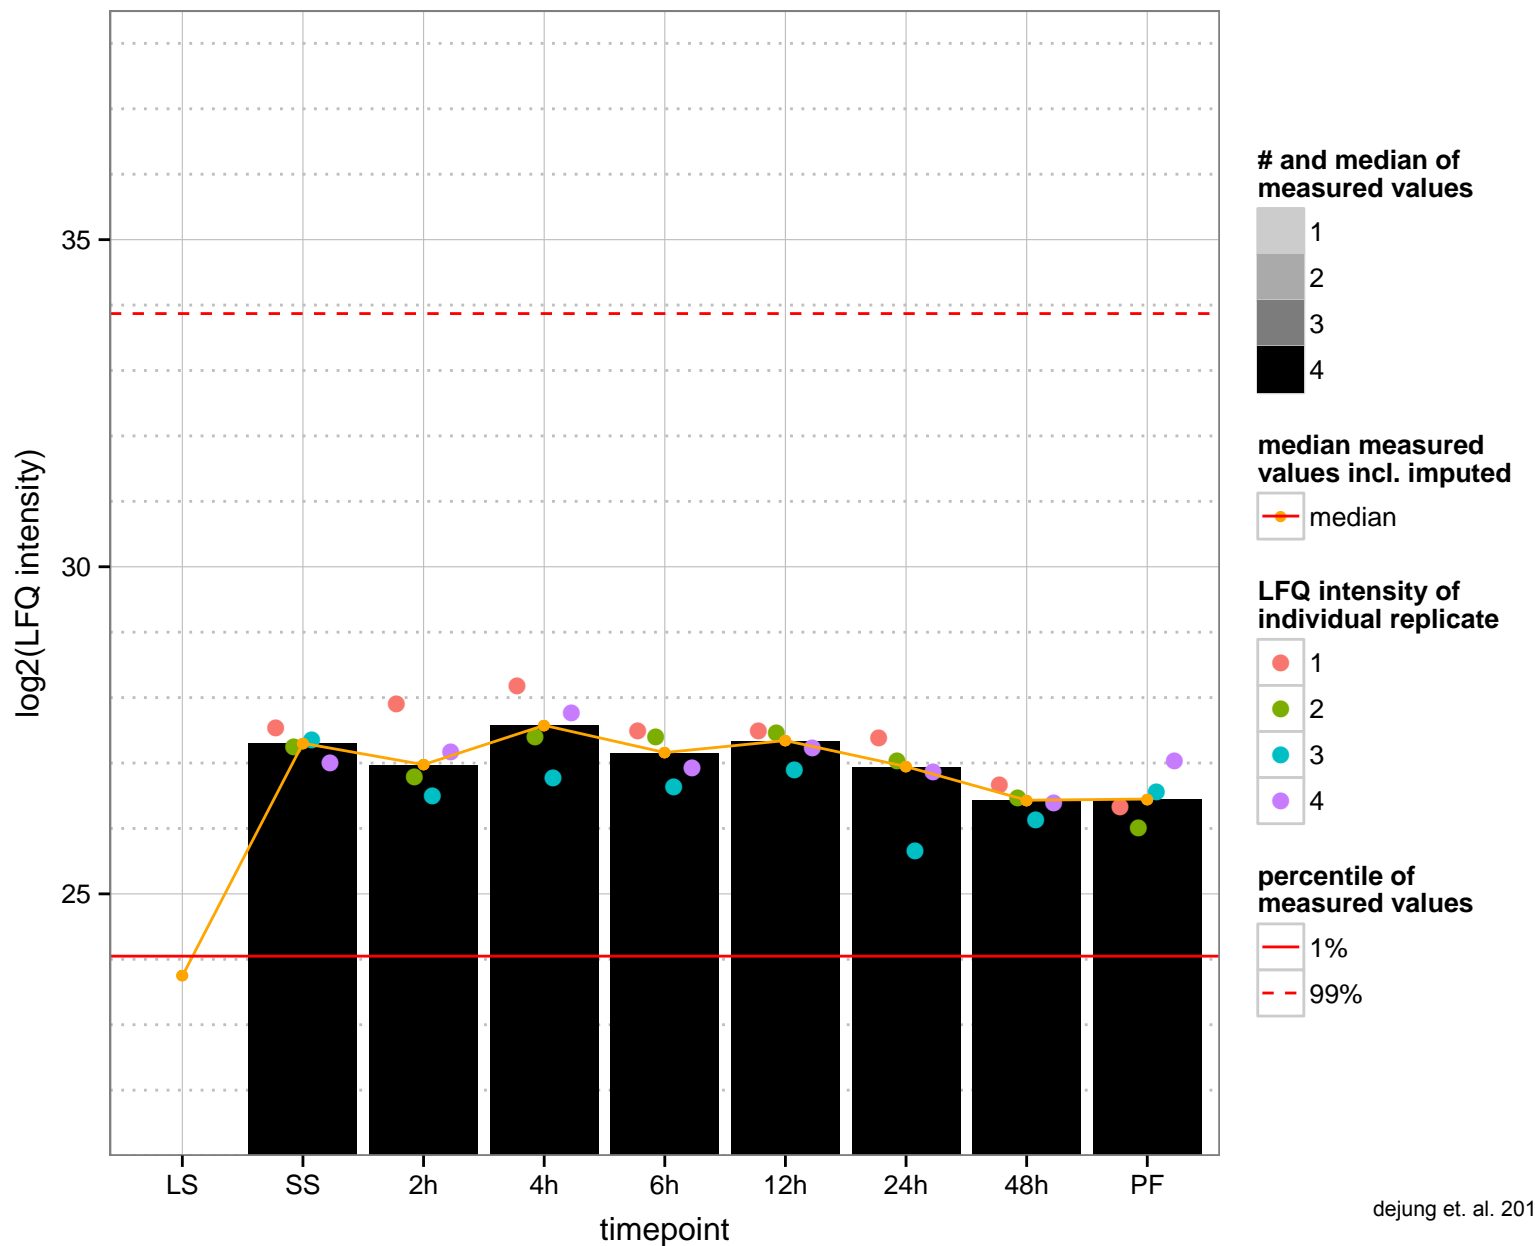

hypothetical protein, conserved  
 Tb927.8.3020  
 AGOF: null  
 AGOC: null  
 AGOP: null  
 PGO: null  
 PGOC: null  
 PGOP: null

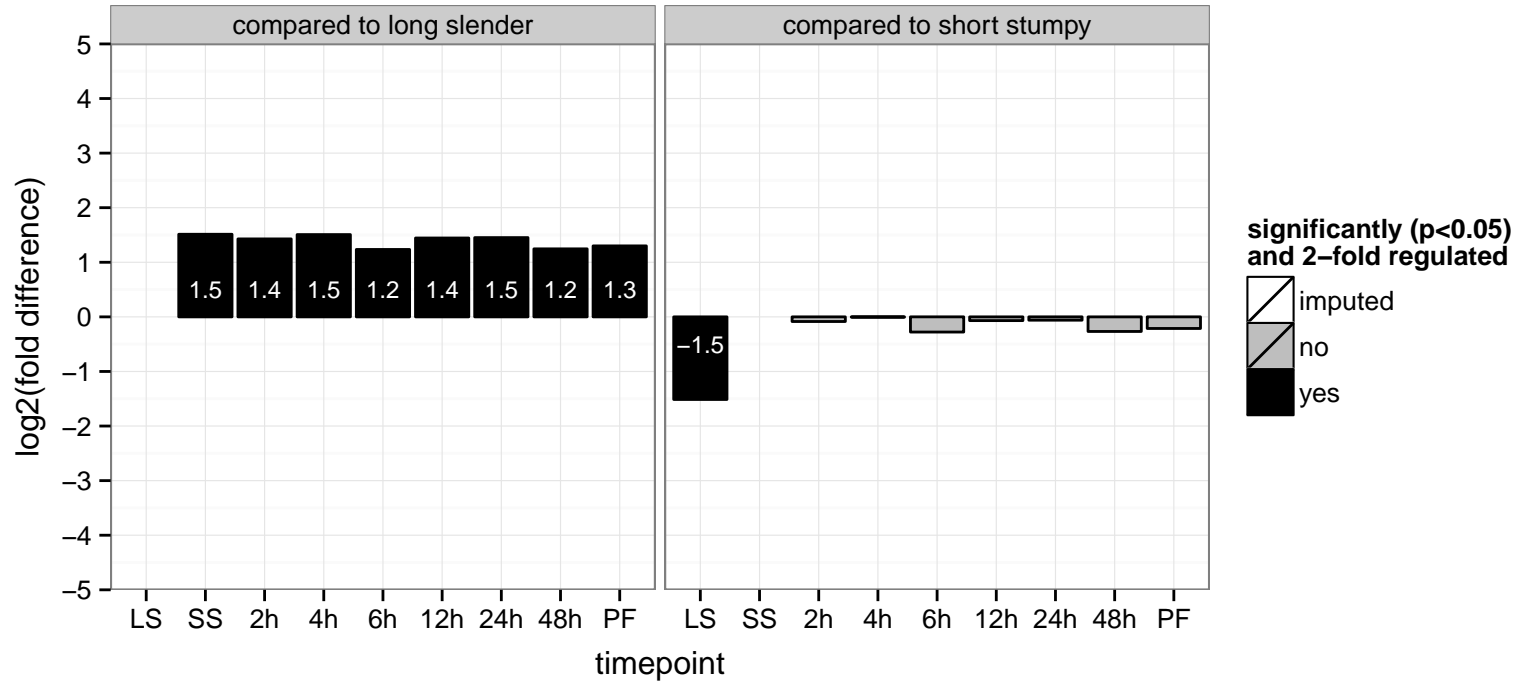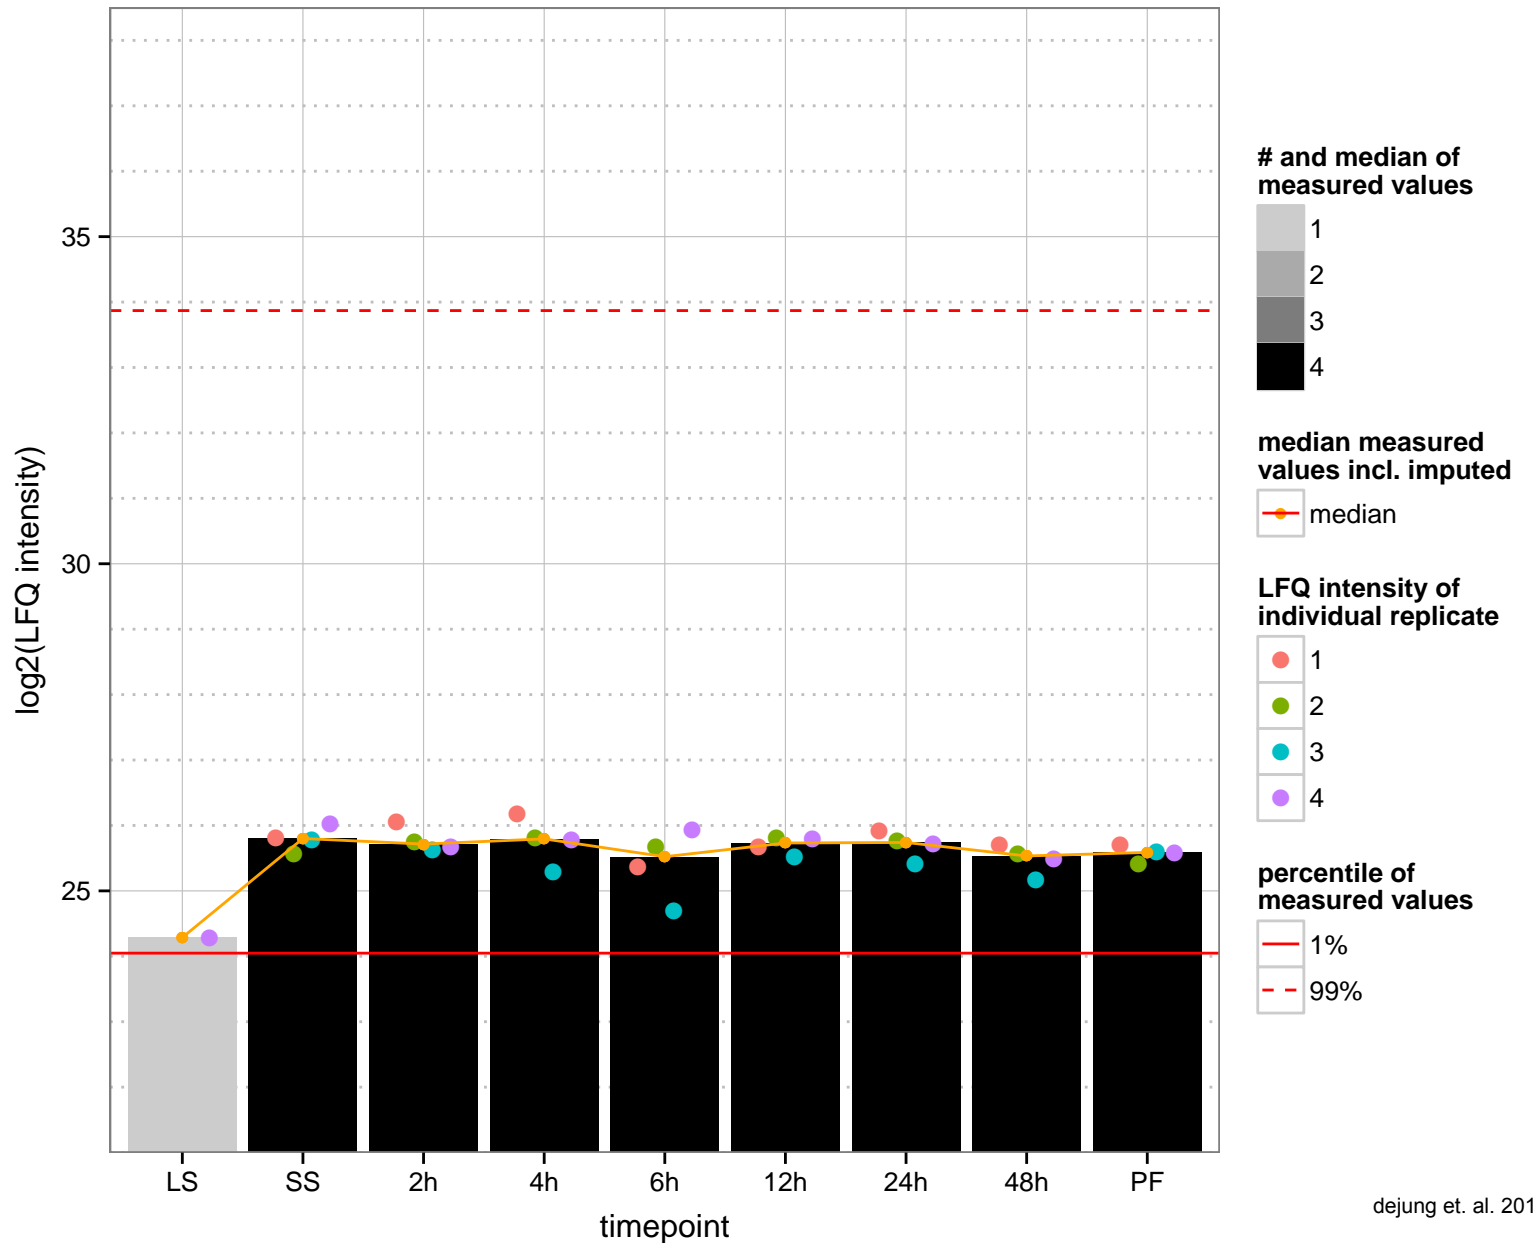

cytosolic leucyl aminopeptidase, putative, metallo-peptidase, Clan MF, Family M17  
 Tb927.8.3060  
 AGOF: aminopeptidase activity, manganese ion binding, metalloexopeptidase activity  
 AGOC: cytoplasm, intracellular  
 AGOP: protein metabolic process, proteolysis  
 PGO: aminopeptidase activity  
 PGOC: intracellular  
 PGOP: proteolysis

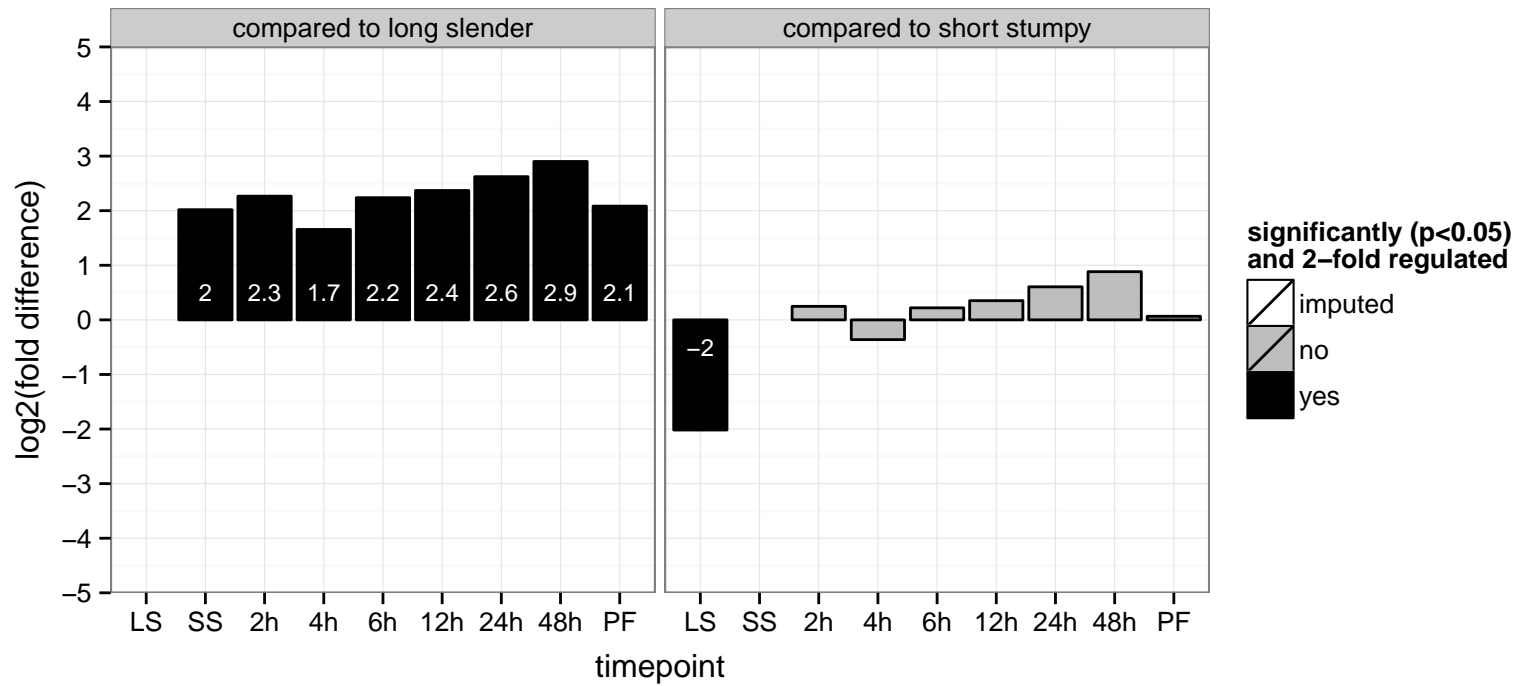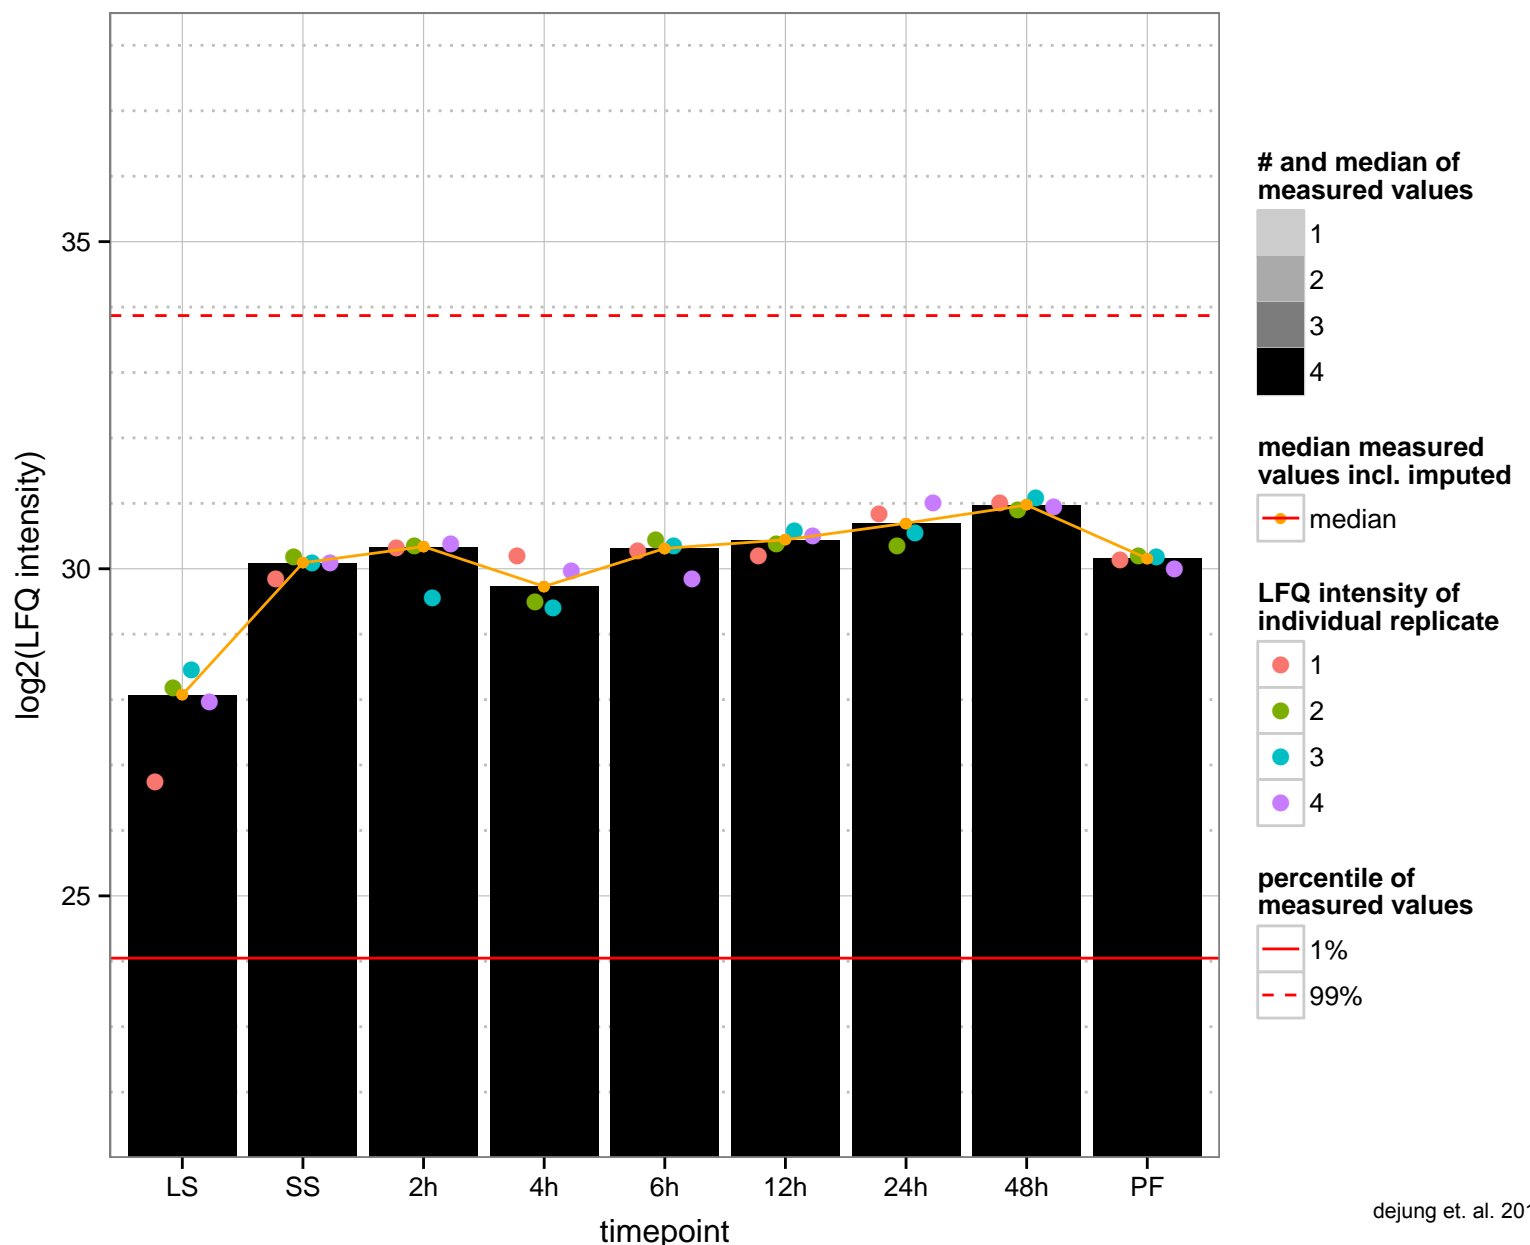

T-complex protein 1, gamma subunit, putative (TCP-1-gamma)

Tb927.8.3150

AGOF: ATP binding, unfolded protein binding

AGOC: chaperonin-containing T-complex

AGOP: protein folding, regulation of cell cycle

PGOF: ATP binding, unfolded protein binding

PGOC: null

PGOP: cellular protein metabolic process, protein folding

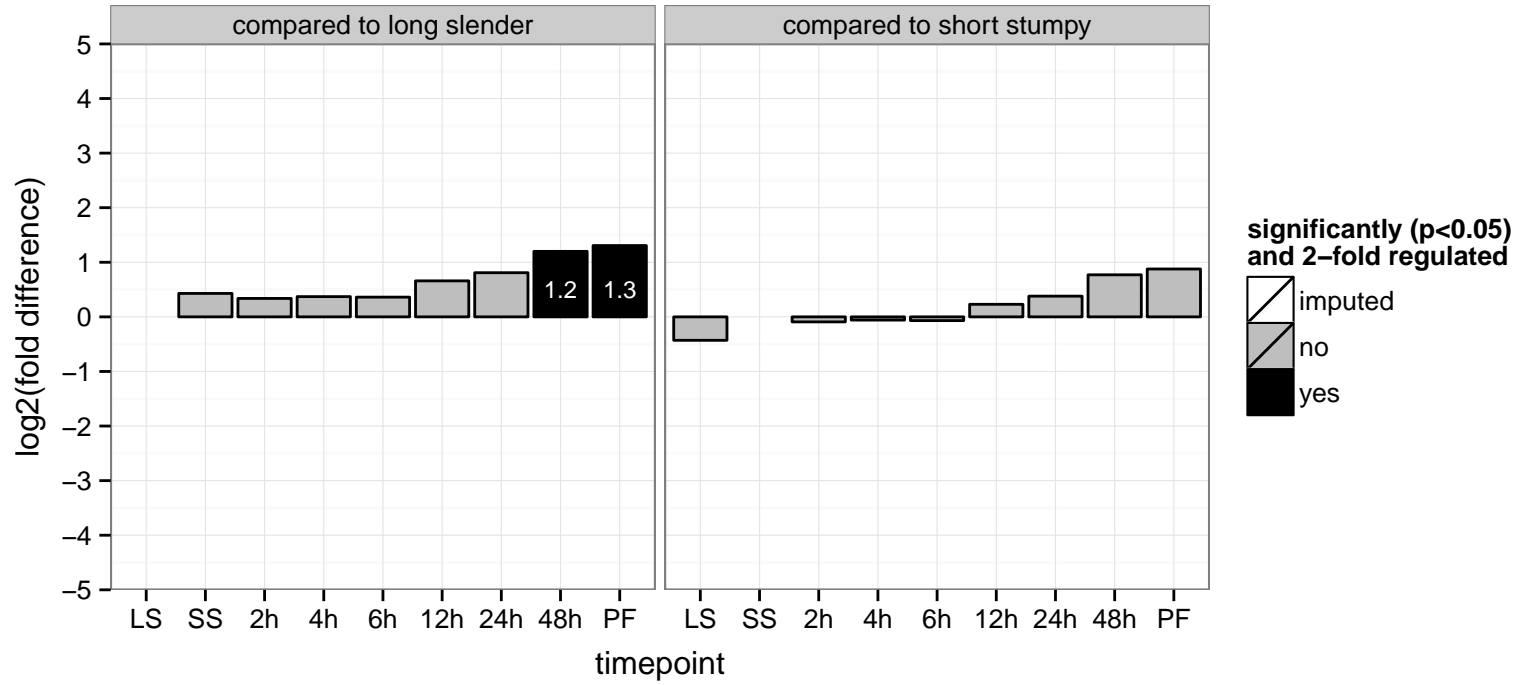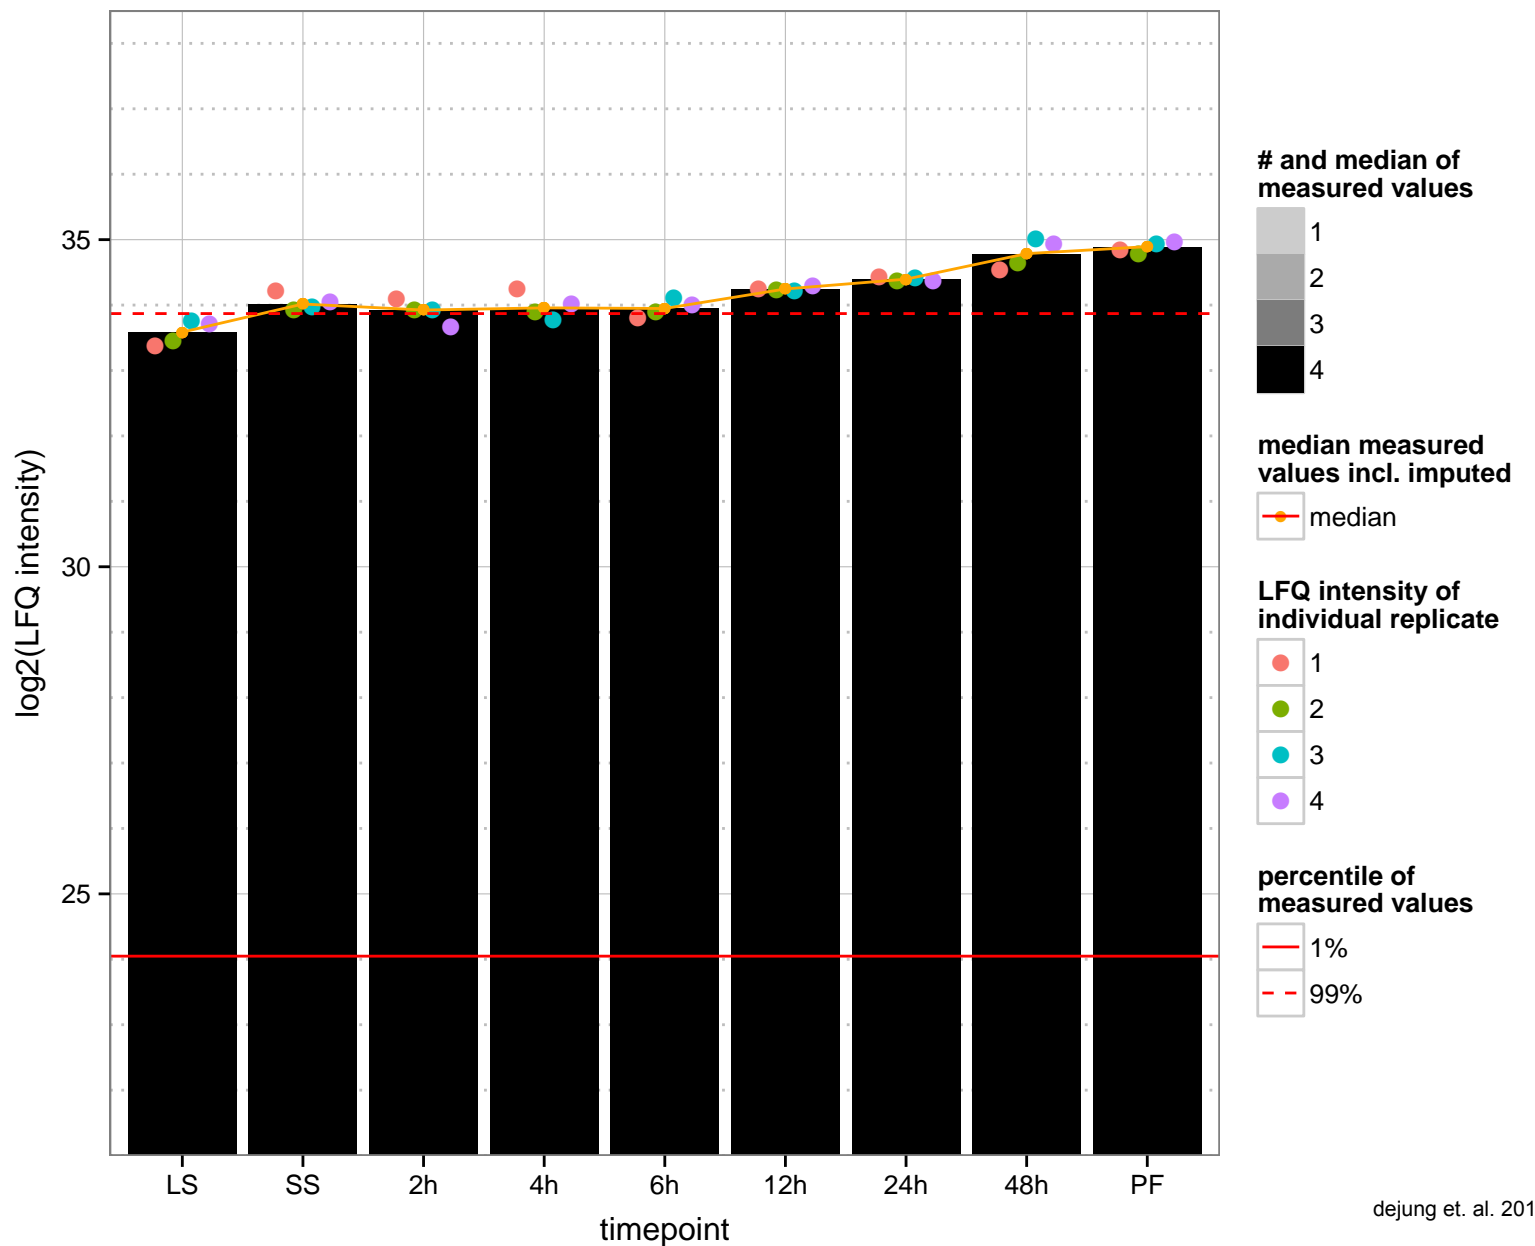



hypothetical protein, conserved  
 Tb927.8.3170  
 AGOF: null  
 AGOC: mitochondrion  
 AGOP: null  
 PGO: null  
 PGOC: null  
 PGOP: null

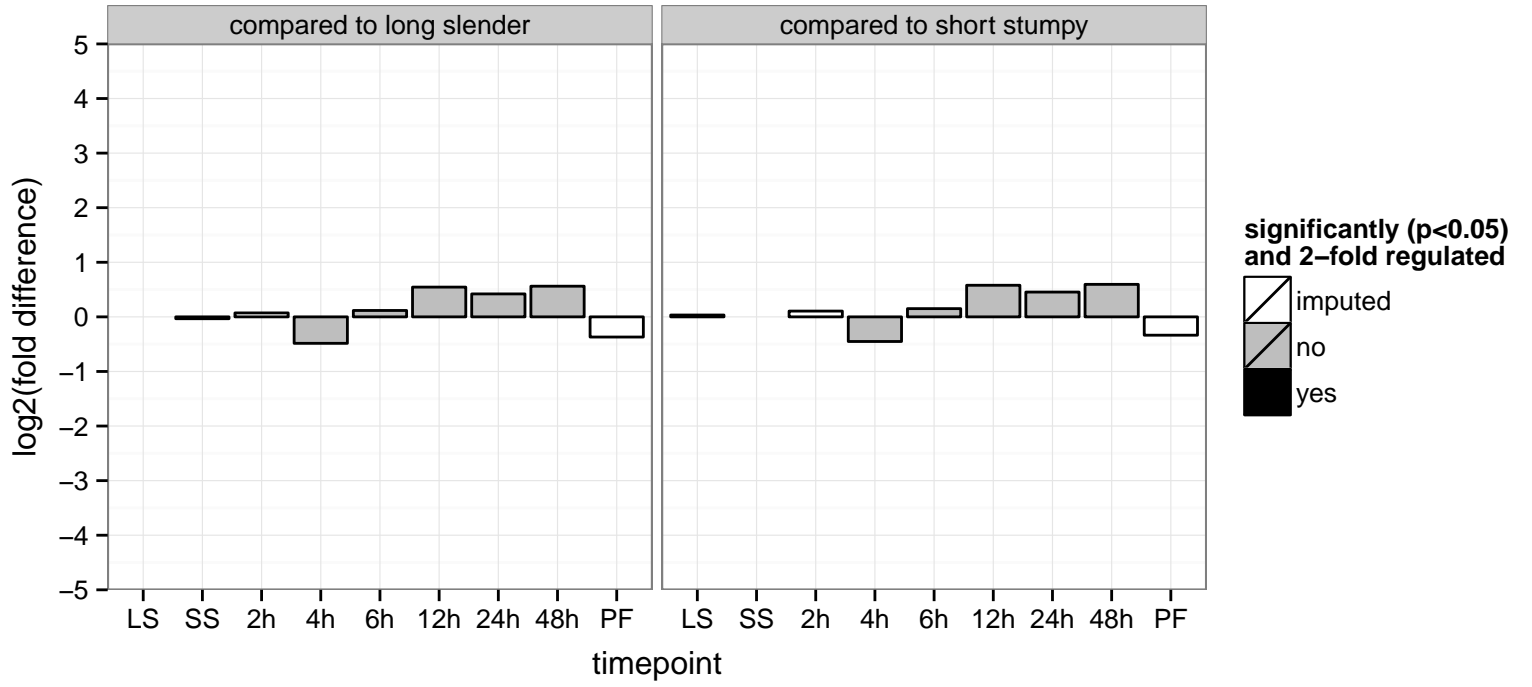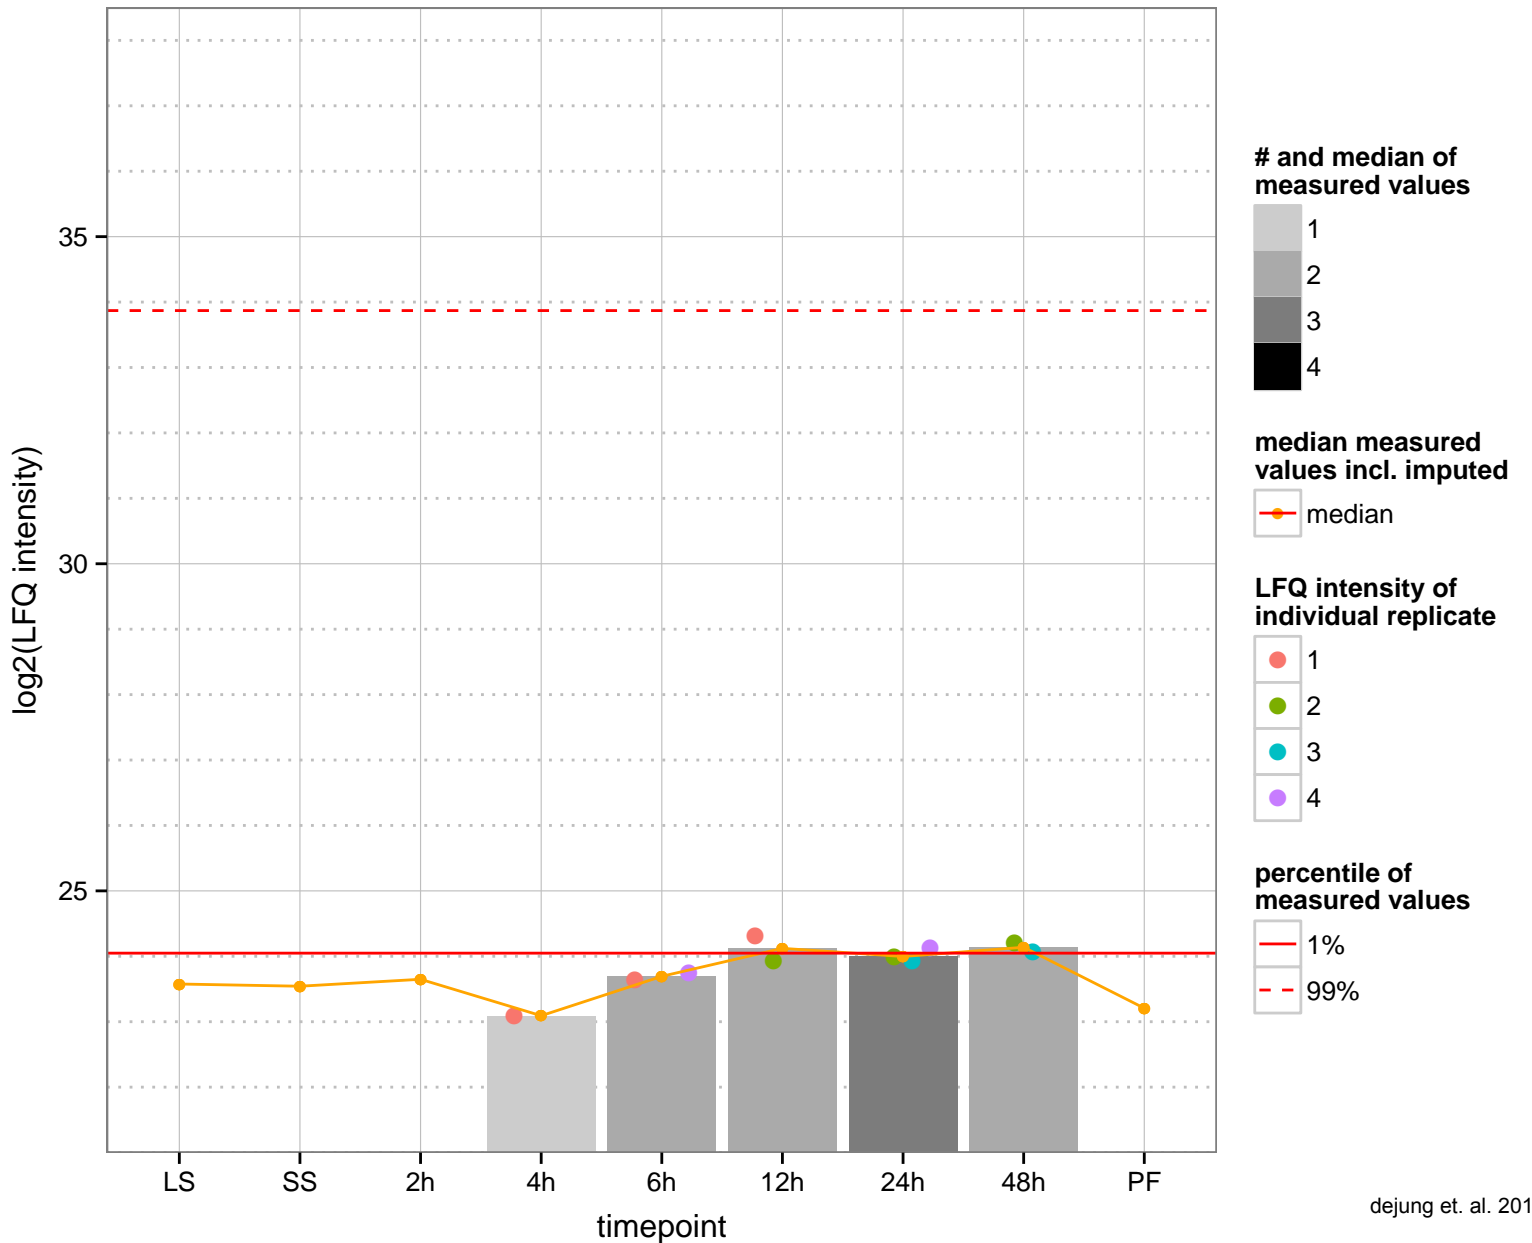

hypothetical protein, conserved  
 Tb927.8.3200  
 AGOF: null  
 AGOC: null  
 AGOP: null  
 PGOF: binding  
 PGO: null  
 PGOP: null

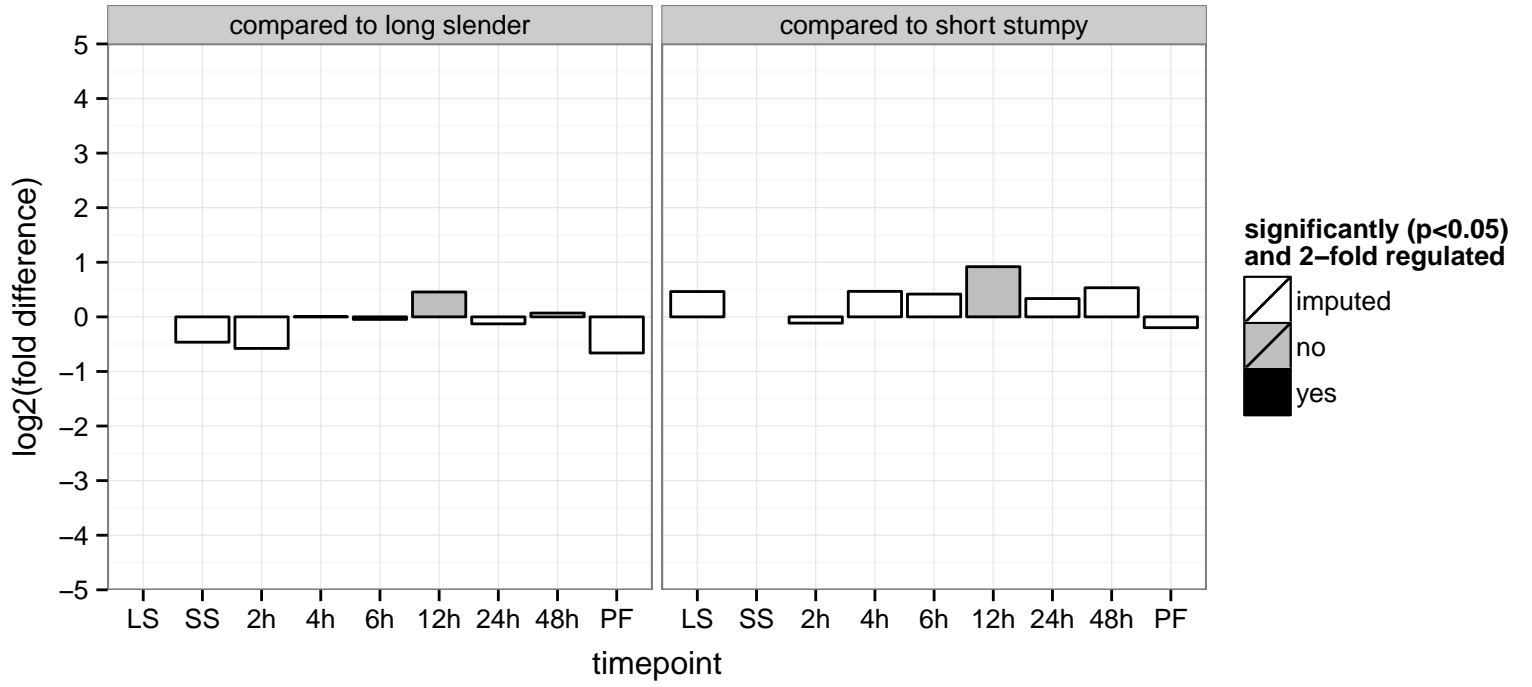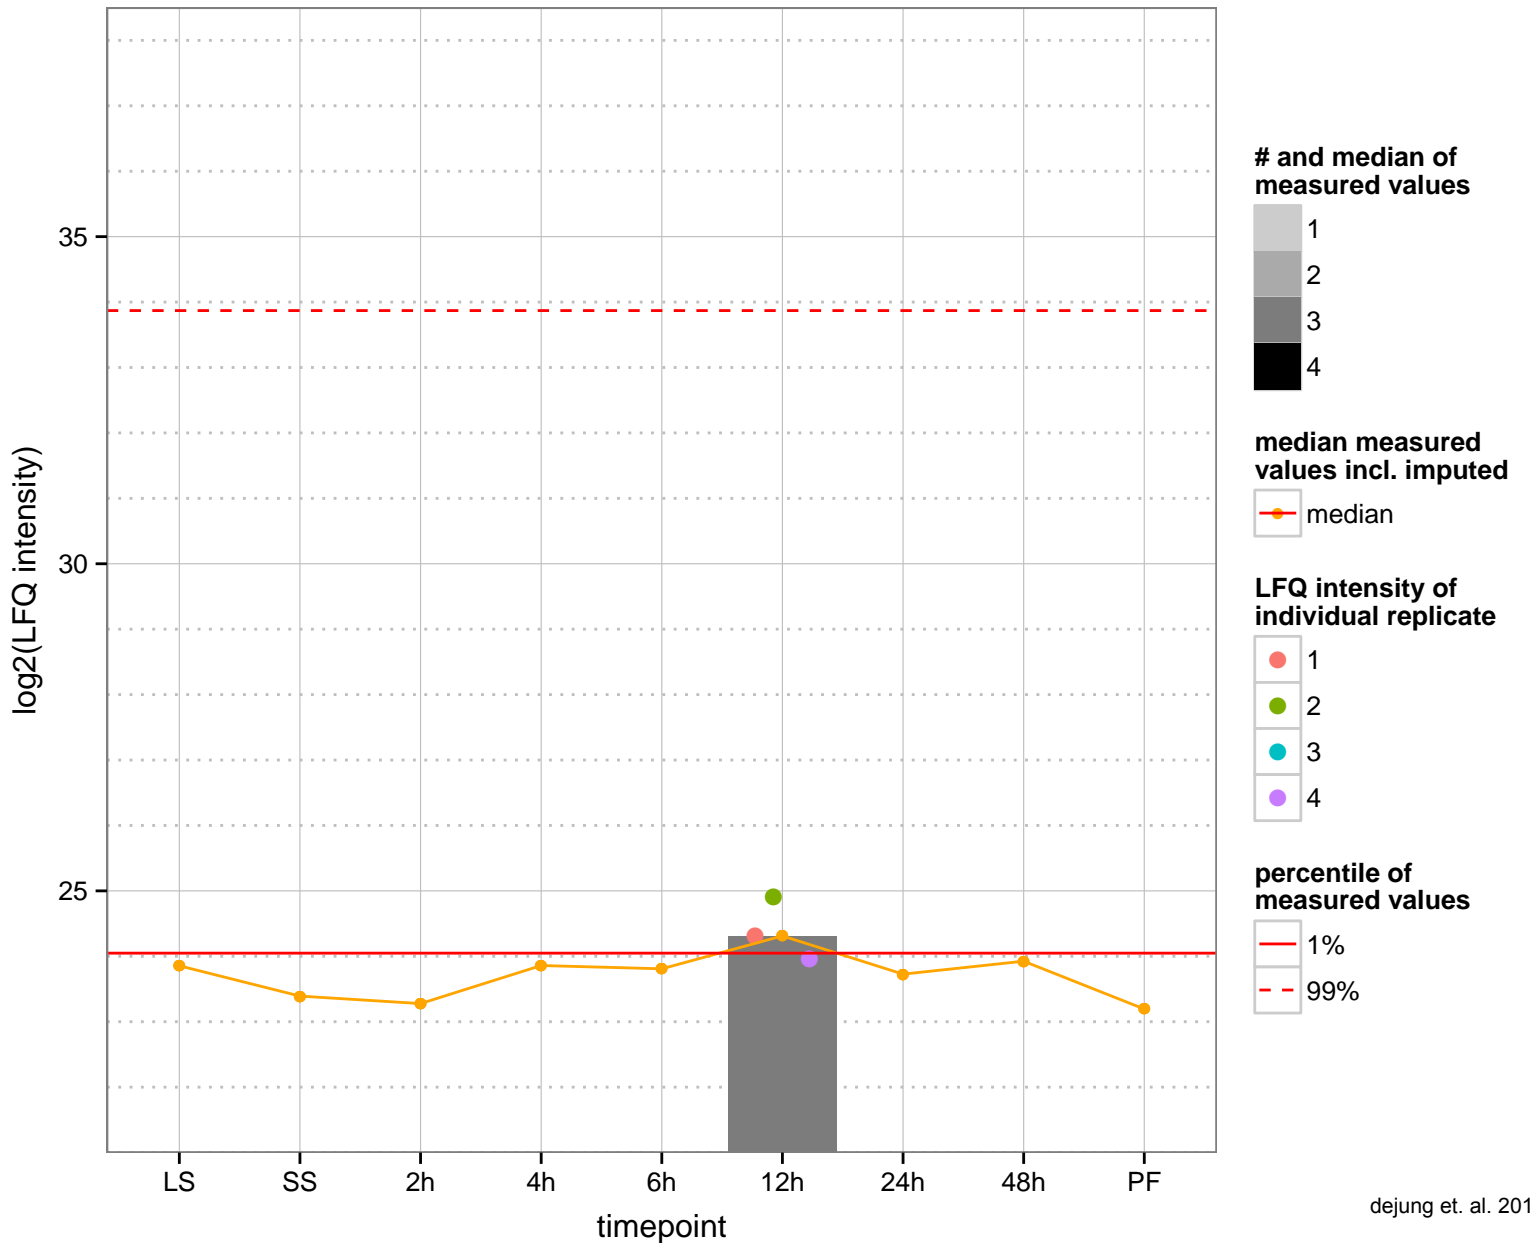

dynein heavy chain, putative

Tb927.8.3250

AGOF: ATP binding, ATPase activity, microtubule motor activity

AGOC: dynein complex

AGOP: microtubule-based movement

PGOF: ATP binding, ATPase activity, microtubule motor activity, nucleoside-triphosphatase activity, nucleotide binding

PGOC: dynein complex

PGOP: microtubule-based movement

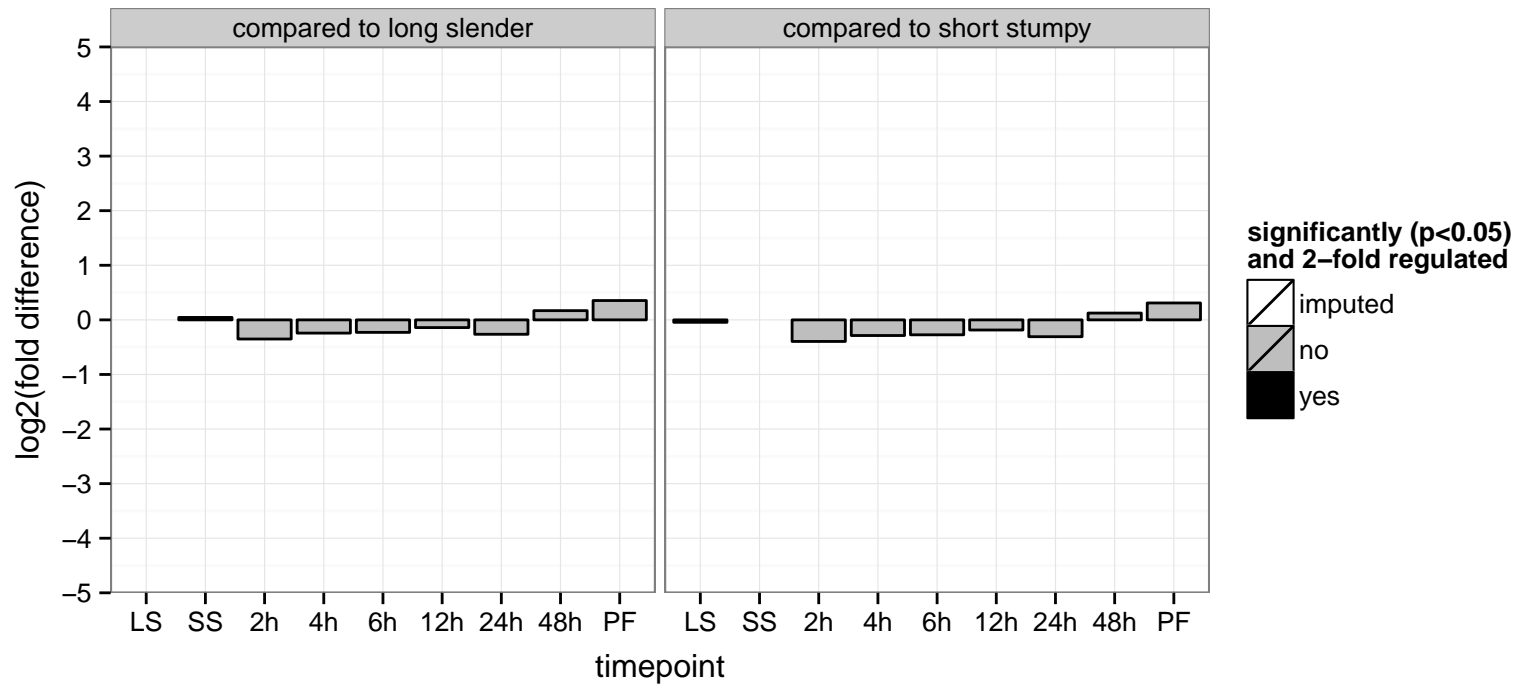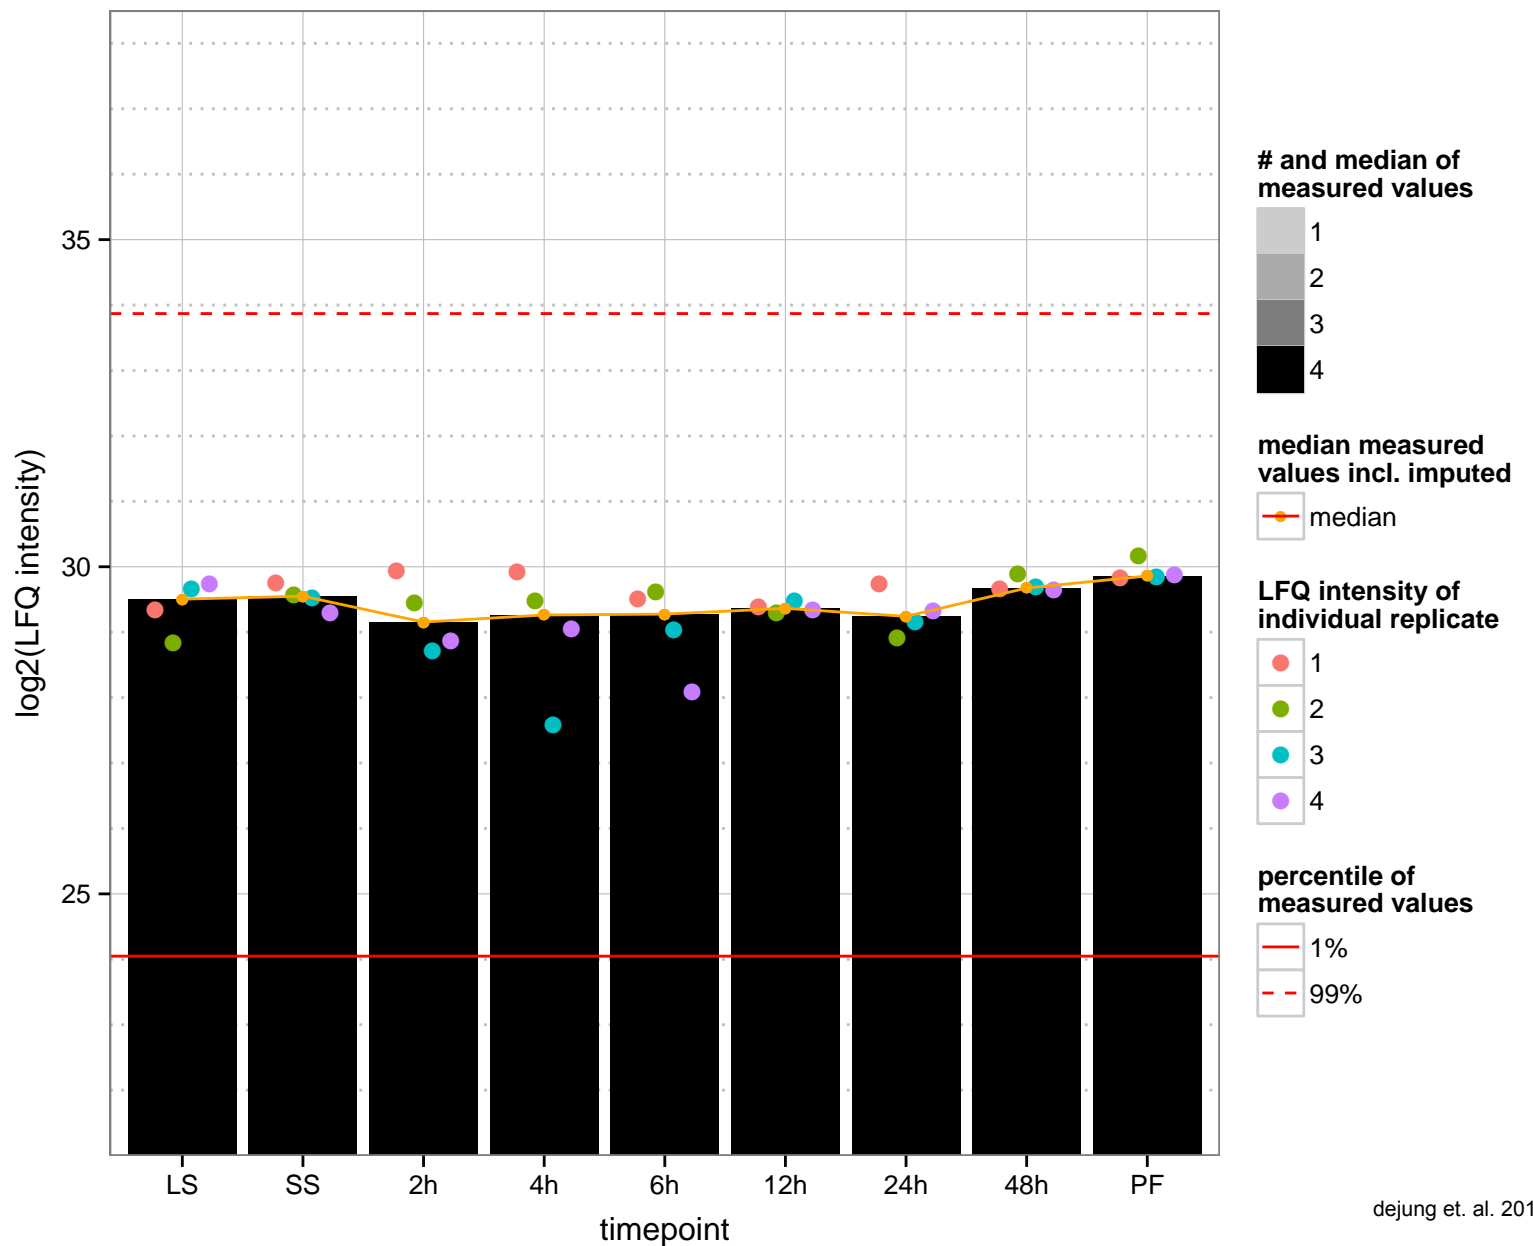

hypothetical protein, conserved  
 Tb927.8.3280  
 AGOF: null  
 AGOC: null  
 AGOP: null  
 PGO: null  
 PGOC: null  
 PGOP: null

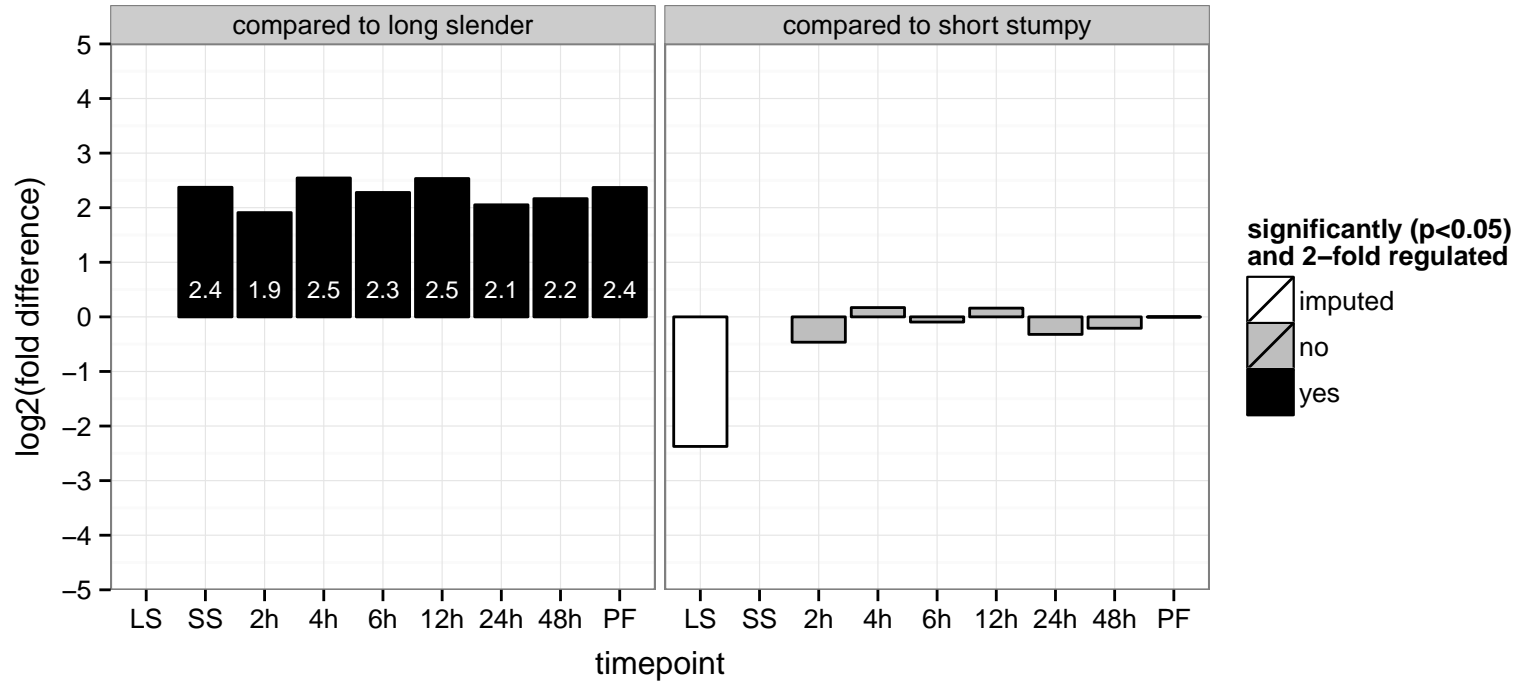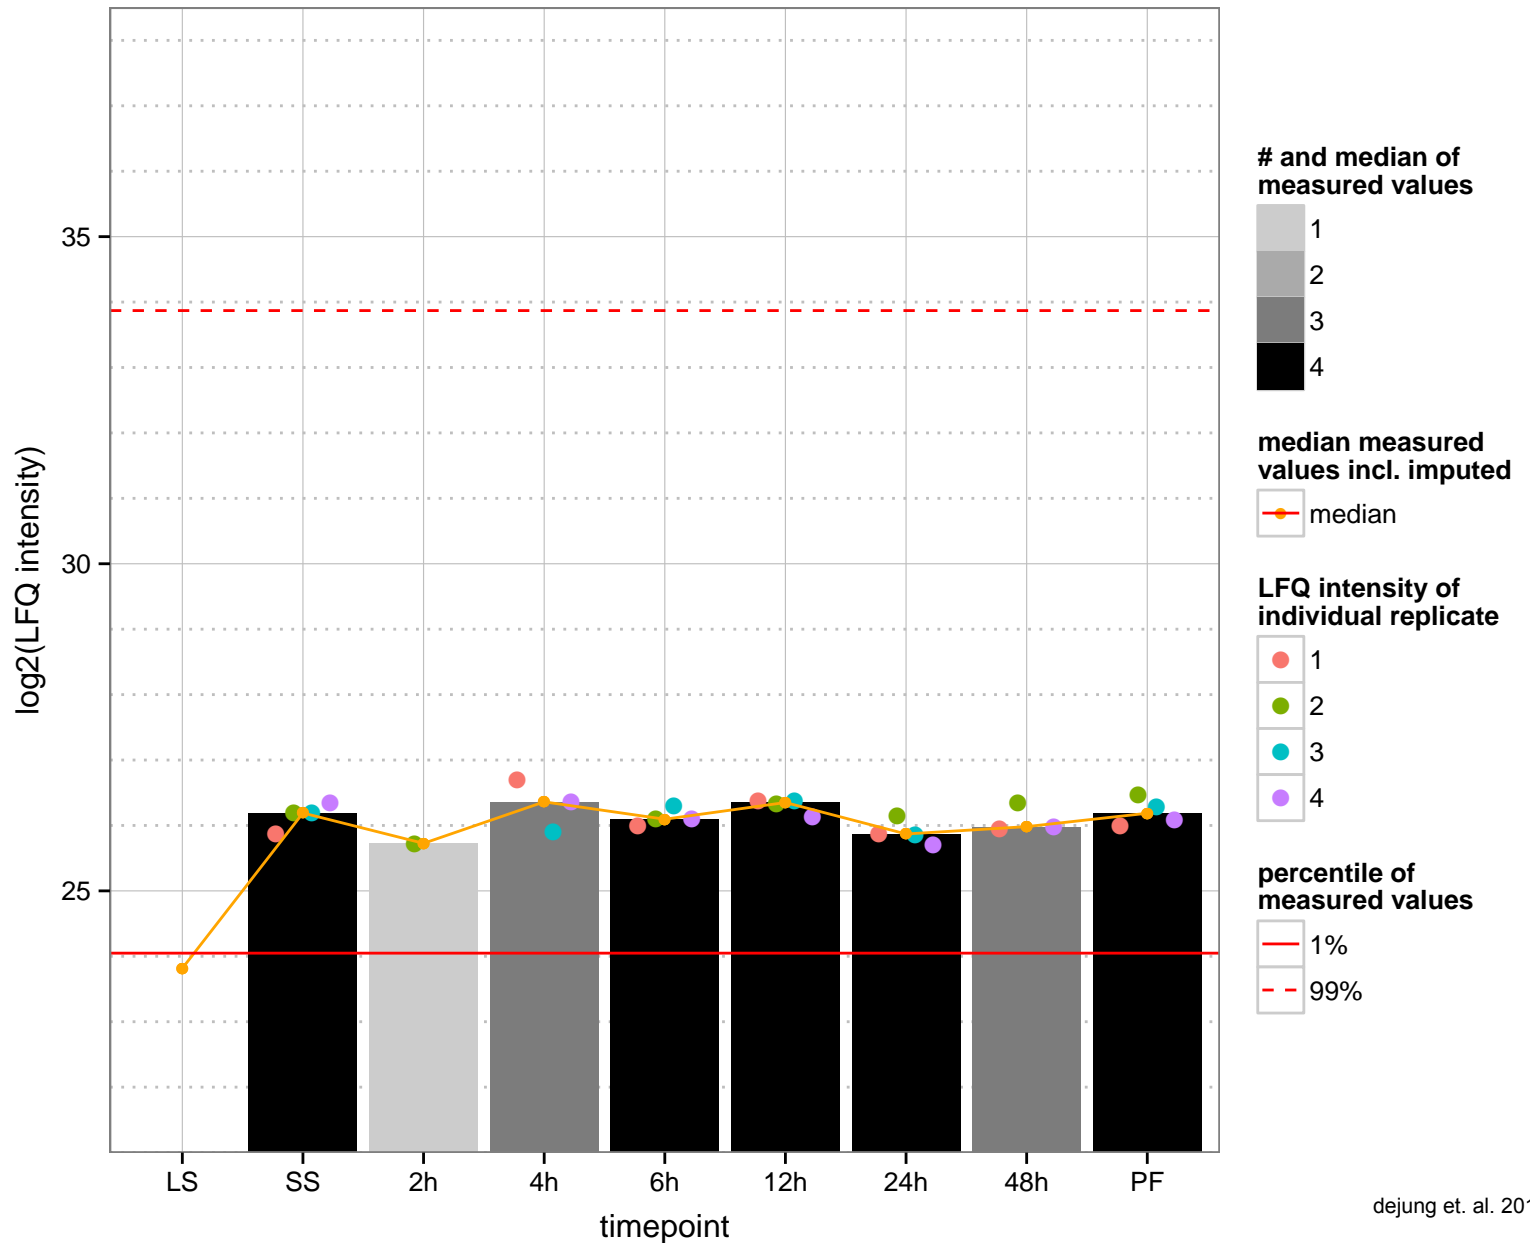

DNA polymerase theta (helicase domain only), putative

Tb927.8.3350;Tb11.v5.0792

AGOF: null, ATP binding, ATP-dependent helicase activity, helicase activity, nucleic acid binding

AGOC: null

AGOP: null, nucleobase-containing compound metabolic process

PGOF: ATP binding, ATP-dependent helicase activity, helicase activity, nucleic acid binding

PGOC: null

PGOP: null

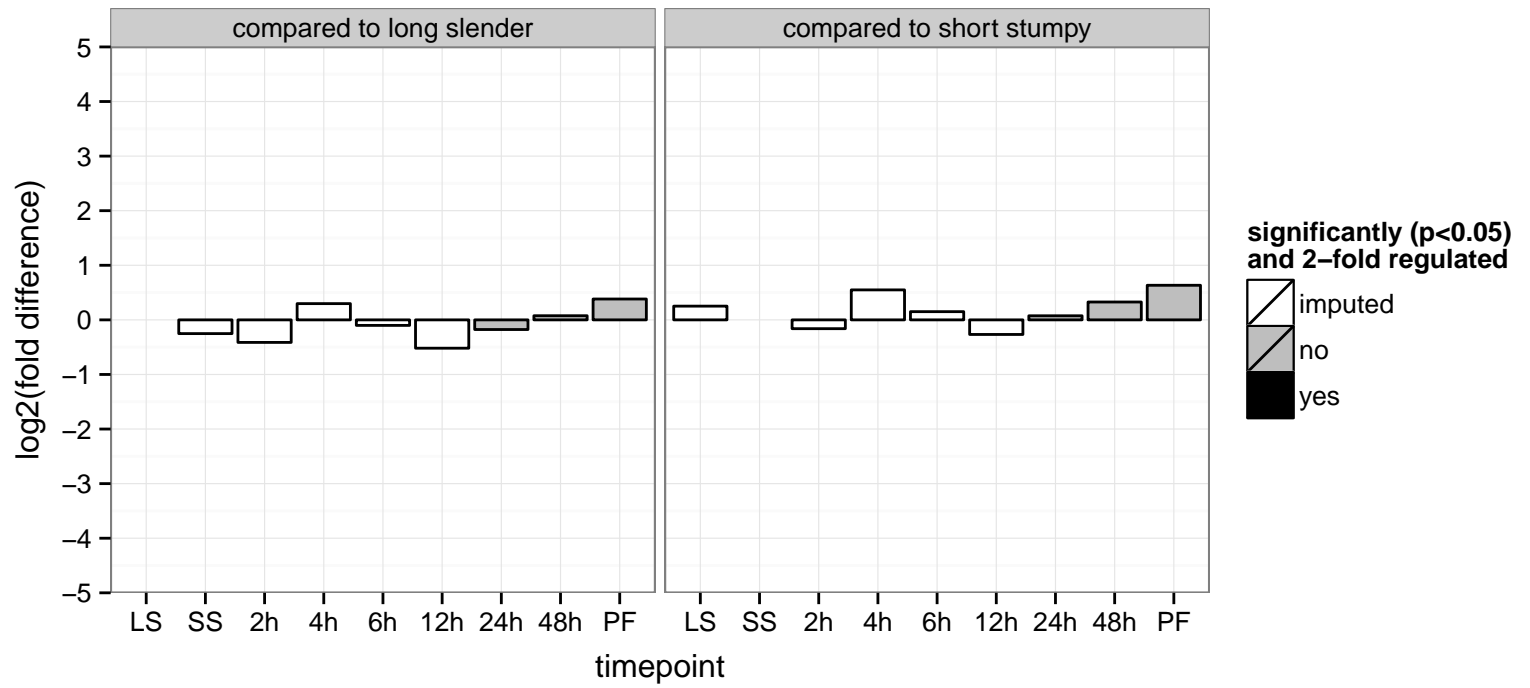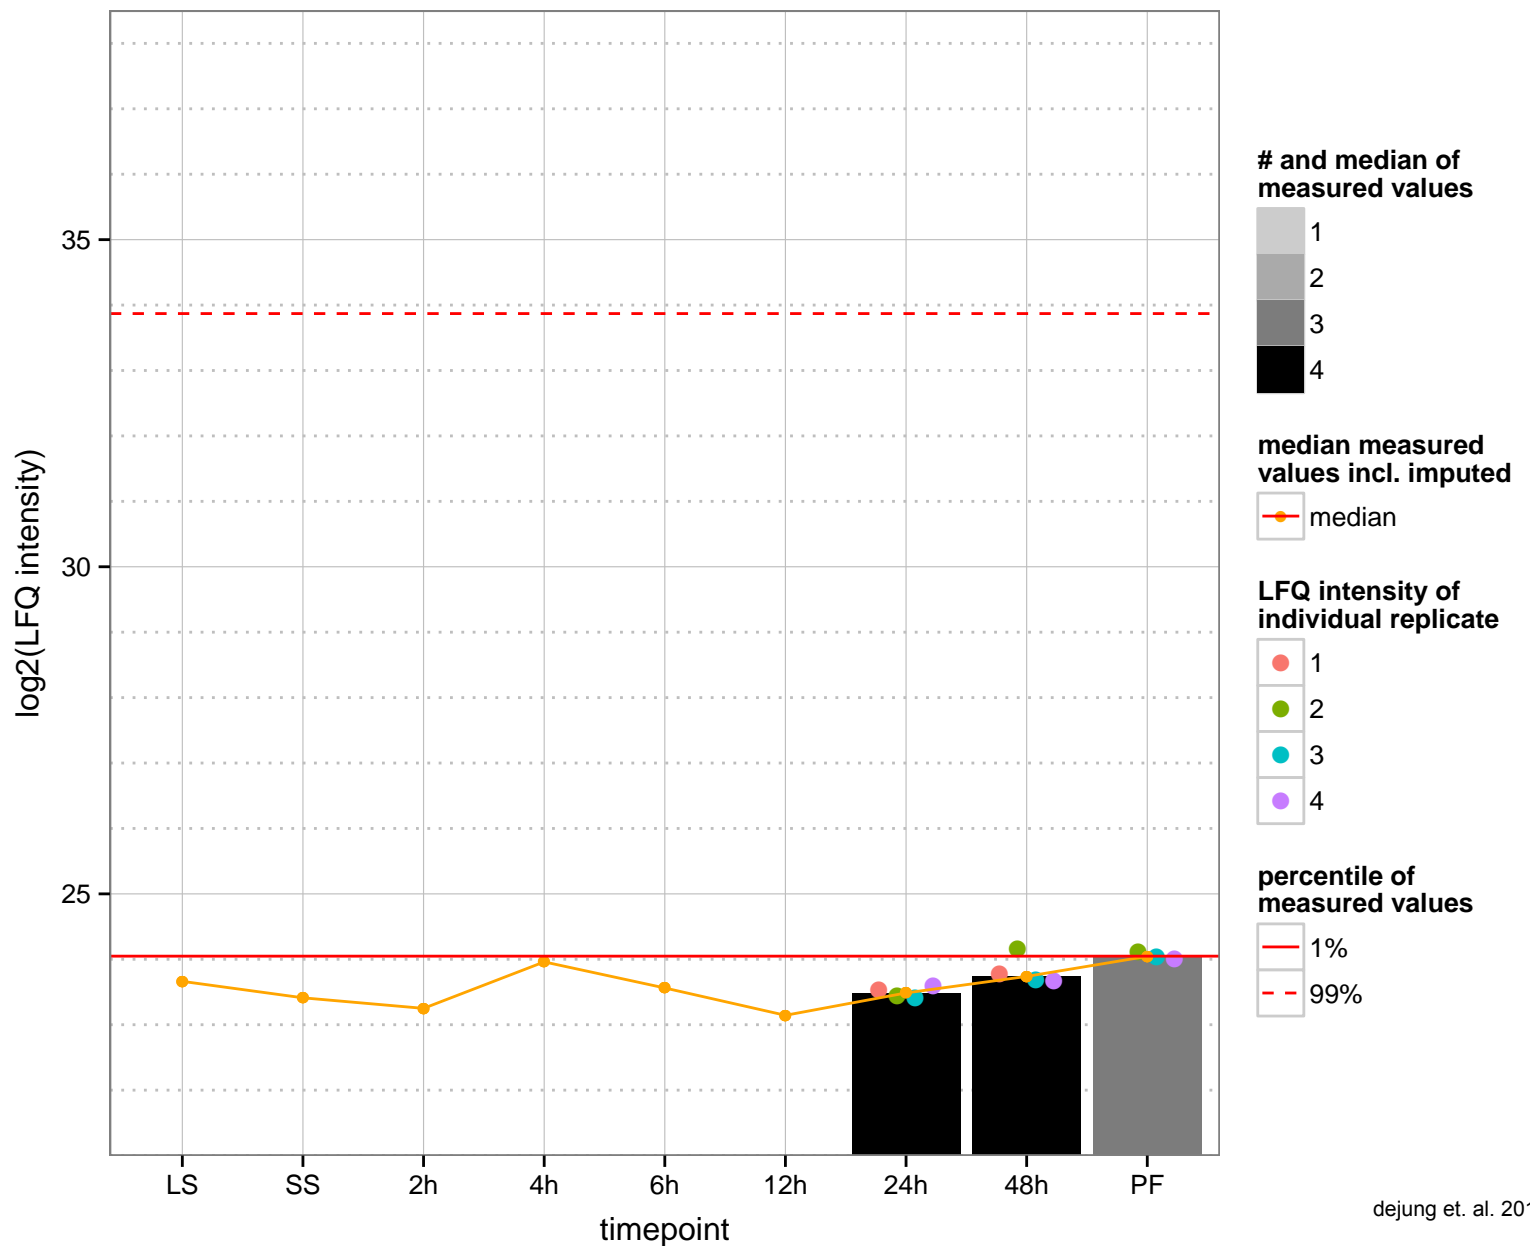

hypothetical protein, conserved  
 Tb927.8.3460  
 AGOF: zinc ion binding  
 AGOC: null  
 AGOP: null  
 PGOF: protein binding, zinc ion binding  
 PGO: null  
 PGOP: null

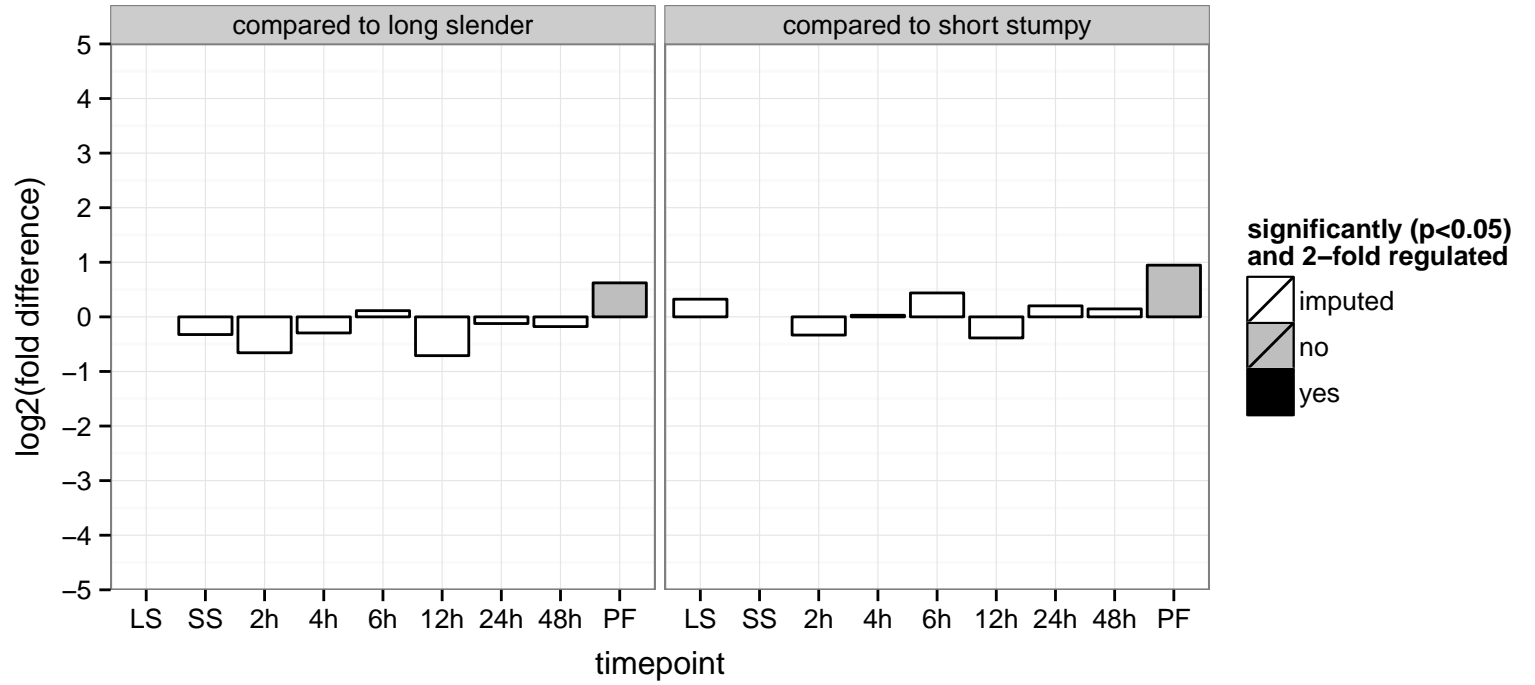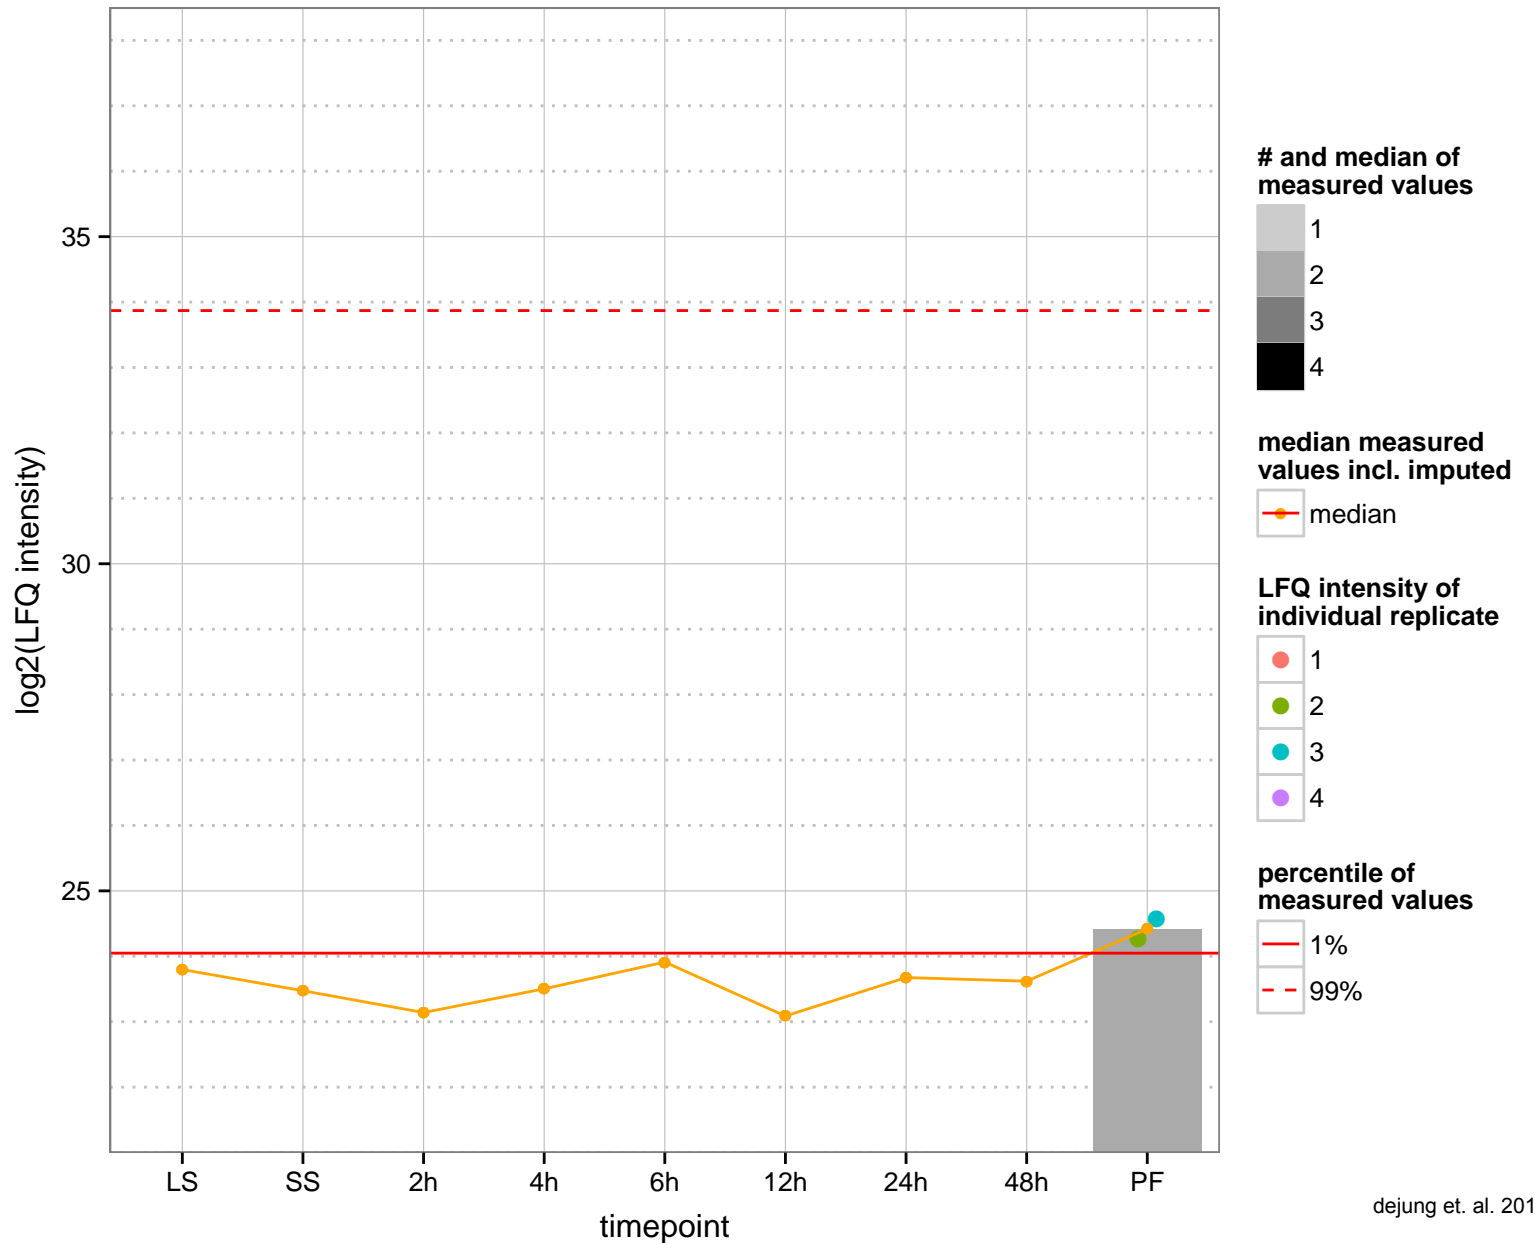

hypothetical protein, conserved  
 Tb927.8.3920;Tb927.8.3500  
 AGOF: null  
 AGOC: null  
 AGOP: null  
 PGOF: binding  
 PGOC: null  
 PGOP: null

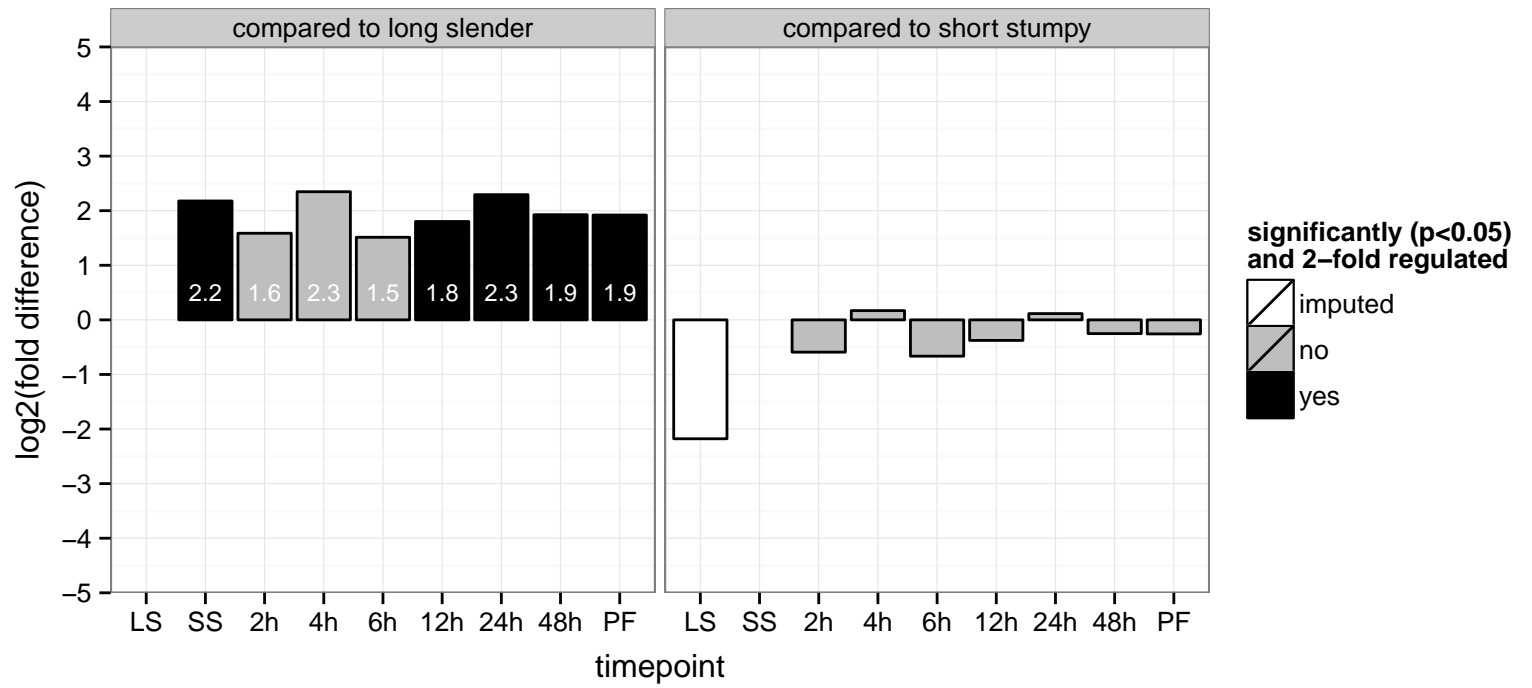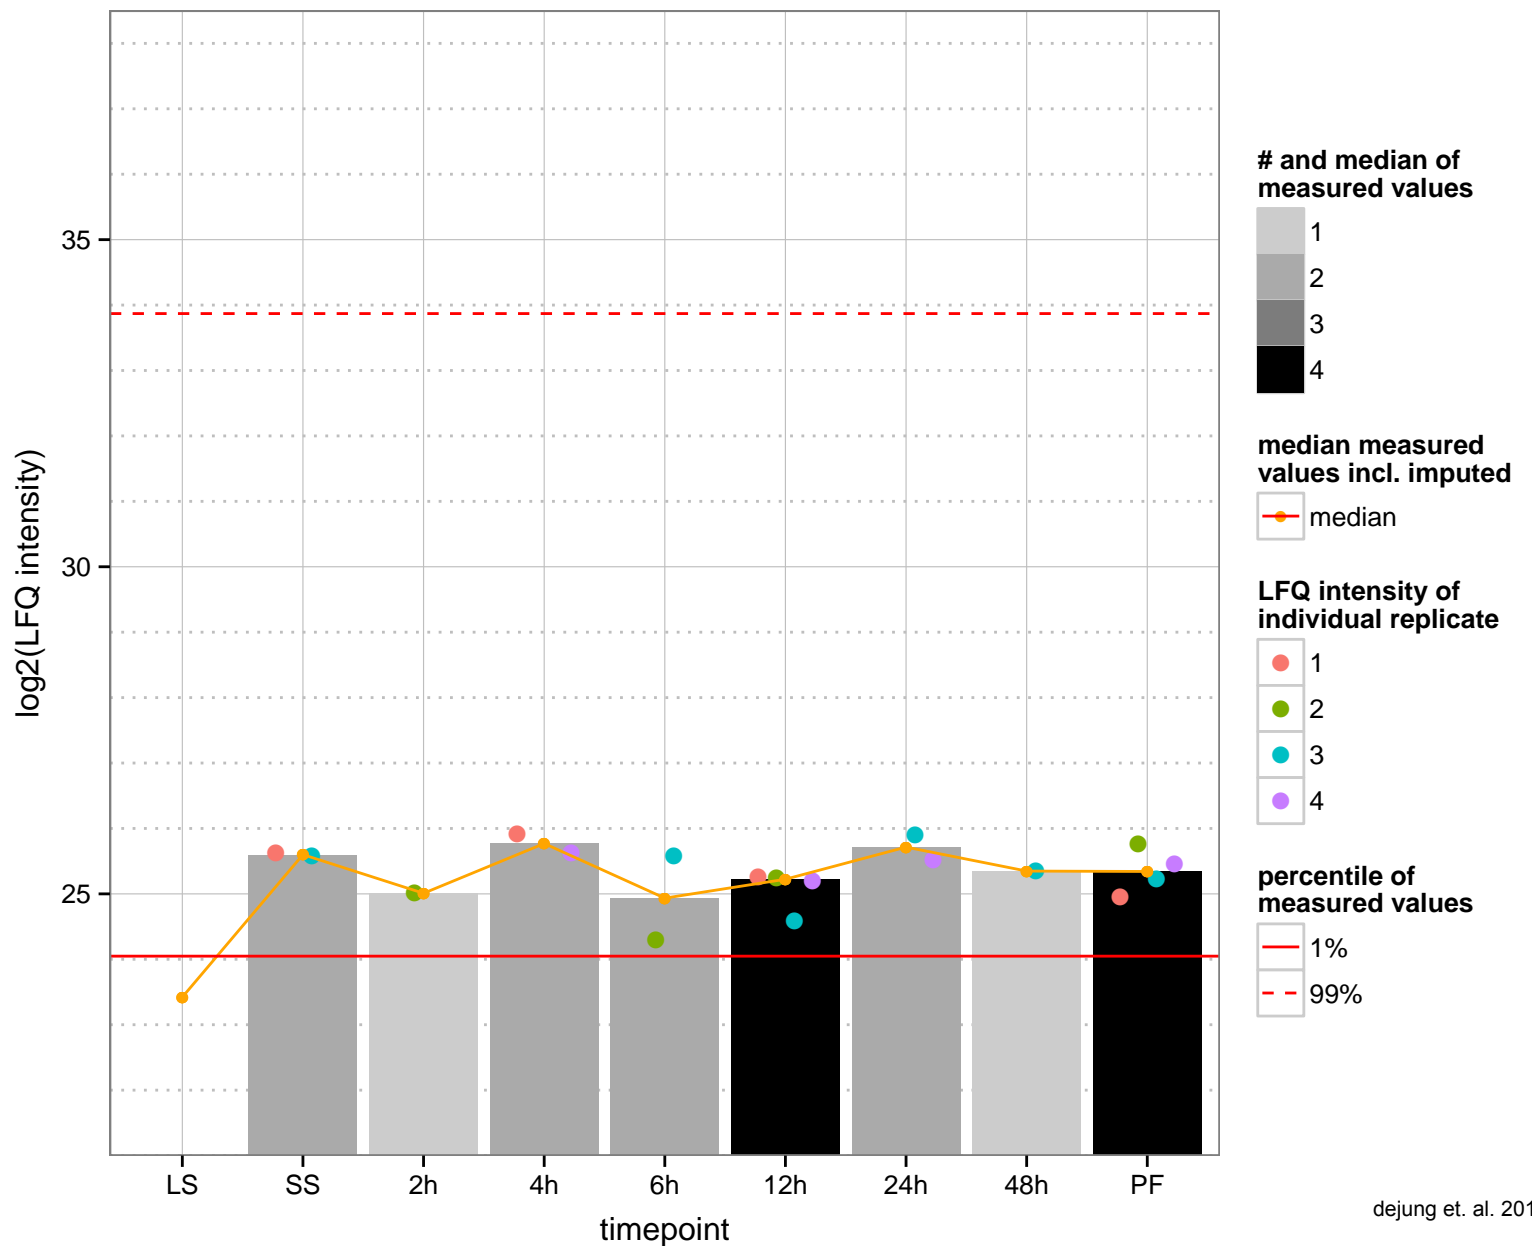

glycerol-3-phosphate dehydrogenase [NAD+], glycosomal  
Tb927.8.3530

AGOF: NAD binding, glycerol-3-phosphate dehydrogenase [NAD+] activity, protein homodimerization activity

AGOC: cytoplasm, glycerol-3-phosphate dehydrogenase complex, glycosome

AGOP: carbohydrate metabolic process, glycerol-3-phosphate catabolic process, glycerol-3-phosphate metabolic process, c

PGOF: NAD binding, glycerol-3-phosphate dehydrogenase [NAD+] activity, oxidoreductase activity, acting on CH-OH group

PGOC: cytoplasm, glycerol-3-phosphate dehydrogenase complex

PGOP: carbohydrate metabolic process, glycerol-3-phosphate catabolic process, glycerol-3-phosphate metabolic process, c

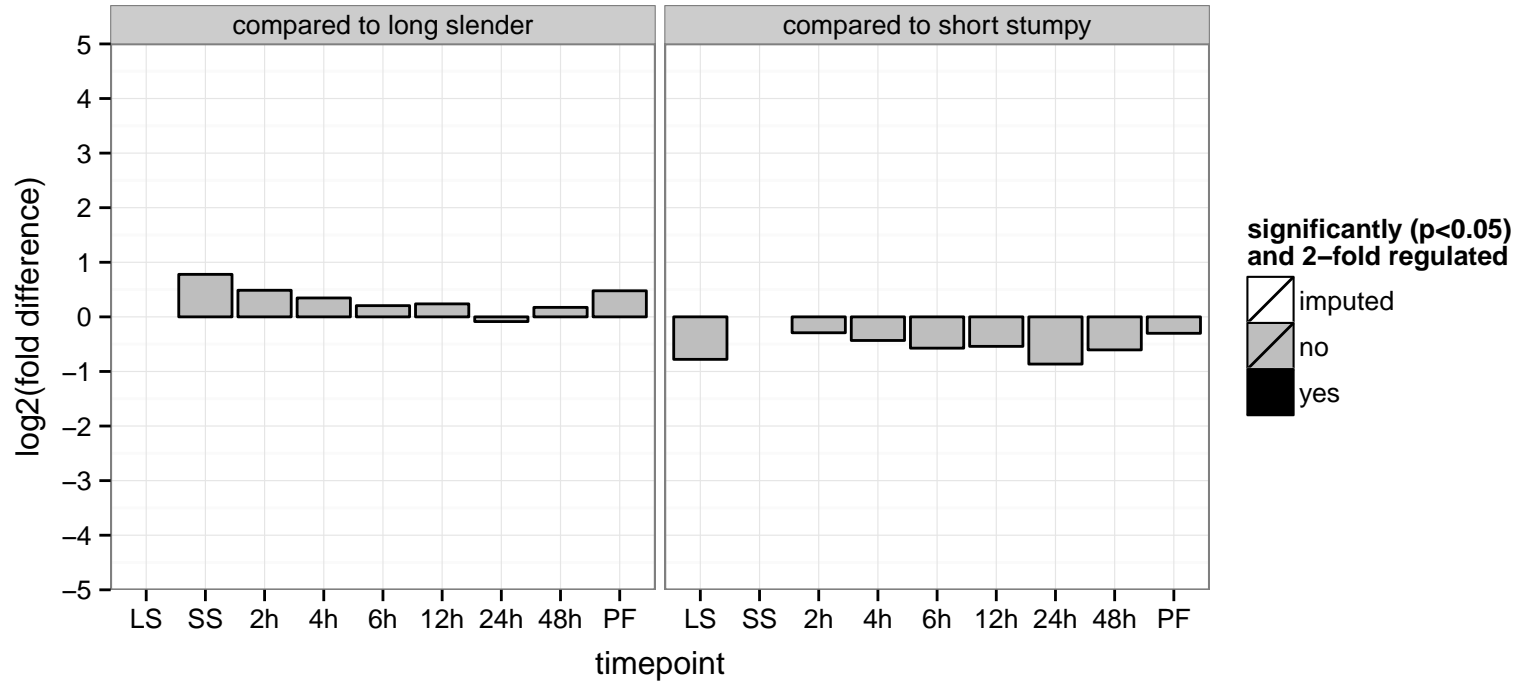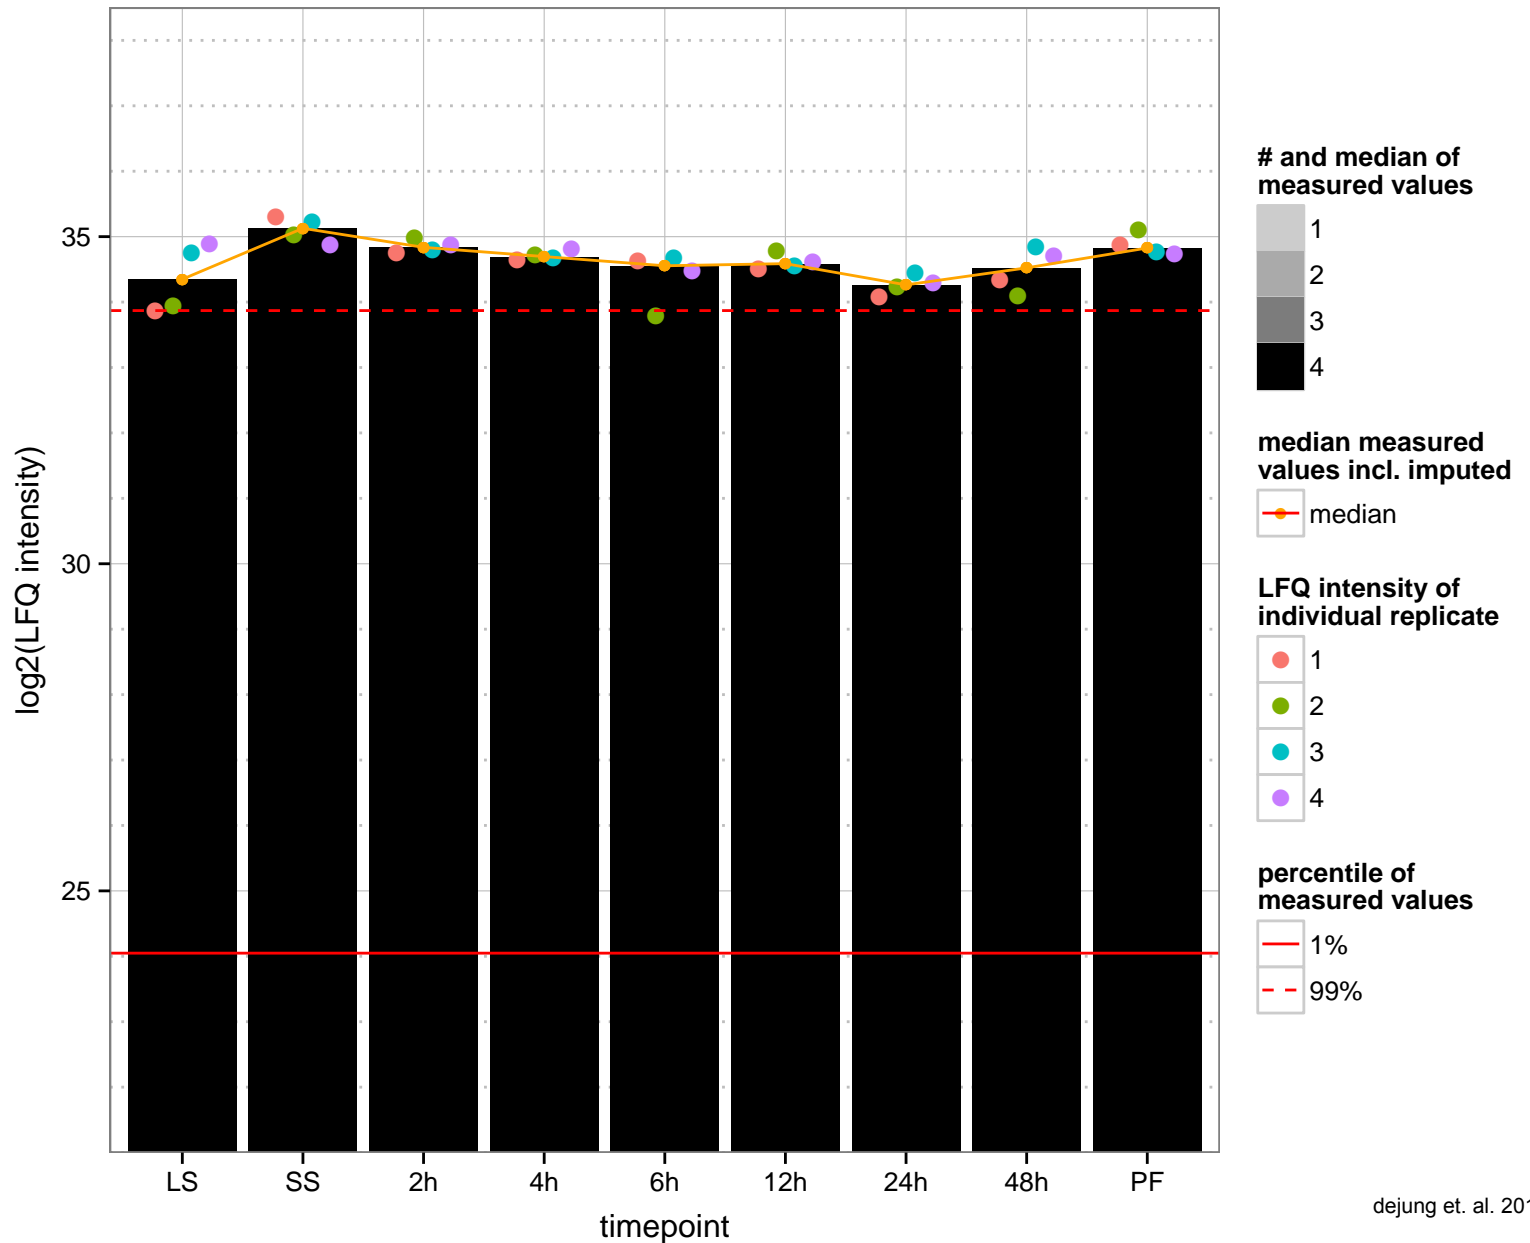



protein transport protein SEC23 (SEC23.1)

Tb927.8.3660

AGOF: GTPase activator activity, protein binding, zinc ion binding

AGOC: COPII vesicle coat

AGOP: ER to Golgi vesicle-mediated transport, intracellular protein transport

PGOF: zinc ion binding

PGOC: COPII vesicle coat

PGOP: ER to Golgi vesicle-mediated transport, intracellular protein transport

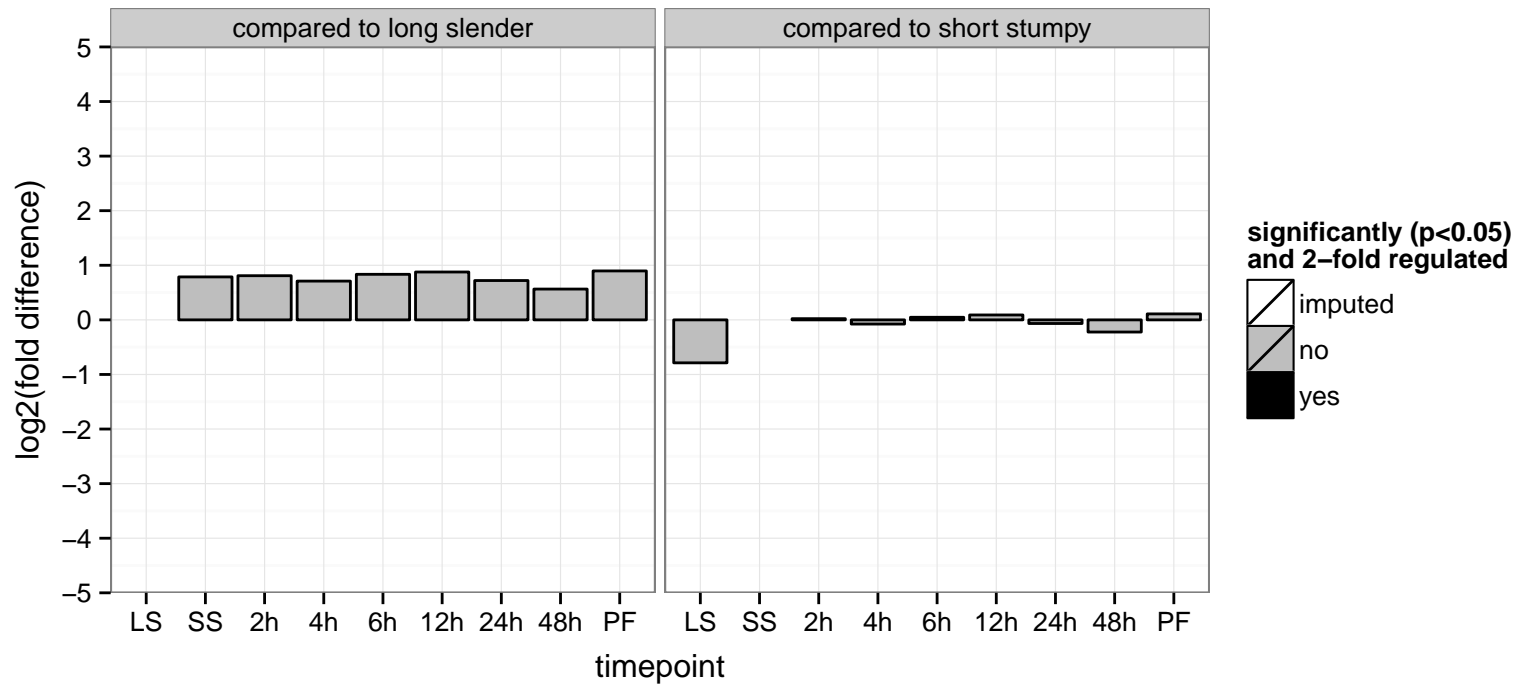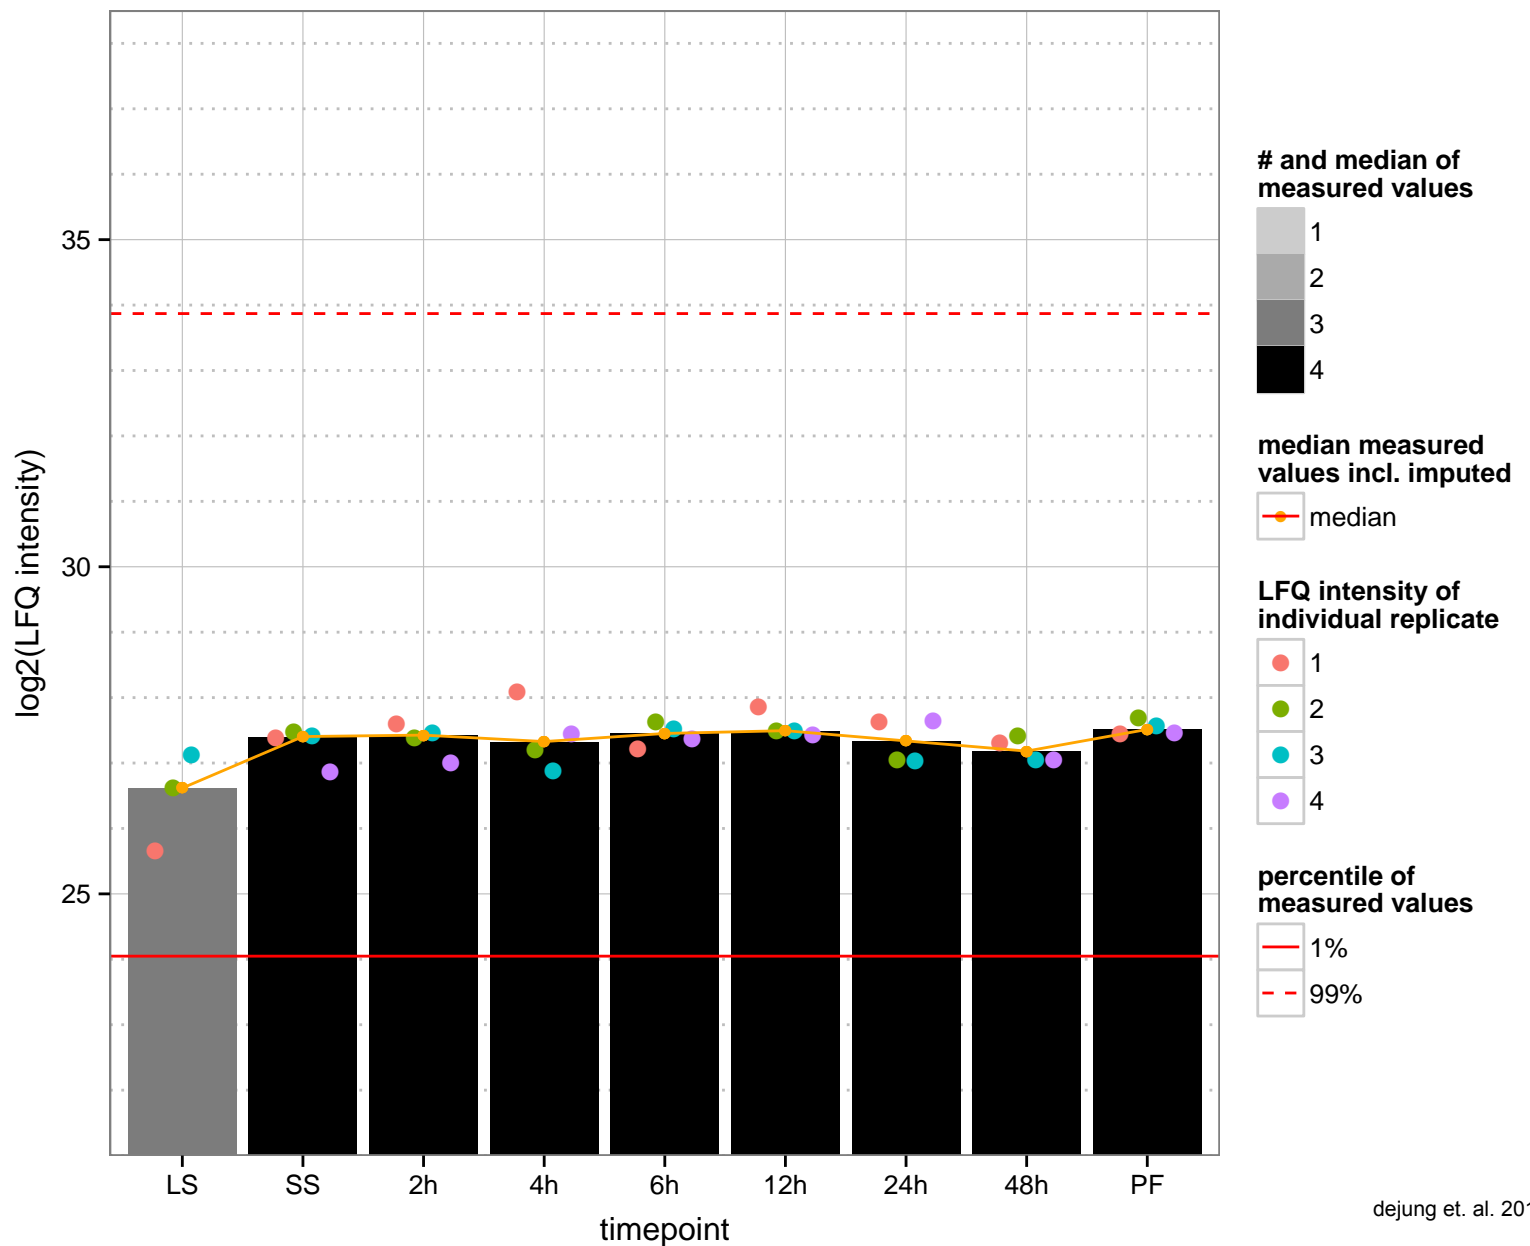

isocitrate dehydrogenase [NADP], mitochondrial precursor, putative (IDH)

Tb927.8.3690

AGOF: NAD binding, isocitrate dehydrogenase (NADP+) activity, magnesium ion binding

AGOC: mitochondrion

AGOP: isocitrate metabolic process, oxidation-reduction process, tricarboxylic acid cycle

PGOF: isocitrate dehydrogenase (NADP+) activity, oxidoreductase activity, acting on the CH-OH group of donors, NAD or NA

PGOC: null

PGOP: isocitrate metabolic process, oxidation-reduction process

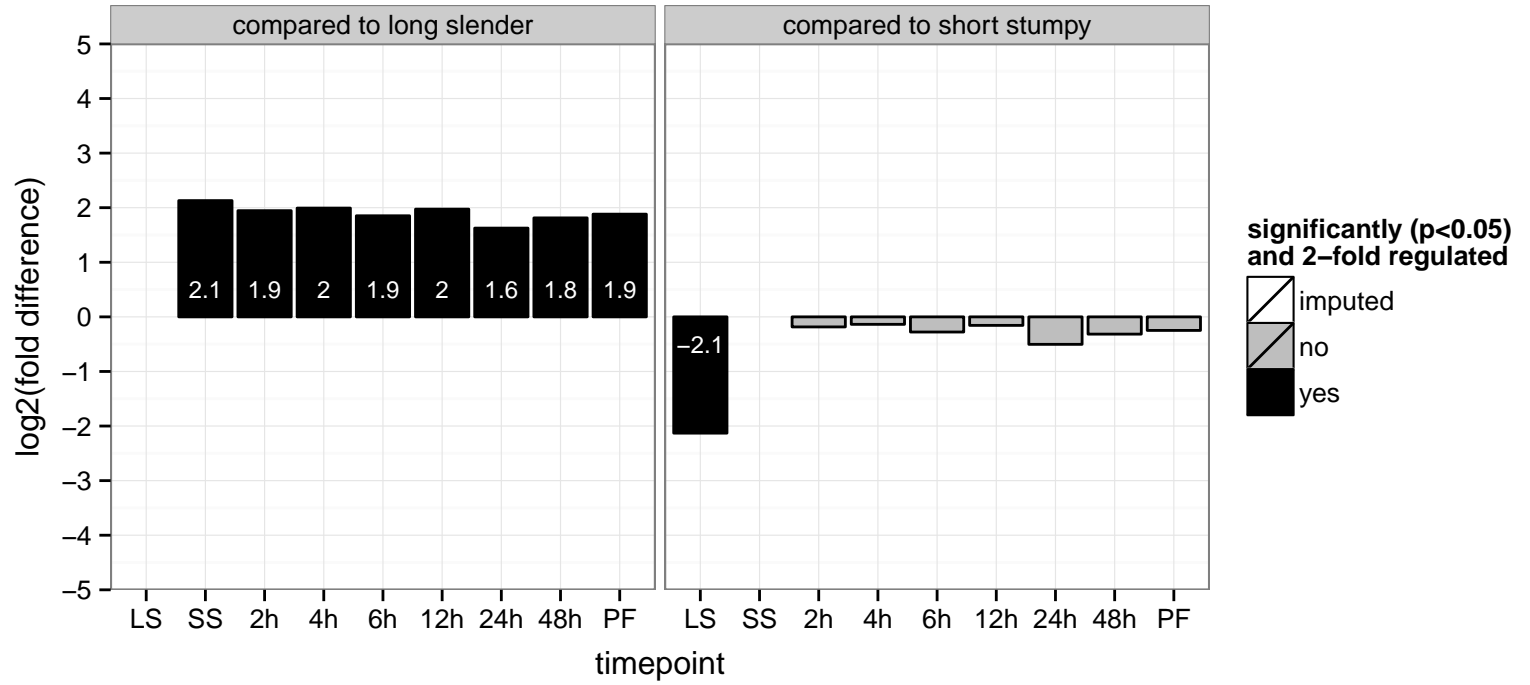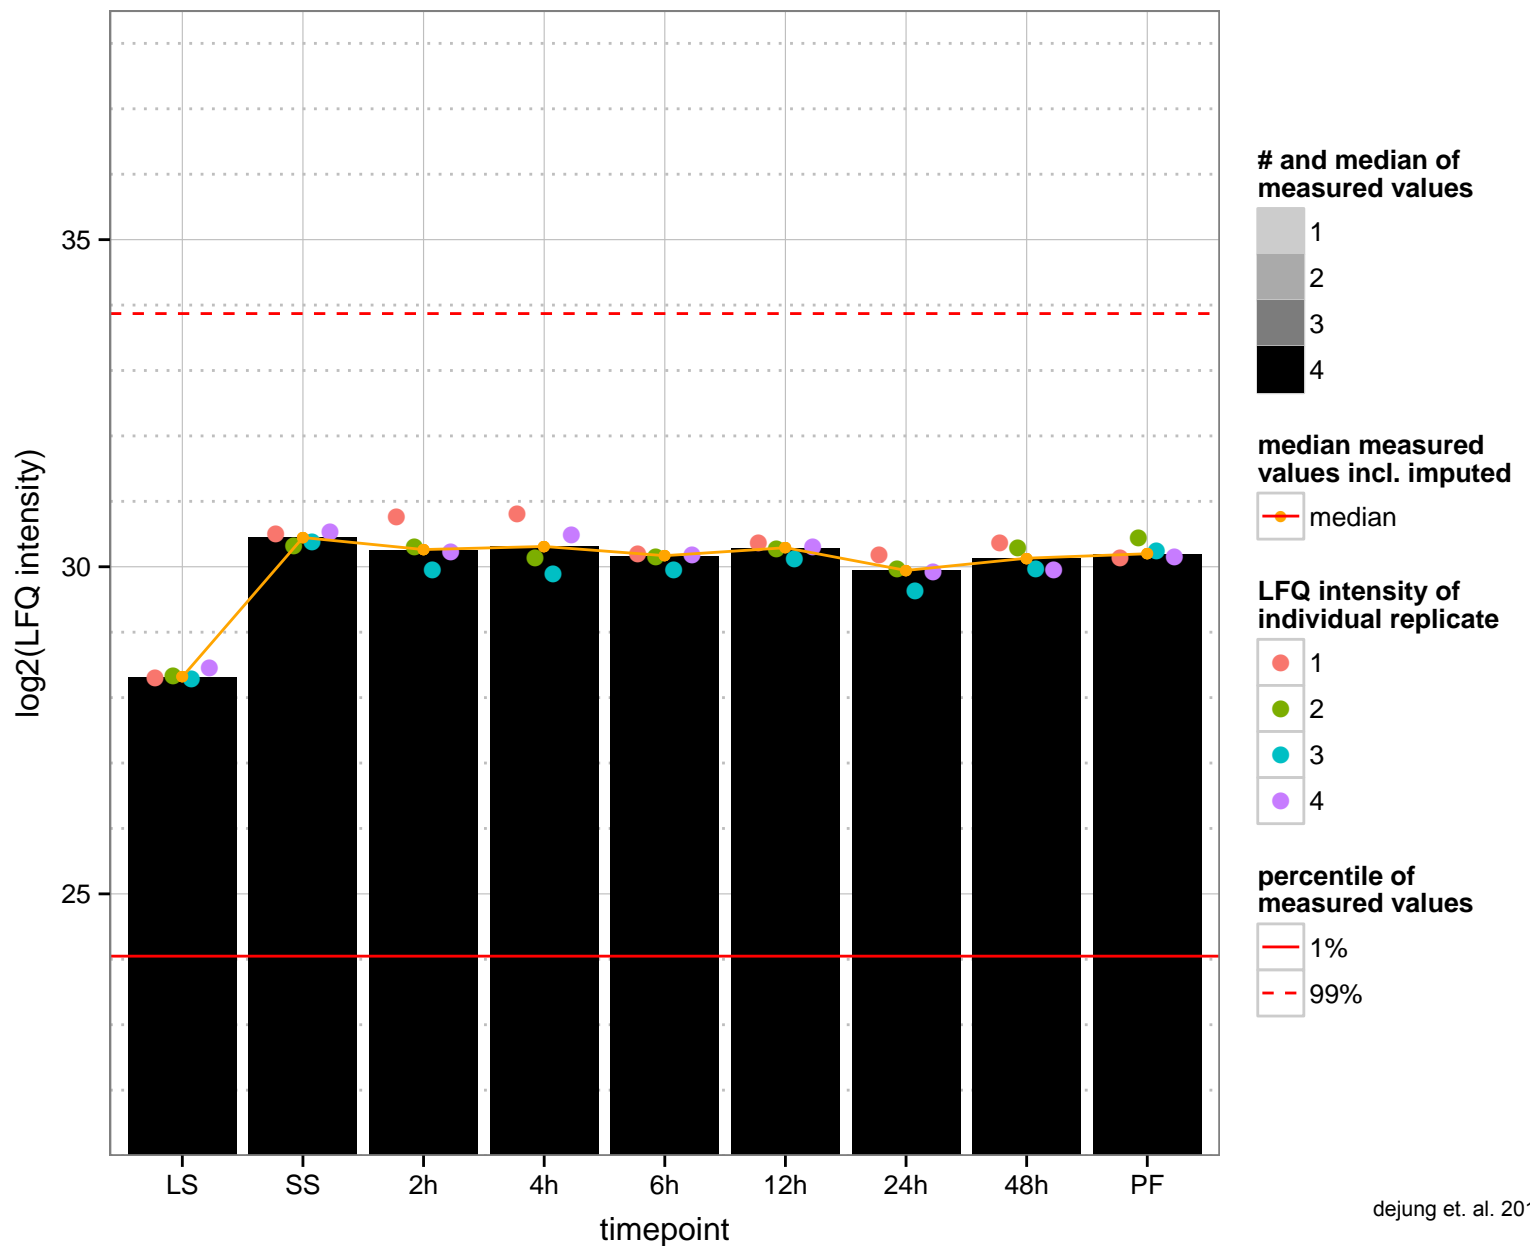

Nucleolar protein 56, putative (NOP56)  
 Tb927.8.3750  
 AGOF: snoRNA binding  
 AGOC: box C/D snoRNP complex, small-subunit processome  
 AGOP: nuclear mRNA splicing, via spliceosome, rRNA processing  
 PGO: null  
 PGOC: null  
 PGO: null

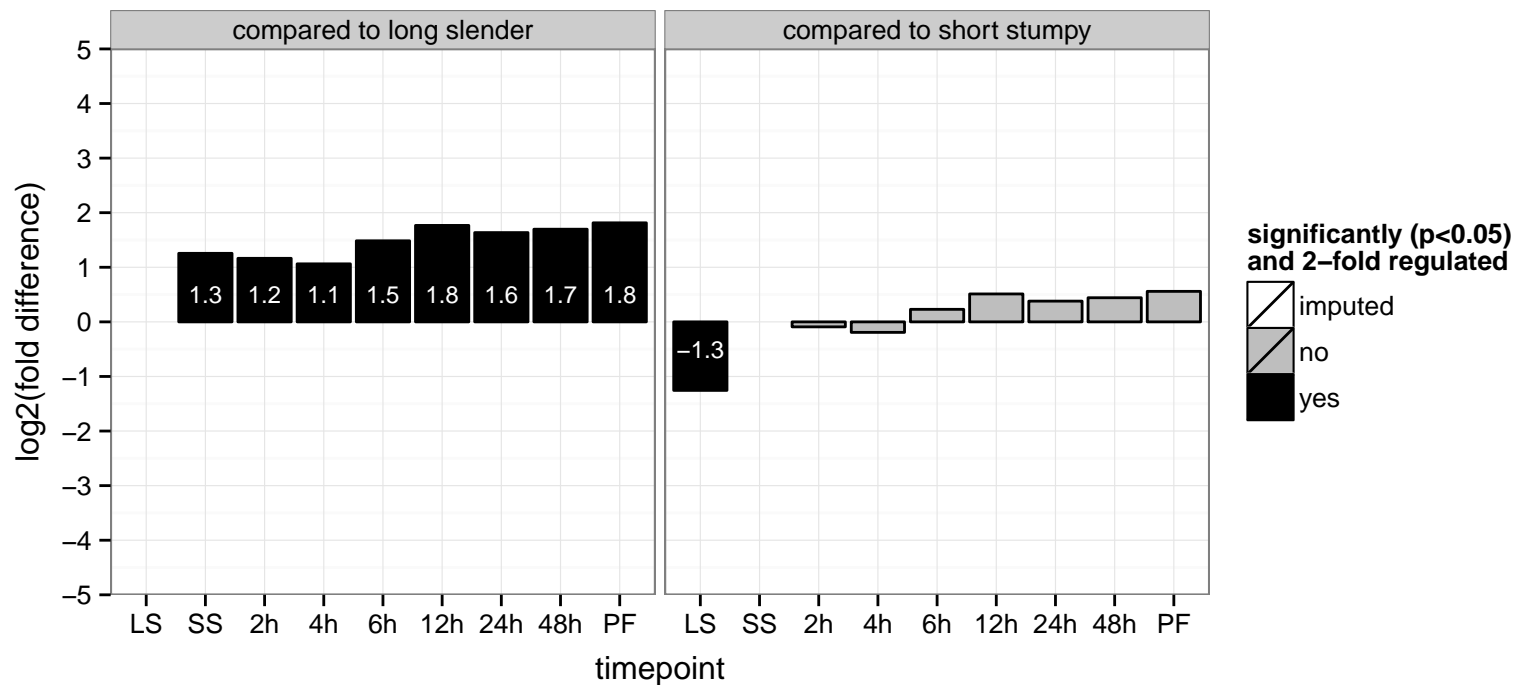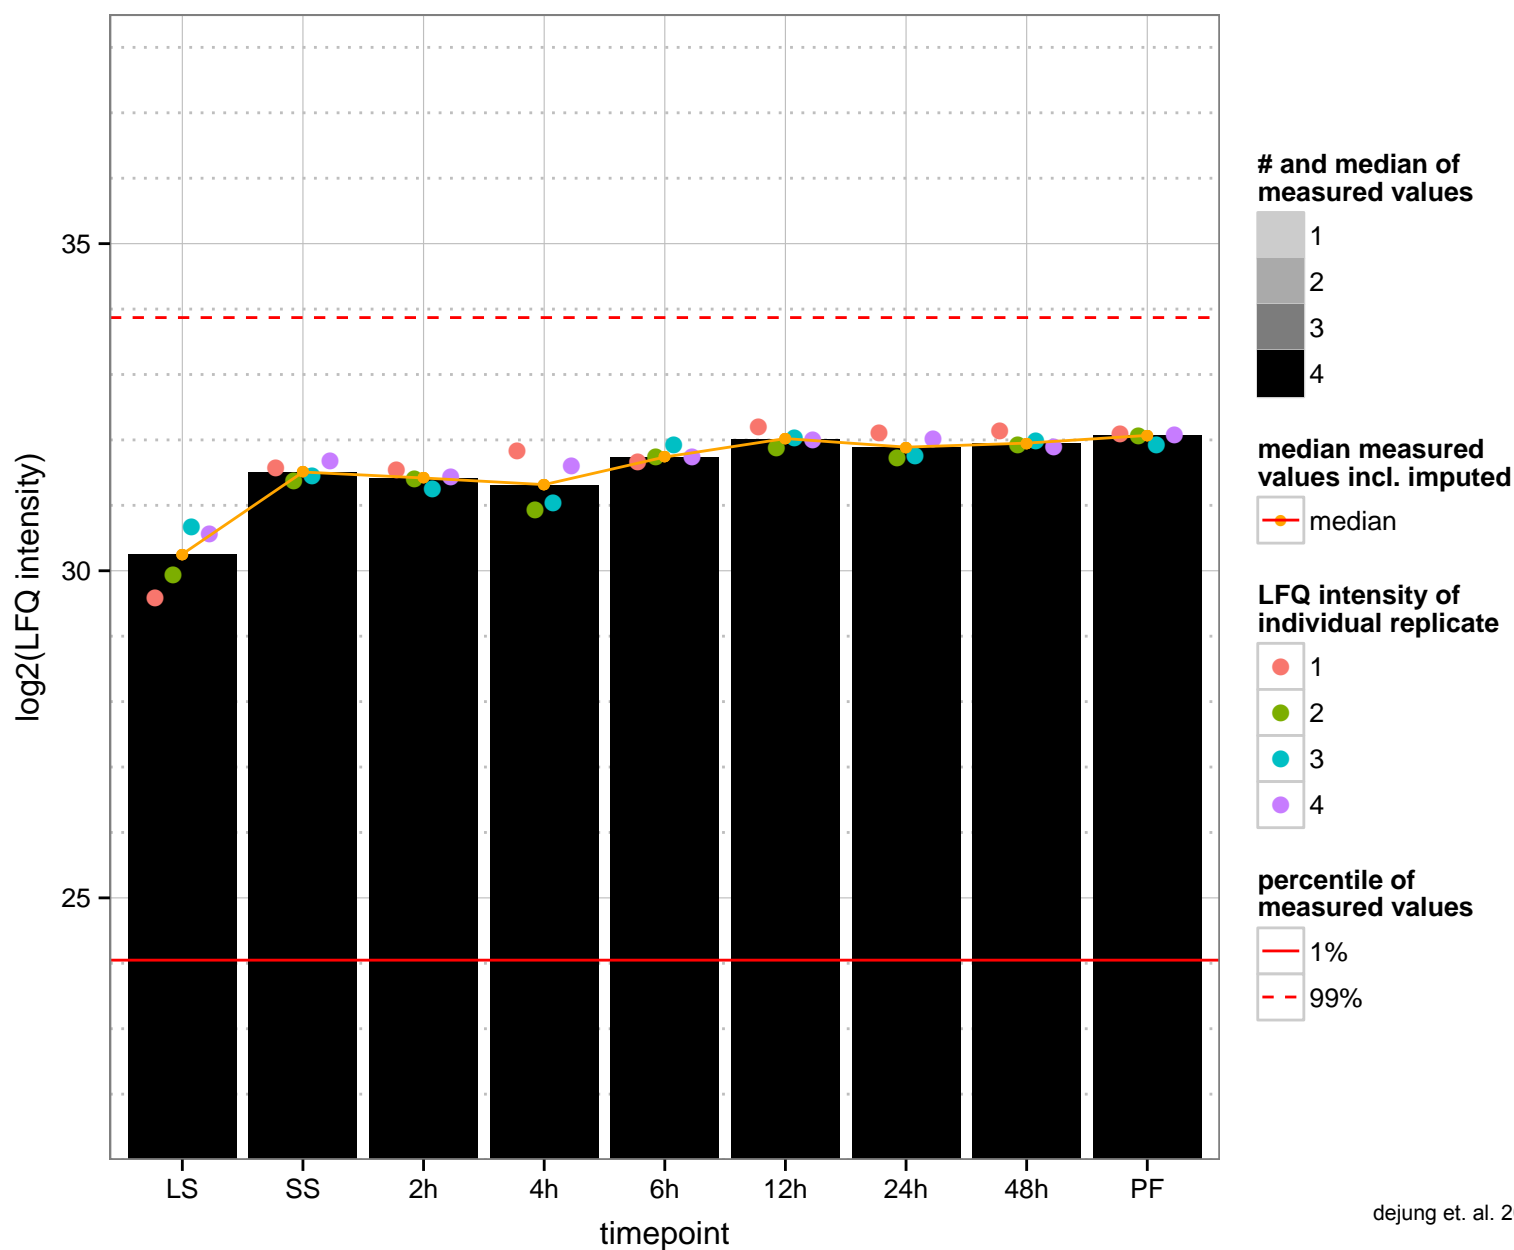

hypothetical protein, conserved  
 Tb927.8.3780  
 AGOF: null  
 AGOC: null  
 AGOP: null  
 PGOF: null  
 PGOC: null  
 PGOP: null

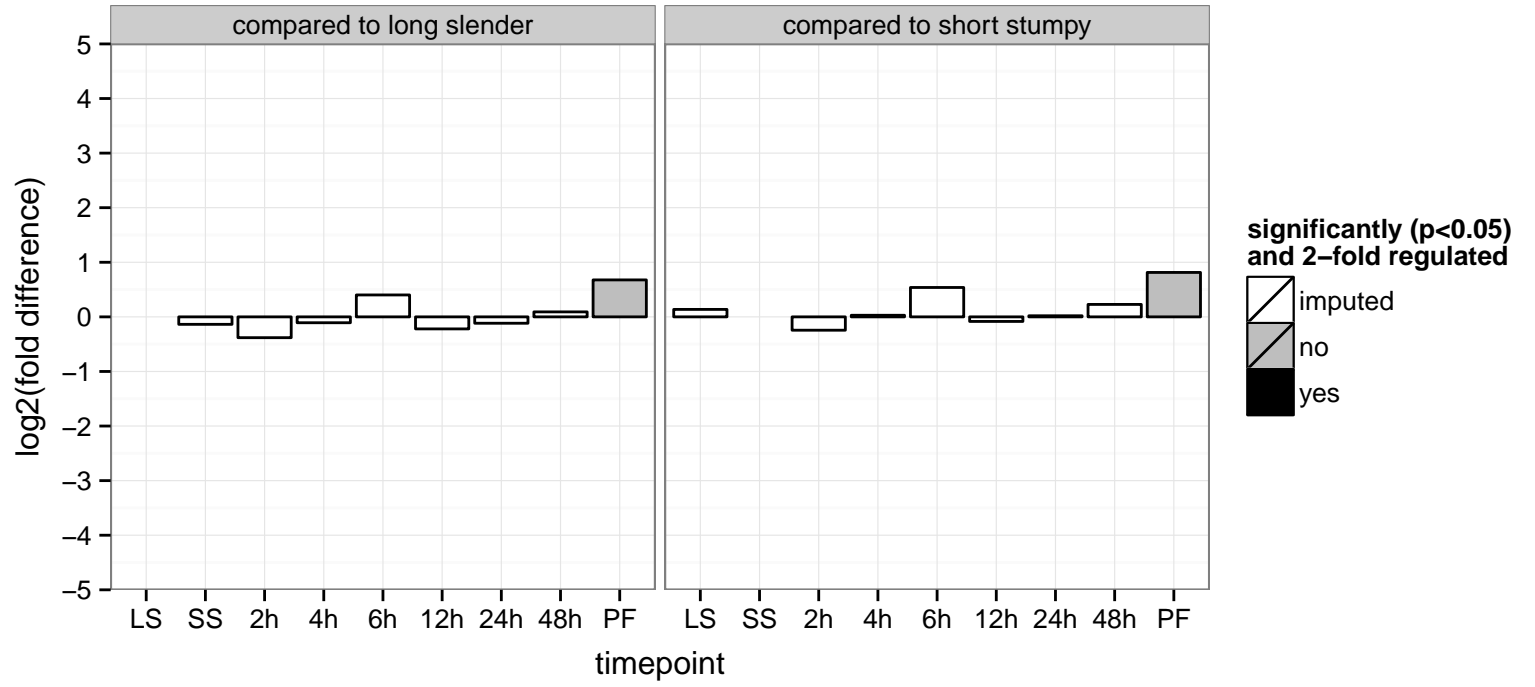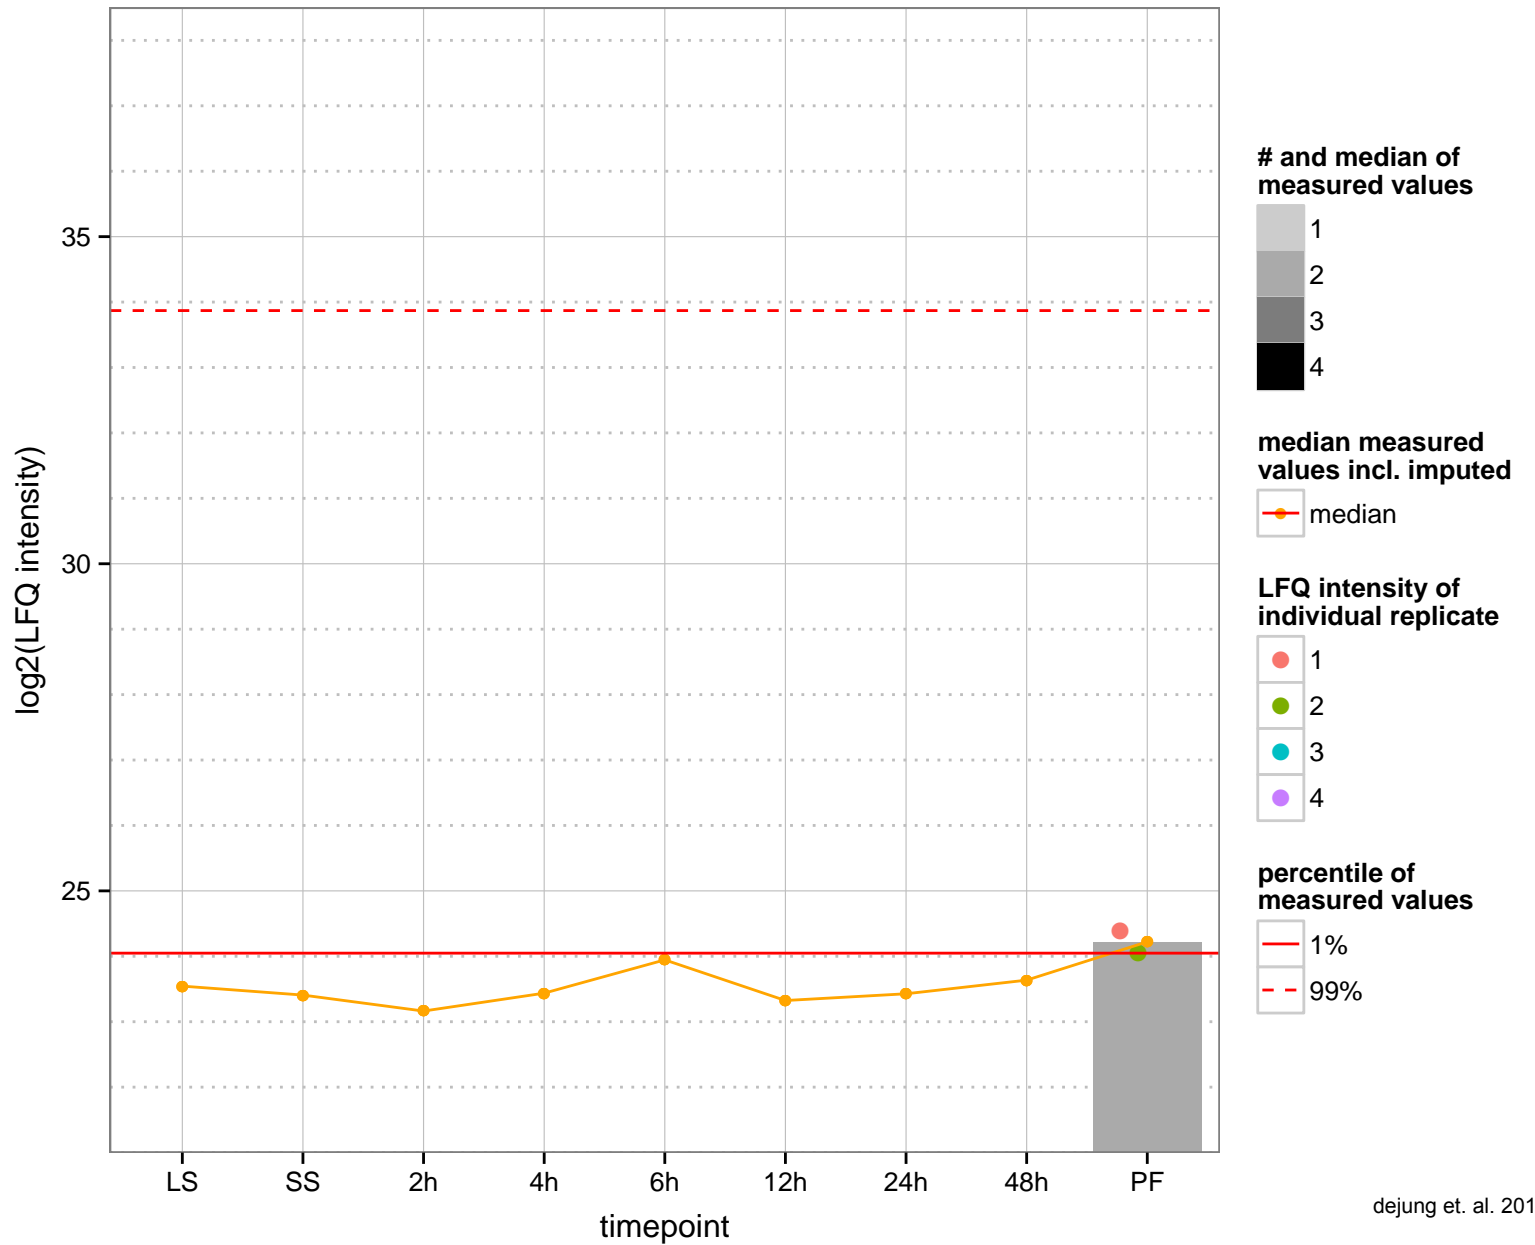

paraflagellar rod component, putative (PFC2)  
 Tb927.8.3790  
 AGOF: null  
 AGOC: null  
 AGOP: null  
 PGOF: null  
 PGO: null  
 PGOP: null

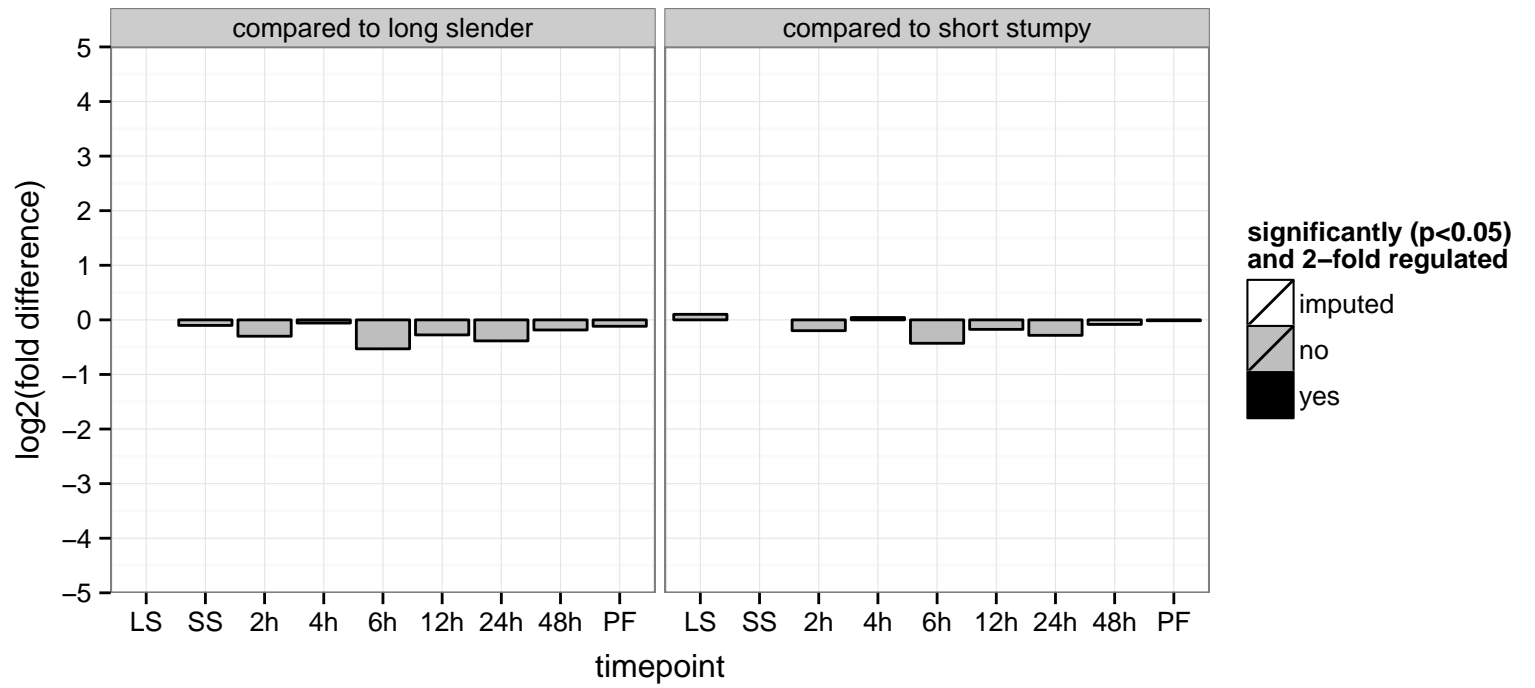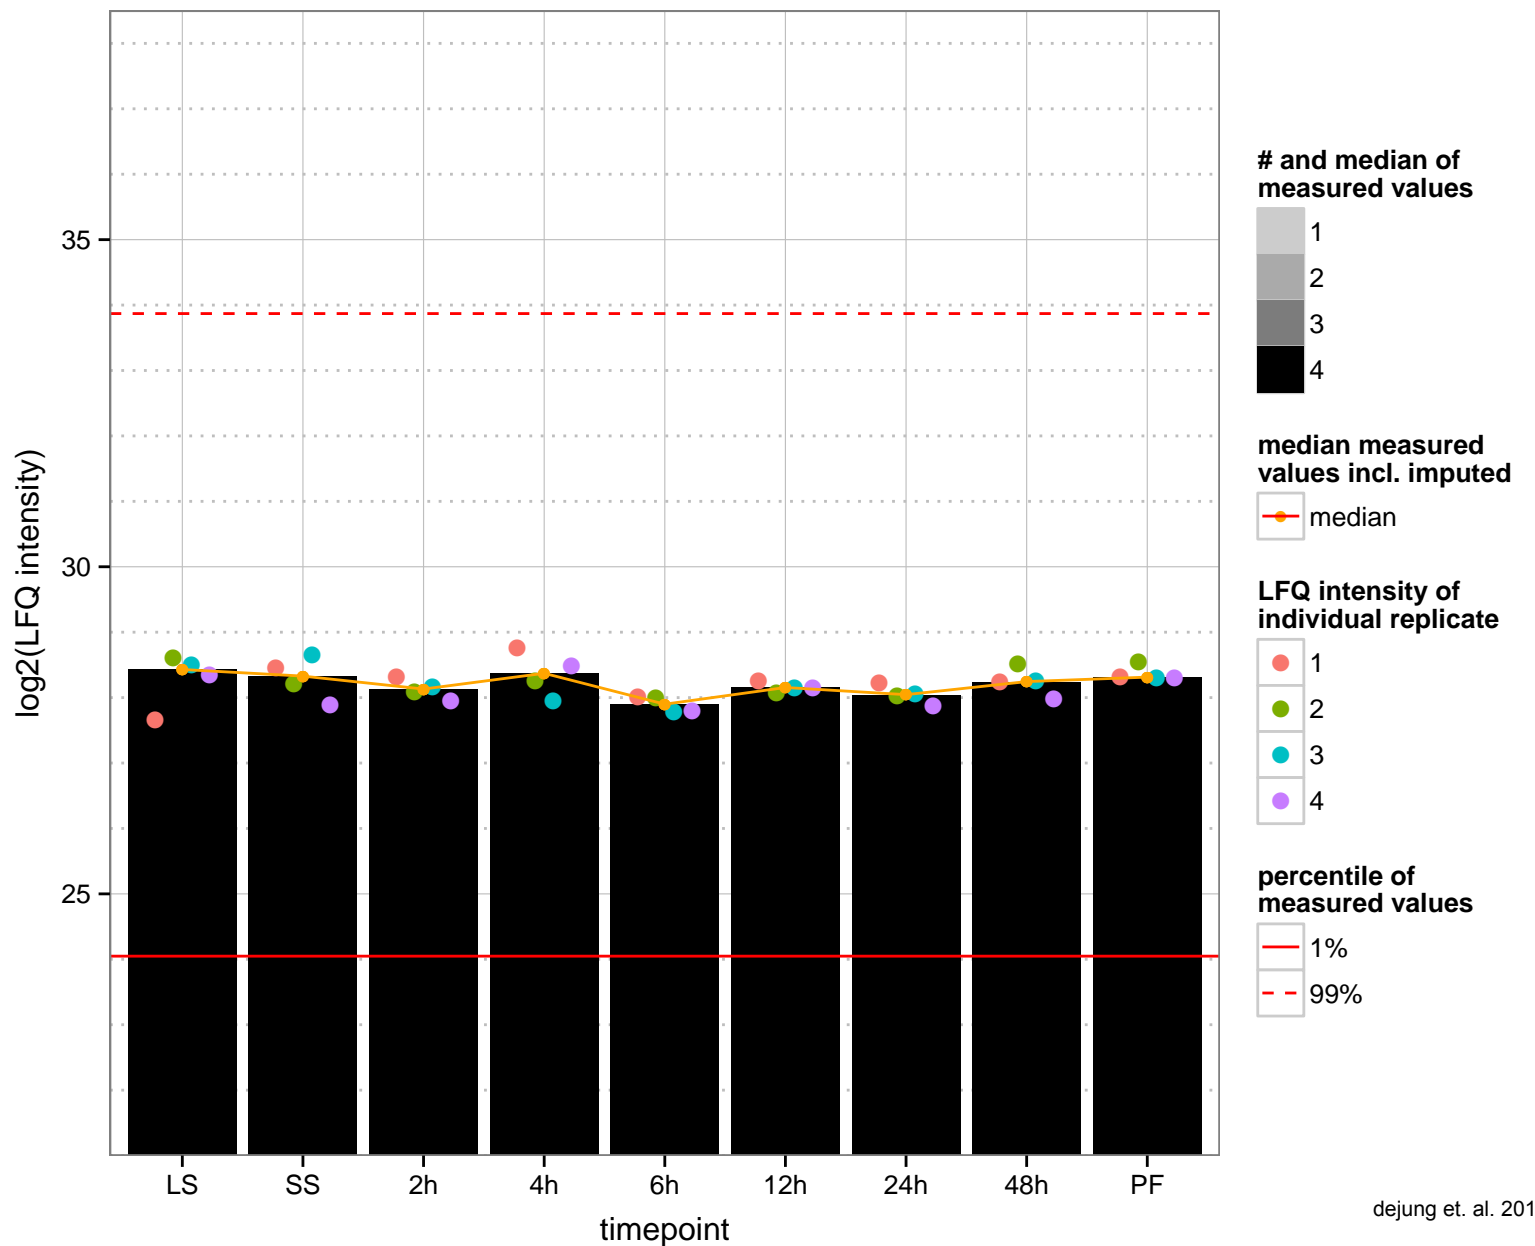

variant surface glycoprotein (VSG), putative, hypothetical protein, conserved  
 Tb927.8.3840  
 AGOF: null  
 AGOC: null  
 AGOP: null  
 PGOF: null  
 PGO: null  
 PGOP: evasion or tolerance of host immune response, null

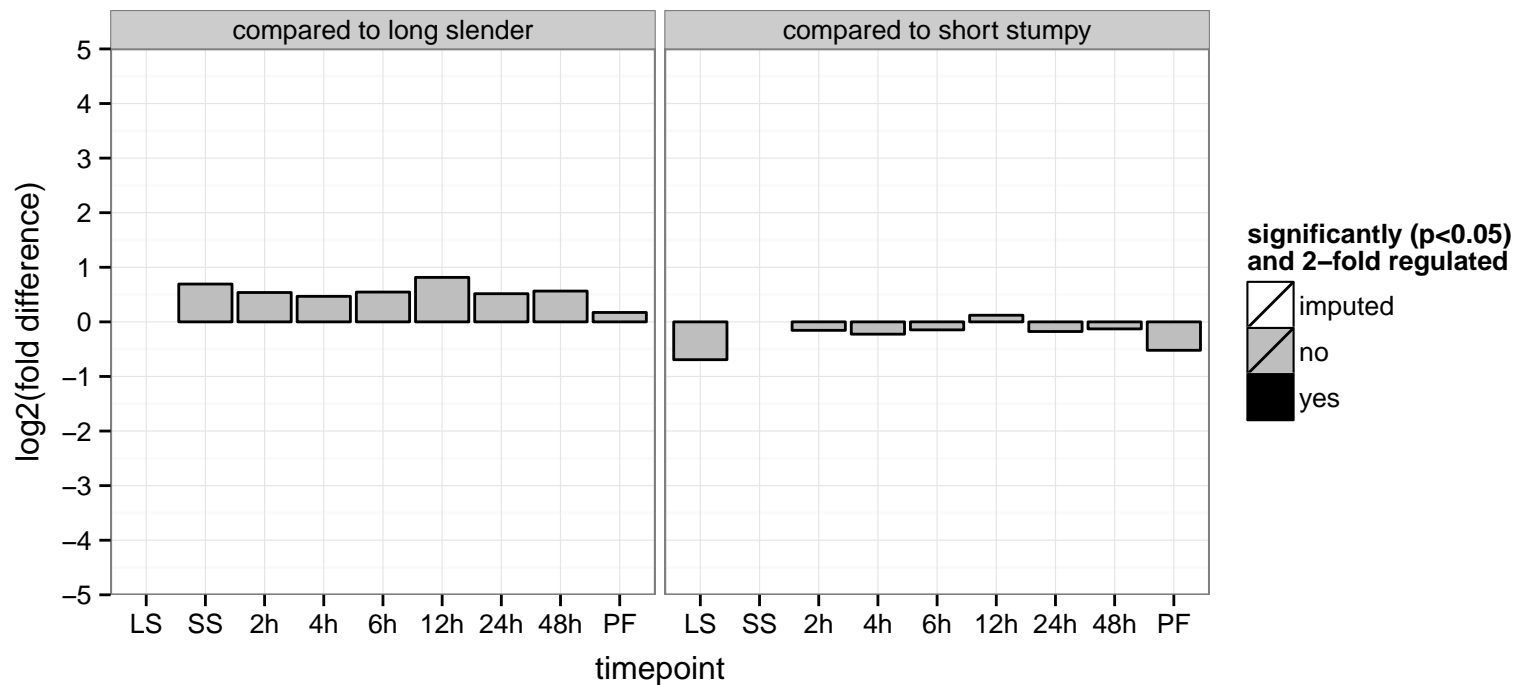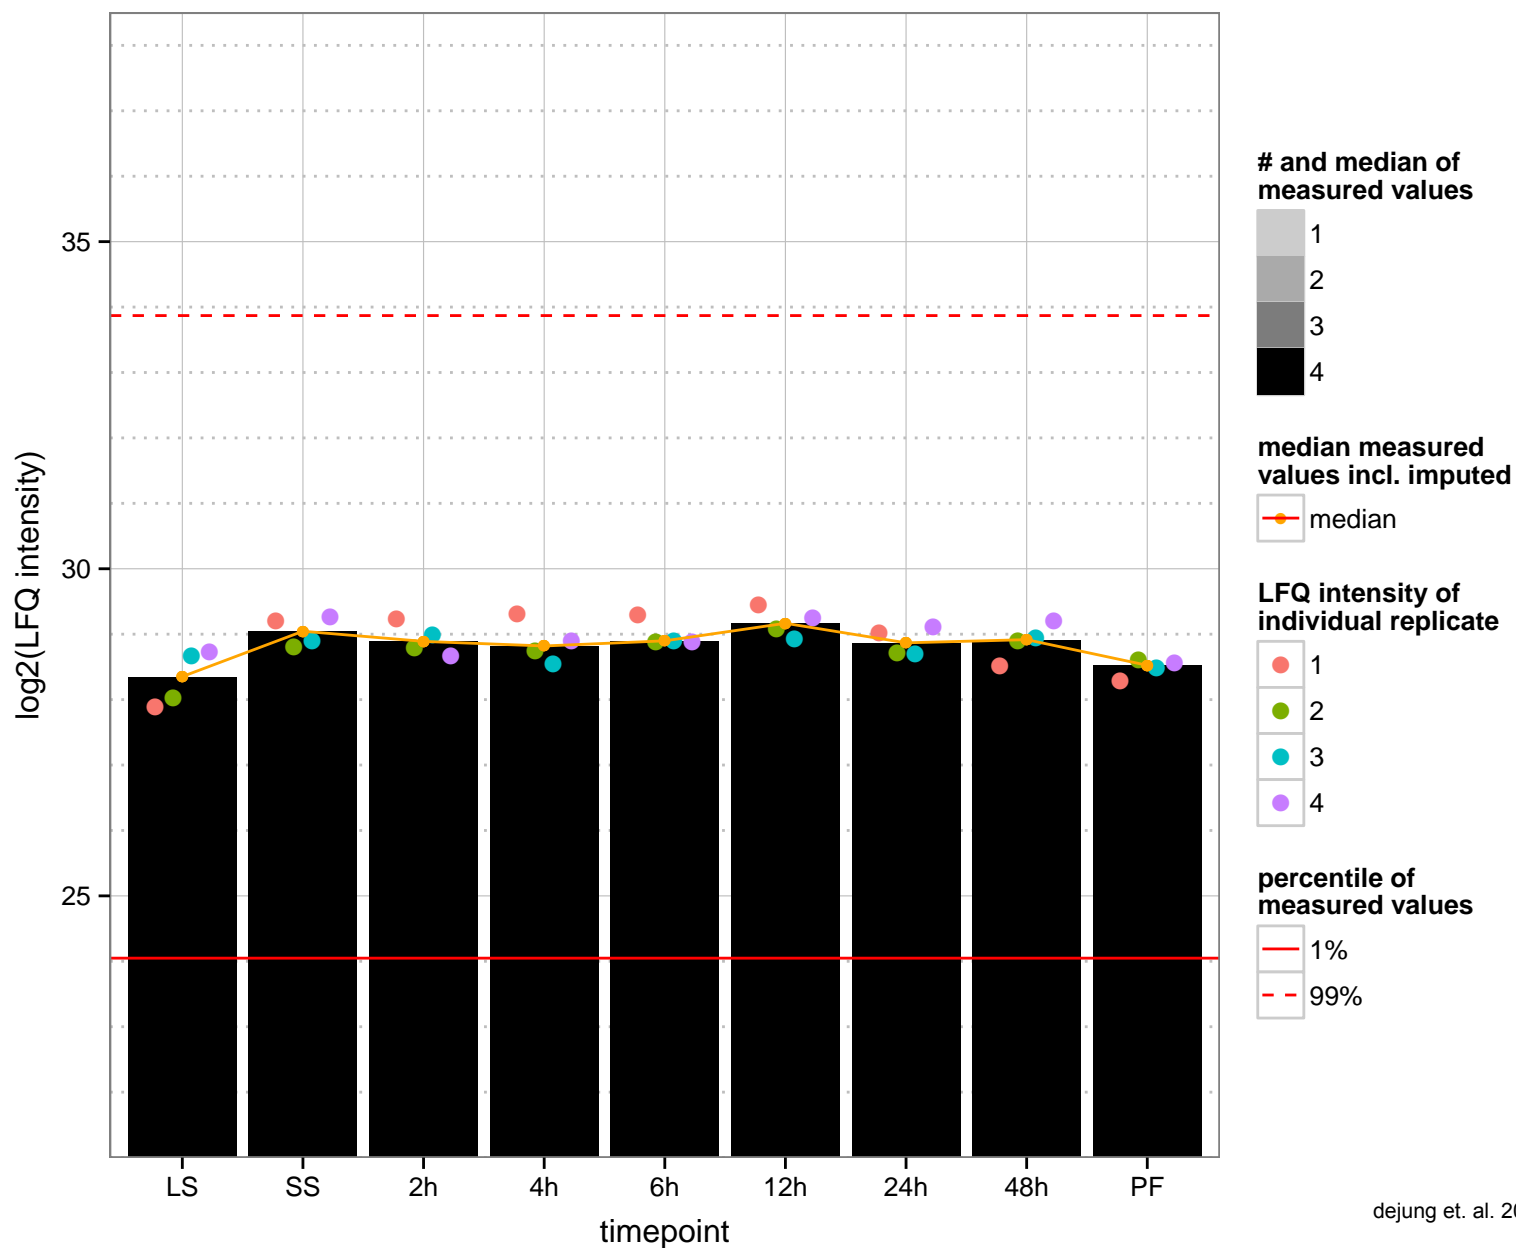

hypothetical protein, conserved  
 Tb927.8.3870;Tb11.v5.0681  
 AGOF: null, structural constituent of cell wall  
 AGOC: null  
 AGOP: null  
 PGO: null  
 PGOC: null  
 PGOP: null

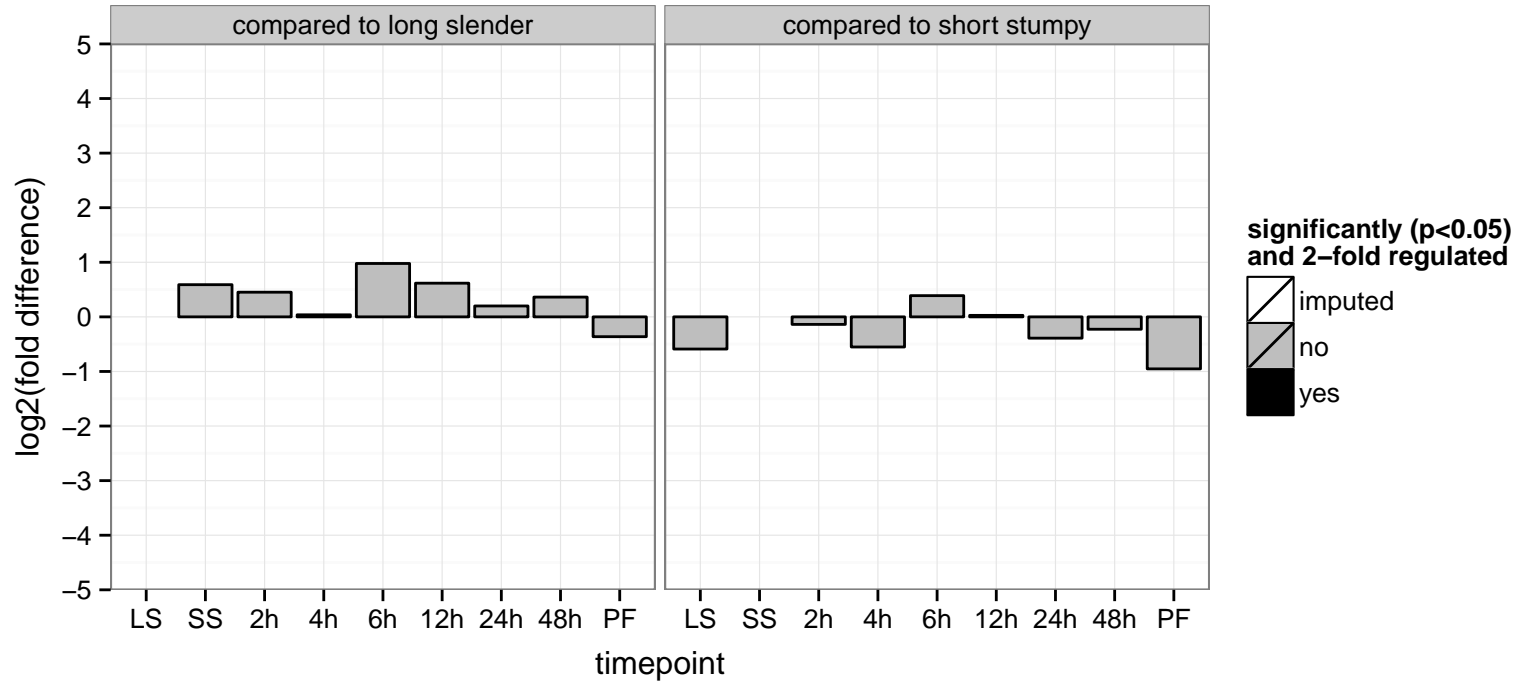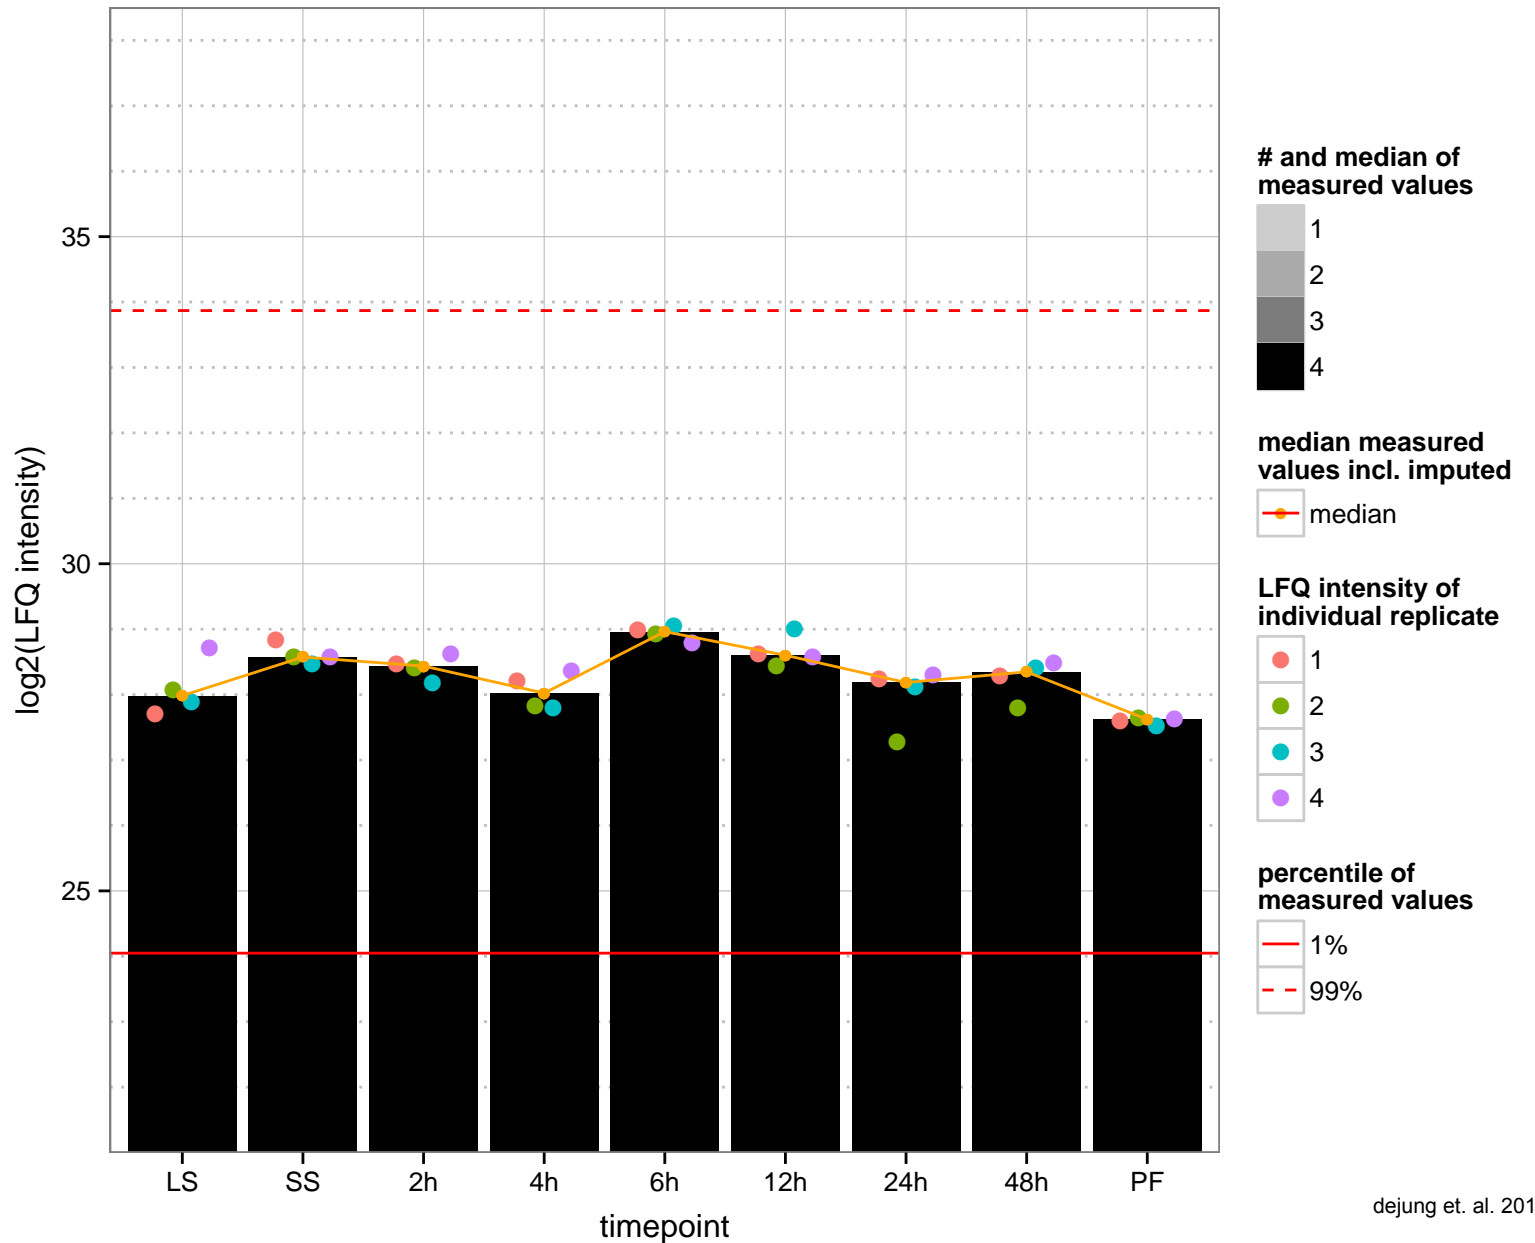

hypothetical protein, conserved  
 Tb927.8.3950  
 AGOF: null  
 AGOC: null  
 AGOP: null  
 PGO: null  
 PGOC: null  
 PGOP: null

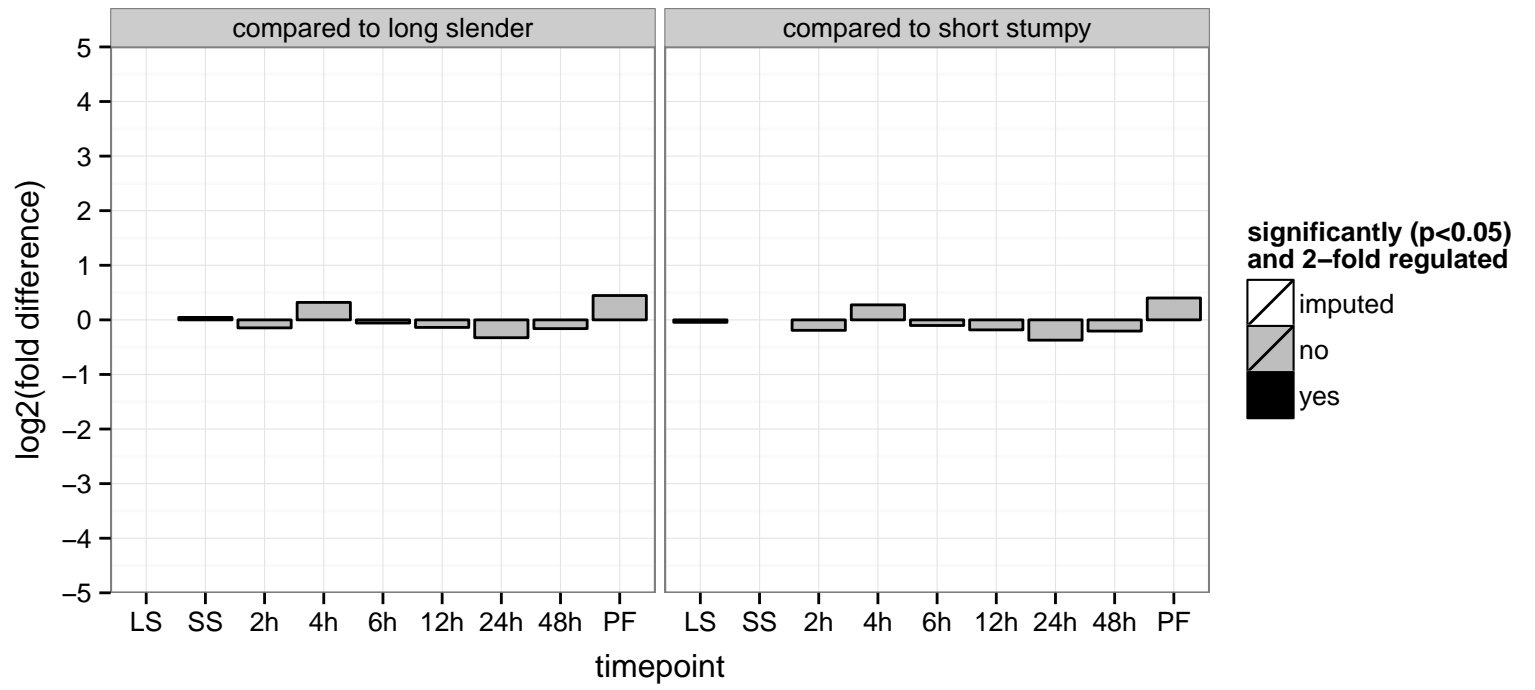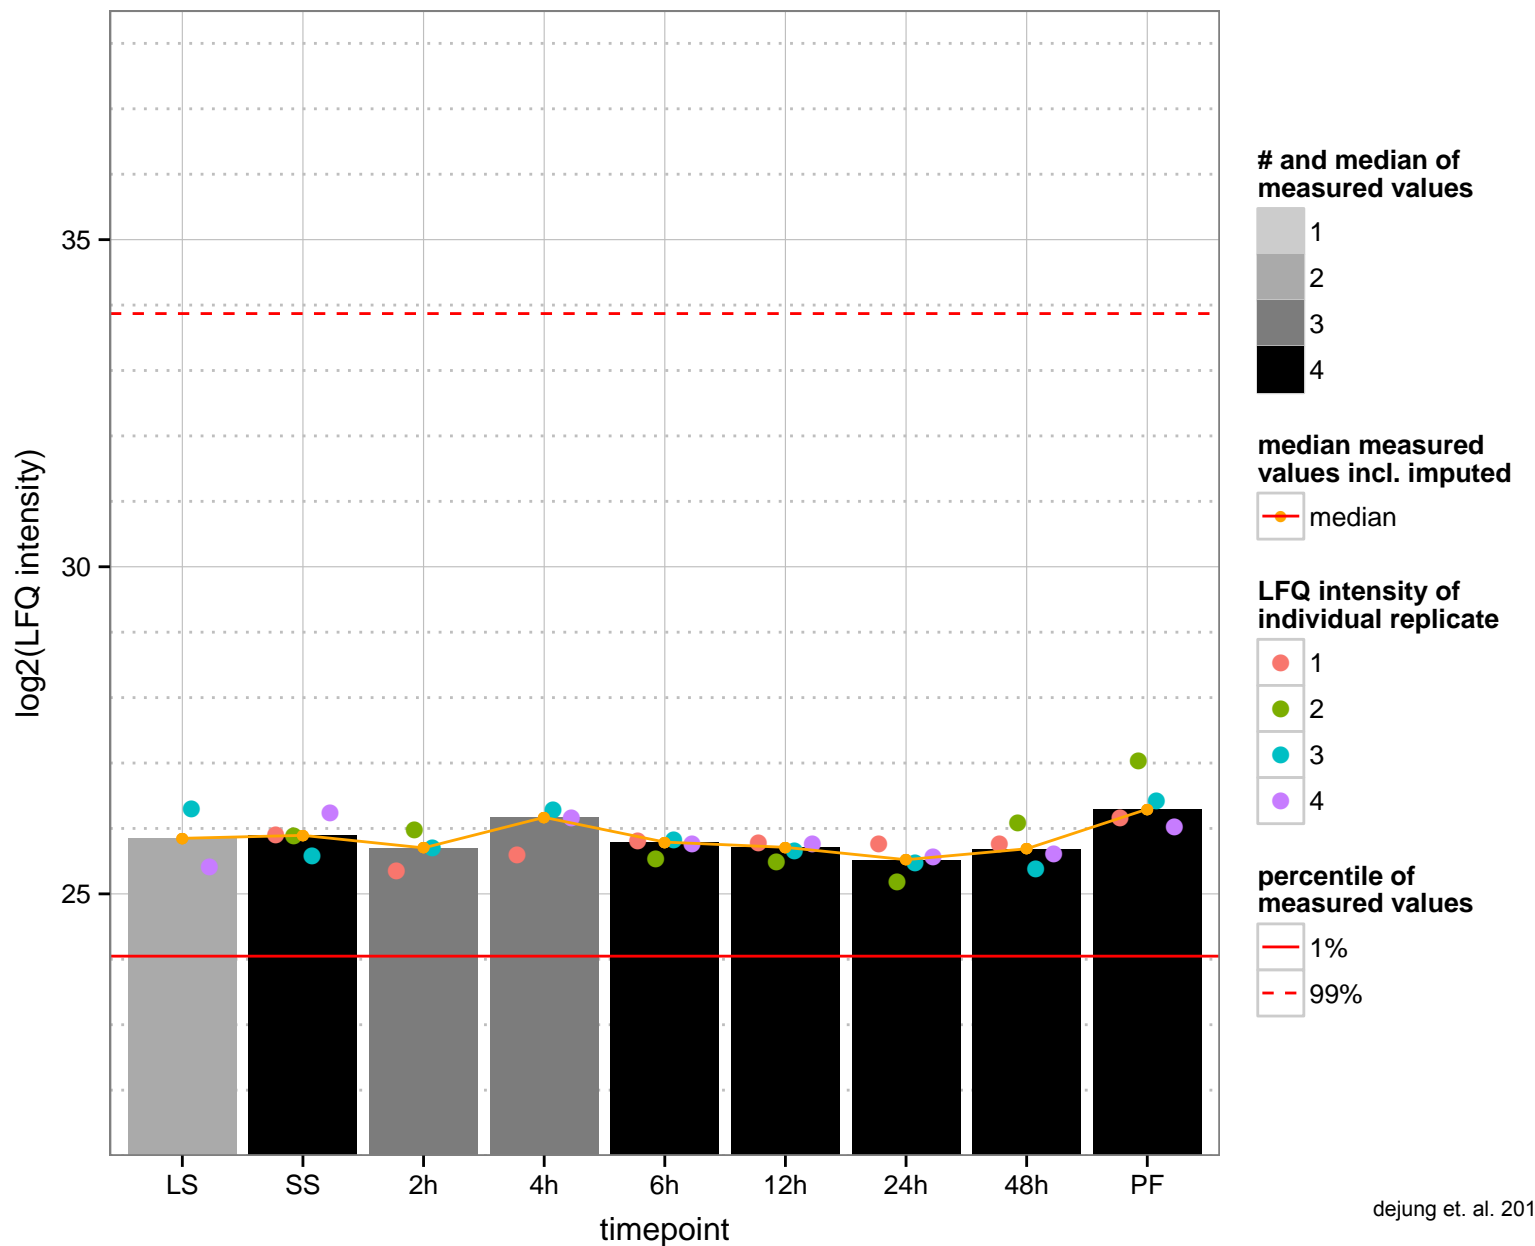



oxidoreductase, putative

Tb927.8.3970

AGOF: alcohol dehydrogenase activity, zinc-dependent, oxidoreductase activity, zinc ion binding

AGOC: null

AGOP: metabolic process, oxidation-reduction process

PGOF: oxidoreductase activity, transferase activity, transferring acyl groups other than amino-acyl groups, zinc ion binding

PGOC: null

PGOP: oxidation-reduction process

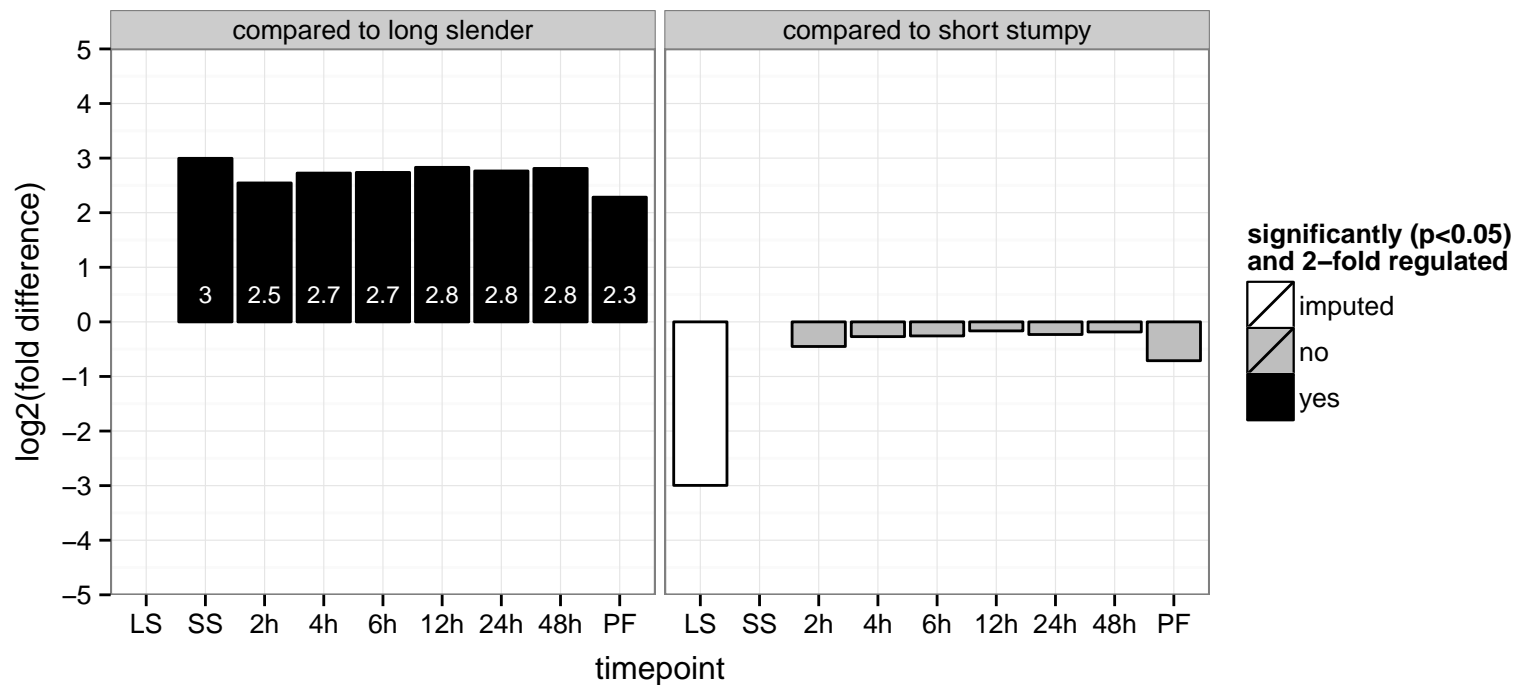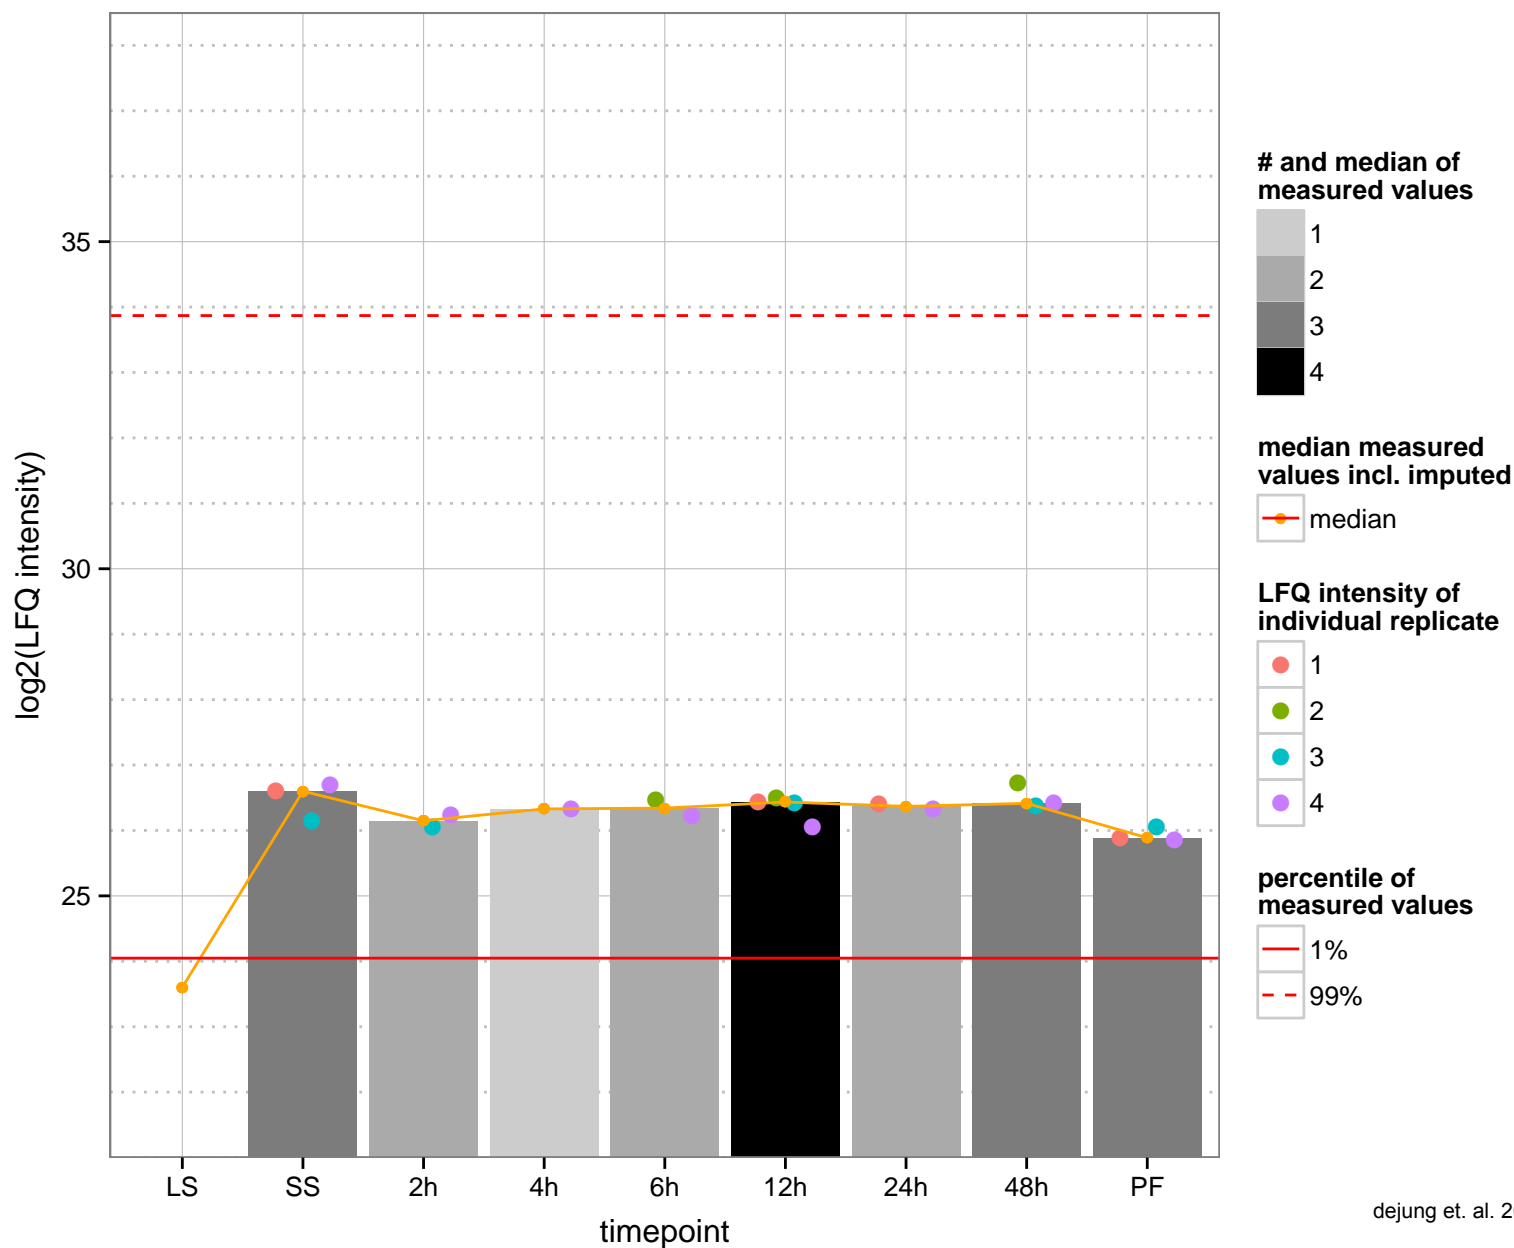

class I transcription factor A, subunit 5b (CITFA-5b)  
 Tb927.8.4130  
 AGOF: null  
 AGOC: null  
 AGOP: null  
 PGO: null  
 PGOC: null  
 PGOP: null

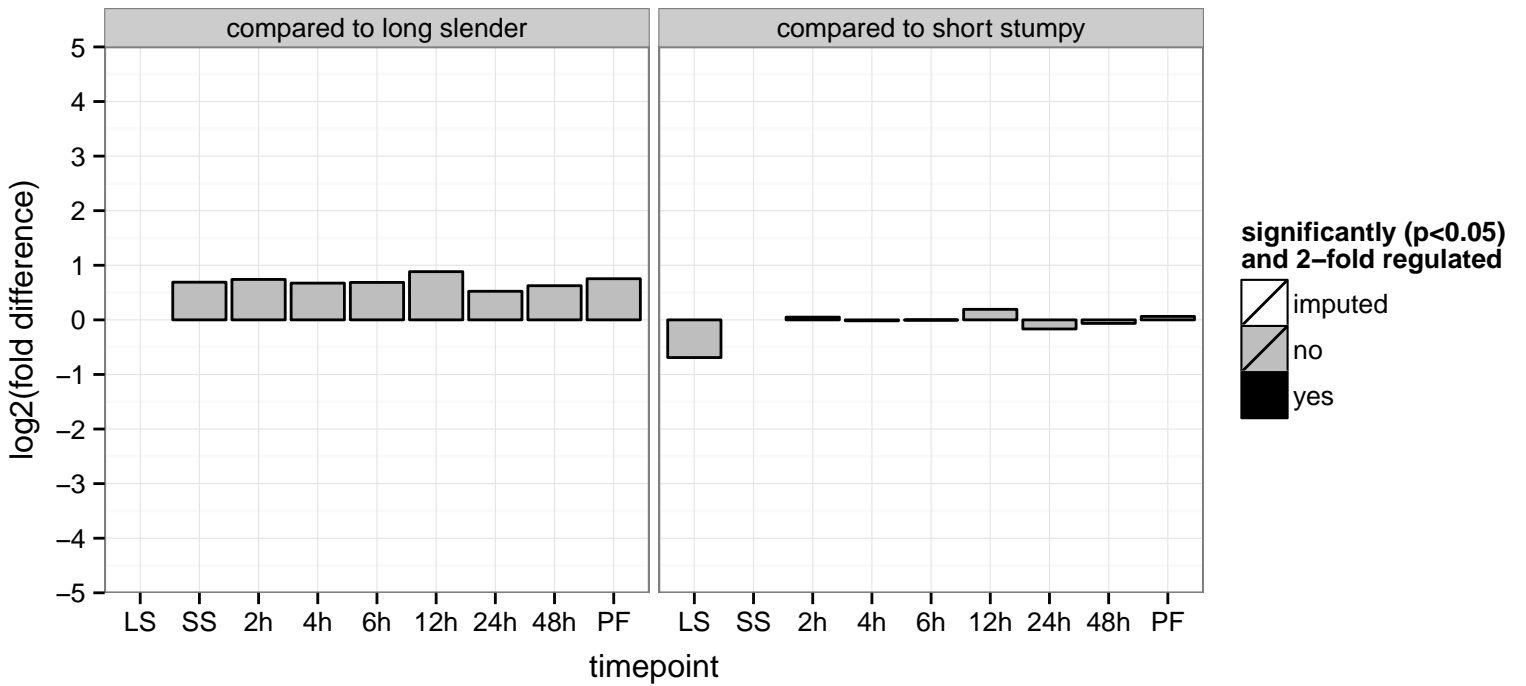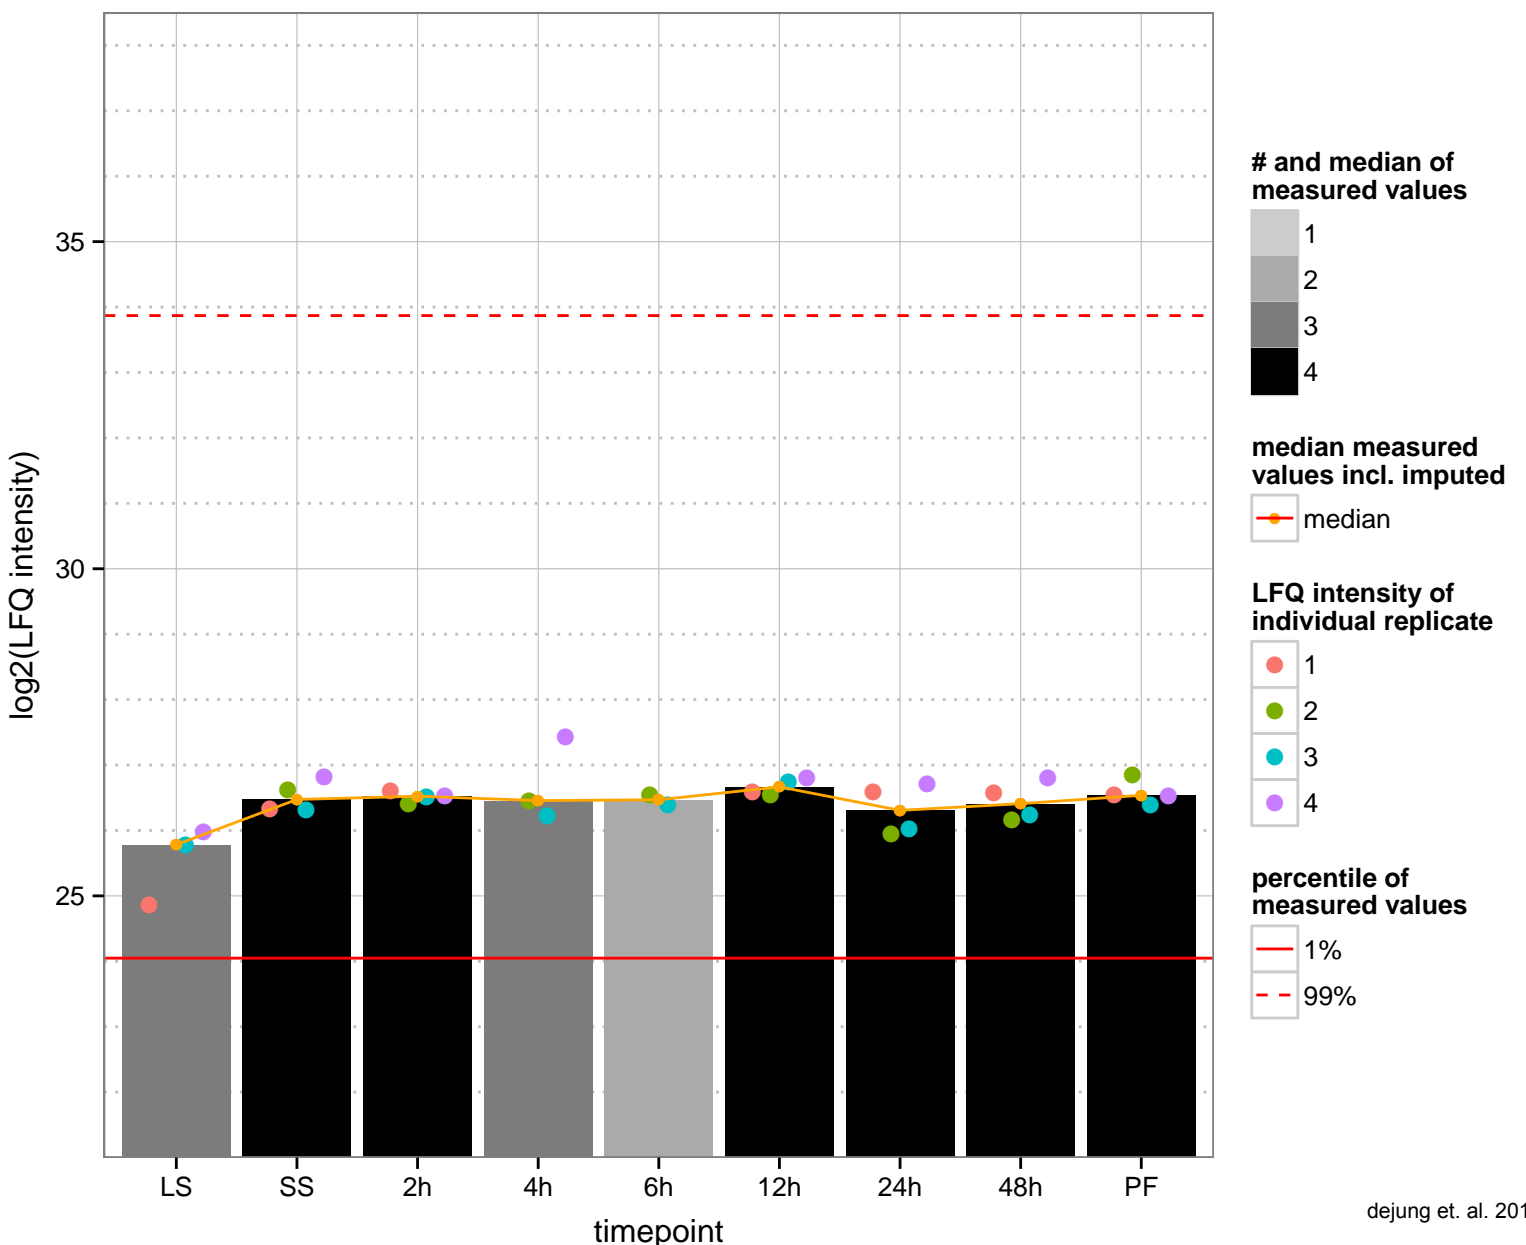

hypothetical protein, conserved  
 Tb927.8.4160  
 AGOF: null  
 AGOC: null  
 AGOP: null  
 PGOF: binding  
 PGO: null  
 PGOP: null

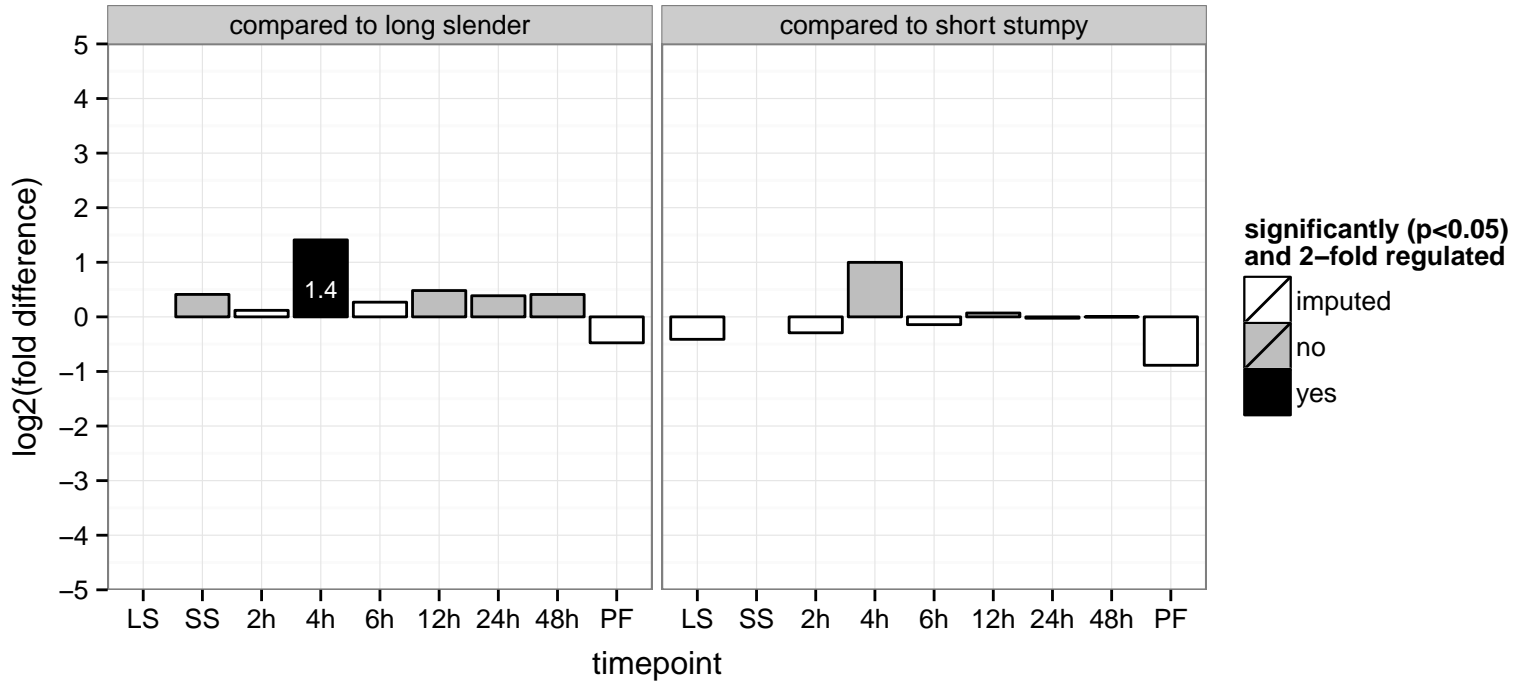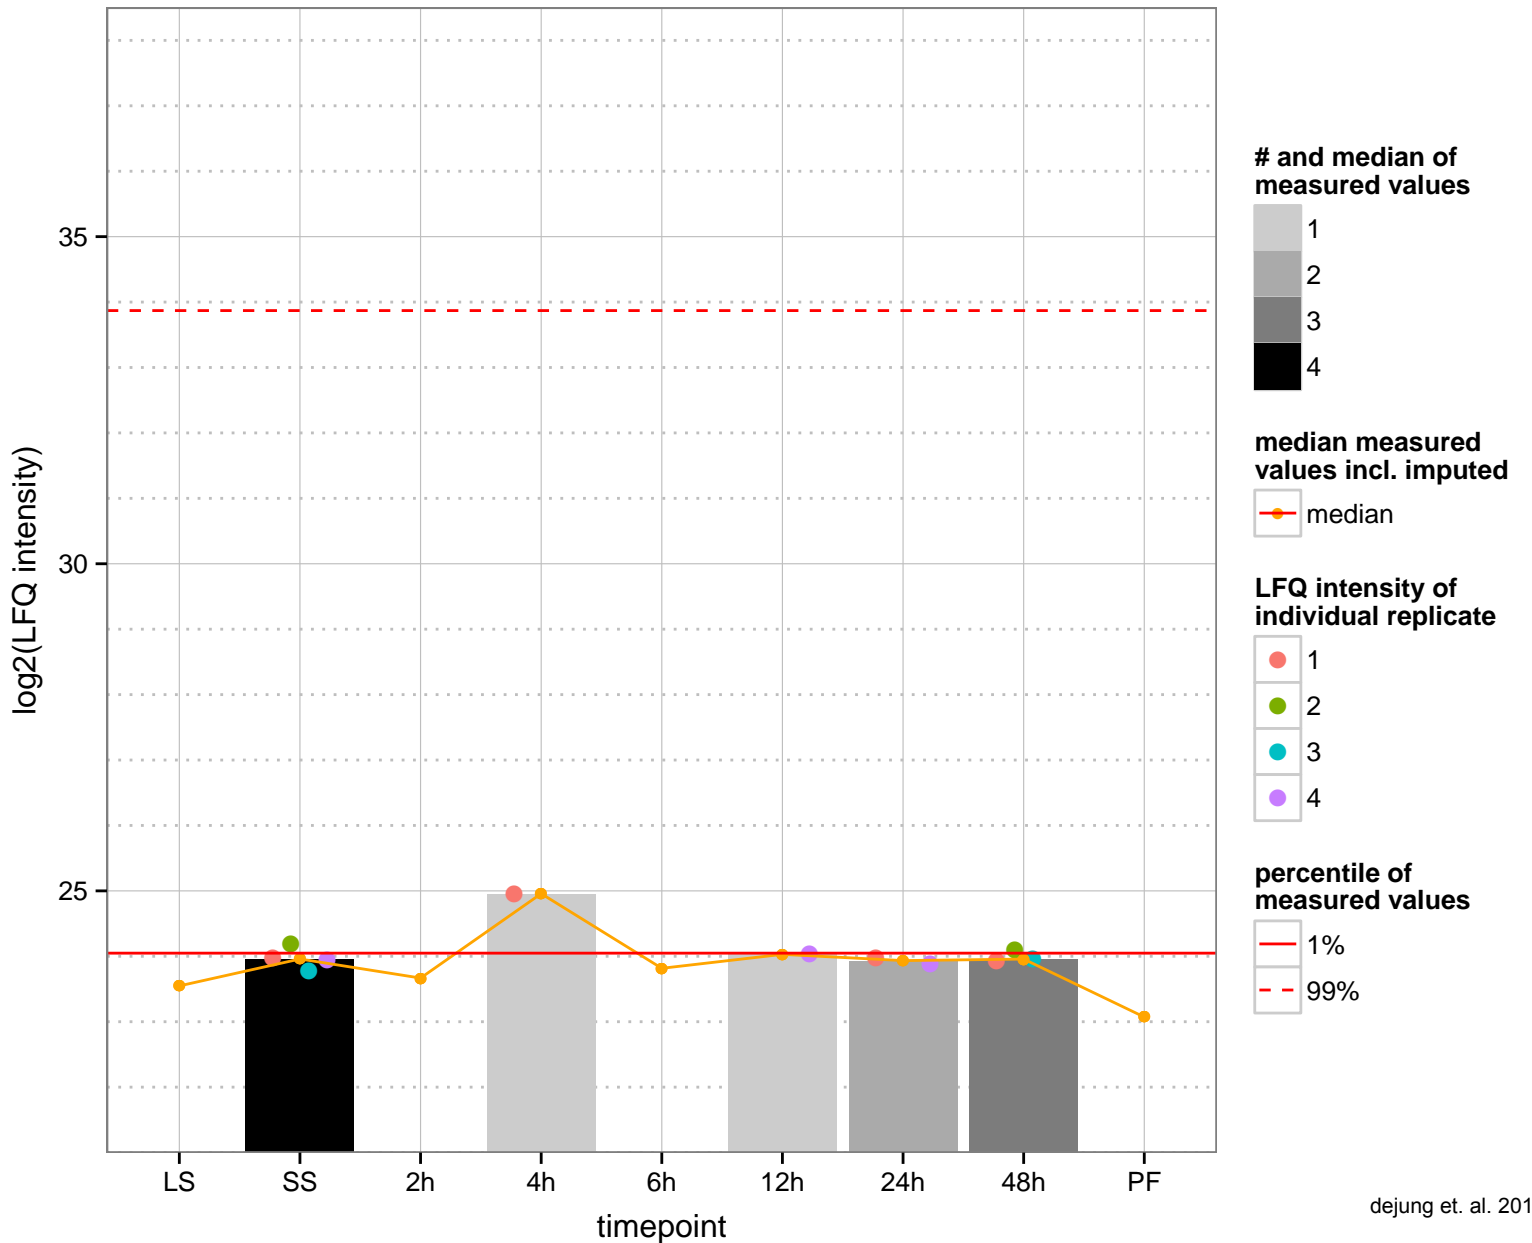

RNA-binding protein, putative (MRD1)  
 Tb927.8.4170  
 AGOF: RNA binding  
 AGOC: null  
 AGOP: RNA processing  
 PGO: nucleic acid binding  
 PGOC: null  
 PGOP: null

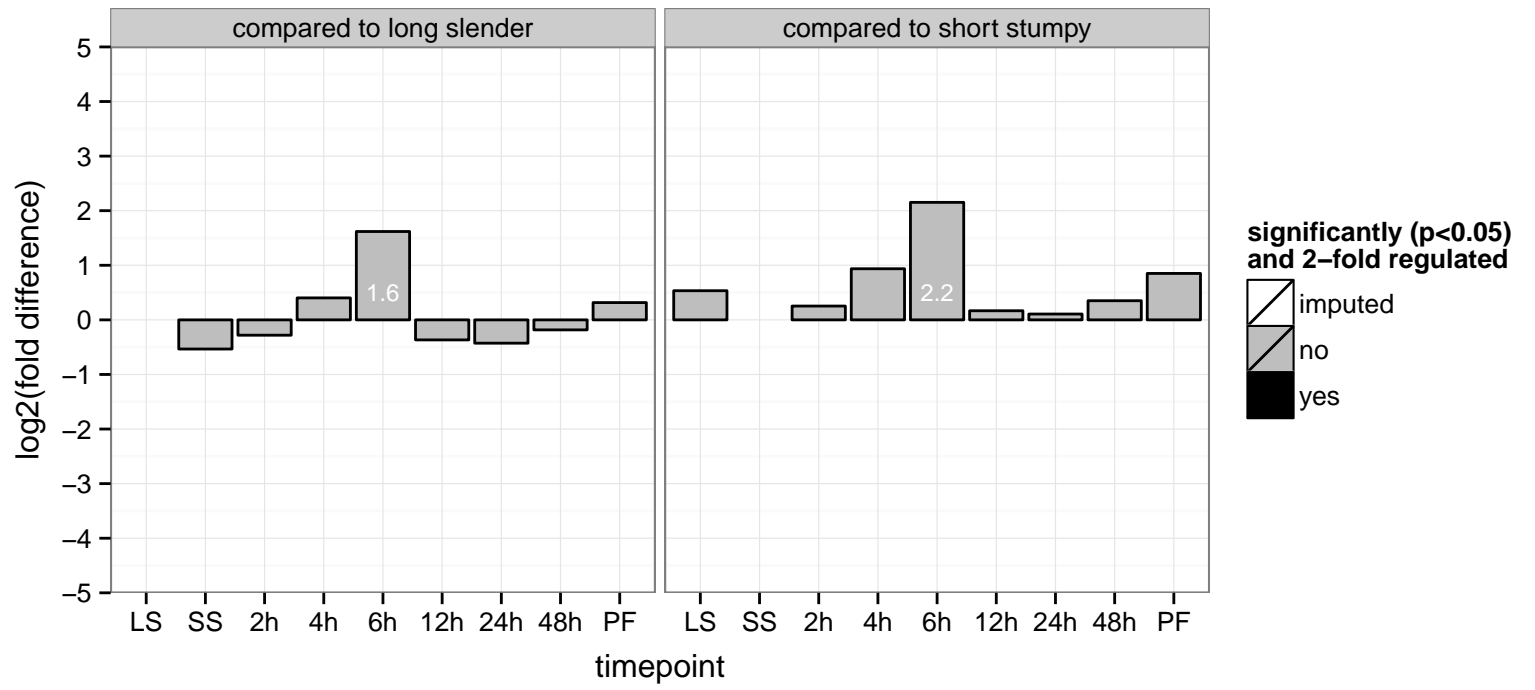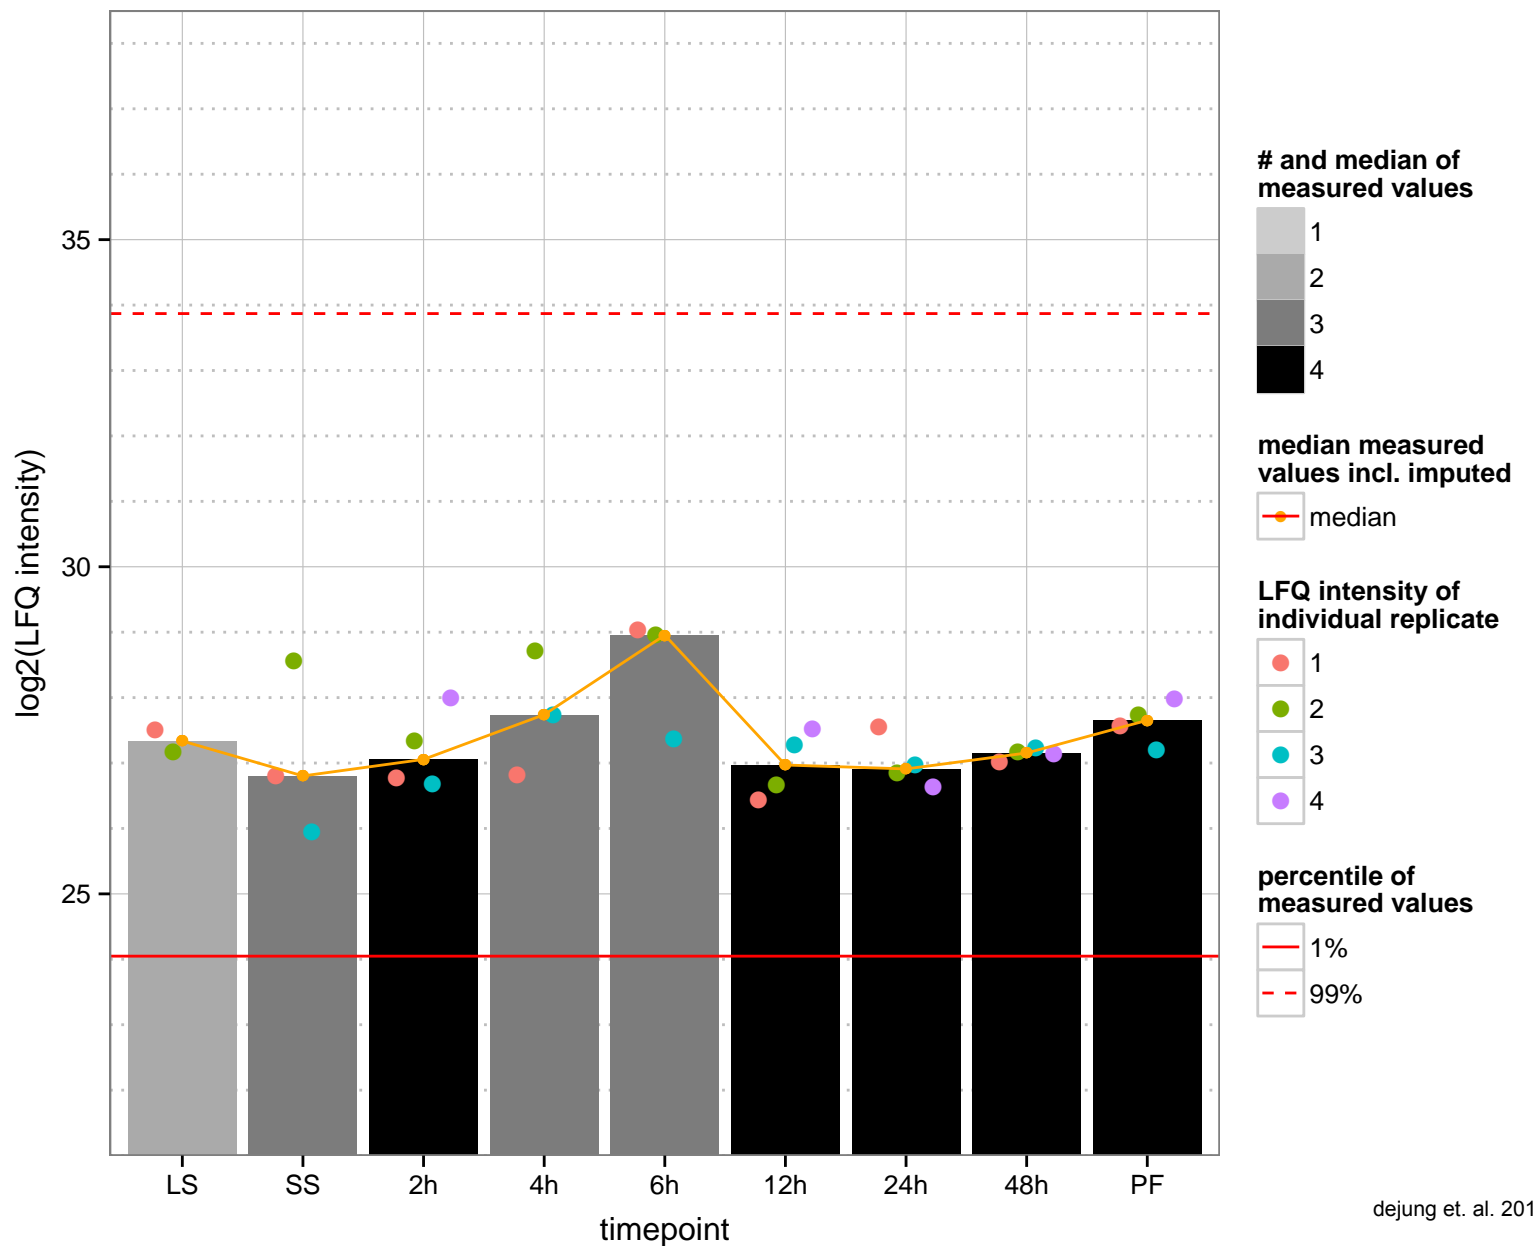

hypothetical protein, conserved  
 Tb927.8.4210  
 AGOF: null  
 AGOC: null  
 AGOP: null  
 PGOF: protein binding  
 PGO: null  
 PGOP: null

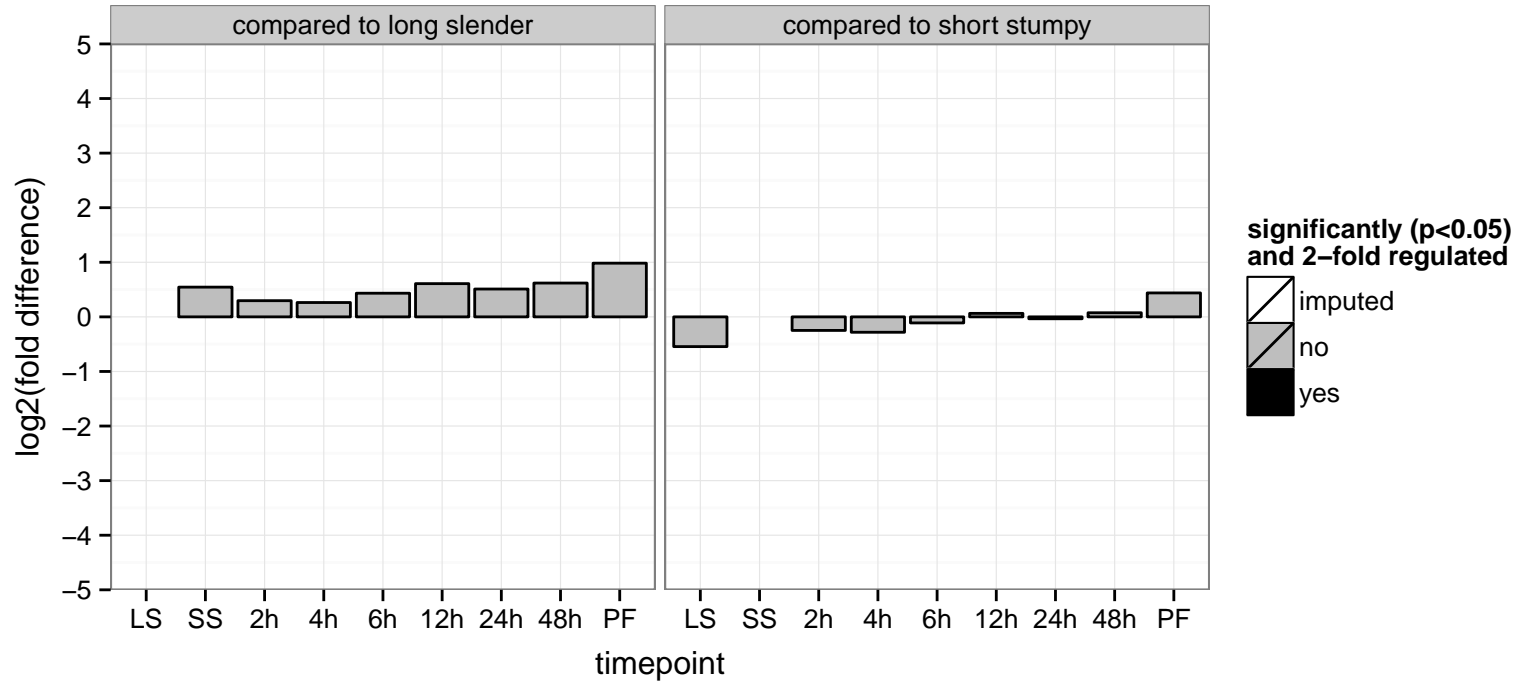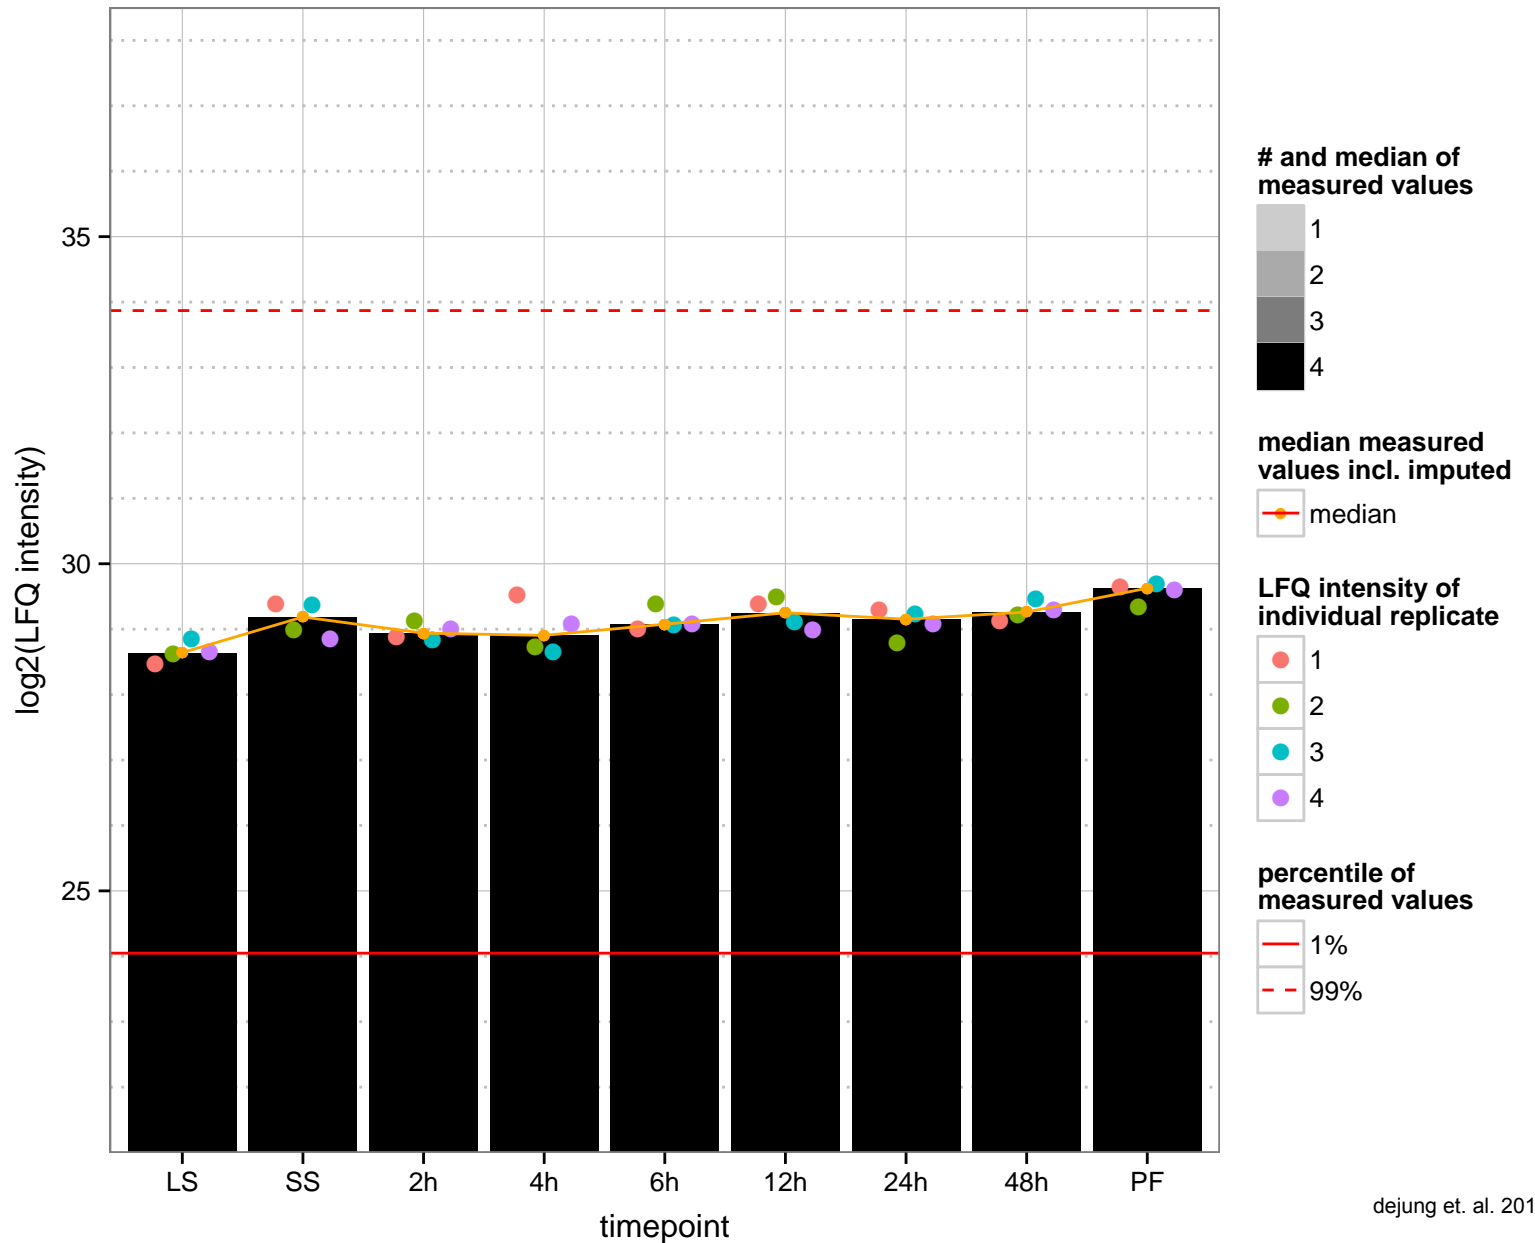

hypothetical protein, conserved  
 Tb927.8.4270  
 AGOF: deaminase activity  
 AGOC: null  
 AGOP: purine ribonucleoside monophosphate biosynthetic process  
 PGO: null  
 PGOC: null  
 PGOP: null

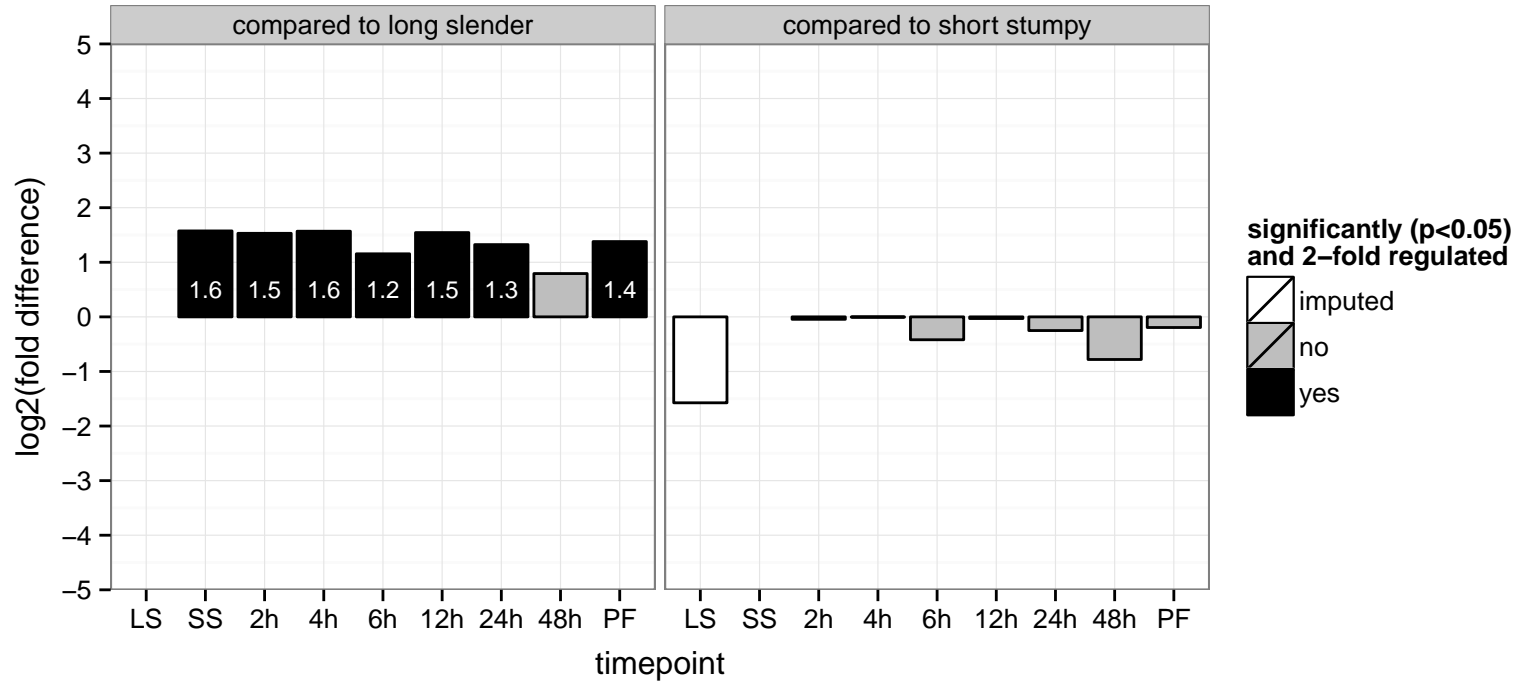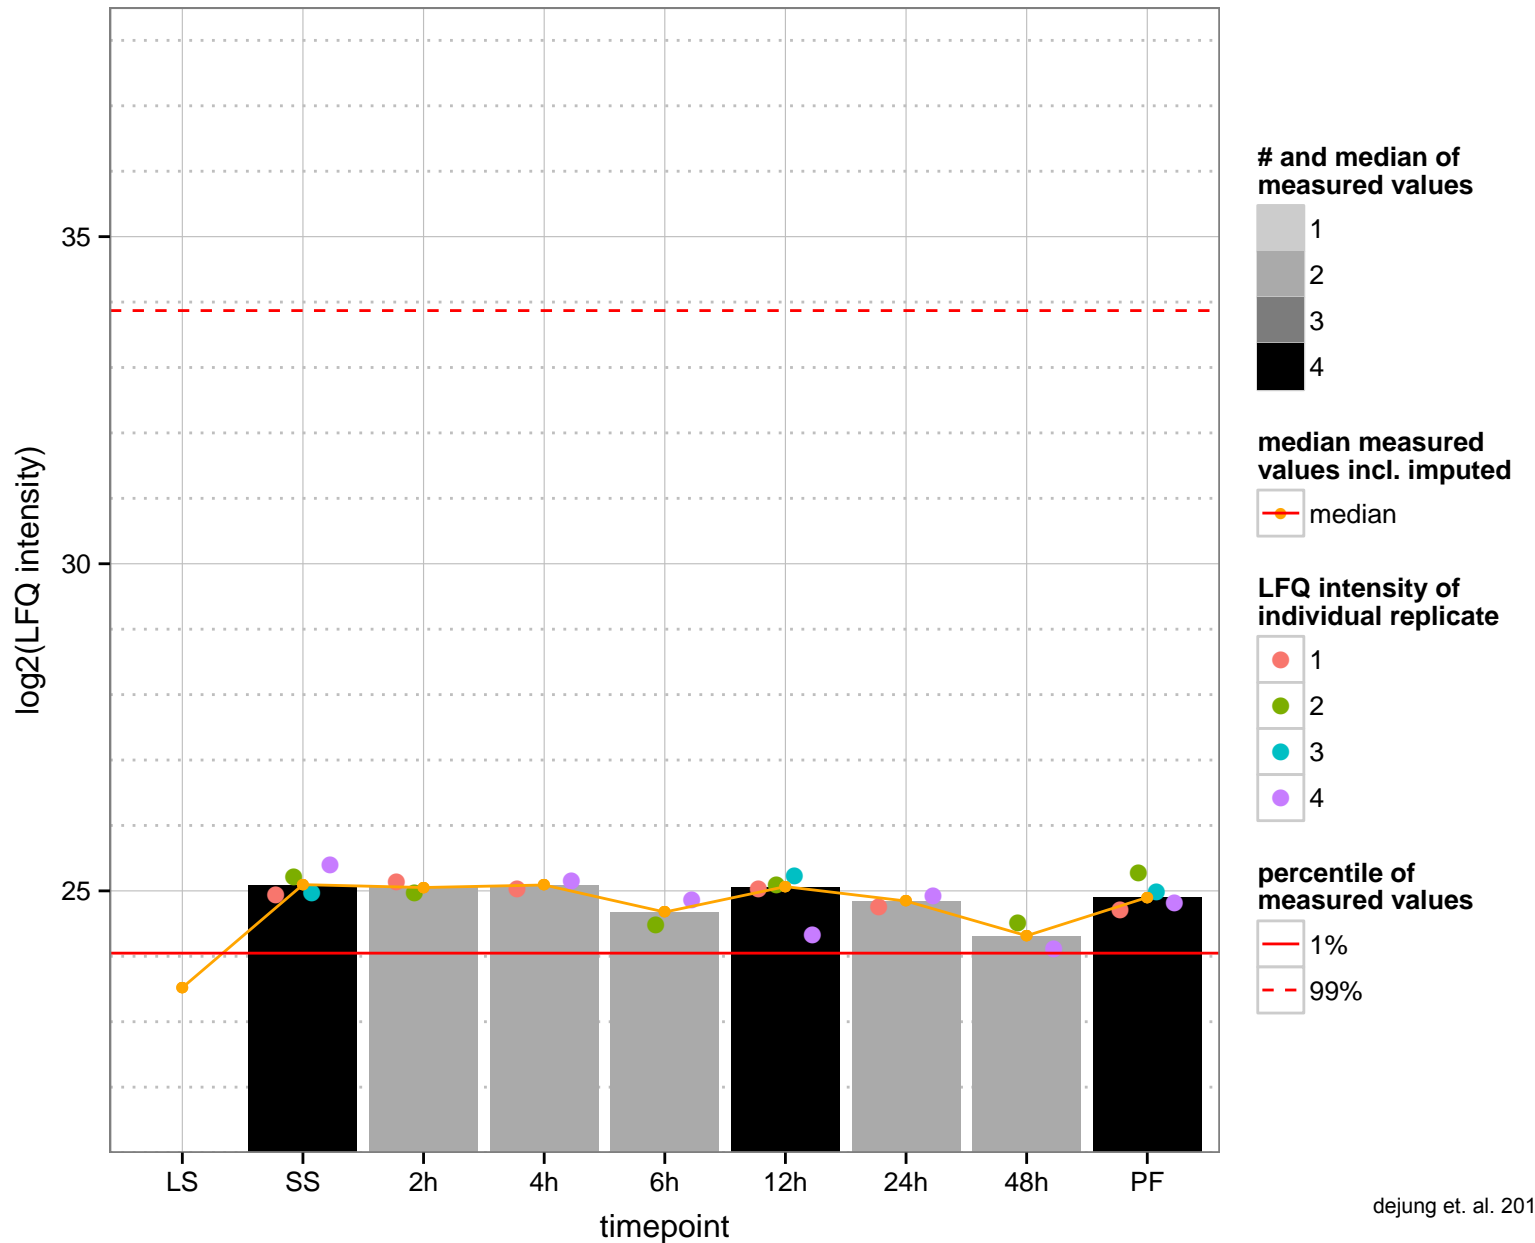

nuclear transport factor 2, putative  
 Tb927.8.4280  
 AGOF: protein transporter activity  
 AGOC: intracellular, nucleus  
 AGOP: protein import into nucleus  
 PGO: null  
 PGO: intracellular  
 PGO: transport

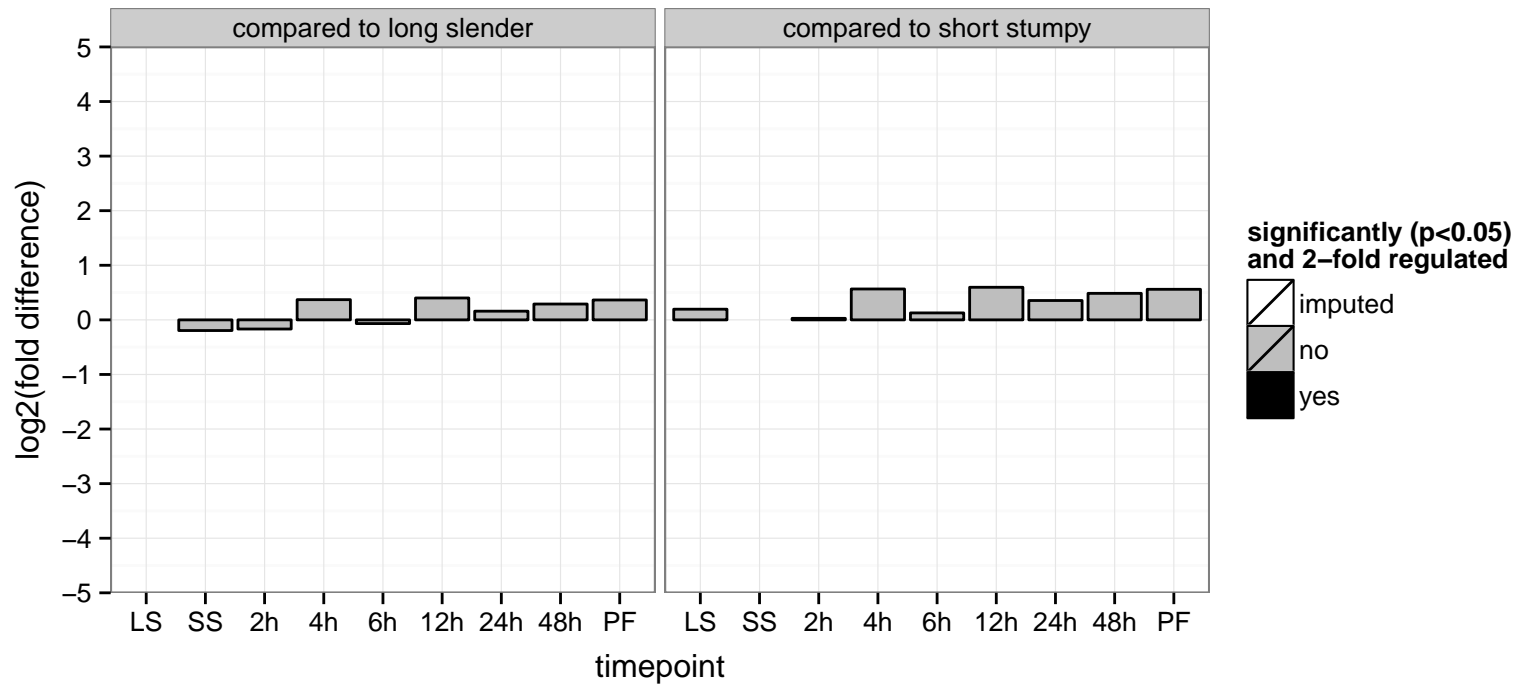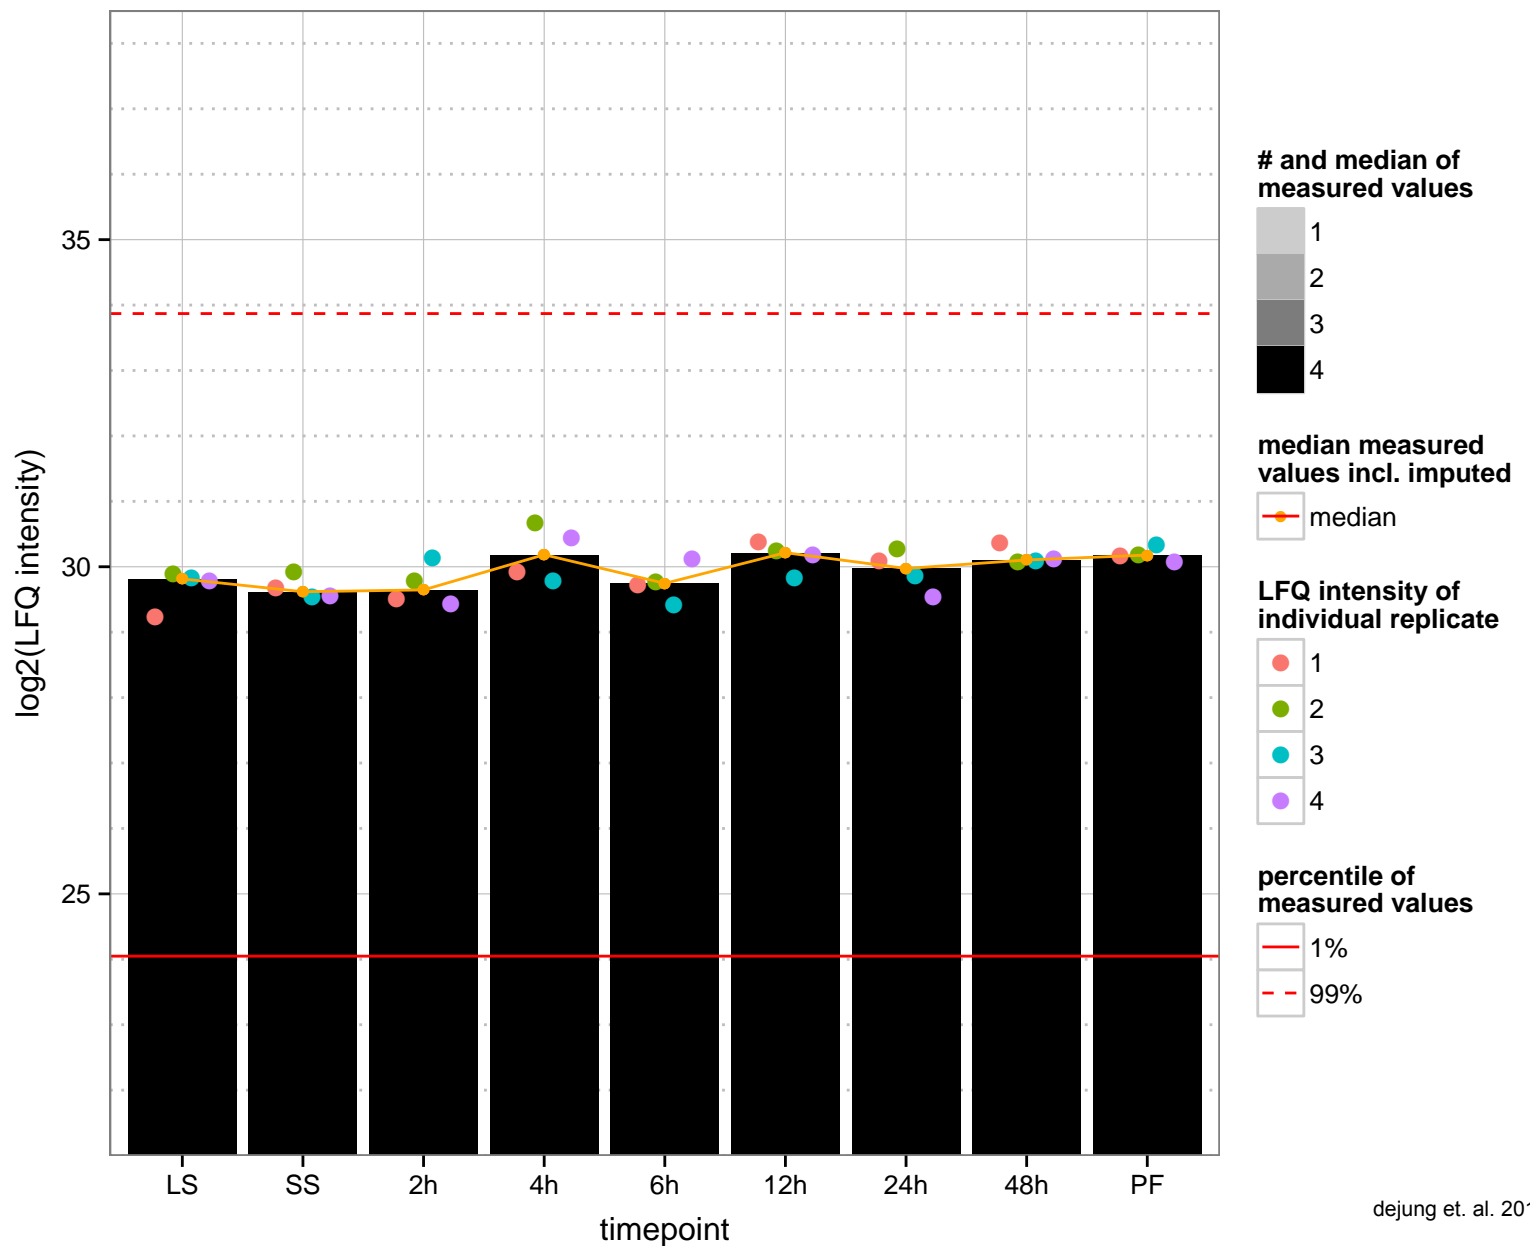

hypothetical protein, conserved  
 Tb927.8.4320  
 AGOF: null  
 AGOC: null  
 AGOP: null  
 PGOF: protein binding  
 PGO: null  
 PGOP: null

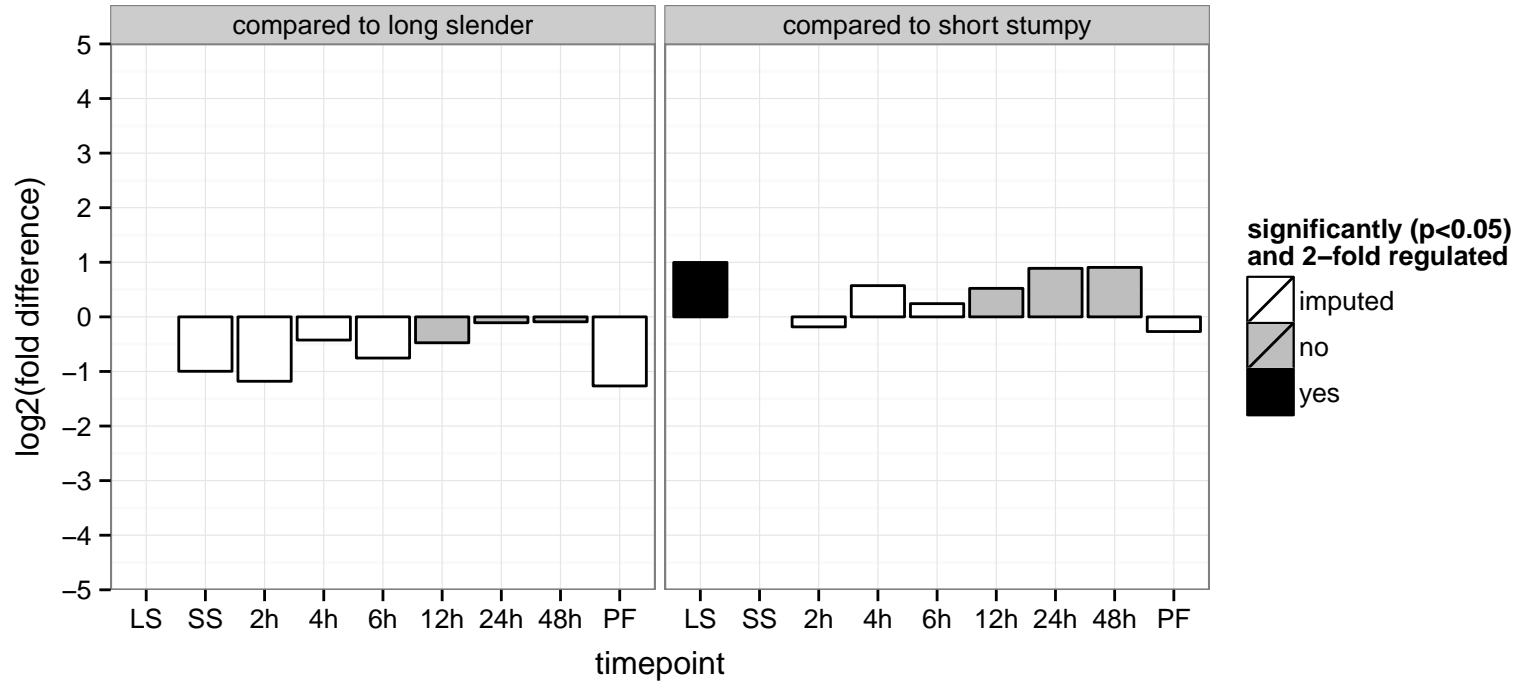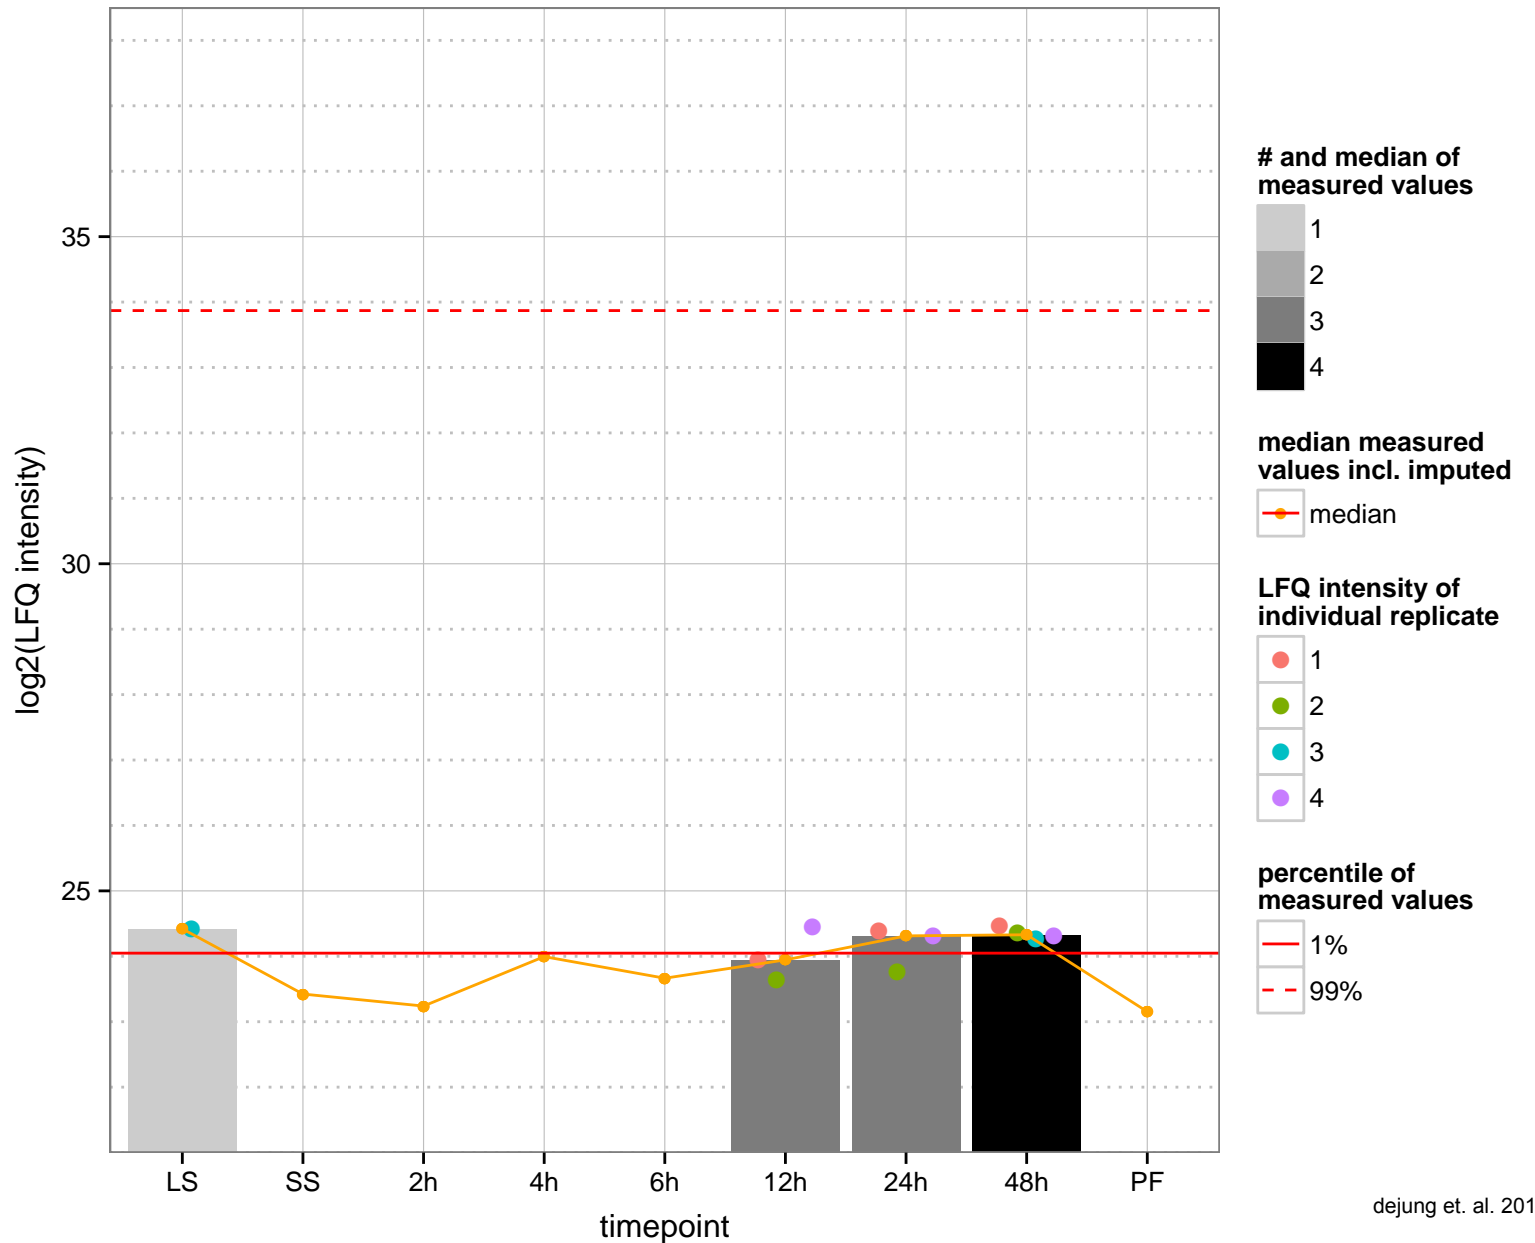



hypothetical protein, conserved  
 Tb927.8.4370  
 AGOF: null  
 AGOC: null  
 AGOP: null  
 PGO: null  
 PGO: null  
 PGO: null

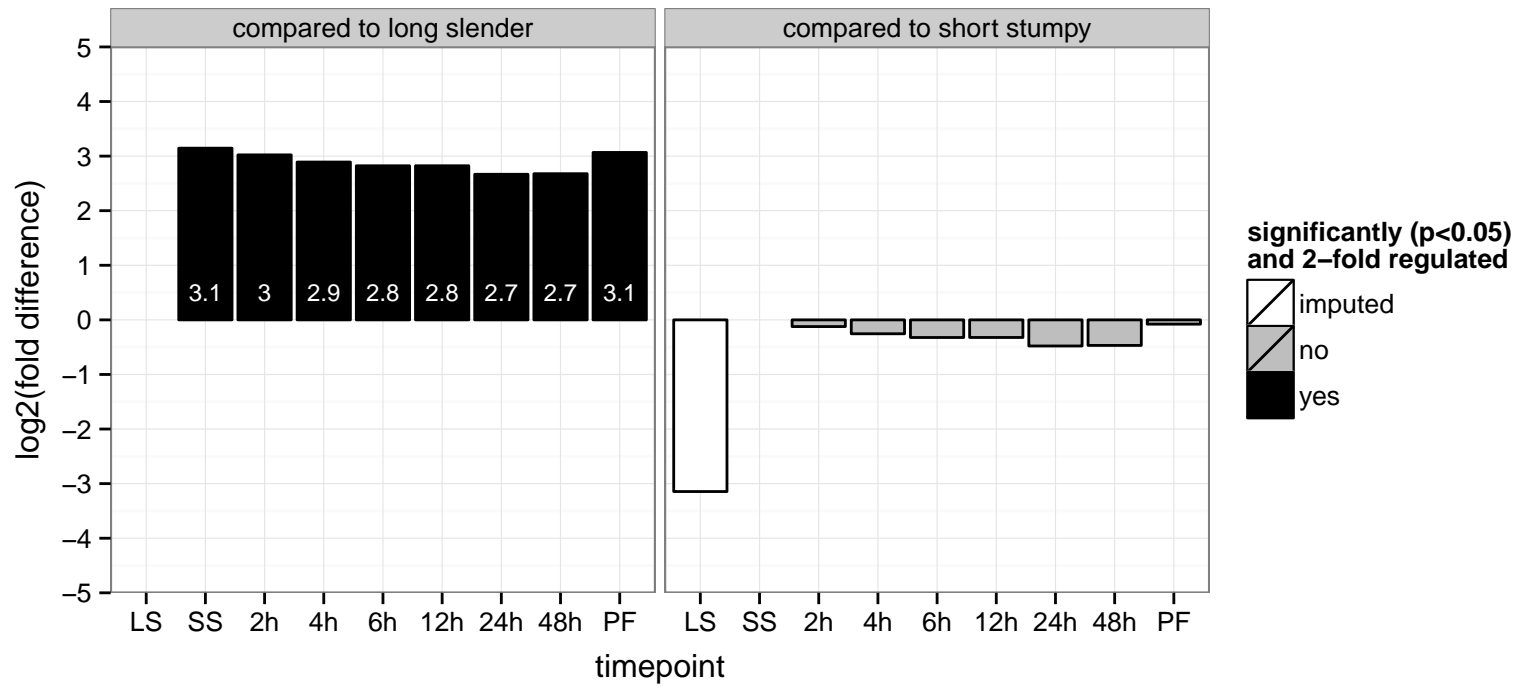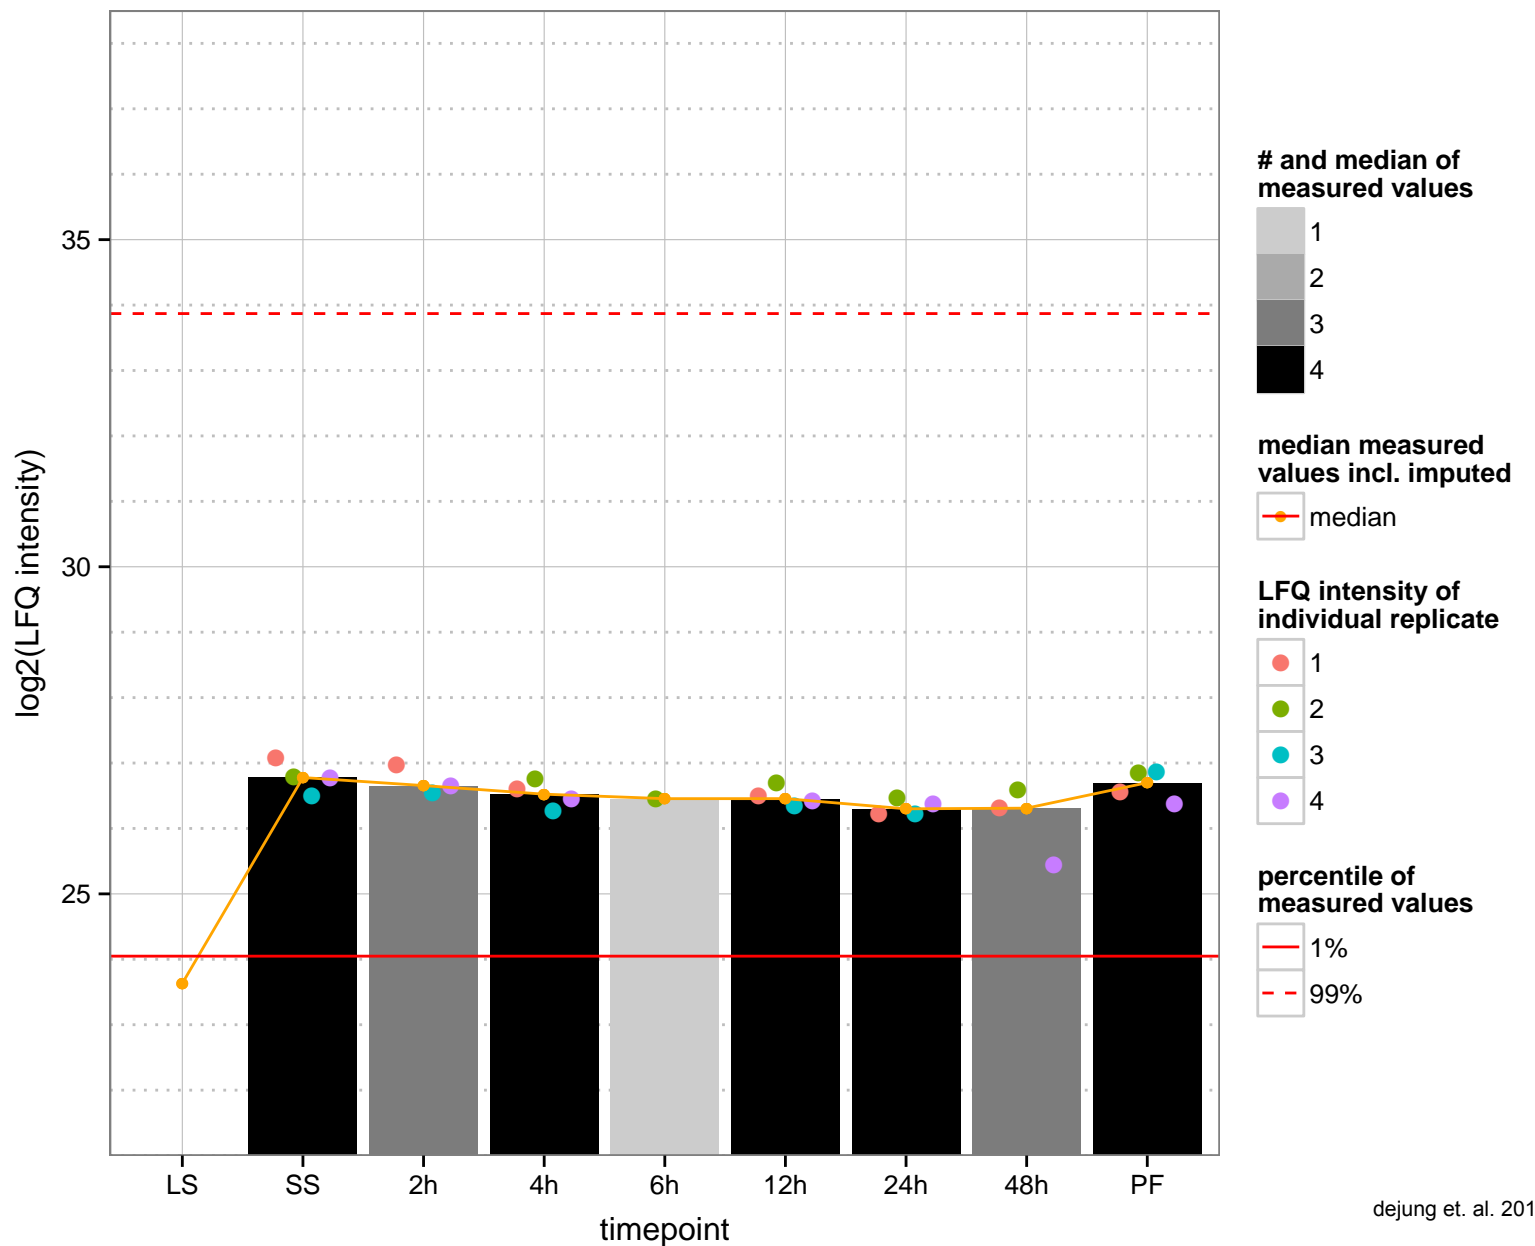

hypothetical protein, conserved  
 Tb927.8.4400  
 AGOF: null  
 AGOC: null  
 AGOP: null  
 PGO: null  
 PGOC: null  
 PGOP: null

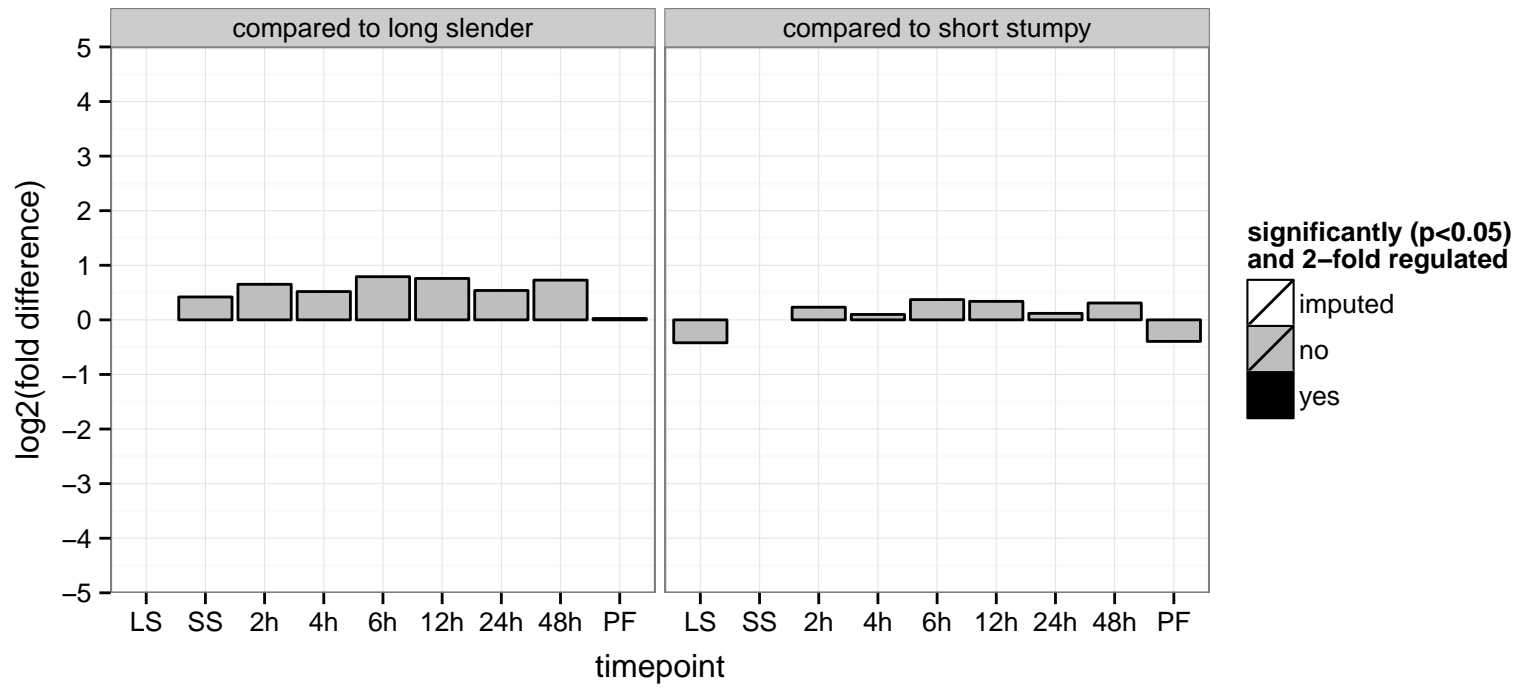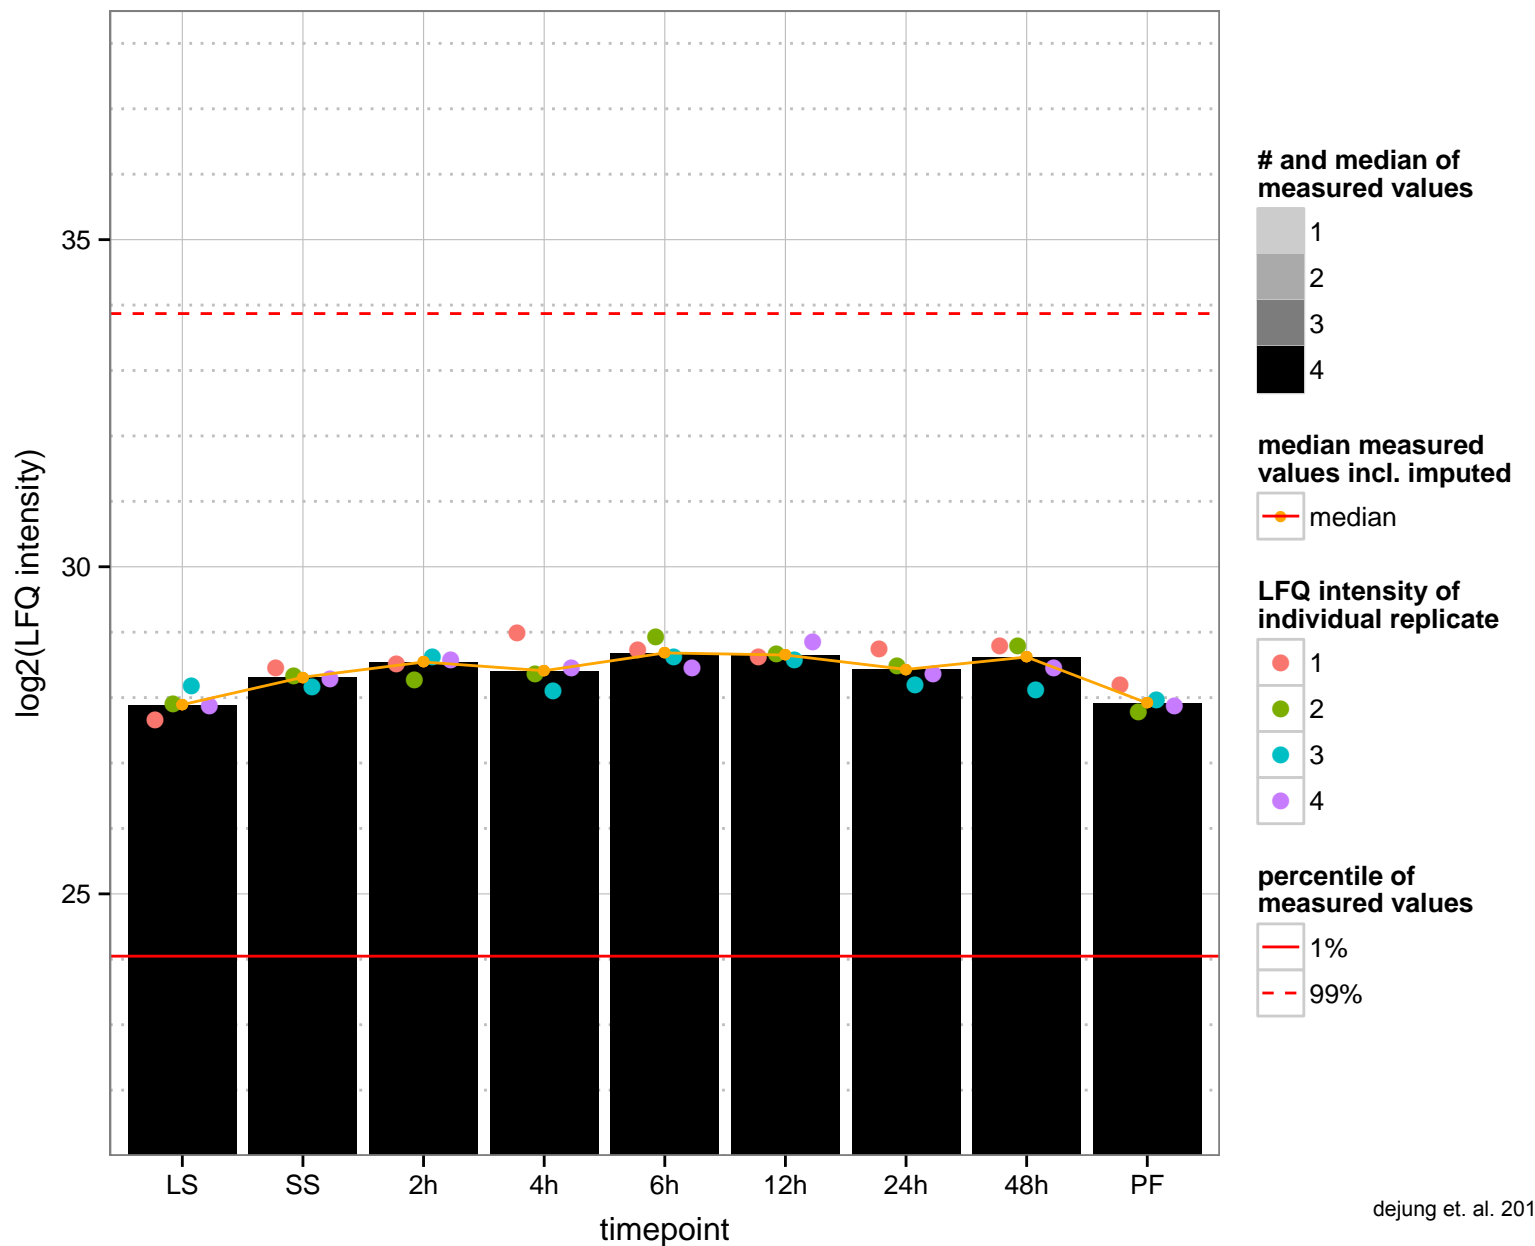

hypothetical protein, conserved  
 Tb927.8.4460  
 AGOF: null  
 AGOC: null  
 AGOP: null  
 PGOF: null  
 PGOE: null  
 PGOP: null

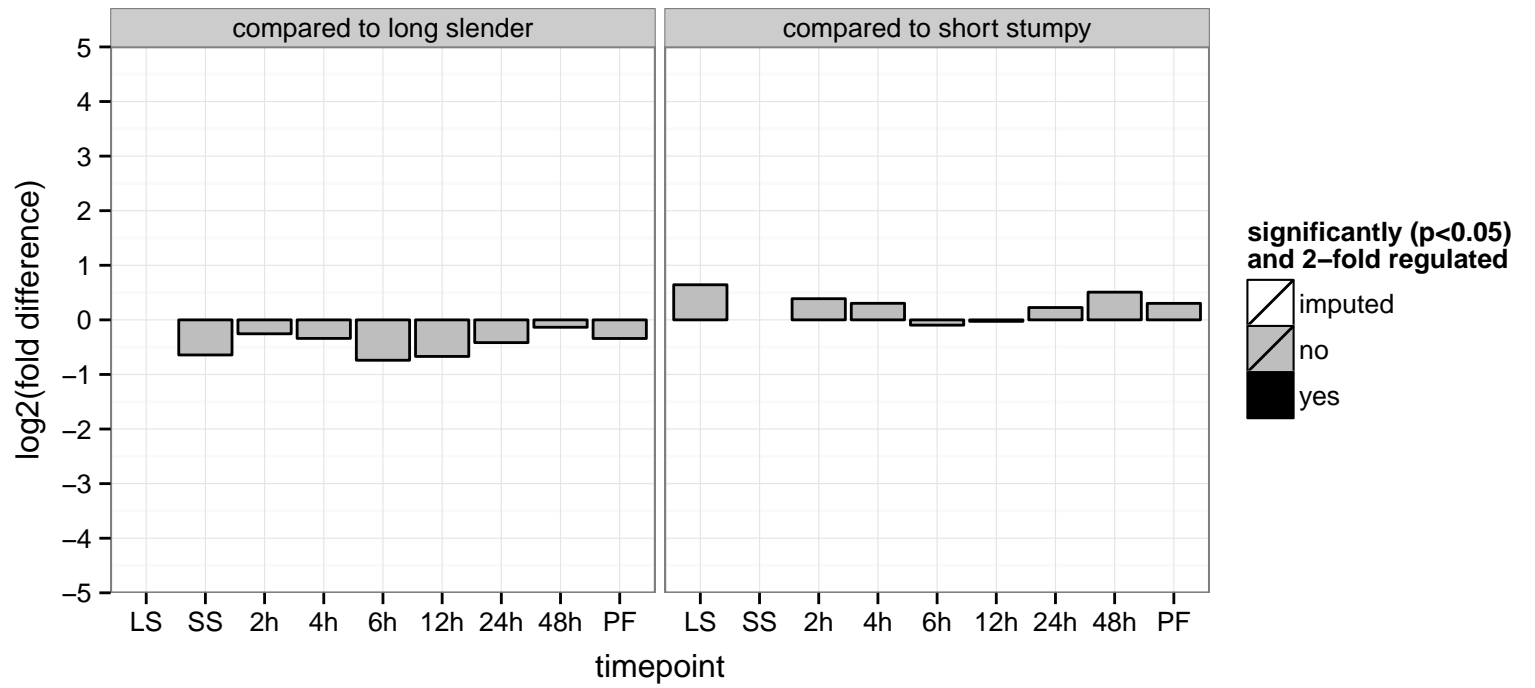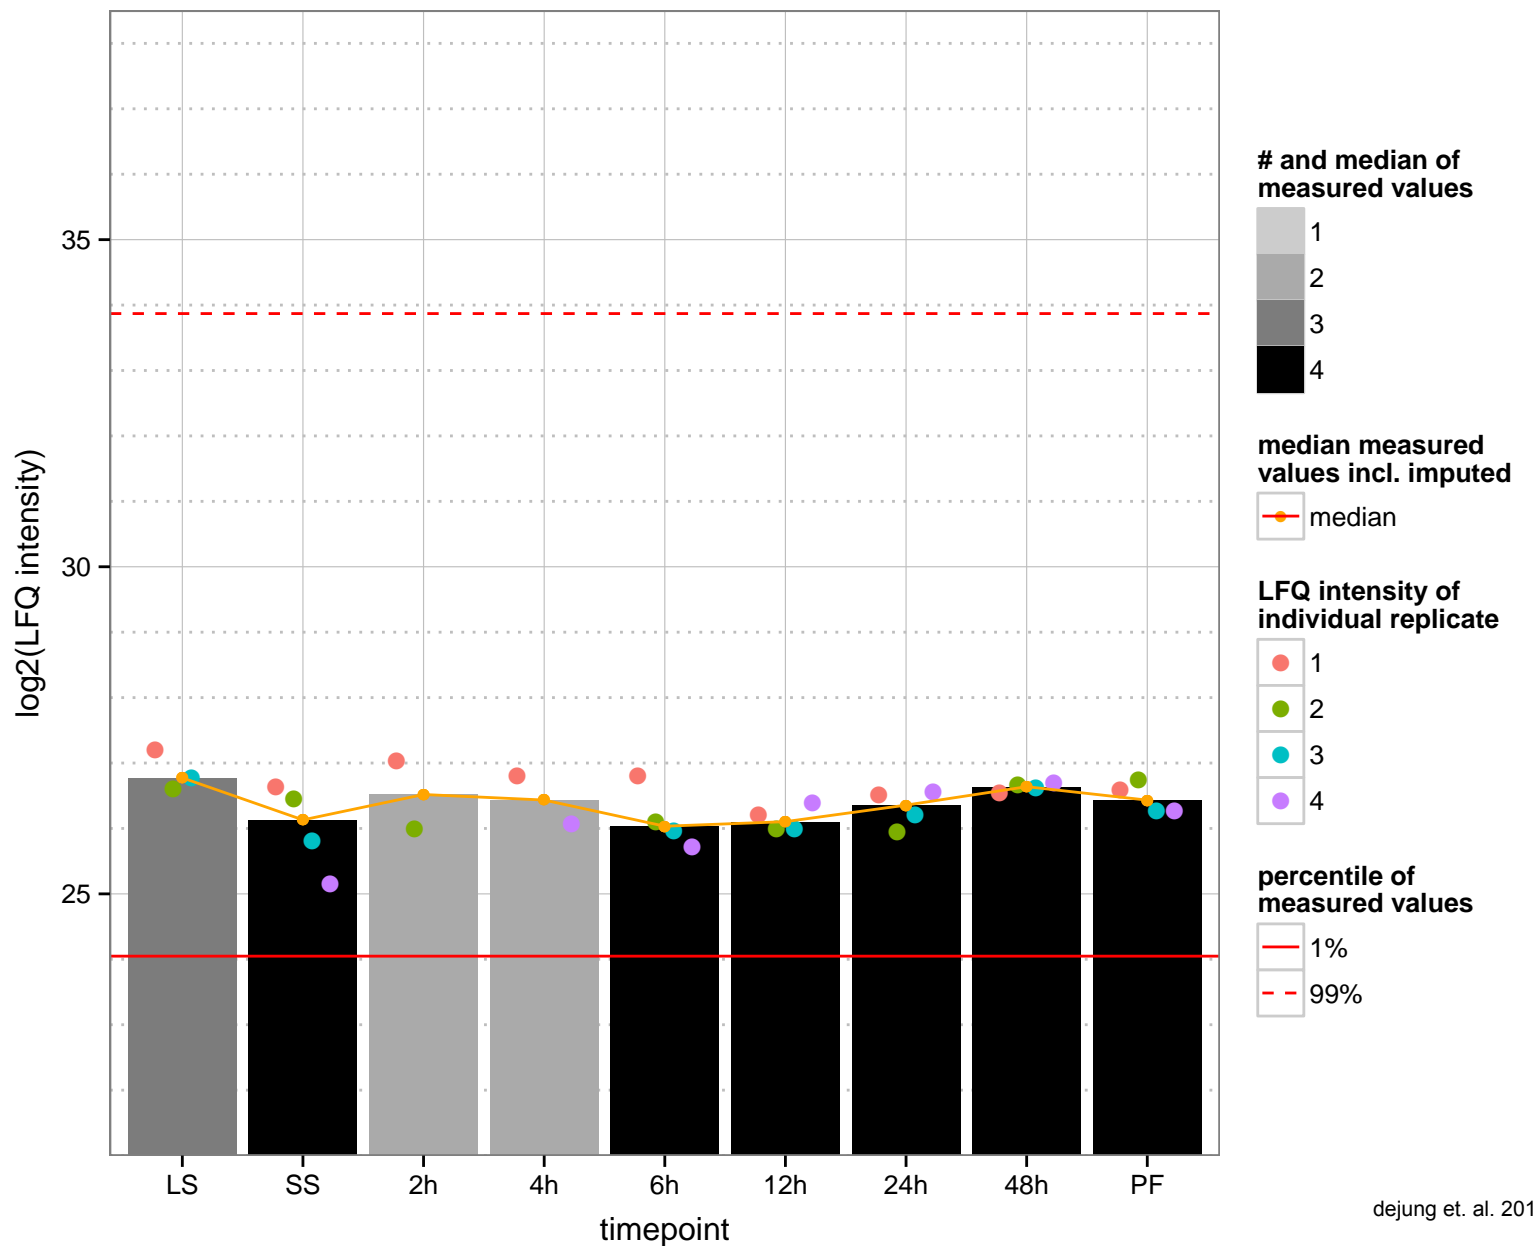

hypothetical protein, conserved, Eukaryotic translation initiation factor 4 gamma type 5 (eif4g5)  
 Tb927.8.4500;Tb11.v5.0763  
 AGOF: null, RNA binding, protein binding  
 AGOC: null, eukaryotic translation initiation factor 4F complex  
 AGOP: null, RNA metabolic process, translation  
 PGO: DNA binding, RNA binding, binding, protein binding  
 PGO: null  
 PGO: null

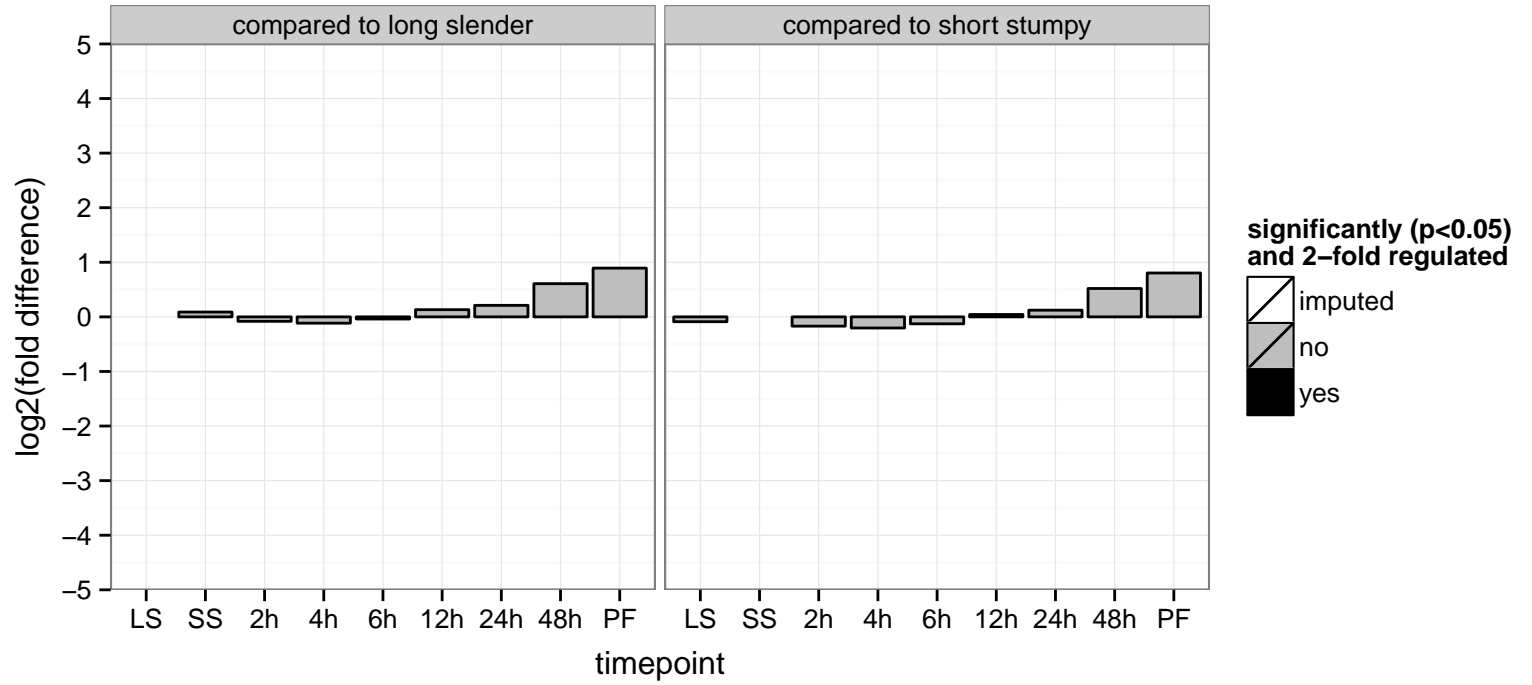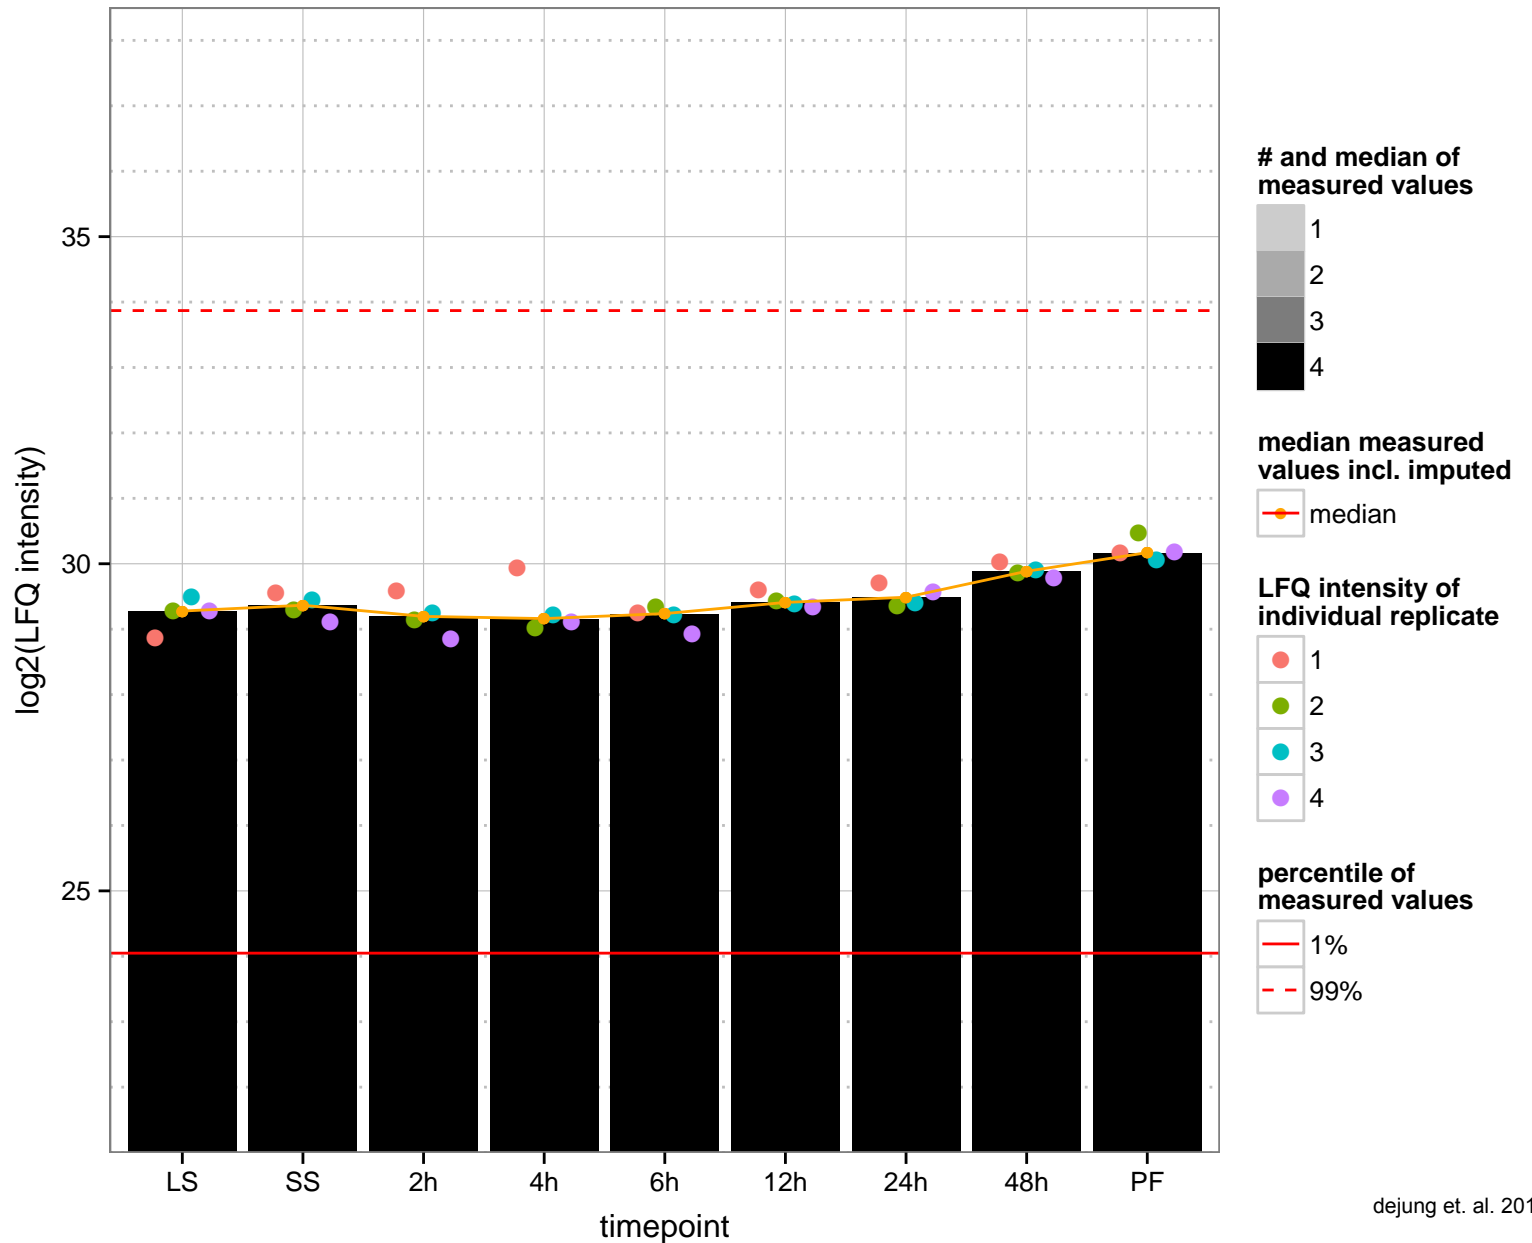

PAB1-binding protein, putative (PBP1)  
 Tb927.8.4540  
 AGOF: null  
 AGOC: cytoplasmic stress granule, polysome  
 AGOP: positive regulation of translation, stress granule assembly  
 PGOF: null  
 PGO: null  
 PGOP: null

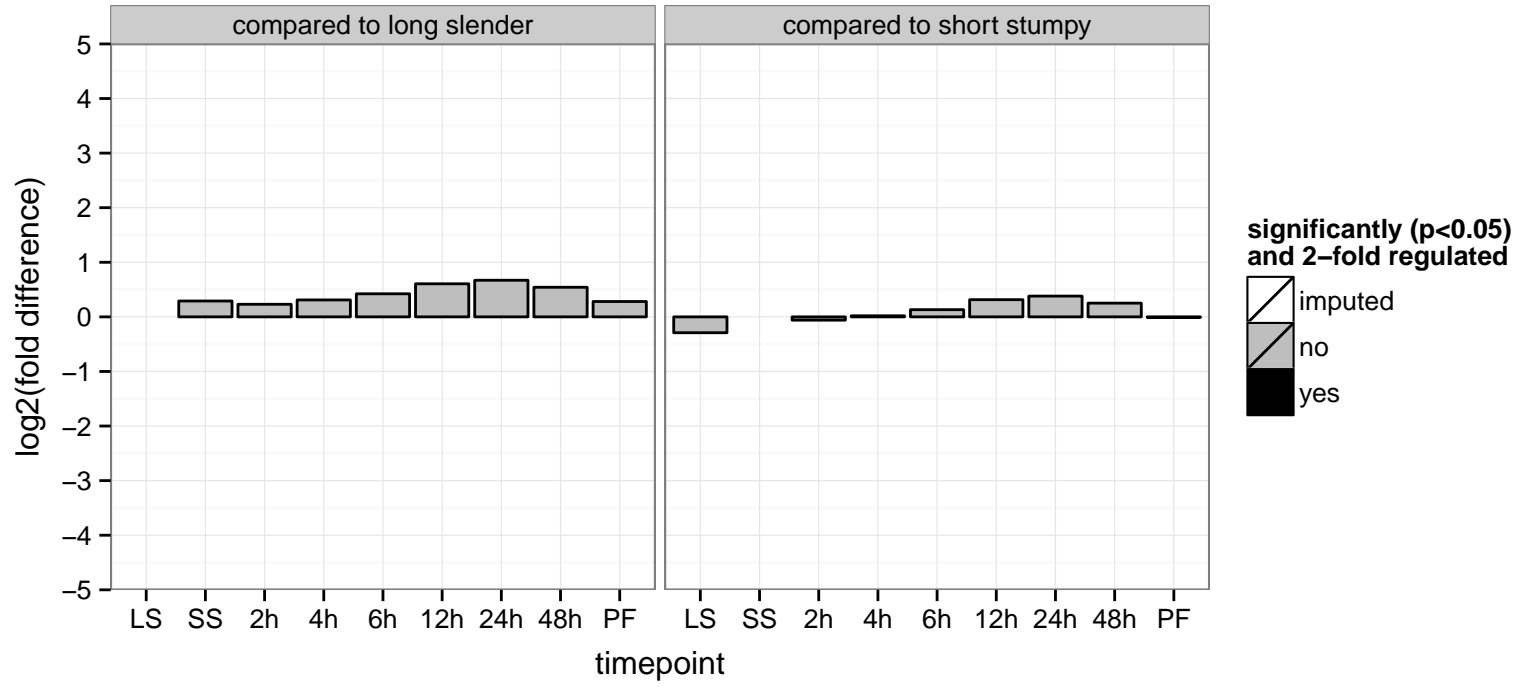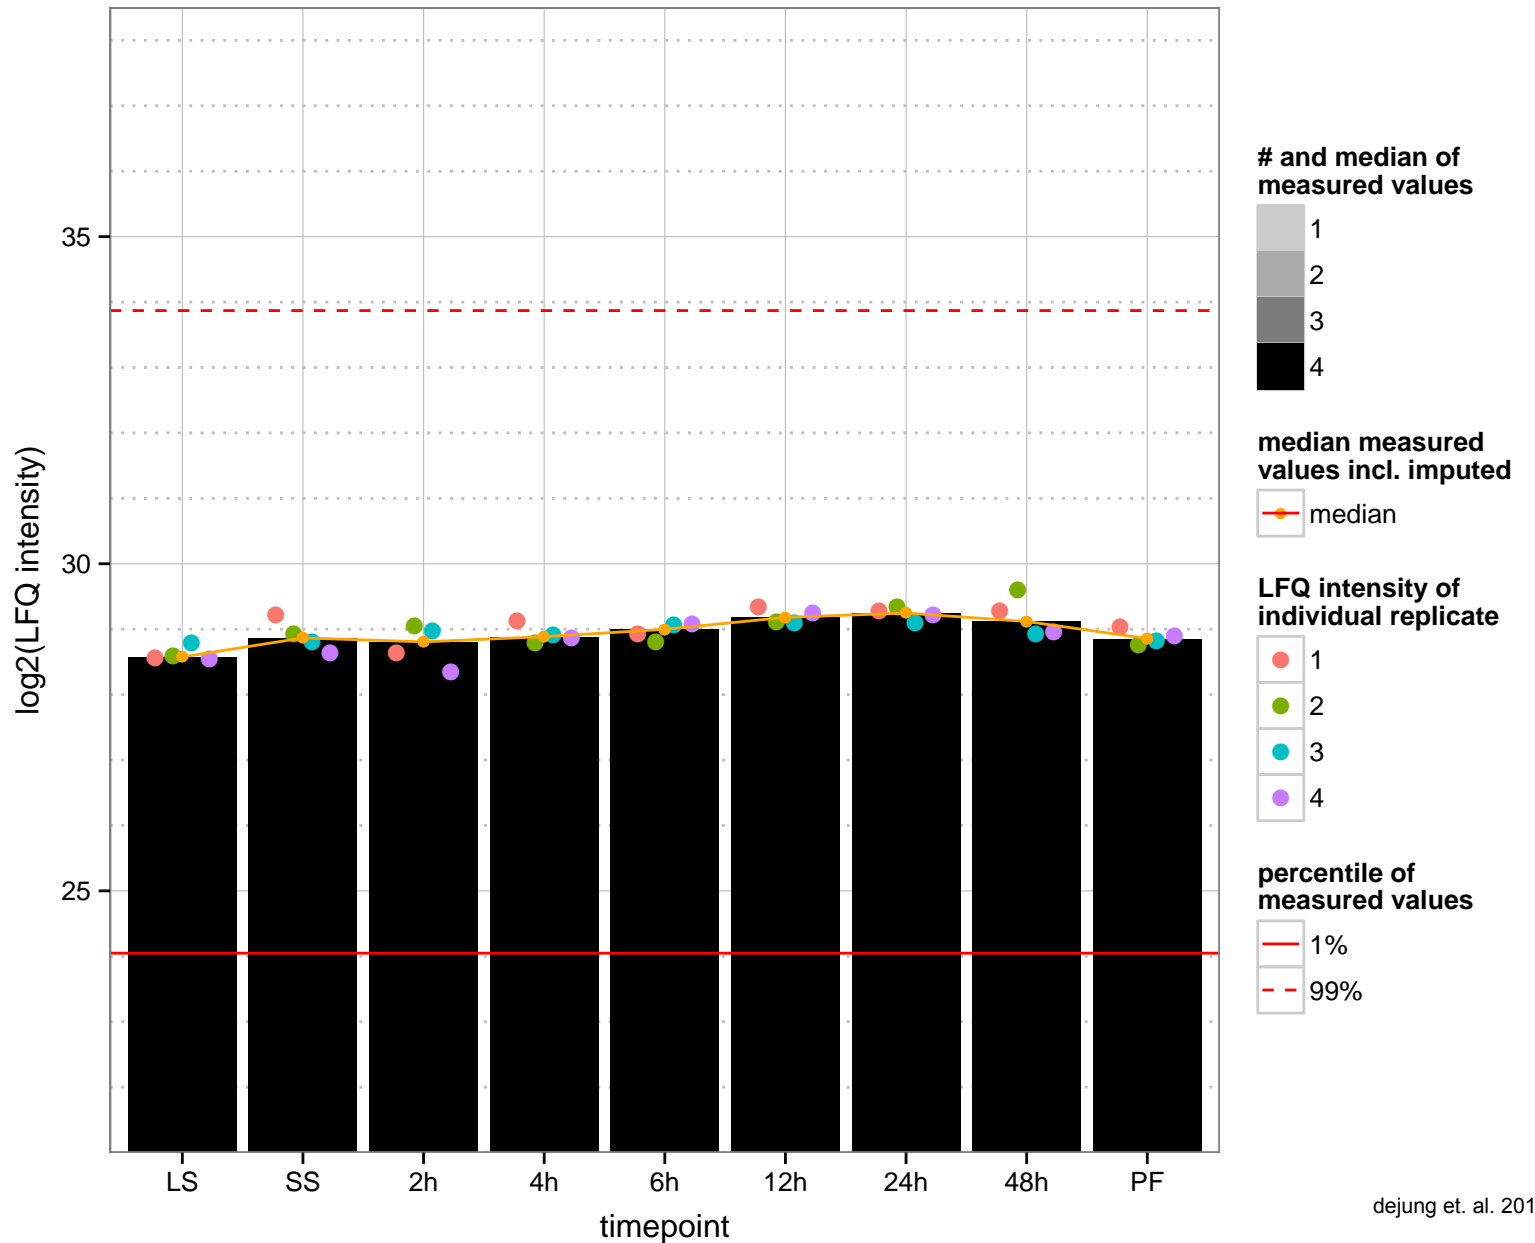

hypothetical protein, conserved  
 Tb927.8.4560  
 AGOF: null  
 AGOC: null  
 AGOP: null  
 PGO: protein binding  
 PGOC: null  
 PGOP: null

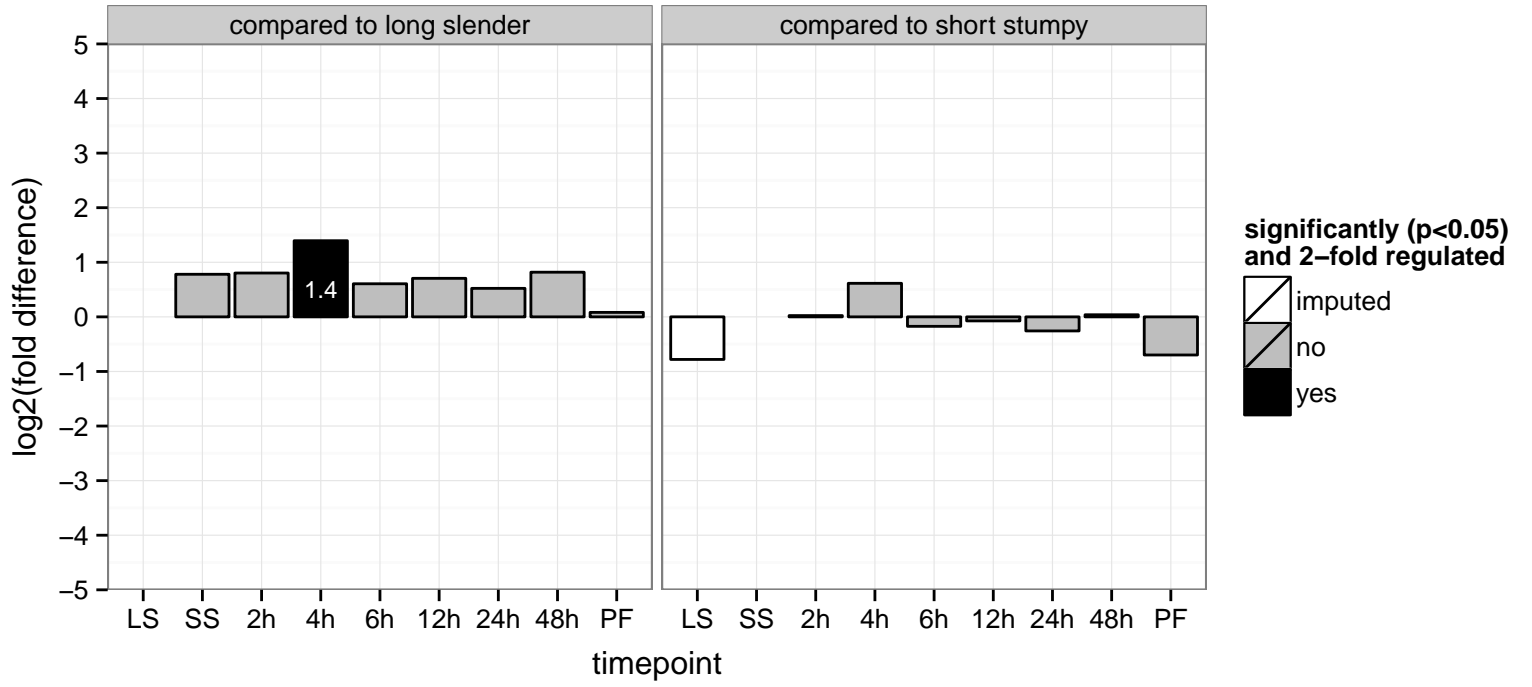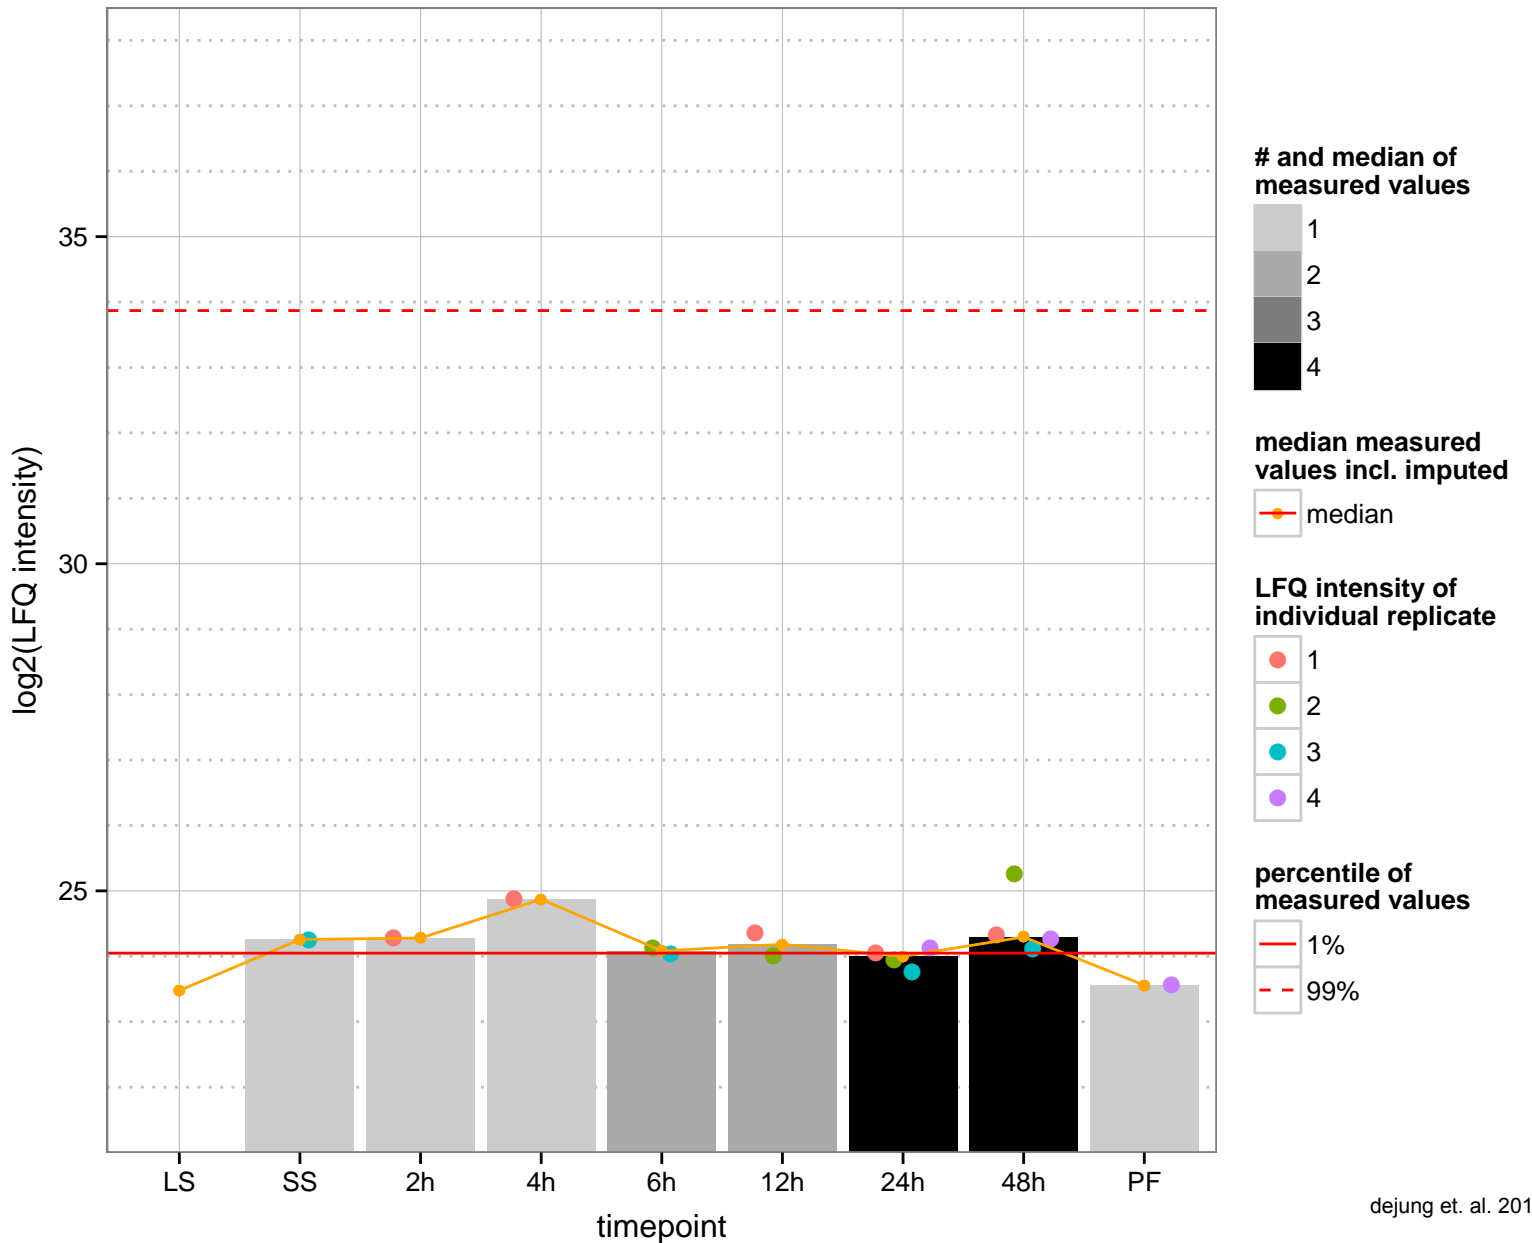

hypothetical protein, conserved  
 Tb927.8.4580  
 AGOF: null  
 AGOC: null  
 AGOP: null  
 PGO: null  
 PGOC: null  
 PGOP: null

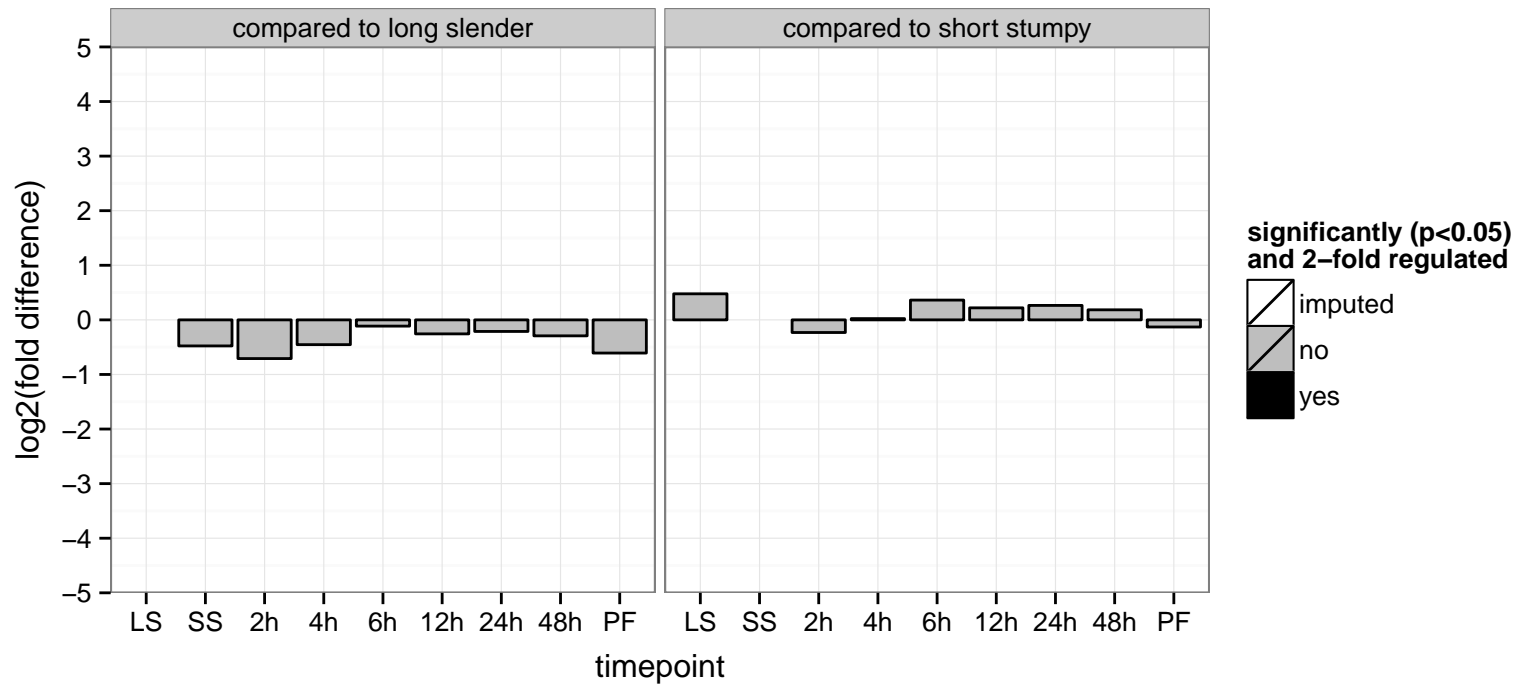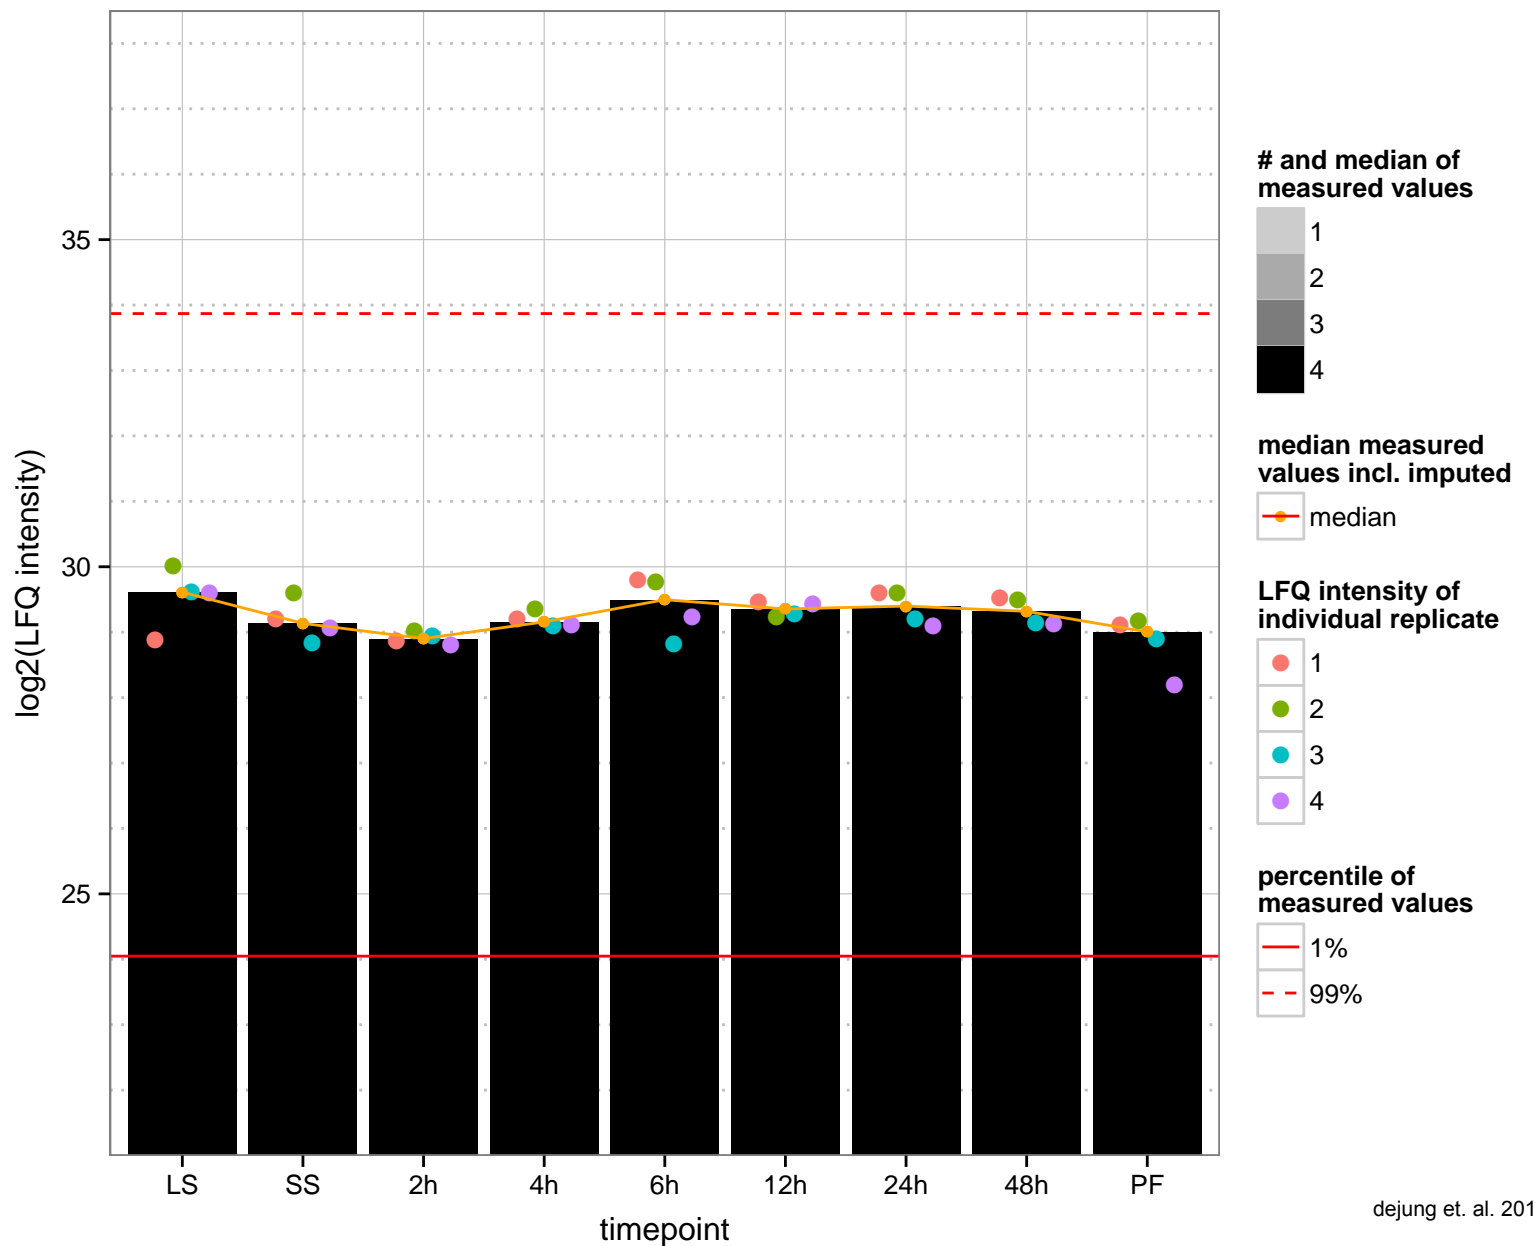

Ras-related protein RabX1 (RABX1)

Tb927.8.4610

AGOF: GTP binding, GTPase activity

AGOC: endoplasmic reticulum, integral to membrane, intracellular

AGOP: intracellular protein transport, nucleocytoplasmic transport, small GTPase mediated signal transduction

PGOF: GTP binding, GTPase activity

PGOC: intracellular, membrane

PGOP: GTP catabolic process, intracellular protein transport, nucleocytoplasmic transport, protein transport, signal transduction

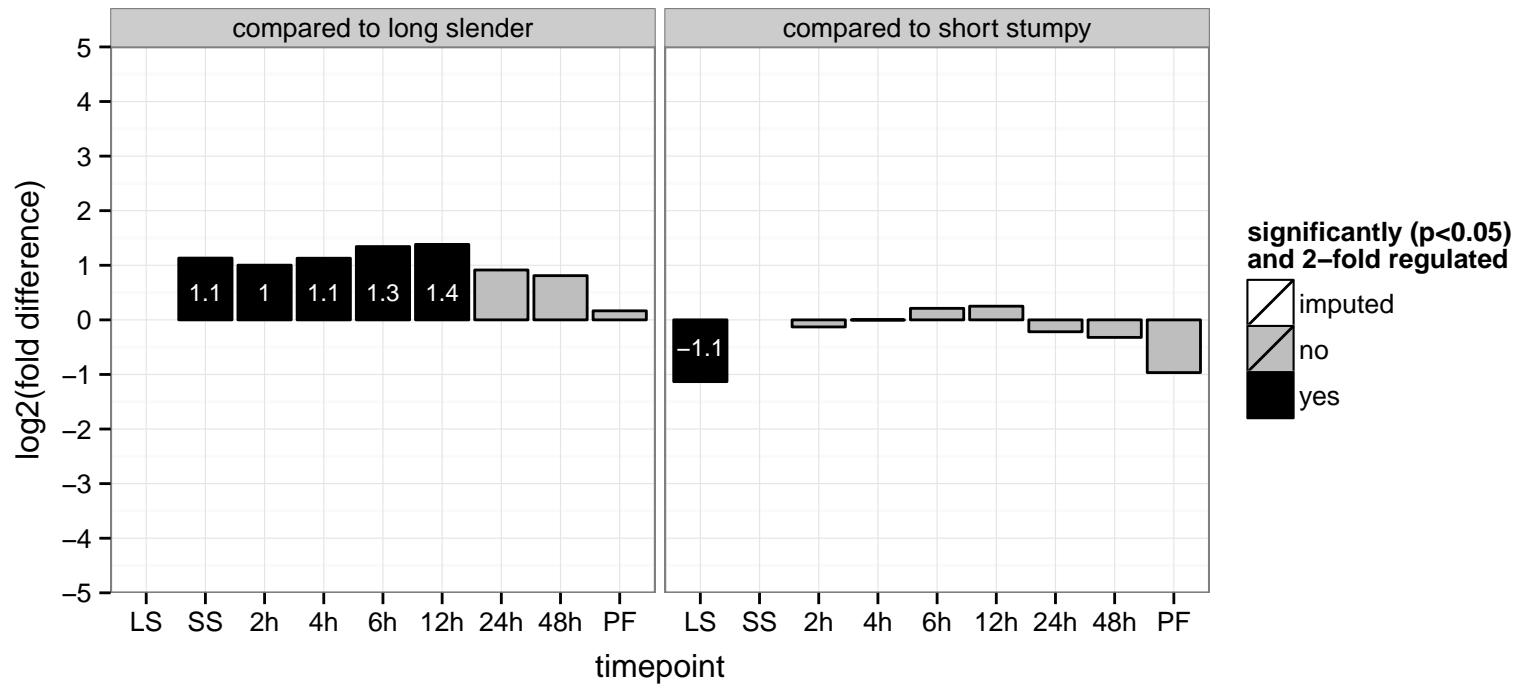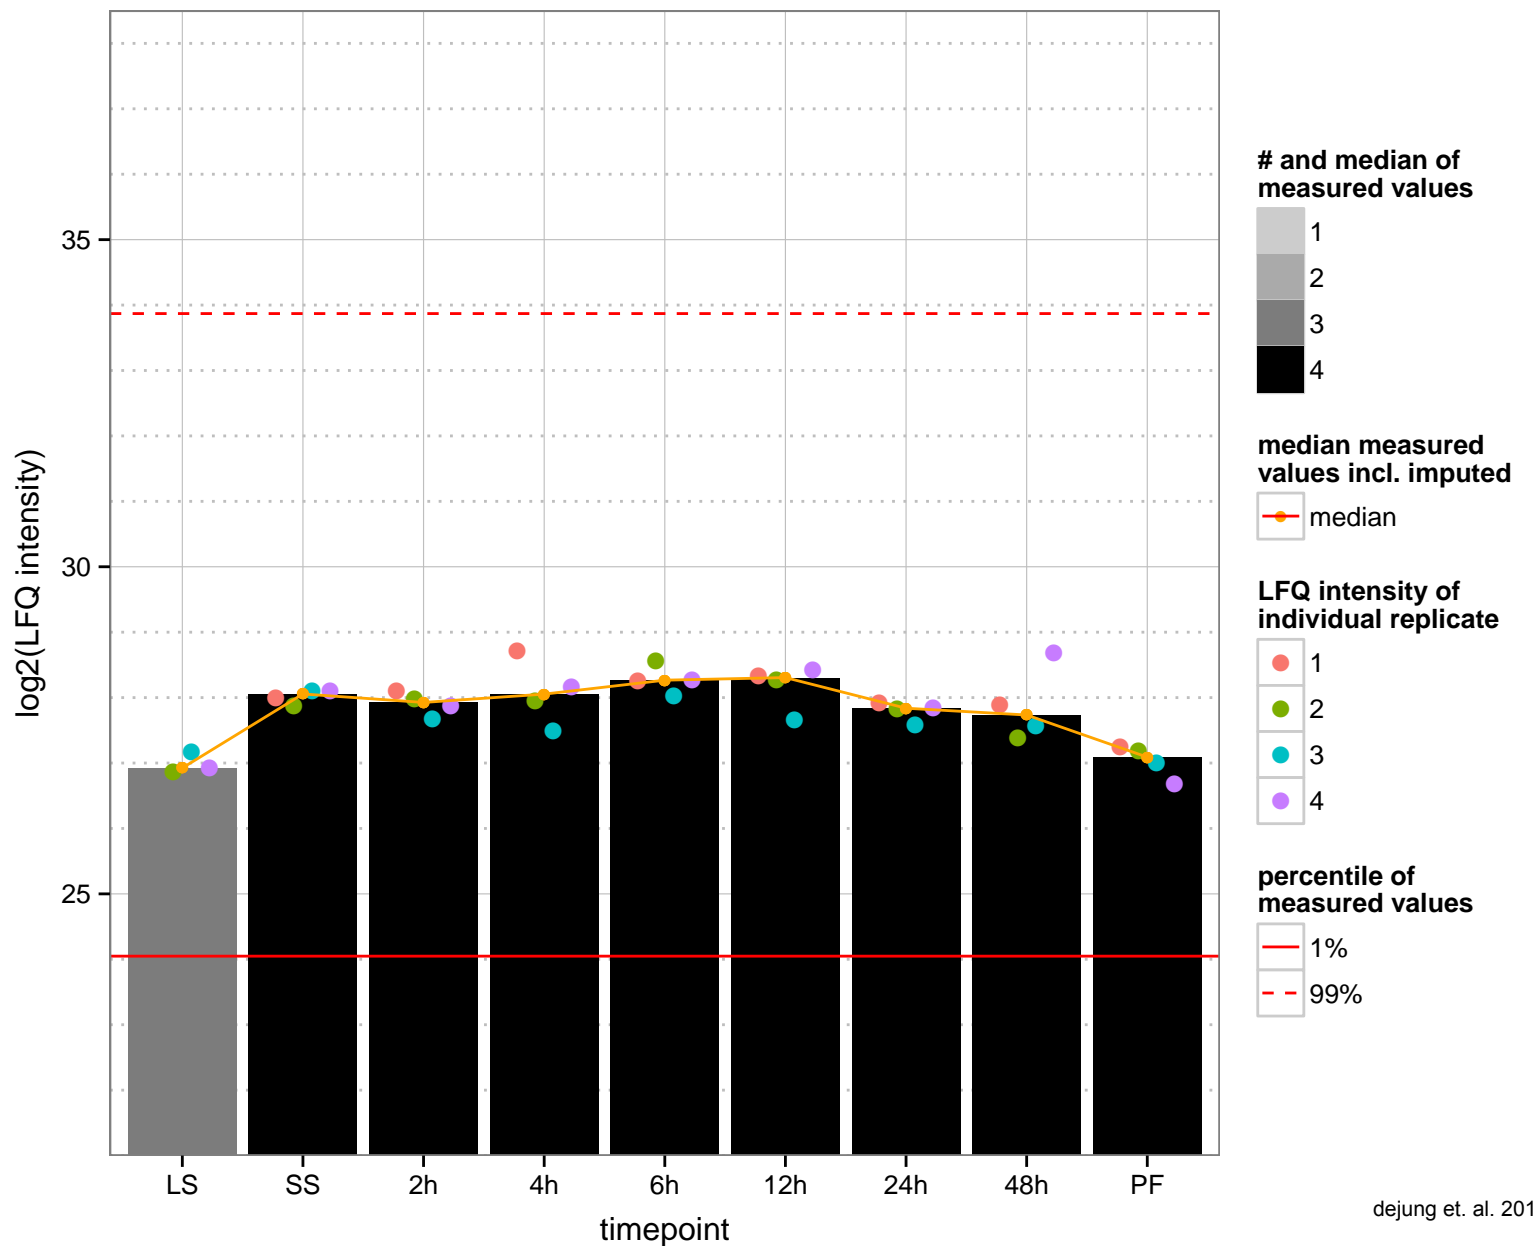



flagellar protofilament ribbon protein, putative

Tb927.8.4640

AGOF: null

AGOC: cilium

AGOP: ciliary or flagellar motility, negative regulation of microtubule depolymerization

PGOF: null

PGOC: null

PGOP: null

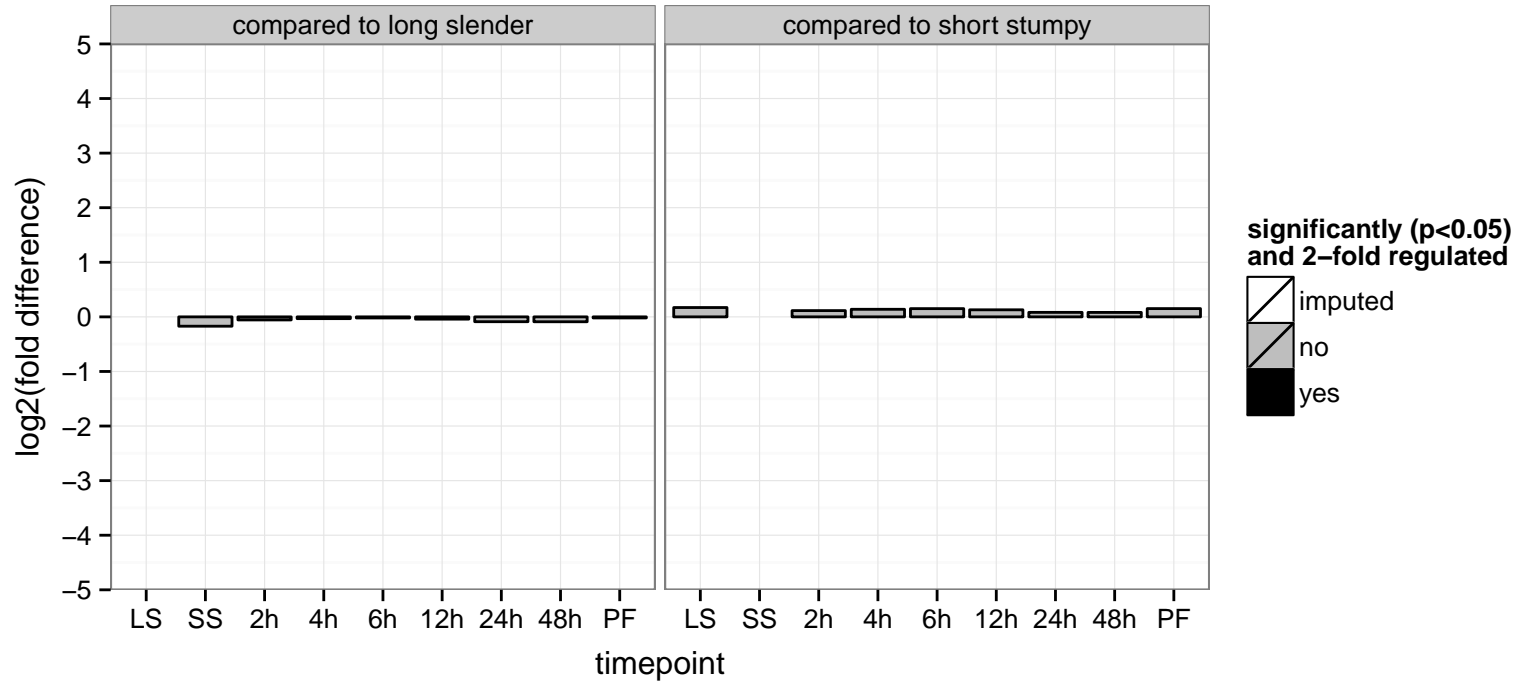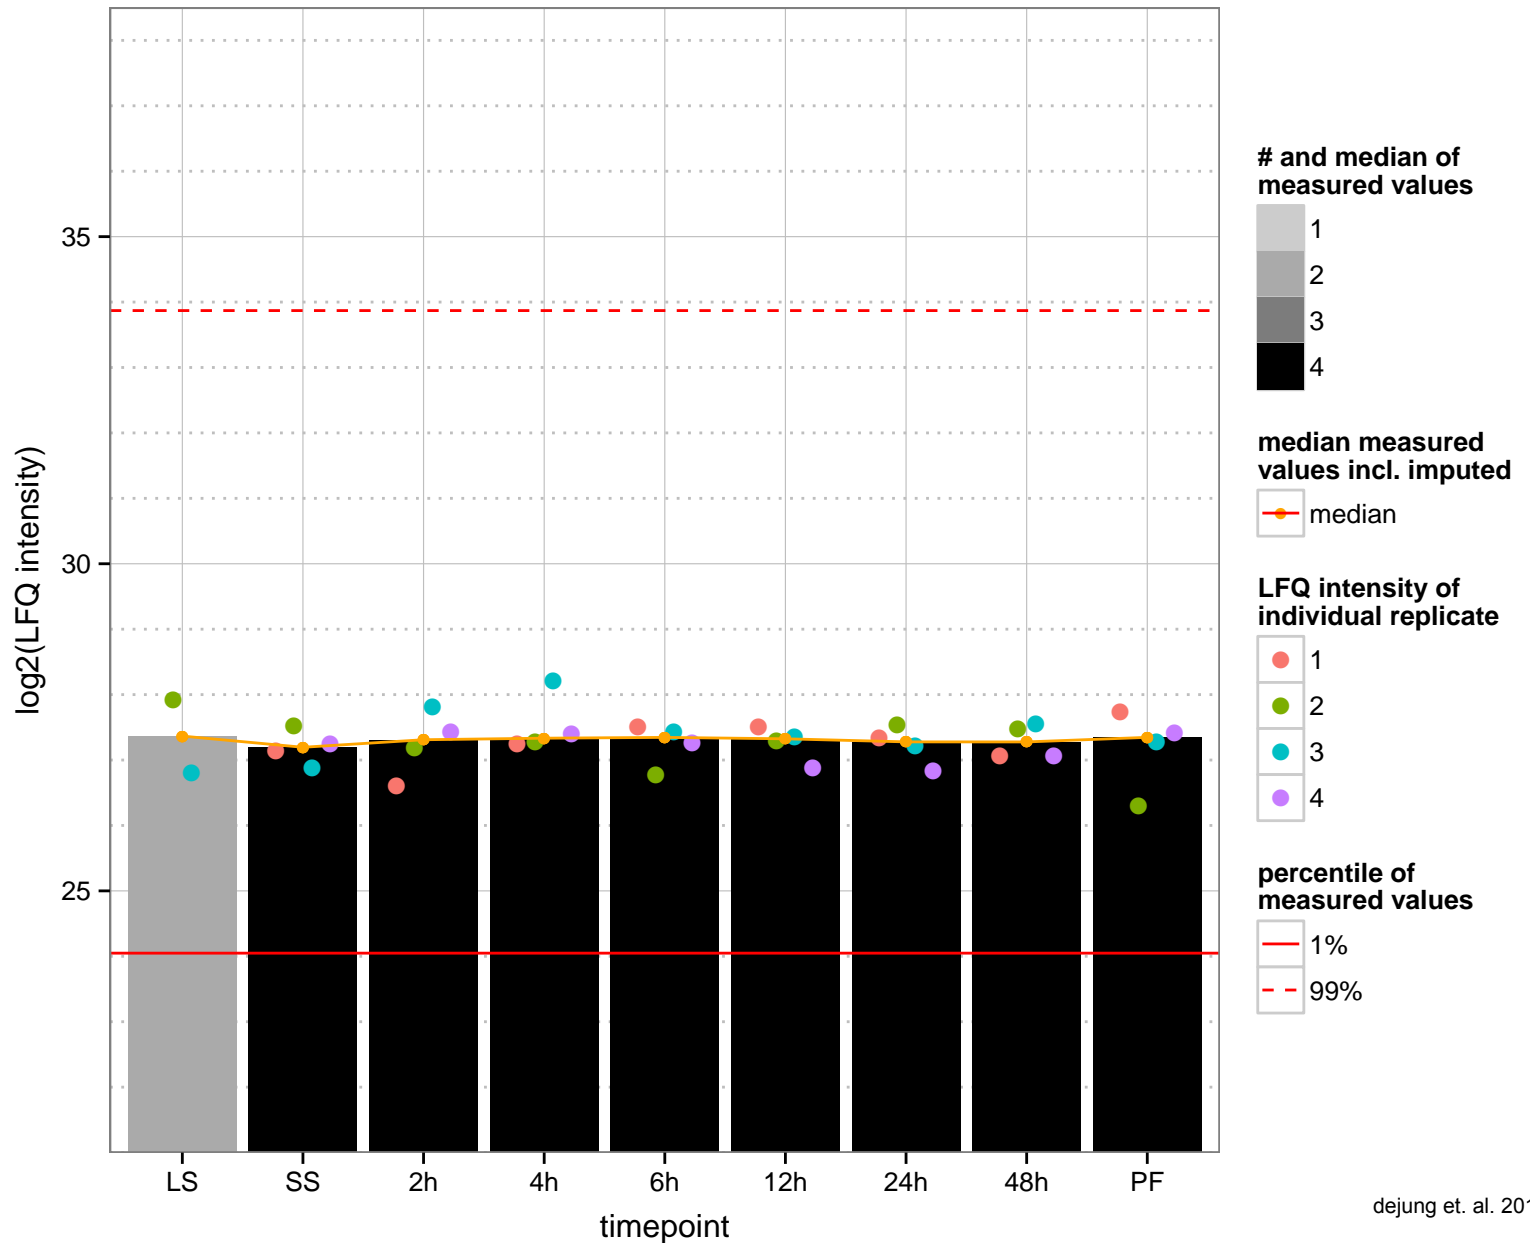

small GTP-binding protein Rab18 (TbRAB18)

Tb927.8.4770

AGOF: GTP binding, GTPase activity

AGOC: intracellular

AGOP: protein transport, small GTPase mediated signal transduction

PGOF: GTP binding, GTPase activity

PGOC: intracellular, membrane

PGOP: GTP catabolic process, protein transport, signal transduction, small GTPase mediated signal transduction

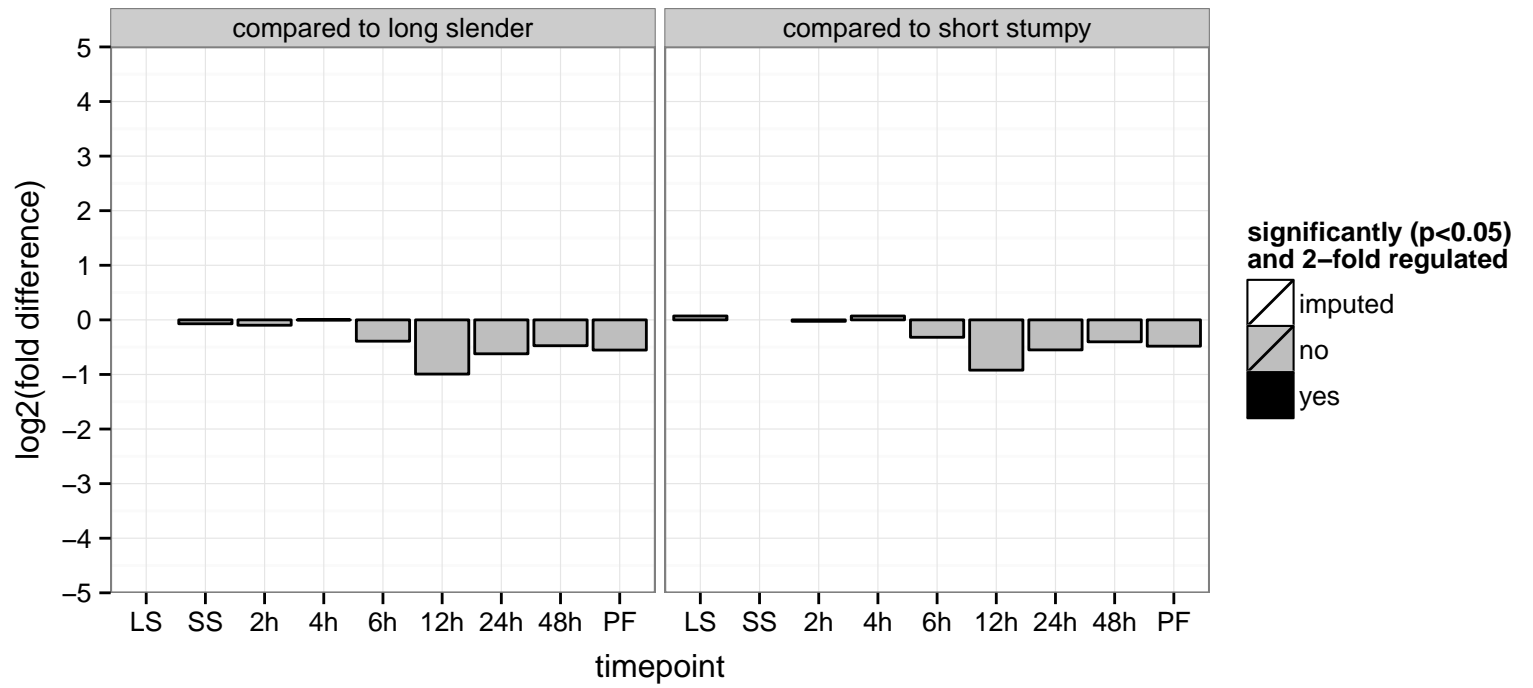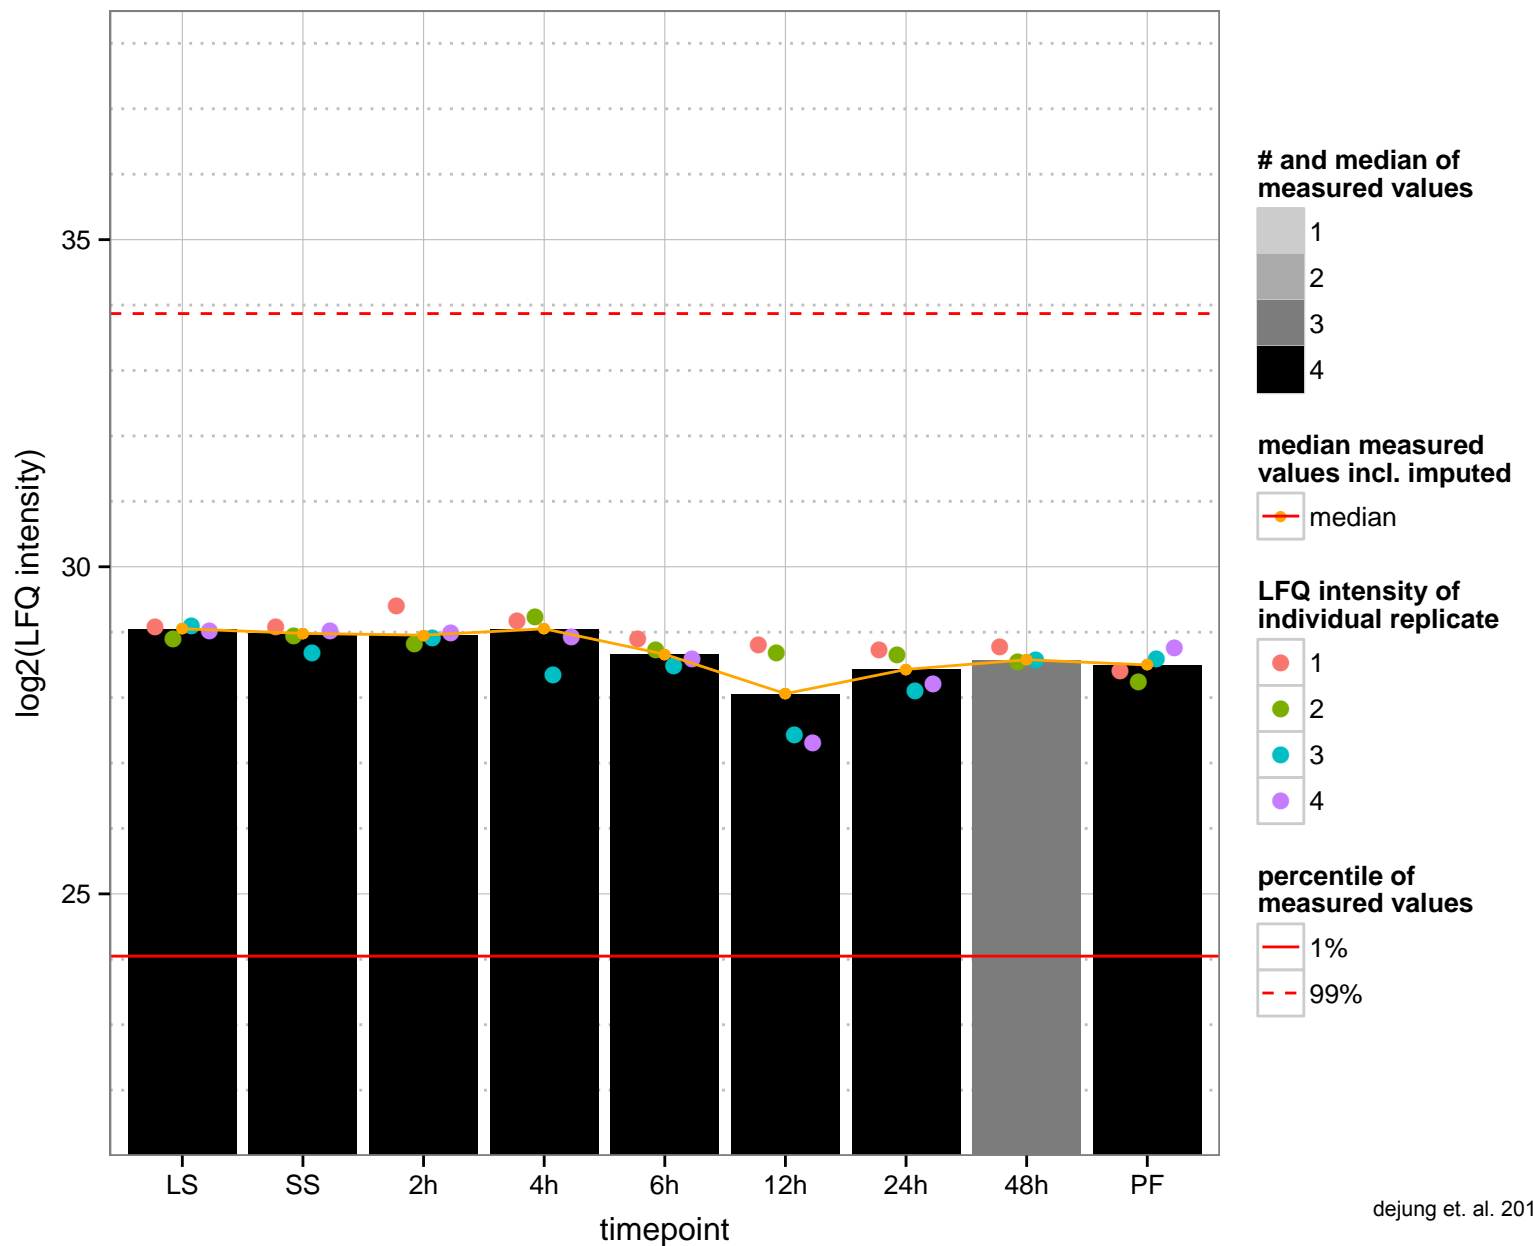

hypothetical protein, conserved  
 Tb927.8.4780  
 AGOF: null  
 AGOC: null  
 AGOP: null  
 PGO: null  
 PGOC: null  
 PGOP: null

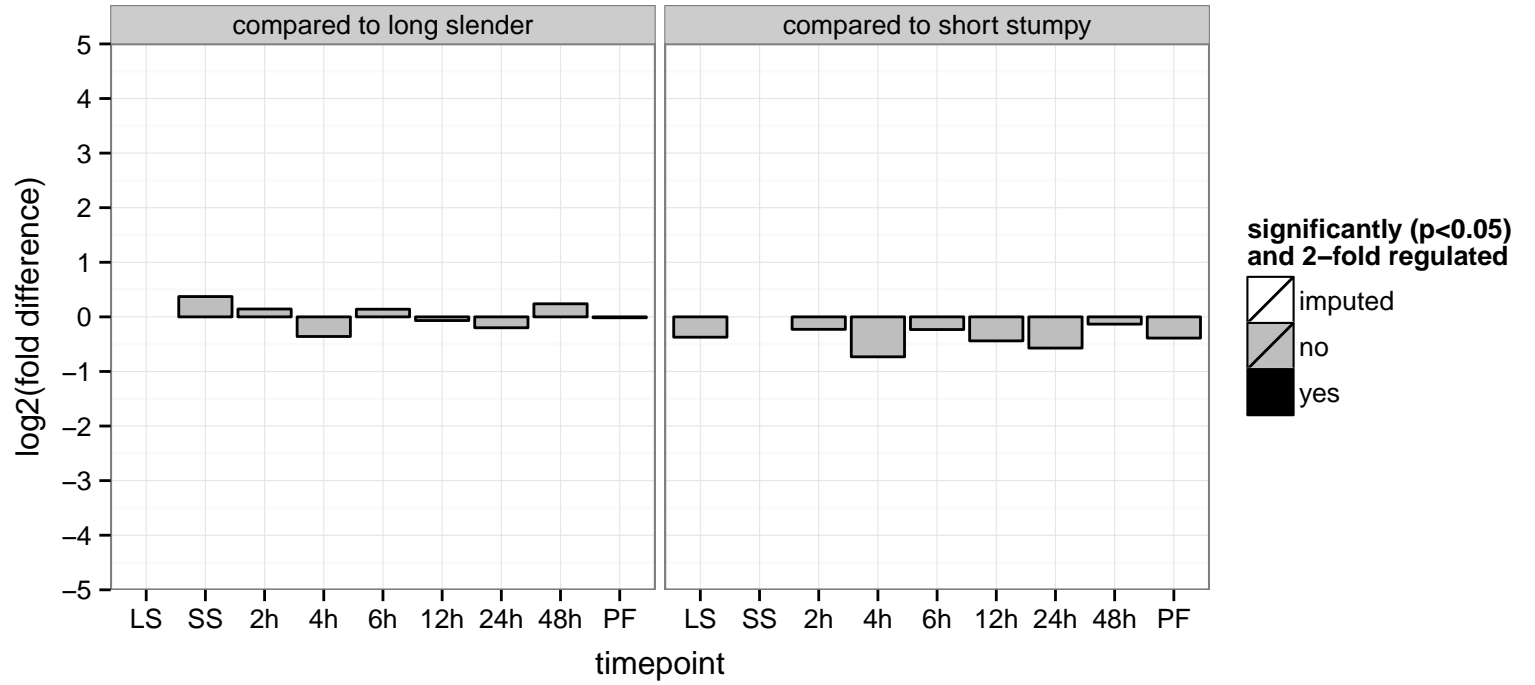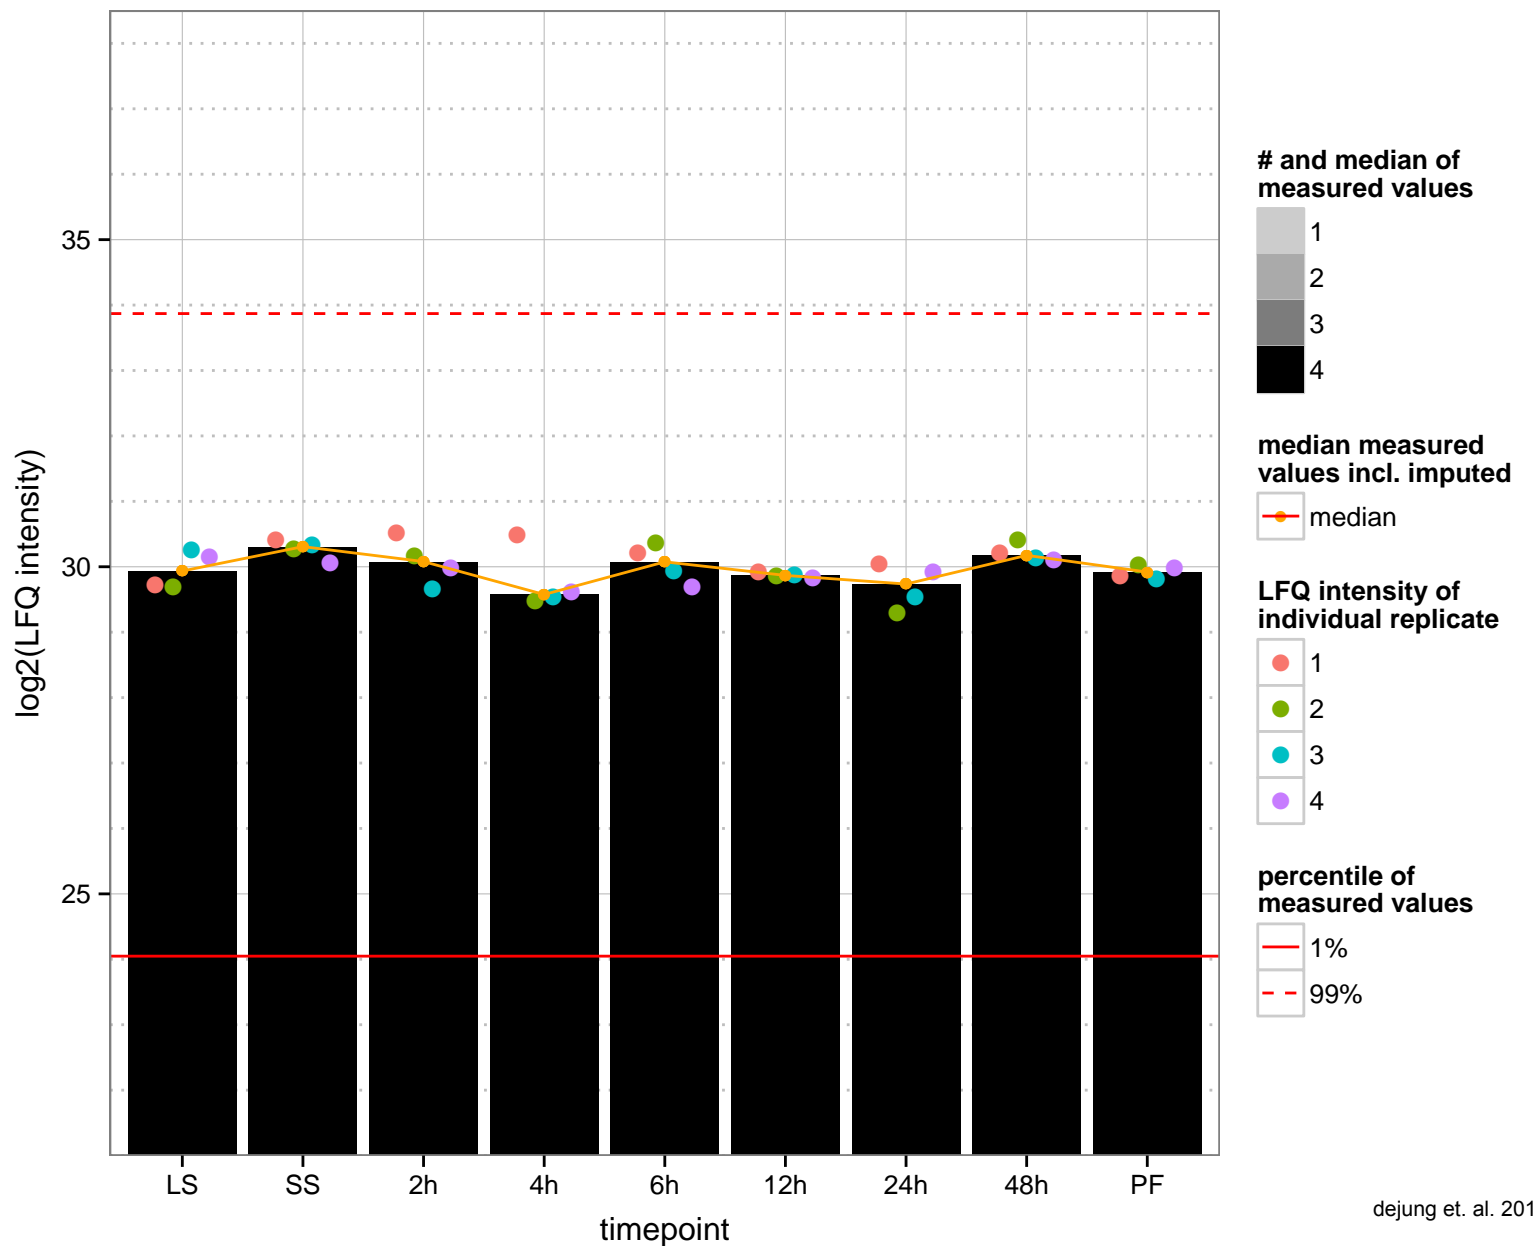

kinesin, putative  
Tb927.8.4840  
AGOF: ATP binding, microtubule motor activity, motor activity  
AGOC: kinesin complex, microtubule associated complex  
AGOP: microtubule-based movement  
PGOF: ATP binding, microtubule motor activity  
PGOC: null  
PGOP: microtubule-based movement

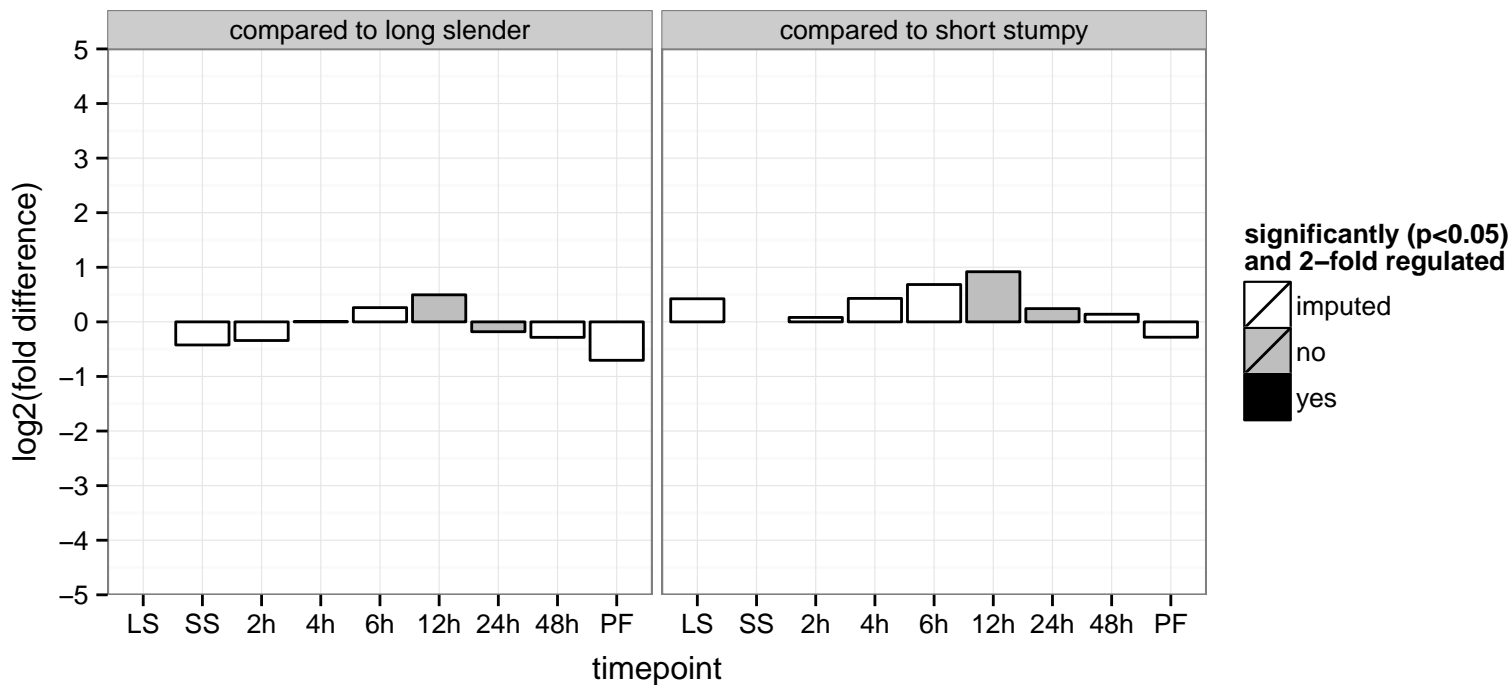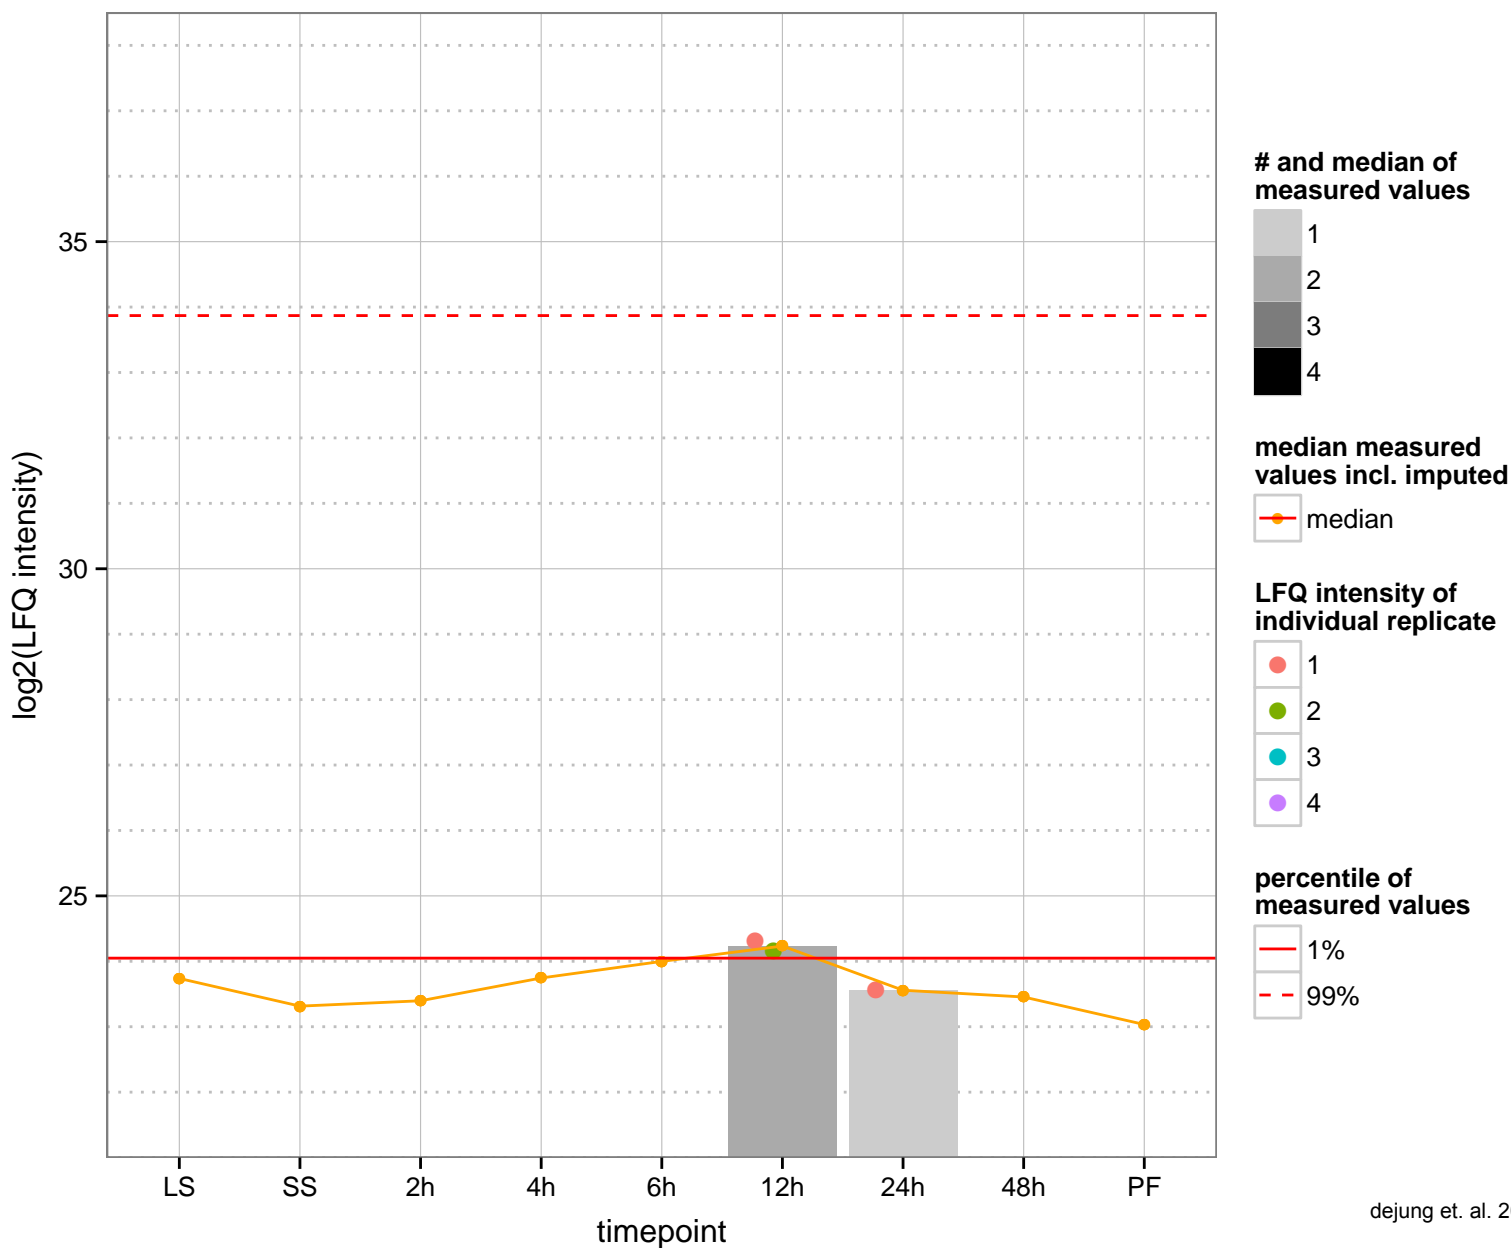

DIGIT, flagellar component  
 Tb927.8.4870  
 AGOF: null  
 AGOC: null  
 AGOP: ciliary or flagellar motility  
 PGO: protein binding  
 PGO: null  
 PGO: null

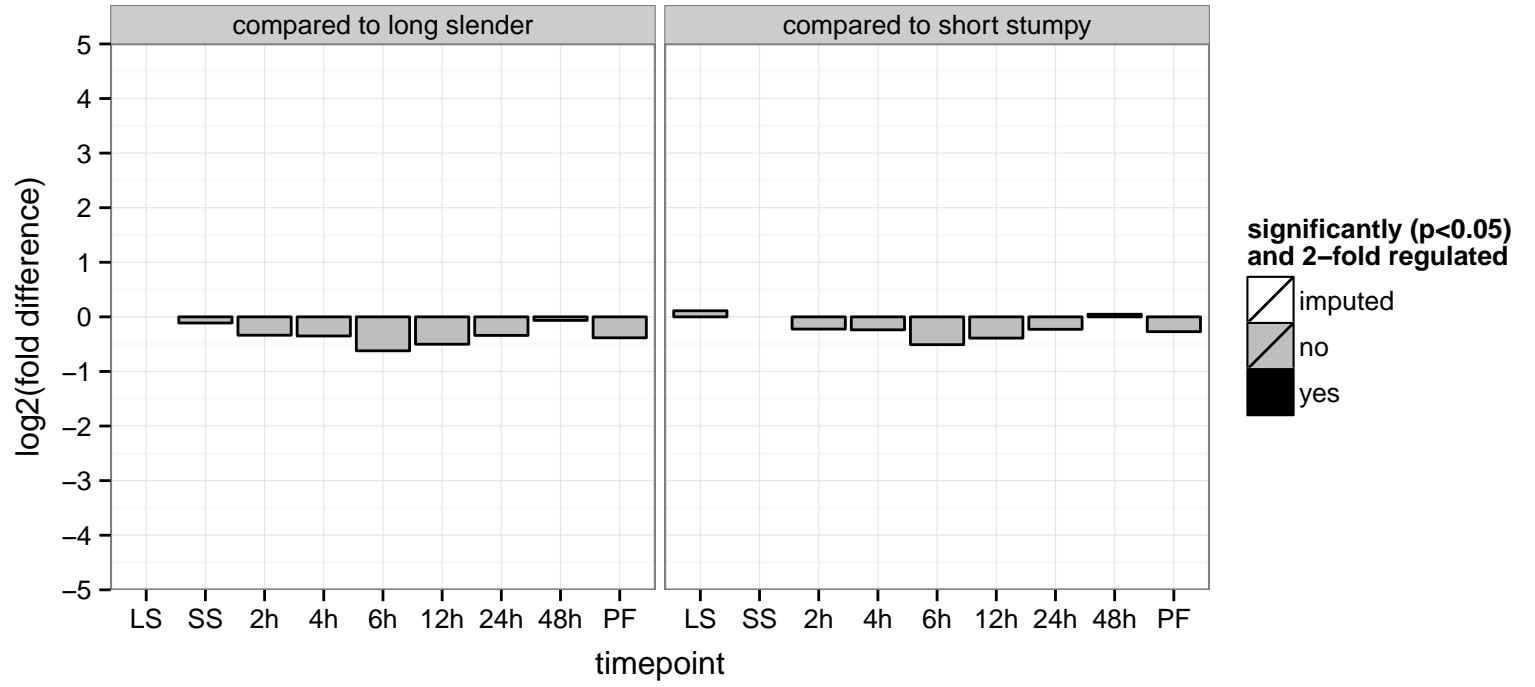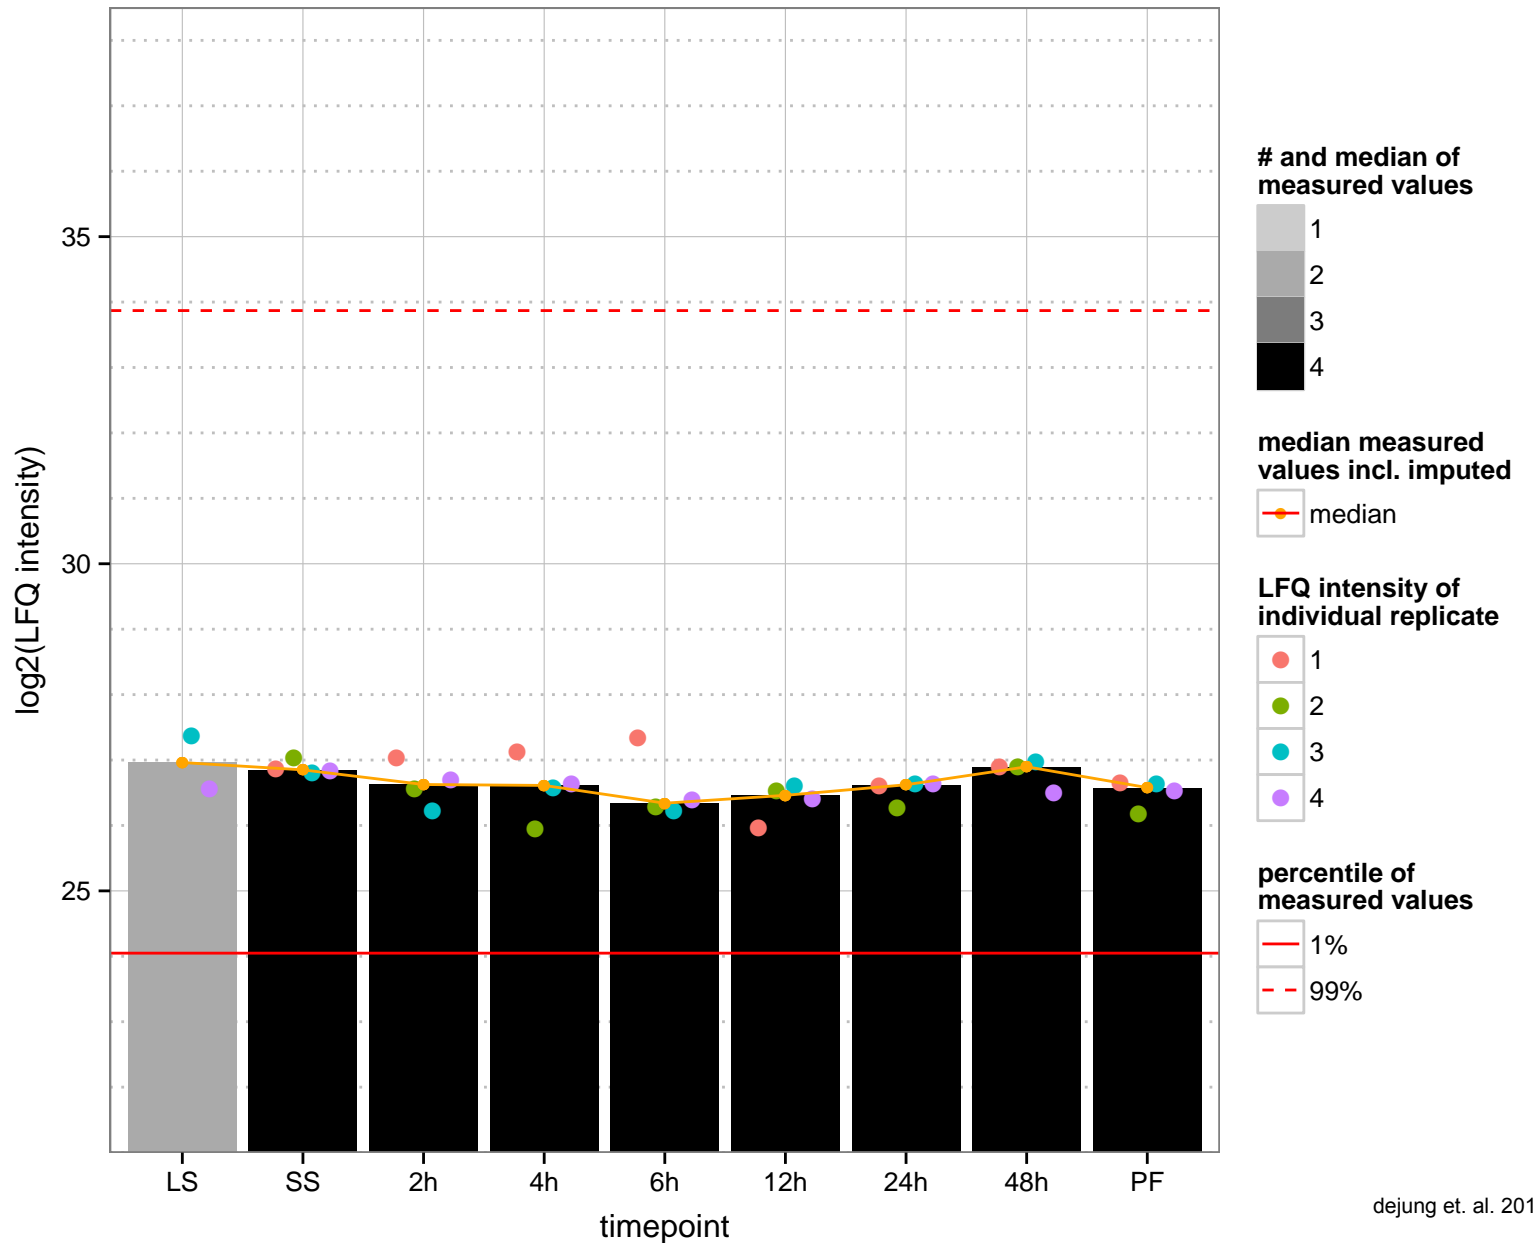

hypothetical protein, conserved  
 Tb927.8.4940  
 AGOF: null  
 AGOC: null  
 AGOP: null  
 PGOF: null  
 PGOE: null  
 PGOP: null

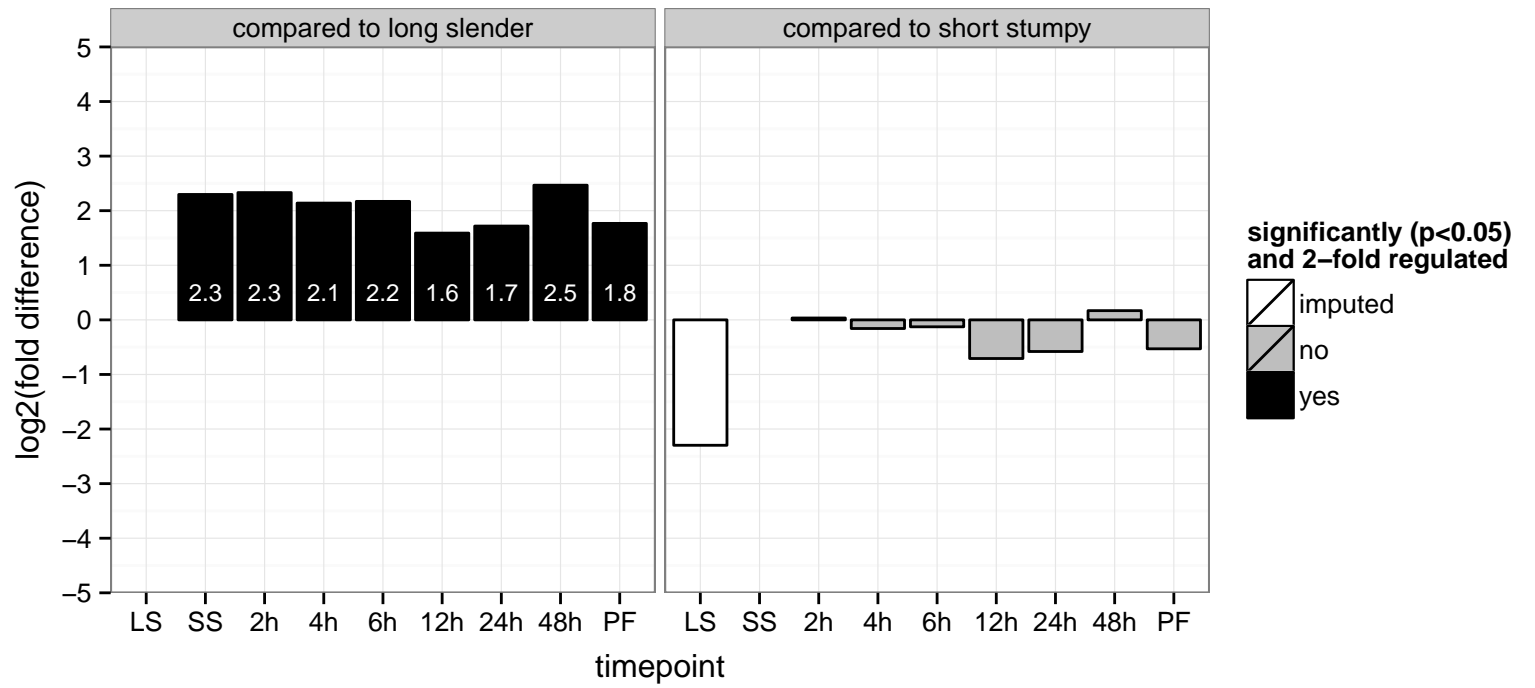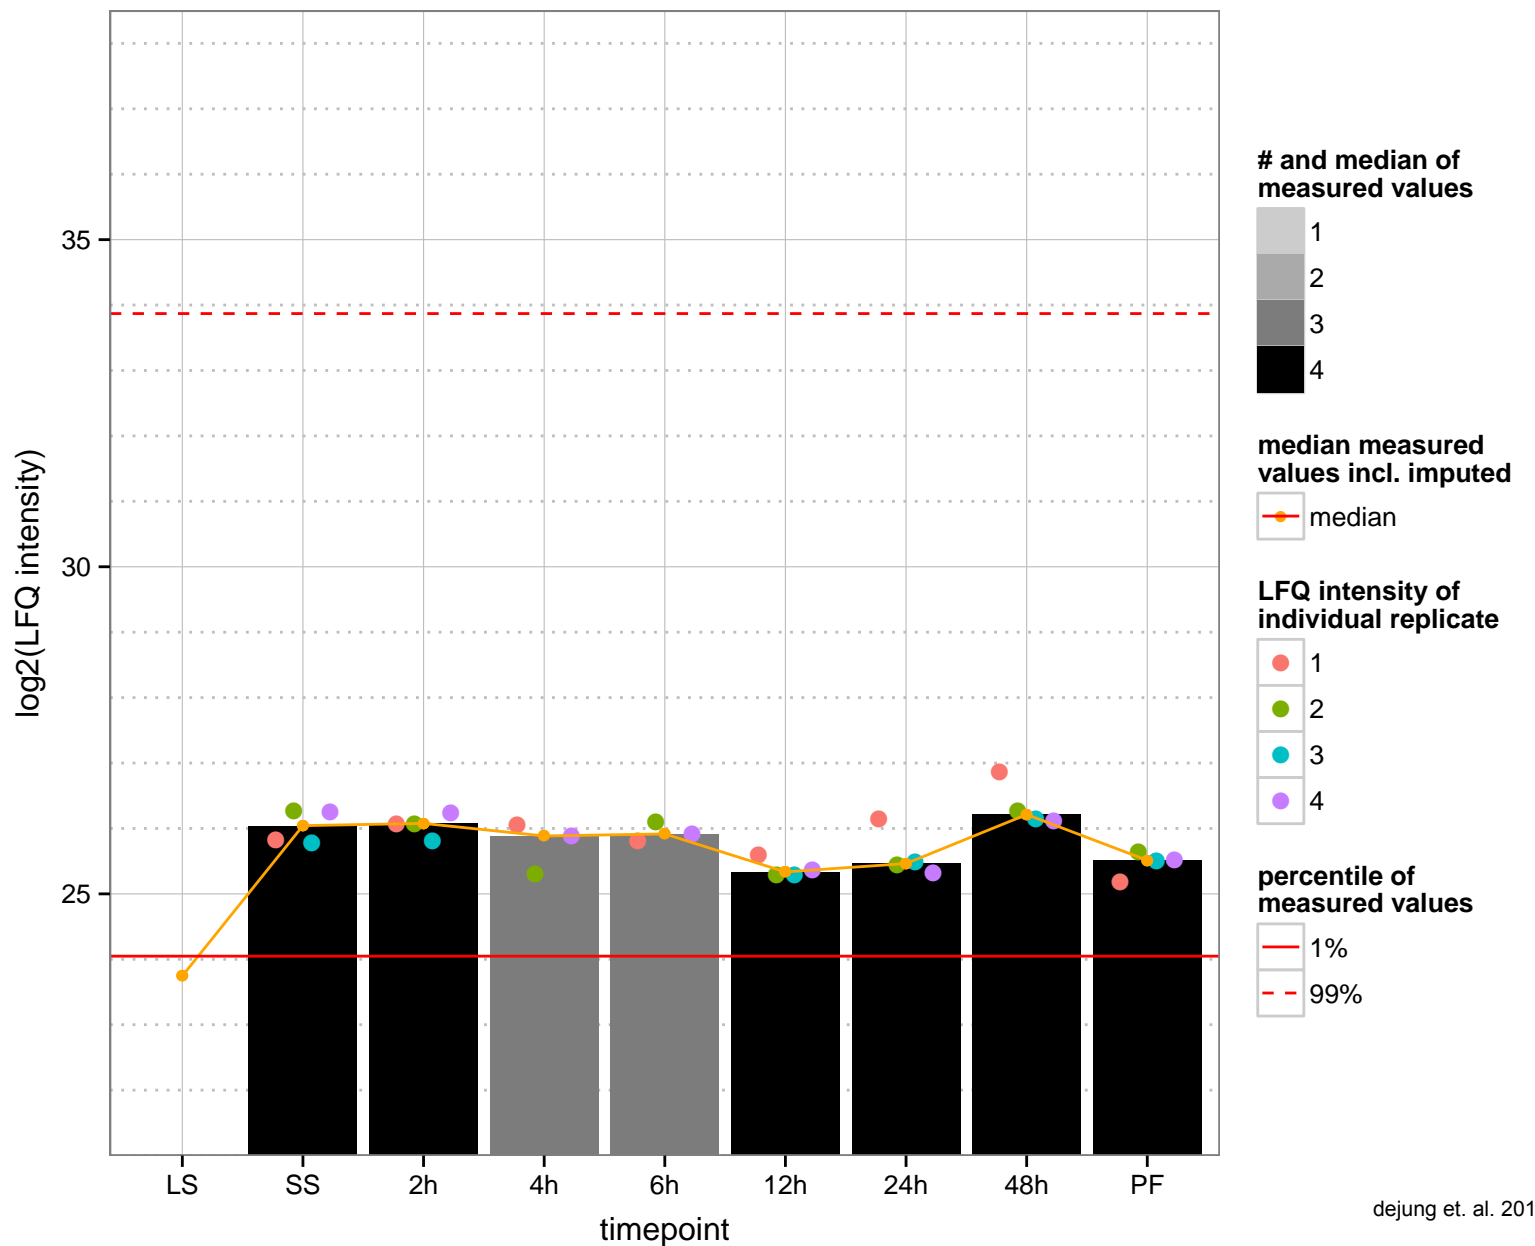

hypothetical protein, conserved  
 Tb927.8.5020  
 AGOF: null  
 AGOC: null  
 AGOP: null  
 PGOF: protein binding  
 PGOC: null  
 PGOP: null

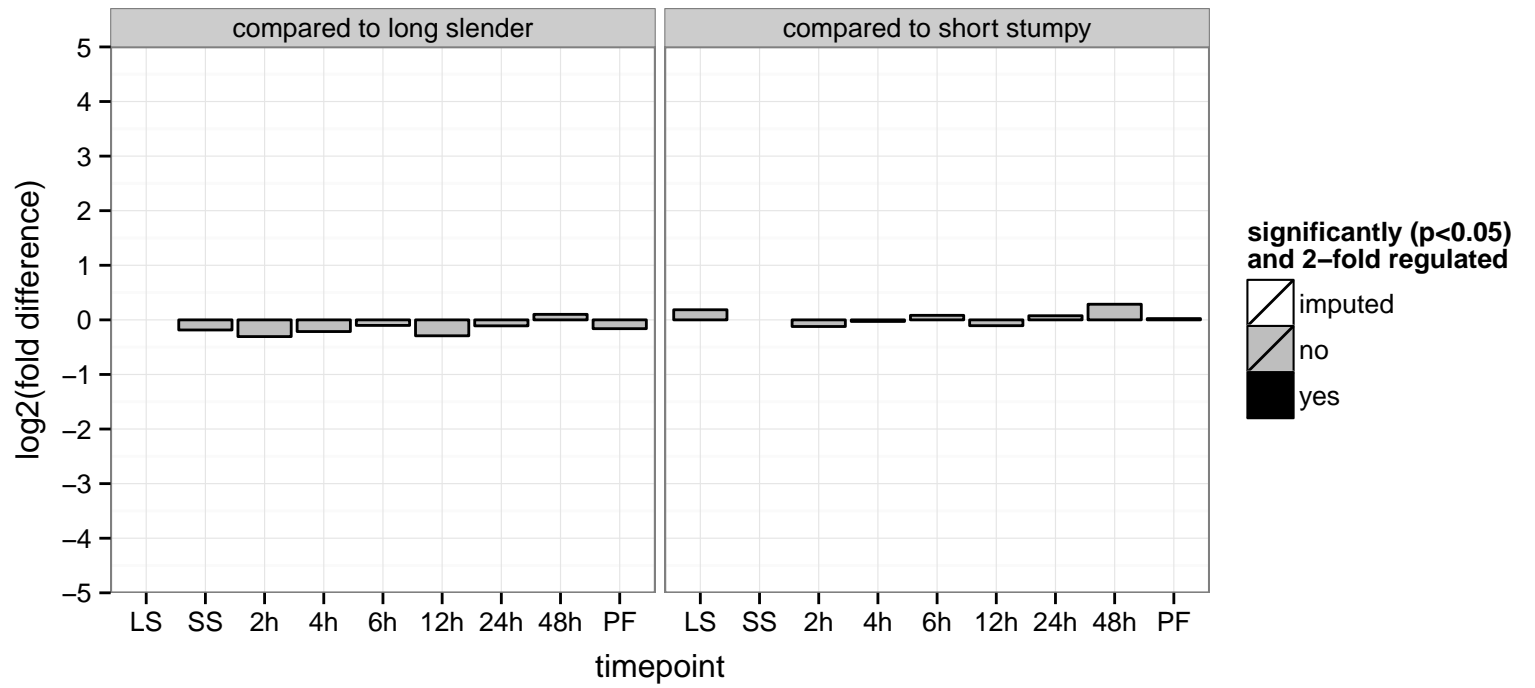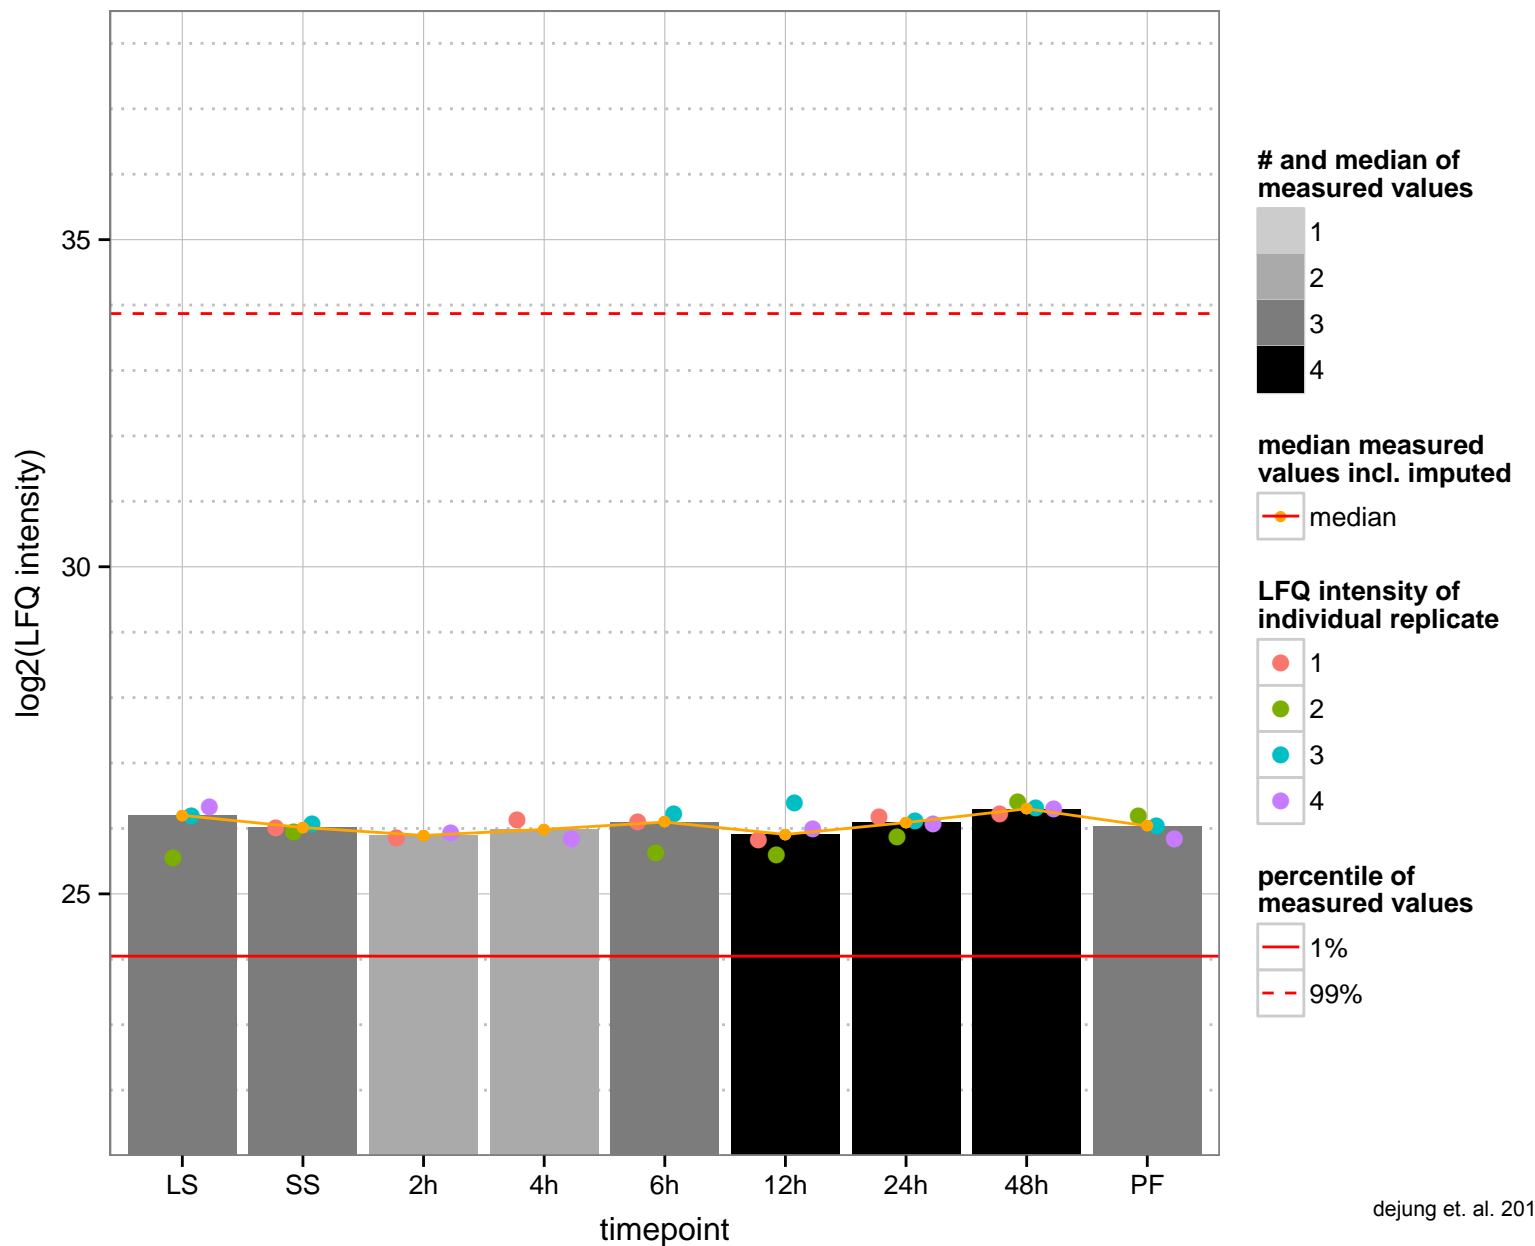

ADP-ribosylation factor, putative, small GTPase  
 Tb927.8.5060  
 AGOF: GTP binding  
 AGOC: intracellular  
 AGOP: intracellular protein transport, small GTPase mediated signal transduction  
 PGO: GTP binding  
 PGOC: intracellular  
 PGOP: intracellular protein transport, small GTPase mediated signal transduction

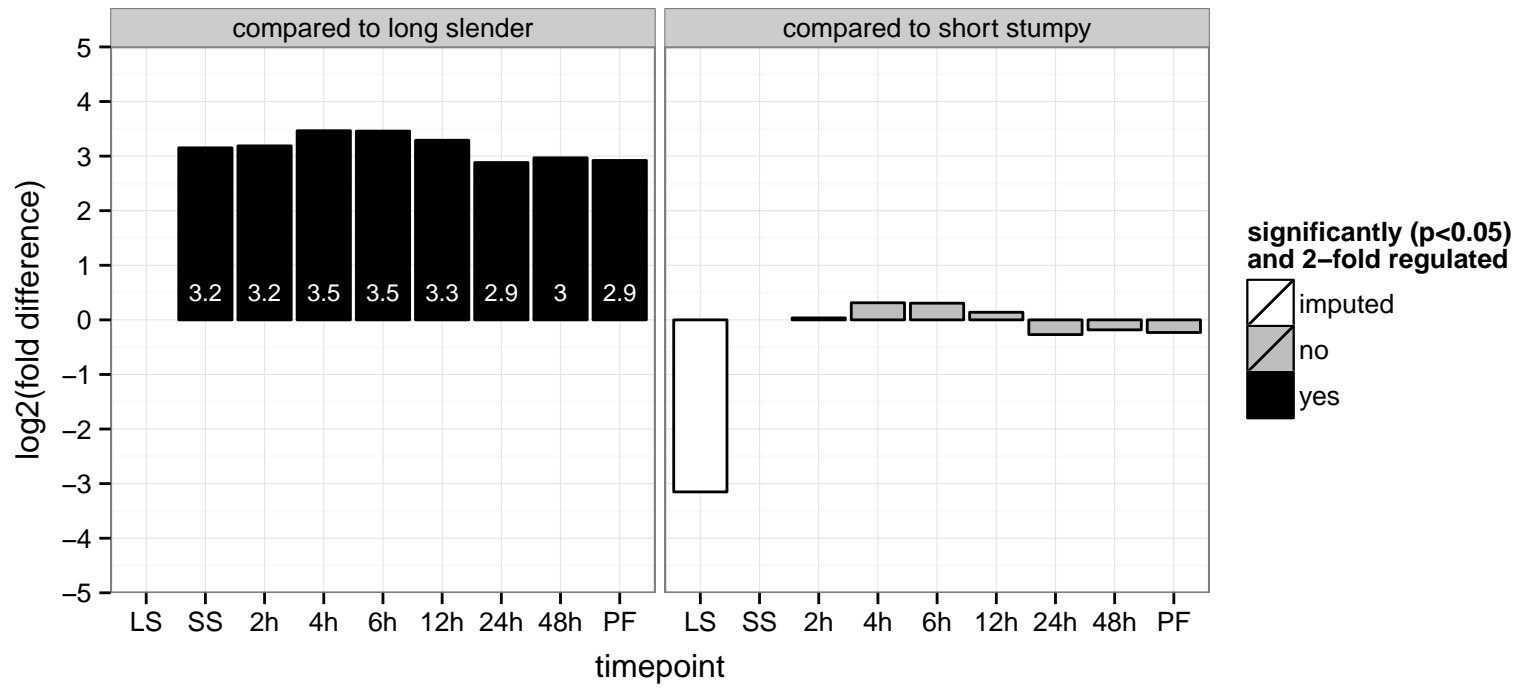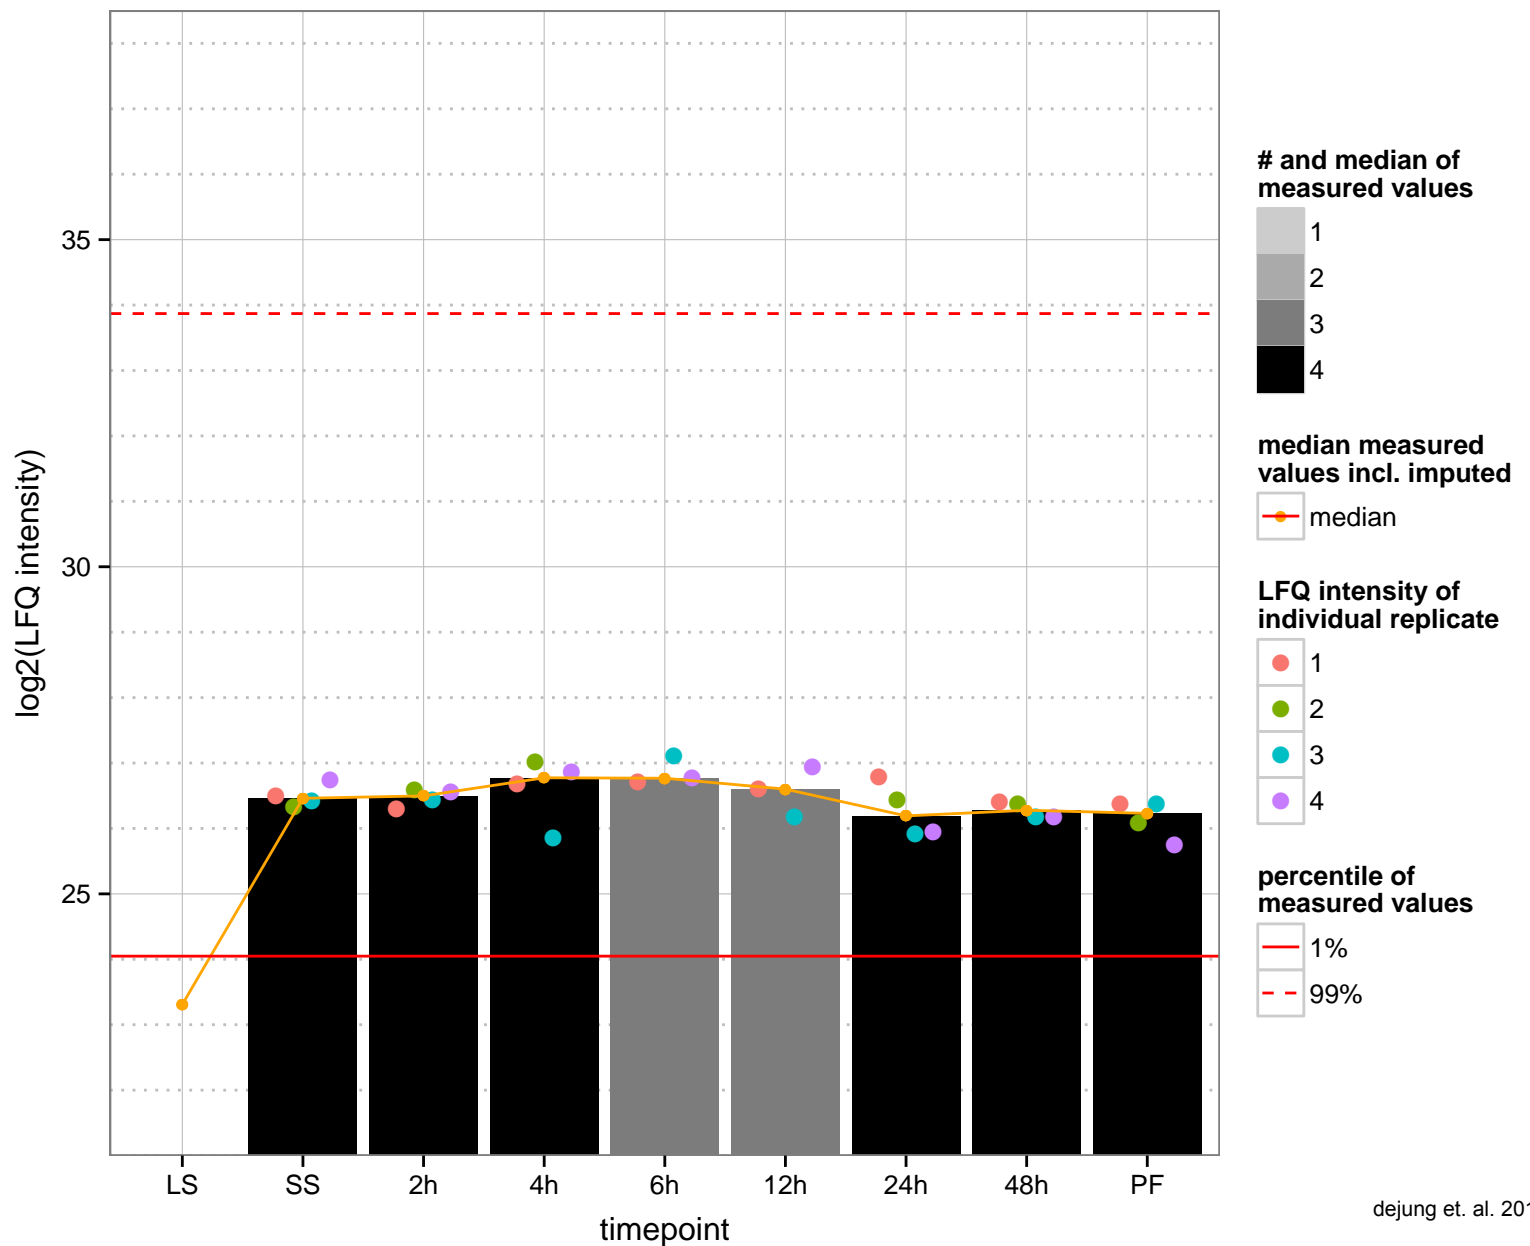



cyclophilin-type peptidyl-prolyl cis-trans isomerase, putative, PPIase, rotamase, cyclophilin, putative (PPIase)  
 Tb927.8.5230  
 AGOF: peptidyl-prolyl cis-trans isomerase activity  
 AGOC: null  
 AGOP: protein folding  
 PGO: peptidyl-prolyl cis-trans isomerase activity  
 PGOC: null  
 PGOP: protein folding

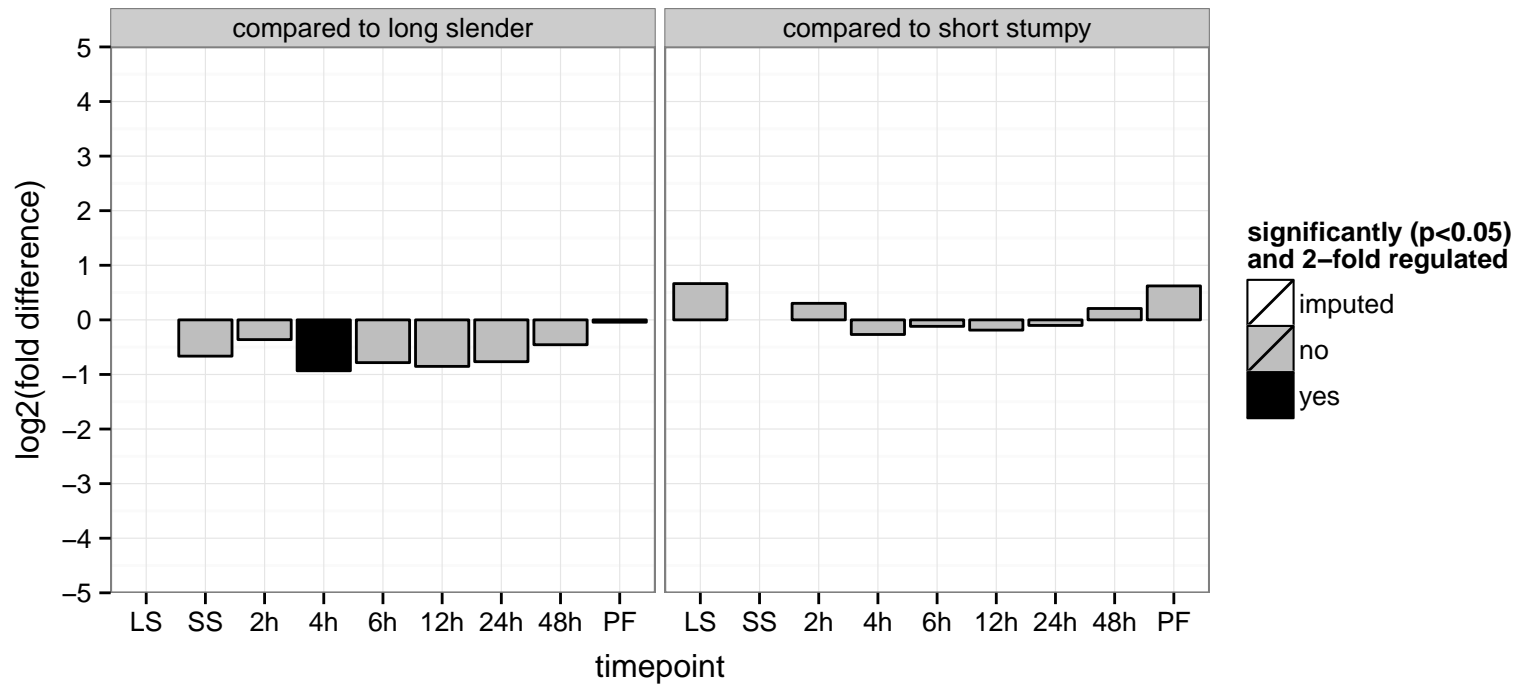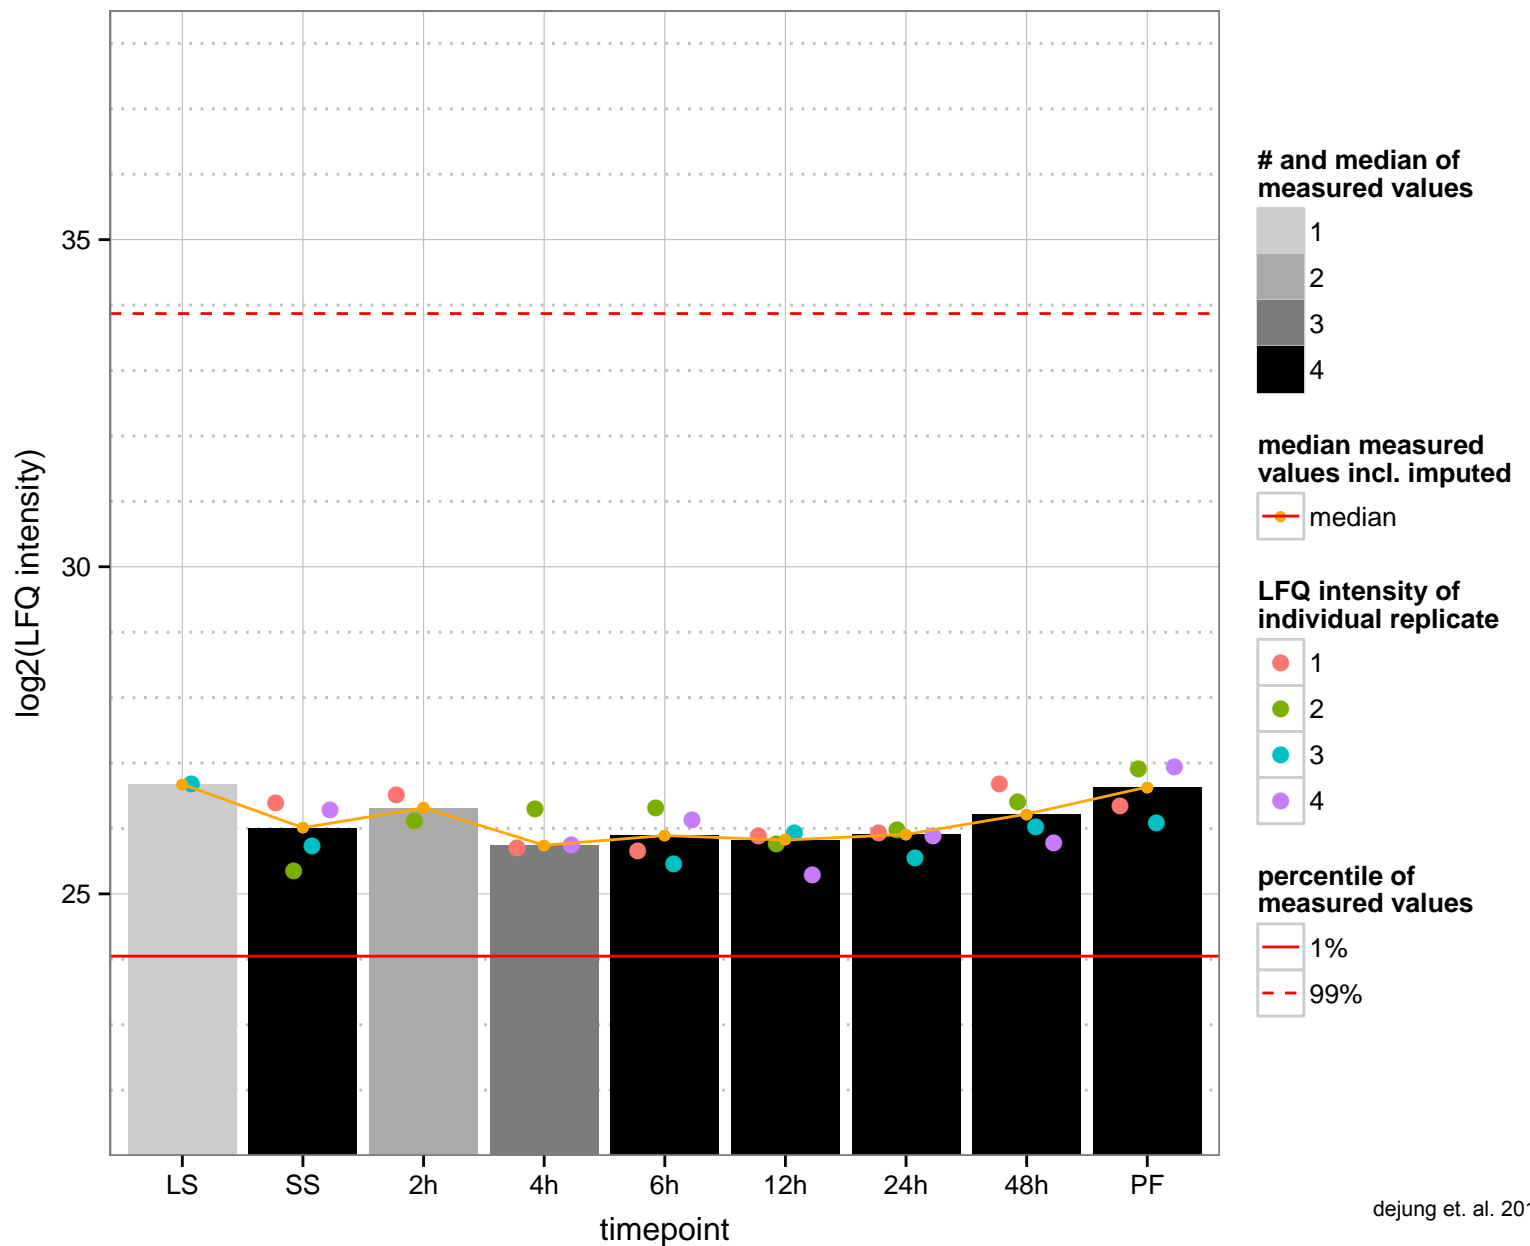

coatomer delta subunit, putative, delta-COP, delta-coat protein  
 Tb927.8.5250  
 AGOF: null  
 AGOC: clathrin adaptor complex, cytoplasm  
 AGOP: intracellular protein transport, vesicle-mediated transport  
 PGO: protein binding  
 PGOC: clathrin adaptor complex  
 PGOP: intracellular protein transport, transport, vesicle-mediated transport

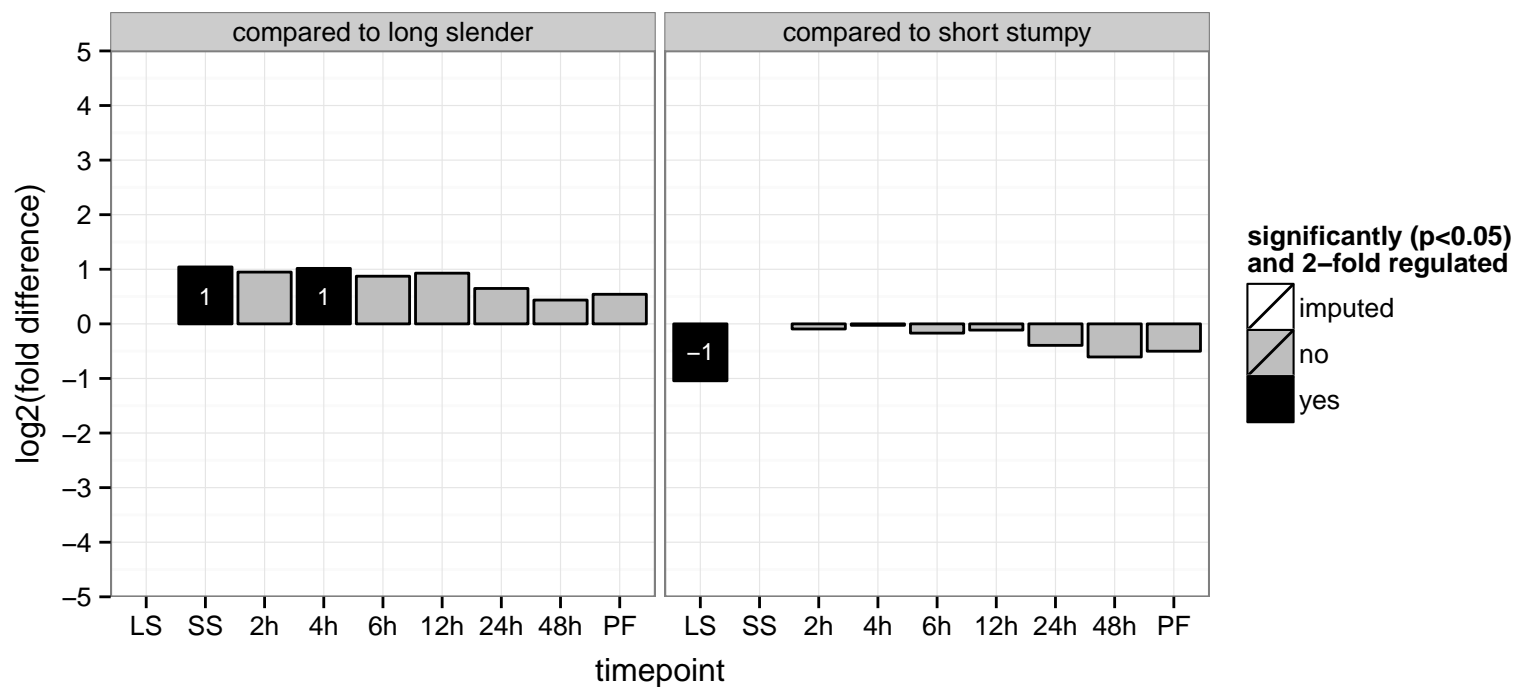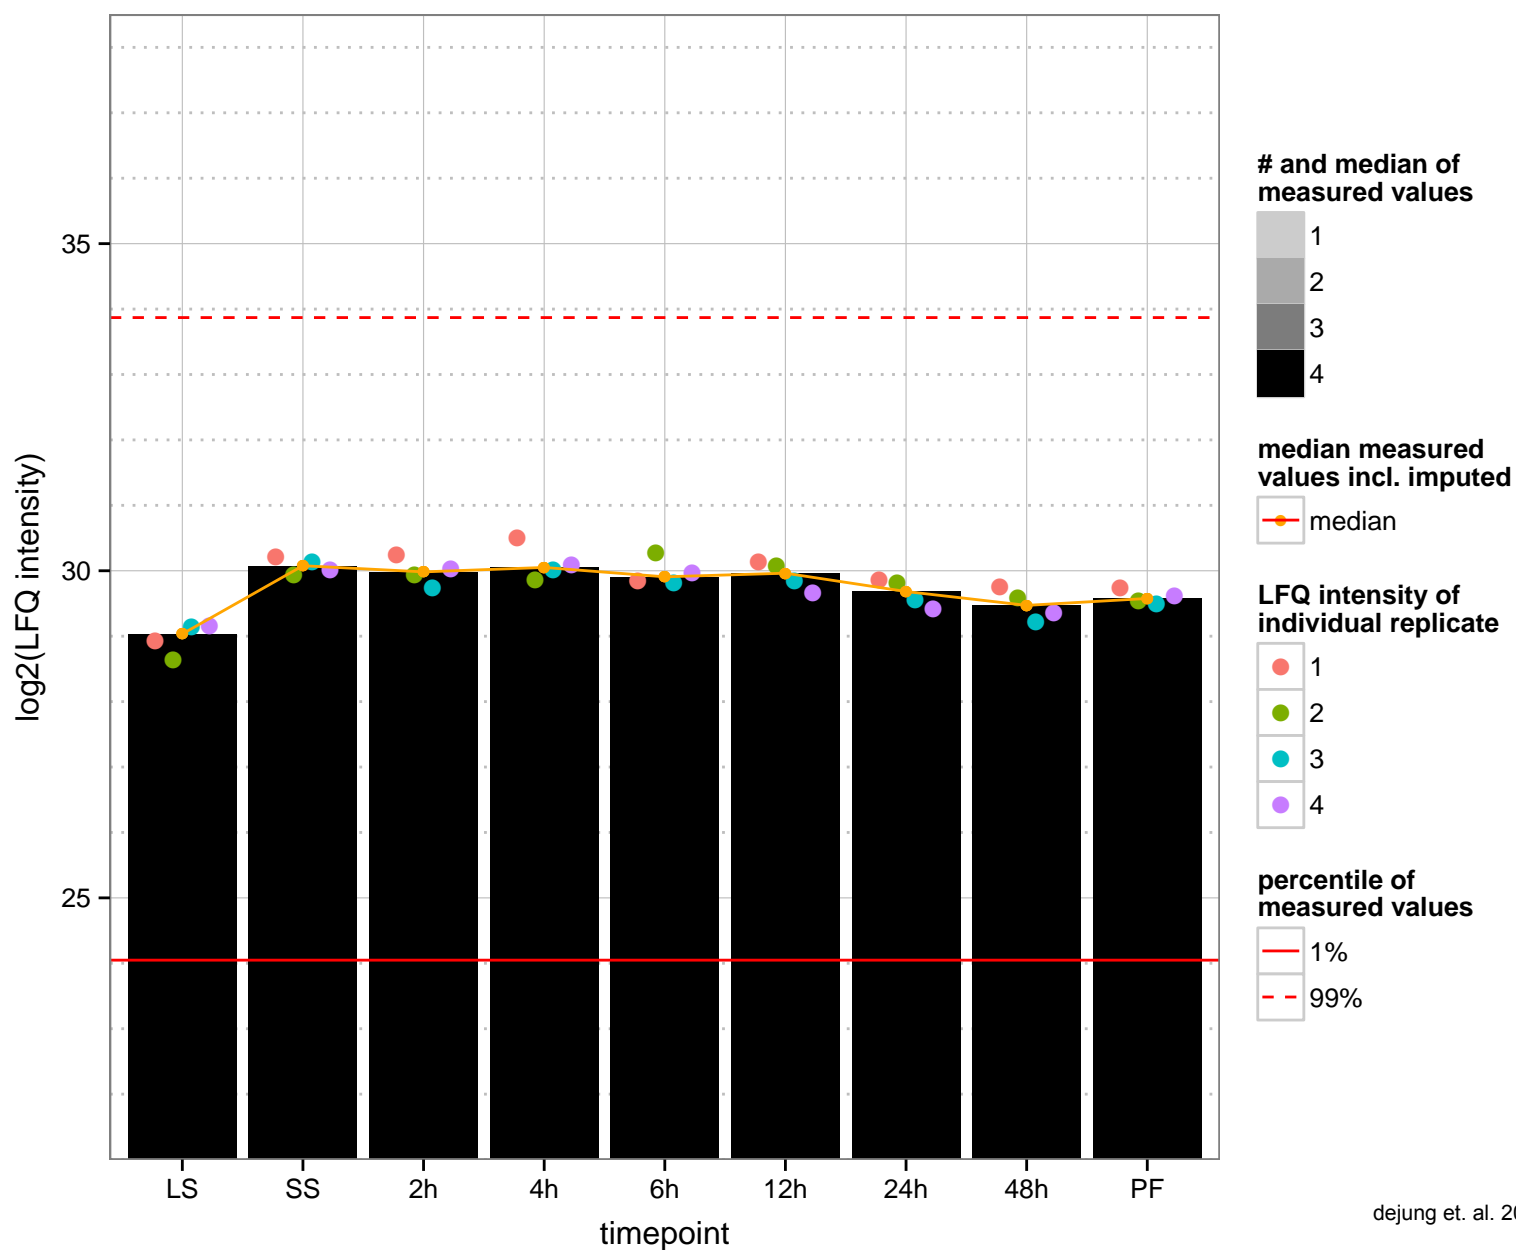

hypothetical protein, conserved  
 Tb927.8.5290  
 AGOF: null  
 AGOC: null  
 AGOP: null  
 PGO: protein binding  
 PGOC: null  
 PGOP: null

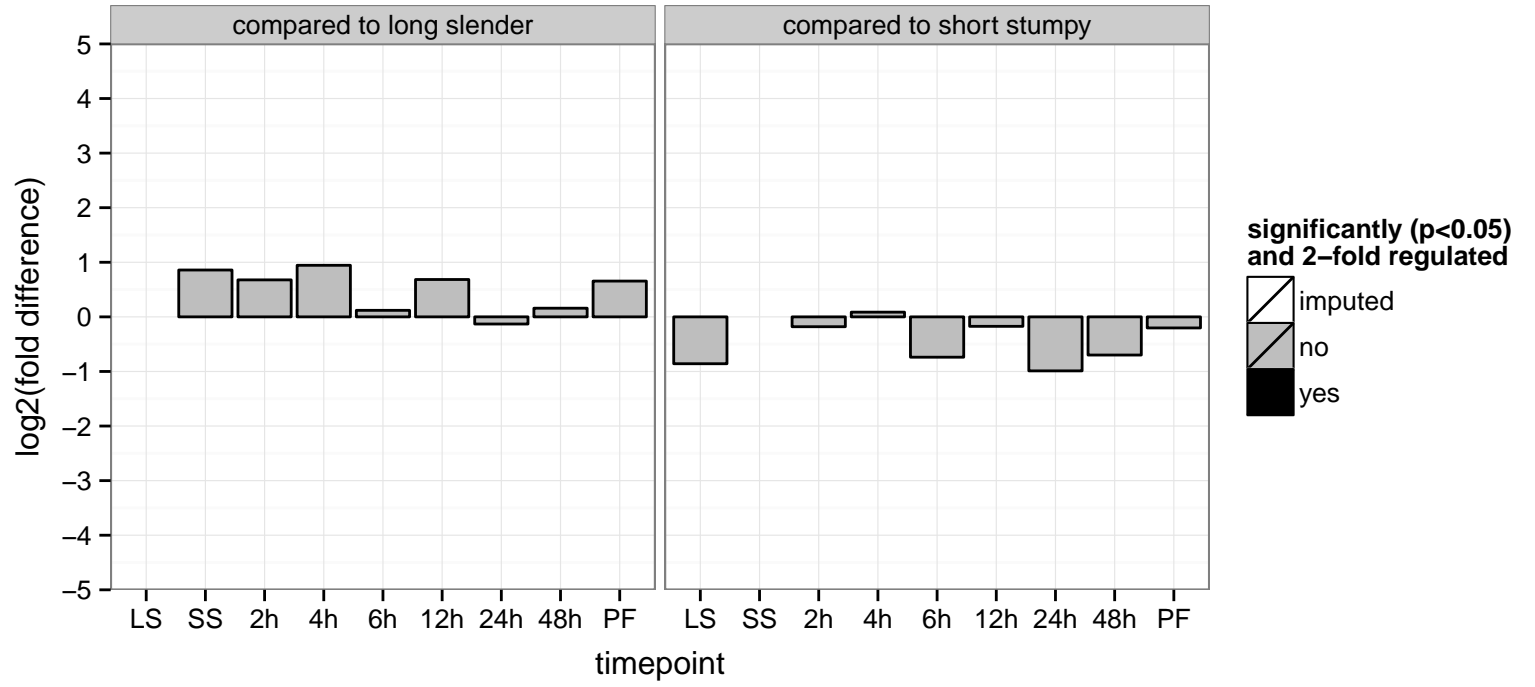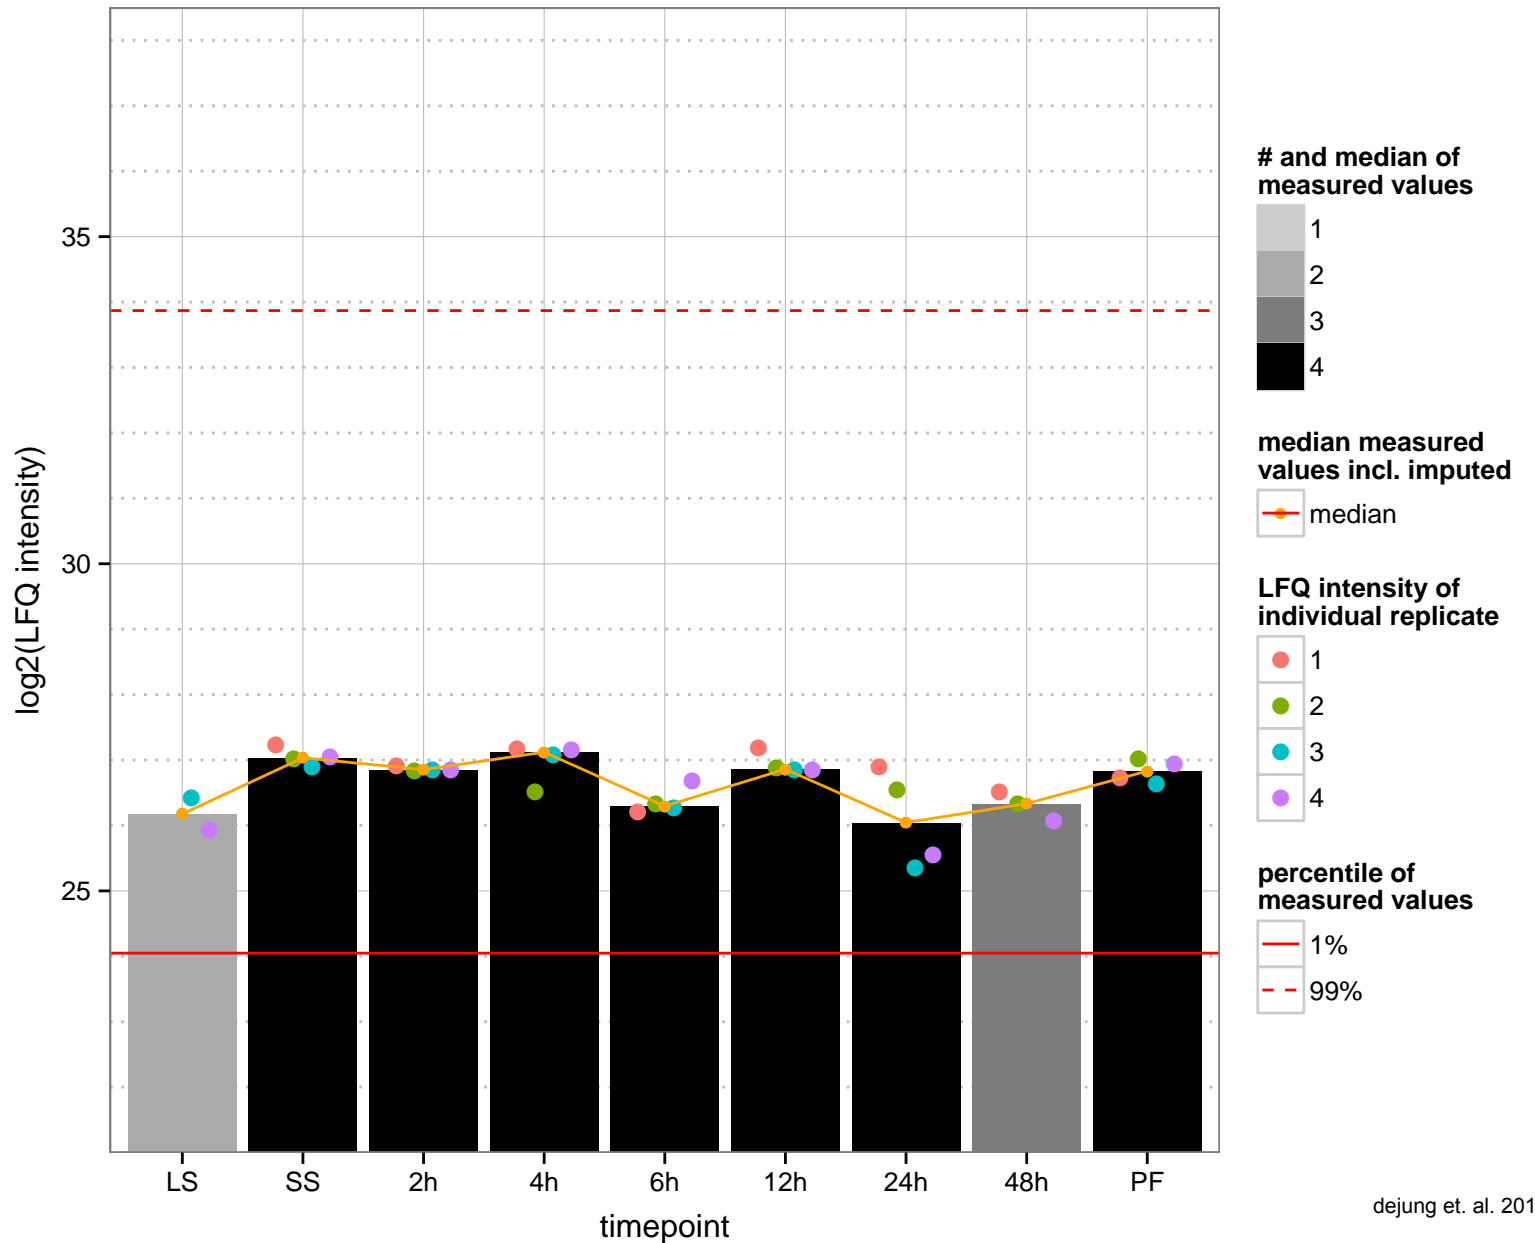

hypothetical protein, conserved  
 Tb927.8.5310  
 AGOF: null  
 AGOC: null  
 AGOP: null  
 PGO: null  
 PGOC: null  
 PGOP: null

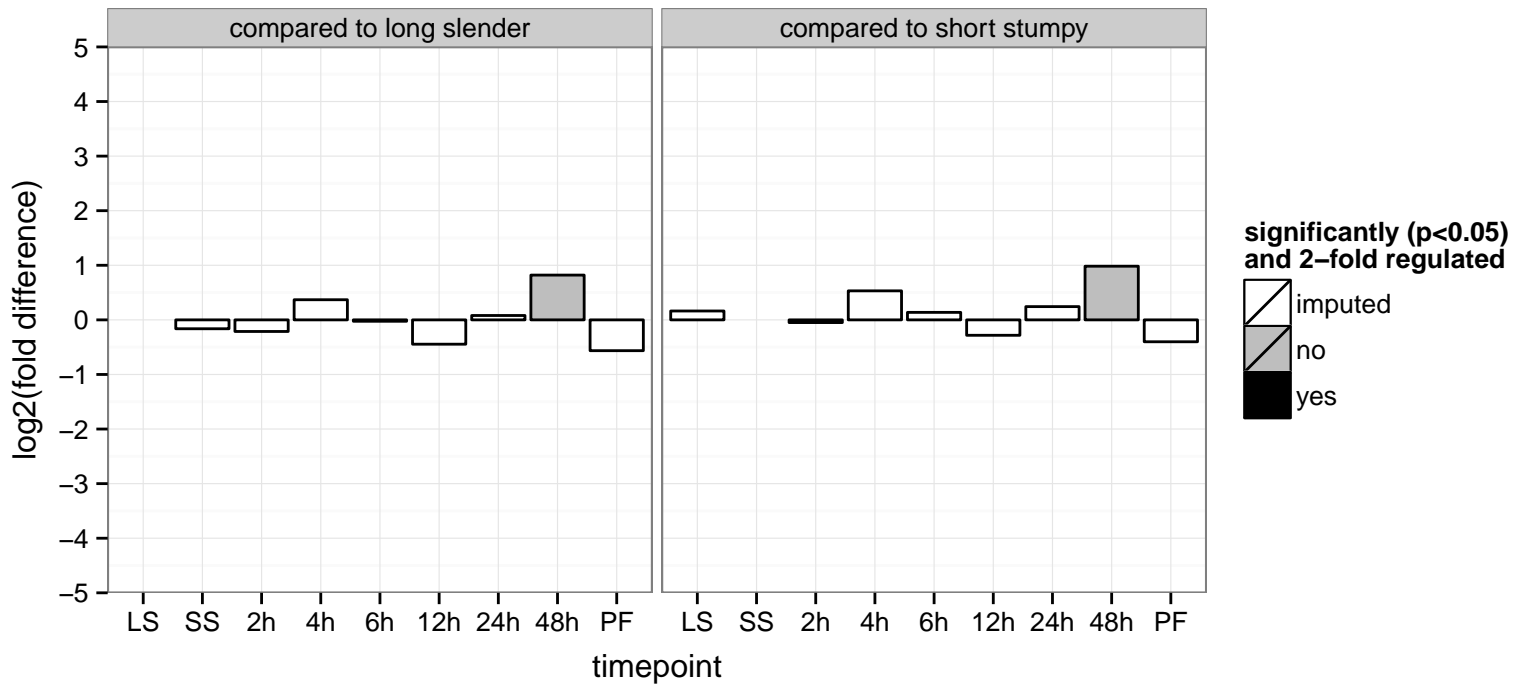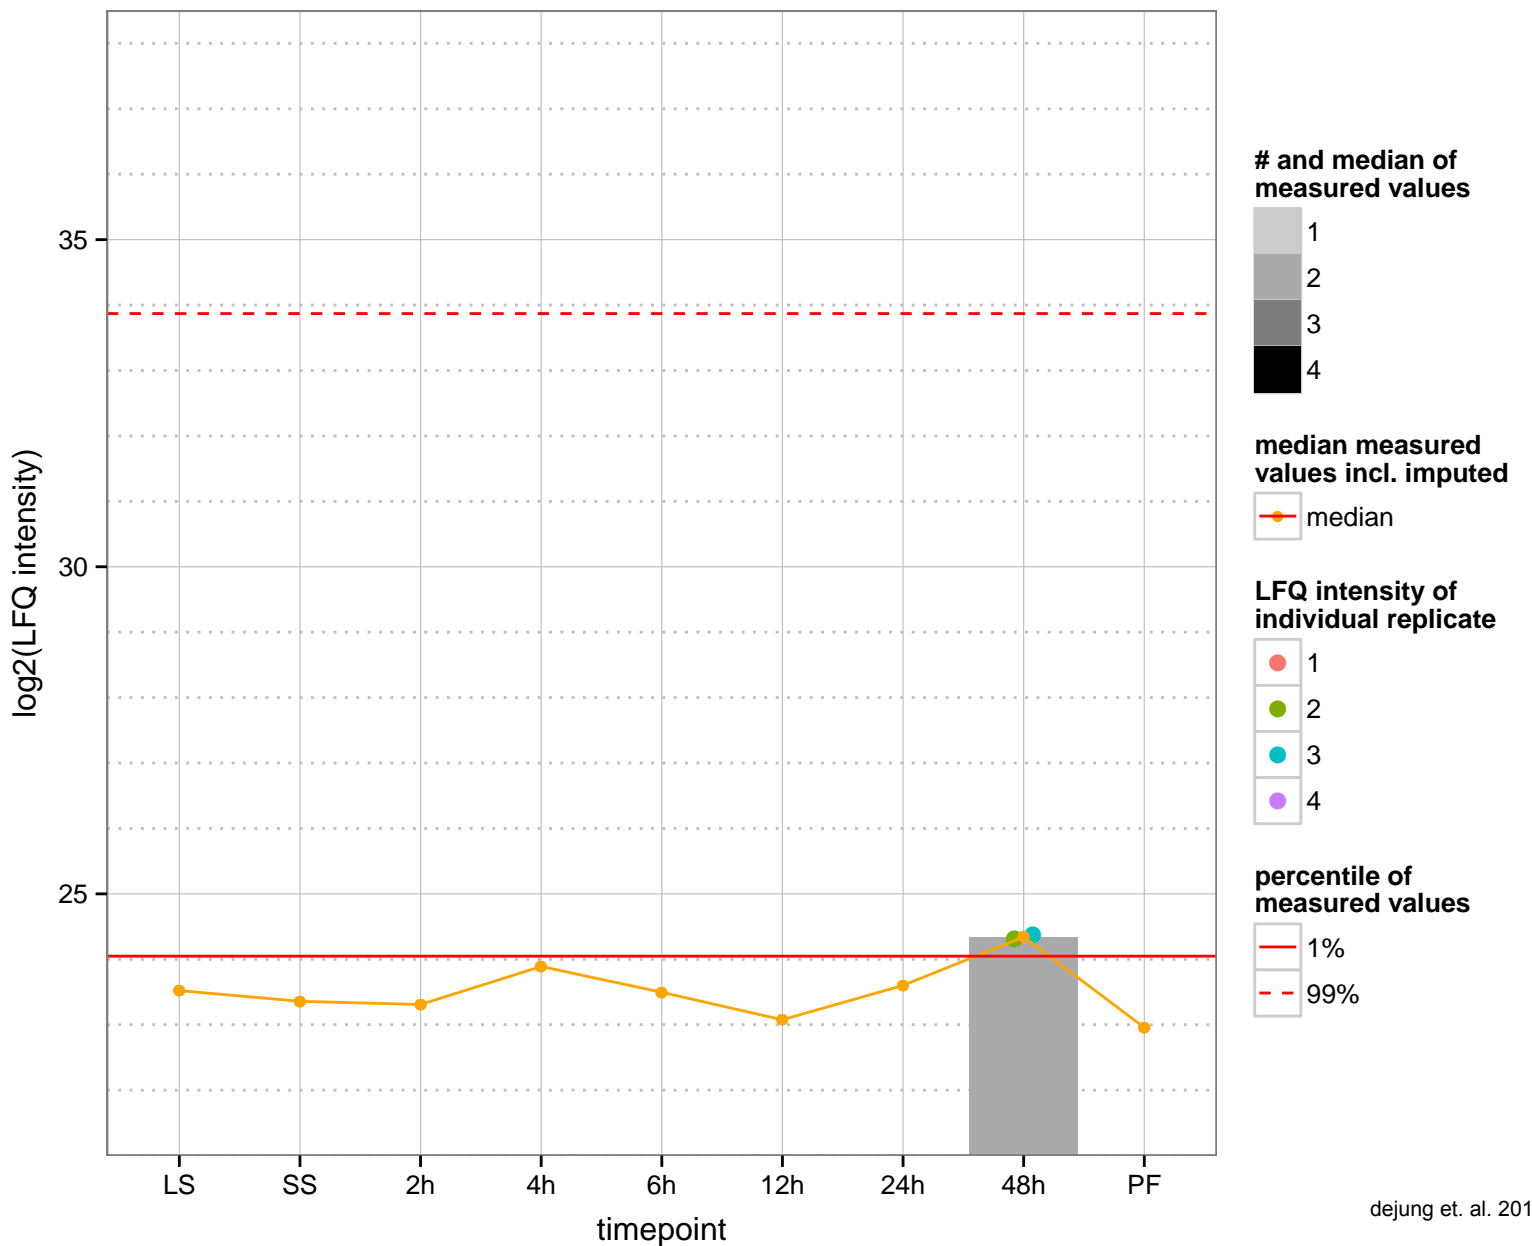

tyrosyl/methionyl-tRNA synthetase, putative  
 Tb927.8.5330  
 AGOF: tRNA binding  
 AGOC: null  
 AGOP: tRNA aminoacylation  
 PGOF: tRNA binding  
 PGOC: null  
 PGOP: null

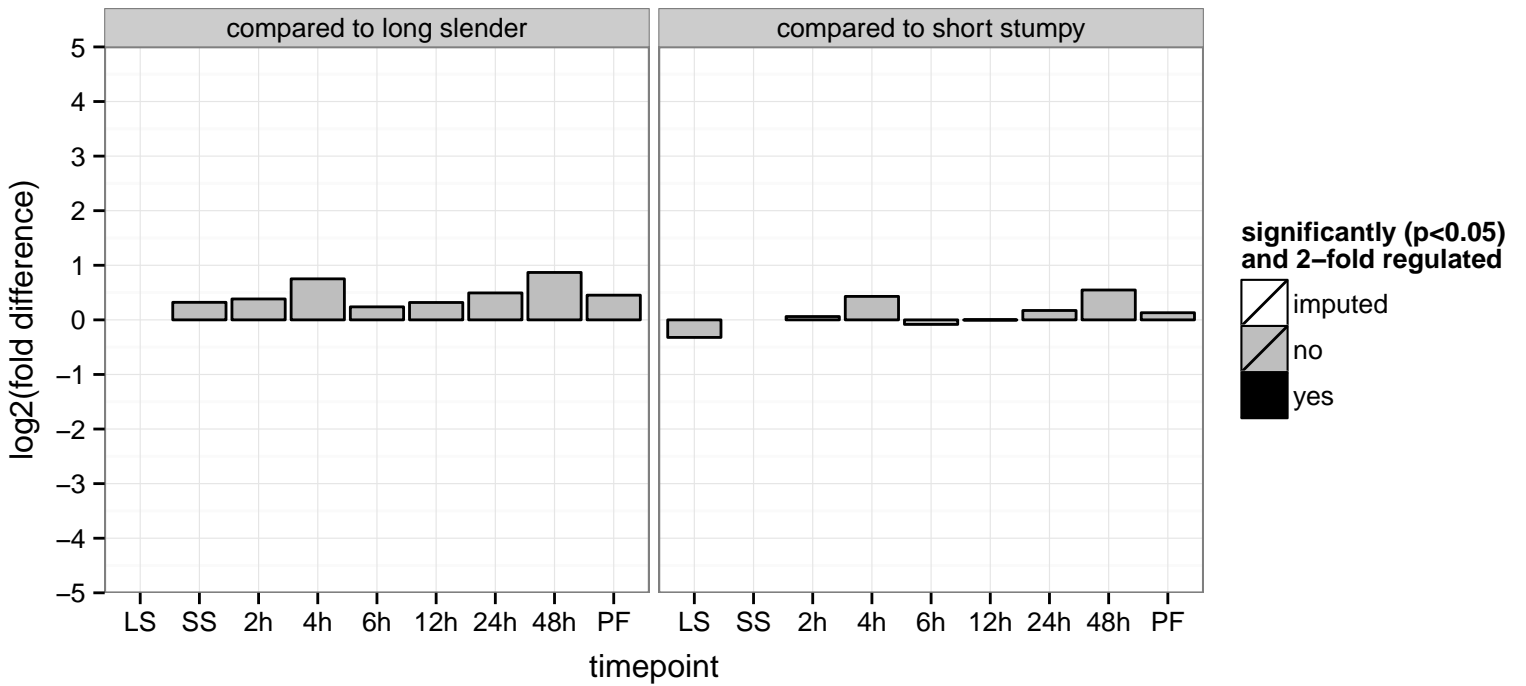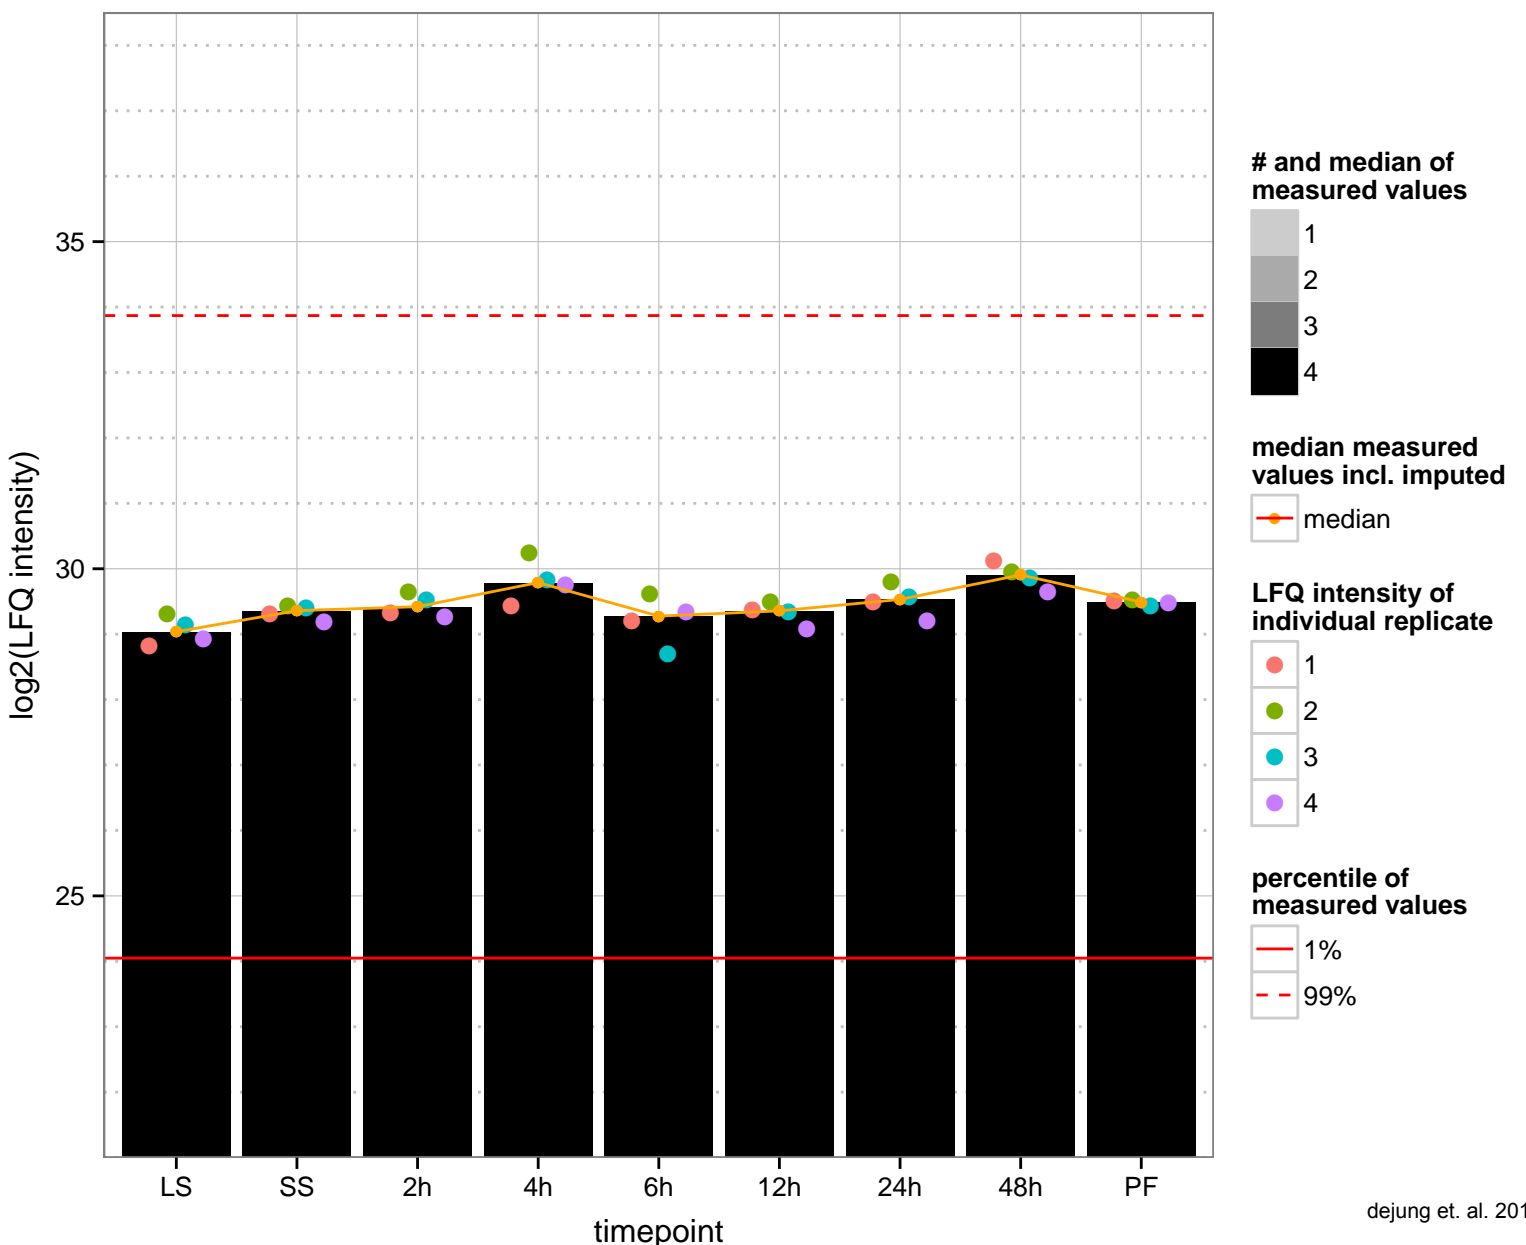

ubiquitin fold modifier protein, putative (UFM1)  
 Tb927.8.5380  
 AGOF: null  
 AGOC: mitochondrion  
 AGOP: protein modification by small protein conjugation  
 PGO: null  
 PGOC: null  
 PGOP: null

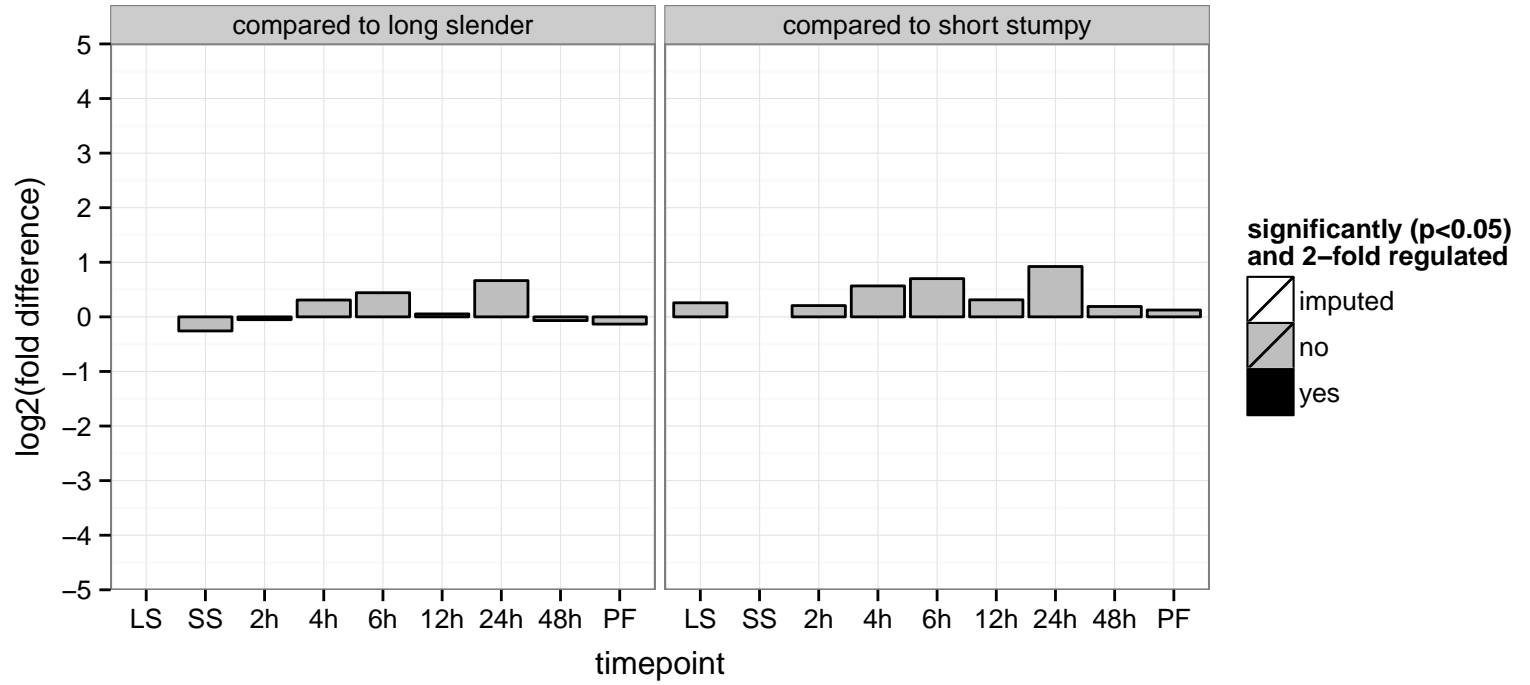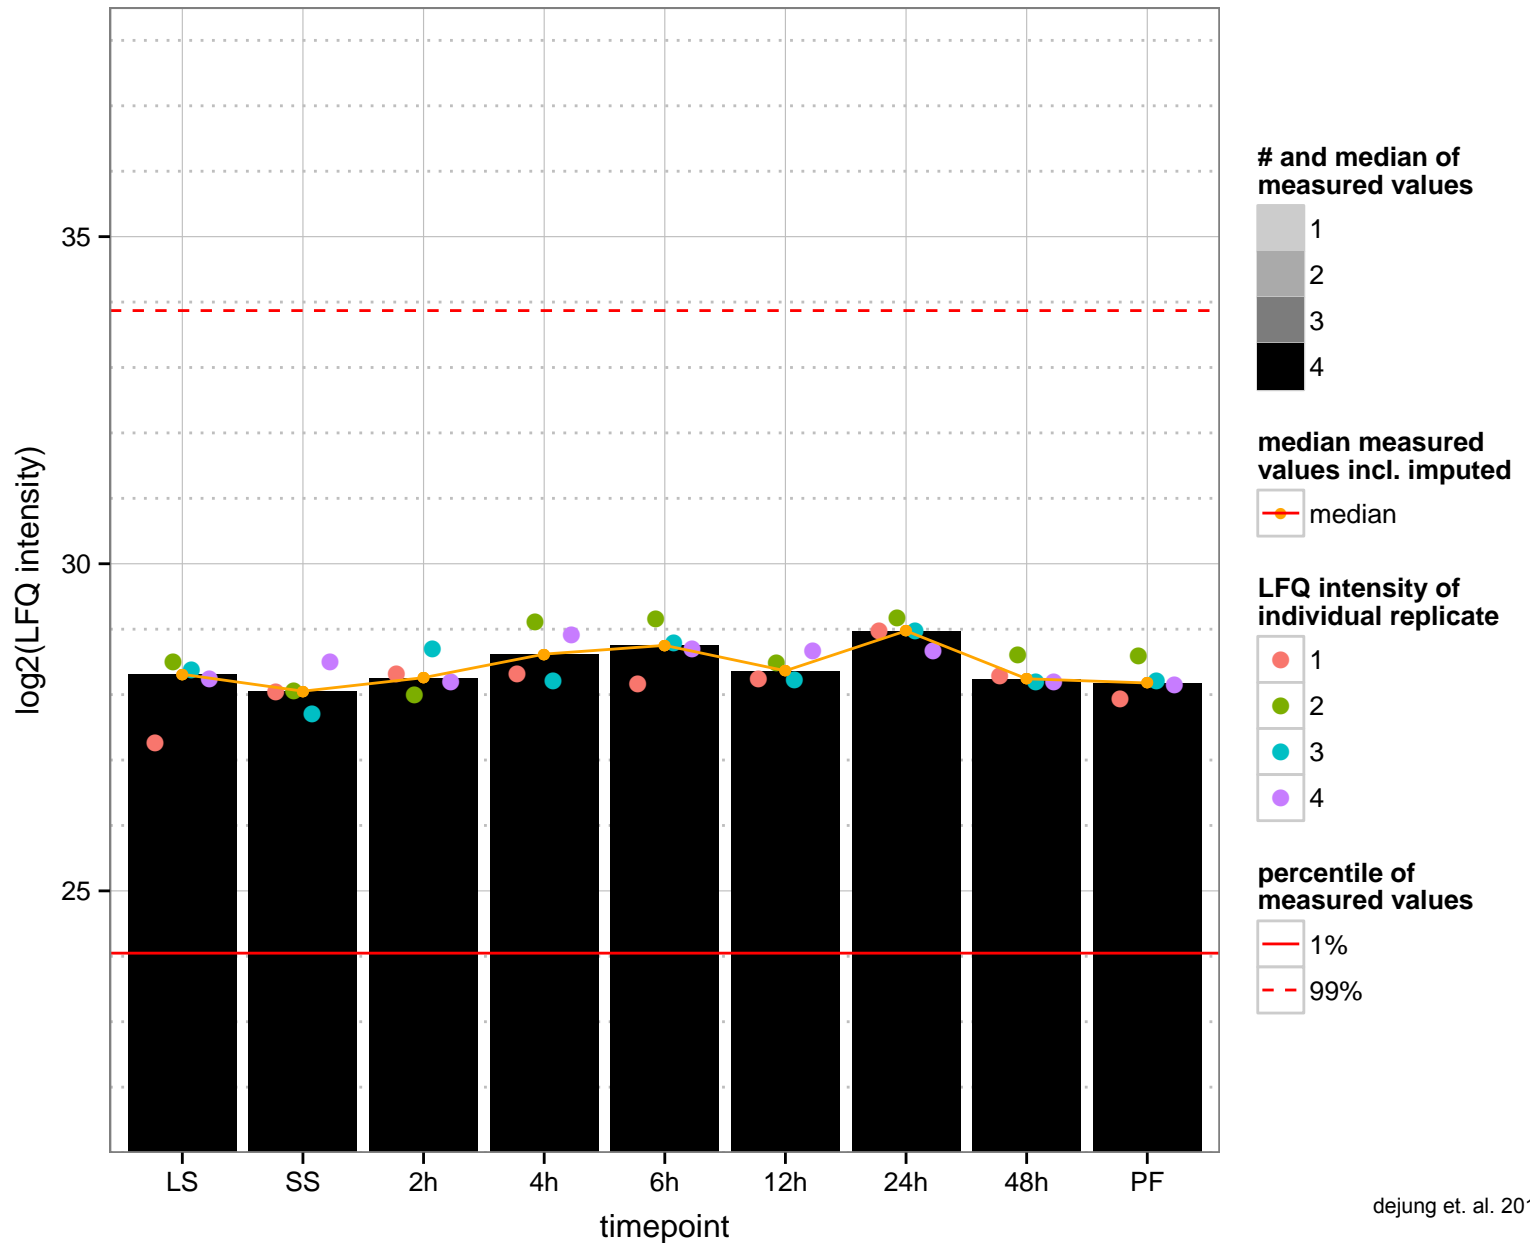

flagellar calcium-binding protein, 24 kDa calflagin, 24 kDa calcimedlin (Tb-24), 44 kDa calflagin, 44 kDa calcimedlin (Tb-44), Tb927.8.5460;Tb11.v5.0797;Tb927.8.5465;Tb11.v5.0798  
 AGOF: null, calcium ion binding  
 AGOC: null, bacterial-type flagellum, cilium, motile cilium  
 AGOP: null, ciliary or flagellar motility, calcium ion transport, ciliary or flagellar motility  
 PGO: null  
 PGOC: null  
 PGOP: null

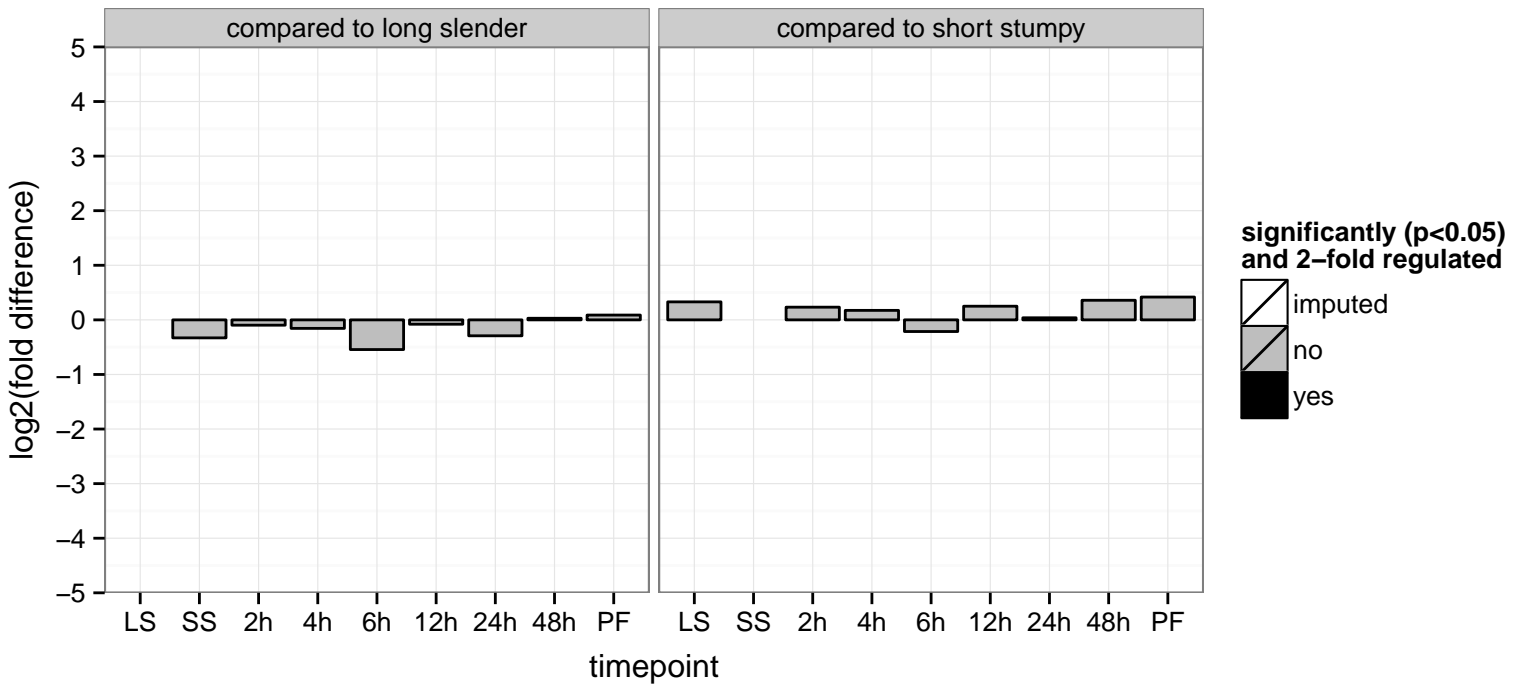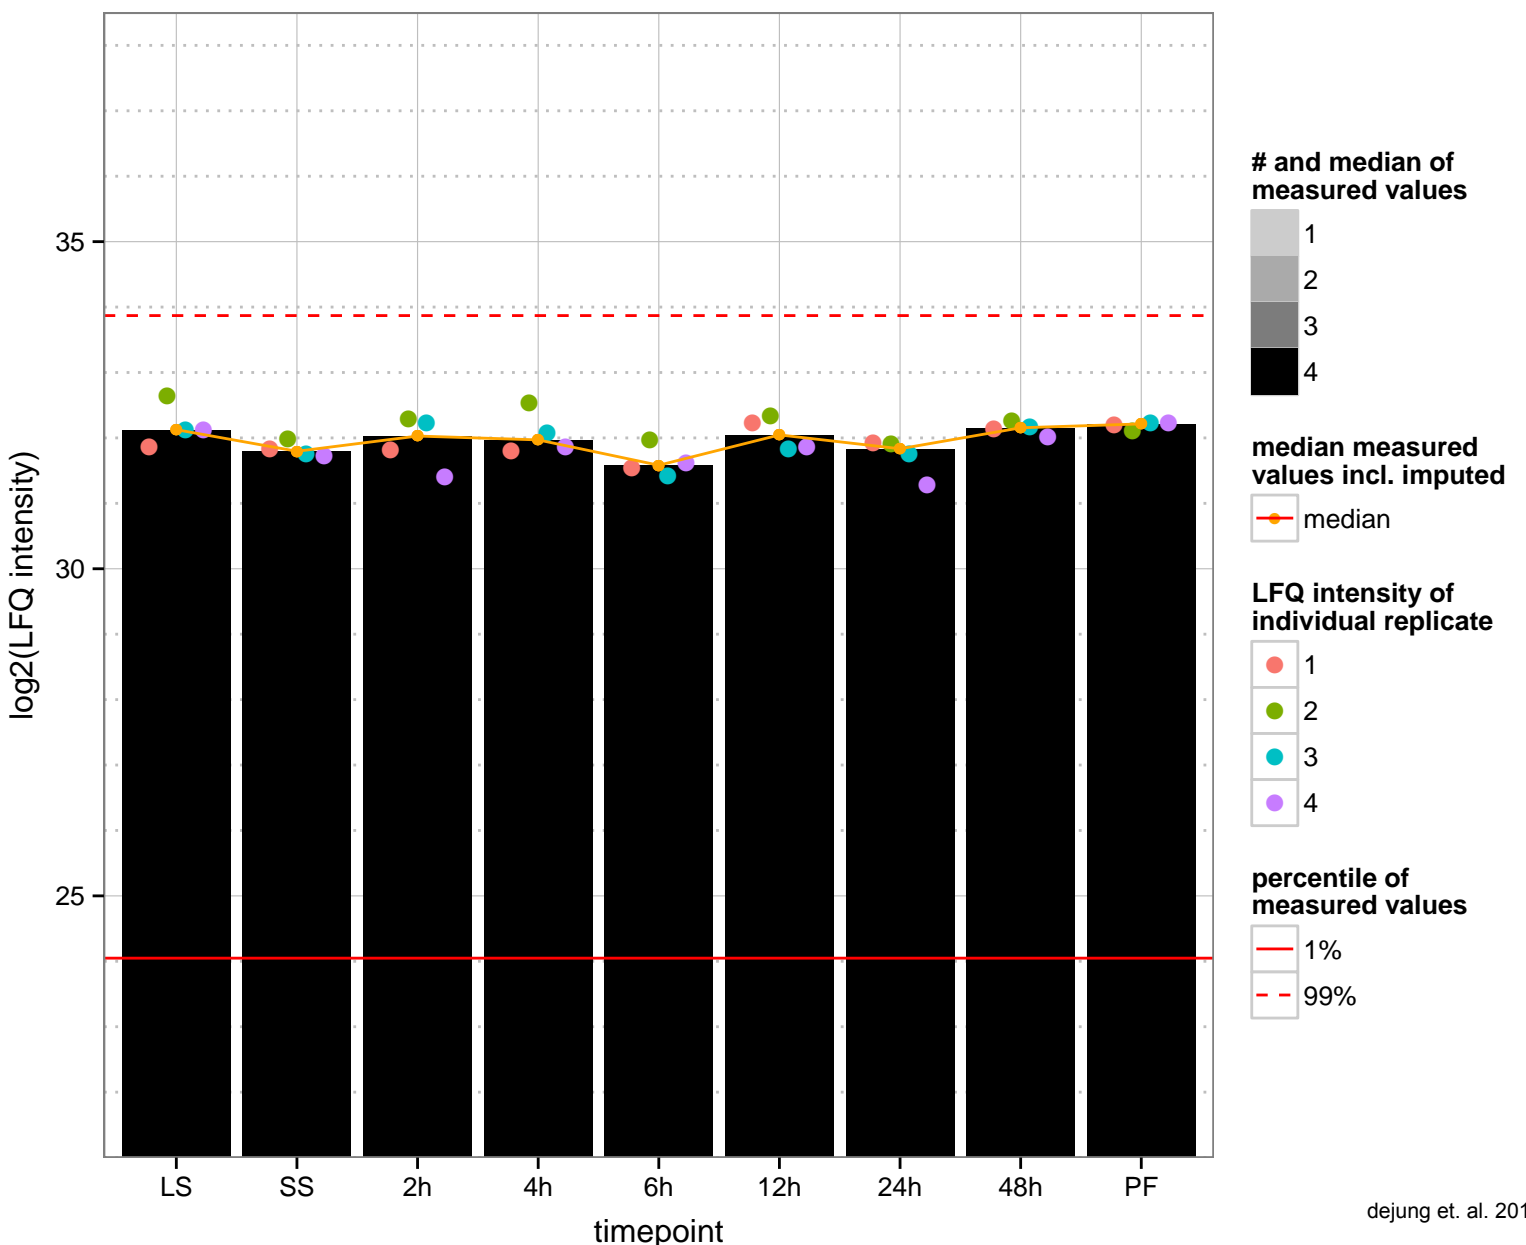

apurinic/aprimidinic endonuclease, putative  
 Tb927.8.5510  
 AGOF: nuclease activity  
 AGOC: null  
 AGOP: DNA repair  
 PGO: nuclease activity  
 PGOC: null  
 PGOP: DNA repair

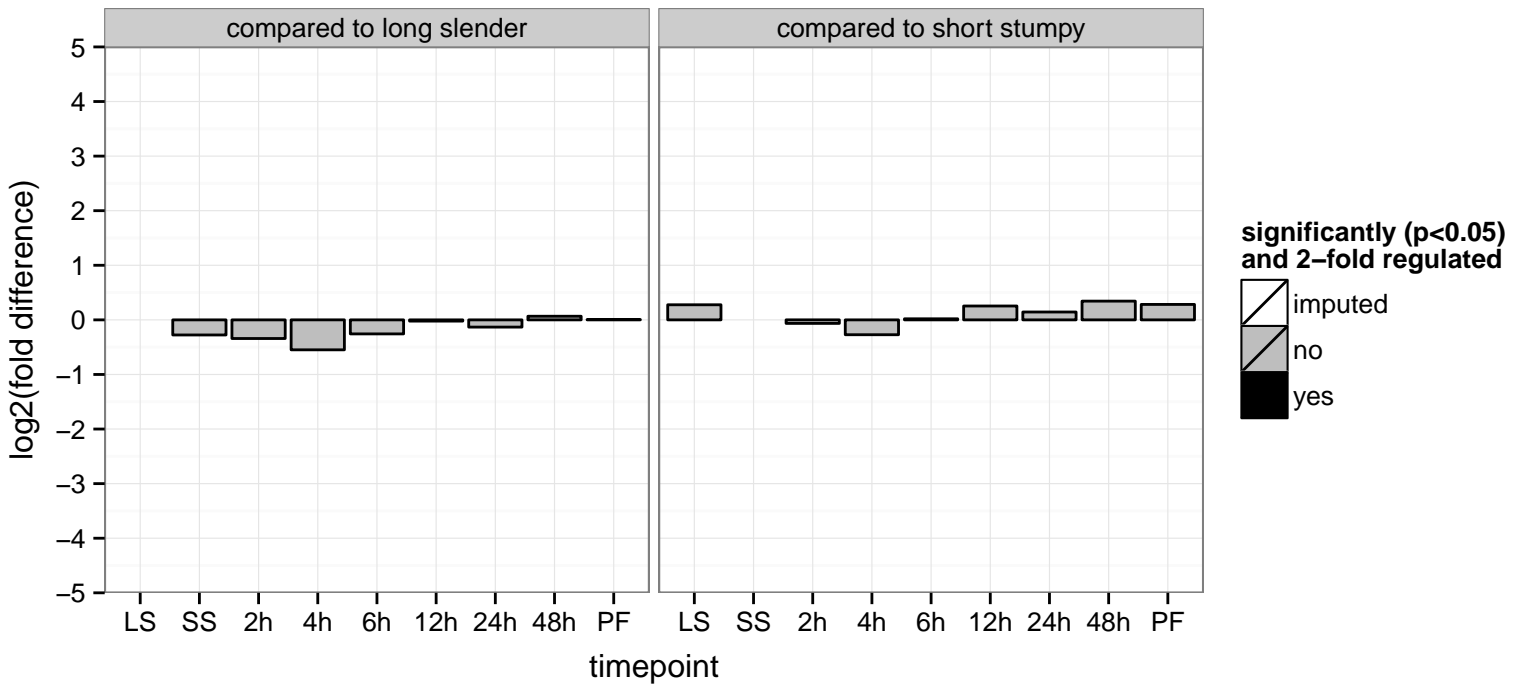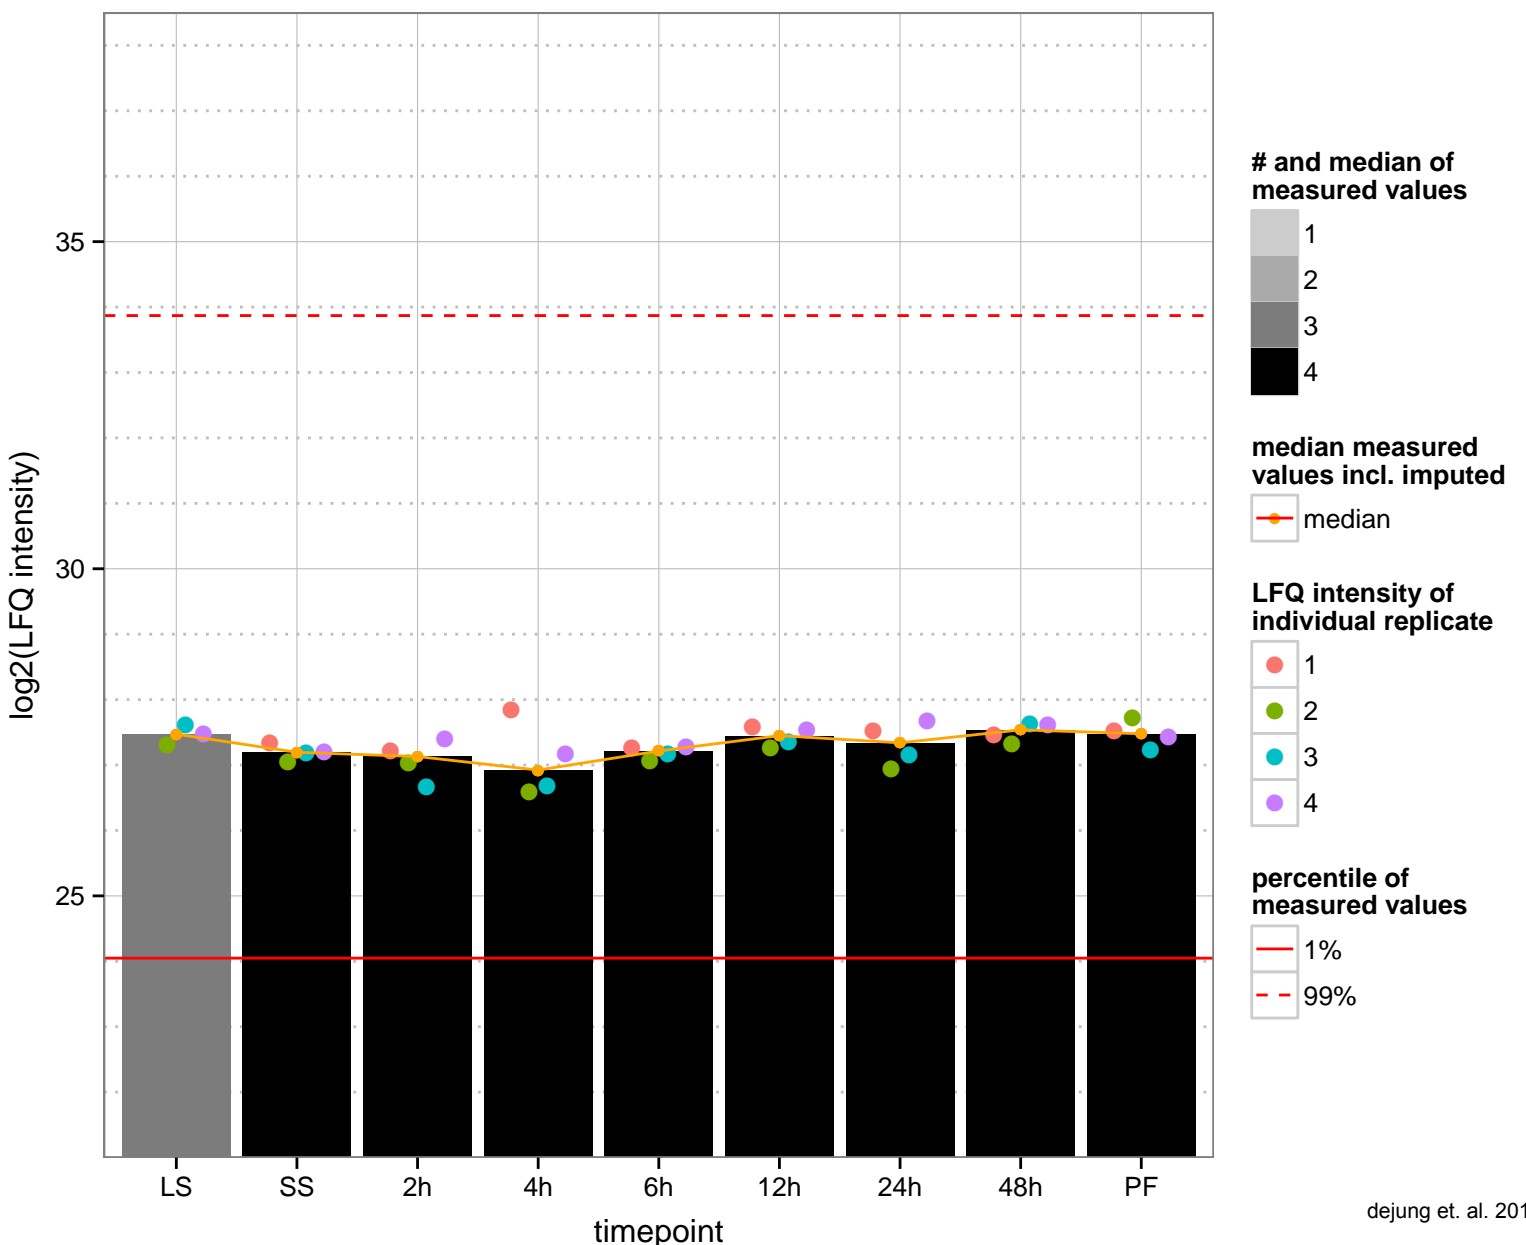



hypothetical protein, conserved  
 Tb927.8.5520  
 AGOF: null  
 AGOC: null  
 AGOP: null  
 PGO: null  
 PGOC: null  
 PGOP: null

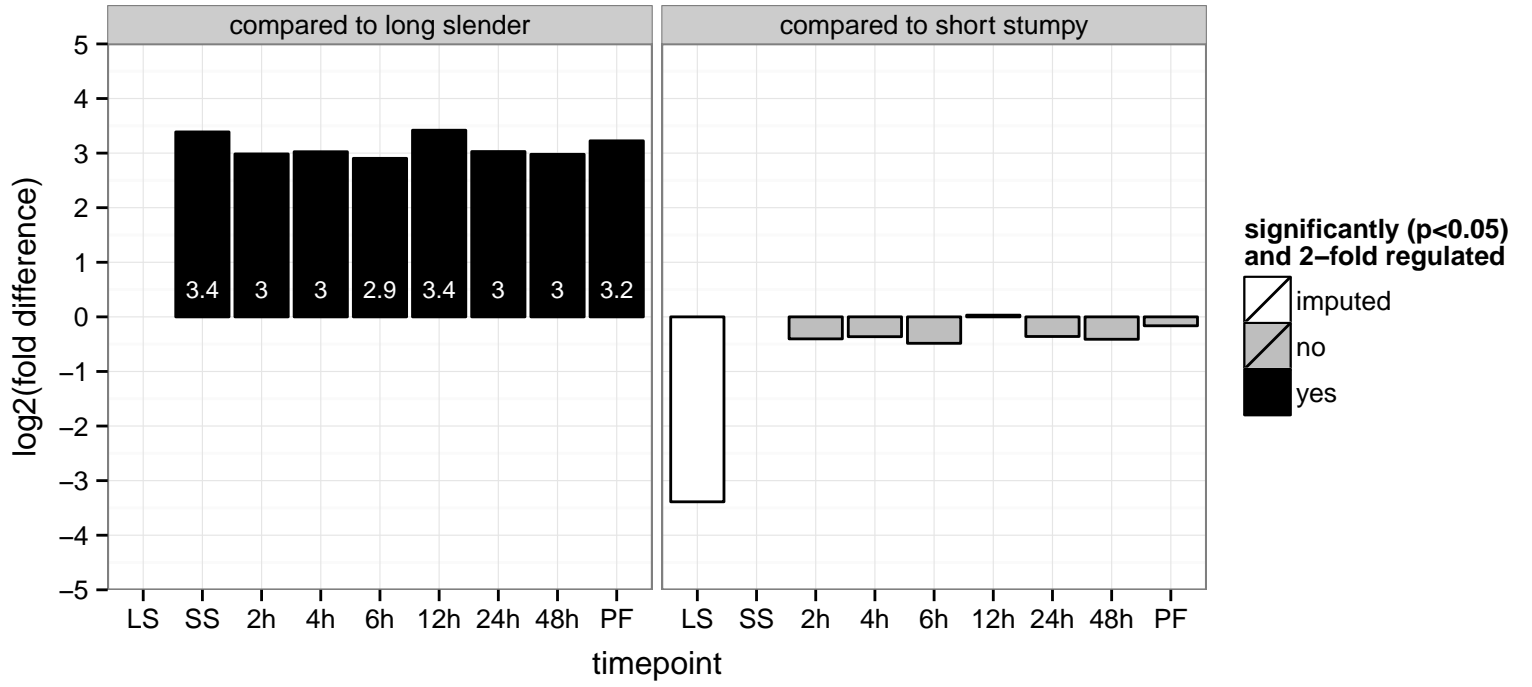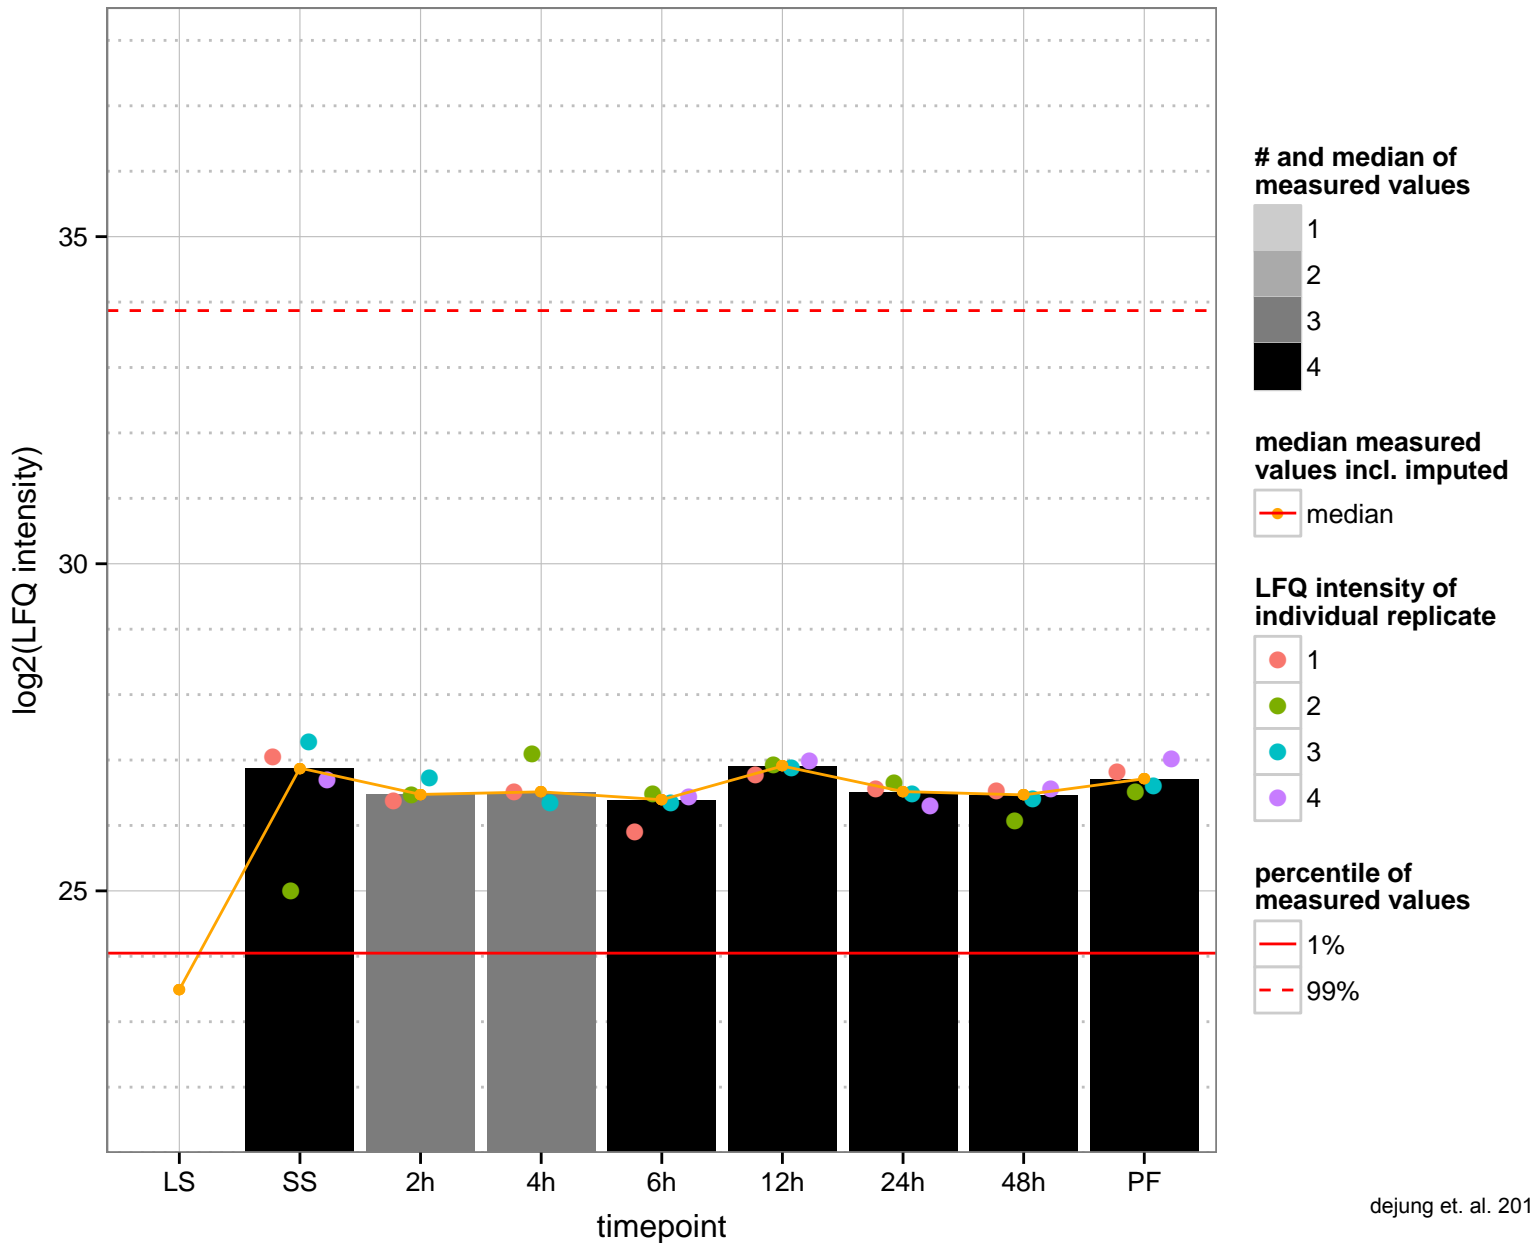

hypothetical protein, conserved  
 Tb927.8.5580  
 AGOF: null  
 AGOC: integral to membrane  
 AGOP: null  
 PGO: null  
 PGO: integral to membrane  
 PGO: null

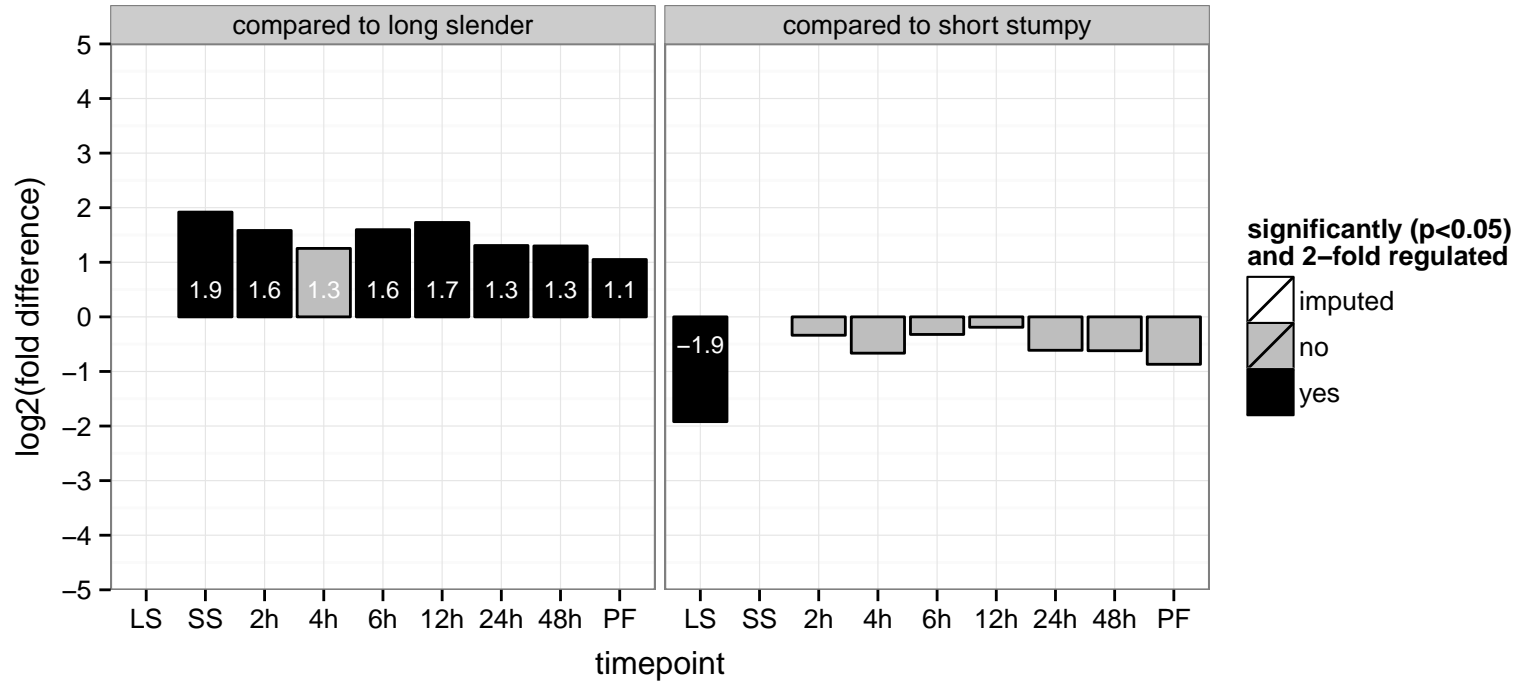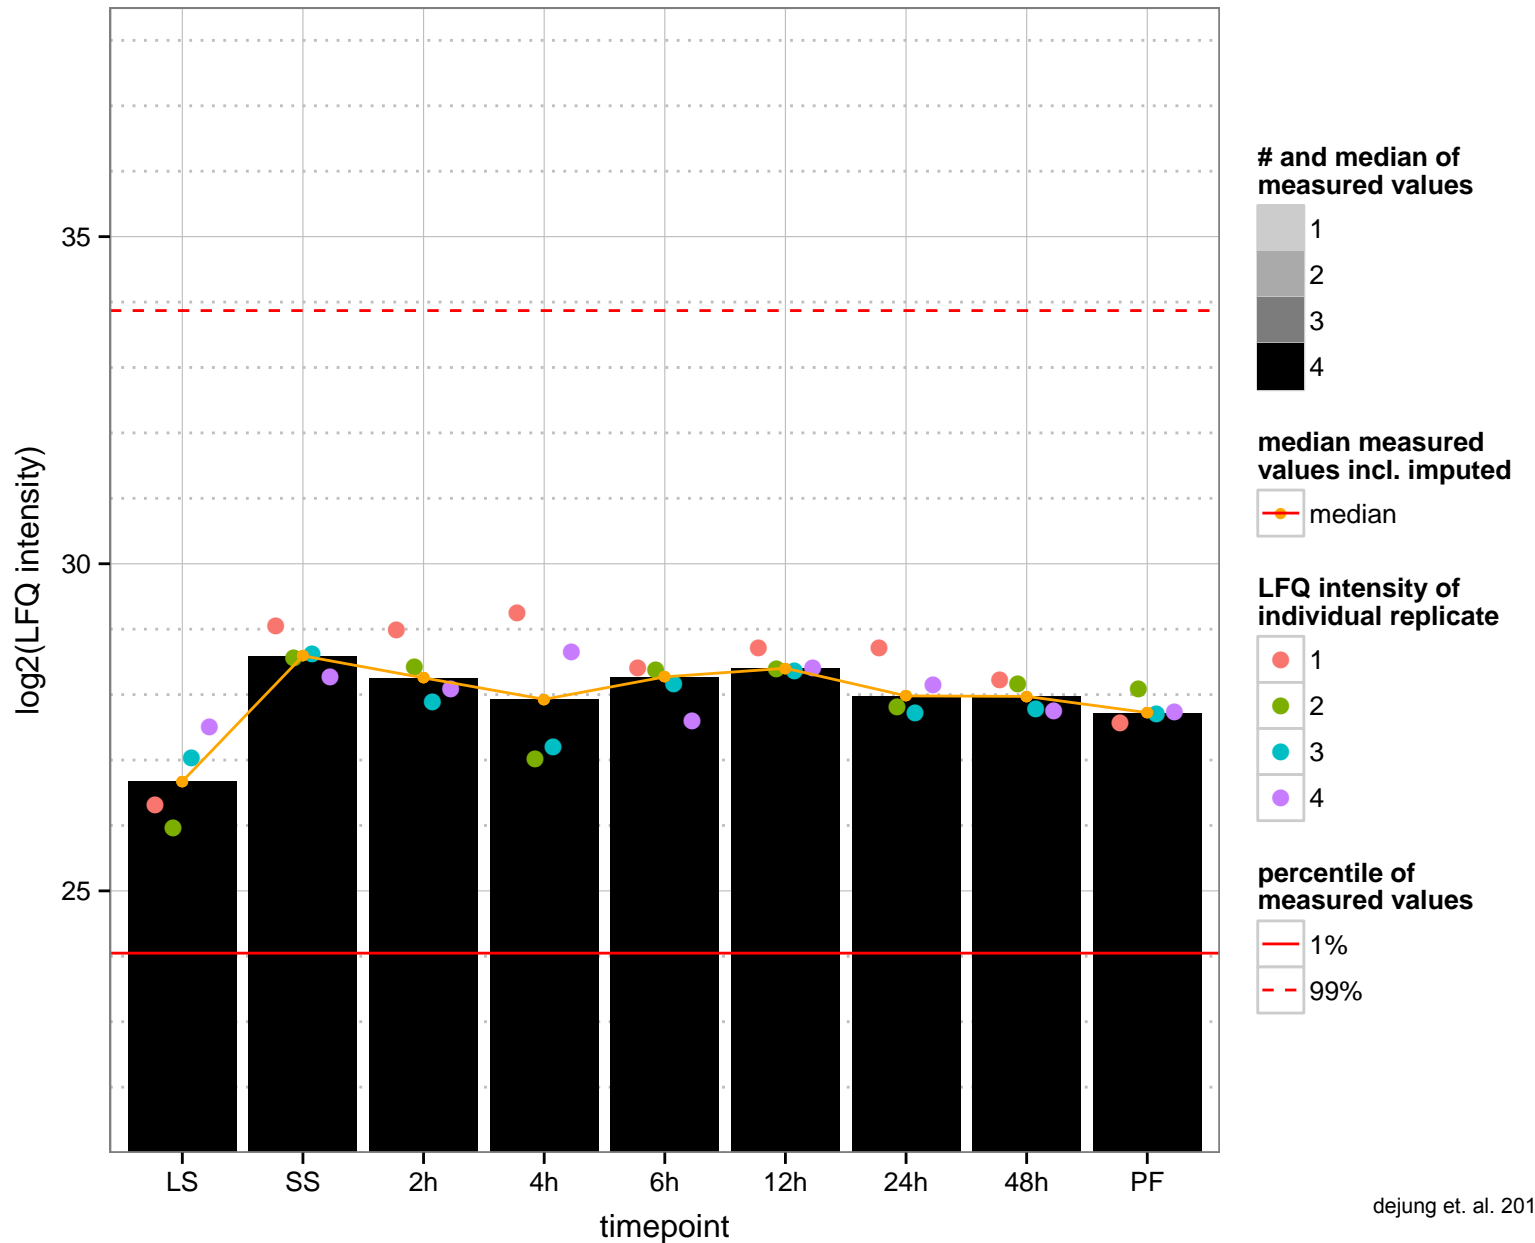

transaldolase, putative

Tb927.8.5600

AGOF: sedoheptulose-7-phosphate:D-glyceraldehyde-3-phosphate glycerontransferase activity

AGOC: cytoplasm

AGOP: pentose-phosphate shunt

PGOF: sedoheptulose-7-phosphate:D-glyceraldehyde-3-phosphate glycerontransferase activity

PGOC: cytoplasm

PGOP: carbohydrate metabolic process, pentose-phosphate shunt

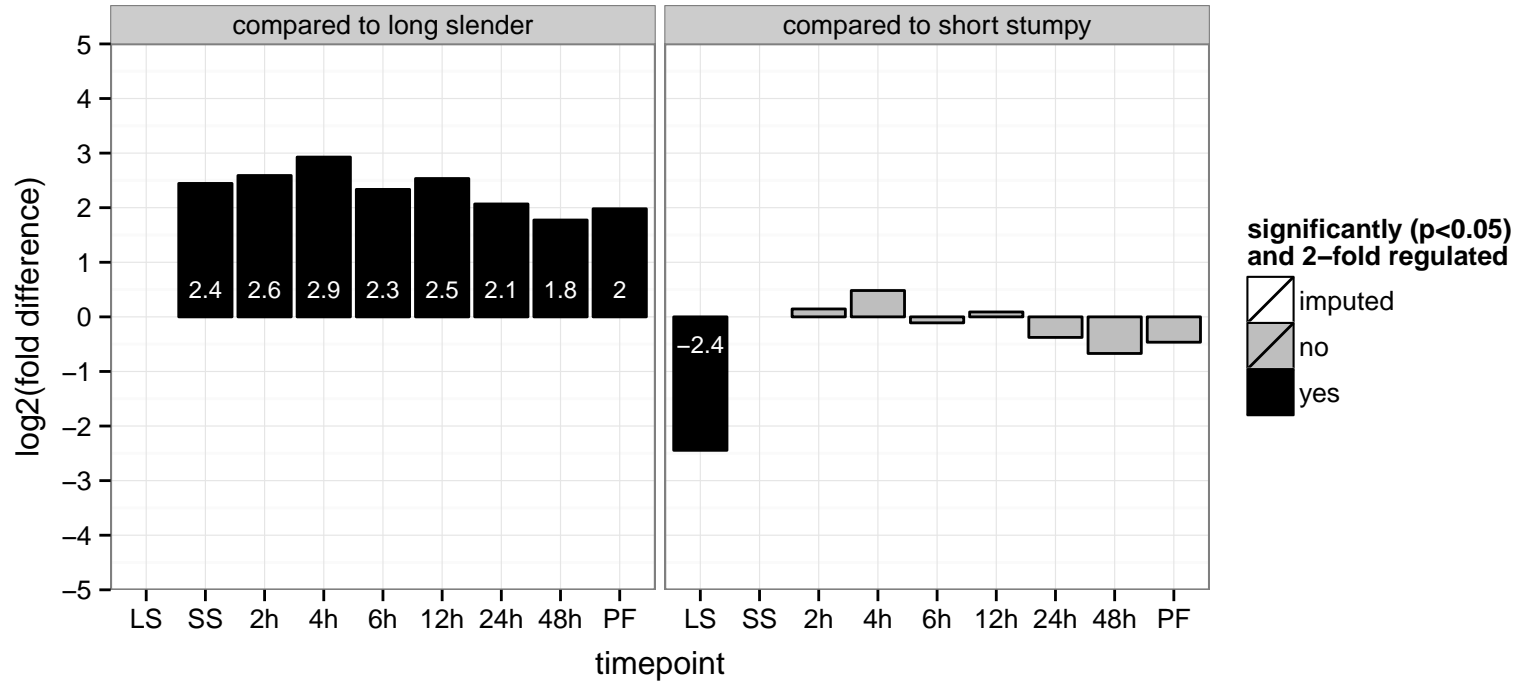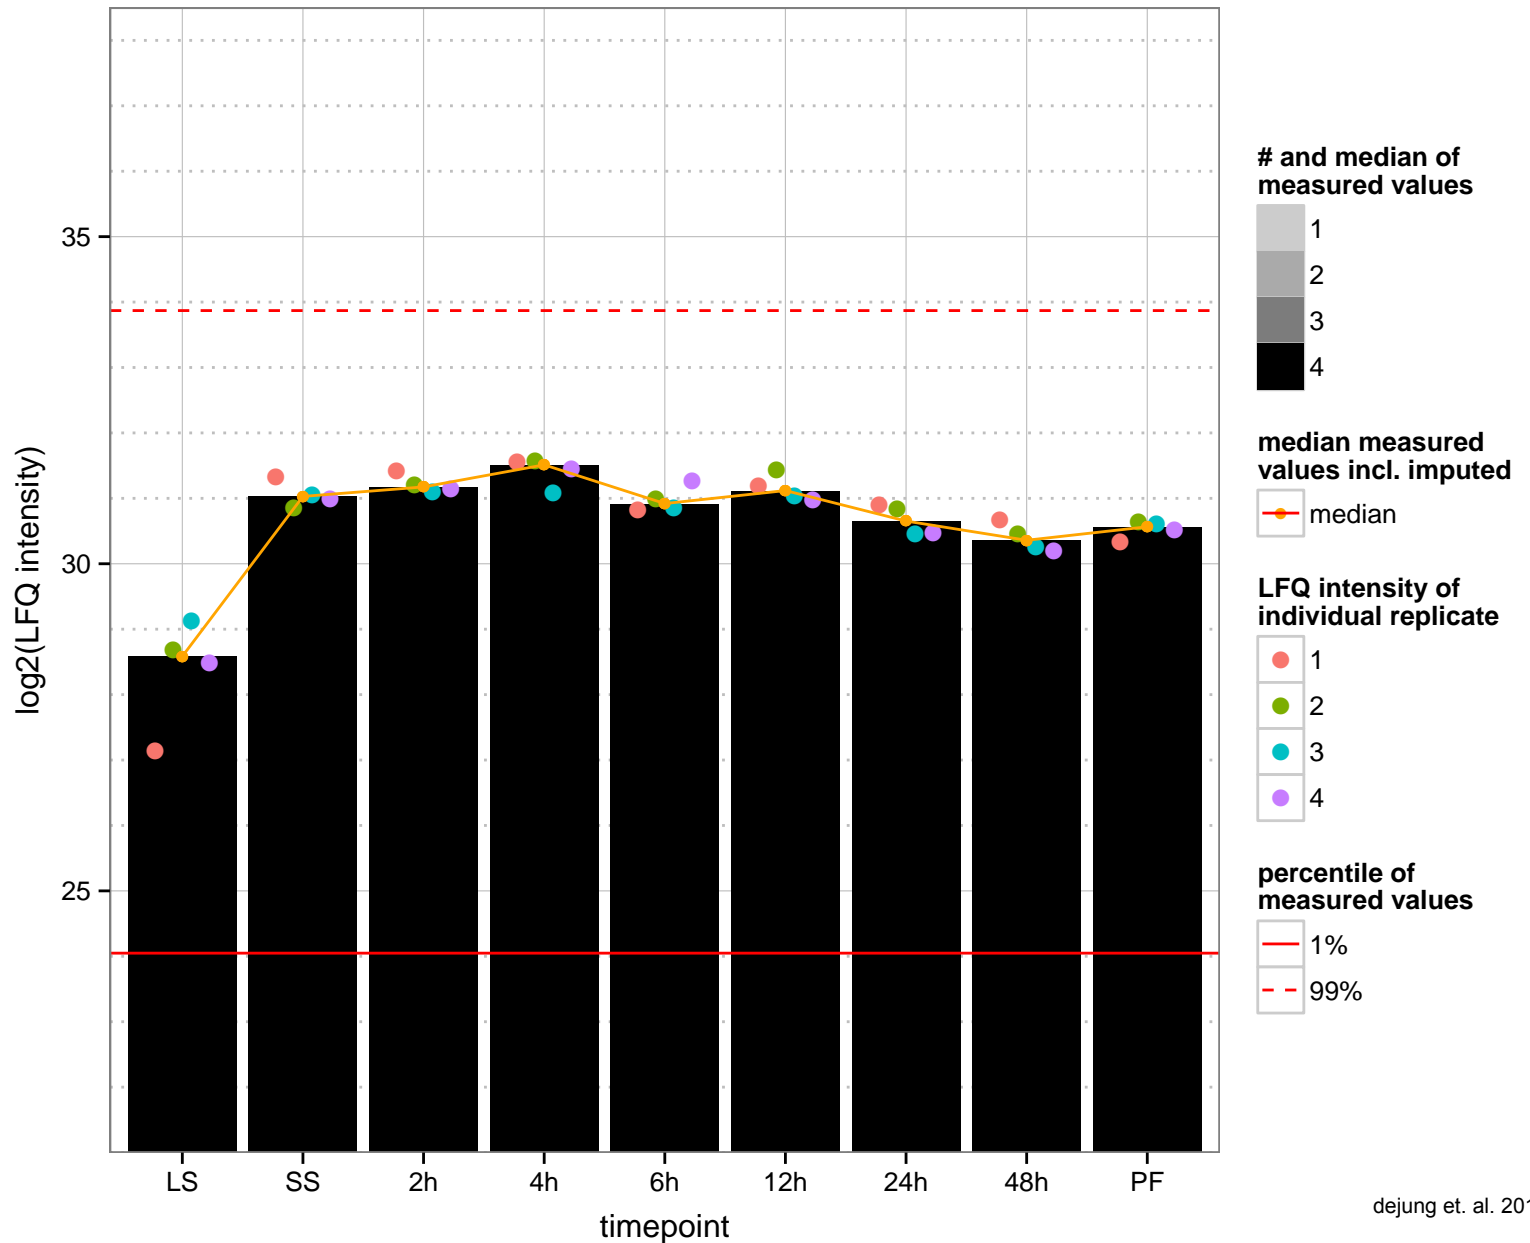

dihydroorotase, putative

Tb927.8.5630

AGOF: hydrolase activity, acting on carbon–nitrogen (but not peptide) bonds, in cyclic amides

AGOC: null

AGOP: pyrimidine nucleobase biosynthetic process

PGOF: hydrolase activity, acting on carbon–nitrogen (but not peptide) bonds

PGOC: null

PGOP: null

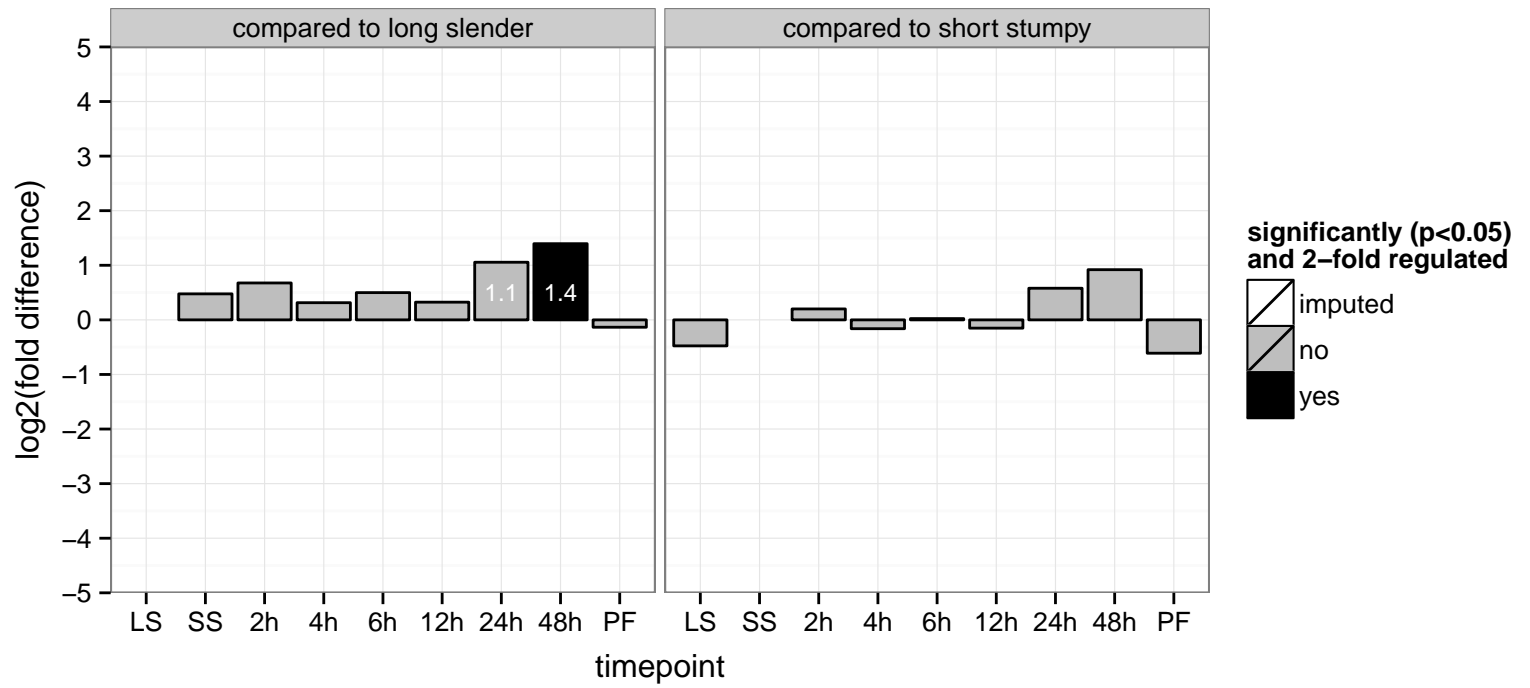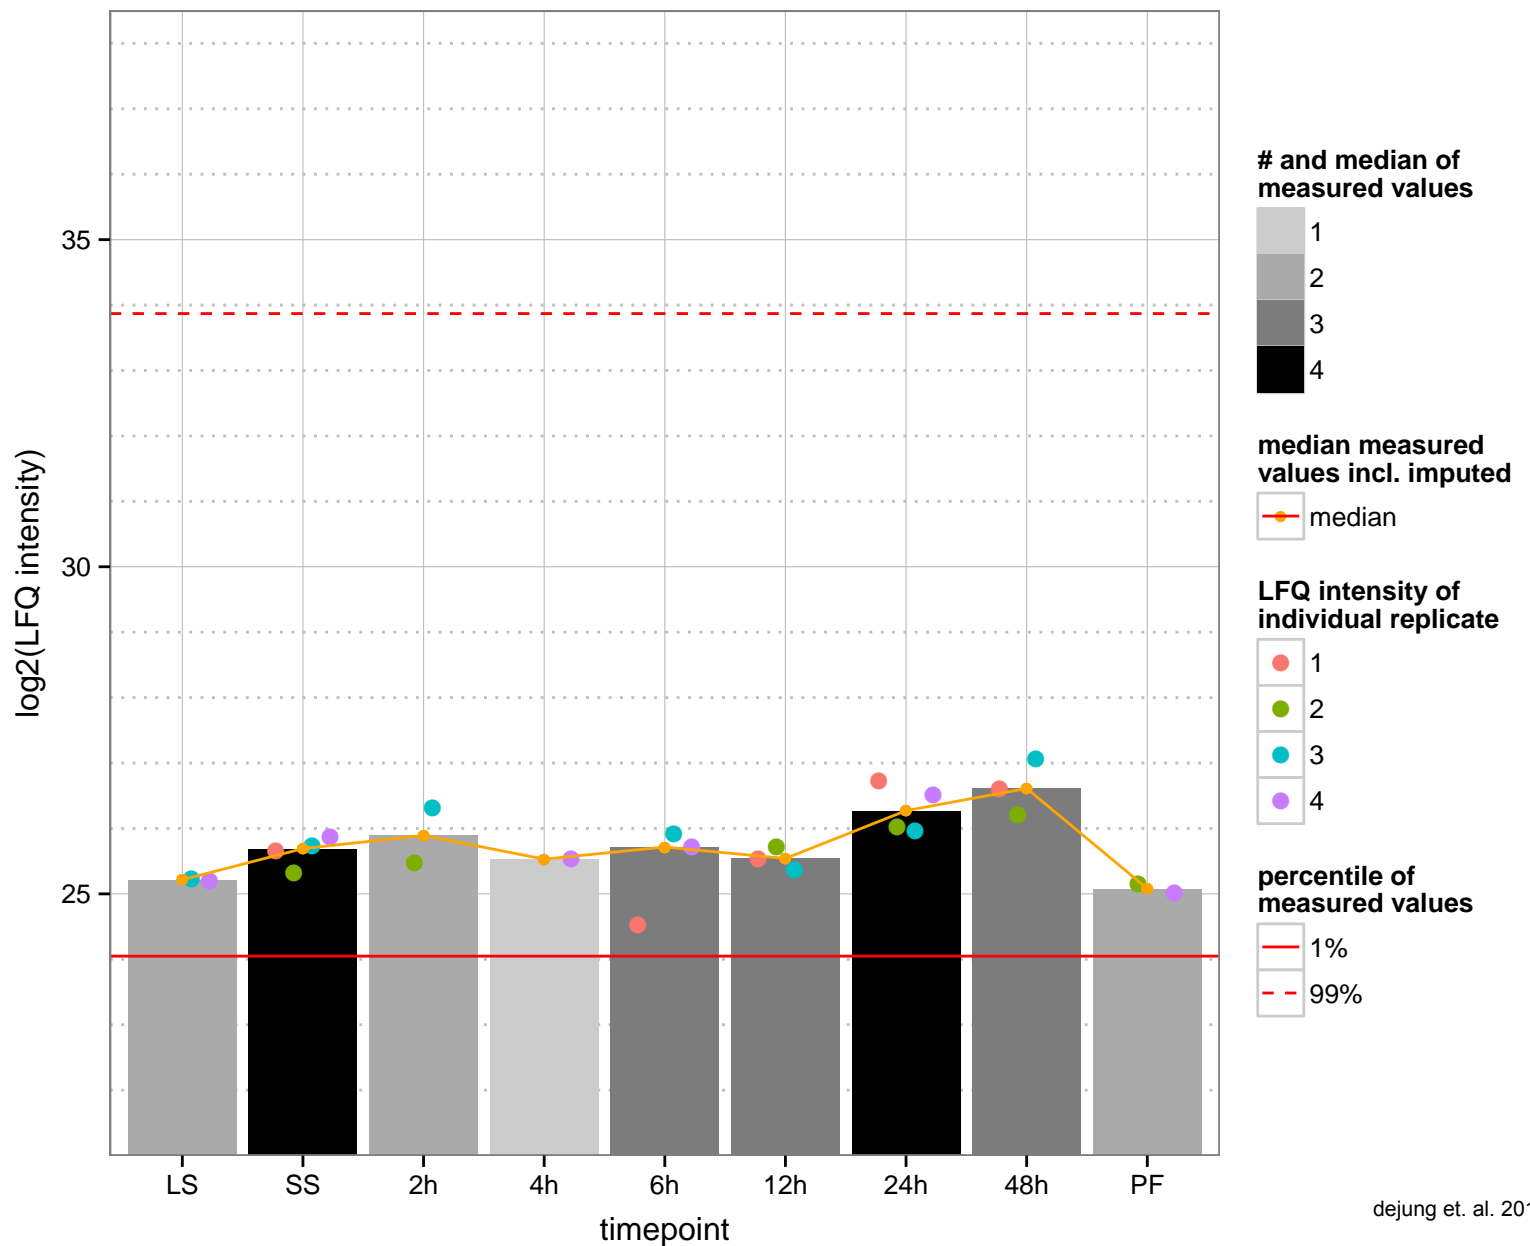

proteasome regulatory non-ATP-ase subunit 10  
 Tb927.8.570  
 AGOF: null  
 AGOC: proteasome complex  
 AGOP: cell growth, ubiquitin-dependent protein catabolic process  
 PGO: protein binding  
 PGO: null  
 PGO: null

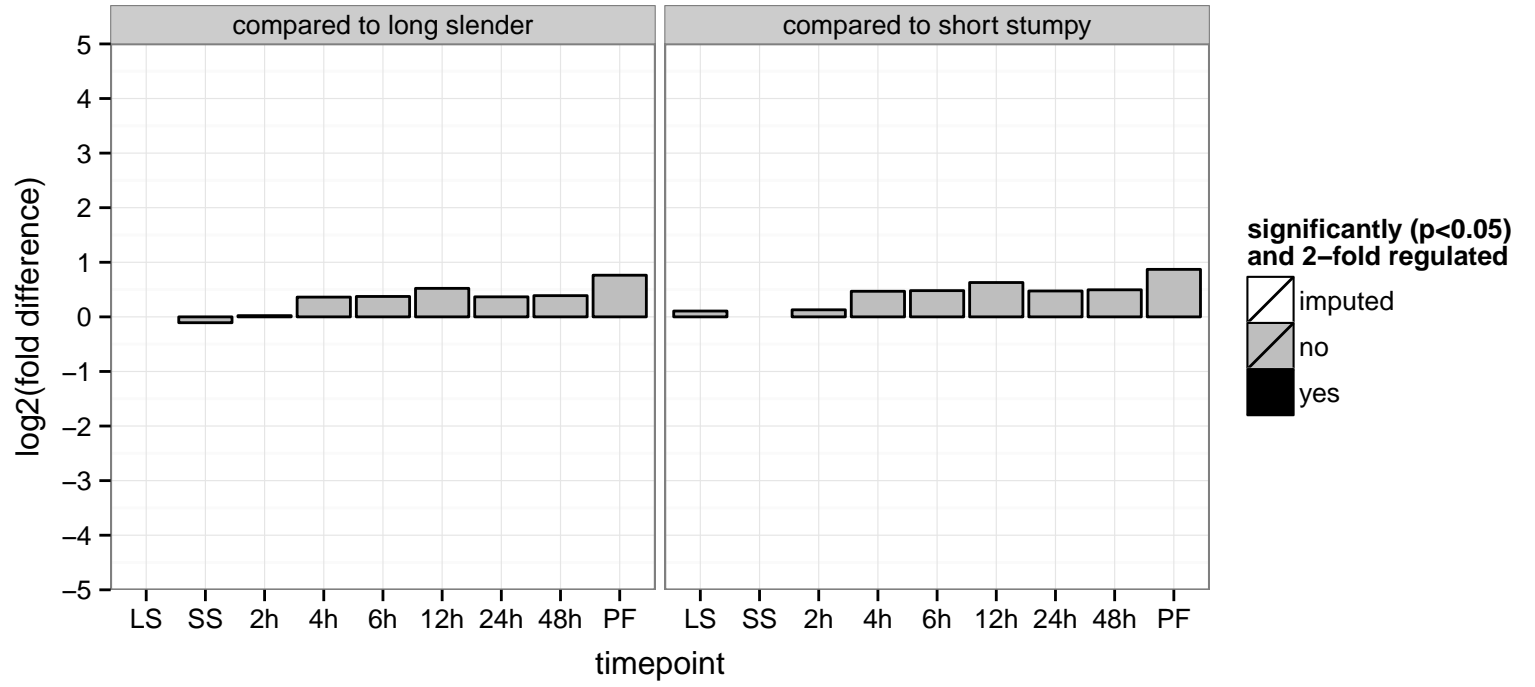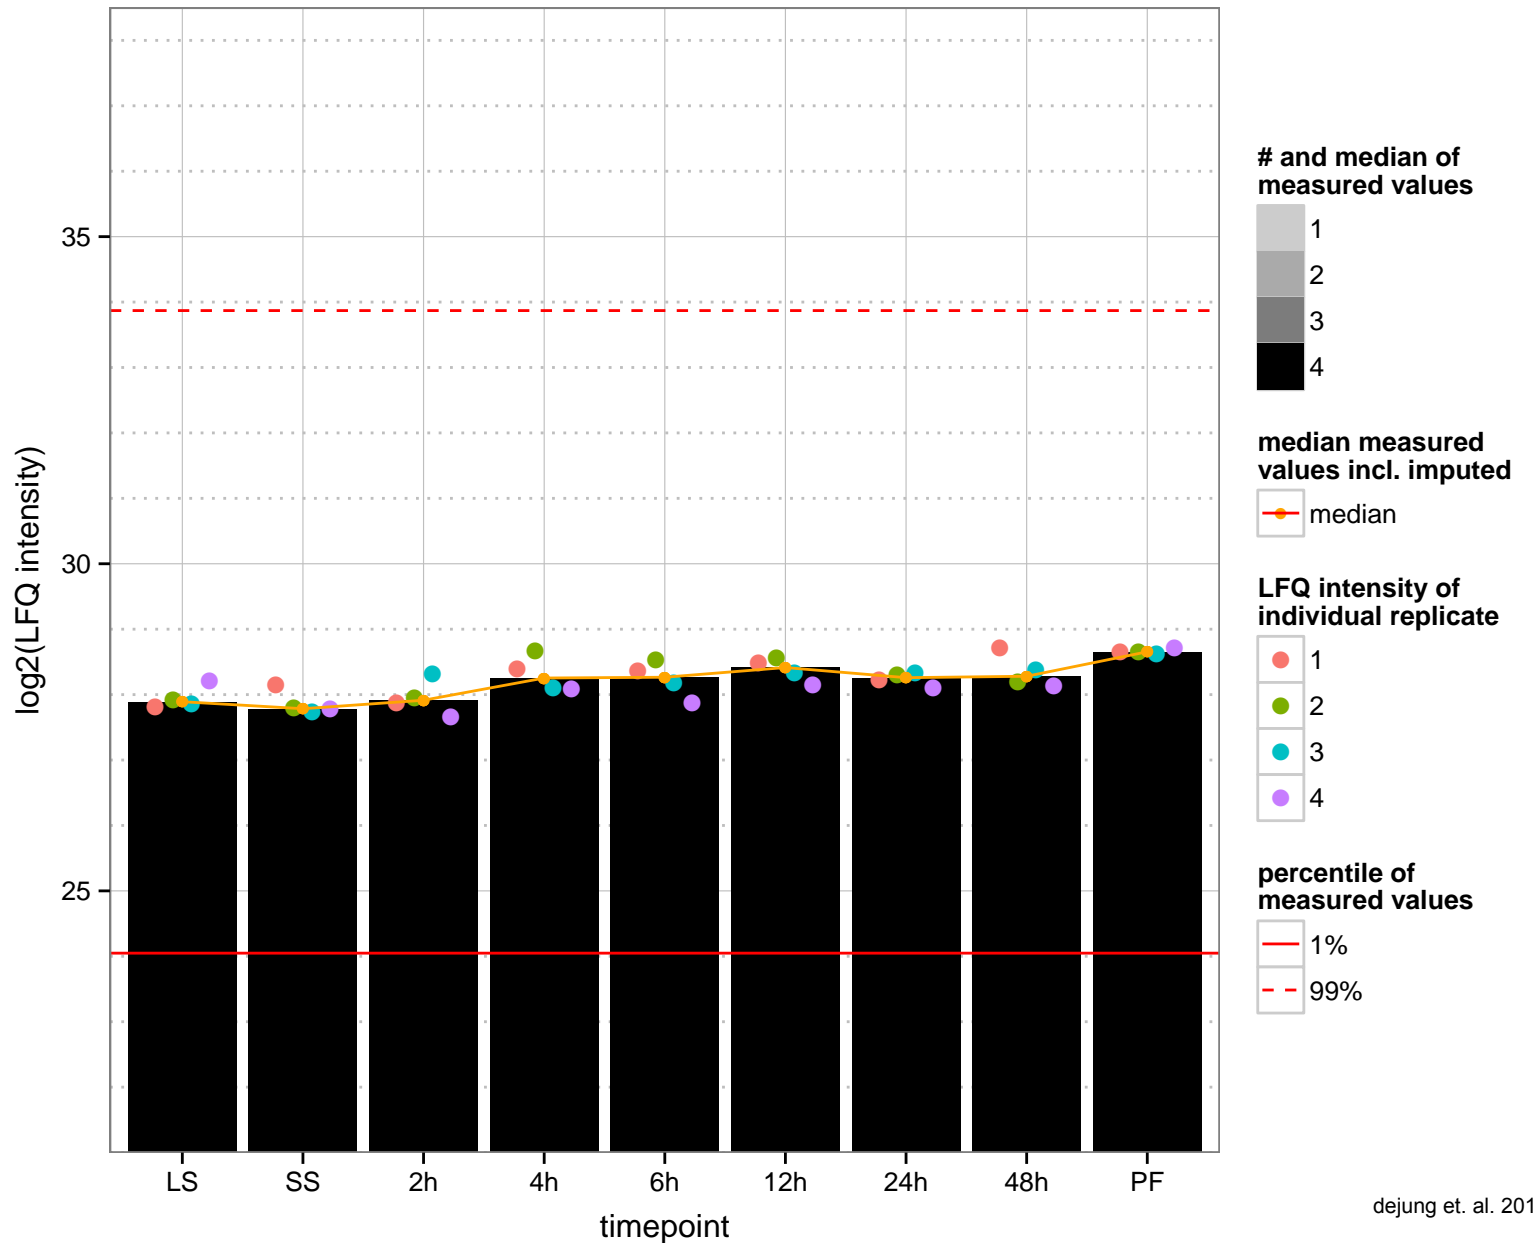

protein kinase, putative

Tb927.8.5730

AGOF: ATP binding, protein kinase activity, protein serine/threonine kinase activity, protein tyrosine kinase activity

AGOC: null

AGOP: growth, protein phosphorylation

PGOF: ATP binding, protein kinase activity, transferase activity, transferring phosphorus-containing groups

PGOC: null

PGOP: protein phosphorylation

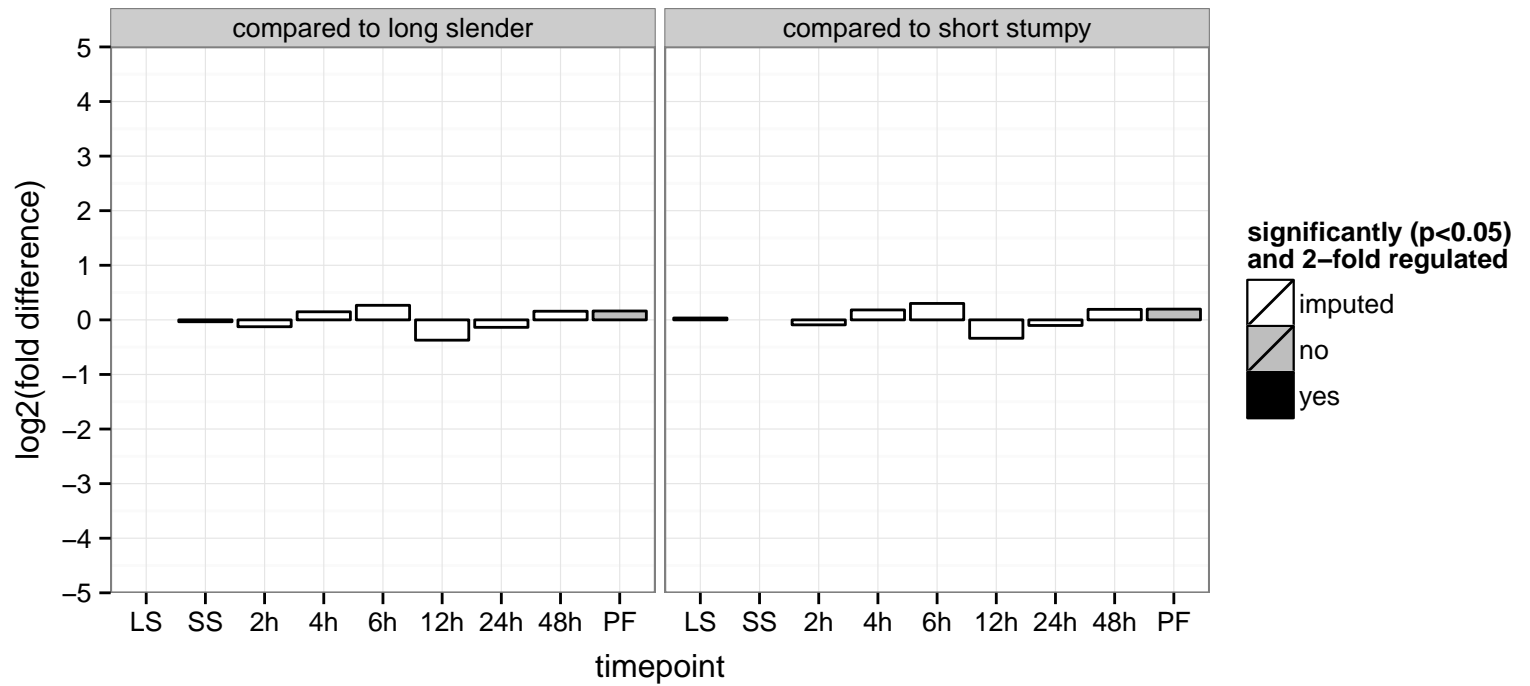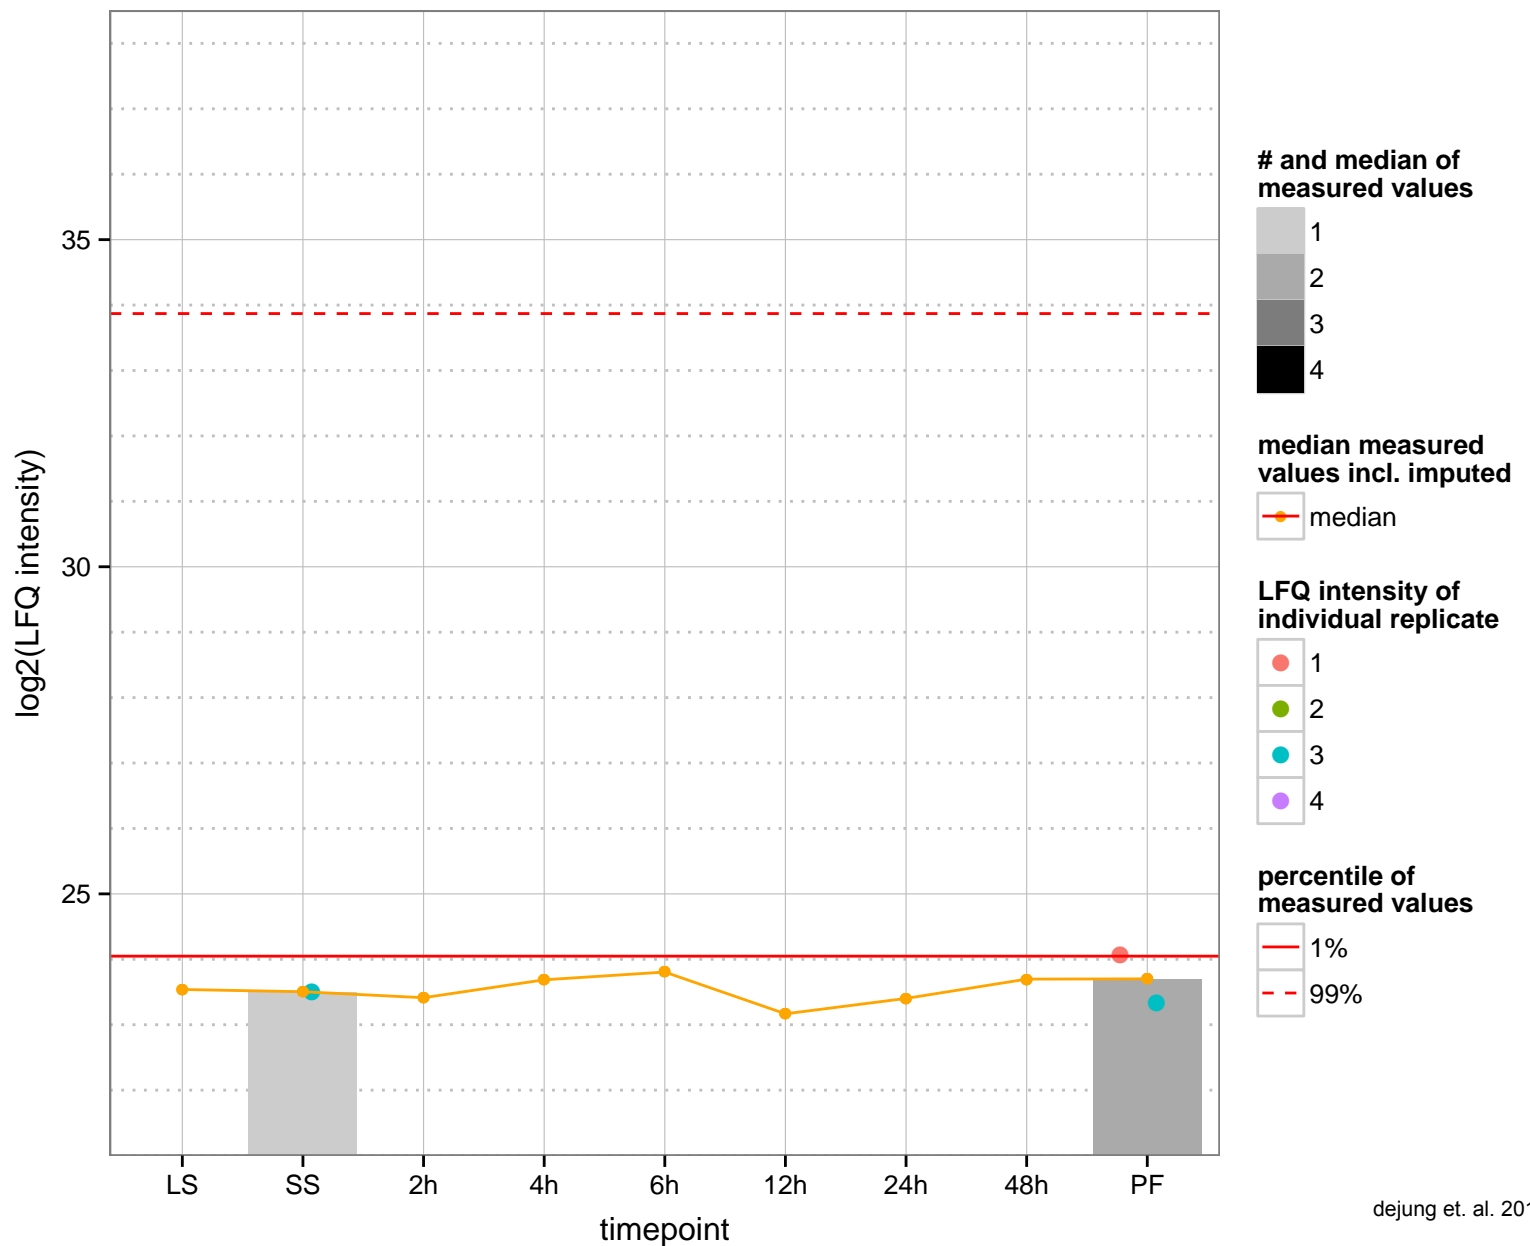

hypothetical protein, conserved  
 Tb927.8.5820  
 AGOF: null  
 AGOC: null  
 AGOP: null  
 PGOF: null  
 PGOC: null  
 PGOP: null

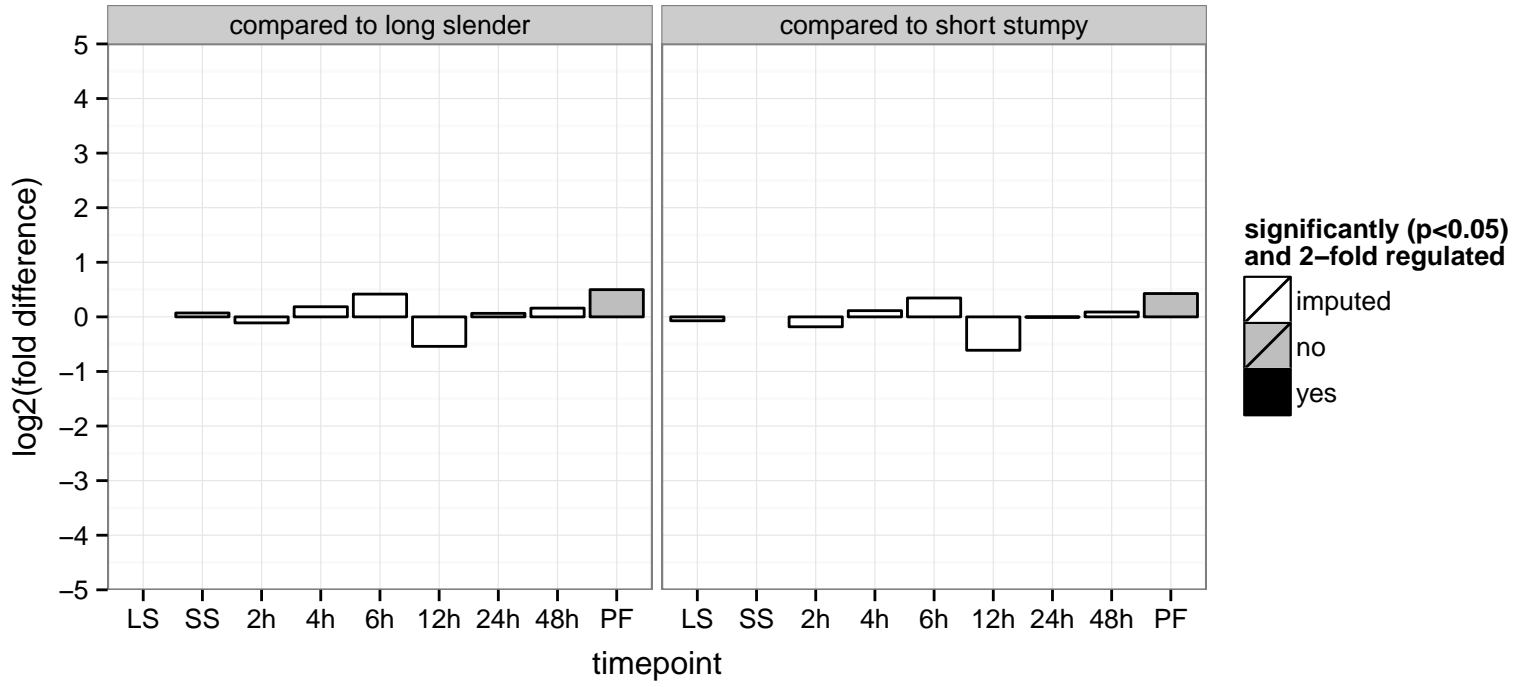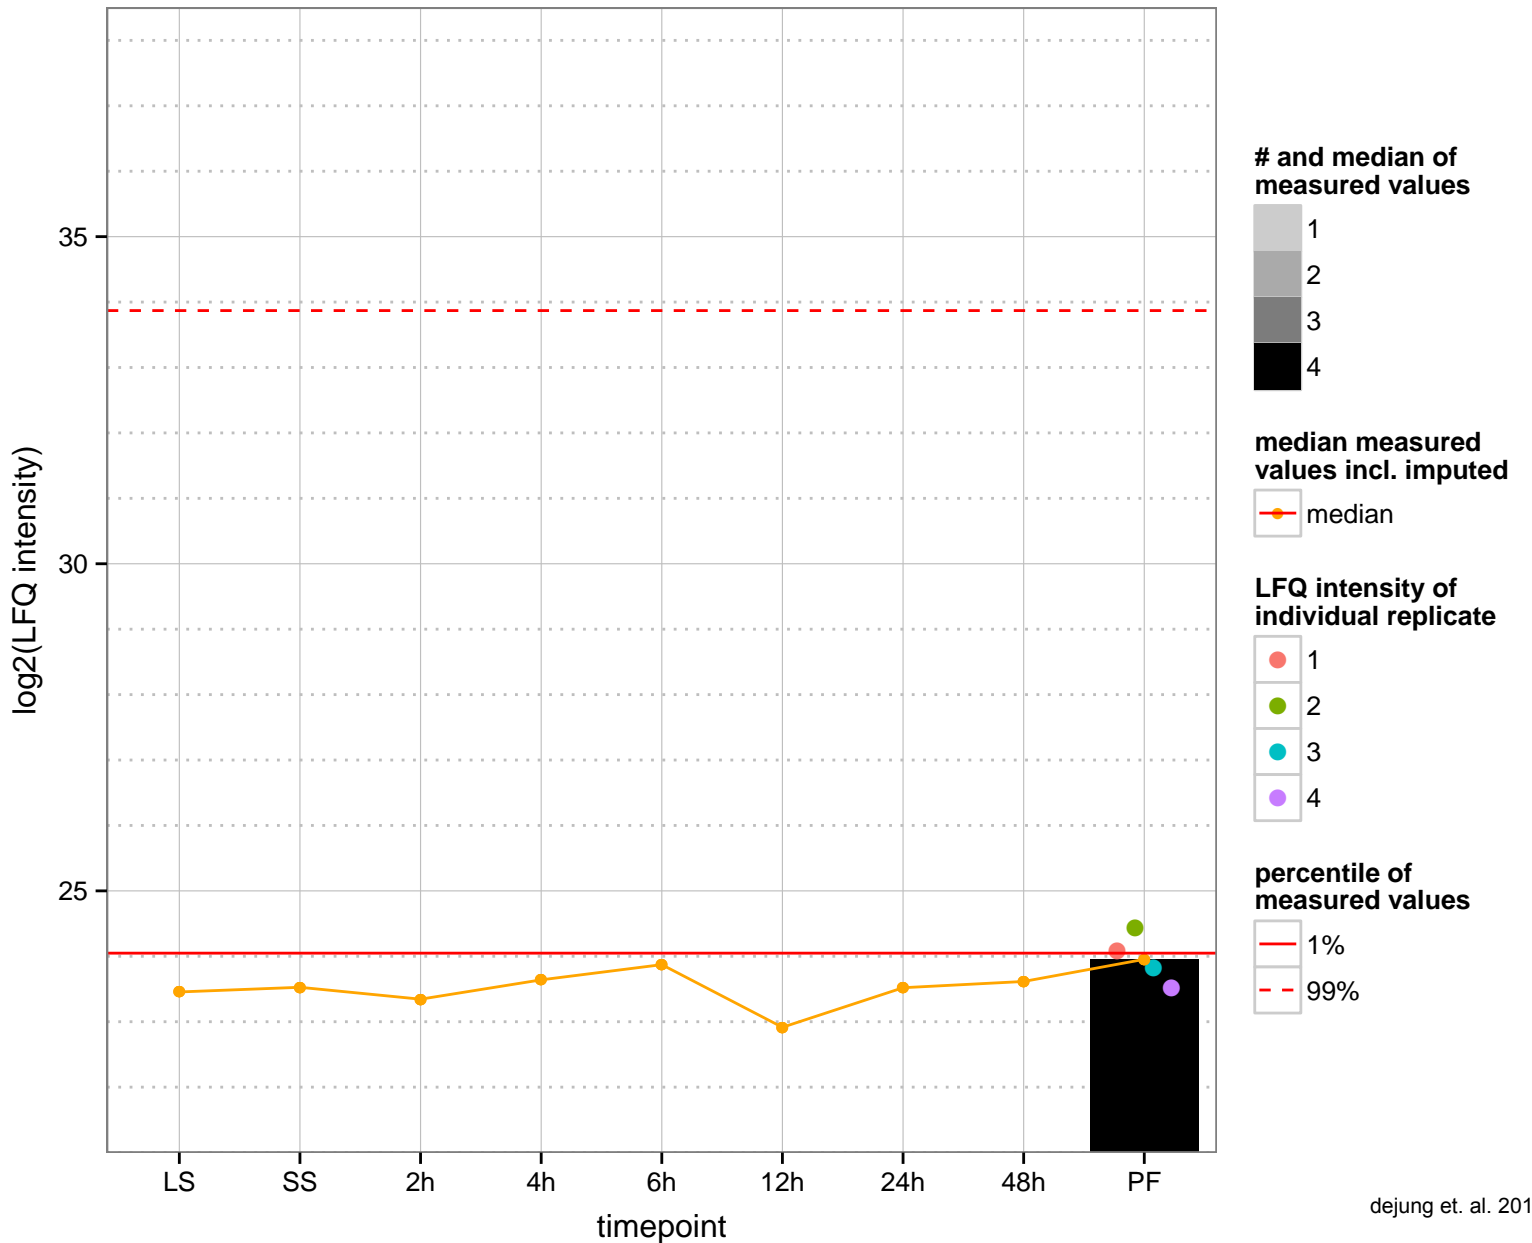

hypothetical protein, conserved  
 Tb927.8.5830  
 AGOF: null  
 AGOC: null  
 AGOP: null  
 PGO: null  
 PGOC: null  
 PGOP: null

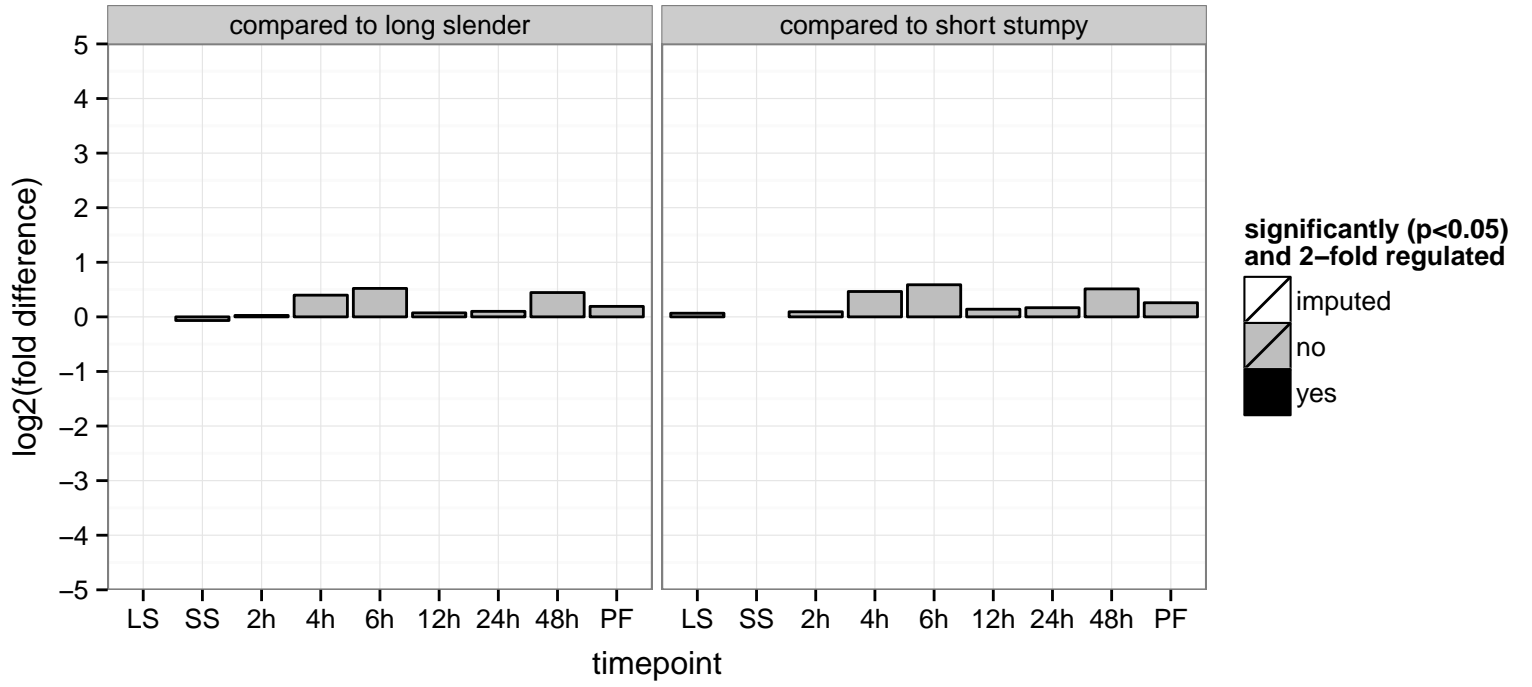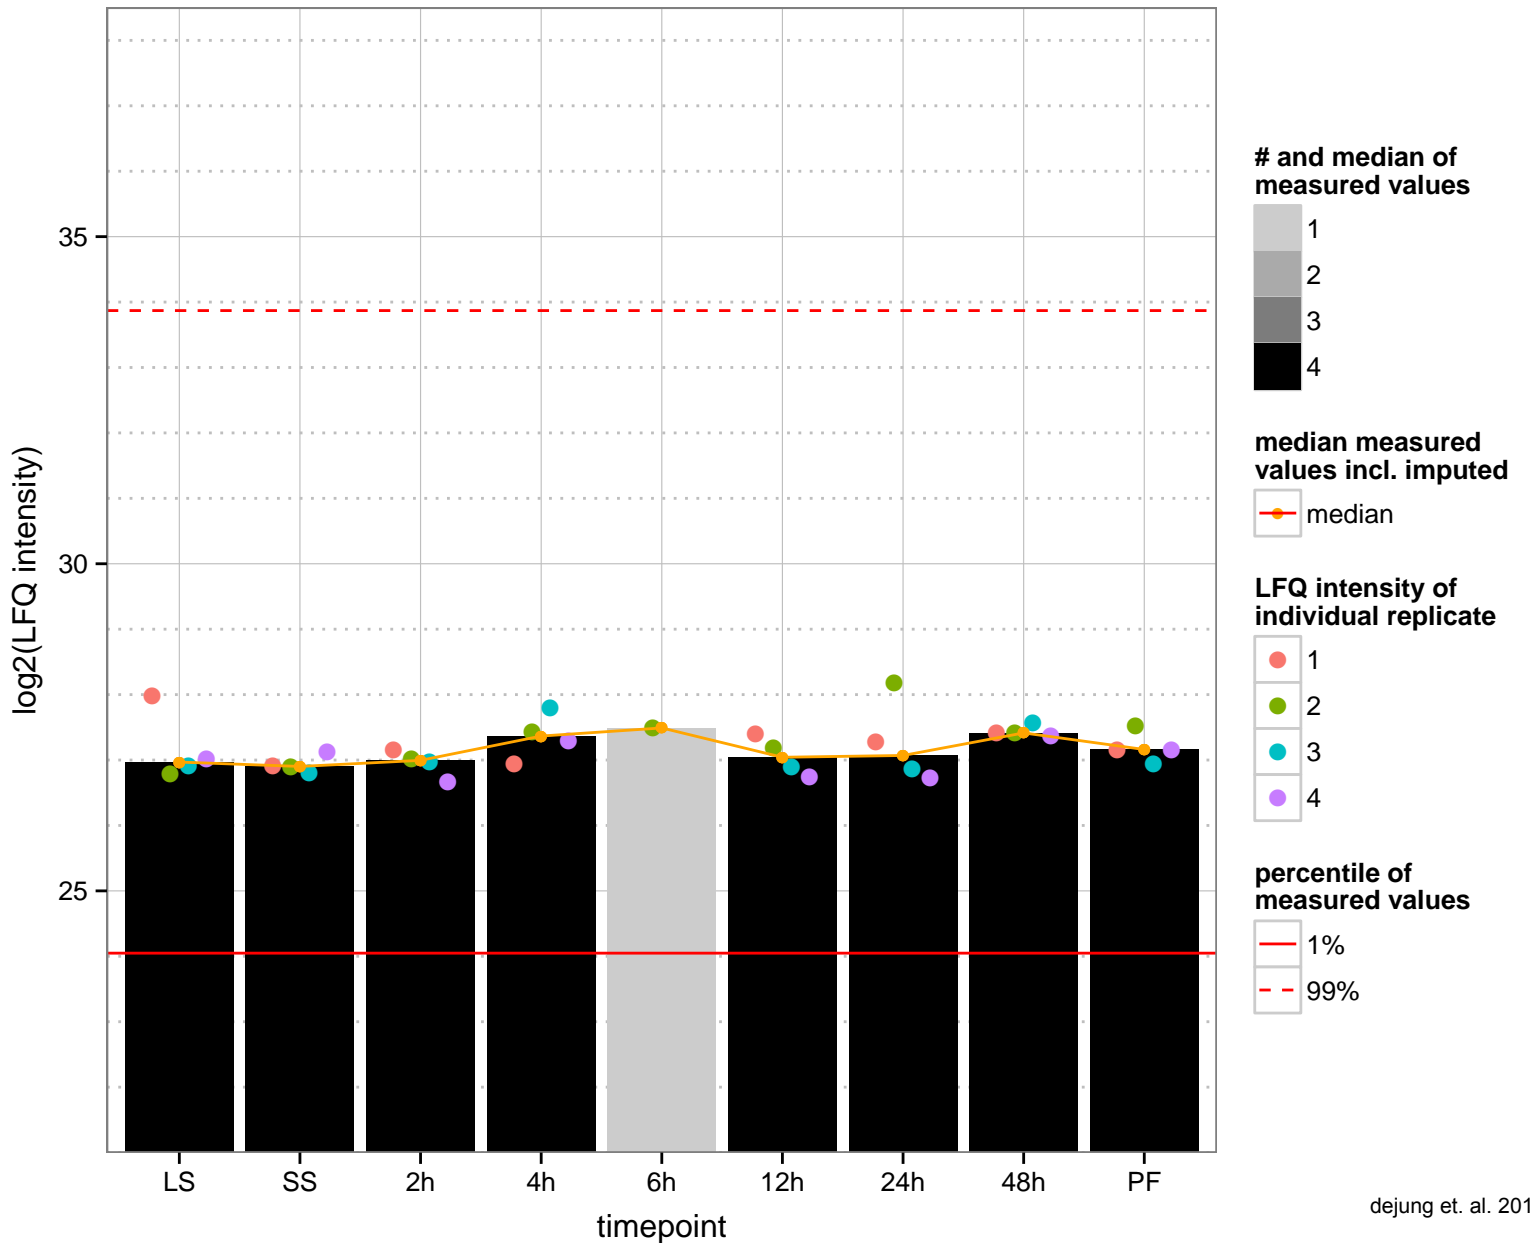



hypothetical protein, conserved  
 Tb927.8.5890  
 AGOF: null  
 AGOC: nucleus  
 AGOP: chromatin assembly or disassembly  
 PGO: null  
 PGO: nucleus  
 PGO: chromatin assembly or disassembly

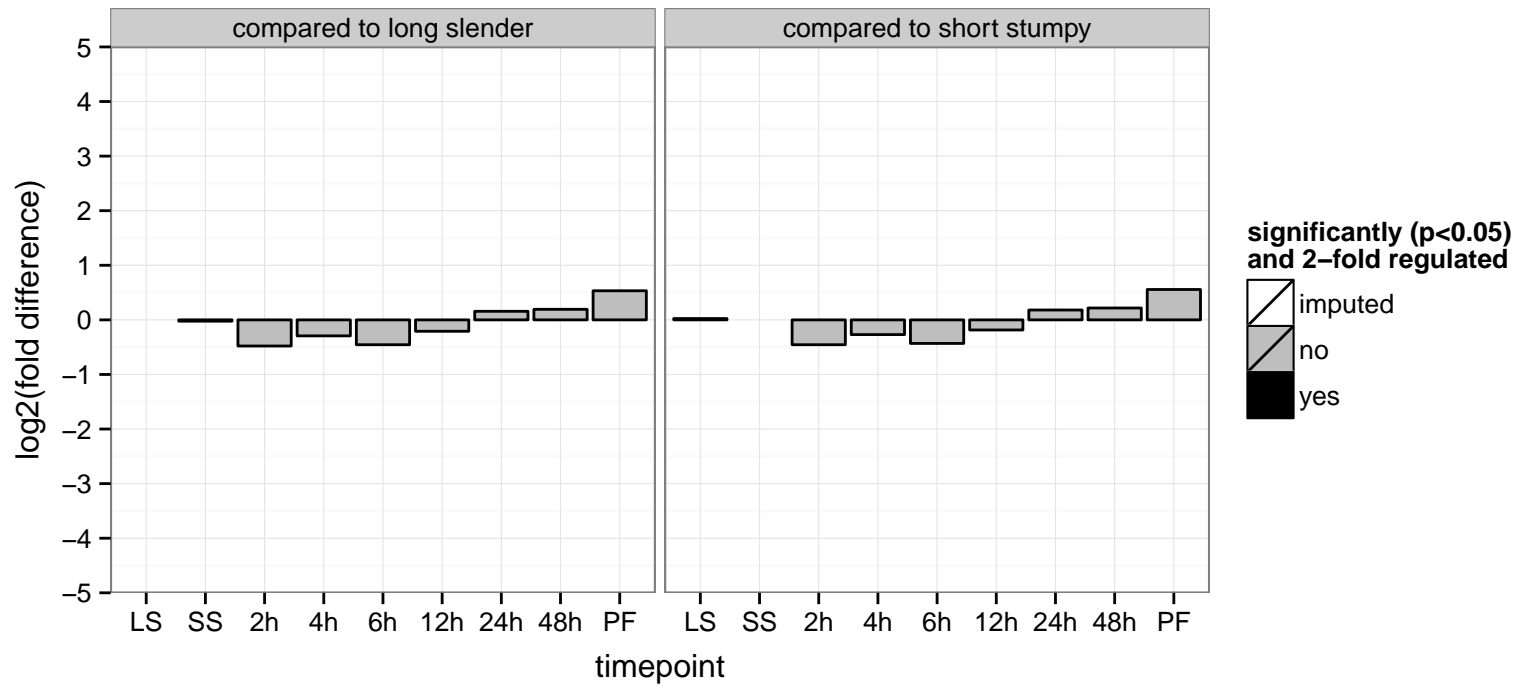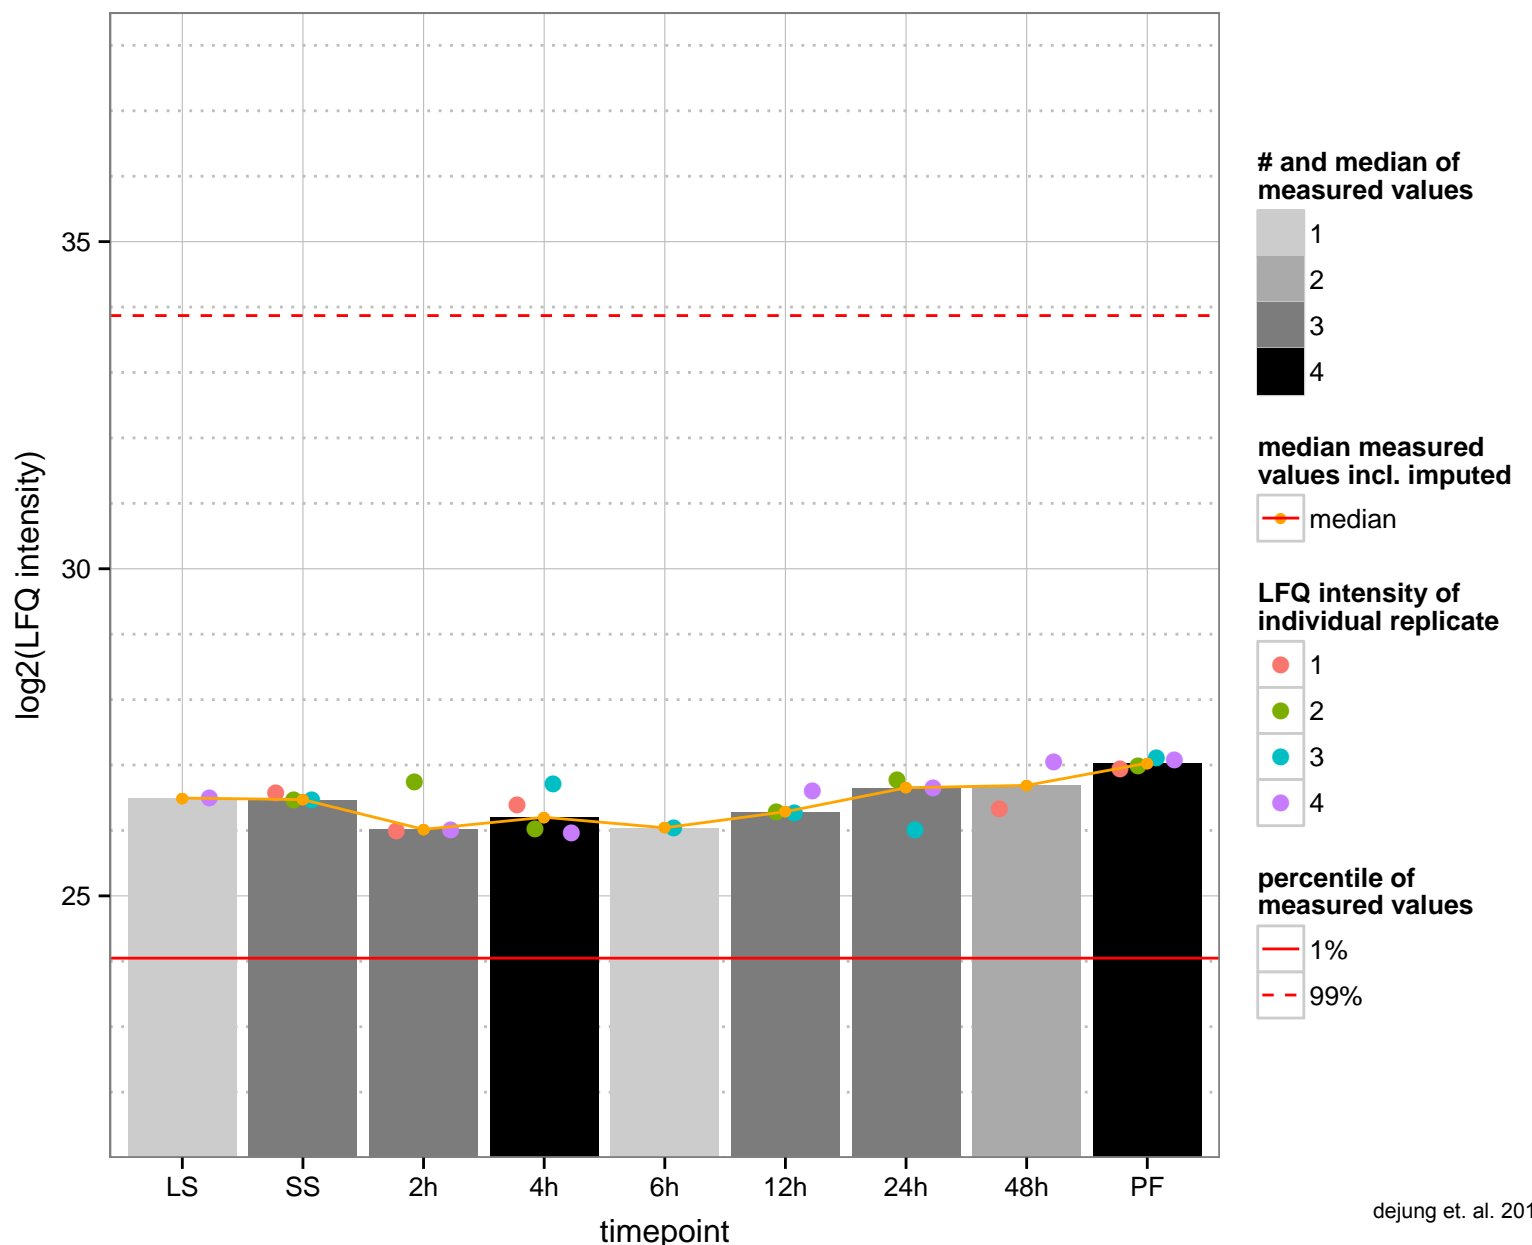

carnitine O-palmitoyltransferase, putative  
 Tb927.8.590  
 AGOF: carnitine O-acetyltransferase activity  
 AGOC: mitochondrion  
 AGOP: generation of precursor metabolites and energy  
 PGOF: transferase activity, transferring acyl groups  
 PGO: null  
 PGOP: null

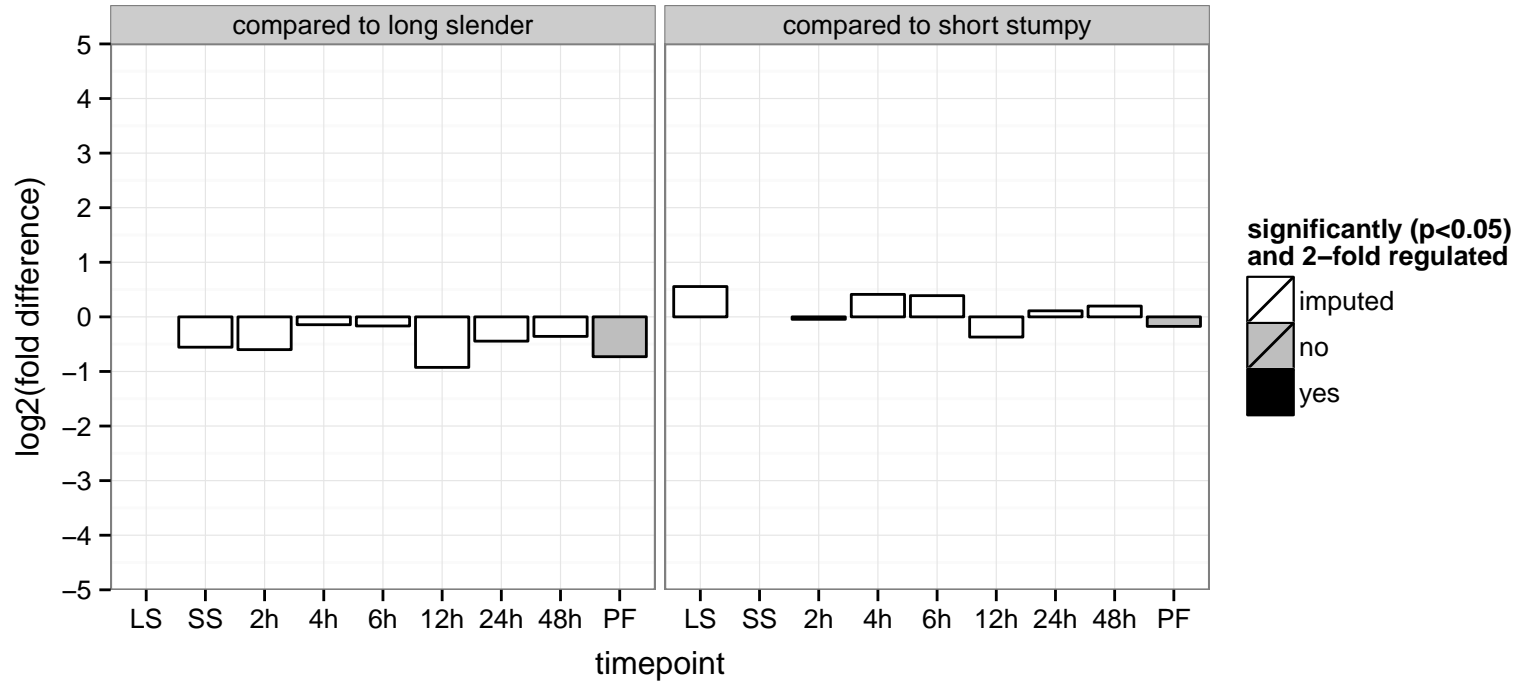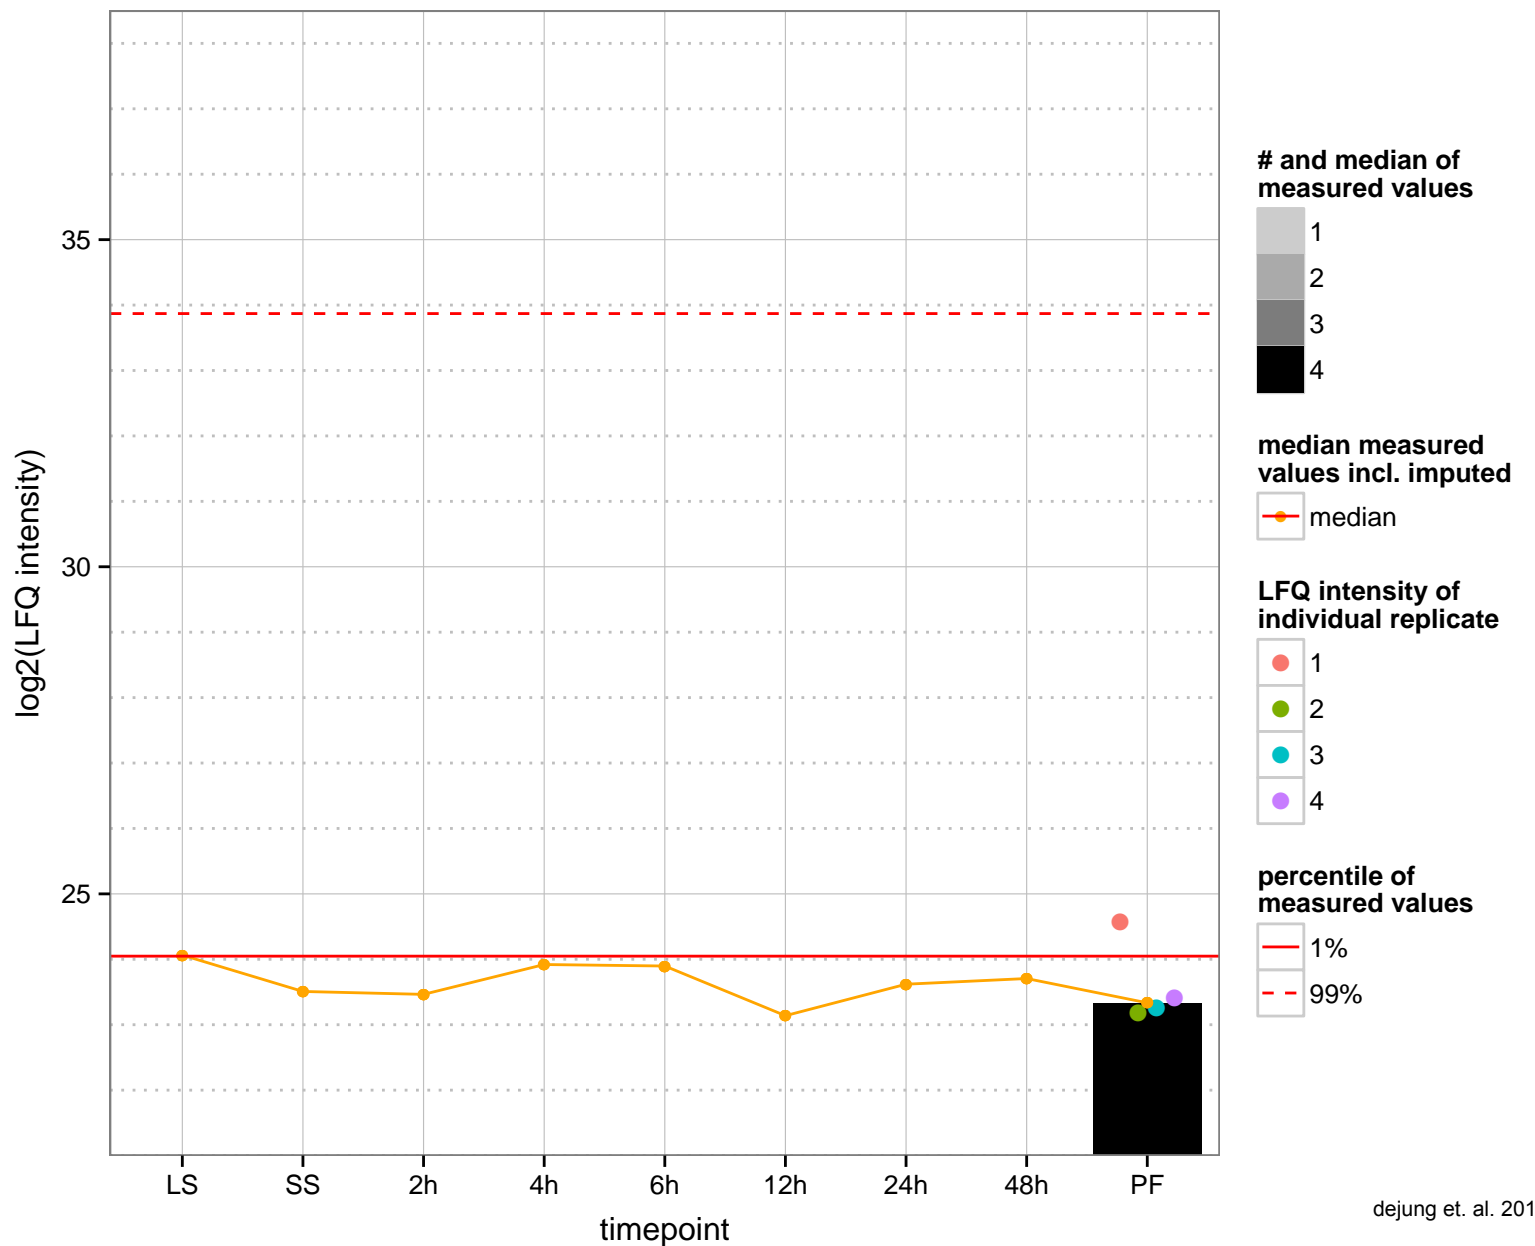

hypothetical protein, conserved  
 Tb927.8.5940  
 AGOF: null  
 AGOC: null  
 AGOP: null  
 PGOF: null  
 PGO: null  
 PGOP: null

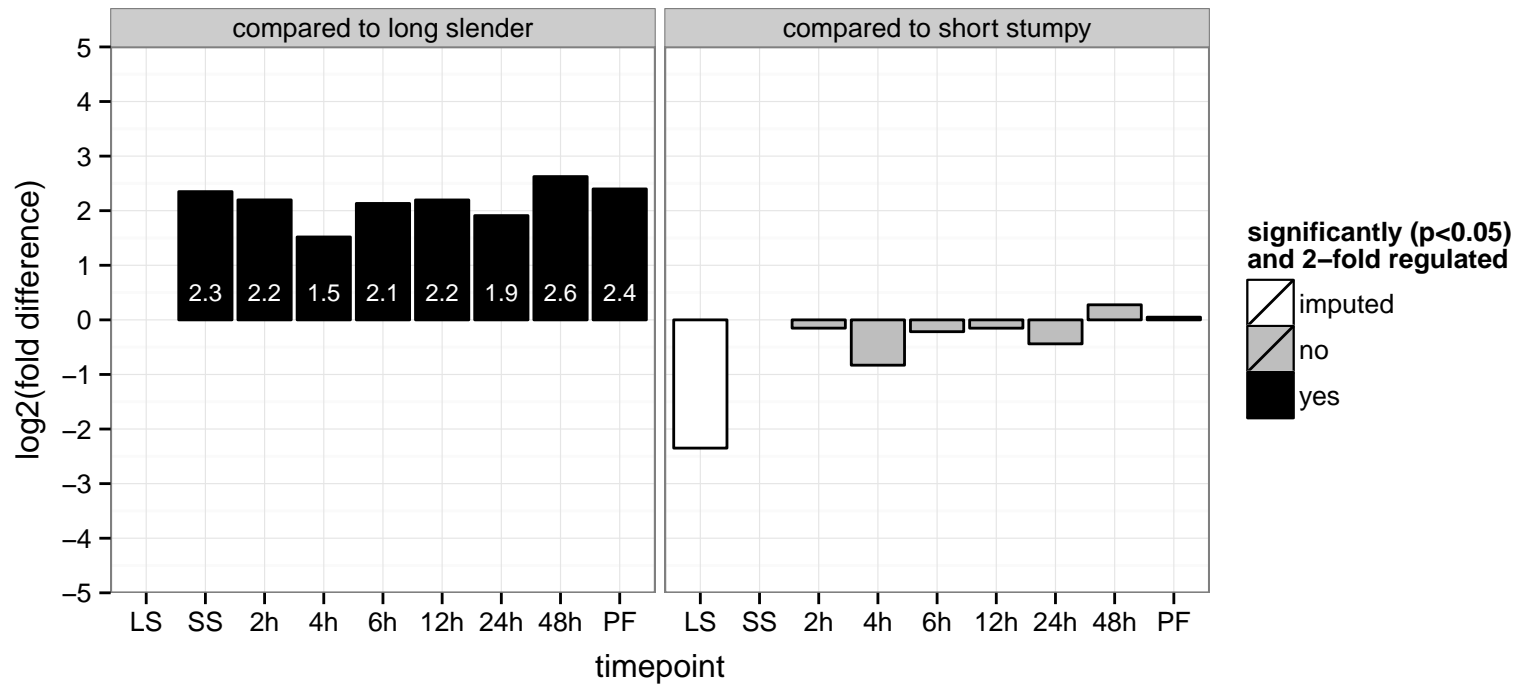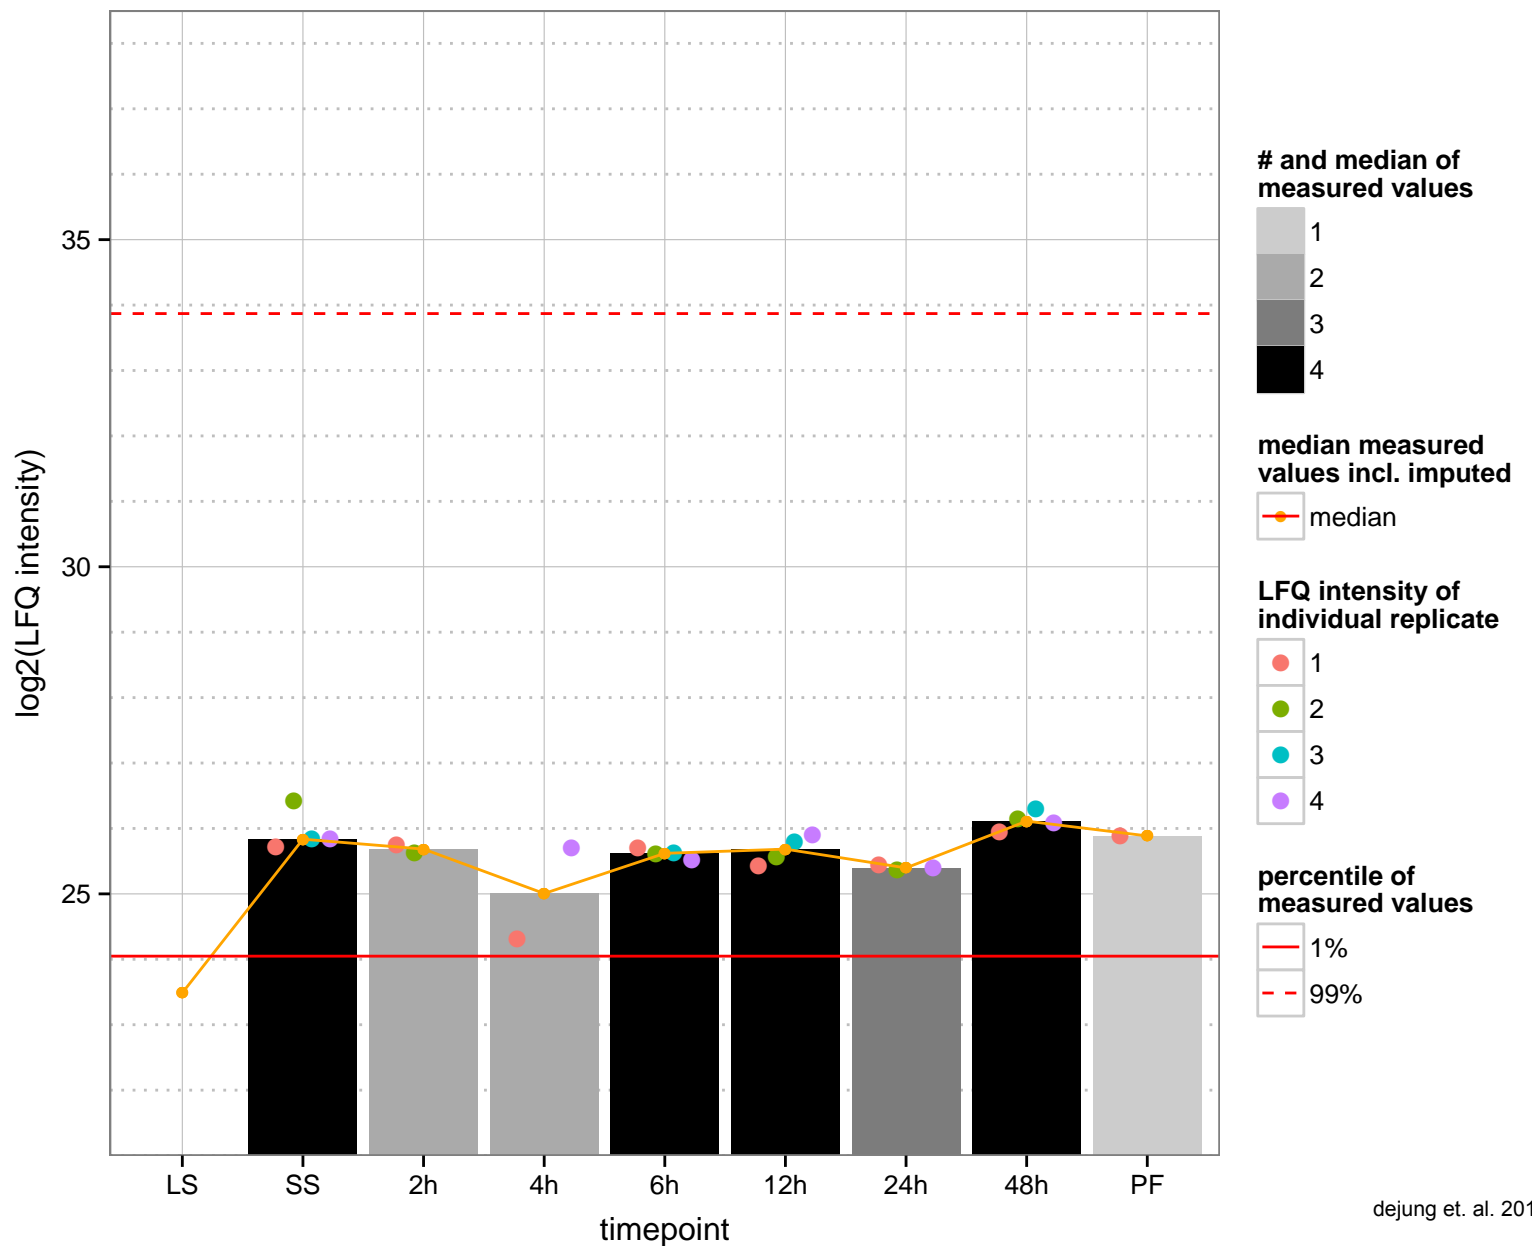

60S ribosomal protein L12, putative  
 Tb927.8.6030;Tb927.9.14000  
 AGOF: structural constituent of ribosome  
 AGOC: intracellular, ribosome  
 AGOP: translation  
 PGOF: structural constituent of ribosome  
 PGO: ribosome  
 PGOP: translation

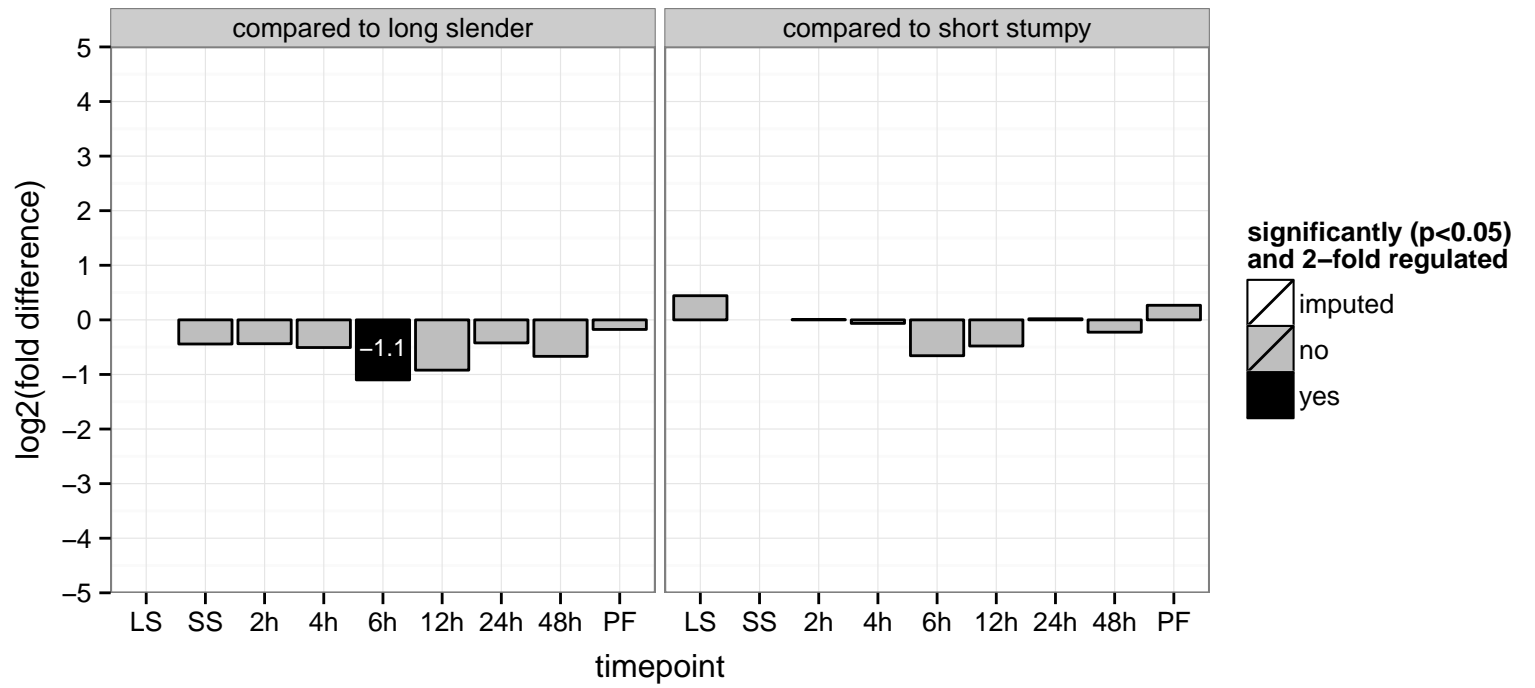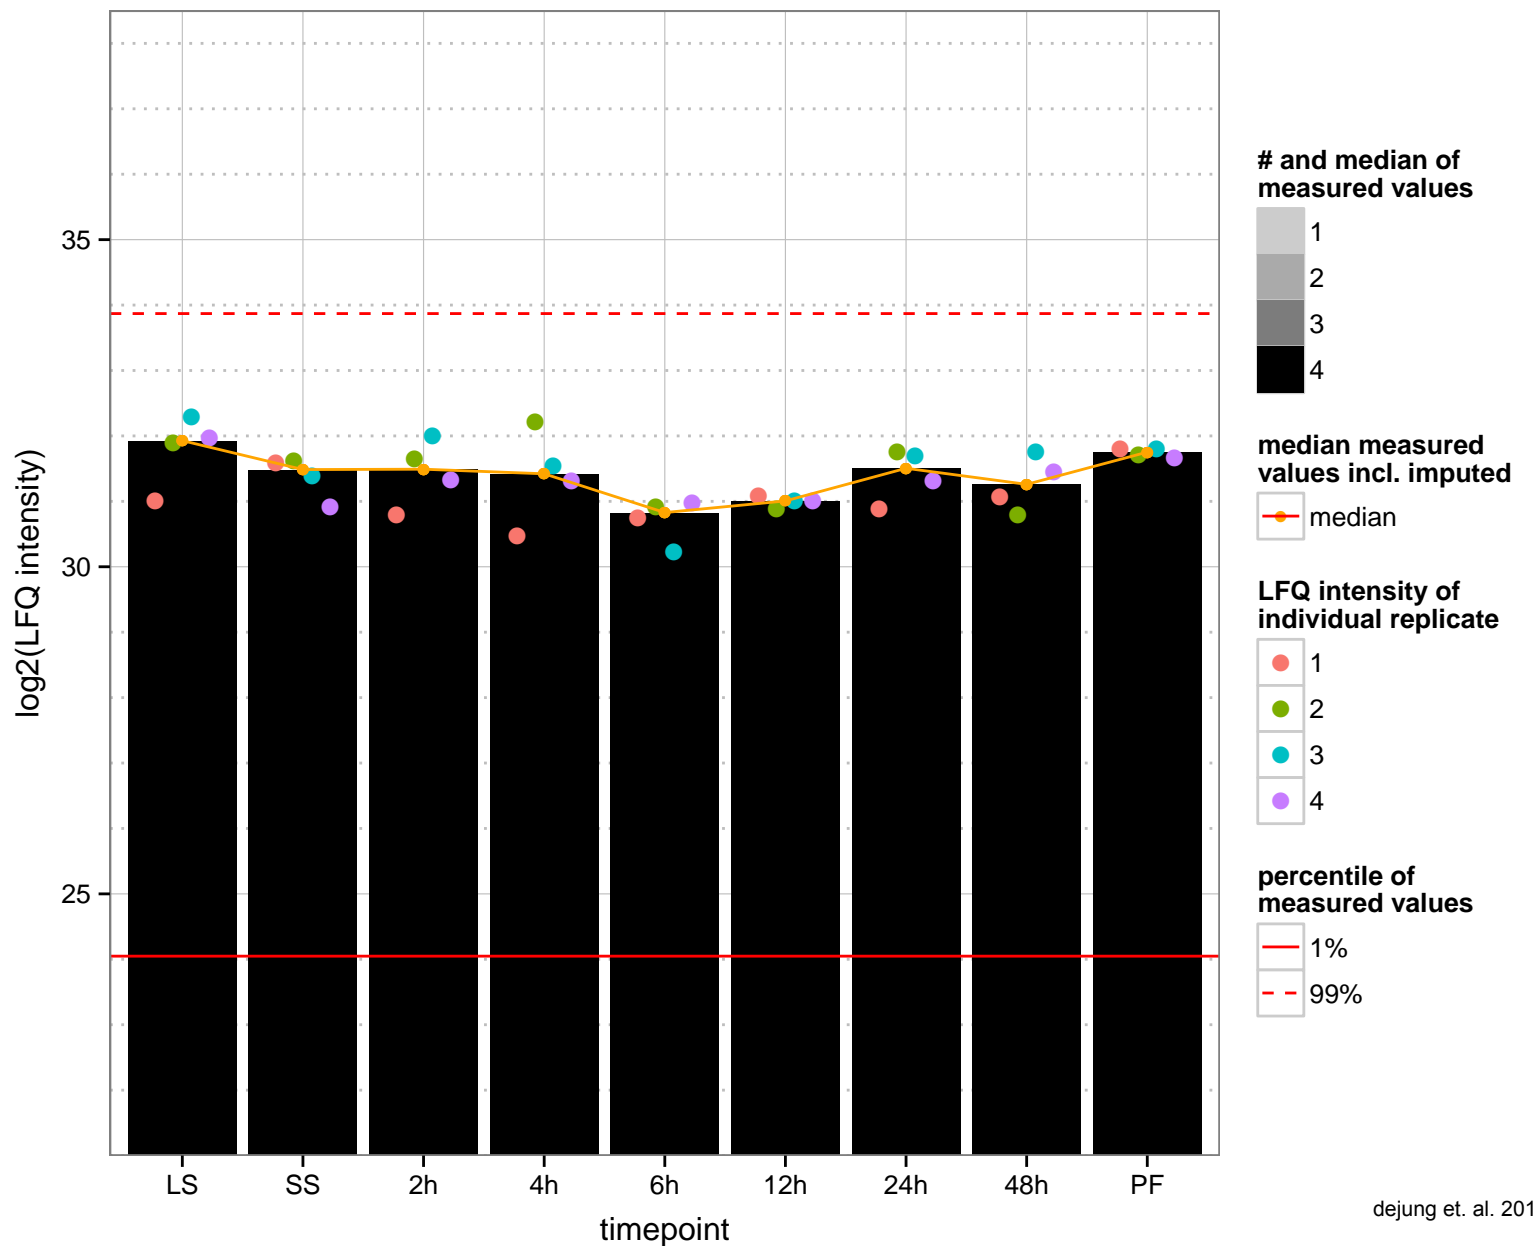

2-amino-3-ketobutyrate coenzyme A ligase, putative, glycine acetyltransferase

Tb927.8.6060

AGOF: glycine C-acetyltransferase activity, pyridoxal phosphate binding, transferase activity, transferring nitrogenous groups

AGOC: mitochondrion

AGOP: biosynthetic process, threonine catabolic process

PGOF: glycine C-acetyltransferase activity, pyridoxal phosphate binding, transferase activity

PGOC: null

PGOP: biosynthetic process

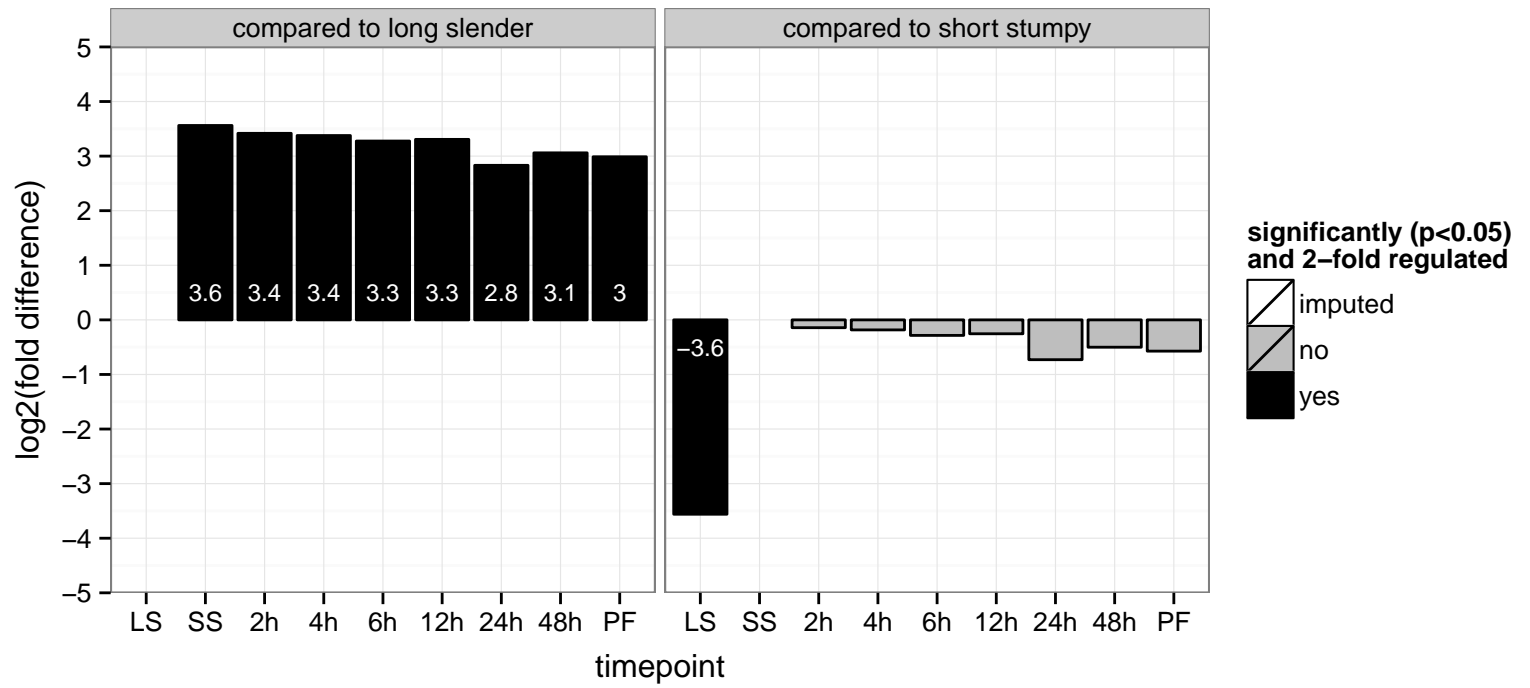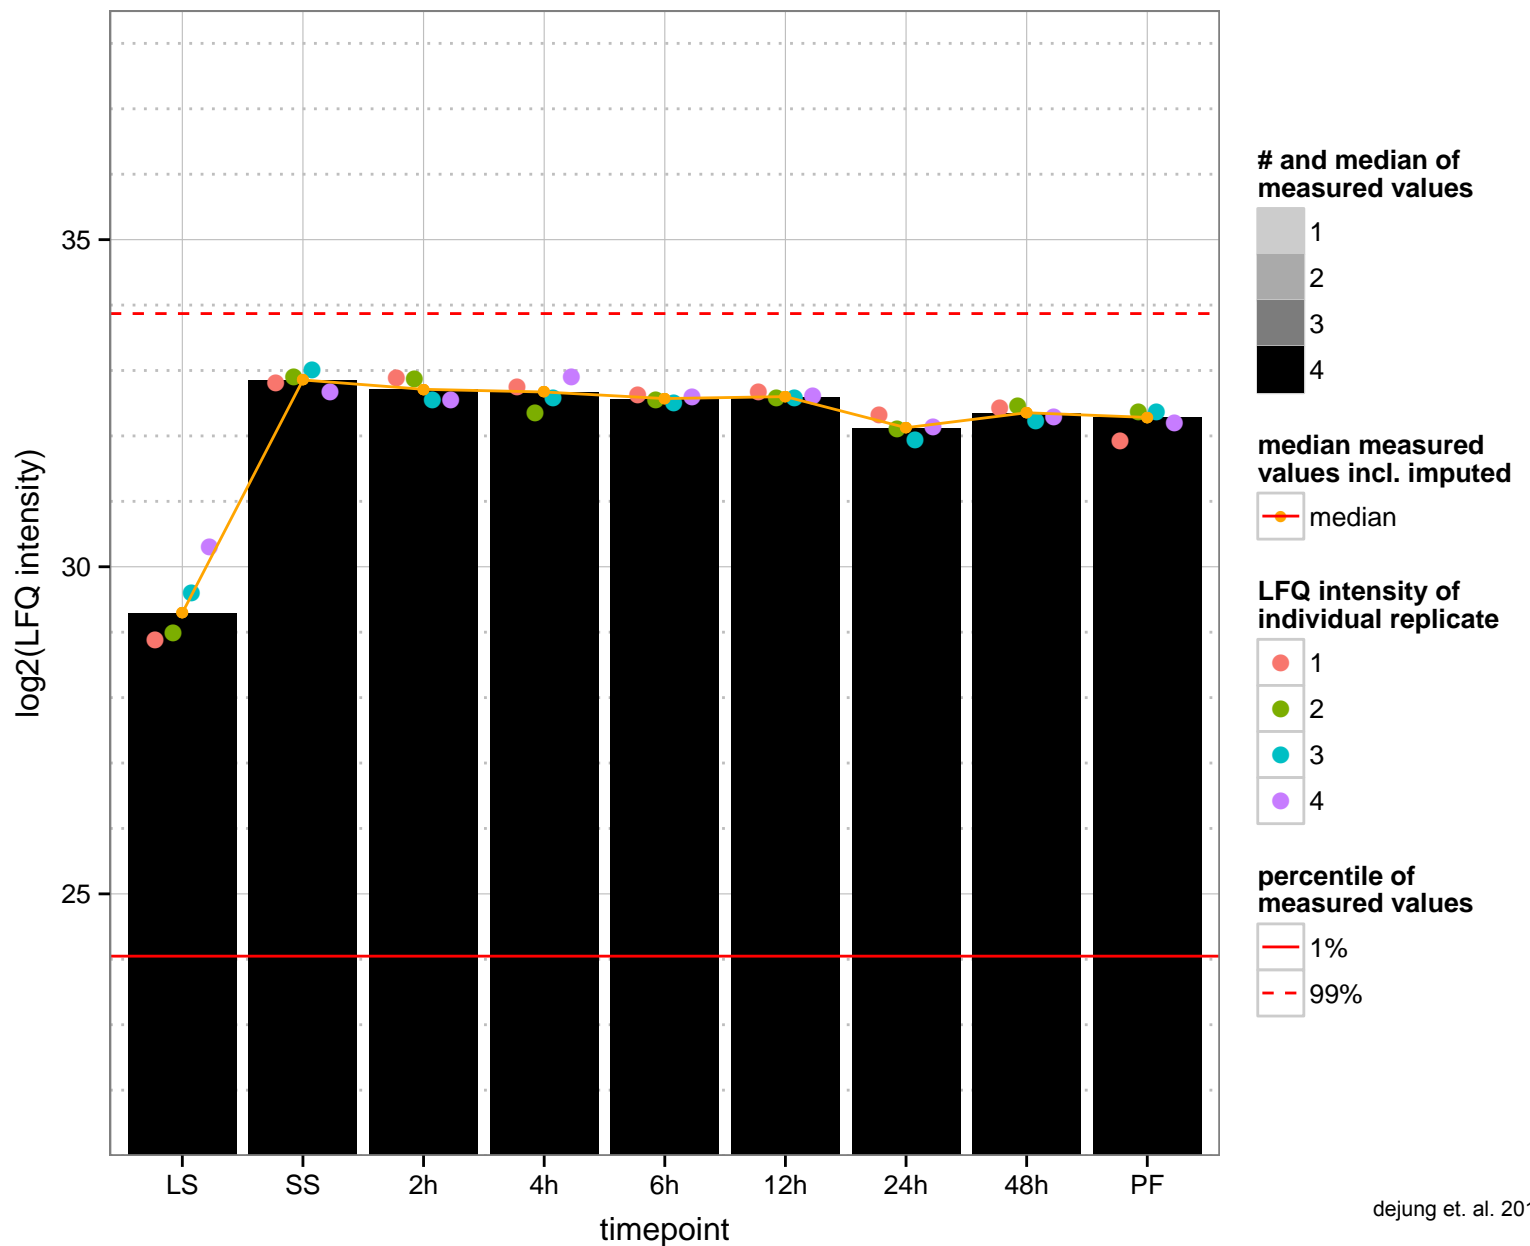

40S ribosomal protein S8, putative  
 Tb927.8.6160;Tb927.8.6150  
 AGOF: structural constituent of ribosome  
 AGOC: intracellular, ribosome  
 AGOP: translation  
 PGOF: structural constituent of ribosome, null  
 PGOC: intracellular, ribosome, null  
 PGOP: translation, null

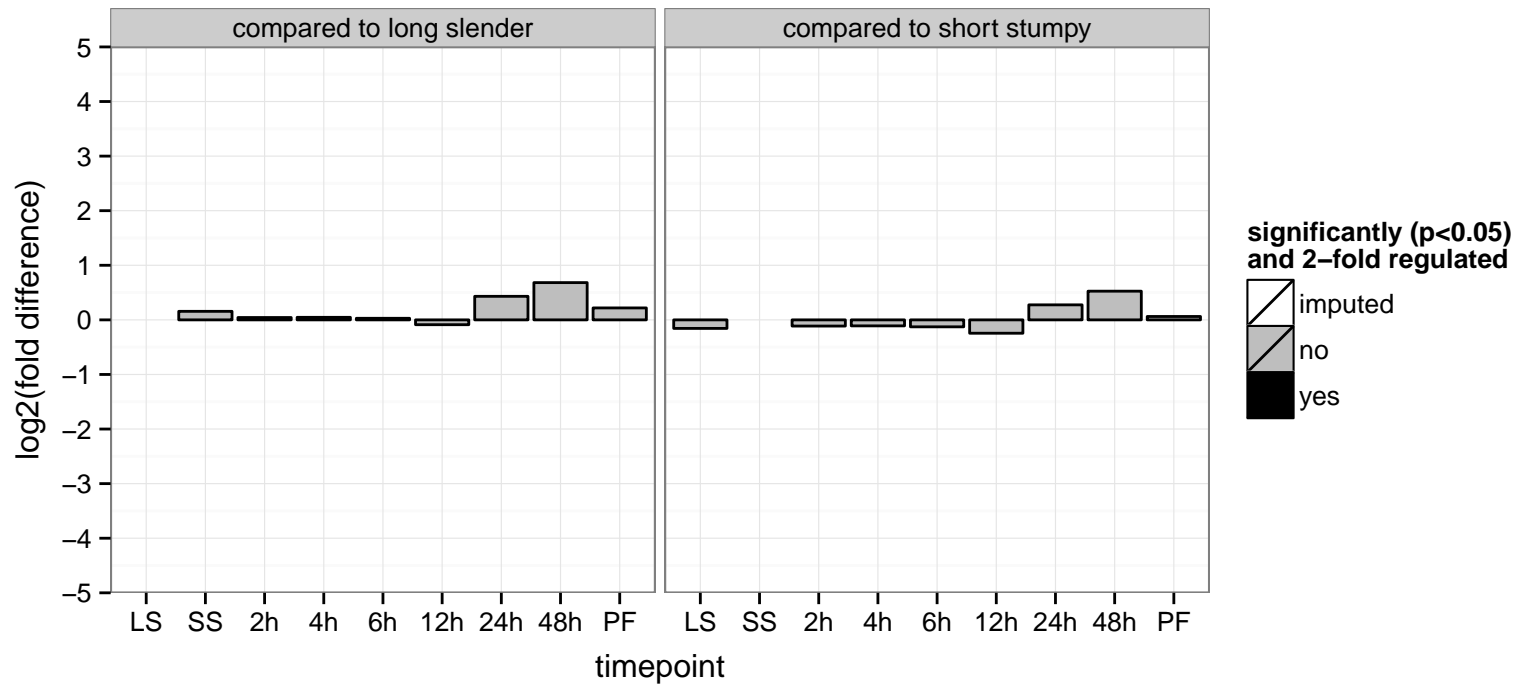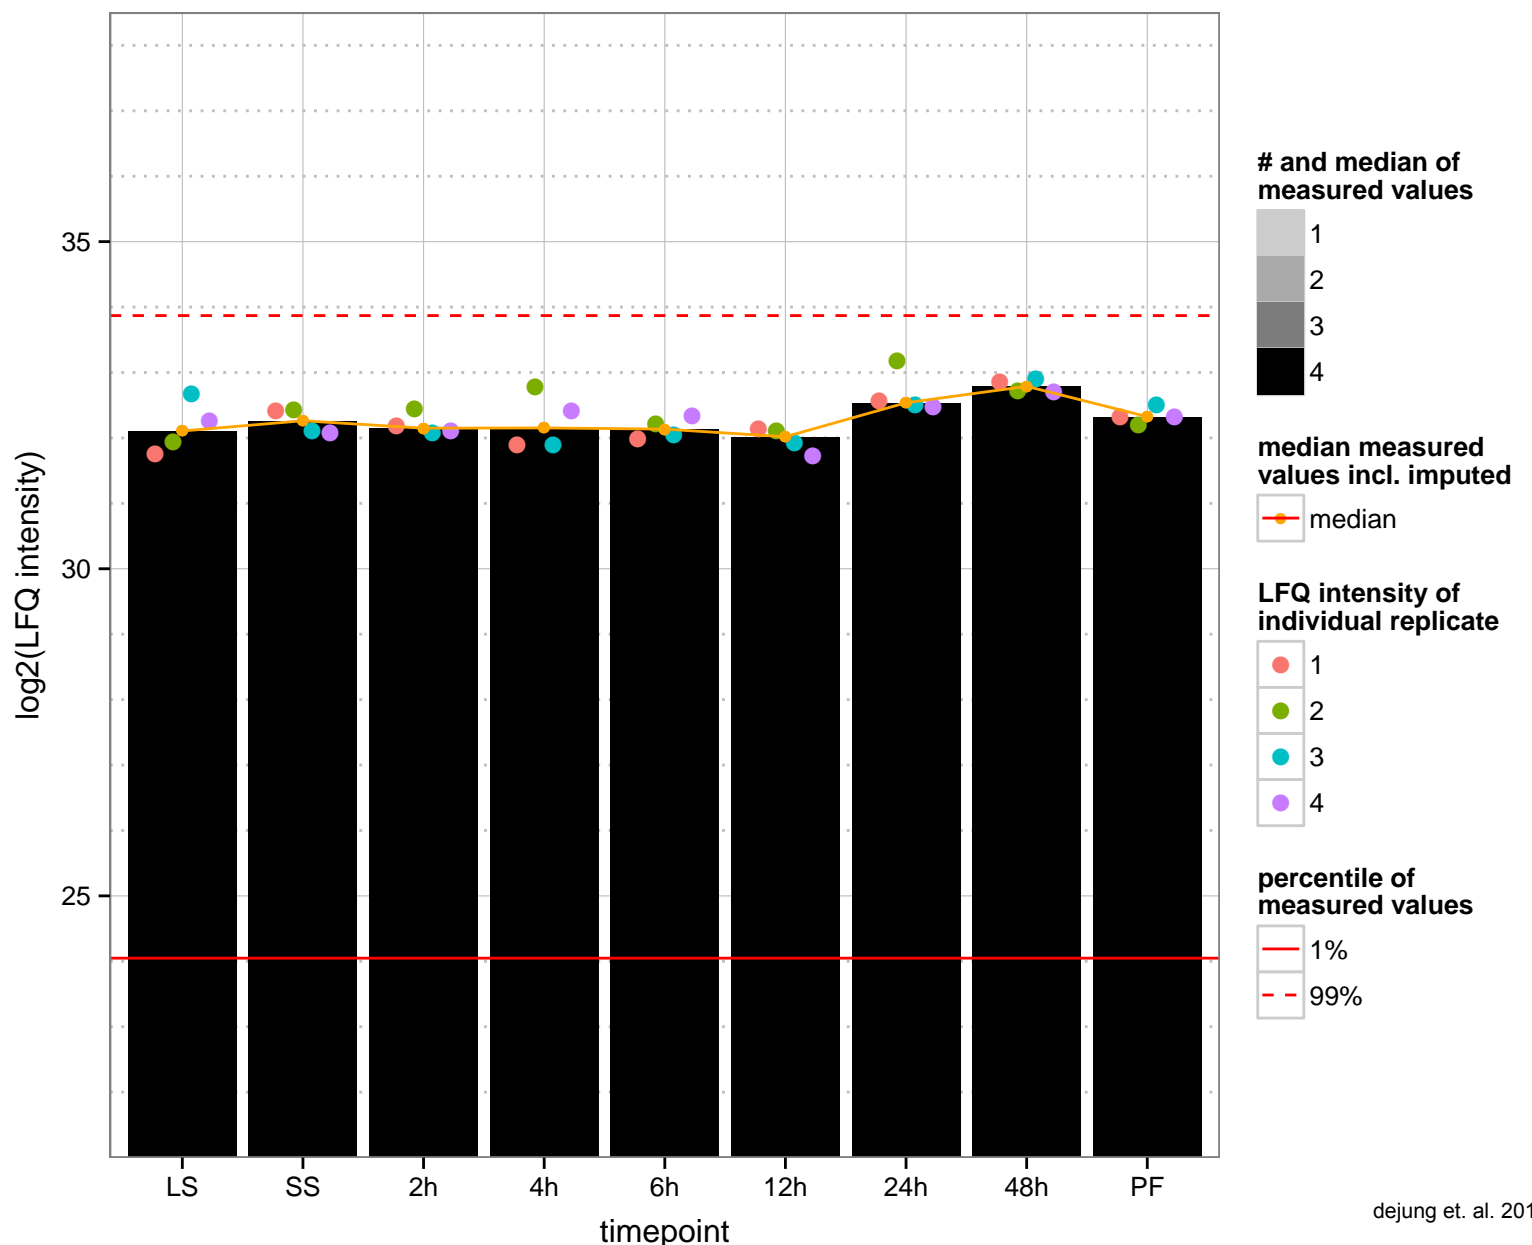

hypothetical protein, conserved  
 Tb927.8.6230  
 AGOF: null  
 AGOC: null  
 AGOP: null  
 PGO: null  
 PGOC: null  
 PGOP: null

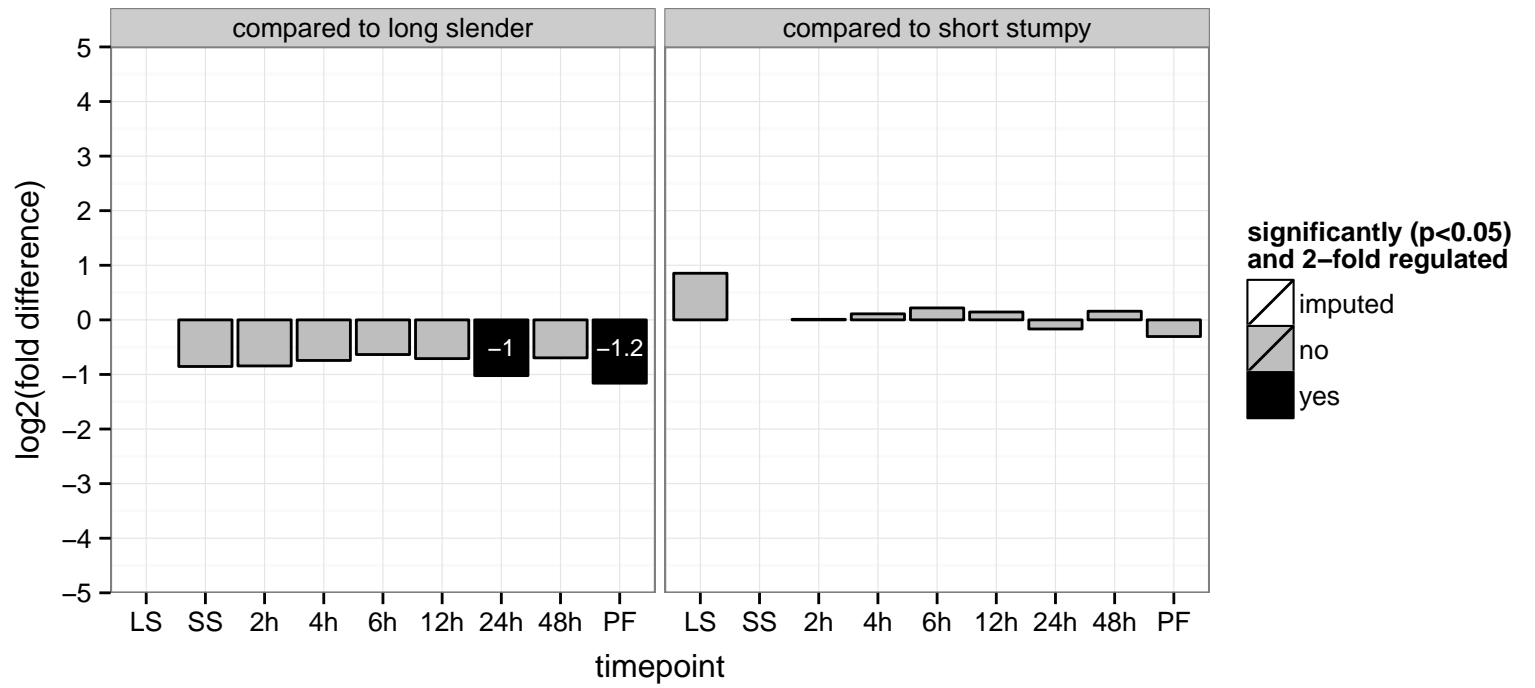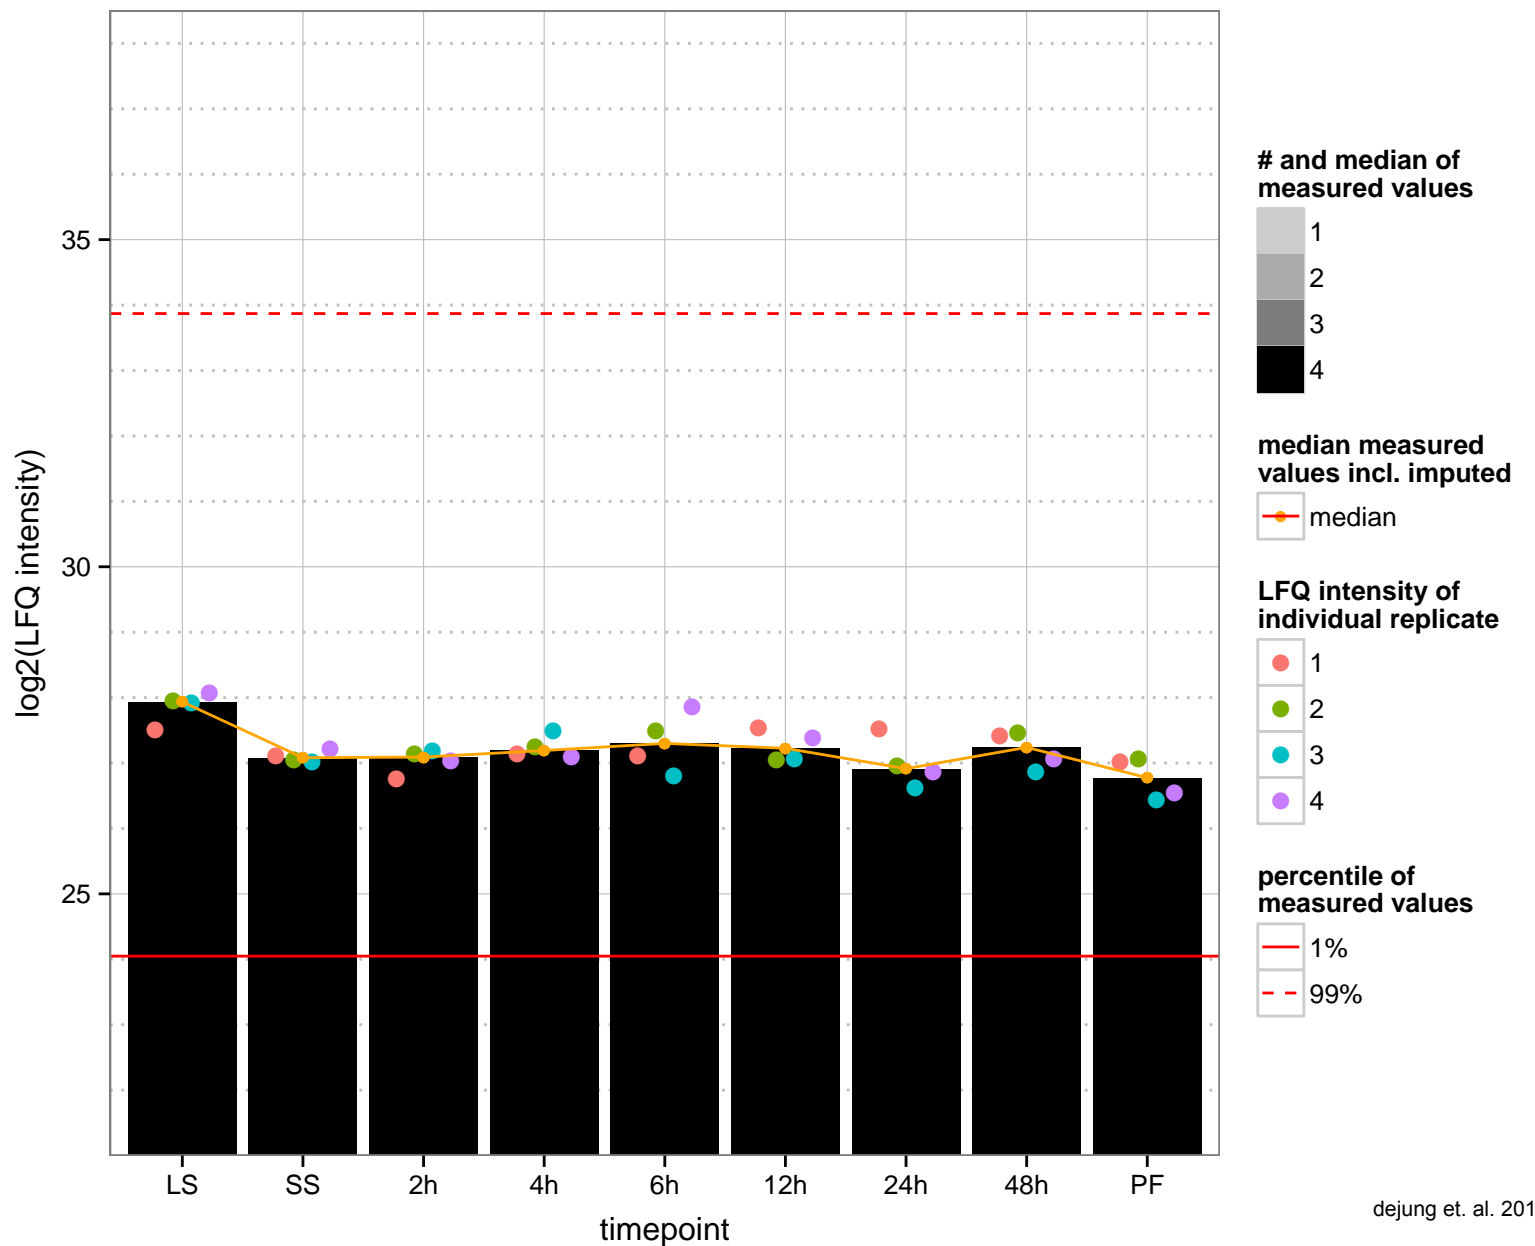

STOP axonemal protein  
 Tb927.8.6240  
 AGOF: microtubule binding  
 AGOC: cytoskeleton  
 AGOP: microtubule anchoring  
 PGO: null  
 PGOC: null  
 PGOP: null

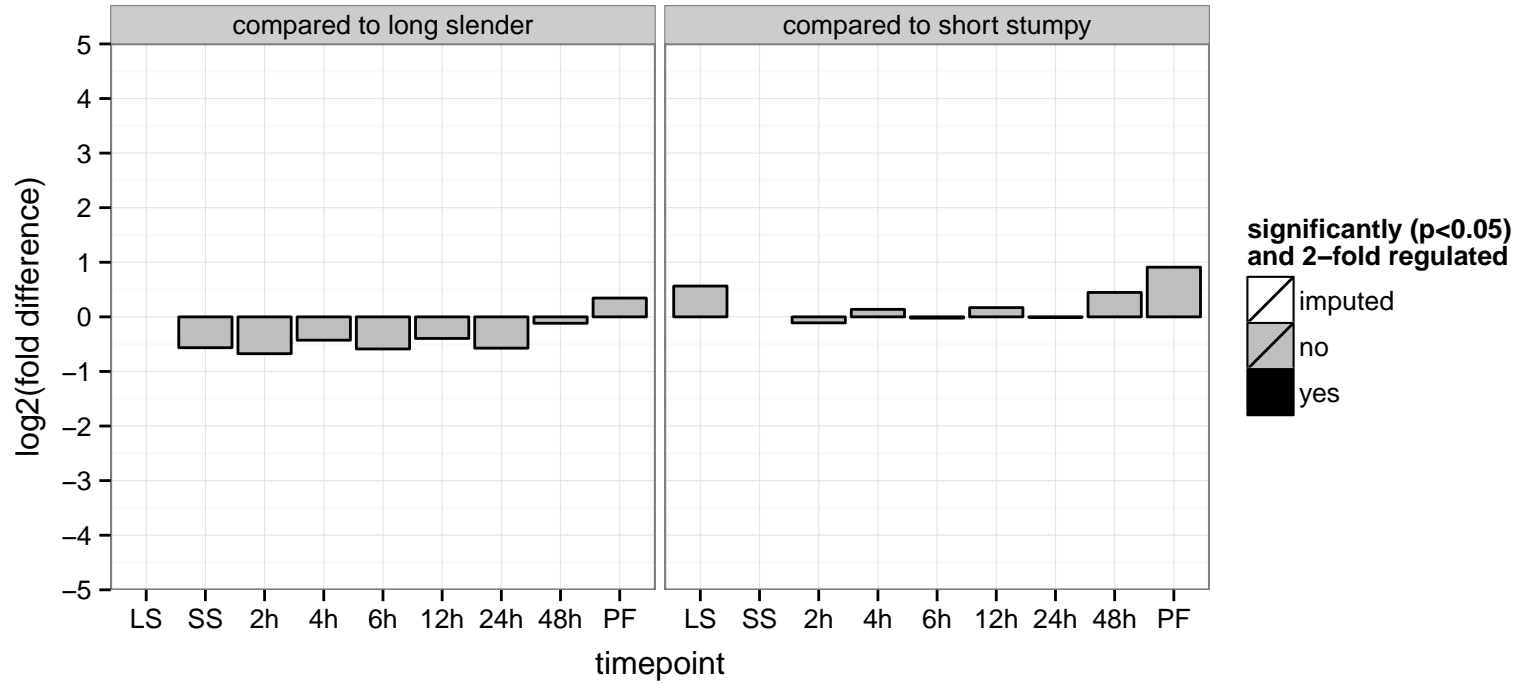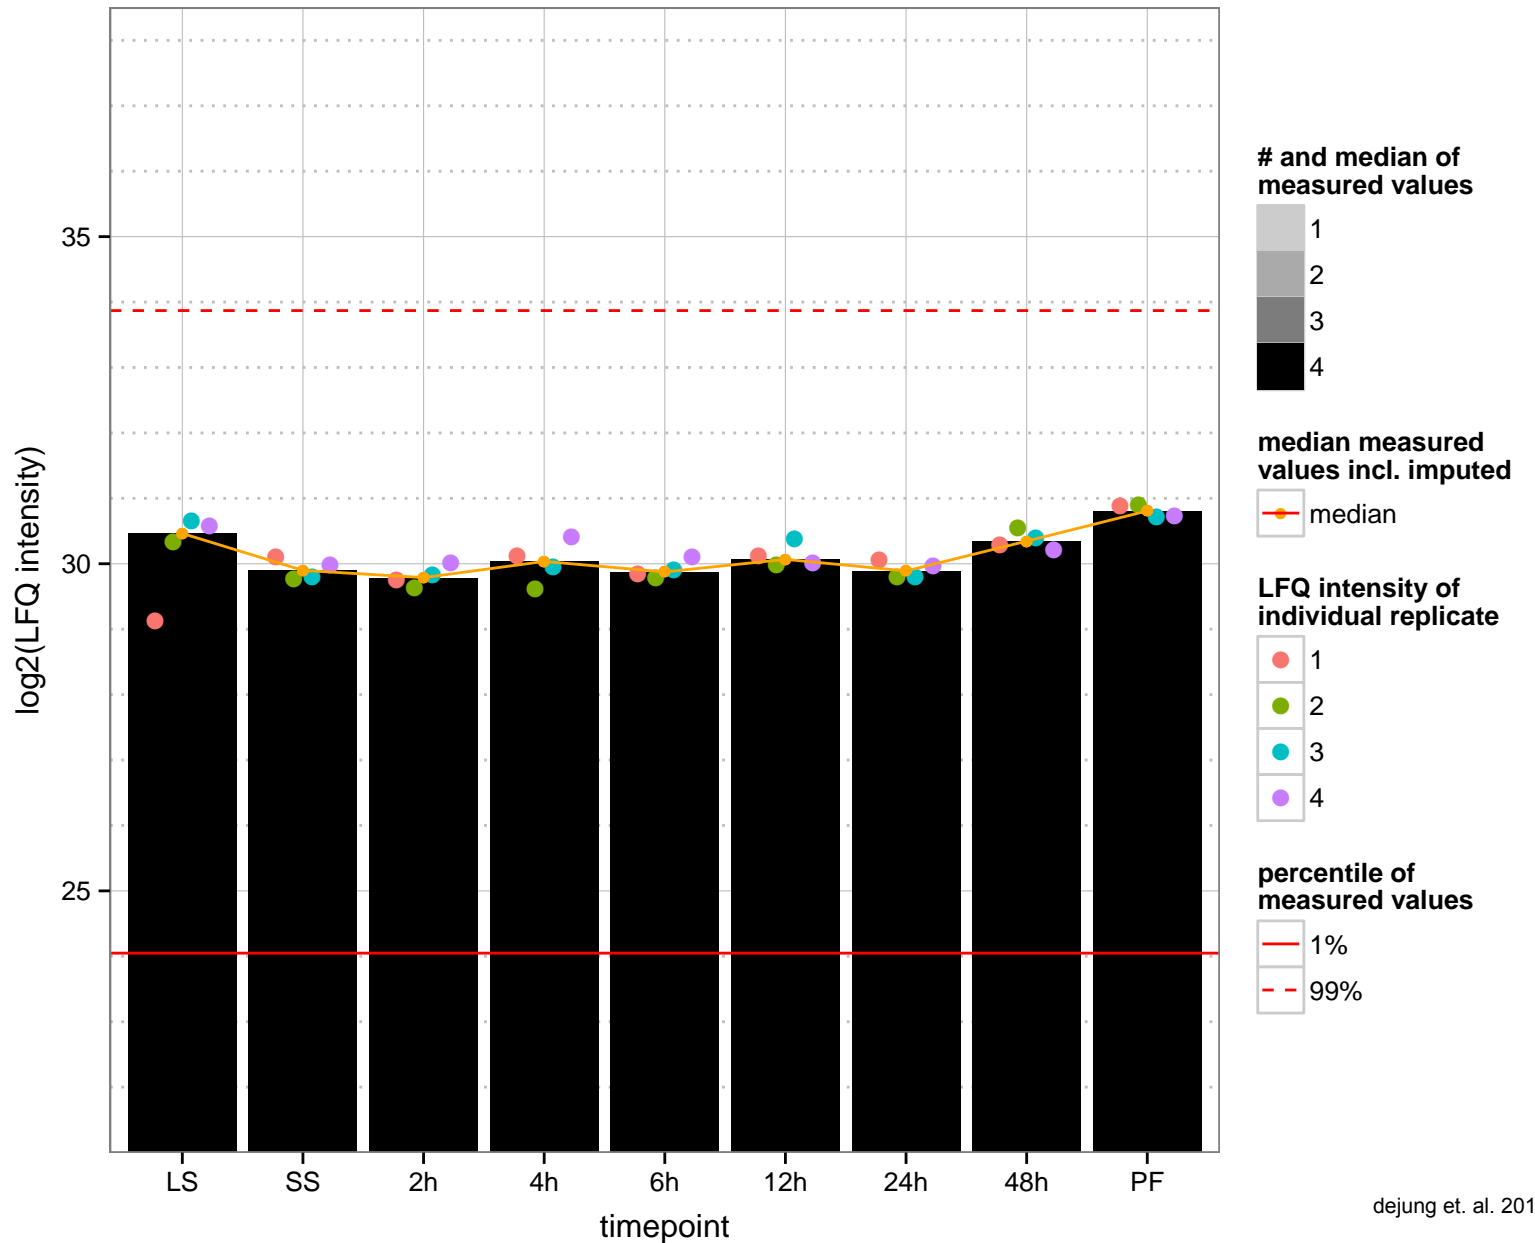



hypothetical protein, conserved  
 Tb927.8.6250  
 AGOF: null  
 AGOC: null  
 AGOP: null  
 PGO: null  
 PGOC: null  
 PGOP: null

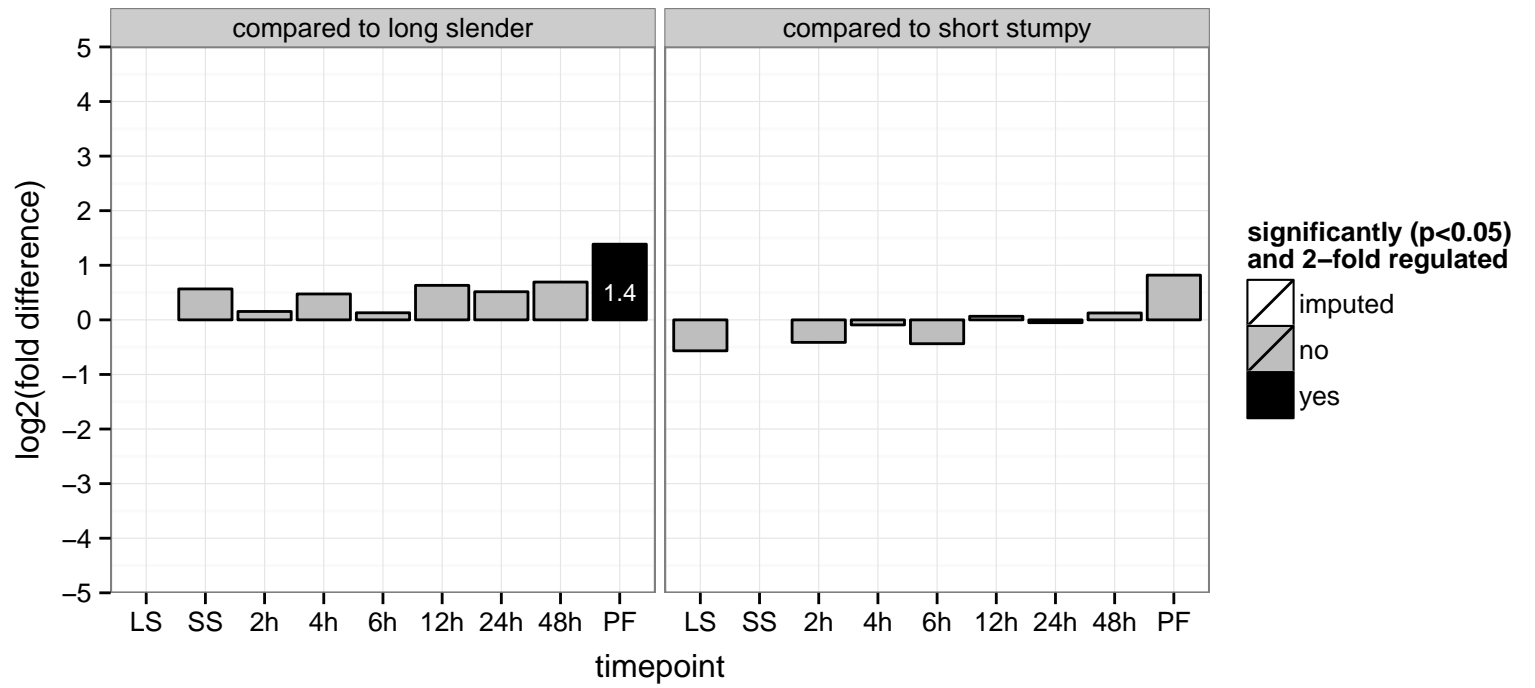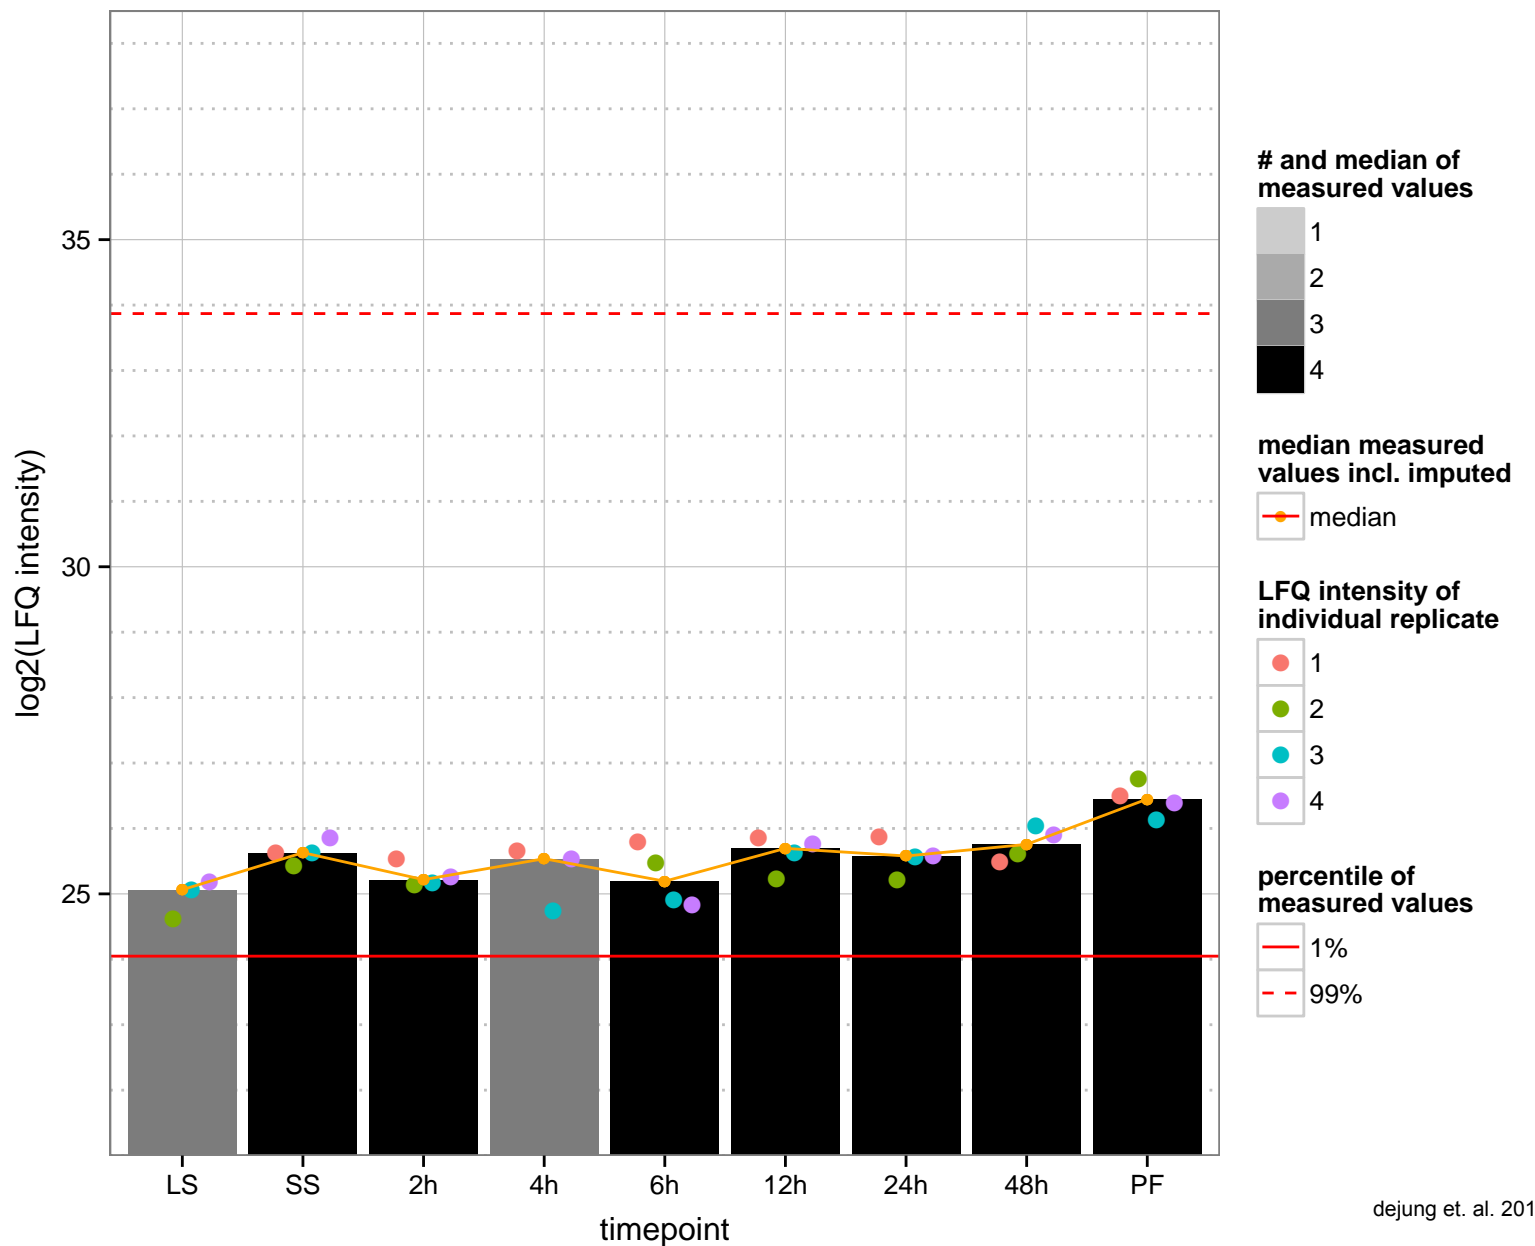

hypothetical protein, conserved  
 Tb927.8.6270  
 AGOF: null  
 AGOC: null  
 AGOP: null  
 PGOF: null  
 PGO: null  
 PGOP: null

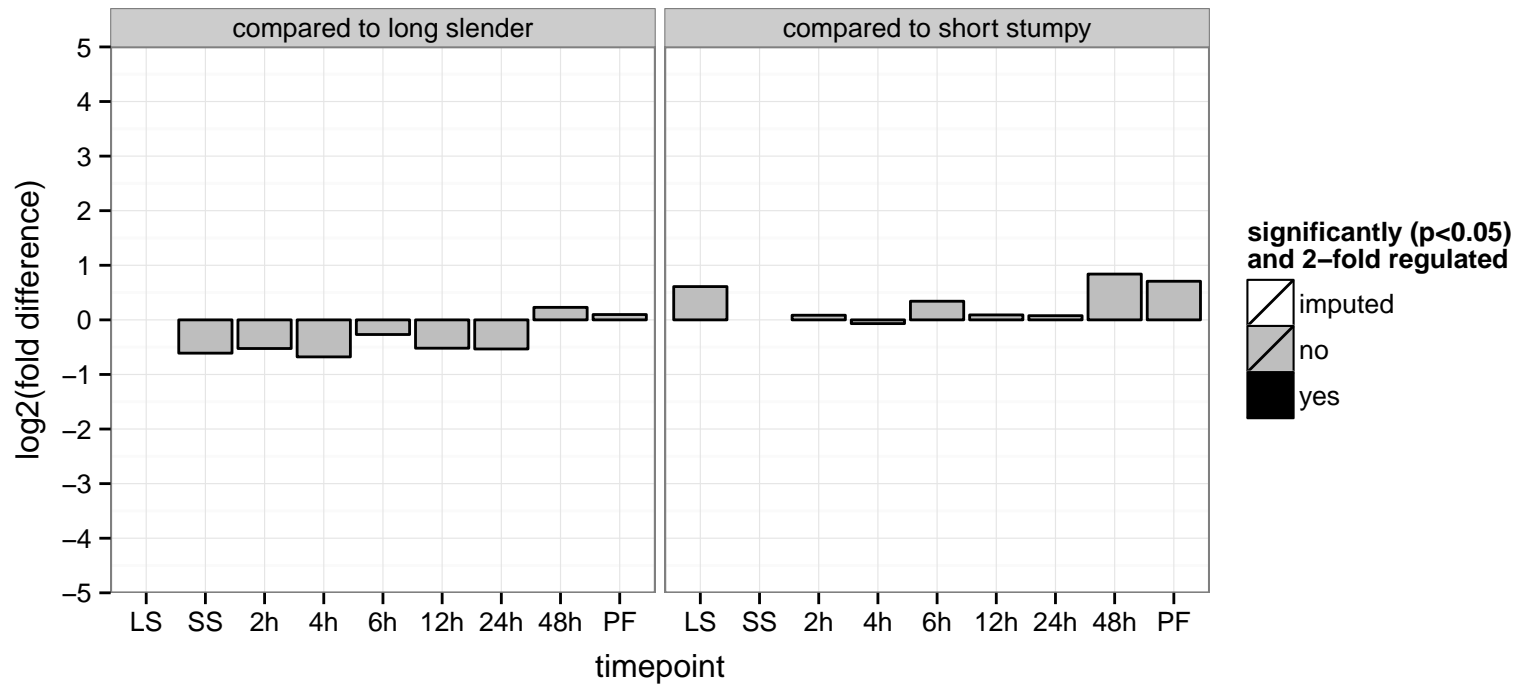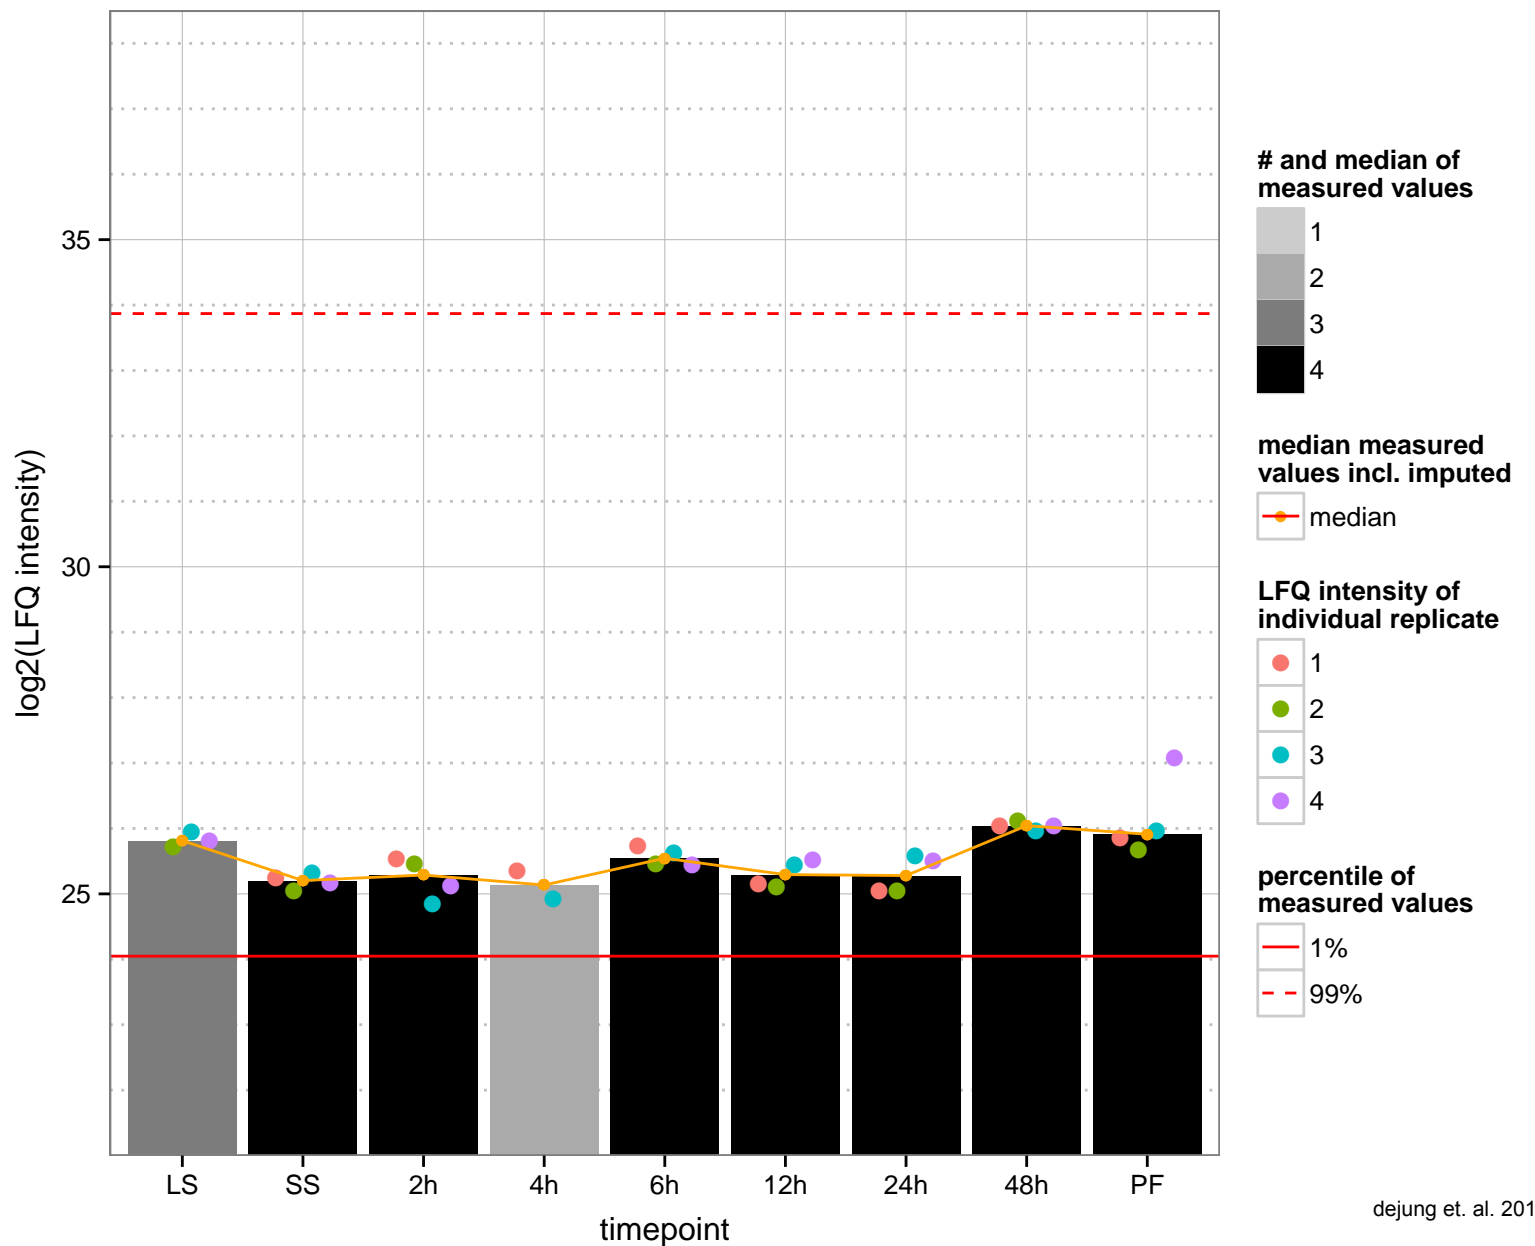

hypothetical protein, conserved

Tb927.8.6290

AGOF: ATP binding, inositol tetrakisphosphate 1-kinase activity, magnesium ion binding

AGOC: intracellular

AGOP: inositol trisphosphate metabolic process

PGOF: null

PGOC: null

PGOP: null

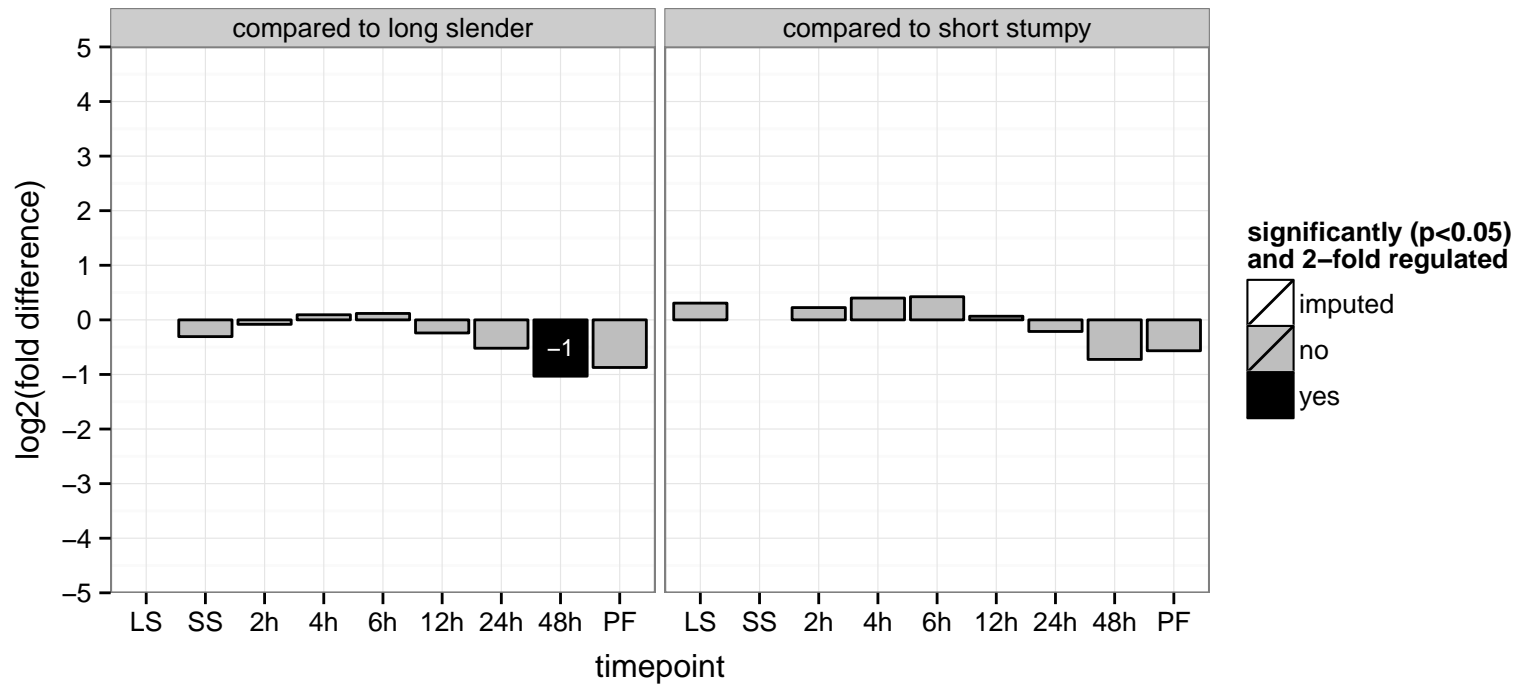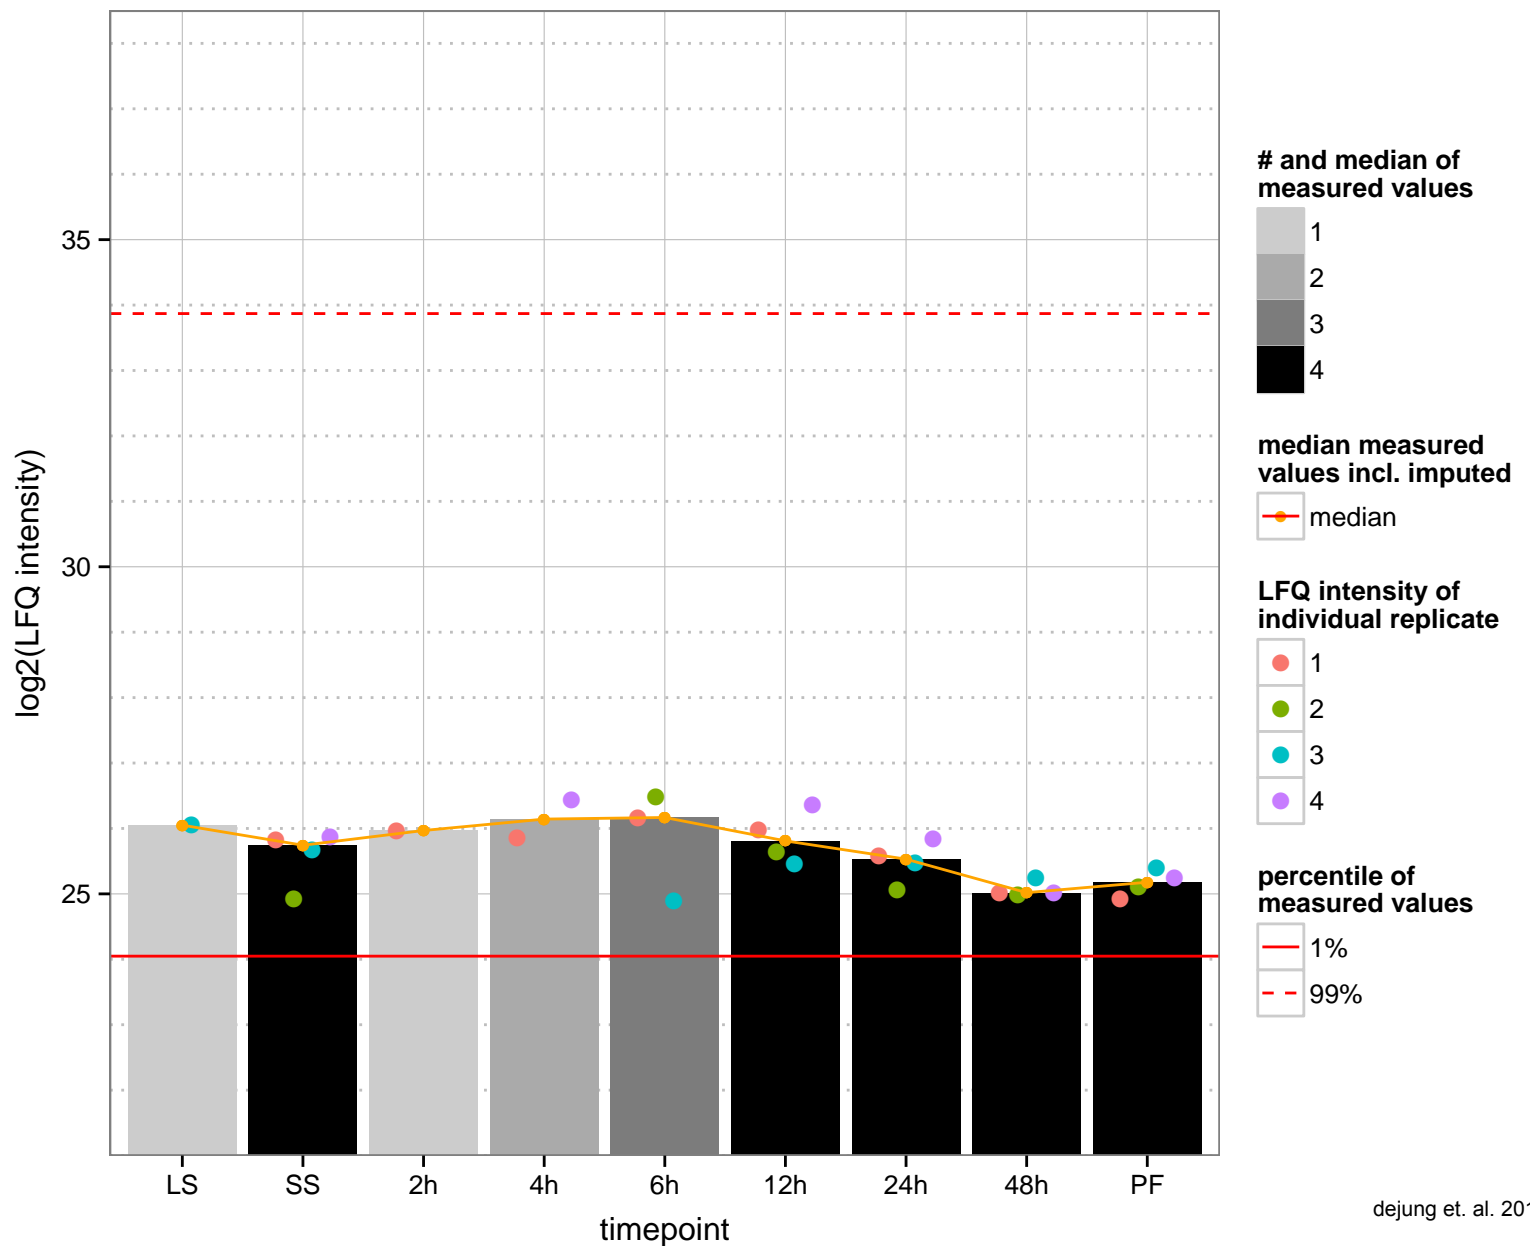

hypothetical protein, conserved  
 Tb927.8.6360  
 AGOF: zinc ion binding  
 AGOC: null  
 AGOP: null  
 PGOF: protein binding, zinc ion binding  
 PGOC: null  
 PGOP: null

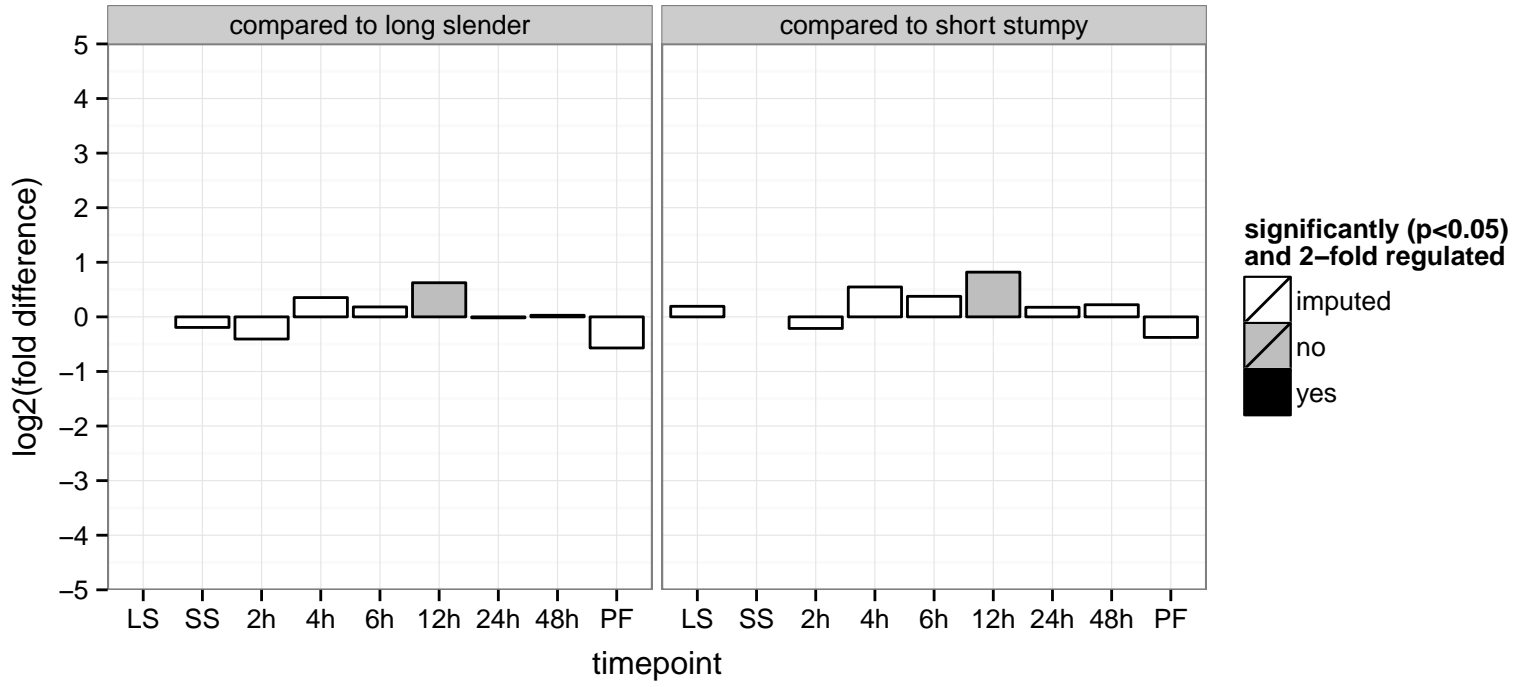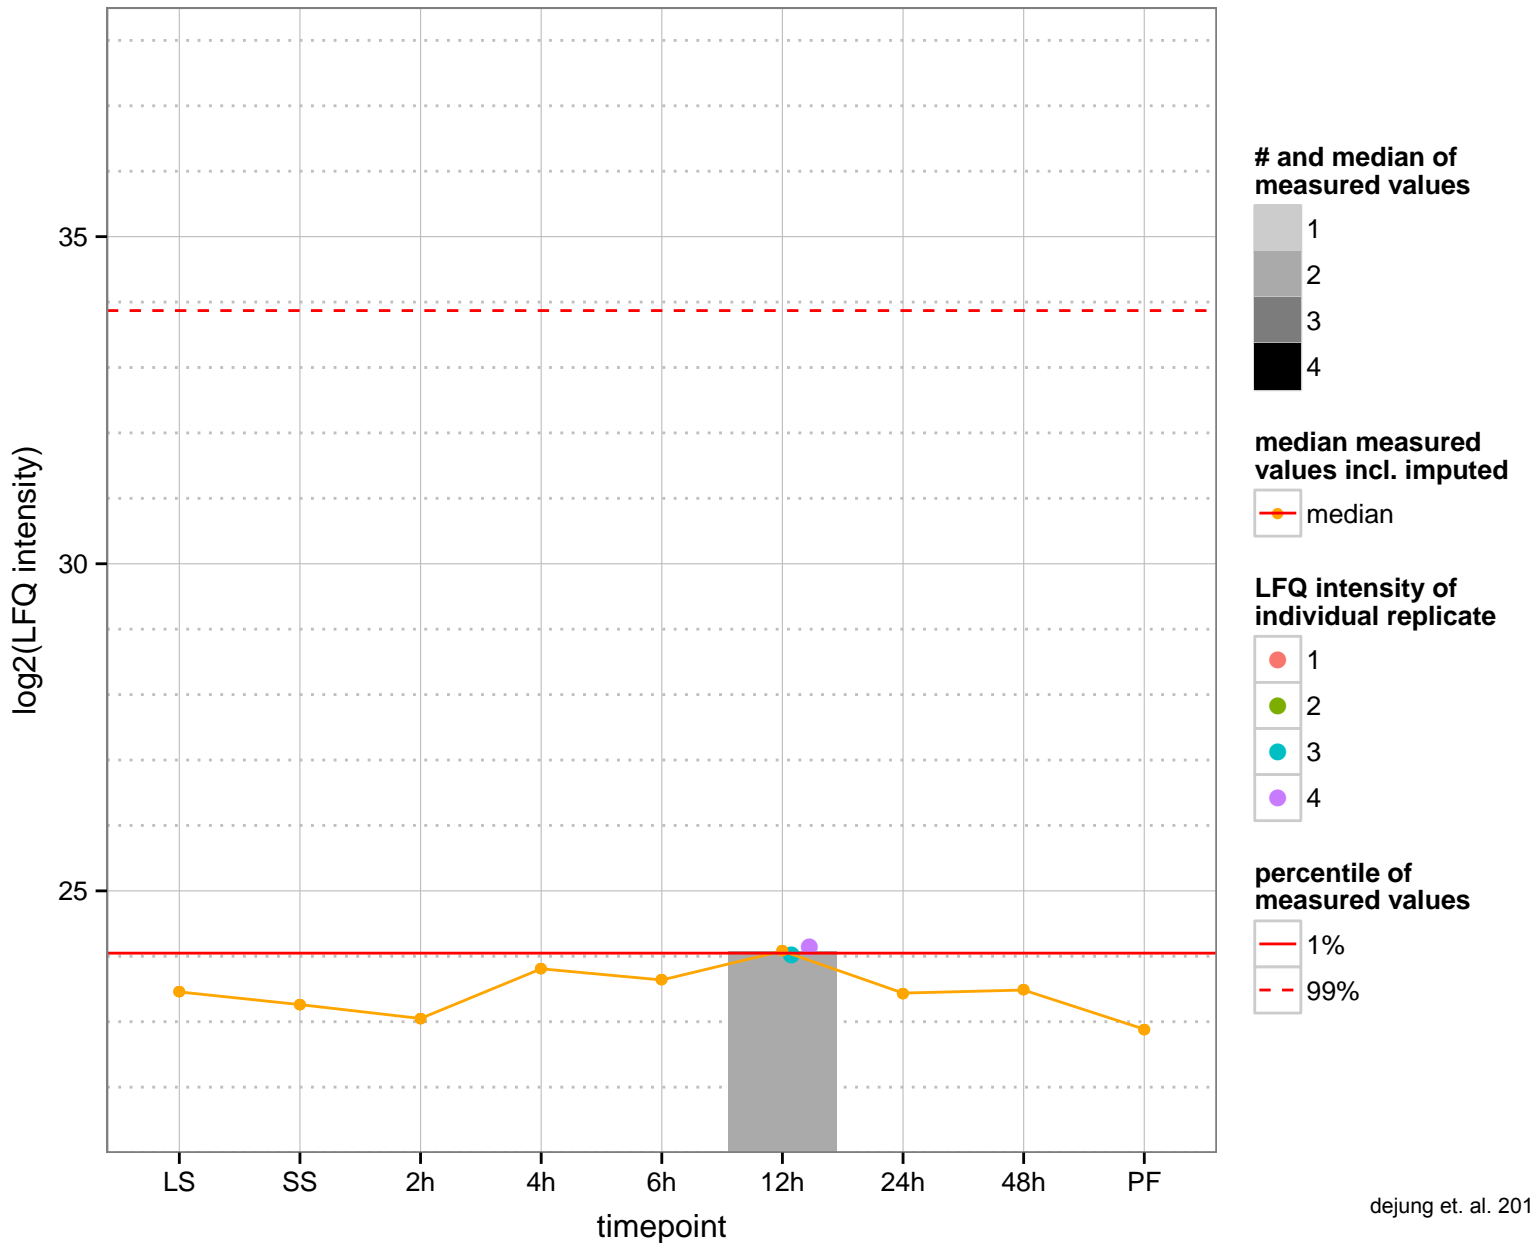

lysophospholipase, putative, alpha/beta hydrolase, putative (TbLysoPLA)

Tb927.8.6390

AGOF: hydrolase activity, acting on ester bonds

AGOC: null

AGOP: metabolic process

PGOF: hydrolase activity

PGOC: null

PGOP: null

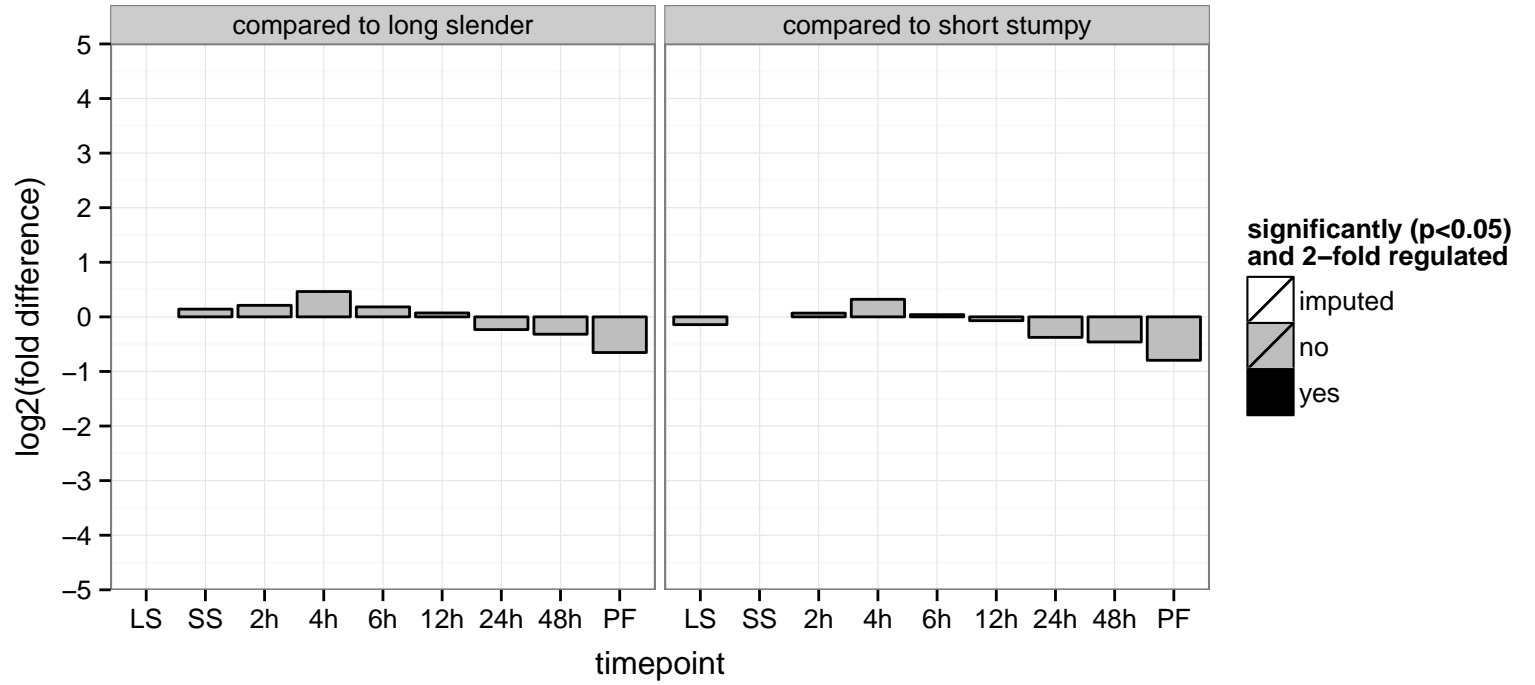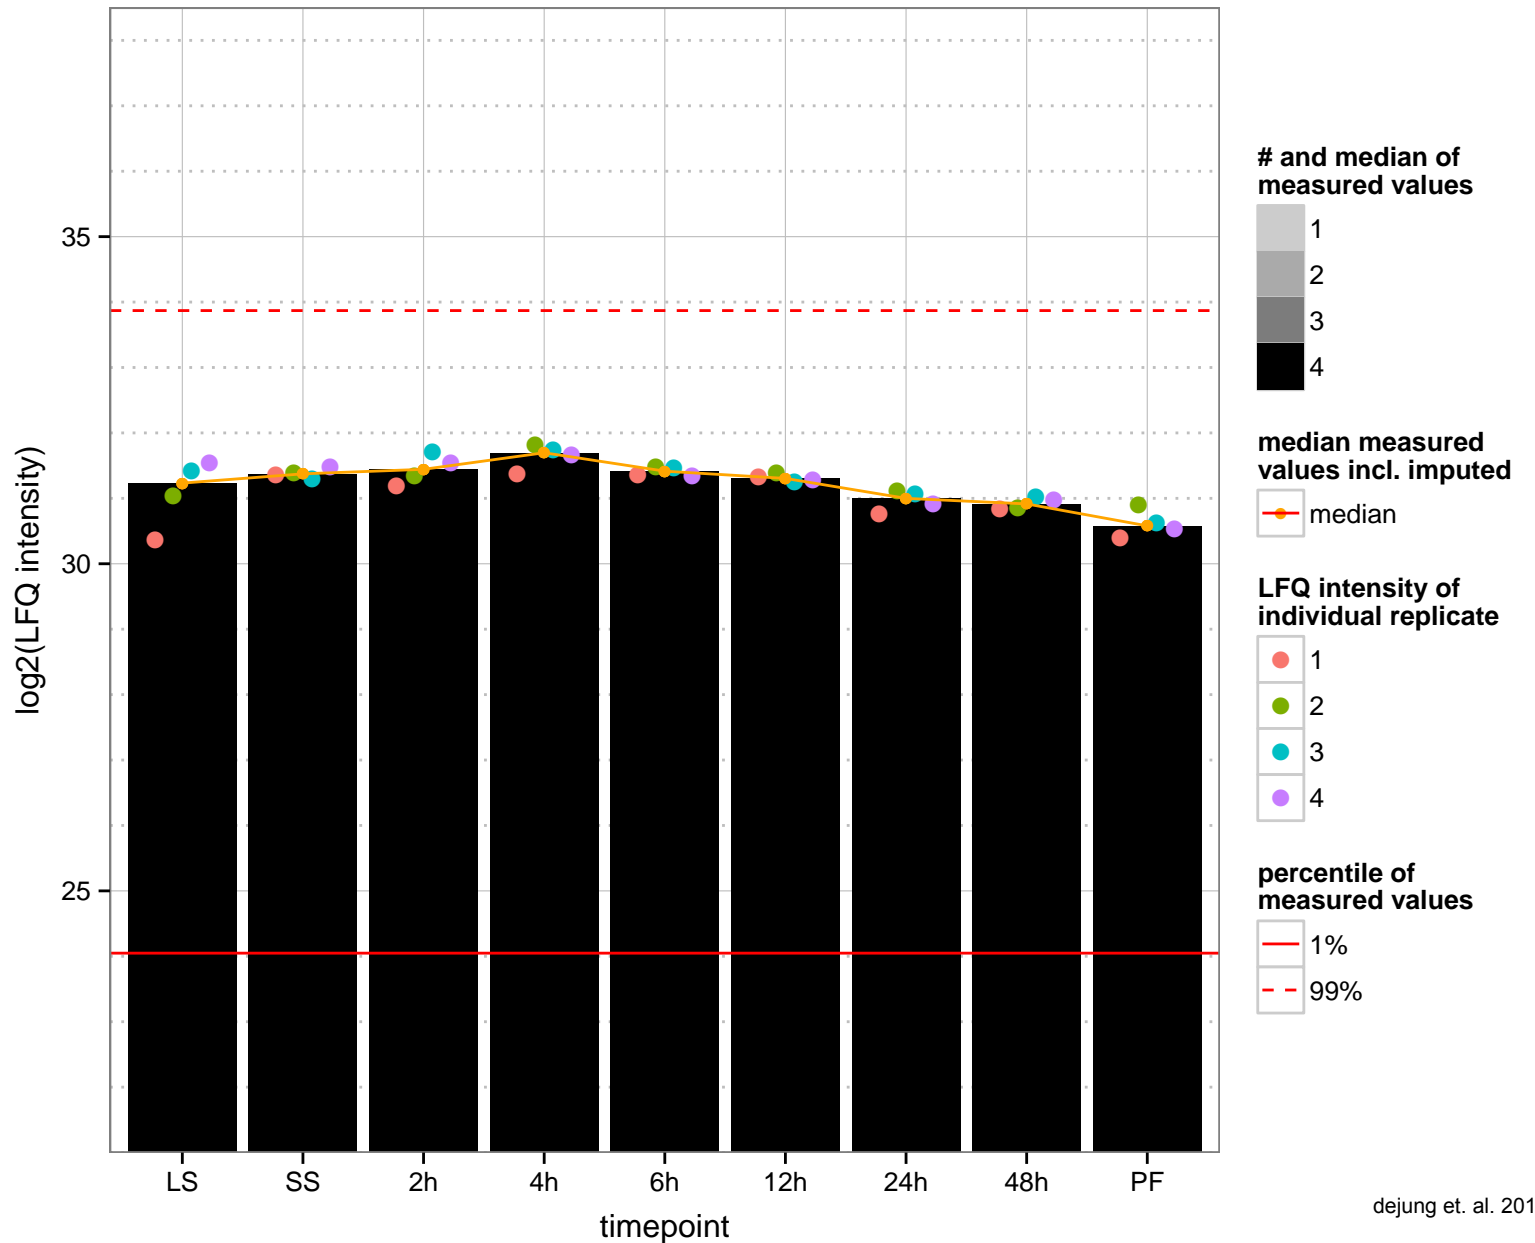

hypothetical protein, conserved  
 Tb927.8.6430  
 AGOF: null  
 AGOC: null  
 AGOP: null  
 PGO: null  
 PGOC: null  
 PGOP: null

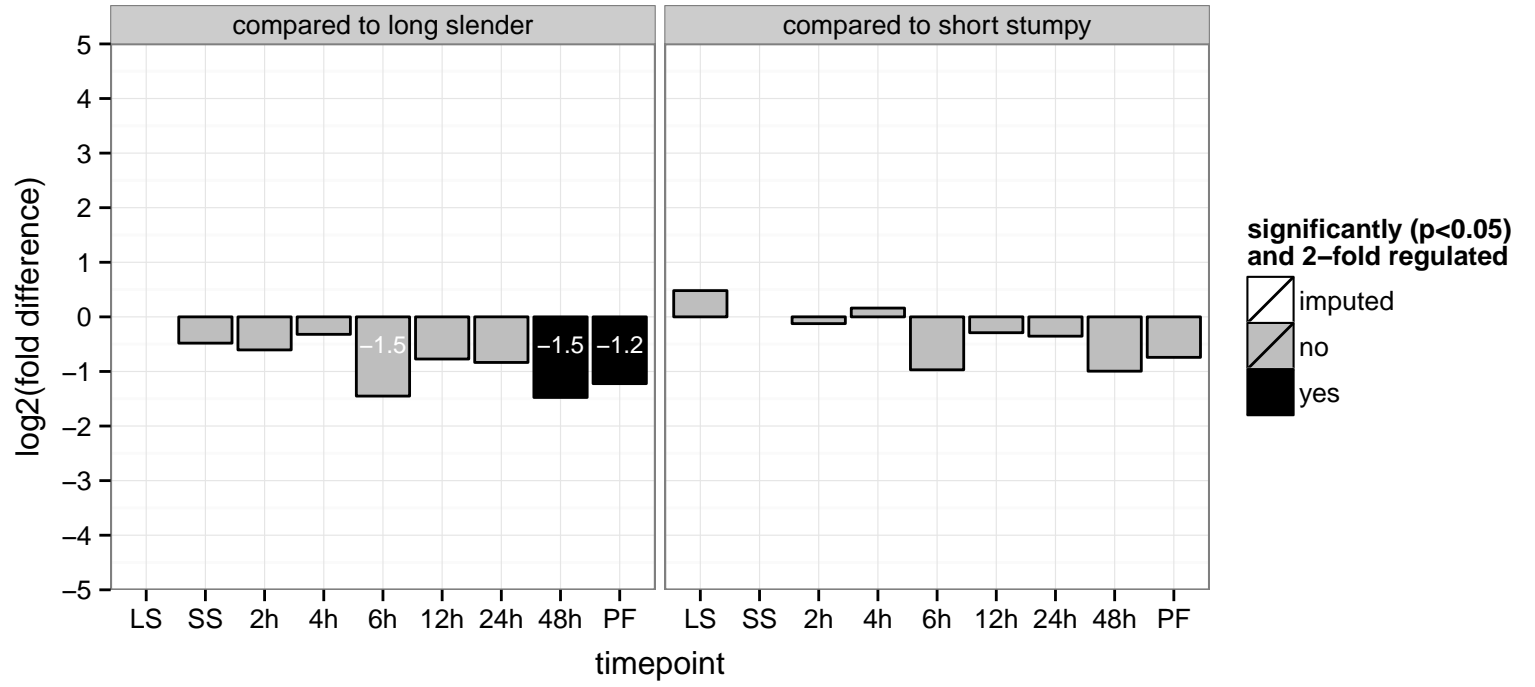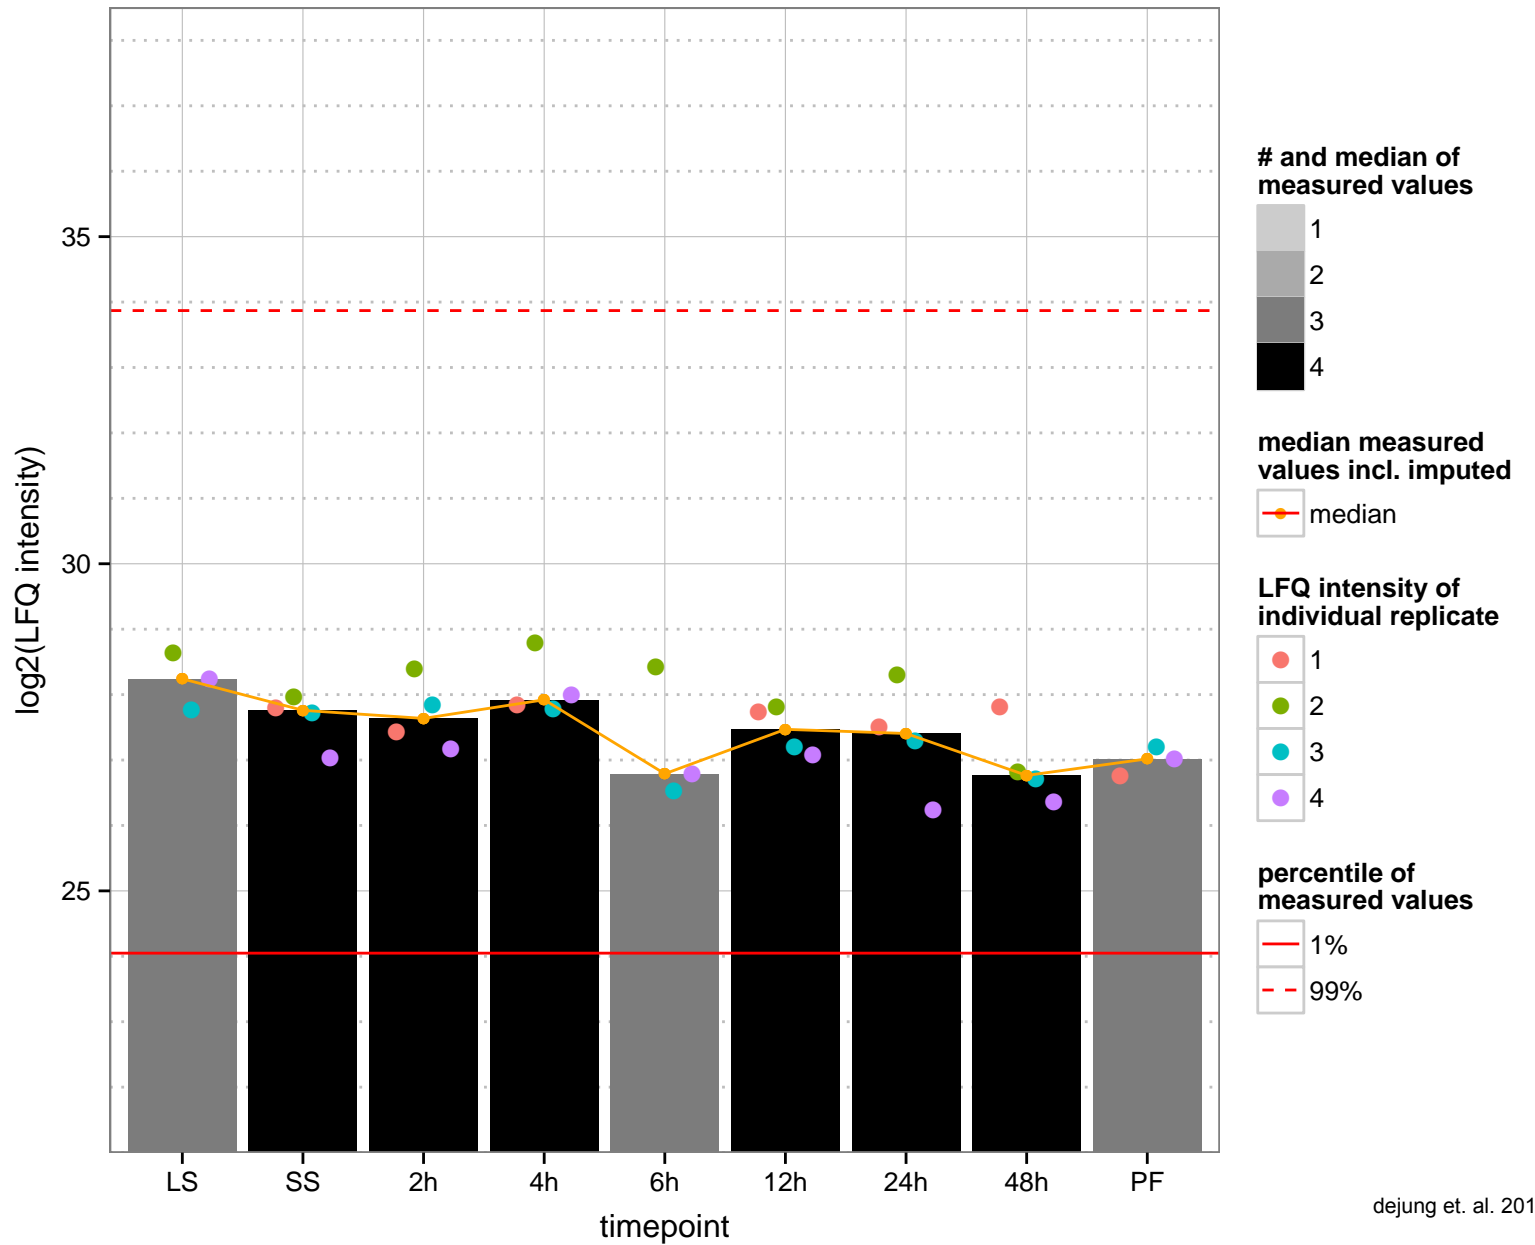

RNA-binding protein, putative (RPB20)  
 Tb927.8.6440  
 AGOF: RNA binding  
 AGOC: null  
 AGOP: RNA processing  
 PGOF: nucleic acid binding  
 PGOC: null  
 PGOP: null

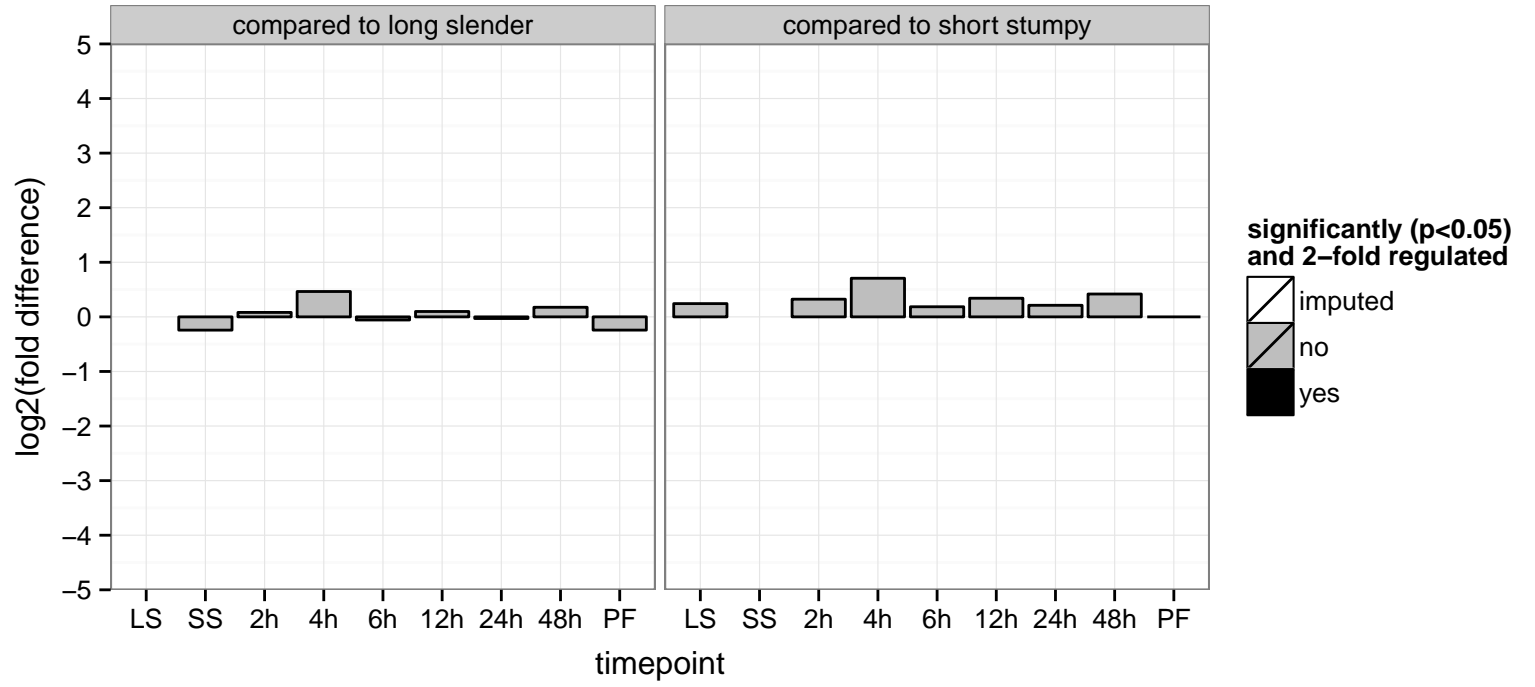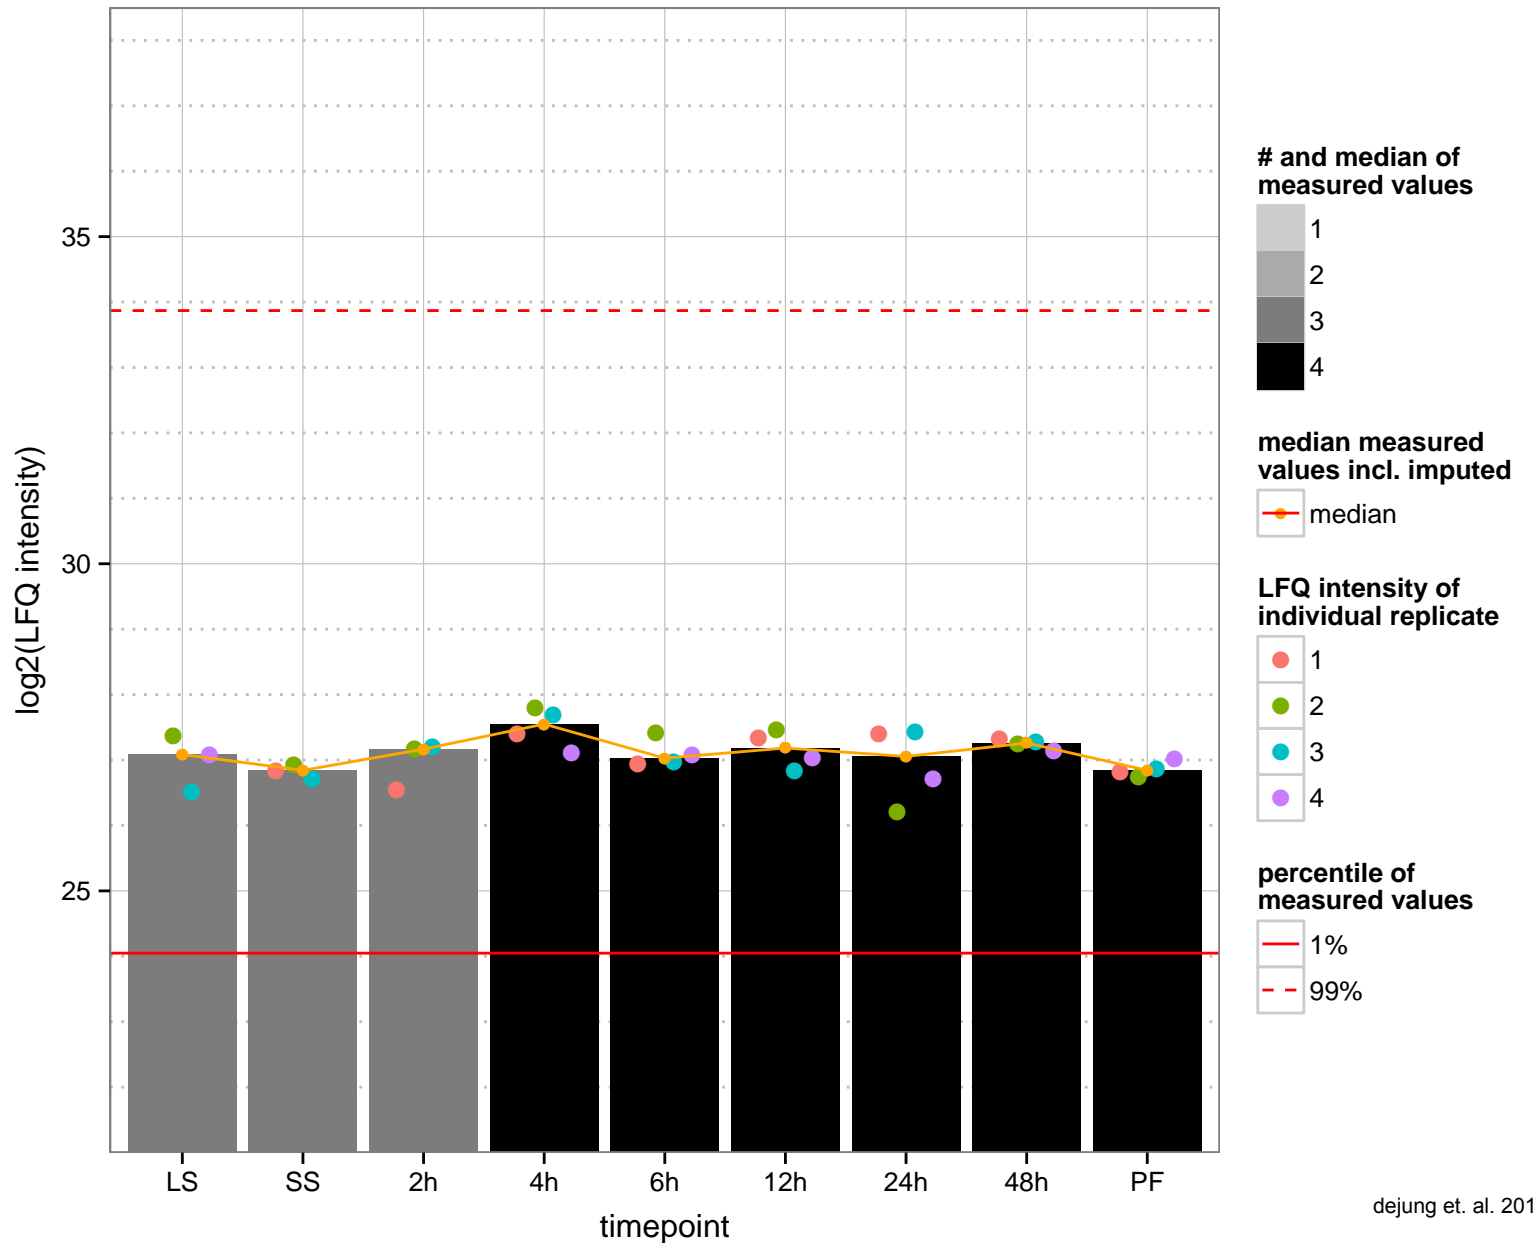

hypothetical protein, conserved  
 Tb927.8.6530  
 AGOF: null  
 AGOC: null  
 AGOP: null  
 PGOF: protein binding  
 PGOC: null  
 PGOP: null

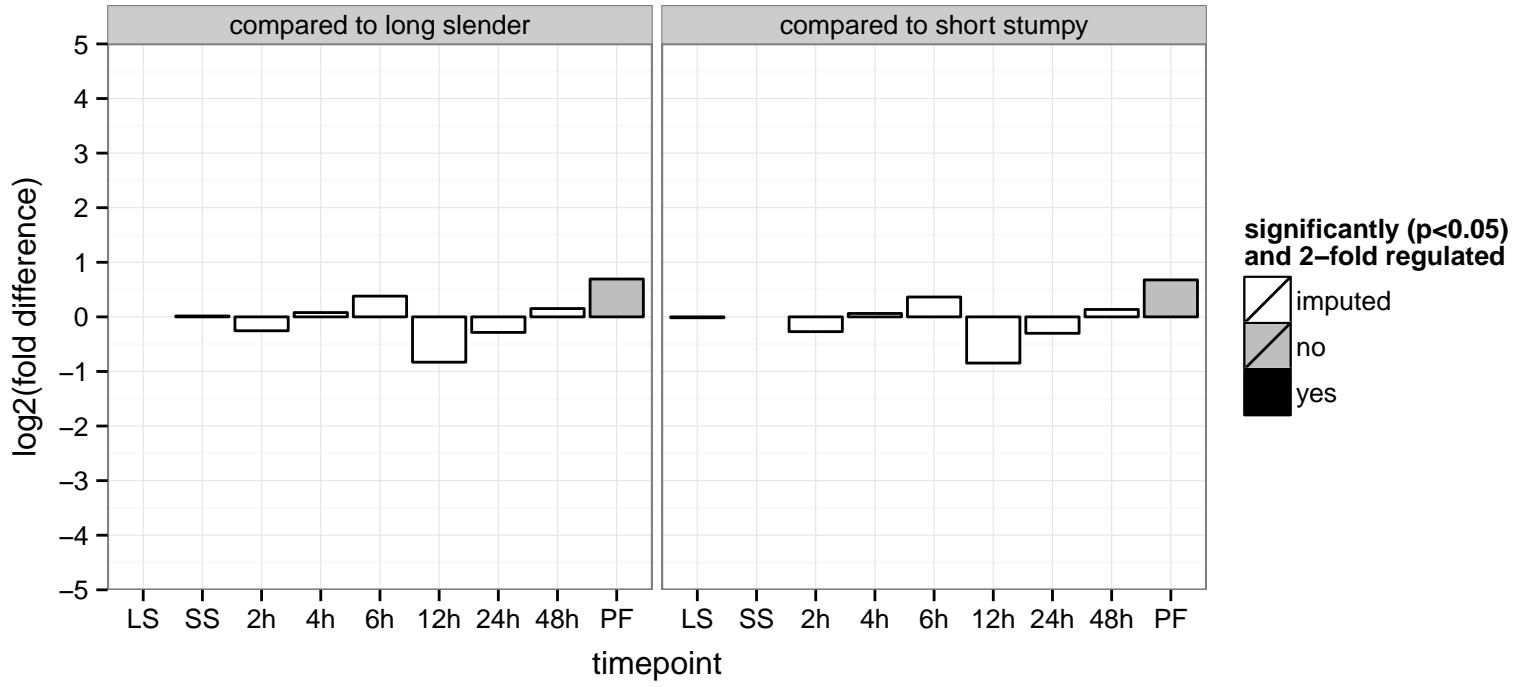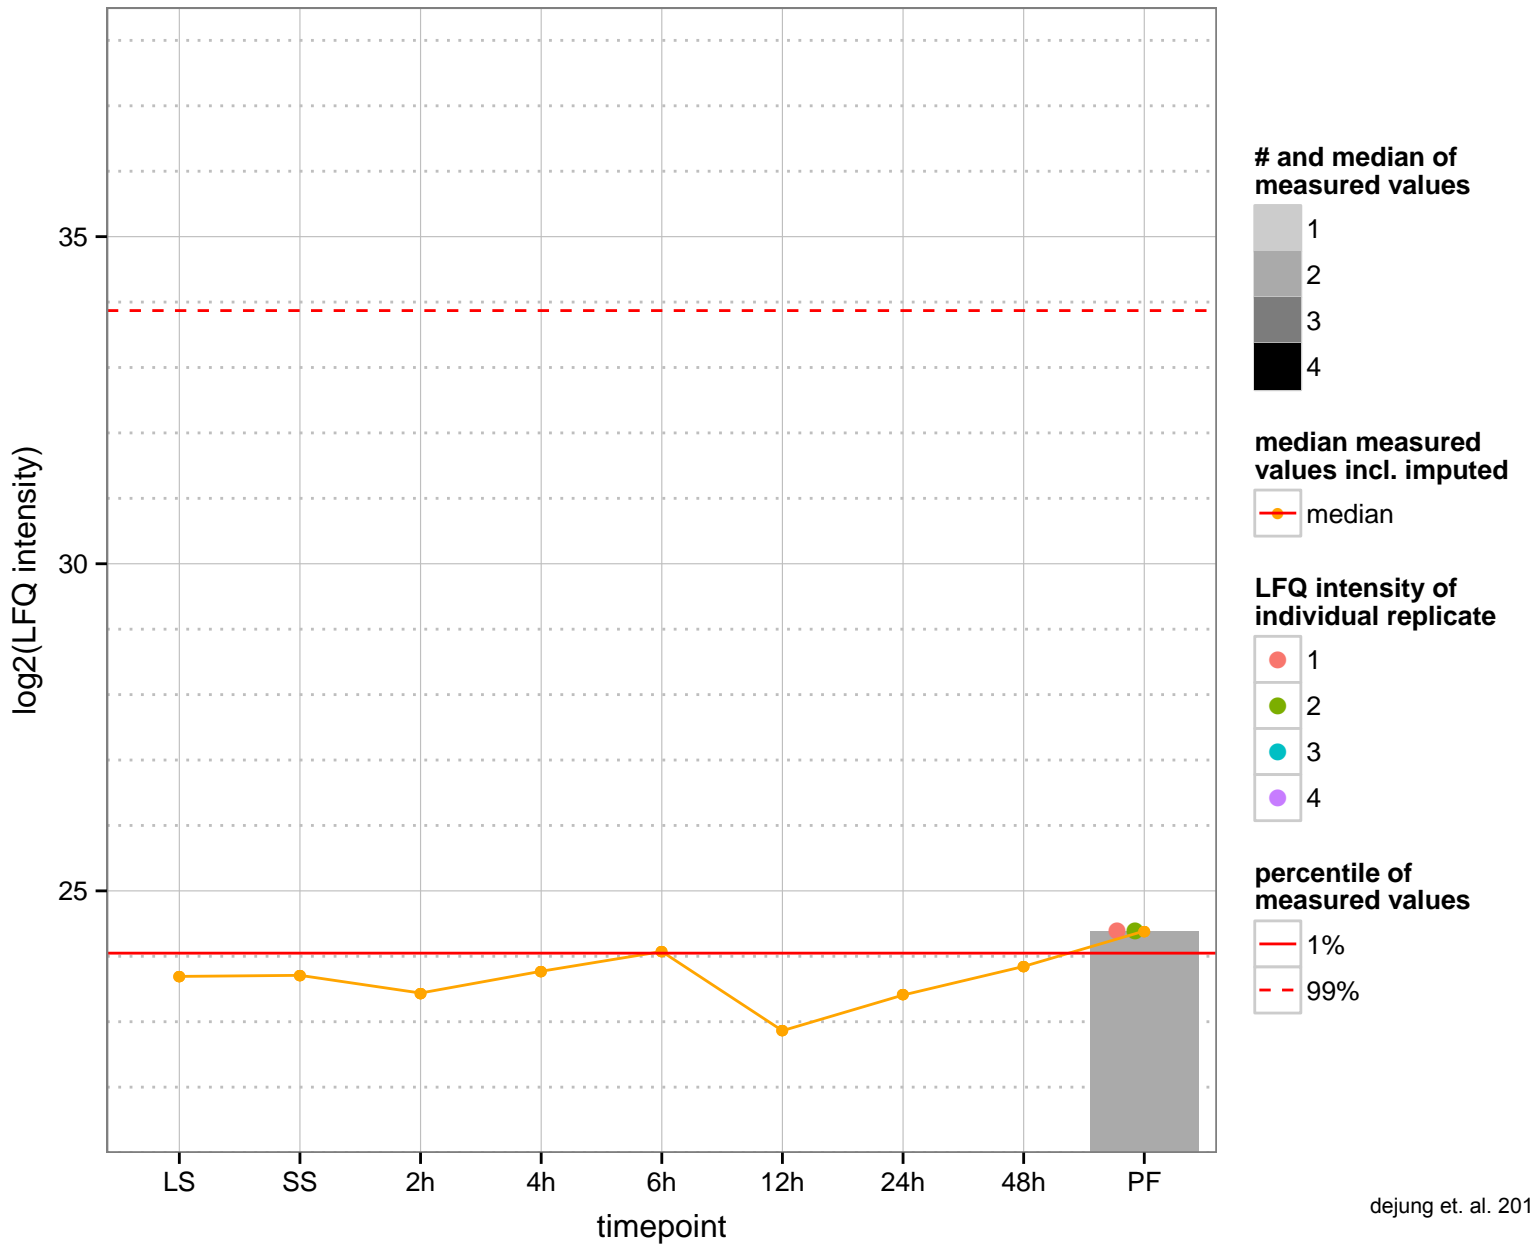



hypothetical protein, conserved  
 Tb927.8.6600  
 AGOF: null  
 AGOC: null  
 AGOP: null  
 PGOF: null  
 PGO: null  
 PGOP: null

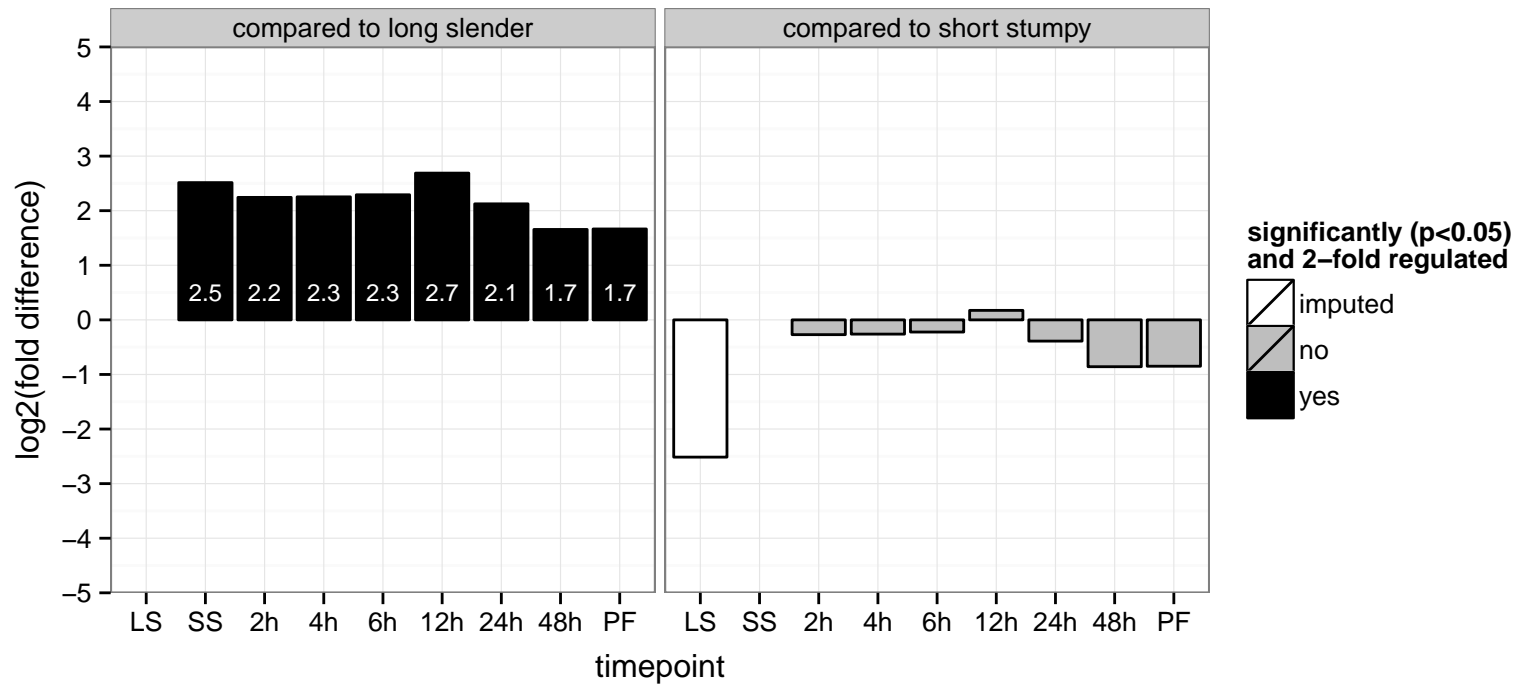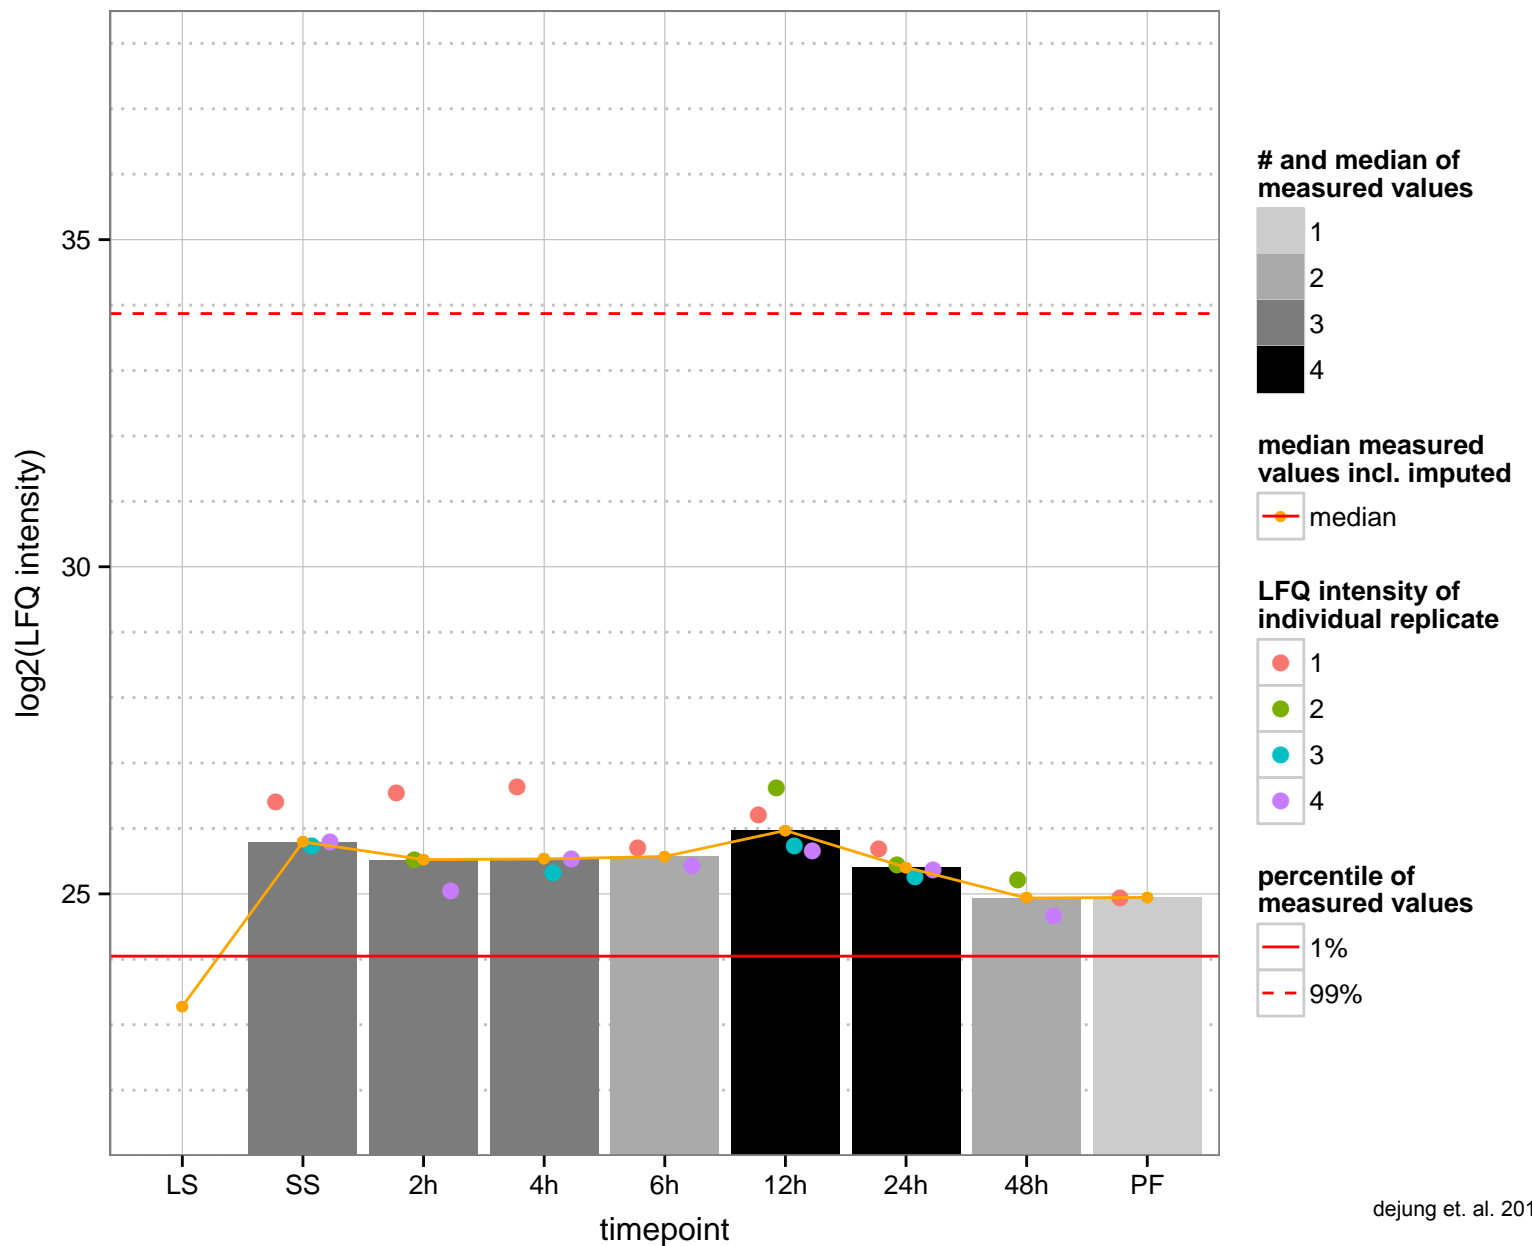

paraflagellar rod component, putative (PFC1)  
 Tb927.8.6660  
 AGOF: null  
 AGOC: null  
 AGOP: null  
 PGOF: null  
 PGO: null  
 PGOP: null

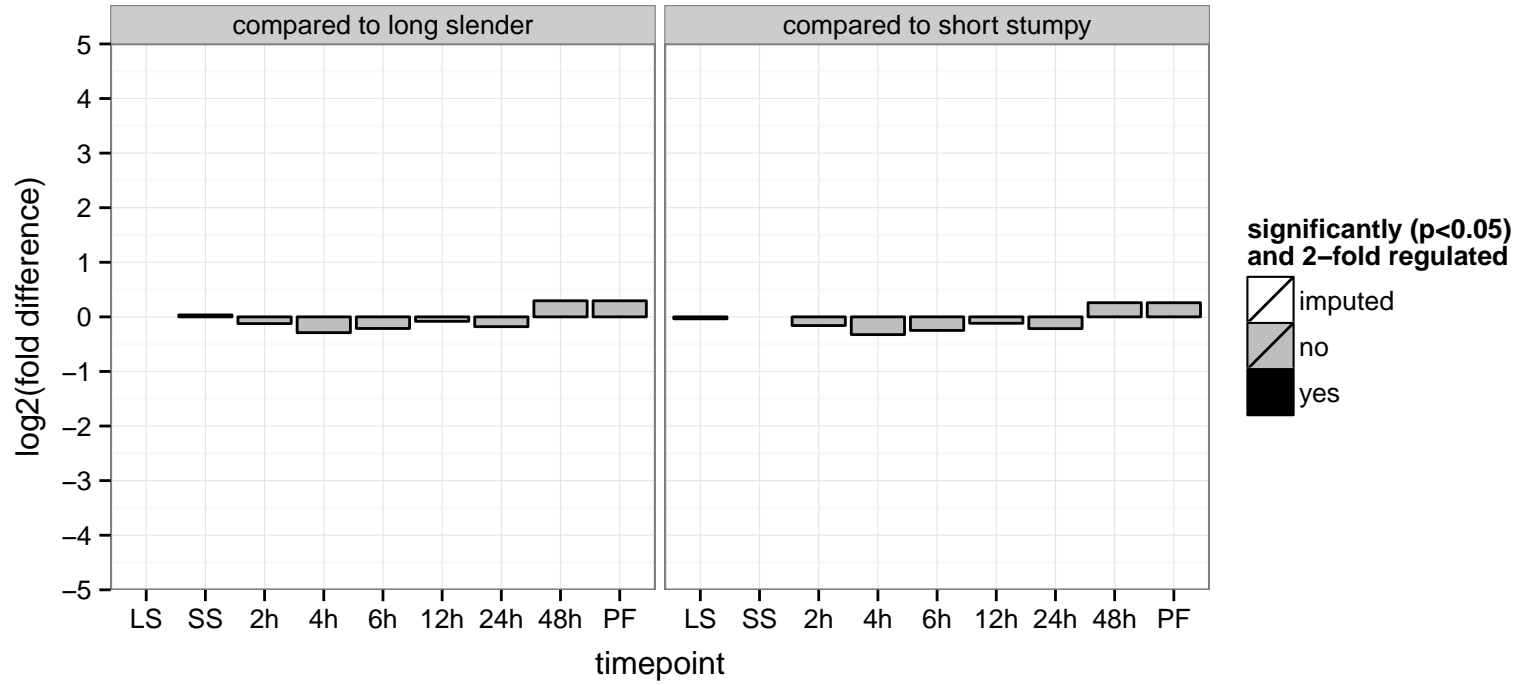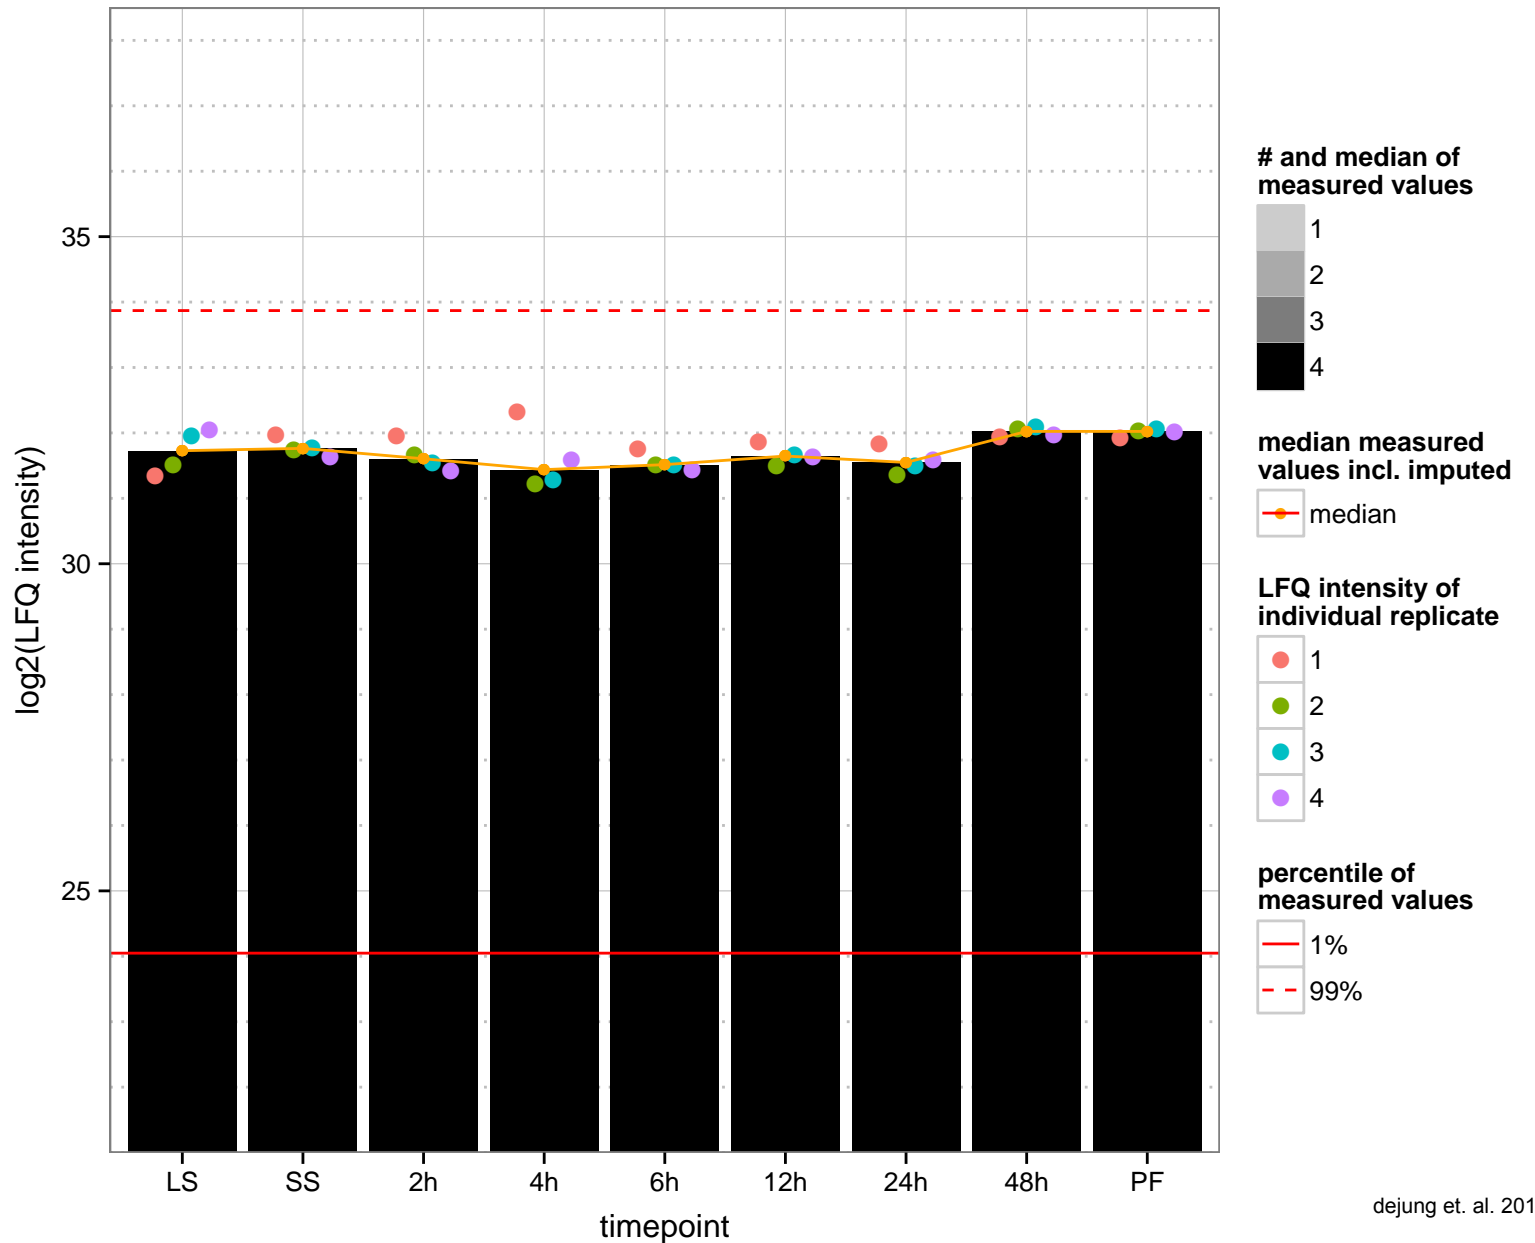

hypothetical protein, conserved  
 Tb927.8.6870  
 AGOF: null  
 AGOC: null  
 AGOP: null  
 PGO: protein binding  
 PGOC: null  
 PGOP: null

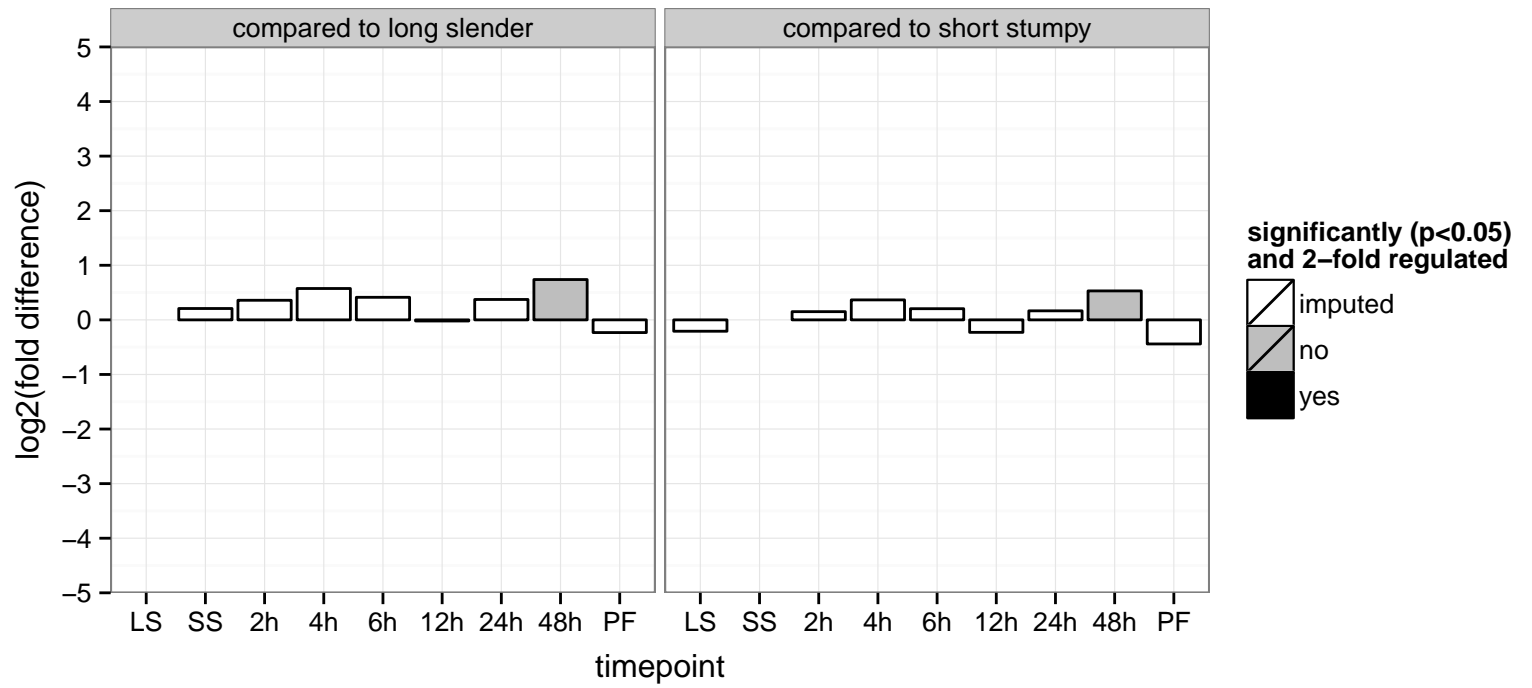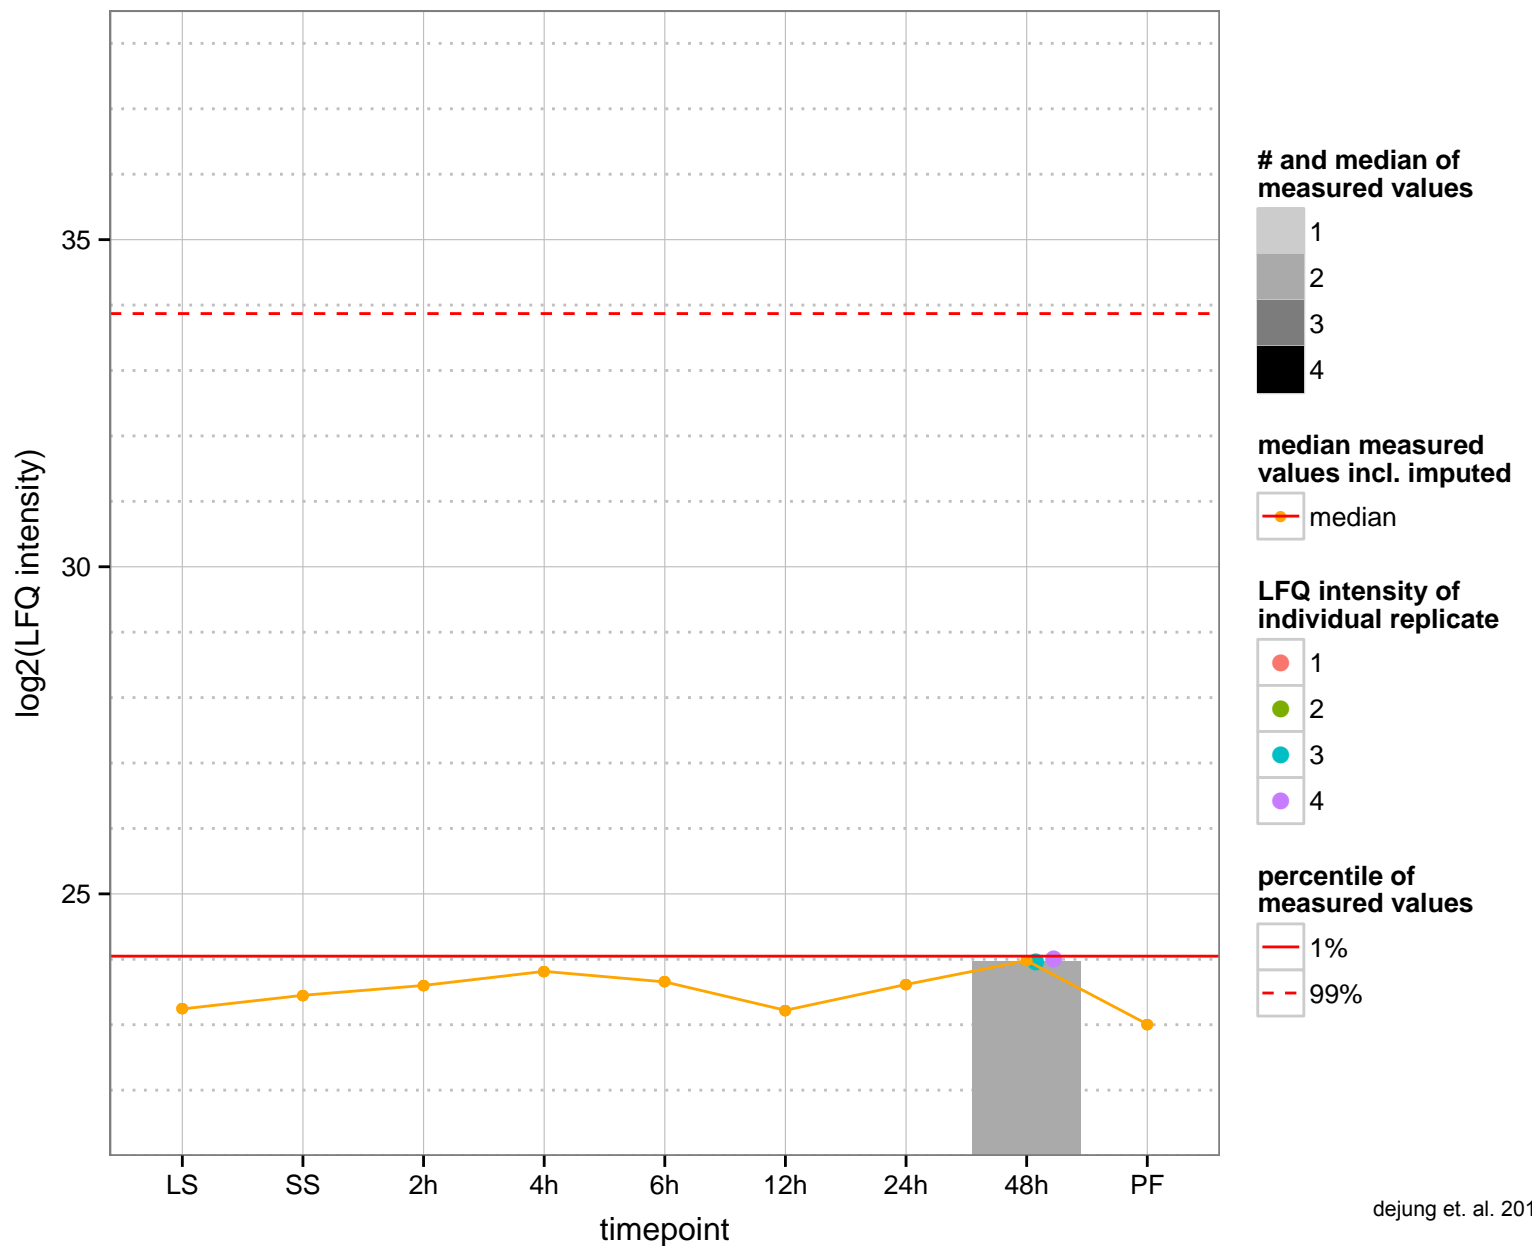

peptidyl-prolyl cis-trans isomerase/rotamase, putative, PPIase, parvulin (PIN1)

Tb927.8.690

AGOF: peptidyl-prolyl cis-trans isomerase activity

AGOC: null

AGOP: protein folding

PGOF: isomerase activity

PGOC: null

PGOP: null

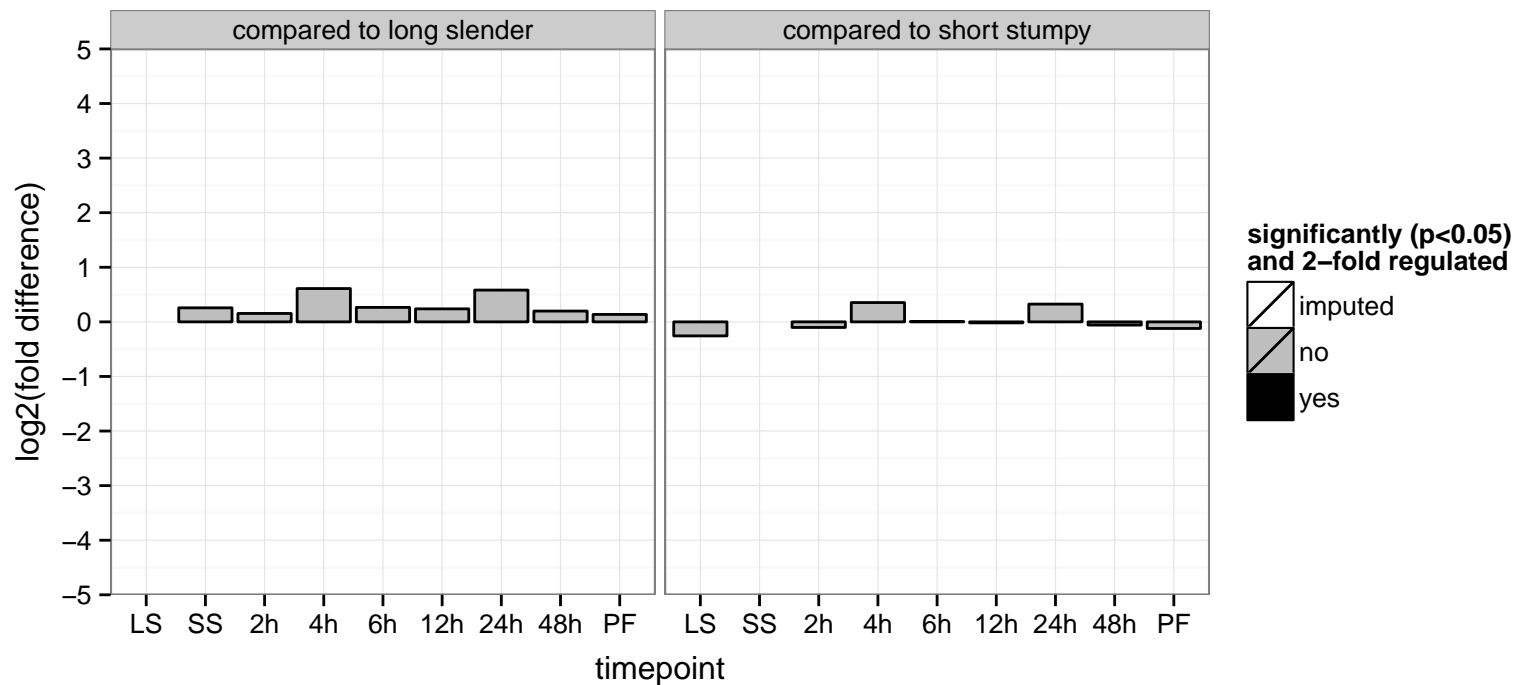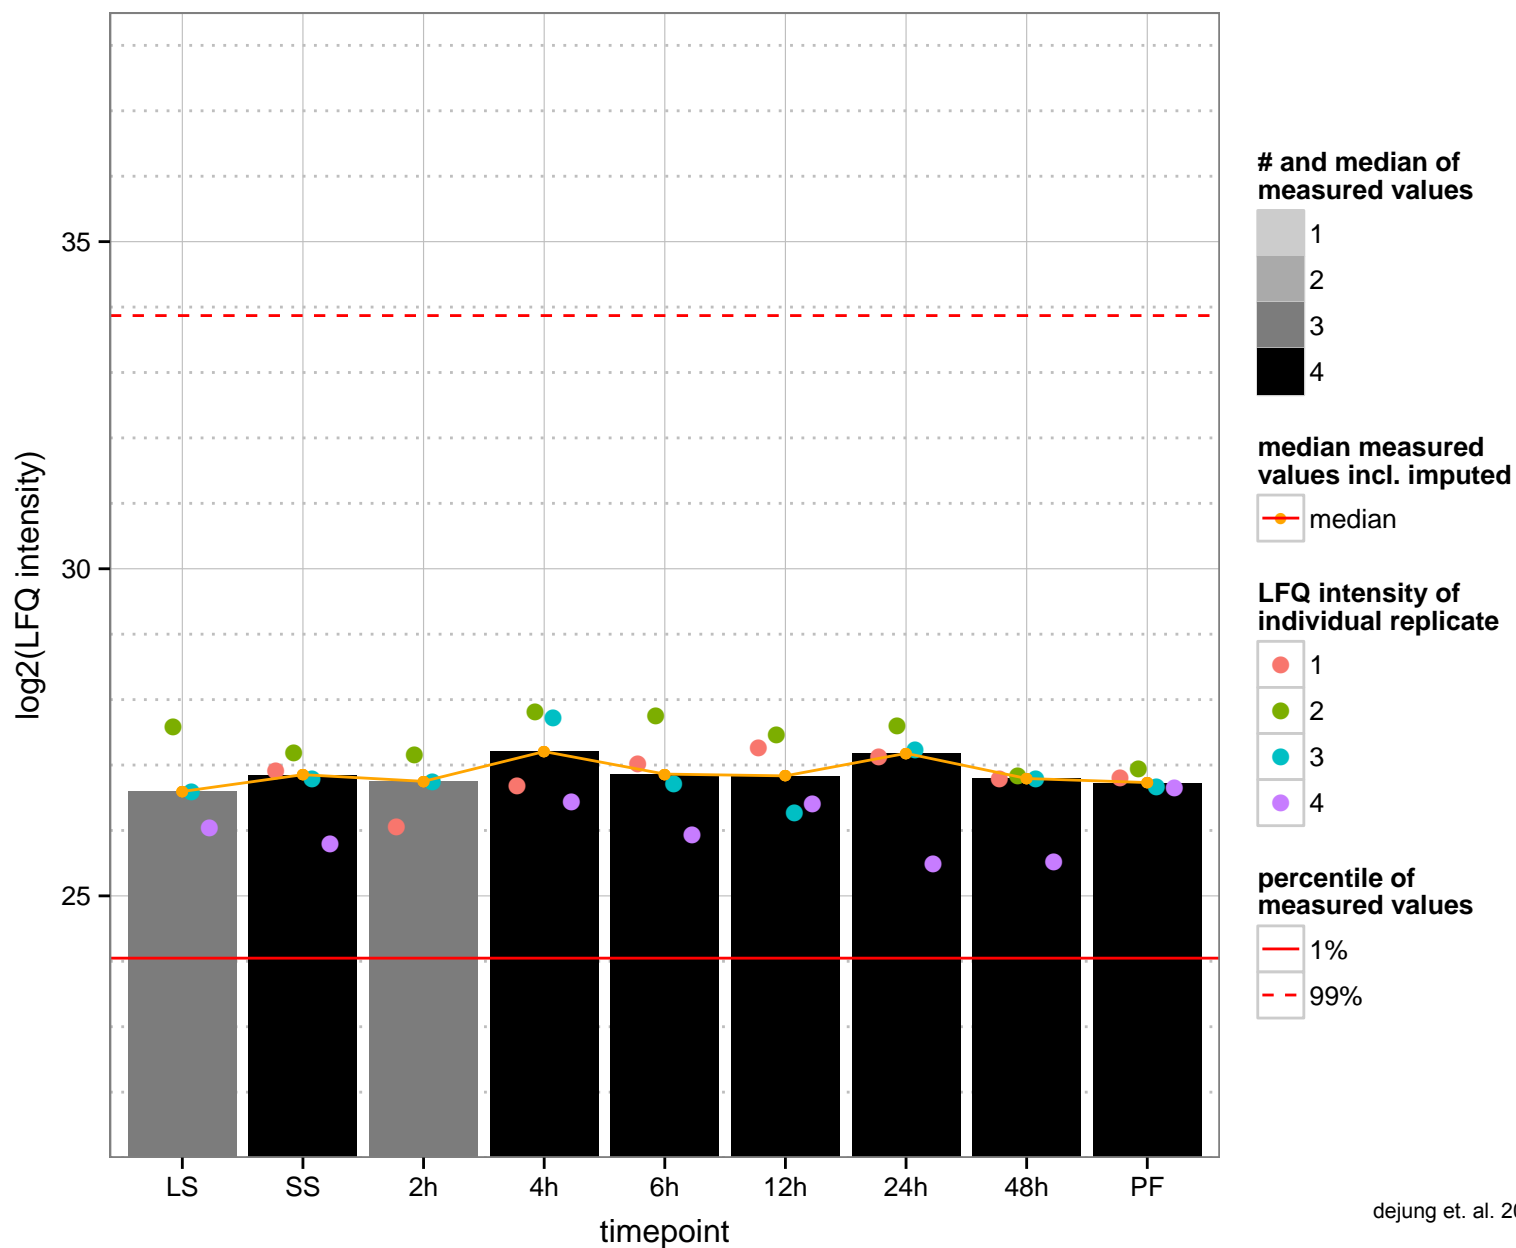

hypothetical protein, conserved  
 Tb927.8.6900  
 AGOF: null  
 AGOC: null  
 AGOP: null  
 PGOF: null  
 PGO C: null  
 PGOP: null

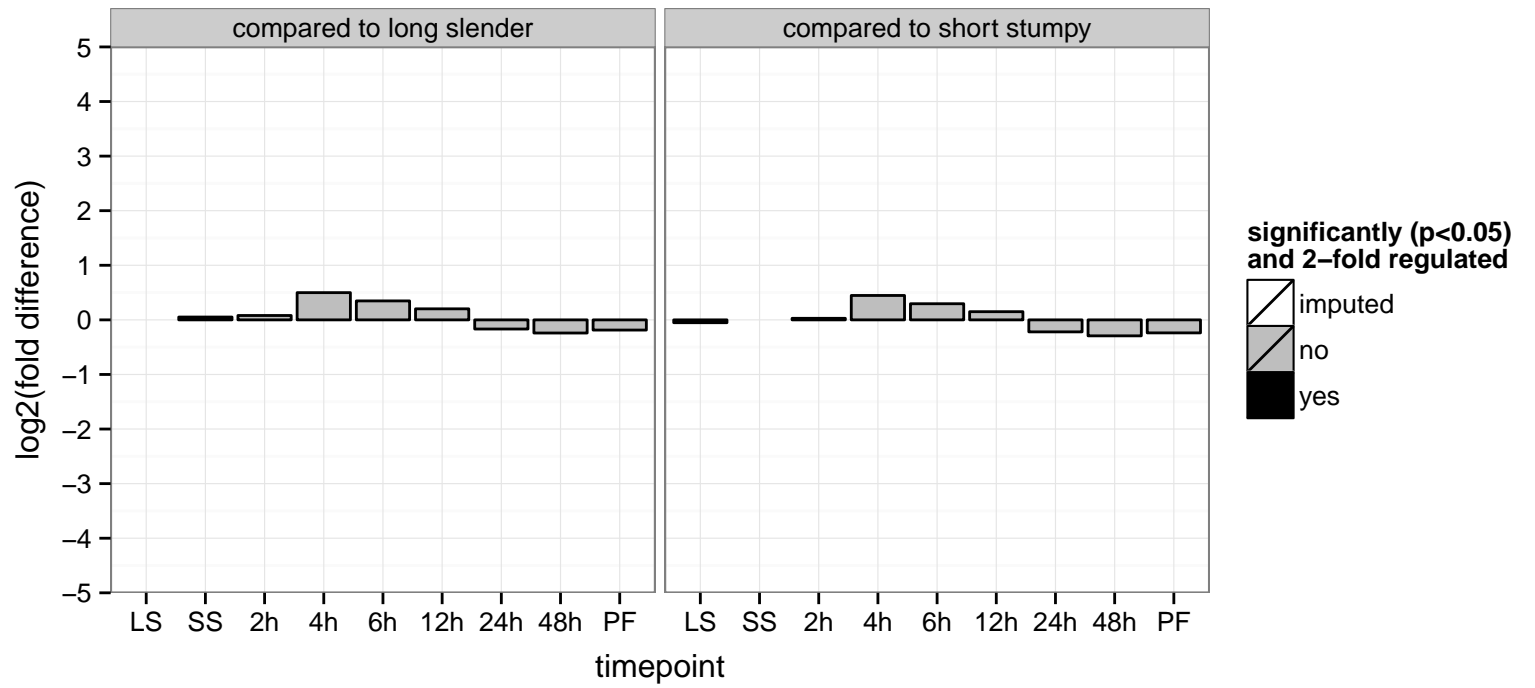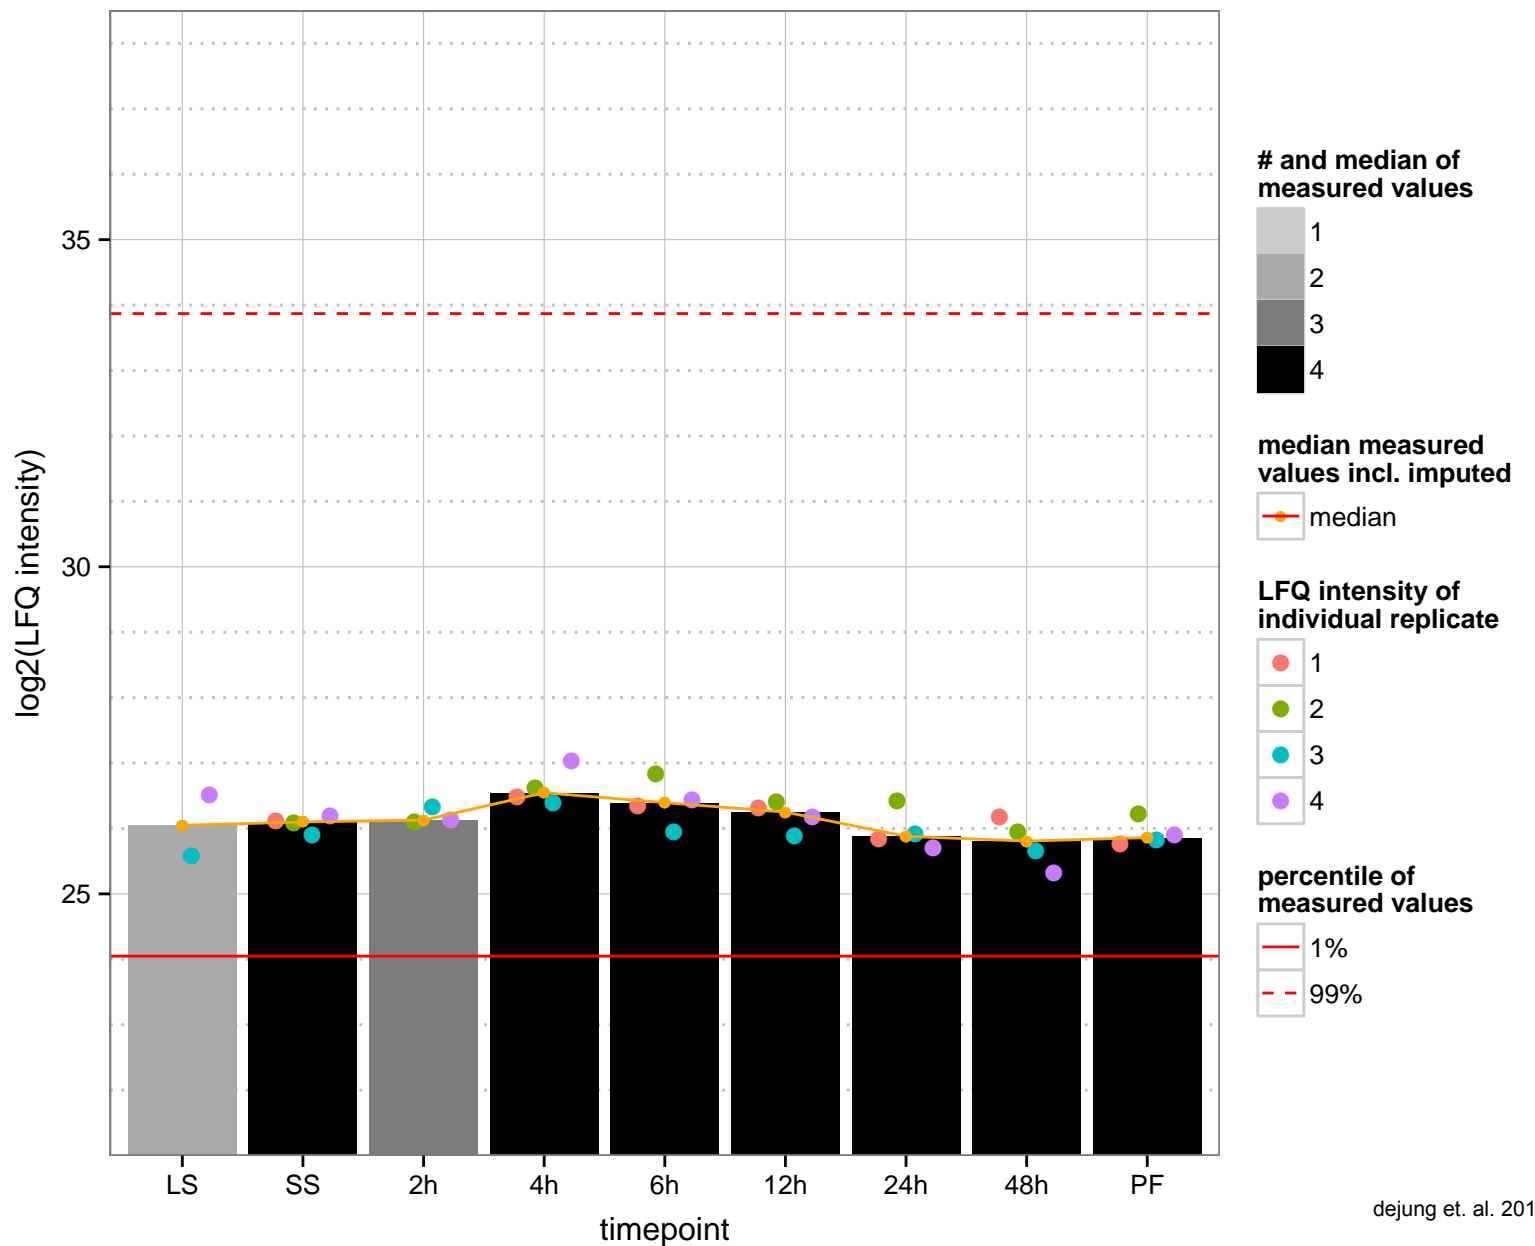

cyclophilin, putative  
 Tb927.8.6910  
 AGOF: peptidyl-prolyl cis-trans isomerase activity  
 AGOC: null  
 AGOP: protein folding  
 PGOF: peptidyl-prolyl cis-trans isomerase activity  
 PGO: null  
 PGOP: protein folding

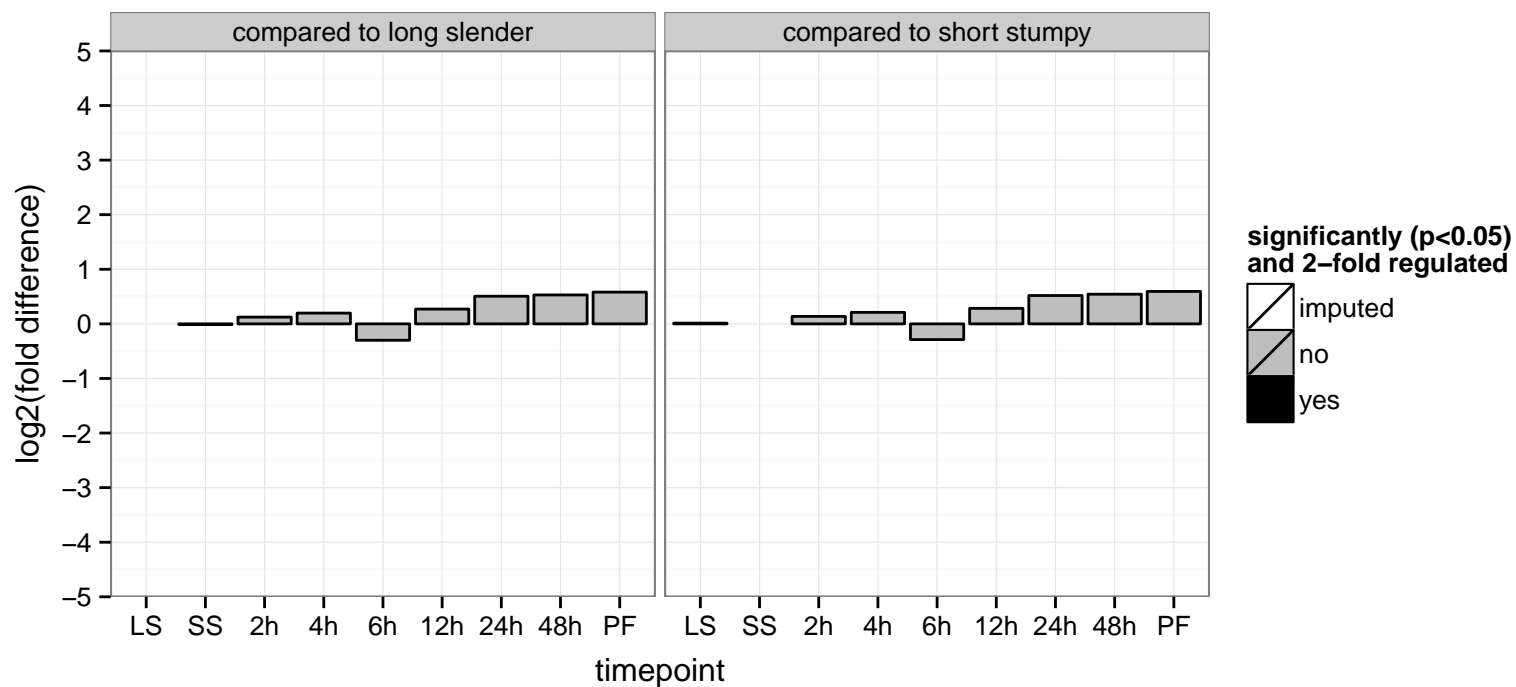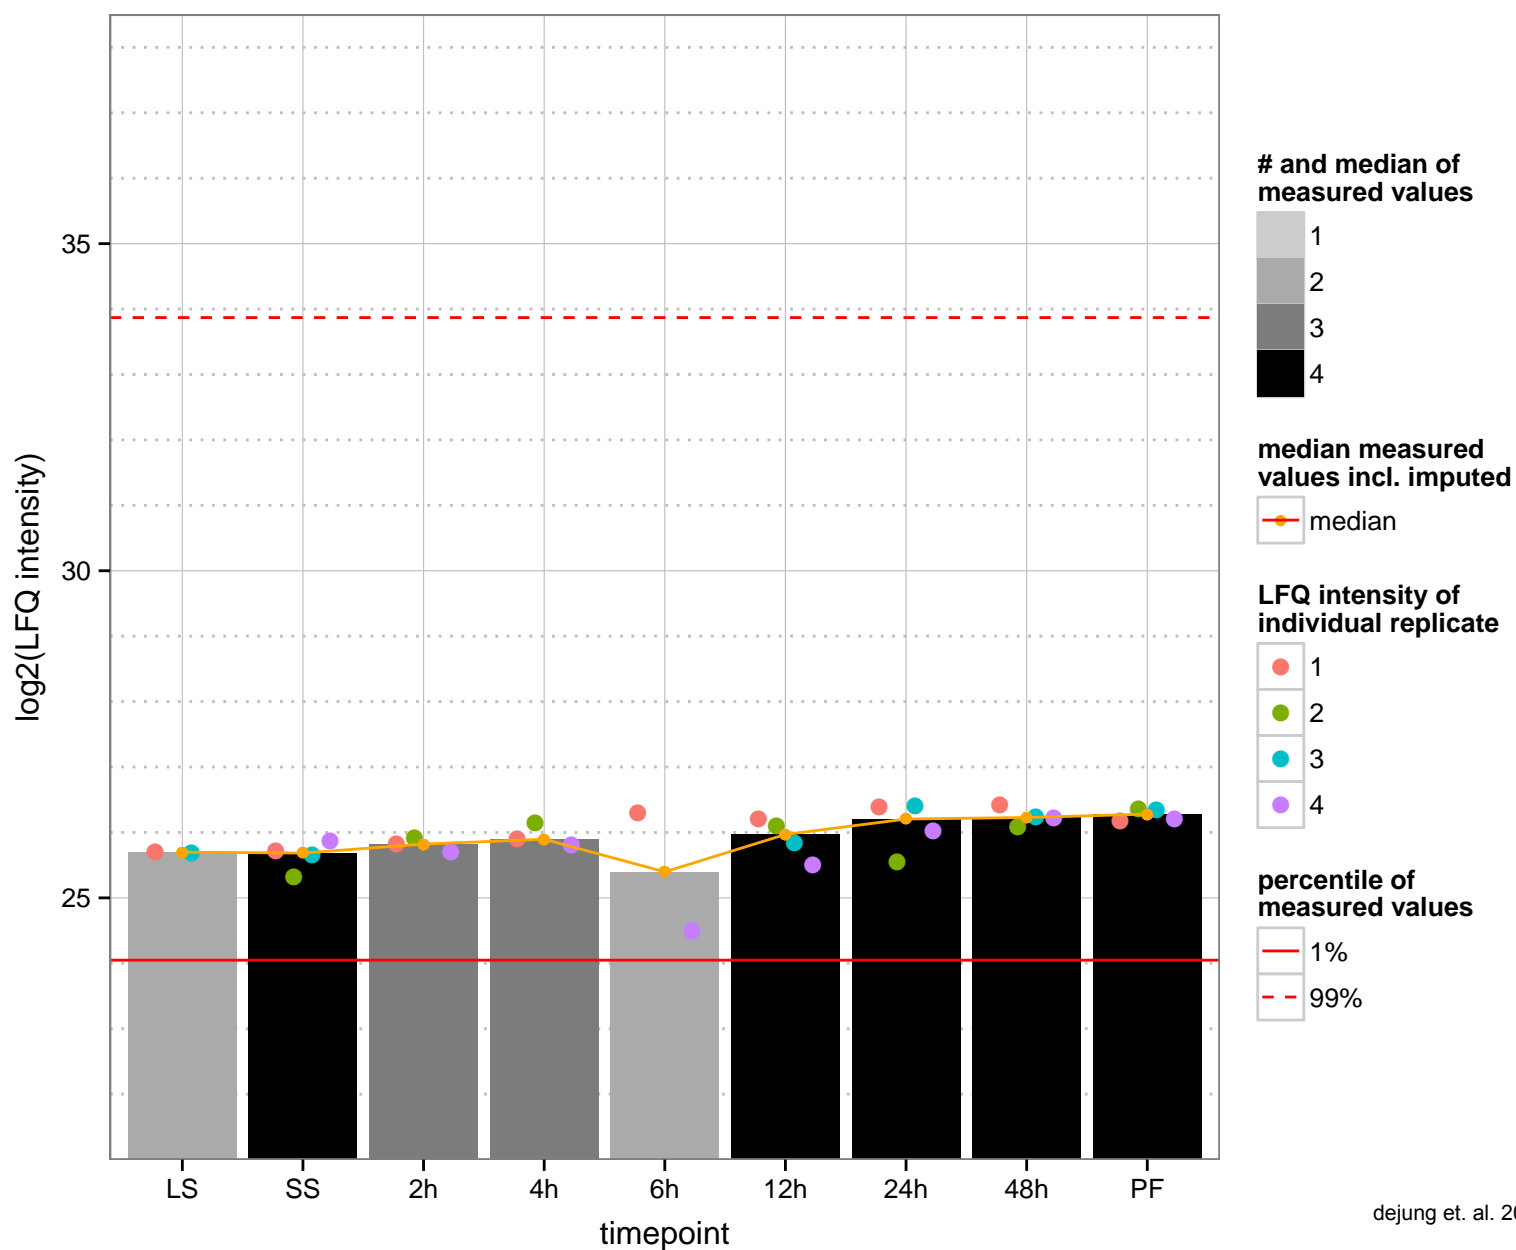

hypothetical protein, conserved  
 Tb927.8.6920  
 AGOF: null  
 AGOC: null  
 AGOP: null  
 PGO: null  
 PGOC: null  
 PGOP: null

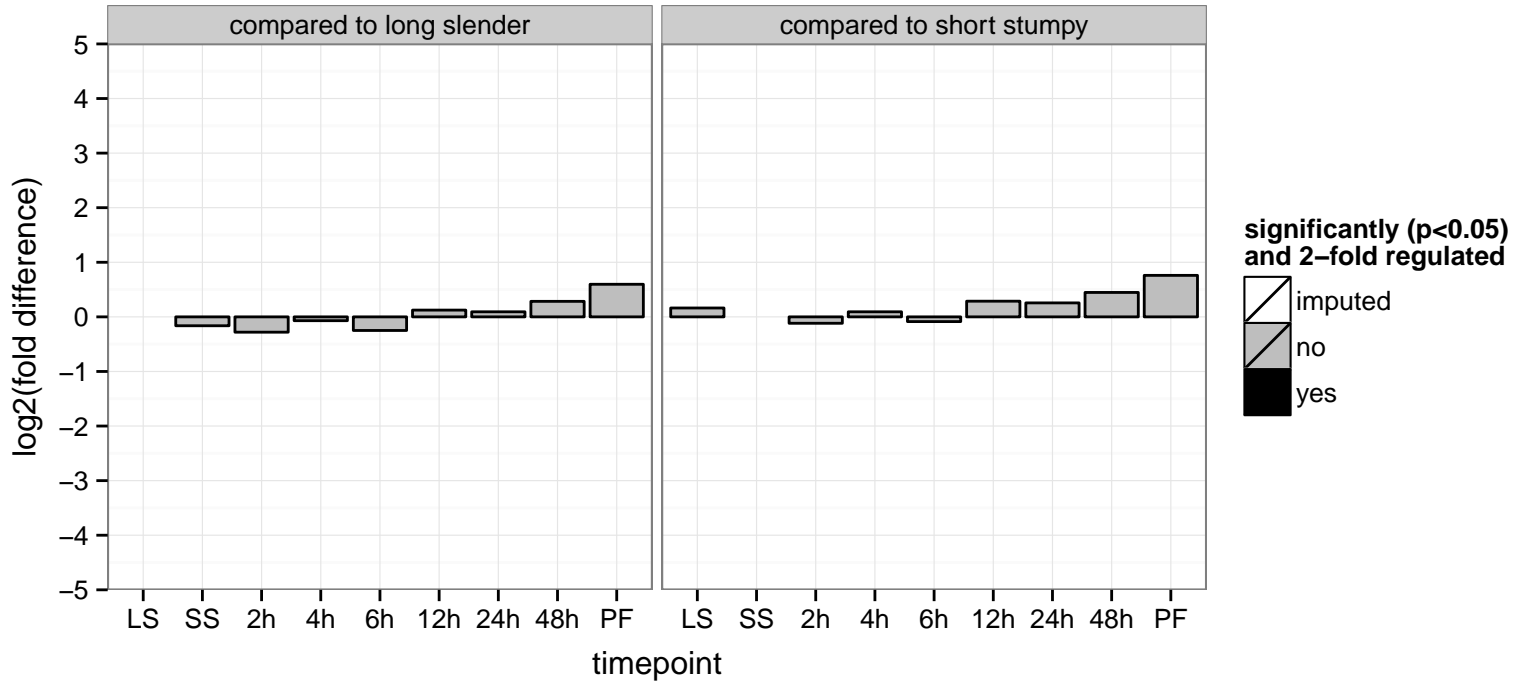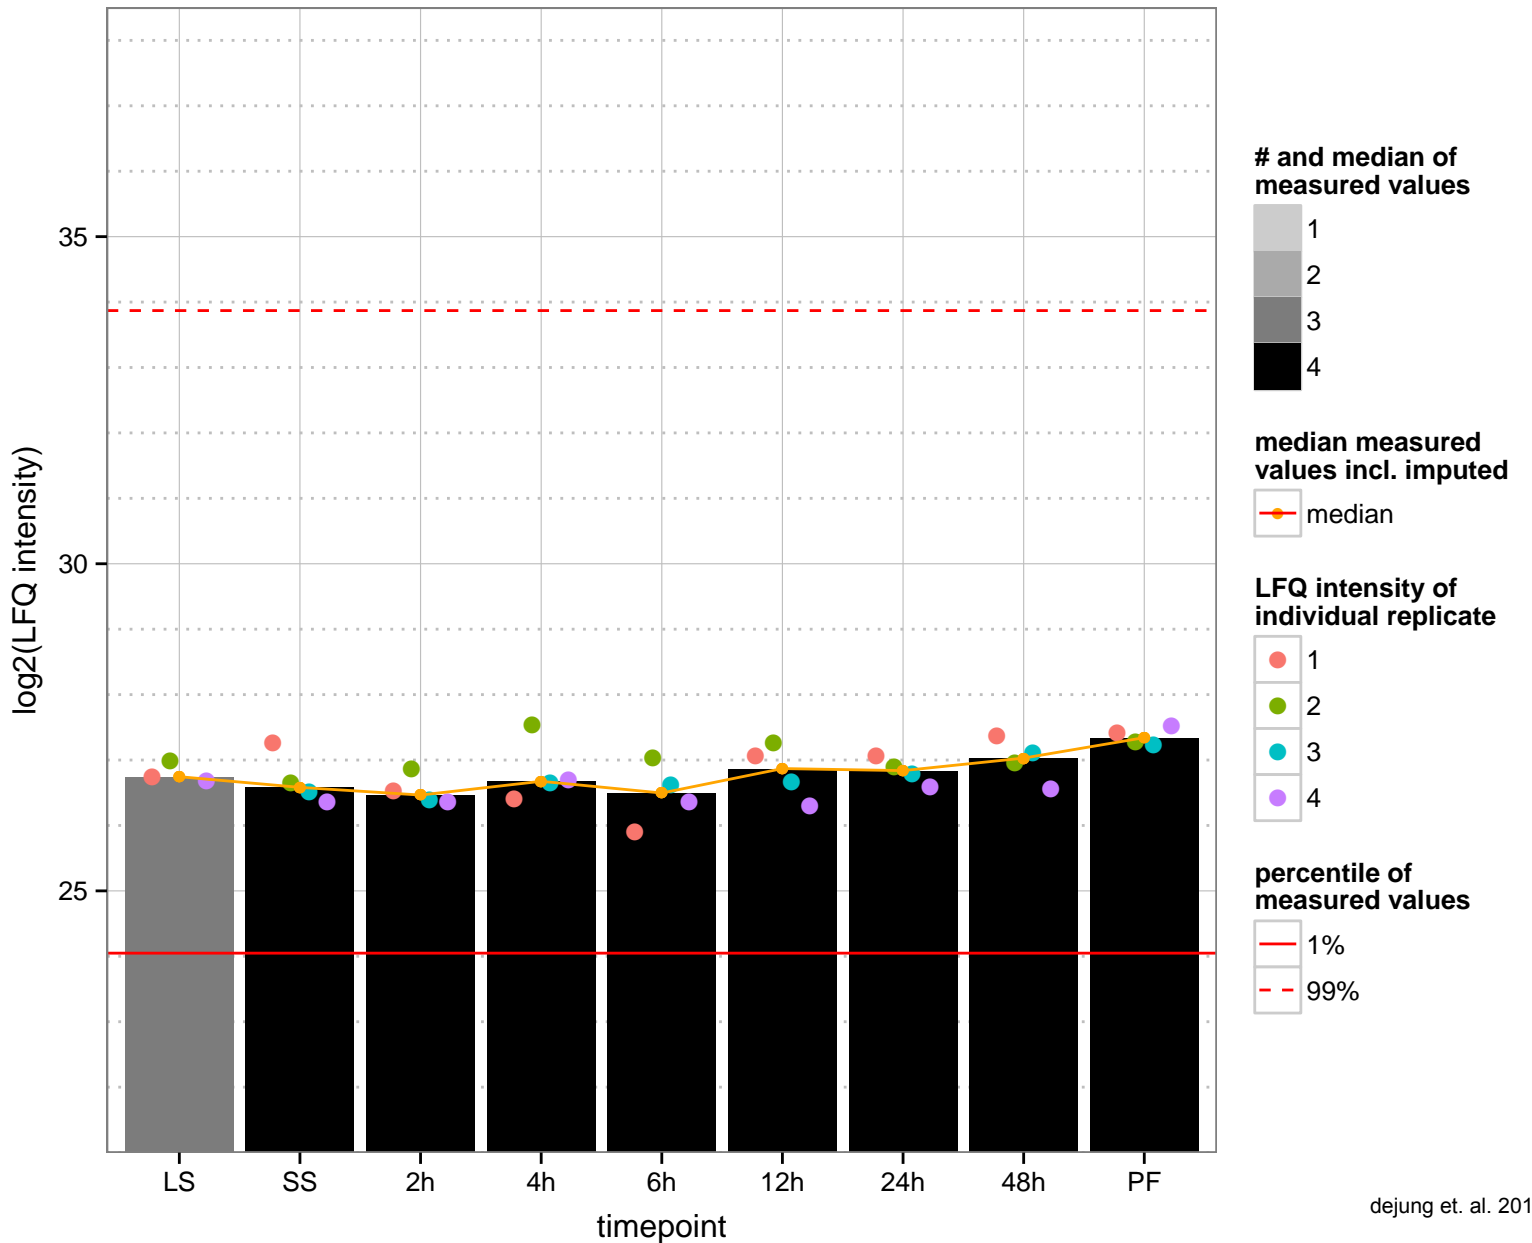

dynein light chain 2B, cytoplasmic, putative, predicted dynein modulator, roadblock/LC7 family member  
 Tb927.8.6950;Tb927.4.5370  
 AGOF: null, microtubule motor activity  
 AGOC: null, cytoplasmic dynein complex  
 AGOP: ciliary or flagellar motility, microtubule-based movement  
 PGO: null  
 PGOC: null  
 PGOP: null

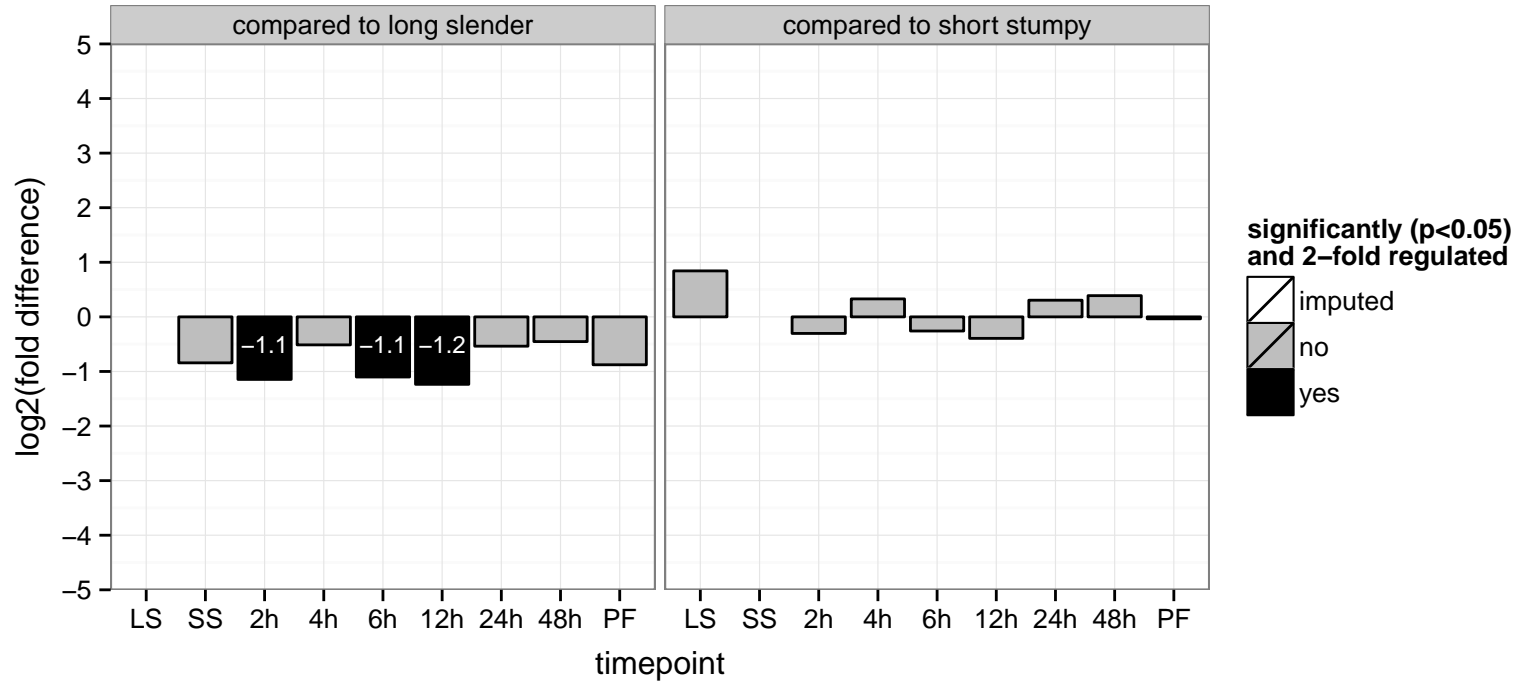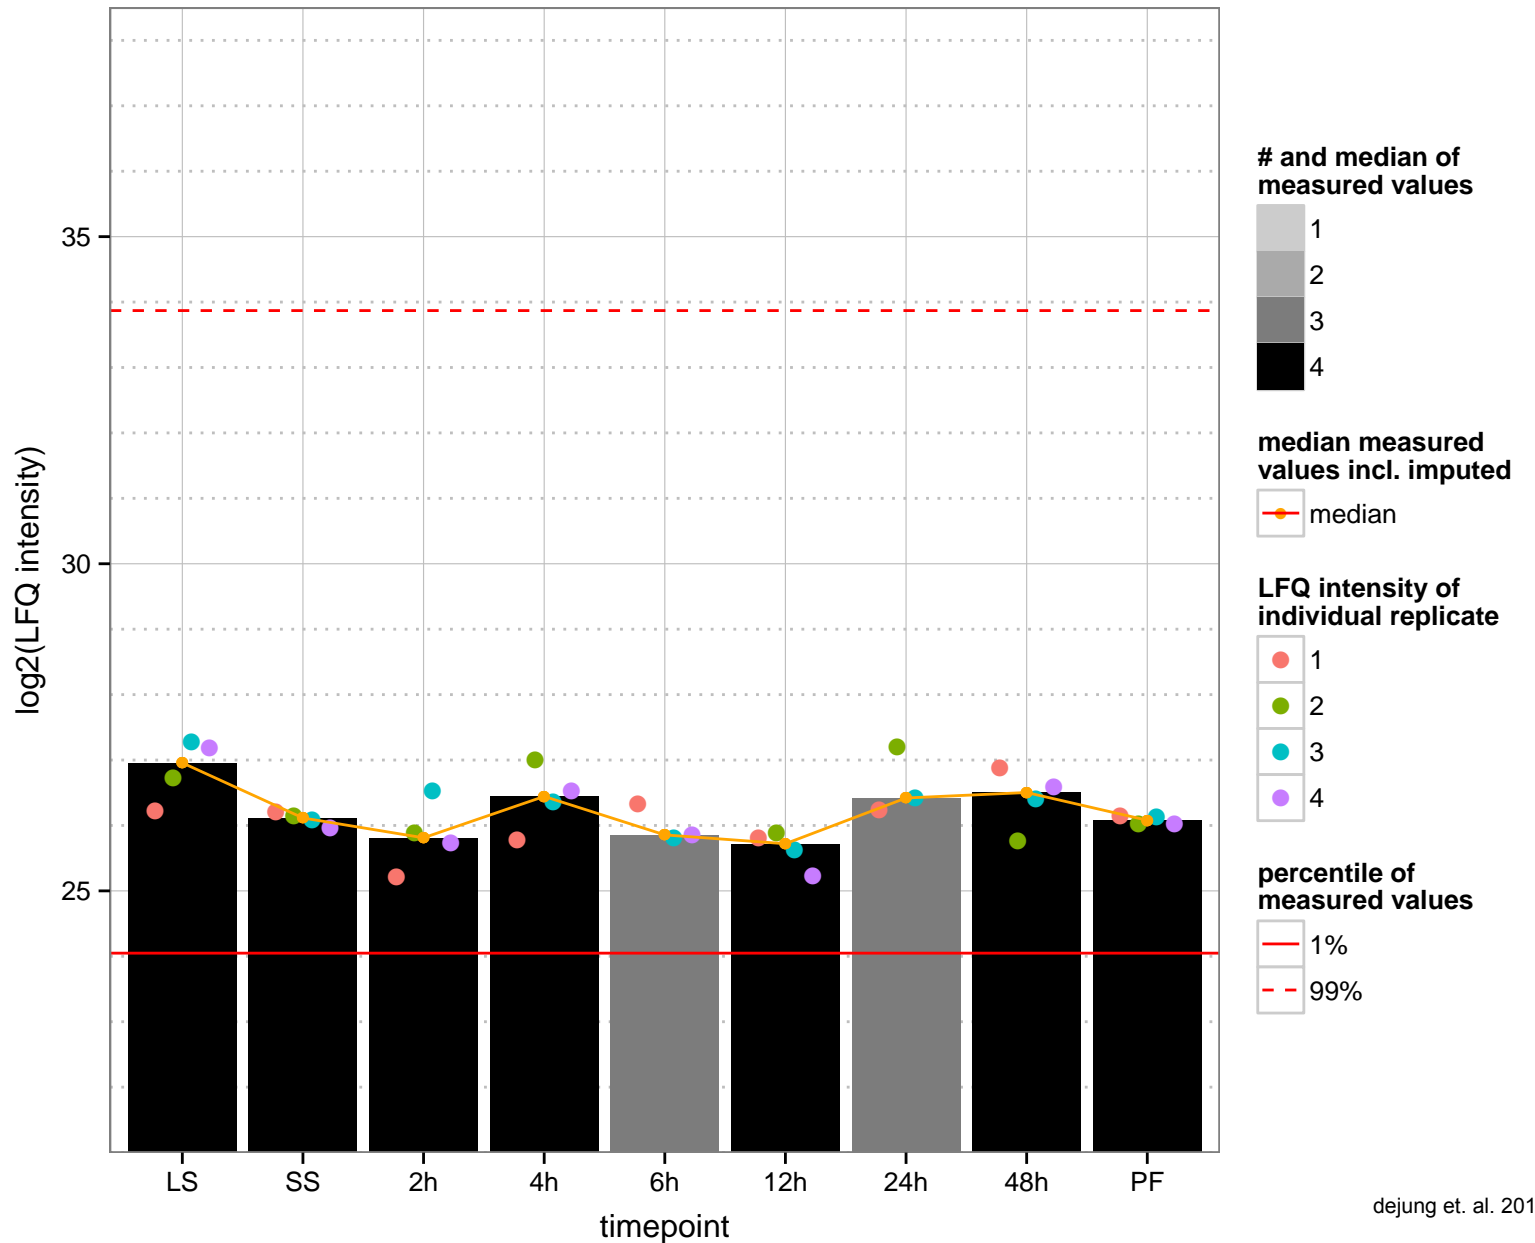



hypothetical protein, conserved  
 Tb927.8.6980  
 AGOF: null  
 AGOC: null  
 AGOP: null  
 PGOF: null  
 PGO: null  
 PGOP: null

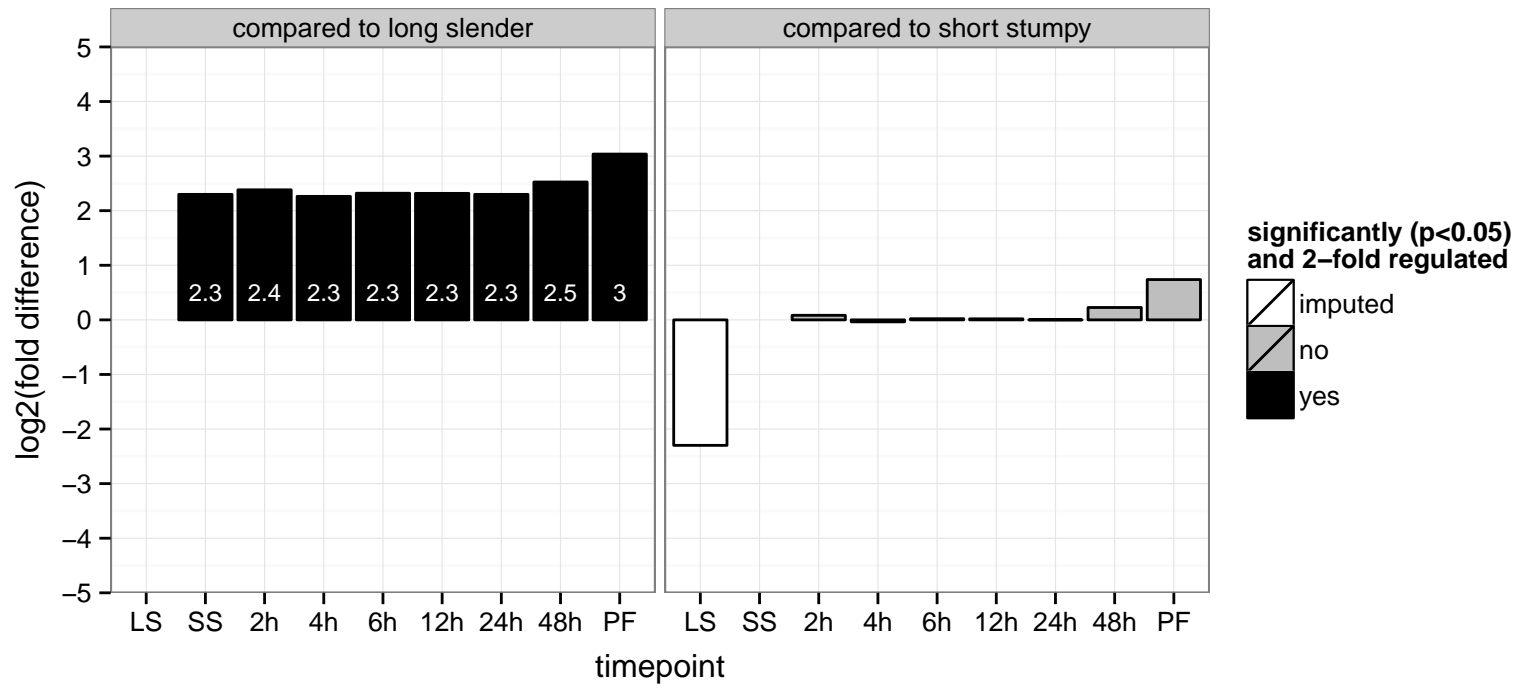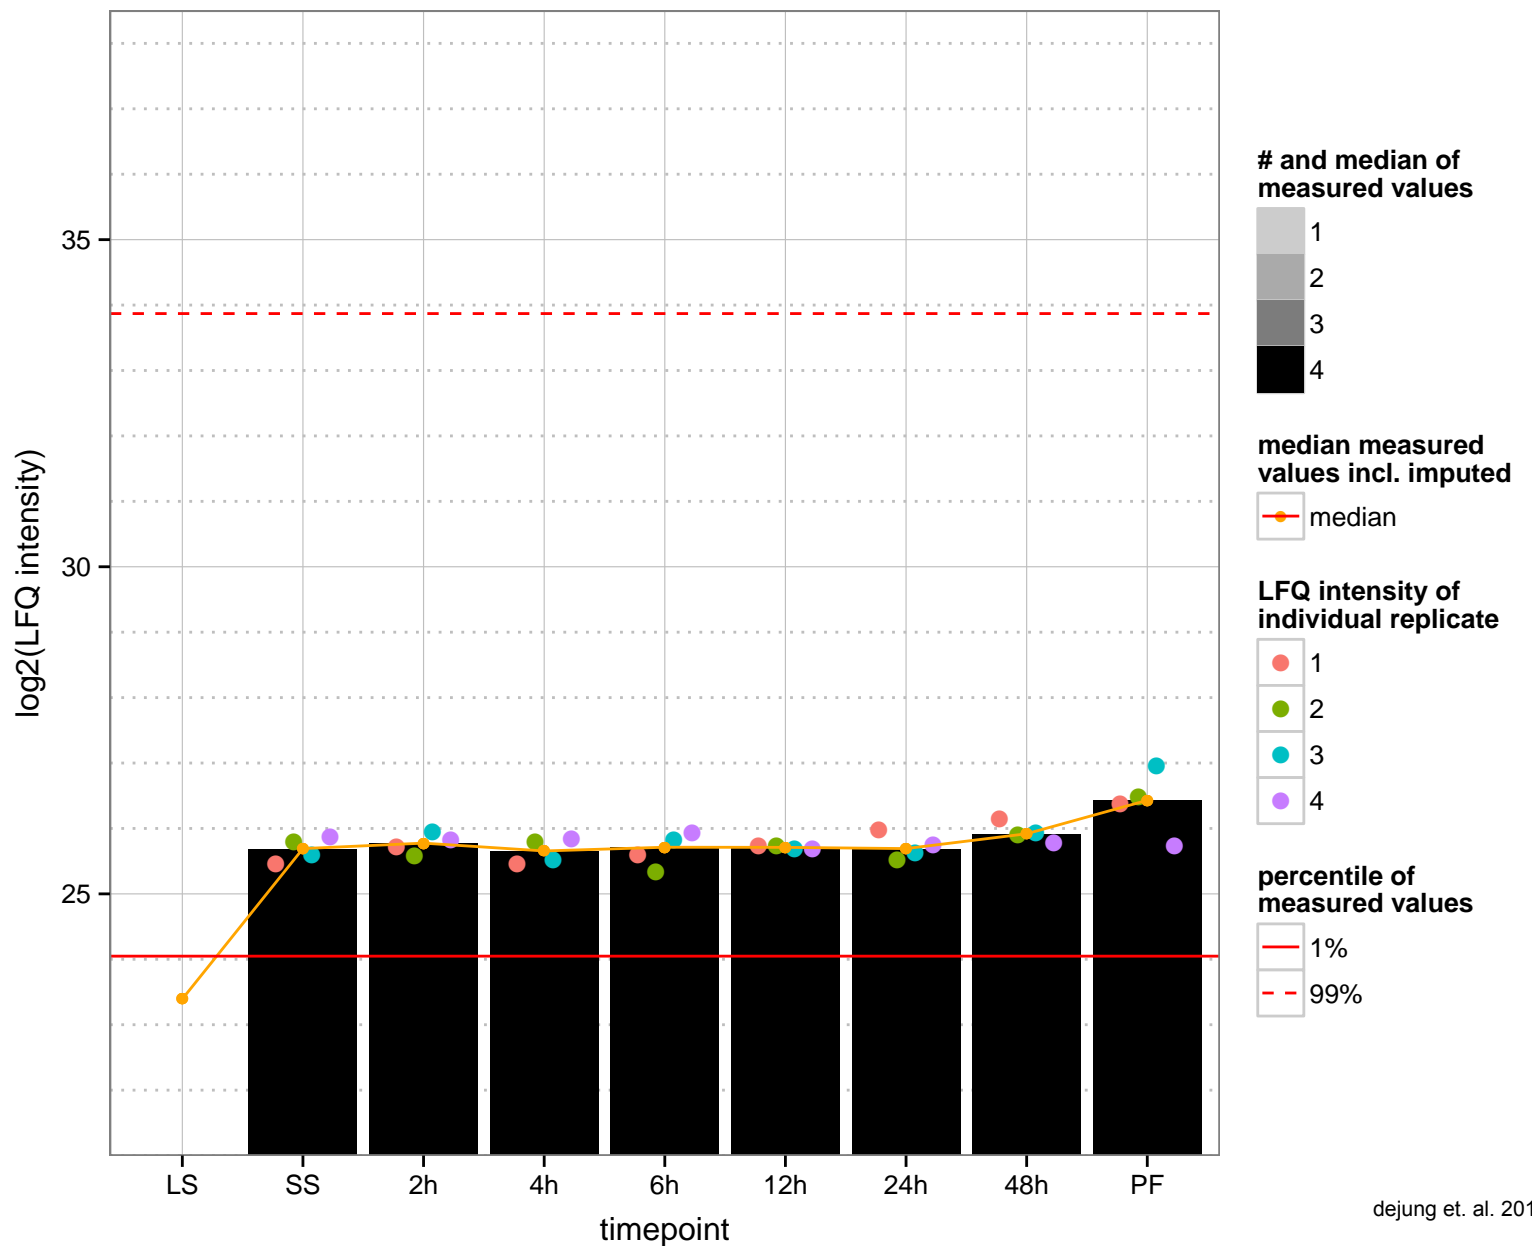

peptidase, putative, metallo-peptidase, Clan ME, Family M16

Tb927.8.7020

AGOF: catalytic activity, metalloendopeptidase activity, zinc ion binding

AGOC: null

AGOP: proteolysis

PGOF: catalytic activity, metal ion binding, metalloendopeptidase activity, zinc ion binding

PGOC: null

PGOP: proteolysis

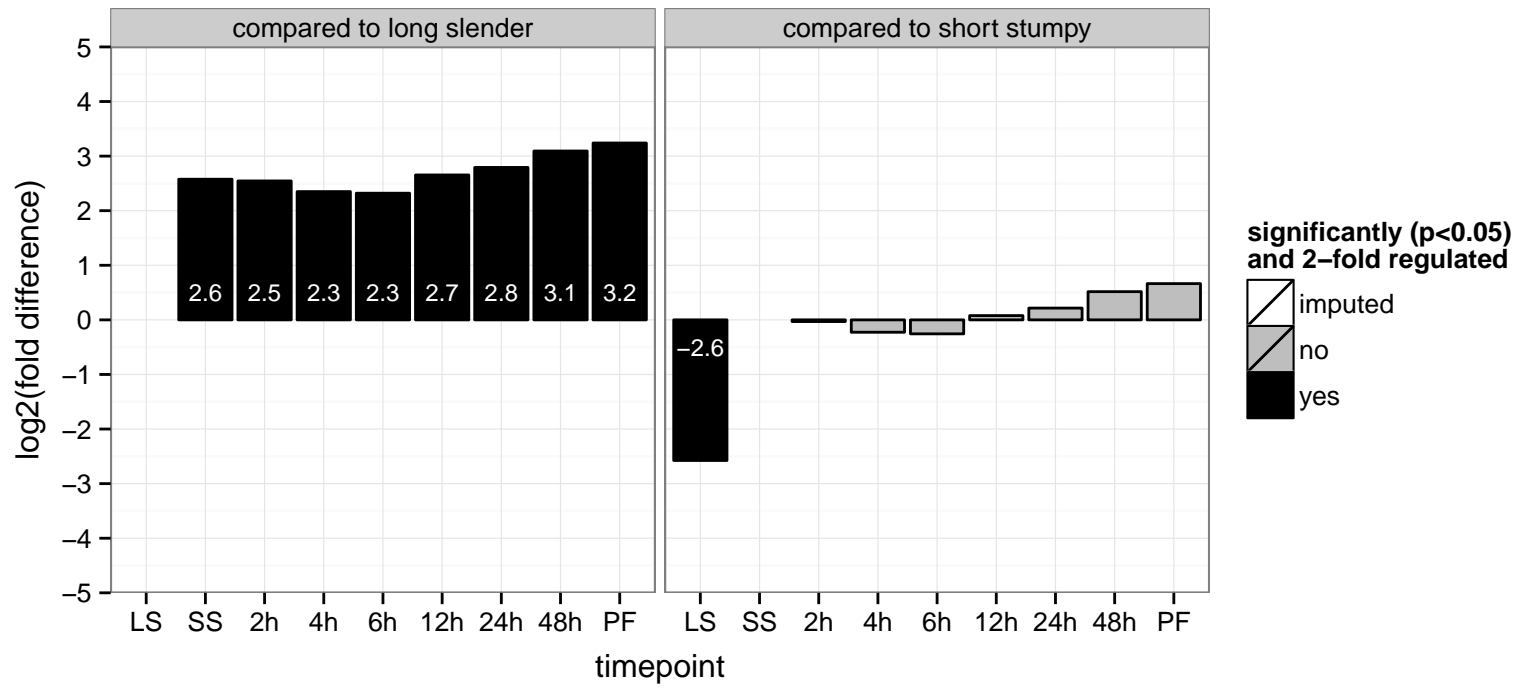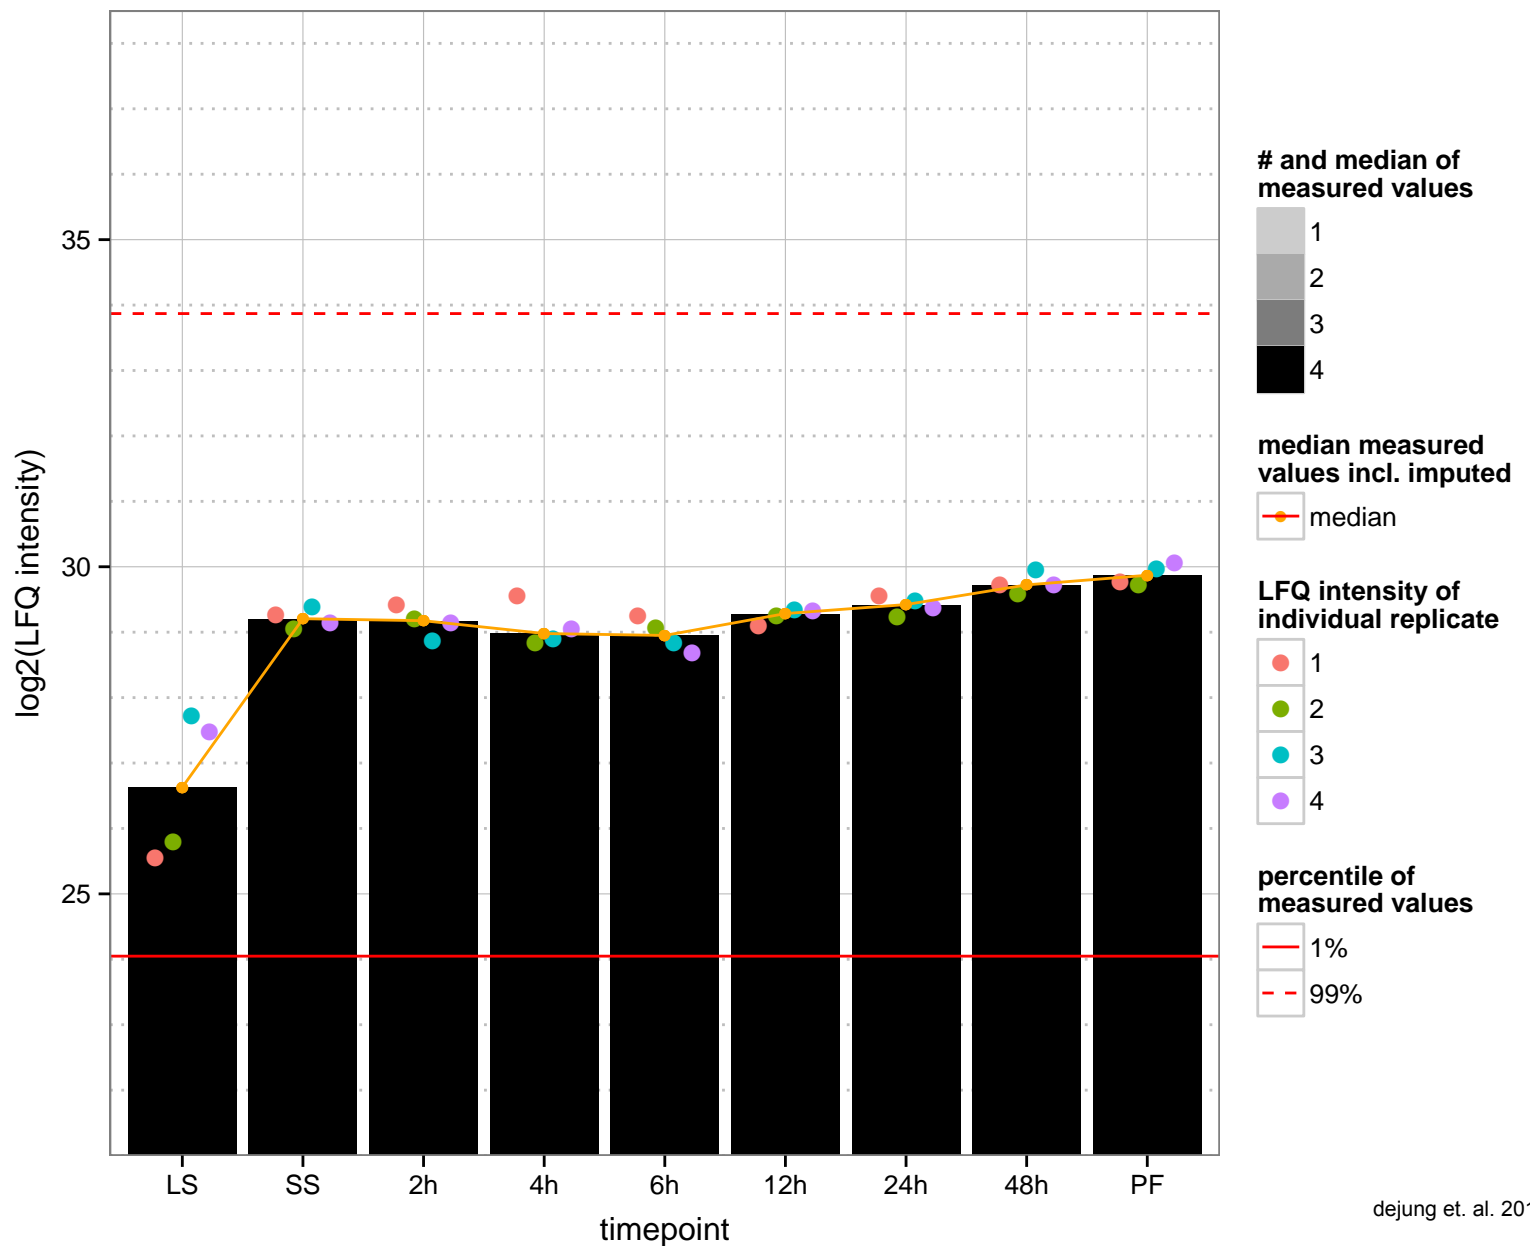

acetyl-CoA carboxylase

Tb927.8.7100

AGOF: ATP binding, acetyl-CoA carboxylase activity, biotin binding, biotin carboxylase activity

AGOC: biotin carboxylase complex, cytoplasm, mitochondrion

AGOP: fatty acid biosynthetic process, fatty acid elongation, quorum sensing

PGOF: ATP binding, acetyl-CoA carboxylase activity, biotin carboxylase activity, catalytic activity, ligase activity, metal ion binding

PGOC: null

PGOP: fatty acid biosynthetic process, metabolic process

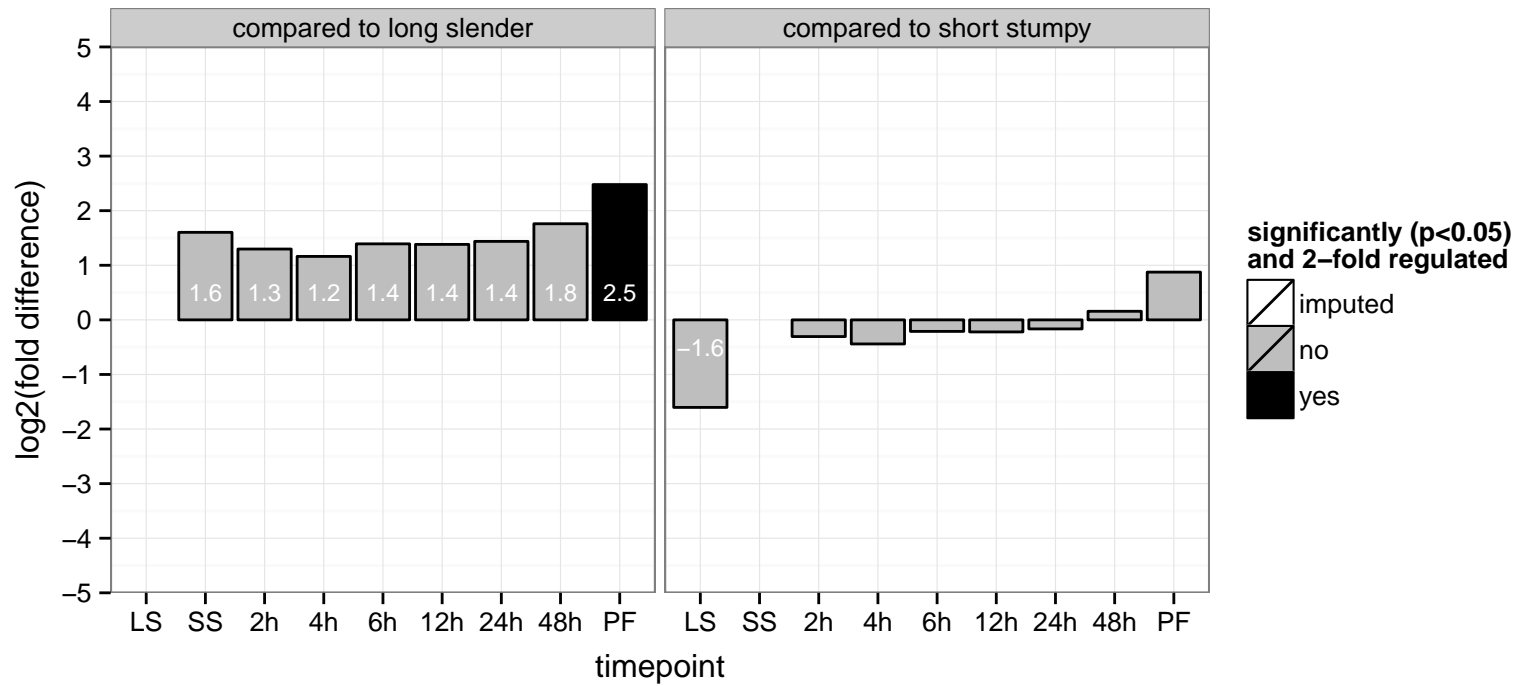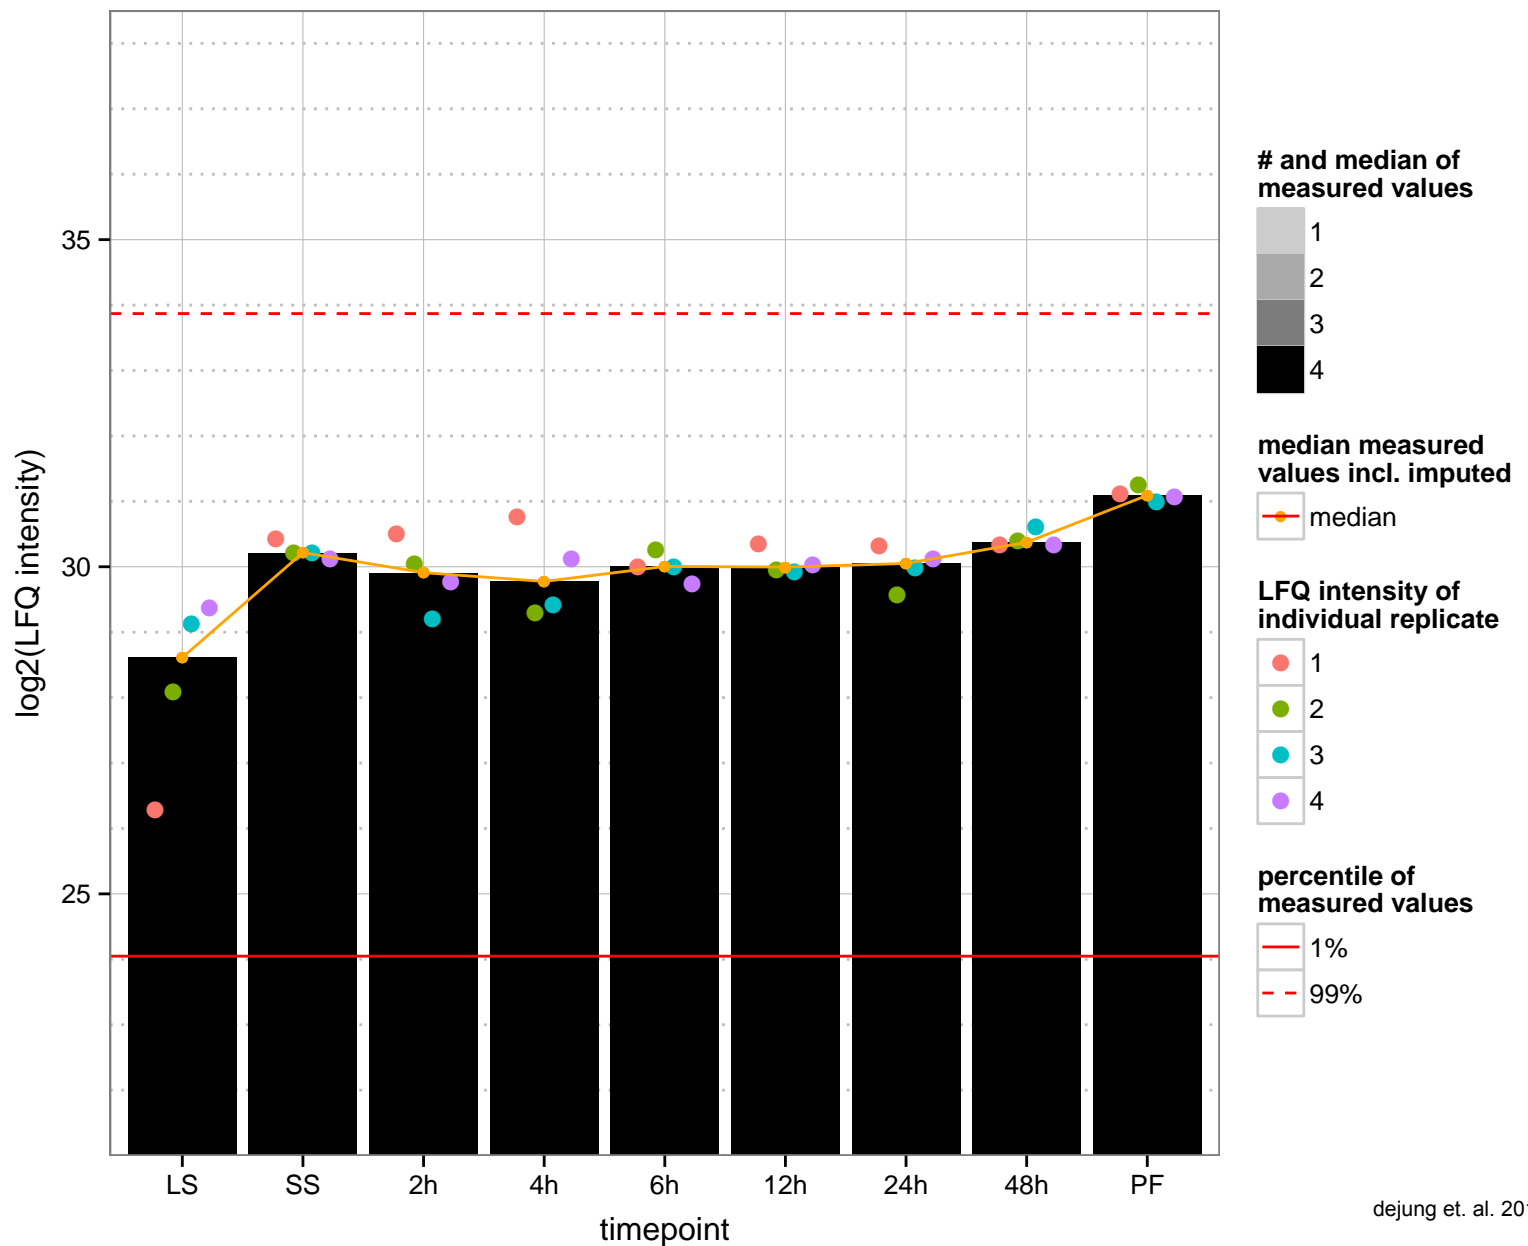

inositol polyphosphate 1-phosphatase, putative  
 Tb927.8.7170  
 AGOF: null  
 AGOC: mitochondrion  
 AGOP: phosphatidylinositol phosphorylation  
 PGO: null  
 PGO: null  
 PGO: null  
 PGOP: phosphatidylinositol phosphorylation

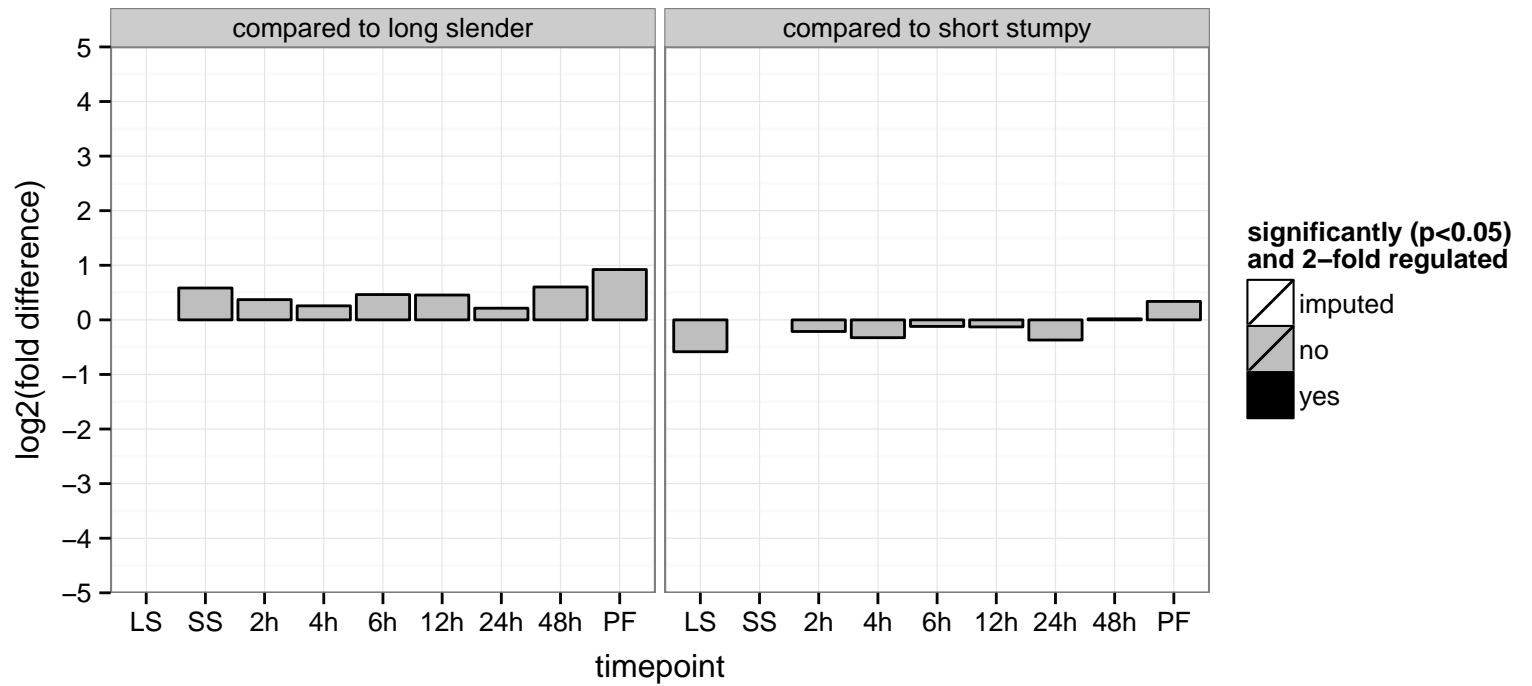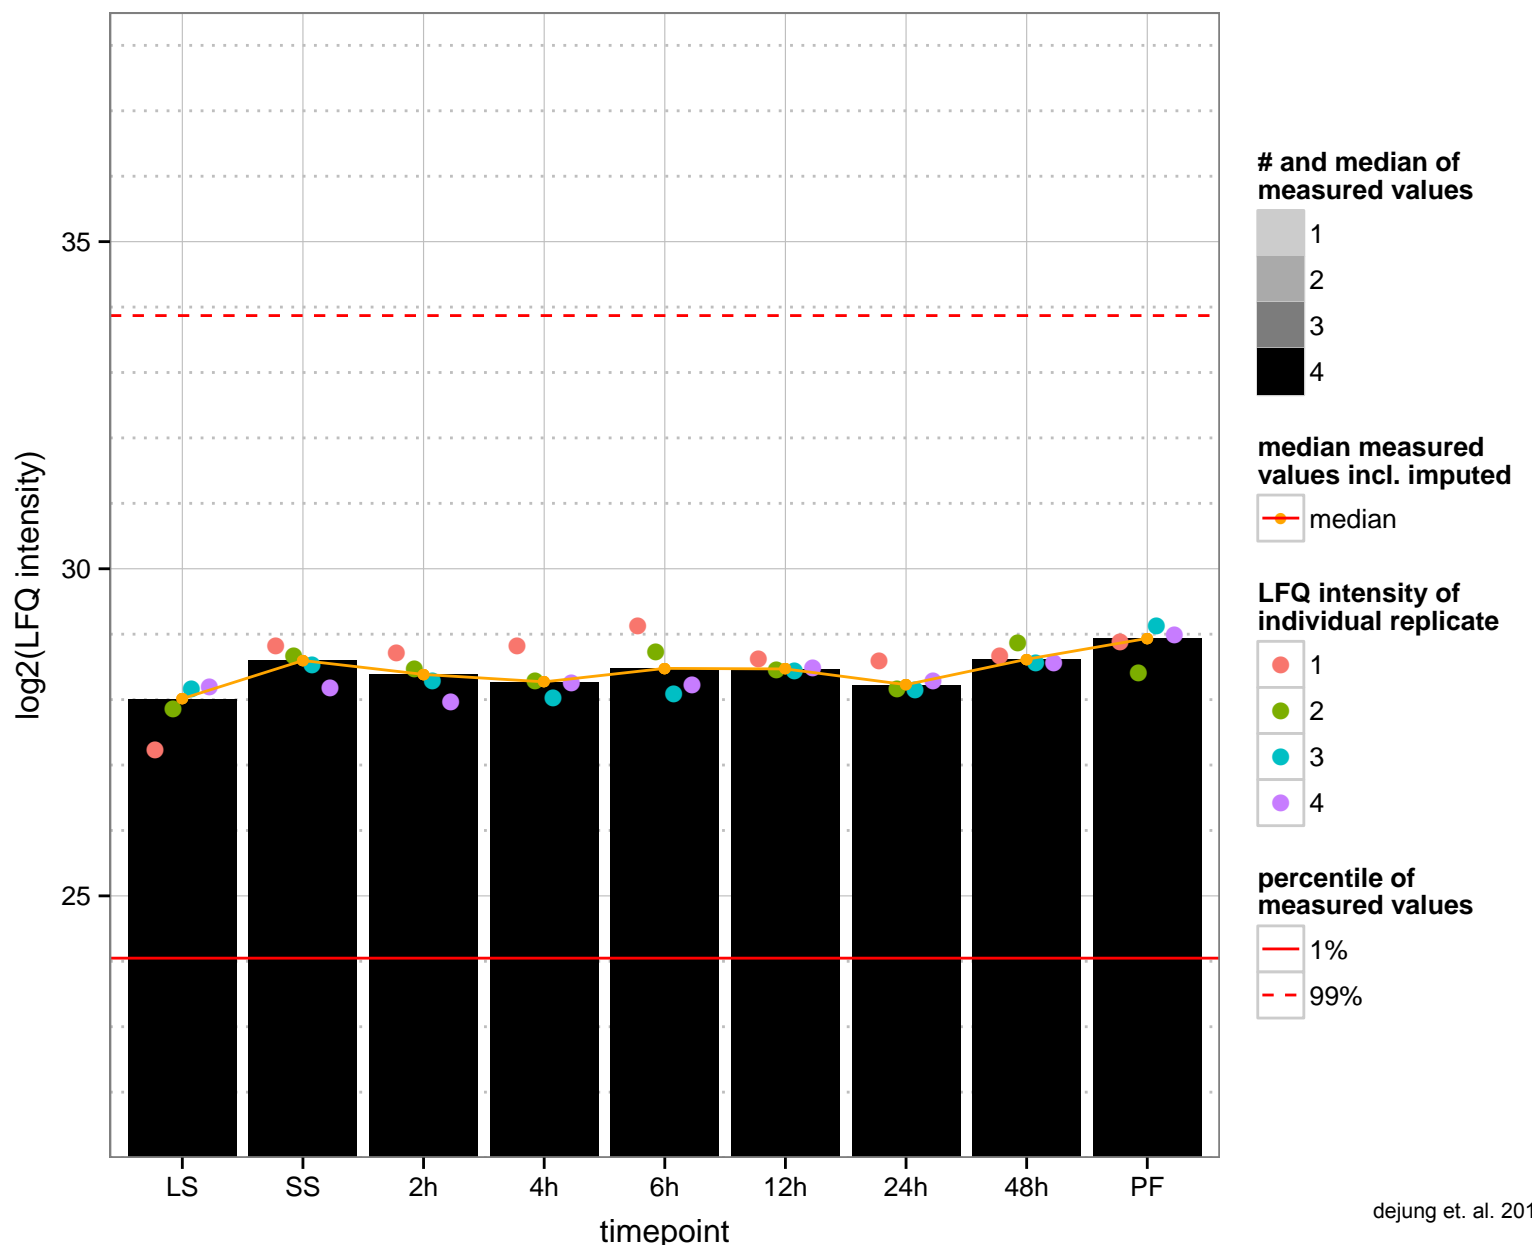

nucleolar RNA-binding protein, putative  
 Tb927.8.730  
 AGOF: RNA binding  
 AGOC: nucleolus  
 AGOP: RNA metabolic process  
 PGO: null  
 PGOC: null  
 PGOP: null

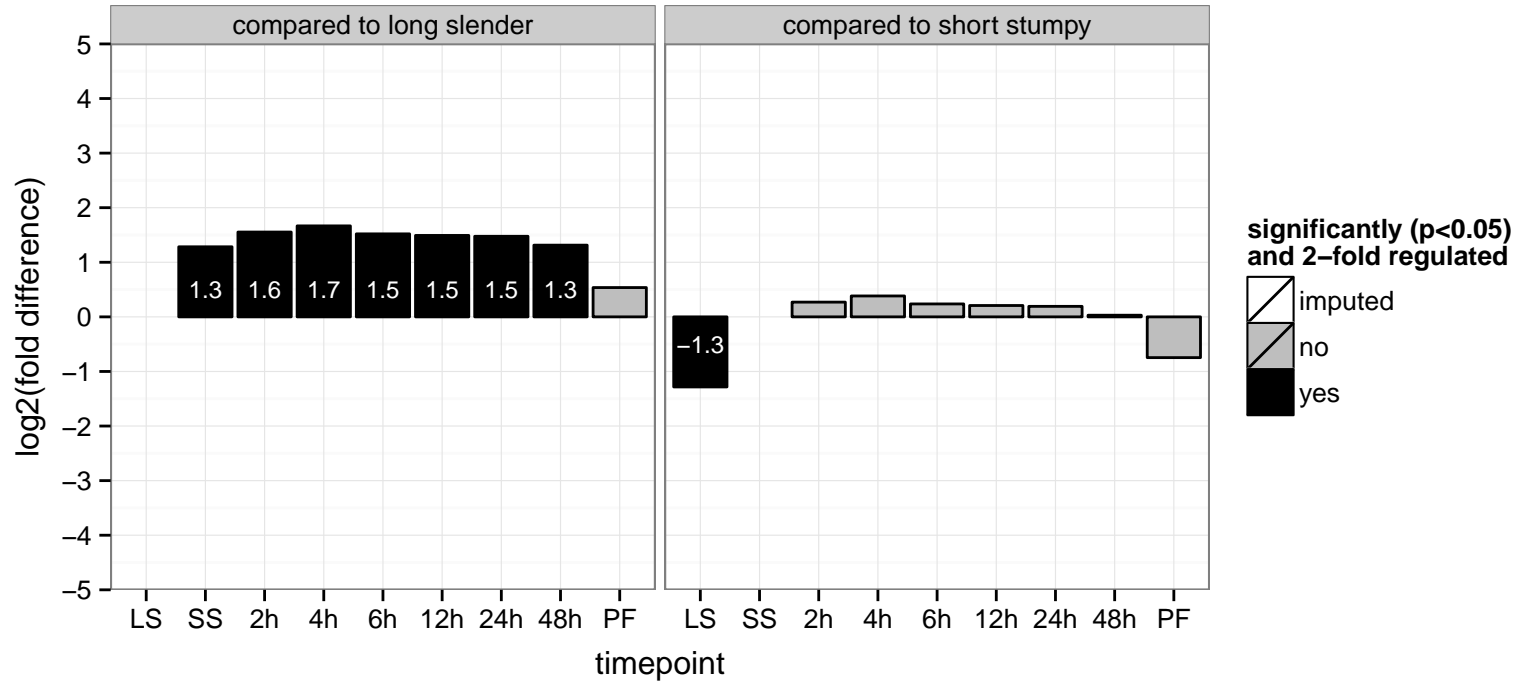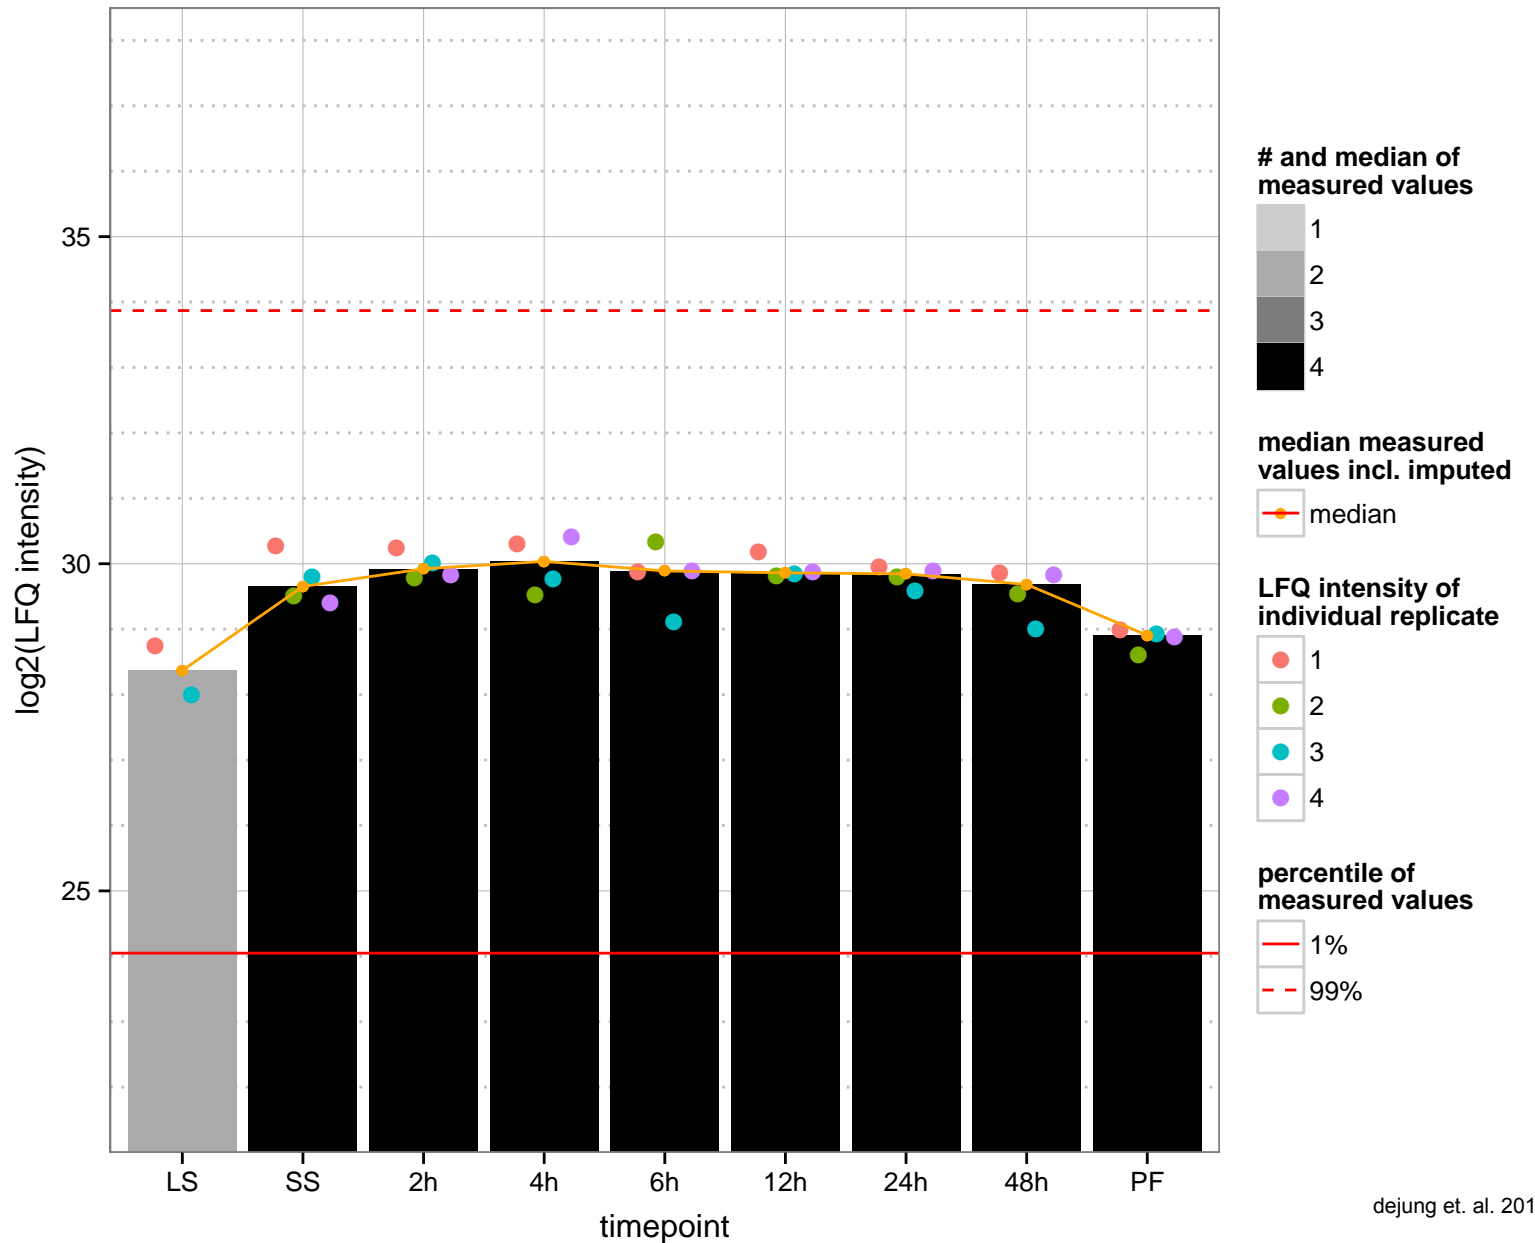

RNA polymerase IIA largest subunit, putative, RNA polymerase IIA largest subunit (RPB1)  
 Tb927.8.7400;Tb927.4.5020;Tb11.v5.0504  
 AGOF: null, DNA binding, DNA-directed RNA polymerase activity  
 AGOC: null, nucleus  
 AGOP: null, transcription, DNA-dependent  
 PGOF: DNA binding, DNA-directed RNA polymerase activity  
 PGO: null  
 PGOP: transcription, DNA-dependent

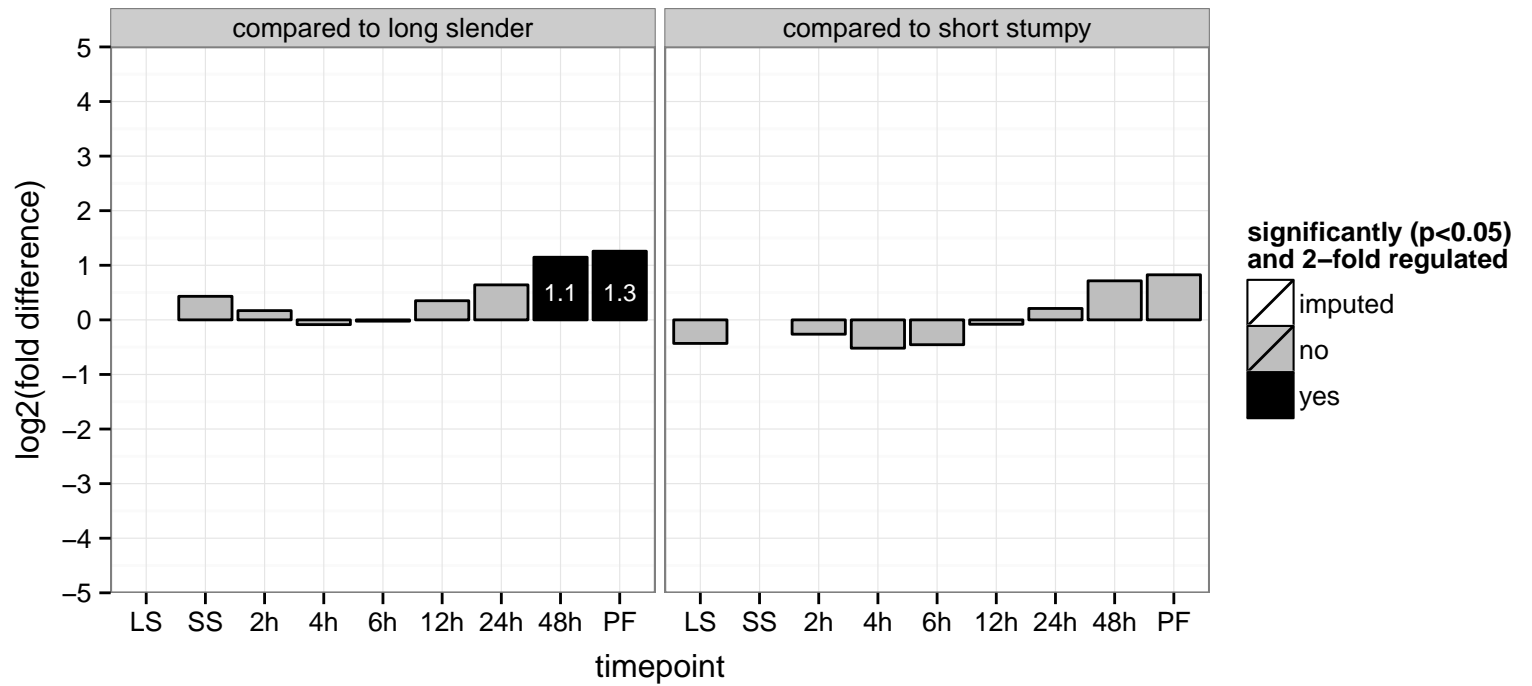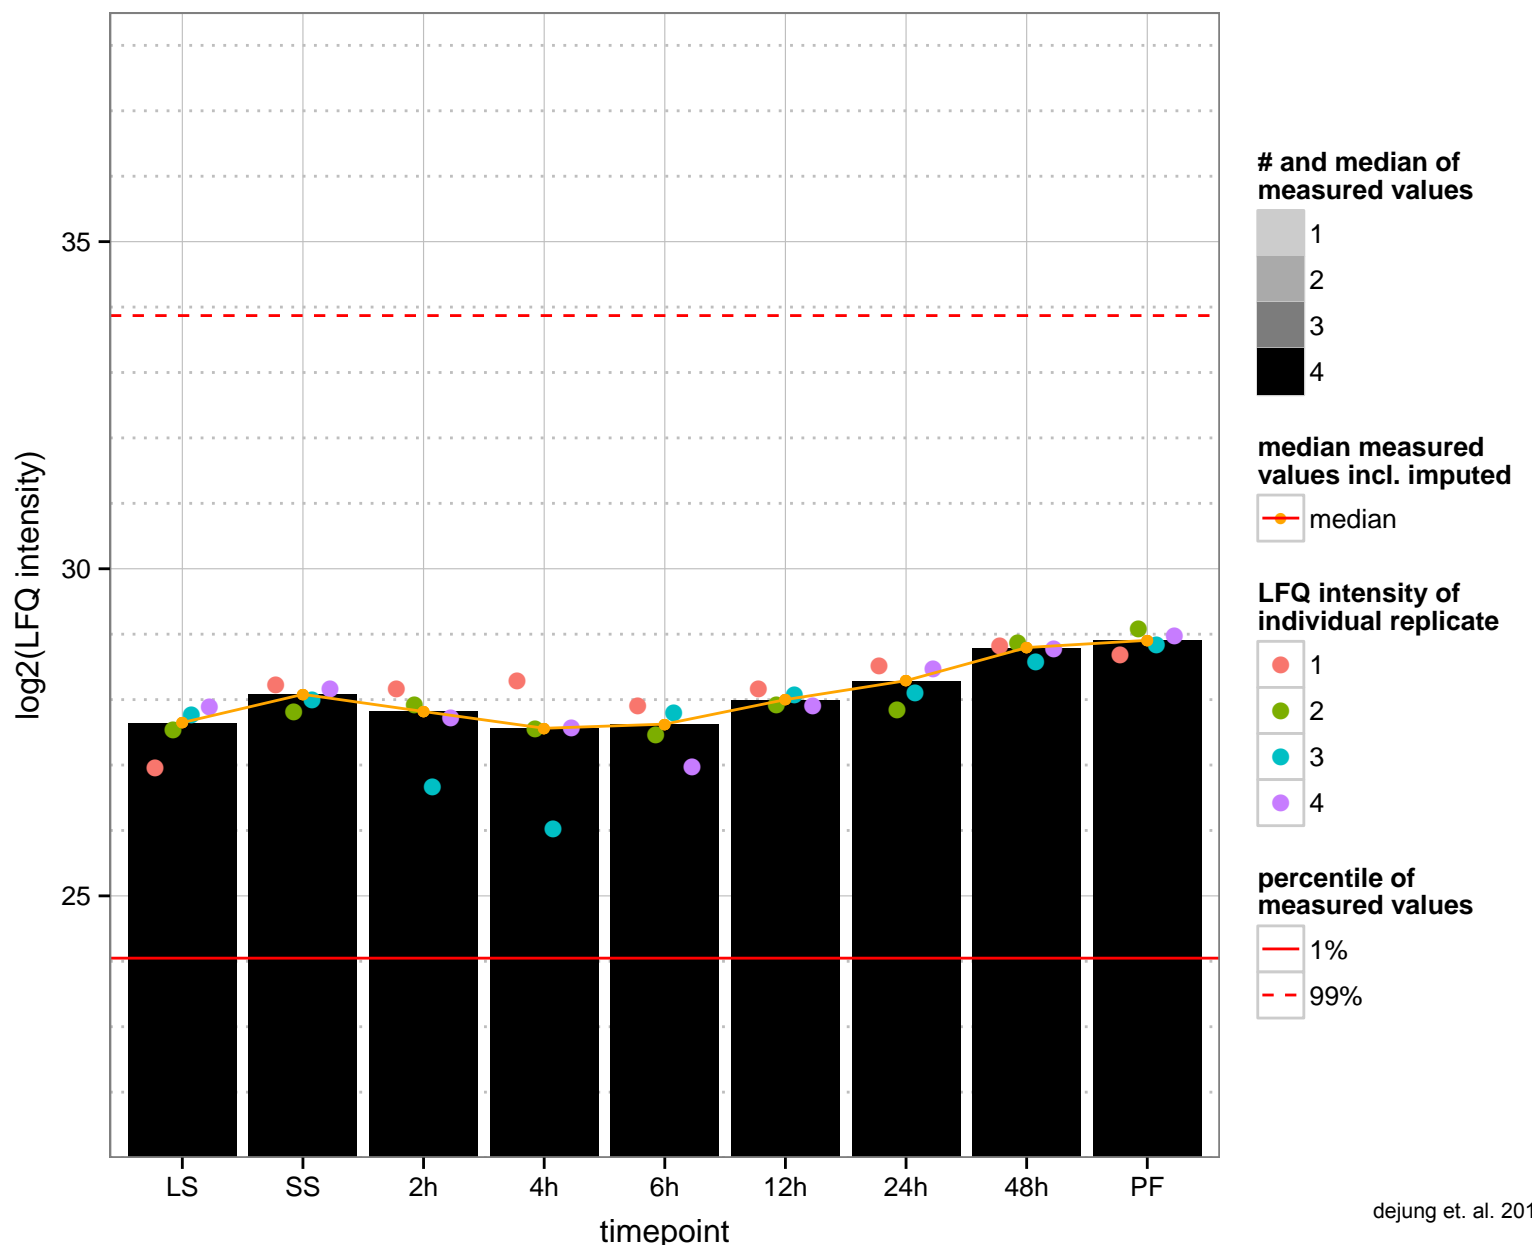

calreticulin, putative

Tb927.8.7410

AGOF: calcium ion binding, carbohydrate binding, glucosidase activity, transferase activity, transferring glycosyl groups, unfolding

AGOC: endoplasmic reticulum, integral to membrane

AGOP: protein folding

PGOF: calcium ion binding, unfolded protein binding

PGOC: endoplasmic reticulum

PGOP: protein folding

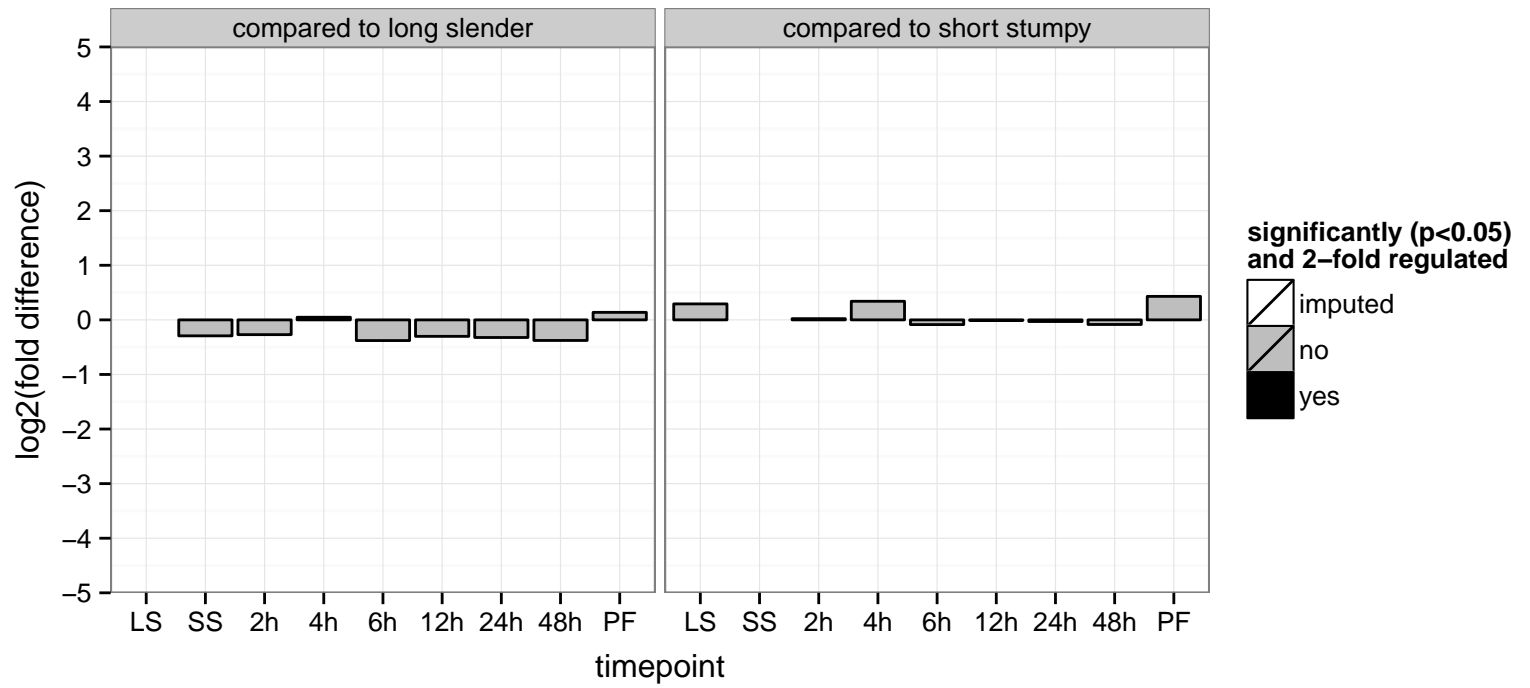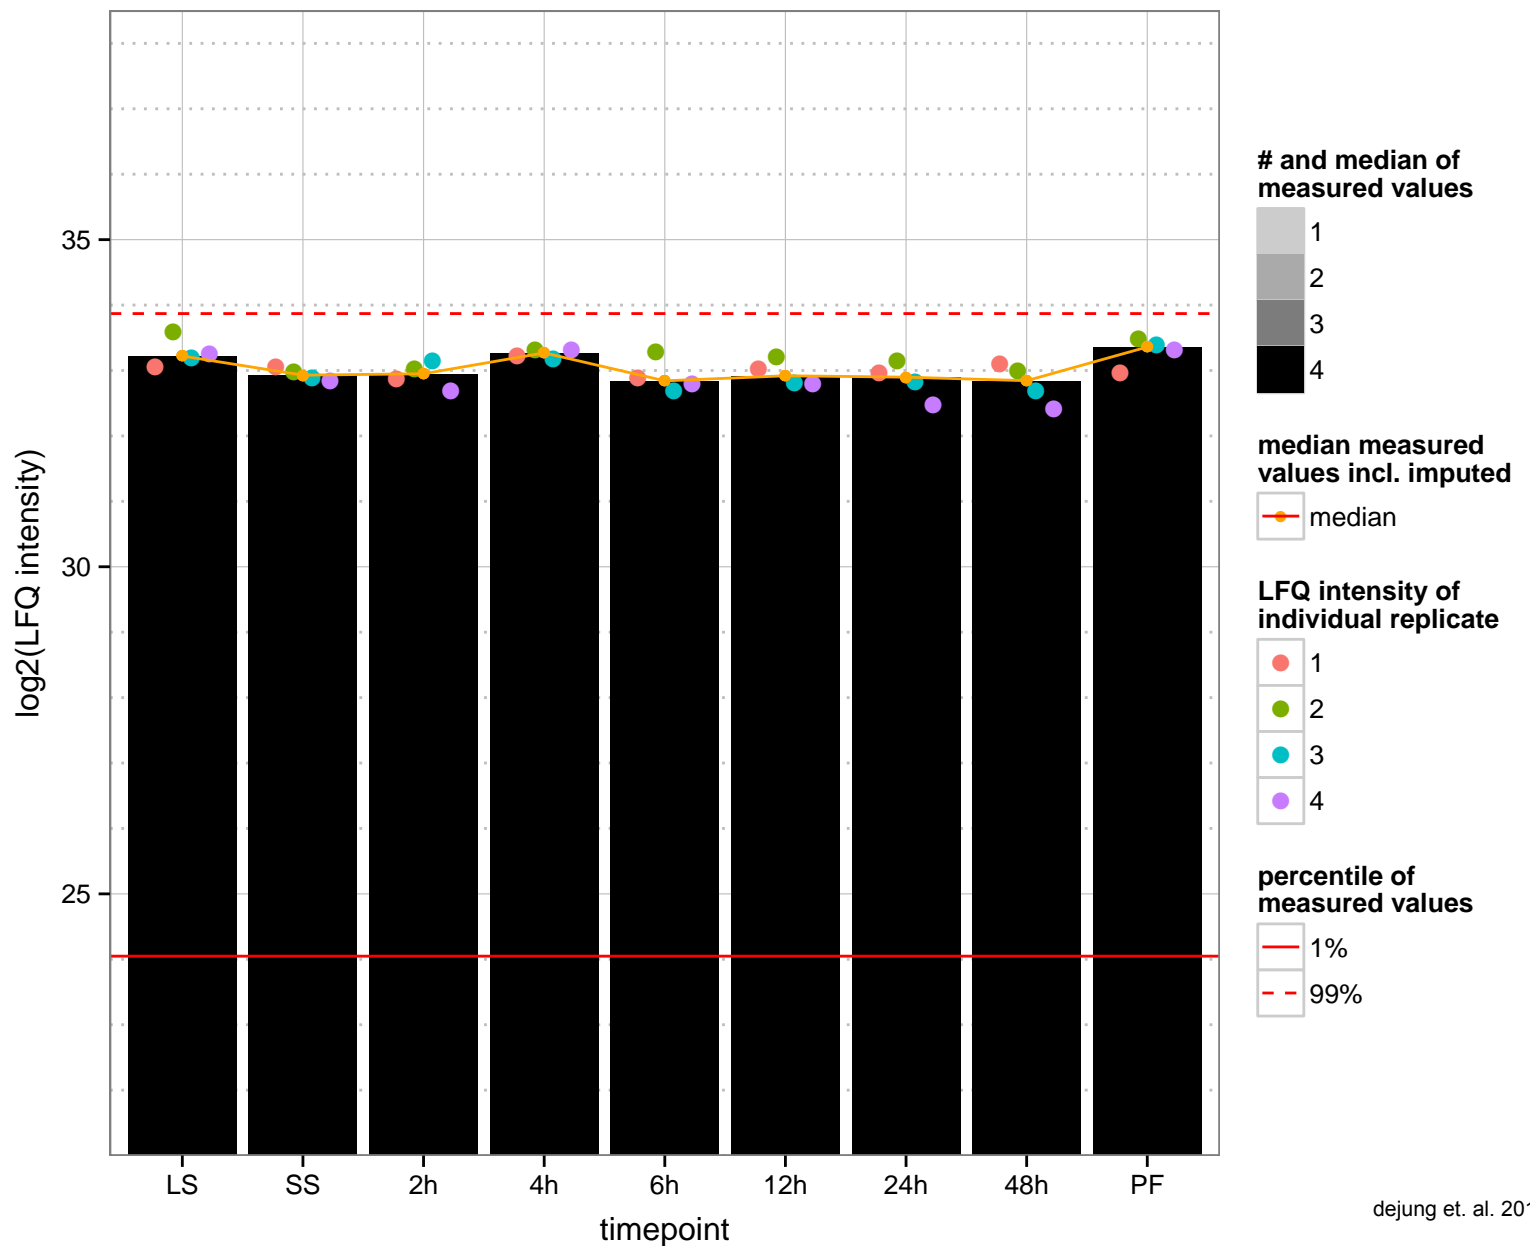

hypothetical protein, conserved  
 Tb927.8.7490  
 AGOF: null  
 AGOC: null  
 AGOP: null  
 PGOF: null  
 PGOC: null  
 PGOP: null

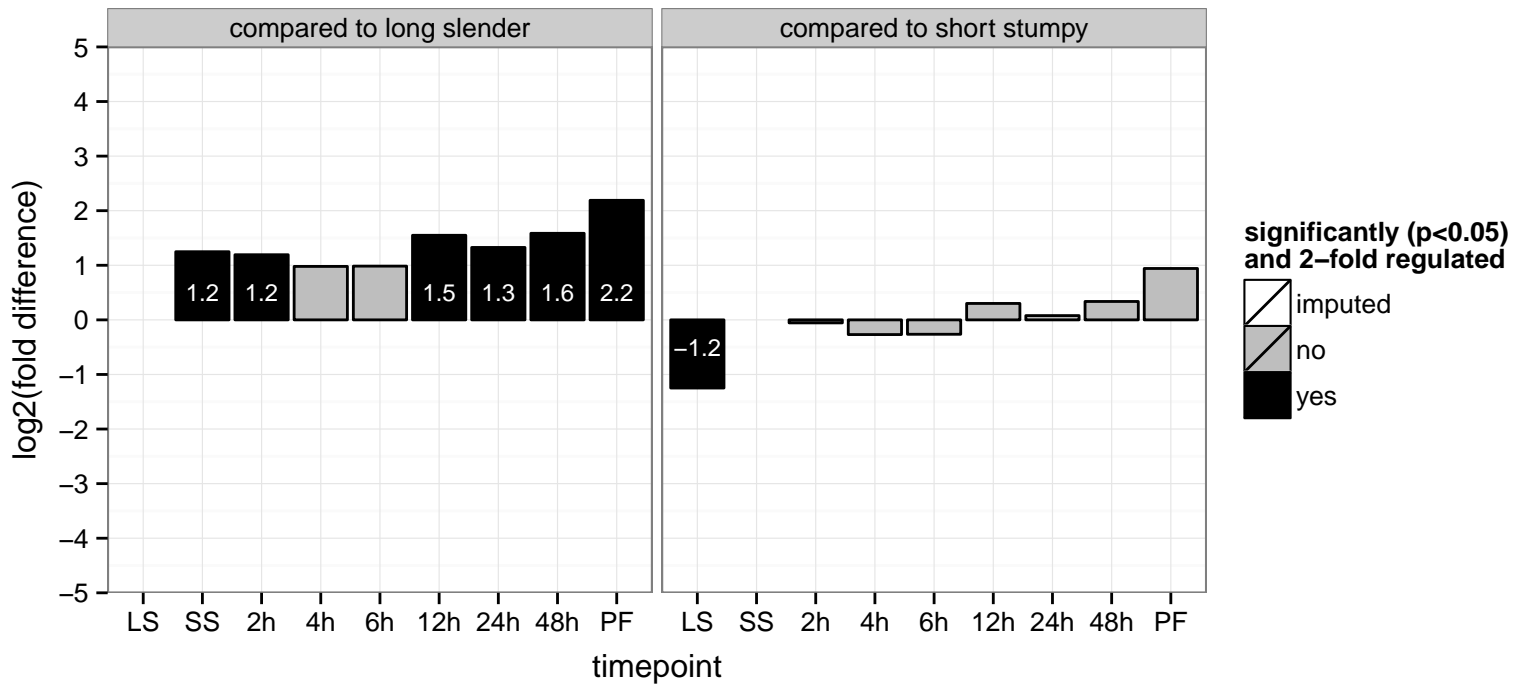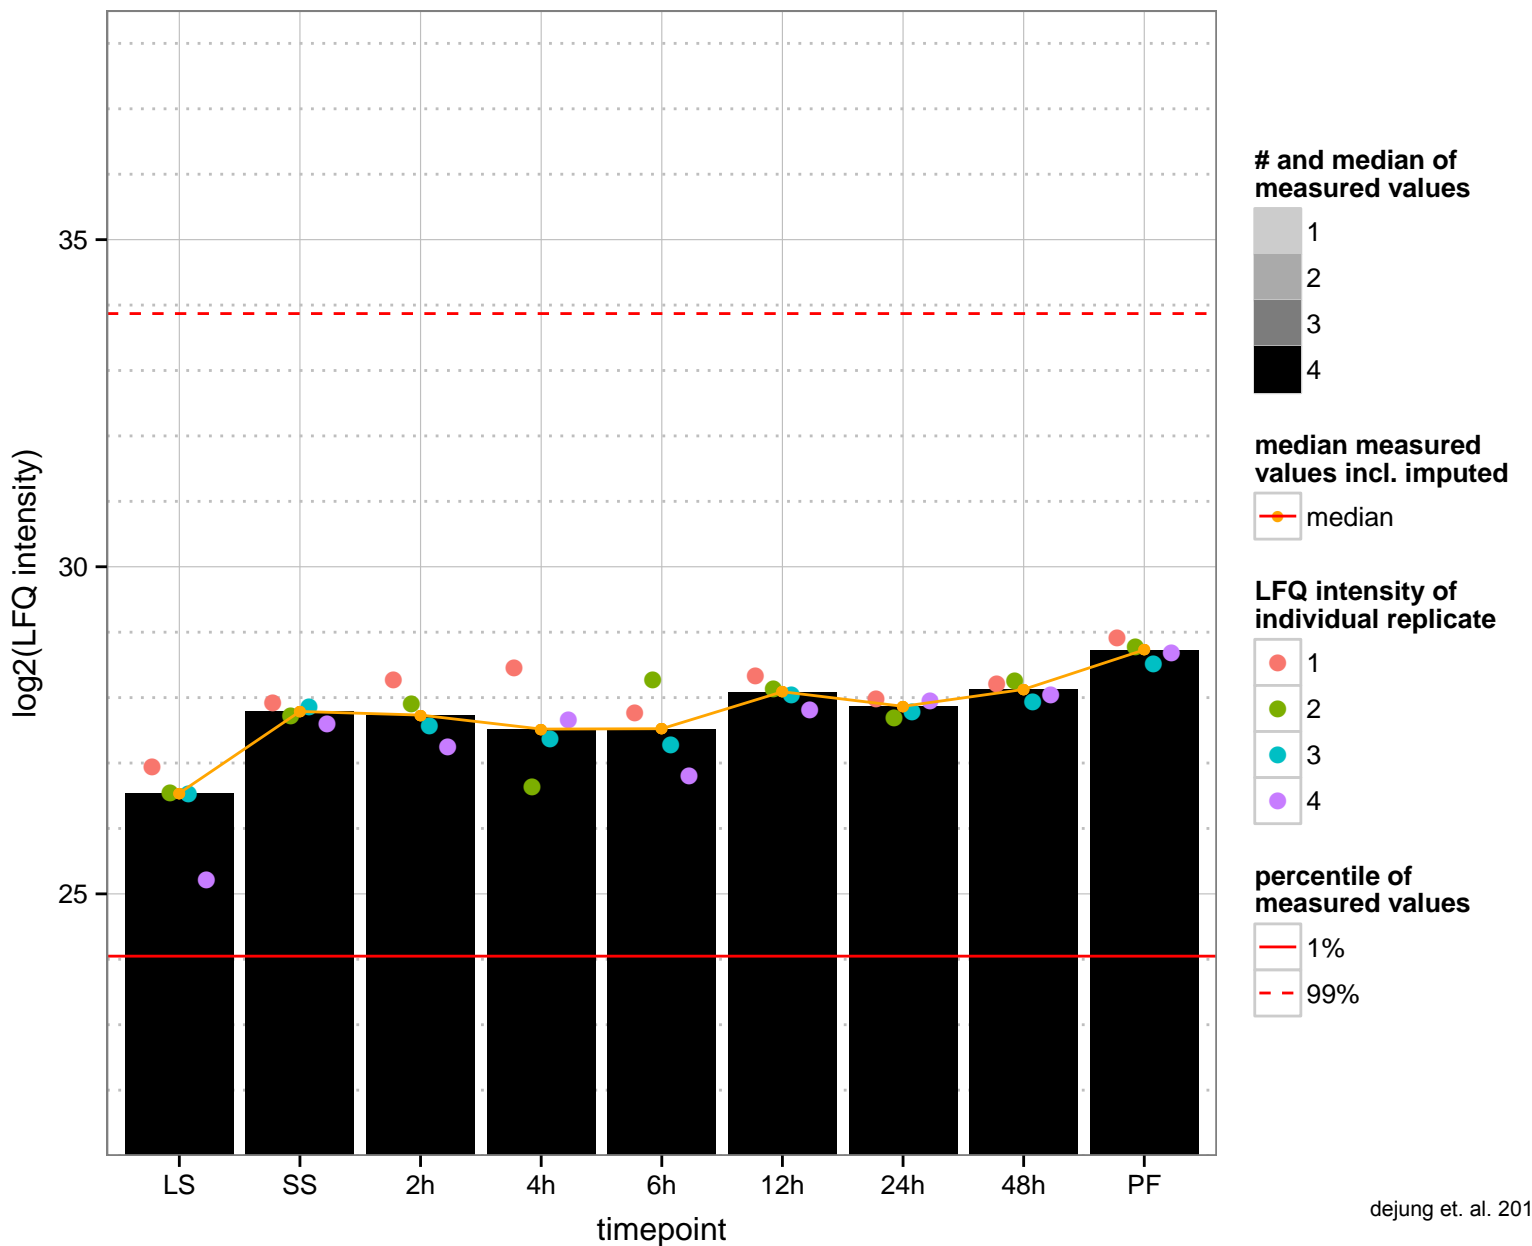



nucleolar RNA-binding protein, putative  
 Tb927.8.750  
 AGOF: RNA binding  
 AGOC: nucleolus  
 AGOP: RNA metabolic process  
 PGO: null  
 PGOC: null  
 PGOP: null

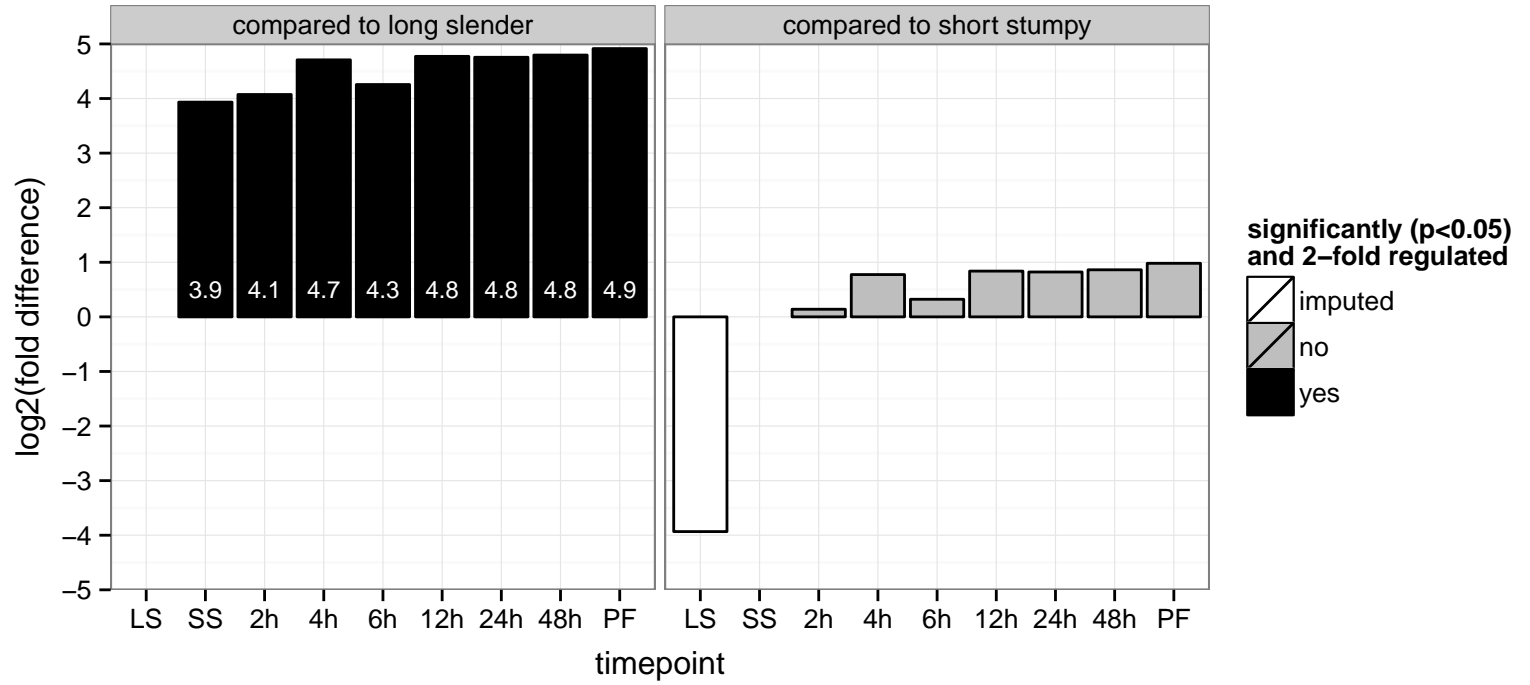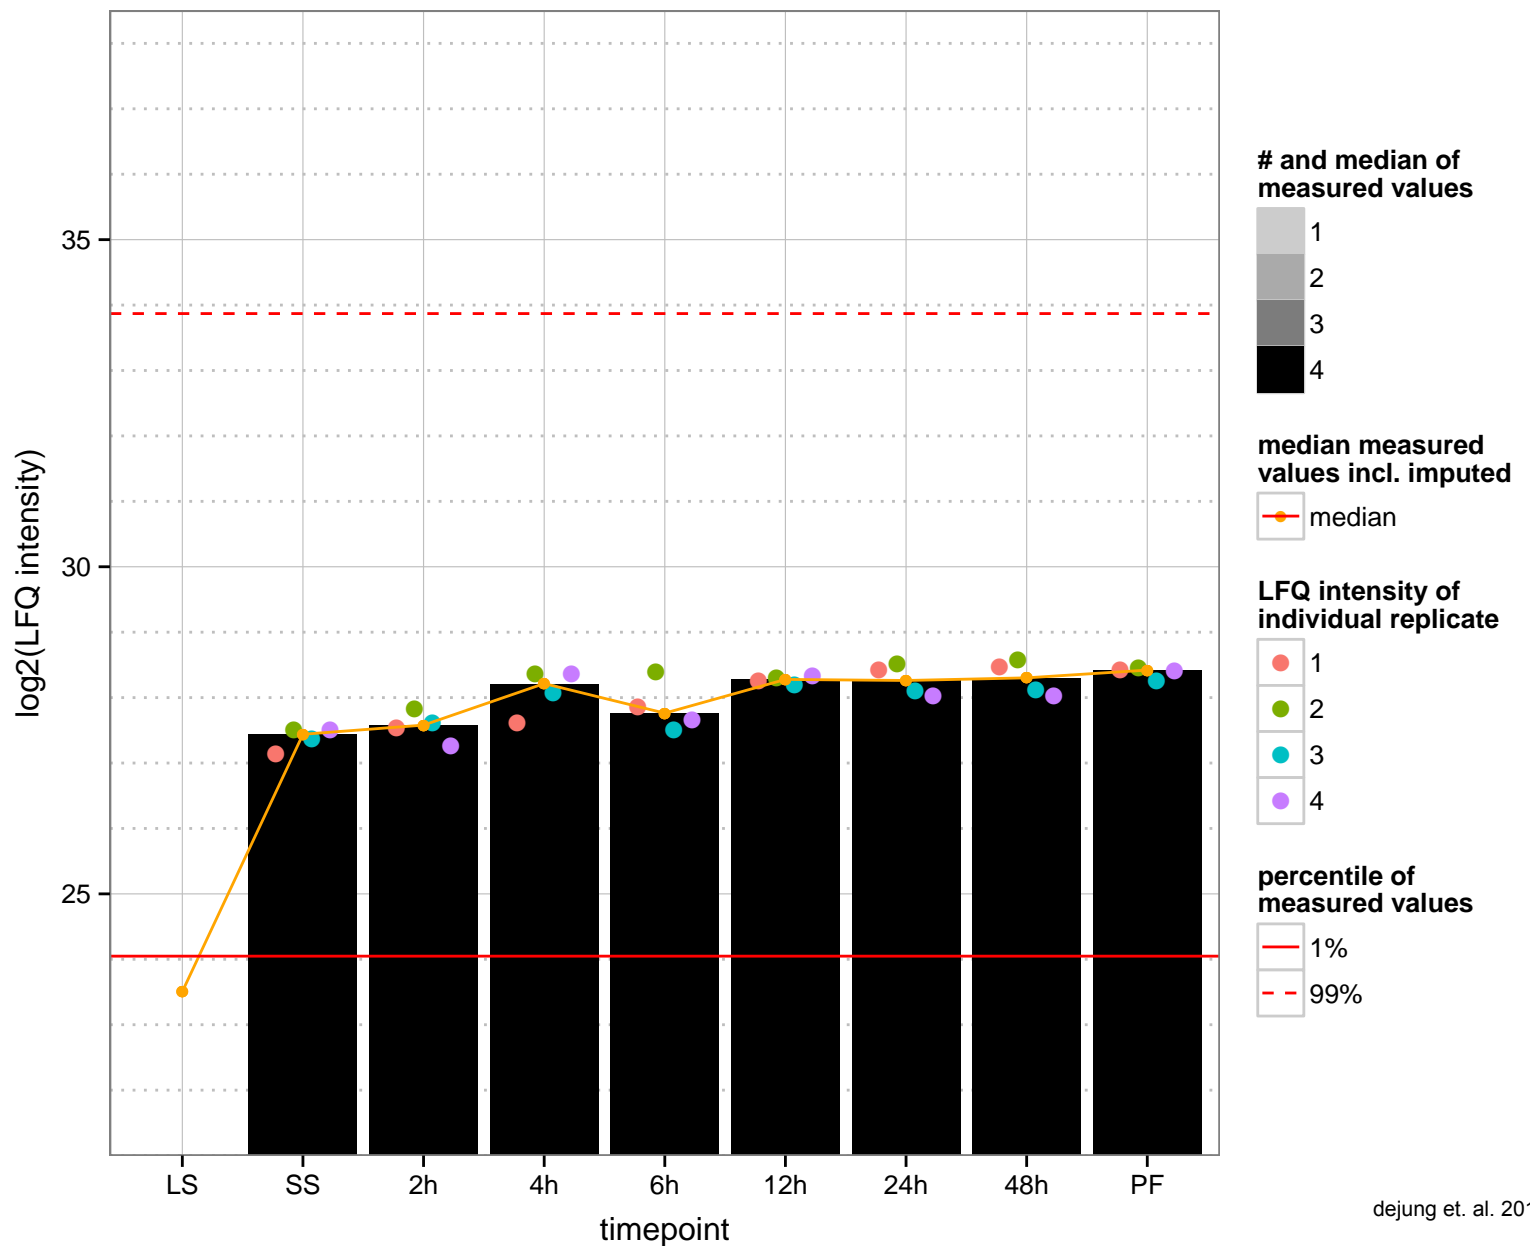

p-nitrophenylphosphatase, putative  
 Tb927.8.7510  
 AGOF: phosphatase activity  
 AGOC: null  
 AGOP: metabolic process  
 PGO: null  
 PGO: null  
 PGO: null

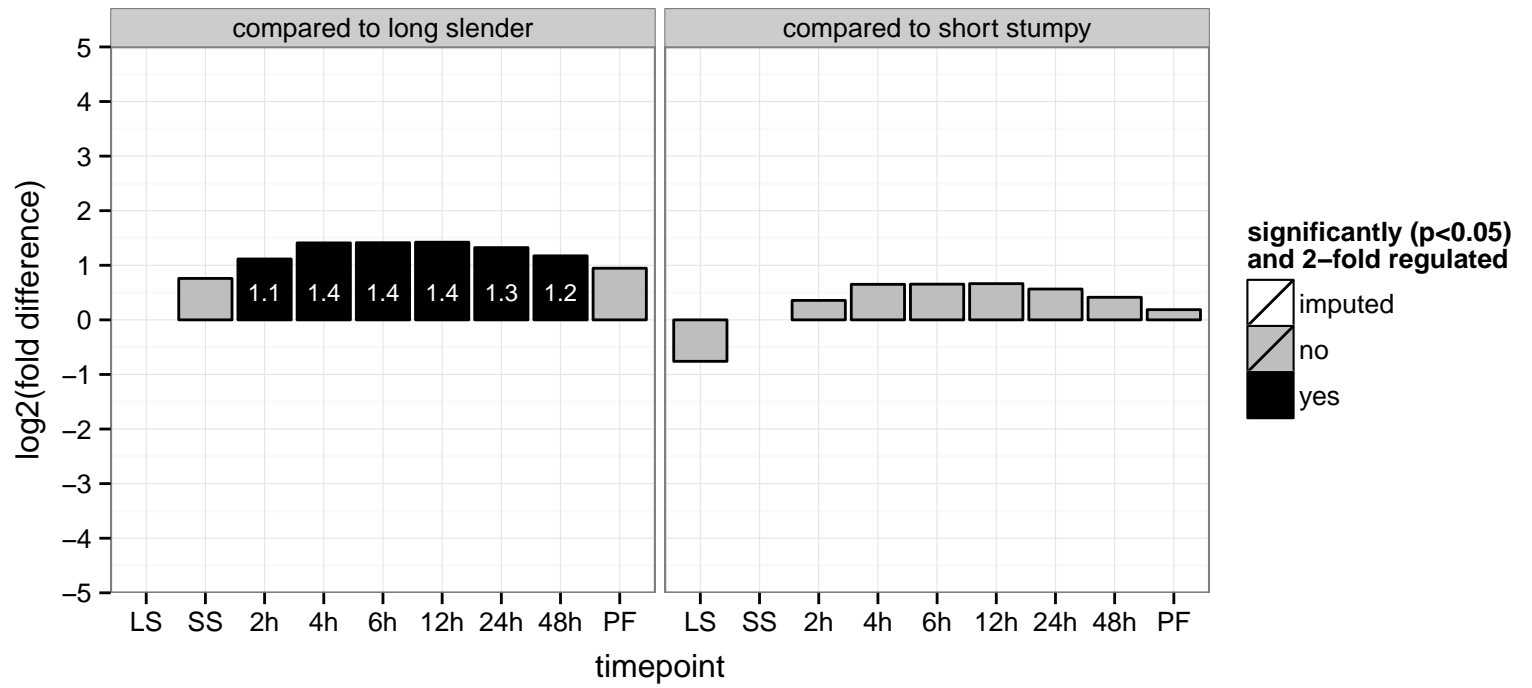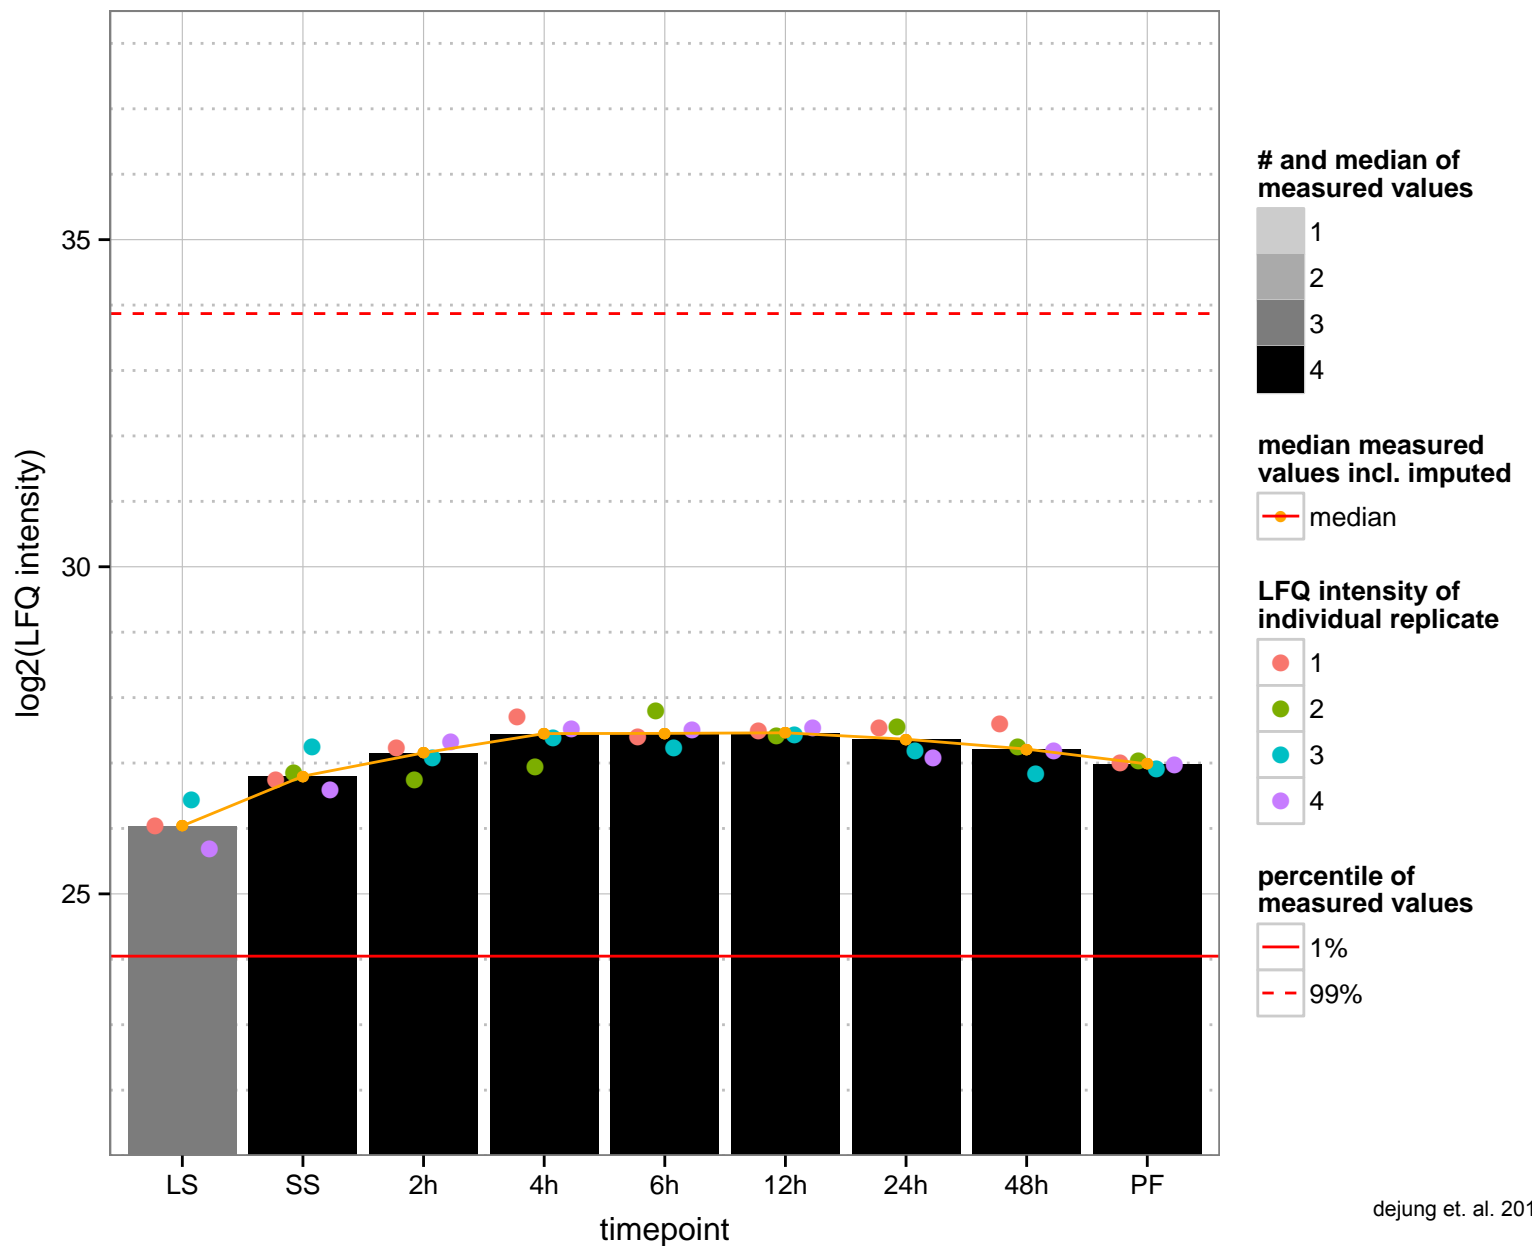

nucleolar RNA-binding protein, truncated, nucleolar RNA-binding protein (Nopp44/46)

Tb927.8.760;Tb927.8.740

AGOF: RNA binding, nucleic acid binding, protein binding, protein serine/threonine/tyrosine kinase activity

AGOC: nucleolus

AGOP: null, RNA metabolic process

PGOF: null

PGOC: null

PGOP: null

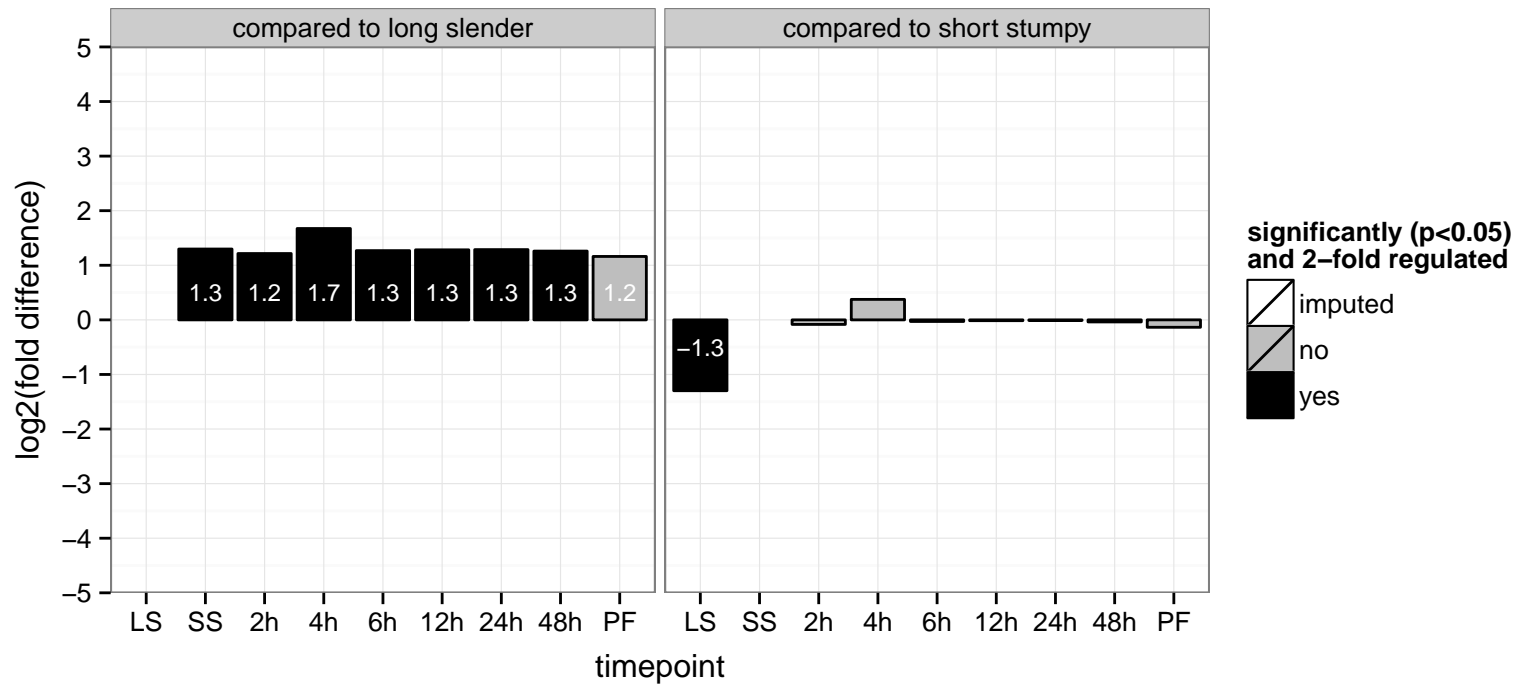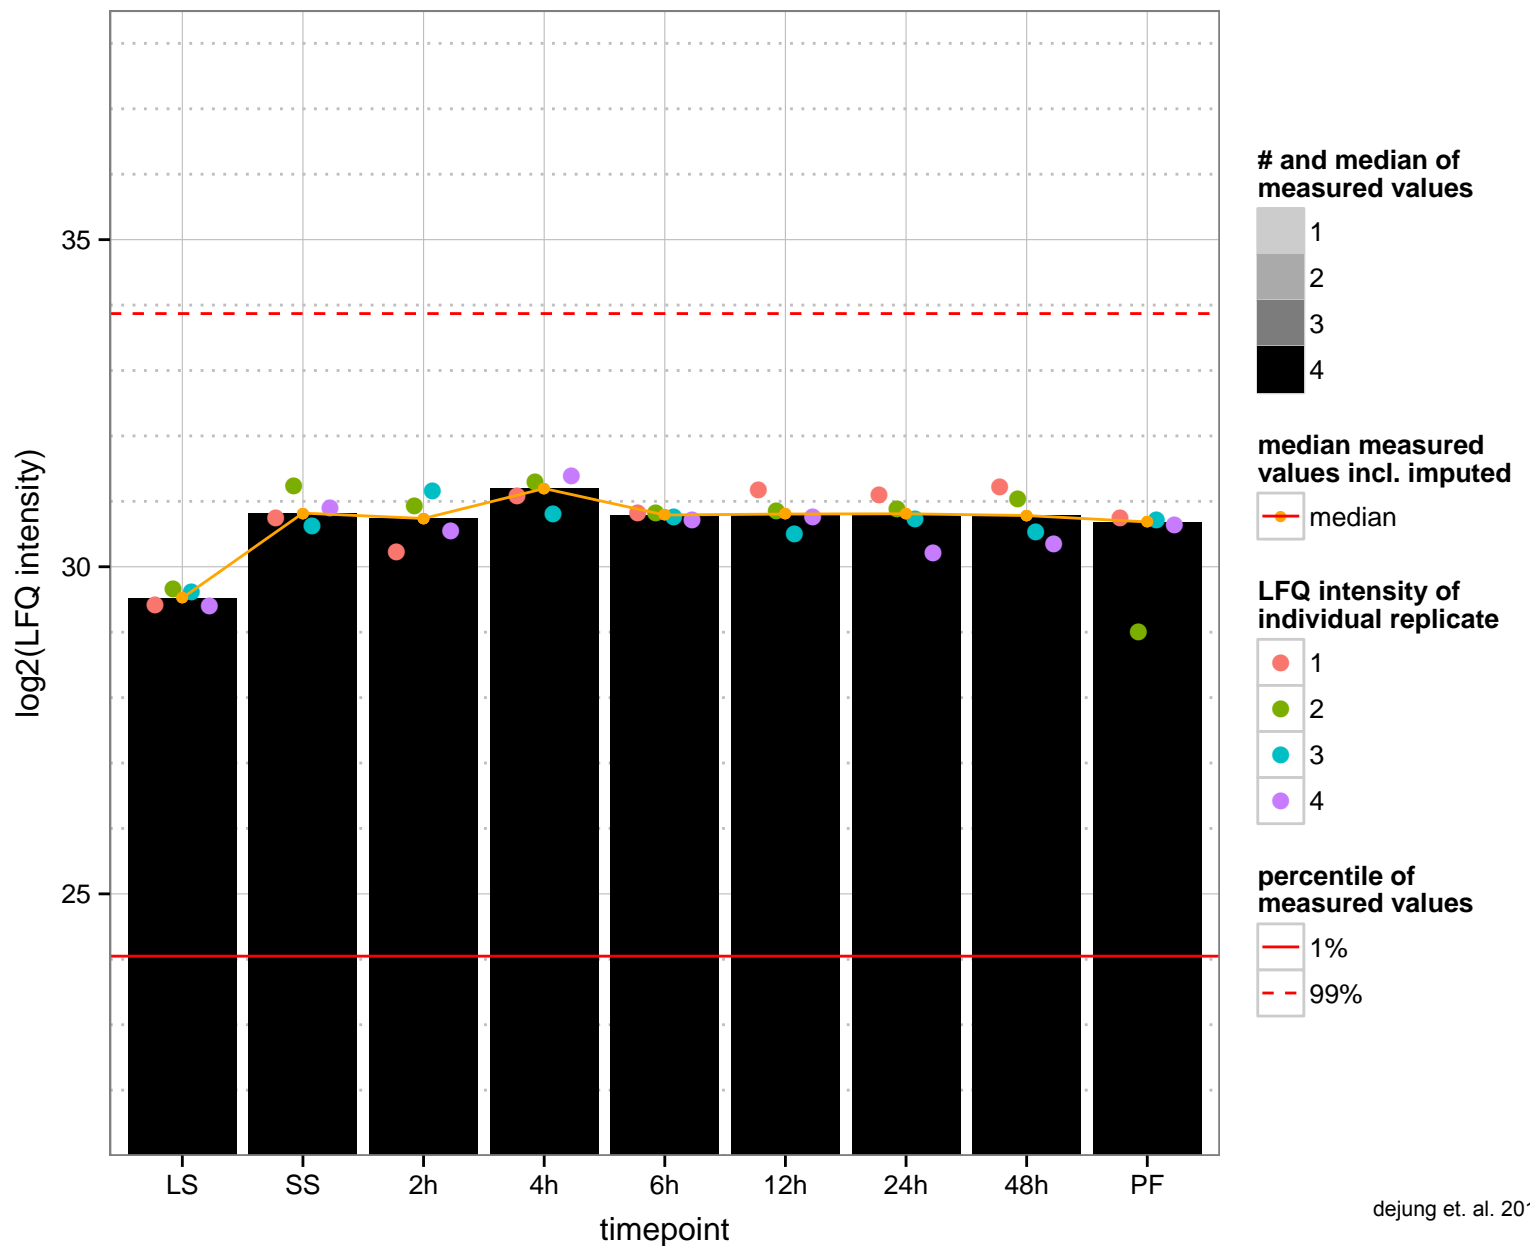

hypothetical protein, conserved  
 Tb927.8.7950  
 AGOF: null  
 AGOC: null  
 AGOP: null  
 PGO: protein binding  
 PGOC: null  
 PGOP: null

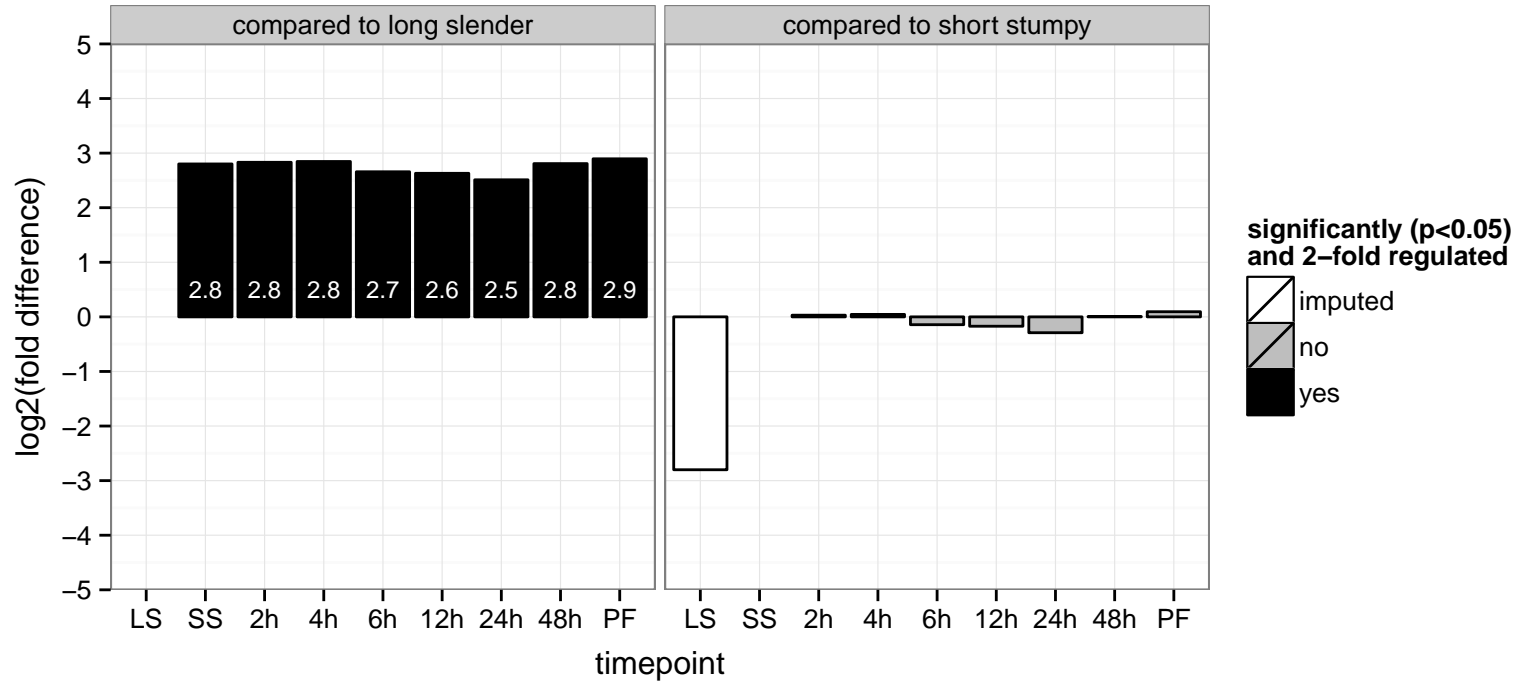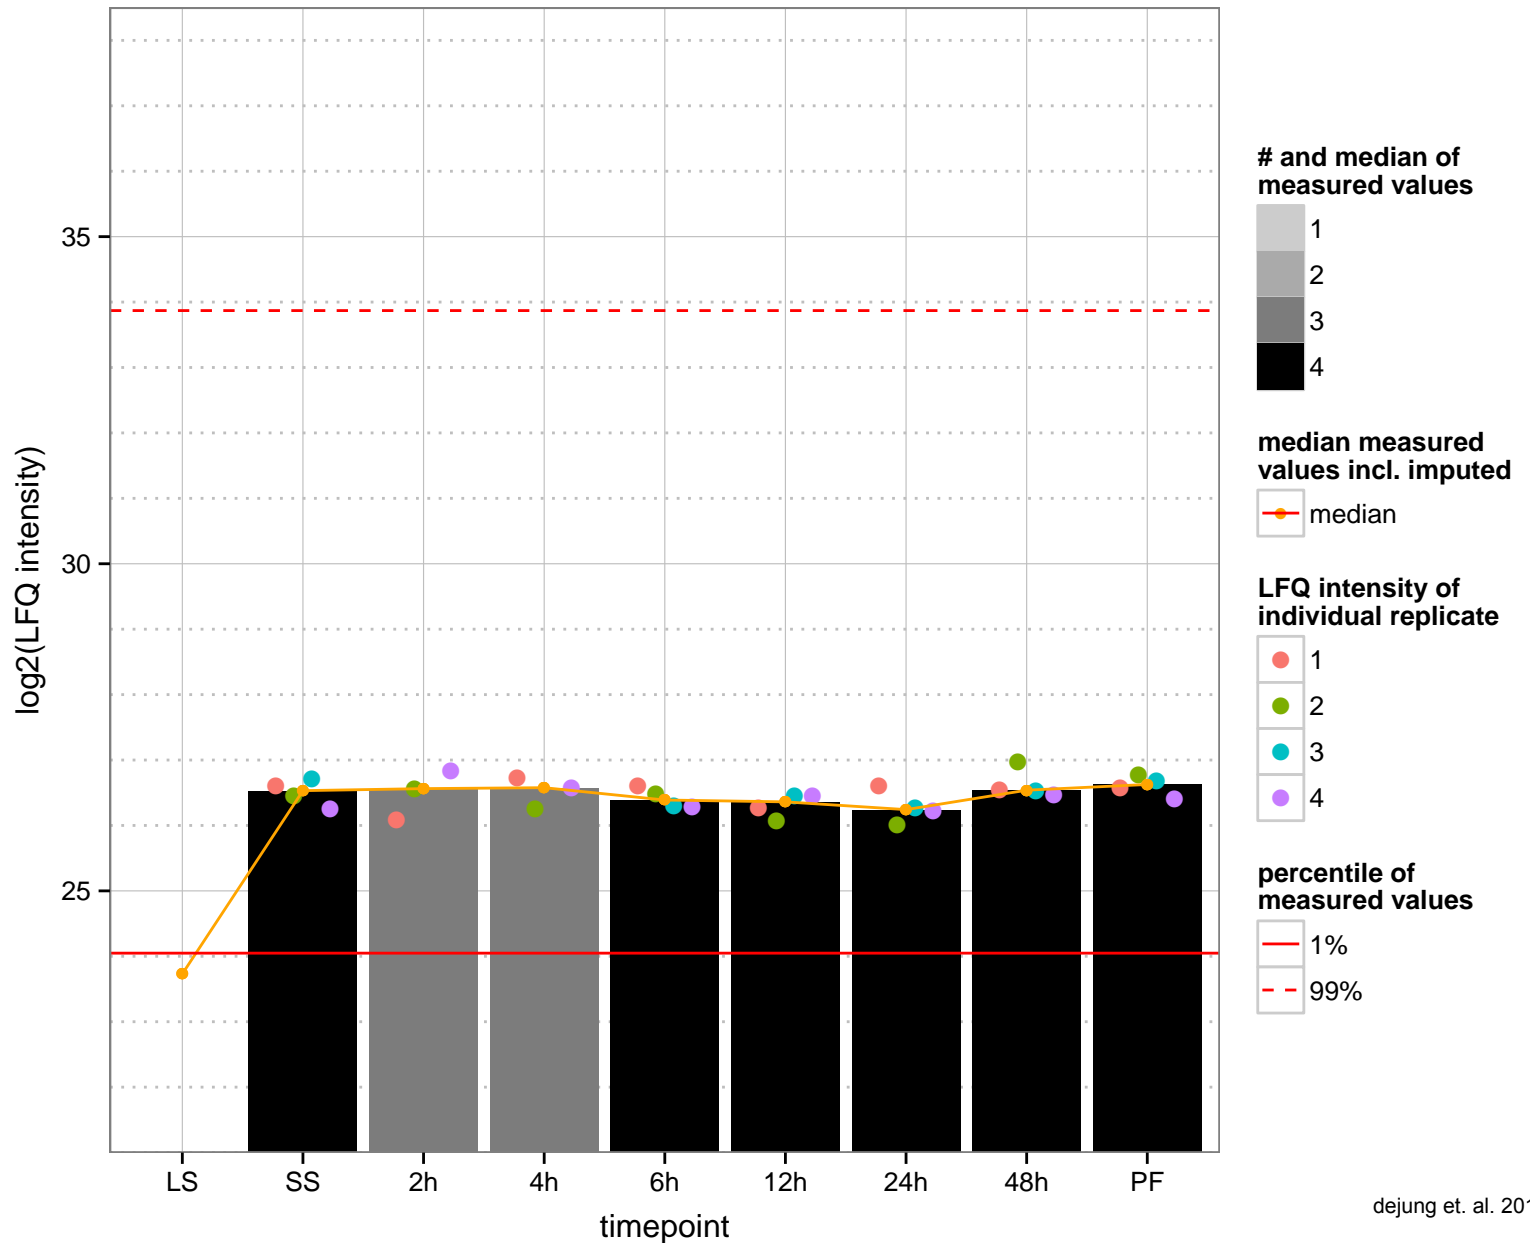

monoglyceride lipase, putative  
 Tb927.8.8020  
 AGOF: hydrolase activity  
 AGOC: null  
 AGOP: null  
 PGOF: null  
 PGOC: null  
 PGOP: null

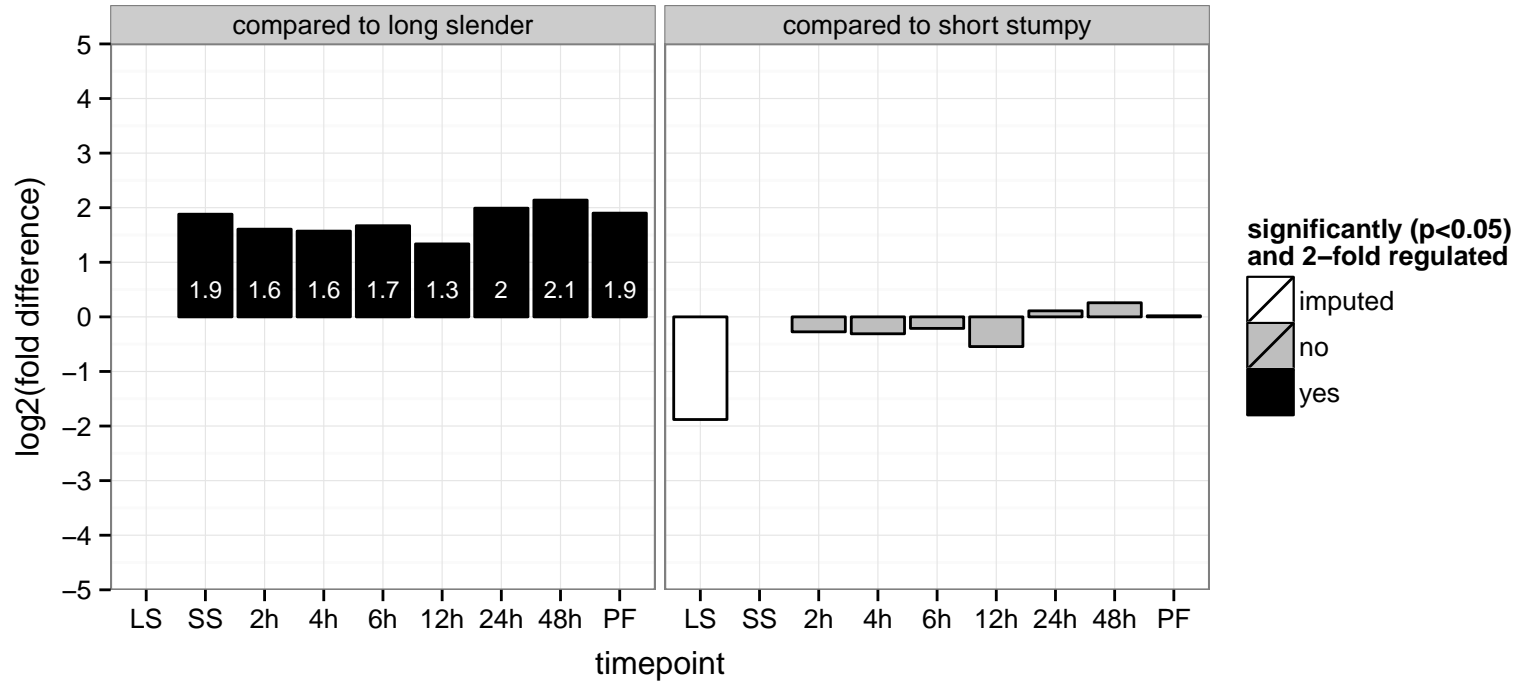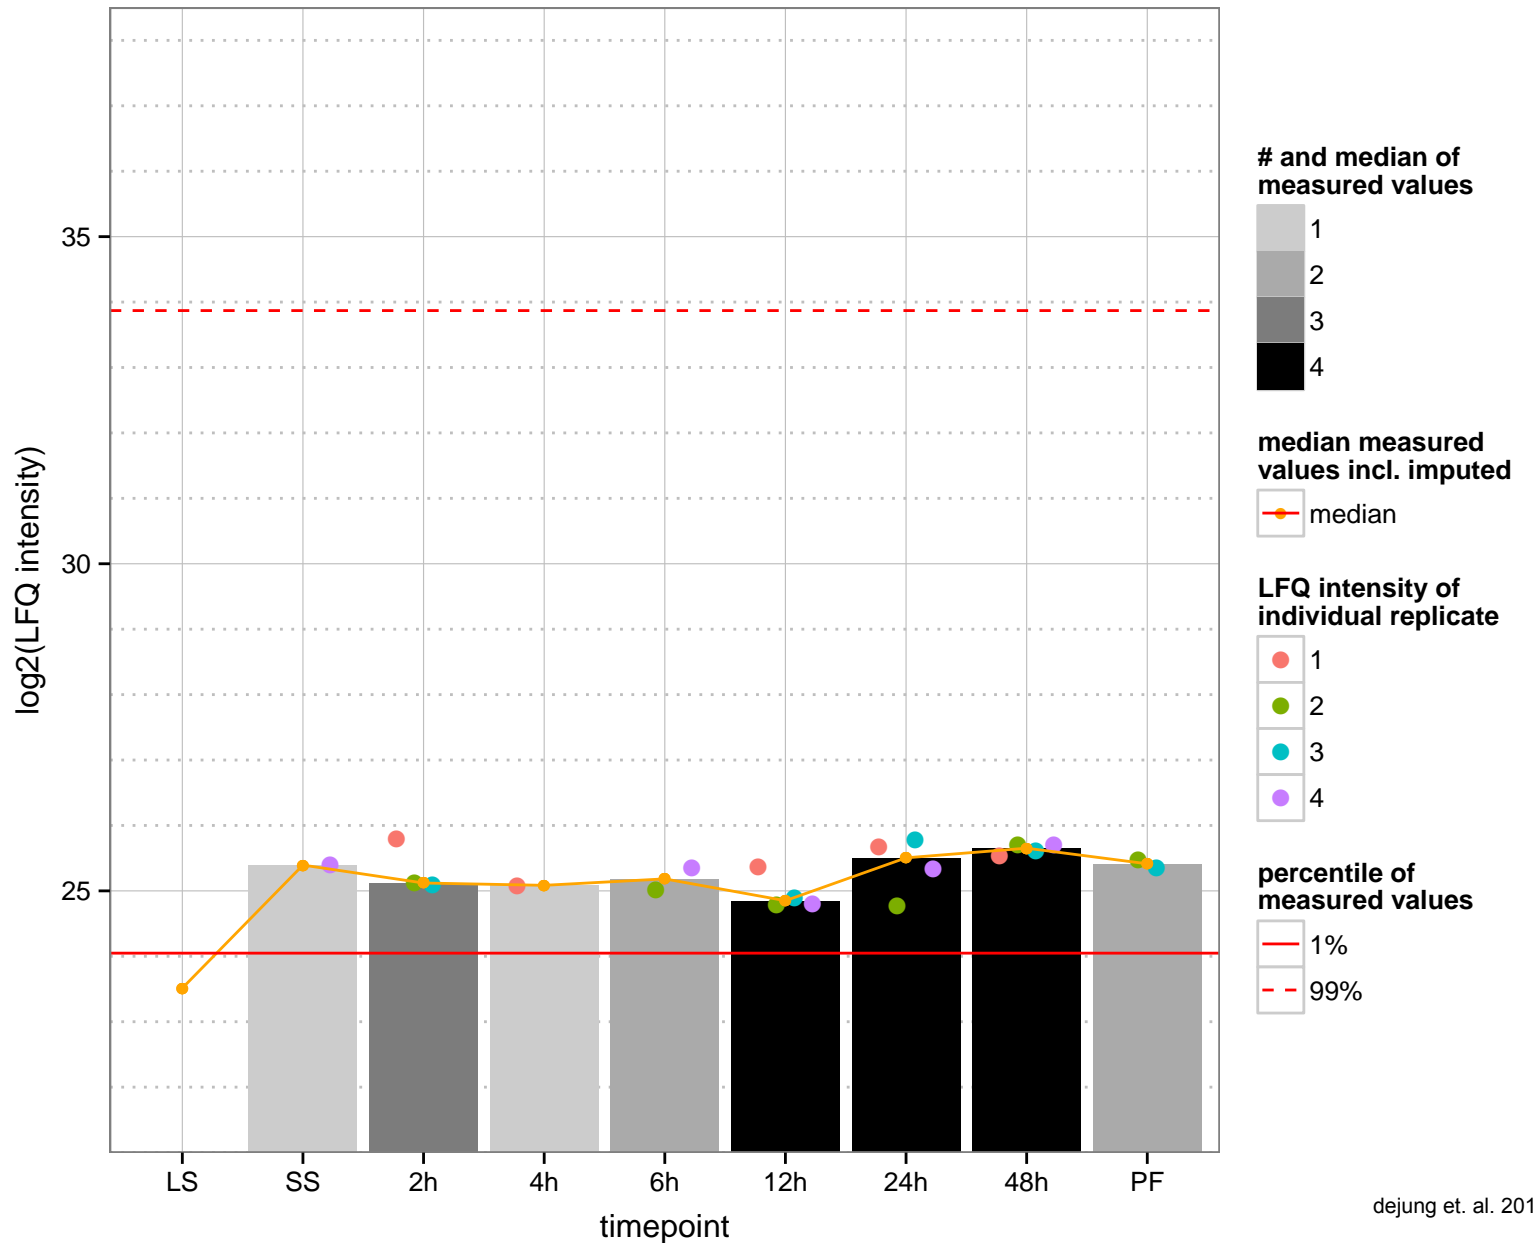

radial spoke protein RSP9, putative  
 Tb927.8.810  
 AGOF: null  
 AGOC: null  
 AGOP: null  
 PGOF: null  
 PGO: null  
 PGOP: null

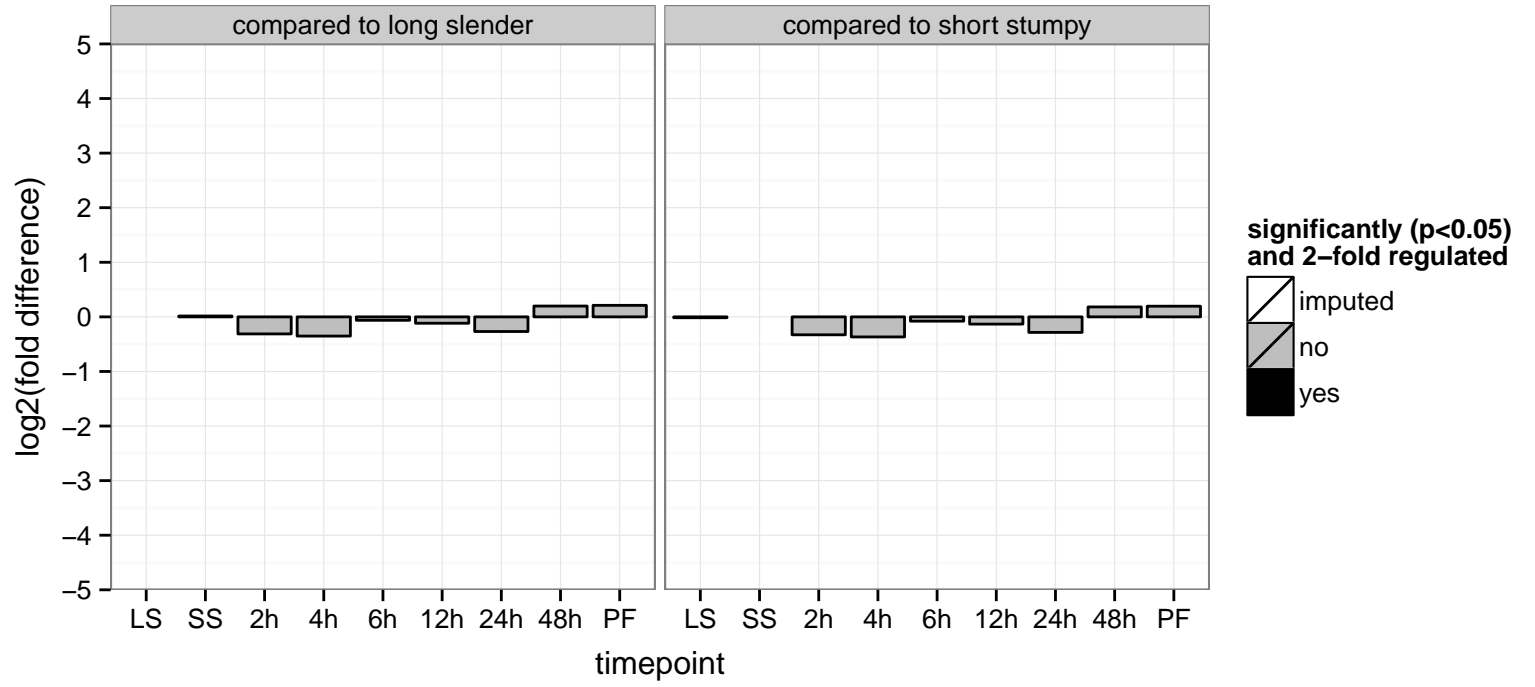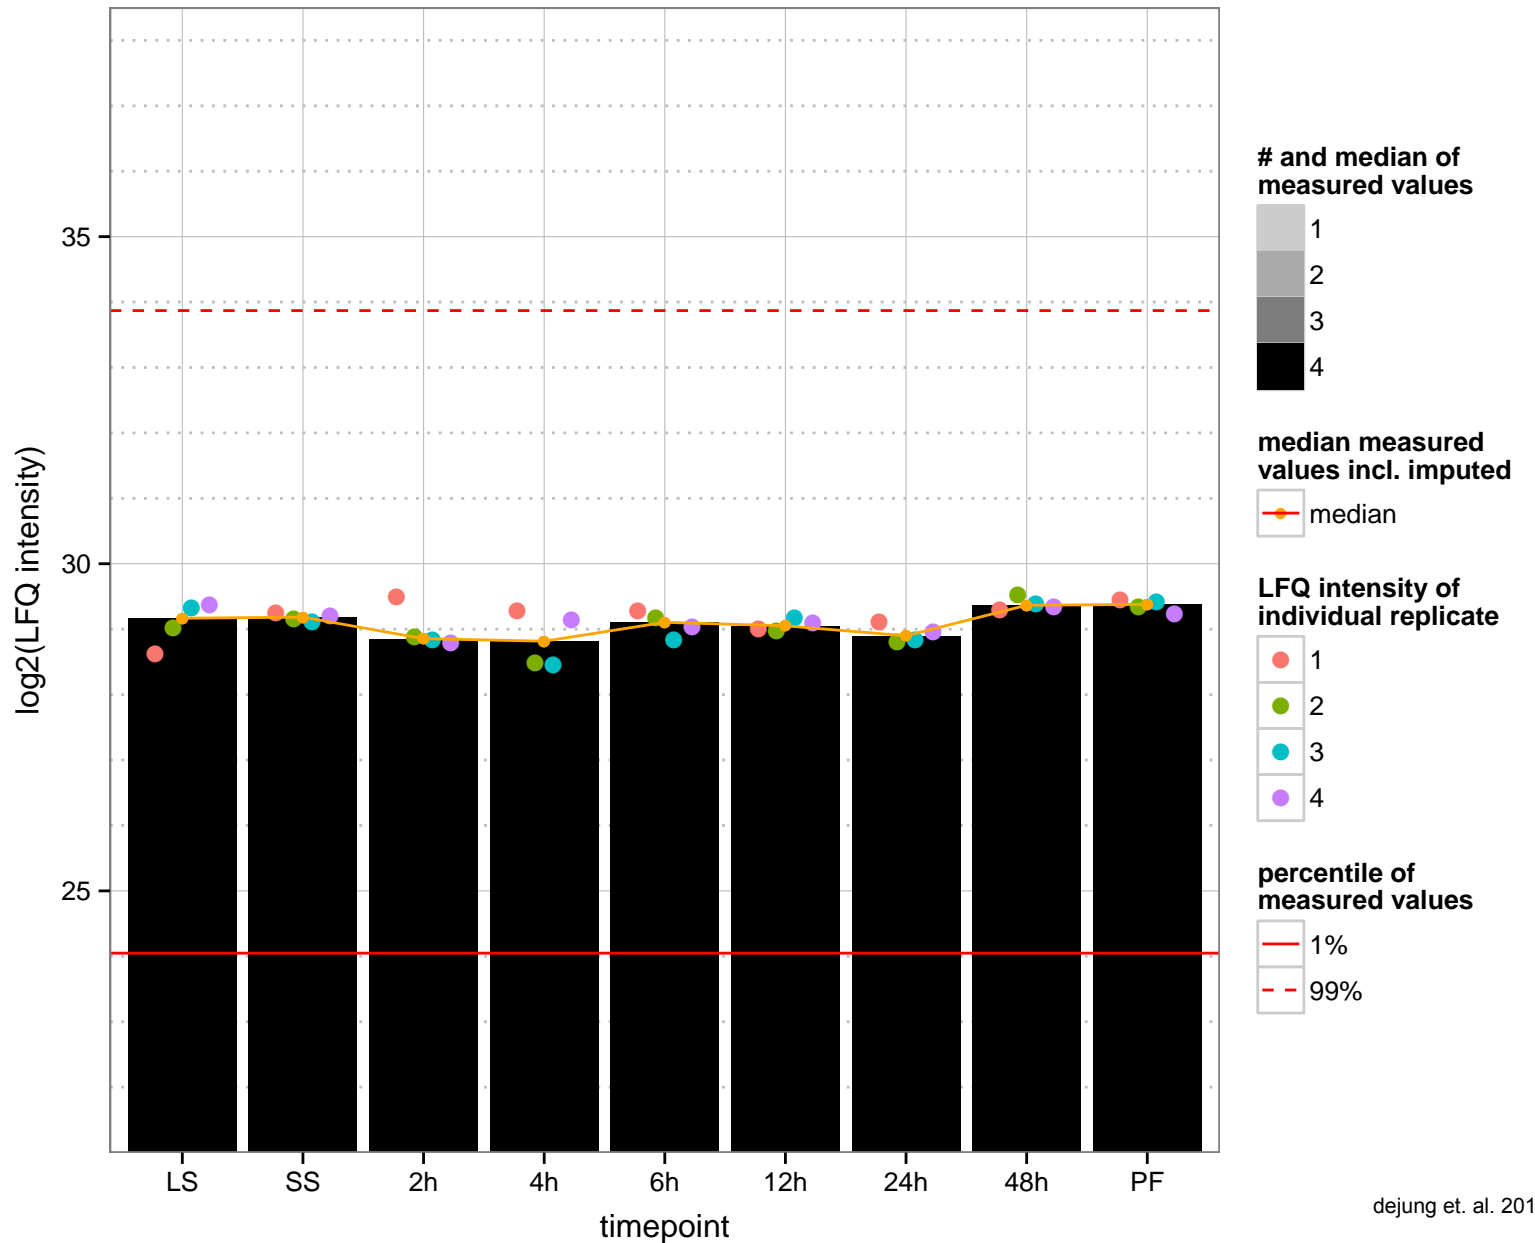

mitochondrial RNA binding protein 1, putative (MRB8170)  
 Tb927.8.8170  
 AGOF: RNA binding  
 AGOC: mitochondrion  
 AGOP: RNA biosynthetic process  
 PGO: null  
 PGOC: null  
 PGOP: null

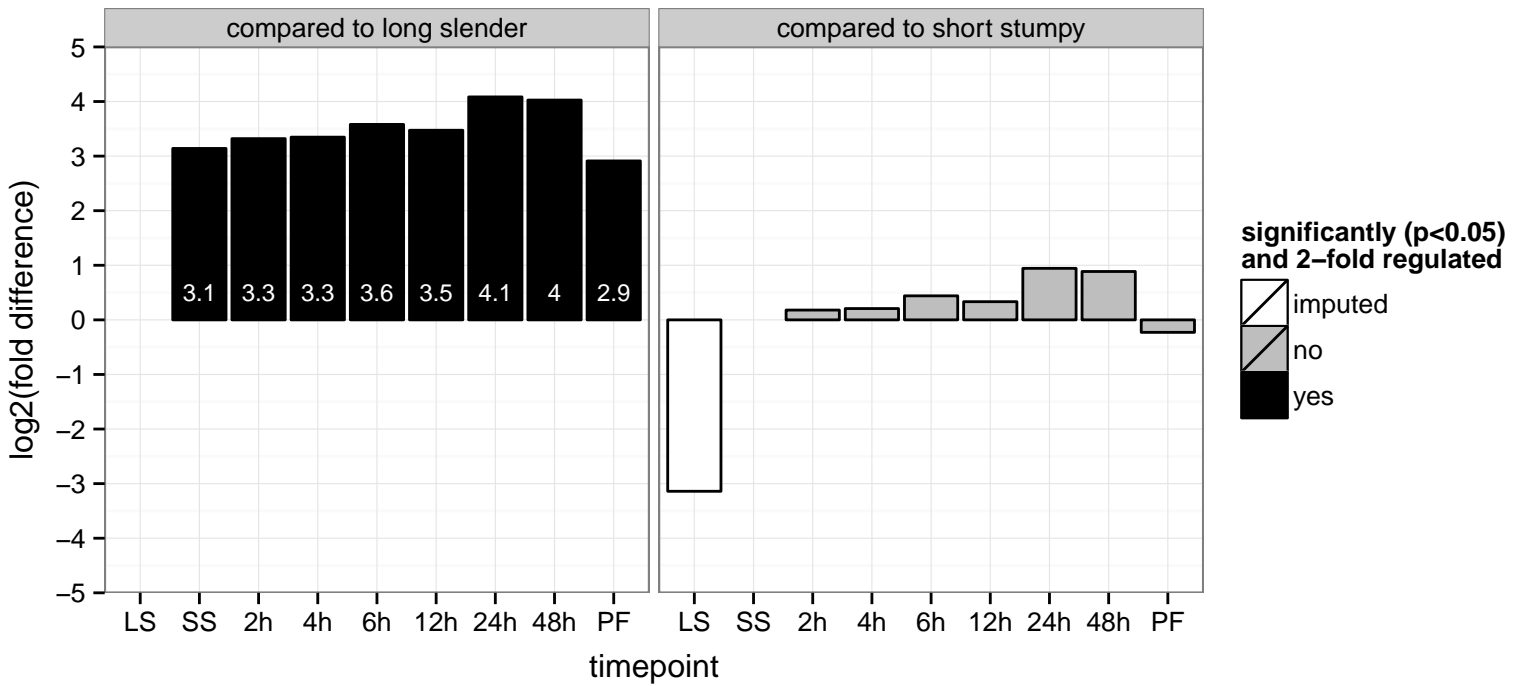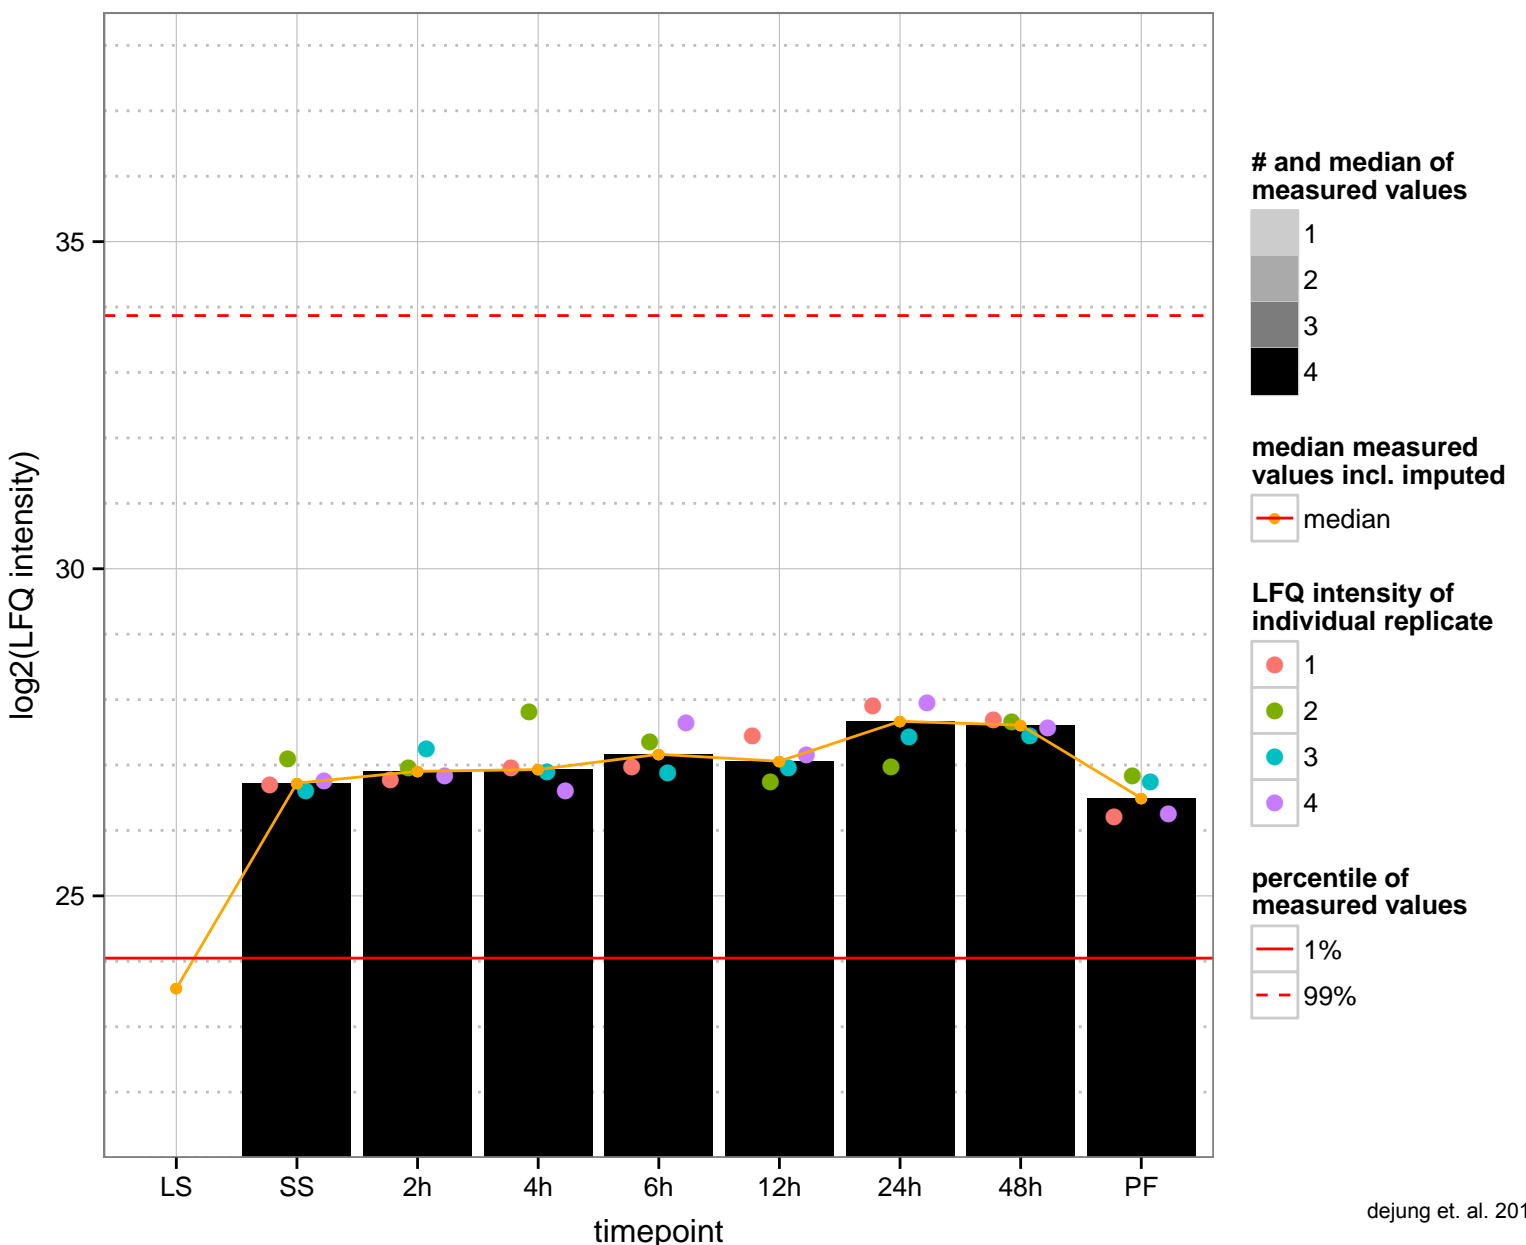

amino acid transporter, putative  
 Tb927.8.8250;Tb927.8.8260  
 AGOF: amine transmembrane transporter activity  
 AGOC: integral to membrane  
 AGOP: amino acid transport  
 PGO: null  
 PGO: null  
 PGO: null

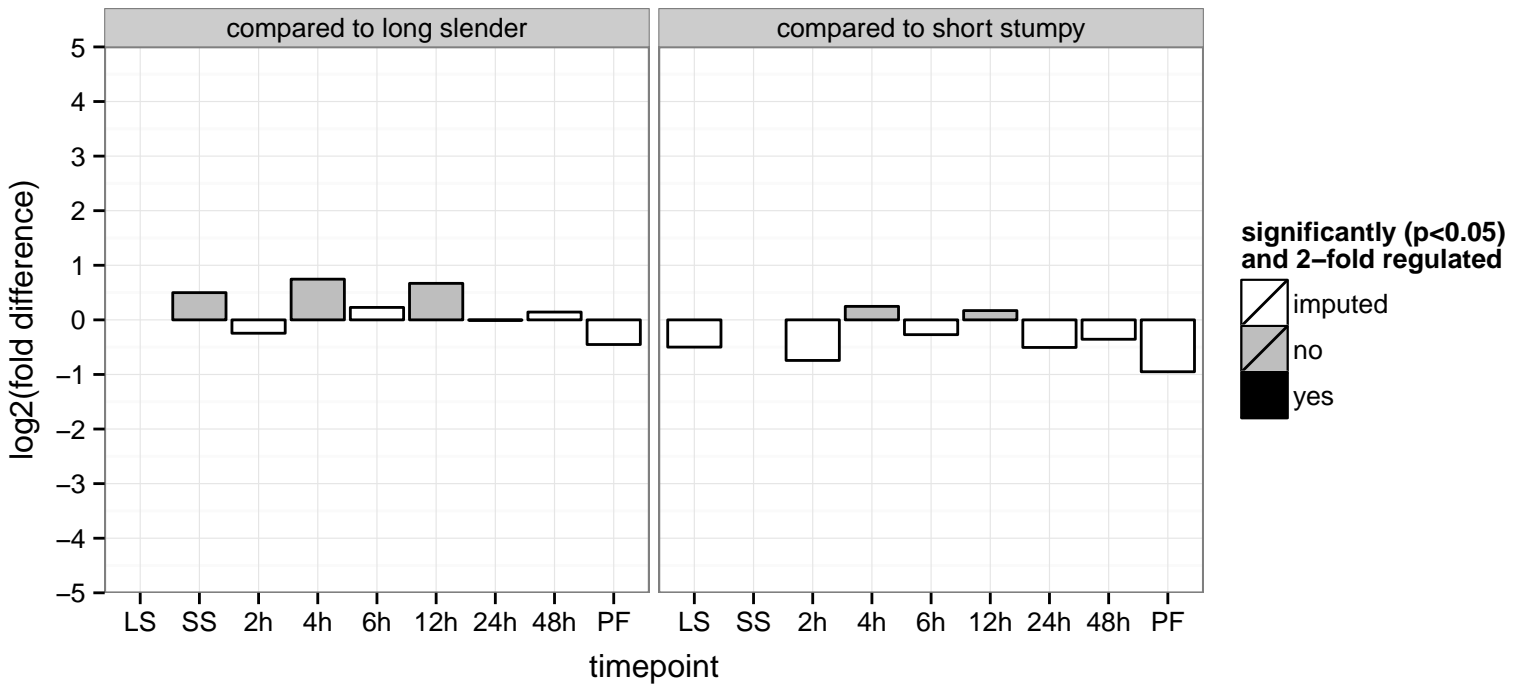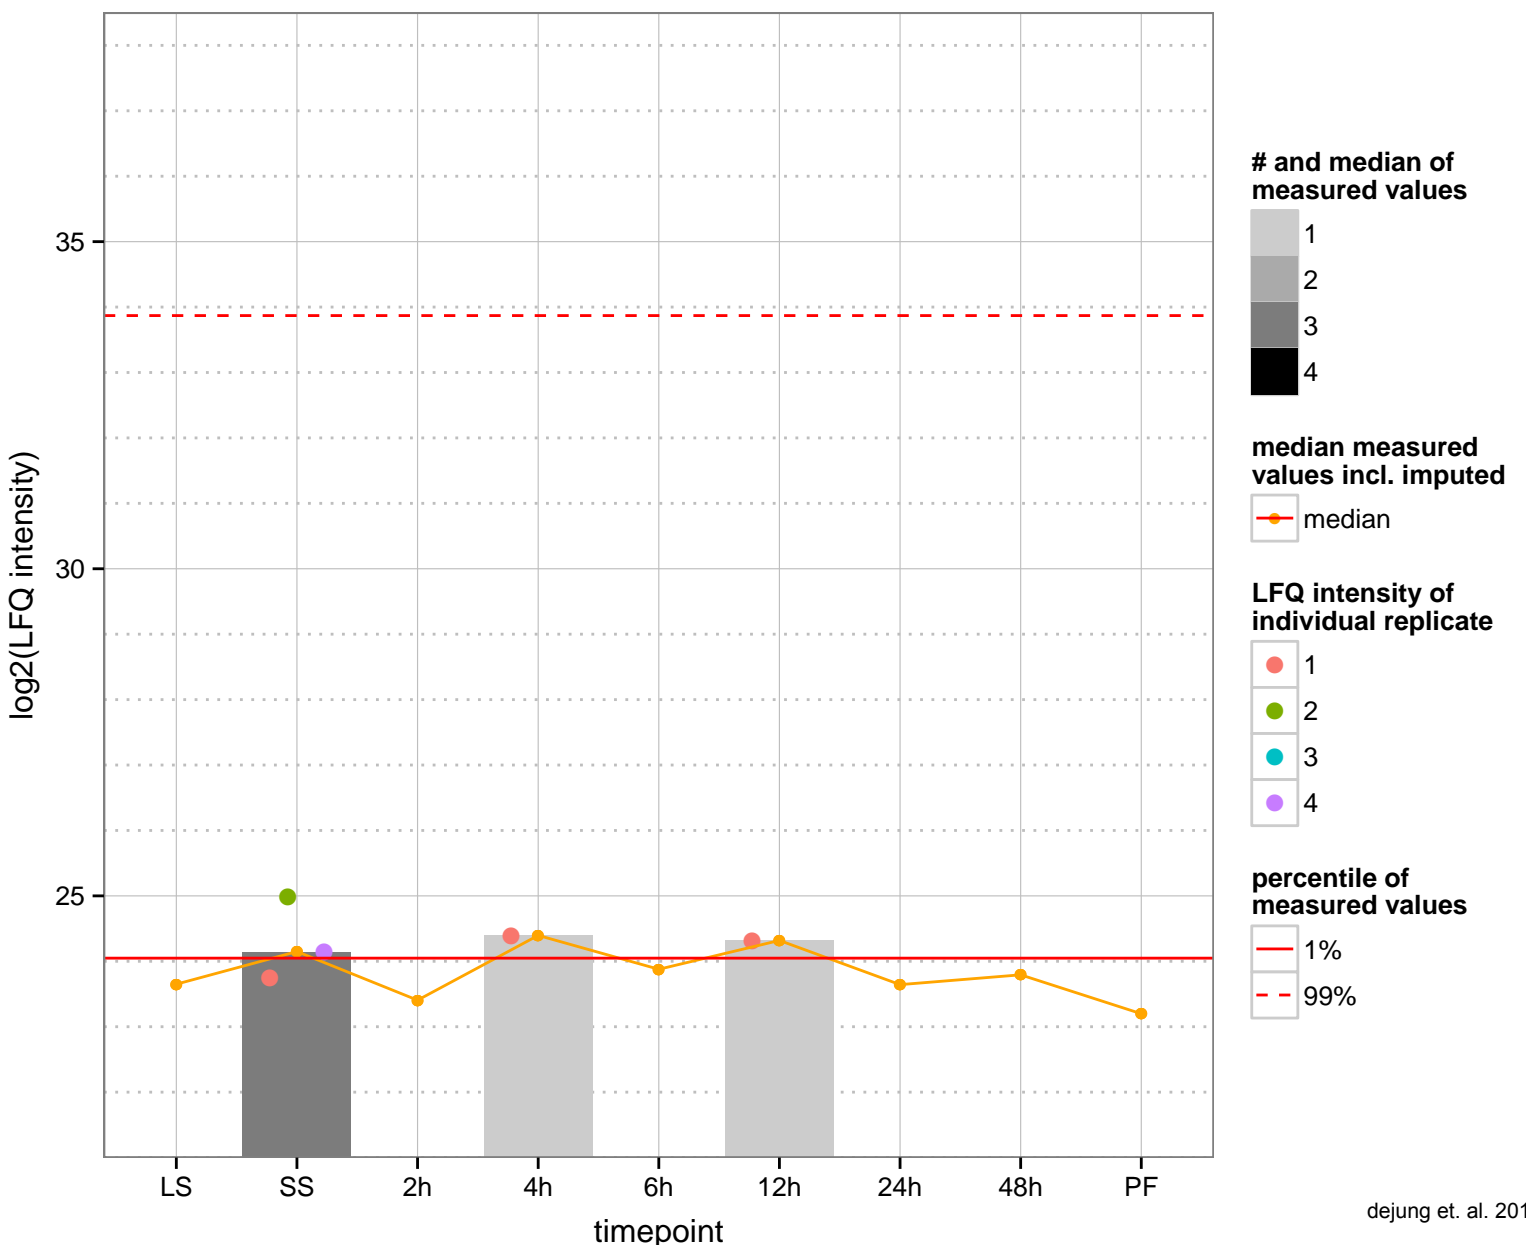



ubiquitin-conjugating enzyme E2, putative, ubiquitin-protein ligase, ubiquitin carrier protein, putative (PEX4)  
 Tb927.8.920  
 AGOF: ubiquitin-protein ligase activity  
 AGOC: null  
 AGOP: cellular protein modification process, post-translational protein modification, regulation of protein metabolic process  
 PGO: acid-amino acid ligase activity  
 PGOC: null  
 PGOP: null

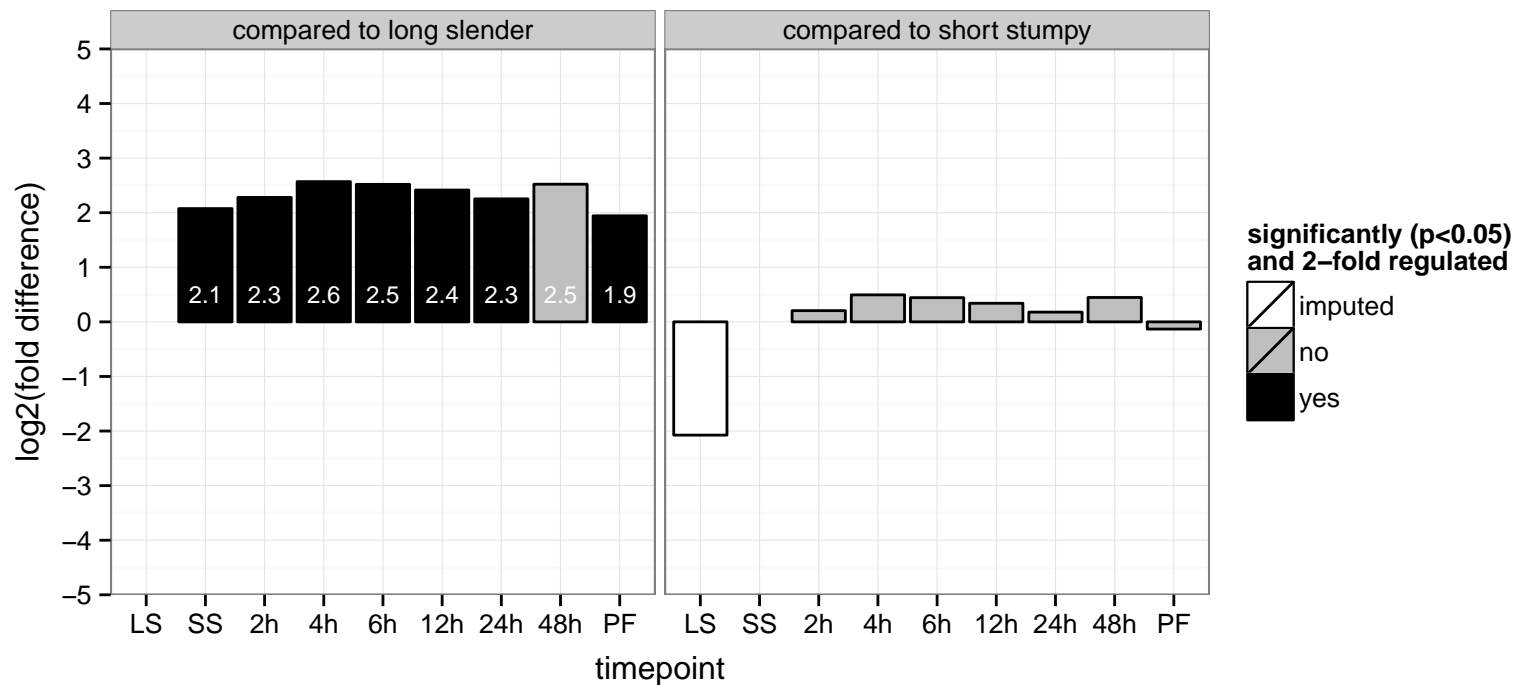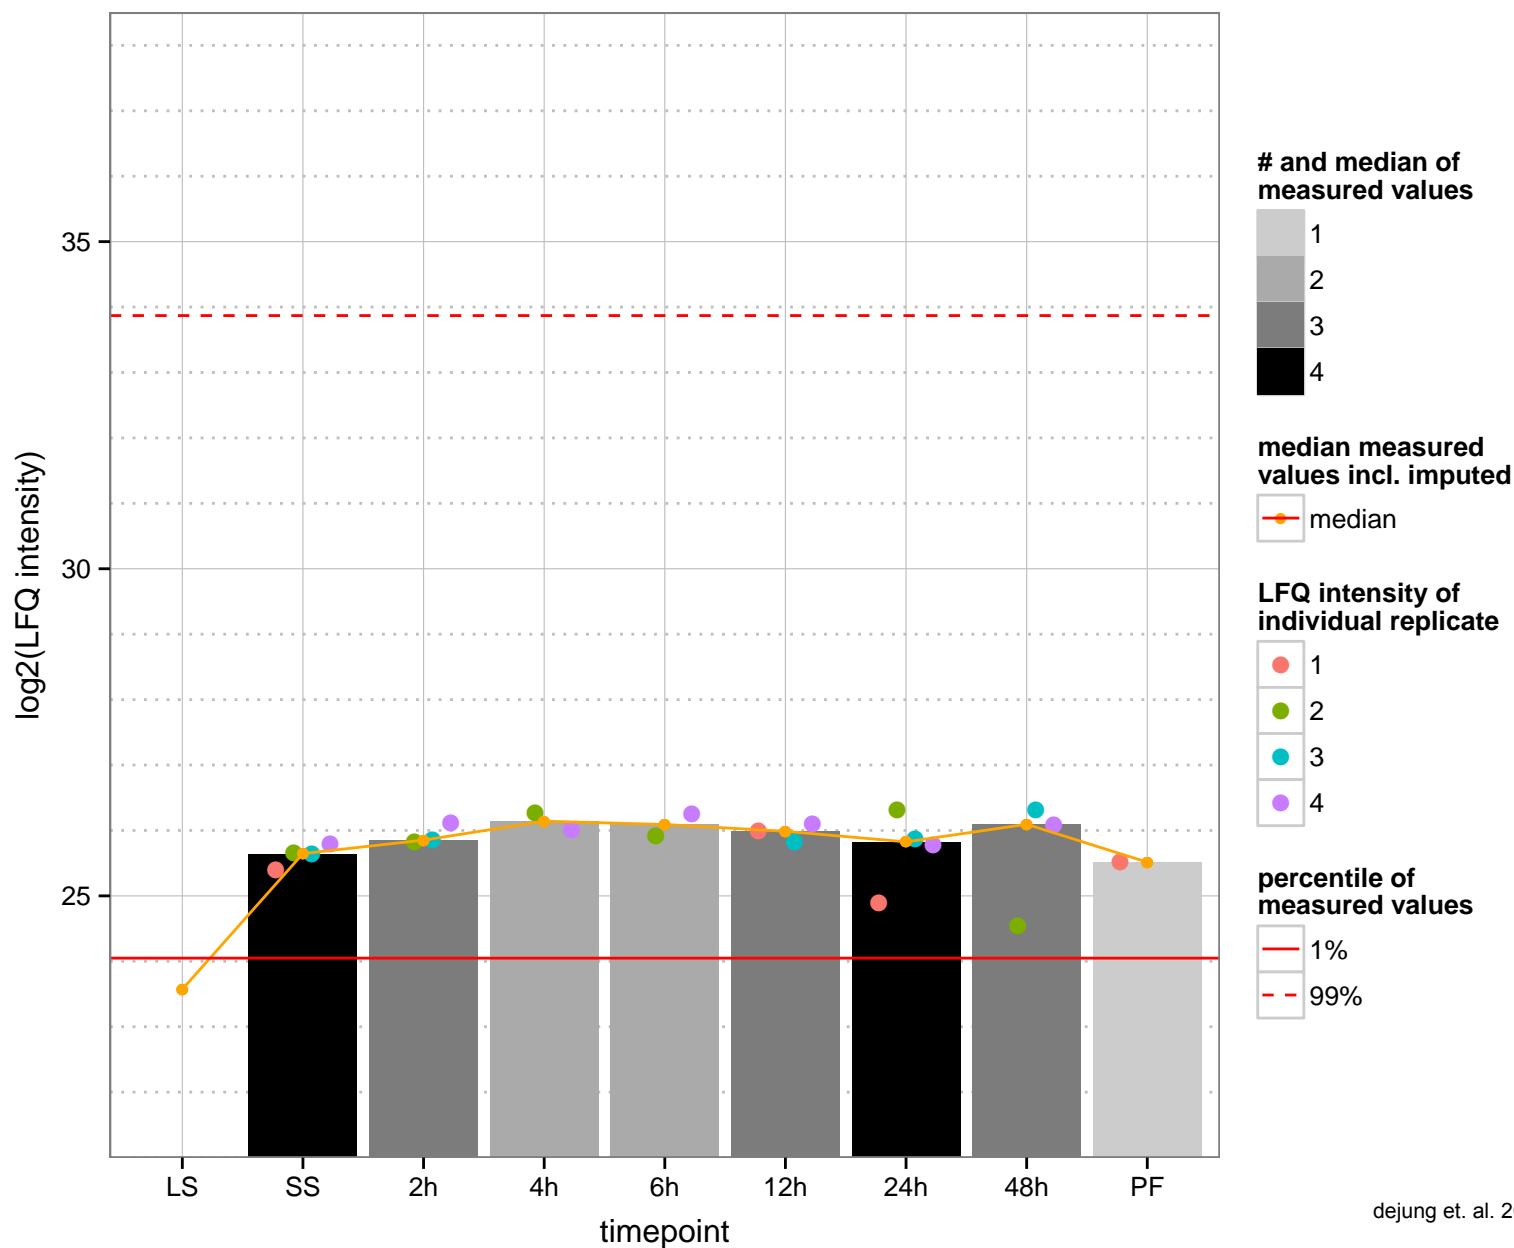

phosphoacetylglucosamine mutase, putative, acetylglucosaminophosphomutase, N-acetylglucosamine-phosphate mutase  
 Tb927.8.980  
 AGOF: phosphoacetylglucosamine mutase activity  
 AGOC: null  
 AGOP: carbohydrate metabolic process, glucosamine metabolic process  
 PGO: intramolecular transferase activity, phosphotransferases, phosphoacetylglucosamine mutase activity  
 PGOC: null  
 PGOP: carbohydrate metabolic process

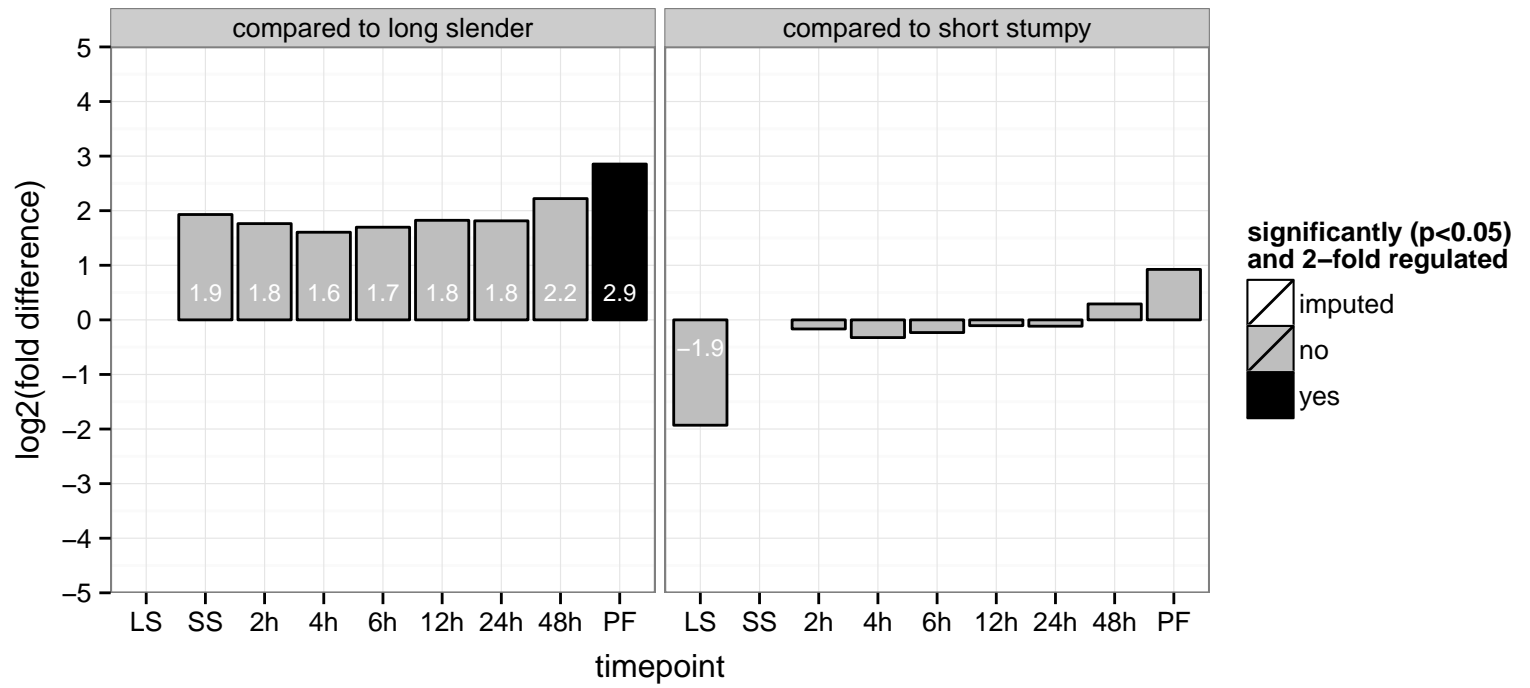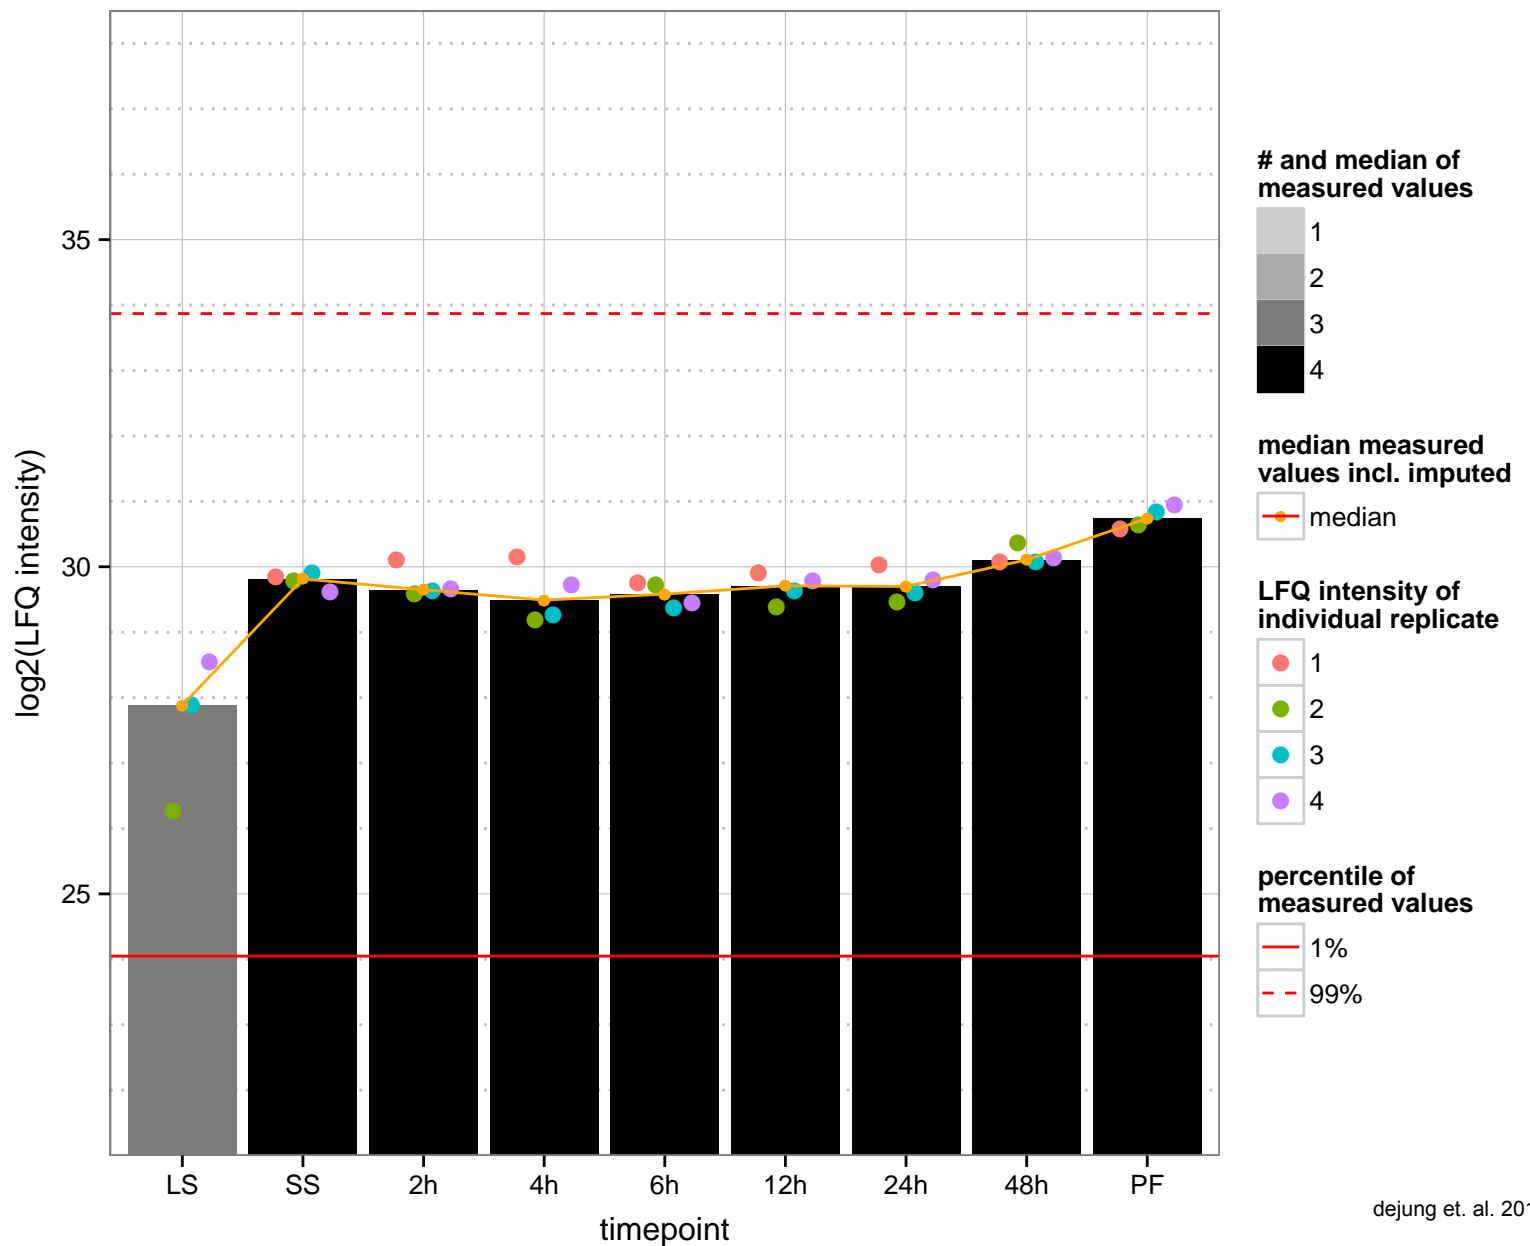

RNA-binding protein 33 (RNA-binding motif protein 33) (RBP33)  
 Tb927.8.990  
 AGOF: RNA binding, mRNA binding  
 AGOC: null  
 AGOP: RNA processing  
 PGO: nucleic acid binding  
 PGOC: null  
 PGOP: null

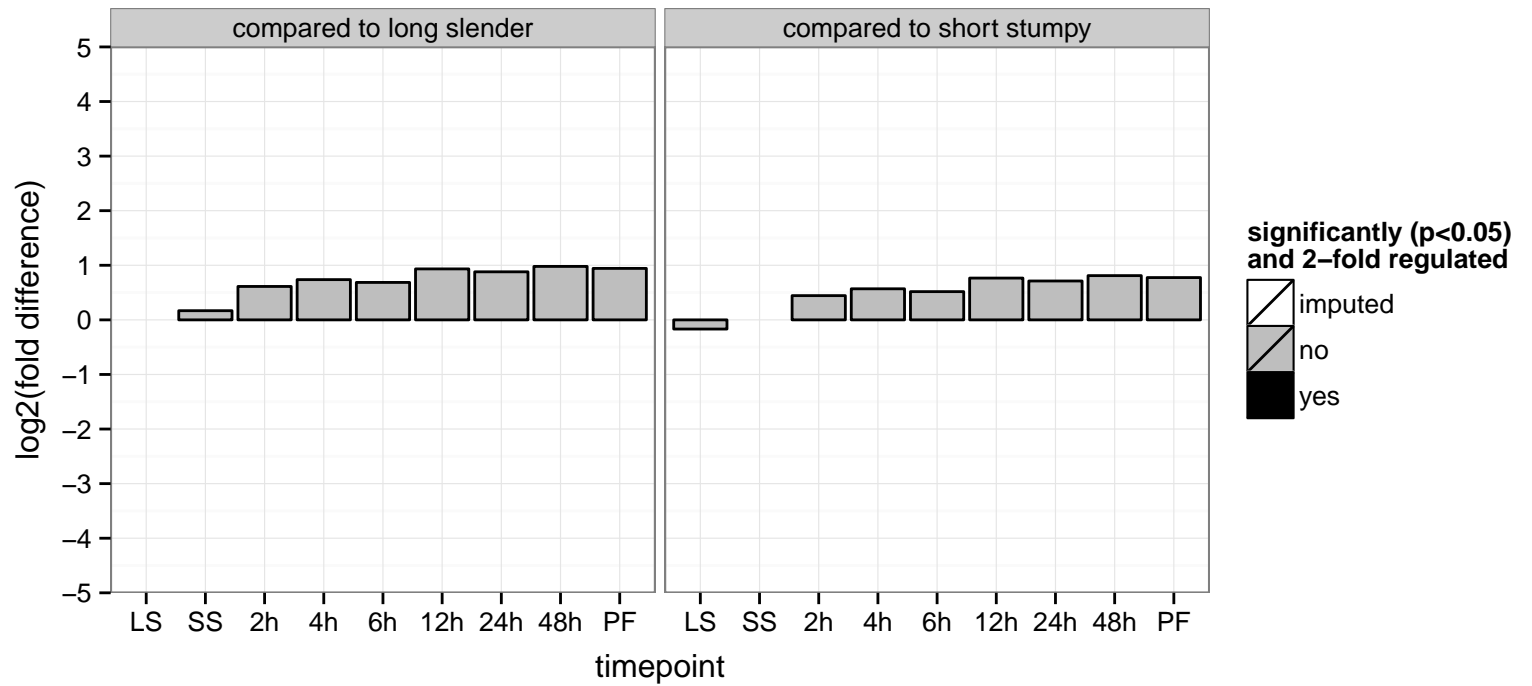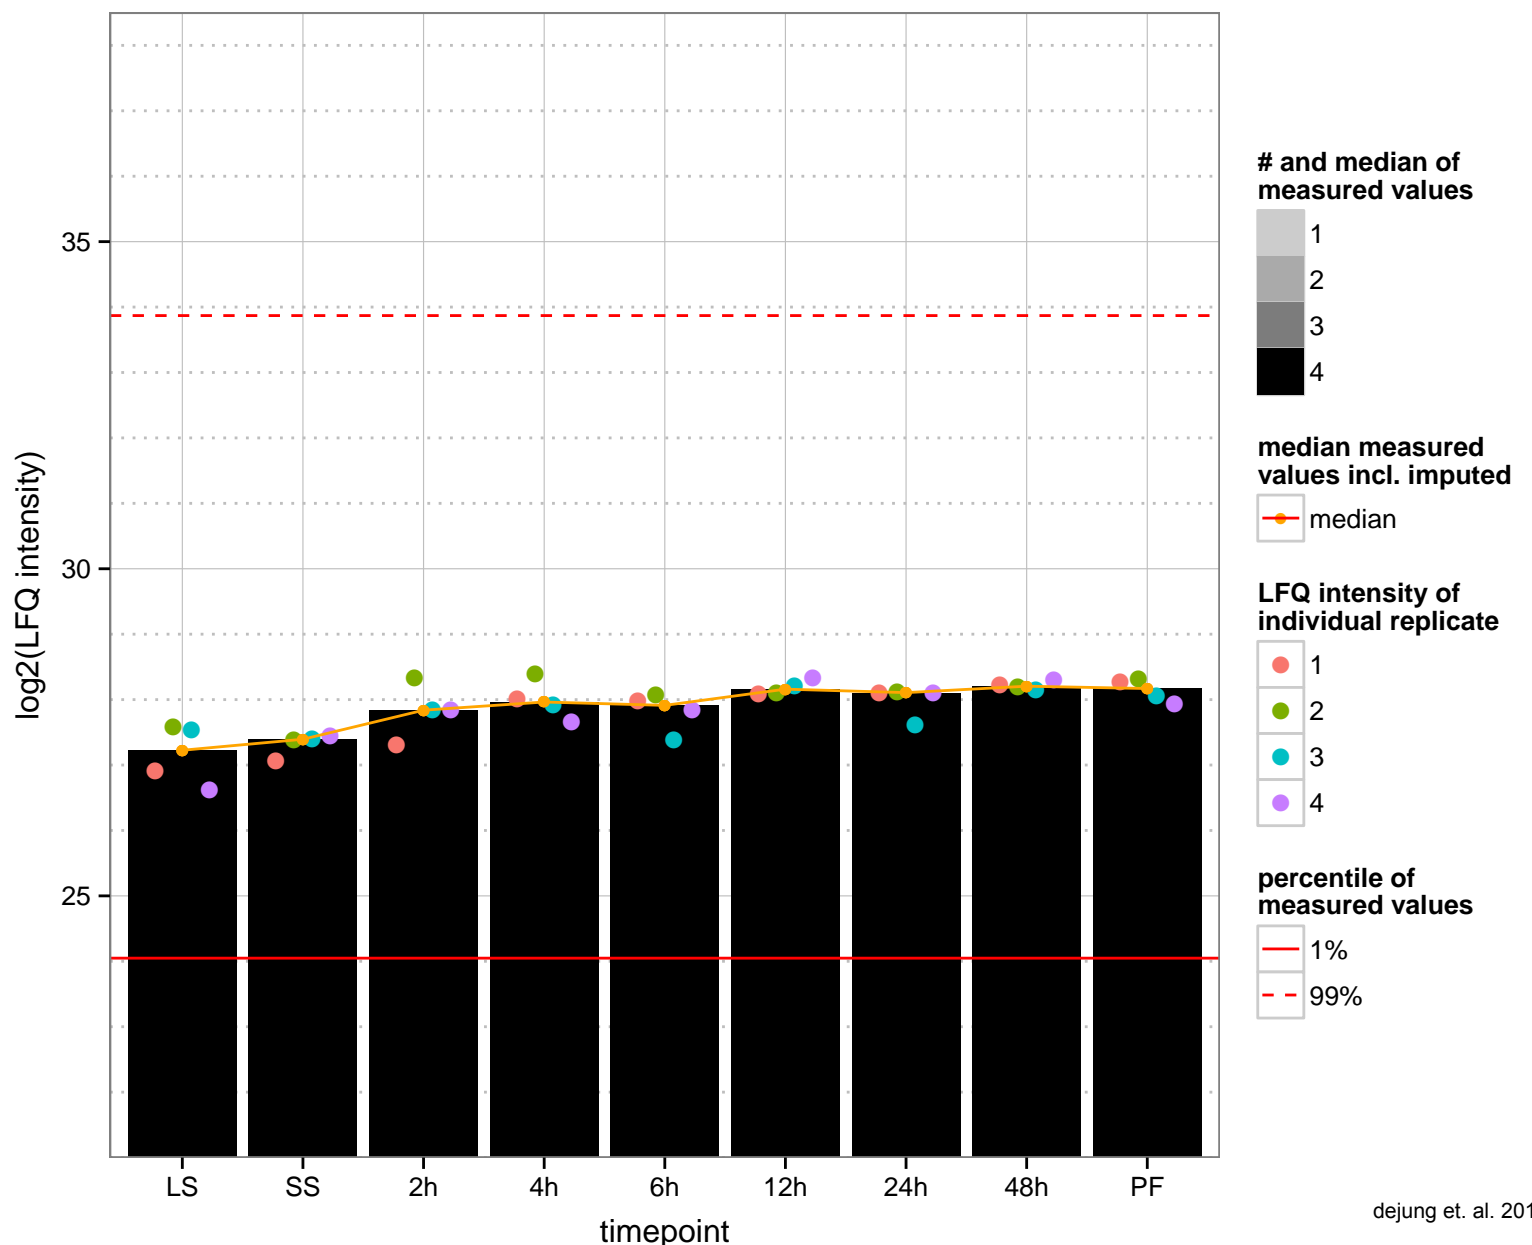

chaperone protein DNAj, putative  
 Tb927.9.10010  
 AGOF: heat shock protein binding, unfolded protein binding  
 AGOC: integral to membrane, mitochondrial inner membrane  
 AGOP: protein folding  
 PGOF: heat shock protein binding  
 PGOC: null  
 PGO: null

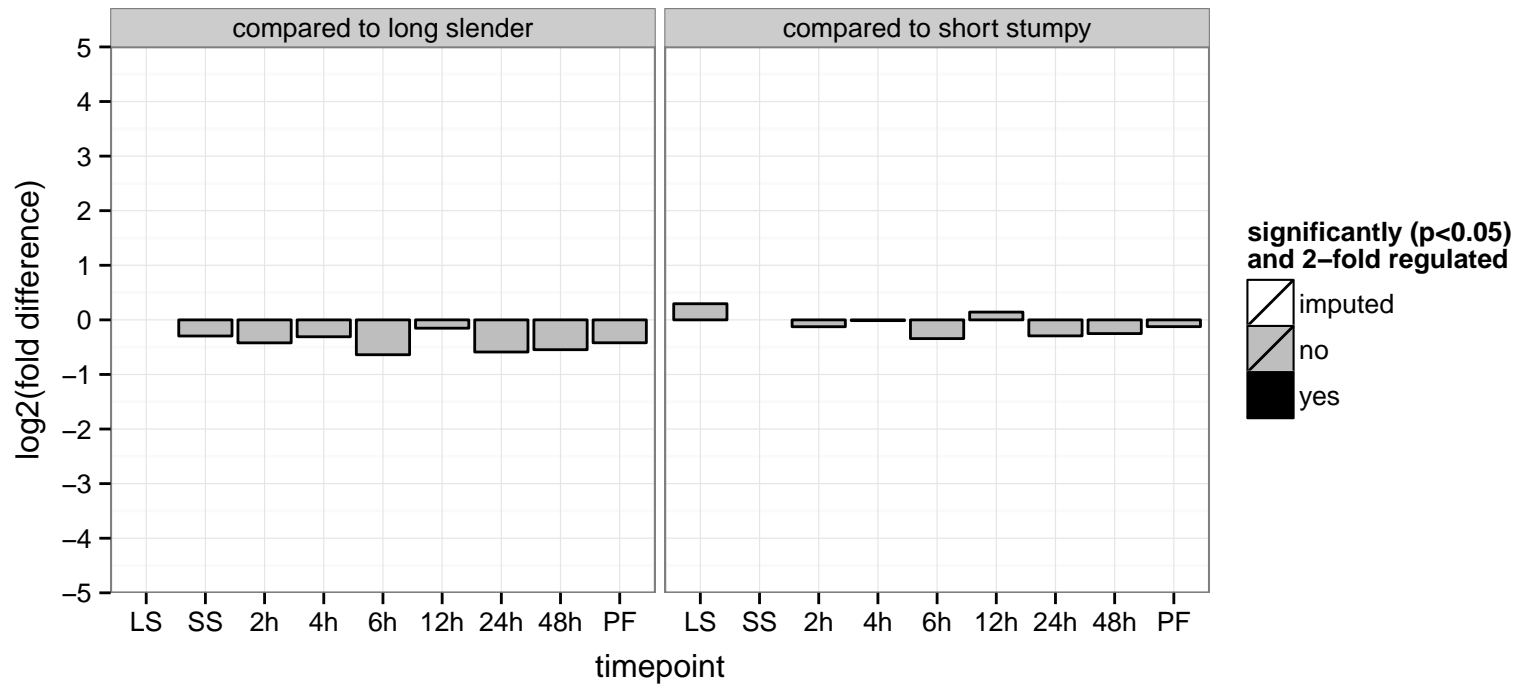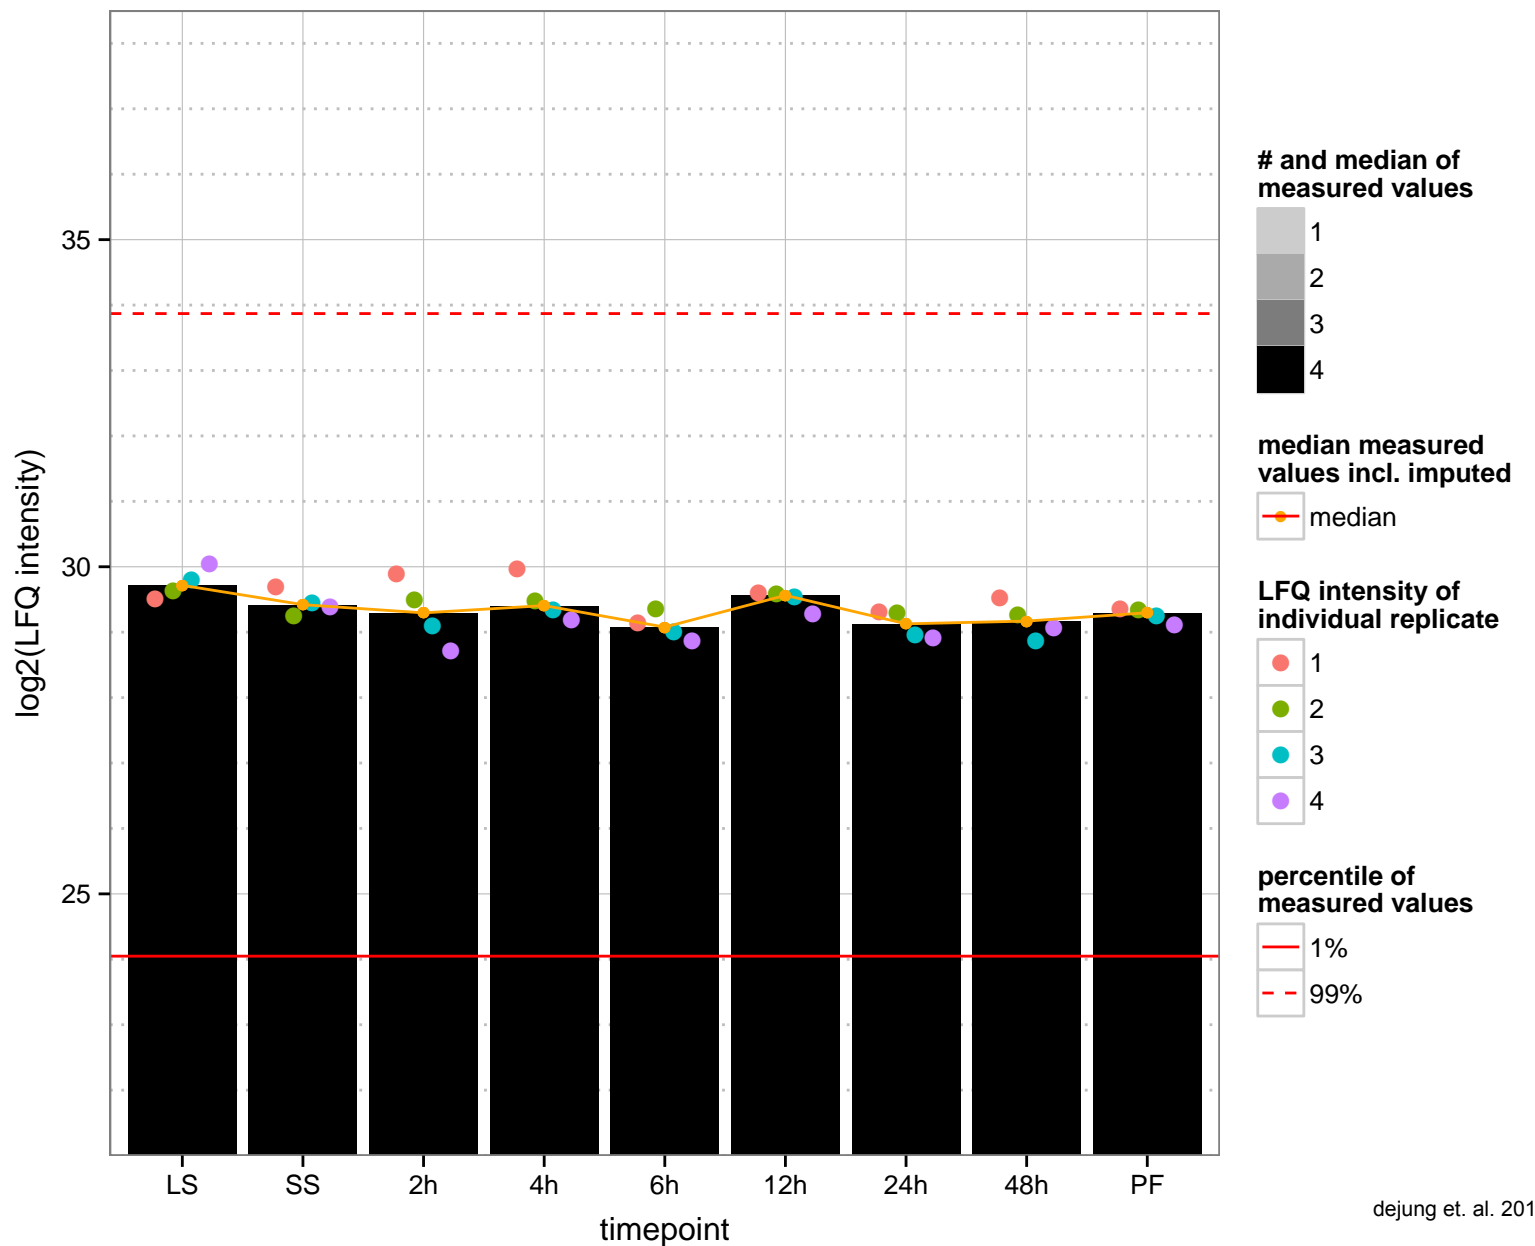

hypothetical protein, conserved  
 Tb927.9.10070  
 AGOF: null  
 AGOC: mitochondrion  
 AGOP: null  
 PGO: null  
 PGOC: null  
 PGOP: null

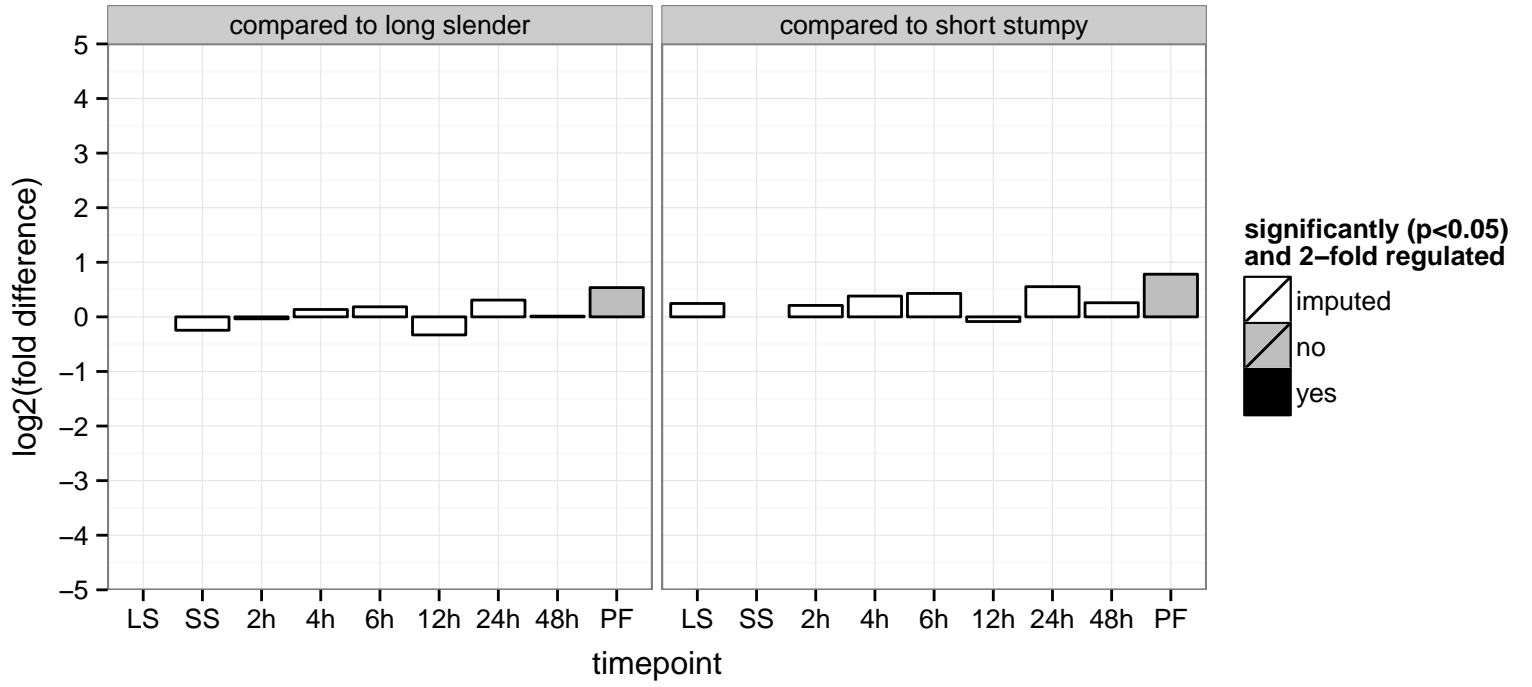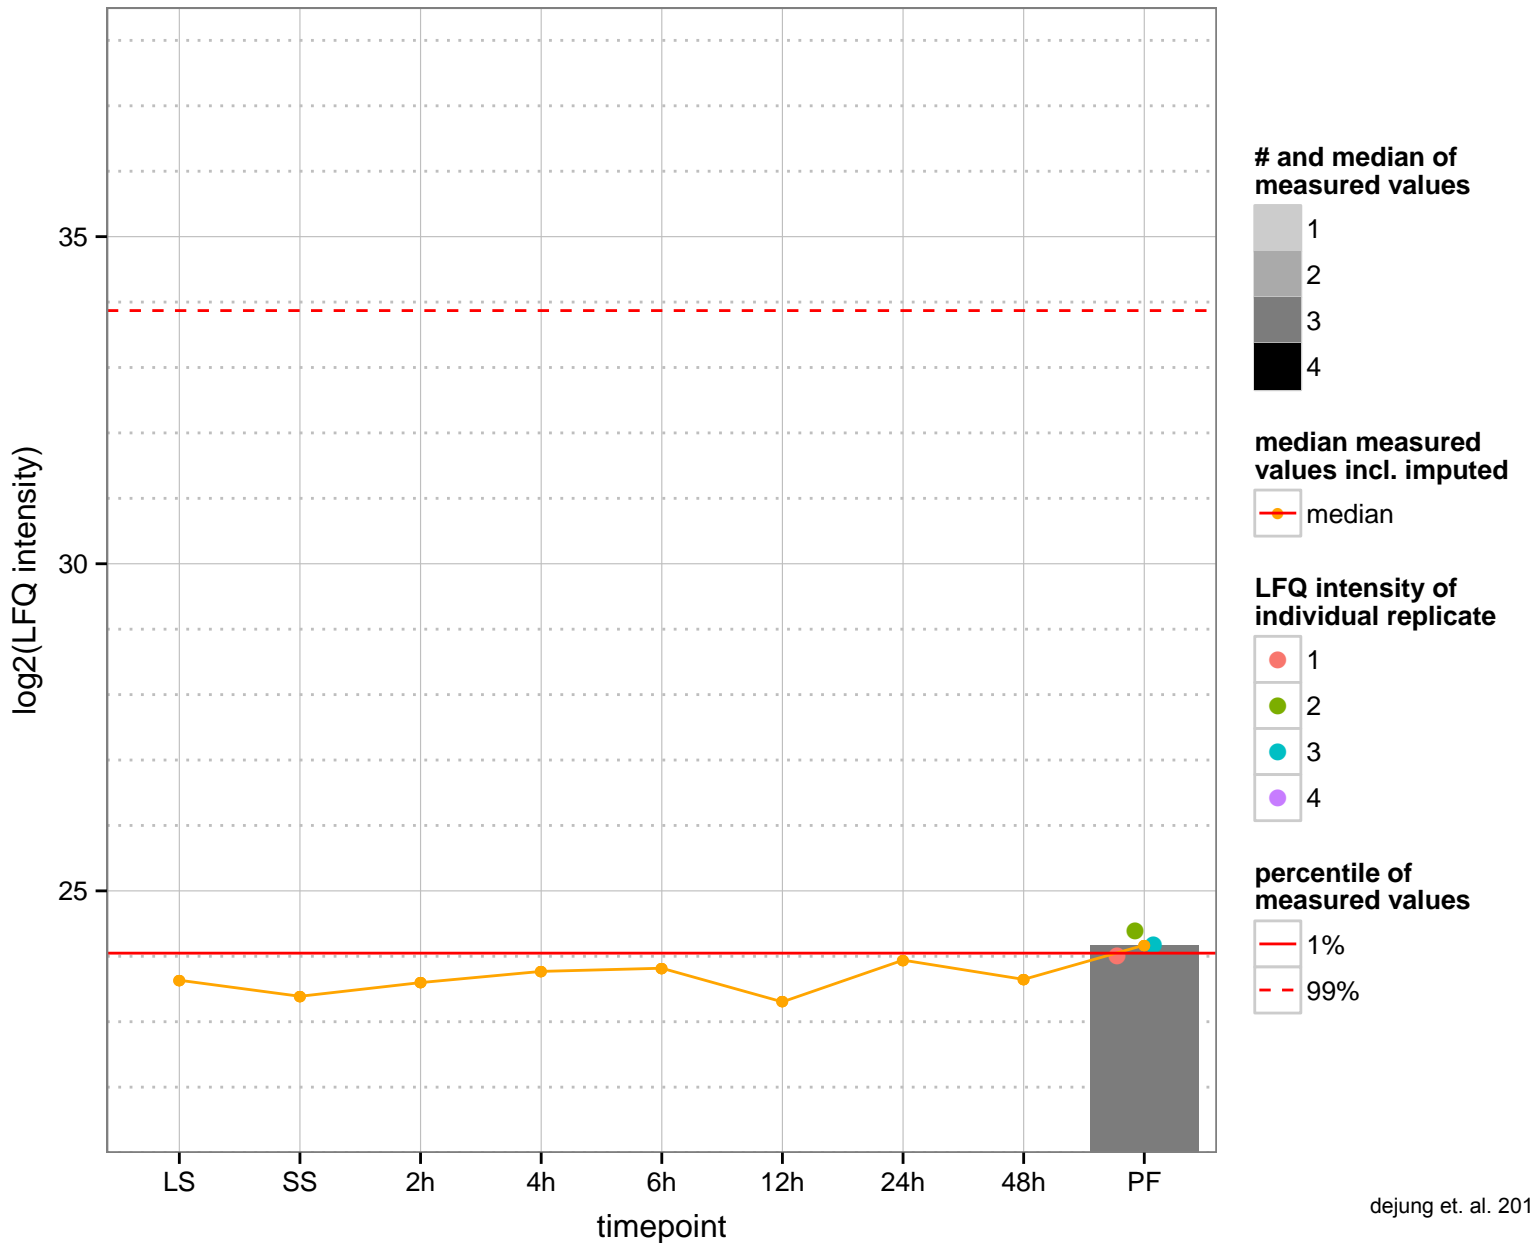

phosphatidylserine decarboxylase, putative  
 Tb927.9.10080  
 AGOF: phosphatidylserine decarboxylase activity  
 AGOC: mitochondrion  
 AGOP: phosphatidylserine catabolic process, phospholipid biosynthetic process  
 PGO: phosphatidylserine decarboxylase activity  
 PGOC: null  
 PGOP: phospholipid biosynthetic process

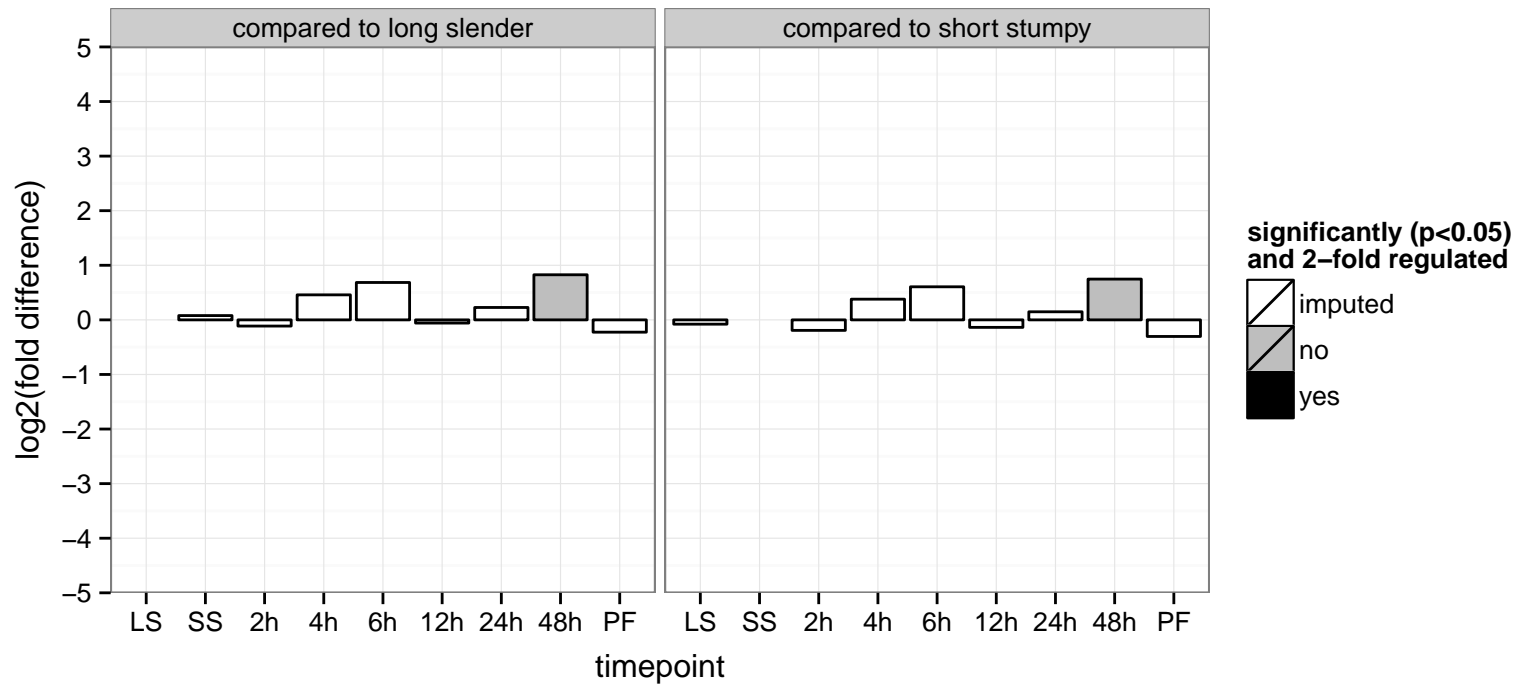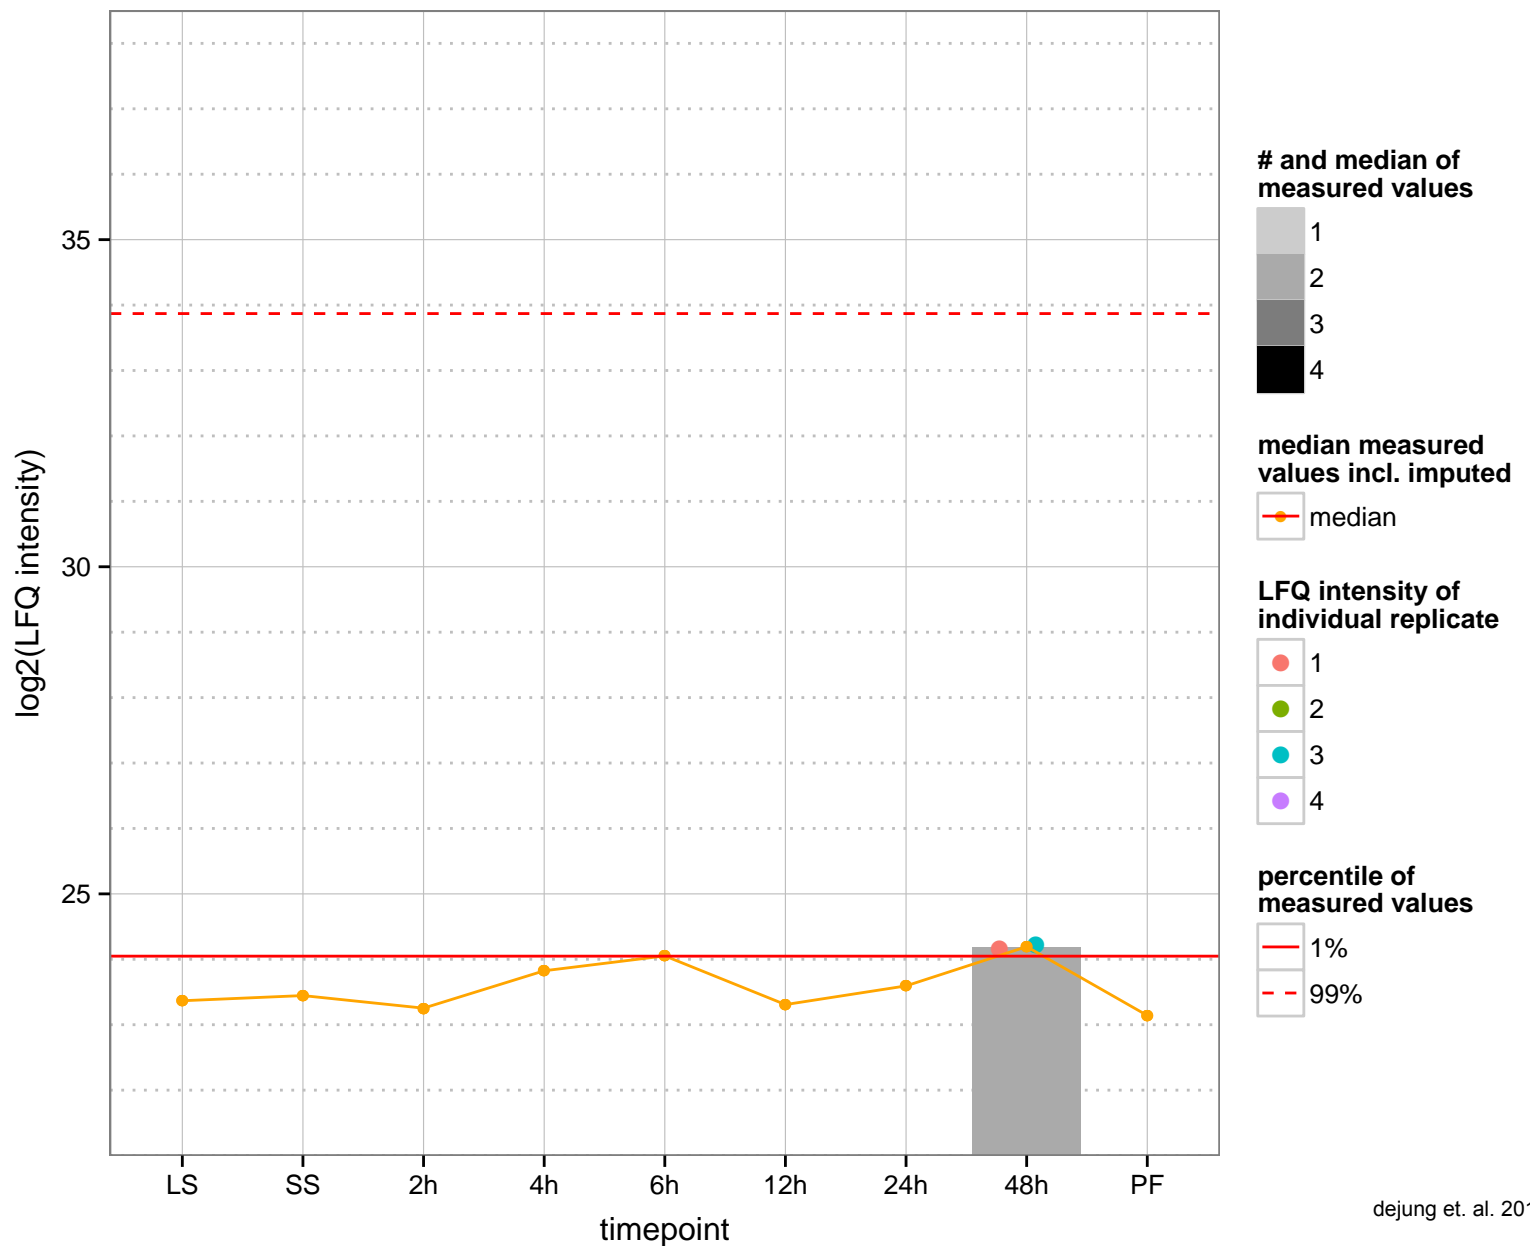

hypothetical protein, conserved  
 Tb927.9.10100  
 AGOF: null  
 AGOC: null  
 AGOP: null  
 PGO: protein binding  
 PGOC: null  
 PGOP: null

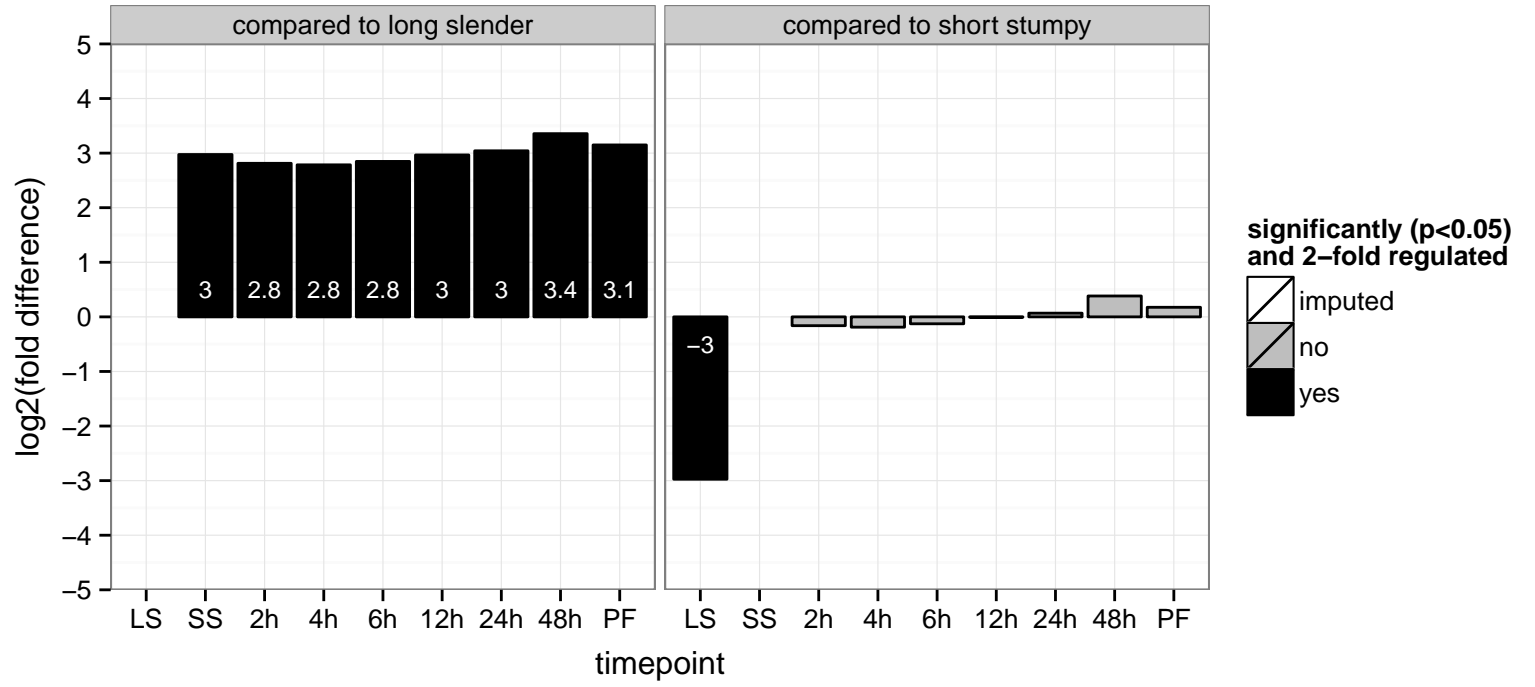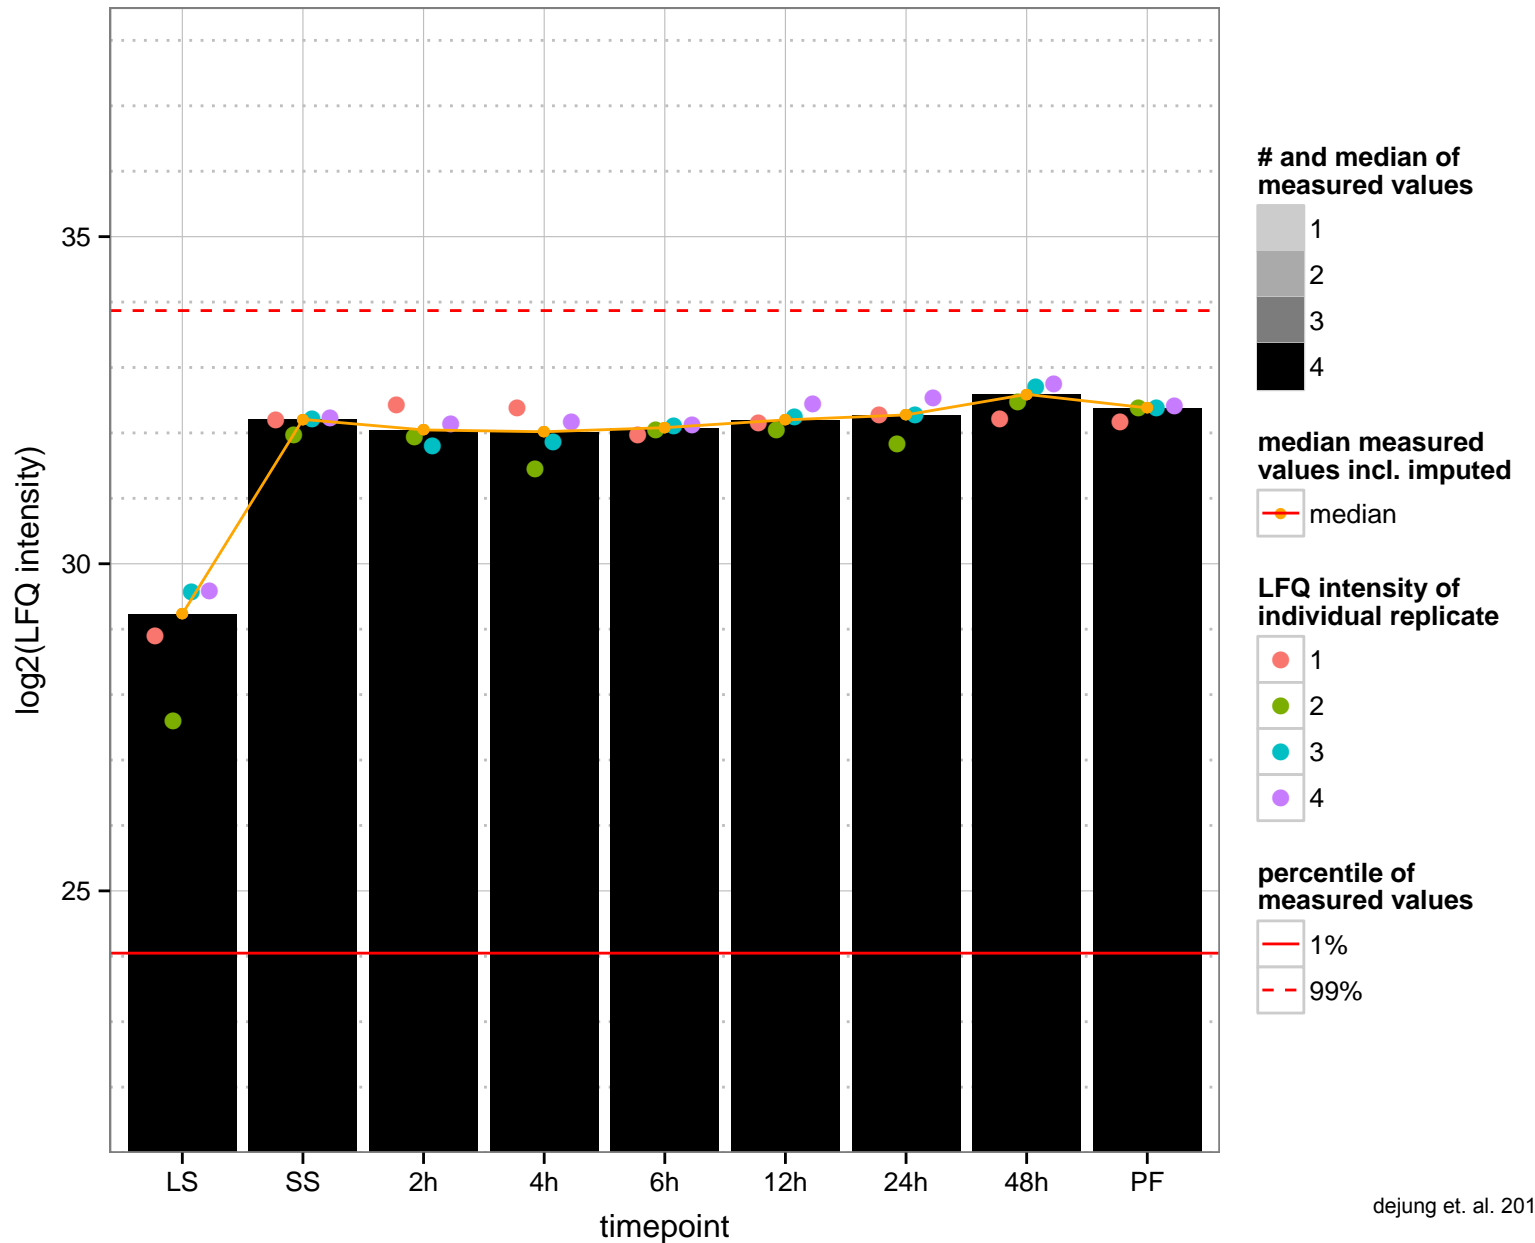

hypothetical protein, conserved  
 Tb927.9.10160  
 AGOF: null  
 AGOC: null  
 AGOP: null  
 PGO: null  
 PGOC: null  
 PGOP: null

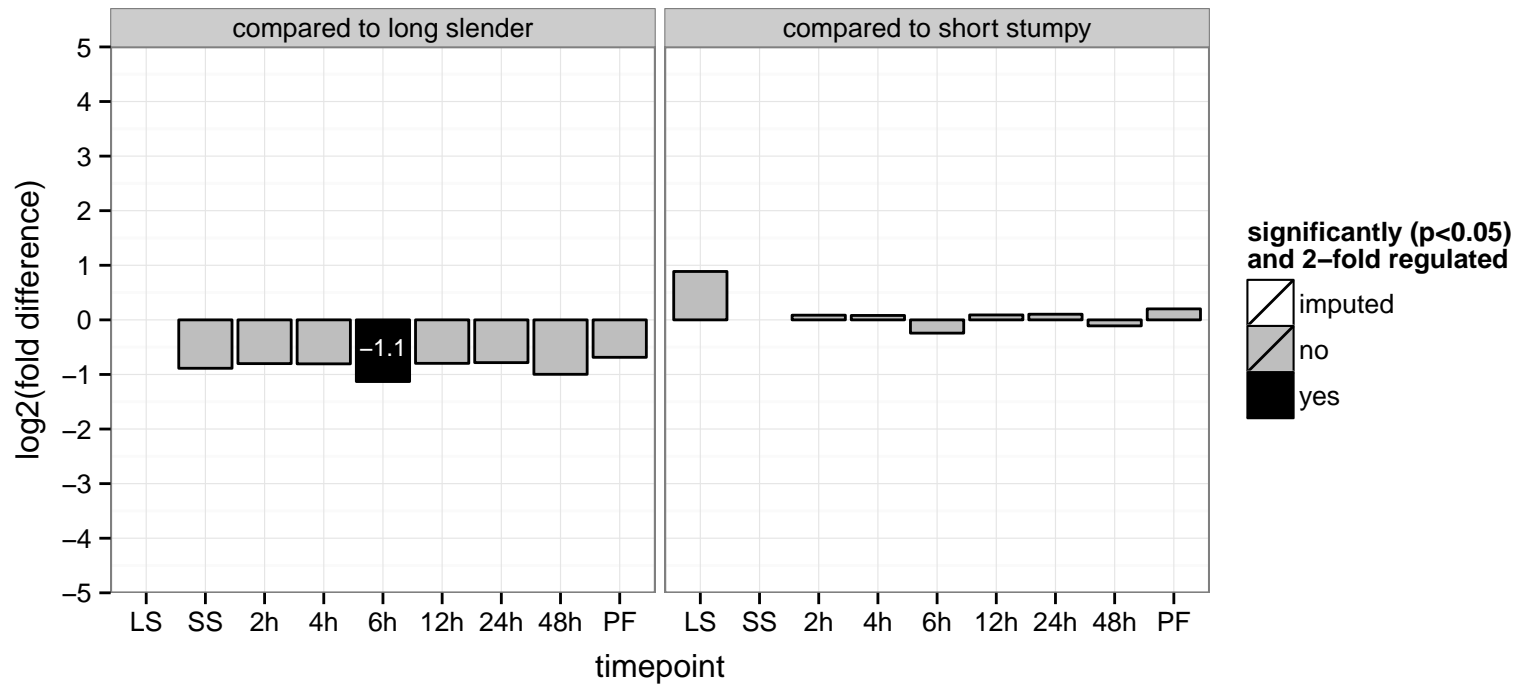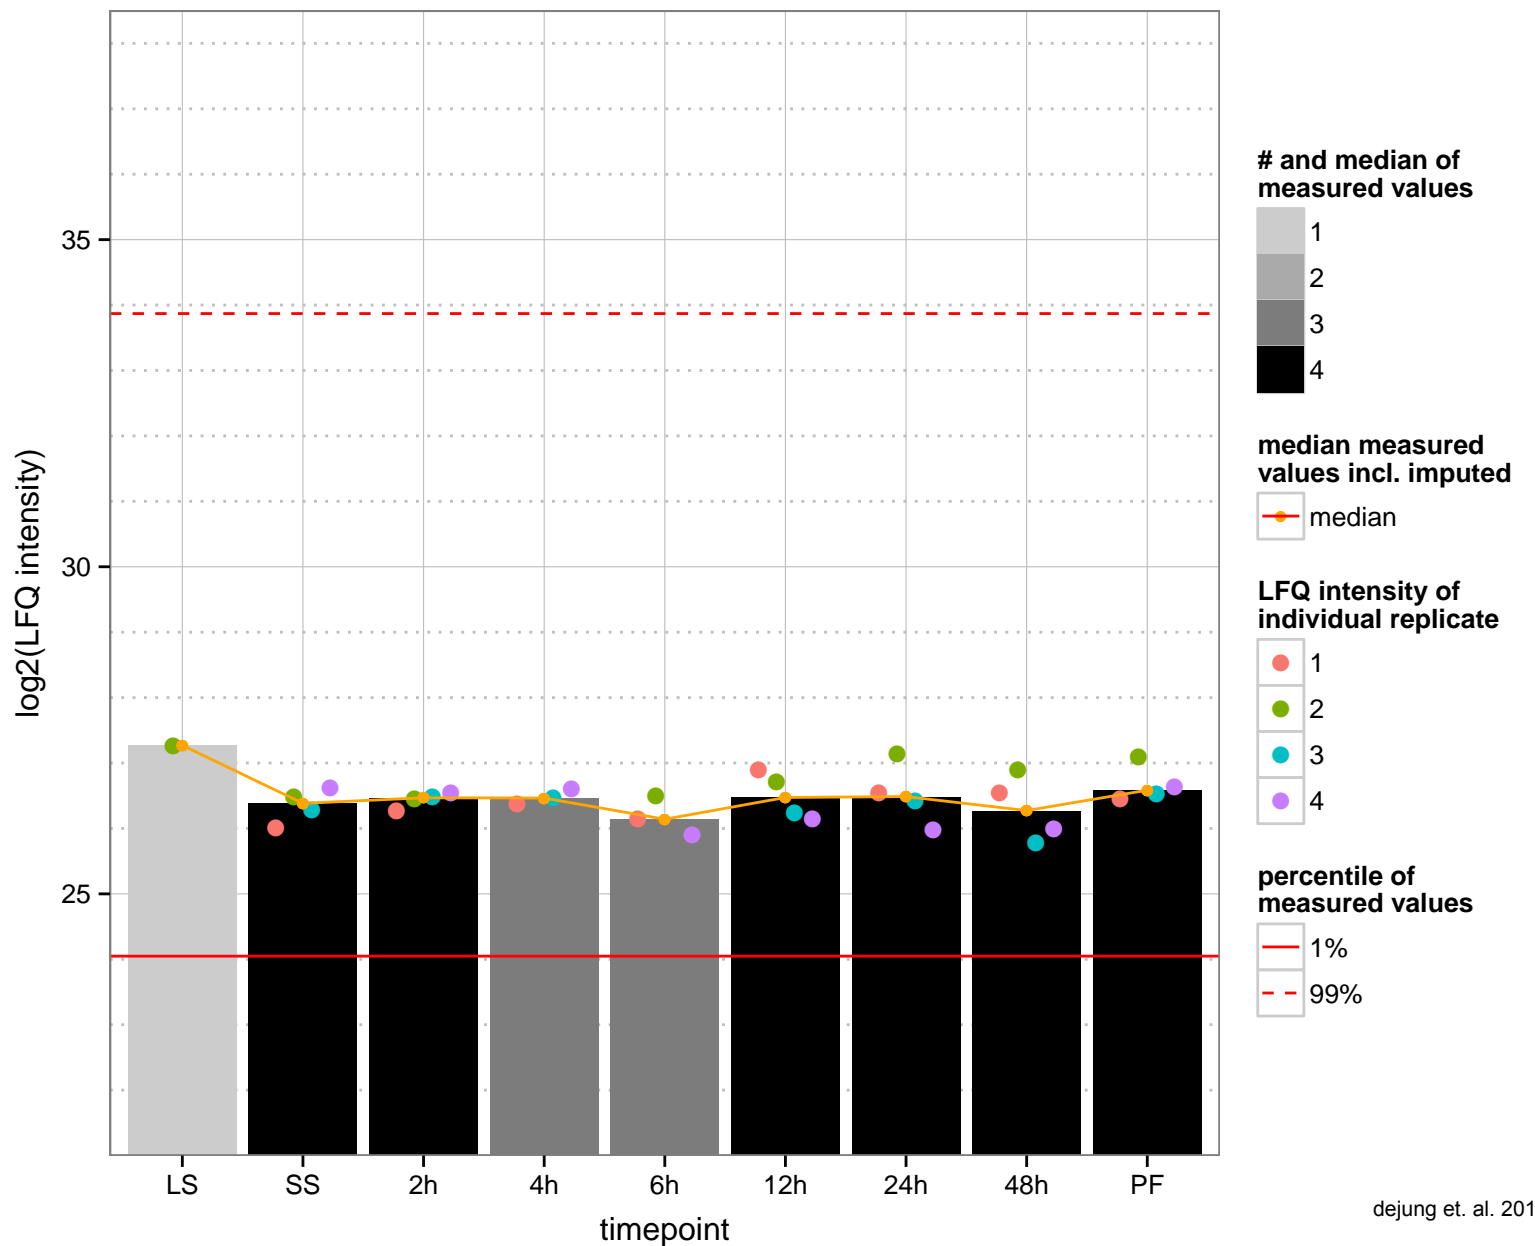



hypothetical protein, conserved  
 Tb927.9.10230  
 AGOF: null  
 AGOC: null  
 AGOP: null  
 PGO: null  
 PGOC: null  
 PGOP: null

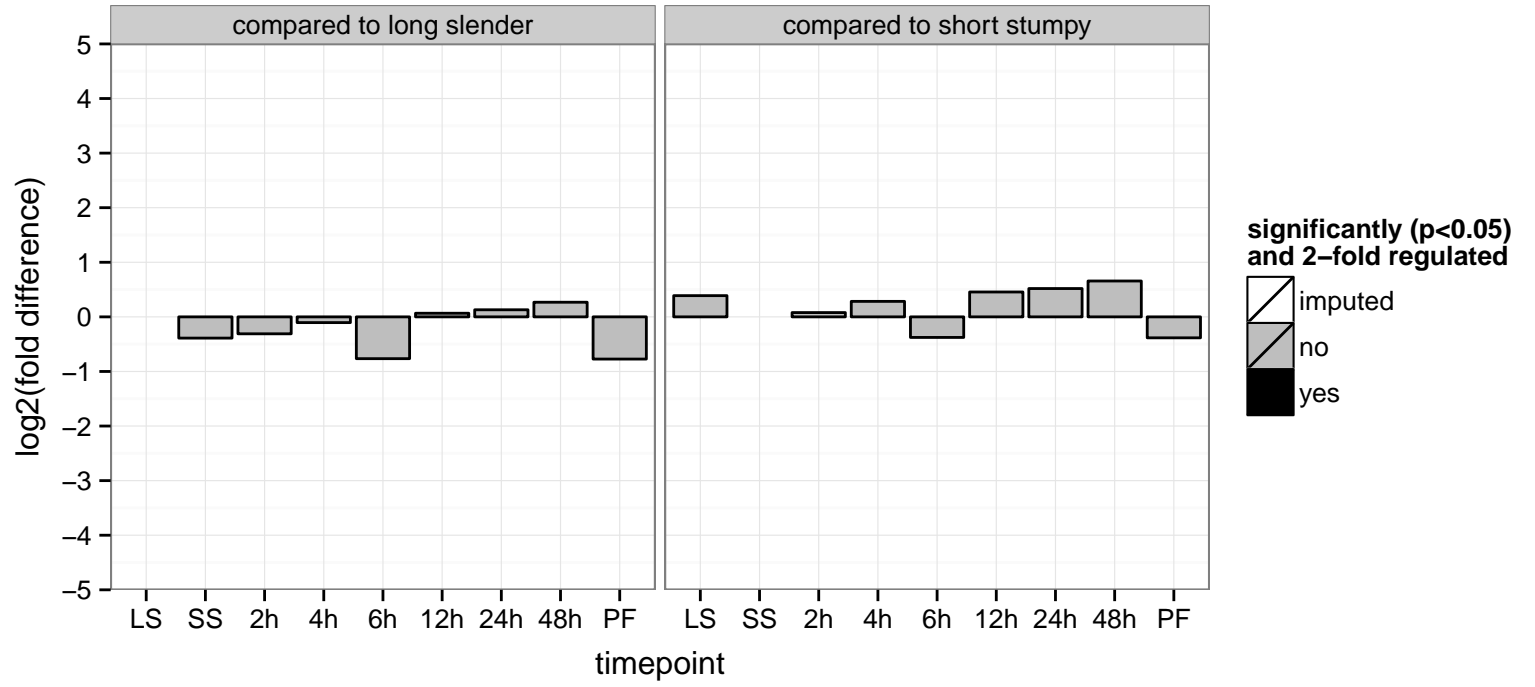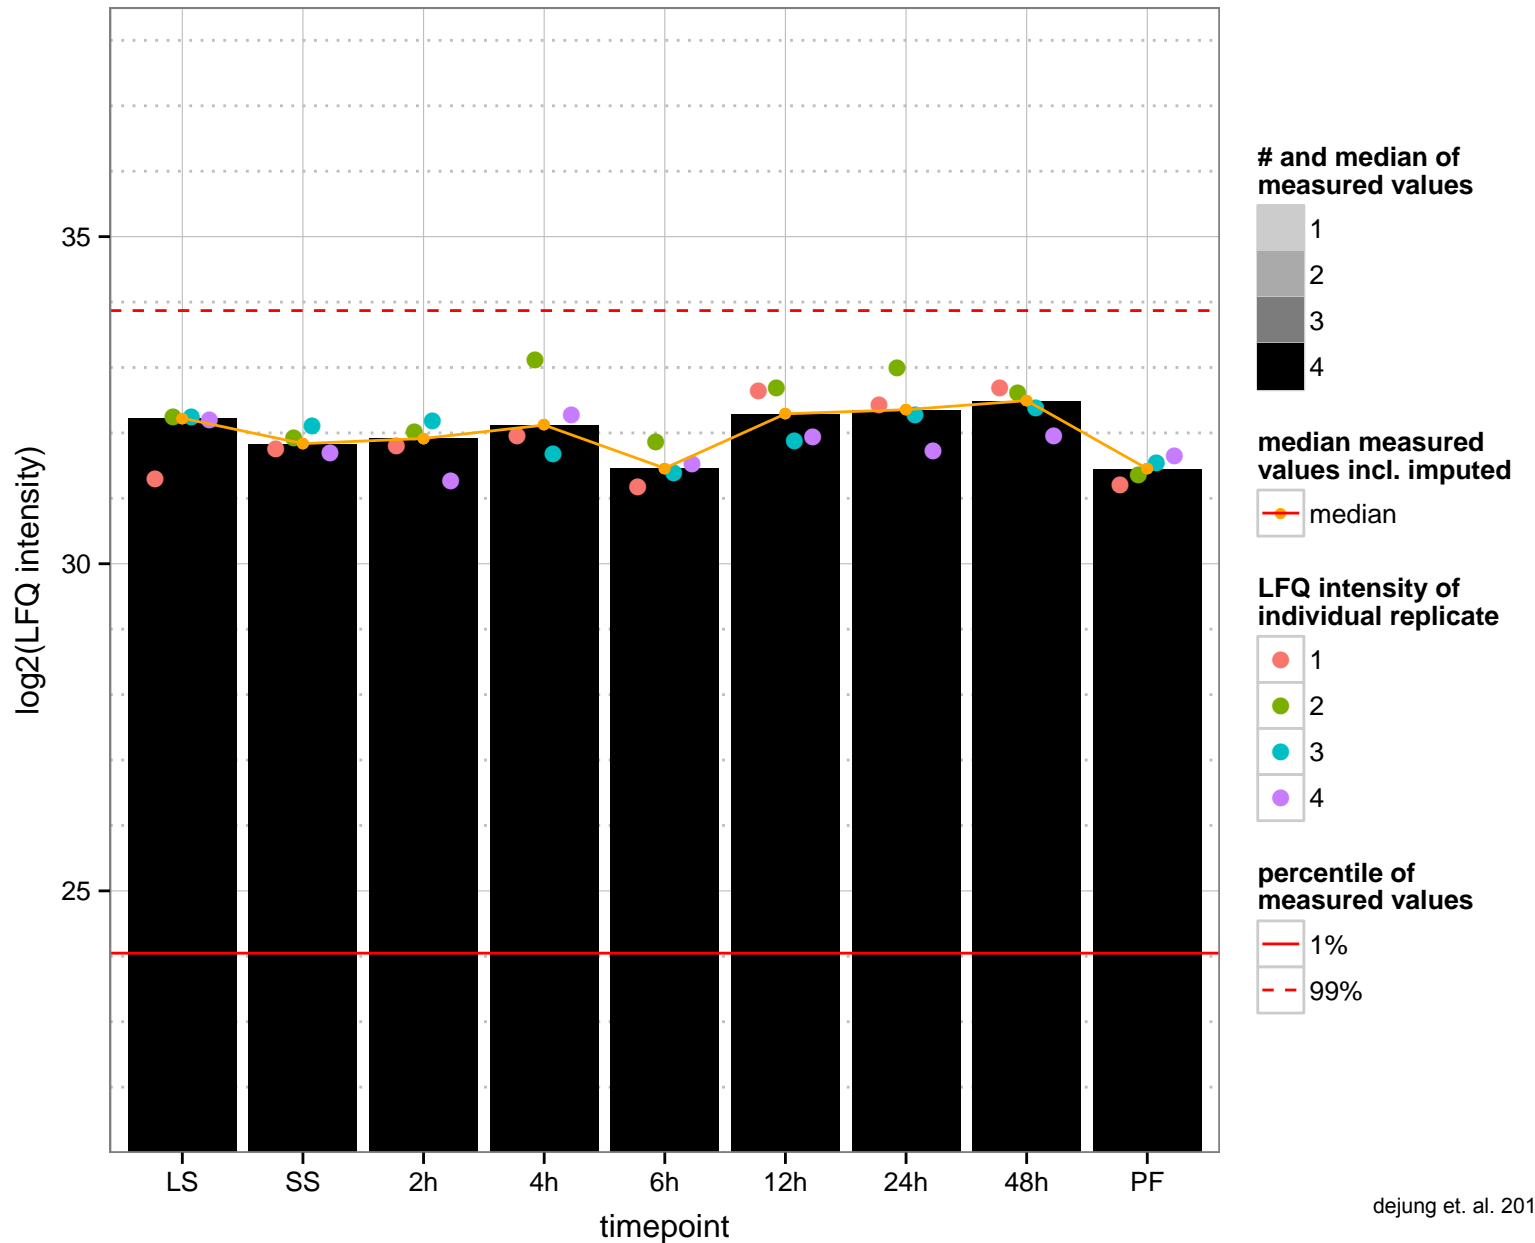

hypothetical protein, conserved  
 Tb927.9.10400  
 AGOF: null  
 AGOC: null  
 AGOP: null  
 PGOF: protein binding  
 PGO: null  
 PGO: null

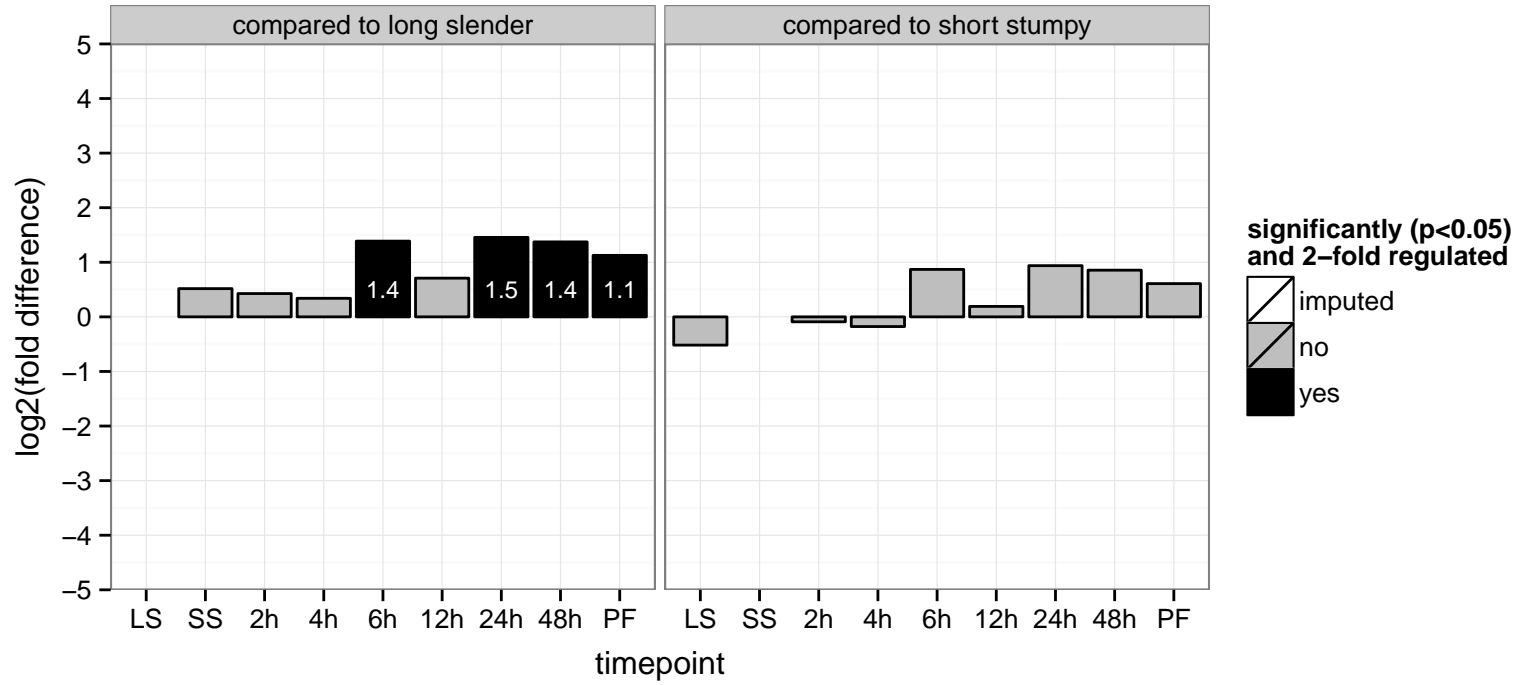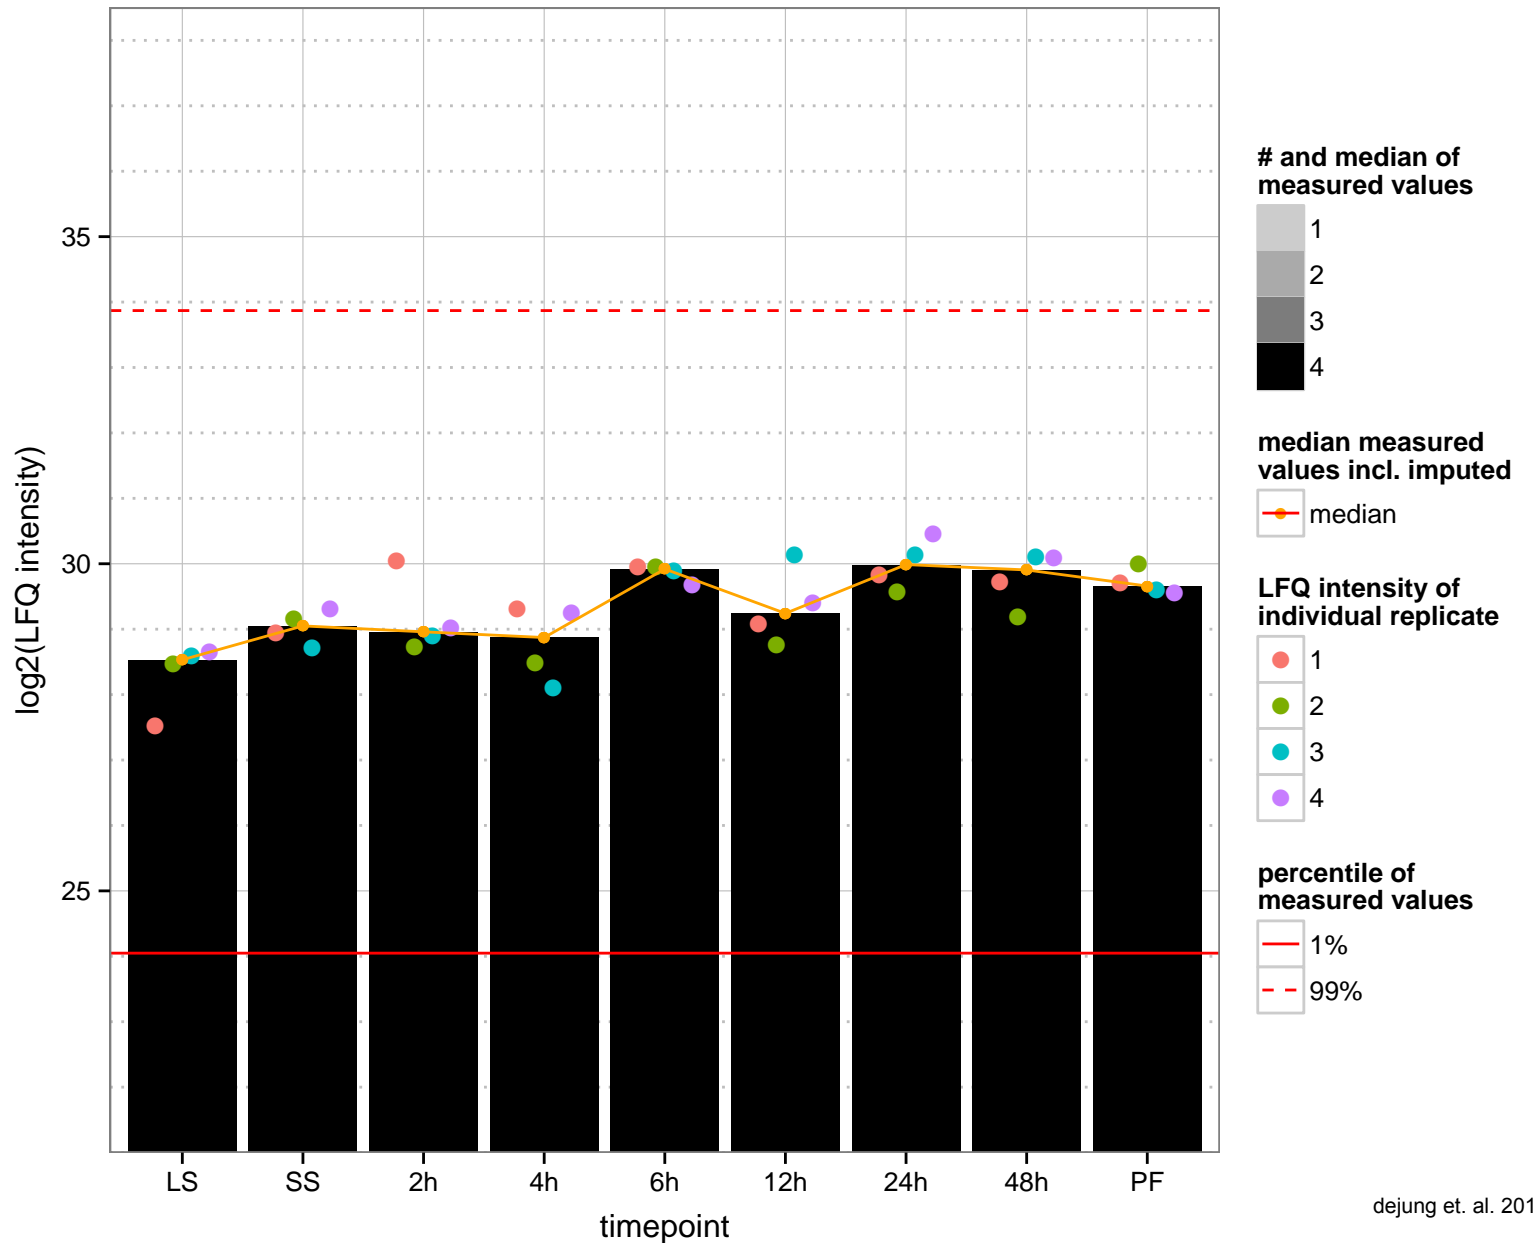

hypothetical protein, conserved  
 Tb927.9.10500  
 AGOF: hydrolase activity  
 AGOC: mitochondrion  
 AGOP: metabolic process  
 PGOF: hydrolase activity  
 PGOC: null  
 PGOP: metabolic process

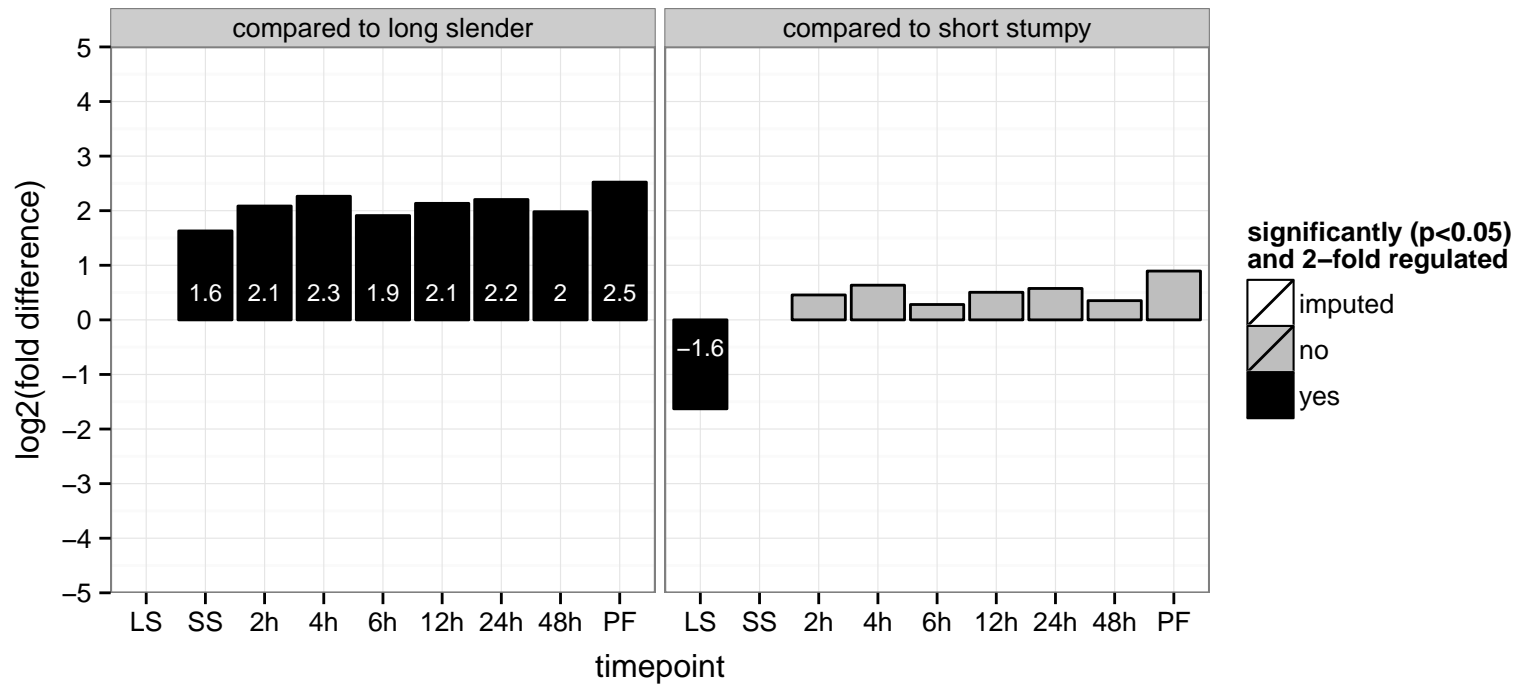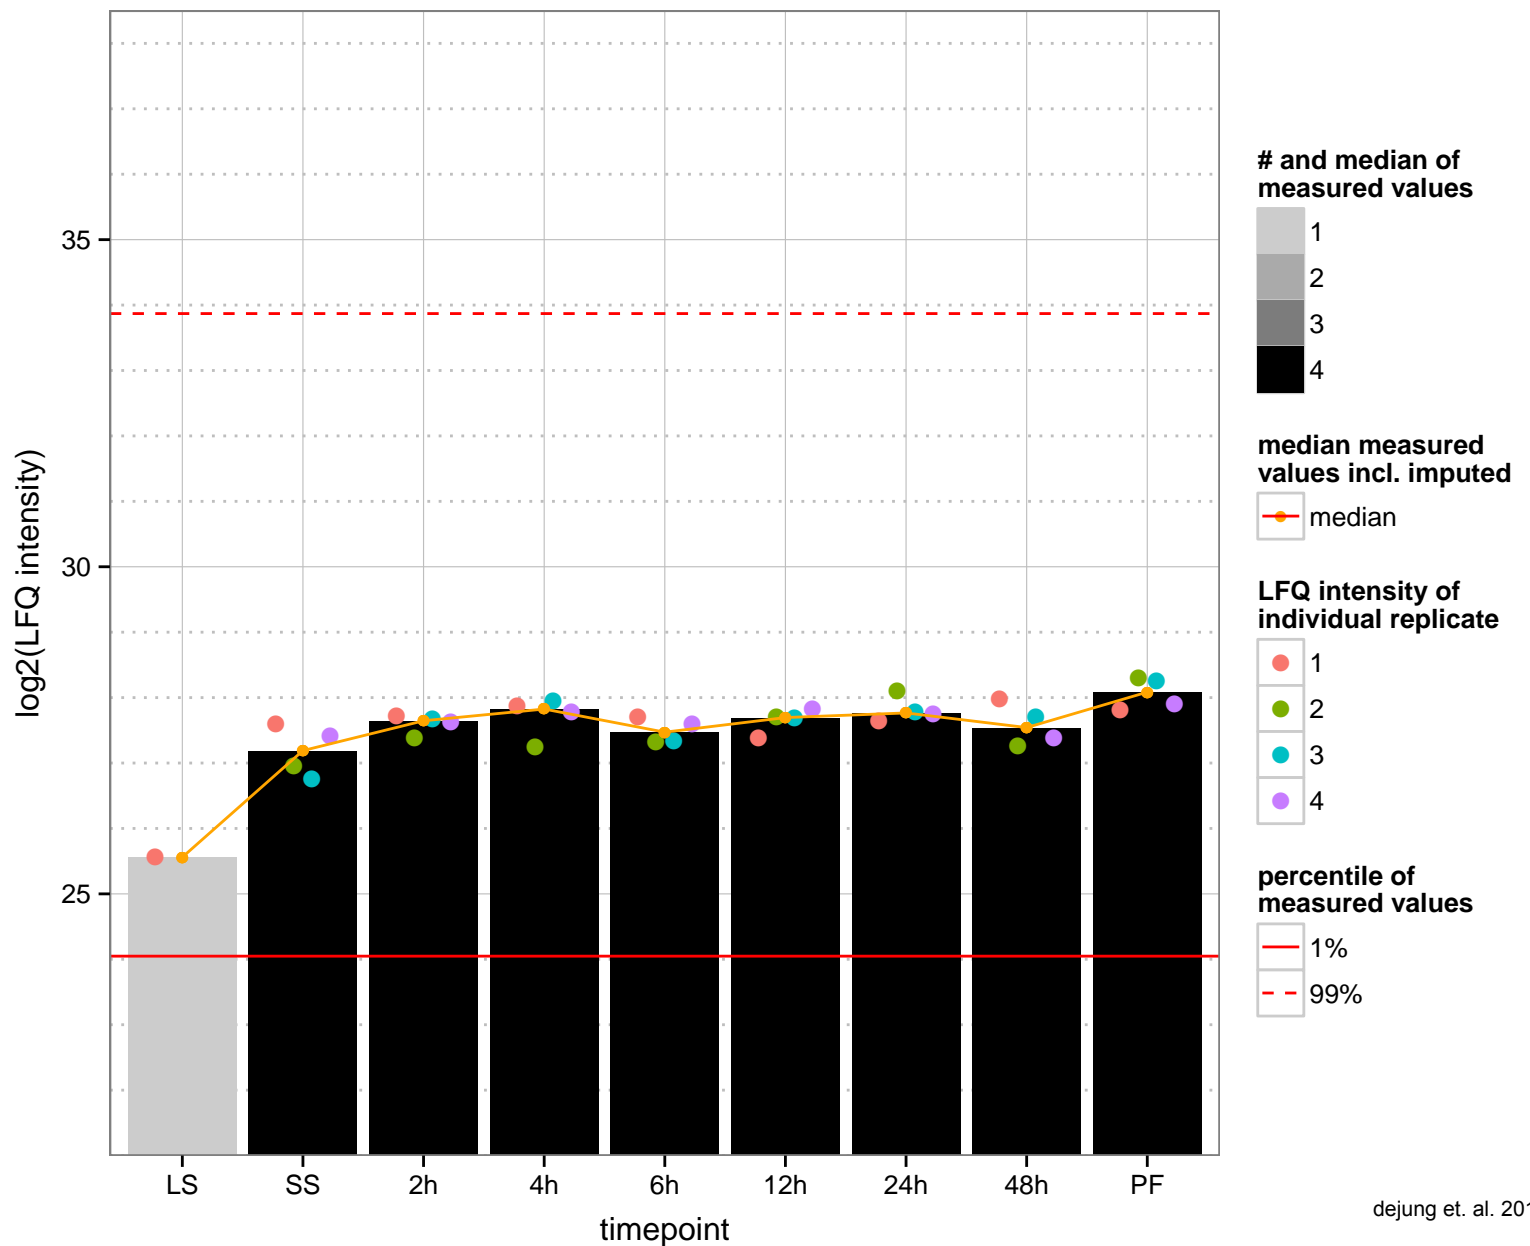

hypothetical protein, conserved  
 Tb927.9.10530  
 AGOF: null  
 AGOC: null  
 AGOP: null  
 PGOF: null  
 PGO: null  
 PGOP: null

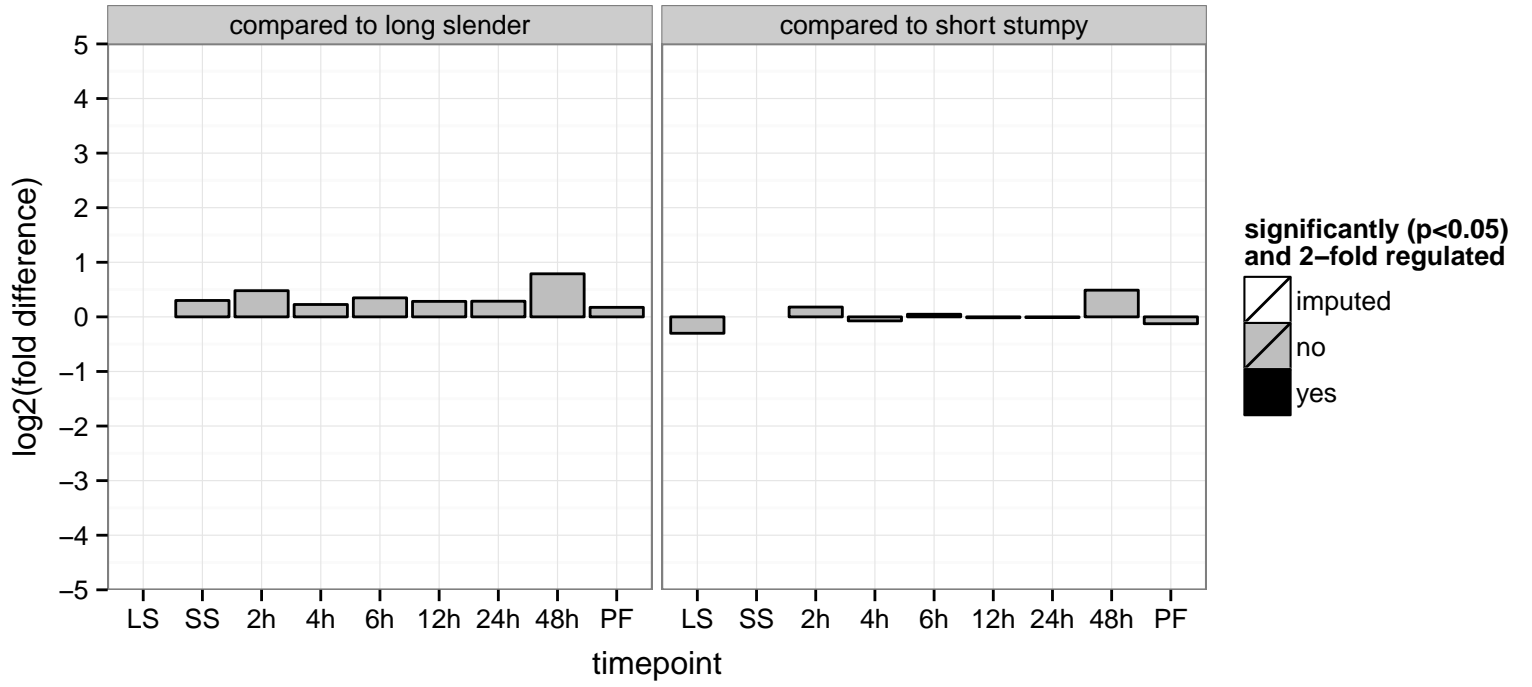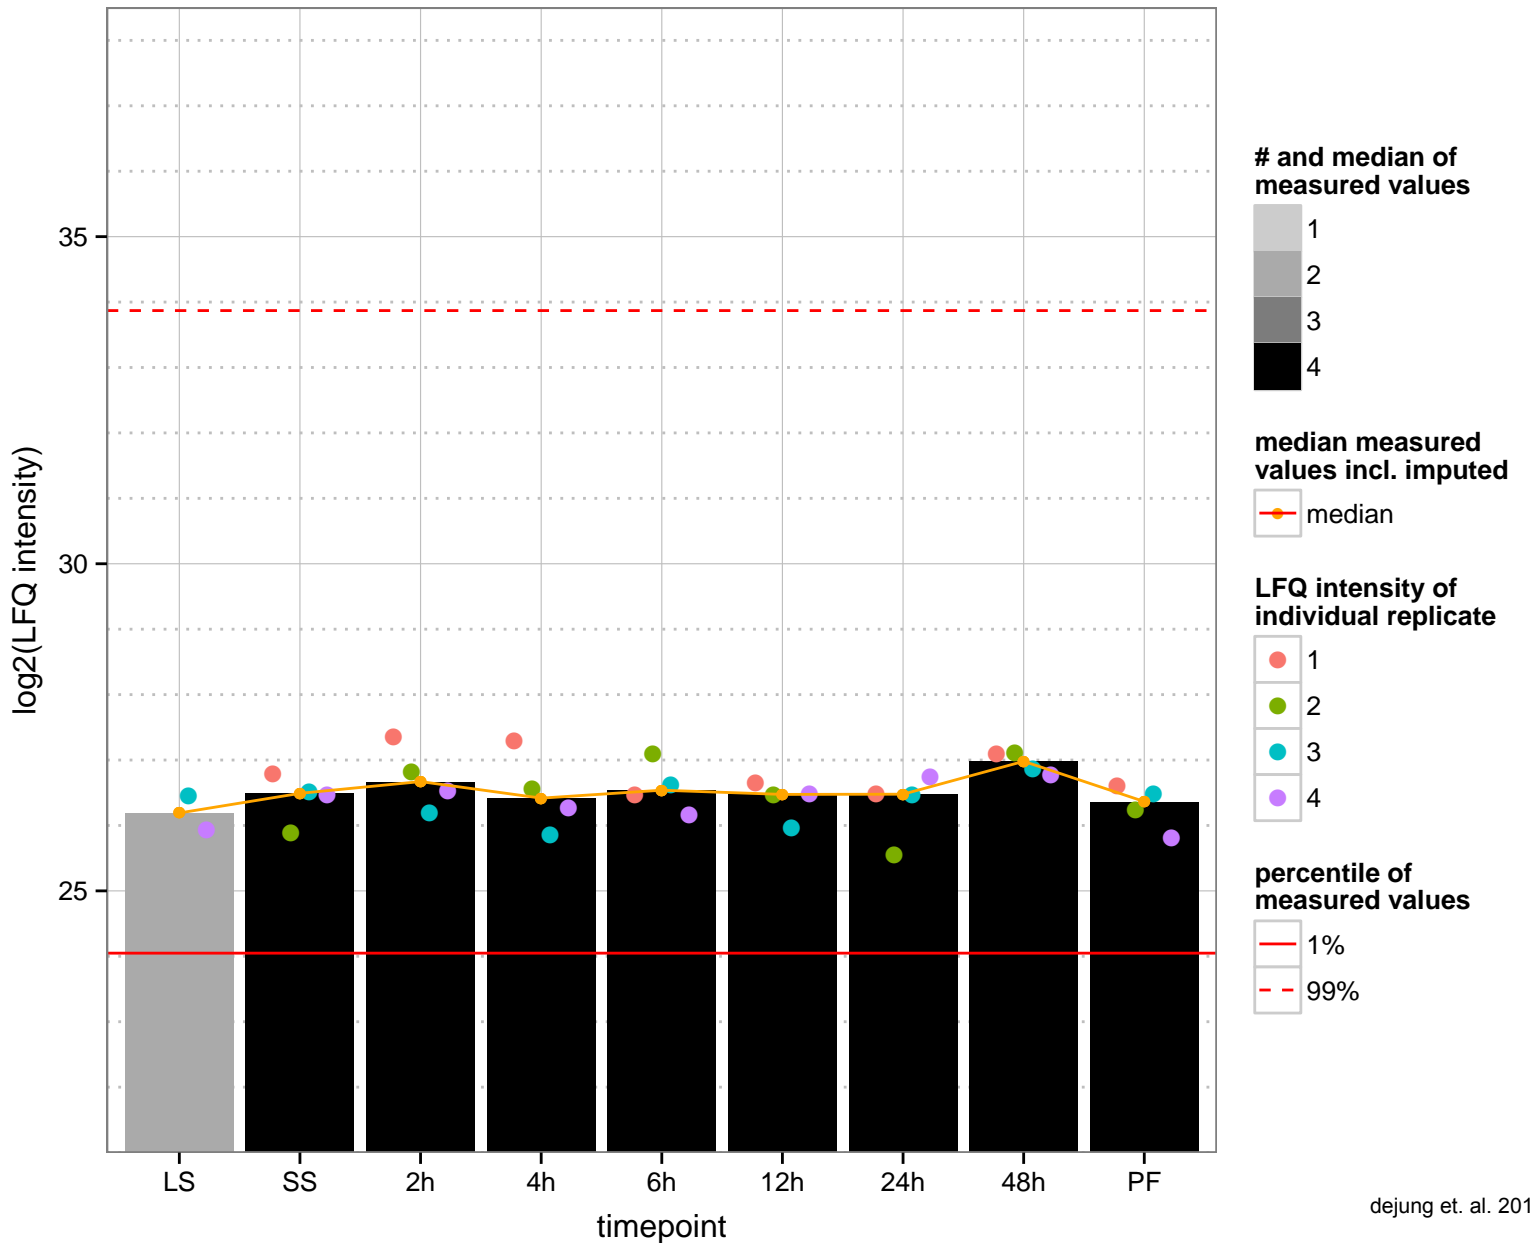

predicted zinc finger protein  
 Tb927.9.10570  
 AGOF: zinc ion binding  
 AGOC: null  
 AGOP: null  
 PGOF: metal ion binding  
 PGOC: null  
 PGOP: null

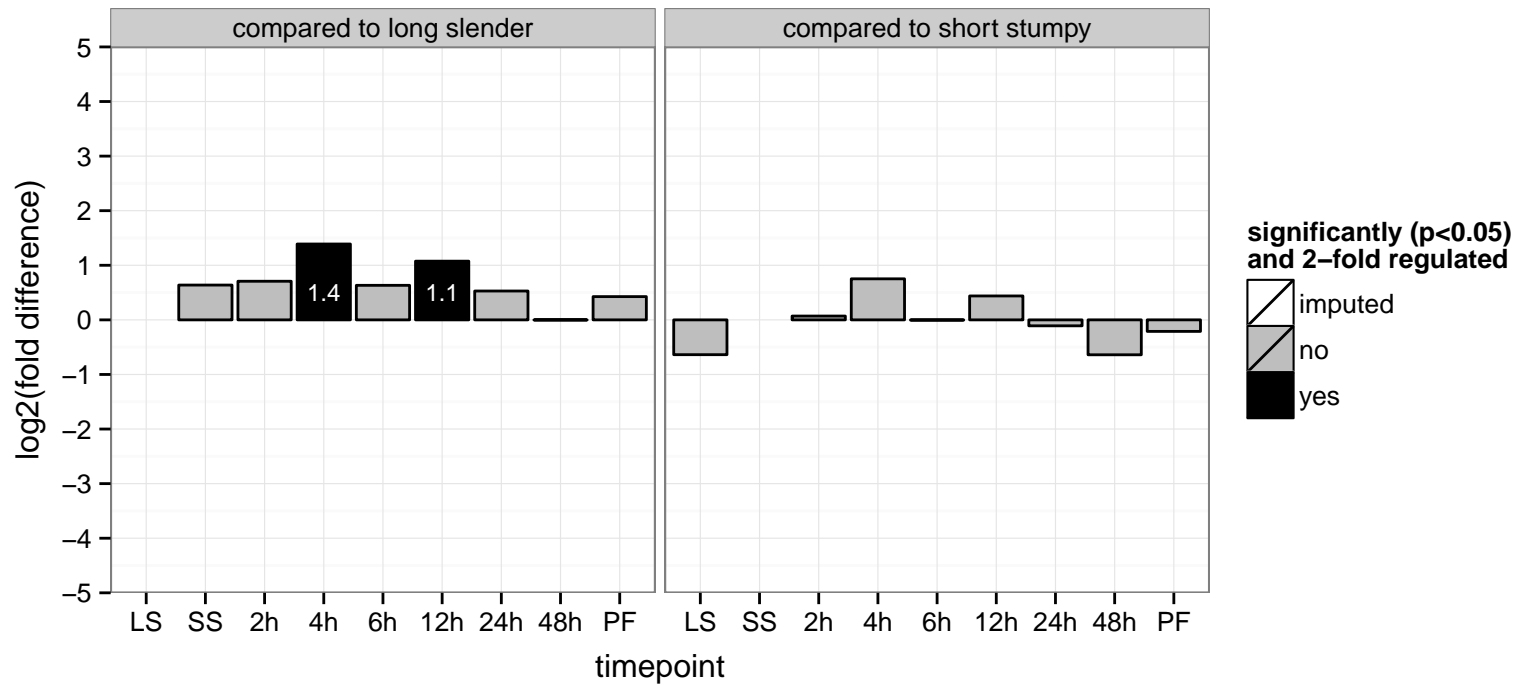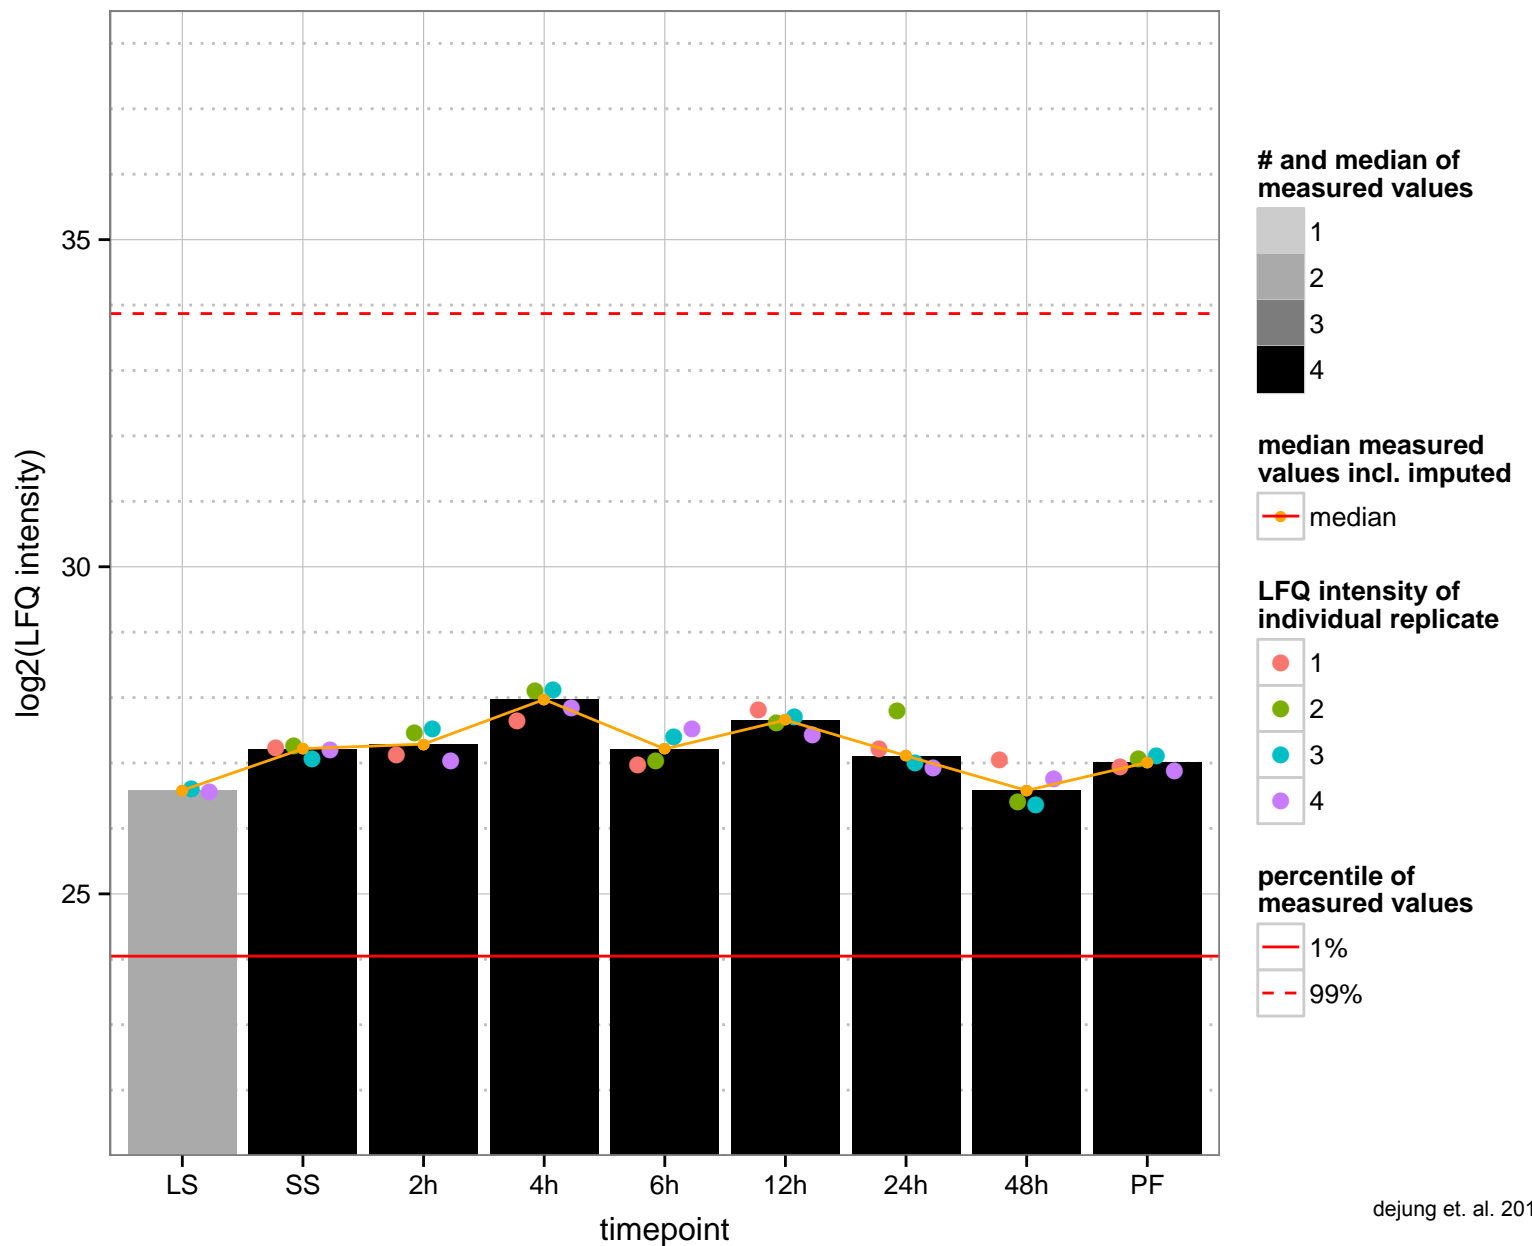

3-demethylubiquinone-9 3-methyltransferase, putative

Tb927.9.10580

AGOF: 2-polyprenyl-6-methoxy-1, 4-benzoquinone methyltransferase activity, hexaprenyldihydroxybenzoate methyltransferase activity

AGOC: mitochondrial membrane, mitochondrion

AGOP: ubiquinone biosynthetic process, ubiquinone metabolic process

PGOF: 2-polyprenyl-6-methoxy-1, 4-benzoquinone methyltransferase activity

PGOC: null

PGOP: ubiquinone biosynthetic process

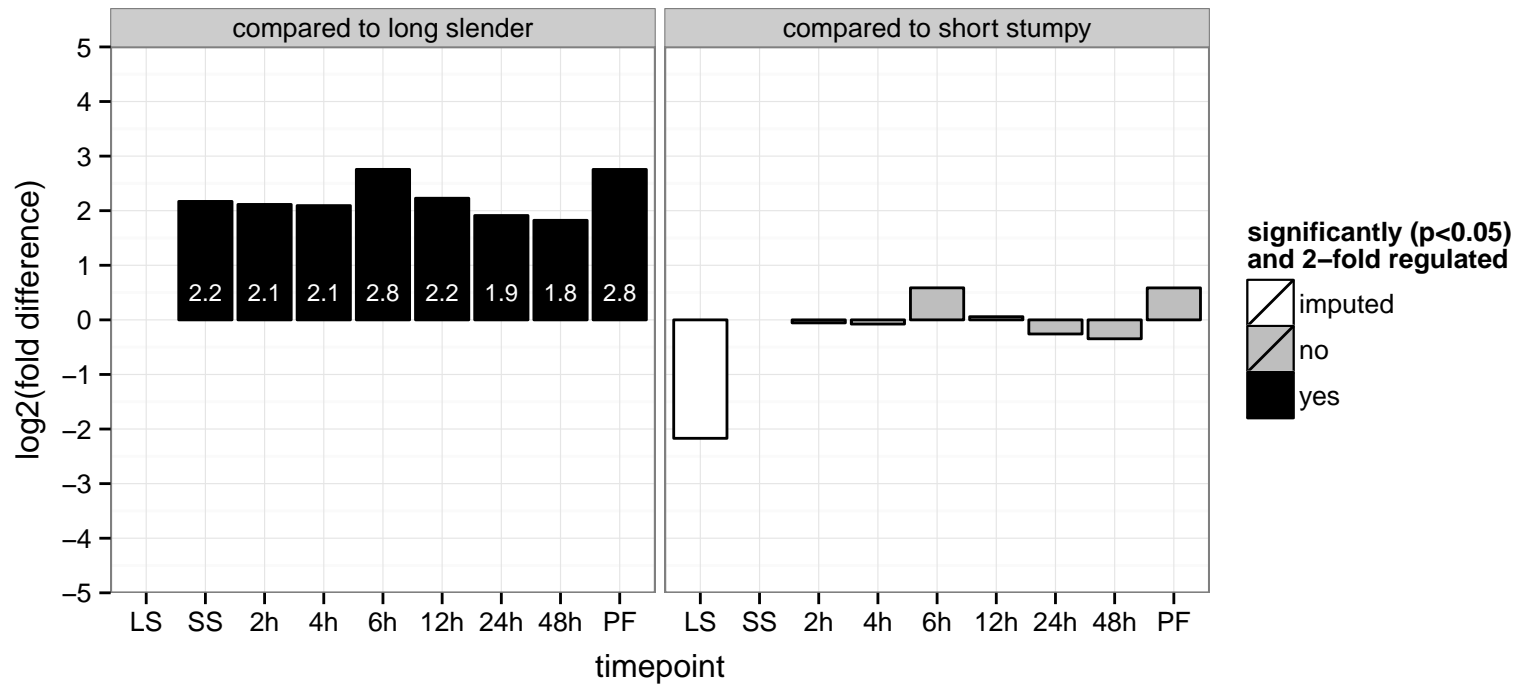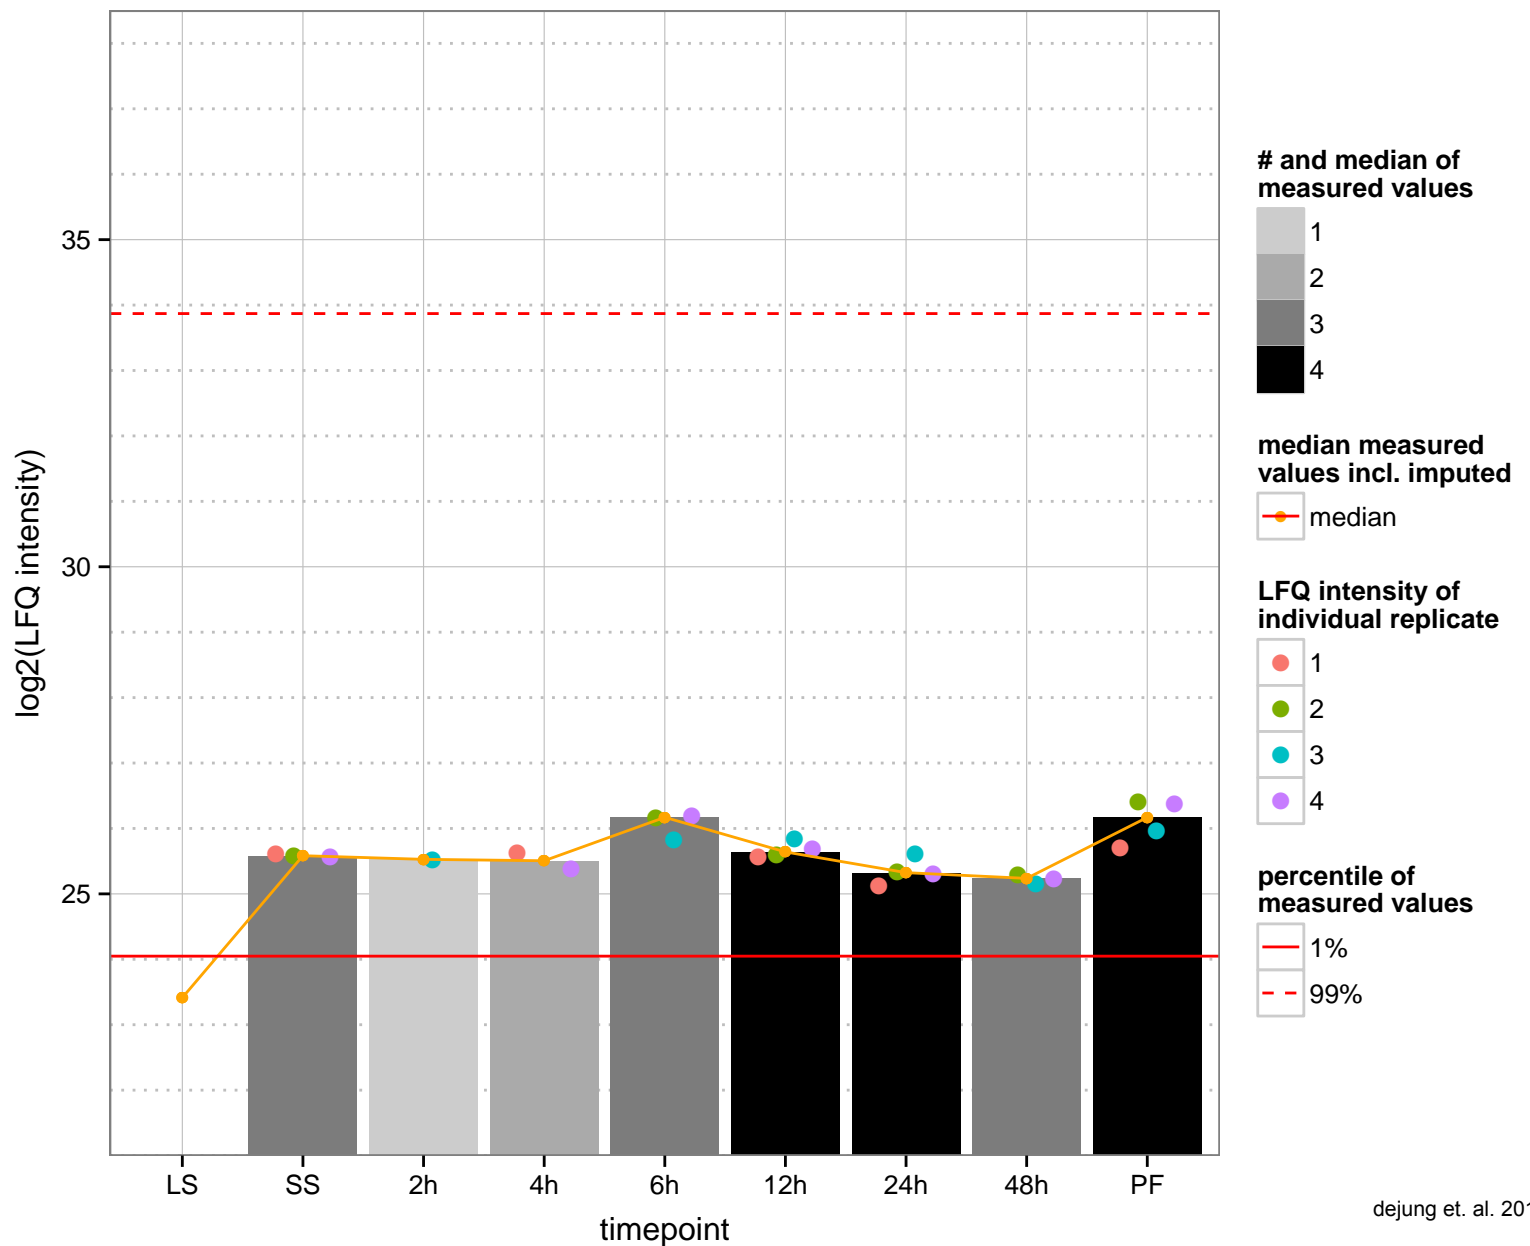

hypothetical protein, conserved  
 Tb927.9.10680  
 AGOF: null  
 AGOC: null  
 AGOP: null  
 PGO: DNA binding, DNA-directed RNA polymerase activity  
 PGOC: DNA-directed RNA polymerase III complex  
 PGOP: transcription from RNA polymerase III promoter

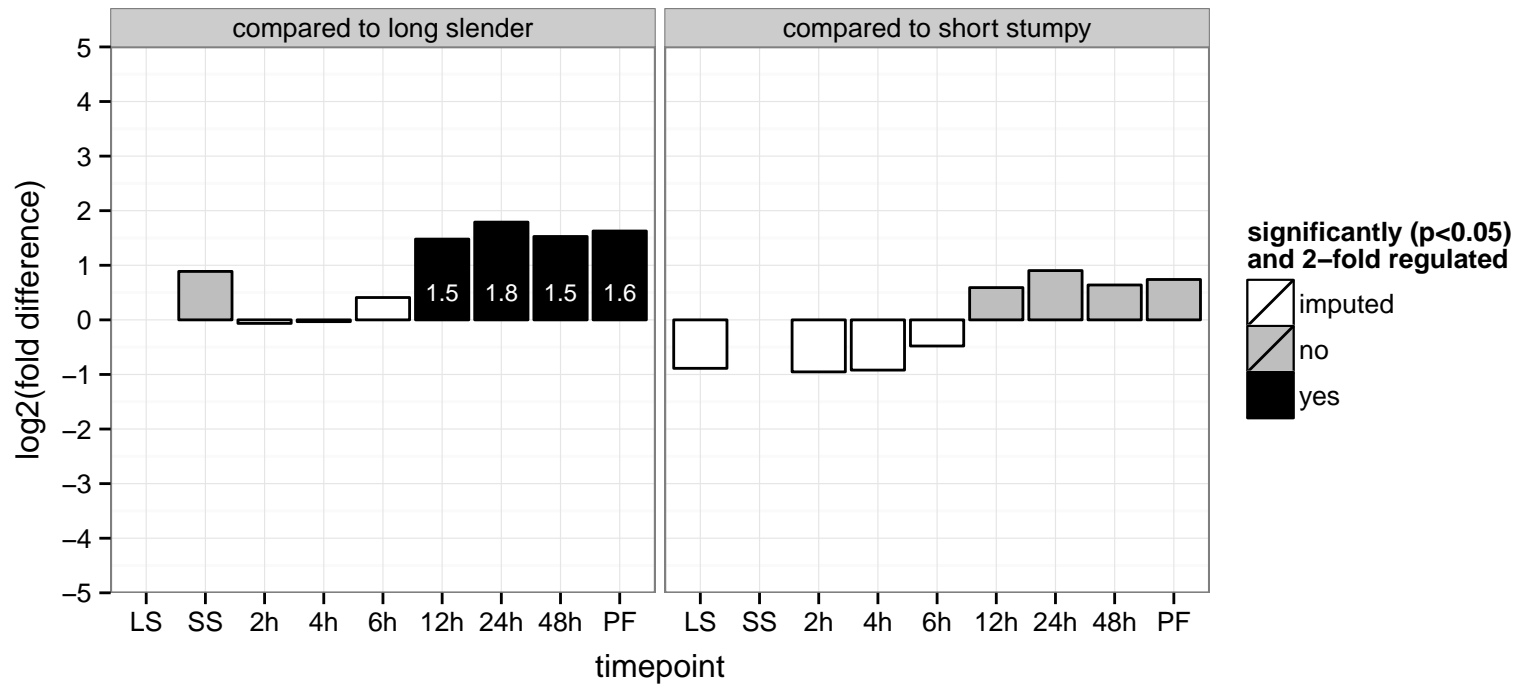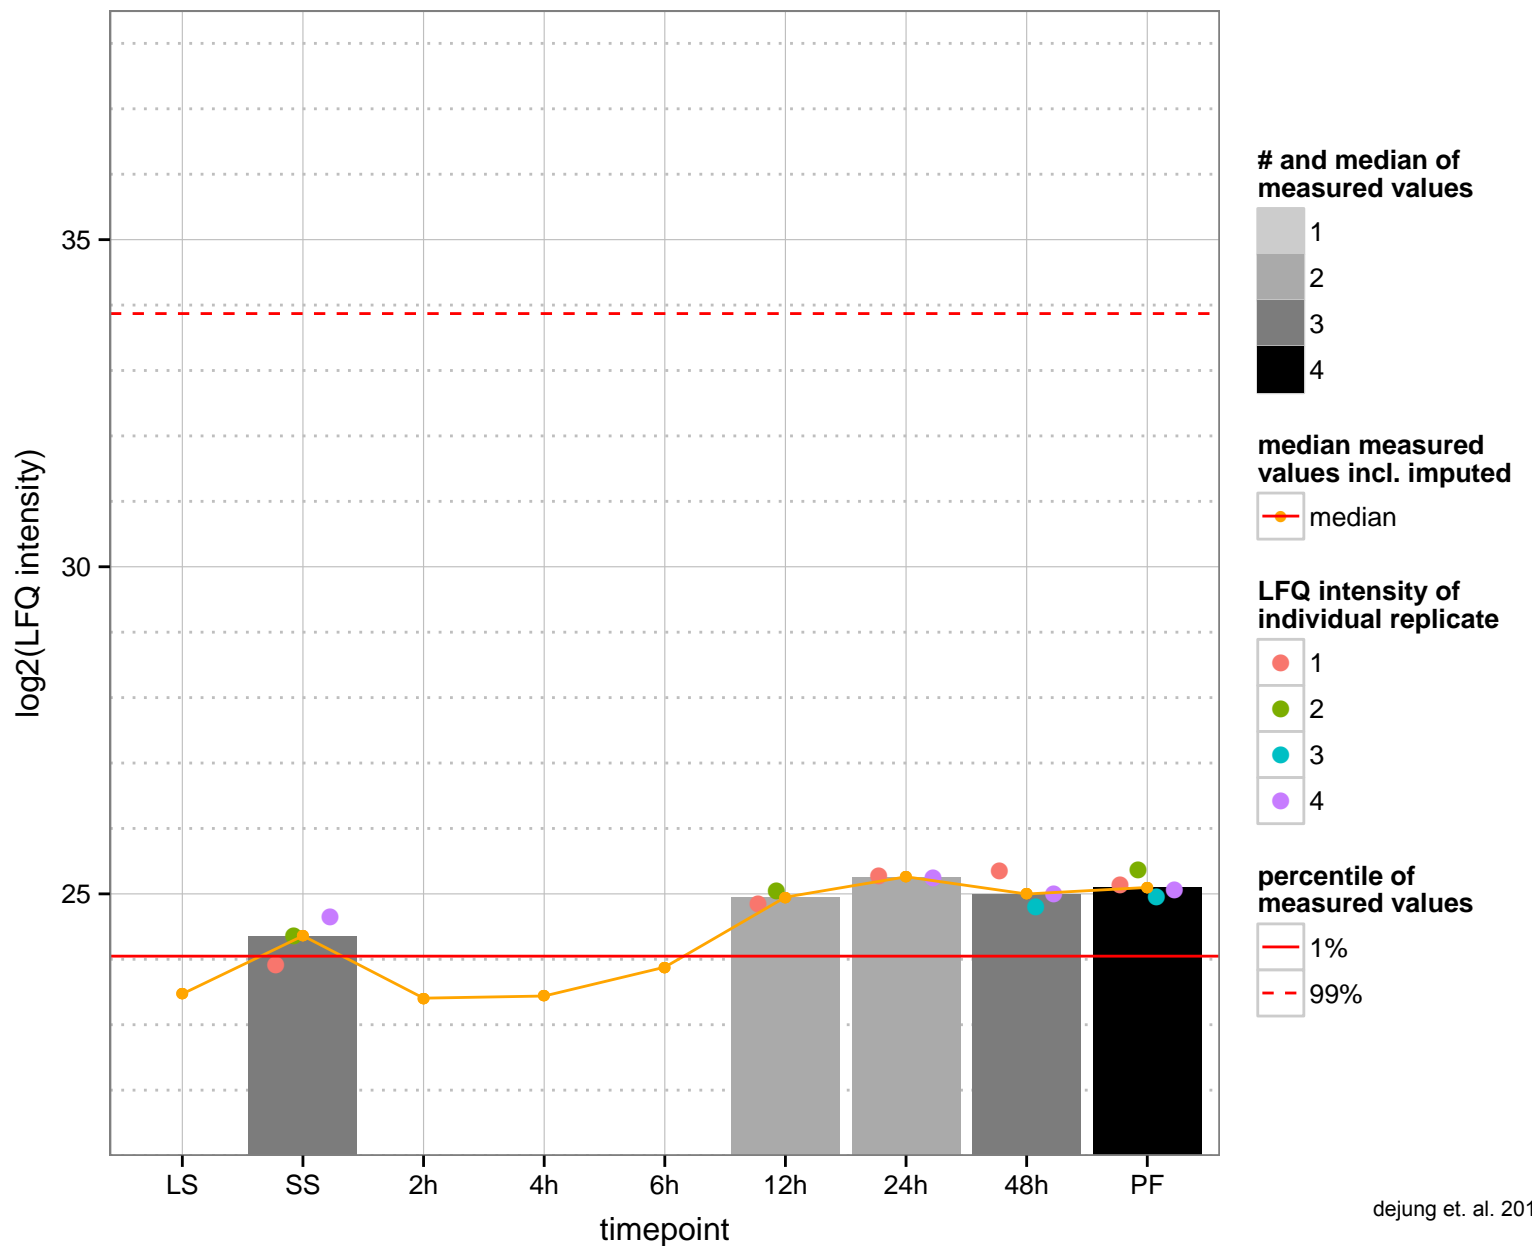

hypothetical protein, conserved  
 Tb927.9.10690  
 AGOF: null  
 AGOC: null  
 AGOP: null  
 PGOF: null  
 PGO: null  
 PGOP: null

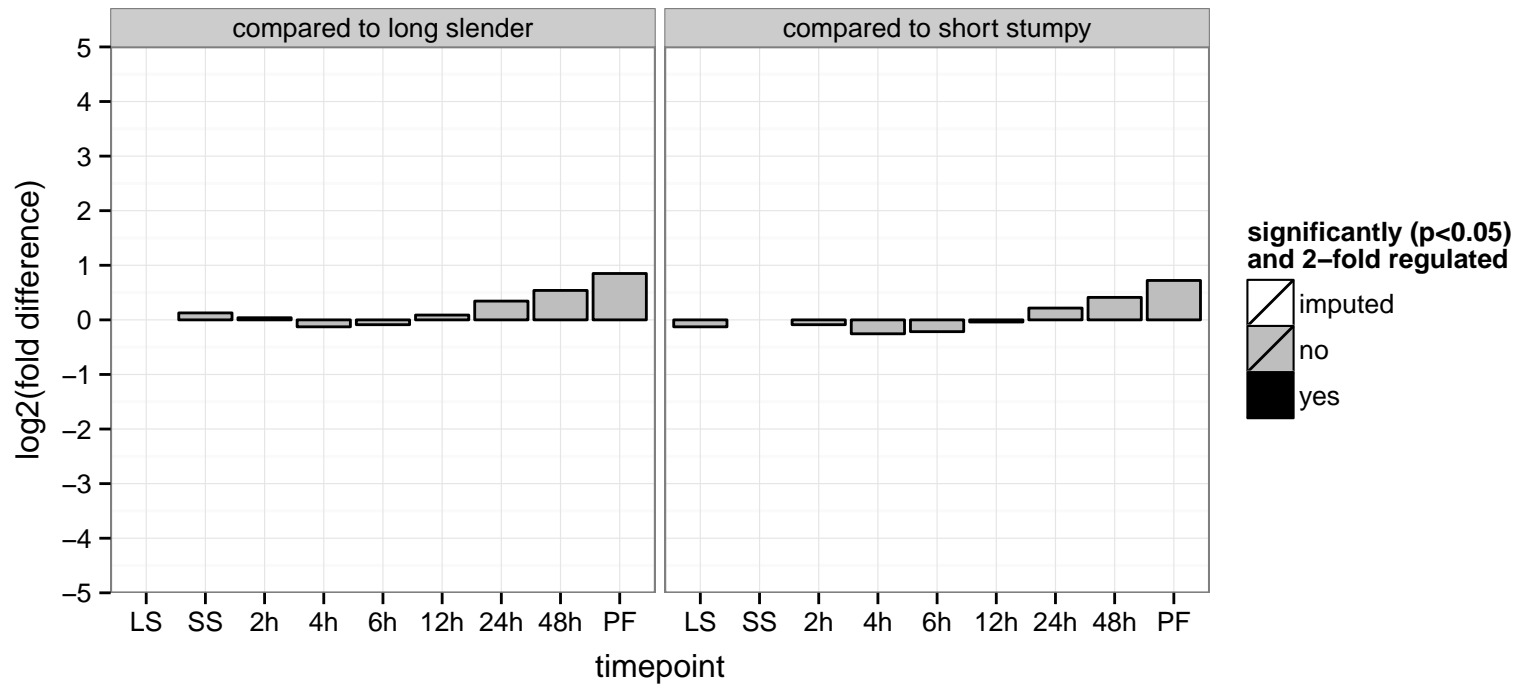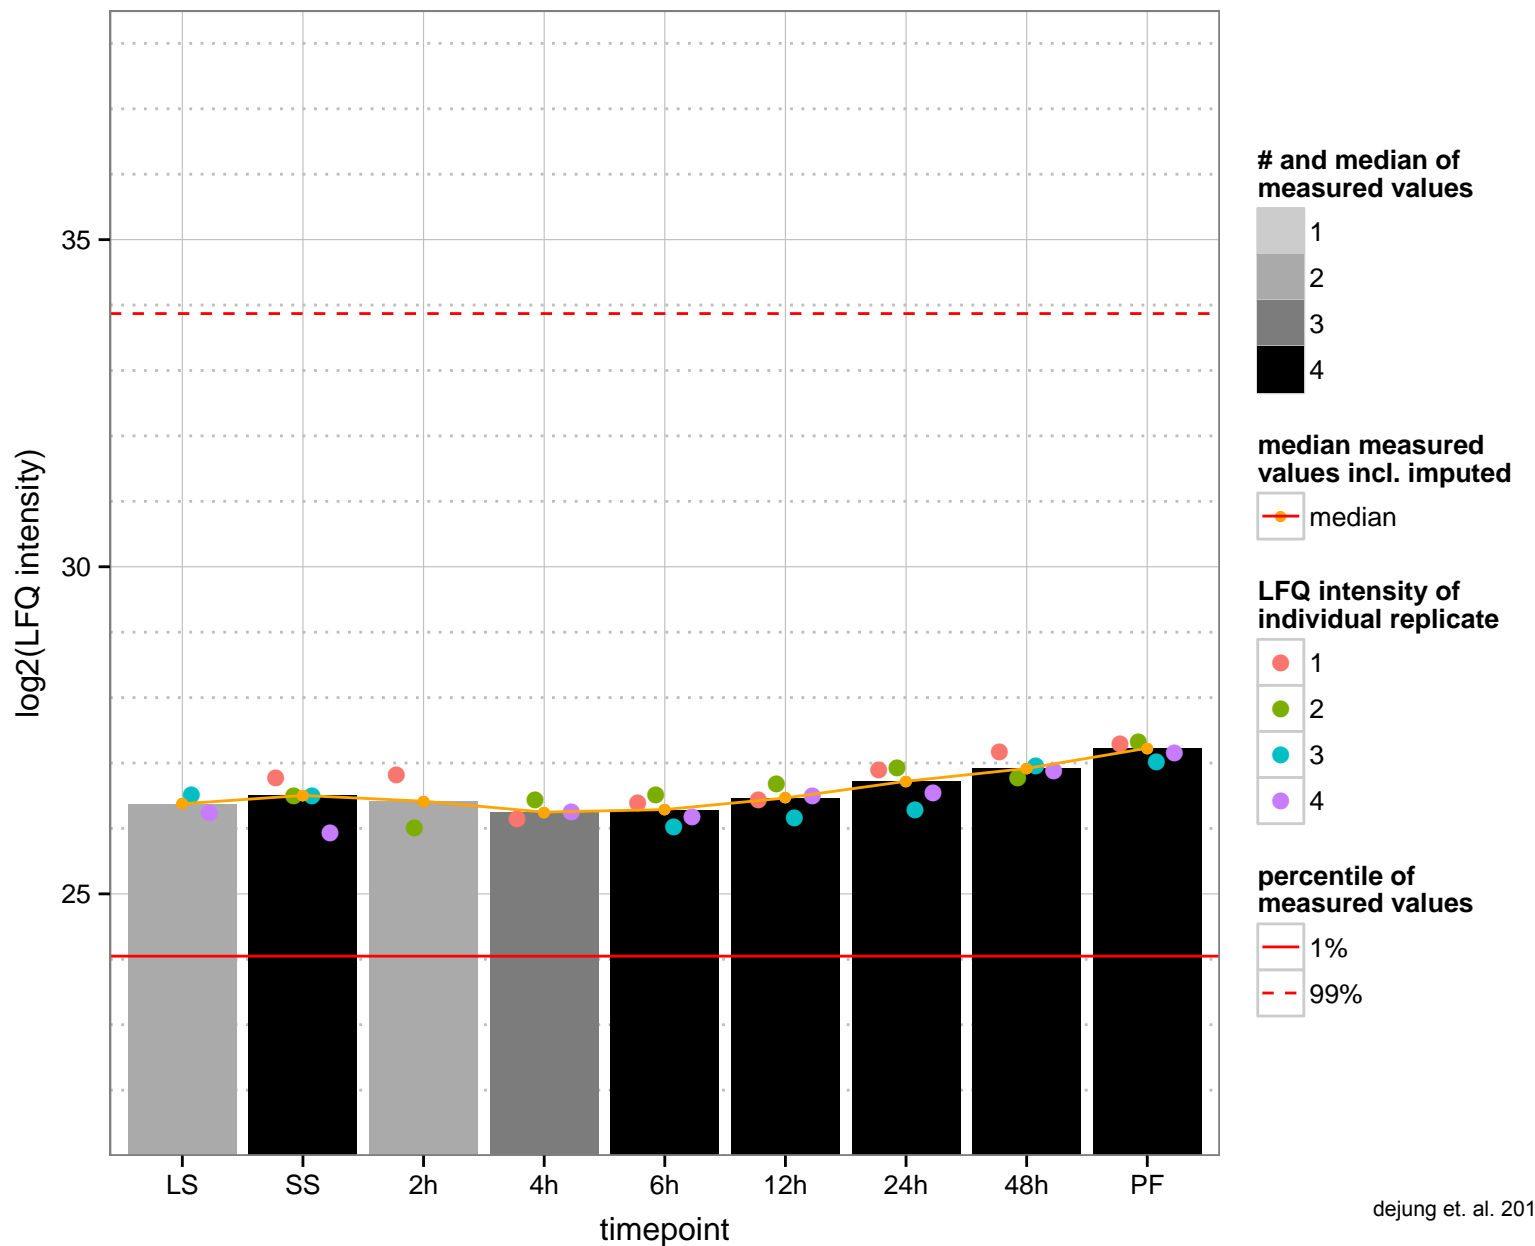



hypothetical protein, conserved  
 Tb927.9.10890  
 AGOF: cAMP-dependent protein kinase regulator activity  
 AGOC: null  
 AGOP: signal transduction  
 PGOF: cAMP-dependent protein kinase regulator activity  
 PGO: null  
 PGO: null  
 PGO: null

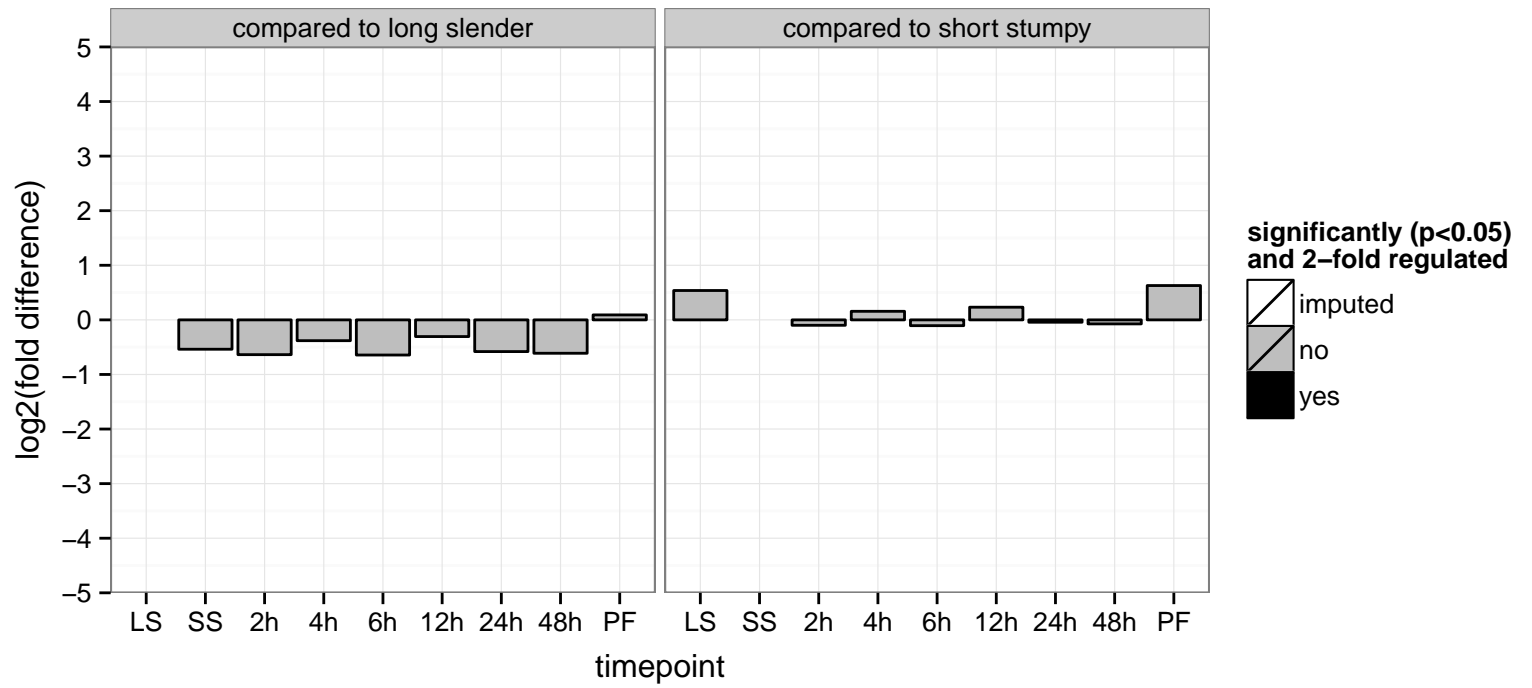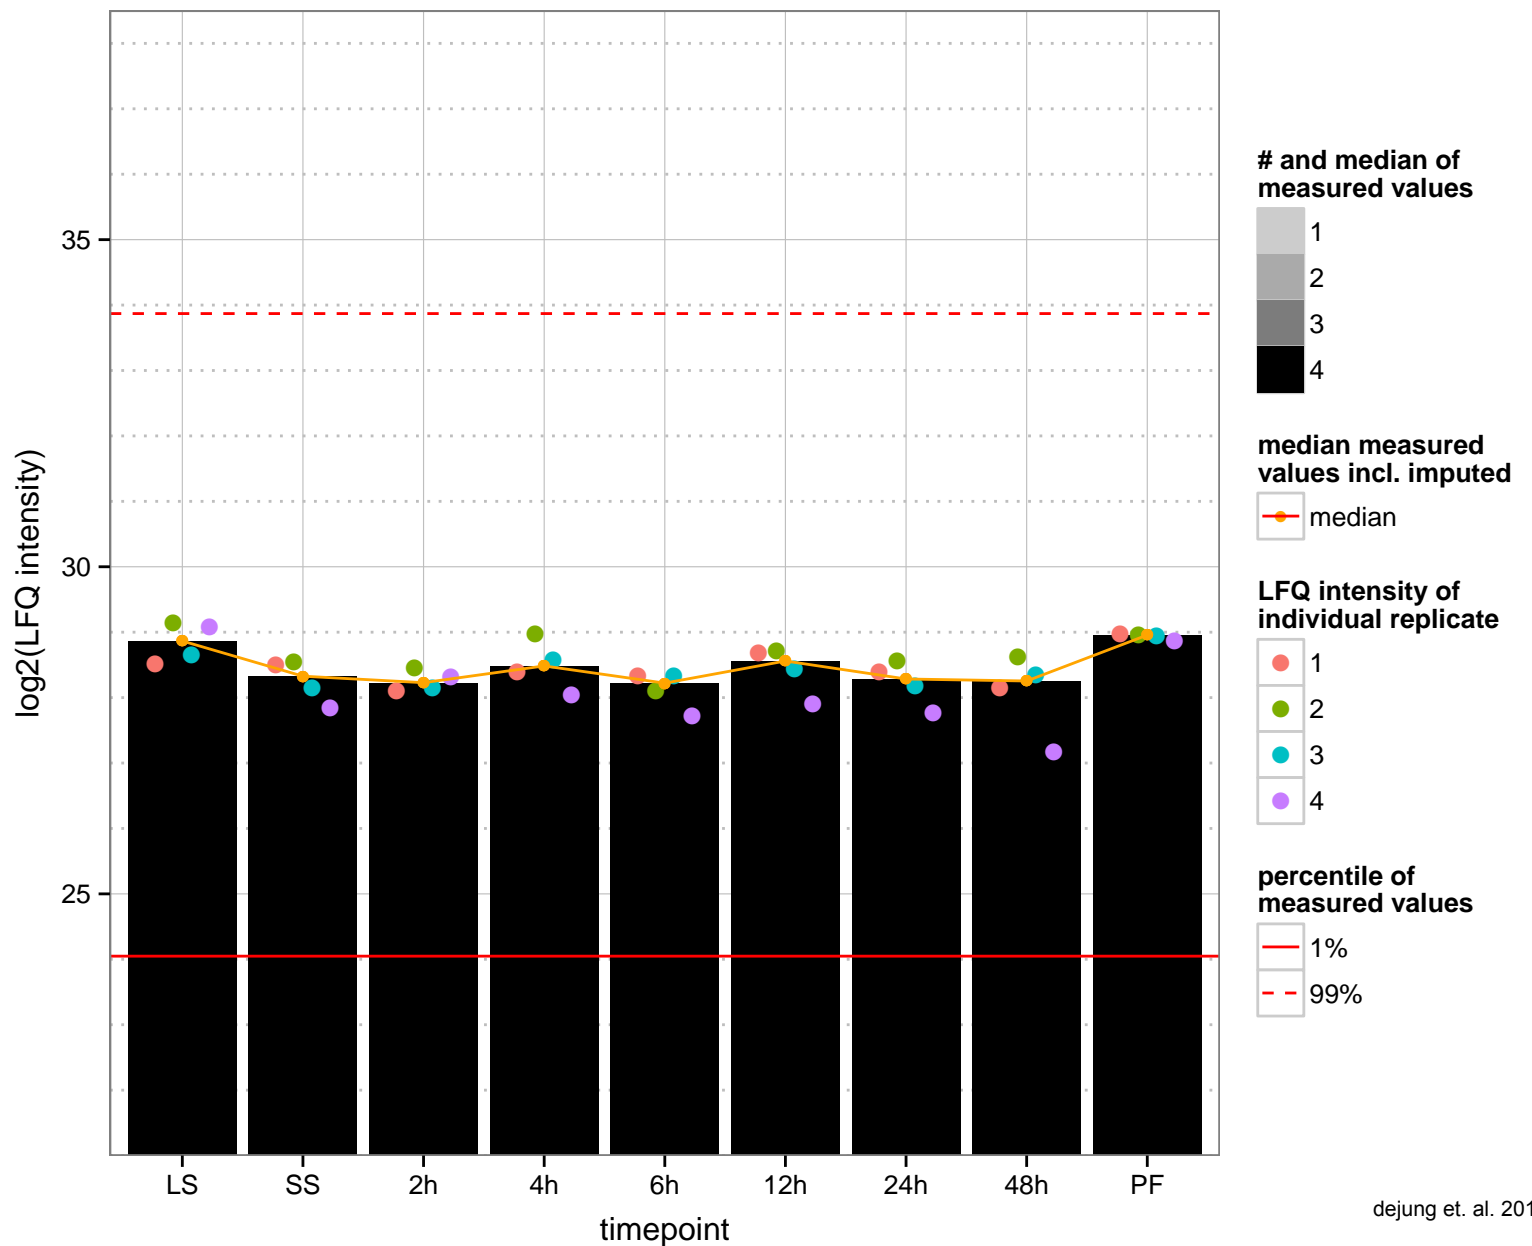

ATP-dependent DEAD/H RNA helicase, putative

Tb927.9.10960

AGOF: ATP binding, ATP-dependent helicase activity, helicase activity, nucleic acid binding

AGOC: null

AGOP: nucleobase-containing compound metabolic process

PGOF: ATP binding, ATP-dependent helicase activity, helicase activity, nucleic acid binding

PGOC: null

PGOP: null

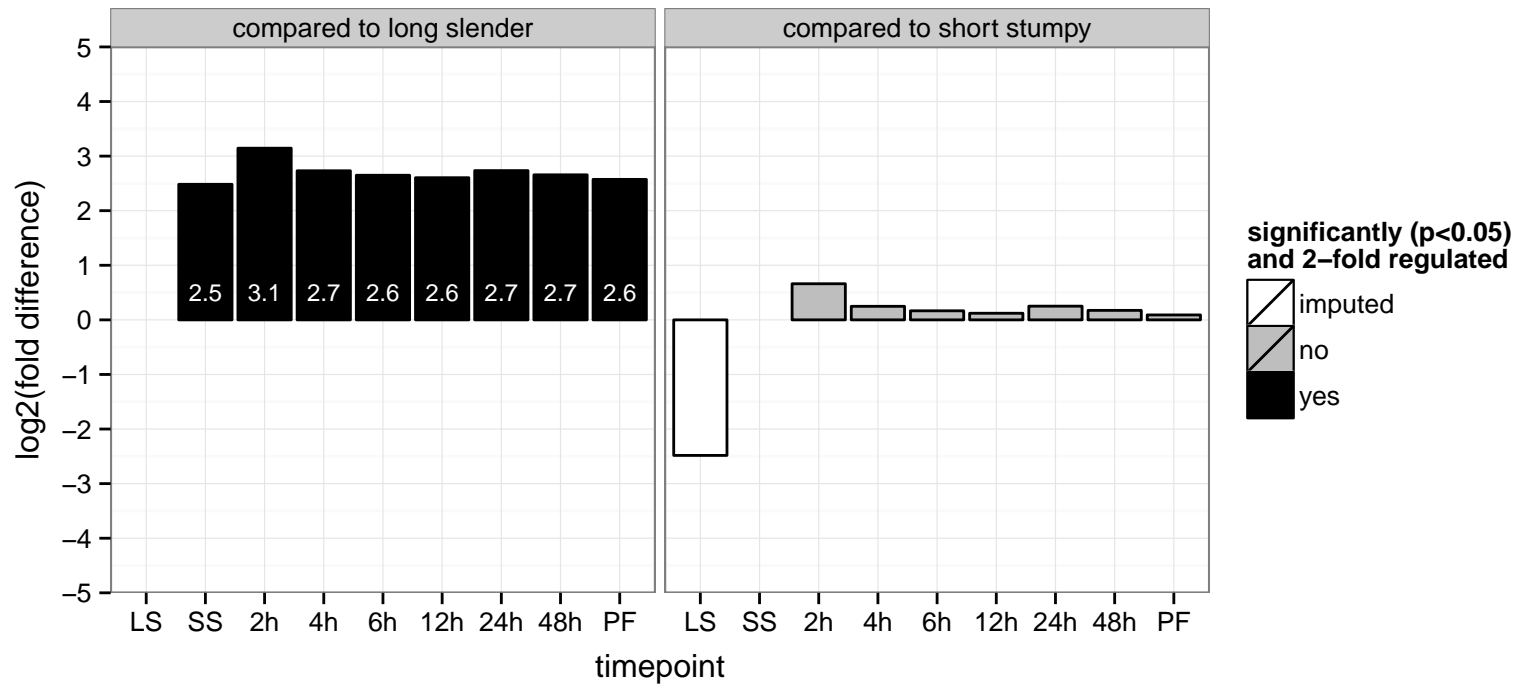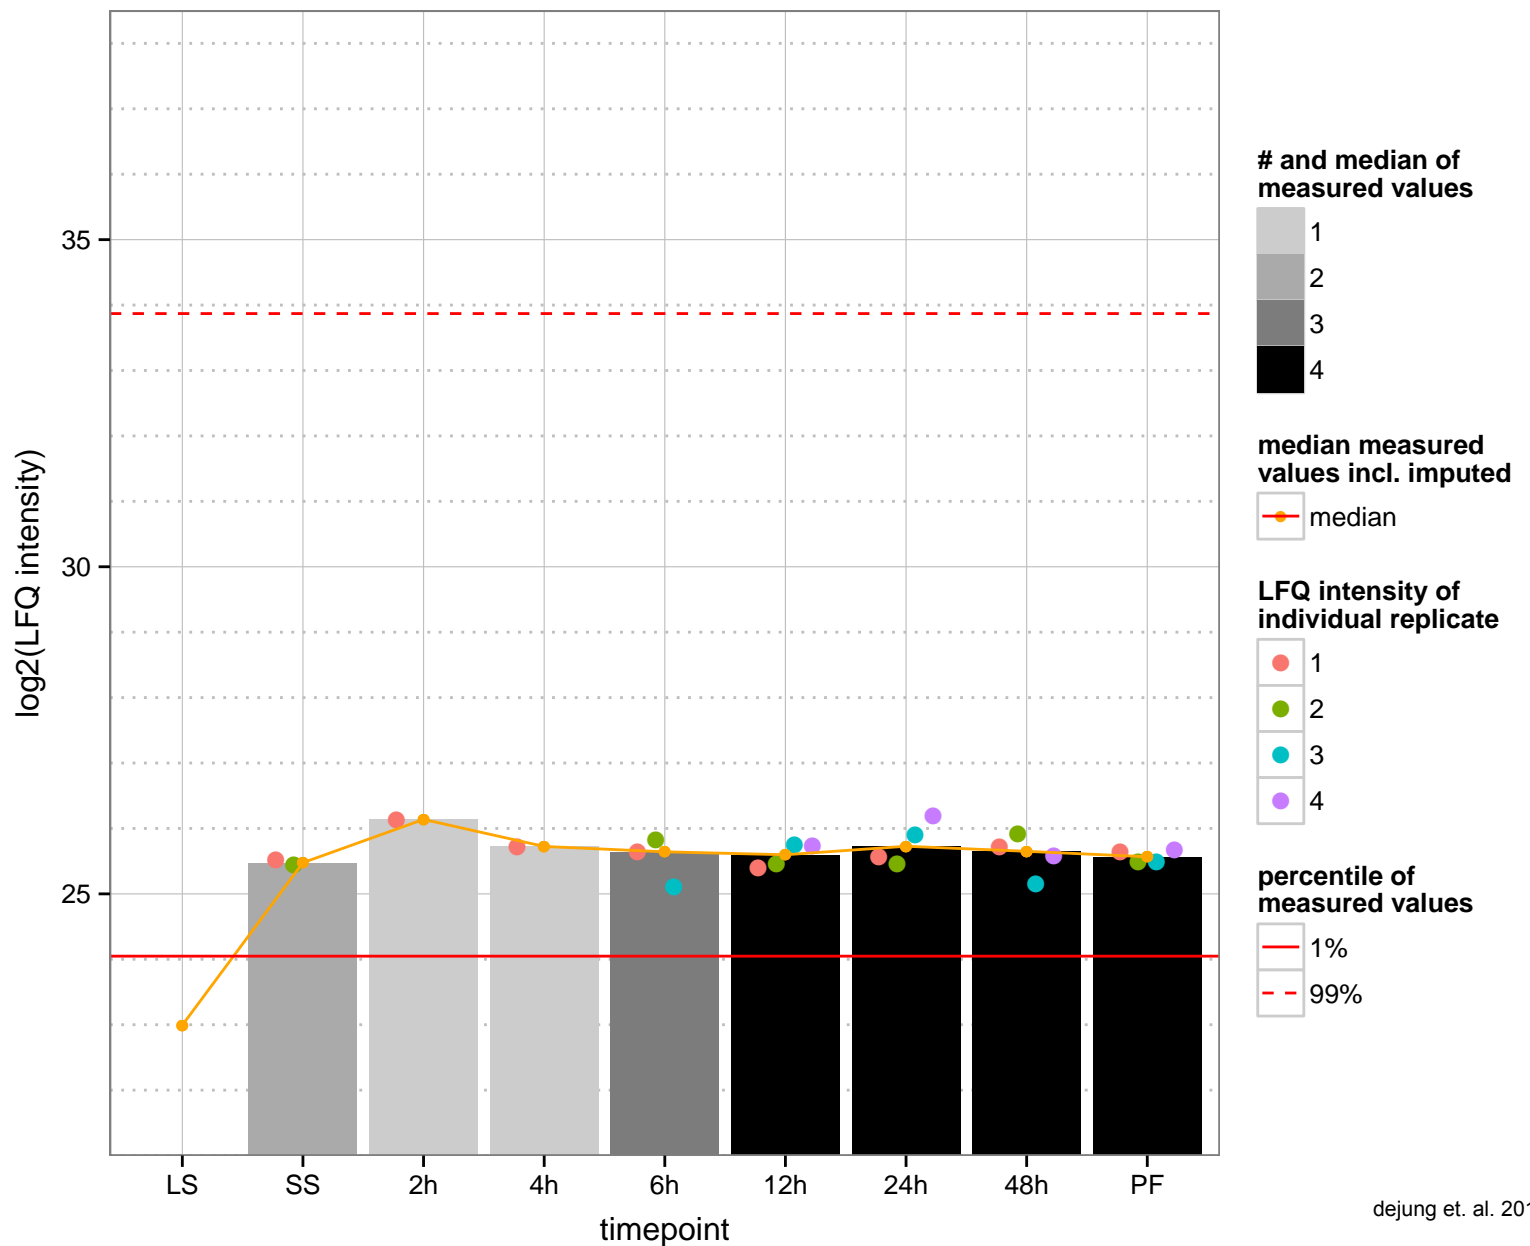

mitochondrial carrier protein (MCP3)  
 Tb927.9.11040  
 AGOF: null  
 AGOC: mitochondrial inner membrane, mitochondrial part  
 AGOP: transport  
 PGO: null  
 PGOC: null  
 PGOP: null

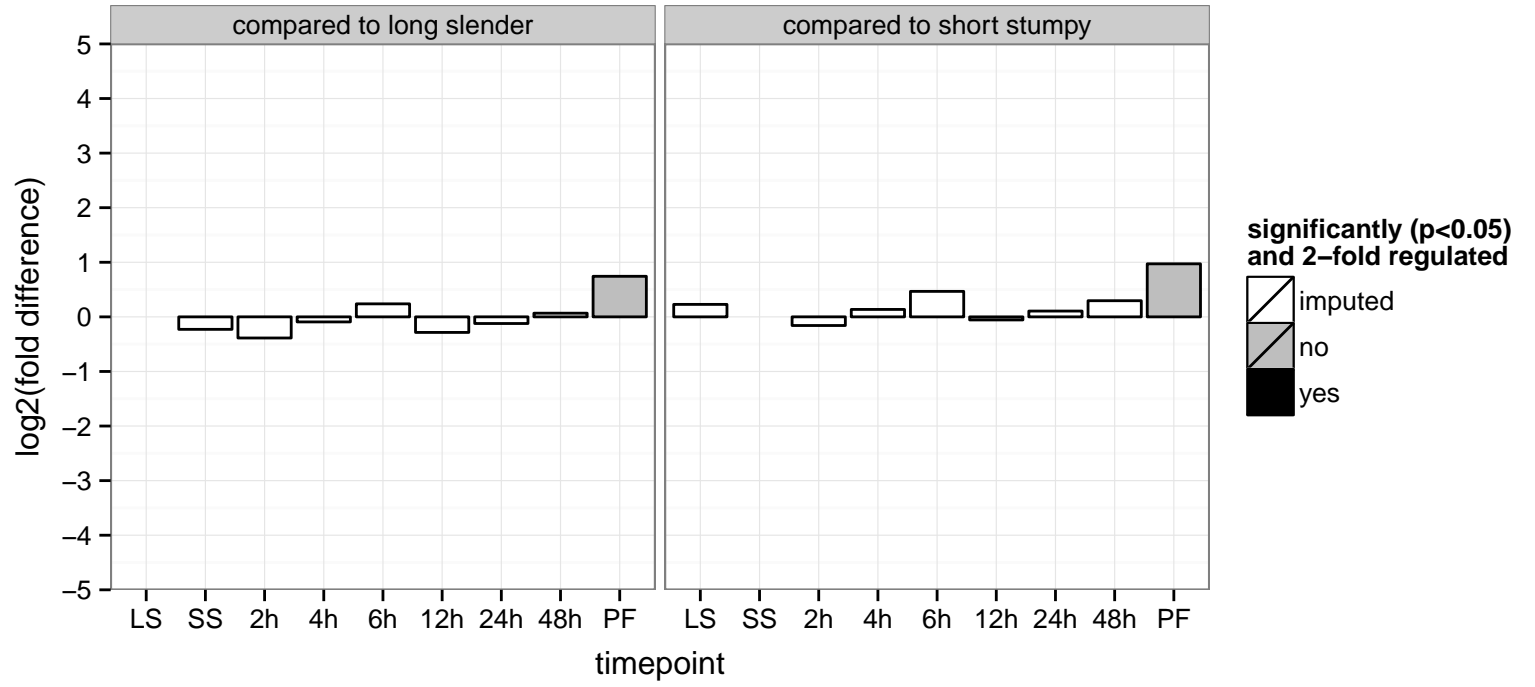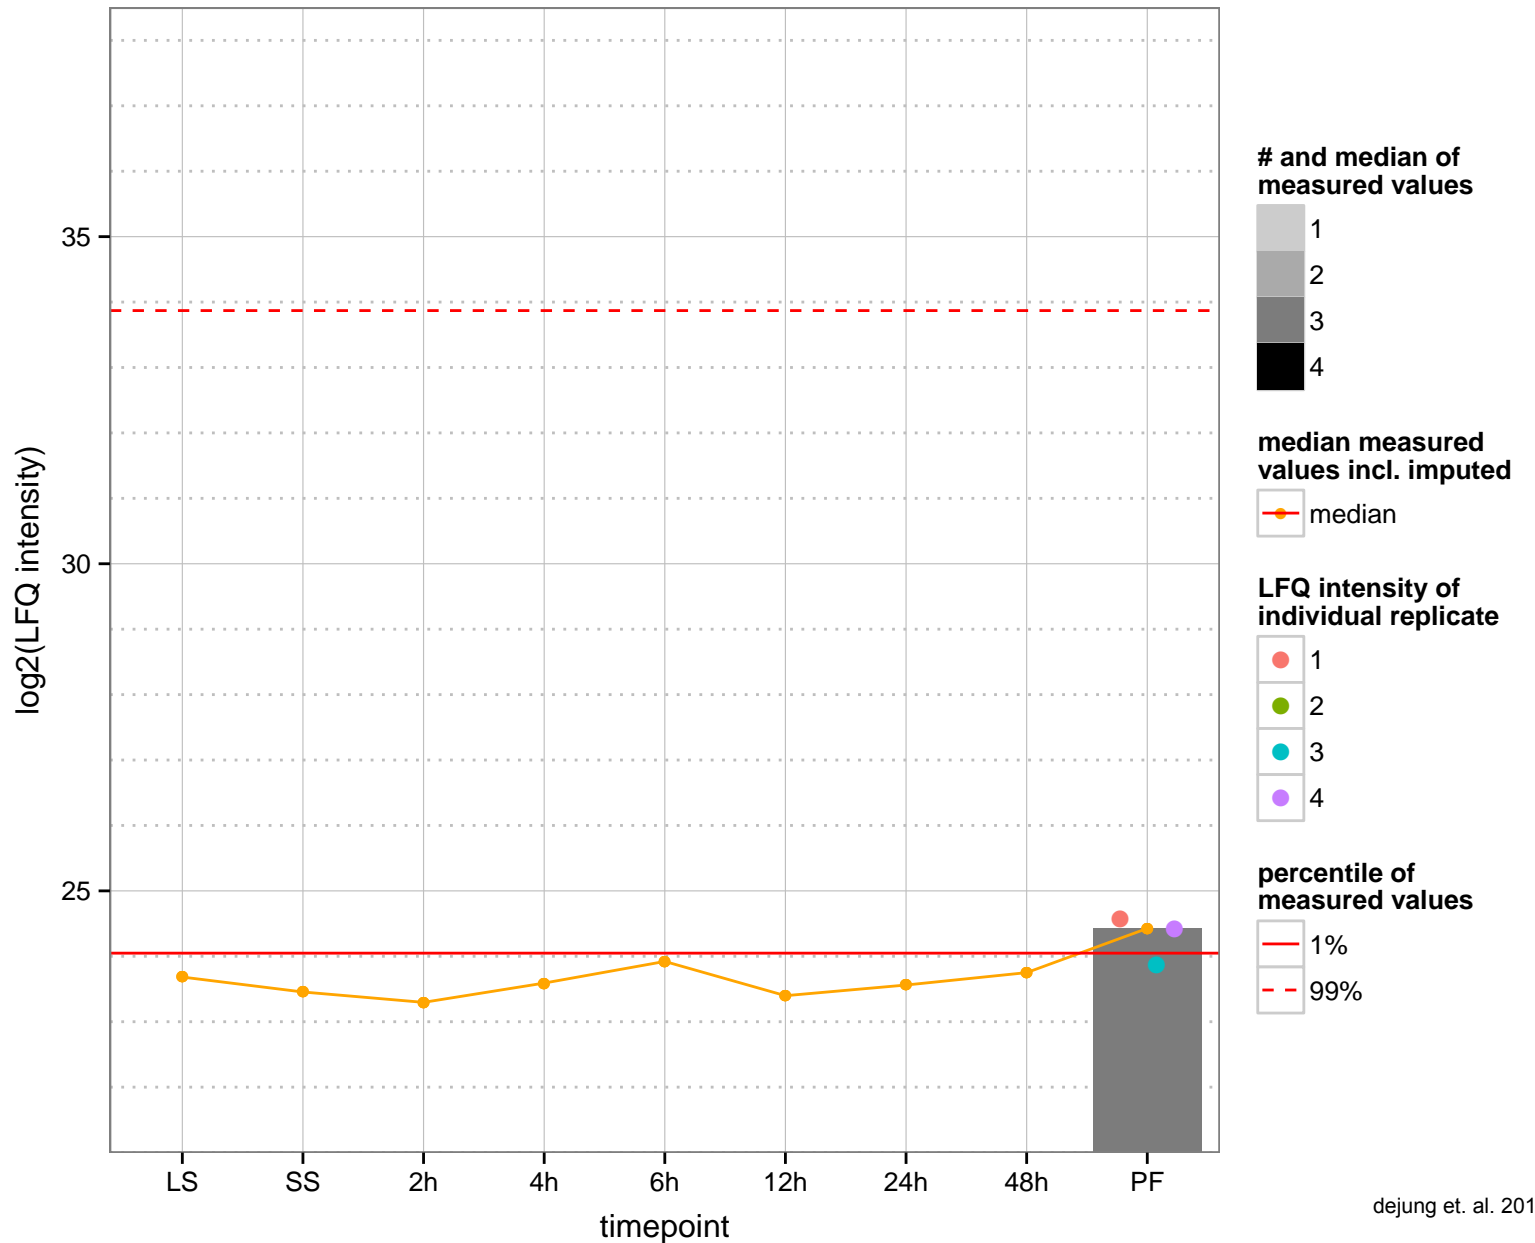

PRP8 protein homologue, U5 snRNA-associated splicing factor  
 Tb927.9.11110  
 AGOF: null  
 AGOC: spliceosomal complex  
 AGOP: nuclear mRNA splicing, via spliceosome  
 PGO: nucleic acid binding, protein binding  
 PGO: spliceosomal complex  
 PGO: nuclear mRNA splicing, via spliceosome

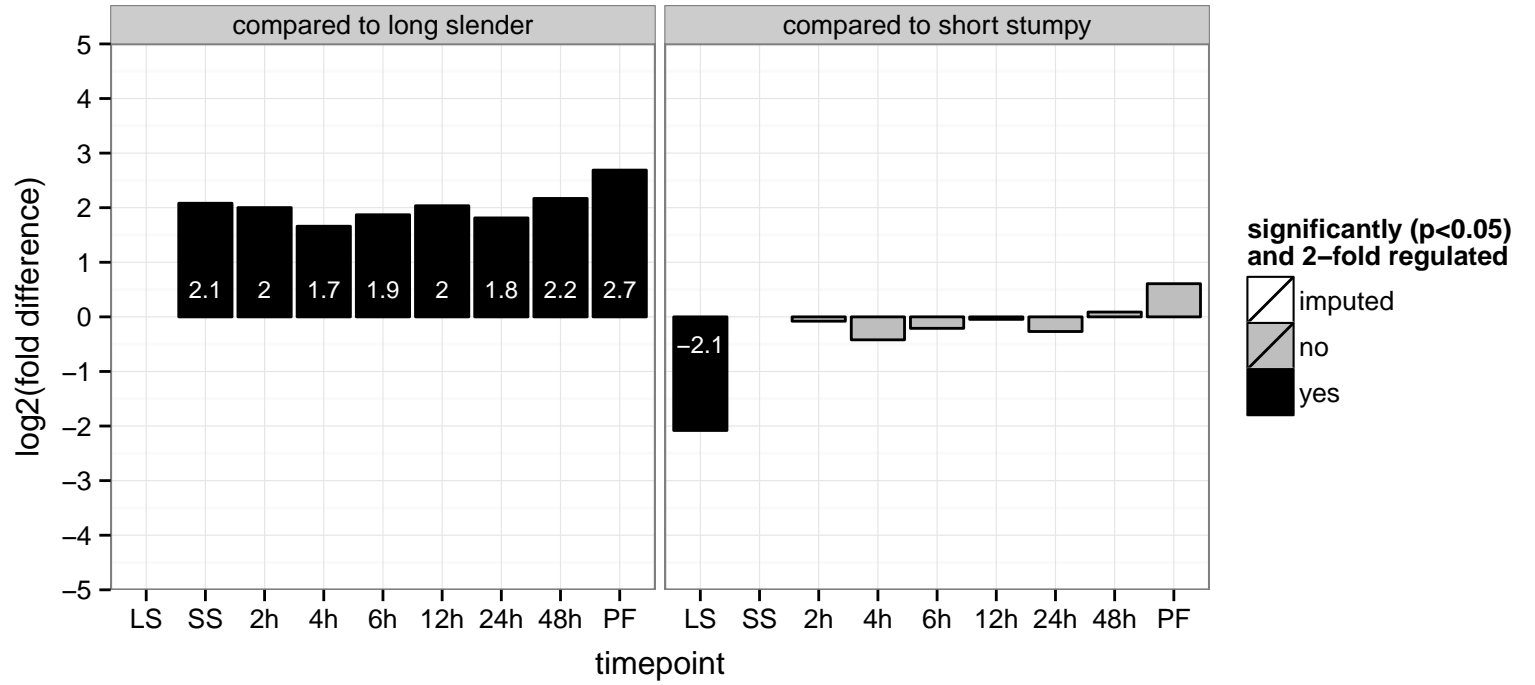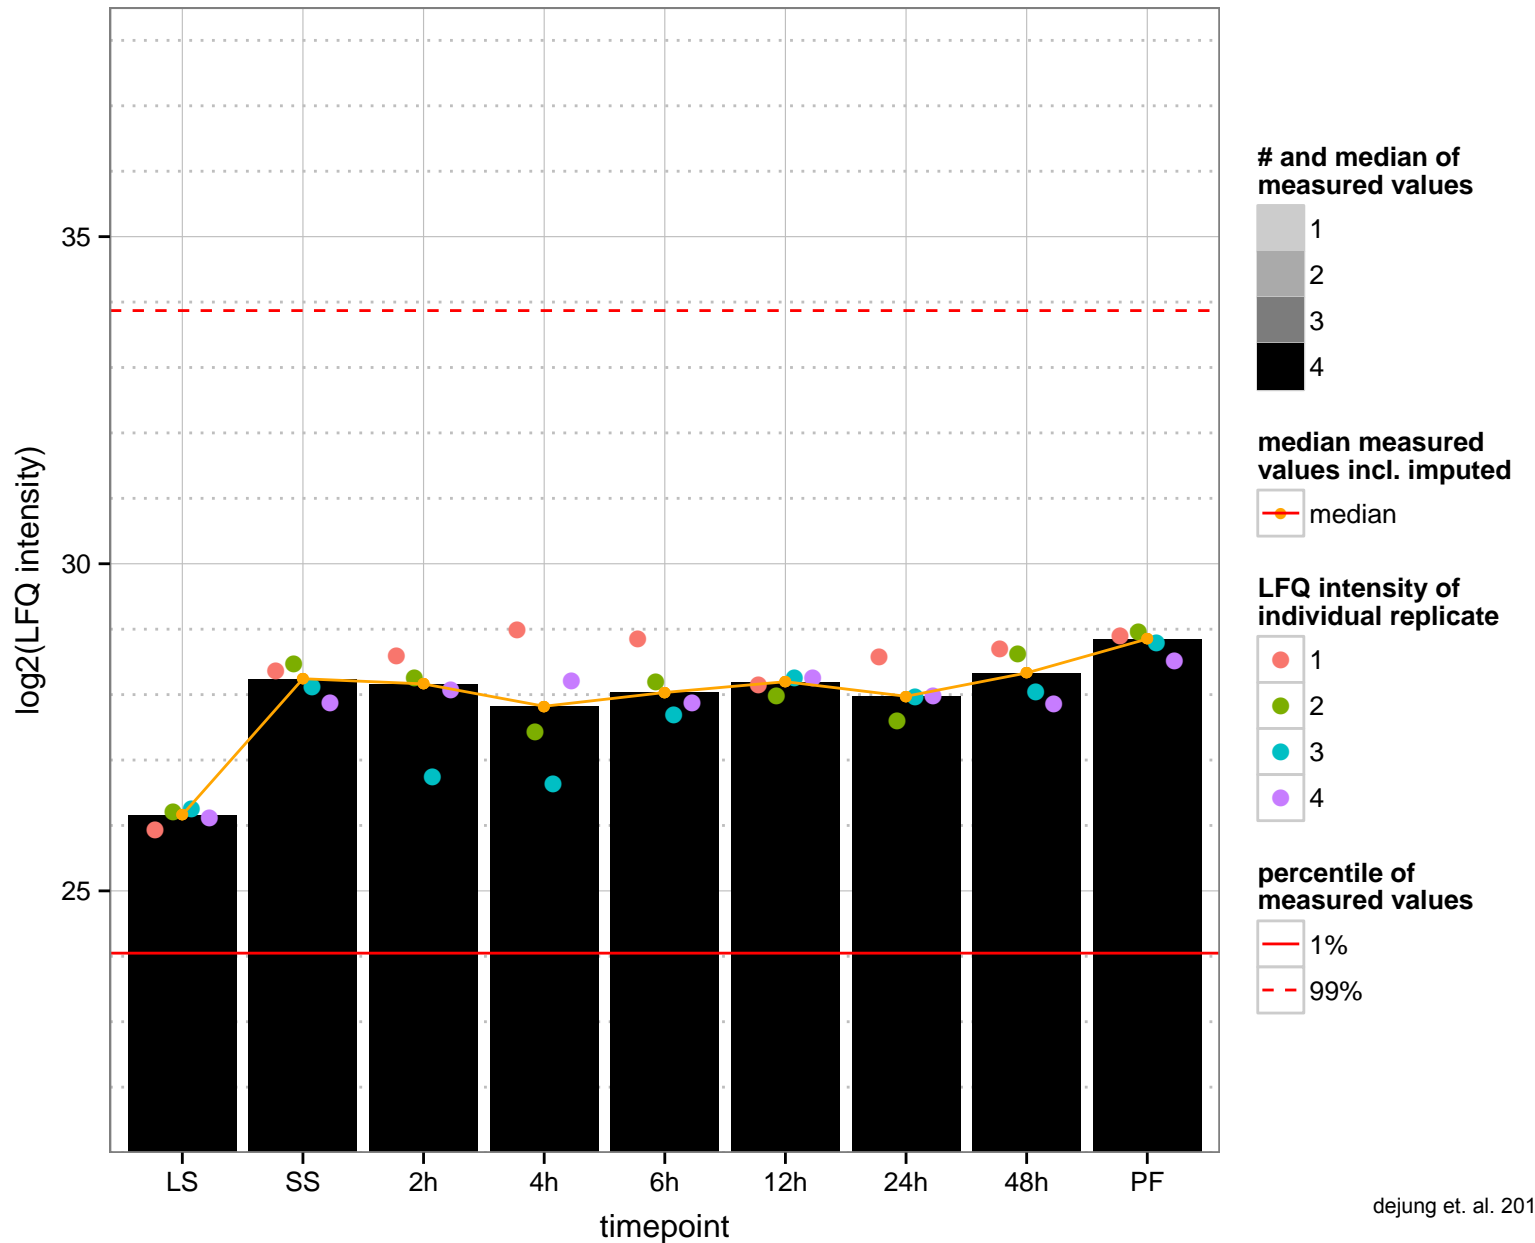

hypothetical protein, conserved  
 Tb927.9.11140  
 AGOF: null  
 AGOC: null  
 AGOP: null  
 PGO: null  
 PGOC: null  
 PGOP: null

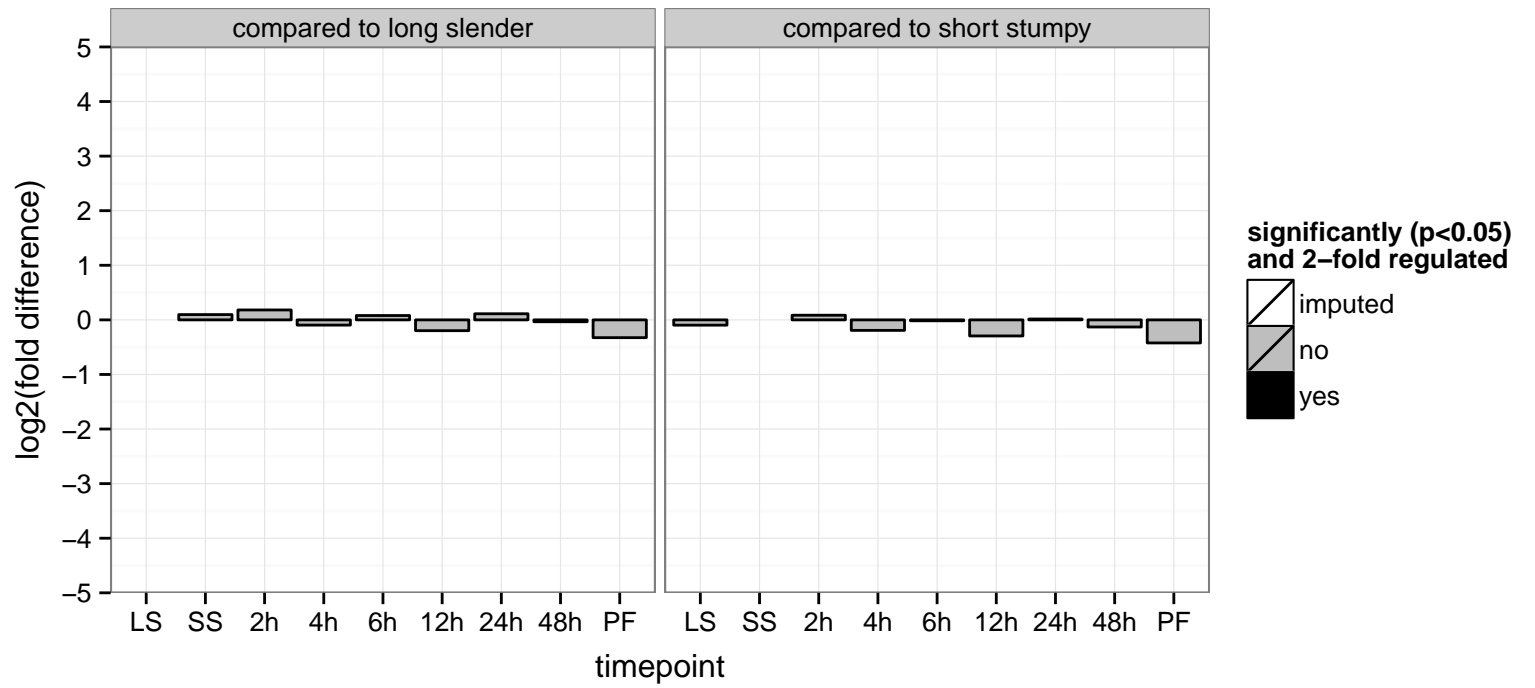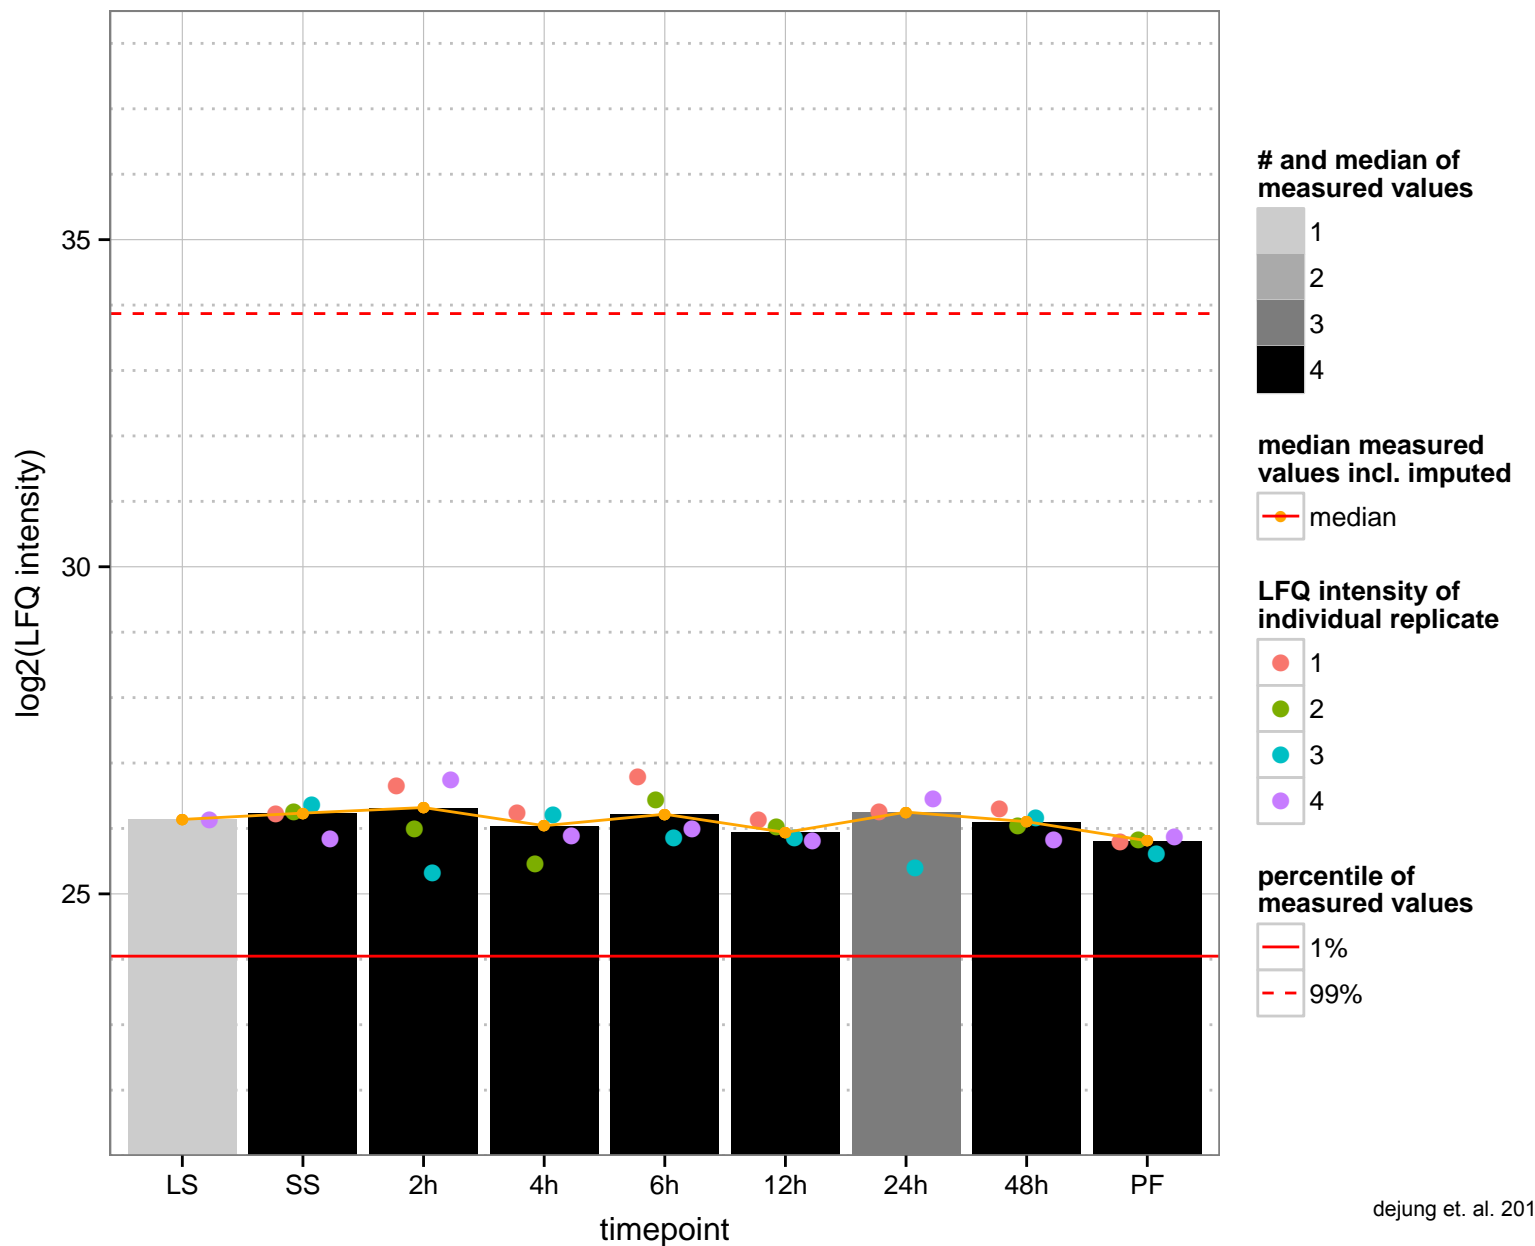

hypothetical protein, conserved  
 Tb927.9.11150  
 AGOF: null  
 AGOC: null  
 AGOP: null  
 PGO: null  
 PGOC: null  
 PGOP: null

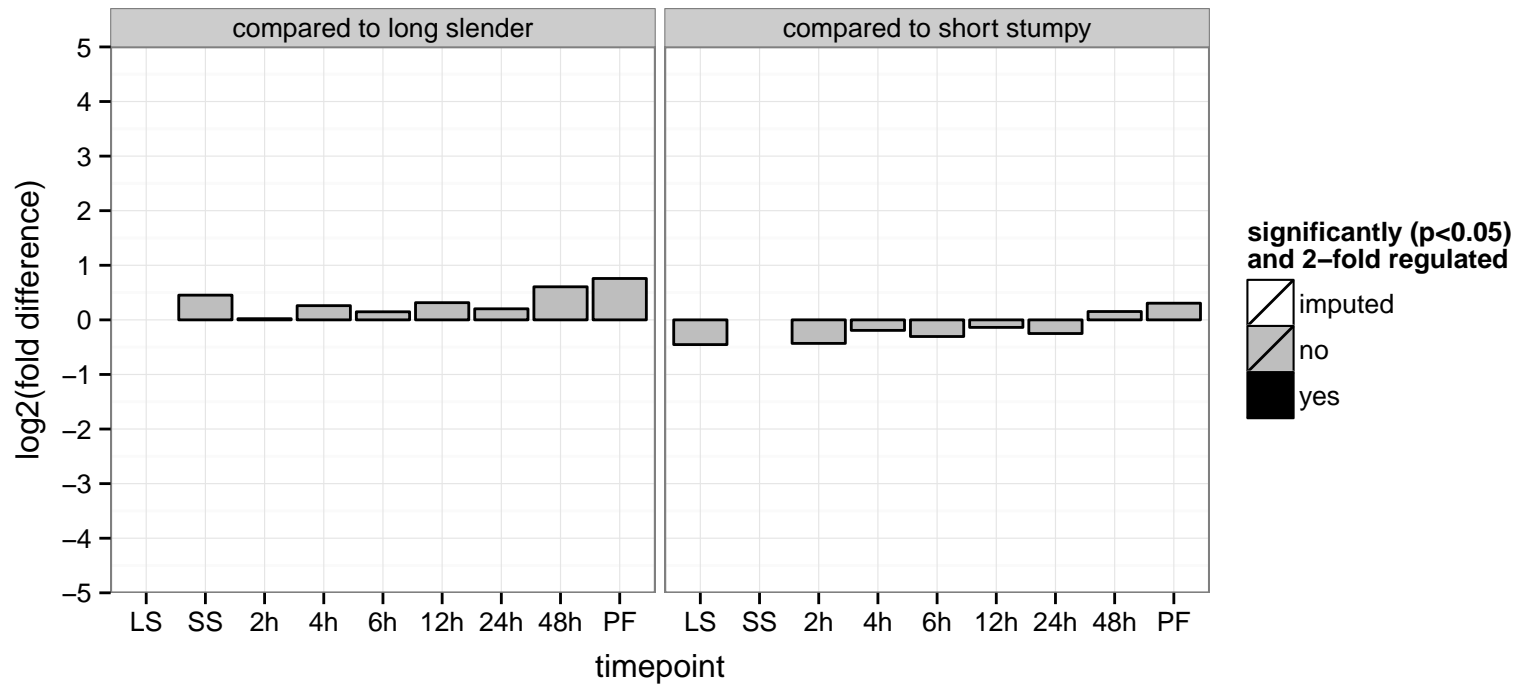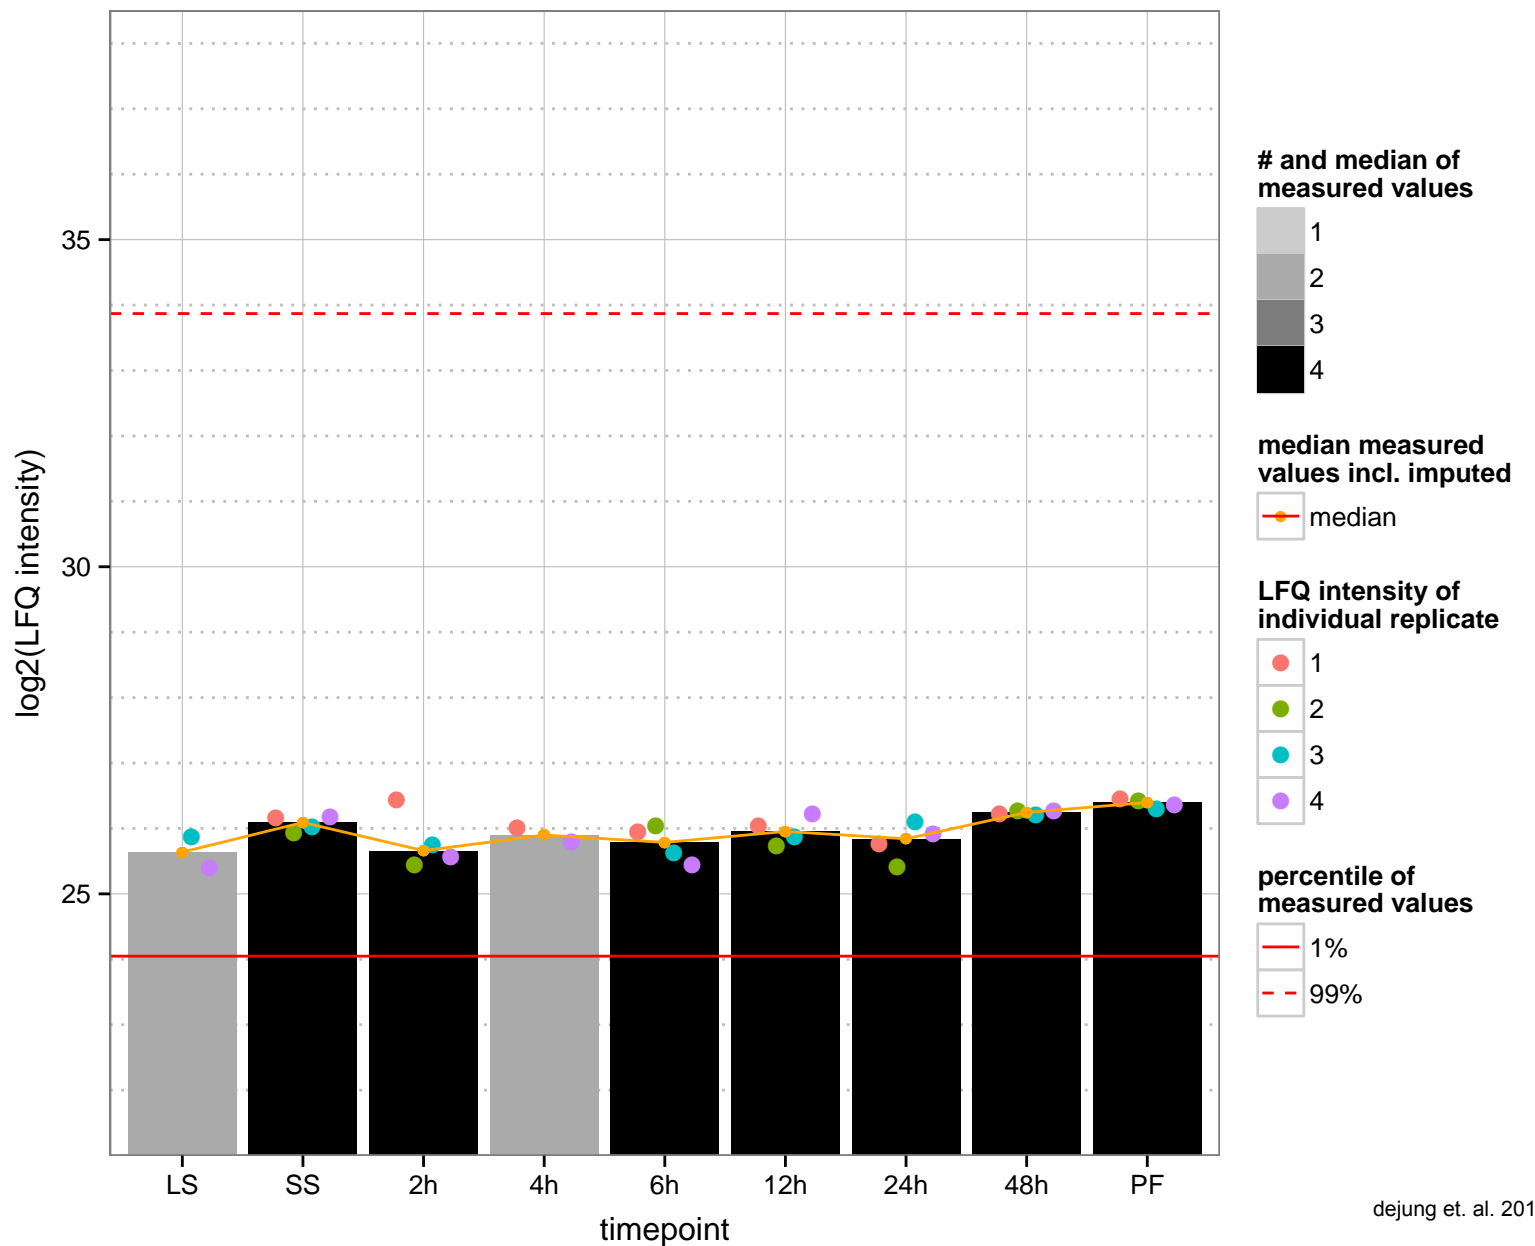

predicted WD40 repeat protein  
 Tb927.9.11250  
 AGOF: null  
 AGOC: null  
 AGOP: null  
 PGO: protein binding  
 PGOC: null  
 PGOP: null

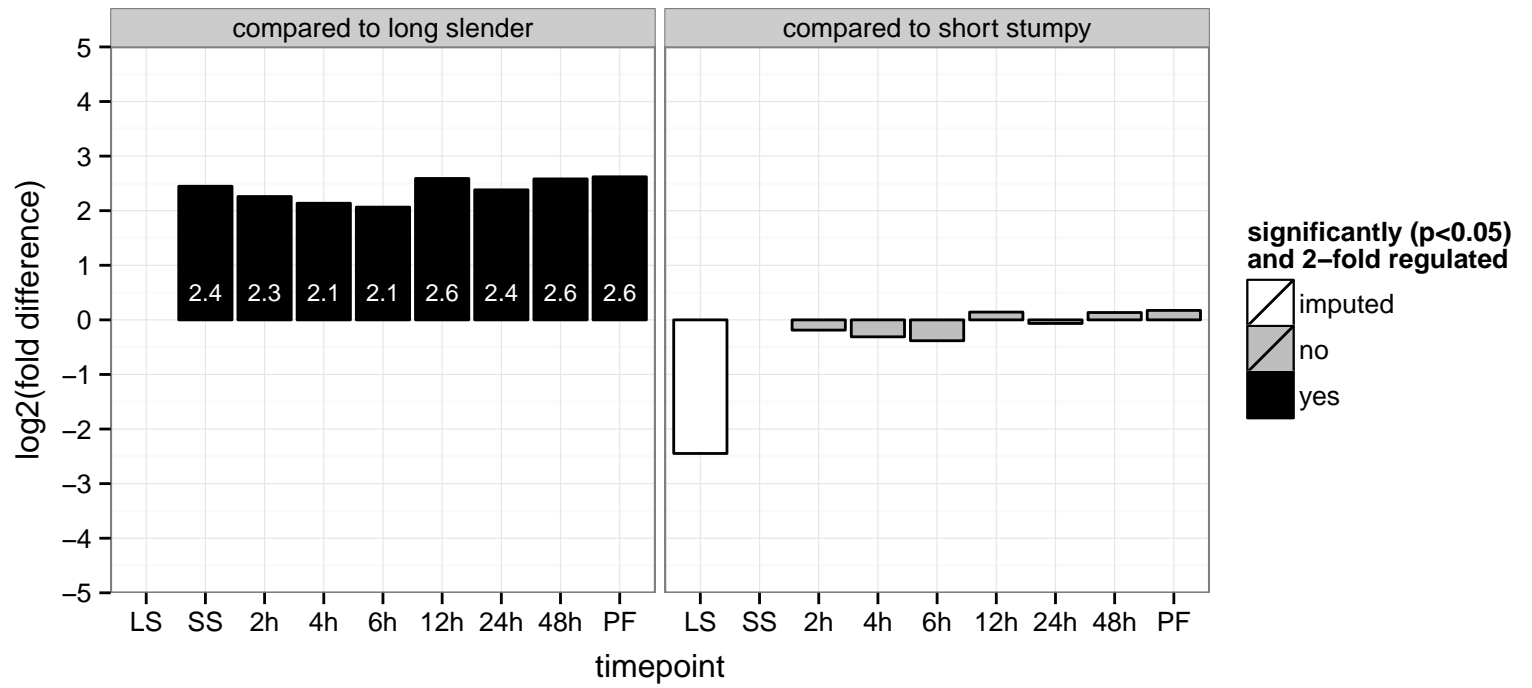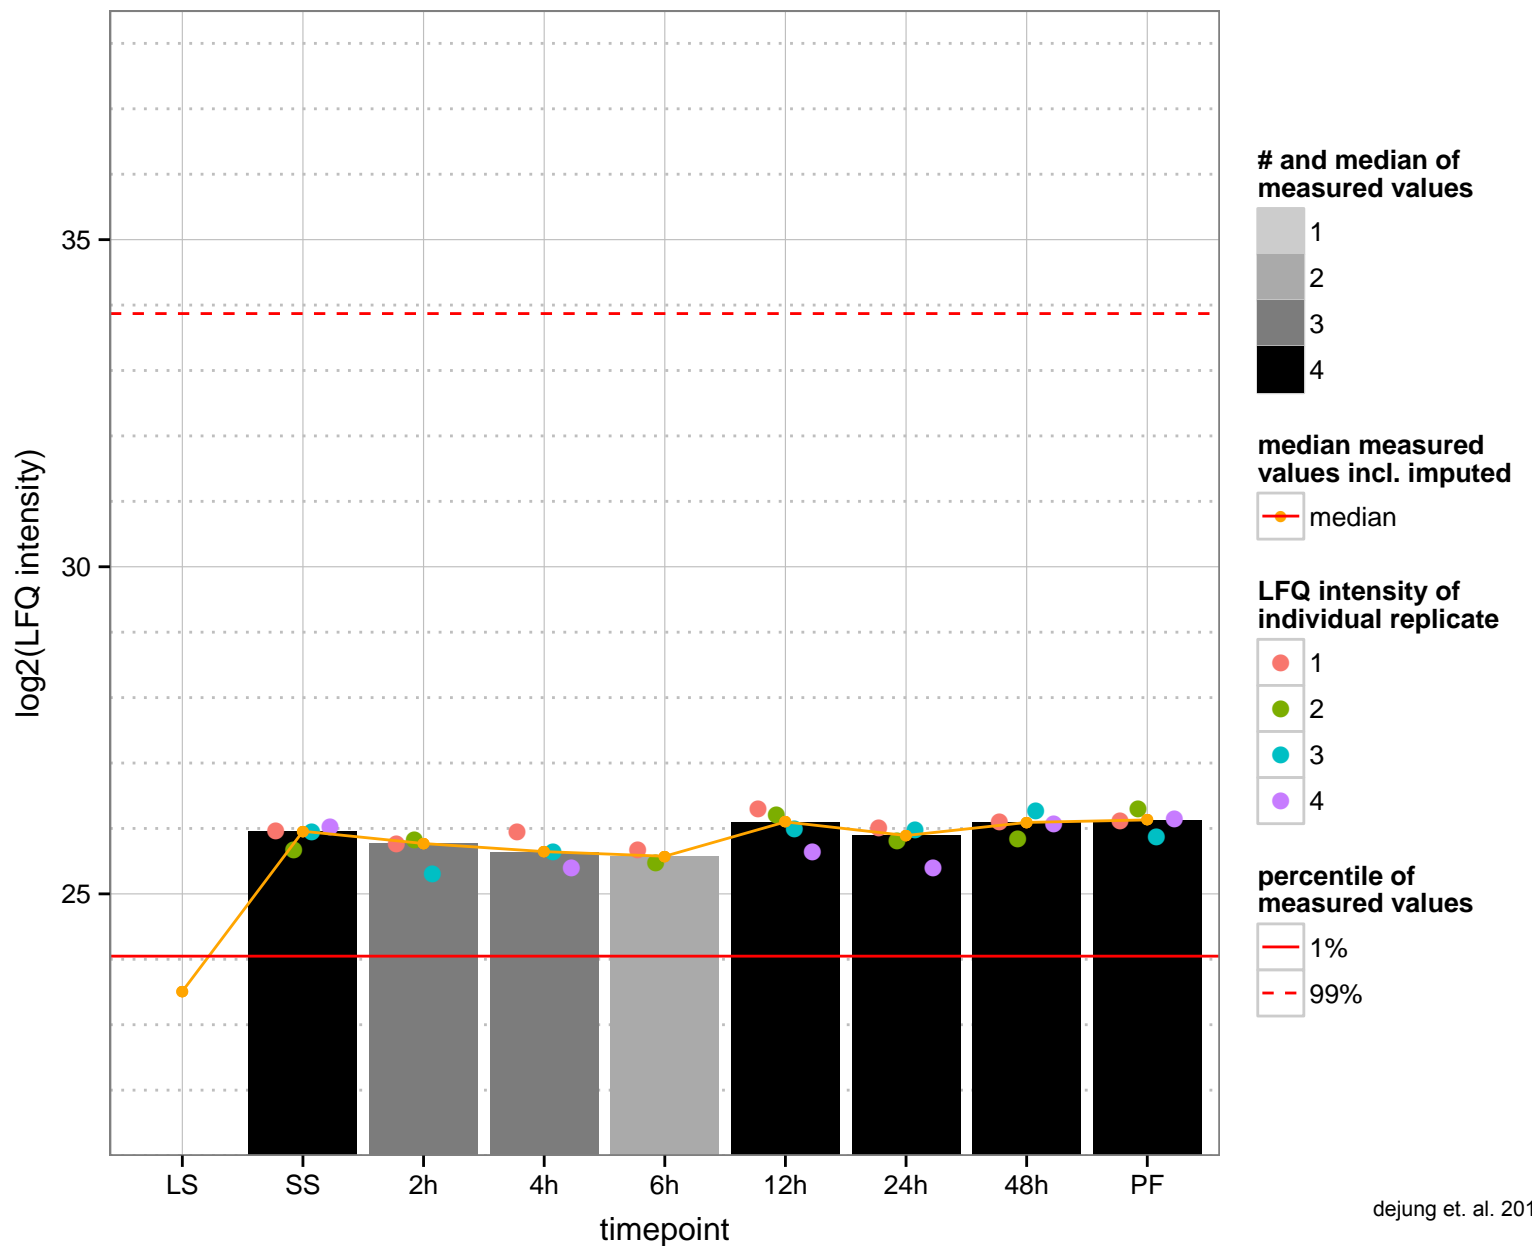

nucleoside diphosphate kinase, putative

Tb927.9.11260

AGOF: ATP binding, nucleoside diphosphate kinase activity

AGOC: cilium

AGOP: CTP biosynthetic process, GTP biosynthetic process, UTP biosynthetic process, ciliary or flagellar motility

PGOF: ATP binding, nucleoside diphosphate kinase activity

PGOC: null

PGOP: CTP biosynthetic process, GTP biosynthetic process, UTP biosynthetic process, nucleoside diphosphate phosphorylation

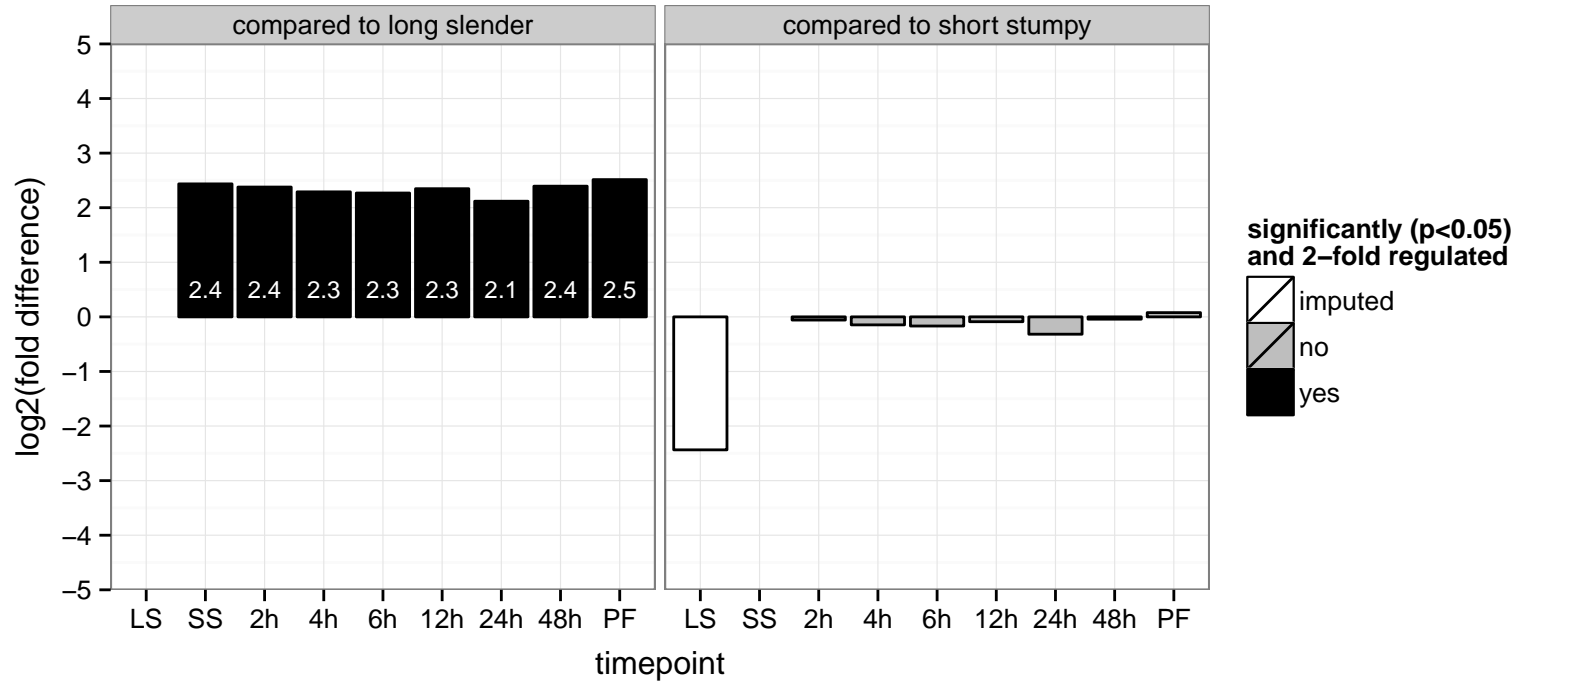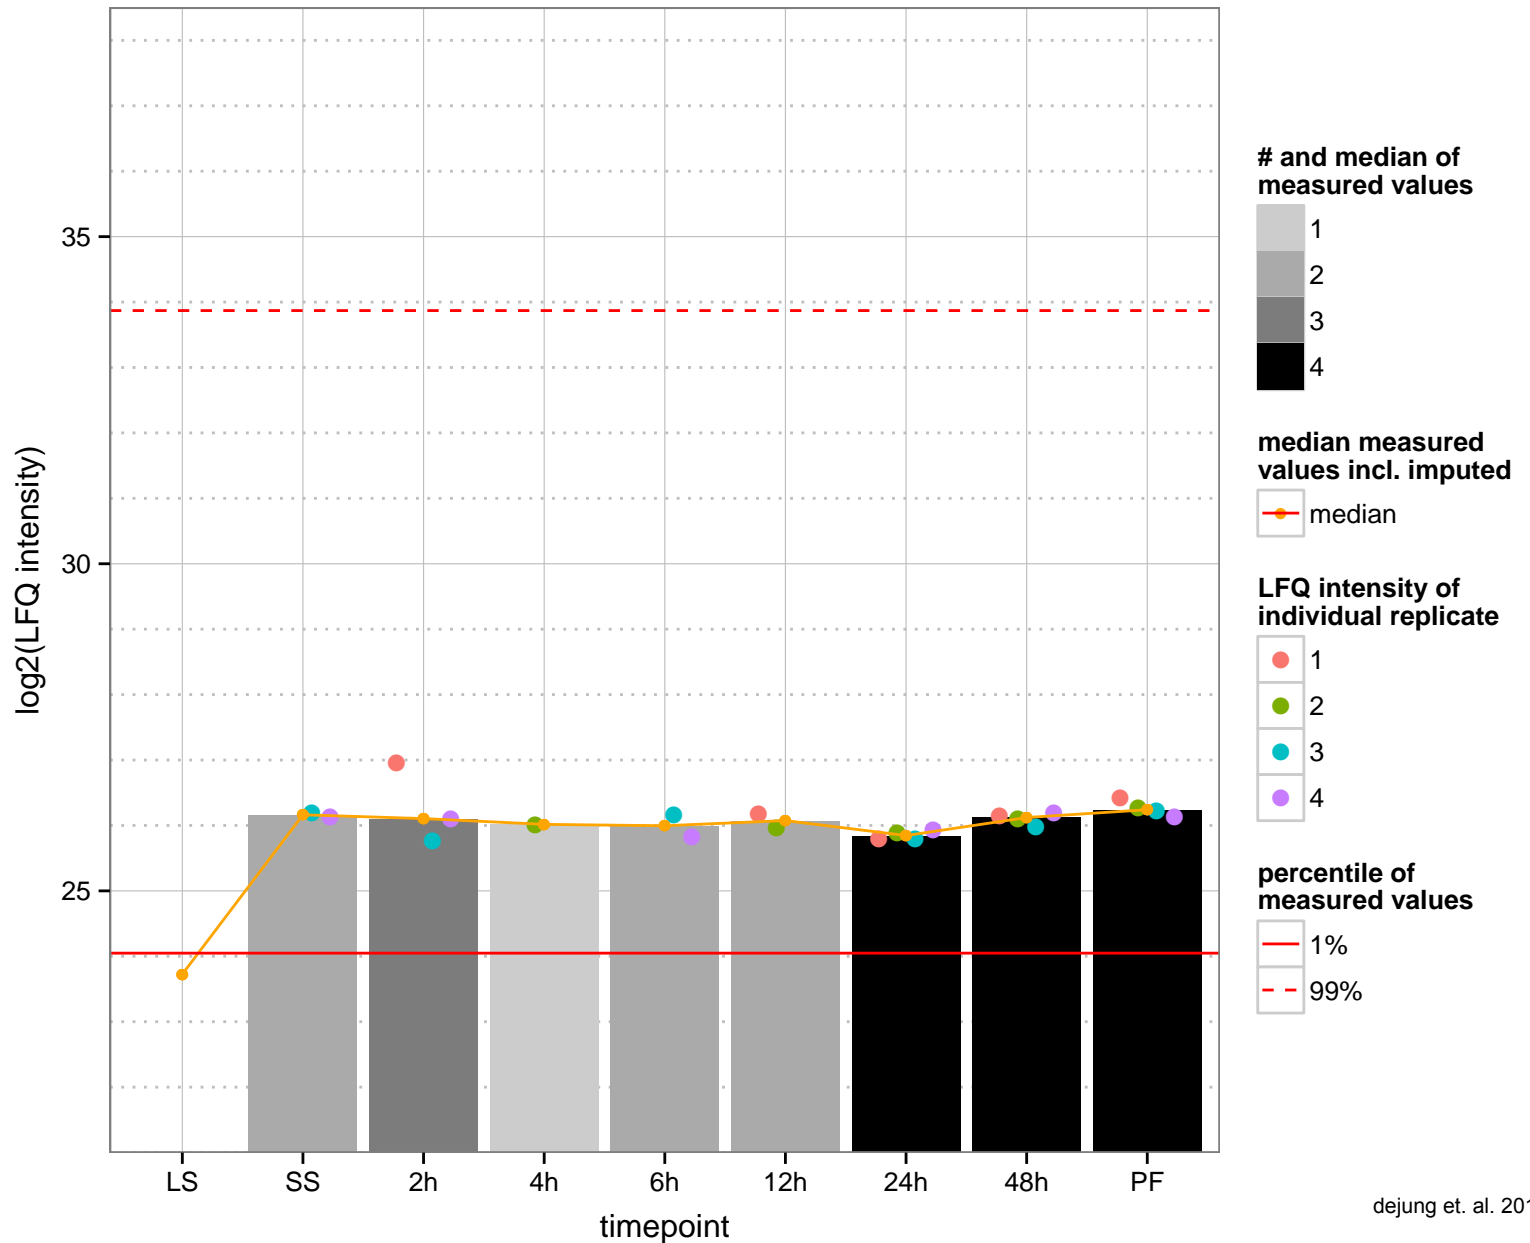



unspecified product  
 Tb927.9.11310  
 AGOF: null  
 AGOC: null  
 AGOP: null  
 PGO: threonine-type endopeptidase activity  
 PGO: proteasome core complex  
 PGO: proteolysis involved in cellular protein catabolic process

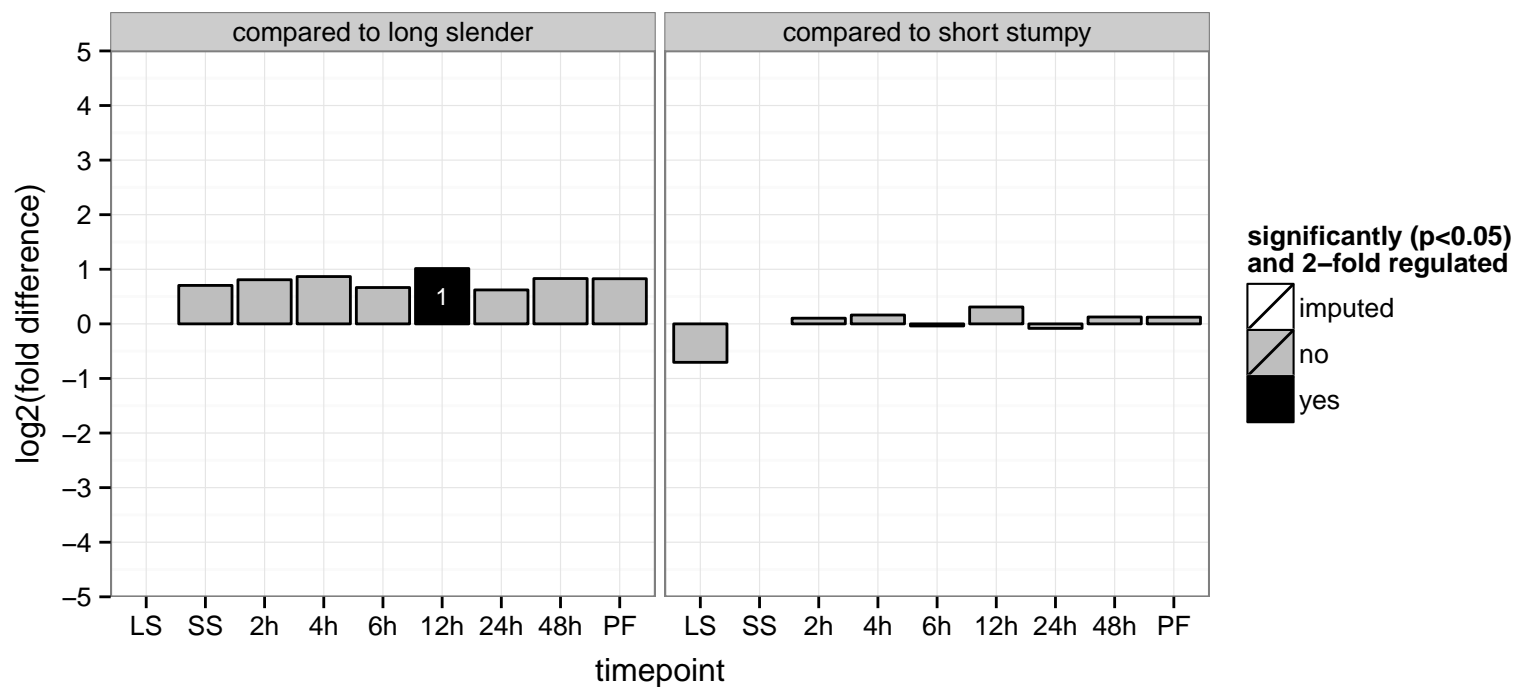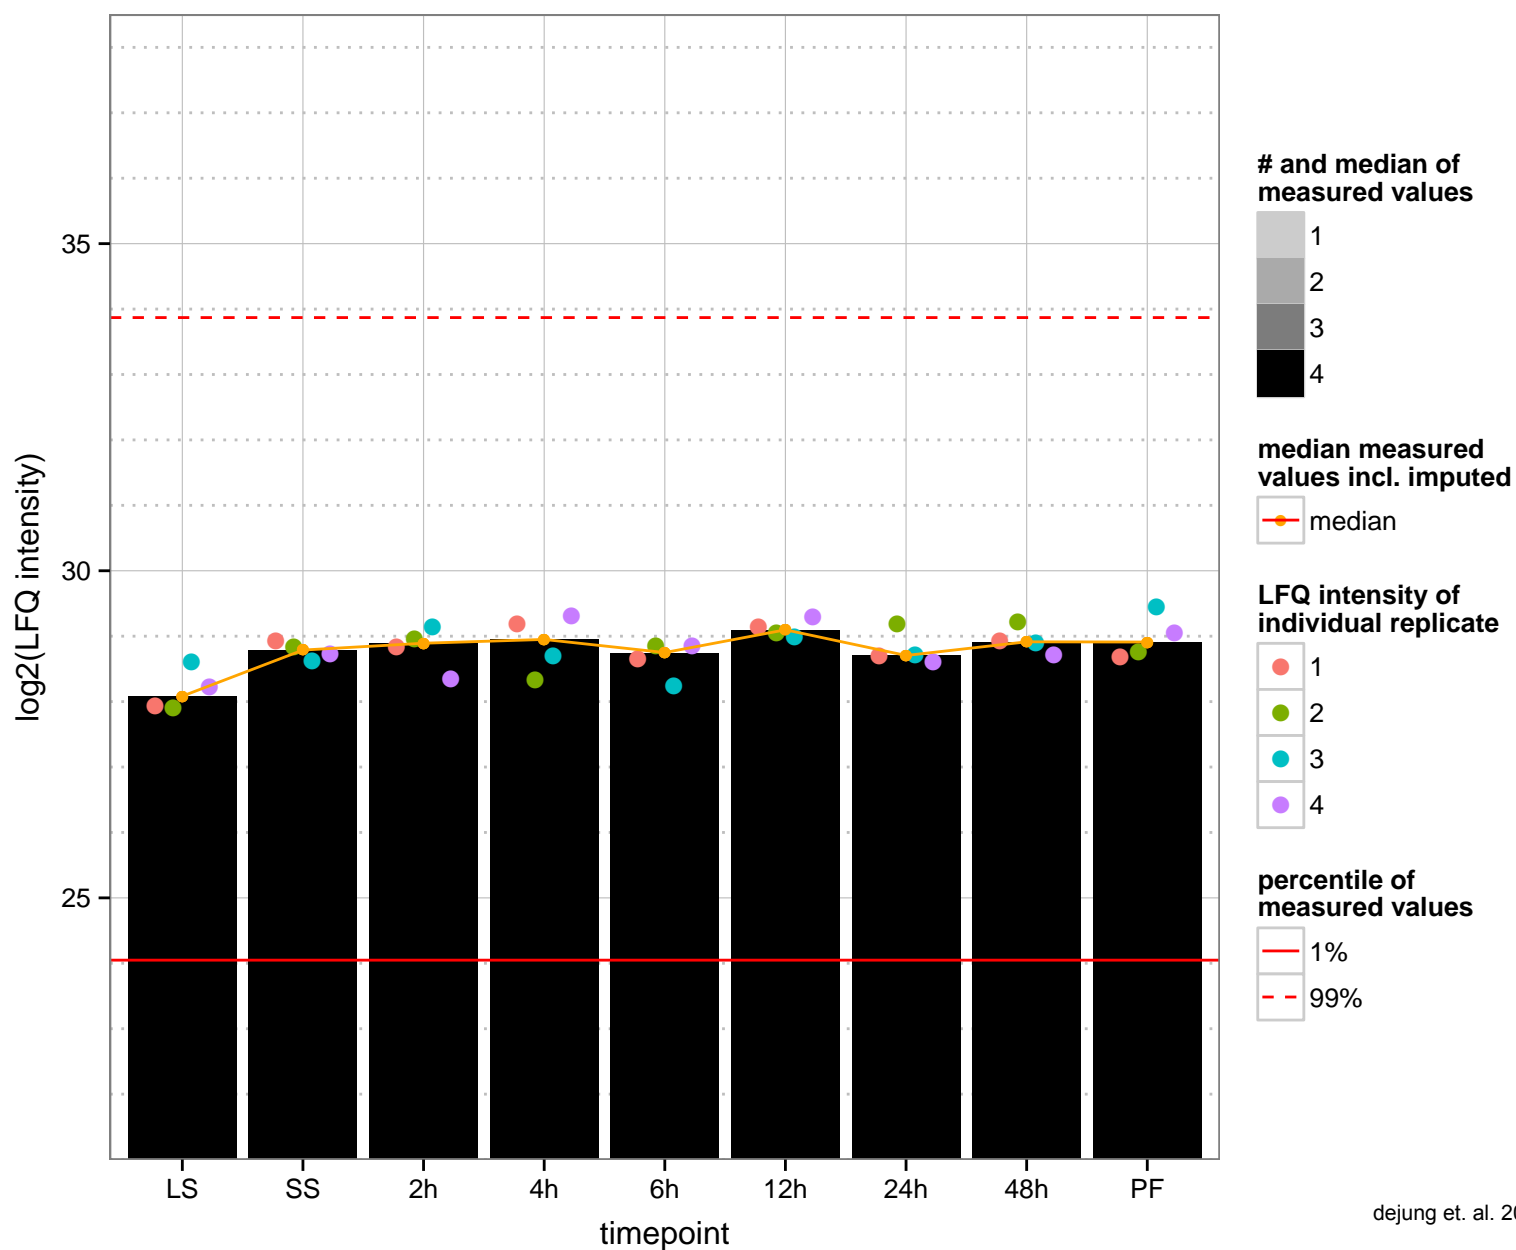

unspecified product  
 Tb927.9.11410;Tb927.9.11380  
 AGOF: structural constituent of ribosome  
 AGOC: intracellular, ribosome  
 AGOP: translation  
 PGOF: null, structural constituent of ribosome  
 PGO: null, ribosome  
 PGOP: null, translation

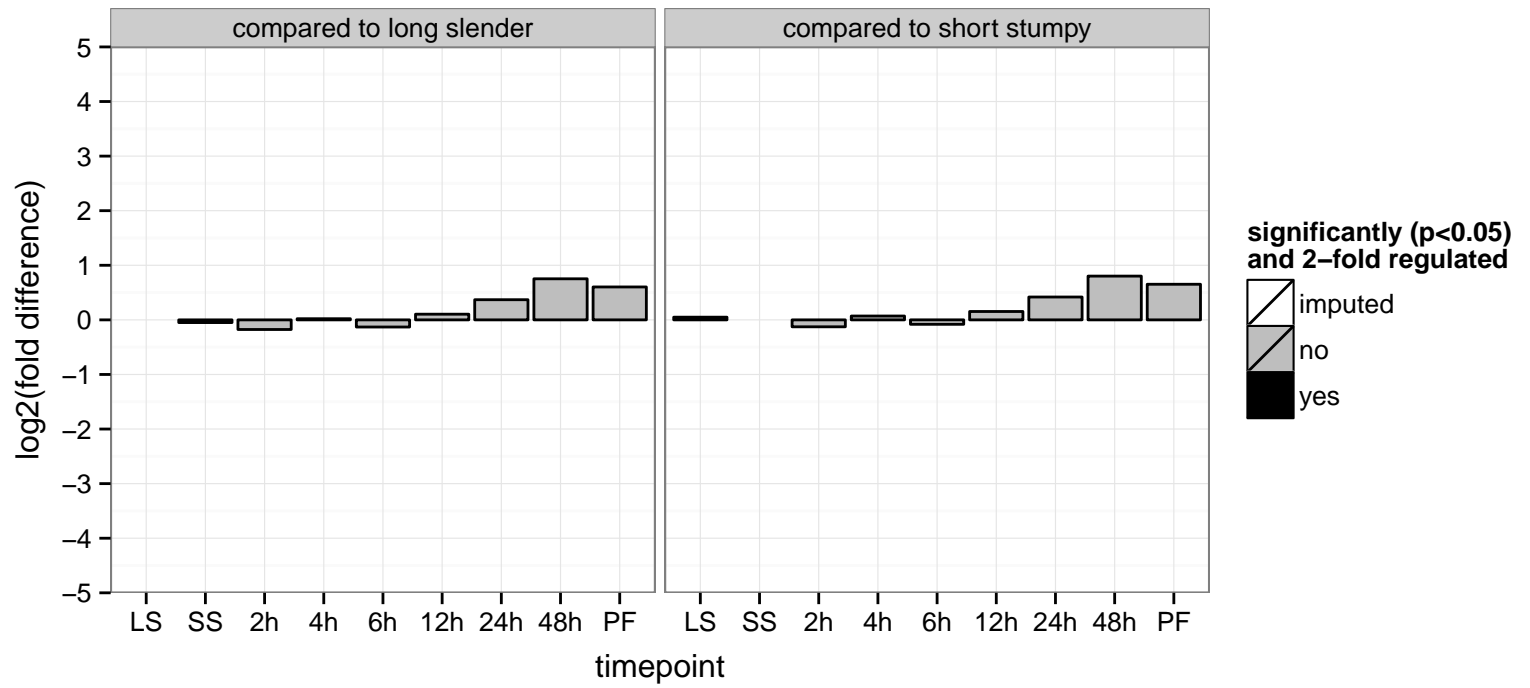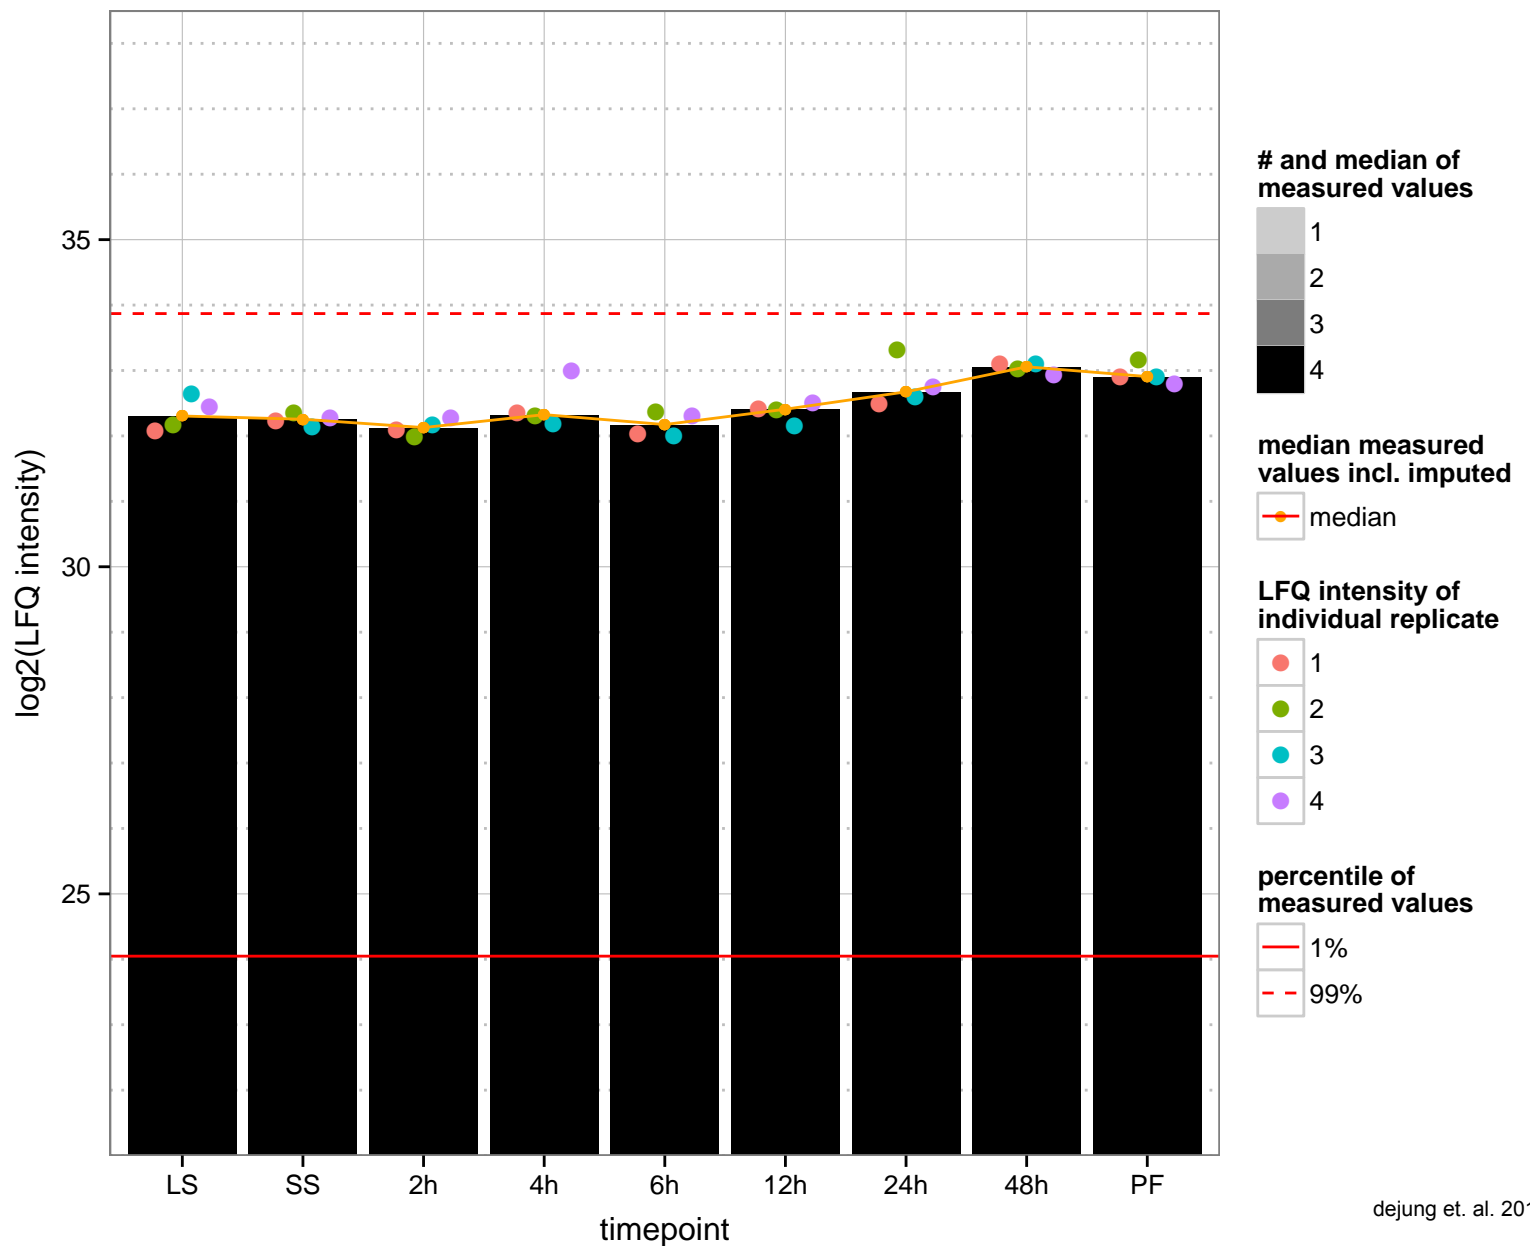

Gim5A protein, glycosomal membrane protein (gim5A)  
 Tb927.9.11580  
 AGOF: null  
 AGOC: glycosome membrane  
 AGOP: null  
 PGO: null  
 PGO: integral to peroxisomal membrane  
 PGO: peroxisome fission

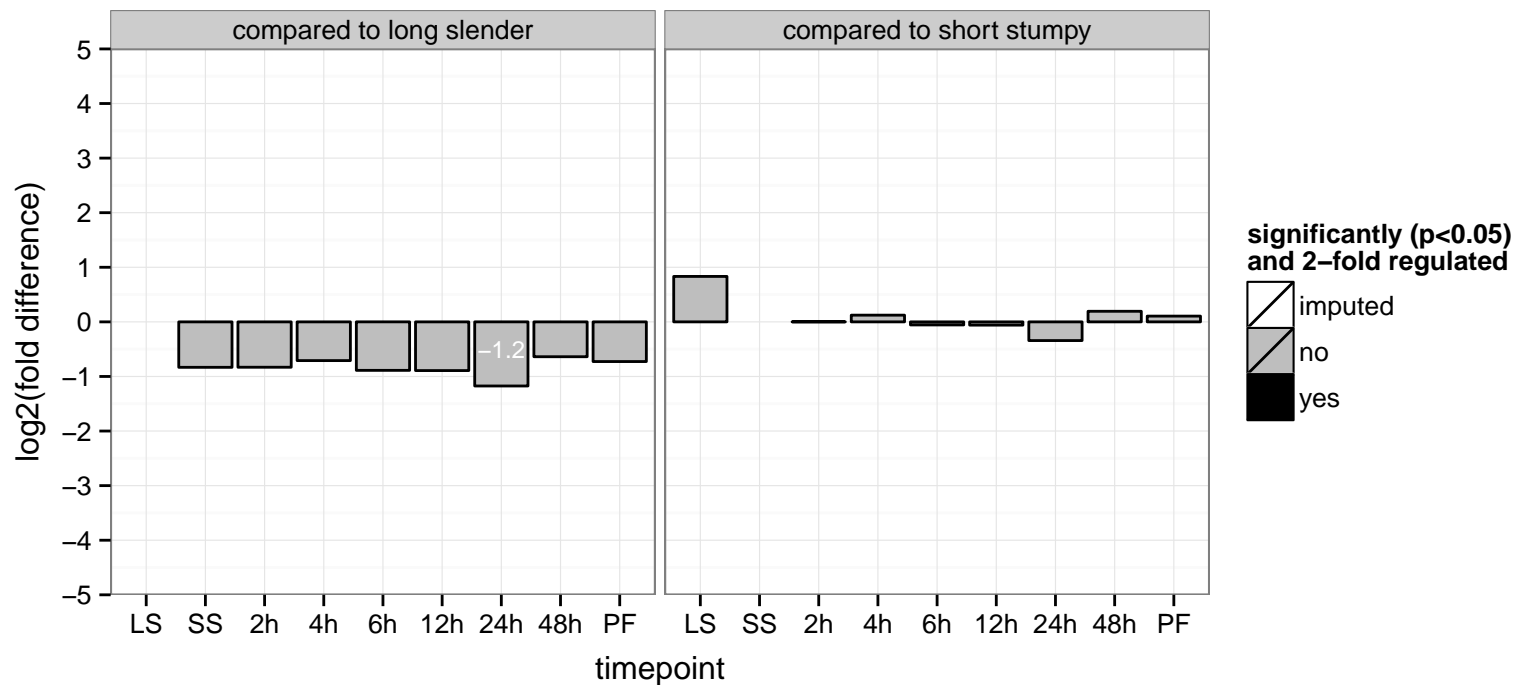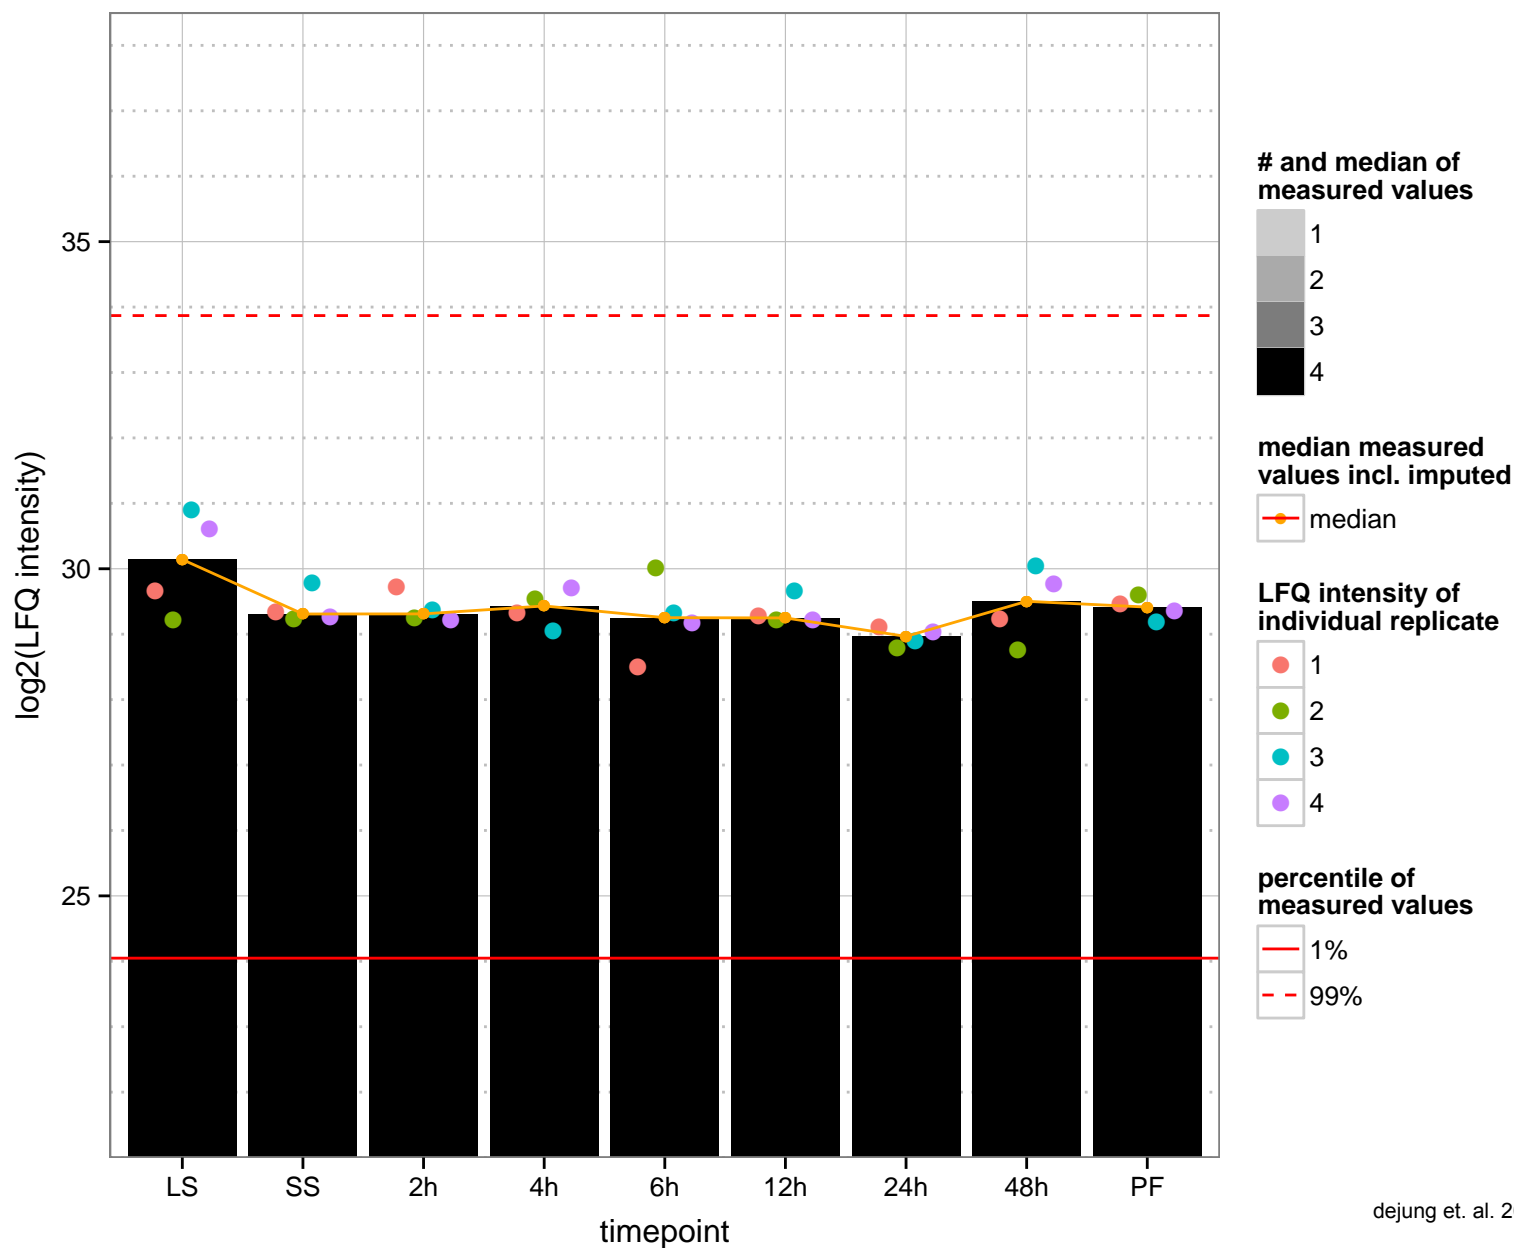

unspecified product (gim5B)  
 Tb927.9.11600  
 AGOF: null  
 AGOC: glycosome membrane  
 AGOP: null  
 PGO: null  
 PGOC: integral to peroxisomal membrane  
 PGOP: peroxisome fission

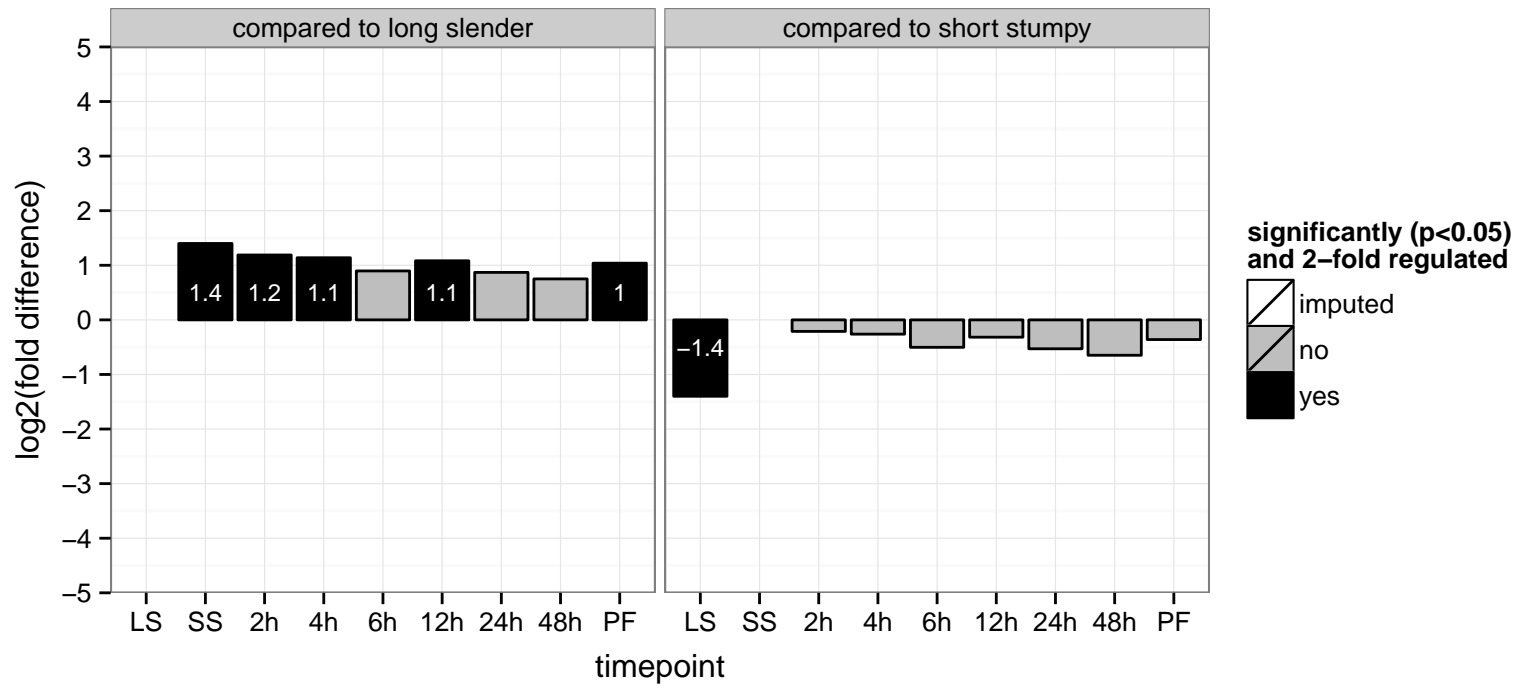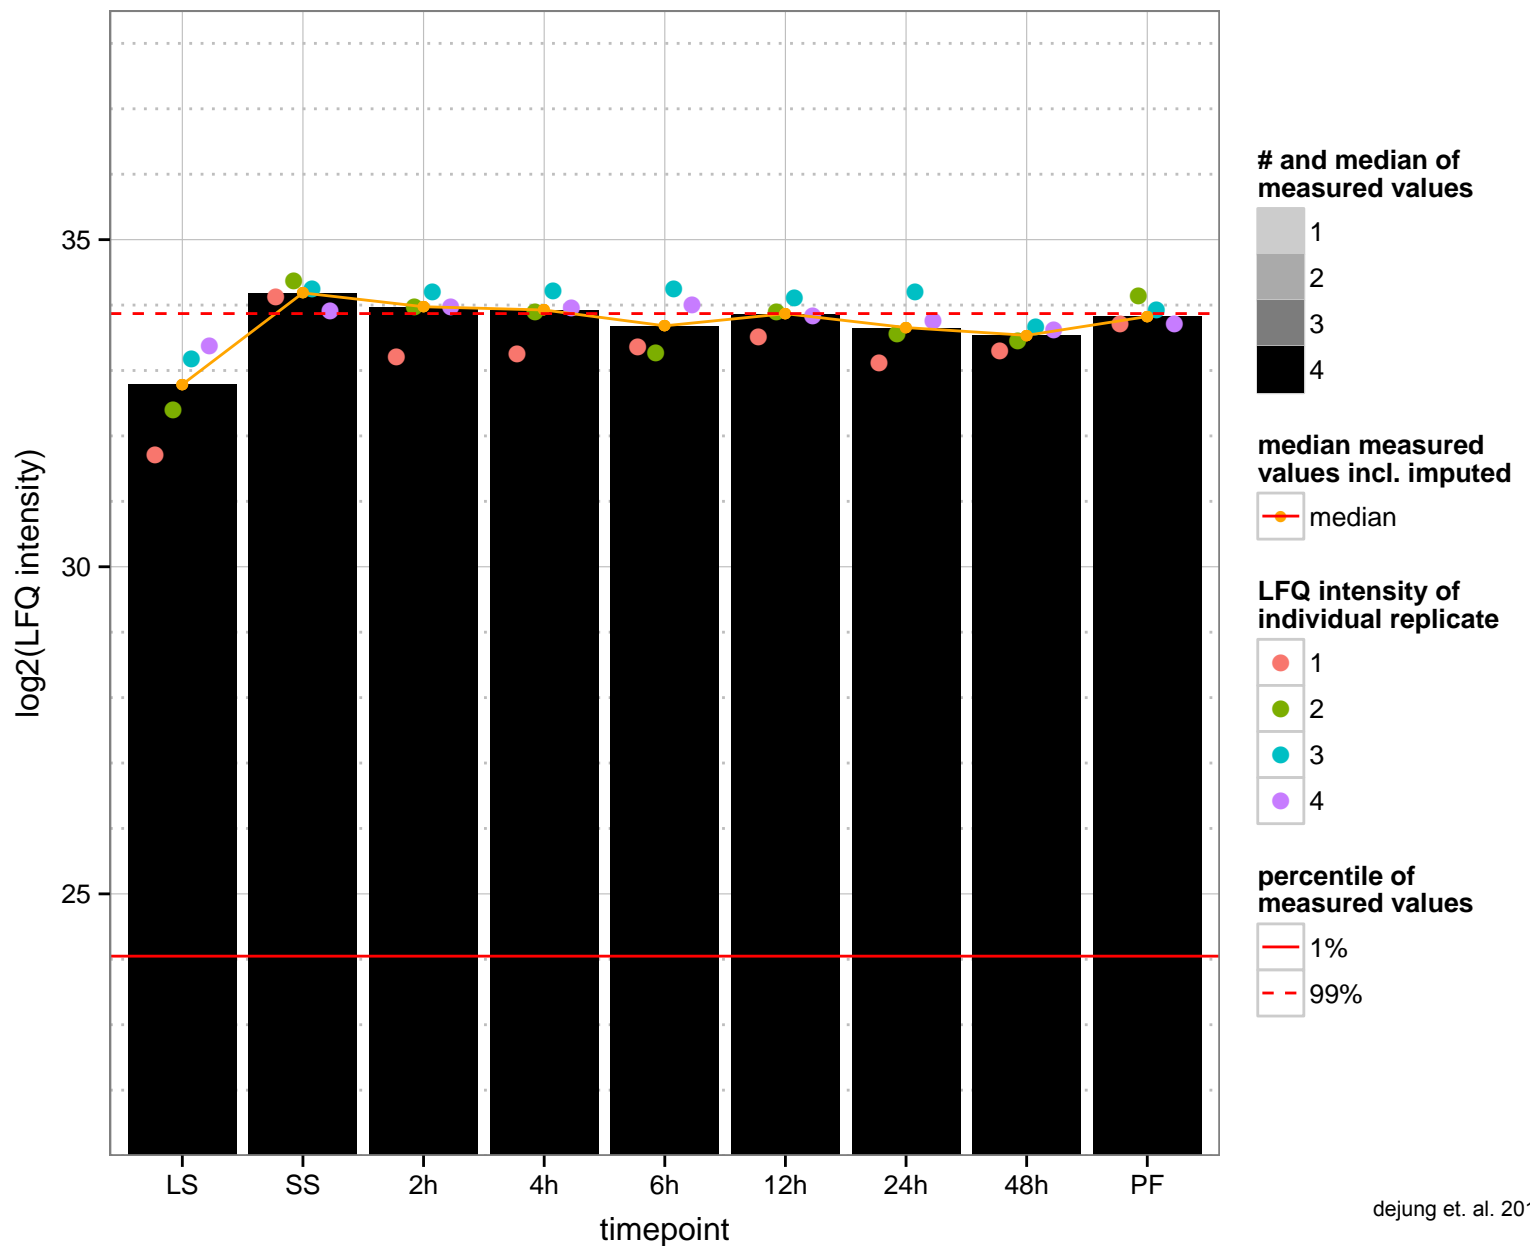

hypothetical protein, conserved  
 Tb927.9.11770  
 AGOF: null  
 AGOC: null  
 AGOP: null  
 PGO: null  
 PGOC: null  
 PGOP: null

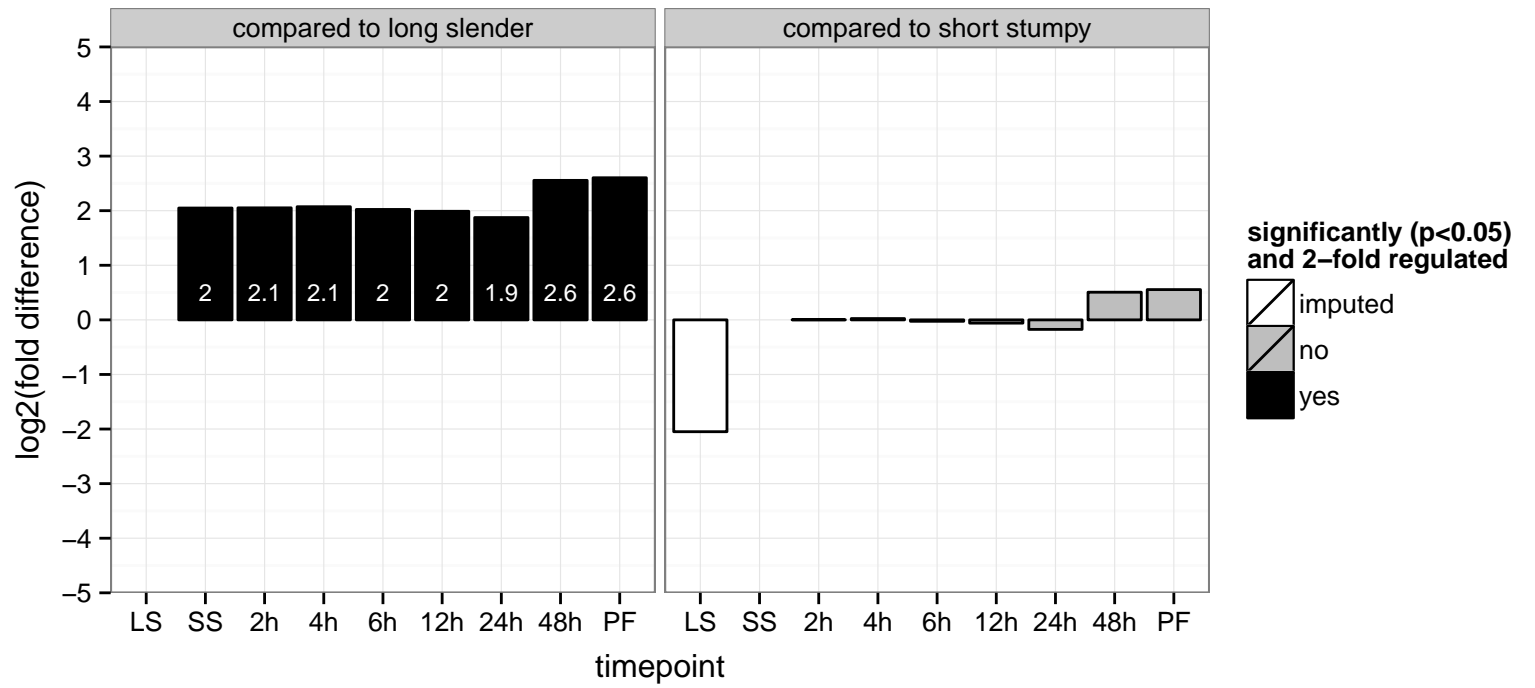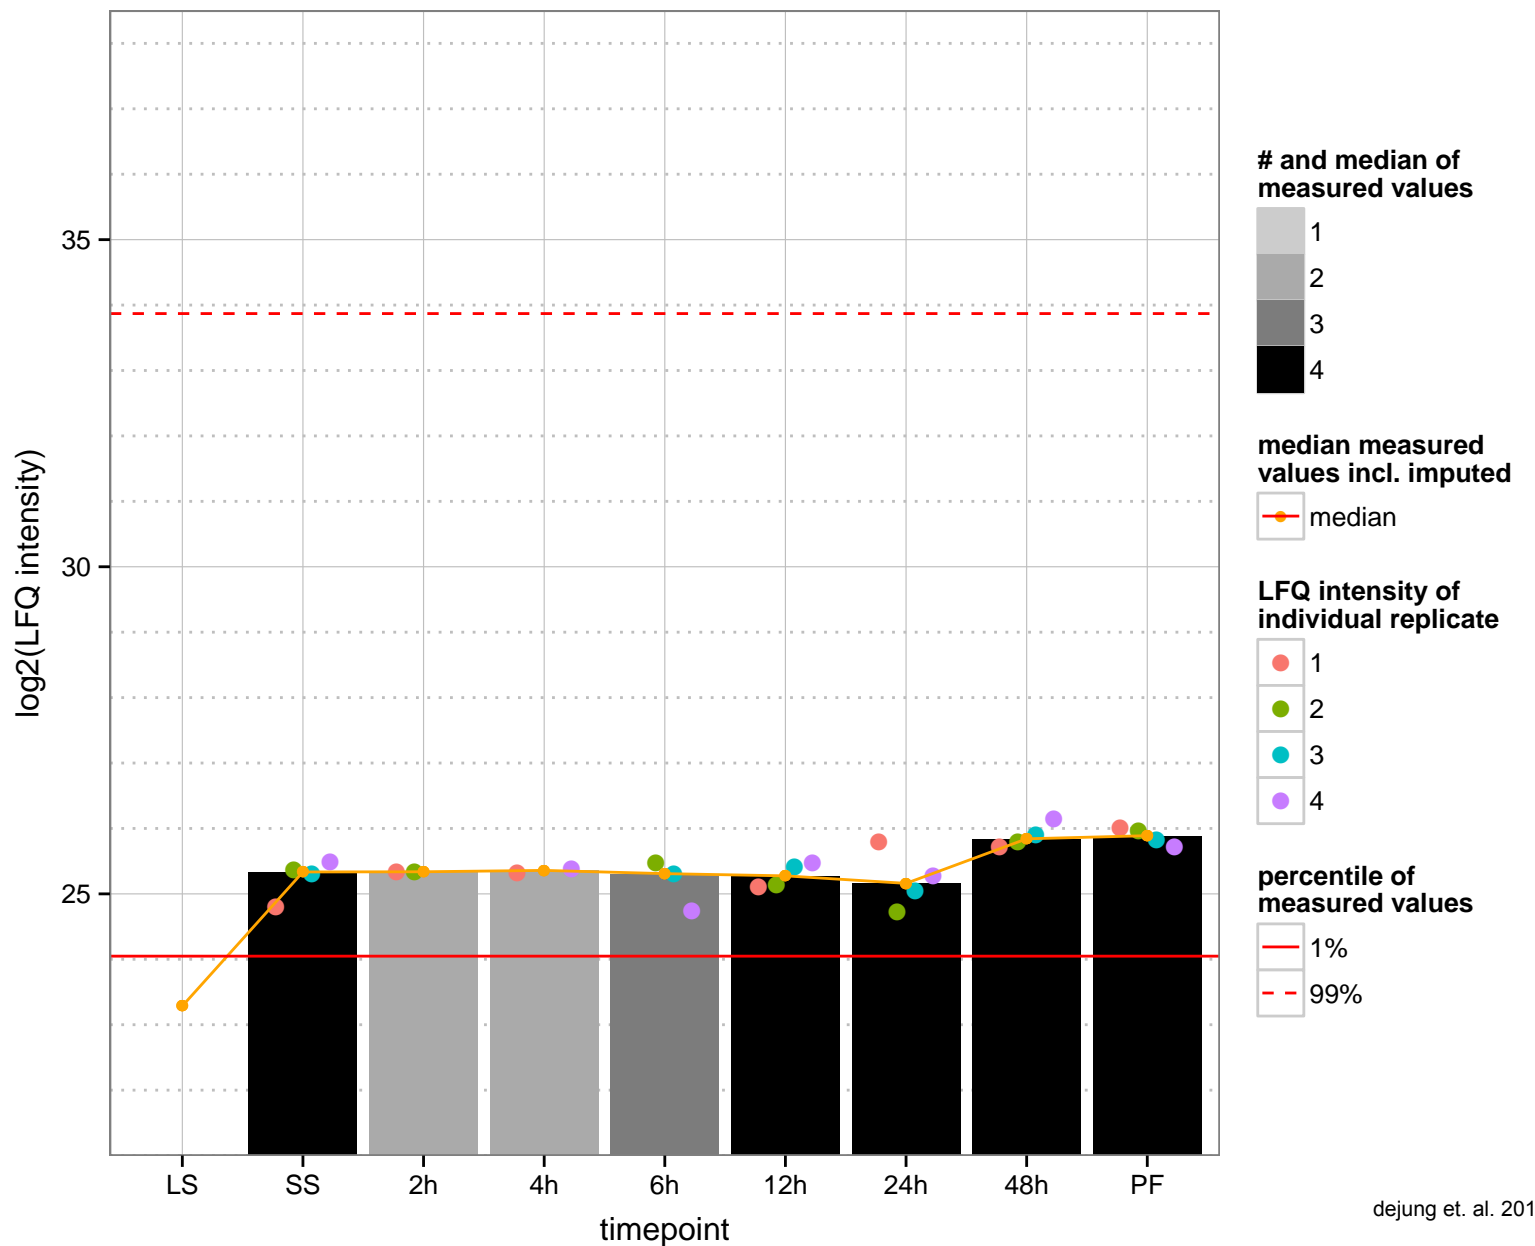

structural maintenance of chromosome 1, putative (SMC1)

Tb927.9.11850

AGOF: ATP binding

AGOC: chromosome, condensin complex, nucleus

AGOP: chromosome organization, chromosome segregation, mitotic sister chromatid segregation

PGOF: ATP binding, protein binding

PGOC: chromosome

PGOP: DNA recombination, DNA repair, chromosome condensation, chromosome organization, sister chromatid cohesion

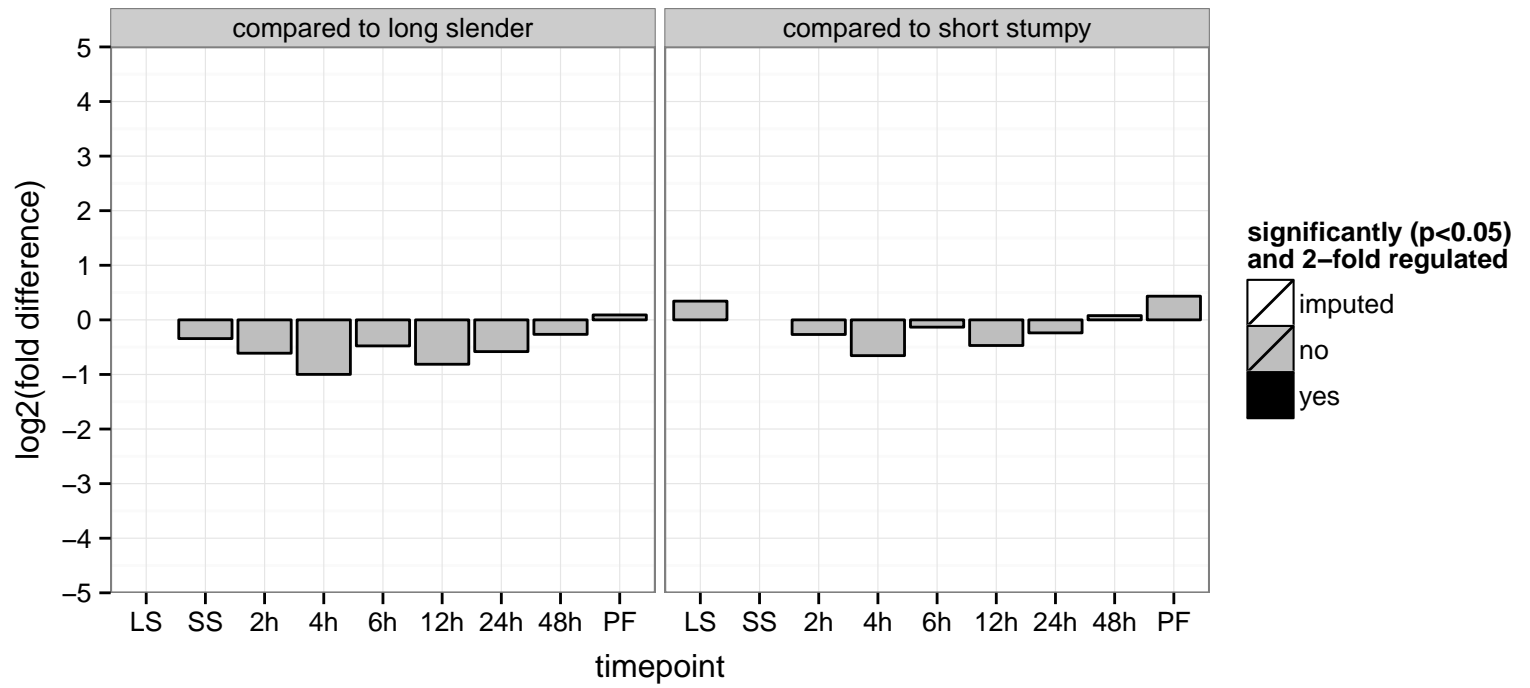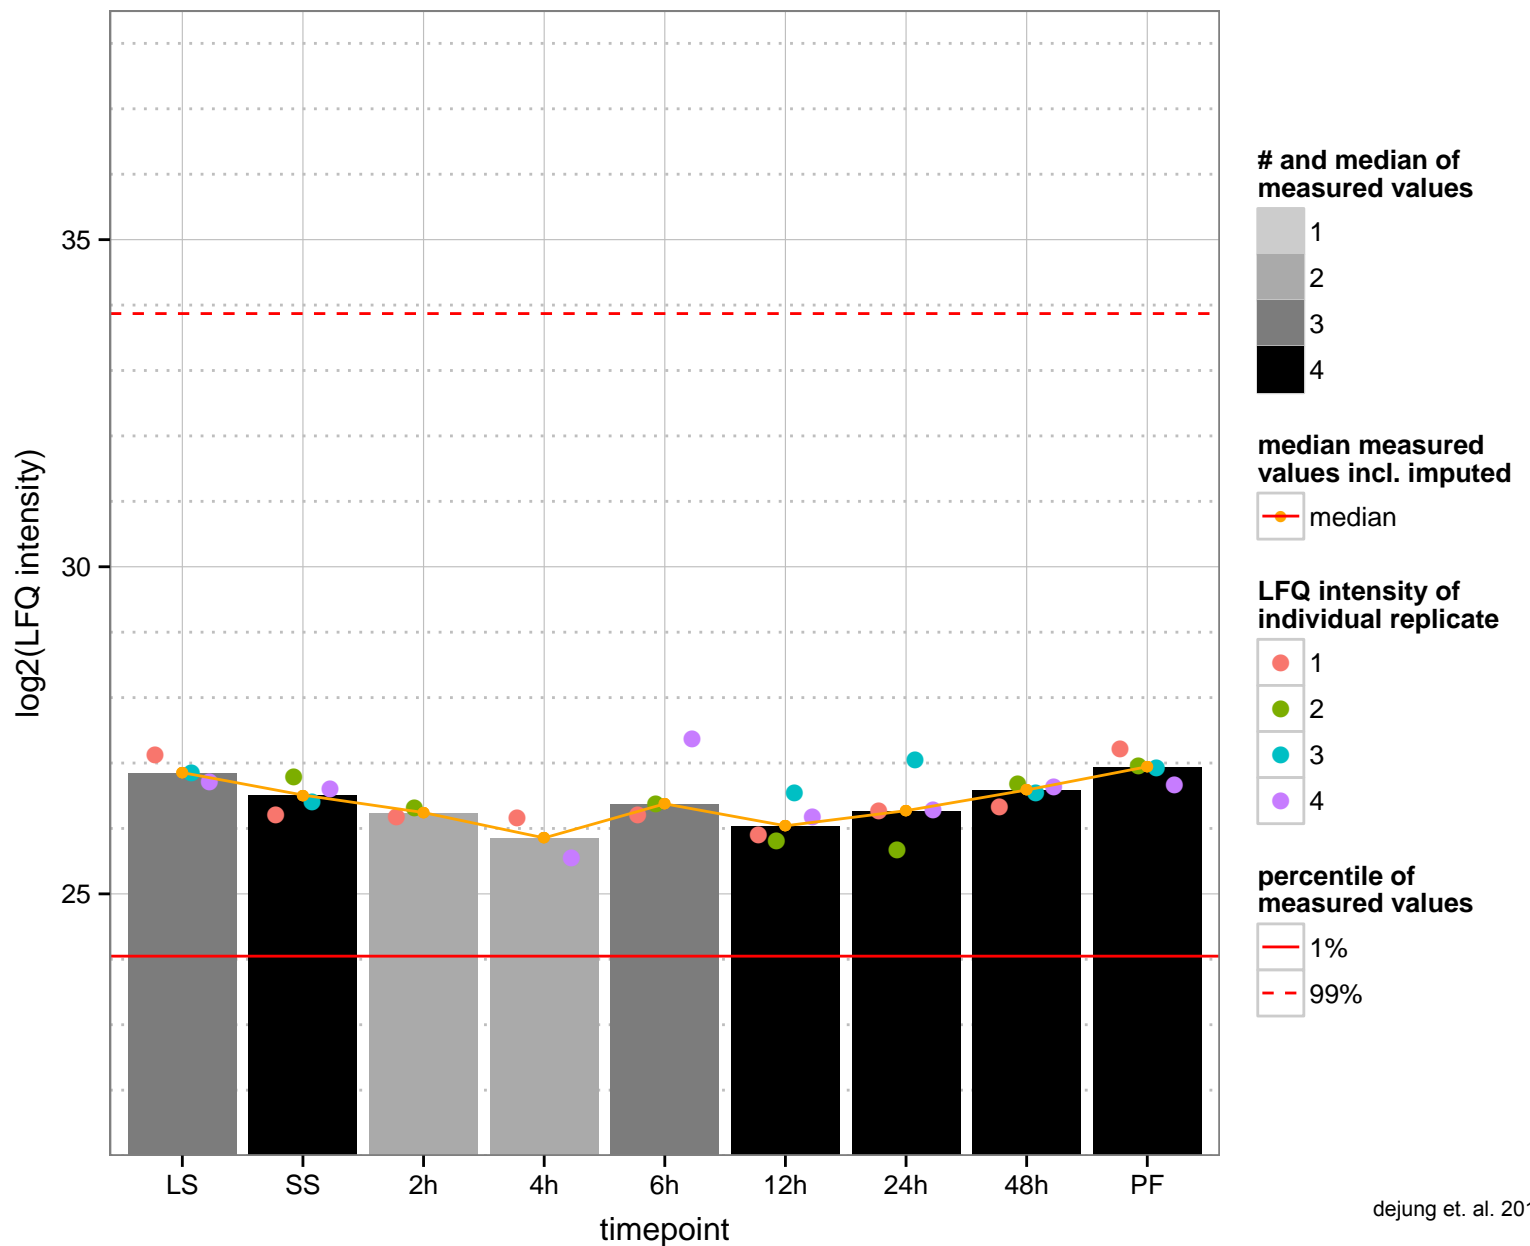

acyl transferase-like protein  
 Tb927.9.11900  
 AGOF: transferase activity  
 AGOC: null  
 AGOP: metabolic process  
 PGO: null  
 PGOC: null  
 PGOP: metabolic process

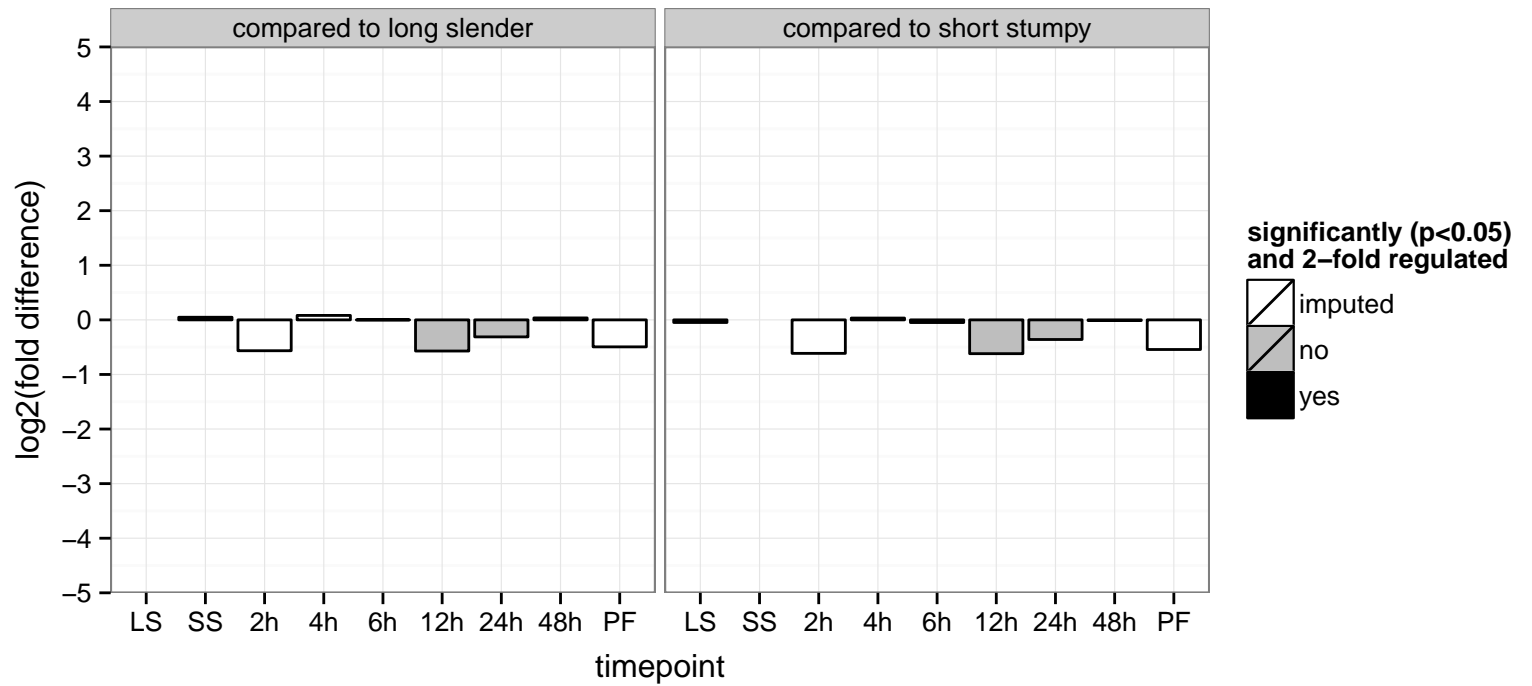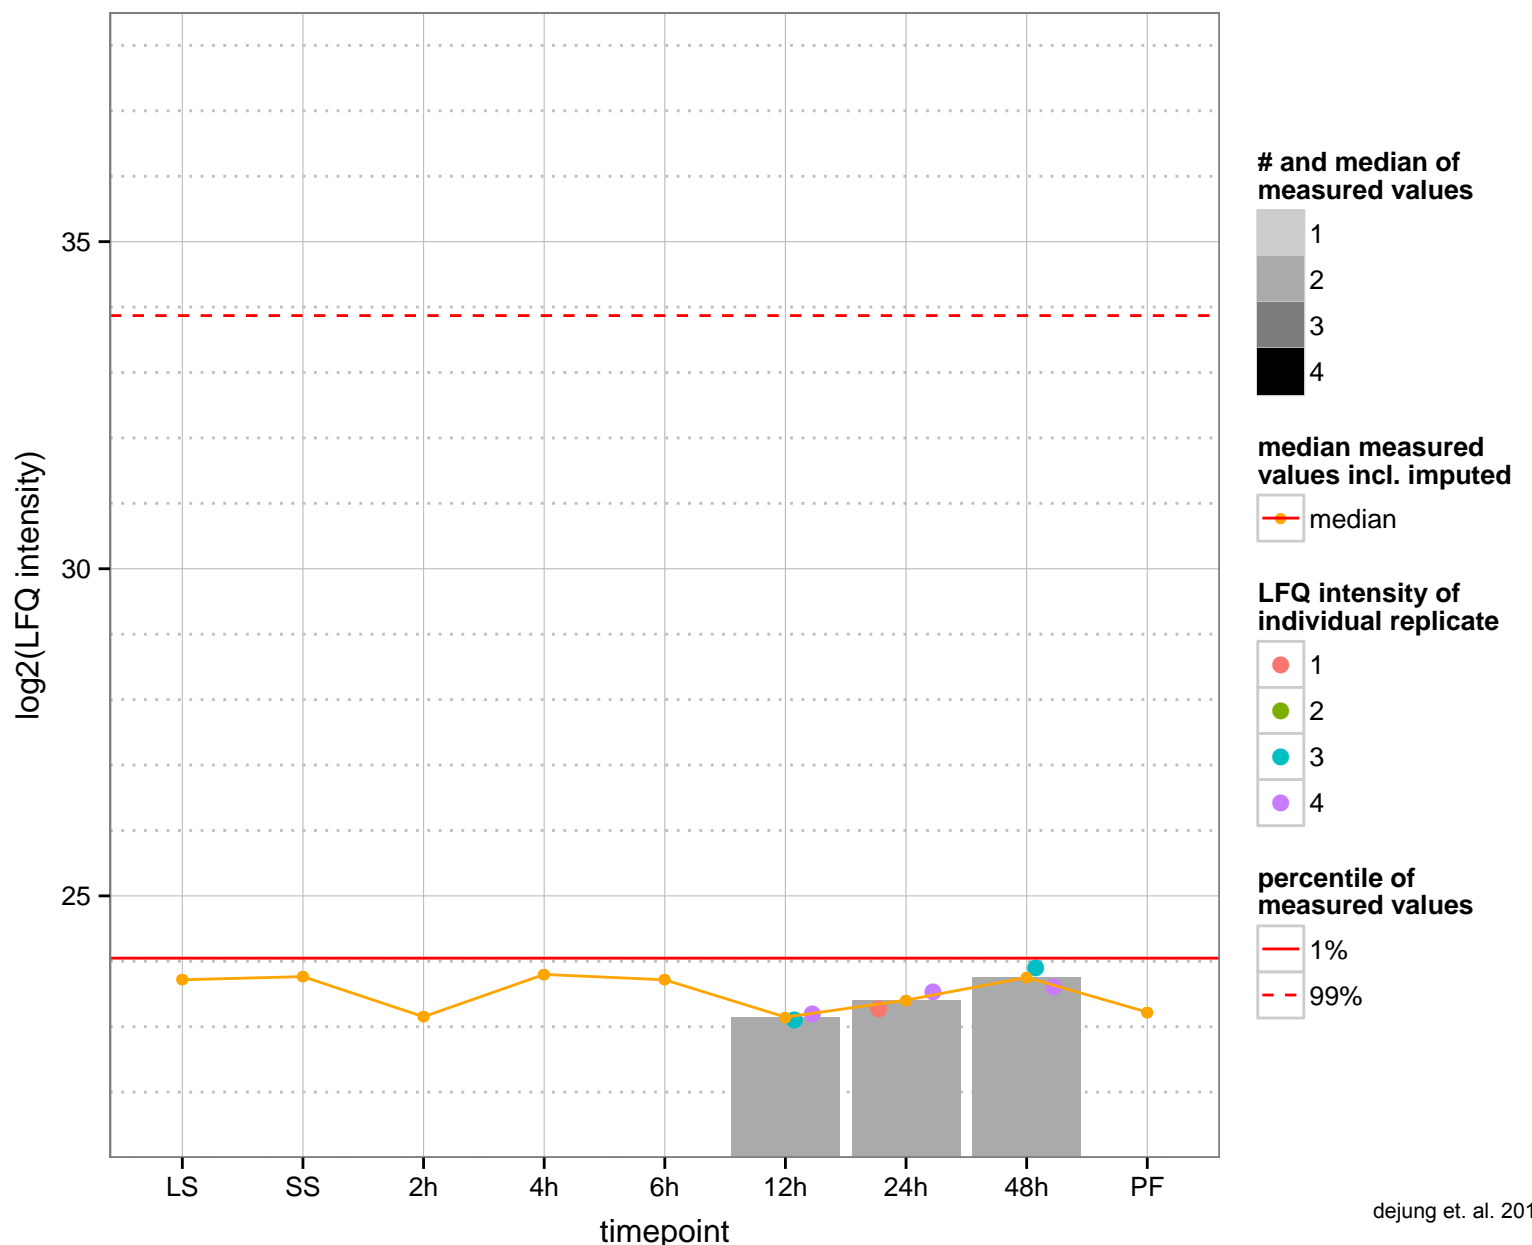

hypothetical protein, conserved  
 Tb927.9.12100  
 AGOF: methyltransferase activity  
 AGOC: mitochondrion  
 AGOP: metabolic process  
 PGO: methyltransferase activity  
 PGOC: null  
 PGOP: metabolic process

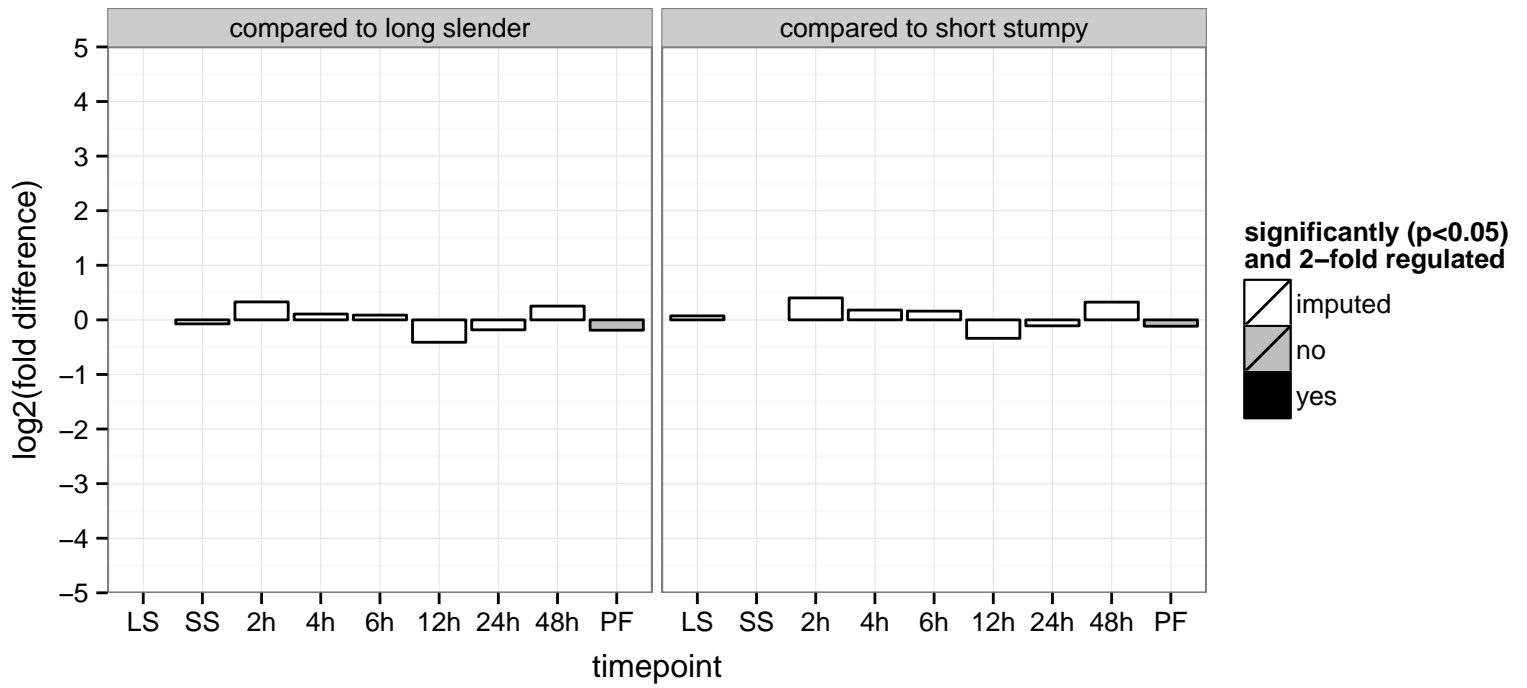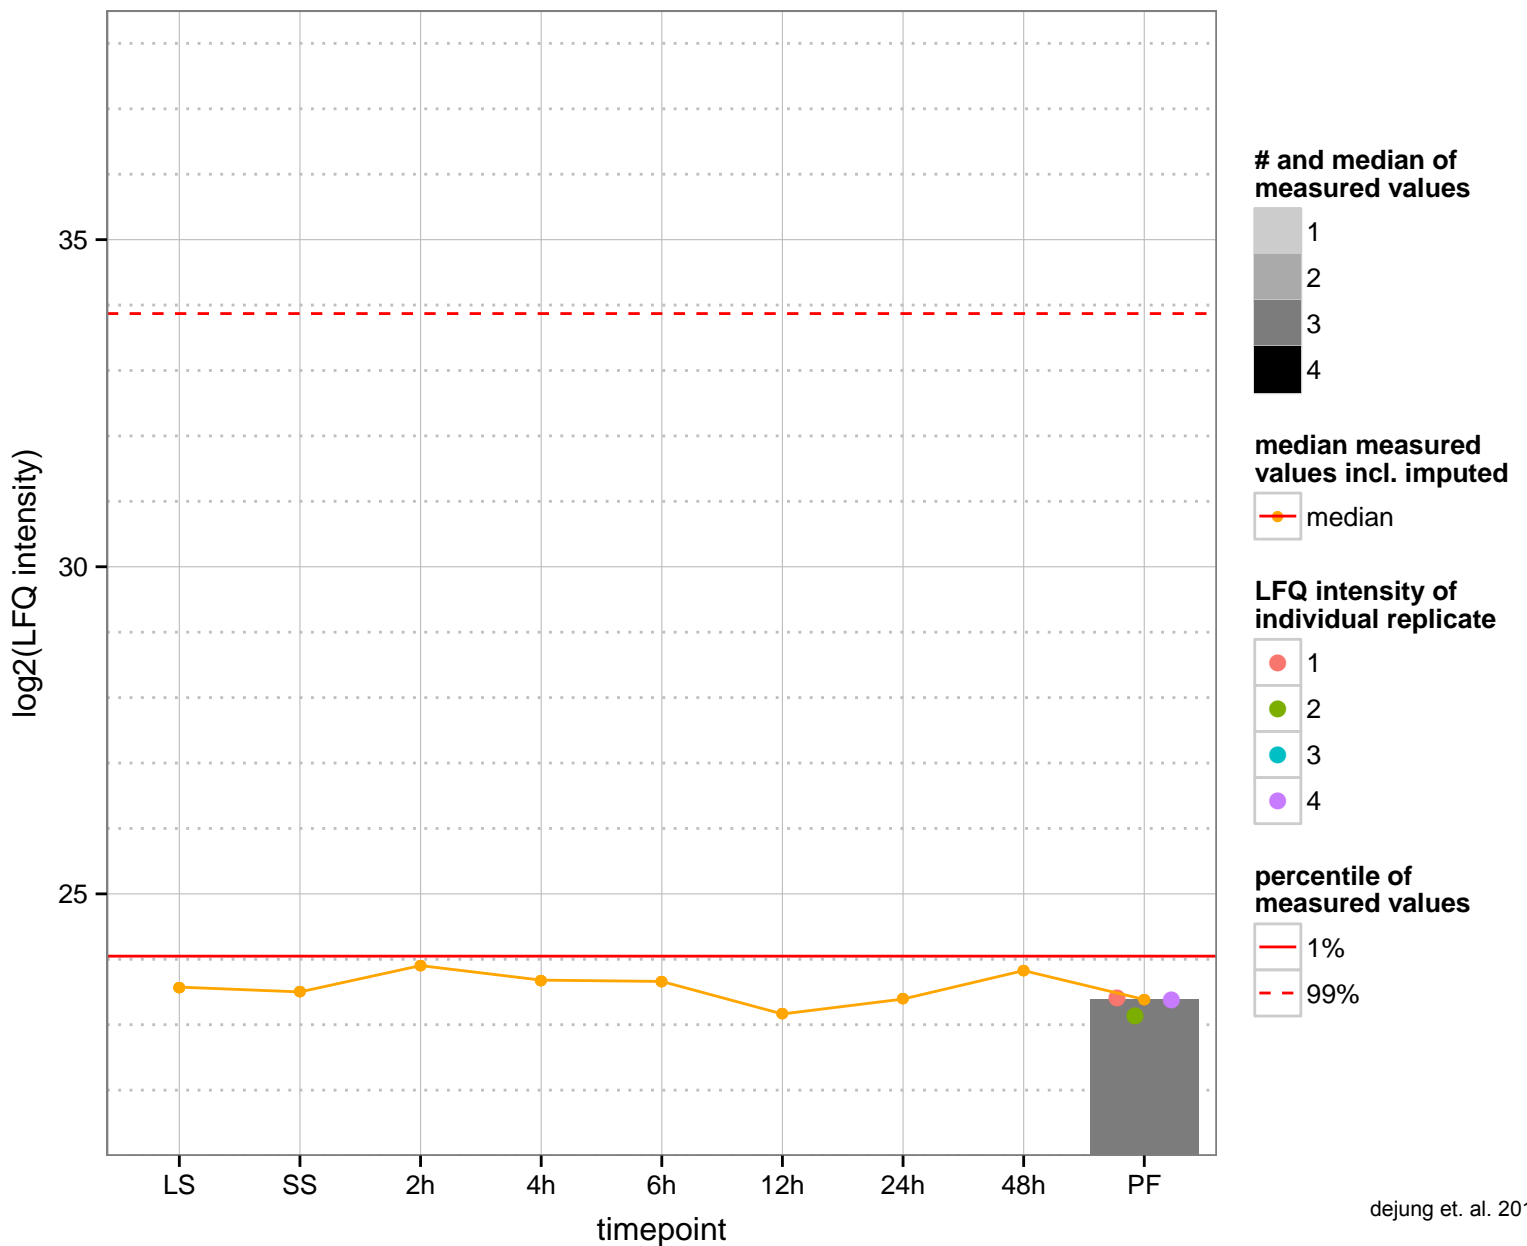



transport protein particle (TRAPP) subunit, putative  
 Tb927.9.12150  
 AGOF: null  
 AGOC: TRAPP complex, membrane  
 AGOP: ER to Golgi vesicle-mediated transport  
 PGO: null  
 PGOC: null  
 PGOP: null

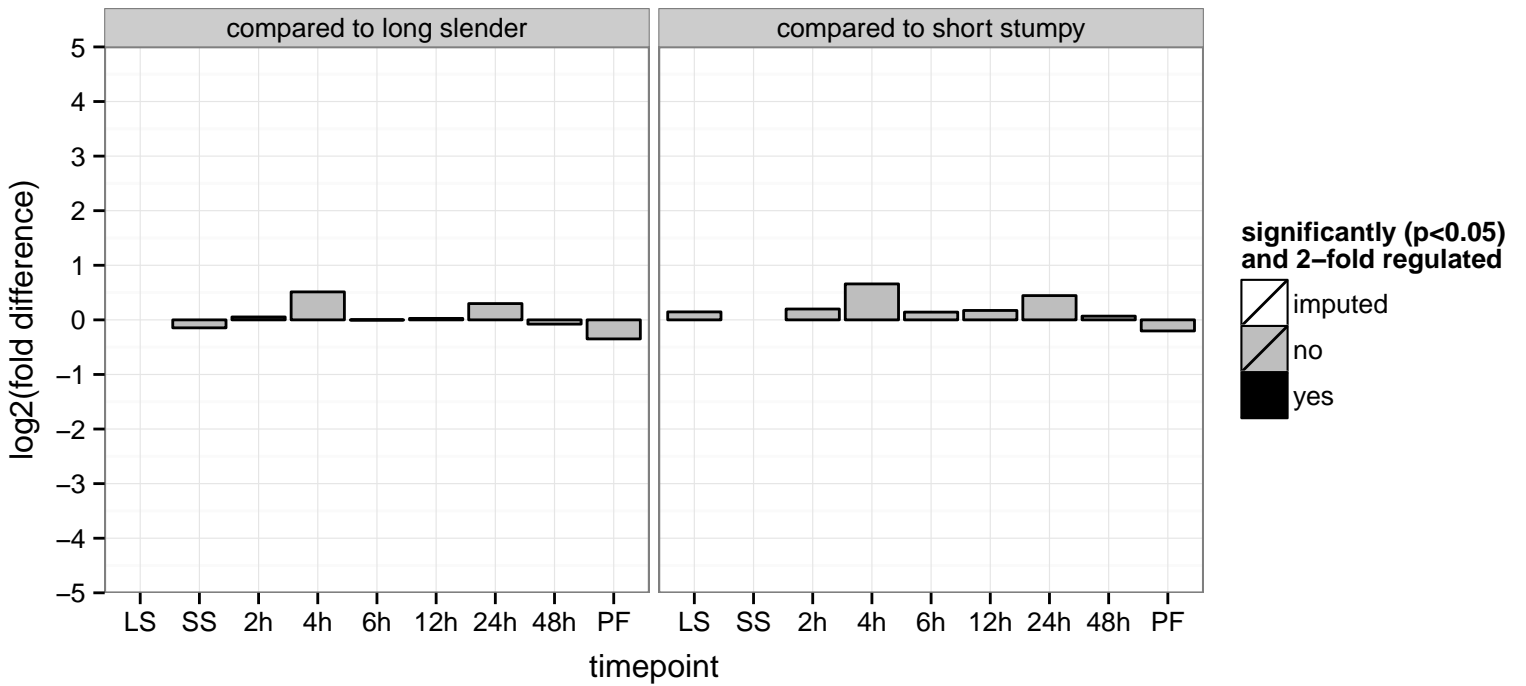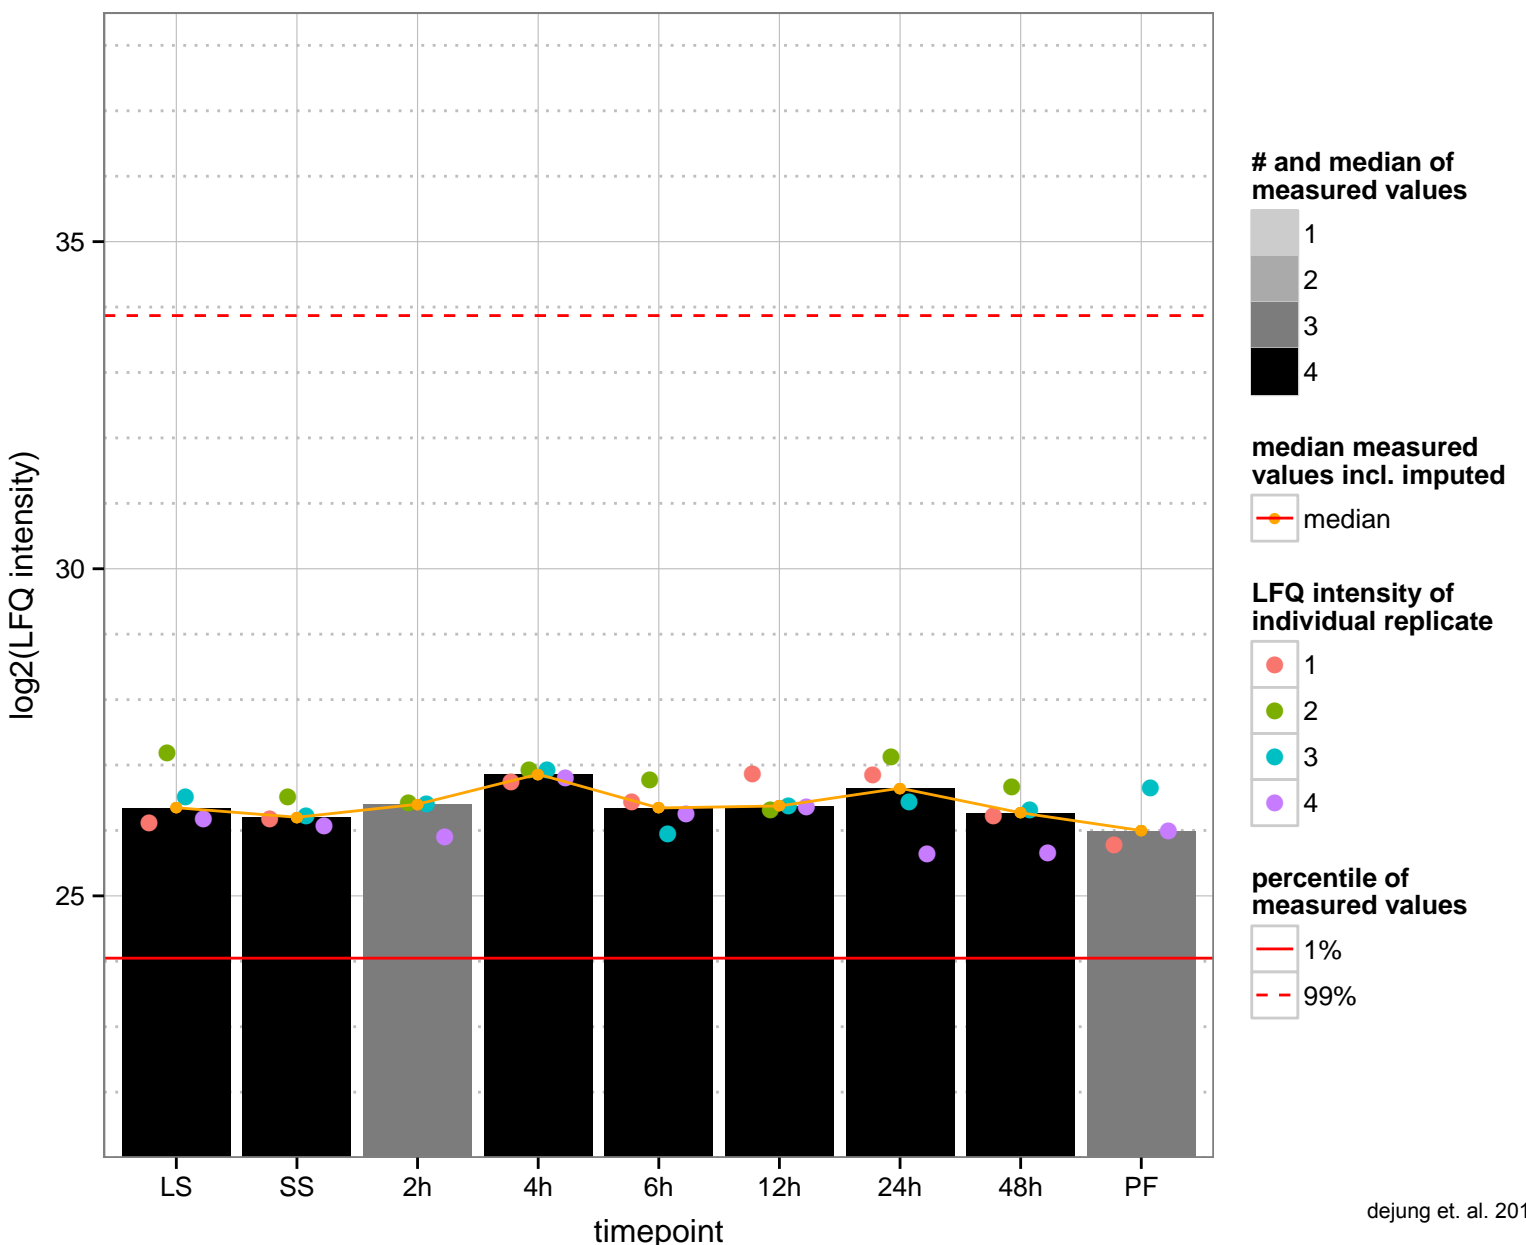

unspecified product  
 Tb927.9.12240;Tb927.9.12200  
 AGOF: structural constituent of ribosome  
 AGOC: intracellular, ribosome  
 AGOP: translation  
 PGOF: structural constituent of ribosome  
 PGO: intracellular, ribosome  
 PGOP: translation

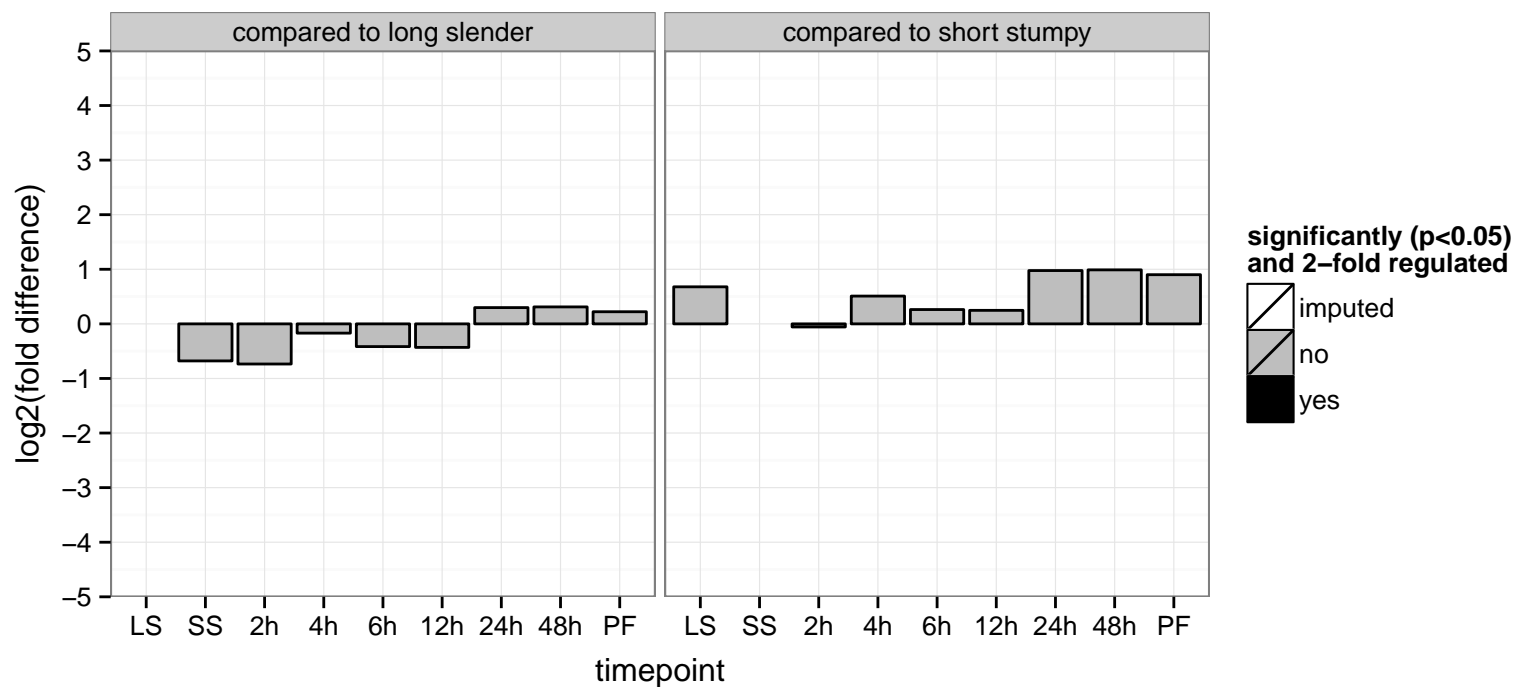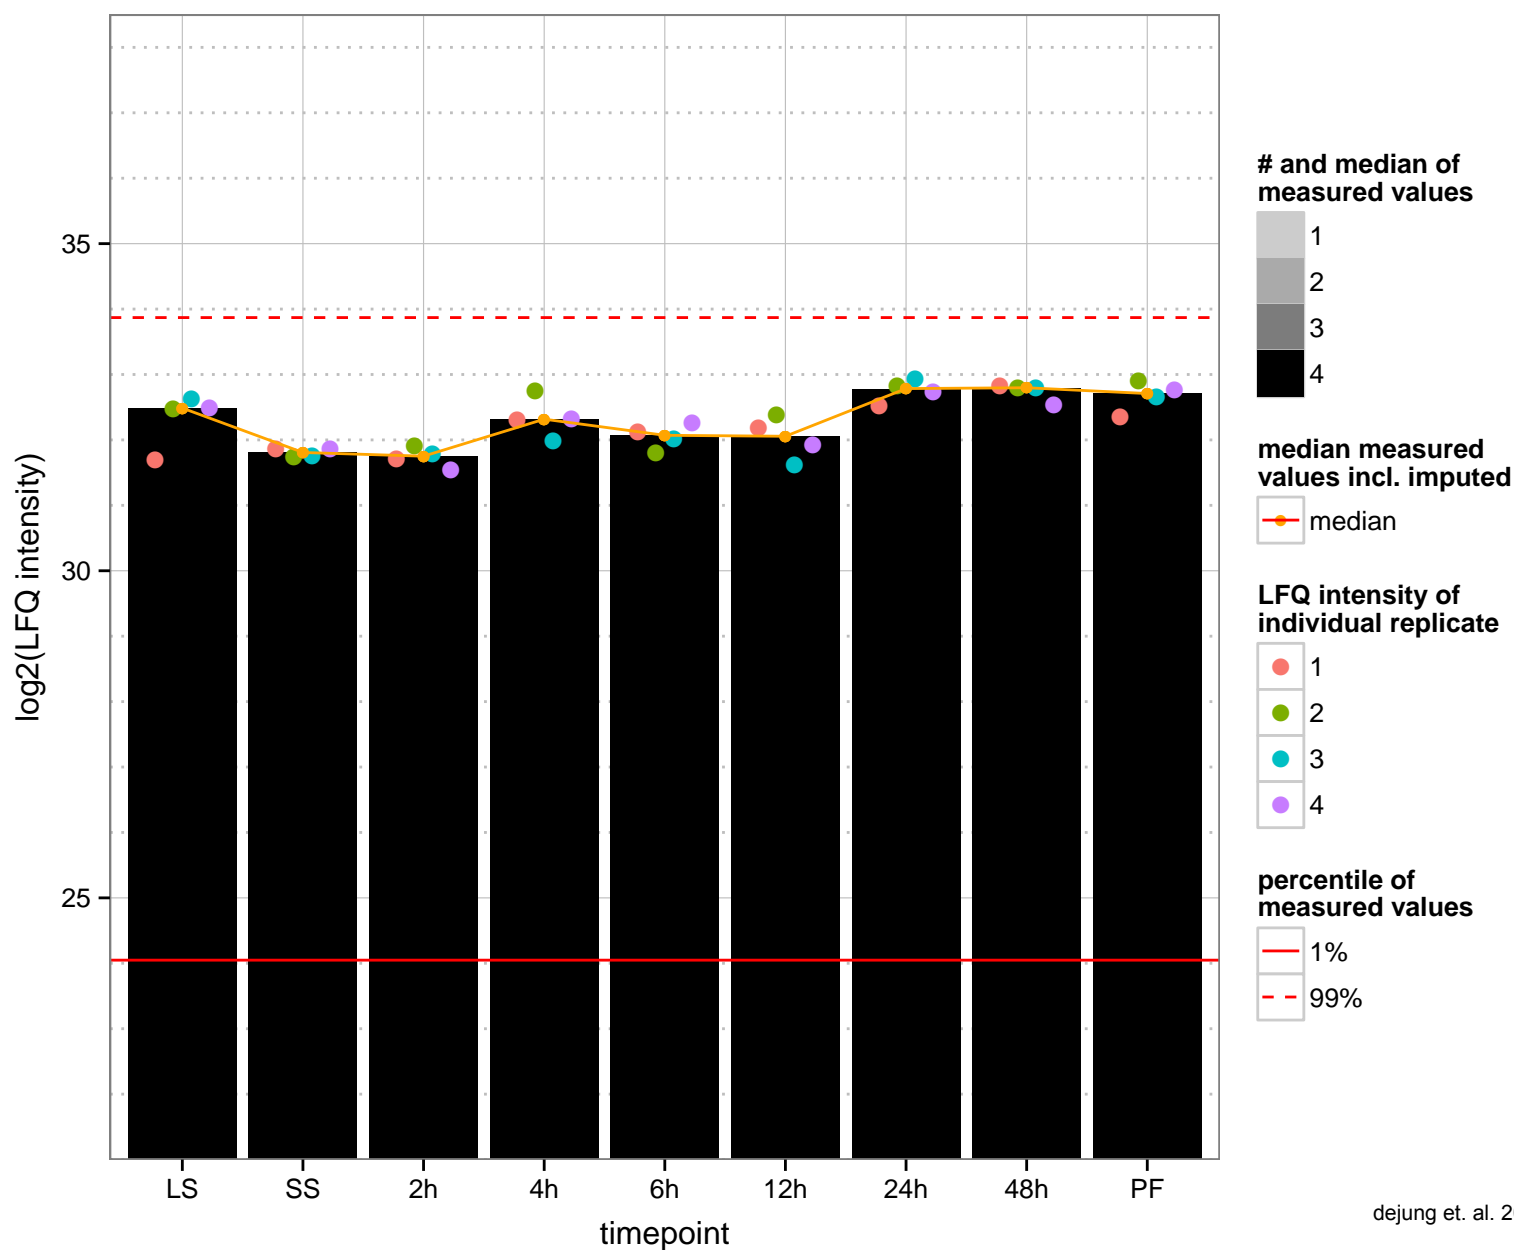

Peroxin 19  
 Tb927.9.12290  
 AGOF: null  
 AGOC: peroxisome  
 AGOP: null  
 PGO: null  
 PGO: peroxisome  
 PGO: null

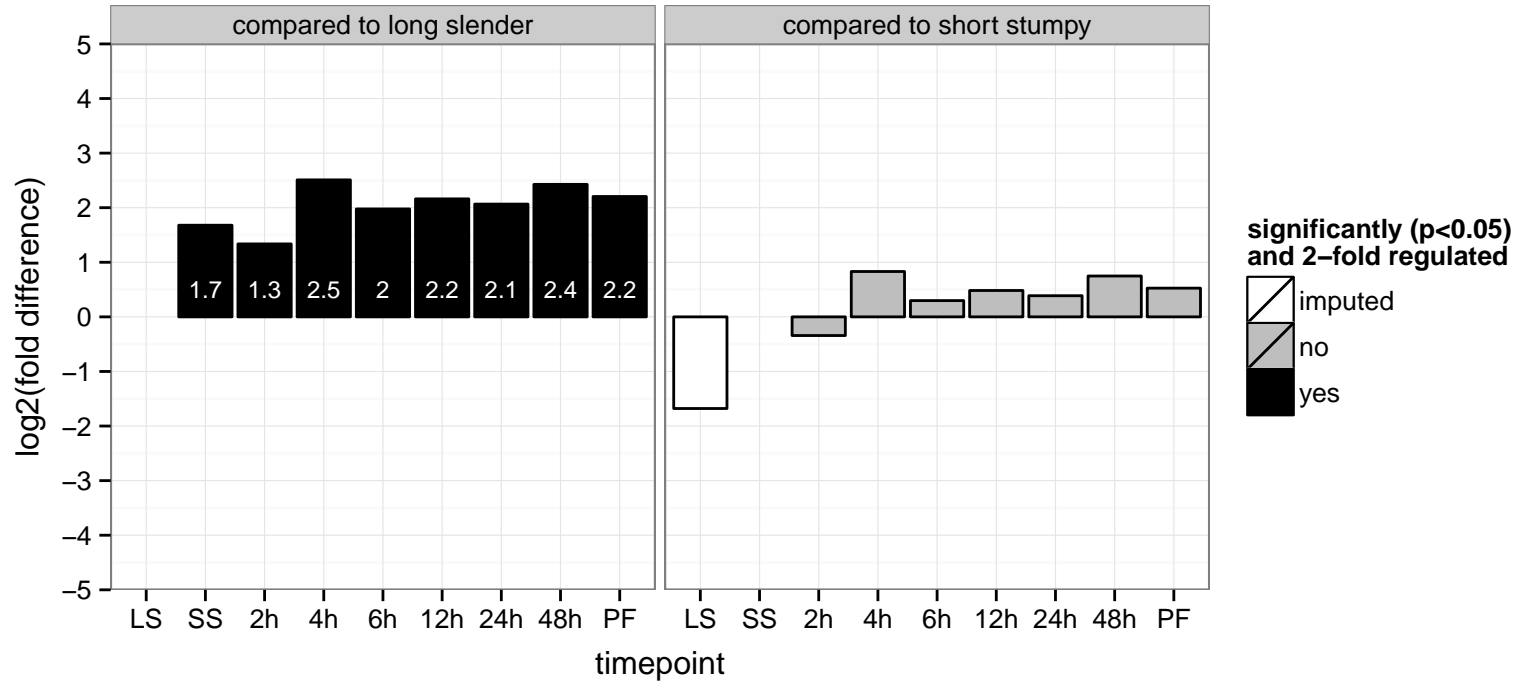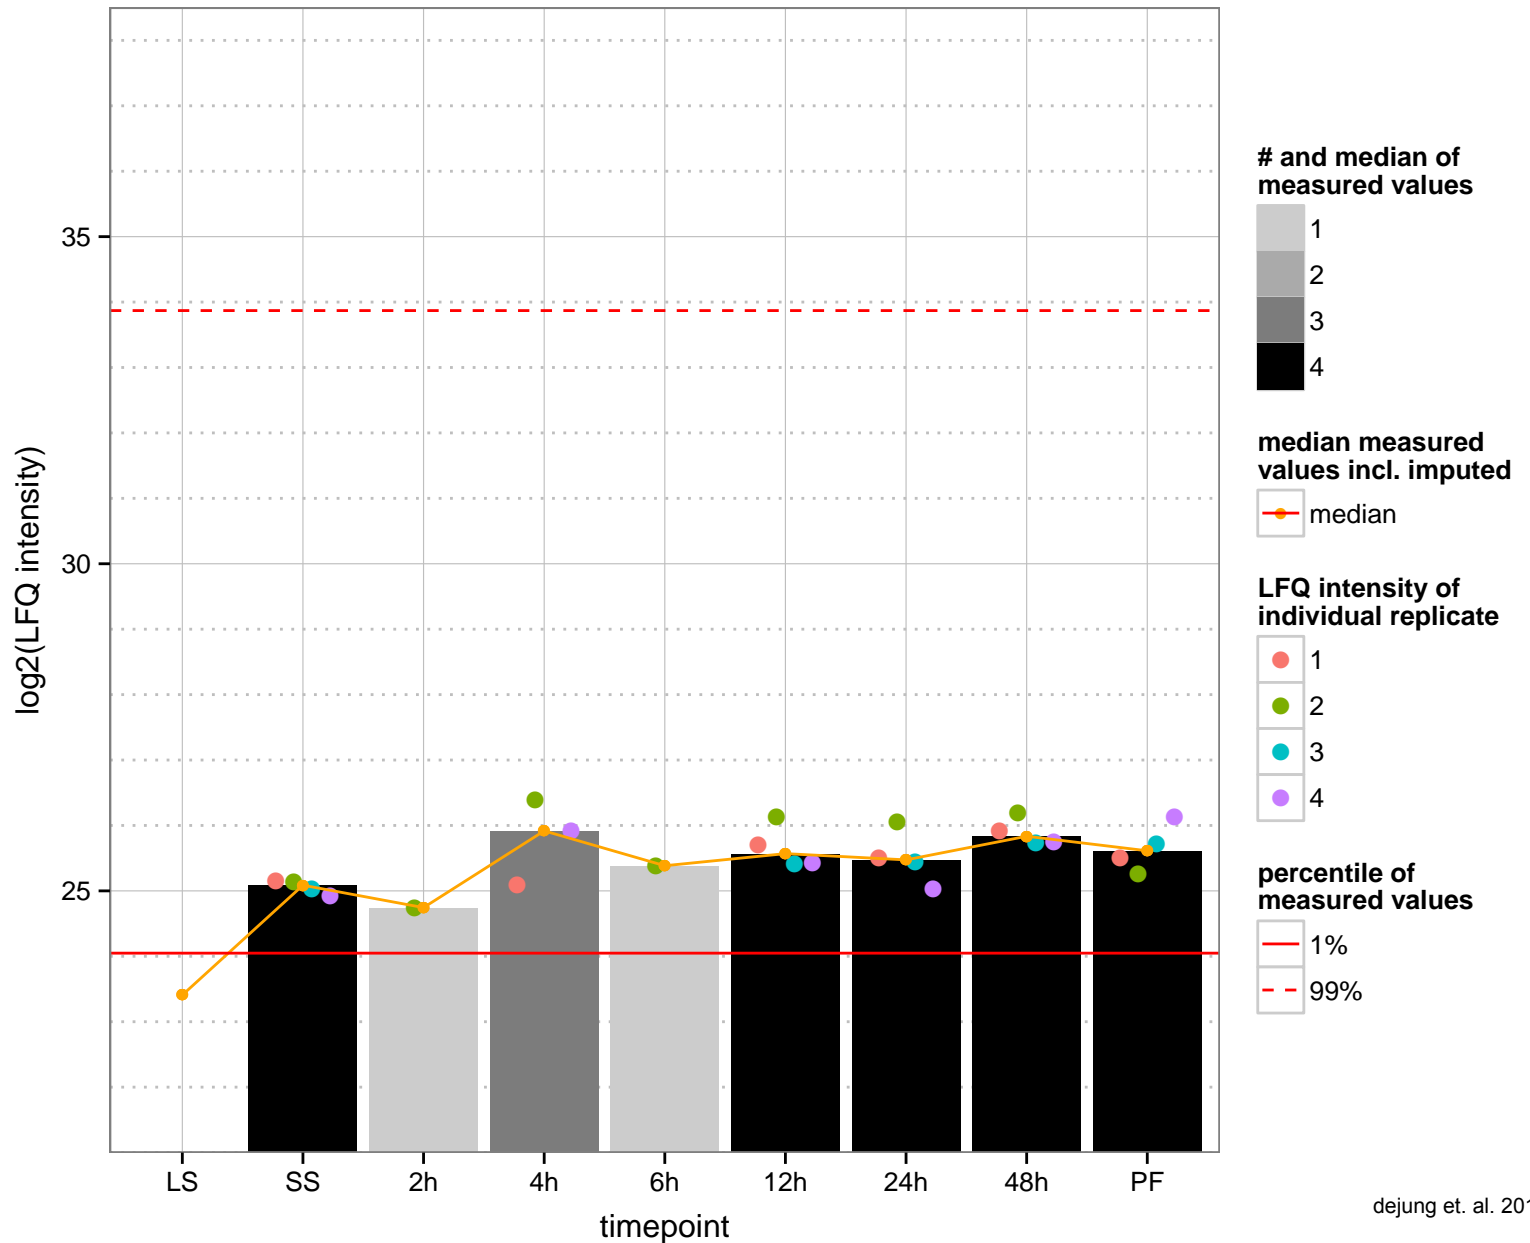

replication factor C, subunit 3, putative

Tb927.9.12300

AGOF: ATP binding, DNA binding, DNA clamp loader activity

AGOC: DNA replication factor C complex

AGOP: DNA replication

PGOF: ATP binding, DNA binding, nucleoside-triphosphatase activity, nucleotide binding

PGOC: null

PGOP: DNA replication

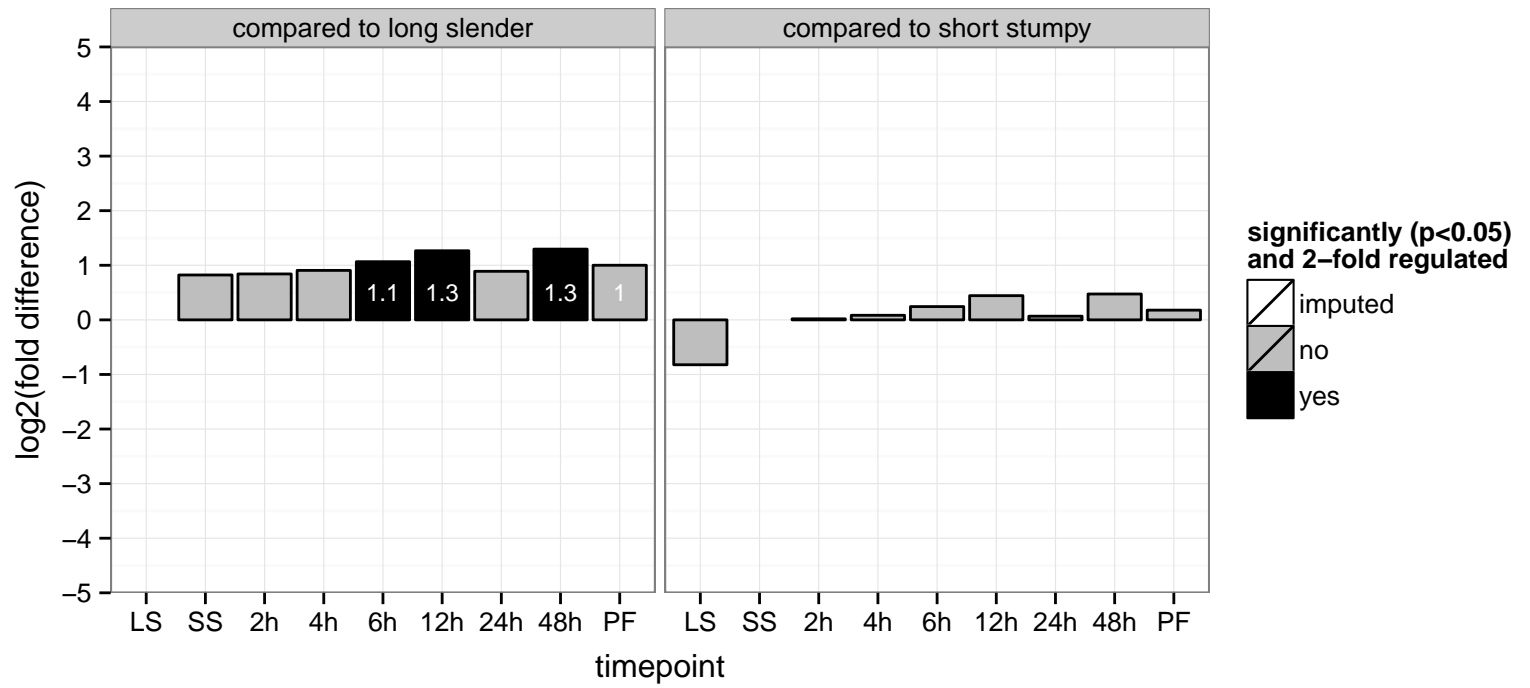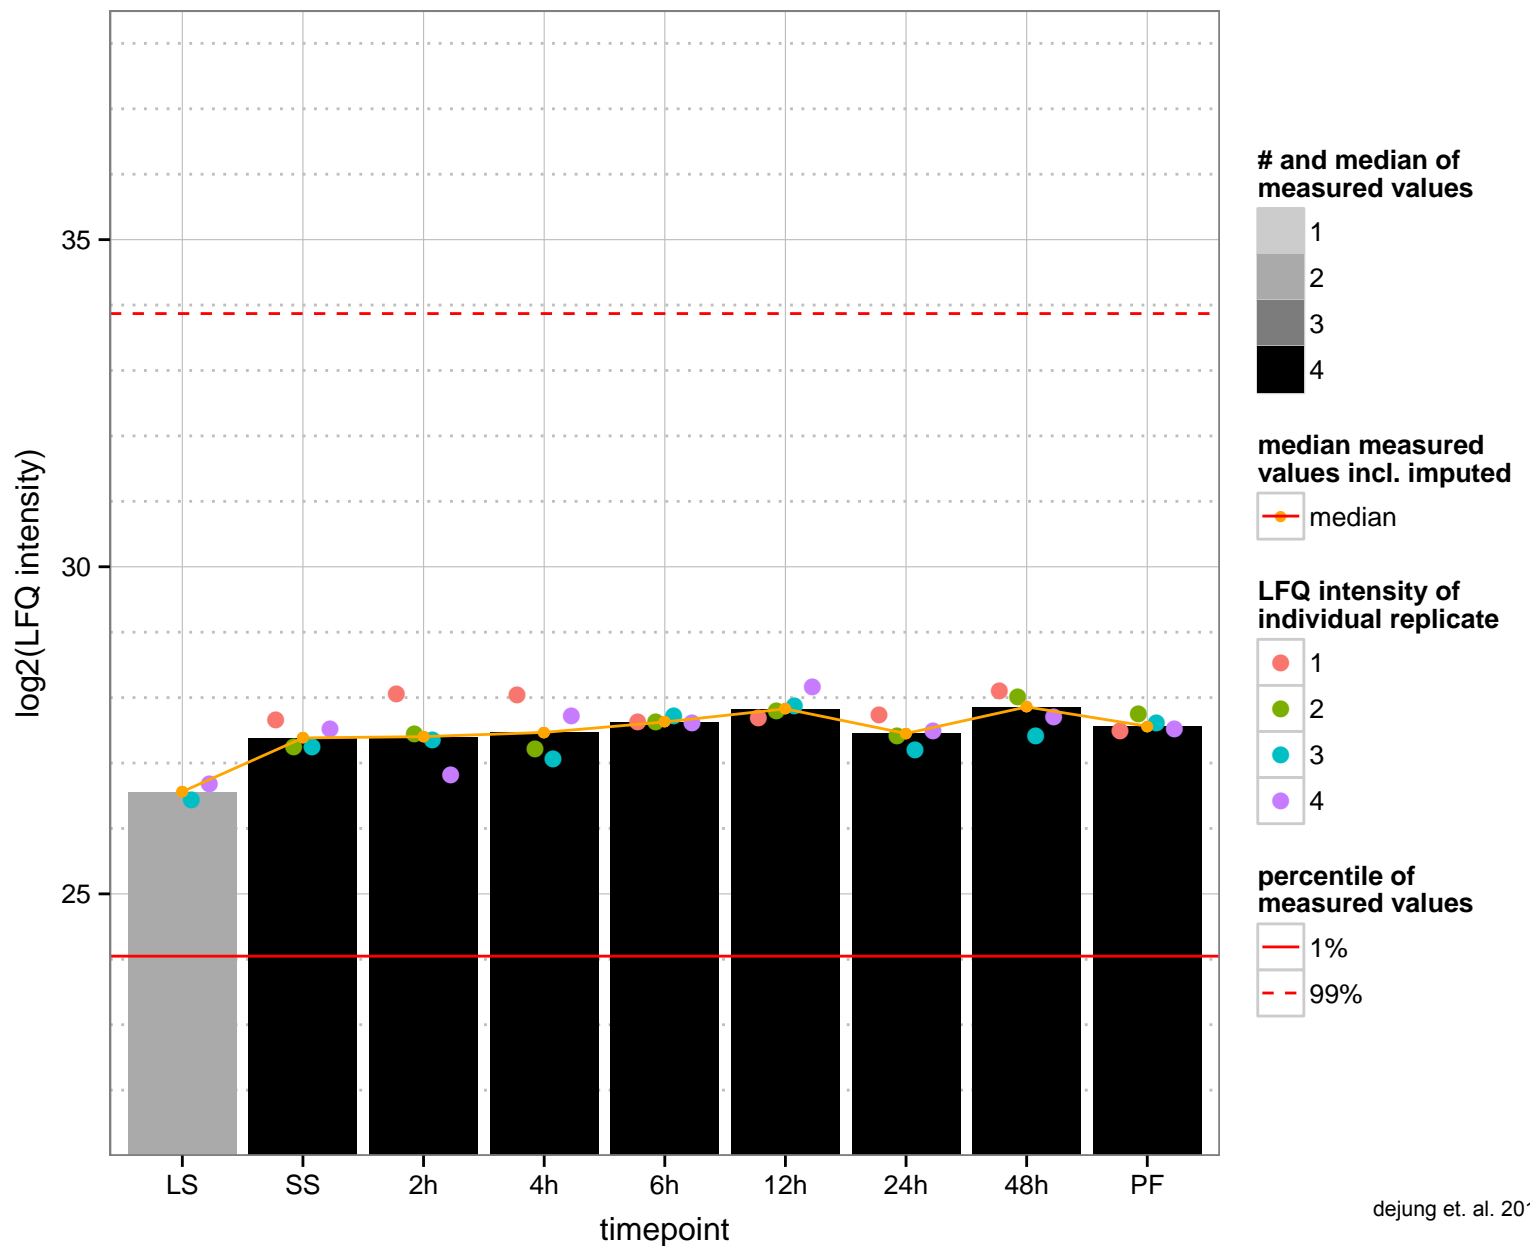

hypothetical protein, conserved  
 Tb927.9.12480  
 AGOF: microtubule motor activity  
 AGOC: microtubule associated complex, mitochondrion  
 AGOP: microtubule-based process  
 PGO: null  
 PGOC: microtubule associated complex  
 PGOP: microtubule-based process

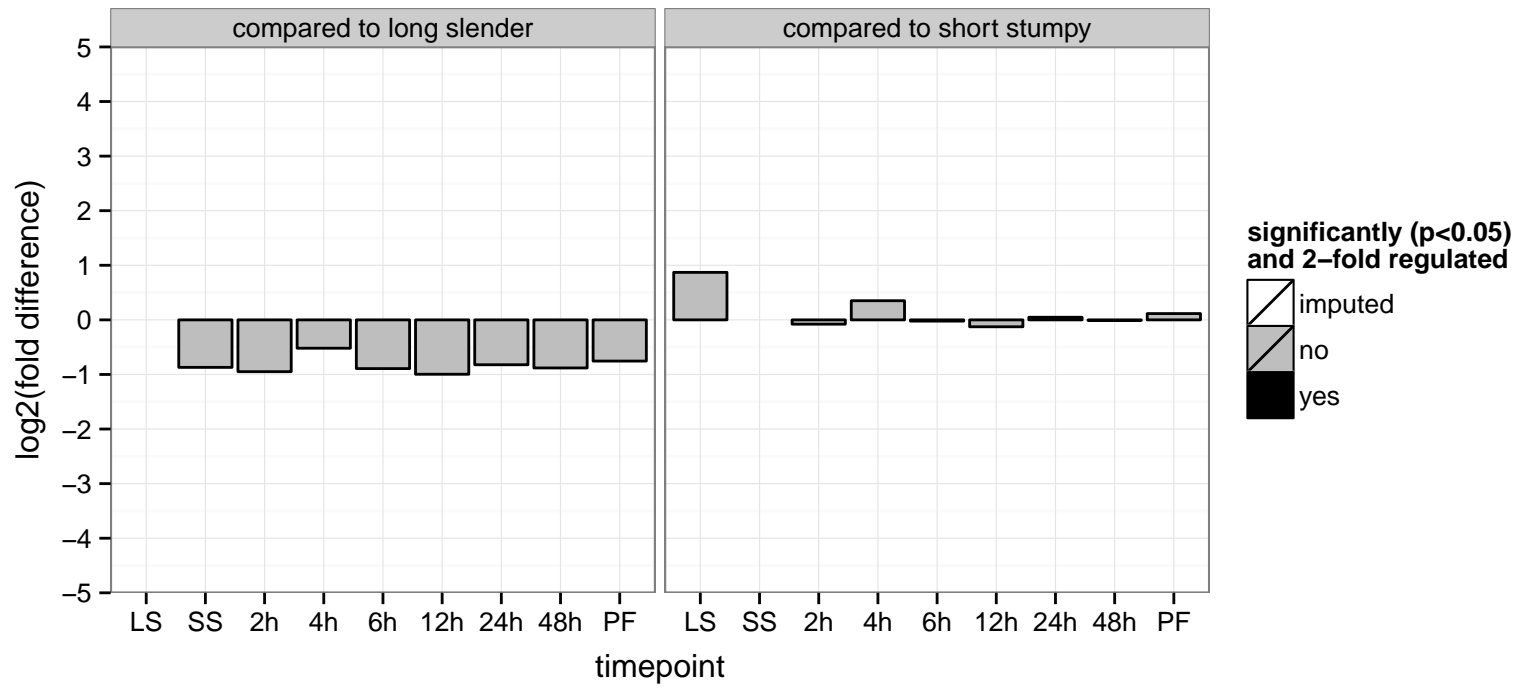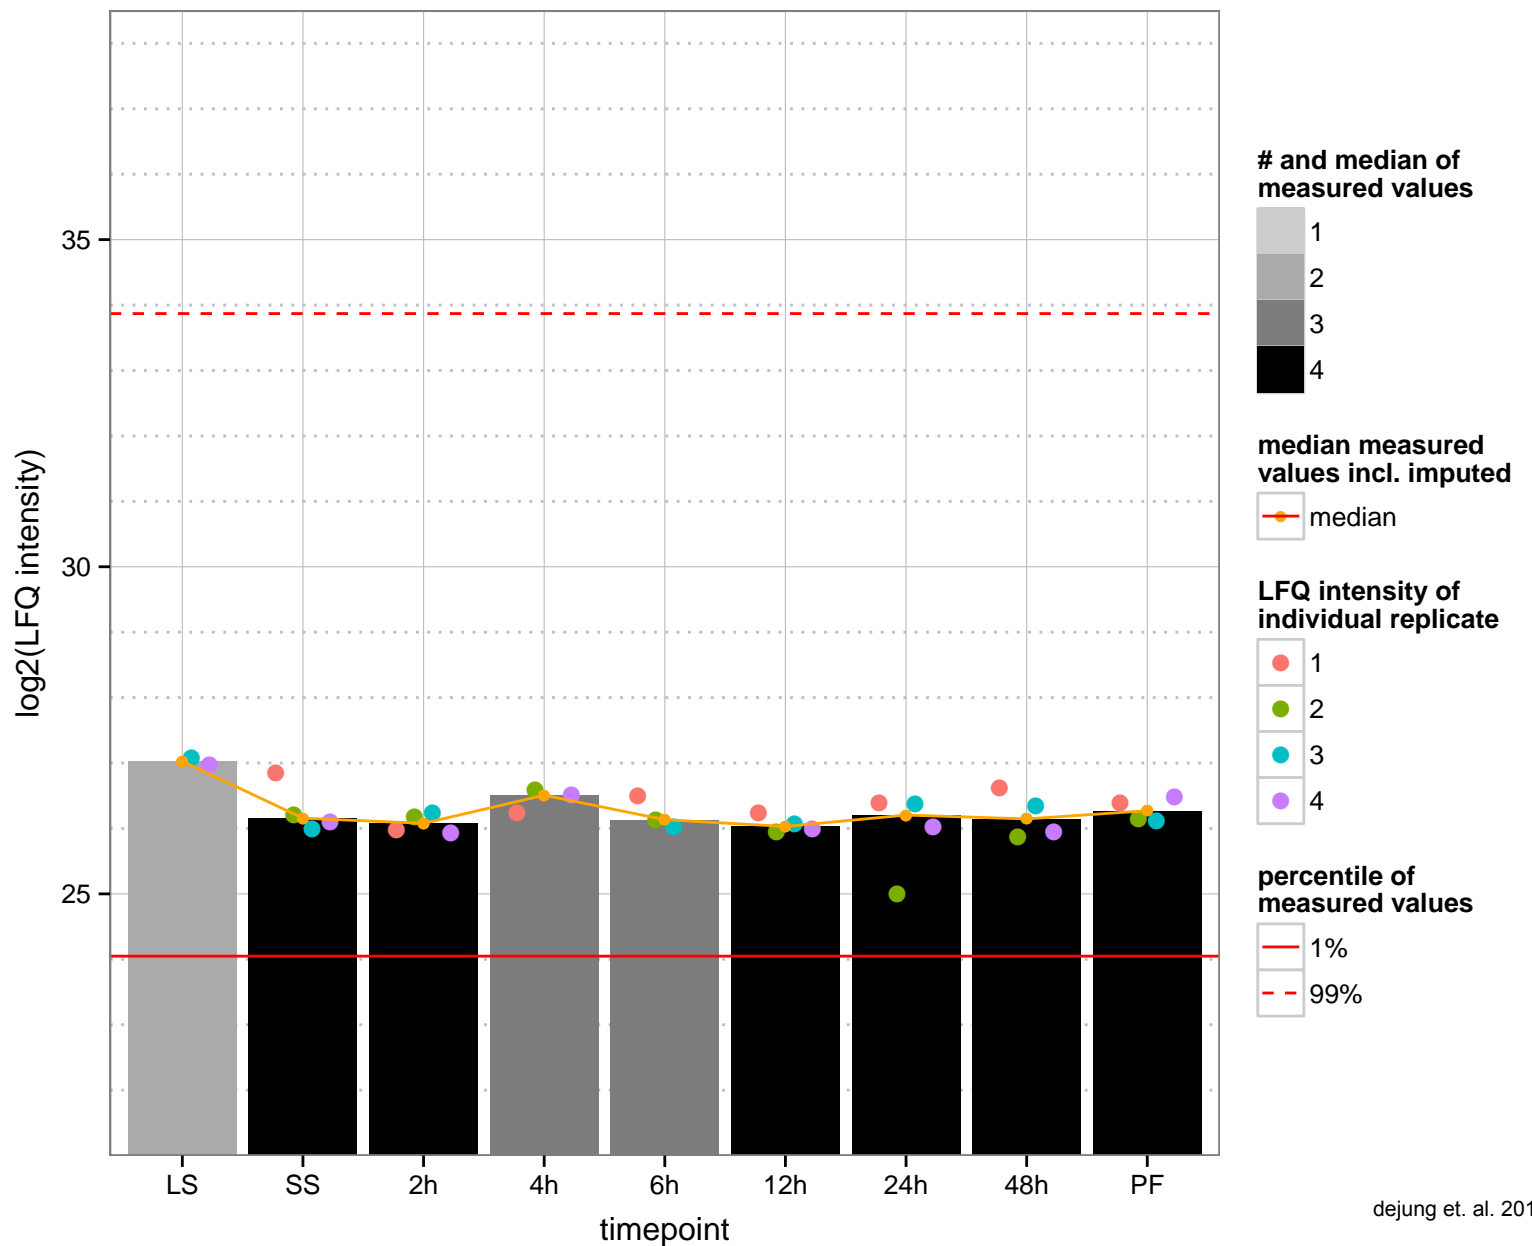

hypothetical protein, conserved  
 Tb927.9.12500  
 AGOF: null  
 AGOC: mitochondrion  
 AGOP: null  
 PGO: null  
 PGO: null  
 PGO: null

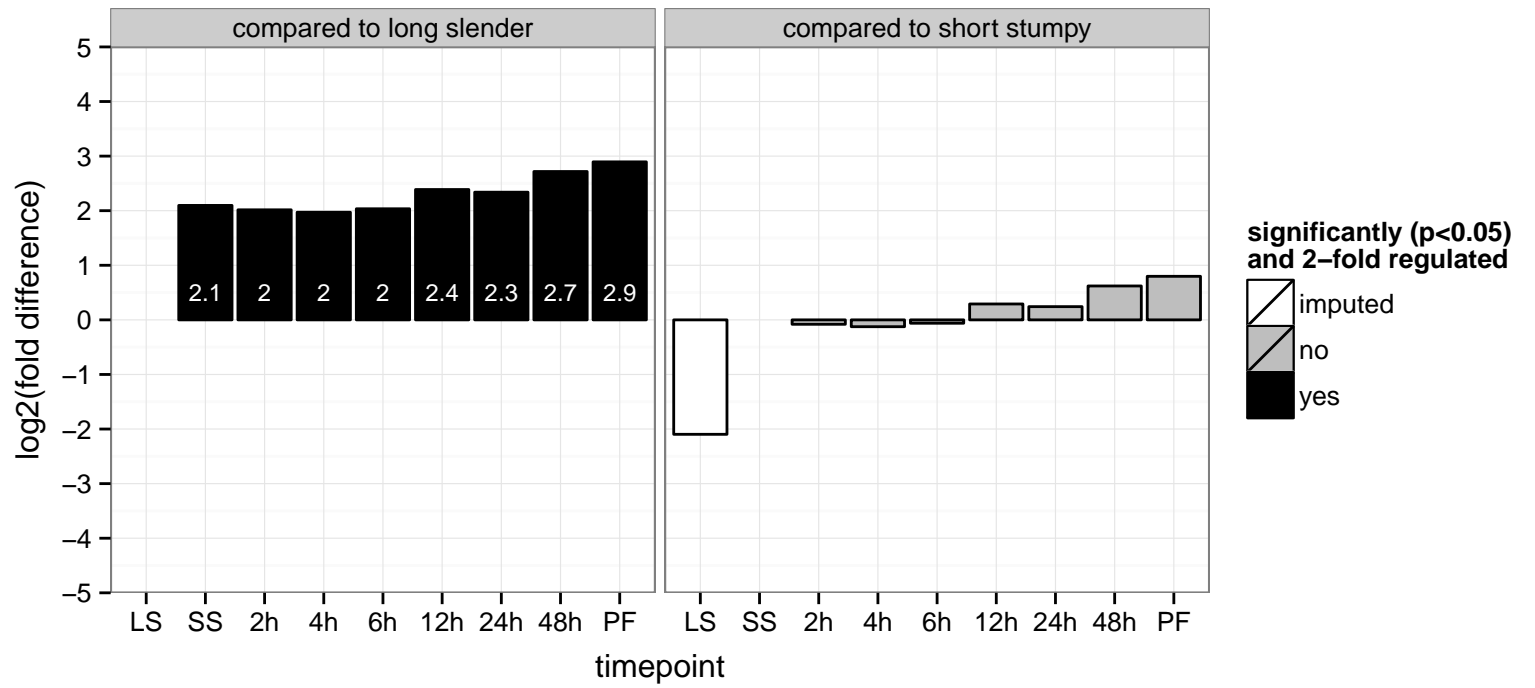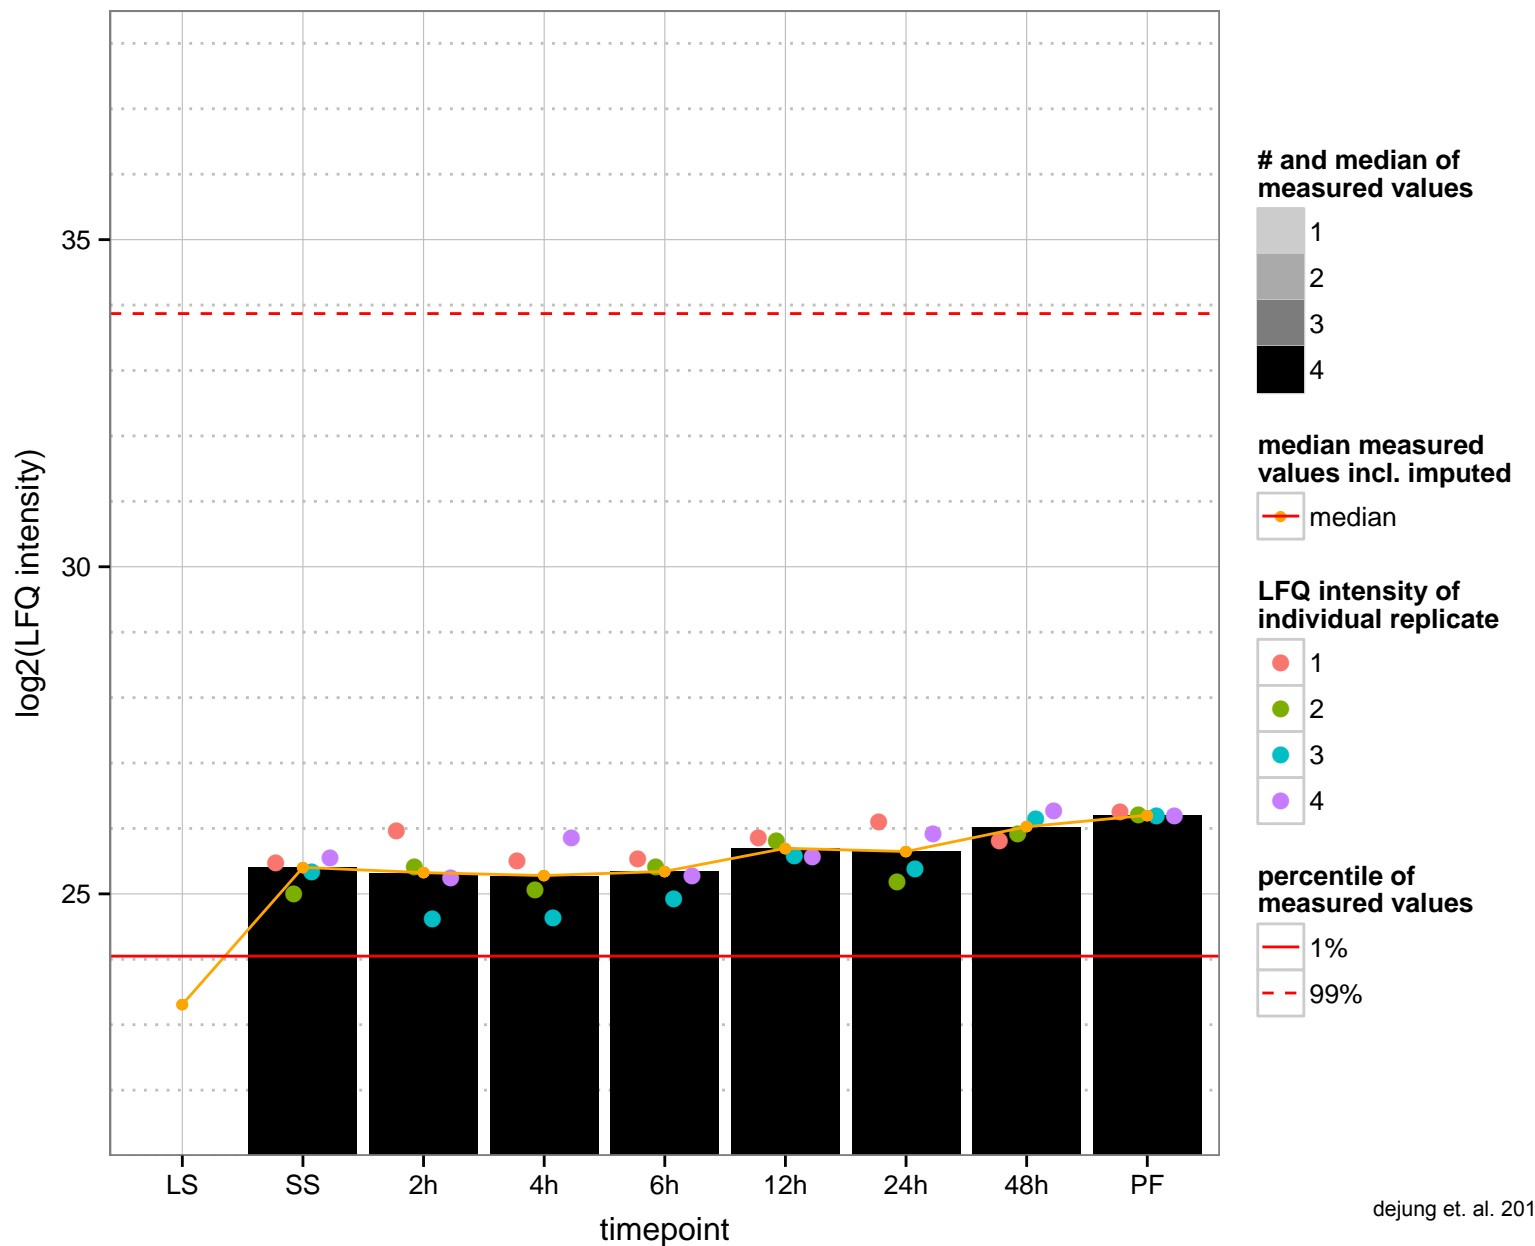

phospholipase A1, putative

Tb927.9.12700

AGOF: 1-alkyl-2-acetylglycerophosphocholine esterase activity, phosphatidylcholine 1-acylhydrolase activity

AGOC: extracellular region

AGOP: lipid catabolic process

PGOF: 1-alkyl-2-acetylglycerophosphocholine esterase activity

PGOC: null

PGOP: lipid catabolic process

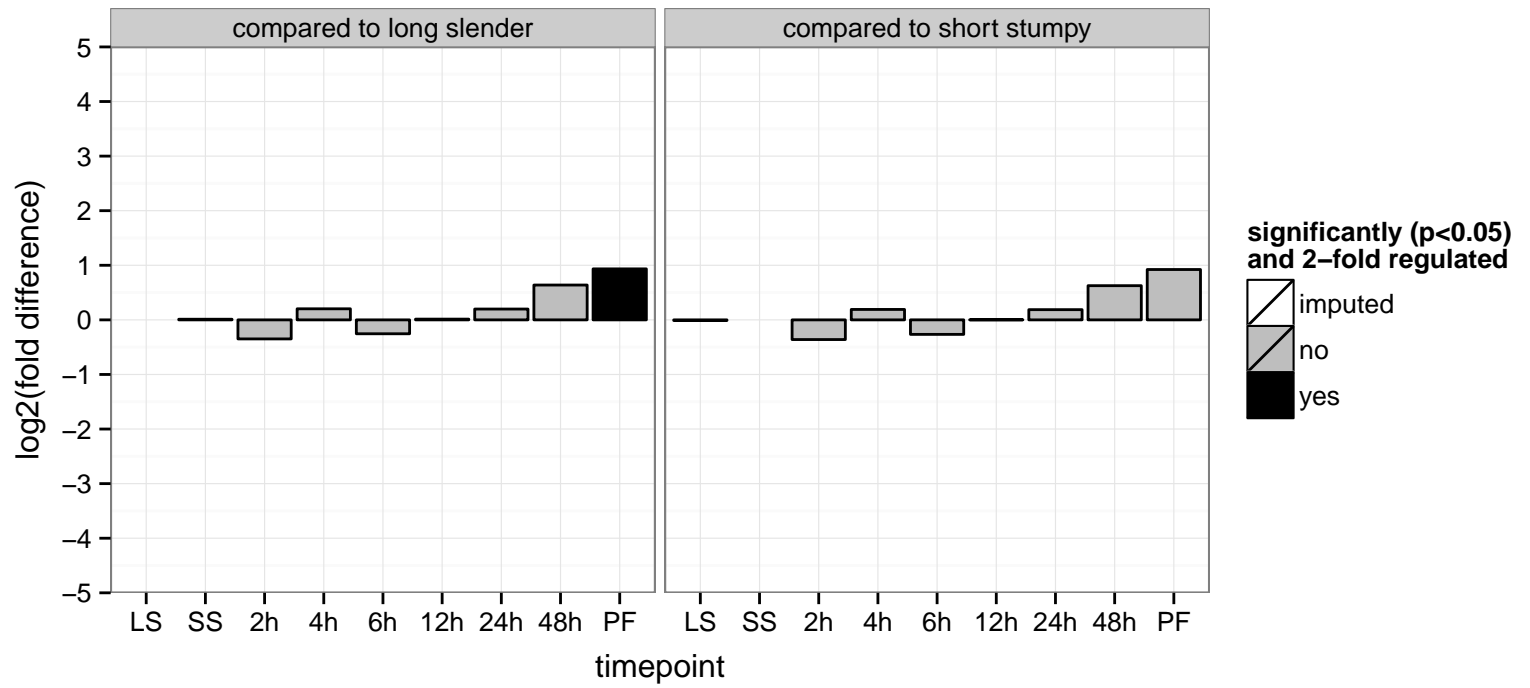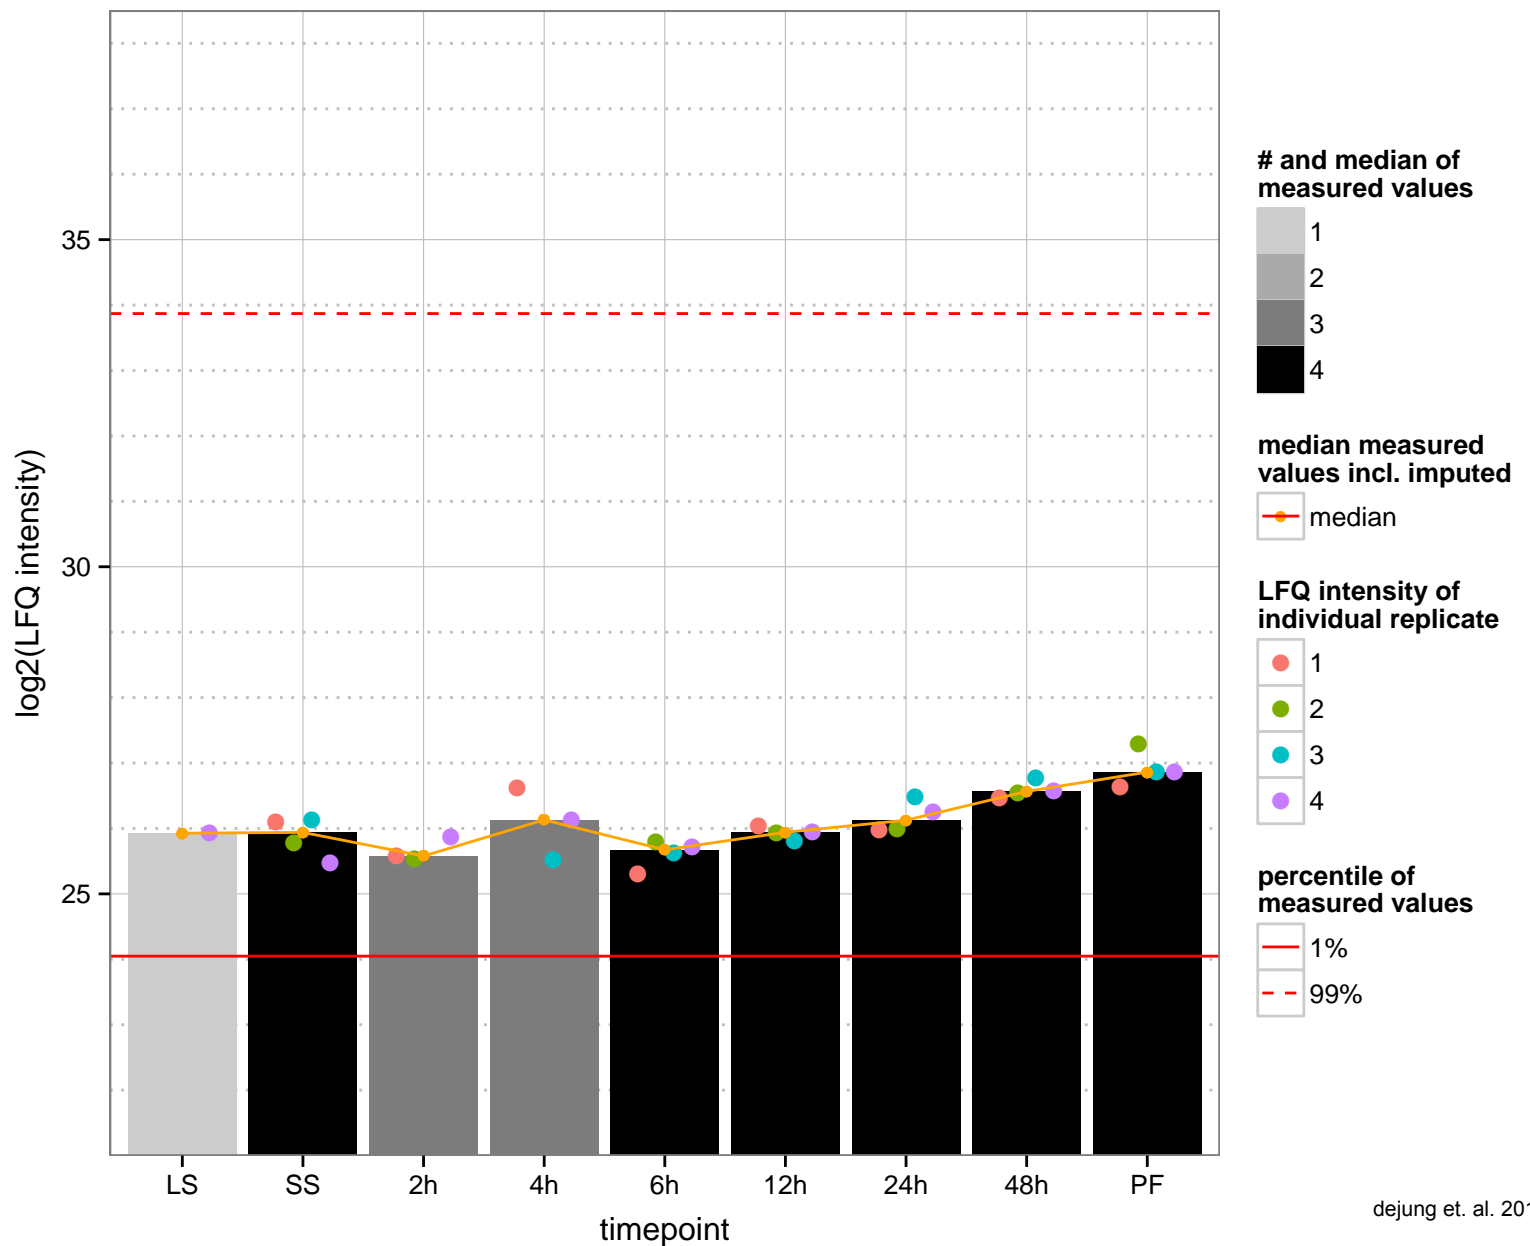

hypothetical protein, conserved  
 Tb927.9.12710  
 AGOF: null  
 AGOC: null  
 AGOP: null  
 PGOF: null  
 PGO: null  
 PGOP: null

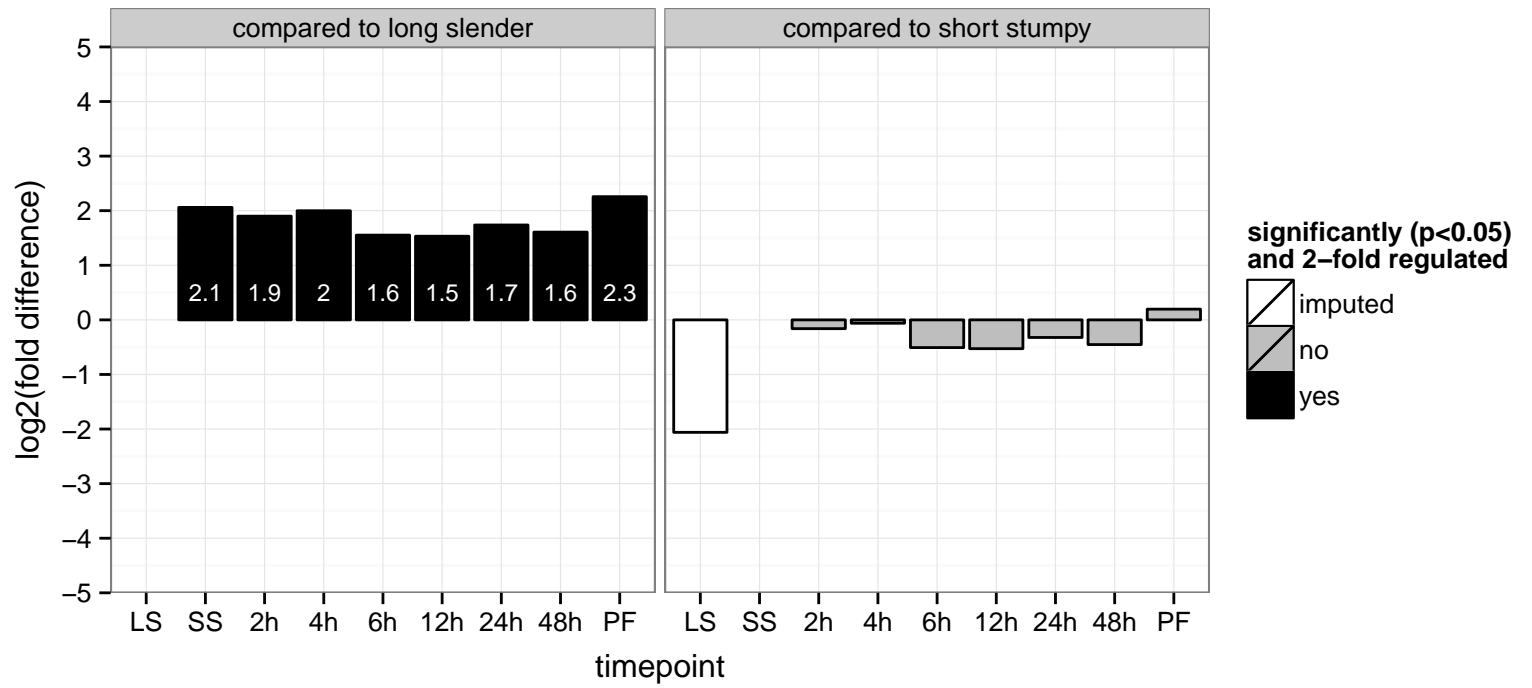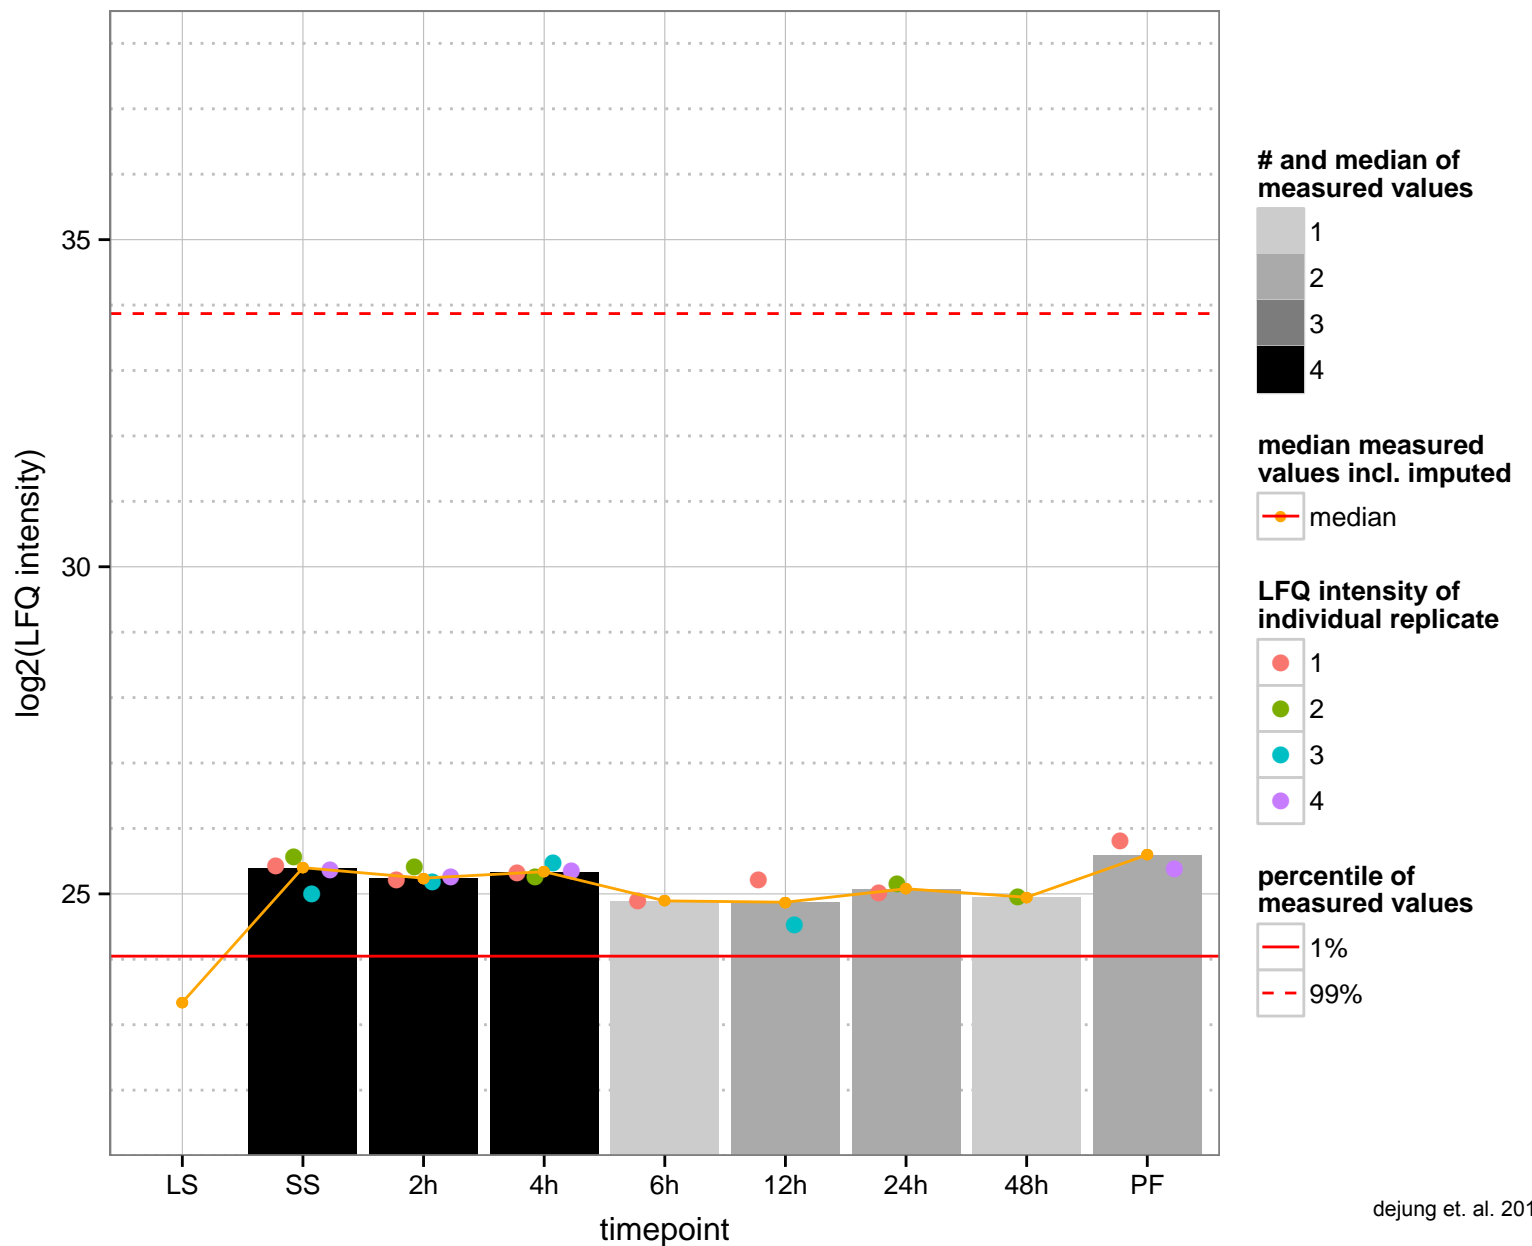



chaperone protein DNAj, putative

Tb927.9.12730

AGOF: chaperone binding, heat shock protein binding, unfolded protein binding

AGOC: mitochondrion

AGOP: protein folding

PGOF: heat shock protein binding, unfolded protein binding

PGOC: null

PGOP: protein folding

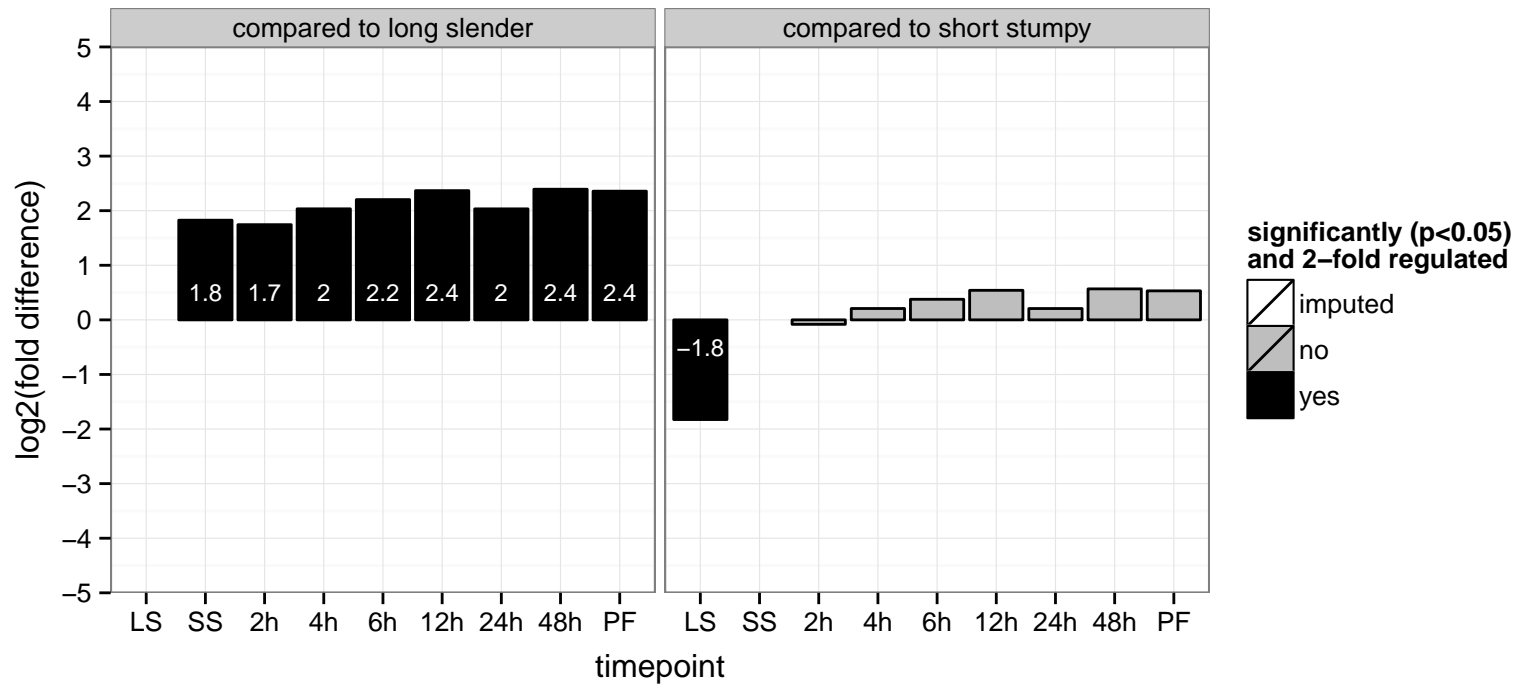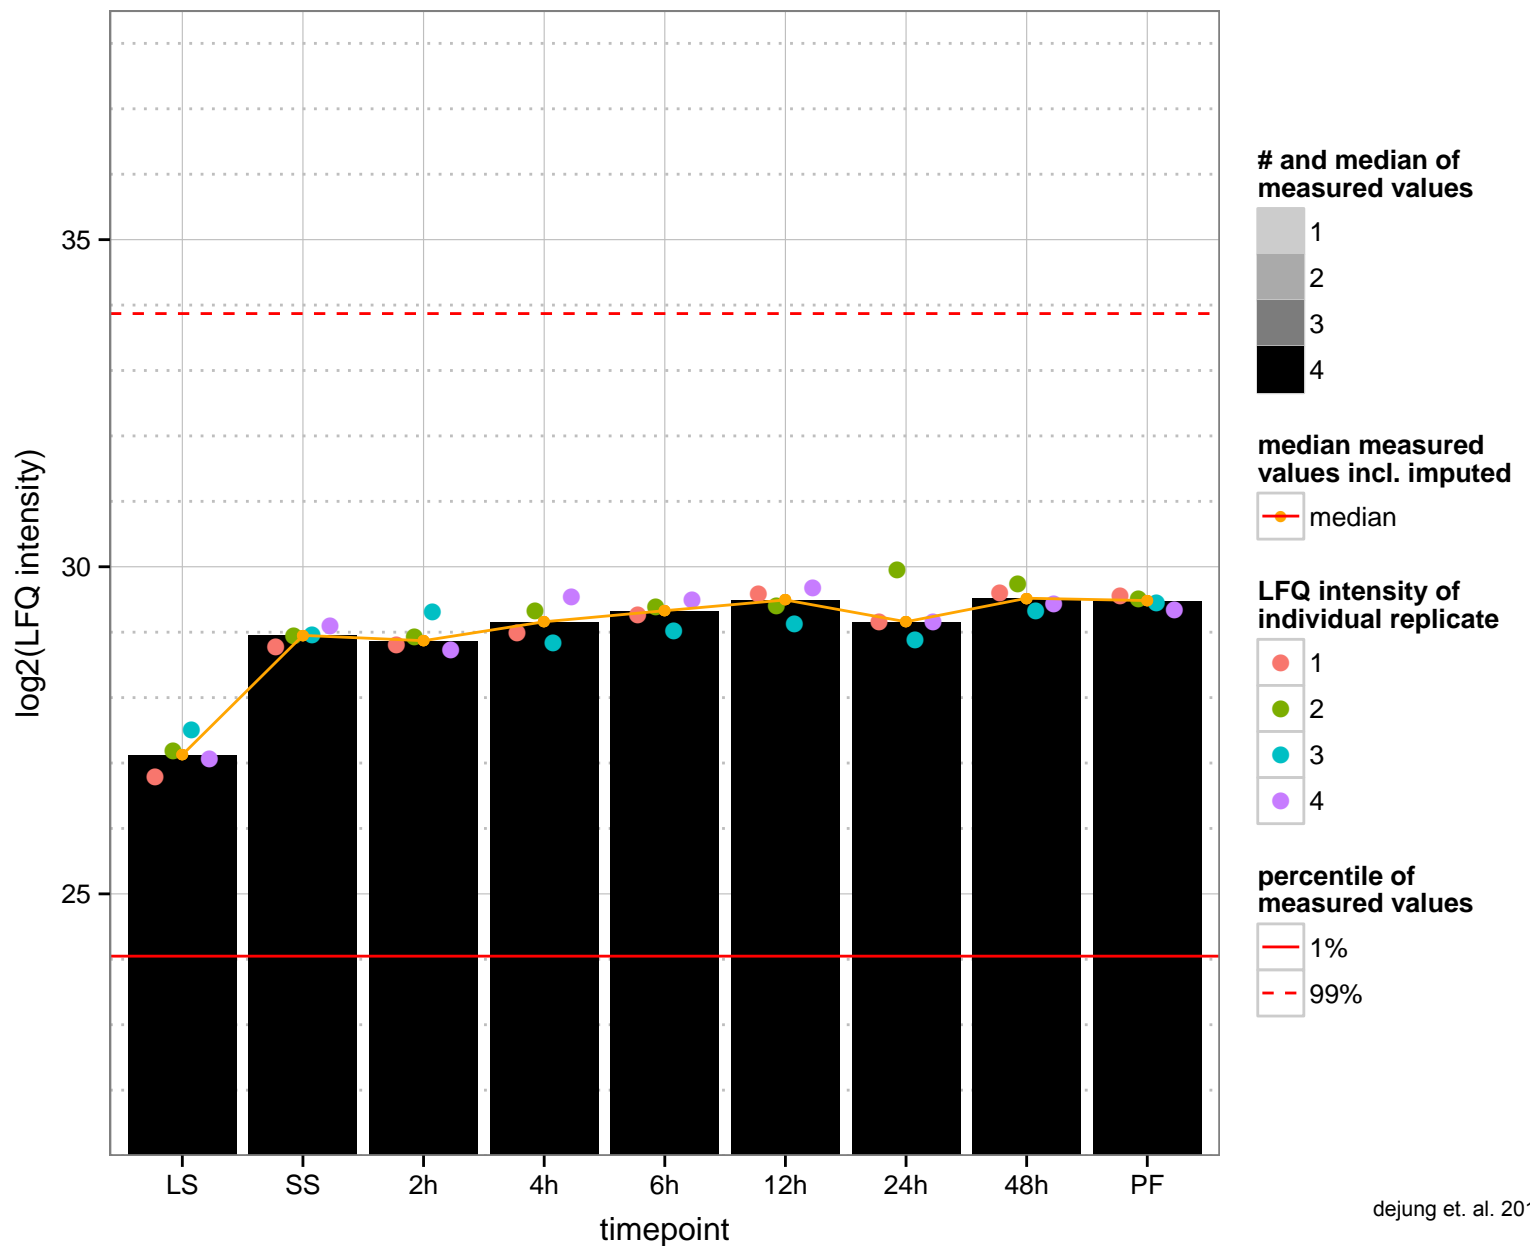

dynein light chain, putative, dynein Tctex2 family  
 Tb927.9.12820  
 AGOF: ATPase activity, coupled  
 AGOC: dynein complex  
 AGOP: microtubule-based movement  
 PGO: null  
 PGOC: null  
 PGOP: null

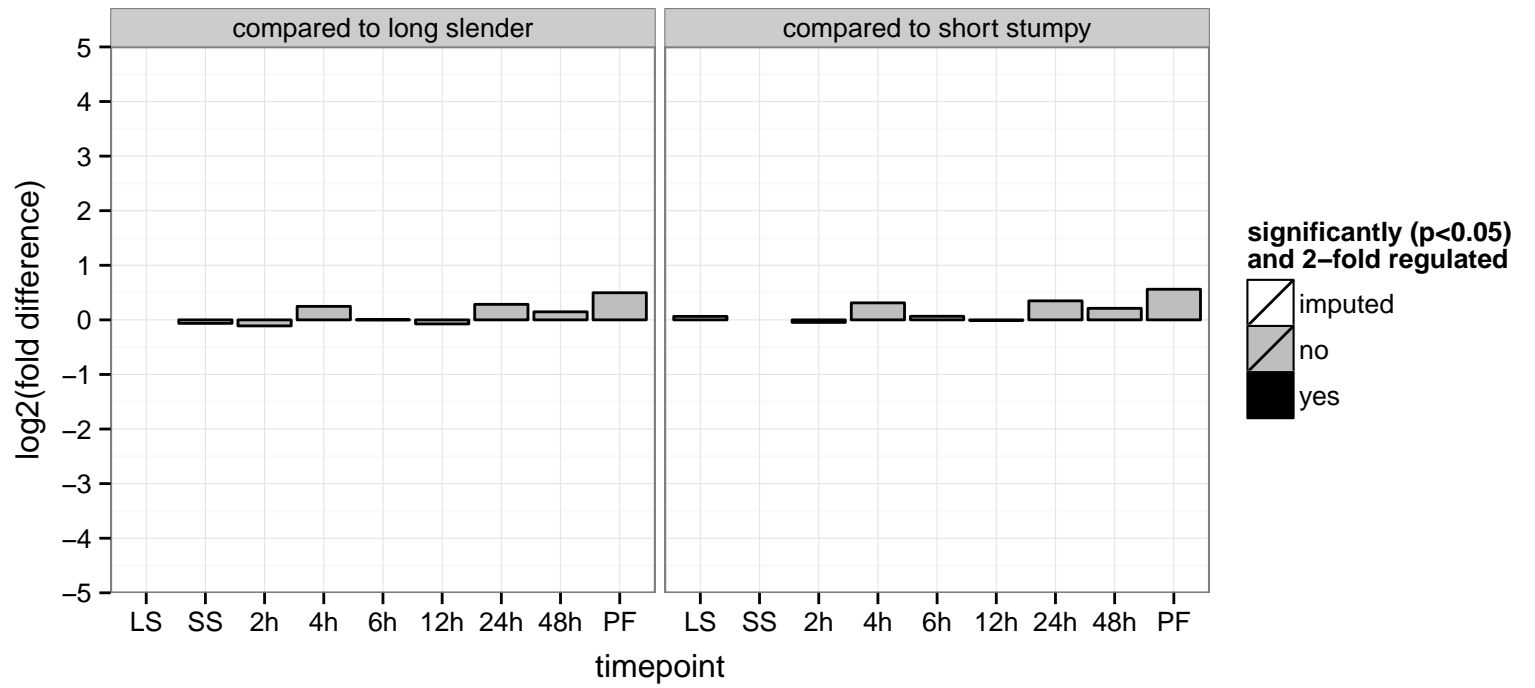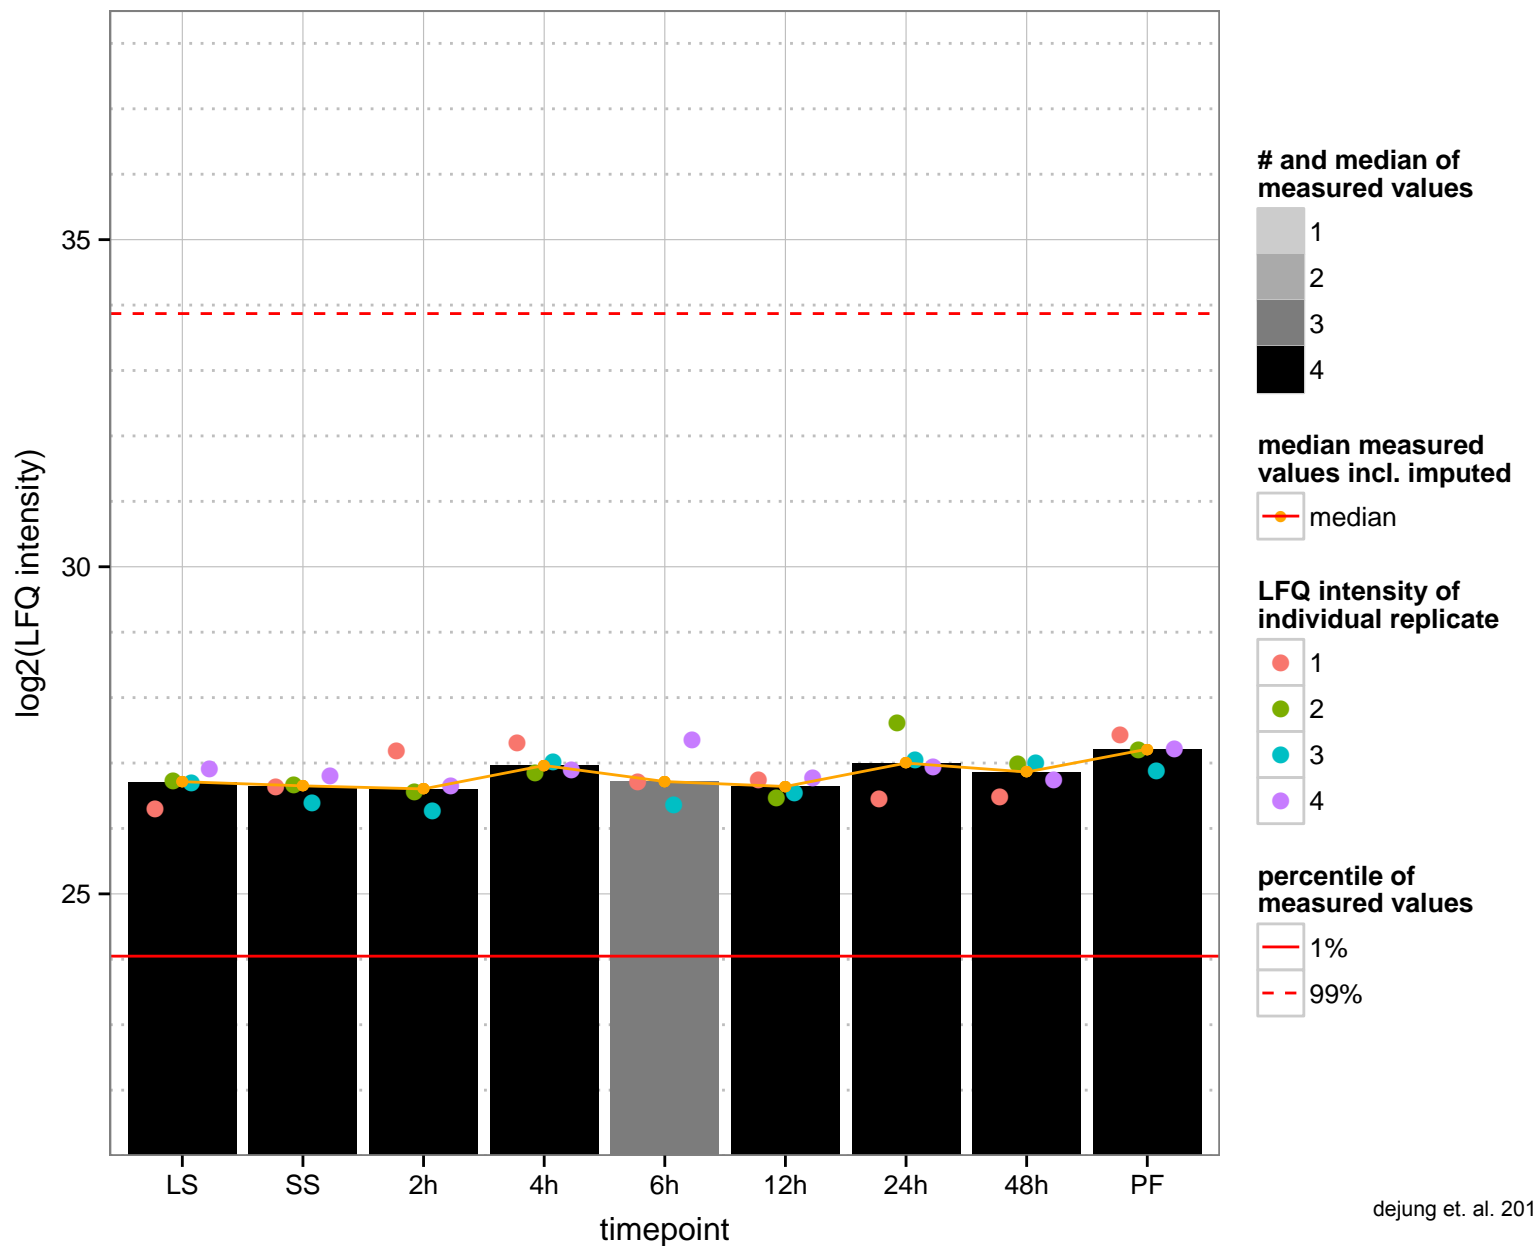

RNA polymerase-associated protein LEO1, putative  
 Tb927.9.12900  
 AGOF: RNA binding  
 AGOC: Cdc73/Paf1 complex  
 AGOP: null  
 PGO: null  
 PGOC: null  
 PGOP: null

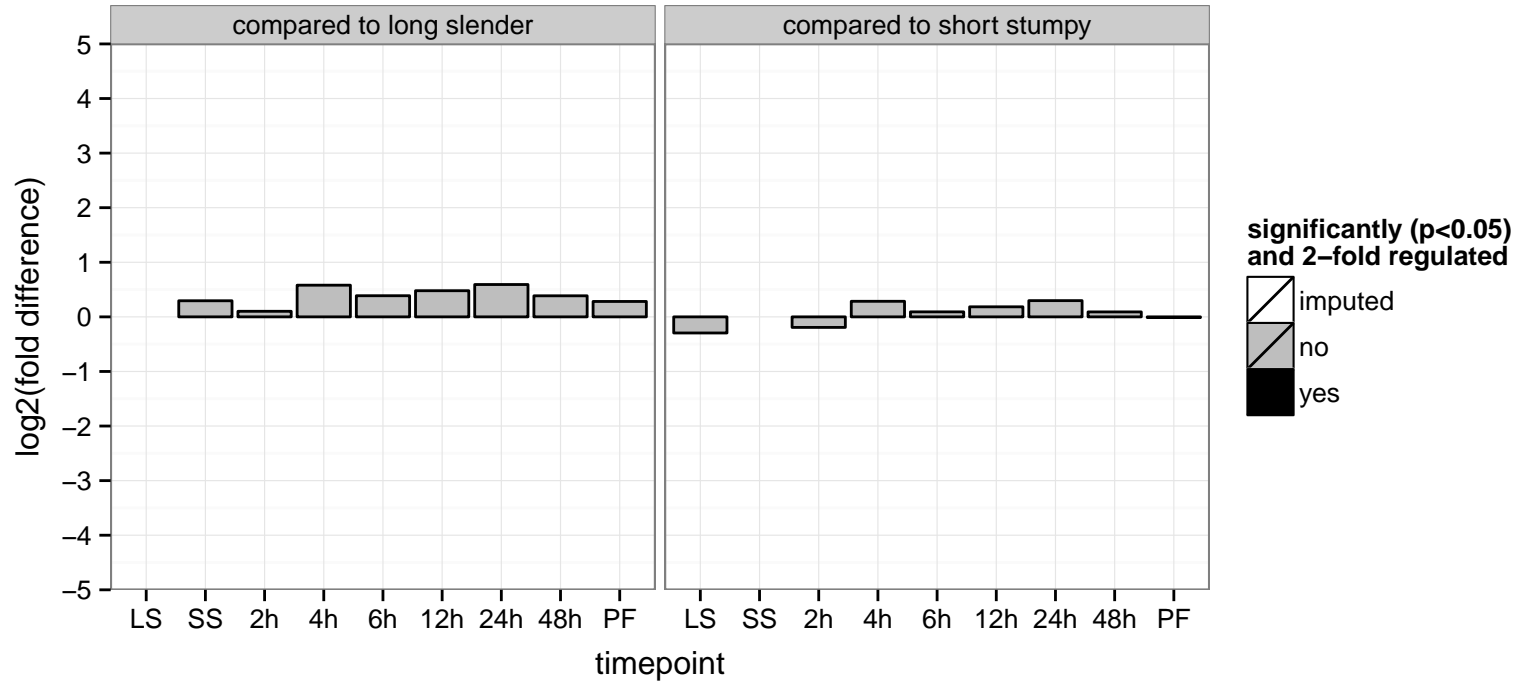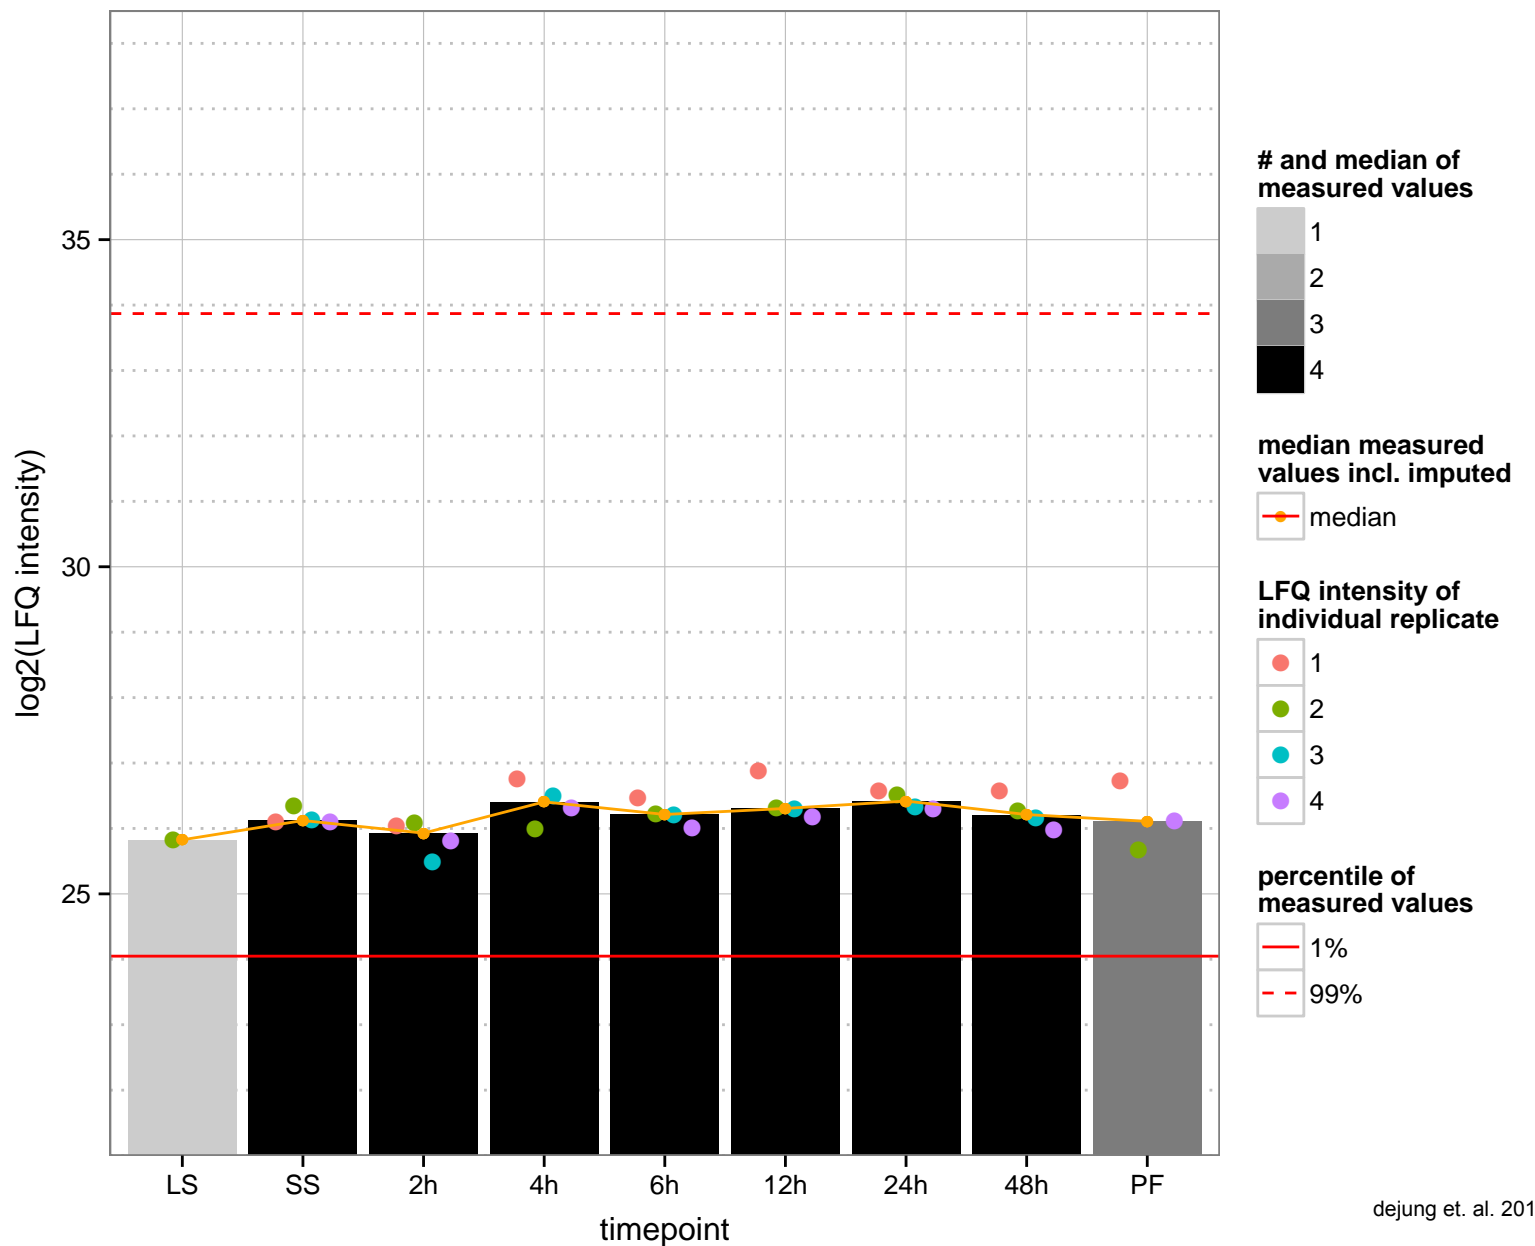

hypothetical protein, conserved  
 Tb927.9.12990  
 AGOF: null  
 AGOC: null  
 AGOP: null  
 PGOF: null, protein binding  
 PGOC: null  
 PGOP: null

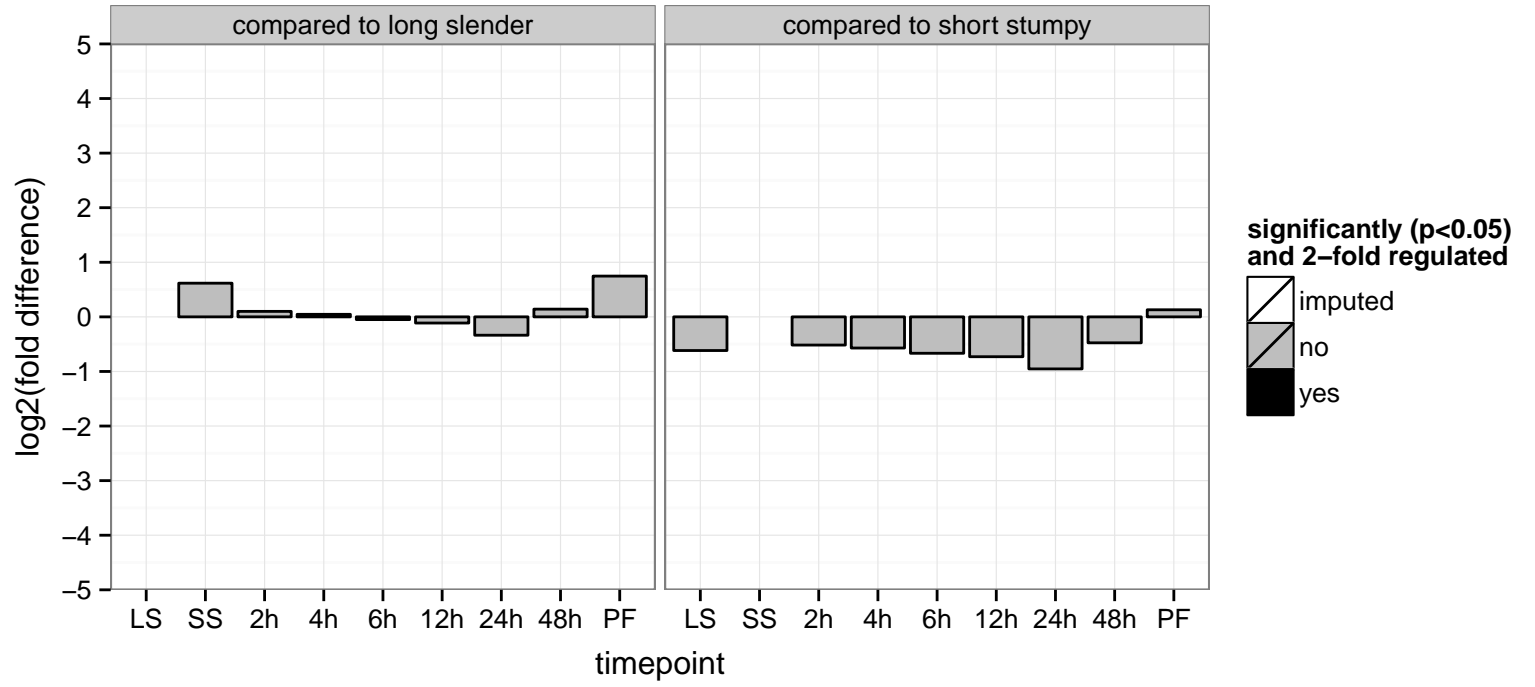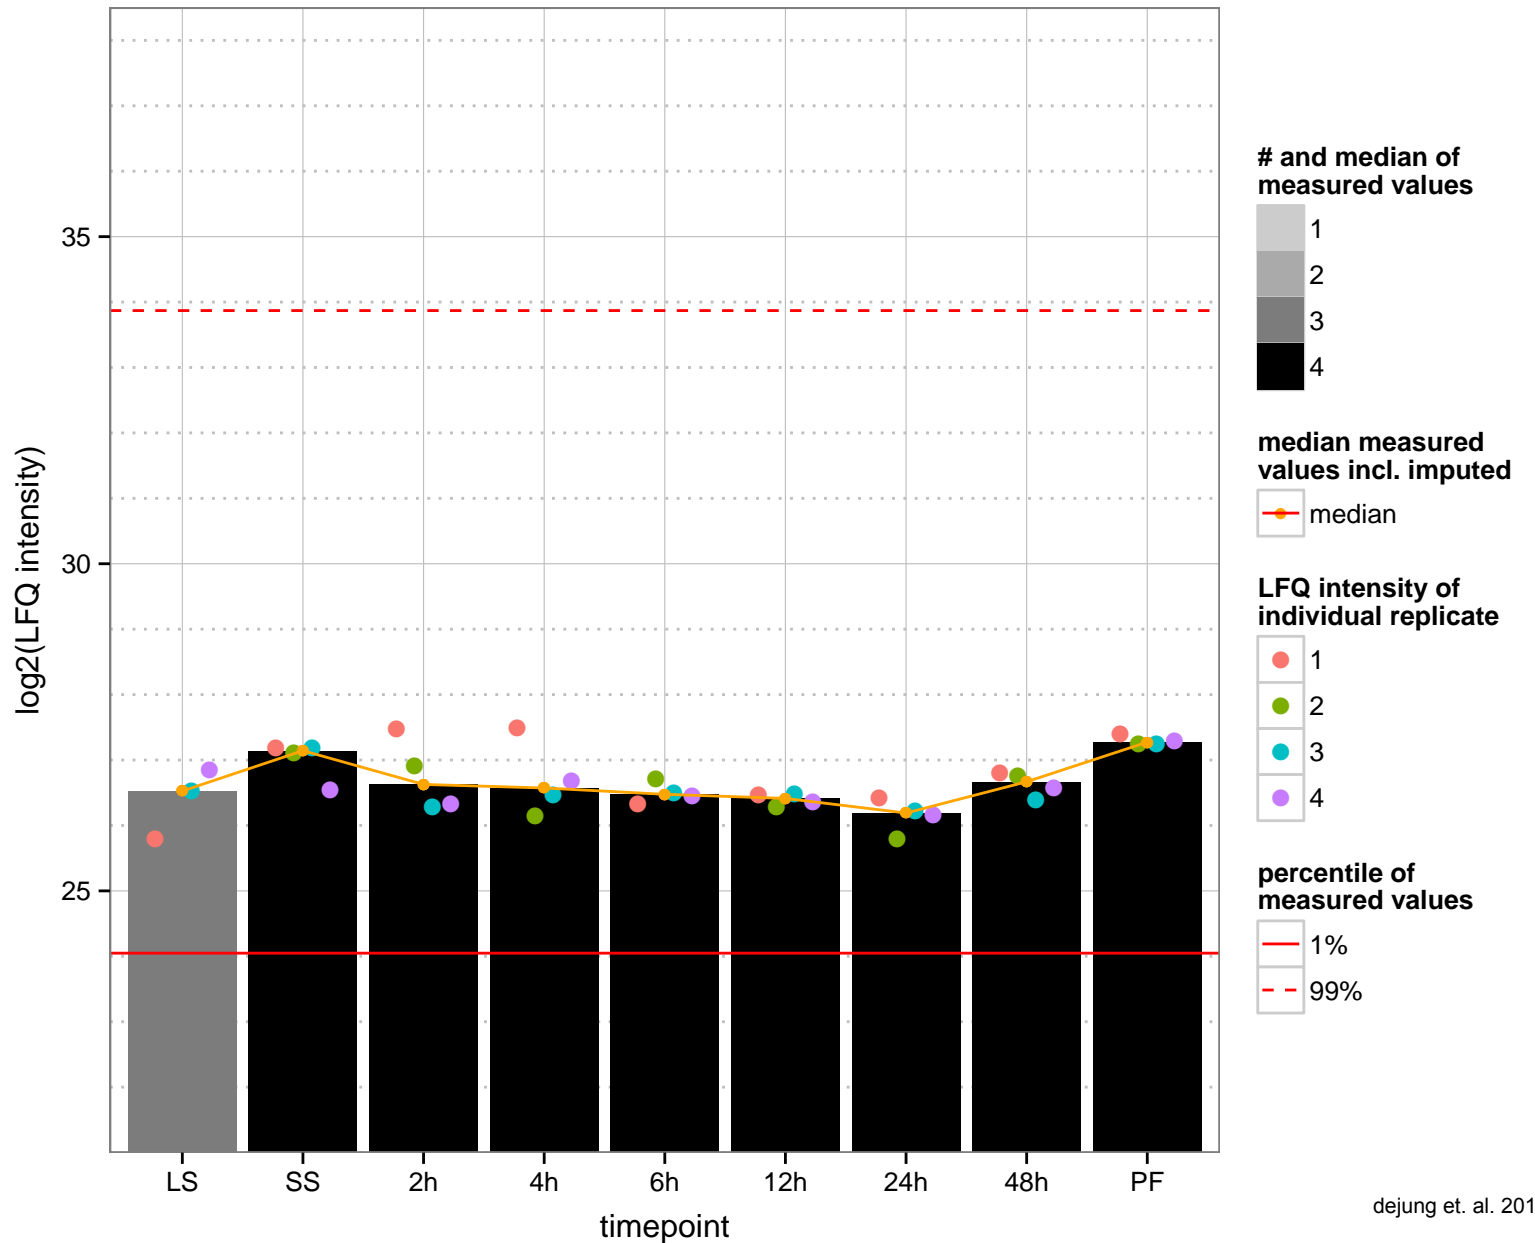

hypothetical protein, conserved  
 Tb927.9.13320  
 AGOF: null  
 AGOC: null  
 AGOP: null  
 PGO: null  
 PGOC: null  
 PGOP: null

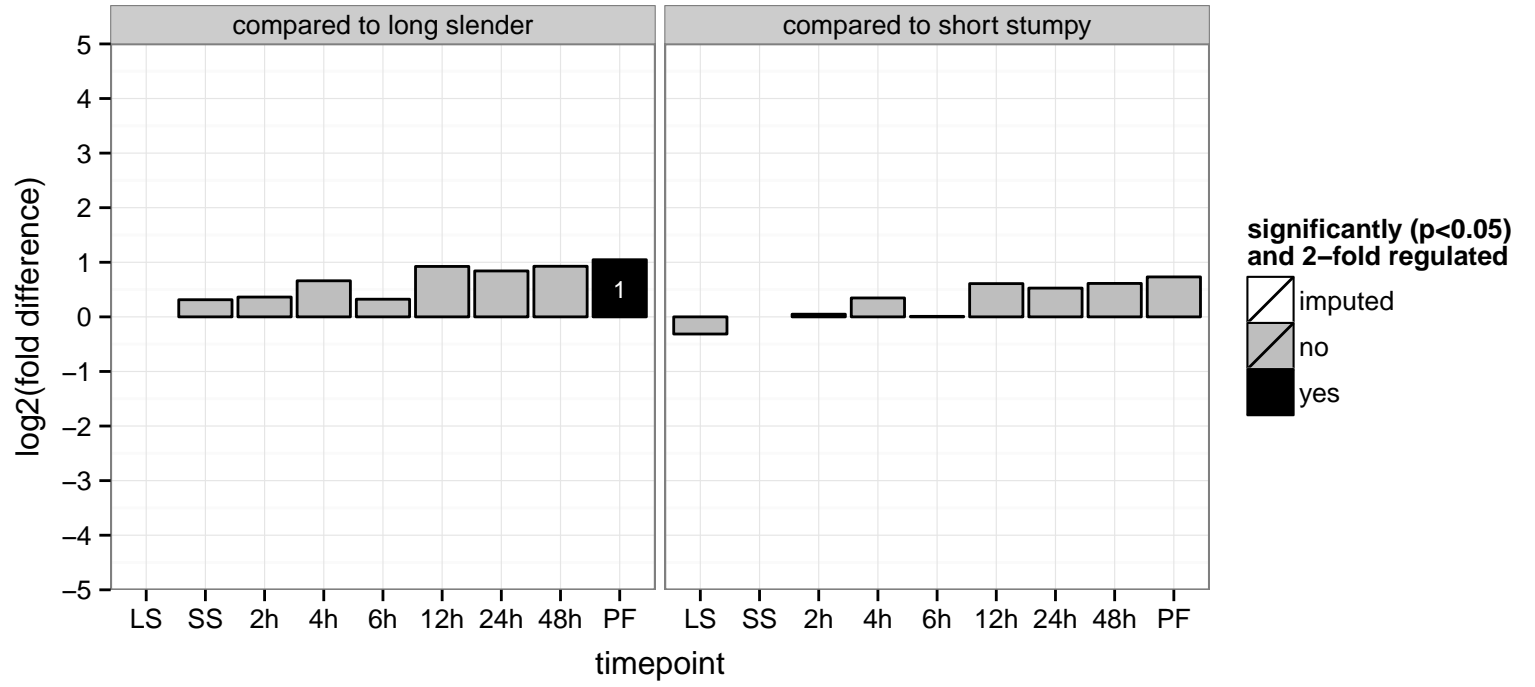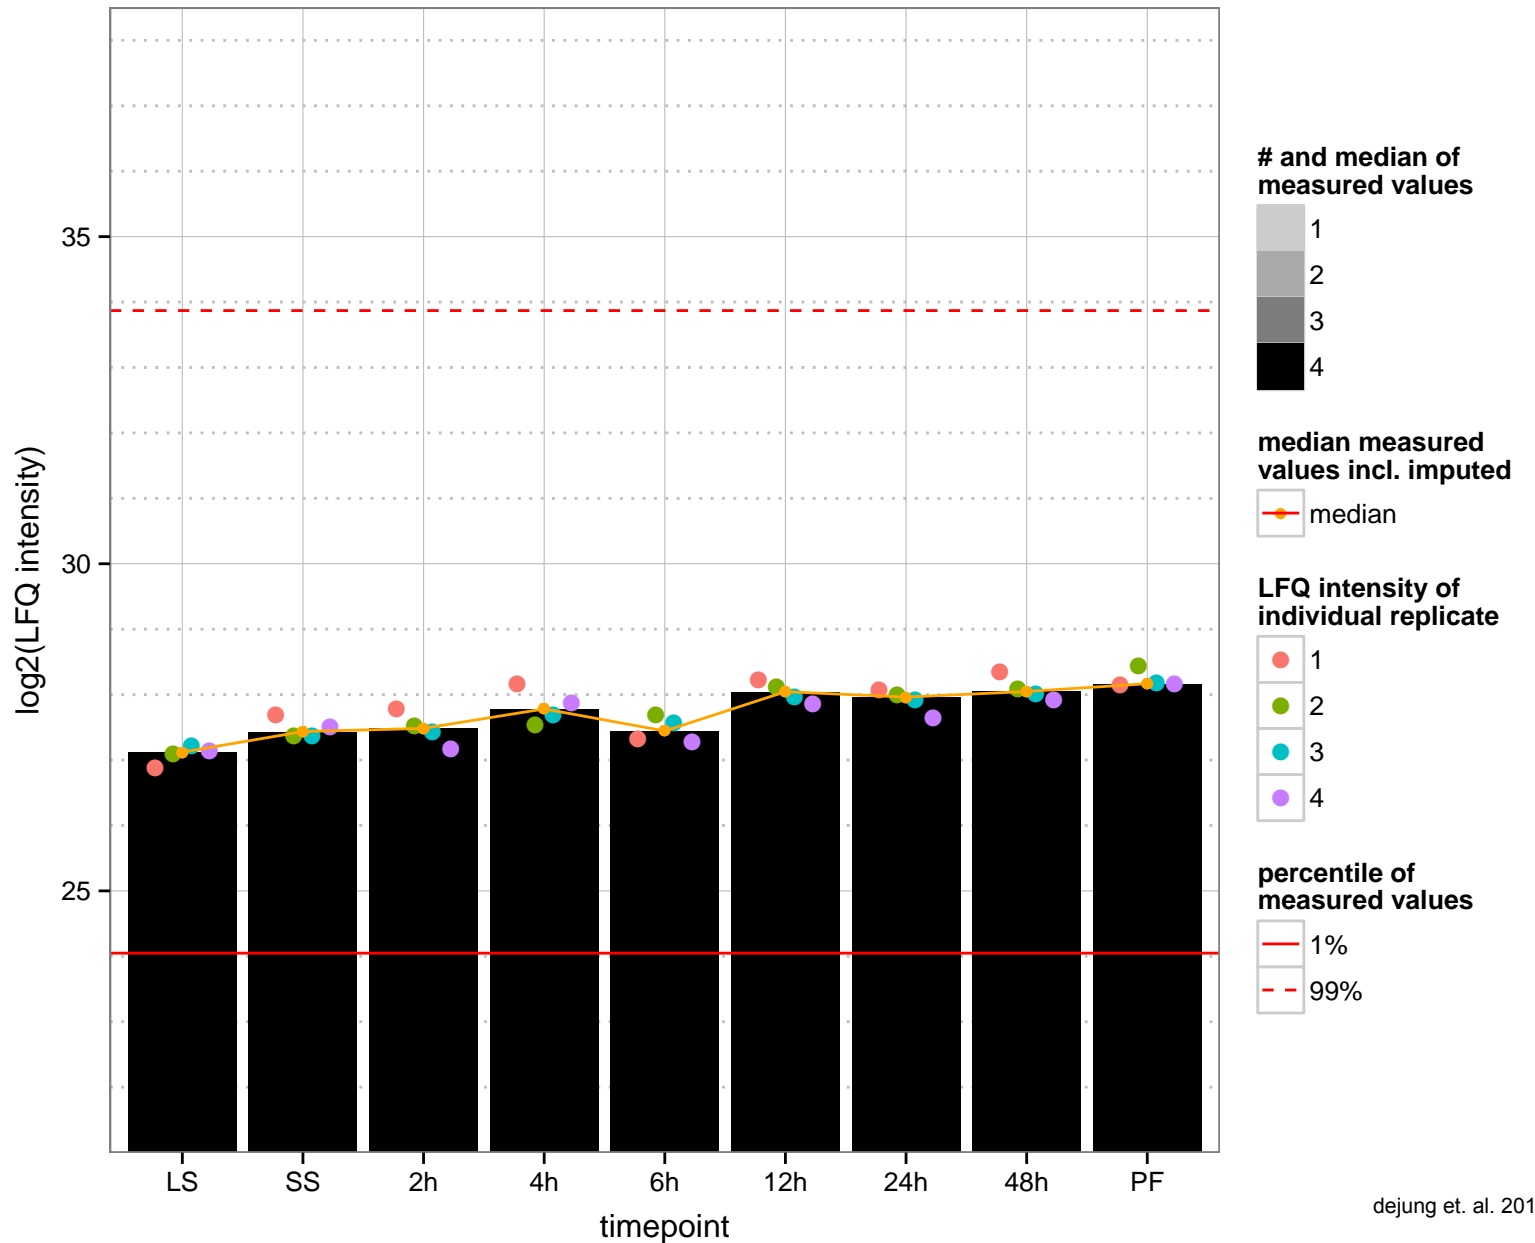

hypothetical protein, conserved  
 Tb927.9.13330  
 AGOF: null  
 AGOC: null  
 AGOP: null  
 PGOF: binding  
 PGOC: null  
 PGOP: null

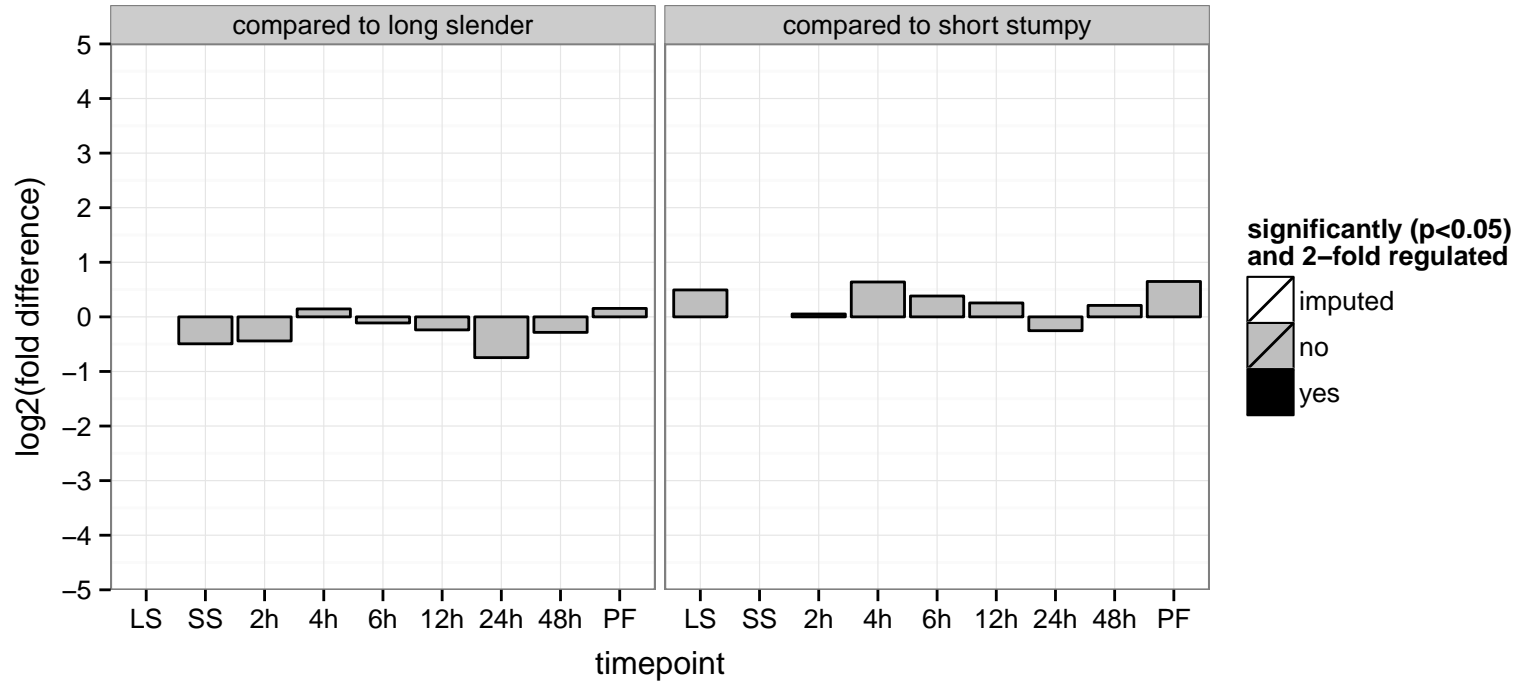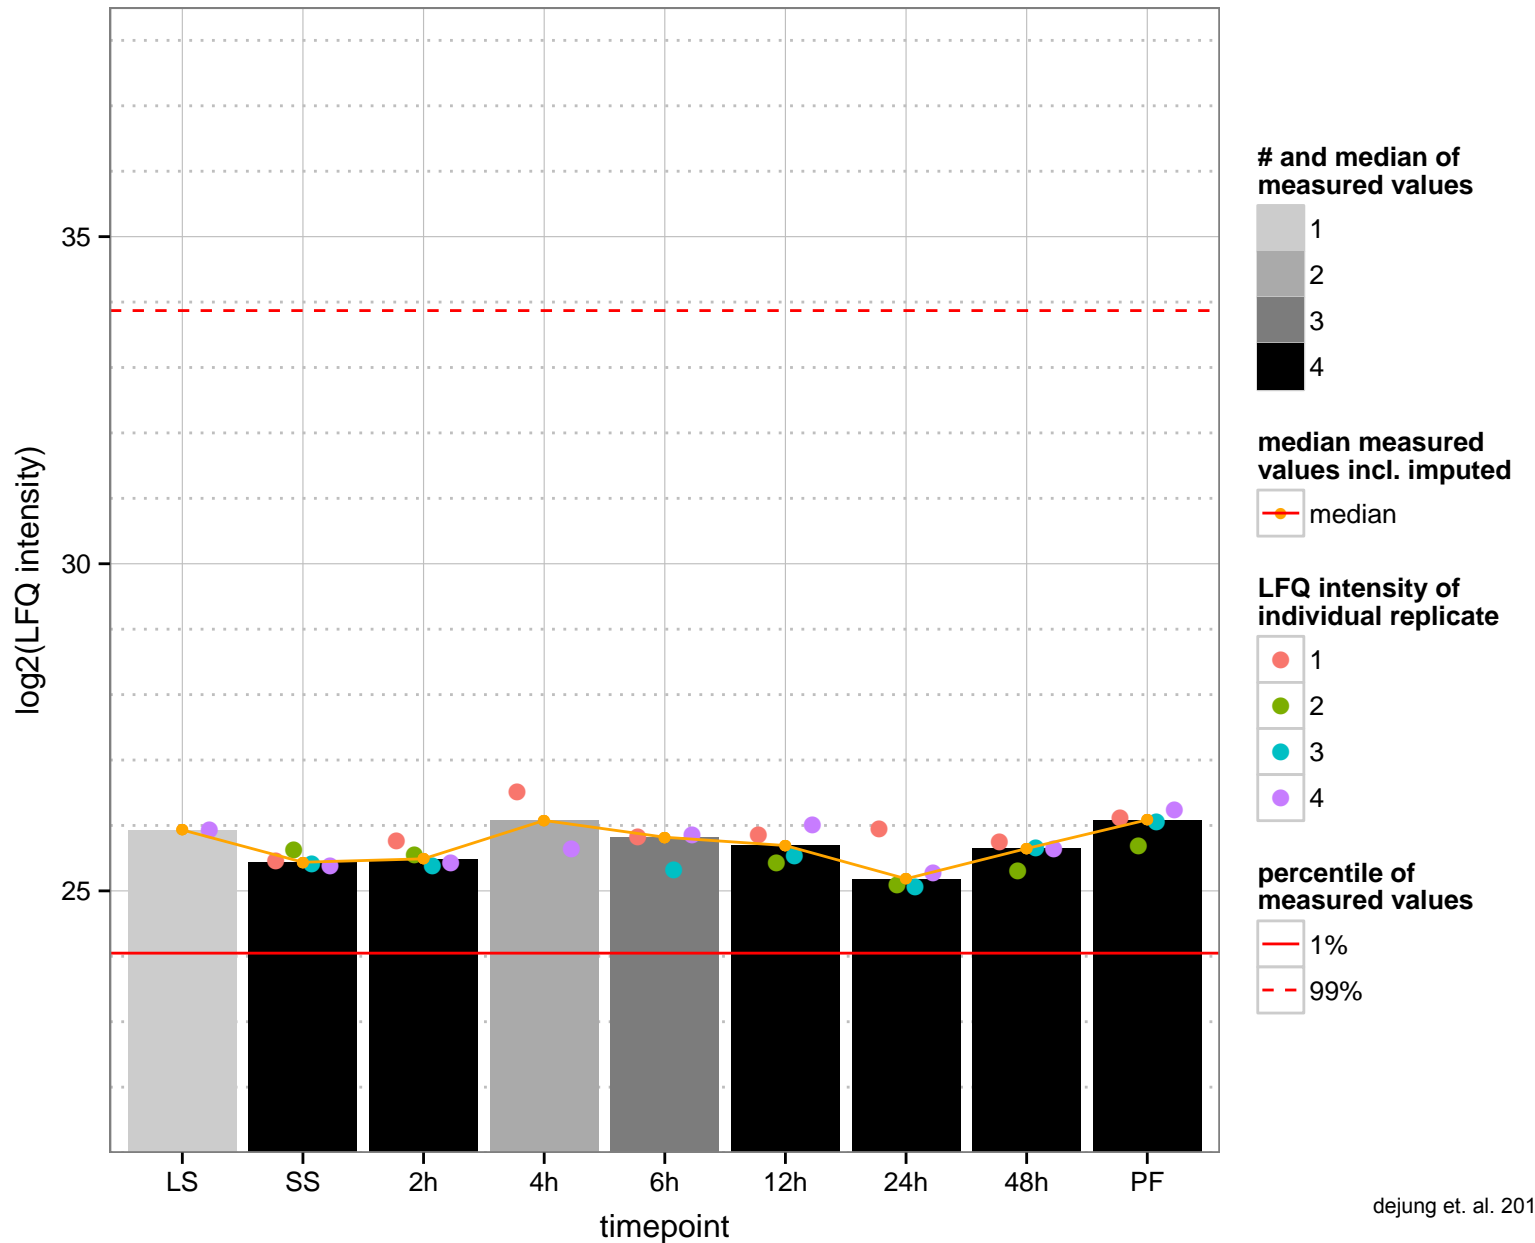

hypothetical protein, conserved  
 Tb927.9.13440  
 AGOF: null  
 AGOC: null  
 AGOP: null  
 PGO: protein binding  
 PGOC: null  
 PGOP: null

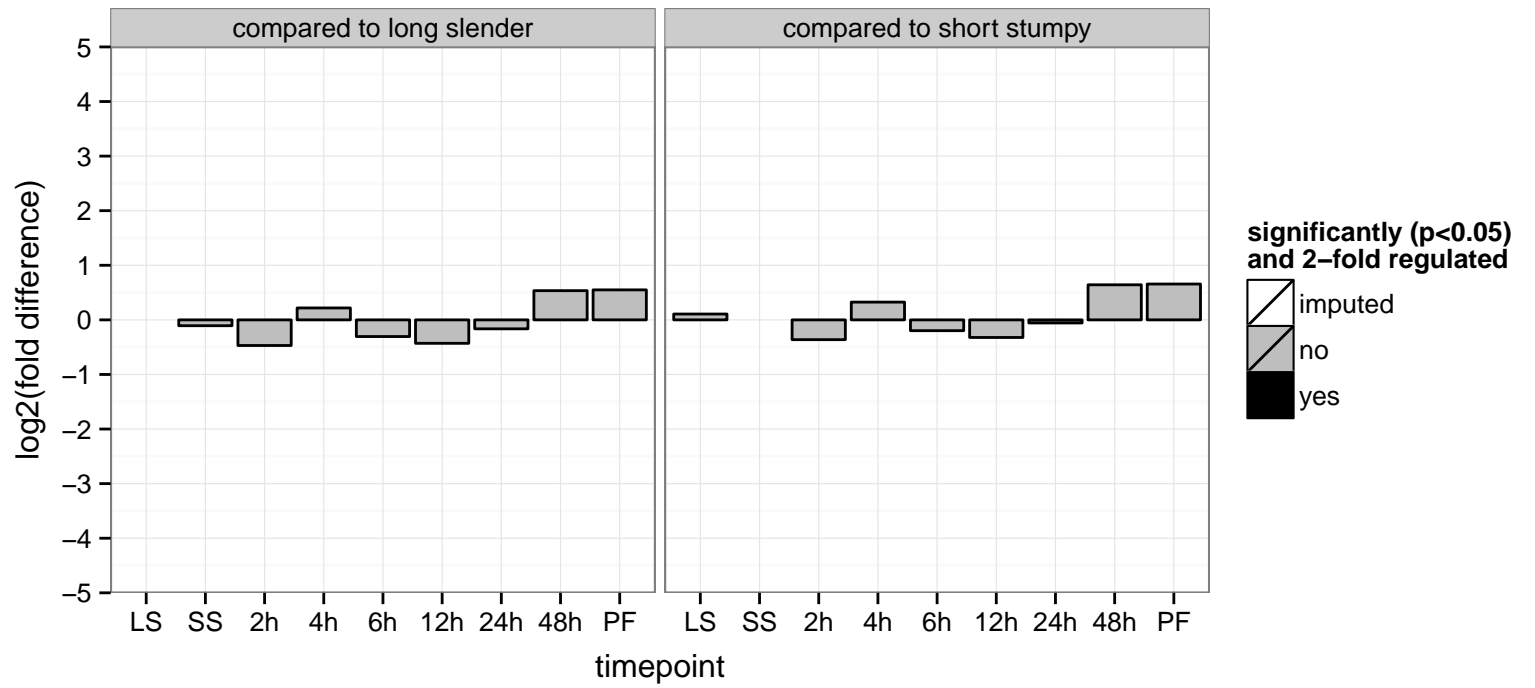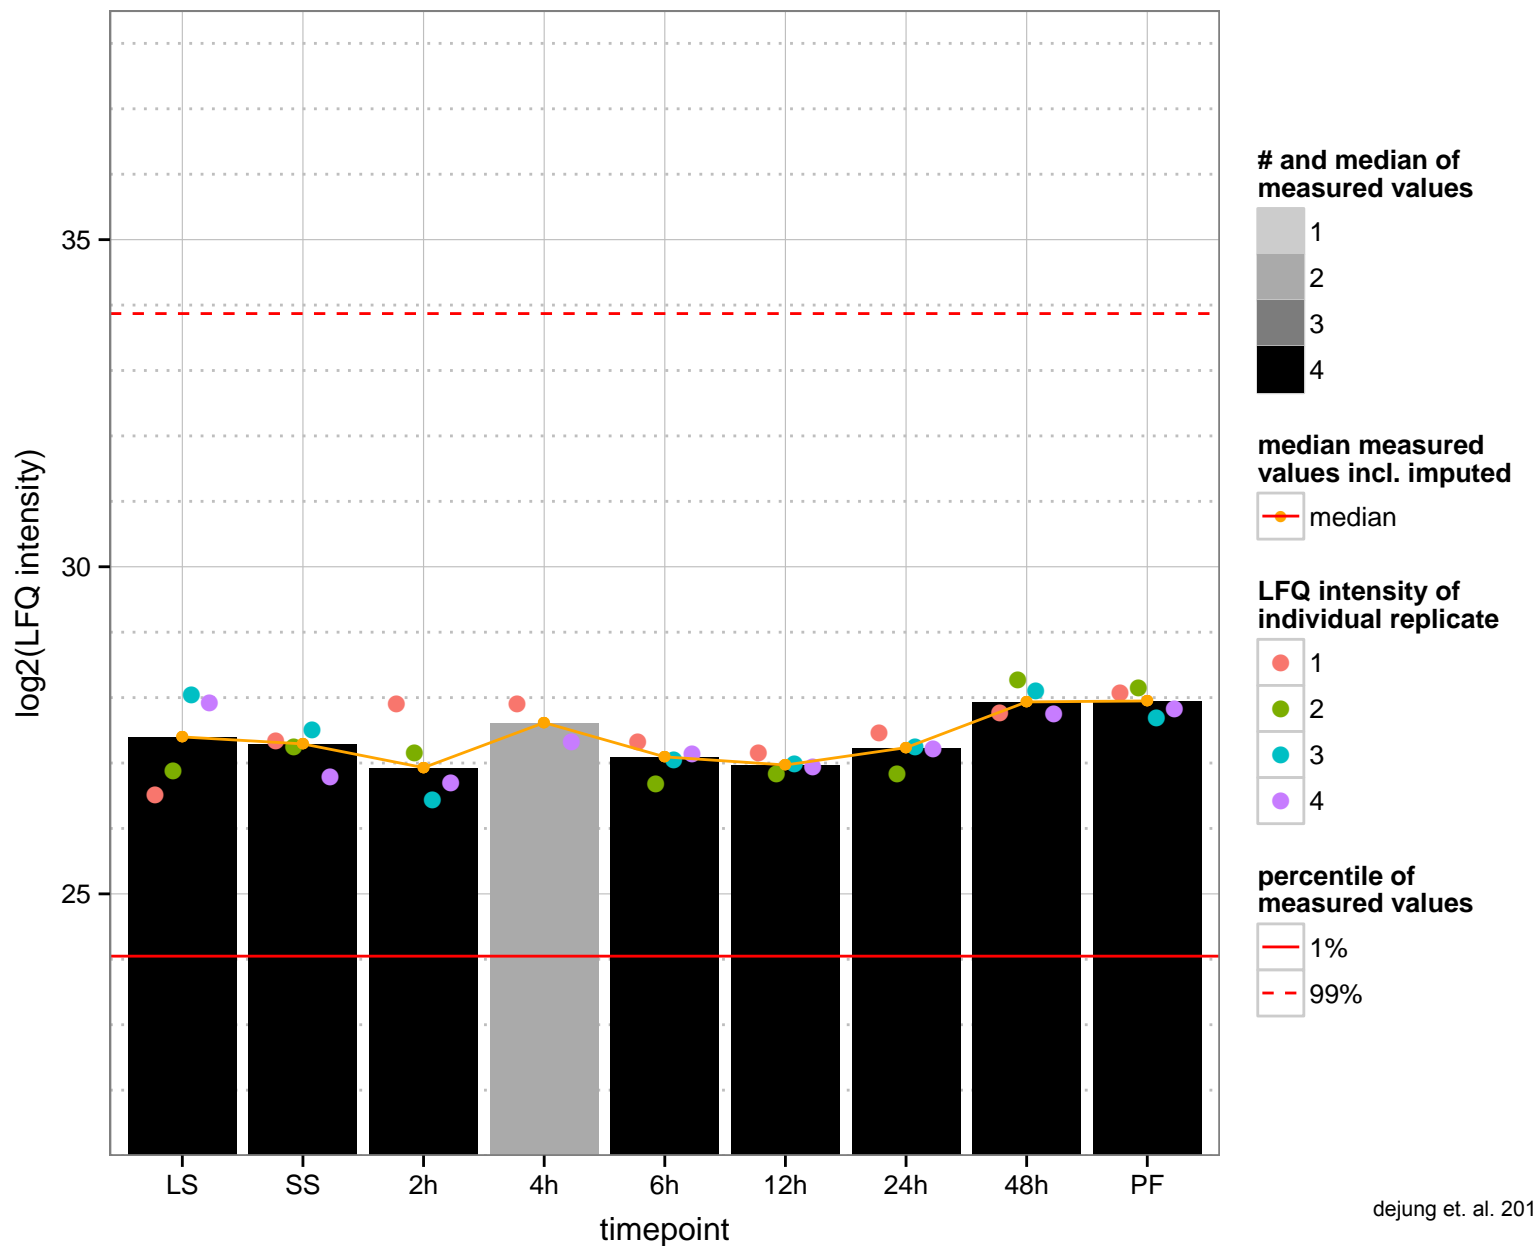

hypothetical protein, conserved  
 Tb927.9.1350  
 AGOF: null  
 AGOC: null  
 AGOP: null  
 PGOF: null  
 PGOE: null  
 PGOP: null

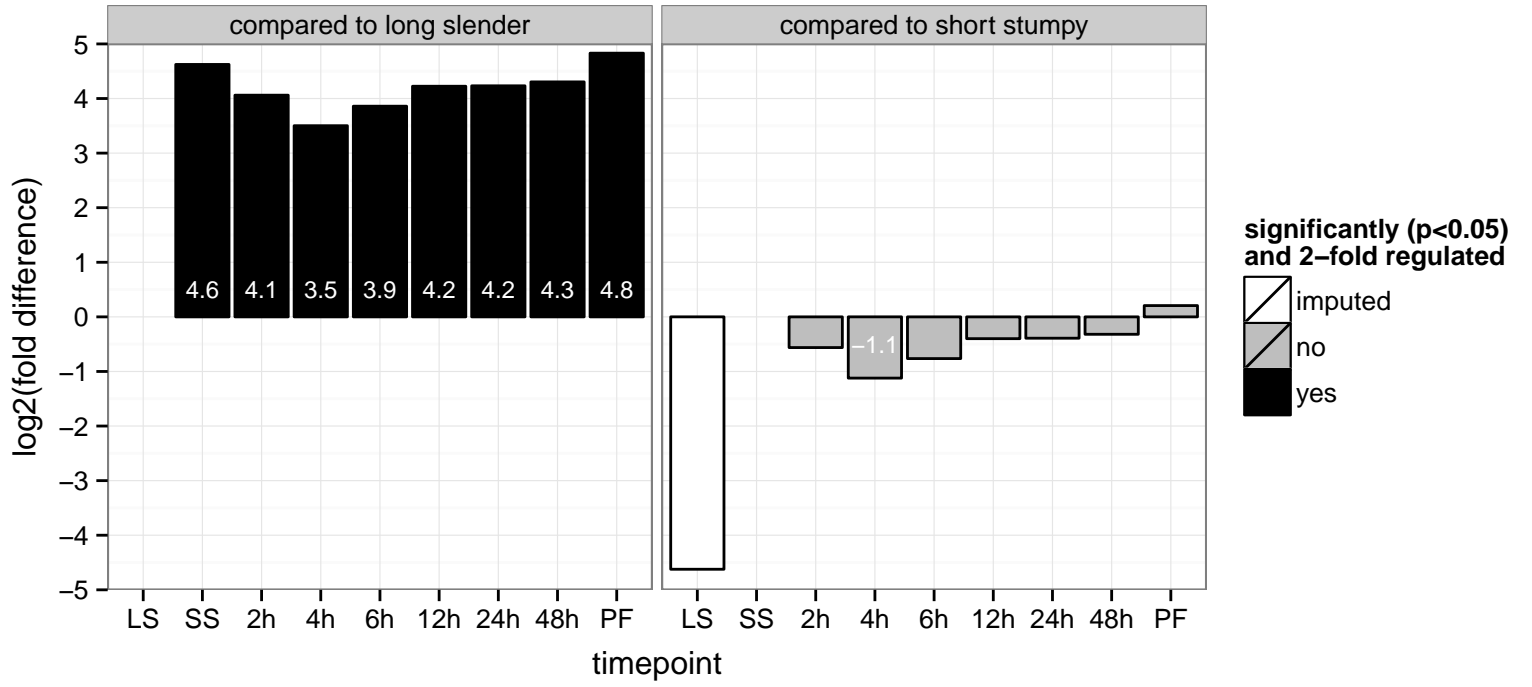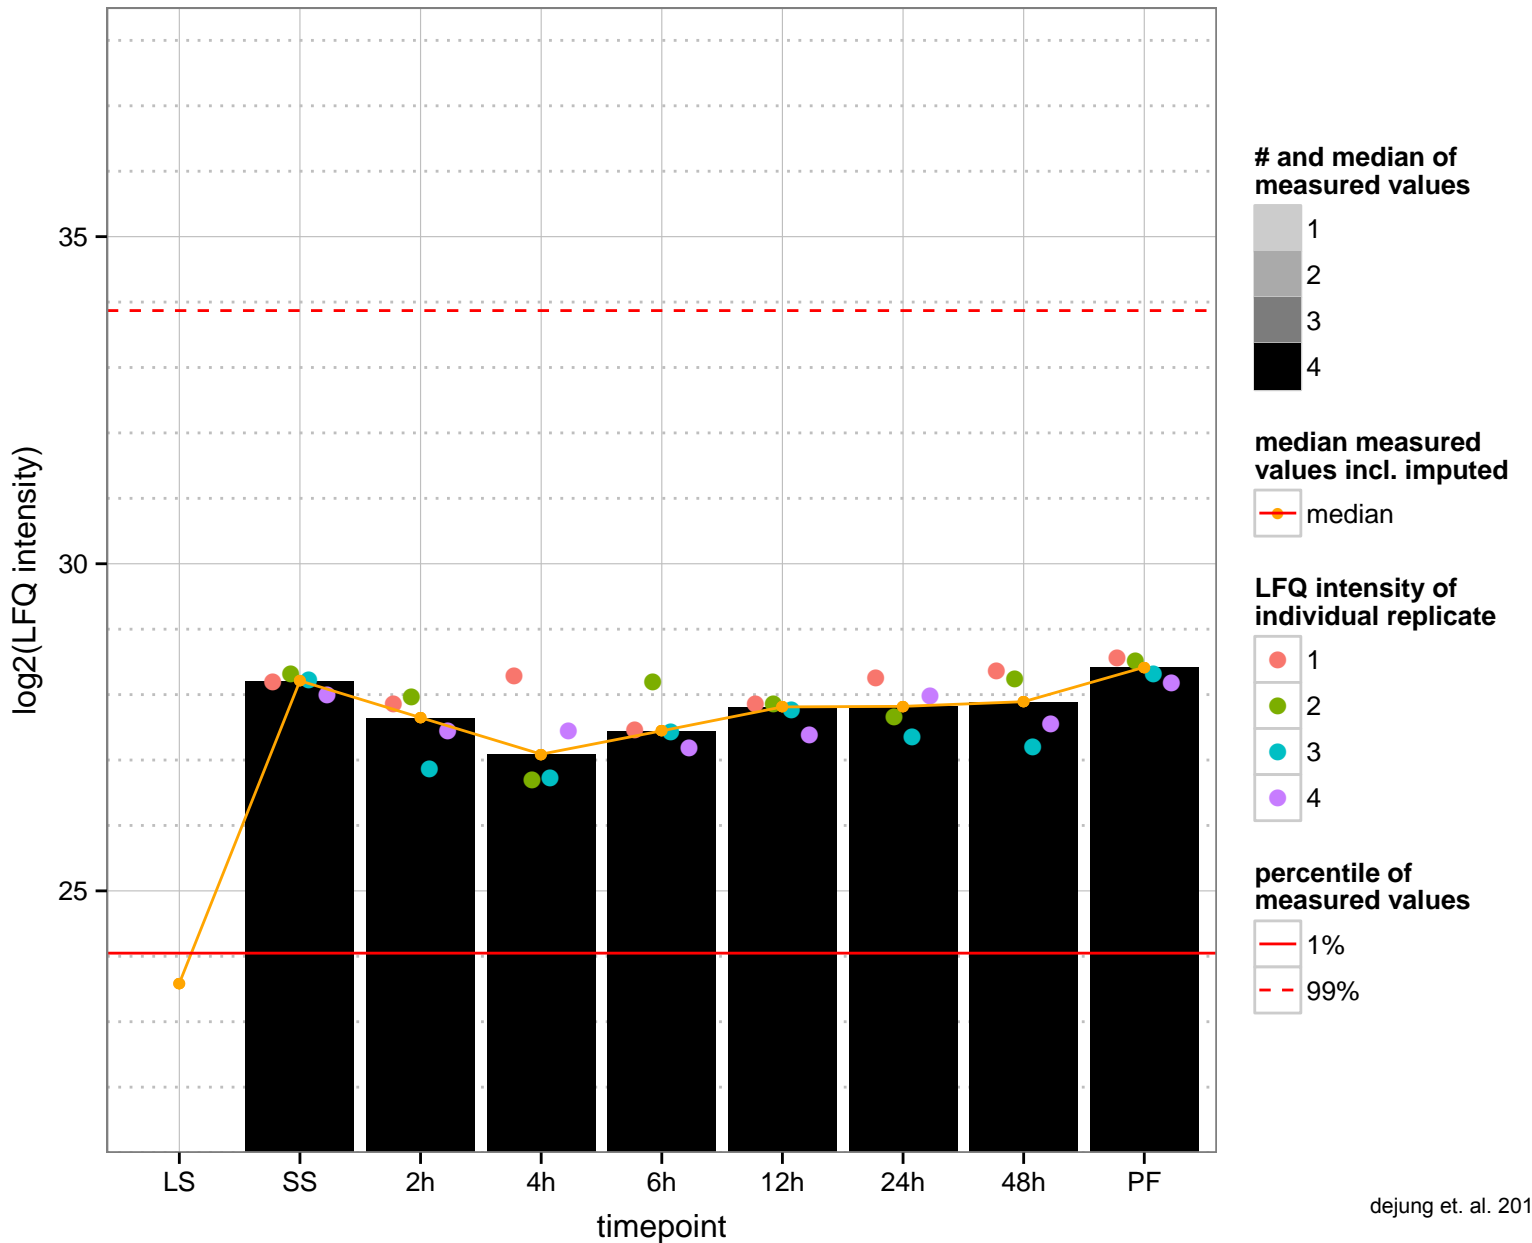



hypothetical protein, conserved  
 Tb927.9.13540  
 AGOF: null  
 AGOC: mitochondrion  
 AGOP: null  
 PGO: null  
 PGOC: null  
 PGOP: null

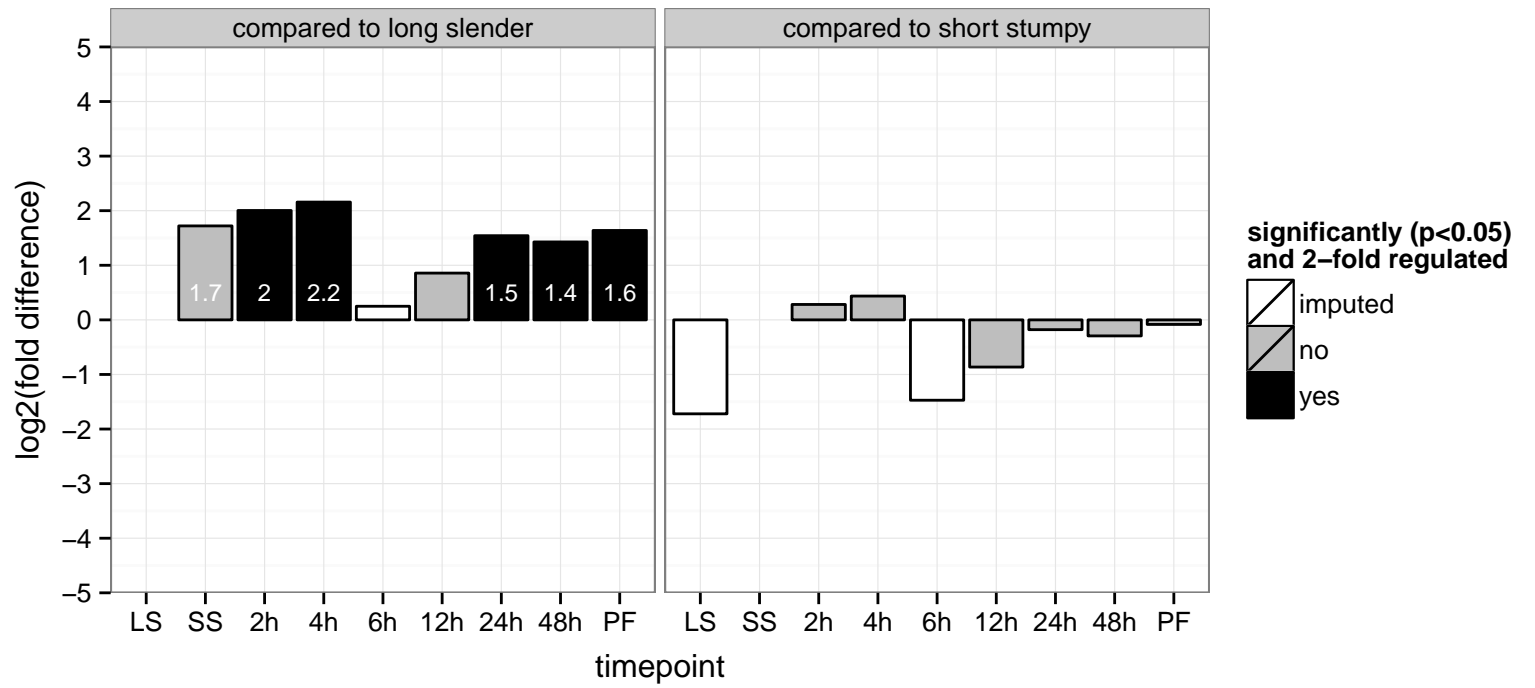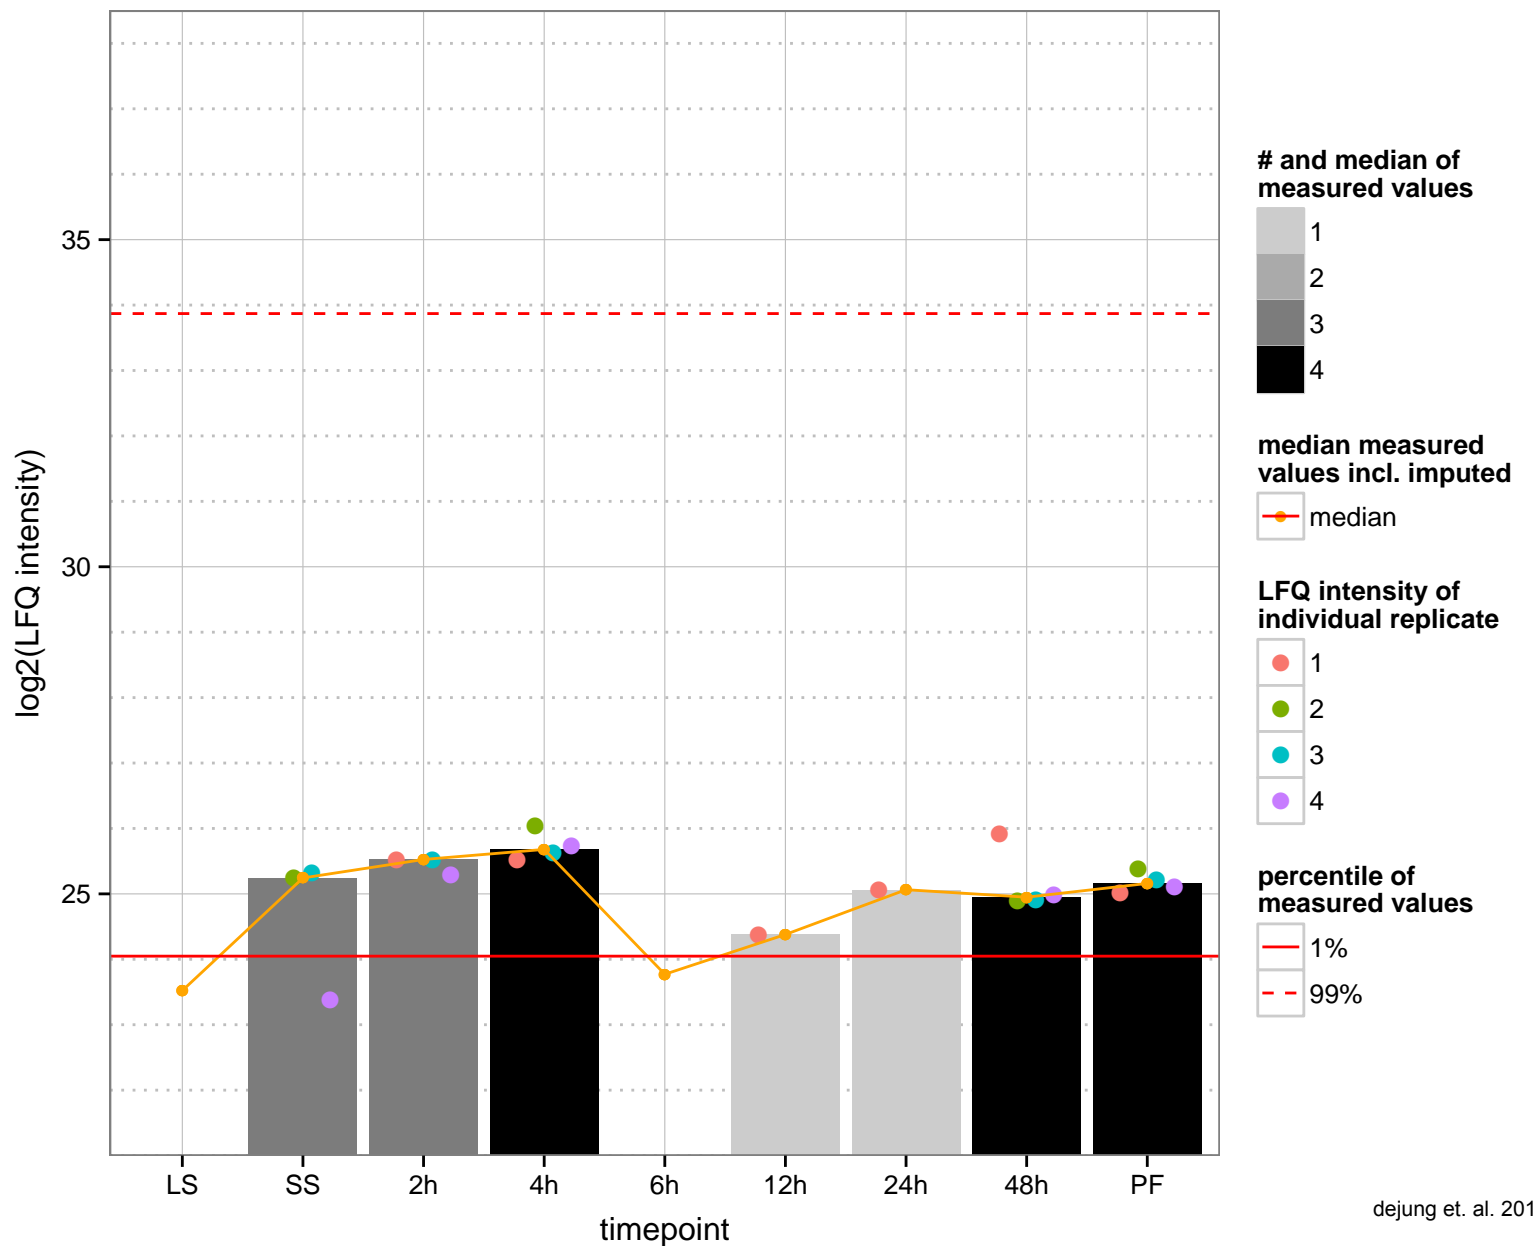

helicase, putative  
 Tb927.9.13610  
 AGOF: ATP-dependent helicase activity, helicase activity, nucleic acid binding  
 AGOC: null  
 AGOP: nucleobase-containing compound metabolic process  
 PGO: ATP binding, ATP-dependent helicase activity, helicase activity, nucleic acid binding  
 PGOC: null  
 PGOP: null

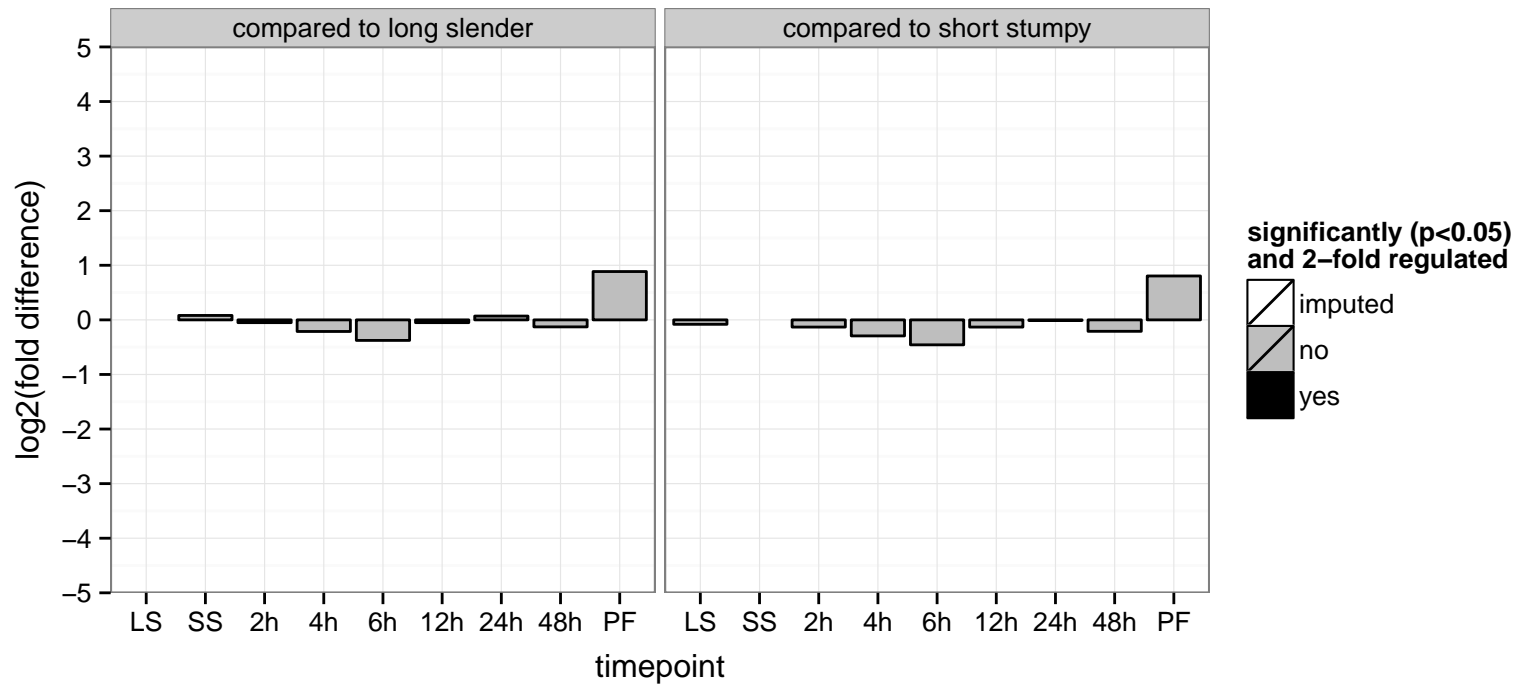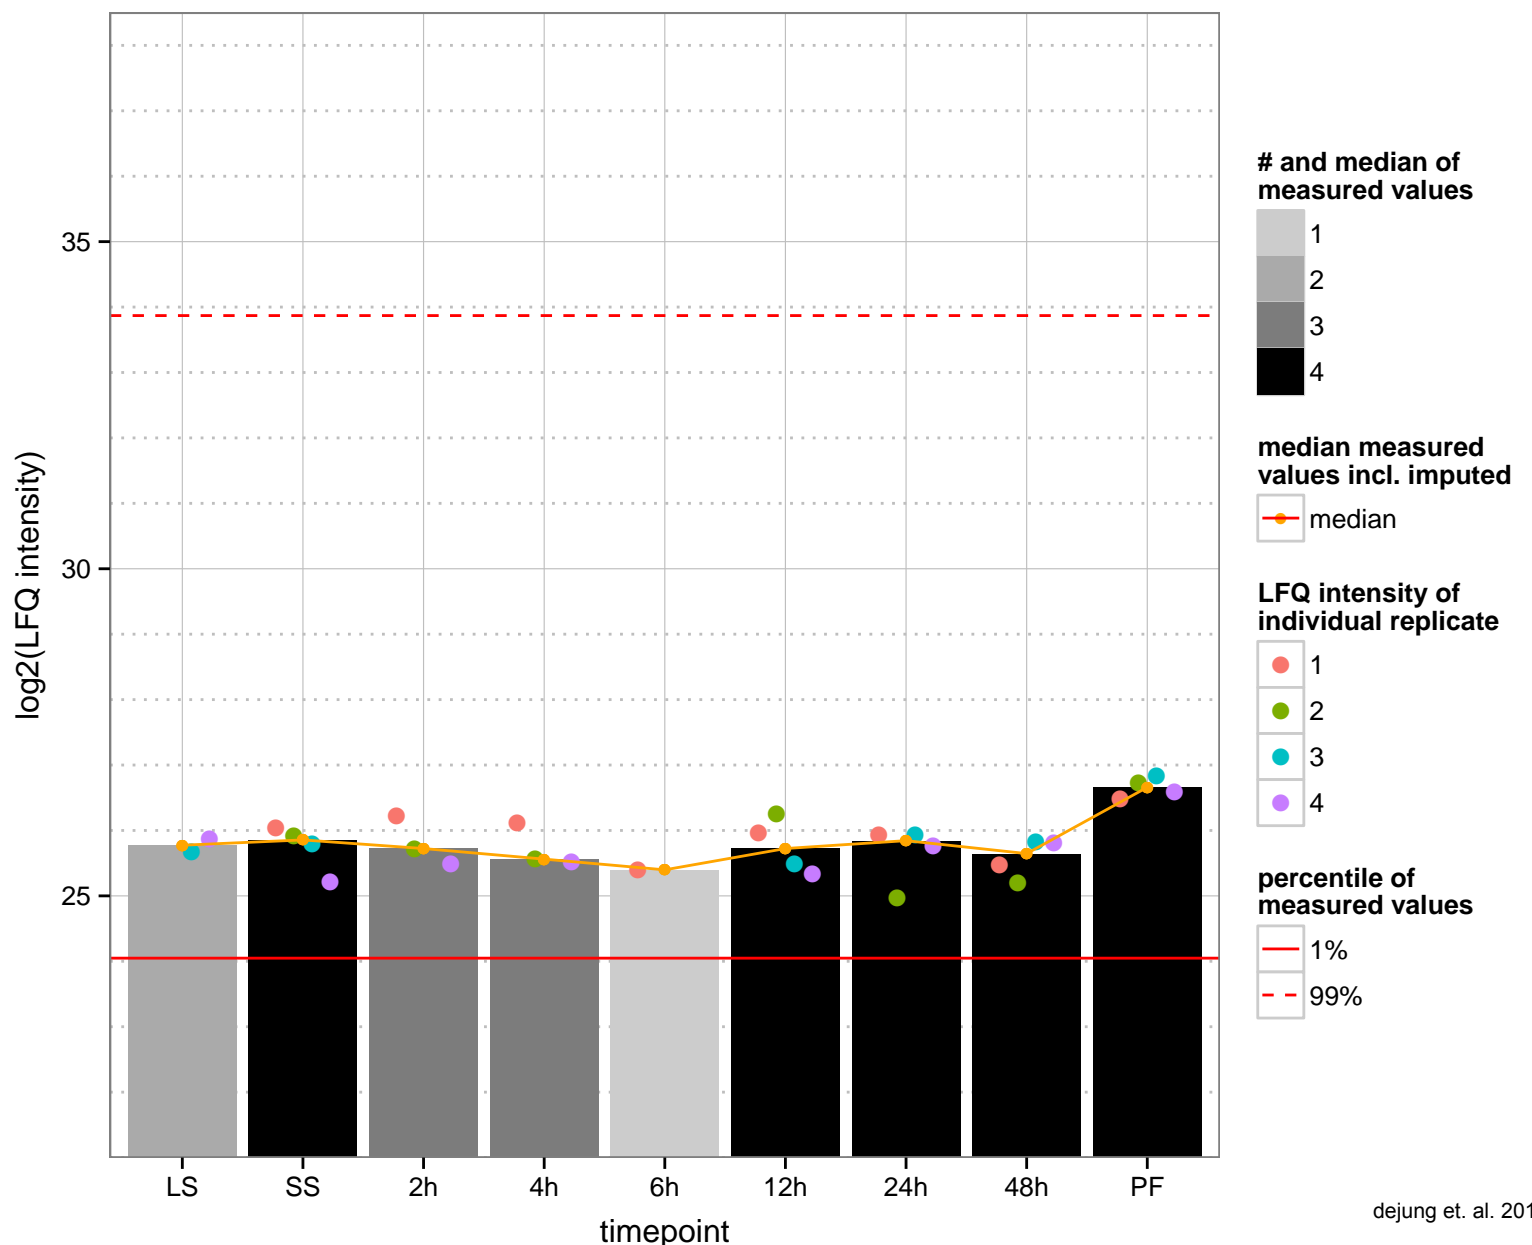

ADP-ribosylation factor, putative  
 Tb927.9.13740;Tb927.9.13710;Tb927.9.13680;Tb927.9.13650  
 AGOF: GTP binding  
 AGOC: intracellular  
 AGOP: intracellular protein transport, small GTPase mediated signal transduction  
 PGO: GTP binding, null  
 PGO: intracellular, null  
 PGOP: intracellular protein transport, protein transport, small GTPase mediated signal transduction, null

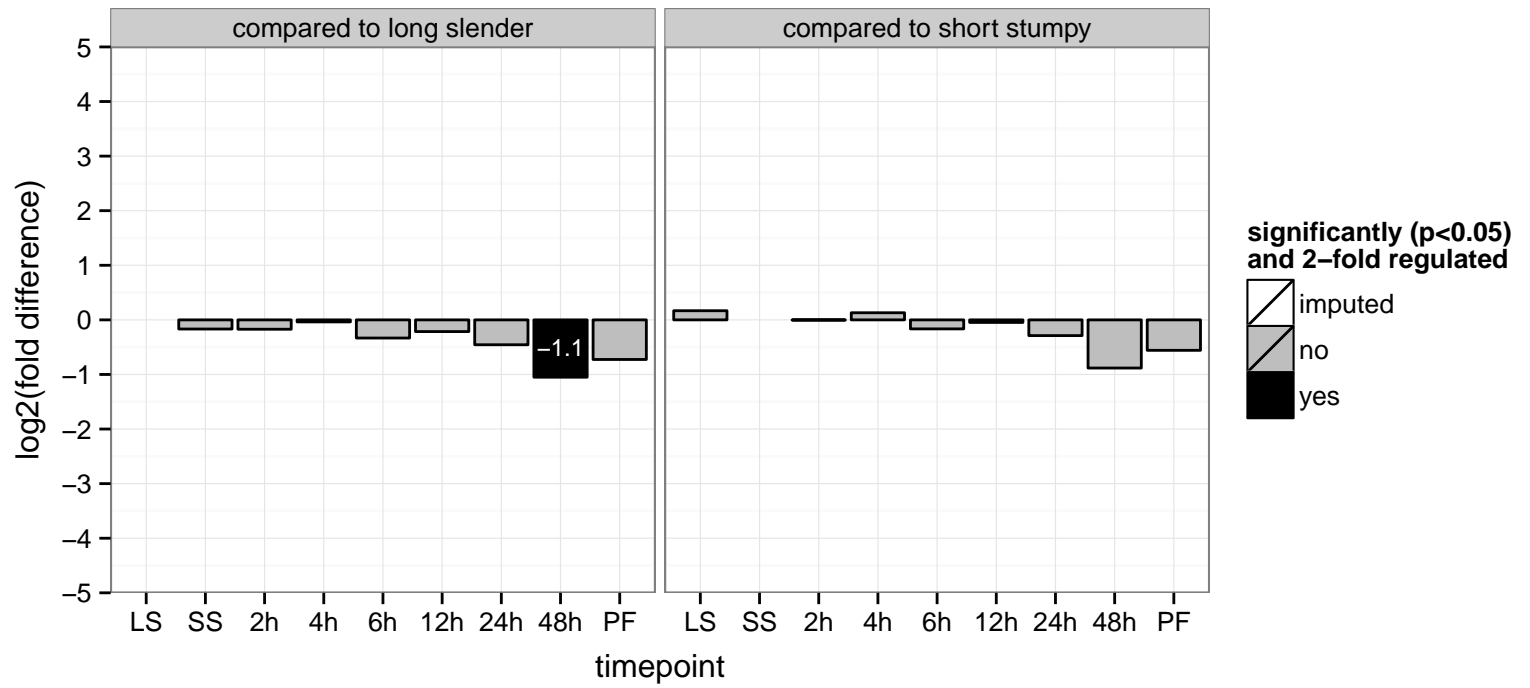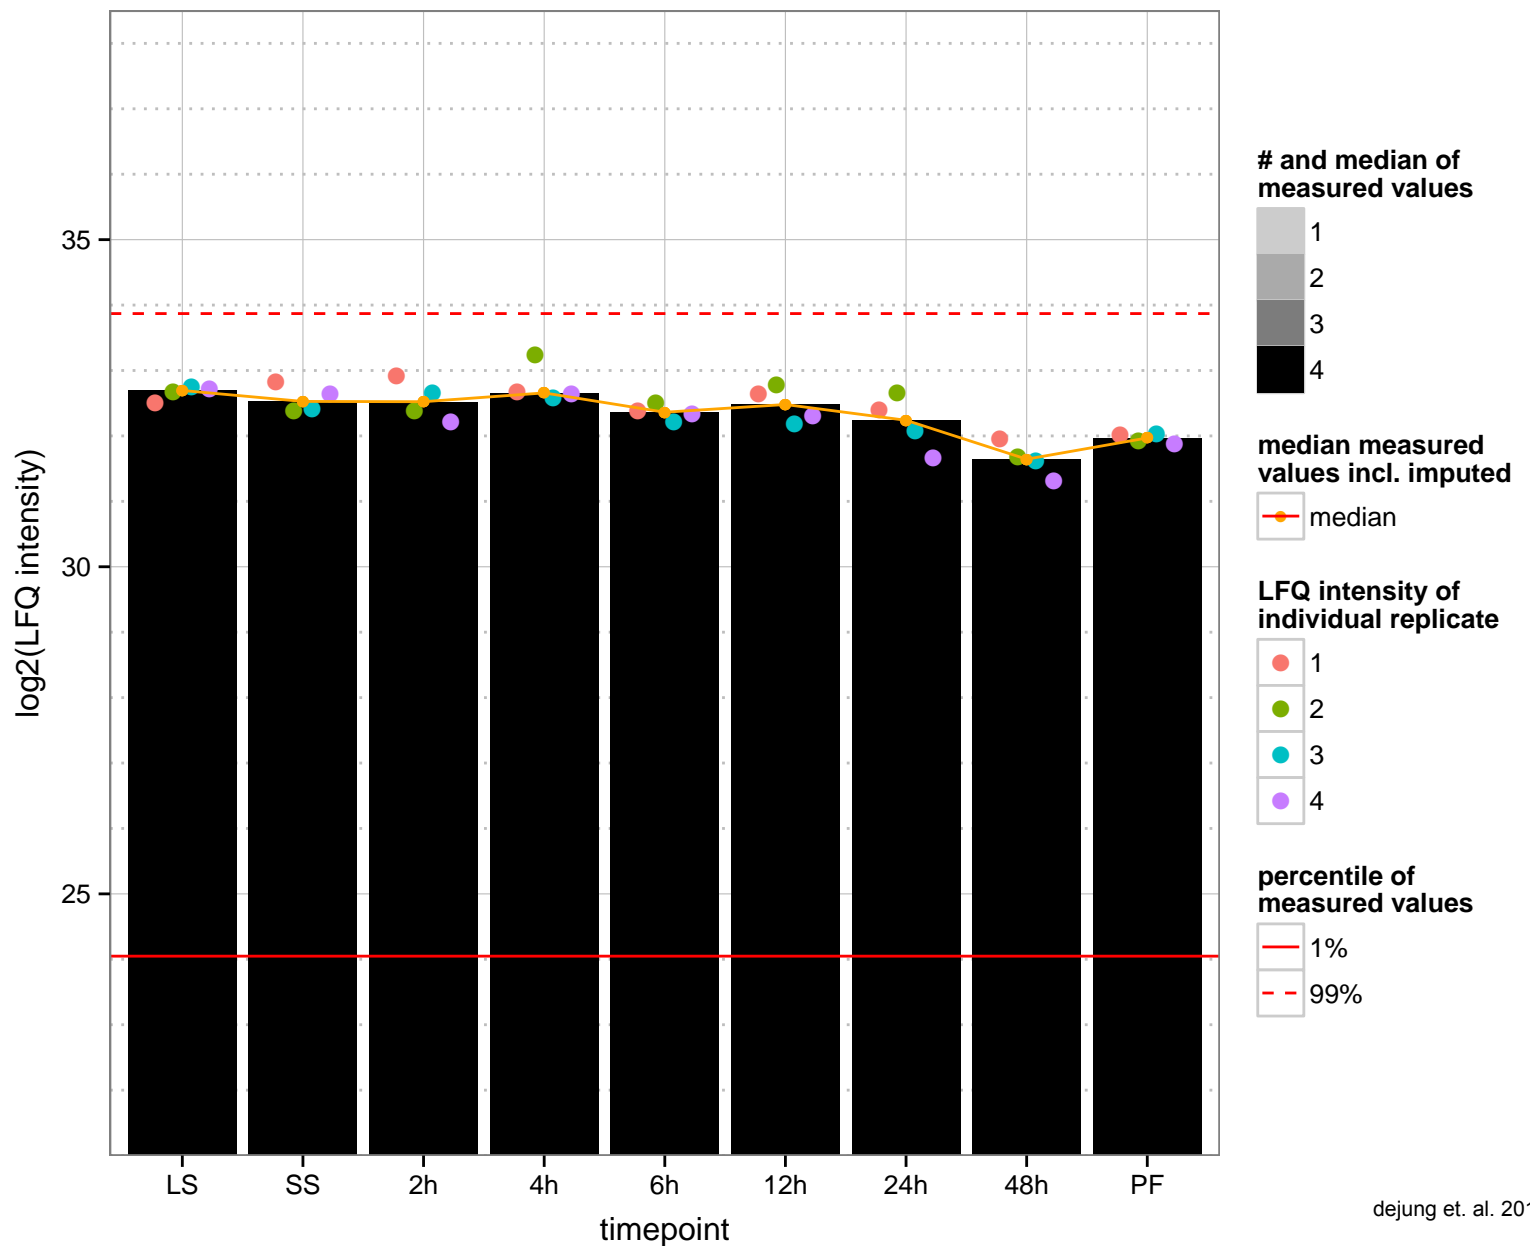

hypothetical protein, conserved  
 Tb927.9.1380  
 AGOF: null  
 AGOC: mitochondrion  
 AGOP: null  
 PGO: null  
 PGO: null  
 PGO: null

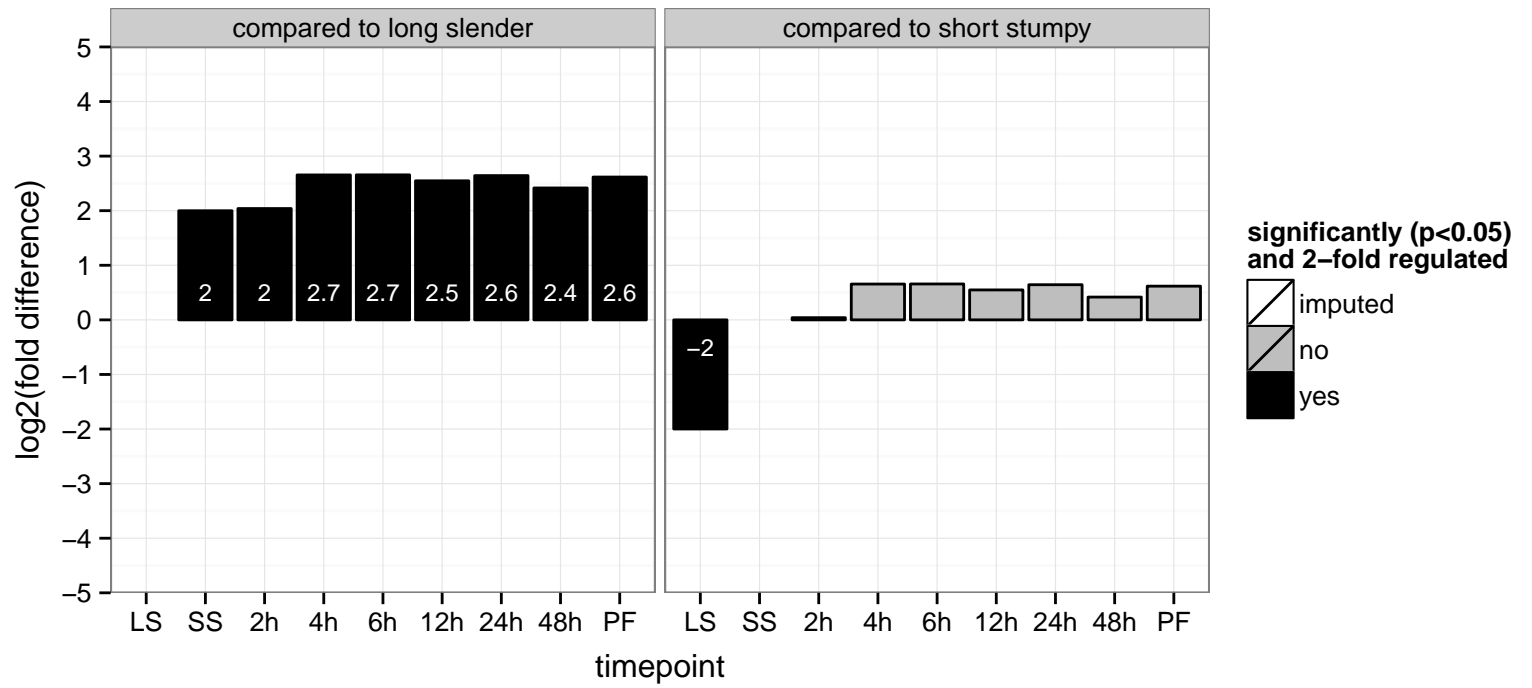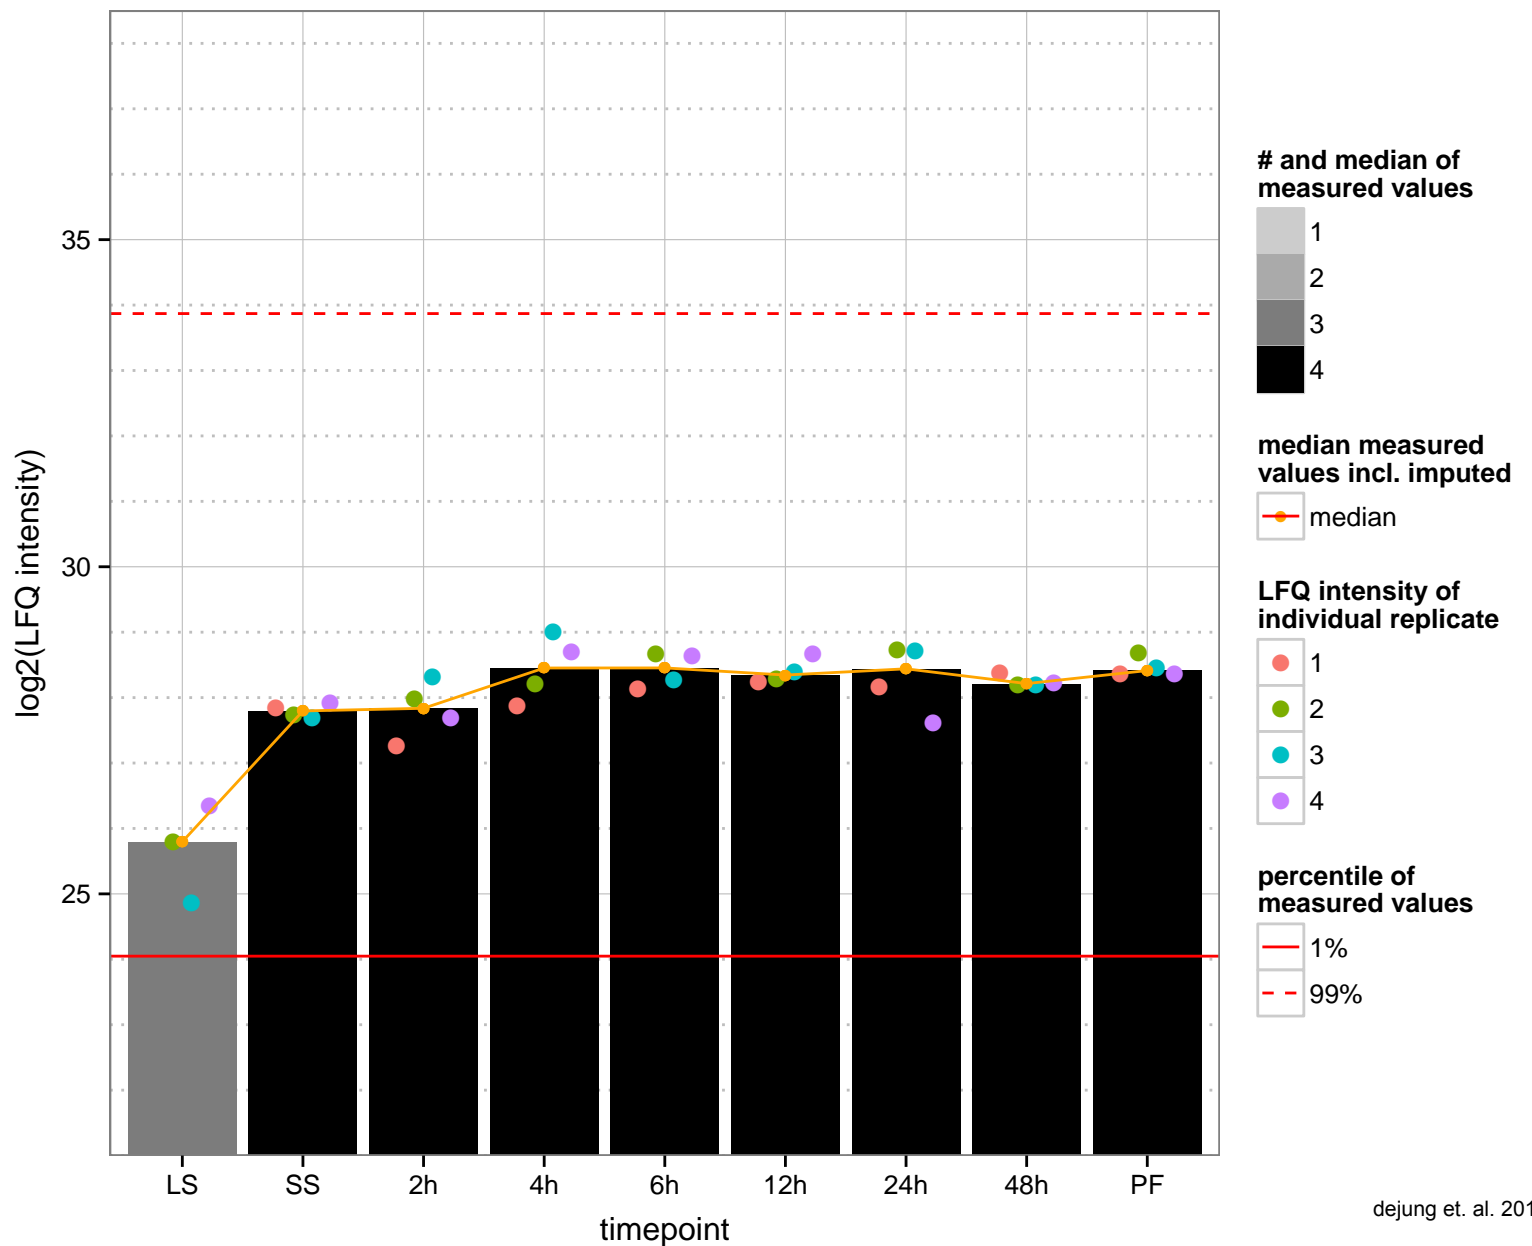

RNA-binding protein, putative (DRBD2)  
 Tb927.9.13990  
 AGOF: RNA binding  
 AGOC: null  
 AGOP: RNA processing  
 PGOF: nucleic acid binding  
 PGOC: null  
 PGOP: null

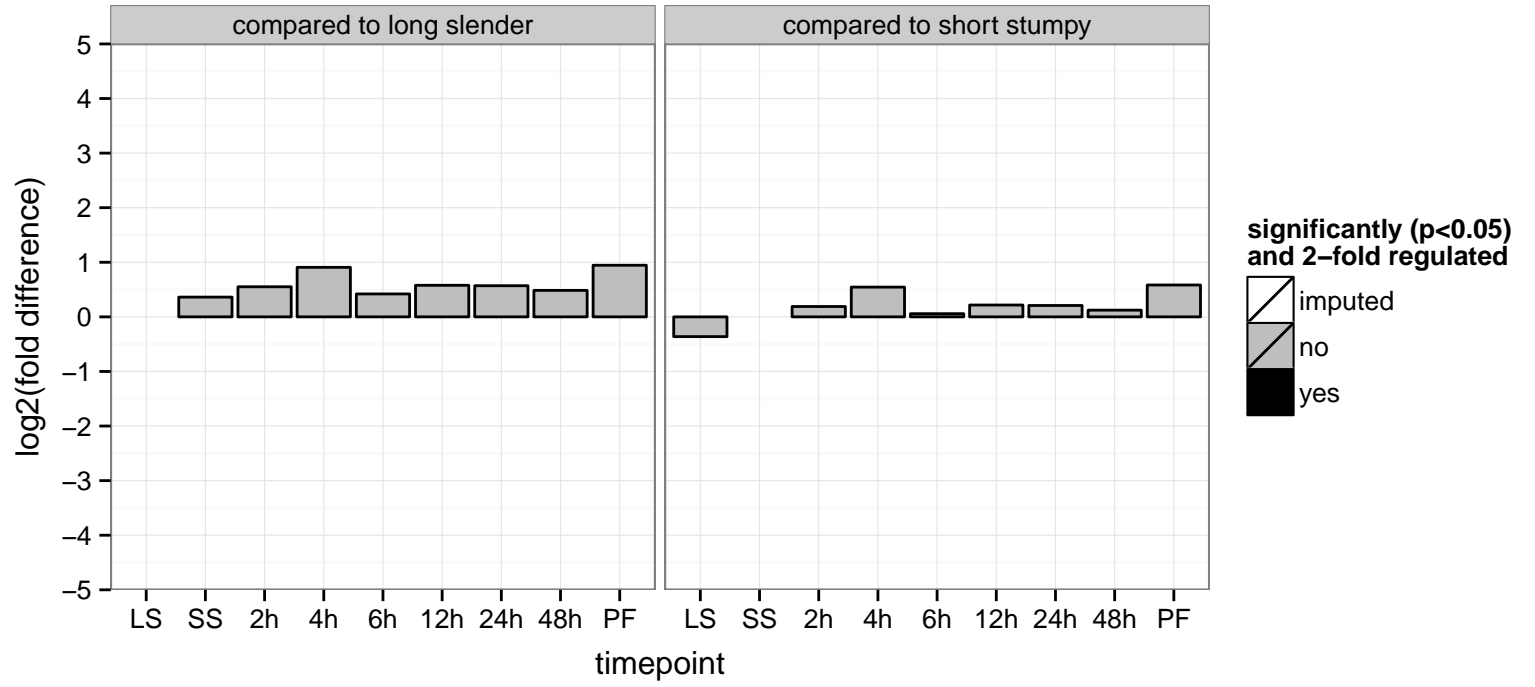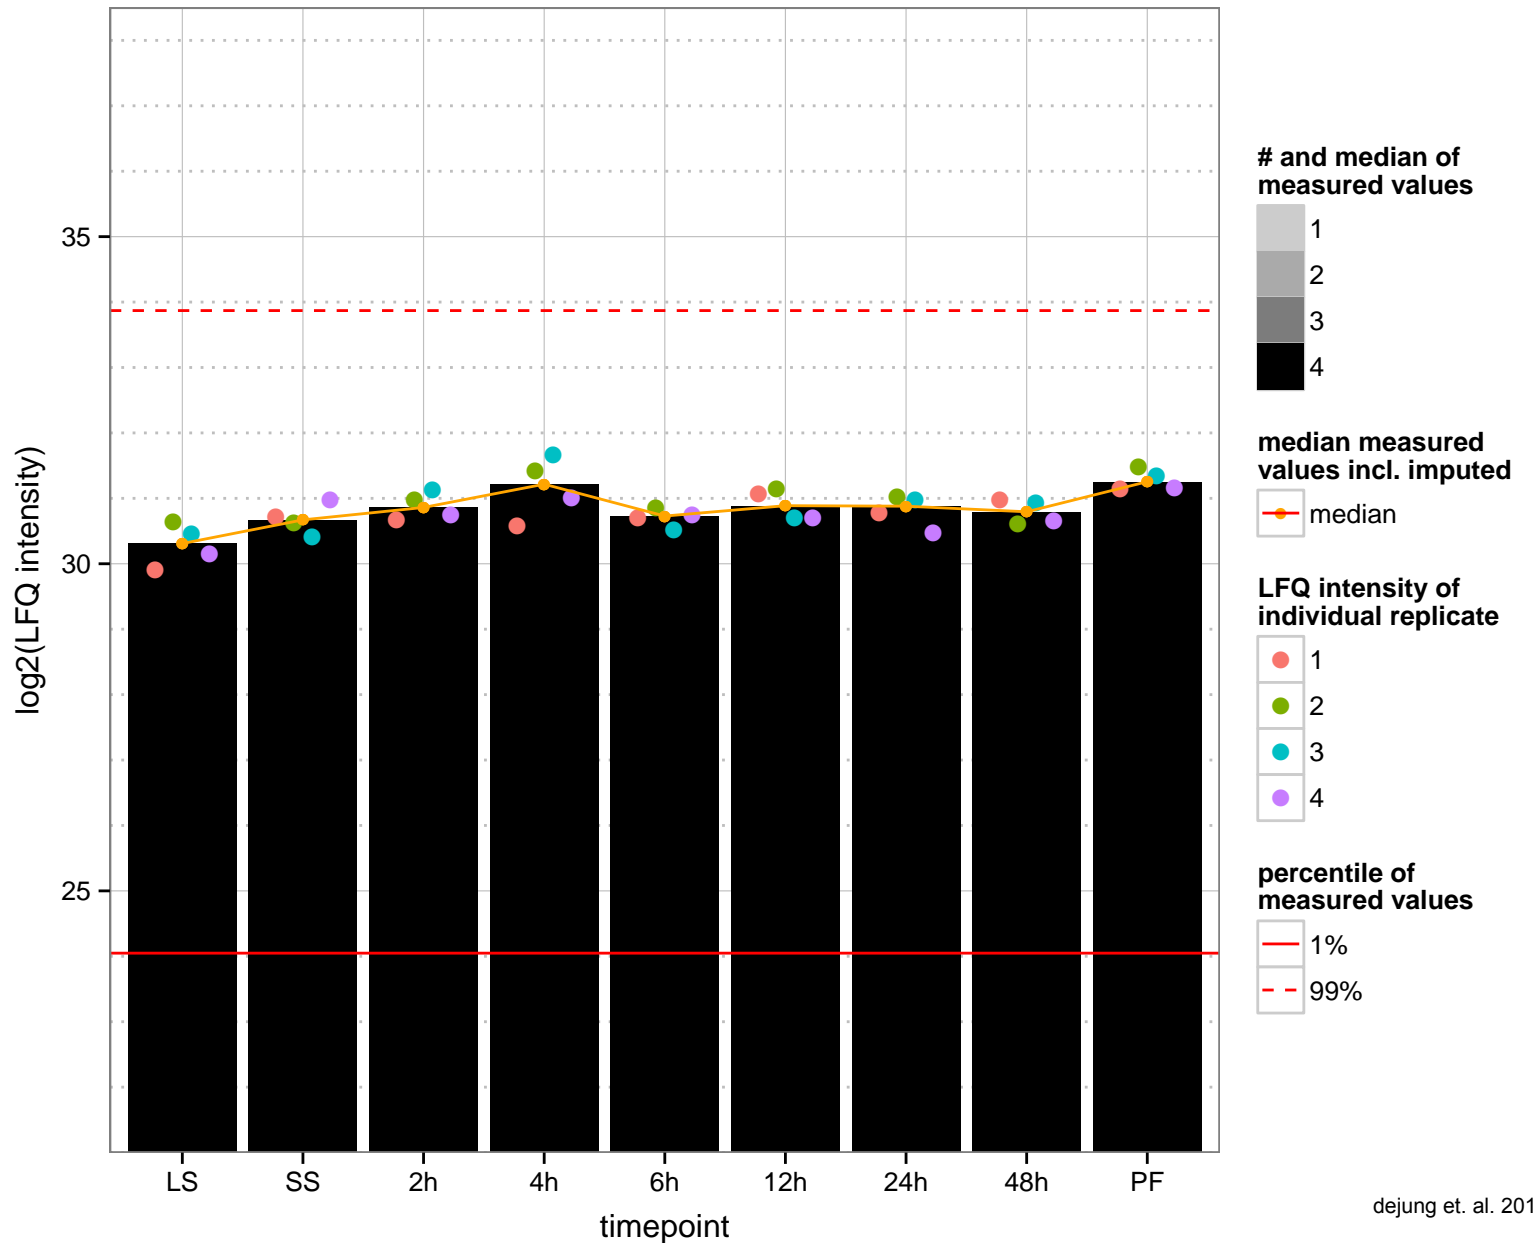

Monoxygenase, putative  
 Tb927.9.1400  
 AGOF: monoxygenase activity  
 AGOC: null  
 AGOP: cellular aromatic compound metabolic process  
 PGO: null  
 PGO: null  
 PGO: null

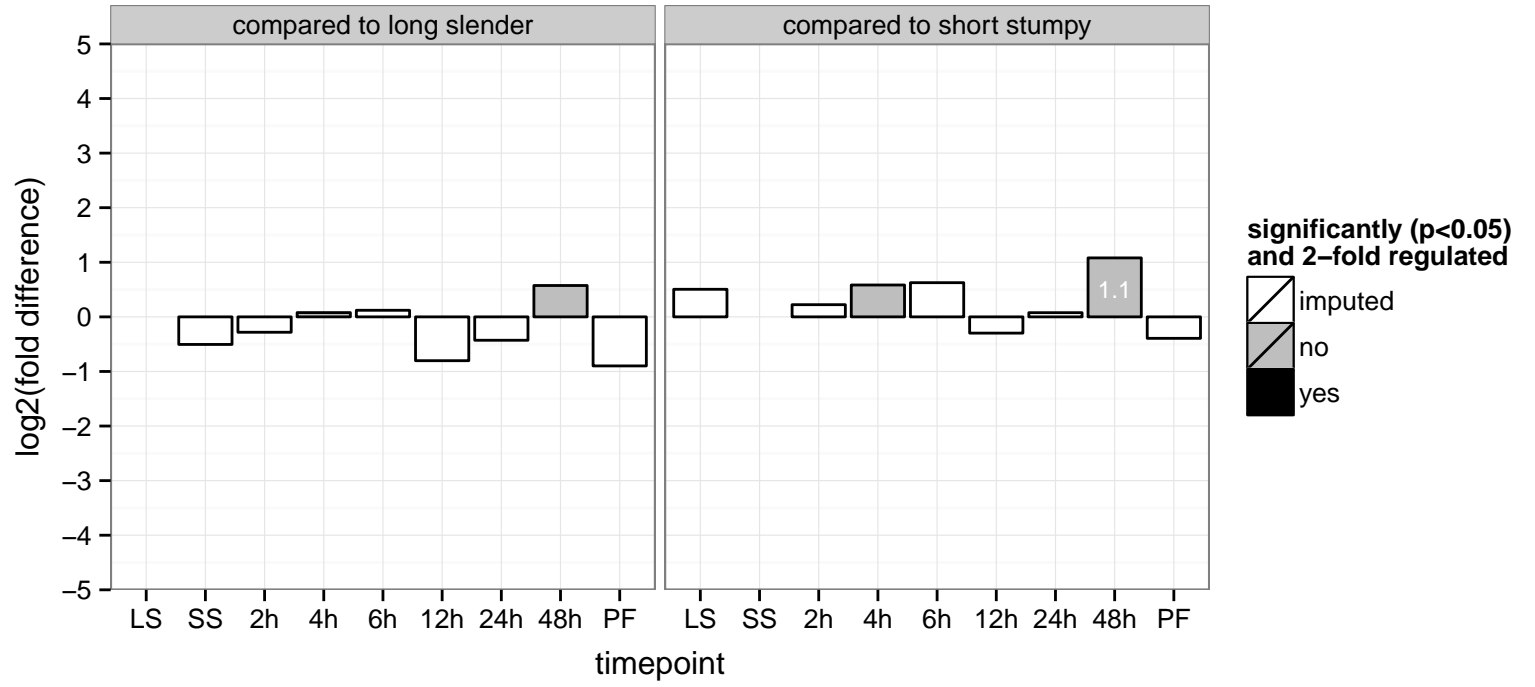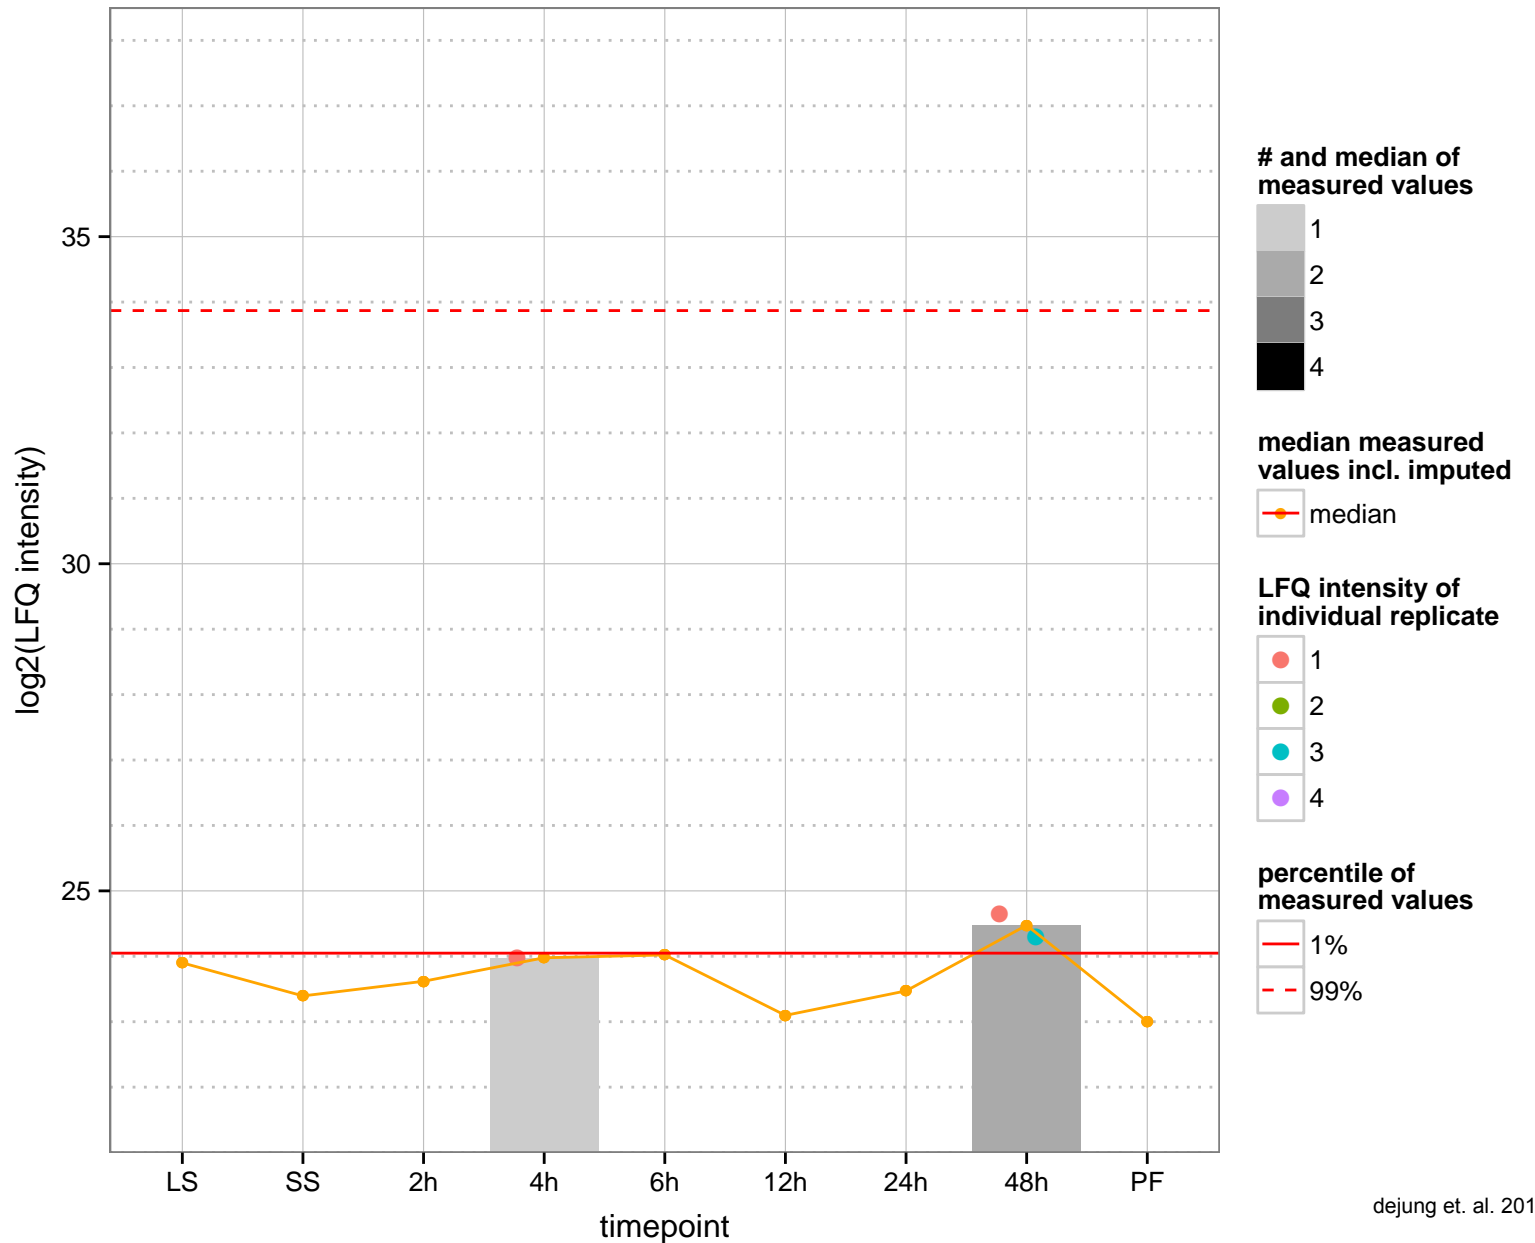

short-chain dehydrogenase, putative  
 Tb927.9.14070  
 AGOF: oxidoreductase activity  
 AGOC: null  
 AGOP: metabolic process  
 PGOF: oxidoreductase activity  
 PGO: null  
 PGOP: metabolic process

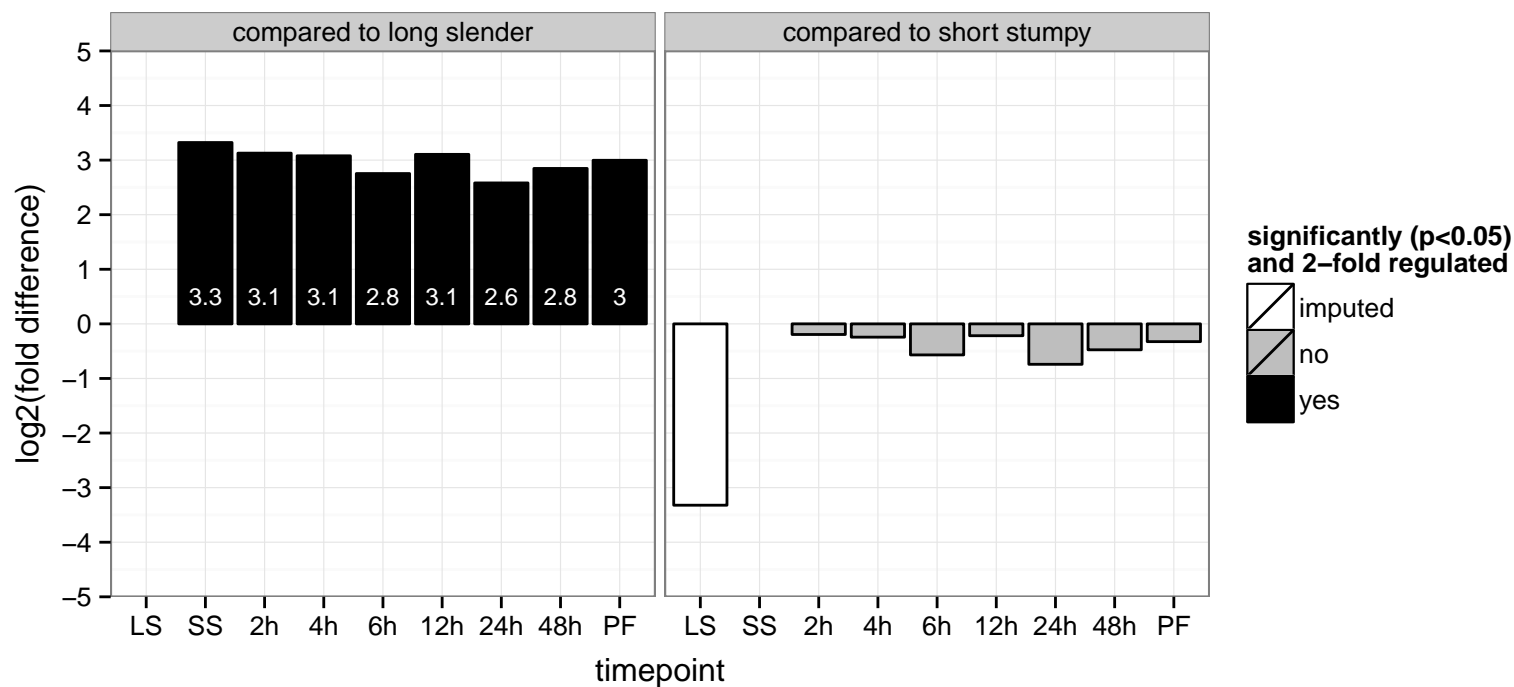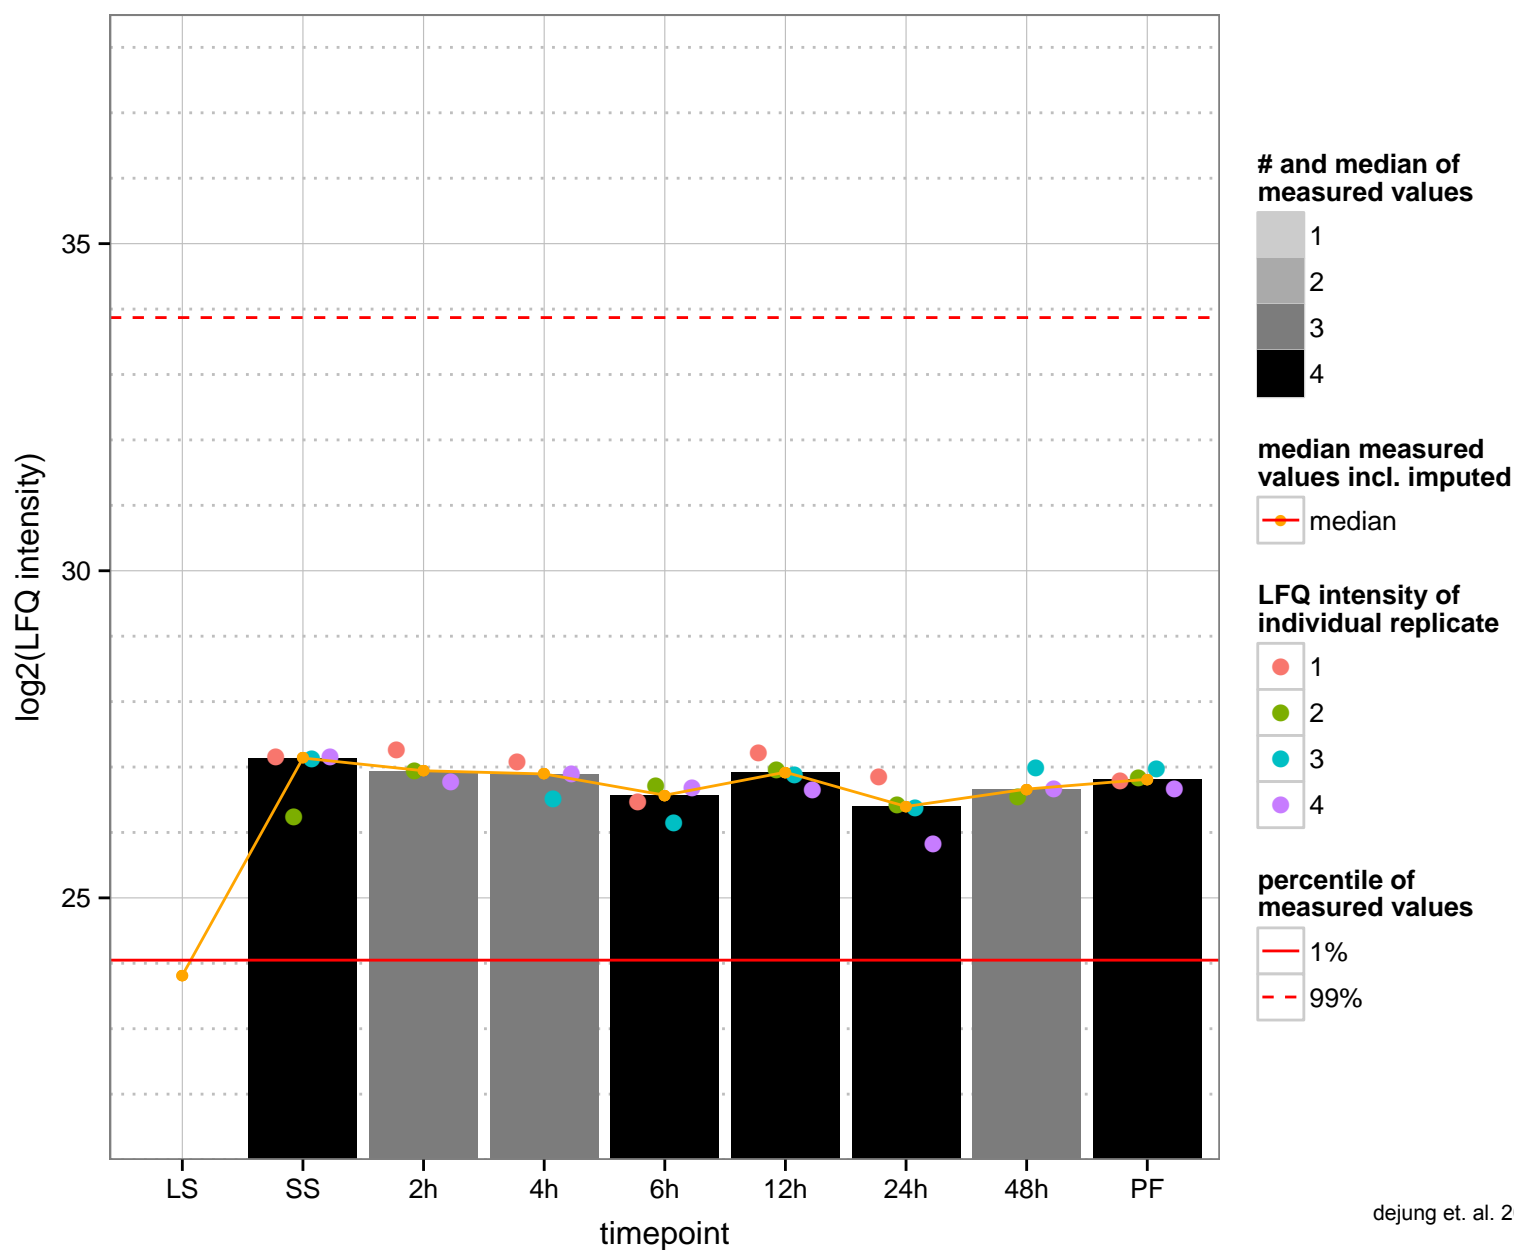

vesicle-associated membrane protein, putative  
 Tb927.9.14080  
 AGOF: null  
 AGOC: integral to membrane  
 AGOP: vesicle-mediated transport  
 PGO: null  
 PGOC: integral to membrane  
 PGO: transport, vesicle-mediated transport

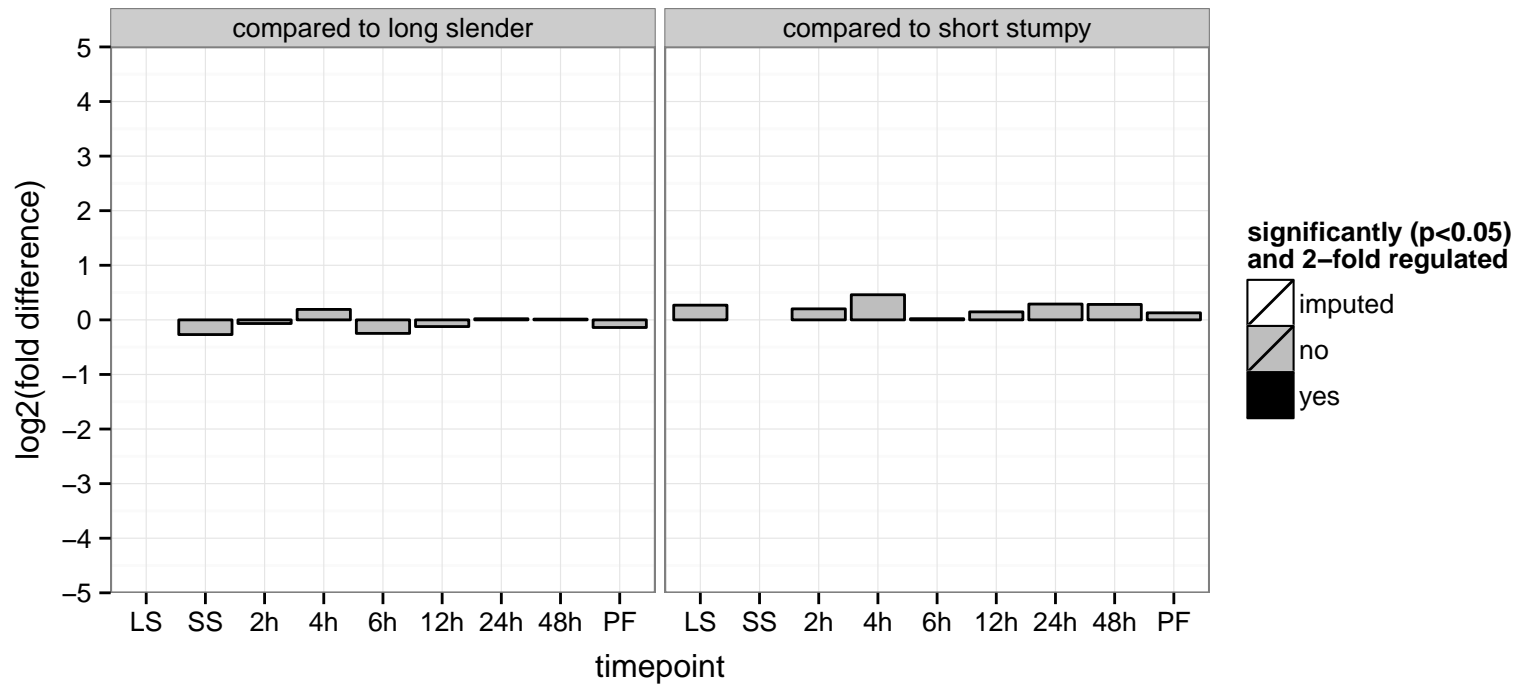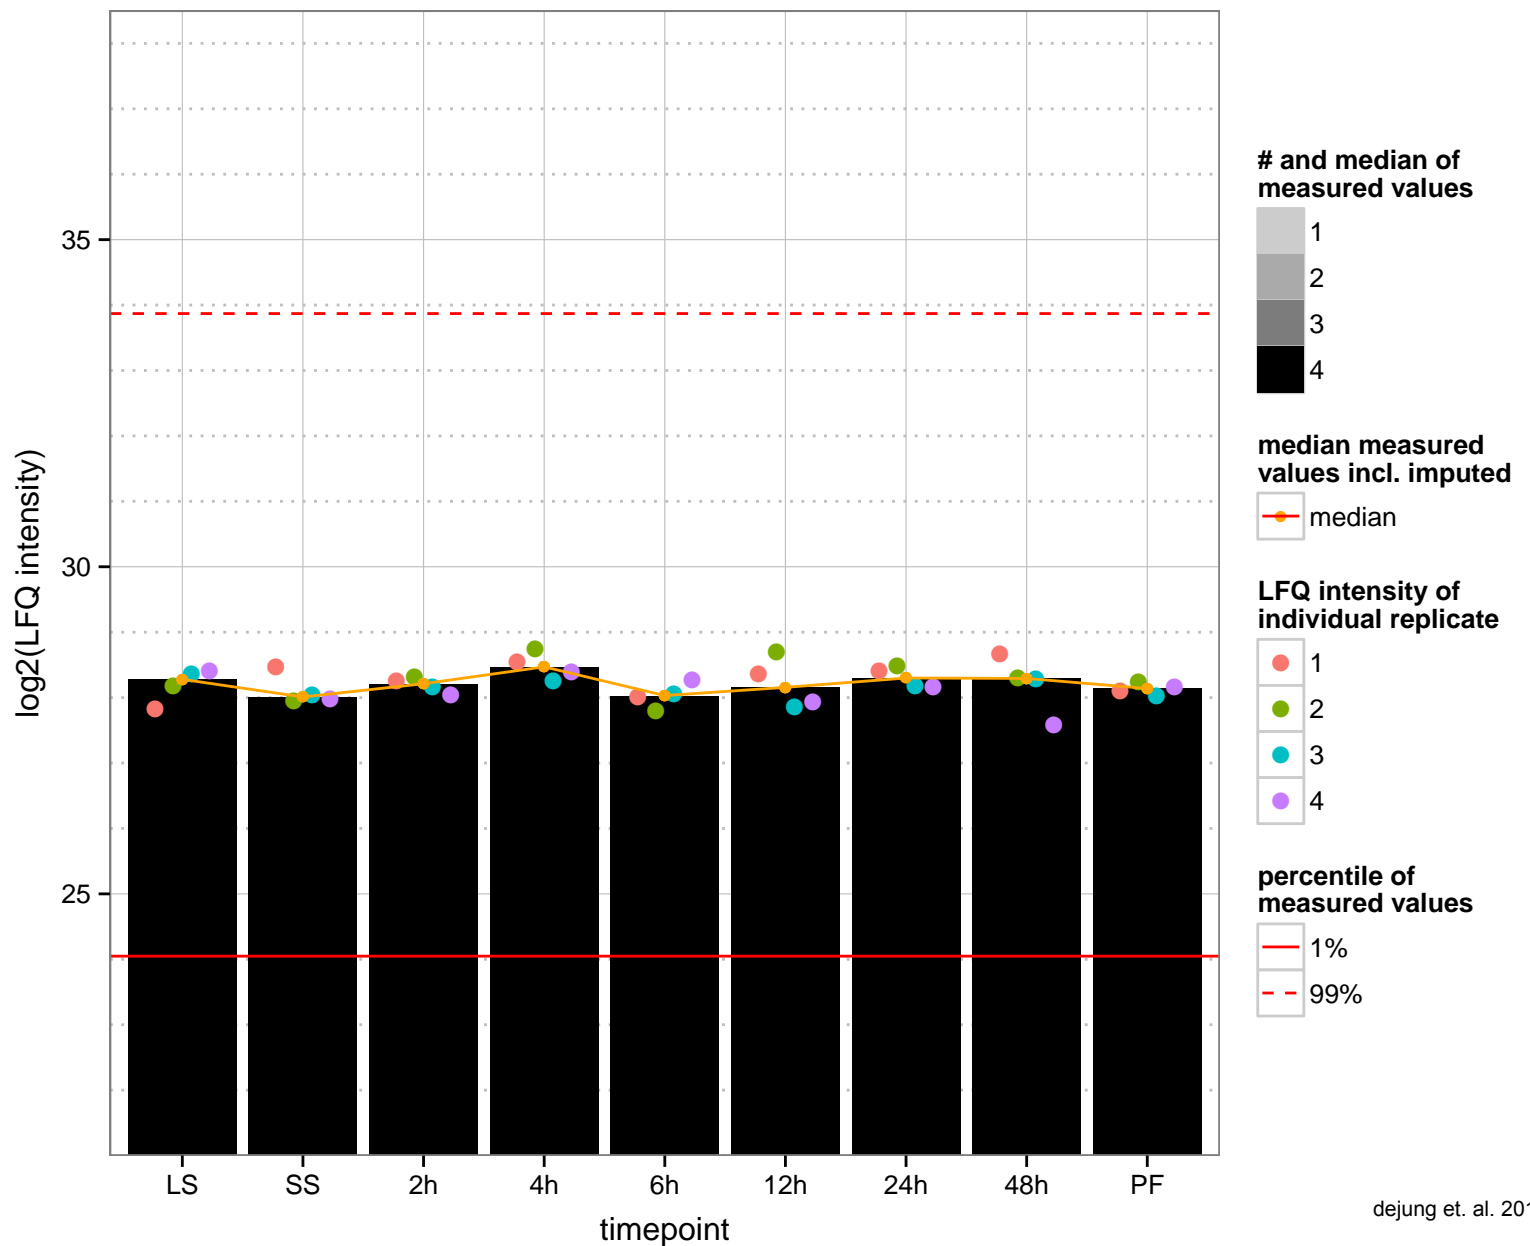



hypothetical protein, conserved  
 Tb927.9.14230  
 AGOF: null  
 AGOC: null  
 AGOP: null  
 PGOF: null  
 PGOC: null  
 PGOP: null

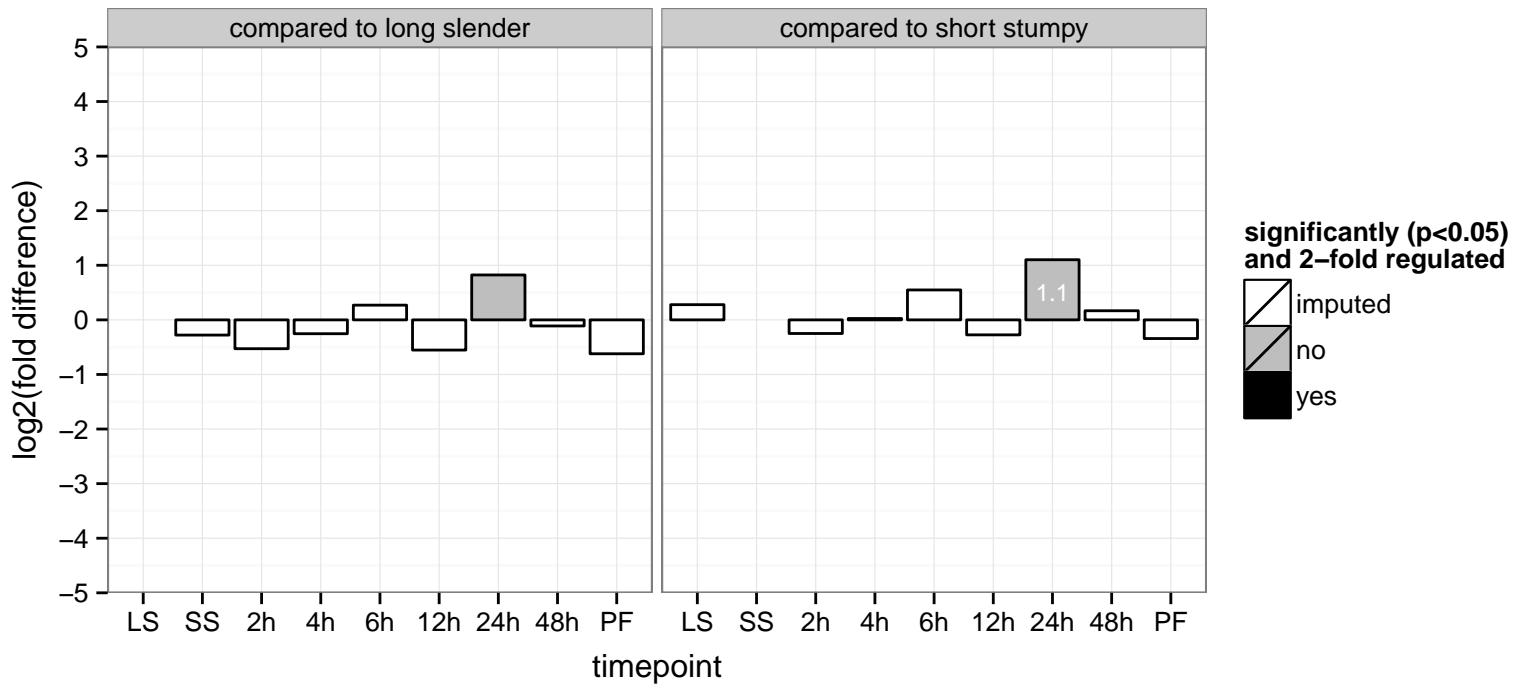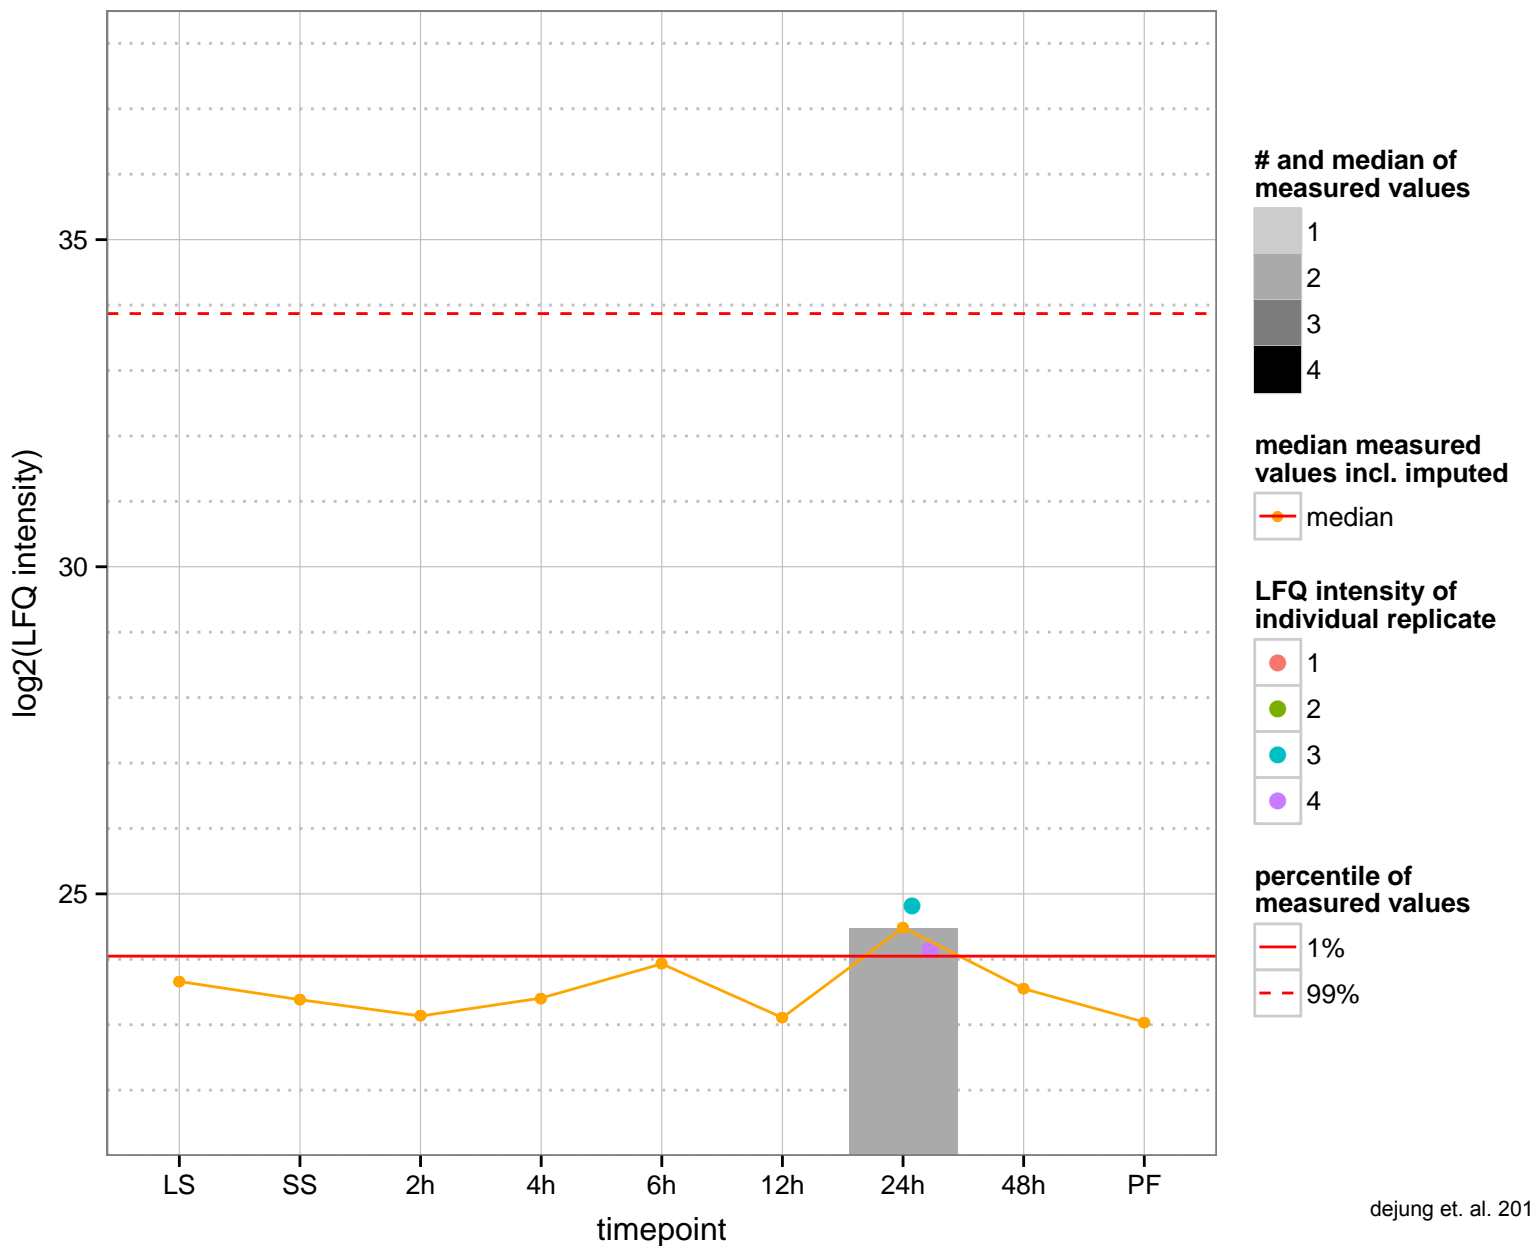

hypothetical protein, conserved, Nucleoporin (Nup82)  
 Tb927.9.14240;Tb11.v5.0621  
 AGOF: null  
 AGOC: null, nuclear pore  
 AGOP: null  
 PGOF: null  
 PGO: null  
 PGOP: null

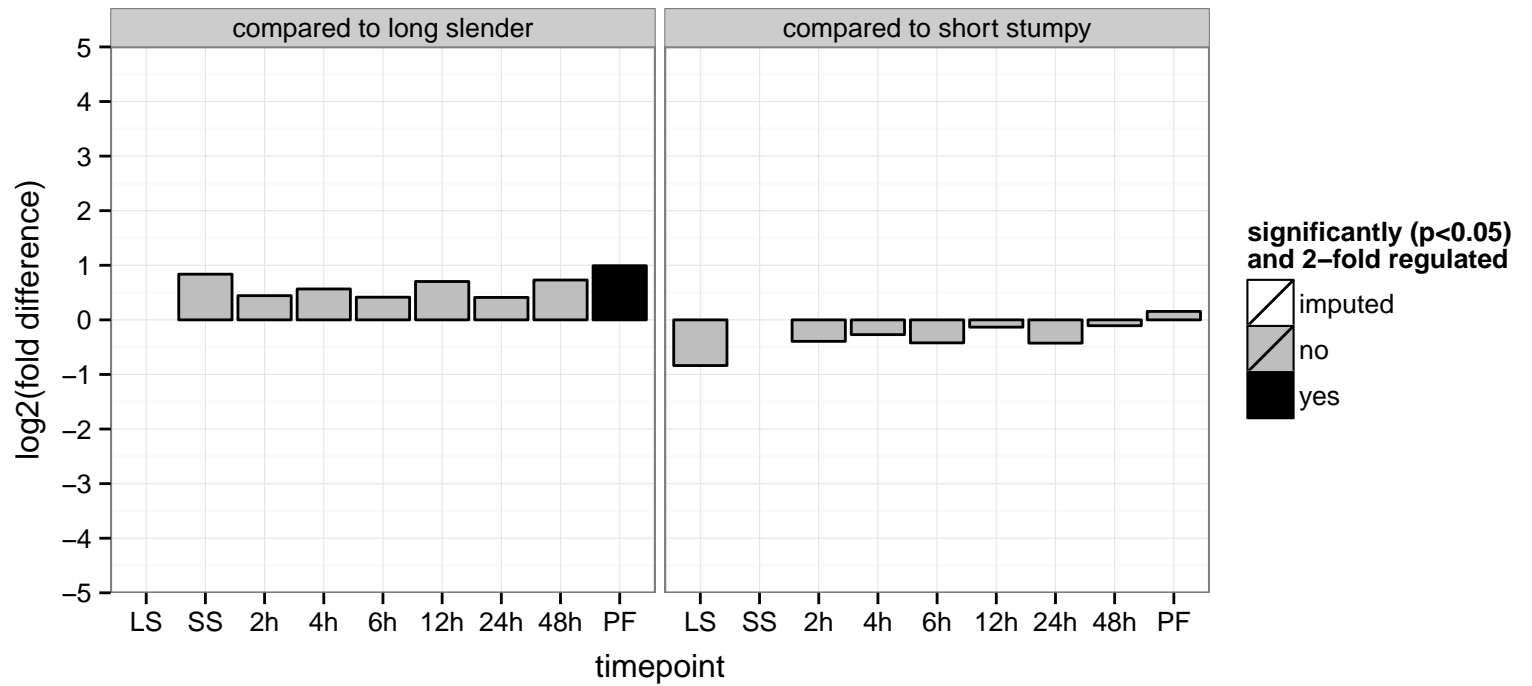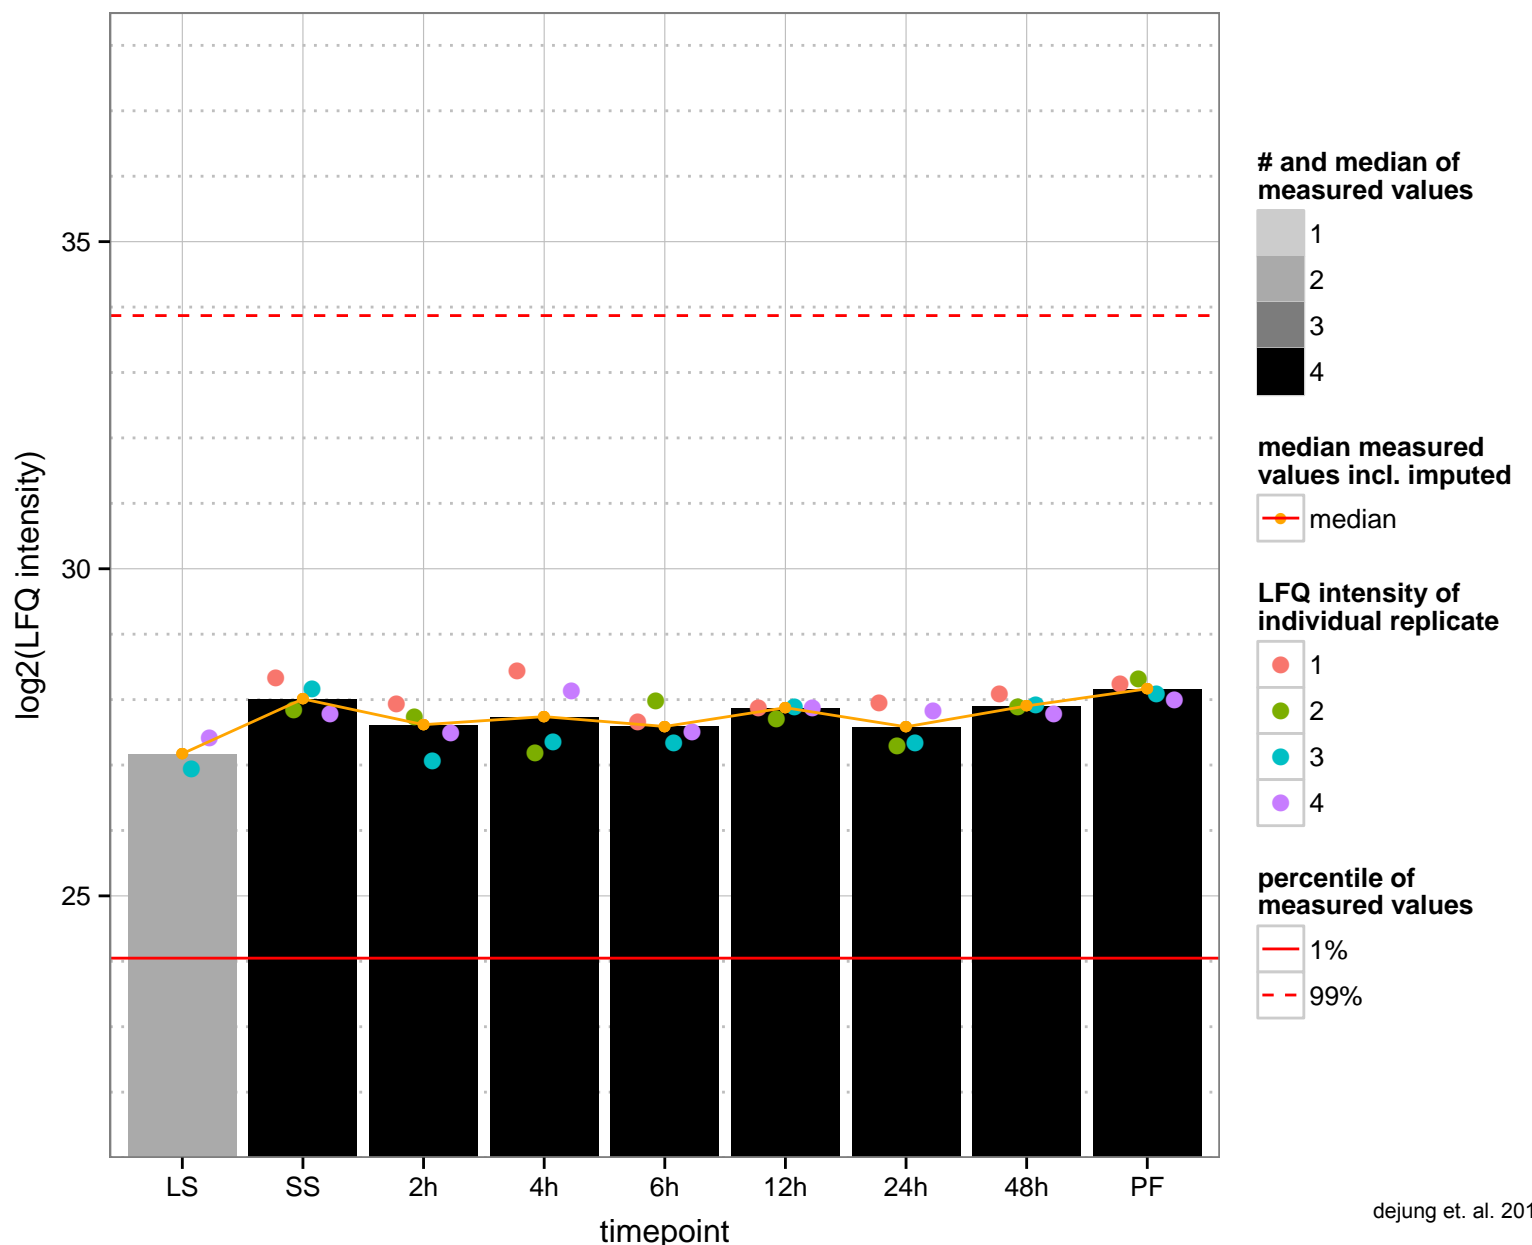

casein kinase II, putative

Tb927.9.14430

AGOF: ATP binding, protein serine/threonine kinase activity, protein tyrosine kinase activity

AGOC: nucleolus

AGOP: growth, protein phosphorylation

PGOF: ATP binding, protein kinase activity, transferase activity, transferring phosphorus-containing groups

PGOC: null

PGOP: protein phosphorylation

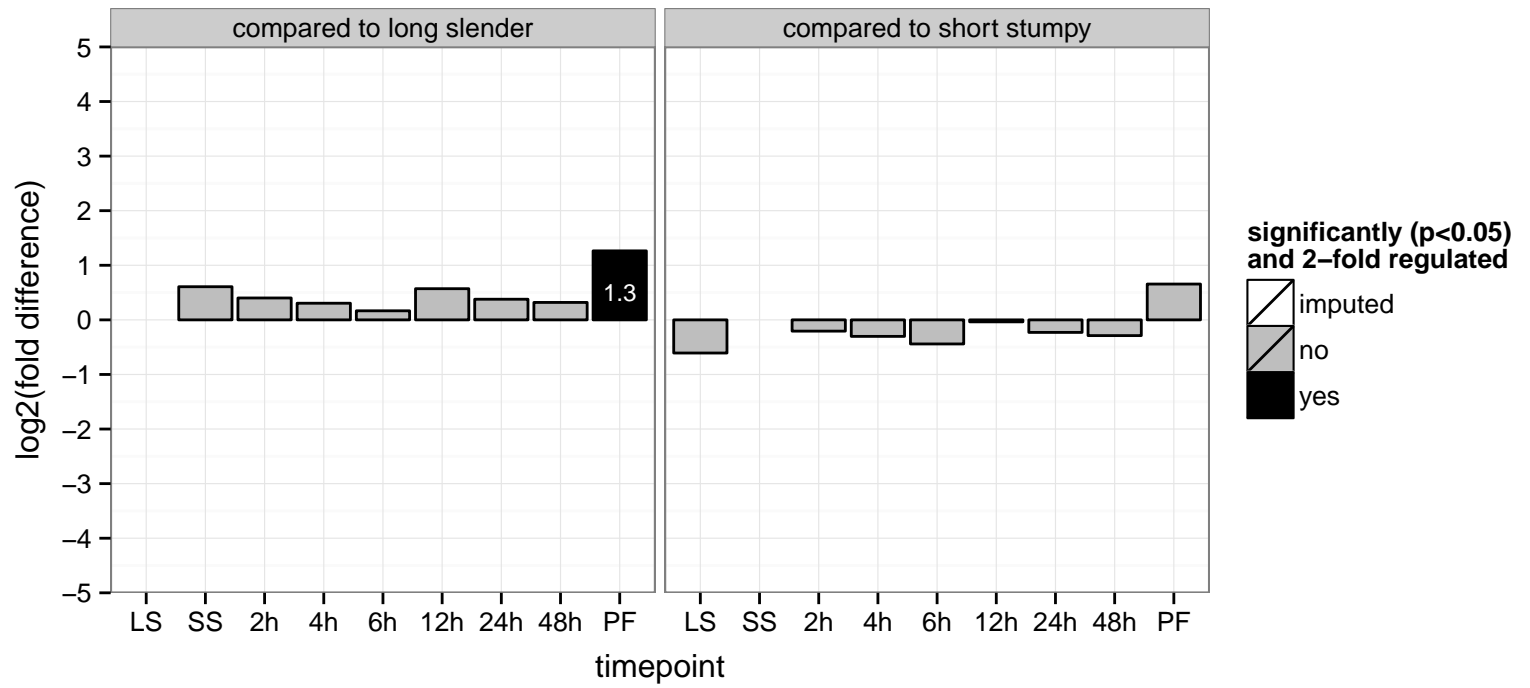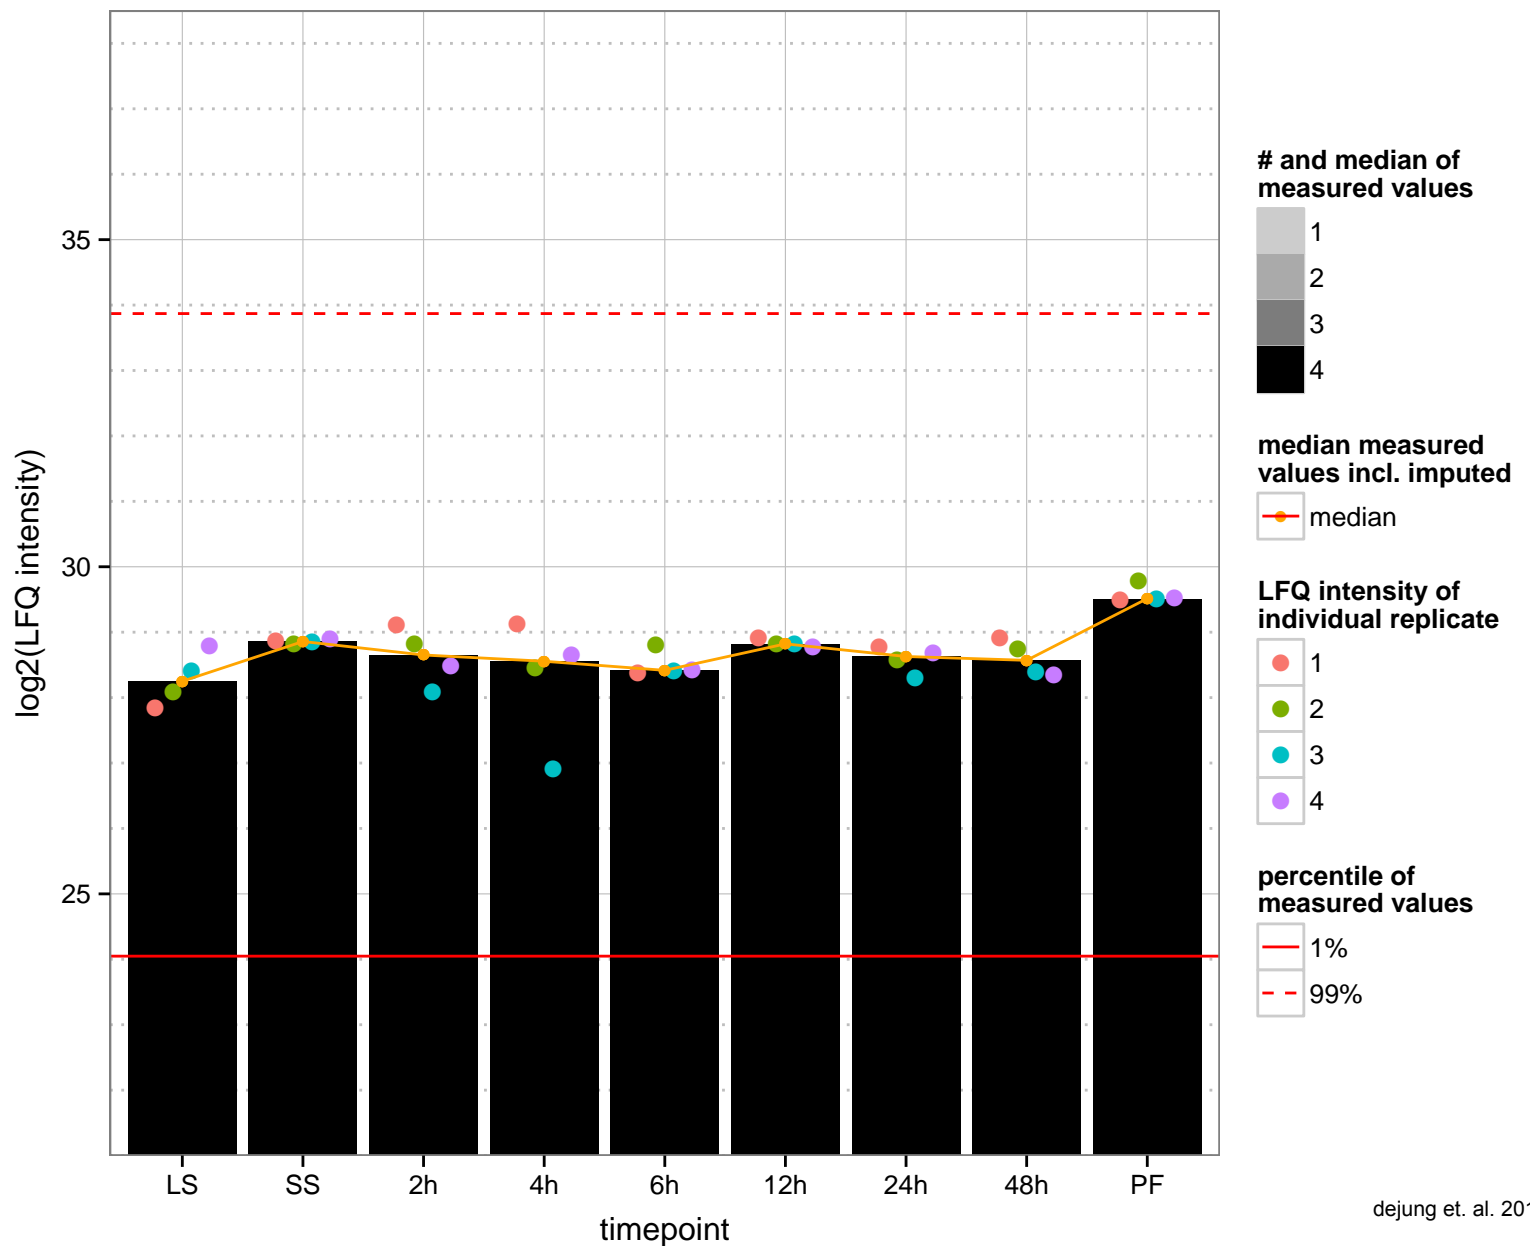

dynein-associated protein, putative  
 Tb927.9.14480  
 AGOF: null  
 AGOC: null  
 AGOP: microtubule-based movement  
 PGO: null  
 PGO: null  
 PGO: null

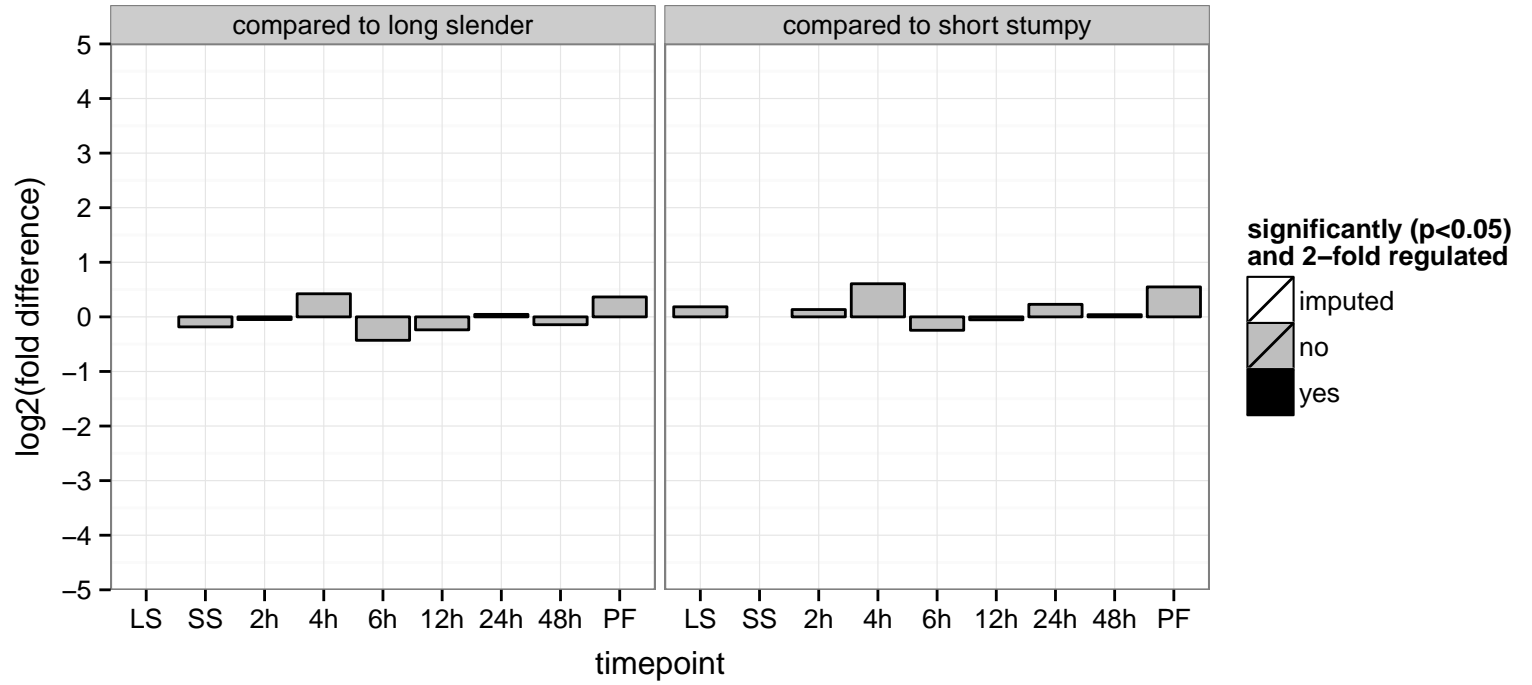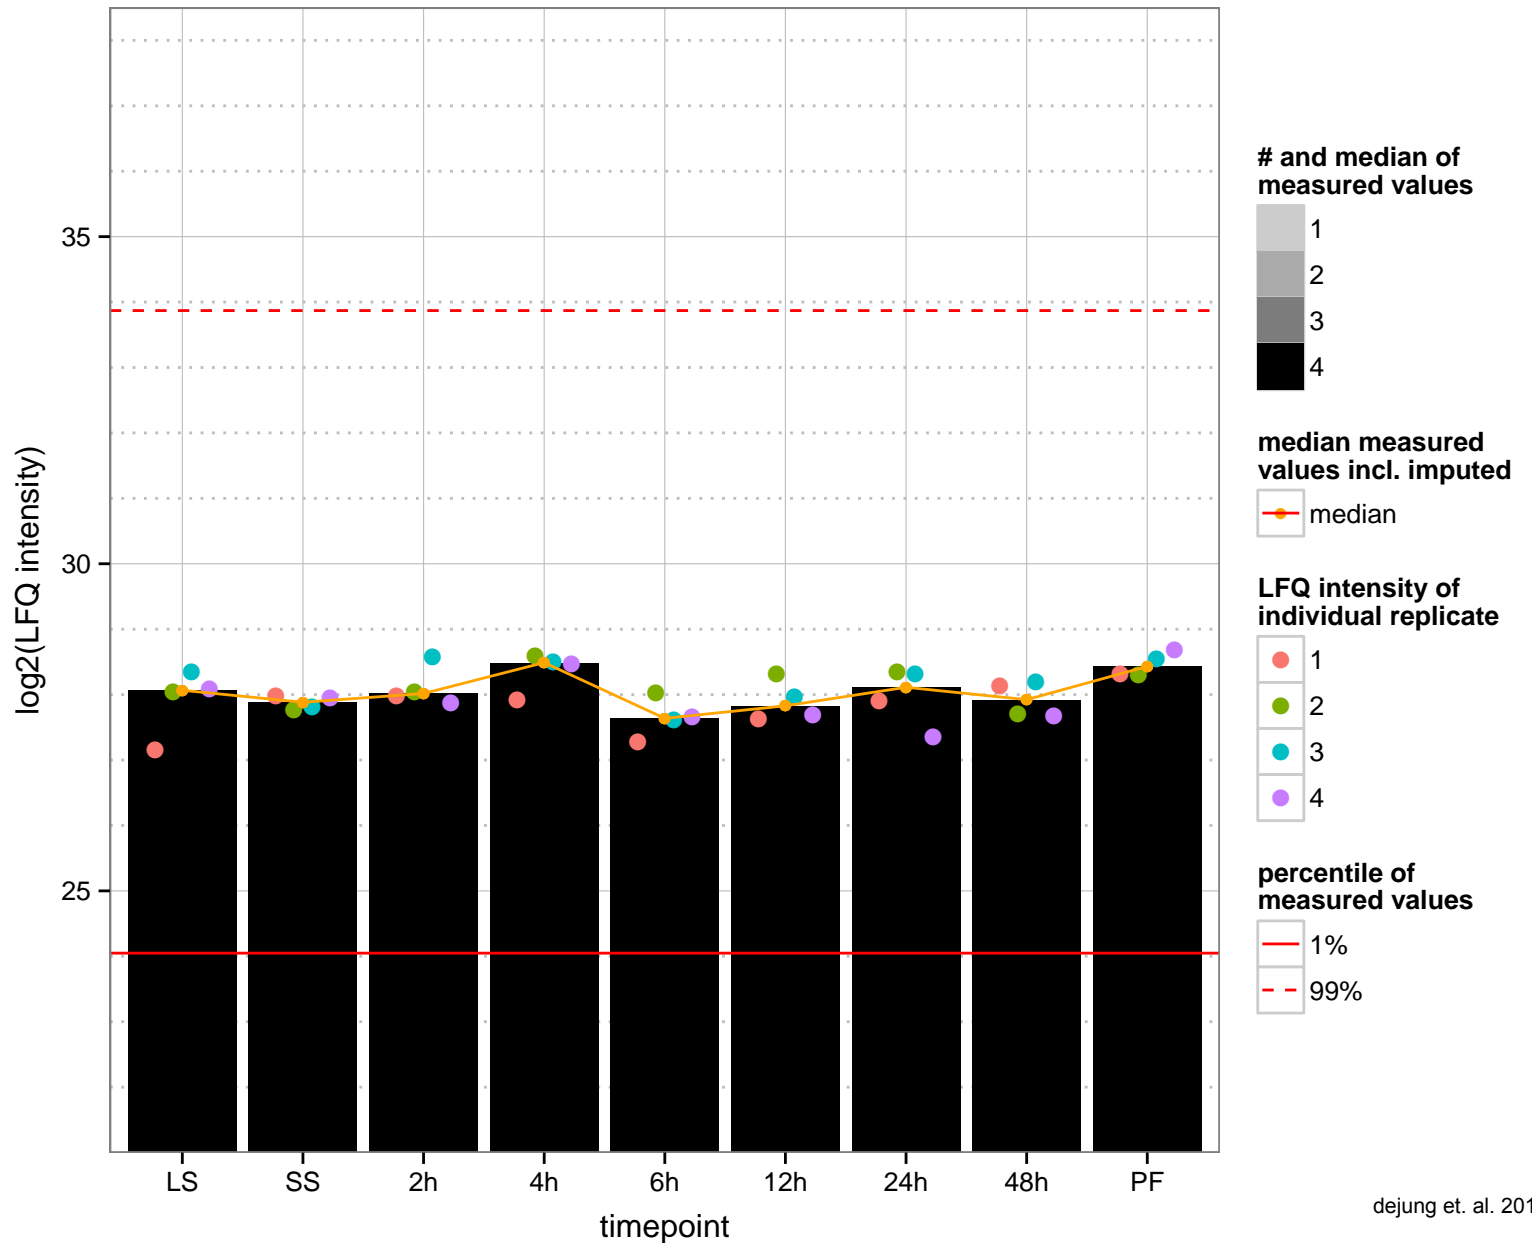

hypothetical protein, conserved  
 Tb927.9.1470  
 AGOF: null  
 AGOC: null  
 AGOP: null  
 PGOF: null  
 PGO: null  
 PGOP: null

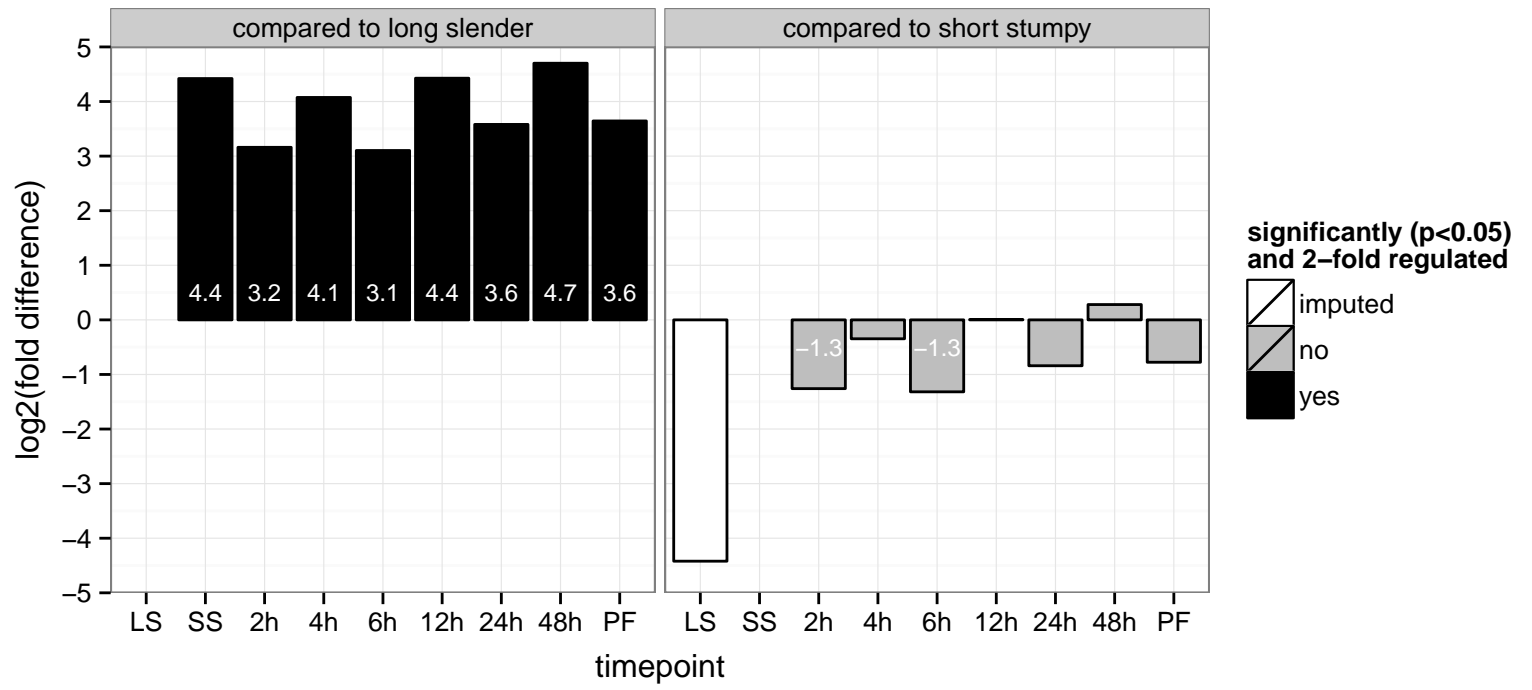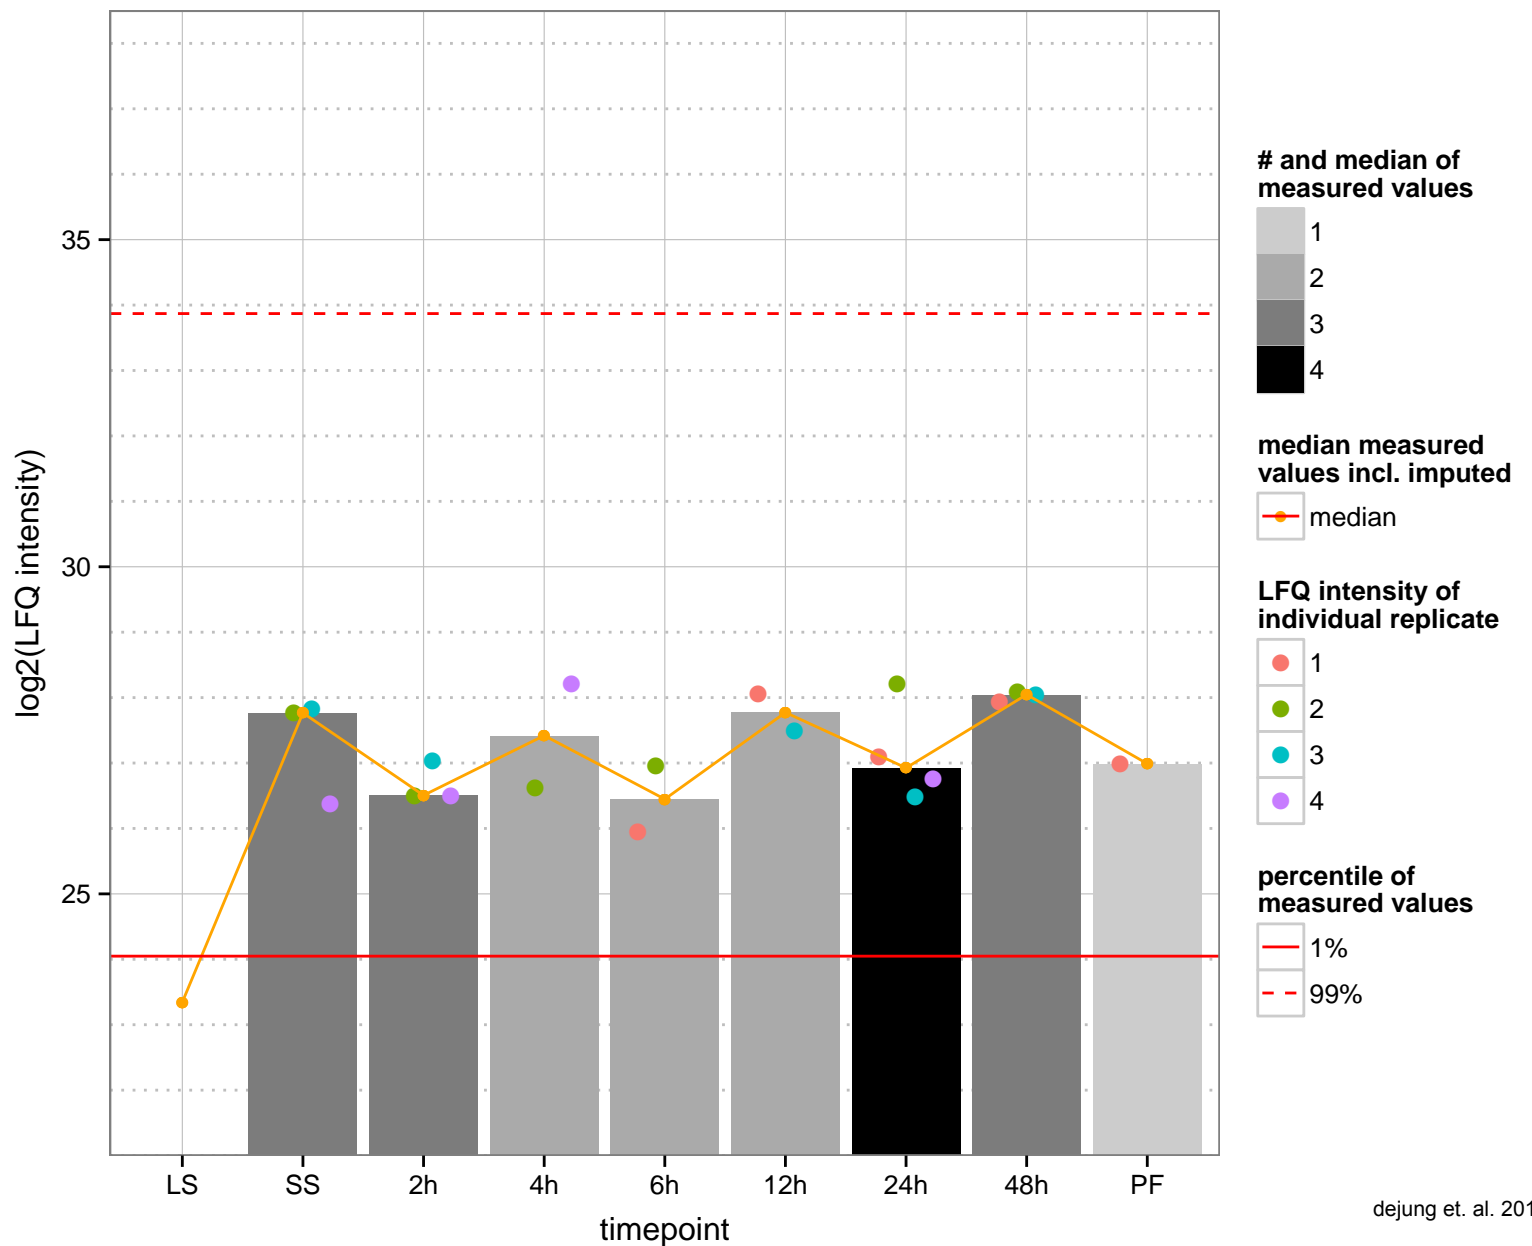

DNA polymerase epsilon subunit b, putative  
 Tb927.9.15030  
 AGOF: DNA binding, DNA-directed DNA polymerase activity  
 AGOC: nucleus  
 AGOP: DNA-dependent DNA replication  
 PGOF: DNA binding, DNA-directed DNA polymerase activity  
 PGO: nucleus  
 PGO: nucleus  
 PGO: nucleus

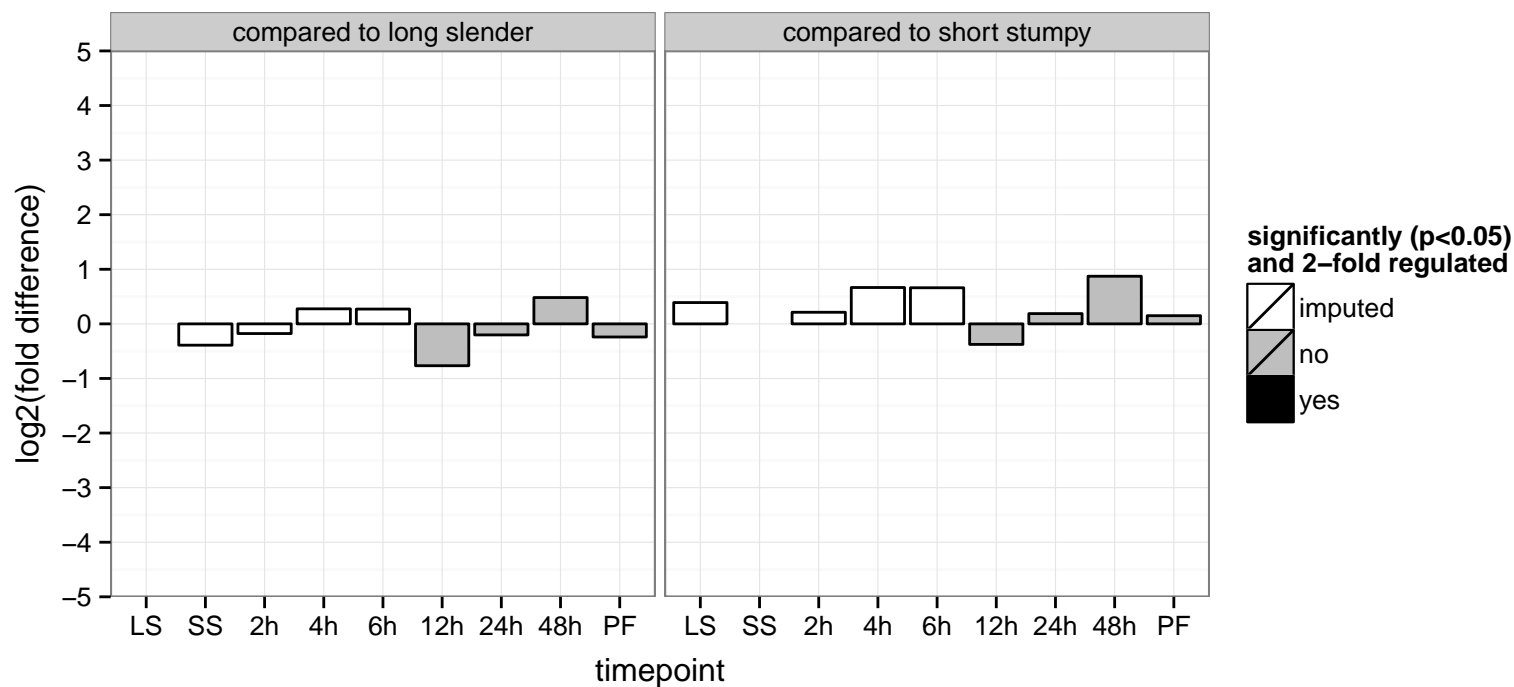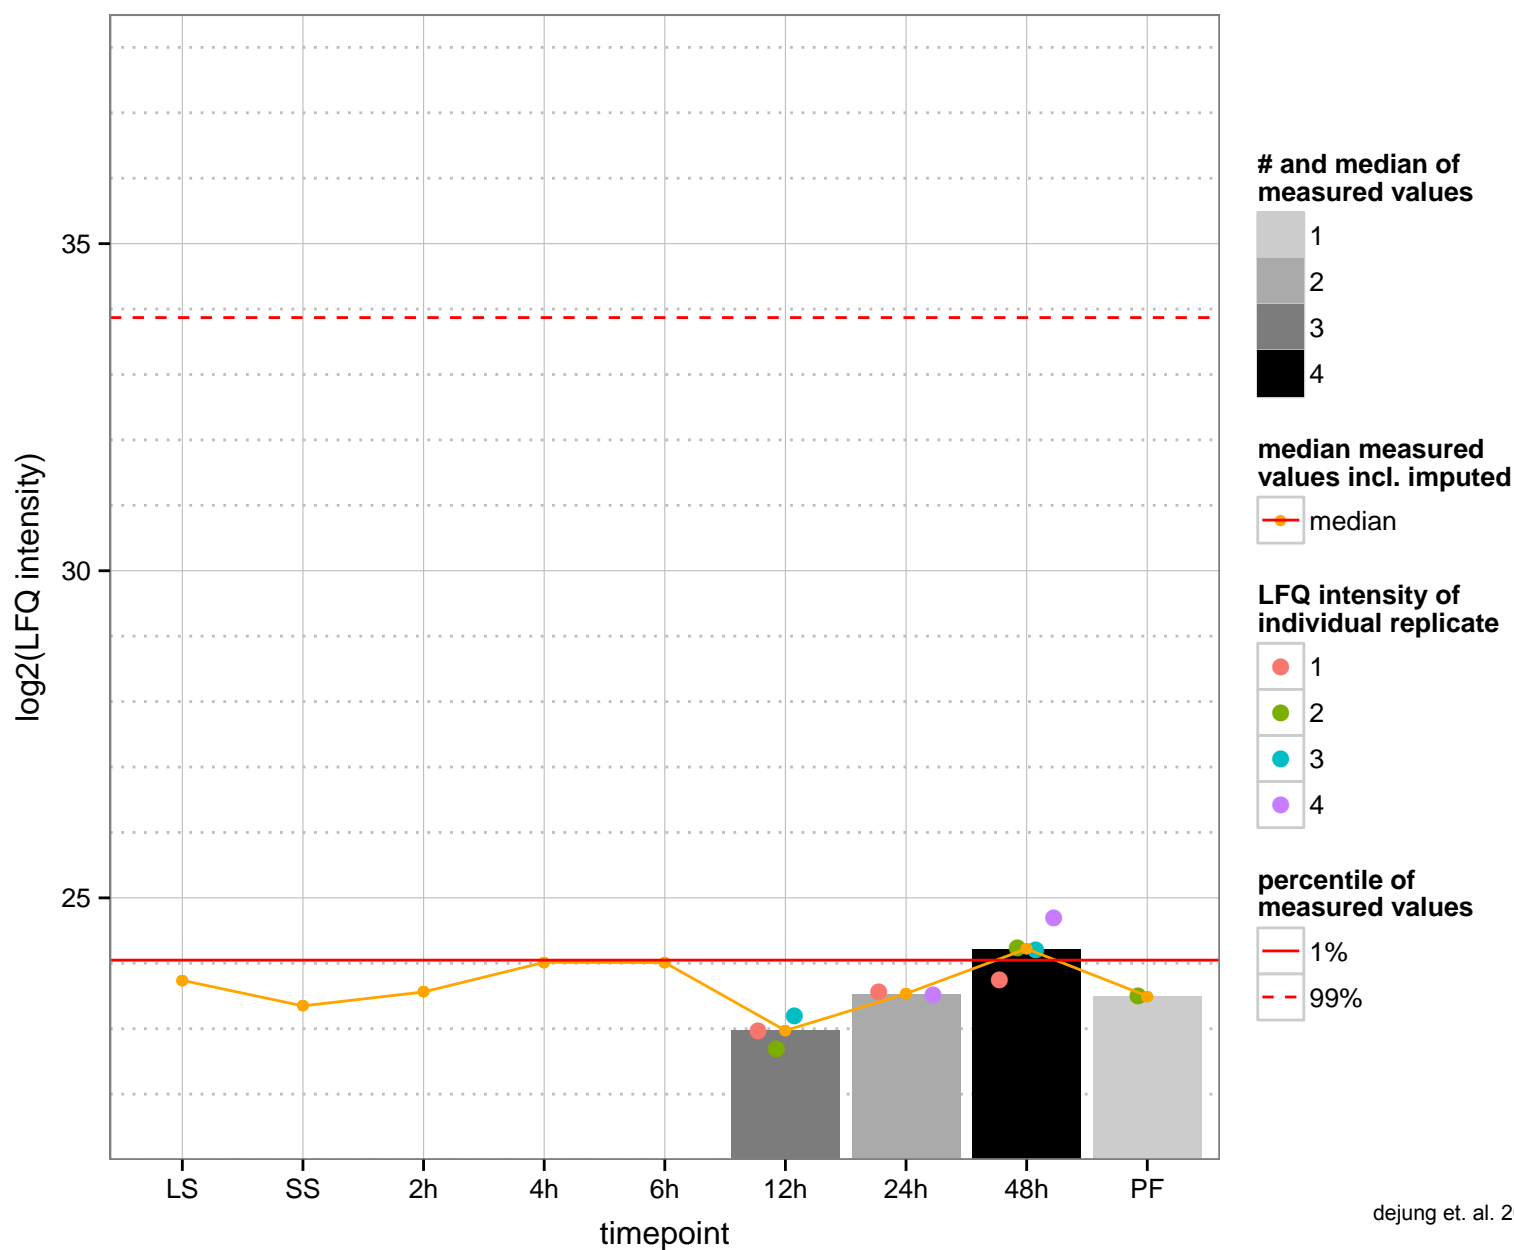

trypanin-related protein, putative  
 Tb927.9.15050  
 AGOF: null  
 AGOC: null  
 AGOP: null  
 PGOF: null  
 PGO: microtubule-based flagellum  
 PGOP: cell motility

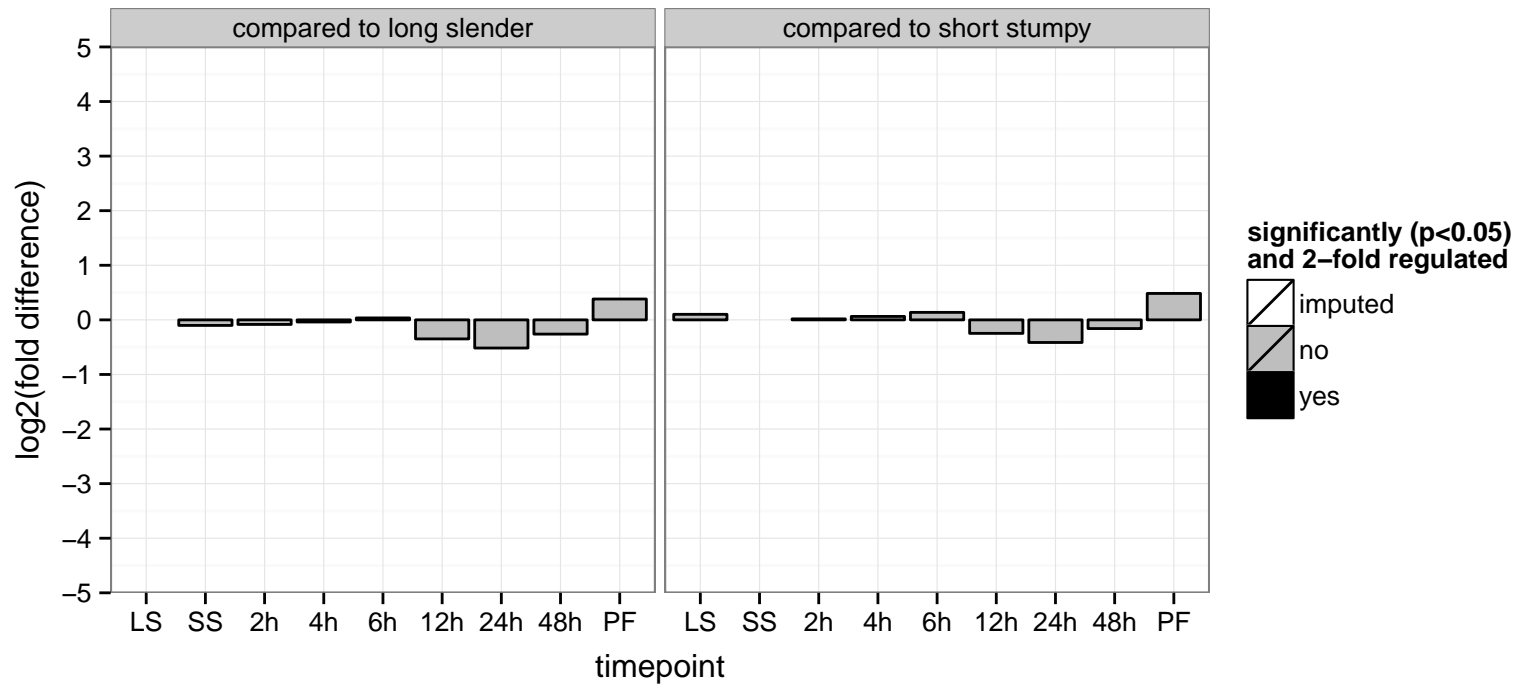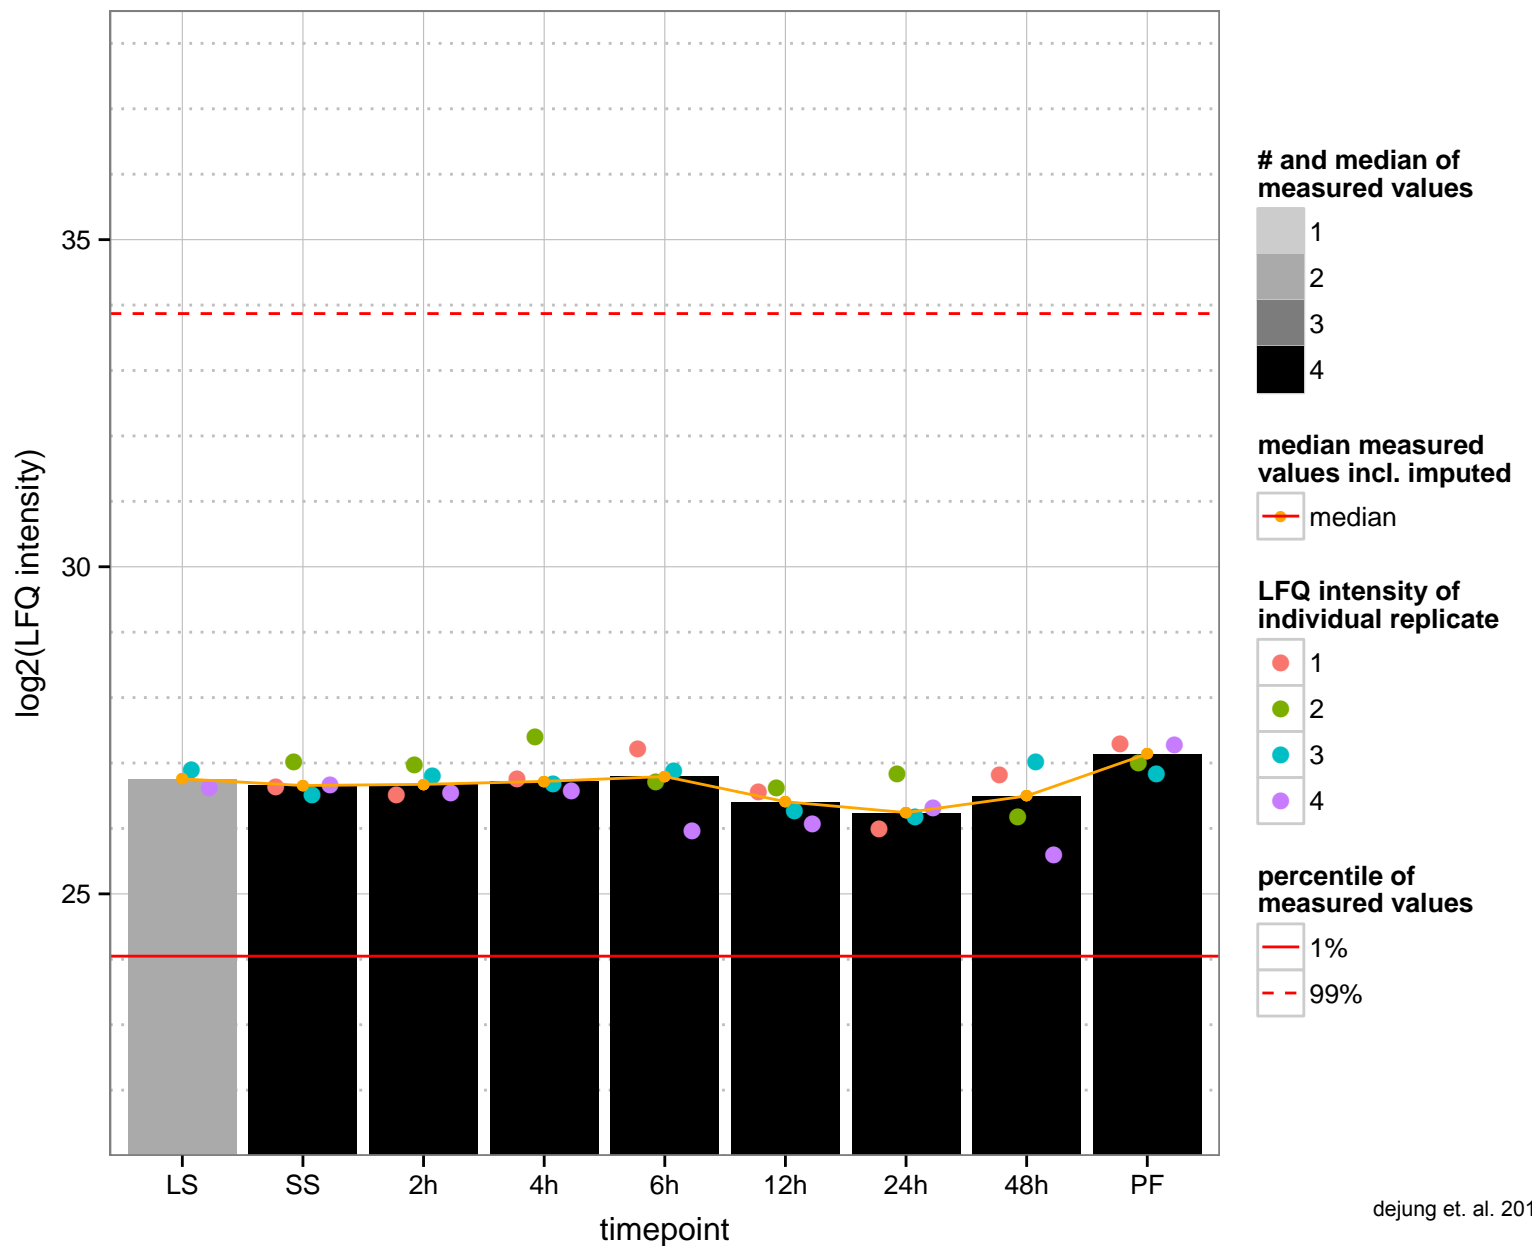

rRNA processing protein, putative  
 Tb927.9.15060  
 AGOF: null  
 AGOC: nucleus  
 AGOP: ribosome biogenesis  
 PGO: null  
 PGOC: null  
 PGOP: null

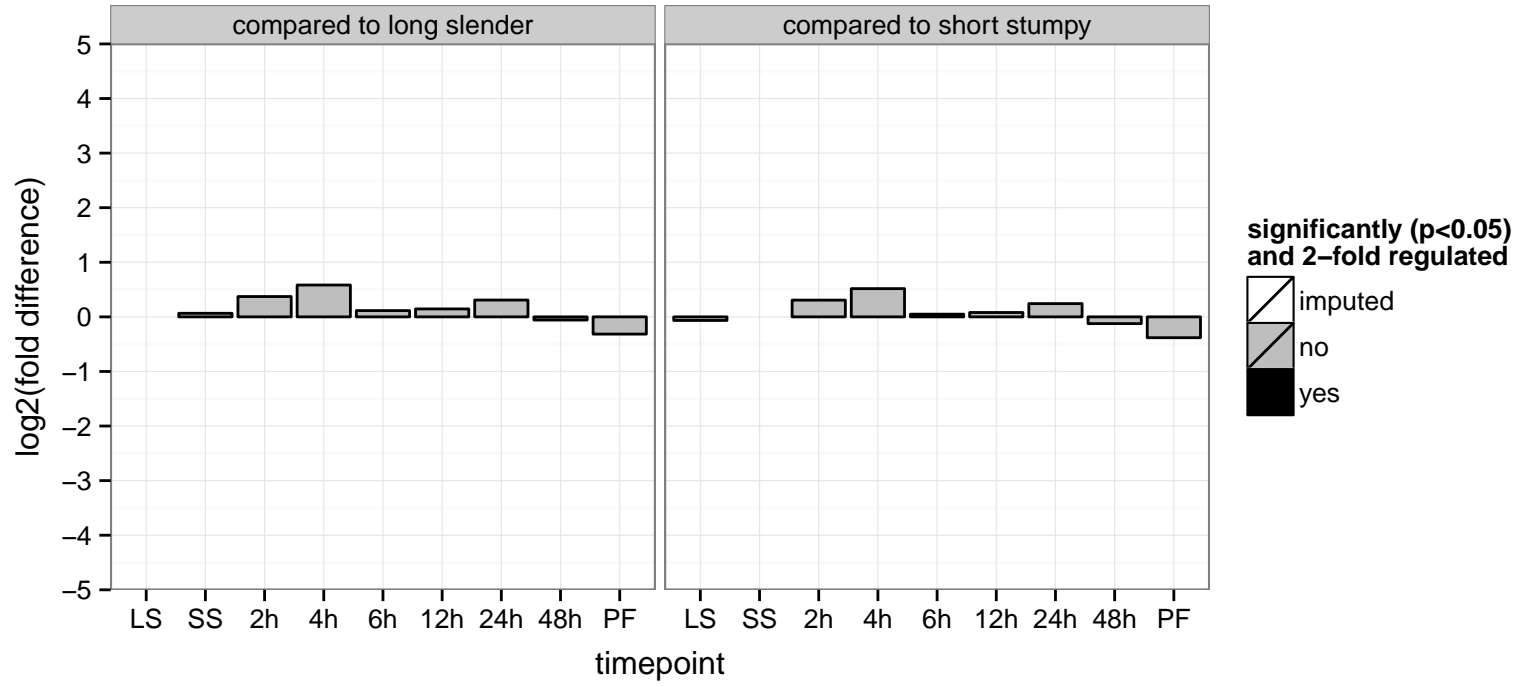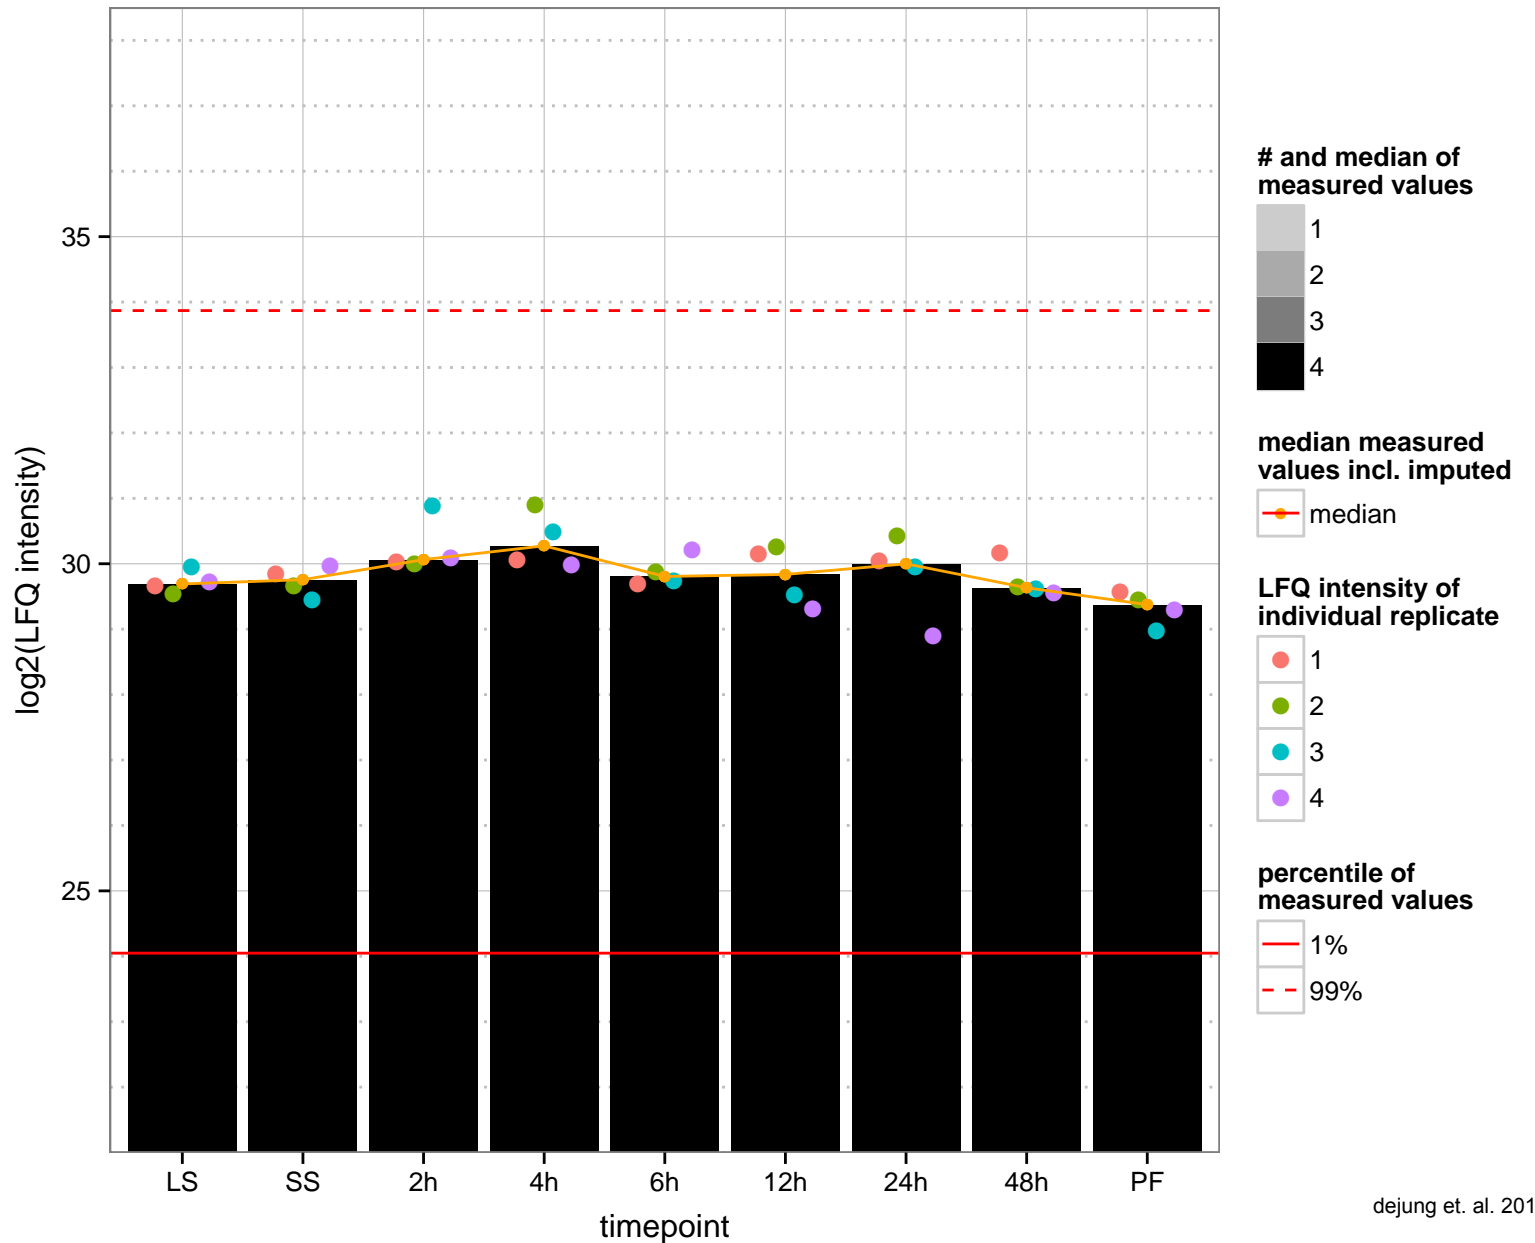



hypothetical protein, conserved  
 Tb927.9.15070  
 AGOF: null  
 AGOC: null  
 AGOP: null  
 PGO: null  
 PGOC: null  
 PGOP: null

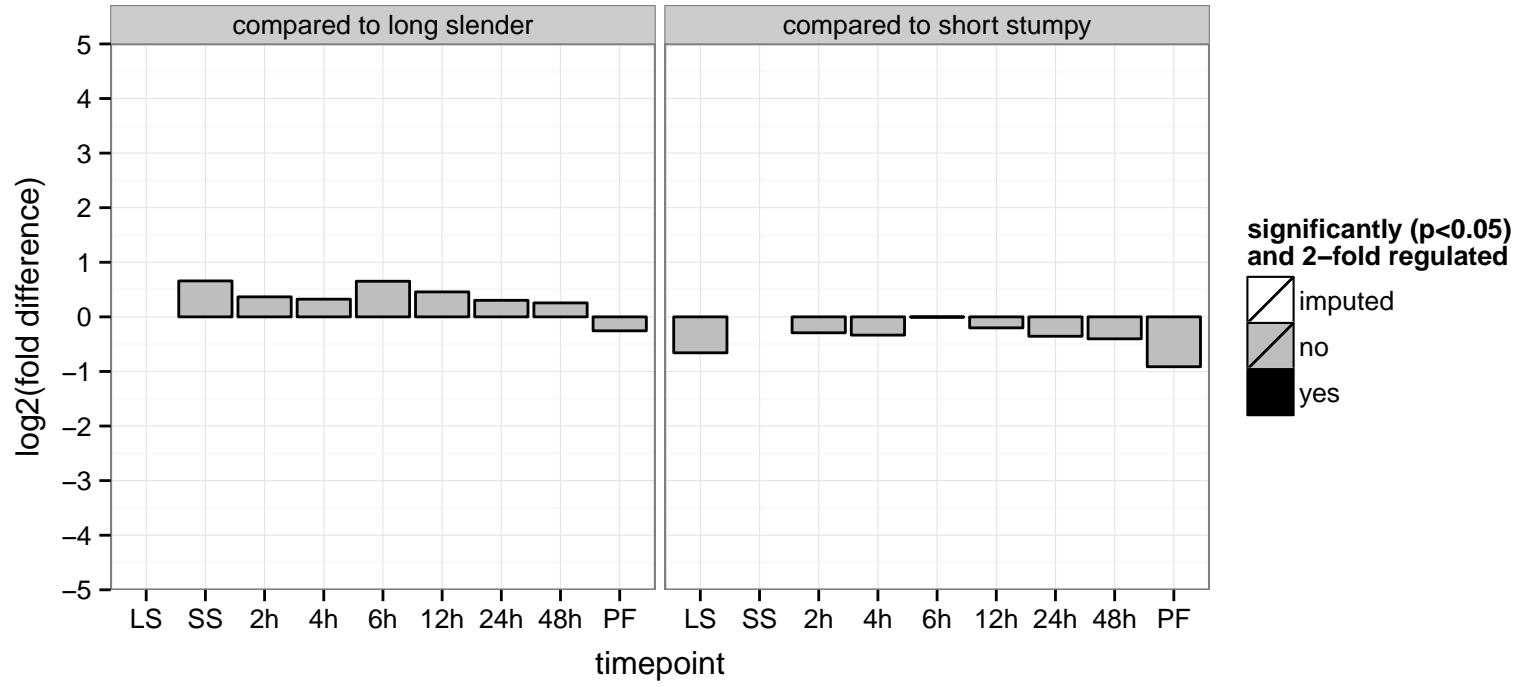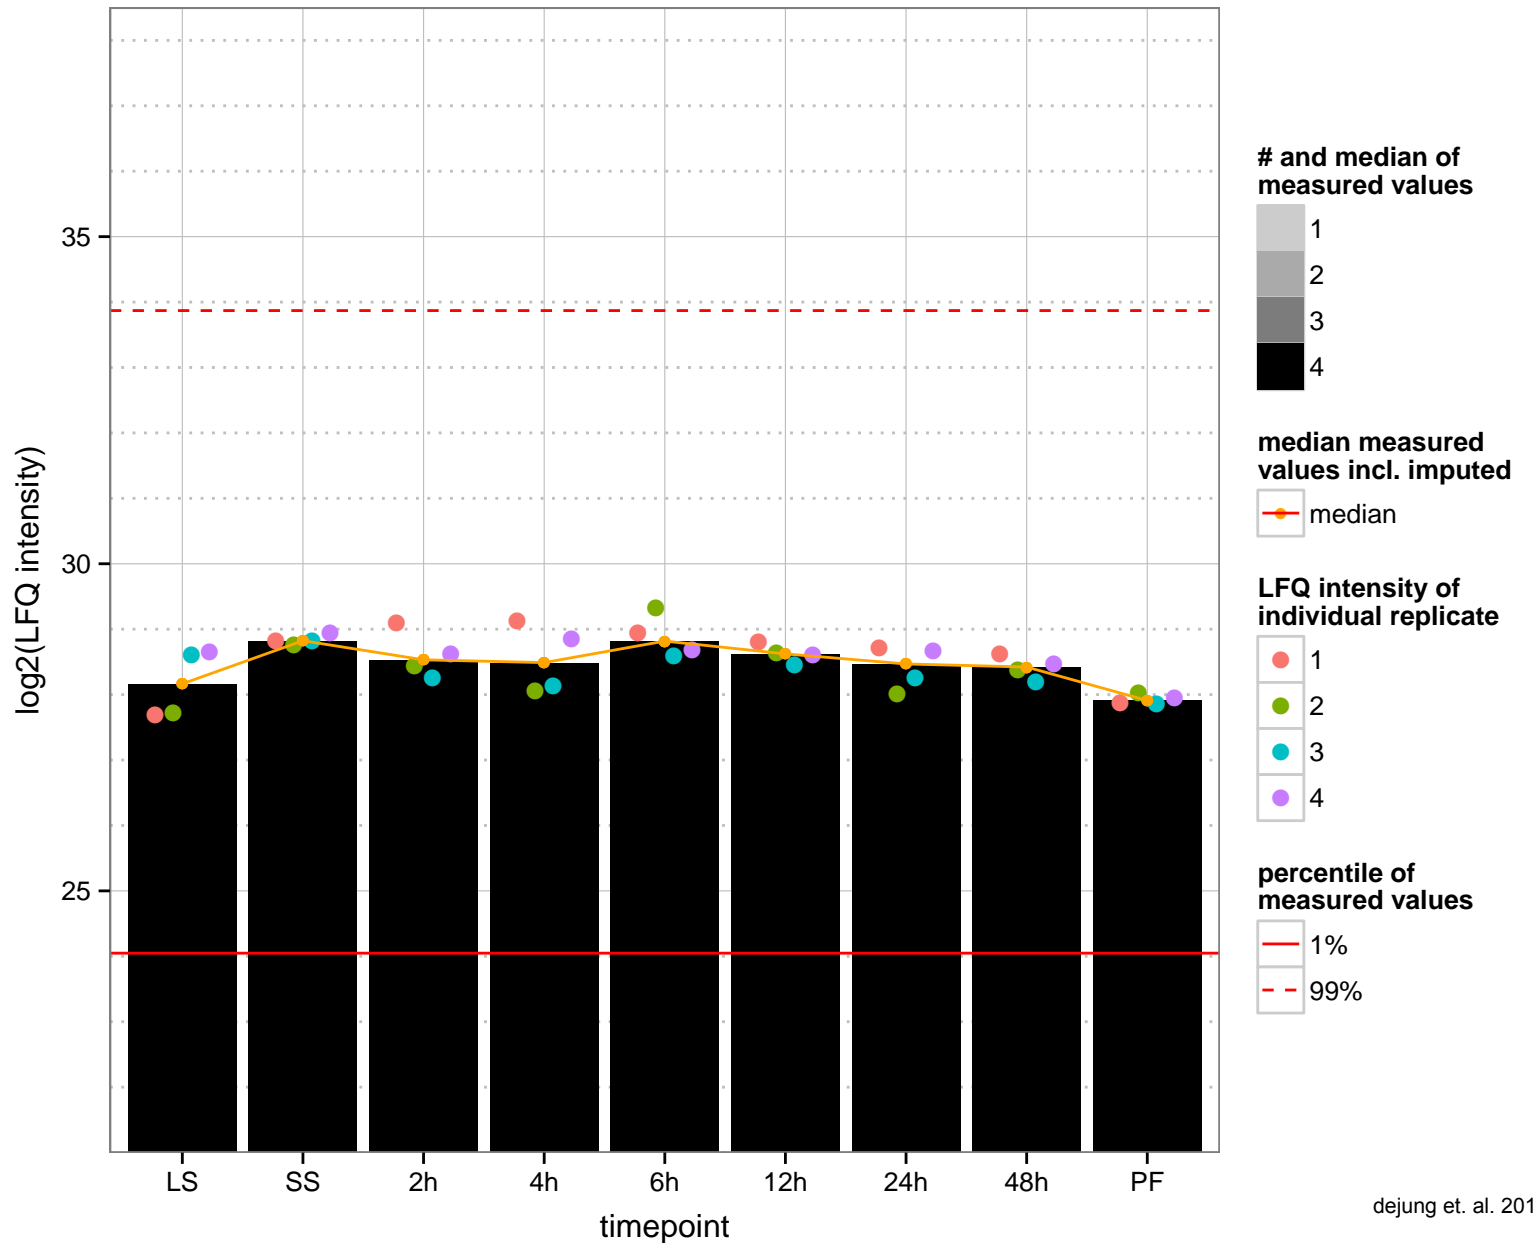

cytosolic coat protein, putative  
 Tb927.9.15090  
 AGOF: protein transmembrane transporter activity  
 AGOC: ER to Golgi transport vesicle membrane, integral to membrane  
 AGOP: transport  
 PGO: null  
 PGOC: integral to membrane  
 PGOP: transport

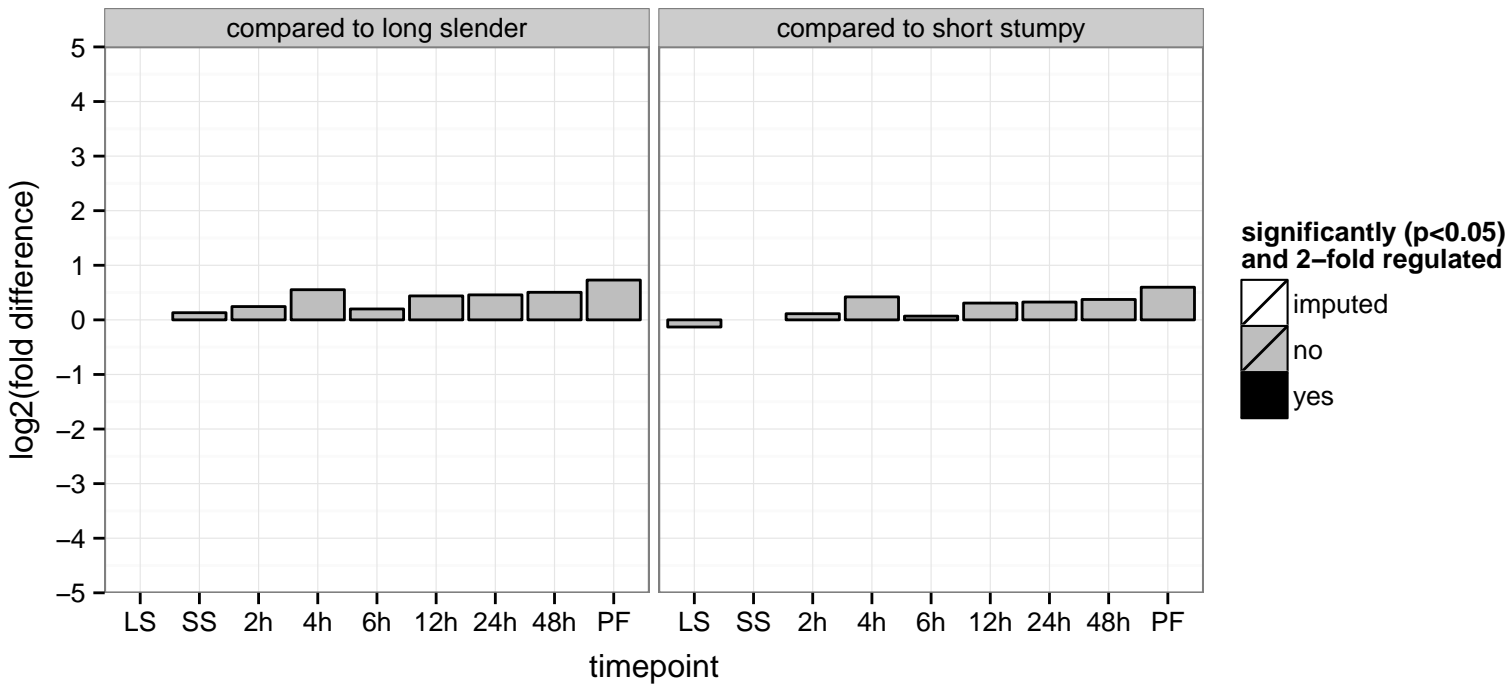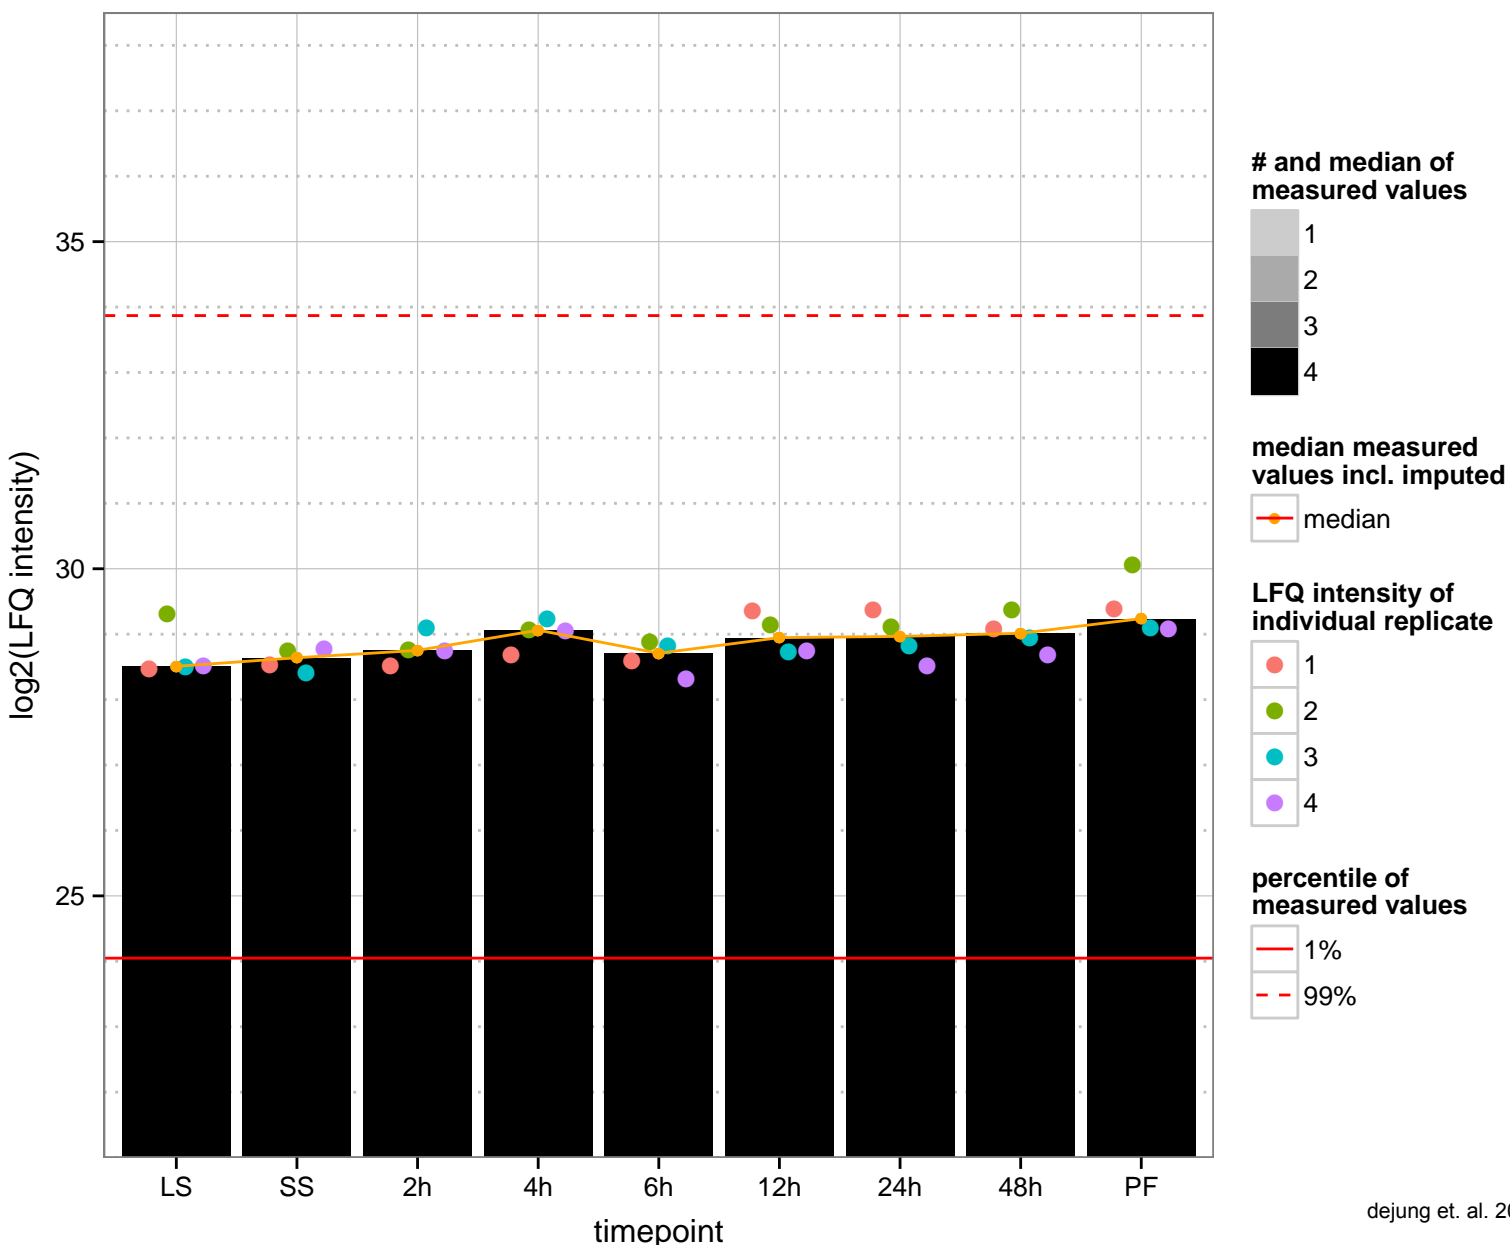

hypothetical protein, conserved  
 Tb927.9.1520  
 AGOF: null  
 AGOC: null  
 AGOP: null  
 PGOF: null  
 PGO C: null  
 PGOP: null

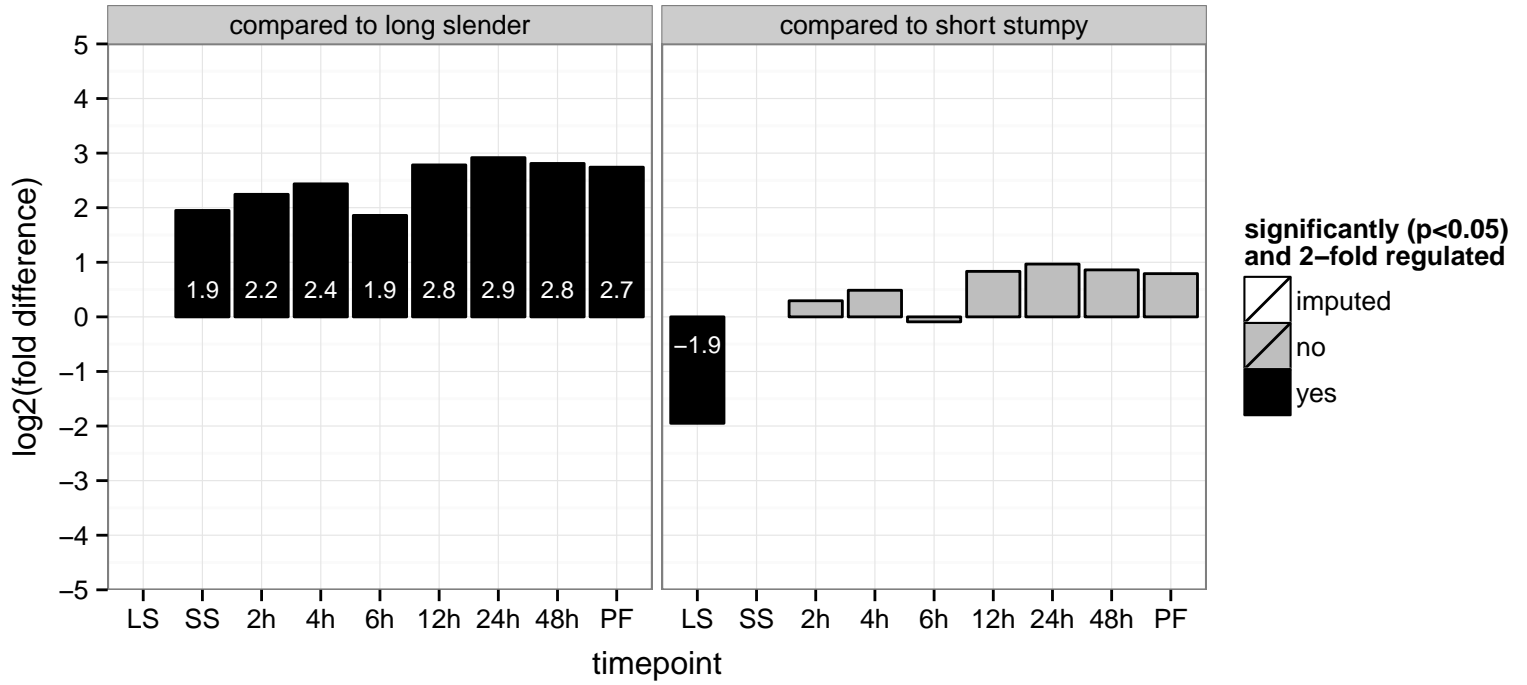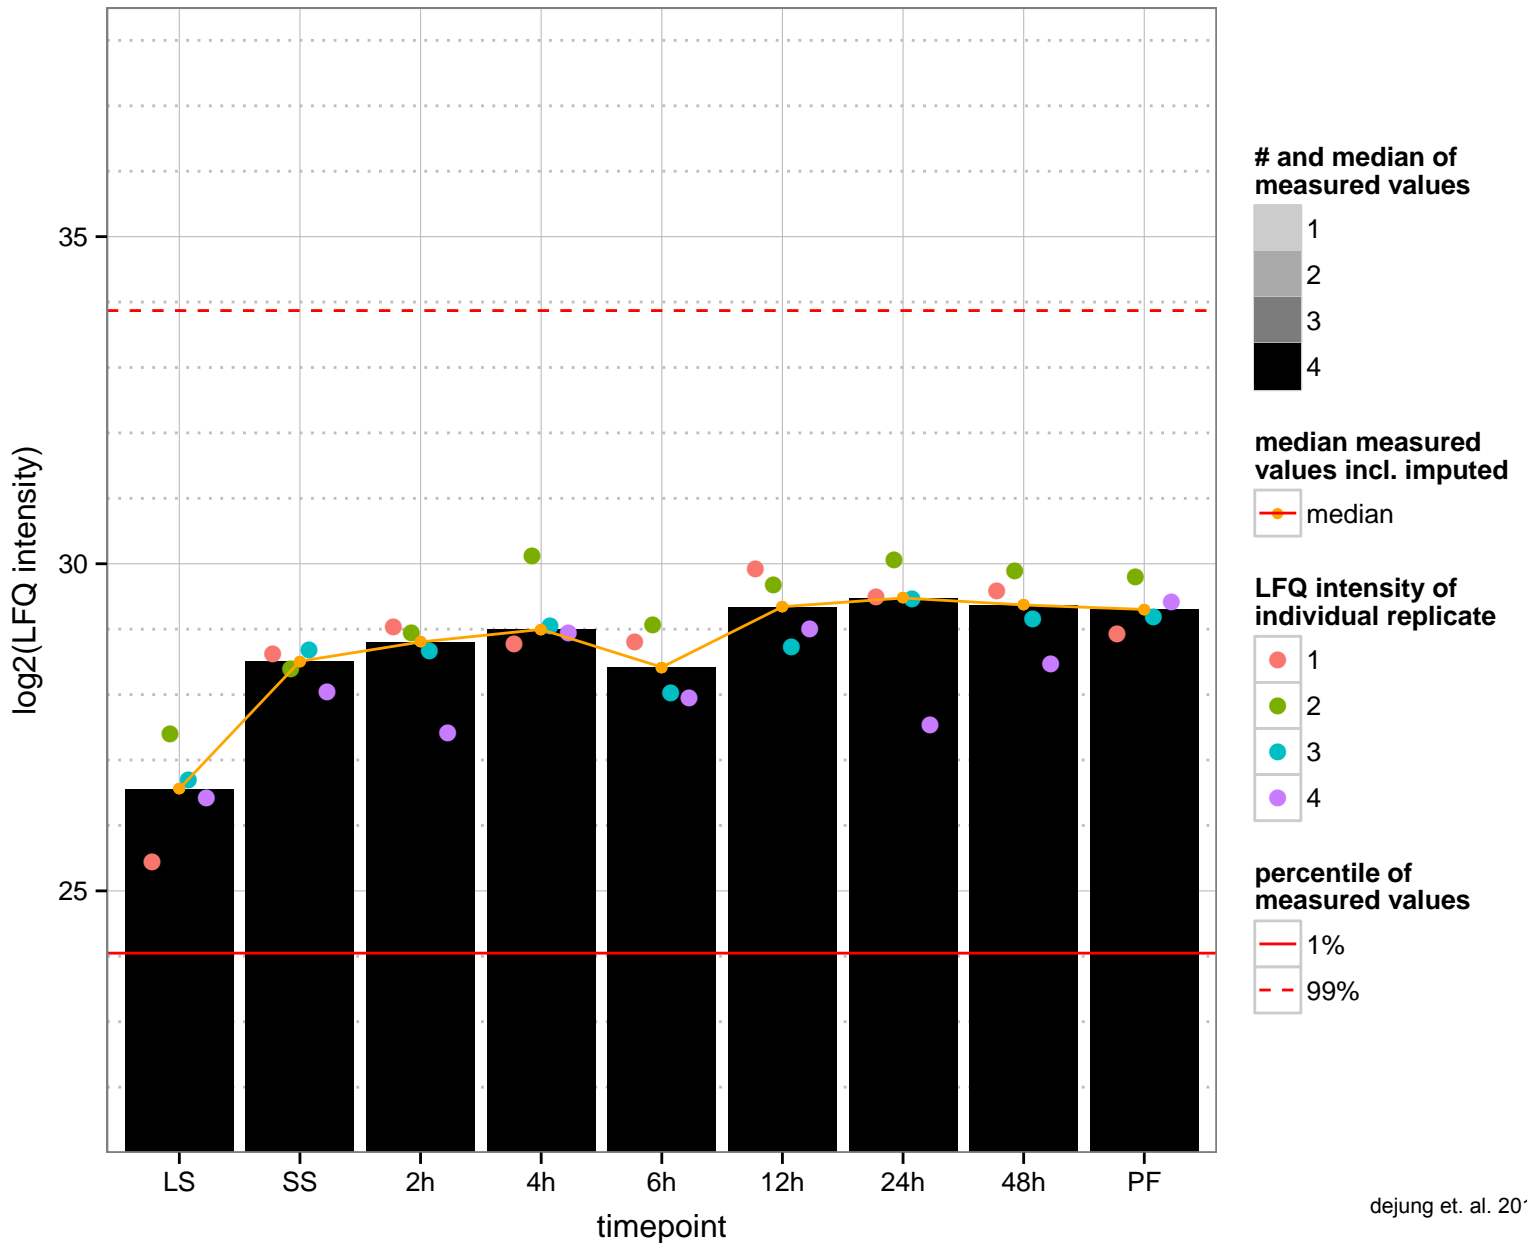

hypothetical protein, conserved  
 Tb927.9.1530  
 AGOF: null  
 AGOC: mitochondrion  
 AGOP: null  
 PGO: null  
 PGOC: null  
 PGOP: null

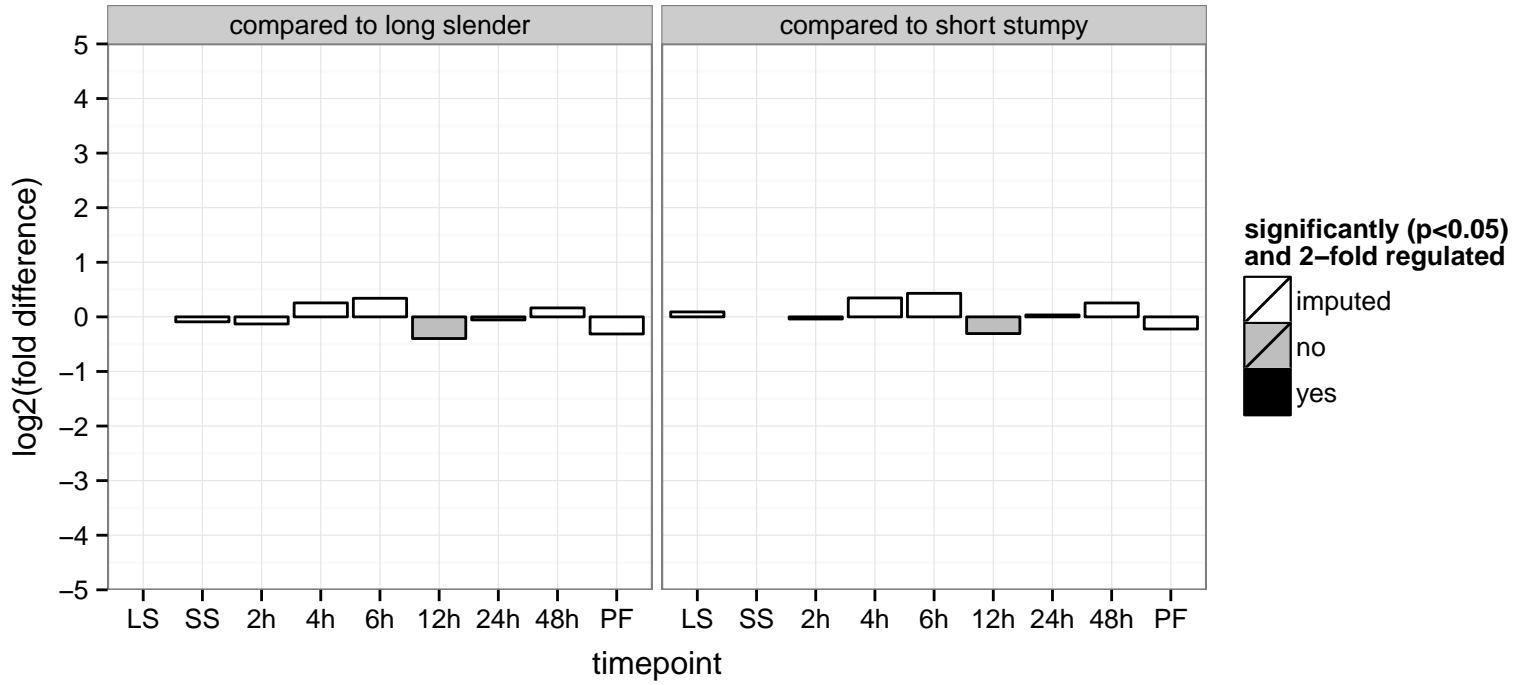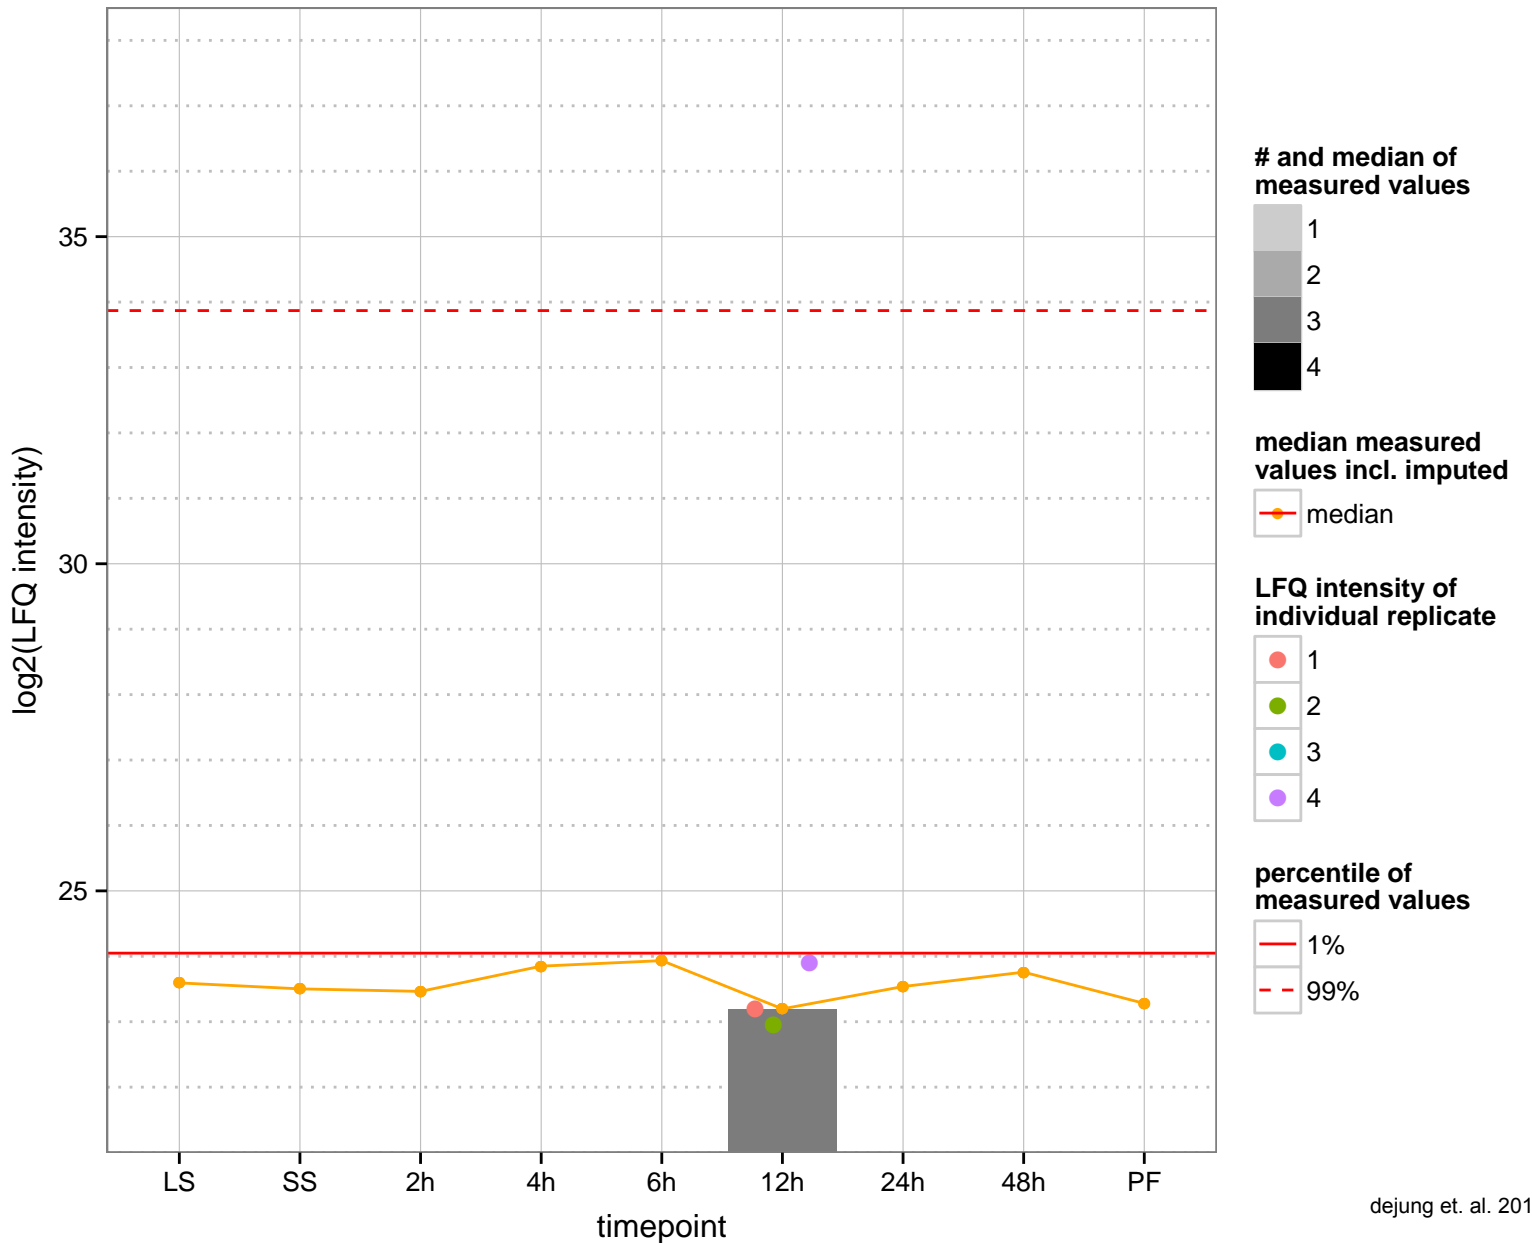

40S ribosomal protein S6, putative  
 Tb927.9.15360  
 AGOF: null  
 AGOC: intracellular, ribosome  
 AGOP: regulation of cell growth, regulation of cell proliferation, translation  
 PGO: structural constituent of ribosome  
 PGO: intracellular, ribosome  
 PGO: translation

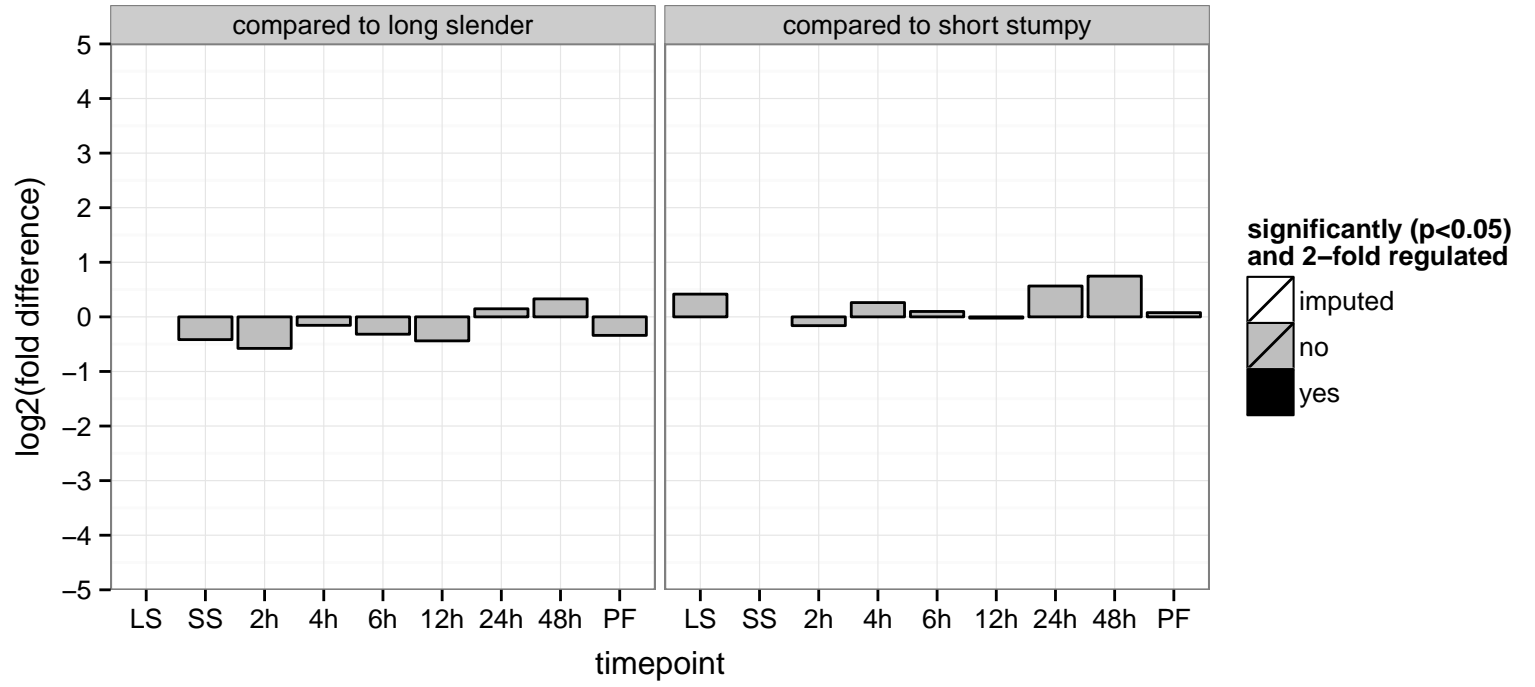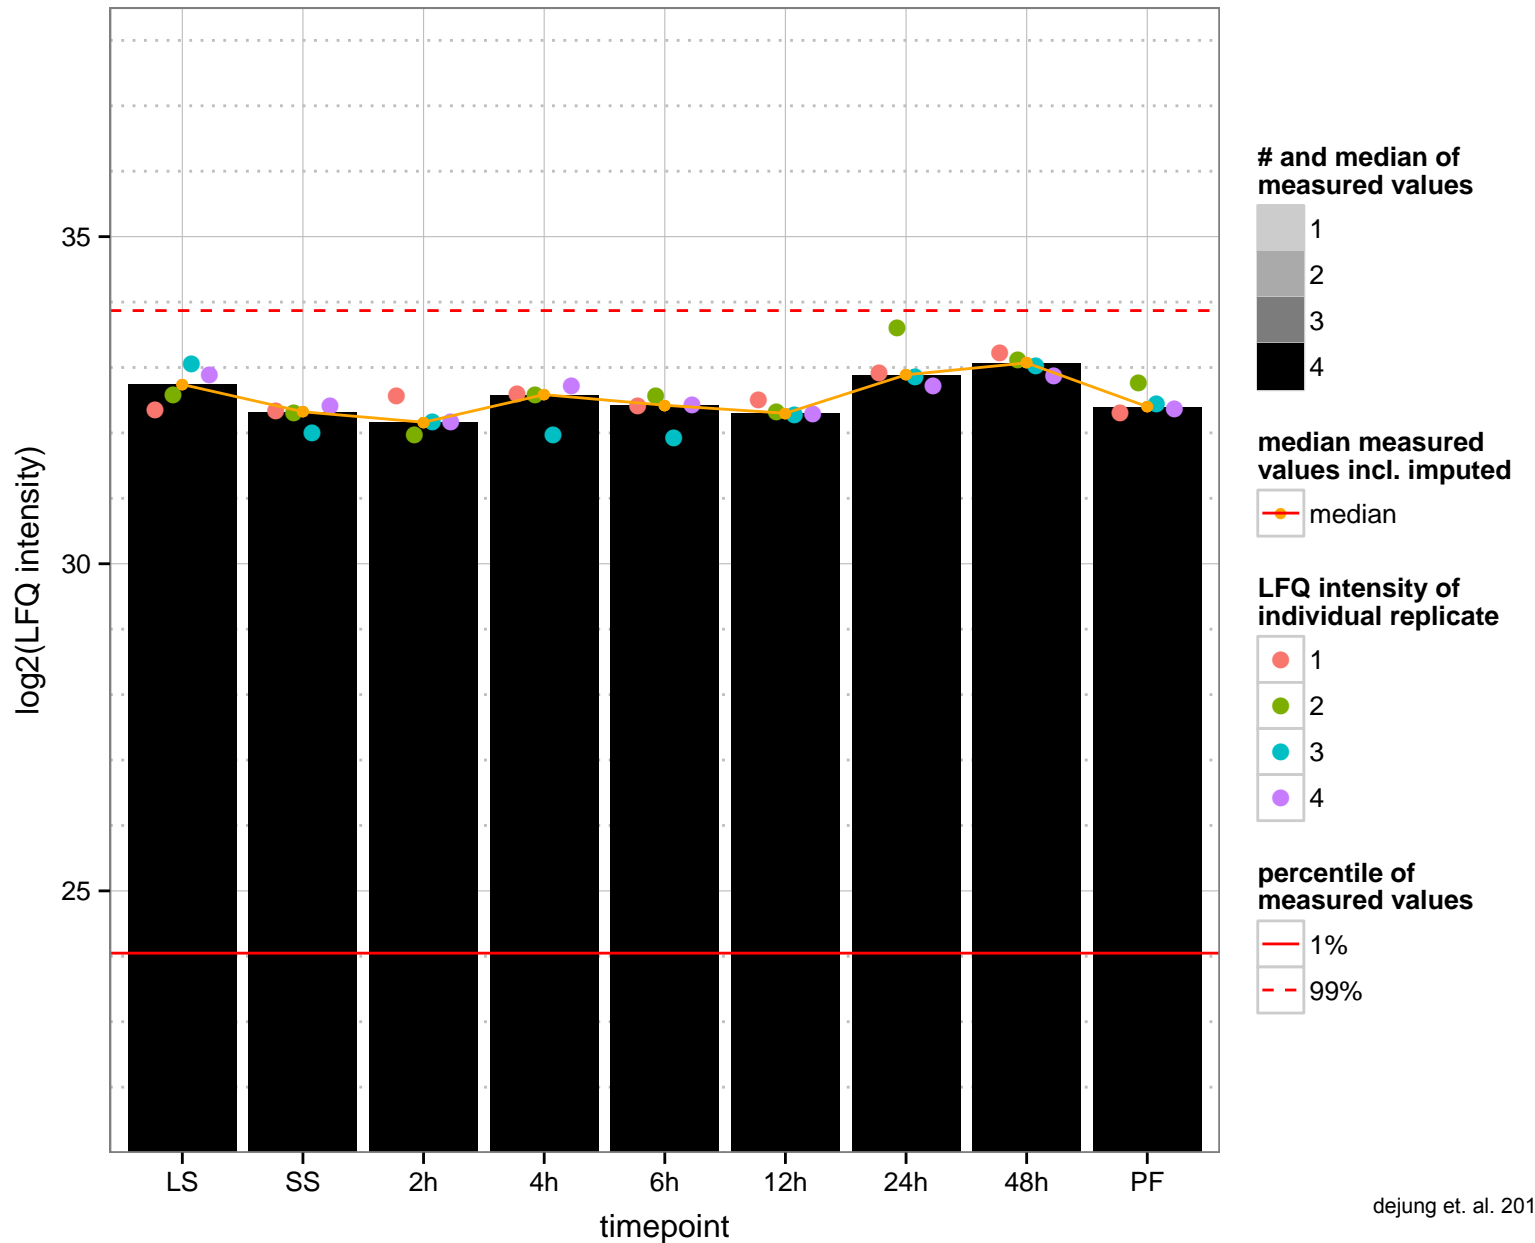

kinesin, putative  
Tb927.9.15470  
AGOF: null, ATP binding, microtubule motor activity, motor activity  
AGOC: null, microtubule associated complex  
AGOP: null, microtubule-based movement  
PGOF: ATP binding, microtubule motor activity  
PGOC: null  
PGOP: microtubule-based movement

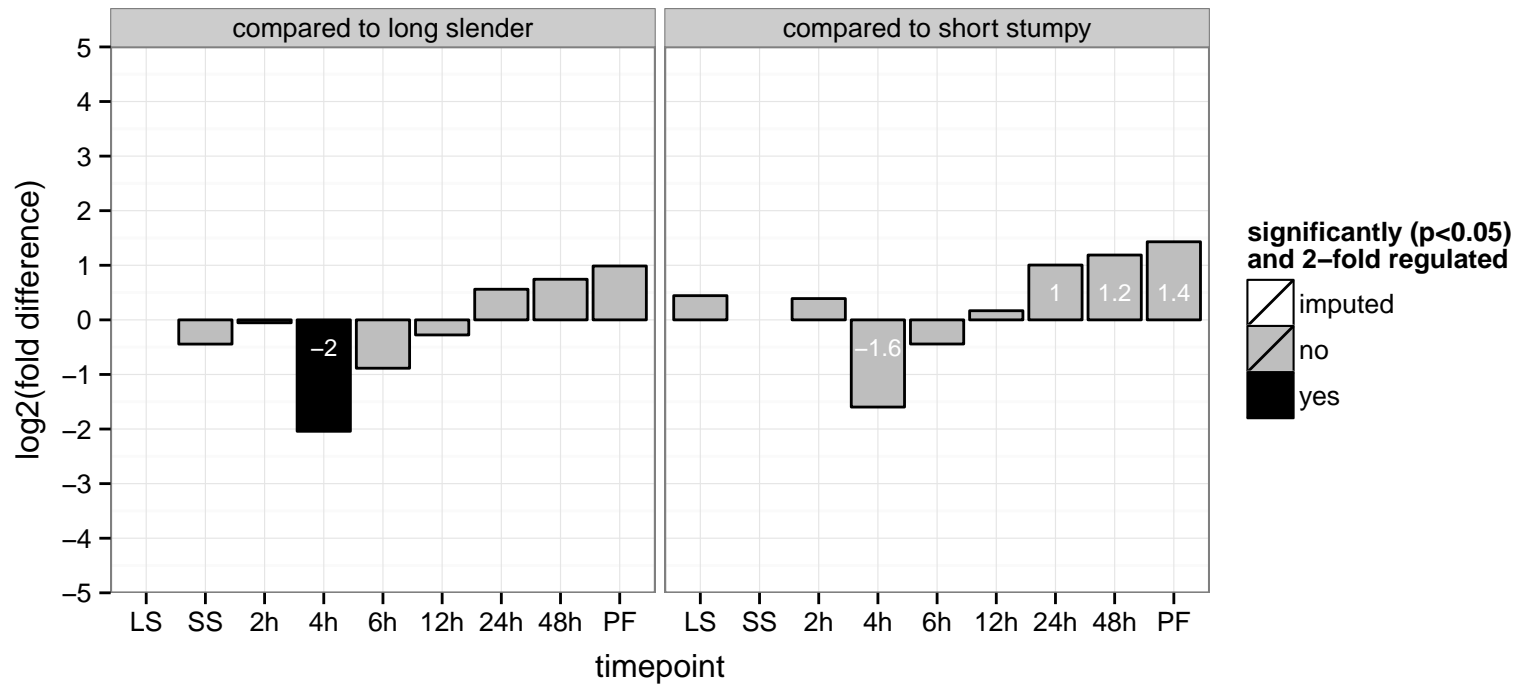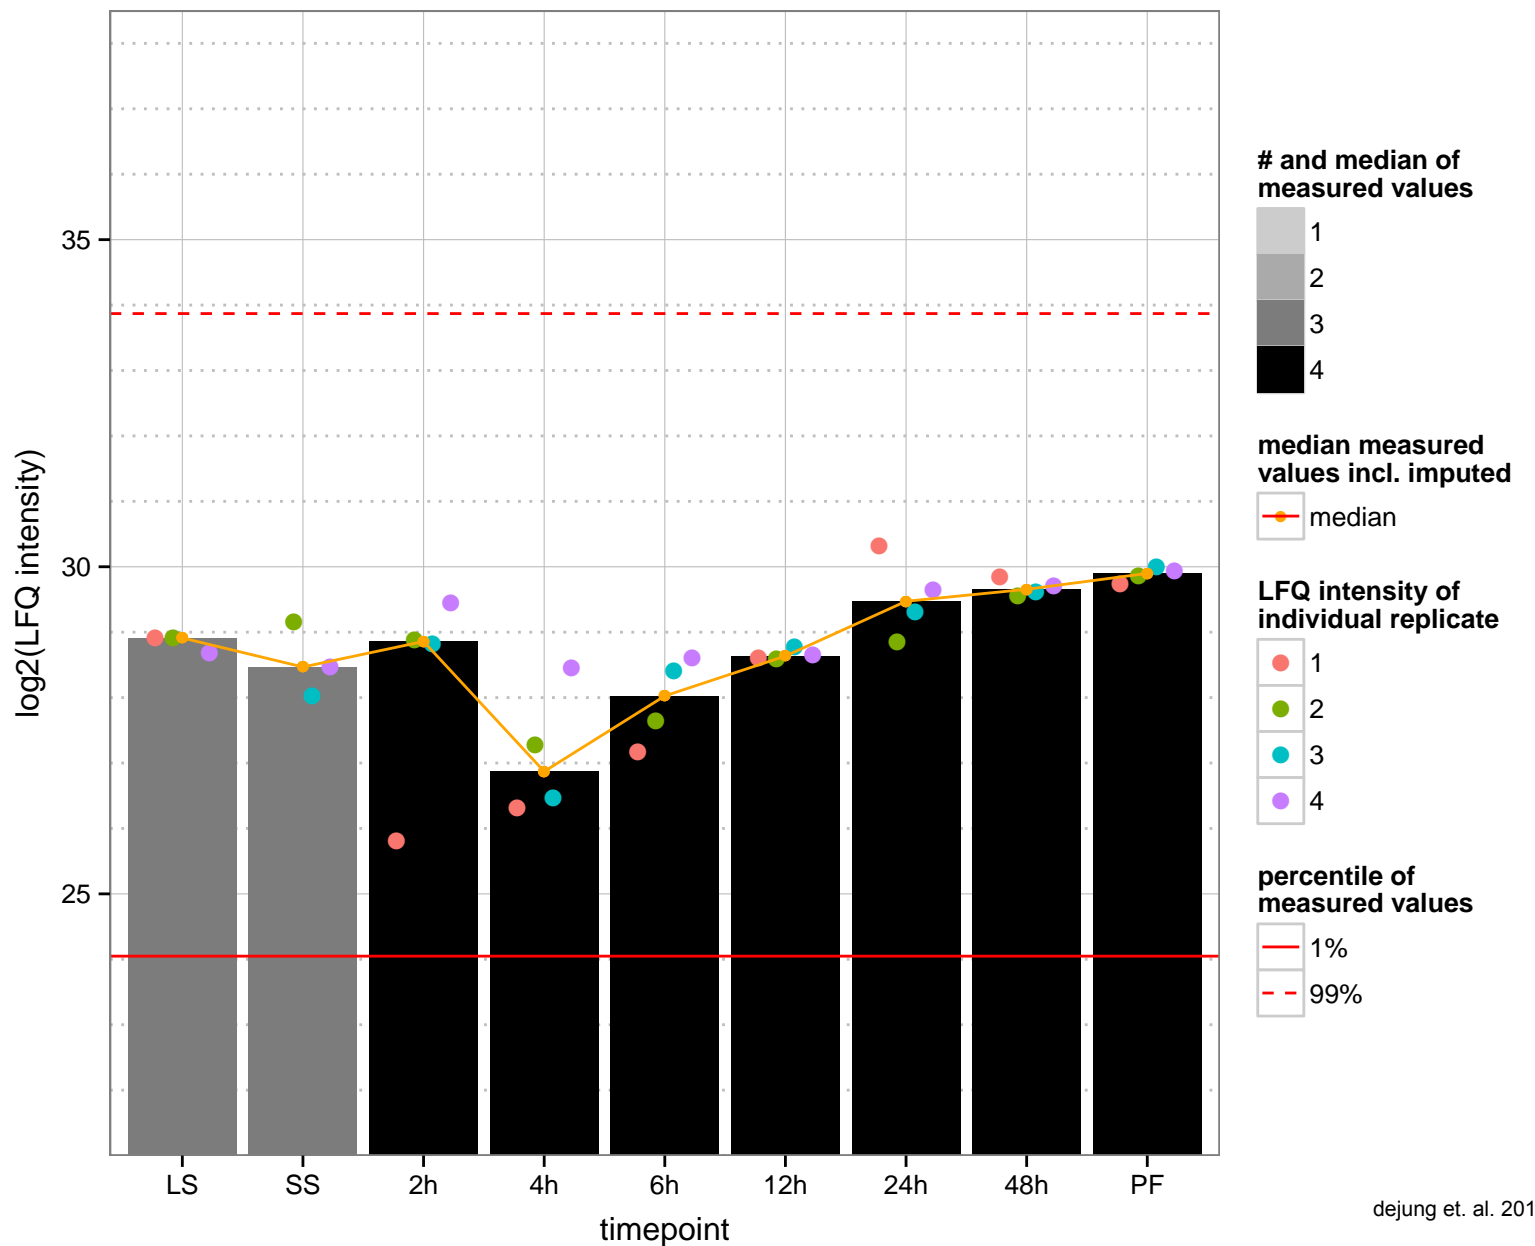

hypothetical protein, conserved  
 Tb927.9.1560  
 AGOF: heat shock protein binding  
 AGOC: null  
 AGOP: null  
 PGOF: heat shock protein binding  
 PGO: null  
 PGOP: null

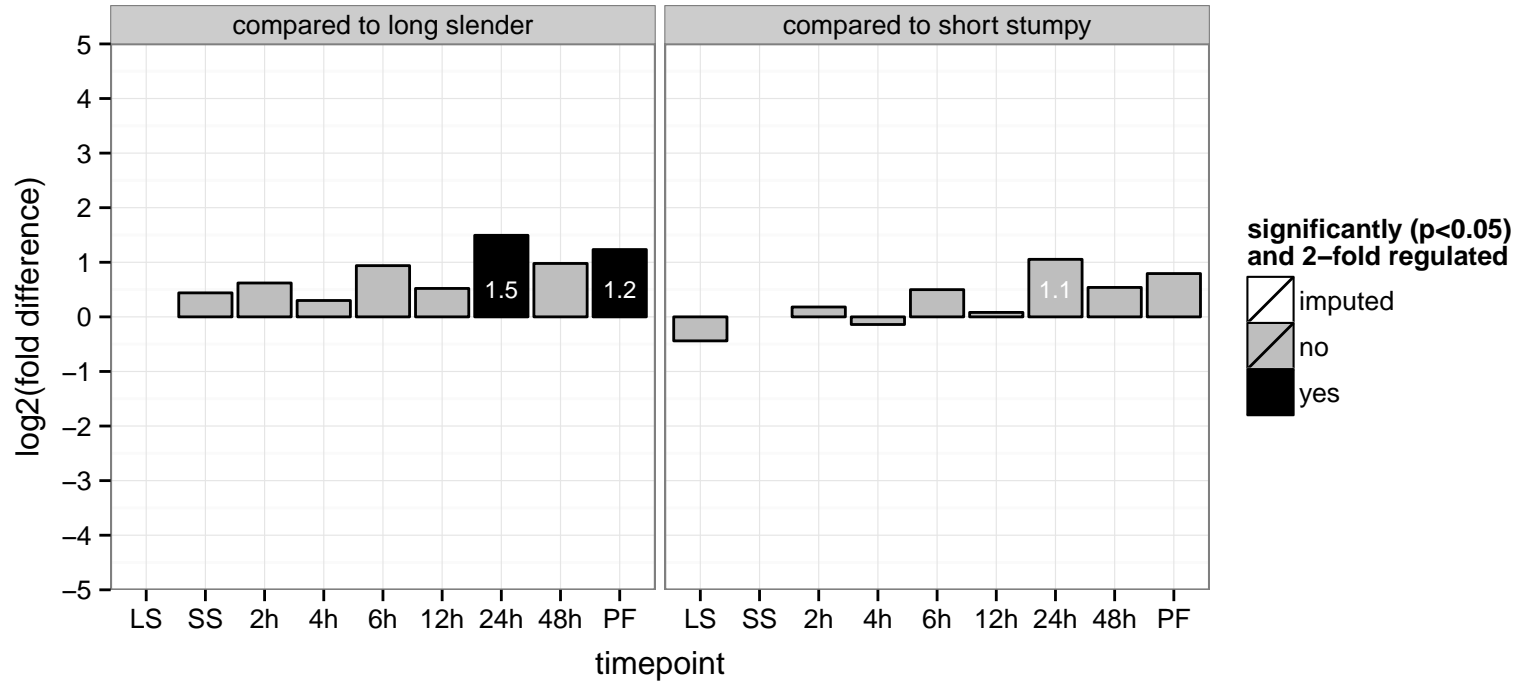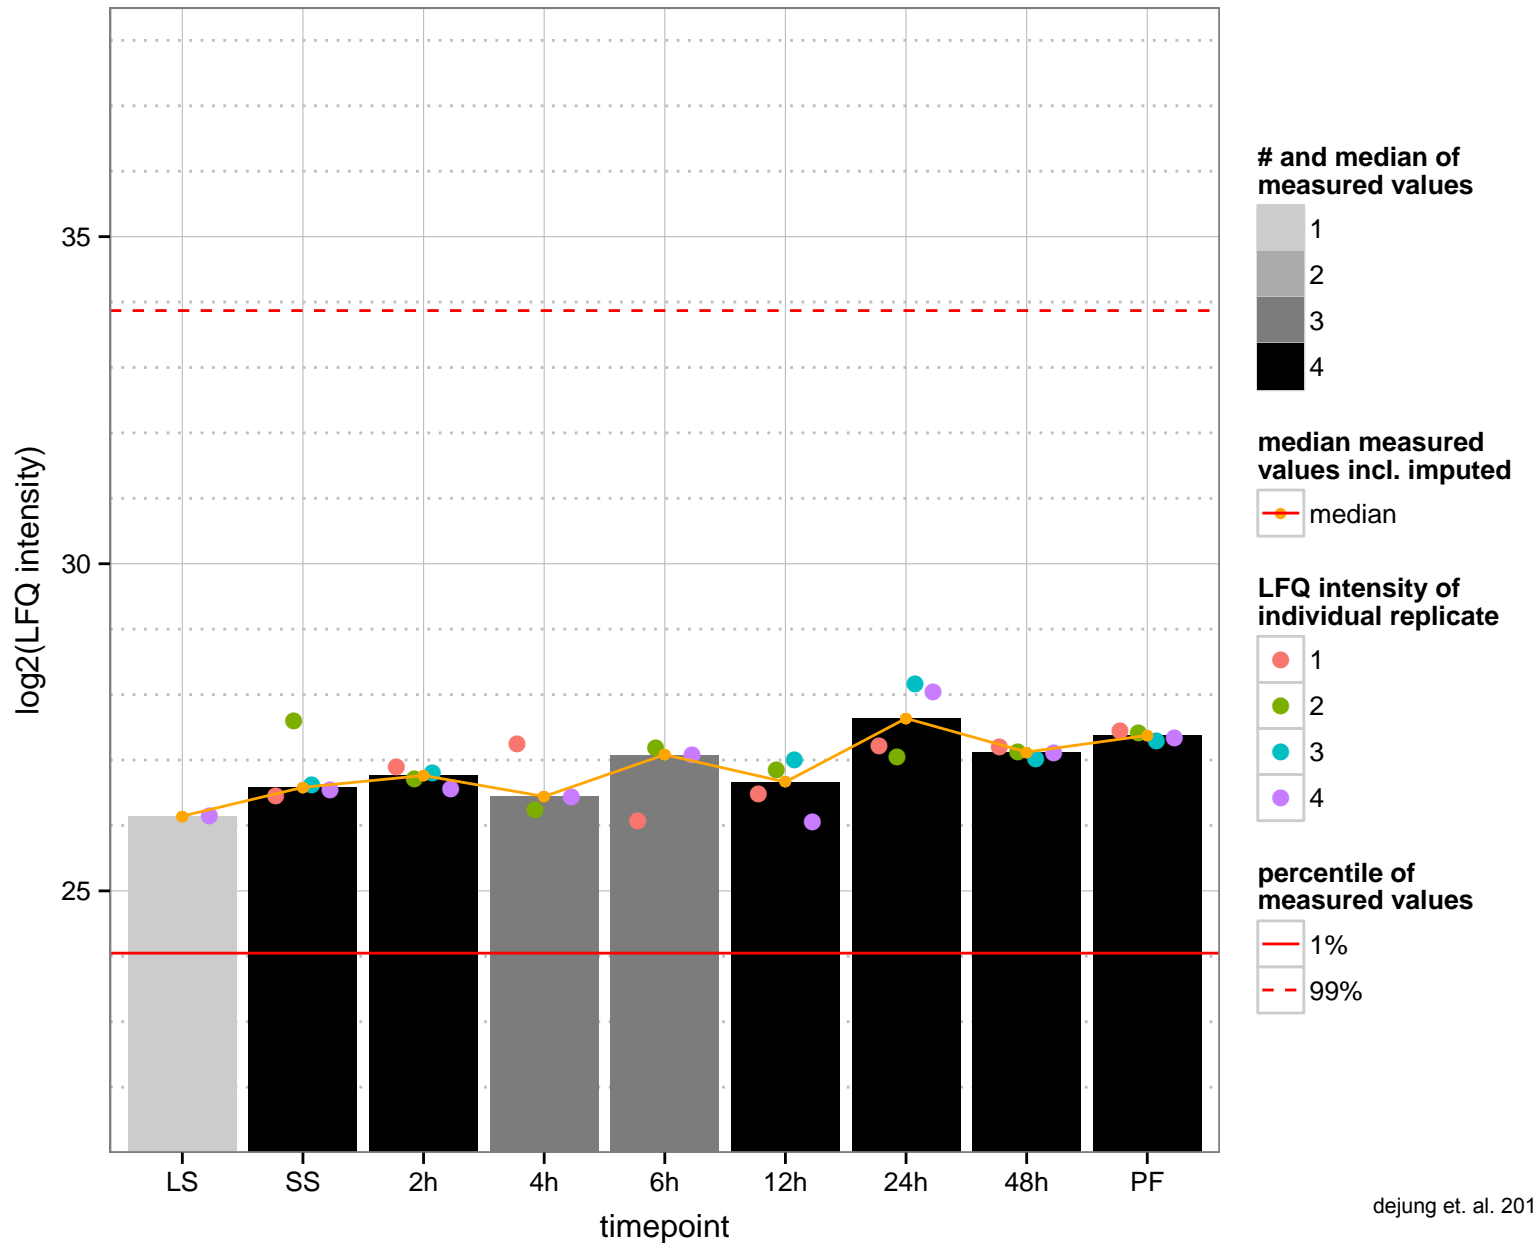

hypothetical protein, conserved  
 Tb927.9.1660  
 AGOF: null  
 AGOC: null  
 AGOP: null  
 PGO: null  
 PGOC: null  
 PGOP: null

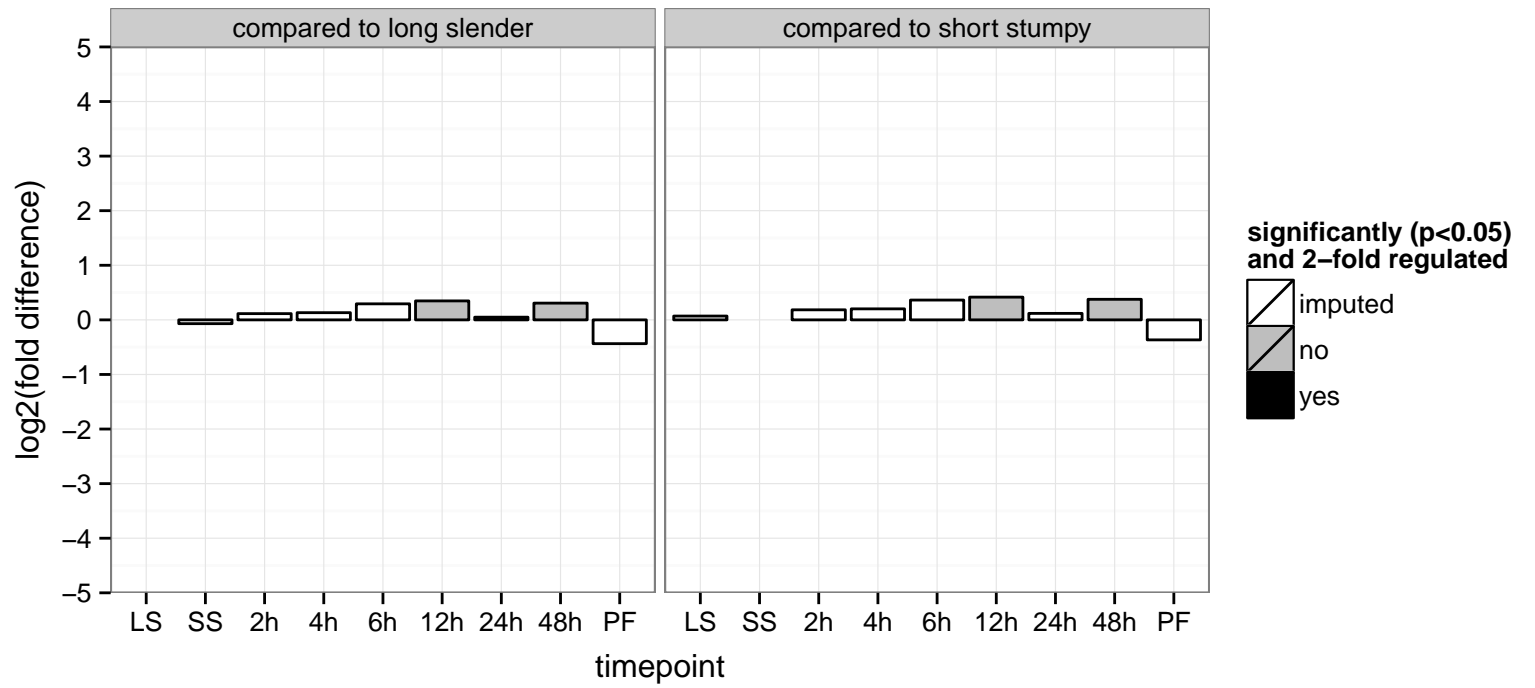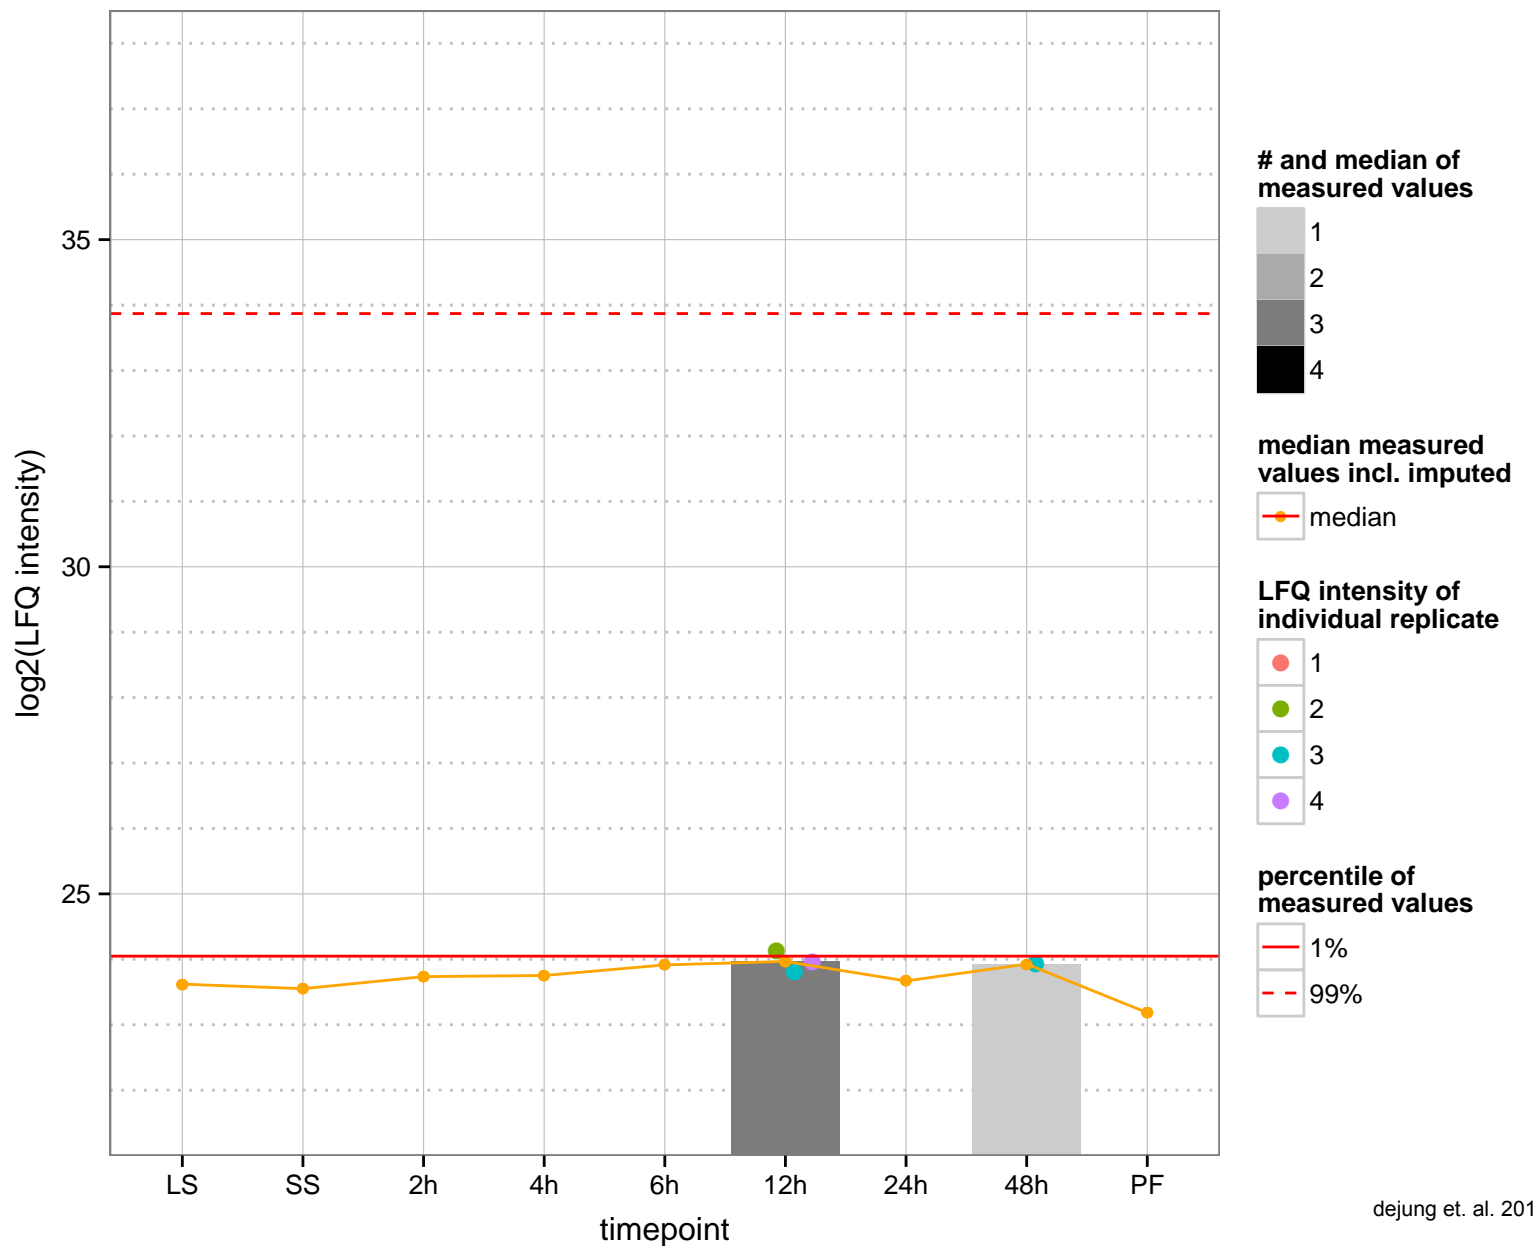



hypothetical protein, conserved  
 Tb927.9.1700  
 AGOF: null  
 AGOC: null  
 AGOP: null  
 PGOF: protein binding  
 PGO: null  
 PGOP: null

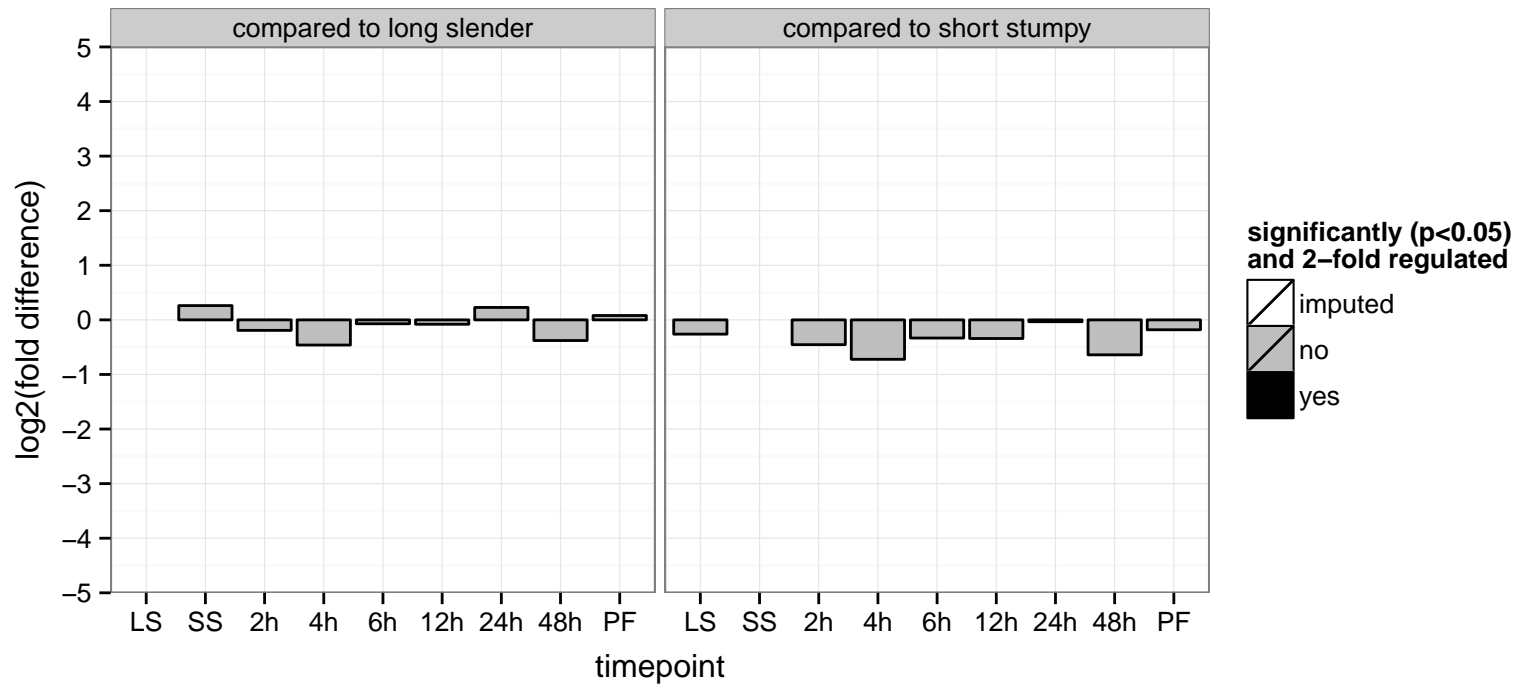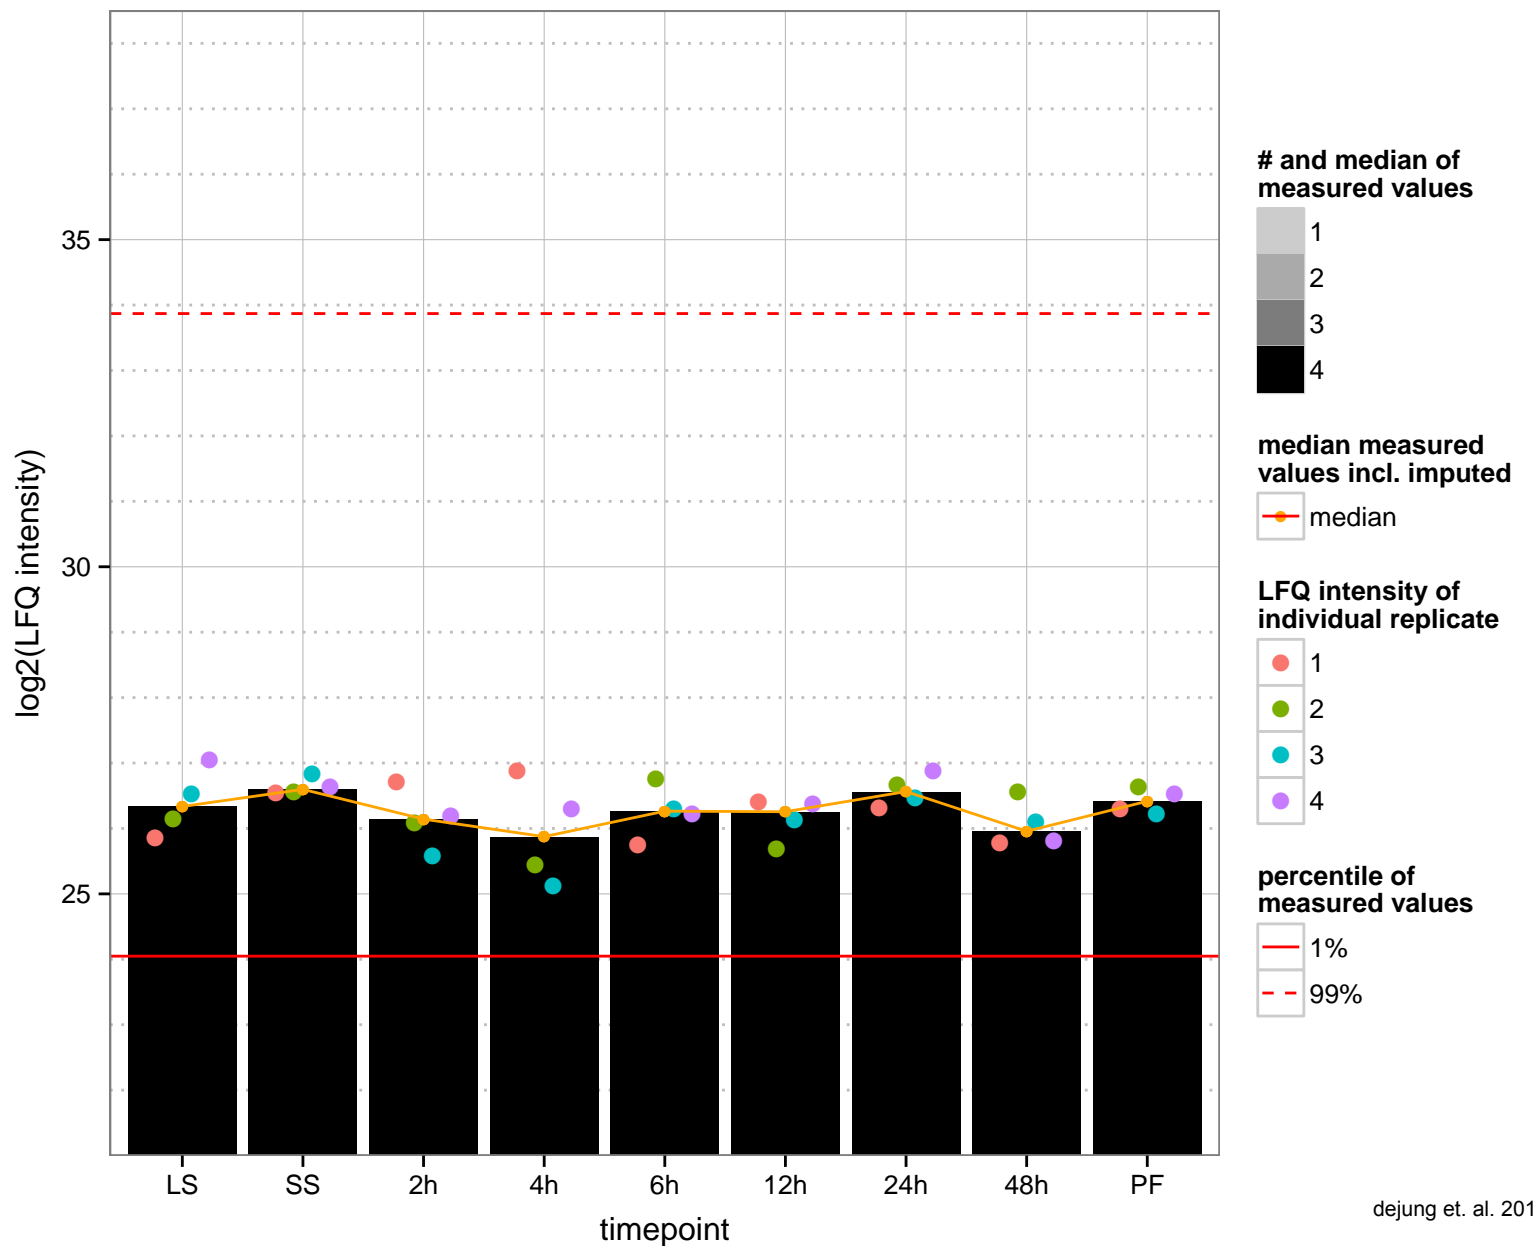

peroxisomal membrane protein 4, putative  
 Tb927.9.1720  
 AGOF: null  
 AGOC: null  
 AGOP: null  
 PGOF: null  
 PGO: null  
 PGOP: null

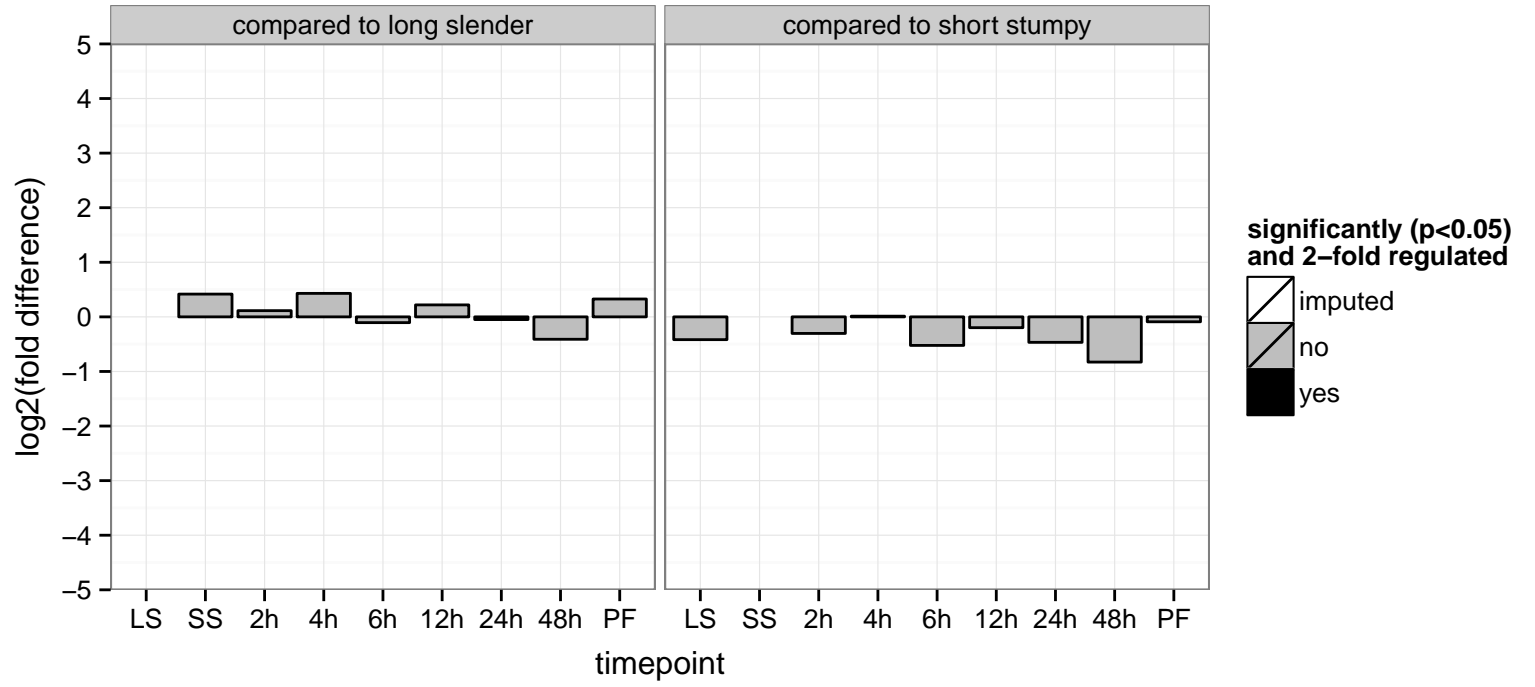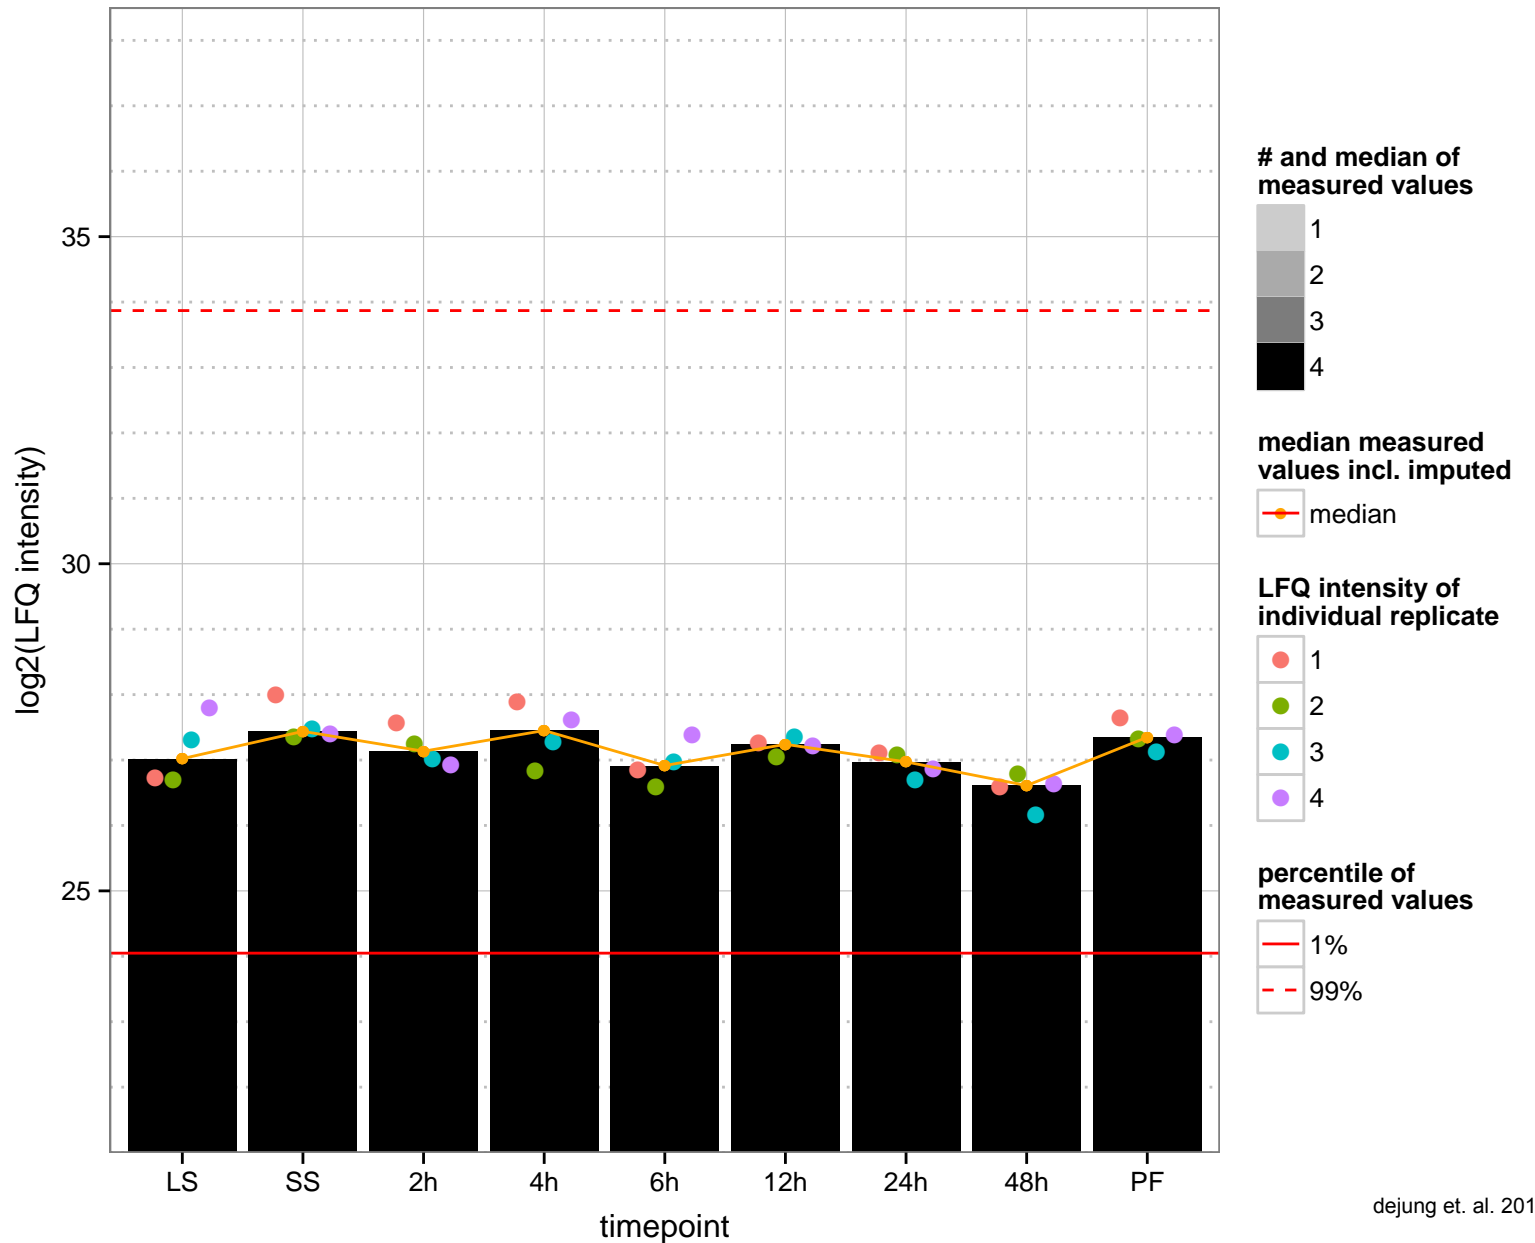

hypothetical protein, conserved  
 Tb927.9.1750  
 AGOF: null  
 AGOC: null  
 AGOP: null  
 PGOF: protein binding  
 PGO: null  
 PGOP: null

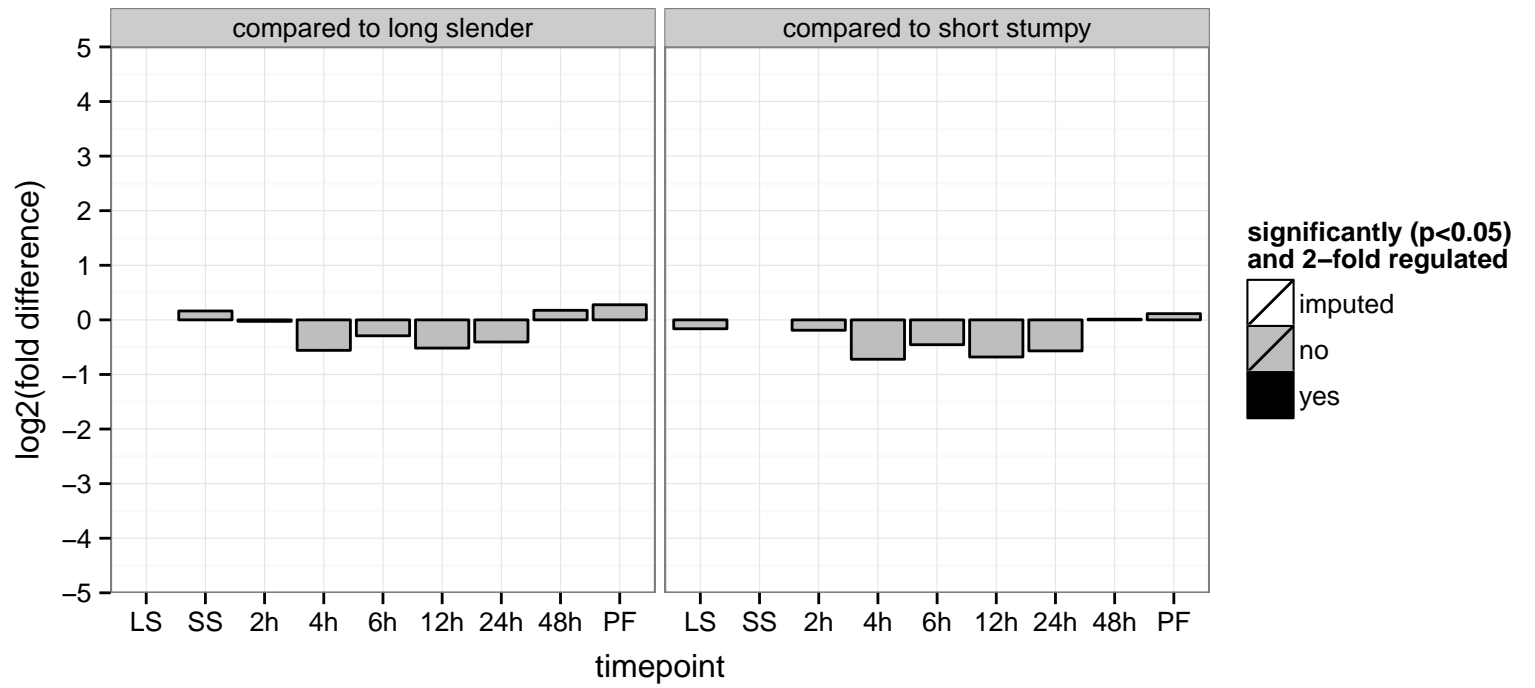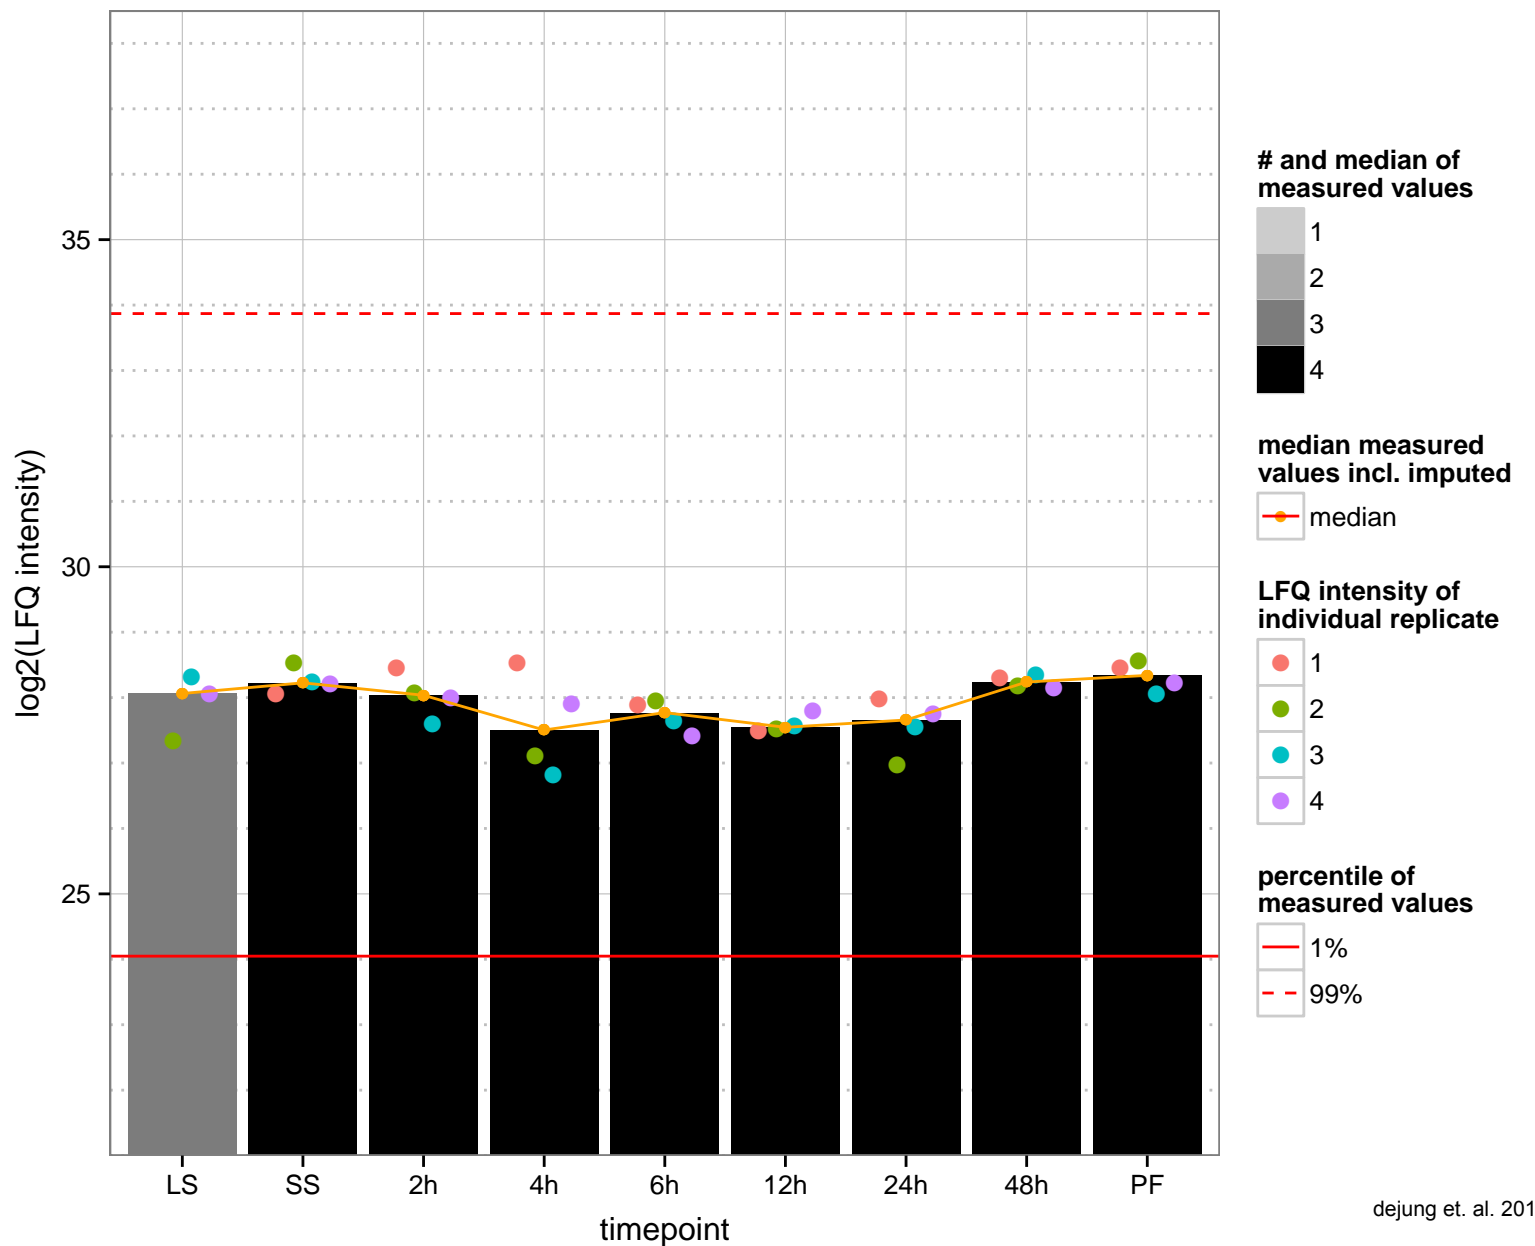

hypothetical protein, conserved

Tb927.9.1770

AGOF: acid-amino acid ligase activity, zinc ion binding

AGOC: intracellular

AGOP: cellular protein modification process

PGOF: acid-amino acid ligase activity, protein binding, zinc ion binding

PGOC: intracellular

PGOP: cellular protein modification process

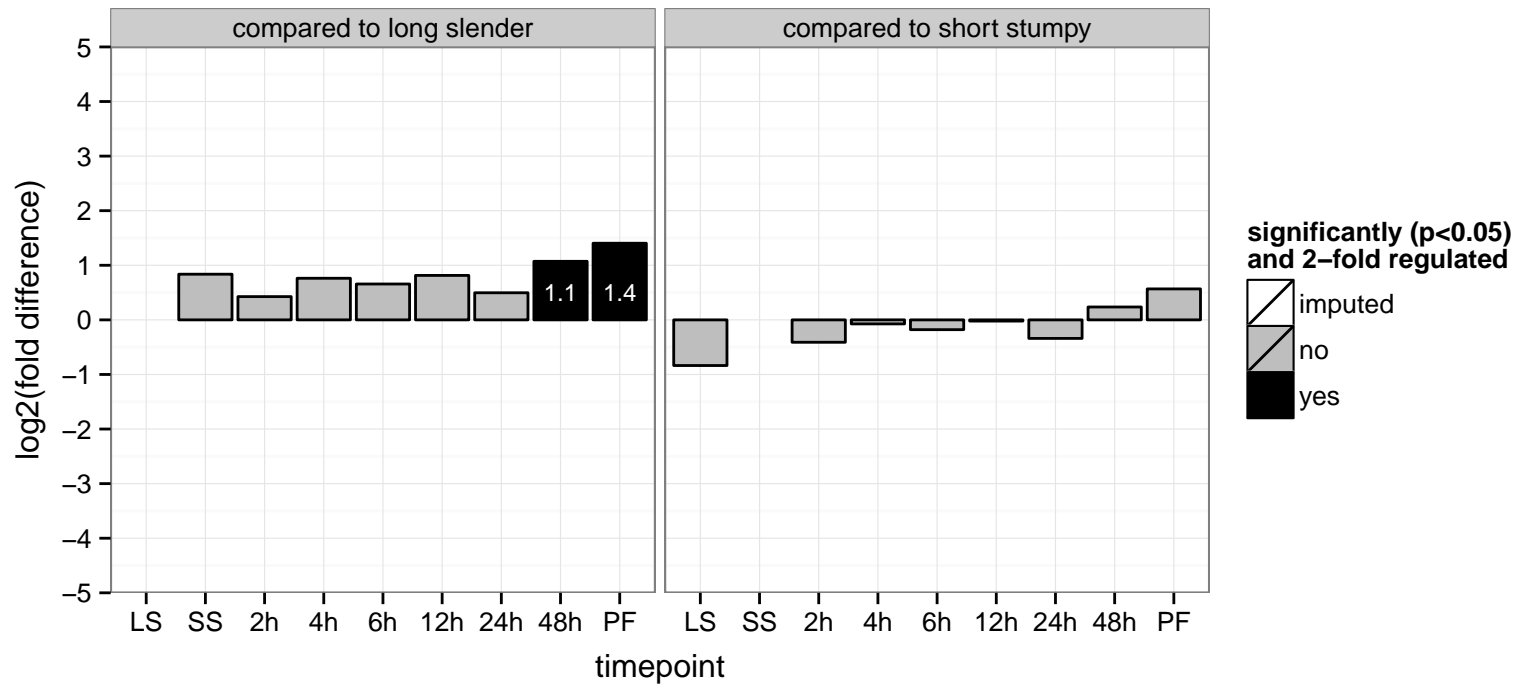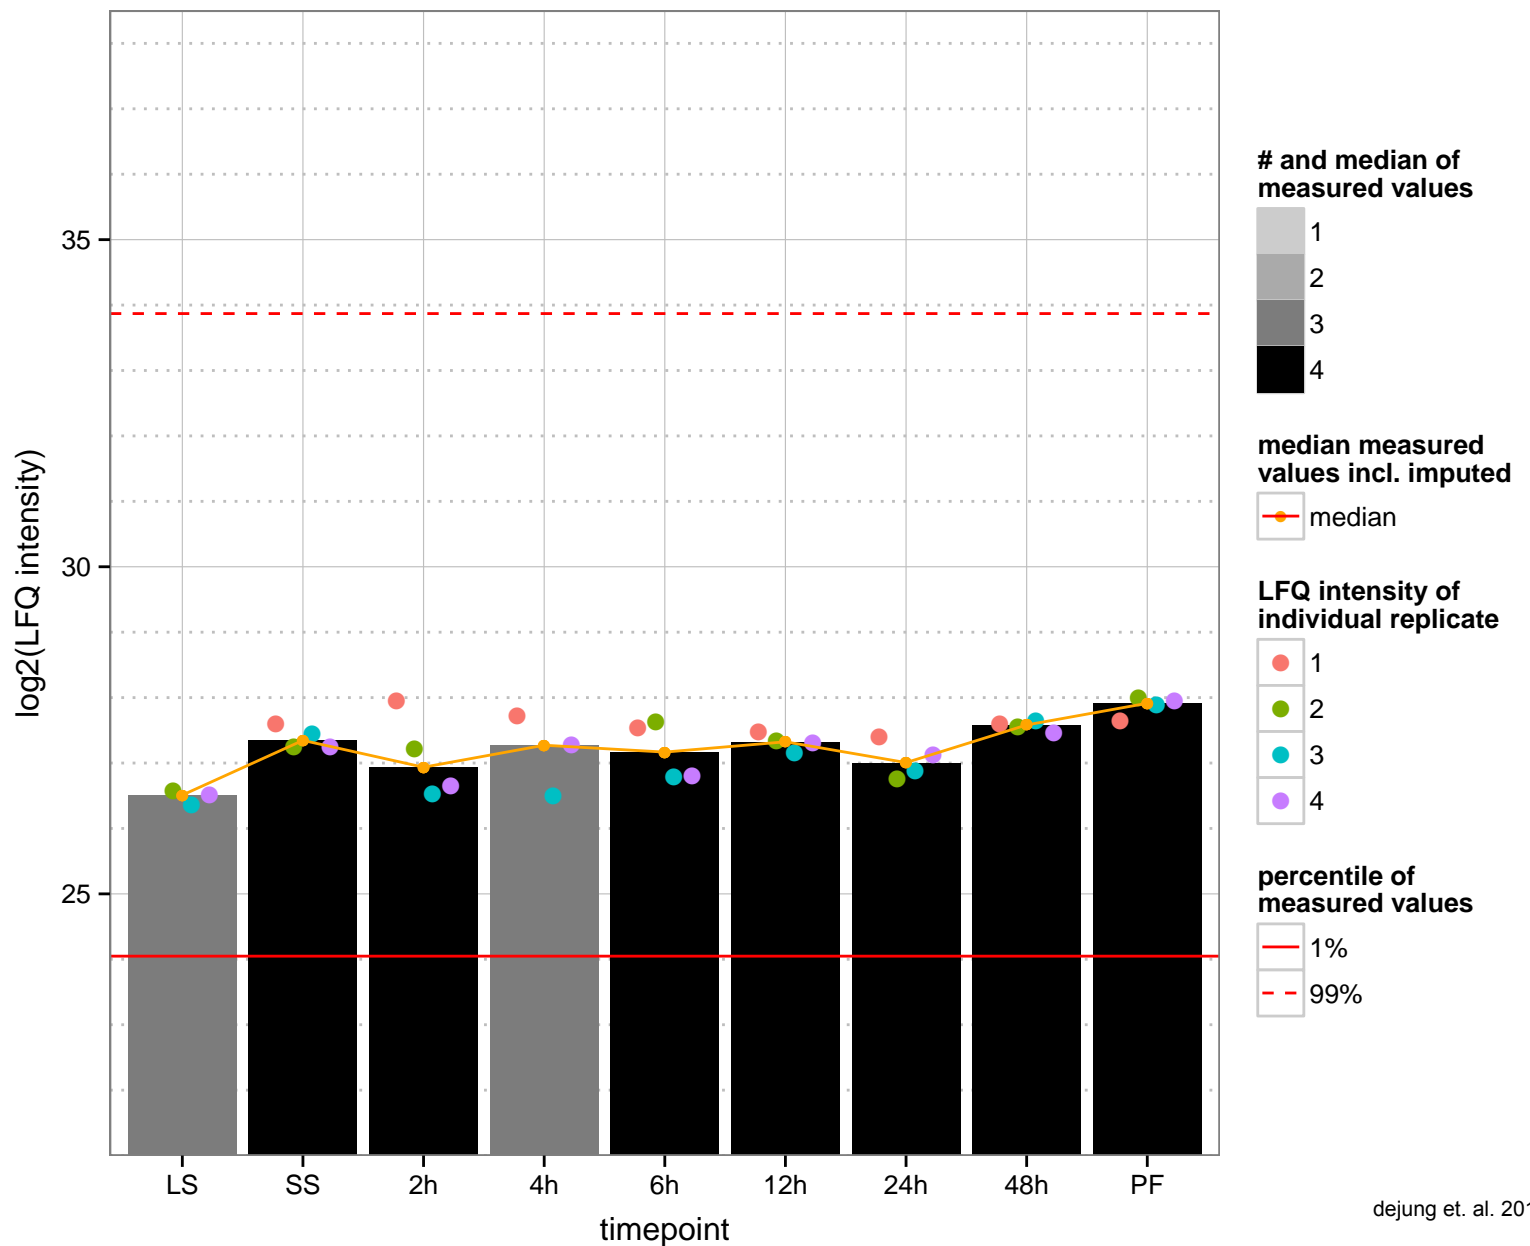

sec1 family transport protein, putative (SLY1)

Tb927.9.1780

AGOF: protein transporter activity

AGOC: mitochondrion

AGOP: protein secretion, vesicle docking involved in exocytosis, vesicle-mediated transport

PGOF: null

PGOC: null

PGOP: vesicle docking involved in exocytosis, vesicle-mediated transport

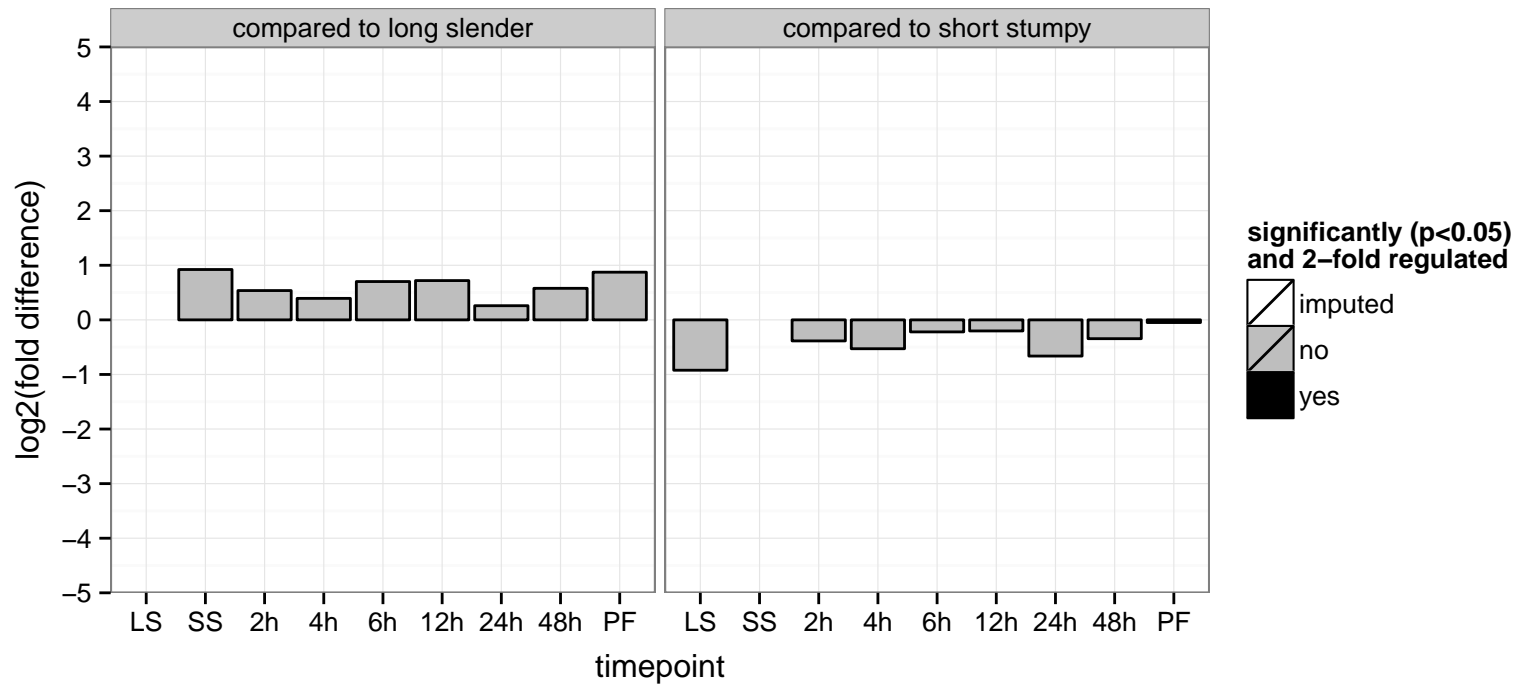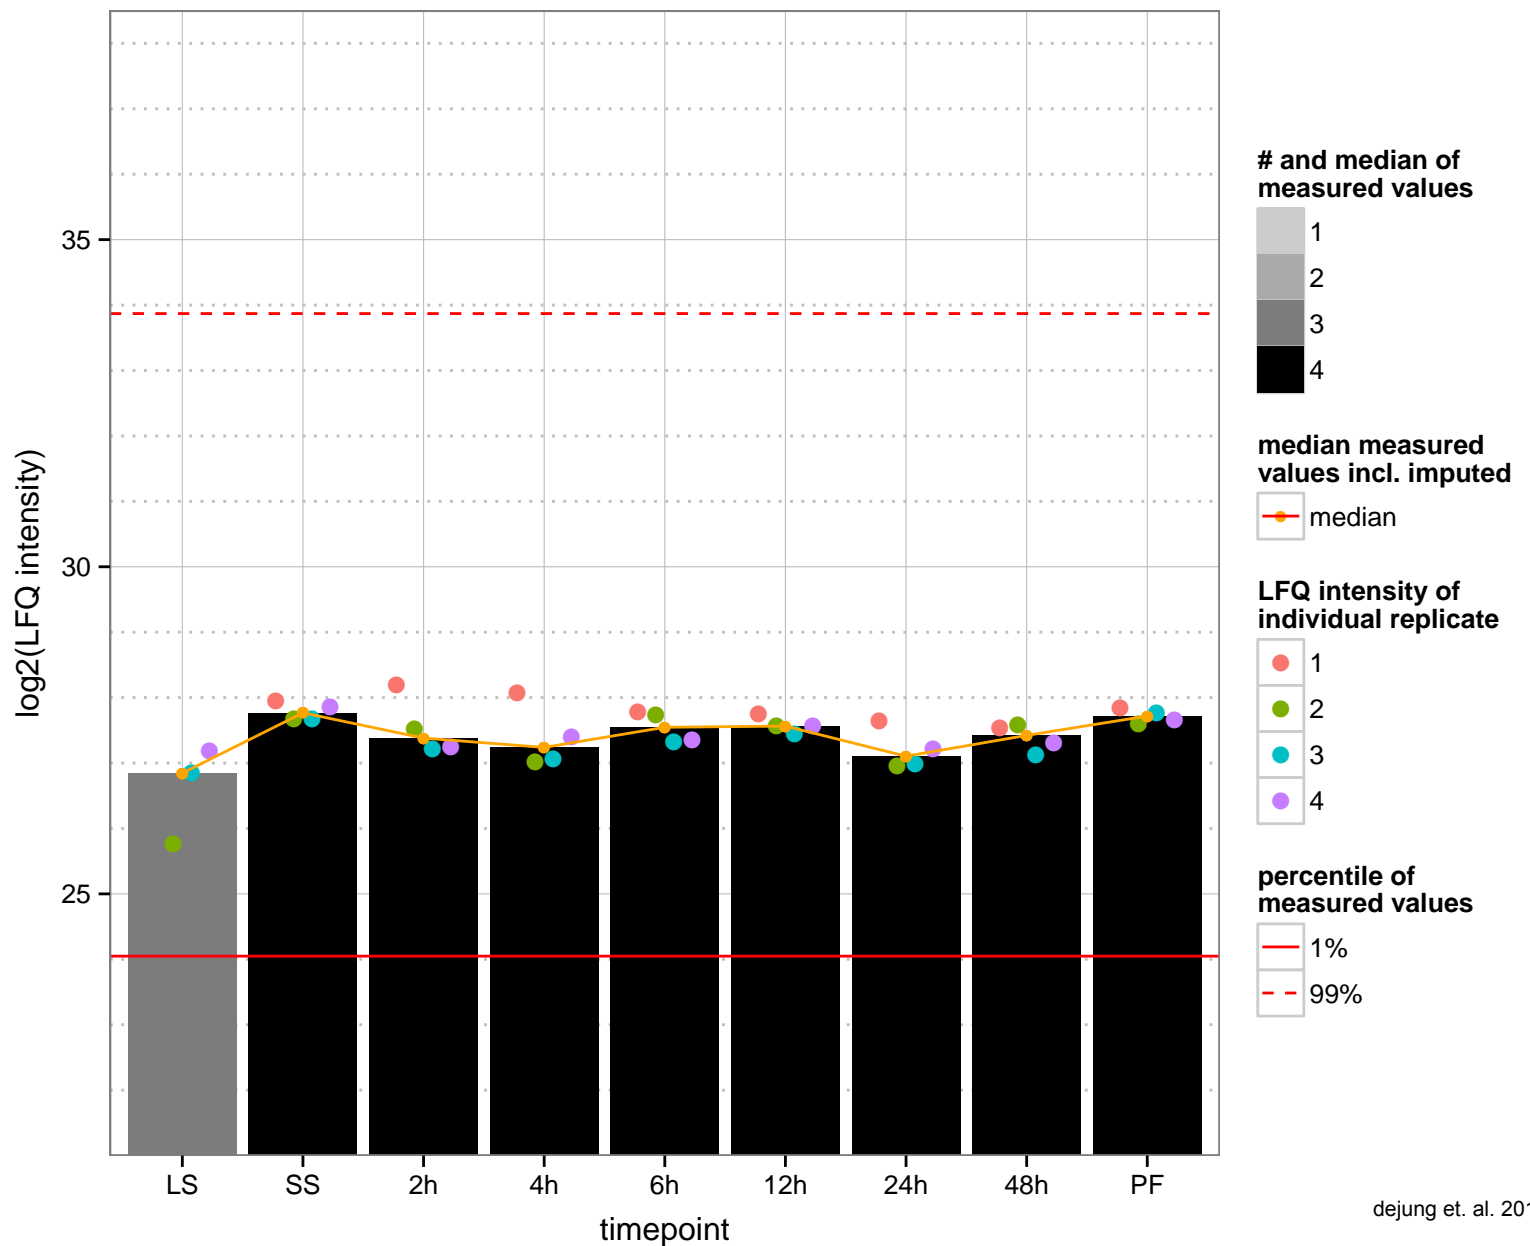

hypothetical protein, conserved  
 Tb927.9.1880  
 AGOF: null  
 AGOC: null  
 AGOP: null  
 PGO: binding, protein binding  
 PGOC: null  
 PGOP: null

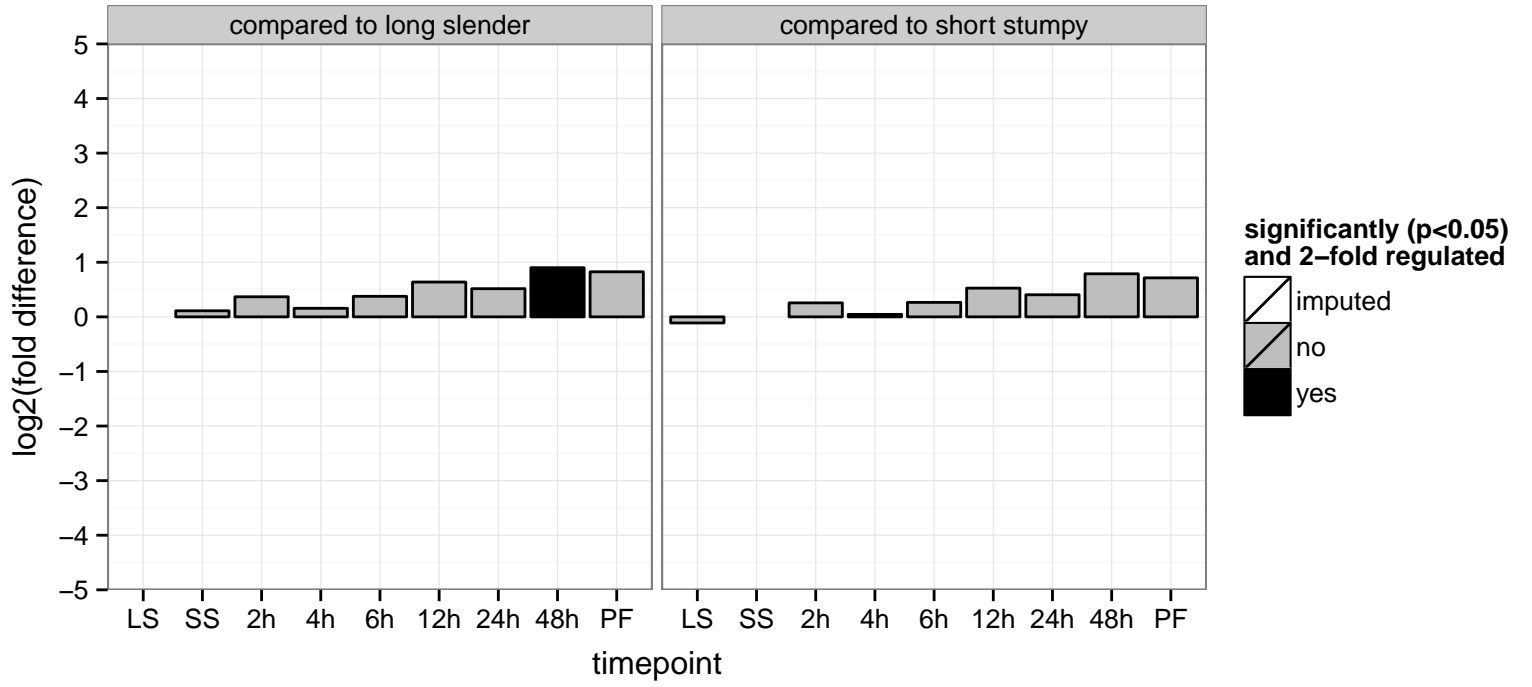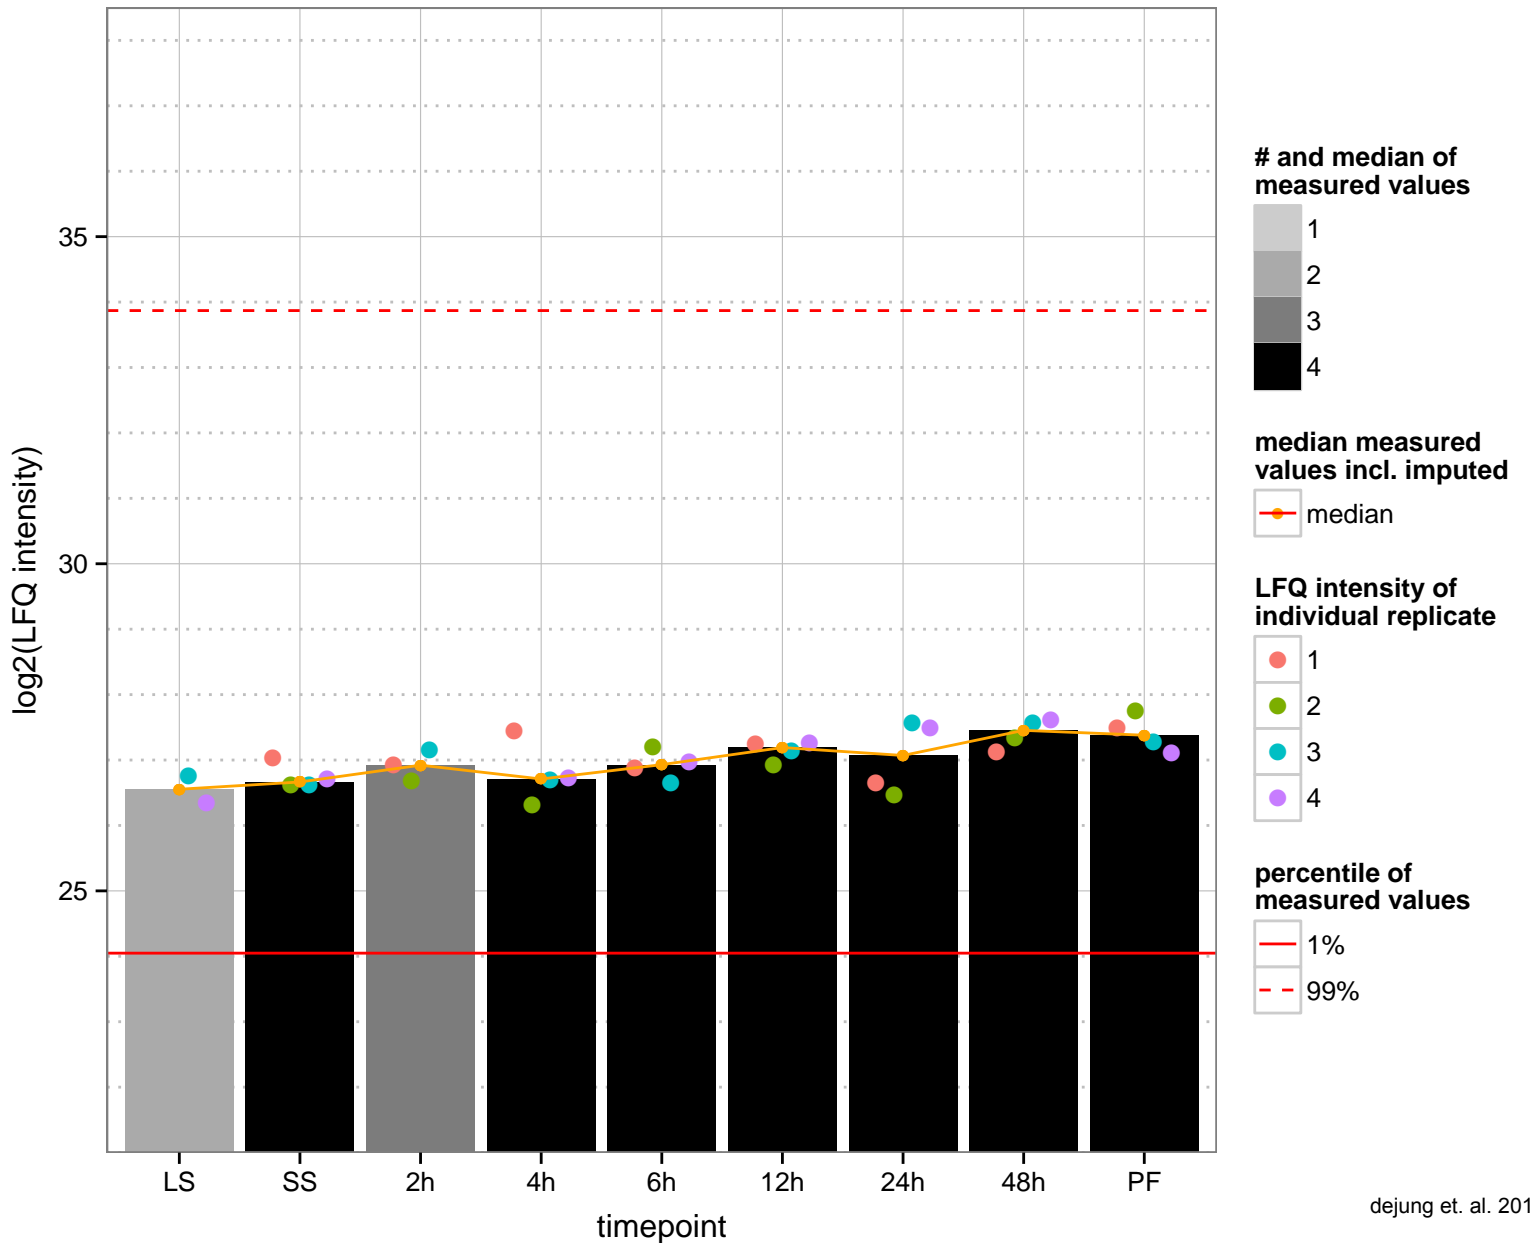

hypothetical protein, conserved  
 Tb927.9.1950  
 AGOF: null  
 AGOC: mitochondrion  
 AGOP: null  
 PGO: null  
 PGOC: null  
 PGOP: null

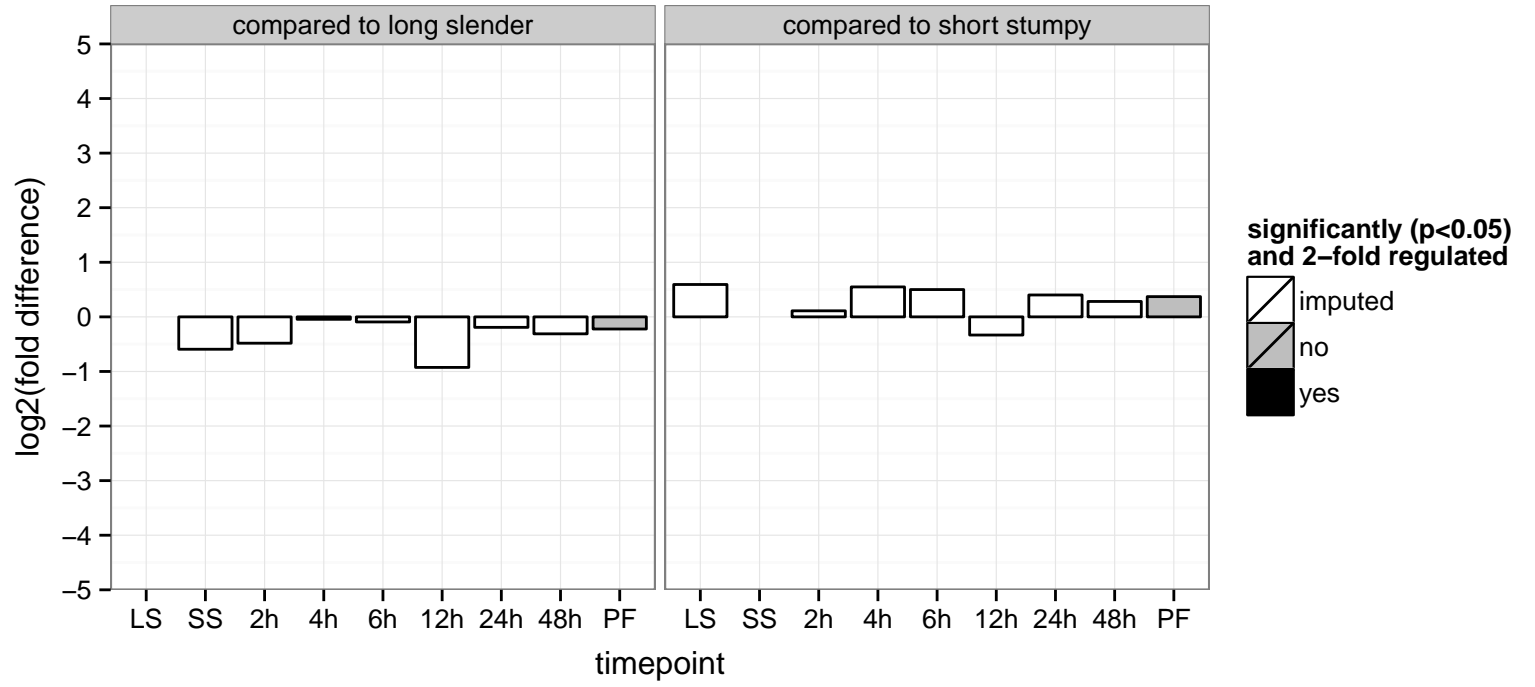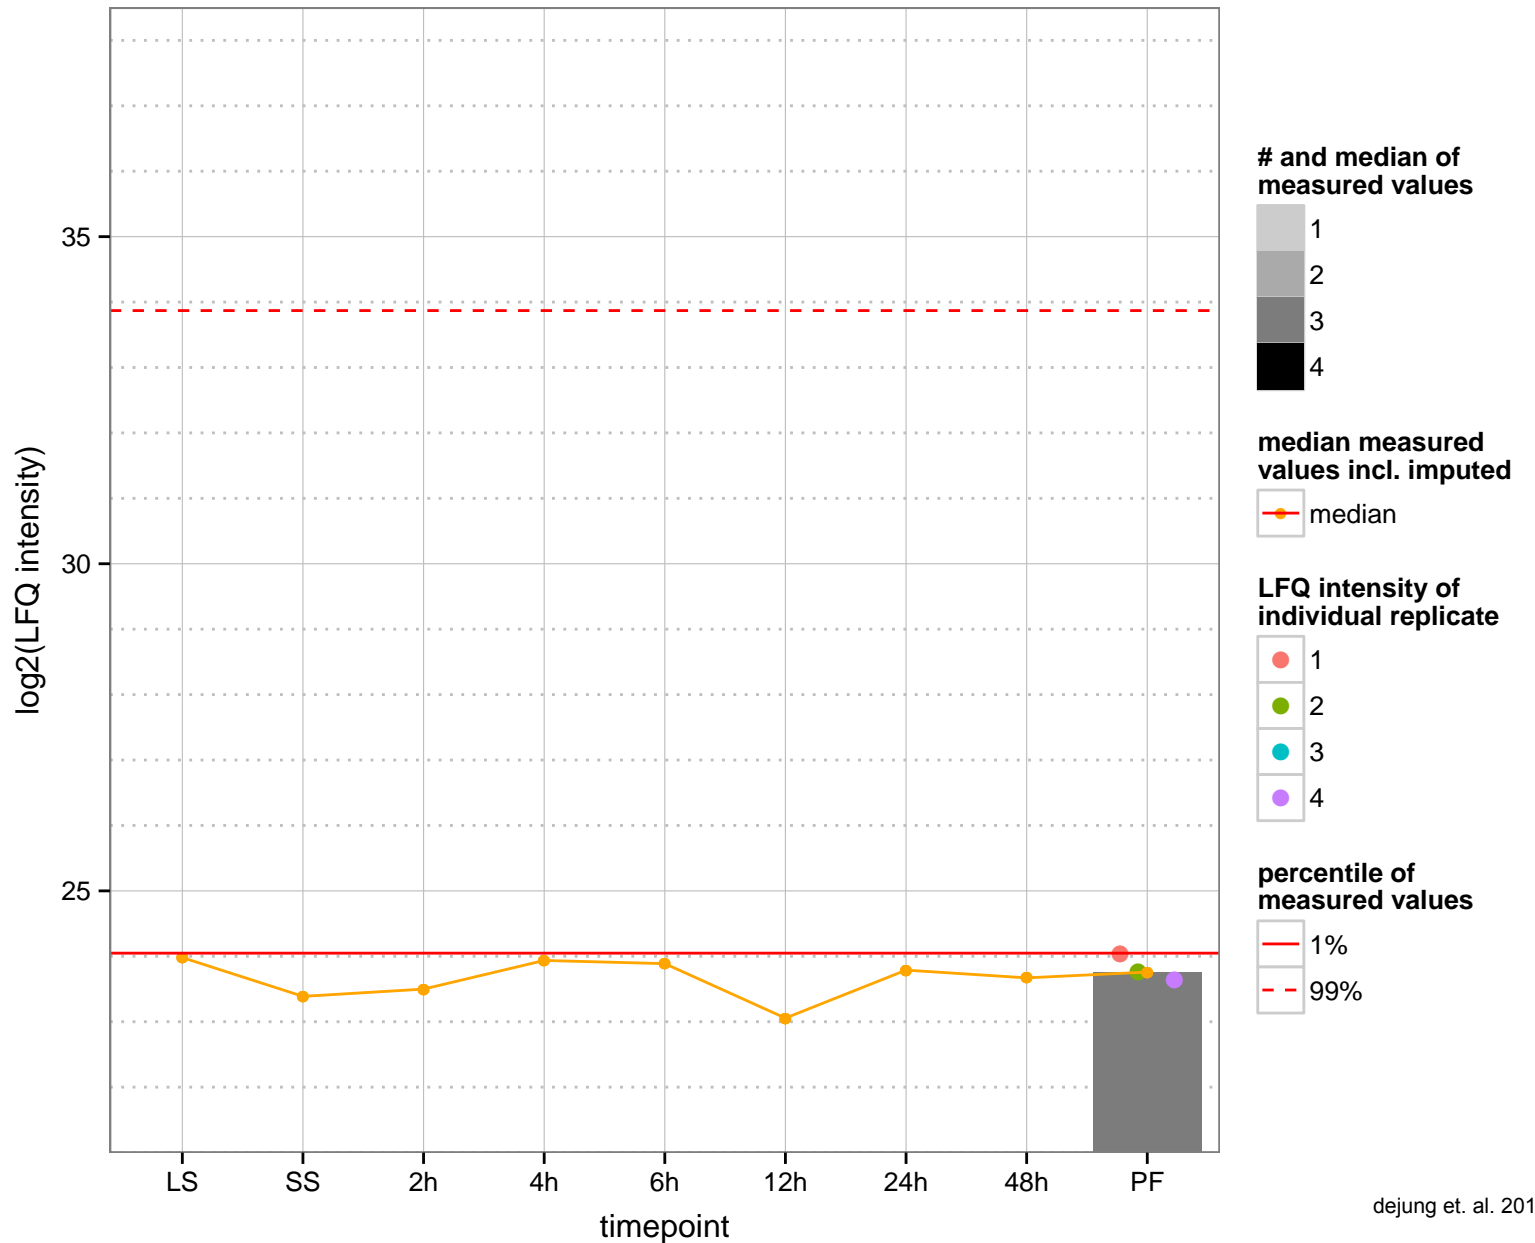

hypothetical protein, conserved  
 Tb927.9.1980  
 AGOF: null  
 AGOC: null  
 AGOP: null  
 PGO: null  
 PGOC: null  
 PGOP: null

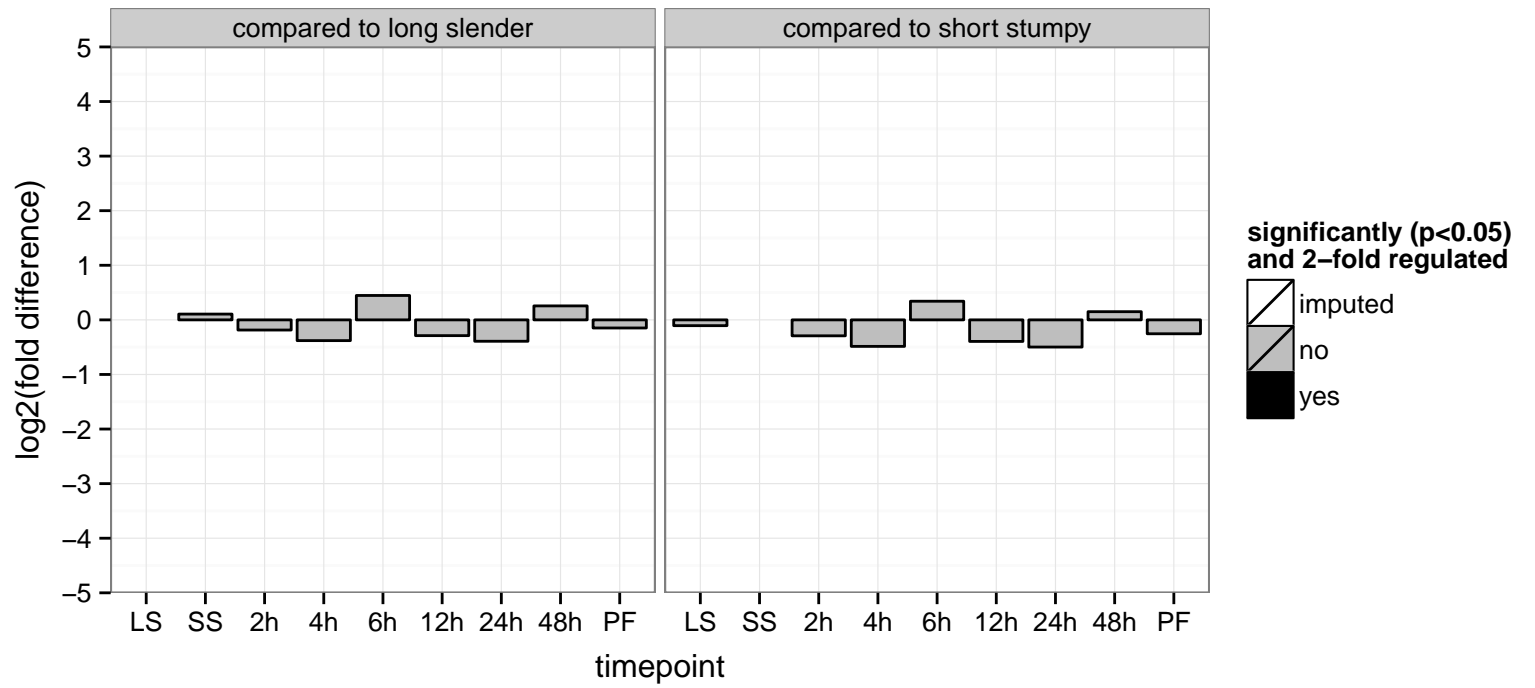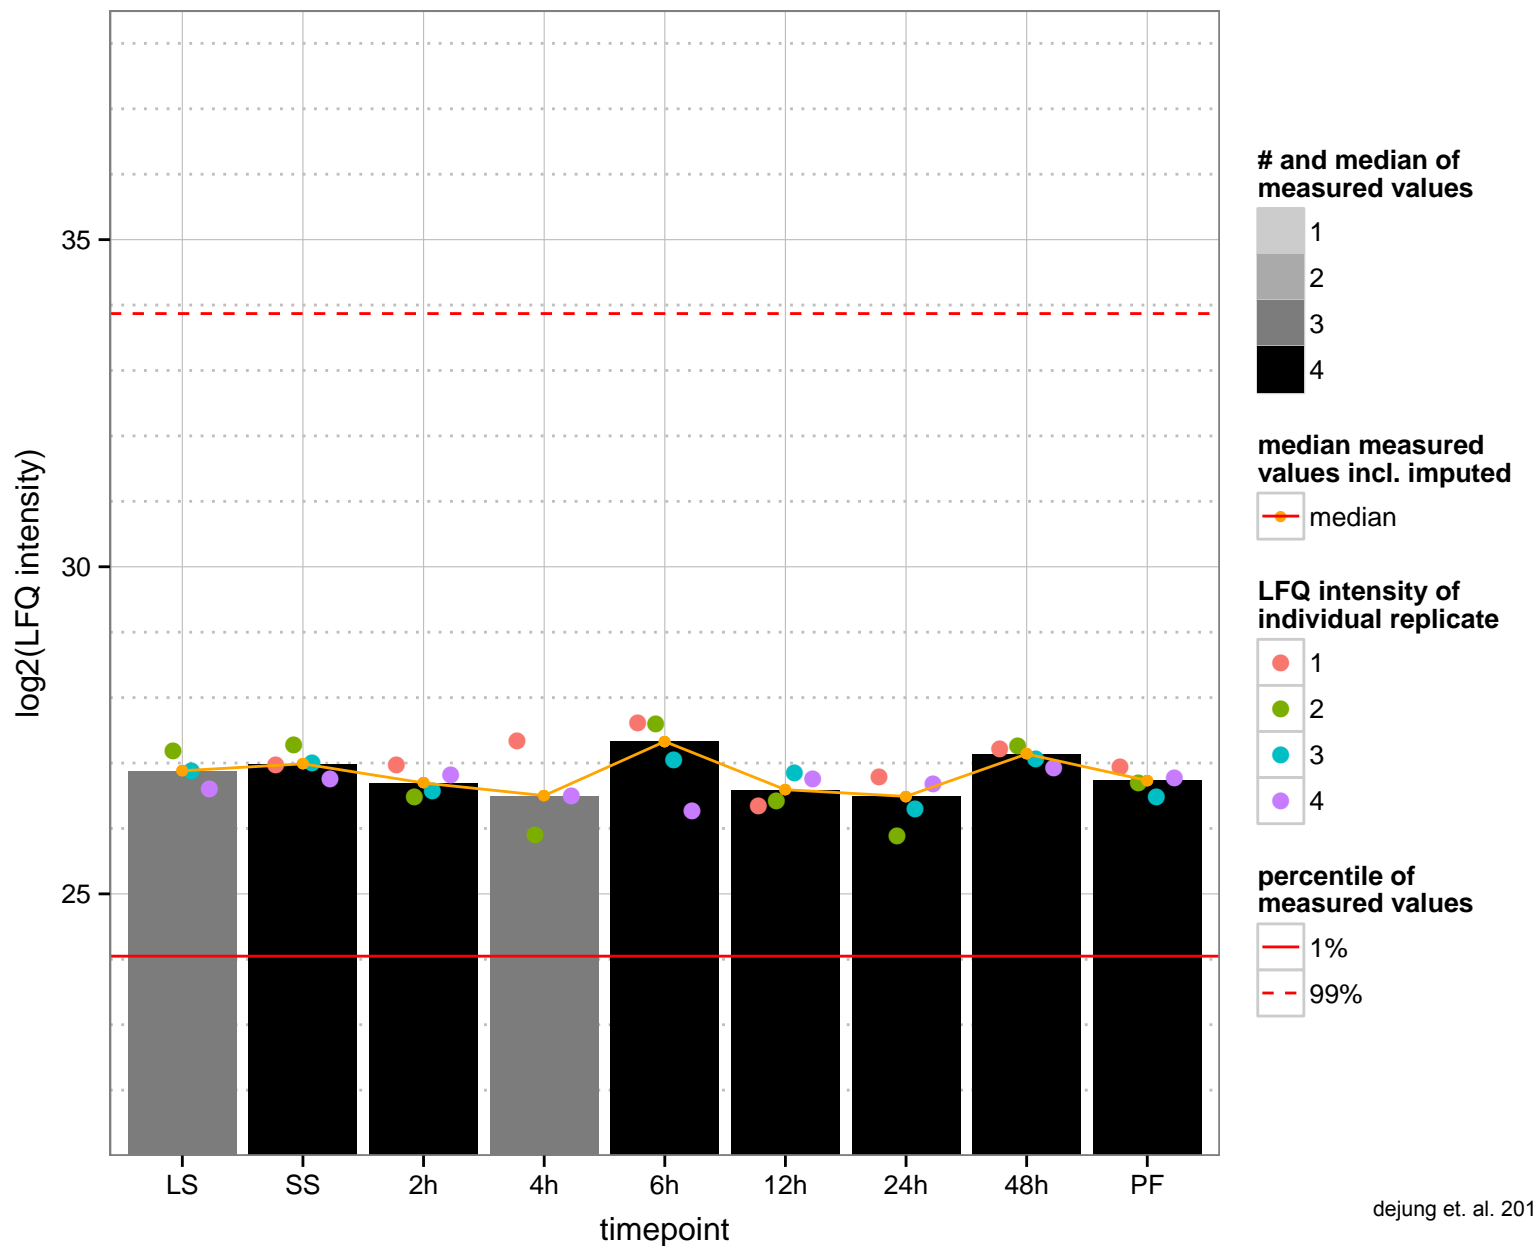



kynureninase, putative  
 Tb927.9.2010  
 AGOF: kynureninase activity, pyridoxal phosphate binding  
 AGOC: cytoplasm  
 AGOP: NAD biosynthetic process, tryptophan catabolic process  
 PGOF: kynureninase activity, pyridoxal phosphate binding  
 PGO: cytoplasm  
 PGOP: NAD biosynthetic process, metabolic process, tryptophan catabolic process

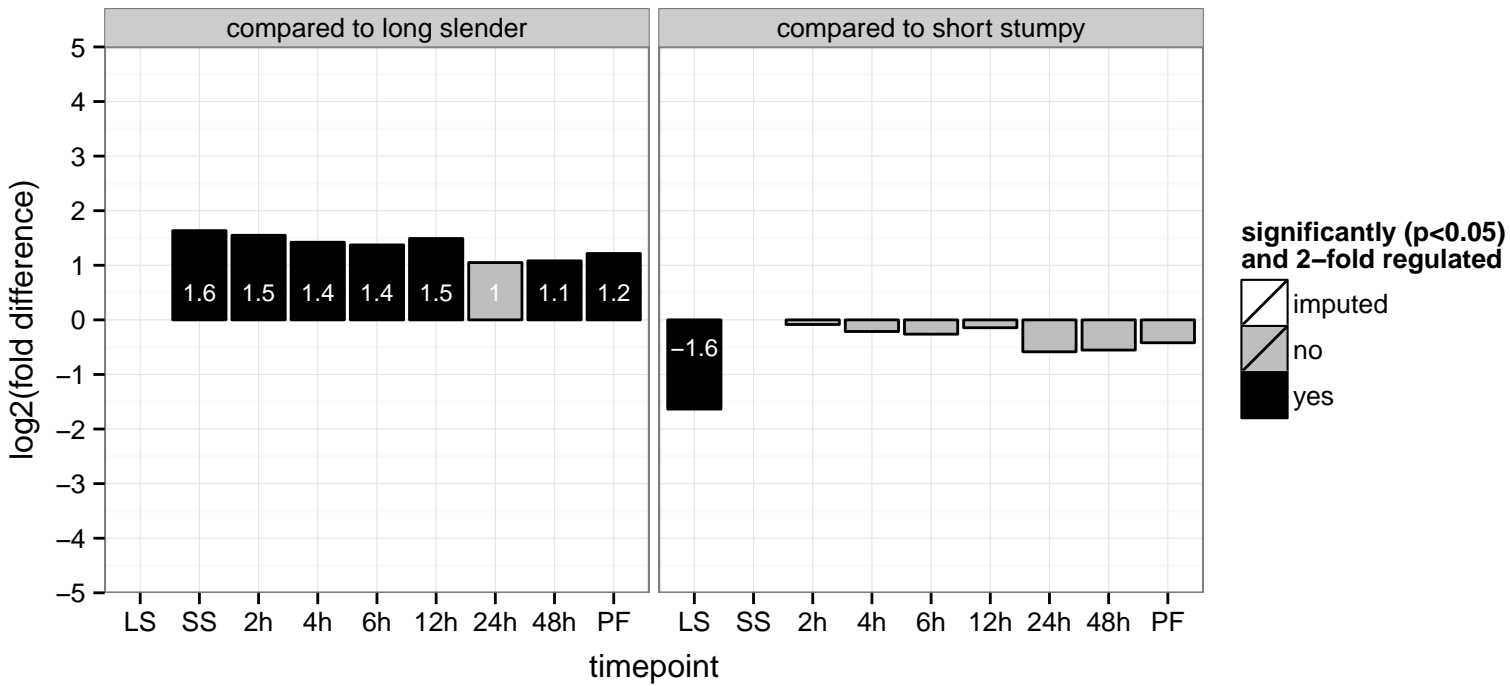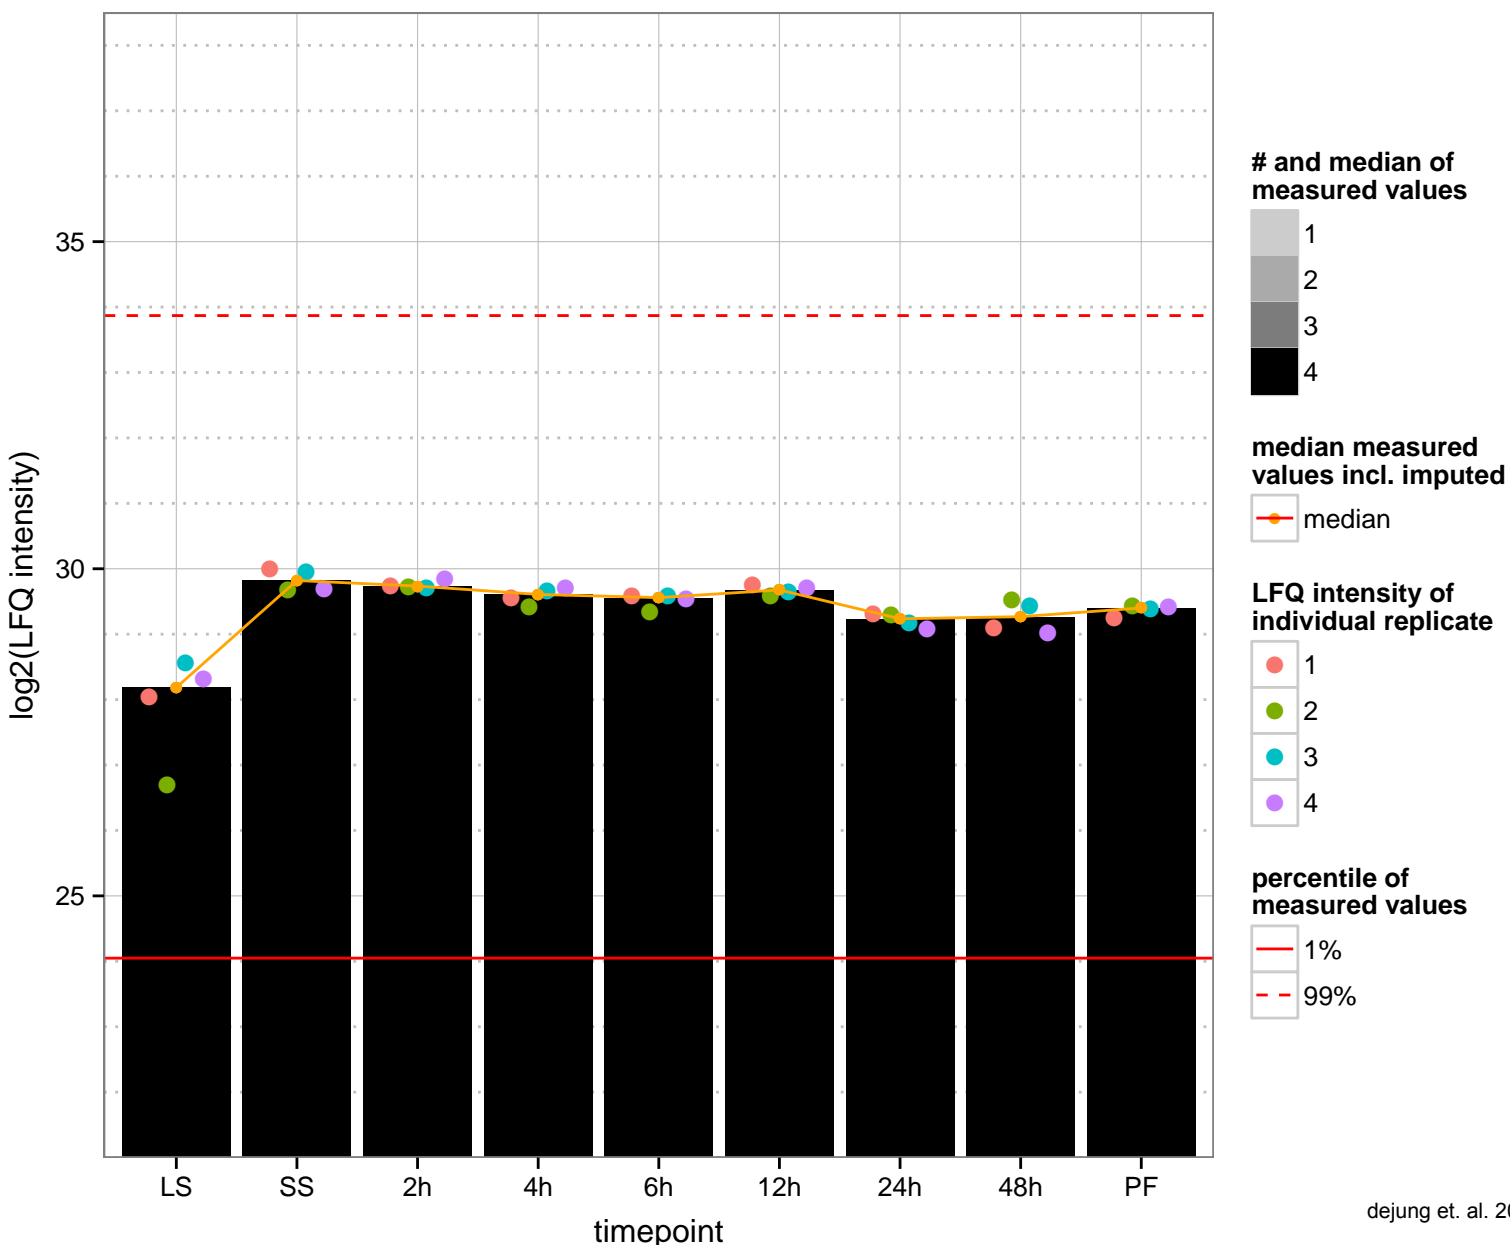

hypothetical protein, conserved  
 Tb927.9.2130  
 AGOF: null  
 AGOC: null  
 AGOP: null  
 PGOF: transferase activity, transferring phosphorus-containing groups  
 PGOC: null  
 PGOP: null

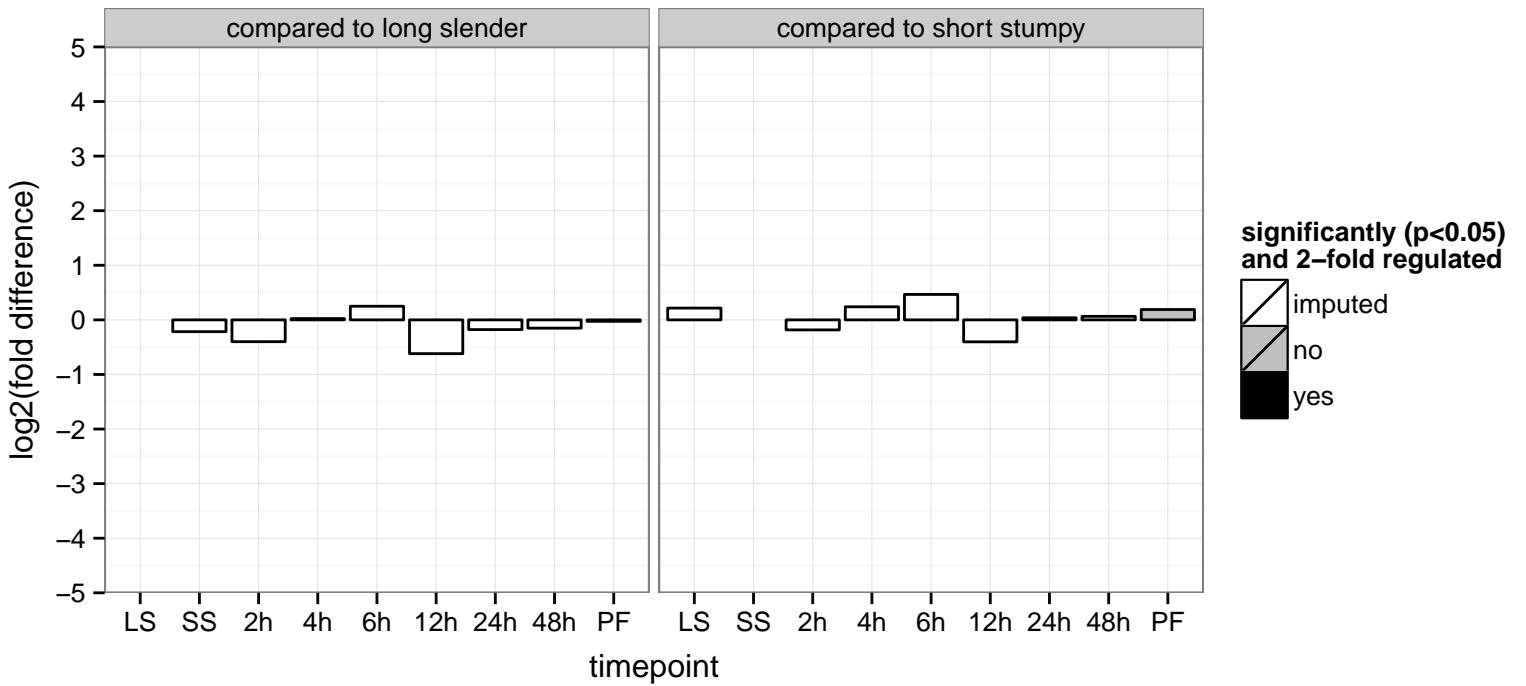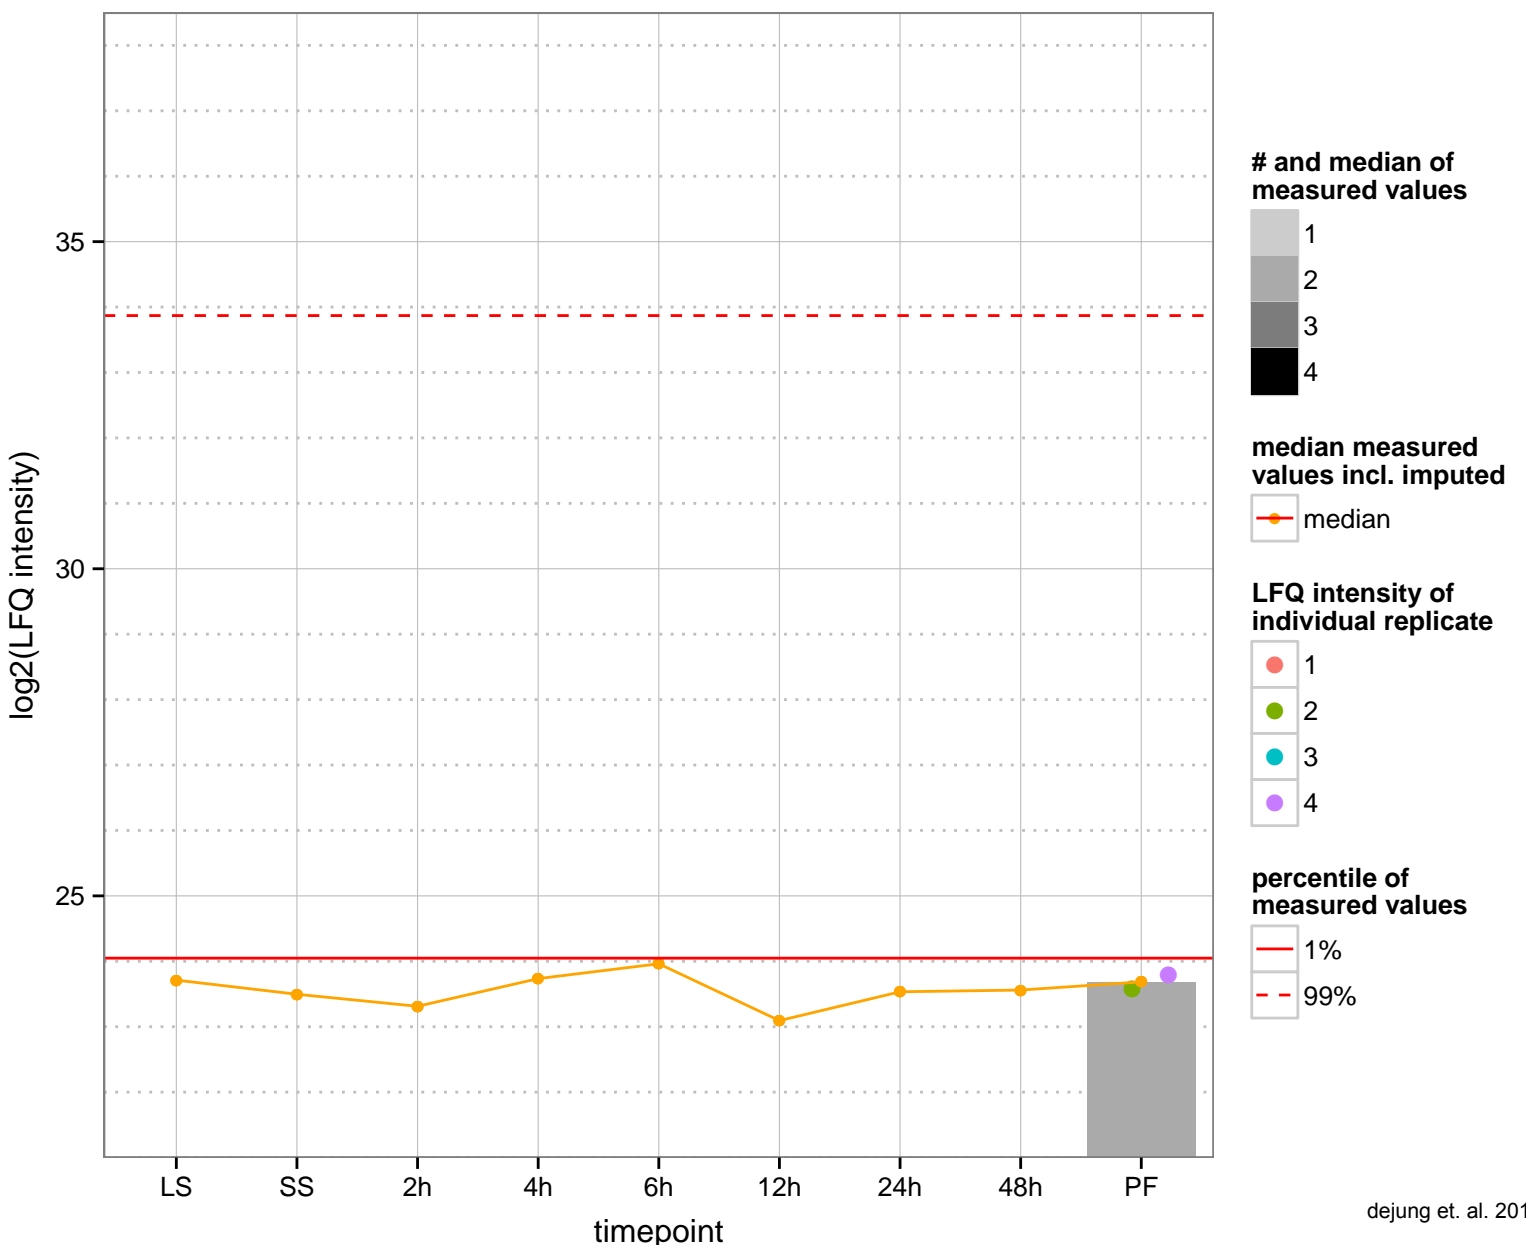

hypothetical protein, conserved  
 Tb927.9.2420  
 AGOF: null  
 AGOC: null  
 AGOP: null  
 PGOF: null  
 PGOC: null  
 PGOP: null

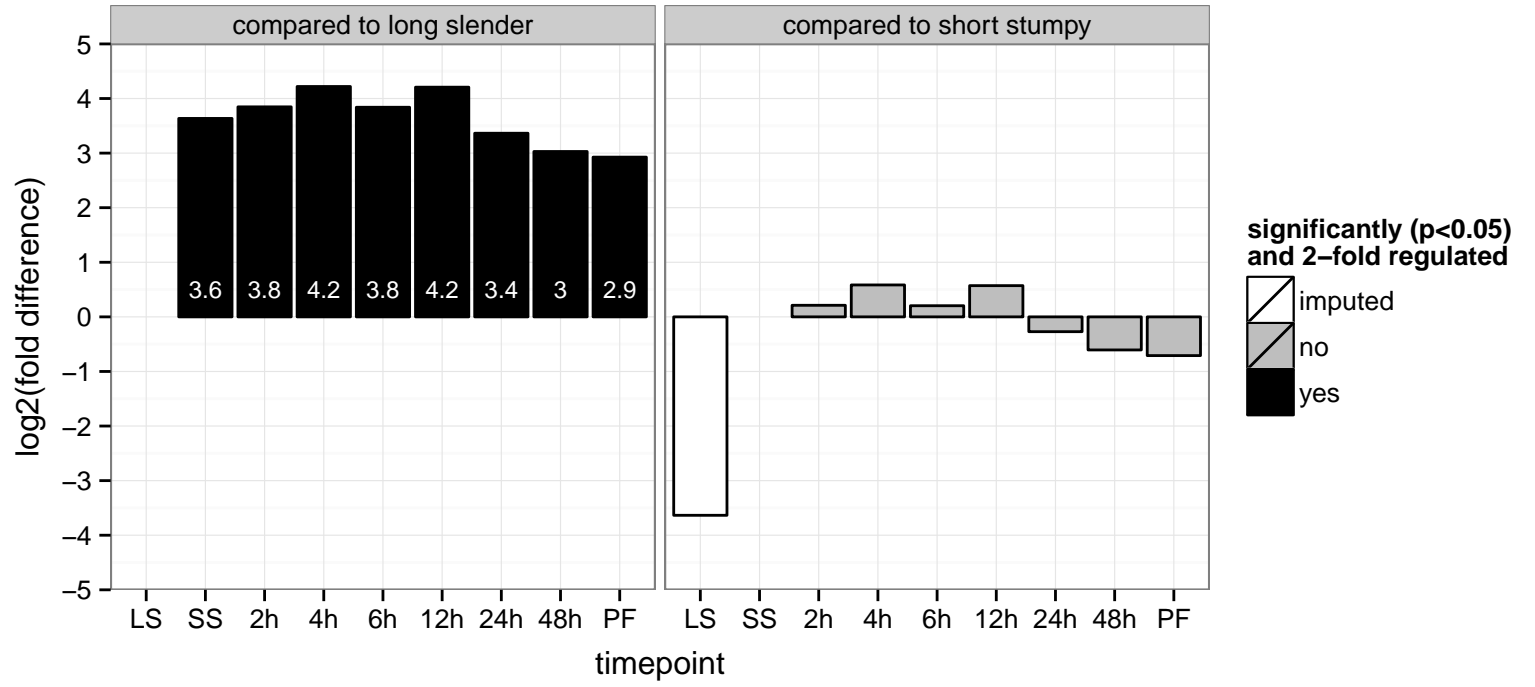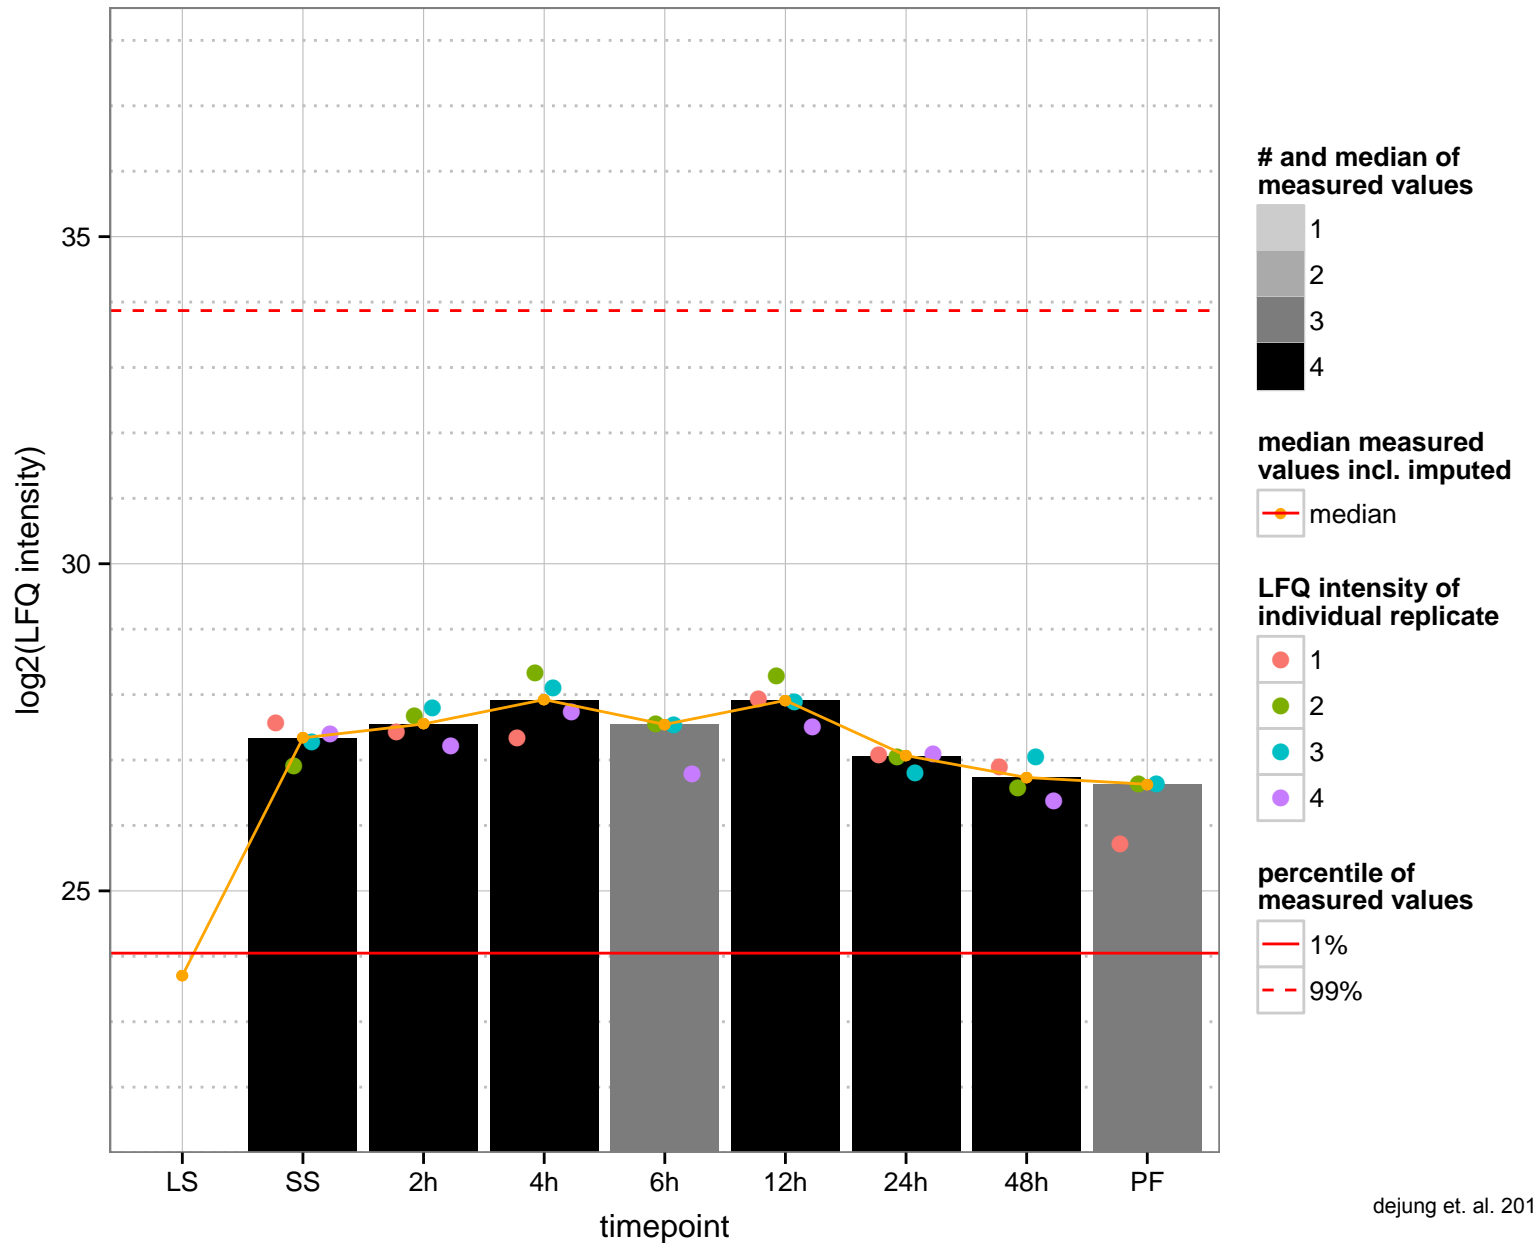

nucleolar protein (NOP86)  
 Tb927.9.2470  
 AGOF: null  
 AGOC: nucleolus  
 AGOP: G2/M transition of mitotic cell cycle  
 PGO: null  
 PGO: null  
 PGO: null

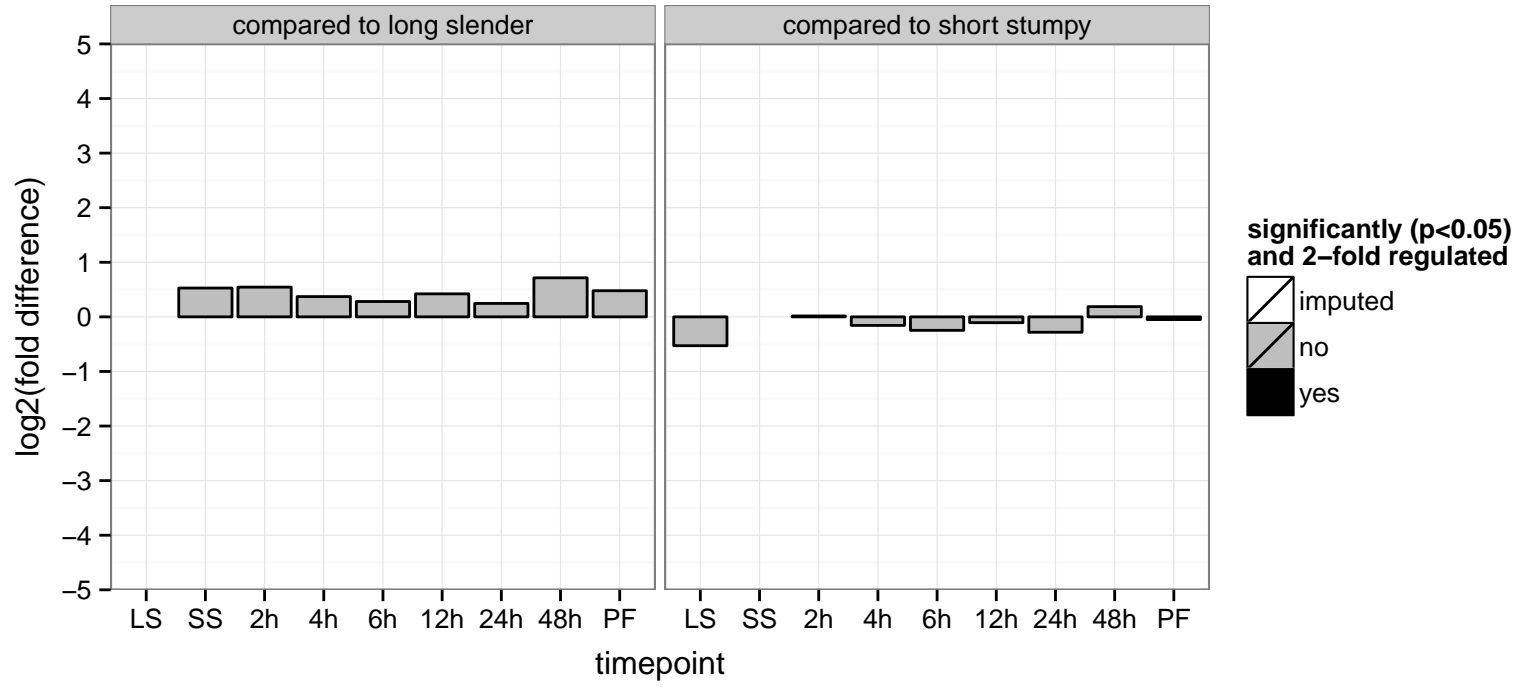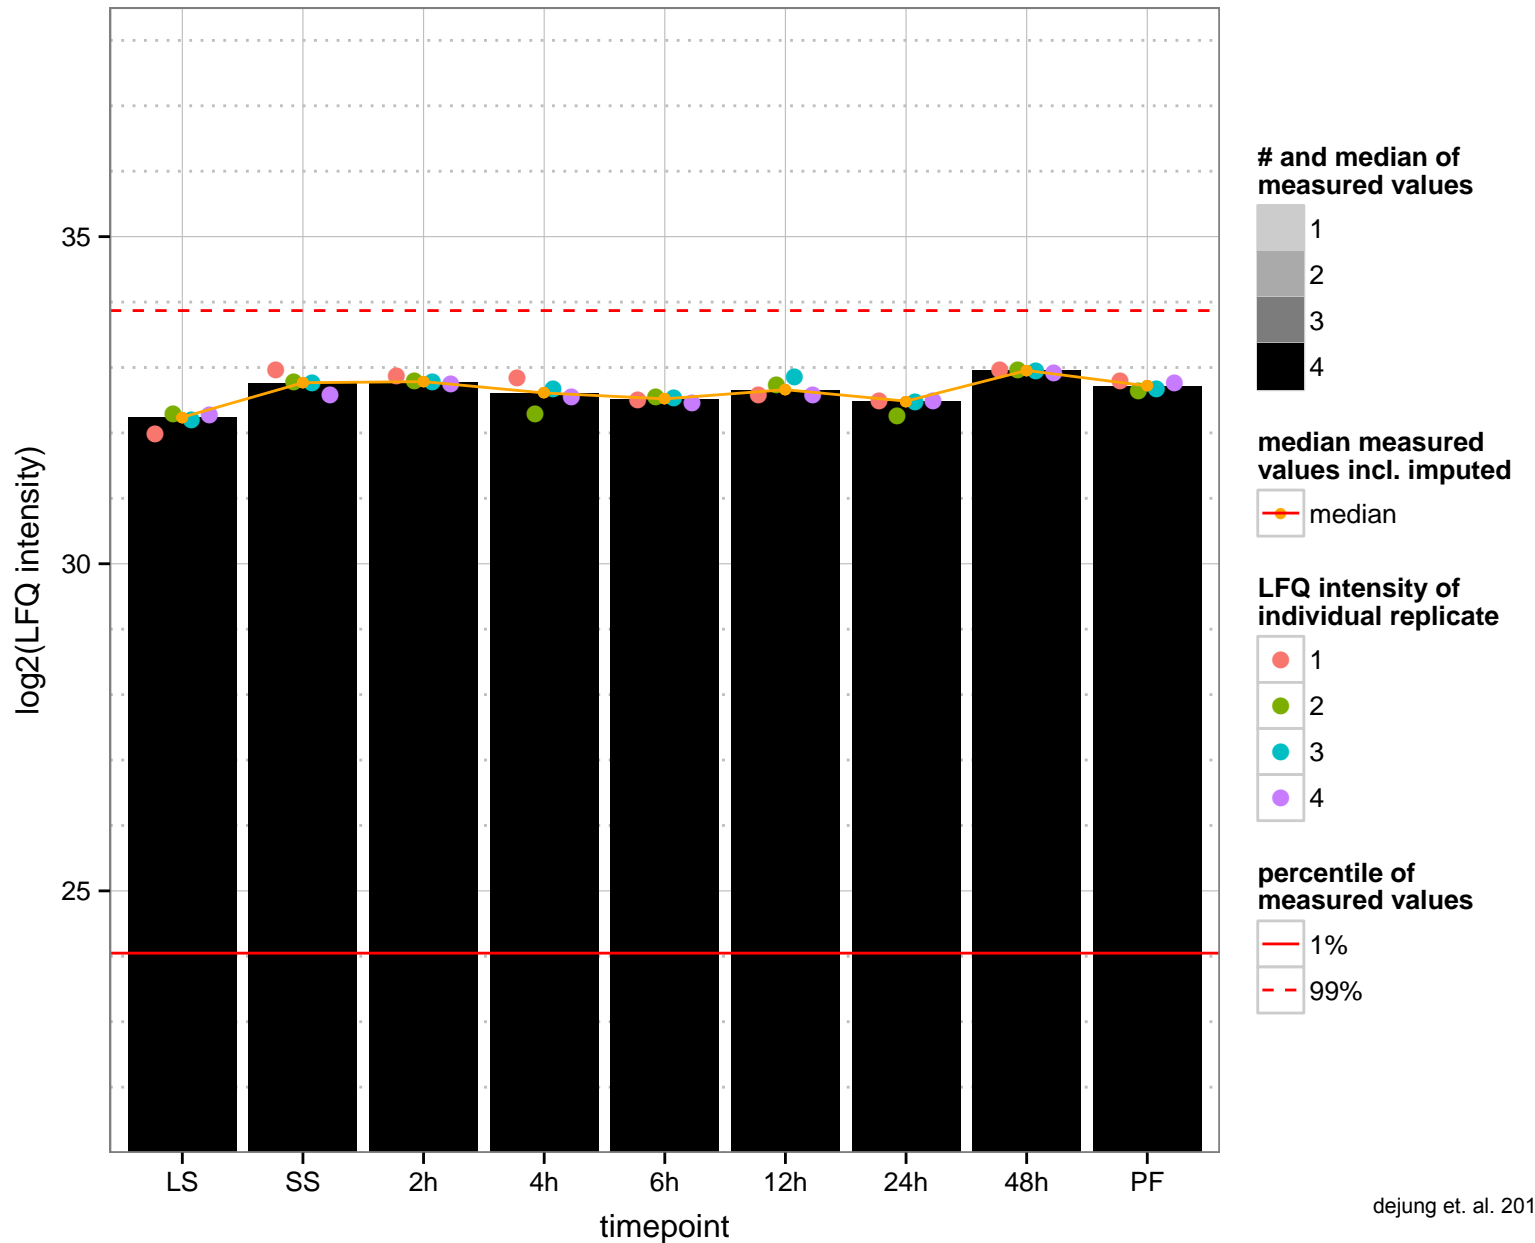

mitotubule-associated protein Gb4, putative, microtubule-associated protein (GB4)  
 Tb927.9.2520;Tb11.v5.0868  
 AGOF: null  
 AGOC: null  
 AGOP: null  
 PGO: null  
 PGOC: null  
 PGOP: null

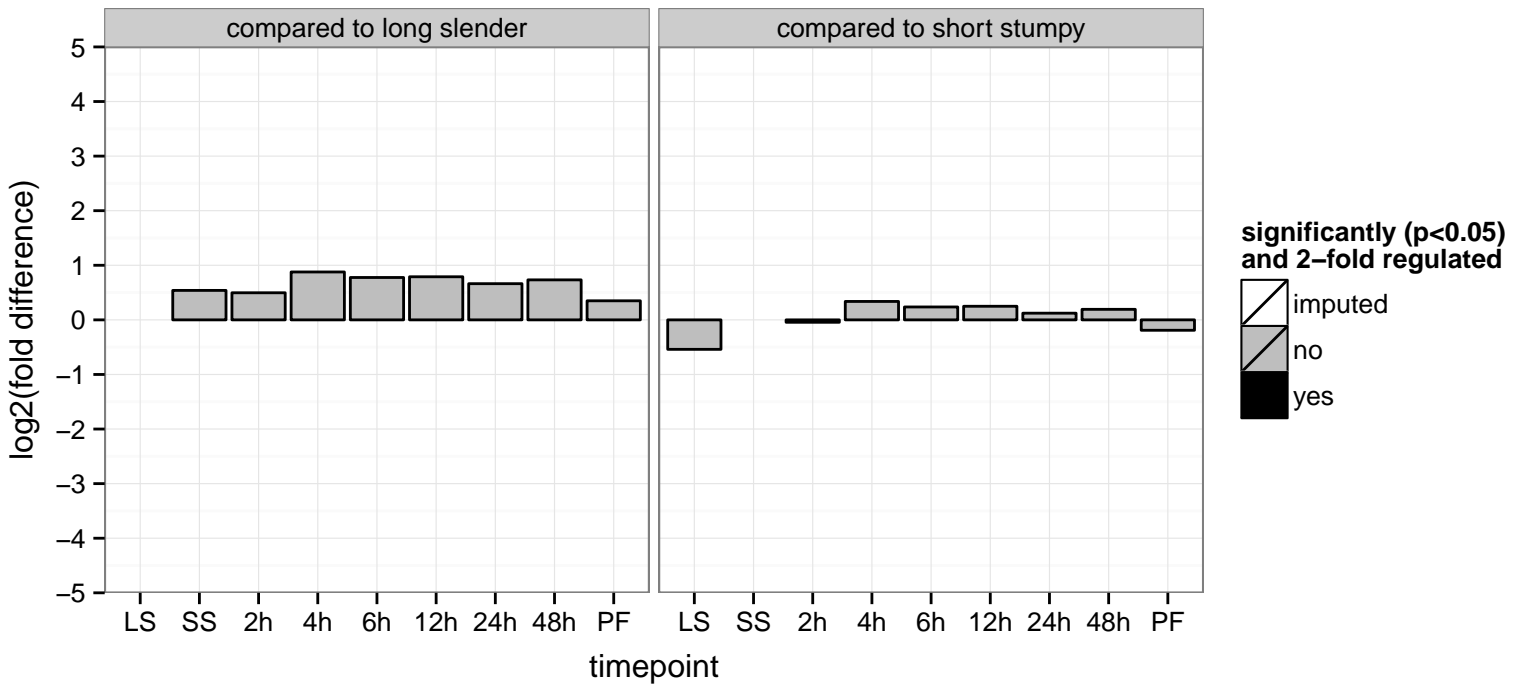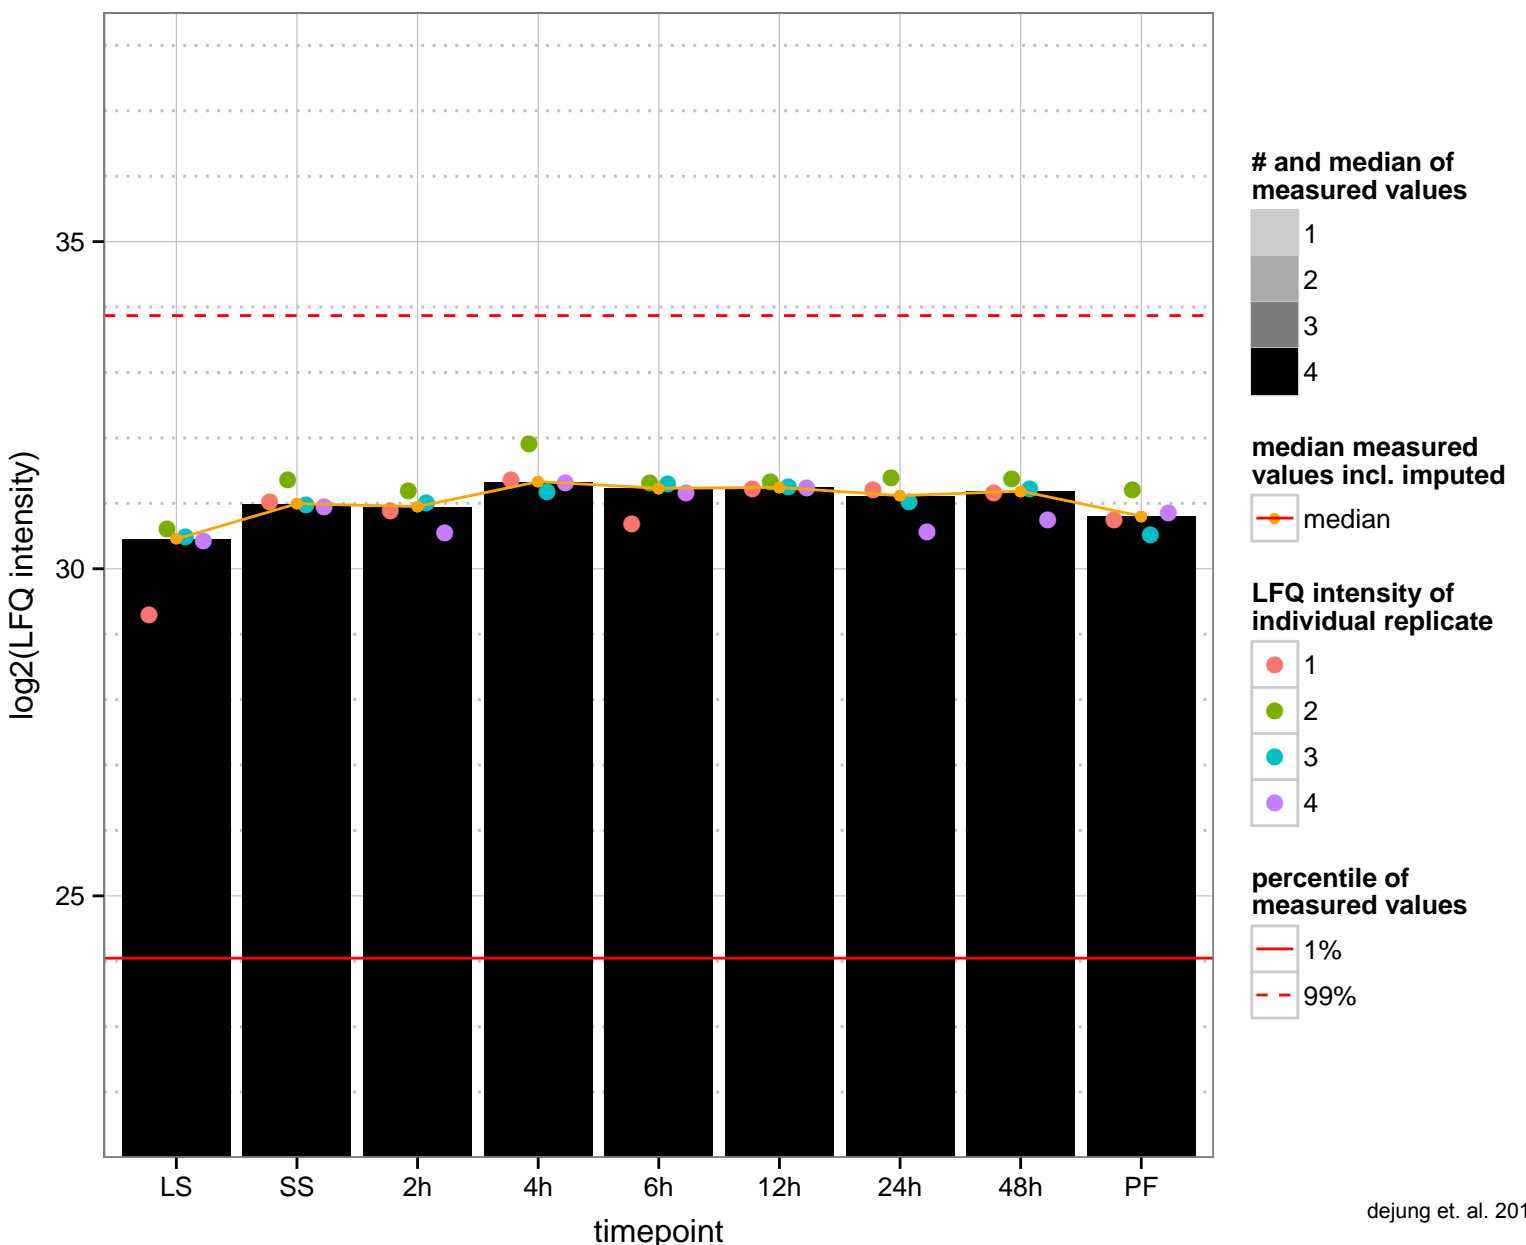

deoxyhypusine hydroxylase, putative  
 Tb927.9.2580  
 AGOF: deoxyhypusine monooxygenase activity  
 AGOC: null  
 AGOP: peptidyl-lysine modification to hypusine  
 PGOF: binding  
 PGO: null  
 PGOP: null

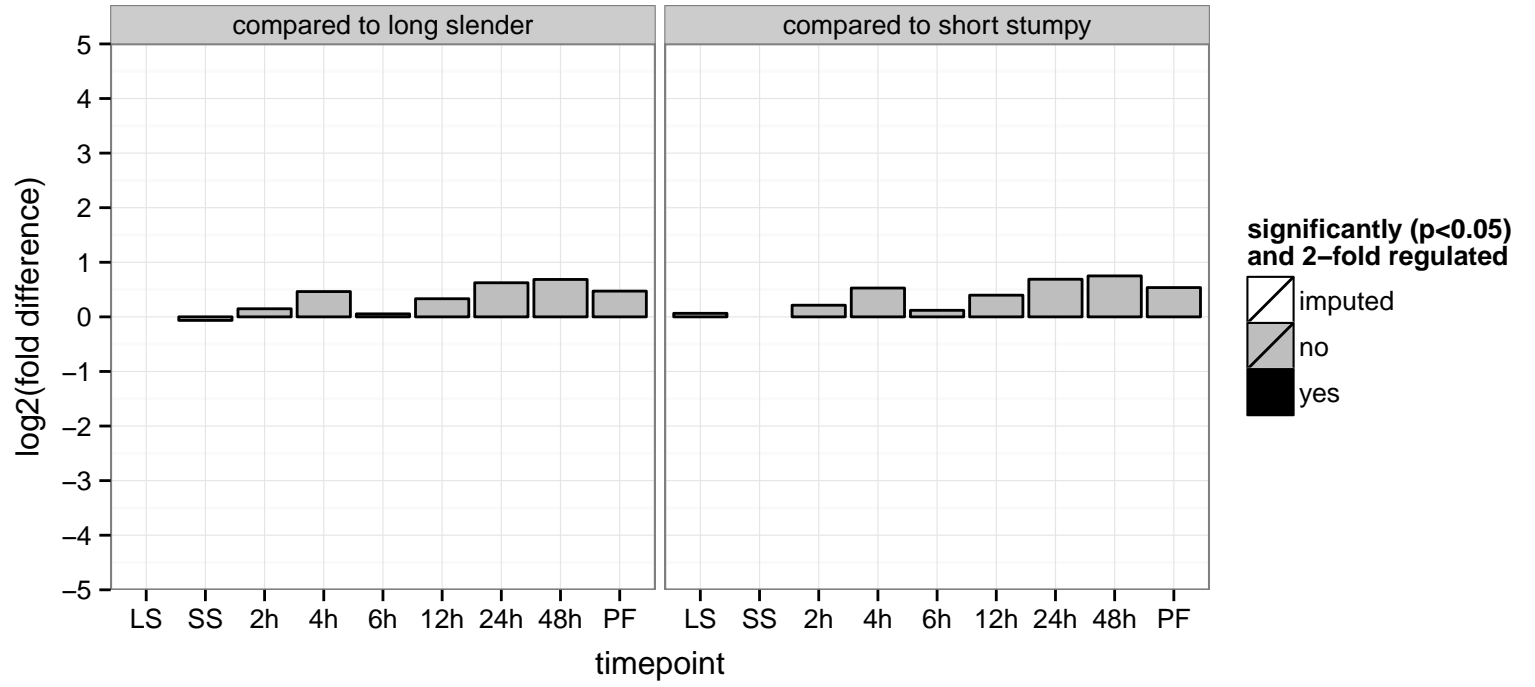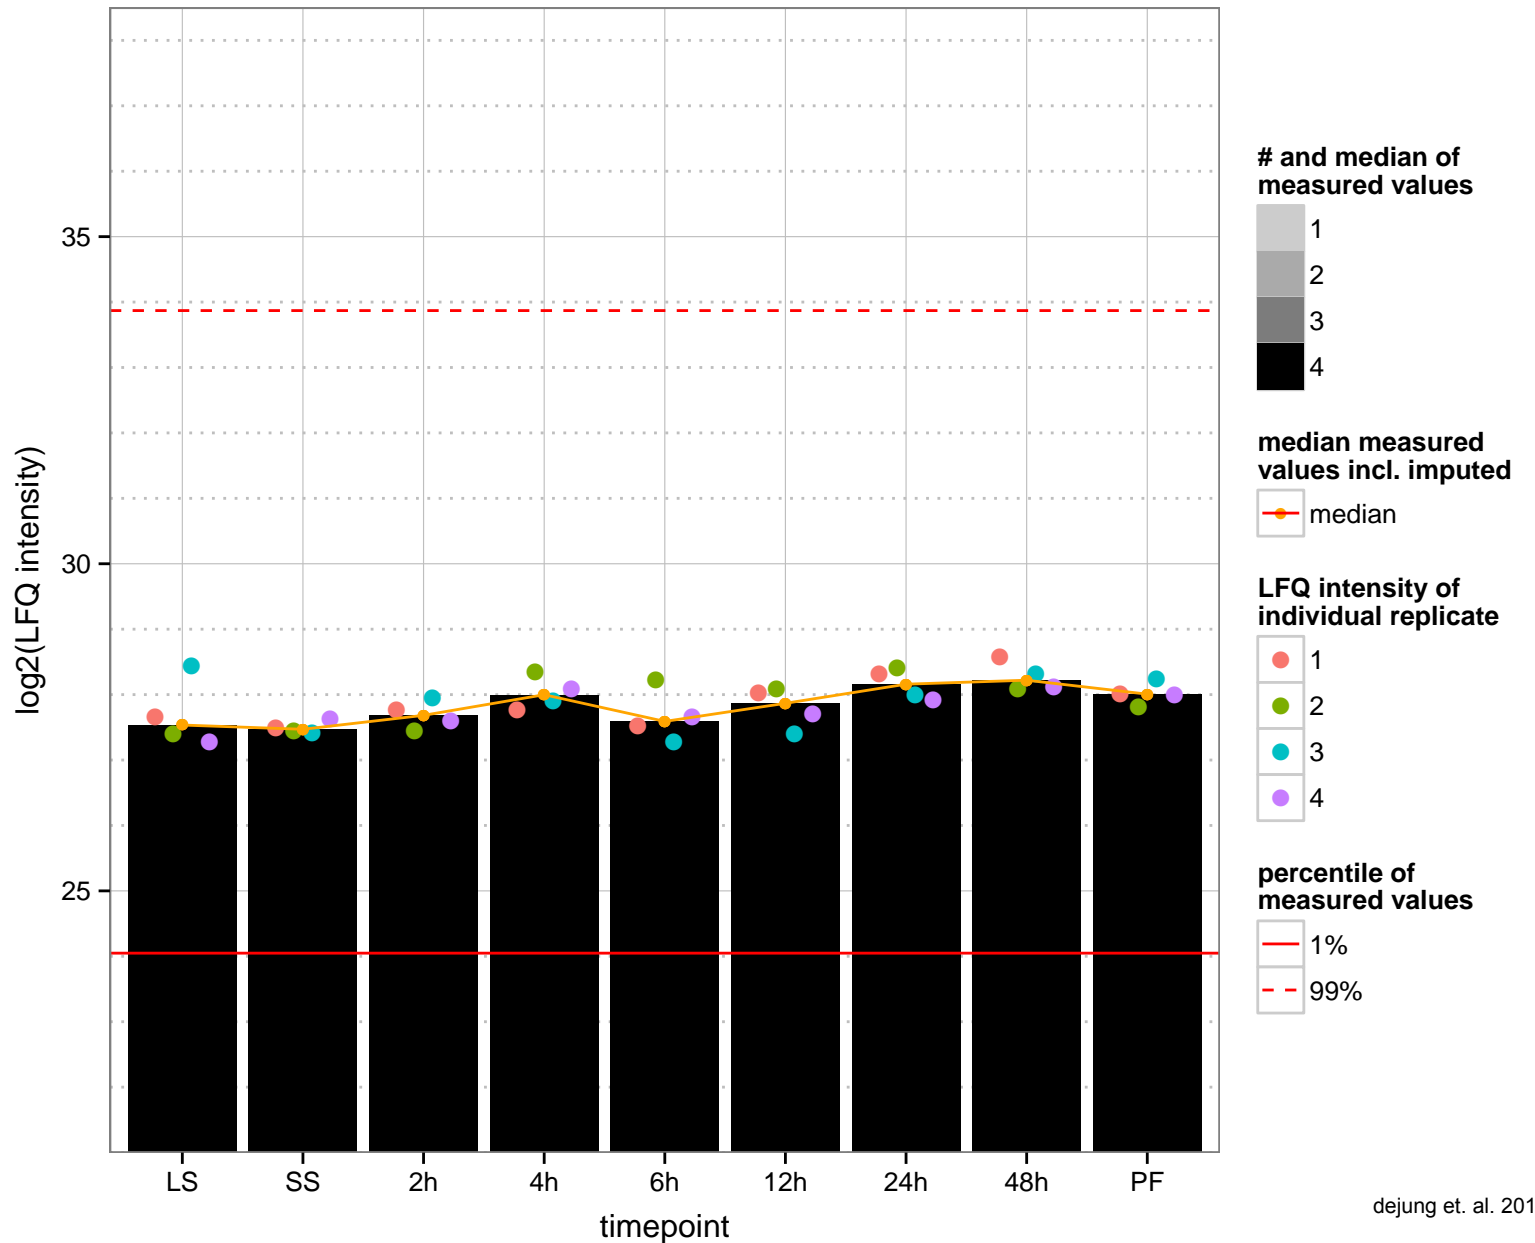

hypothetical protein, conserved  
 Tb927.9.2590  
 AGOF: null  
 AGOC: null  
 AGOP: null  
 PGOF: binding  
 PGO: null  
 PGOP: null

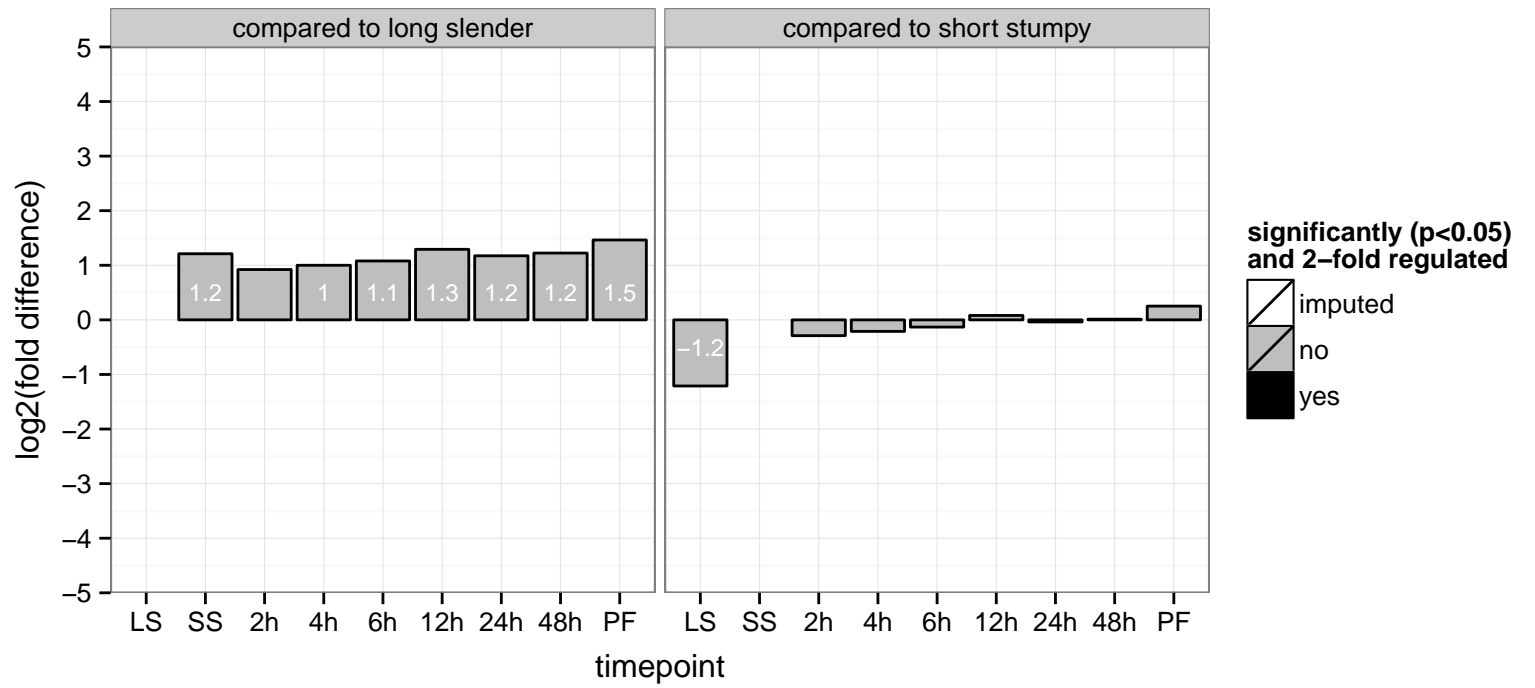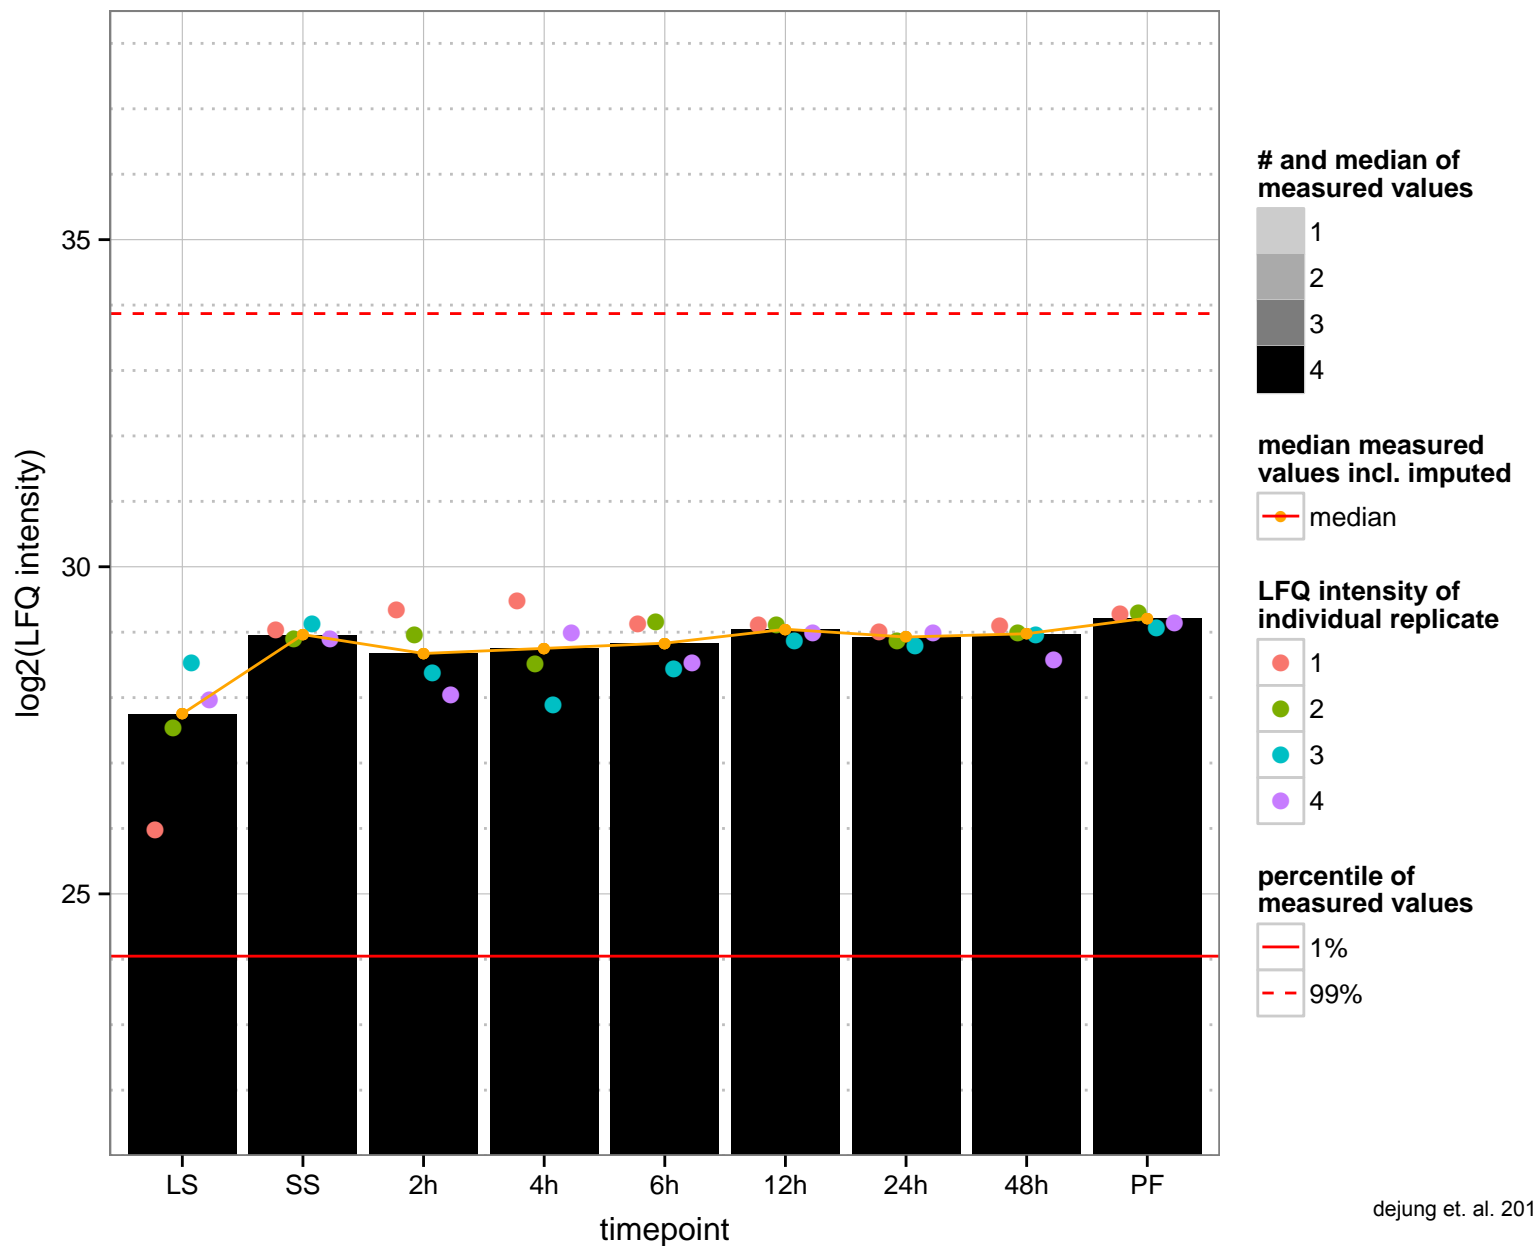

hypothetical protein, conserved  
 Tb927.9.2600  
 AGOF: null  
 AGOC: null  
 AGOP: null  
 PGOF: null  
 PGO: intracellular  
 PGO: ER to Golgi vesicle-mediated transport

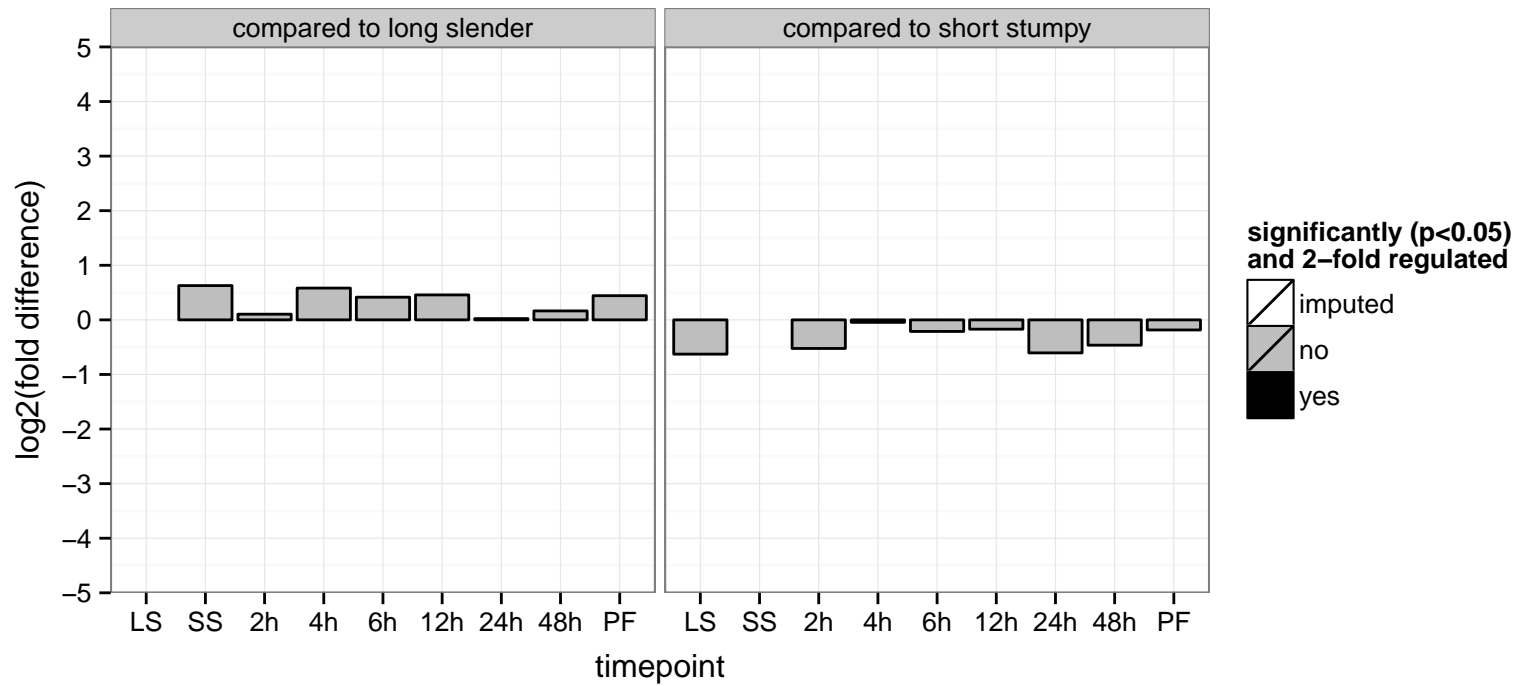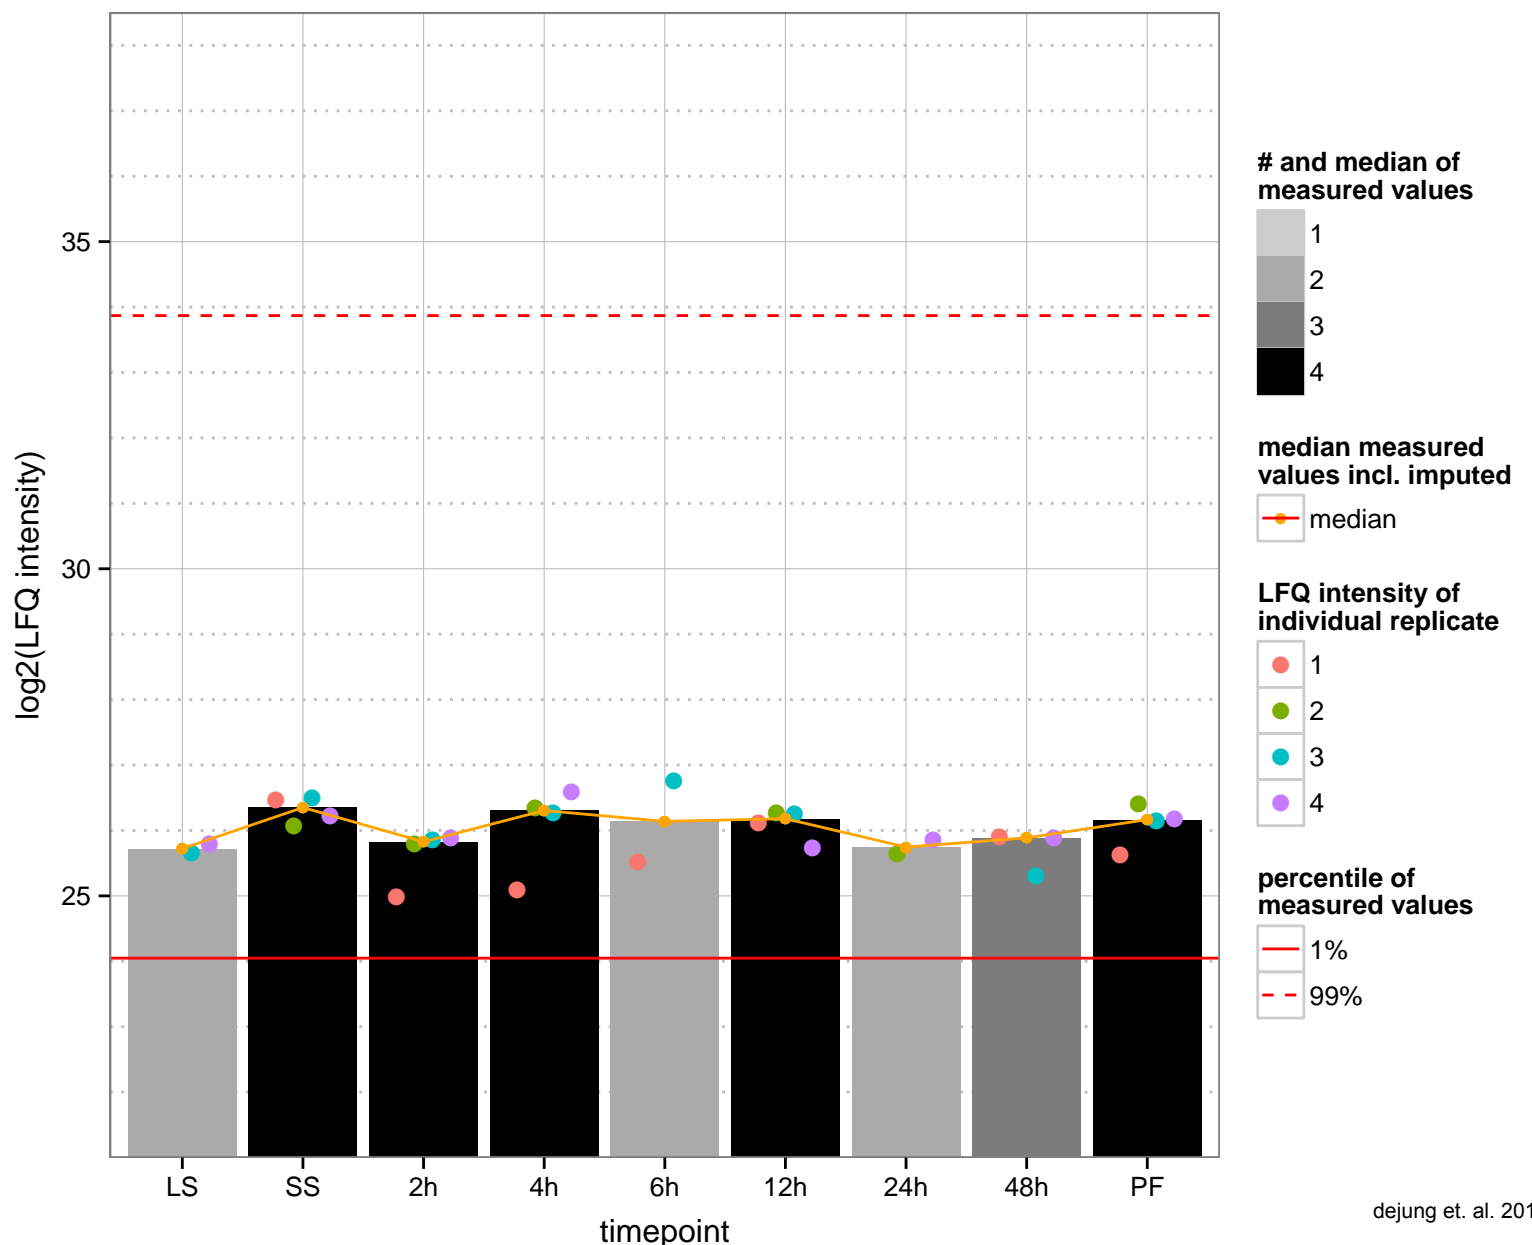



hypothetical protein, conserved  
 Tb927.9.2650  
 AGOF: null  
 AGOC: null  
 AGOP: null  
 PGO: null  
 PGOC: null  
 PGOP: null

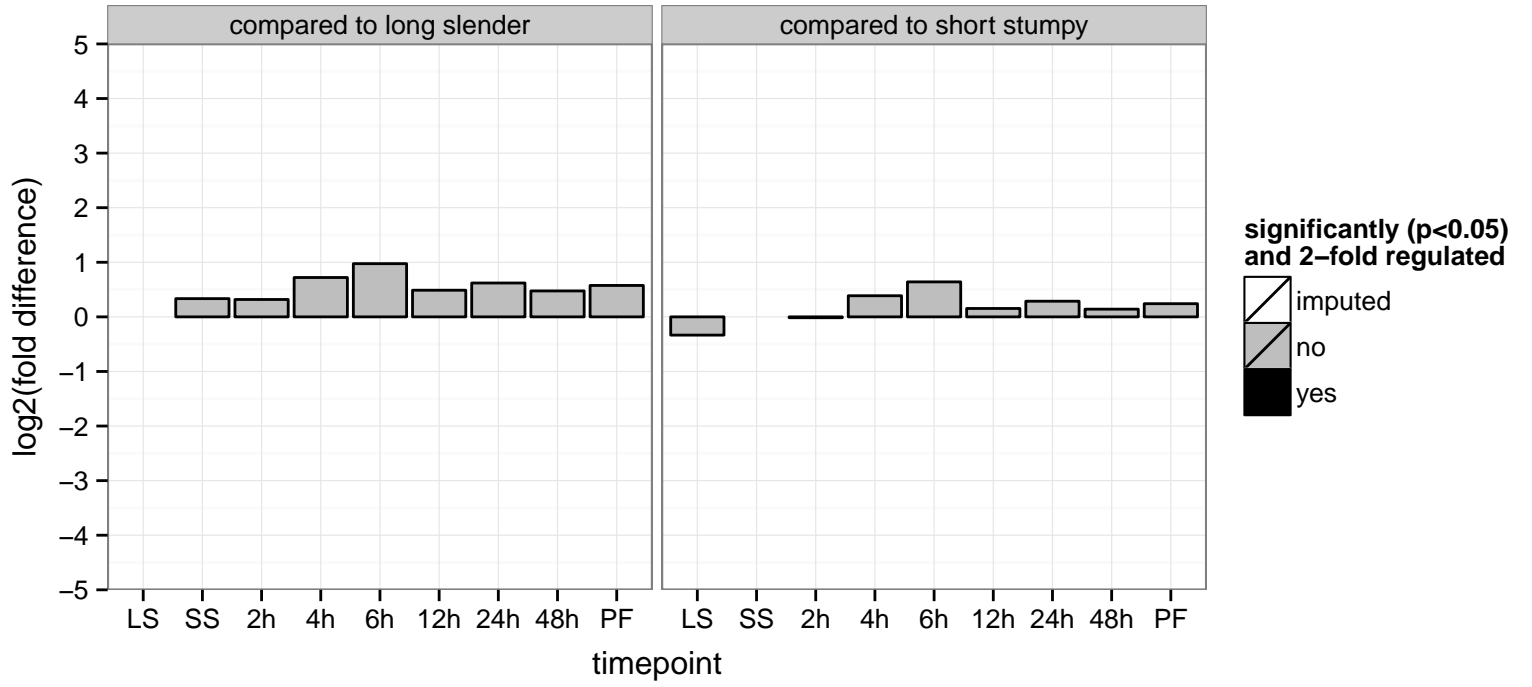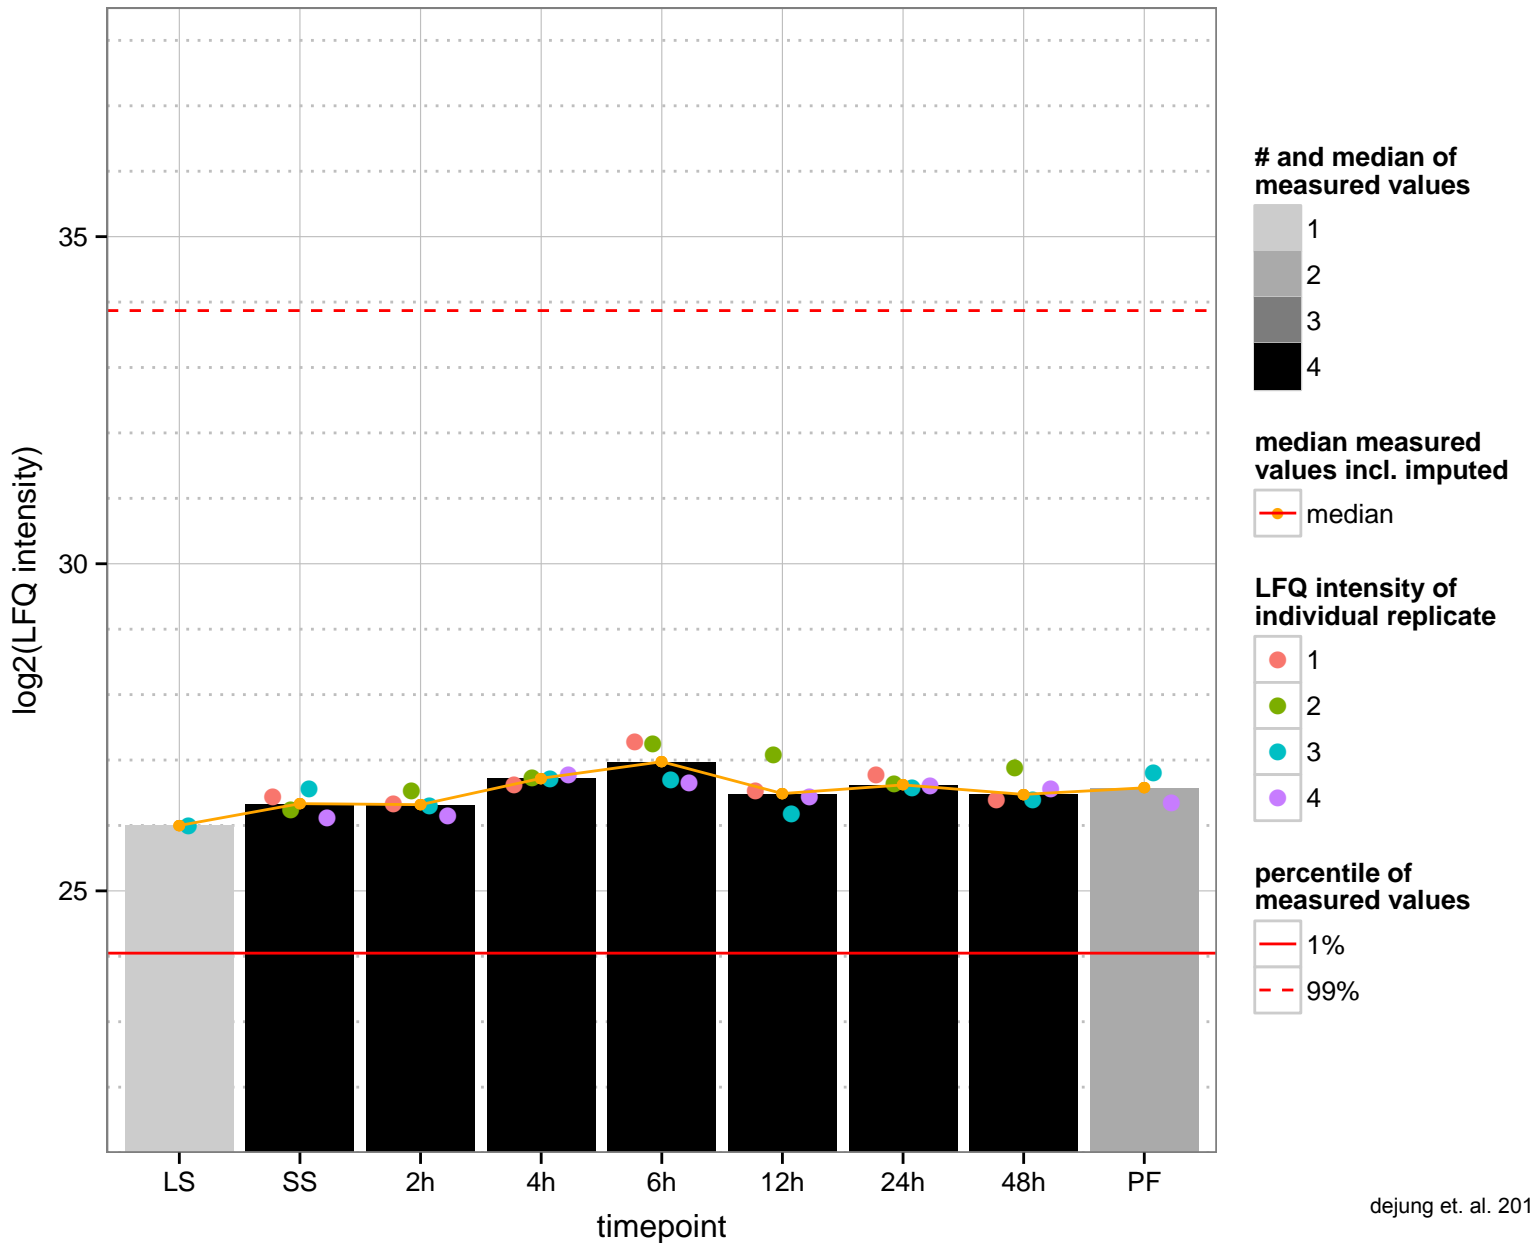

hypothetical protein, conserved  
 Tb927.9.2980  
 AGOF: null  
 AGOC: null  
 AGOP: null  
 PGO: cAMP-dependent protein kinase regulator activity  
 PGO: null  
 PGO: signal transduction

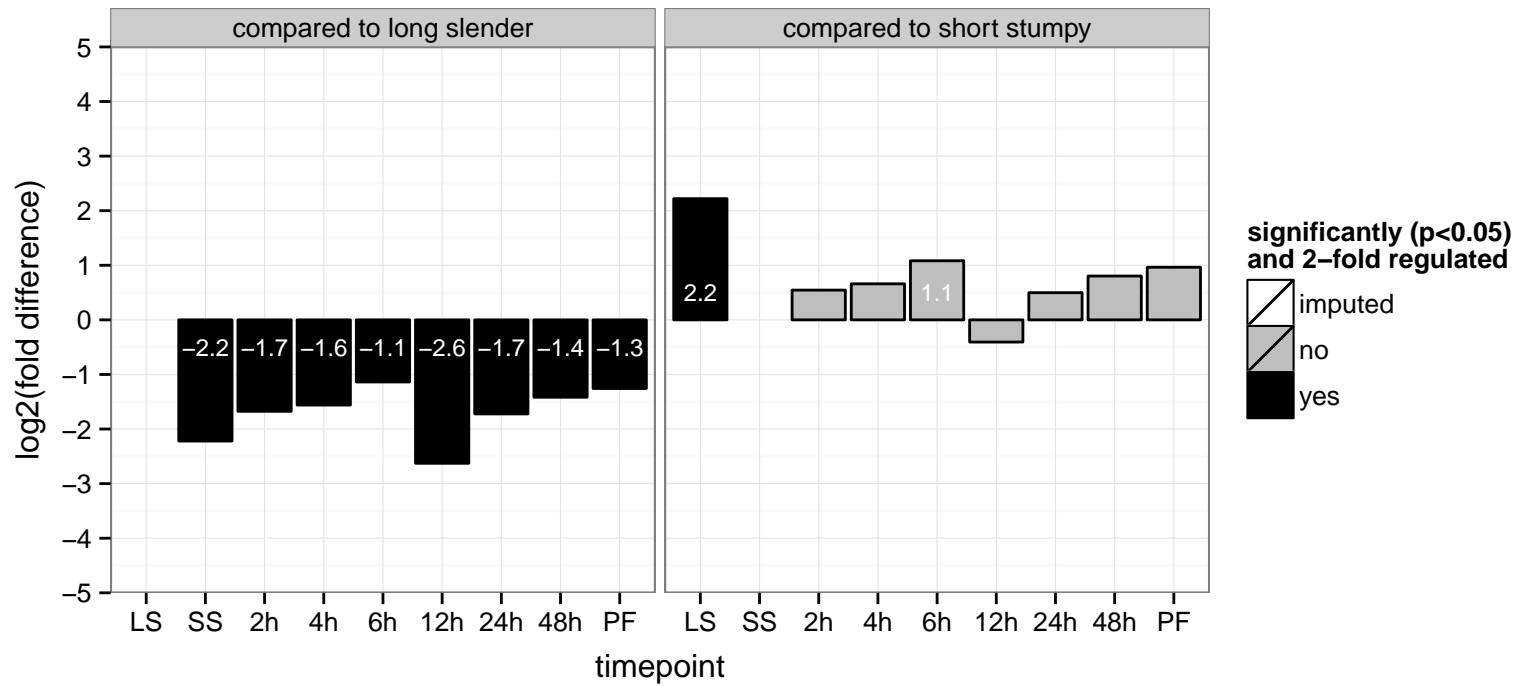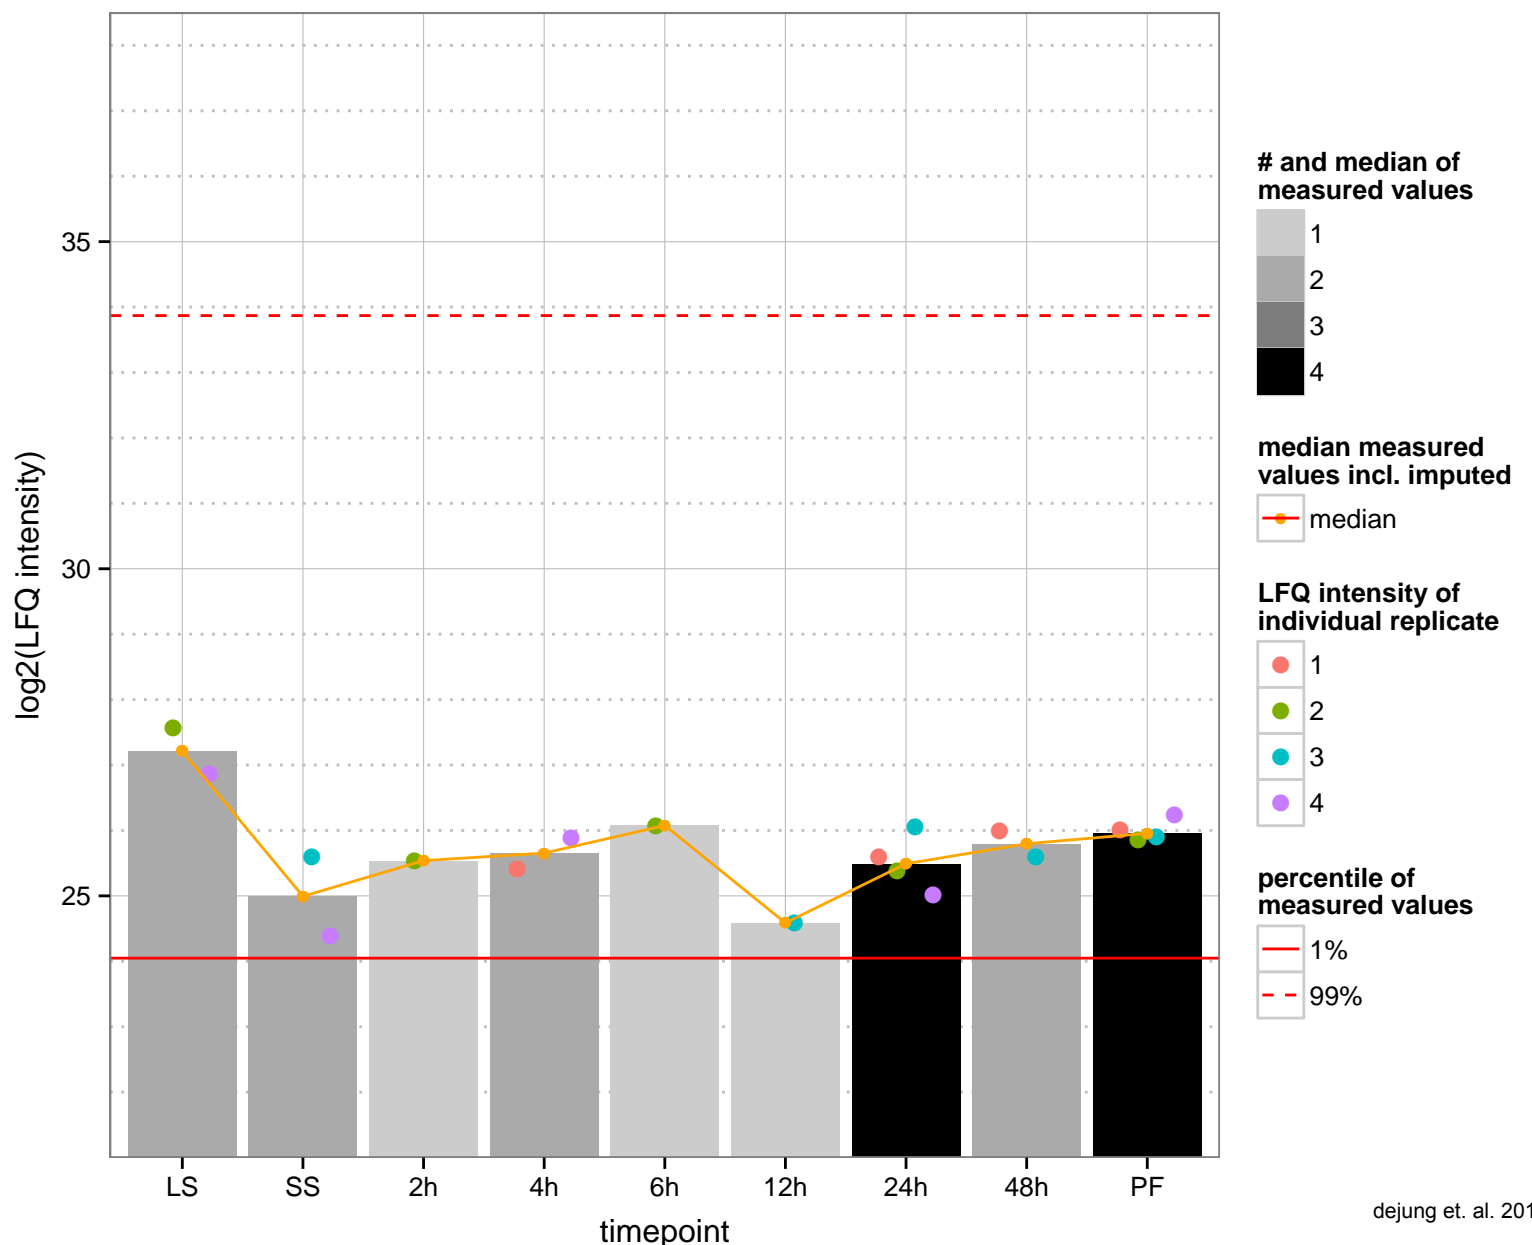

cytidine deaminase, putative  
 Tb927.9.3000  
 AGOF: cytidine deaminase activity, hydrolase activity, zinc ion binding  
 AGOC: null  
 AGOP: cytidine metabolic process  
 PGOF: catalytic activity, hydrolase activity, zinc ion binding  
 PGOC: null  
 PGOP: null

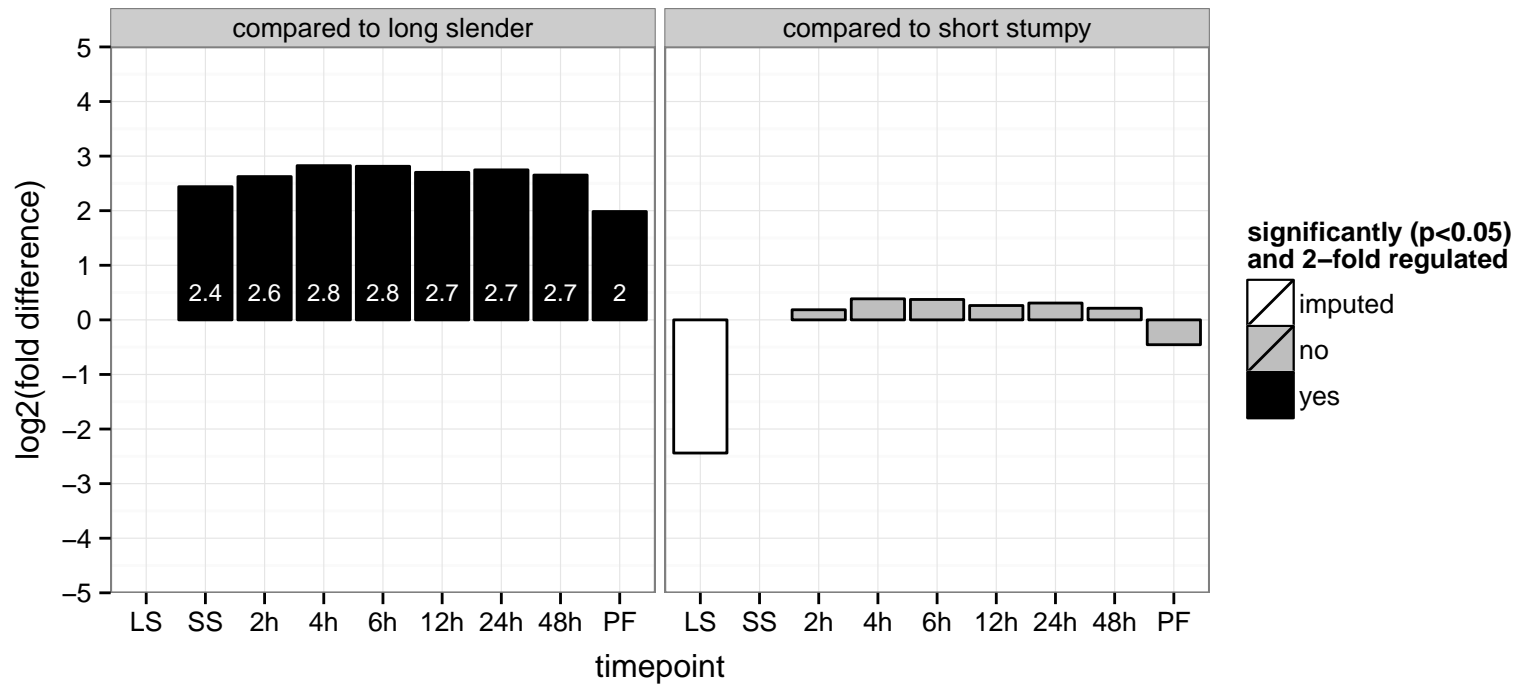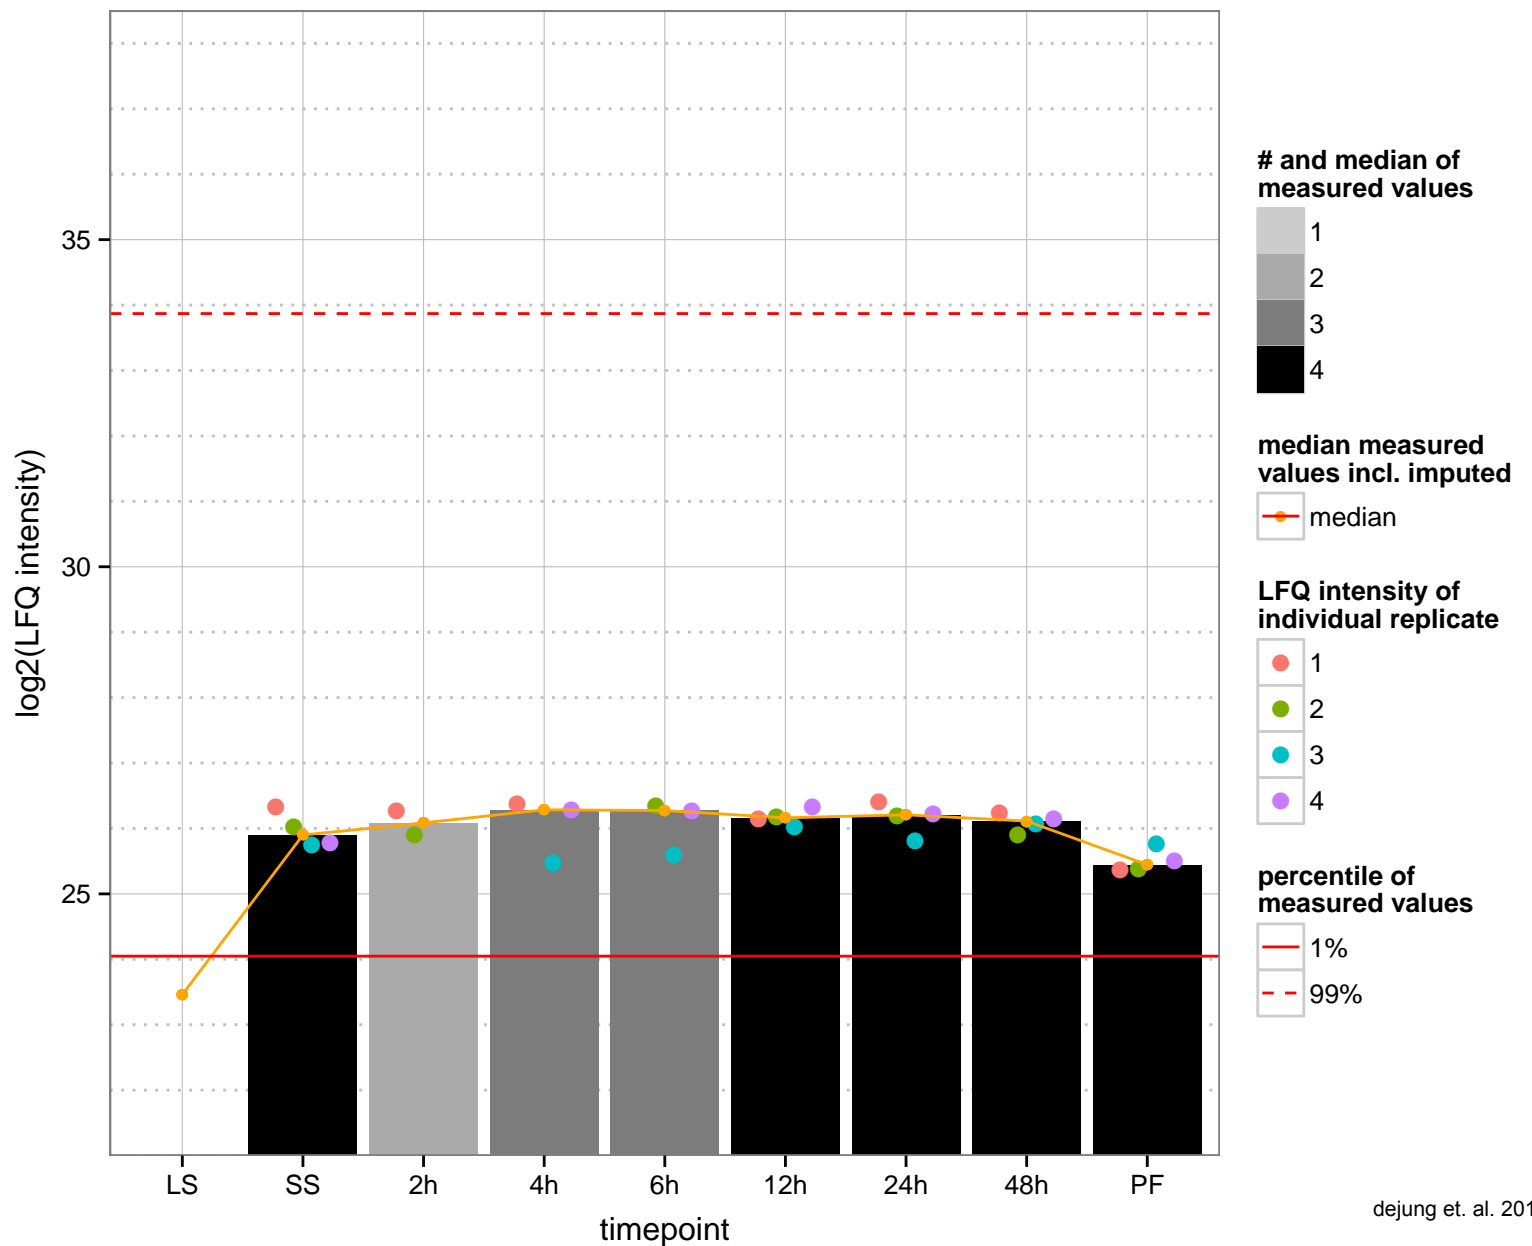

acidocalcisomal exopolyphosphatase  
 Tb927.9.3280  
 AGOF: exopolyphosphatase activity, manganese ion binding  
 AGOC: cytoplasm  
 AGOP: polyphosphate metabolic process  
 PGOF: hydrolase activity, manganese ion binding, pyrophosphatase activity  
 PGOC: cytoplasm  
 PGOP: null

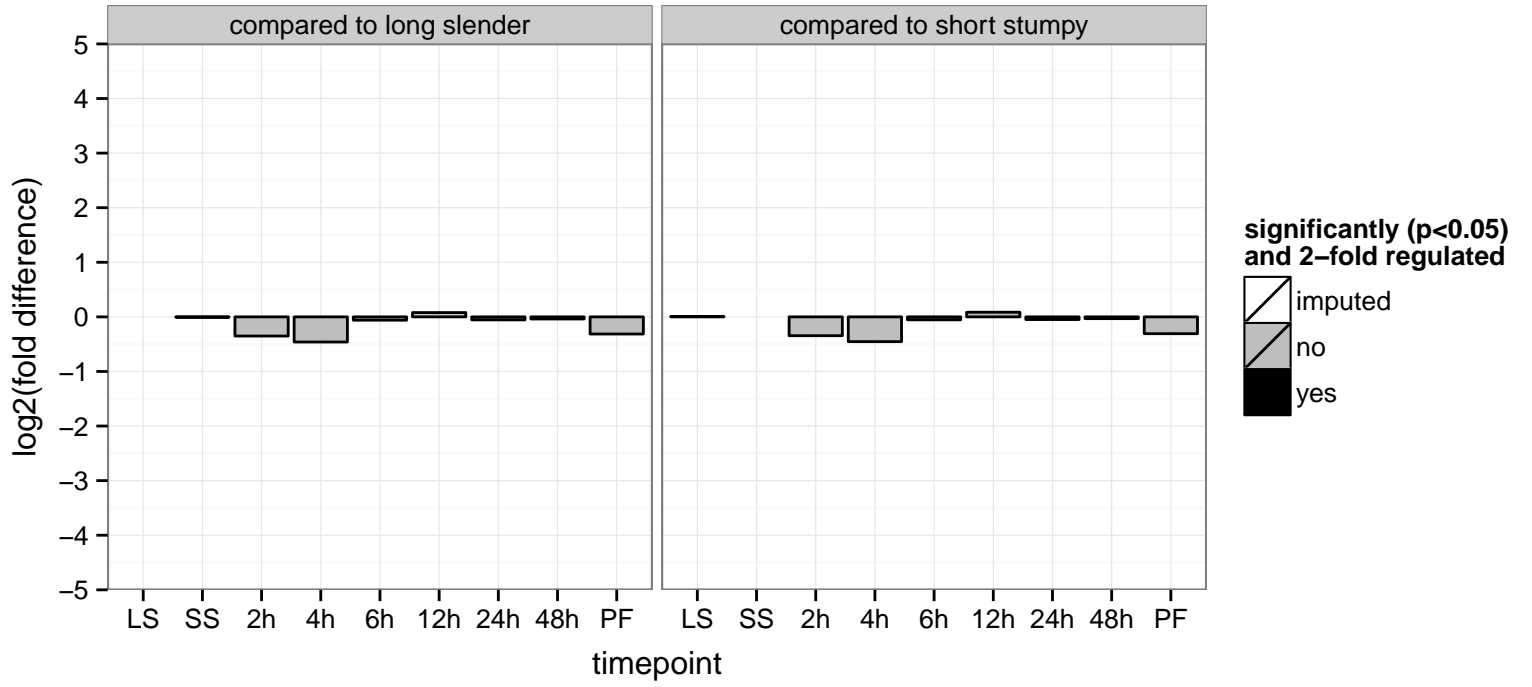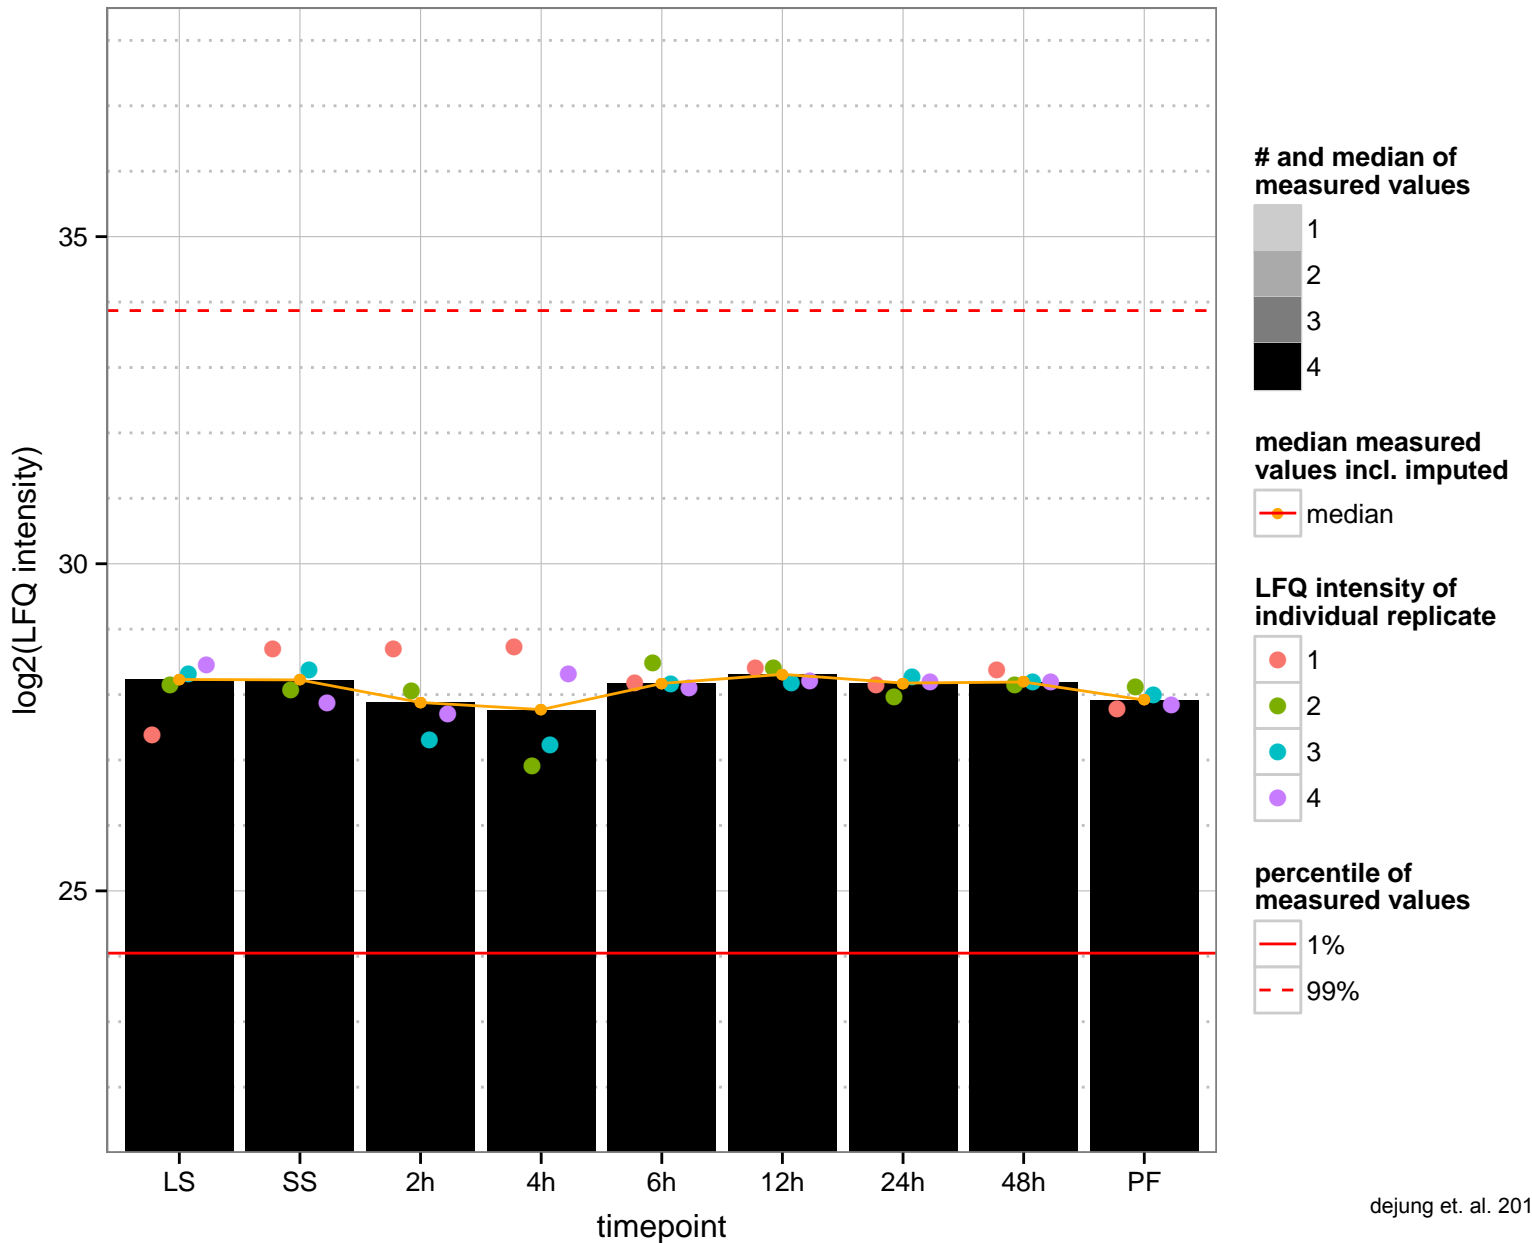

endo-beta-N-acetylglucosaminidase, putative

Tb927.9.3400

AGOF: hydrolase activity, acting on glycosyl bonds, mannosyl-glycoprotein endo-beta-N-acetylglucosaminidase activity

AGOC: cytoplasm

AGOP: null

PGOF: mannosyl-glycoprotein endo-beta-N-acetylglucosaminidase activity

PGOC: cytoplasm

PGOP: null

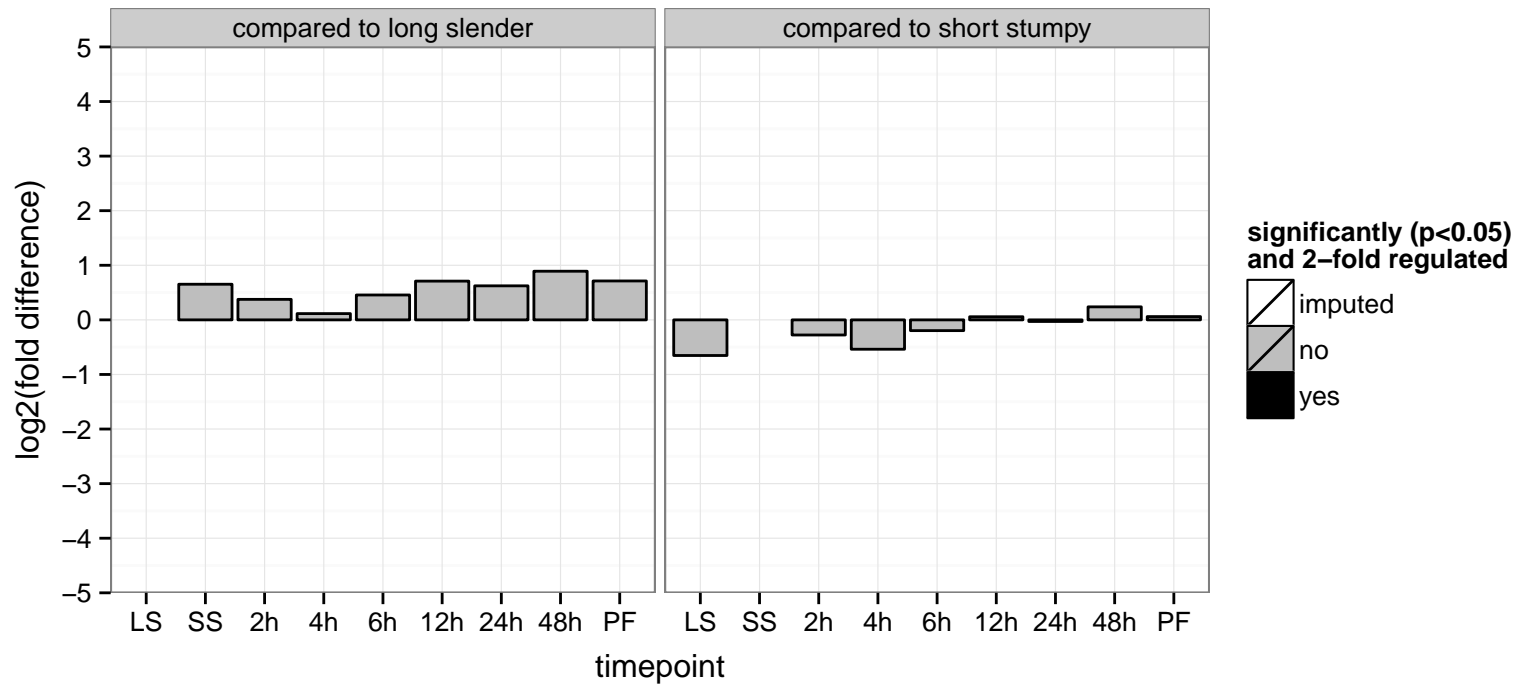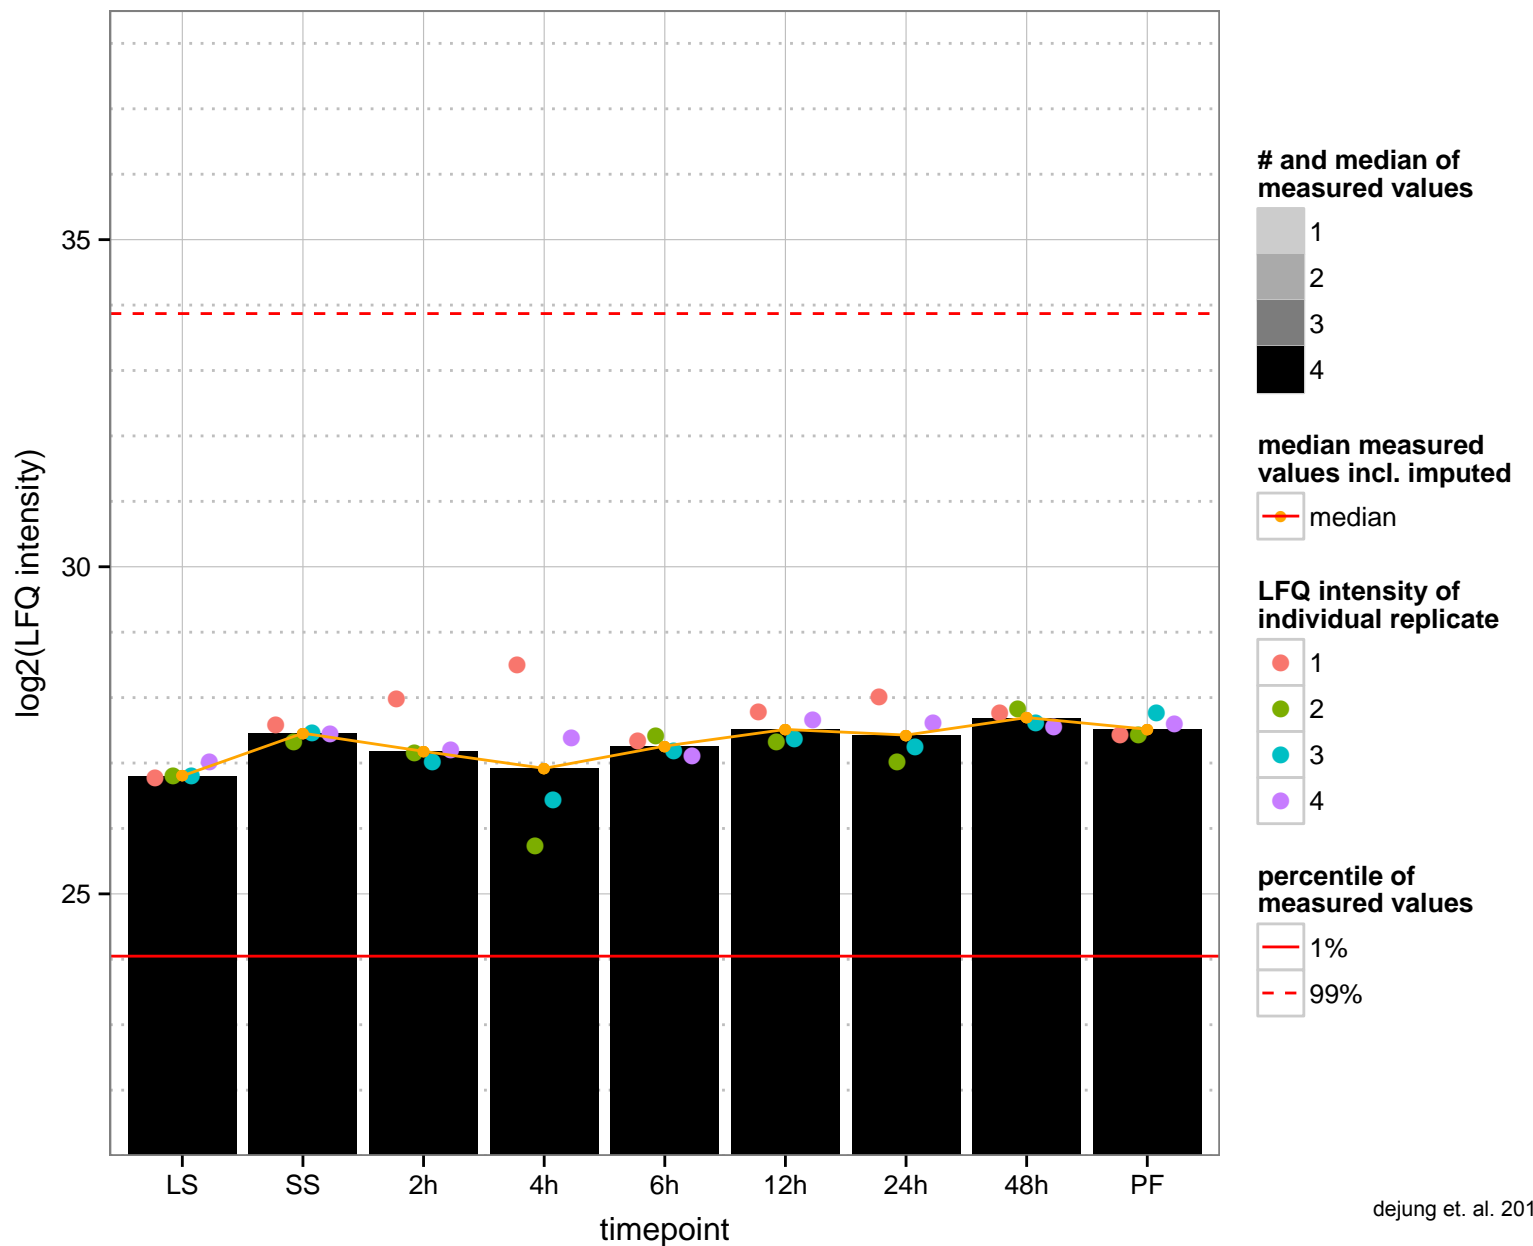

cyclophilin type peptidyl-prolyl cis-trans isomerase, putative  
 Tb927.9.3440  
 AGOF: peptidyl-prolyl cis-trans isomerase activity  
 AGOC: null  
 AGOP: protein folding  
 PGOF: peptidyl-prolyl cis-trans isomerase activity  
 PGO: null  
 PGOP: protein folding

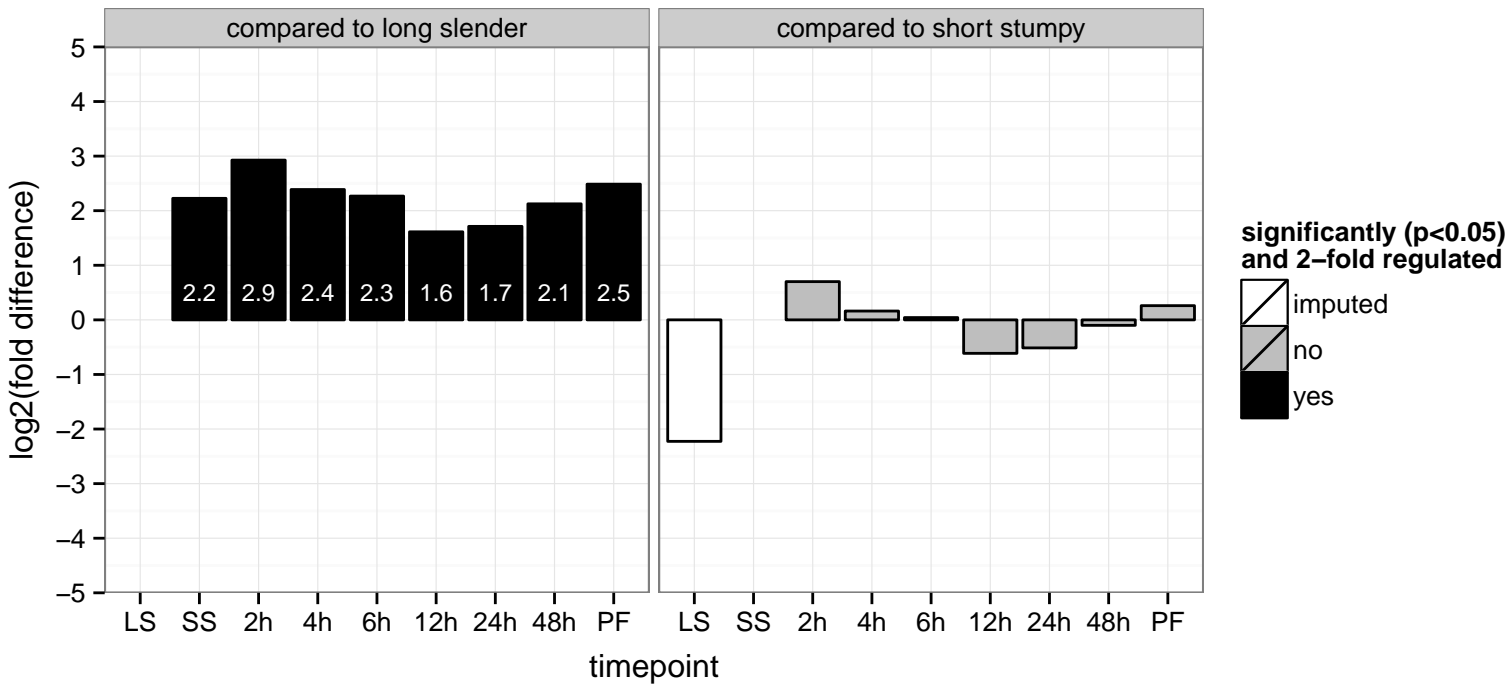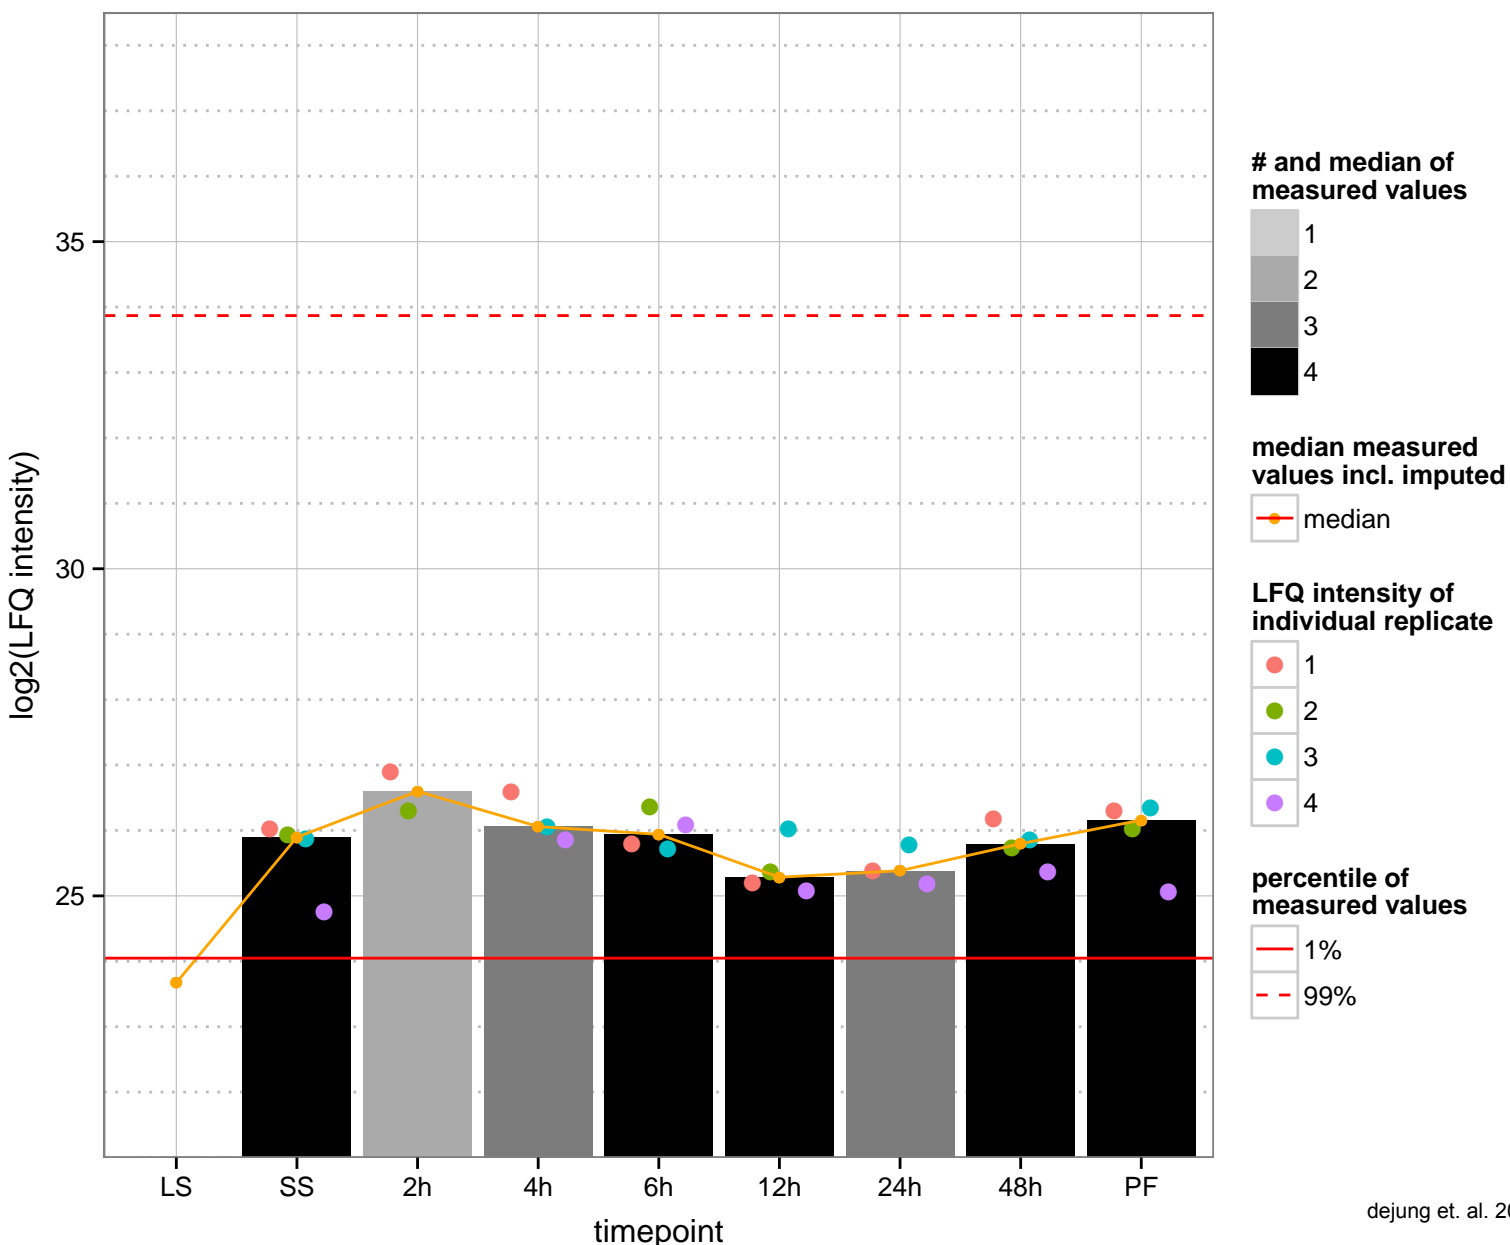

low molecular weight protein tyrosine phosphatase, putative  
 Tb927.9.3470  
 AGOF: protein tyrosine phosphatase activity  
 AGOC: mitochondrion  
 AGOP: protein dephosphorylation  
 PGO: null  
 PGOC: null  
 PGOP: null

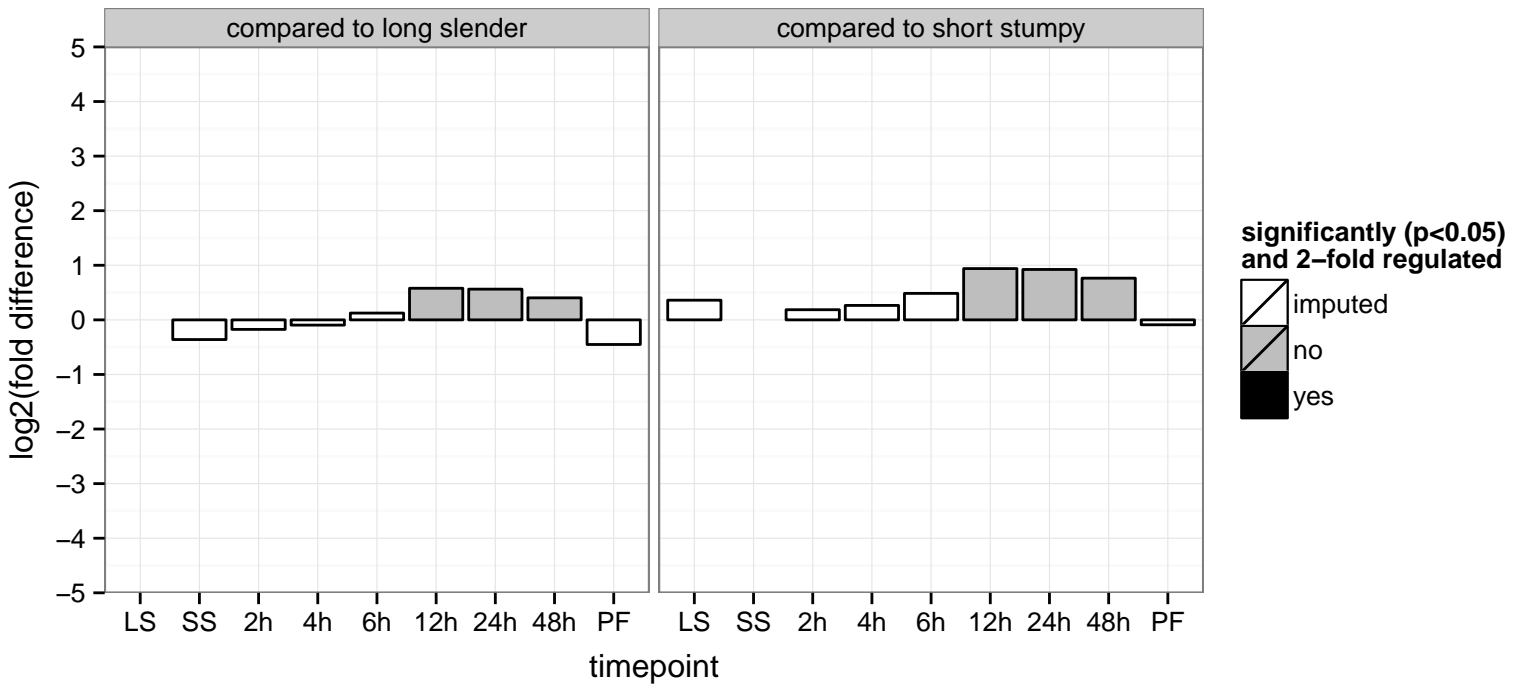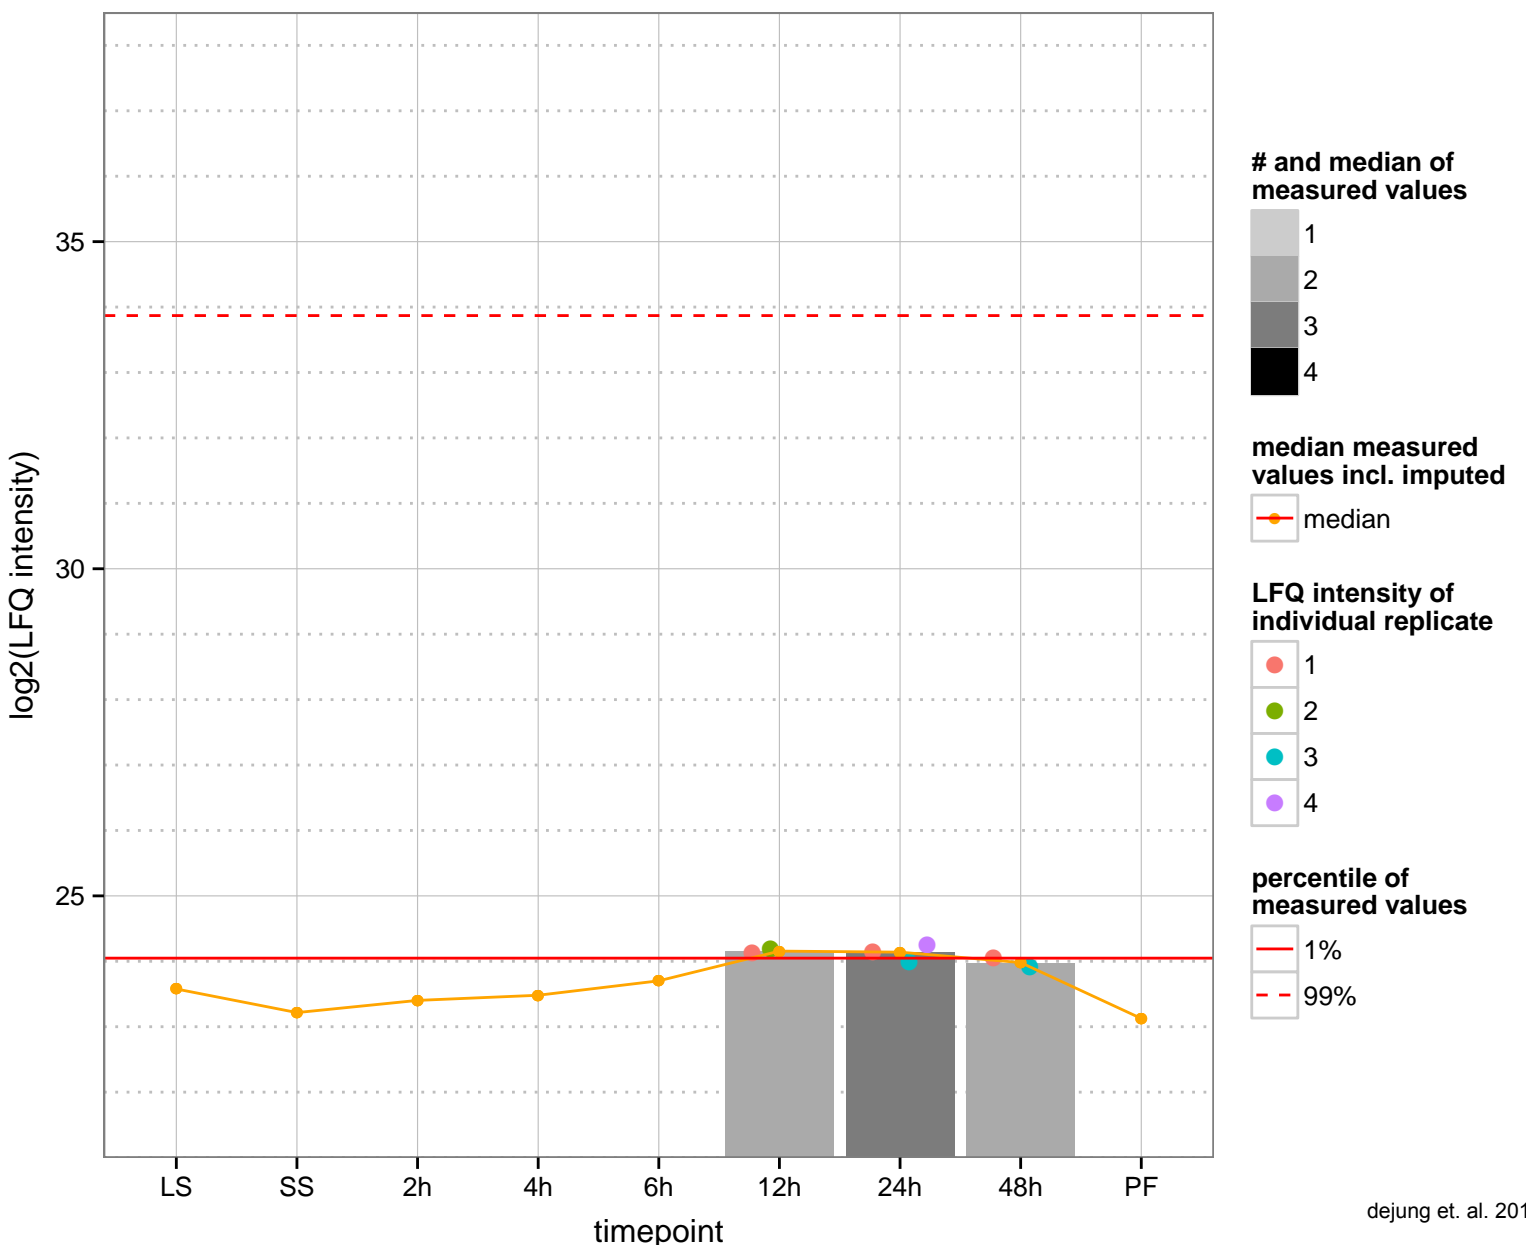

hypothetical protein, conserved  
 Tb927.9.3620  
 AGOF: null  
 AGOC: null  
 AGOP: null  
 PGO: null  
 PGOC: null  
 PGOP: null

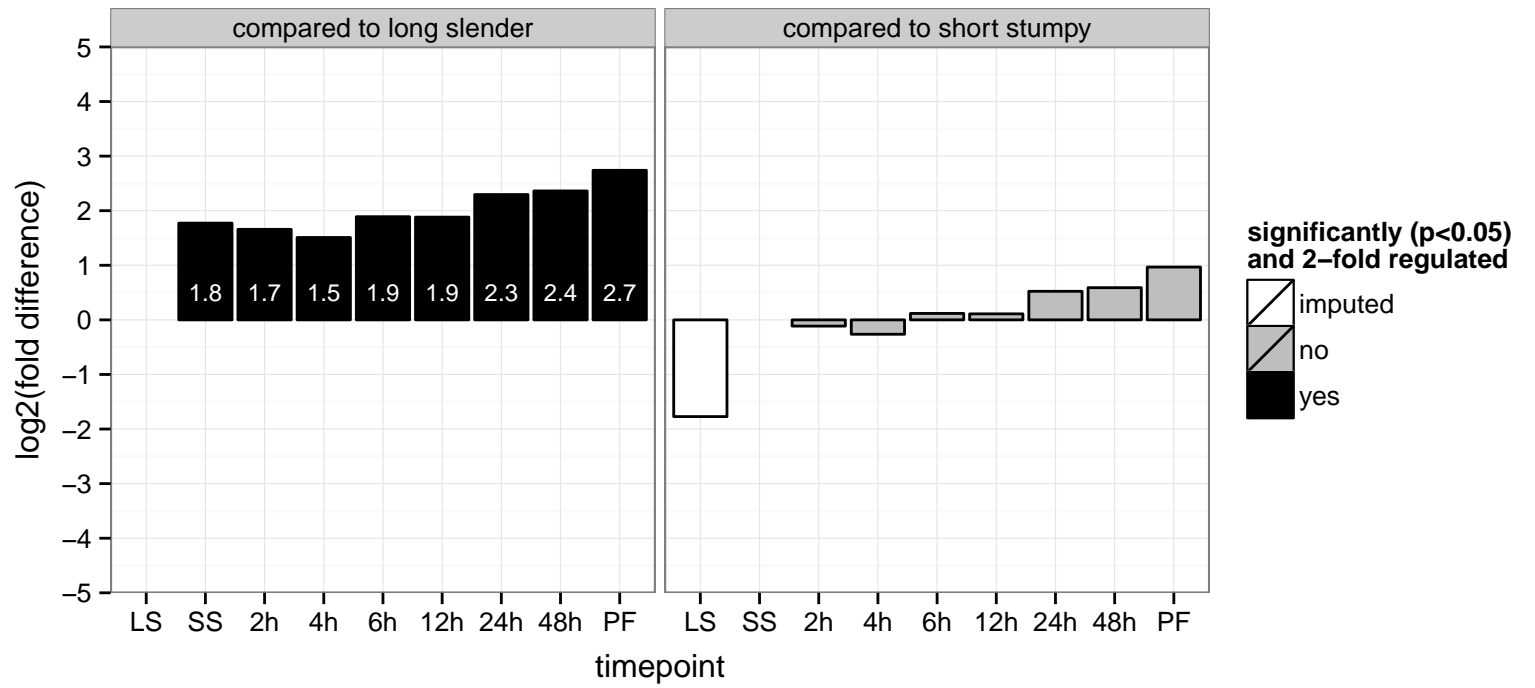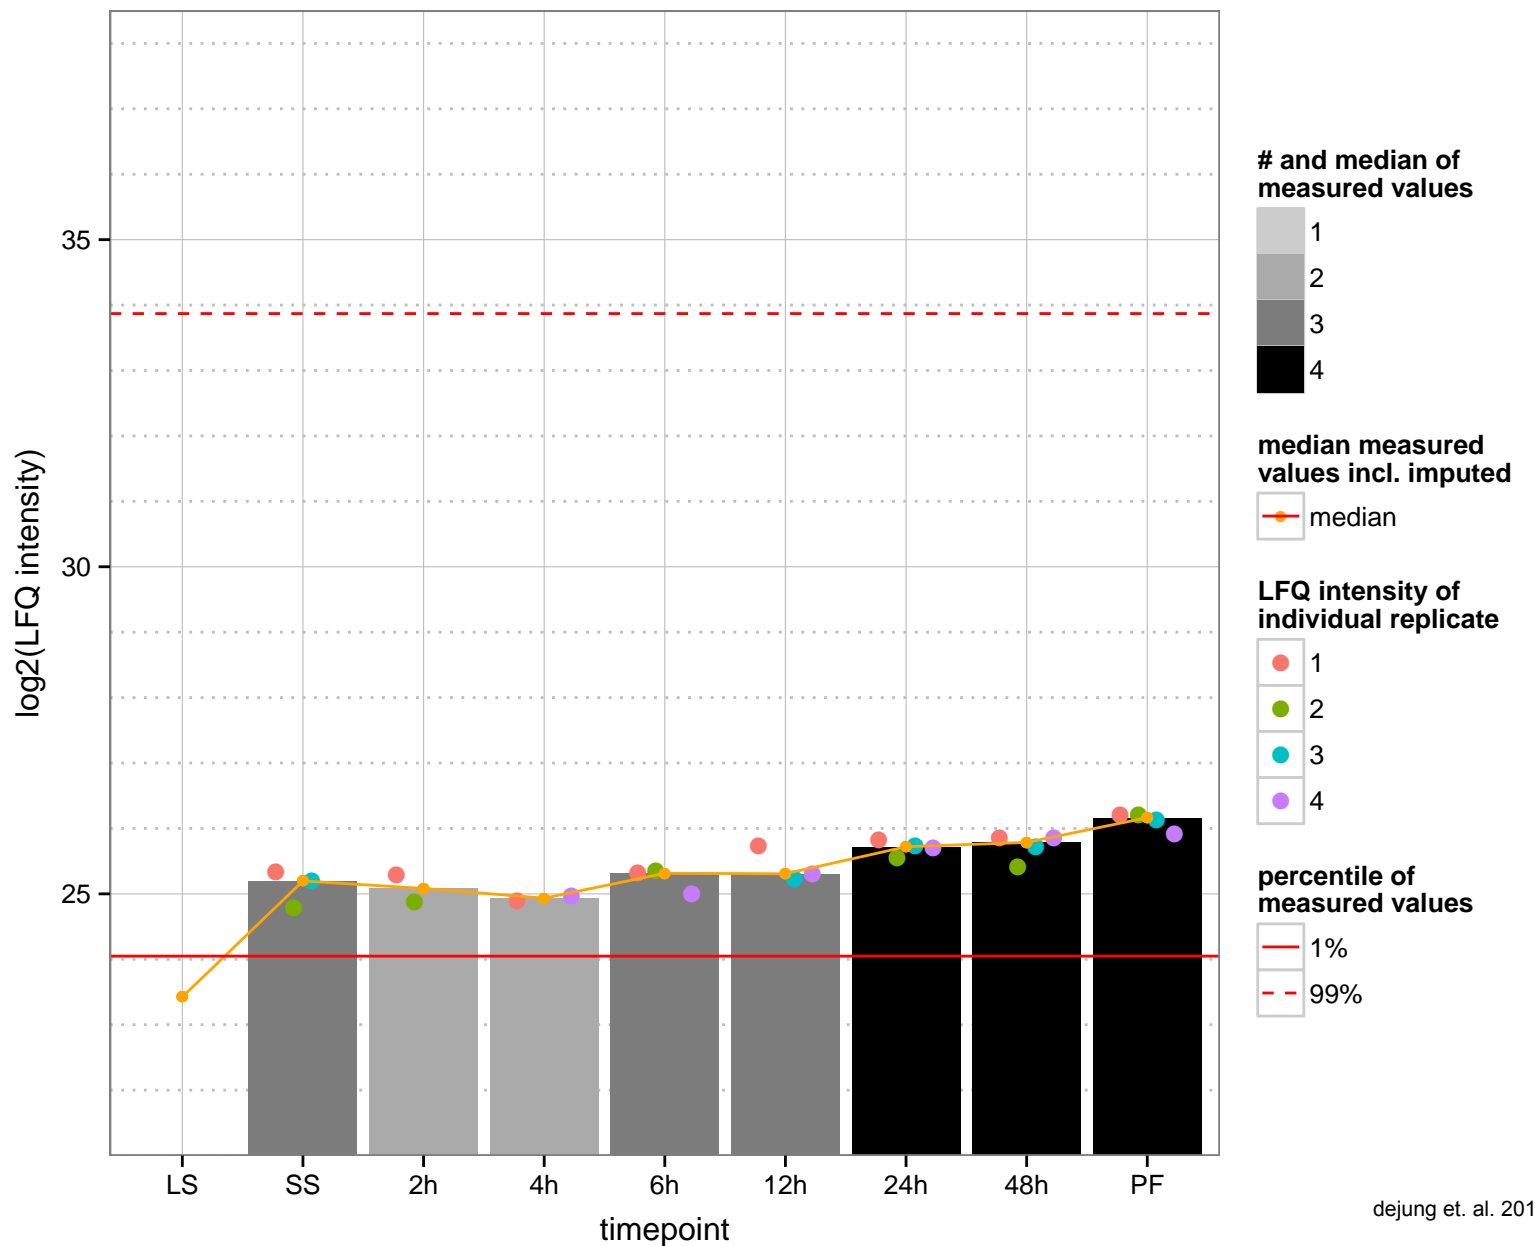



hypothetical protein, conserved  
 Tb927.9.3630;Tb11.v5.0530  
 AGOF: null  
 AGOC: null  
 AGOP: null  
 PGOF: null  
 PGOC: null  
 PGOP: null

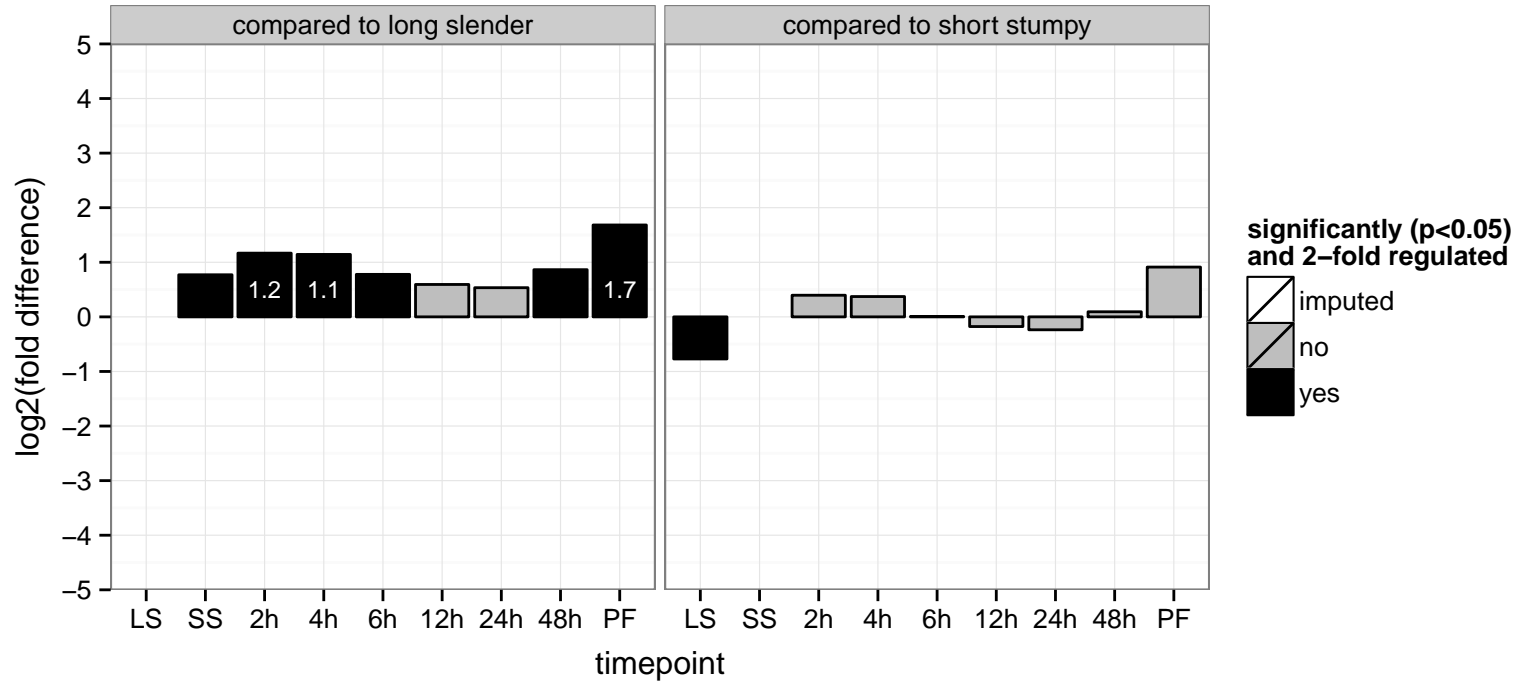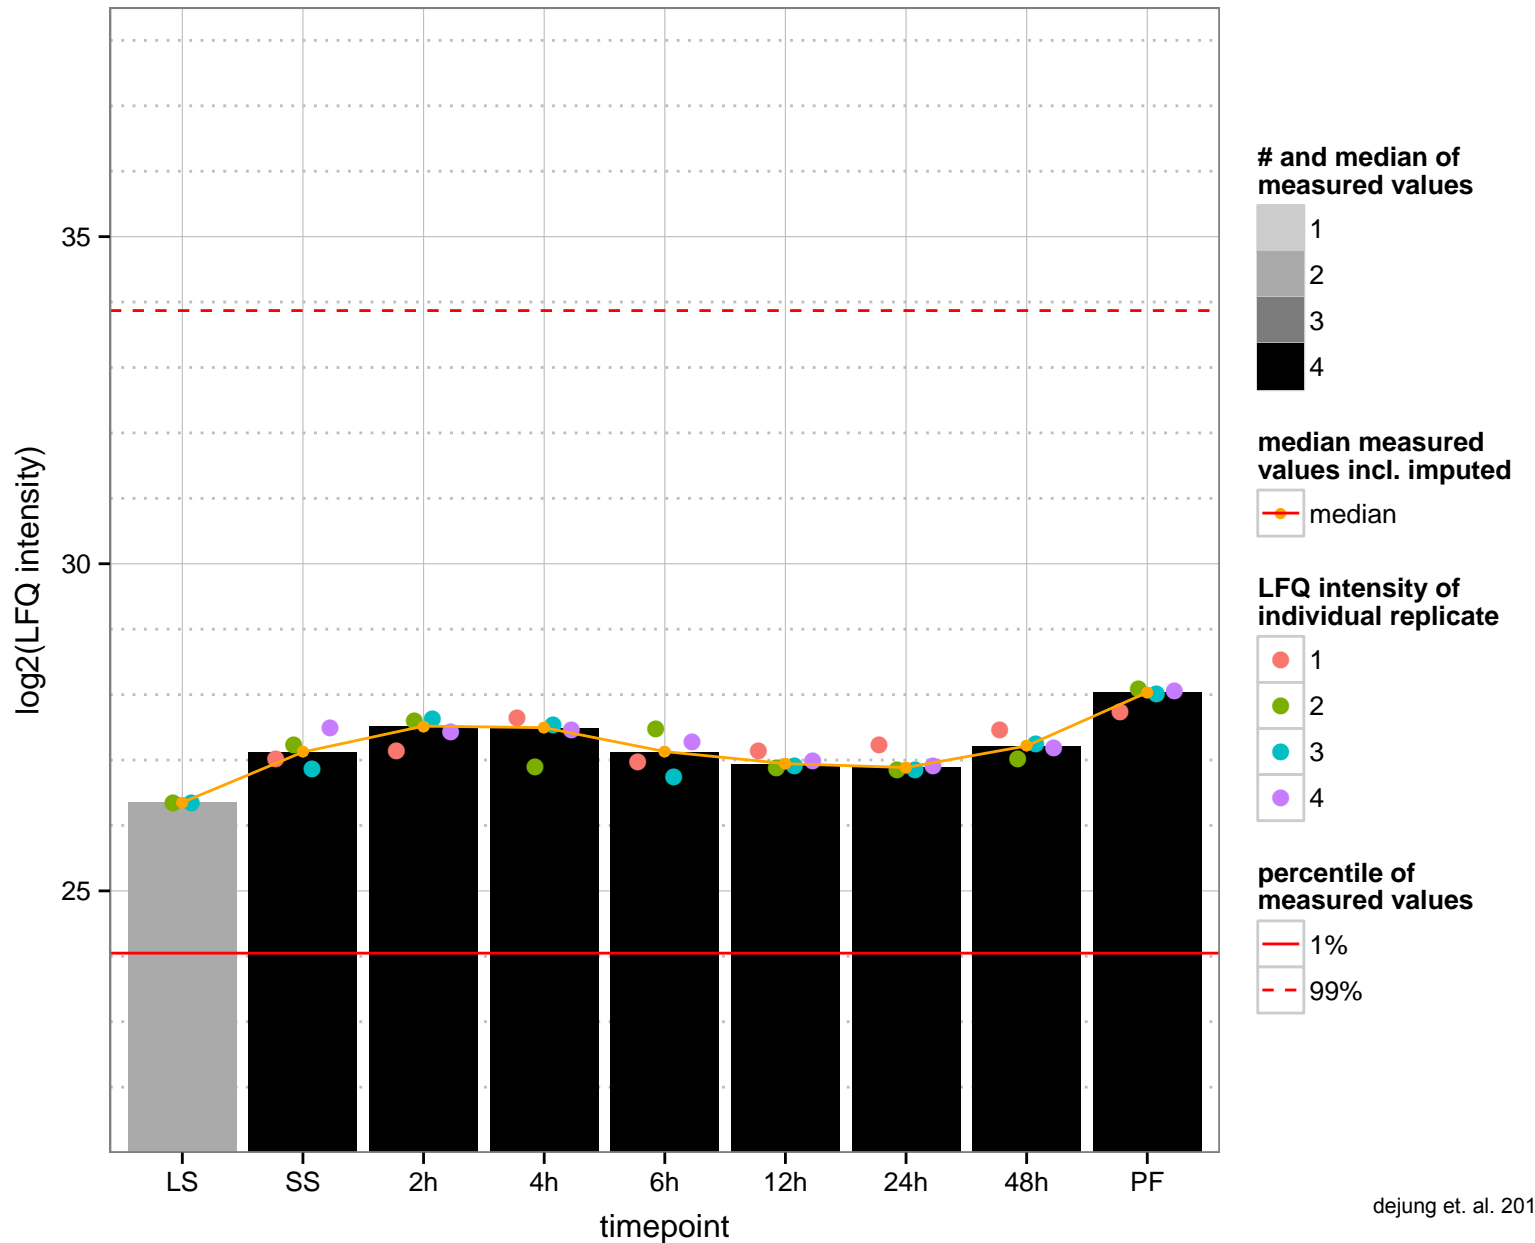

hypothetical protein, conserved  
 Tb927.9.3670  
 AGOF: null  
 AGOC: mitochondrion  
 AGOP: null  
 PGO: null  
 PGO: null  
 PGO: null

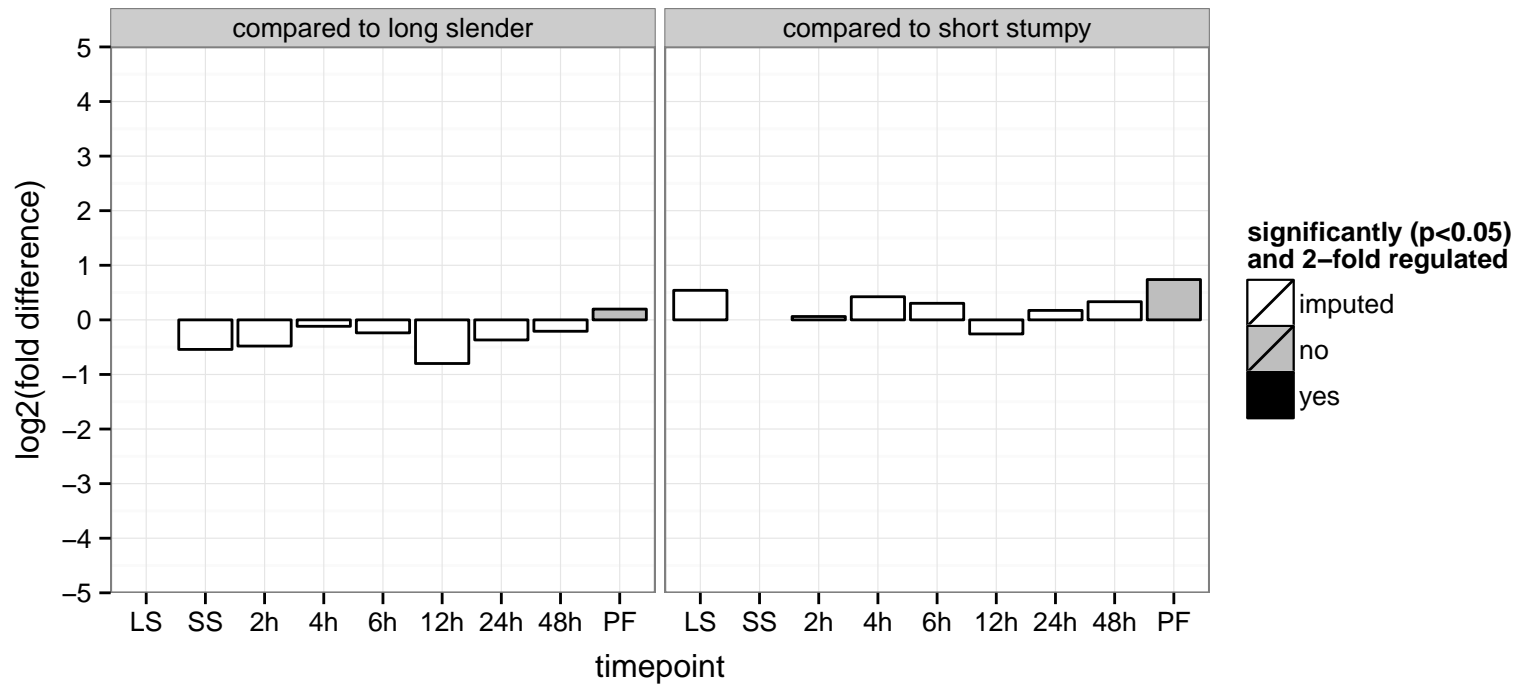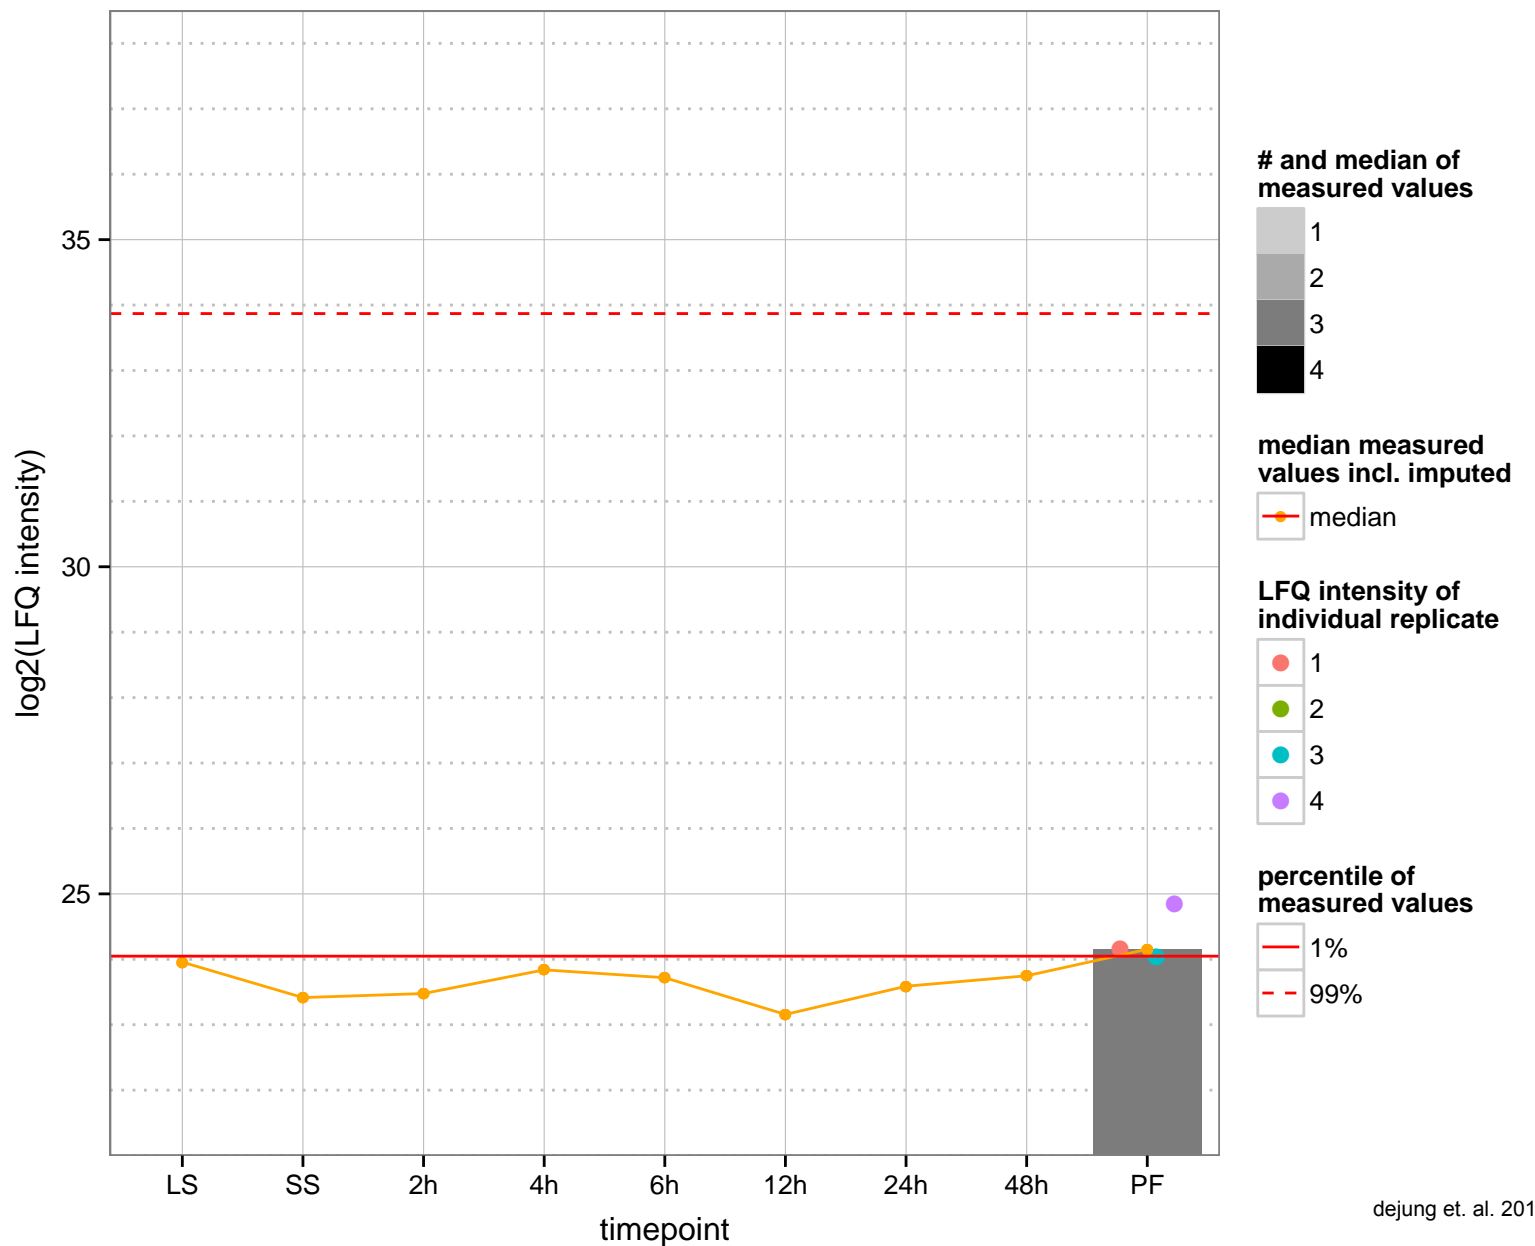

poly(A) export protein, putative (TbGLE2)  
 Tb927.9.3760  
 AGOF: null  
 AGOC: null  
 AGOP: null  
 PGO: protein binding  
 PGOC: null  
 PGOP: null

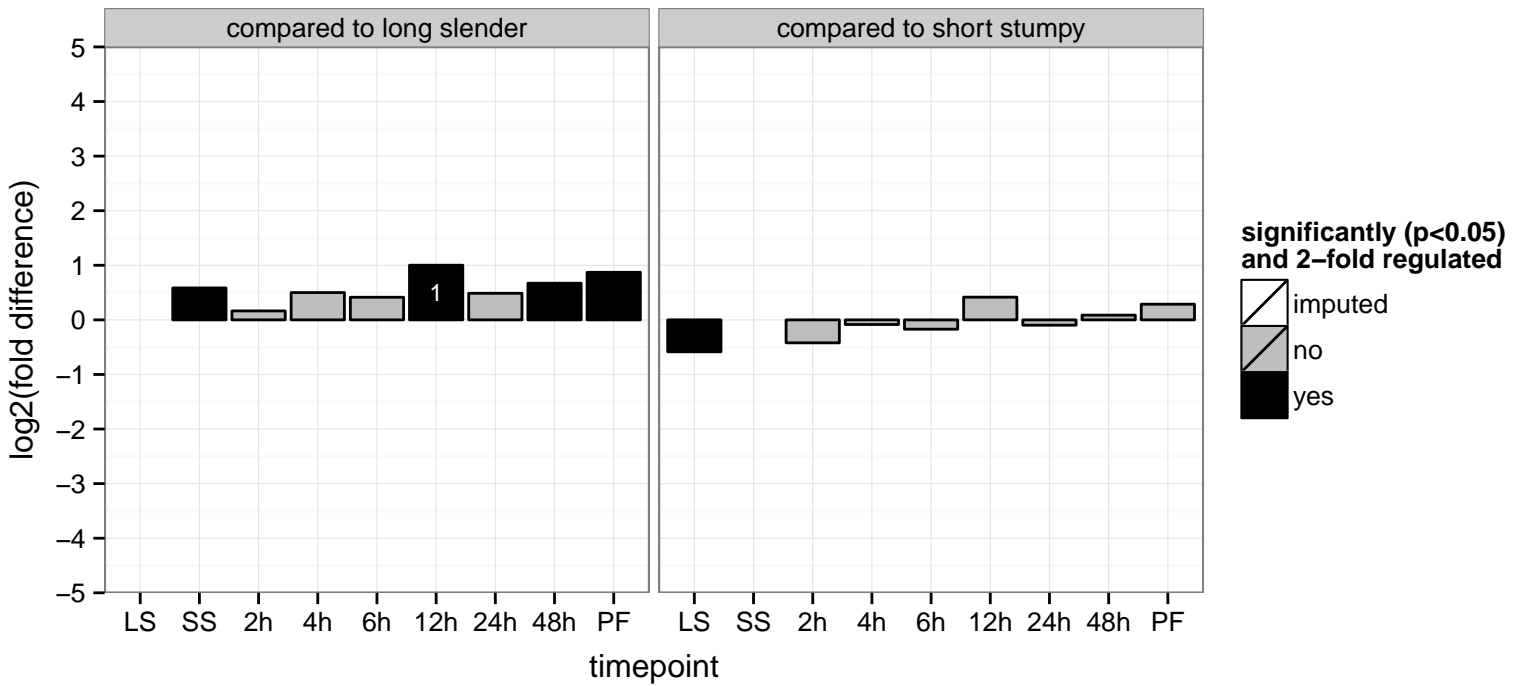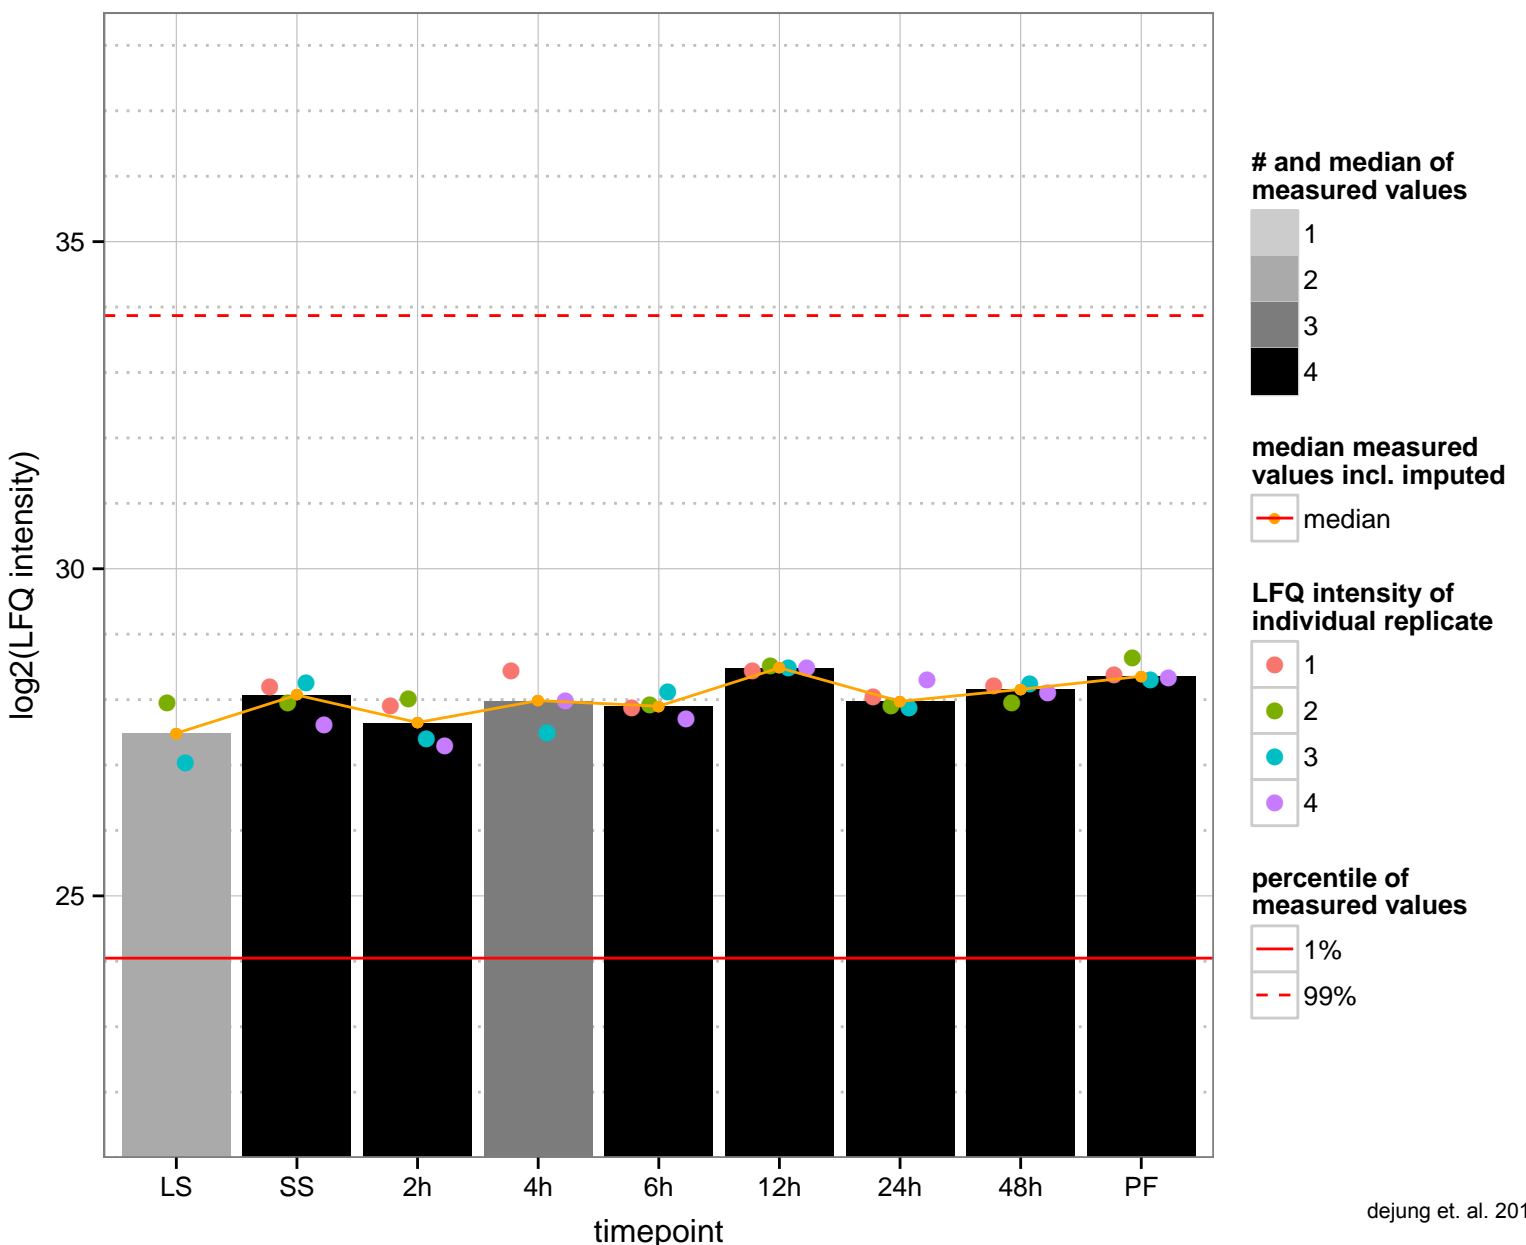

hypothetical protein, conserved  
 Tb927.9.3870  
 AGOF: null  
 AGOC: null  
 AGOP: null  
 PGOF: null  
 PGOC: null  
 PGOP: null

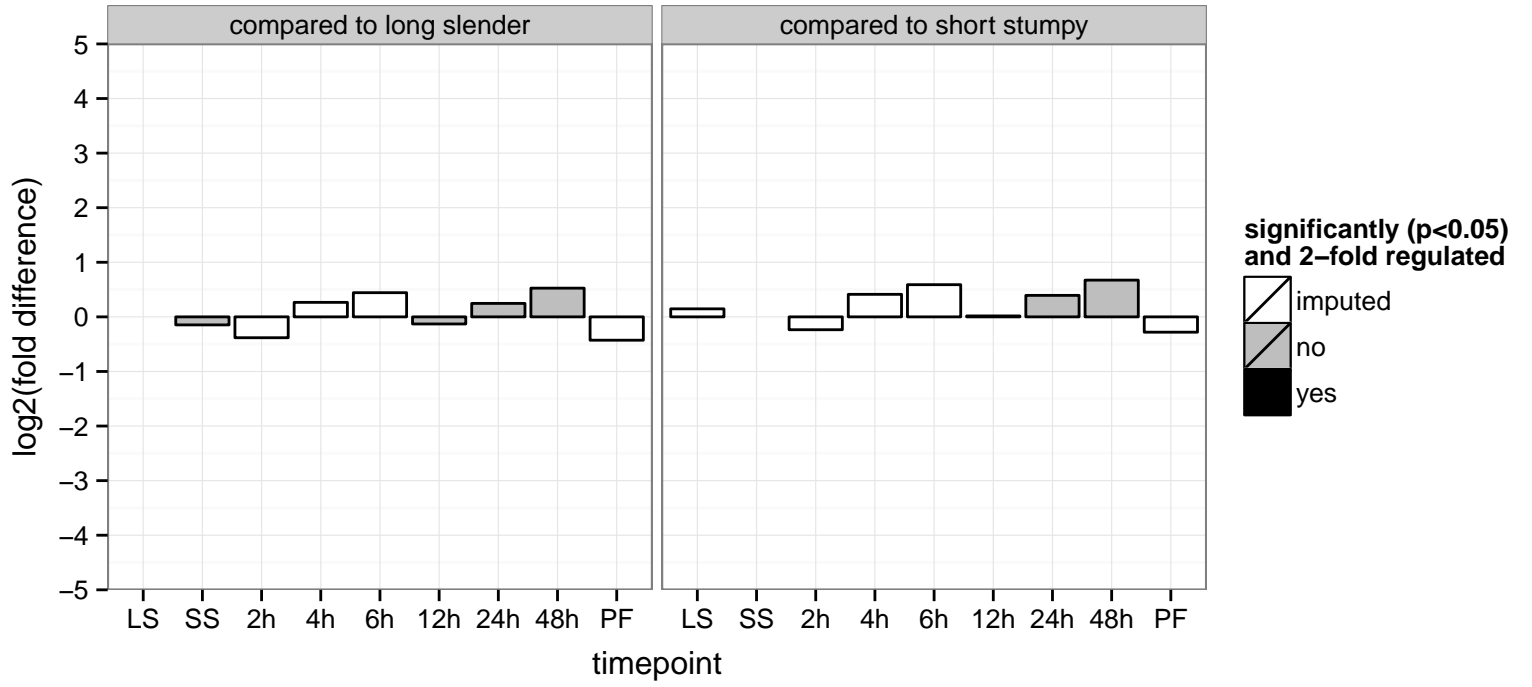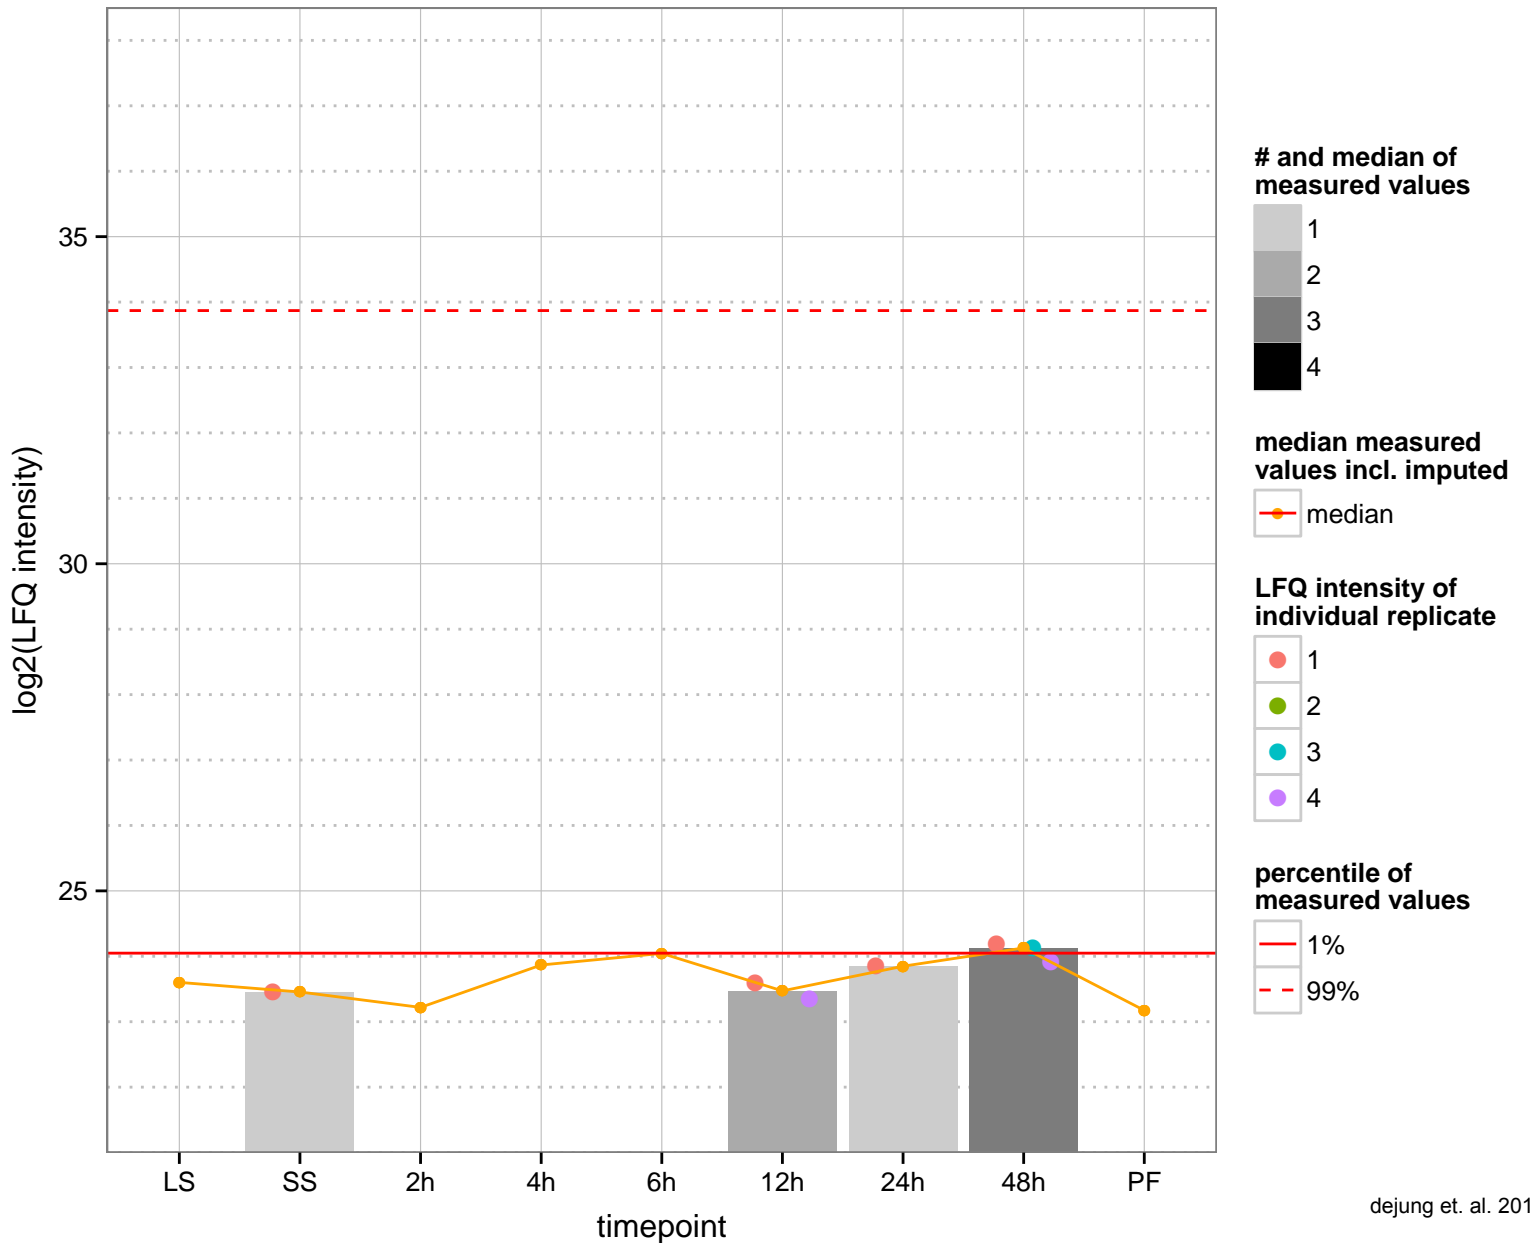

nicotinamidase, putative (PNC1)  
 Tb927.9.4040;Tb927.9.3970  
 AGOF: hydrolase activity, nicotinamidase activity  
 AGOC: cytosol  
 AGOP: NAD biosynthetic process, metabolic process  
 PGO: null, catalytic activity  
 PGO: null  
 PGO: null, metabolic process

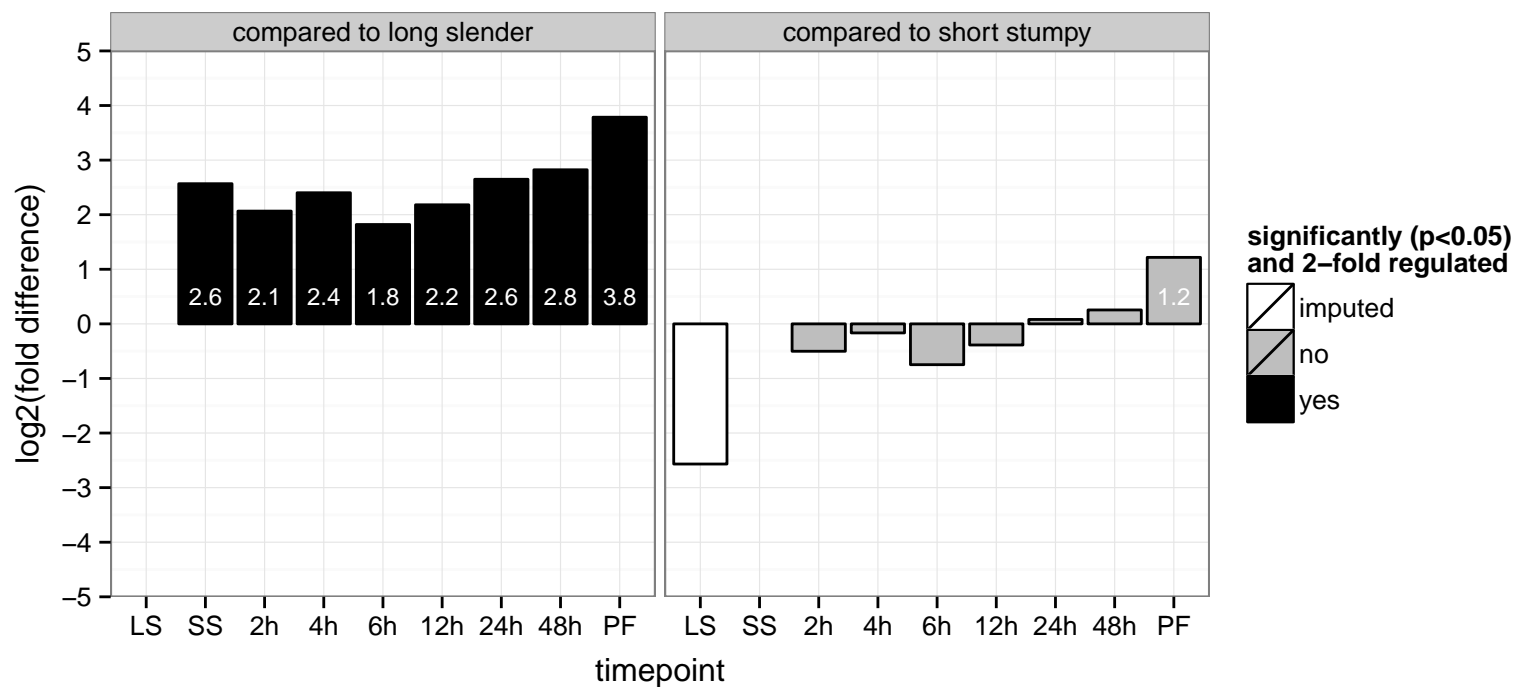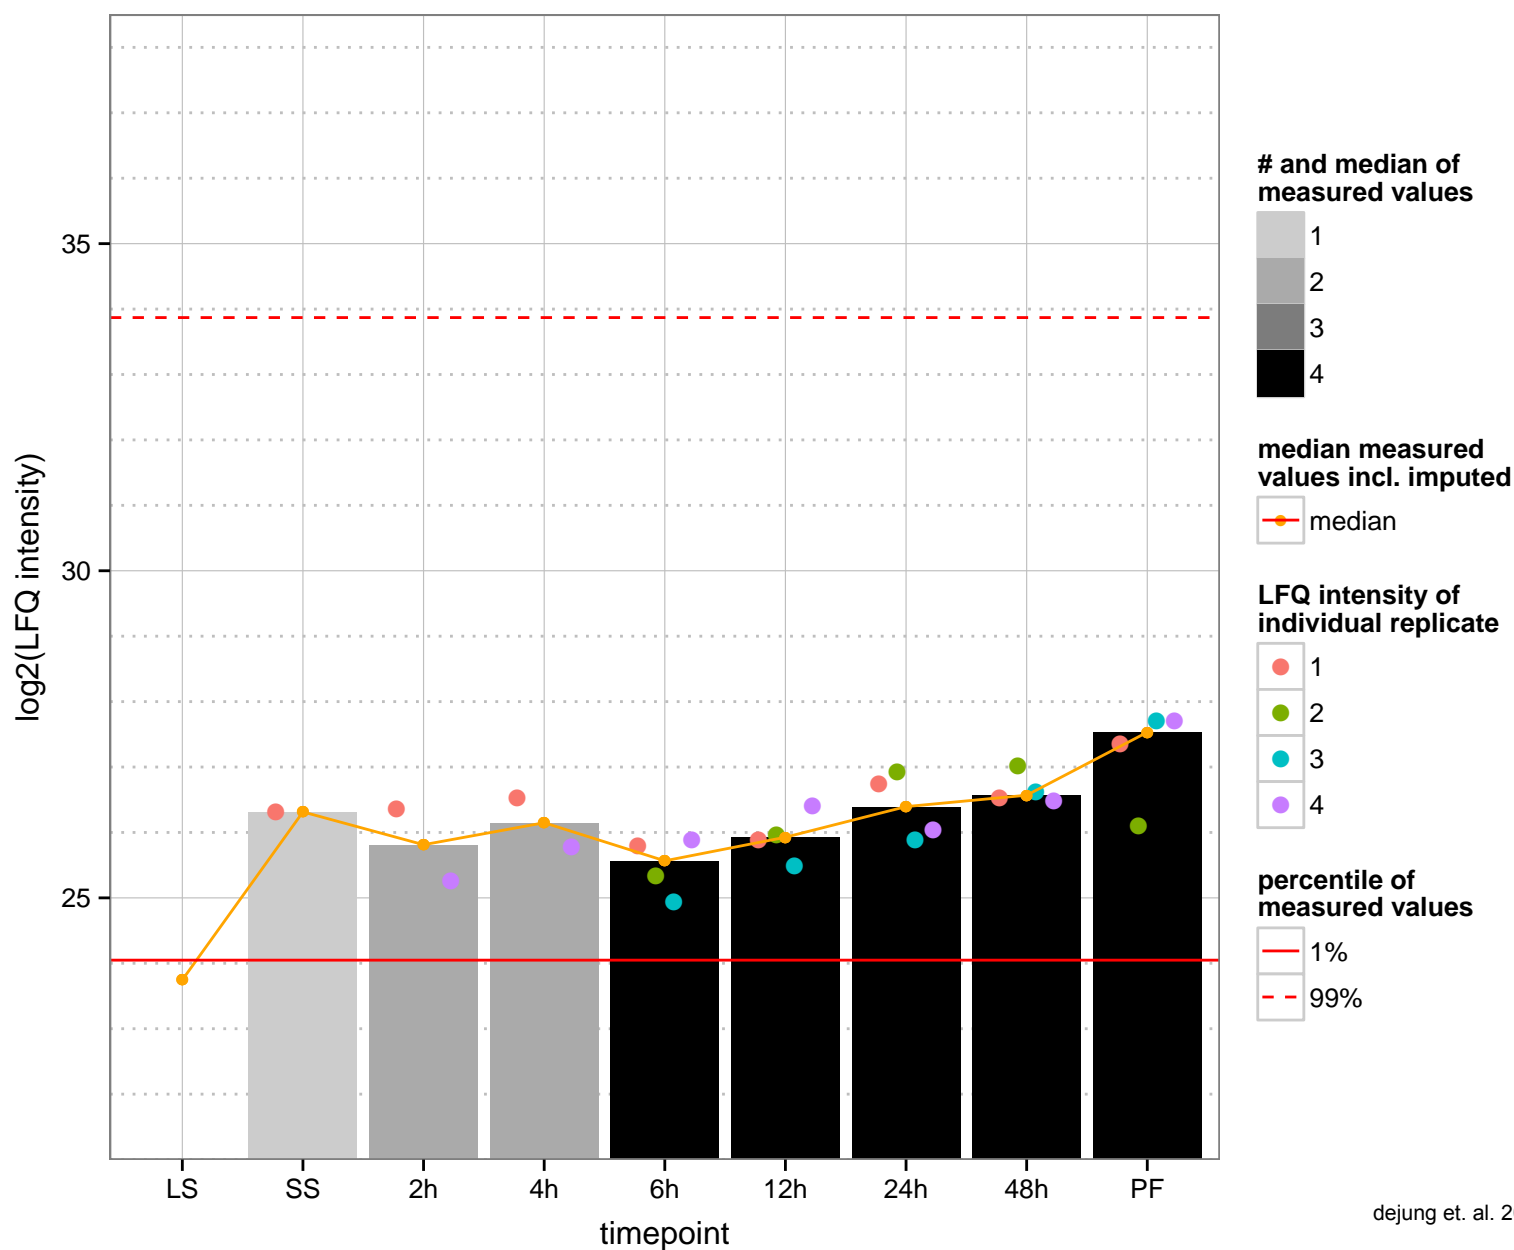

ribosomal protein S7, putative  
 Tb927.9.3990;Tb927.9.3920  
 AGOF: structural constituent of ribosome  
 AGOC: intracellular, ribosome  
 AGOP: translation  
 PGOF: structural constituent of ribosome  
 PGO: intracellular, ribosome  
 PGOP: translation

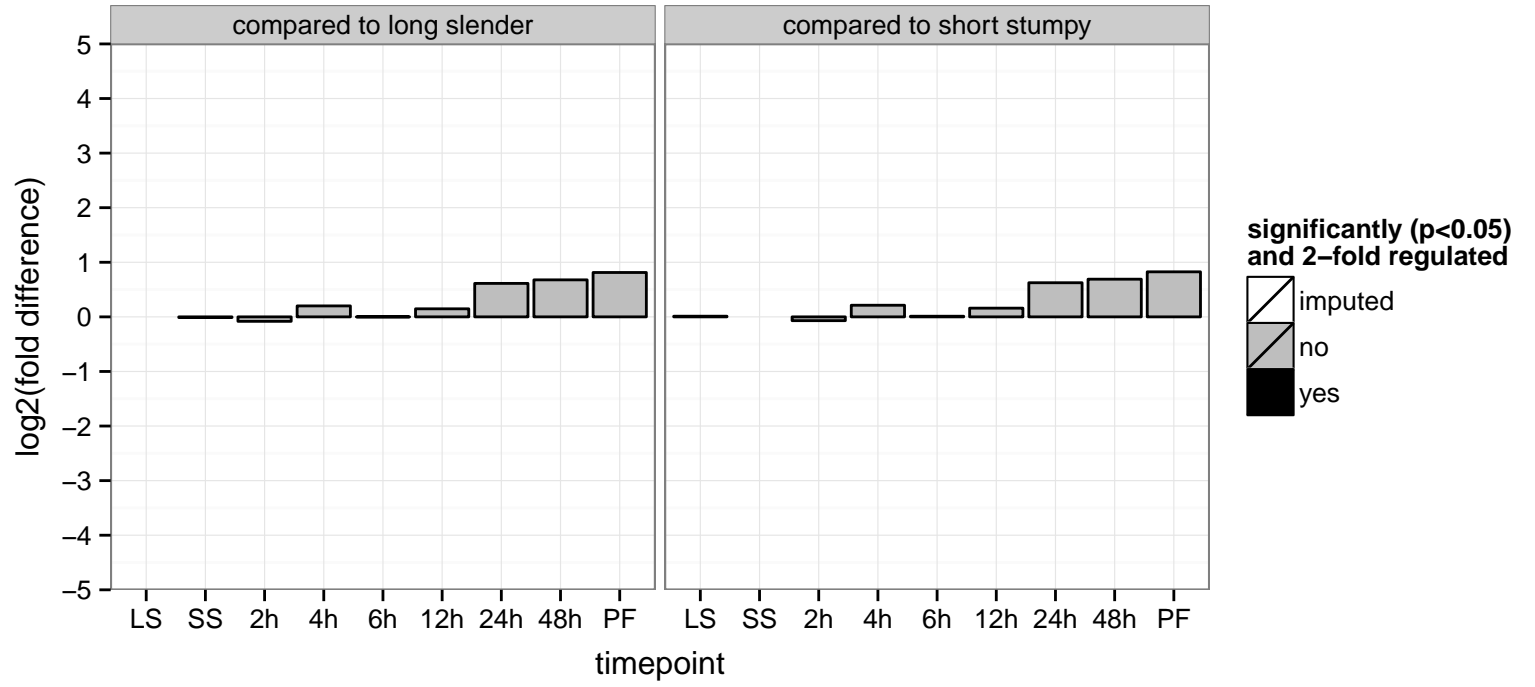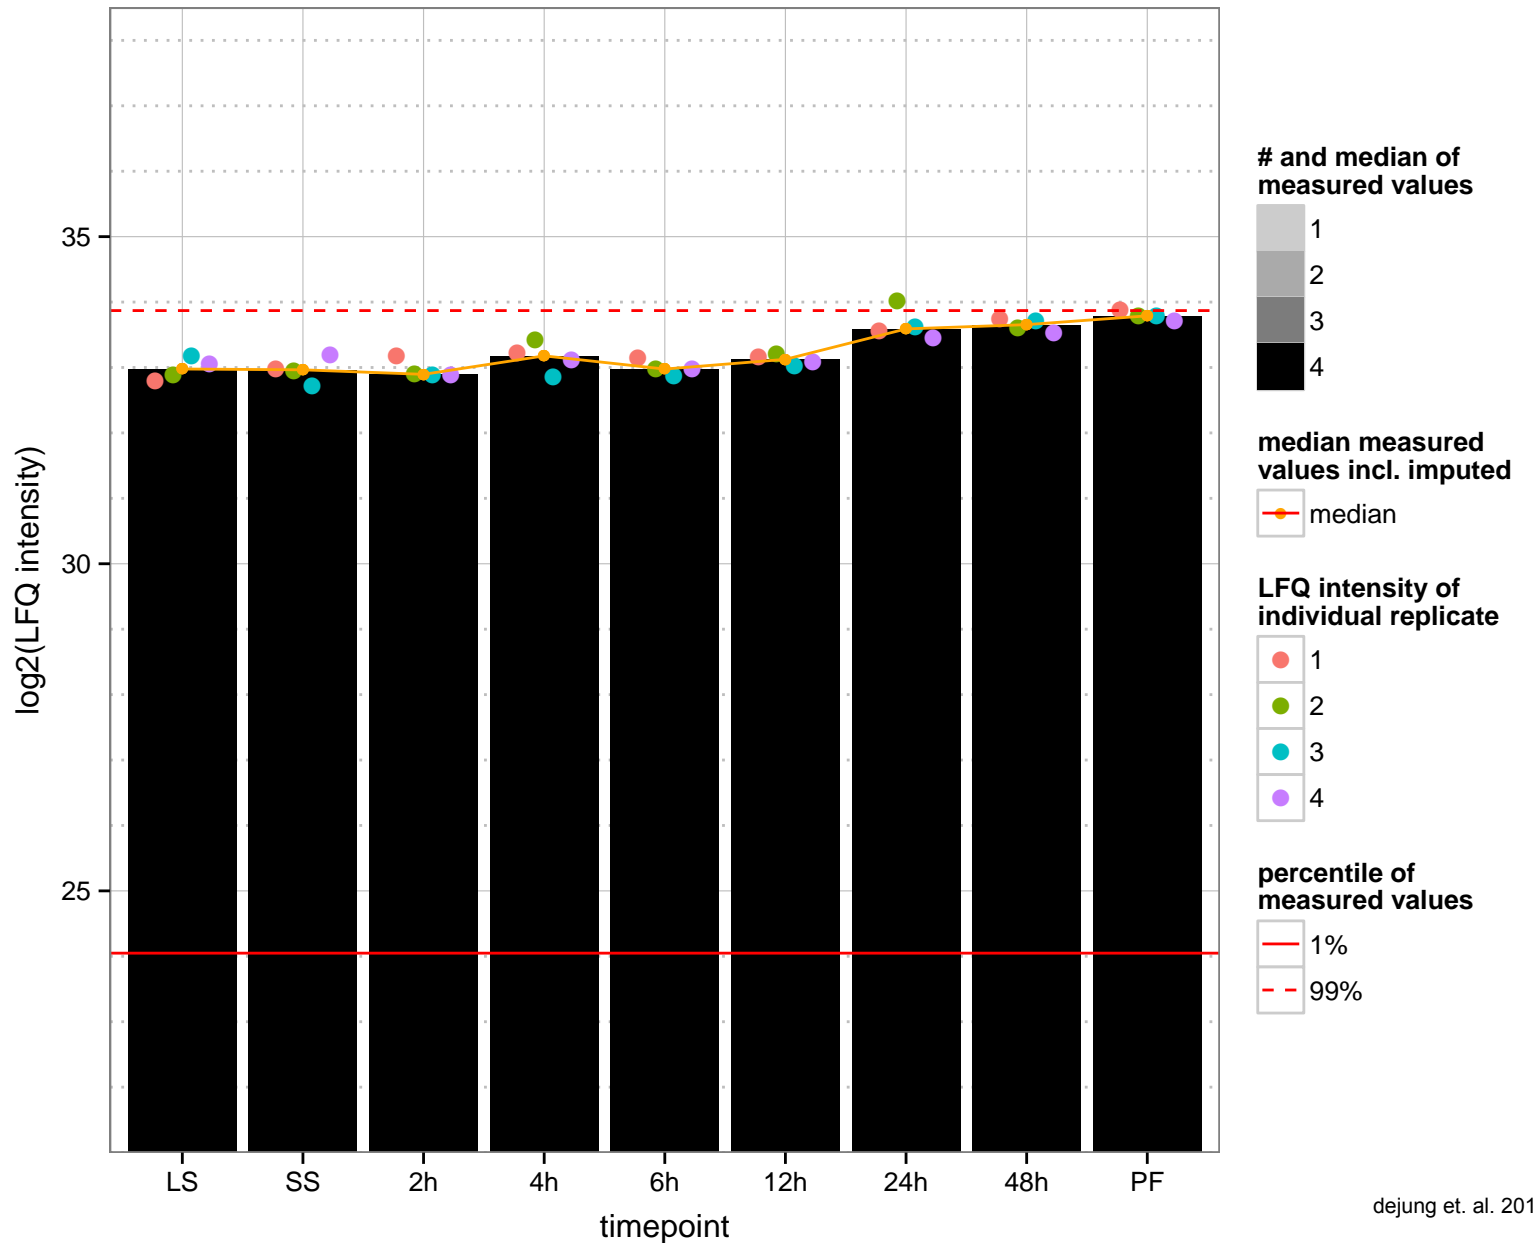

hypothetical protein, conserved  
 Tb927.9.4050  
 AGOF: zinc ion binding  
 AGOC: null  
 AGOP: null  
 PGOF: protein binding, zinc ion binding  
 PGOC: null  
 PGOP: null

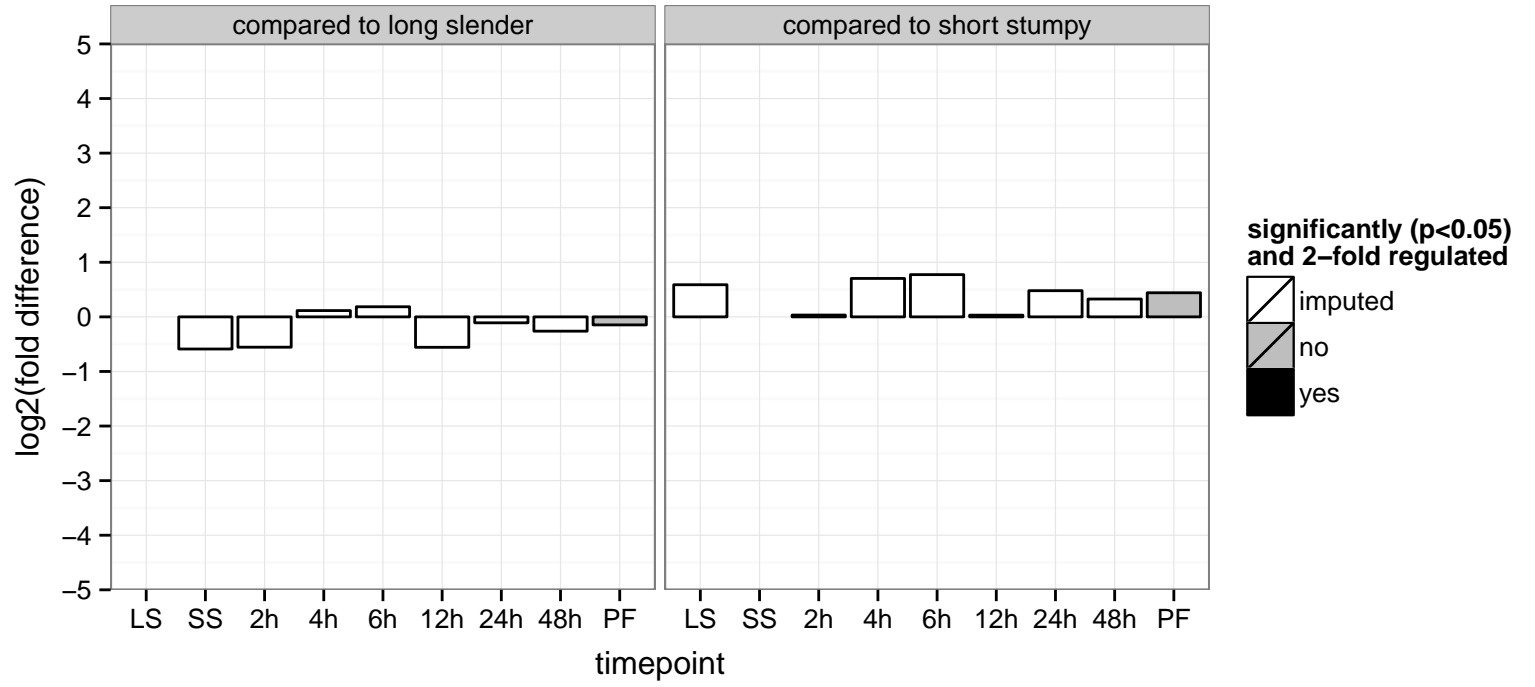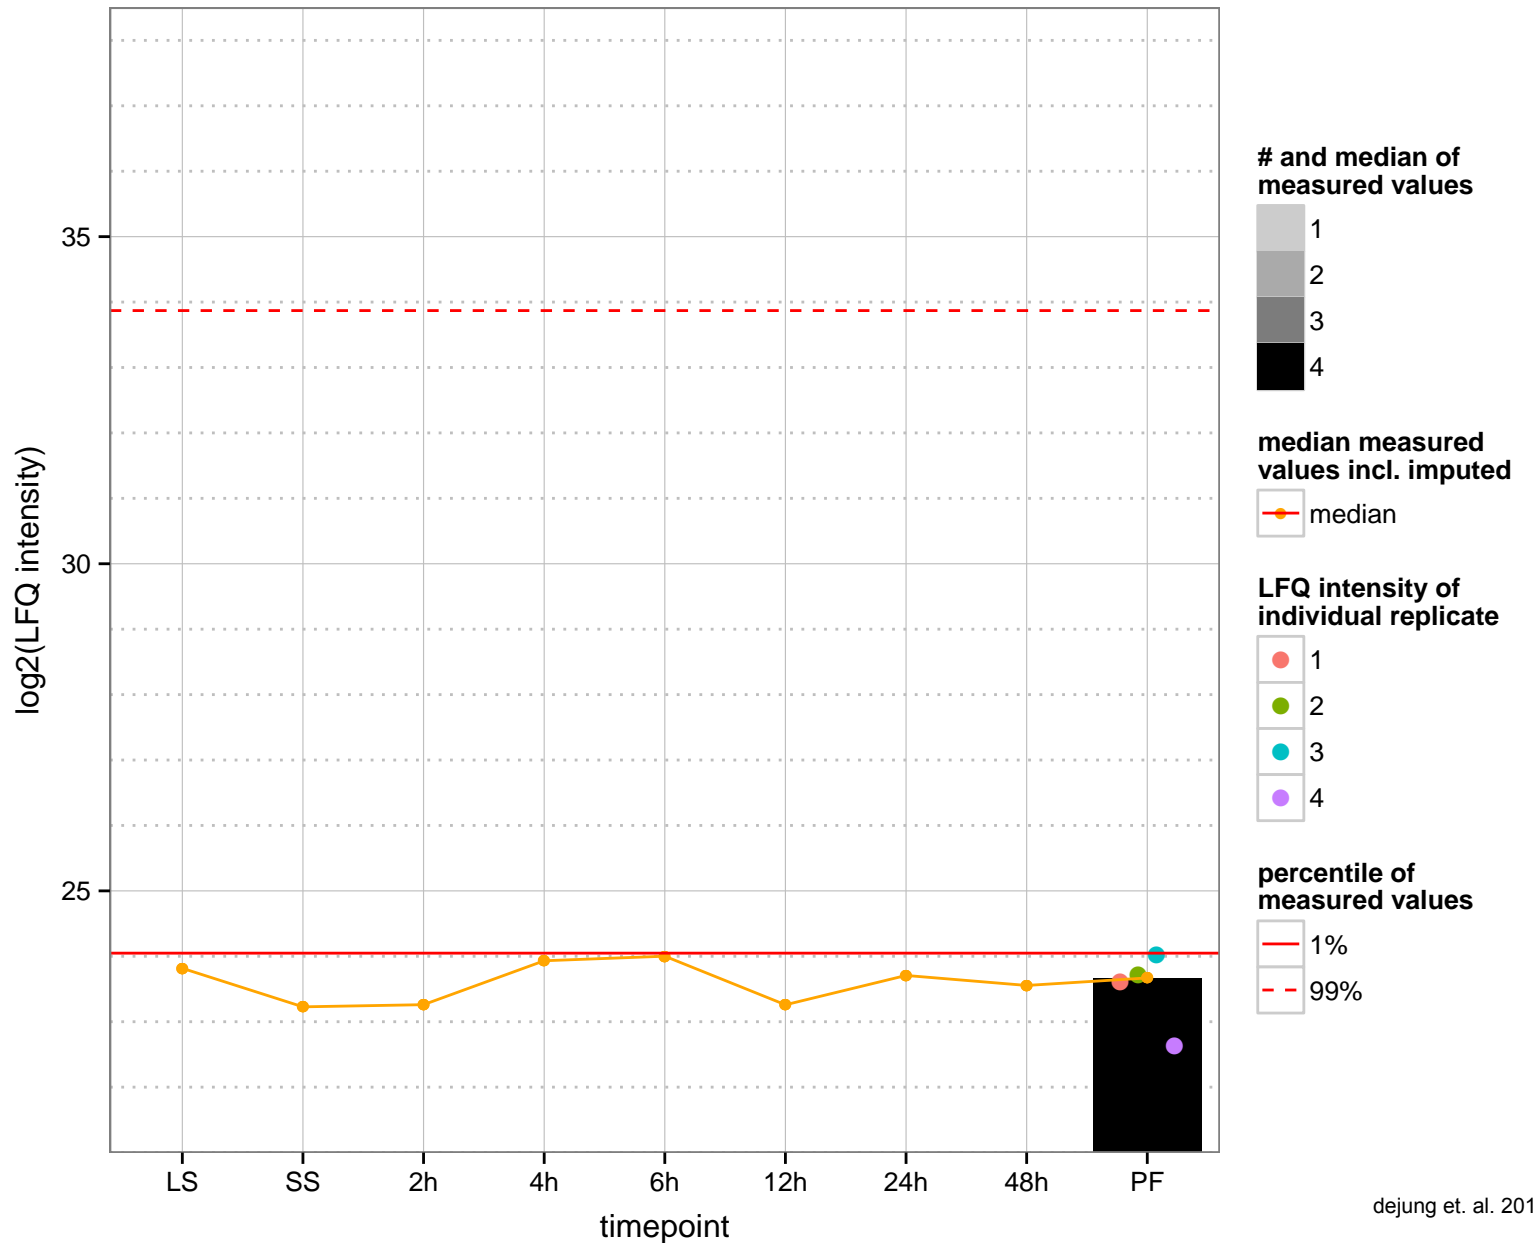

conserved protein  
 Tb927.9.4080  
 AGOF: zinc ion binding  
 AGOC: null  
 AGOP: modulation of development of symbiont involved in interaction with host, quorum sensing involved in interaction with host  
 PGOF: zinc ion binding  
 PGOC: null  
 PGOP: null

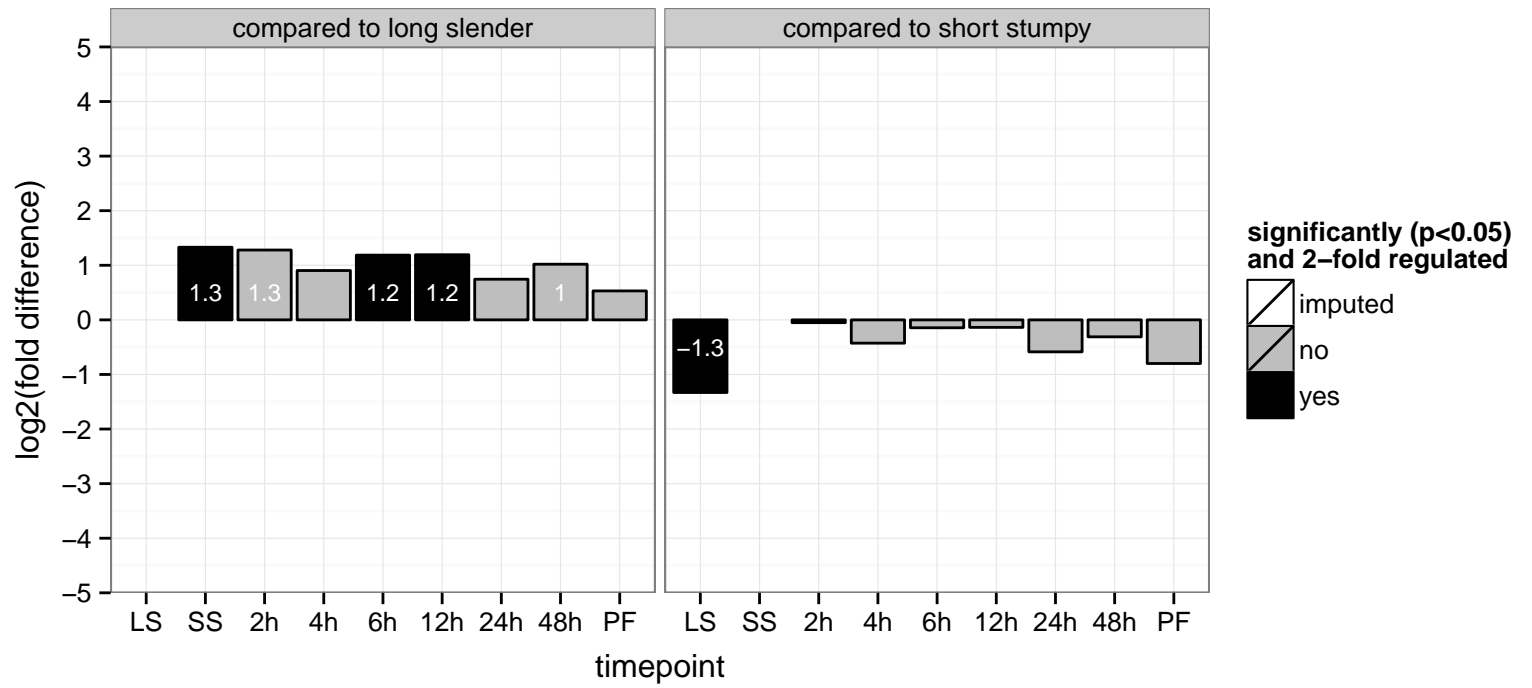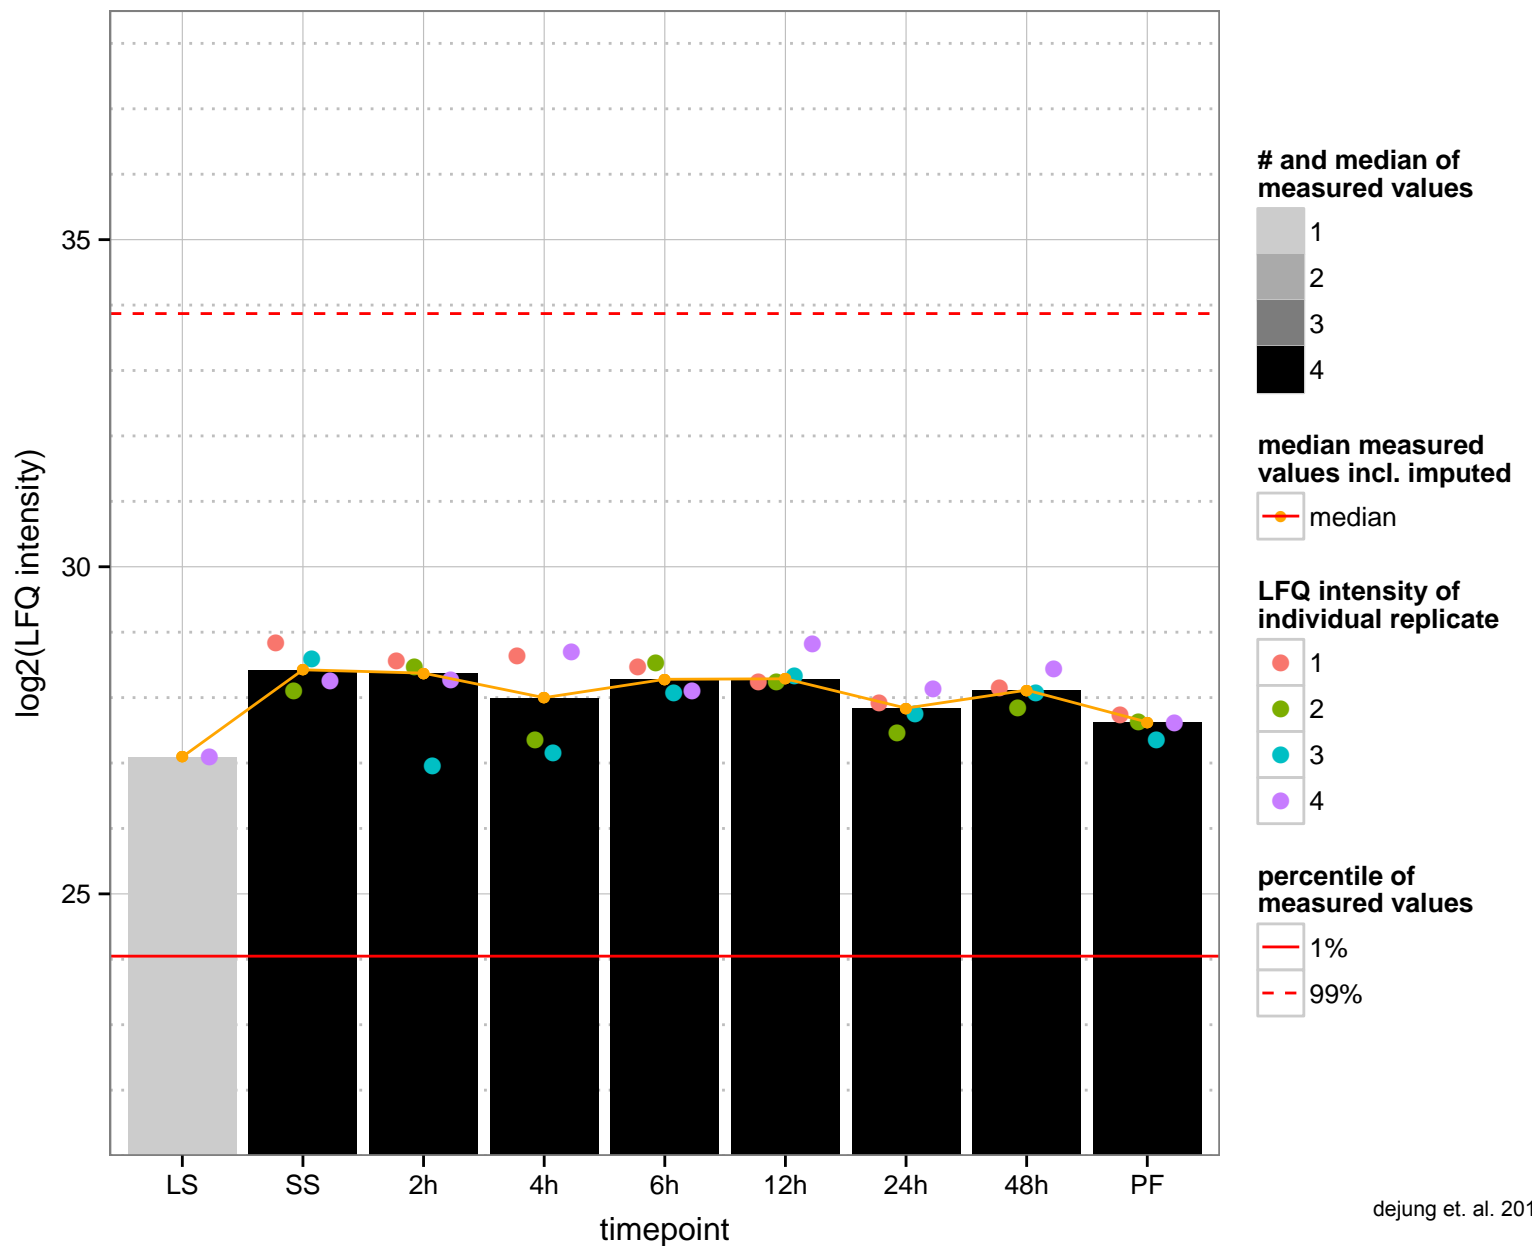



fatty acyl CoA syntetase 1 (ACS1)  
 Tb927.9.4190  
 AGOF: fatty-acyl-CoA synthase activity  
 AGOC: membrane  
 AGOP: fatty acid metabolic process  
 PGO: catalytic activity  
 PGOC: null  
 PGOP: metabolic process

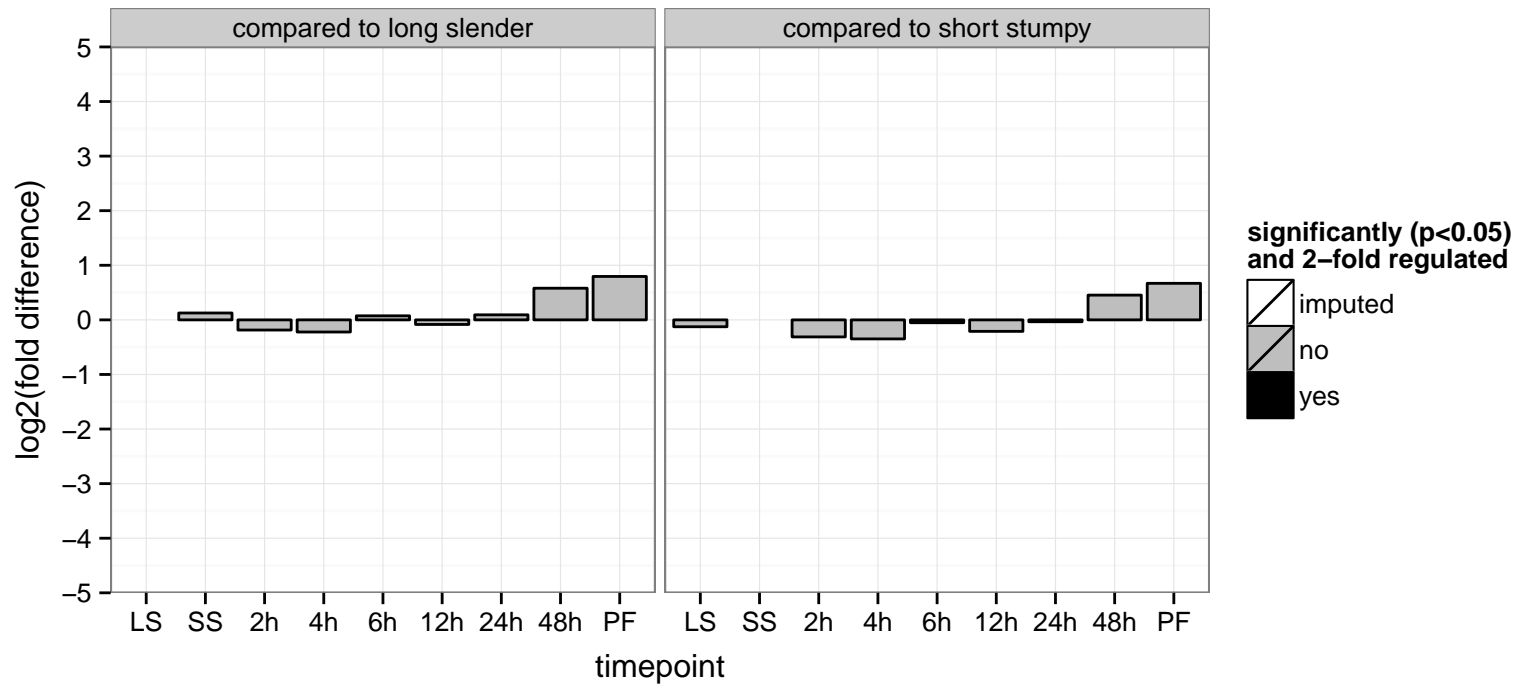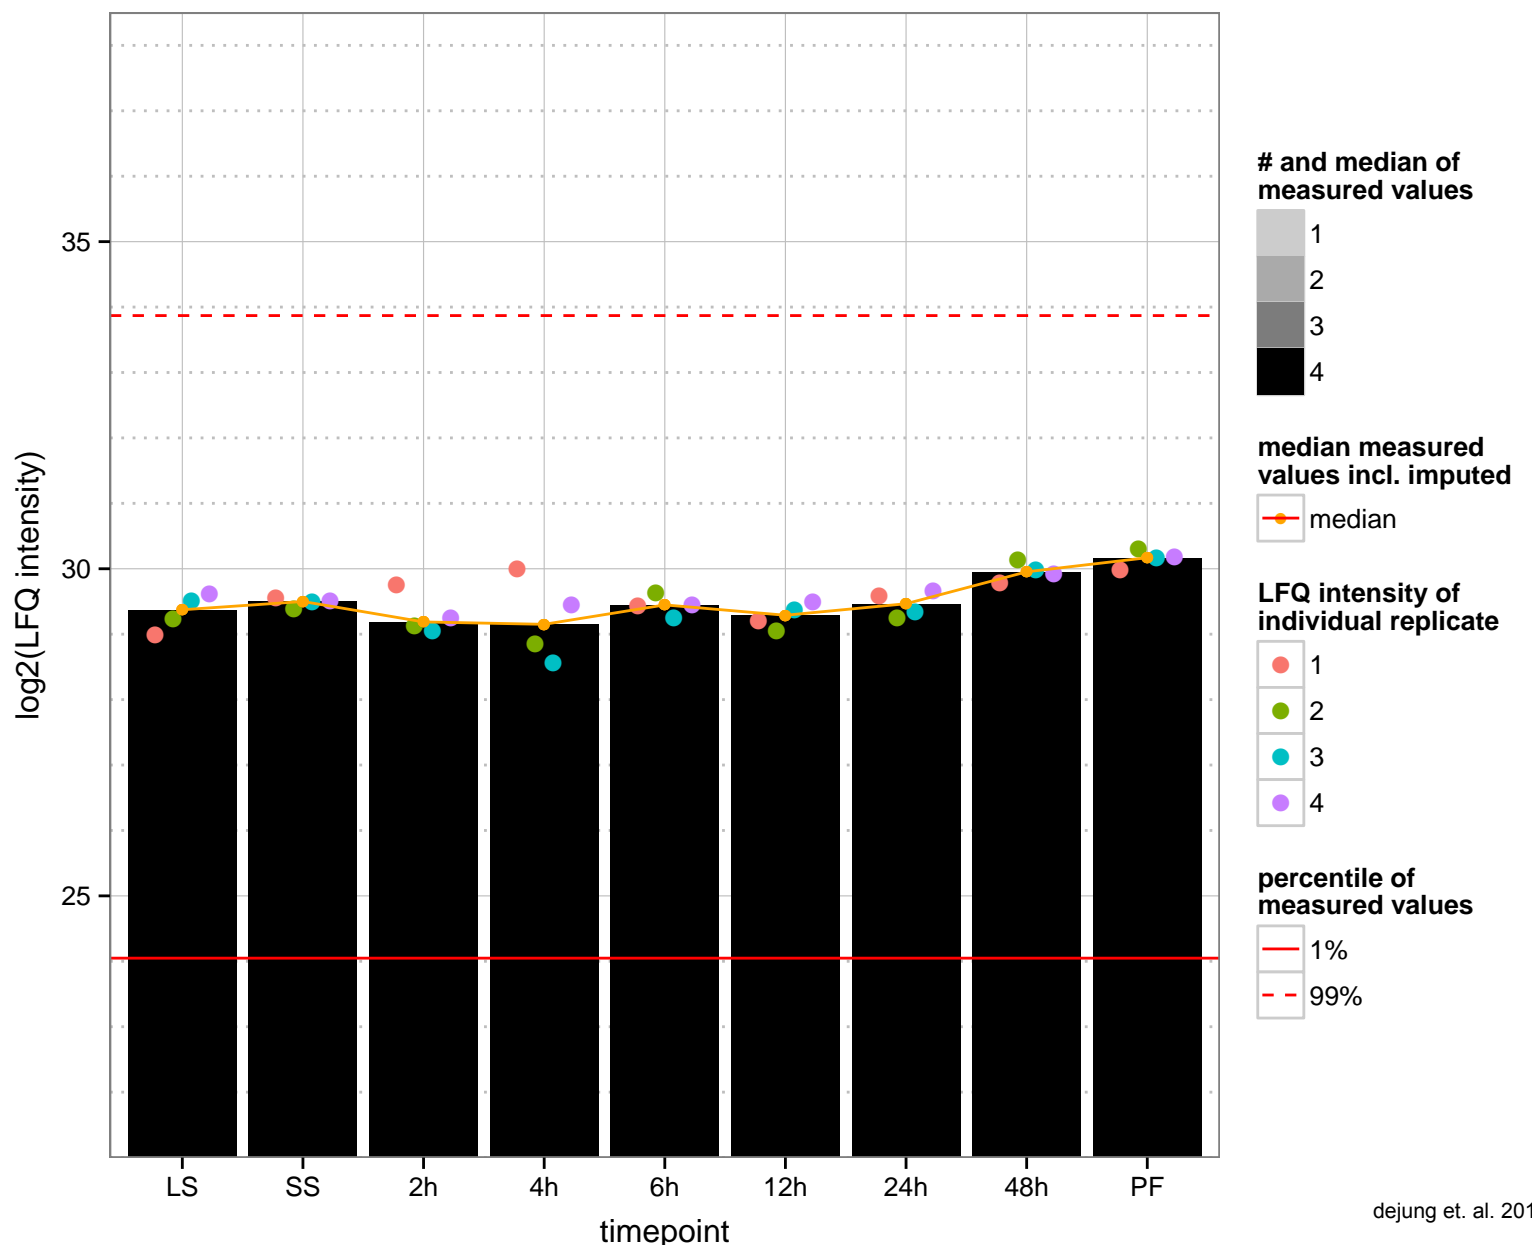

fatty acyl CoA synthetase 4 (ACS4)  
 Tb927.9.4230  
 AGOF: fatty-acyl-CoA synthase activity  
 AGOC: membrane  
 AGOP: fatty acid metabolic process  
 PGO: catalytic activity  
 PGOC: null  
 PGOP: metabolic process

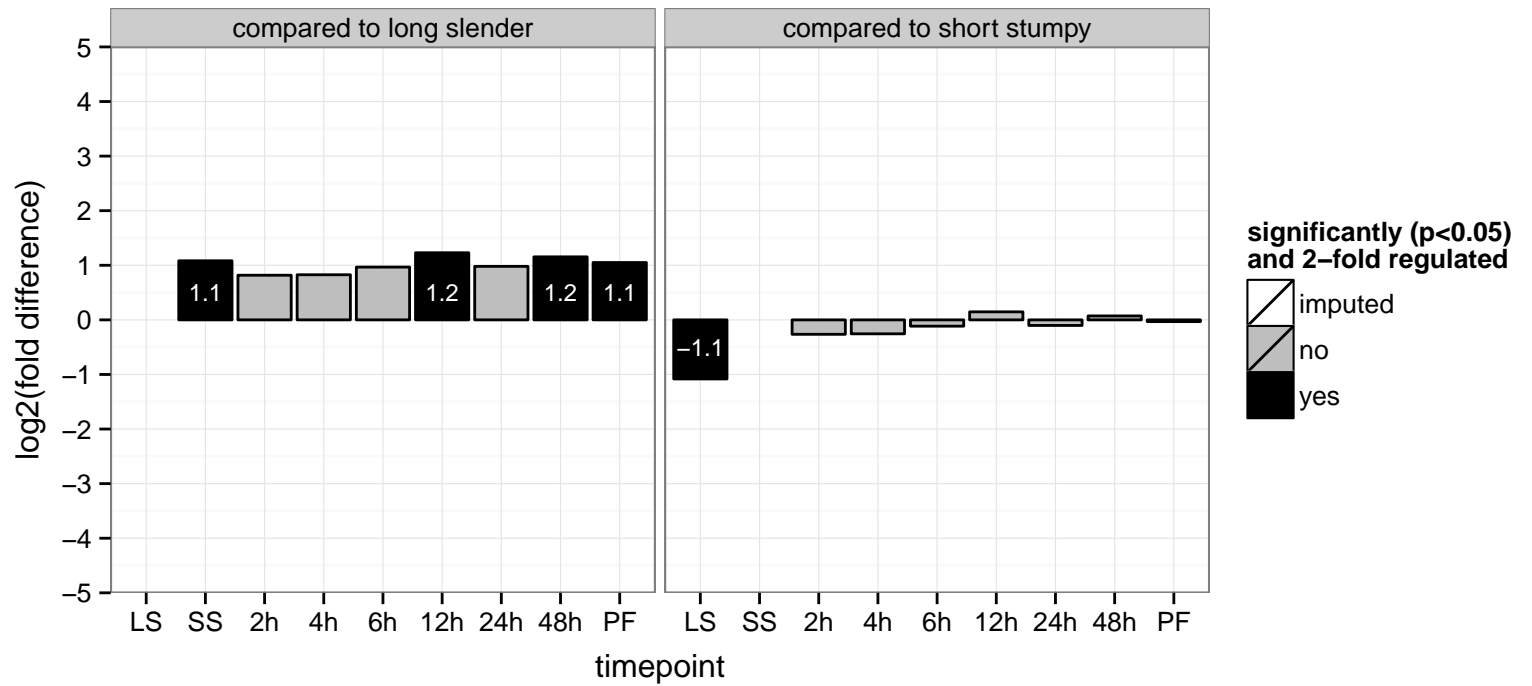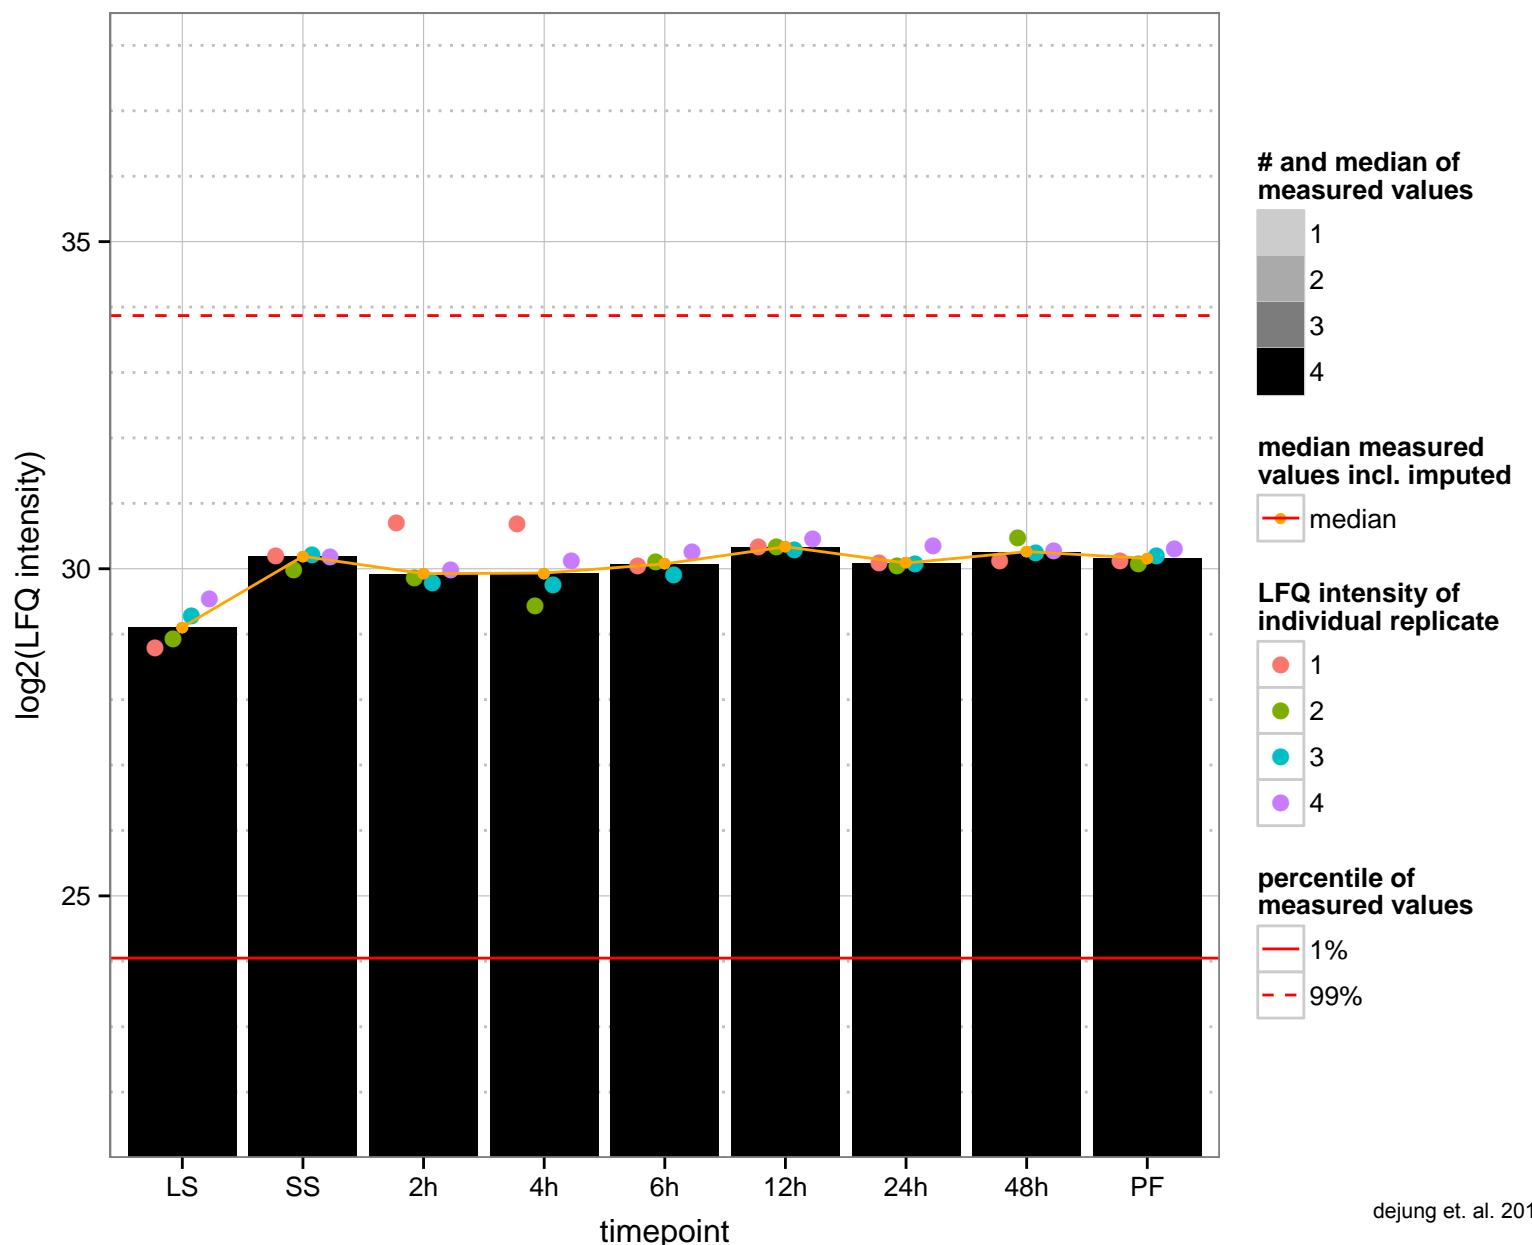

hypothetical protein, conserved  
 Tb927.9.4250  
 AGOF: null  
 AGOC: null  
 AGOP: null  
 PGO: null  
 PGOC: null  
 PGOP: null

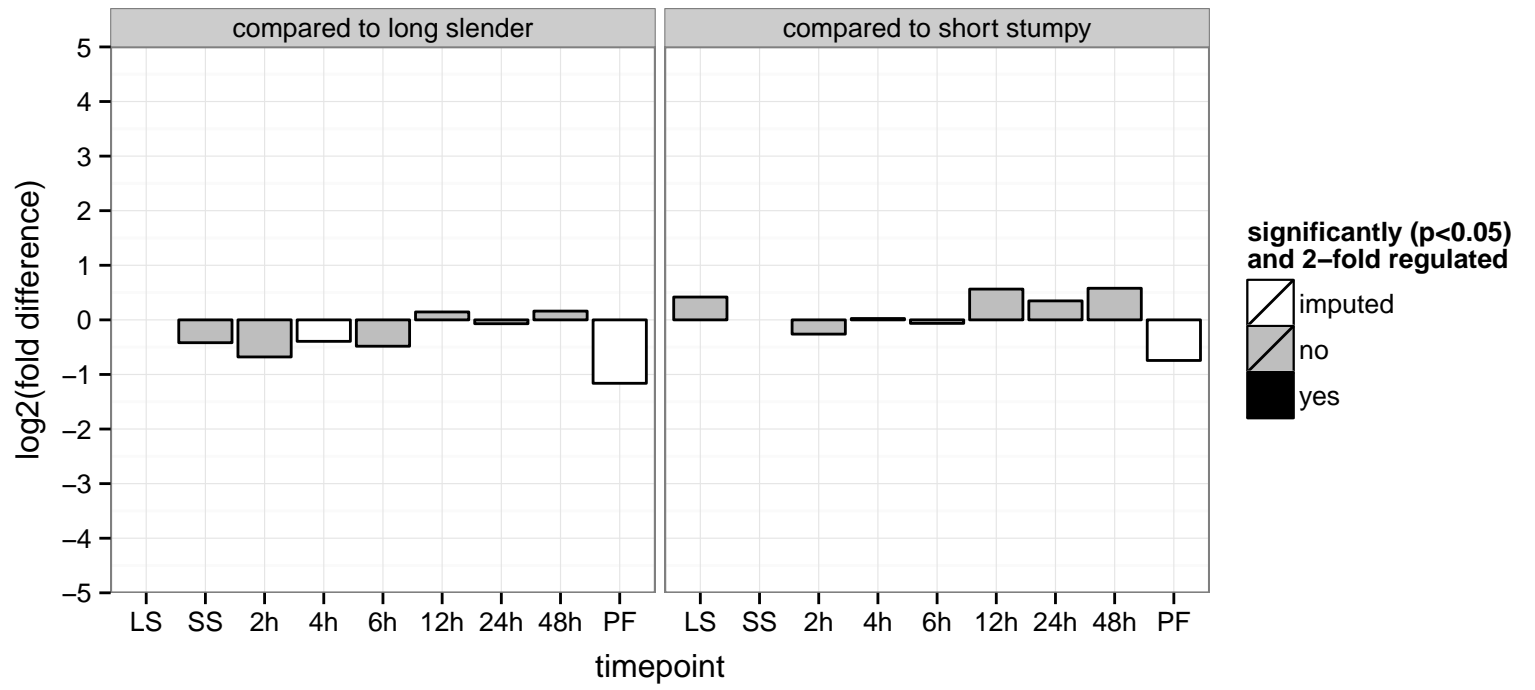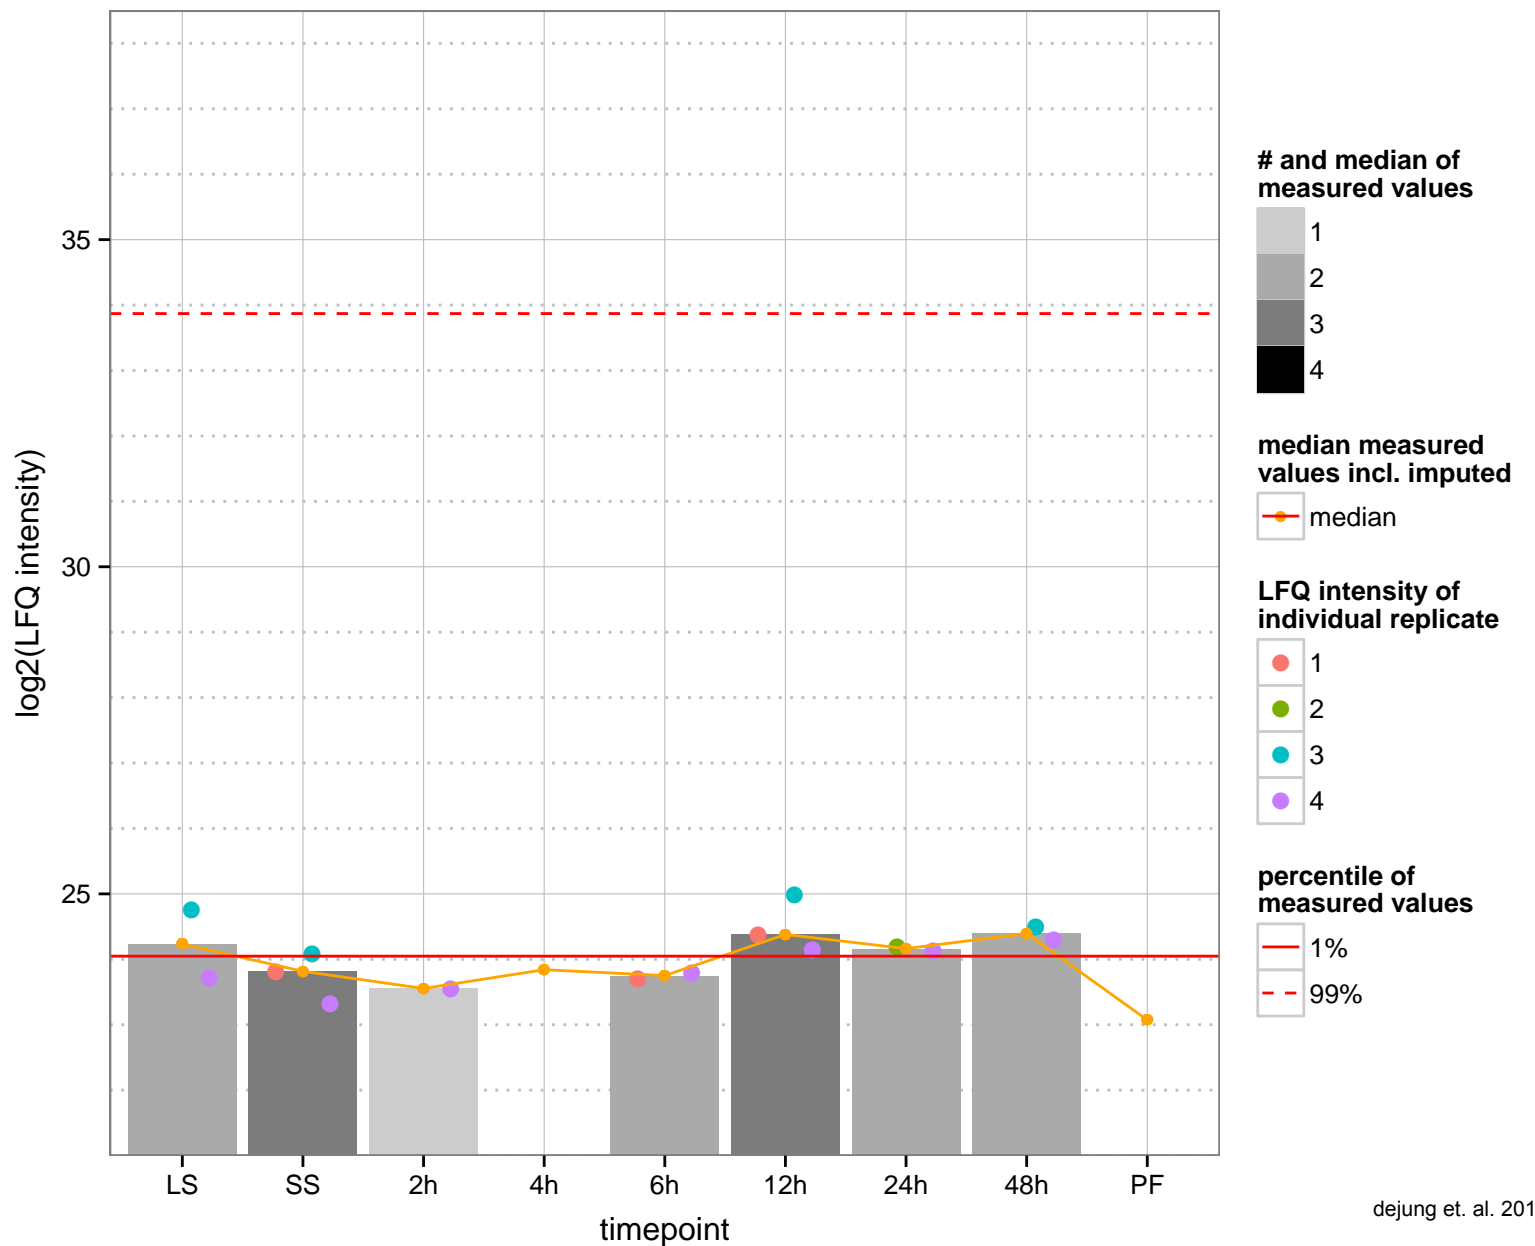

DNA–damage inducible protein DDI1–like protein  
 Tb927.9.4390  
 AGOF: aspartic–type endopeptidase activity  
 AGOC: null  
 AGOP: nucleotide–excision repair, proteolysis  
 PGOF: aspartic–type endopeptidase activity, protein binding  
 PGO: null  
 PGOP: proteolysis

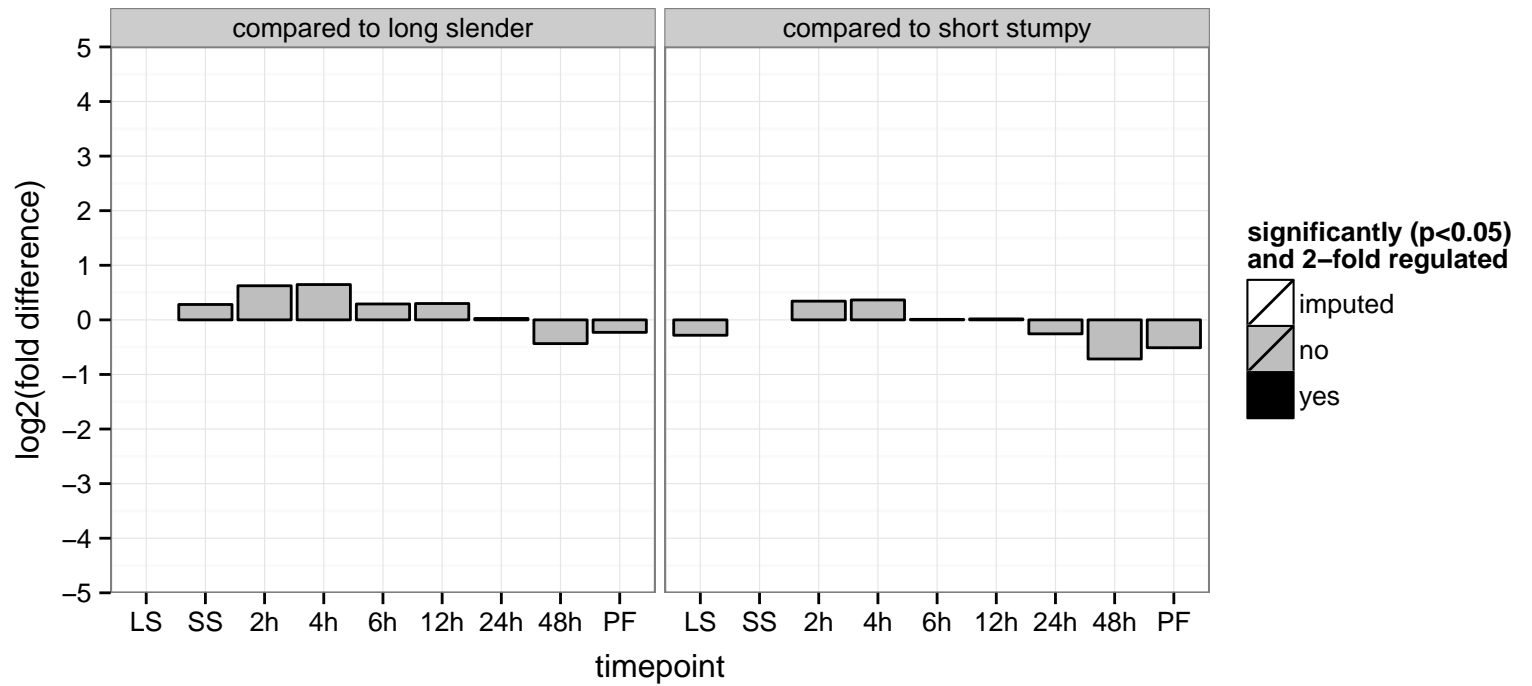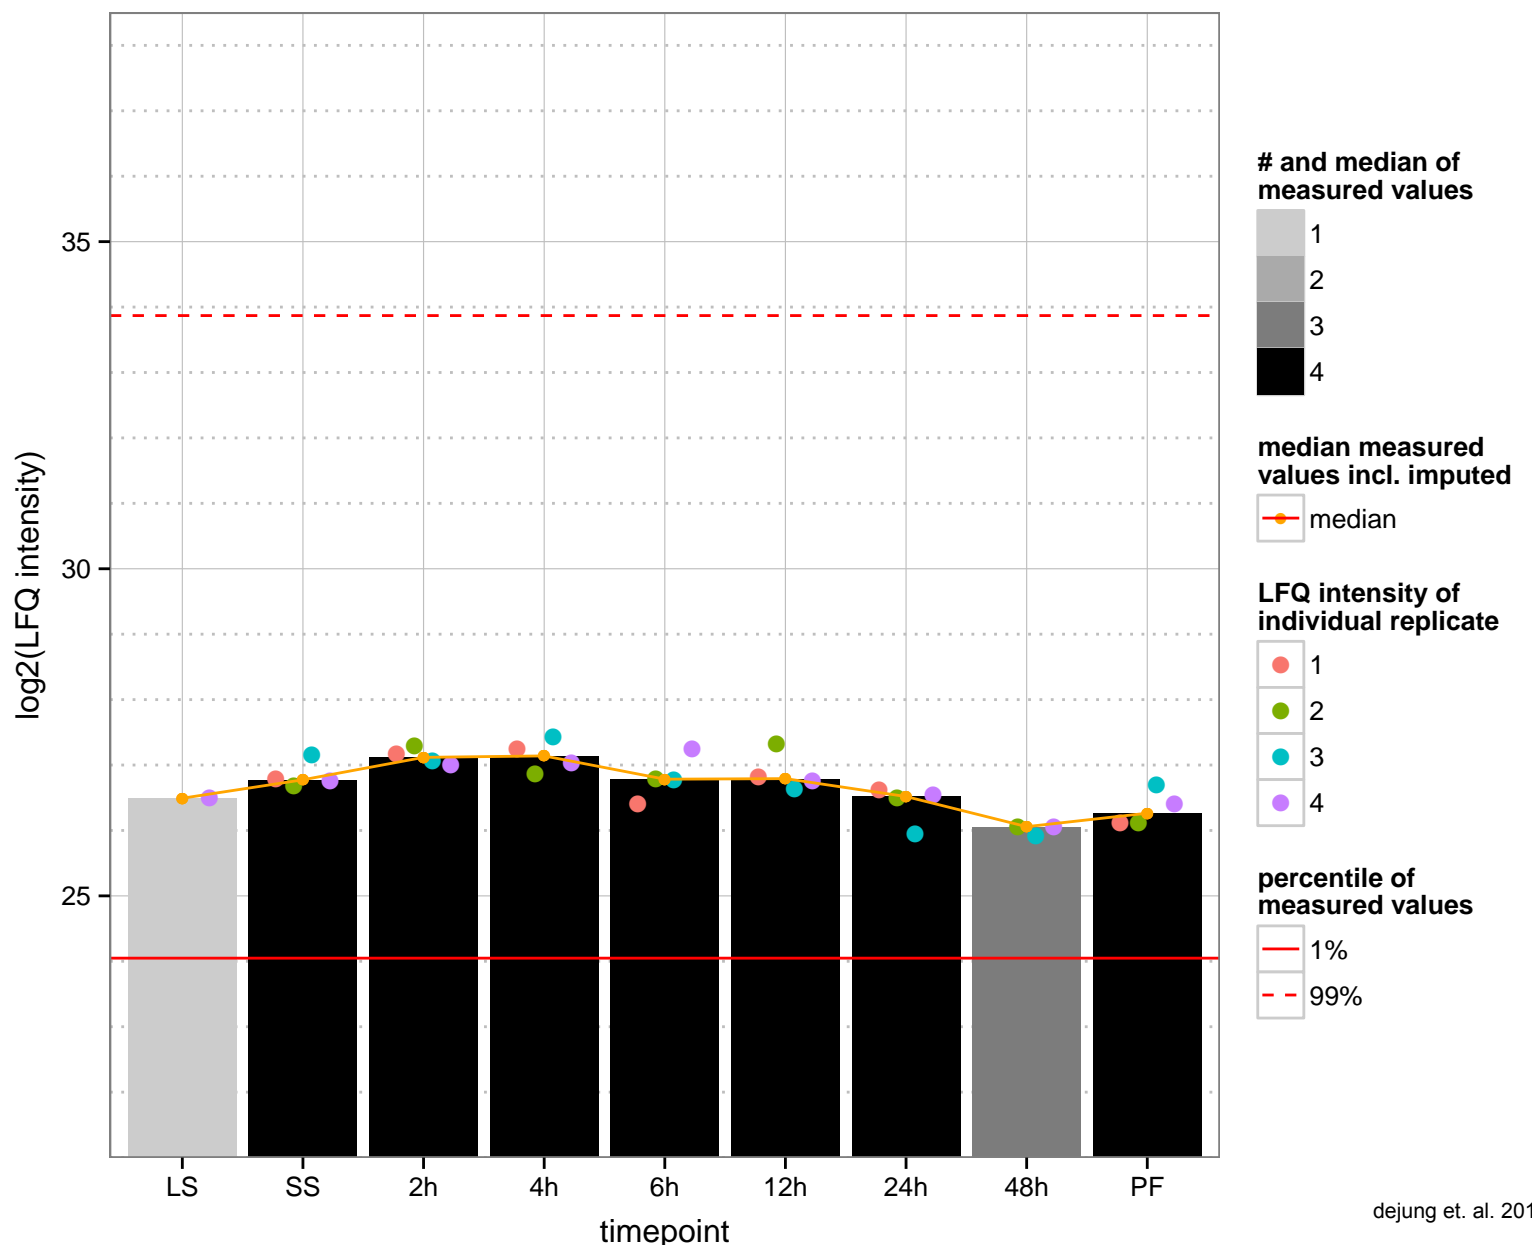

hypothetical protein, conserved  
 Tb927.9.4420  
 AGOF: null  
 AGOC: null  
 AGOP: null  
 PGO: null  
 PGOC: null  
 PGOP: null

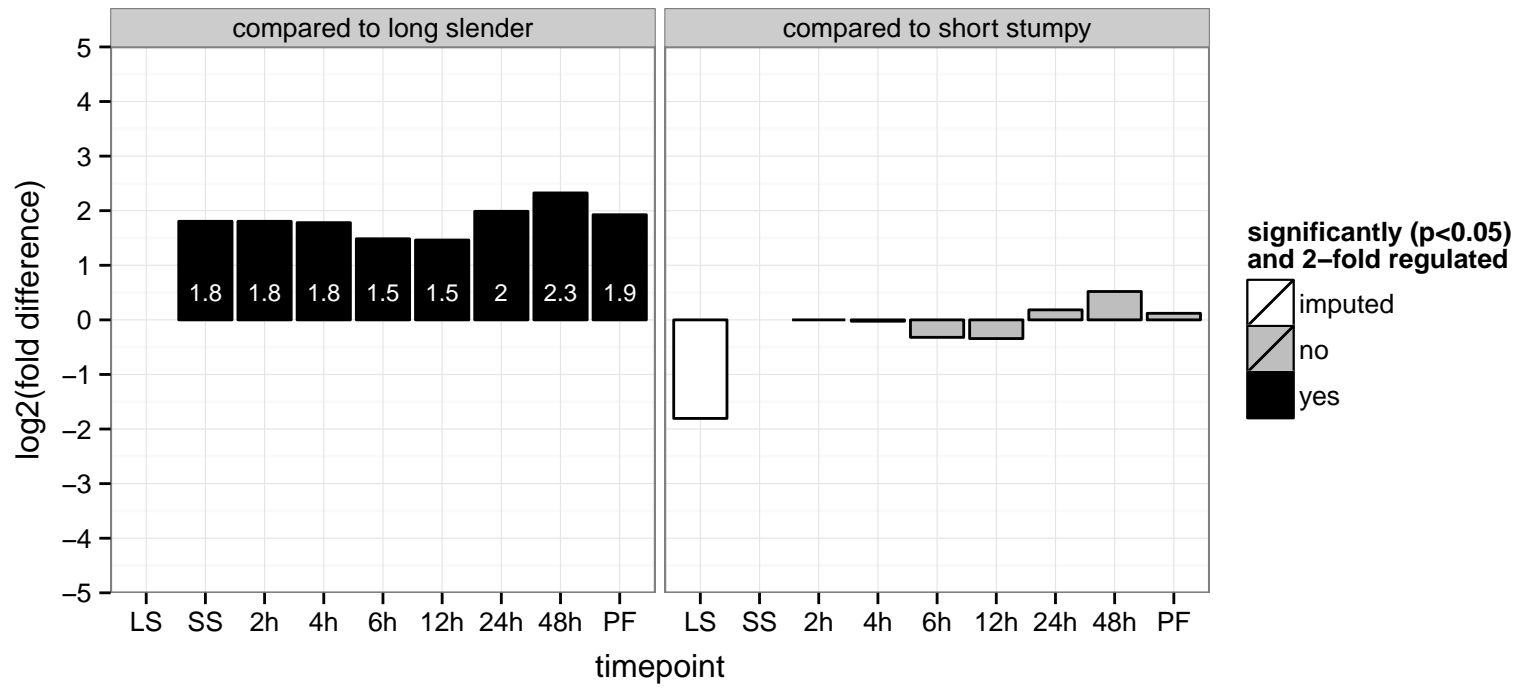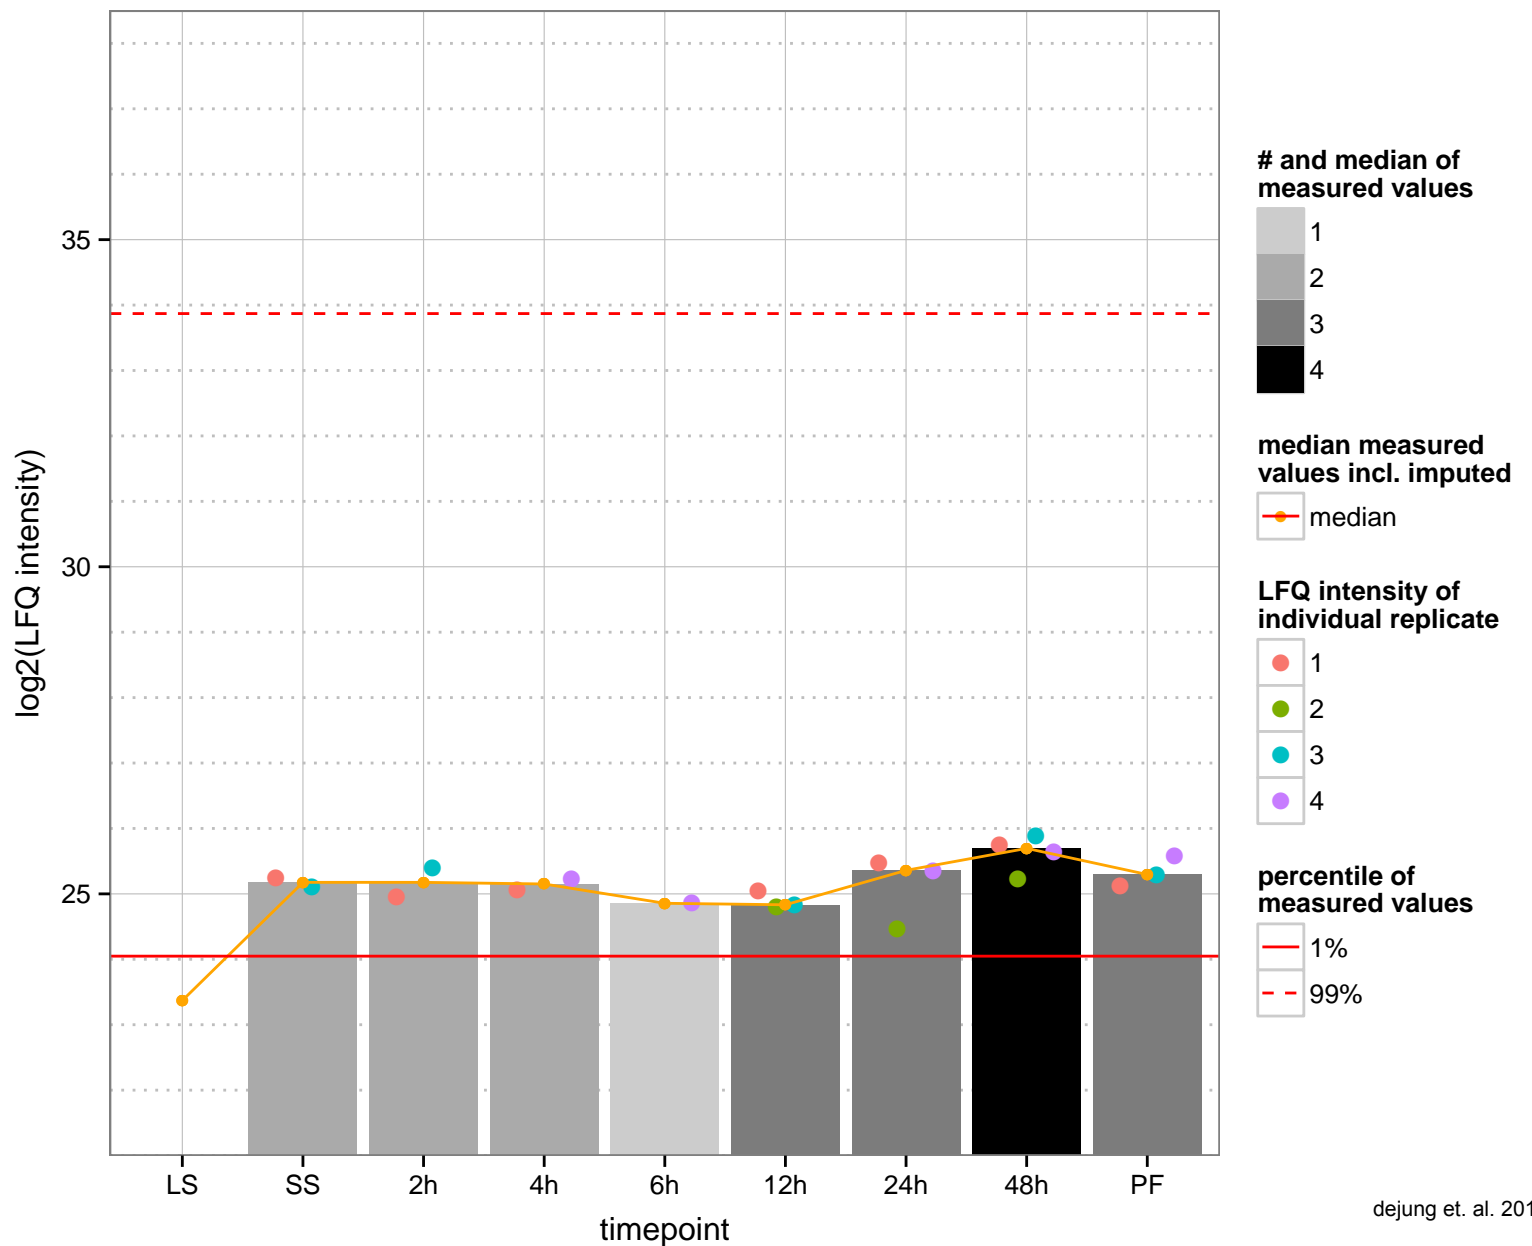

mitochondrial processing peptide beta subunit, putative, metallo-peptidase, Clan ME, Family M16

Tb927.9.4520

AGOF: catalytic activity, metalloendopeptidase activity, zinc ion binding

AGOC: mitochondrial processing peptidase complex, mitochondrion

AGOP: protein processing involved in protein targeting to mitochondrion, proteolysis

PGOF: catalytic activity, metal ion binding, metalloendopeptidase activity, zinc ion binding

PGOC: null

PGOP: proteolysis

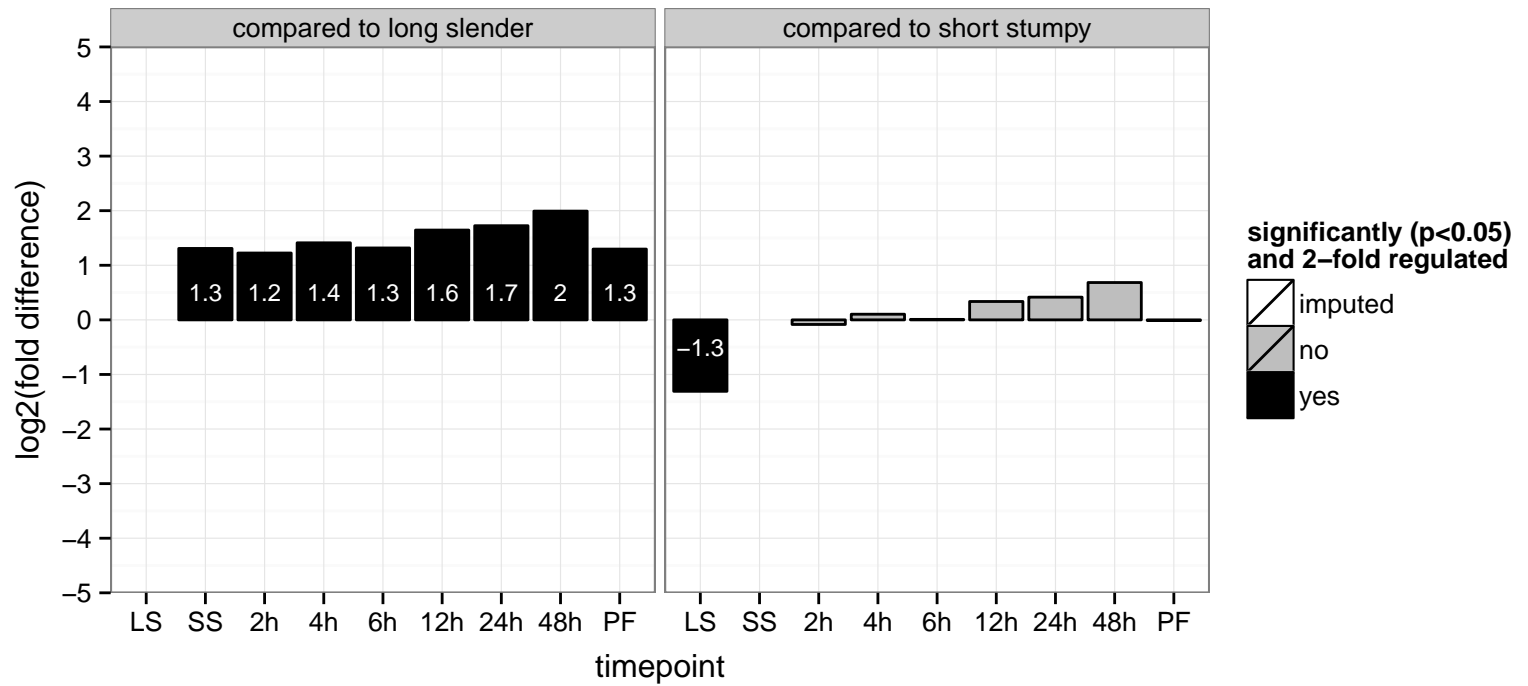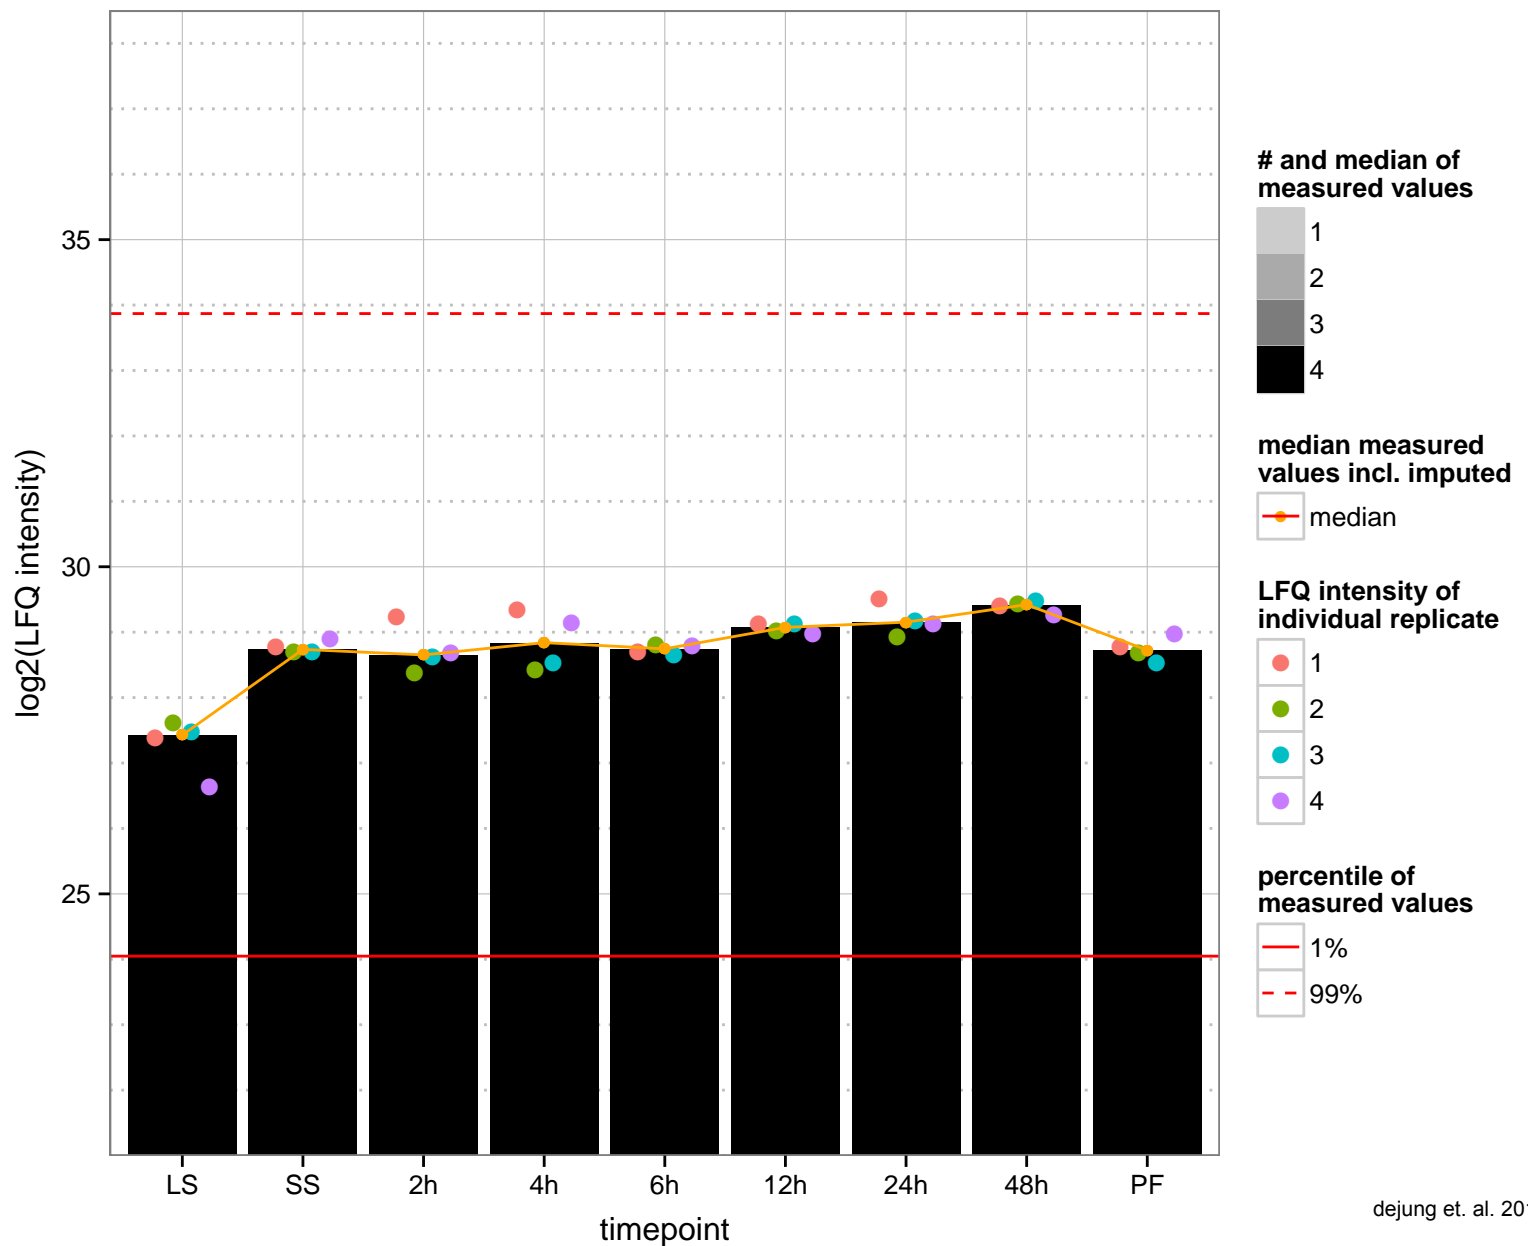

hypothetical protein, conserved  
 Tb927.9.4660  
 AGOF: null  
 AGOC: null  
 AGOP: null  
 PGO: null  
 PGOC: null  
 PGOP: null

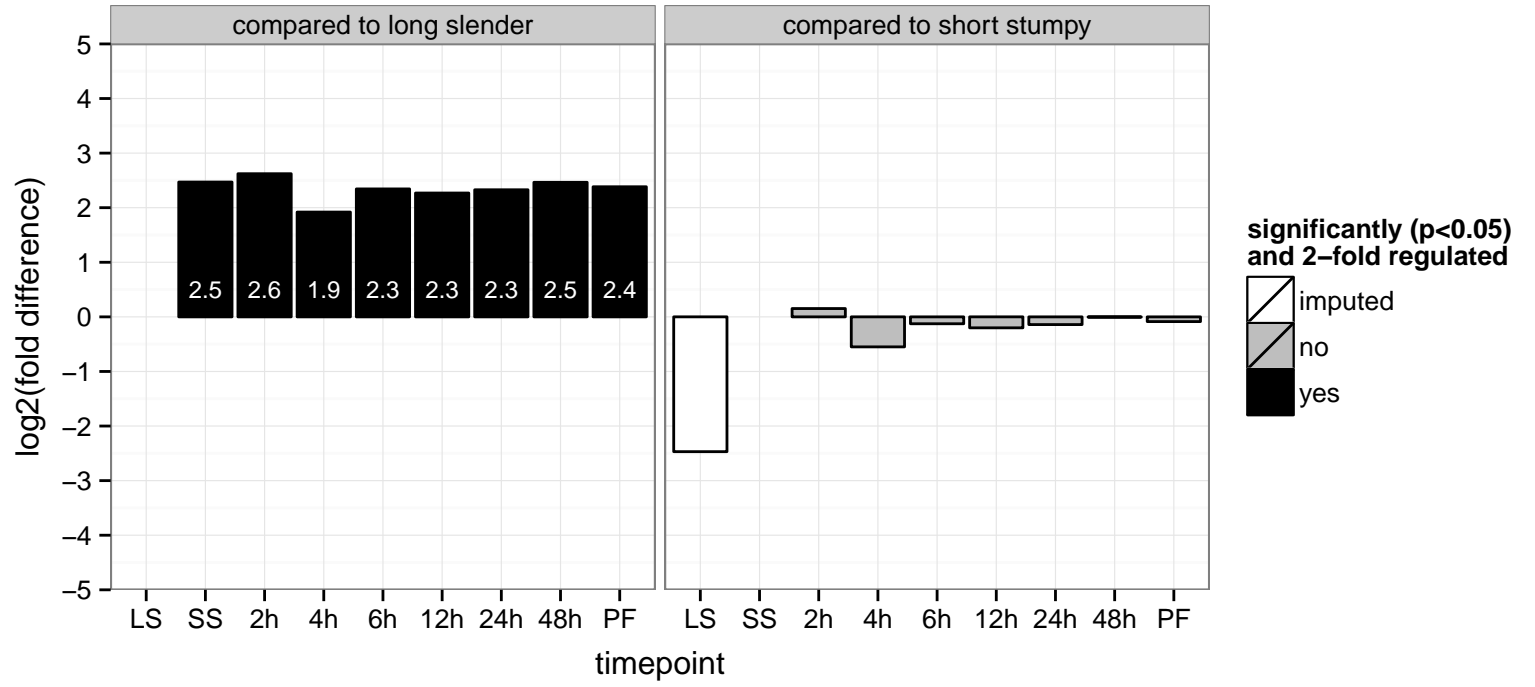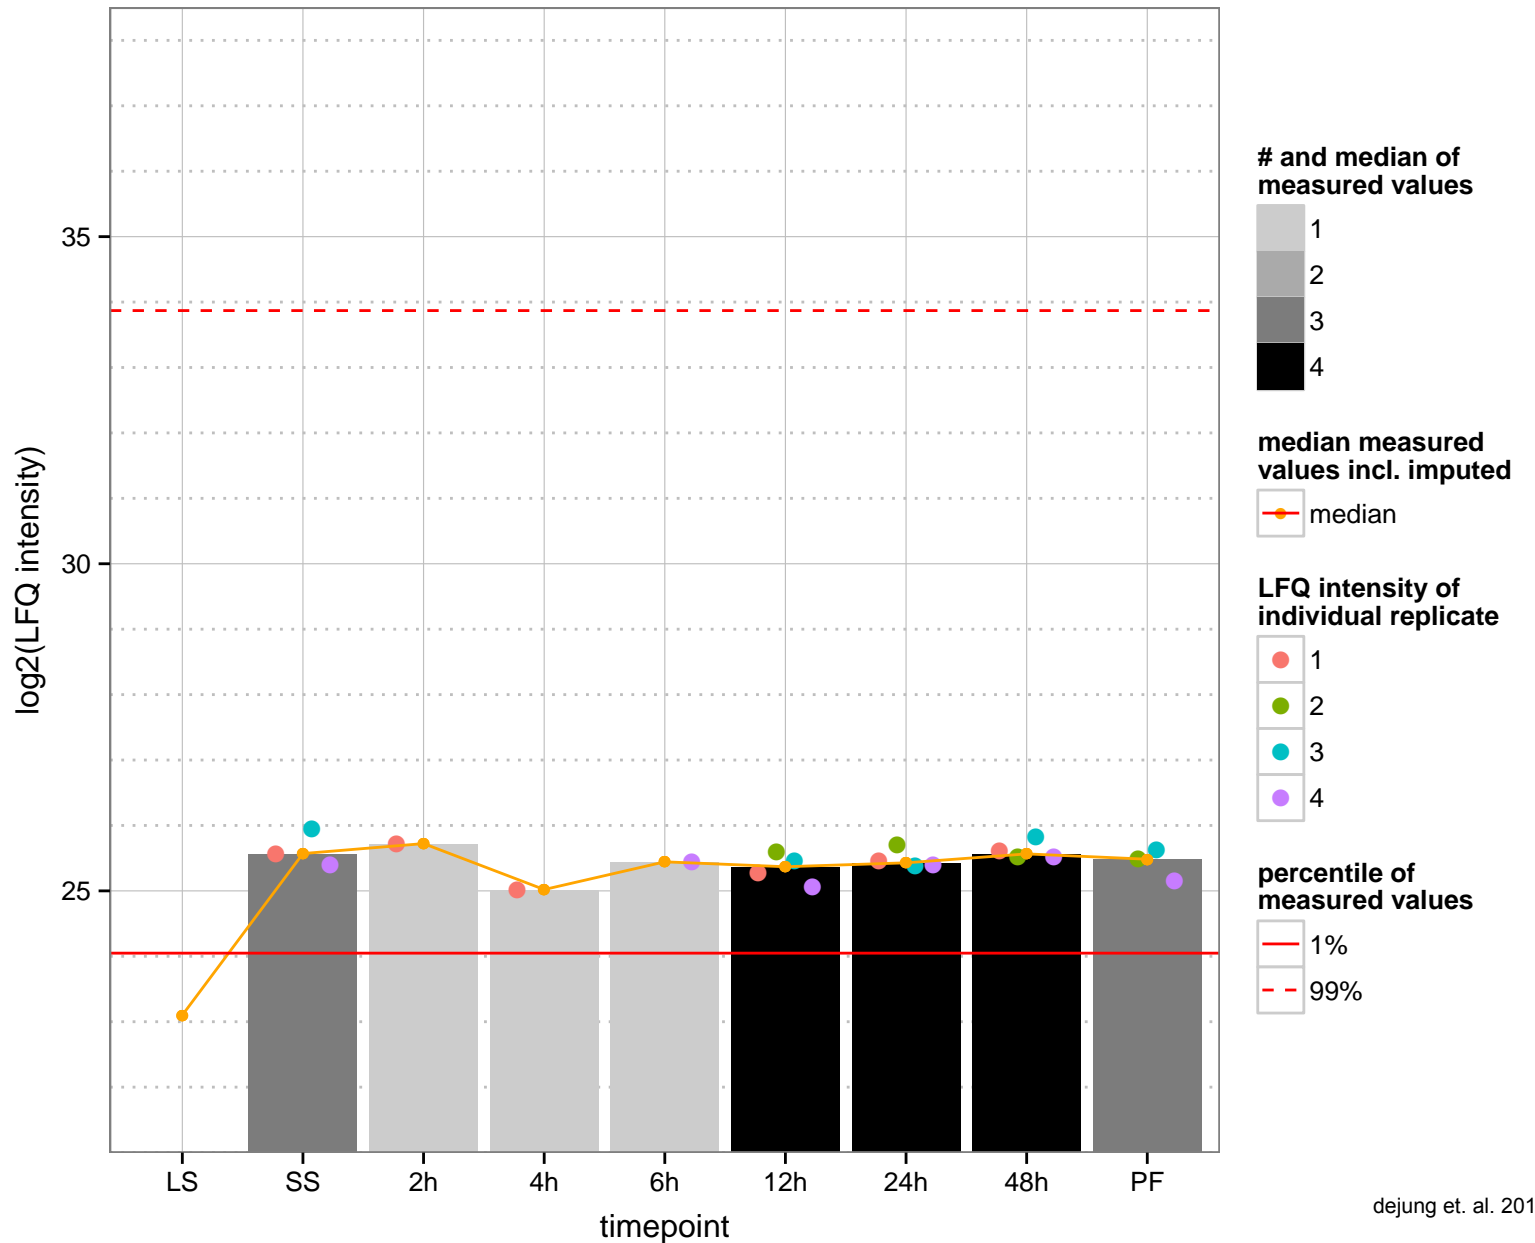

ATP-dependent DEAD box helicase, putative, eukaryotic initiation factor 4a

Tb927.9.4680

AGOF: ATP binding, ATP-dependent helicase activity, helicase activity, nucleic acid binding

AGOC: cytosol

AGOP: nucleobase-containing compound metabolic process, translation

PGOF: ATP binding, ATP-dependent helicase activity, helicase activity, nucleic acid binding

PGOC: null

PGOP: null

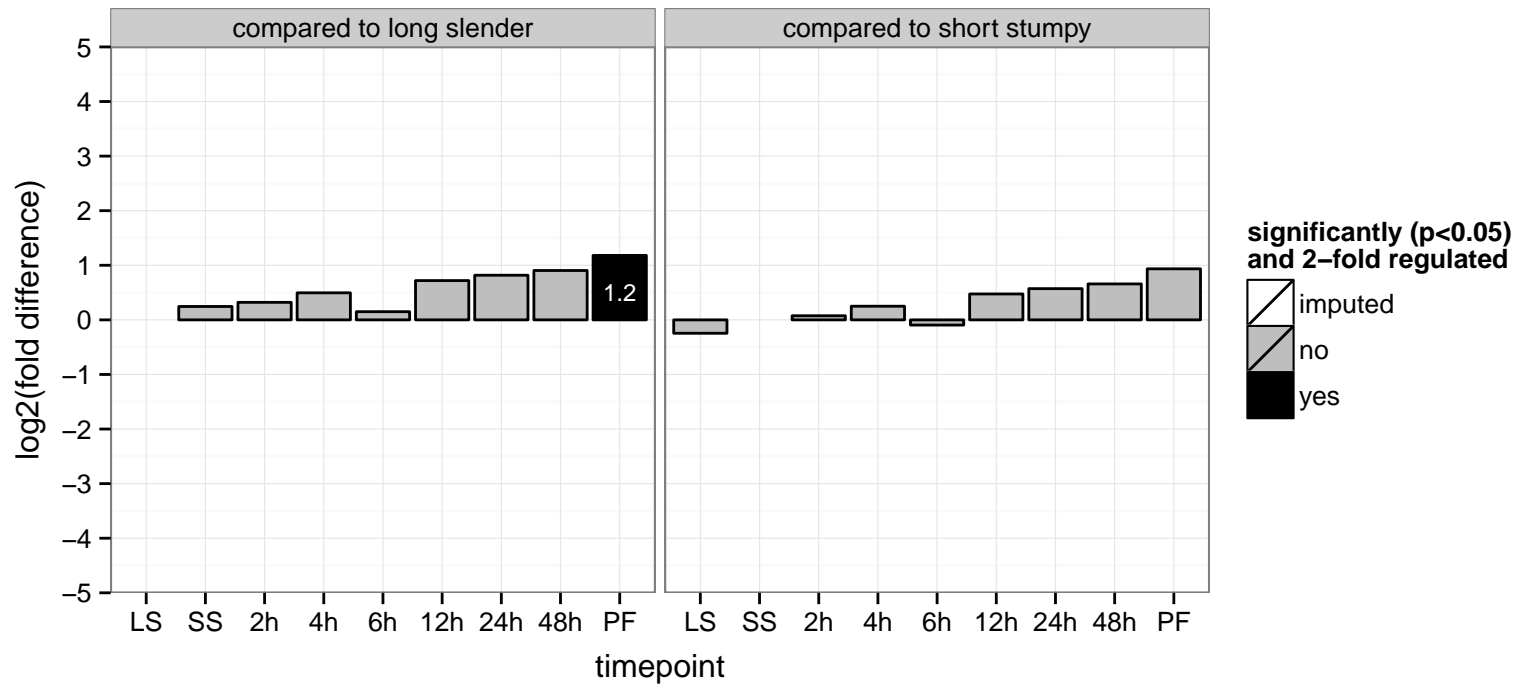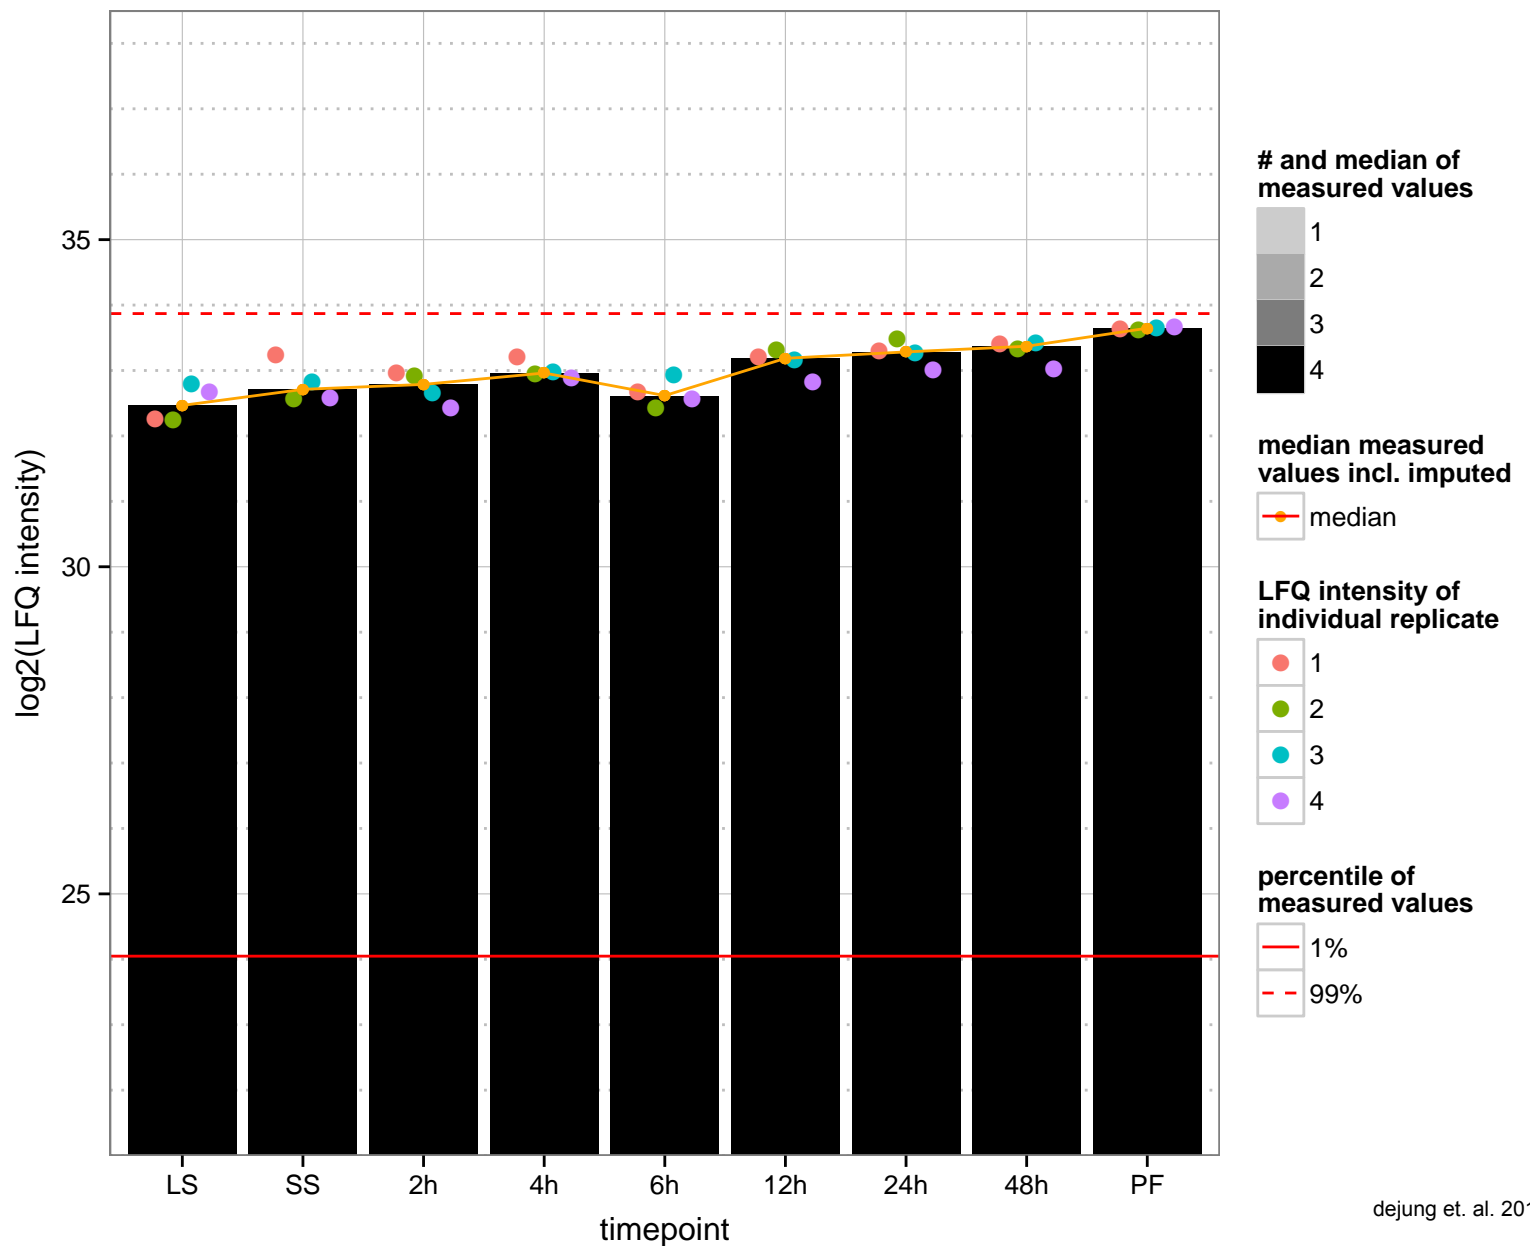



hypothetical protein, conserved  
 Tb927.9.5000  
 AGOF: null  
 AGOC: null  
 AGOP: null  
 PGOF: null  
 PGOE: null  
 PGOP: null

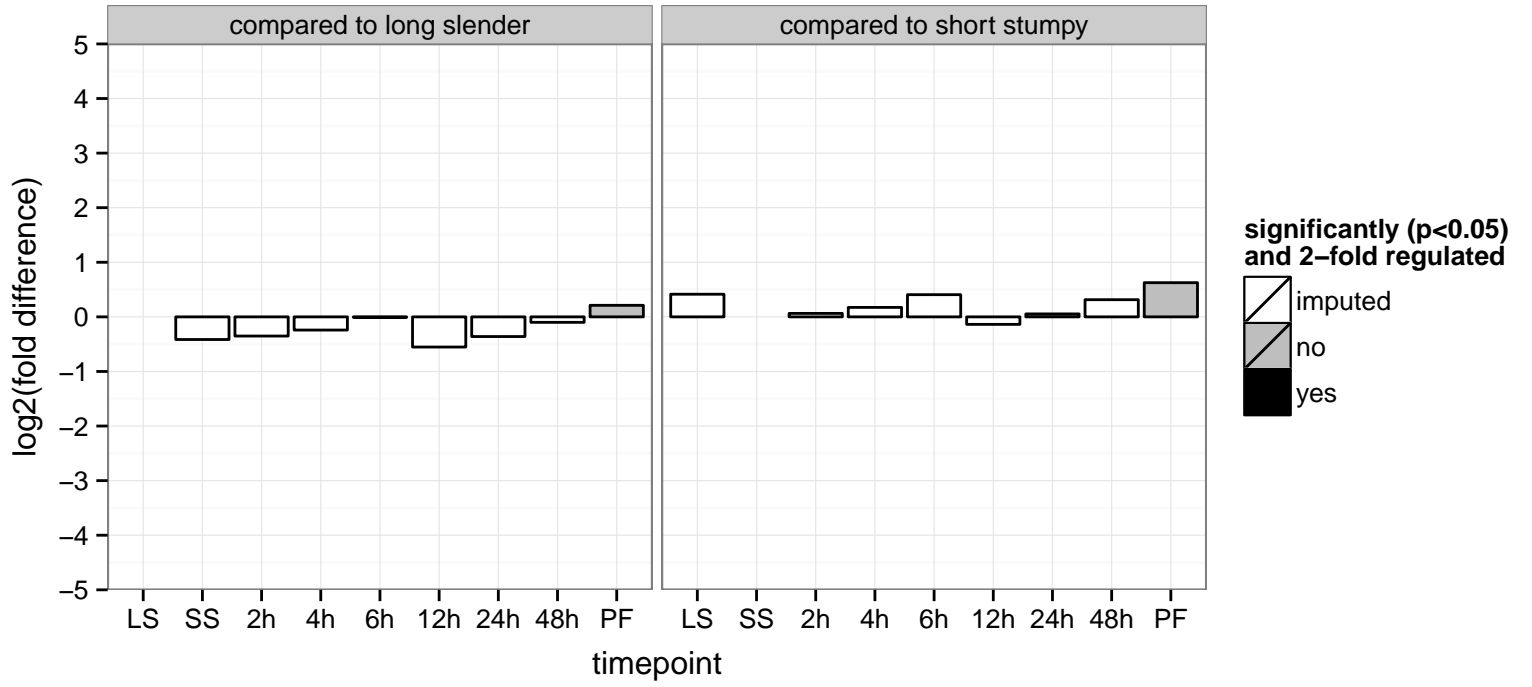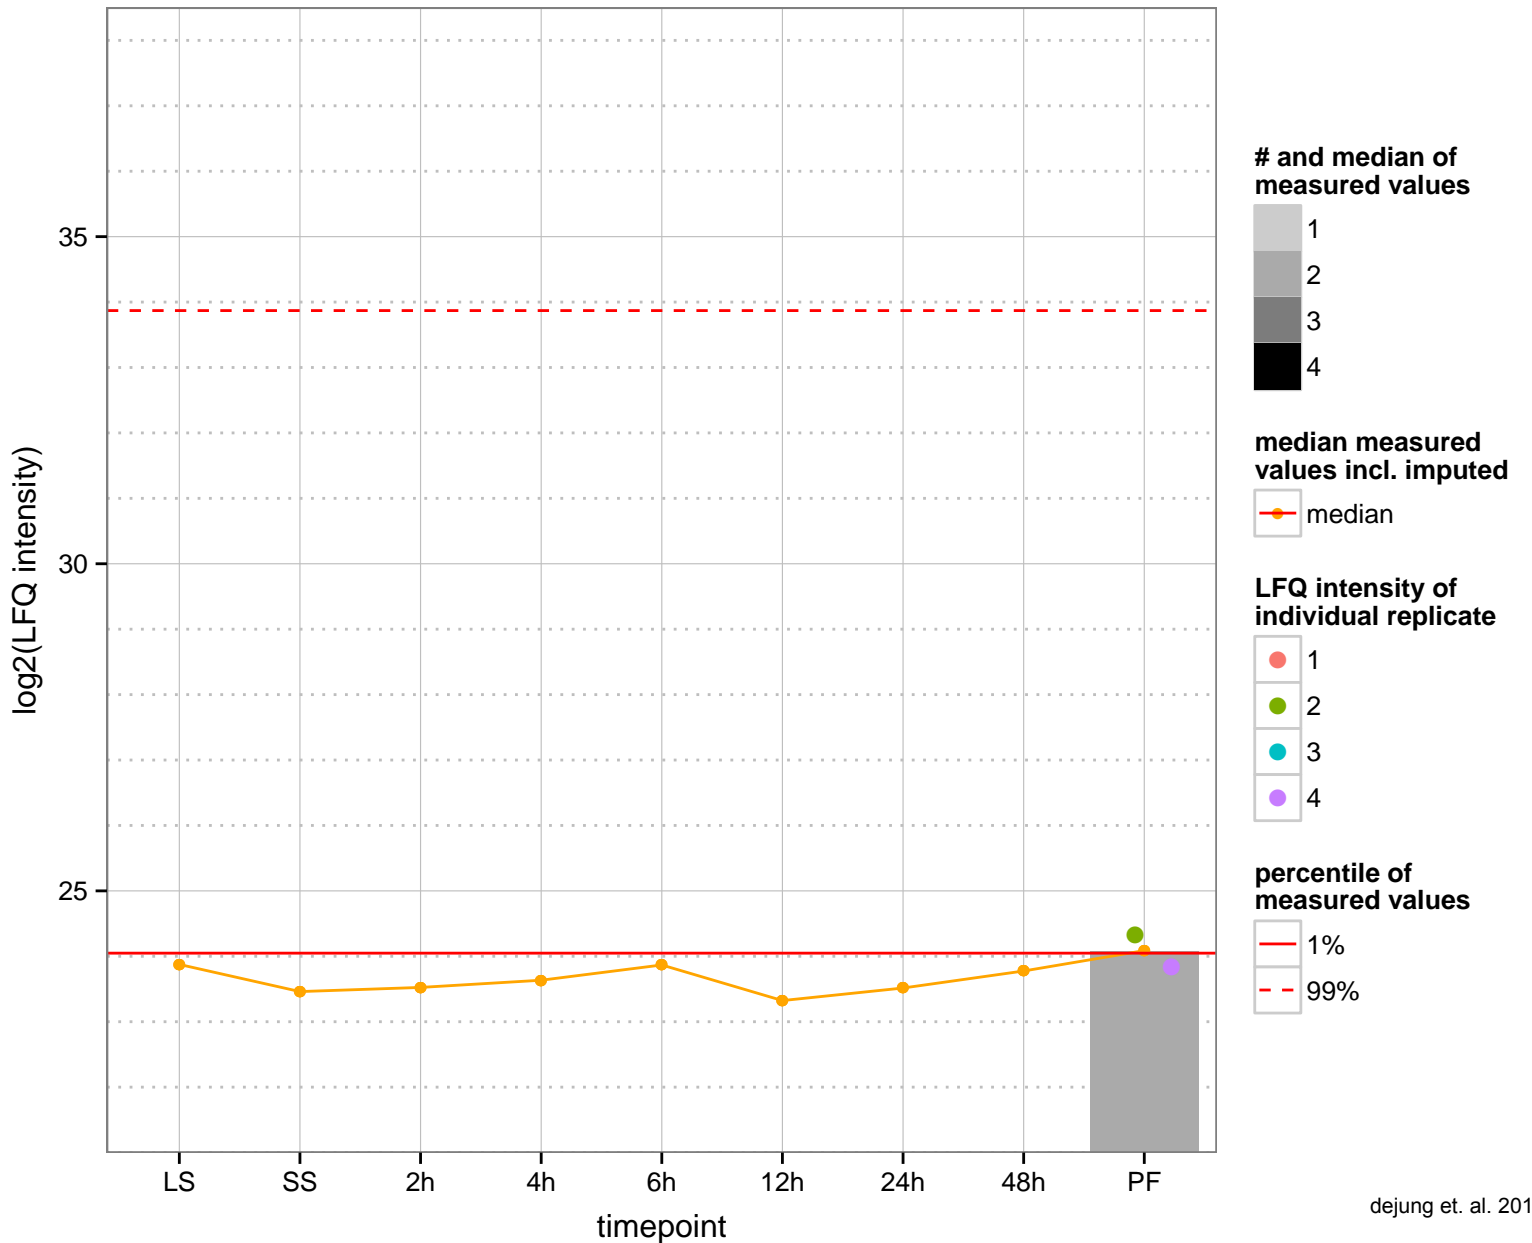

hypothetical protein, conserved  
 Tb927.9.5020  
 AGOF: null  
 AGOC: null  
 AGOP: null  
 PGOF: protein binding  
 PGOC: null  
 PGOP: null

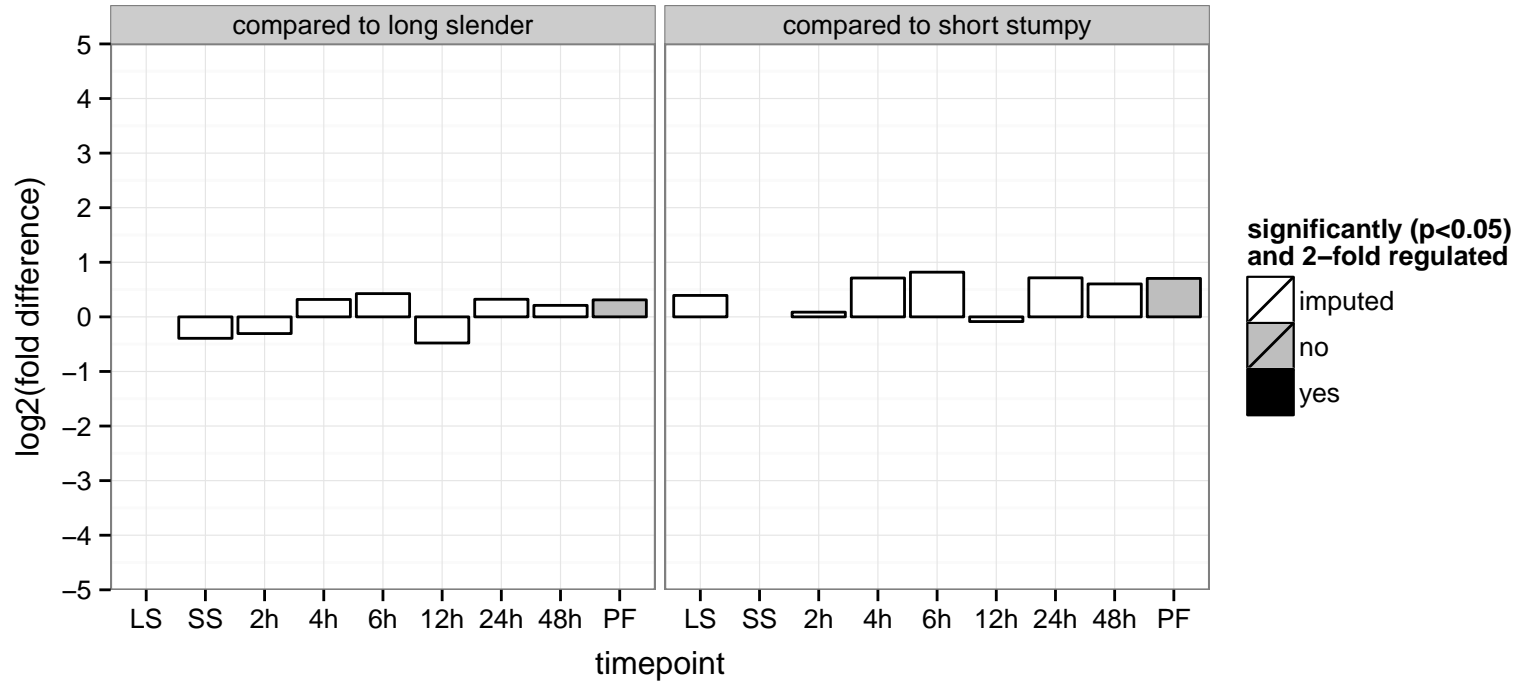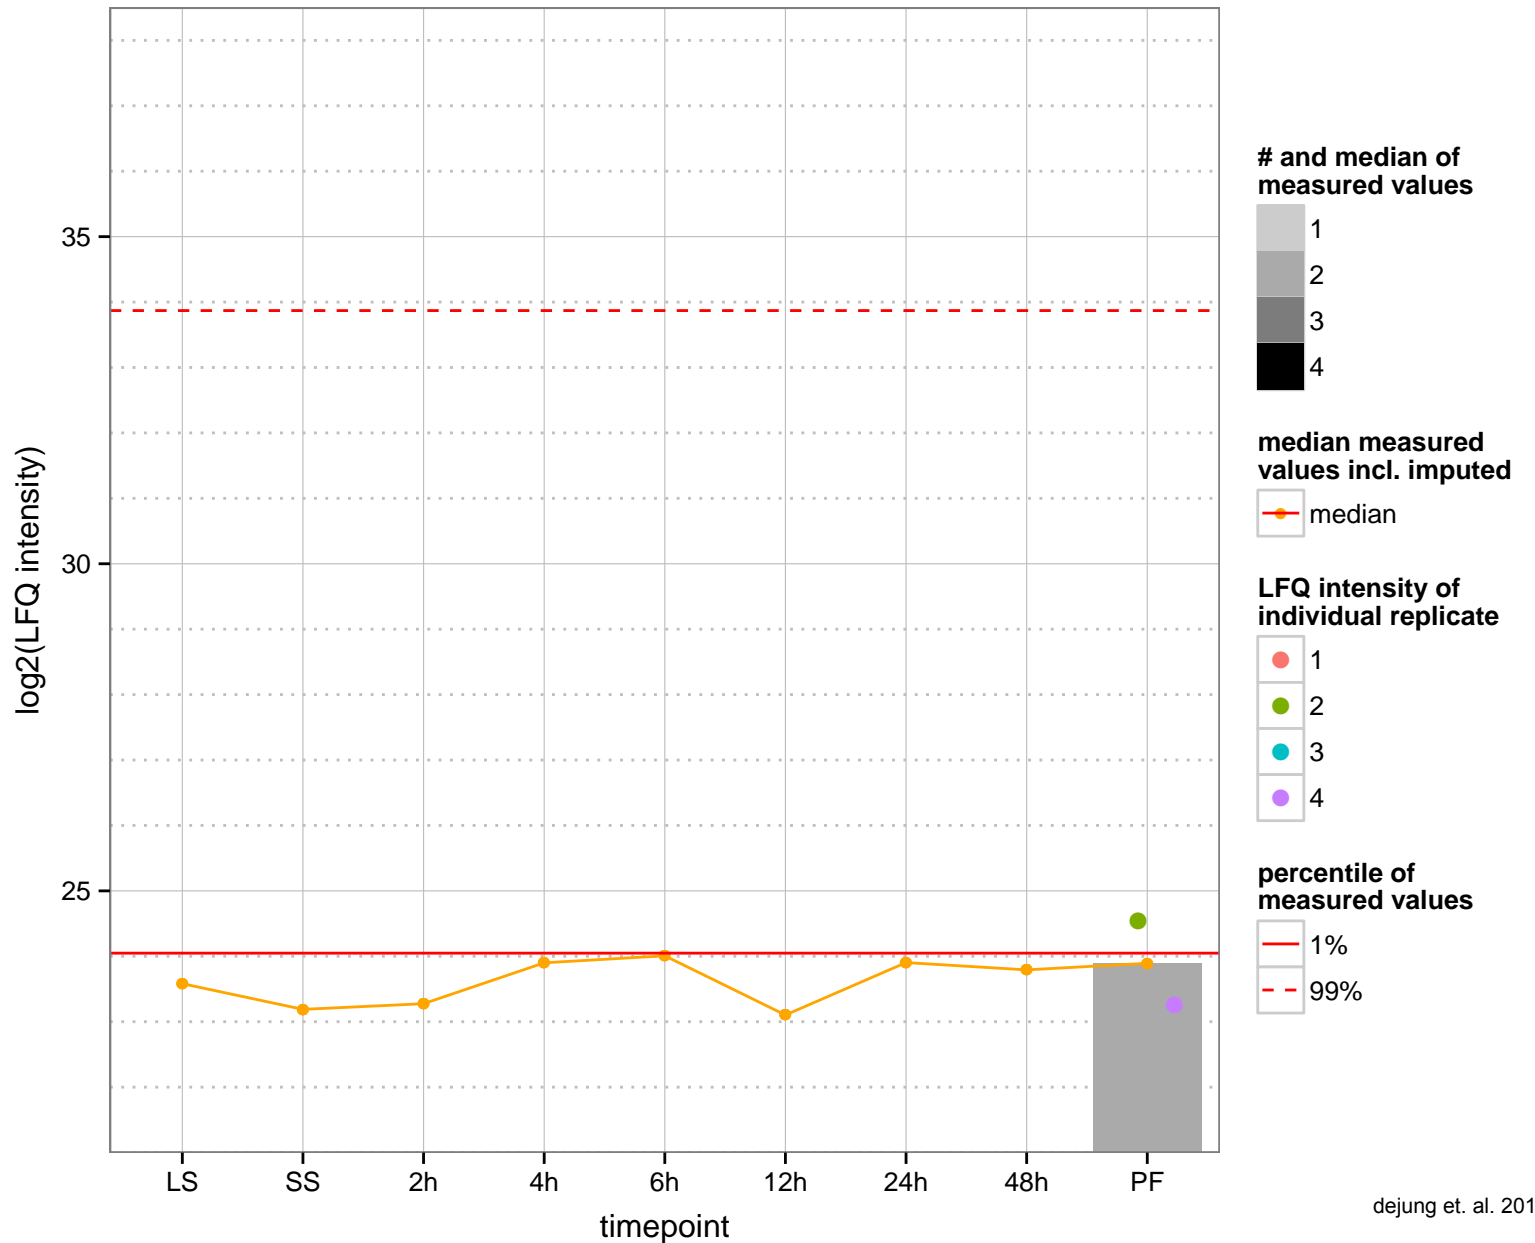

ribosomal protein S6, putative, NHP2/RS6-like protein (NHP2)  
 Tb927.9.5150  
 AGOF: structural constituent of ribosome  
 AGOC: ribosome  
 AGOP: translation  
 PGO: null  
 PGO: null  
 PGO: null

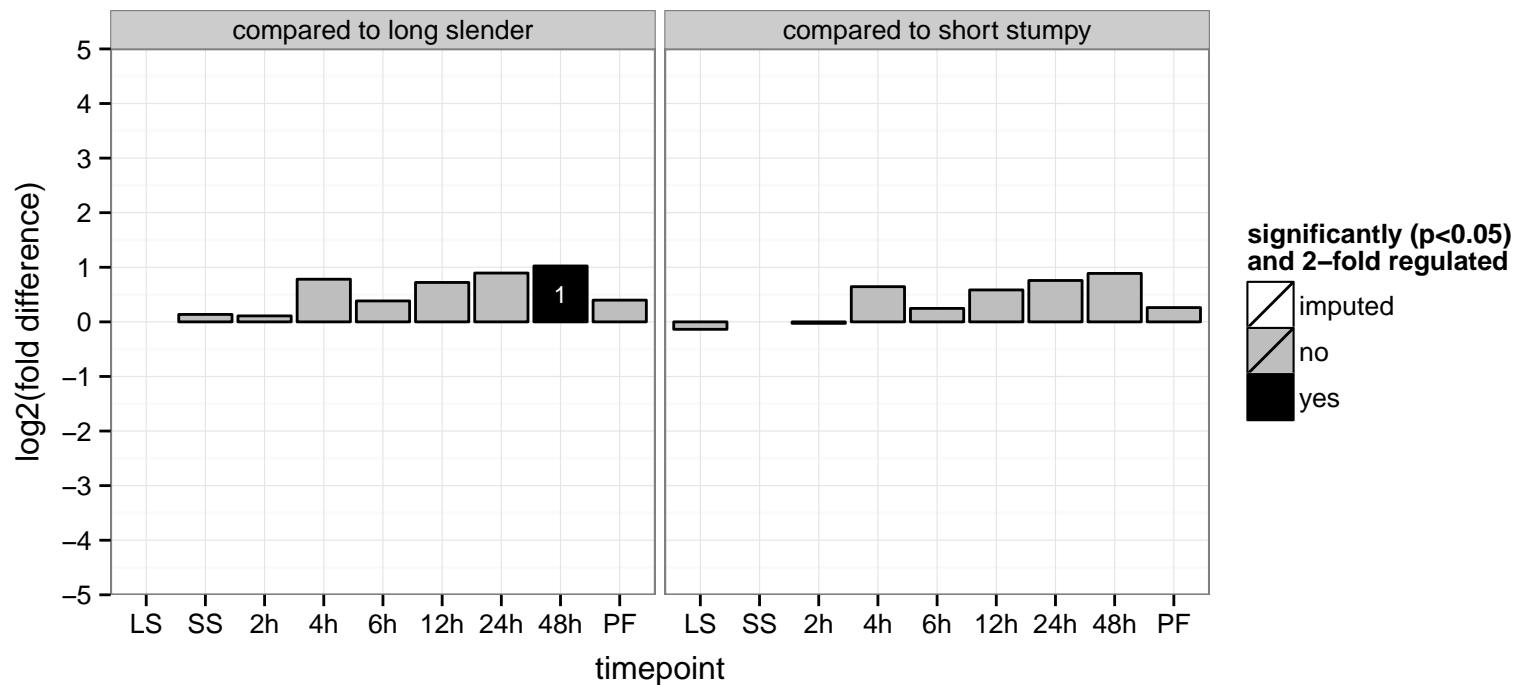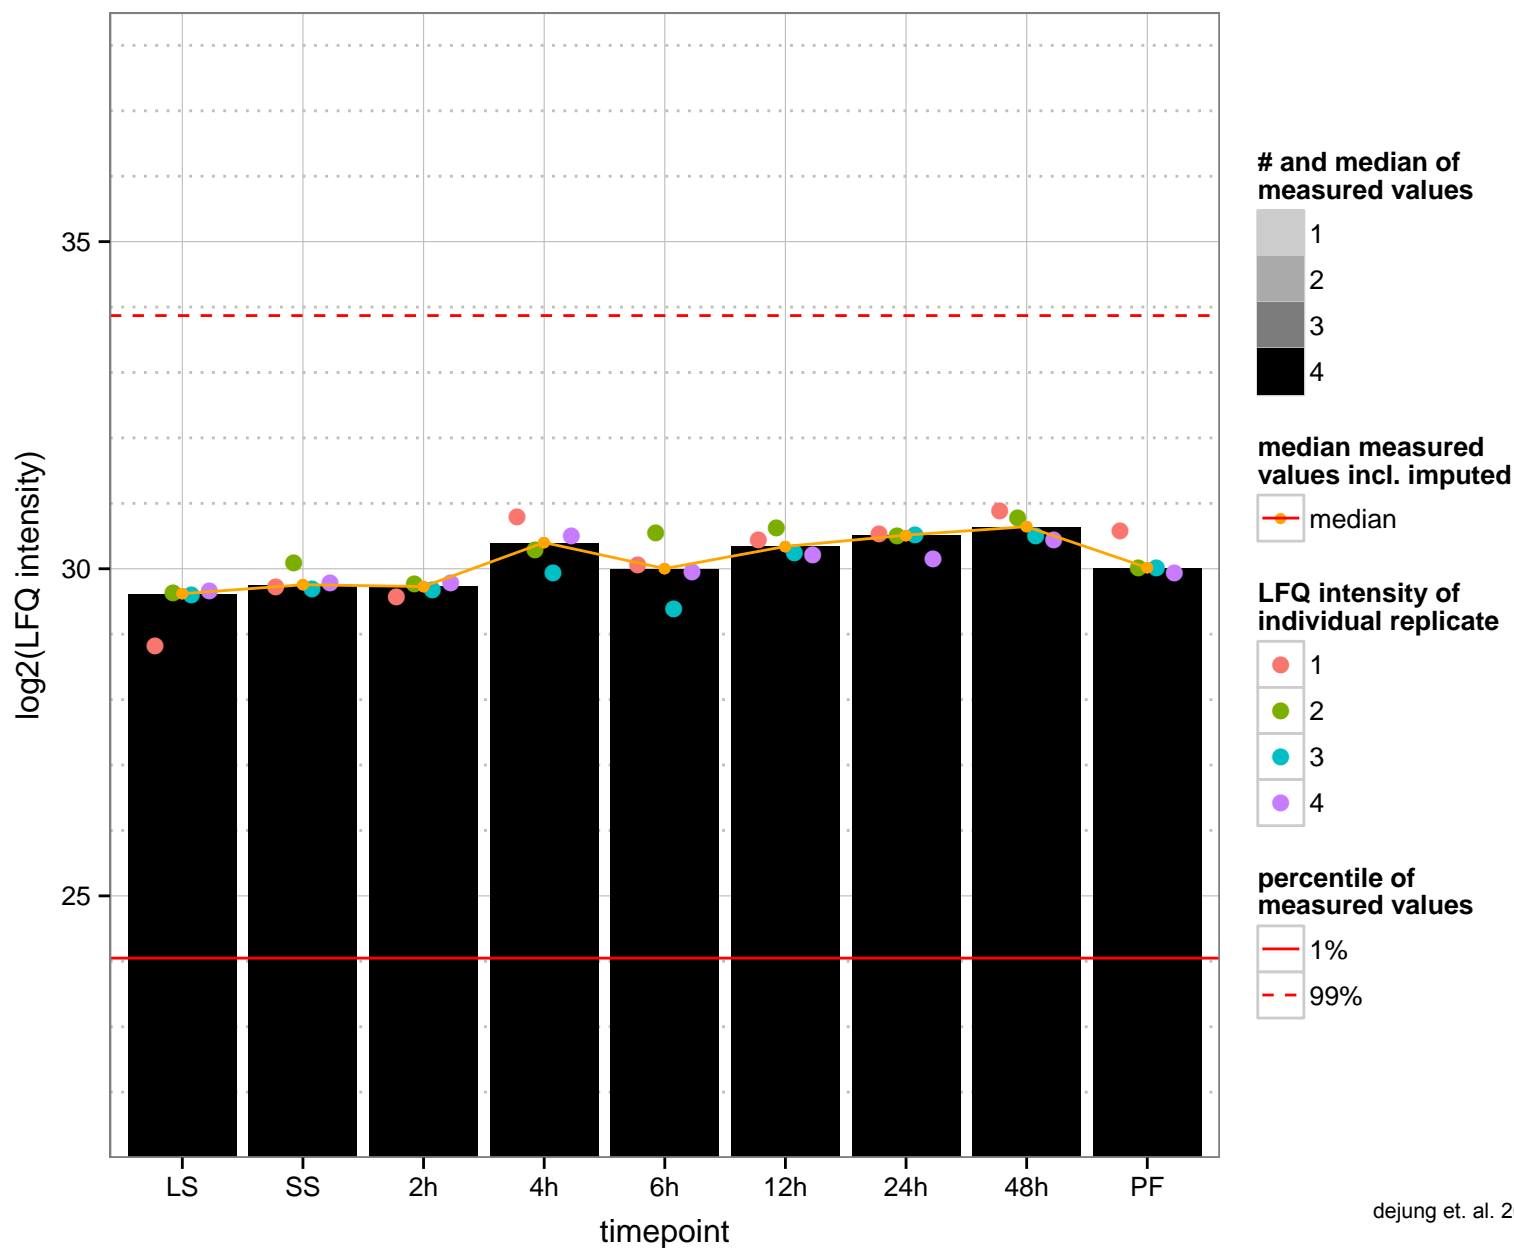

phosphomevalonate kinase protein, putative

Tb927.9.5170

AGOF: ATP binding, phosphomevalonate kinase activity

AGOC: cytoplasm, nucleus

AGOP: ergosterol biosynthetic process, farnesyl diphosphate biosynthetic process, mevalonate pathway, isopentenyl diphospho

PGOF: ATP binding

PGOC: null

PGOP: null

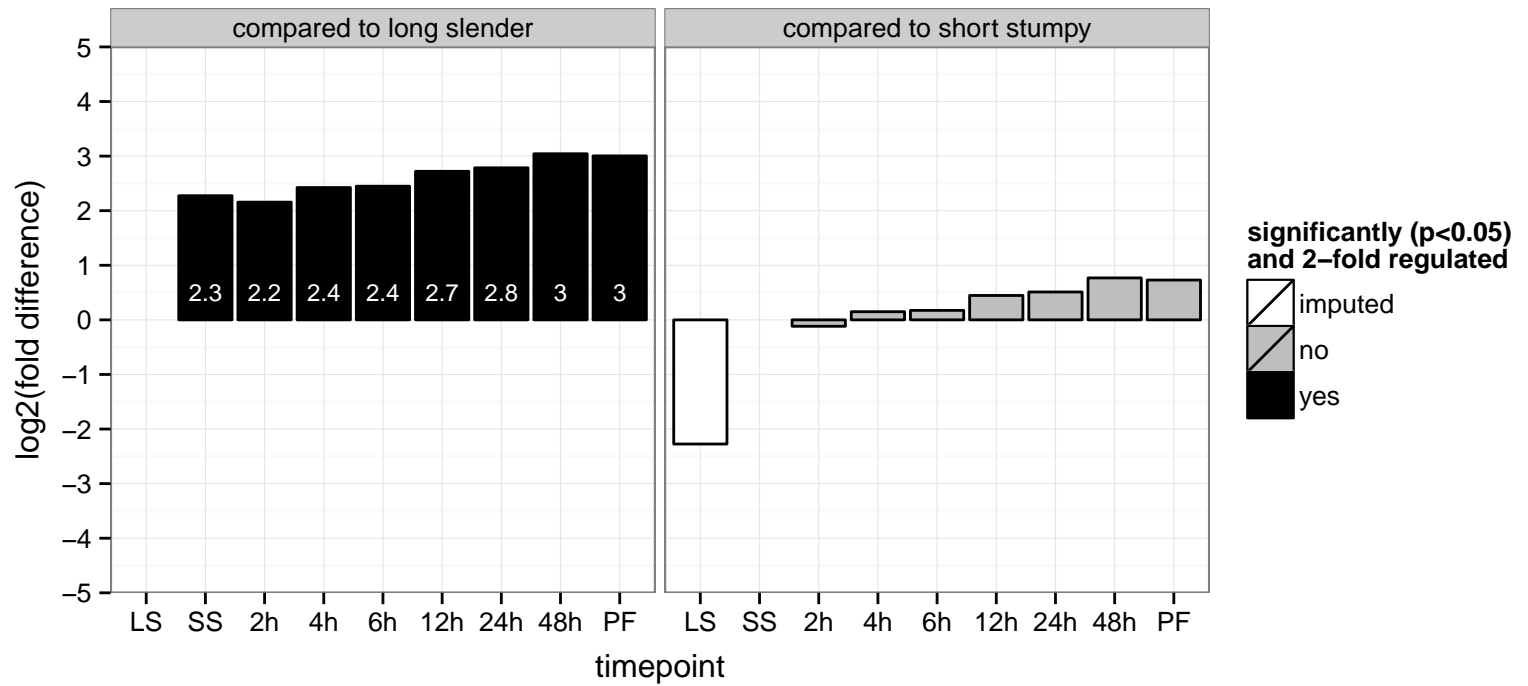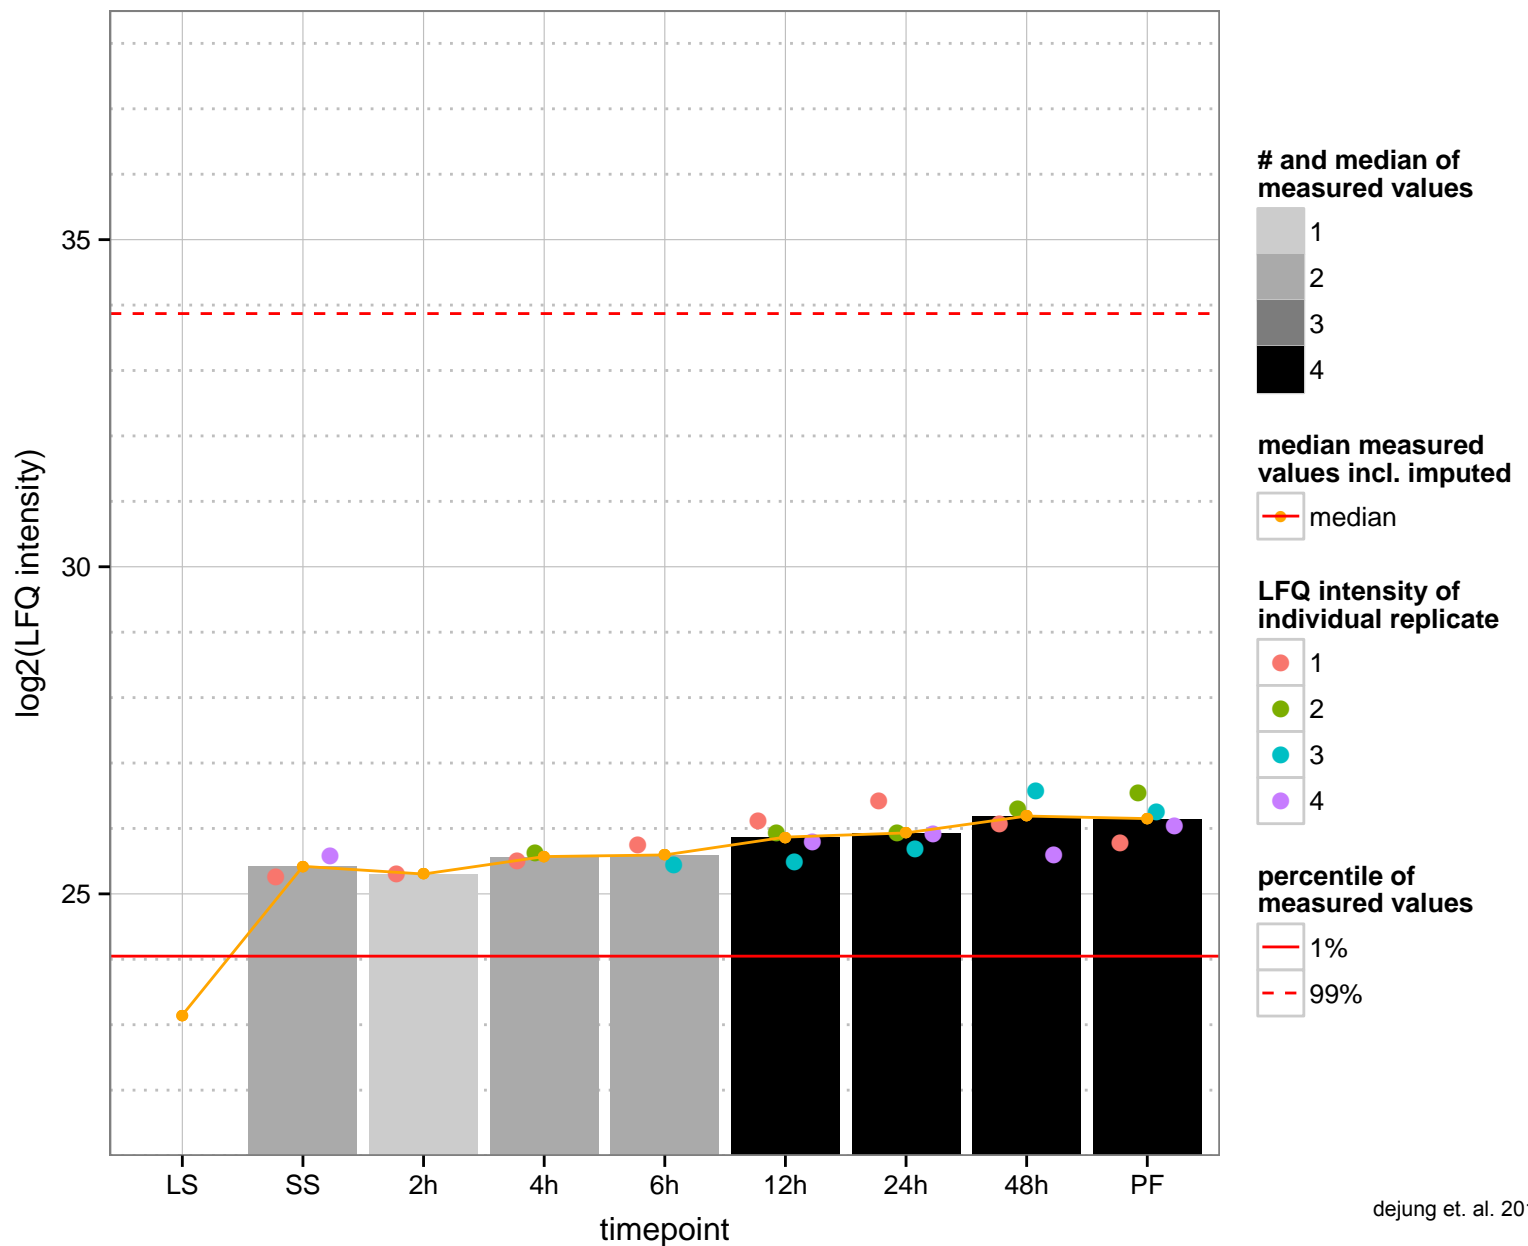

proliferative cell nuclear antigen (PCNA), putative  
 Tb927.9.5190  
 AGOF: DNA binding, DNA polymerase processivity factor activity  
 AGOC: PCNA complex  
 AGOP: regulation of DNA replication  
 PGOF: DNA binding, DNA polymerase processivity factor activity  
 PGO: PCNA complex  
 PGOP: regulation of DNA replication

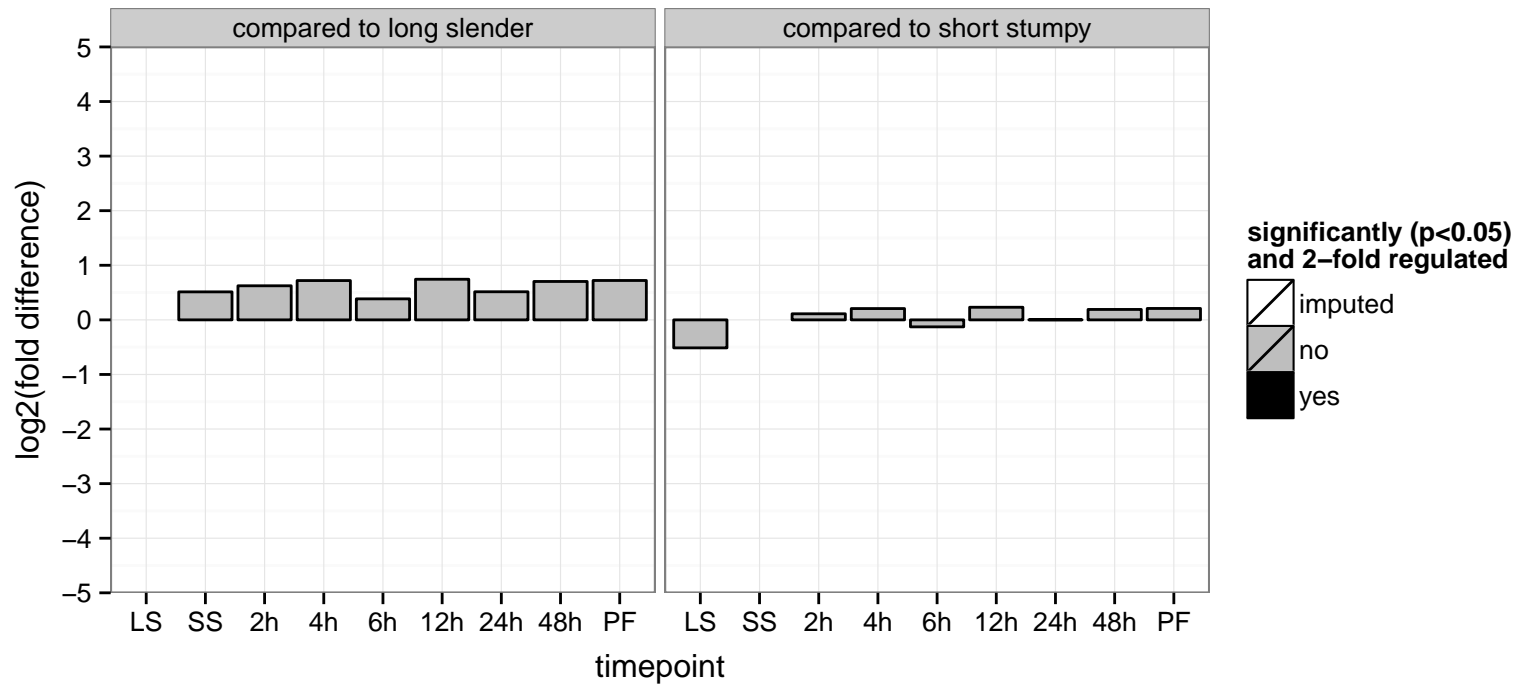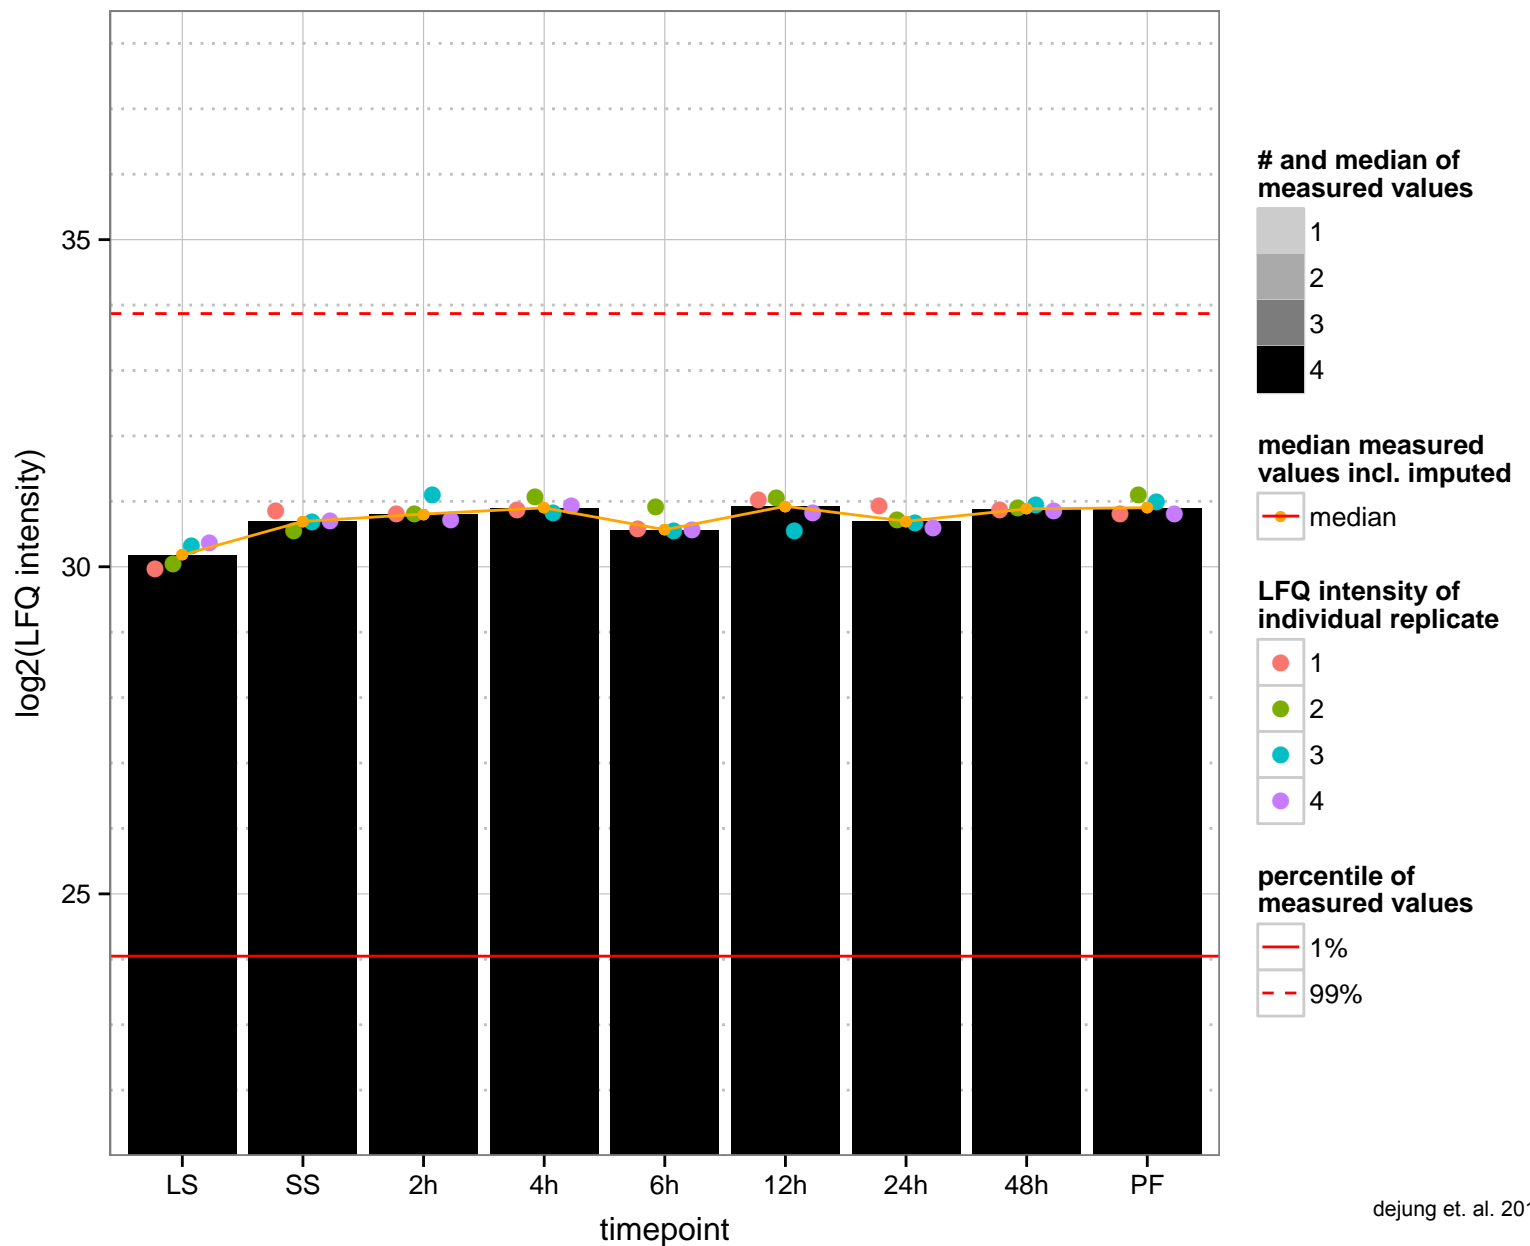

glutamyl-tRNA synthetase, putative

Tb927.9.5210

AGOF: ATP binding, glutamine-tRNA ligase activity

AGOC: cytoplasm

AGOP: glutamyl-tRNA aminoacylation, translation

PGOF: ATP binding, aminoacyl-tRNA ligase activity, glutamine-tRNA ligase activity, ligase activity, forming aminoacyl-tRNA

PGOC: cytoplasm

PGOP: glutamyl-tRNA aminoacylation, tRNA aminoacylation, tRNA aminoacylation for protein translation, translation

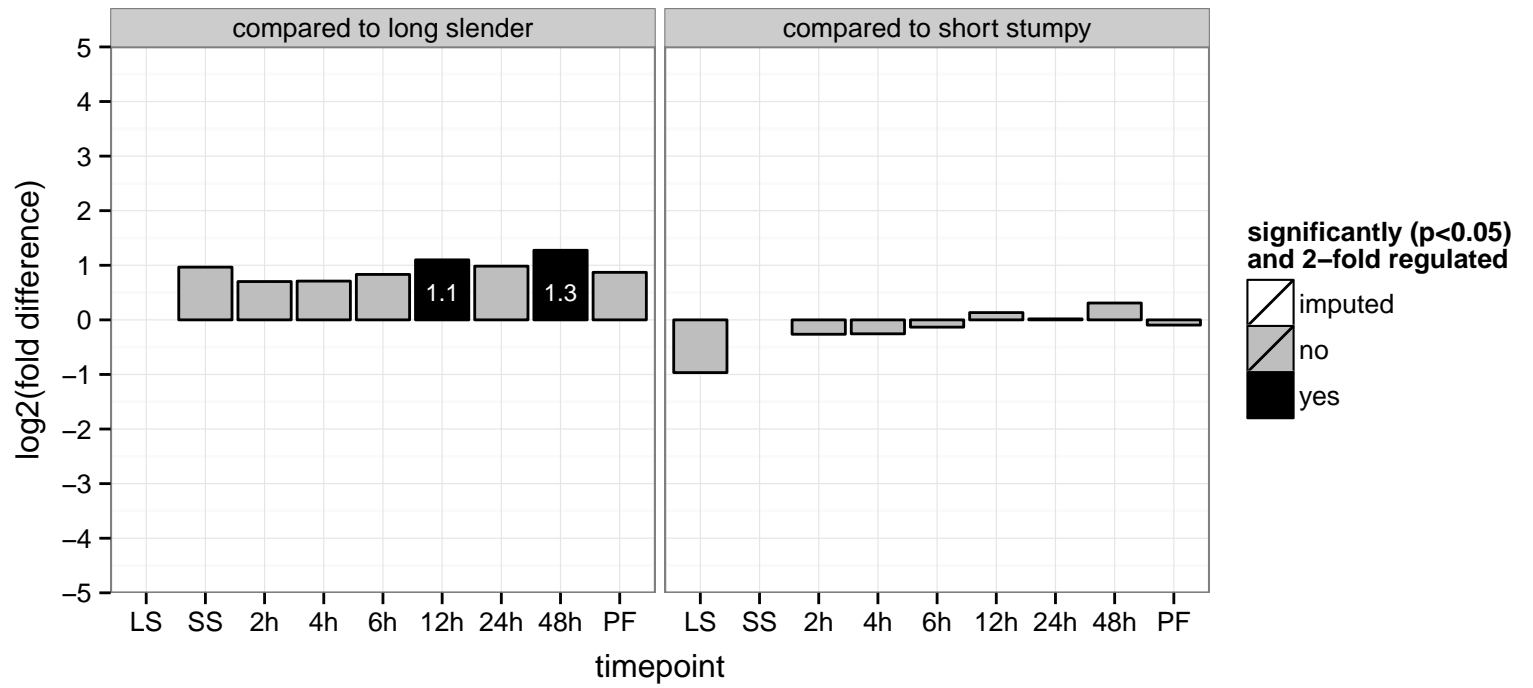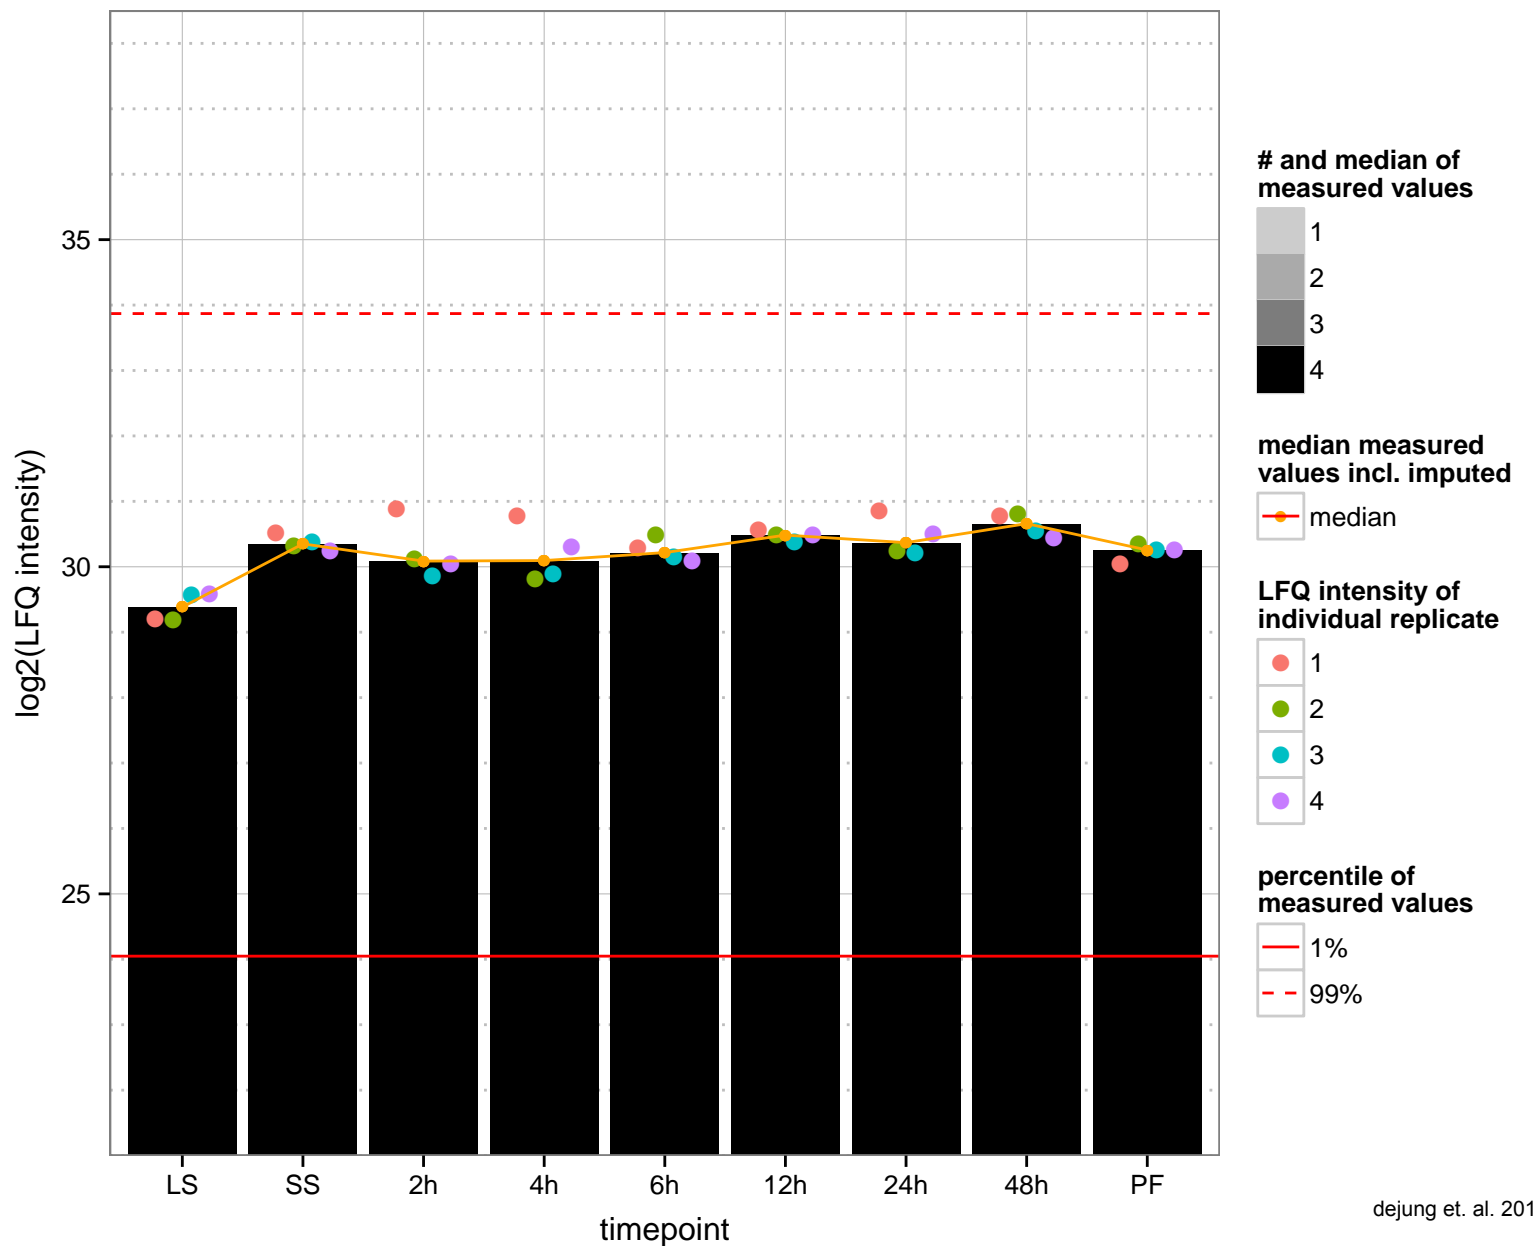

nucleolar RNA binding protein, putative  
 Tb927.9.5320  
 AGOF: snoRNA binding  
 AGOC: null  
 AGOP: nuclear mRNA splicing, via spliceosome  
 PGO: null  
 PGO: null  
 PGO: null

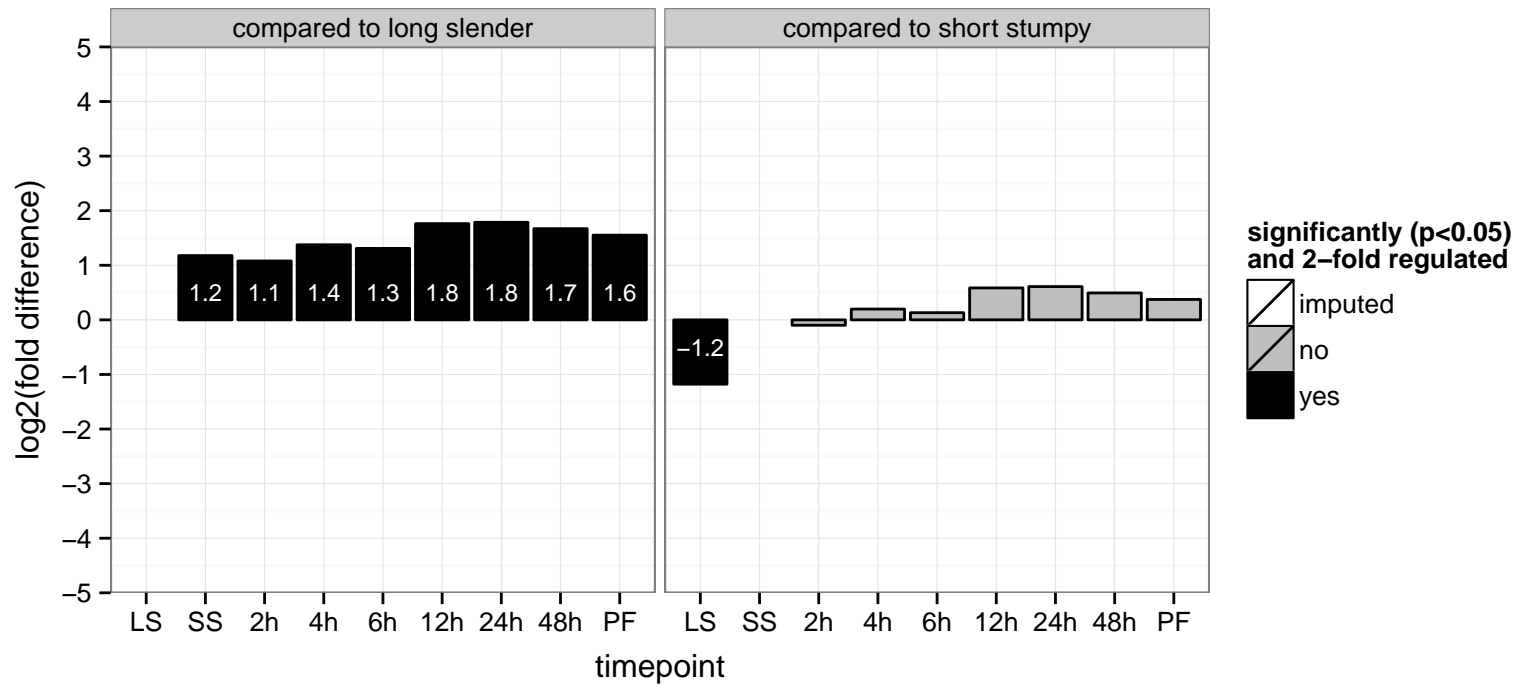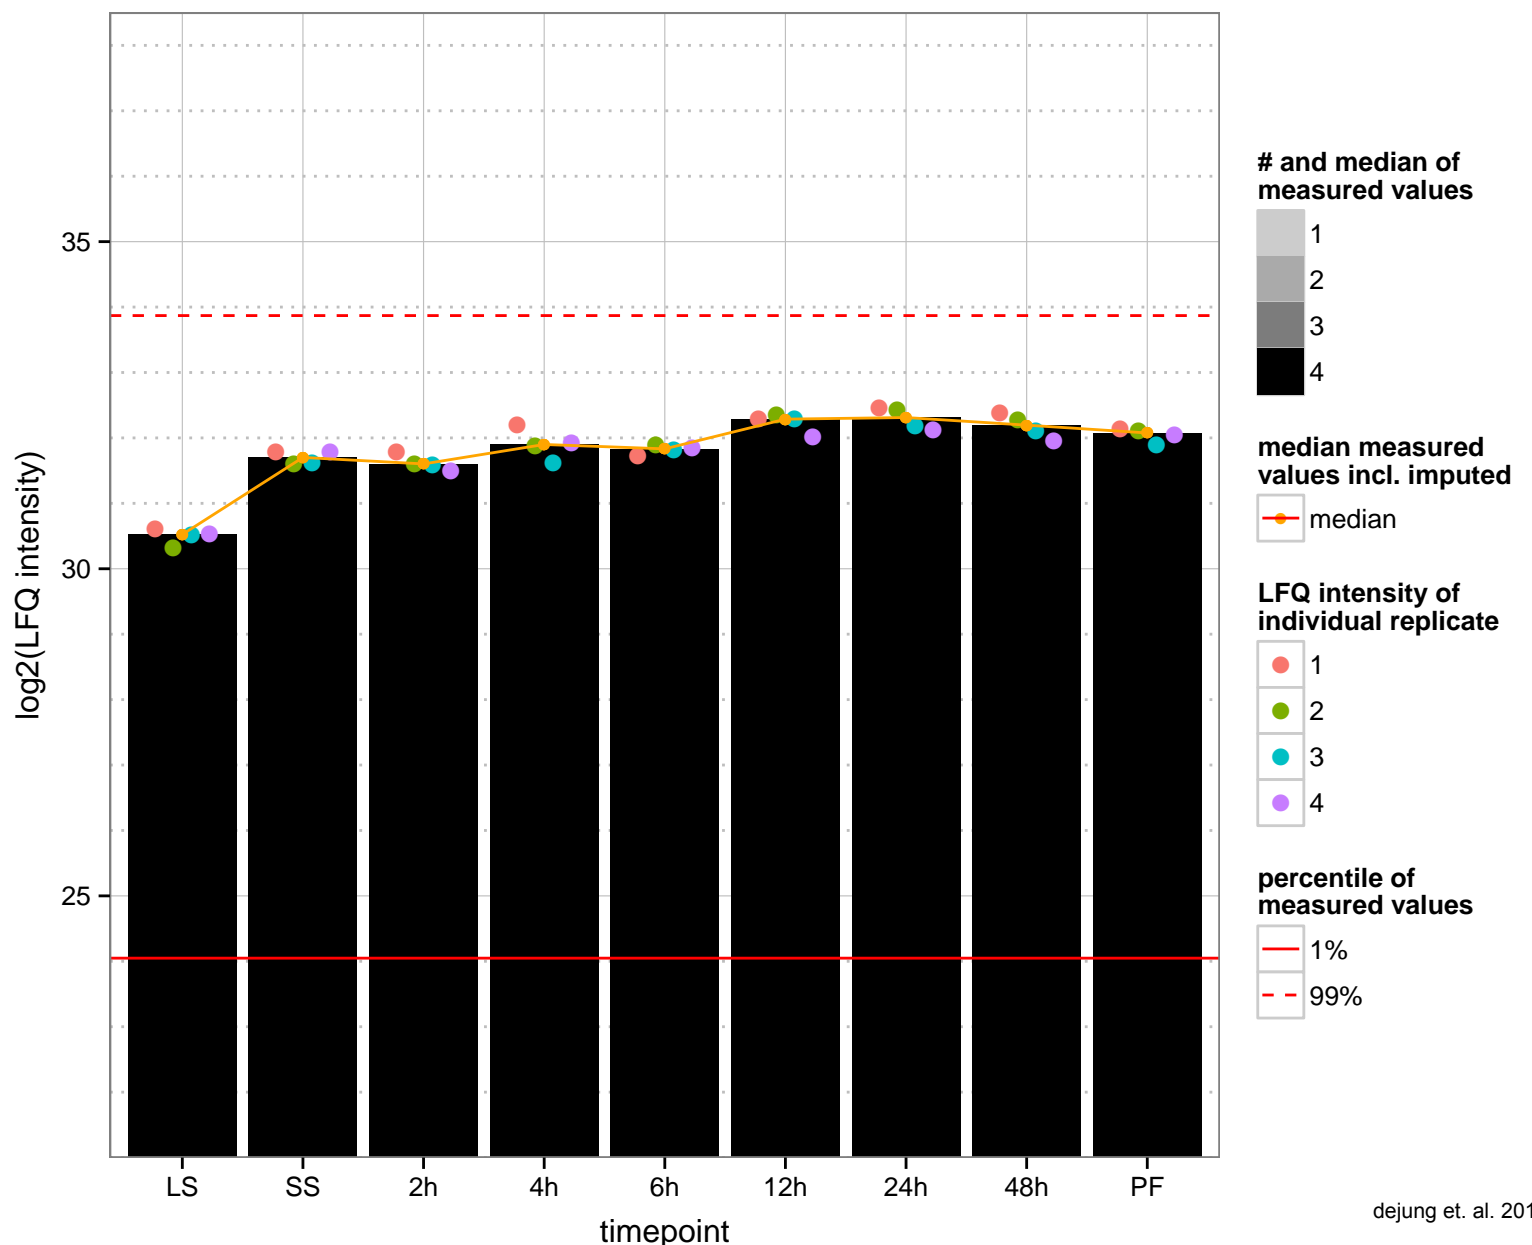

hypothetical protein, conserved  
 Tb927.9.5410  
 AGOF: null  
 AGOC: null  
 AGOP: null  
 PGO: null  
 PGOC: null  
 PGOP: null

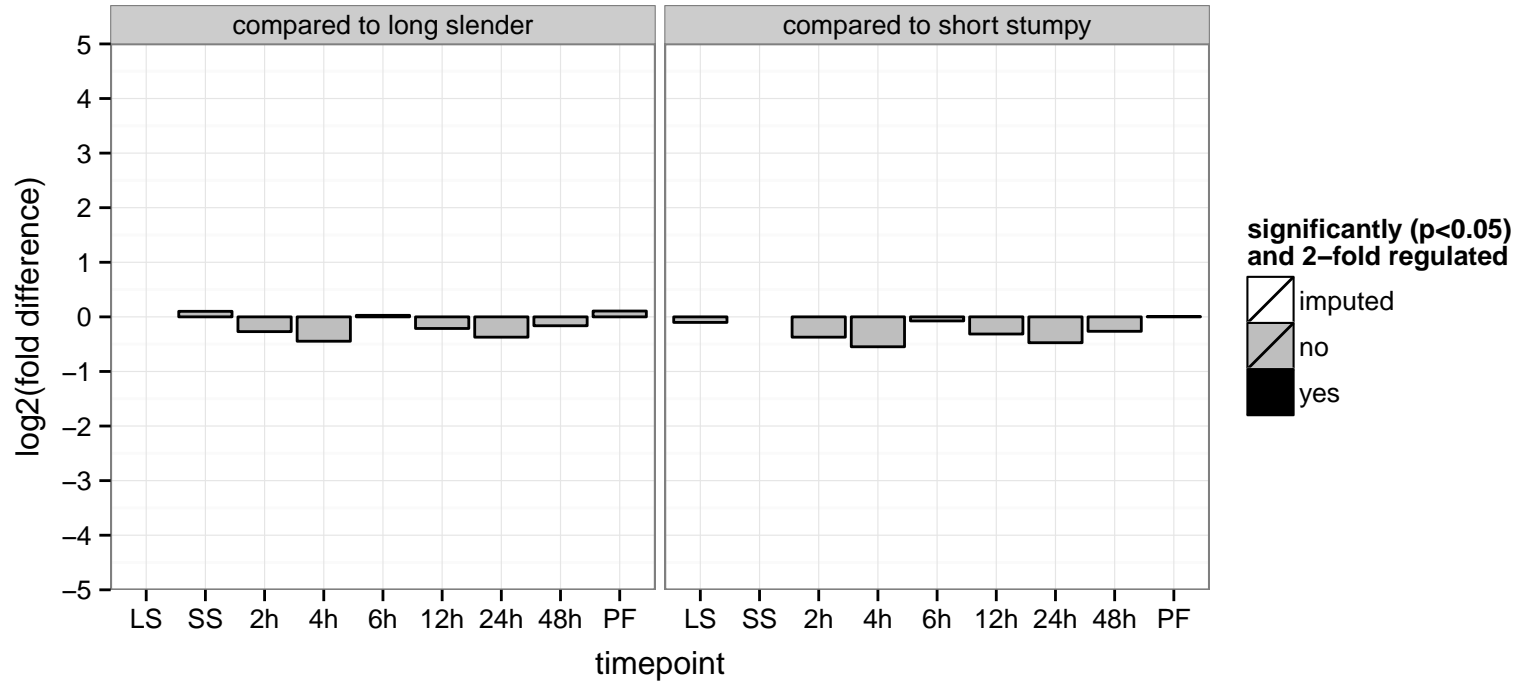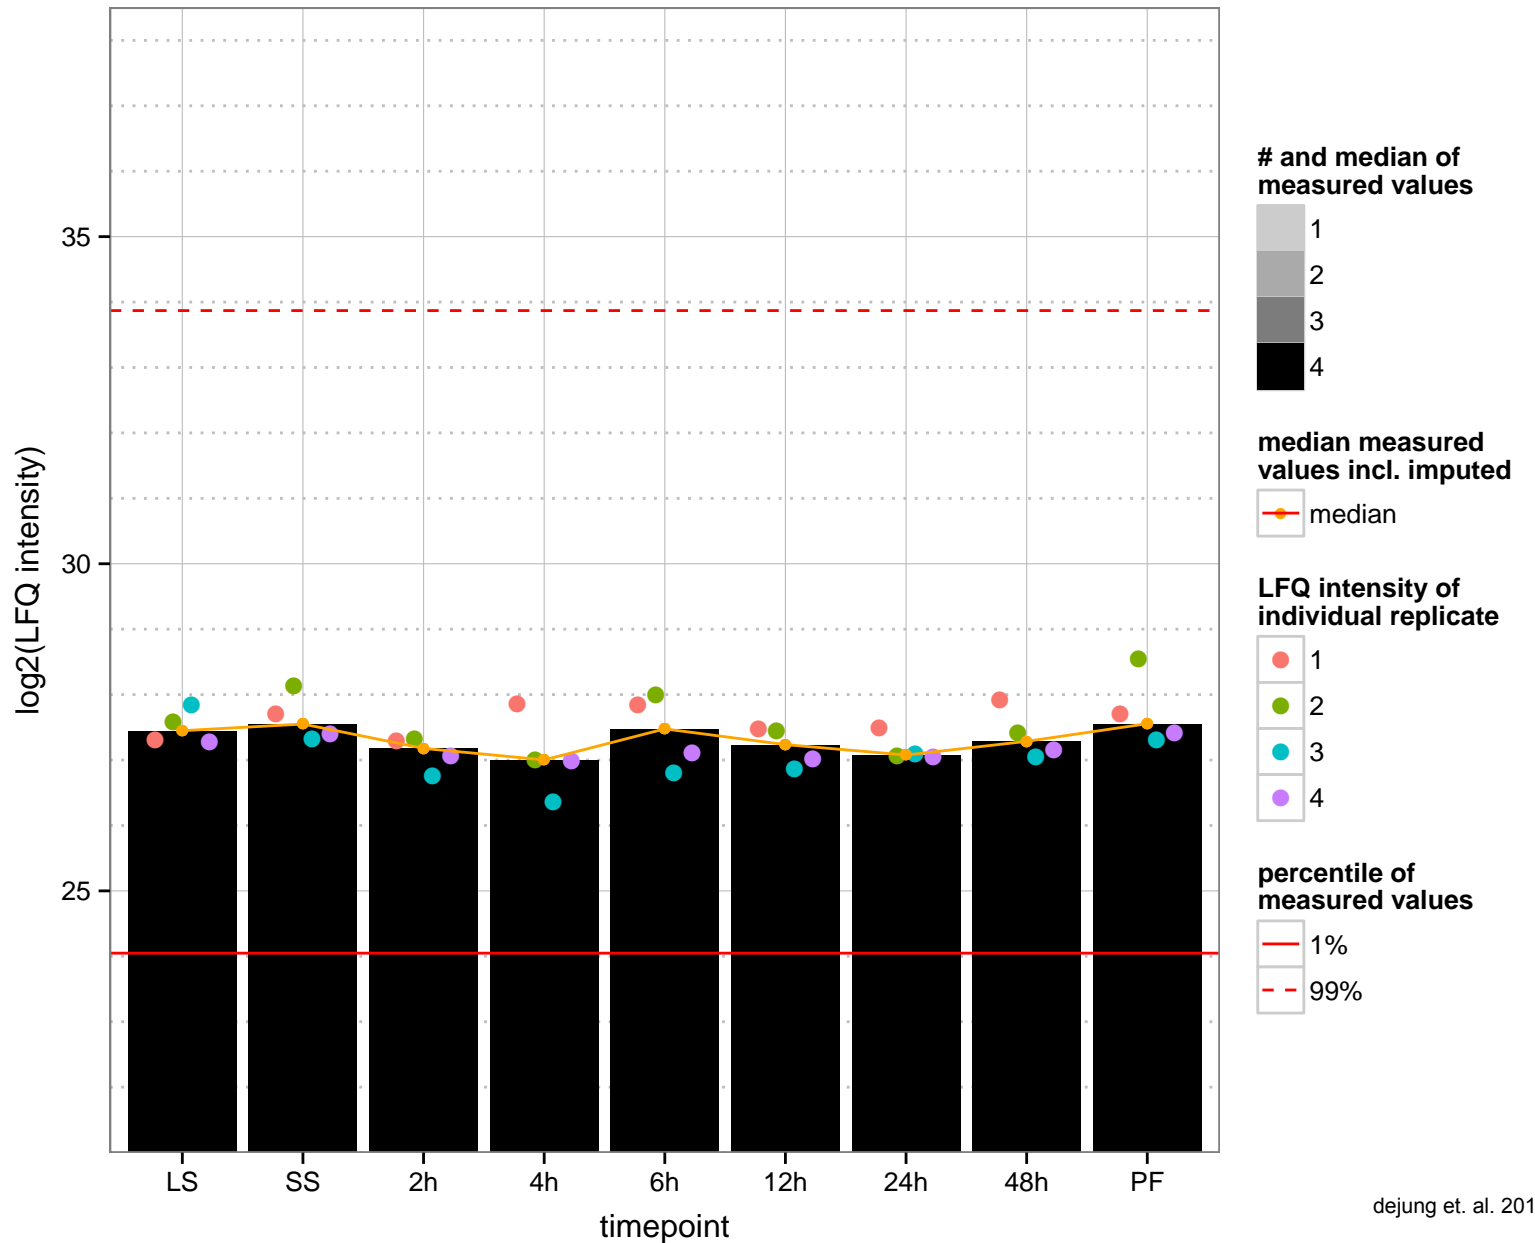



Eukaryotic translation initiation factor 4 gamma type 2 (eif4g2)

Tb927.9.5460

AGOF: RNA binding, nucleic acid binding, protein binding

AGOC: eukaryotic translation initiation factor 4F complex

AGOP: RNA metabolic process, nucleobase-containing compound metabolic process, translation

PGOF: DNA binding, RNA binding, binding, protein binding

PGOC: null

PGOP: null

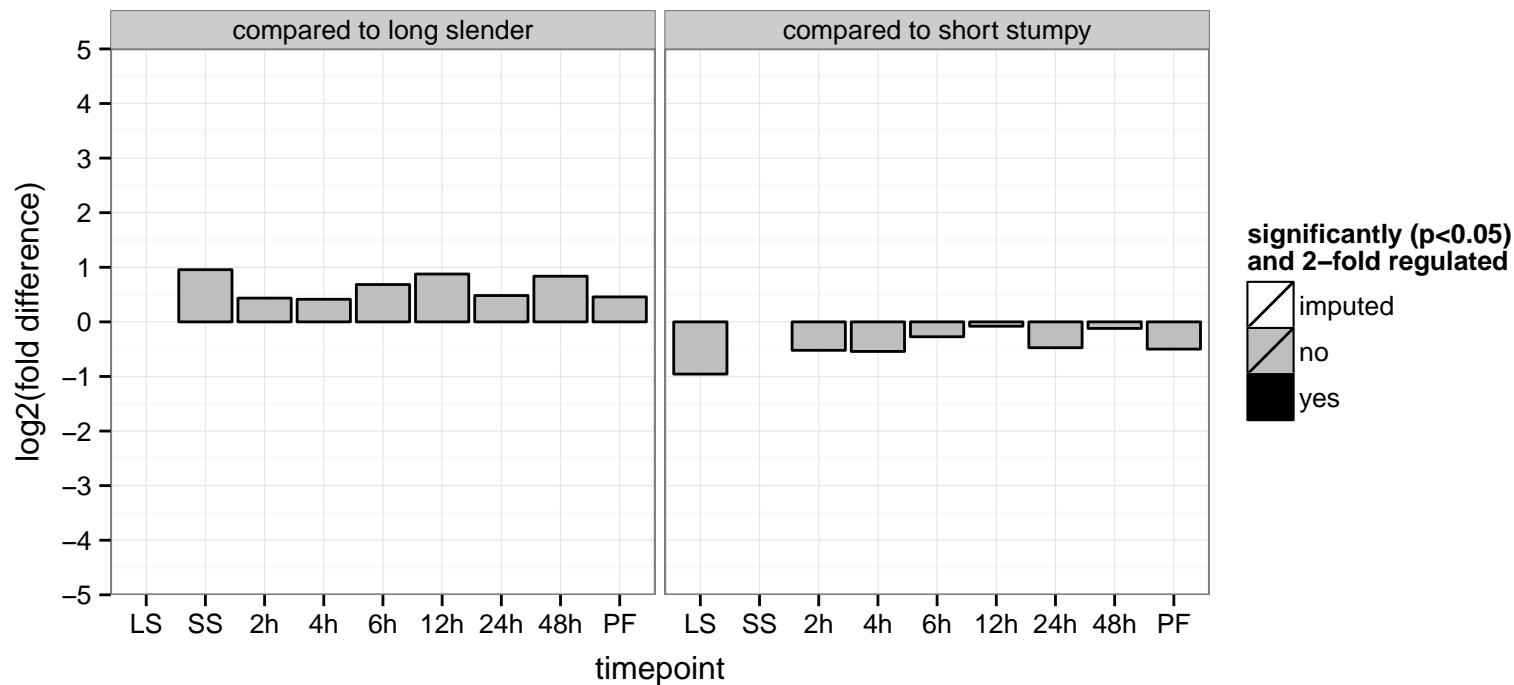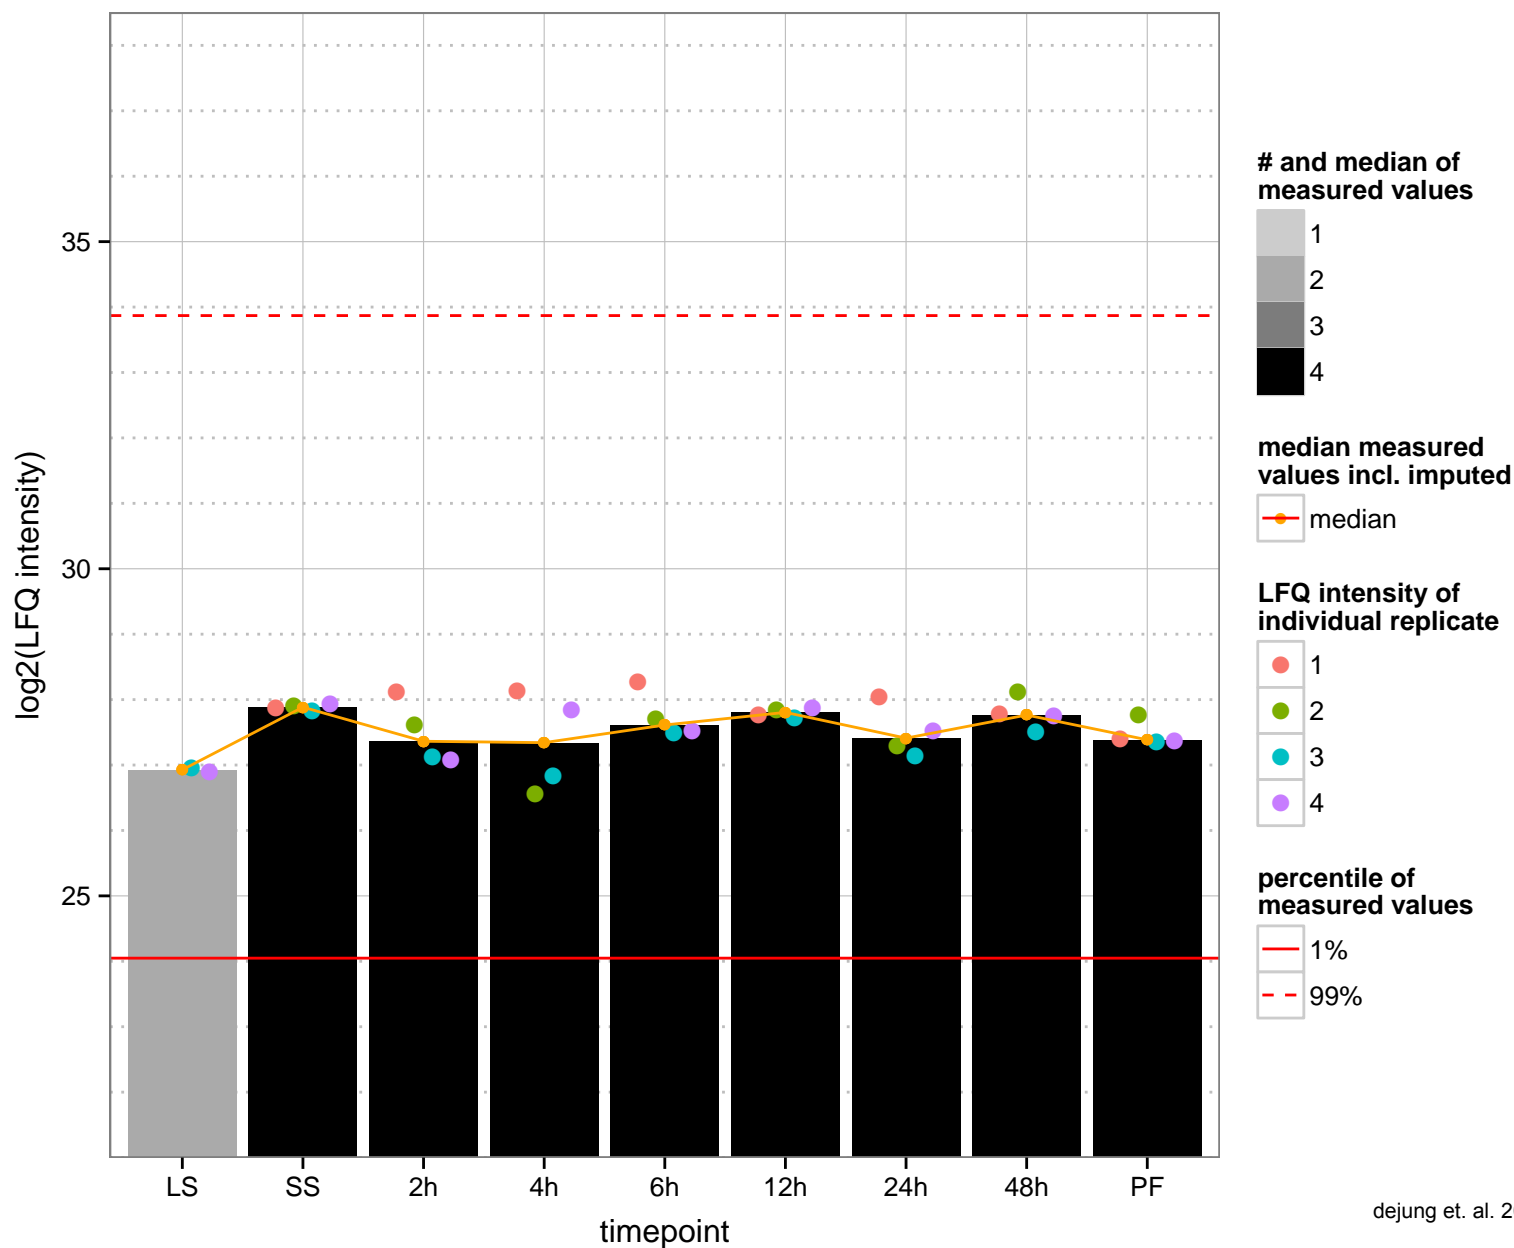

DNA topoisomerase ii (TOP2)

Tb927.9.5590

AGOF: ATP binding, DNA topoisomerase (ATP-hydrolyzing) activity

AGOC: chromosome, mitochondrion, nucleus

AGOP: DNA topological change

PGOF: ATP binding, DNA binding, DNA topoisomerase (ATP-hydrolyzing) activity

PGOC: chromosome

PGOP: DNA topological change

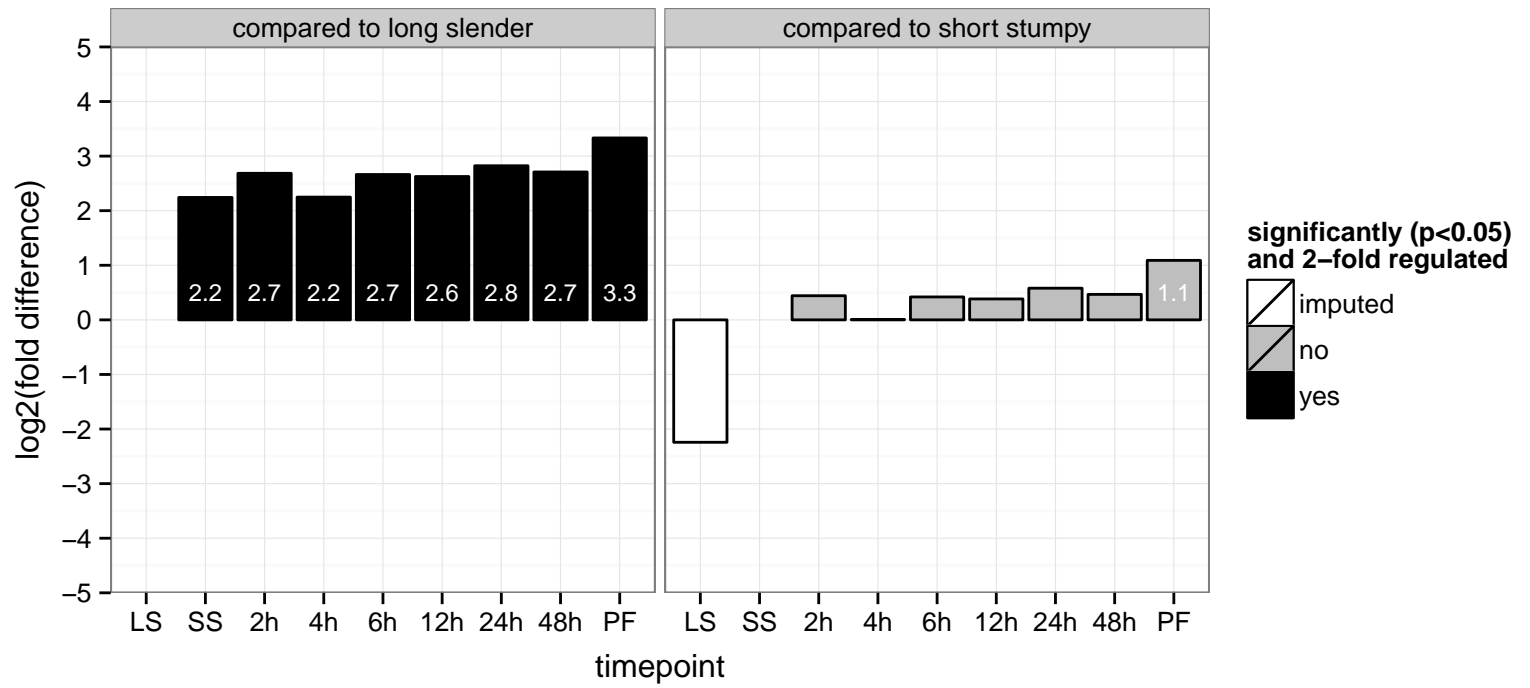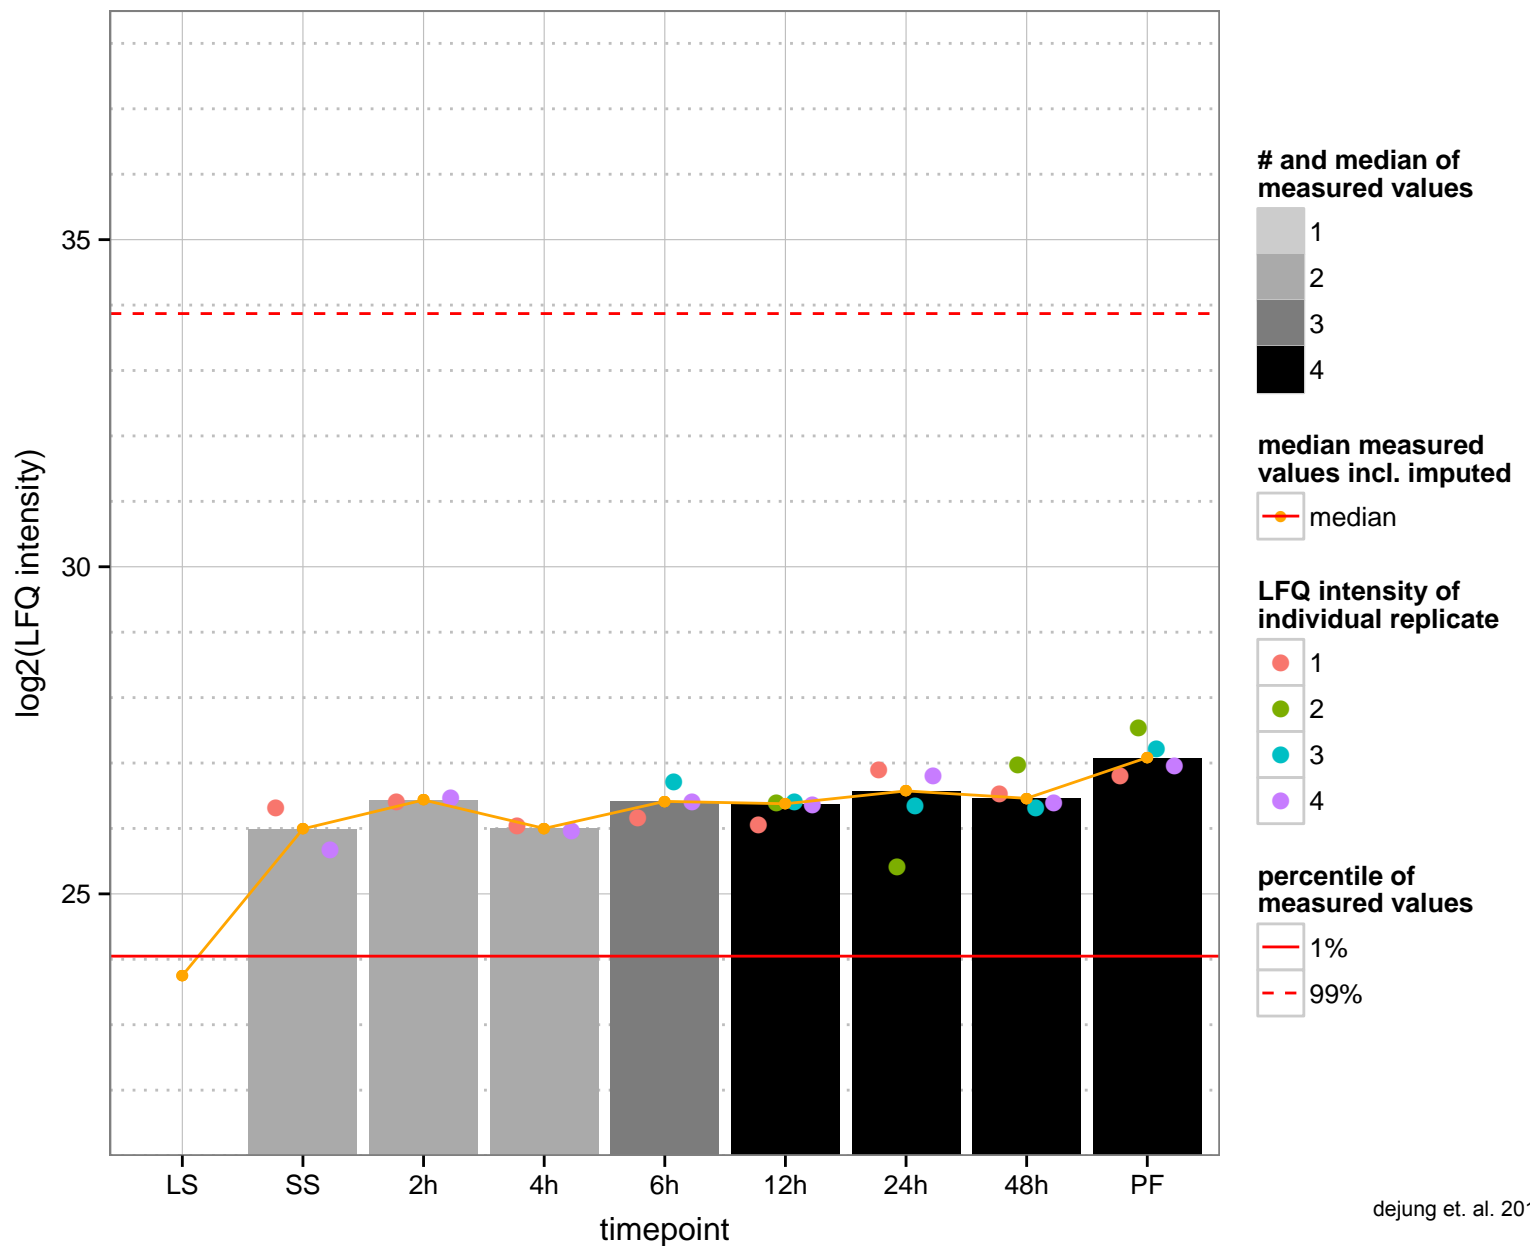

unspecified product  
 Tb927.9.5840;Tb927.9.5750  
 AGOF: null  
 AGOC: null  
 AGOP: null  
 PGO: antioxidant activity, oxidoreductase activity, peroxiredoxin activity  
 PGOC: null  
 PGOP: oxidation–reduction process

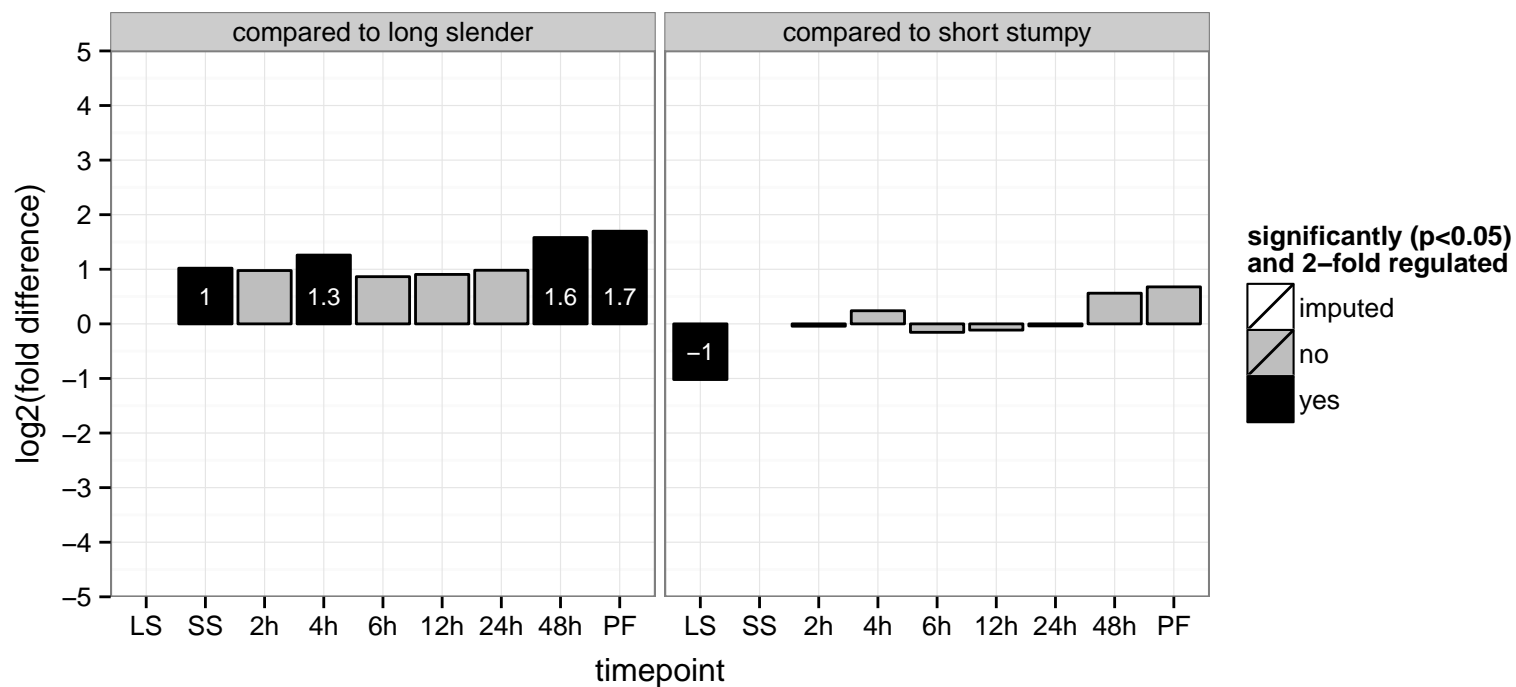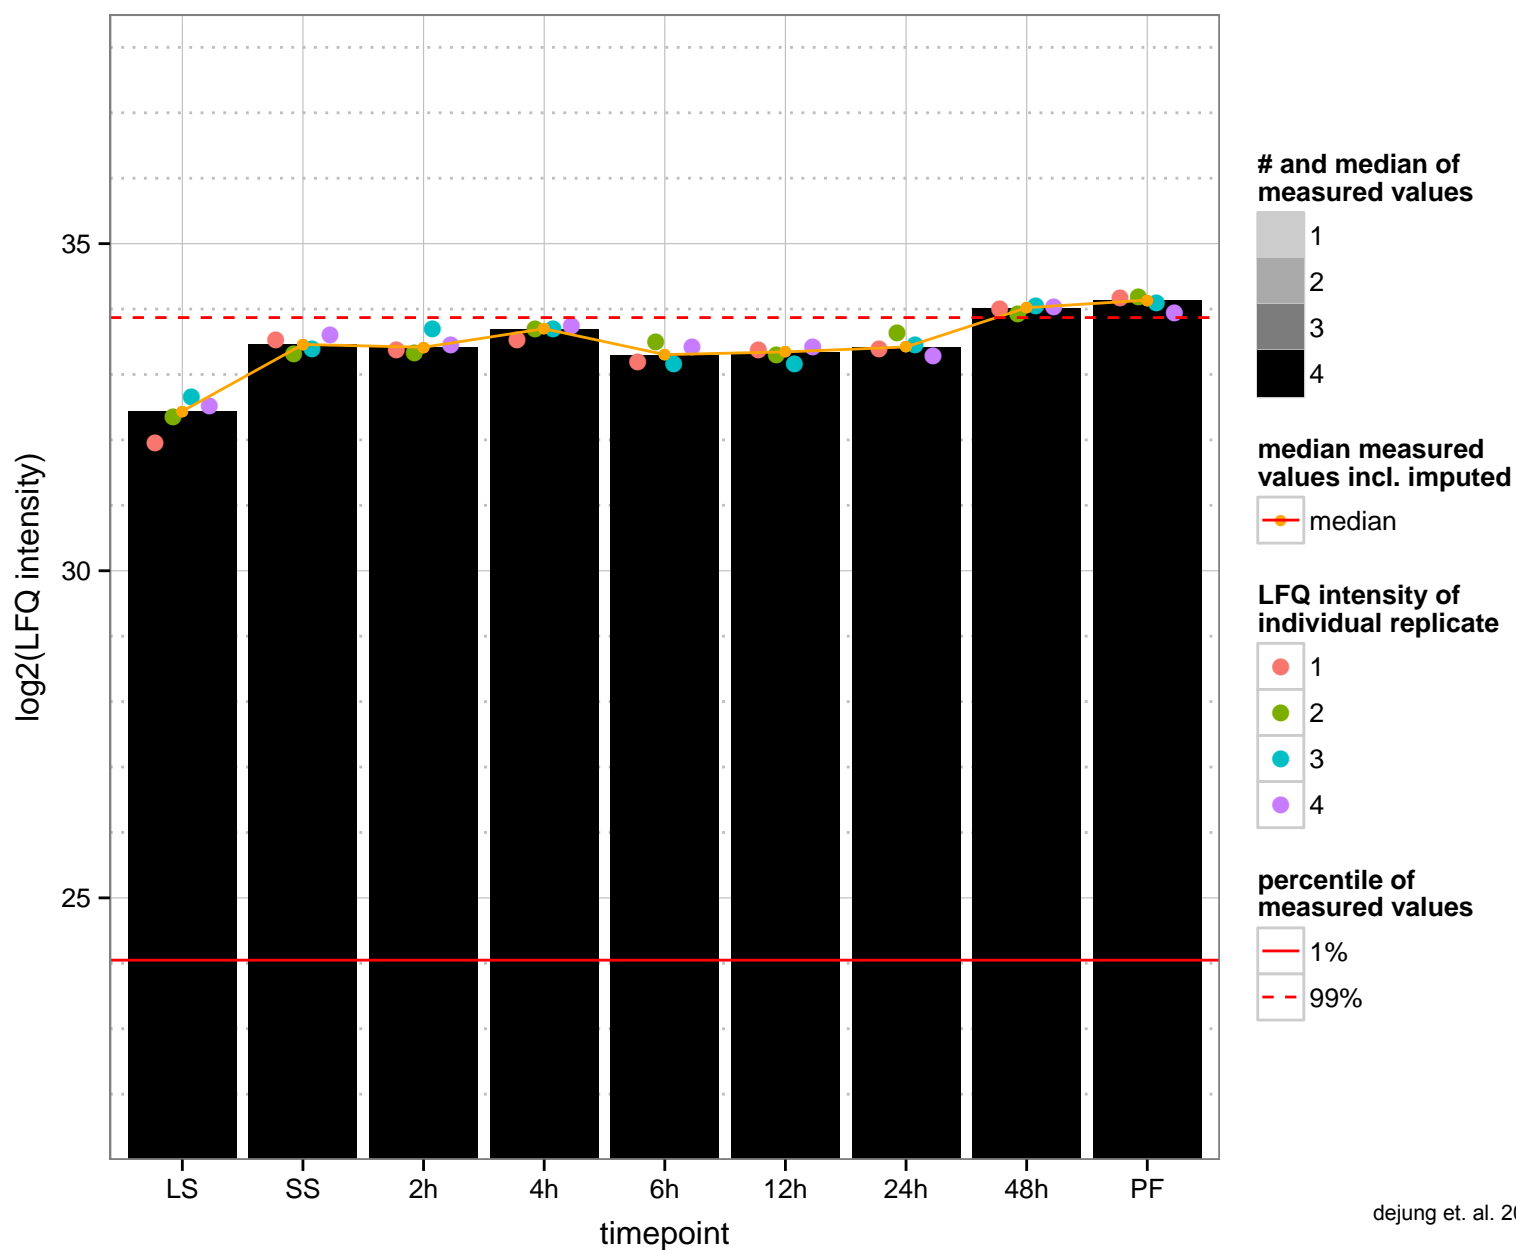

E1-like ubiquitin-activating enzyme, putative (UBA5)

Tb927.9.6040

AGOF: catalytic activity, small conjugating protein binding, small protein activating enzyme activity

AGOC: mitochondrion

AGOP: null

PGOF: catalytic activity

PGOC: null

PGOP: null

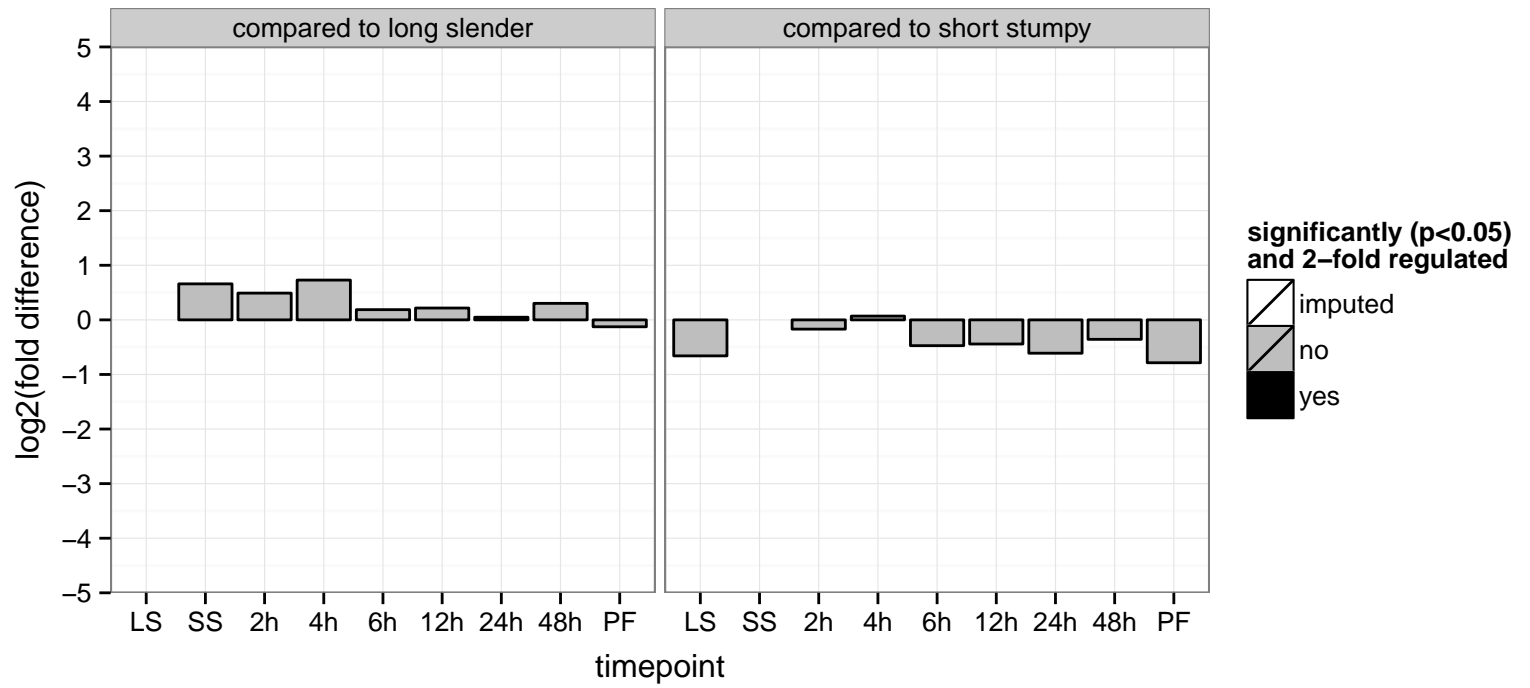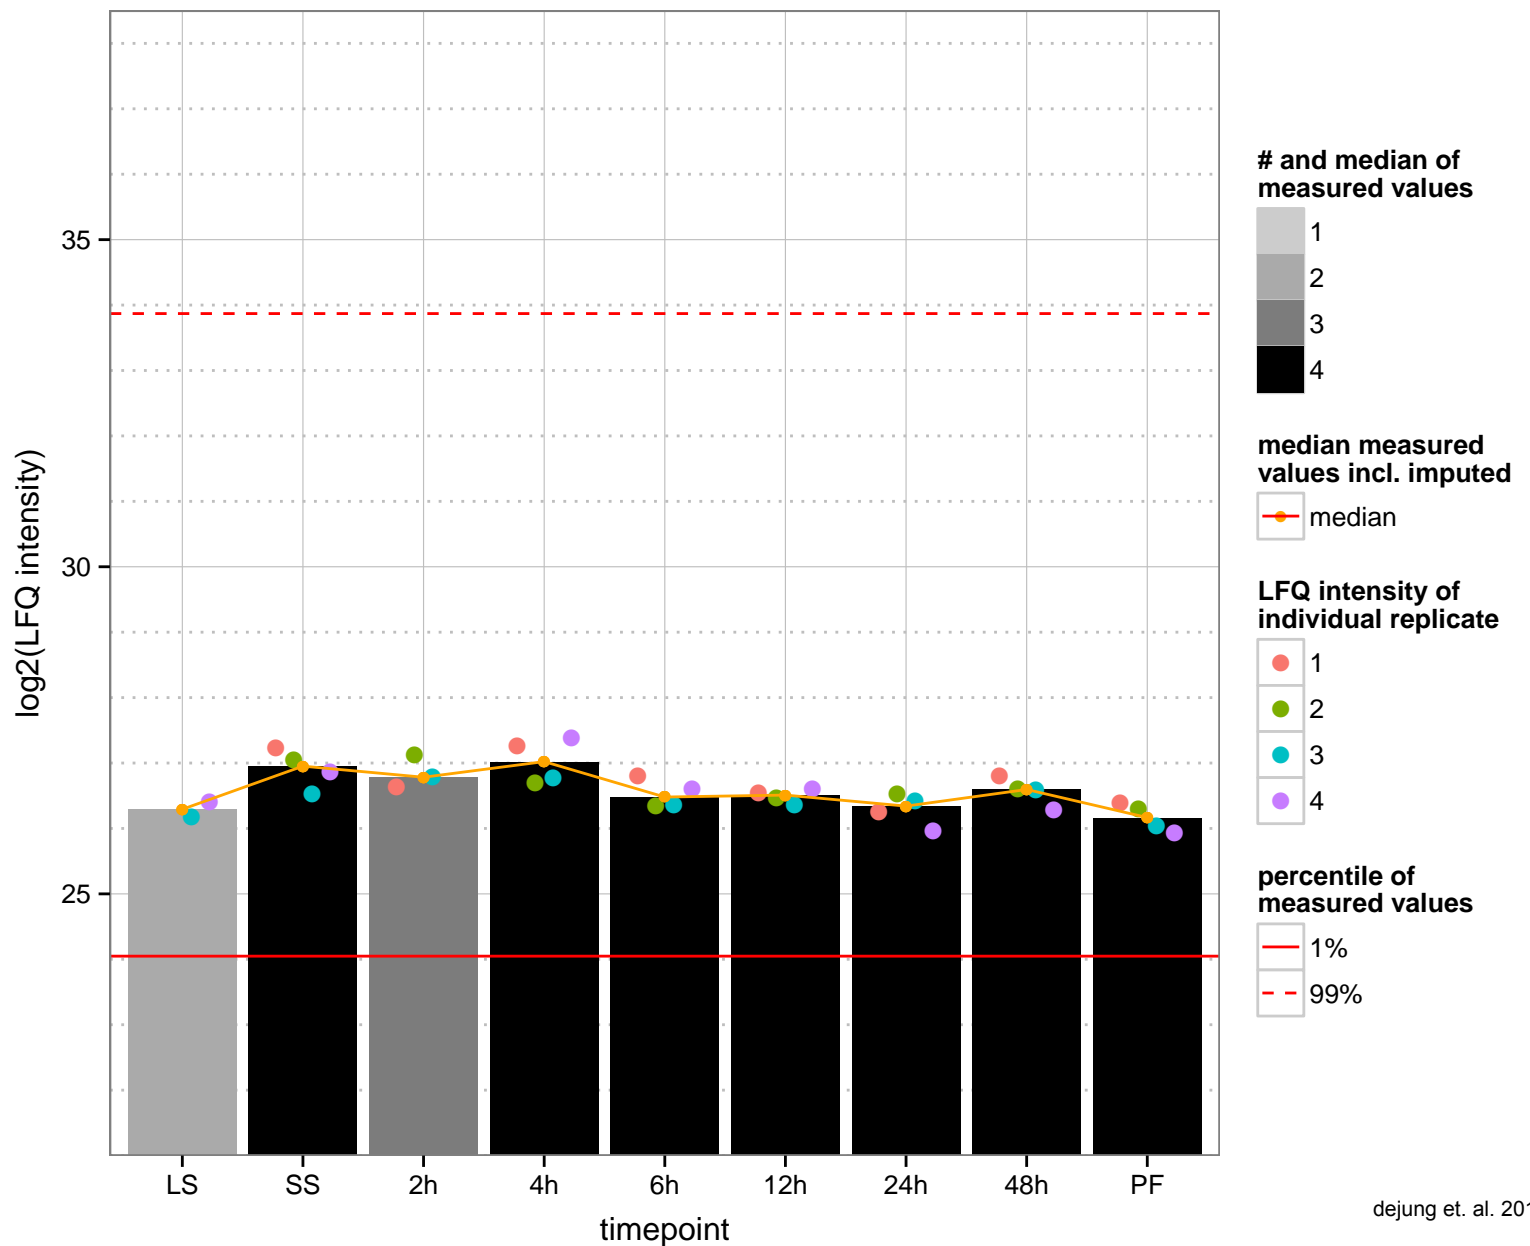

calmodulin, putative  
 Tb927.9.6130  
 AGOF: calcium ion binding  
 AGOC: null  
 AGOP: null  
 PGOF: calcium ion binding  
 PGOC: null  
 PGOP: null

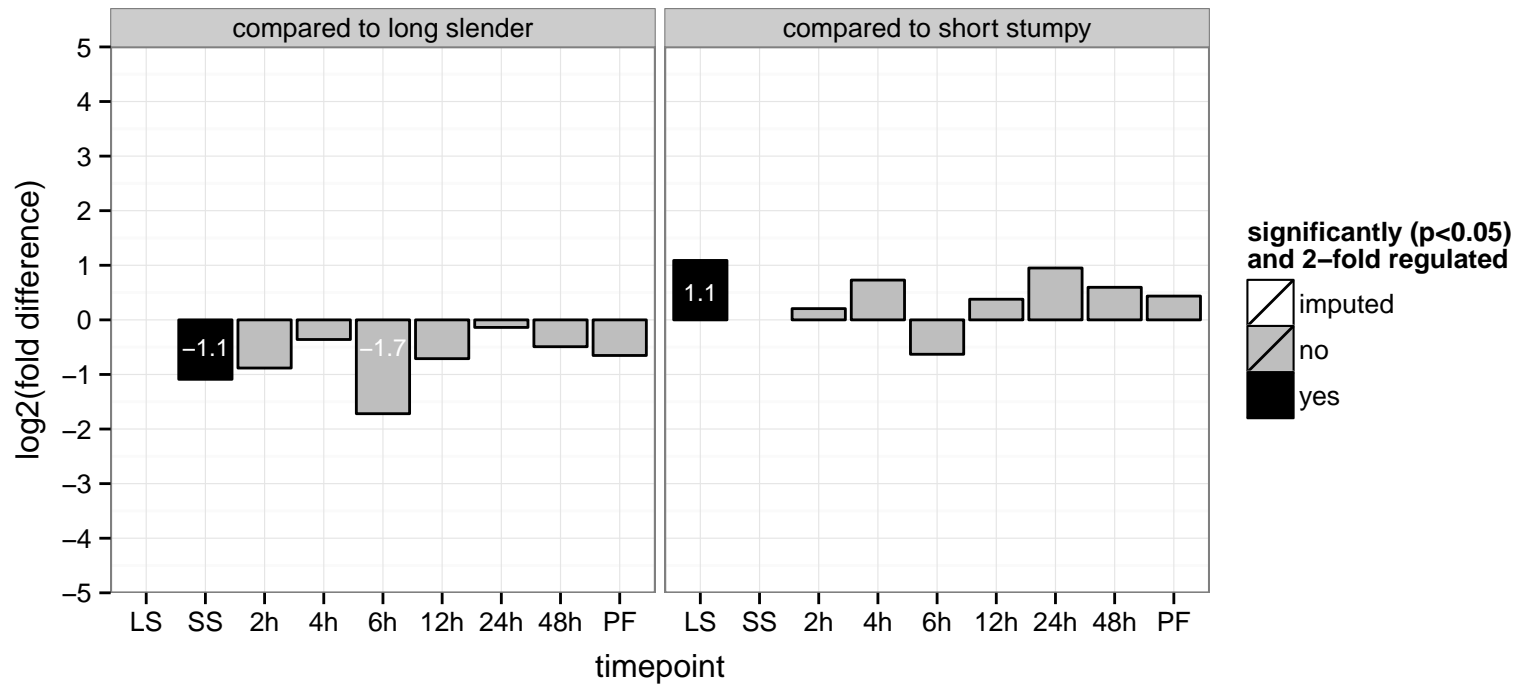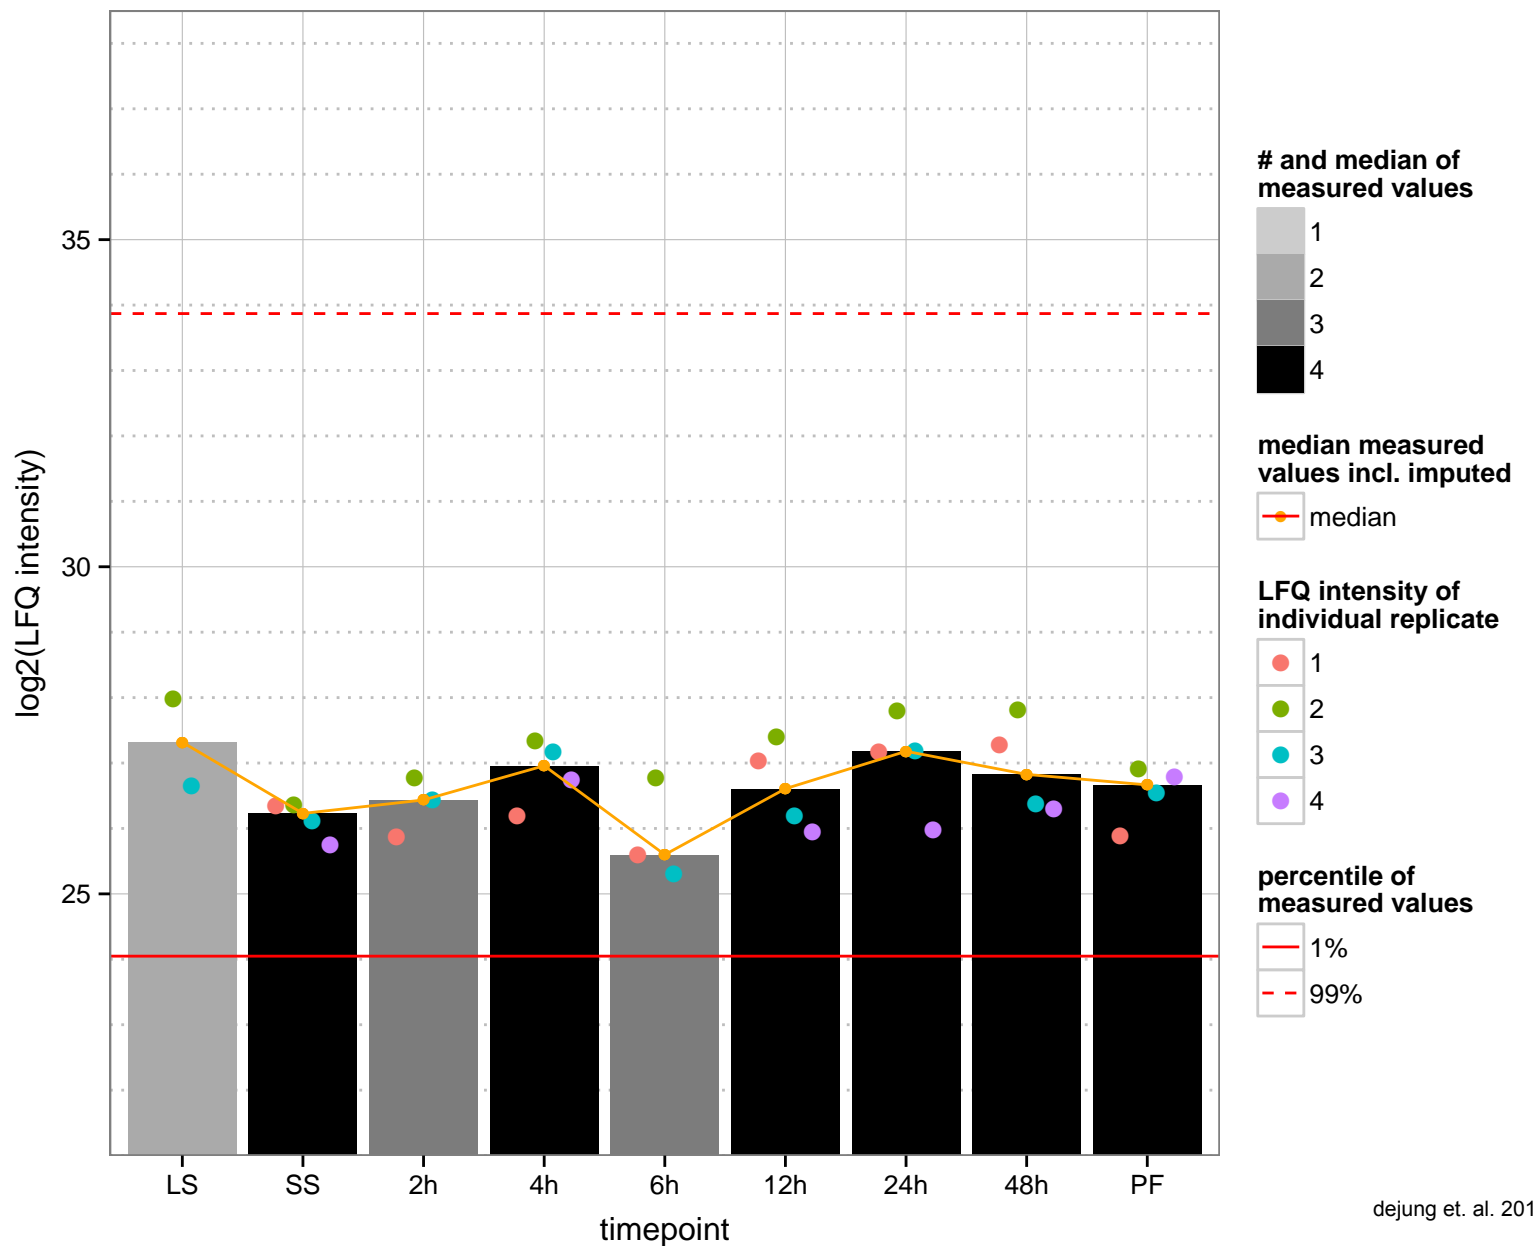

unspecified product  
 Tb927.9.6230;Tb927.9.6170  
 AGOF: null  
 AGOC: null  
 AGOP: null  
 PGO: kinase activity, transferase activity, transferring phosphorus-containing groups  
 PGOC: null  
 PGOP: null

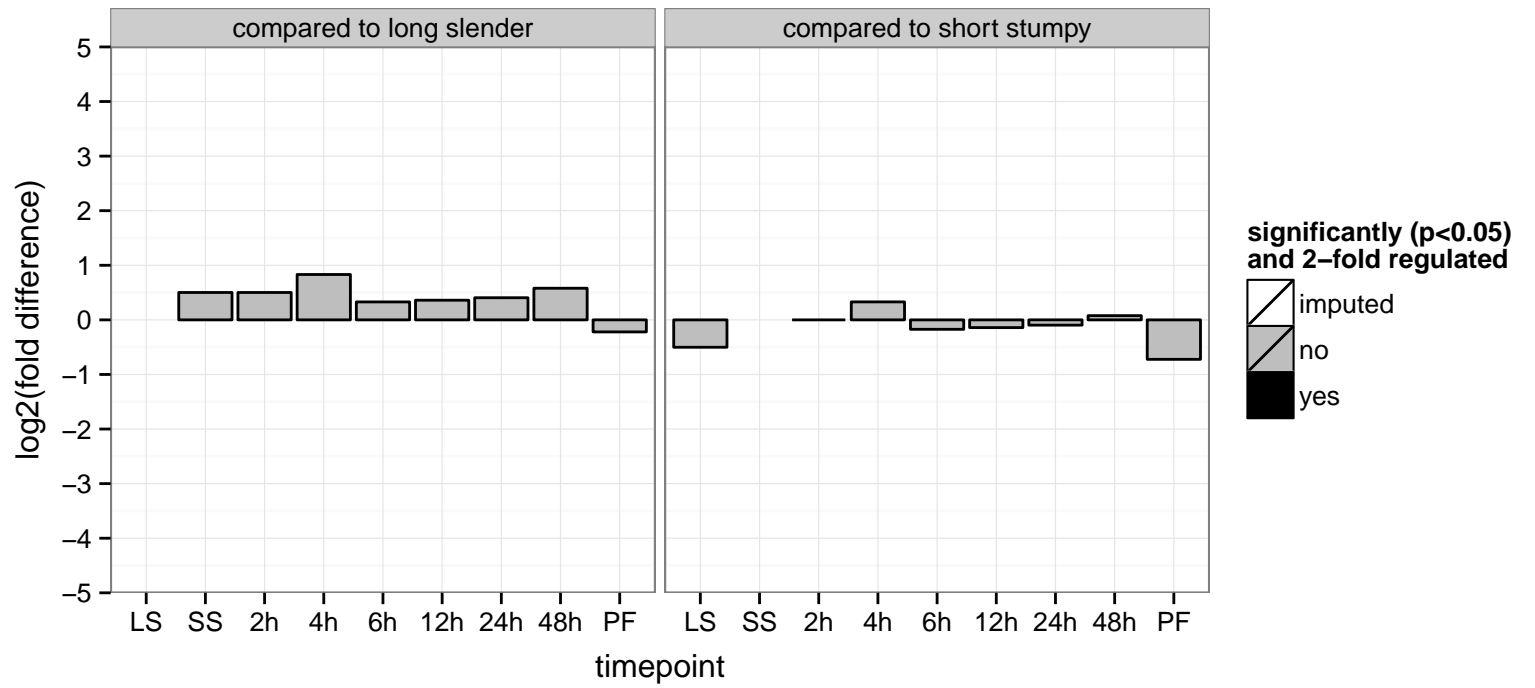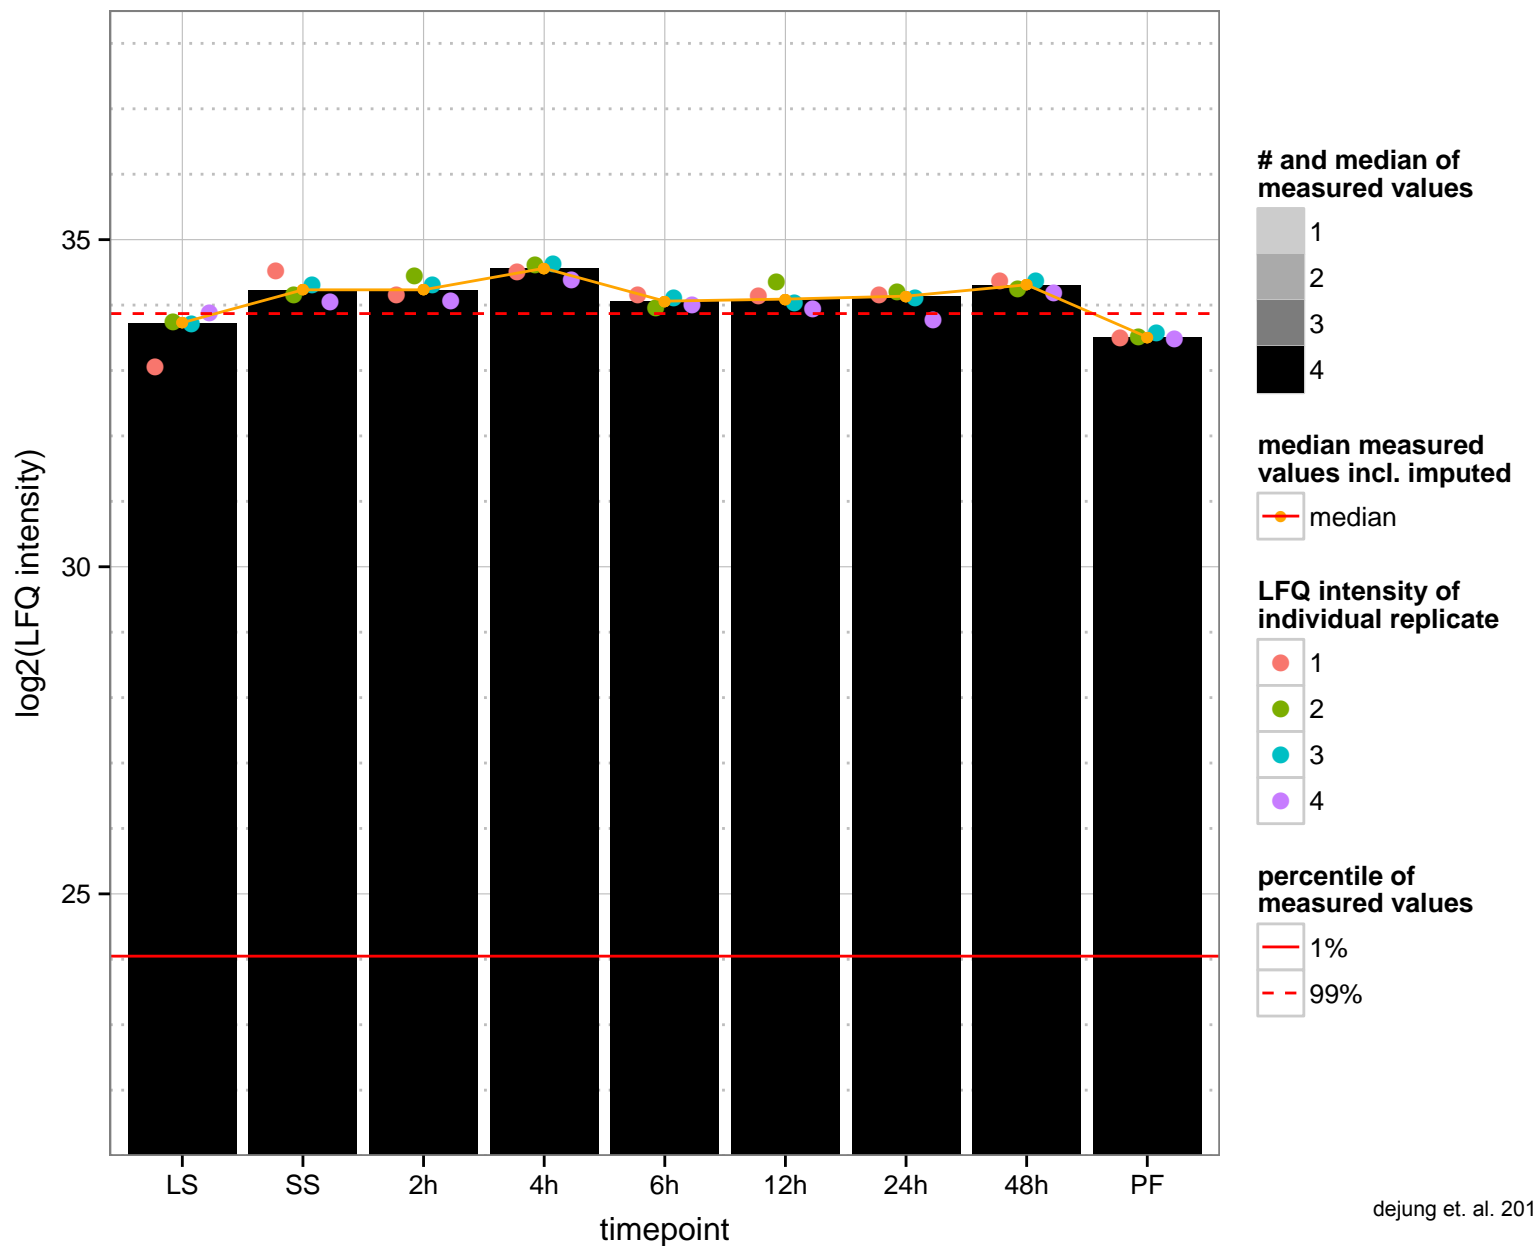

Rab geranylgeranyl transferase component A, putative, Rab escort protein 1  
 Tb927.9.6430  
 AGOF: Rab GTPase binding  
 AGOC: Rab-protein geranylgeranyltransferase complex  
 AGOP: regulation of GTPase activity, vesicle-mediated transport  
 PGO: null  
 PGOC: null  
 PGOP: null

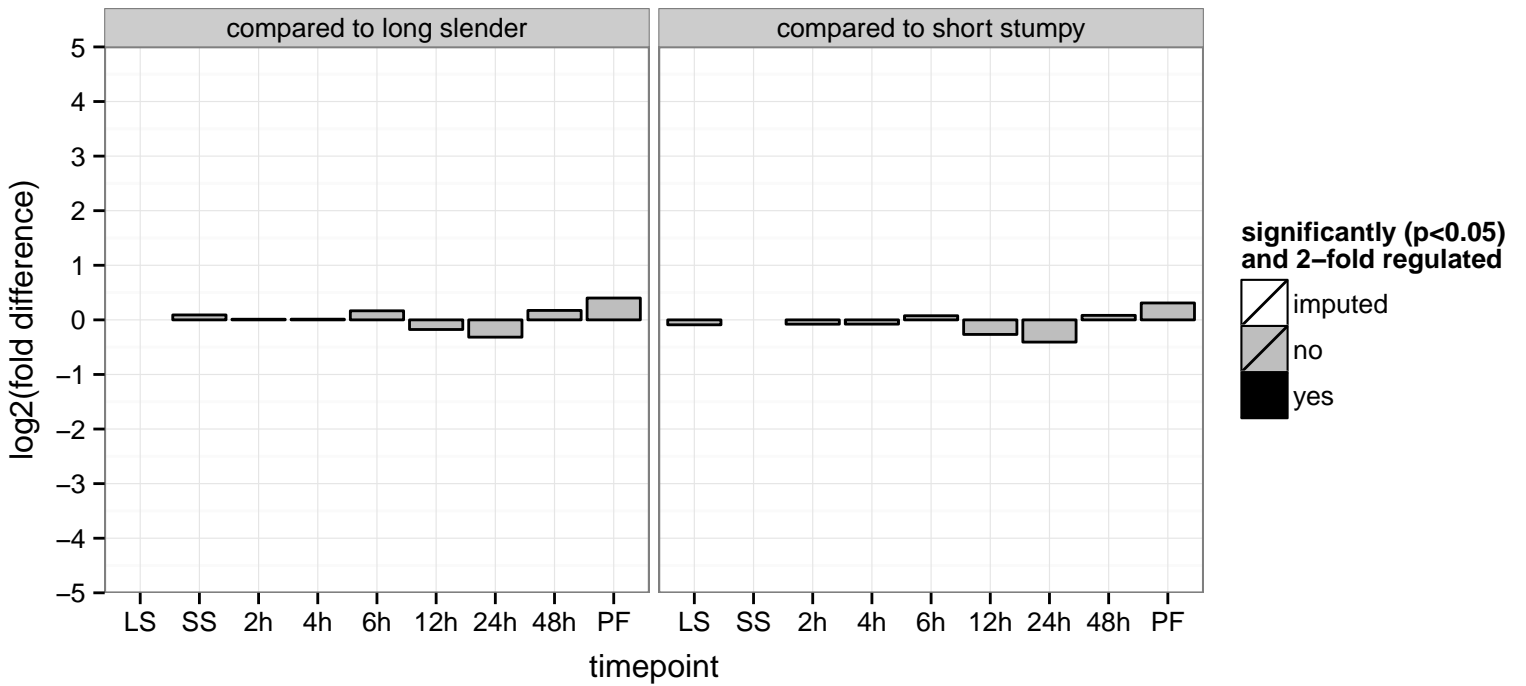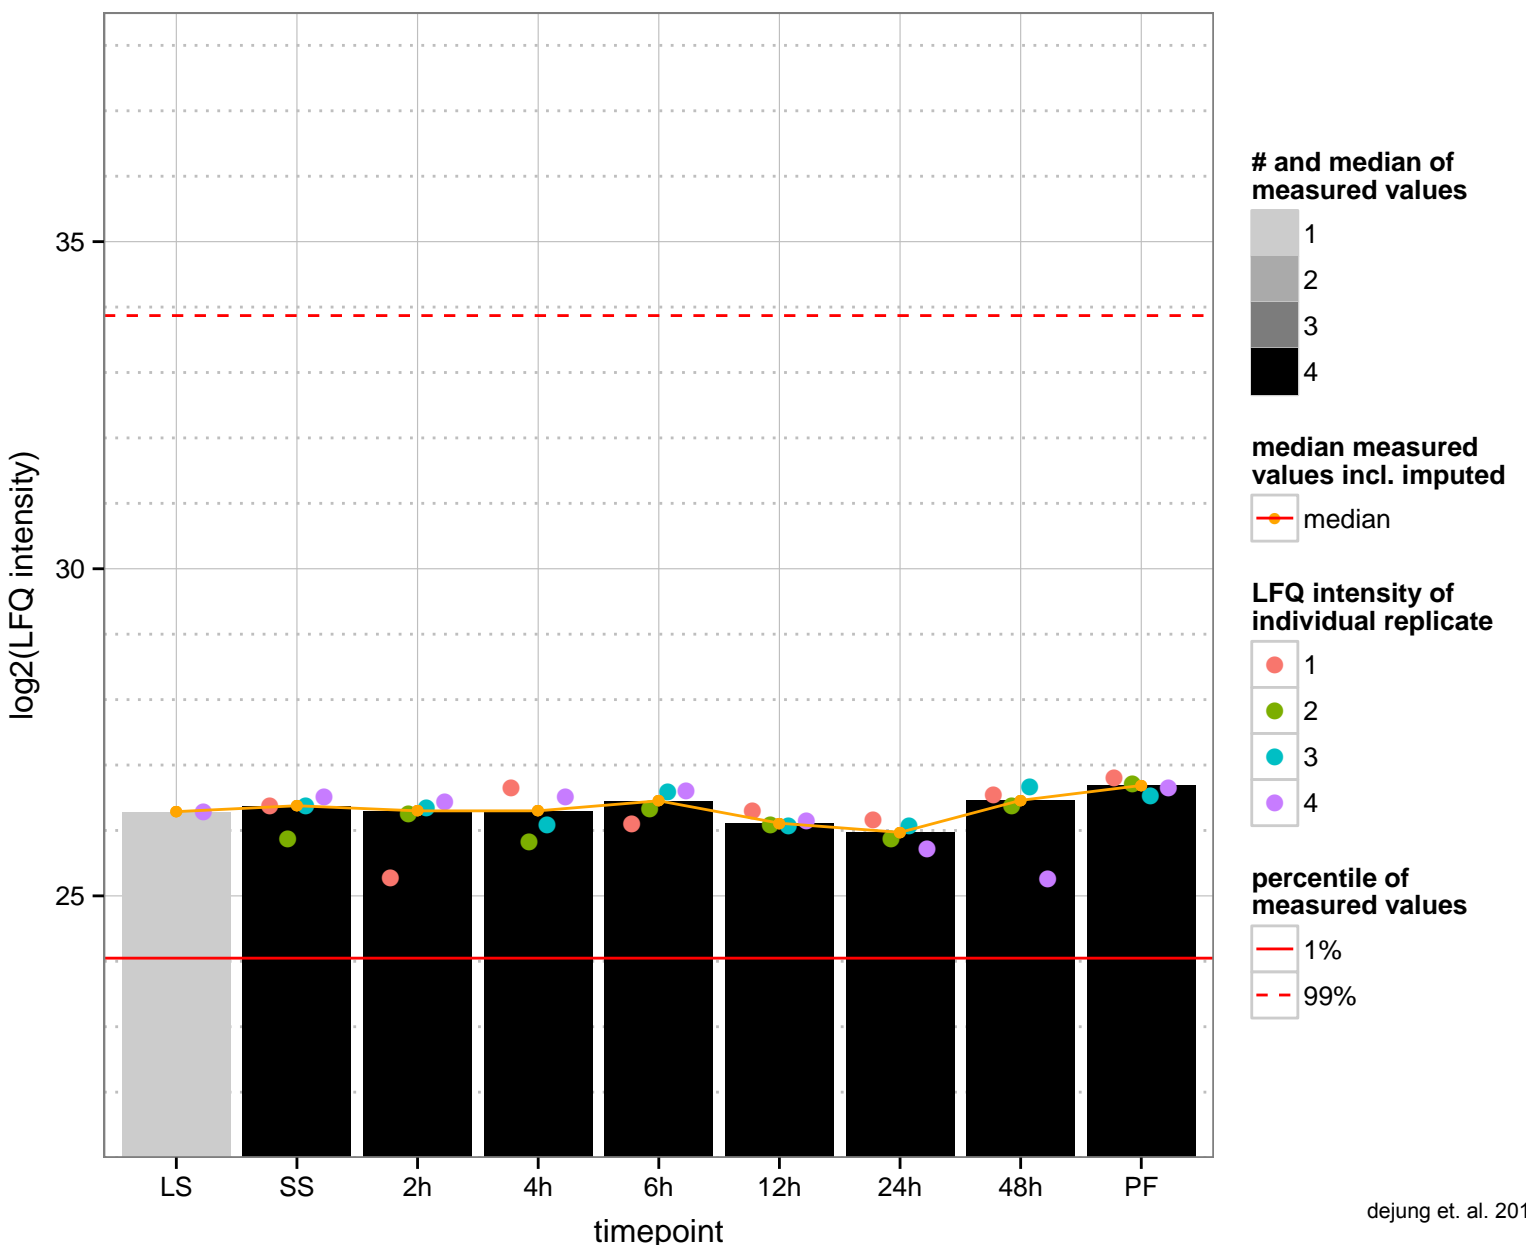

hypothetical protein, conserved  
 Tb927.9.6450  
 AGOF: null  
 AGOC: null  
 AGOP: null  
 PGO: null  
 PGOC: null  
 PGOP: null

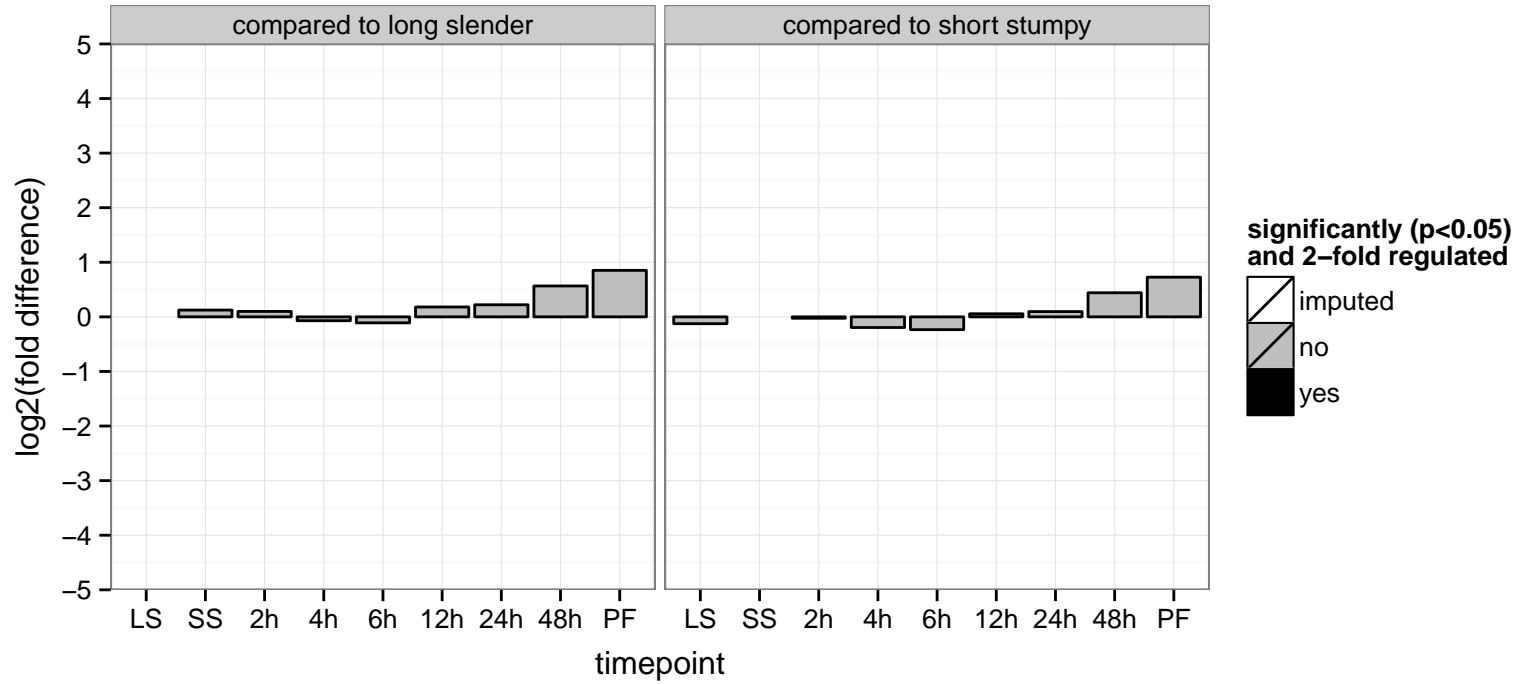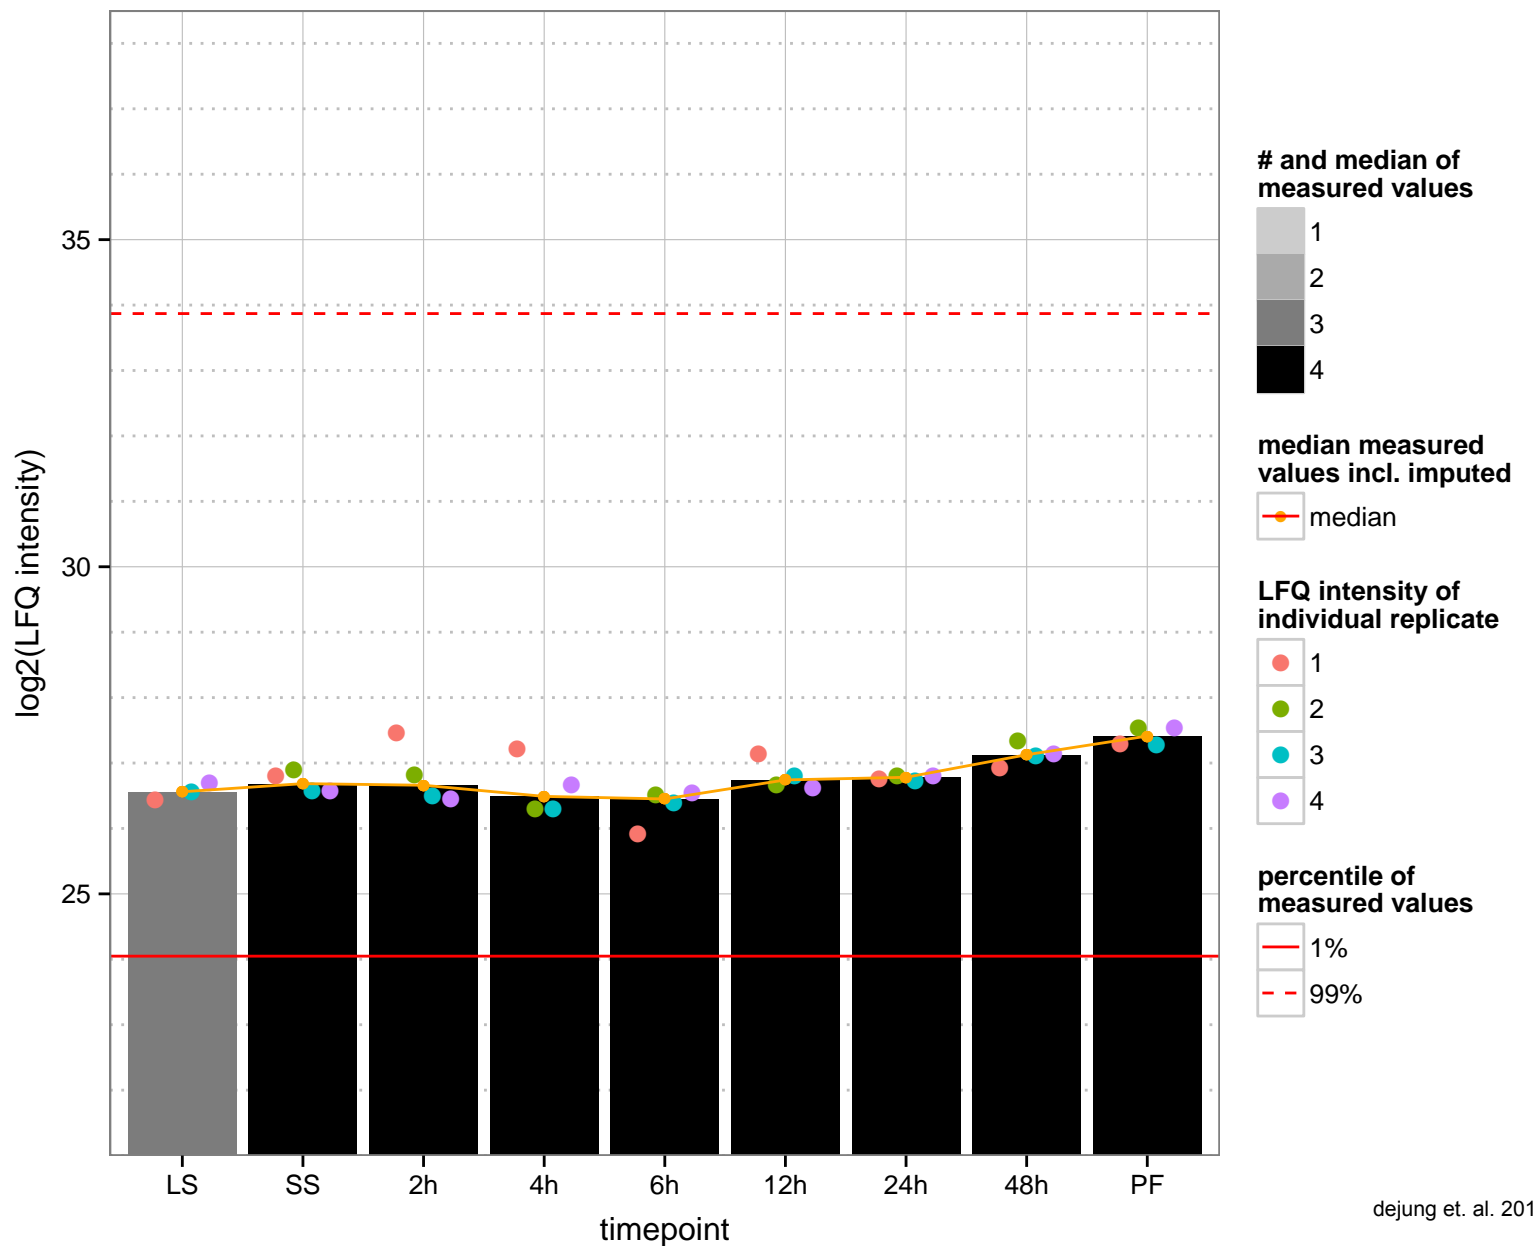



hypothetical protein, conserved  
 Tb927.9.6460  
 AGOF: null  
 AGOC: null  
 AGOP: null  
 PGO: null  
 PGOC: null  
 PGOP: null

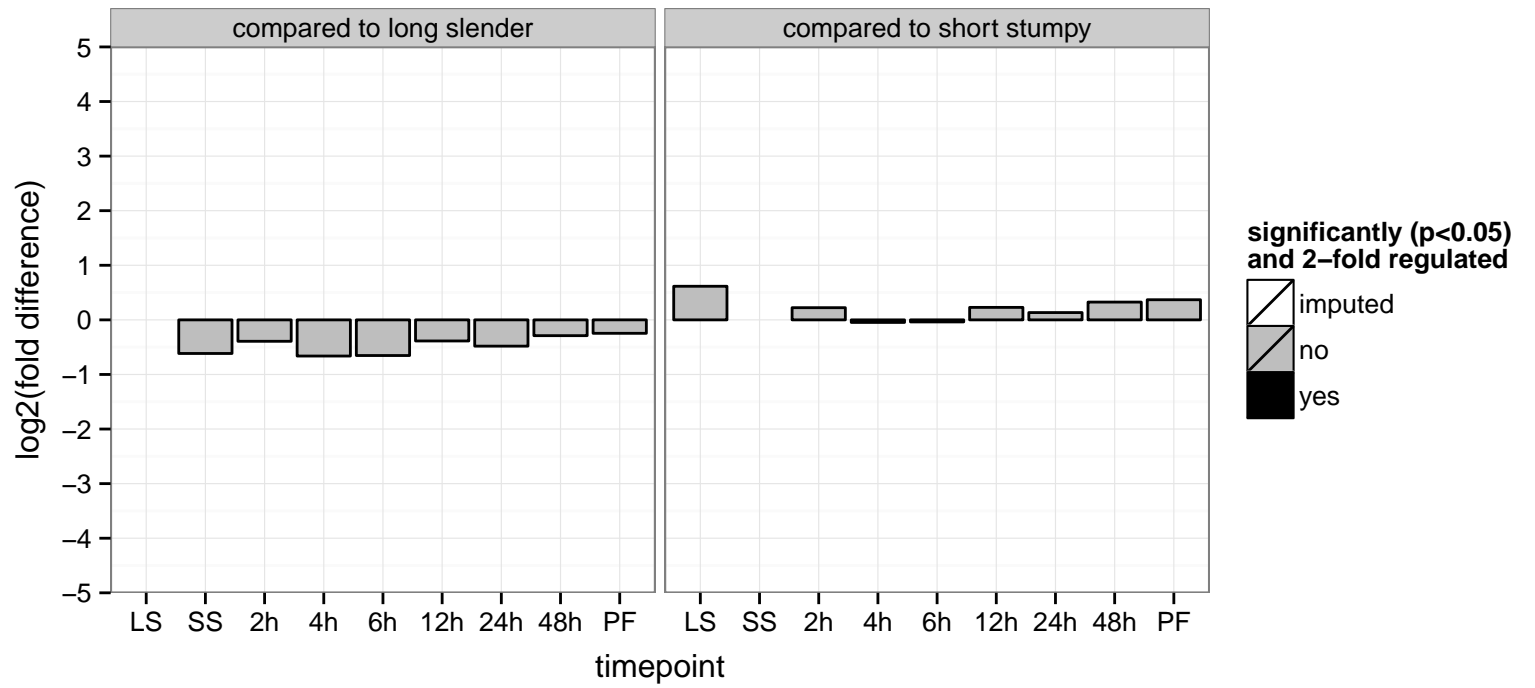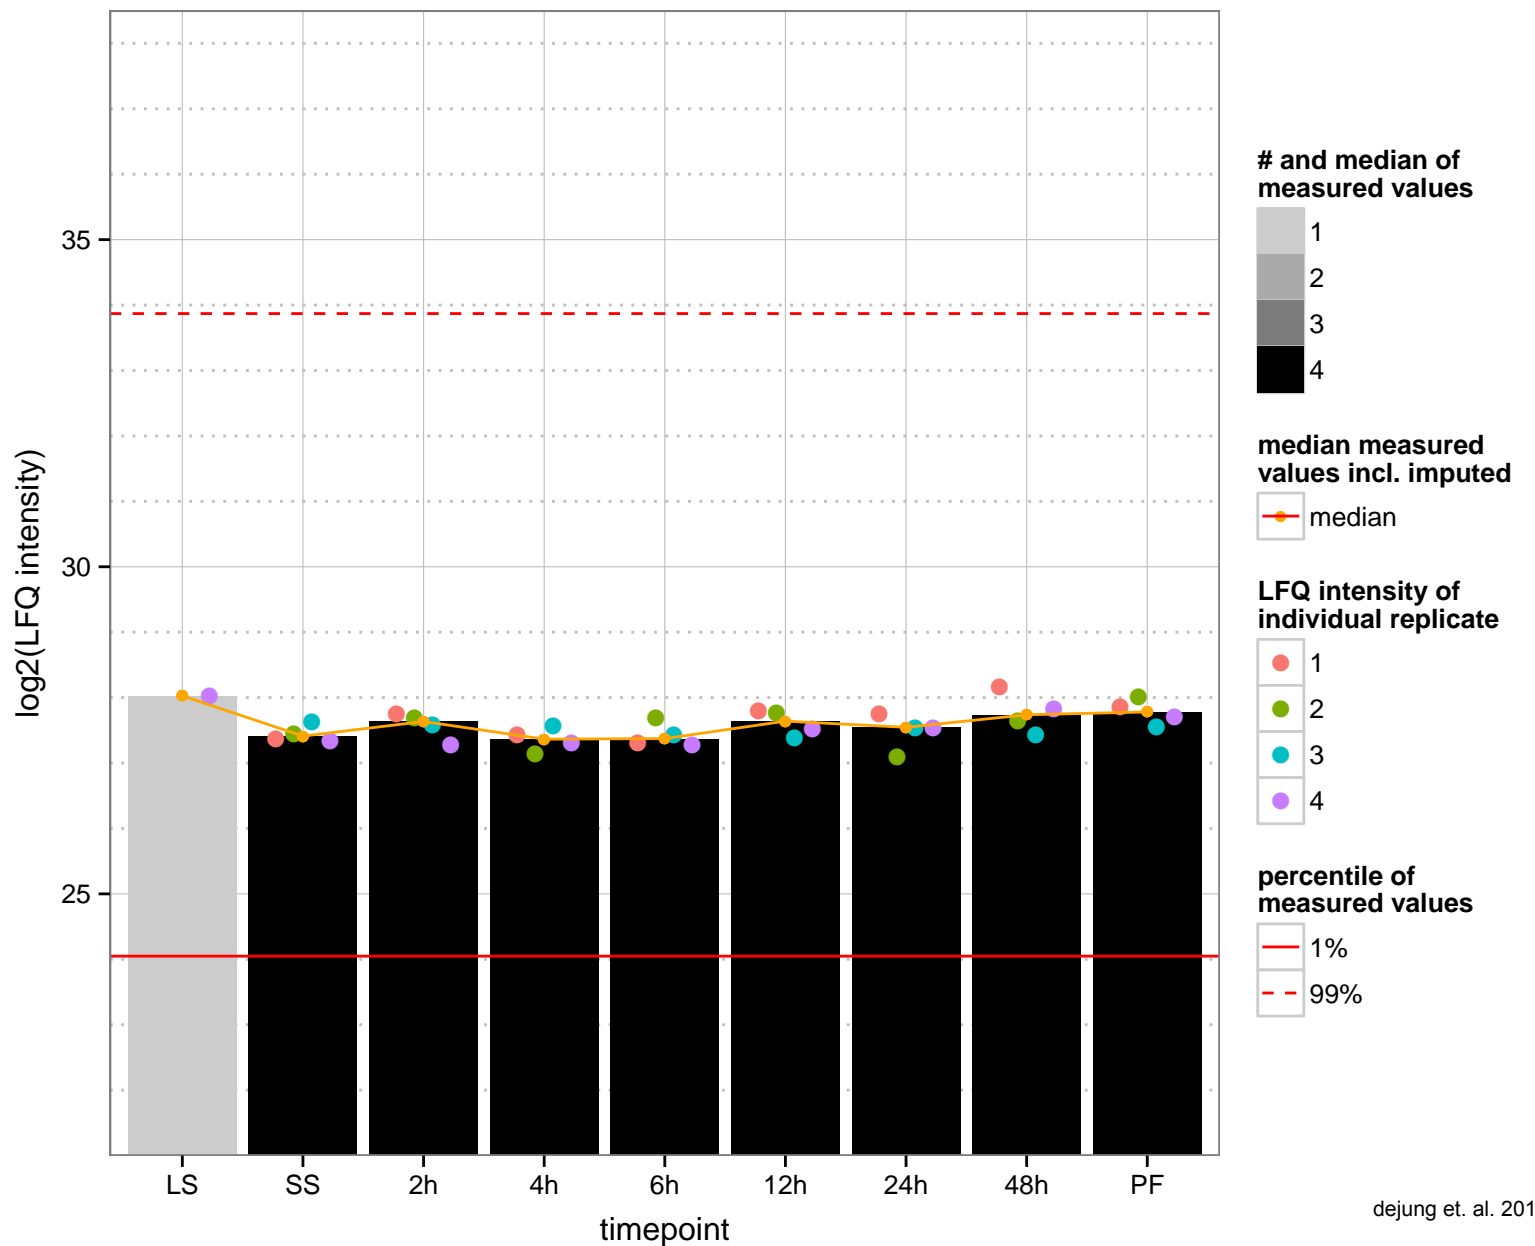

hypothetical protein, conserved  
 Tb927.9.6510  
 AGOF: null  
 AGOC: mitochondrion  
 AGOP: null  
 PGO: null  
 PGO: null  
 PGO: null

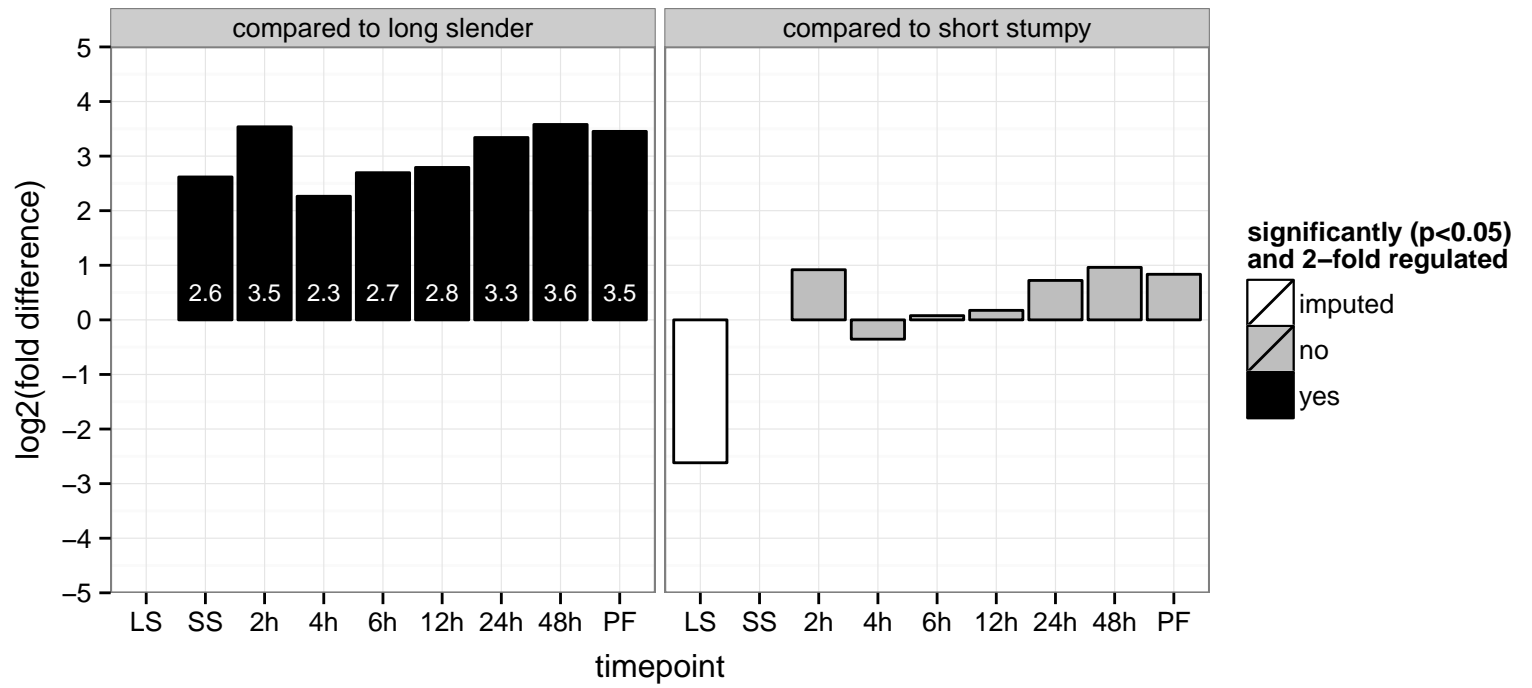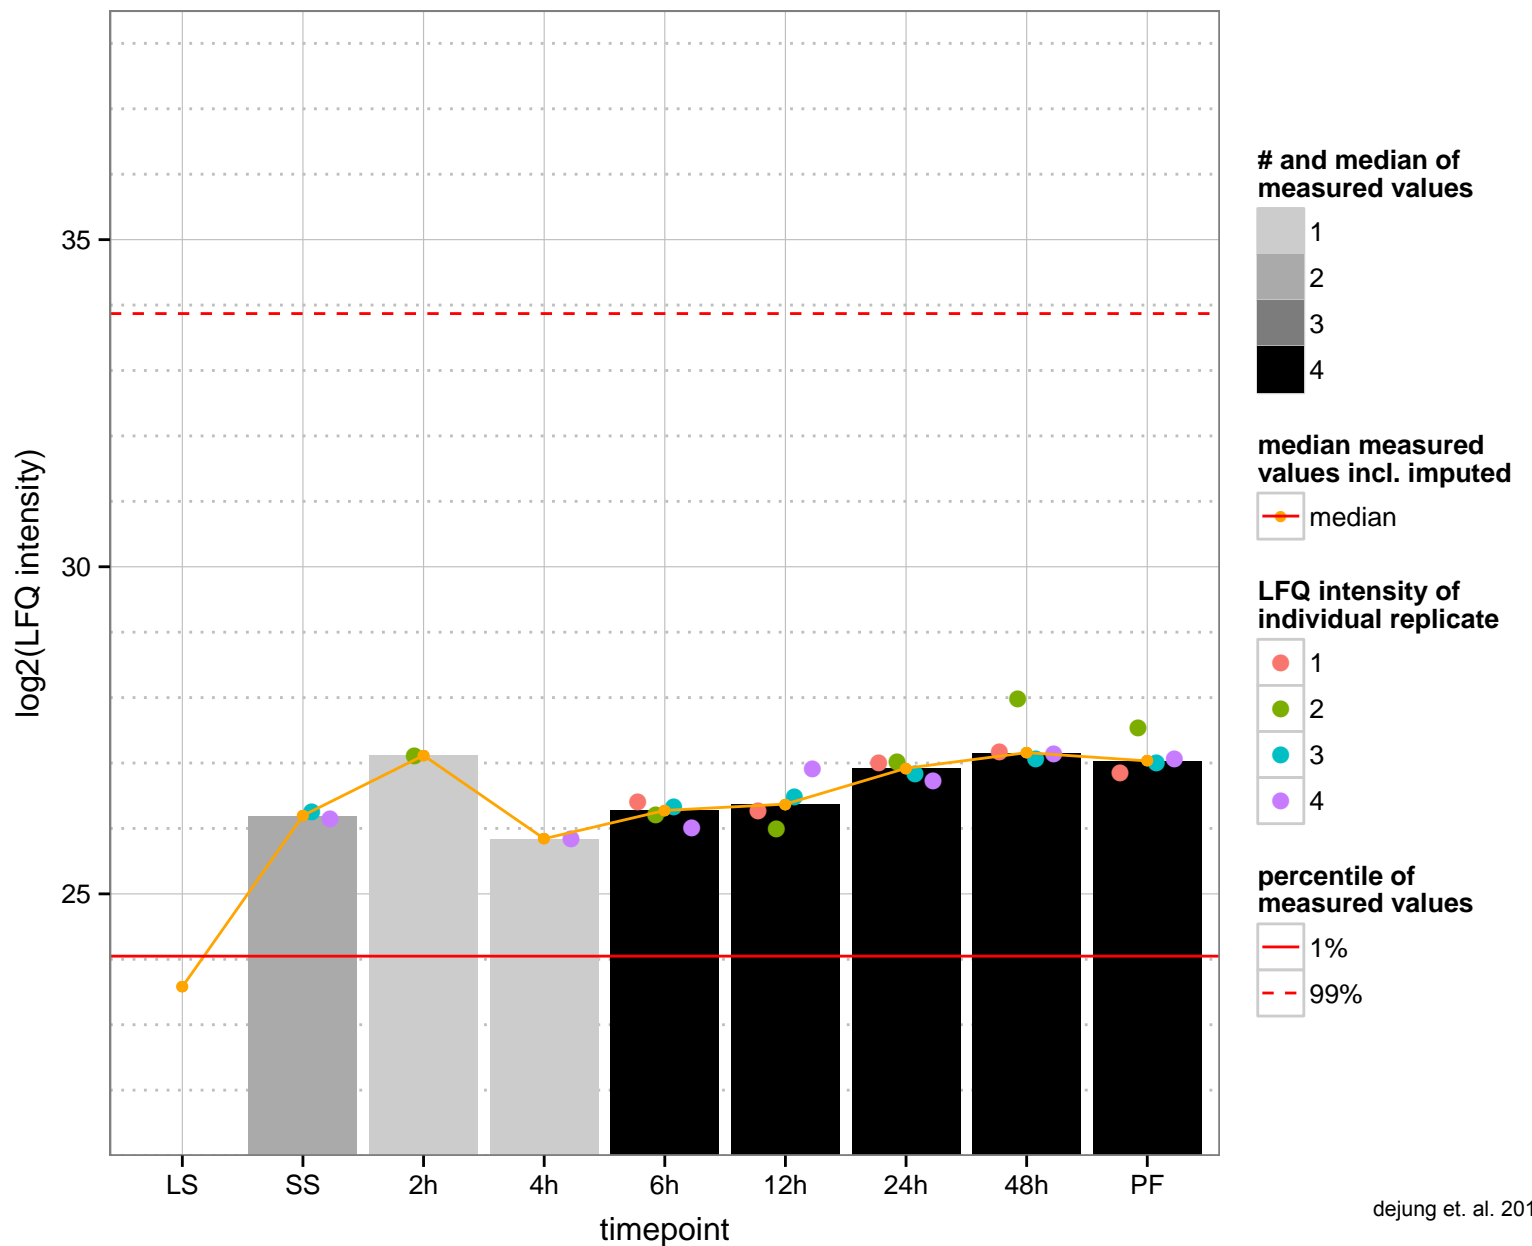

hypothetical protein, conserved  
 Tb927.9.6580  
 AGOF: null  
 AGOC: null  
 AGOP: null  
 PGO: null  
 PGOC: null  
 PGOP: null

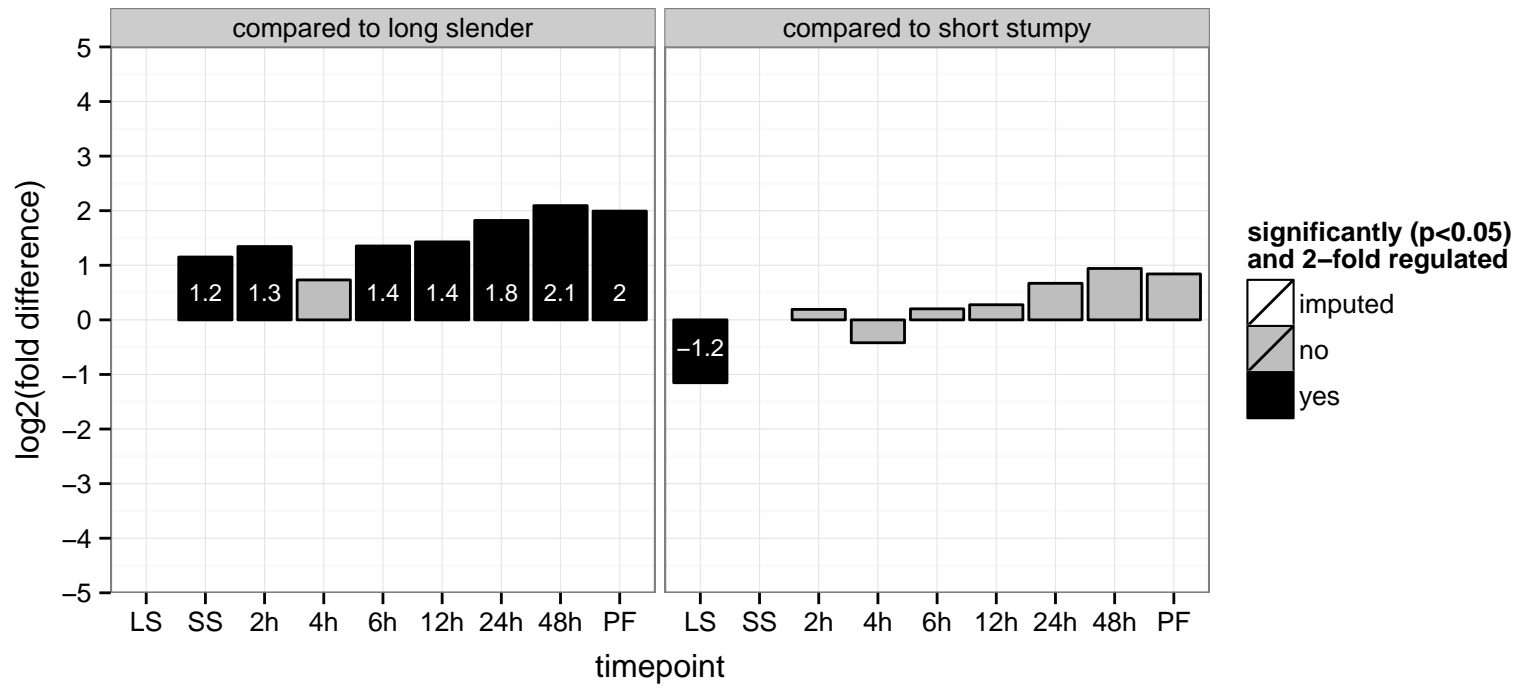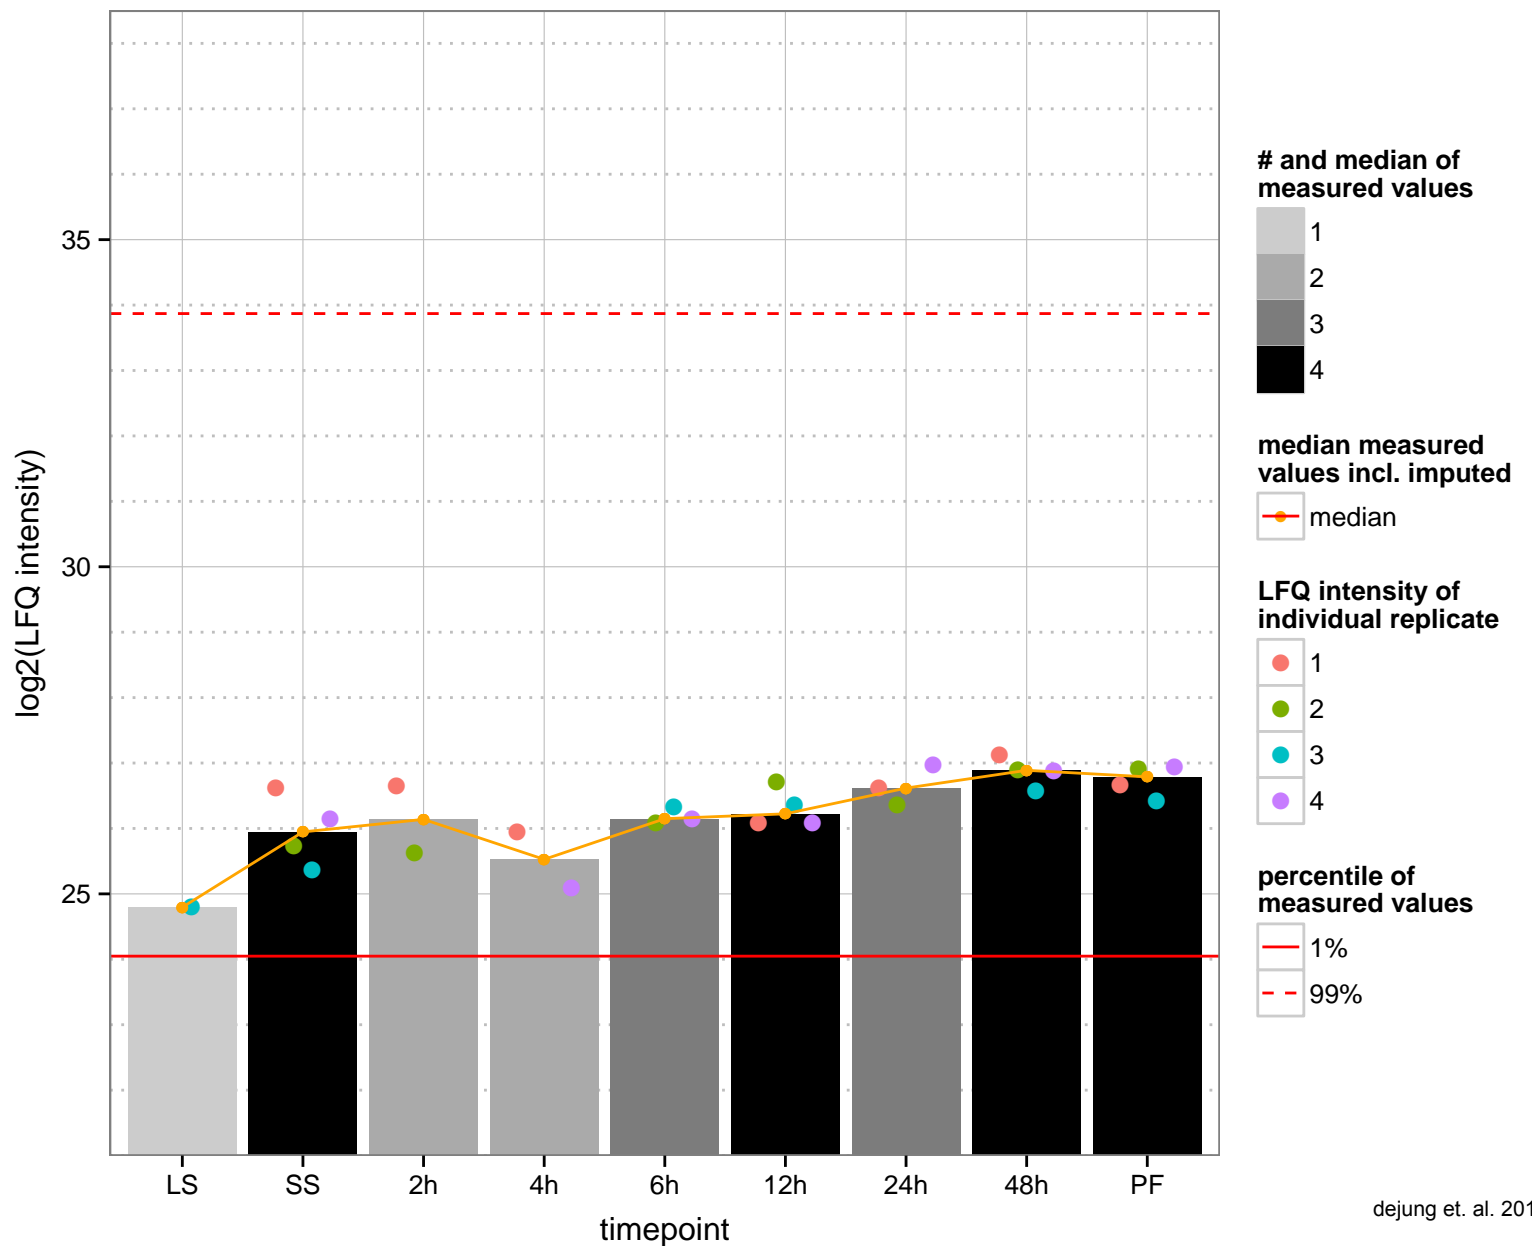

hypothetical protein, conserved  
 Tb927.9.6760  
 AGOF: null  
 AGOC: null  
 AGOP: null  
 PGO: null  
 PGOC: null  
 PGOP: null

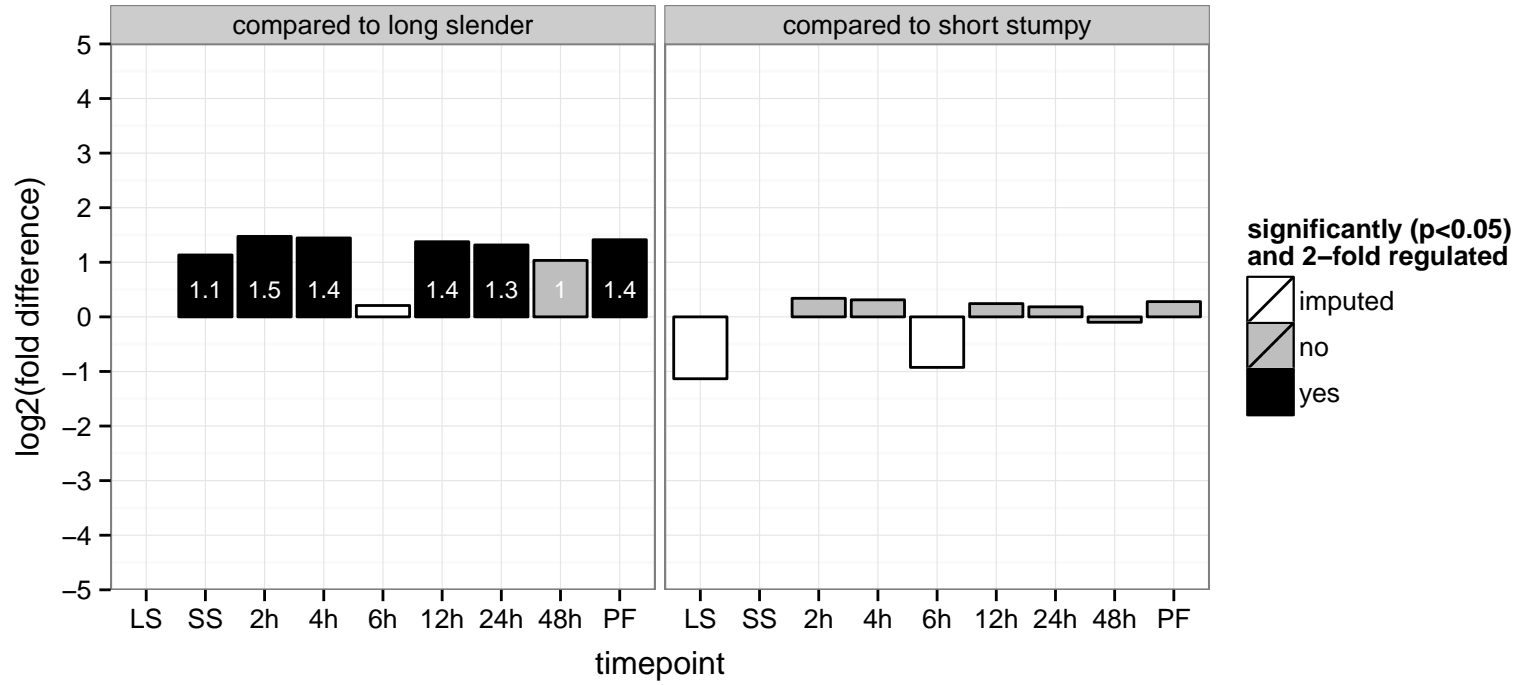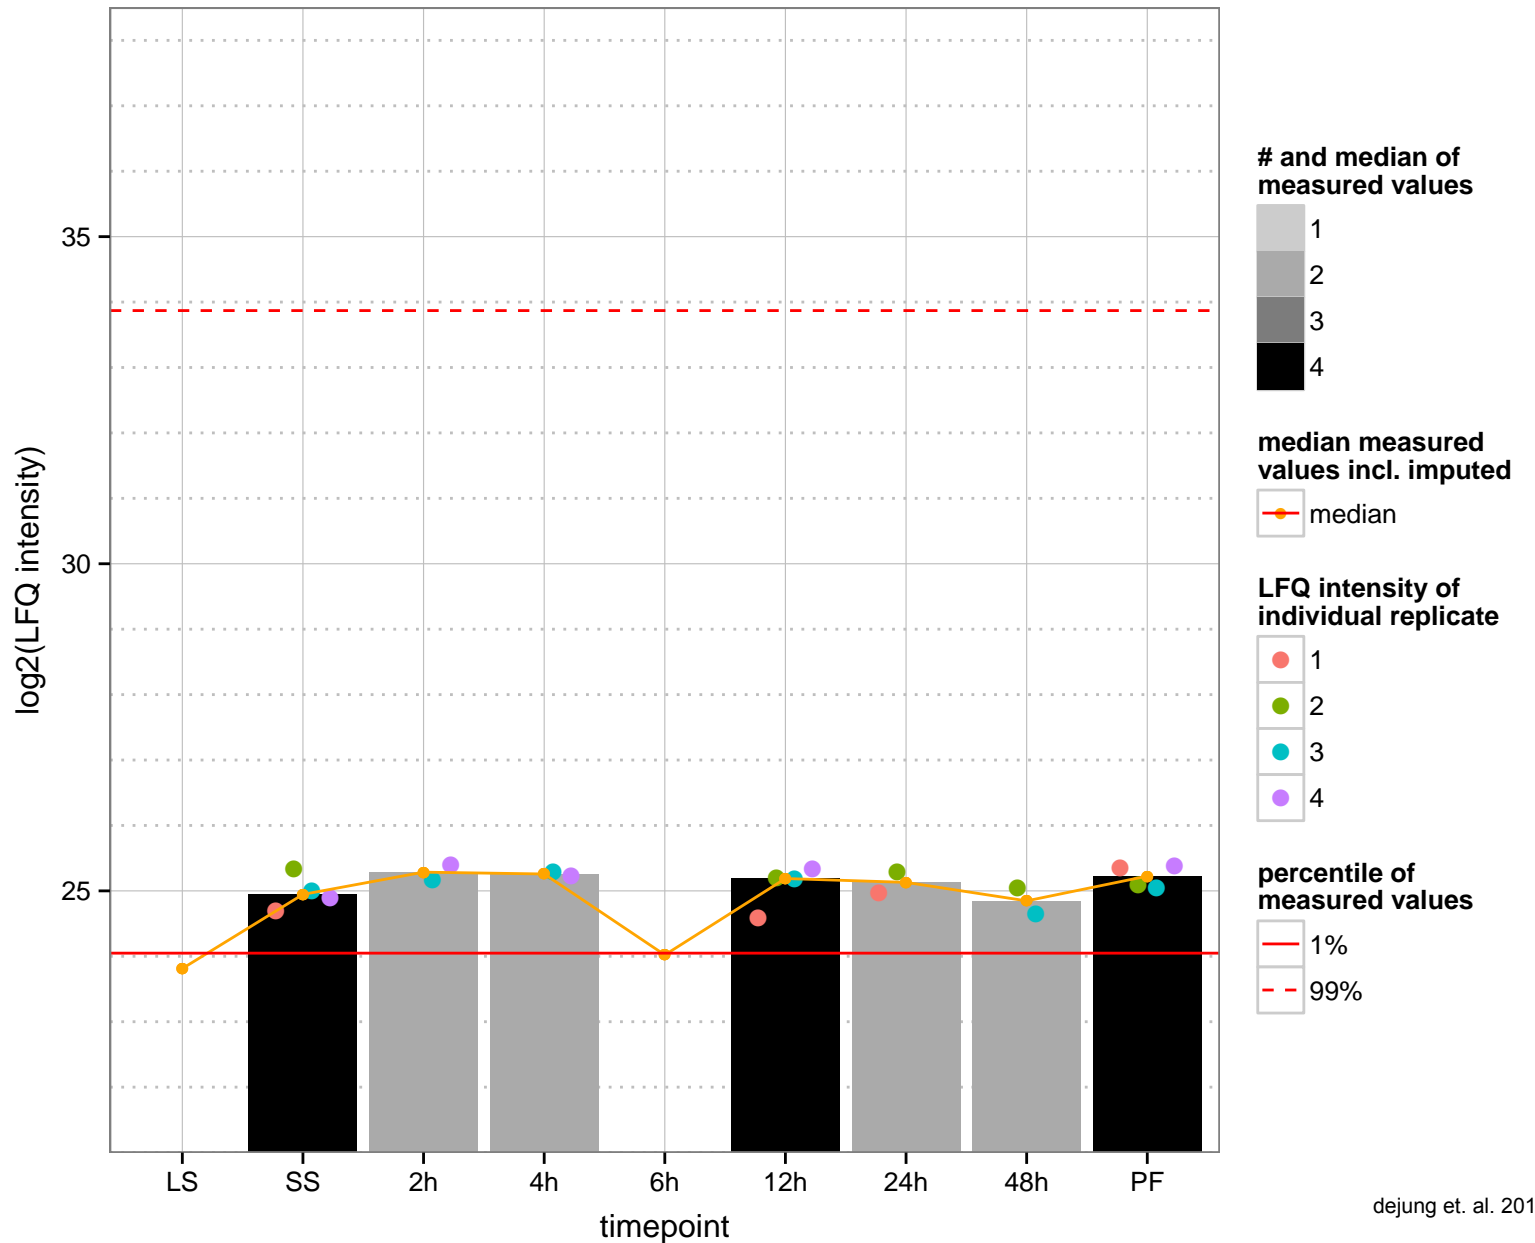

cAMP-specific phosphodiesterase, putative  
 Tb927.9.6880  
 AGOF: 3', 5'-cyclic-AMP phosphodiesterase activity  
 AGOC: null  
 AGOP: signal transduction  
 PGOF: 3', 5'-cyclic-nucleotide phosphodiesterase activity  
 PGOC: null  
 PGOP: signal transduction

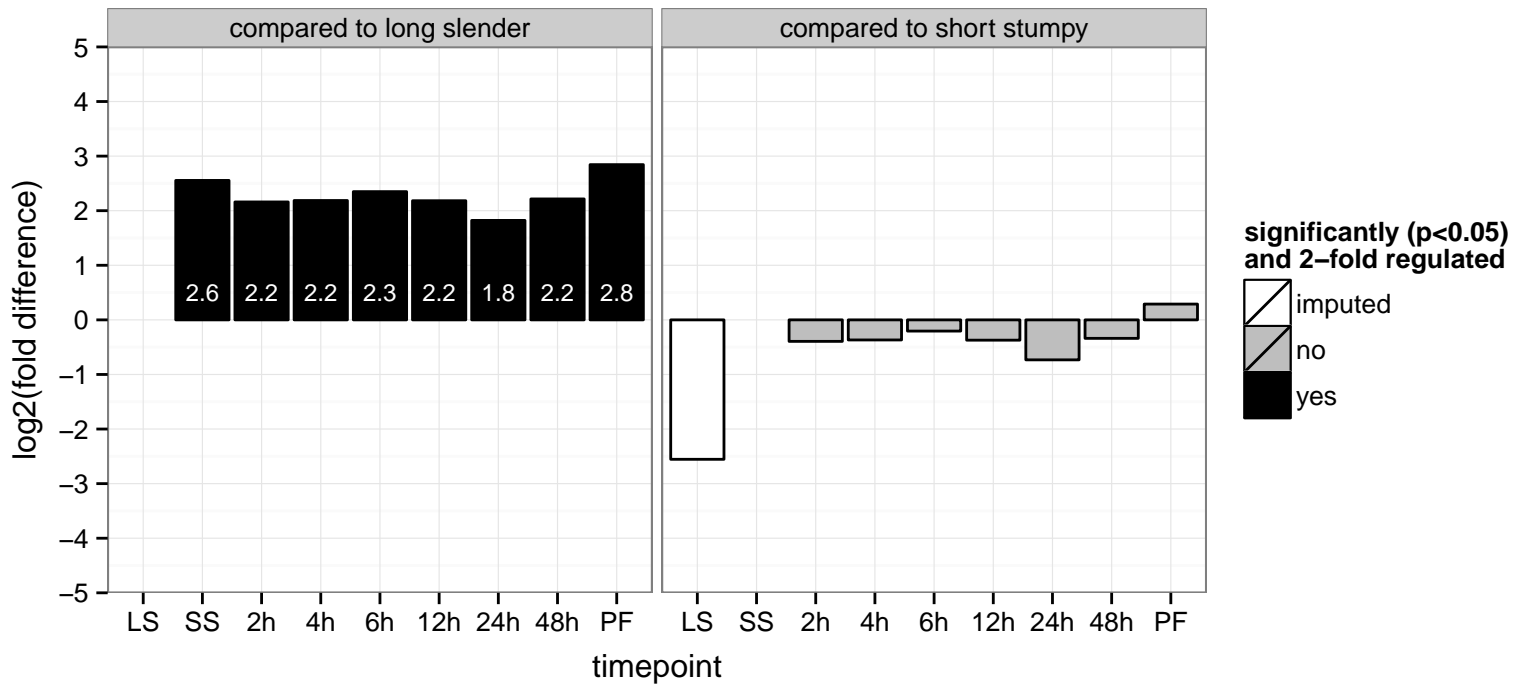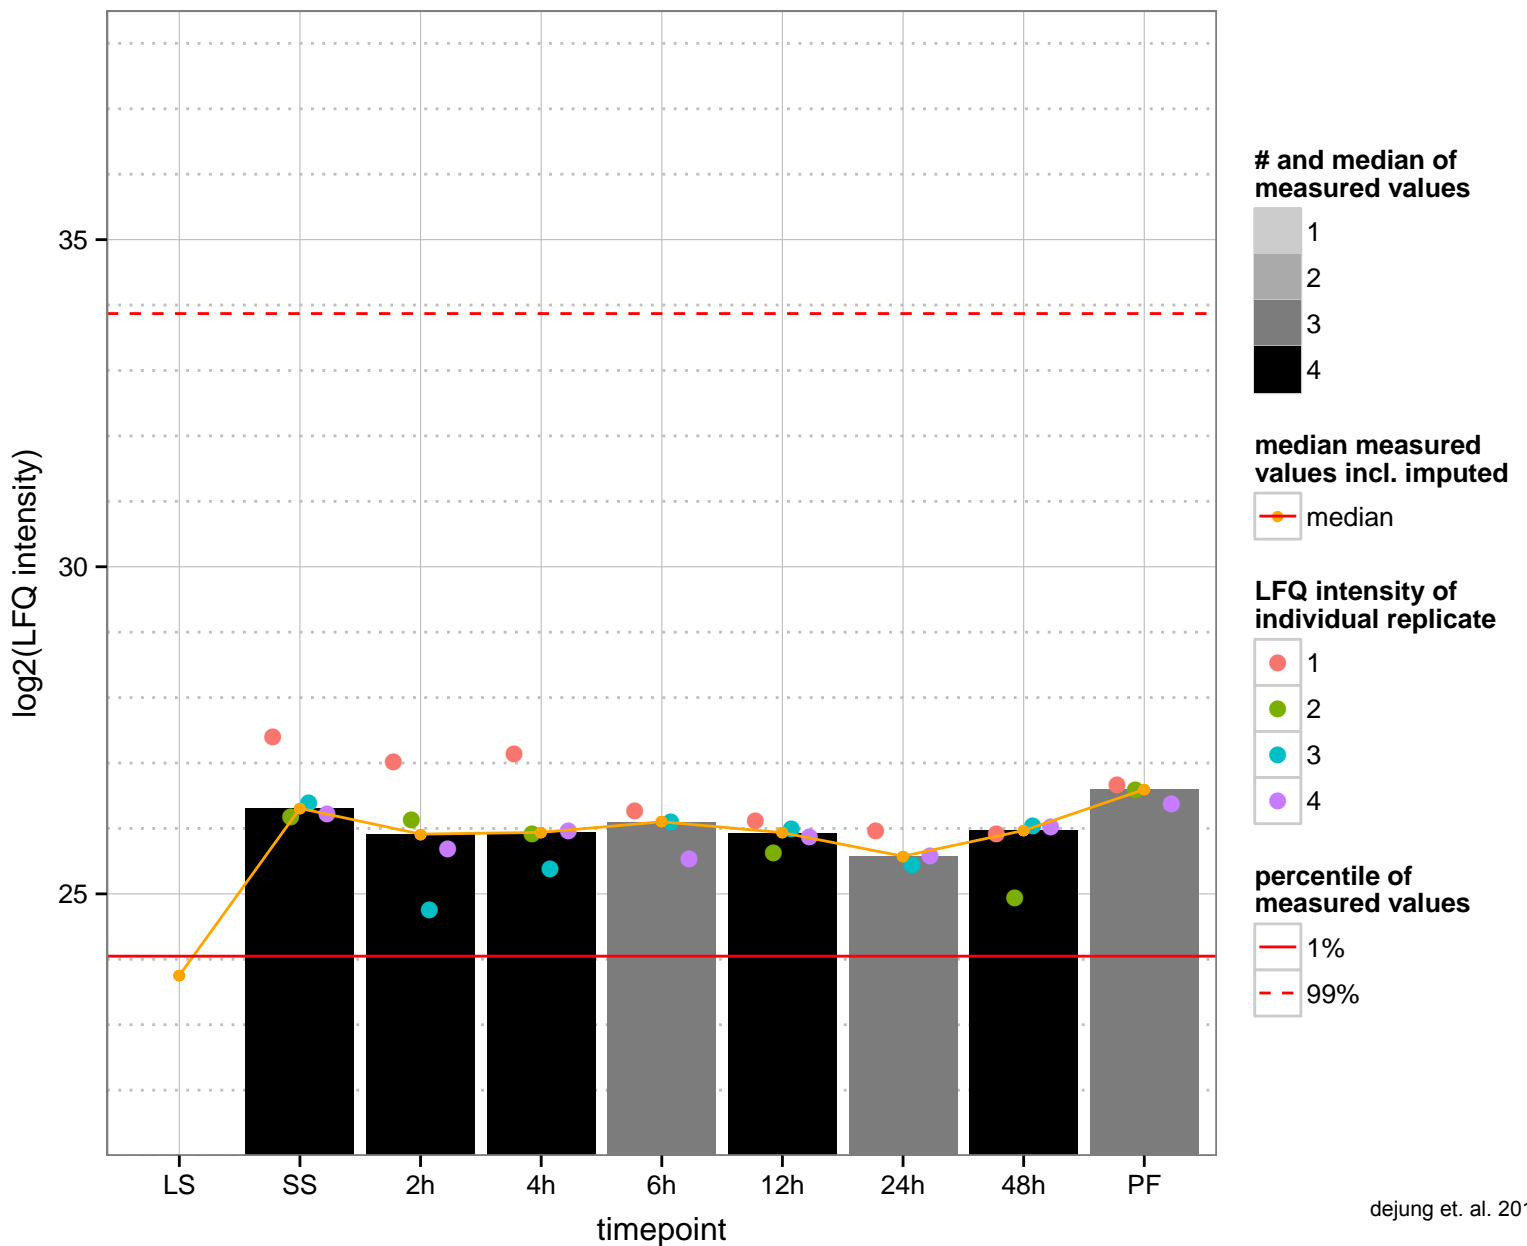

DNA topoisomerase type IB small subunit

Tb927.9.6940

AGOF: ATP binding, DNA topoisomerase type I activity, magnesium ion binding

AGOC: nucleus

AGOP: DNA topological change, chromatin assembly or disassembly

PGOF: DNA binding

PGOC: null

PGOP: null

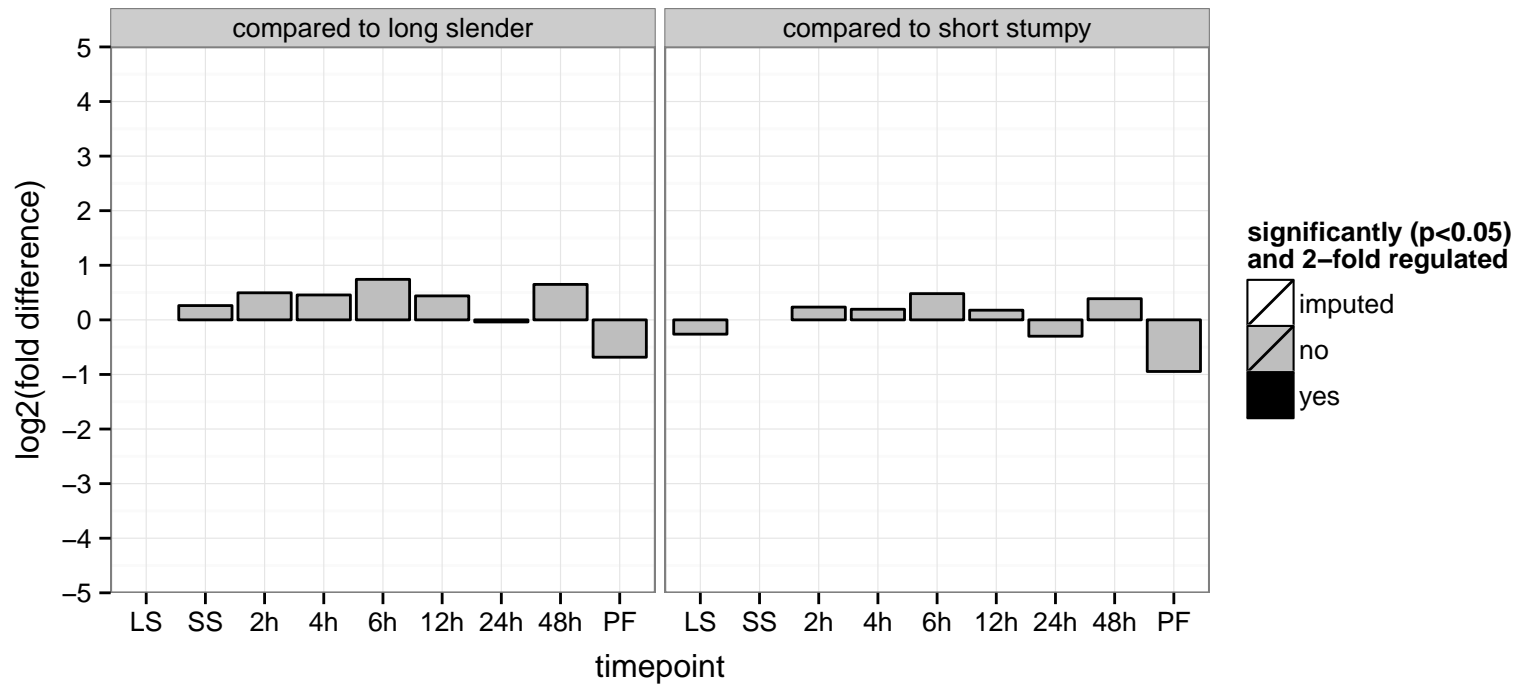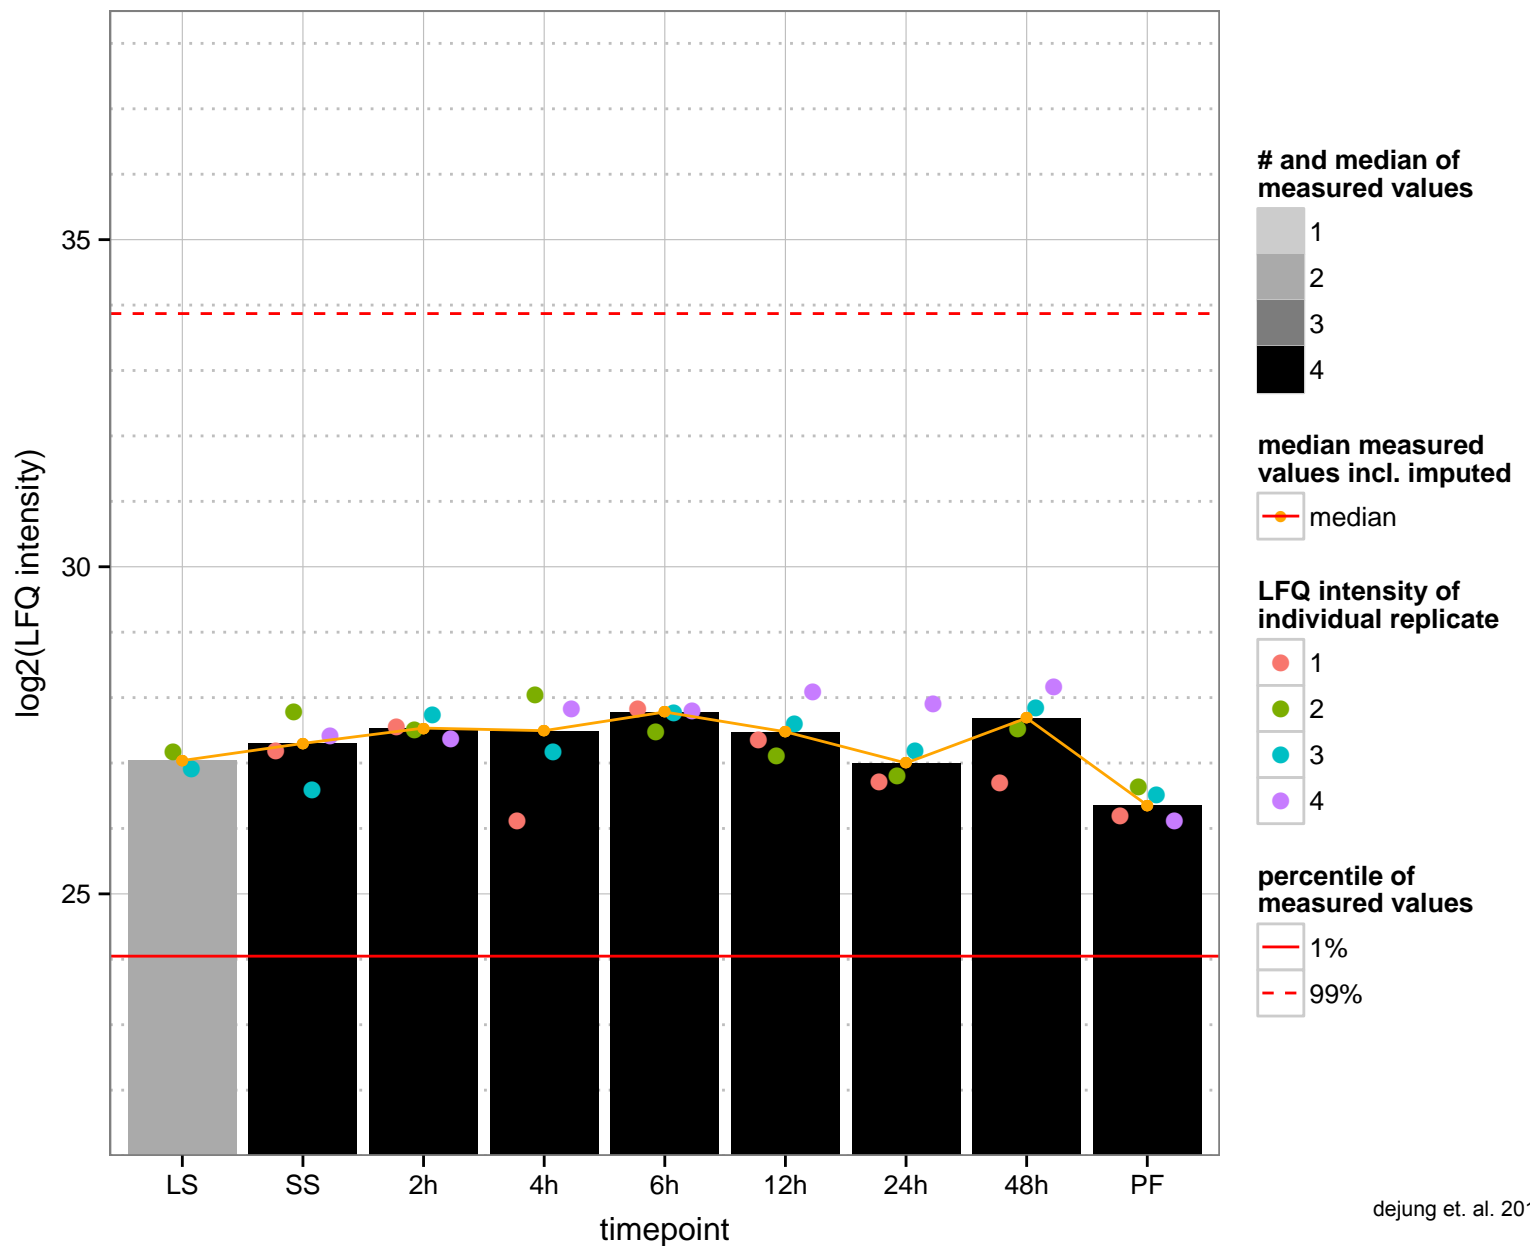

RNA pseudouridylate synthase protein, putative  
 Tb927.9.7150  
 AGOF: RNA binding, pseudouridine synthase activity  
 AGOC: null  
 AGOP: RNA processing, pseudouridine synthesis  
 PGOF: RNA binding, pseudouridine synthase activity  
 PGOC: null  
 PGOP: RNA modification, pseudouridine synthesis

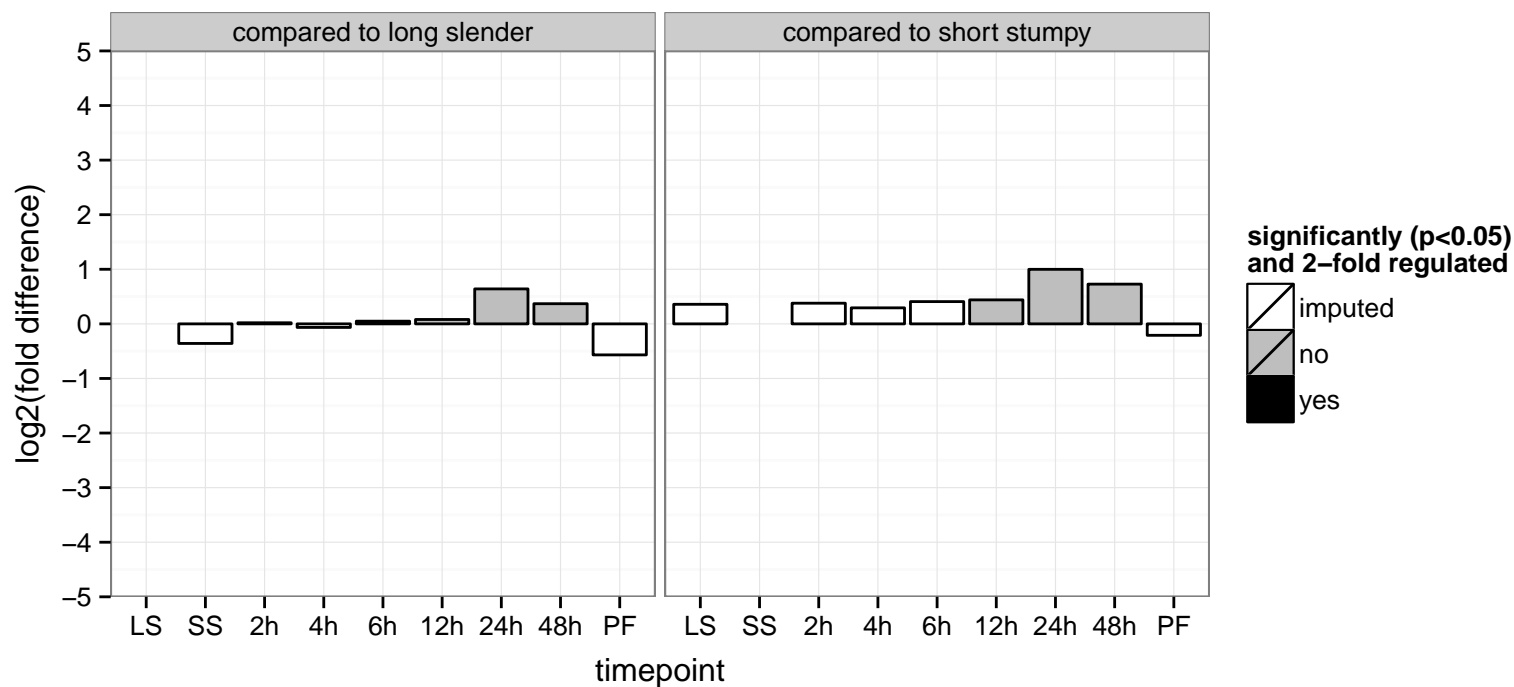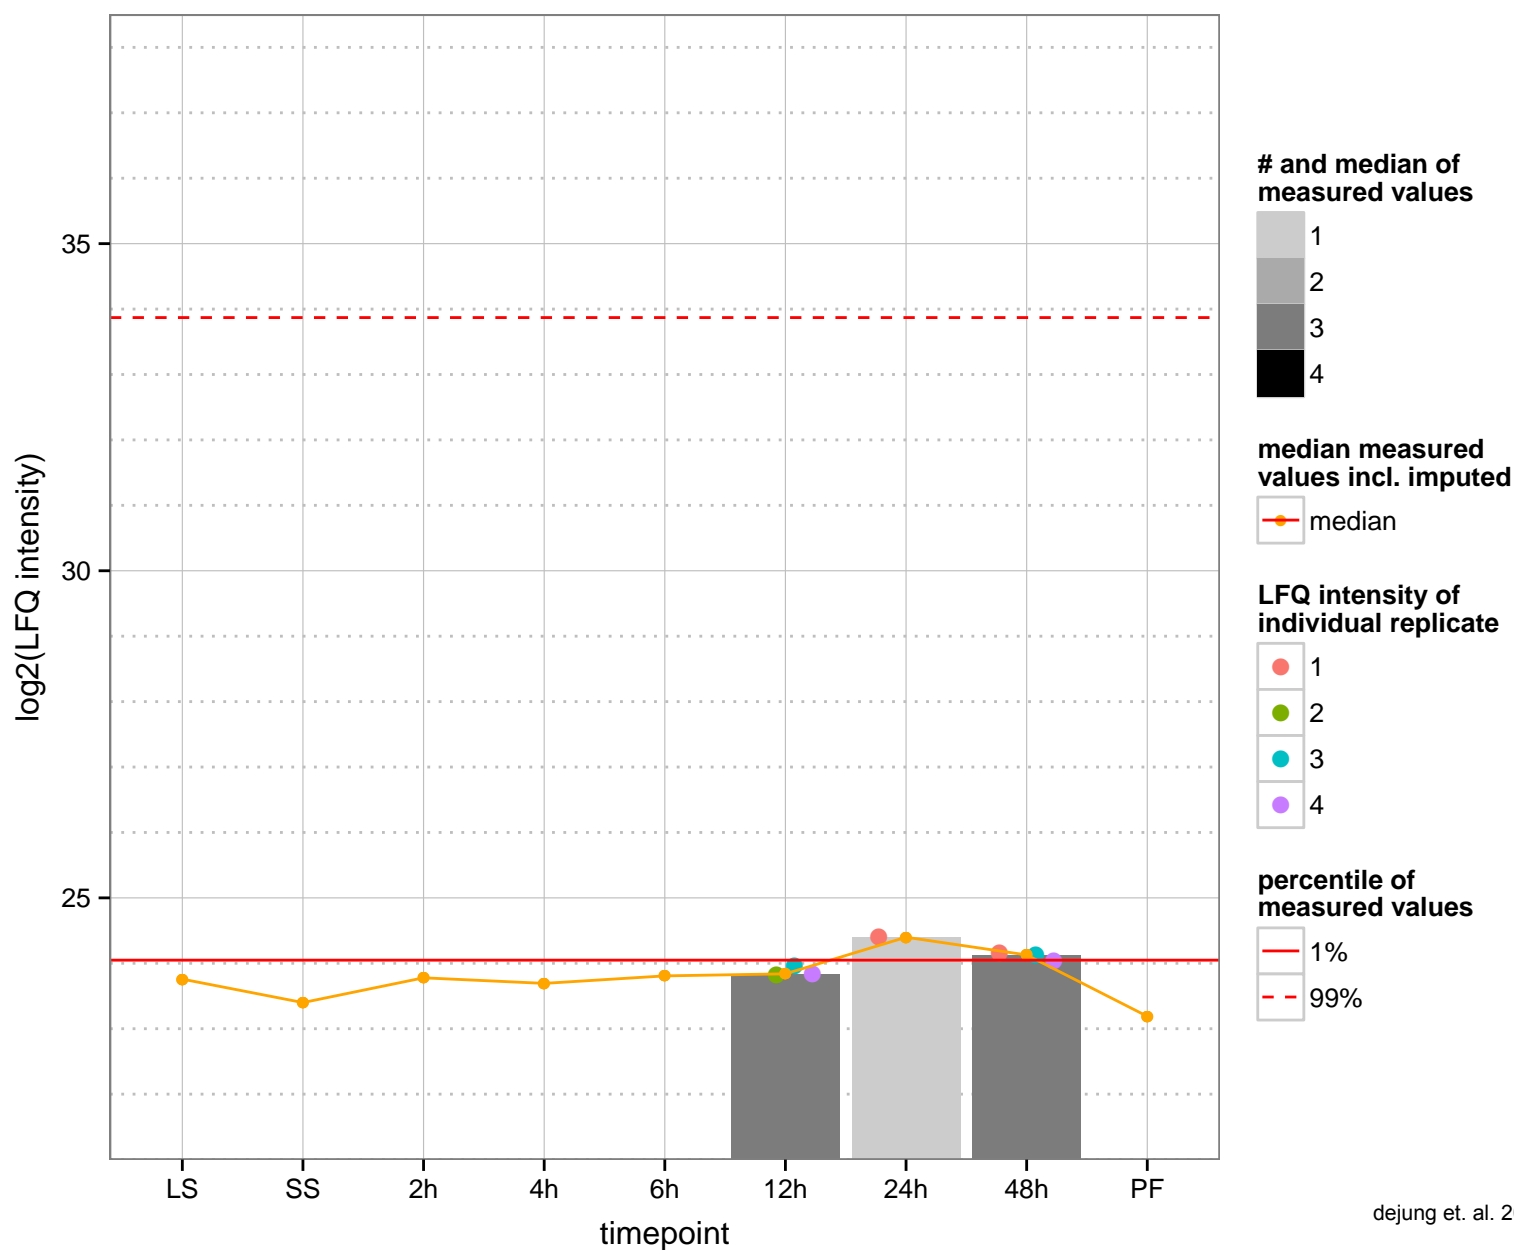

adenosine monophosphate deaminase, putative, AMP deaminase  
 Tb927.9.7180  
 AGOF: AMP deaminase activity  
 AGOC: null  
 AGOP: purine ribonucleoside monophosphate biosynthetic process  
 PGO: deaminase activity  
 PGO: null  
 PGO: purine ribonucleoside monophosphate biosynthetic process

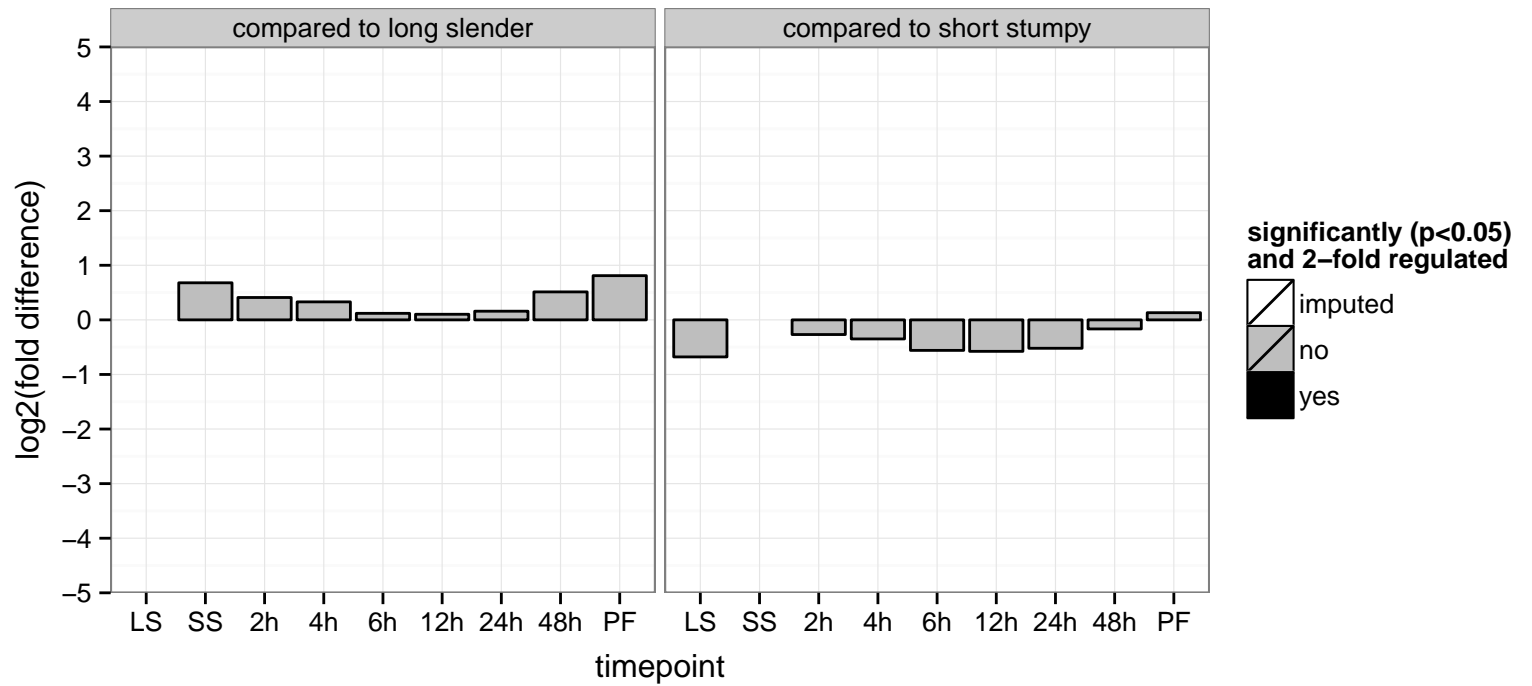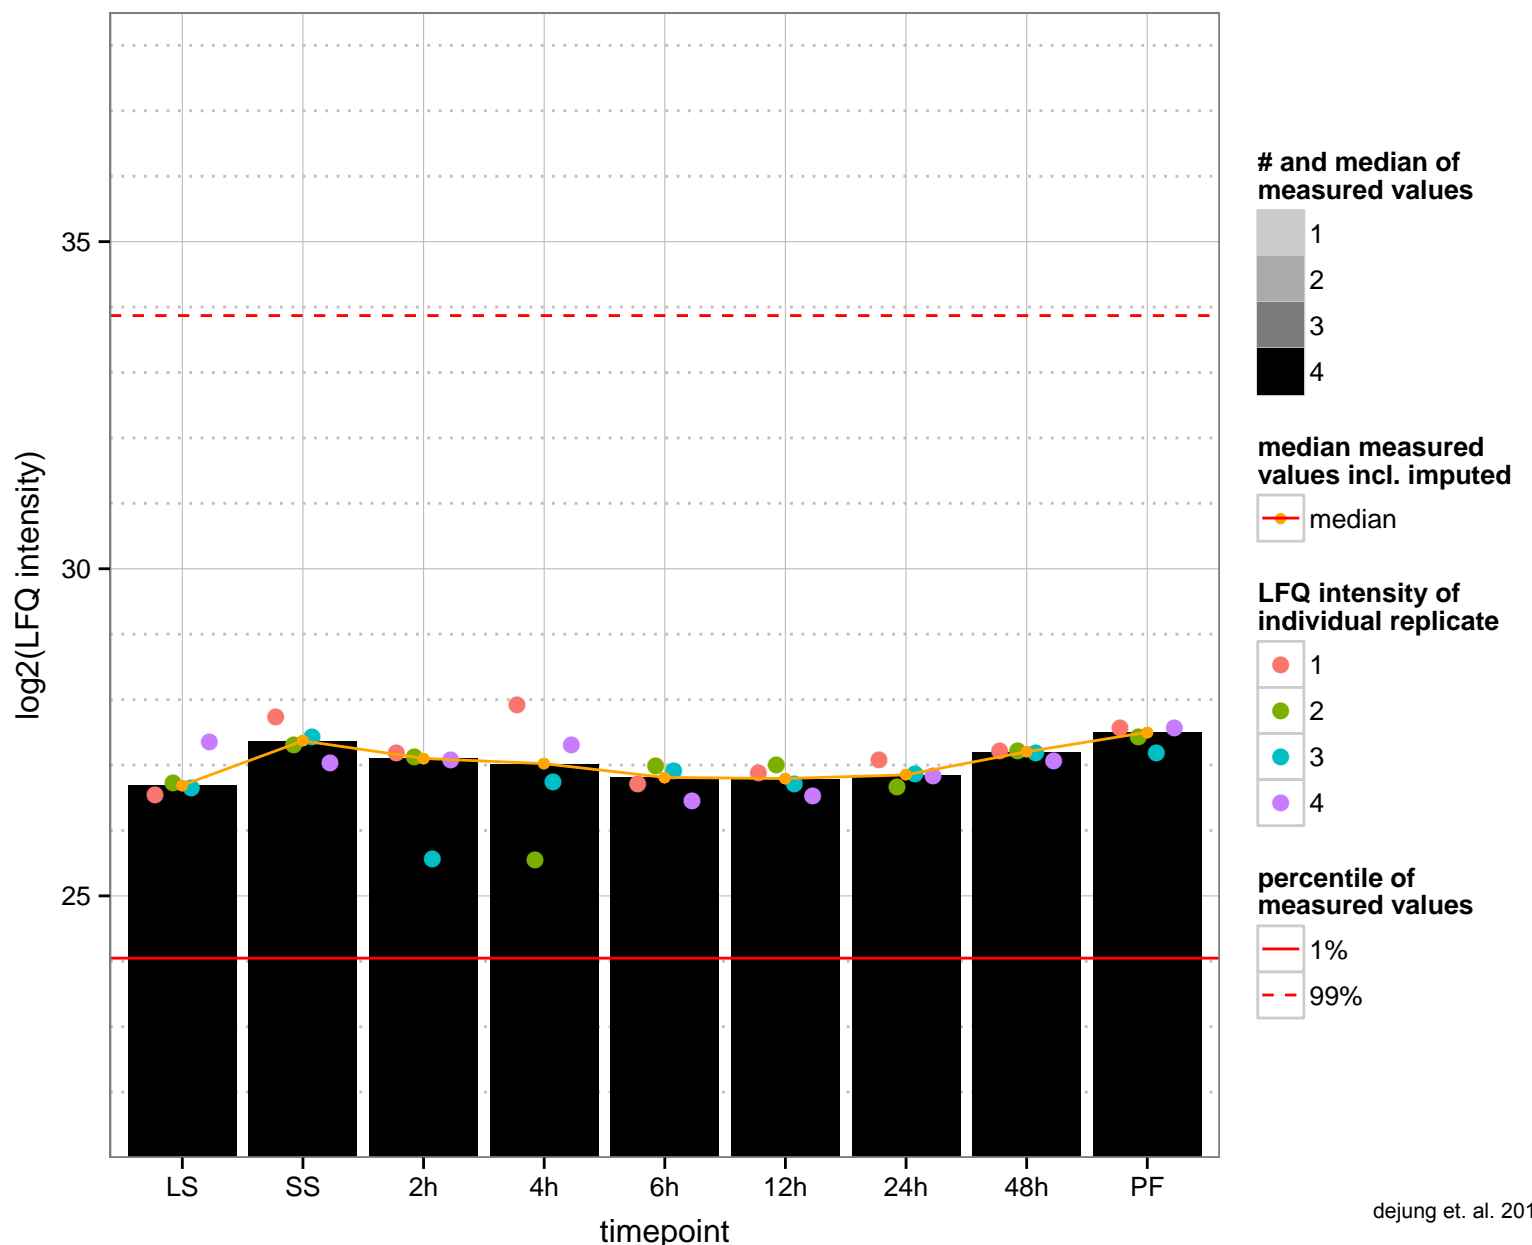



mitochondrial exoribonuclease DSS-1, exoribonuclease DSS-1 (EMBL:AY233297)  
 Tb927.9.7210  
 AGOF: RNA binding, exoribonuclease activity  
 AGOC: mitochondrion  
 AGOP: mitochondrial RNA 5'-end processing  
 PGO: RNA binding, ribonuclease activity  
 PGO: null  
 PGO: null

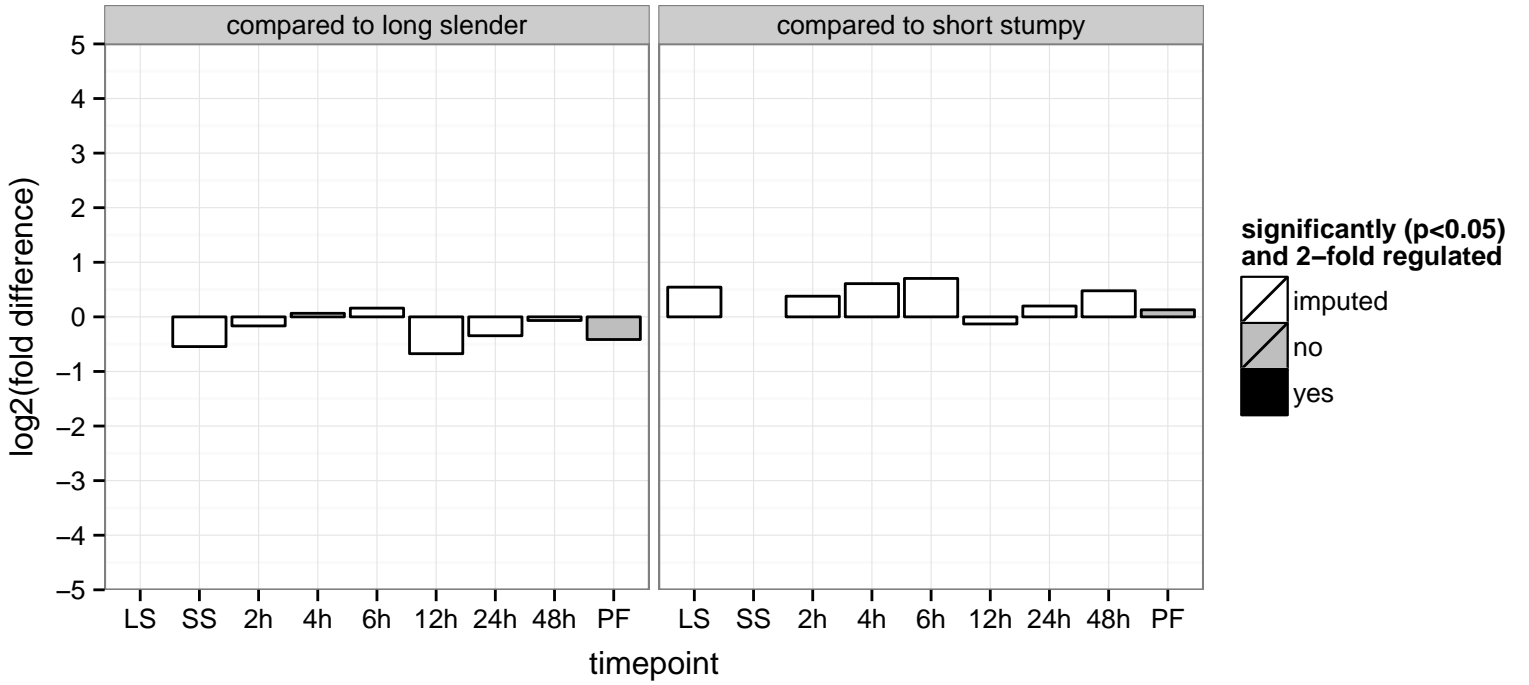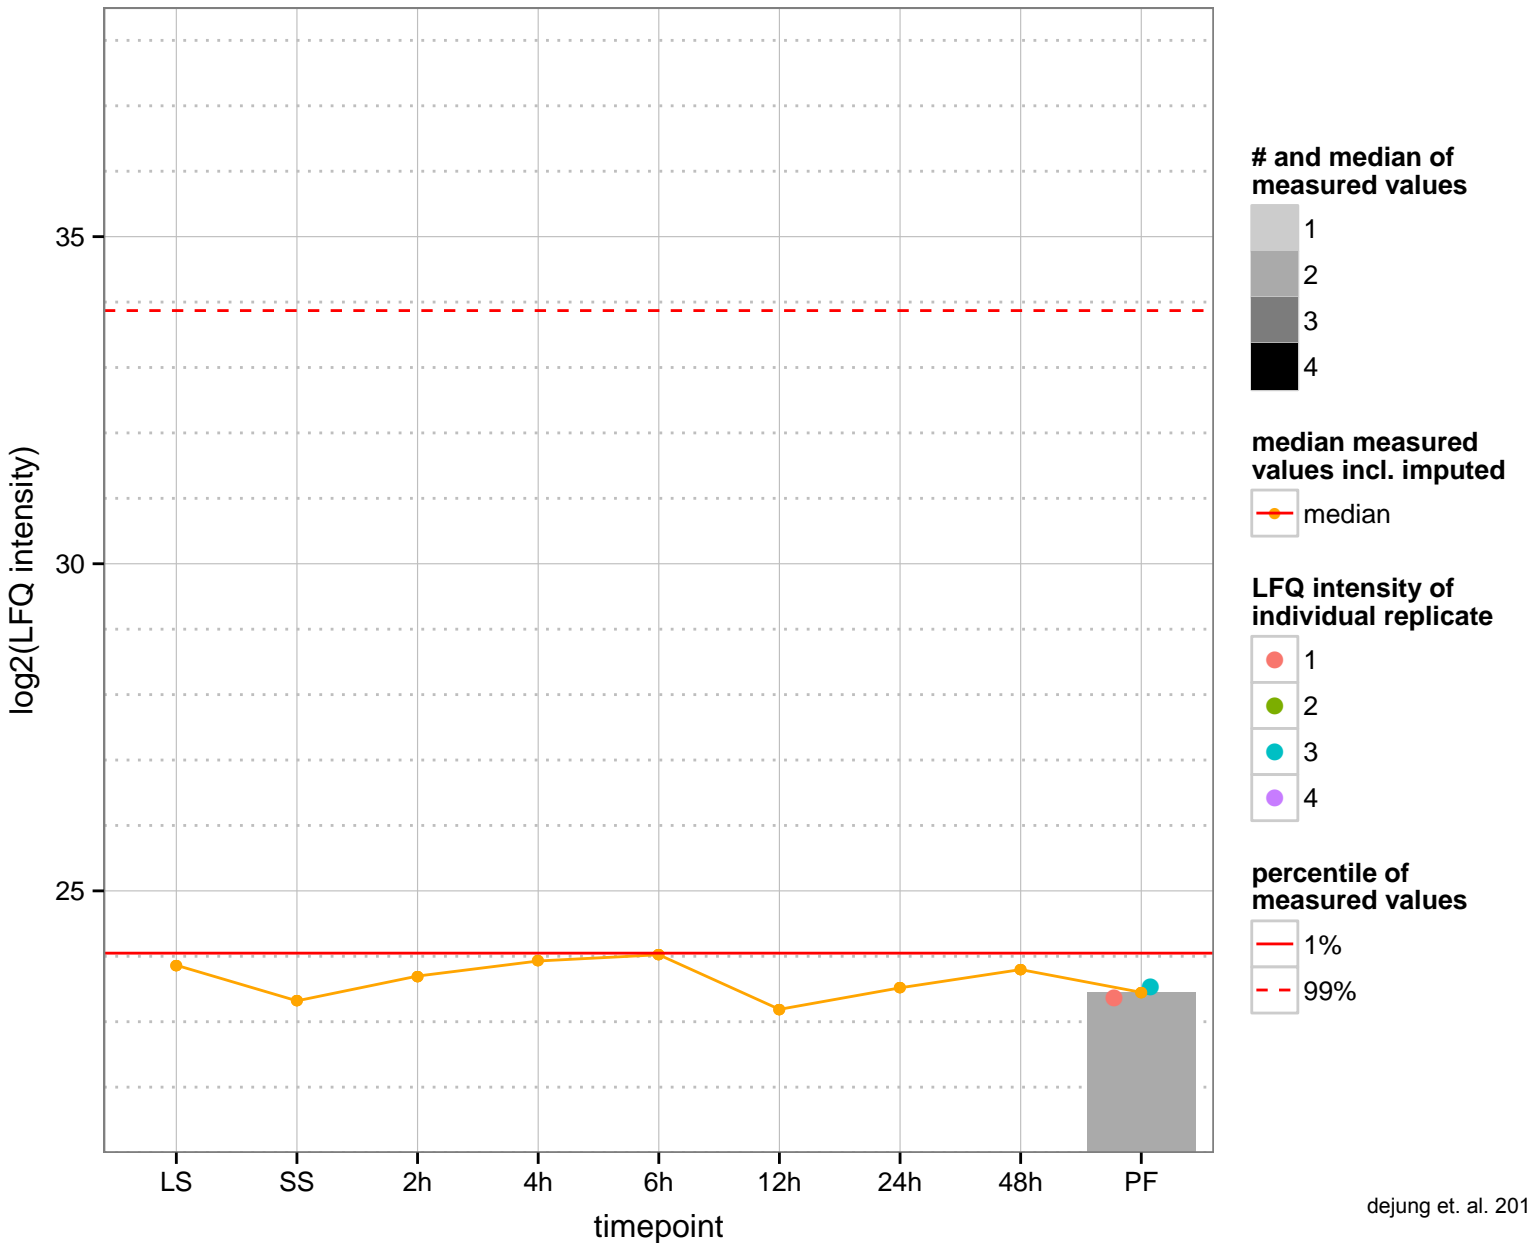

calpain-like cysteine peptidase, putative, cysteine peptidase, Clan CA, family C2  
 Tb927.9.7540  
 AGOF: calcium-dependent cysteine-type endopeptidase activity  
 AGOC: intracellular  
 AGOP: proteolysis  
 PGOF: calcium-dependent cysteine-type endopeptidase activity  
 PGOC: intracellular  
 PGOP: proteolysis

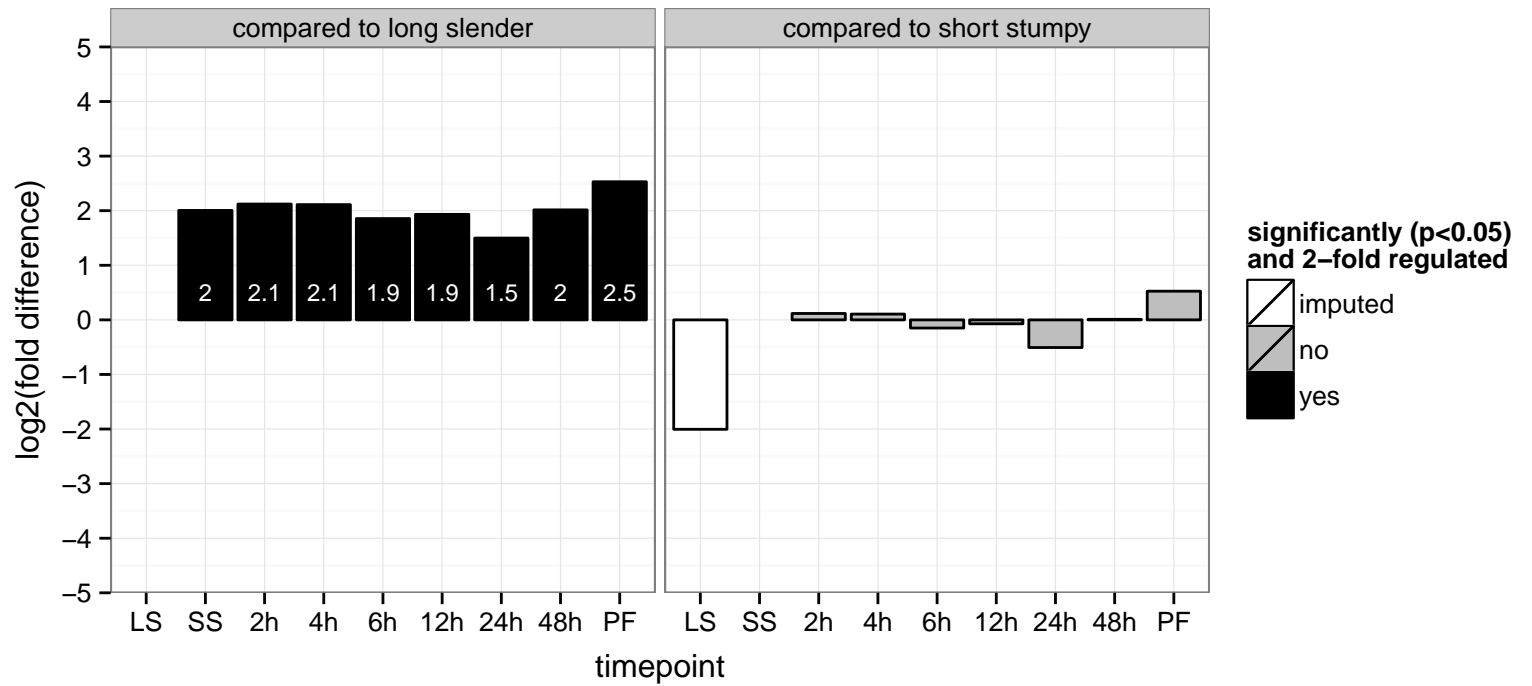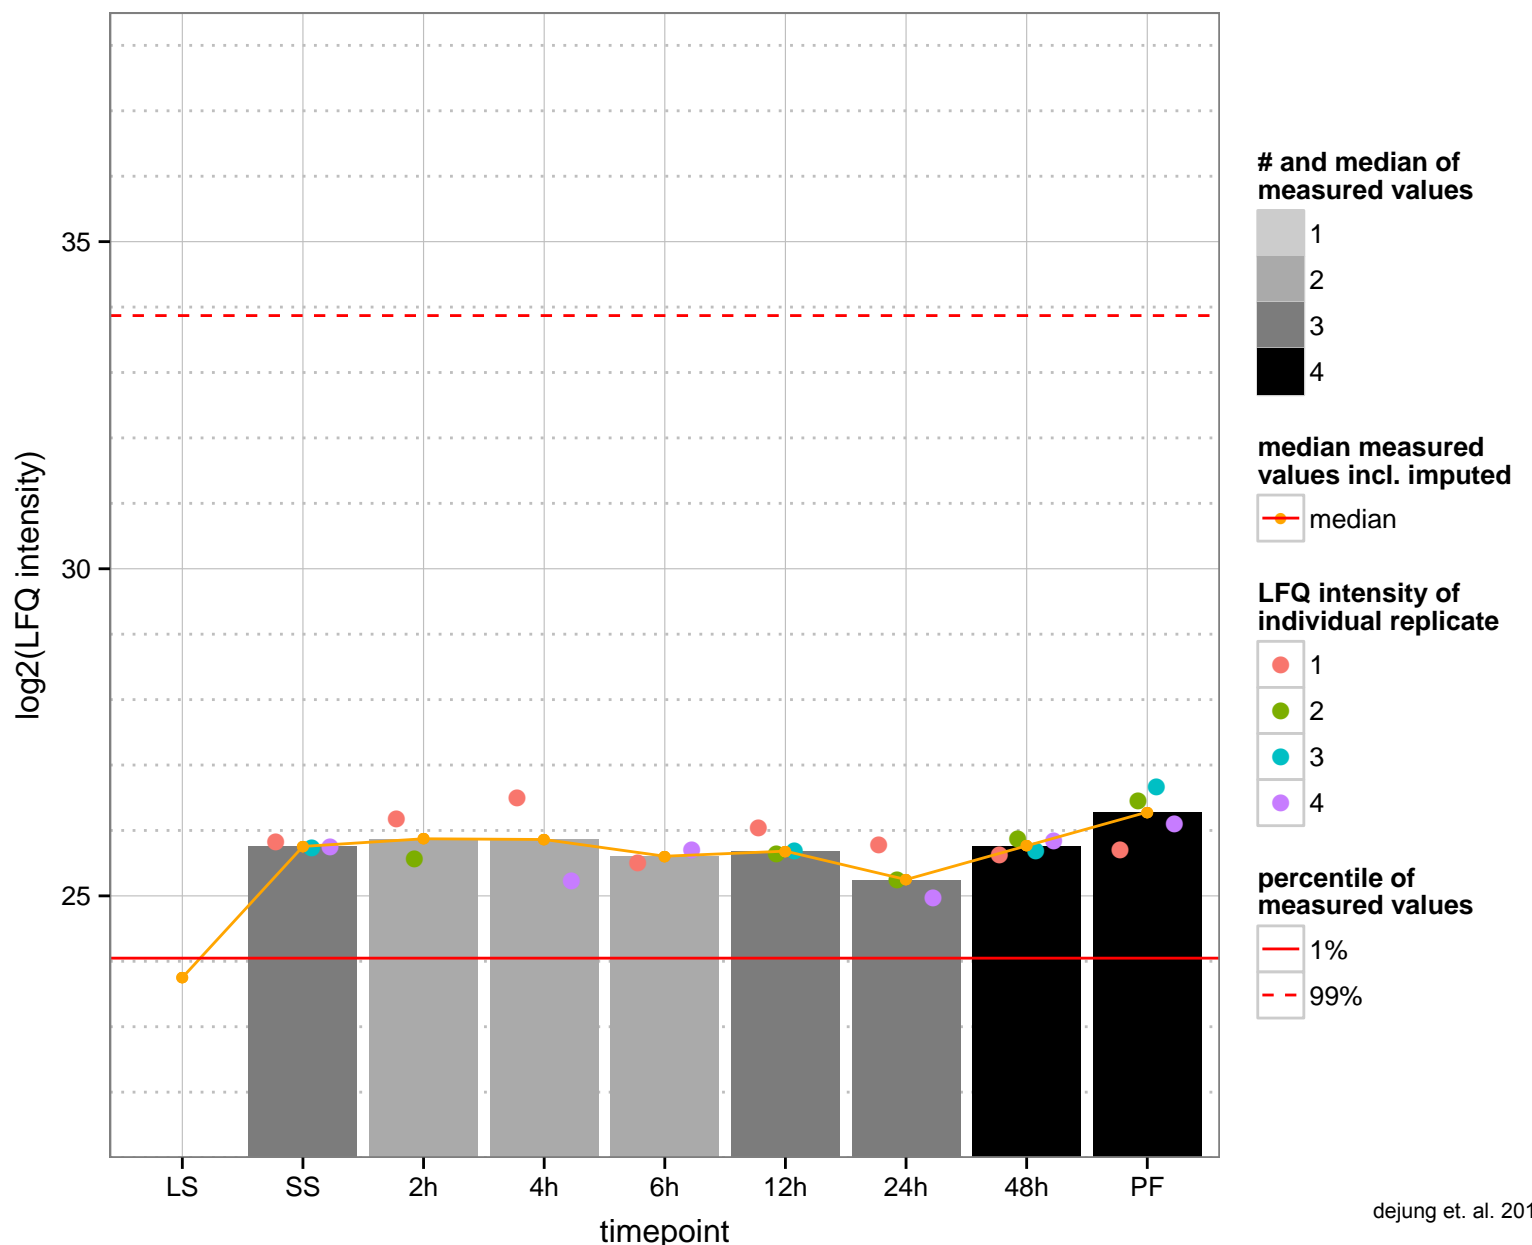

ADP-ribosylation factor, putative  
 Tb927.9.7650  
 AGOF: GTP binding  
 AGOC: intracellular  
 AGOP: intracellular protein transport, small GTPase mediated signal transduction  
 PGO: GTP binding  
 PGO: intracellular  
 PGO: intracellular protein transport, small GTPase mediated signal transduction

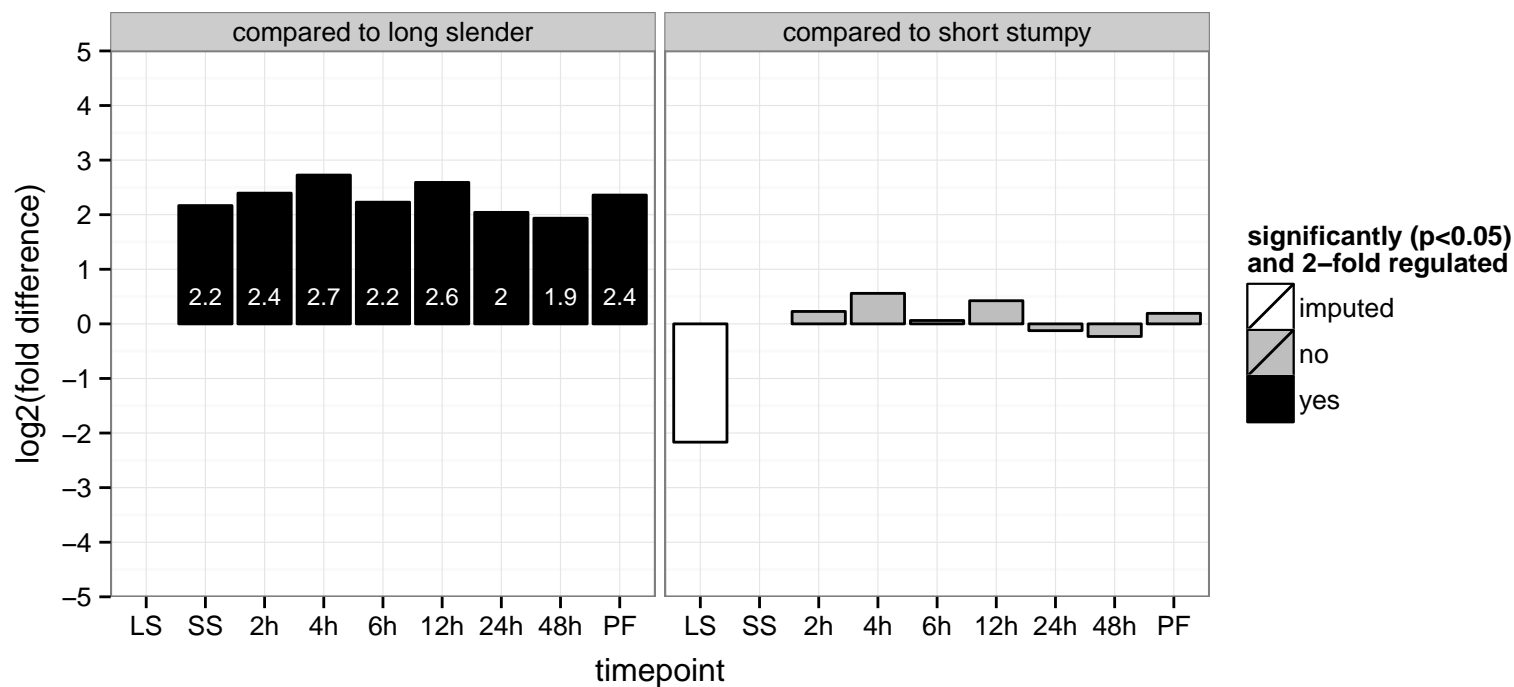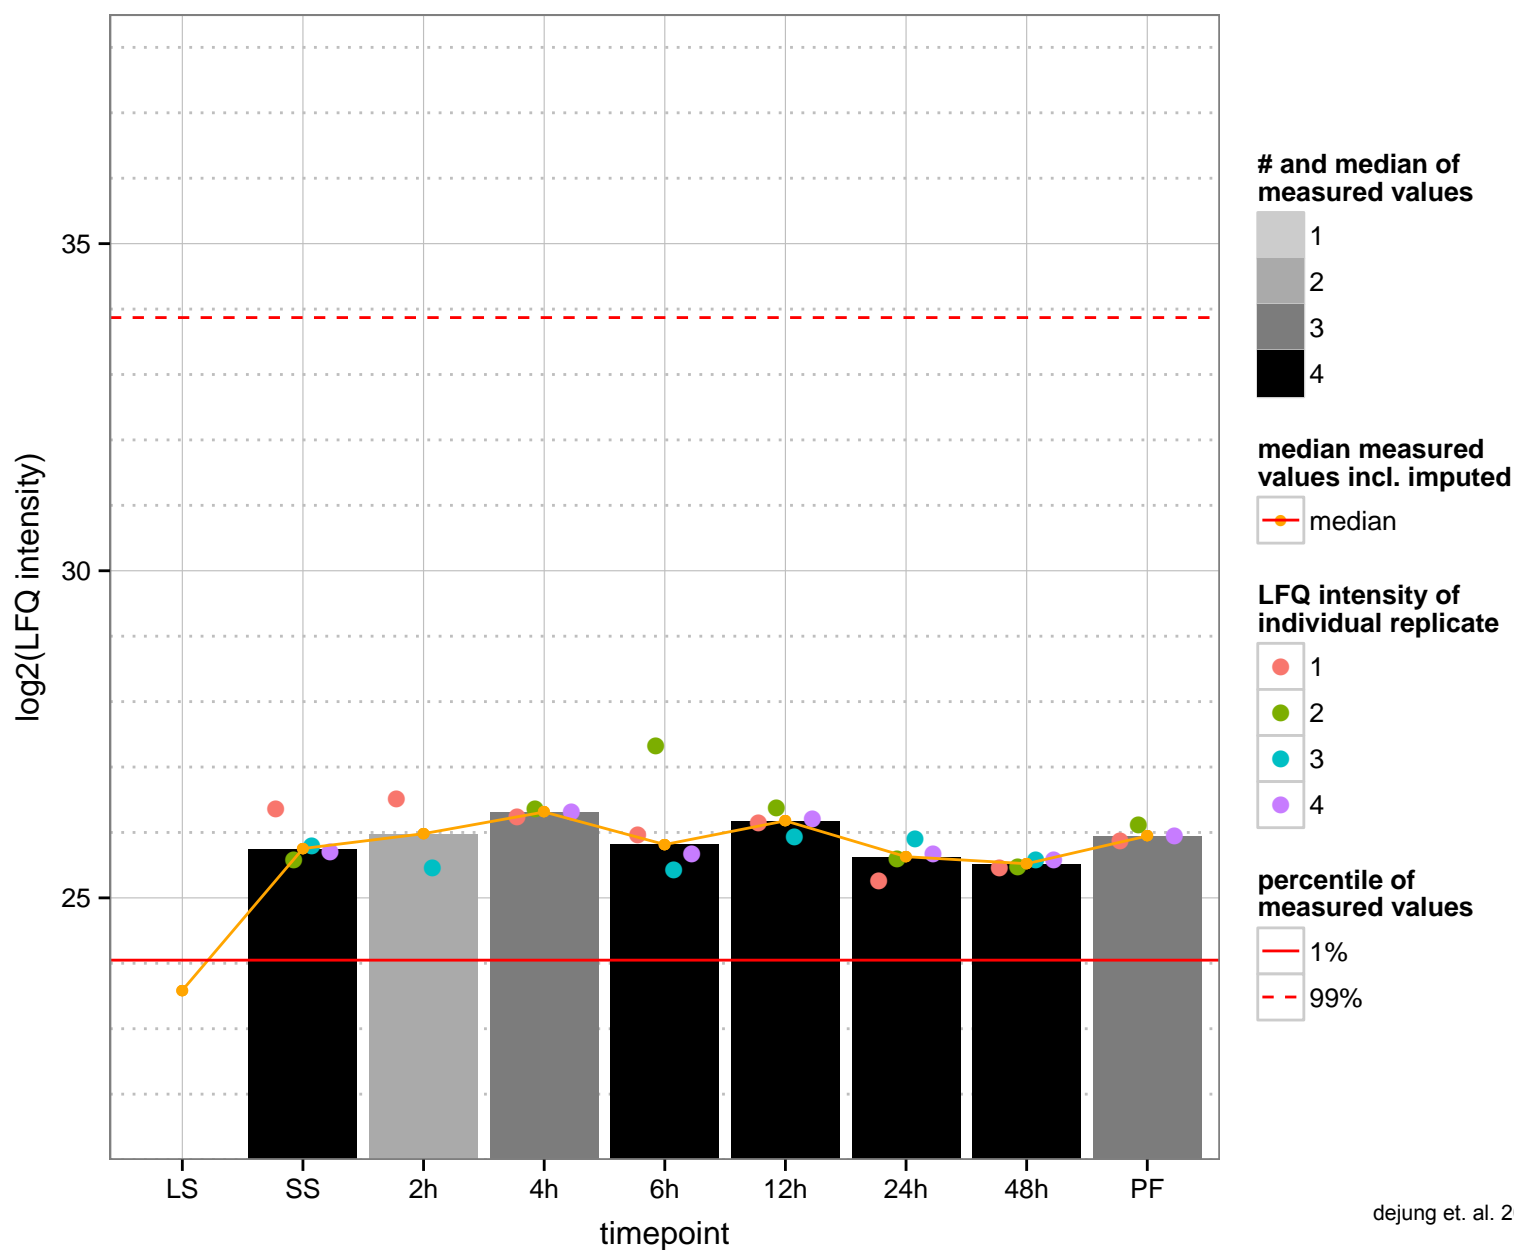

predicted tetratricopeptide repeat protein  
 Tb927.9.7720  
 AGOF: null  
 AGOC: null  
 AGOP: null  
 PGOF: protein binding  
 PGO: null  
 PGOP: null

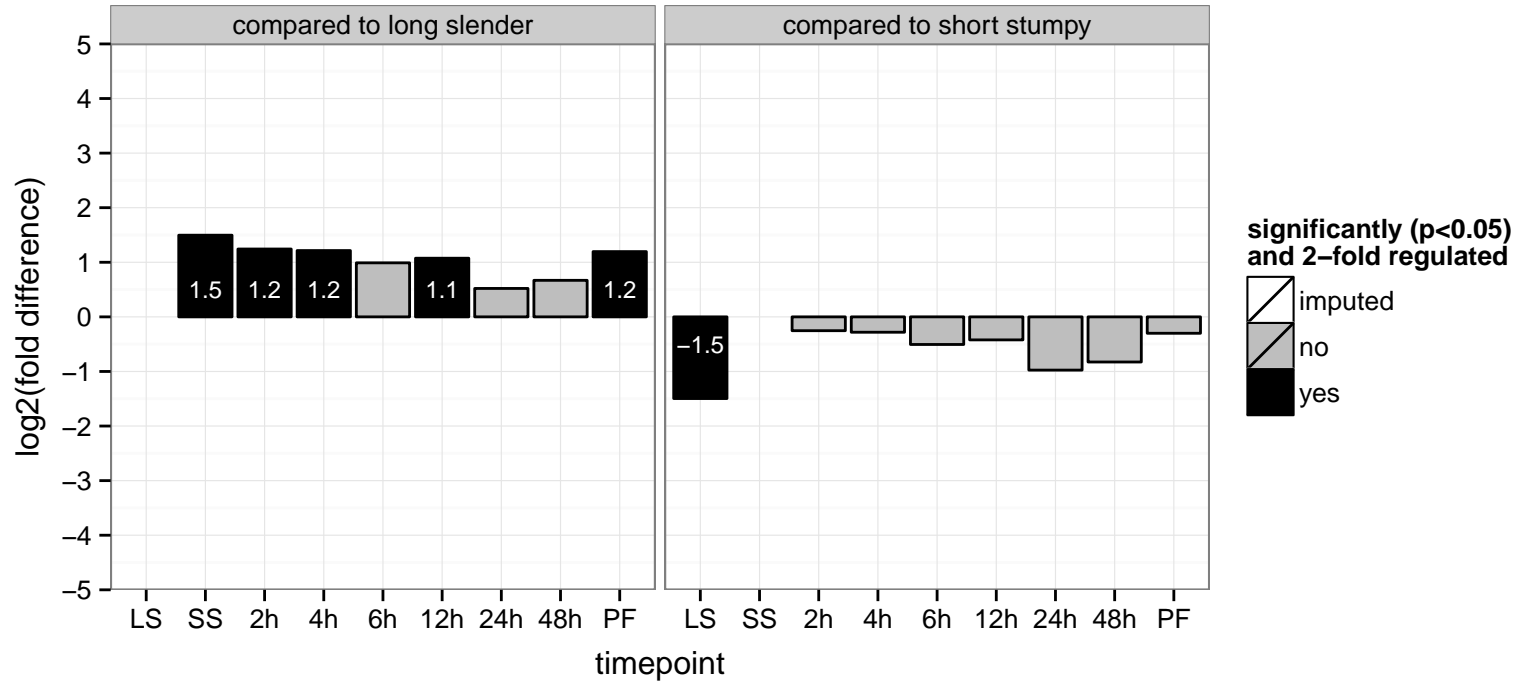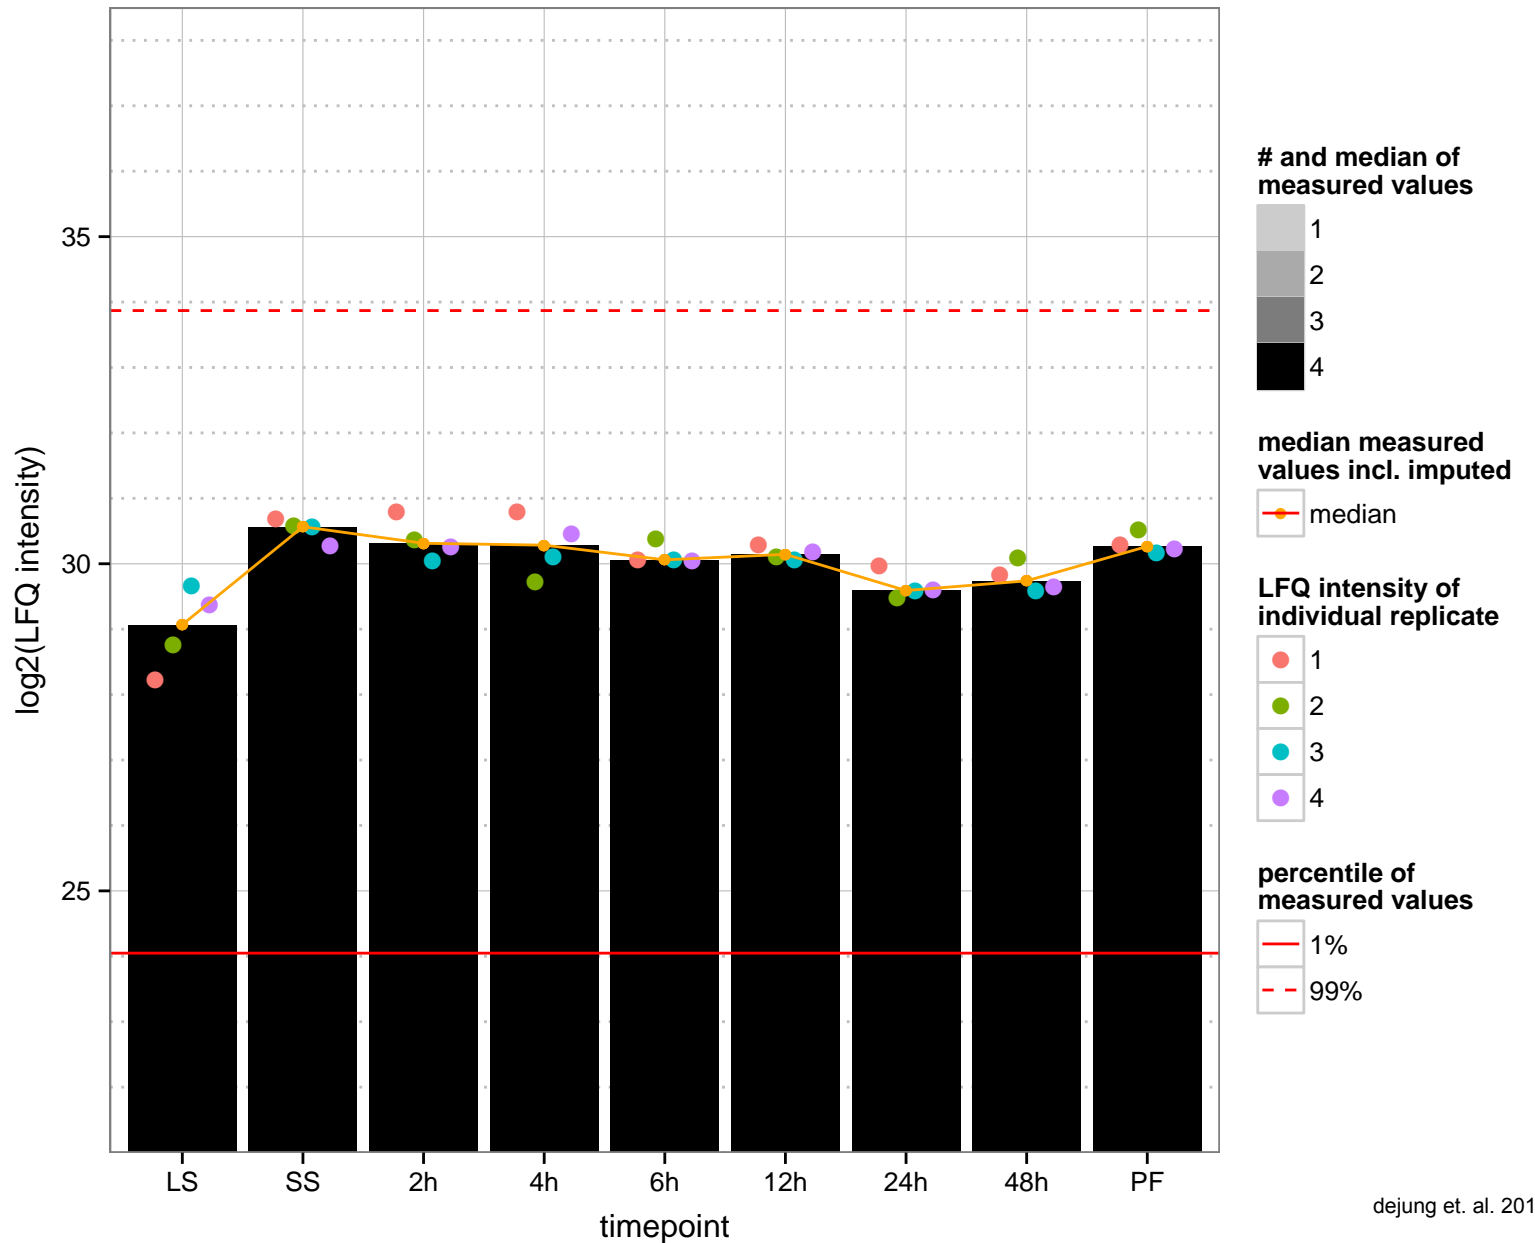

spermidine synthase, SPDSYN (SpSyn)  
 Tb927.9.7770  
 AGOF: spermidine synthase activity  
 AGOC: null  
 AGOP: null  
 PGOF: catalytic activity  
 PGO: null  
 PGOP: null

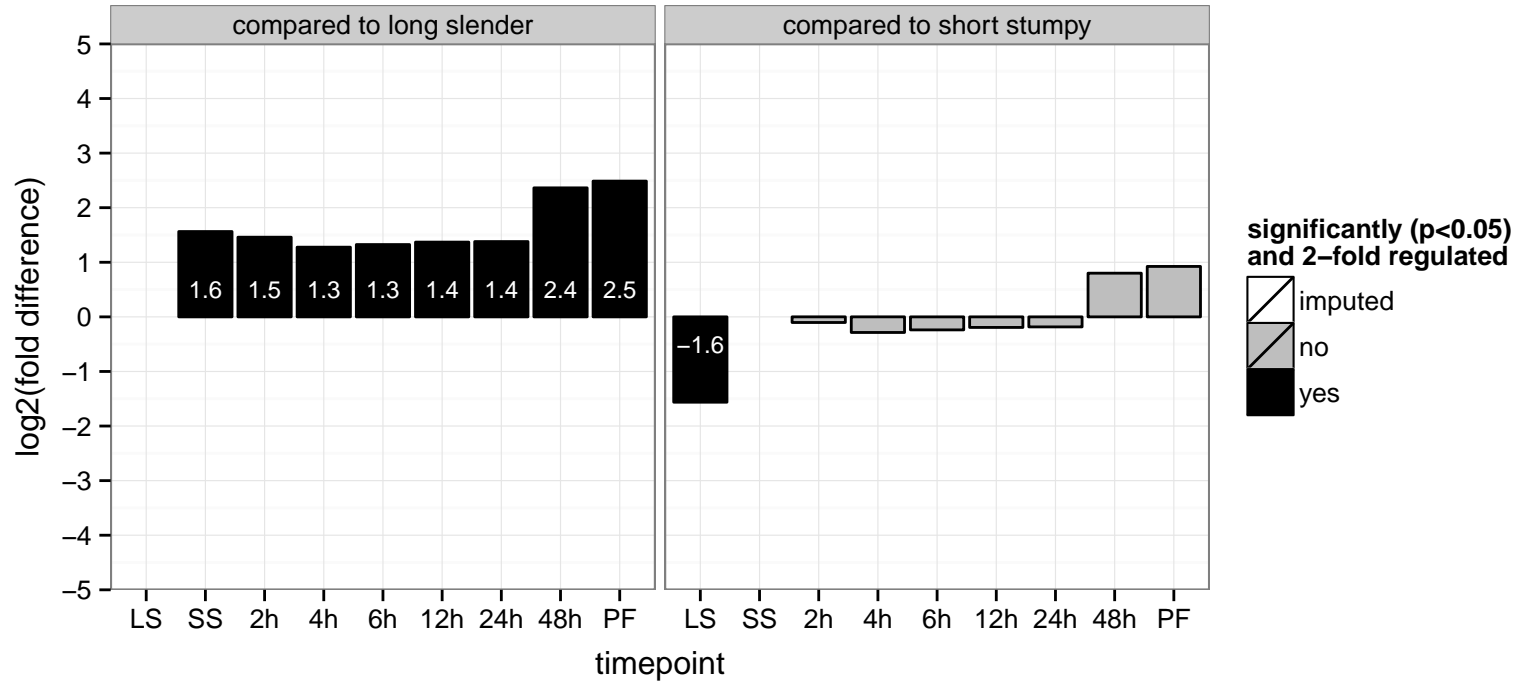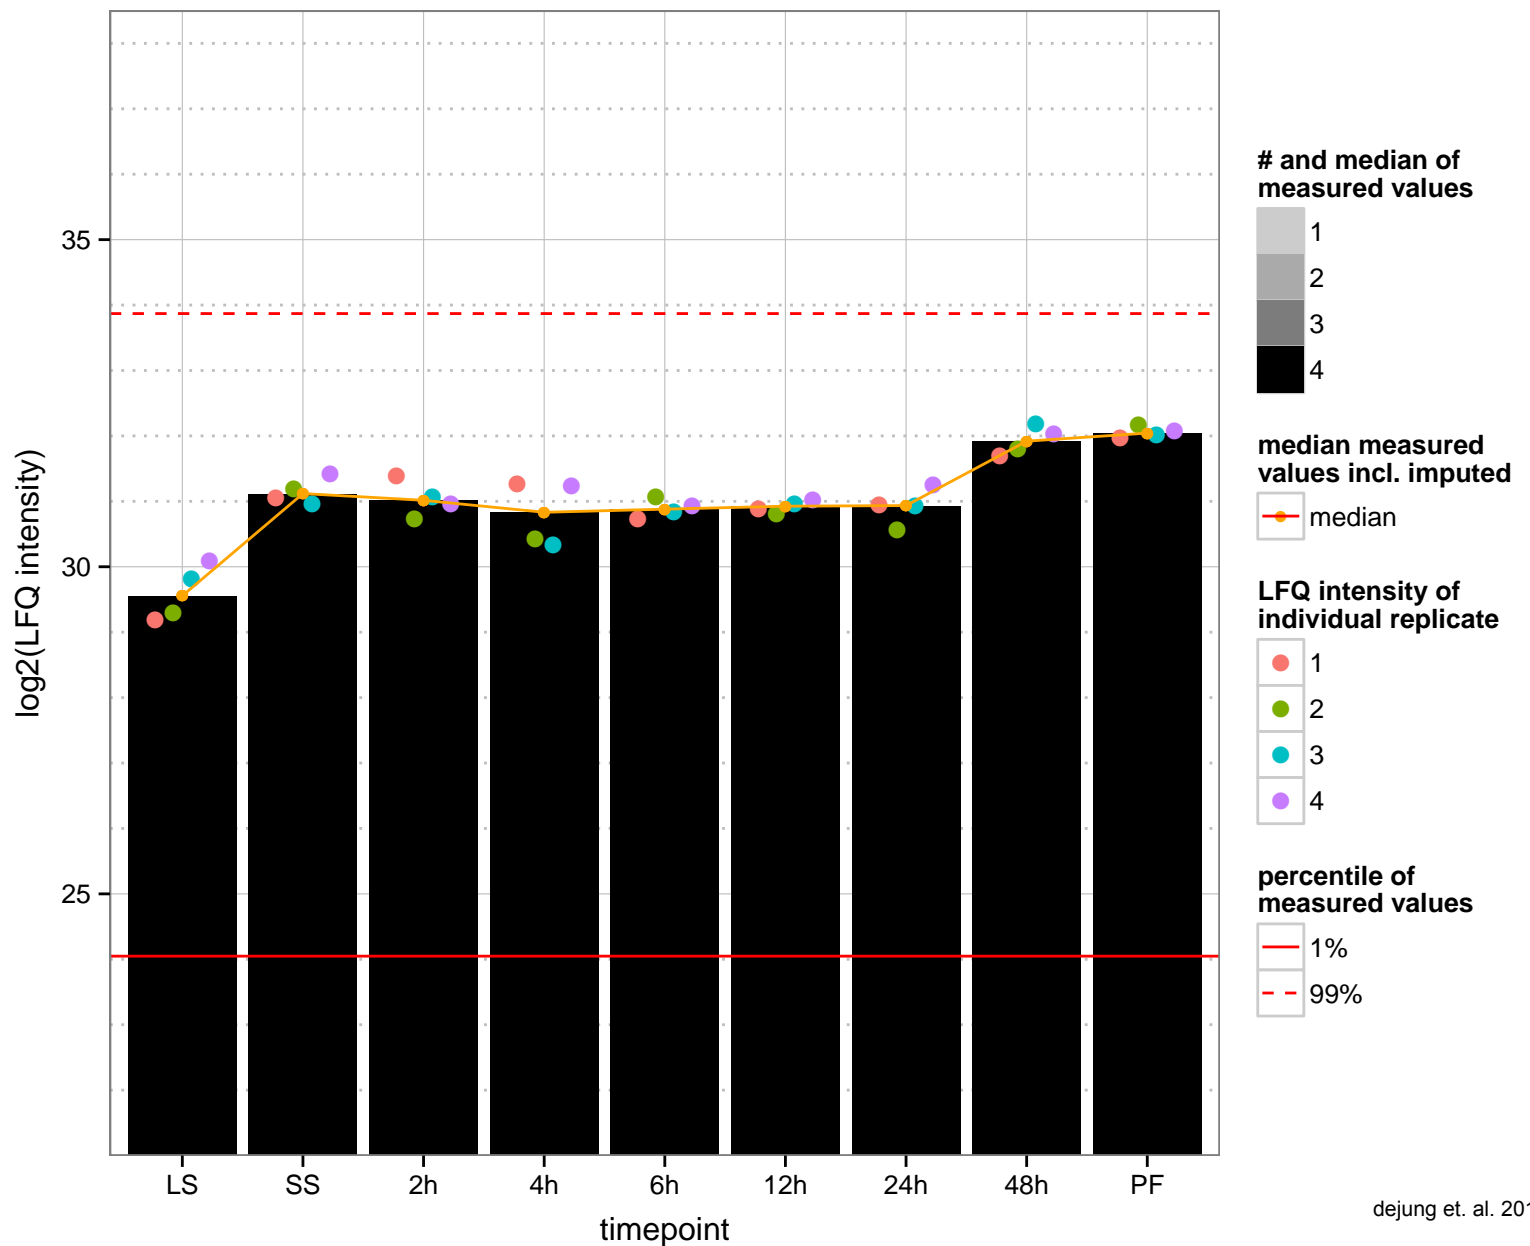

hypothetical protein, conserved  
 Tb927.9.7800  
 AGOF: null  
 AGOC: null  
 AGOP: null  
 PGO: null  
 PGOC: null  
 PGOP: null

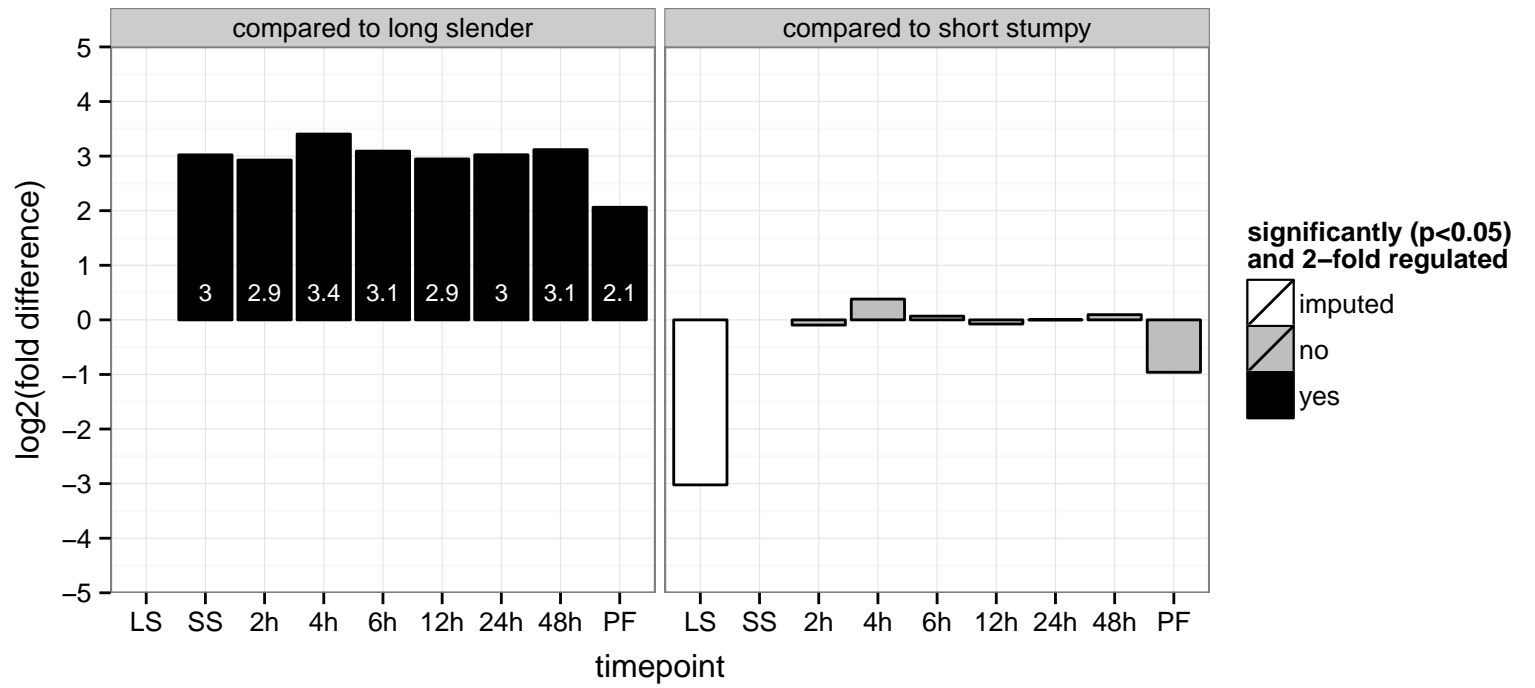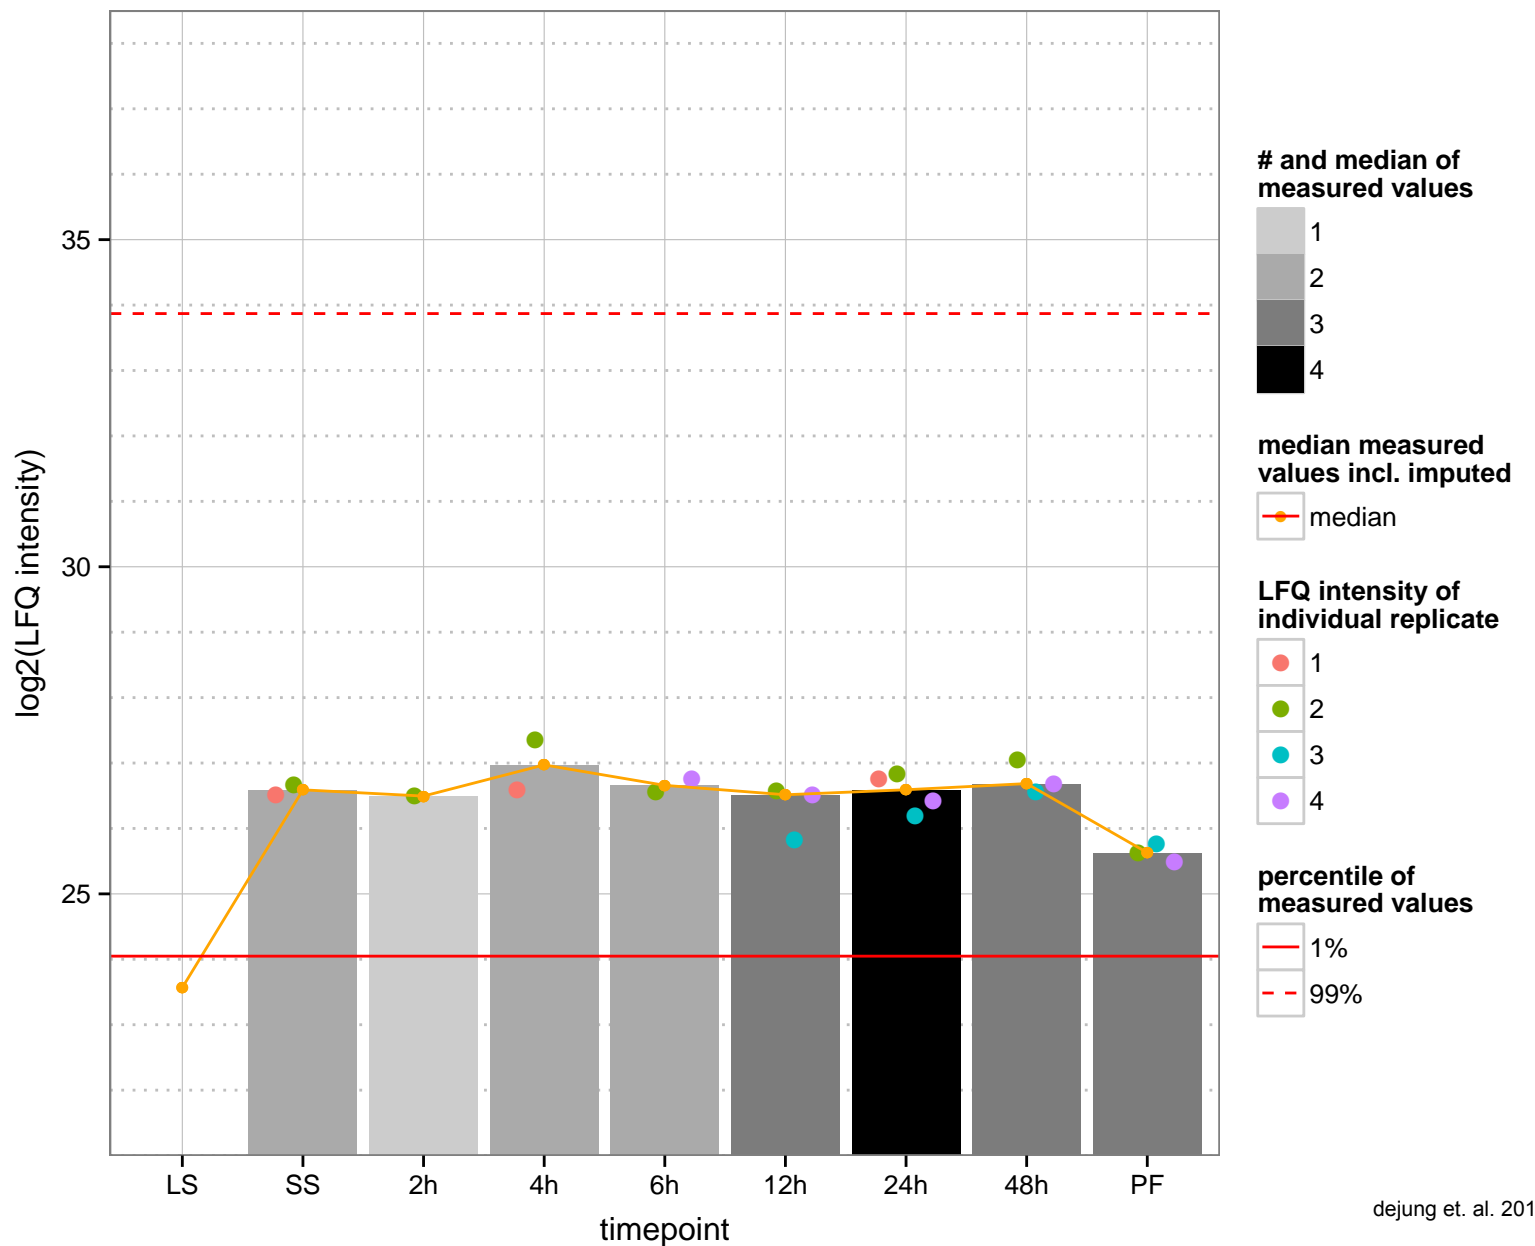

hypothetical protein, conserved  
 Tb927.9.8190  
 AGOF: null  
 AGOC: null  
 AGOP: null  
 PGO: null  
 PGOC: null  
 PGOP: null

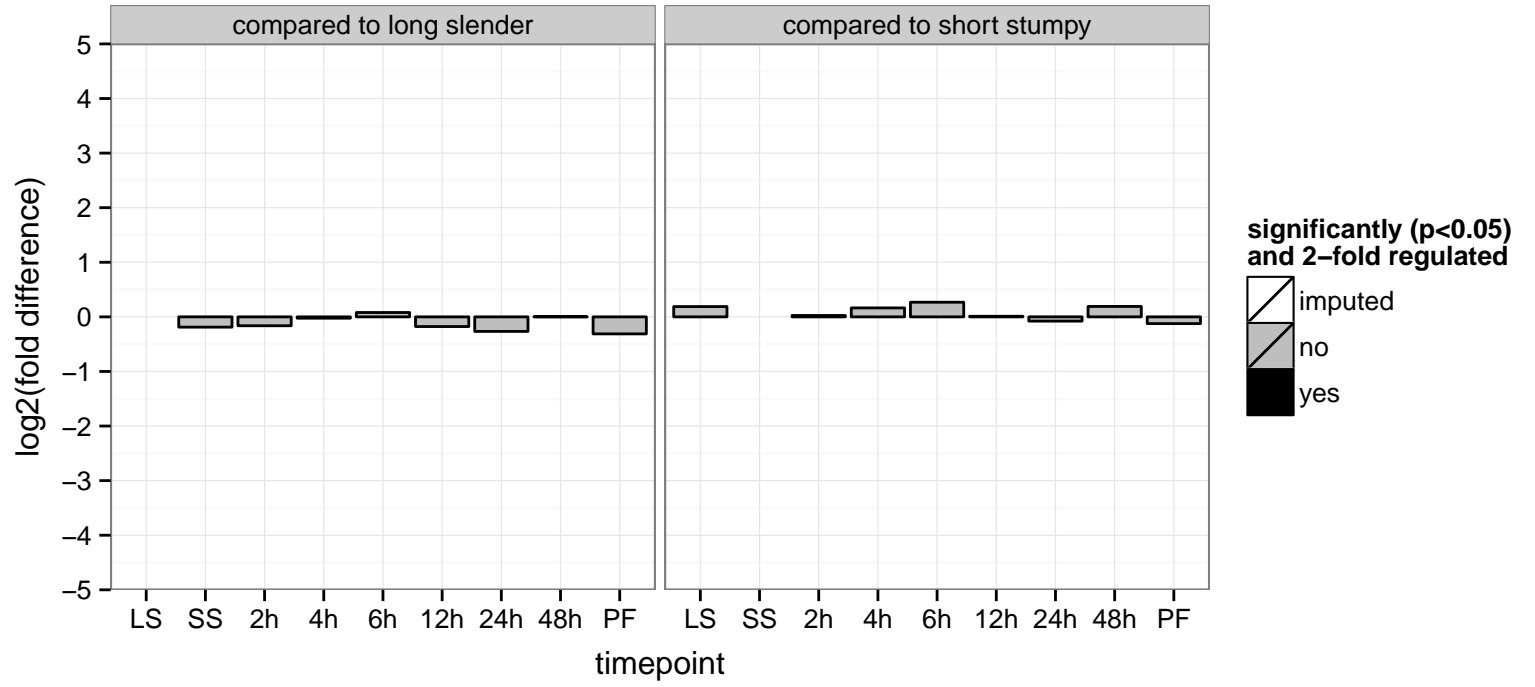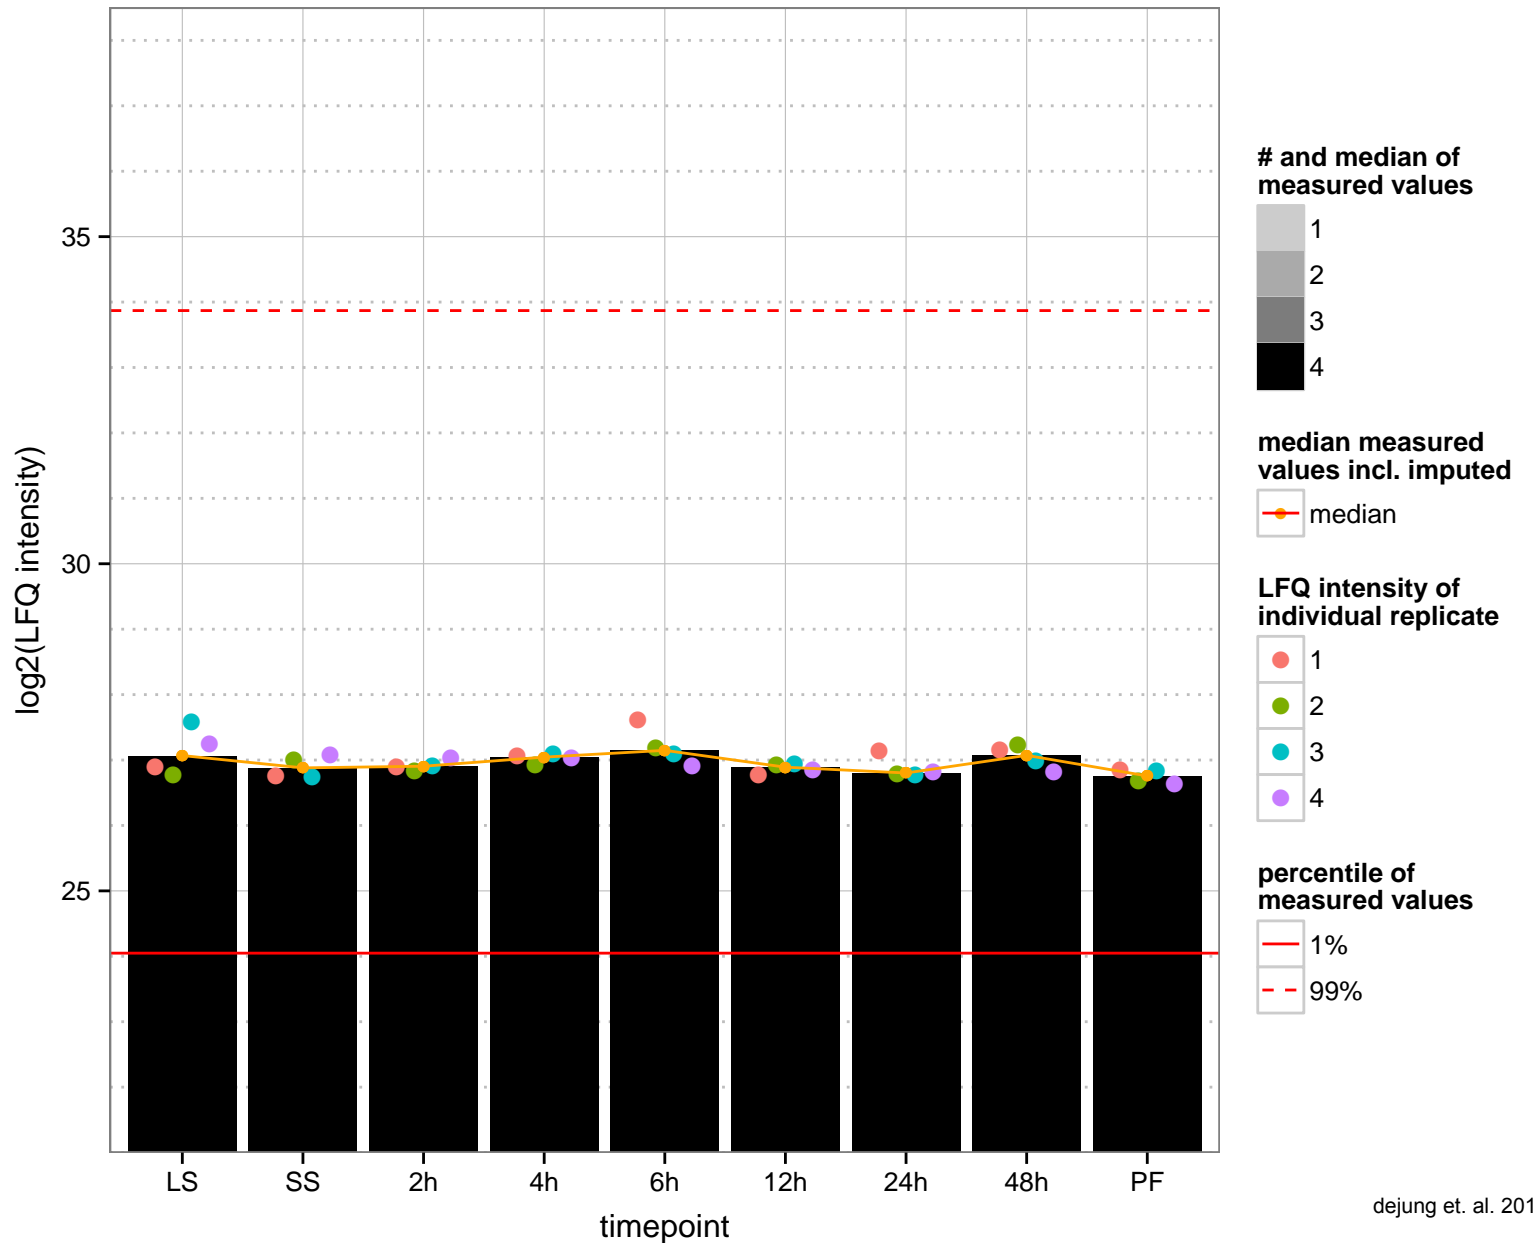

hypothetical protein, conserved  
 Tb927.9.8200;Tb11.v5.0687  
 AGOF: null  
 AGOC: null, intracellular, nucleolus  
 AGOP: null, cell proliferation  
 PGO: null  
 PGO: nucleolus  
 PGO: ribosome biogenesis

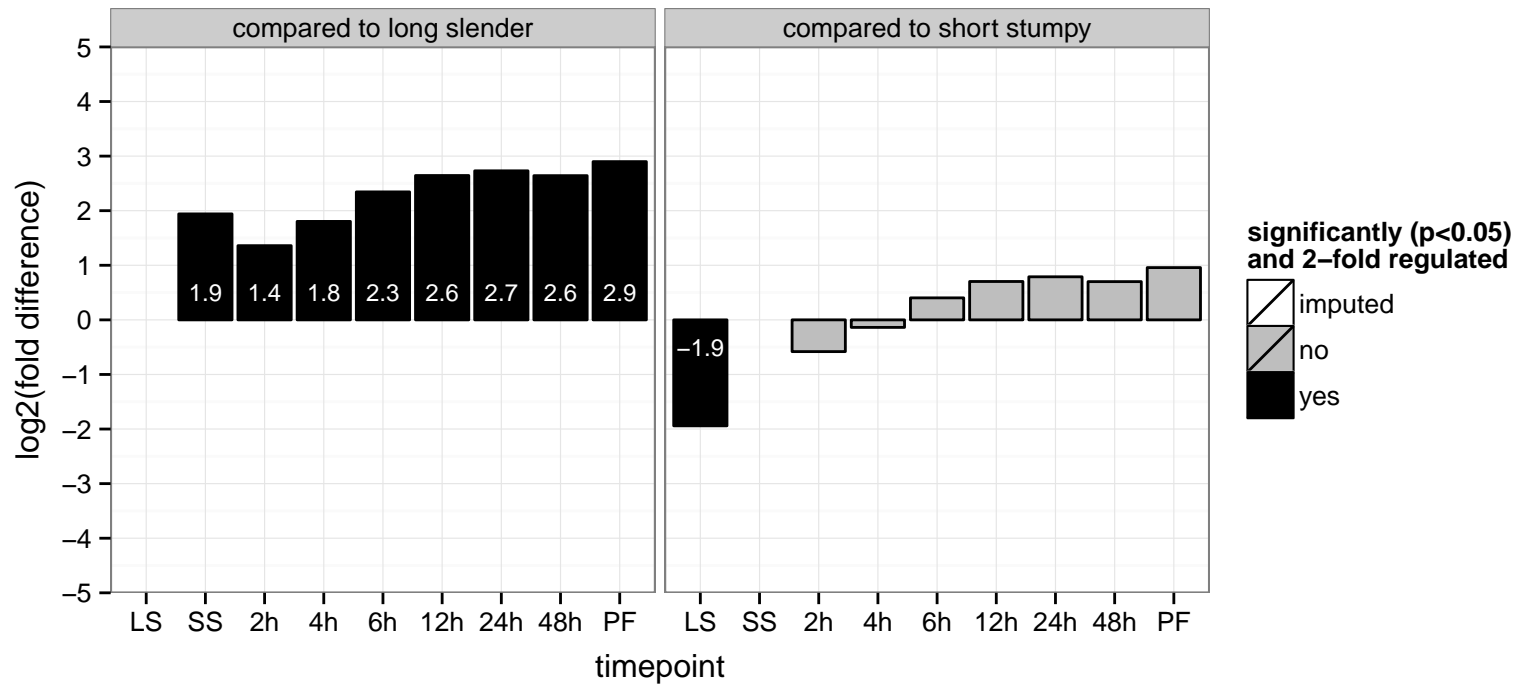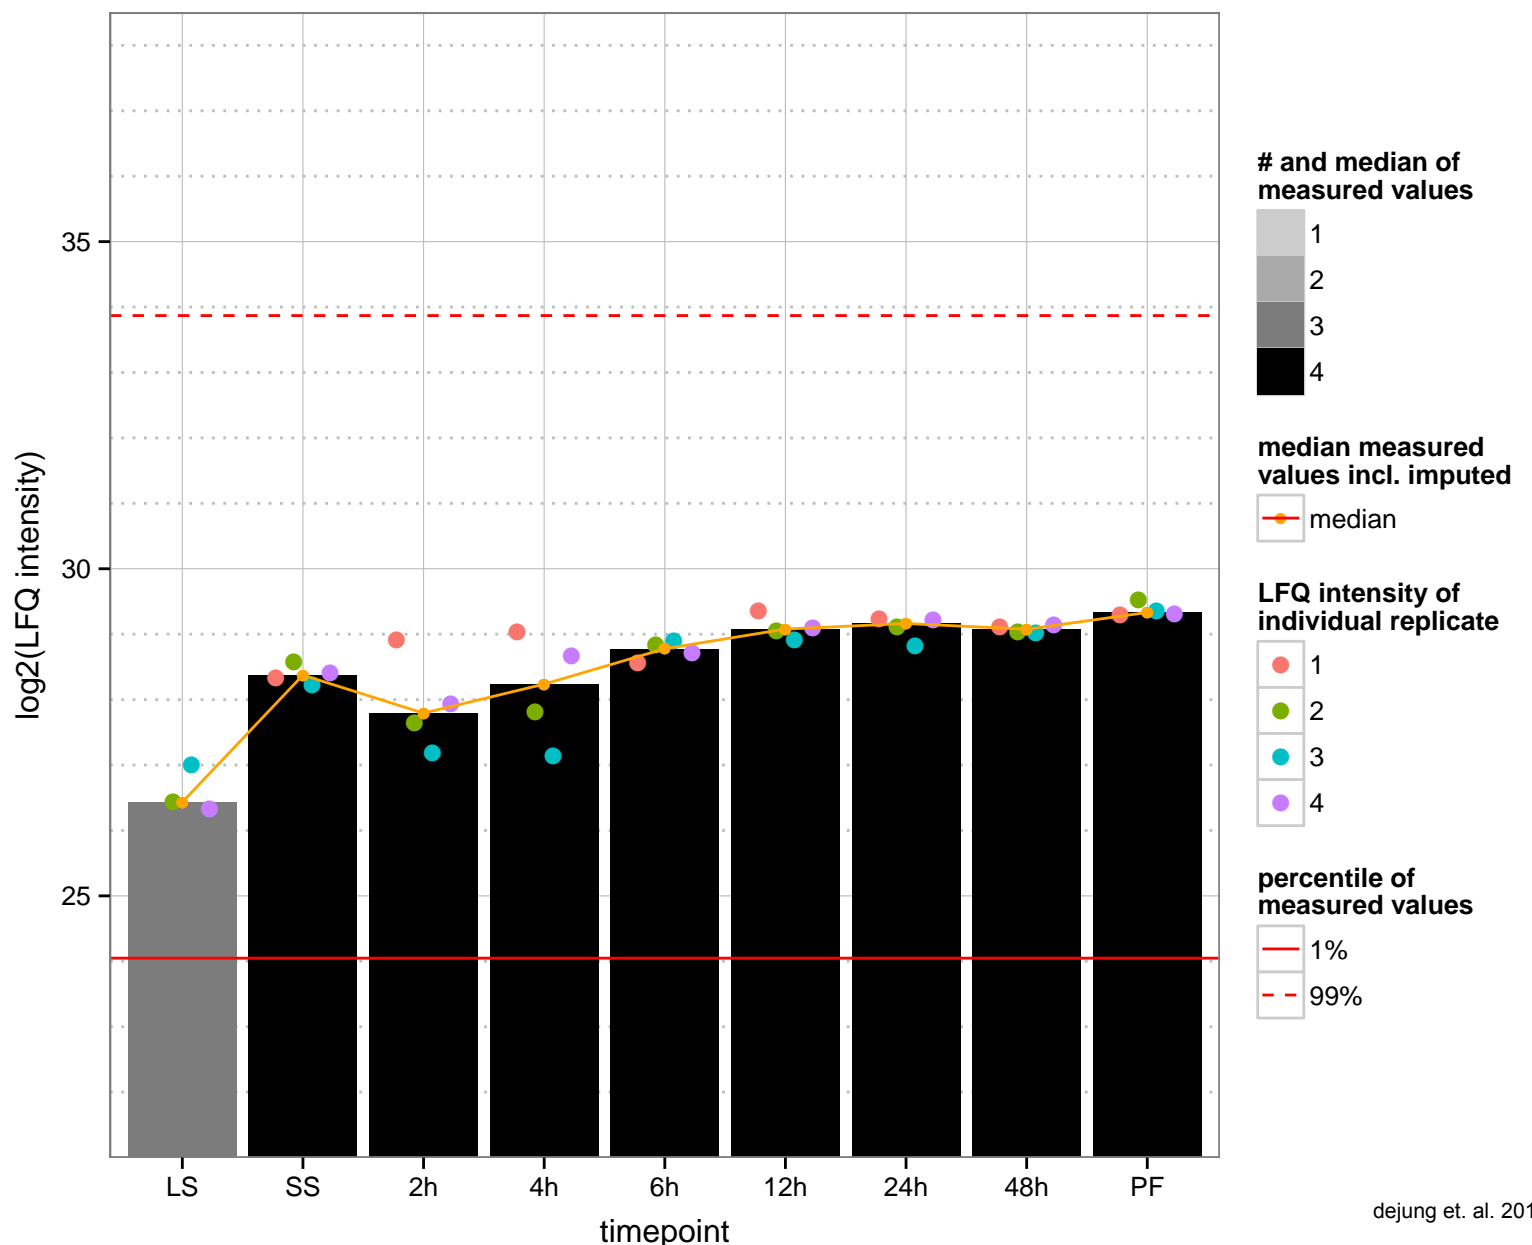



chaperone protein DNAj, putative  
 Tb927.9.8410  
 AGOF: heat shock protein binding, unfolded protein binding  
 AGOC: mitochondrion  
 AGOP: protein folding  
 PGOF: heat shock protein binding, unfolded protein binding  
 PGO: null  
 PGOP: protein folding

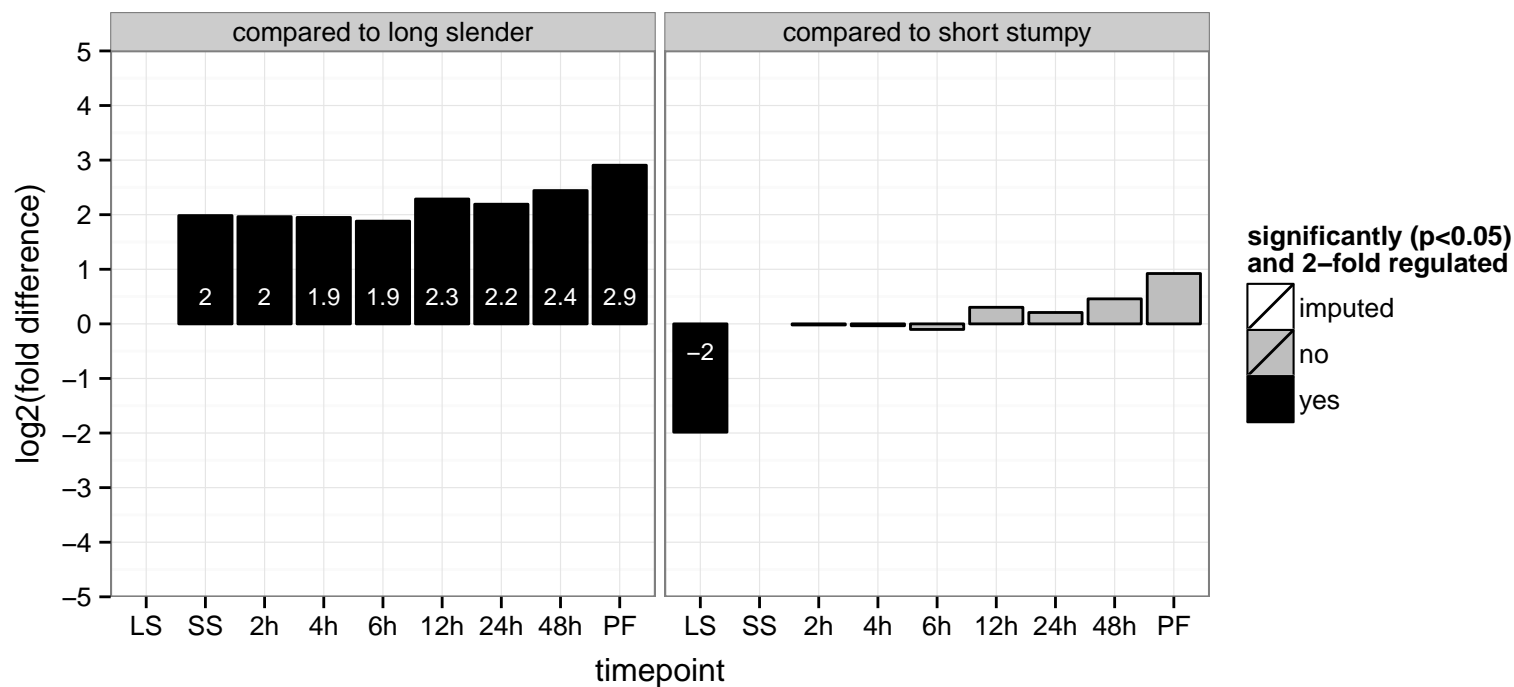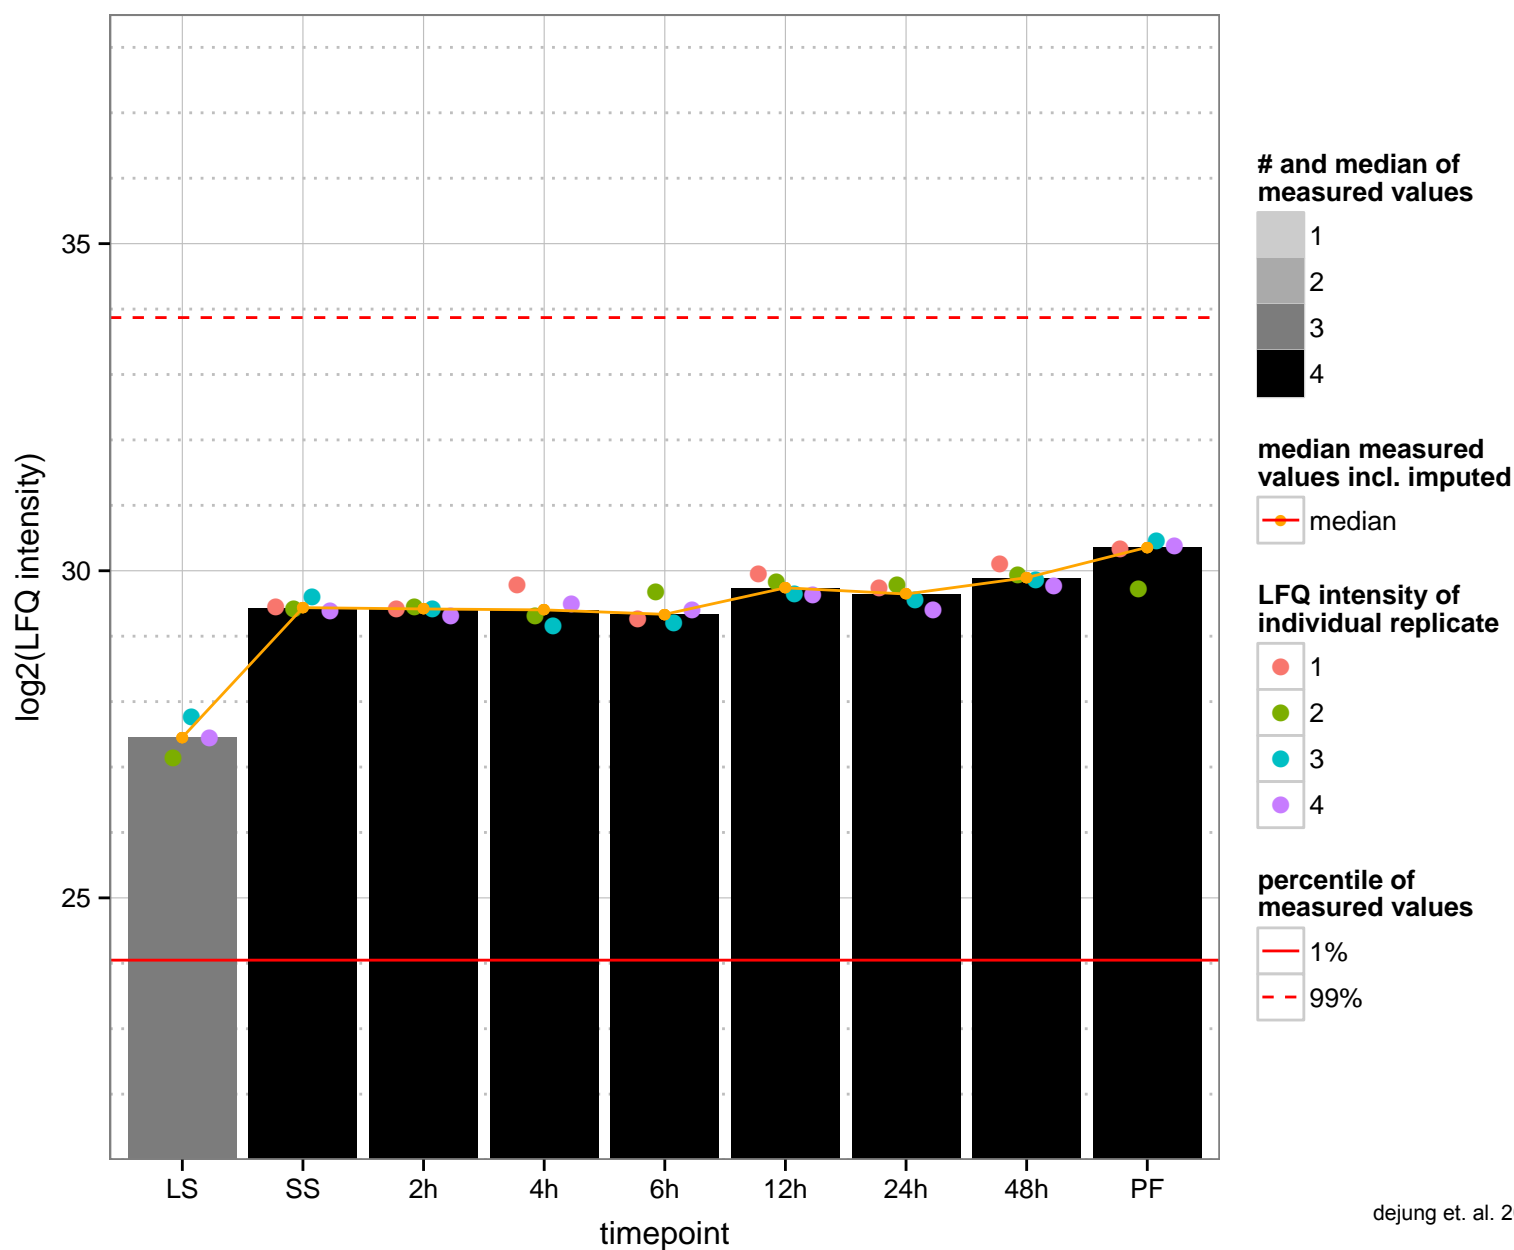

tRNA nucleotidyltransferase, putative  
 Tb927.9.8780  
 AGOF: RNA binding, nucleotidyltransferase activity  
 AGOC: null  
 AGOP: RNA processing  
 PGO: RNA binding, nucleotidyltransferase activity  
 PGOC: null  
 PGOP: RNA processing

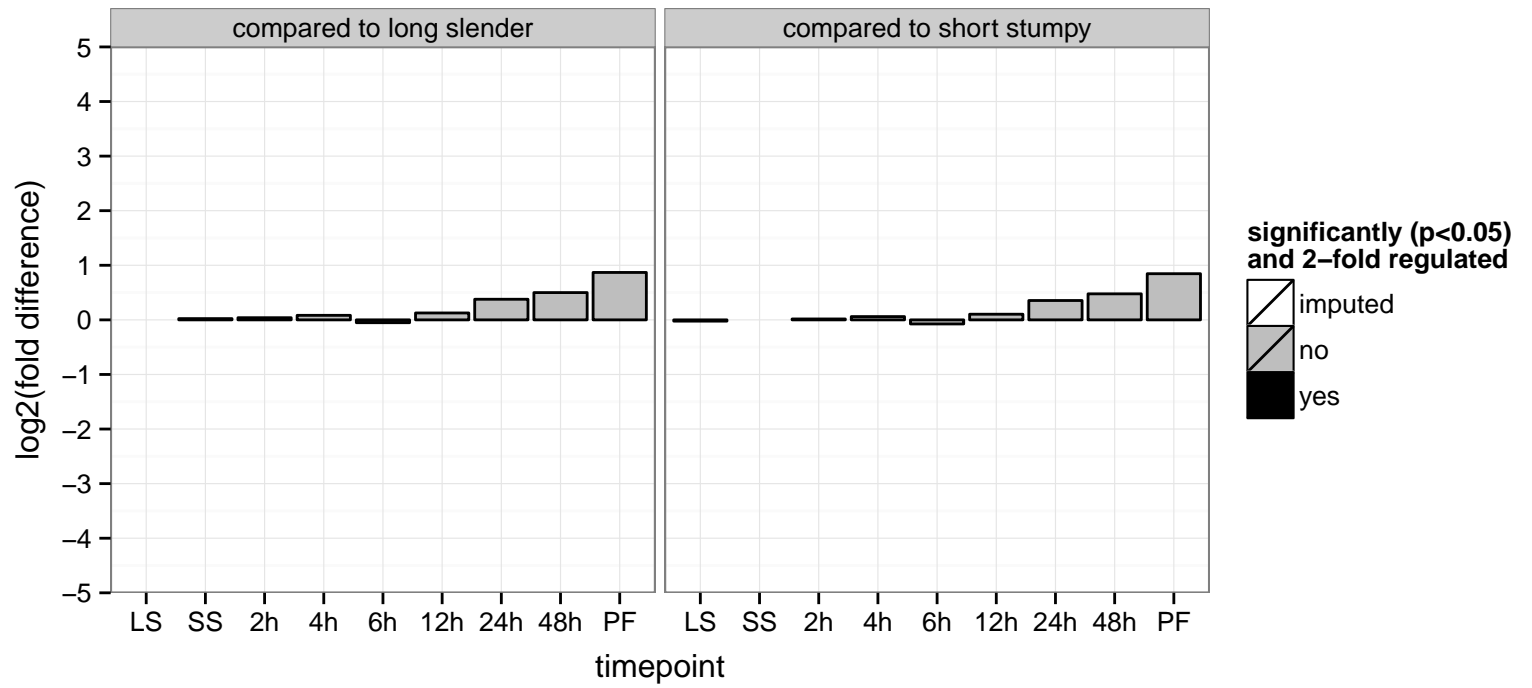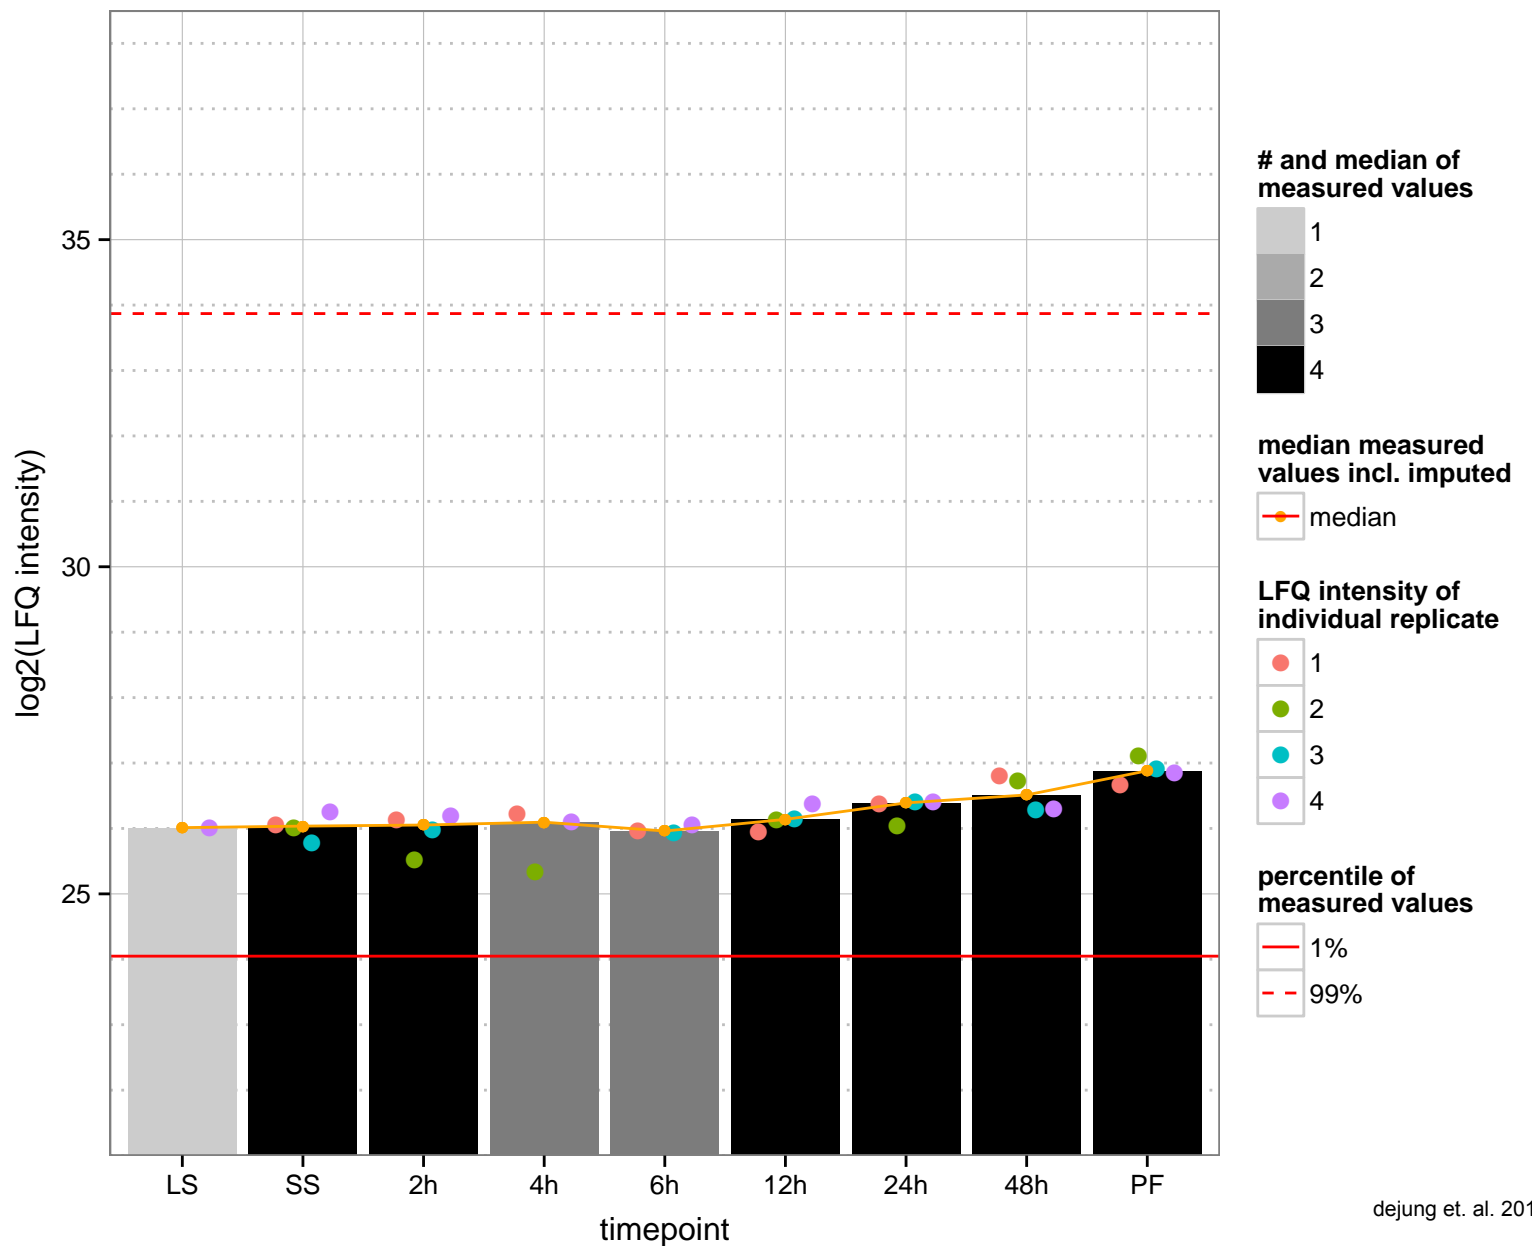

hypothetical protein, conserved  
 Tb927.9.8810  
 AGOF: null  
 AGOC: null  
 AGOP: null  
 PGO: null  
 PGOC: null  
 PGOP: null

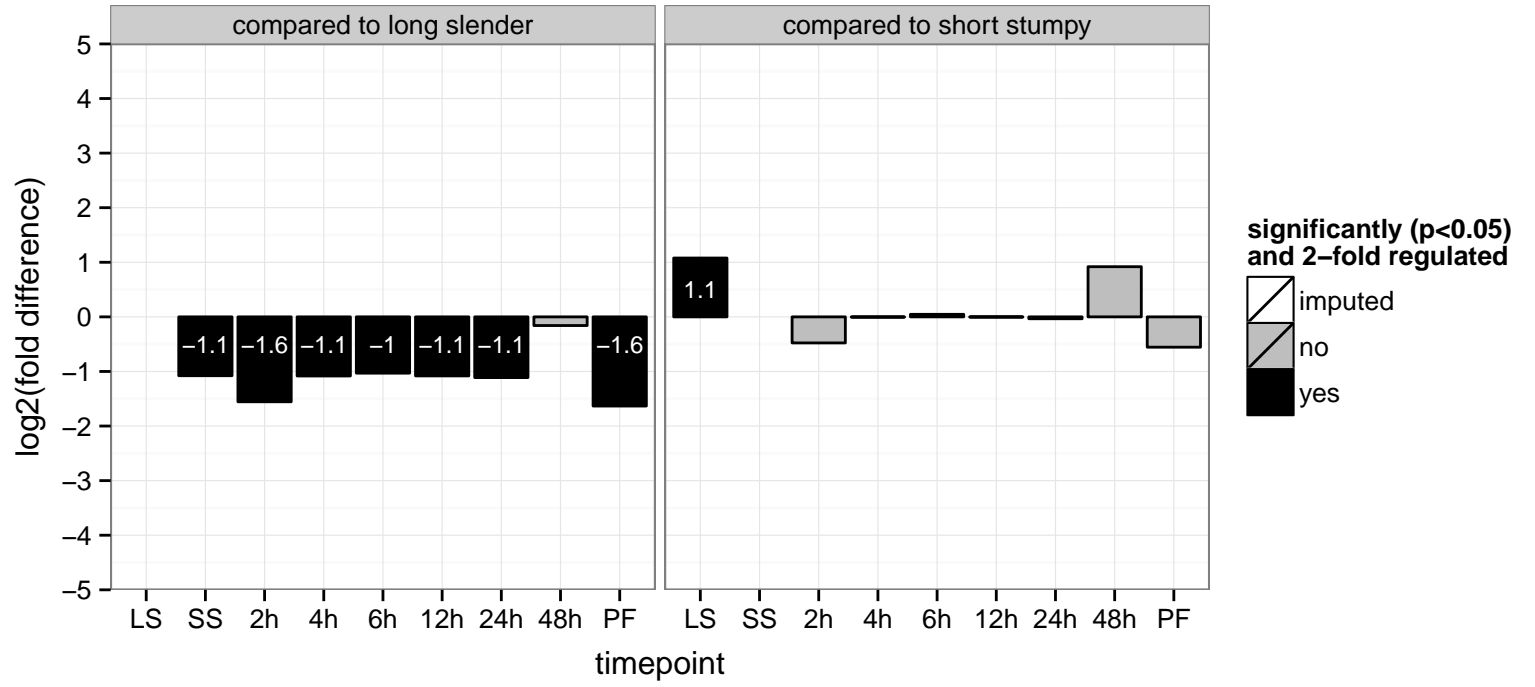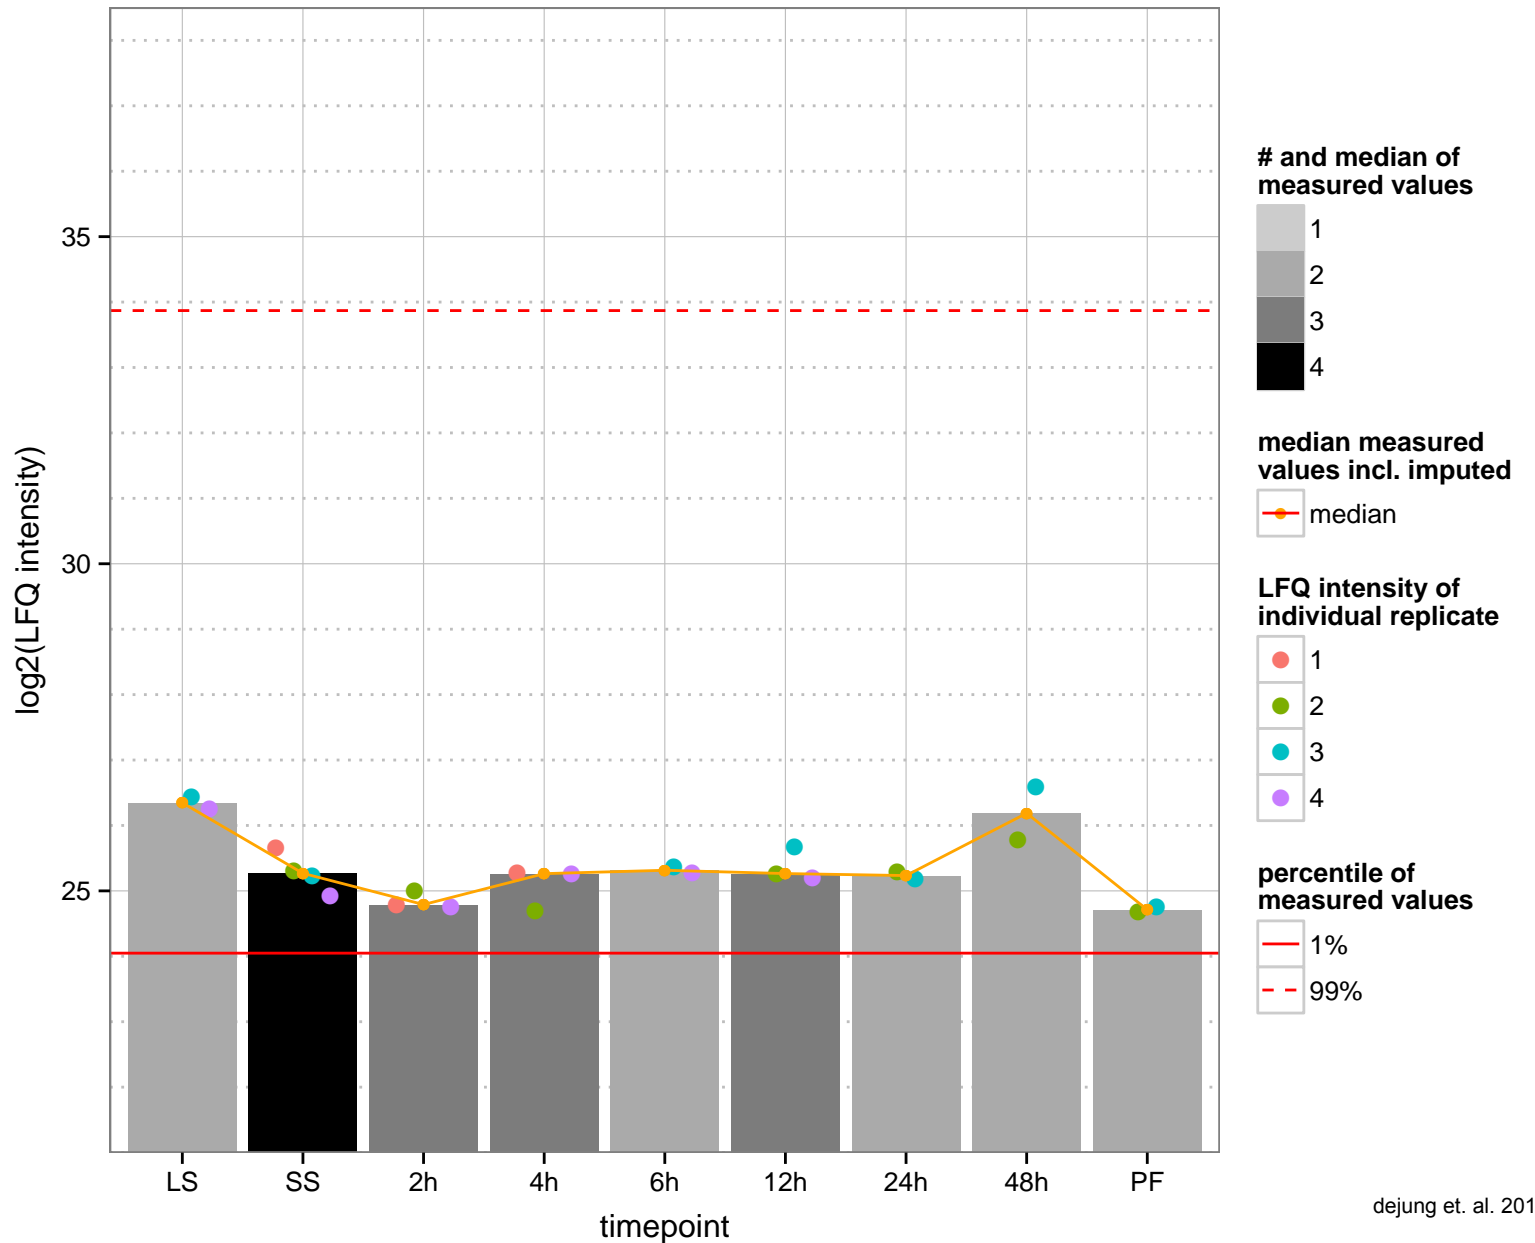

actin A  
 Tb927.9.8880;Tb927.9.8850  
 AGOF: structural constituent of cytoskeleton  
 AGOC: actin cytoskeleton, cytoplasm  
 AGOP: cytoskeleton organization  
 PGO: null  
 PGOC: null  
 PGOP: null

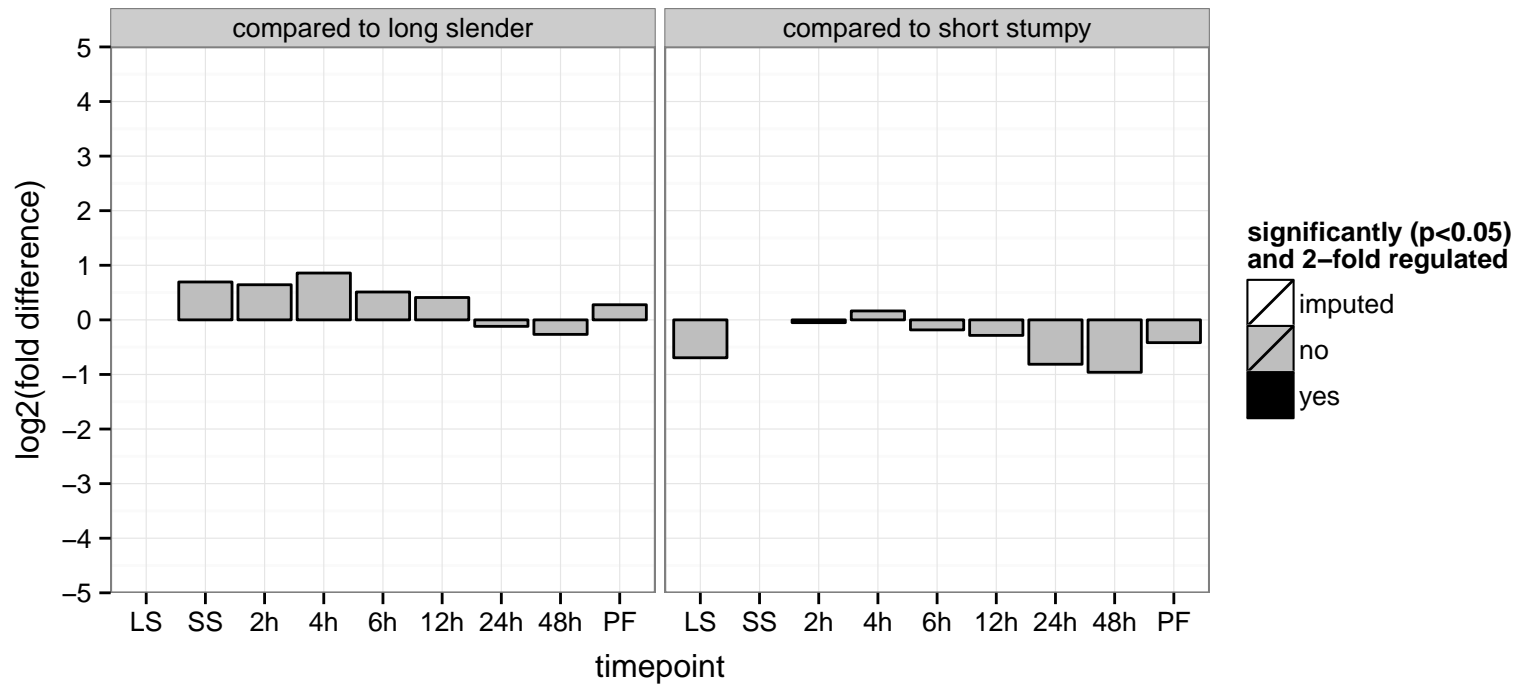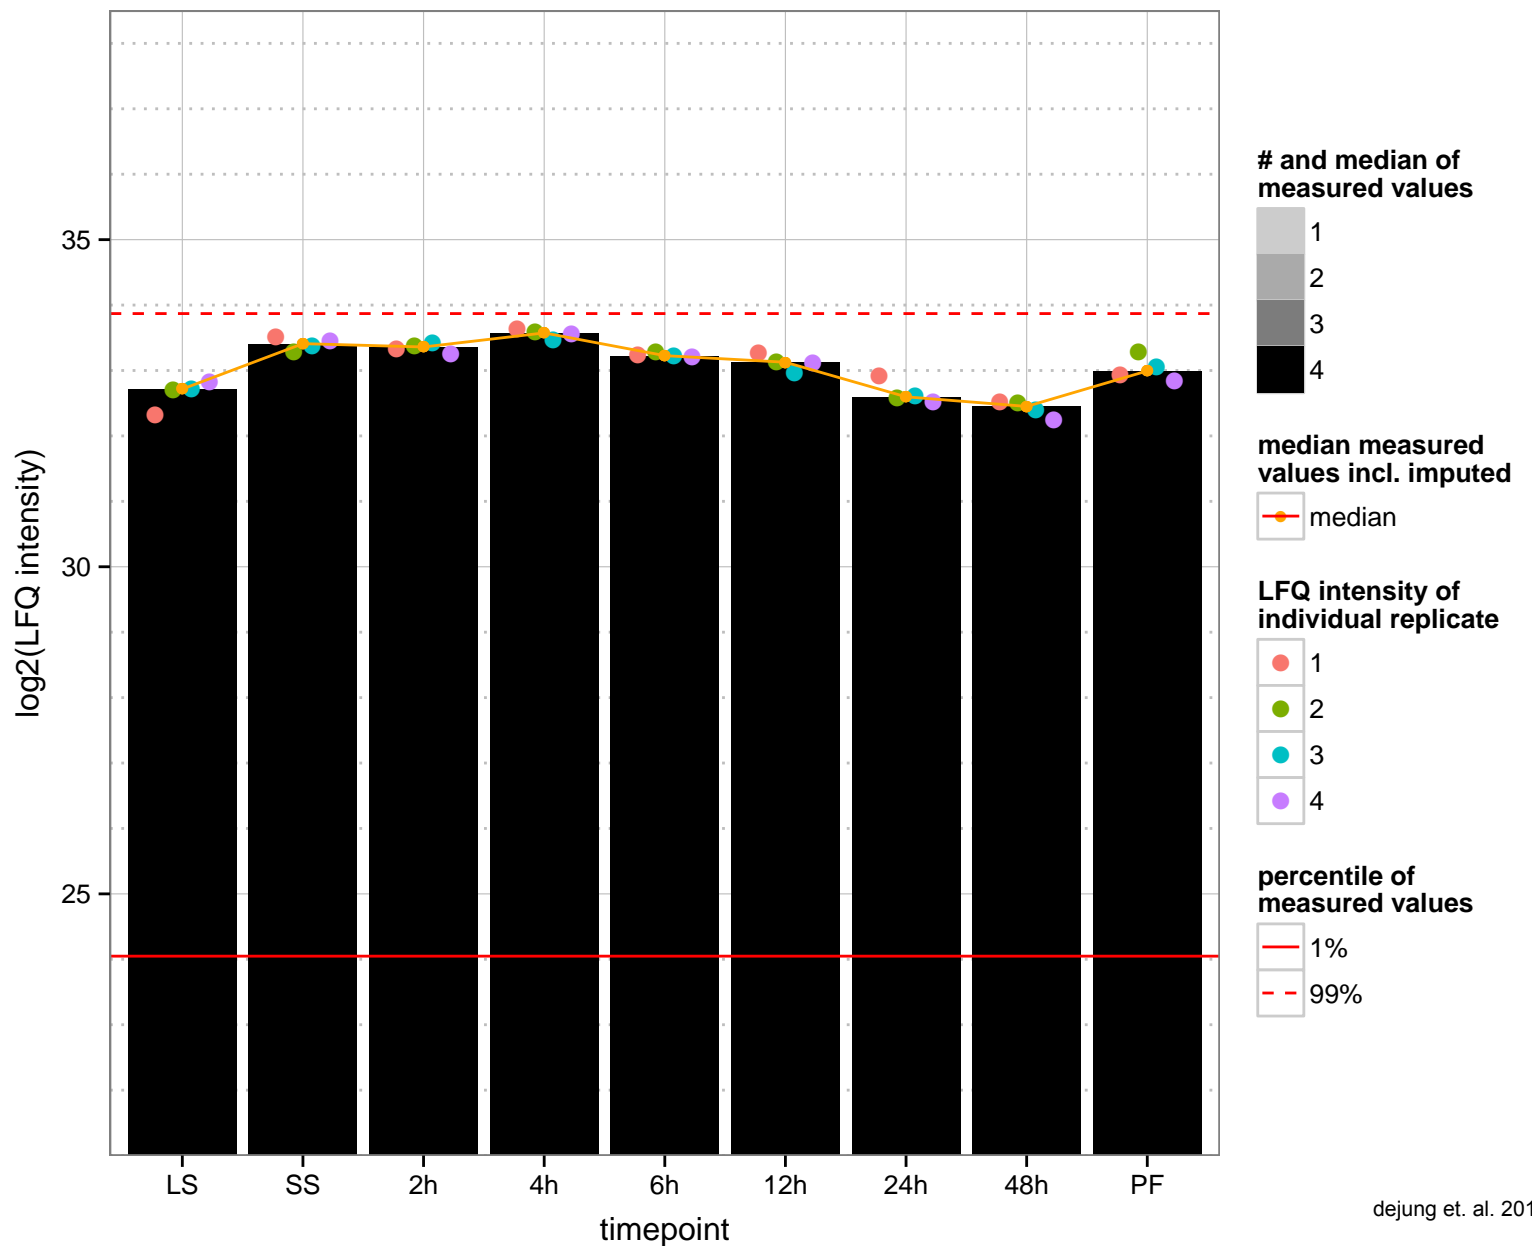

CAAX prenyl protease 1, putative, metallo-peptidase, Clan M- Family M48

Tb927.9.8950

AGOF: metalloendopeptidase activity

AGOC: membrane, mitochondrial inner membrane

AGOP: proteolysis

PGOF: metalloendopeptidase activity

PGOC: membrane

PGOP: proteolysis

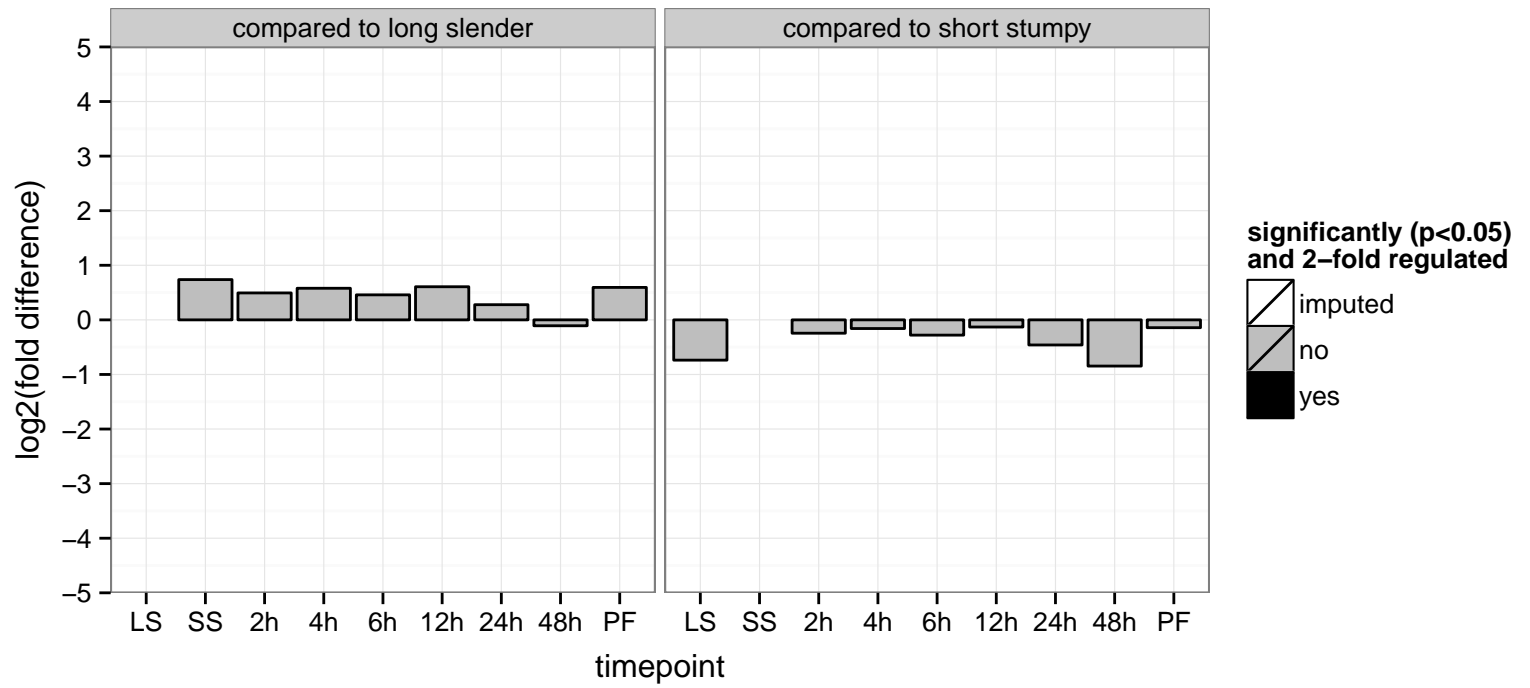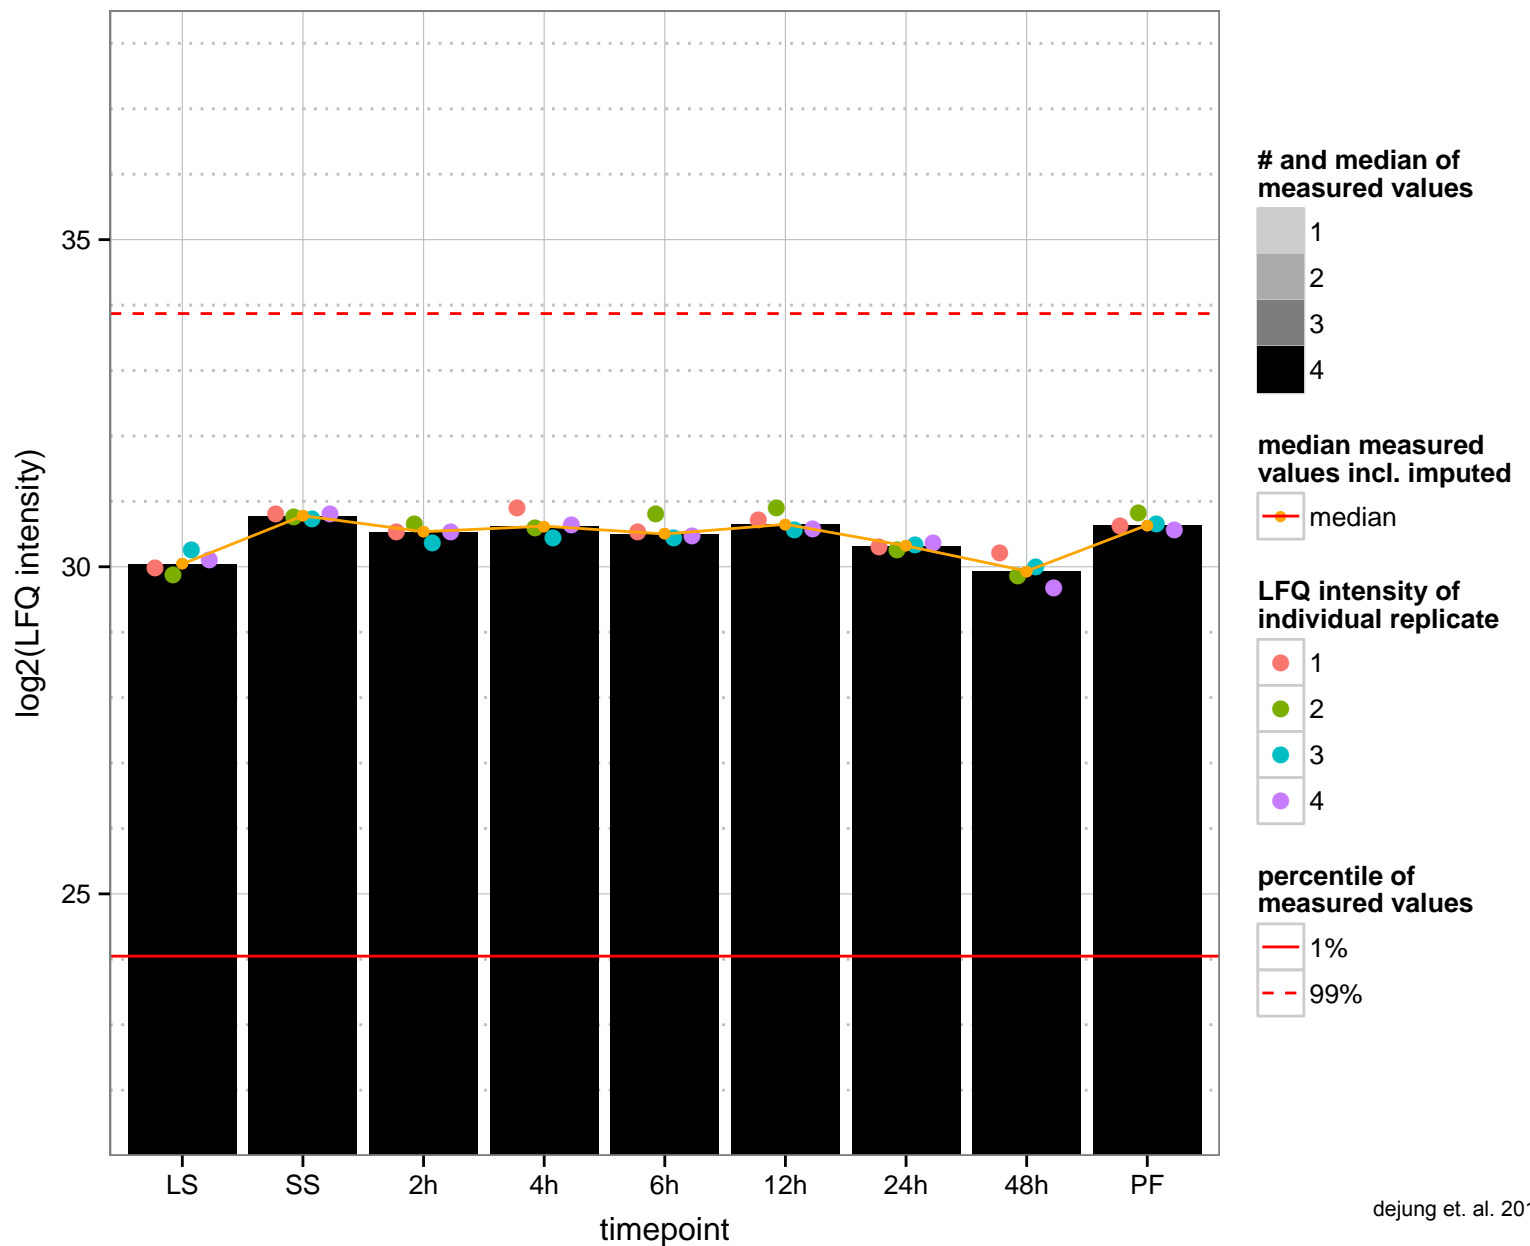

hypothetical protein, conserved  
 Tb927.9.8990  
 AGOF: null  
 AGOC: null  
 AGOP: null  
 PGOF: protein binding  
 PGO: null  
 PGOP: null

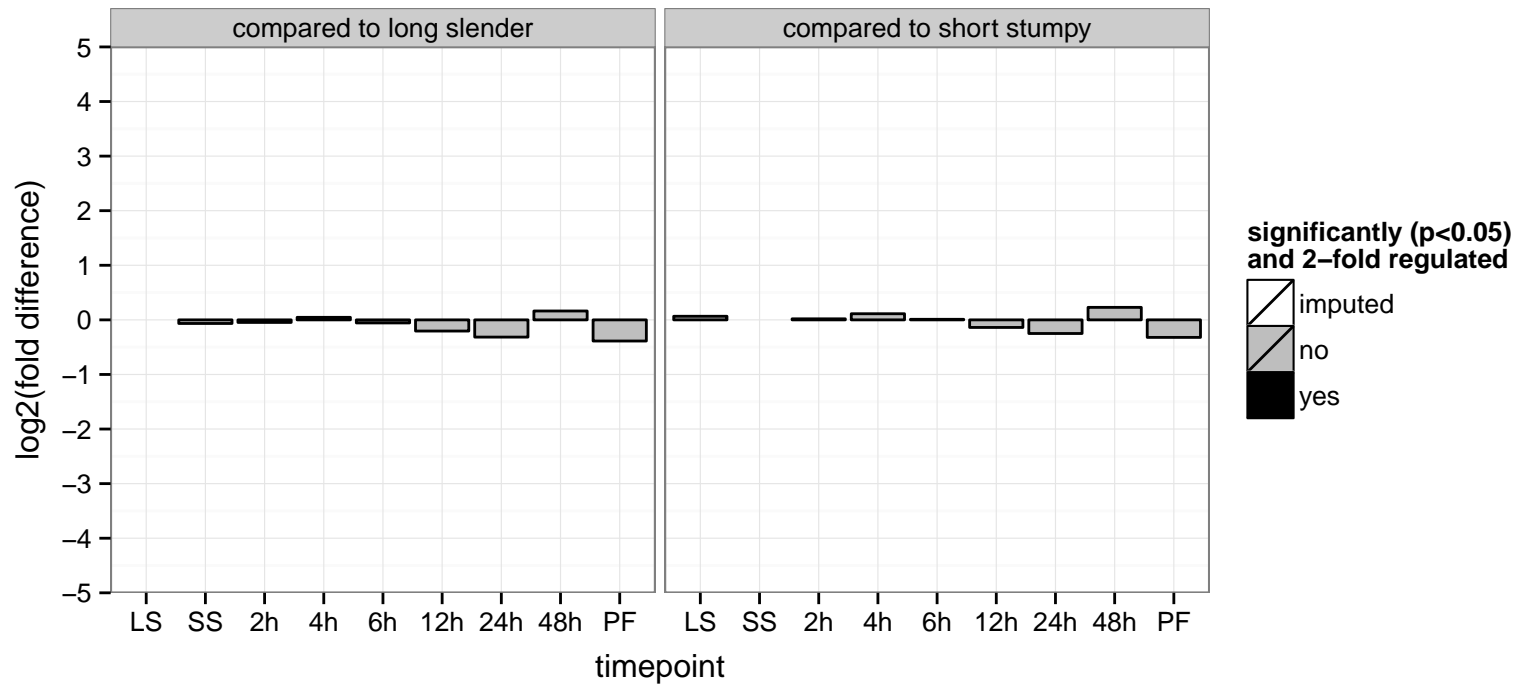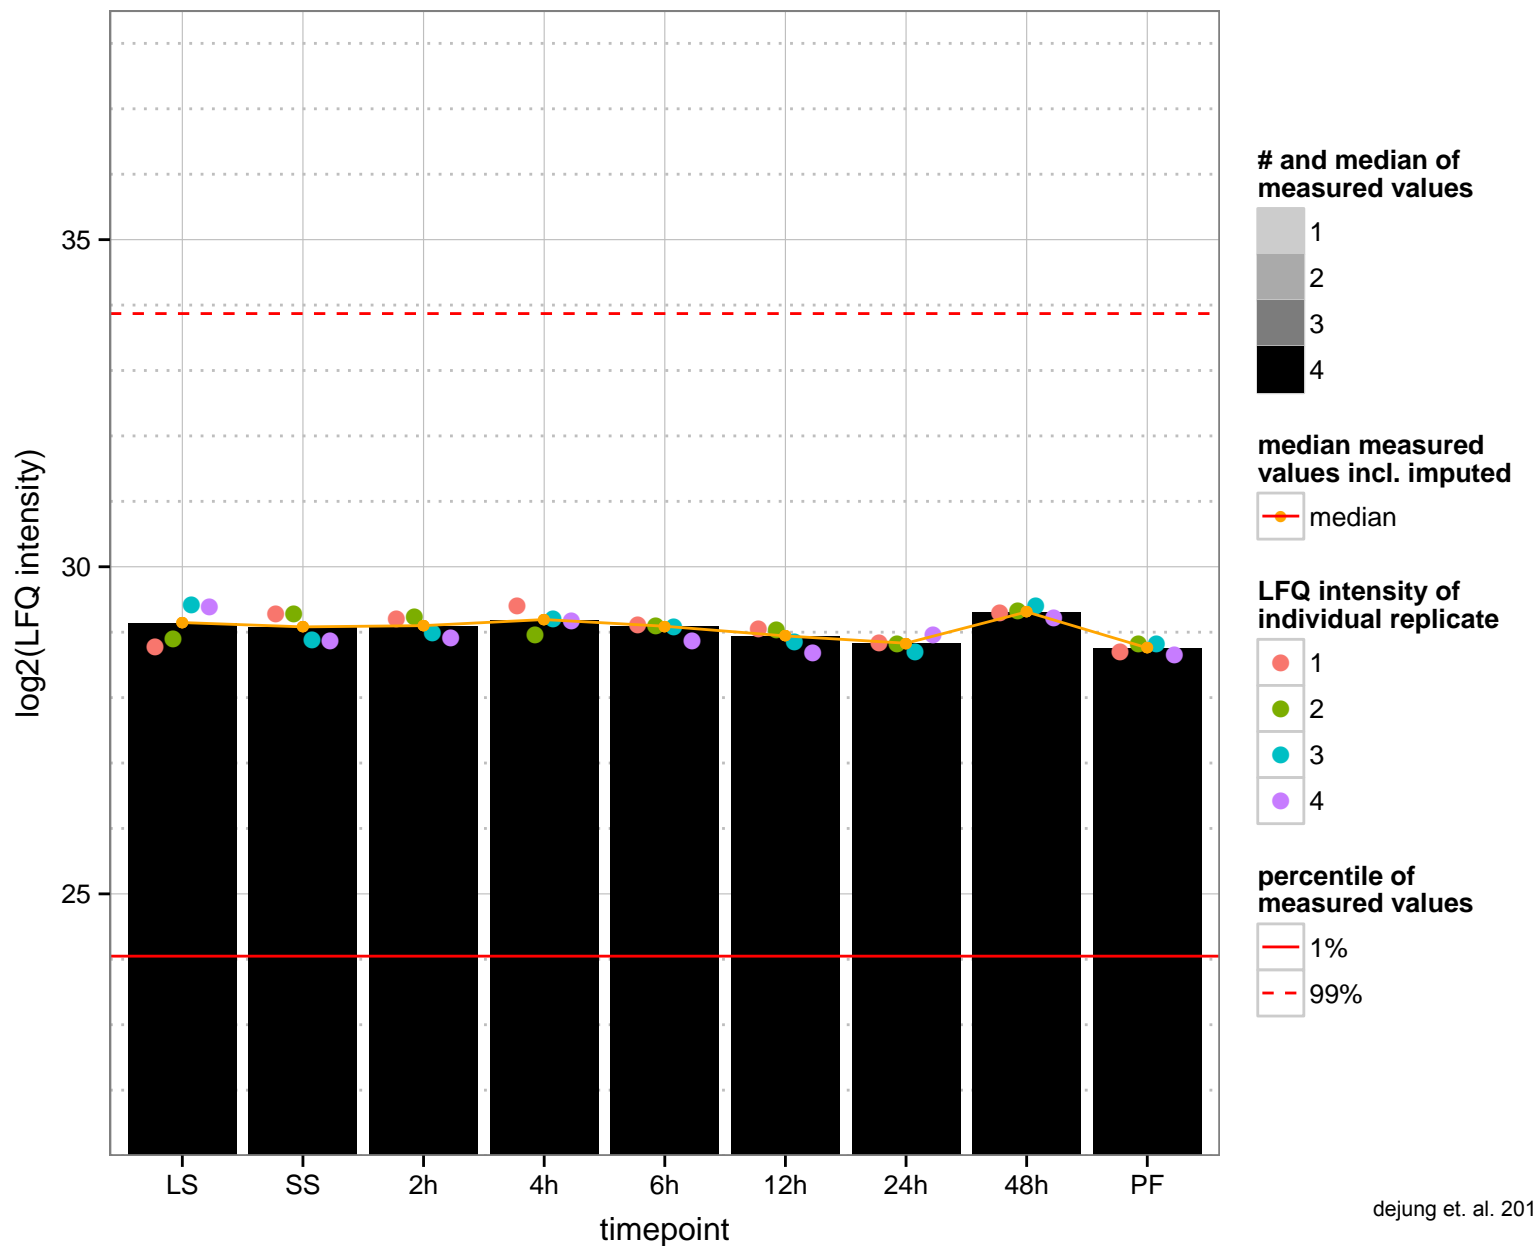

hypothetical protein, conserved  
 Tb927.9.9010  
 AGOF: null  
 AGOC: null  
 AGOP: null  
 PGO: null  
 PGOC: null  
 PGOP: null

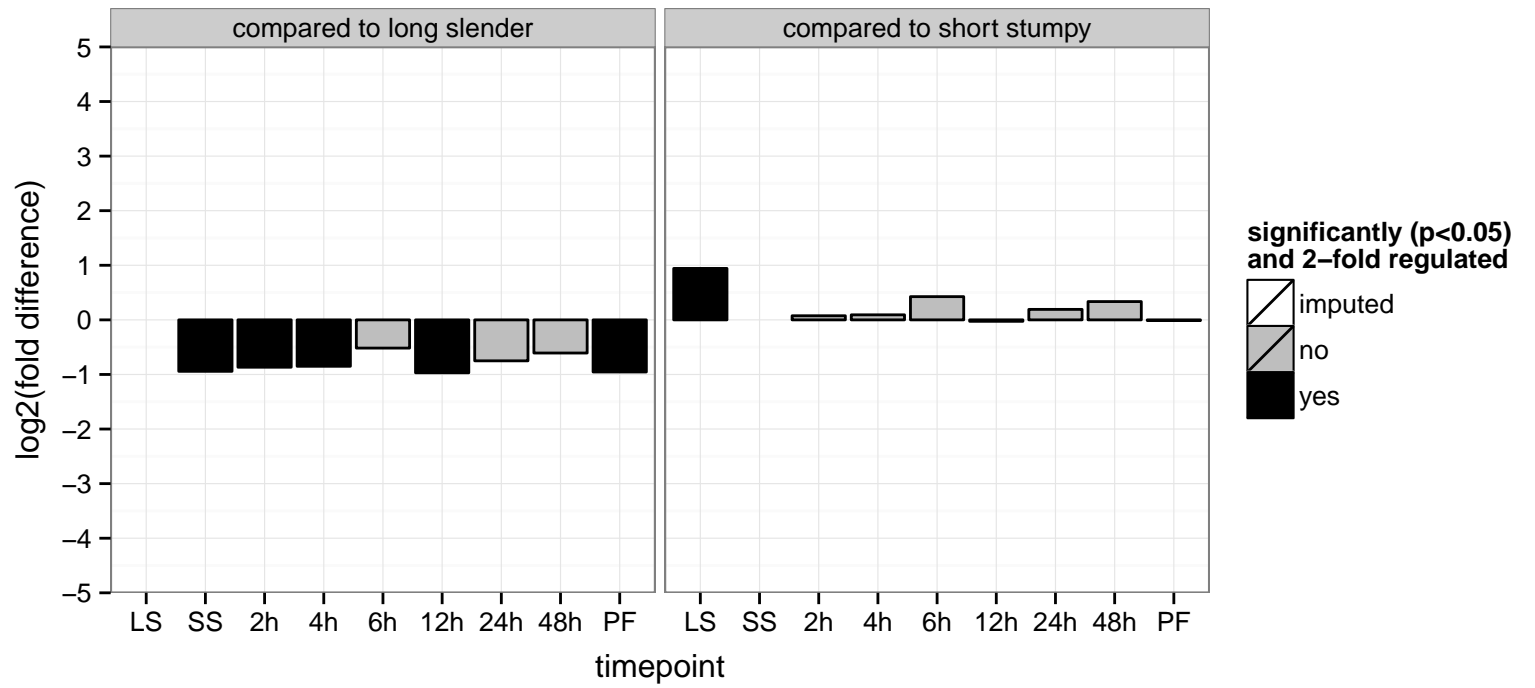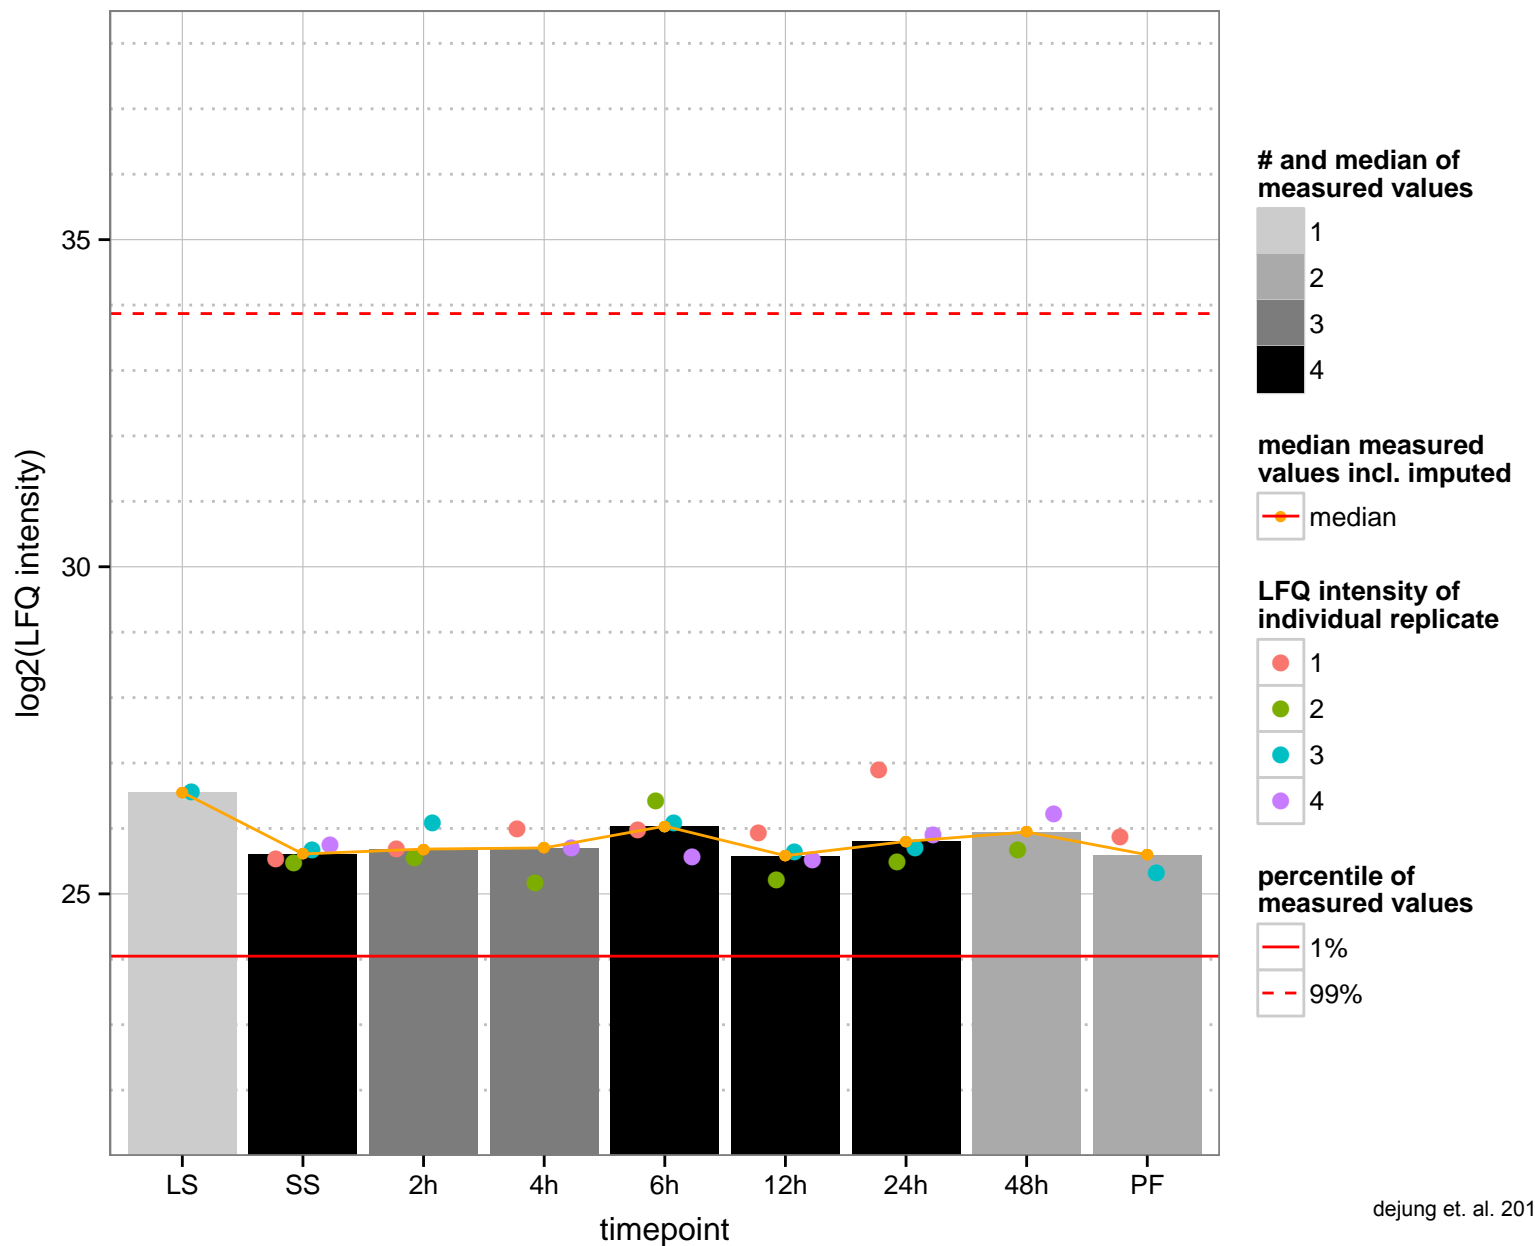

Lsm12 protein, putative  
 Tb927.9.9060  
 AGOF: null  
 AGOC: cytoplasmic stress granule  
 AGOP: null  
 PGO: null  
 PGOC: null  
 PGOP: null

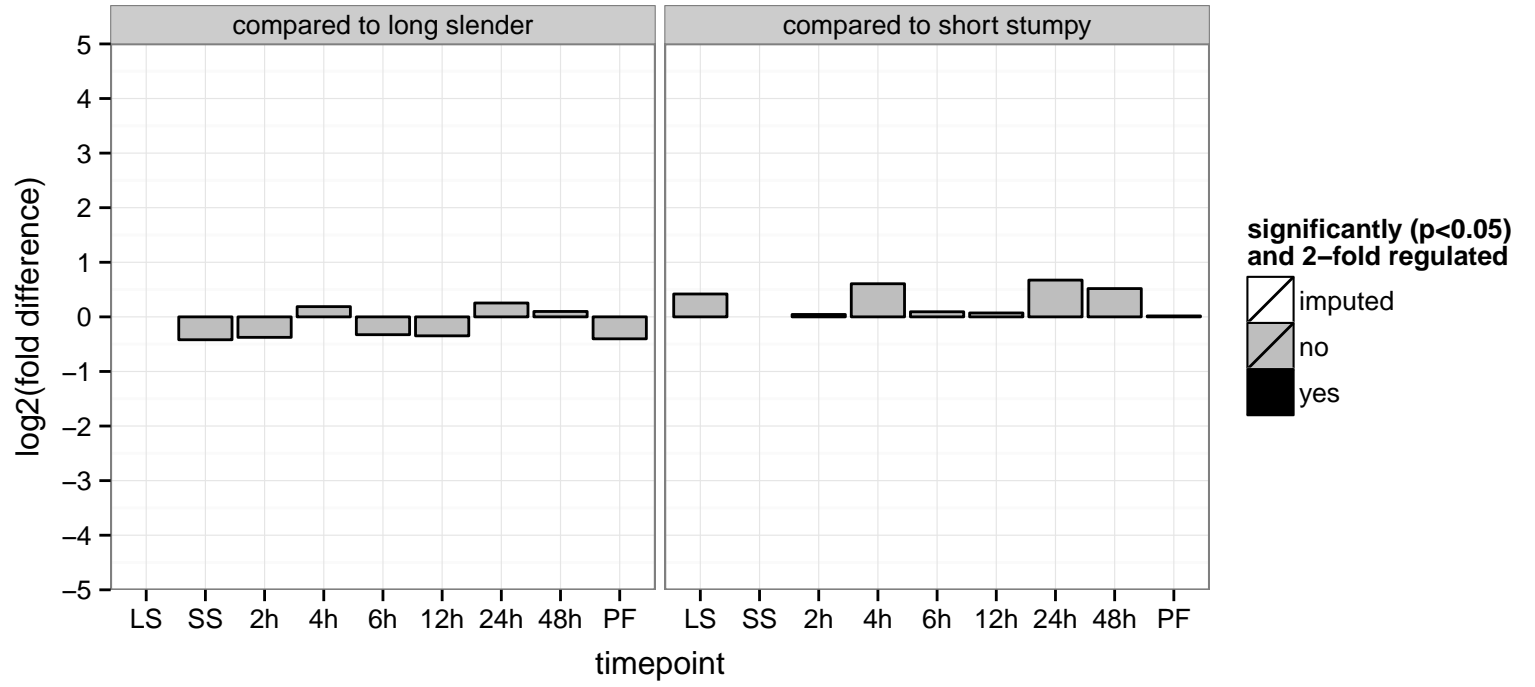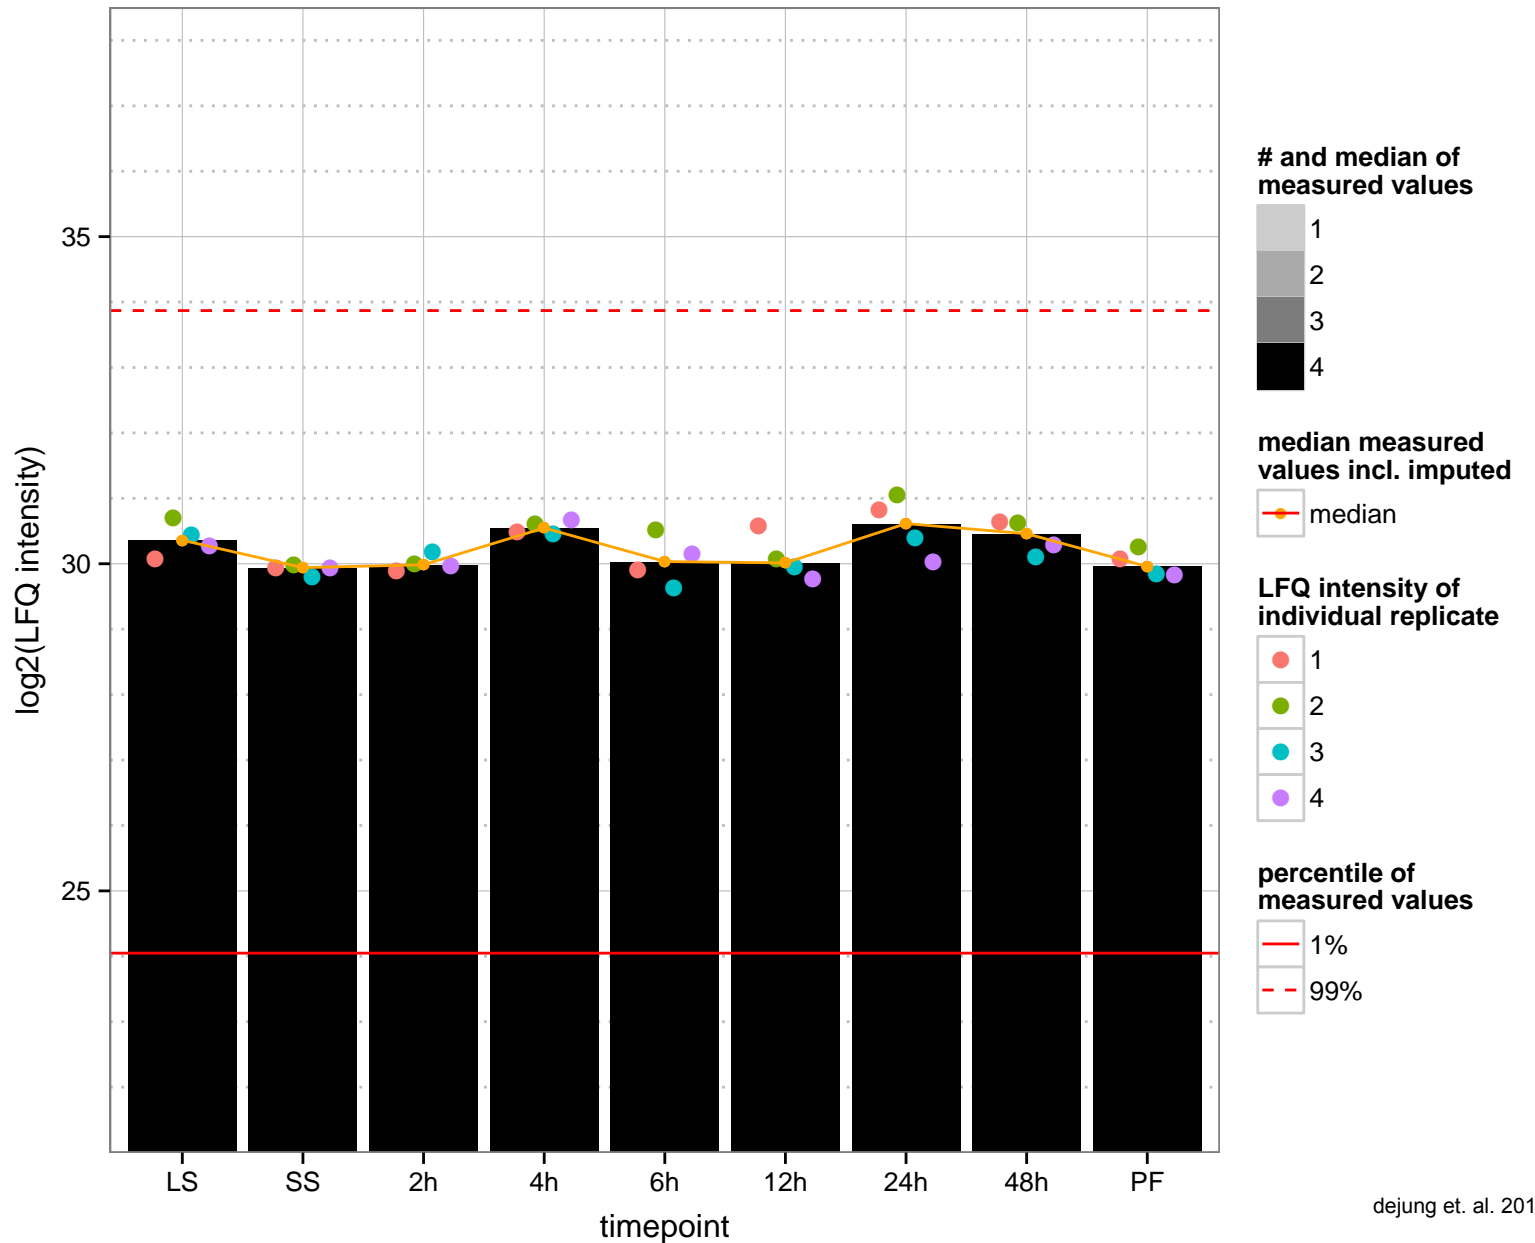



tRNA (guanine-N(7)-)-methyltransferase, putative, methyltransferase  
 Tb927.9.9120  
 AGOF: tRNA (guanine-N7-)-methyltransferase activity  
 AGOC: null  
 AGOP: tRNA modification  
 PGOF: tRNA (guanine-N7-)-methyltransferase activity  
 PGOC: null  
 PGOP: tRNA modification

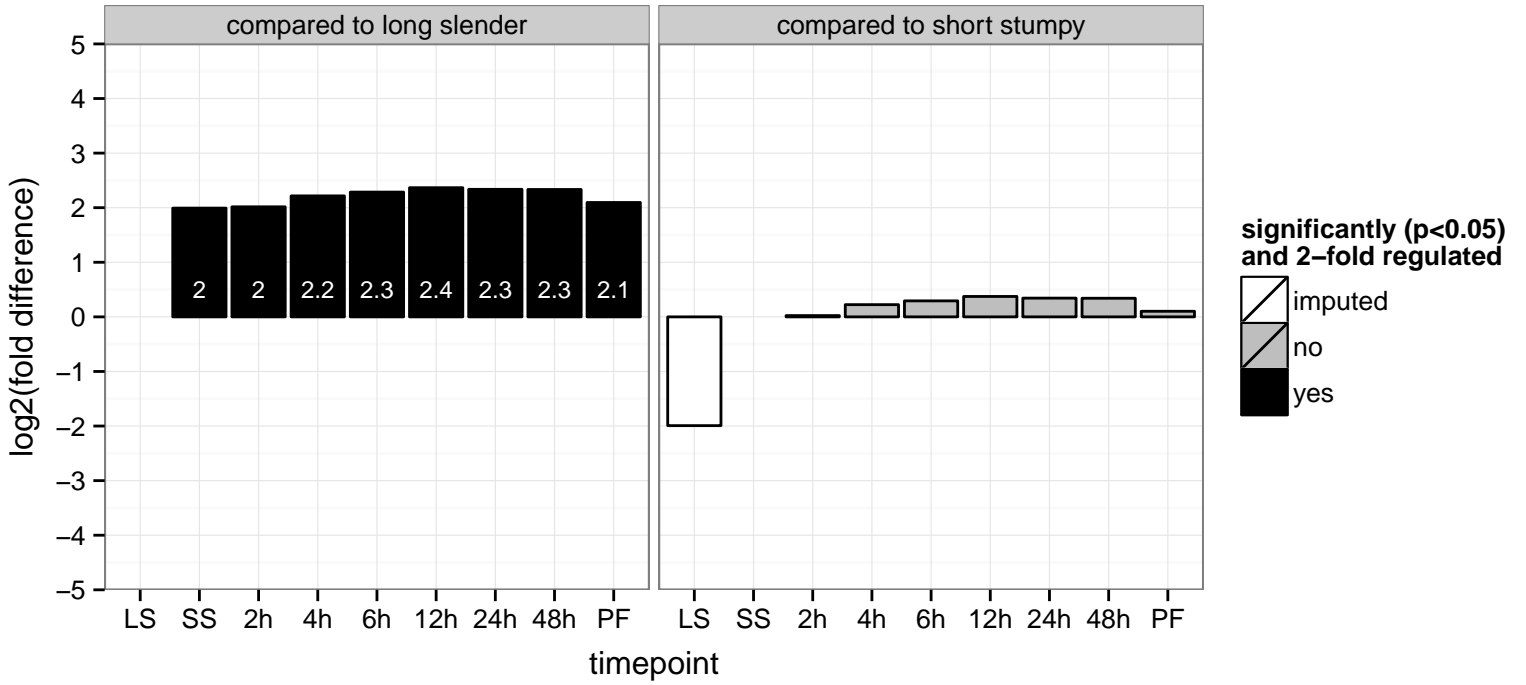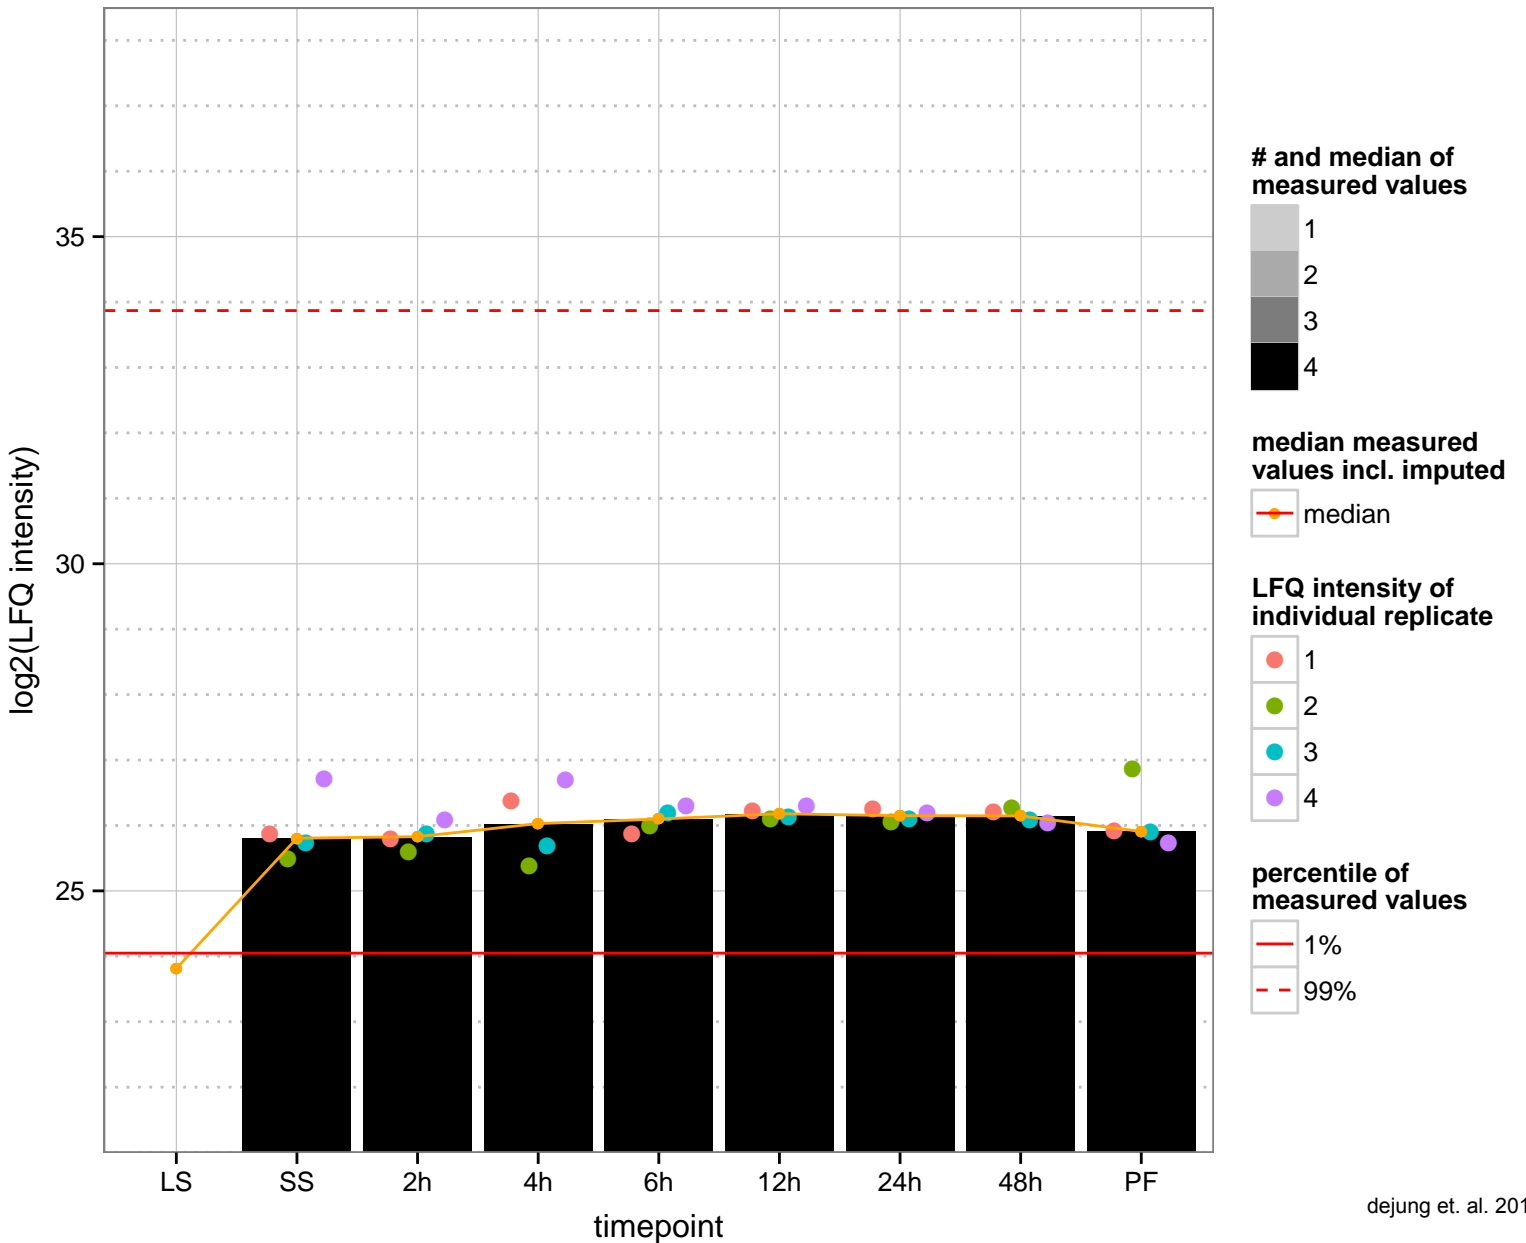

GTP-binding protein, putative  
 Tb927.9.9150  
 AGOF: GTP binding  
 AGOC: null  
 AGOP: null  
 PGOF: GTP binding  
 PGOC: null  
 PGOP: null

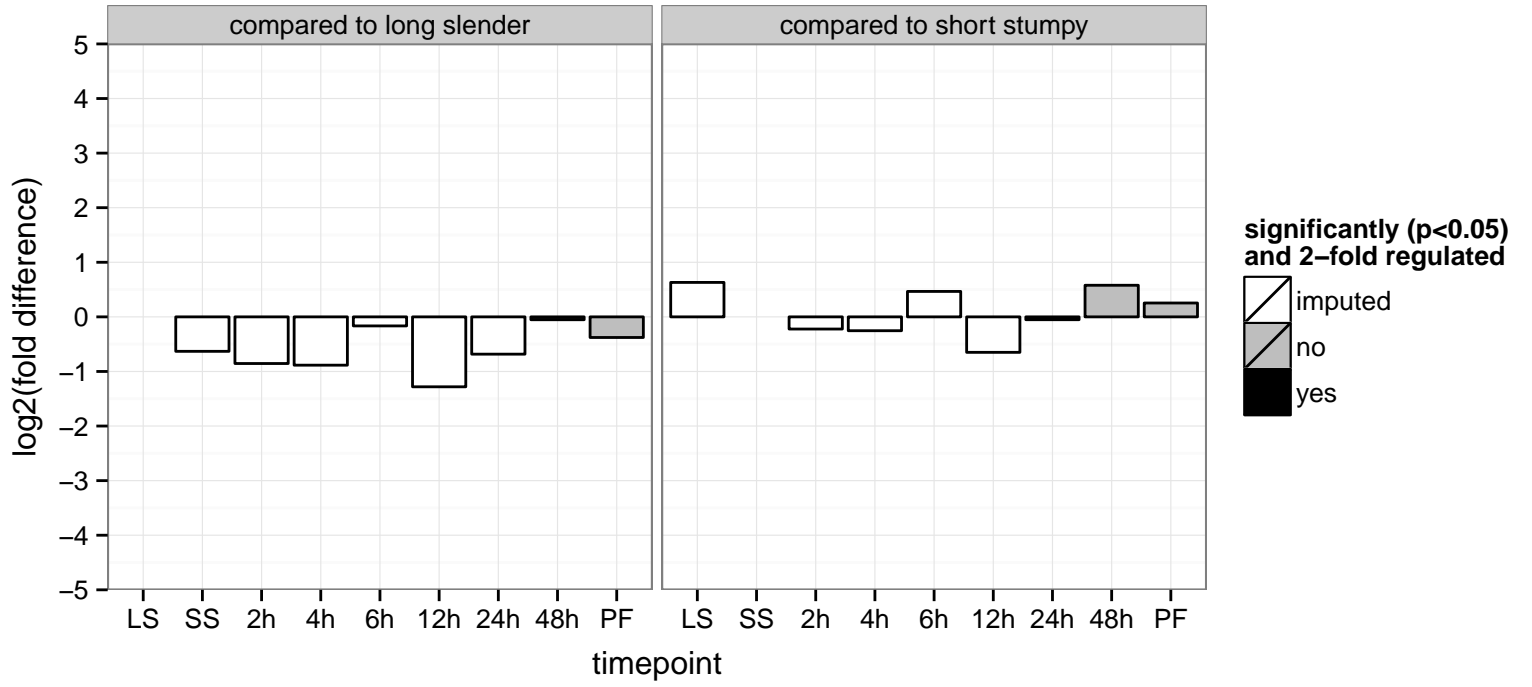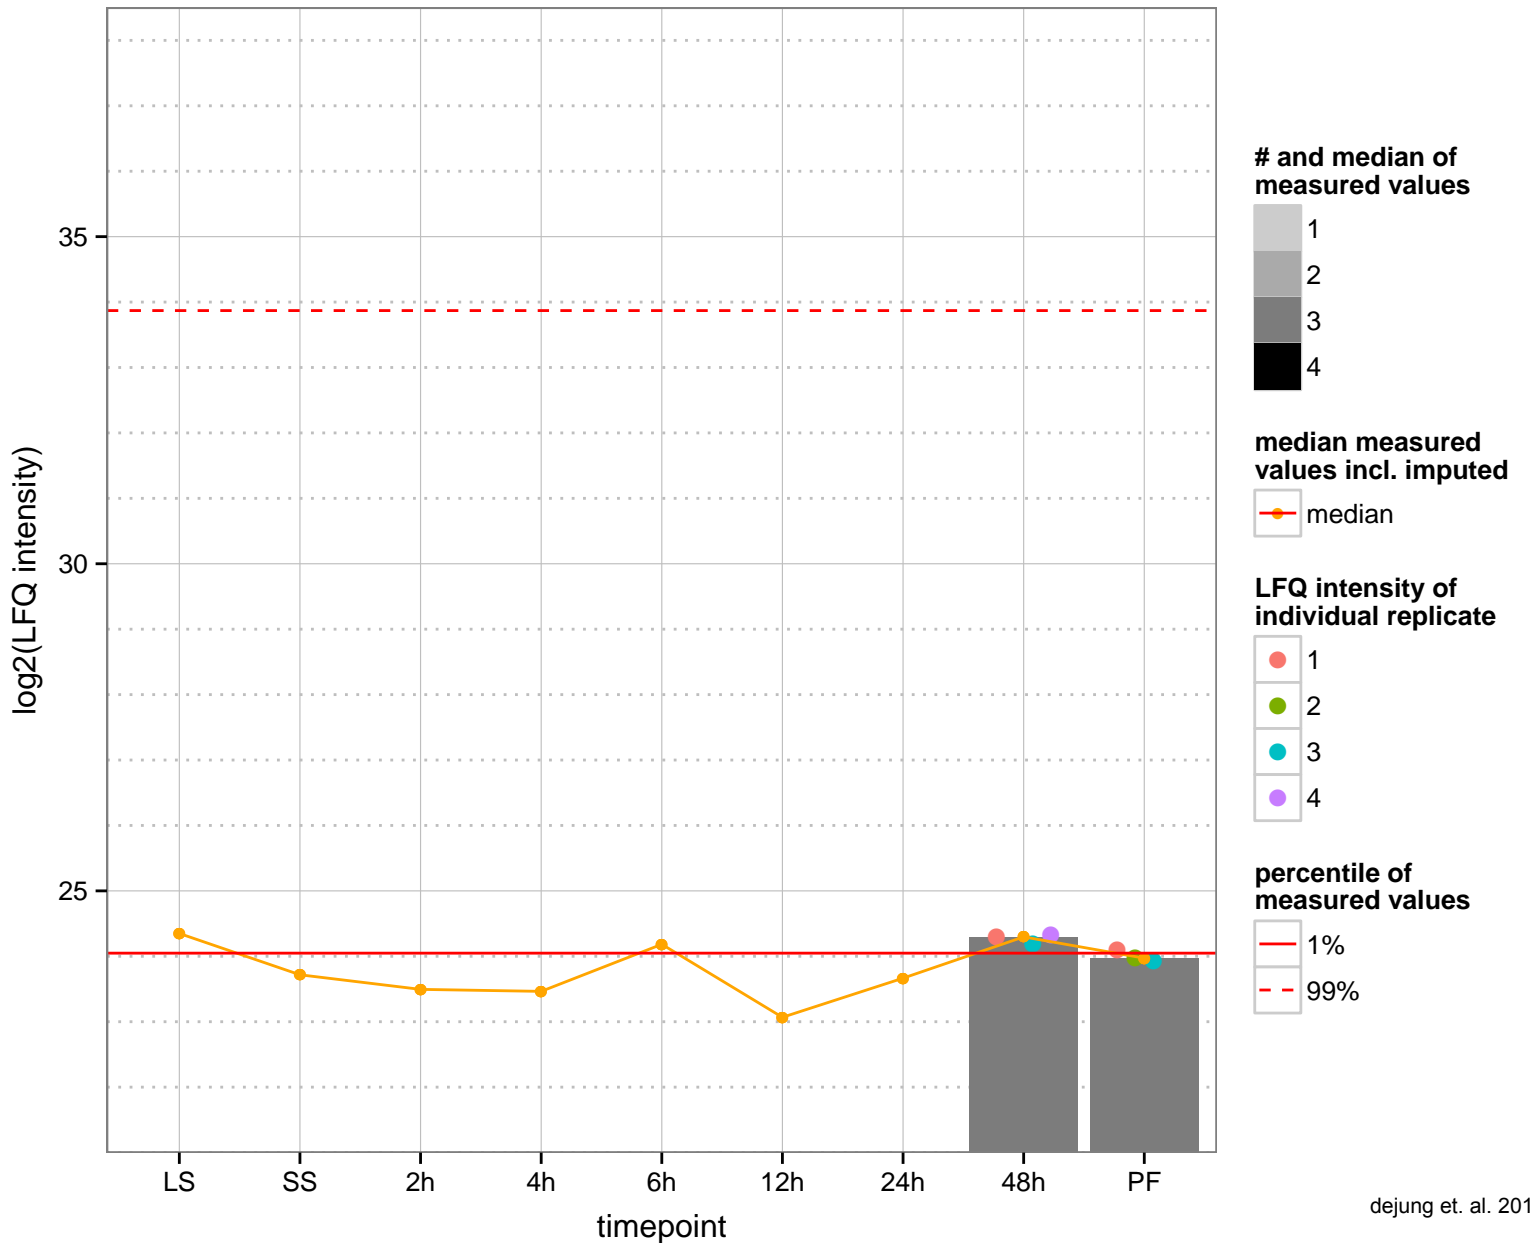

hypothetical protein, conserved  
 Tb927.9.9260  
 AGOF: null  
 AGOC: null  
 AGOP: null  
 PGO: null  
 PGOC: null  
 PGOP: null

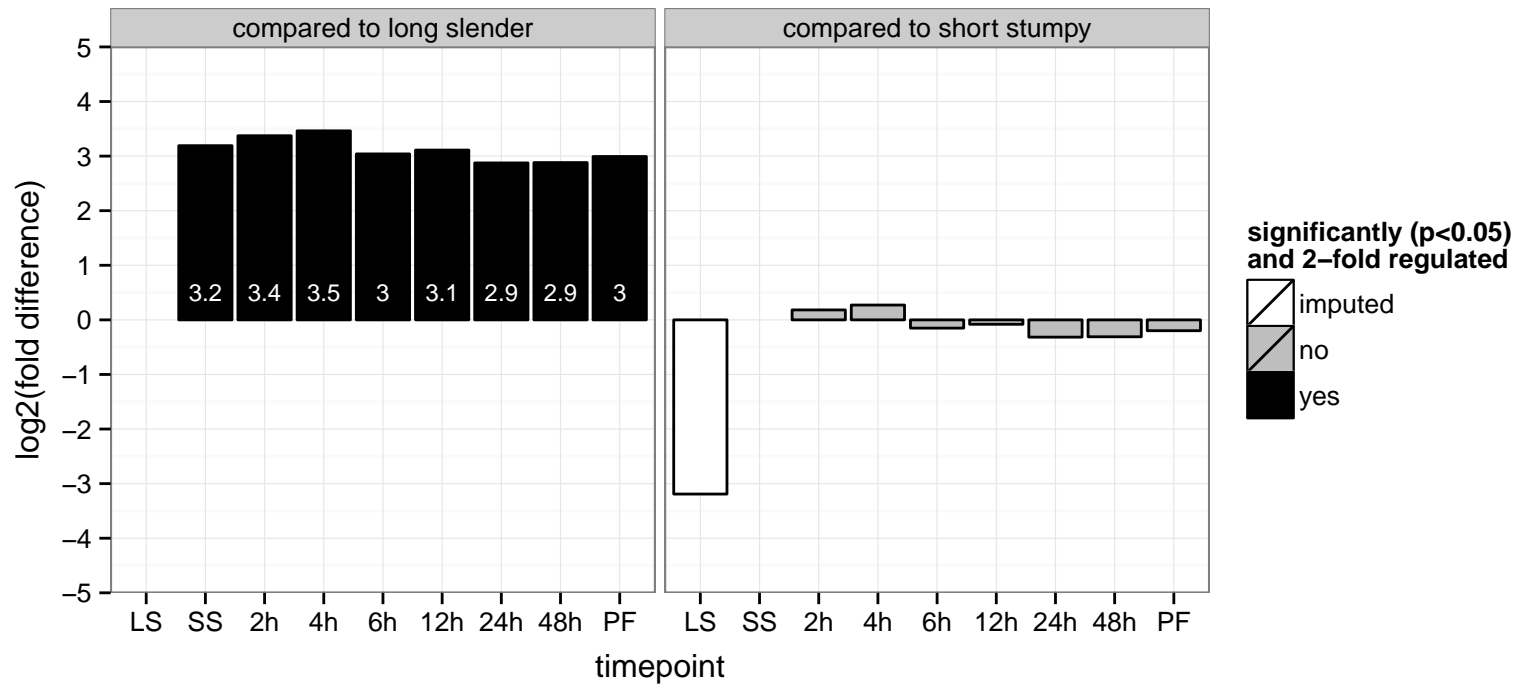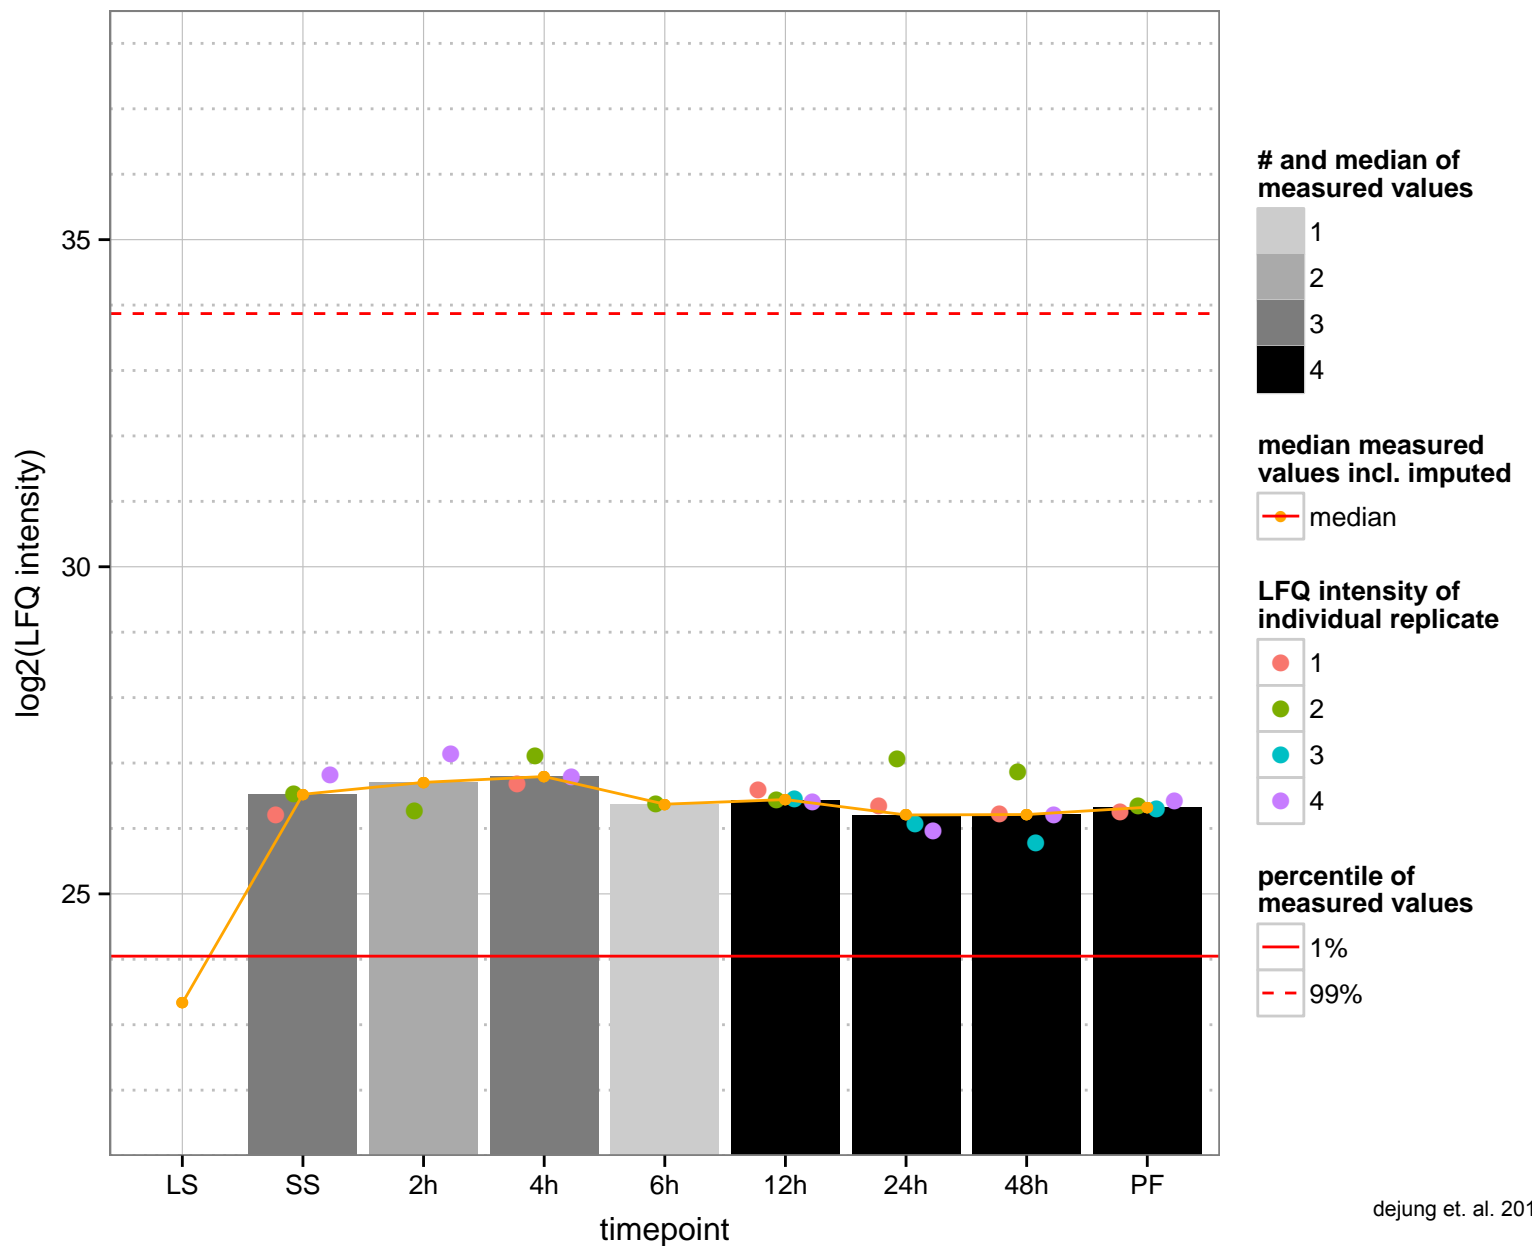

Polyadenylate-binding protein 1 (Poly(A)-binding protein 1) (PABP 1) (PABP1)

Tb927.9.9290

AGOF: RNA binding, poly(A) RNA binding

AGOC: cytoplasm, nucleus

AGOP: RNA processing, regulation of translational initiation

PGOF: RNA binding, nucleic acid binding

PGOC: null

PGOP: null

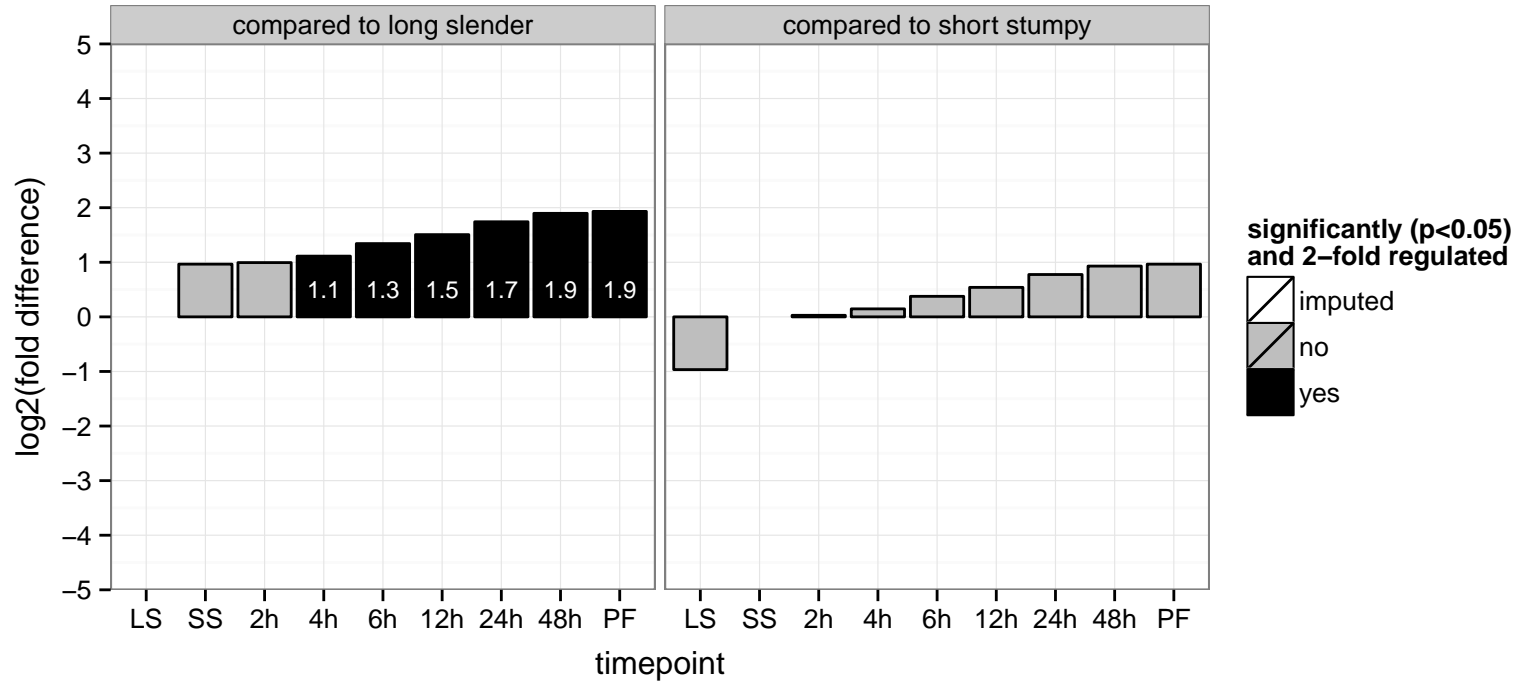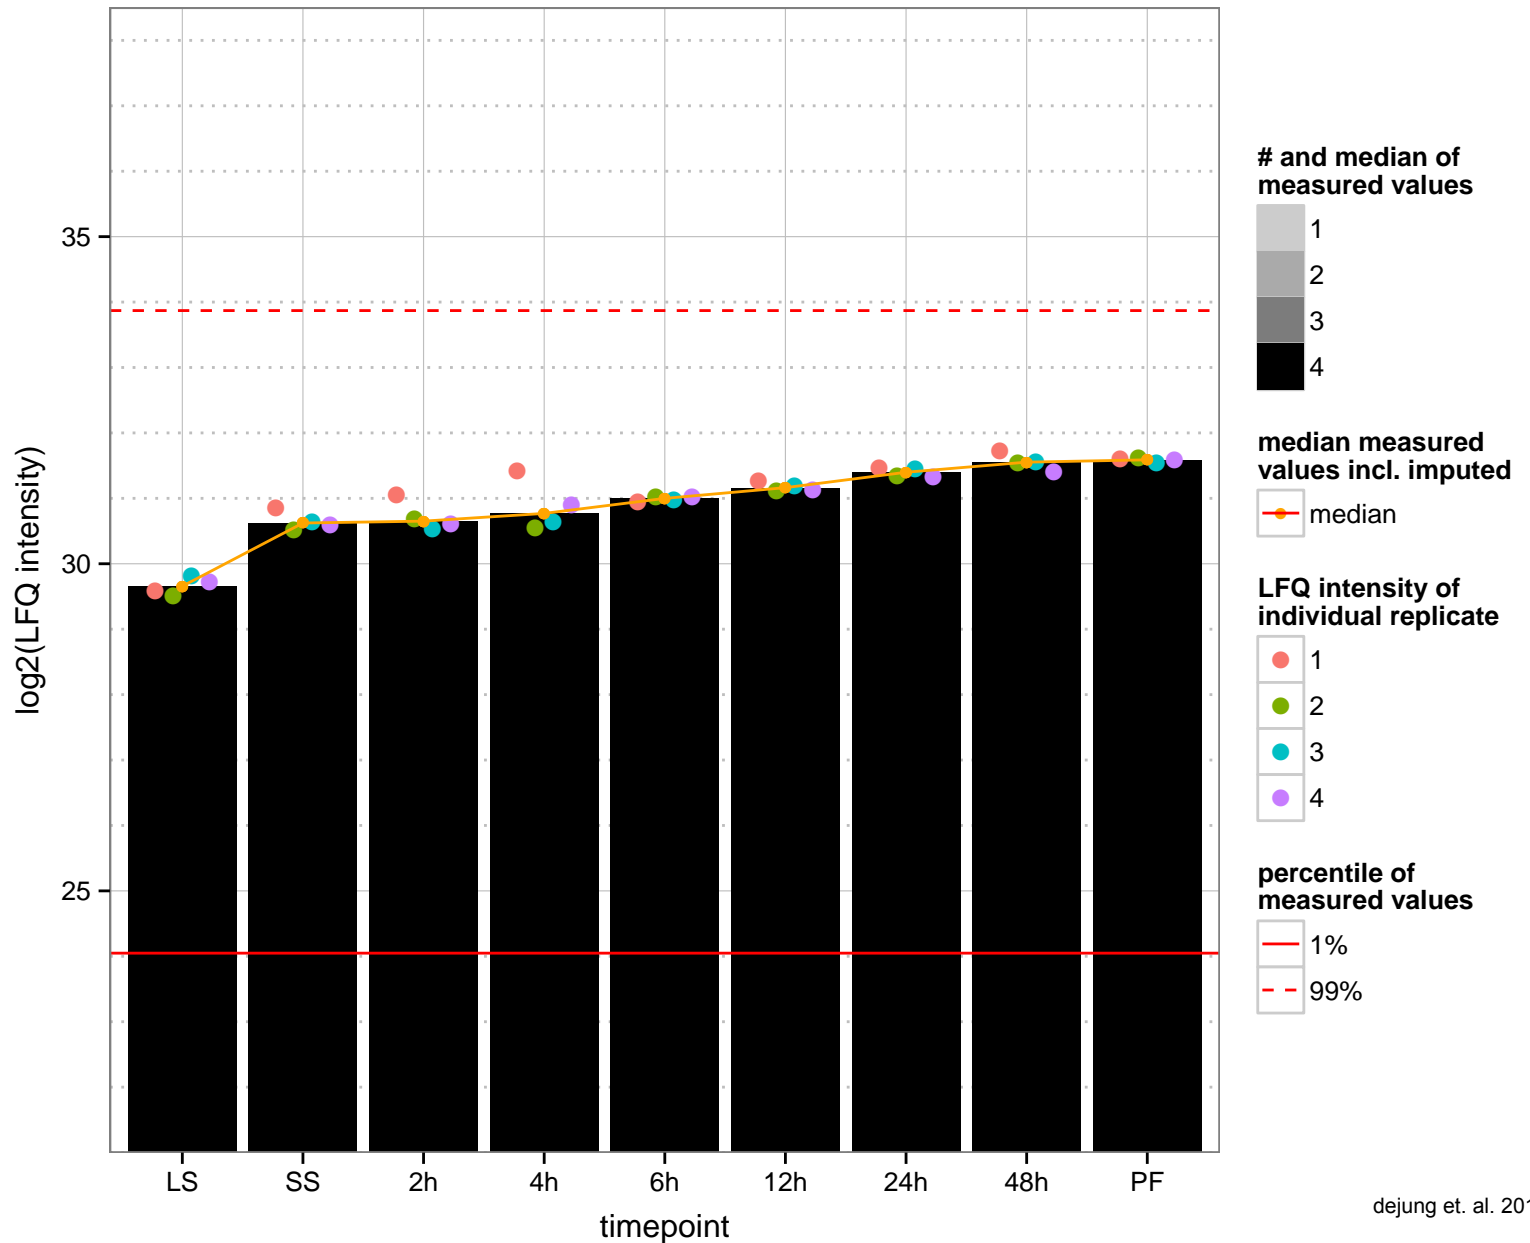

tubulin tyrosine ligase protein, putative  
 Tb927.9.9580  
 AGOF: null  
 AGOC: null  
 AGOP: cellular protein modification process  
 PGO: tubulin-tyrosine ligase activity  
 PGO: null  
 PGO: cellular protein modification process

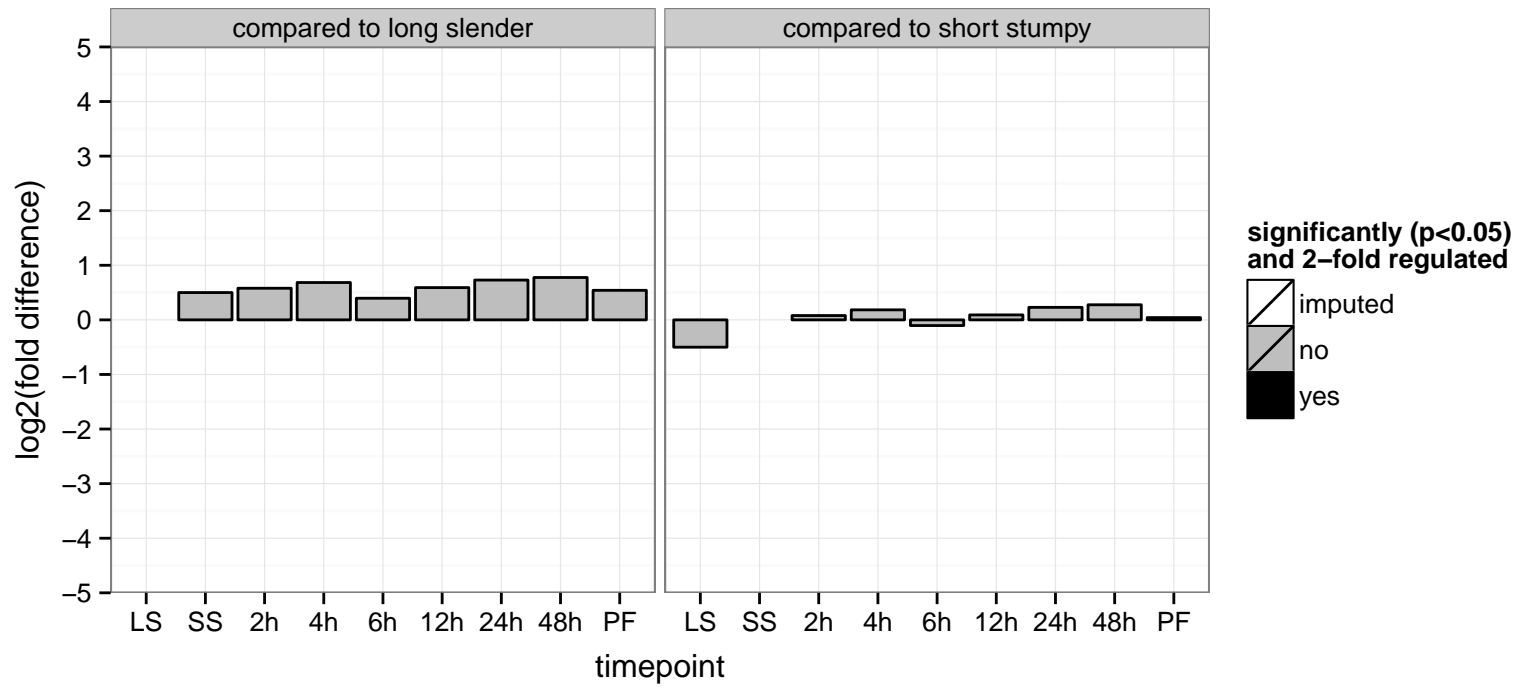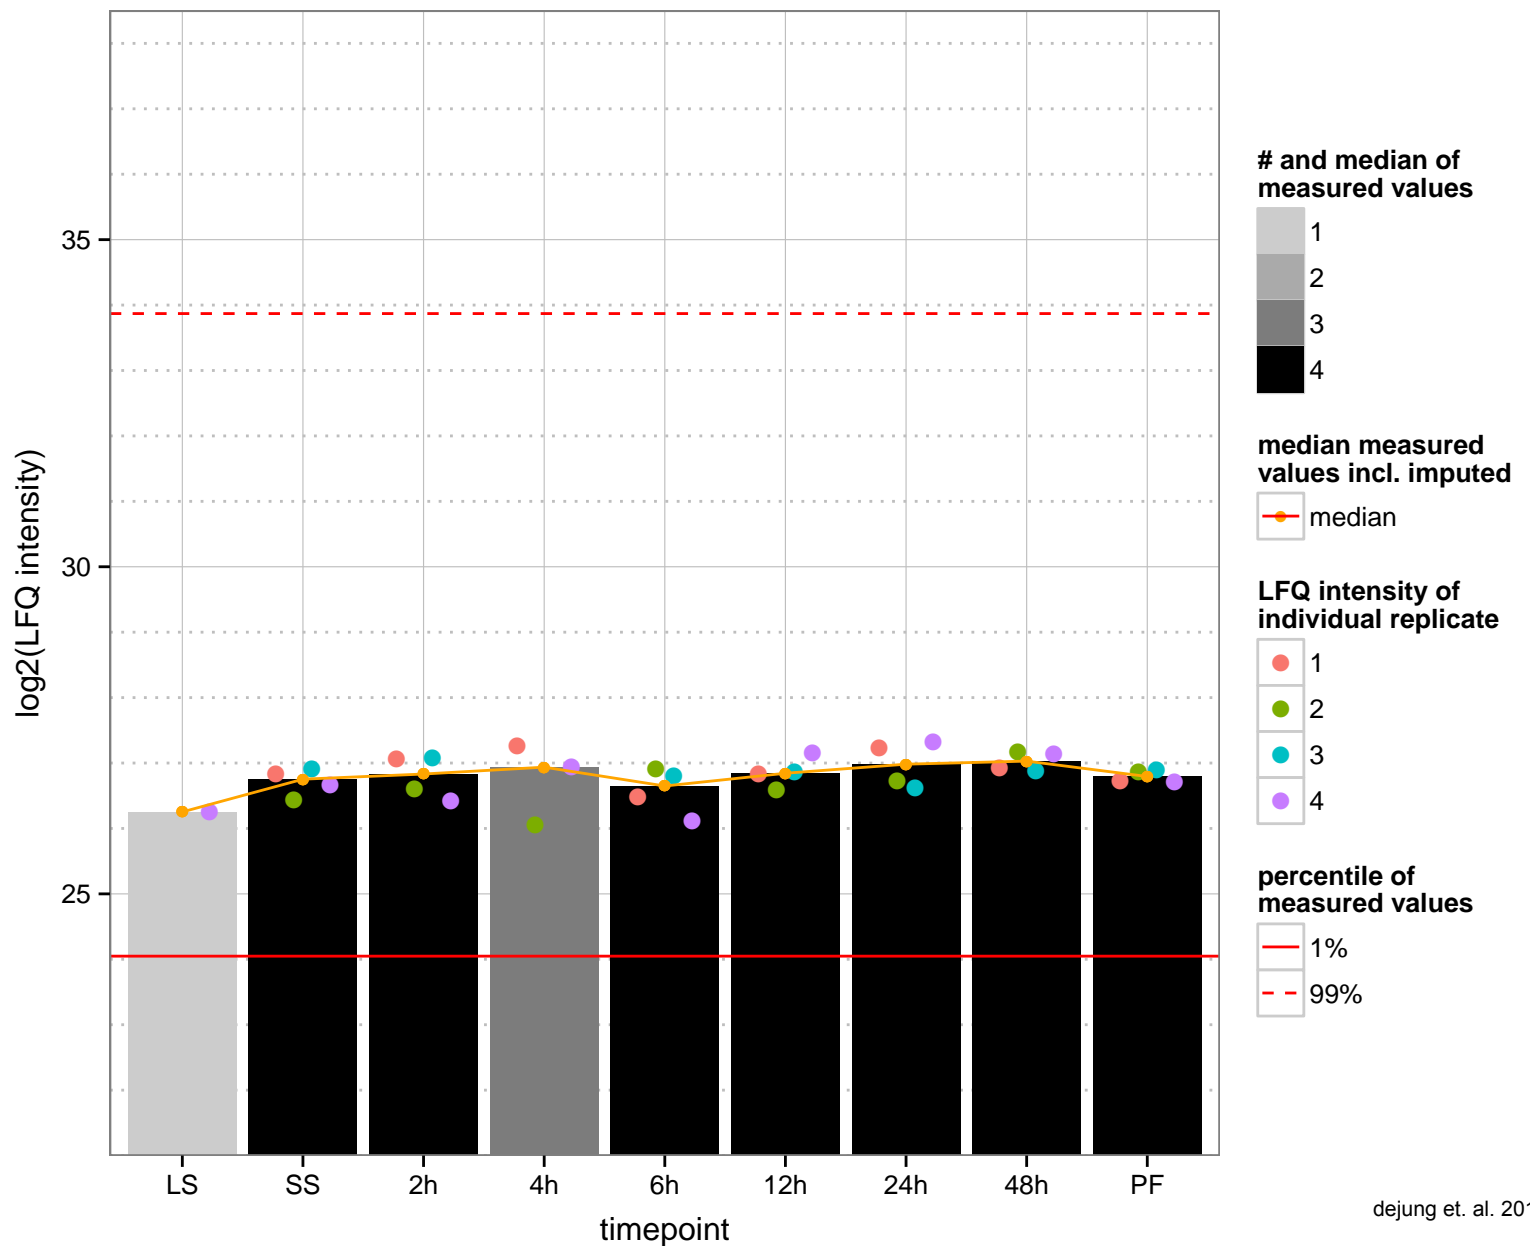

proteasome alpha 1 subunit, putative, 20S proteasome subunit alpha-6, (putative) (TbPSA6)  
Tb927.9.9670

AGOF: endopeptidase activity, threonine-type endopeptidase activity

AGOC: proteasome core complex

AGOP: ubiquitin-dependent protein catabolic process

PGOF: endopeptidase activity, threonine-type endopeptidase activity

PGOC: proteasome core complex, proteasome core complex, alpha-subunit complex

PGOP: proteolysis involved in cellular protein catabolic process, ubiquitin-dependent protein catabolic process

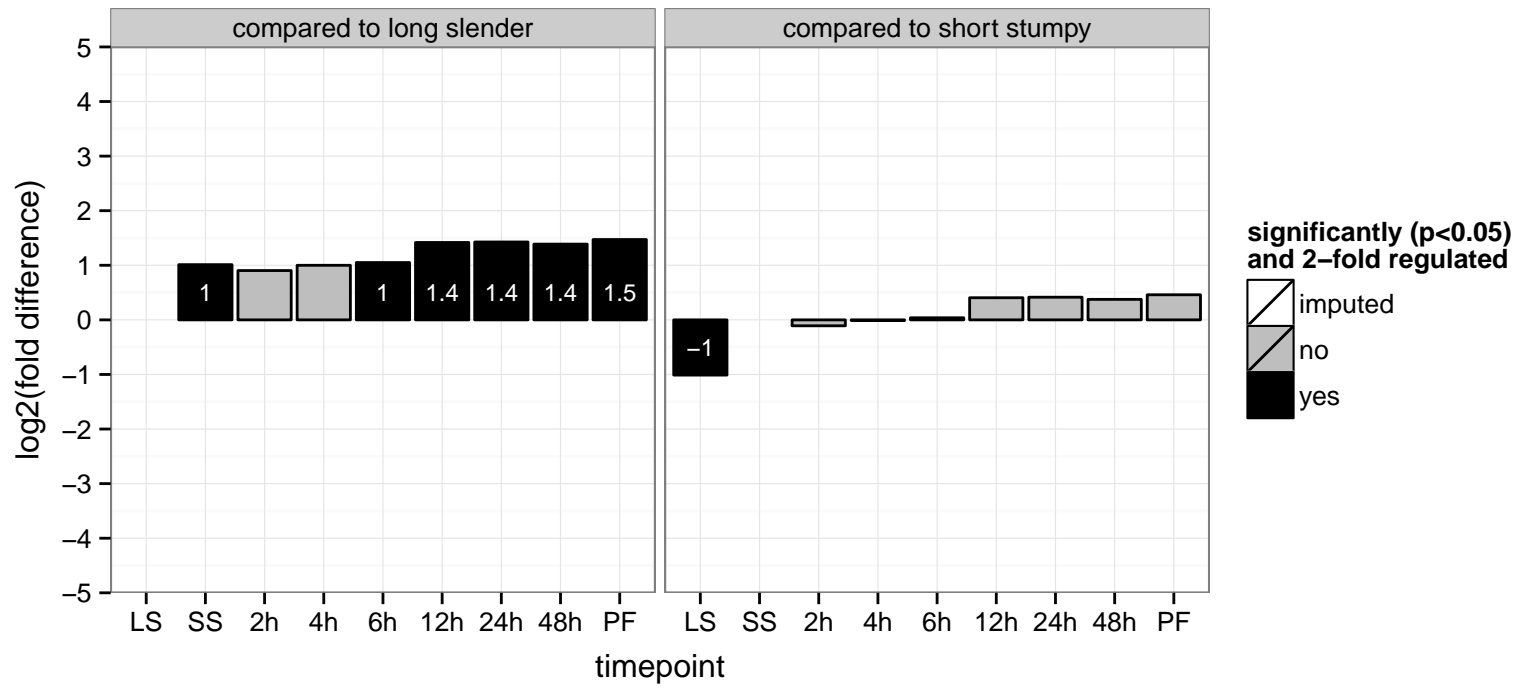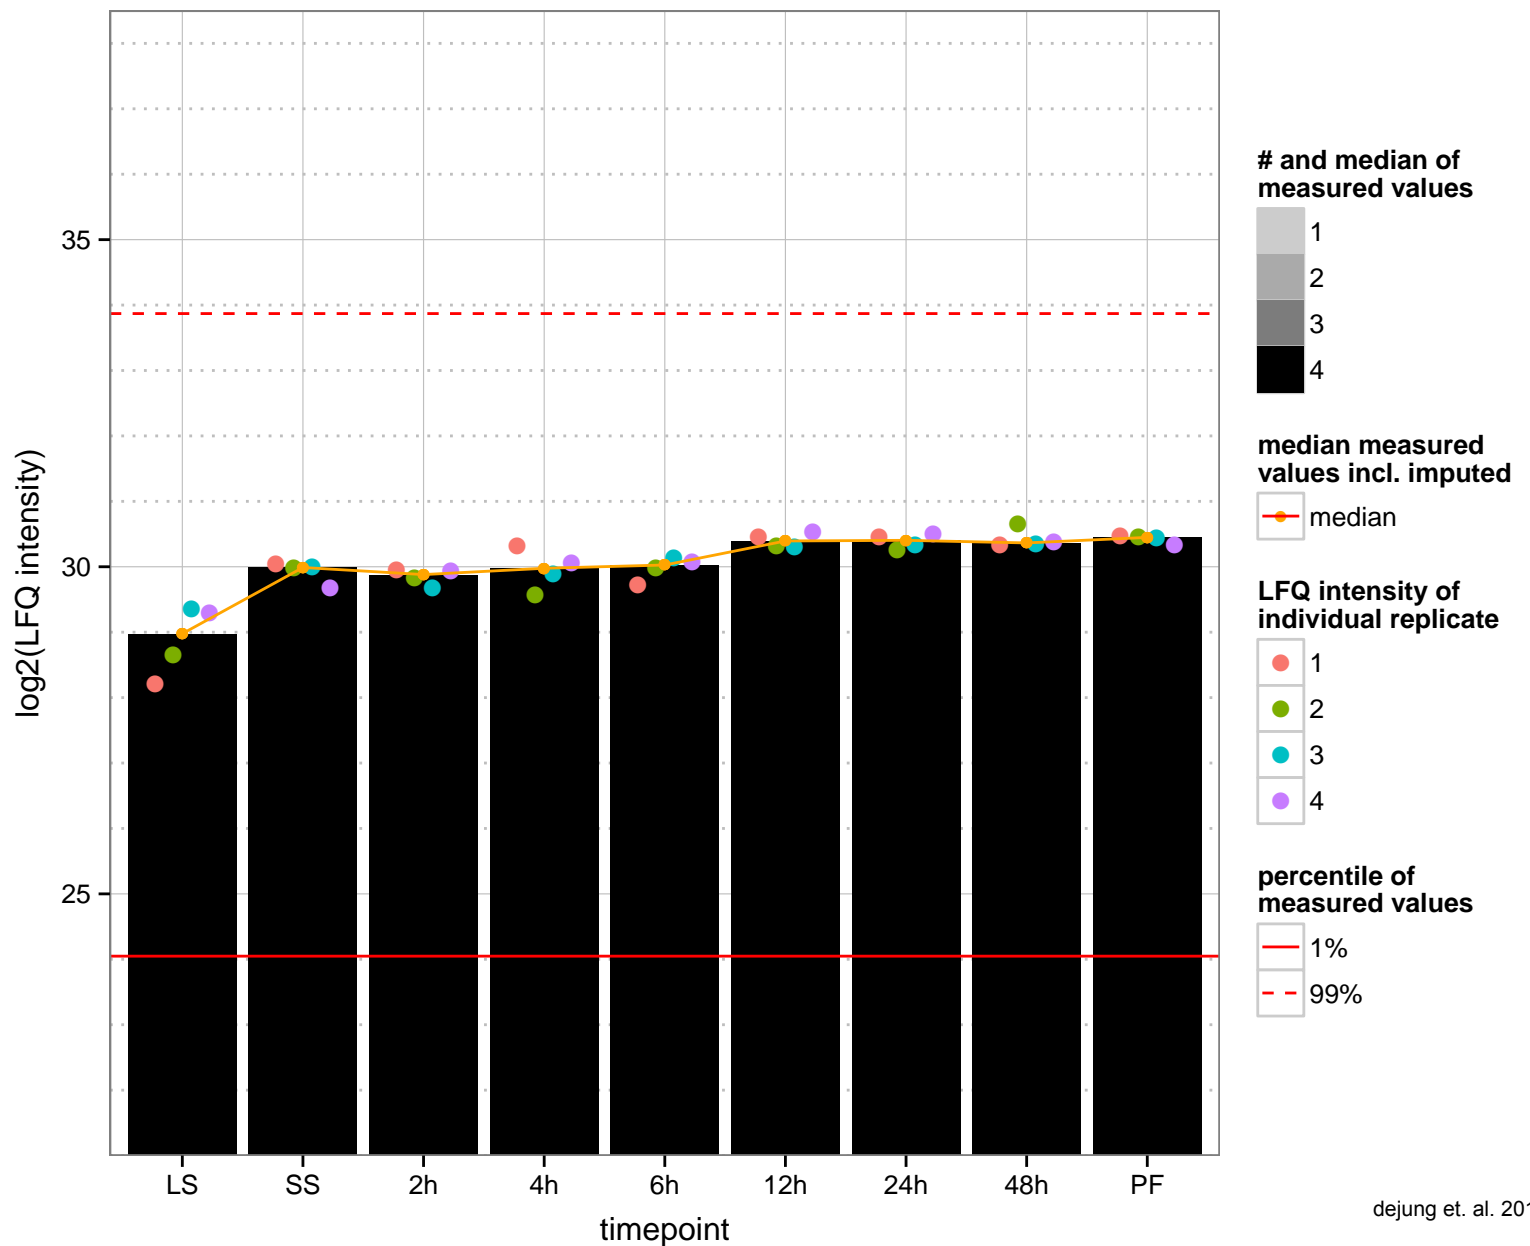

hypothetical protein, conserved  
 Tb927.9.9710  
 AGOF: null  
 AGOC: null  
 AGOP: null  
 PGOF: null  
 PGO: null  
 PGOP: null

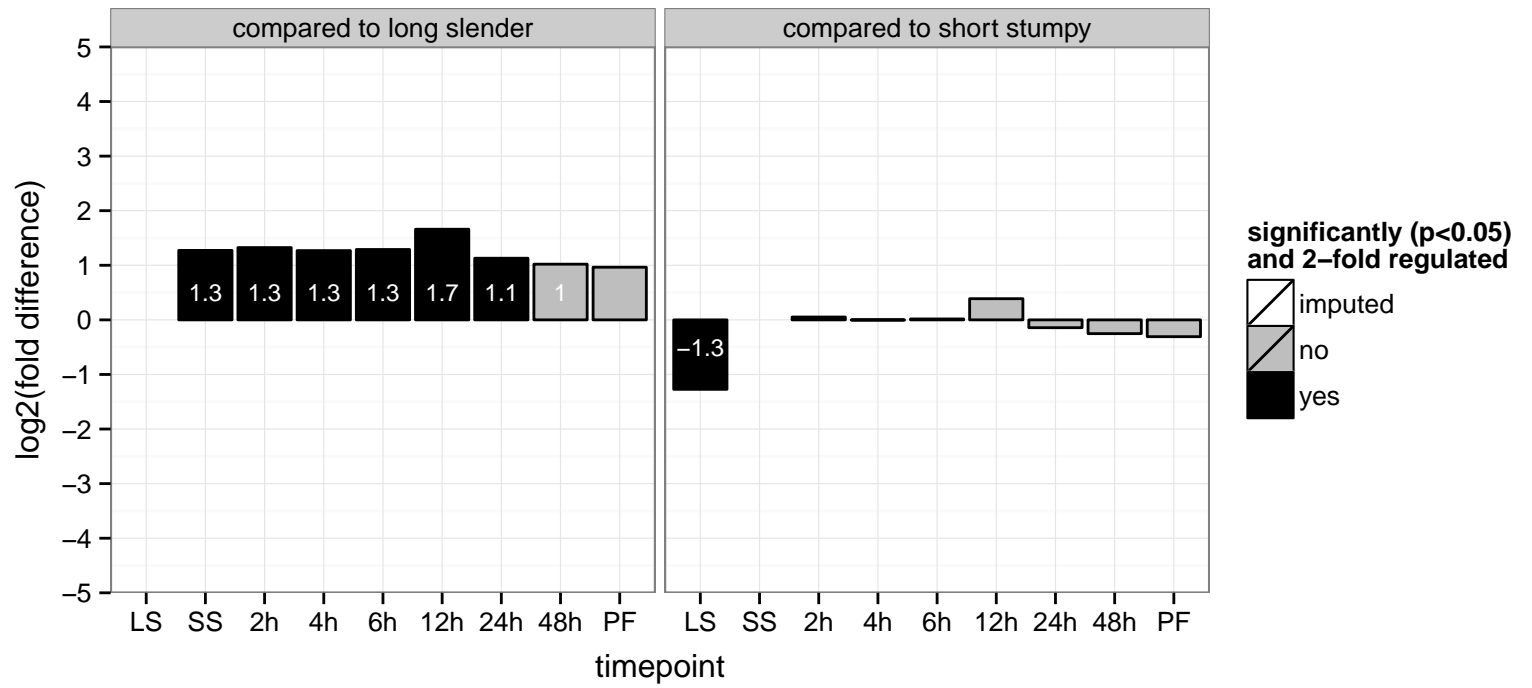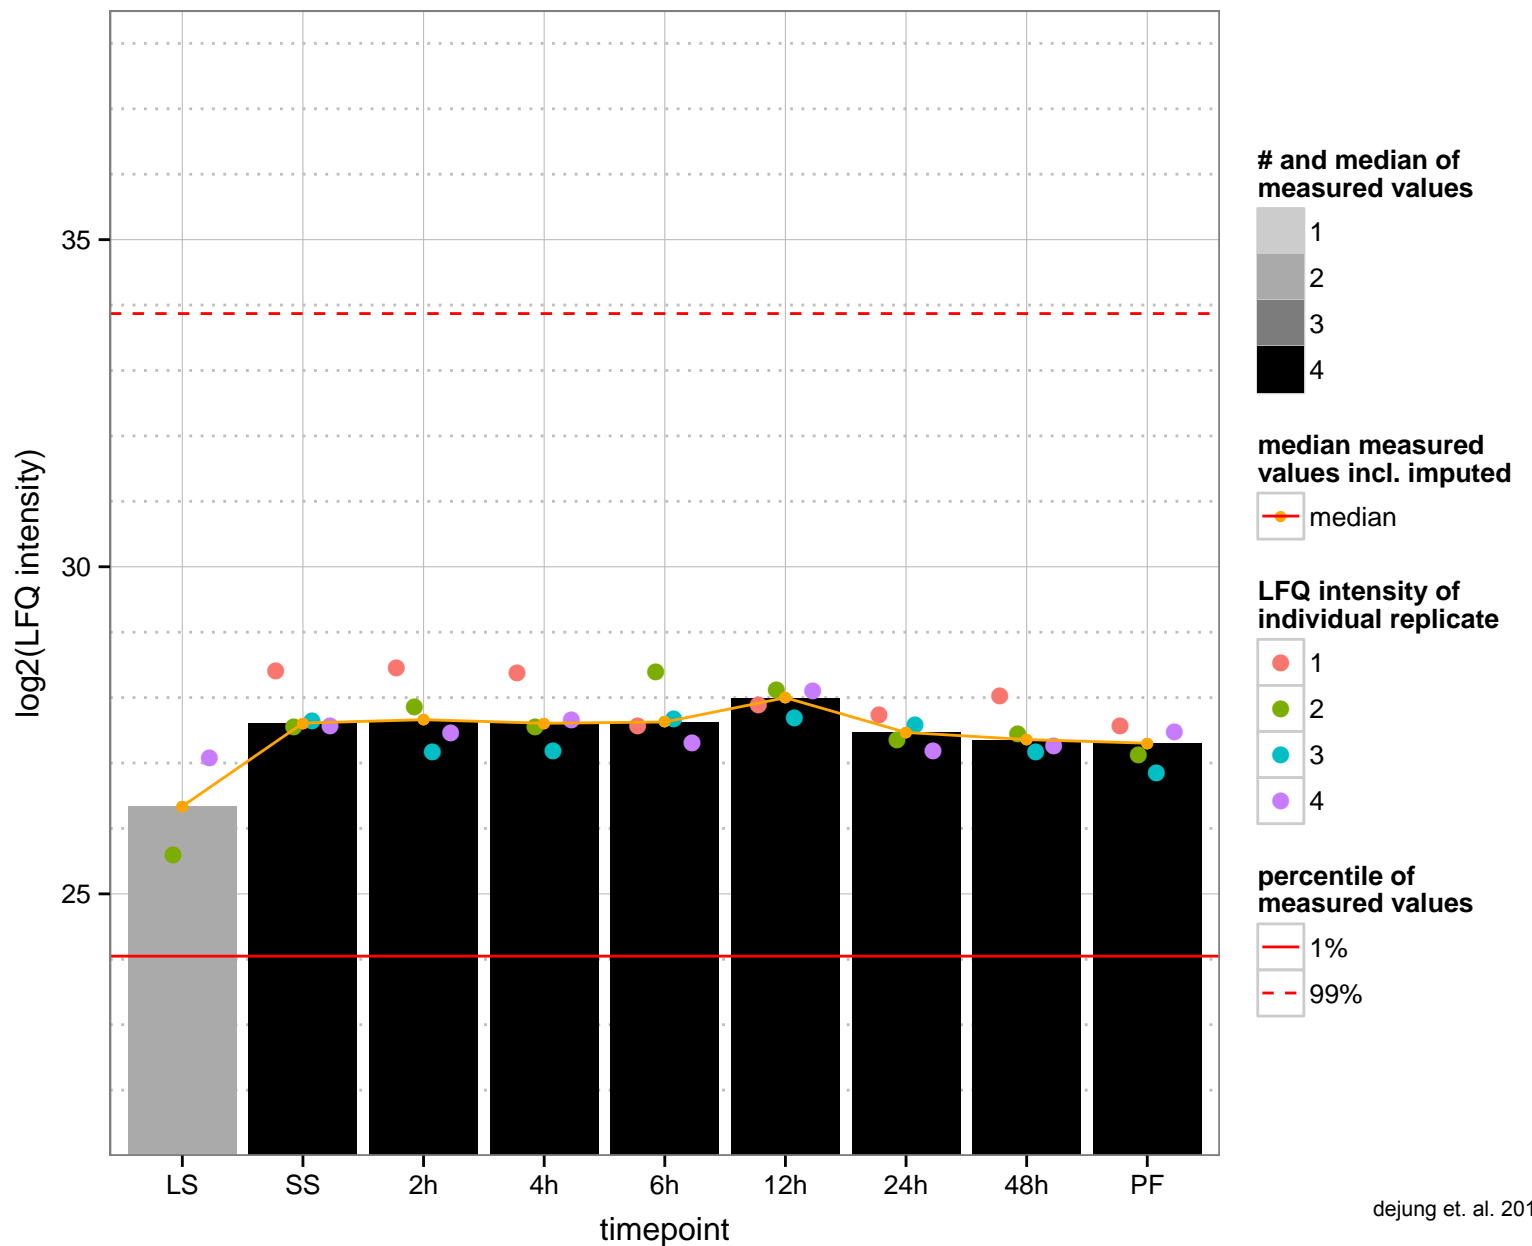

AMP deaminase, putative  
 Tb927.9.9740  
 AGOF: AMP deaminase activity  
 AGOC: mitochondrion  
 AGOP: purine ribonucleoside monophosphate biosynthetic process  
 PGO: deaminase activity  
 PGO: null  
 PGO: purine ribonucleoside monophosphate biosynthetic process

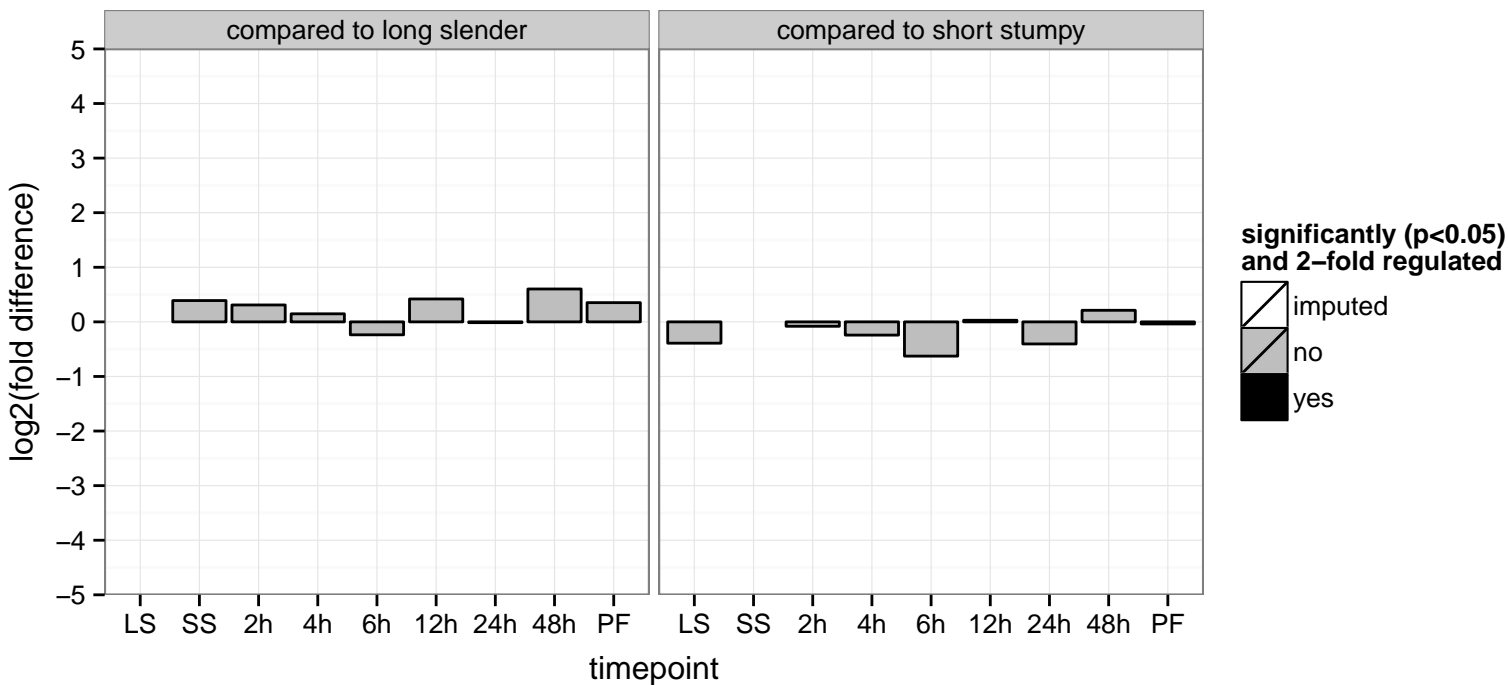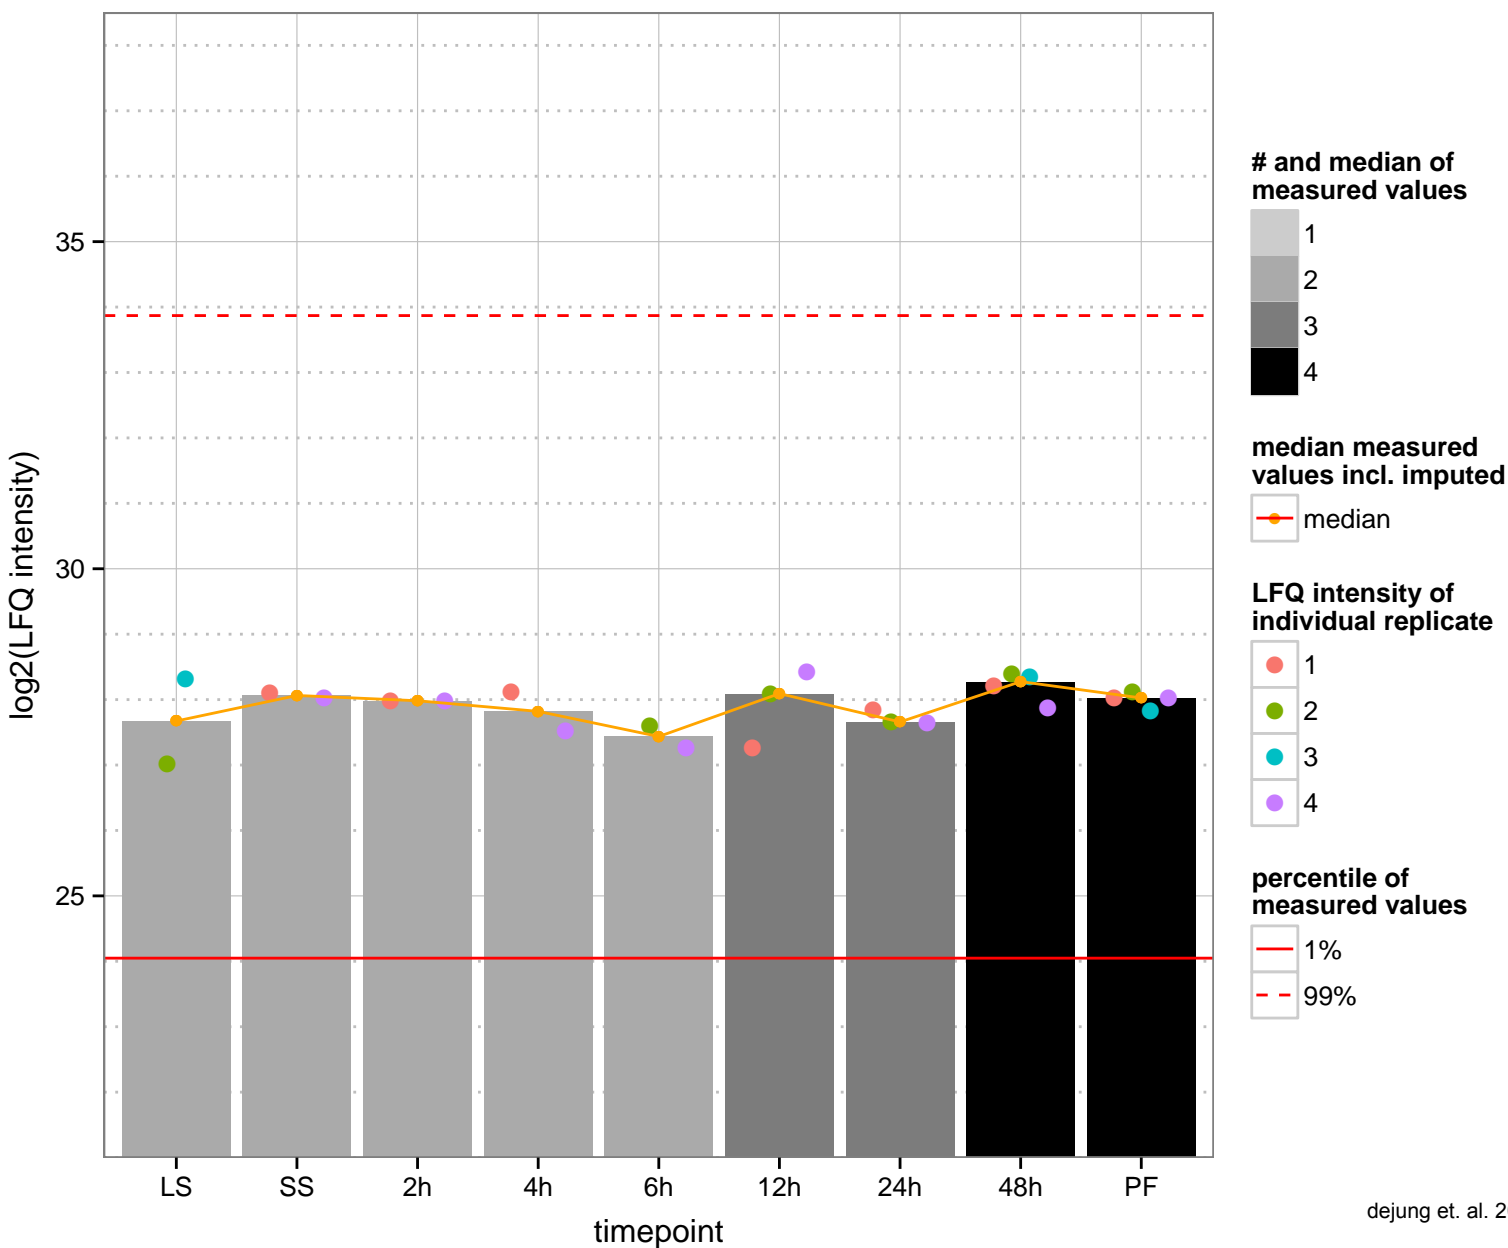



membrane- trafficking protein, putative  
 Tb927.9.9750  
 AGOF: null  
 AGOC: integral to membrane  
 AGOP: protein transport  
 PGO: null  
 PGOC: integral to membrane  
 PGOP: protein transport

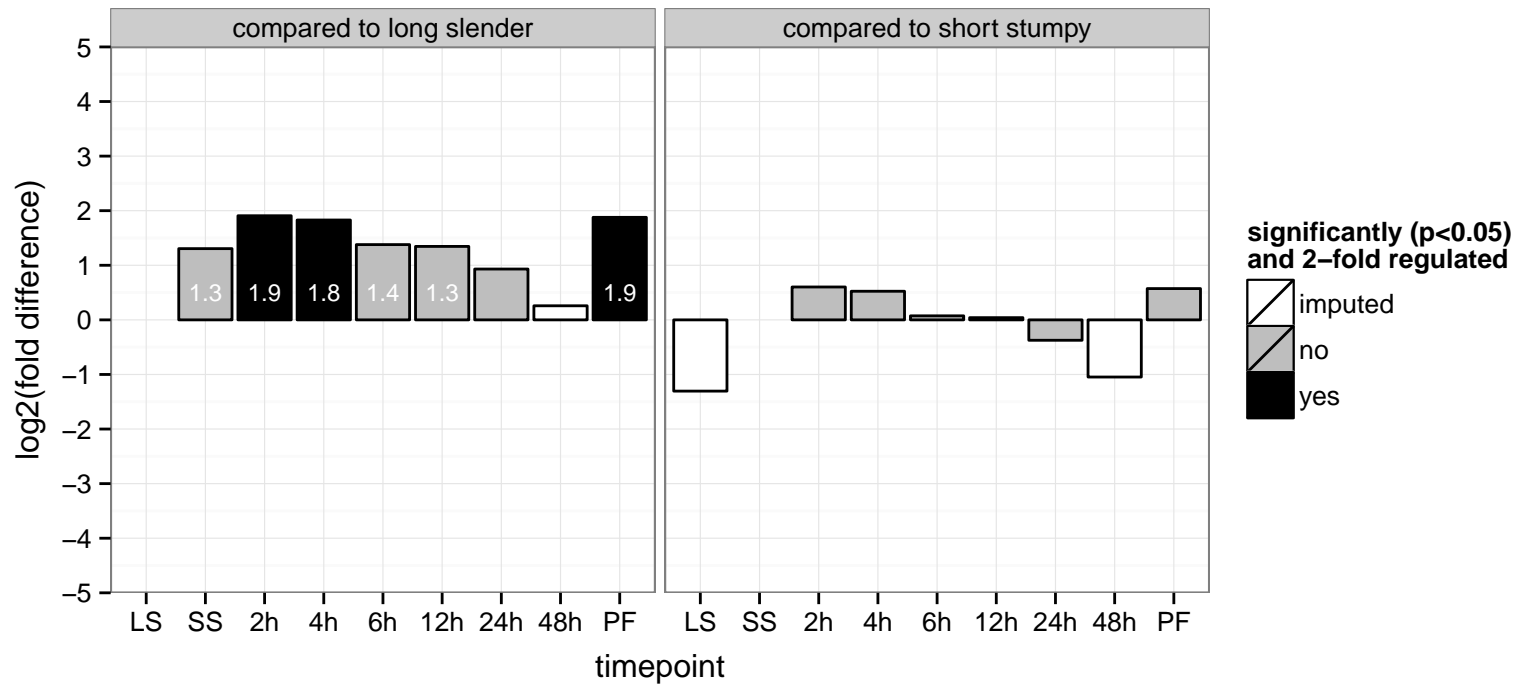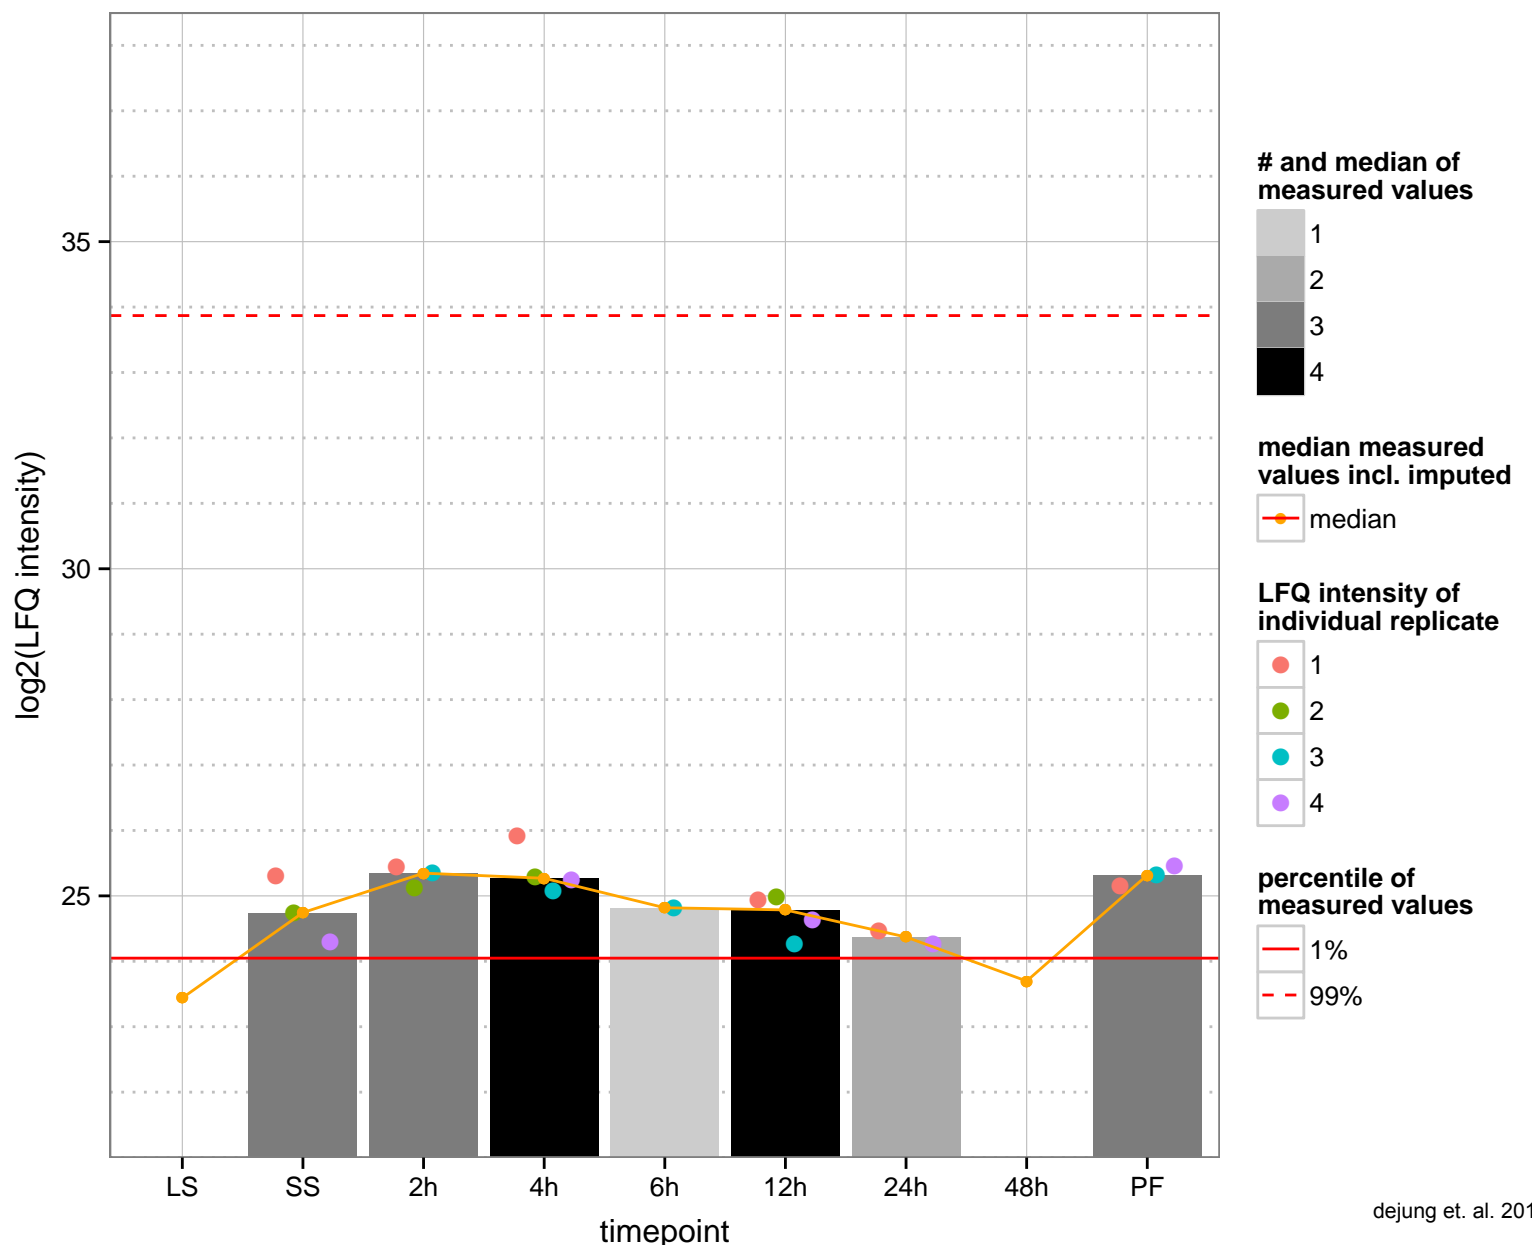

hypothetical protein, conserved  
 Tb927.9.9810  
 AGOF: null  
 AGOC: null  
 AGOP: null  
 PGO: null  
 PGOC: null  
 PGOP: null

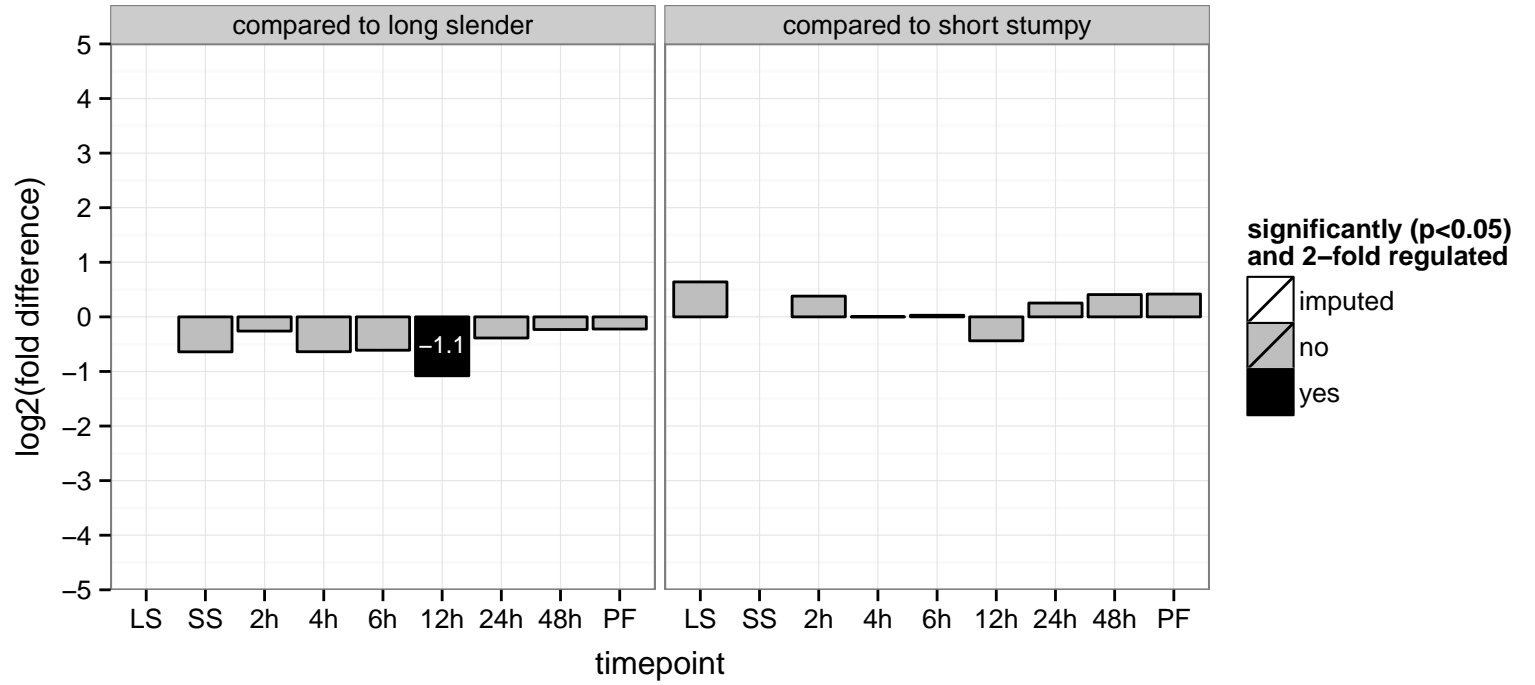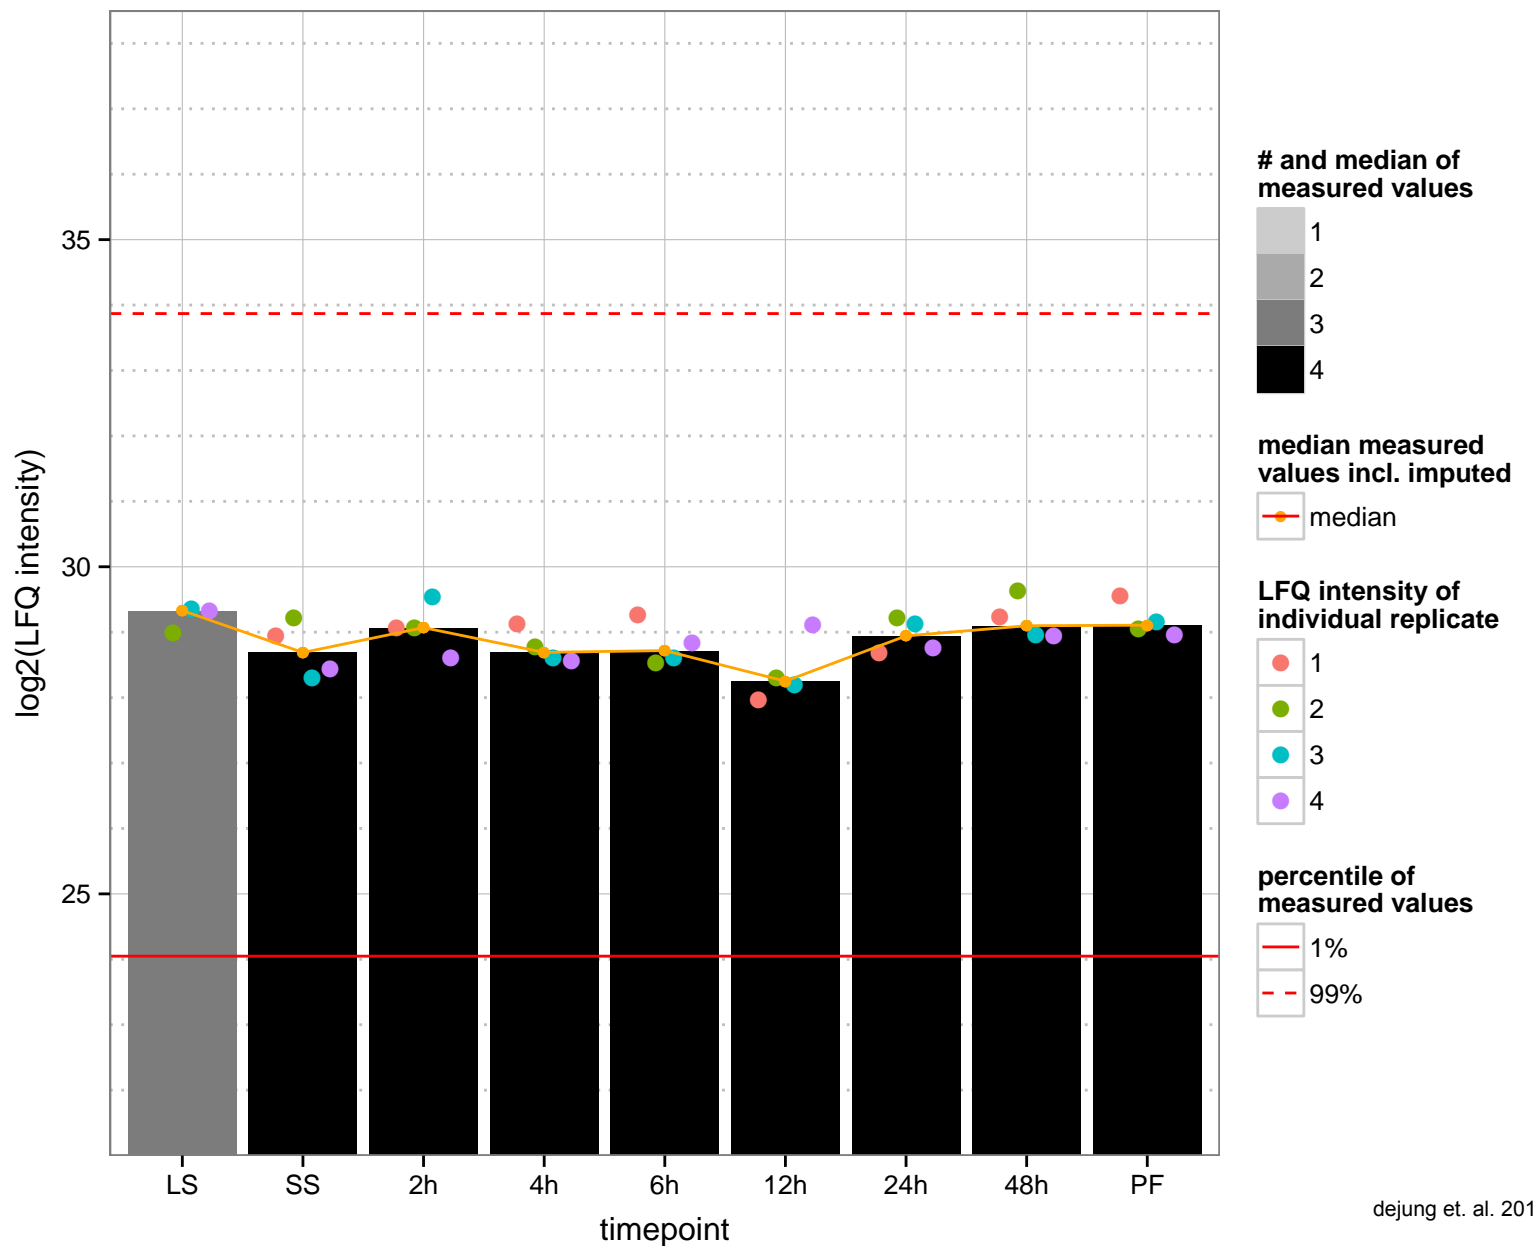

glyceraldehyde-3-phosphate dehydrogenase, putative

Tb927.9.9820

AGOF: NAD binding, glyceraldehyde-3-phosphate dehydrogenase (NAD+) (phosphorylating) activity

AGOC: null

AGOP: glycolysis

PGOF: oxidoreductase activity, acting on the aldehyde or oxo group of donors, NAD or NADP as acceptor

PGOC: null

PGOP: oxidation-reduction process

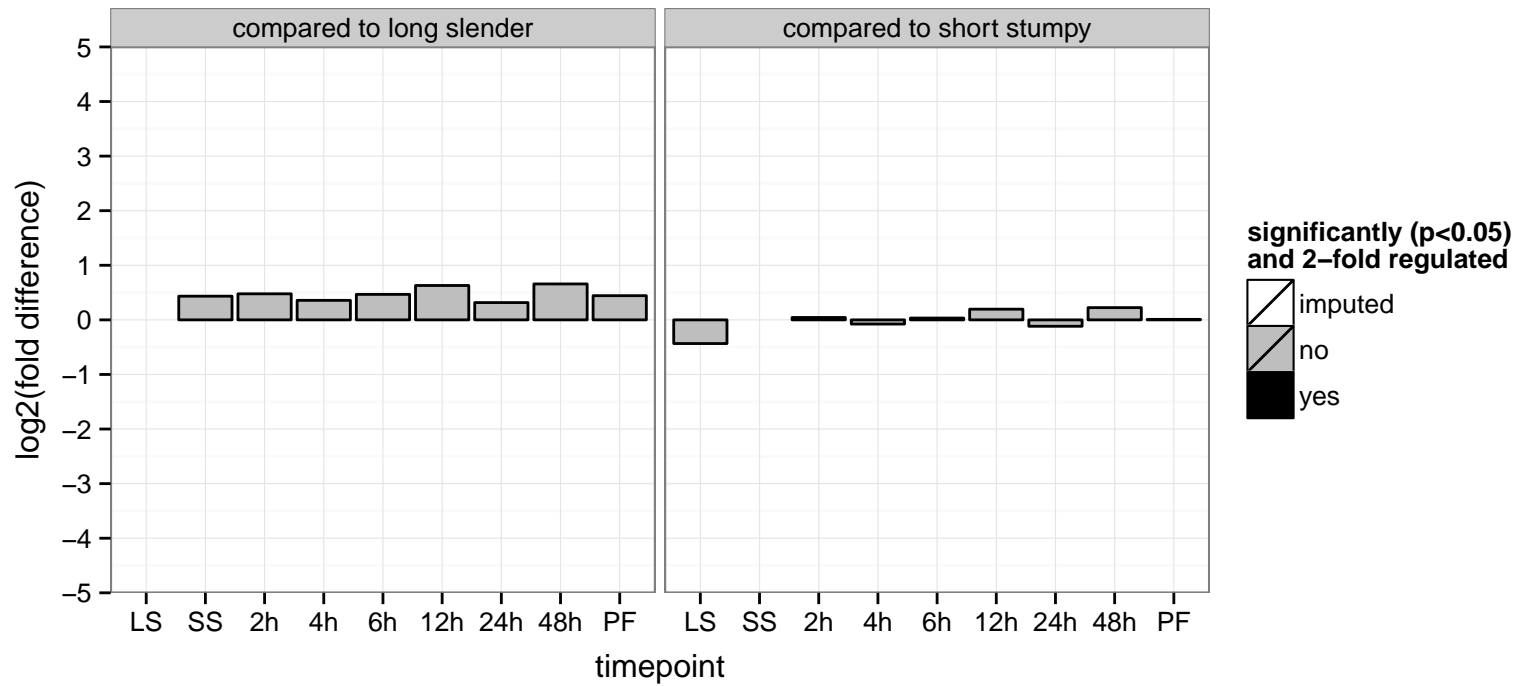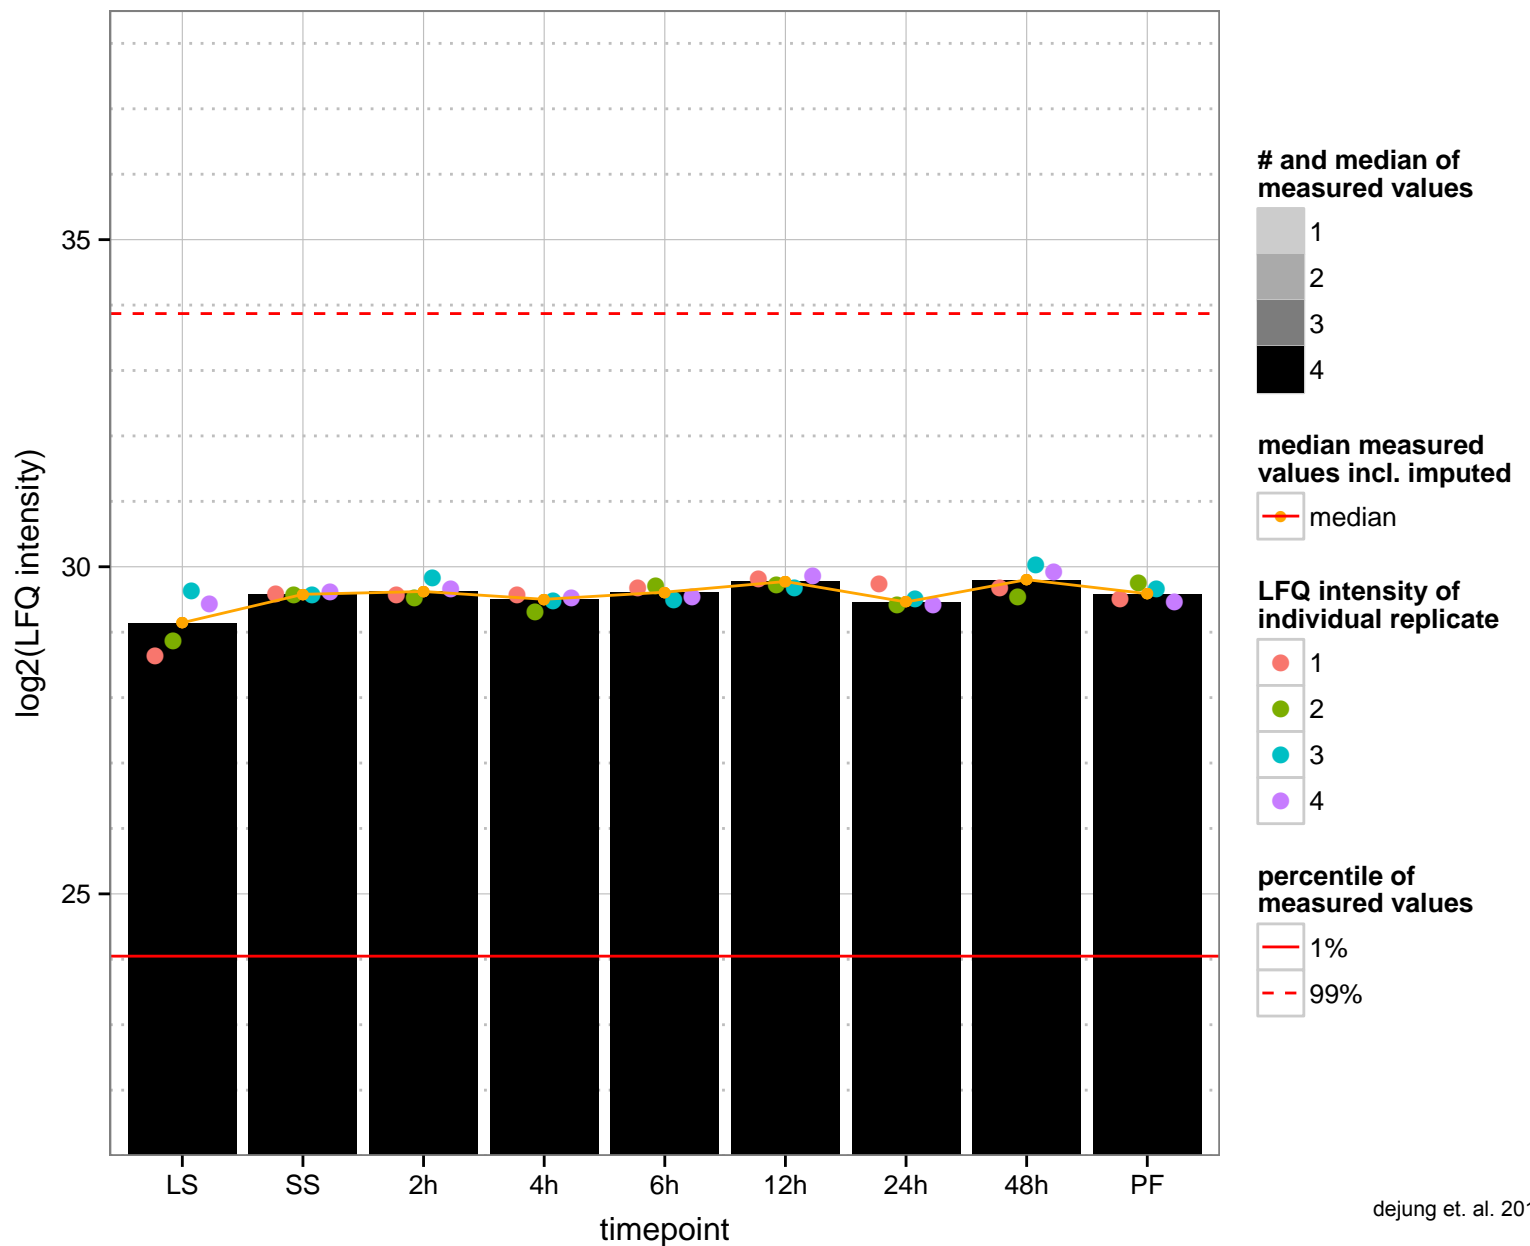

lipoic acid containing carrier protein, putative (GCVH)

Tb927.9.9840

AGOF: null

AGOC: glycine cleavage complex, mitochondrion

AGOP: glycine catabolic process

PGOF: null

PGOC: glycine cleavage complex

PGOP: glycine catabolic process, glycine decarboxylation via glycine cleavage system

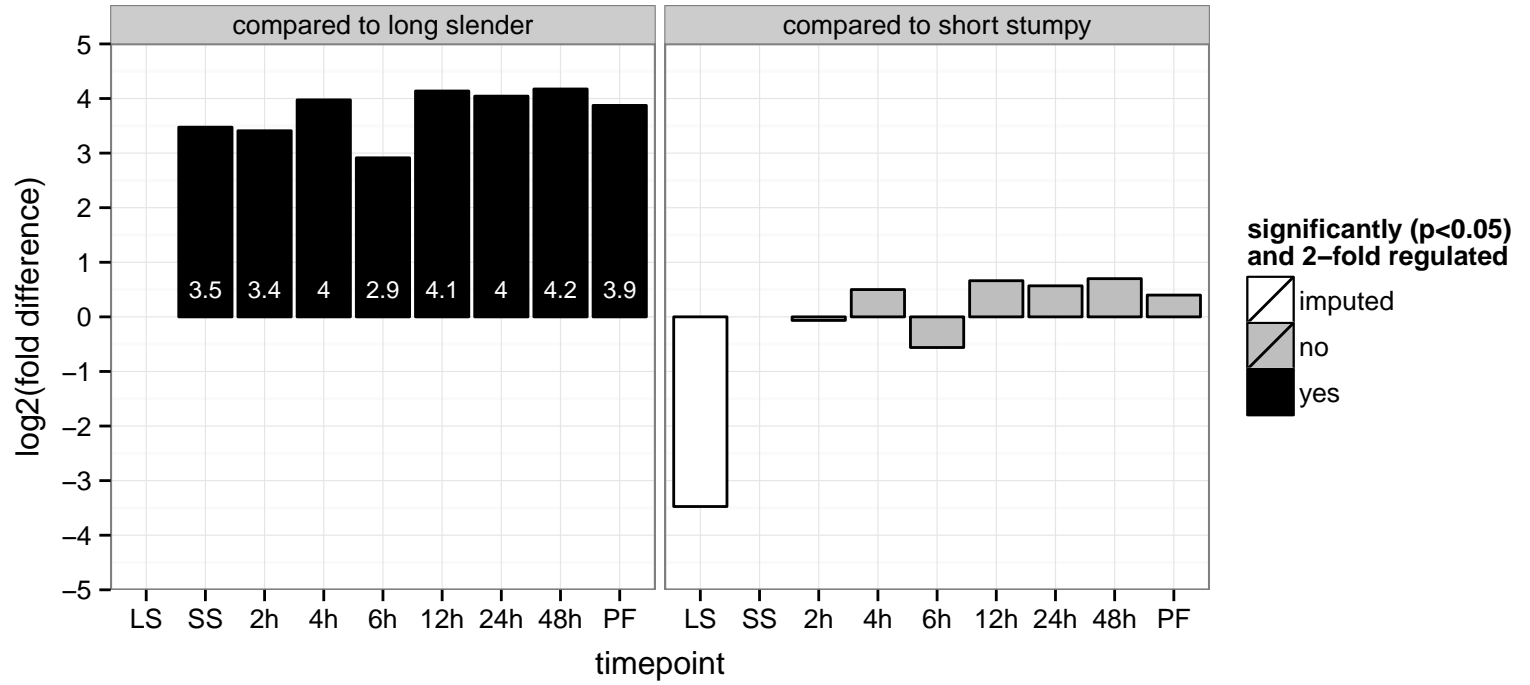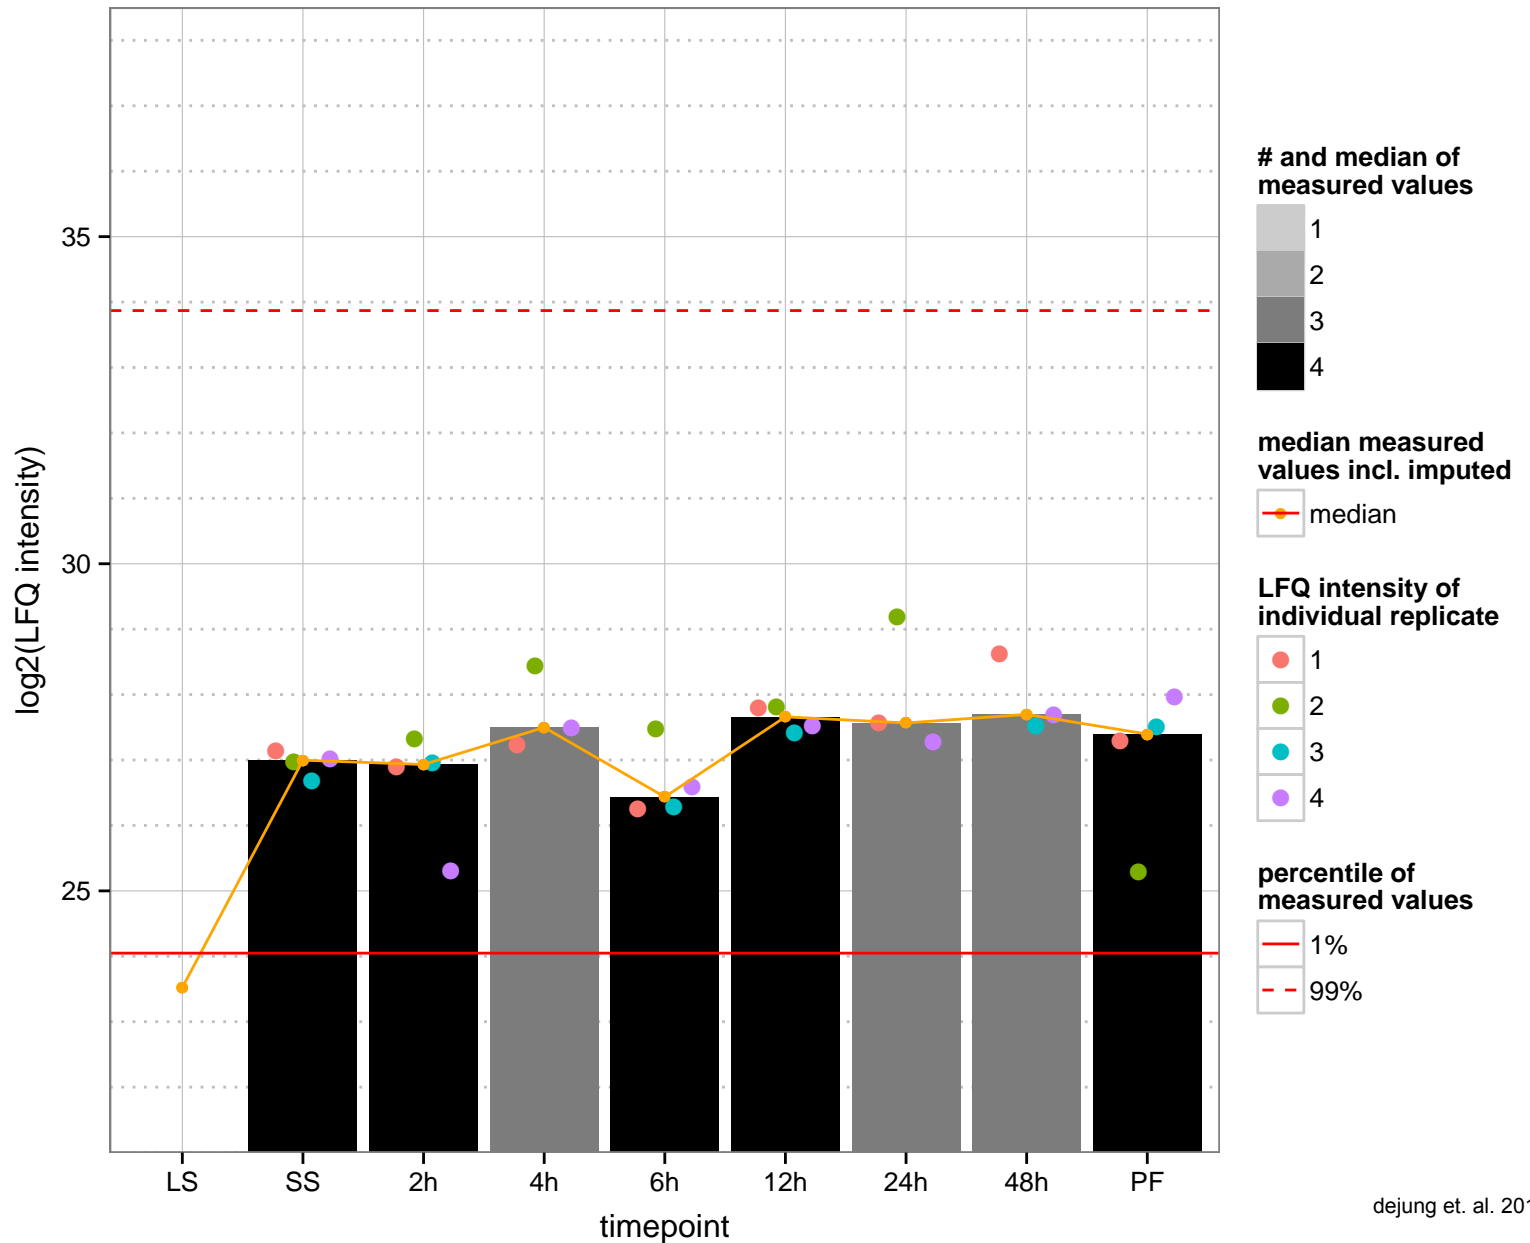

hypothetical protein, conserved  
 Tb927.9.9860  
 AGOF: ATP binding  
 AGOC: null  
 AGOP: protein folding  
 PGO: null  
 PGOC: null  
 PGOP: null

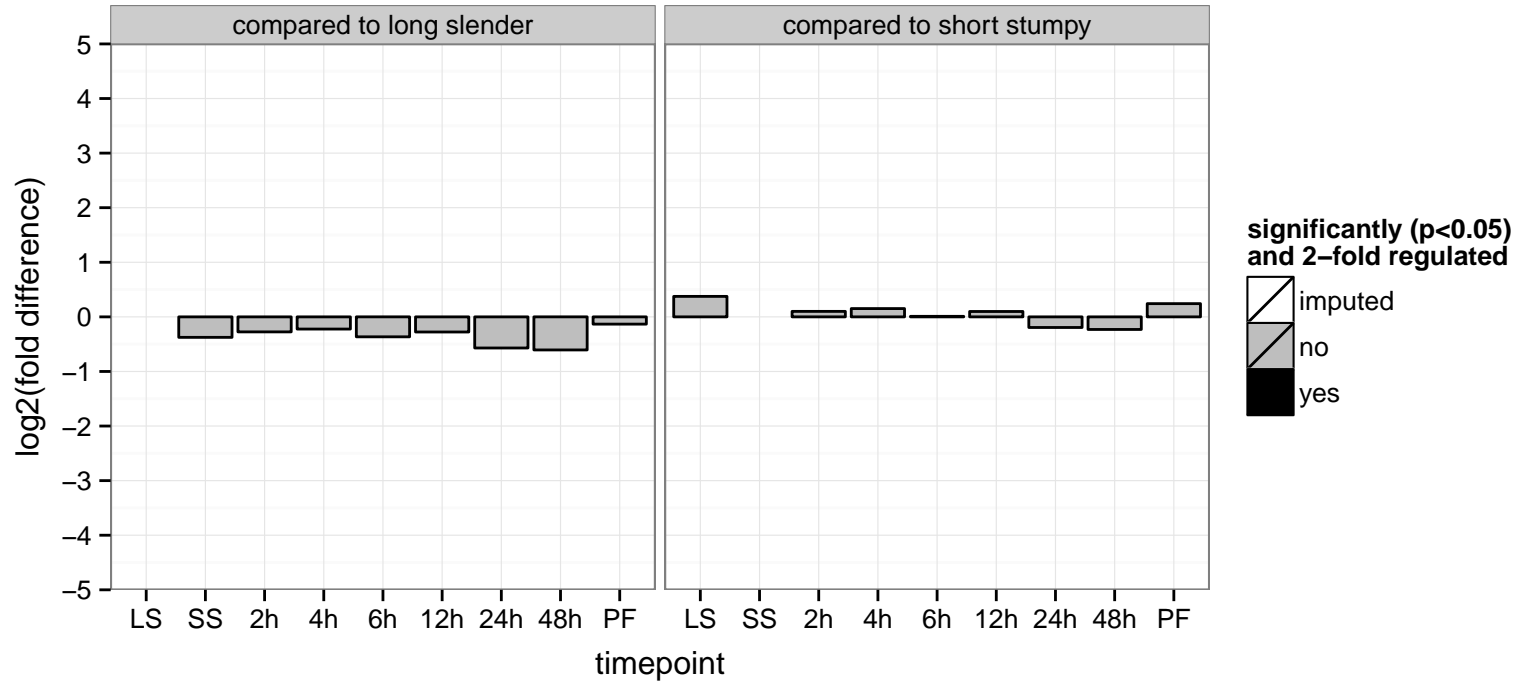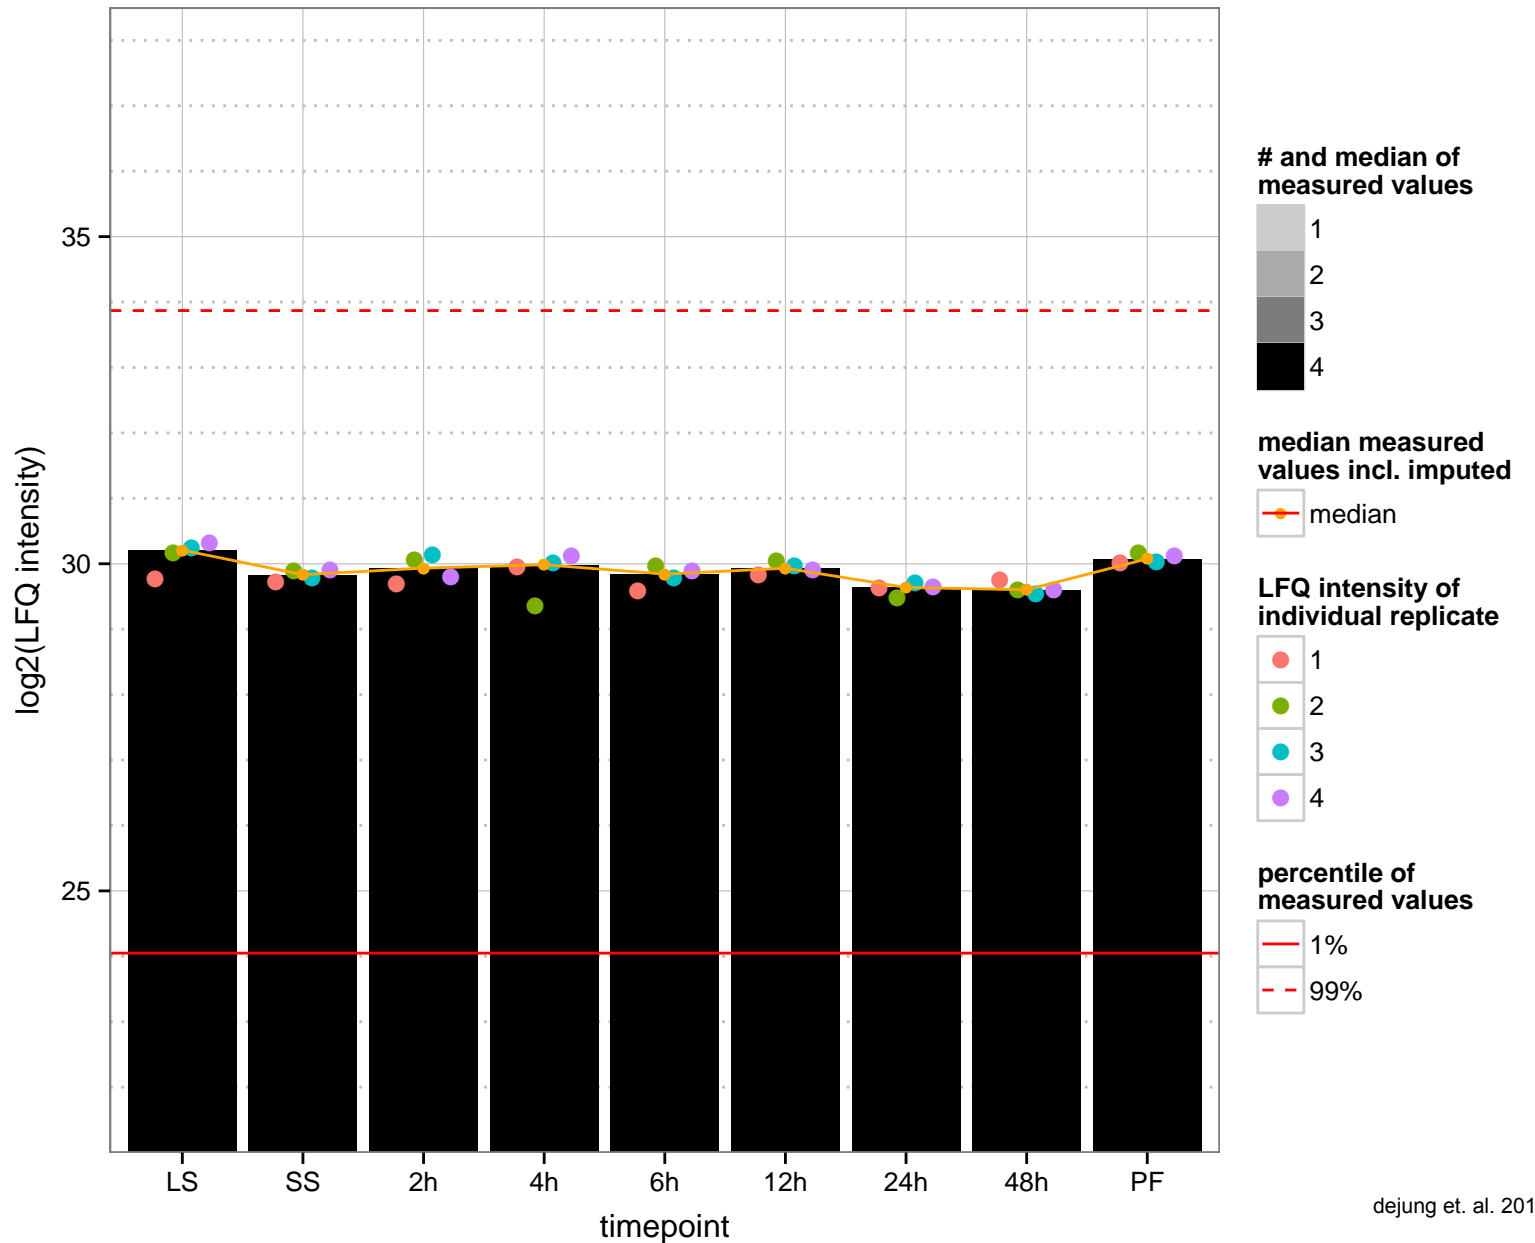

MCAK-like kinesin, putative  
 Tb927.9.9870  
 AGOF: ATP binding, microtubule motor activity, motor activity  
 AGOC: microtubule associated complex  
 AGOP: microtubule-based movement  
 PGOF: ATP binding, microtubule motor activity  
 PGO: null  
 PGOP: microtubule-based movement

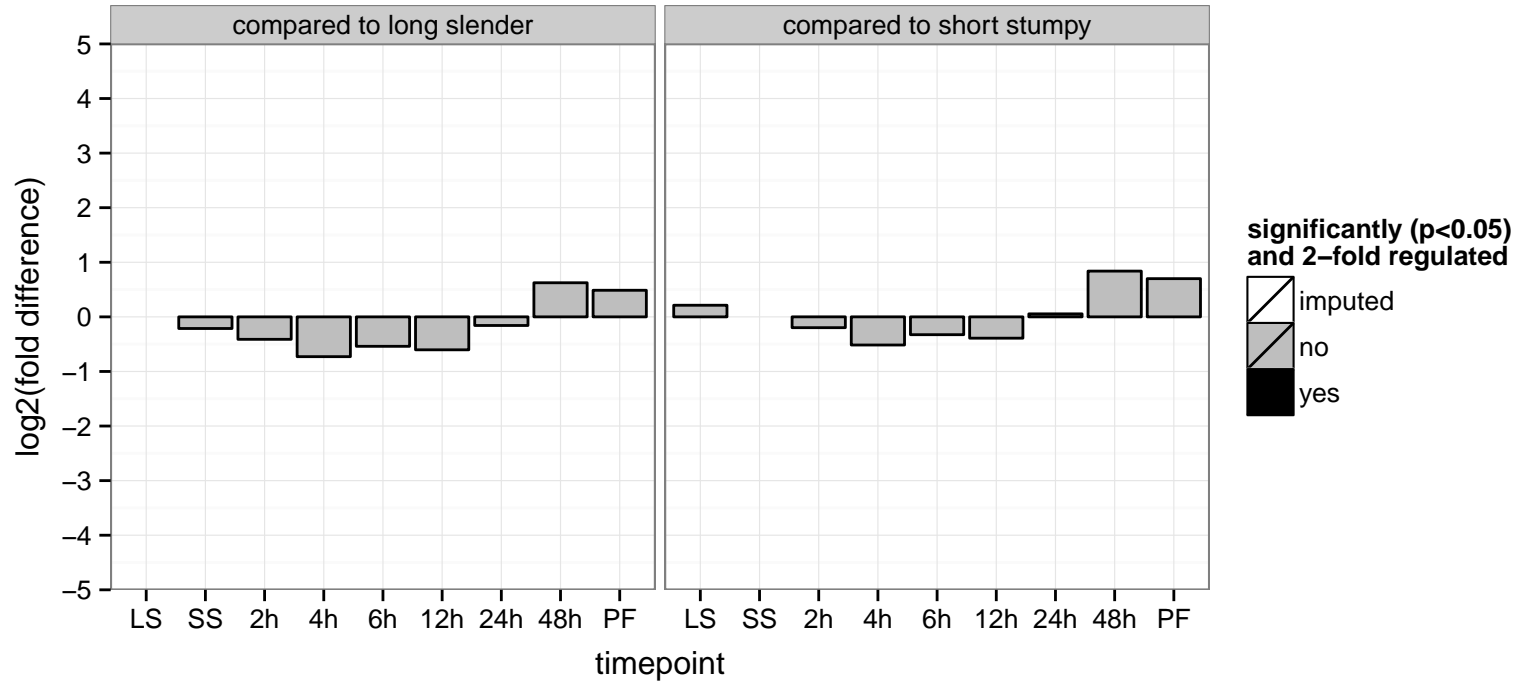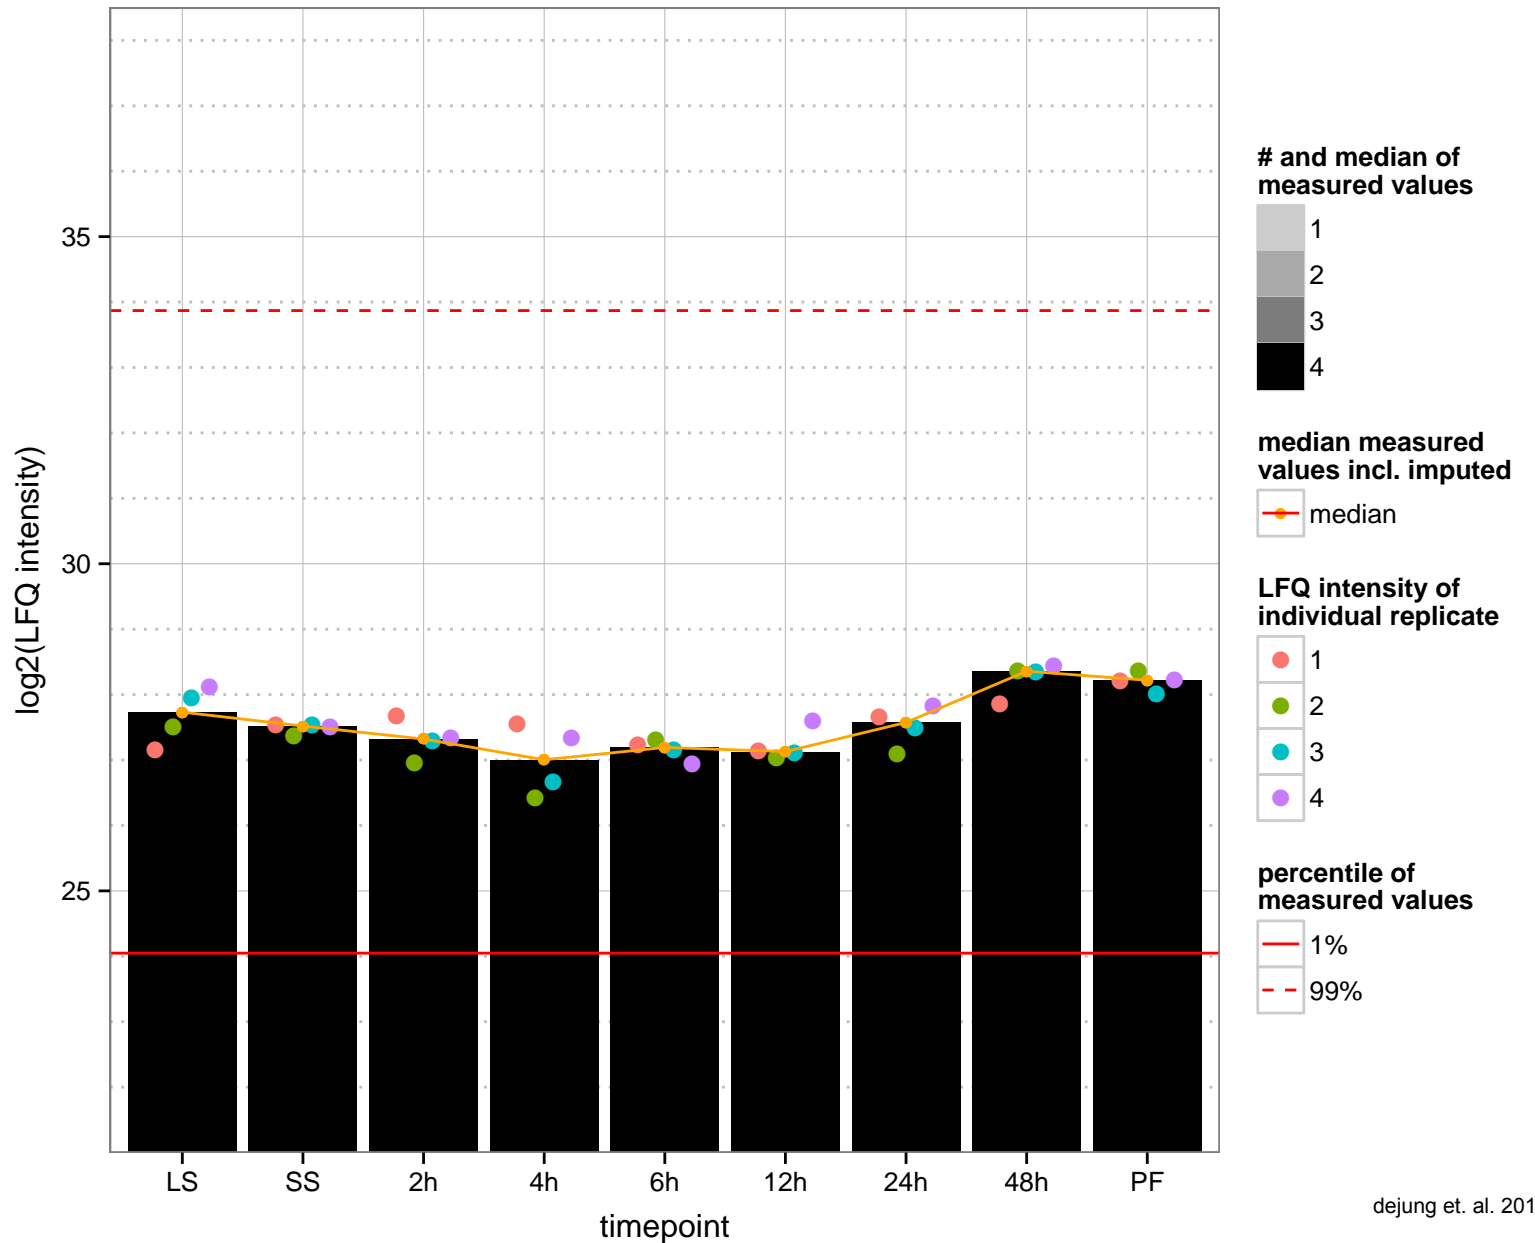

PACRGB  
 Tb927.9.9940  
 AGOF: null  
 AGOC: cilium part  
 AGOP: null  
 PGO: binding  
 PGOC: null  
 PGOP: null

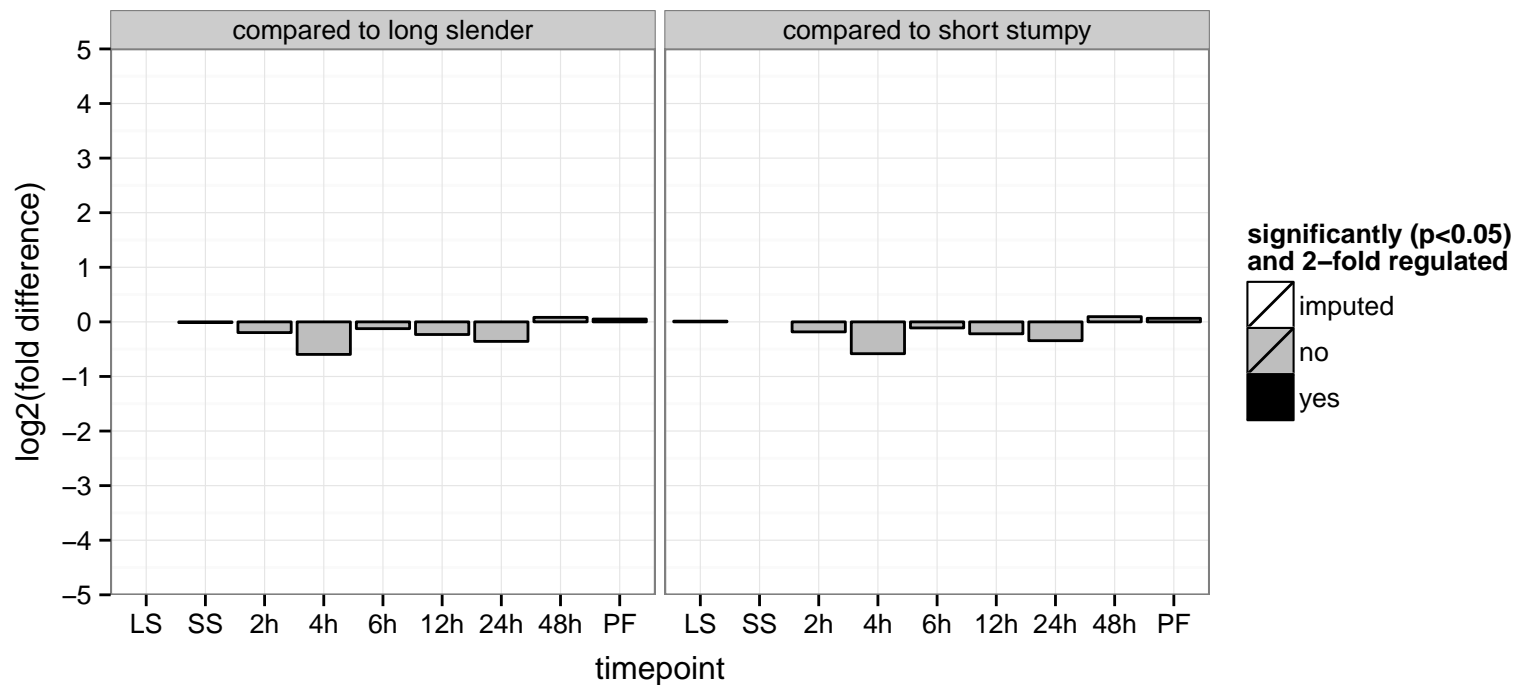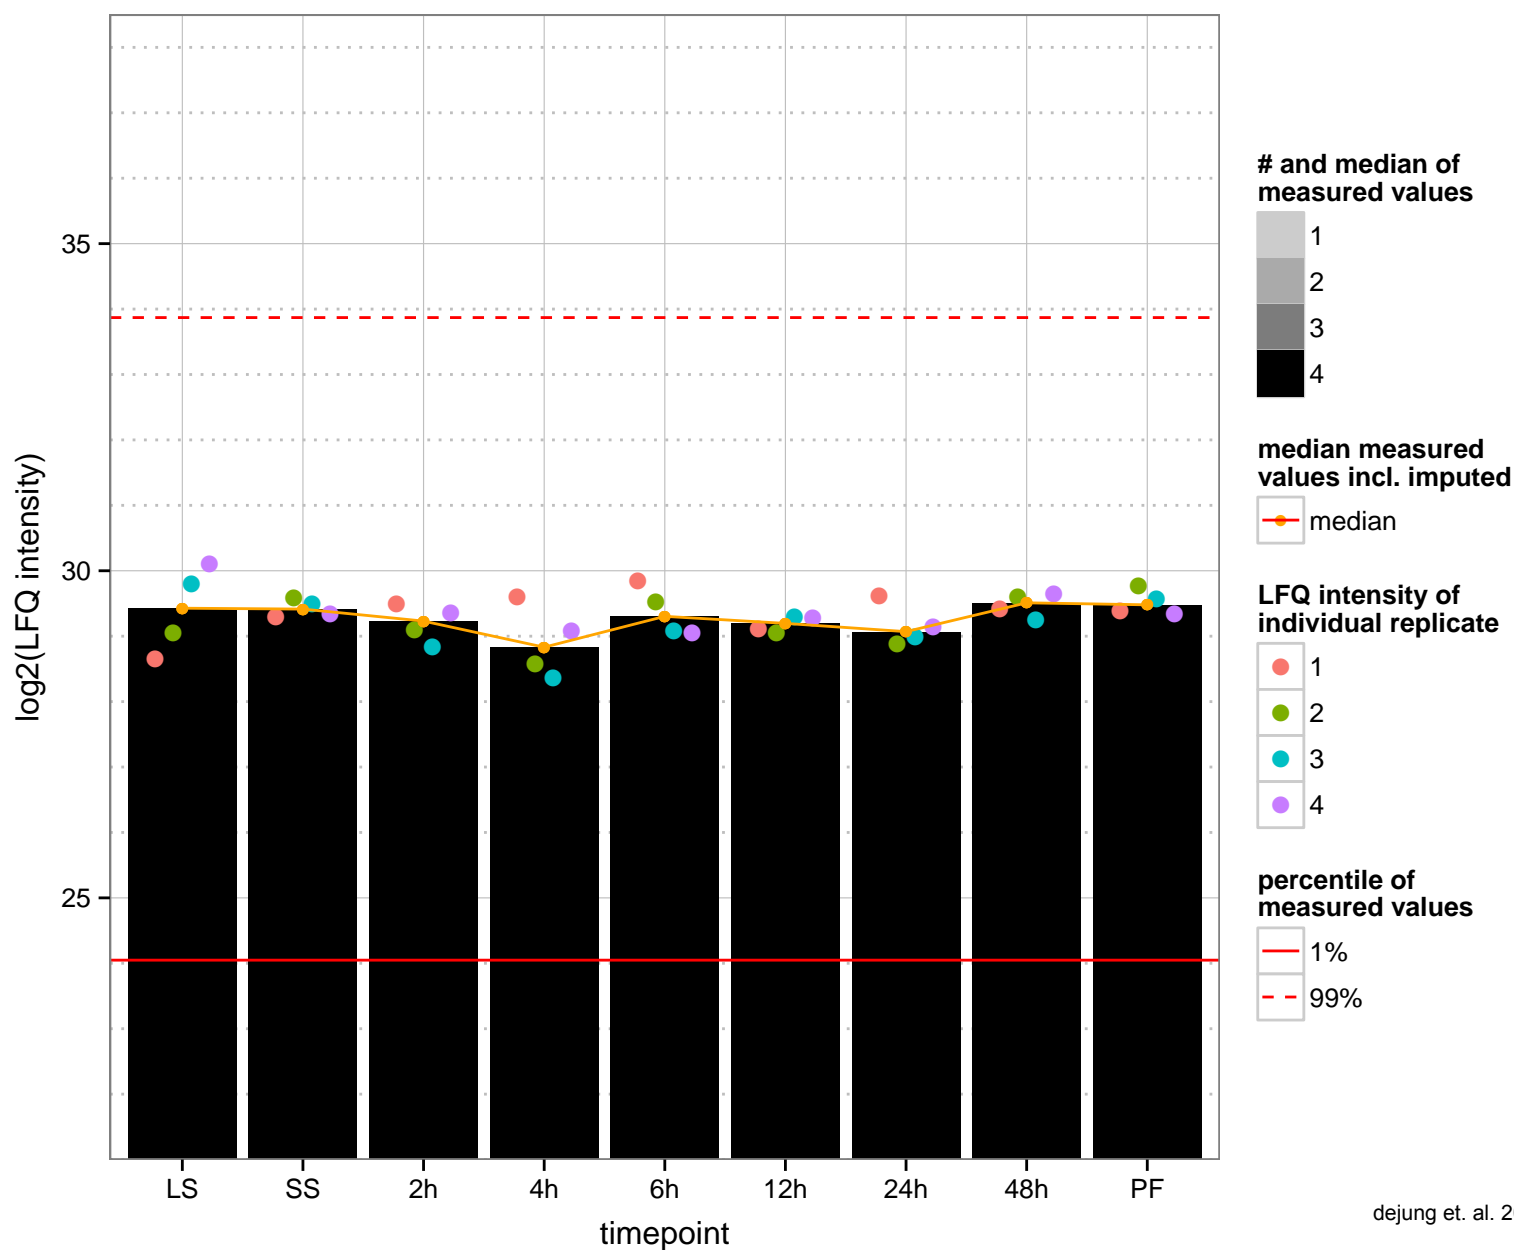

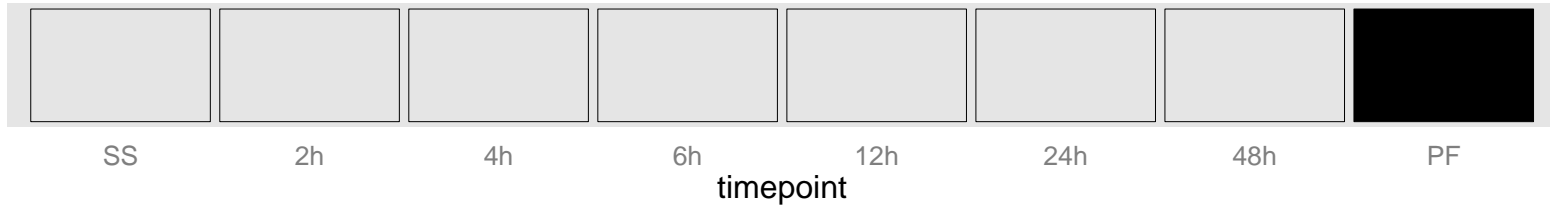

**regulated**  not regulated  significant down  significant up



hypothetical protein, conserved, BAC from homologous region on chr5  
 Tb927.5.4470;Tb05.5K5.120  
 AGOF: phosphorus–oxygen lyase activity  
 AGOC: null  
 AGOP: cyclic nucleotide biosynthetic process, intracellular signal transduction  
 PGO: phosphorus–oxygen lyase activity  
 PGOC: null  
 PGOP: cyclic nucleotide biosynthetic process, intracellular signal transduction

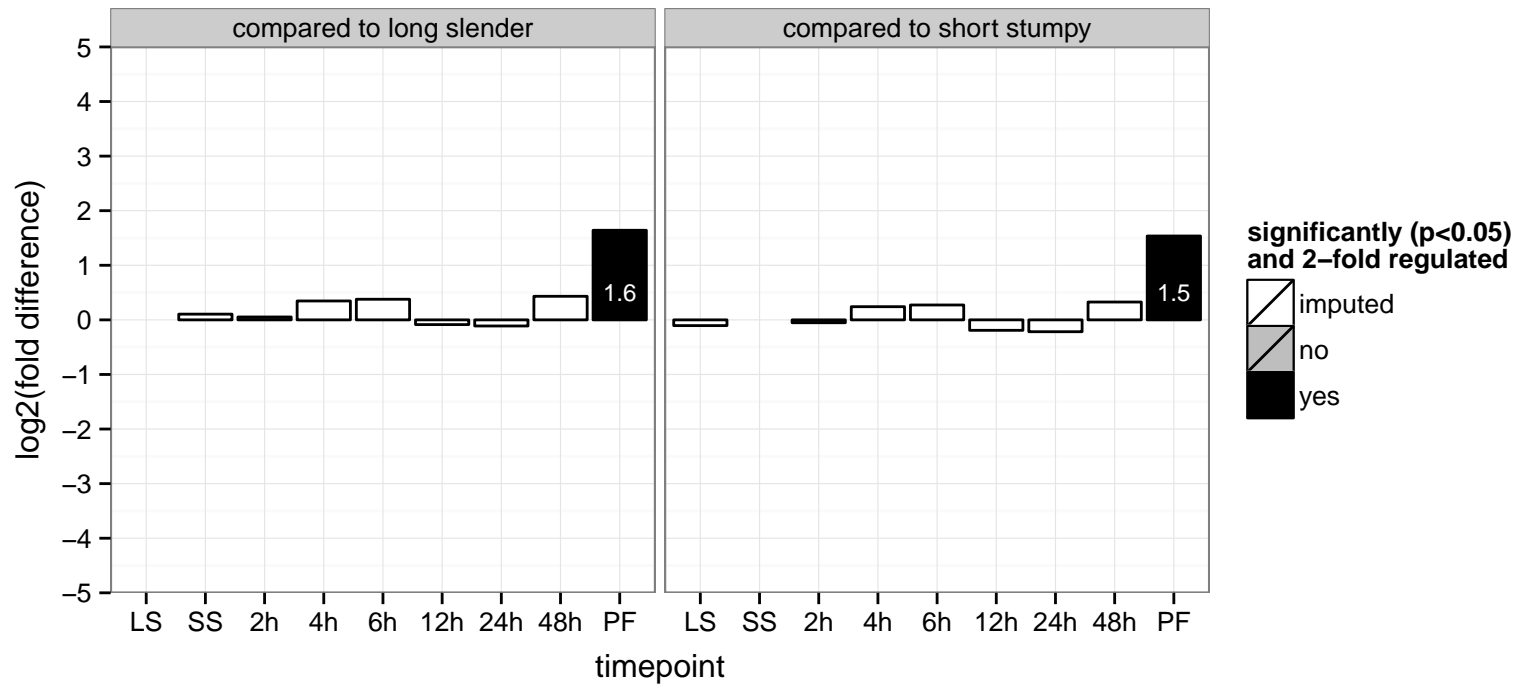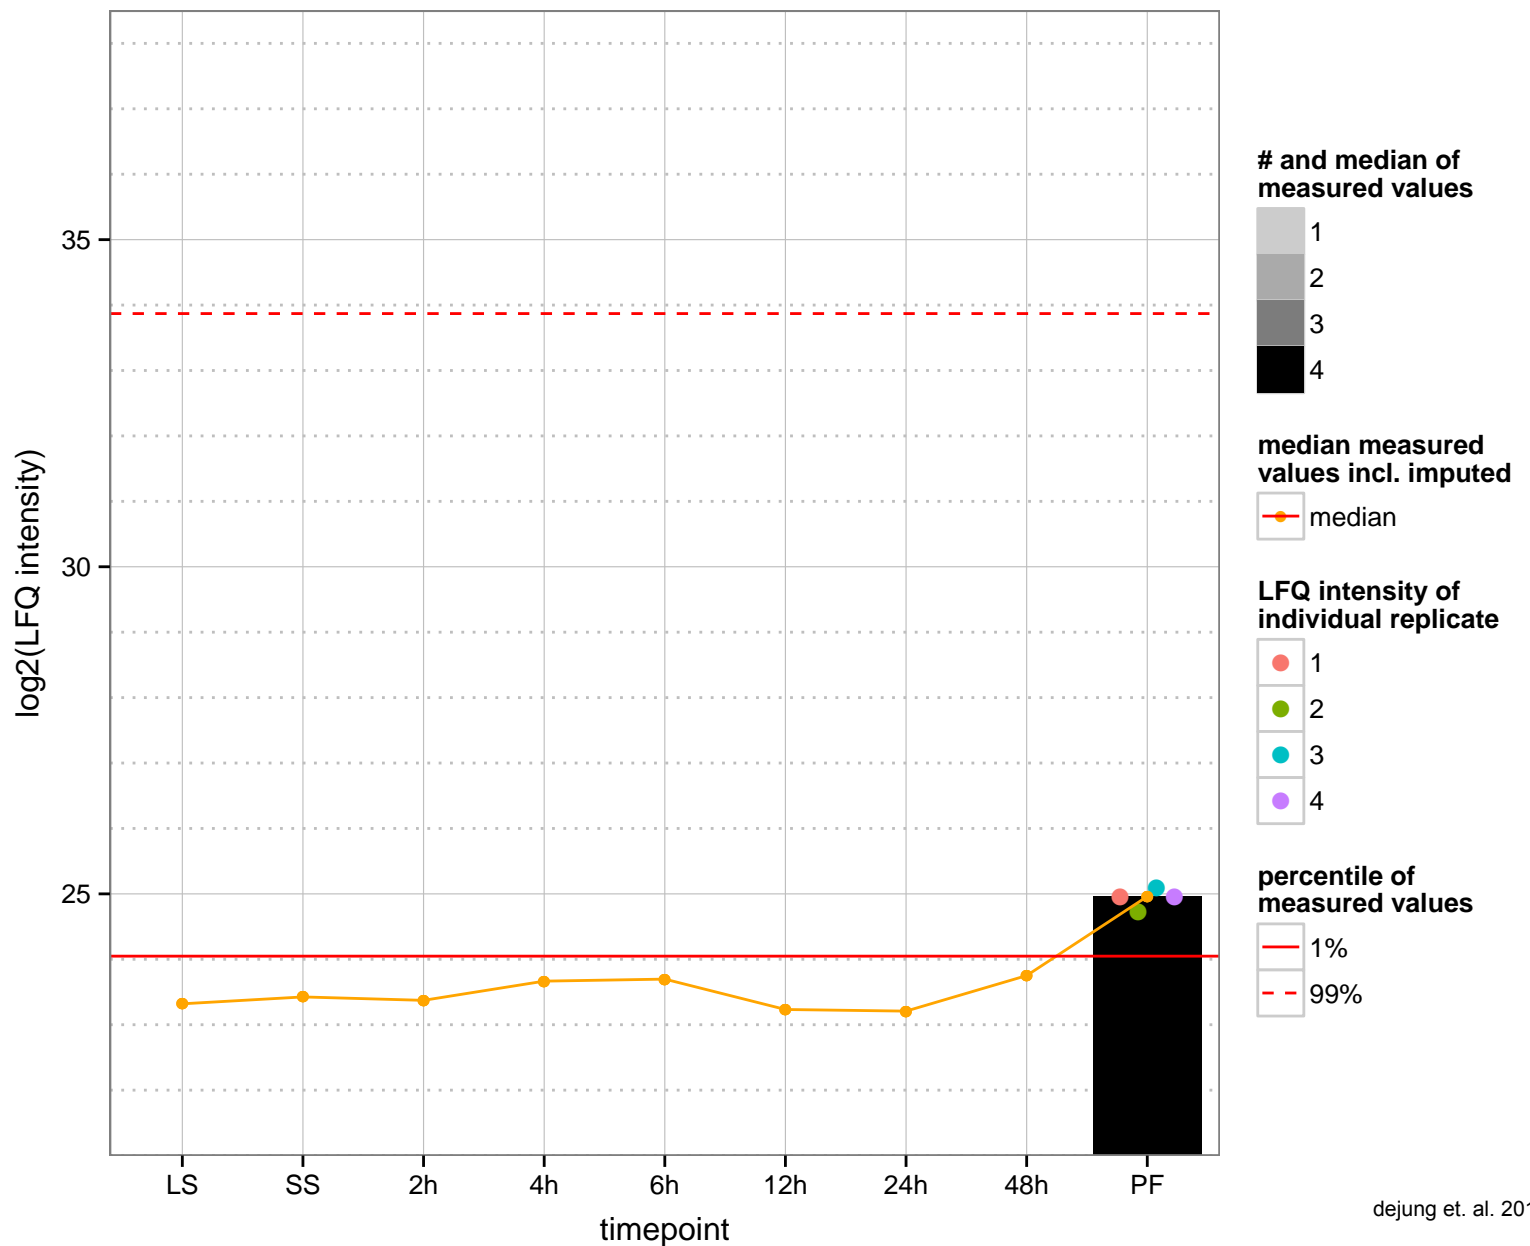

hypothetical protein, conserved  
 Tb11.02.5360b;Tb11.02.5360  
 AGOF: null  
 AGOC: null  
 AGOP: null  
 PGO: null  
 PGOC: null  
 PGOP: null

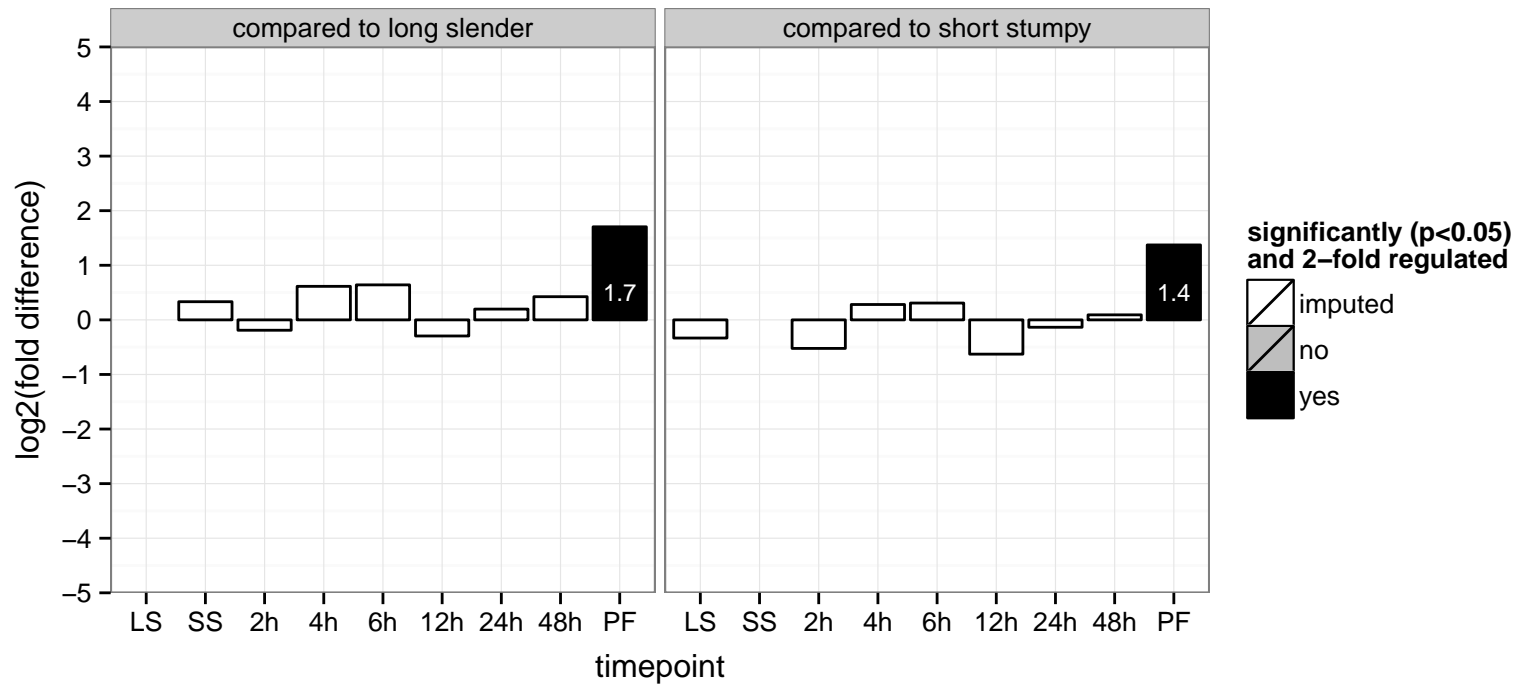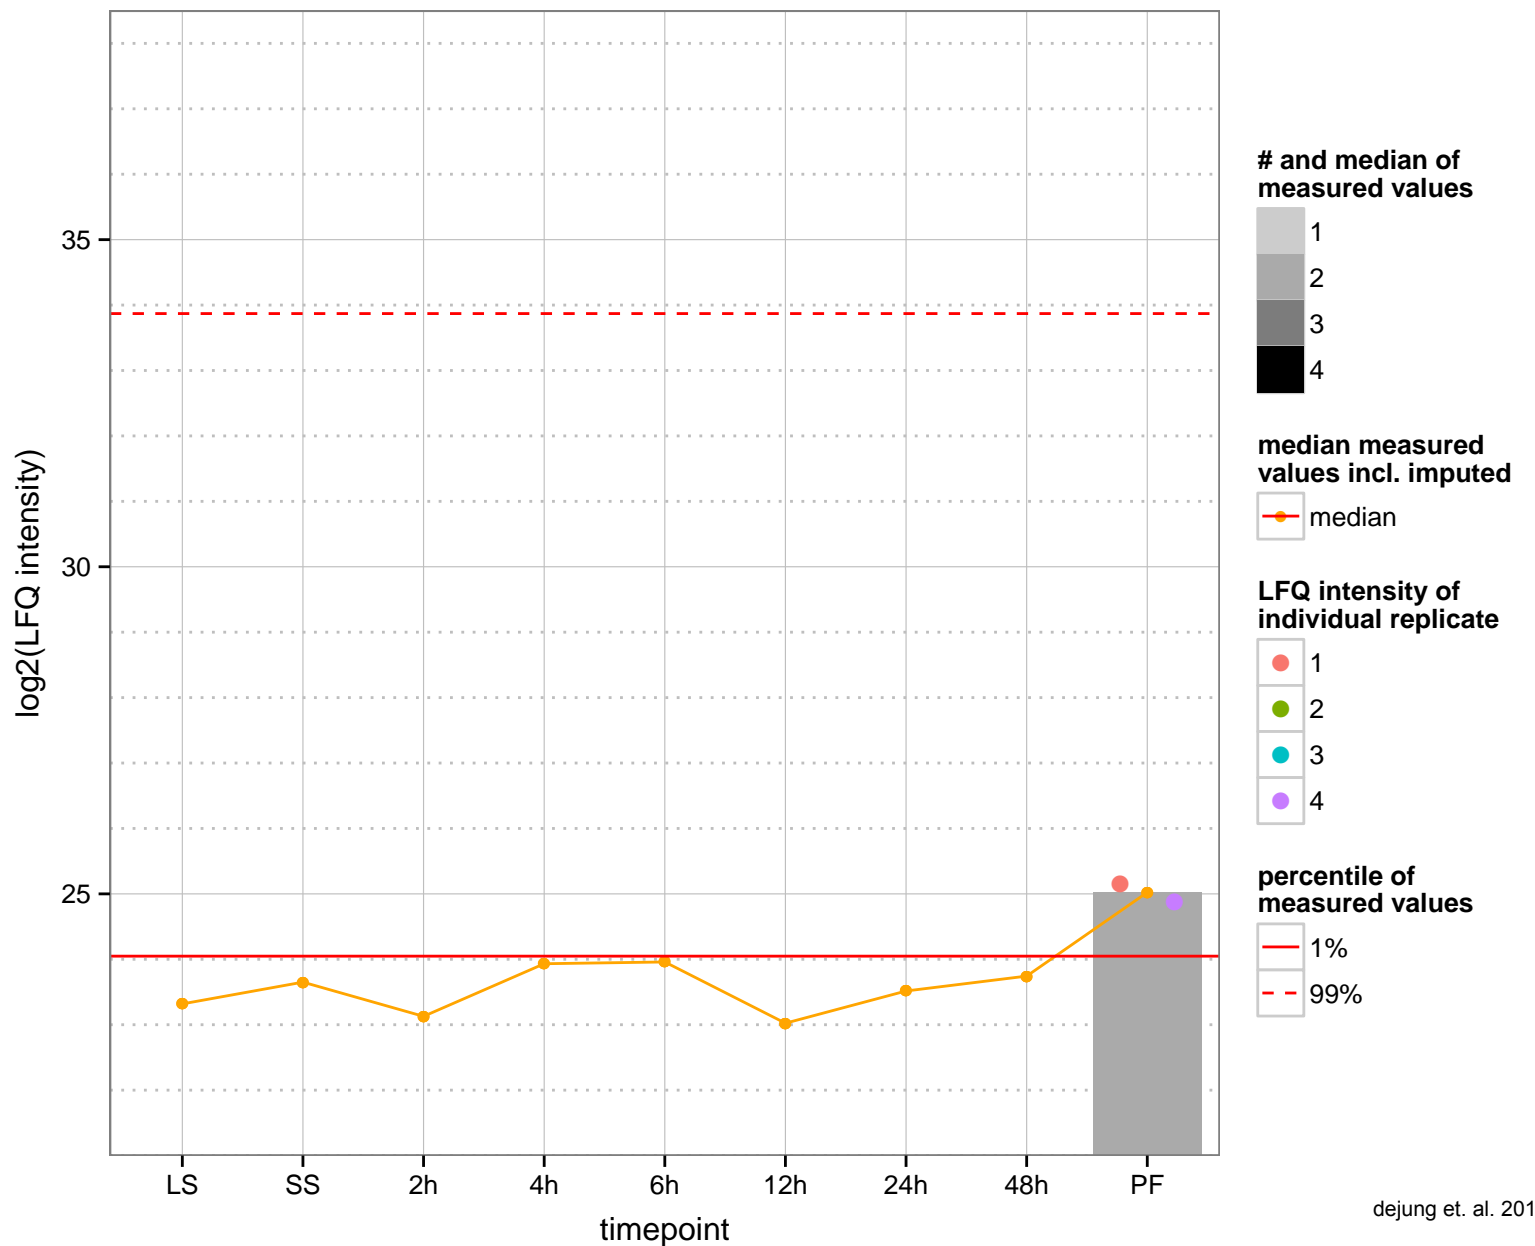

exosome complex exonuclease RRP44p homologue (RRP44), exosome complex exonuclease RRP44p homologue, putative  
 Tb11.02.5380b;Tb11.02.5380  
 AGOF: RNA binding, guanyl–nucleotide exchange factor activity, ribonuclease activity  
 AGOC: exosome (RNase complex), mitochondrion  
 AGOP: rRNA processing  
 PGO: RNA binding, ribonuclease activity  
 PGO: null  
 PGO: null

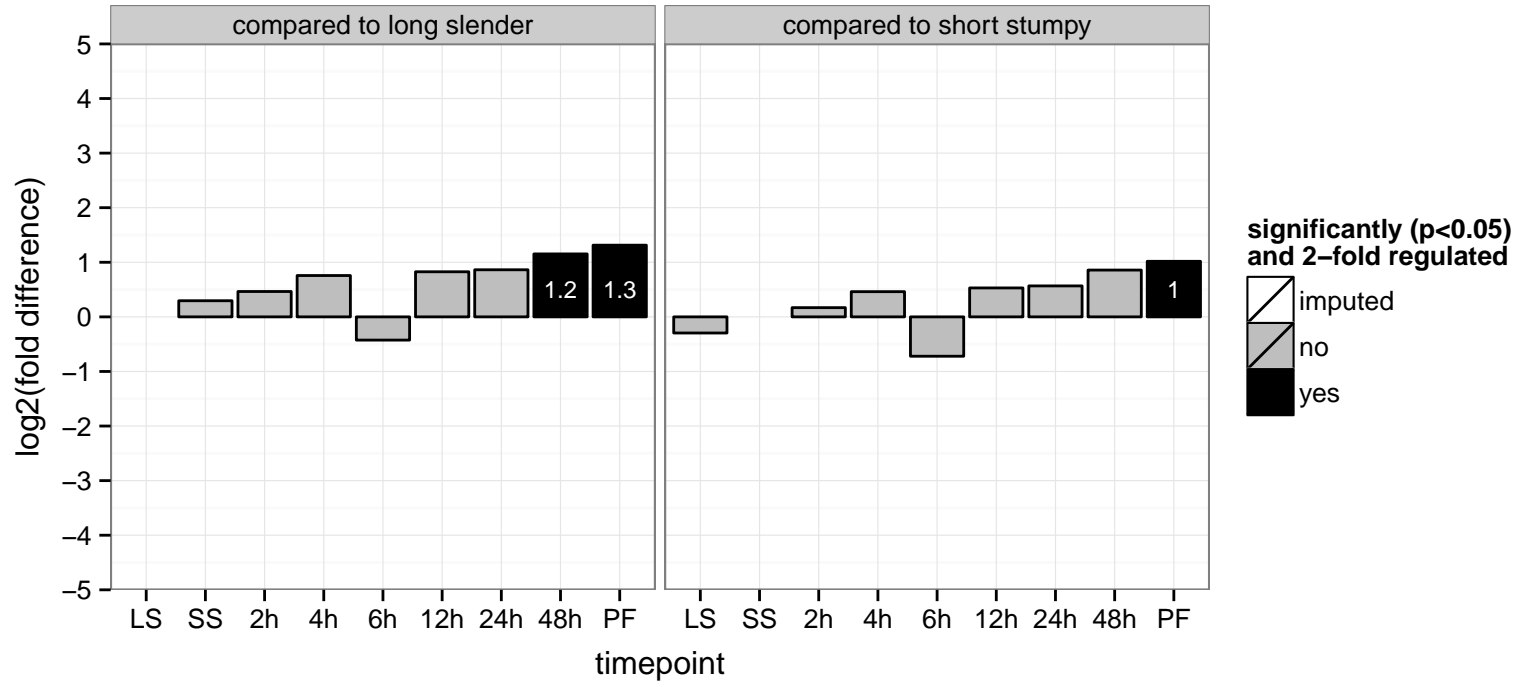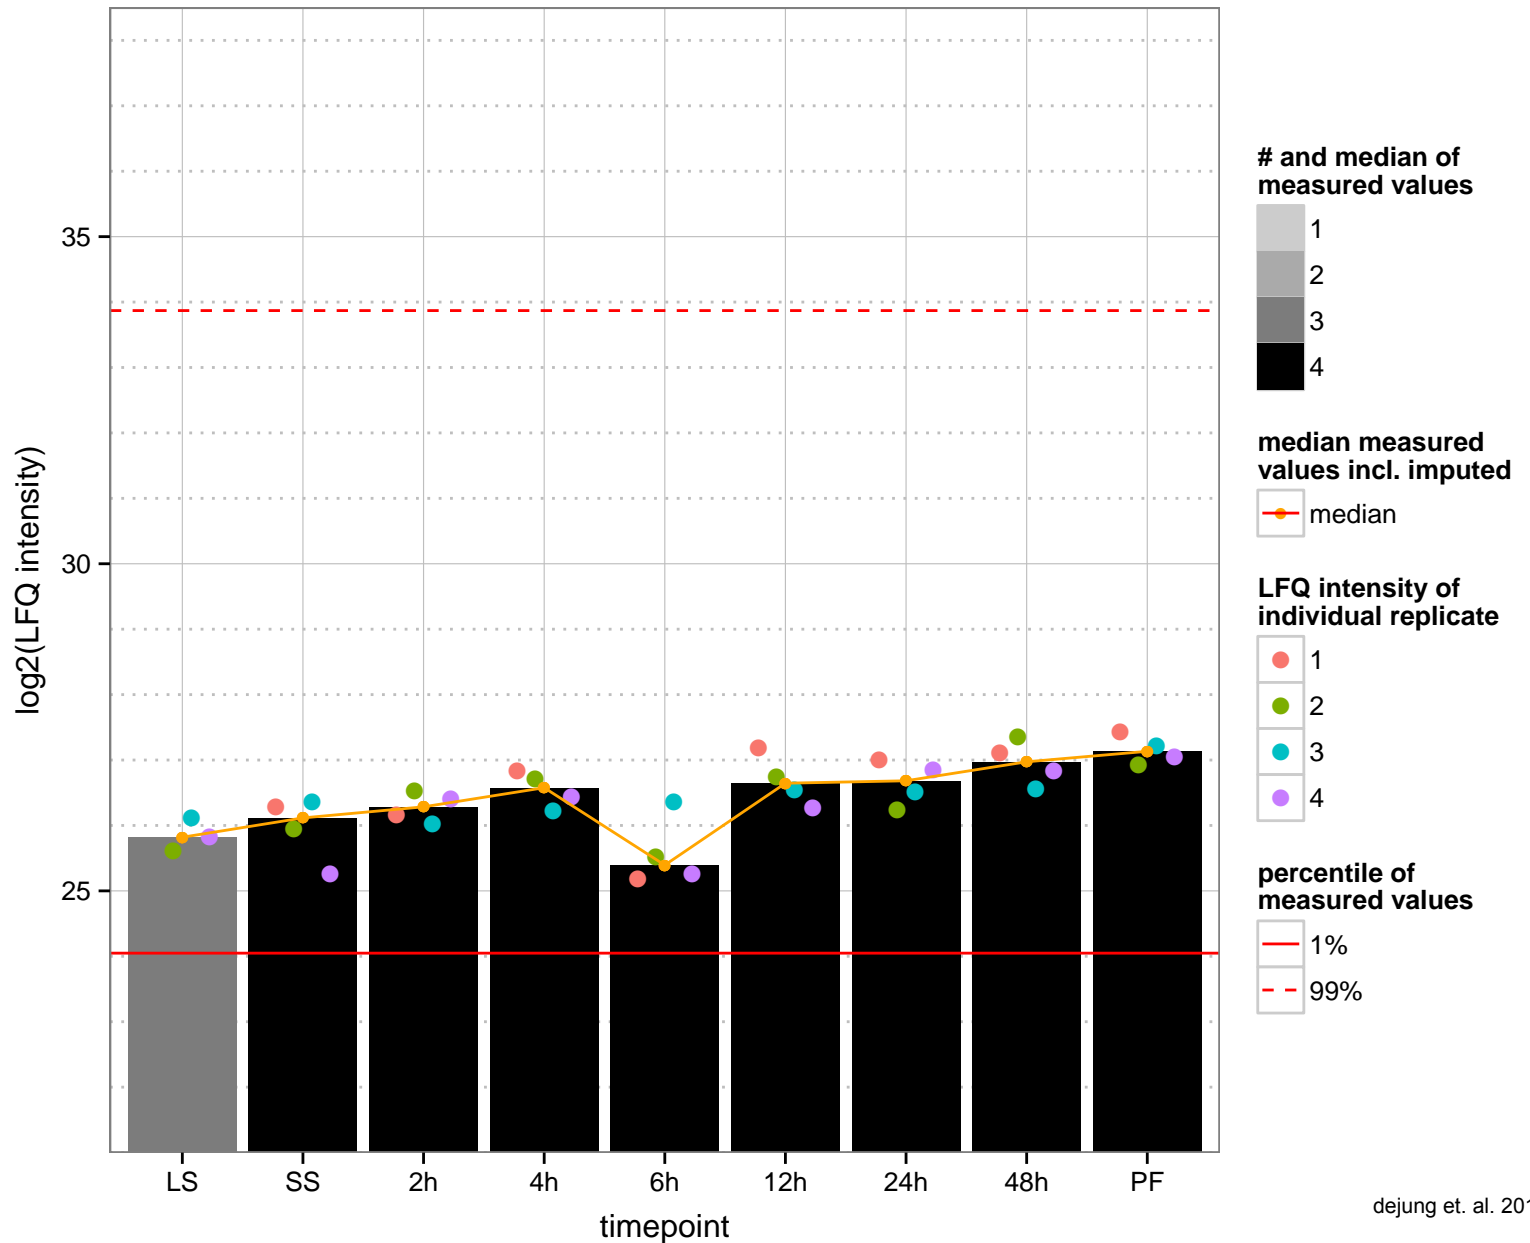

mRNA processing protein, putative  
 Tb11.02.5390b;Tb11.02.5390  
 AGOF: mRNA binding  
 AGOC: mitochondrion  
 AGOP: mitochondrial RNA processing  
 PGO: null  
 PGOC: null  
 PGOP: null

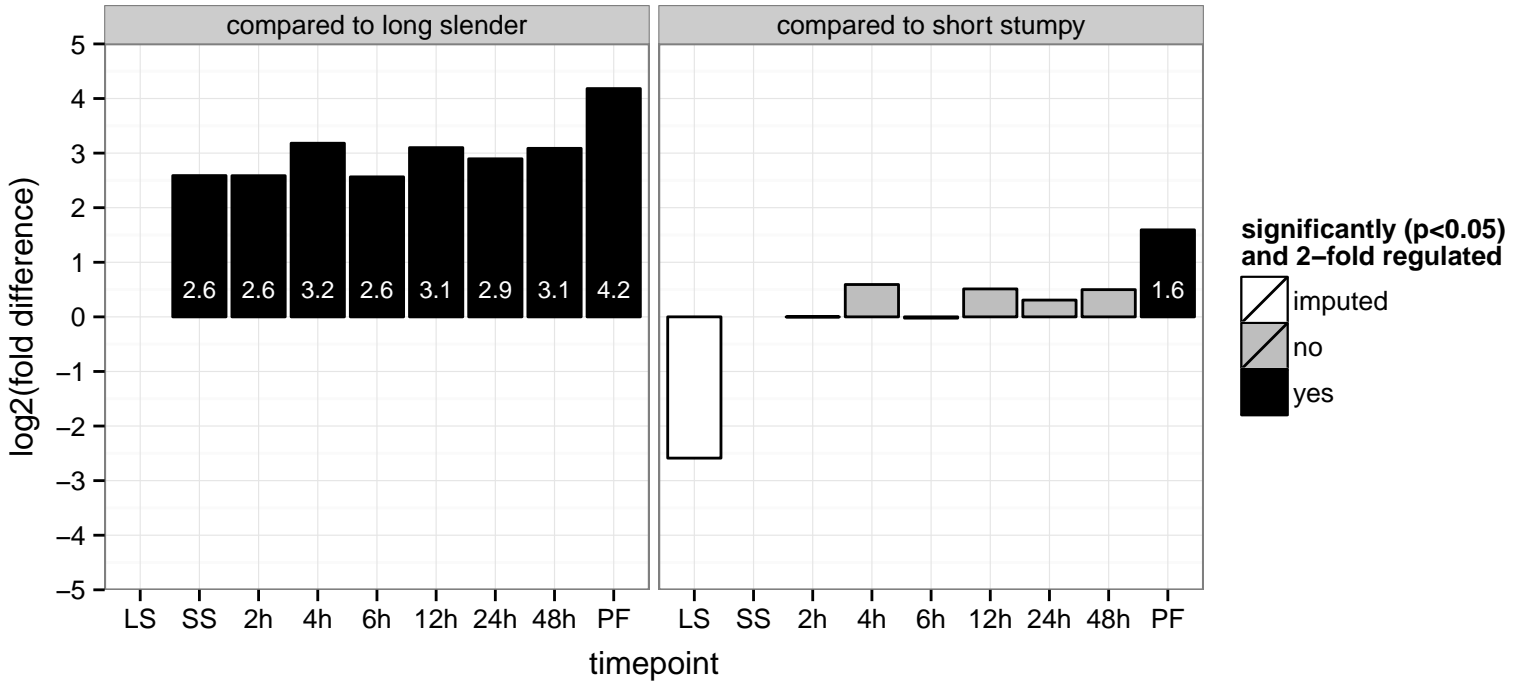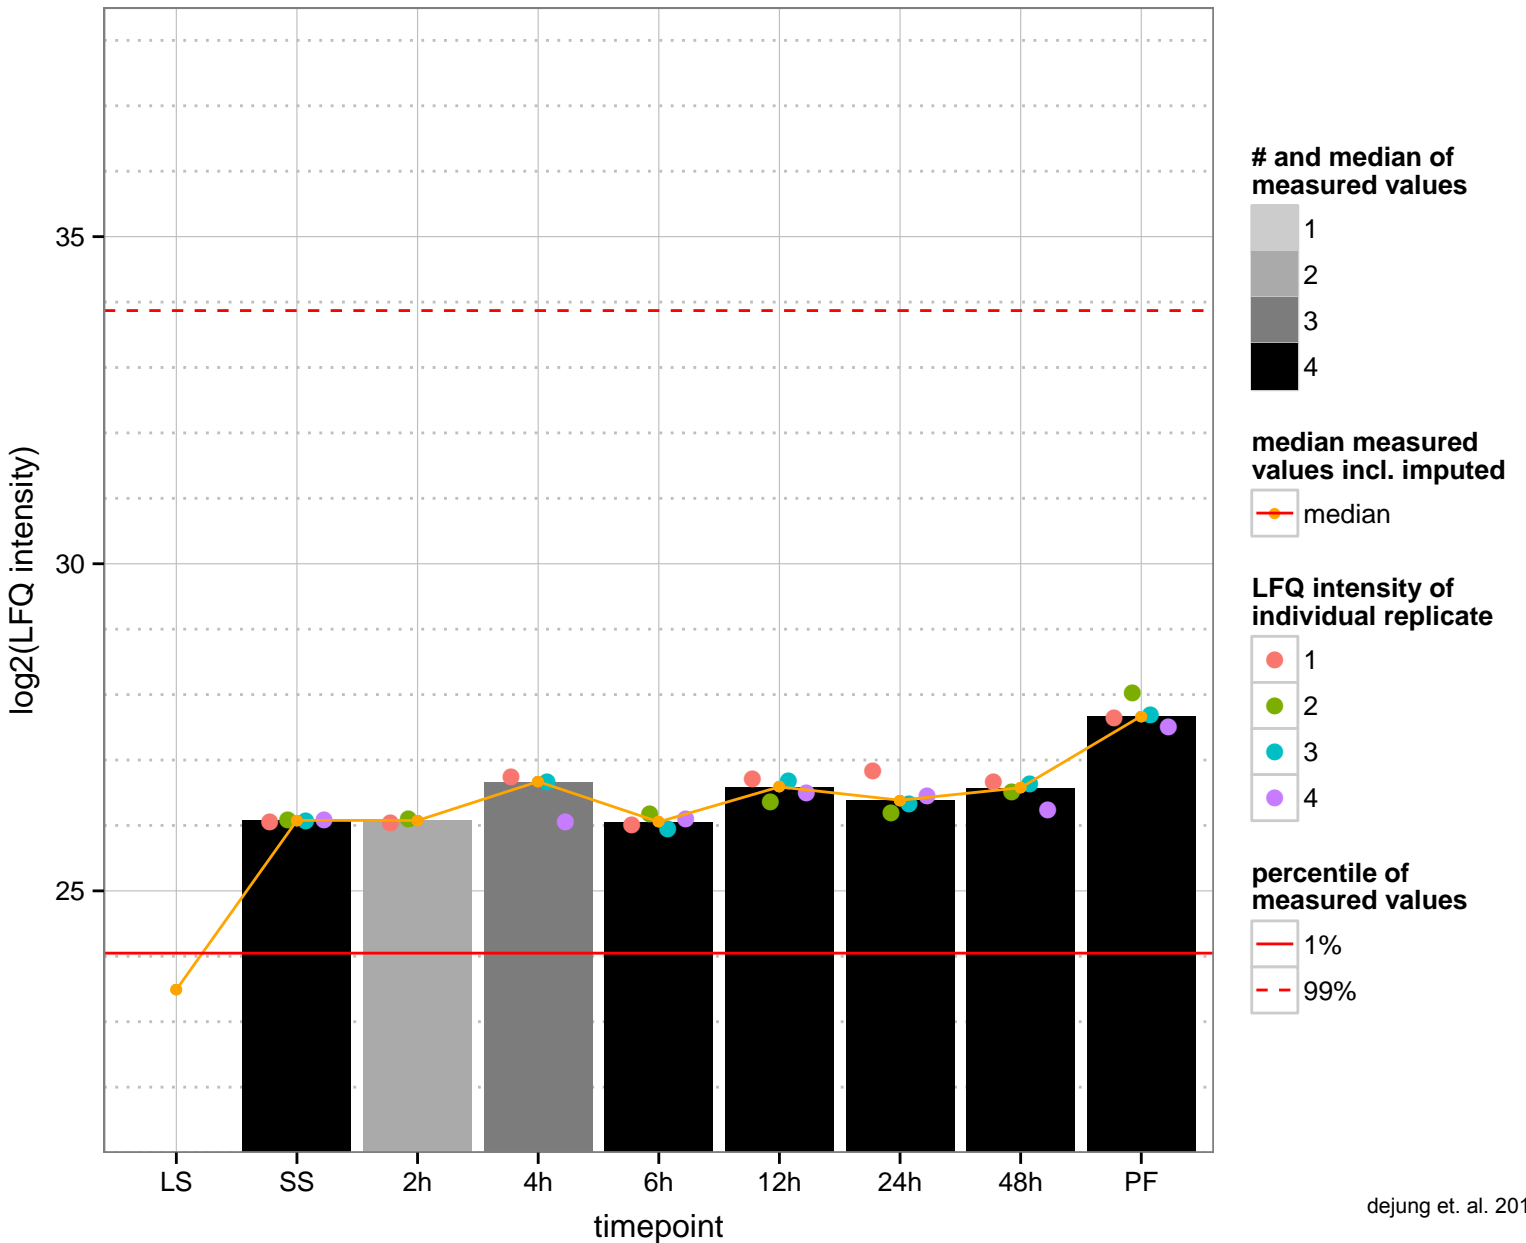

ribonuclease H1, putative  
 Tb927.7.4930;Tb11.v5.0174  
 AGOF: null, magnesium ion binding, nucleic acid binding, ribonuclease H activity  
 AGOC: null  
 AGOP: null  
 PGOF: magnesium ion binding, nucleic acid binding, ribonuclease H activity  
 PGOC: null  
 PGOP: null

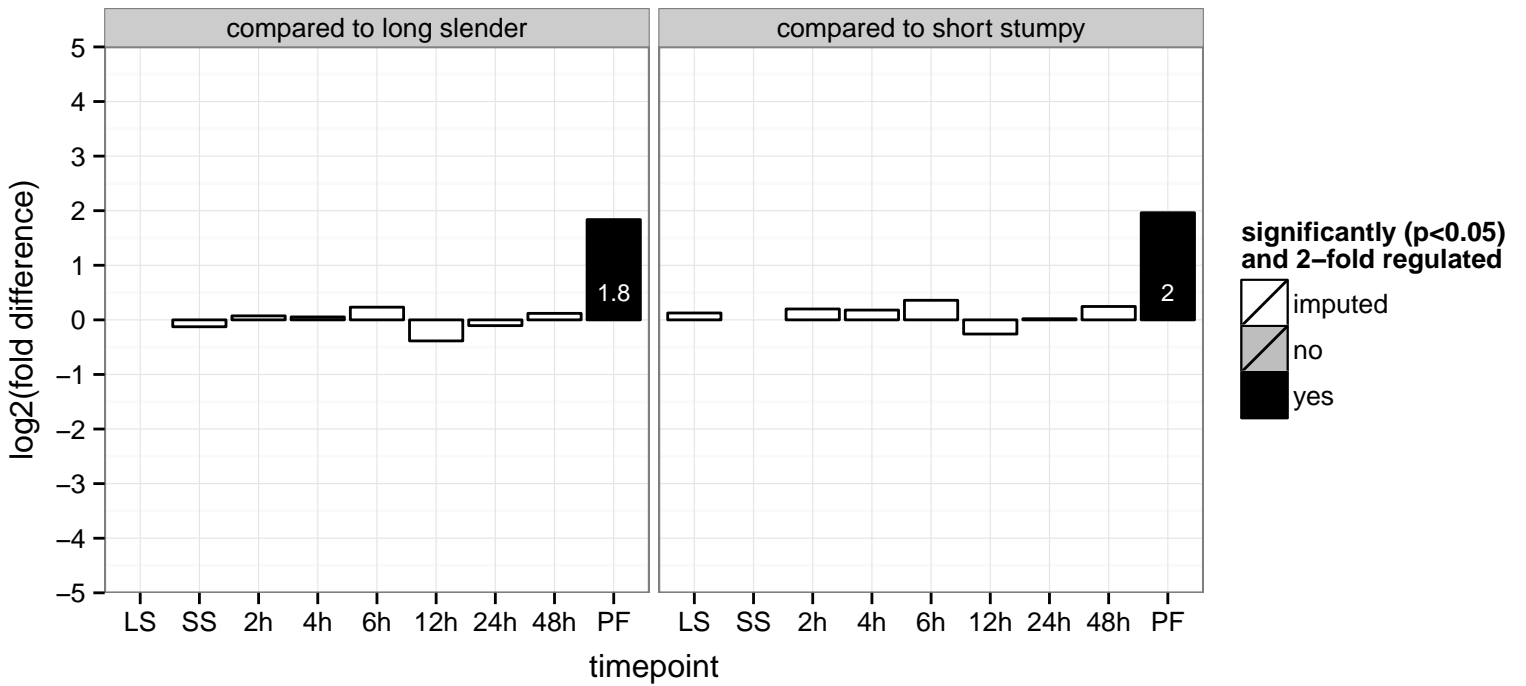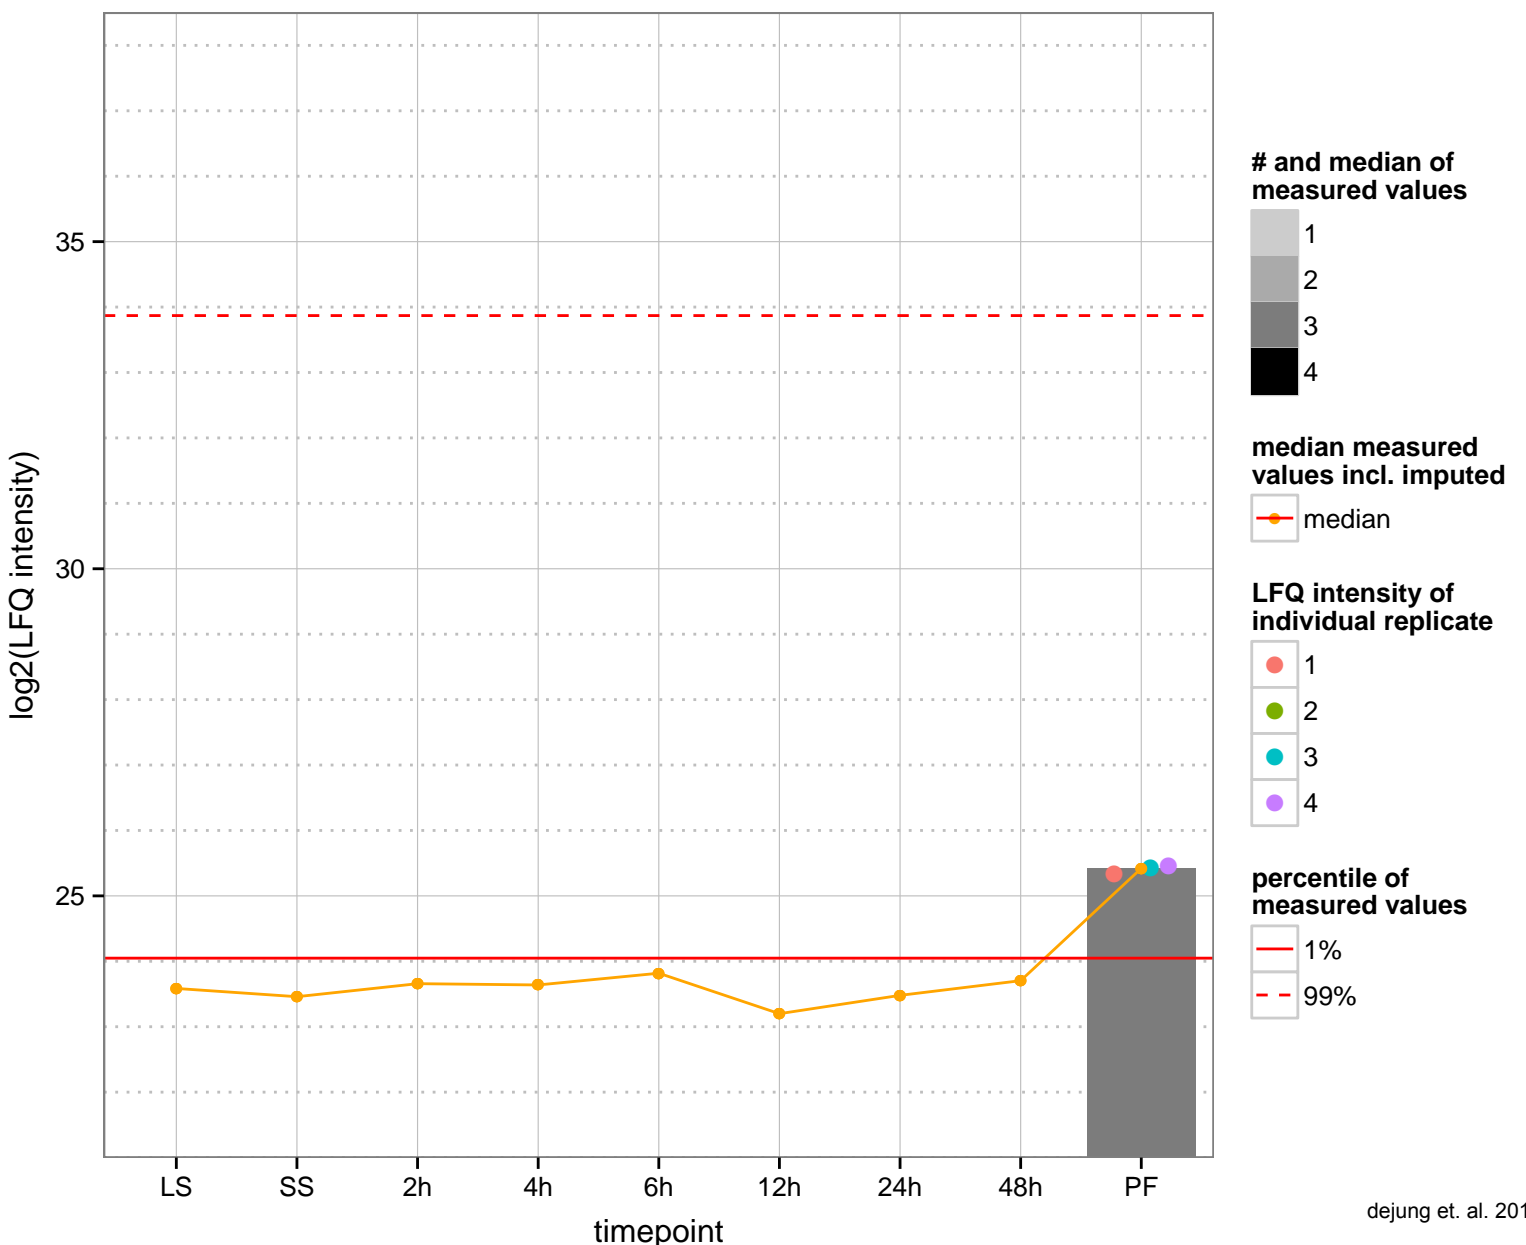

hypothetical protein, conserved  
 Tb927.10.5200;Tb11.v5.0237  
 AGOF: null  
 AGOC: null  
 AGOP: null  
 PGOF: null  
 PGO: null  
 PGOP: null

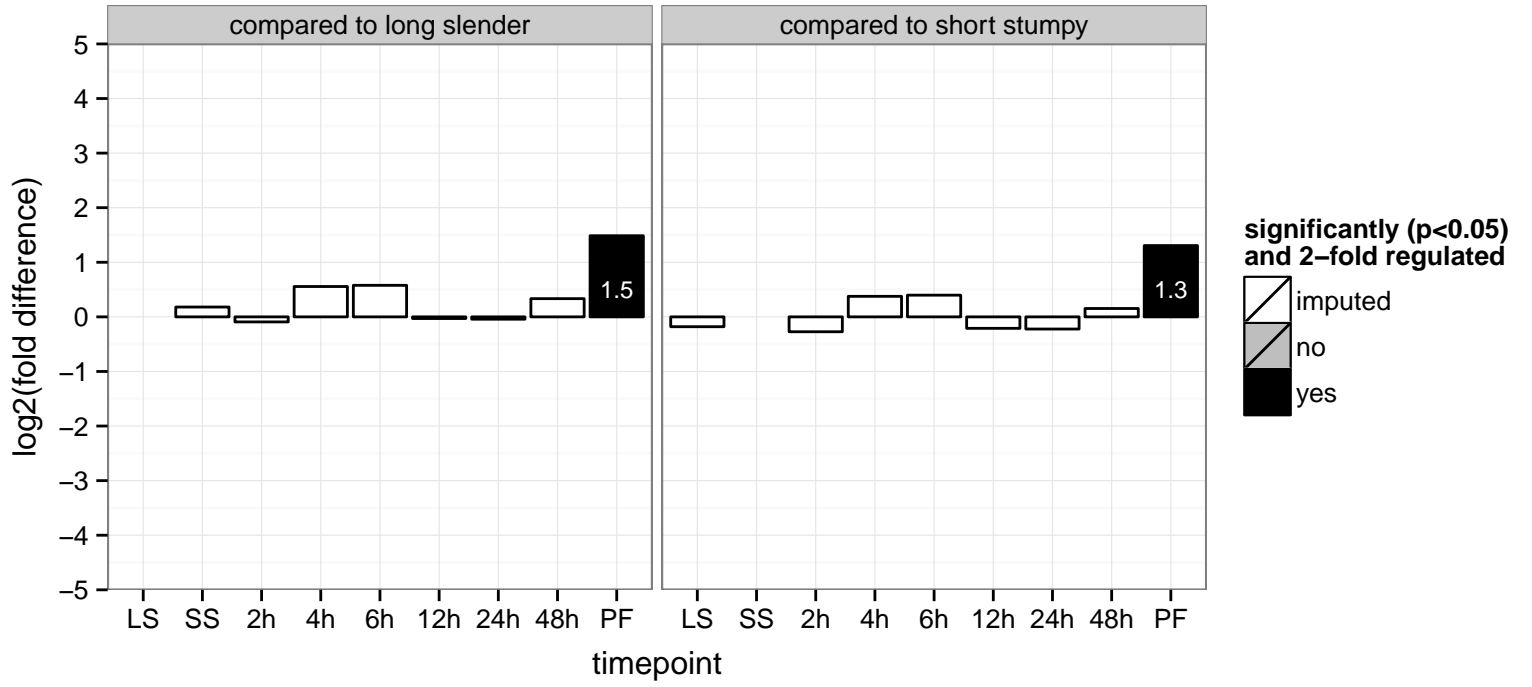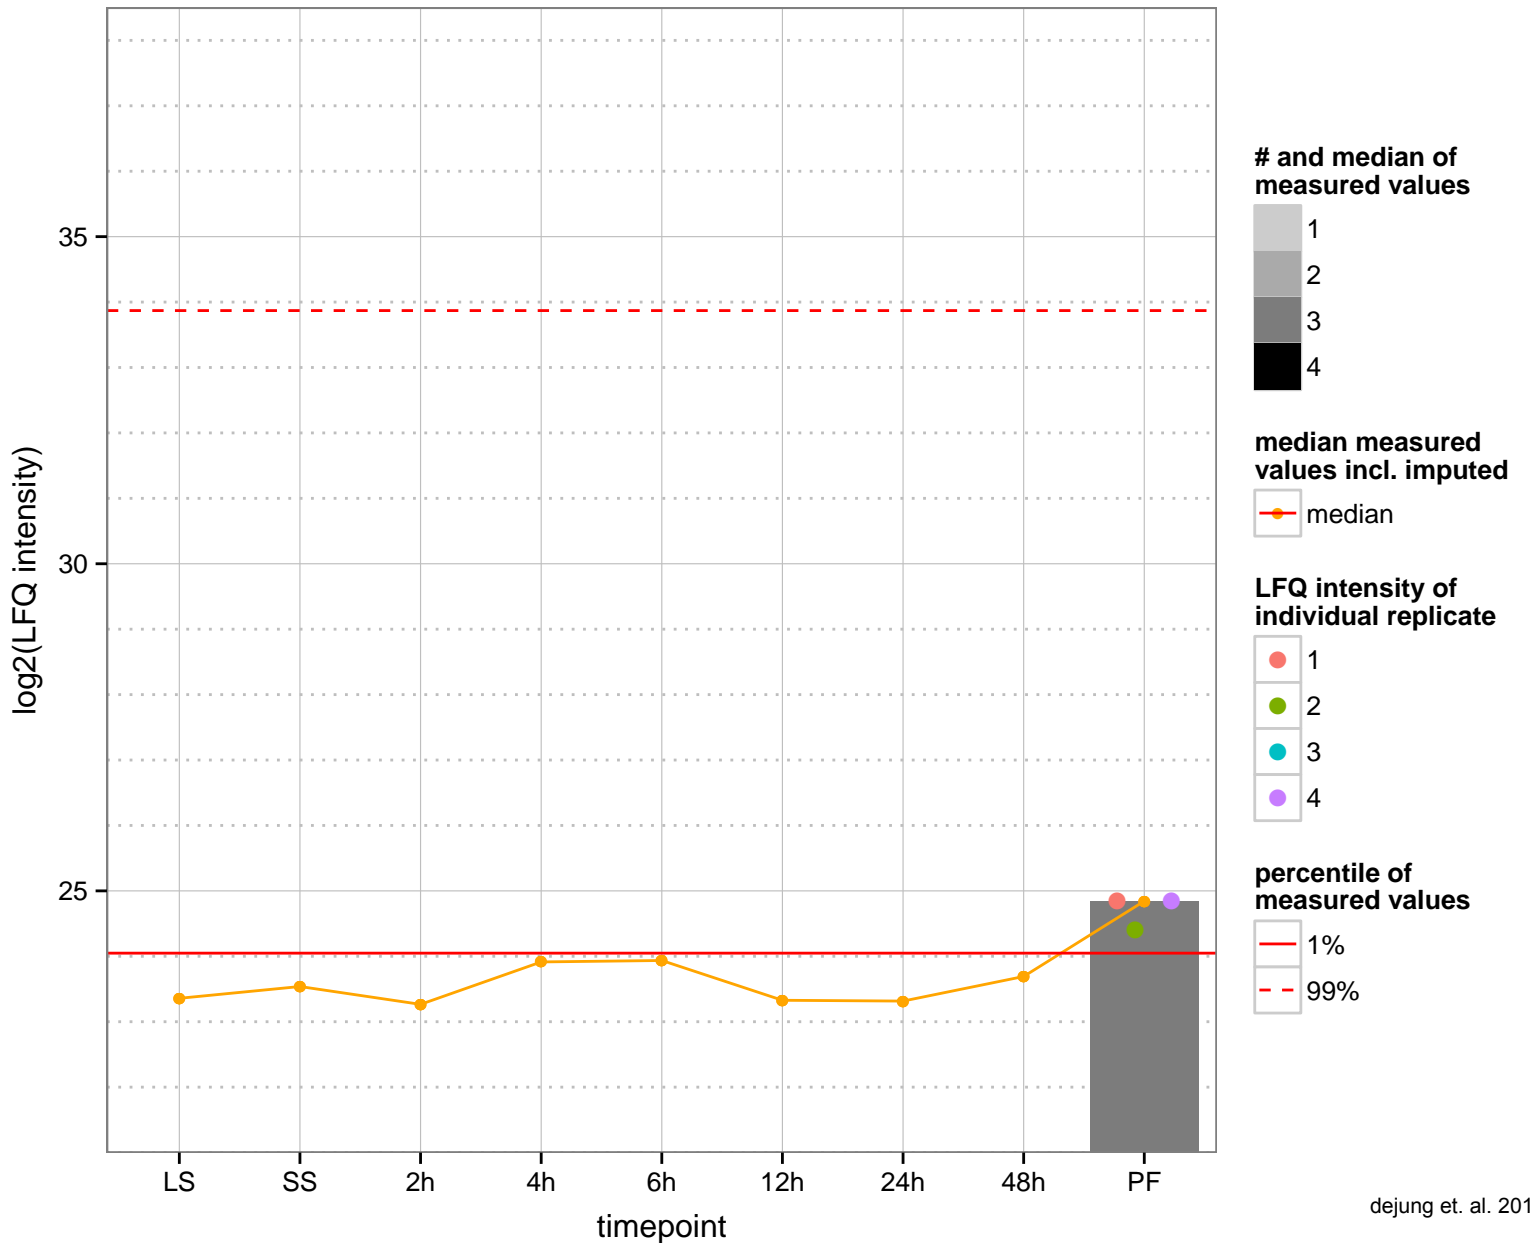

hypothetical protein, conserved  
 Tb927.10.6320;Tb11.v5.0274  
 AGOF: null  
 AGOC: null  
 AGOP: null  
 PGOF: binding  
 PGO: null  
 PGOP: null

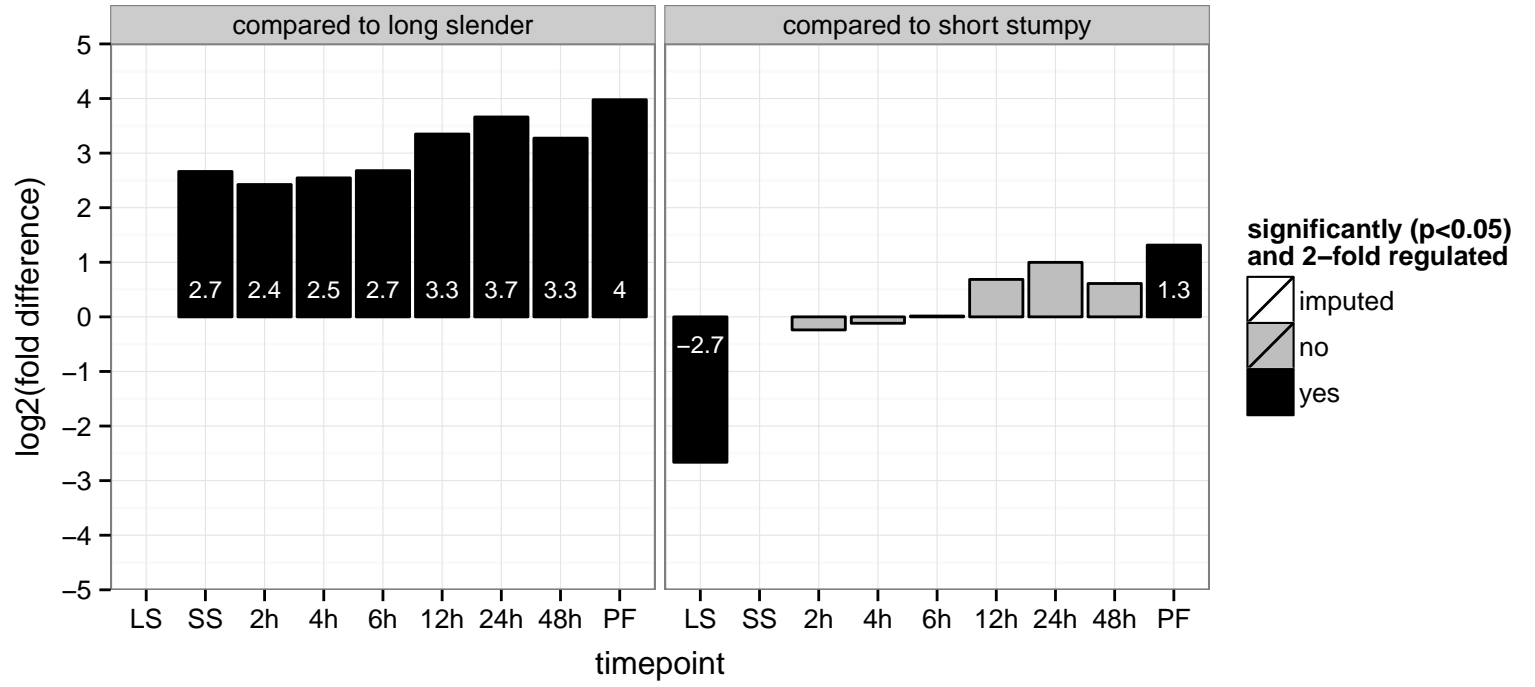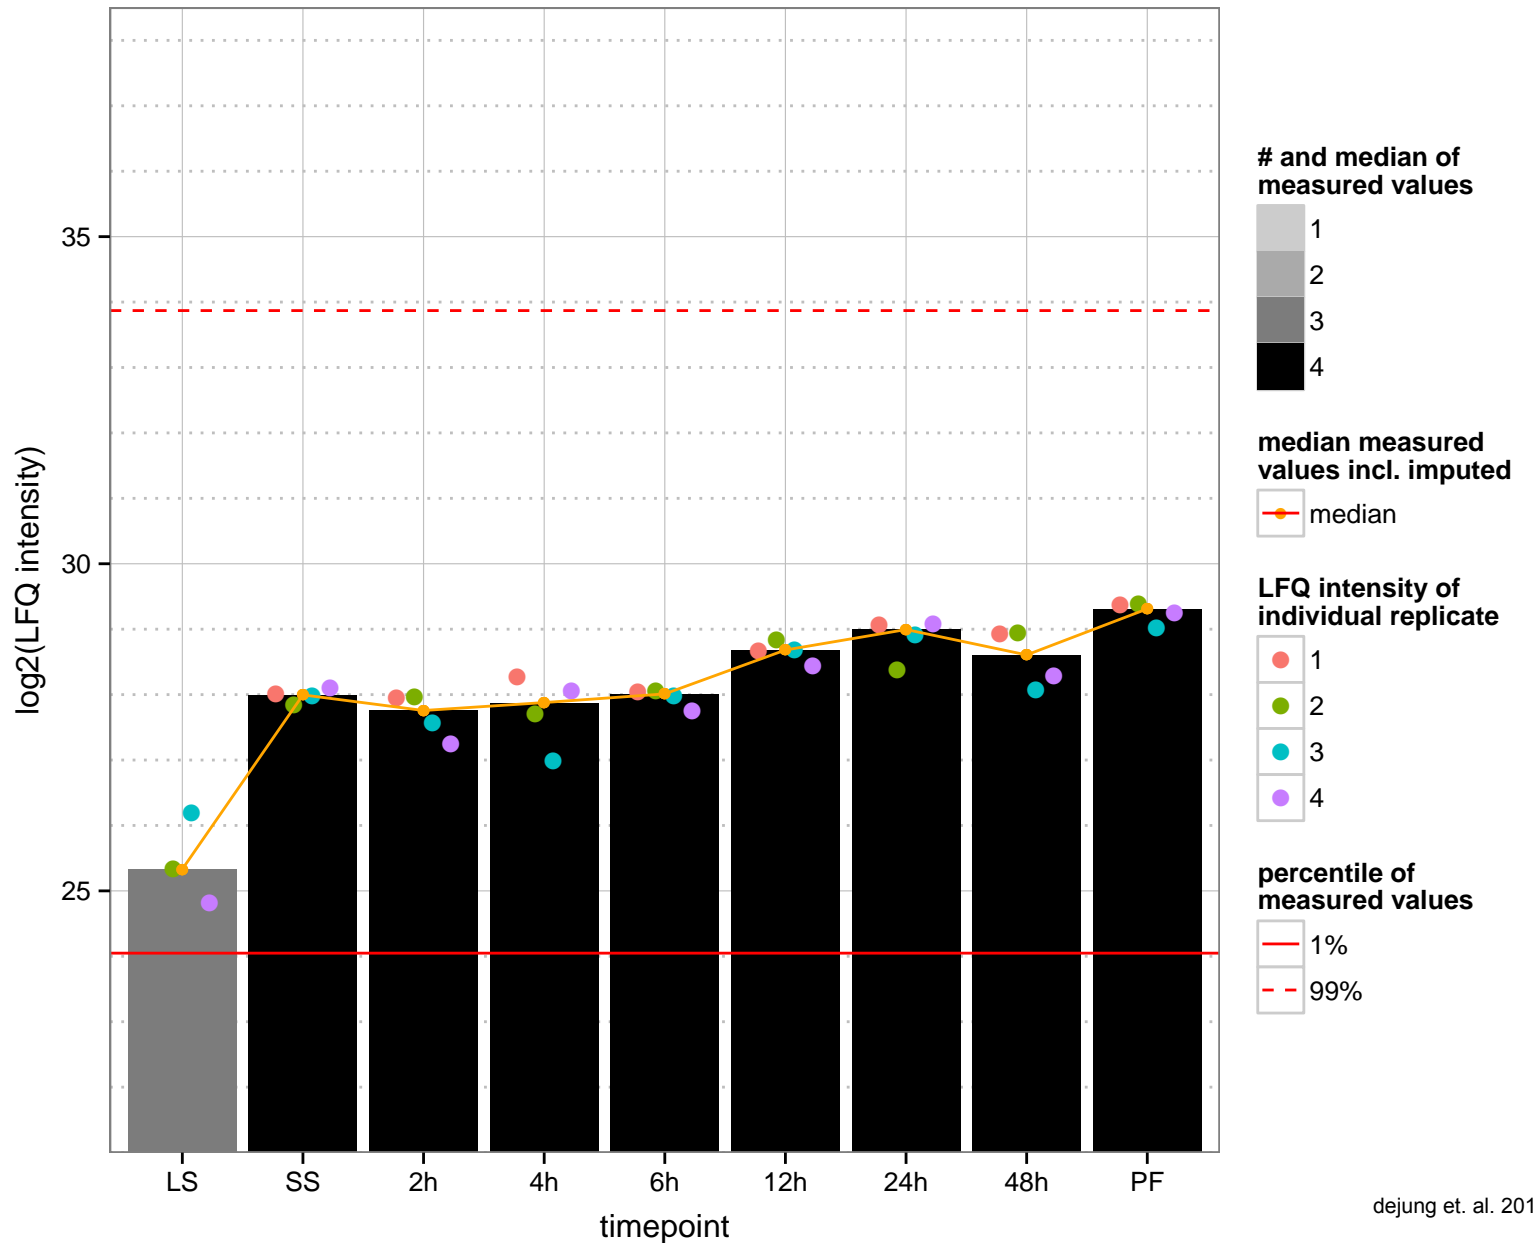

cation transporter, putative  
 Tb927.10.15940;Tb11.v5.0304  
 AGOF: null, cation transmembrane transporter activity  
 AGOC: null, membrane, mitochondrion  
 AGOP: null, cation transport  
 PGOF: cation transmembrane transporter activity  
 PGO: integral to membrane  
 PGO: cation transport, transmembrane transport

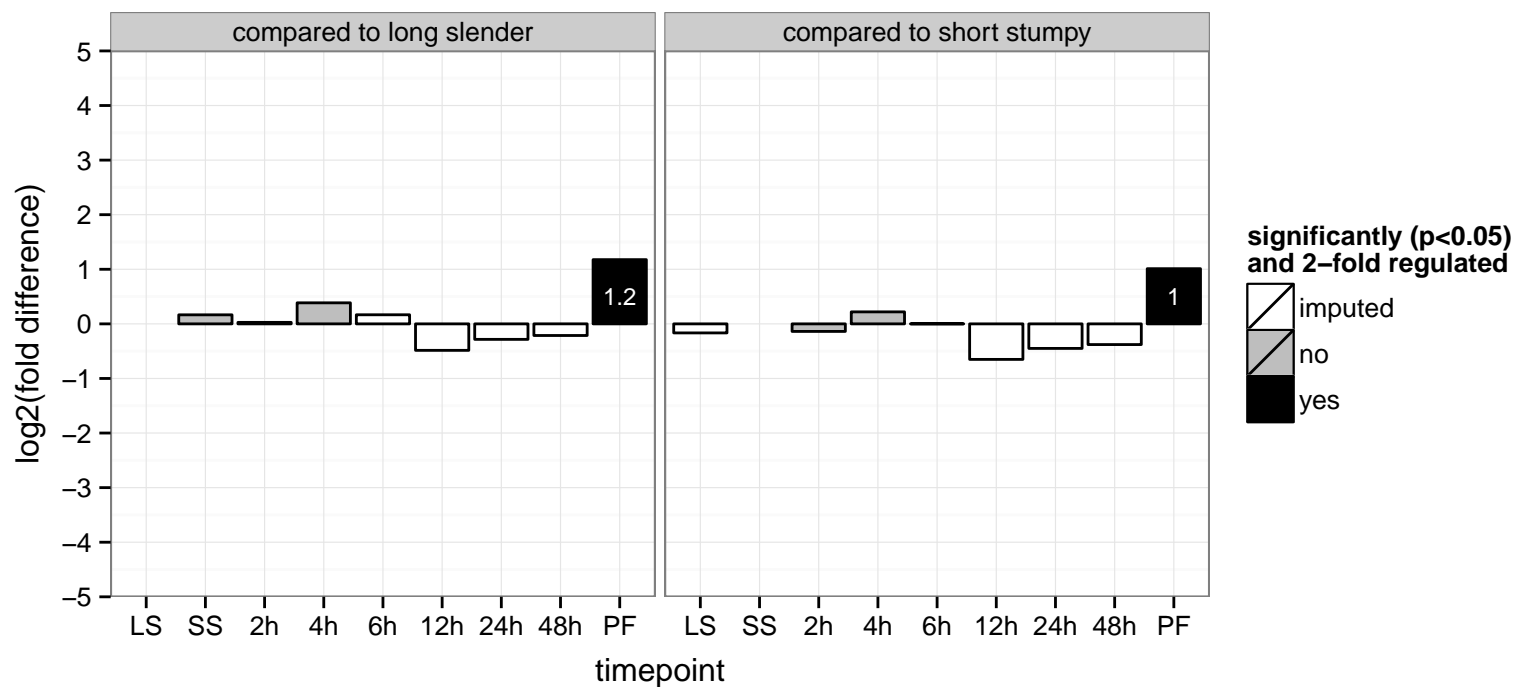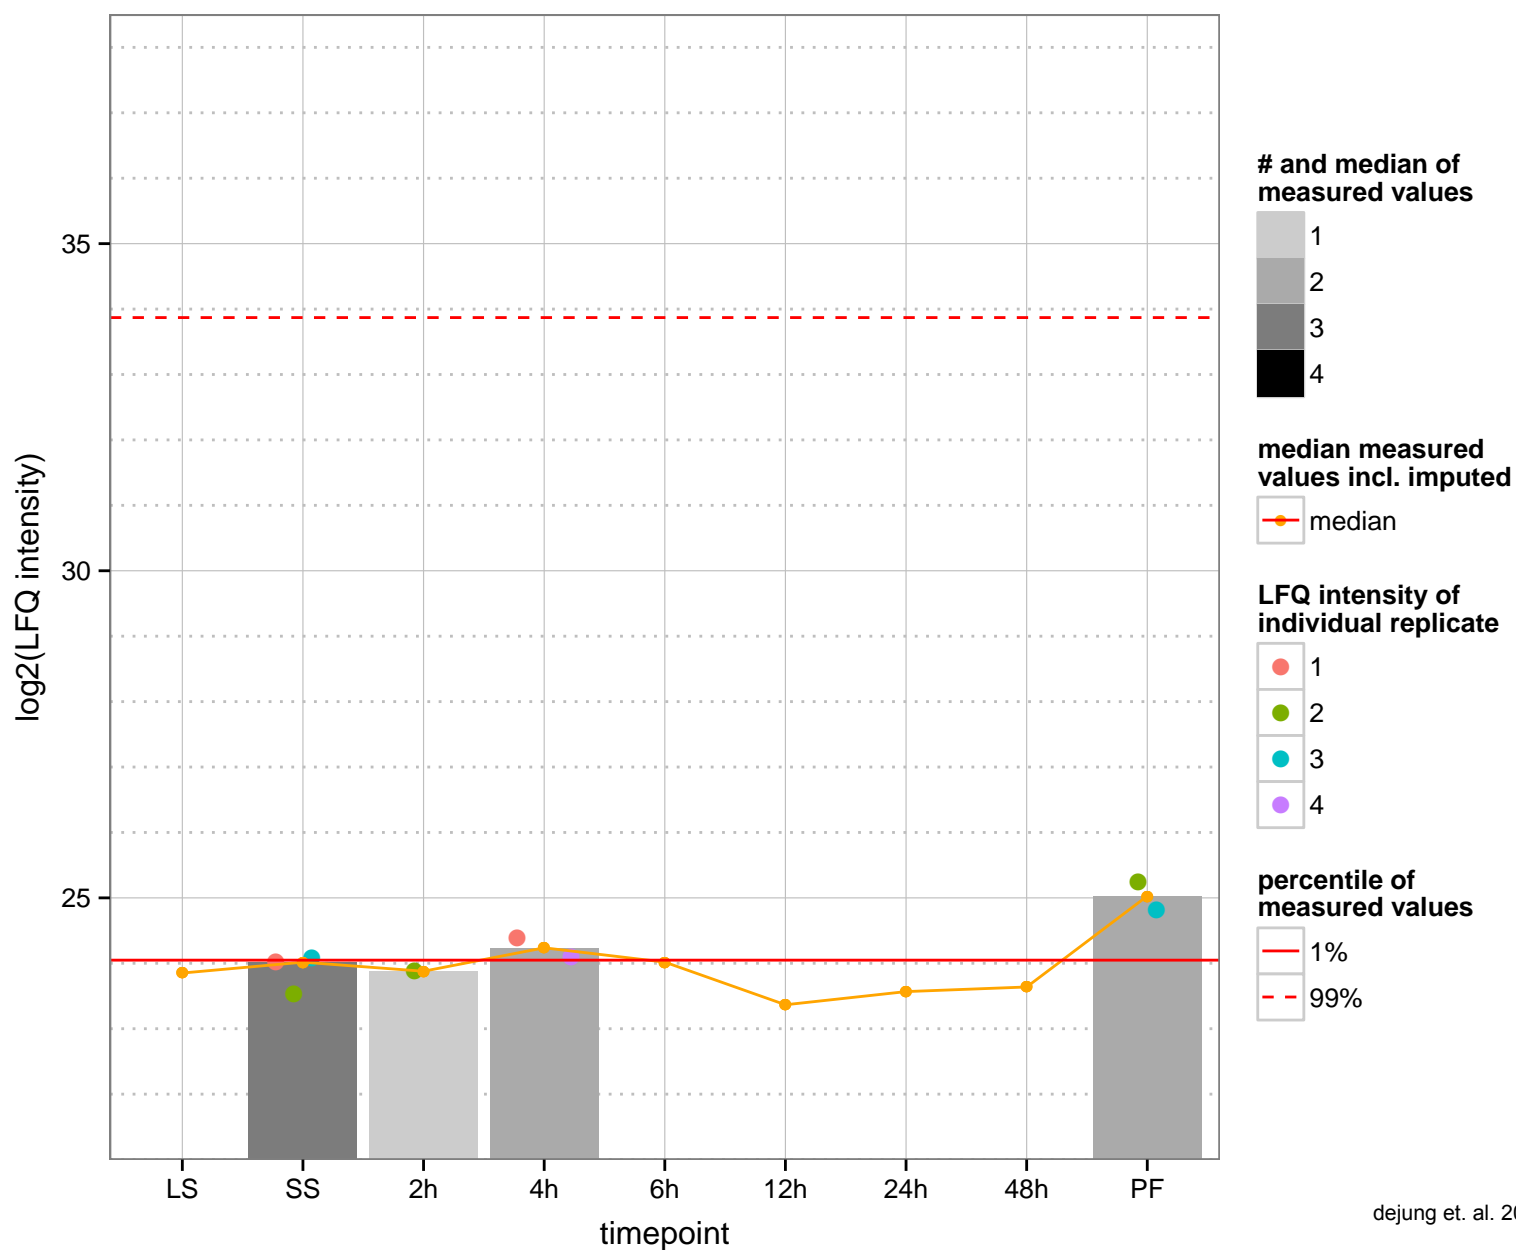



hypothetical protein, conserved, Mitochondrial Editosome-like Complex TUTase (MEAT1)  
 Tb927.1.1330;Tb11.v5.0371  
 AGOF: null, RNA uridylyltransferase activity  
 AGOC: null, mitochondrion  
 AGOP: null, transcription, DNA-dependent  
 PGO: null  
 PGO: null  
 PGO: null

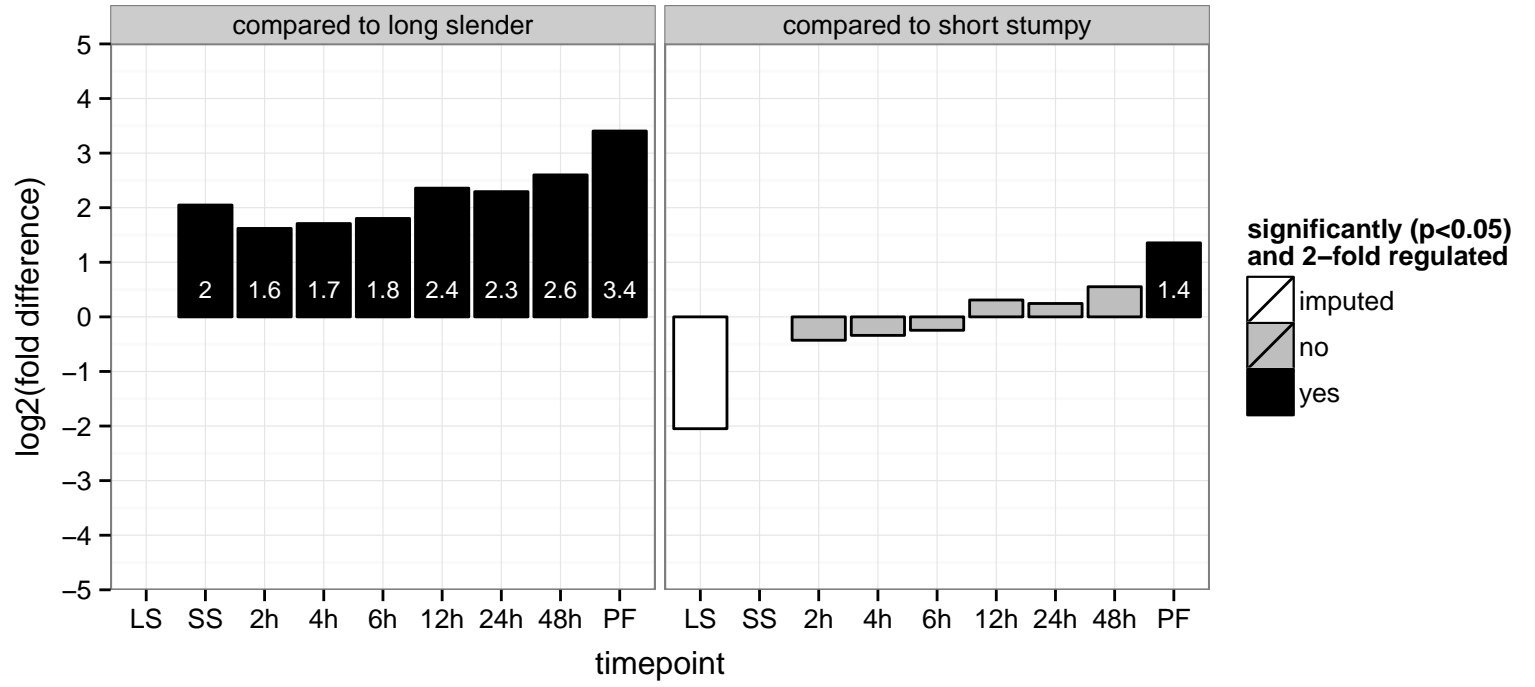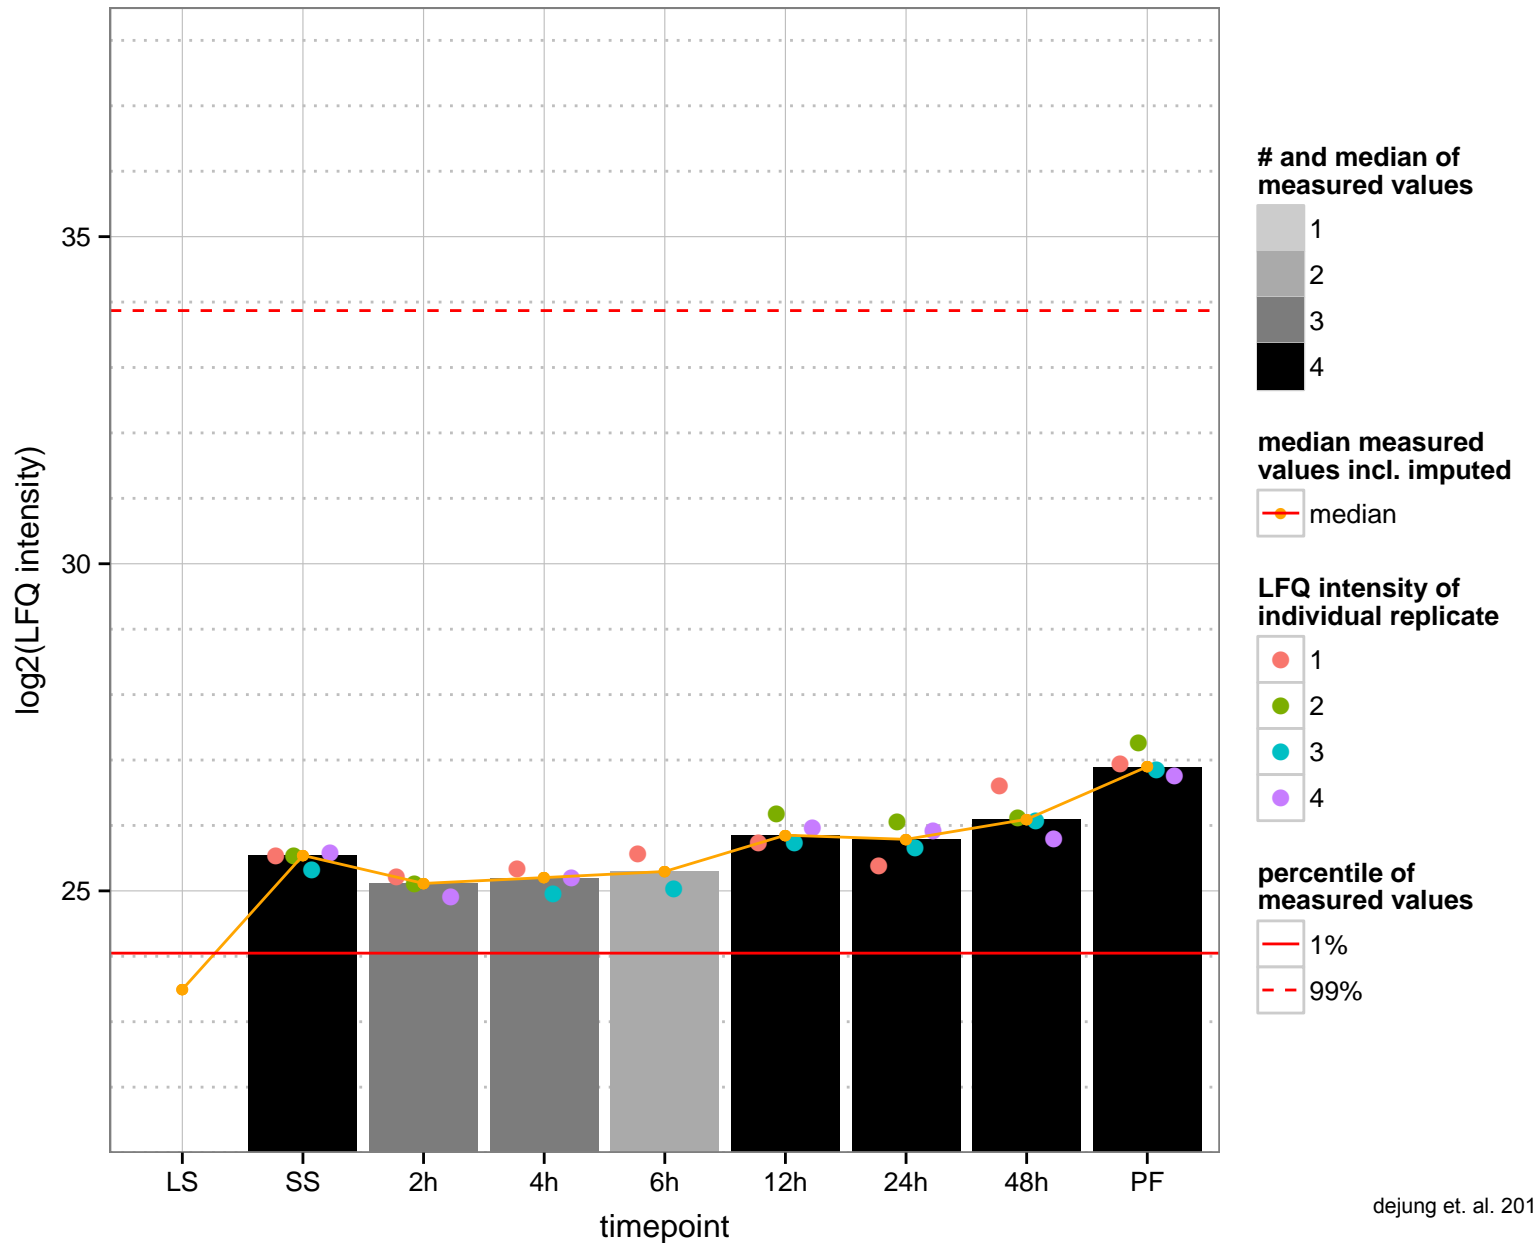

ATP-dependent zinc metallopeptidase, putative, metallo-peptidase, Clan MA(E) Family M41  
 Tb927.10.16150;Tb11.v5.0397  
 AGOF: null, ATP binding, metalloendopeptidase activity, nucleoside-triphosphatase activity  
 AGOC: null, mitochondrion  
 AGOP: null, proteolysis  
 PGOF: ATP binding, metalloendopeptidase activity, nucleoside-triphosphatase activity, nucleotide binding  
 PGOC: null  
 PGOP: proteolysis

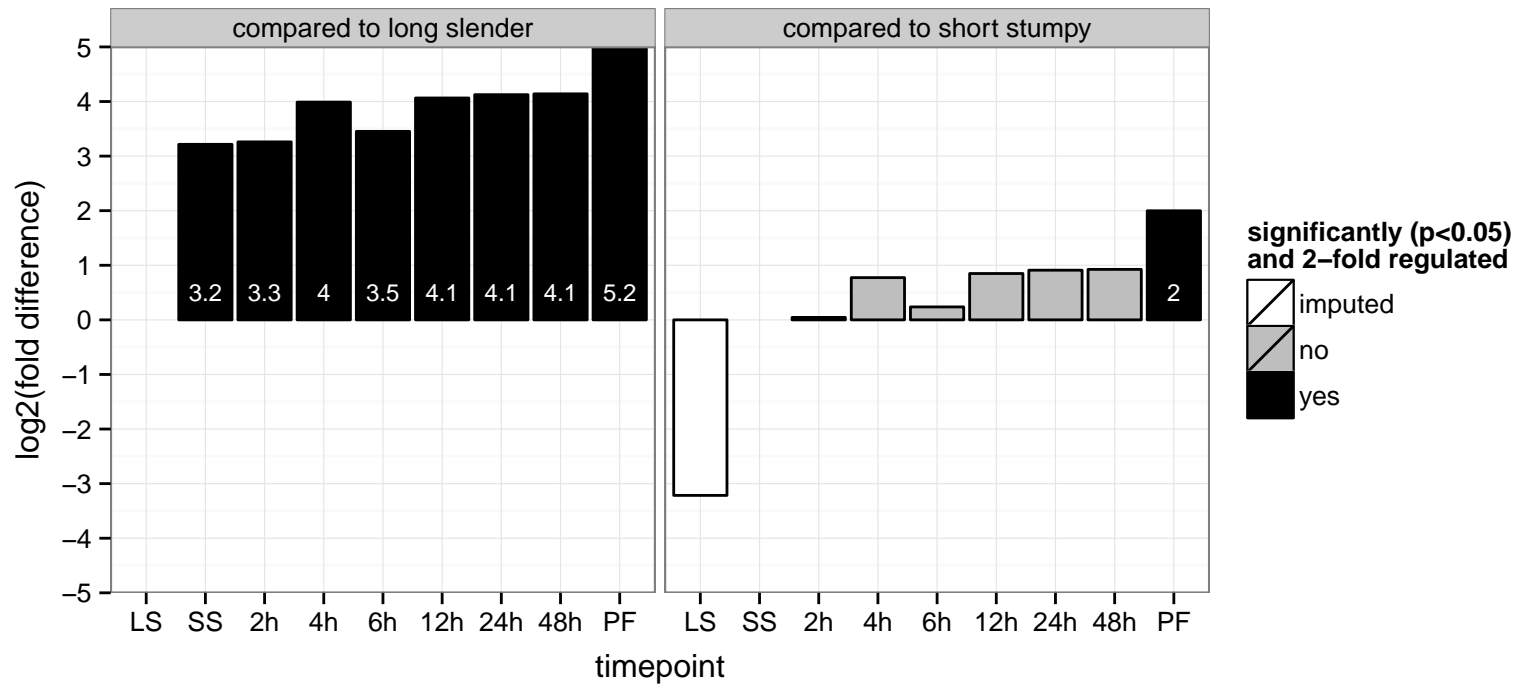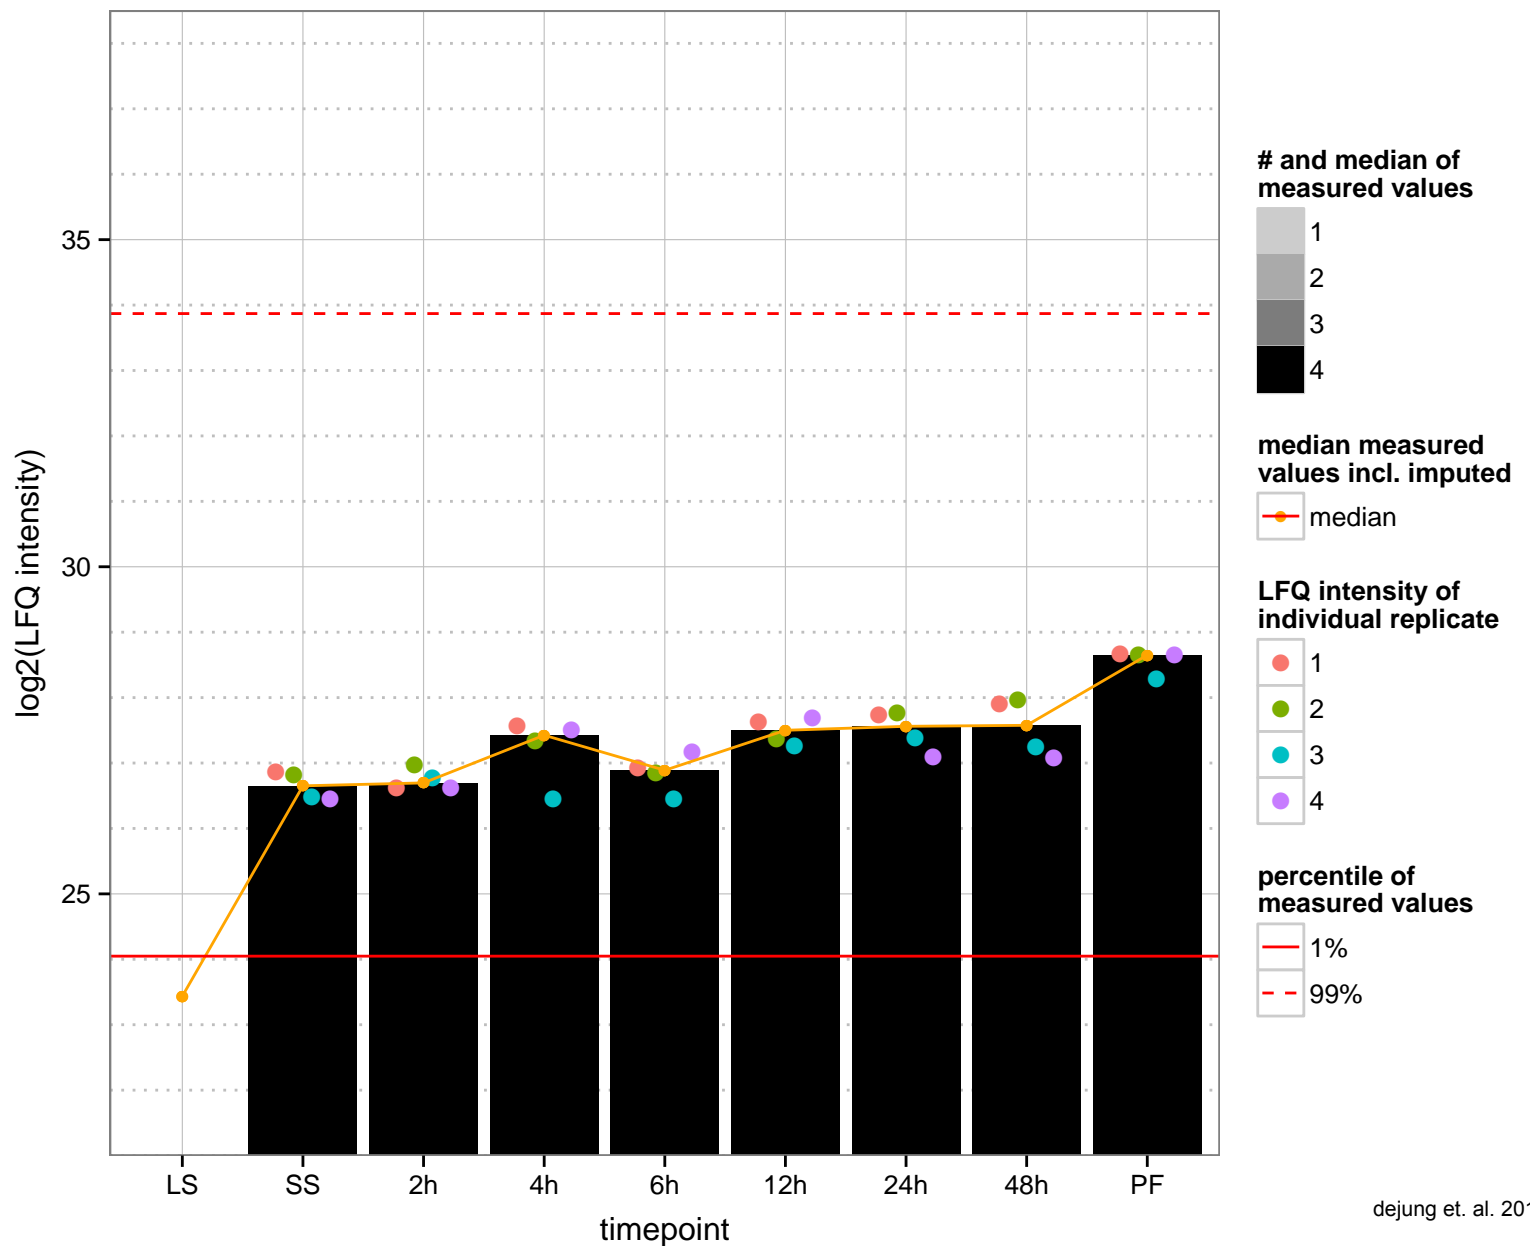

hypothetical protein, conserved  
 Tb11.v5.0517;Tb927.11.4050  
 AGOF: null  
 AGOC: null  
 AGOP: null  
 PGO: null  
 PGOC: null  
 PGOP: null

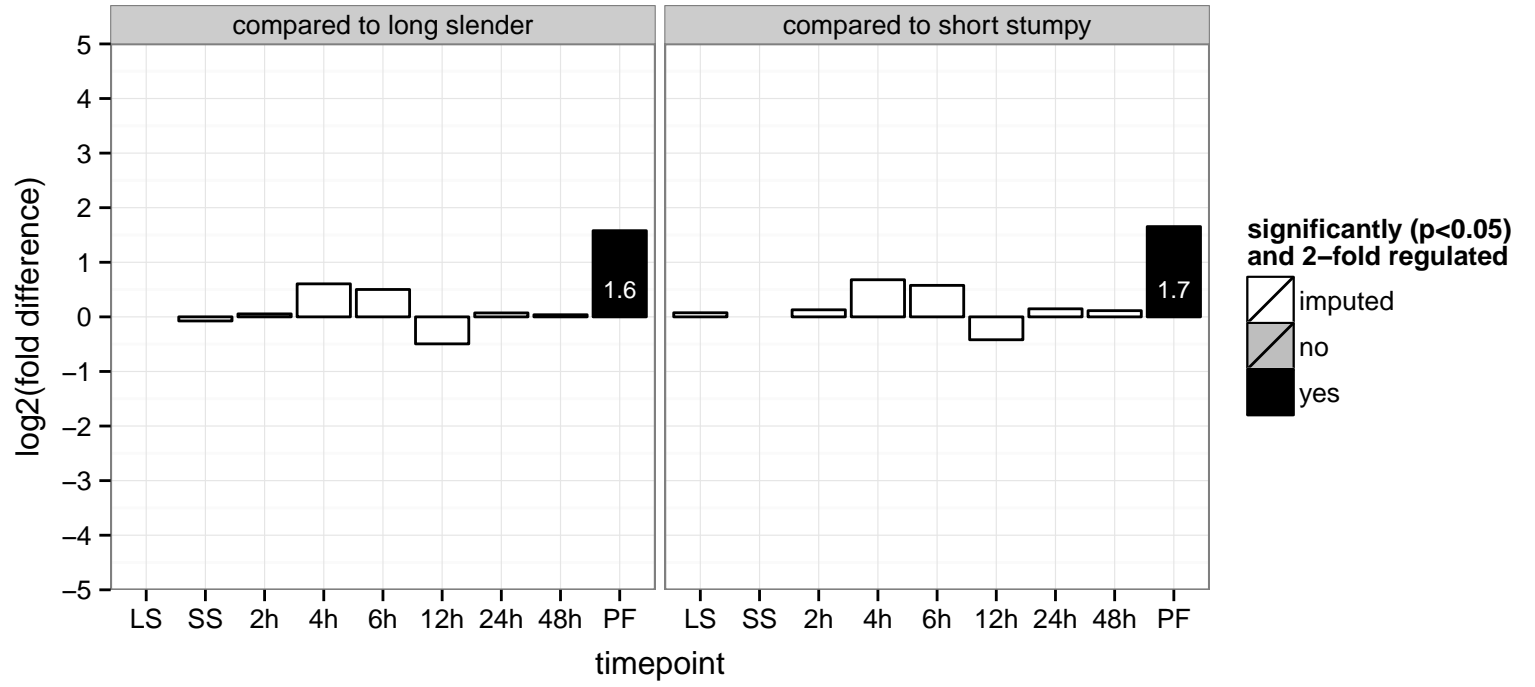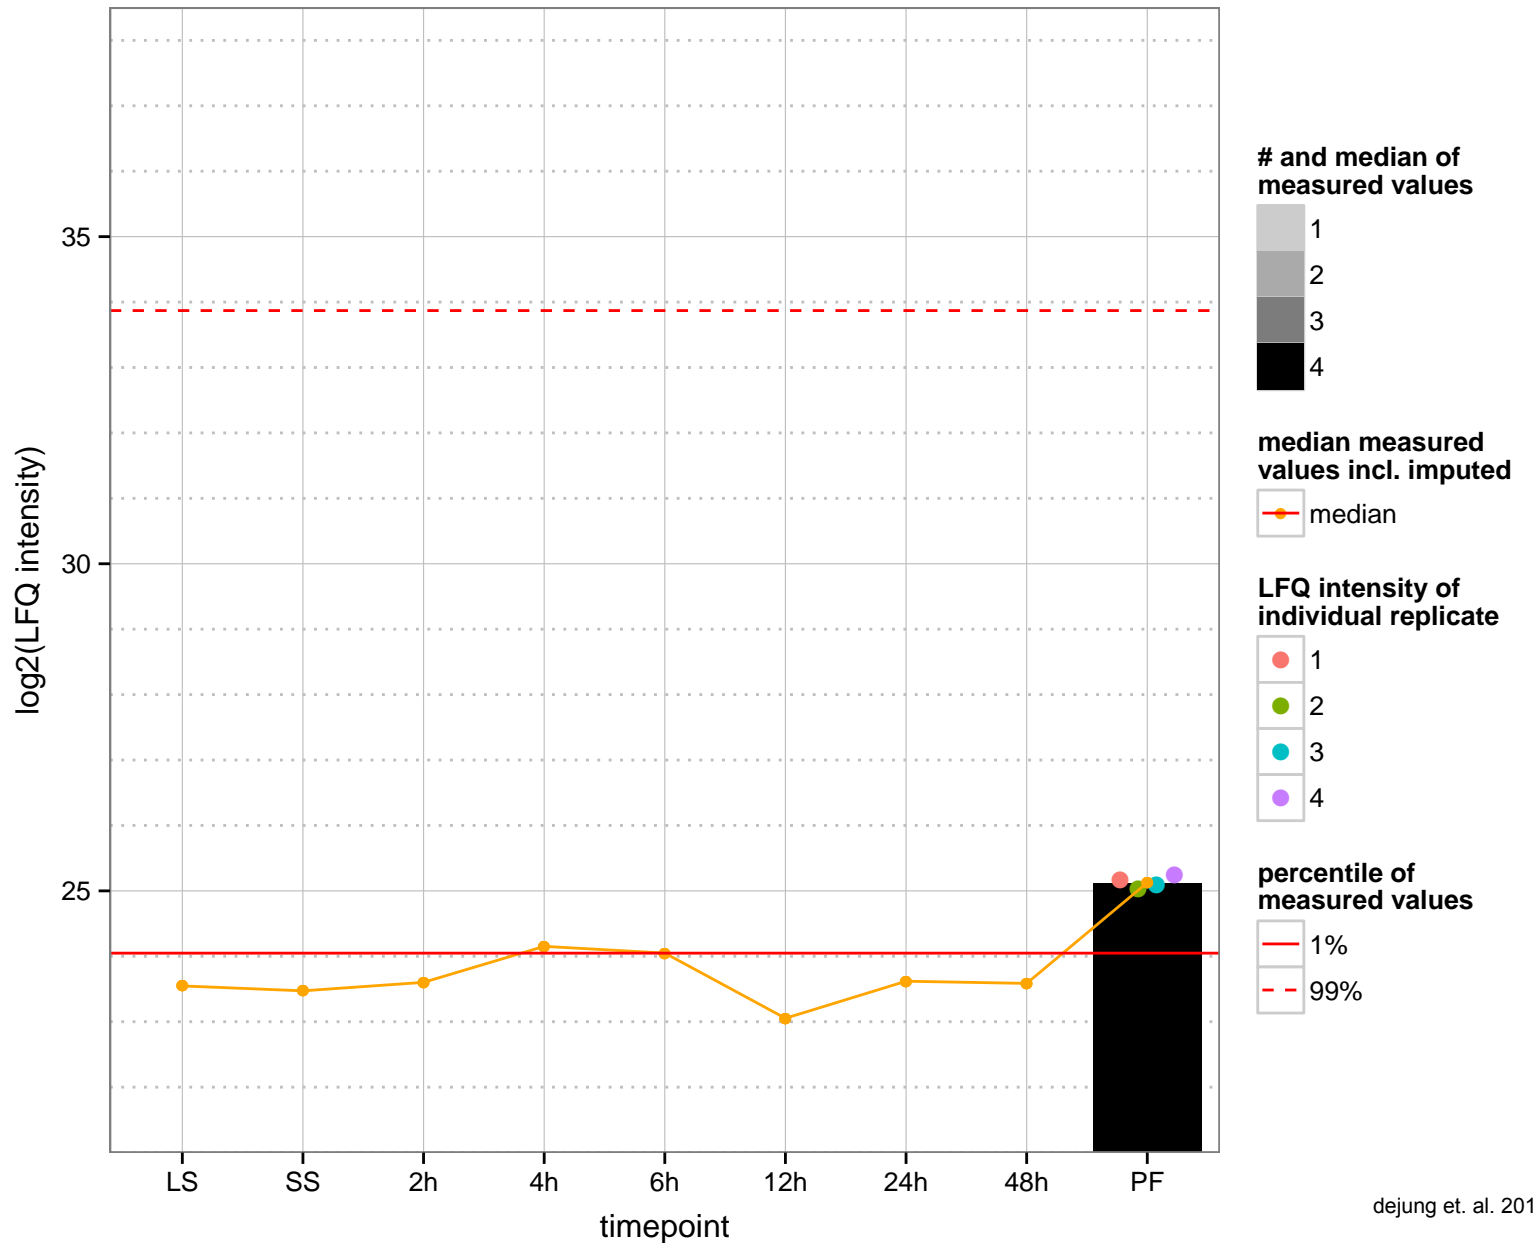

hypothetical protein, conserved  
 Tb927.8.3320;Tb11.v5.0519  
 AGOF: null  
 AGOC: null, mitochondrion  
 AGOP: null  
 PGO: protein binding  
 PGOC: null  
 PGOP: null

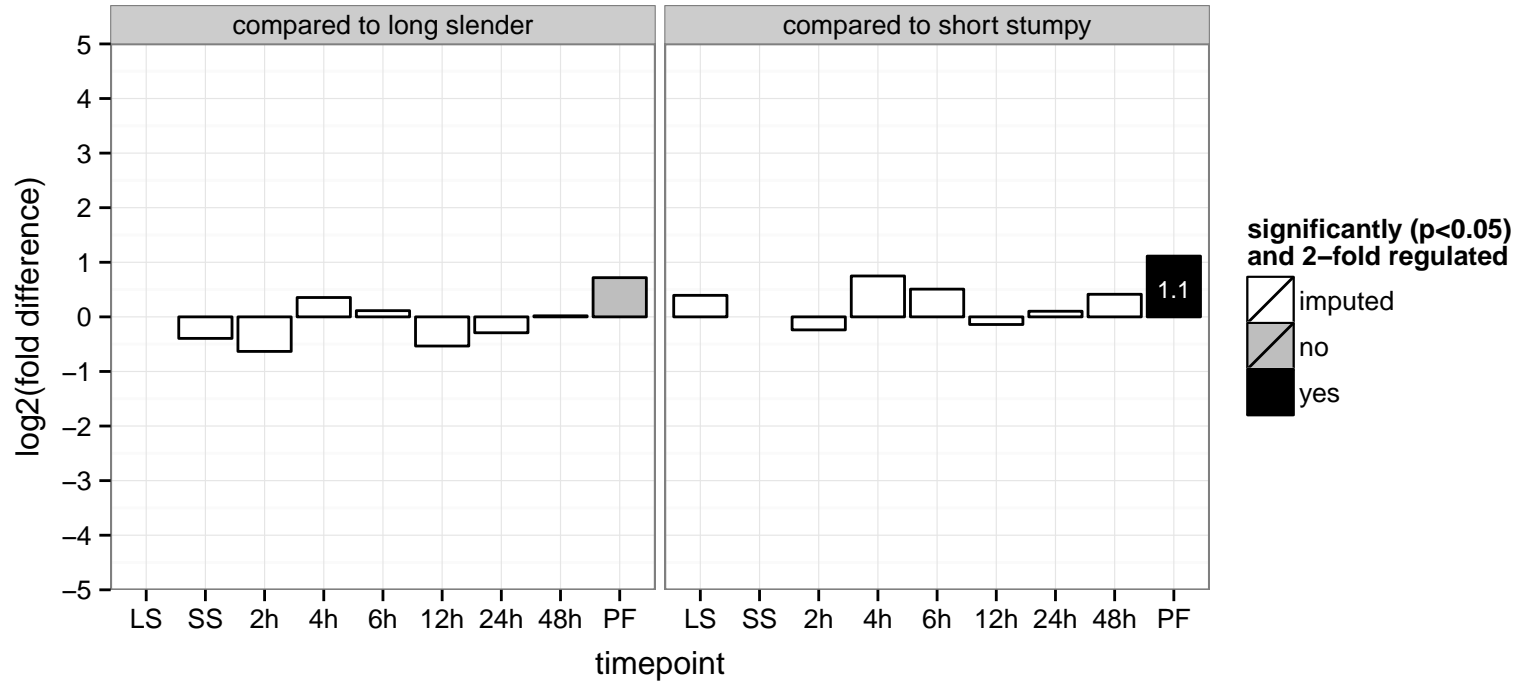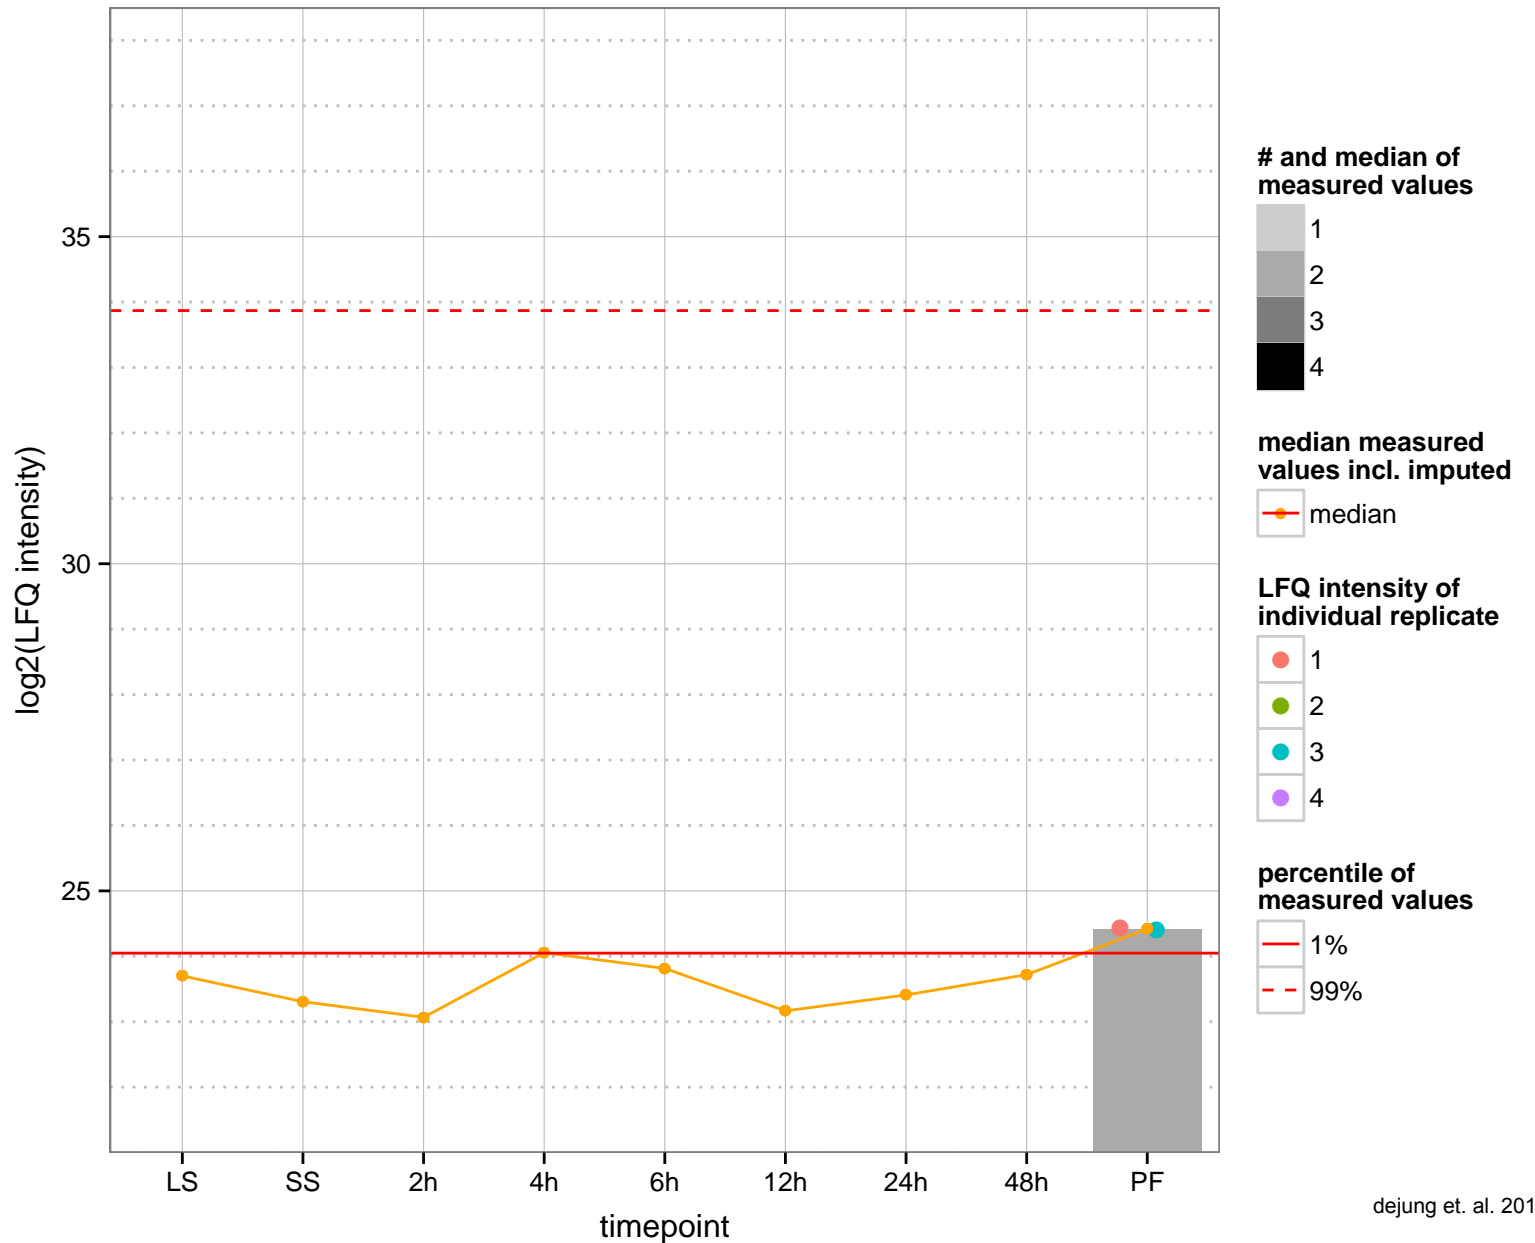

hypothetical protein, conserved, leucine-rich repeat-containing protein  
 Tb927.1.780;Tb11.v5.0523  
 AGOF: null  
 AGOC: null  
 AGOP: null  
 PGO: null  
 PGOC: null  
 PGOP: null

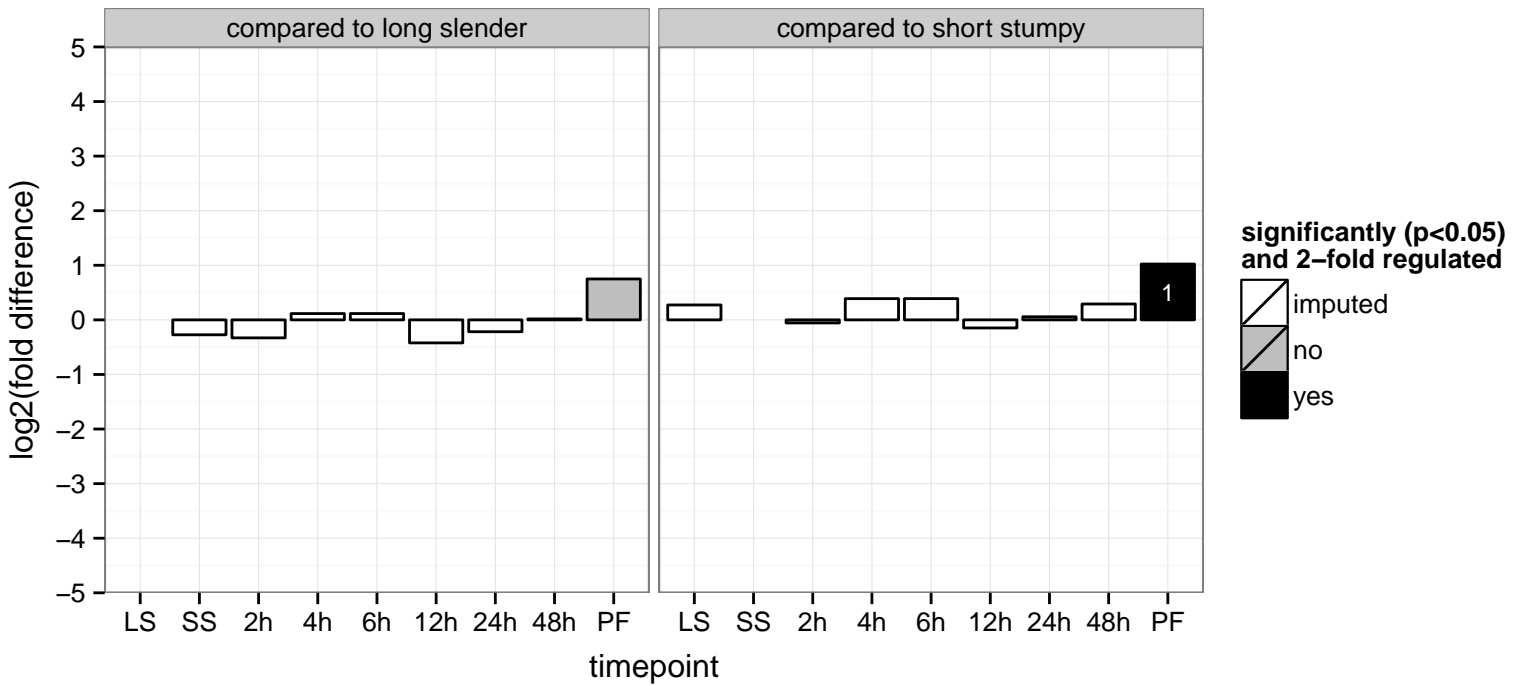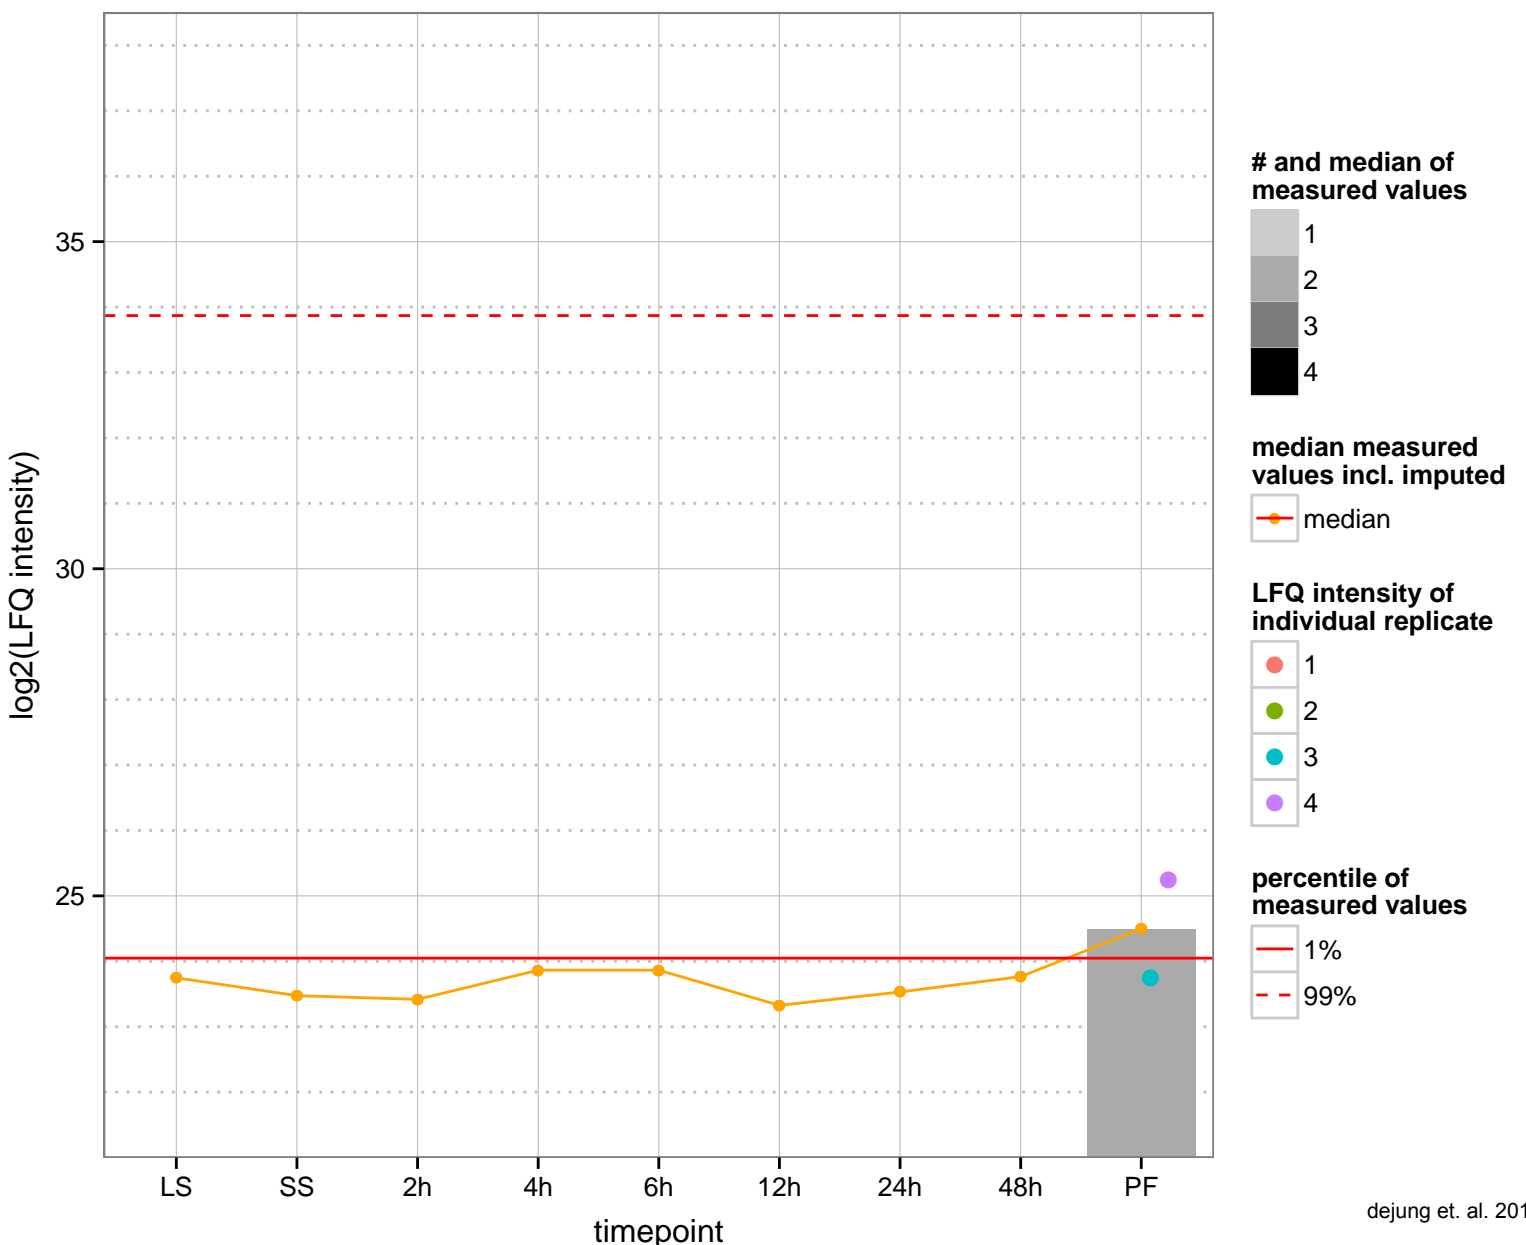

protein kinase, putative  
Tb927.7.3210;Tb11.v5.0652

AGOF: null, ATP binding, protein kinase activity, protein serine/threonine kinase activity, protein tyrosine kinase activity

AGOC: null

AGOP: null, growth, protein phosphorylation

PGOF: ATP binding, protein kinase activity, transferase activity, transferring phosphorus-containing groups

PGOC: null

PGOP: protein phosphorylation

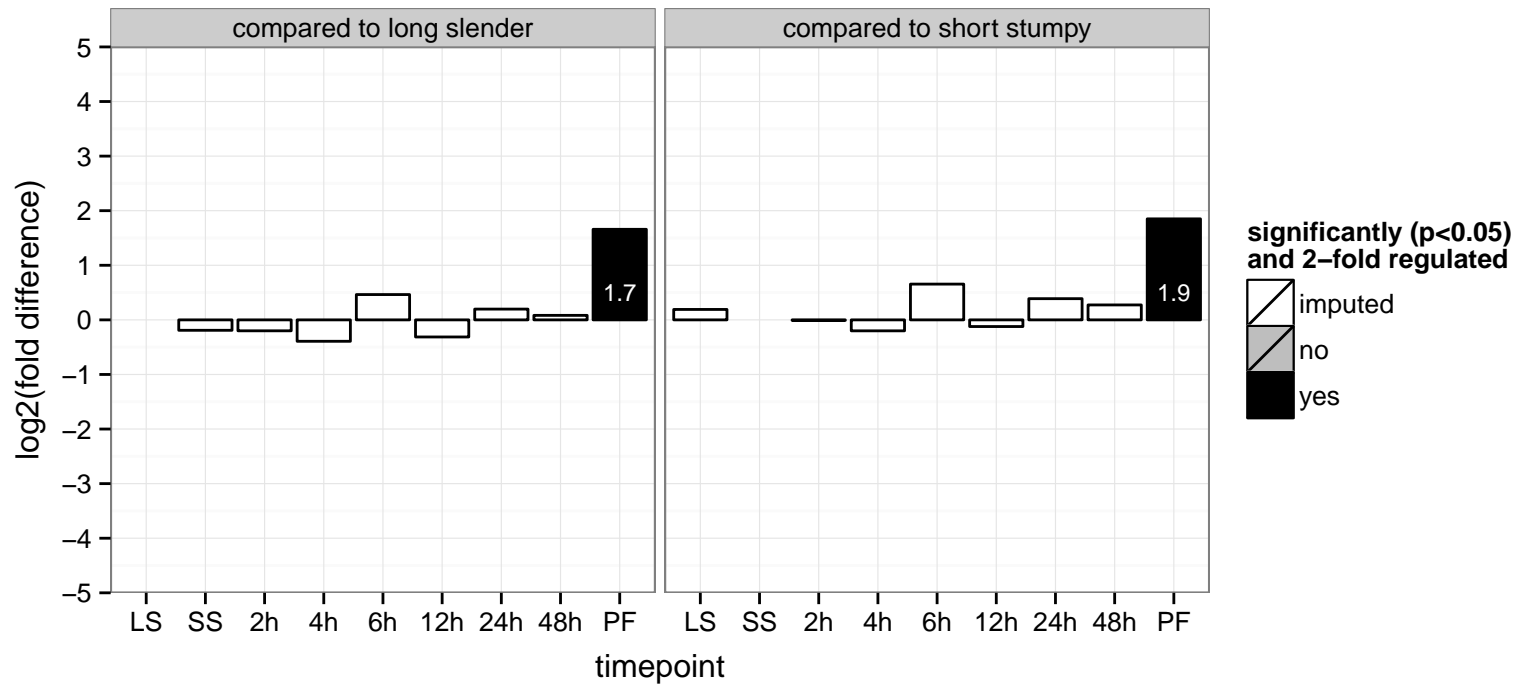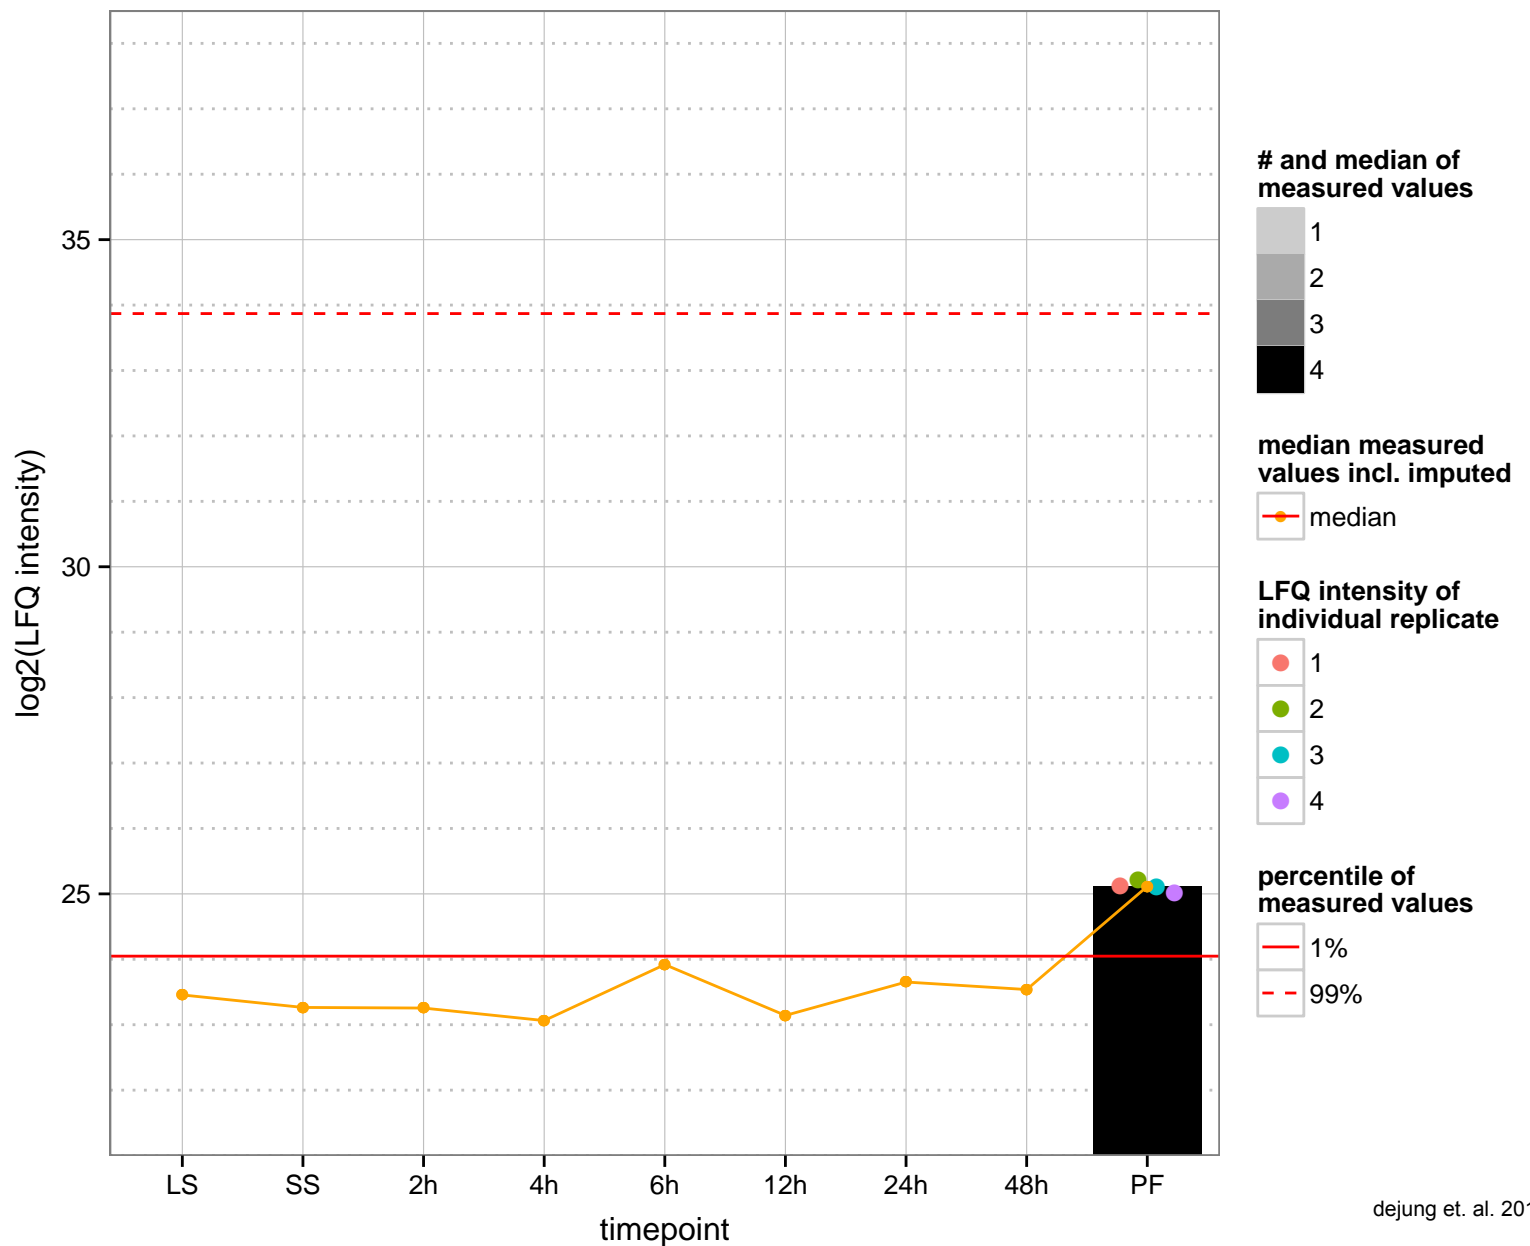

tatD related deoxyribonuclease, putative

Tb927.11.6090;Tb11.v5.0746

AGOF: null, deoxyribonuclease activity, endodeoxyribonuclease activity, producing 5'-phosphomonoesters

AGOC: null

AGOP: null, metabolic process

PGOF: endodeoxyribonuclease activity, producing 5'-phosphomonoesters

PGOC: null

PGOP: null

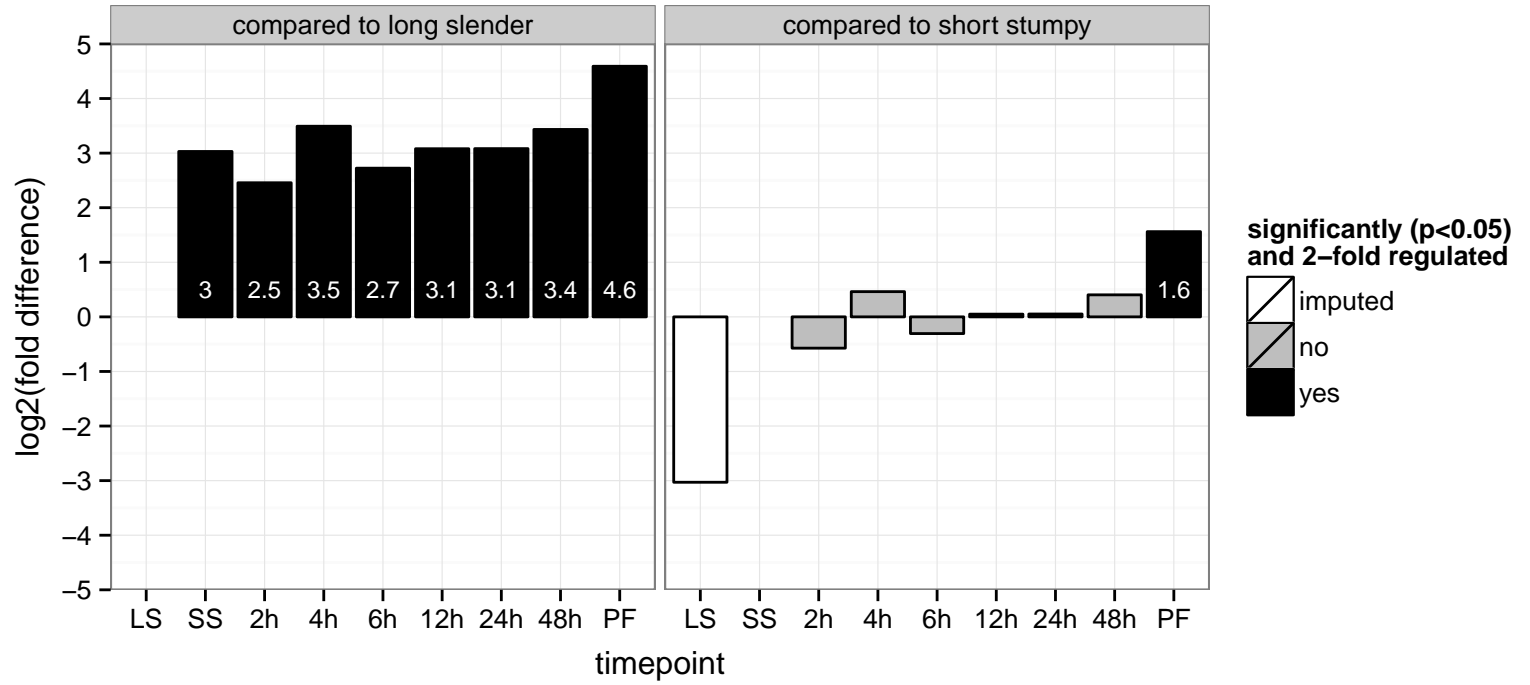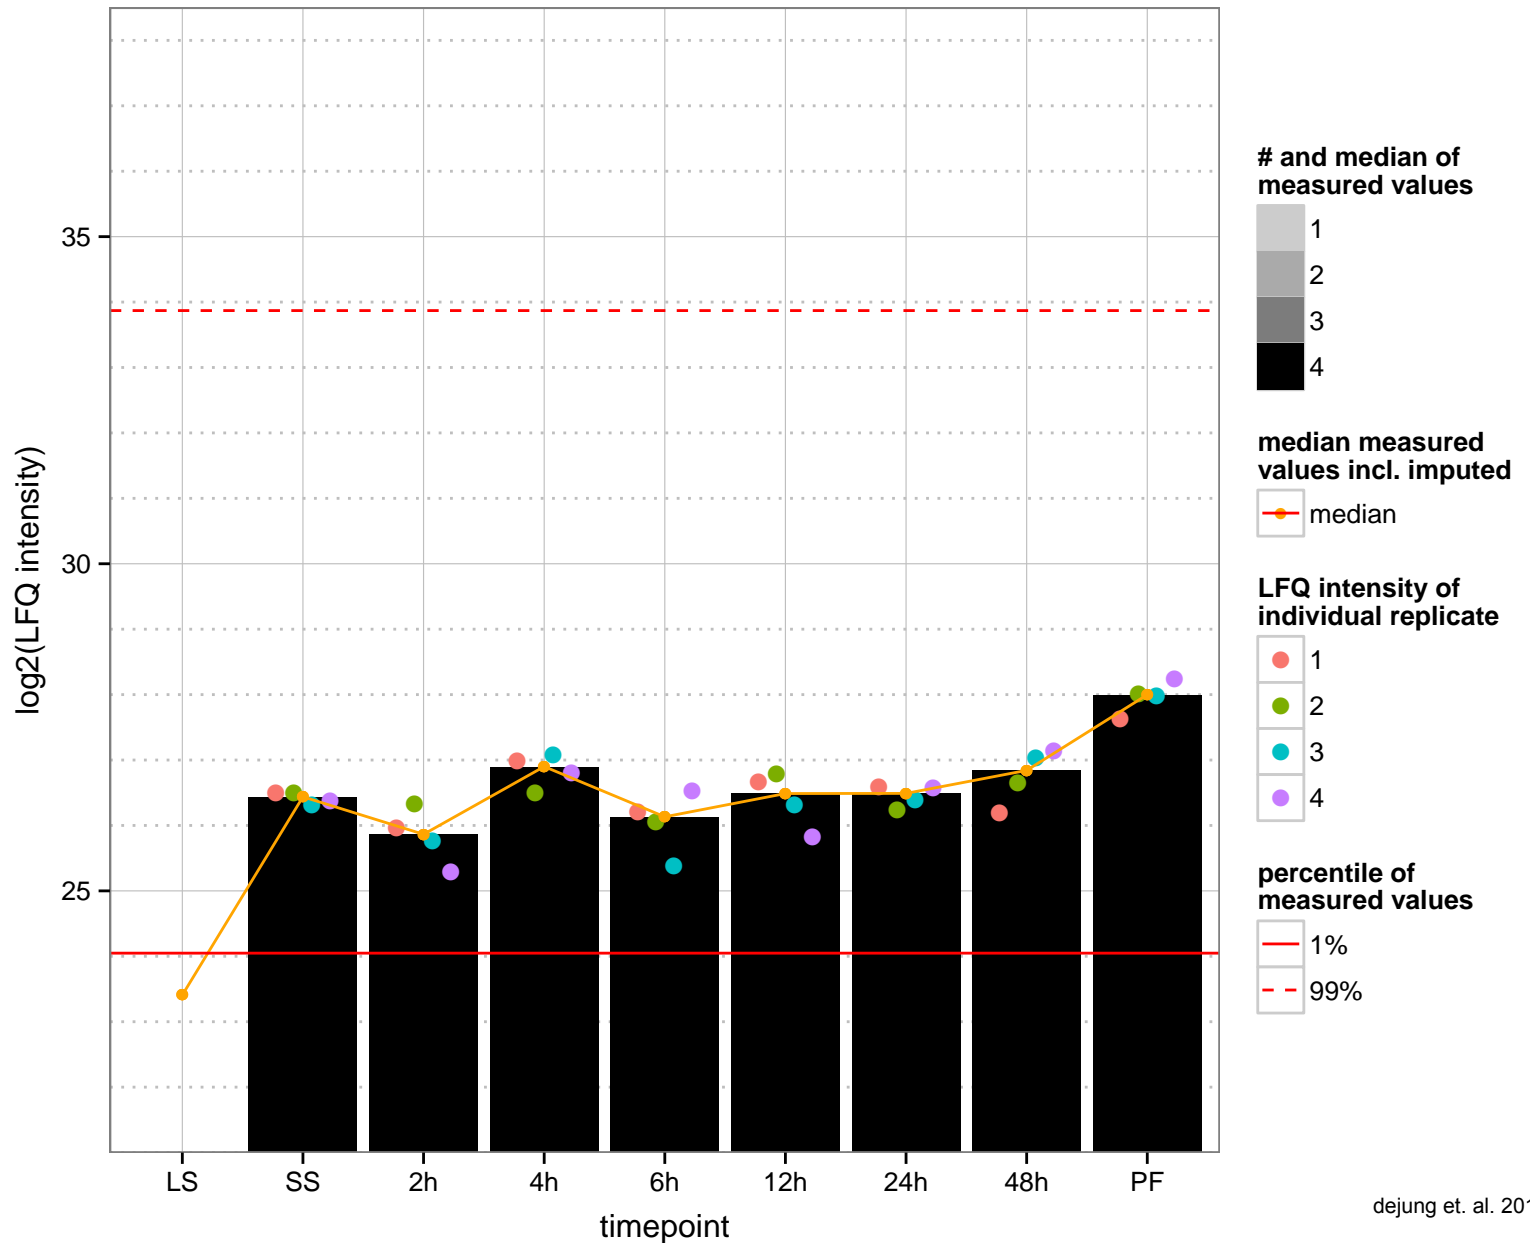

UDP-Gal or UDP-GlcNAc-dependent glycosyltransferase, putative  
 Tb927.4.5300;Tb11.v5.0880;Tb927.4.5290;Tb927.4.5270;Tb927.4.5260;Tb927.4.5250;Tb927.4.5280  
 AGOF: null, UDP-glycosyltransferase activity, galactosyltransferase activity  
 AGOC: null, integral to membrane, membrane, membrane  
 AGOP: null, GPI anchor biosynthetic process, protein glycosylation  
 PGO: galactosyltransferase activity, null  
 PGOC: membrane, null  
 PGOP: protein glycosylation, null

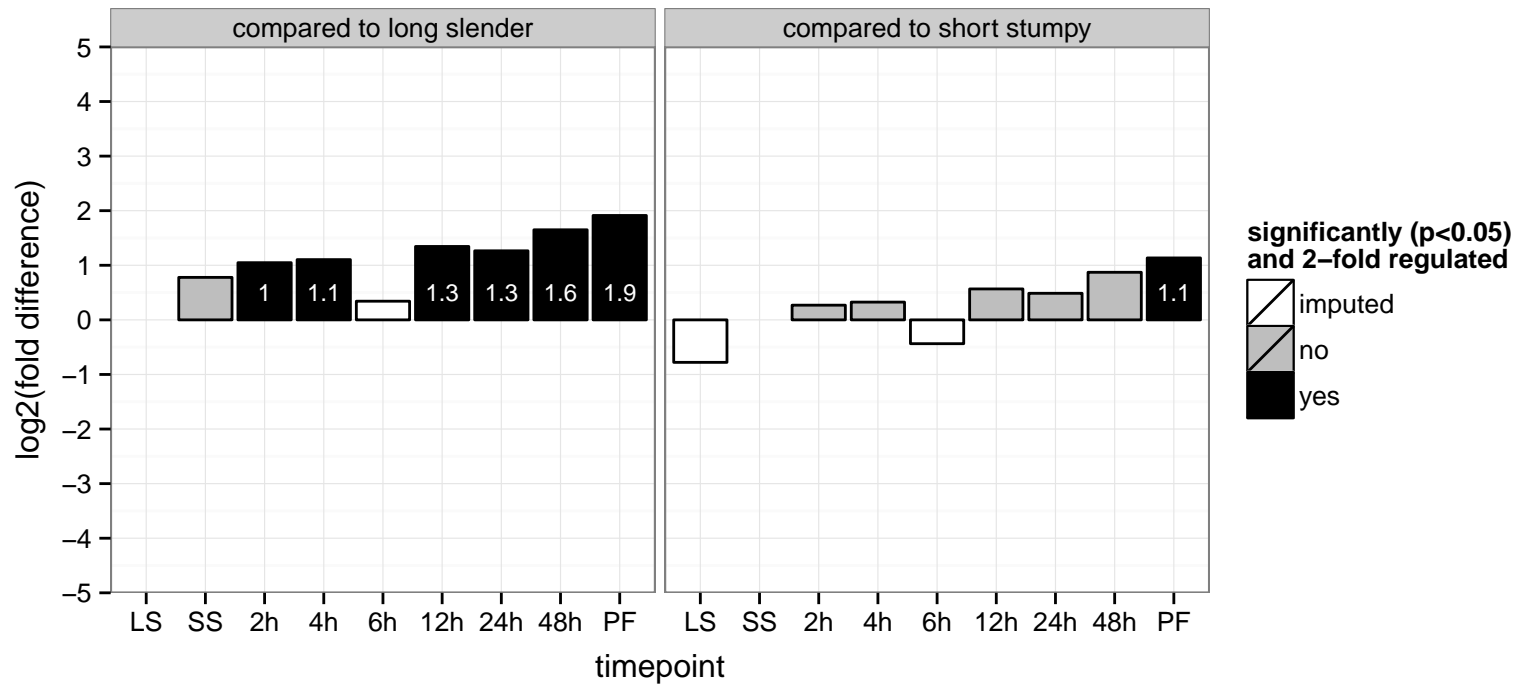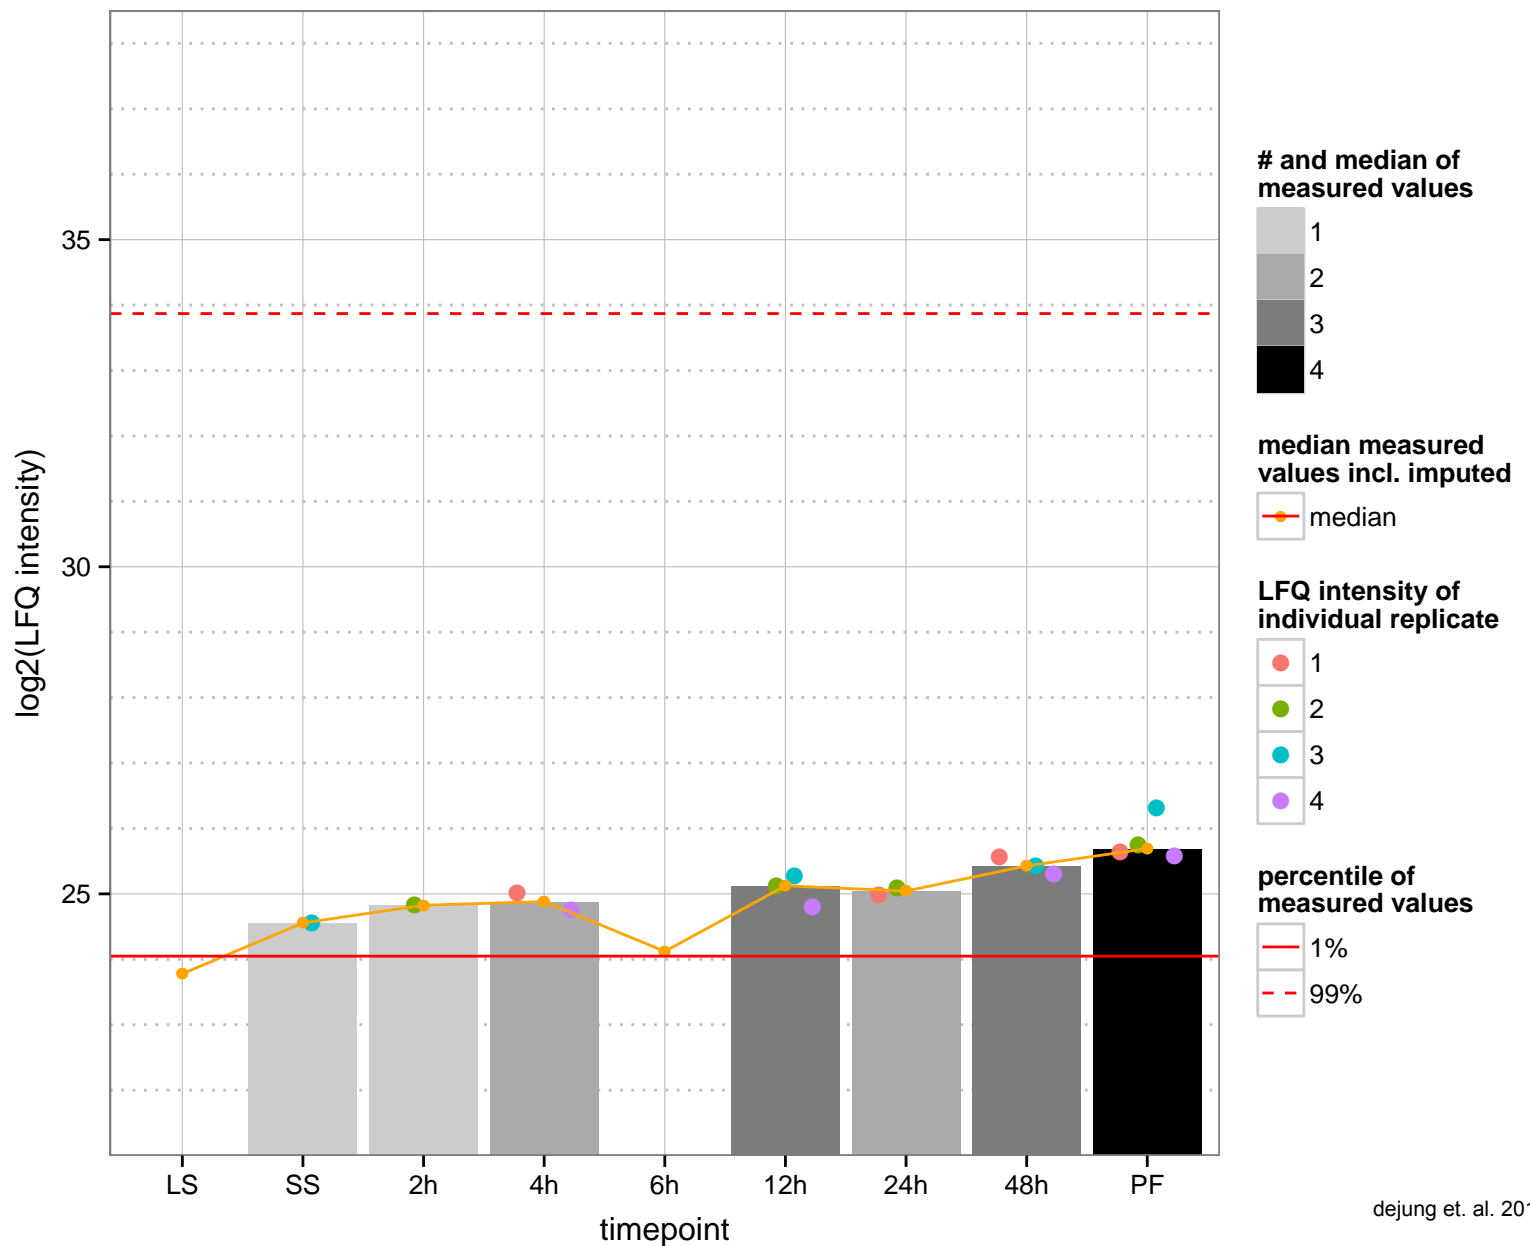



hypothetical protein, conserved  
 Tb927.4.3080;Tb11.v5.0963  
 AGOF: null  
 AGOC: null, mitochondrion  
 AGOP: null  
 PGO: null  
 PGOC: null  
 PGOP: null

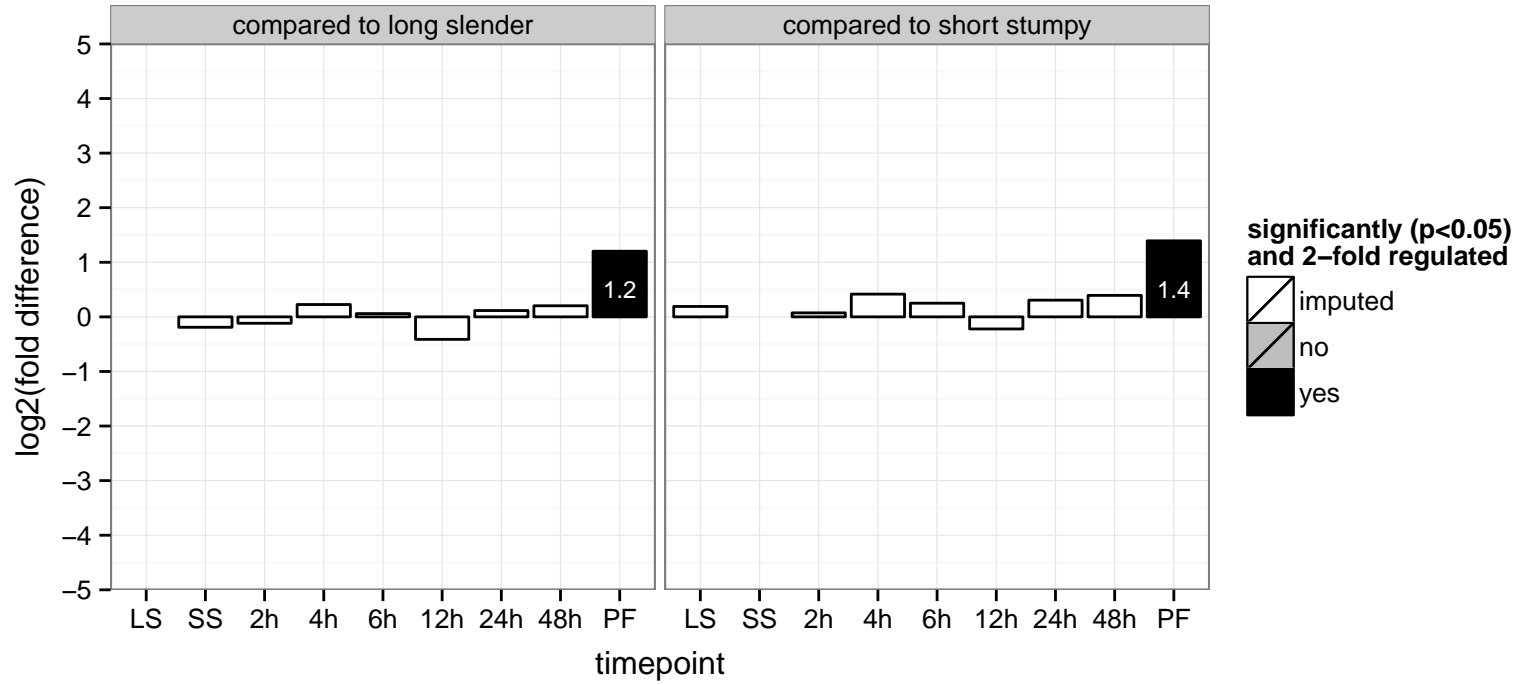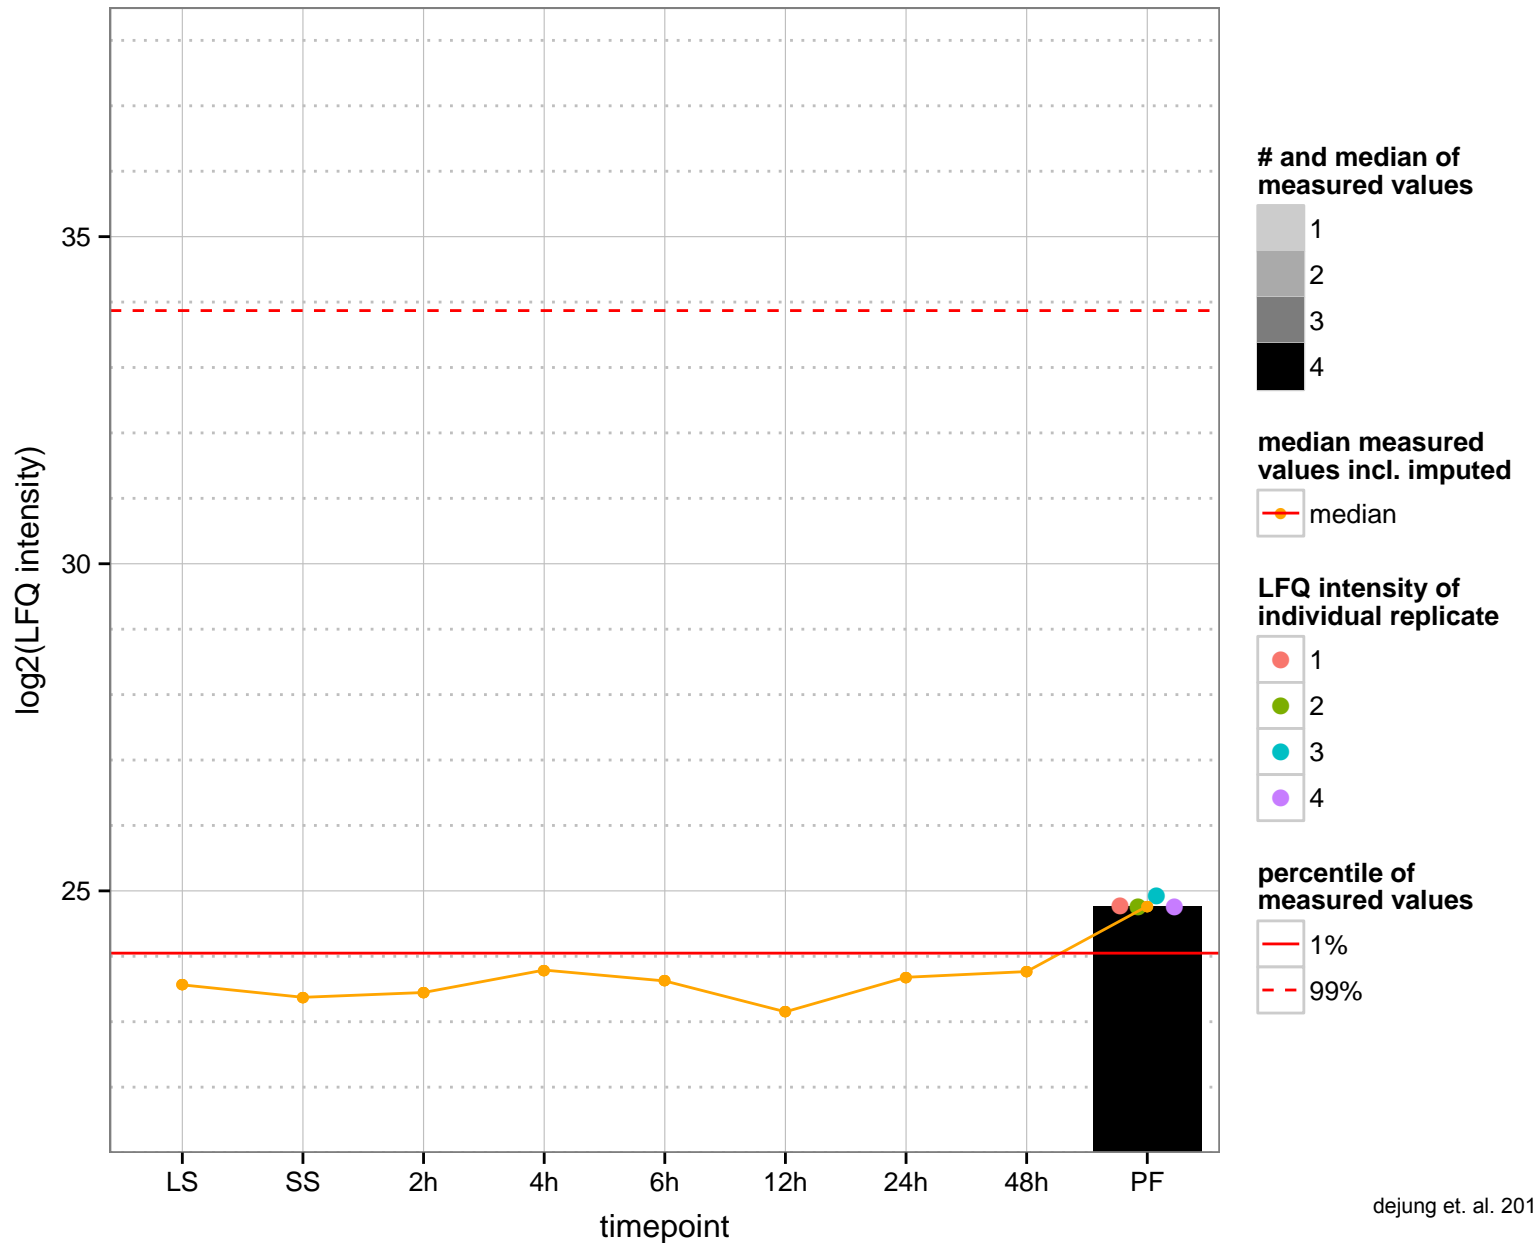

hypothetical protein, conserved  
 Tb927.4.2990;Tb11.v5.0968  
 AGOF: null, phosphorus–oxygen lyase activity  
 AGOC: null  
 AGOP: null, cyclic nucleotide biosynthetic process, intracellular signal transduction  
 PGO: phosphorus–oxygen lyase activity  
 PGOC: null  
 PGOP: cyclic nucleotide biosynthetic process, intracellular signal transduction

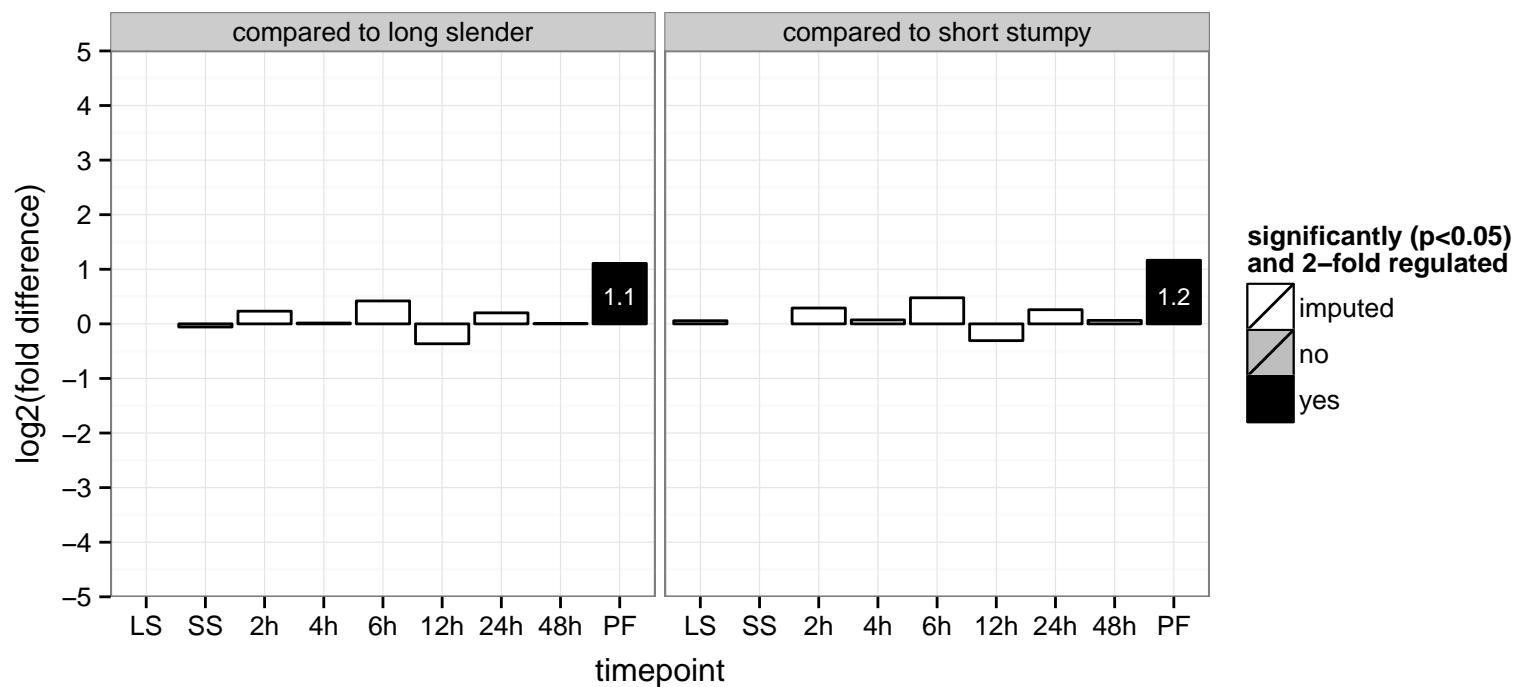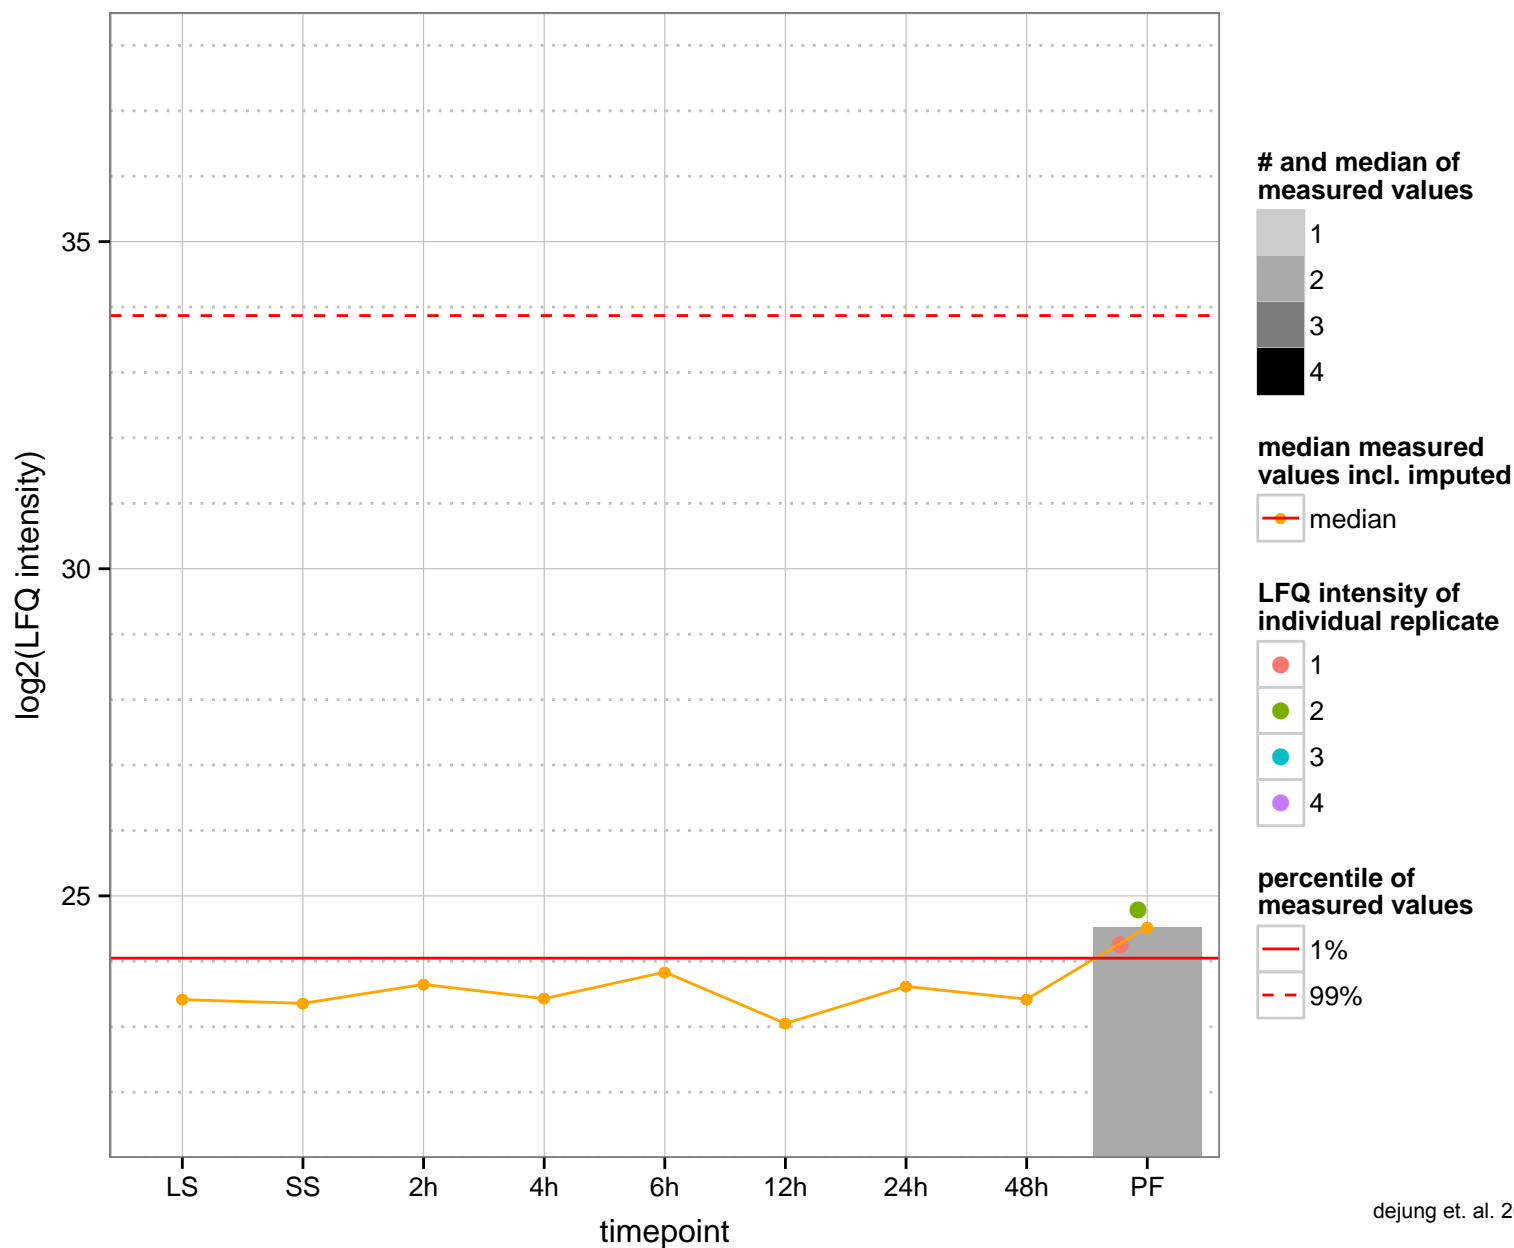

protein kinase, putative  
 Tb927.10.3340;Tb11.v5.1022  
 AGOF: null, ATP binding, protein serine/threonine kinase activity, protein tyrosine kinase activity  
 AGOC: null  
 AGOP: null, protein phosphorylation  
 PGO: ATP binding, protein kinase activity, transferase activity, transferring phosphorus-containing groups  
 PGO: null  
 PGOP: protein phosphorylation

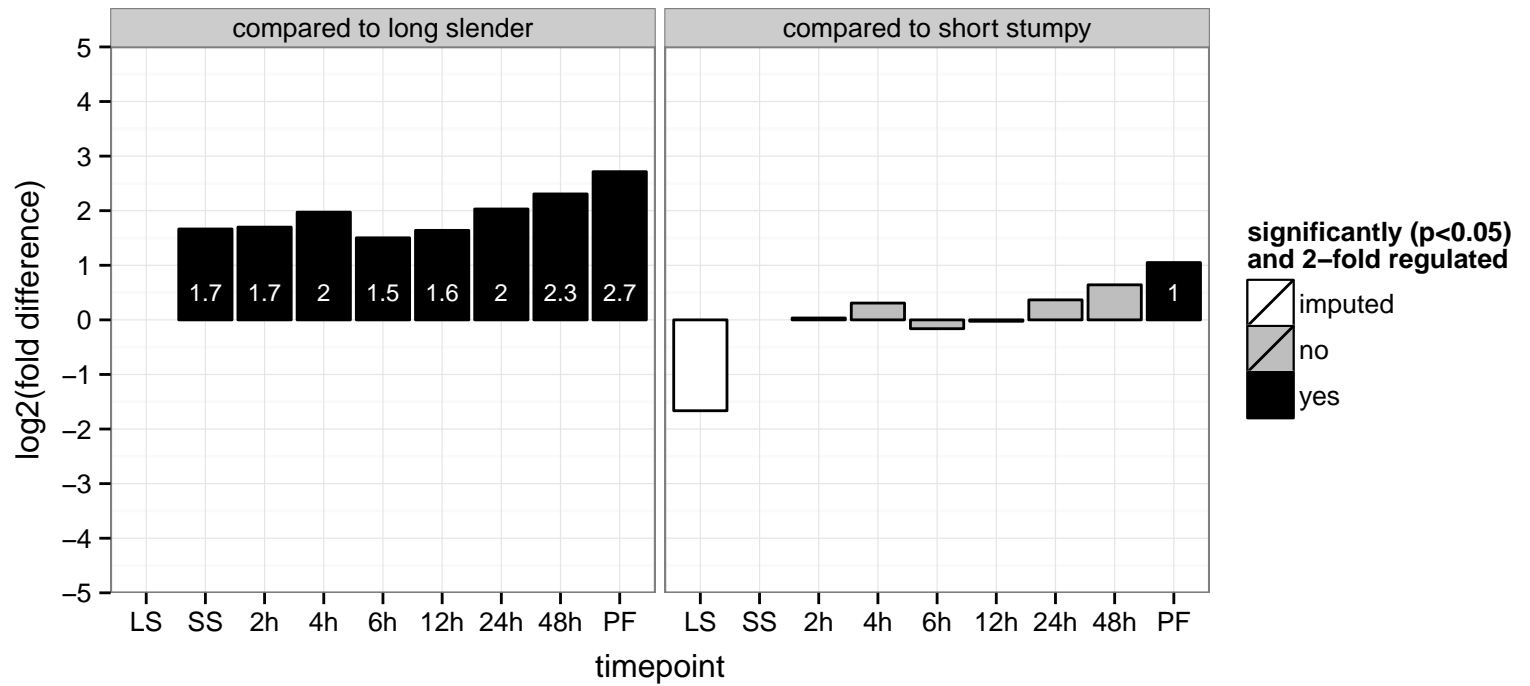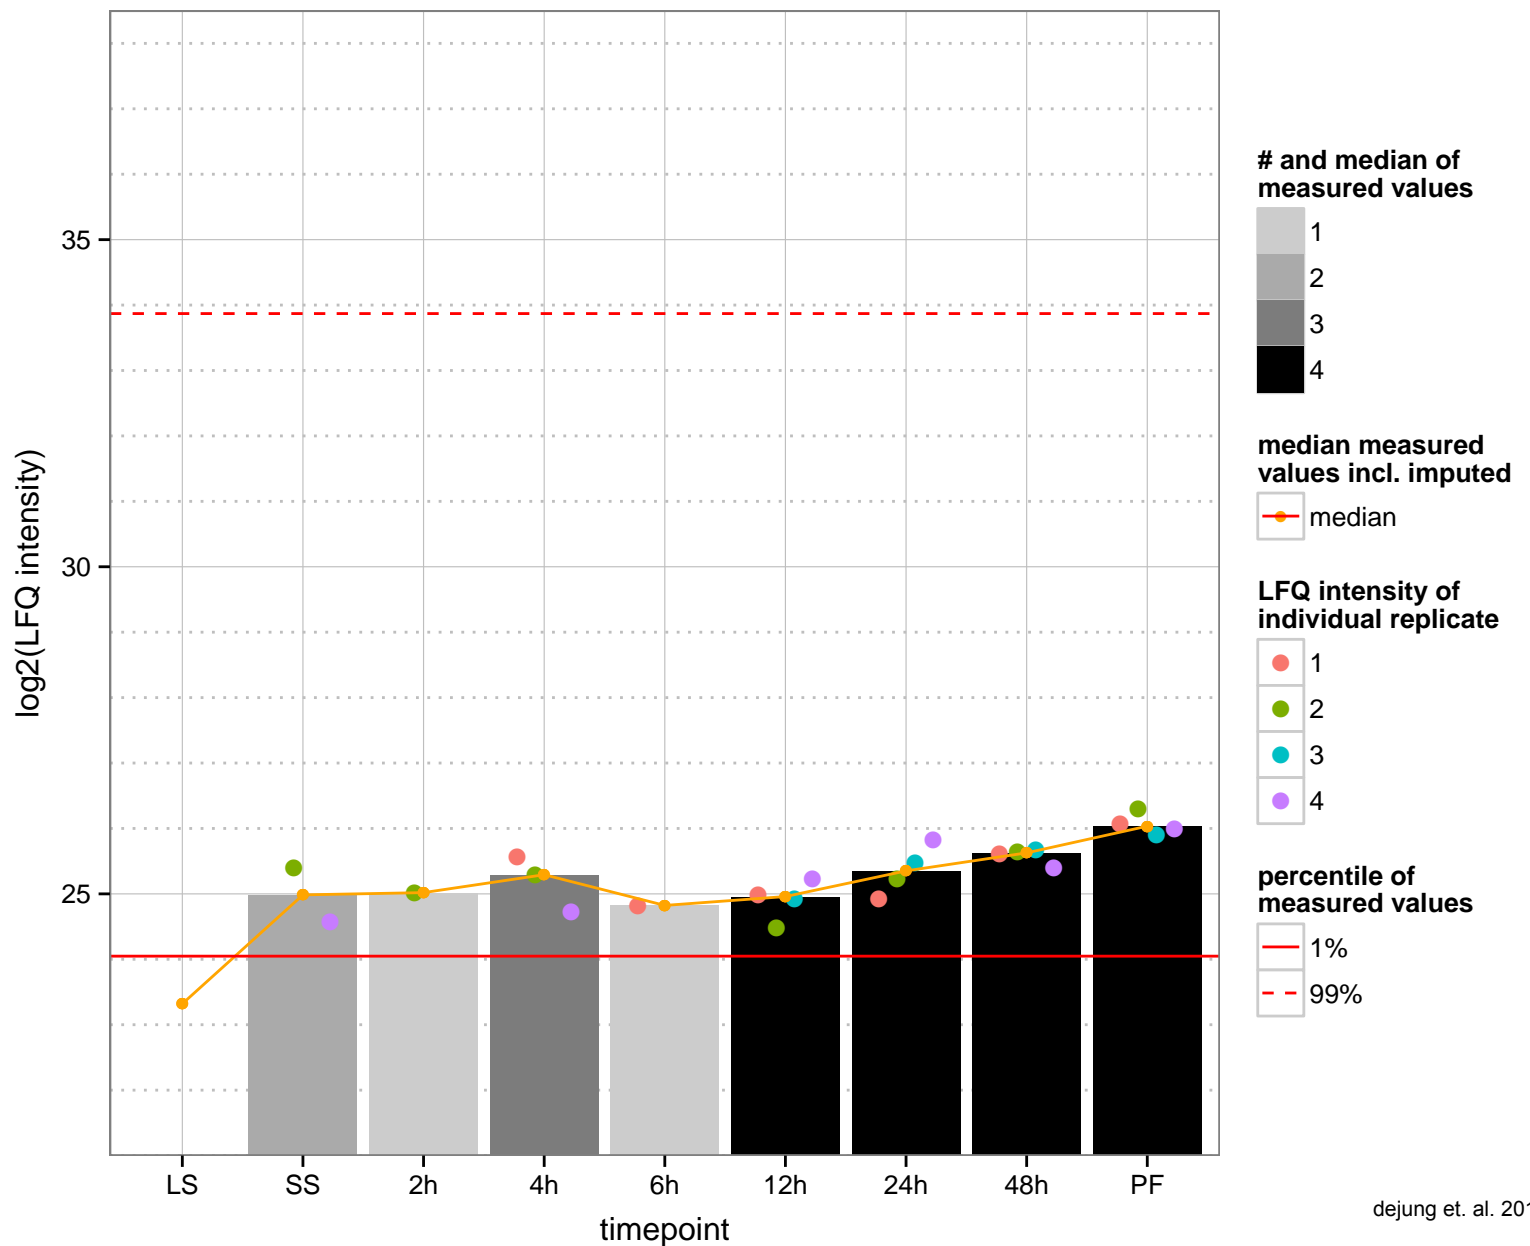

40S ribosomal protein S4, putative  
 Tb927.11.3600;Tb927.11.3590;Tb11.v5.1059  
 AGOF: null, RNA binding, structural constituent of ribosome  
 AGOC: null, intracellular, ribosome  
 AGOP: null, translation  
 PGOF: RNA binding, structural constituent of ribosome, null  
 PGO: intracellular, ribosome, null  
 PGO: translation, null

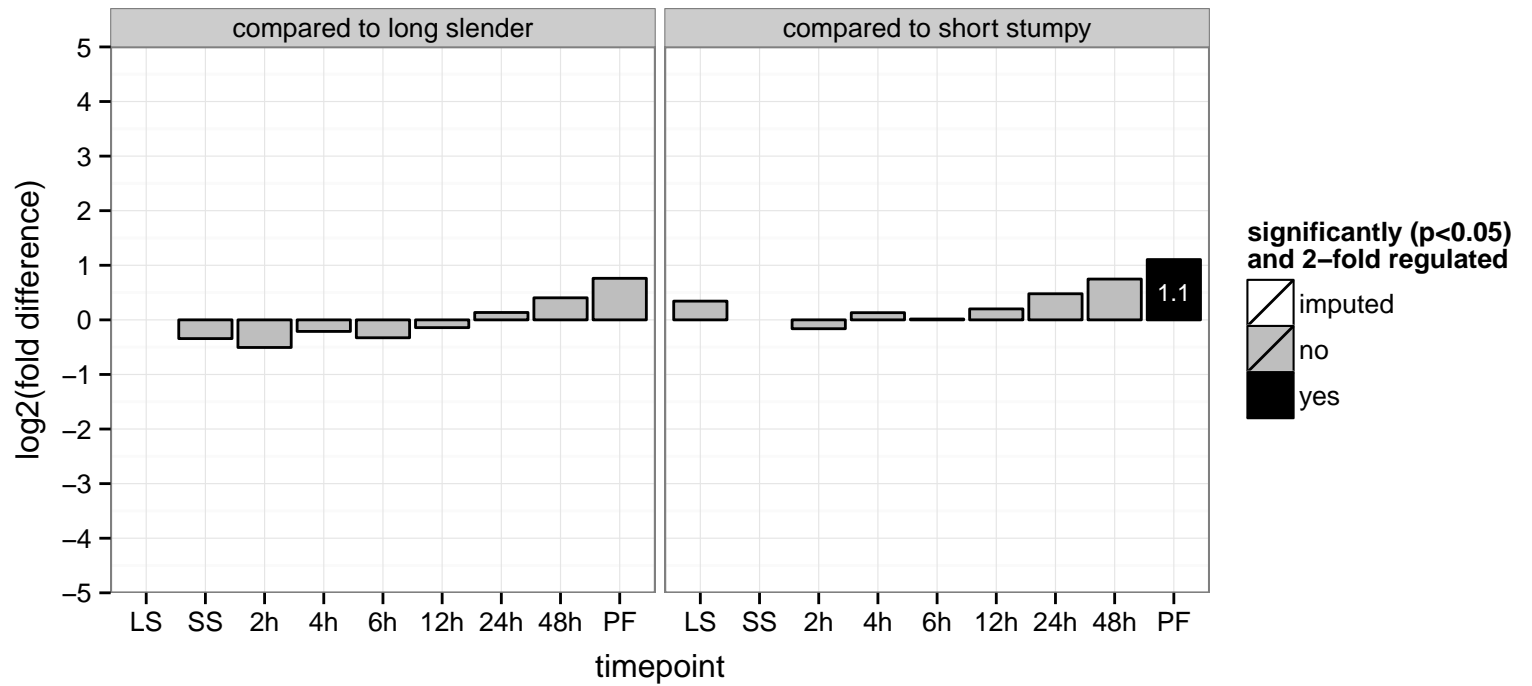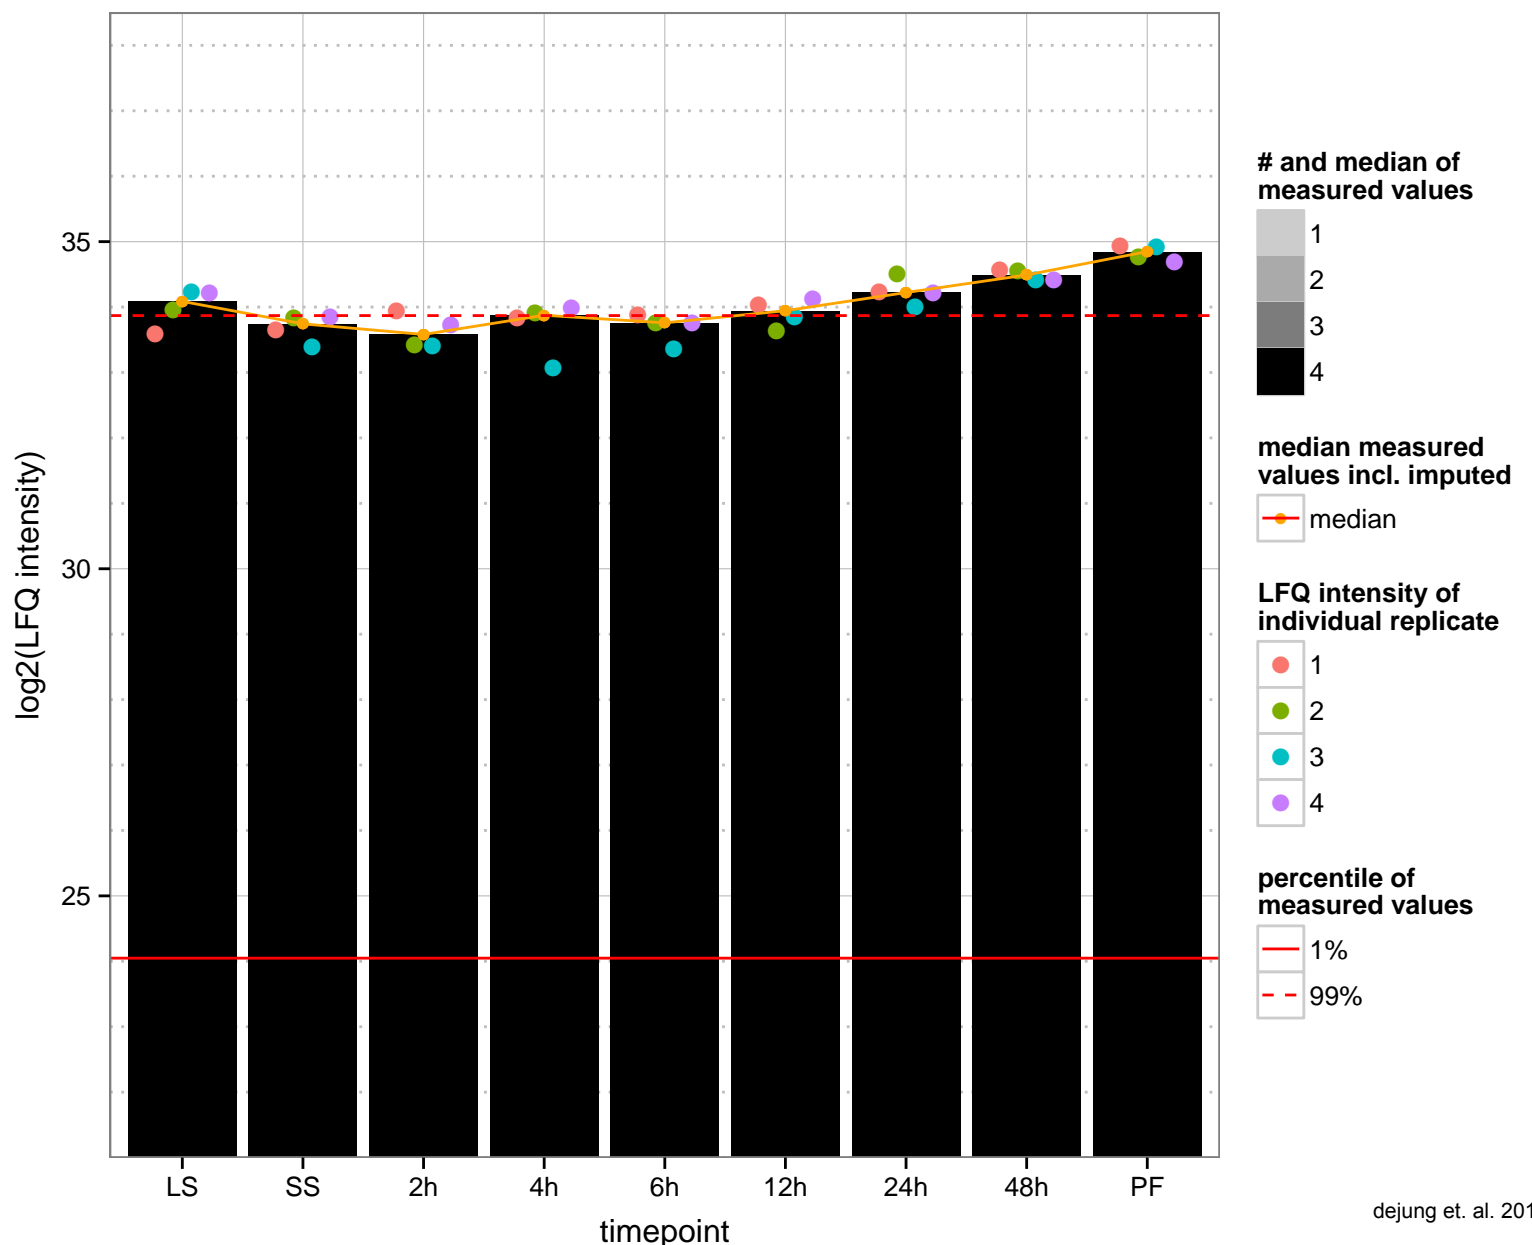

Tubulin/FtsZ family, putative  
 Tb927.1.1540  
 AGOF: null  
 AGOC: null  
 AGOP: null  
 PGO: null  
 PGOC: protein complex  
 PGOP: protein polymerization

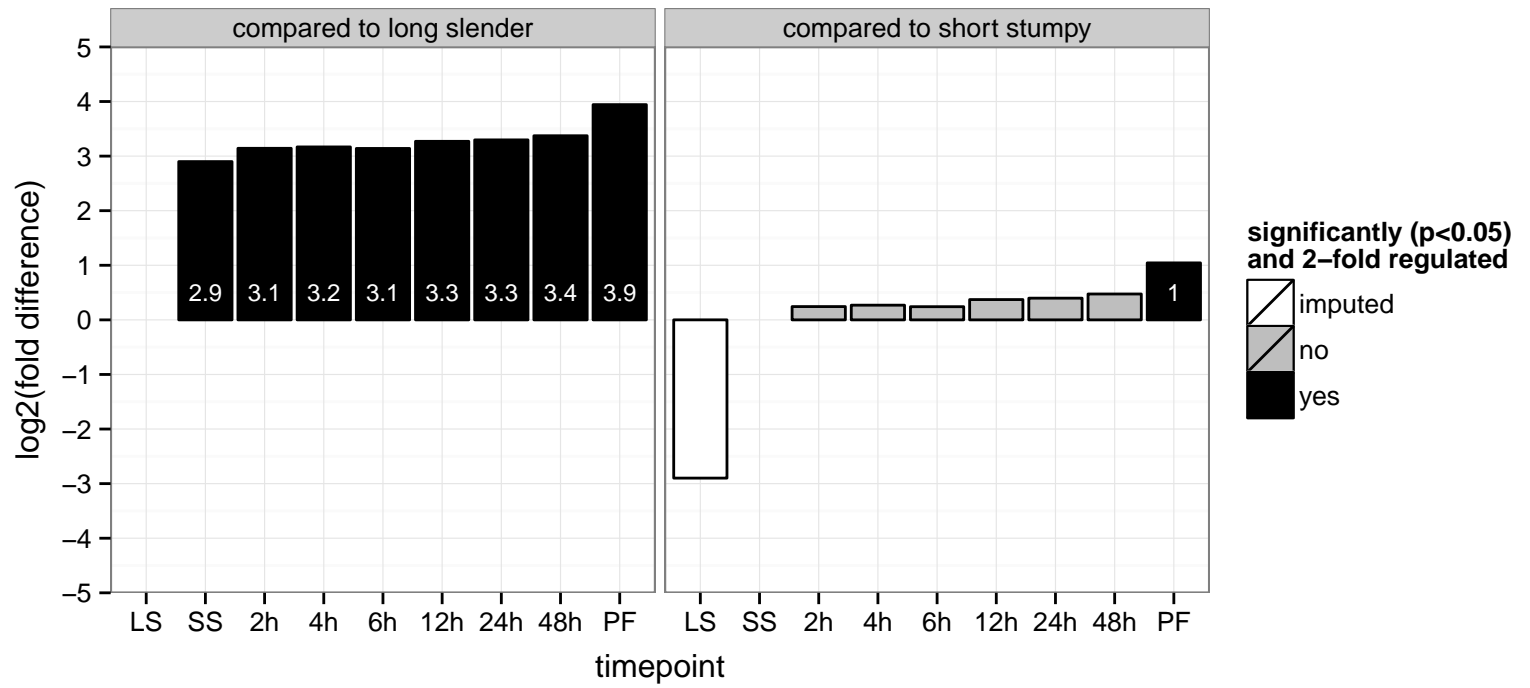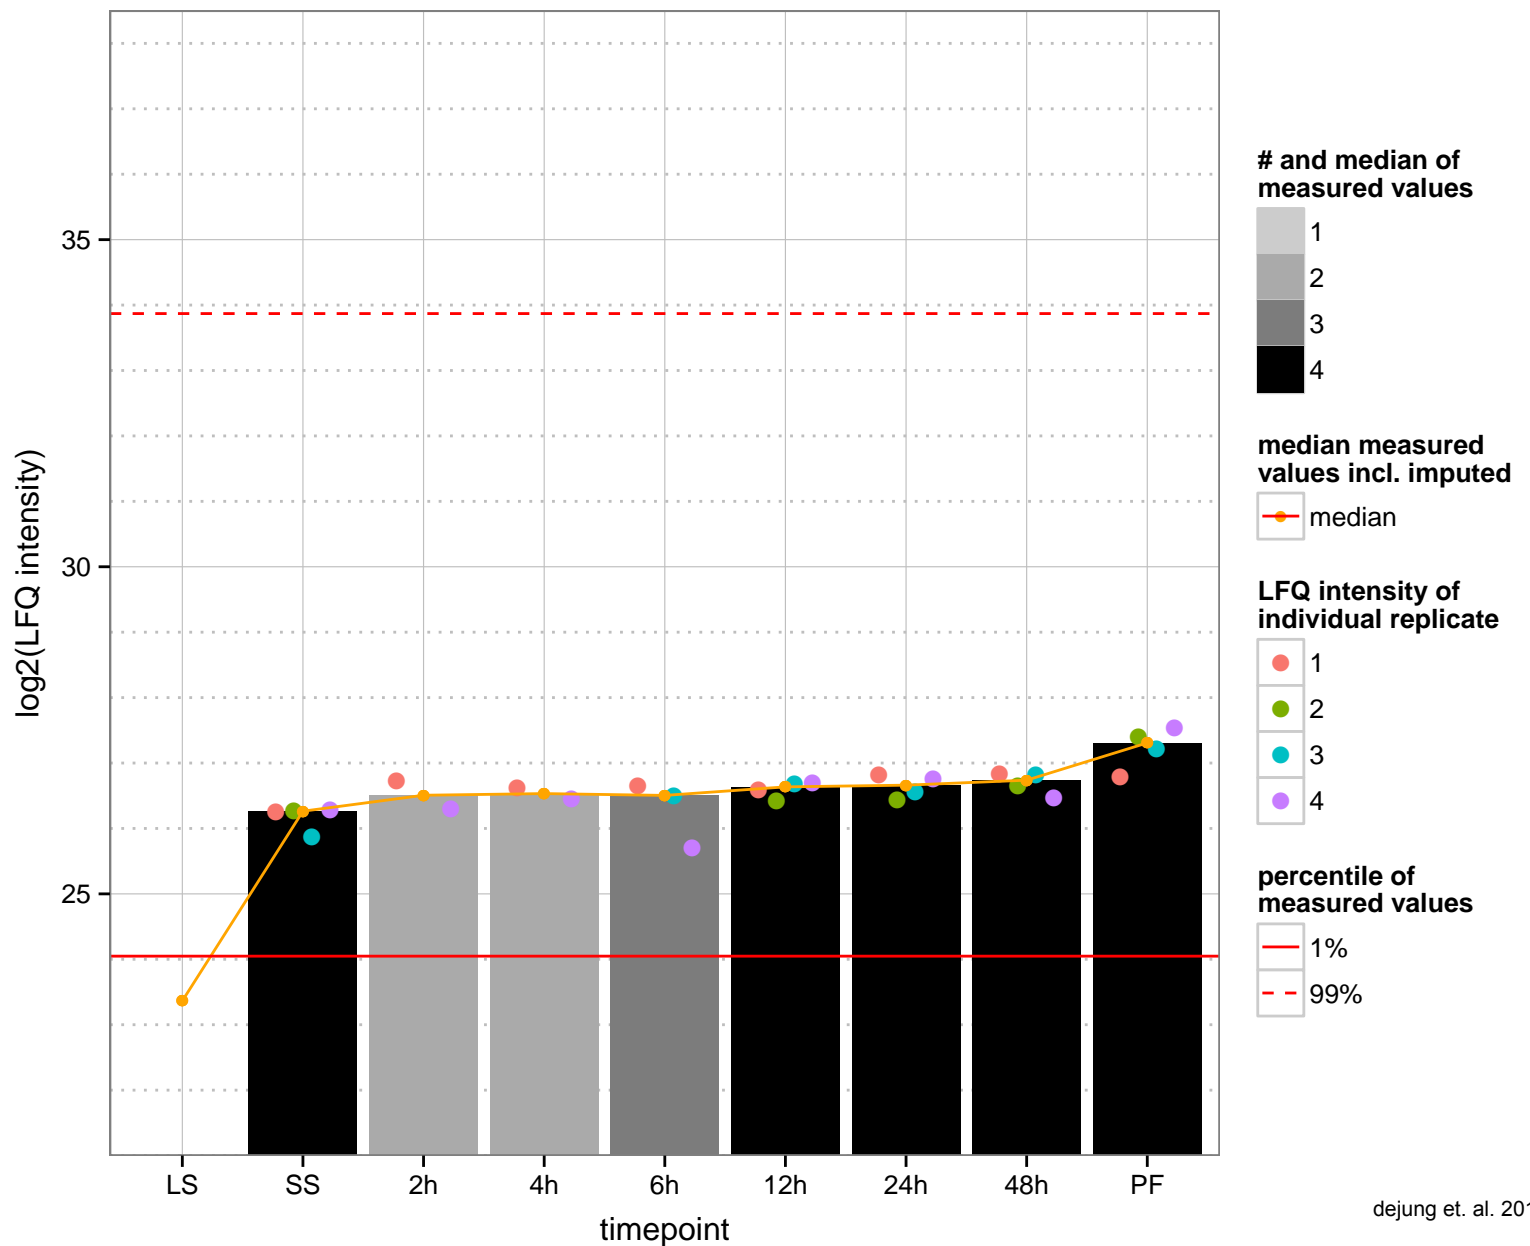

tubulin-tyrosine ligase, putative  
 Tb927.1.1550  
 AGOF: tubulin-tyrosine ligase activity  
 AGOC: null  
 AGOP: cellular protein modification process  
 PGOF: tubulin-tyrosine ligase activity  
 PGOC: null  
 PGOP: cellular protein modification process

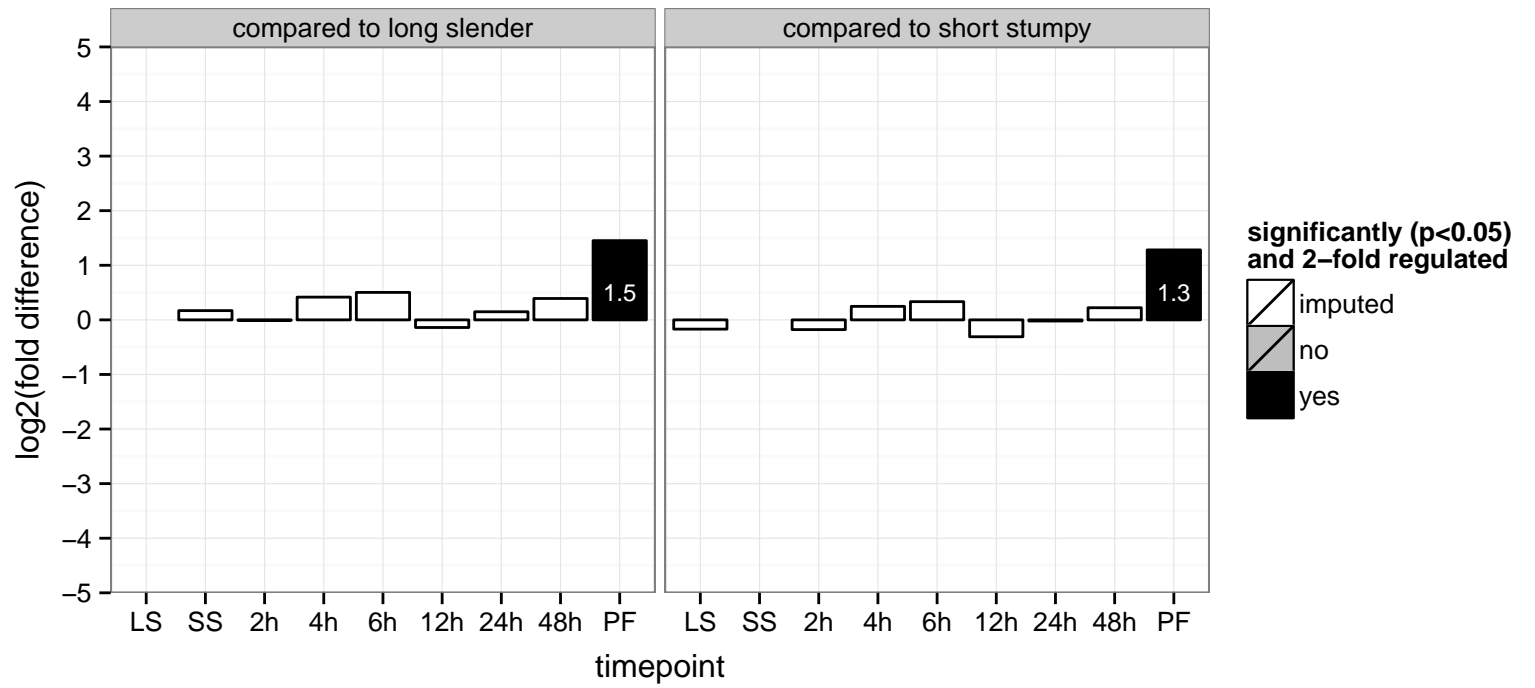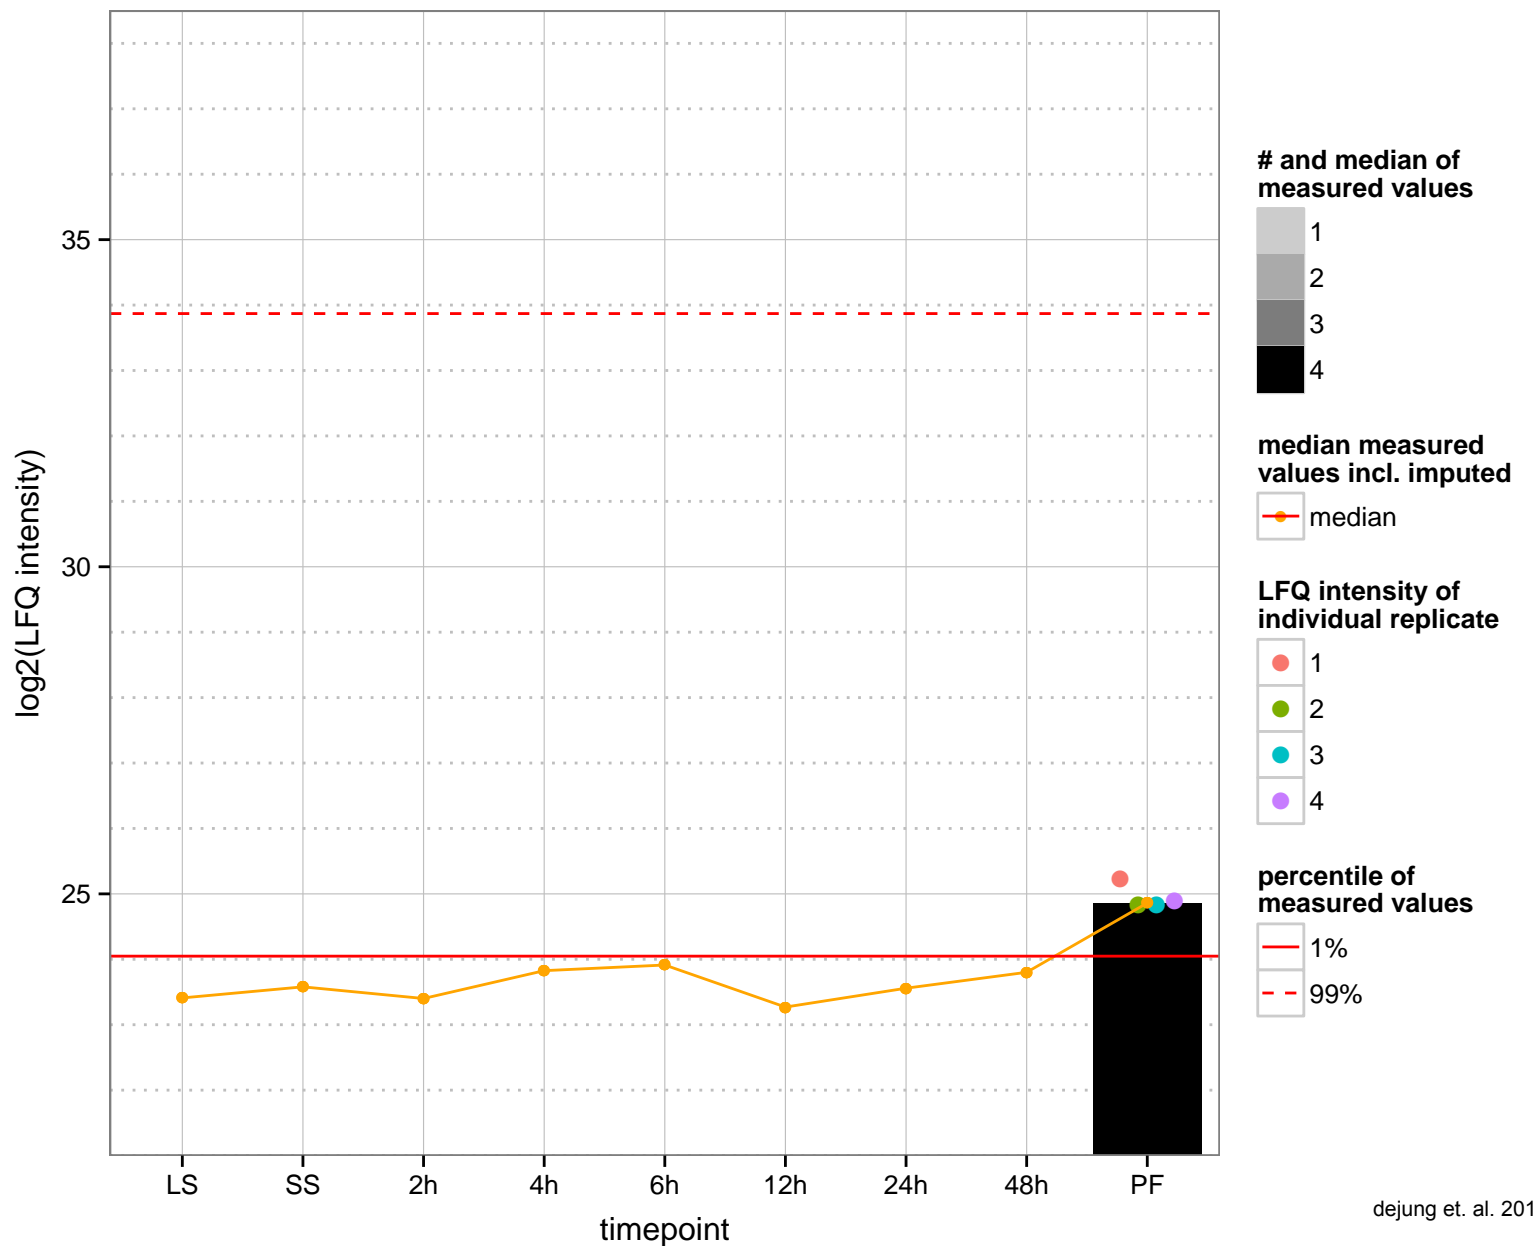

RNasePH-like protein, exosome-associated protein 1, Rrp42 homologue (TbEAP1)  
 Tb927.1.2580  
 AGOF: 3'-5'-exoribonuclease activity, RNA binding  
 AGOC: null  
 AGOP: RNA processing  
 PGOF: null  
 PGOC: null  
 PGOP: null

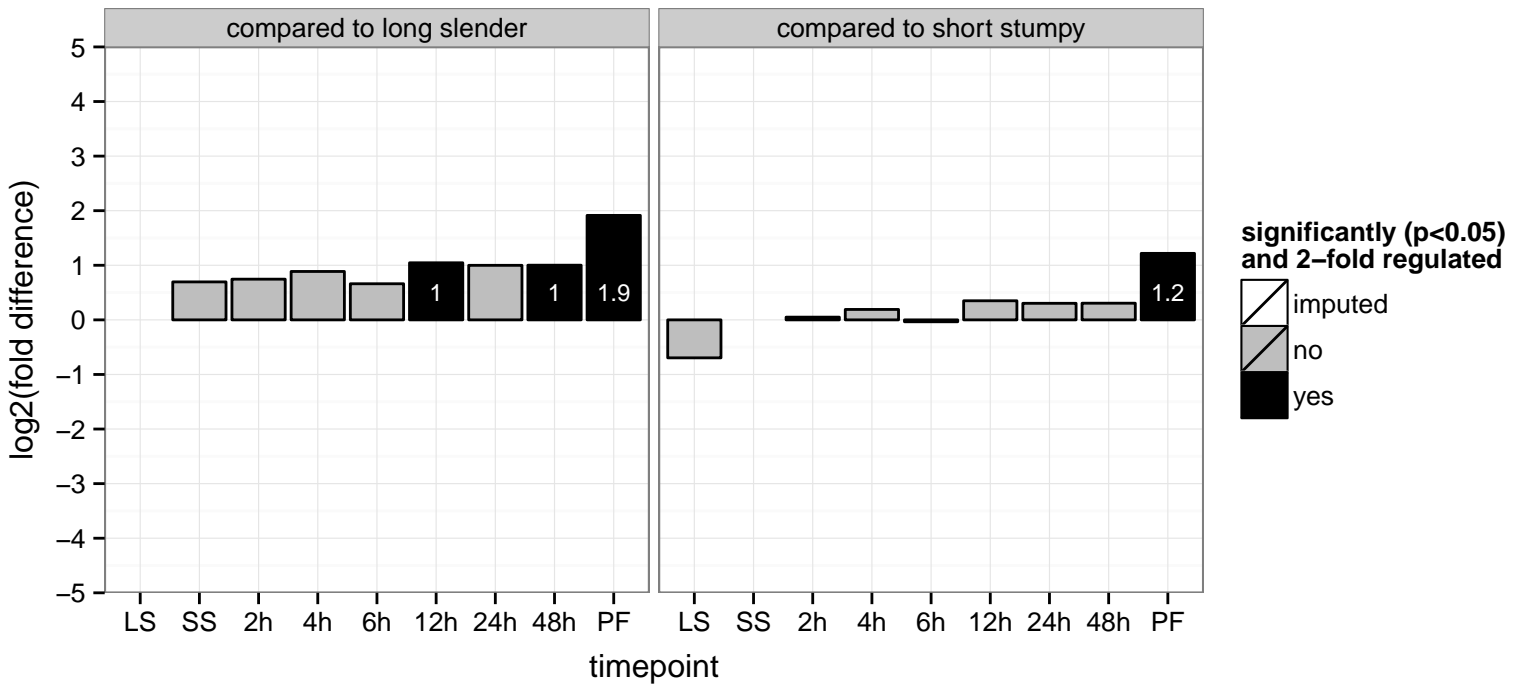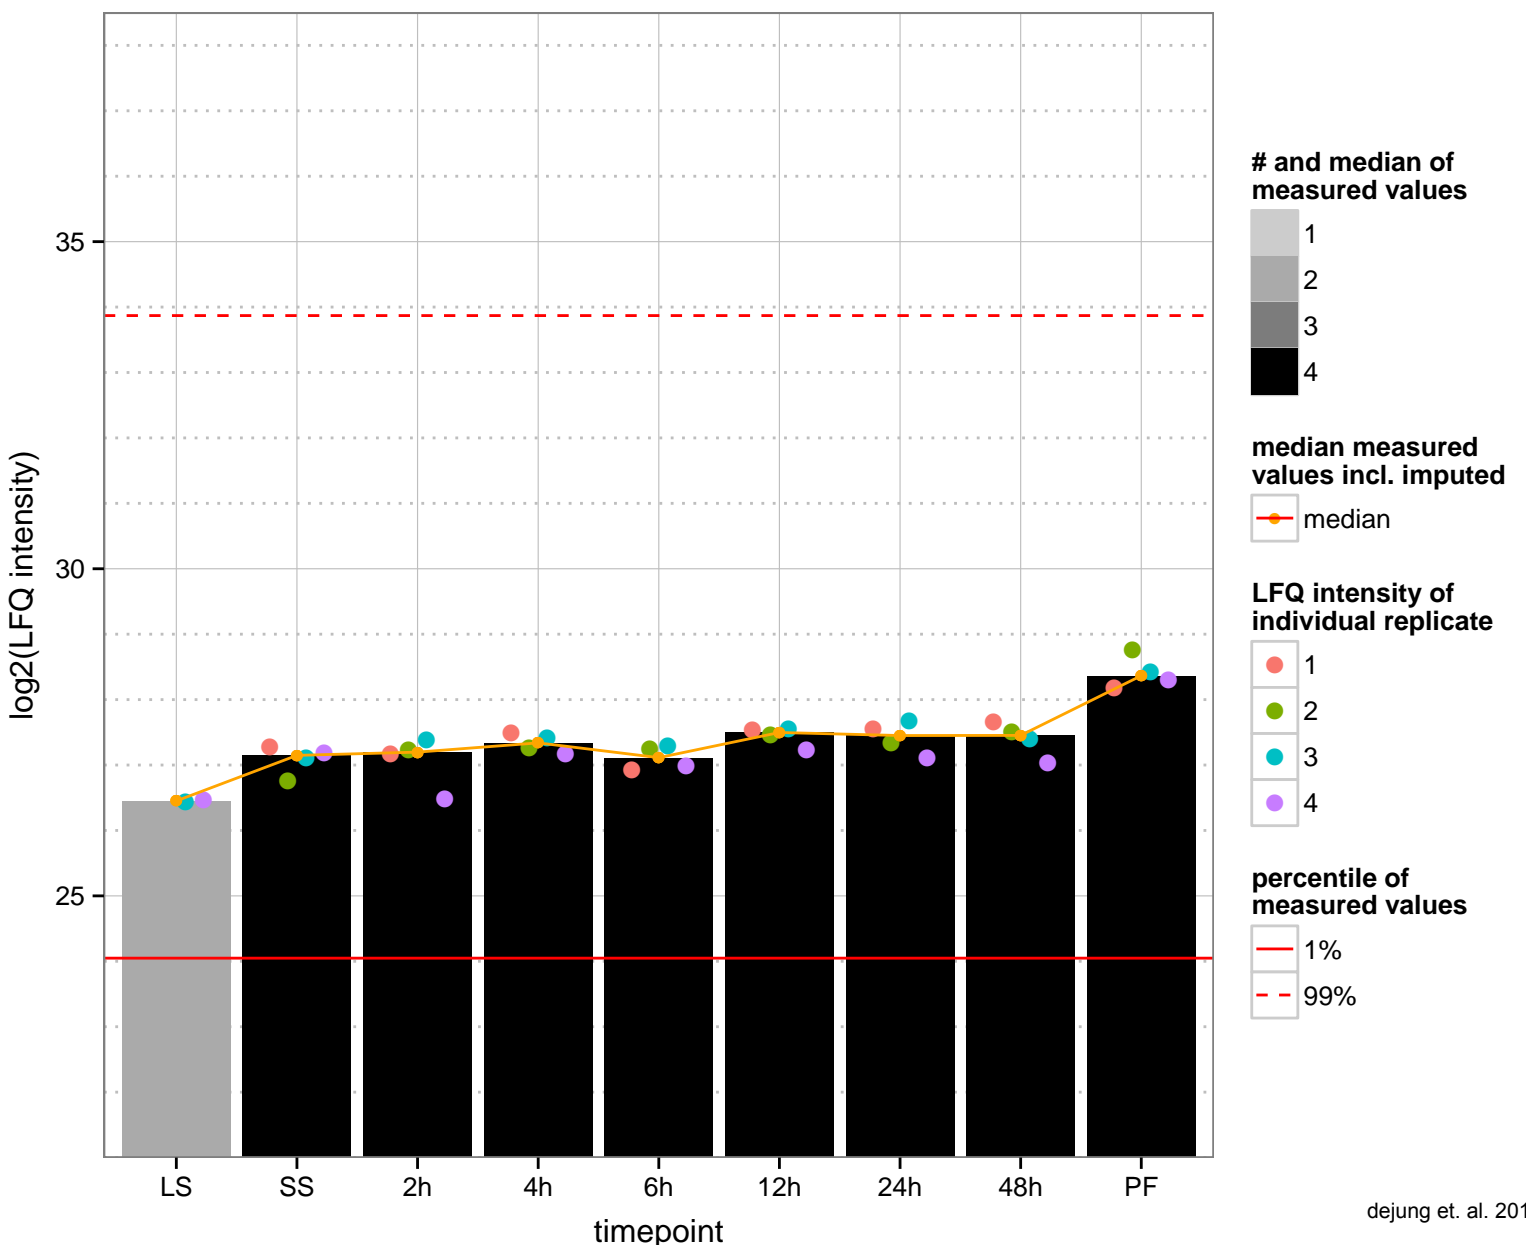

hypothetical protein, conserved  
 Tb927.1.2750  
 AGOF: null  
 AGOC: null  
 AGOP: null  
 PGO: null  
 PGOC: null  
 PGOP: null

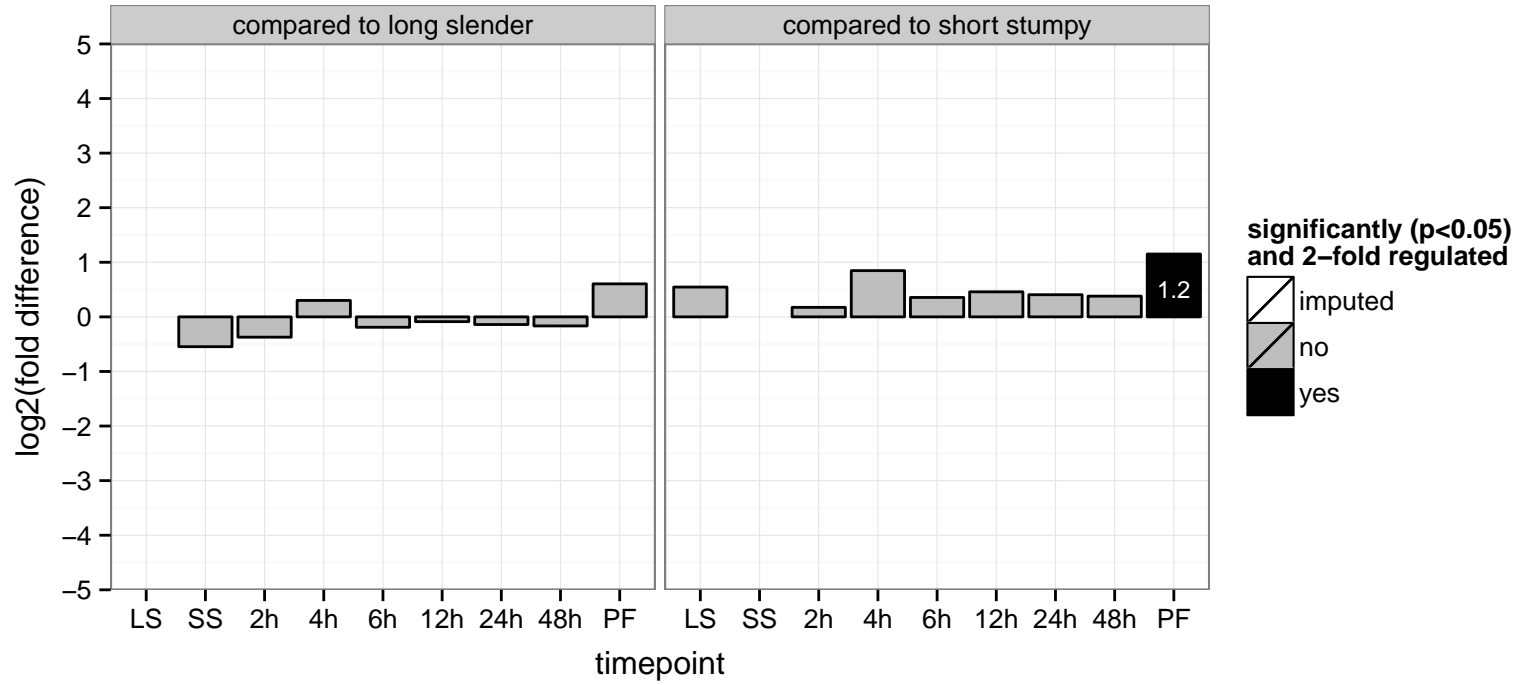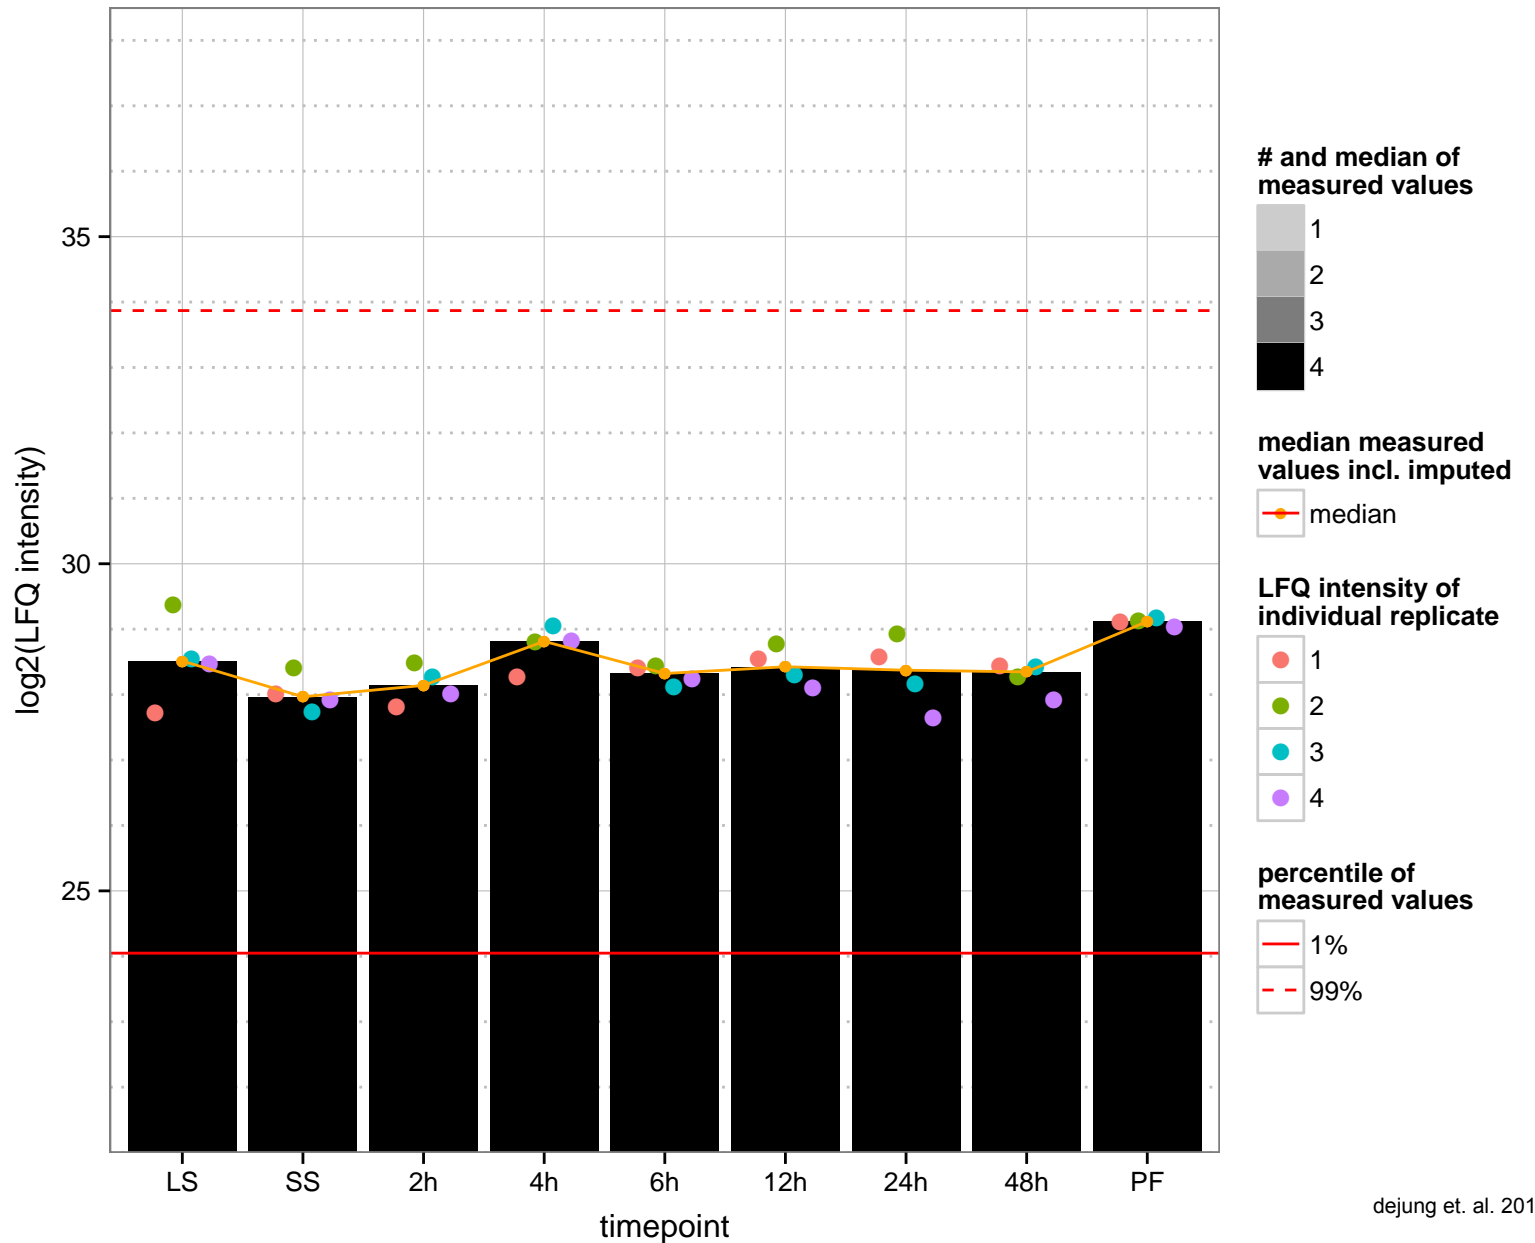



mRNA processing protein, putative  
 Tb927.1.3010  
 AGOF: mRNA binding  
 AGOC: mitochondrion  
 AGOP: mRNA processing  
 PGO: null  
 PGO: null  
 PGO: null

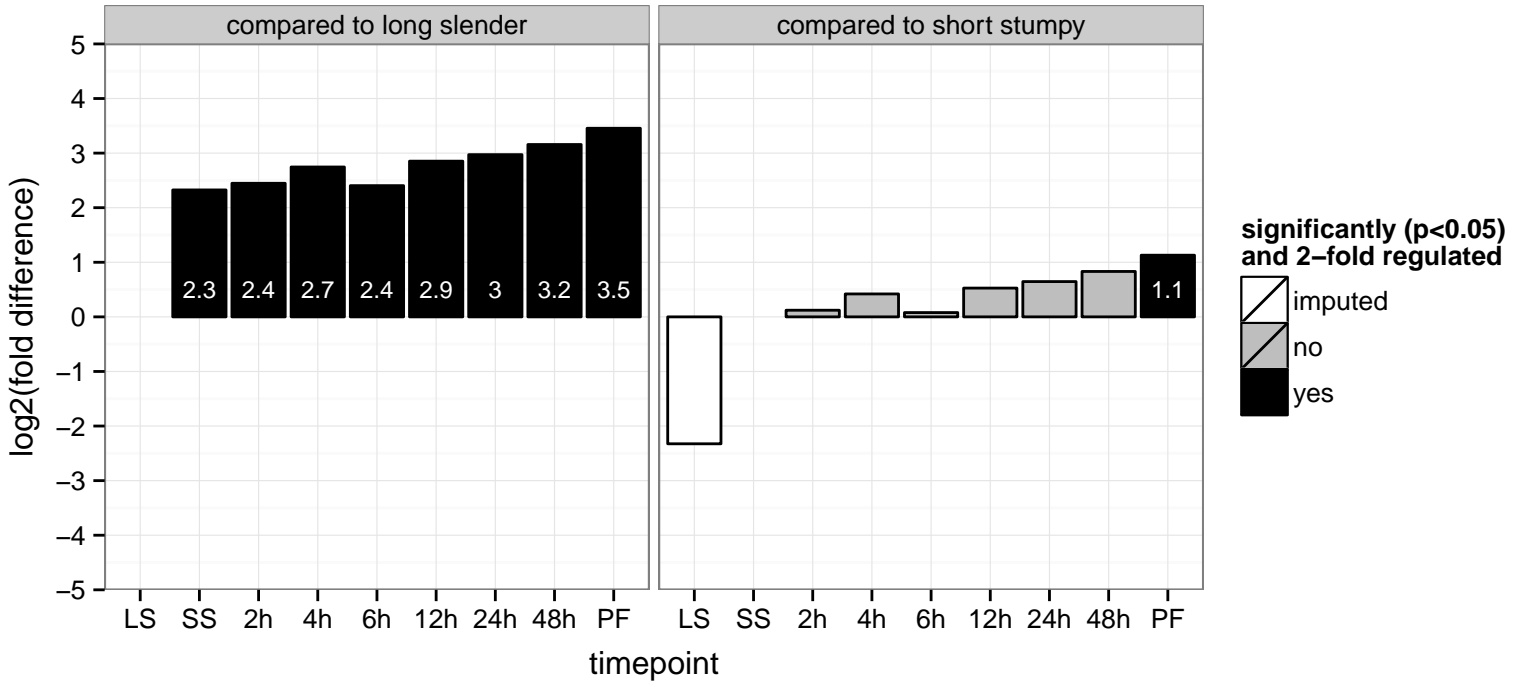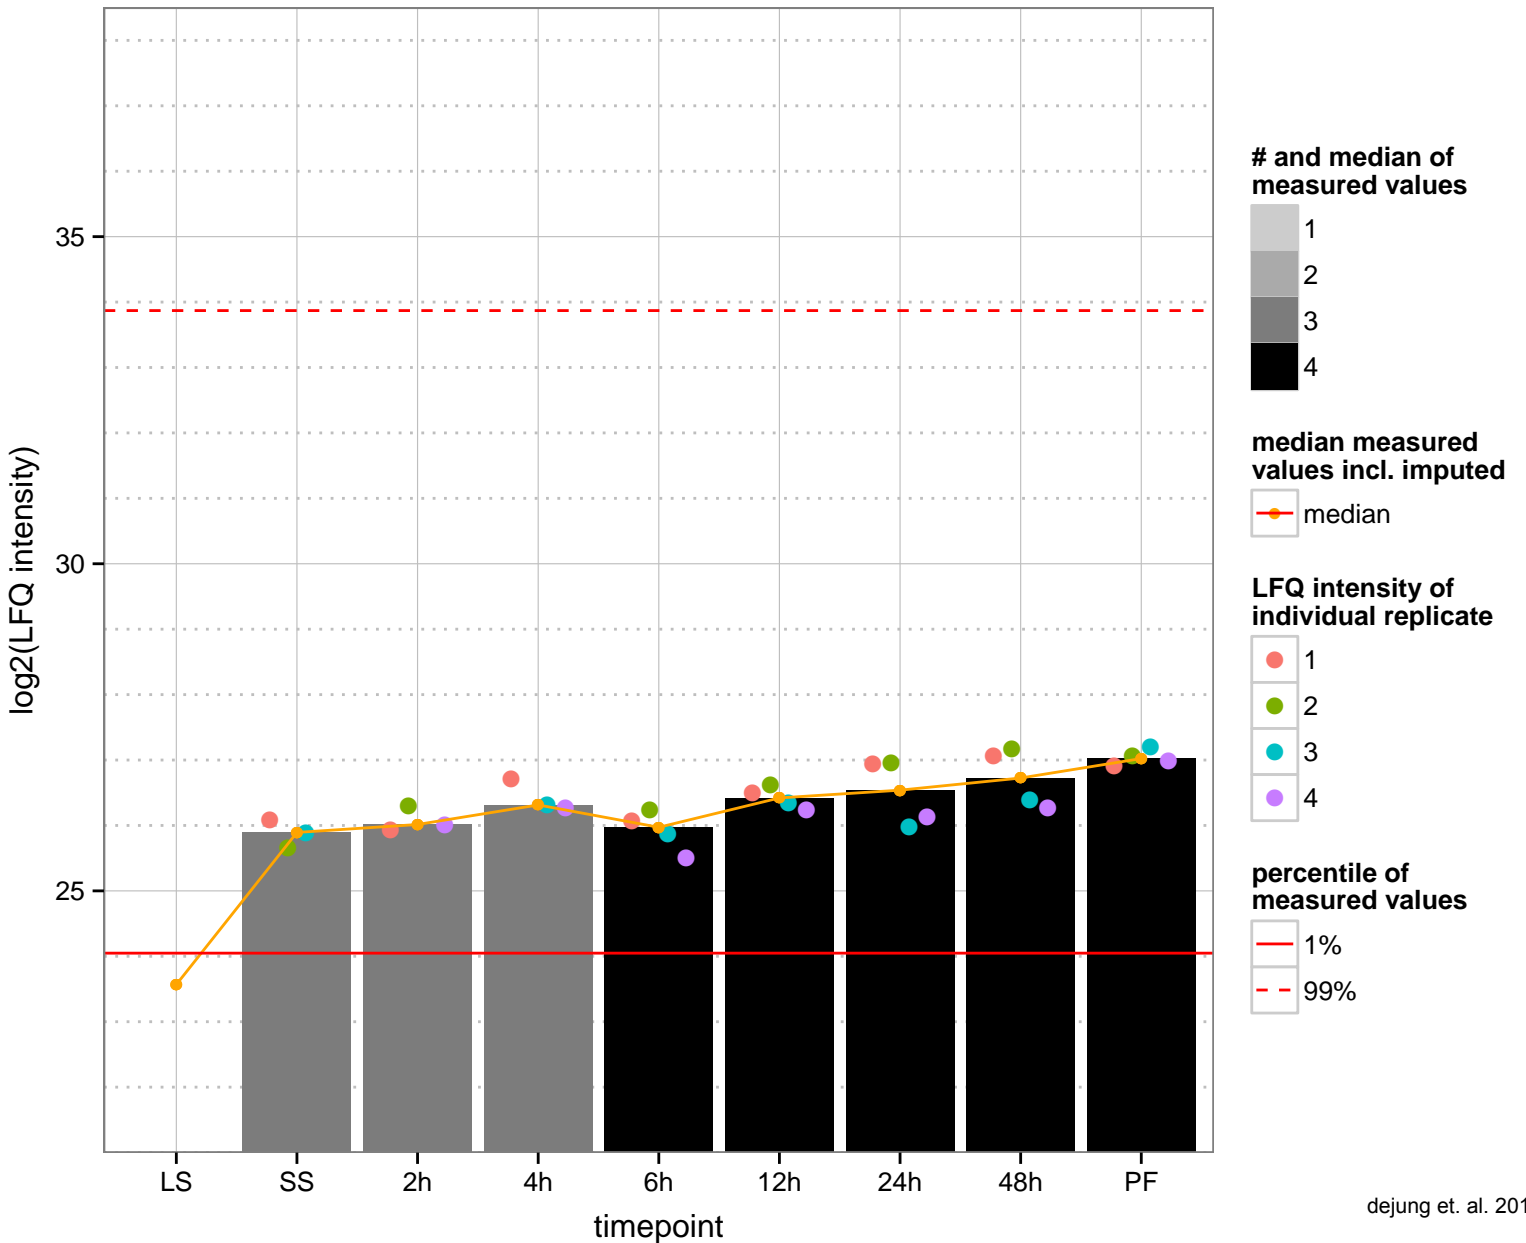

hypothetical protein, conserved  
 Tb927.1.3050  
 AGOF: methyltransferase activity  
 AGOC: null  
 AGOP: metabolic process  
 PGO: RNA methyltransferase activity  
 PGO: null  
 PGOP: RNA processing

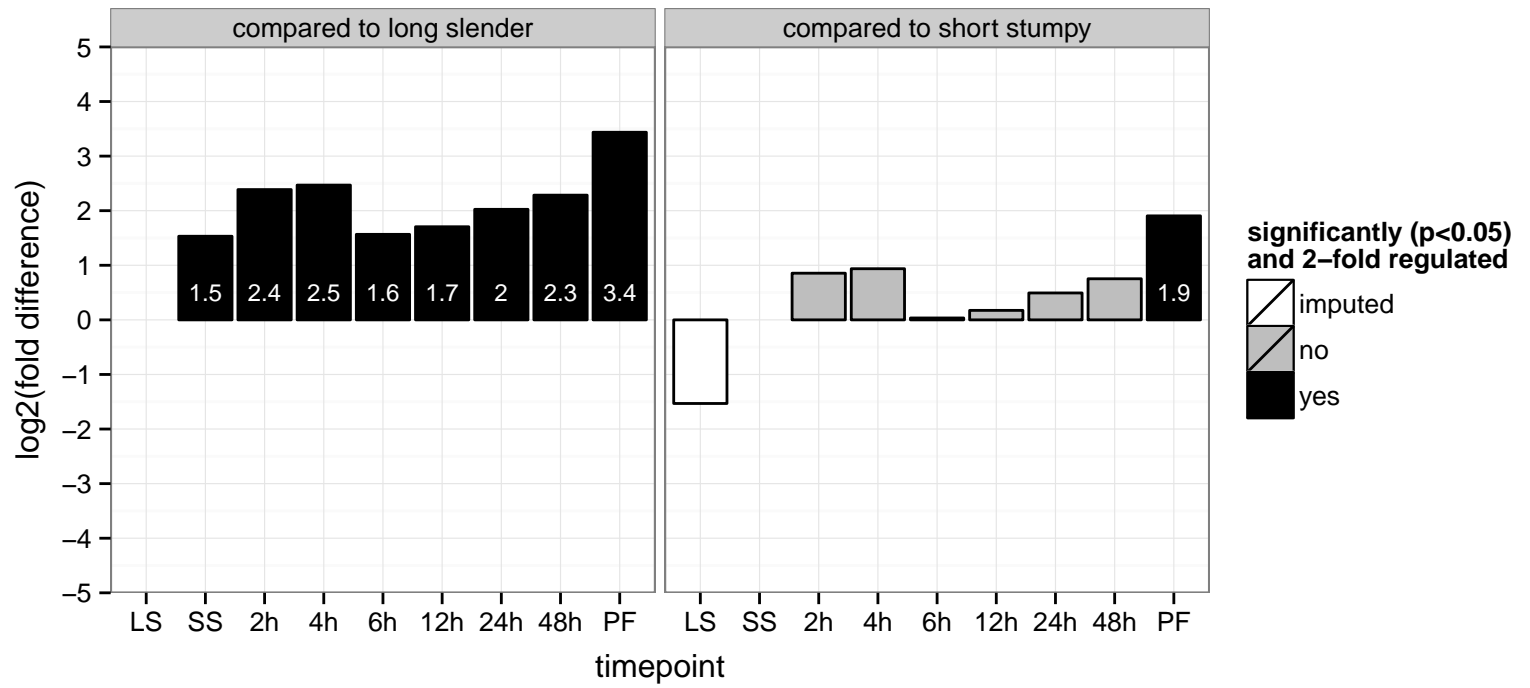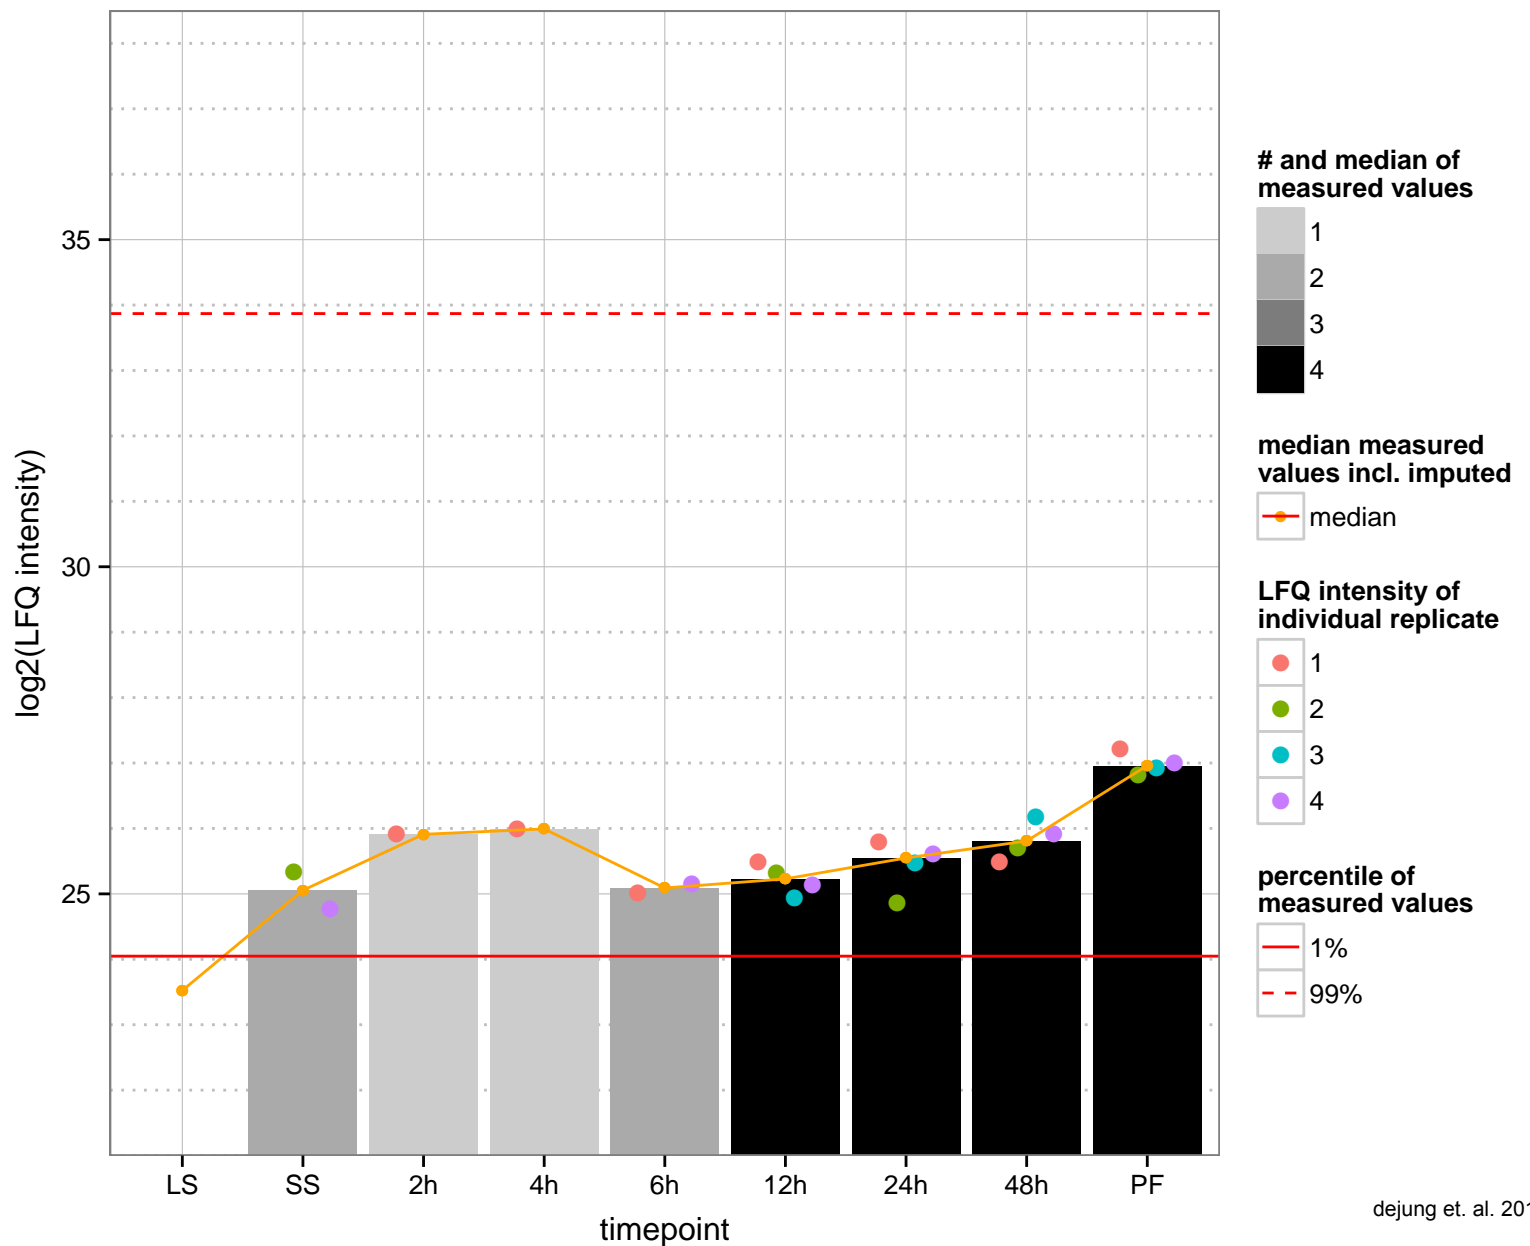

conserved protein, unknown function  
 Tb927.1.650  
 AGOF: null  
 AGOC: null  
 AGOP: chromatin organization  
 PGO: null  
 PGOC: null  
 PGOP: null

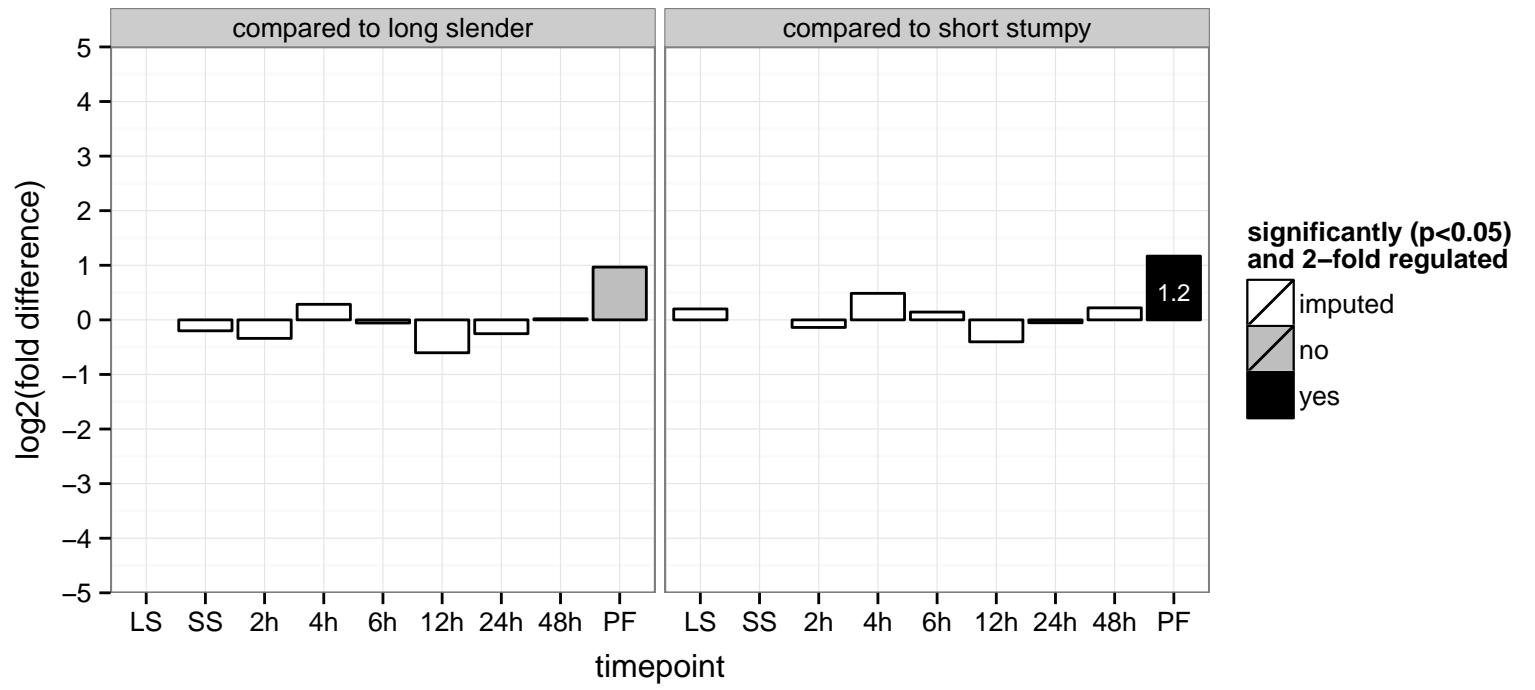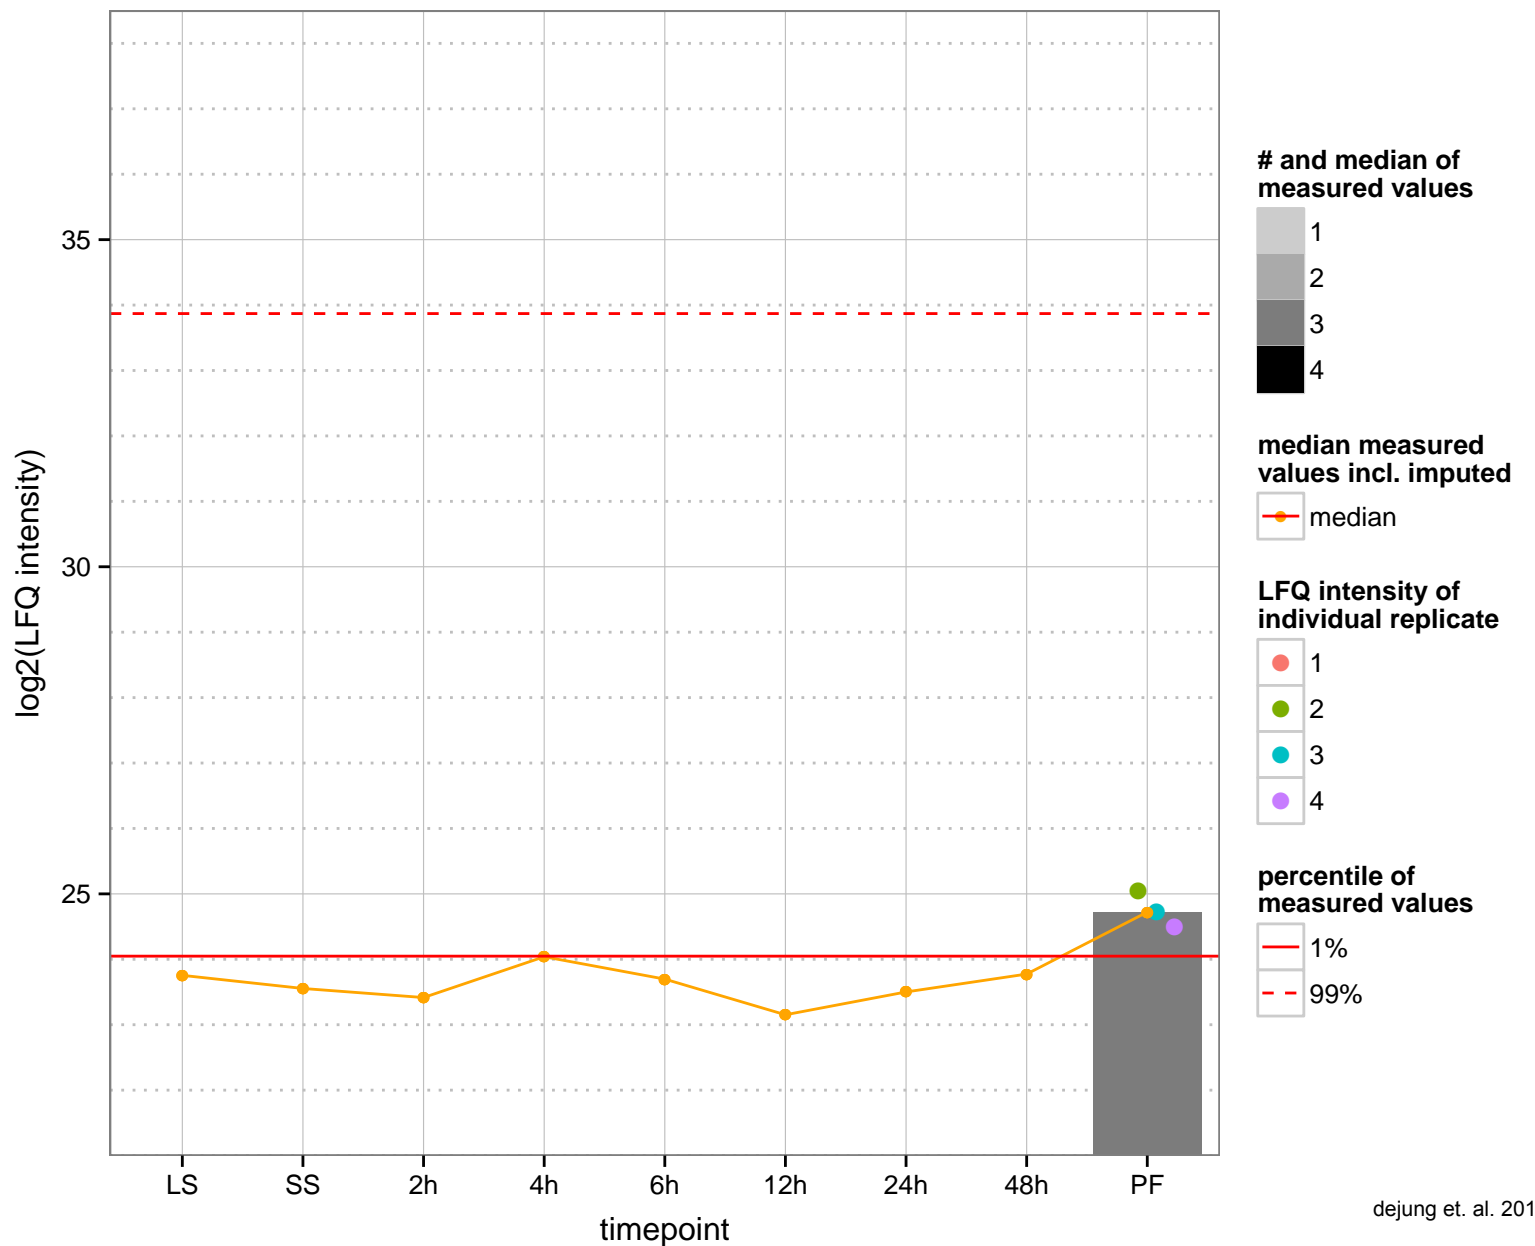

phosphoglycerate kinase (PGKA)  
 Tb927.1.720  
 AGOF: phosphoglycerate kinase activity  
 AGOC: glycosome  
 AGOP: glycolysis  
 PGOF: phosphoglycerate kinase activity  
 PGO: null  
 PGOP: glycolysis

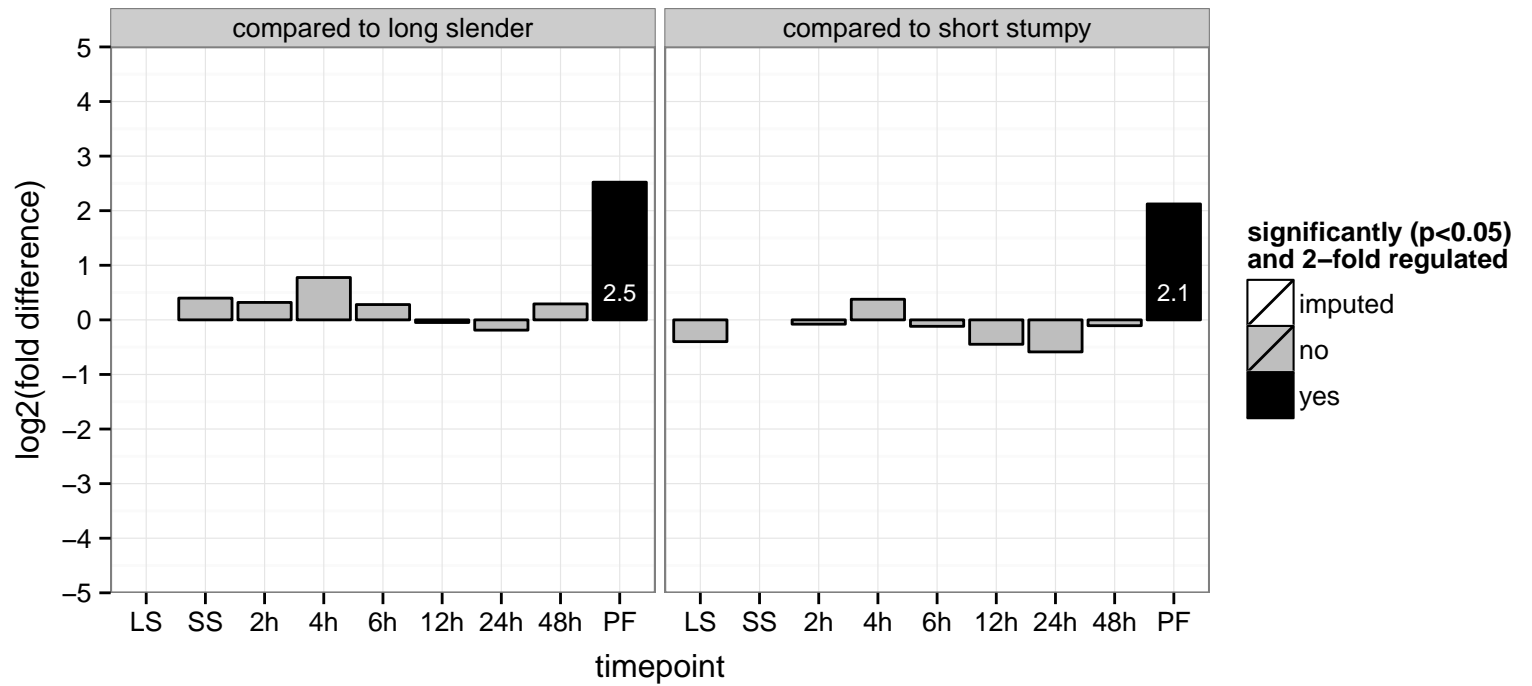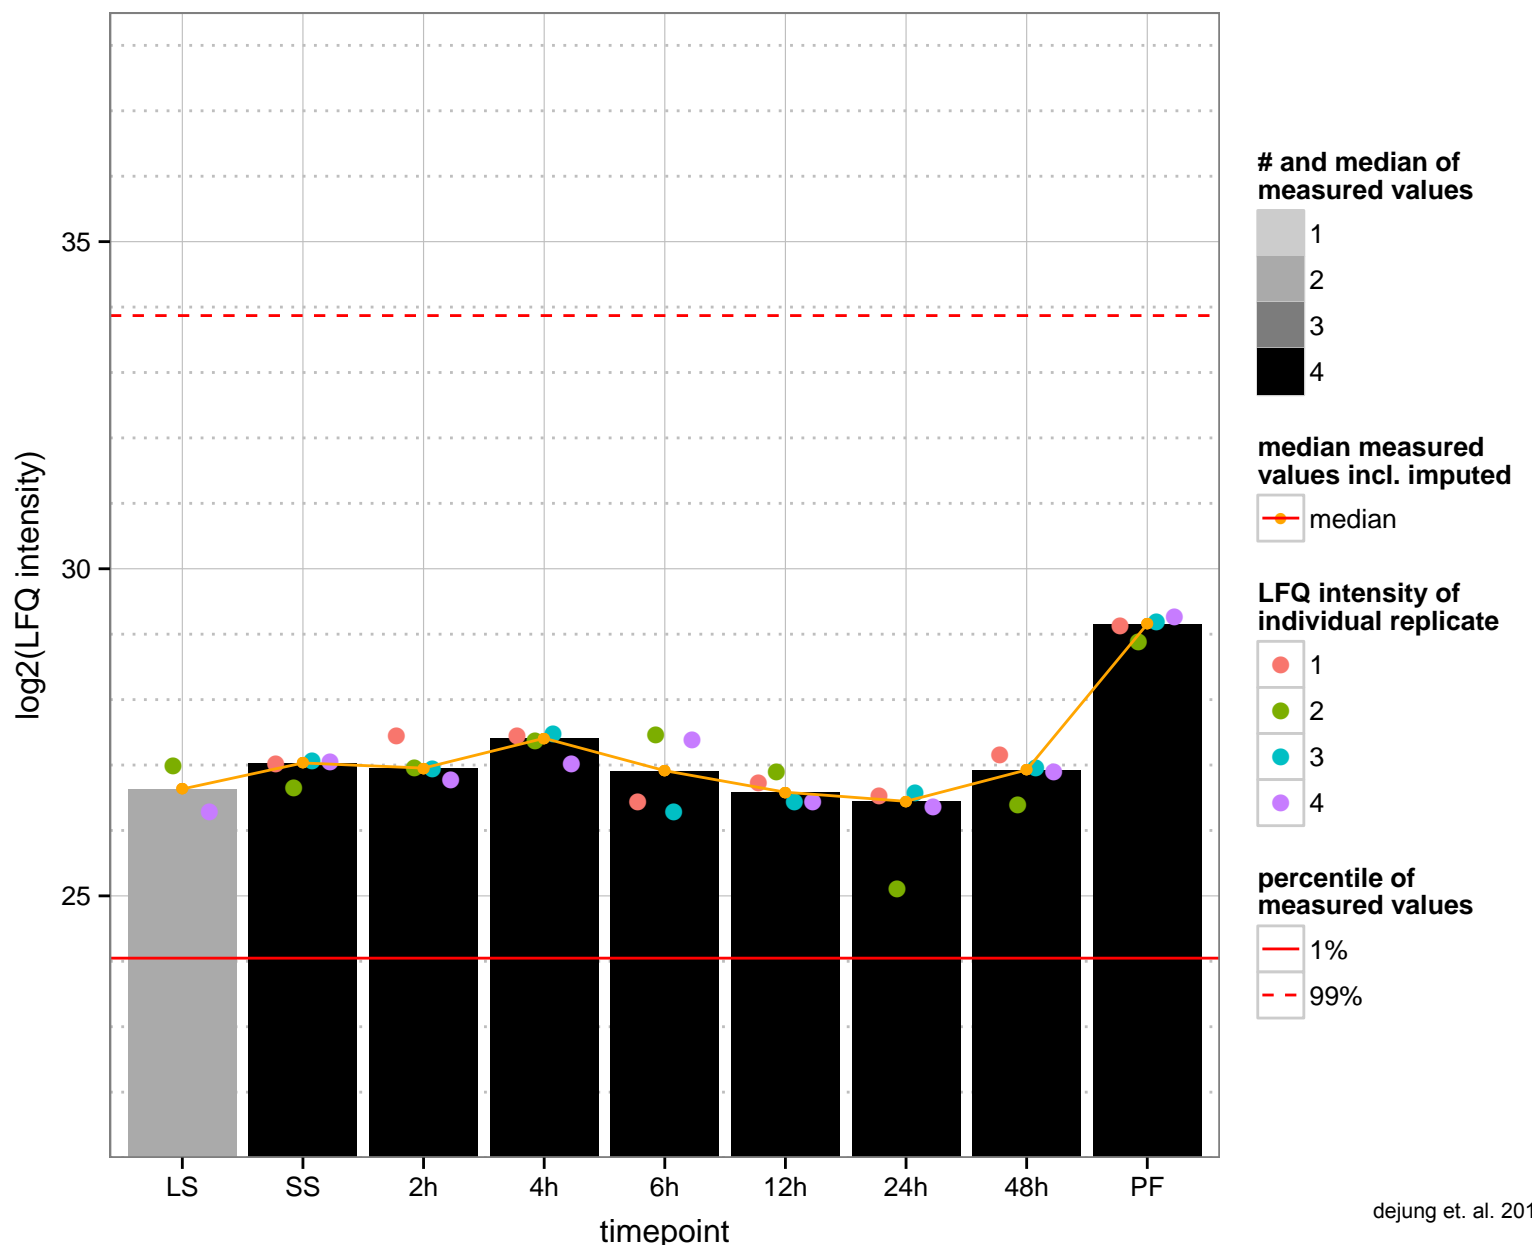

predicted WD40 repeat protein  
 Tb927.10.10170  
 AGOF: null  
 AGOC: null  
 AGOP: null  
 PGO: protein binding  
 PGOC: null  
 PGOP: null

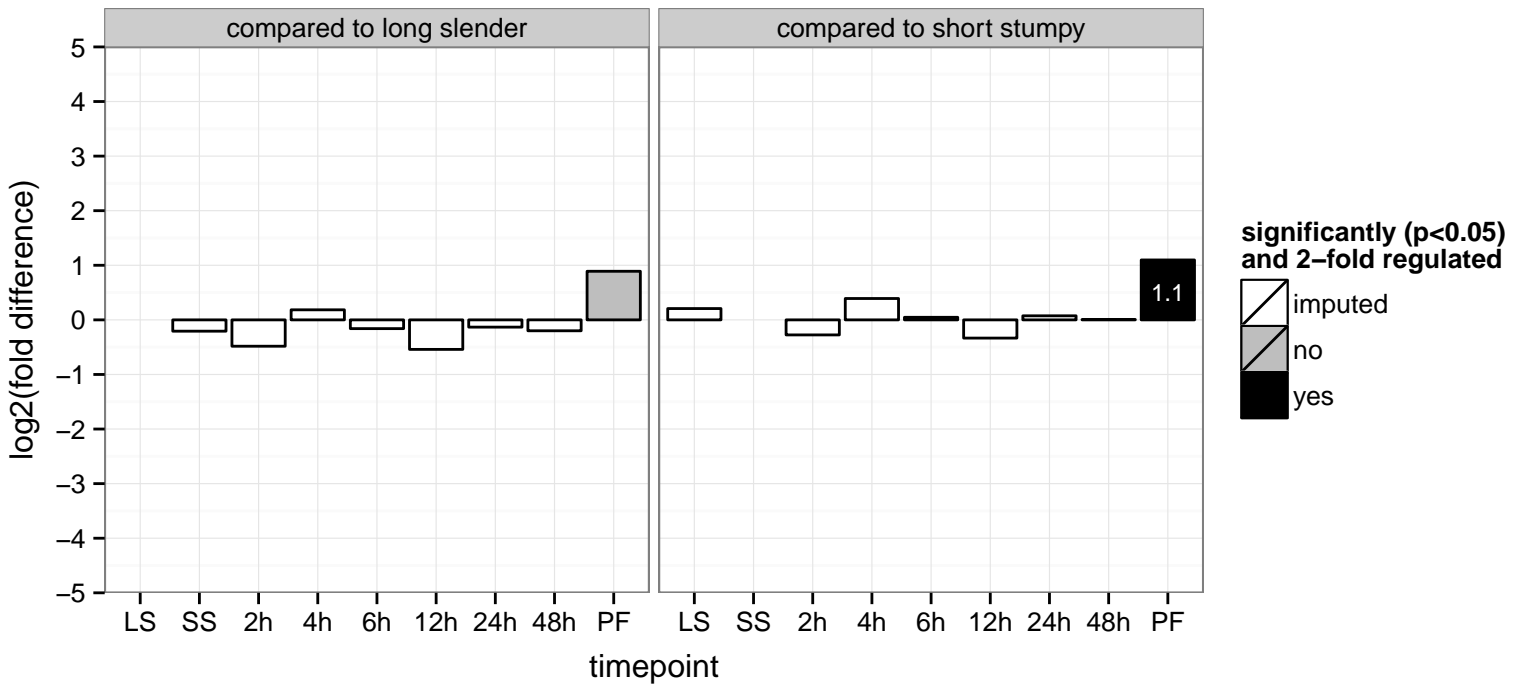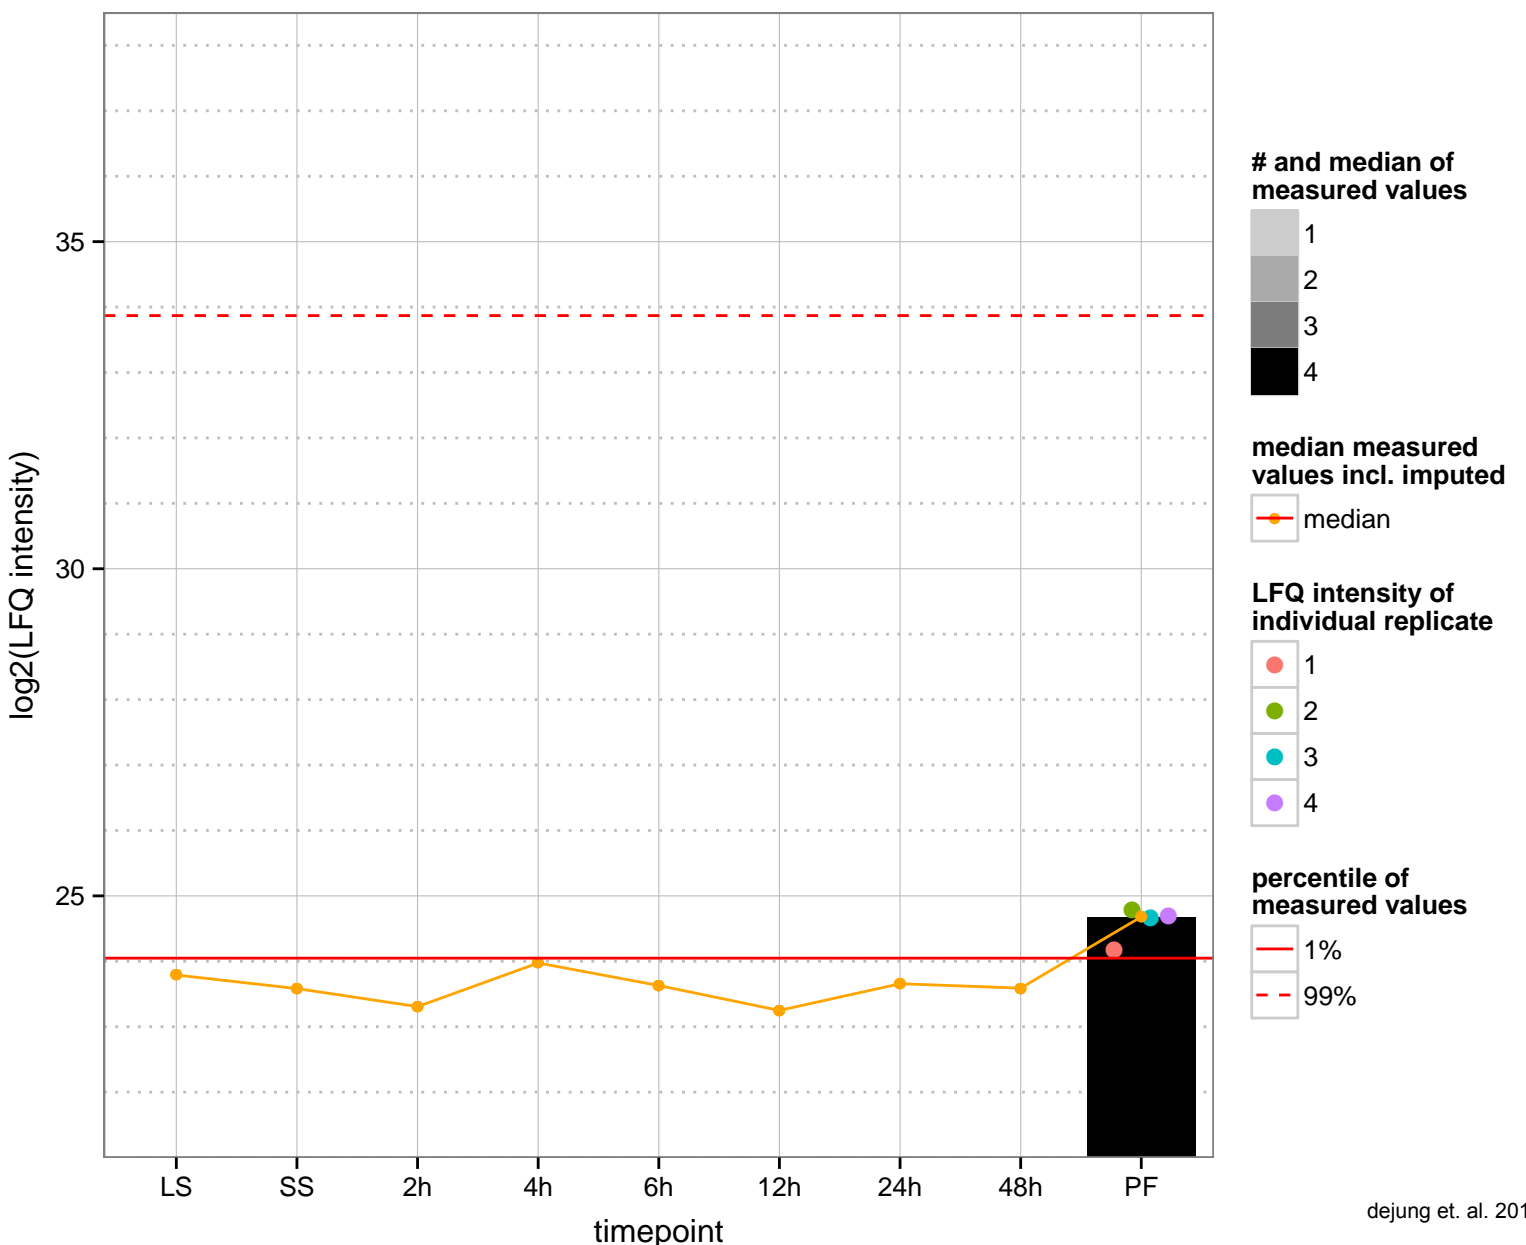

hypothetical protein, conserved  
 Tb927.10.10690  
 AGOF: null  
 AGOC: null  
 AGOP: null  
 PGOF: null  
 PGO C: null  
 PGOP: null

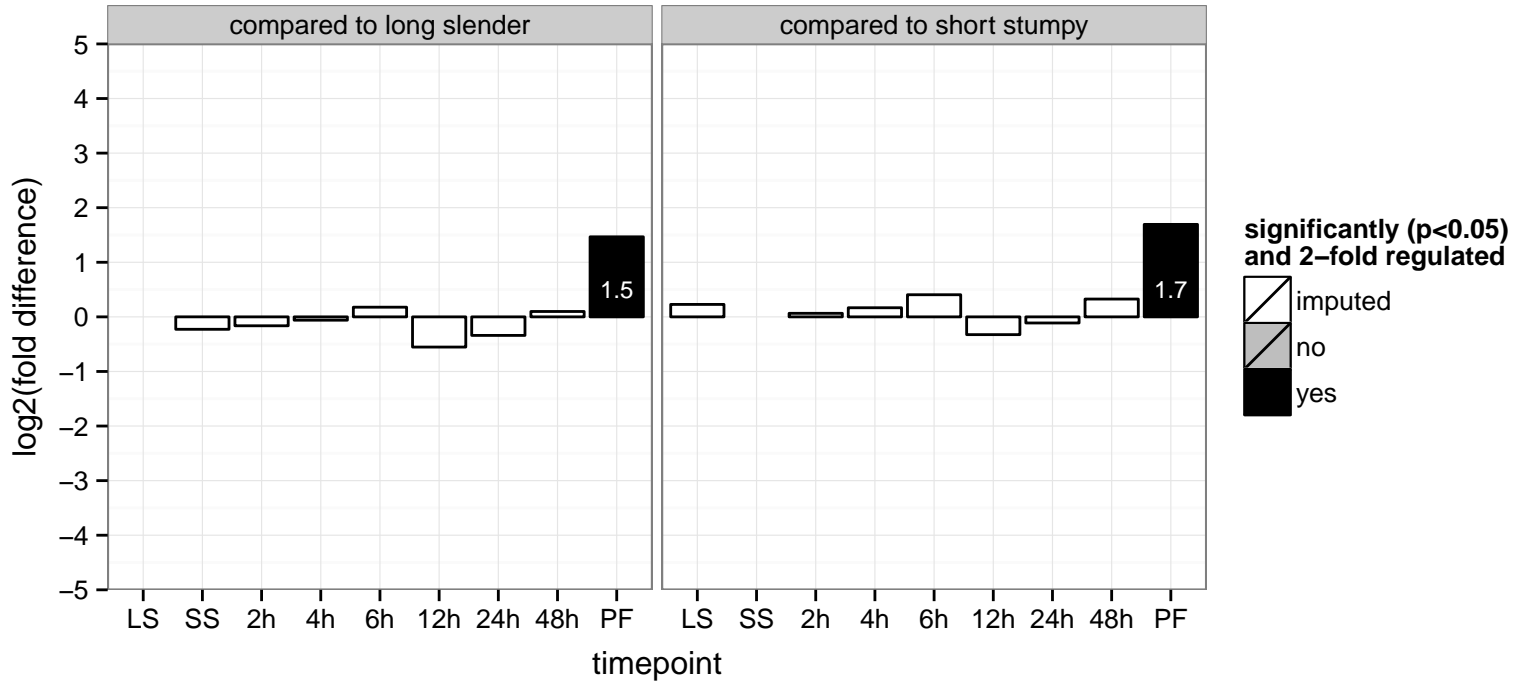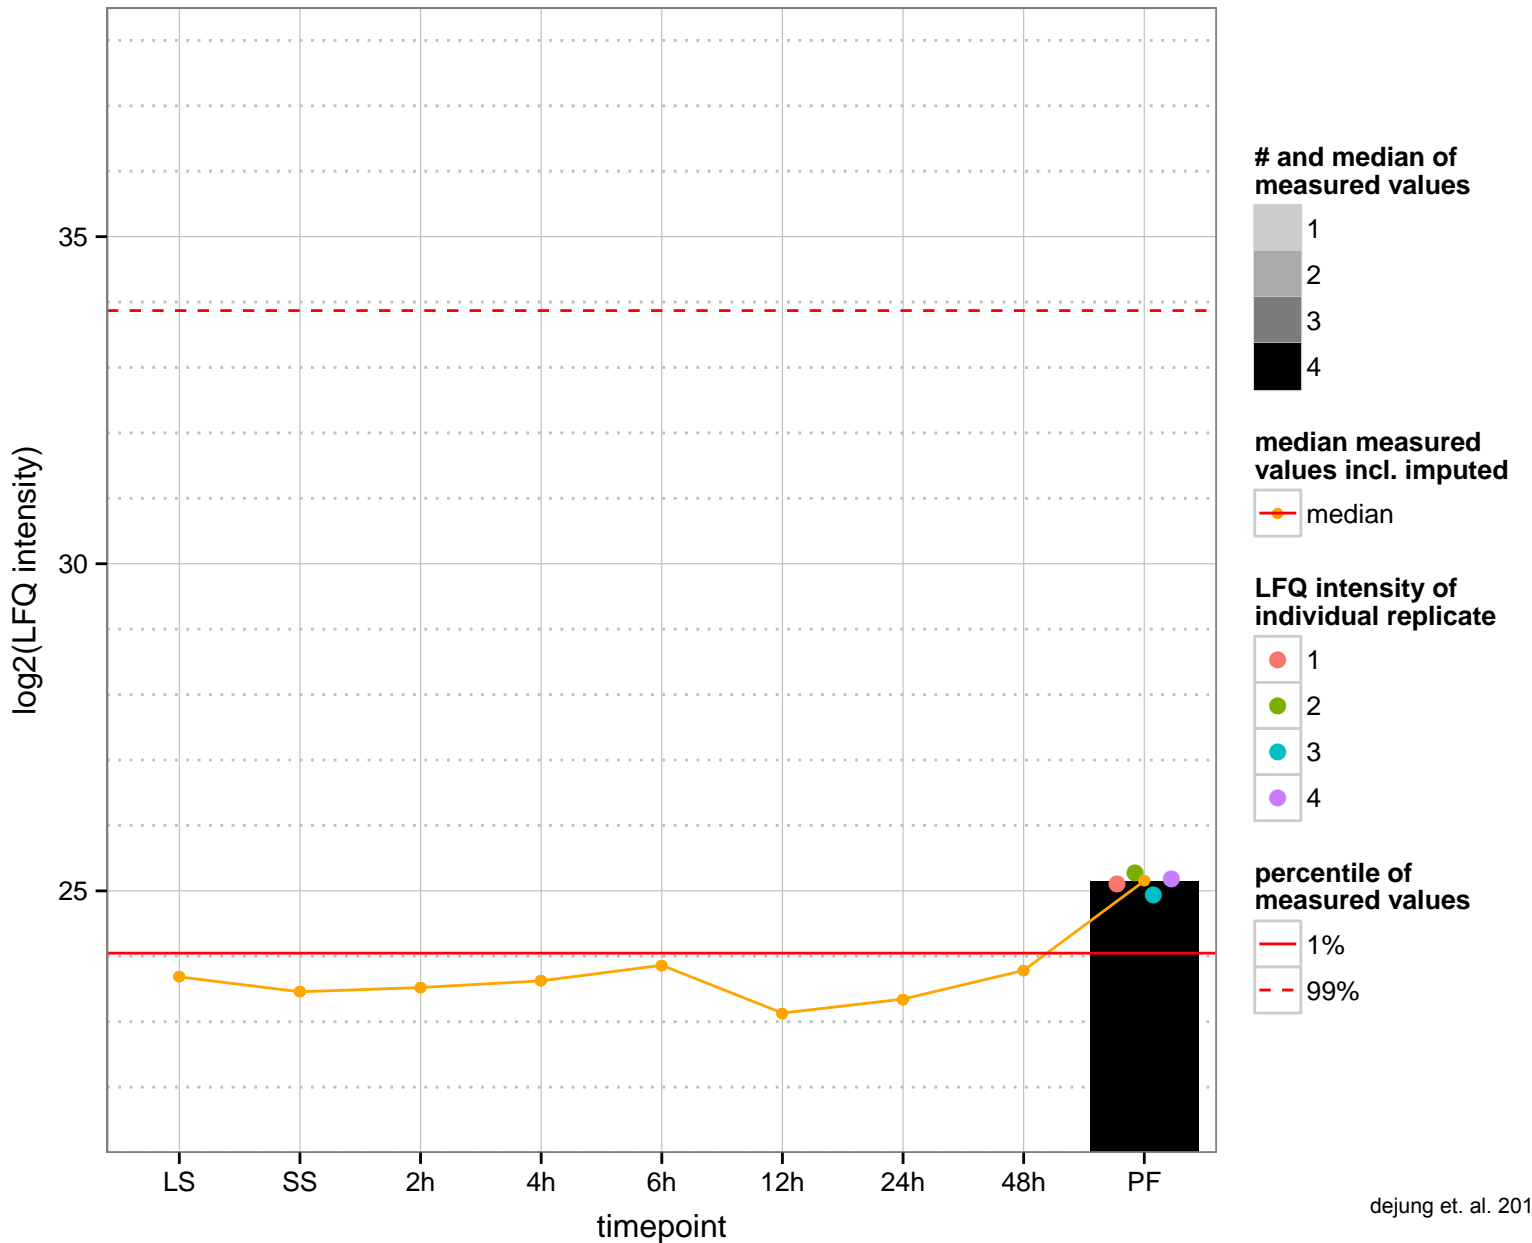

hypothetical protein, conserved  
 Tb927.10.11230  
 AGOF: null  
 AGOC: null  
 AGOP: null  
 PGOF: null  
 PGO: null  
 PGOP: null

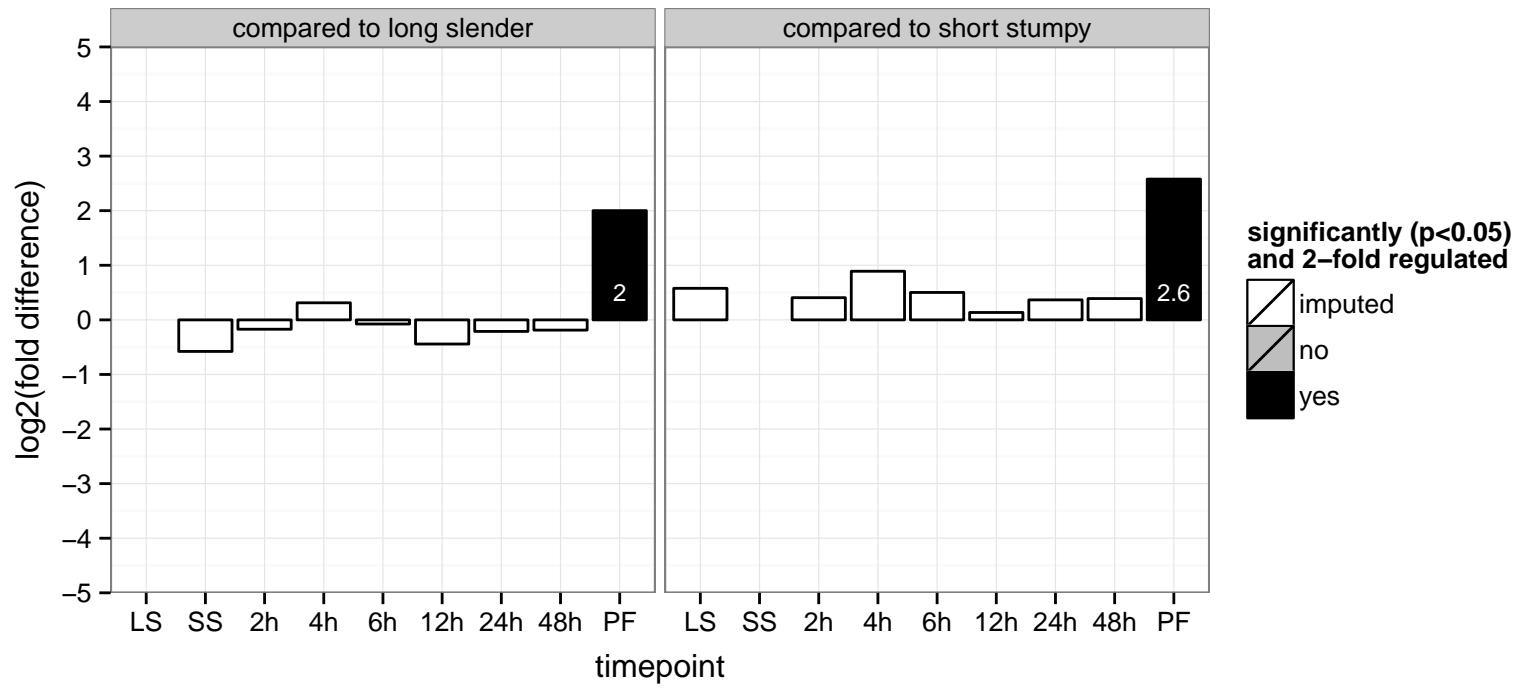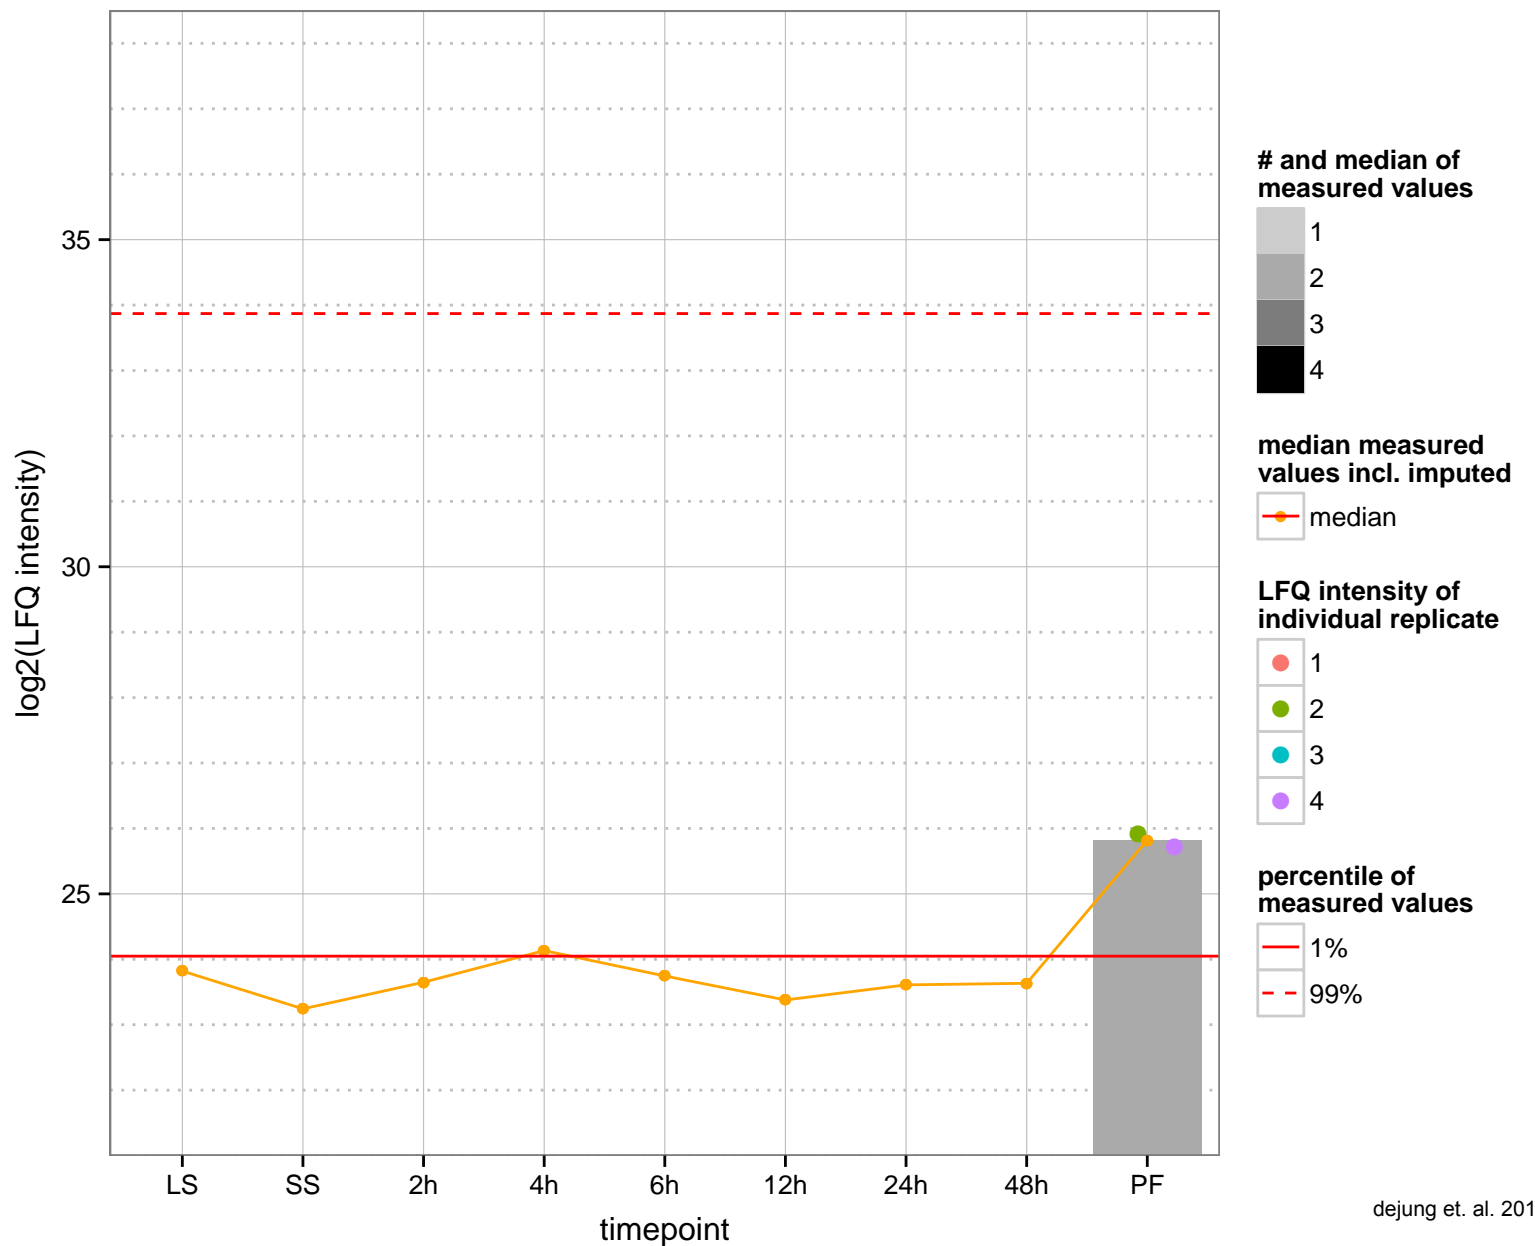

hypothetical protein, conserved  
 Tb927.10.11340;Tb11.v5.0604  
 AGOF: null  
 AGOC: null  
 AGOP: null  
 PGO: null  
 PGOC: null  
 PGOP: null

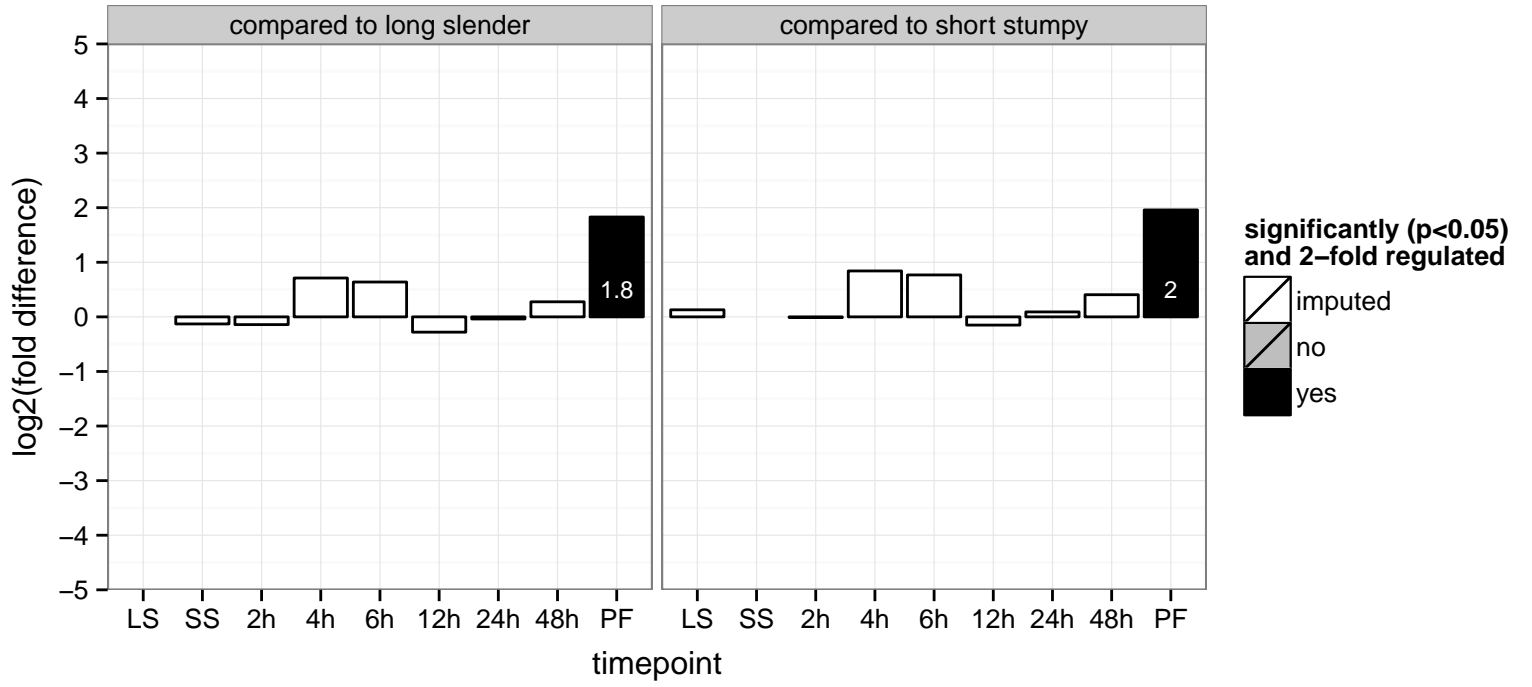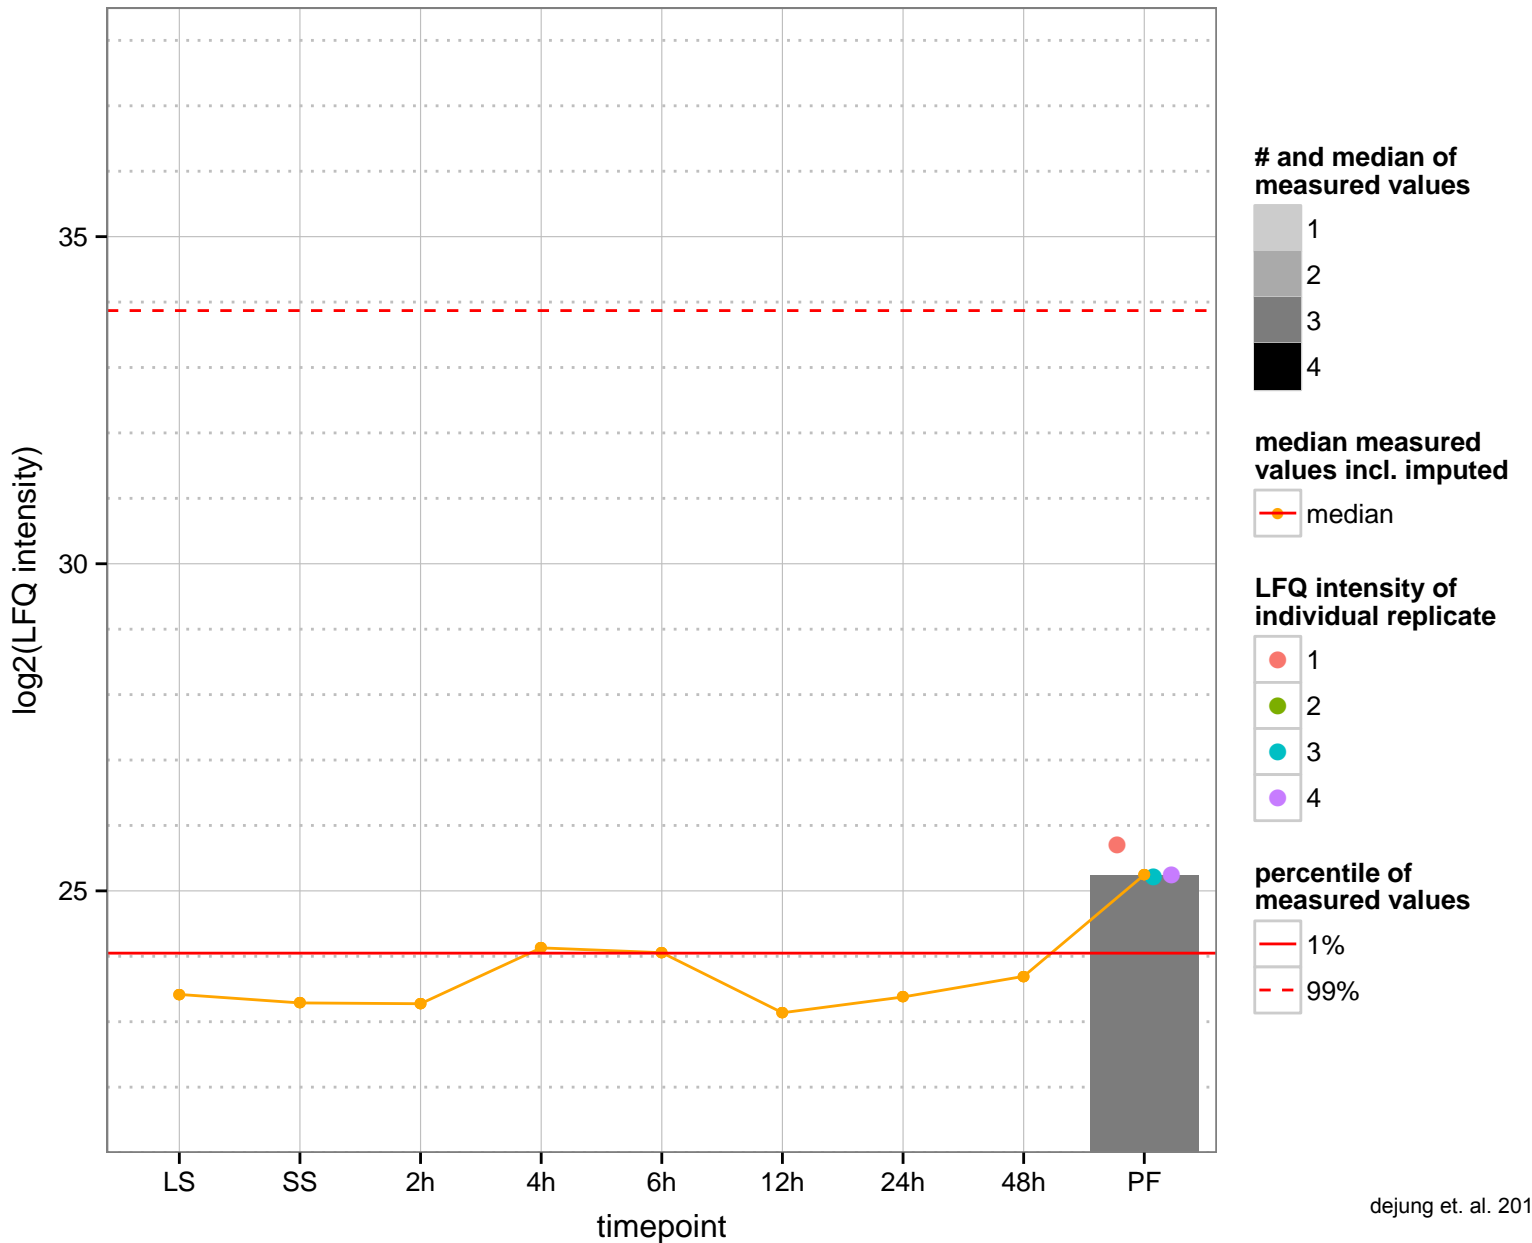



hypothetical protein, conserved  
 Tb927.10.11410  
 AGOF: null  
 AGOC: null  
 AGOP: null  
 PGOF: null  
 PGO C: null  
 PGOP: null

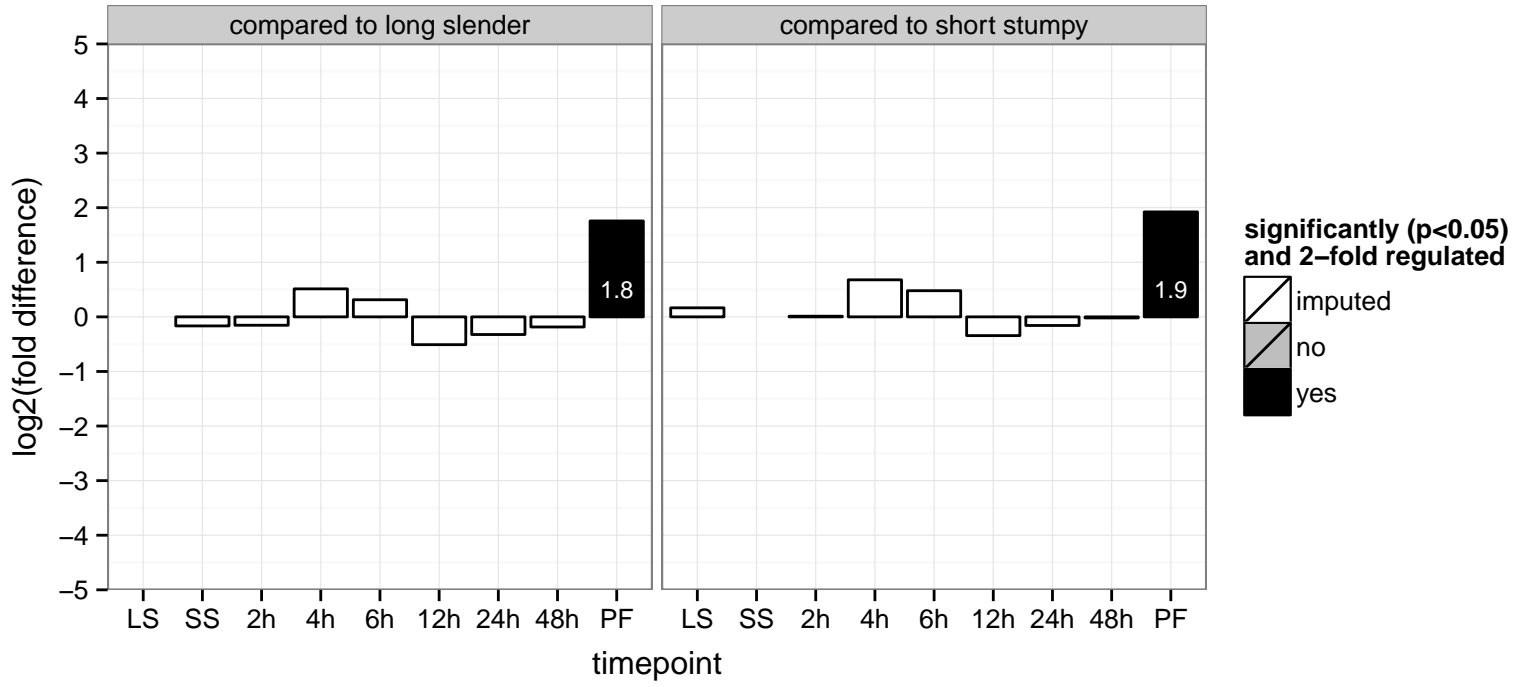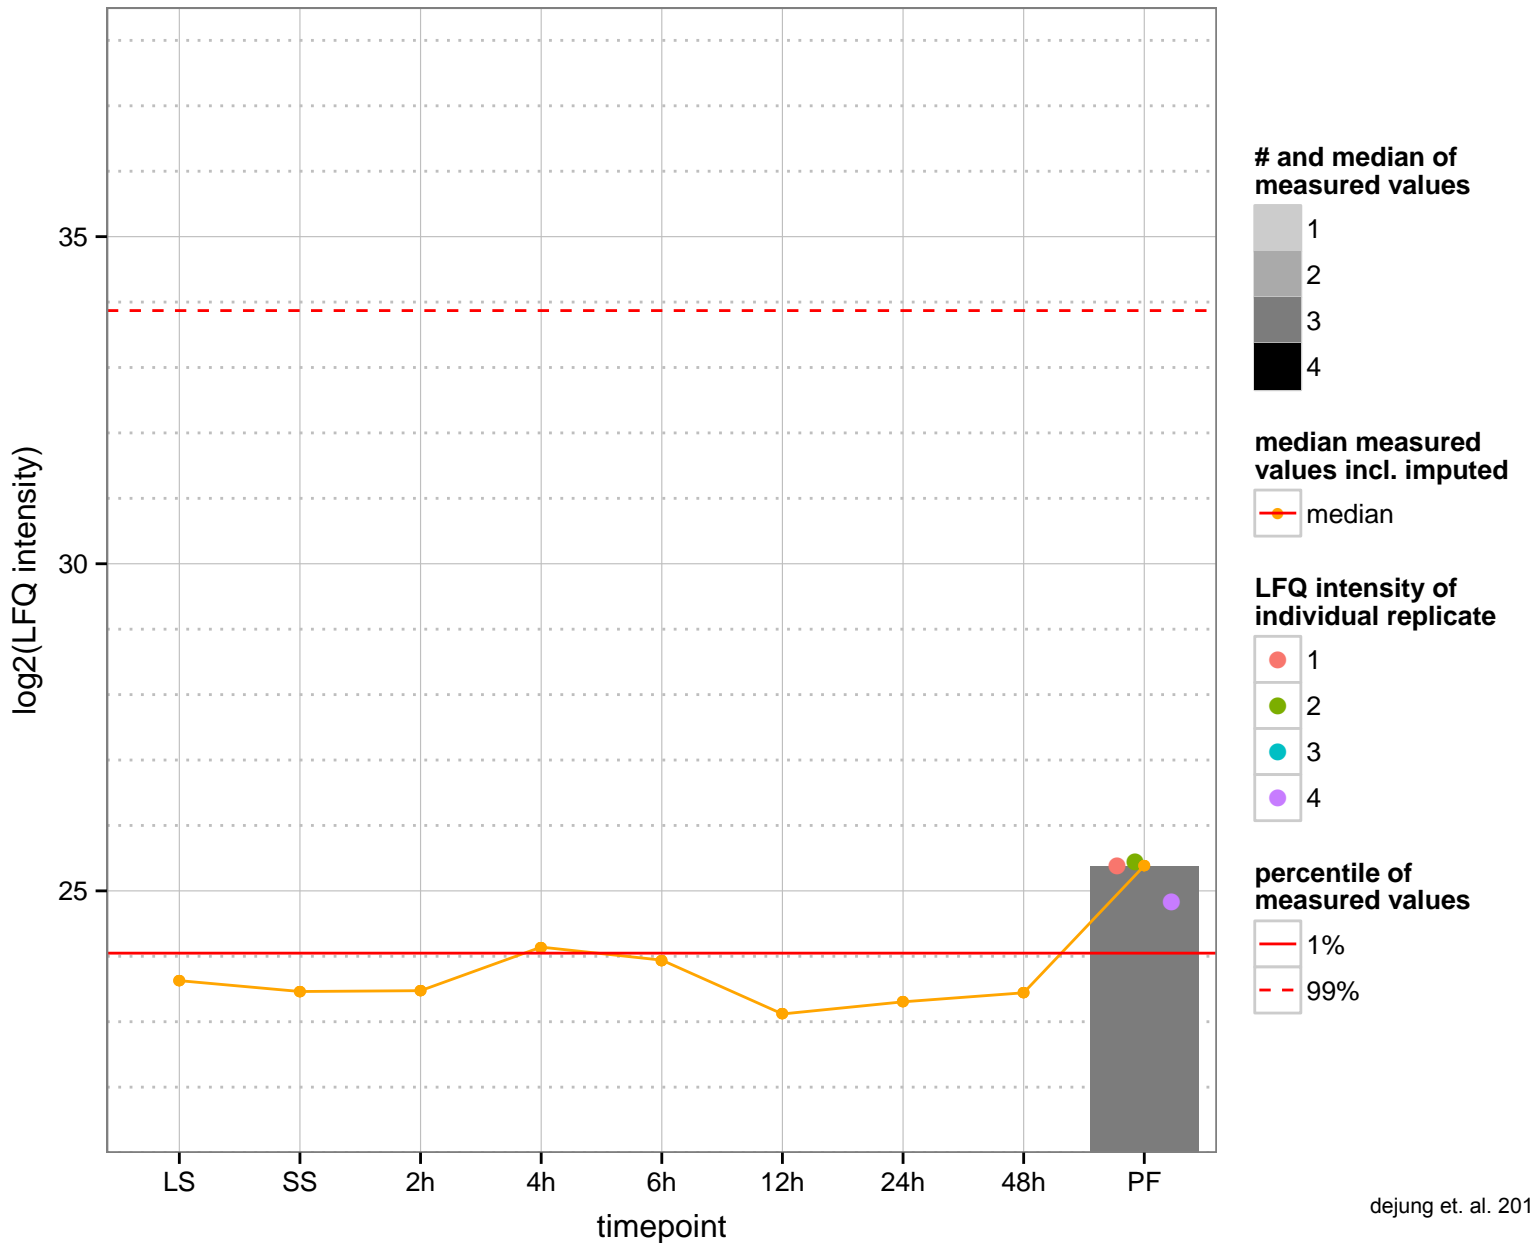

hypothetical protein, conserved  
 Tb927.10.11810  
 AGOF: null  
 AGOC: null  
 AGOP: null  
 PGOF: null  
 PGO C: null  
 PGOP: null

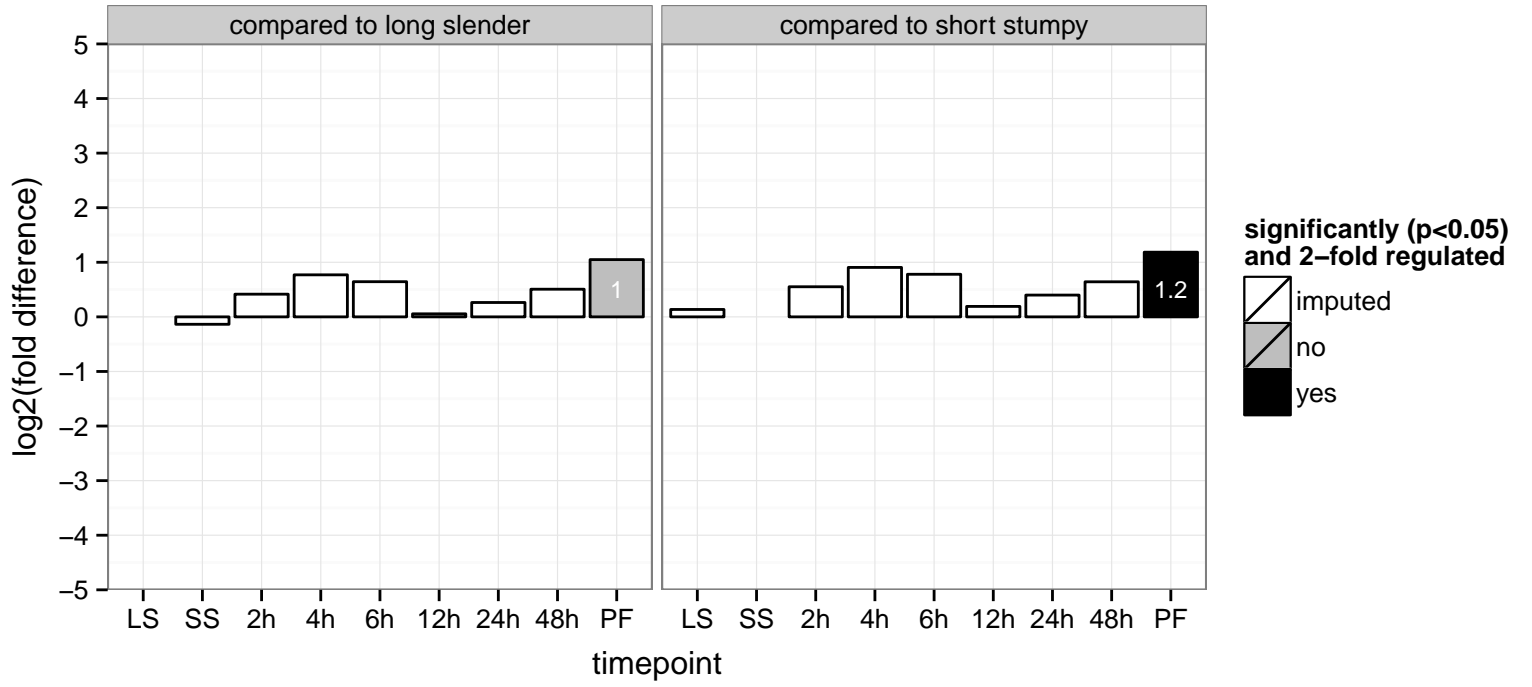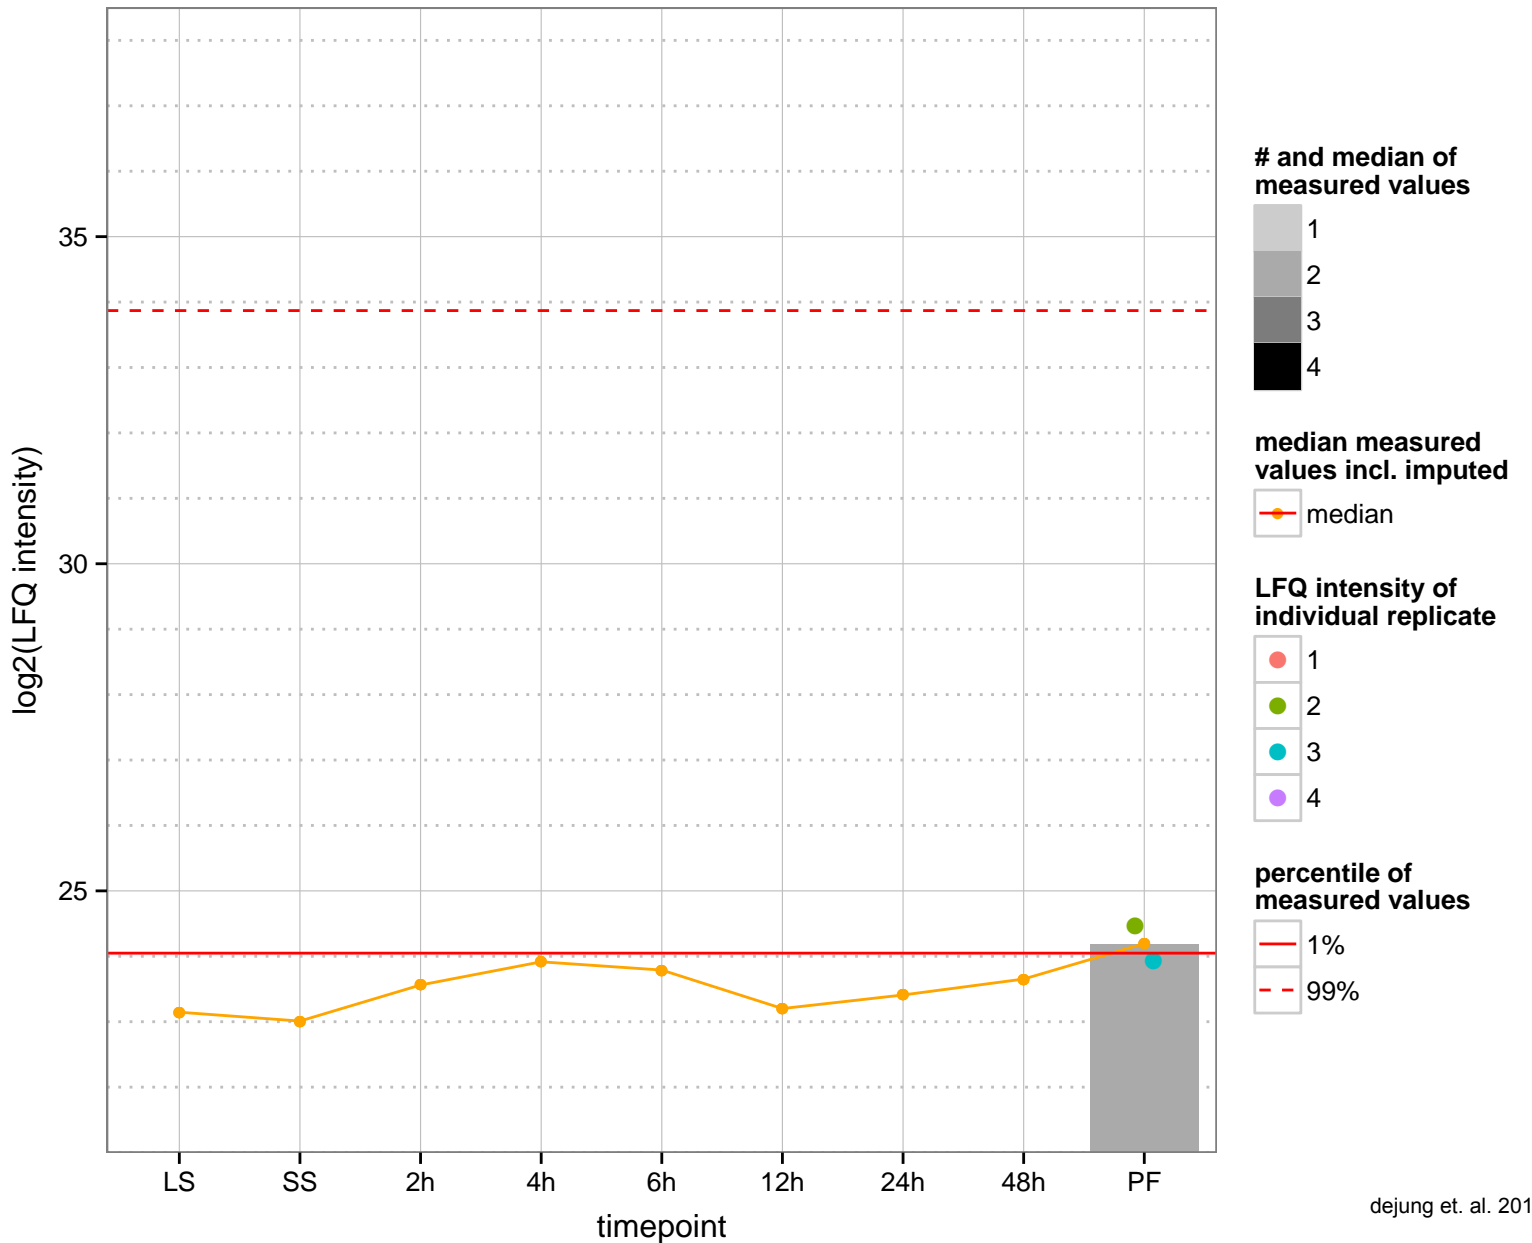

hypothetical protein  
 Tb927.10.11840  
 AGOF: null  
 AGOC: null  
 AGOP: null  
 PGO: protein binding  
 PGOC: null  
 PGOP: null

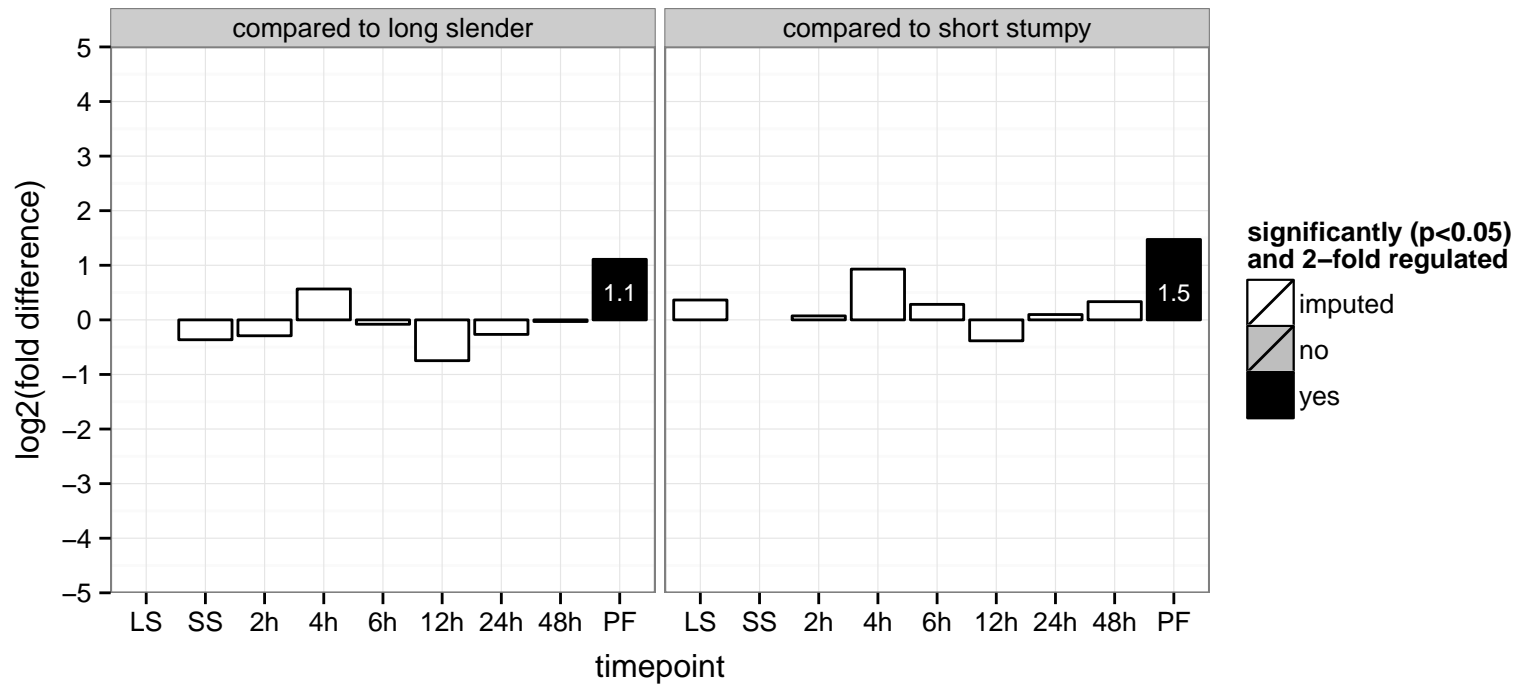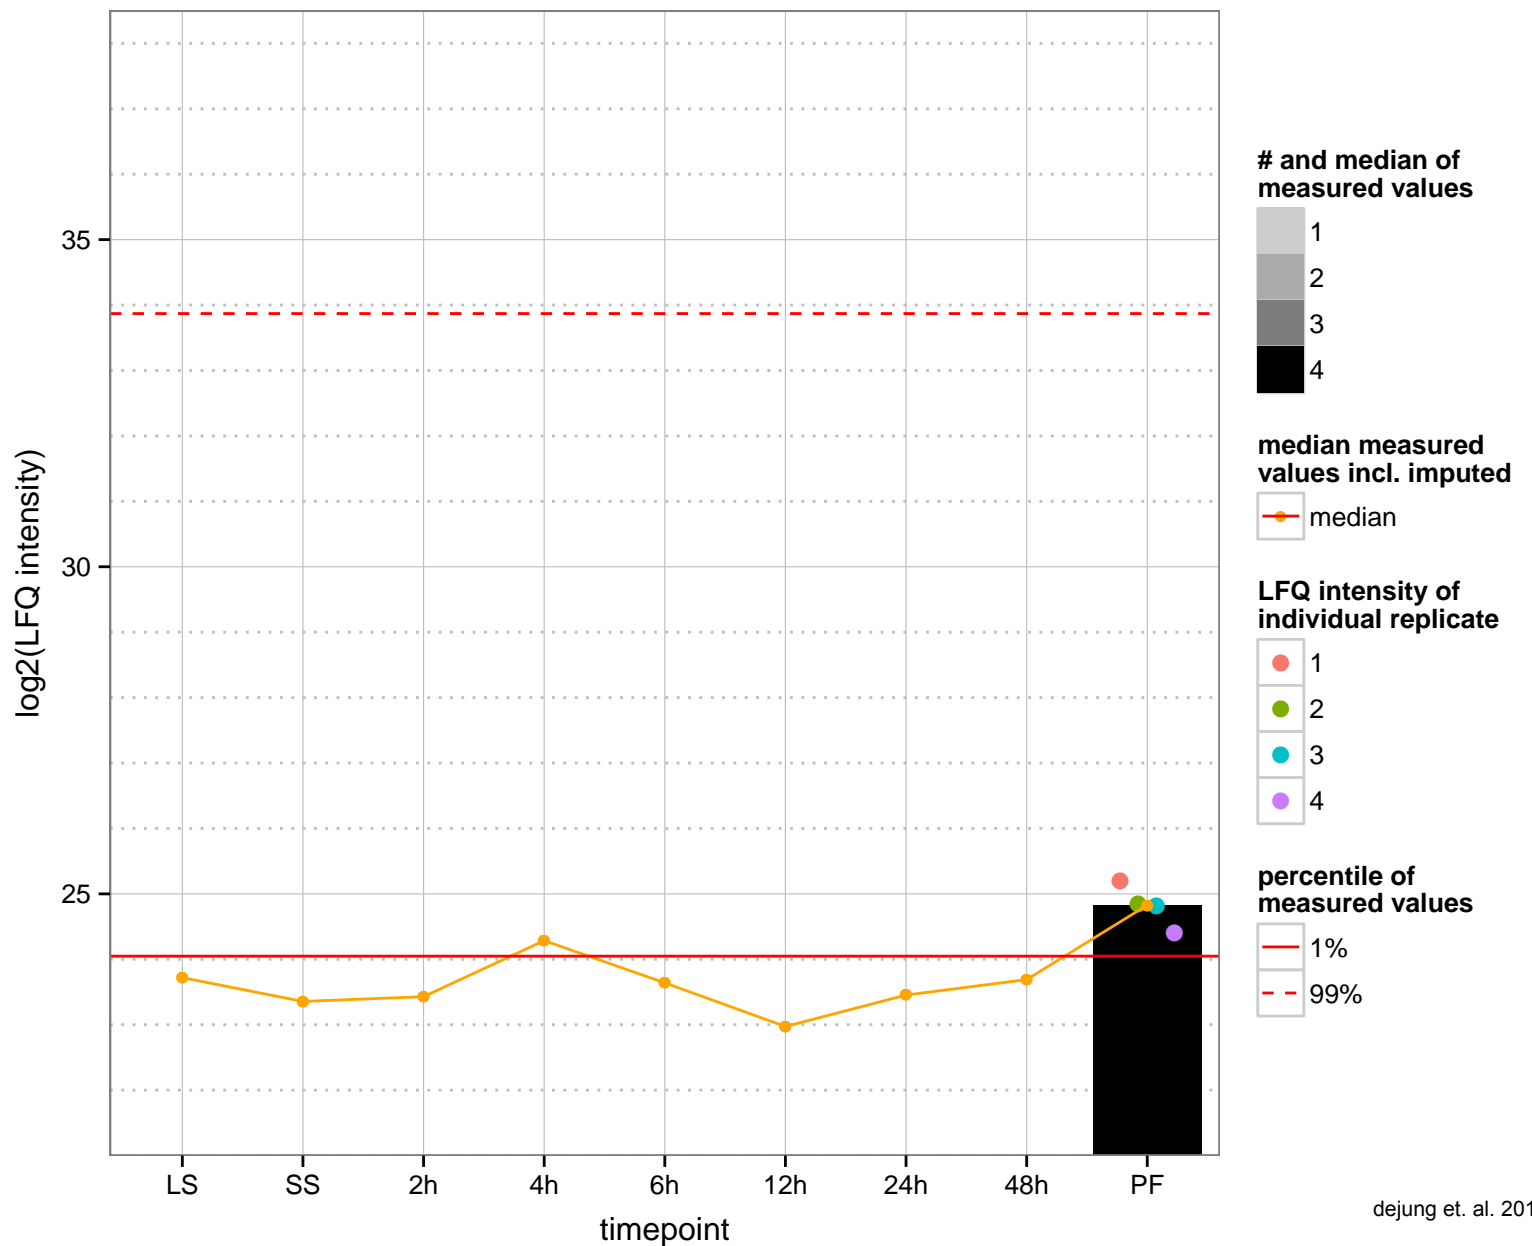

hypothetical protein, conserved  
 Tb927.10.12180  
 AGOF: null  
 AGOC: null  
 AGOP: null  
 PGO: null  
 PGOC: null  
 PGOP: null

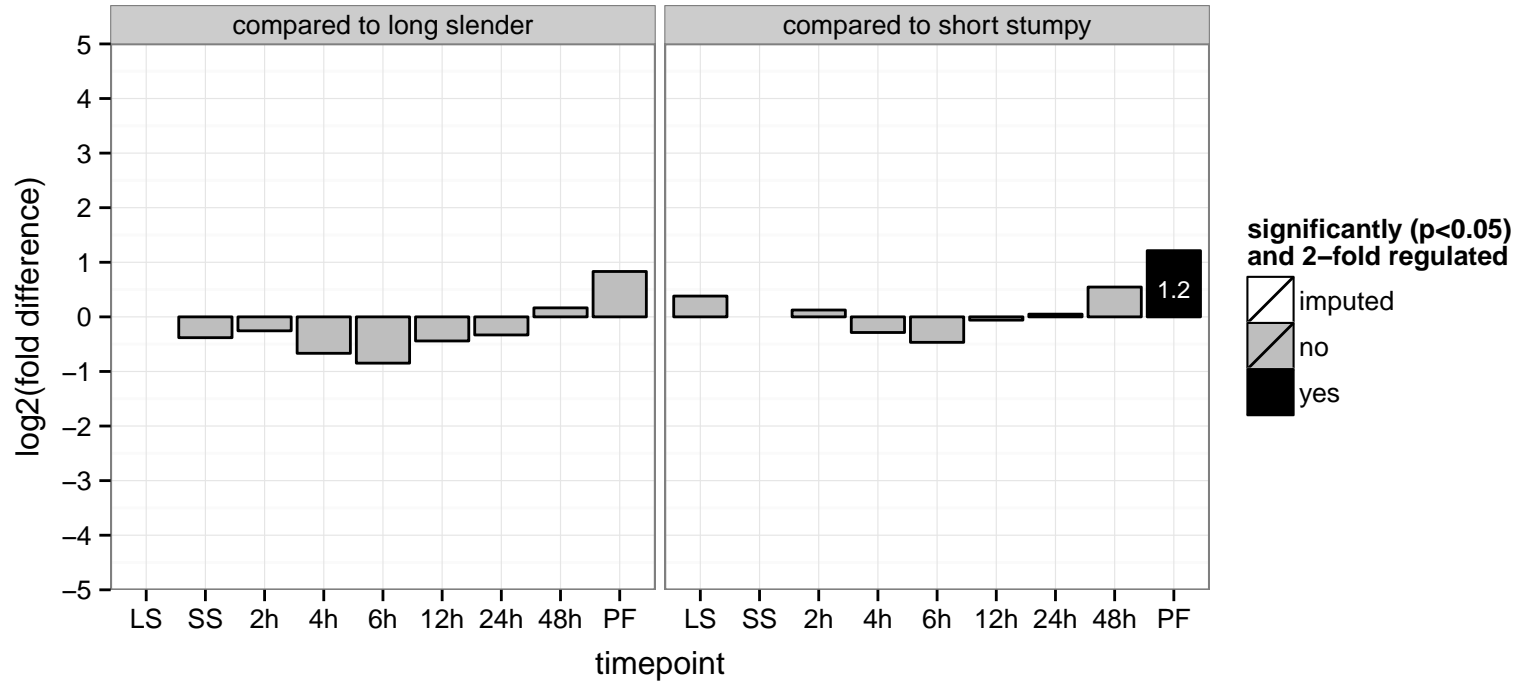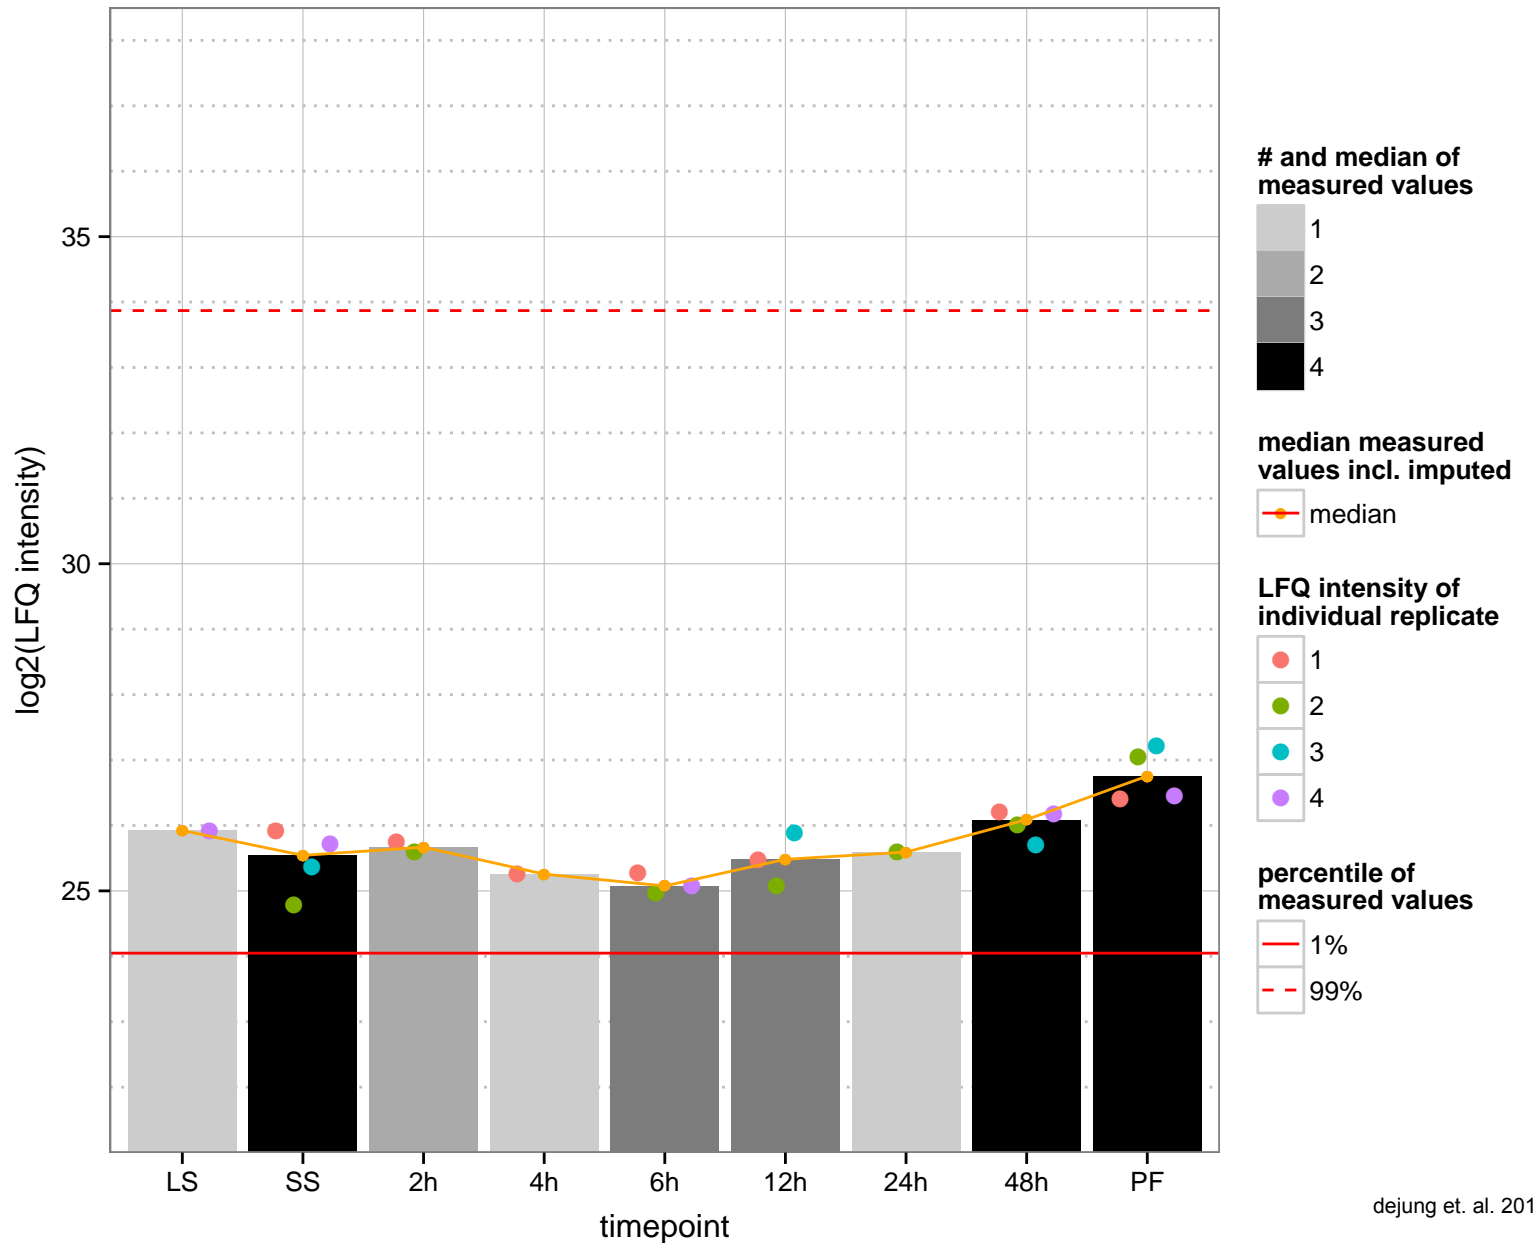

hypothetical protein, conserved  
 Tb927.10.12930  
 AGOF: null  
 AGOC: mitochondrion  
 AGOP: null  
 PGO: null  
 PGO: null  
 PGO: null

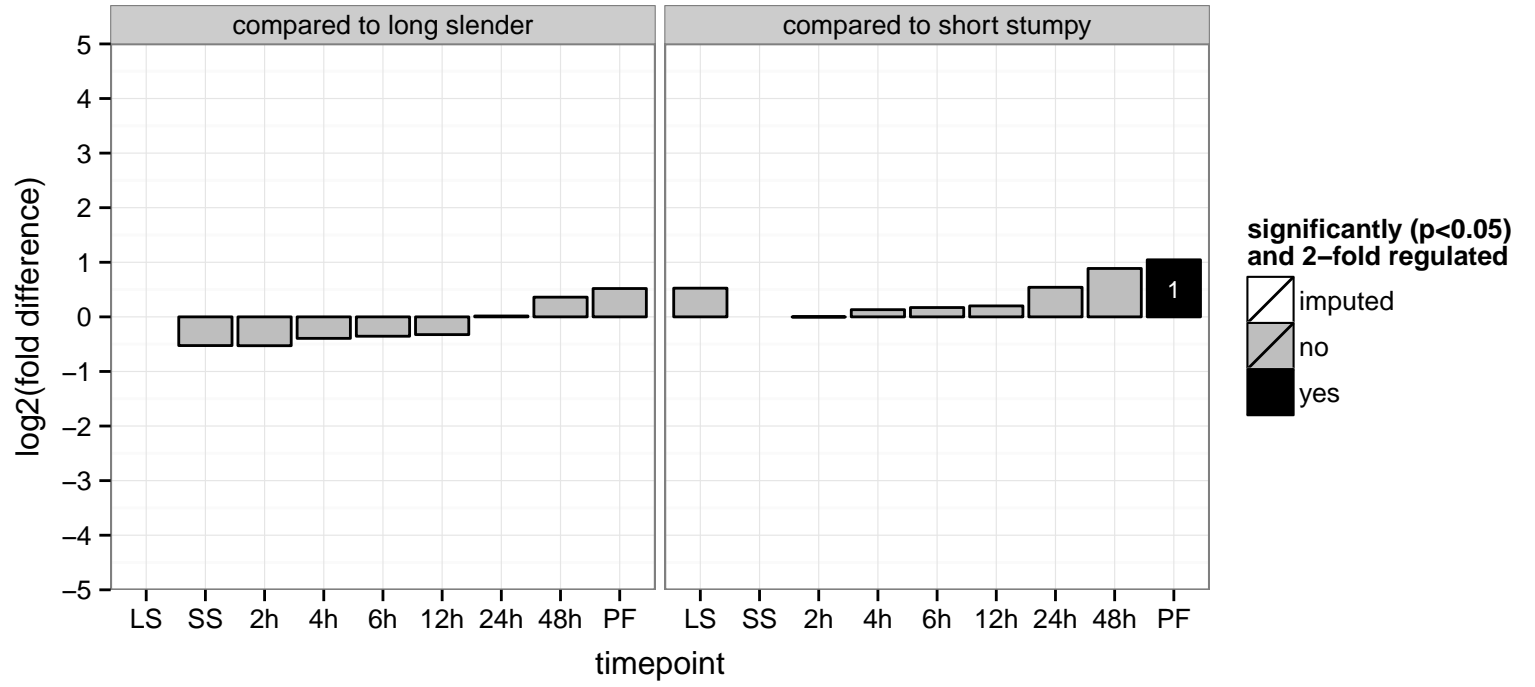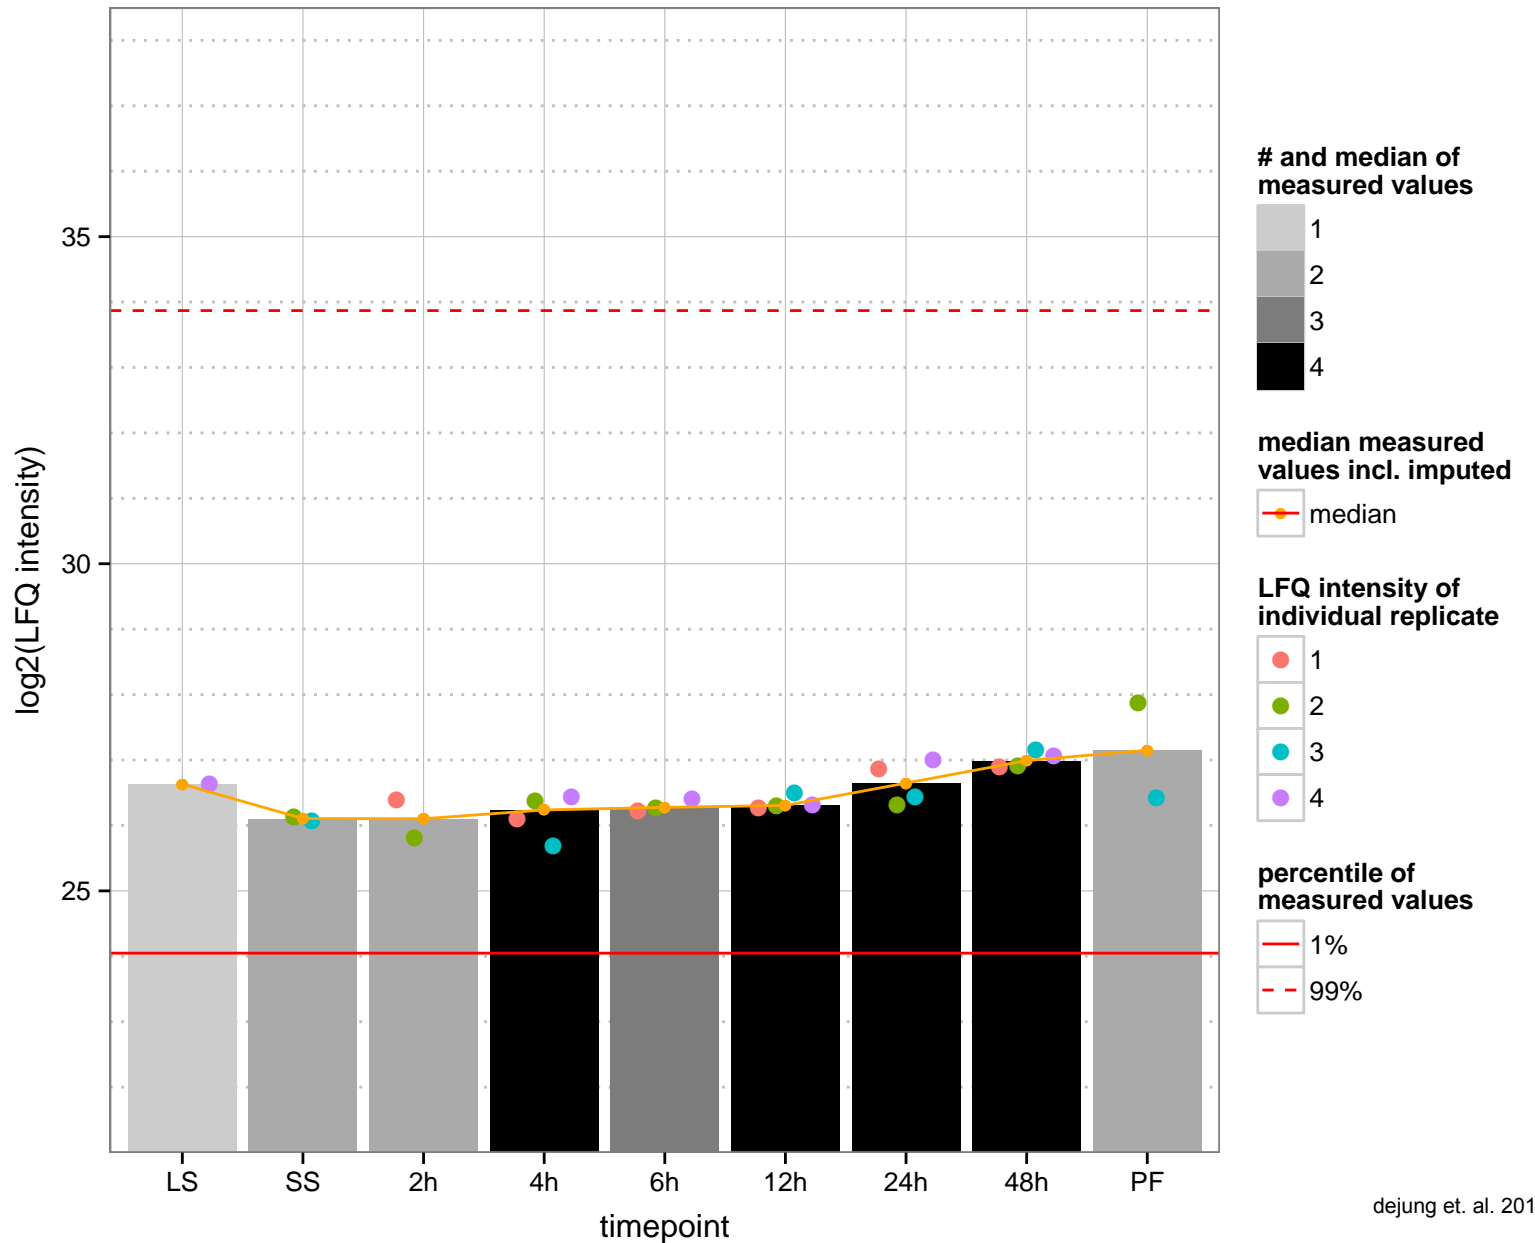

hypothetical protein, conserved  
 Tb927.10.13180  
 AGOF: null  
 AGOC: null  
 AGOP: null  
 PGOF: null  
 PGO: null  
 PGOP: null

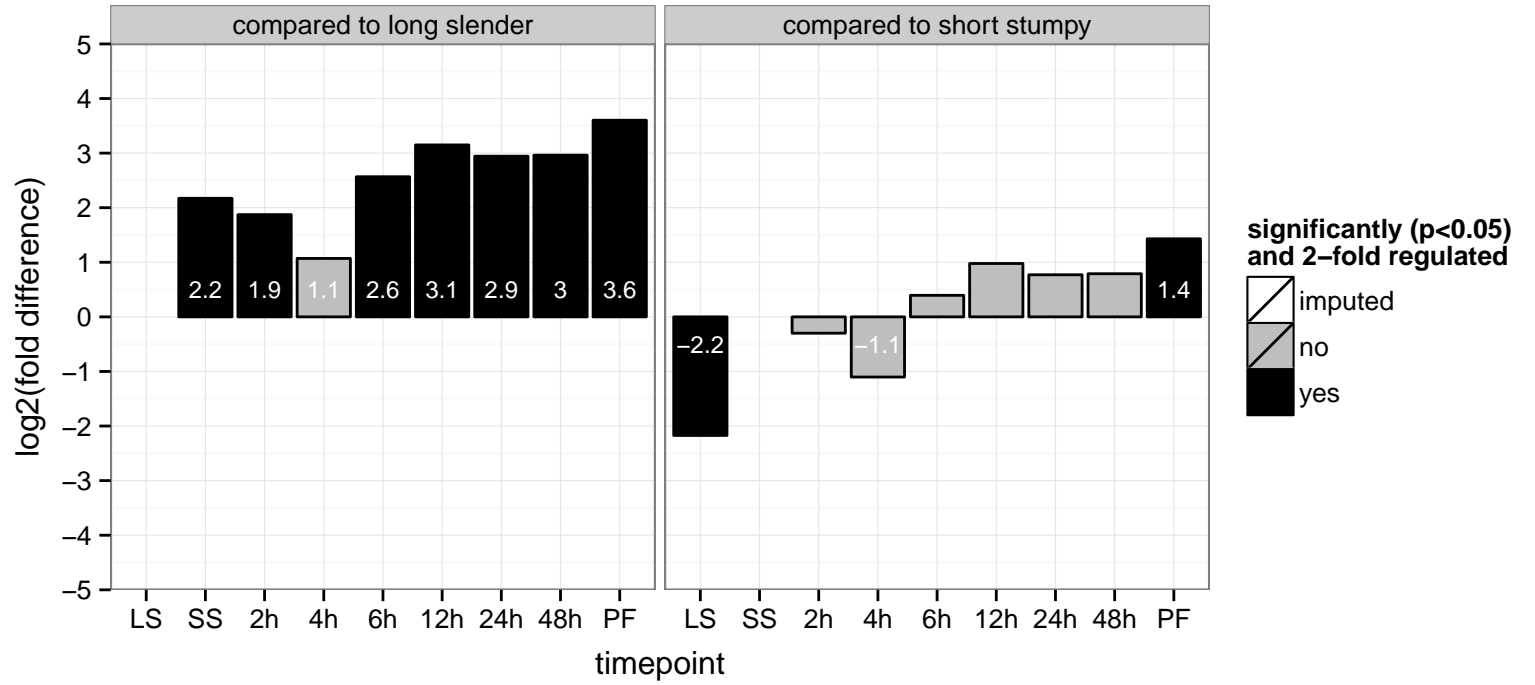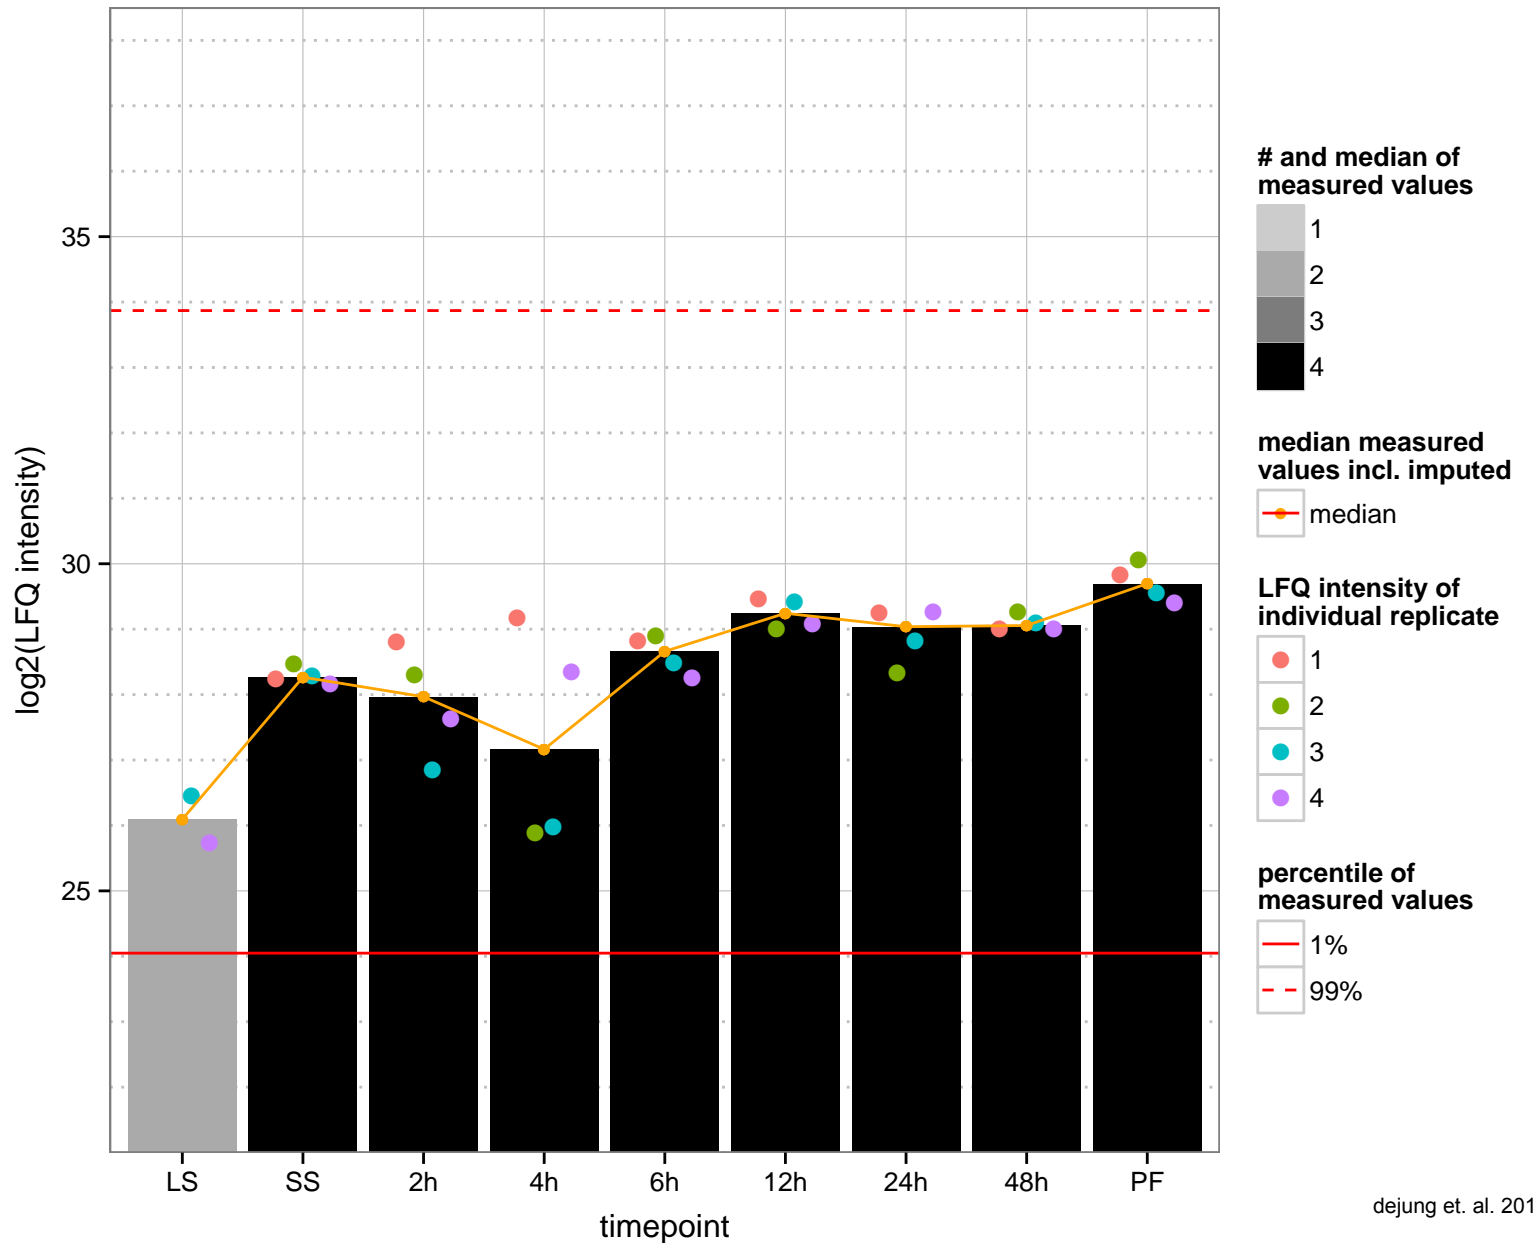

hypothetical protein, conserved  
 Tb927.10.13230  
 AGOF: null  
 AGOC: null  
 AGOP: null  
 PGO: null  
 PGOC: null  
 PGOP: null

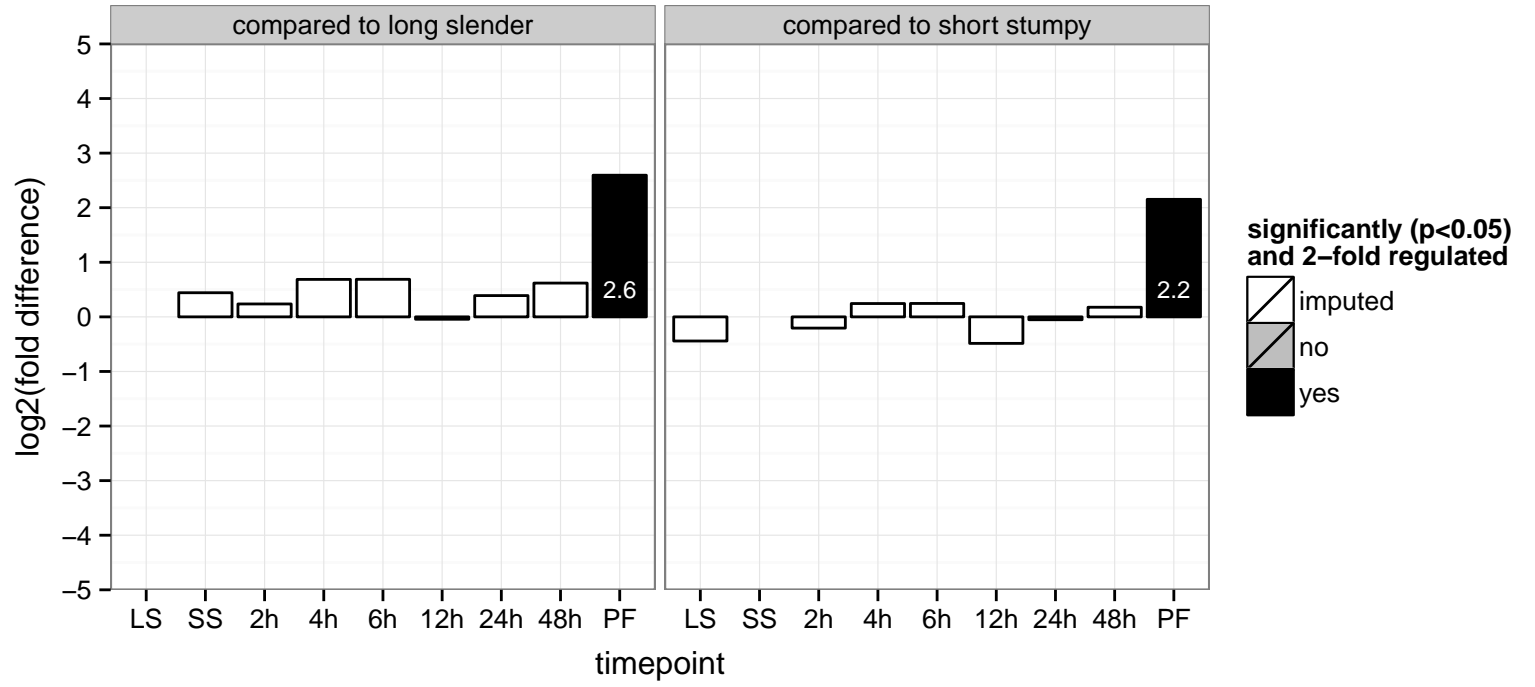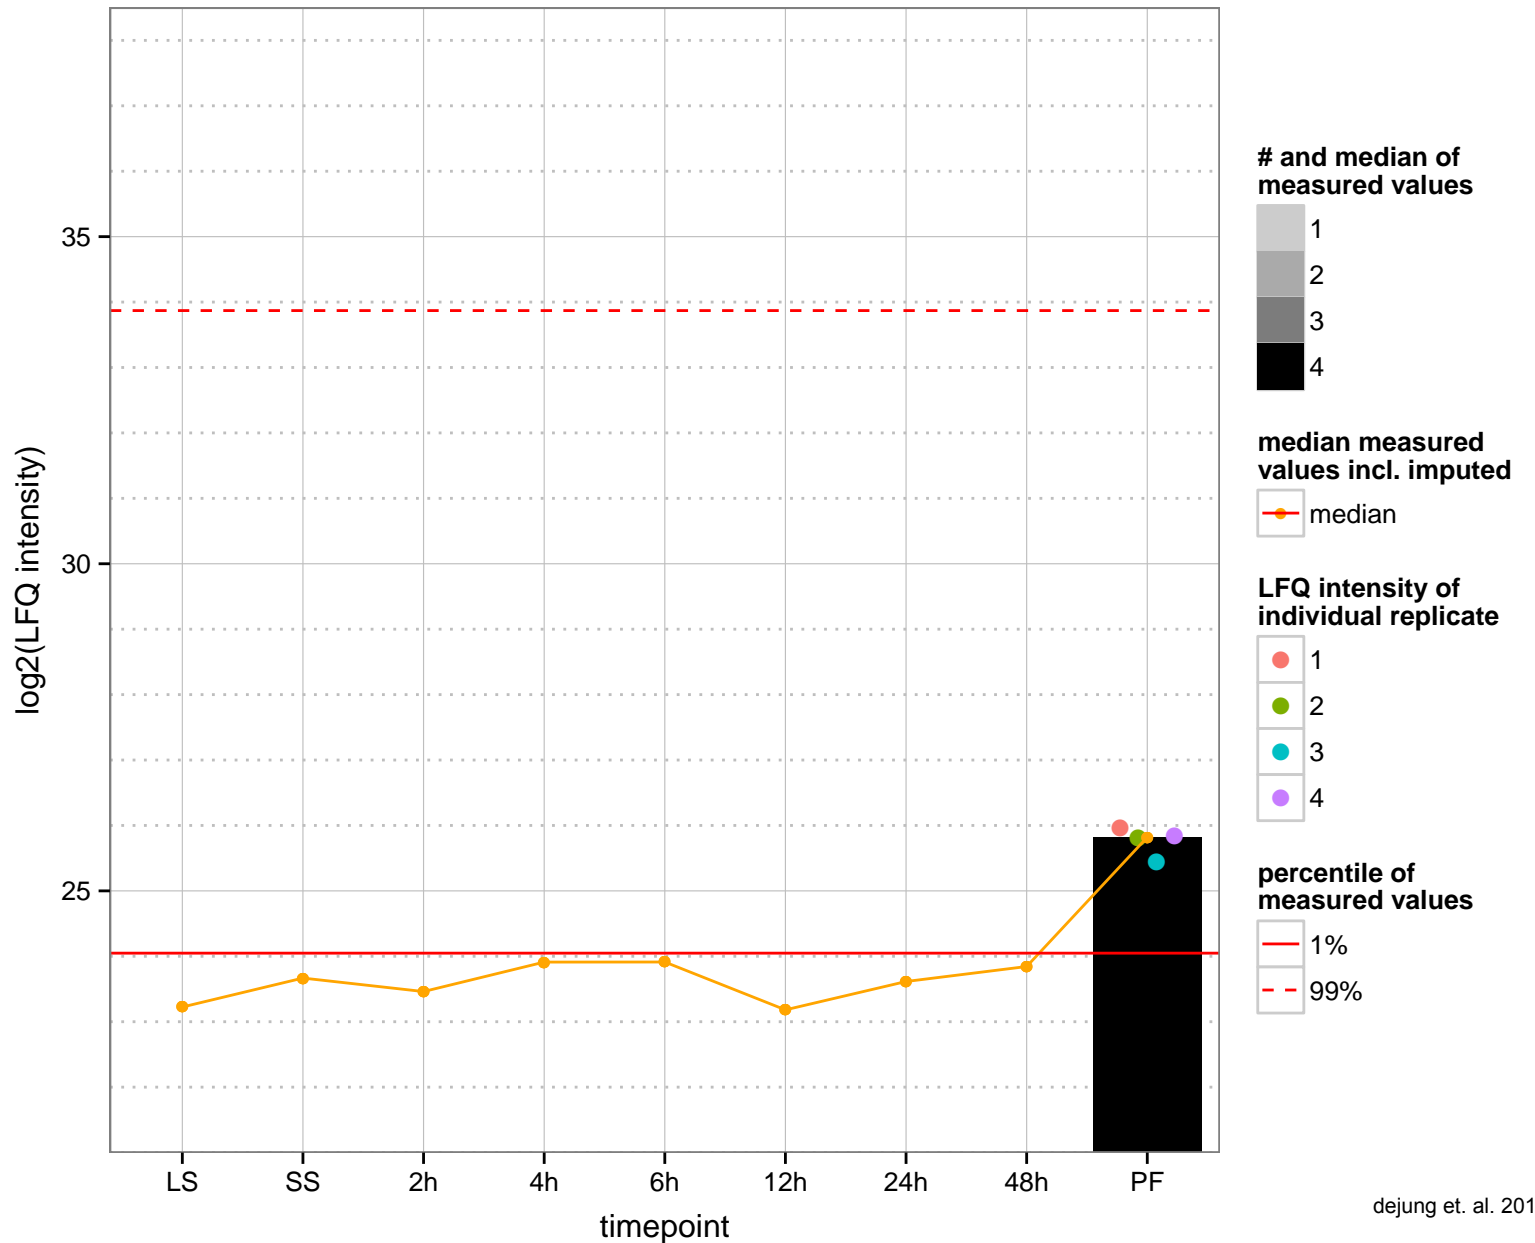

hypothetical protein, conserved  
 Tb927.10.13280  
 AGOF: null  
 AGOC: null  
 AGOP: null  
 PGOF: binding  
 PGO: null  
 PGOP: null

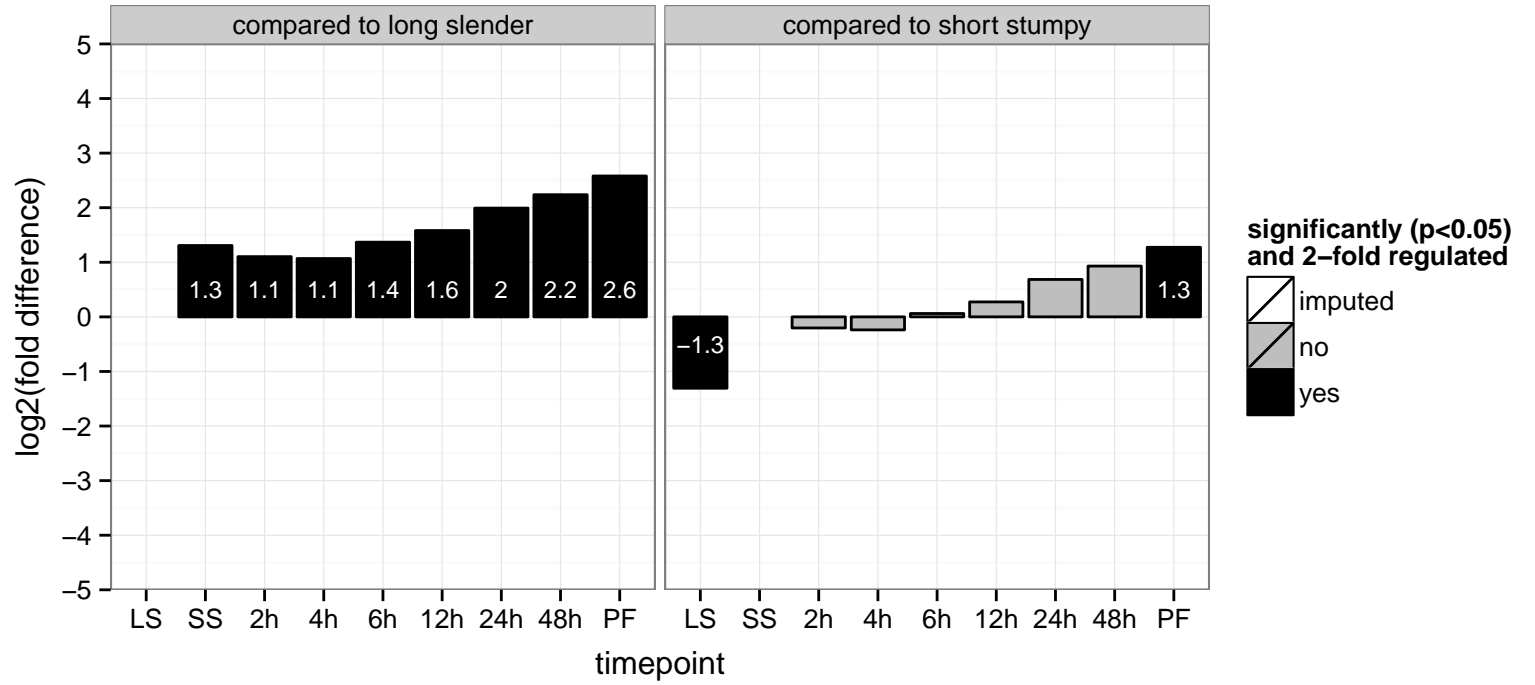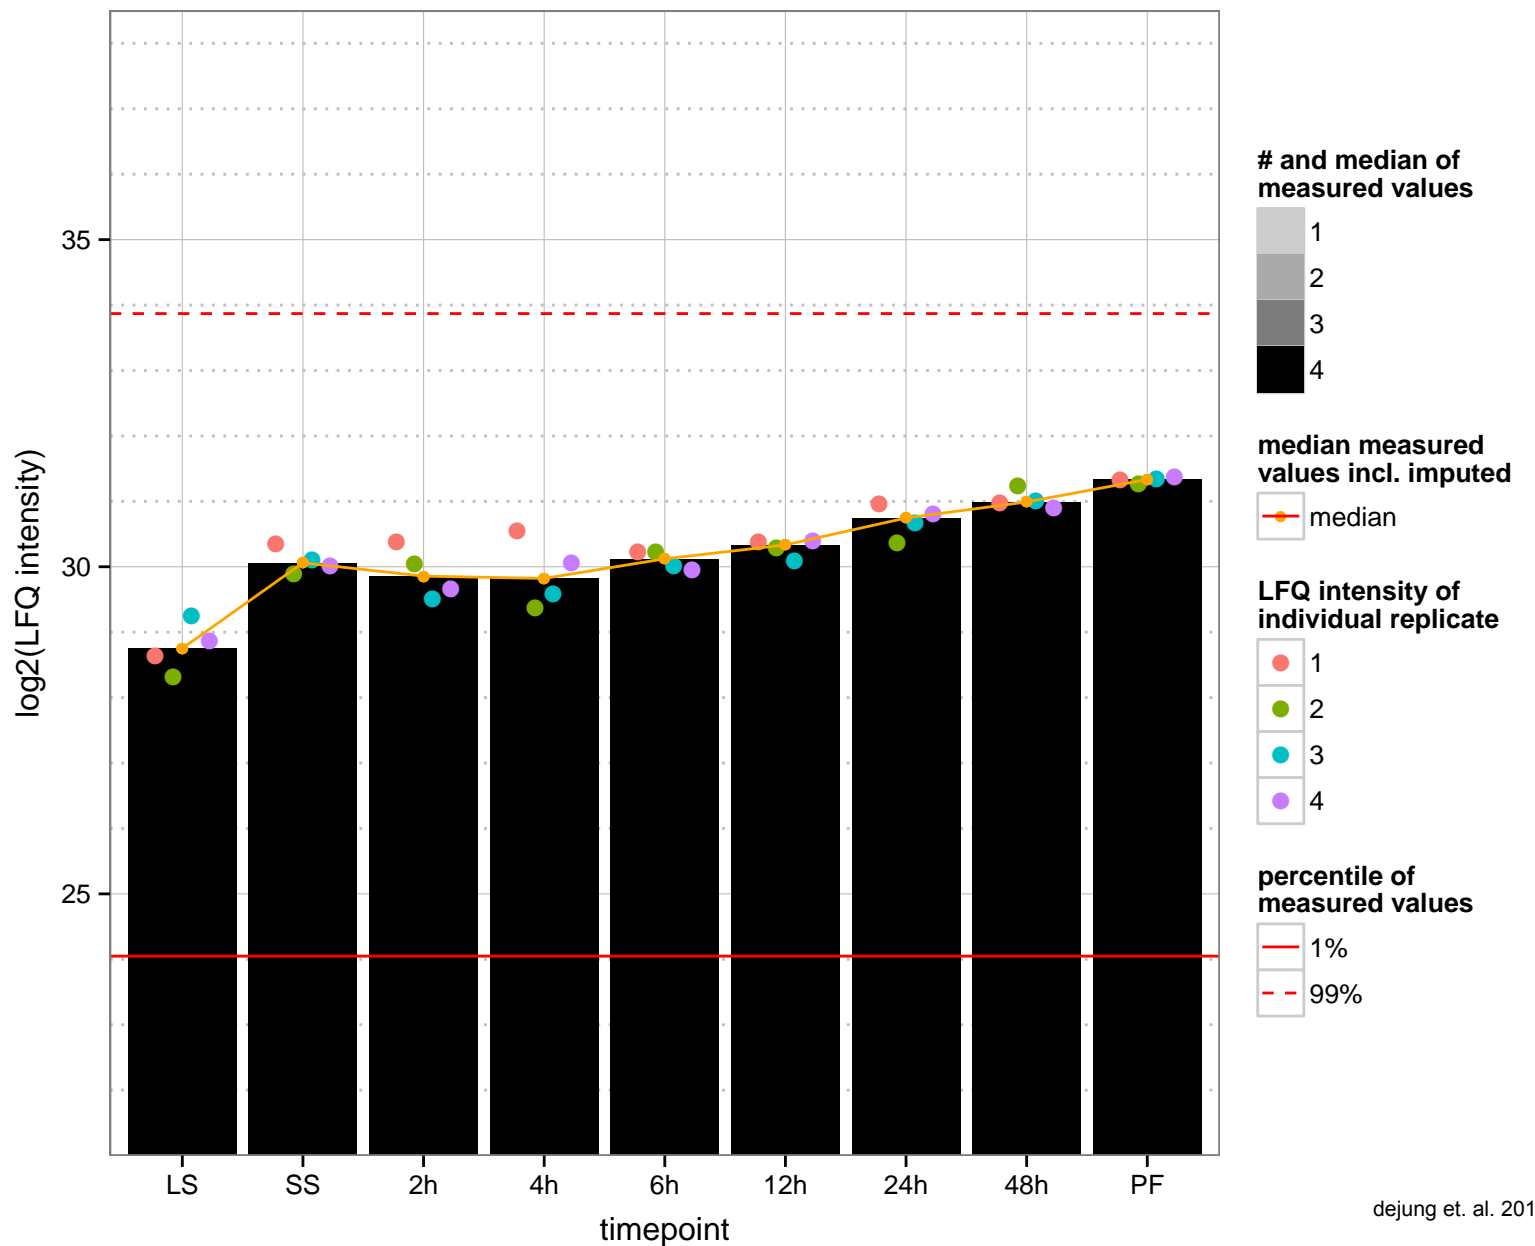



Dynein light chain Tctex-type, putative  
 Tb927.10.13370  
 AGOF: microtubule motor activity  
 AGOC: cytoplasmic dynein complex  
 AGOP: microtubule-based process  
 PGO: null  
 PGOC: null  
 PGOP: null

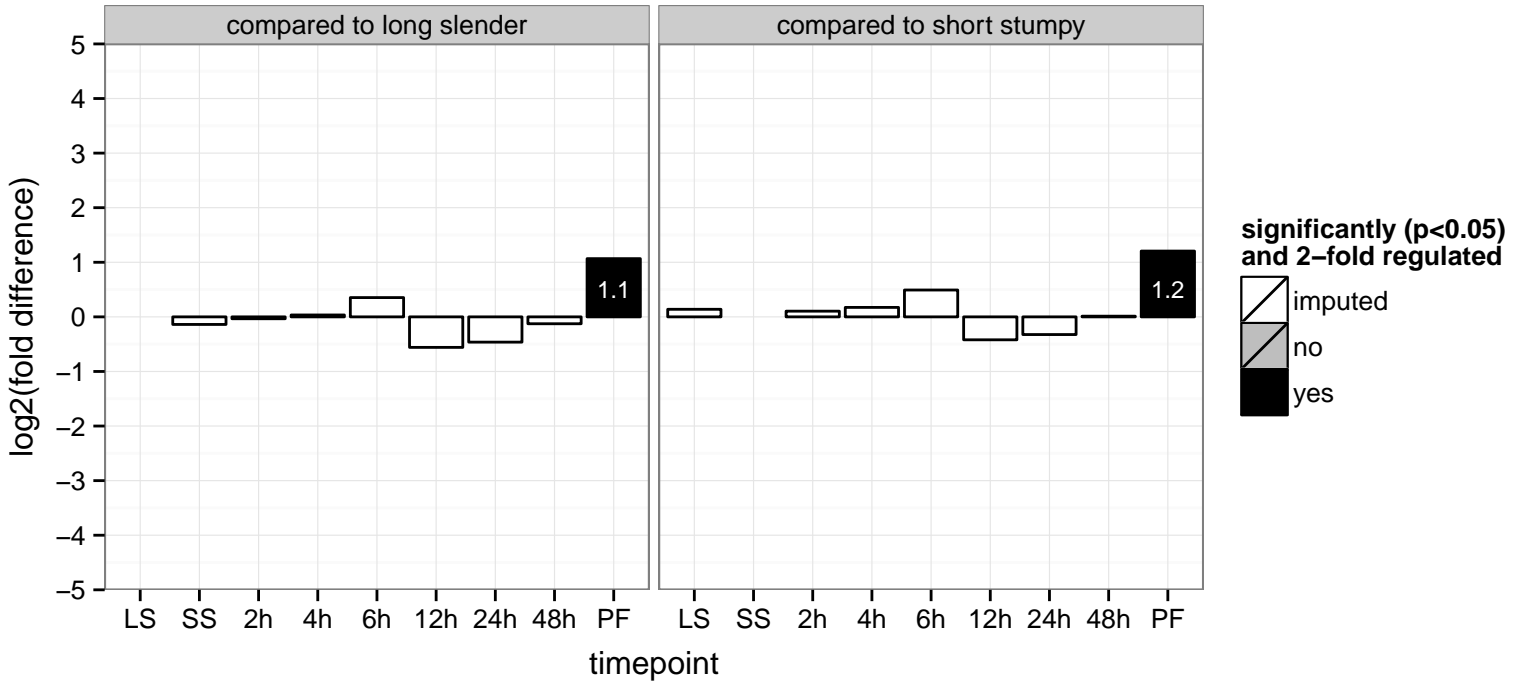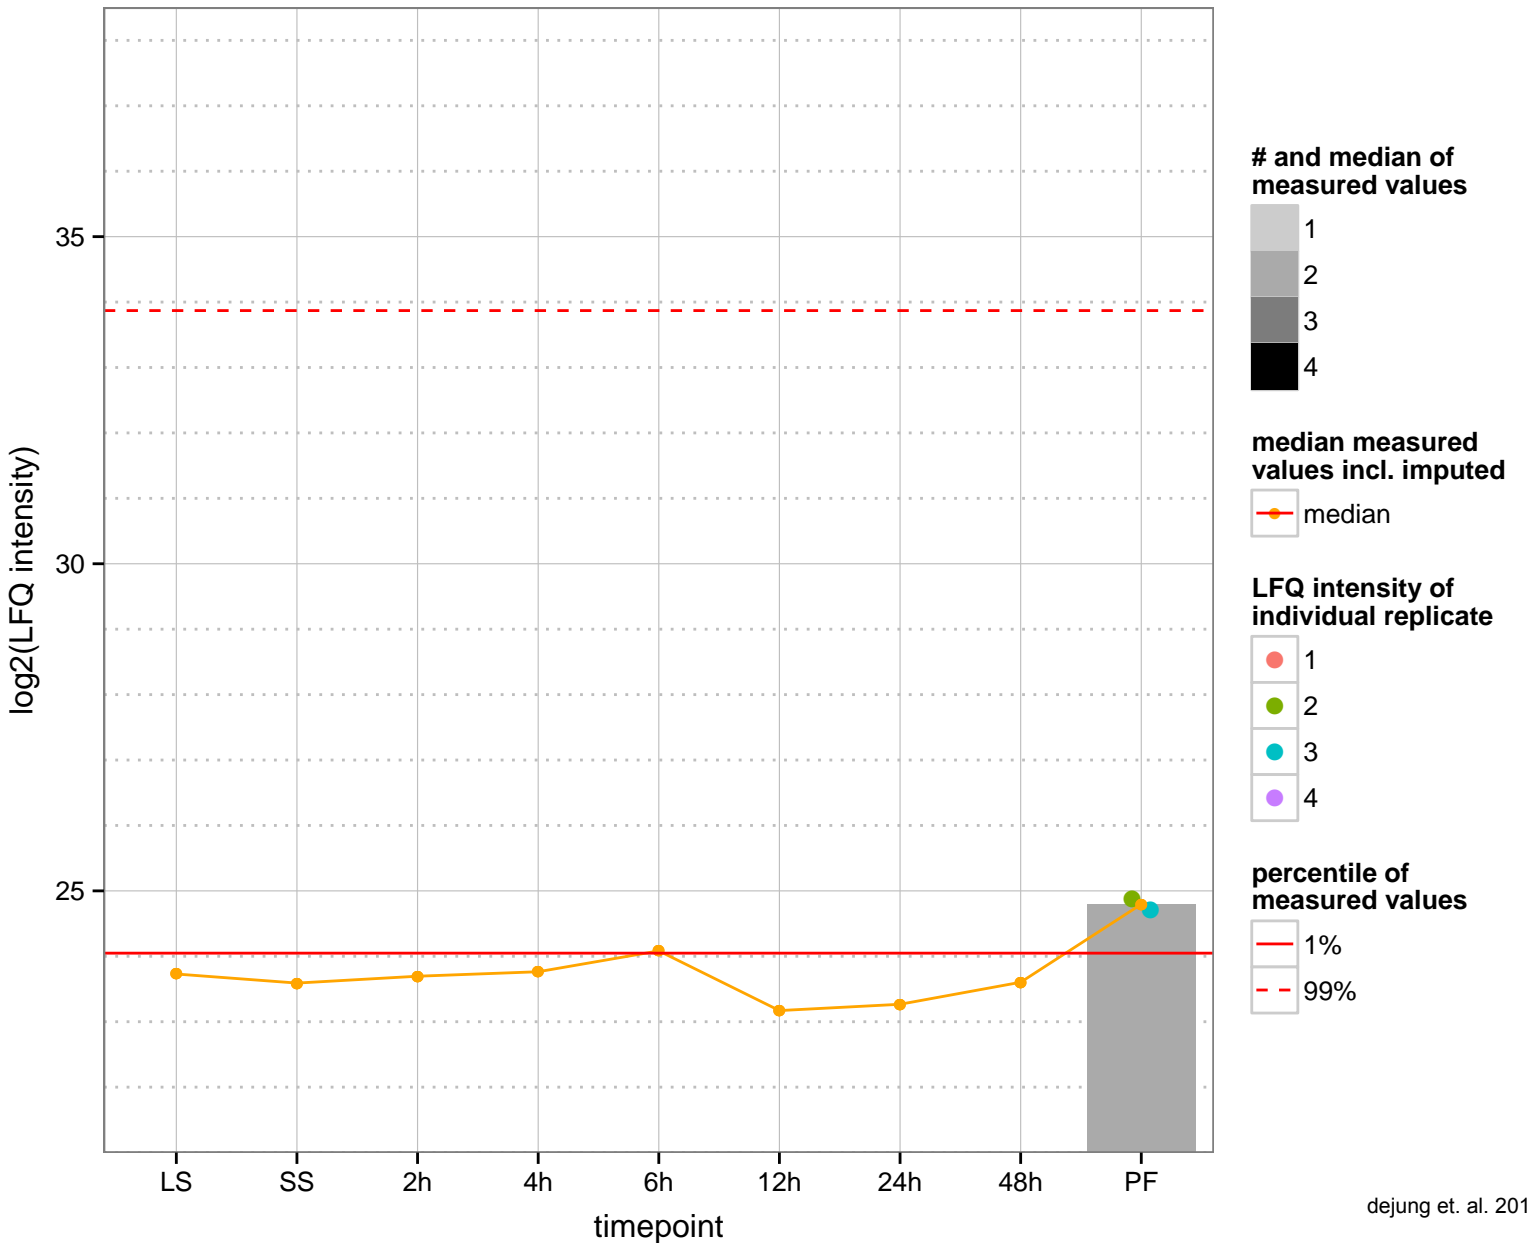

60S ribosomal protein L10a, putative (RPL10A)  
 Tb927.11.9710;Tb927.10.13500  
 AGOF: RNA binding, structural constituent of ribosome  
 AGOC: ribosome, large ribosomal subunit  
 AGOP: RNA processing, translation  
 PGOF: RNA binding, structural constituent of ribosome  
 PGO: large ribosomal subunit  
 PGOP: translation

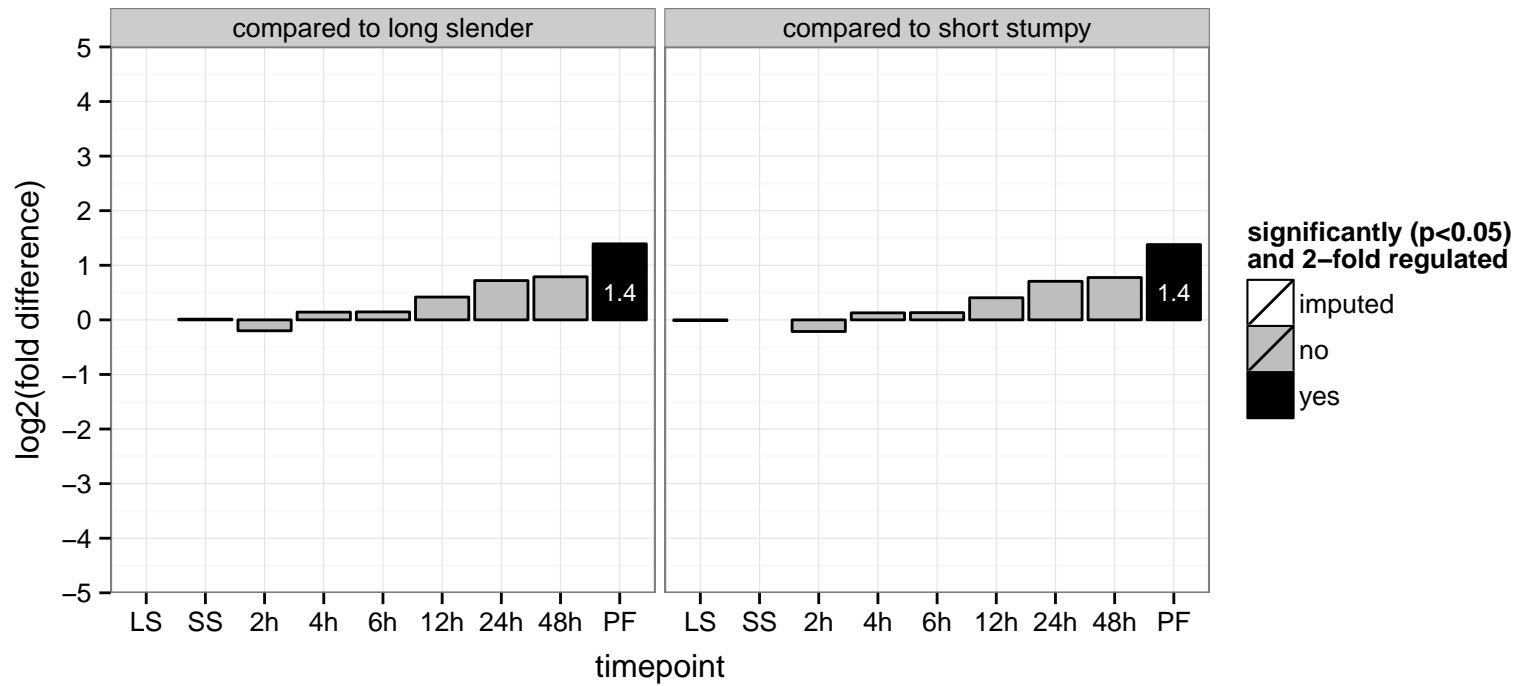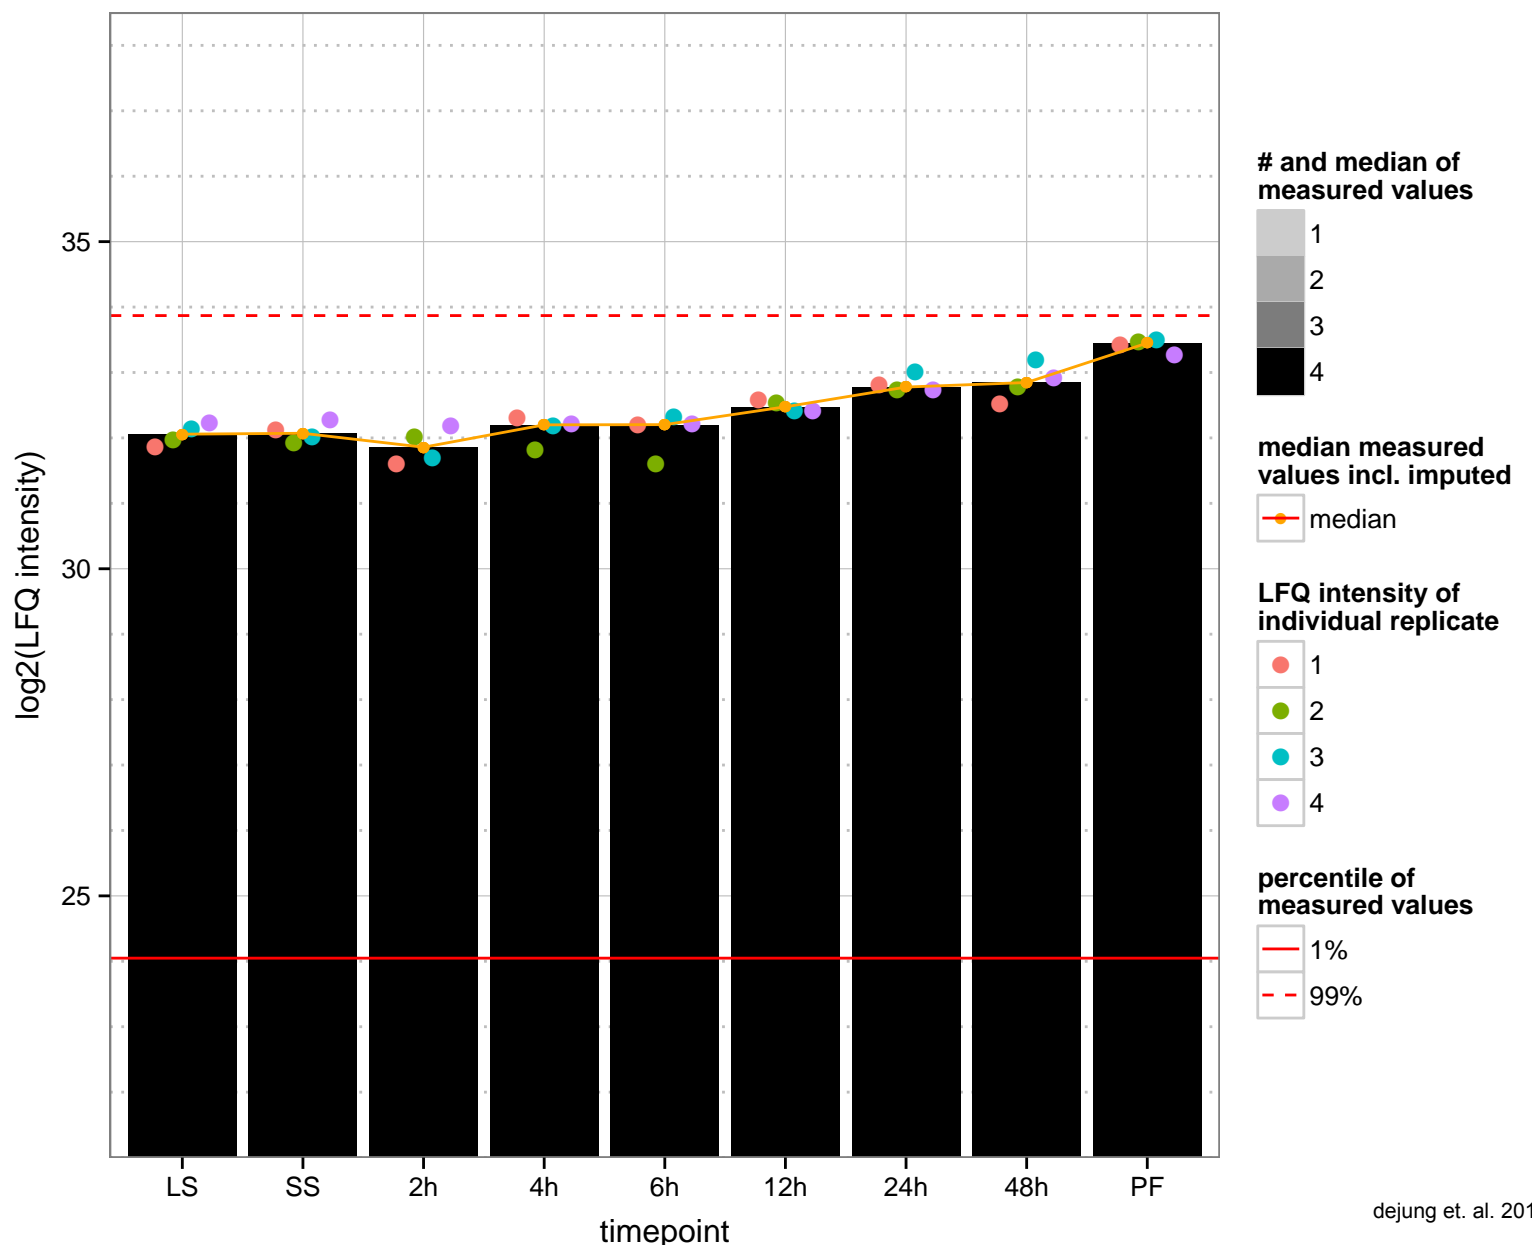

hypothetical protein, conserved  
 Tb927.10.13660  
 AGOF: null  
 AGOC: null  
 AGOP: null  
 PGOF: null  
 PGO C: null  
 PGOP: null

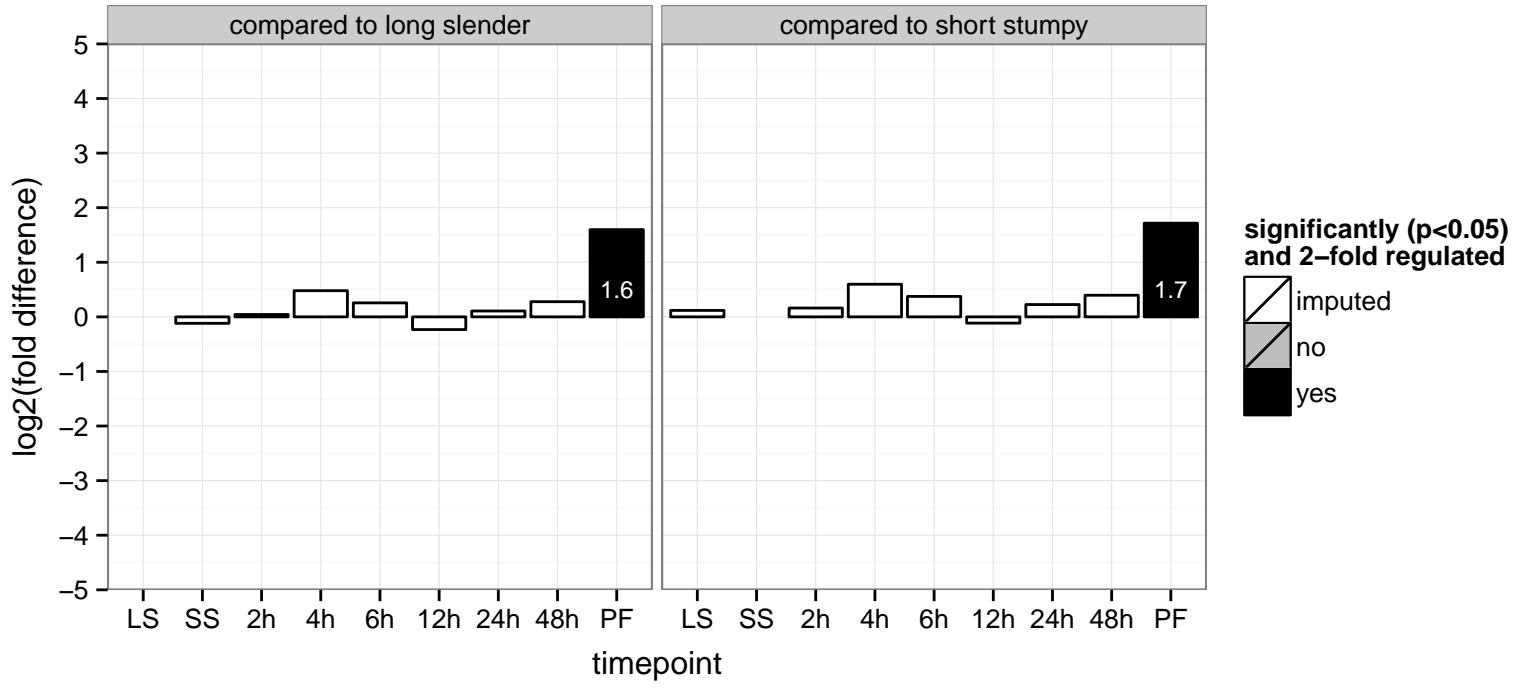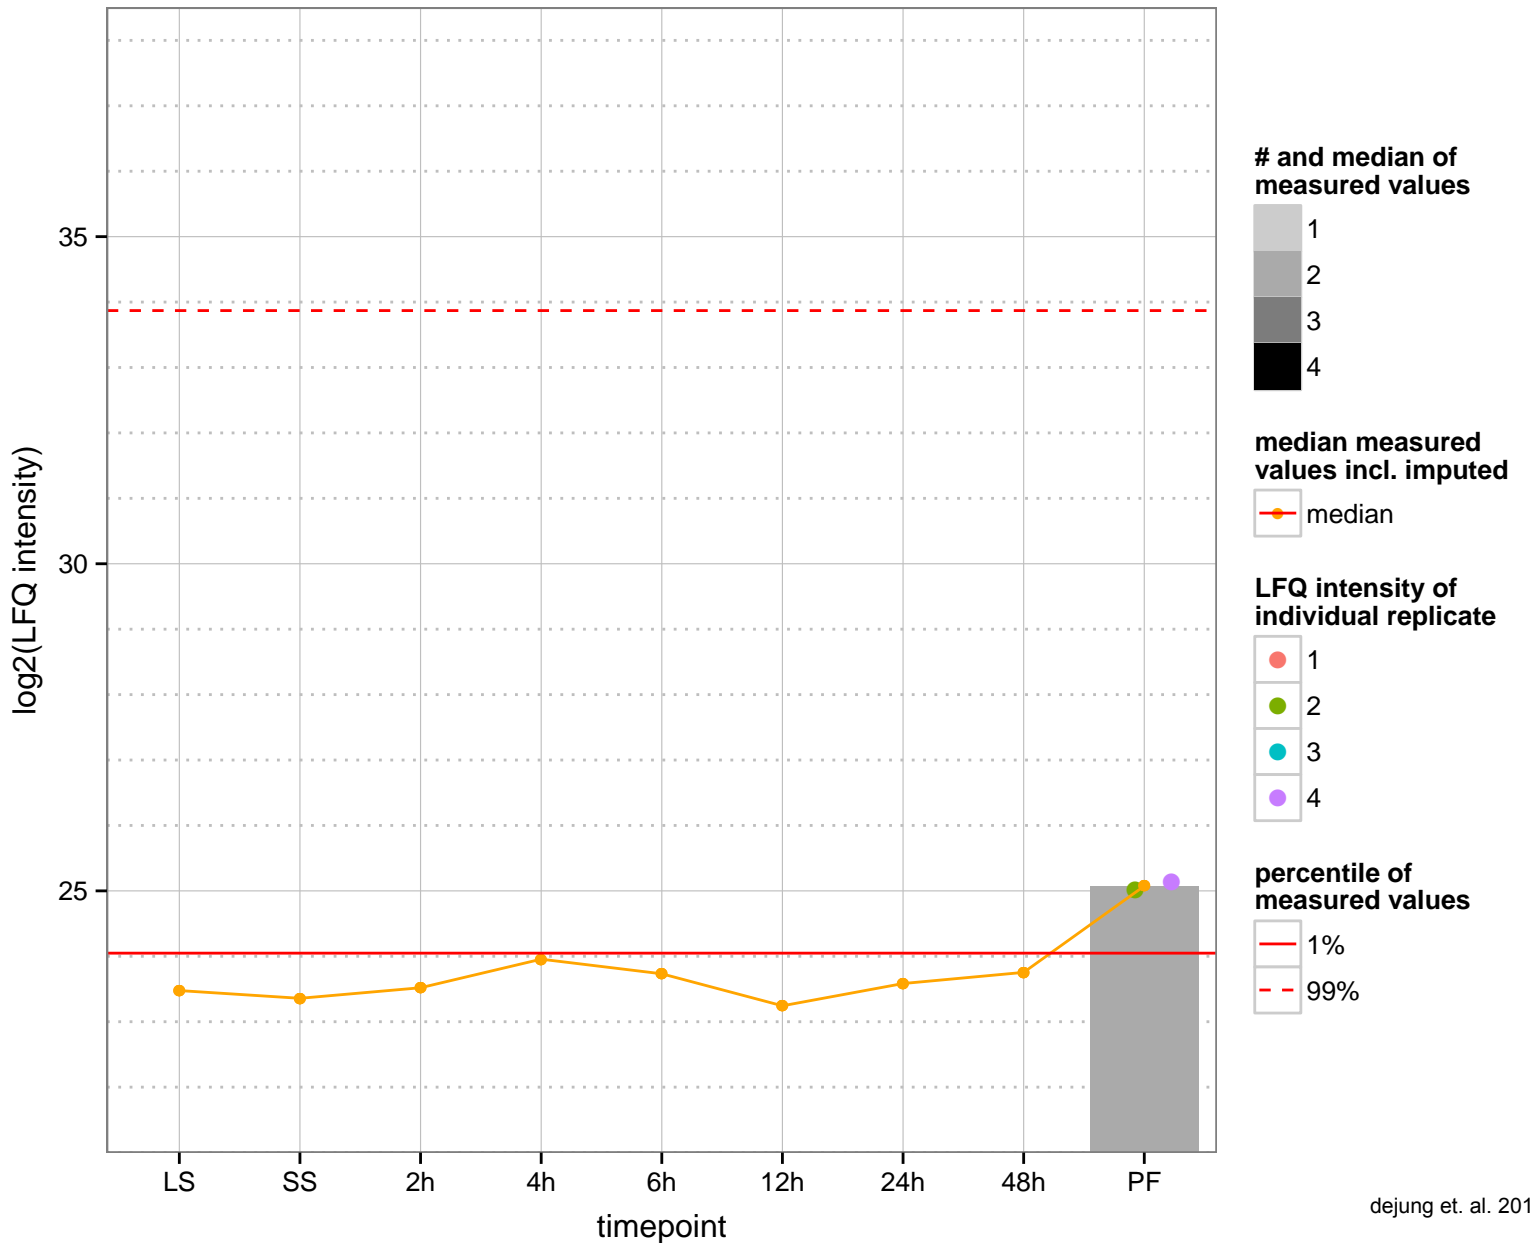

NA, aconitase (ACO)  
 Tb927.10.14000  
 AGOF: NA, aconitate hydratase activity  
 AGOC: NA, cytosol, mitochondrion  
 AGOP: NA, tricarboxylic acid cycle  
 PGO: NA, 4 iron, 4 sulfur cluster binding  
 PGOC: NA, null  
 PGOP: NA, metabolic process

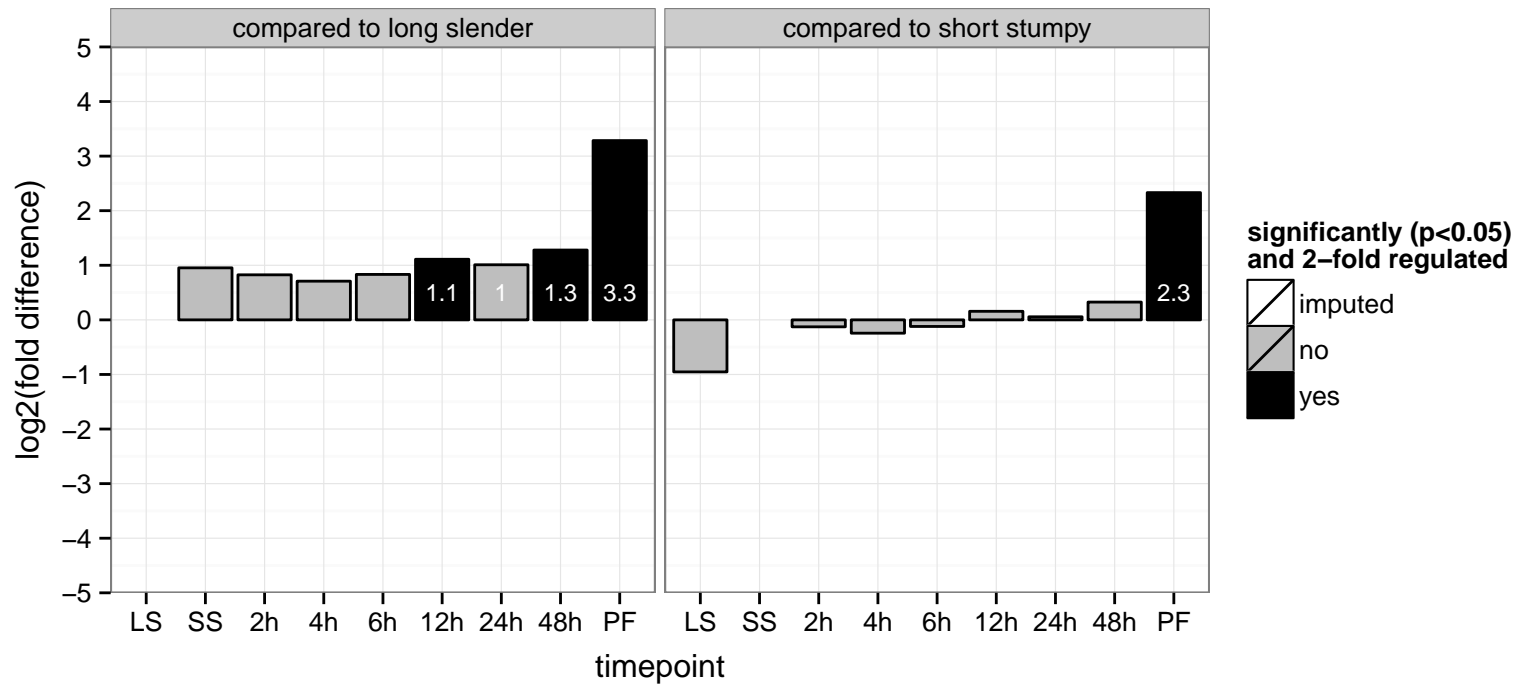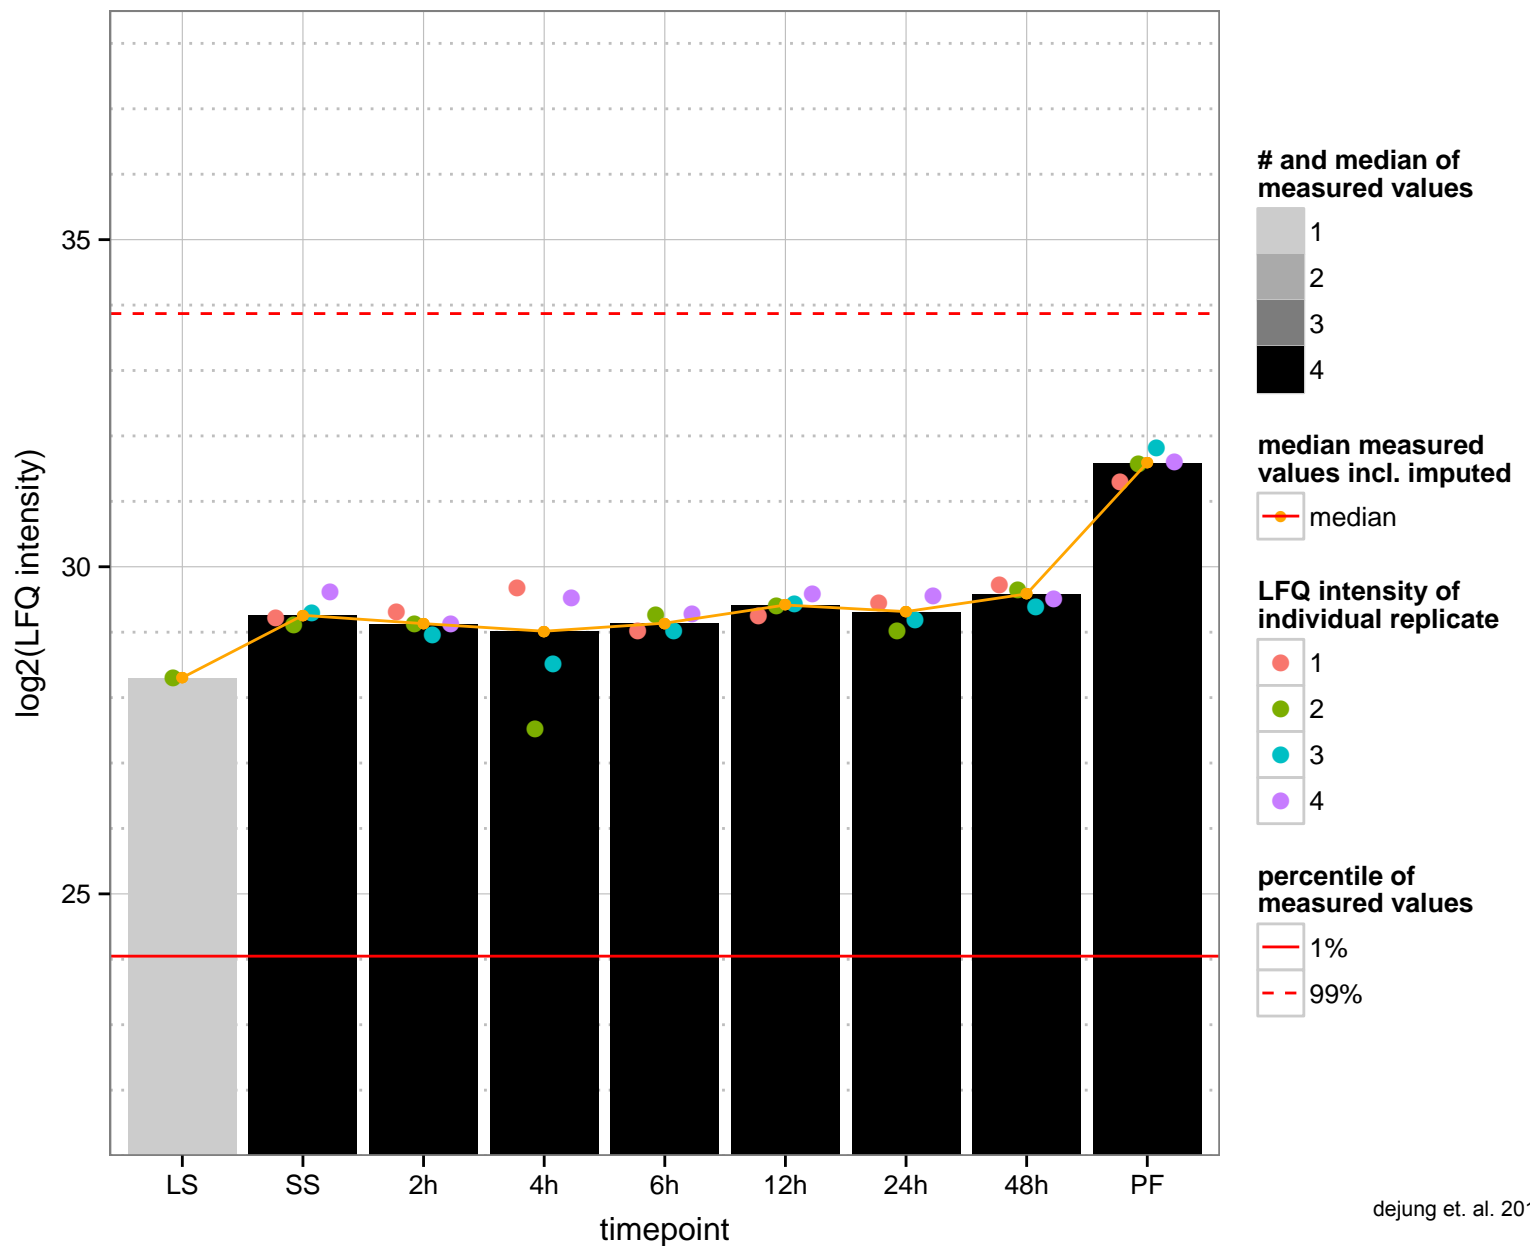

hypothetical protein, conserved  
 Tb927.10.14030  
 AGOF: null  
 AGOC: null  
 AGOP: null  
 PGO: null  
 PGOC: null  
 PGOP: null

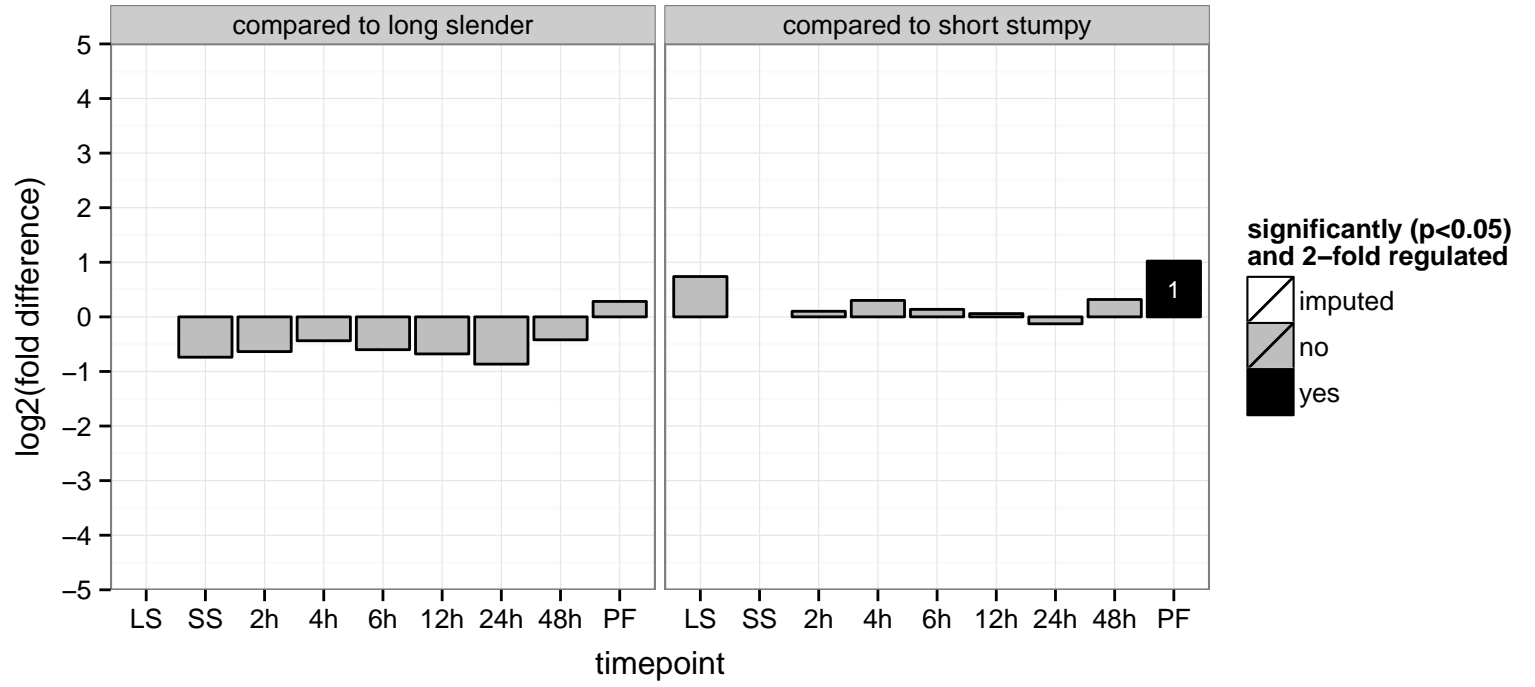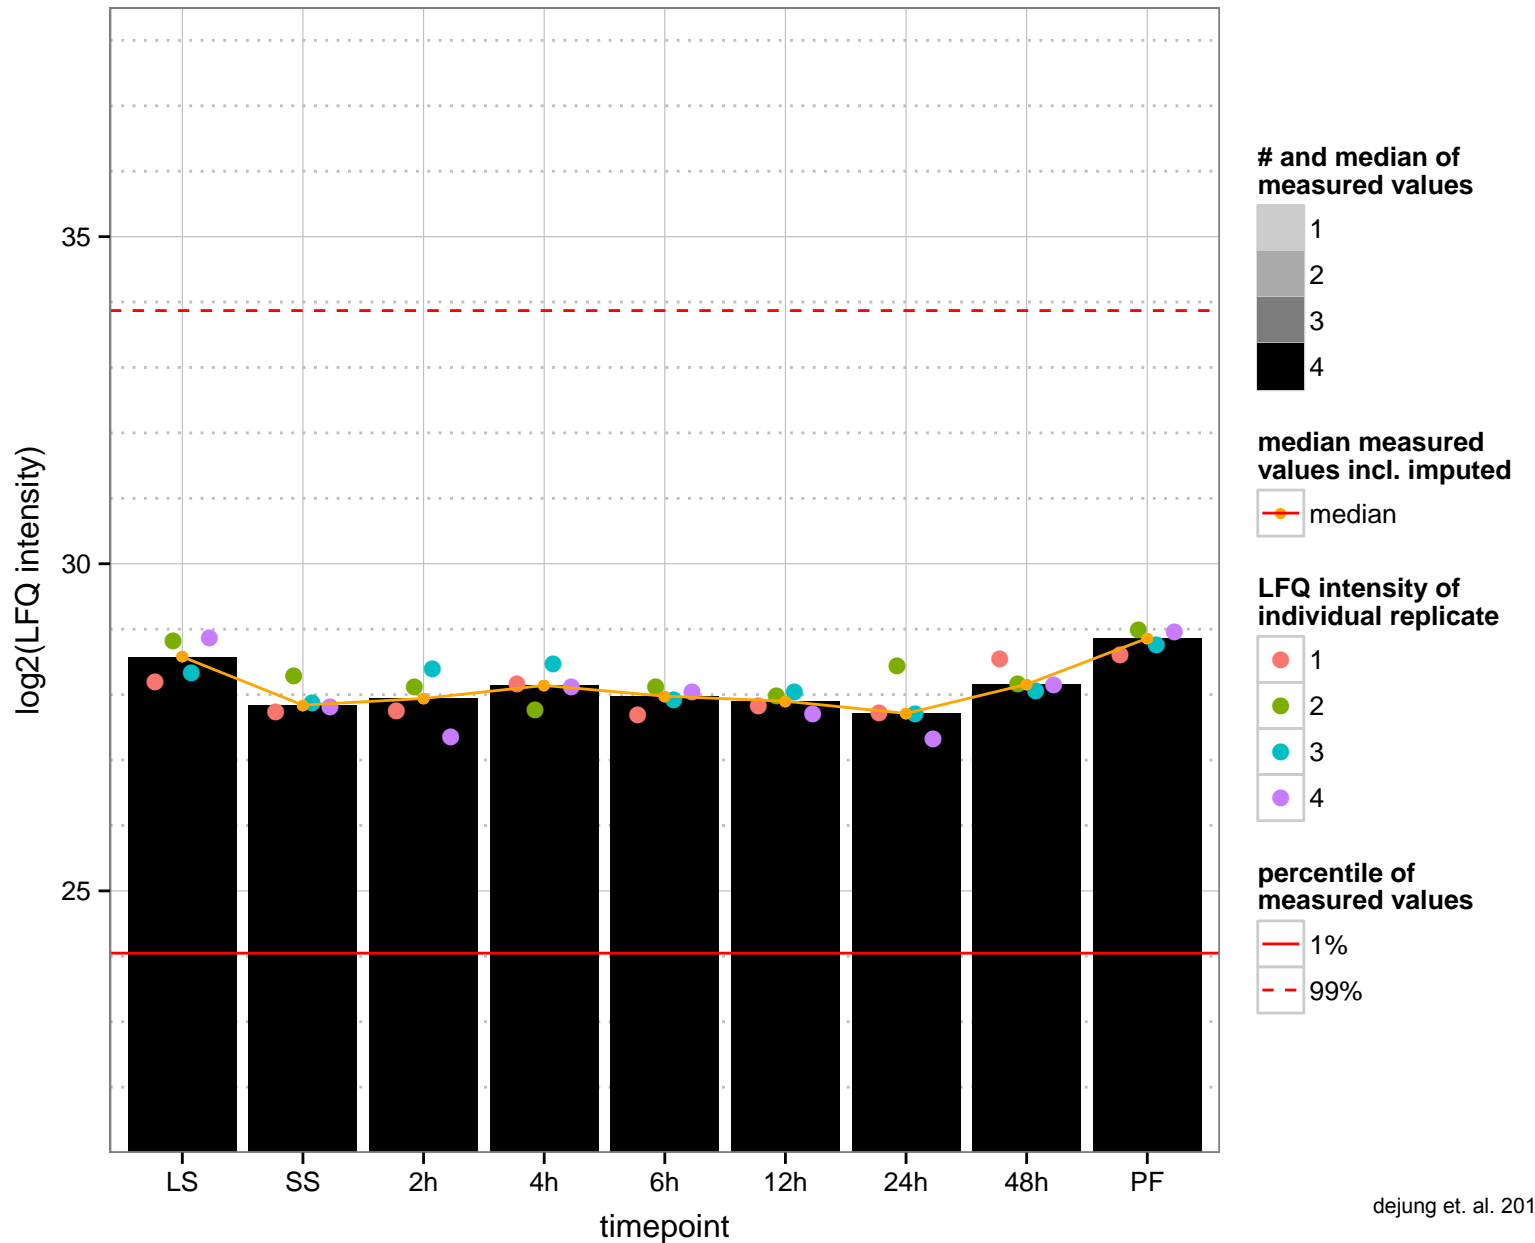

nuclear segregation protein, putative

Tb927.10.14150

AGOF: RNA binding

AGOC: nuclear outer membrane–endoplasmic reticulum membrane network, polysome, ribonucleoprotein complex

AGOP: chromosome segregation, meiosis, regulation of mitosis

PGOF: null

PGOC: null

PGOP: null

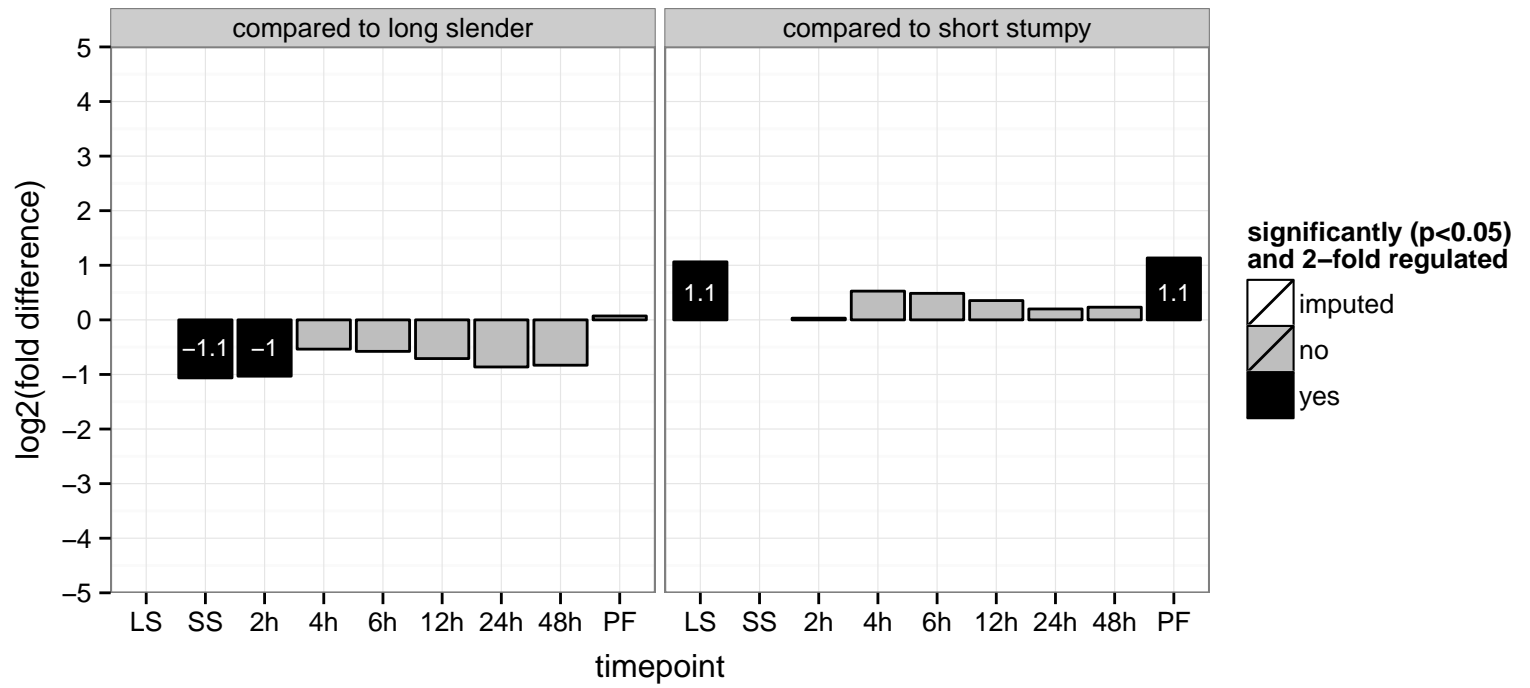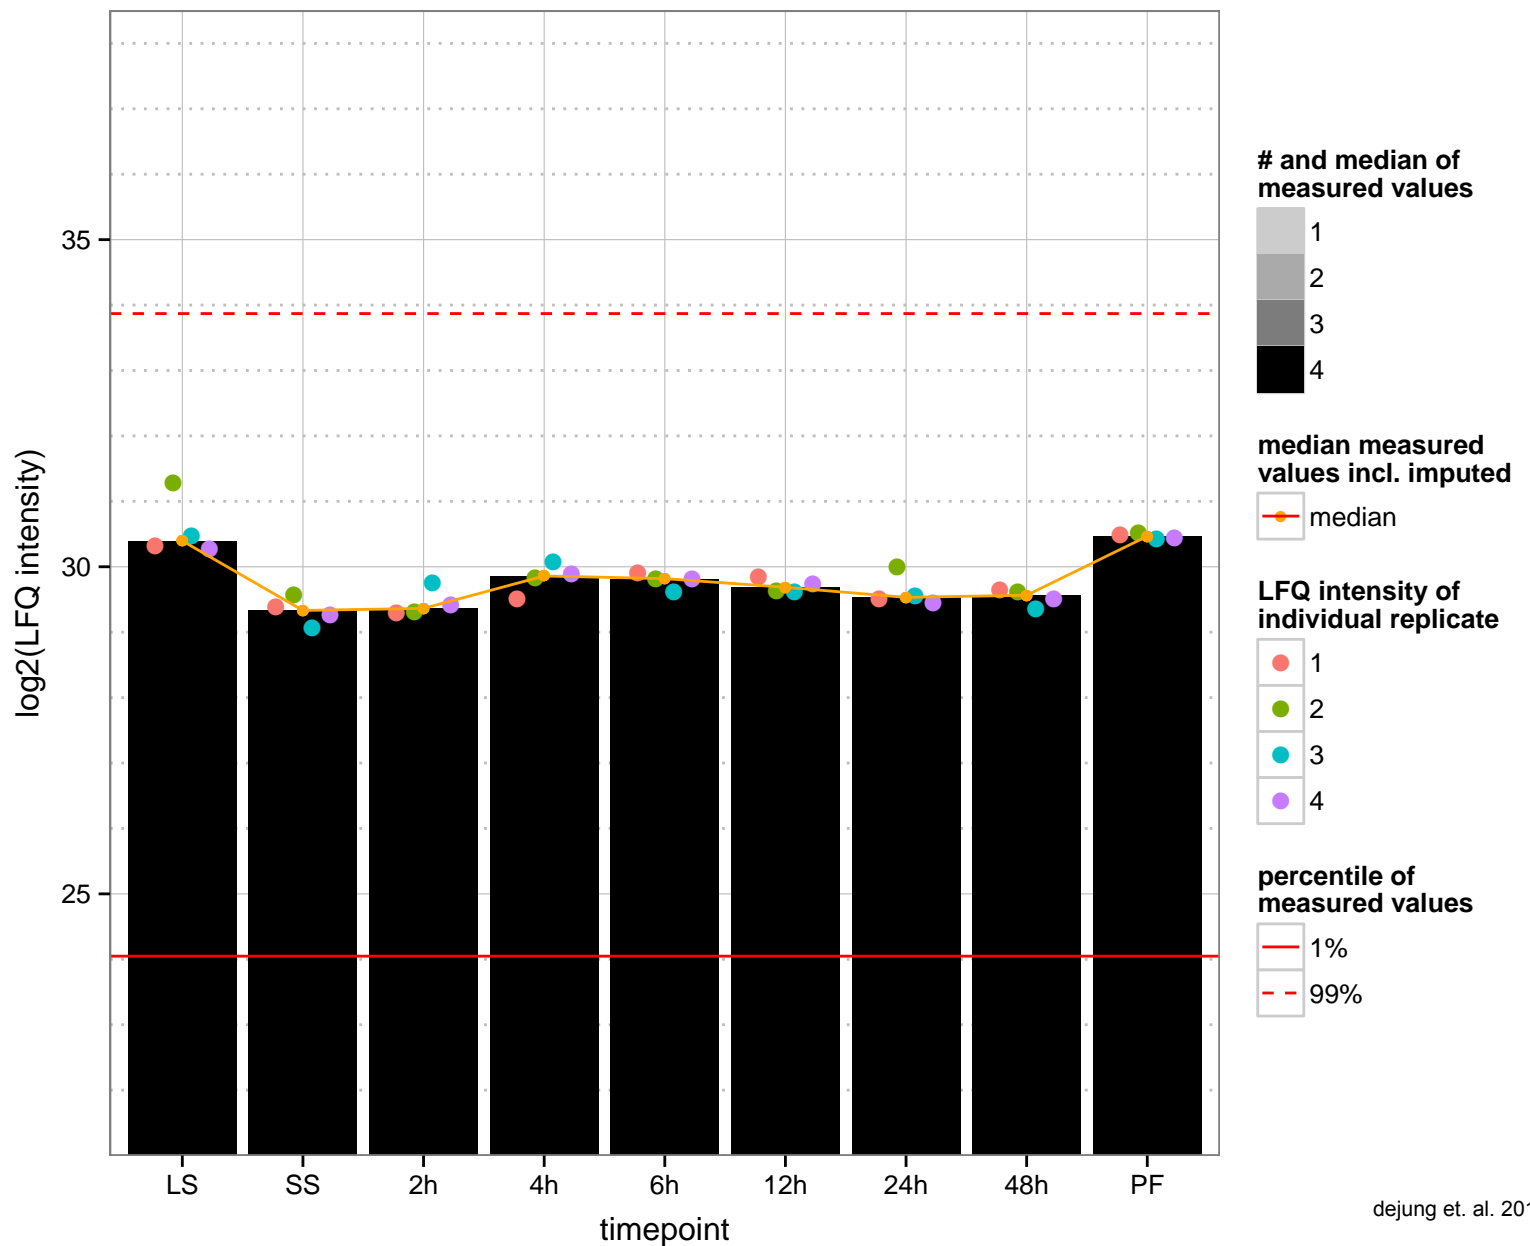

hypothetical protein, conserved  
 Tb927.10.14320  
 AGOF: null  
 AGOC: null  
 AGOP: null  
 PGOF: binding, protein binding  
 PGO: null  
 PGOP: null

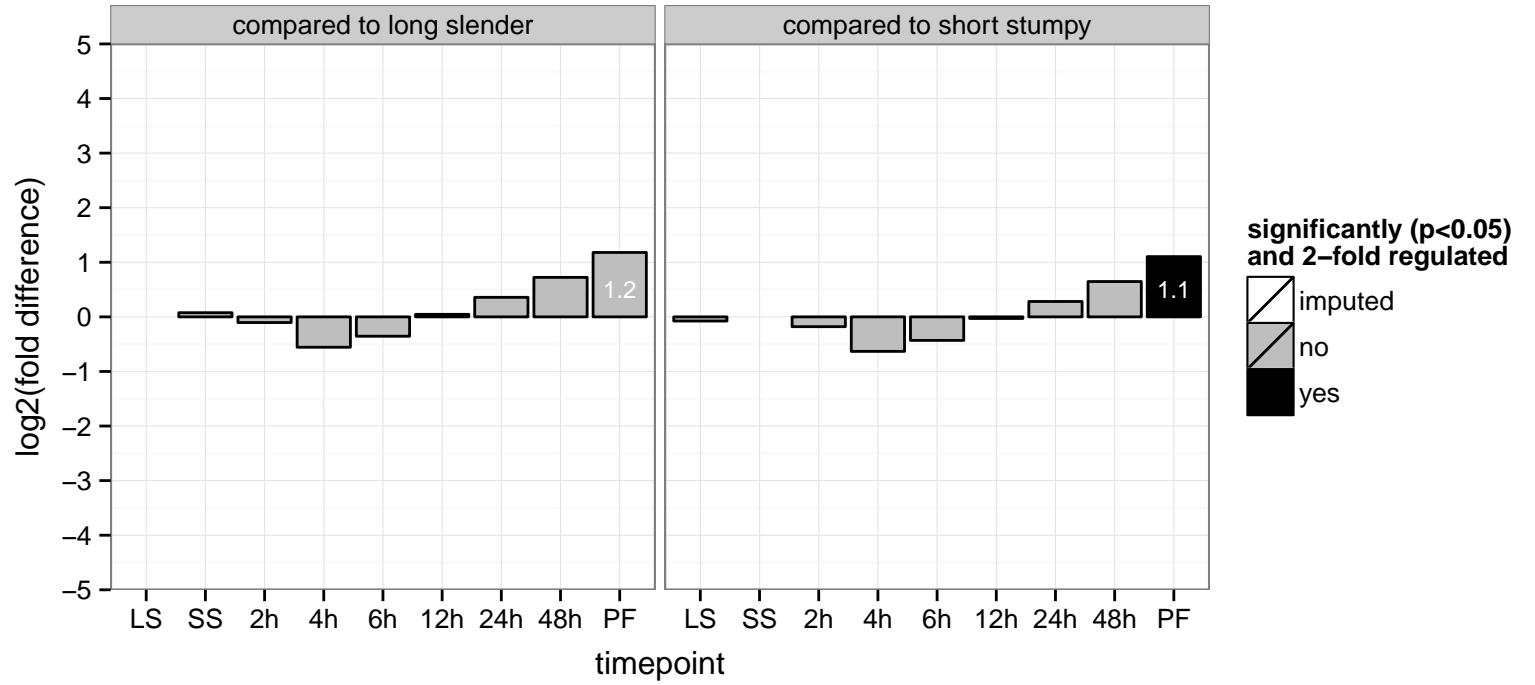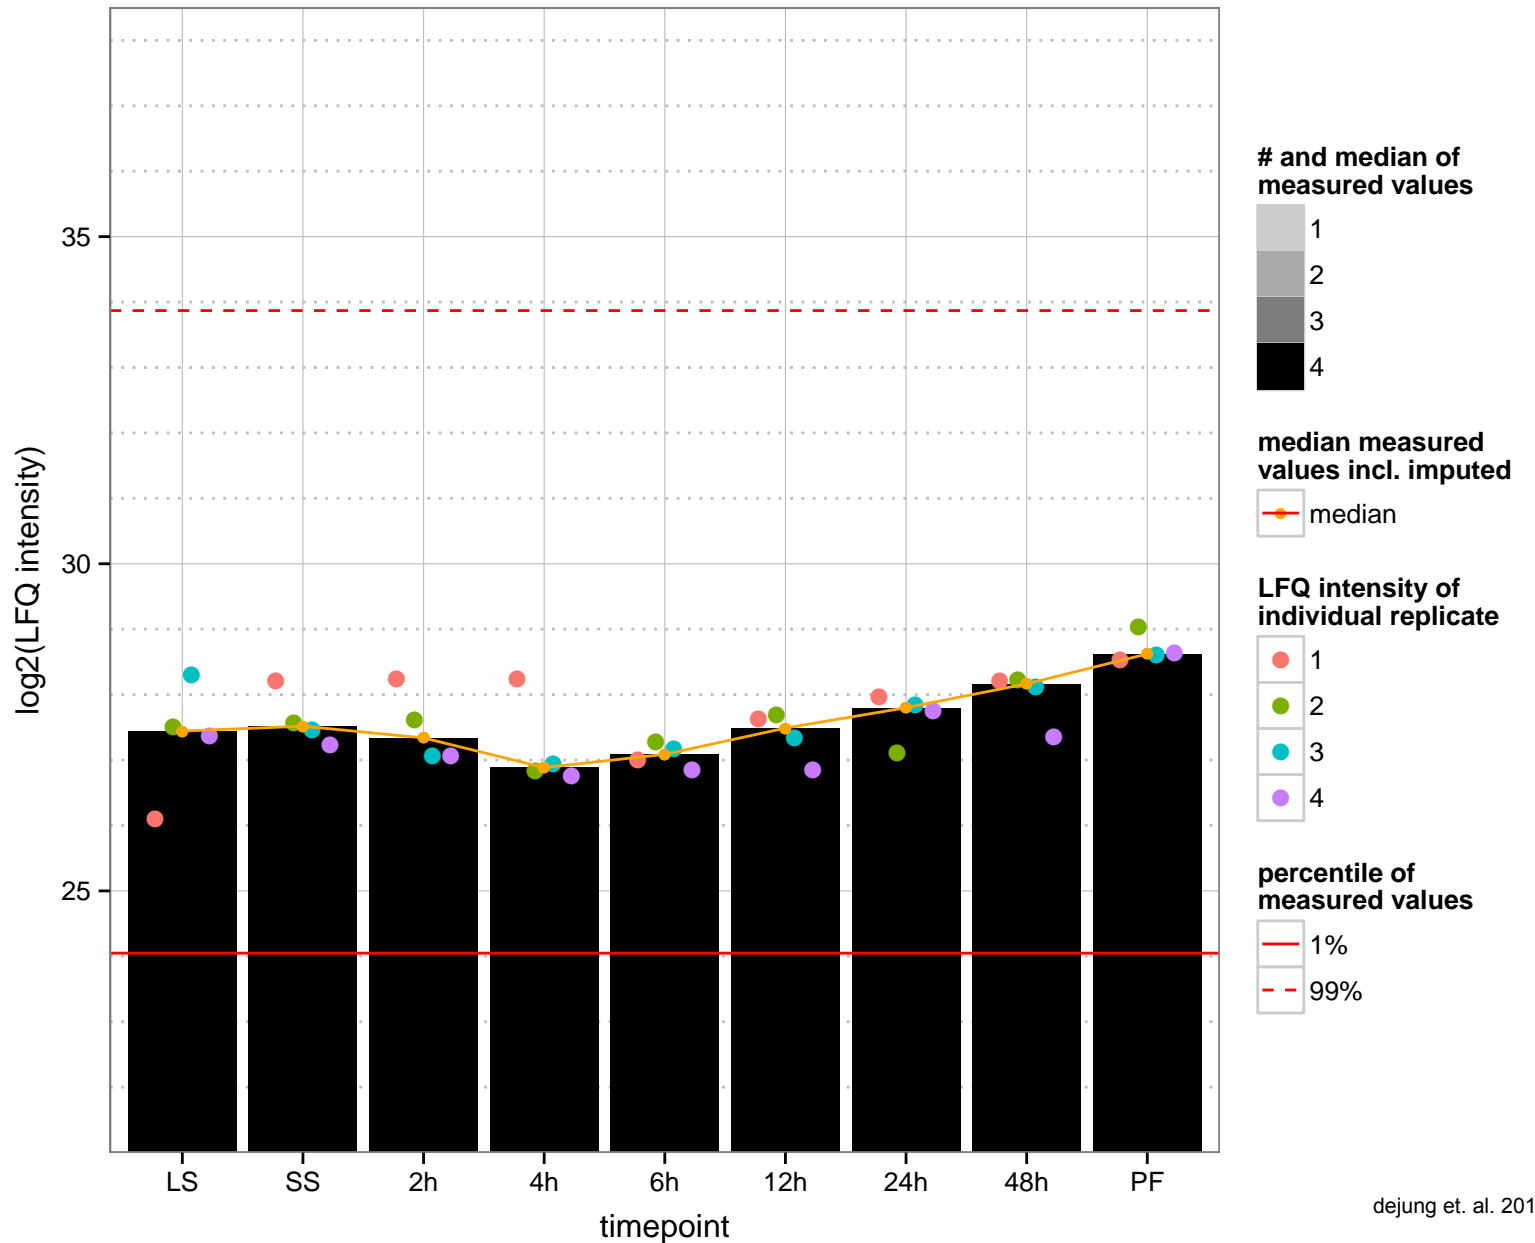

hypothetical protein, conserved  
 Tb927.10.14380  
 AGOF: ATP binding  
 AGOC: null  
 AGOP: null  
 PGO: null  
 PGOC: null  
 PGOP: null

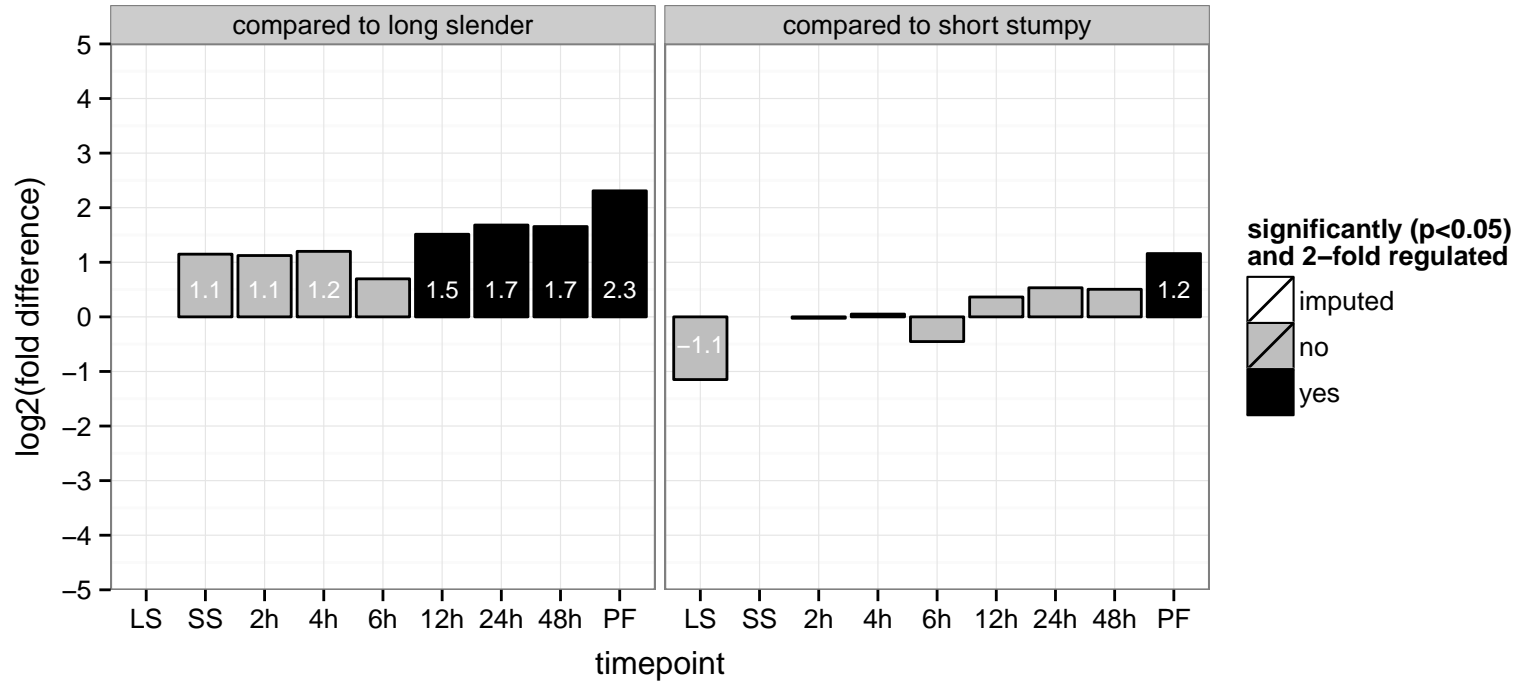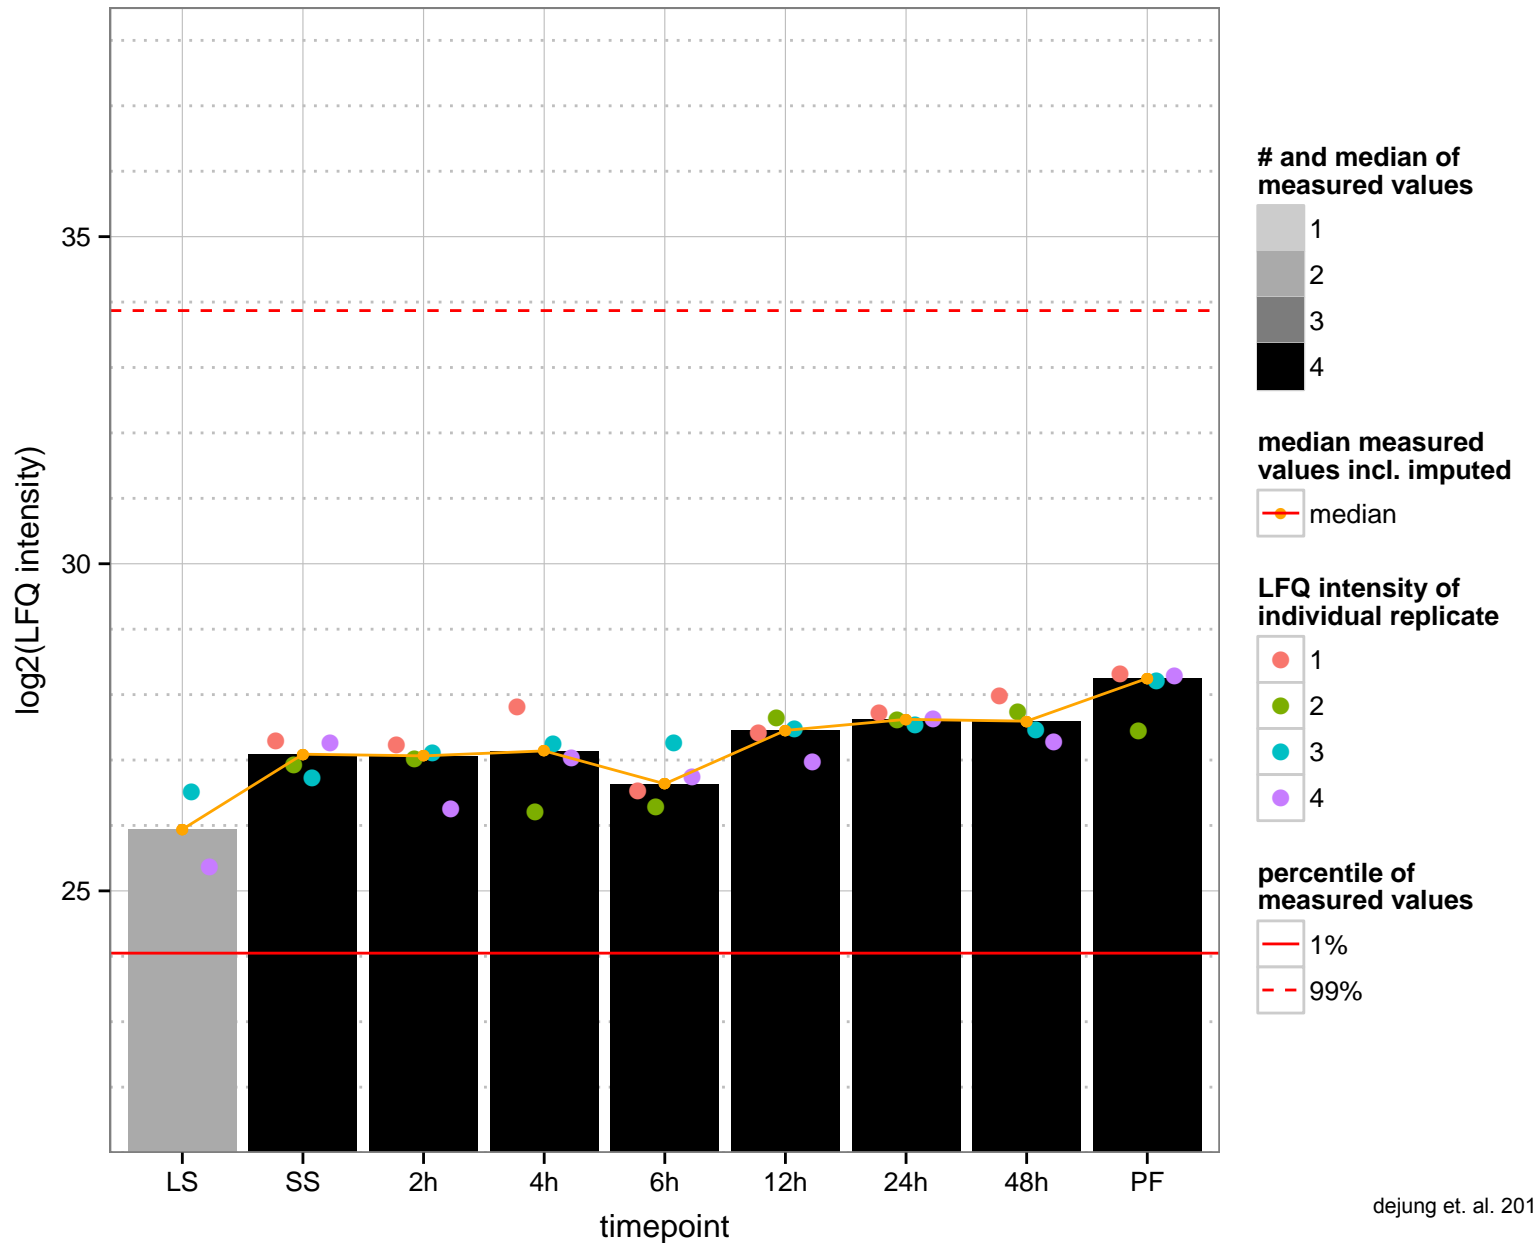



hypothetical protein, conserved  
 Tb927.10.14430  
 AGOF: null  
 AGOC: null  
 AGOP: null  
 PGOF: null  
 PGO: null  
 PGOP: null

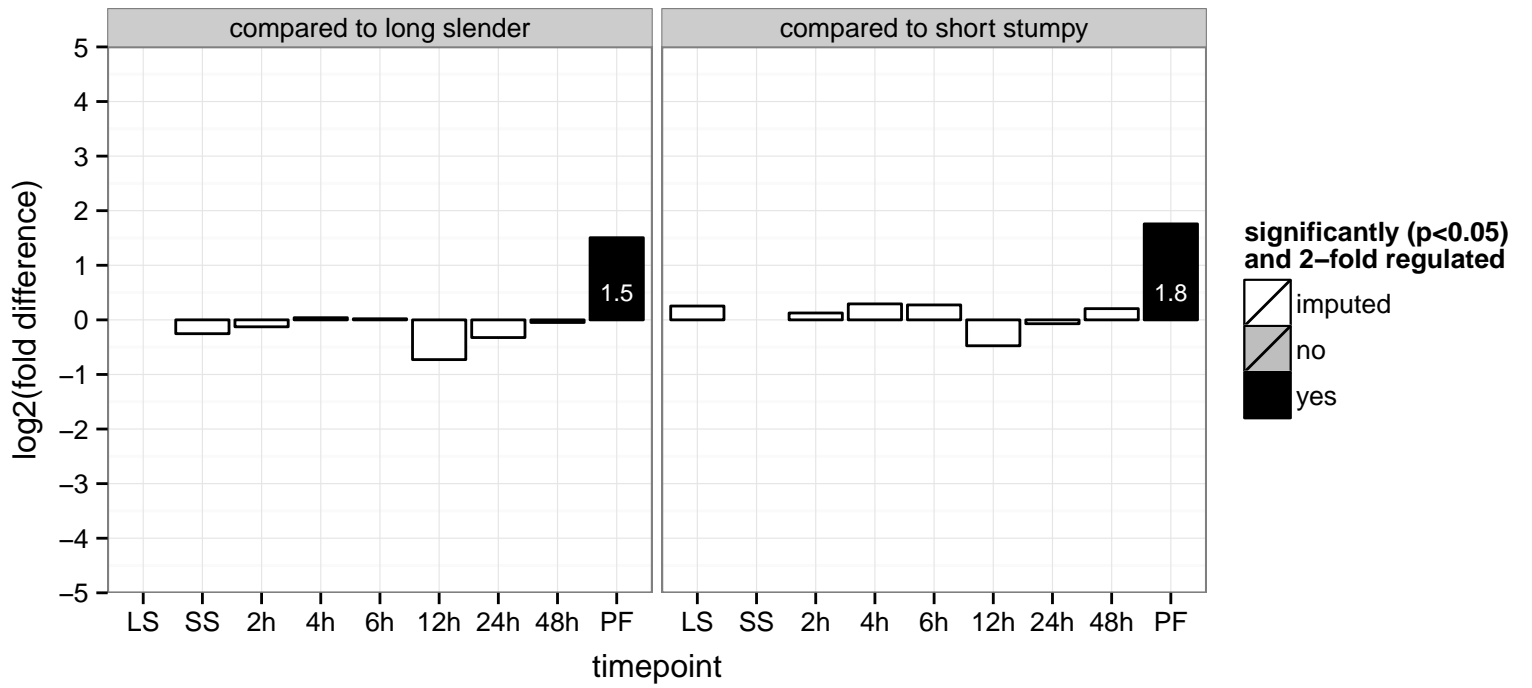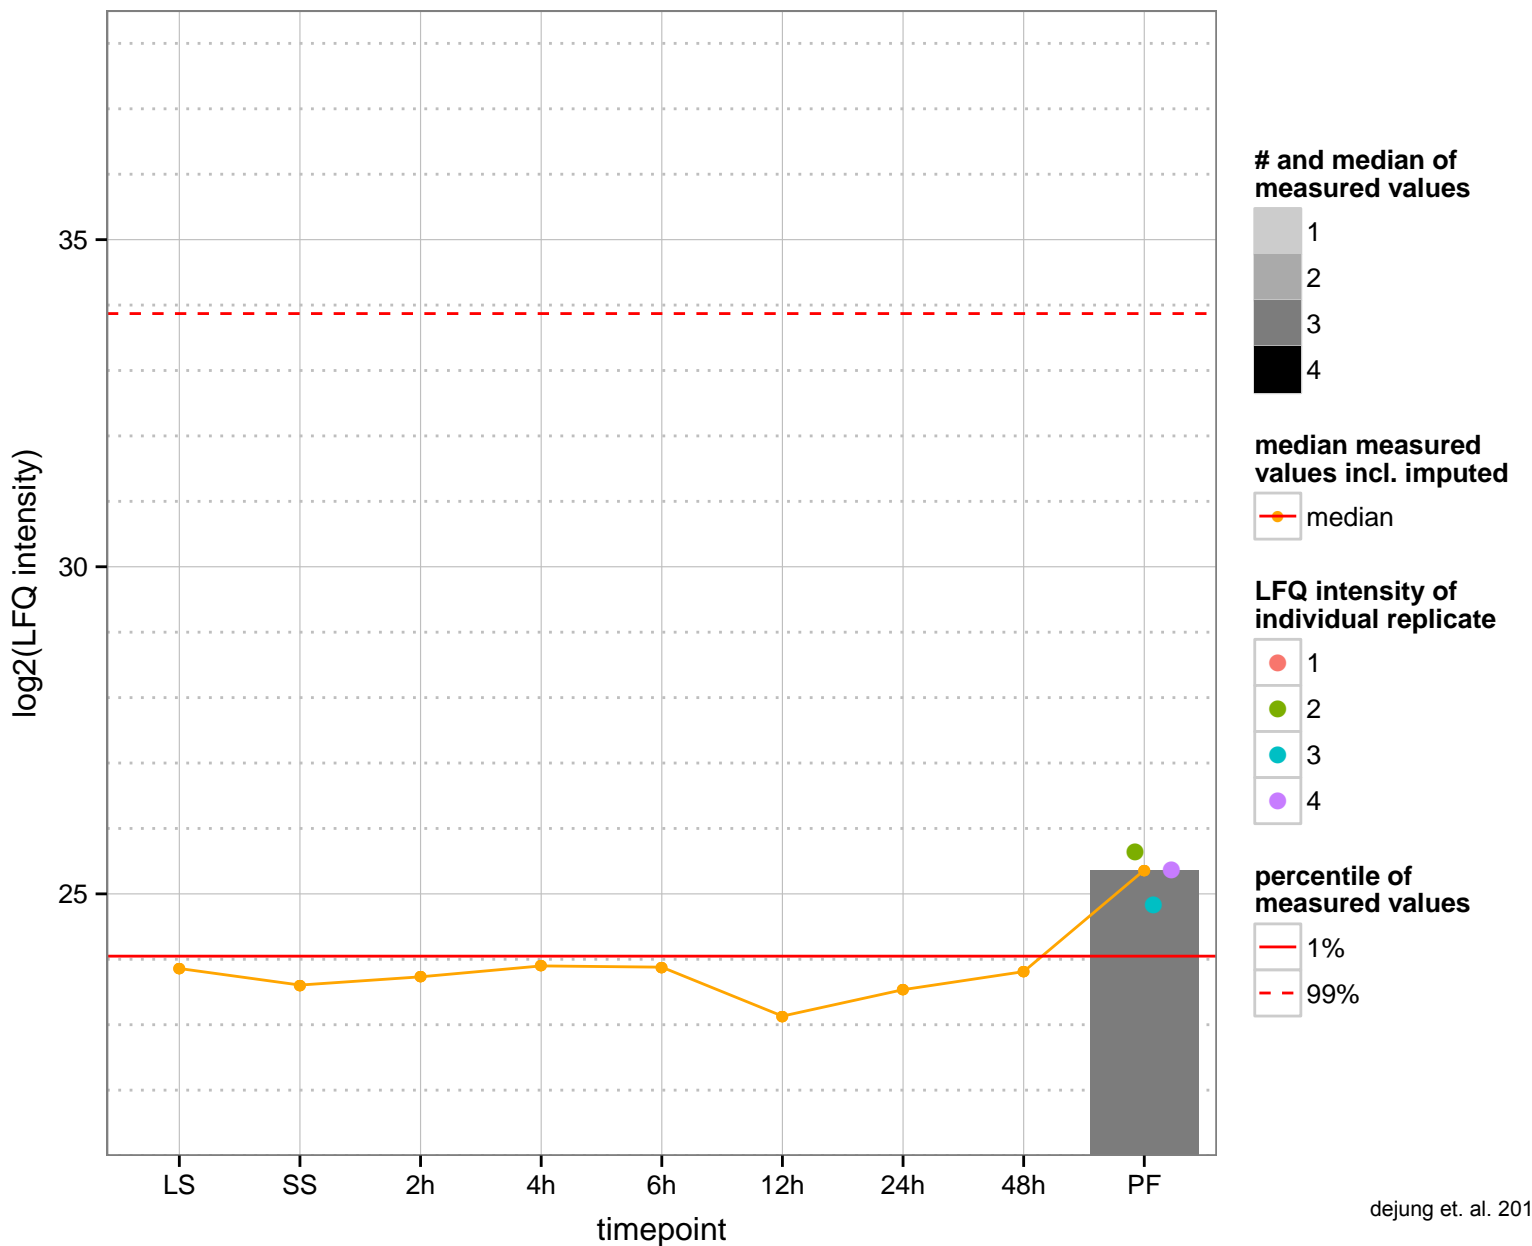

hypothetical protein, conserved  
 Tb927.10.14870  
 AGOF: null  
 AGOC: null  
 AGOP: null  
 PGO: null  
 PGOC: null  
 PGOP: null

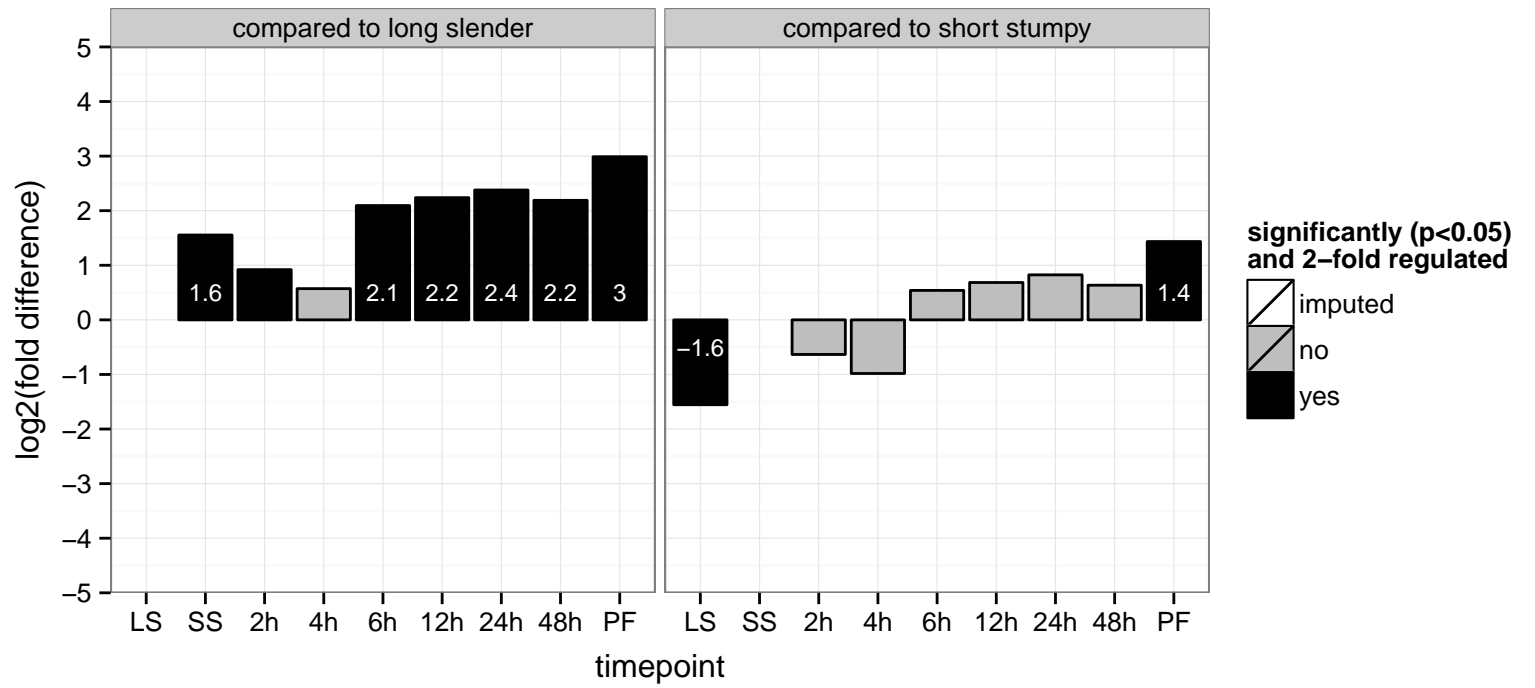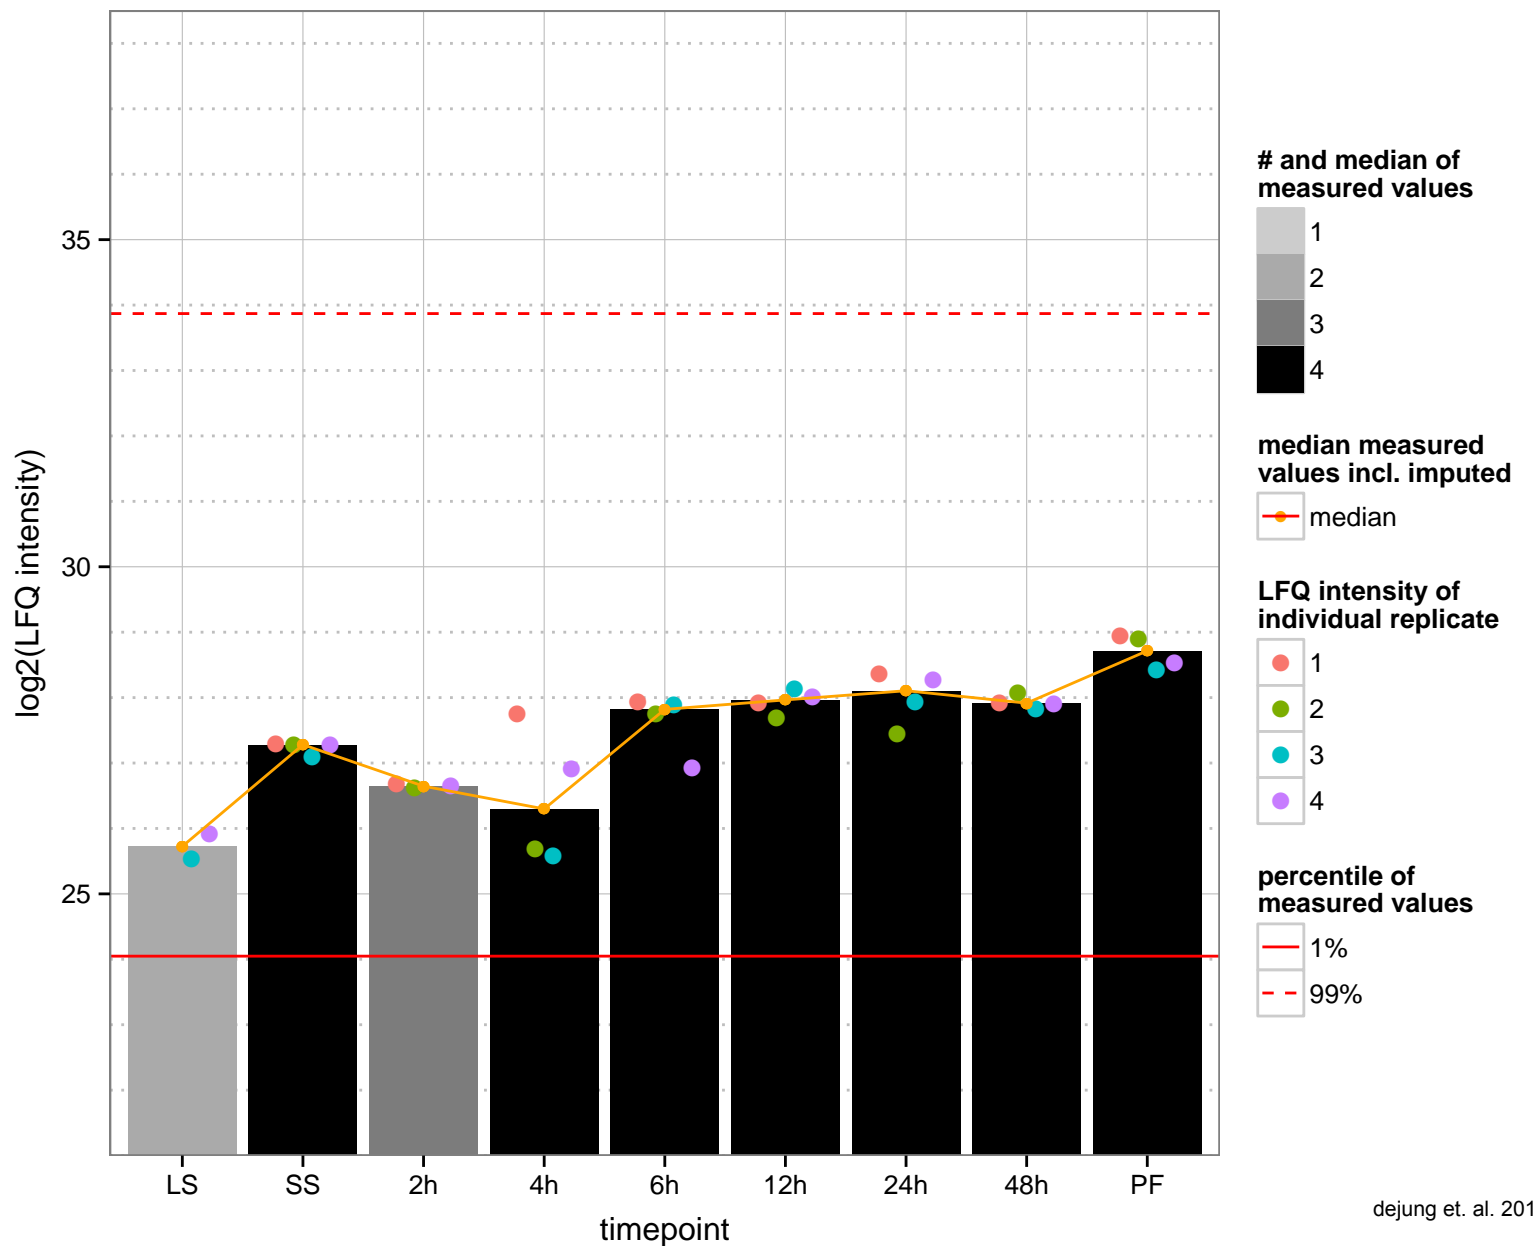

ATP-dependent DEAD/H RNA helicase, putative

Tb927.10.1720

AGOF: ATP binding, ATP-dependent helicase activity, helicase activity, nucleic acid binding

AGOC: null

AGOP: nucleobase-containing compound metabolic process

PGOF: ATP binding, ATP-dependent helicase activity, helicase activity, nucleic acid binding

PGOC: null

PGOP: null

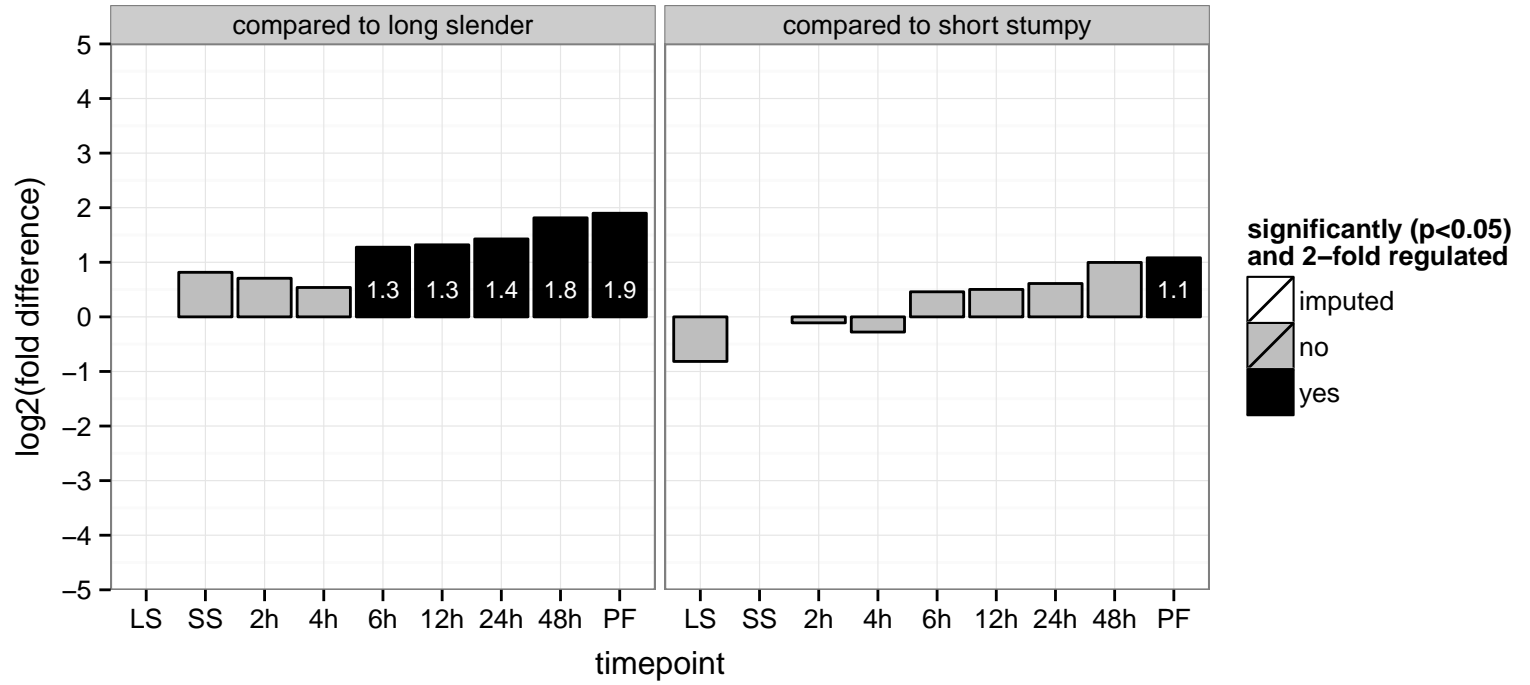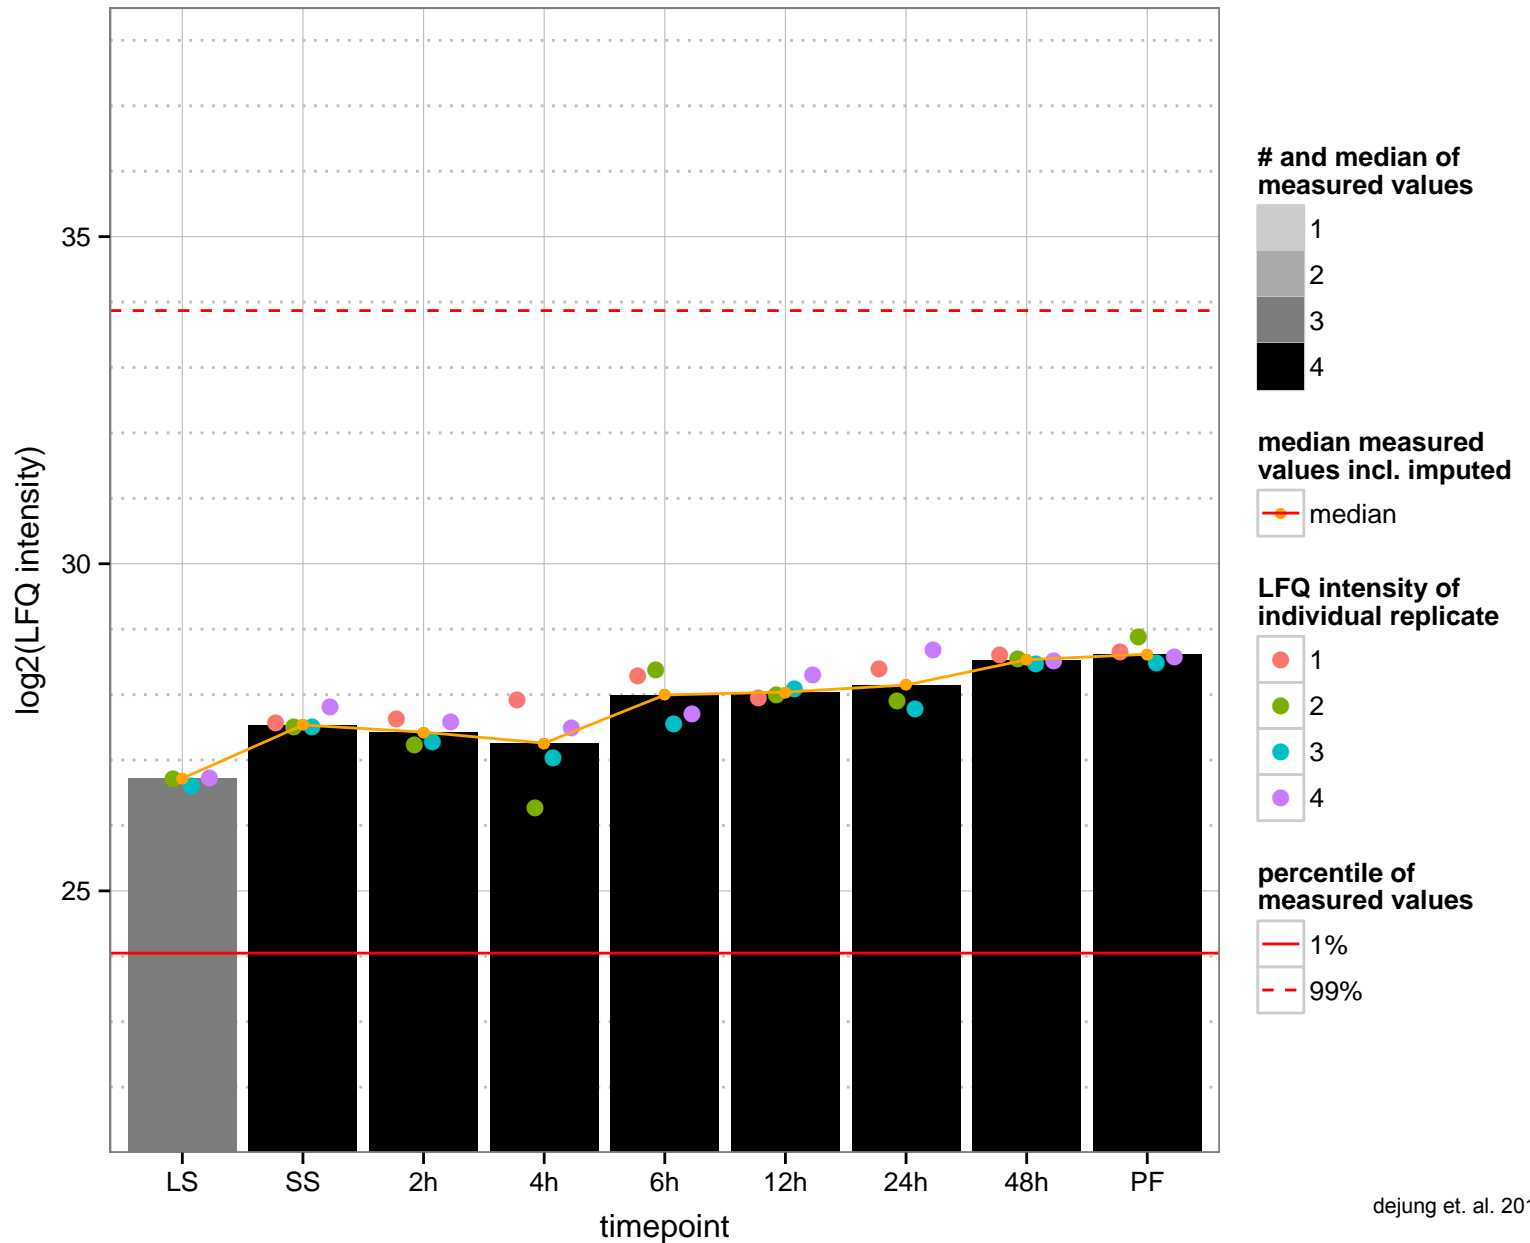

chaperone protein DNAj, putative  
 Tb927.10.2290  
 AGOF: chaperone binding, heat shock protein binding, unfolded protein binding  
 AGOC: null  
 AGOP: protein folding  
 PGOF: heat shock protein binding, unfolded protein binding  
 PGO: null  
 PGOP: protein folding

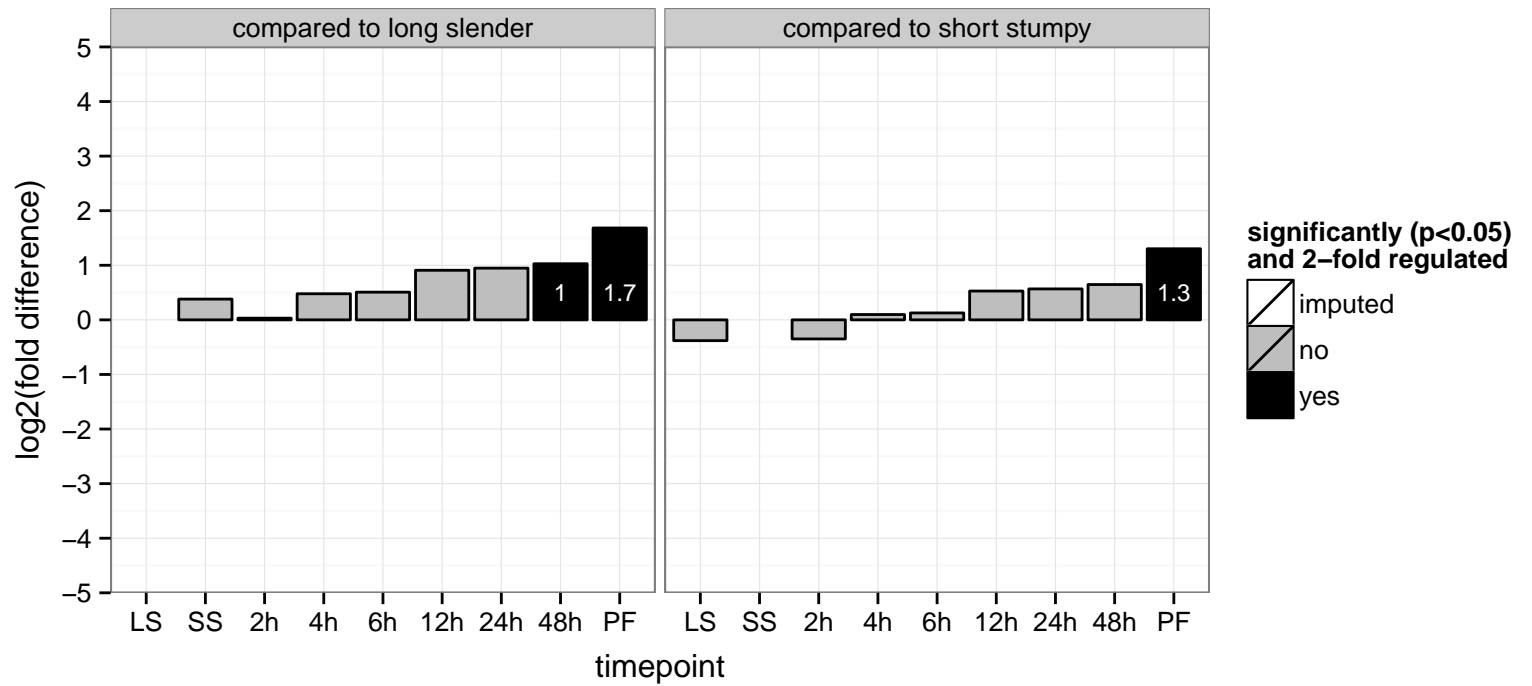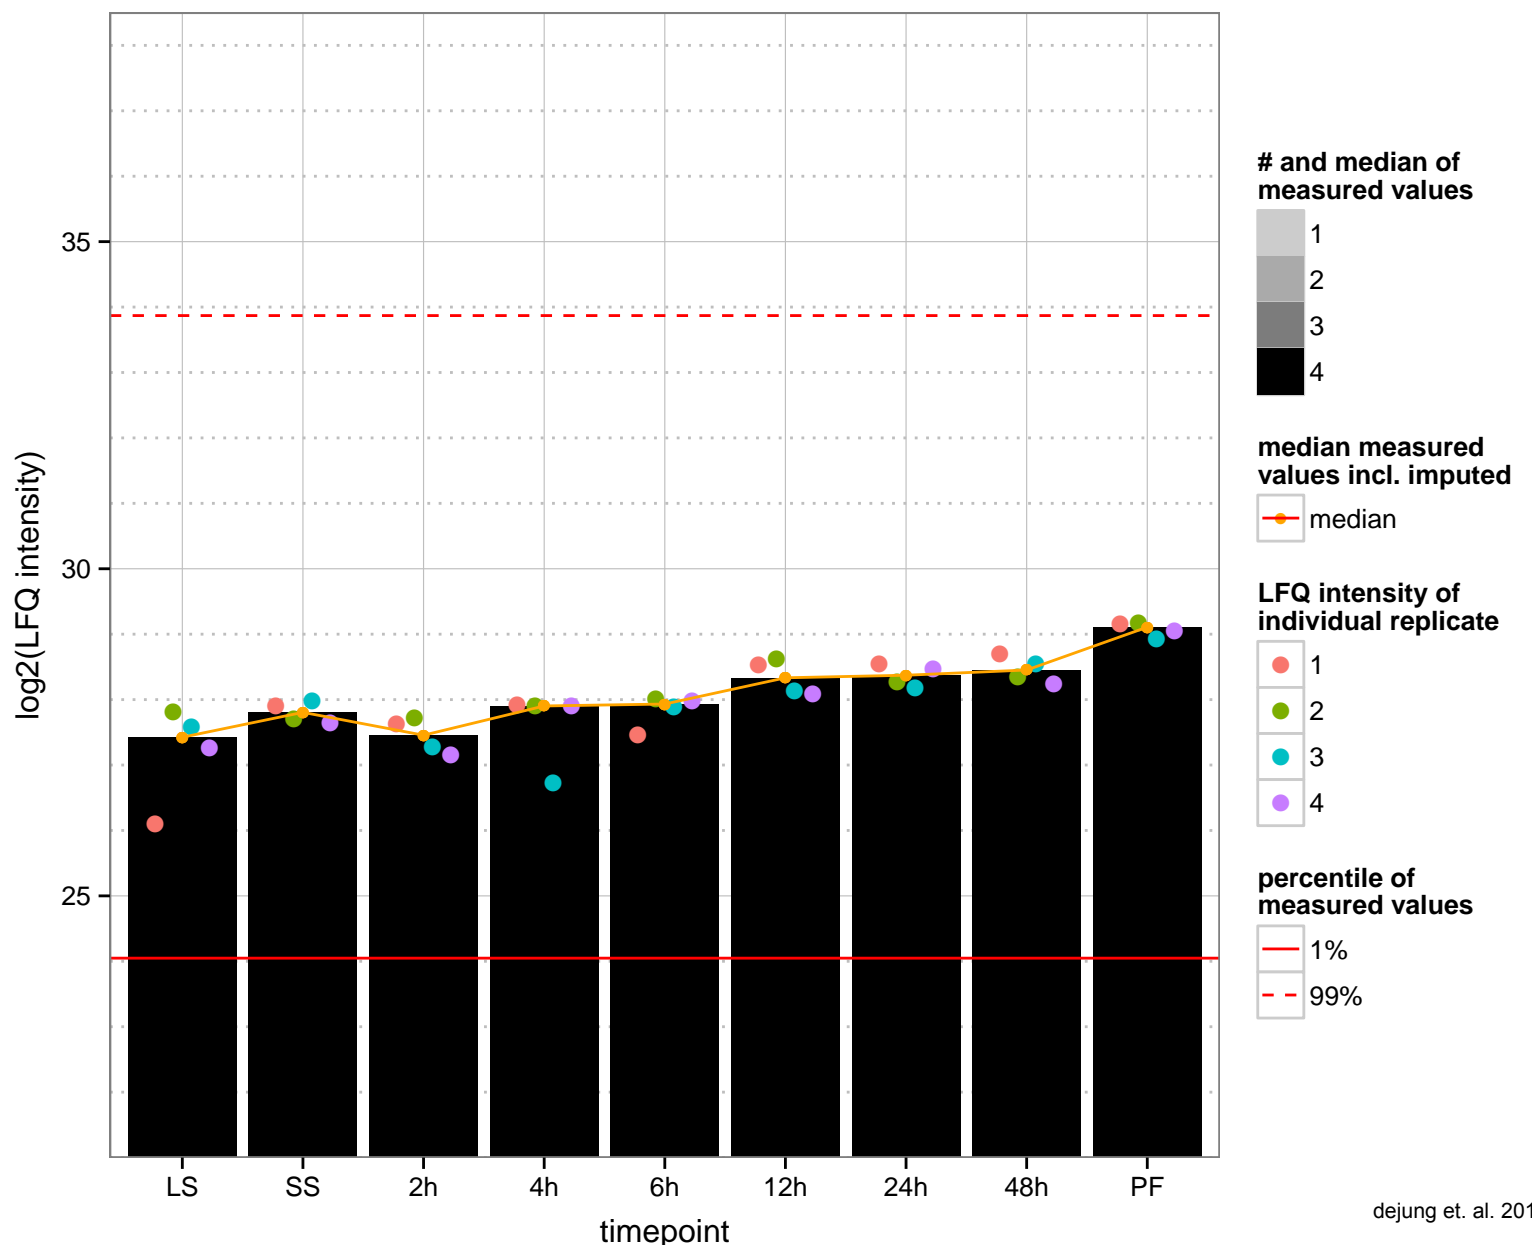

hypothetical protein, conserved  
 Tb927.10.2320  
 AGOF: null  
 AGOC: null  
 AGOP: null  
 PGOF: protein binding  
 PGO: null  
 PGOP: null

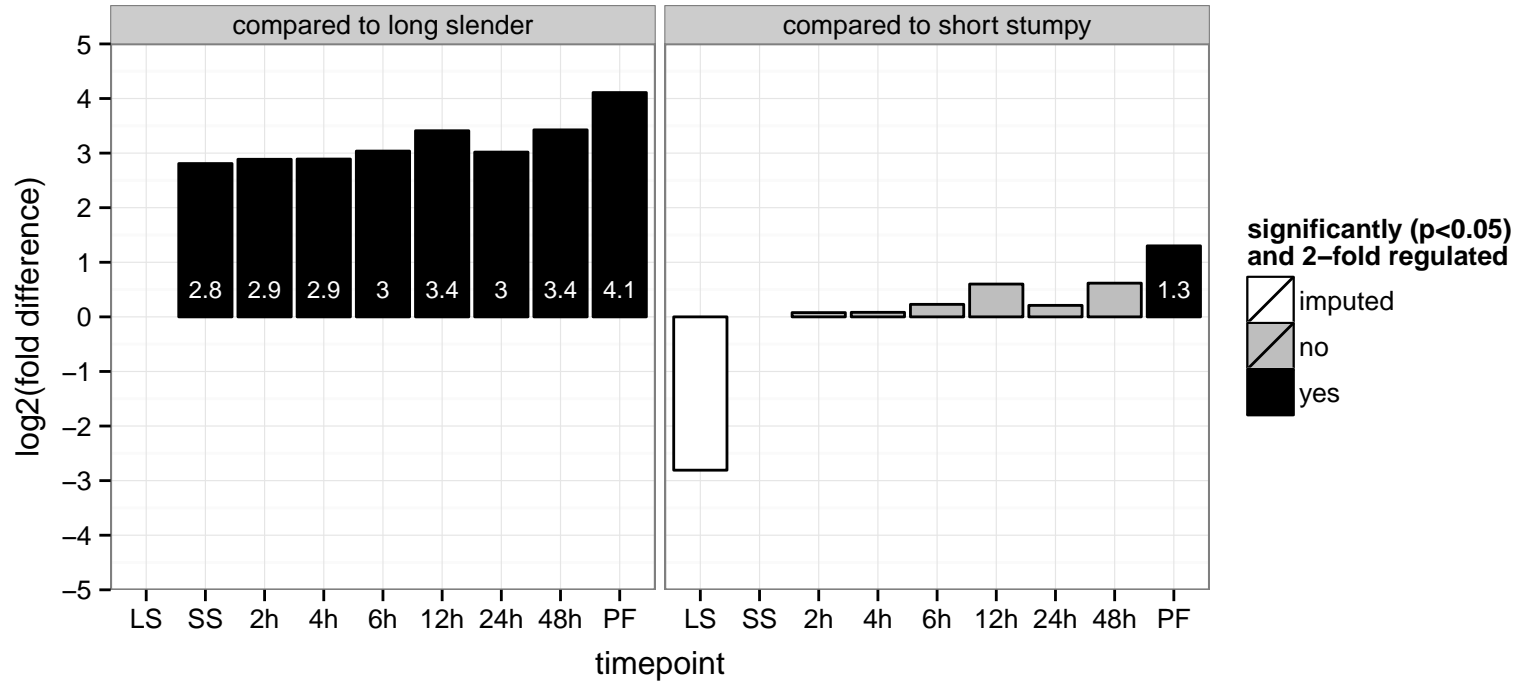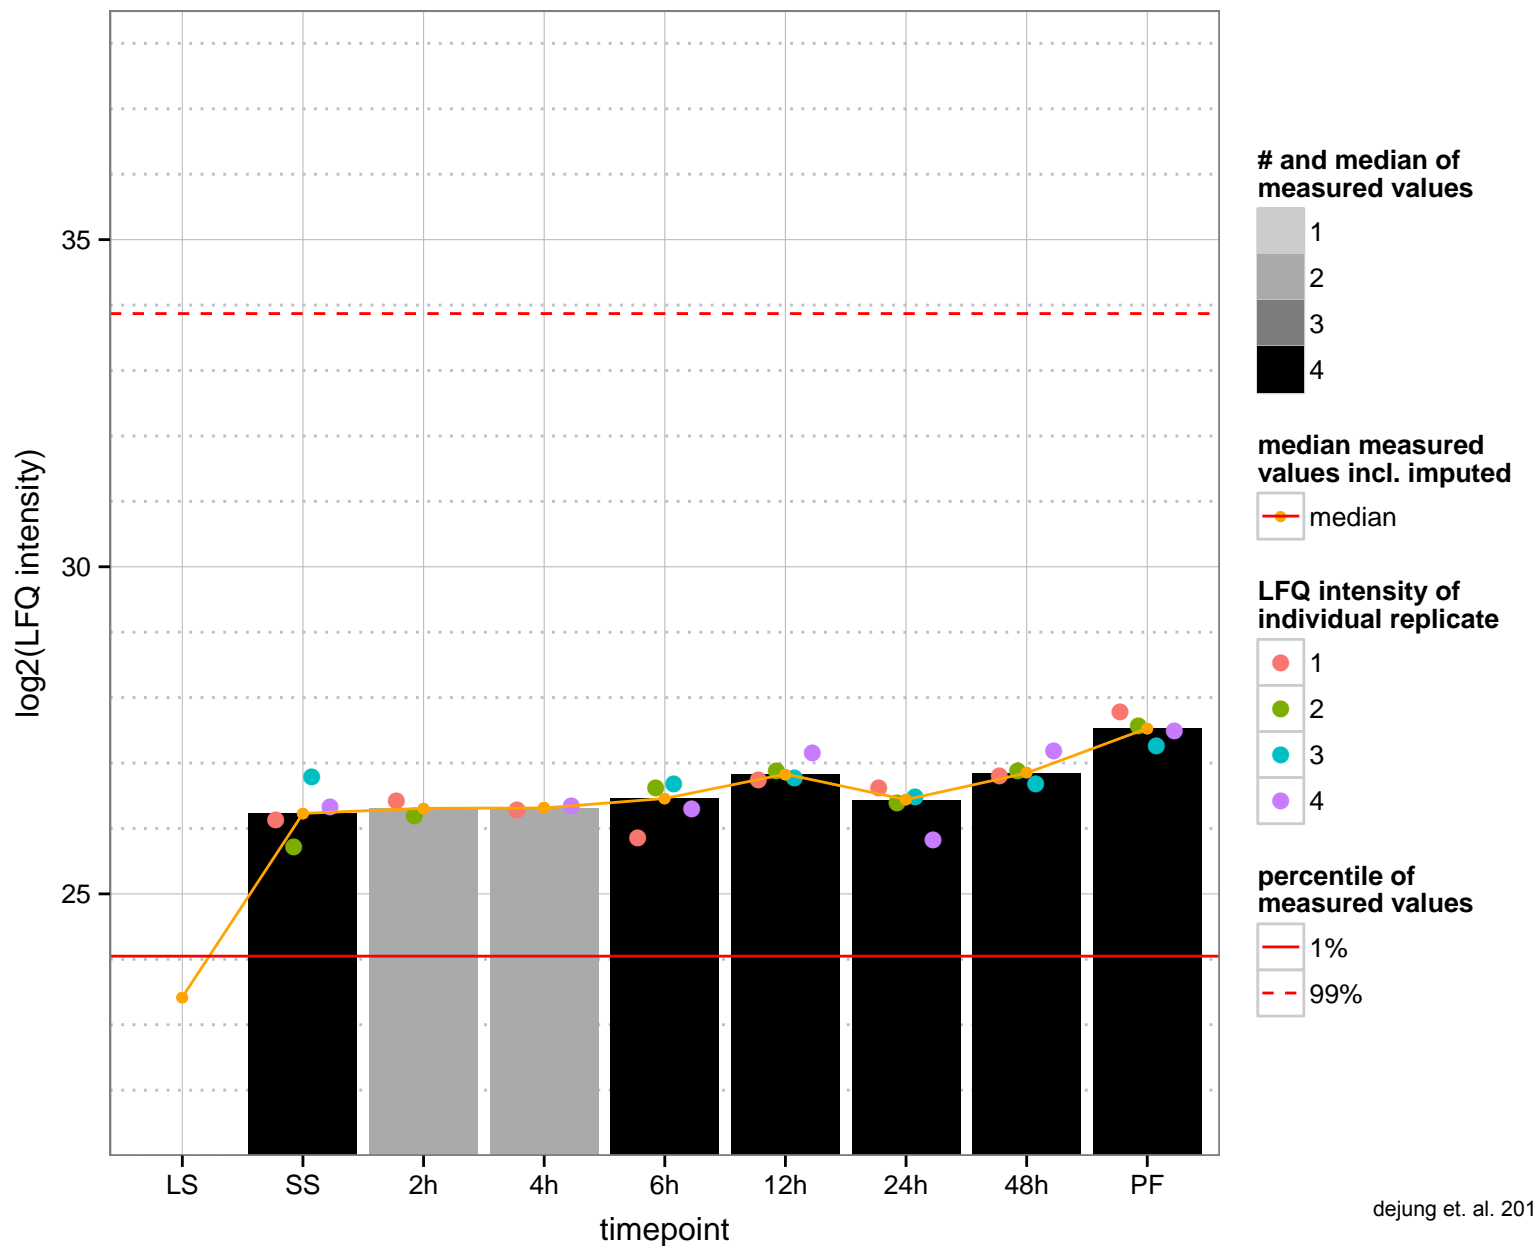

peroxin 14, putative (PEX14)  
 Tb927.10.240  
 AGOF: null  
 AGOC: glycosome membrane, peroxisome  
 AGOP: protein targeting to vacuole  
 PGO: null  
 PGOC: null  
 PGOP: null

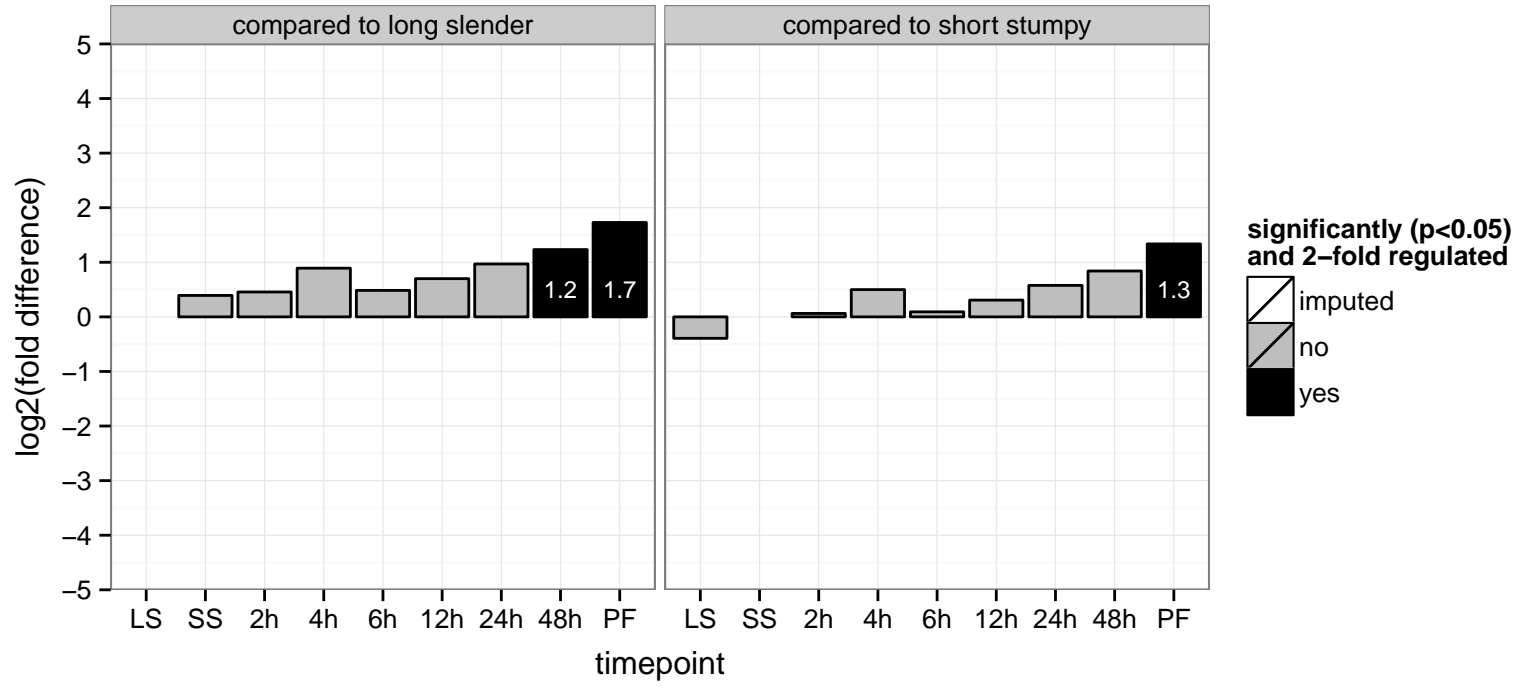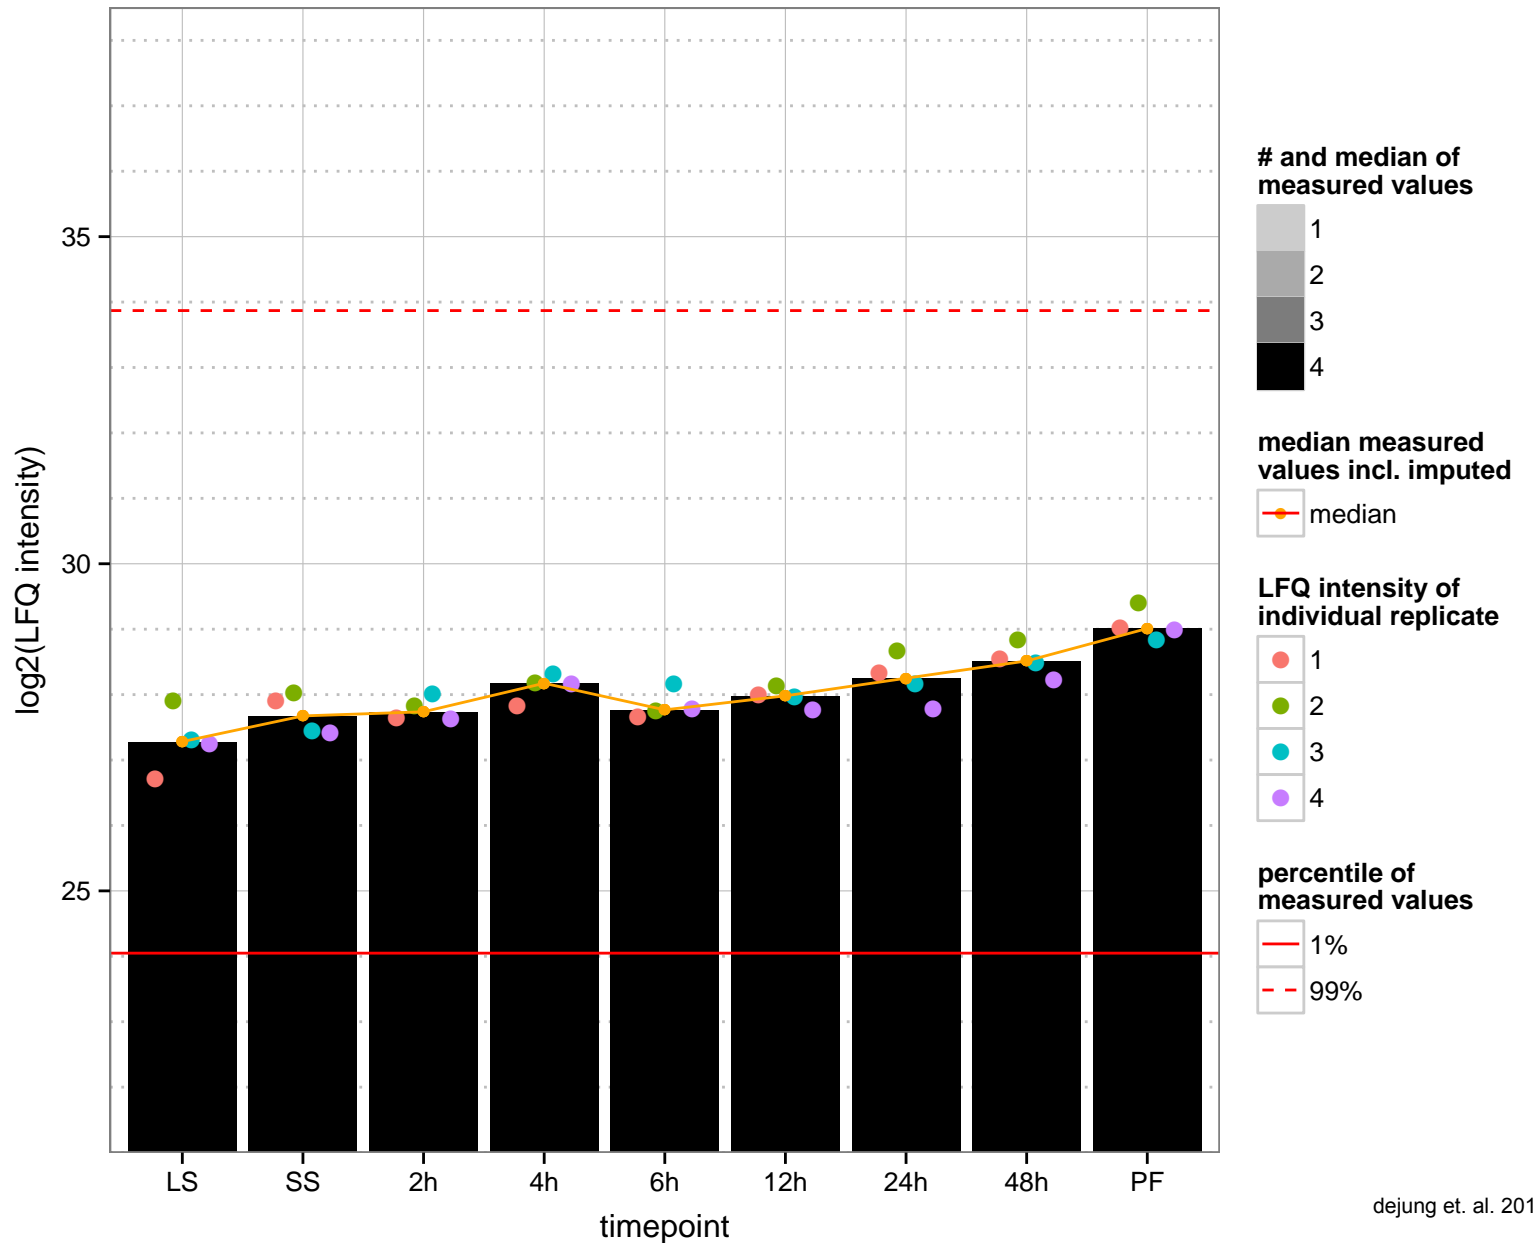

nuclear cap binding complex subunit CBP110, putative, hypothetical protein, conserved (CBP110), nuclear cap binding complex  
 Tb927.10.2990;Tb11.v5.1039  
 AGOF: null  
 AGOC: nuclear cap binding complex  
 AGOP: null  
 PGO: null  
 PGOC: null  
 PGOP: null

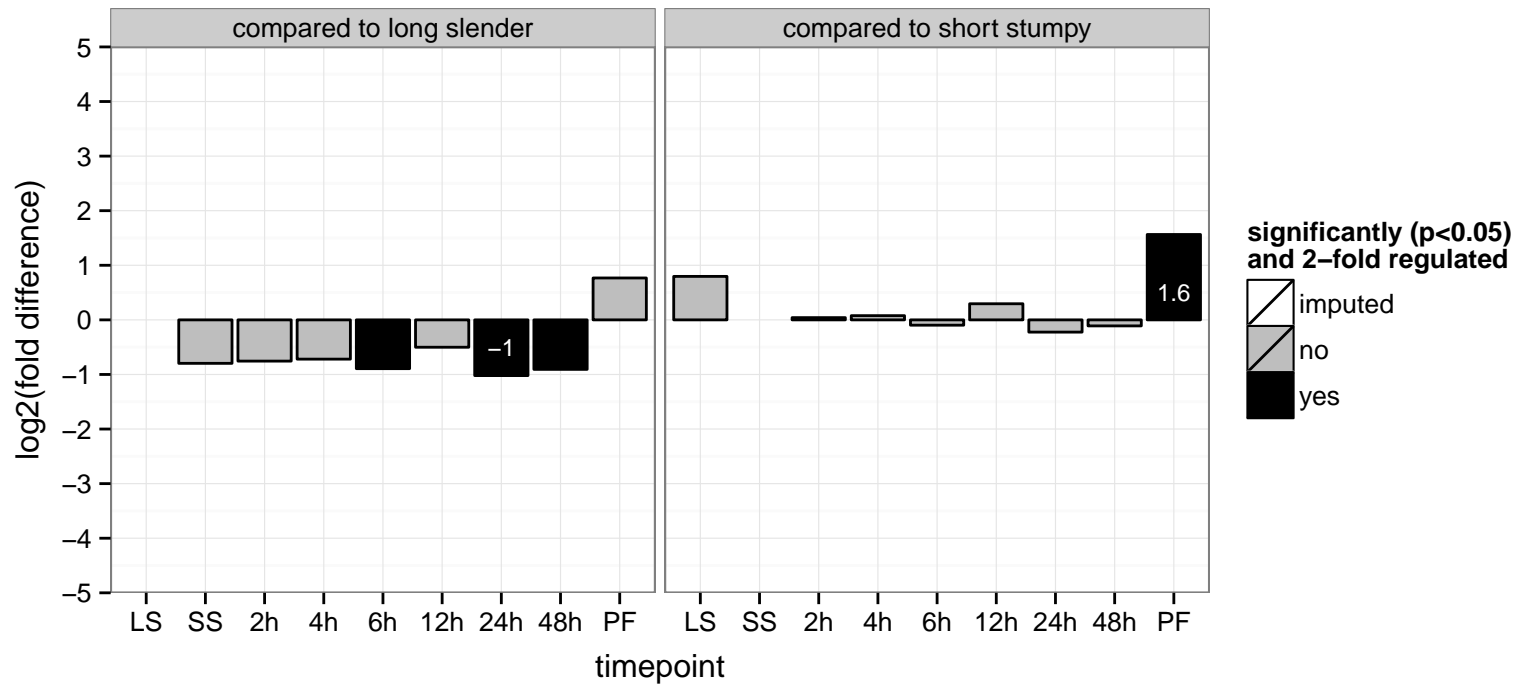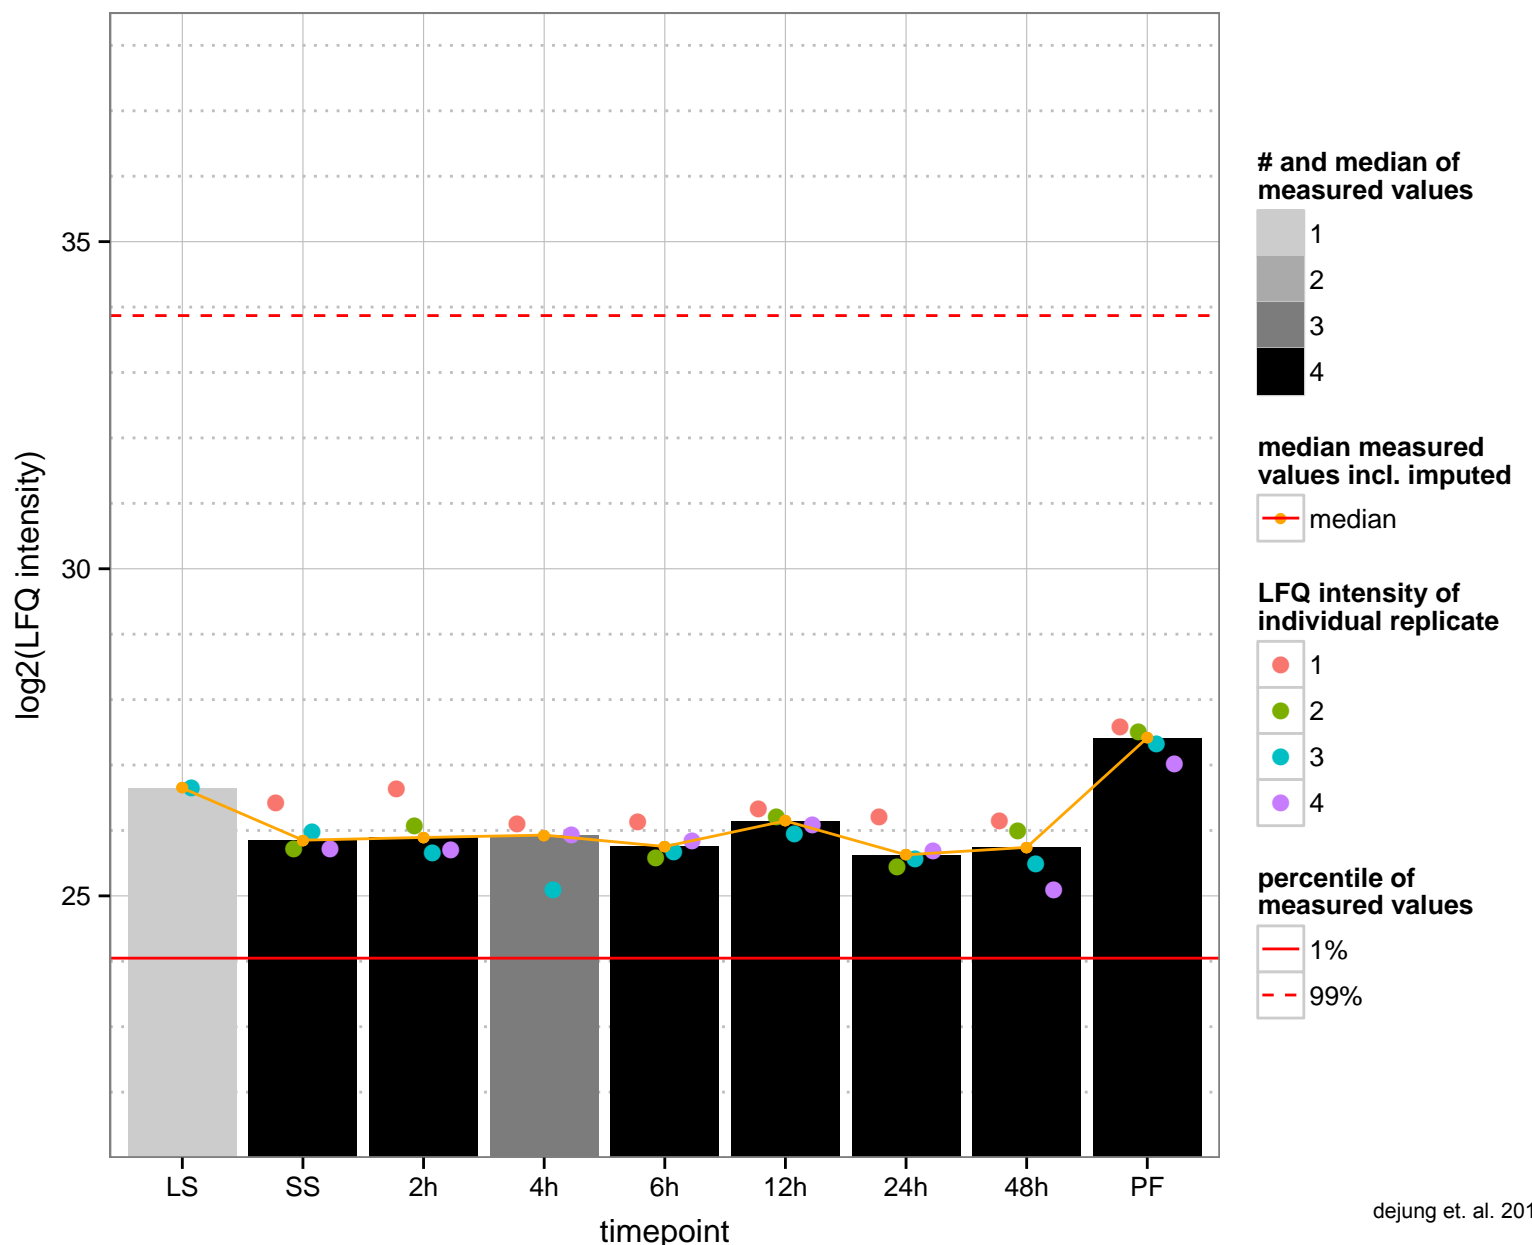

cytochrome c oxidase assembly protein, putative  
 Tb927.10.3120  
 AGOF: copper ion binding  
 AGOC: mitochondrion  
 AGOP: aerobic respiration  
 PGO: copper ion binding  
 PGOC: null  
 PGOP: null

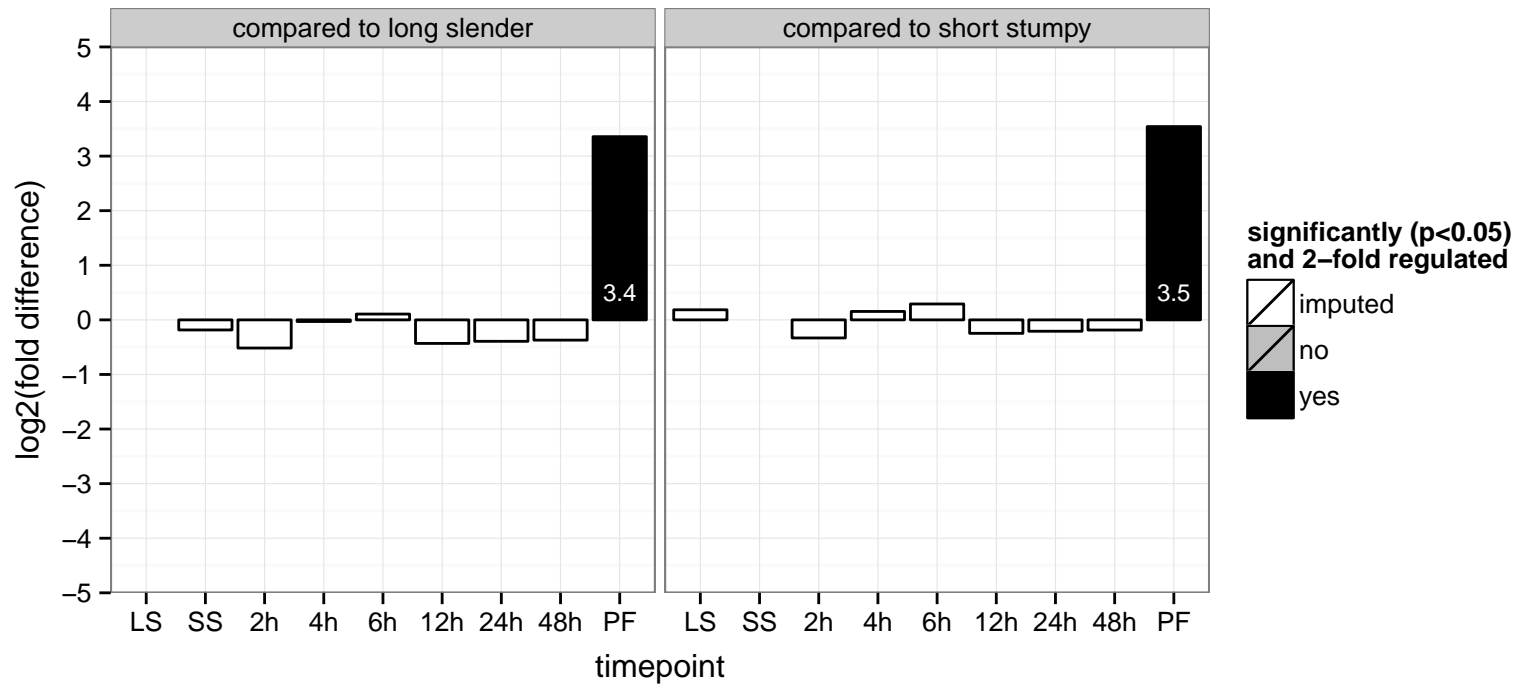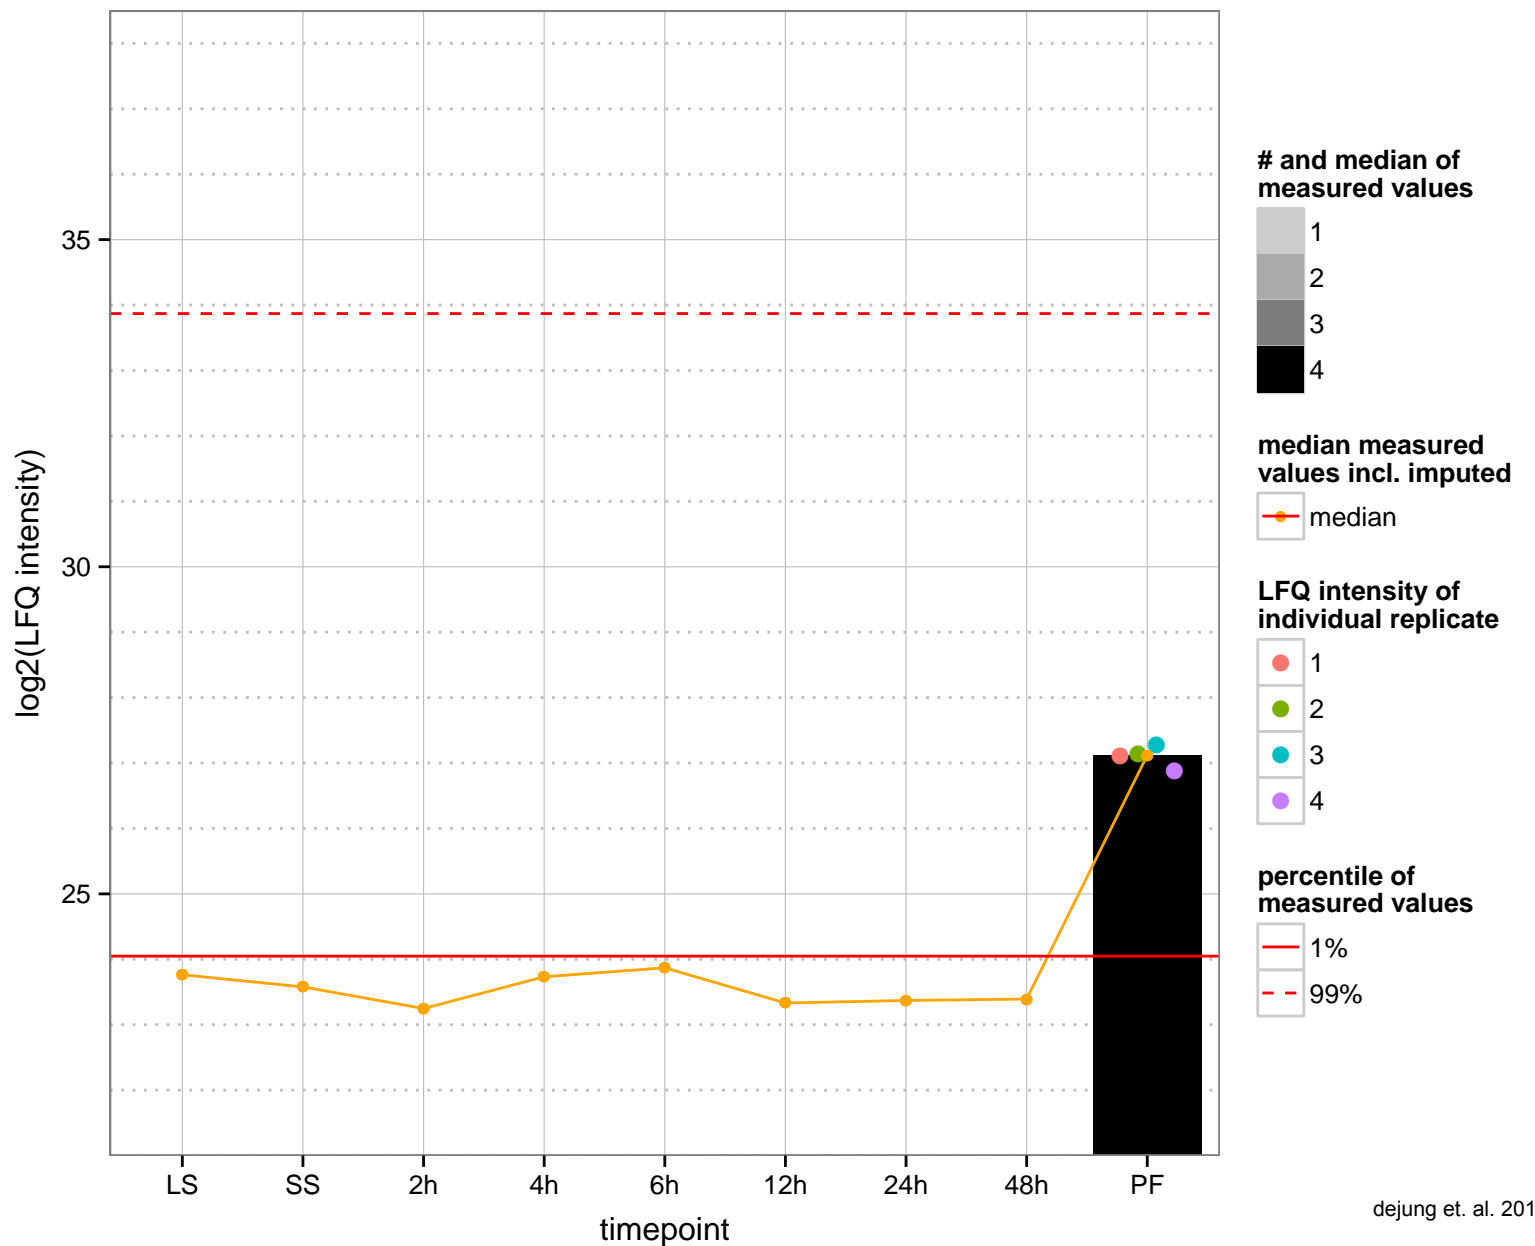



60S acidic ribosomal protein P2, putative  
 Tb927.10.3380;Tb927.10.3370  
 AGOF: structural constituent of ribosome  
 AGOC: intracellular, ribosome  
 AGOP: translation, translational elongation  
 PGO: null, structural constituent of ribosome  
 PGOC: null, intracellular, ribosome  
 PGO: null, translational elongation

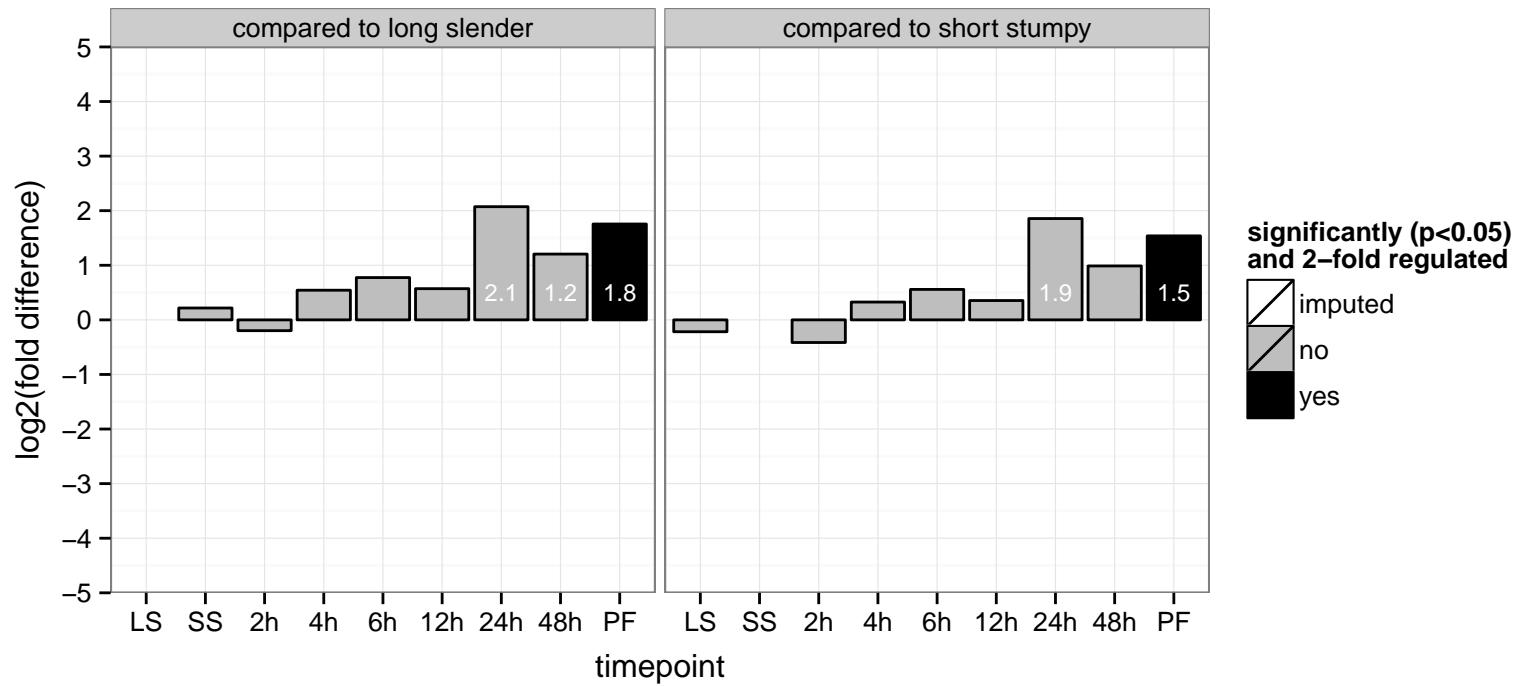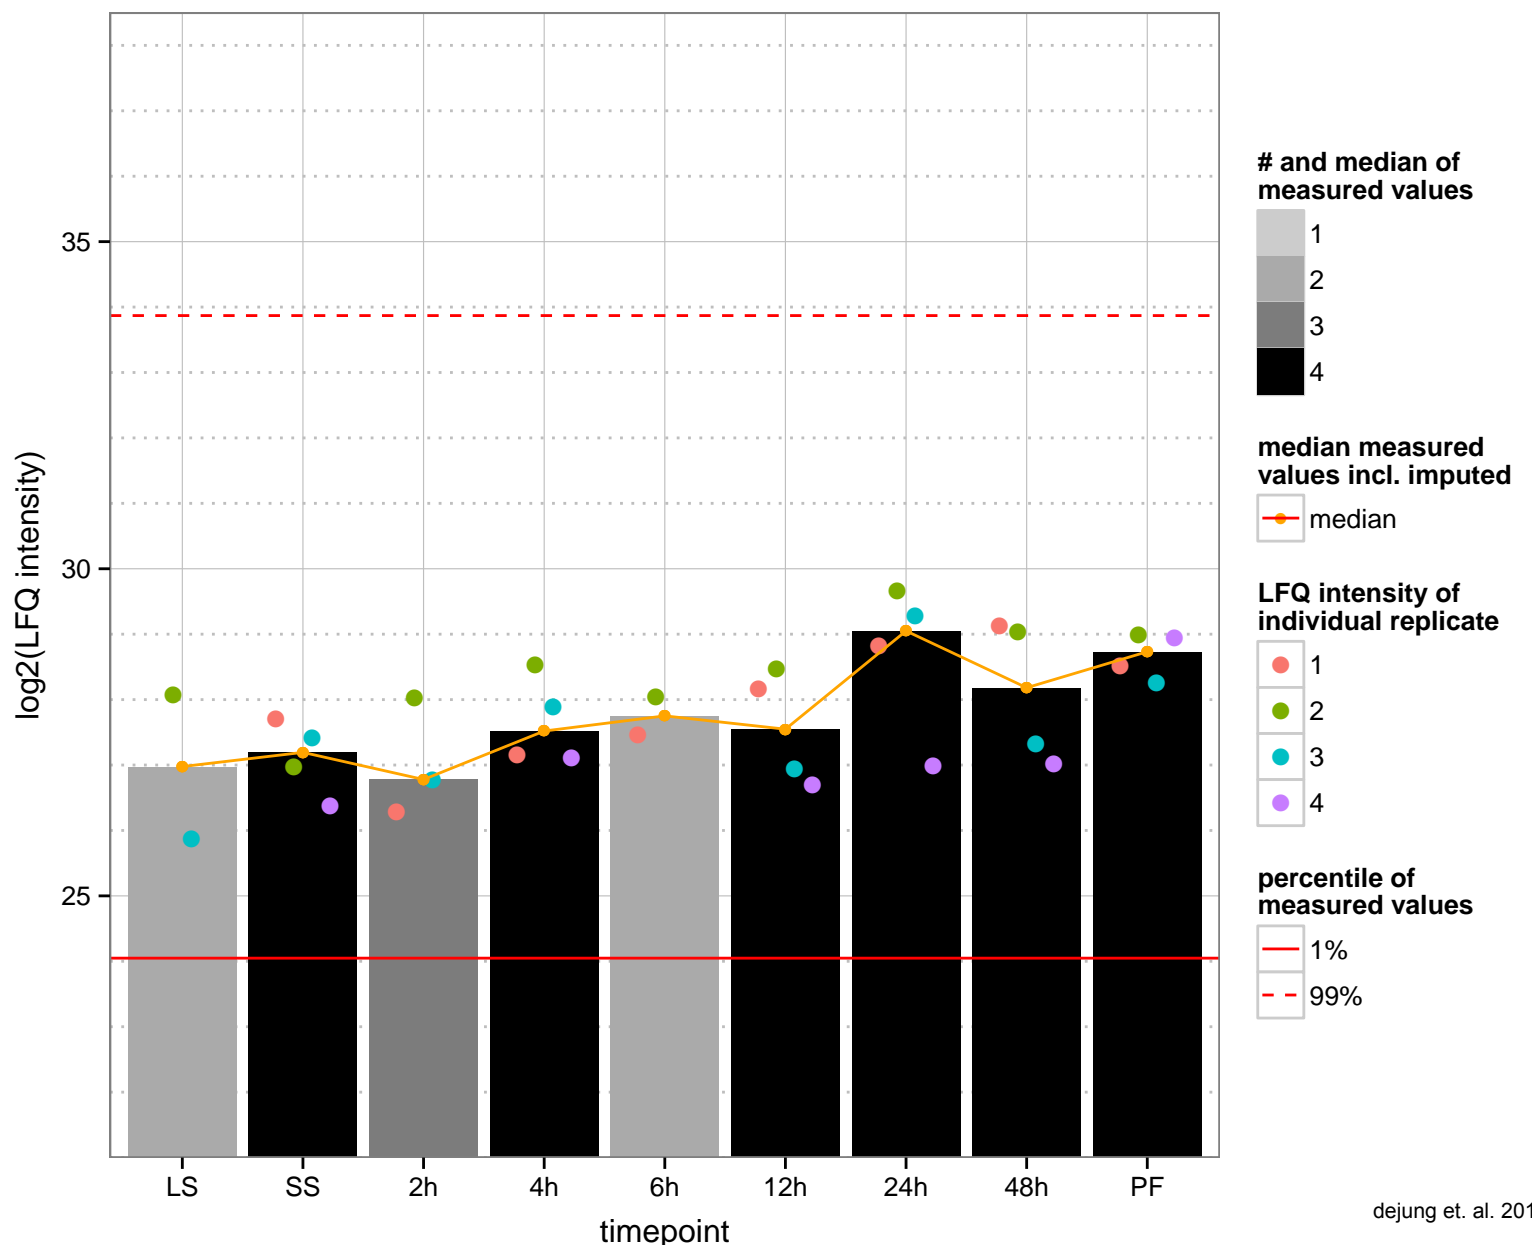

hypothetical protein, conserved  
 Tb927.10.3430  
 AGOF: null  
 AGOC: null  
 AGOP: null  
 PGOF: null  
 PGO C: null  
 PGOP: null

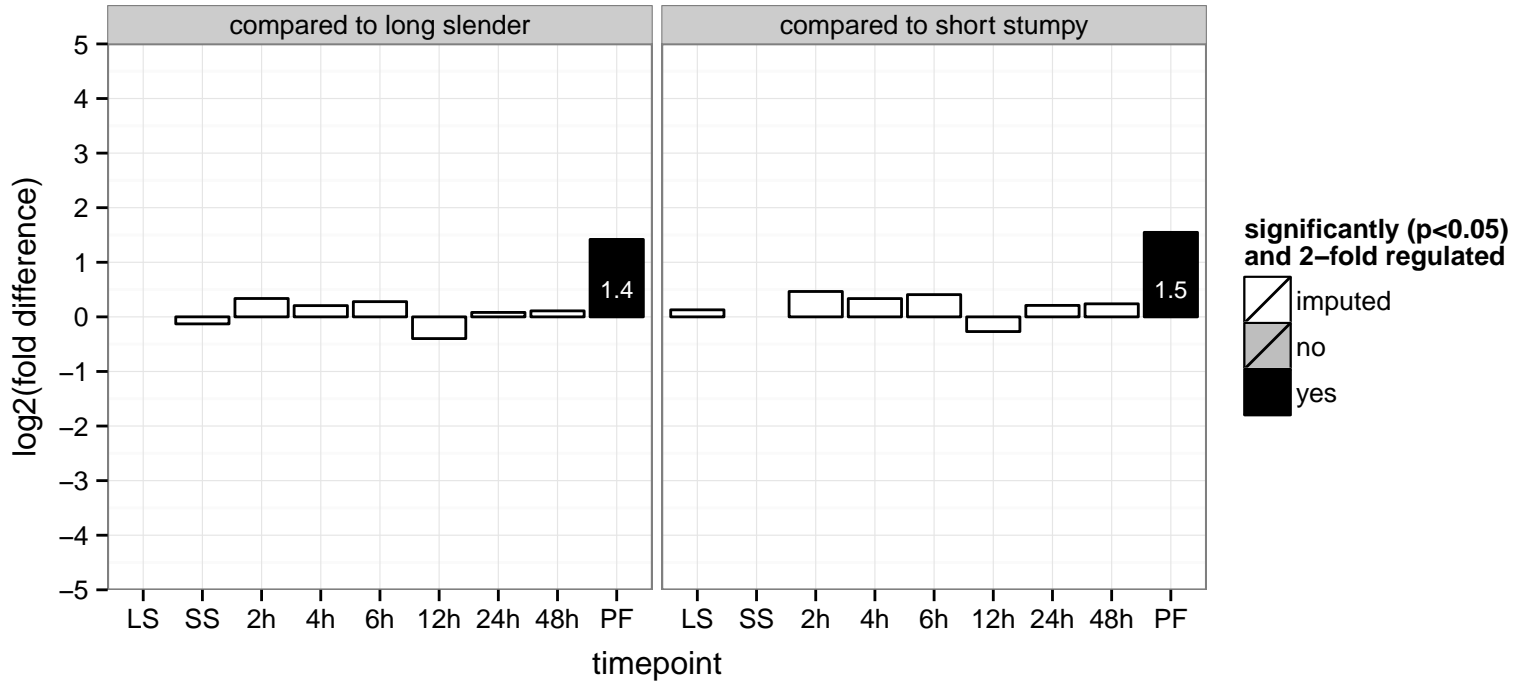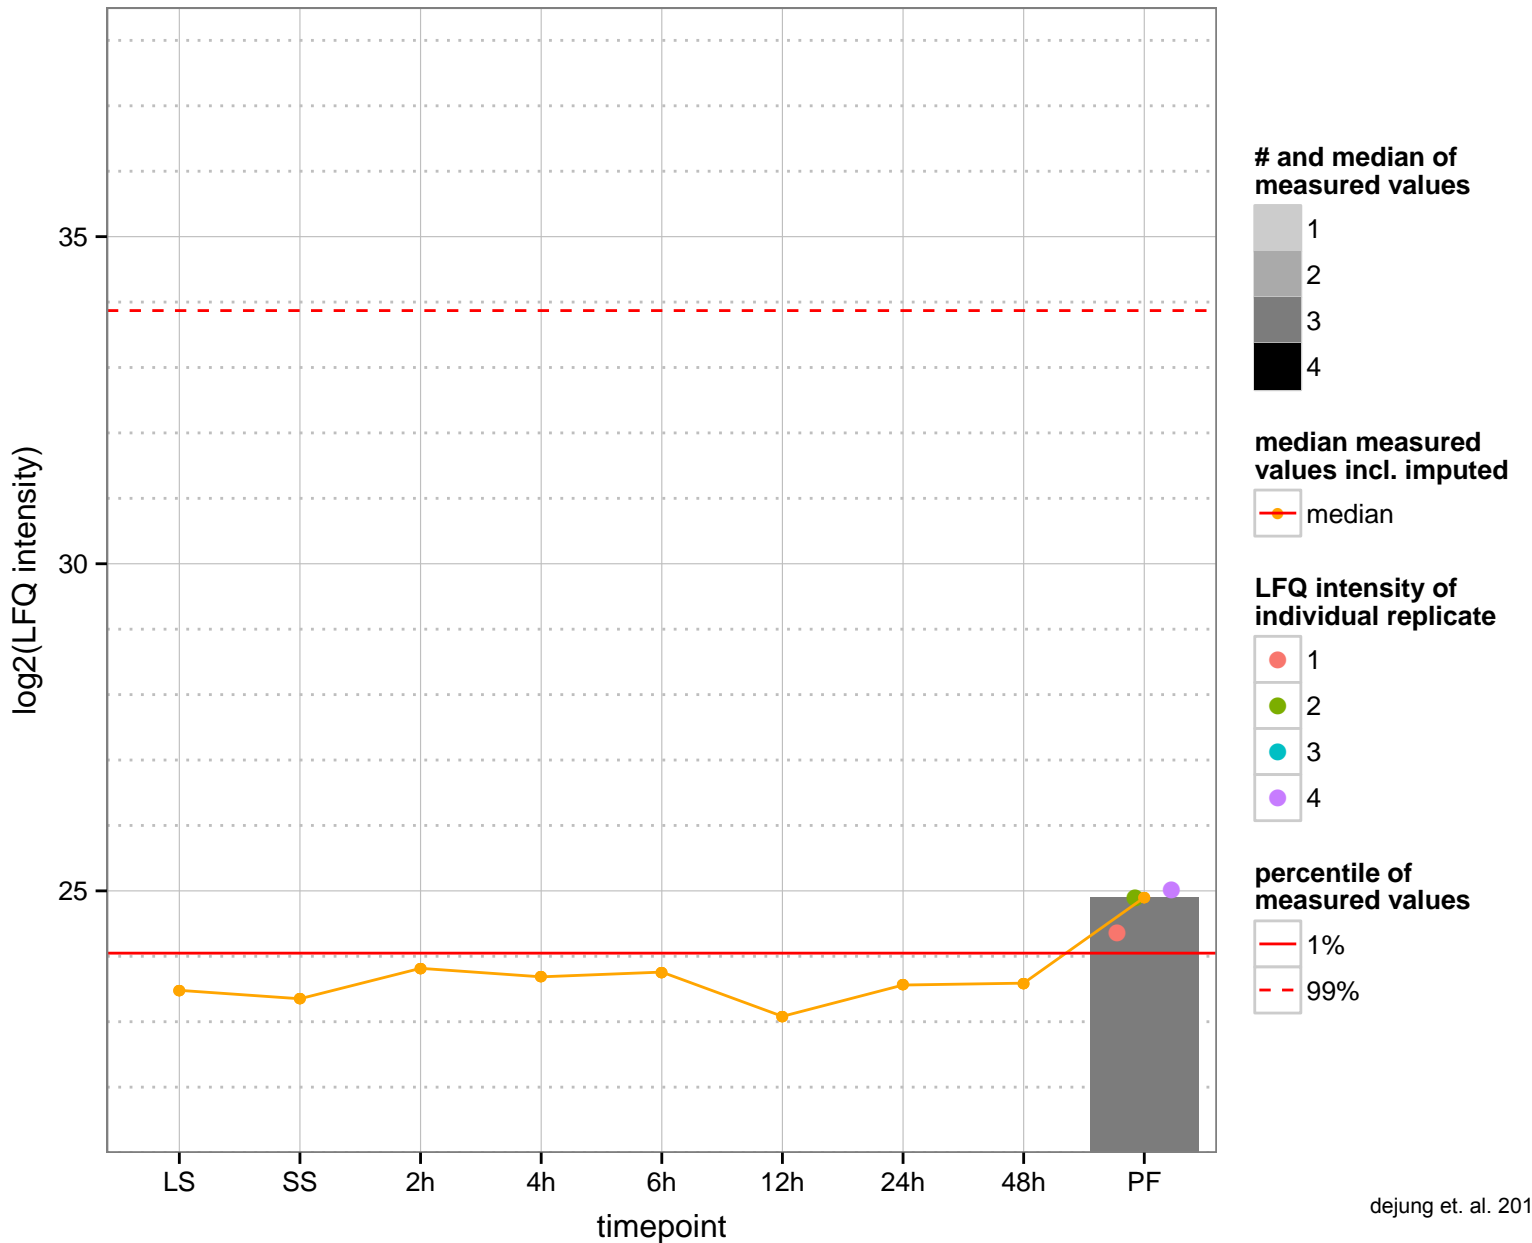

serine palmitoyltransferase, putative

Tb927.10.4050;Tb11.v5.0649

AGOF: null, pyridoxal phosphate binding, serine C-palmitoyltransferase activity, transferase activity, transferring nitrogenous g

AGOC: null

AGOP: null, biosynthetic process

PGOF: pyridoxal phosphate binding, transferase activity

PGOC: null

PGOP: biosynthetic process

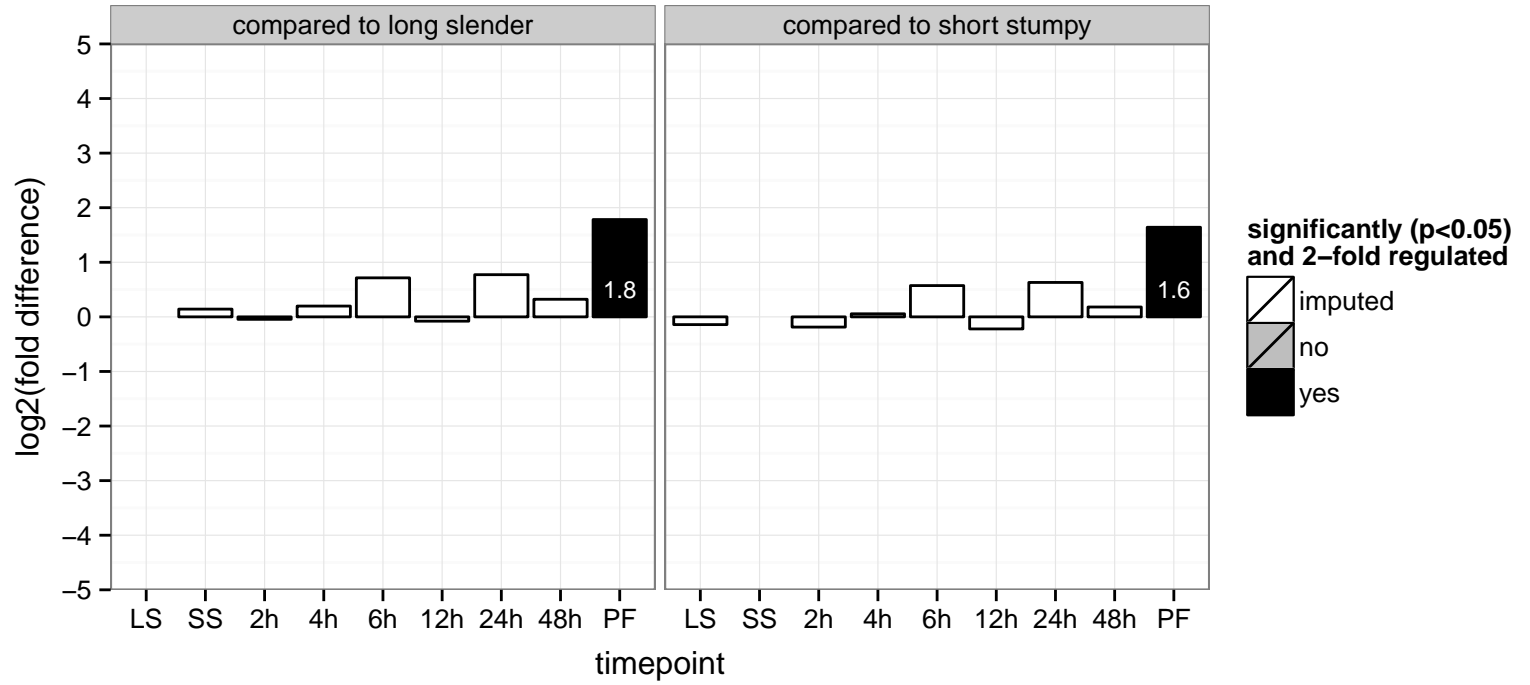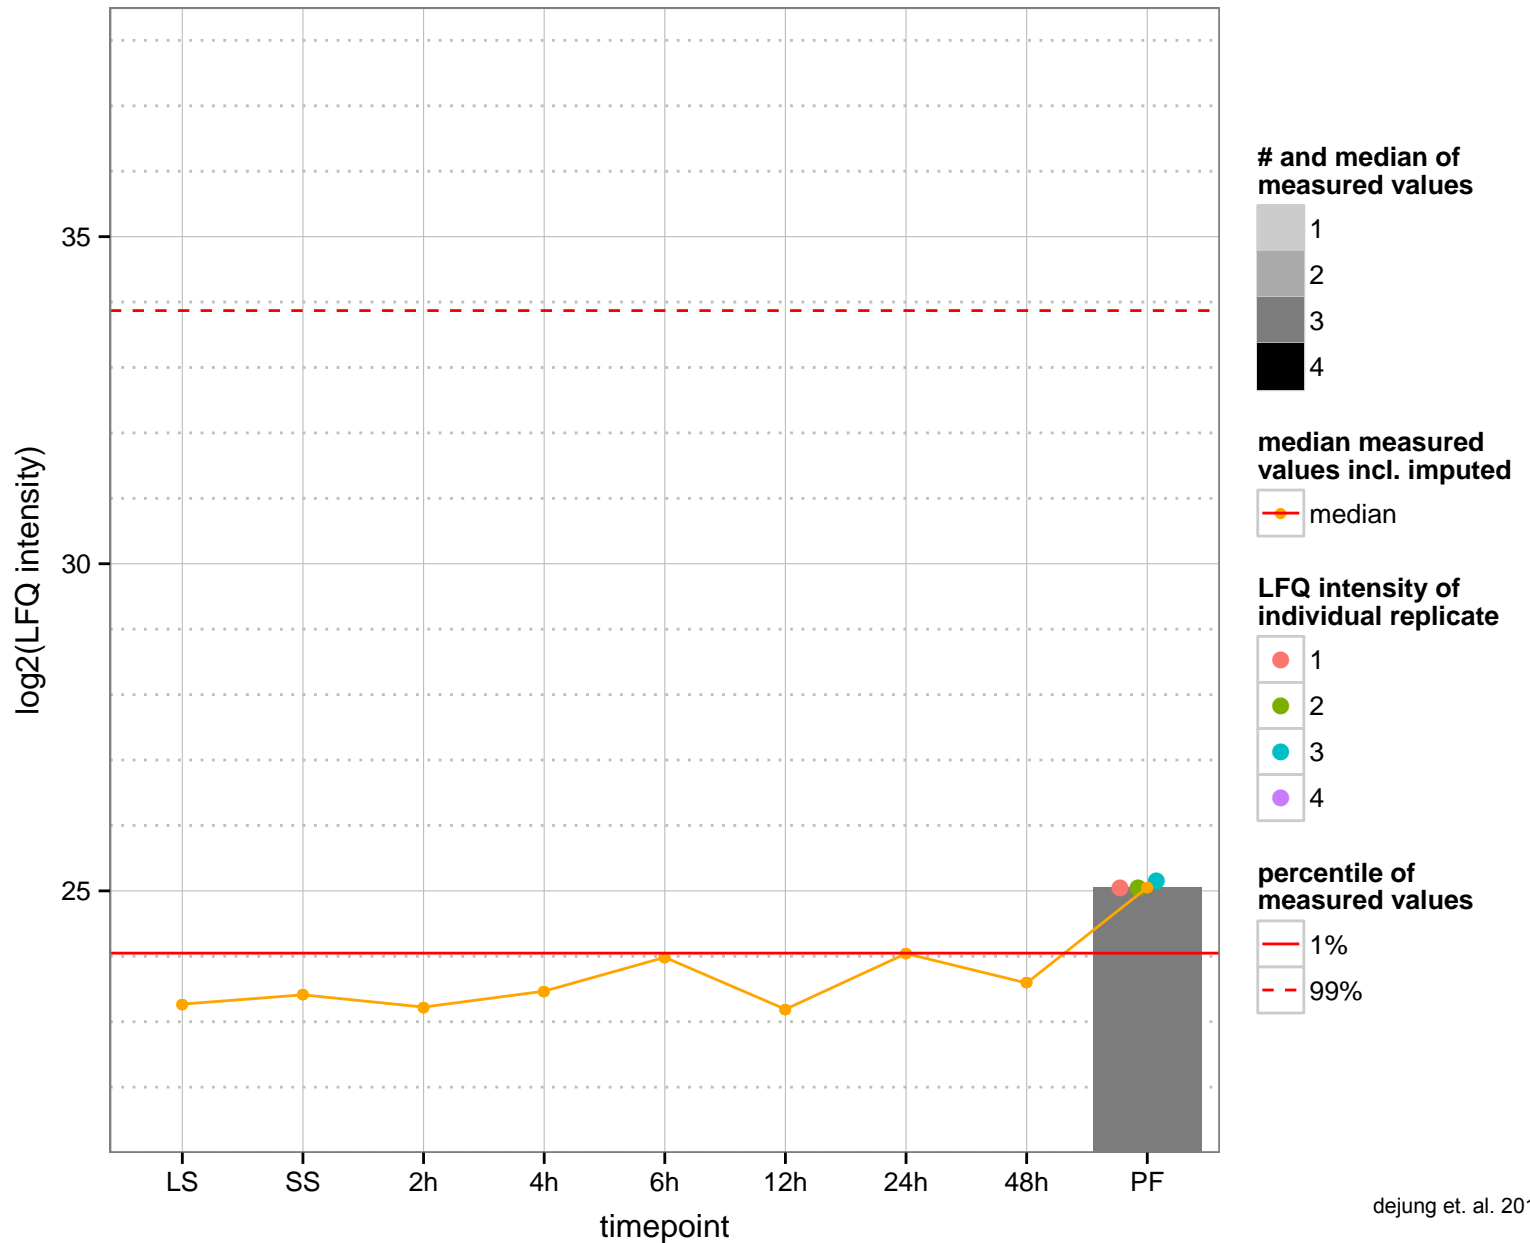

elongation factor 2  
 Tb927.10.4570;Tb927.10.4560  
 AGOF: GTP binding, GTPase activity  
 AGOC: null  
 AGOP: translation  
 PGOF: null, GTP binding, GTPase activity  
 PGO: null  
 PGOP: null

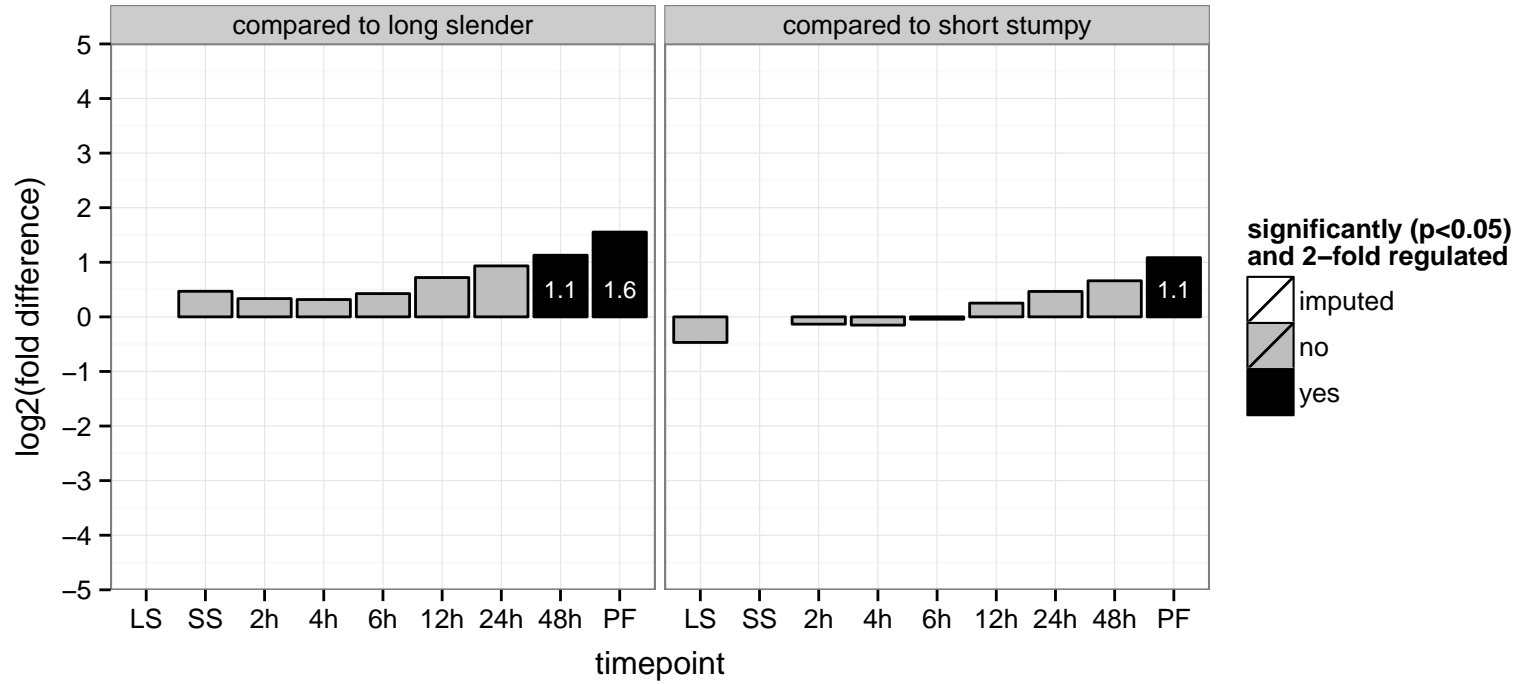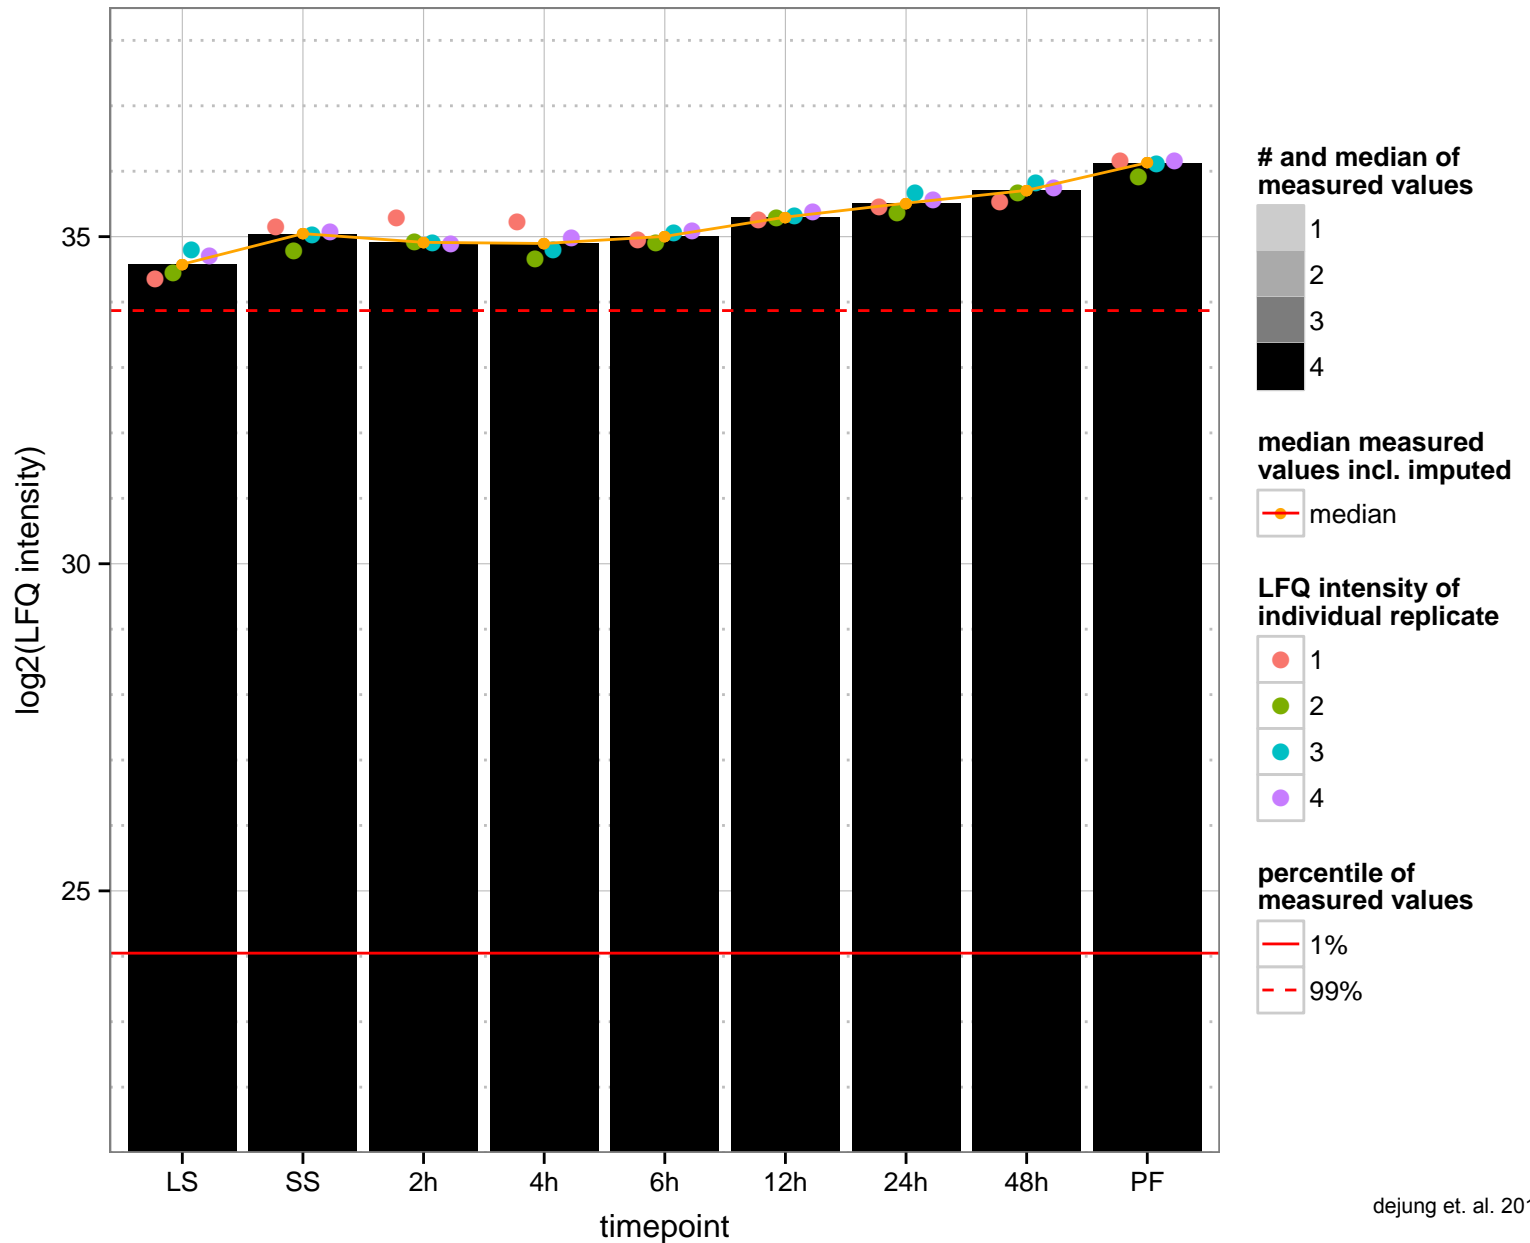

nucleolar RNA-binding protein, putative  
 Tb927.10.4740  
 AGOF: RNA binding  
 AGOC: nucleolus  
 AGOP: rRNA metabolic process  
 PGO: null  
 PGOC: null  
 PGOP: null

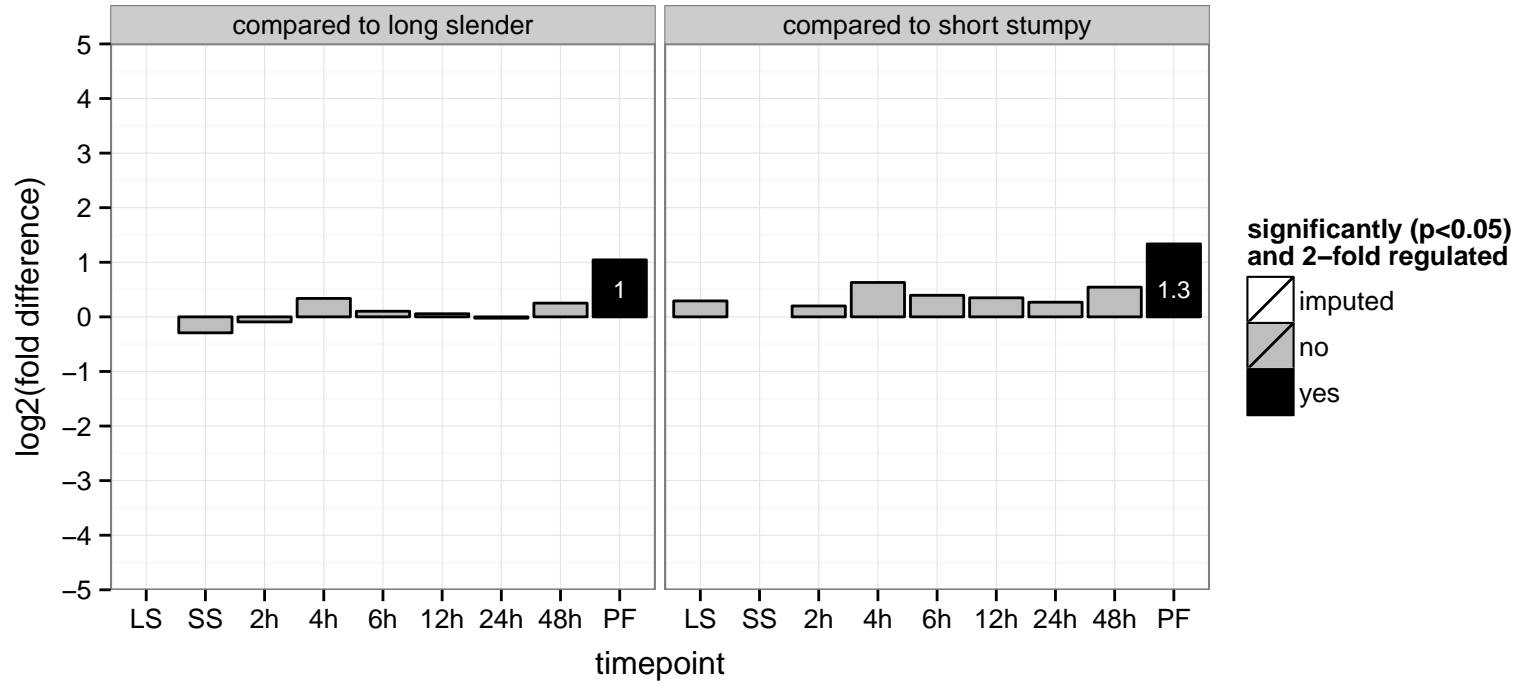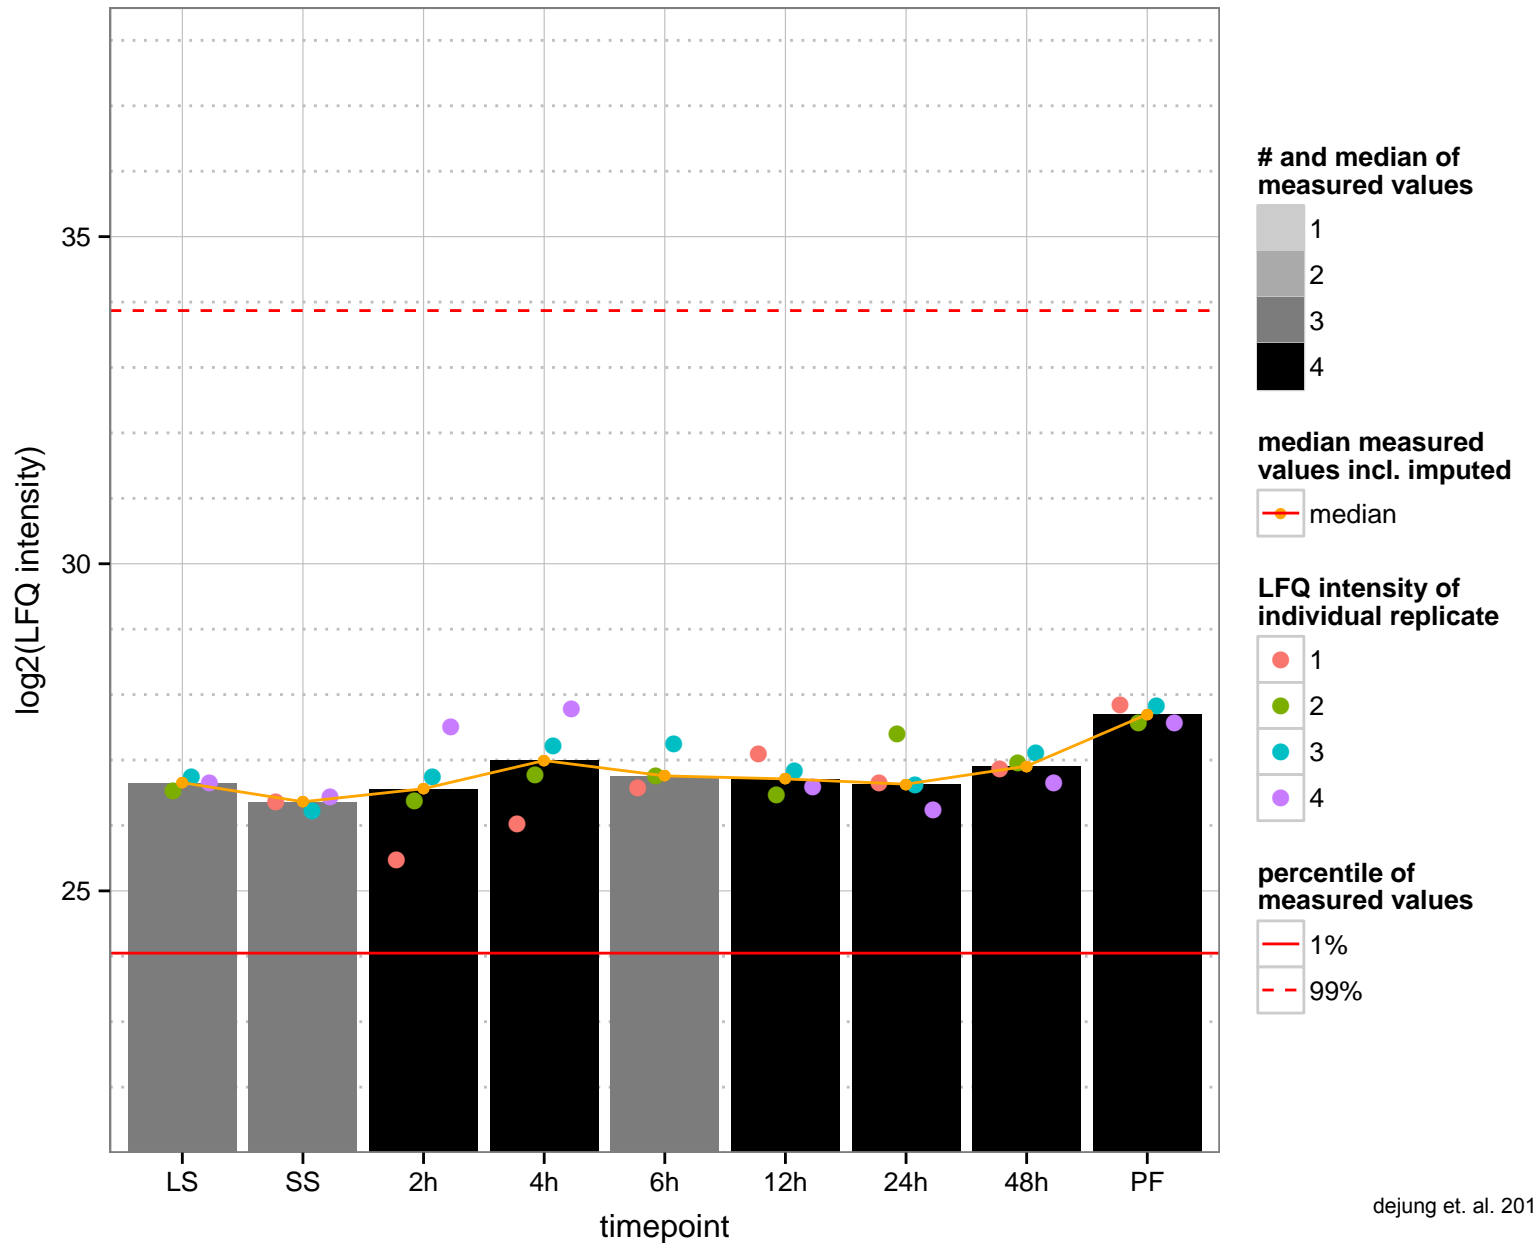

hypothetical protein, conserved  
 Tb927.10.4760  
 AGOF: null  
 AGOC: null  
 AGOP: null  
 PGO: null  
 PGO: null  
 PGO: membrane  
 PGO: null

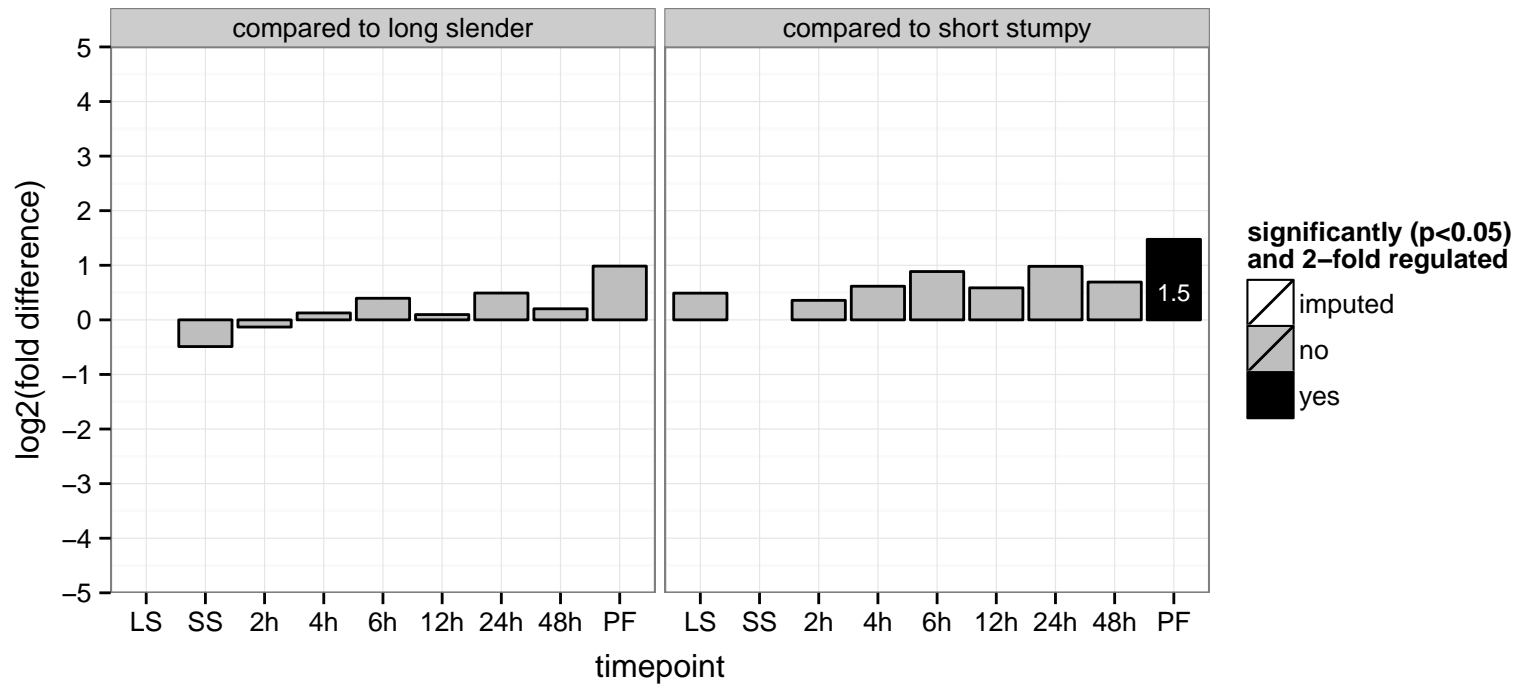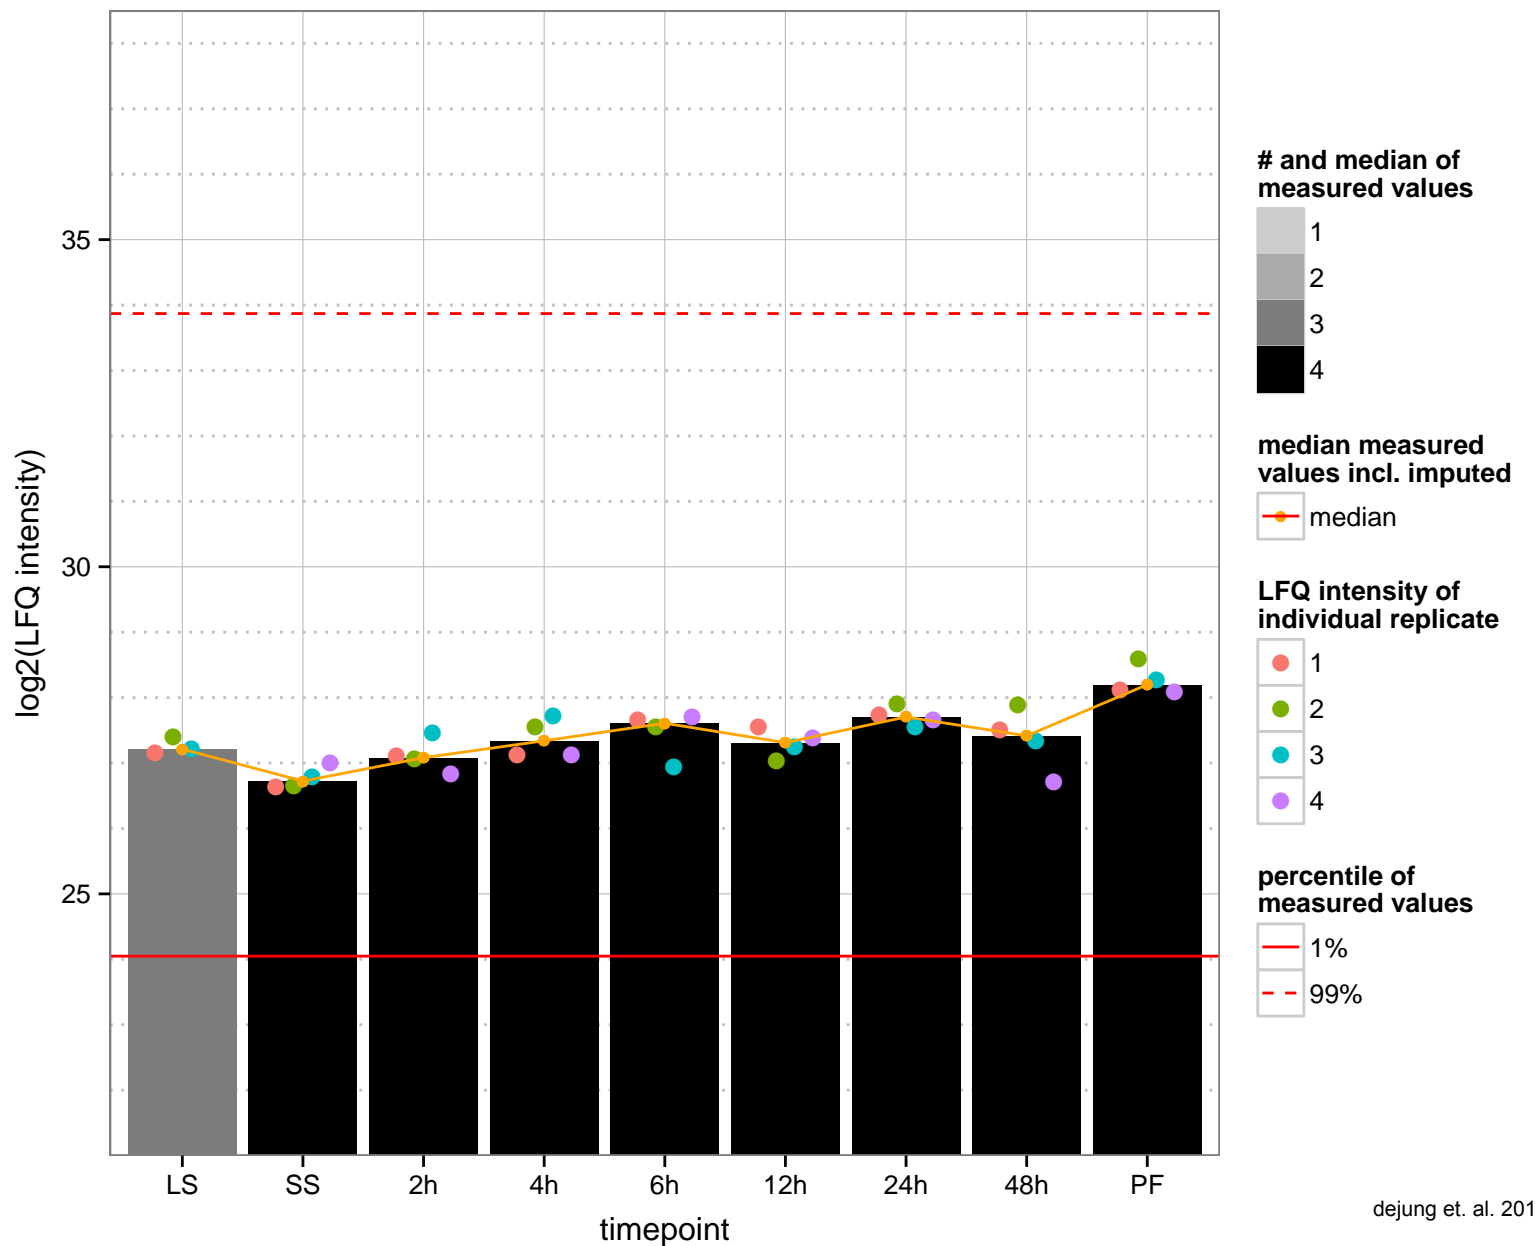

Eukaryotic translation initiation factor 4E type 5 (eif4e5)

Tb927.10.5020

AGOF: RNA 7-methylguanosine cap binding, RNA cap 4 binding, protein binding, translation initiation factor activity

AGOC: cytoplasm, eukaryotic translation initiation factor 4F complex

AGOP: cell motility, translation, translational initiation

PGOF: RNA binding, translation initiation factor activity

PGOC: cytoplasm

PGOP: translational initiation

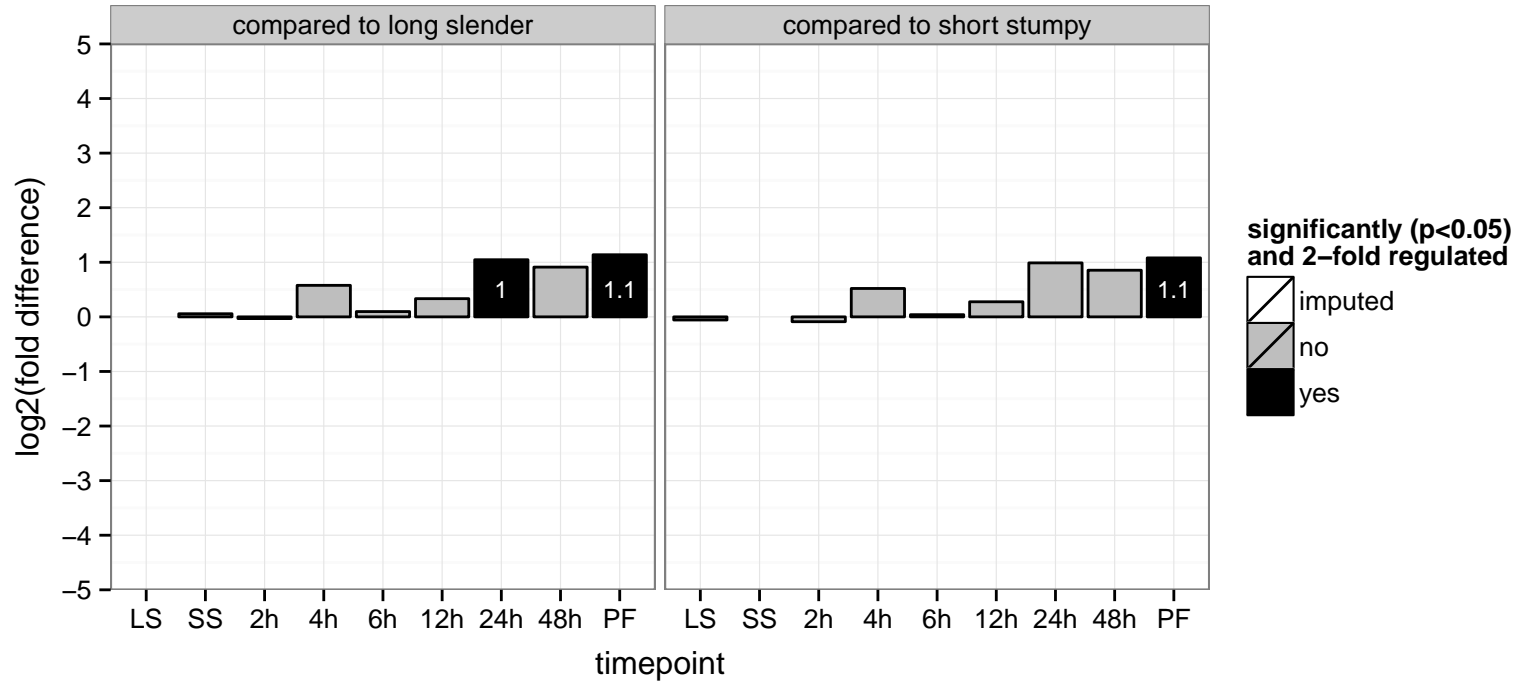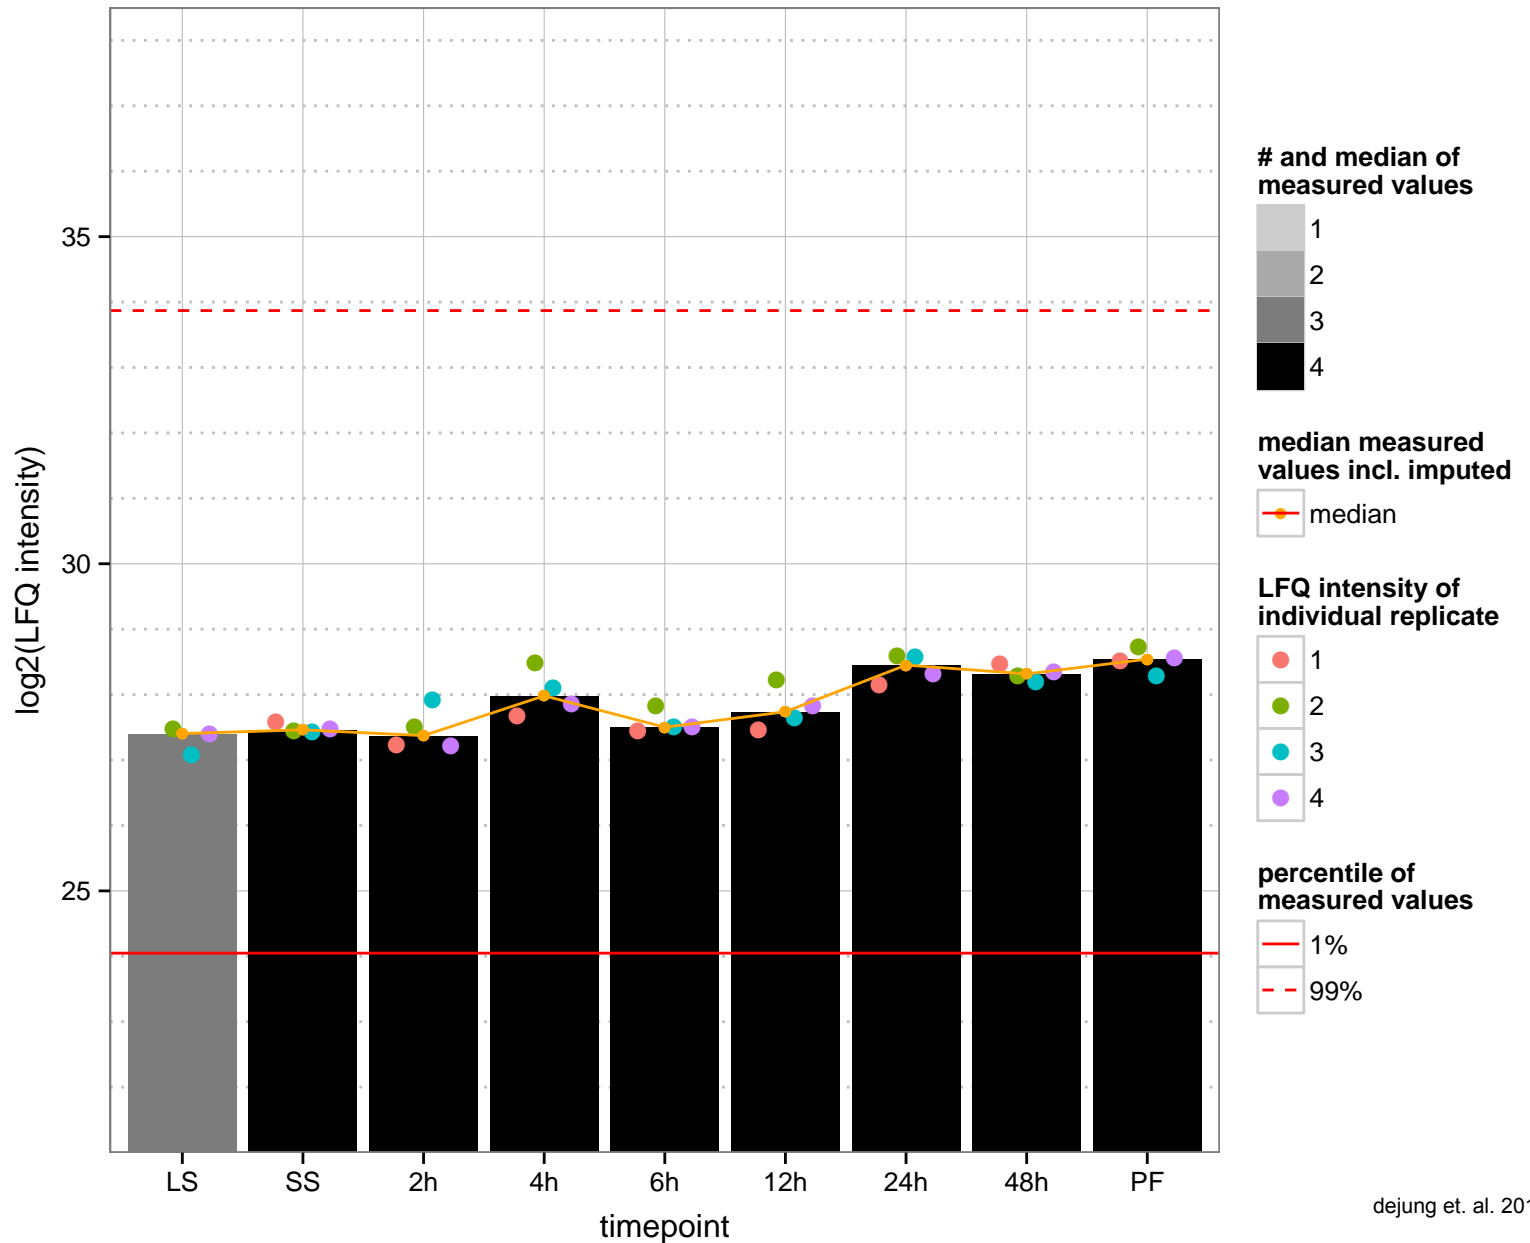

ubiquitin/ribosomal protein S27a, putative  
 Tb927.10.5030;Tb927.7.3680  
 AGOF: heme binding, structural constituent of ribosome, structural constituent of ribosome  
 AGOC: intracellular, ribosome  
 AGOP: ribosome biogenesis, translation, translation  
 PGO: structural constituent of ribosome  
 PGO: intracellular, ribosome  
 PGO: translation

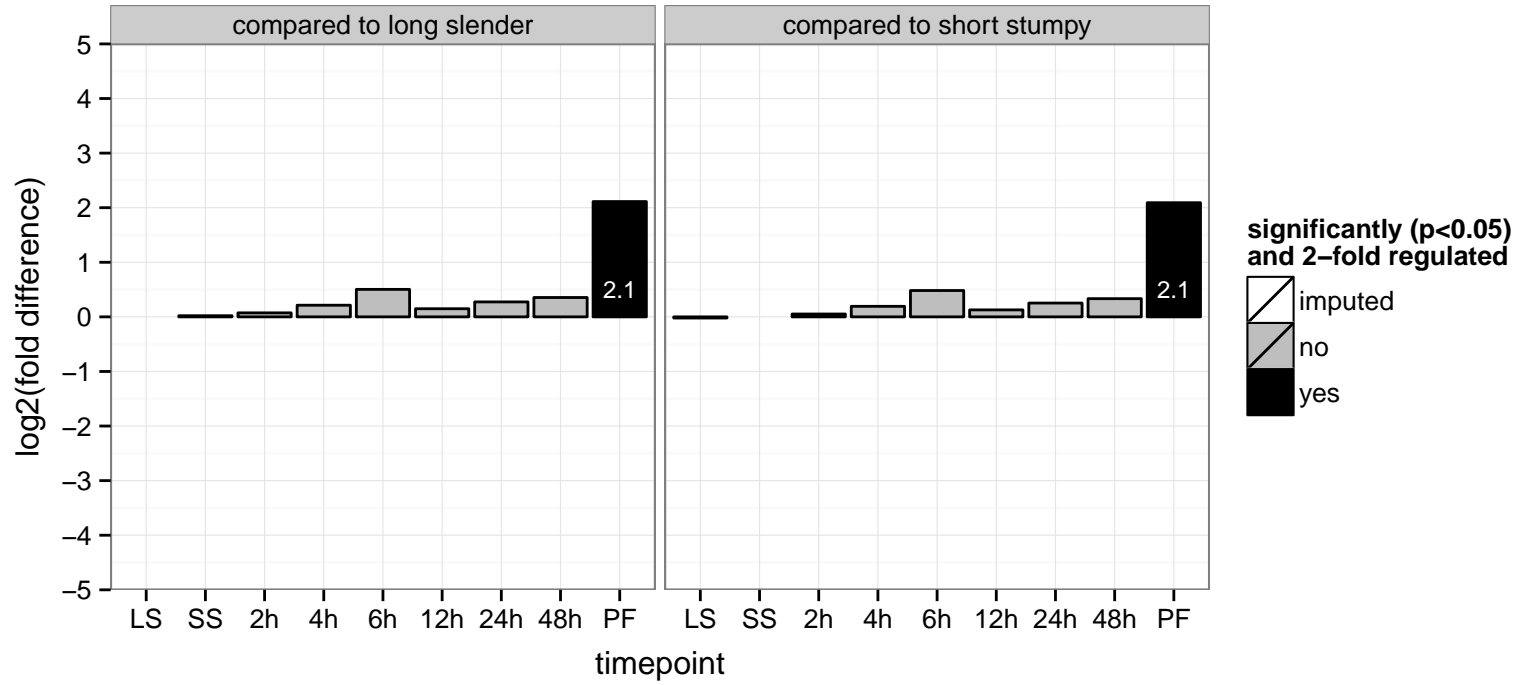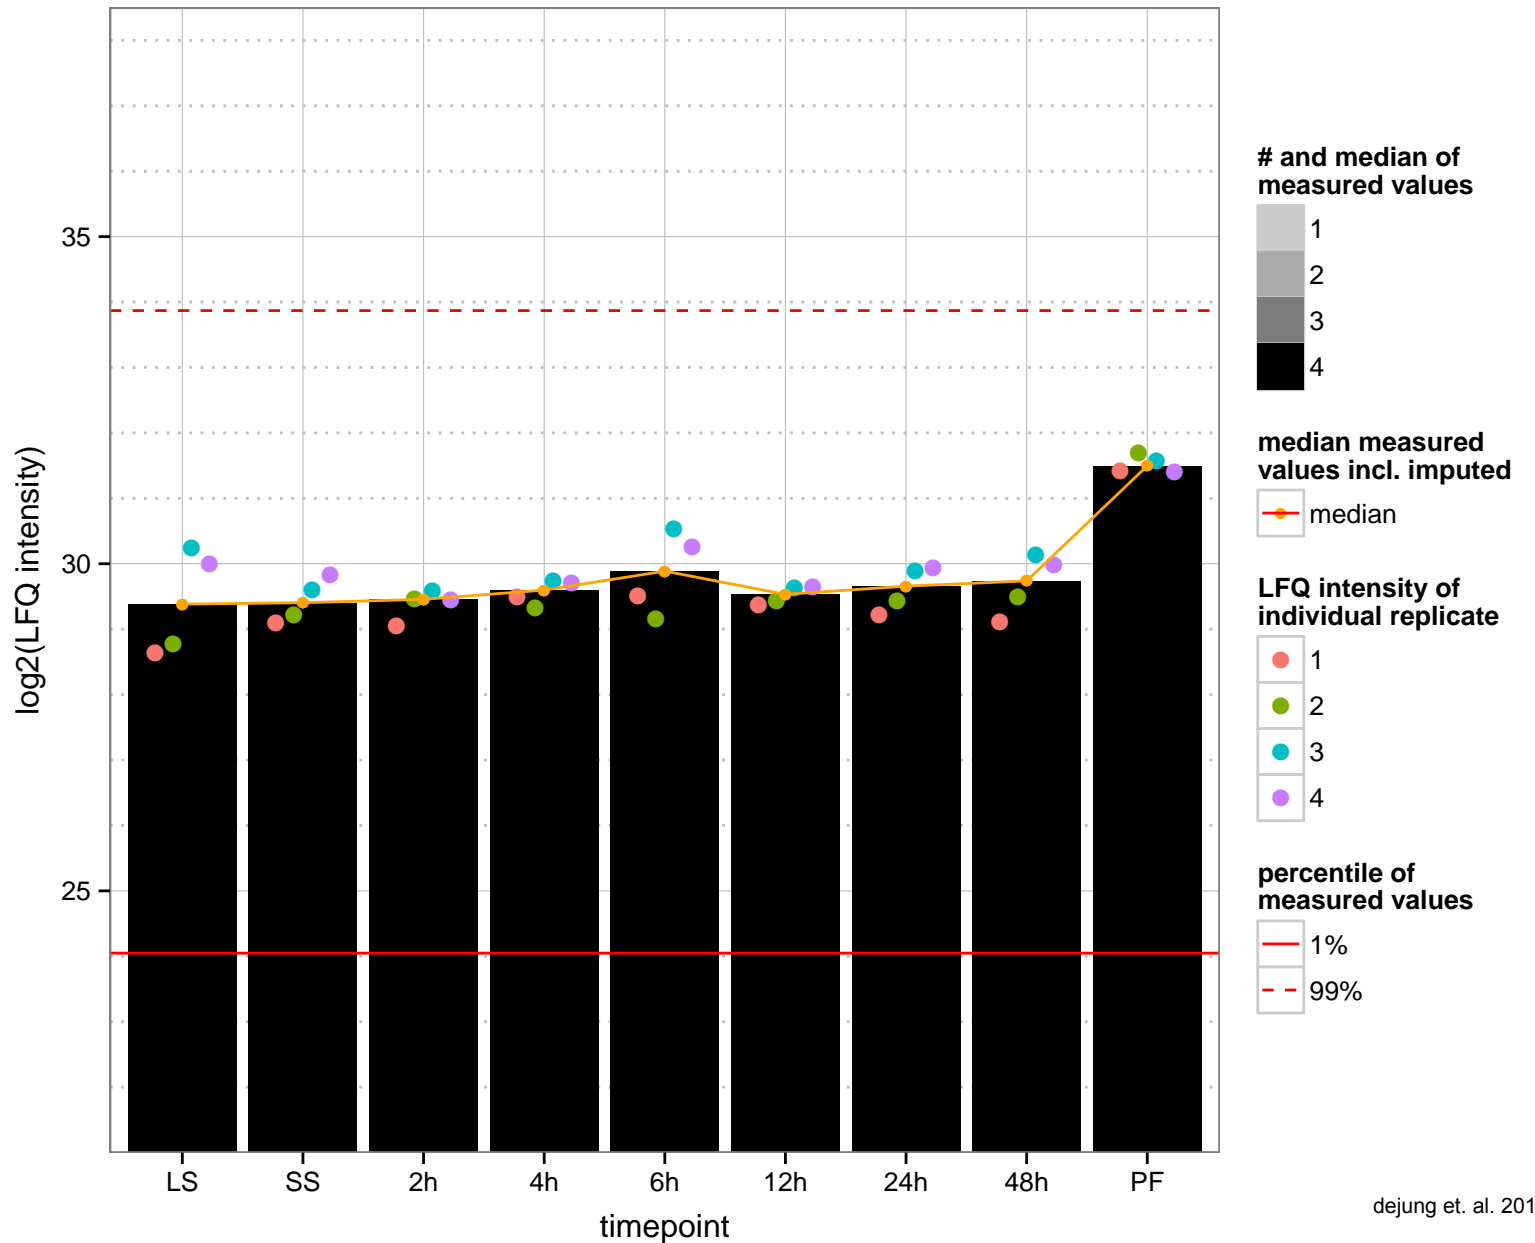



hypothetical protein, conserved  
 Tb927.10.510;Tb11.v5.0374  
 AGOF: null  
 AGOC: null  
 AGOP: null  
 PGOF: null  
 PGO: null  
 PGOP: null

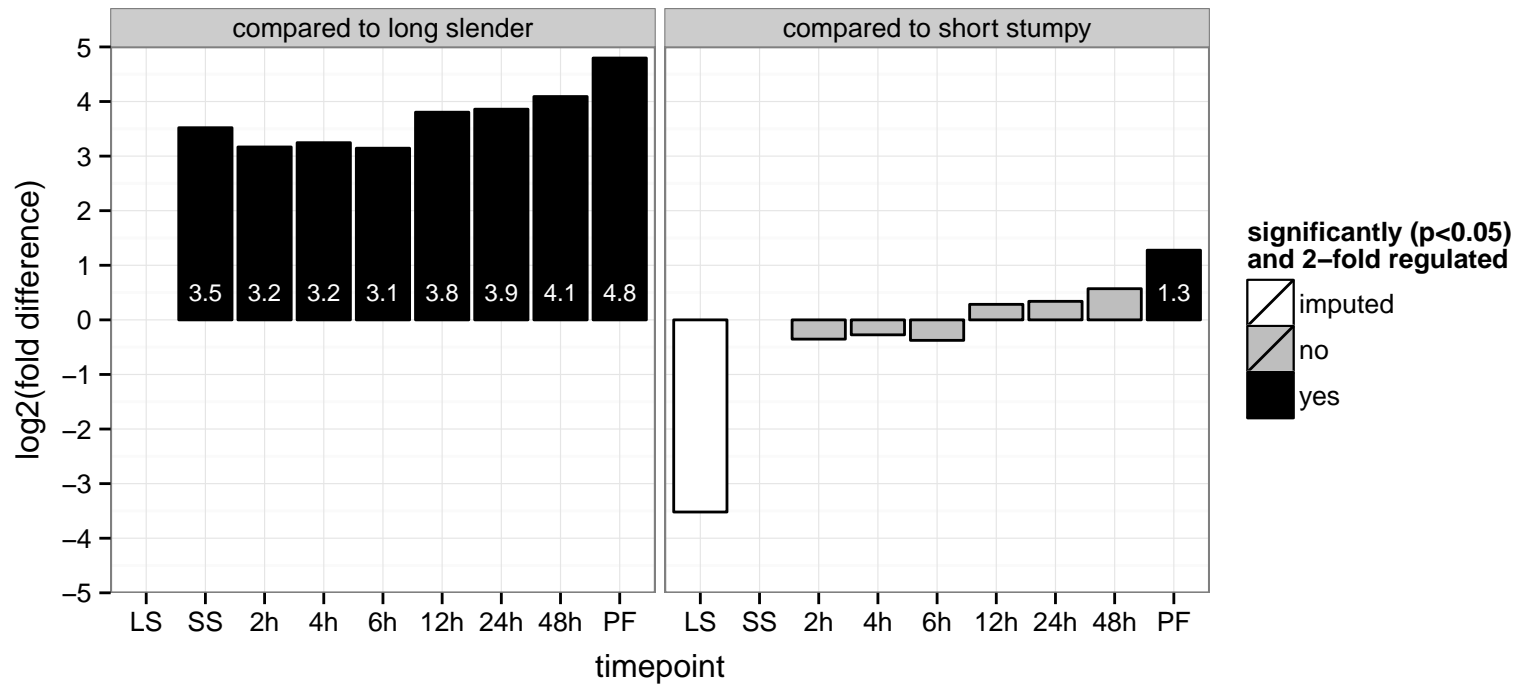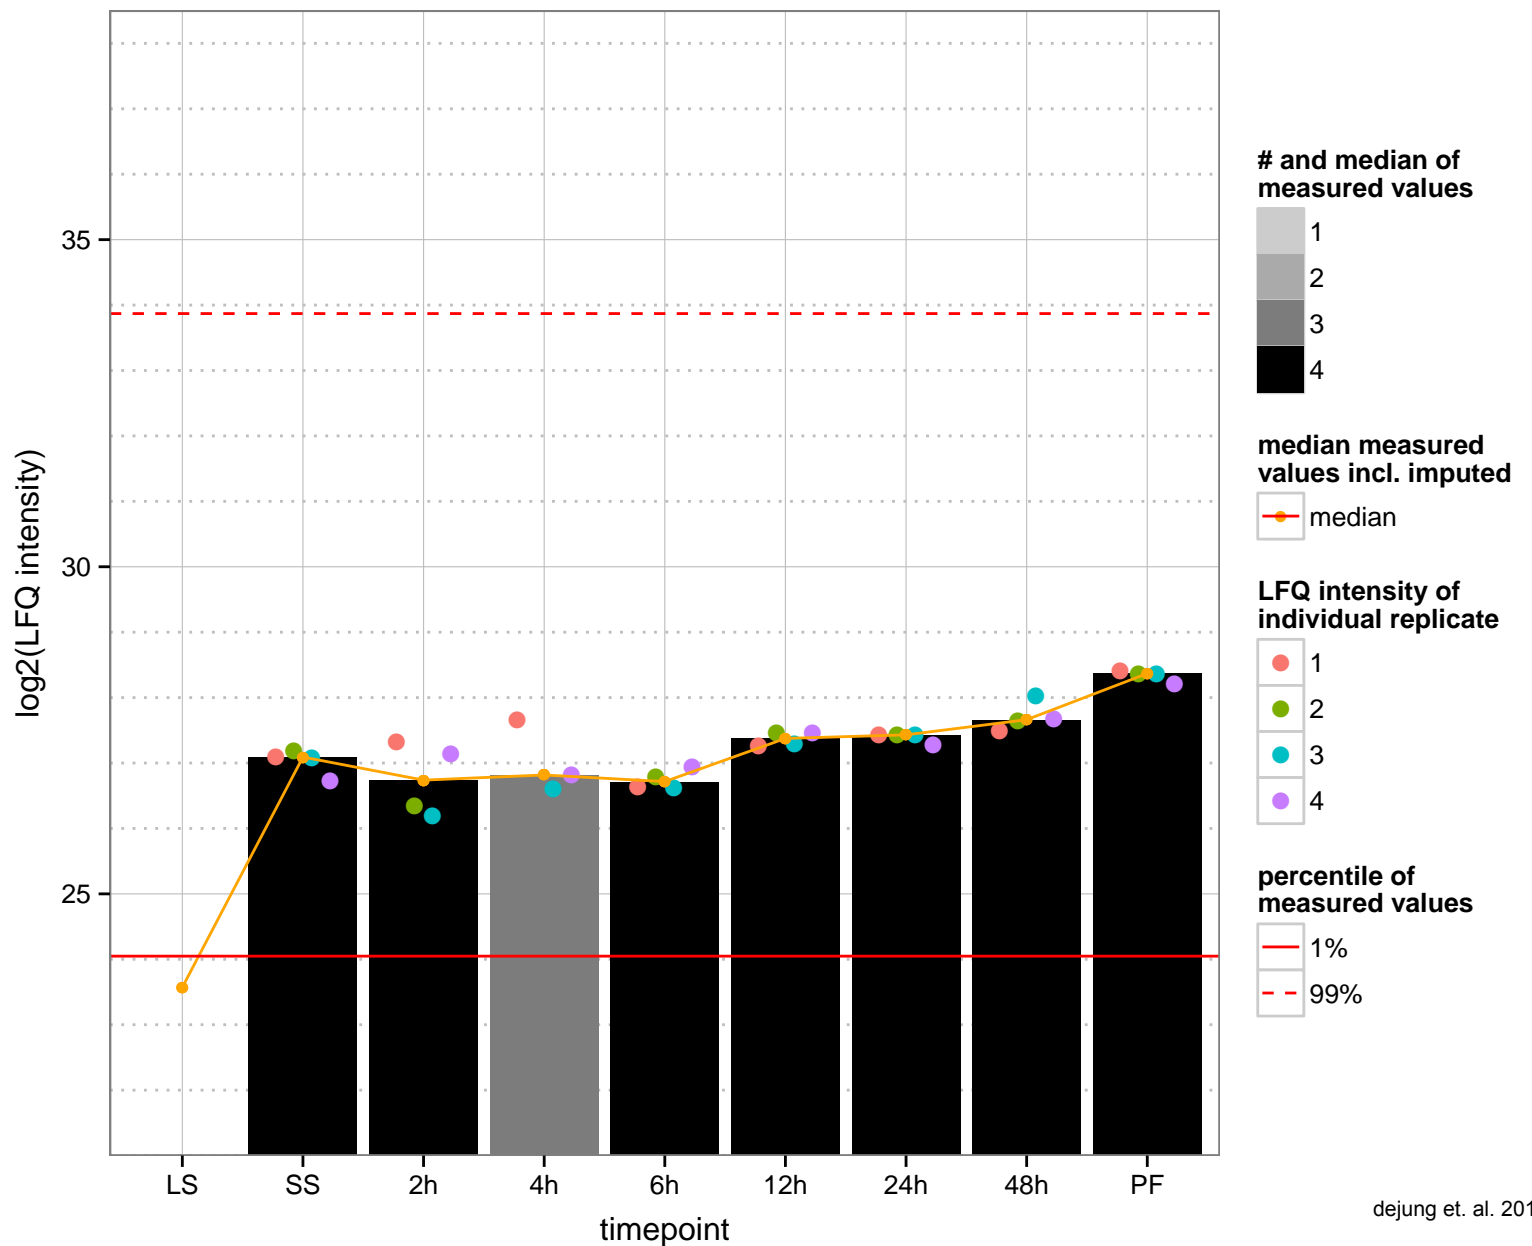

hypothetical protein, conserved  
 Tb927.10.5260;Tb11.v5.0497  
 AGOF: null  
 AGOC: null  
 AGOP: null  
 PGOF: protein binding  
 PGOC: null  
 PGOP: null

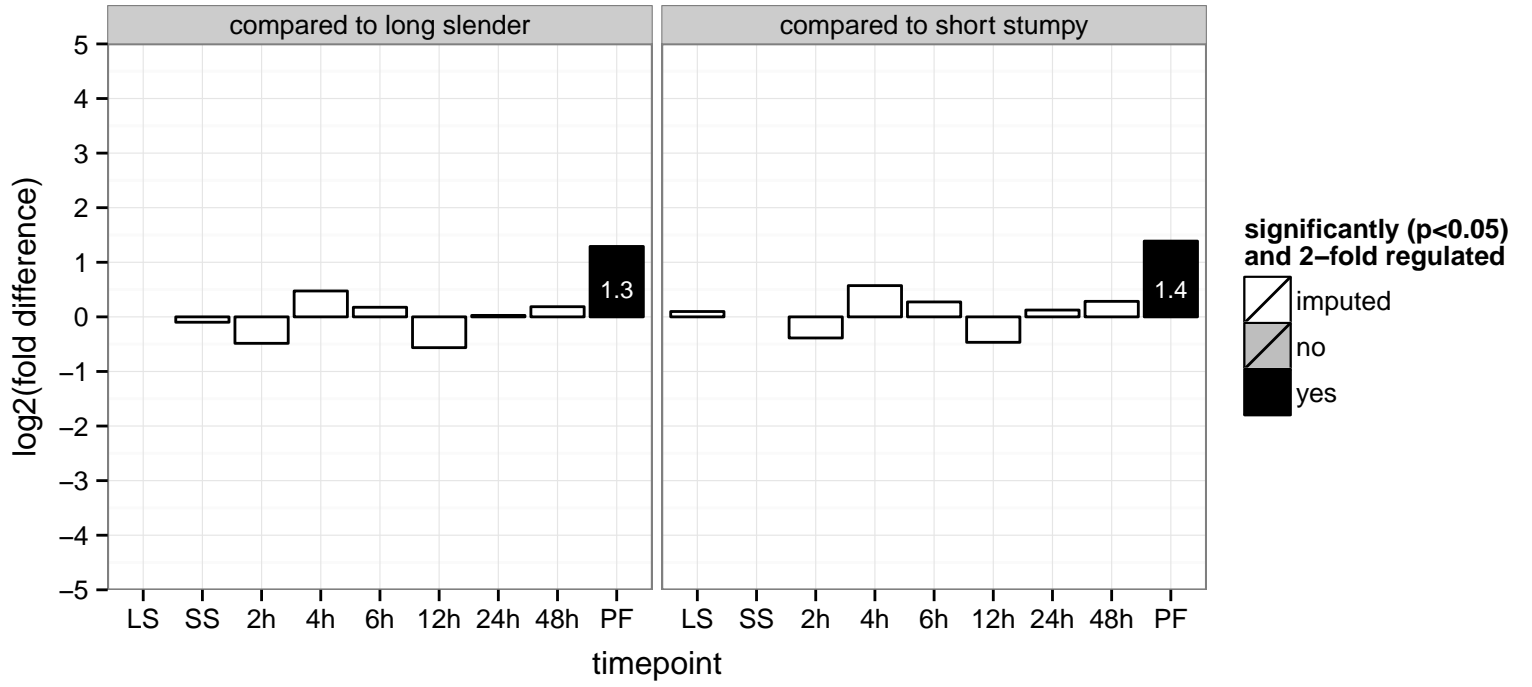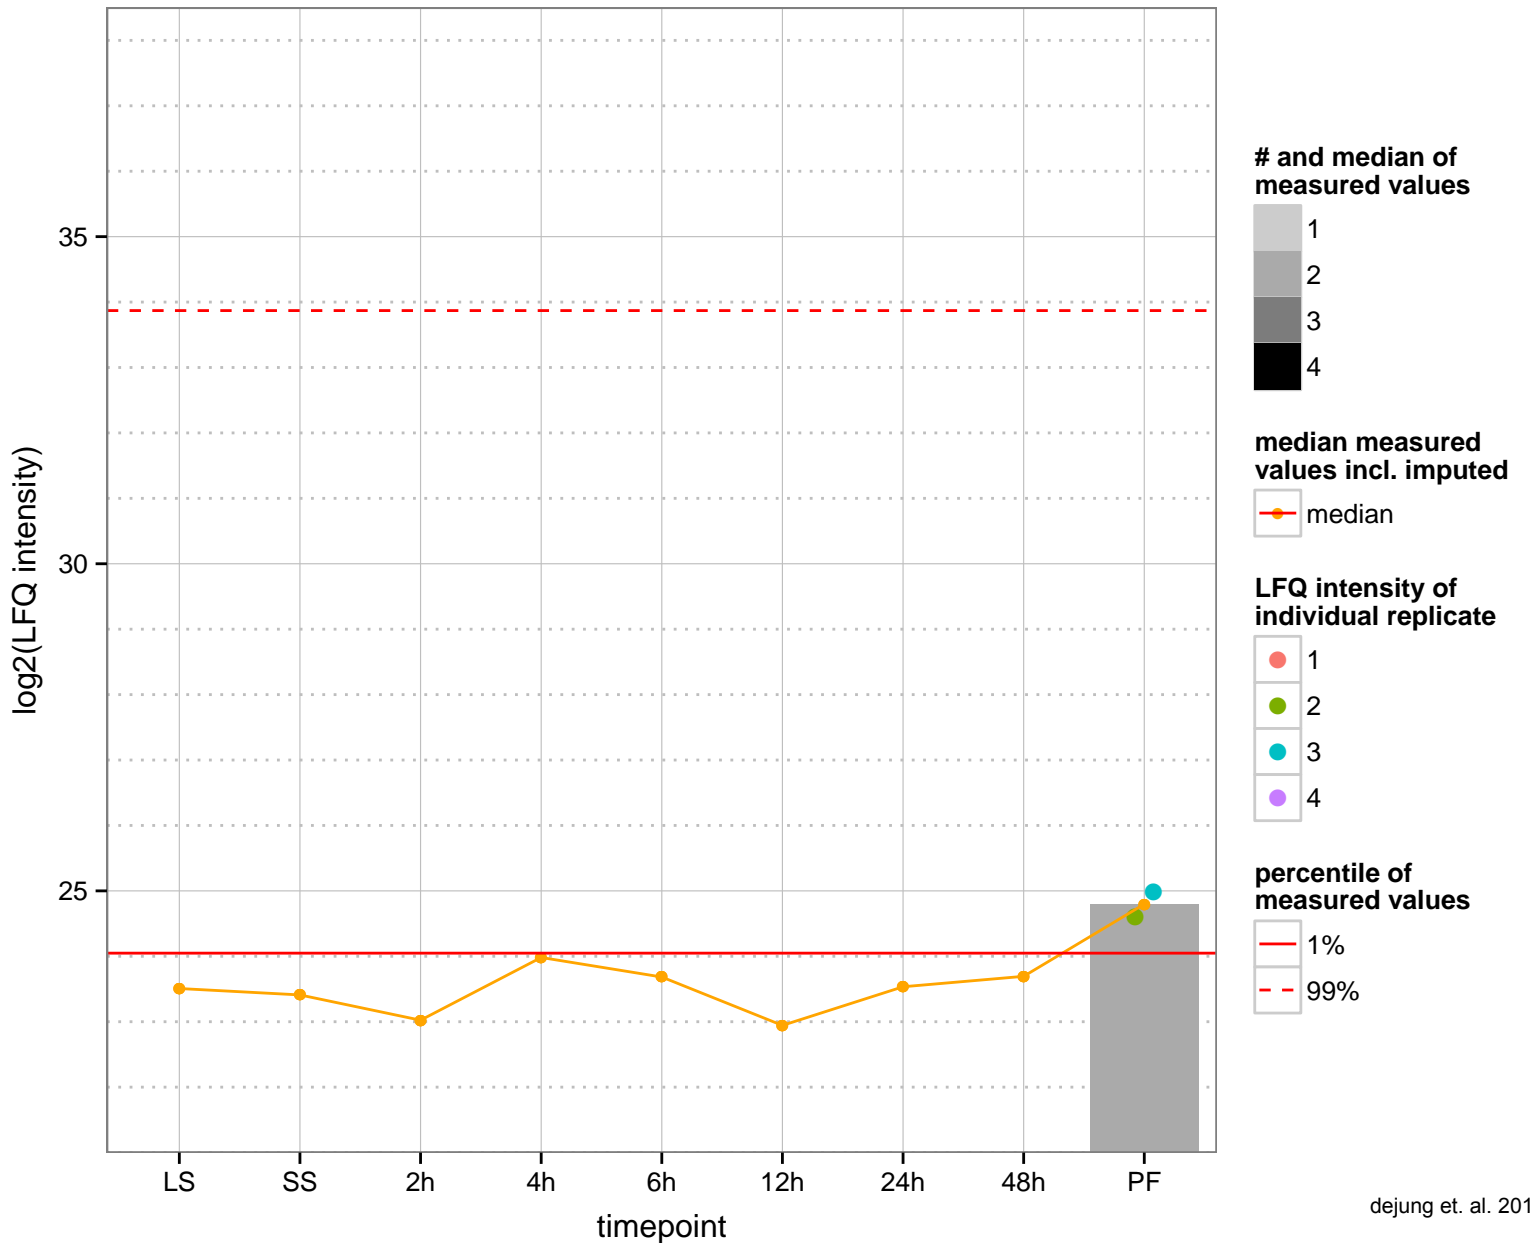

heat shock protein, putative  
 Tb927.10.5660  
 AGOF: heat shock protein binding  
 AGOC: mitochondrion  
 AGOP: protein folding  
 PGOF: heat shock protein binding  
 PGOC: null  
 PGO: null

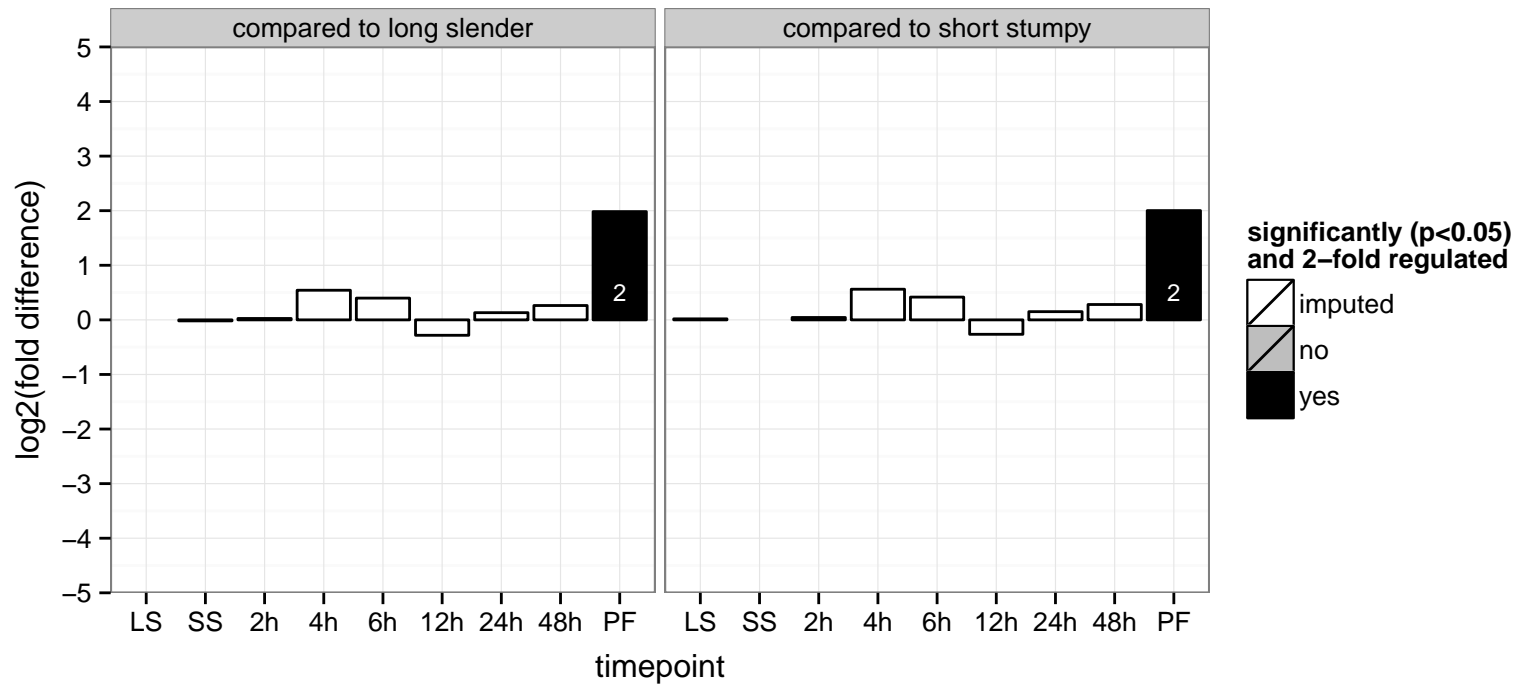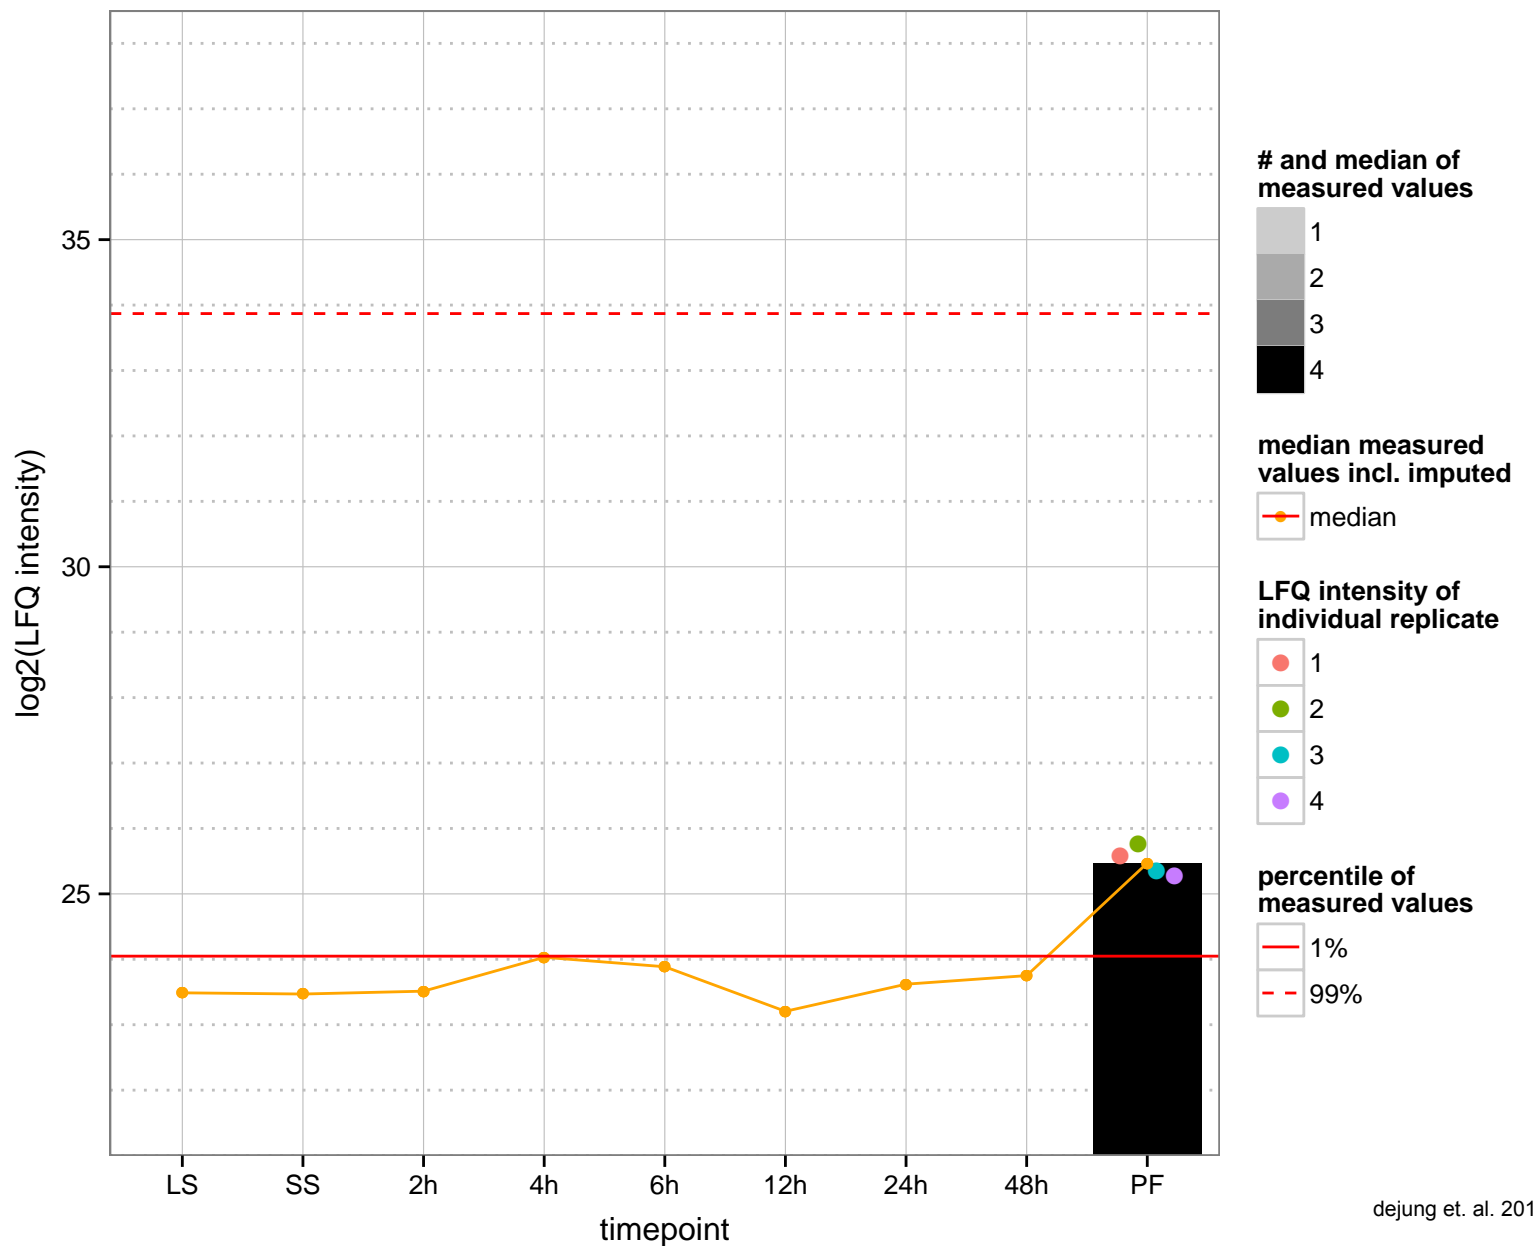

N-acetyltransferase subunit Nat1, putative (NAT1)  
 Tb927.10.5670  
 AGOF: N-acetyltransferase activity  
 AGOC: null  
 AGOP: cellular protein modification process  
 PGOF: protein binding  
 PGO: null  
 PGOP: null

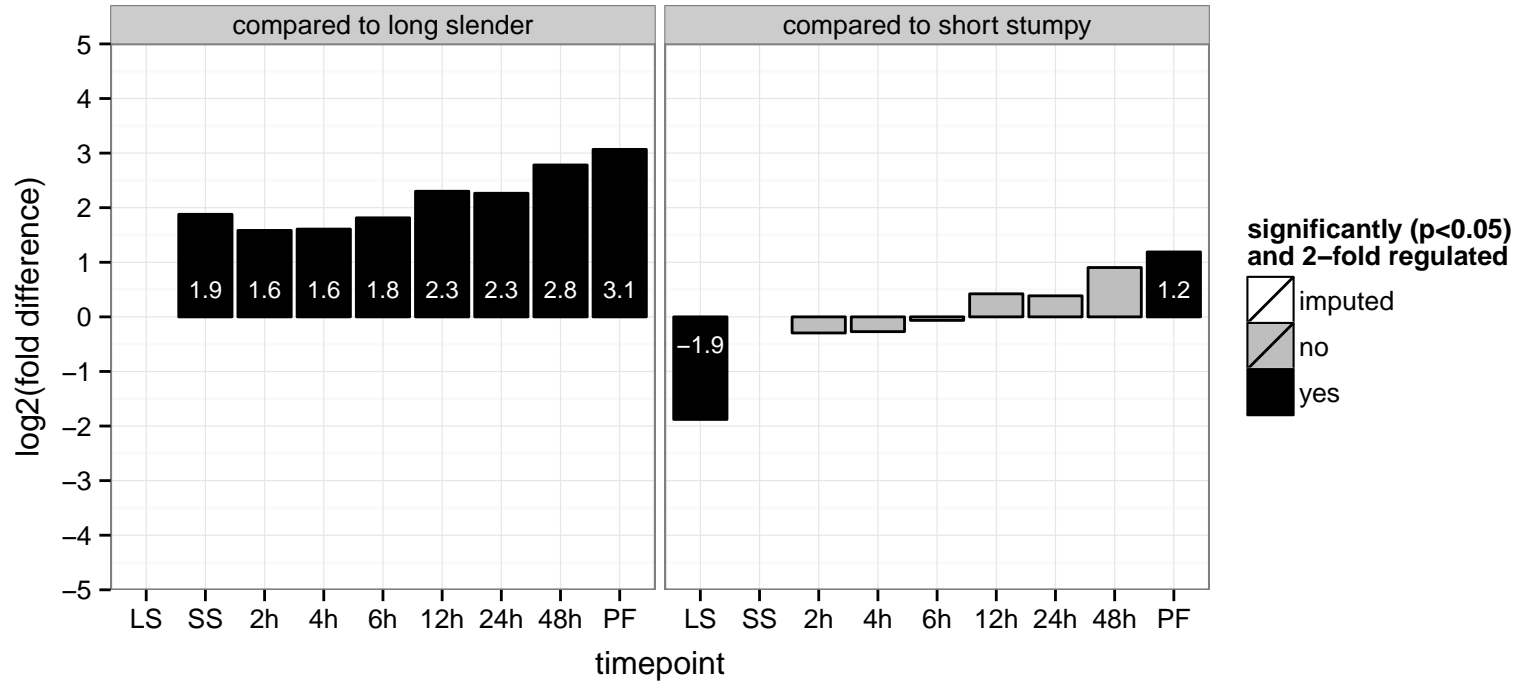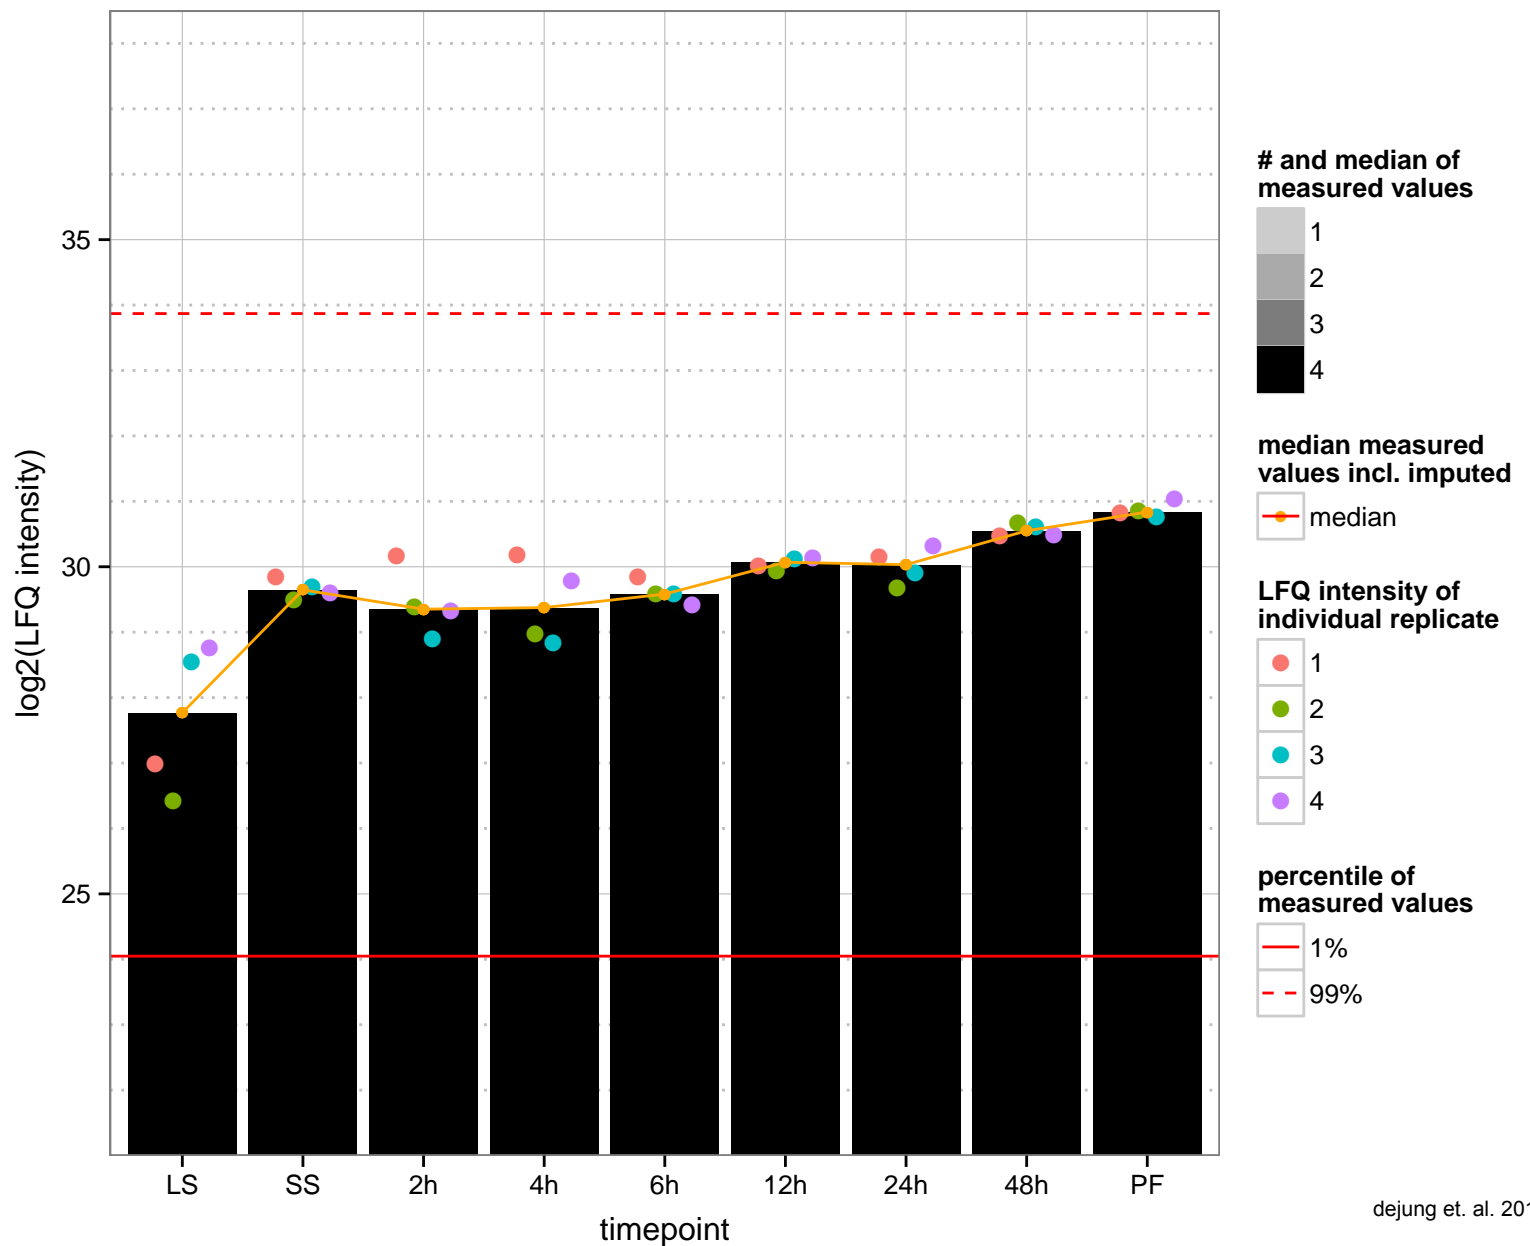

hypothetical protein, conserved  
 Tb927.10.5920  
 AGOF: null  
 AGOC: null  
 AGOP: null  
 PGO: null  
 PGOC: null  
 PGOP: null

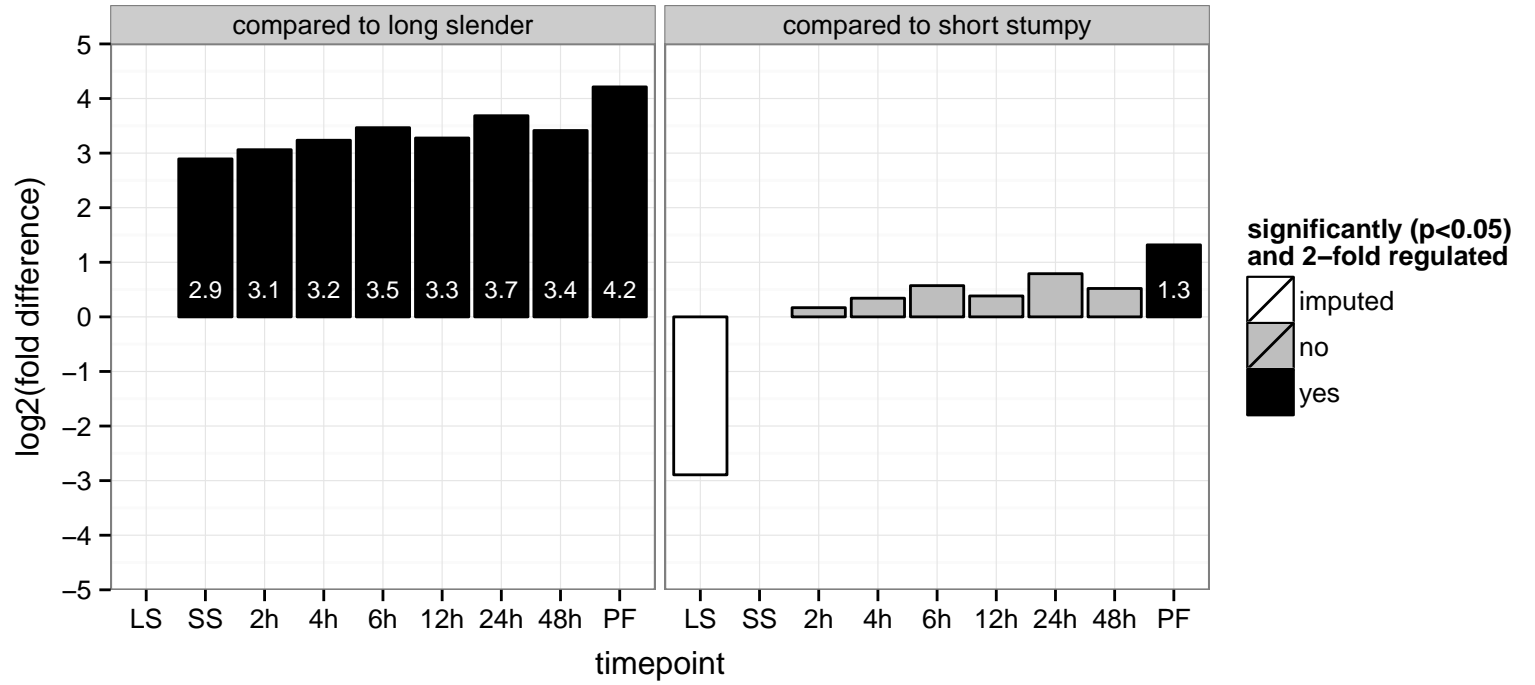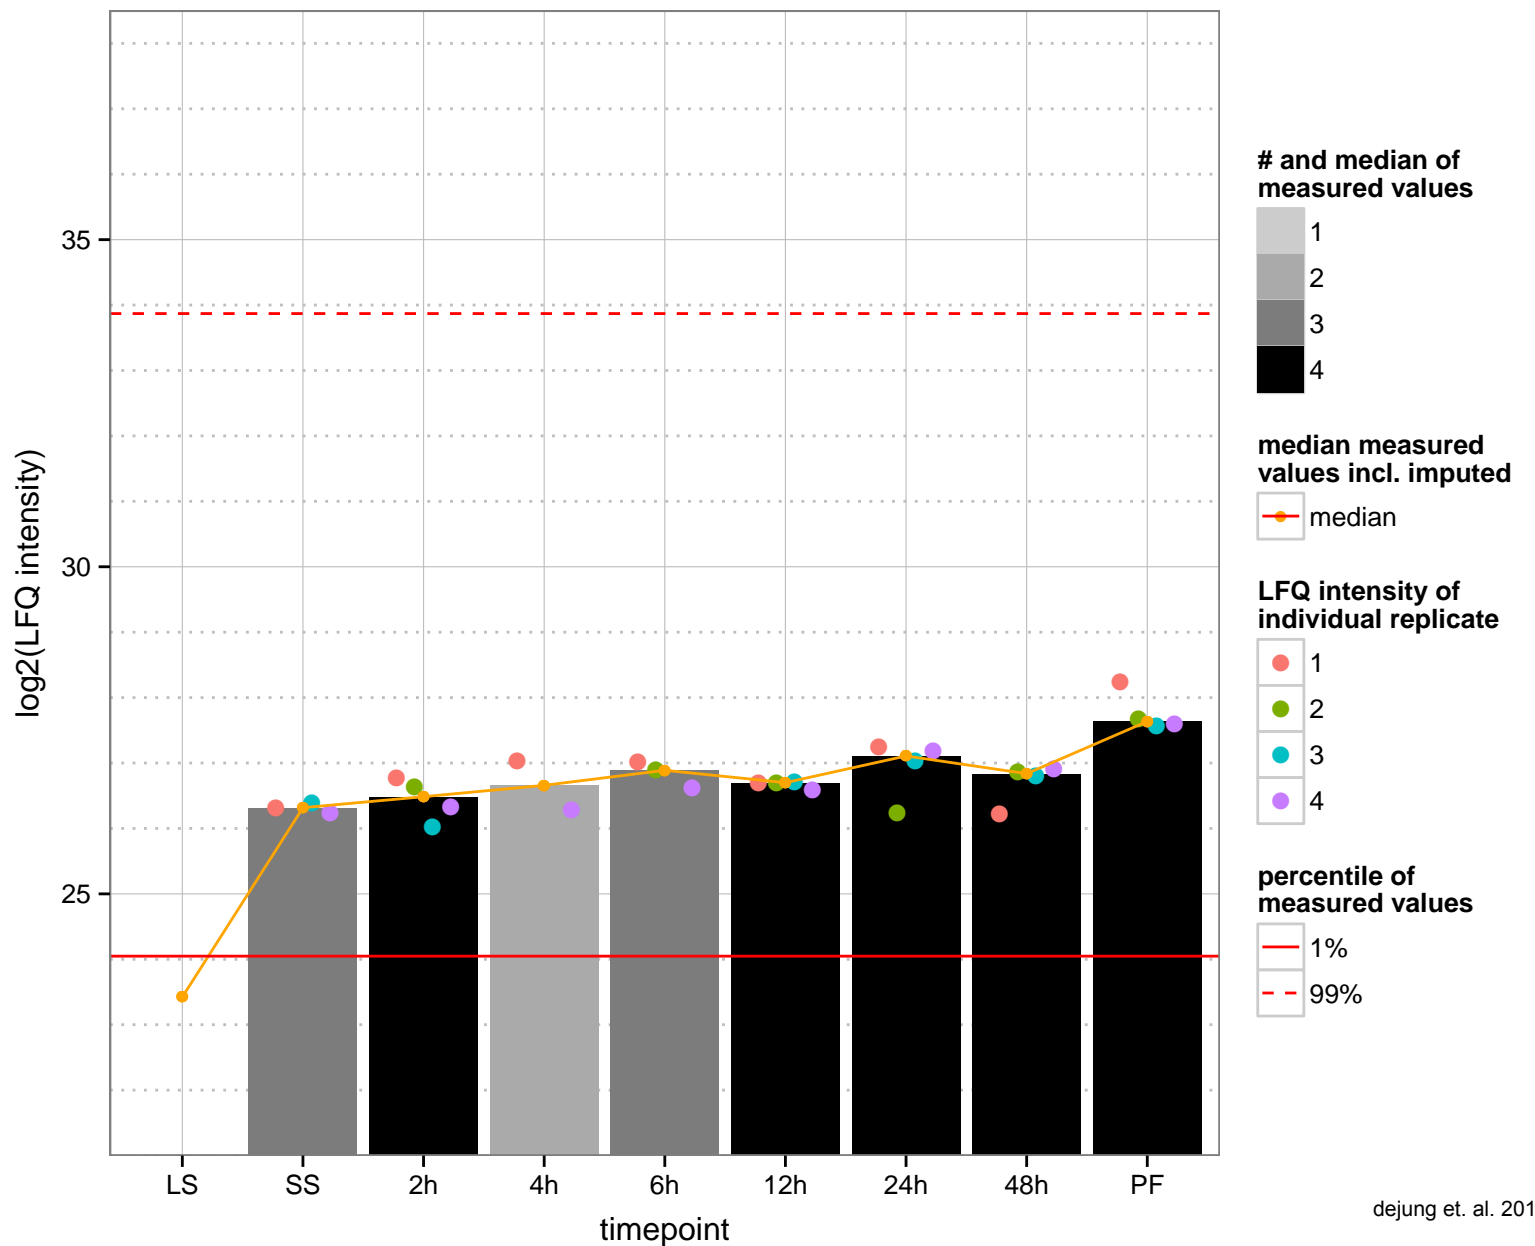

hypothetical protein, conserved  
 Tb927.10.6180  
 AGOF: null  
 AGOC: null  
 AGOP: null  
 PGO: null  
 PGO: null  
 PGO: null

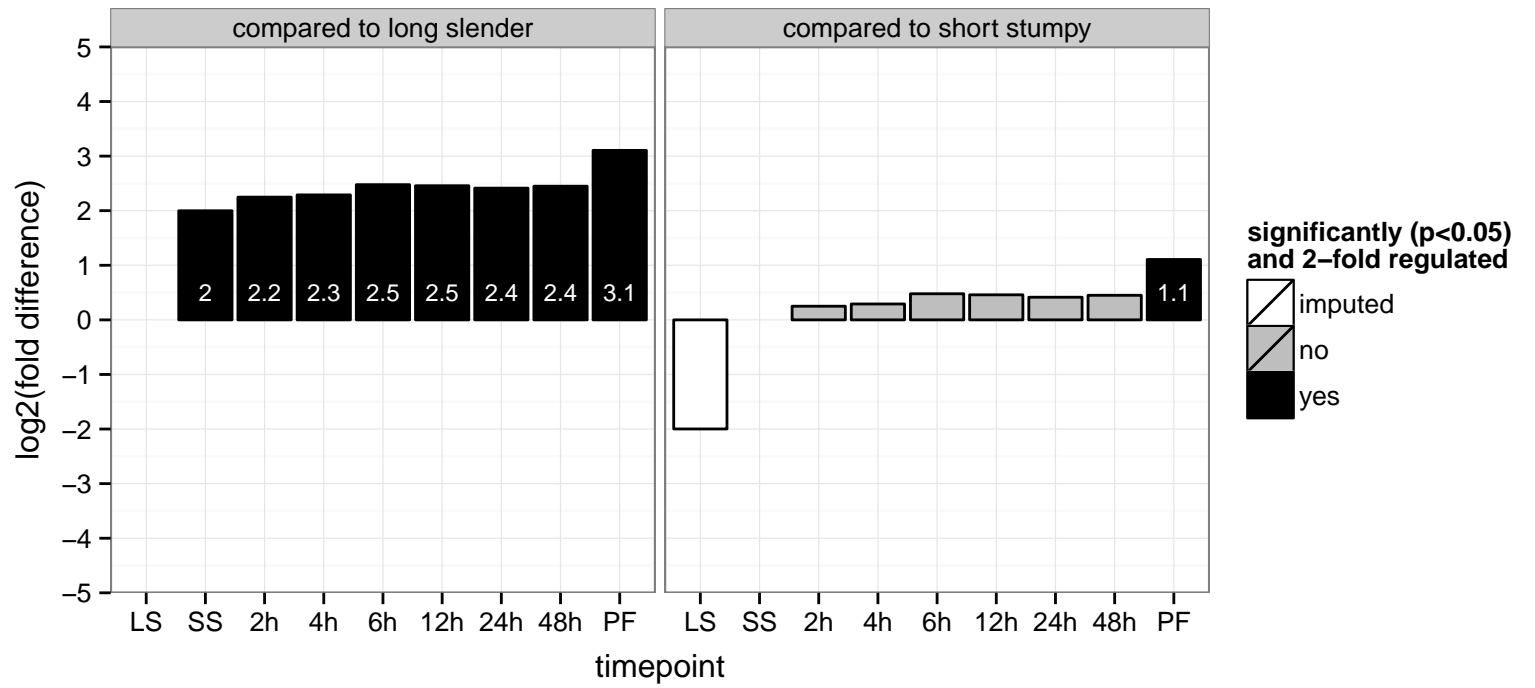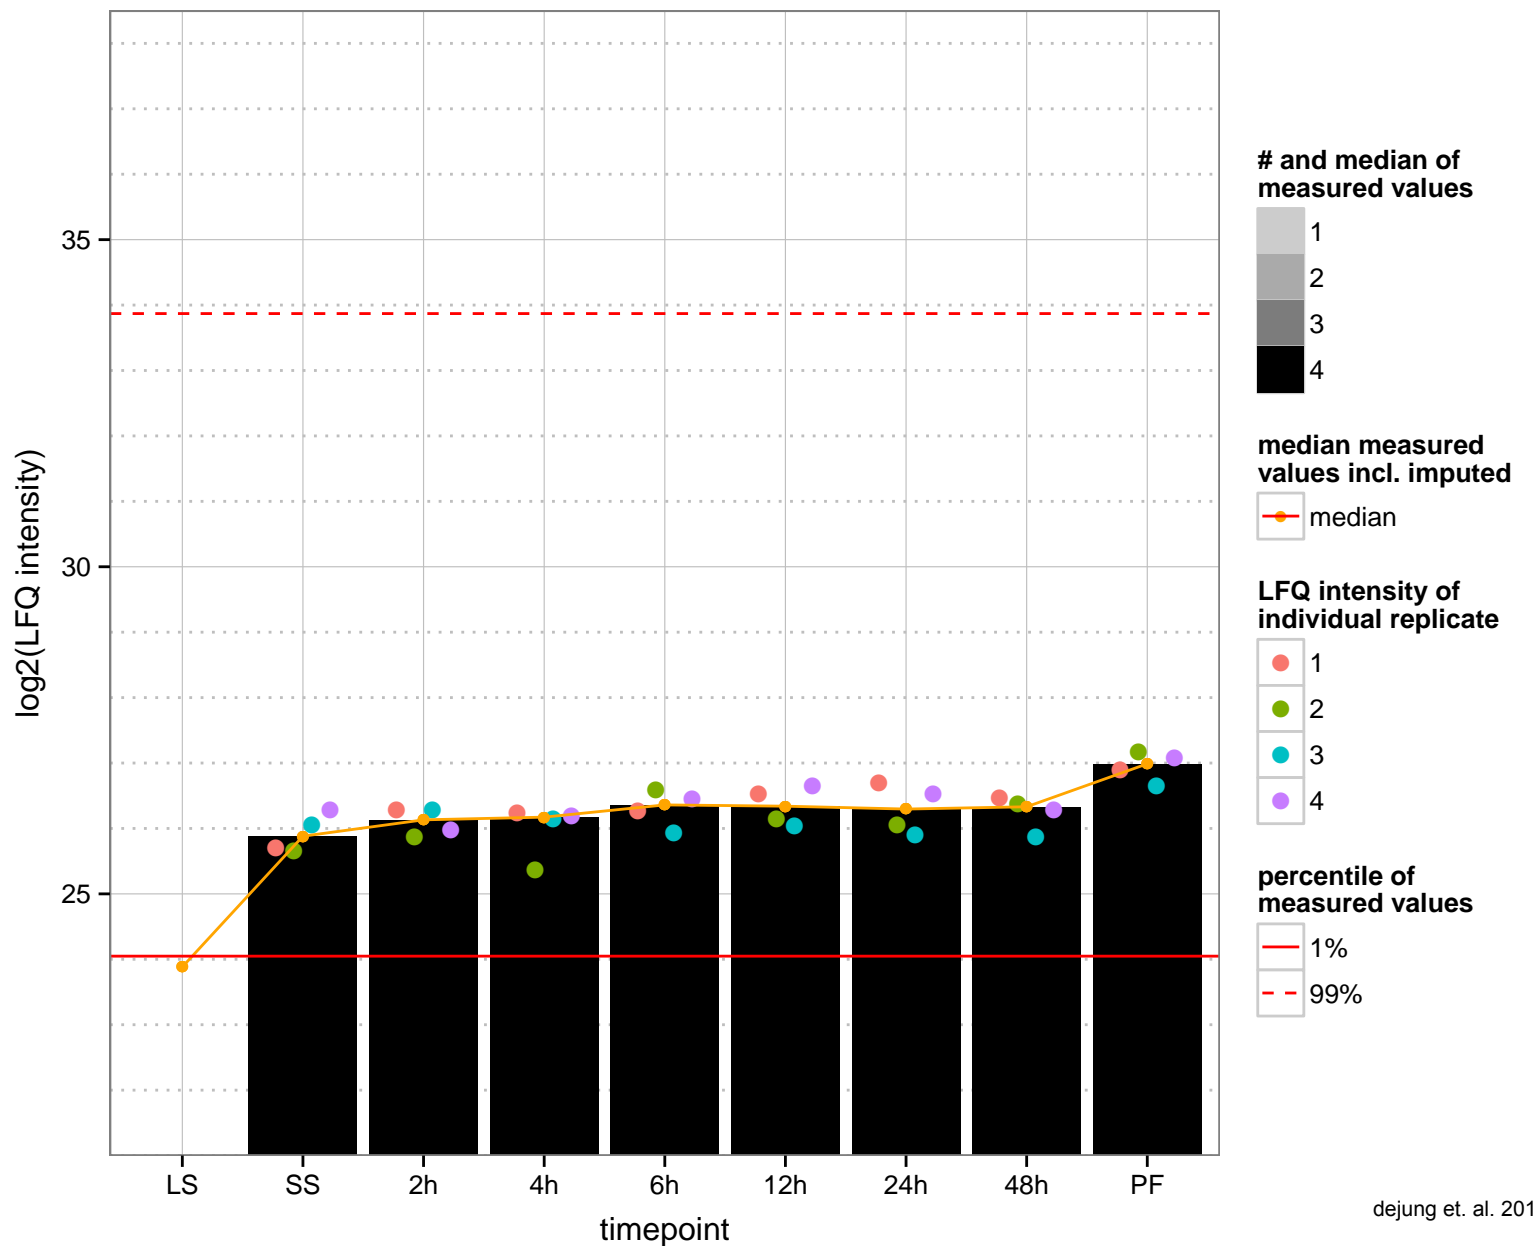

member of the NOL1/NOP2/sun family of proteins  
 Tb927.10.6680  
 AGOF: null  
 AGOC: null  
 AGOP: null  
 PGO: null  
 PGOC: null  
 PGOP: null

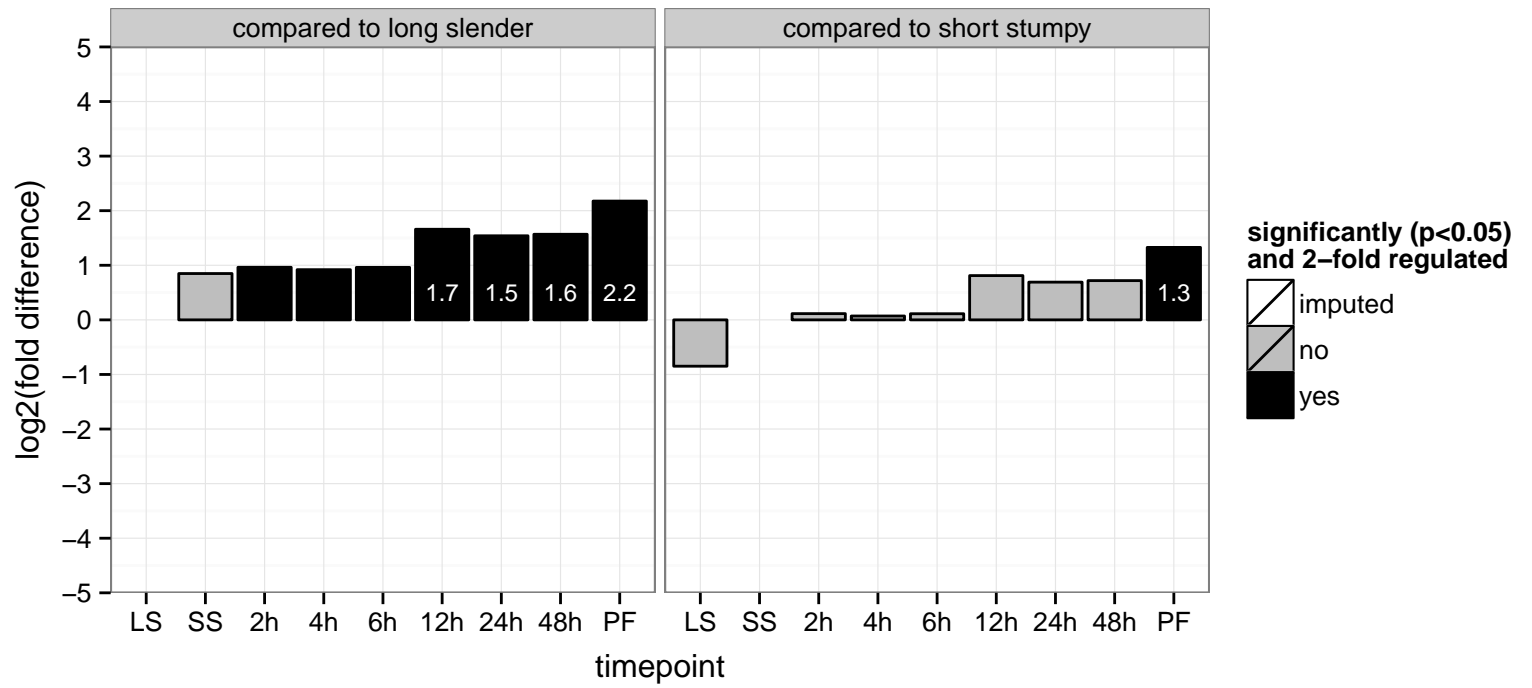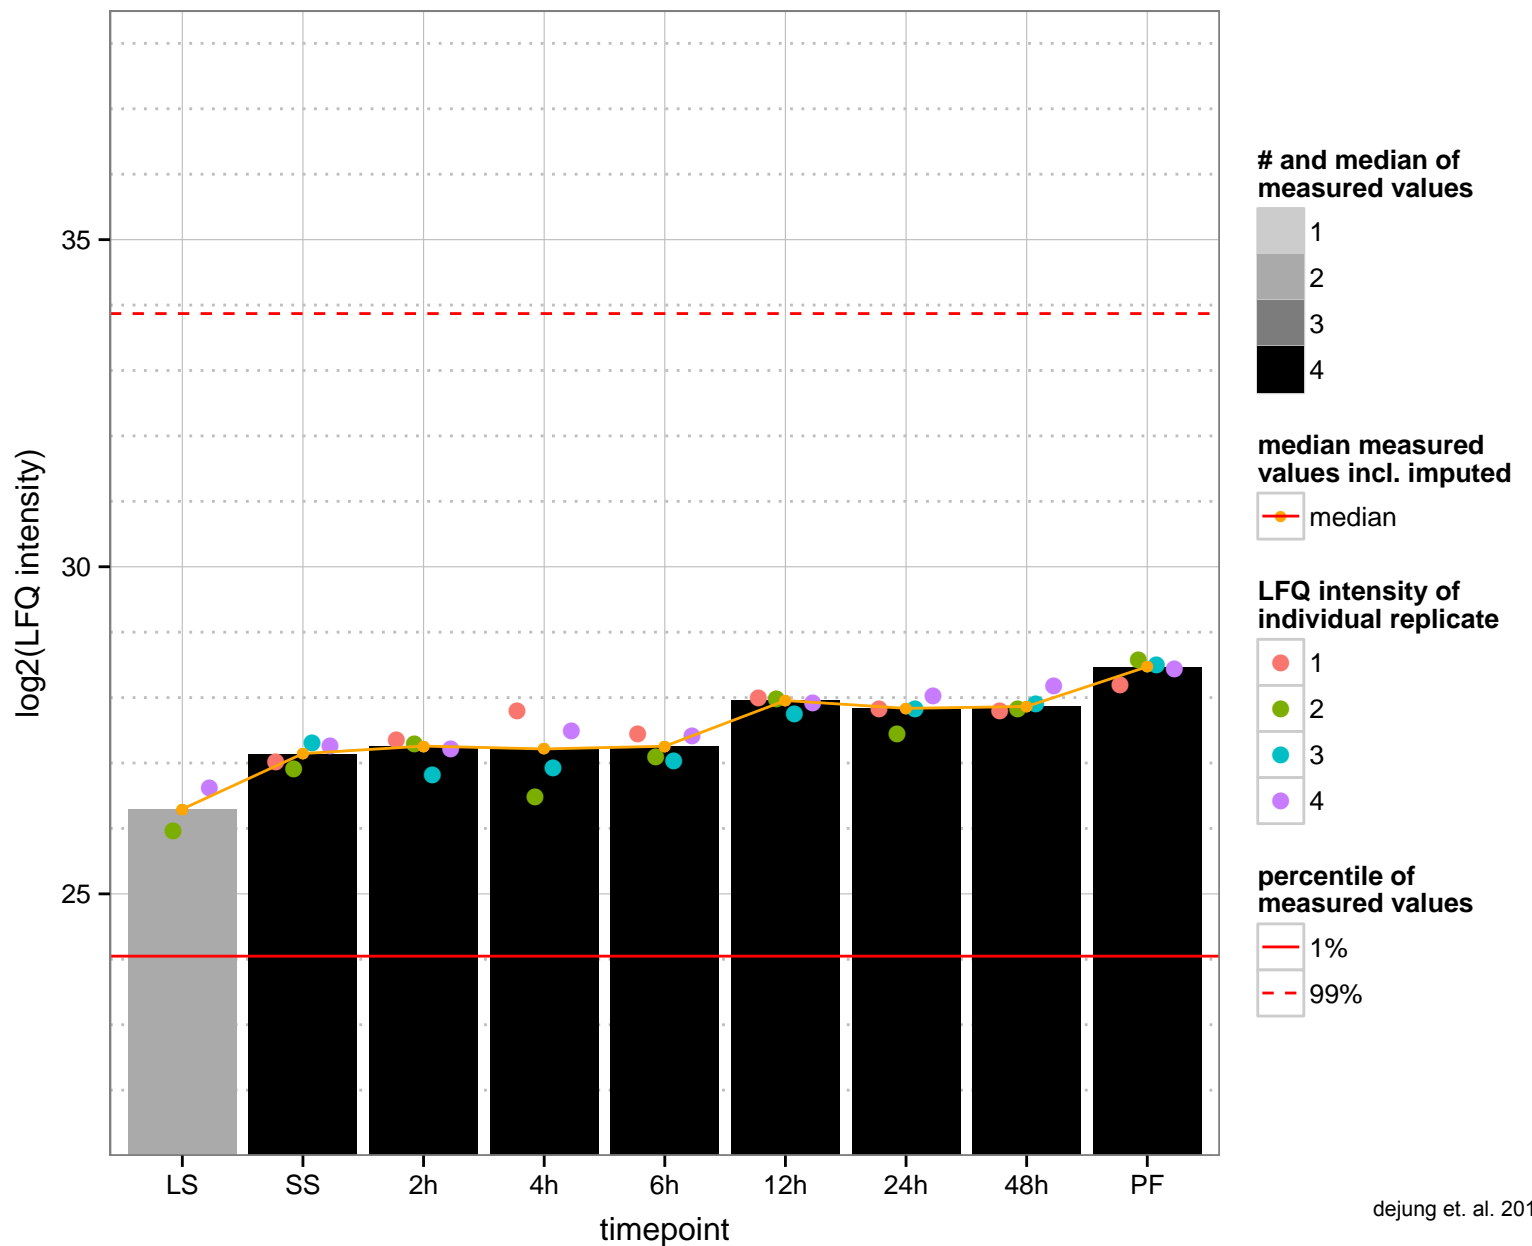

hypothetical protein, conserved  
 Tb927.10.6710  
 AGOF: null  
 AGOC: null  
 AGOP: null  
 PGOF: null  
 PGO C: null  
 PGOP: null

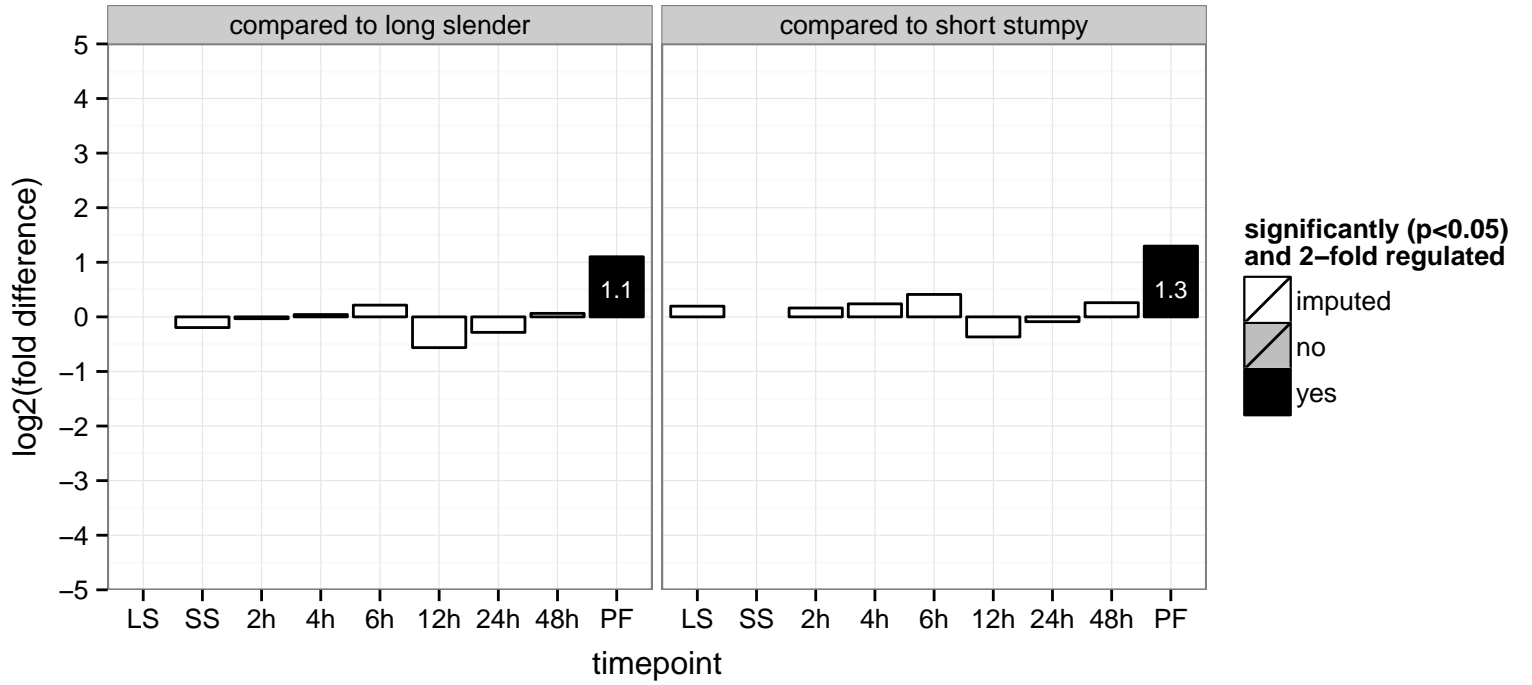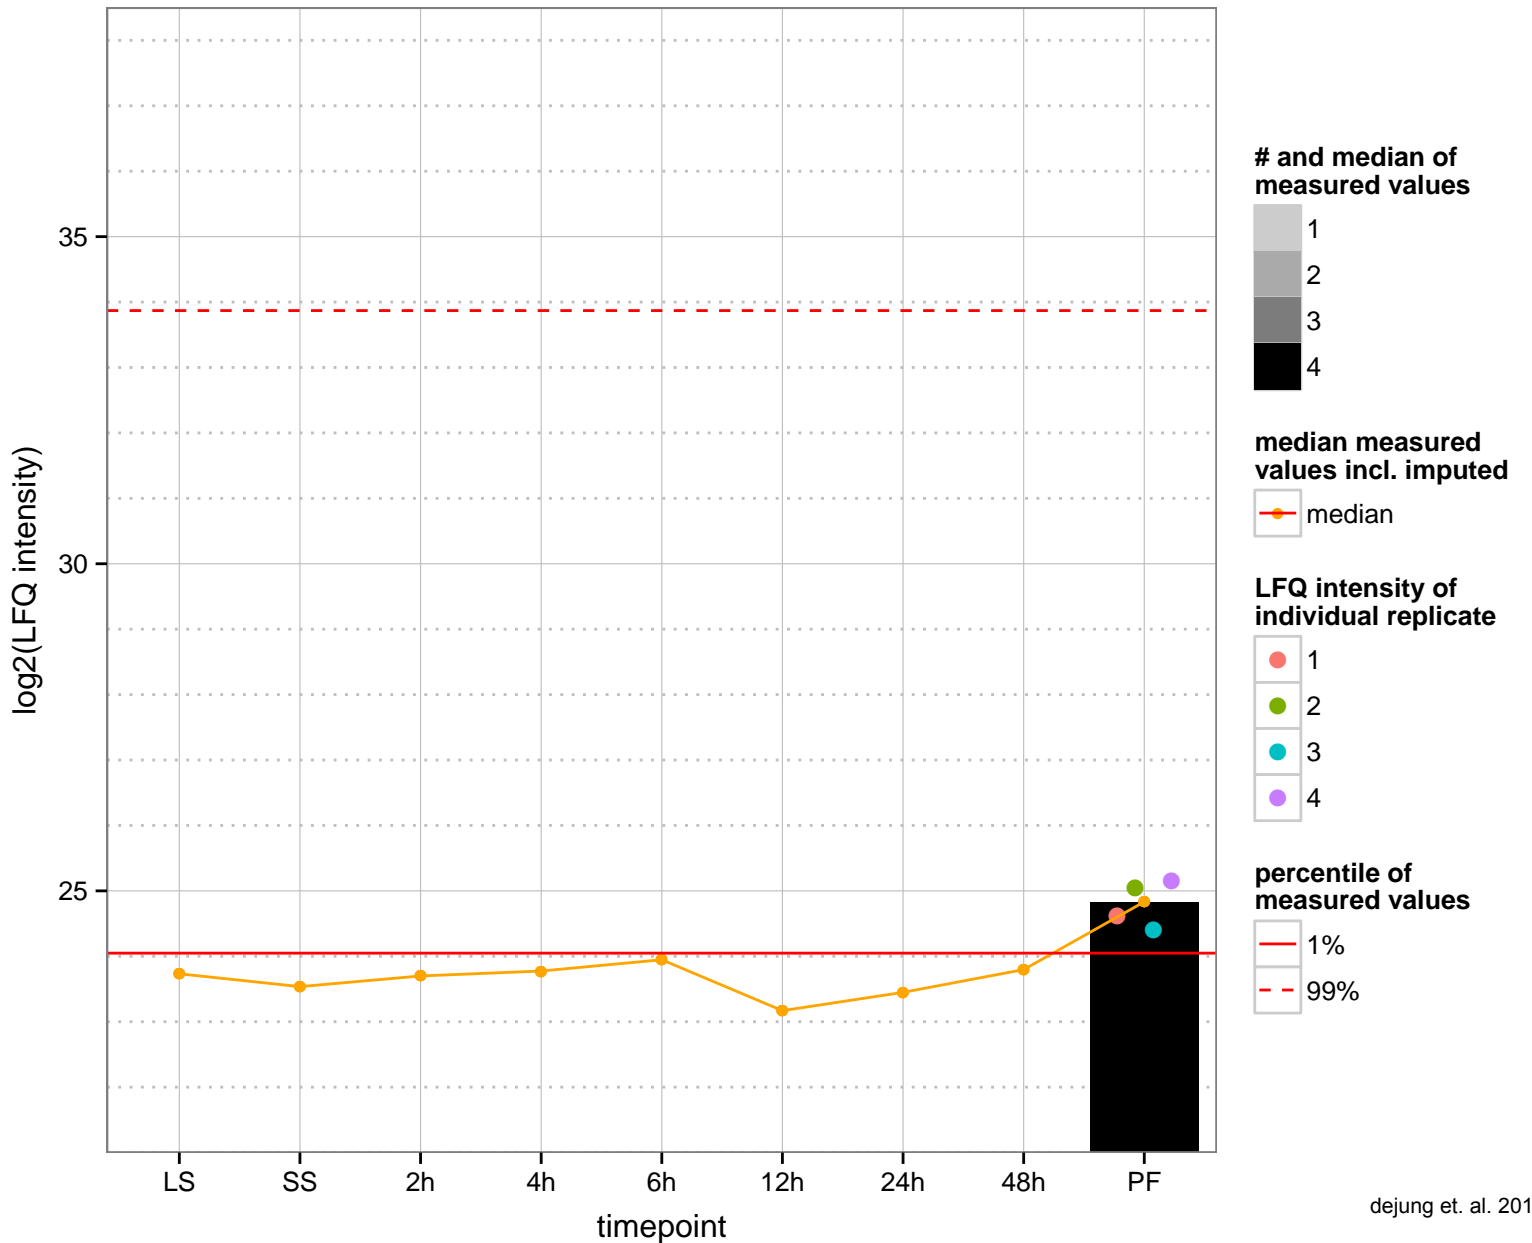



chromatin assembly factor 1 subunit B, putative  
 Tb927.10.7050  
 AGOF: histone binding, unfolded protein binding  
 AGOC: null  
 AGOP: chromatin assembly, chromatin assembly or disassembly, nucleosome assembly  
 PGOF: protein binding  
 PGOC: null  
 PGOP: null

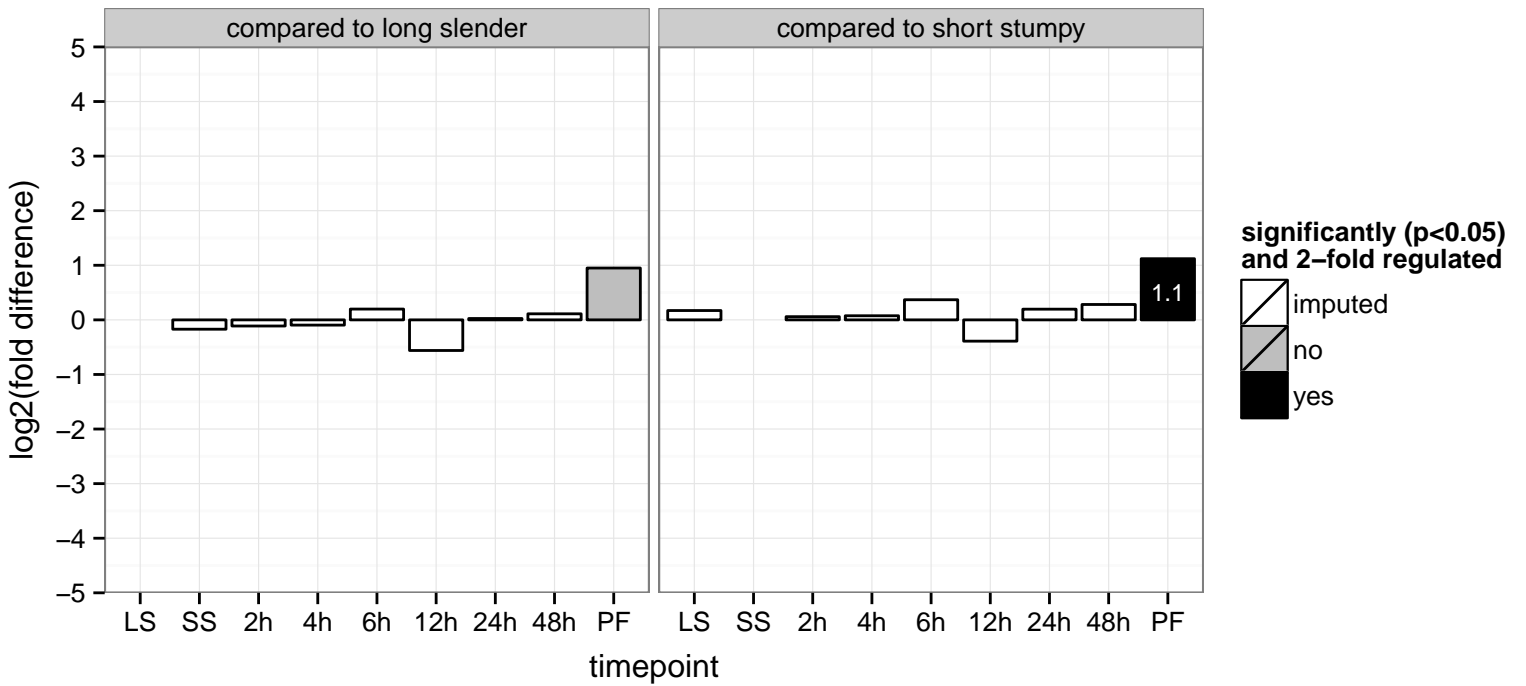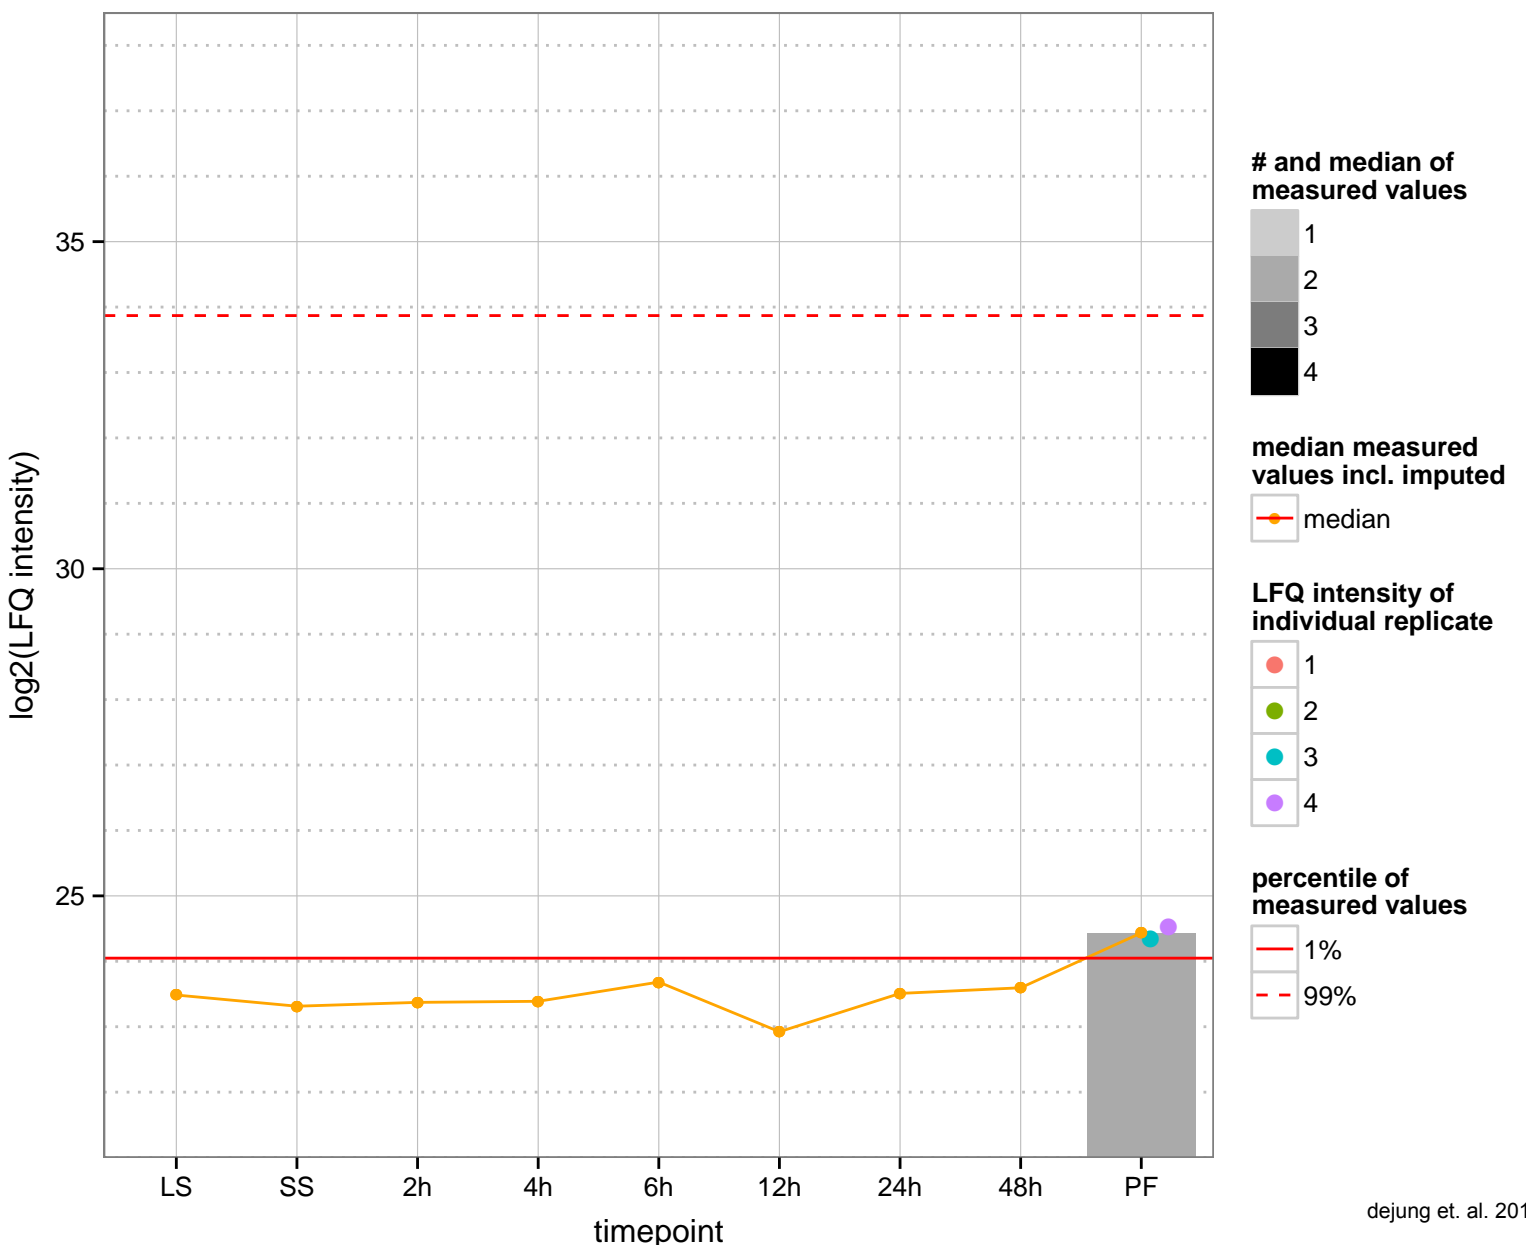

hypothetical protein, conserved  
 Tb927.10.7270  
 AGOF: null  
 AGOC: null  
 AGOP: null  
 PGOF: null  
 PGO C: null  
 PGOP: null

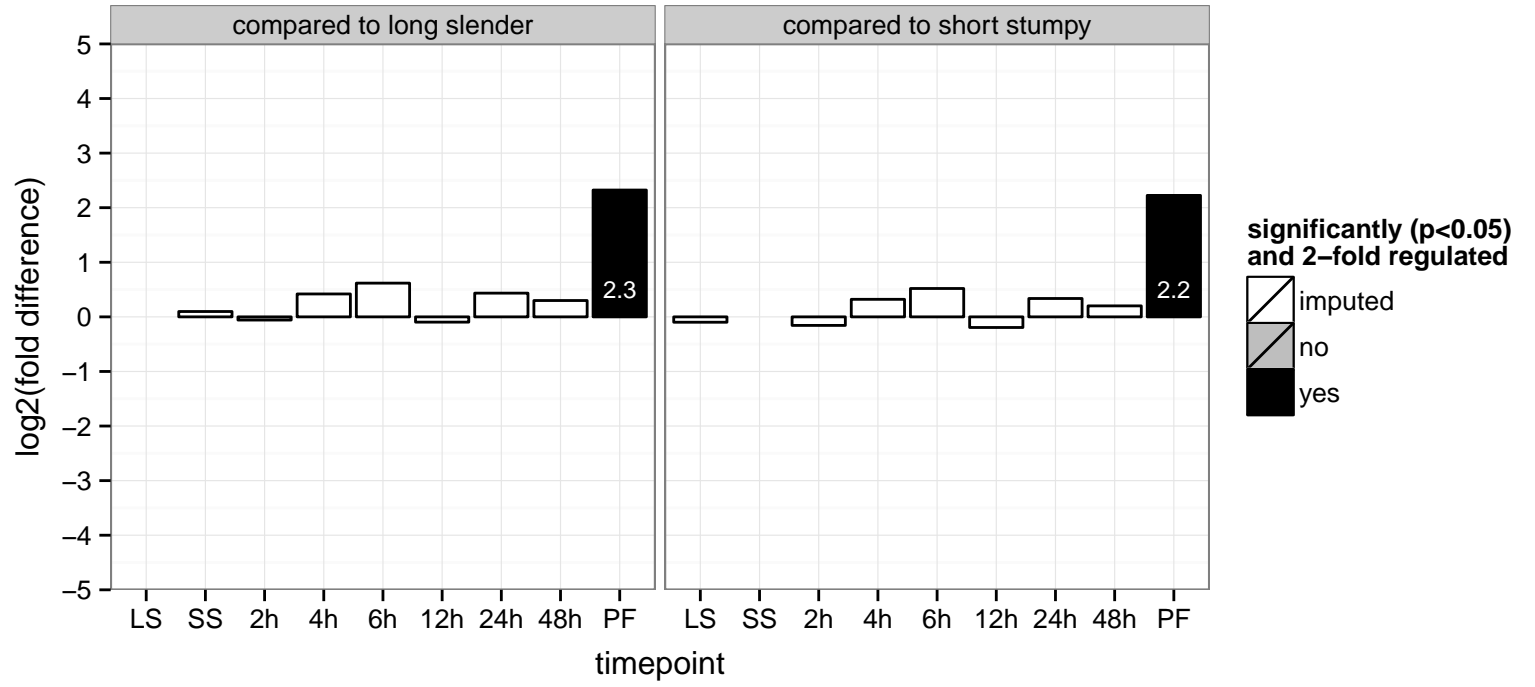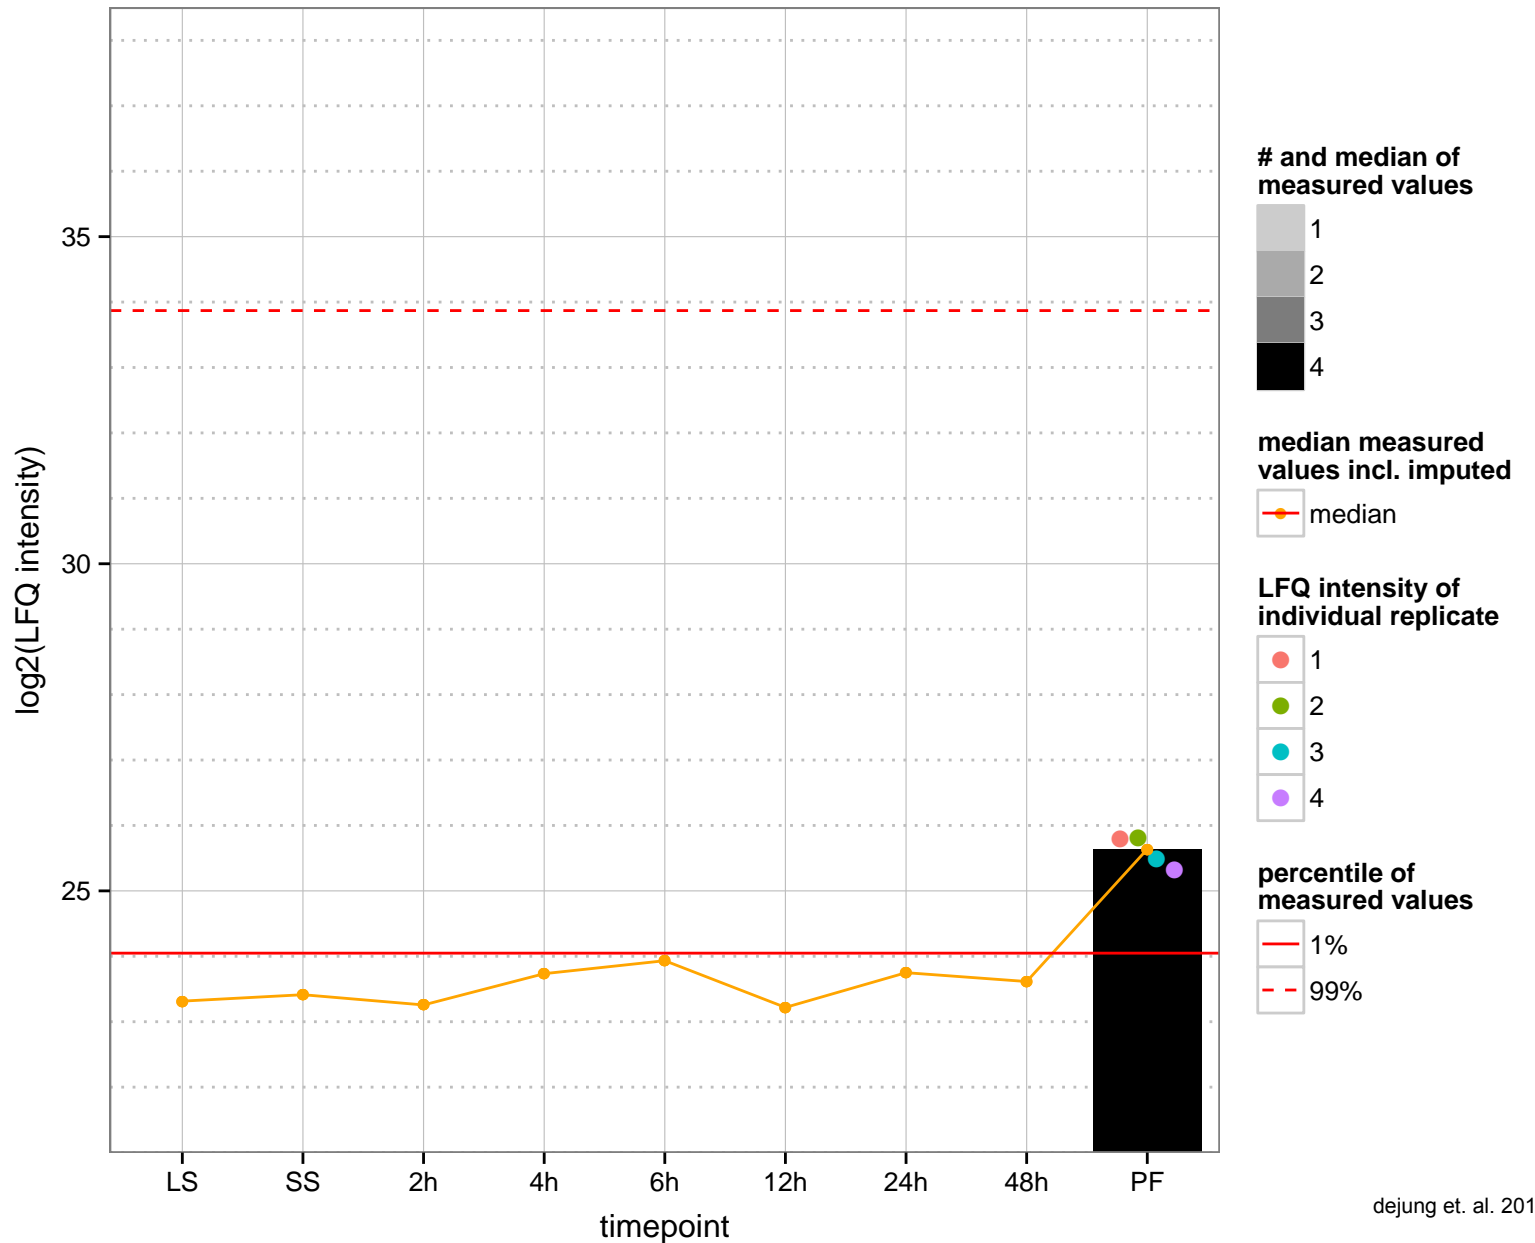

terminal uridylyltransferase 3, putative (TUT3)  
 Tb927.10.7310  
 AGOF: null  
 AGOC: mitochondrion  
 AGOP: null  
 PGO: null  
 PGOC: null  
 PGOP: null

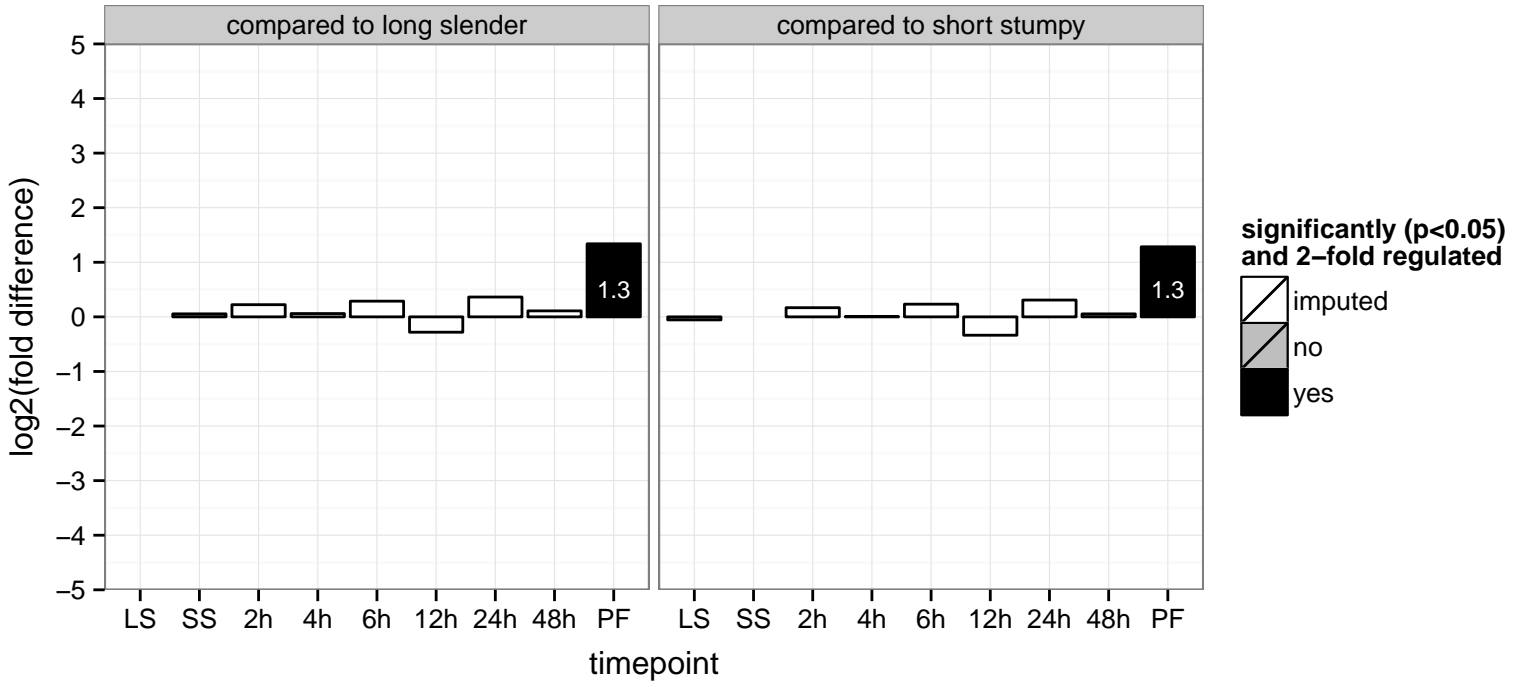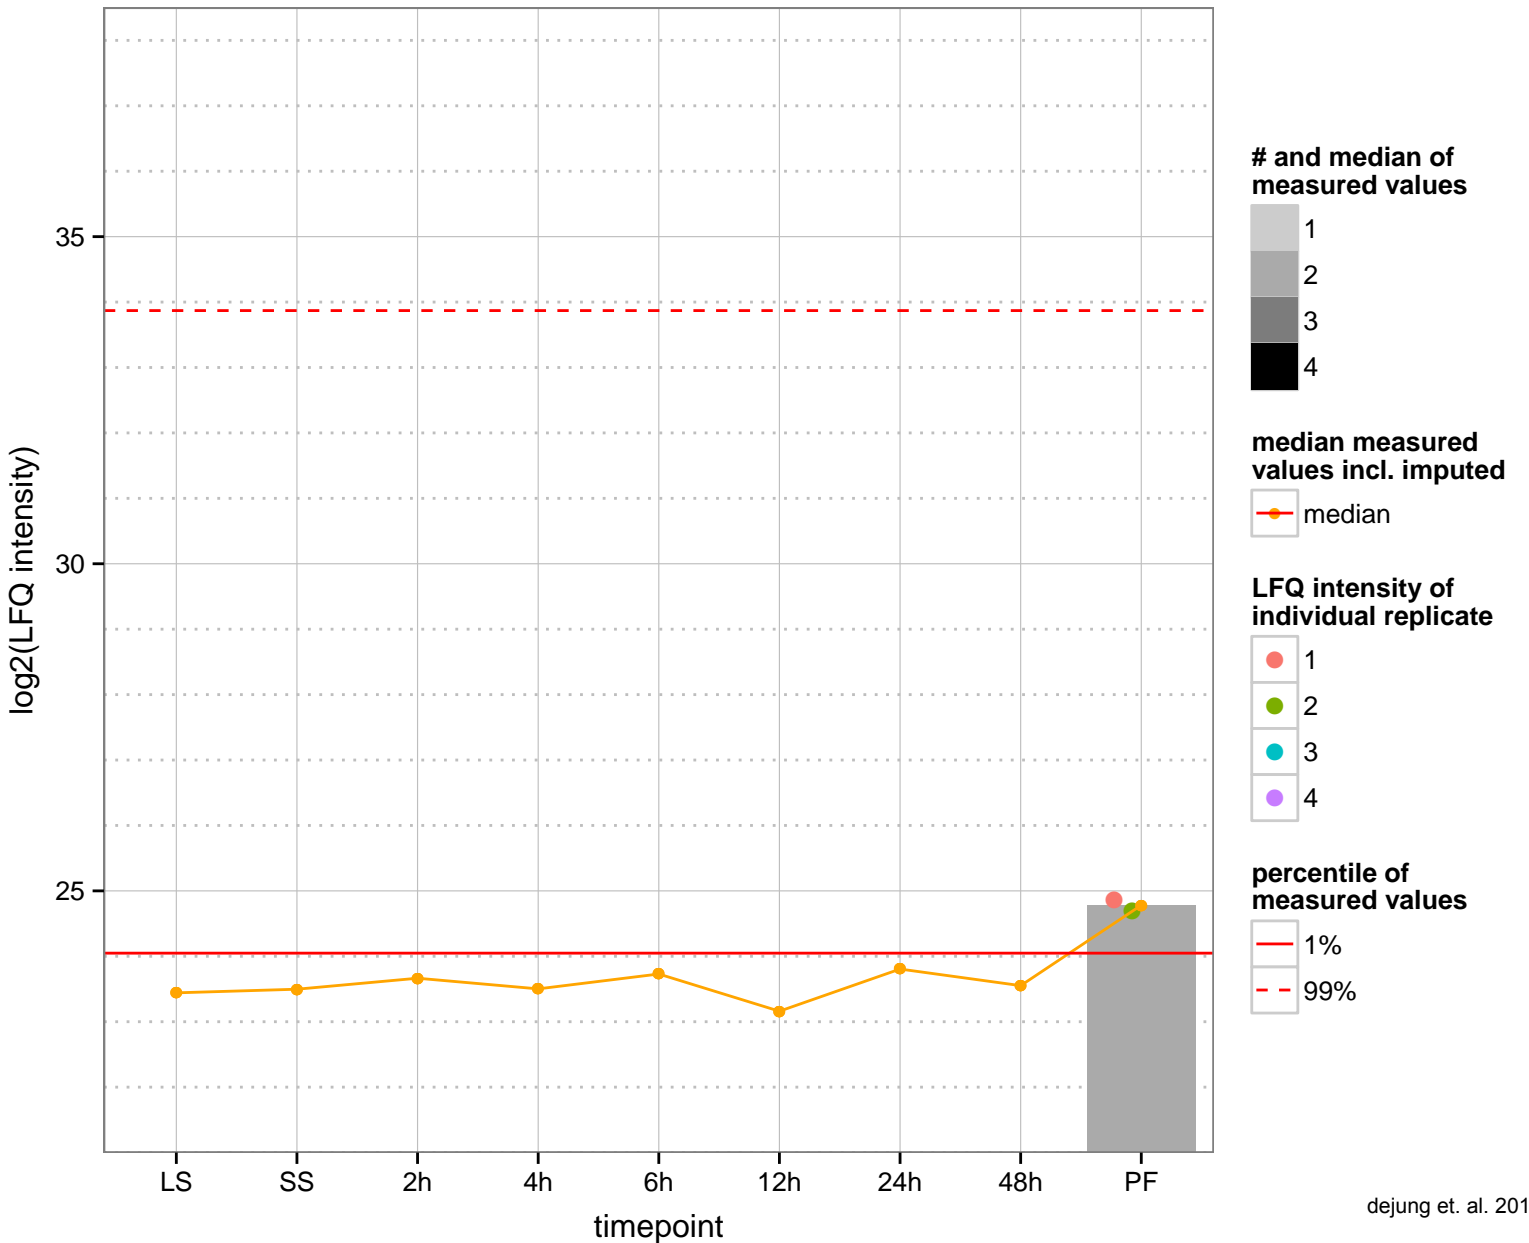

40S ribosomal protein S24E, putative  
 Tb927.10.7340;Tb927.10.7330  
 AGOF: structural constituent of ribosome  
 AGOC: intracellular, ribosome  
 AGOP: translation  
 PGOF: null, structural constituent of ribosome  
 PGO: null, intracellular, ribosome  
 PGOP: null, translation

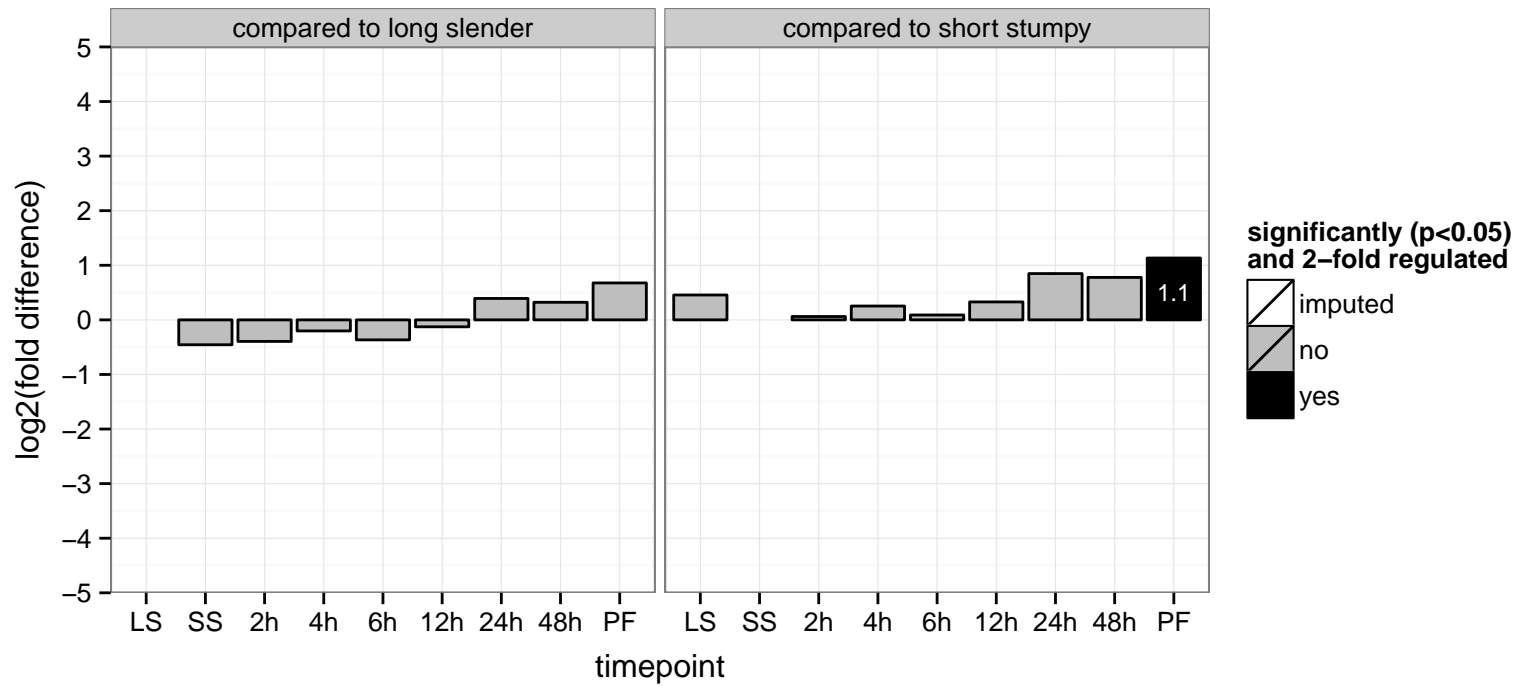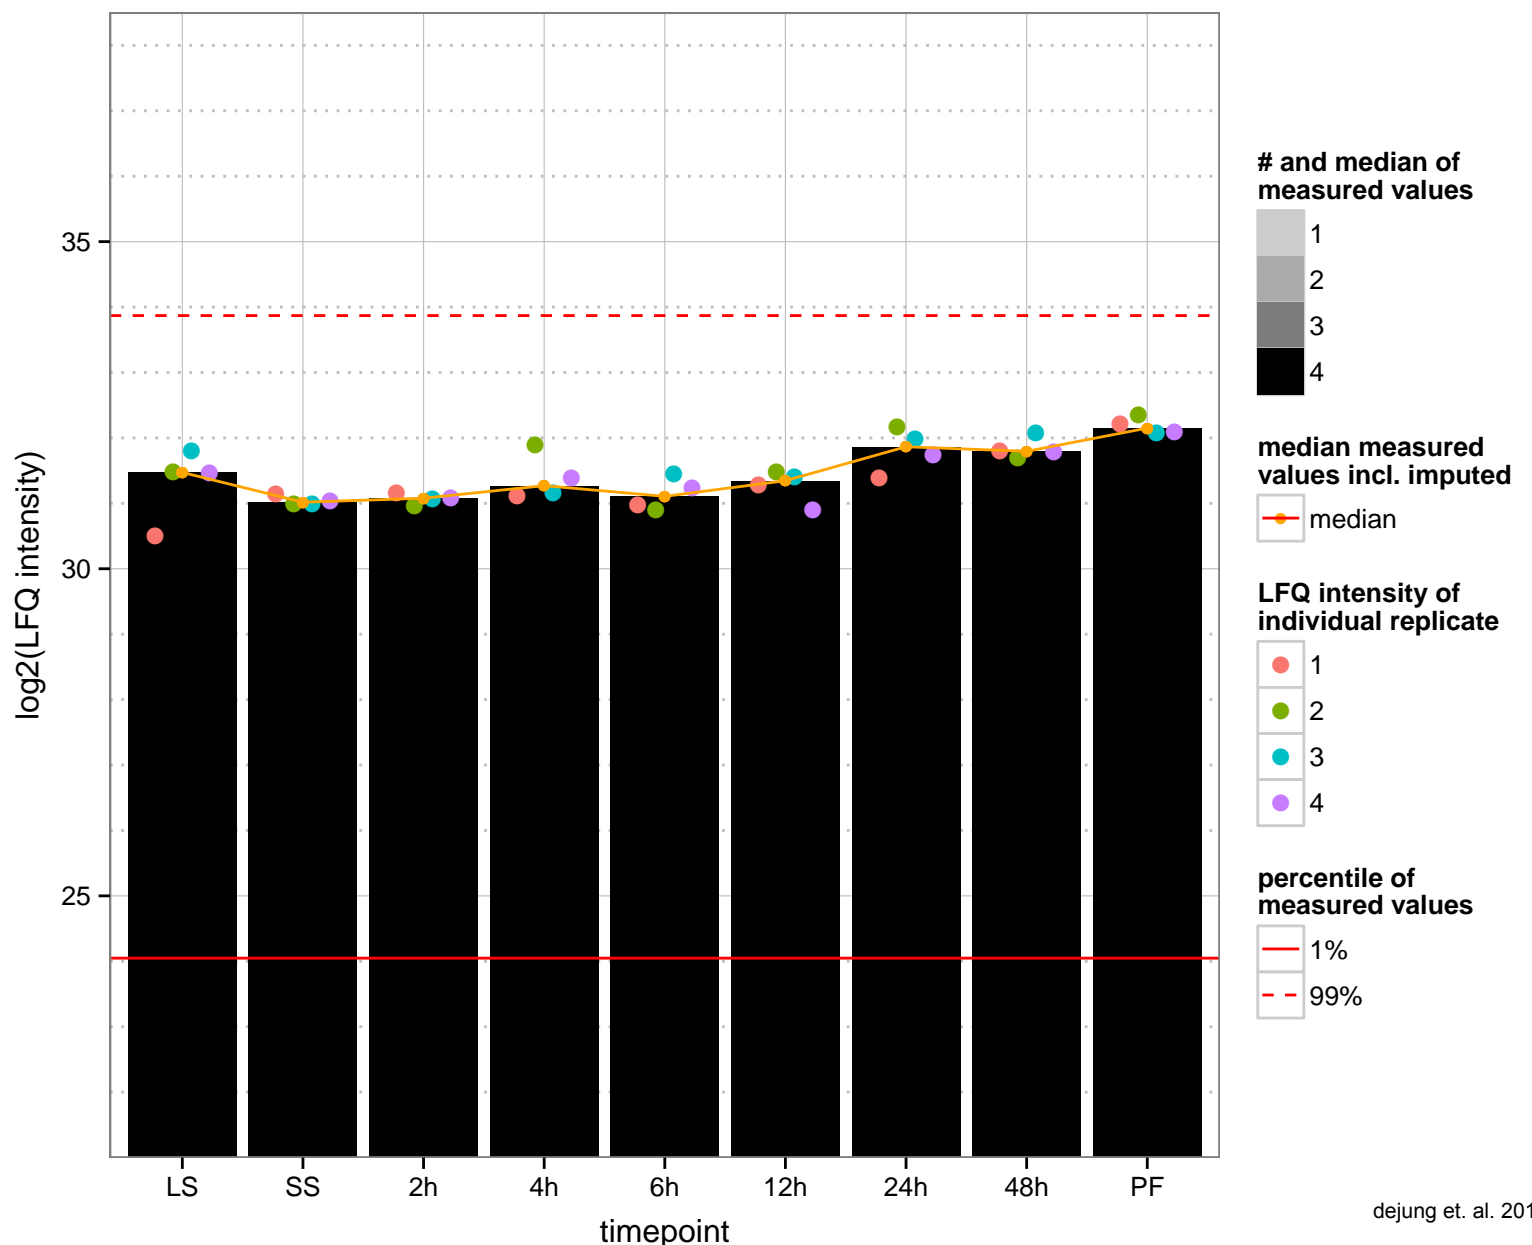

hypothetical protein, conserved  
 Tb927.10.7600  
 AGOF: null  
 AGOC: null  
 AGOP: null  
 PGOF: null  
 PGOC: null  
 PGOP: null

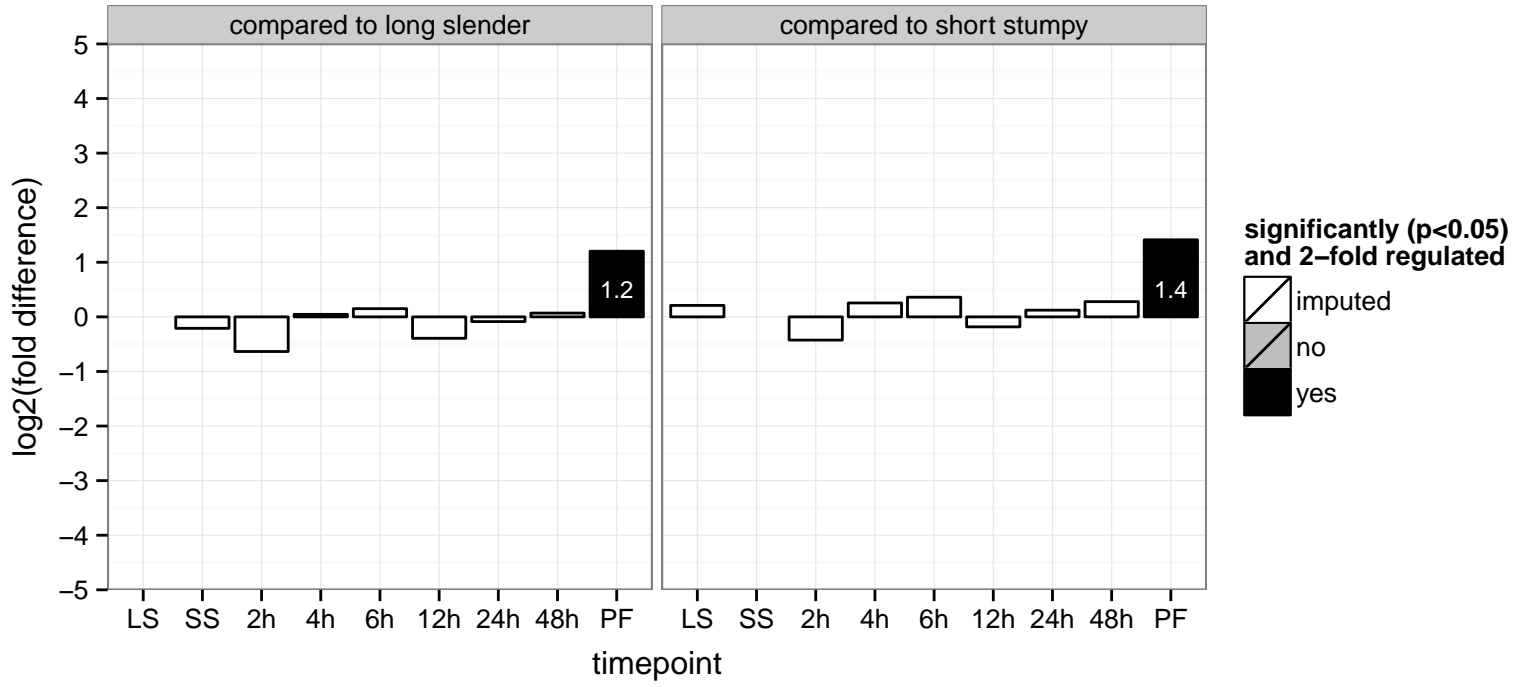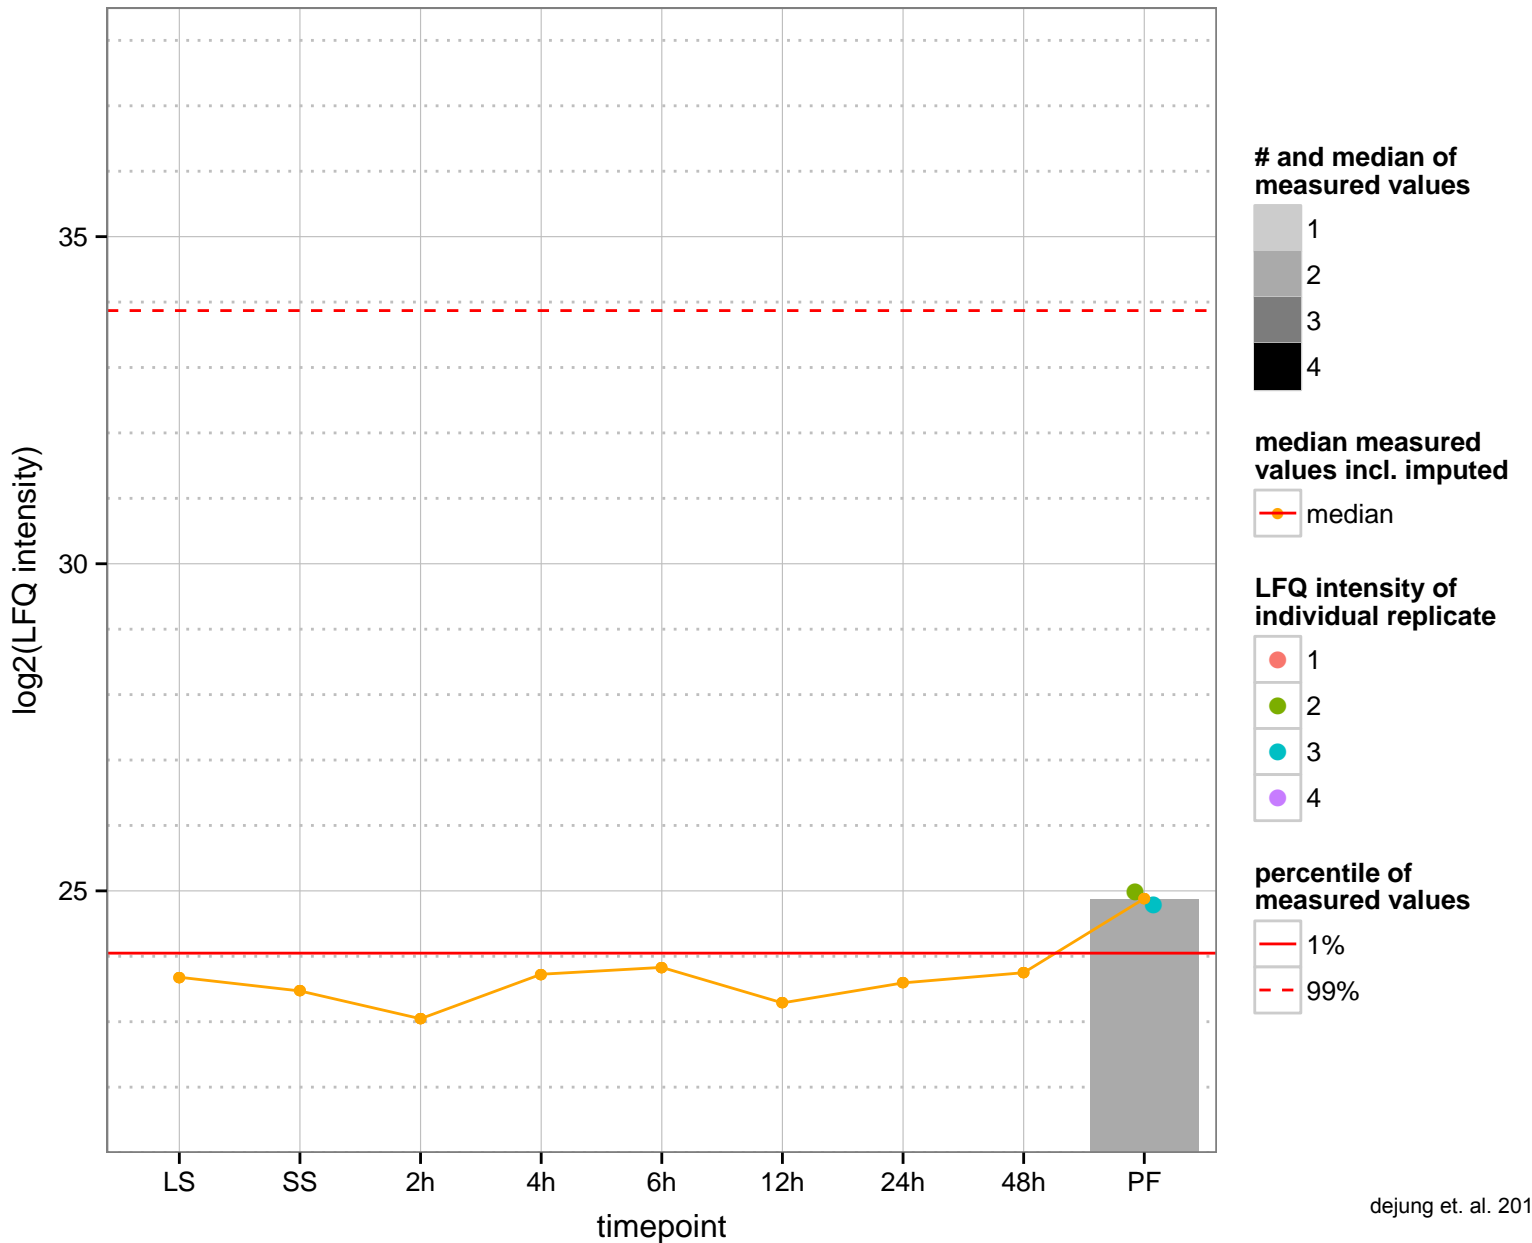

GTPase activating protein, putative  
 Tb927.10.7680  
 AGOF: Rab GTPase activator activity  
 AGOC: intracellular  
 AGOP: regulation of Rab GTPase activity  
 PGO: Rab GTPase activator activity  
 PGO: intracellular  
 PGO: regulation of Rab GTPase activity

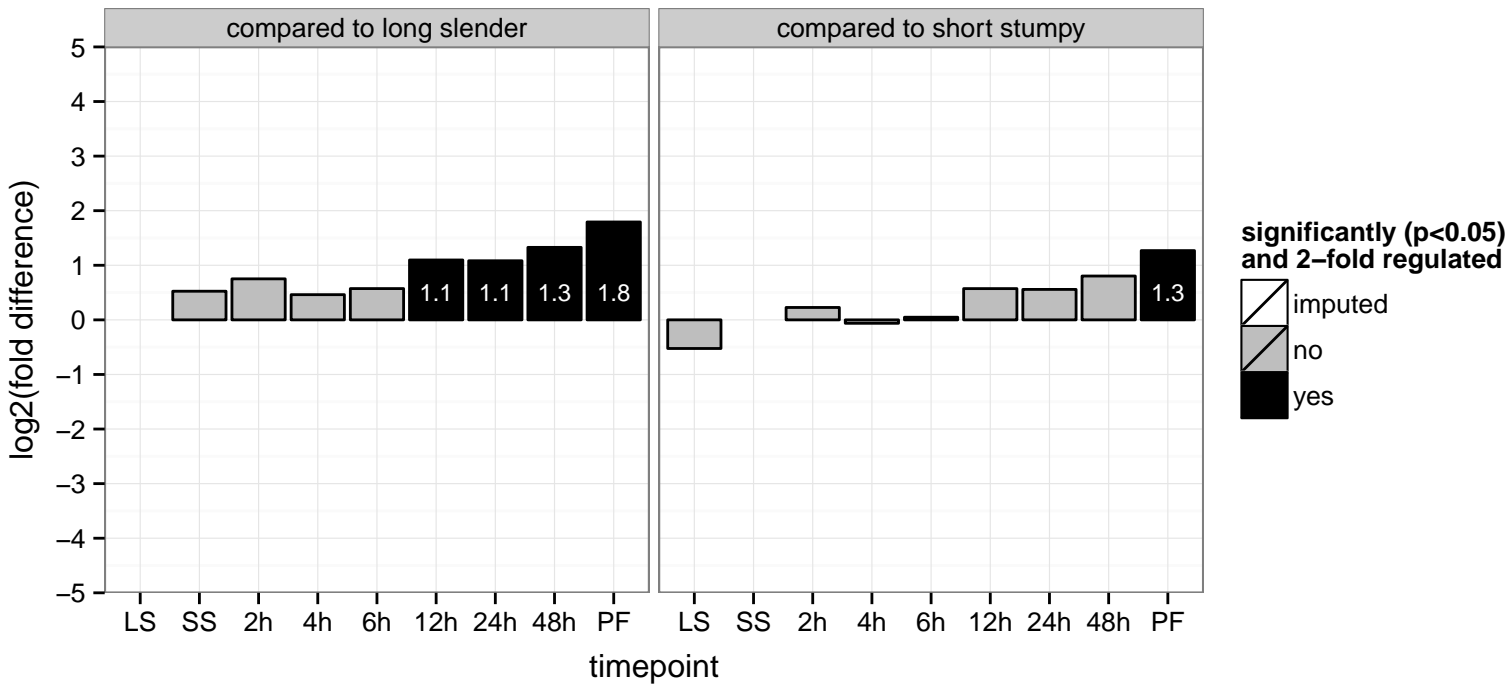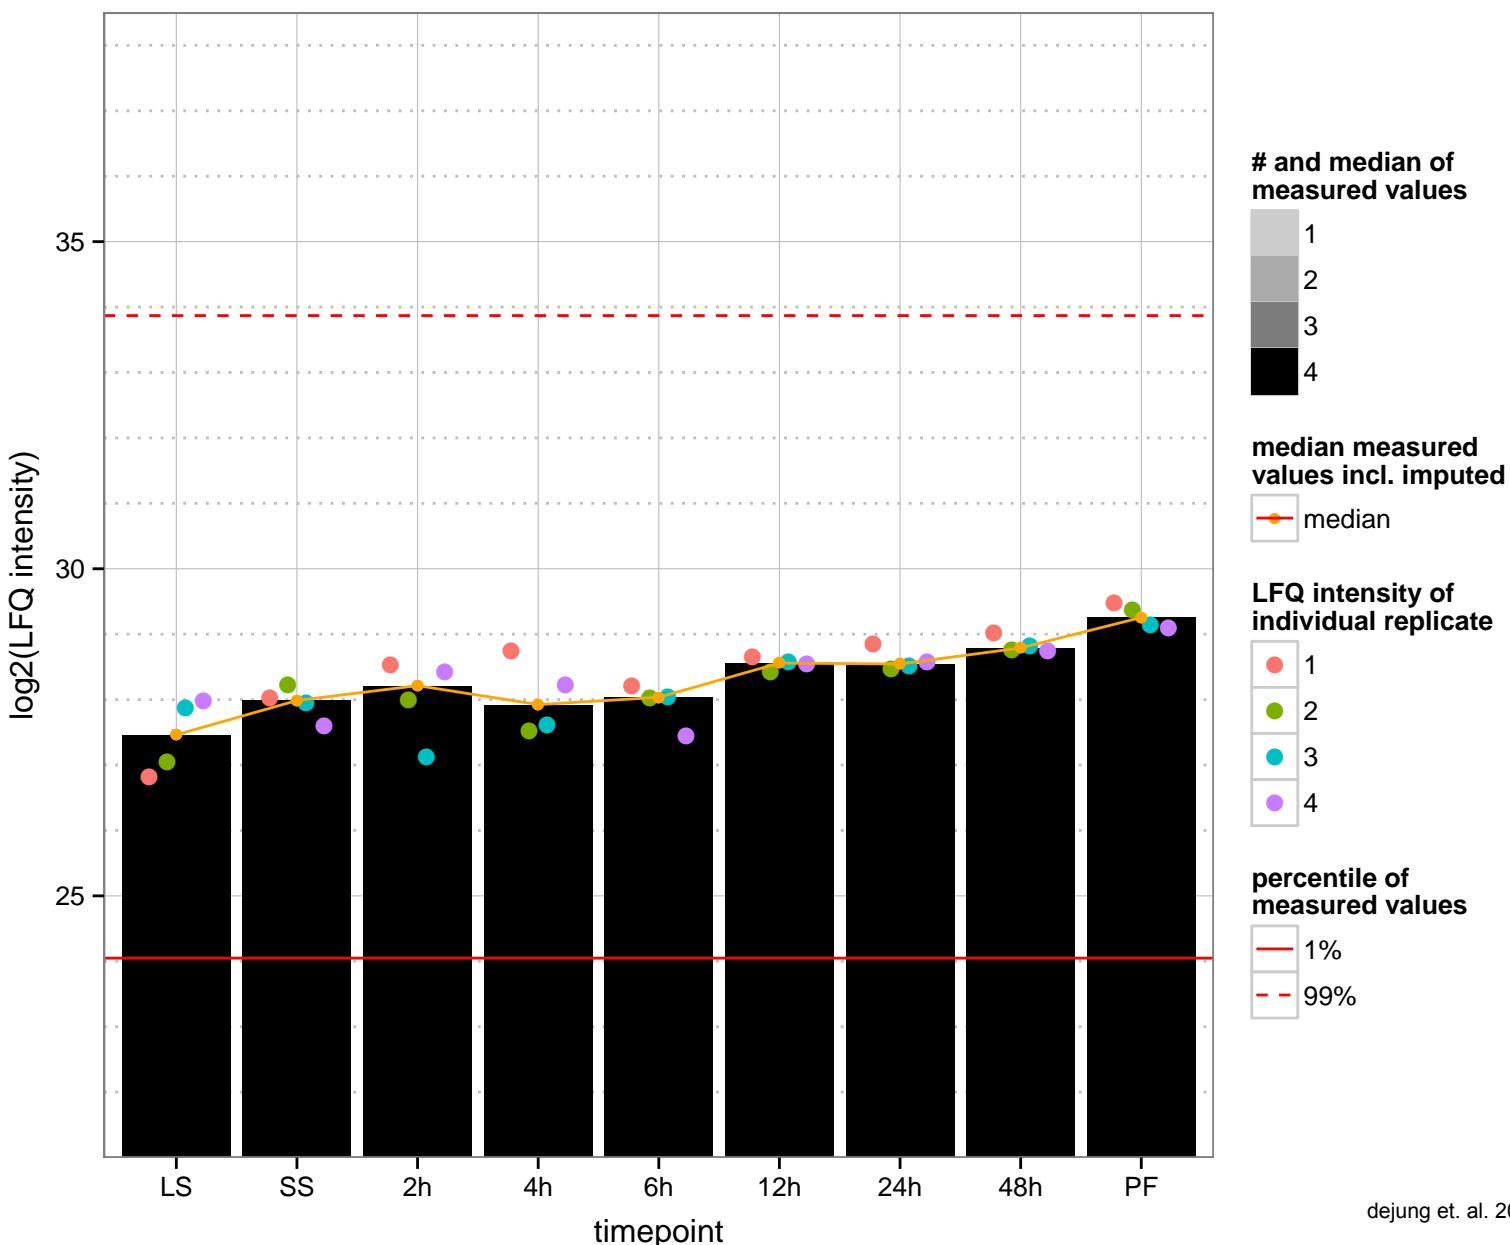

prolyl oligopeptidase, putative, serine peptidase clan SC, family S9A, putative (POP)

Tb927.10.8020

AGOF: APG8-specific protease activity, oligopeptidase activity, serine-type endopeptidase activity

AGOC: cytoplasm, nucleus

AGOP: proteolysis

PGOF: serine-type endopeptidase activity, serine-type peptidase activity

PGOC: null

PGOP: proteolysis

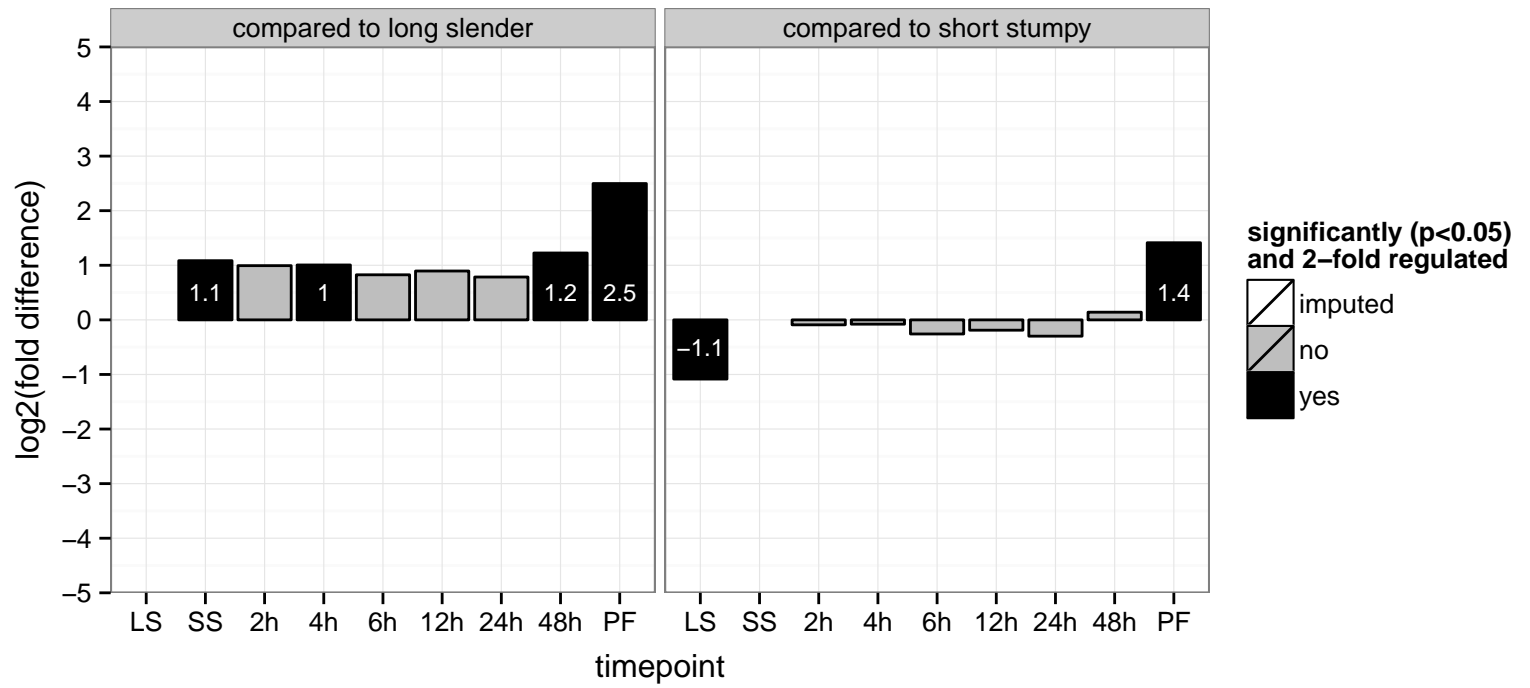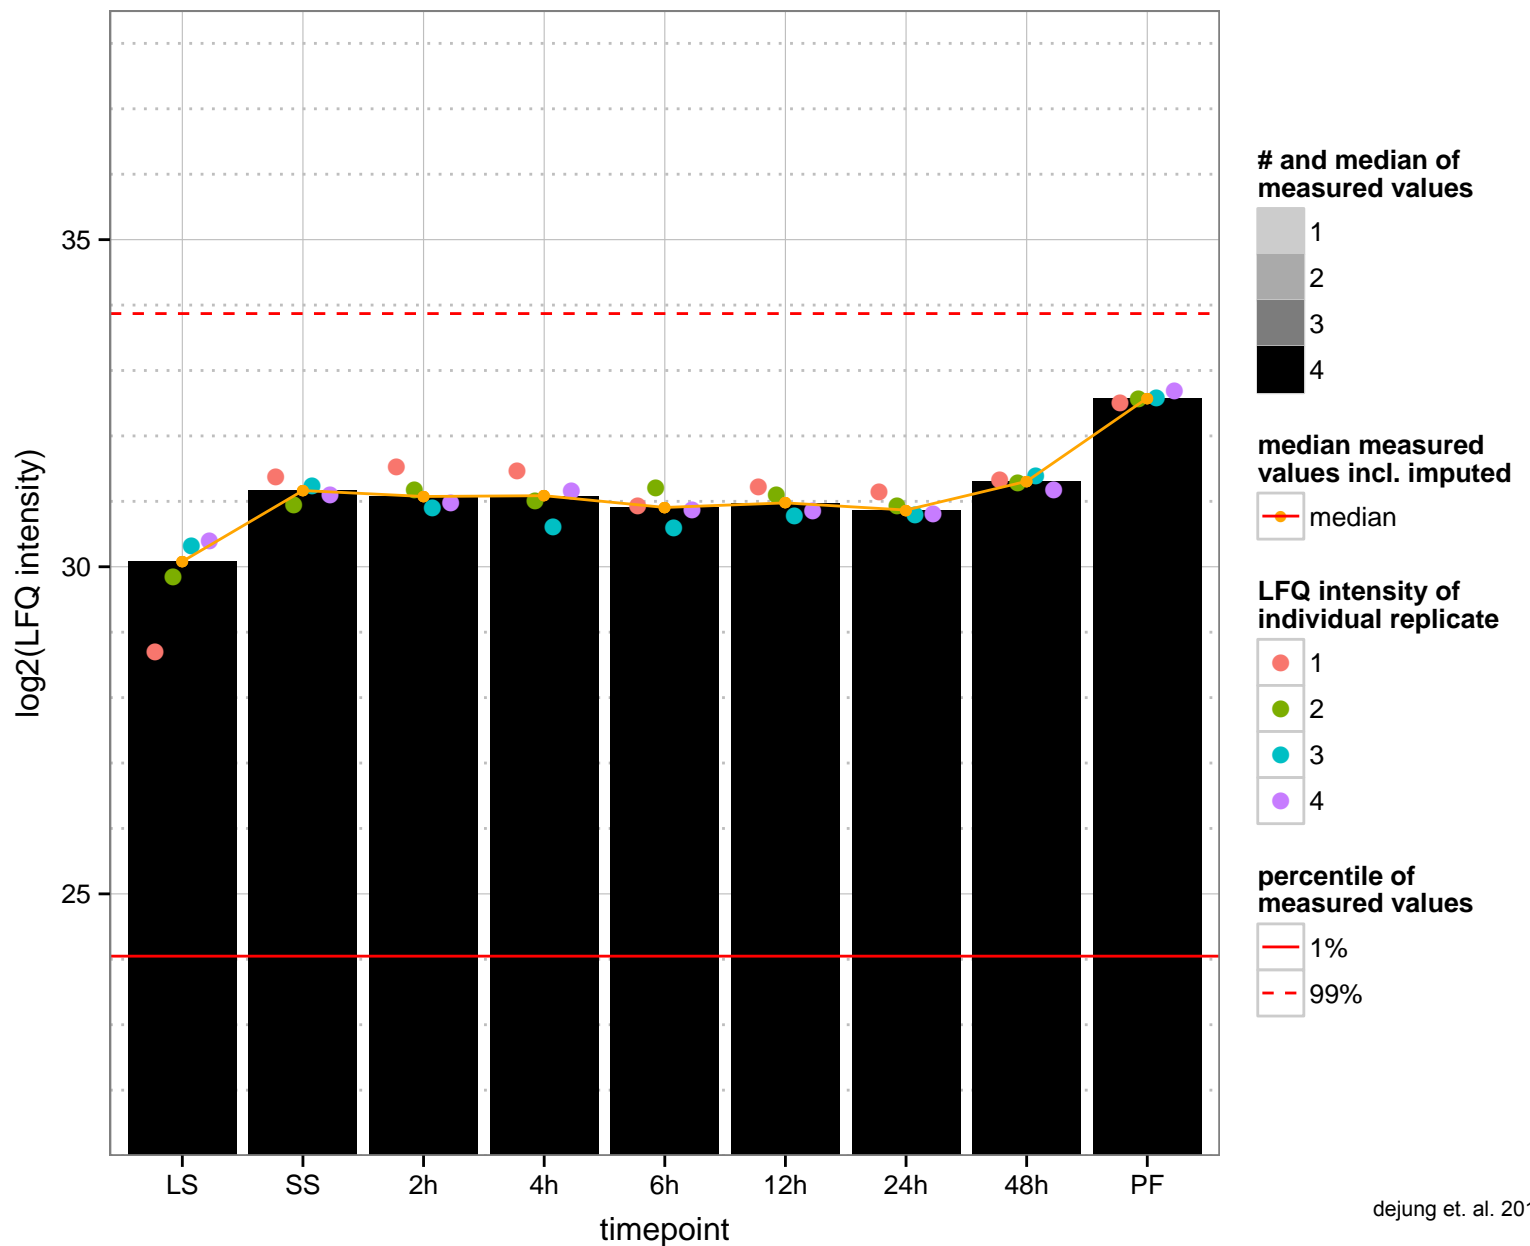

hypothetical protein, conserved  
 Tb927.10.8200  
 AGOF: RNA binding  
 AGOC: null  
 AGOP: RNA processing  
 PGOF: RNA binding, structural constituent of ribosome  
 PGO: large ribosomal subunit  
 PGOP: translation

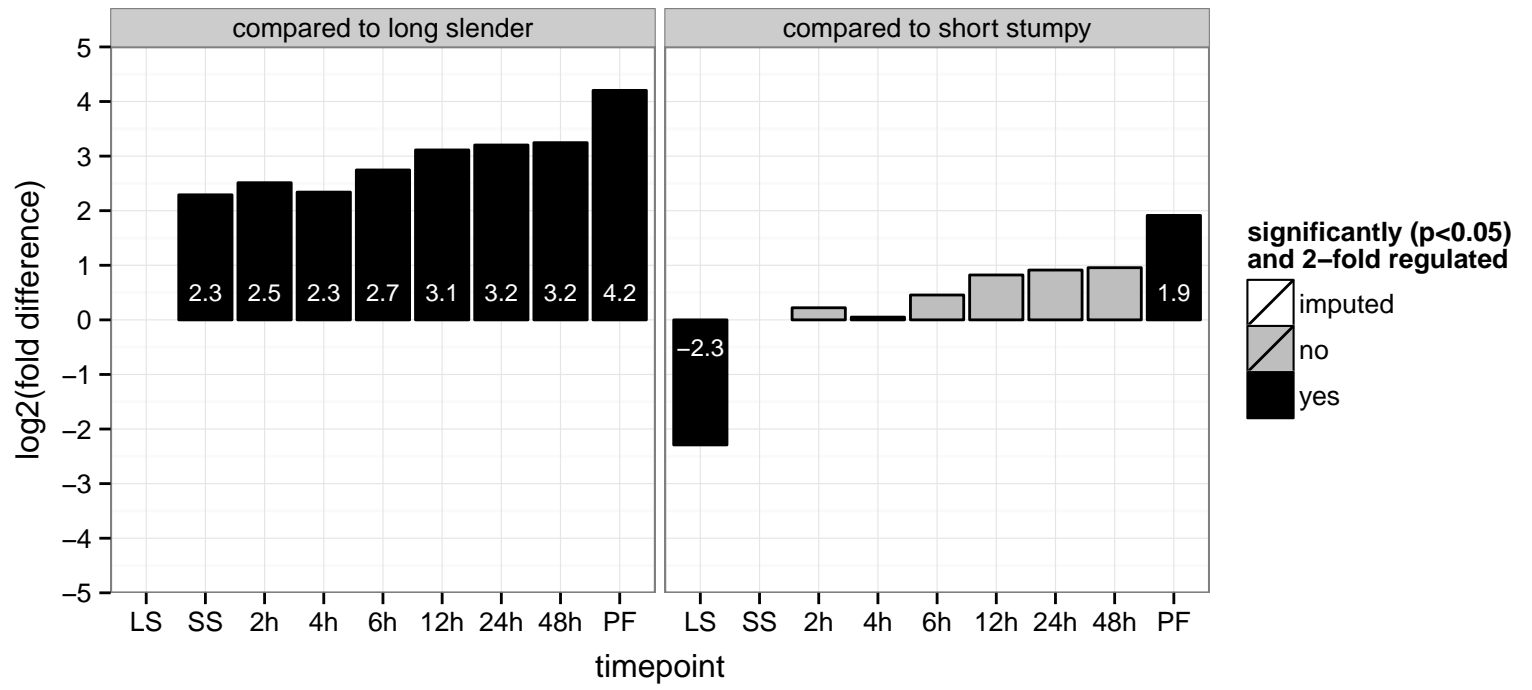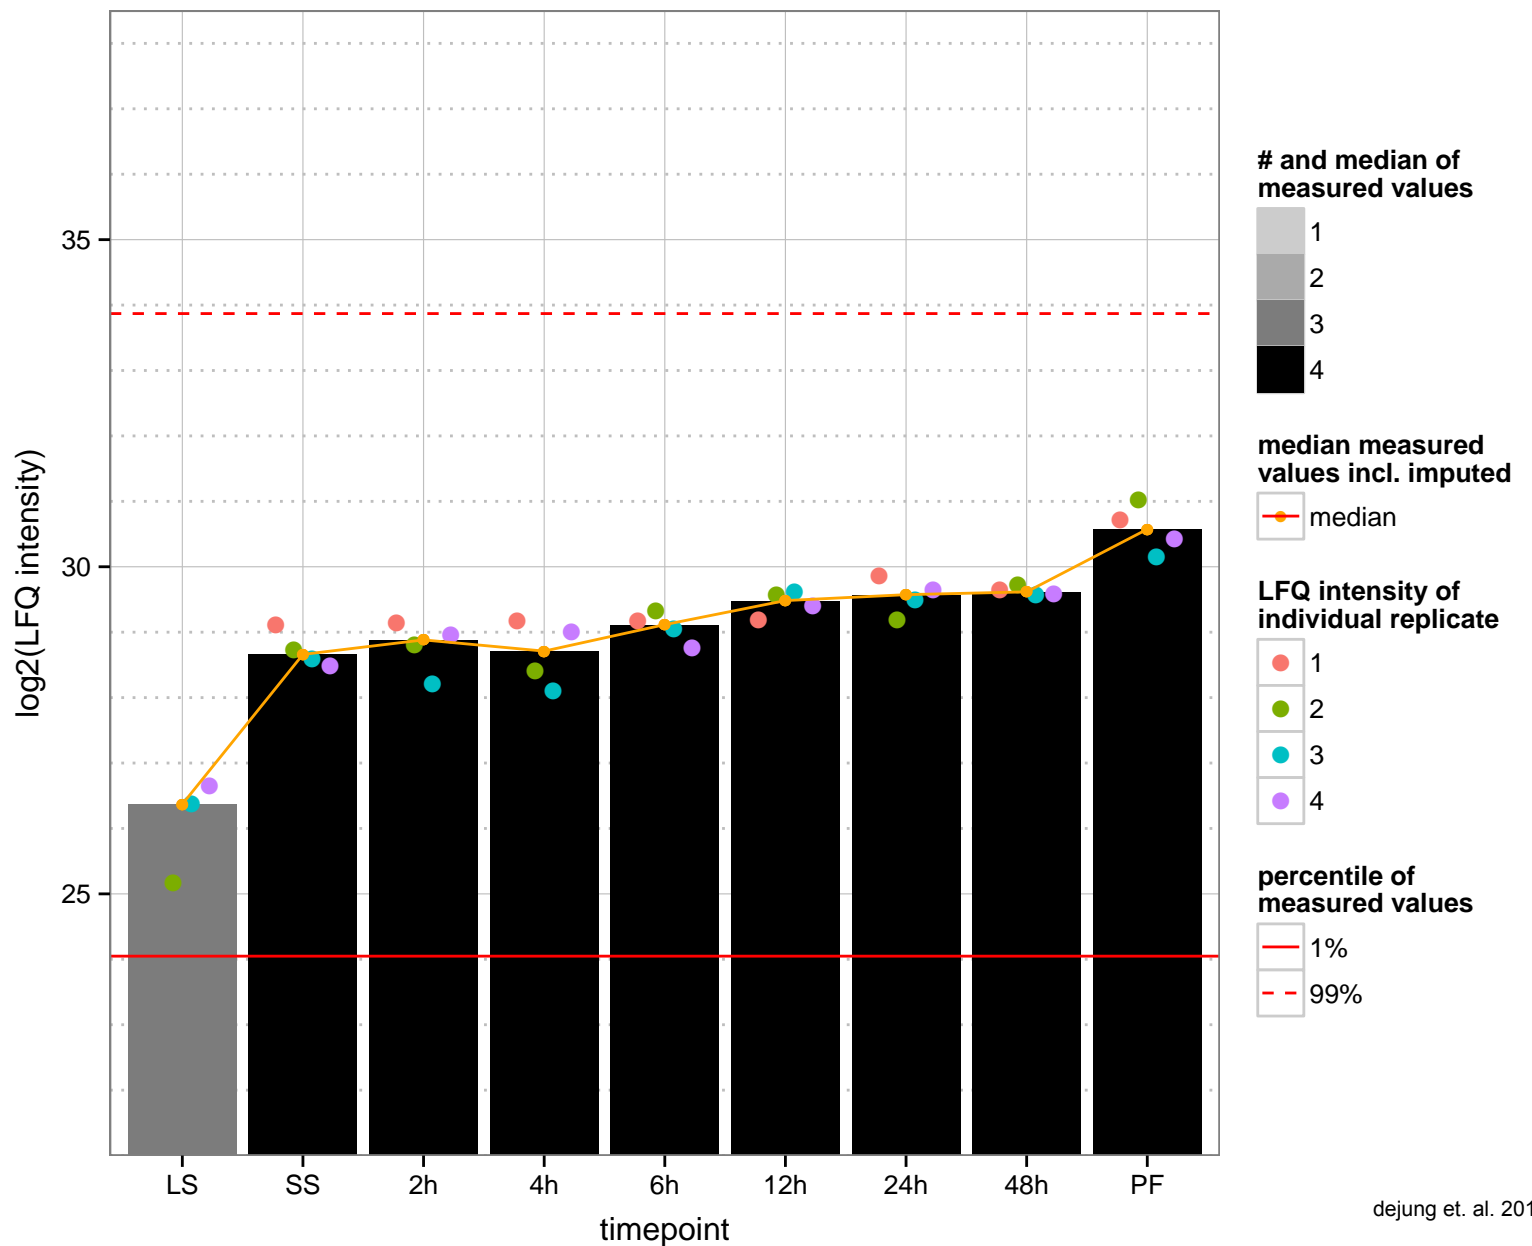



S. cerevisiae PSP1 homologue, putative  
 Tb927.10.8330  
 AGOF: null  
 AGOC: null  
 AGOP: null  
 PGO: null  
 PGOC: null  
 PGOP: null

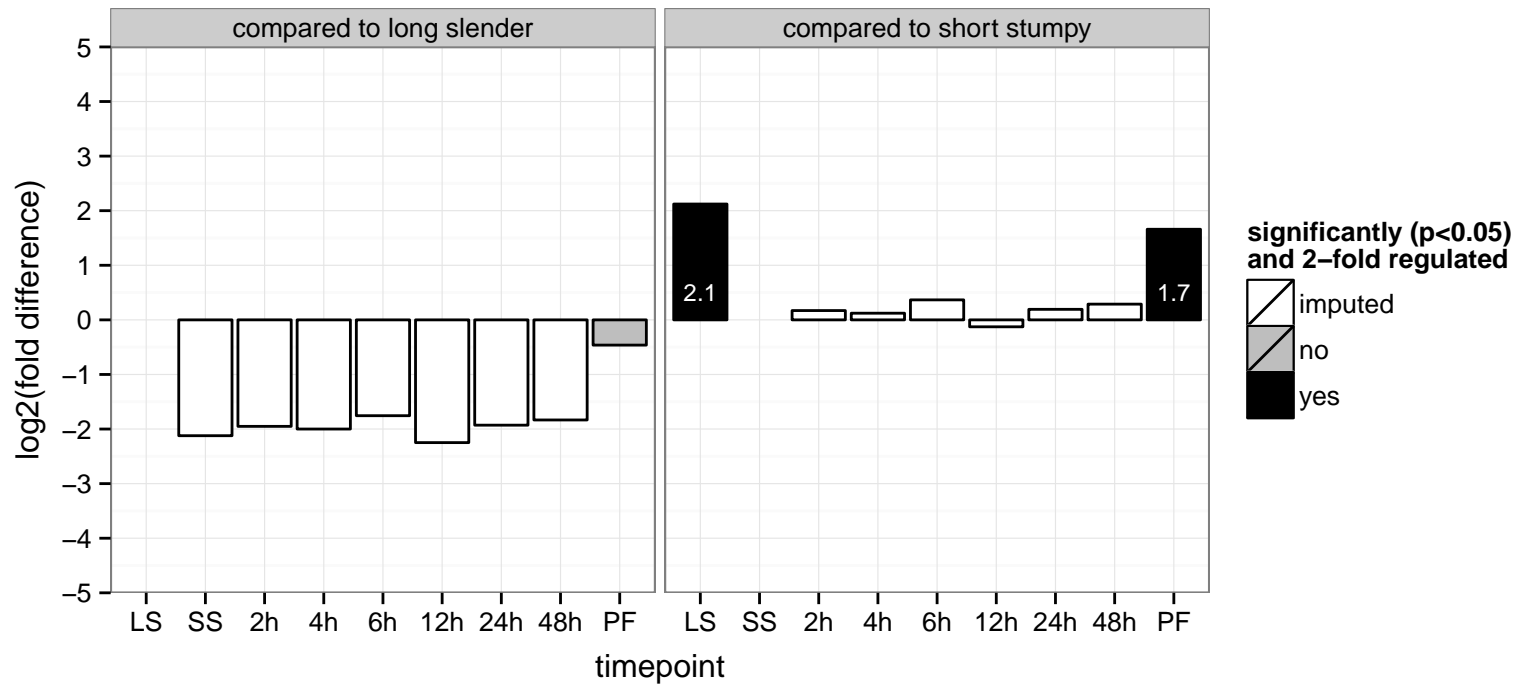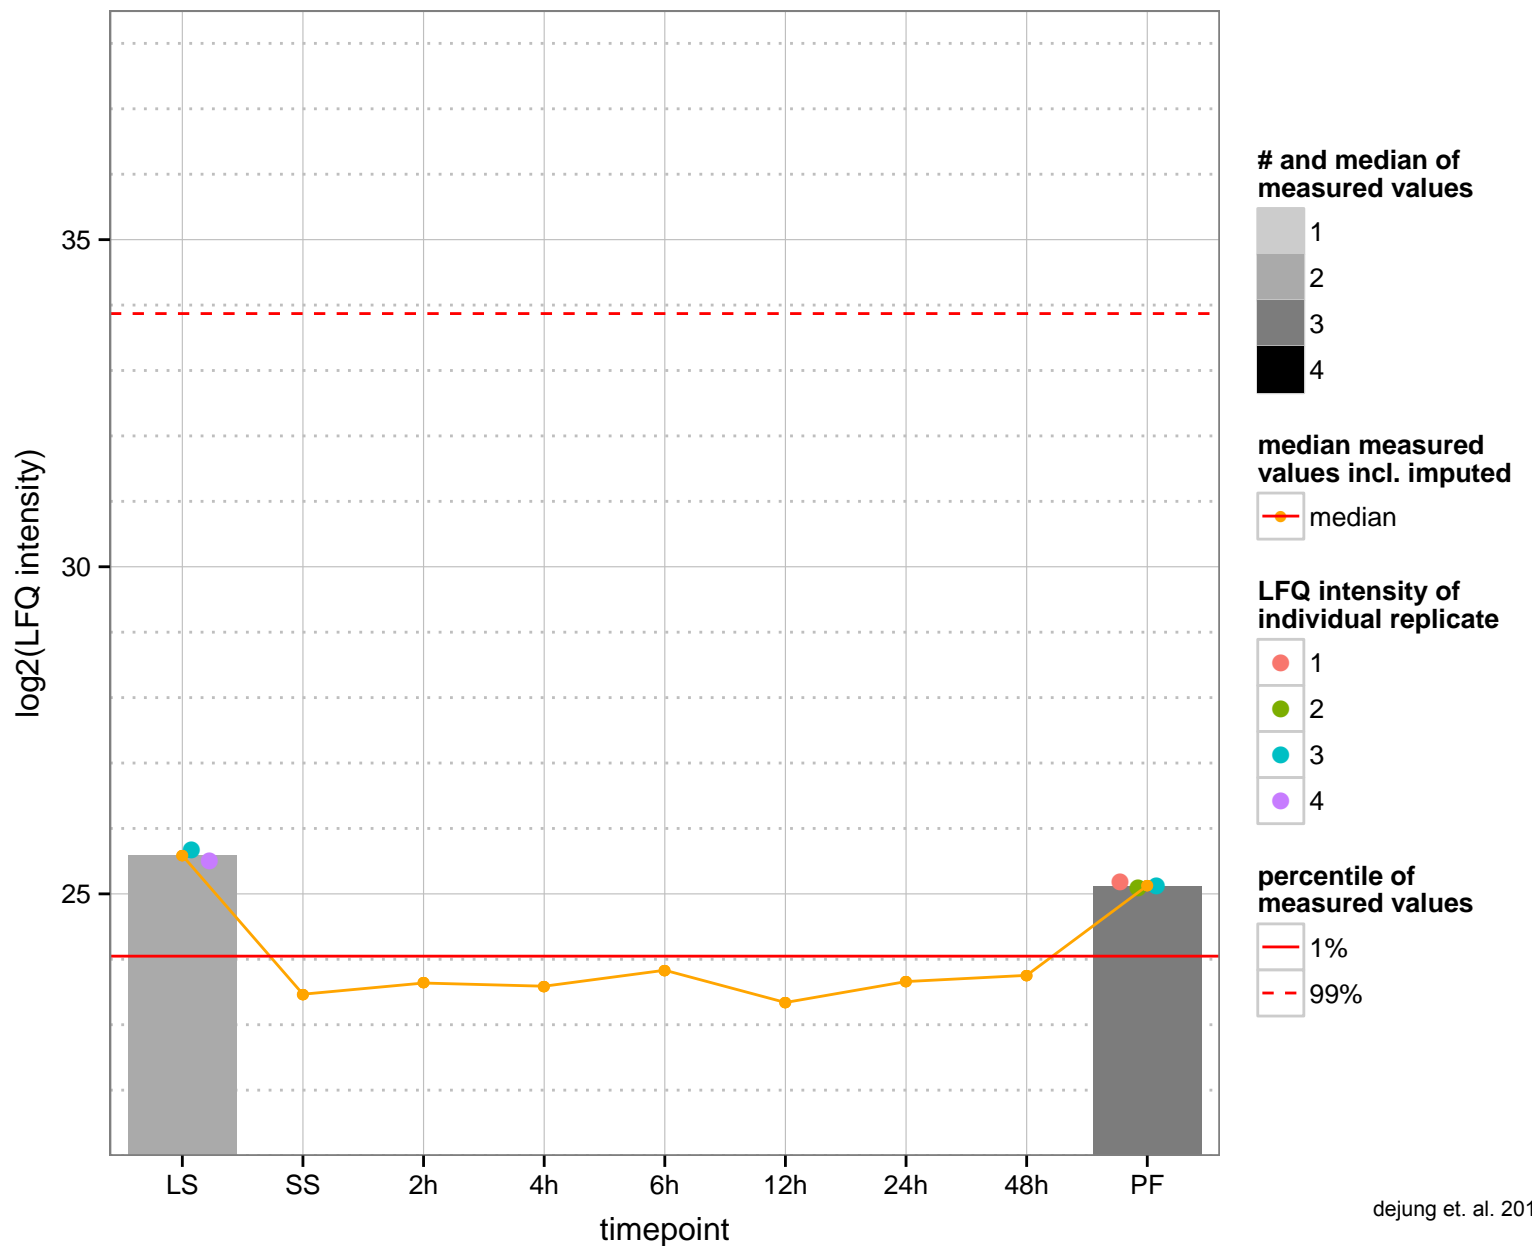

ADP-ribosylation factor 3, putative, ADP-ribosylation factor-like protein, putative (ARL3)  
 Tb927.10.8580  
 AGOF: GTP binding  
 AGOC: intracellular  
 AGOP: intracellular protein transport, small GTPase mediated signal transduction  
 PGO: GTP binding  
 PGOC: intracellular  
 PGOP: intracellular protein transport, protein transport, small GTPase mediated signal transduction

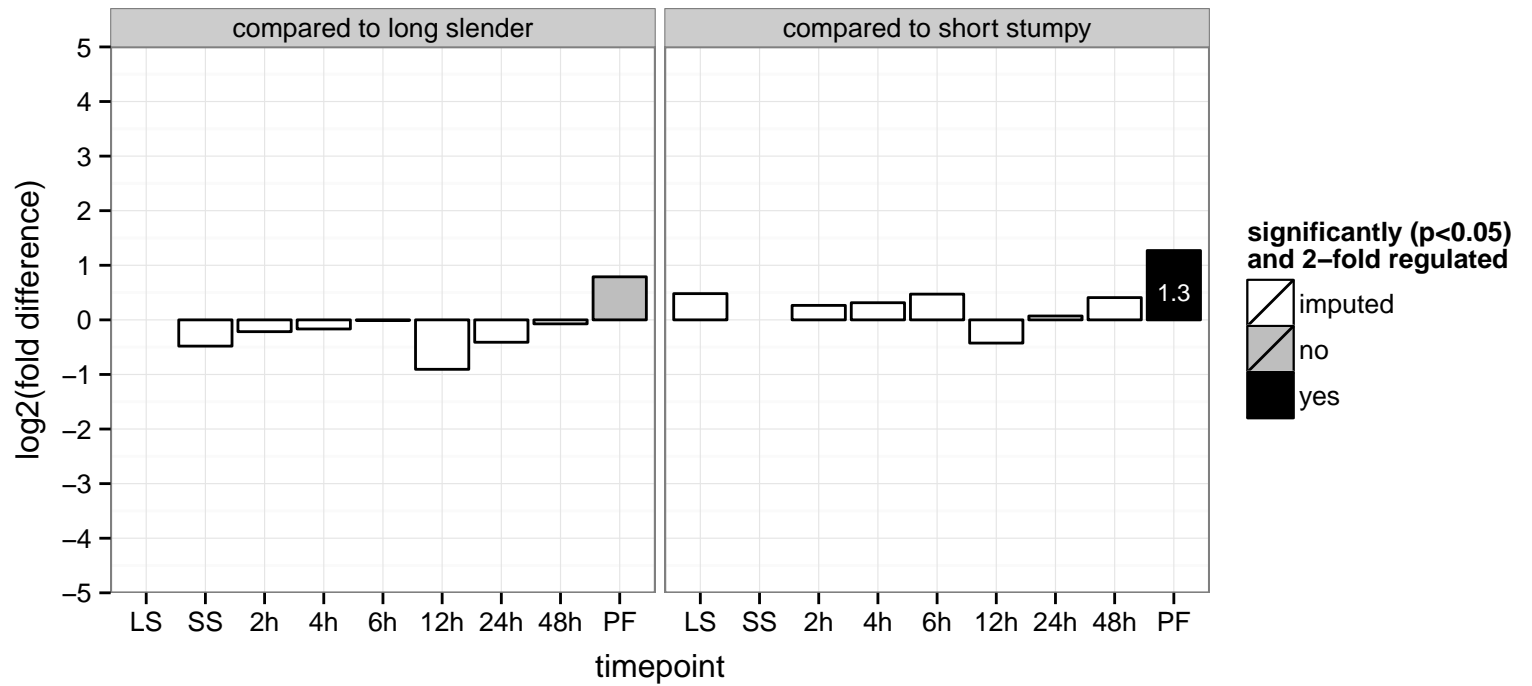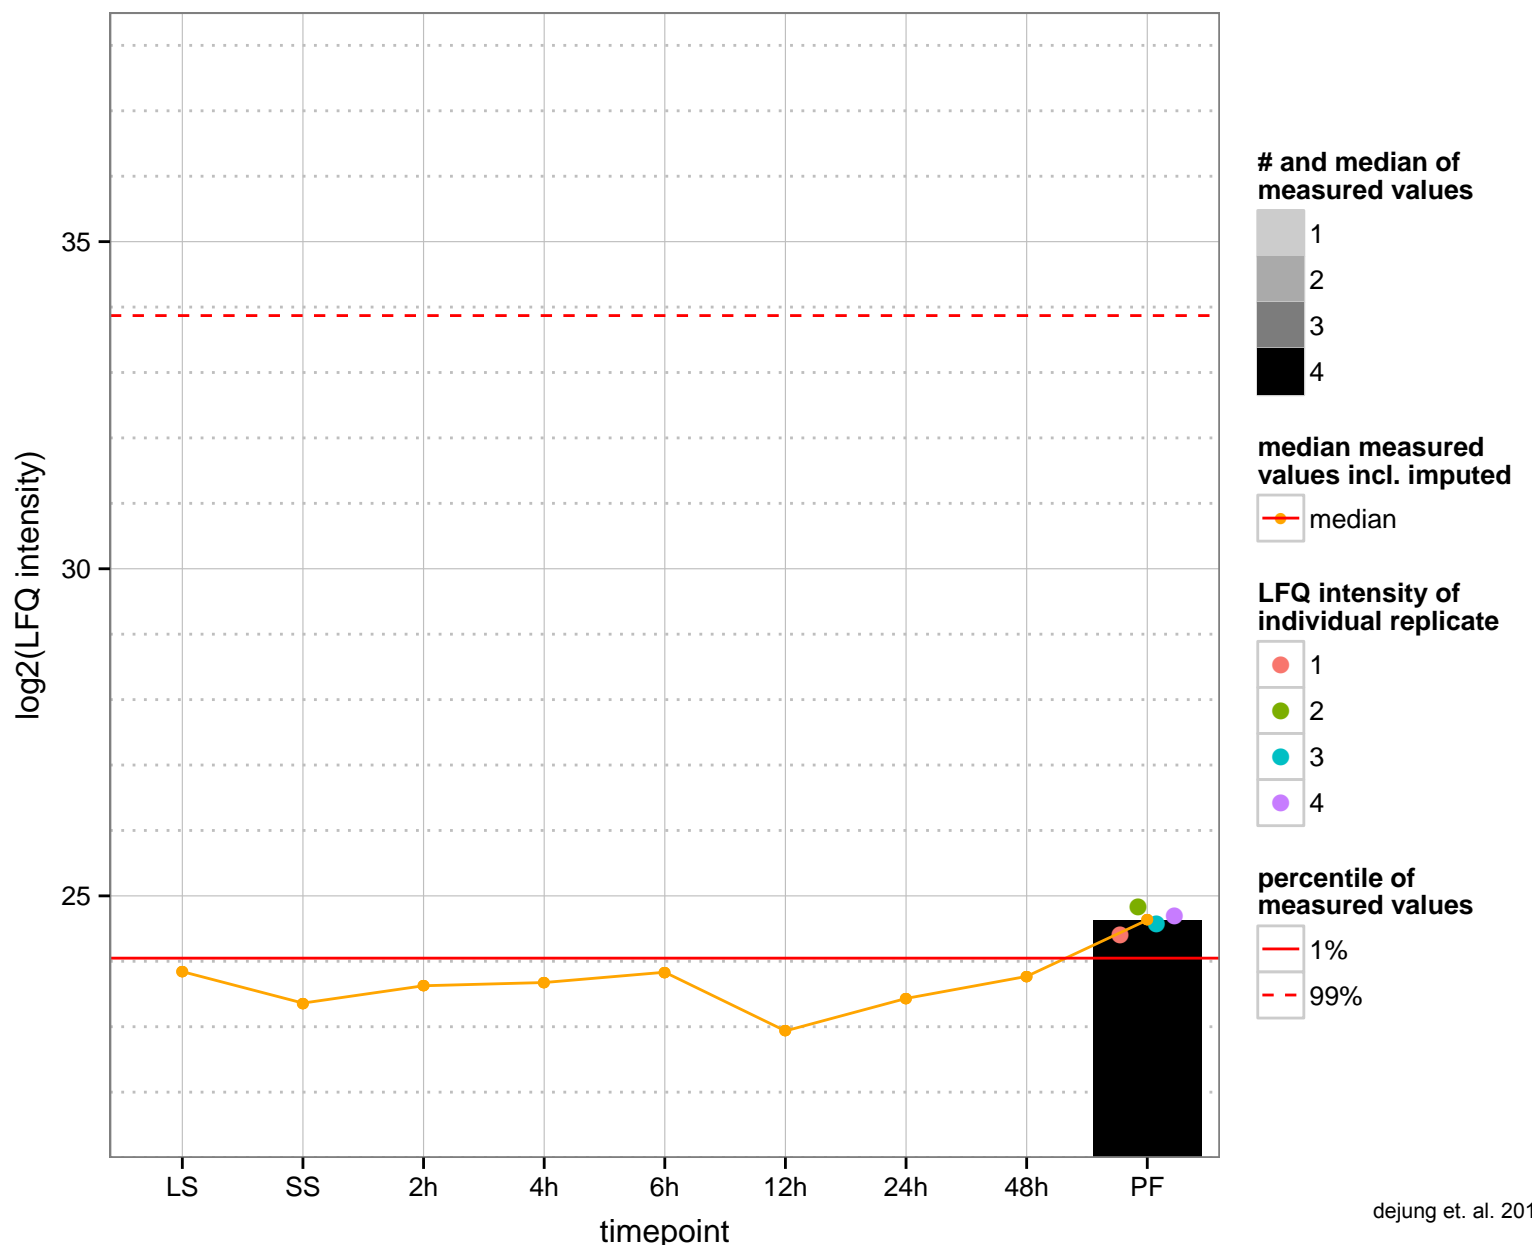

nucleoporin, putative (Nup181)  
 Tb927.10.8910  
 AGOF: null  
 AGOC: nuclear pore  
 AGOP: intracellular transport  
 PGO: null  
 PGO: null  
 PGO: null

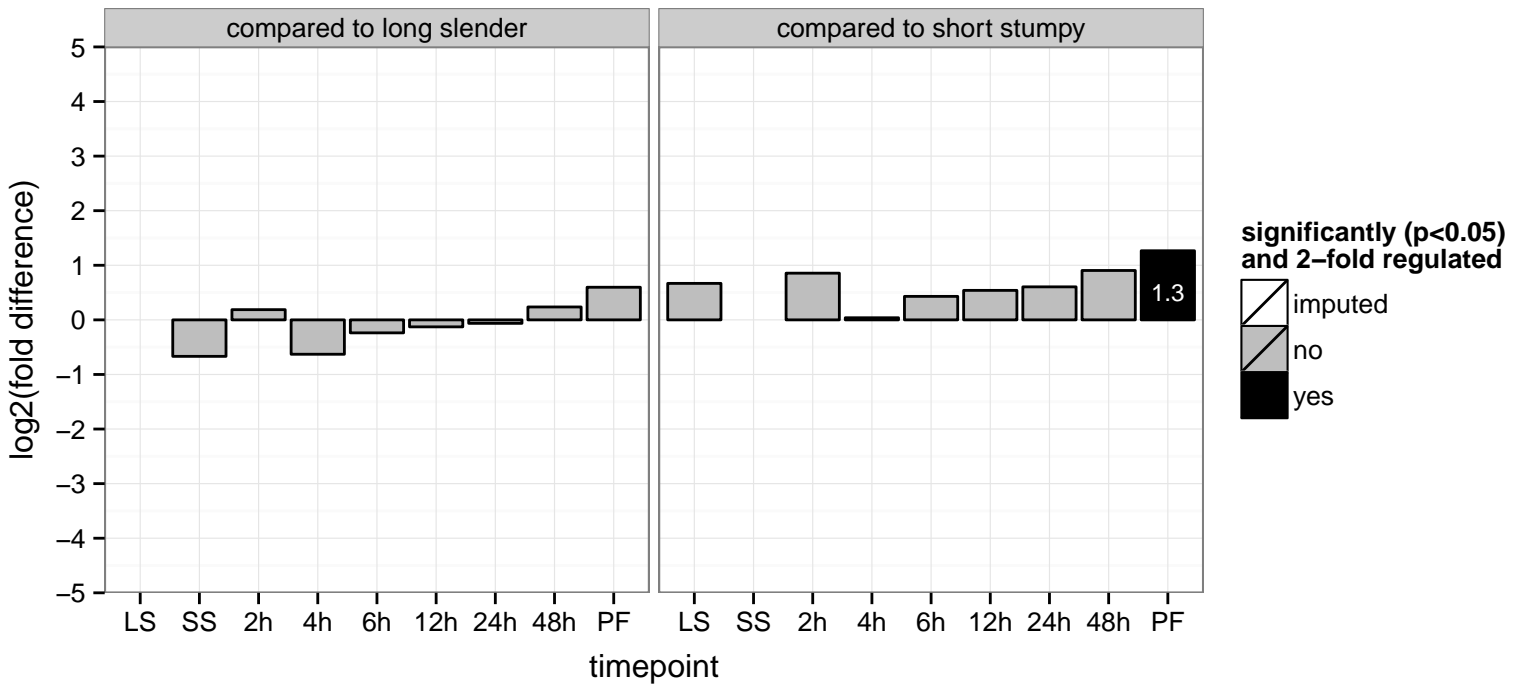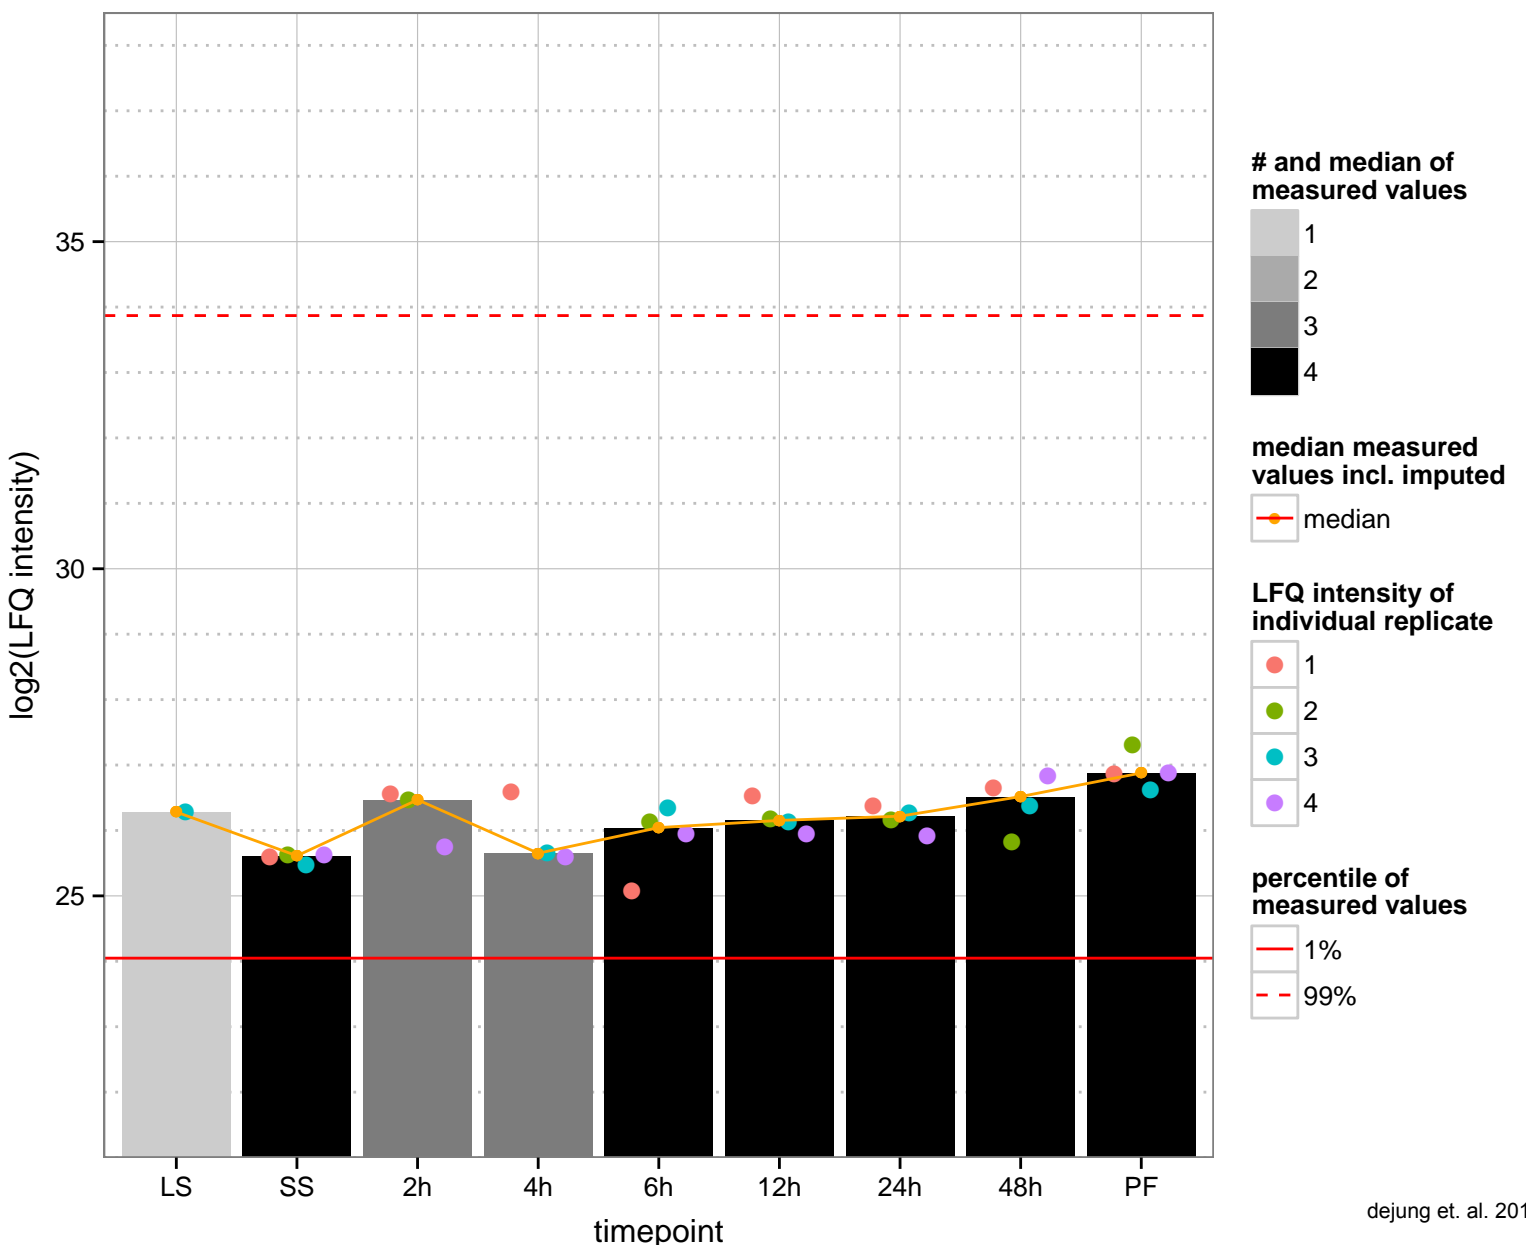

hypothetical protein, conserved  
 Tb927.10.9070  
 AGOF: null  
 AGOC: null  
 AGOP: null  
 PGOF: null  
 PGOC: null  
 PGOP: null

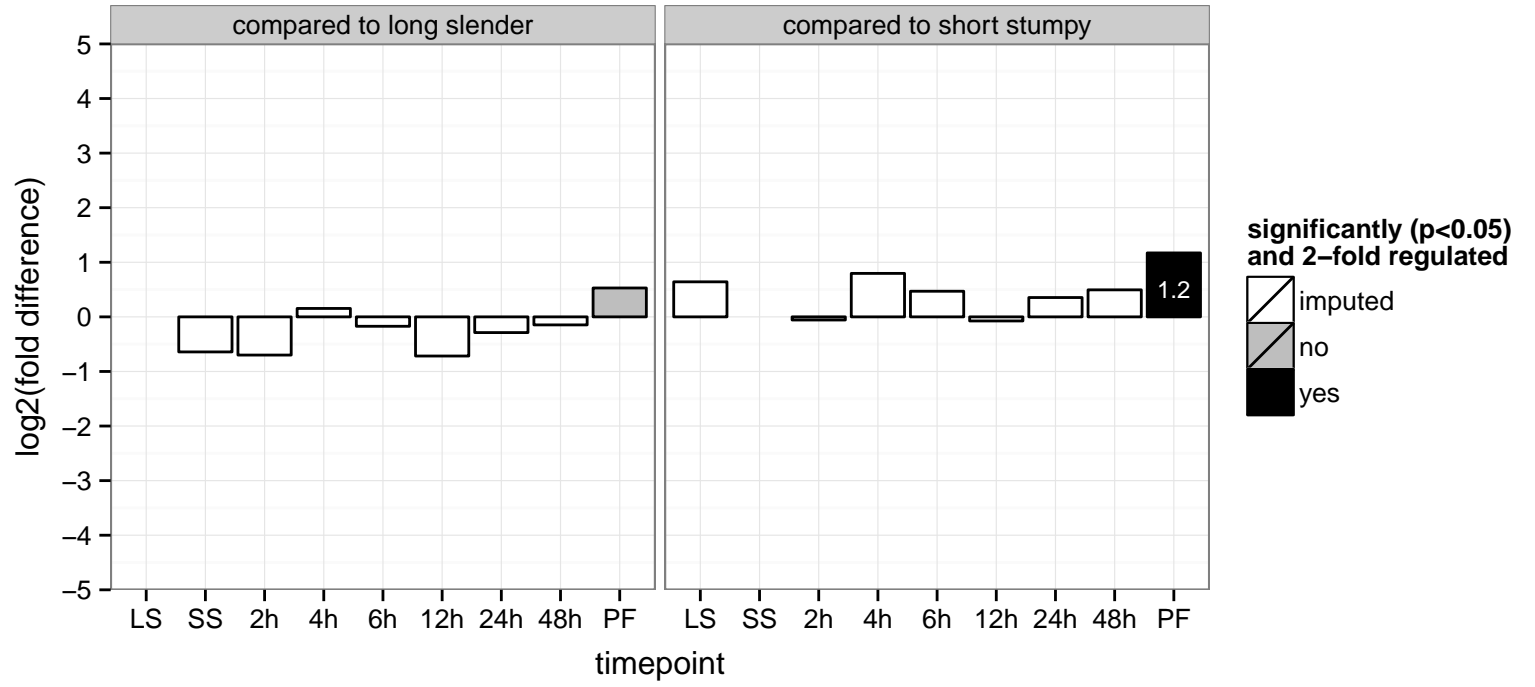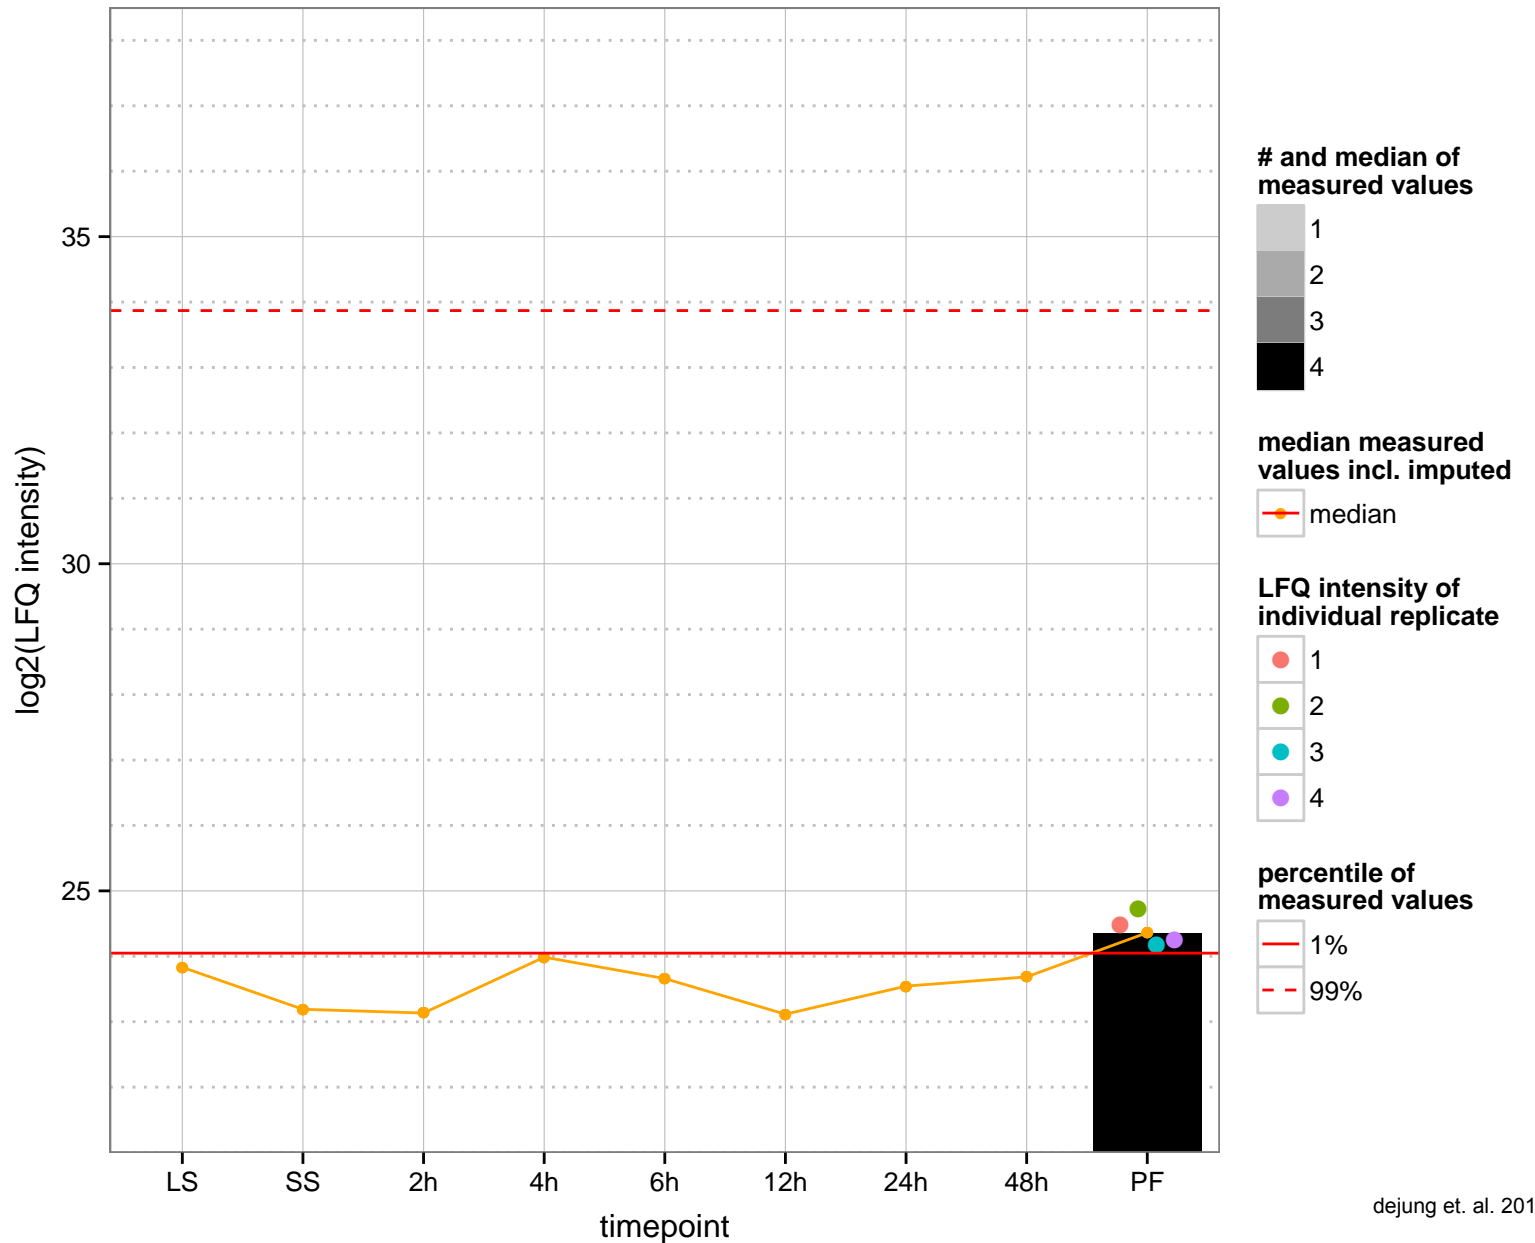

hypothetical protein, conserved  
 Tb927.10.9120  
 AGOF: null  
 AGOC: mitochondrion  
 AGOP: null  
 PGO: null  
 PGO: null  
 PGO: null

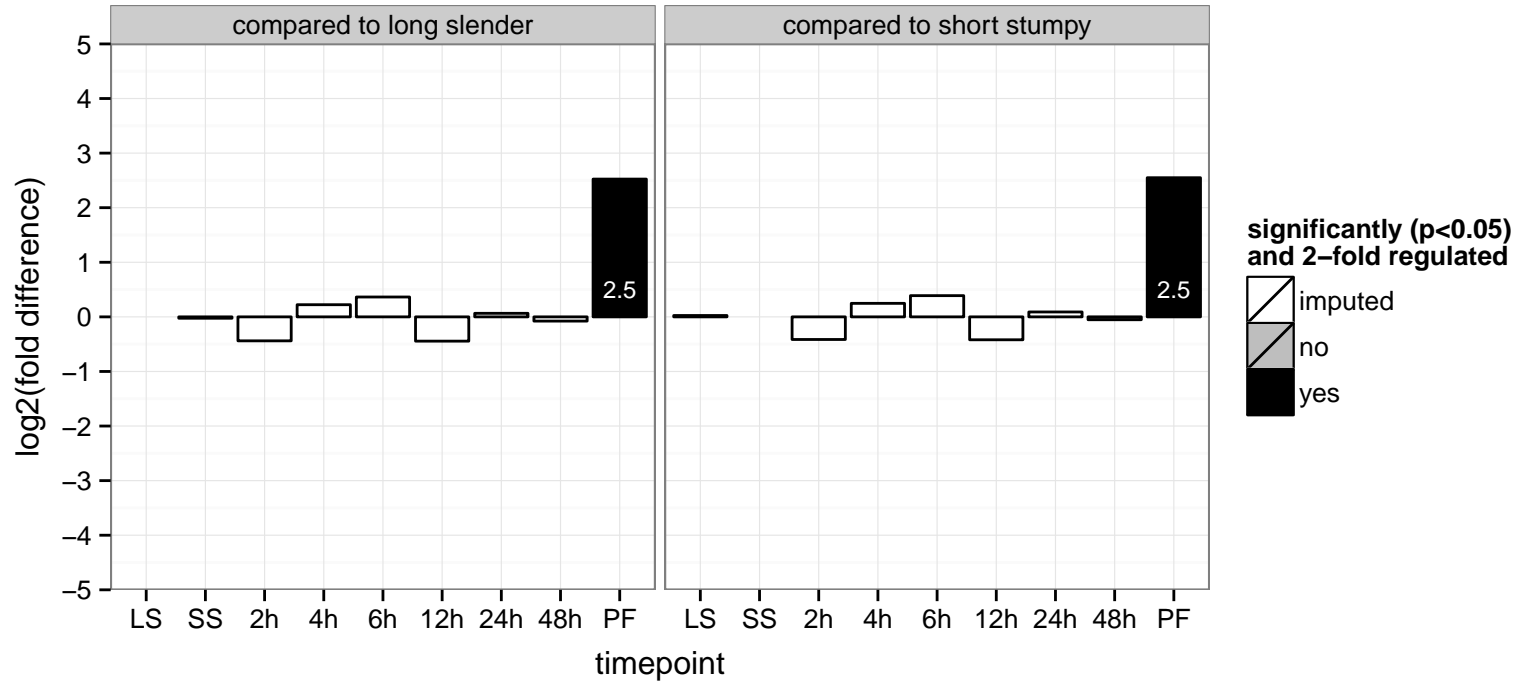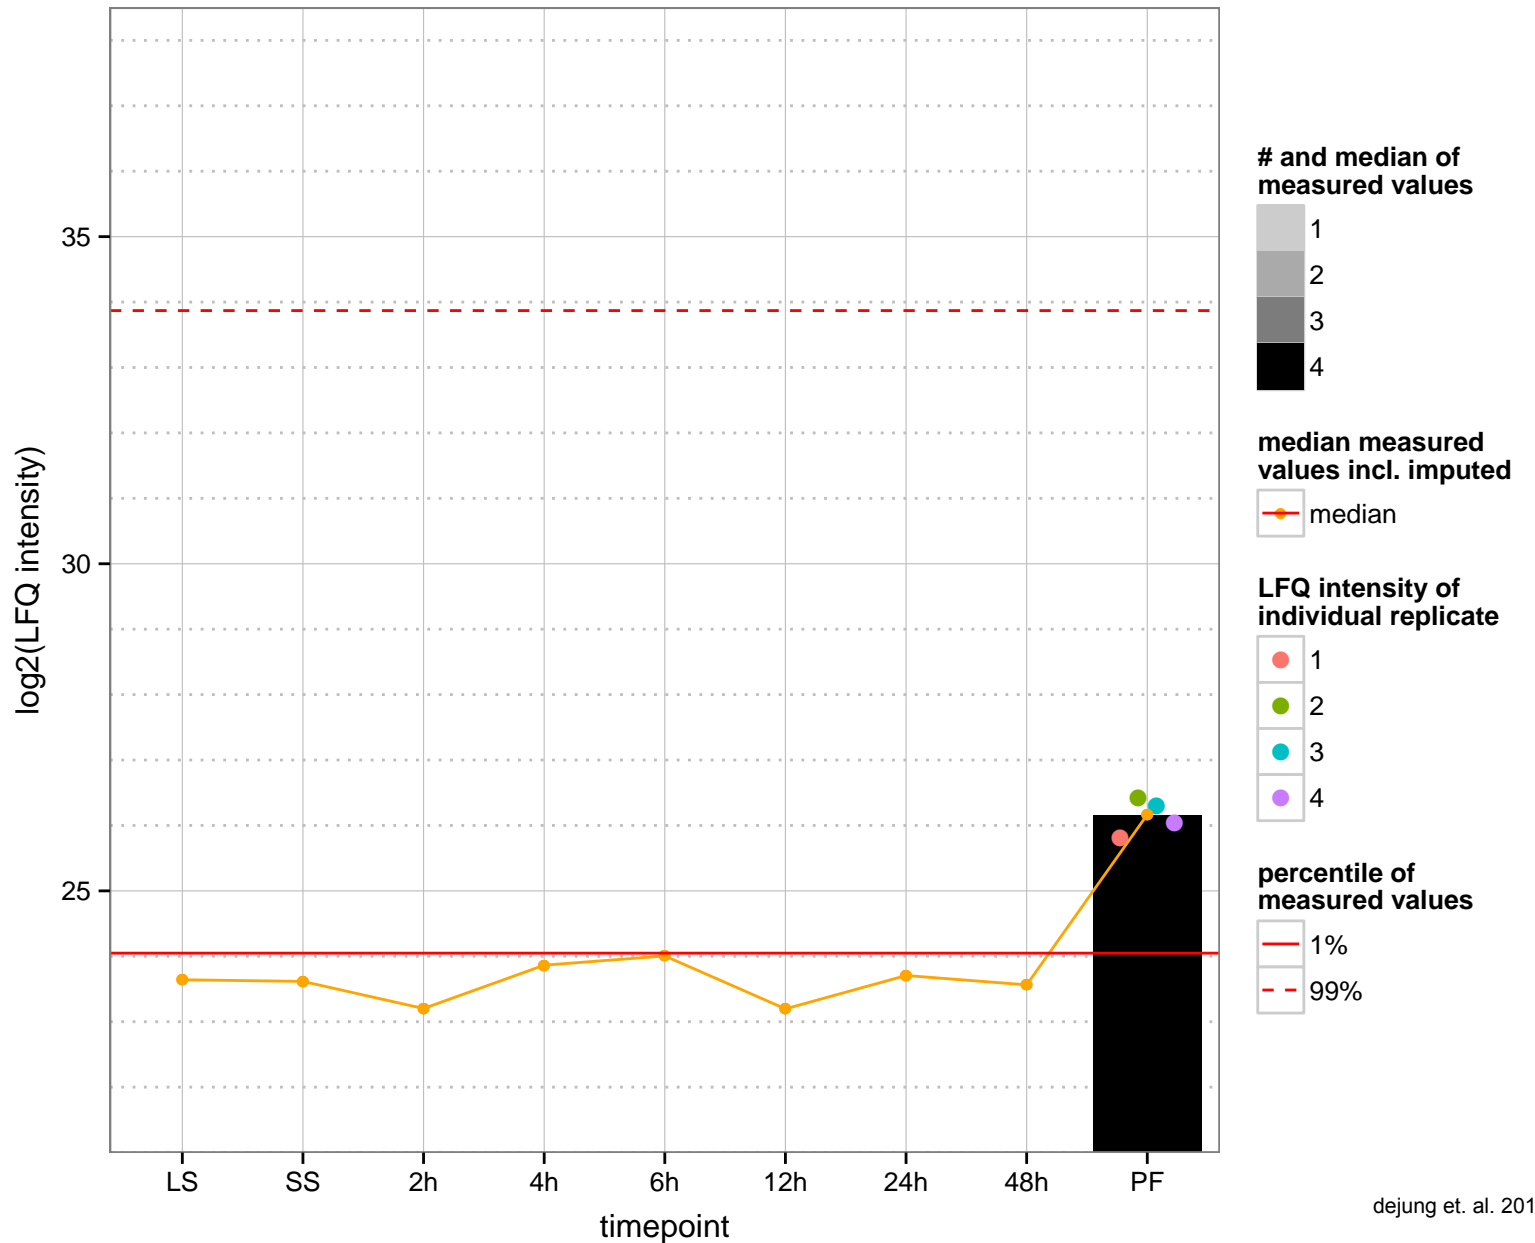

hypothetical protein, conserved  
 Tb927.10.9150  
 AGOF: null  
 AGOC: null  
 AGOP: null  
 PGOF: null  
 PGO C: null  
 PGOP: null

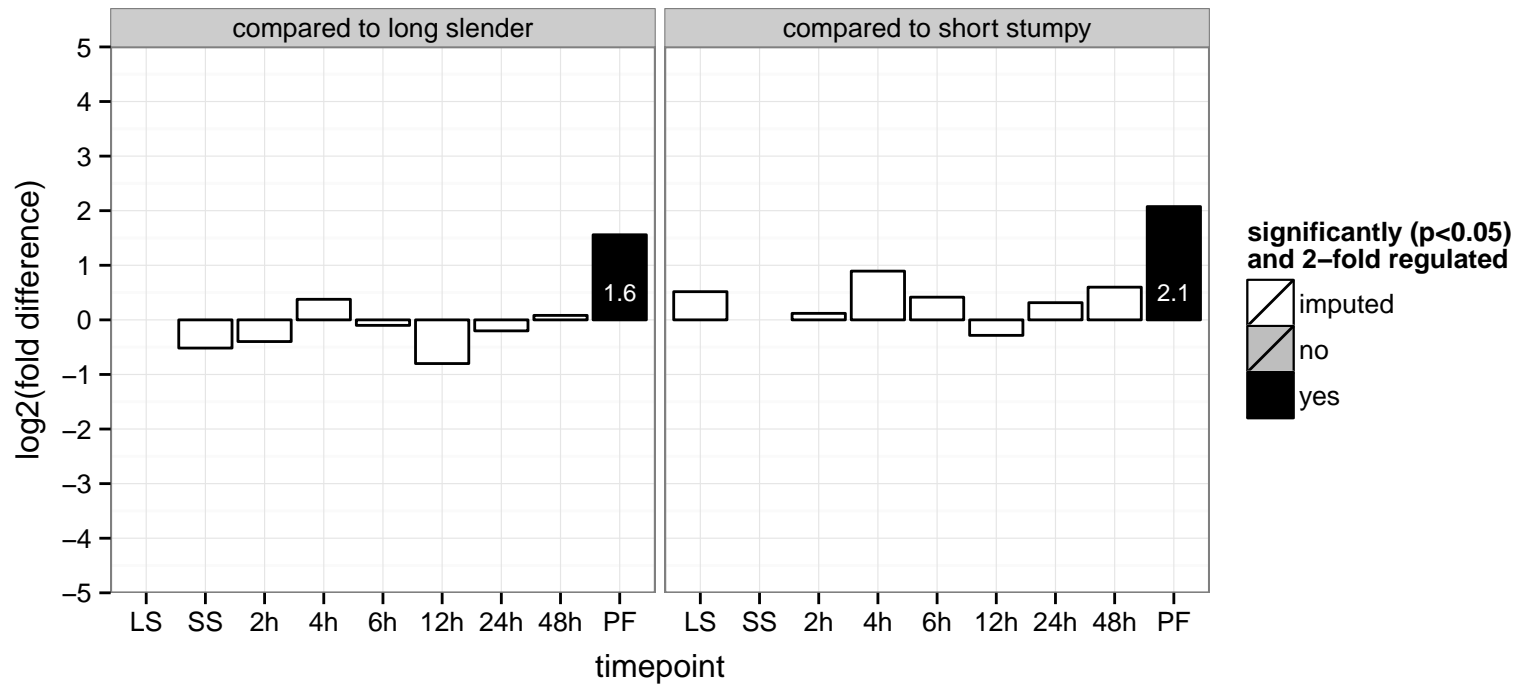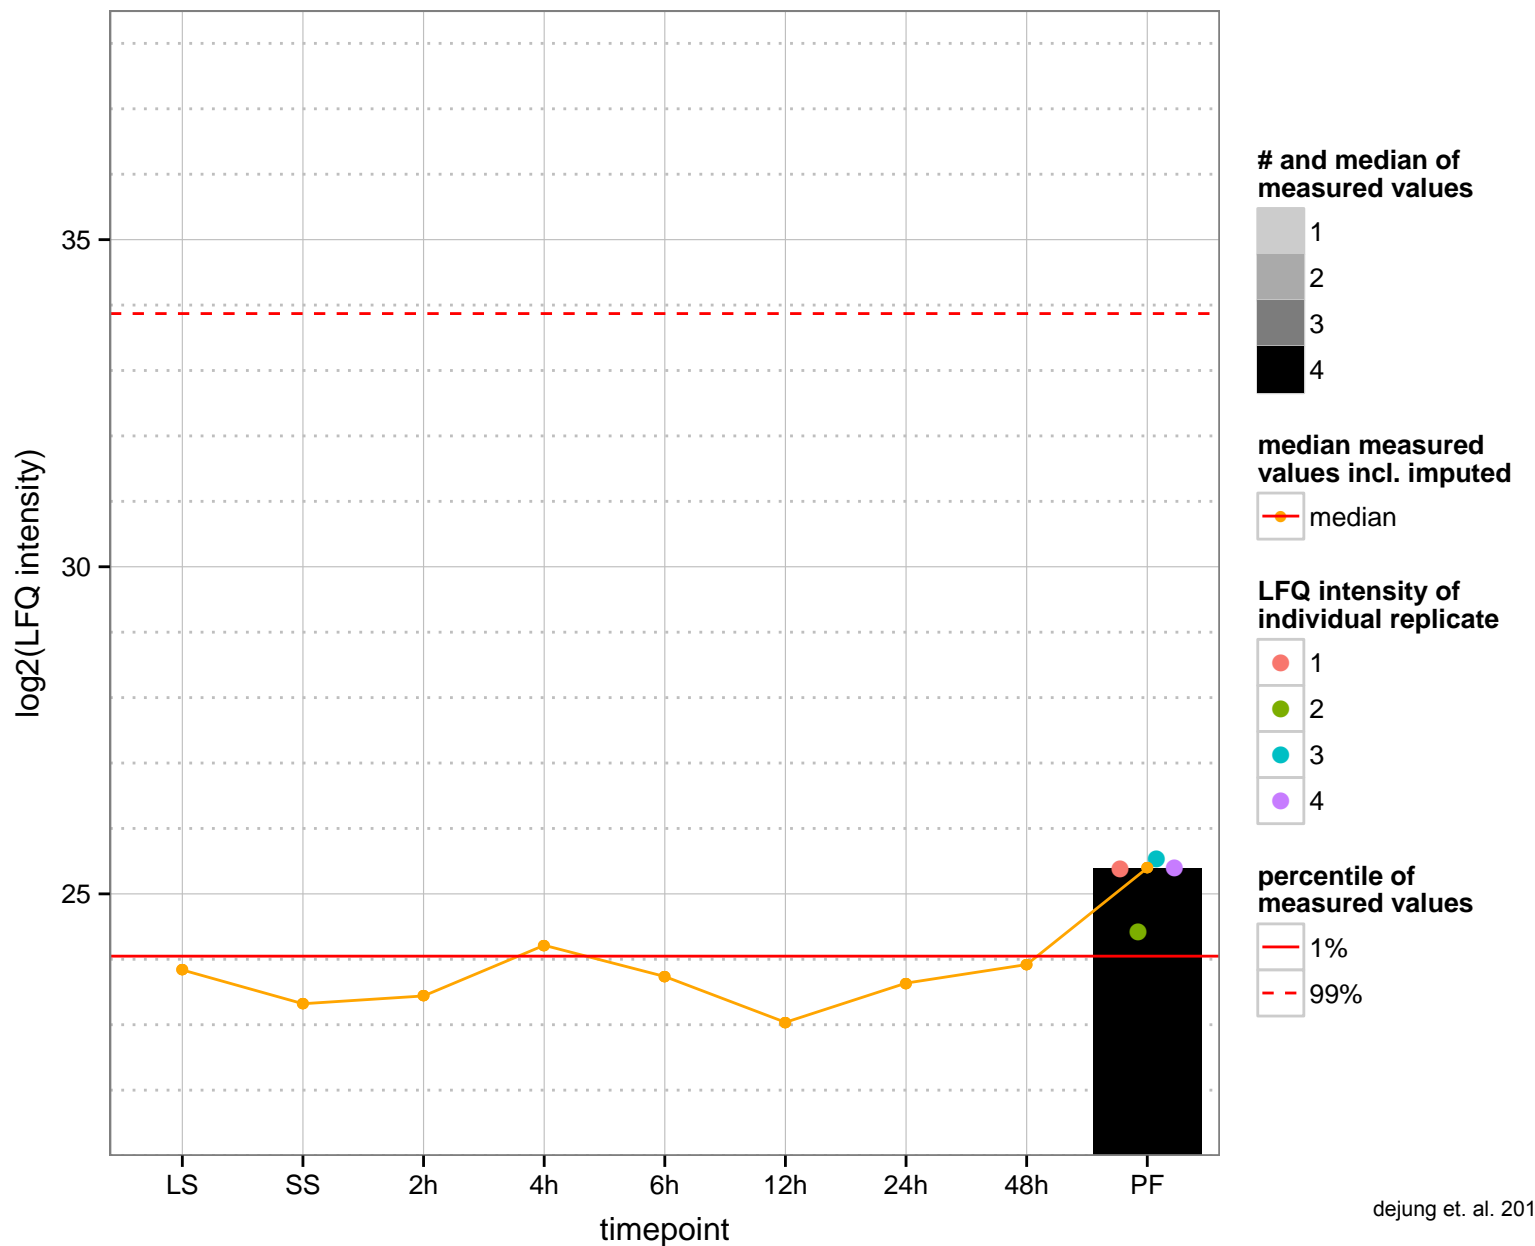

60S ribosomal protein L18, putative (TbL18LP), putative (RPL18)  
 Tb927.11.4300;Tb927.10.9880  
 AGOF: structural constituent of ribosome  
 AGOC: intracellular, ribosome  
 AGOP: translation, null  
 PGO: null  
 PGOC: null  
 PGOP: null

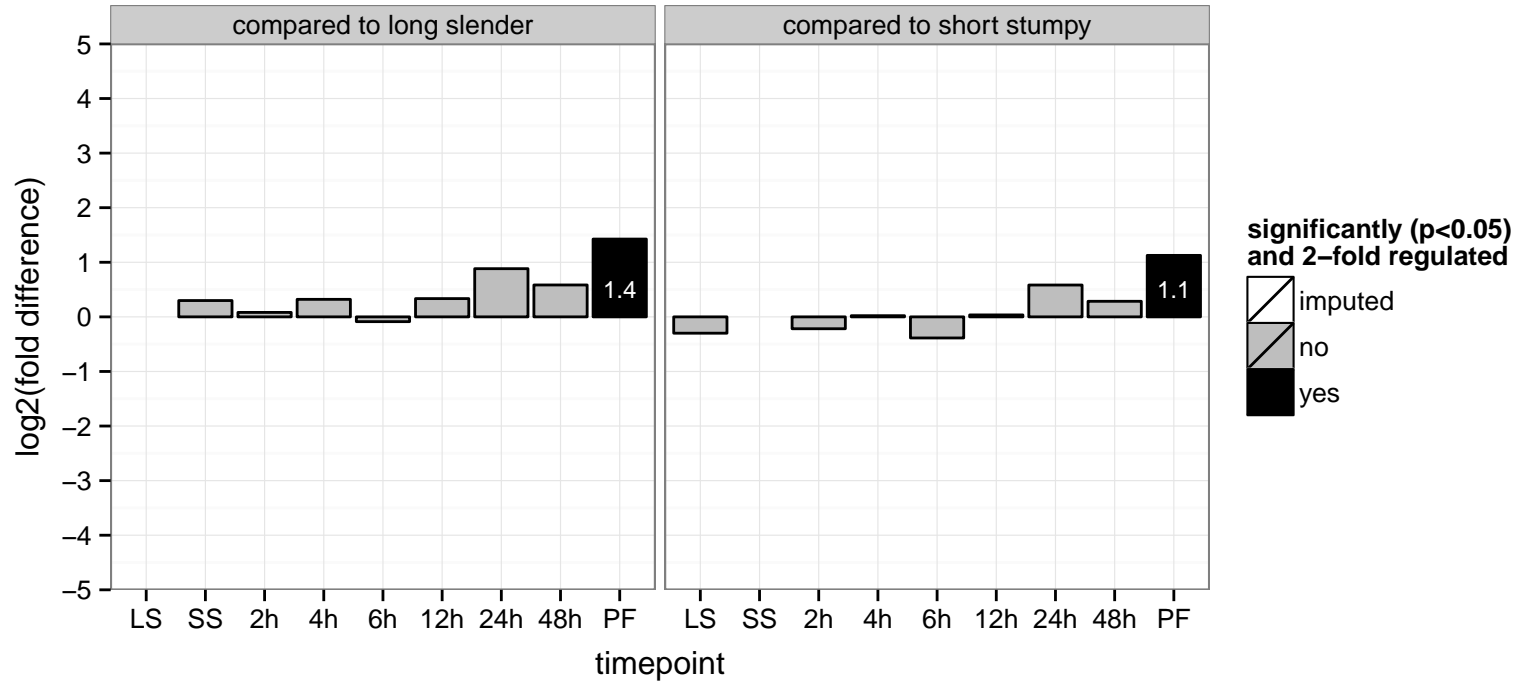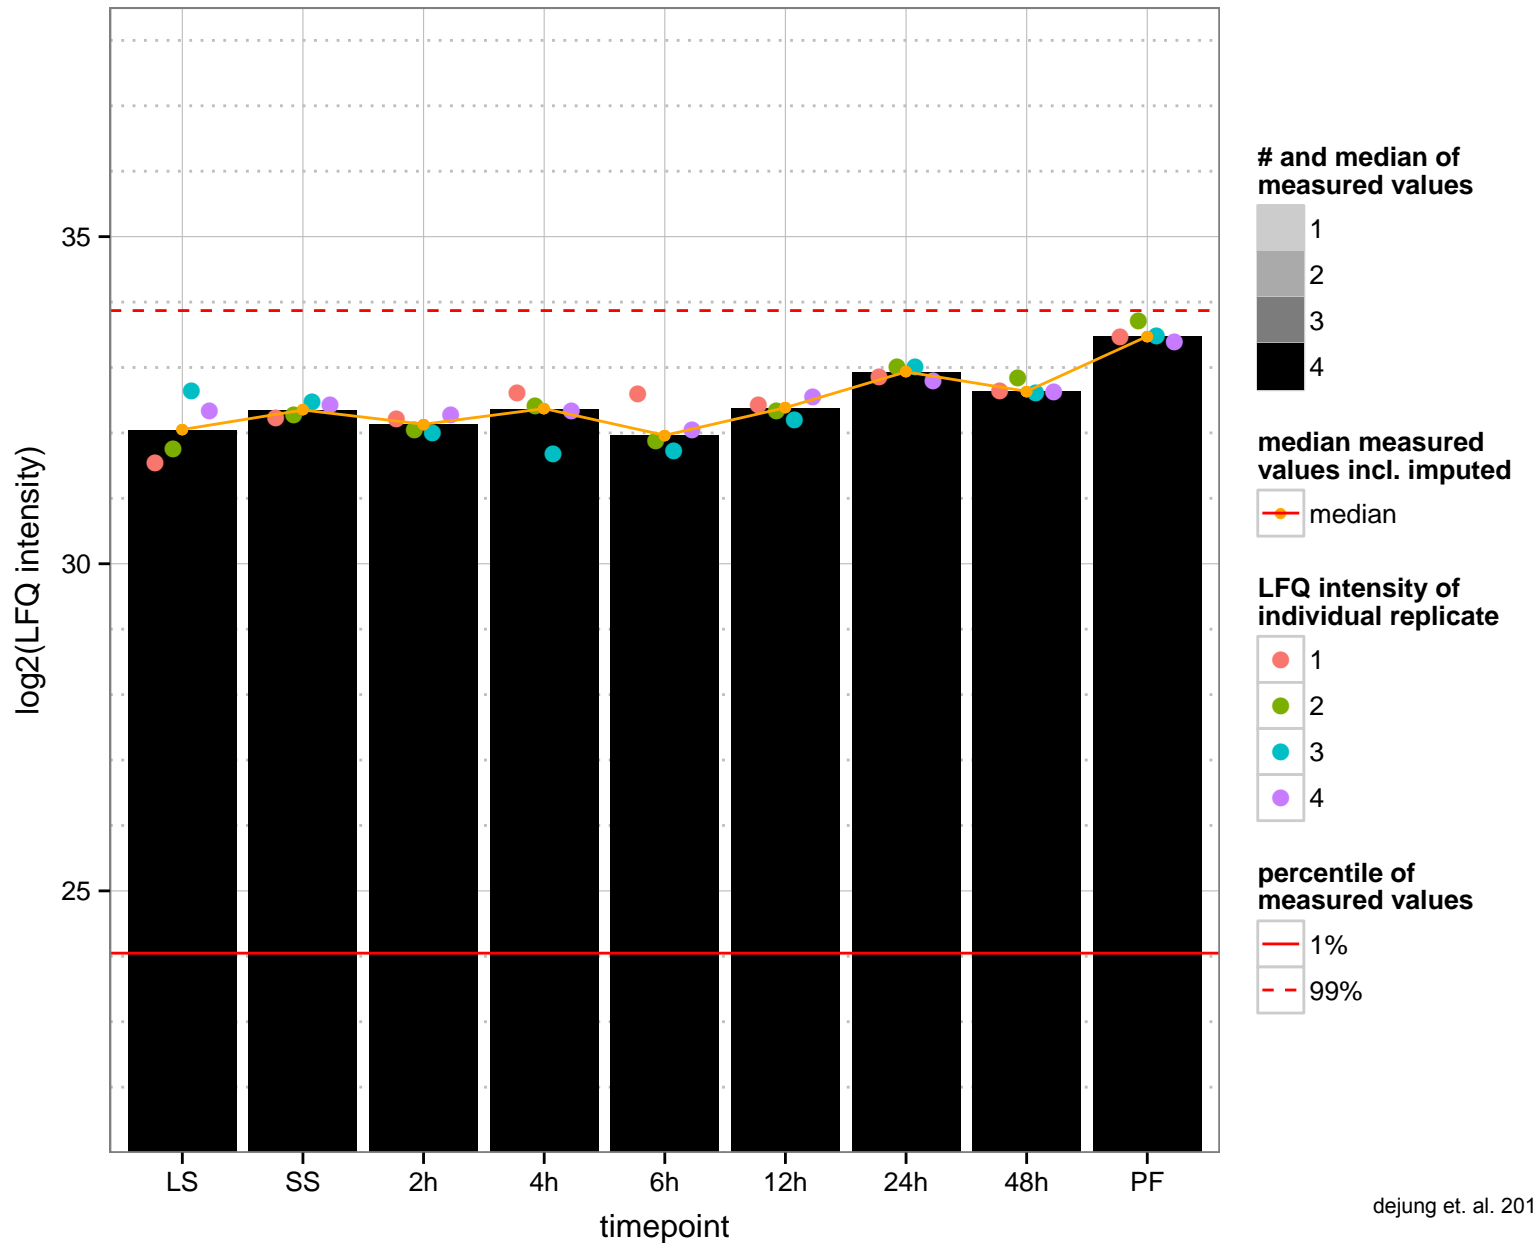

hypothetical protein, conserved  
 Tb927.10.9960  
 AGOF: null  
 AGOC: null  
 AGOP: null  
 PGOF: null  
 PGO C: null  
 PGOP: null

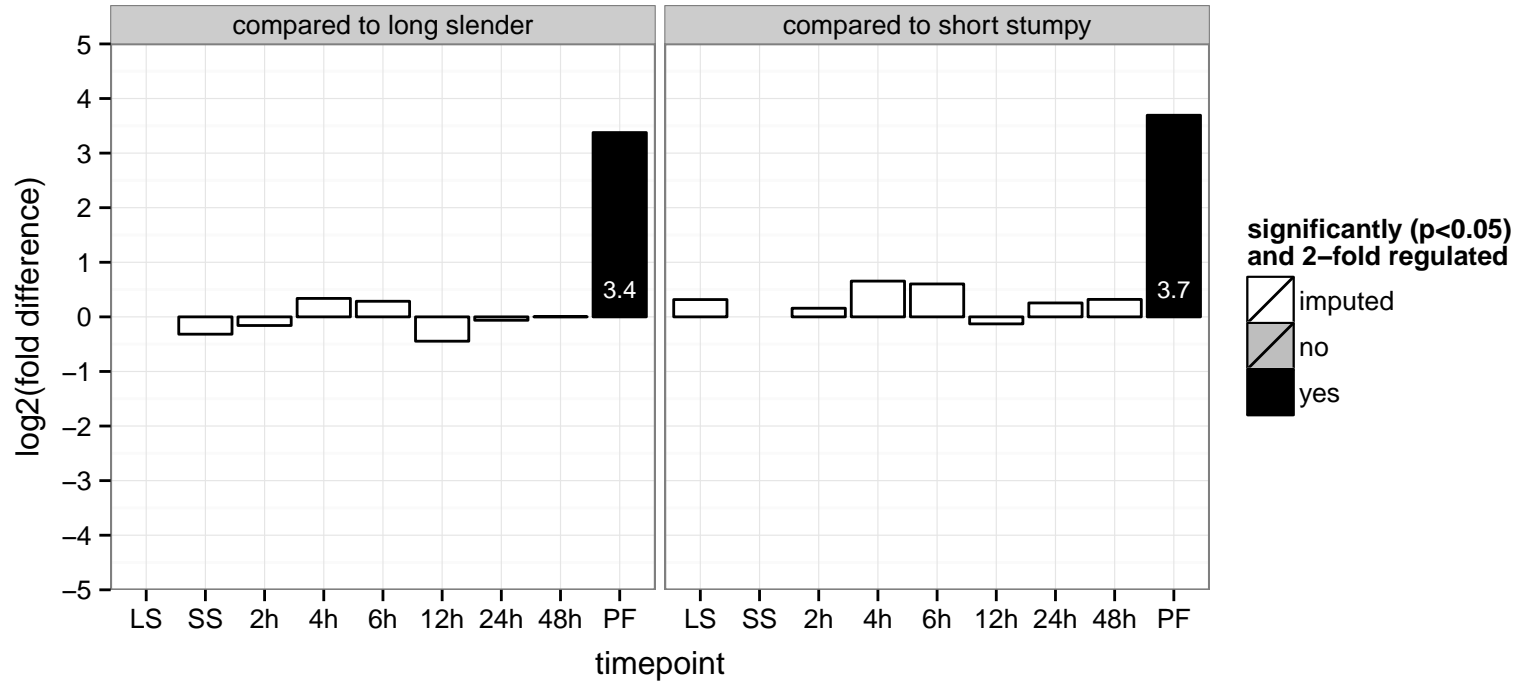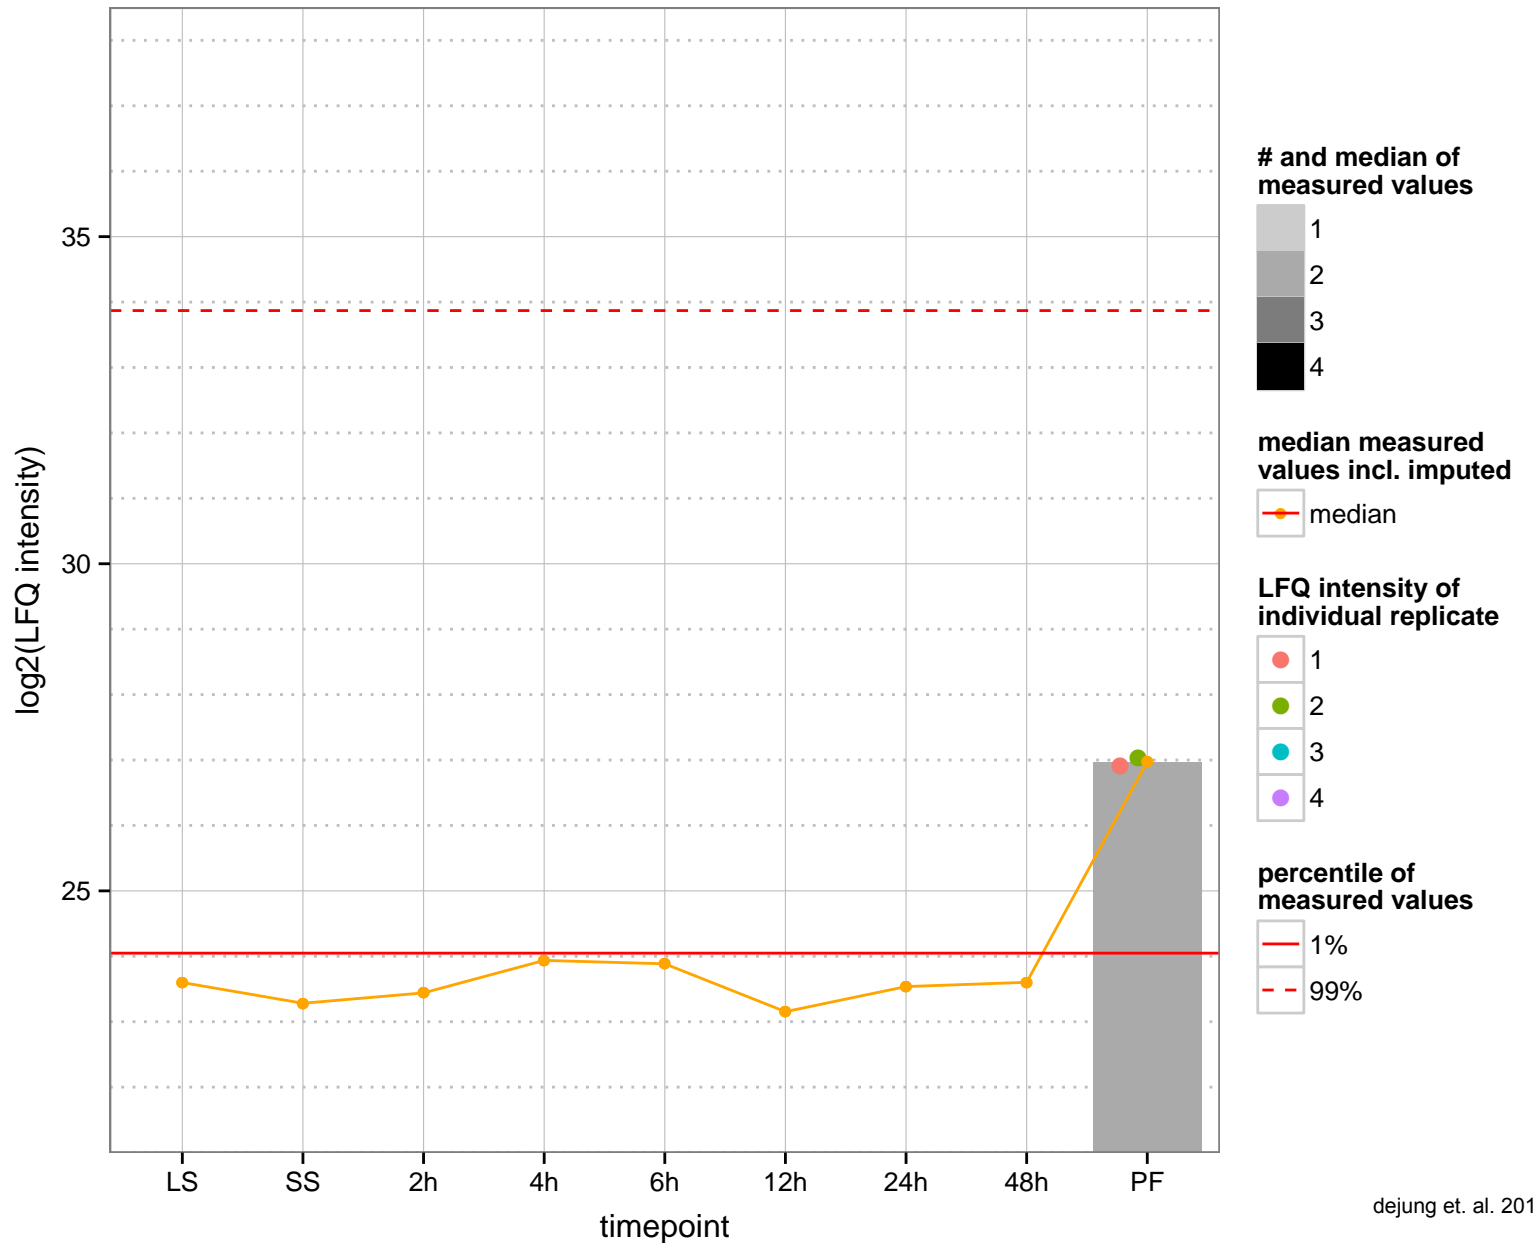



60S ribosomal protein L29, putative  
 Tb927.11.10030  
 AGOF: structural constituent of ribosome  
 AGOC: intracellular, ribosome  
 AGOP: translation  
 PGOF: structural constituent of ribosome  
 PGO: intracellular, ribosome  
 PGOP: translation

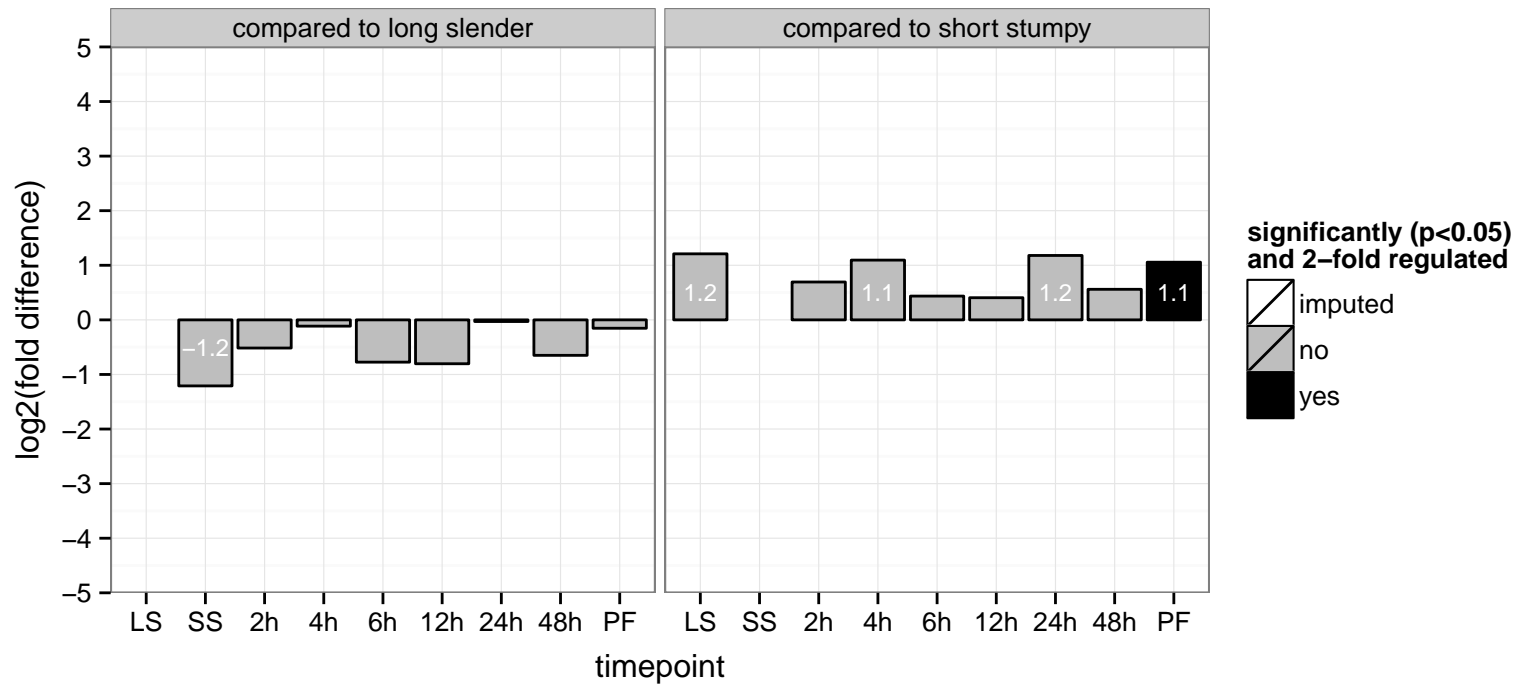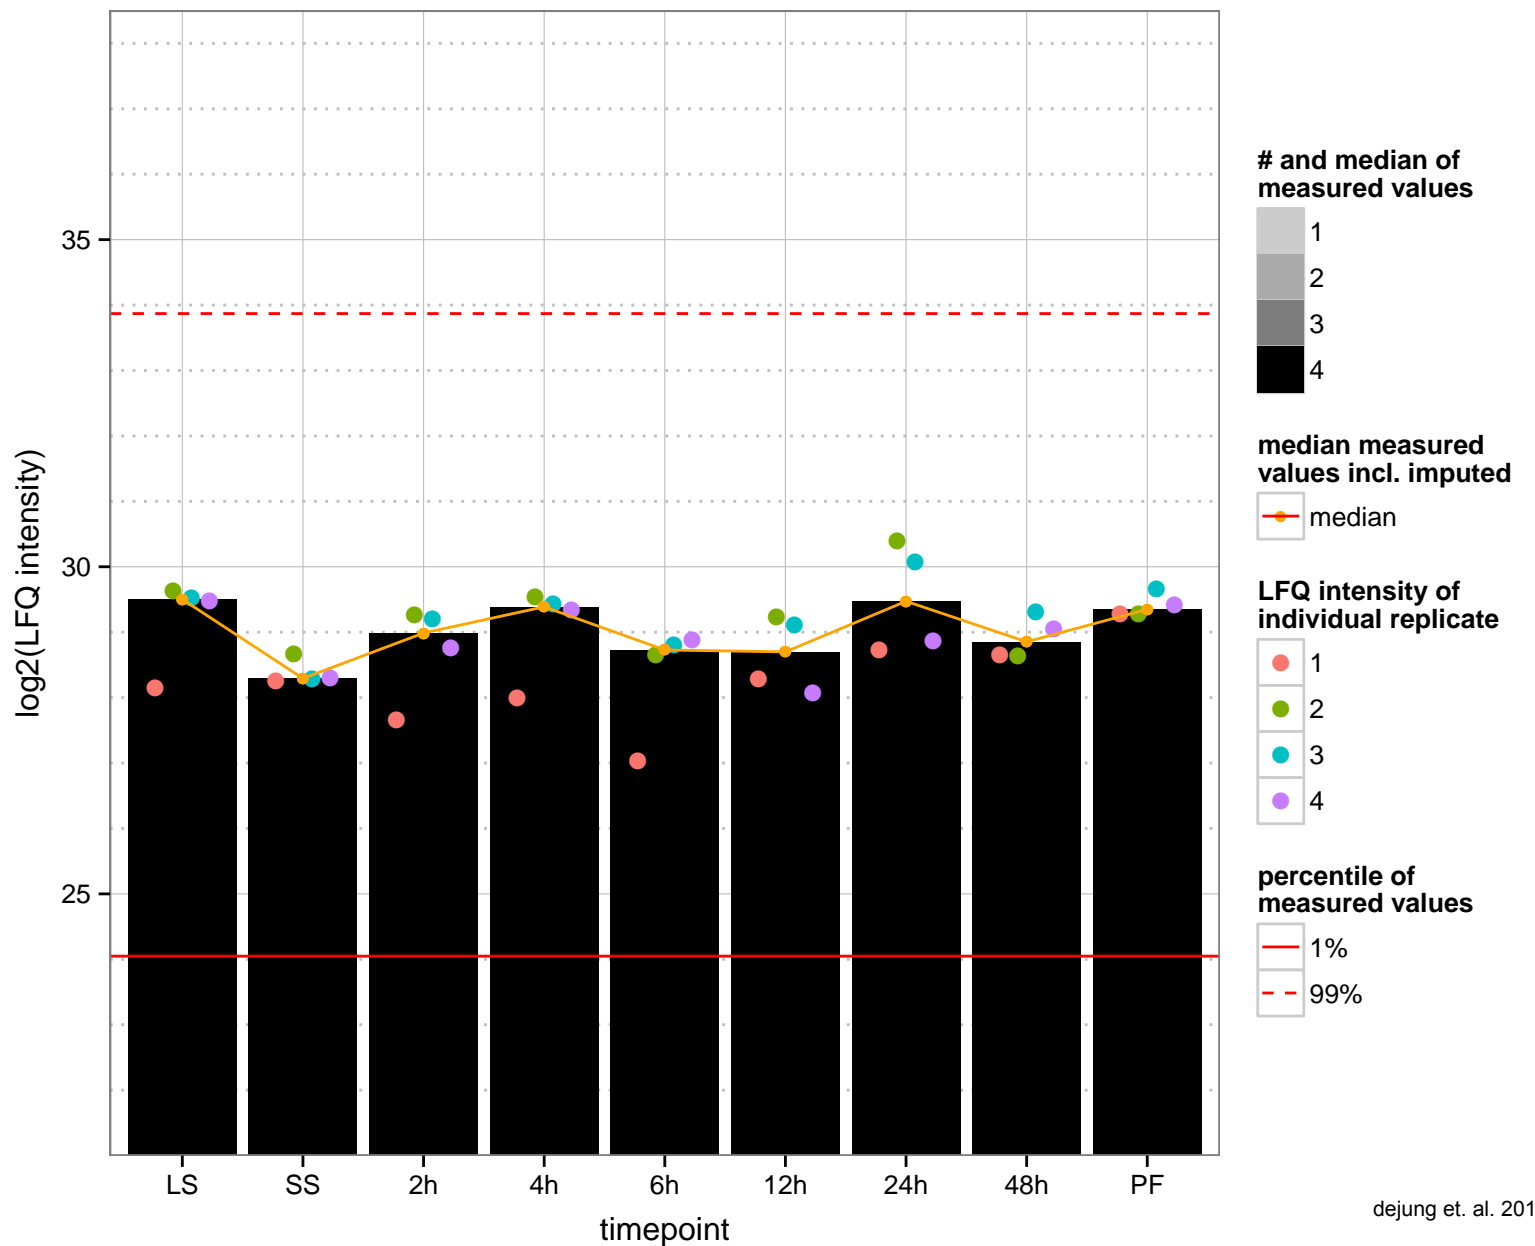

hypothetical protein, conserved  
 Tb927.11.10080  
 AGOF: null  
 AGOC: mitochondrion  
 AGOP: null  
 PGO: null  
 PGO: null  
 PGO: null

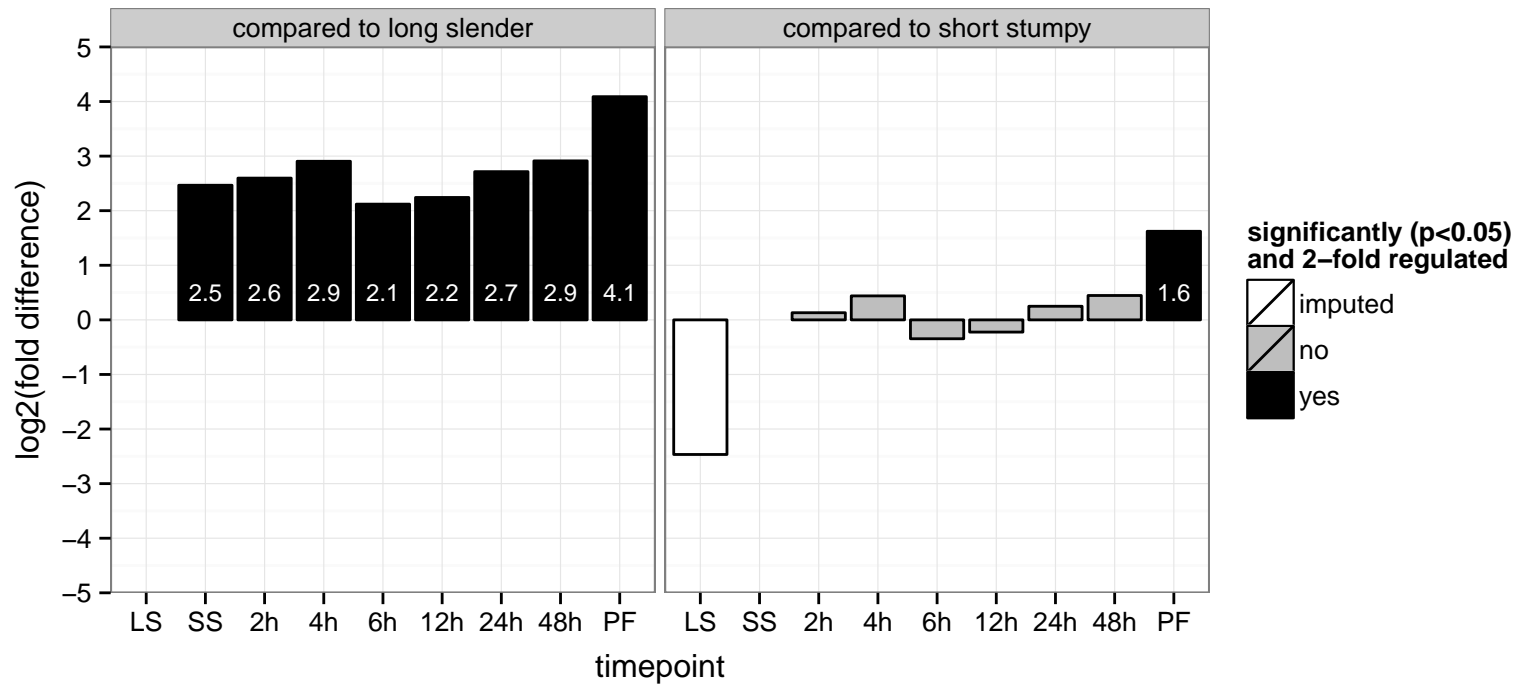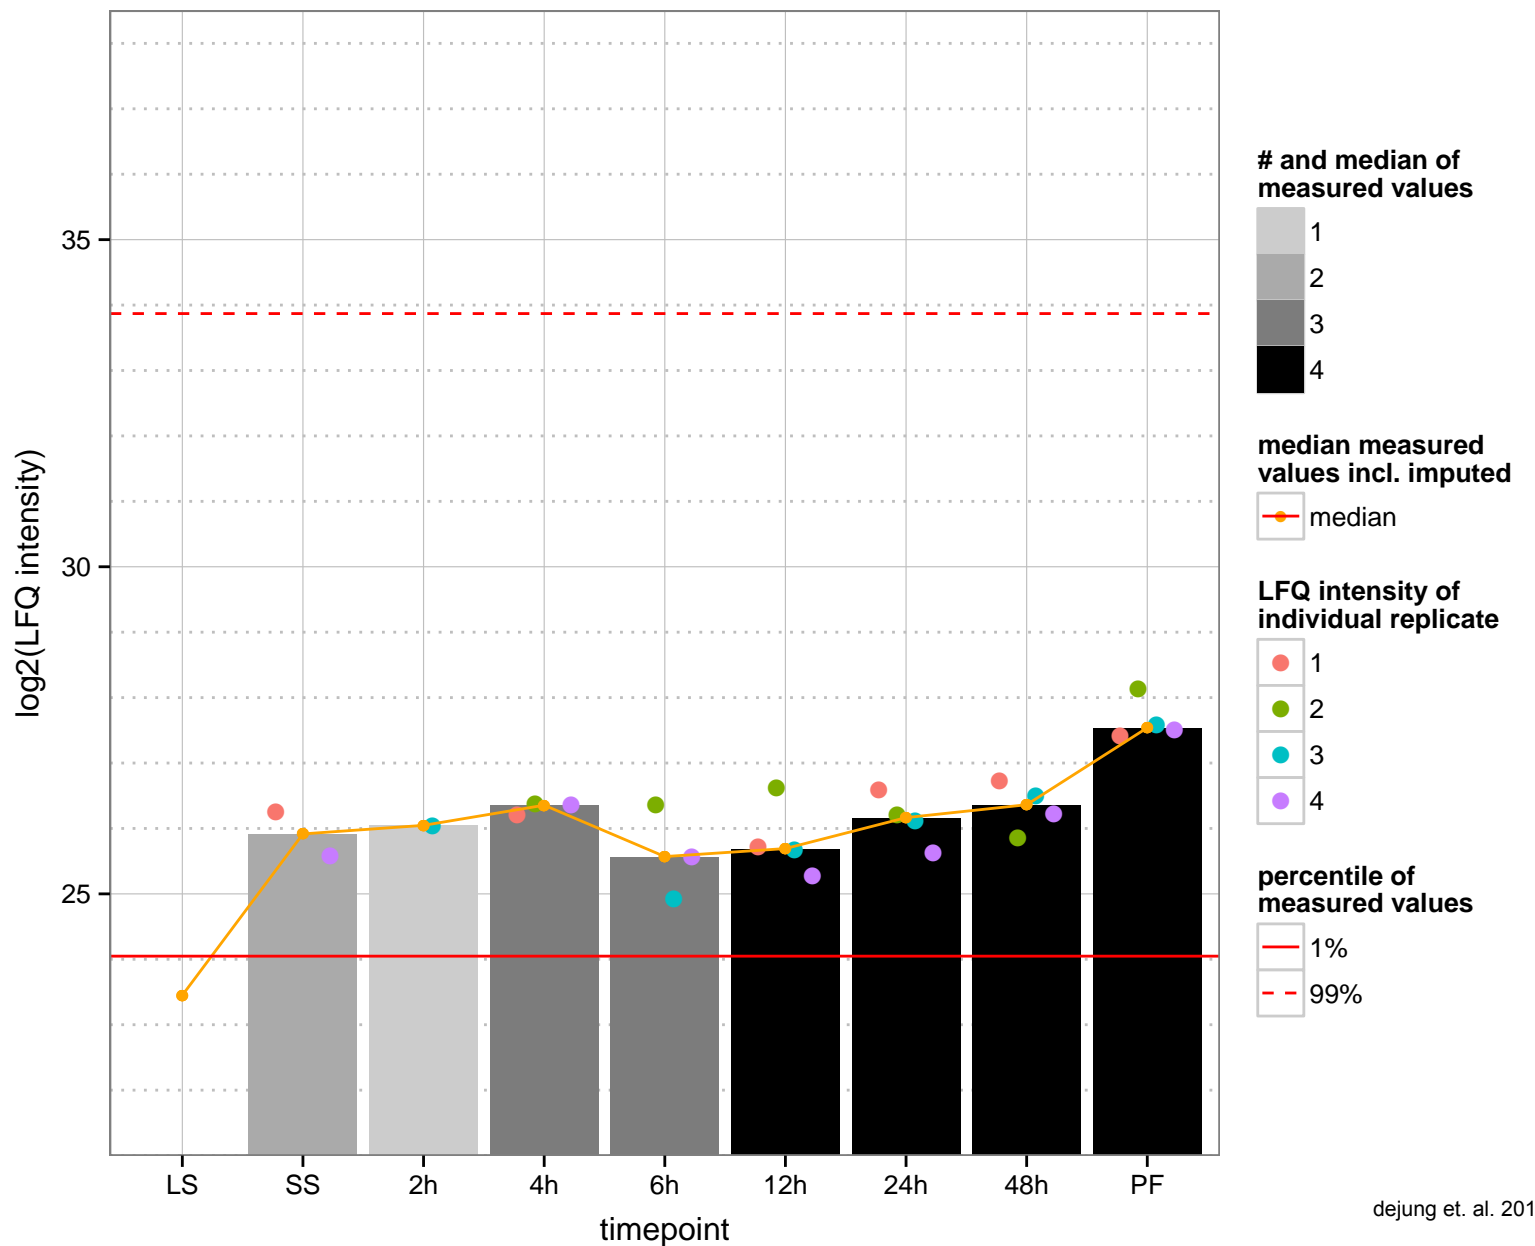

hypothetical protein, conserved  
 Tb927.11.1040  
 AGOF: null  
 AGOC: null  
 AGOP: null  
 PGOF: null  
 PGOC: null  
 PGOP: null

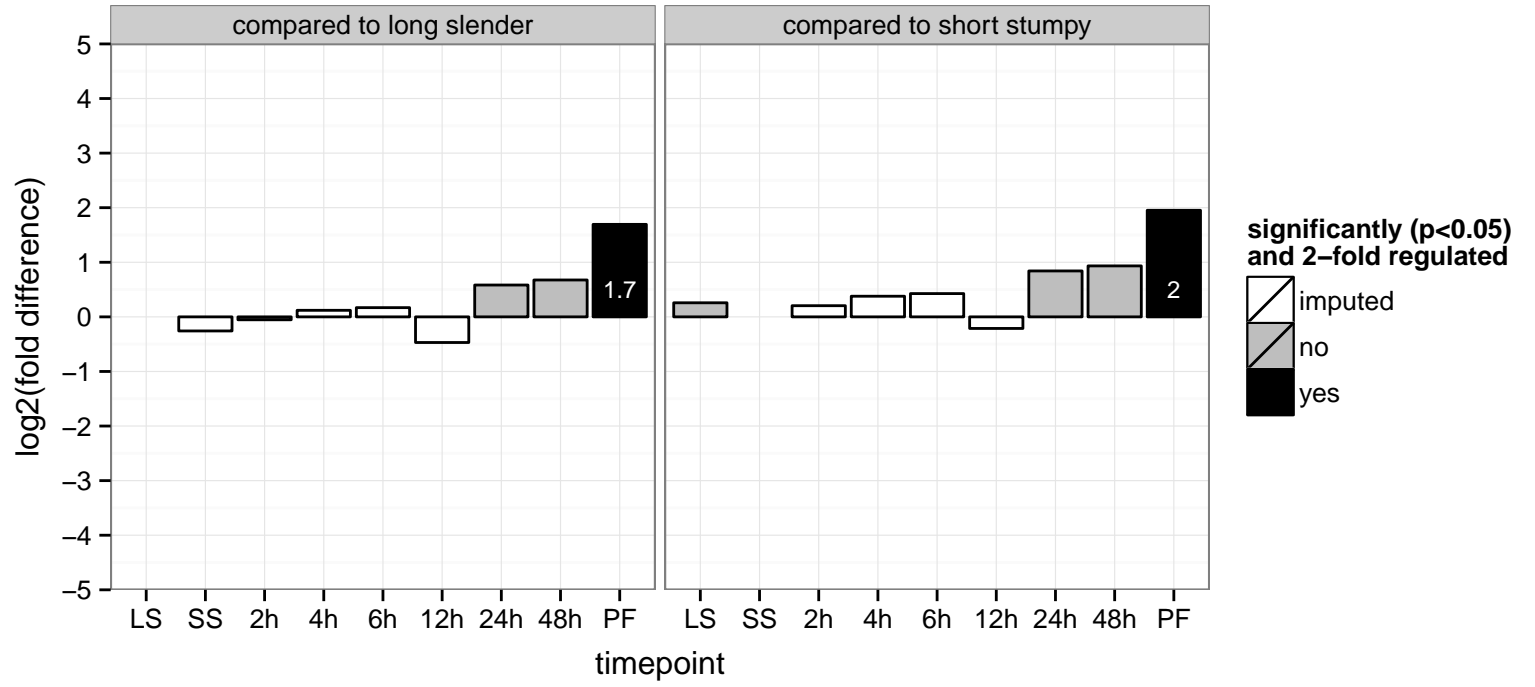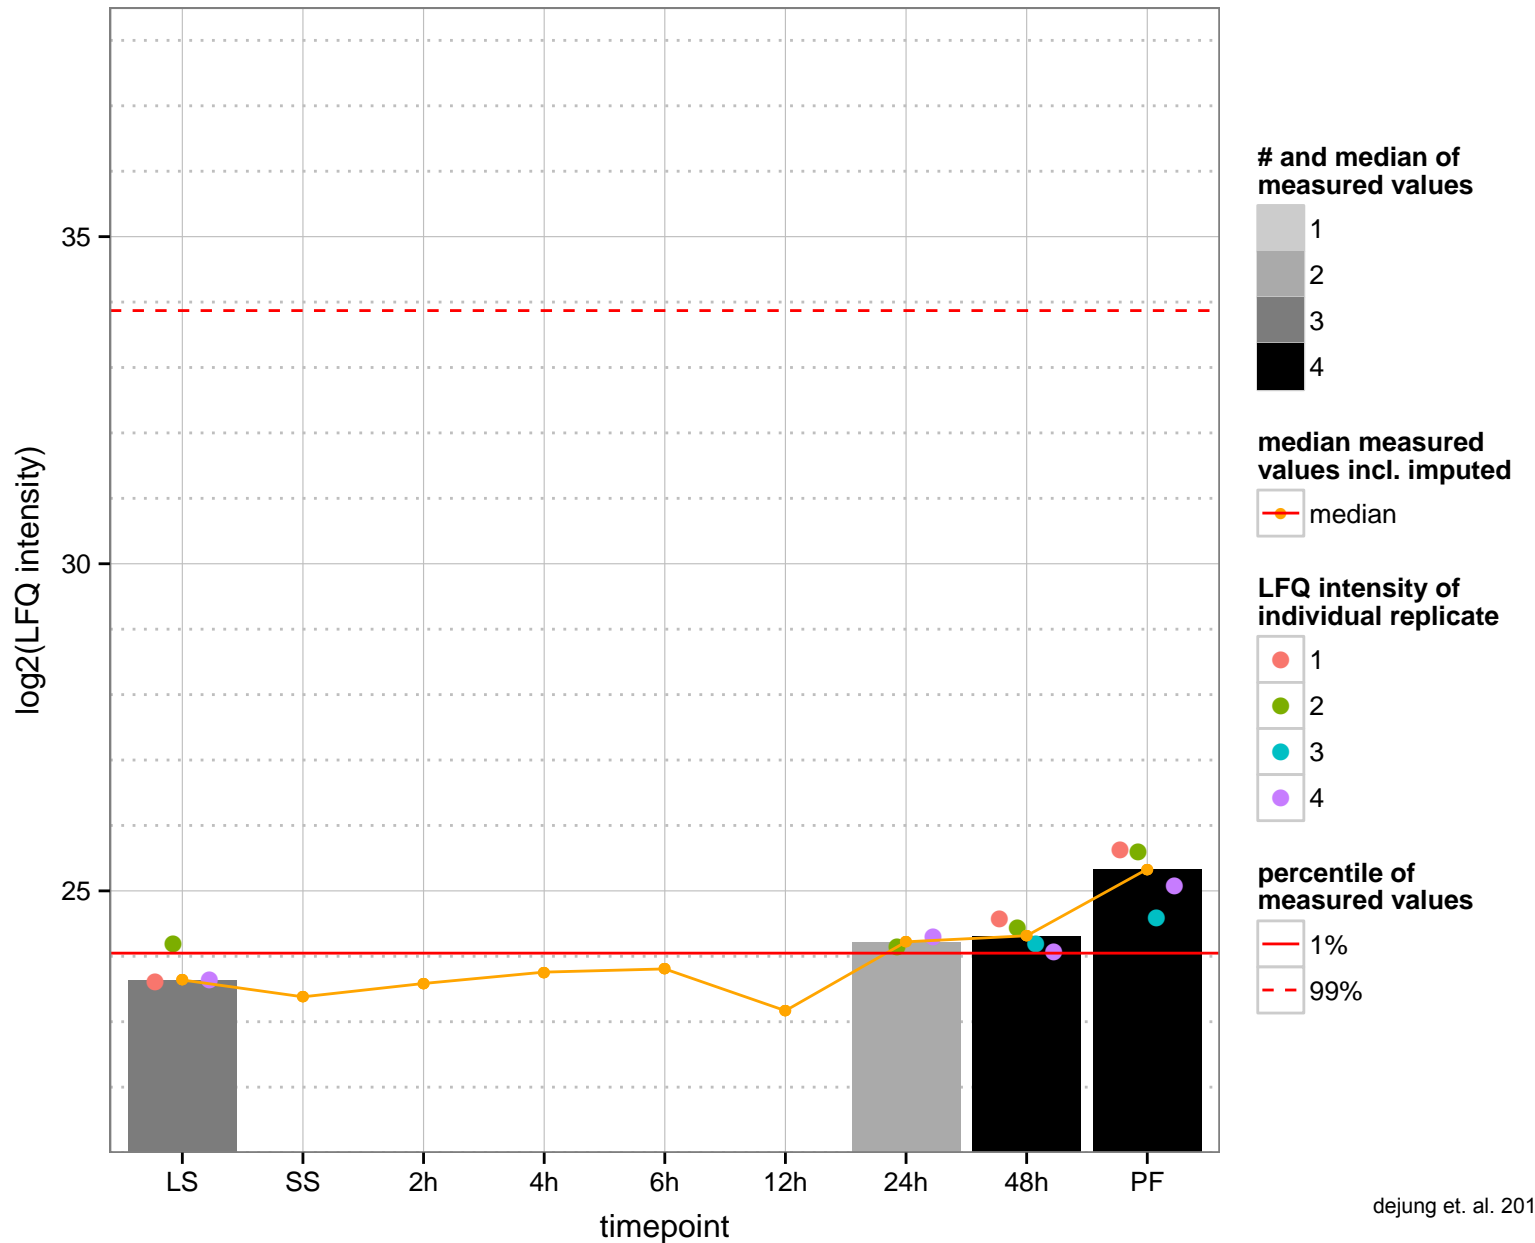

hypothetical protein, conserved  
 Tb927.11.10460  
 AGOF: null  
 AGOC: nucleus  
 AGOP: DNA replication  
 PGO: null  
 PGOC: null  
 PGOP: null

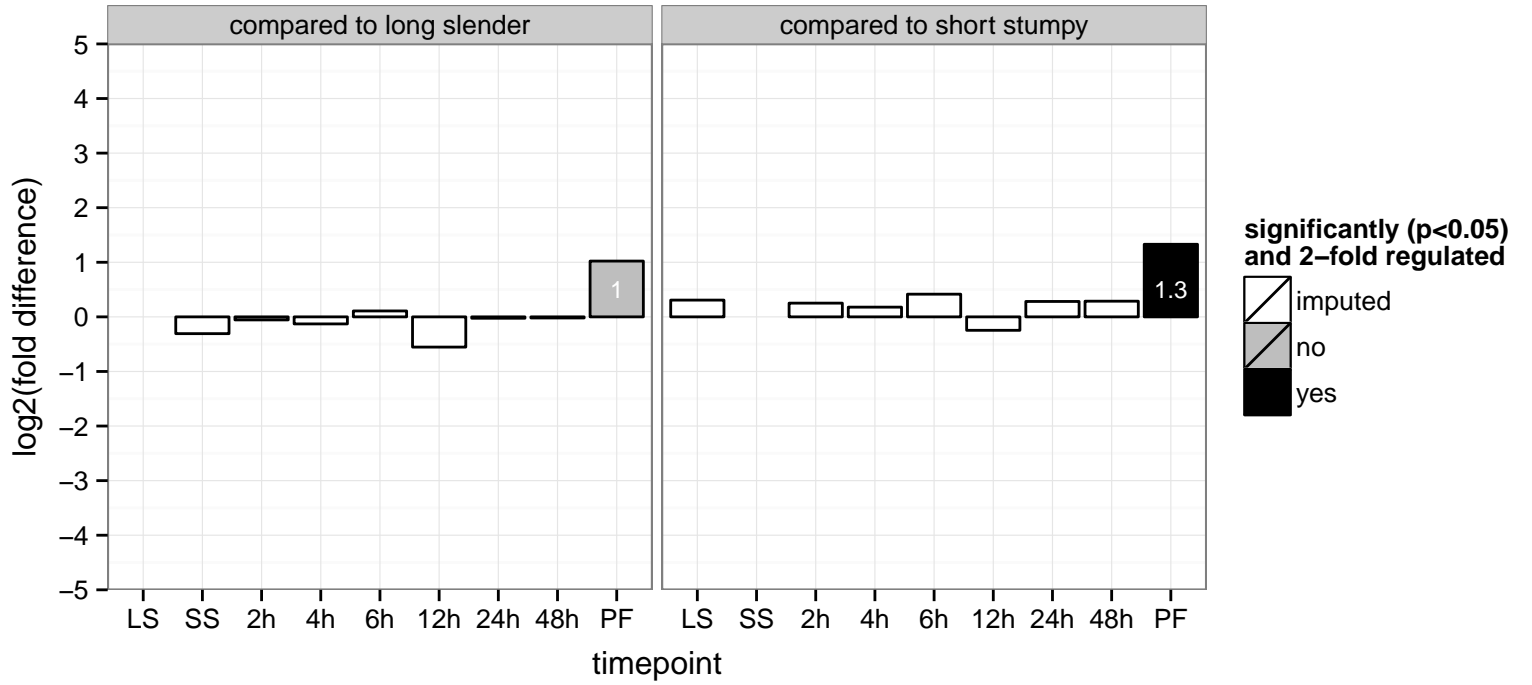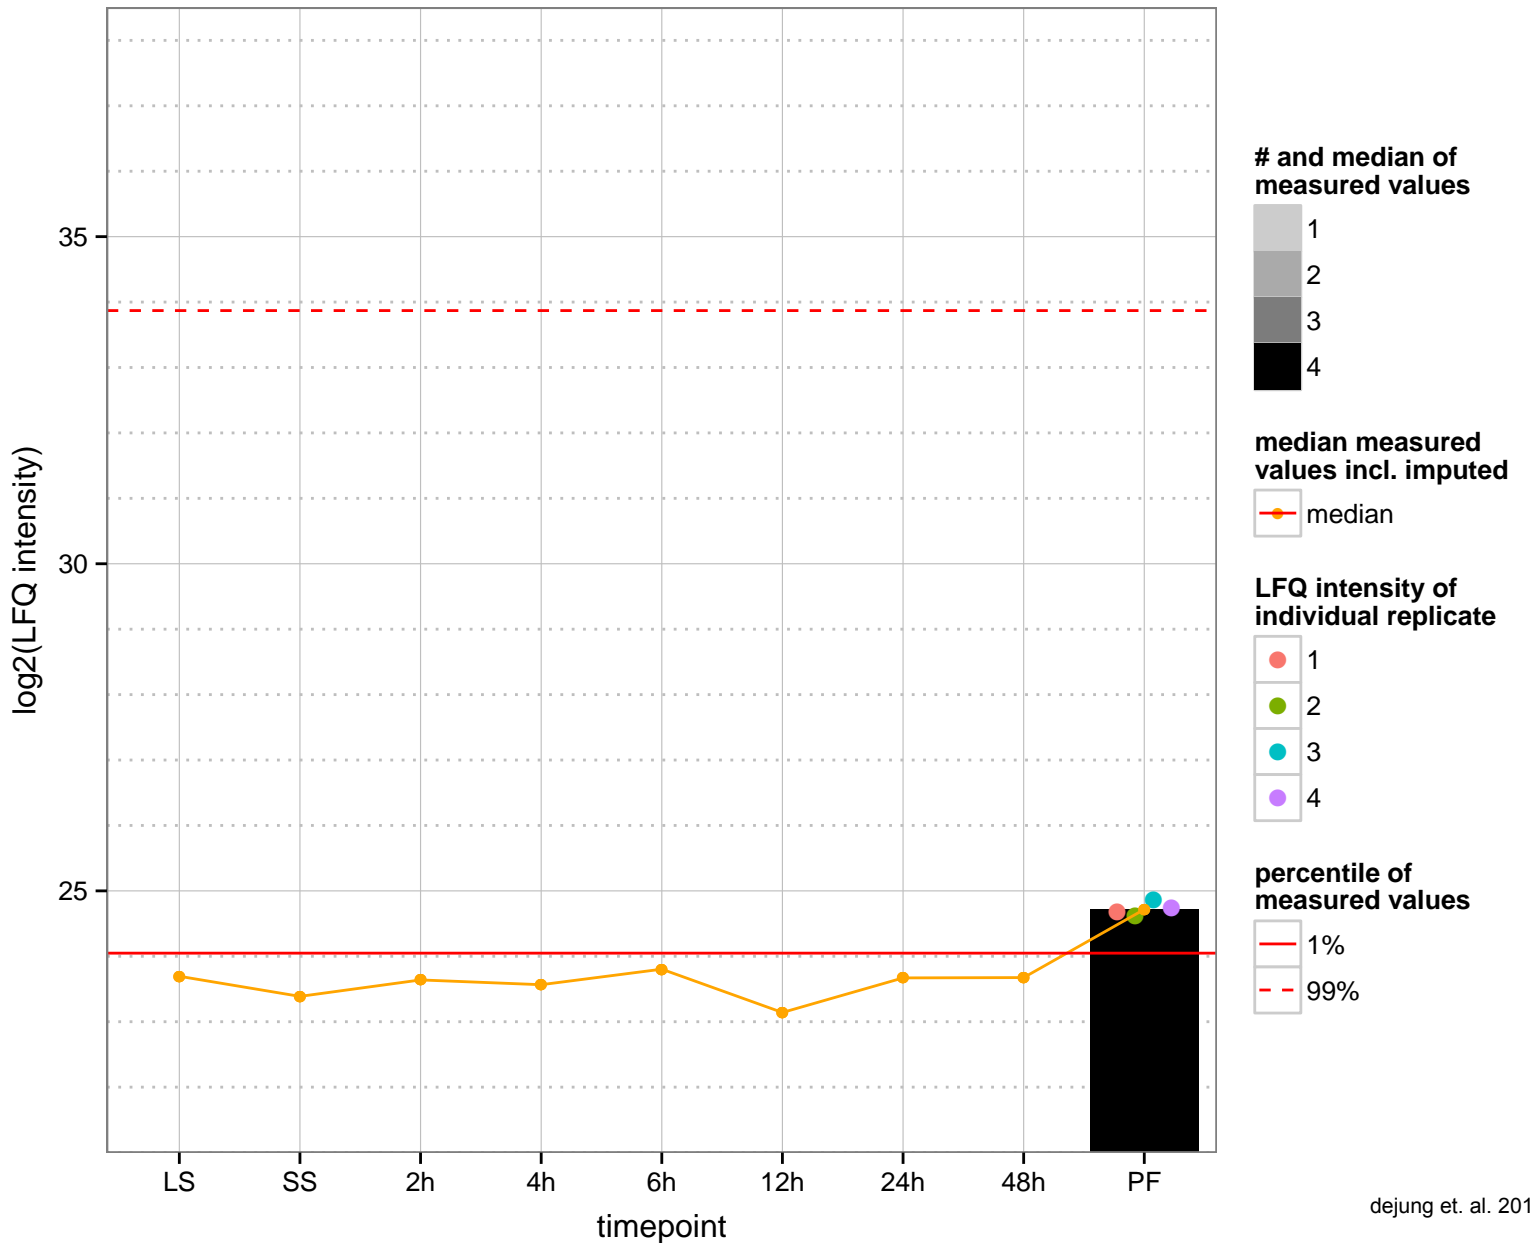

hypothetical protein, conserved  
 Tb927.11.10470  
 AGOF: null  
 AGOC: null  
 AGOP: null  
 PGOF: null  
 PGO C: null  
 PGOP: null

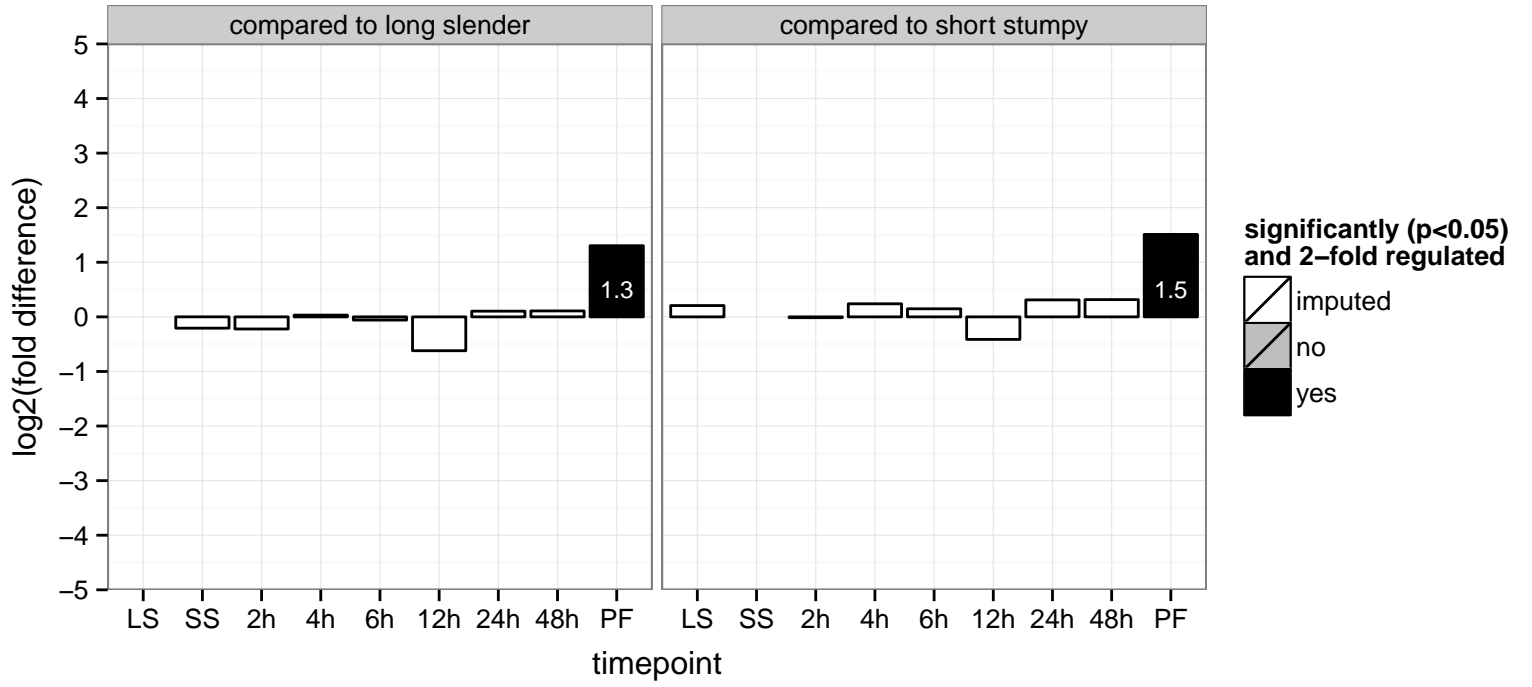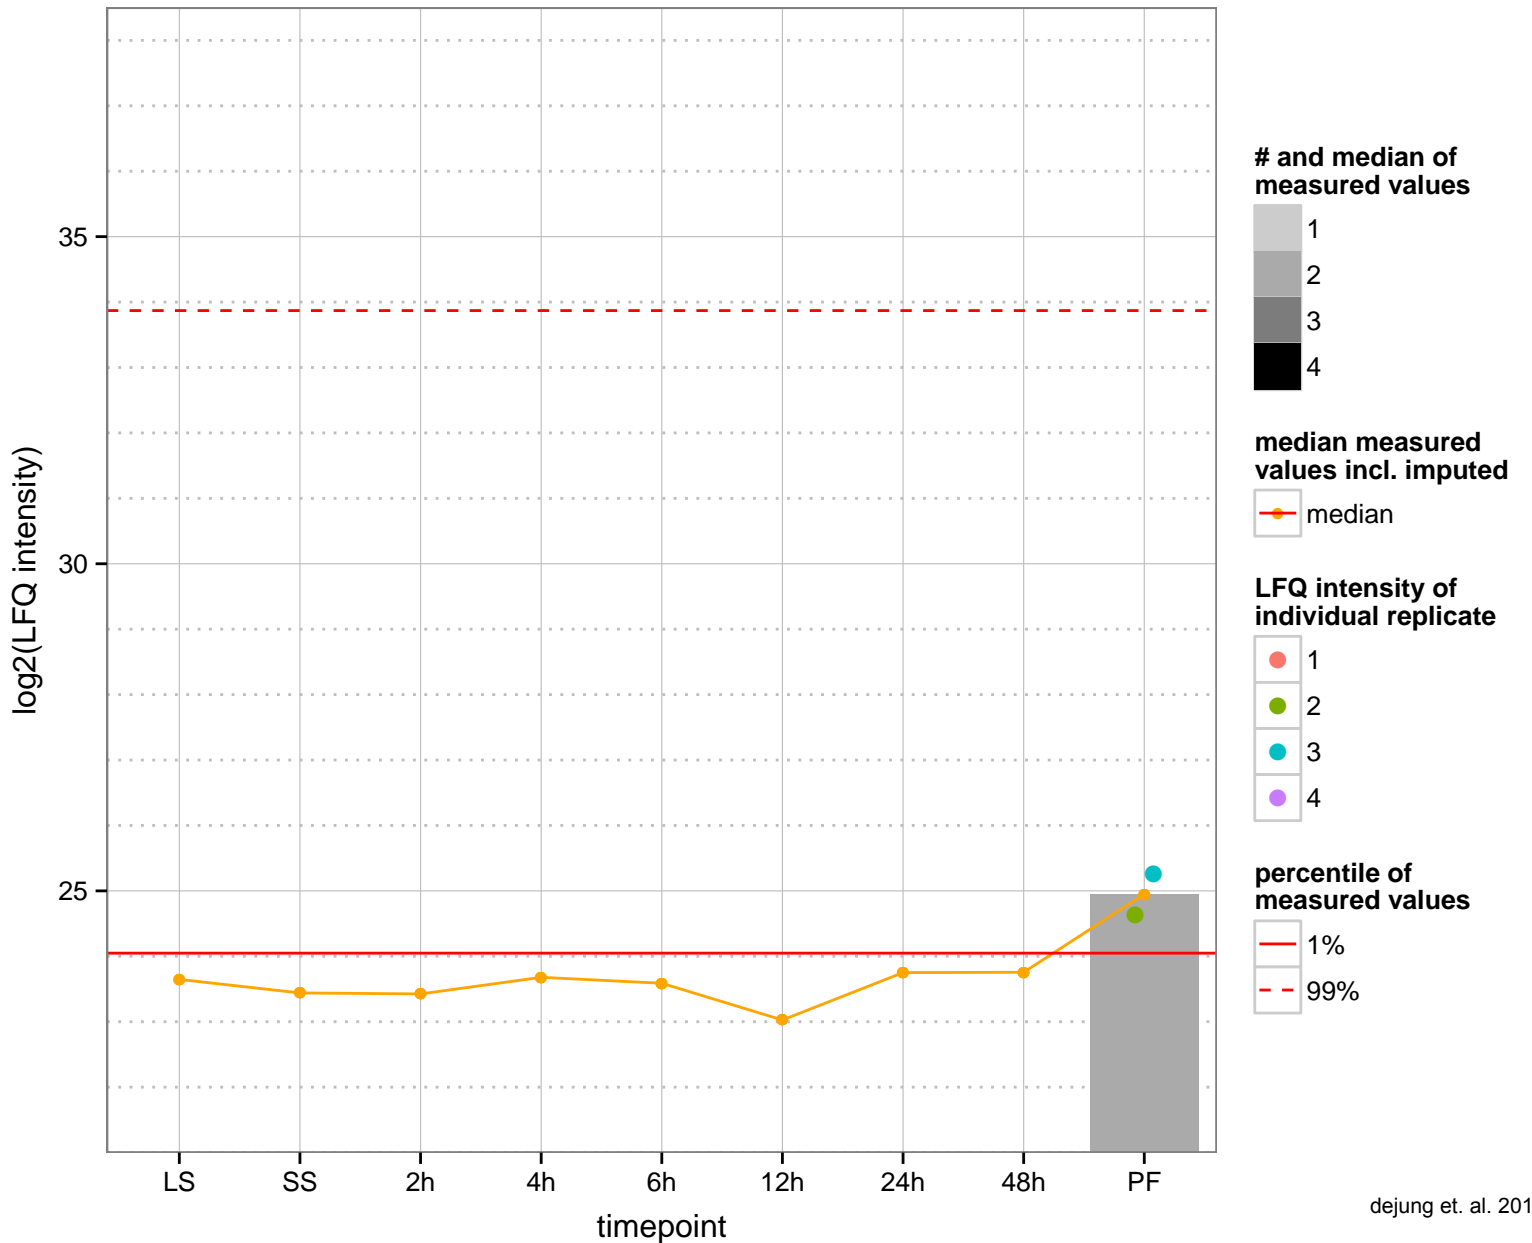

kinetoplastid kinetochore protein 2, serine/threonine-protein kinase, putative, putative (kkt2)

Tb927.11.10520

AGOF: ATP binding, protein serine/threonine kinase activity

AGOC: kinetochore

AGOP: chromosome segregation, protein phosphorylation

PGOF: ATP binding, protein kinase activity, transferase activity, transferring phosphorus-containing groups

PGOC: null

PGOP: protein phosphorylation

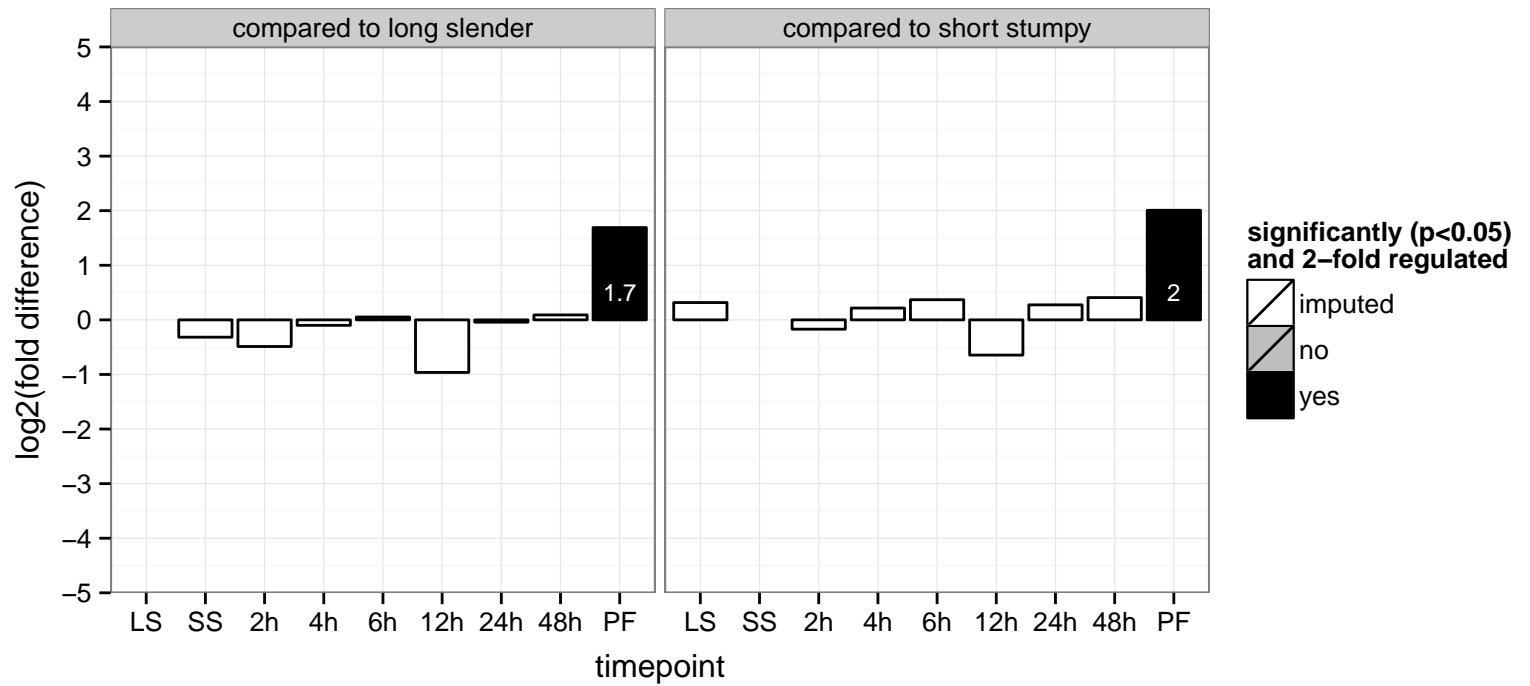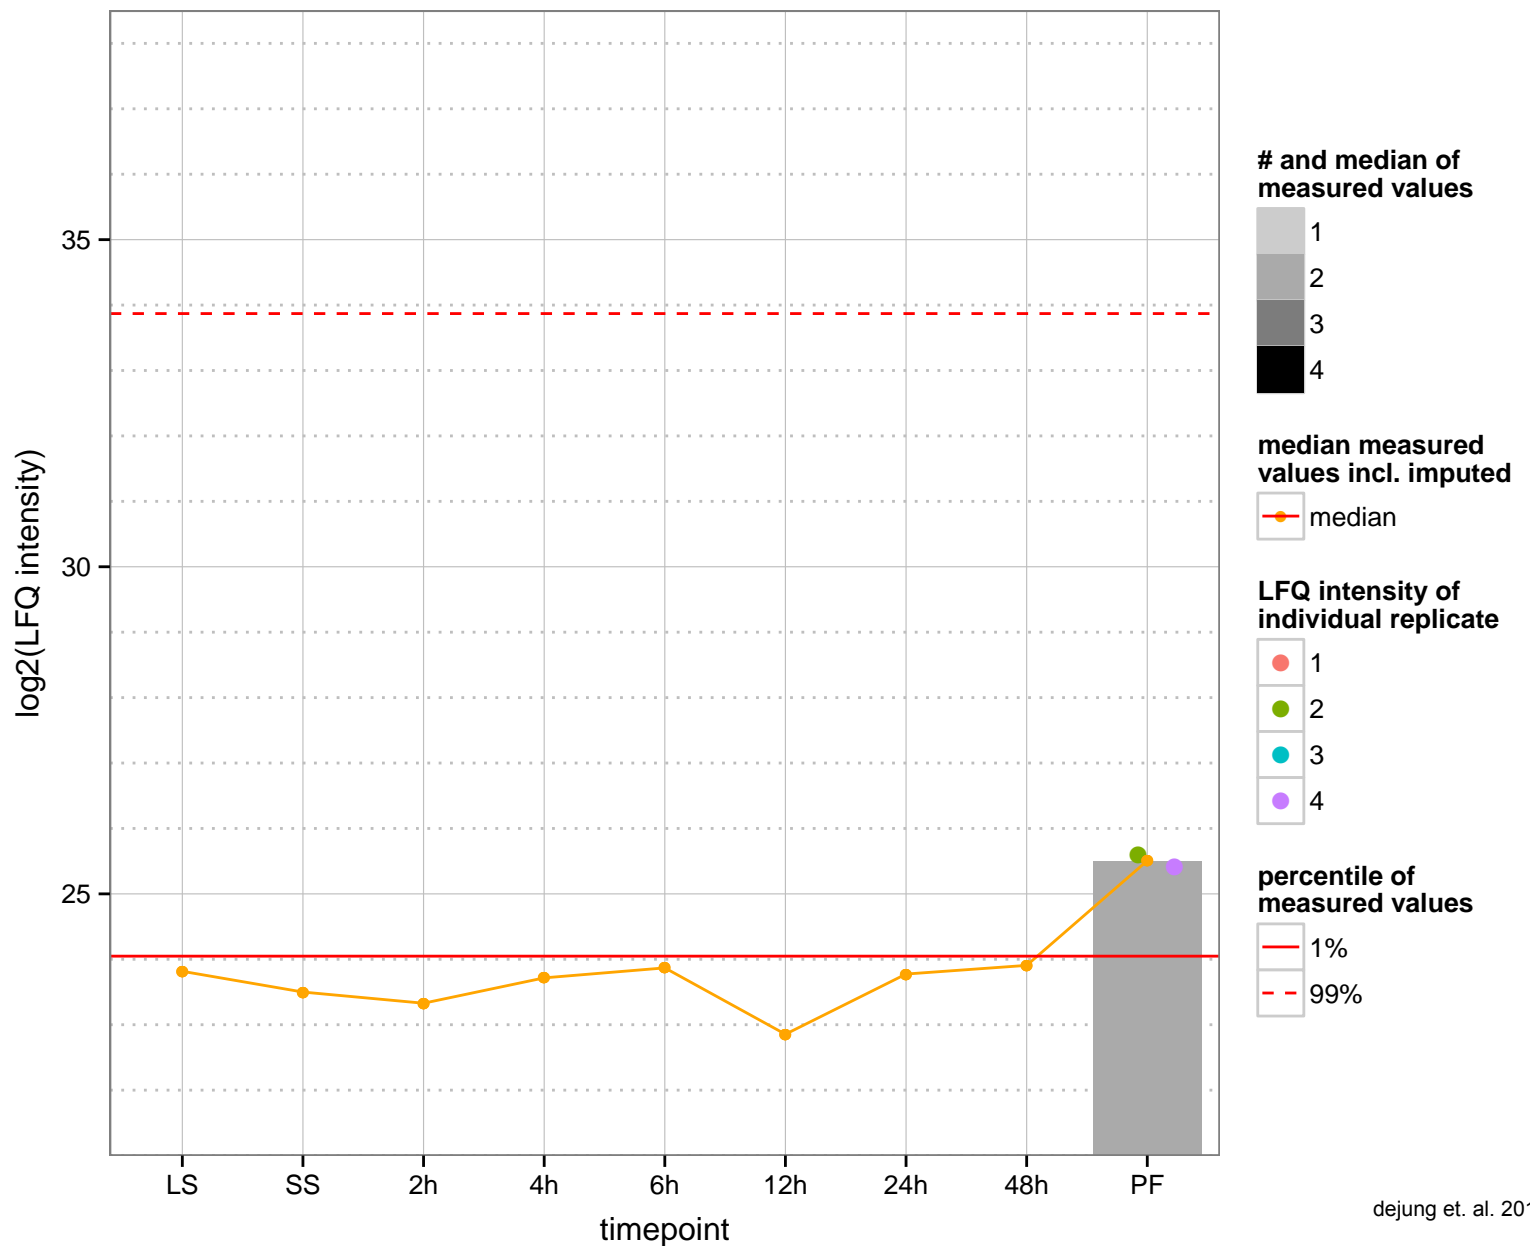

hypothetical protein, conserved  
 Tb927.11.10590  
 AGOF: null  
 AGOC: mitochondrion  
 AGOP: null  
 PGO: null  
 PGO: null  
 PGO: null

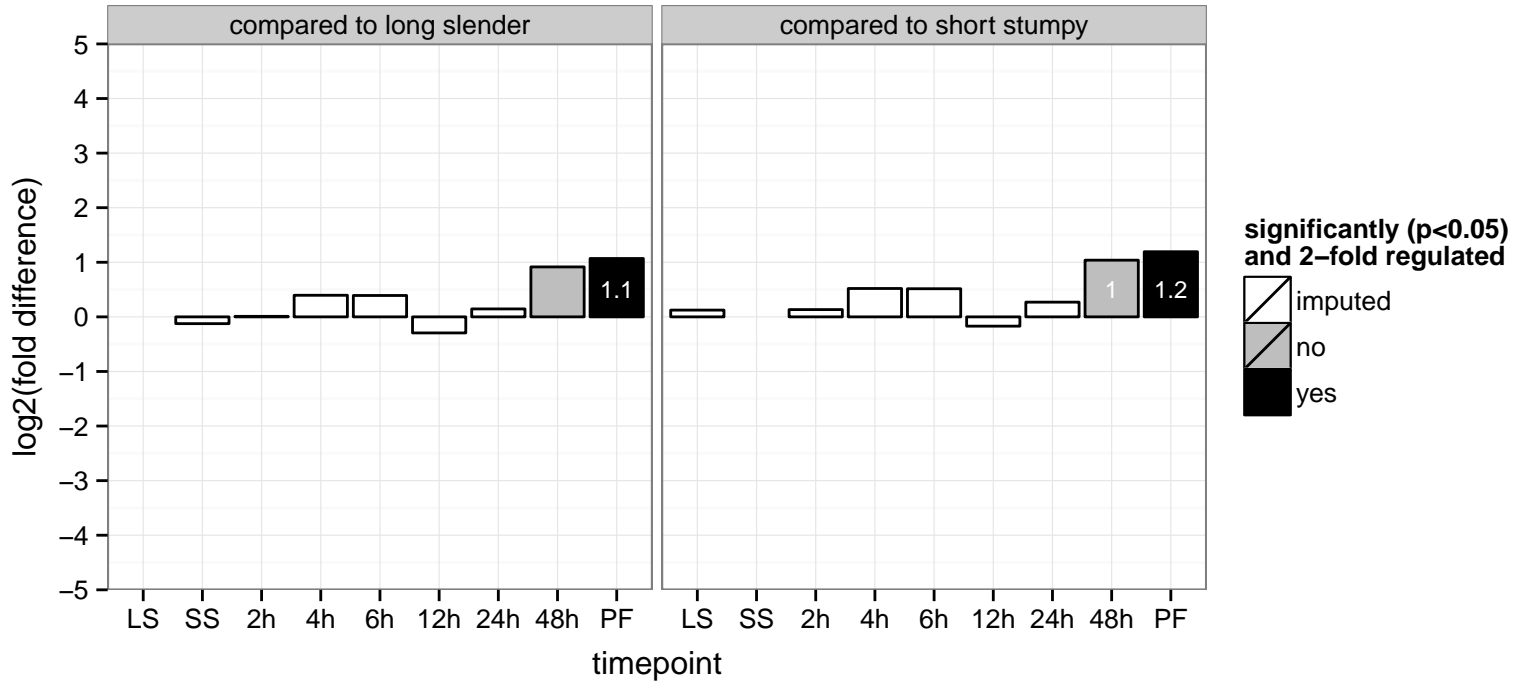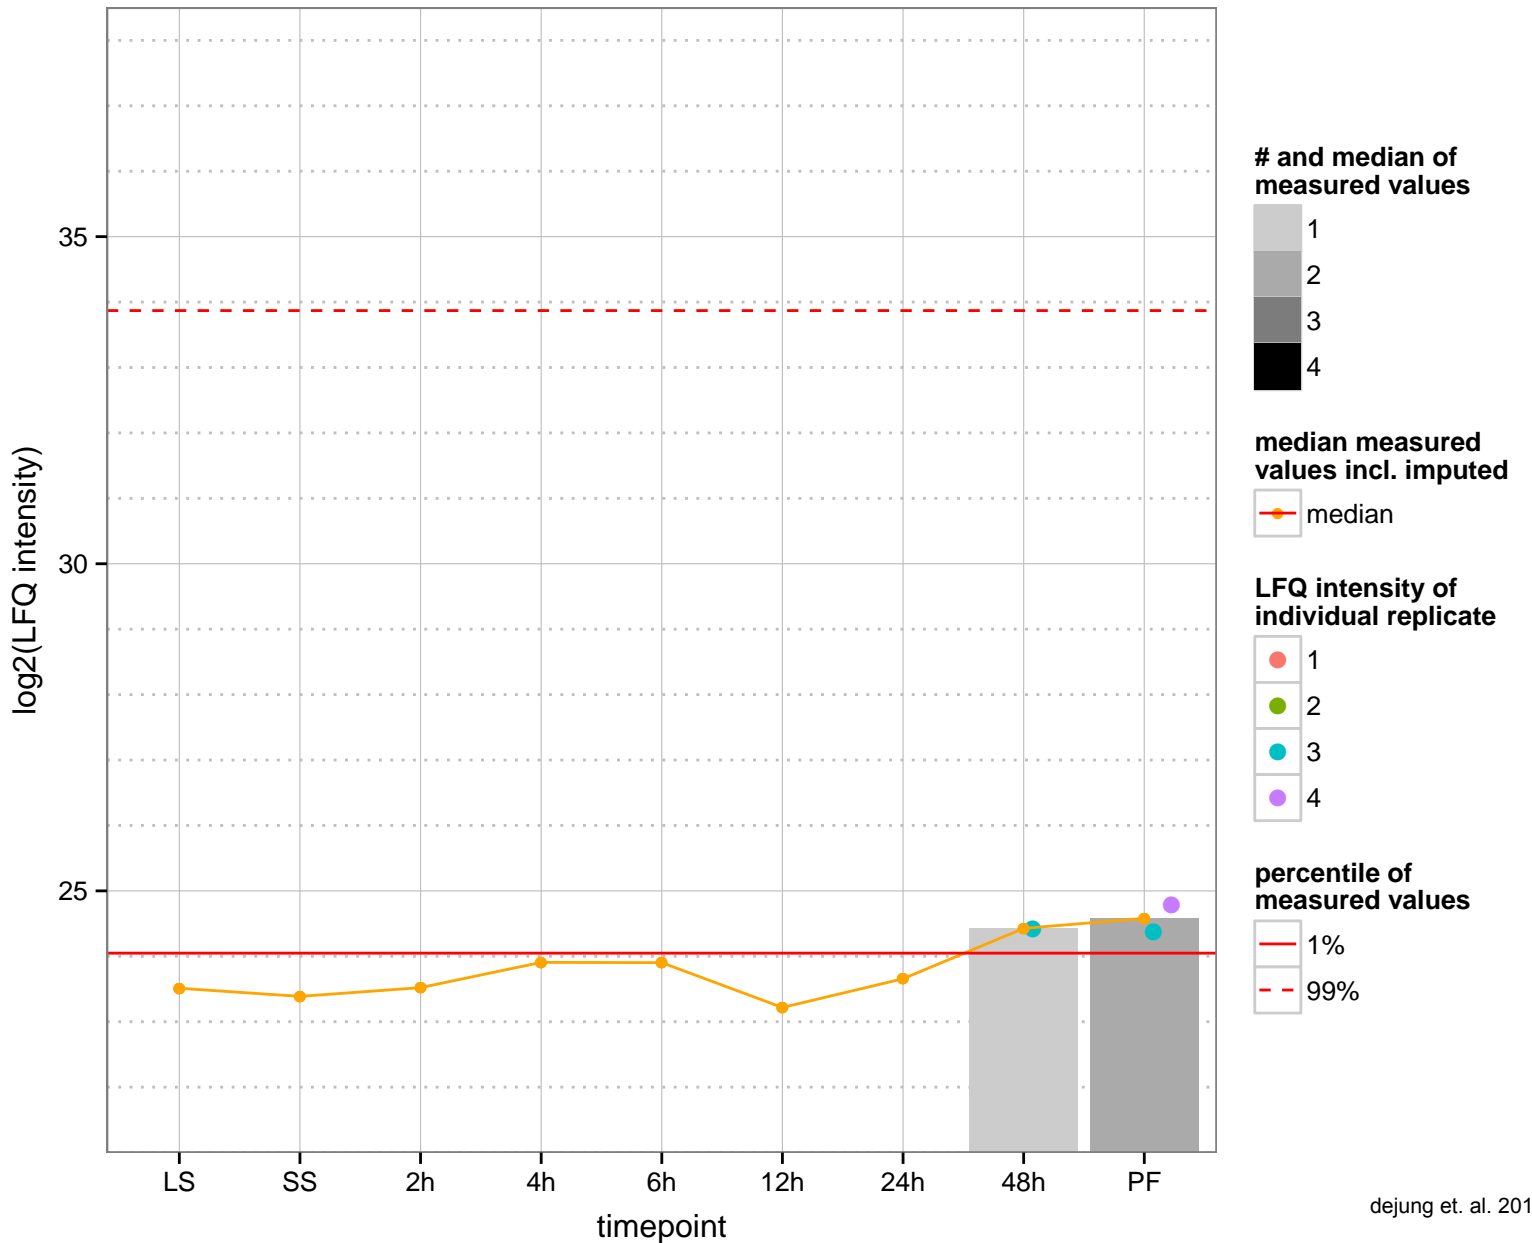

hypothetical protein, conserved  
 Tb927.11.10660;Tb11.v5.0377;Tb11.v5.0762;Tb11.v5.0378  
 AGOF: null  
 AGOC: null  
 AGOP: null, protein metabolic process  
 PGO: null  
 PGOC: null  
 PGOP: null

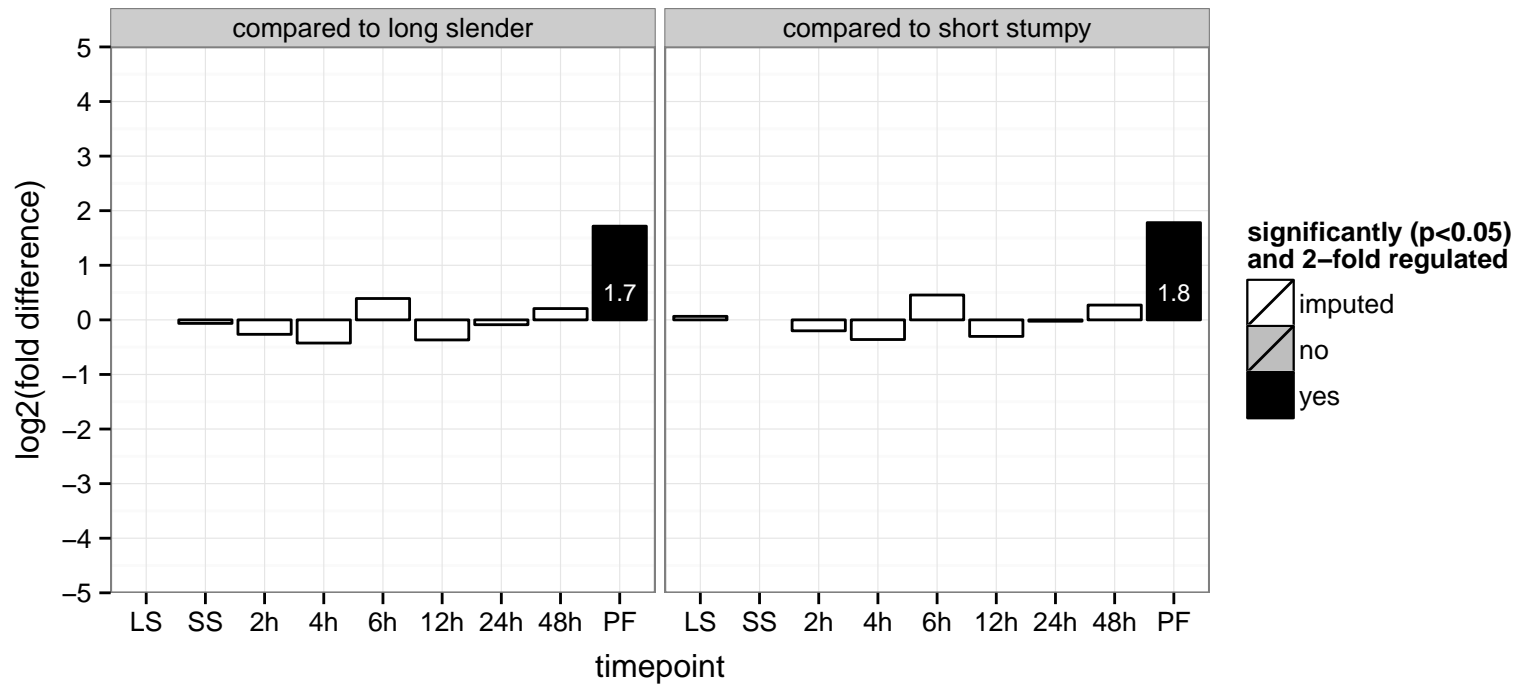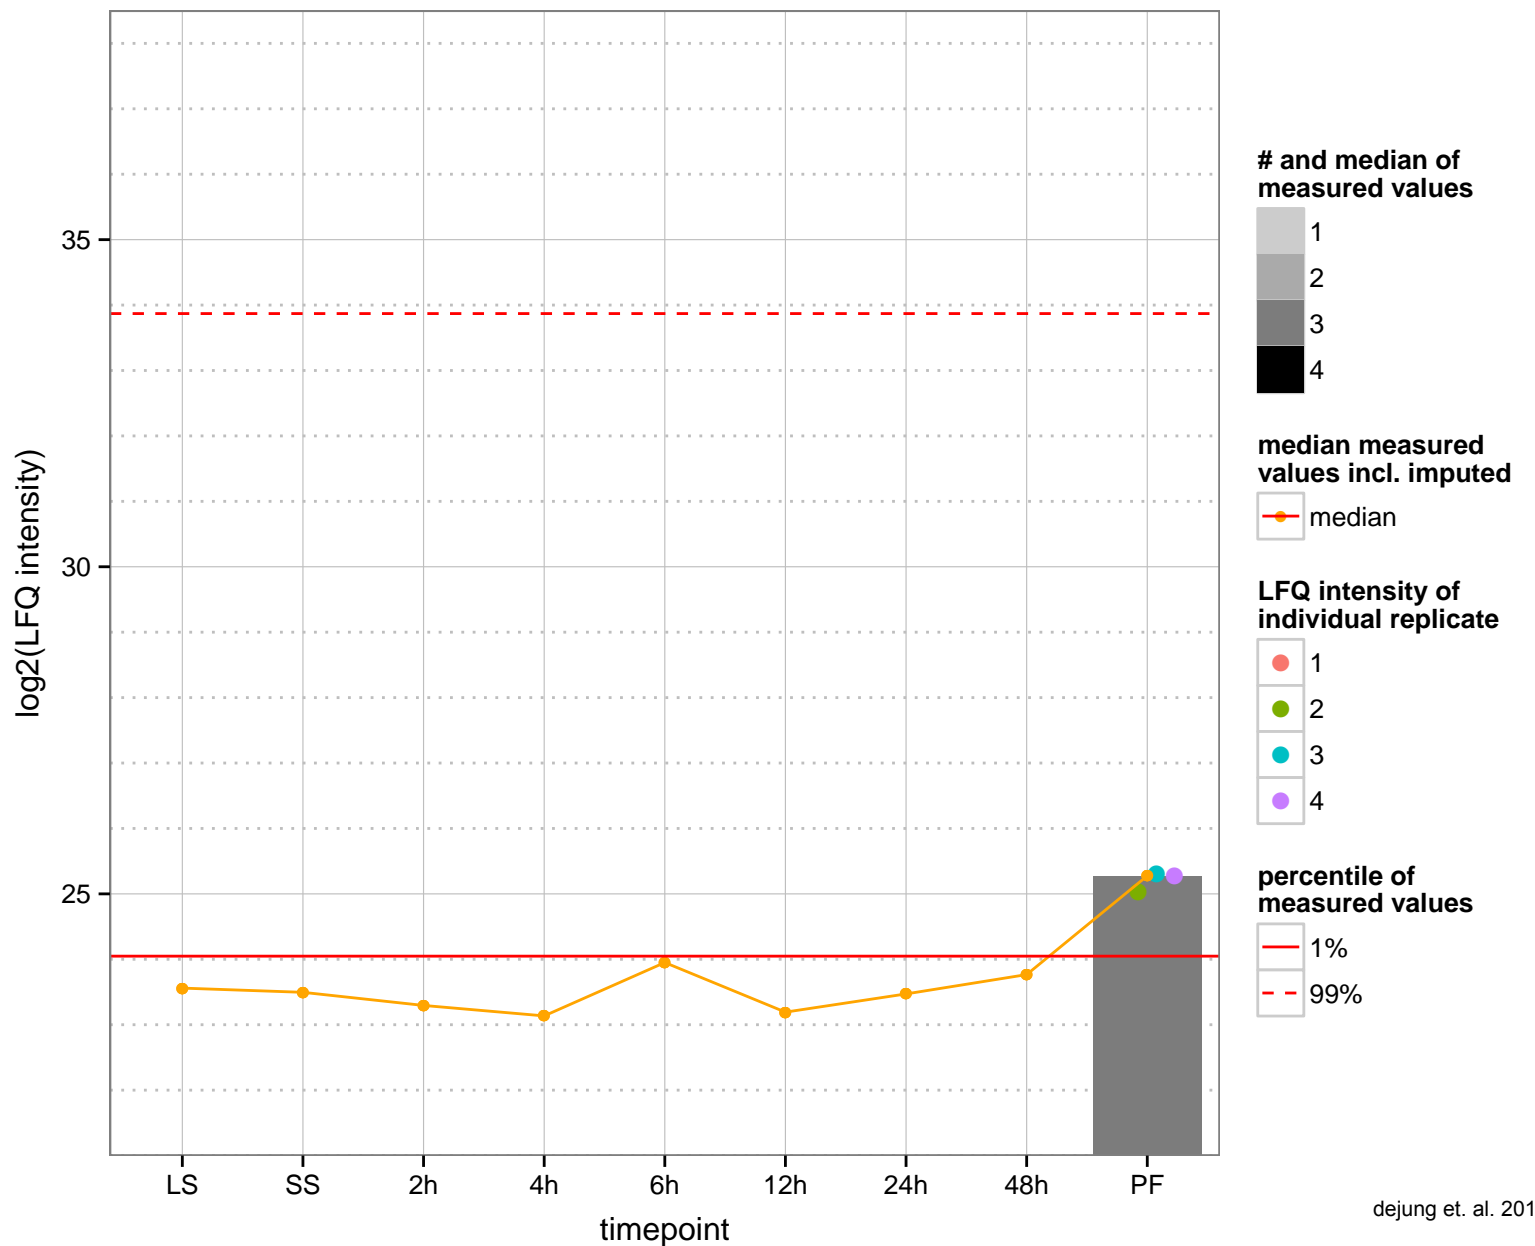



receptor for activated C kinase 1 (RACK1)  
 Tb927.11.11370;Tb927.11.11360  
 AGOF: protein kinase C binding  
 AGOC: ribosome  
 AGOP: apoptotic process, regulation of cytokinesis  
 PGOF: null, protein binding  
 PGO: null  
 PGOP: null

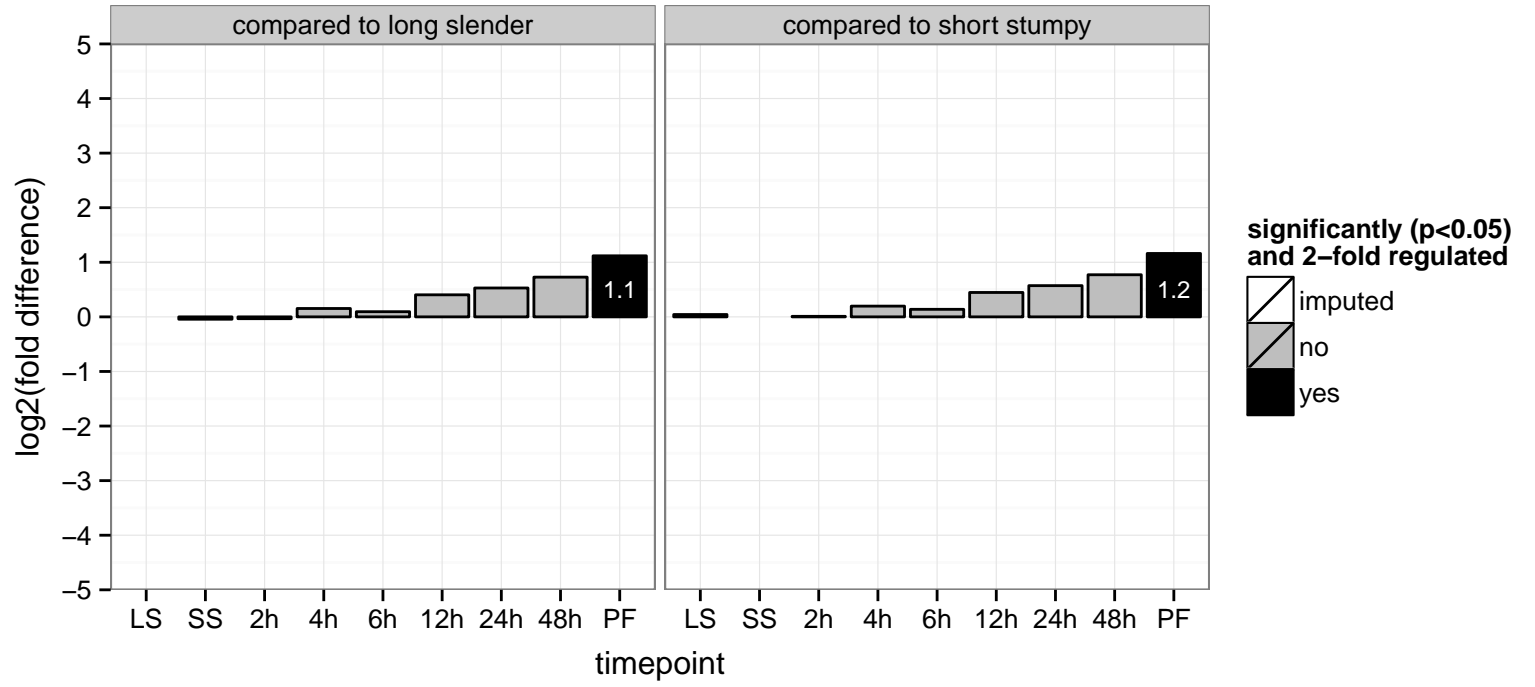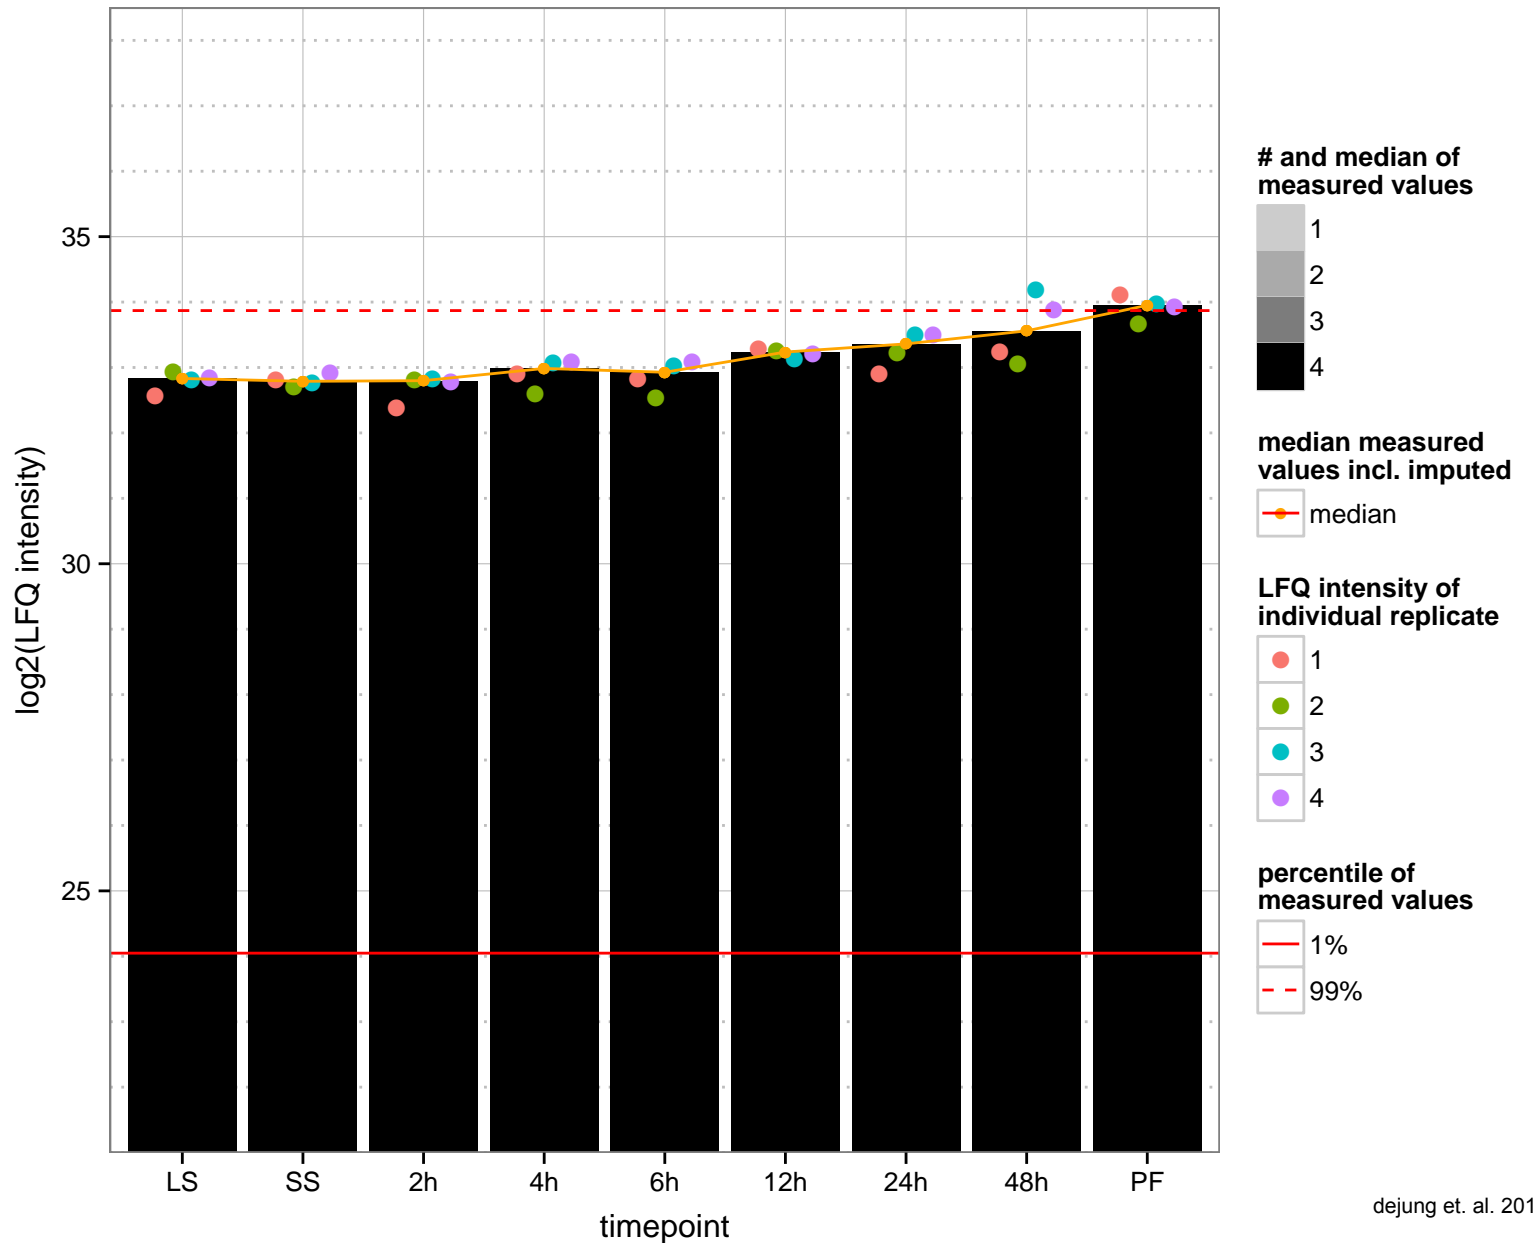

DNA replication licensing factor MCM6, putative  
 Tb927.11.11640  
 AGOF: ATP binding, DNA binding  
 AGOC: nucleus  
 AGOP: DNA replication, DNA-dependent DNA replication initiation  
 PGO: ATP binding, DNA binding  
 PGO: null  
 PGO: DNA replication

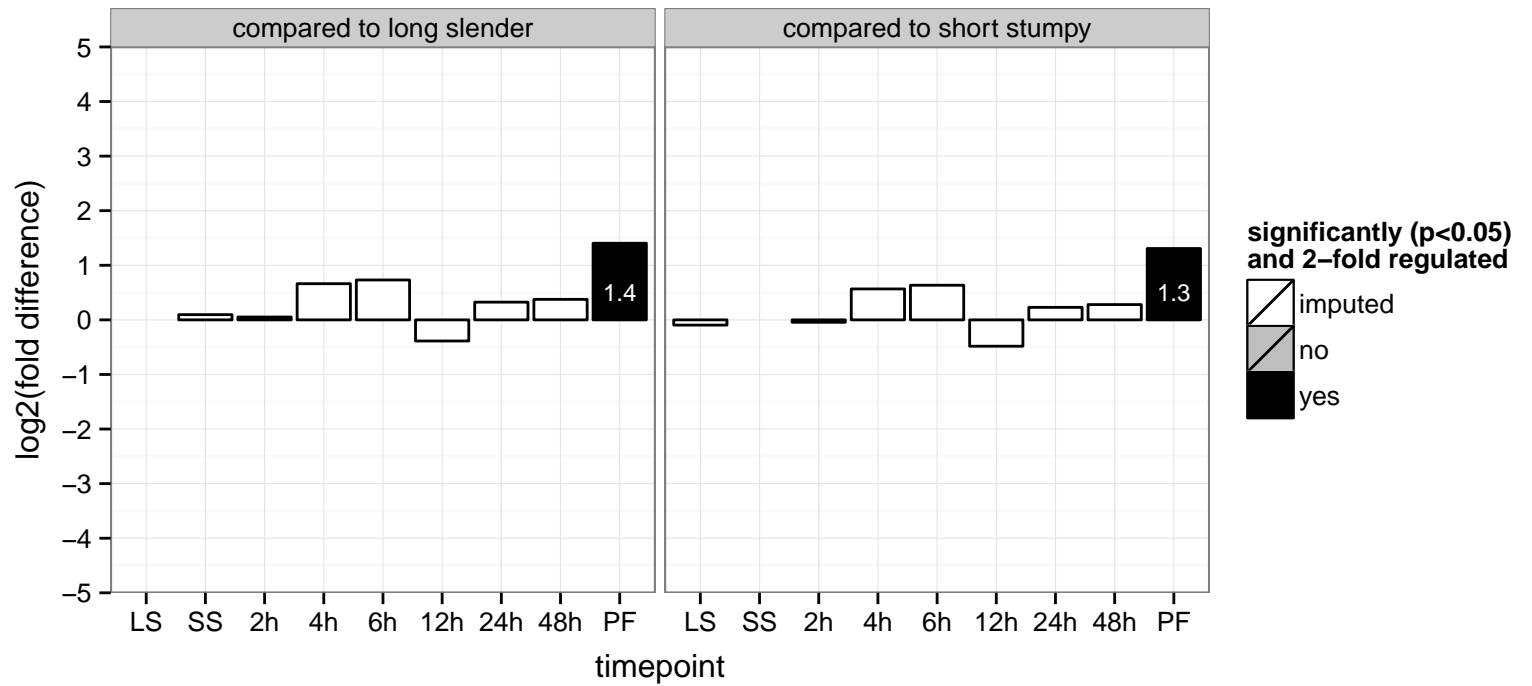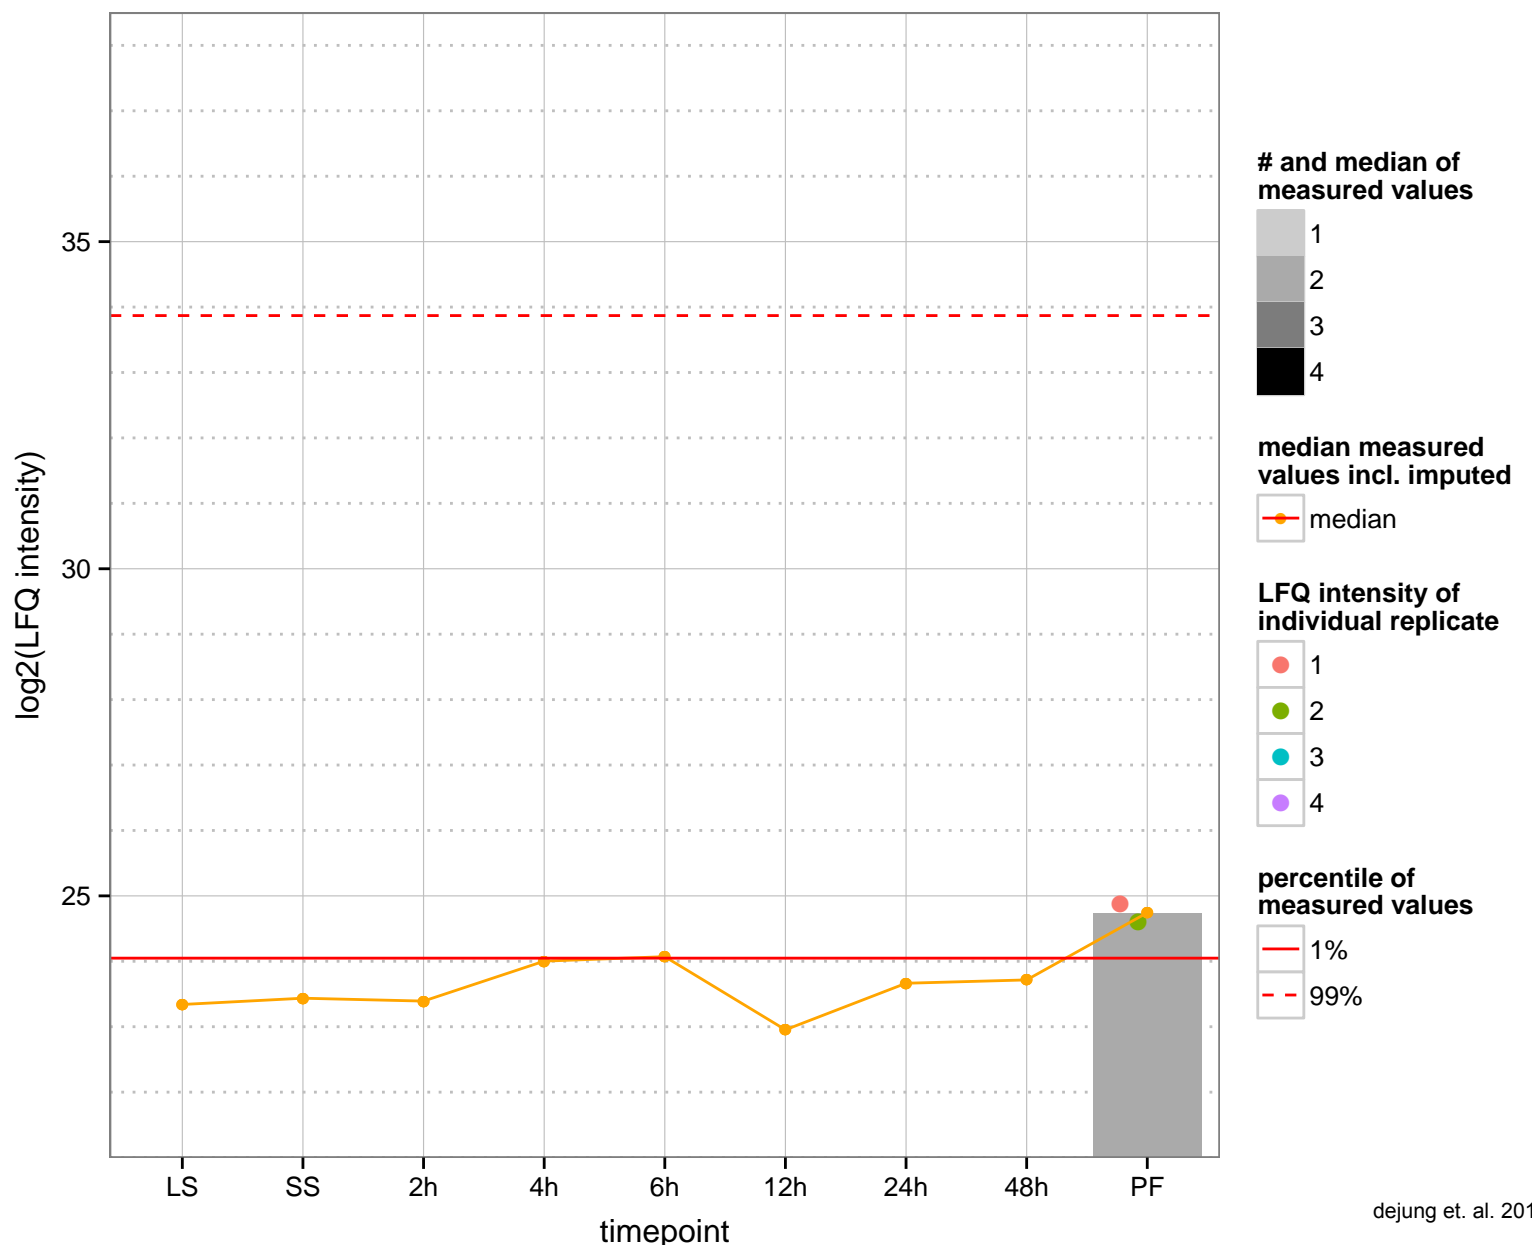

acyl-CoA dehydrogenase, putative

Tb927.11.11780

AGOF: oxidoreductase activity, oxidoreductase activity, acting on the CH-CH group of donors

AGOC: null

AGOP: metabolic process, oxidation-reduction process

PGOF: oxidoreductase activity, acting on the CH-CH group of donors

PGOC: null

PGOP: metabolic process, oxidation-reduction process

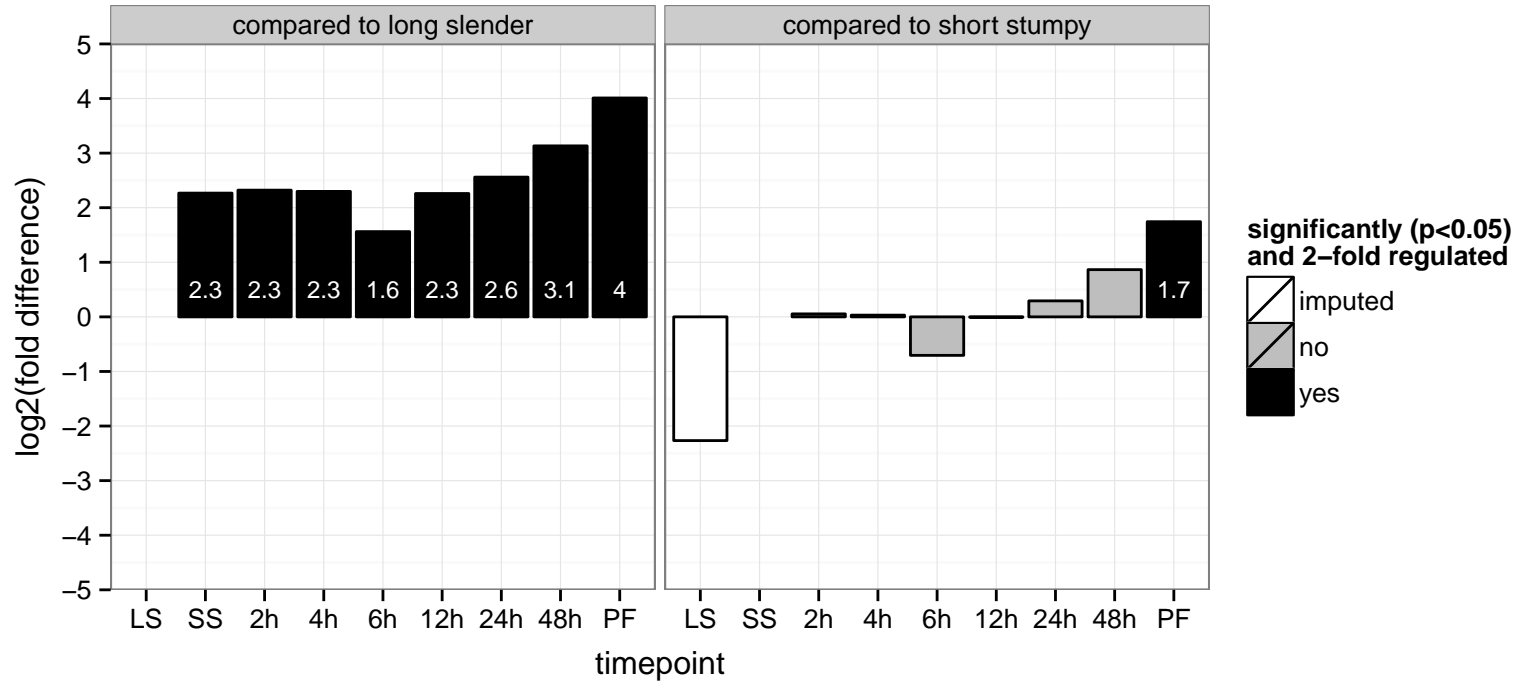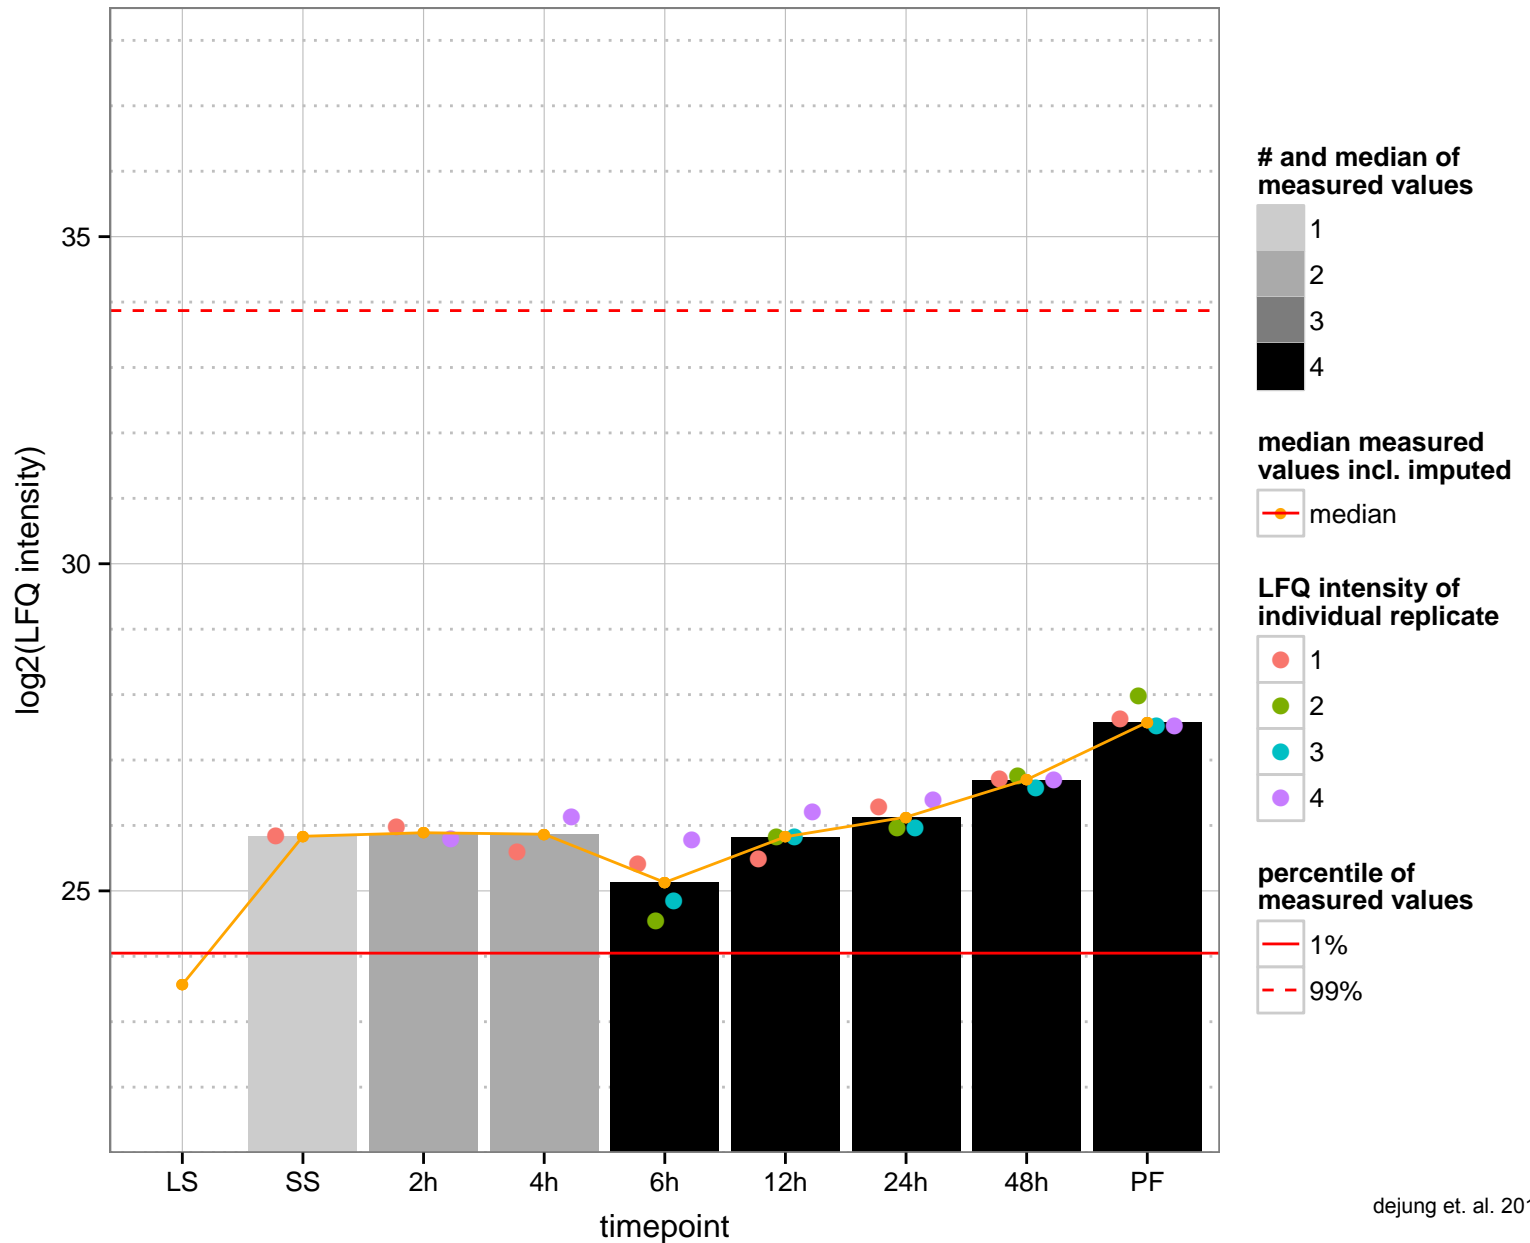

40S ribosomal protein S17, putative  
 Tb927.11.11830;Tb927.11.11820  
 AGOF: structural constituent of ribosome  
 AGOC: intracellular, ribosome  
 AGOP: translation  
 PGO: structural constituent of ribosome, null  
 PGOC: intracellular, ribosome, null  
 PGOP: translation, null

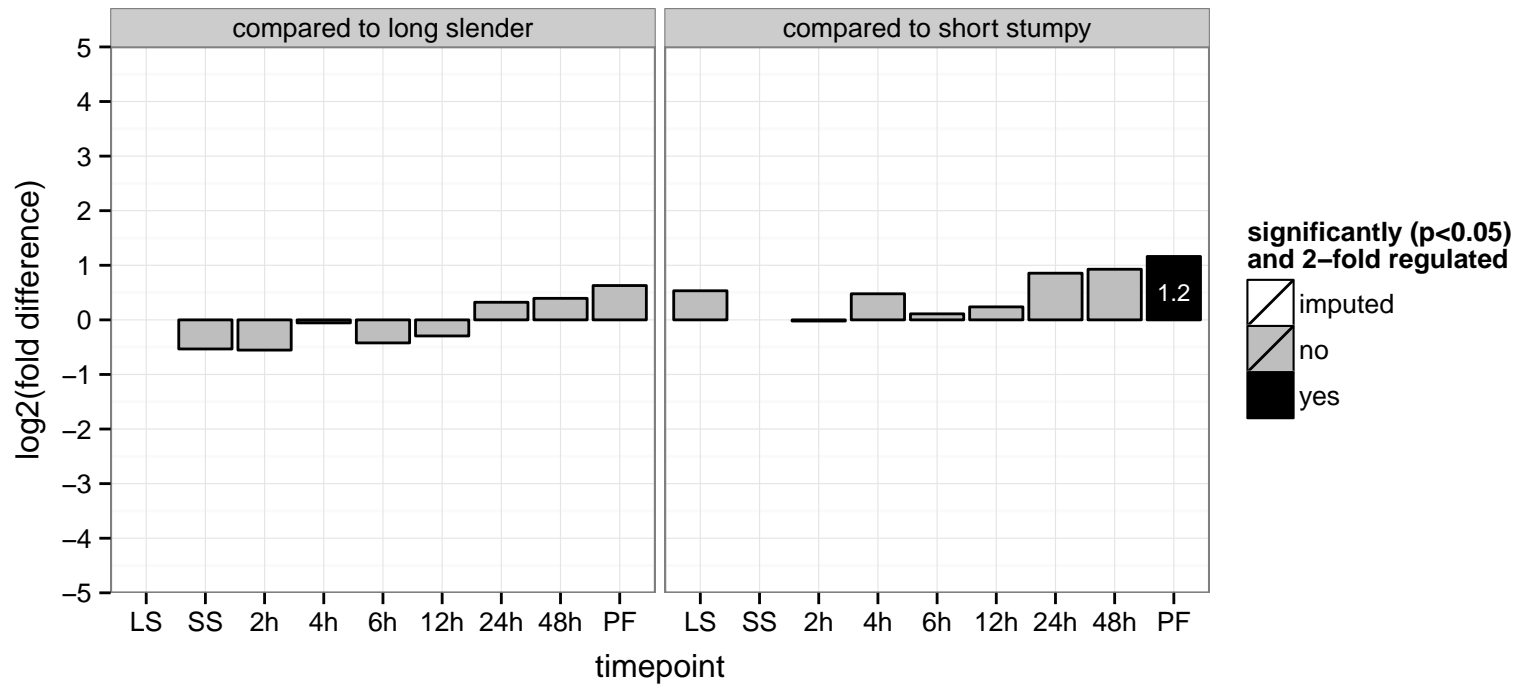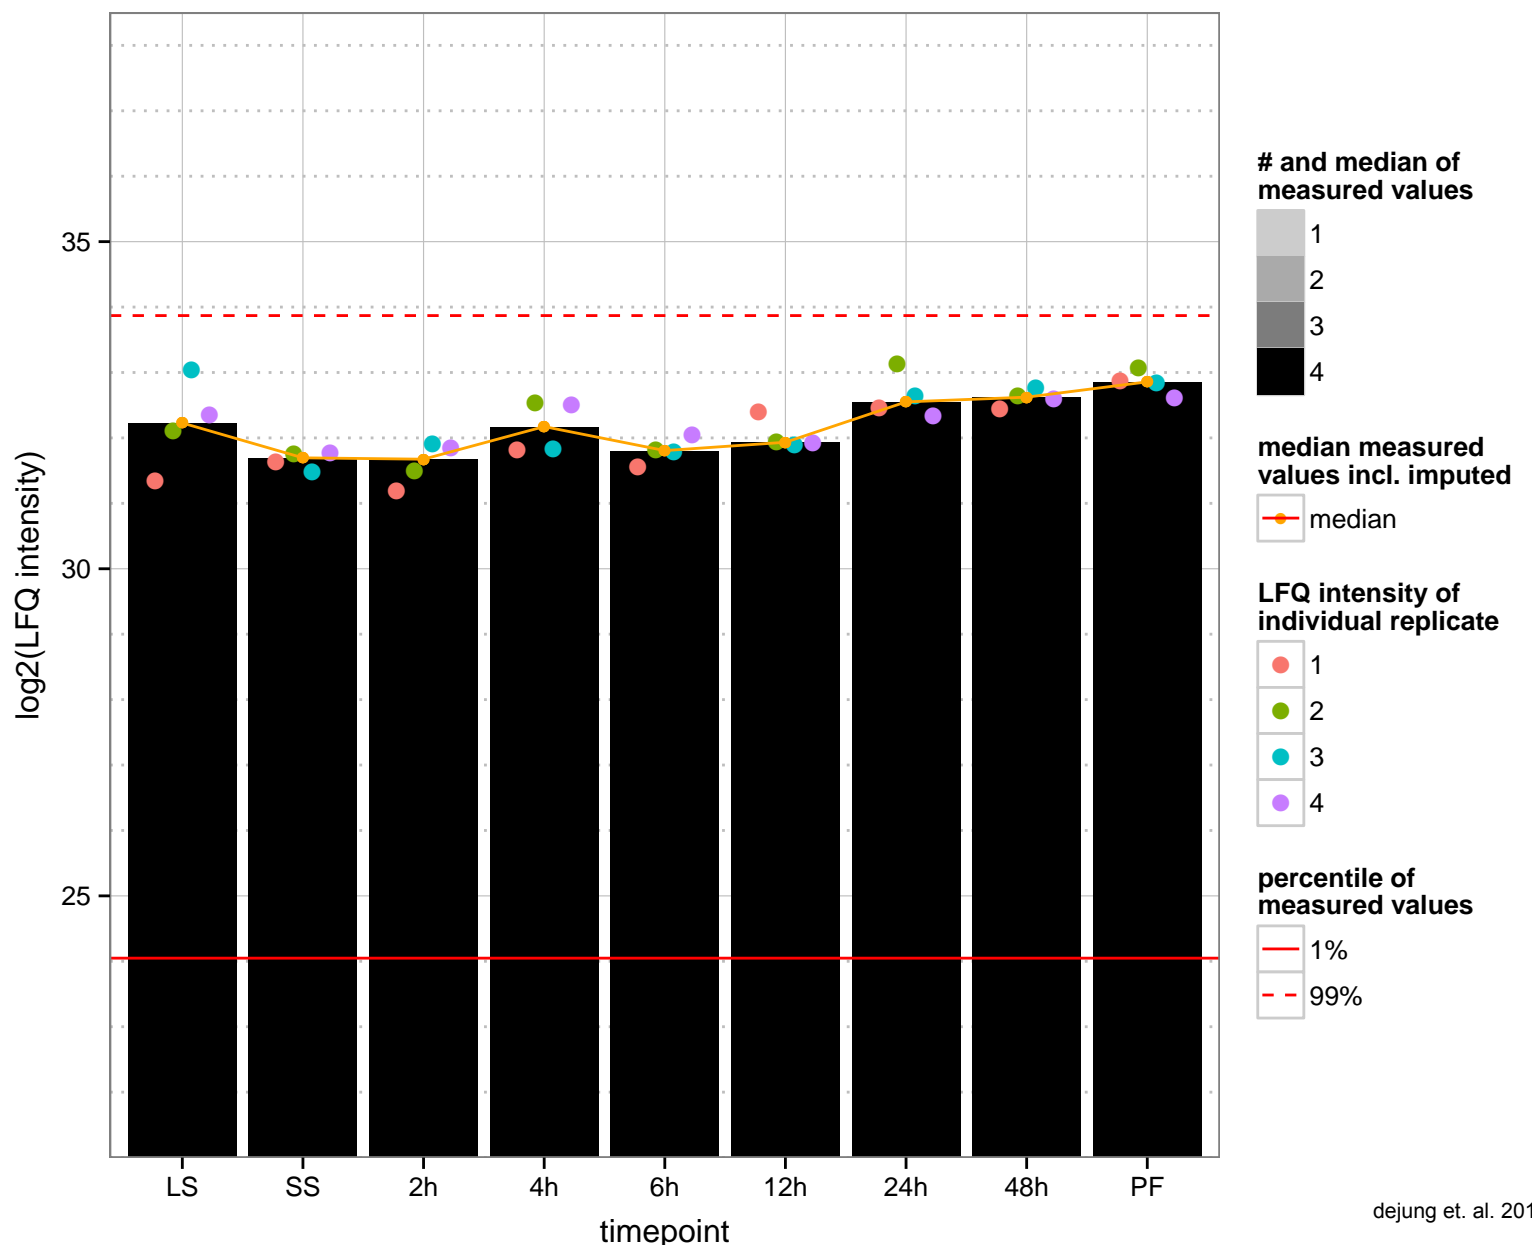

hypothetical protein, conserved  
 Tb927.11.12030  
 AGOF: null  
 AGOC: null  
 AGOP: null  
 PGO: protein binding  
 PGOC: null  
 PGOP: null

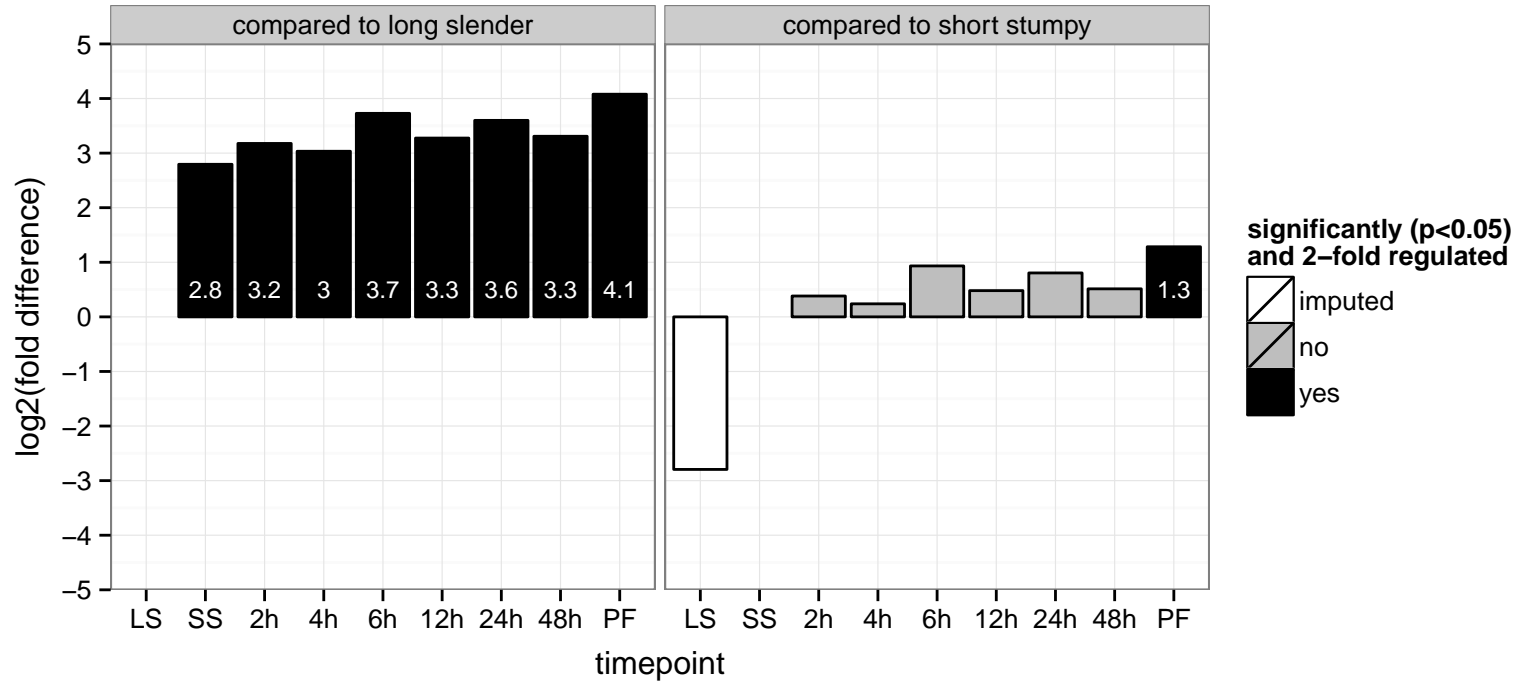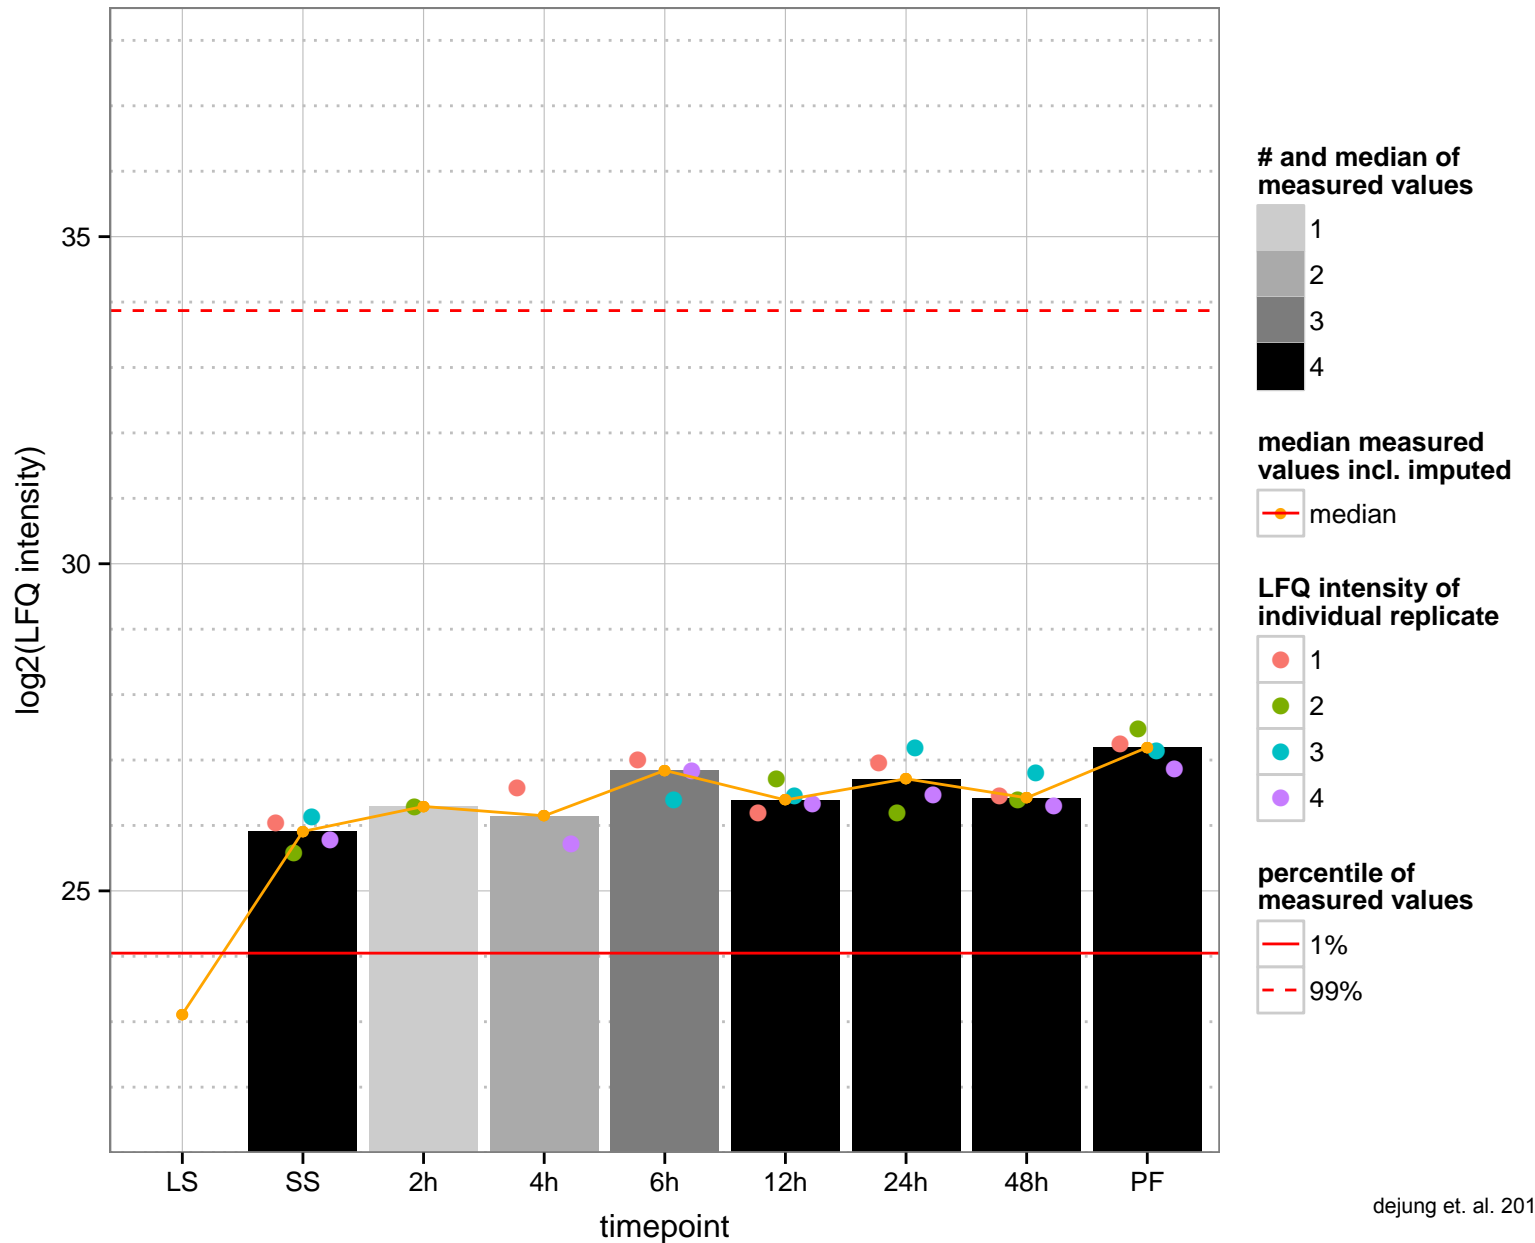

flagellar protein essential for flagellar pocket biogenesis (BILBO1)

Tb927.11.12150

AGOF: calcium ion binding

AGOC: null

AGOP: null

PGOF: calcium ion binding

PGOC: null

PGOP: null

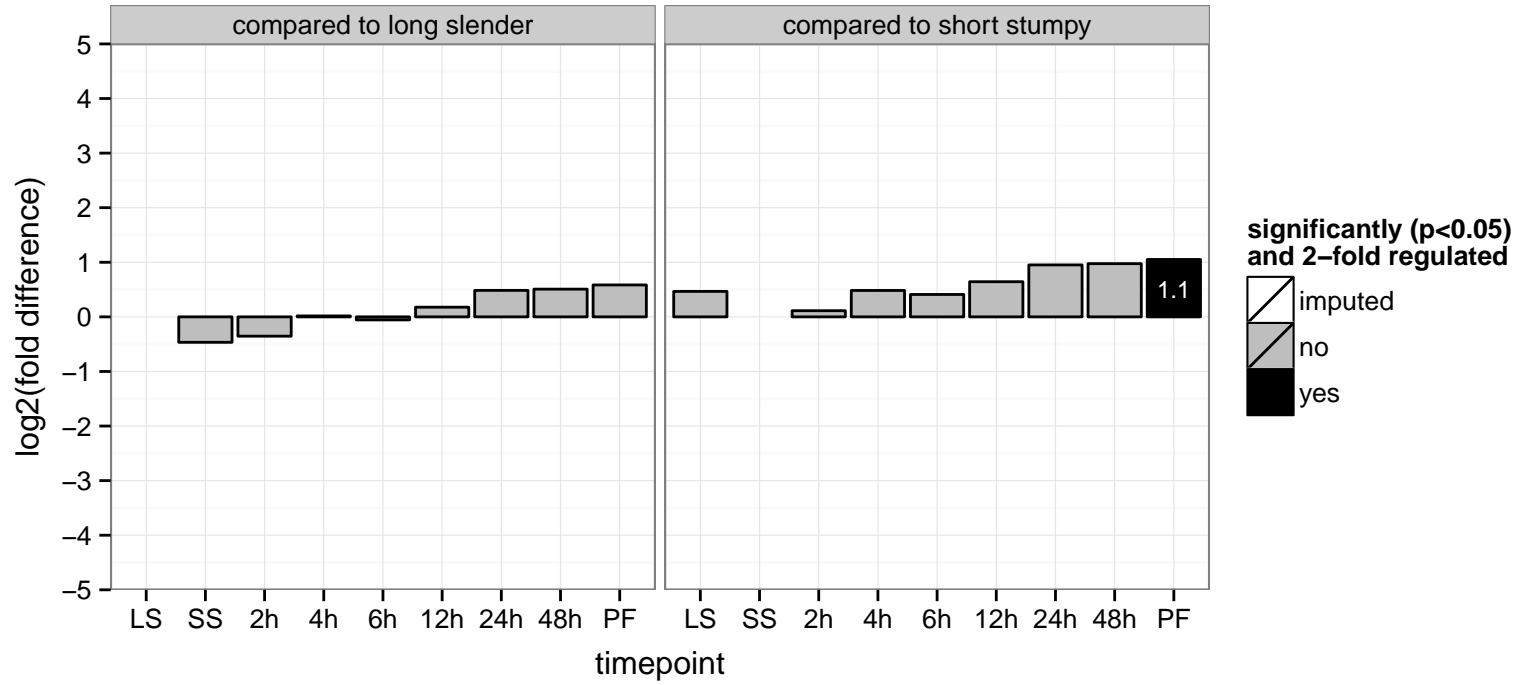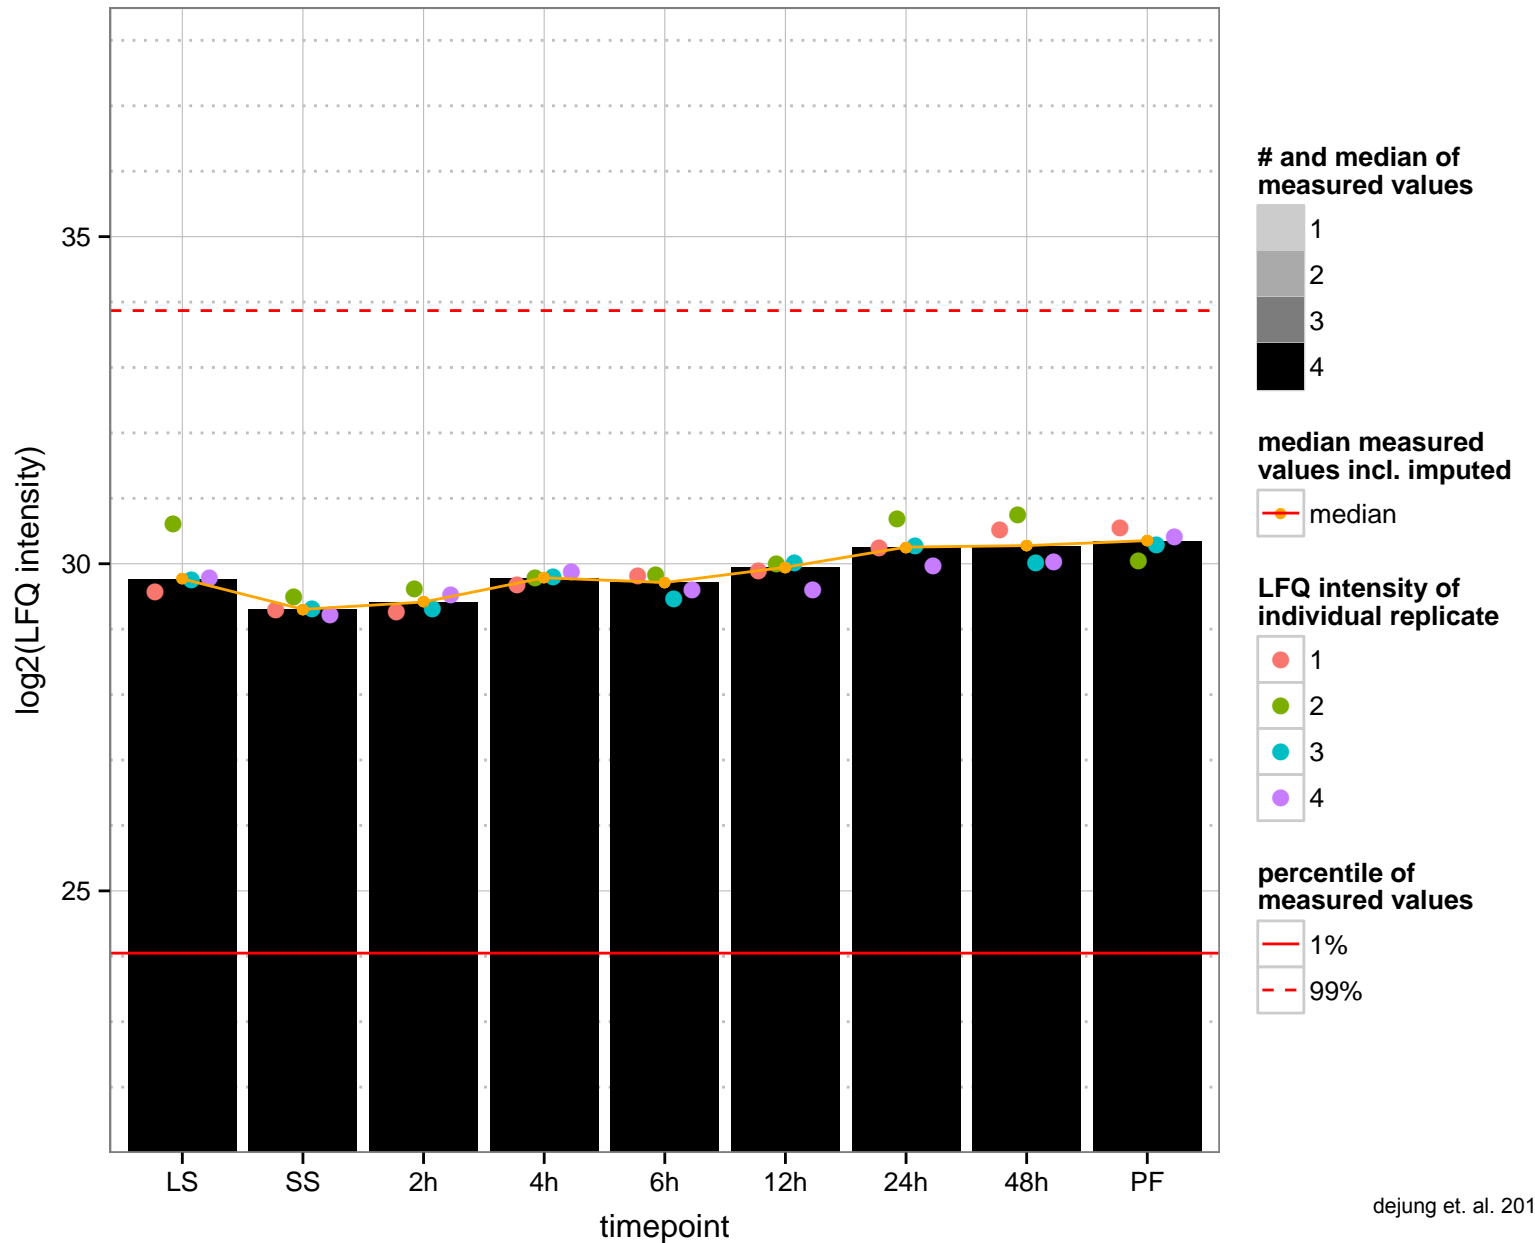

hypothetical protein, conserved  
 Tb927.11.12160  
 AGOF: null  
 AGOC: mitochondrion  
 AGOP: null  
 PGO: null  
 PGO: null  
 PGO: null

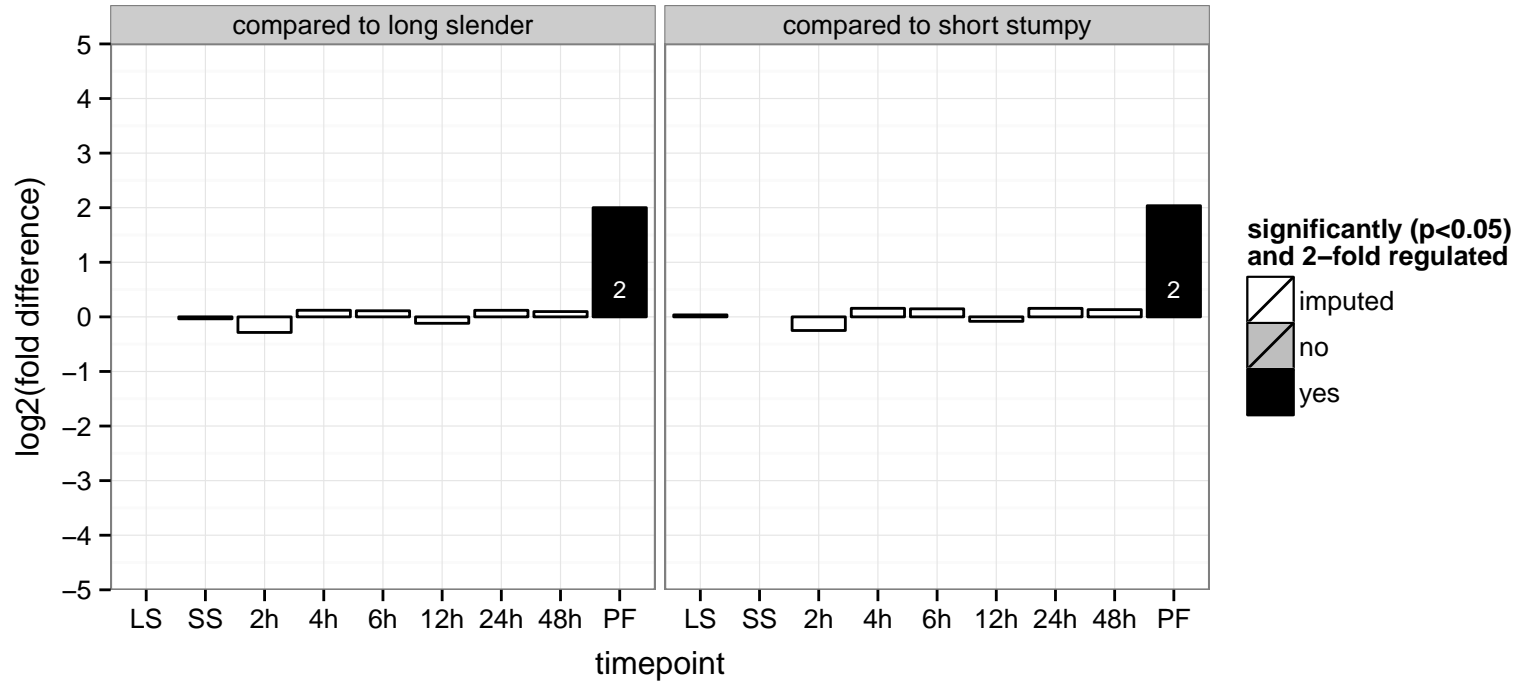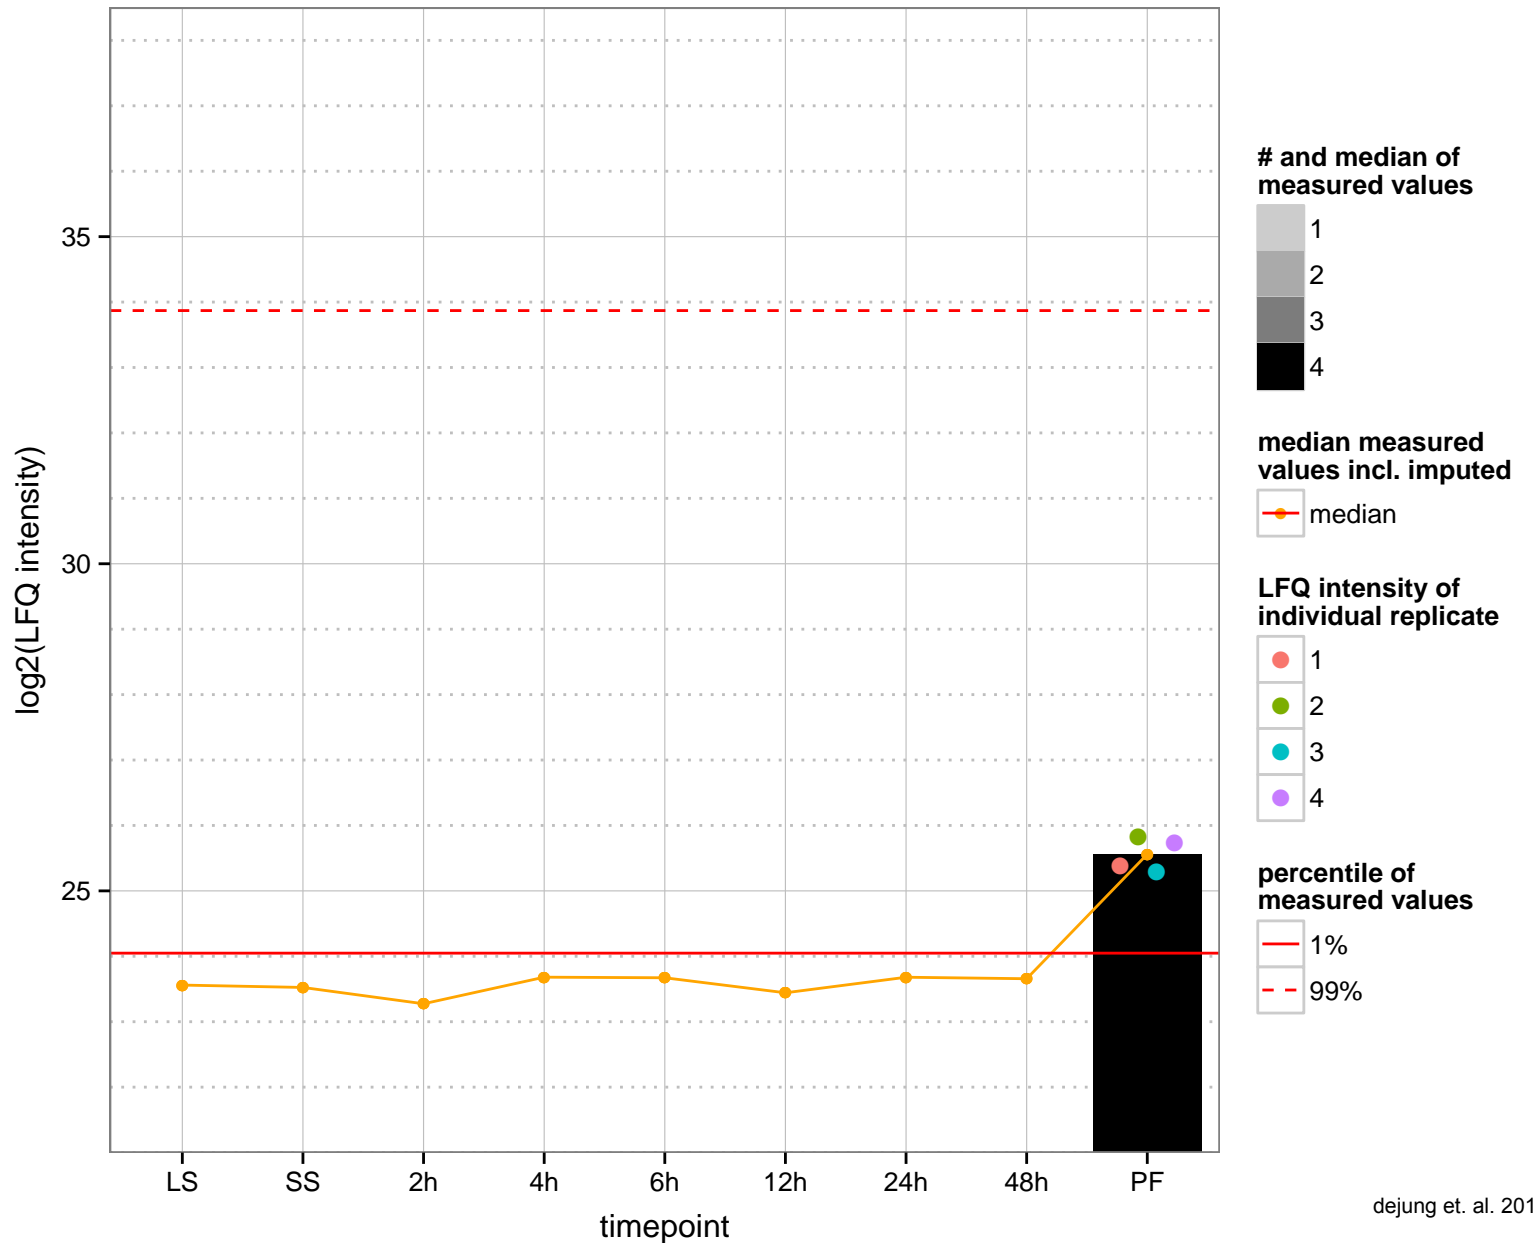

kinetoplastid kinetochore protein 10 (kkt10)

Tb927.11.12410

AGOF: ATP binding, protein serine/threonine kinase activity, protein tyrosine kinase activity

AGOC: null

AGOP: cell proliferation, mitotic cell cycle, protein phosphorylation

PGOF: ATP binding, protein kinase activity, transferase activity, transferring phosphorus-containing groups

PGOC: null

PGOP: protein phosphorylation

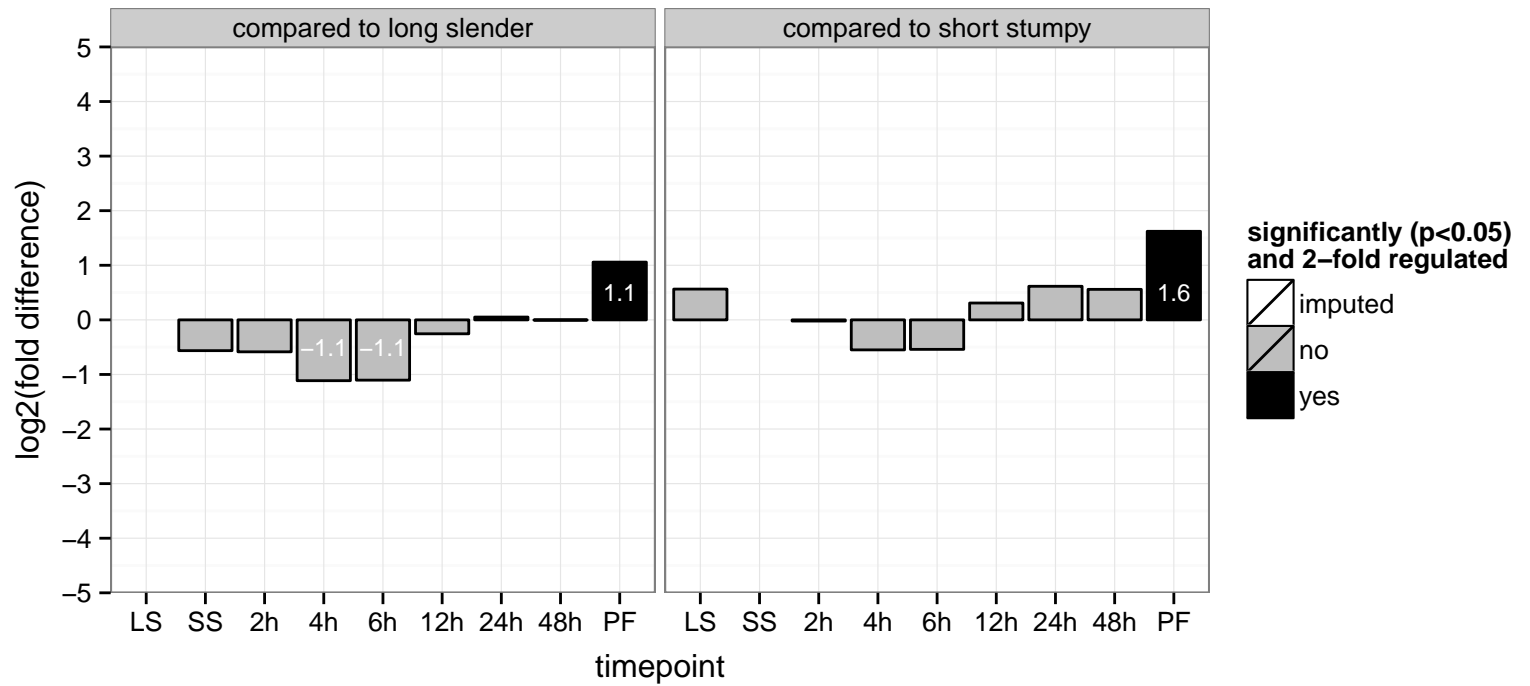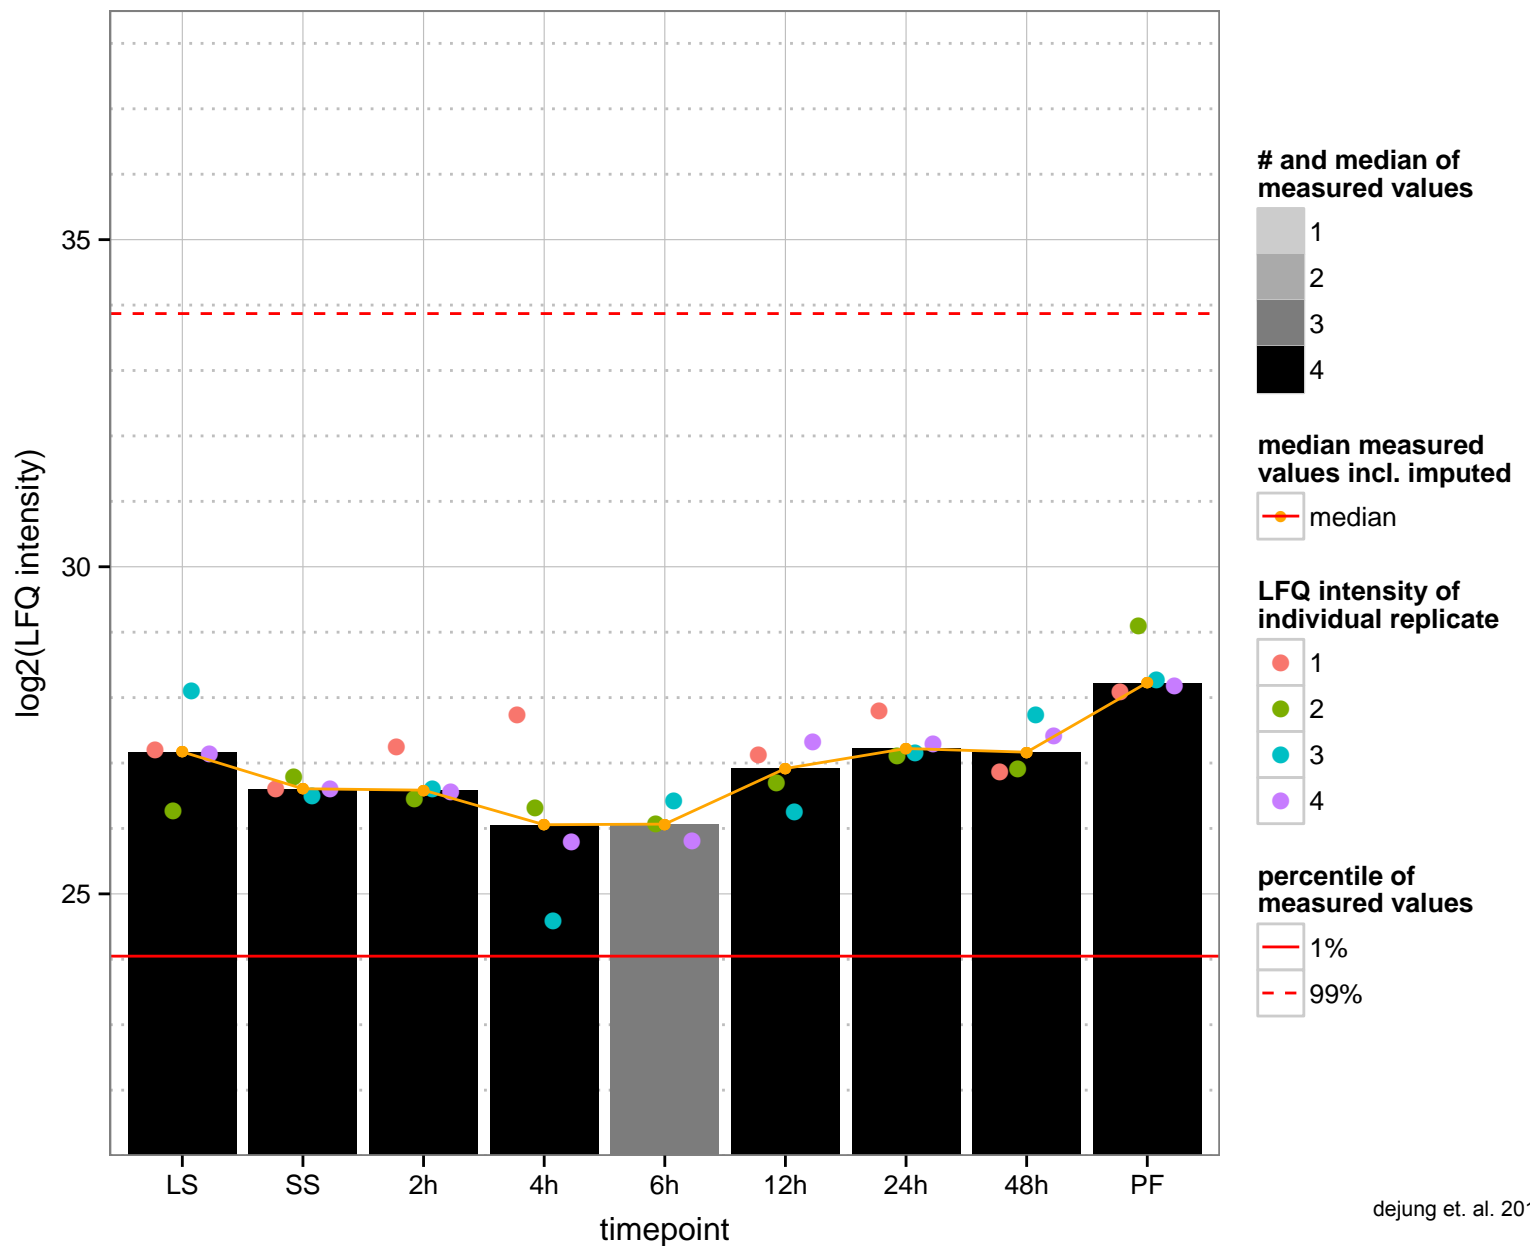



hypothetical protein  
 Tb927.11.12560  
 AGOF: null  
 AGOC: null  
 AGOP: null  
 PGO: null  
 PGOC: null  
 PGOP: null

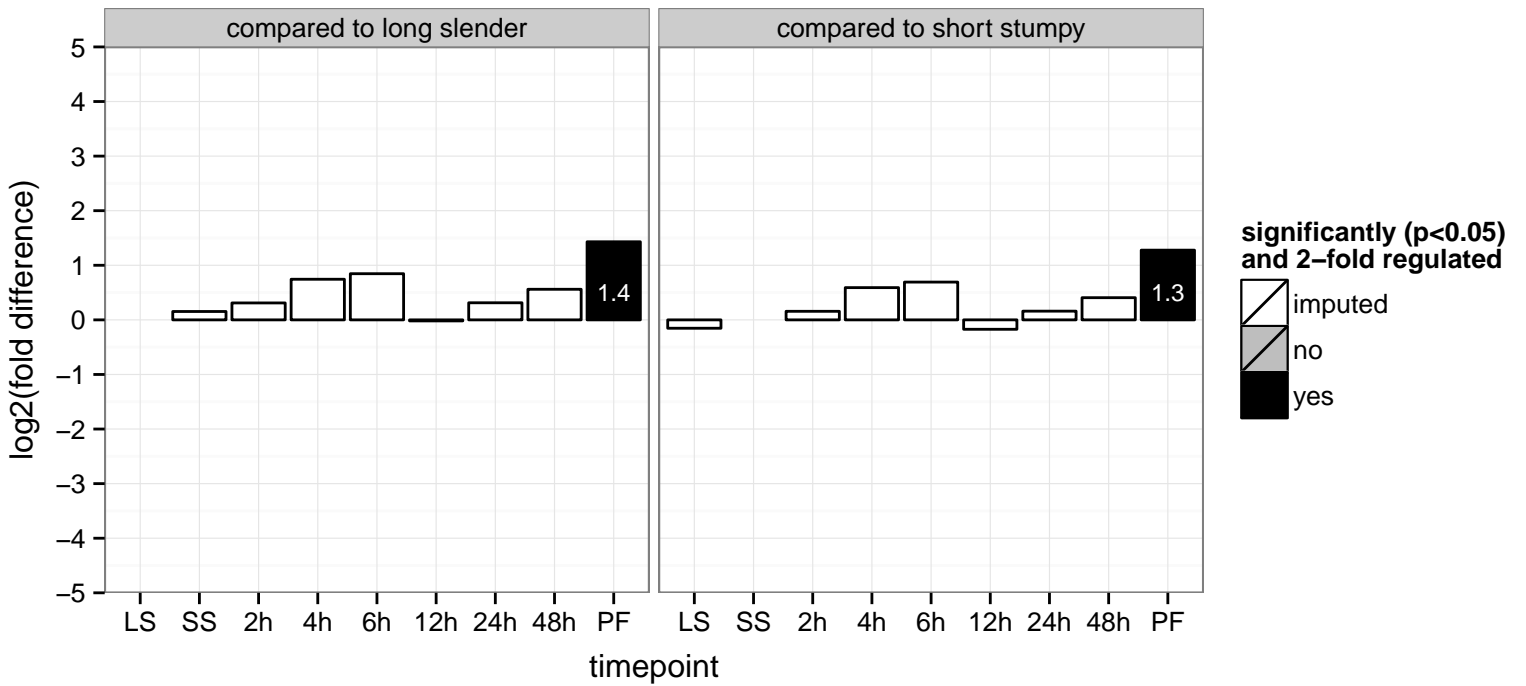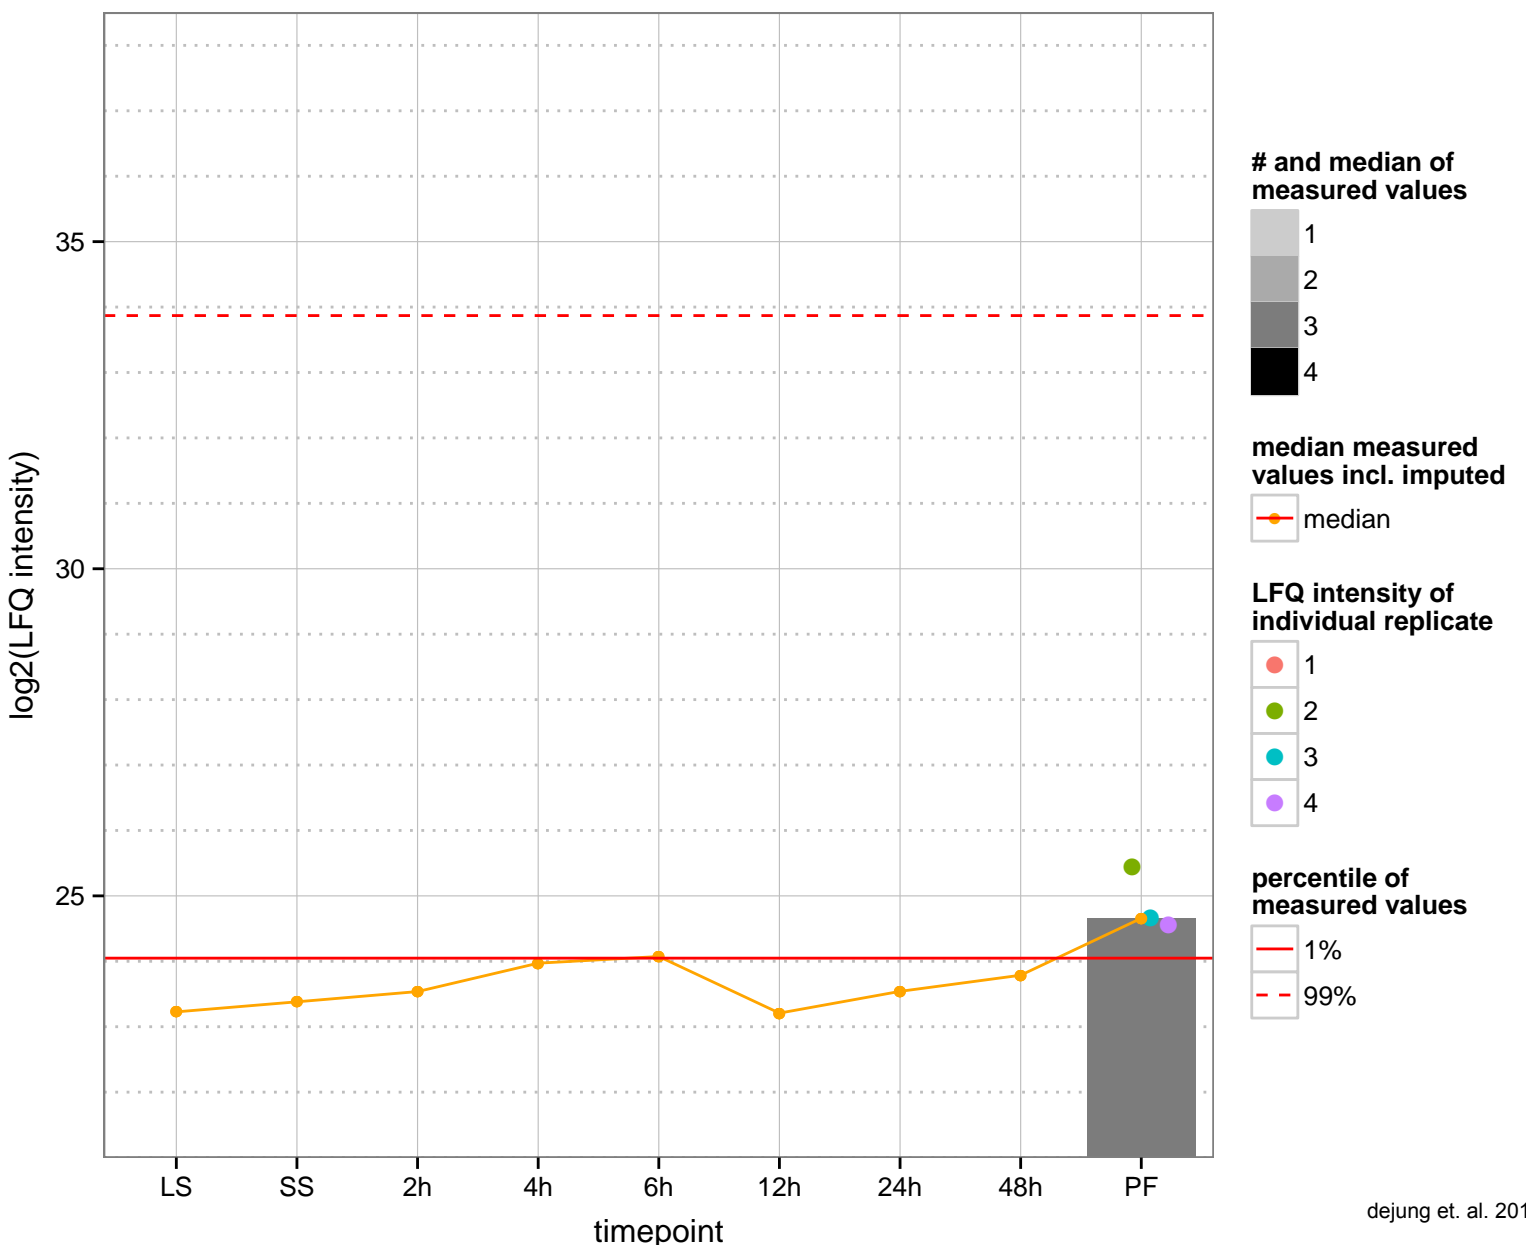

oligopeptidase b, serine peptidase, clan SC, family S9A-like protein (OPB)  
 Tb927.11.12850  
 AGOF: serine-type endopeptidase activity, serine-type peptidase activity  
 AGOC: null  
 AGOP: proteolysis  
 PGOF: serine-type endopeptidase activity, serine-type peptidase activity  
 PGO: null  
 PGOP: proteolysis

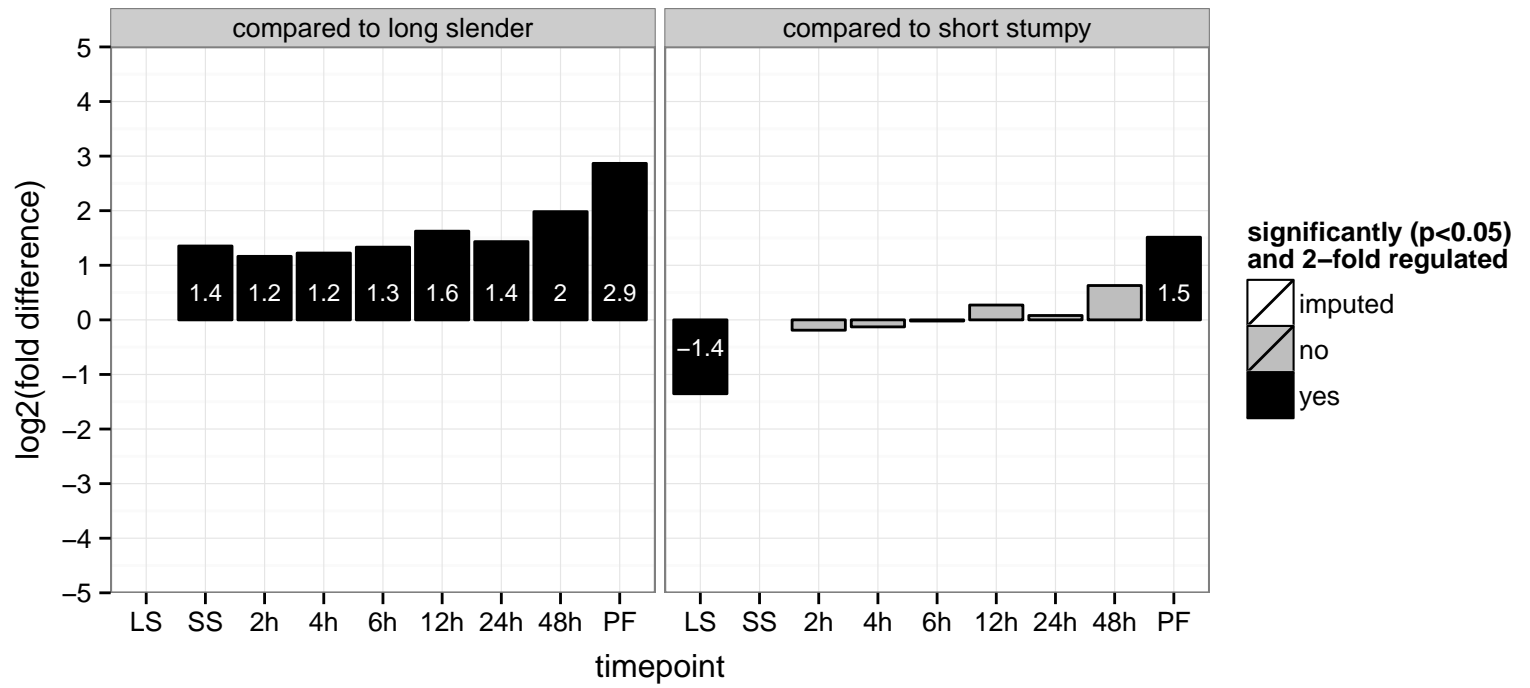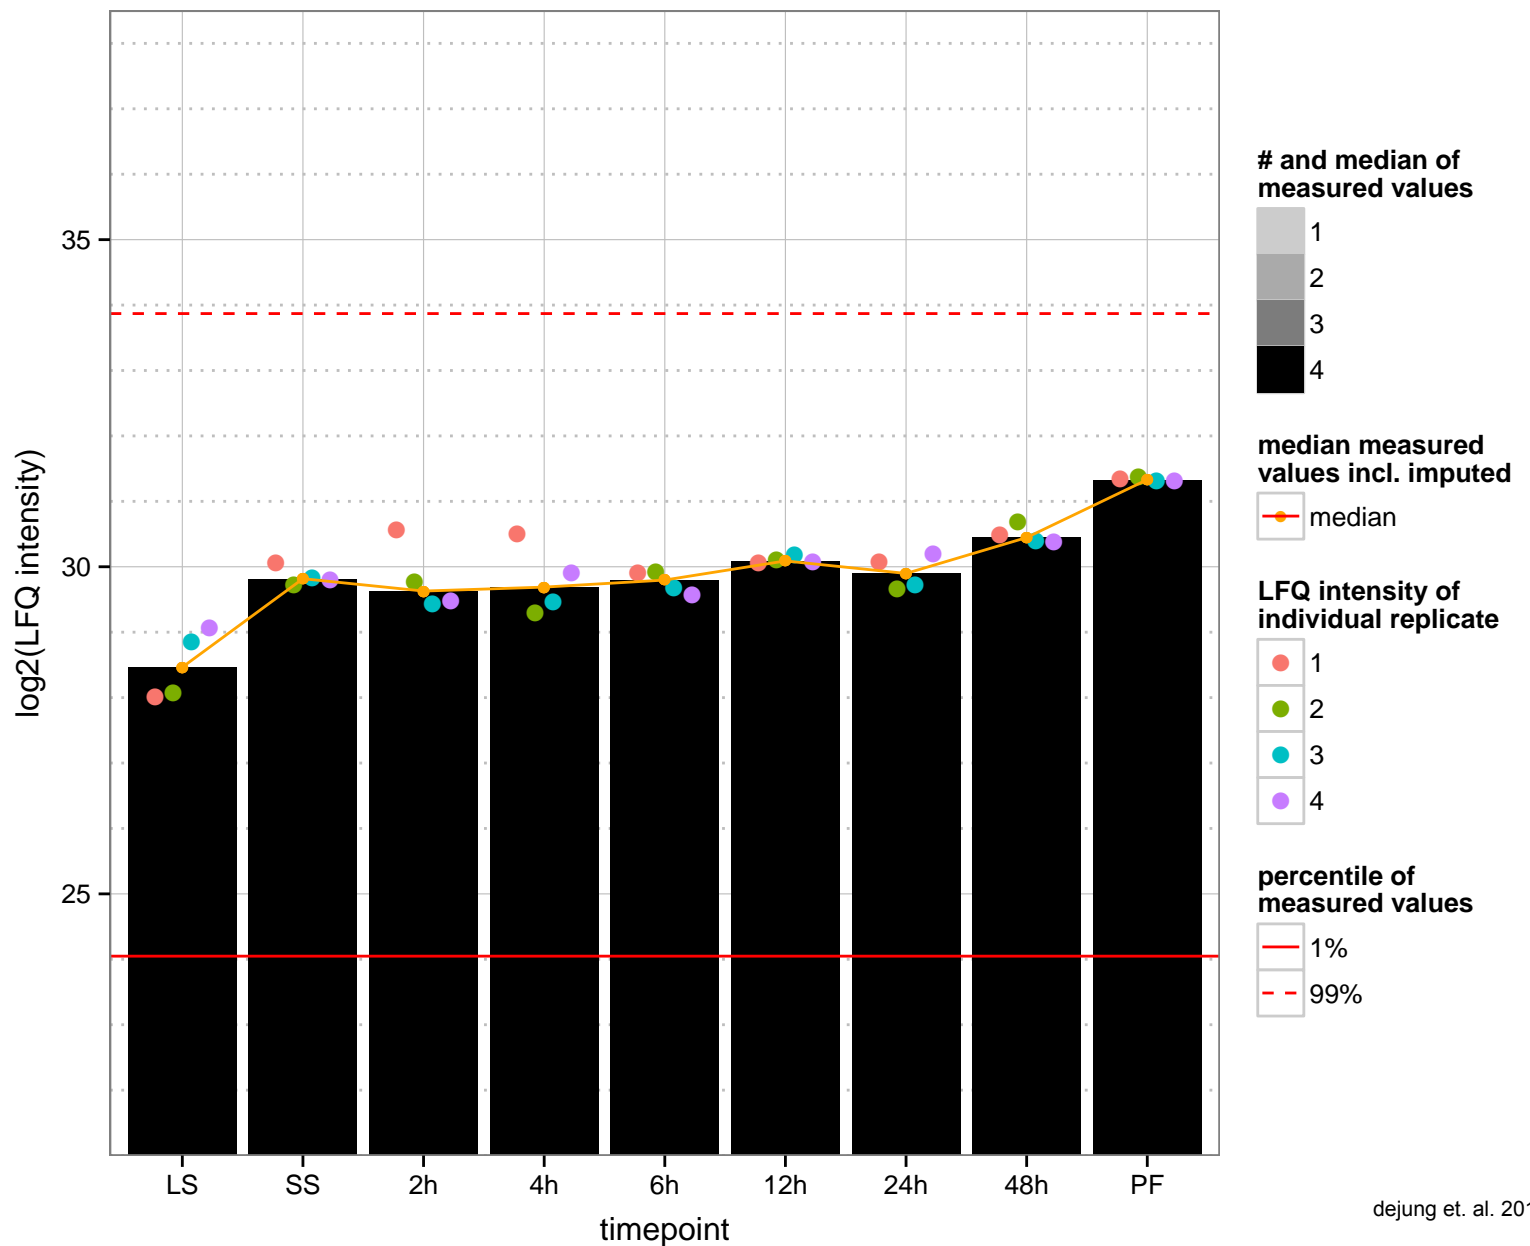

translation-associated element 2, putative  
 Tb927.11.13060  
 AGOF: null  
 AGOC: cytoplasm  
 AGOP: translation  
 PGO: null  
 PGOC: null  
 PGOP: null

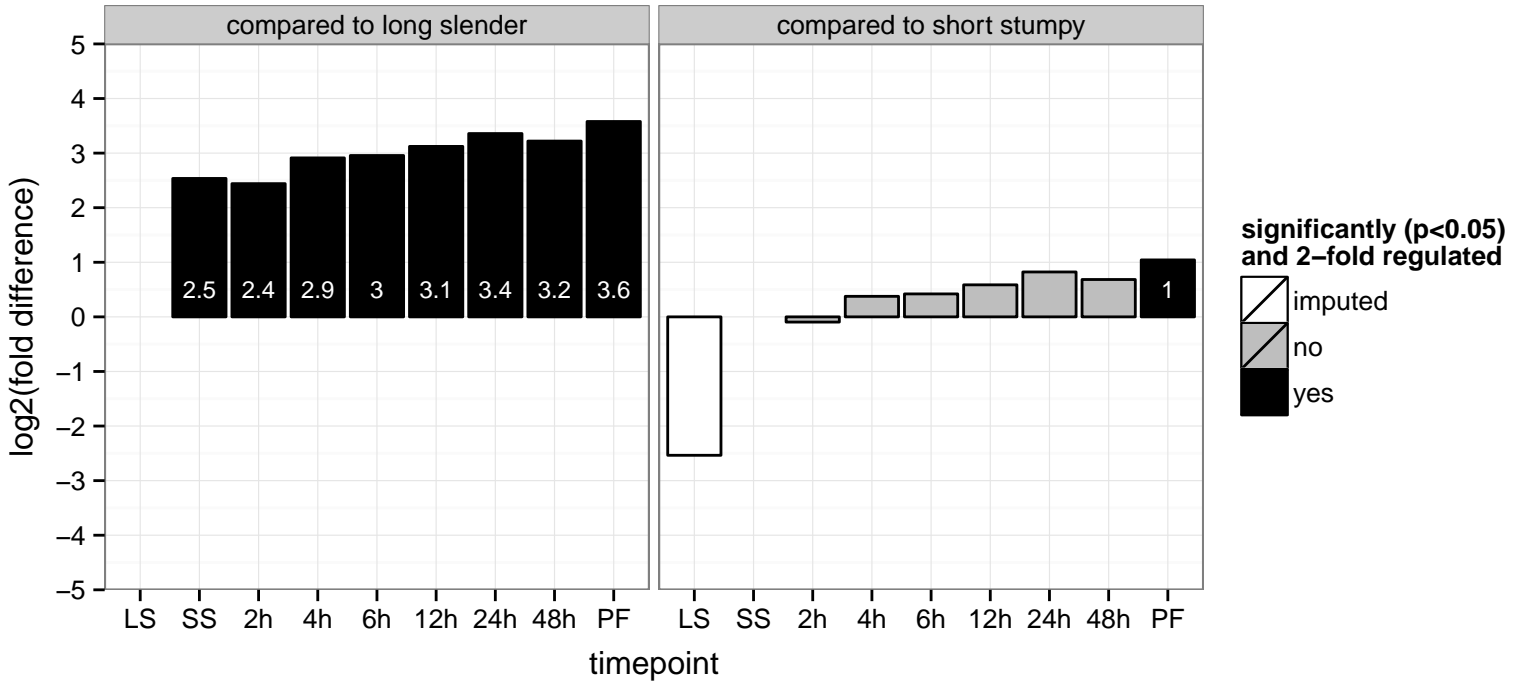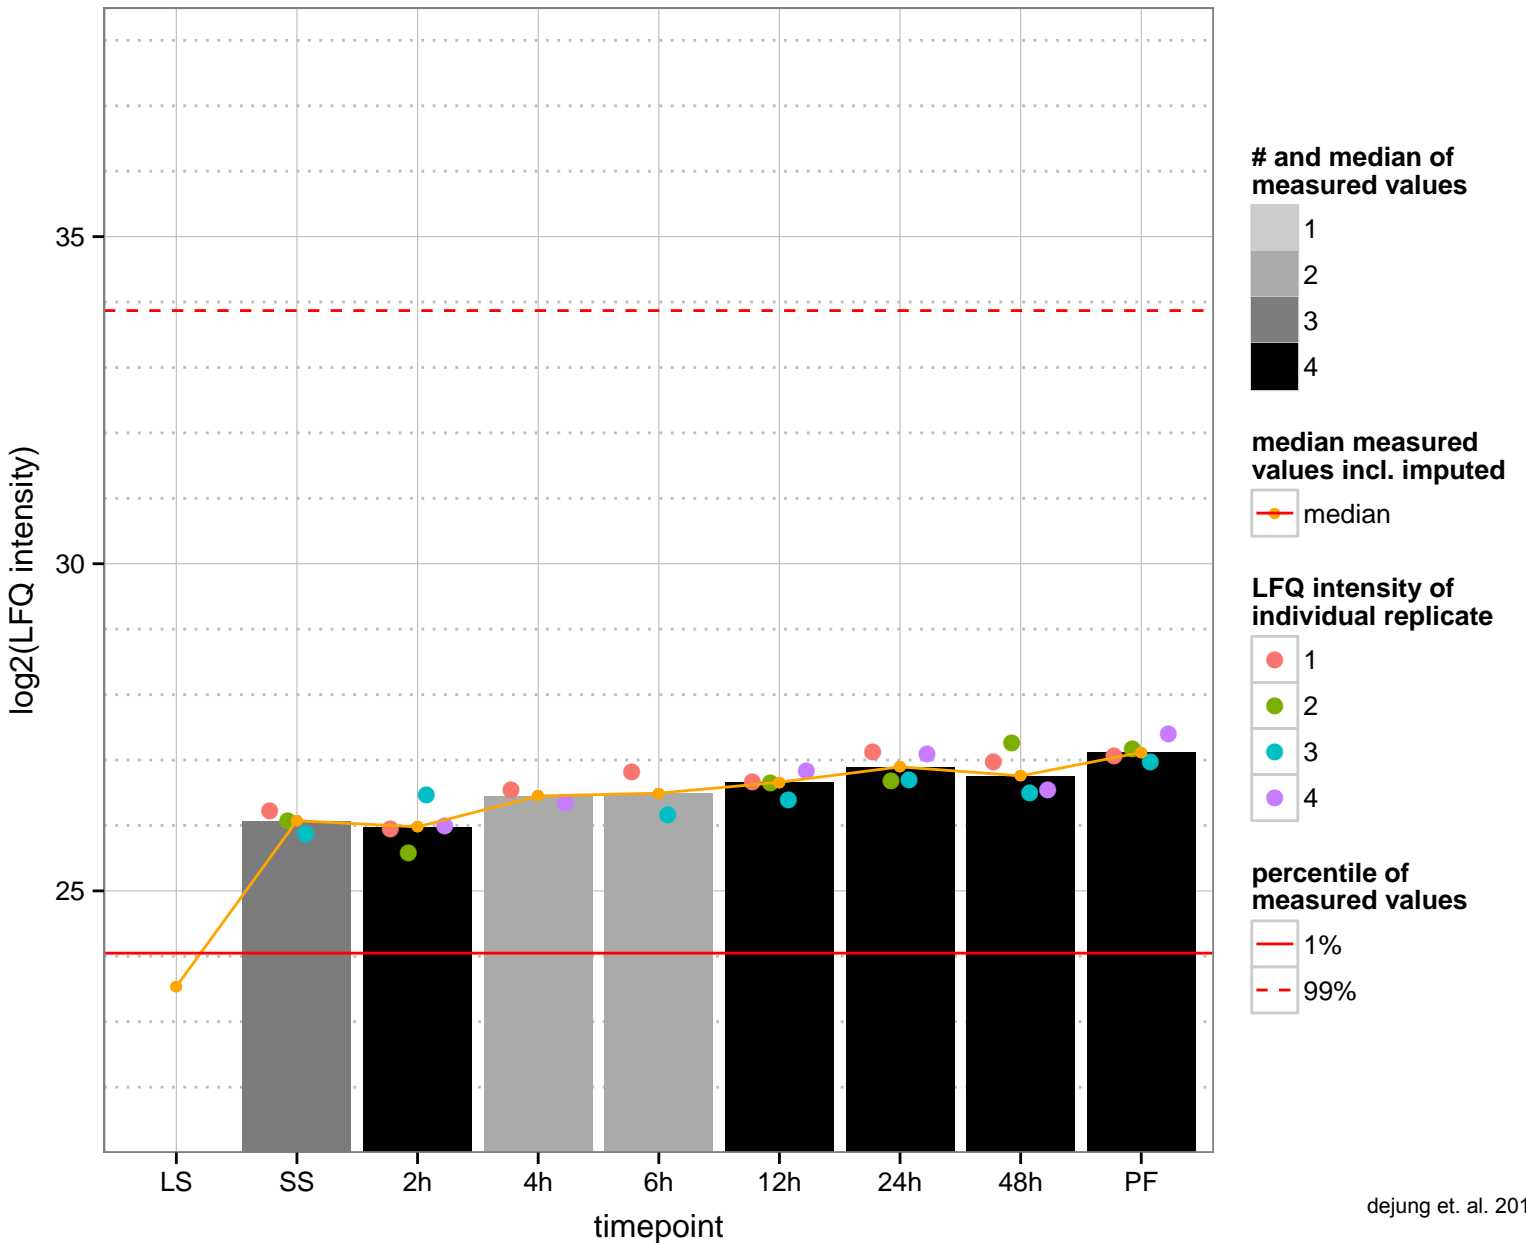

NADH-cytochrome b5 reductase, putative (B5R)  
 Tb927.11.1310  
 AGOF: cytochrome-b5 reductase activity, electron carrier activity  
 AGOC: mitochondrion  
 AGOP: oxidation-reduction process  
 PGO: oxidoreductase activity  
 PGO: null  
 PGO: oxidation-reduction process

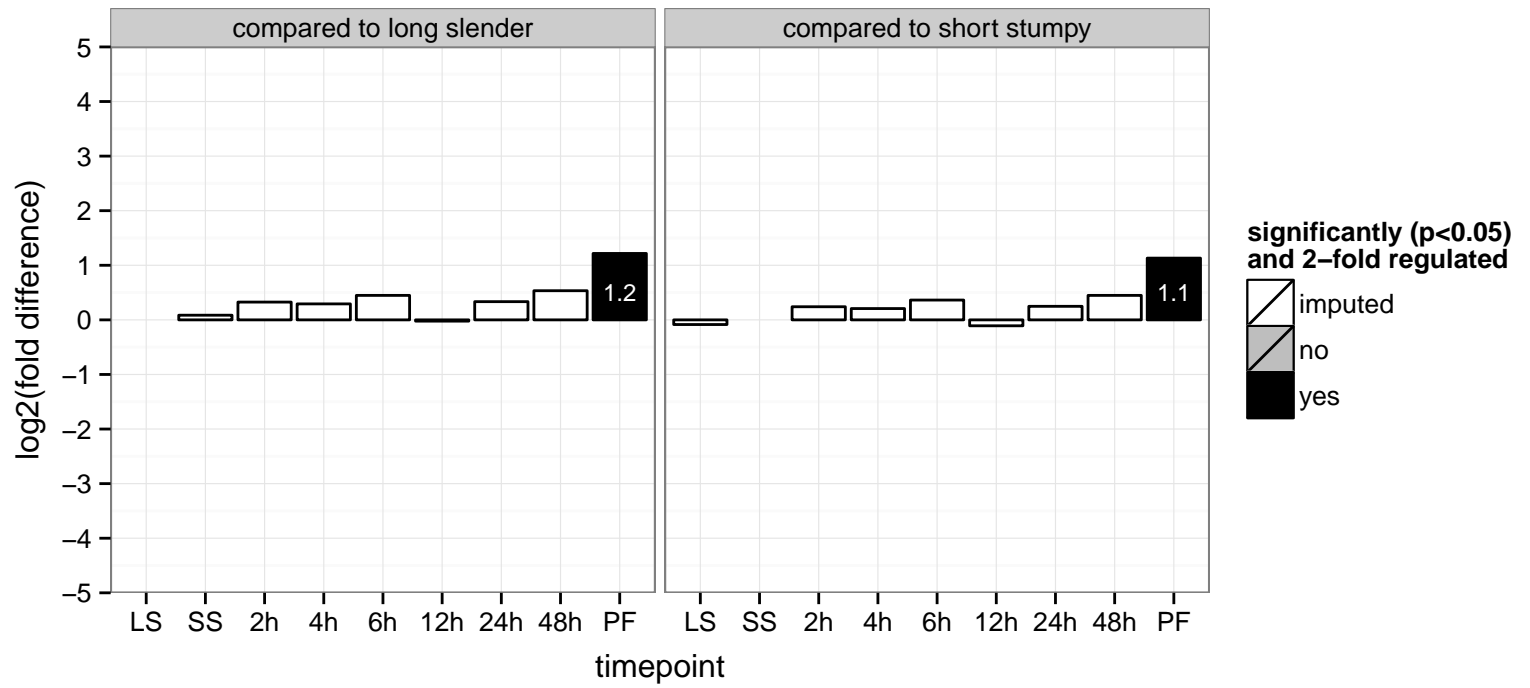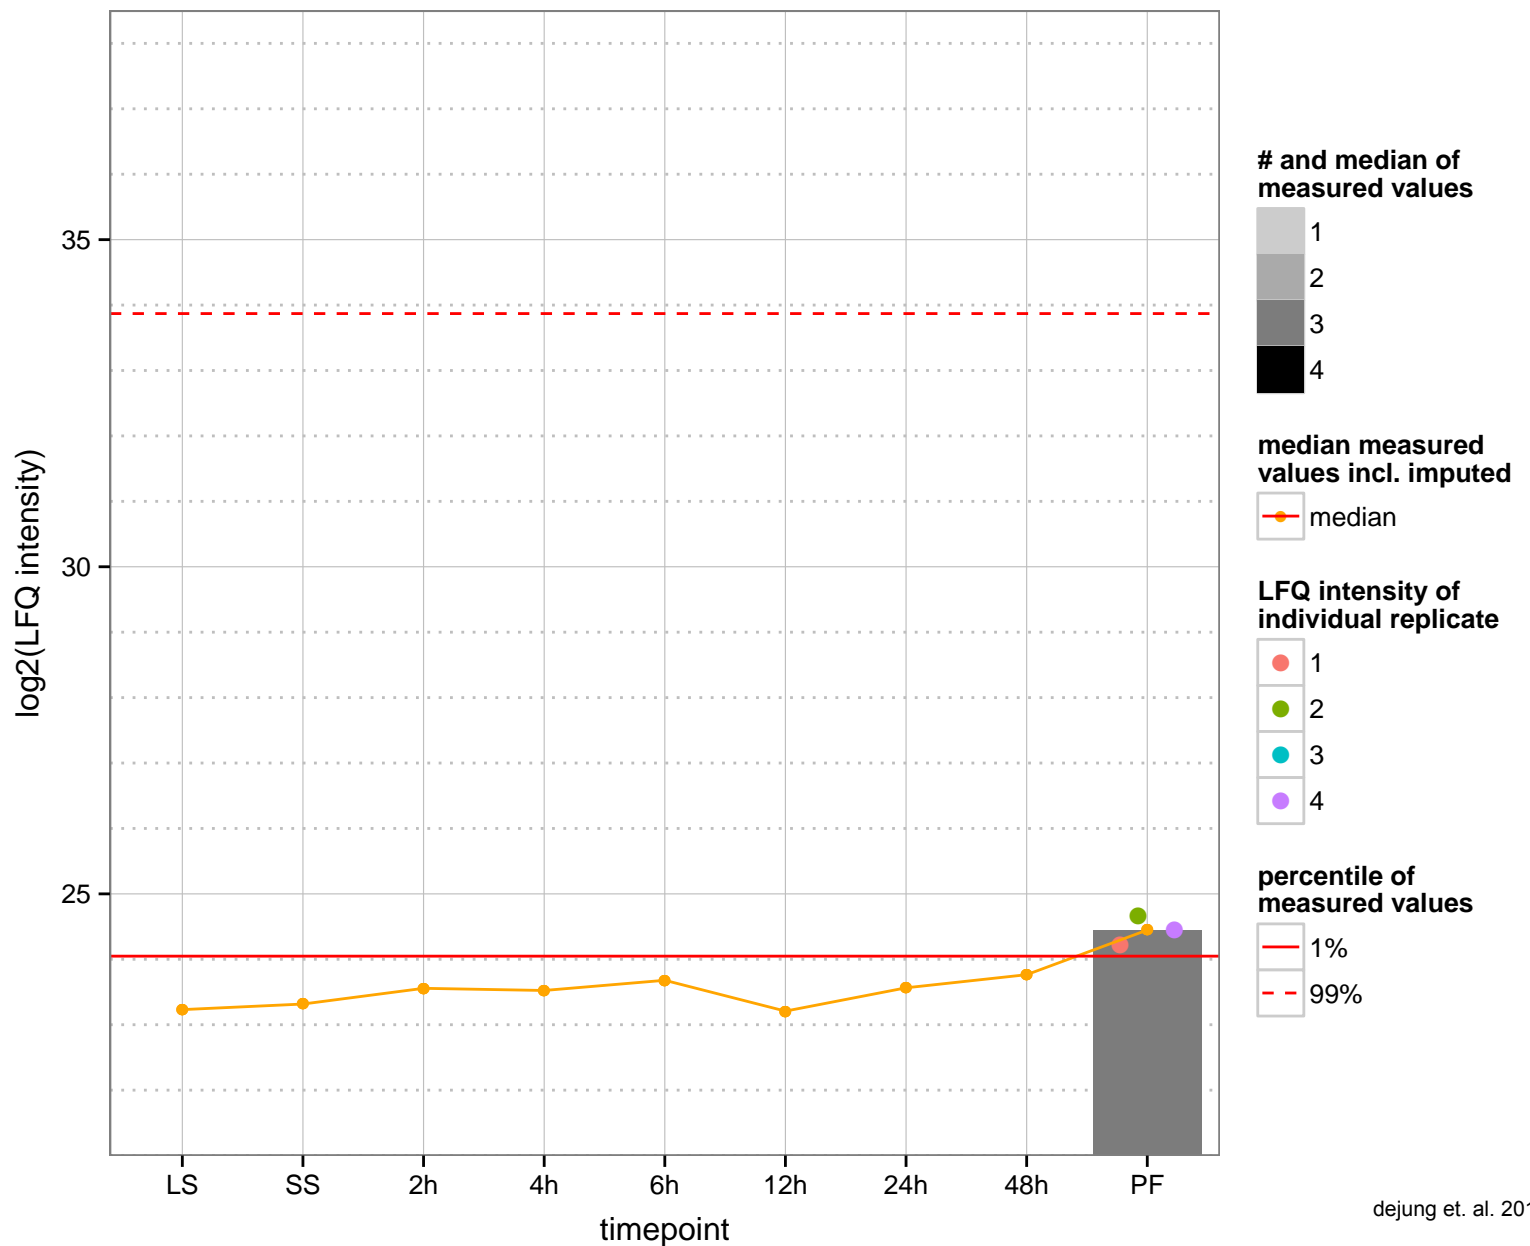

hypothetical protein, conserved  
 Tb927.11.13200  
 AGOF: null  
 AGOC: membrane  
 AGOP: null  
 PGO: null  
 PGOC: membrane  
 PGOP: null

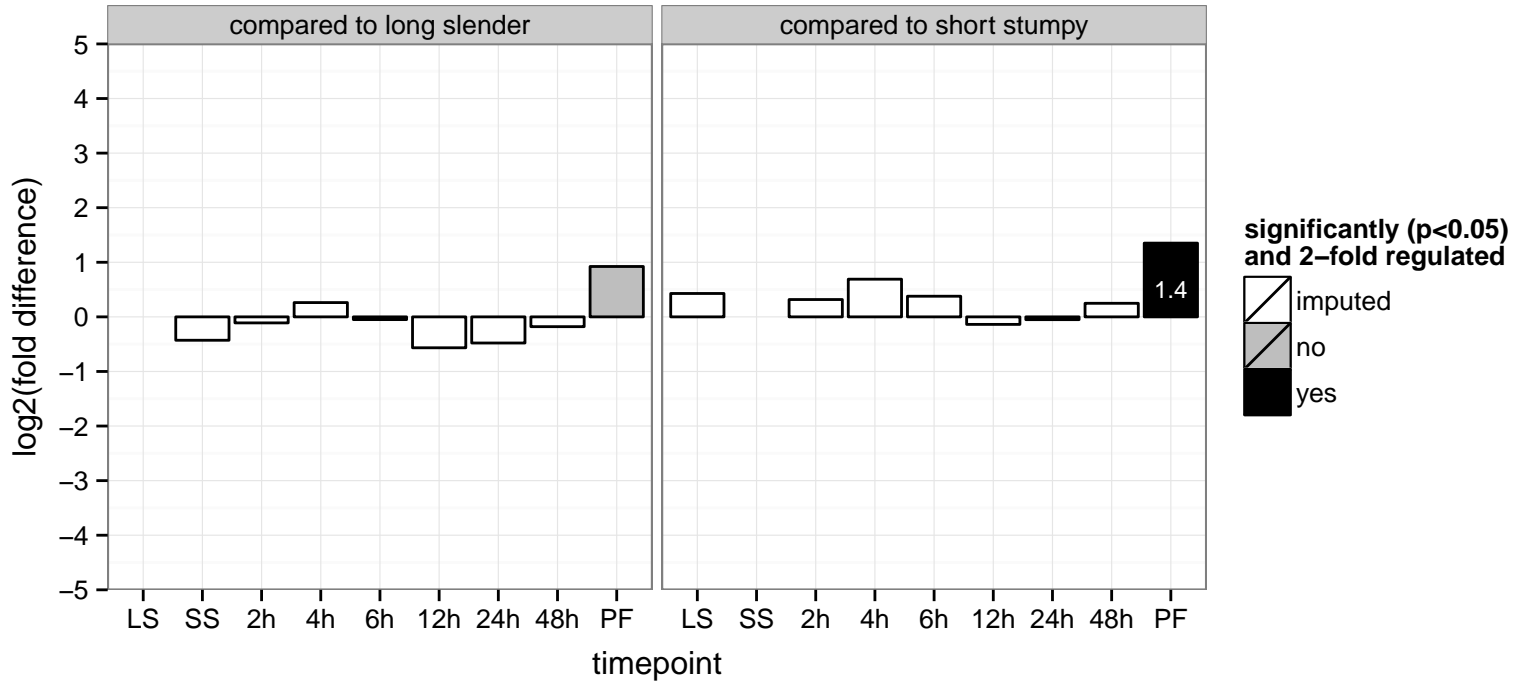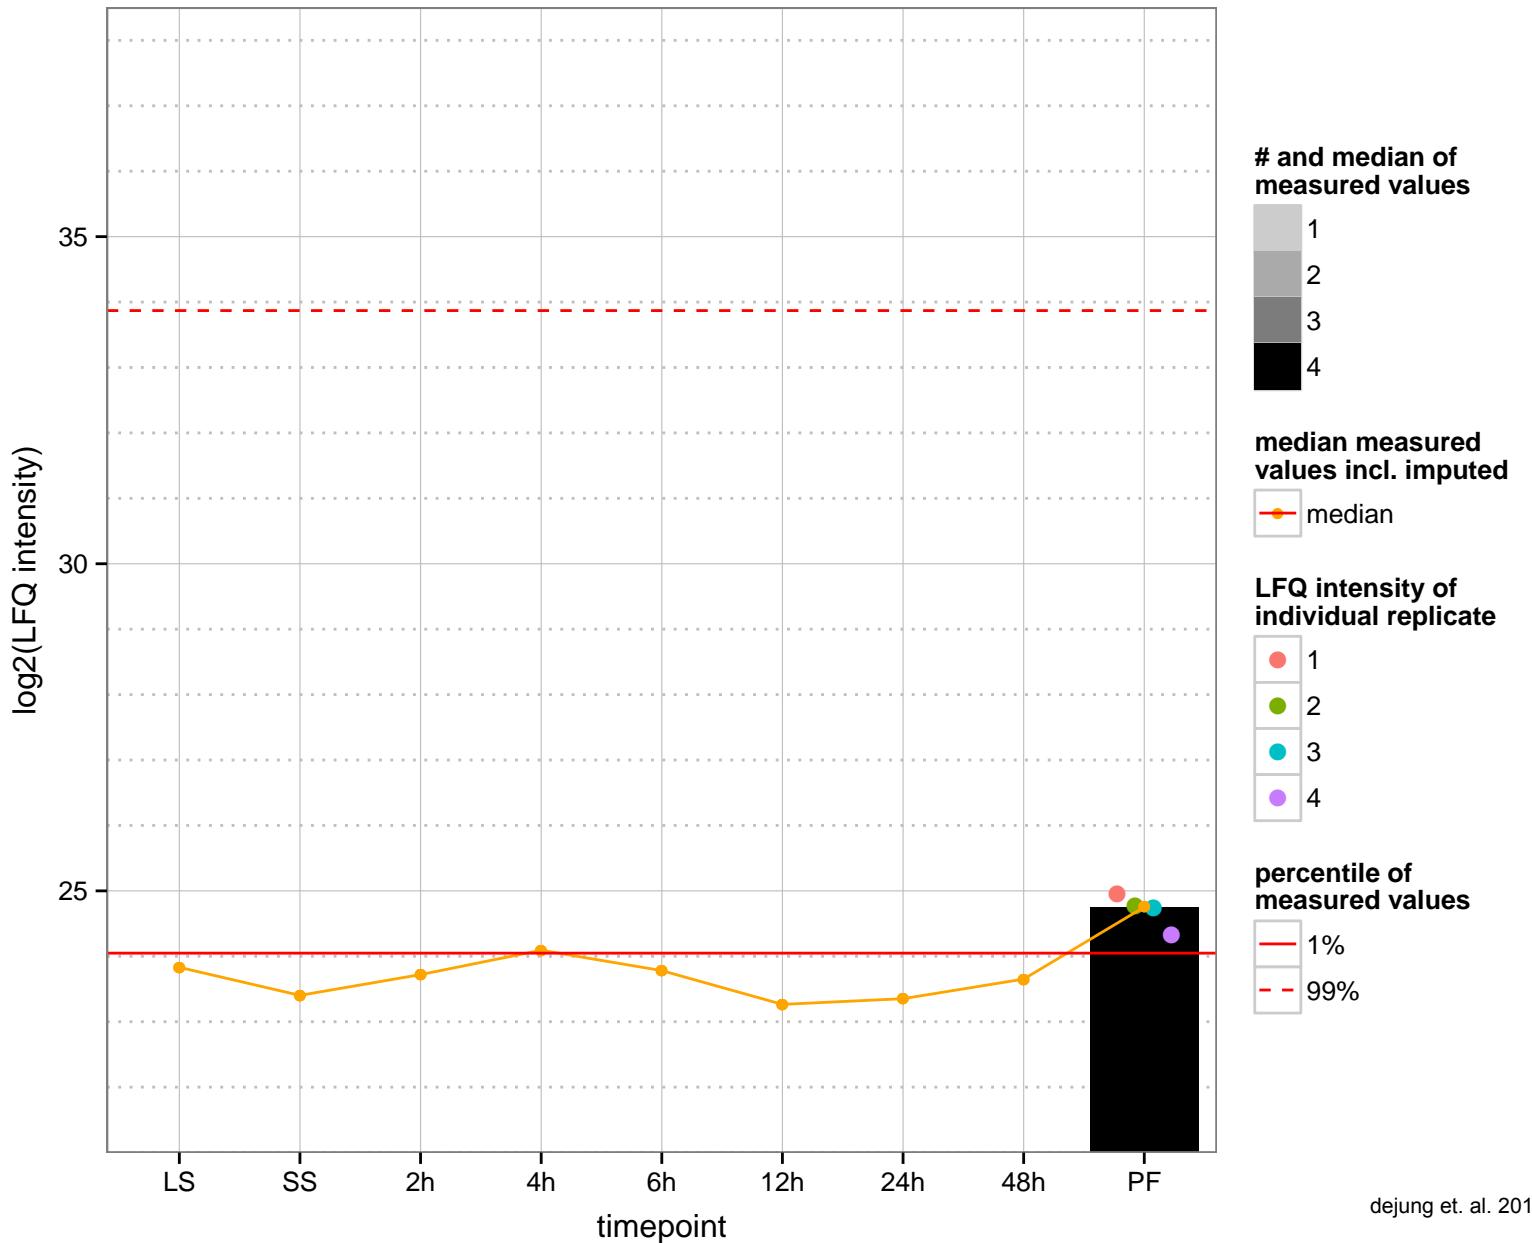

hypothetical protein, conserved  
 Tb927.11.13310  
 AGOF: null  
 AGOC: null  
 AGOP: null  
 PGOF: null  
 PGOC: null  
 PGOP: null

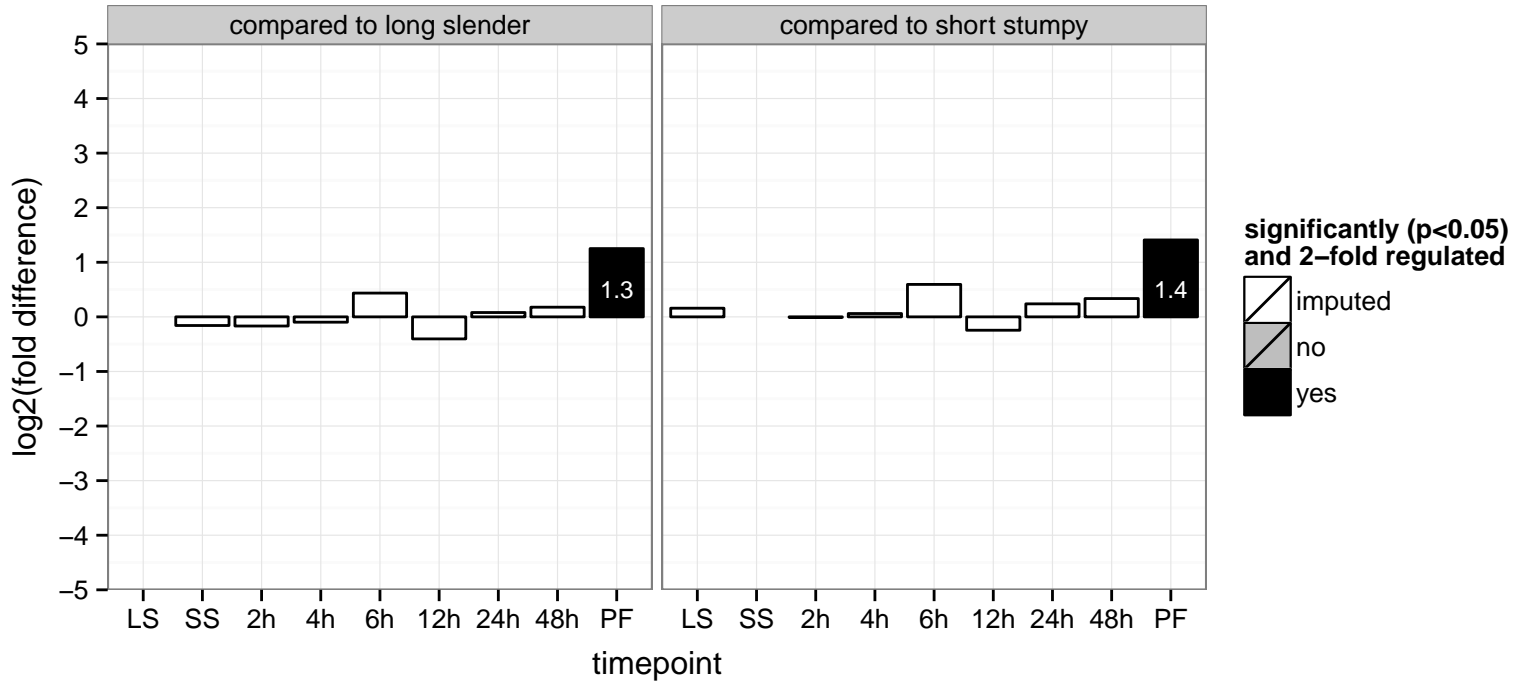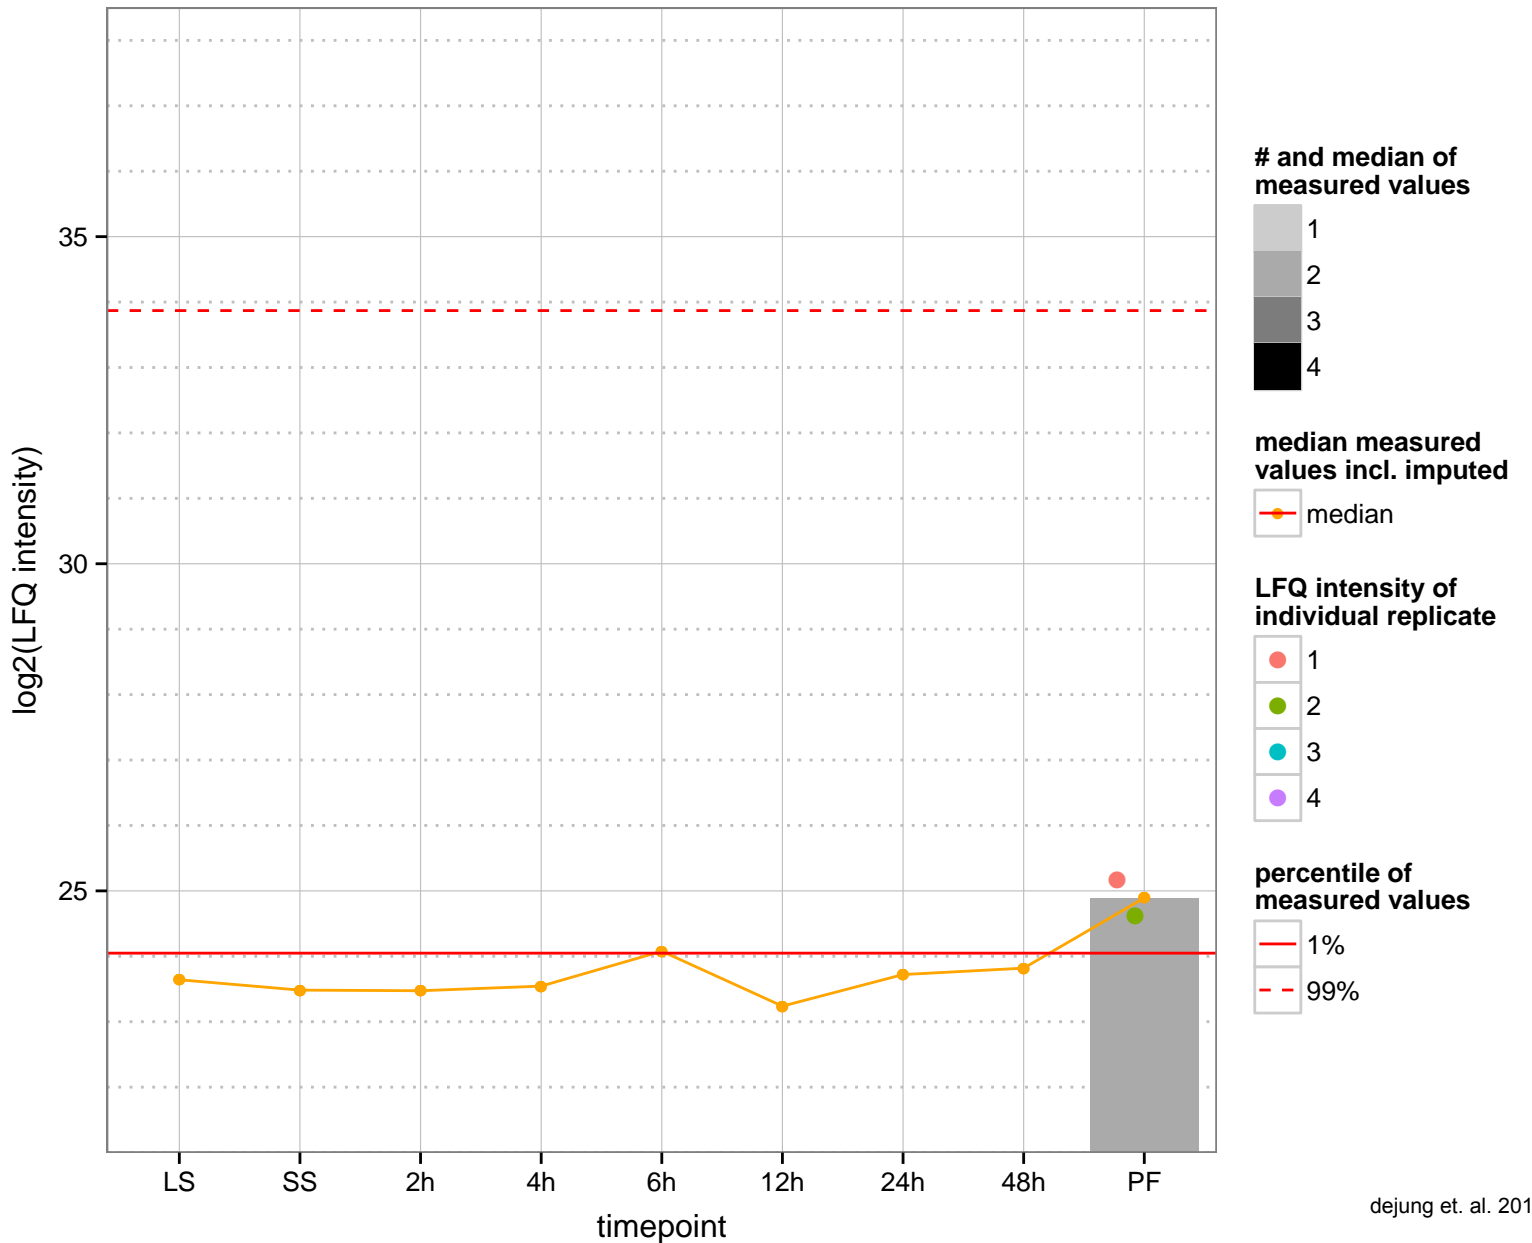

ATP-dependent helicase, putative  
 Tb927.11.13380  
 AGOF: nucleoside-triphosphatase activity, nucleotide binding  
 AGOC: null  
 AGOP: null  
 PGOF: nucleoside-triphosphatase activity, nucleotide binding  
 PGO: null  
 PGOP: null

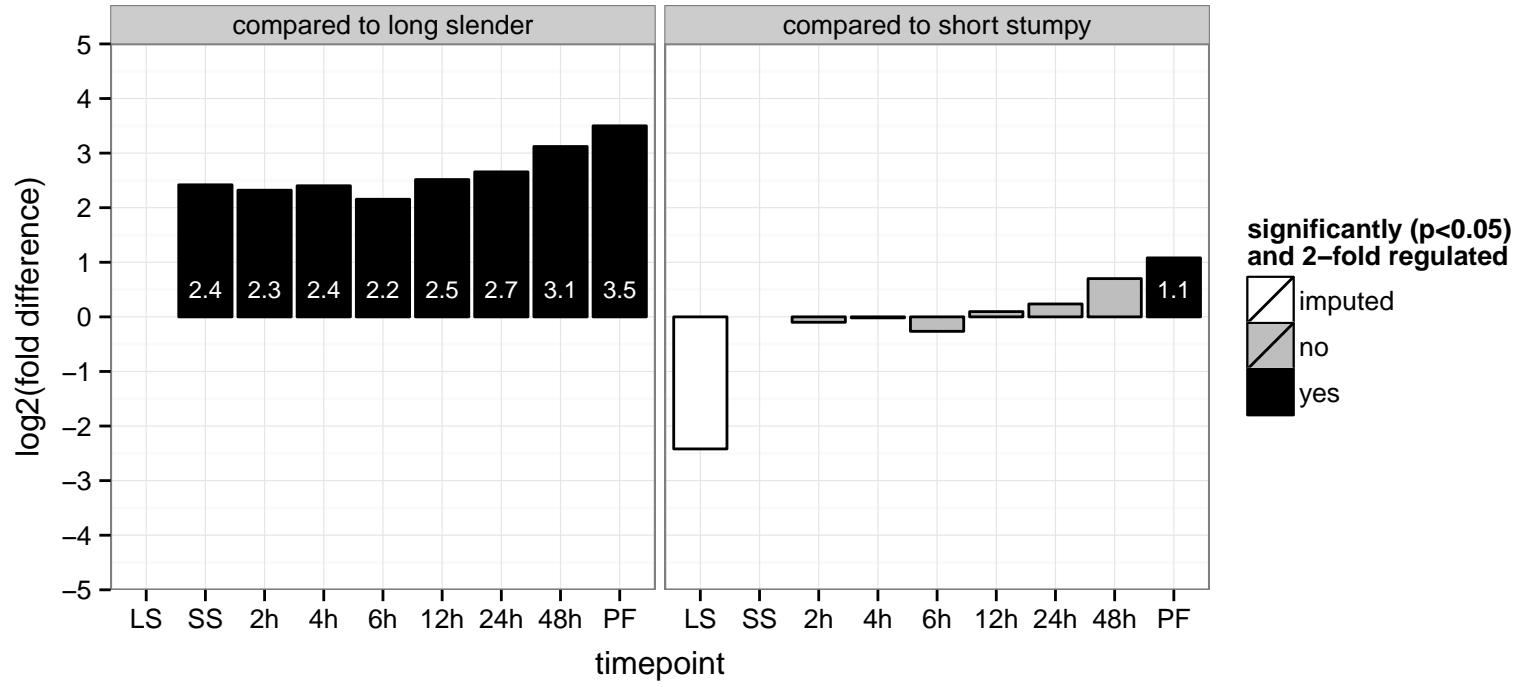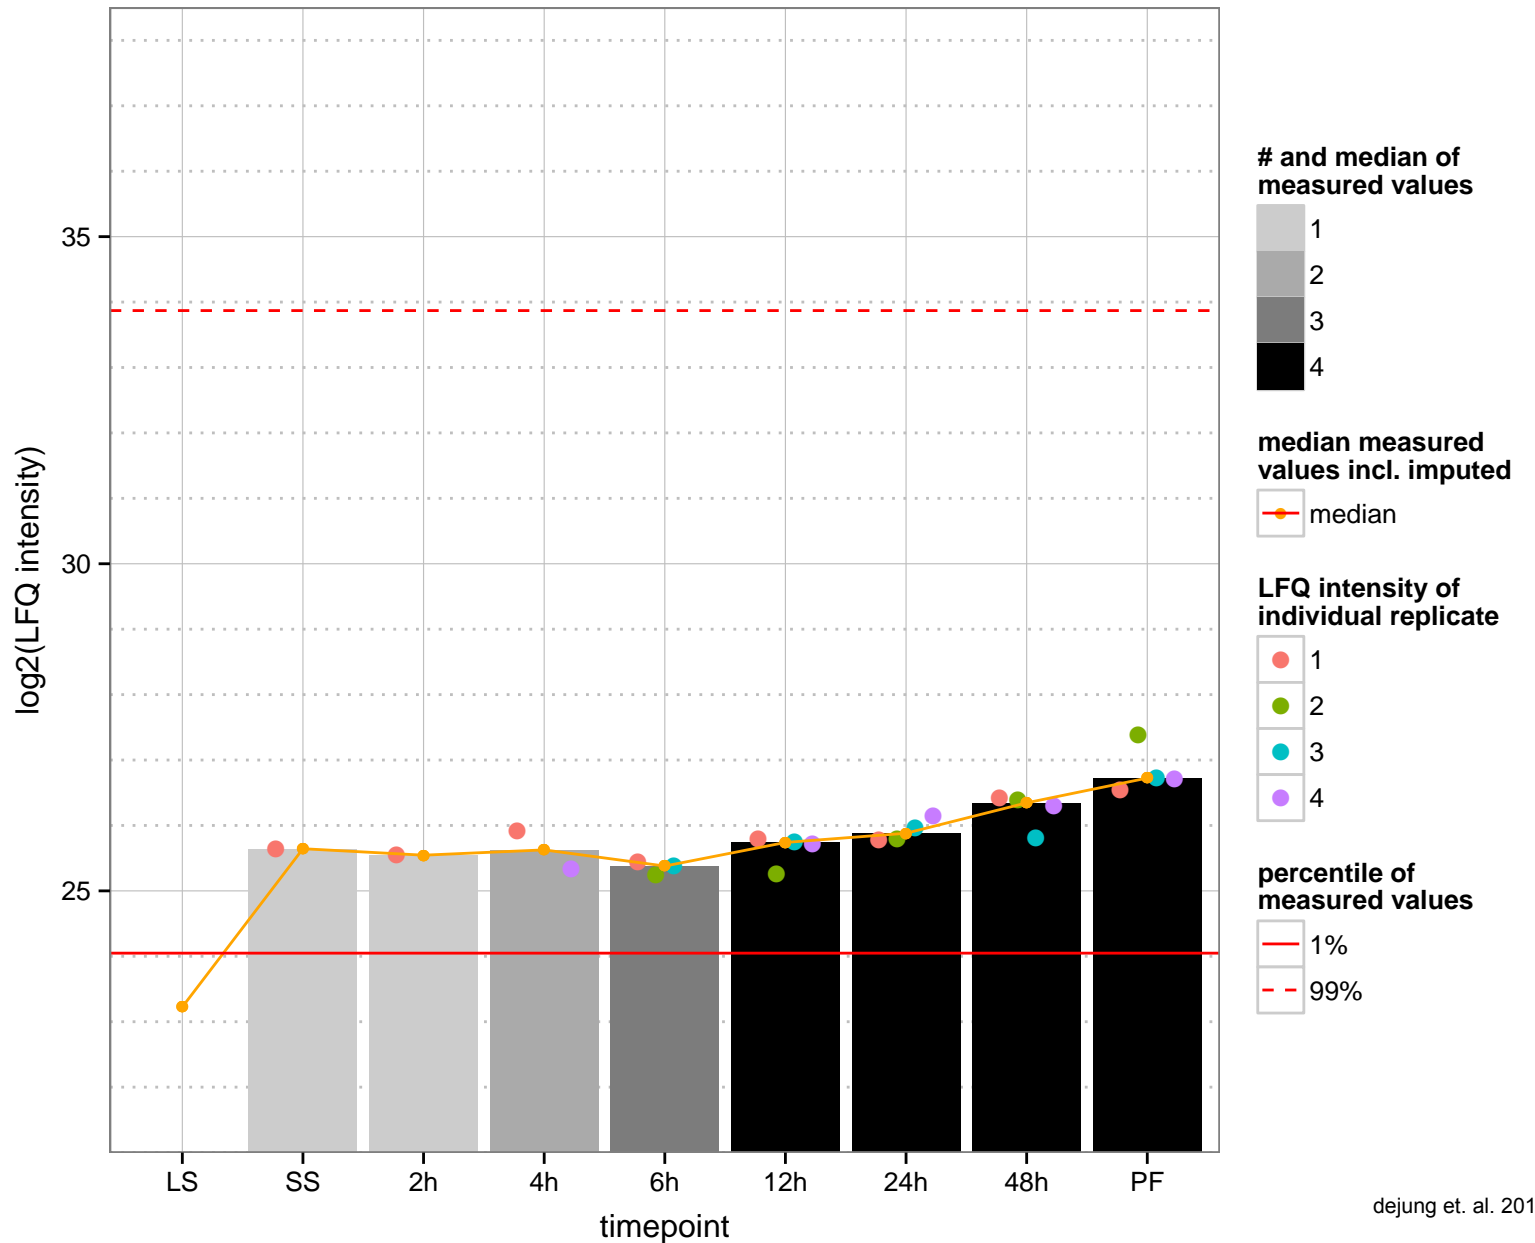

hypothetical protein, conserved  
 Tb927.11.13520  
 AGOF: null  
 AGOC: null  
 AGOP: null  
 PGO: null  
 PGO: null  
 PGO: null

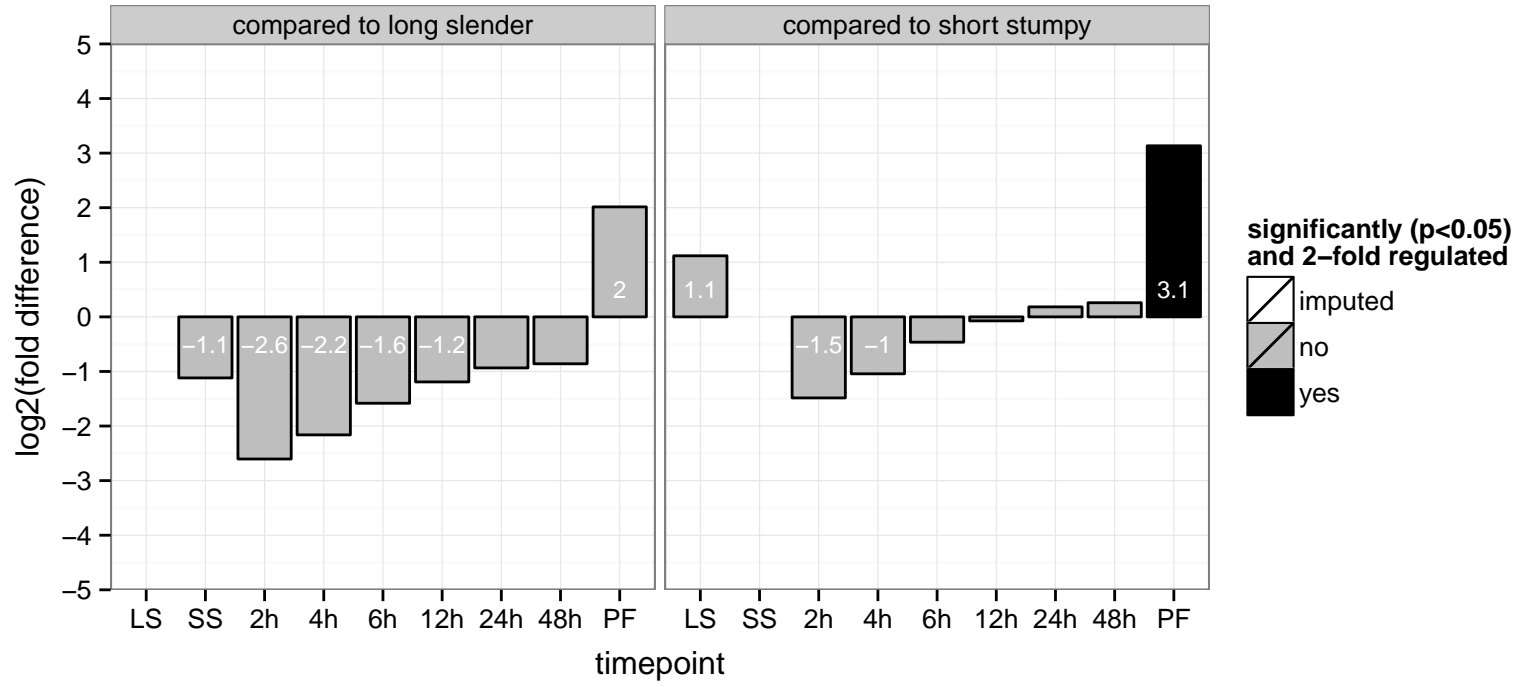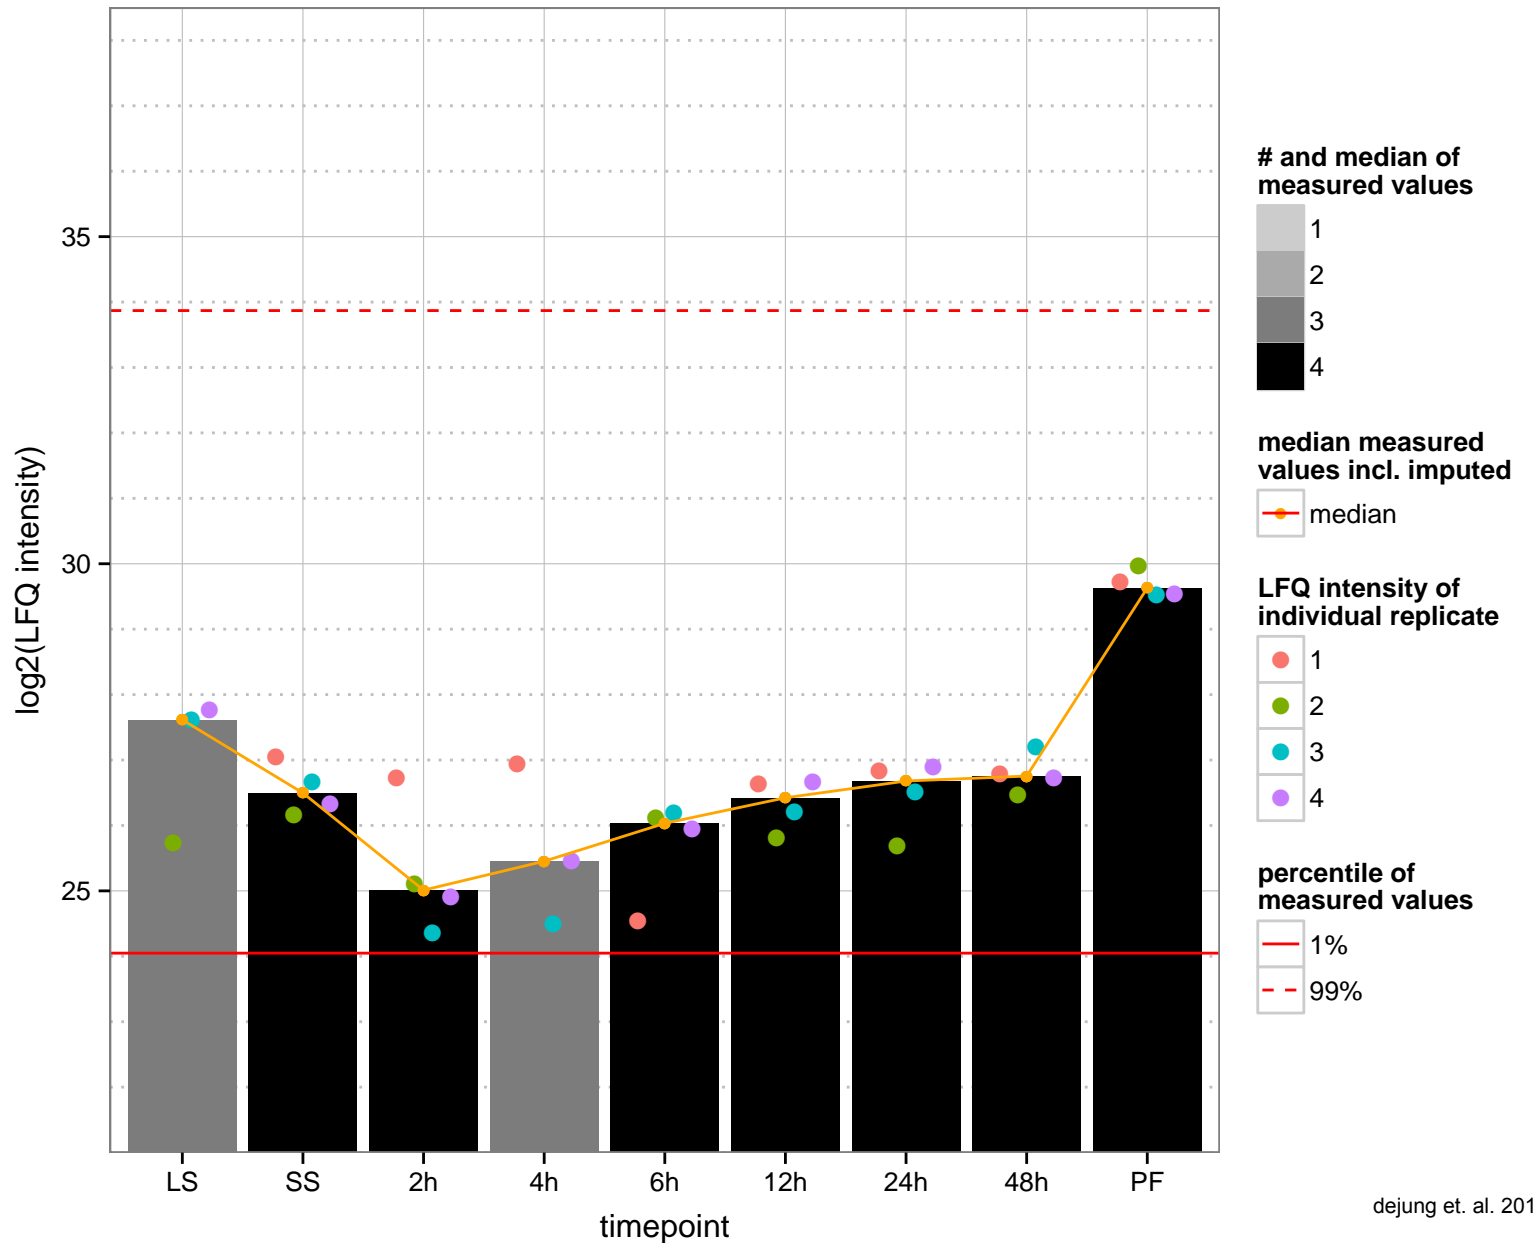



hypothetical protein, conserved  
 Tb927.11.13680  
 AGOF: null  
 AGOC: null  
 AGOP: null  
 PGOF: null  
 PGO: null  
 PGOP: null

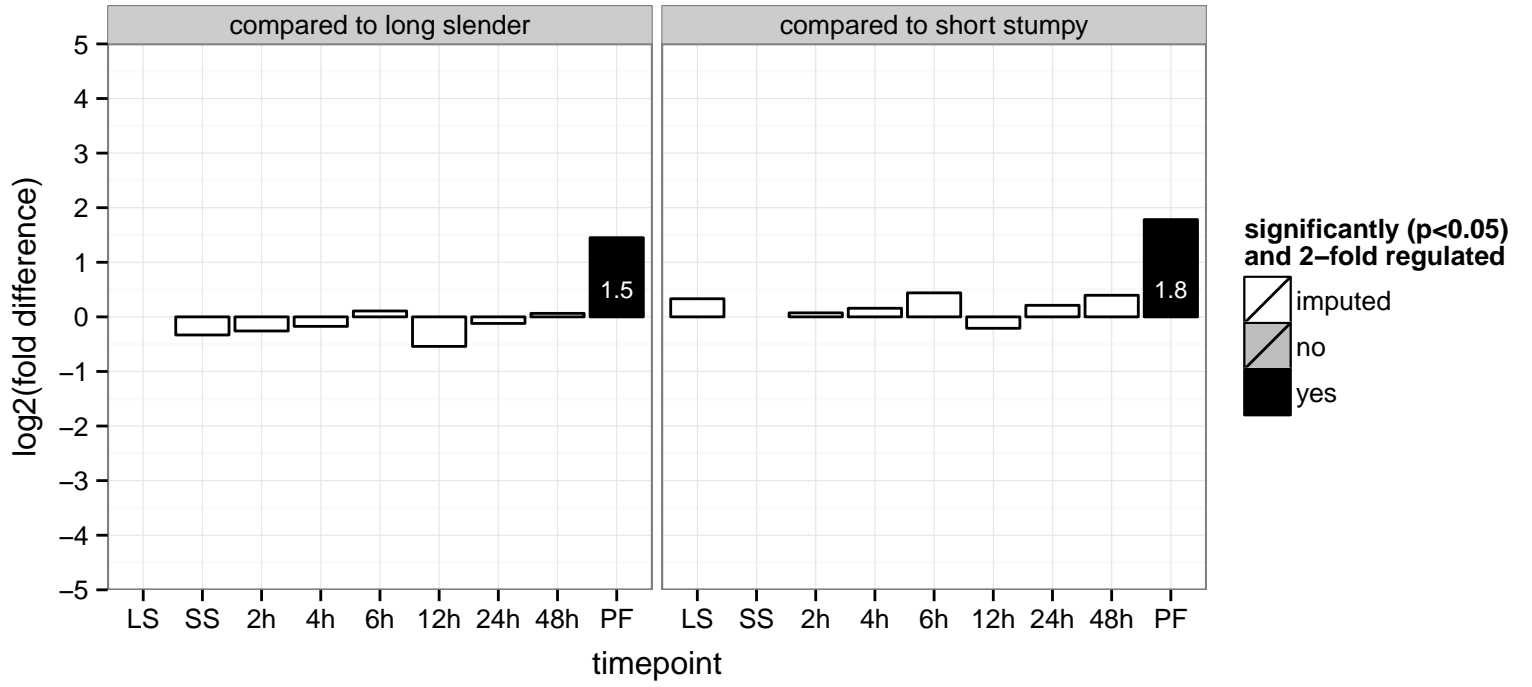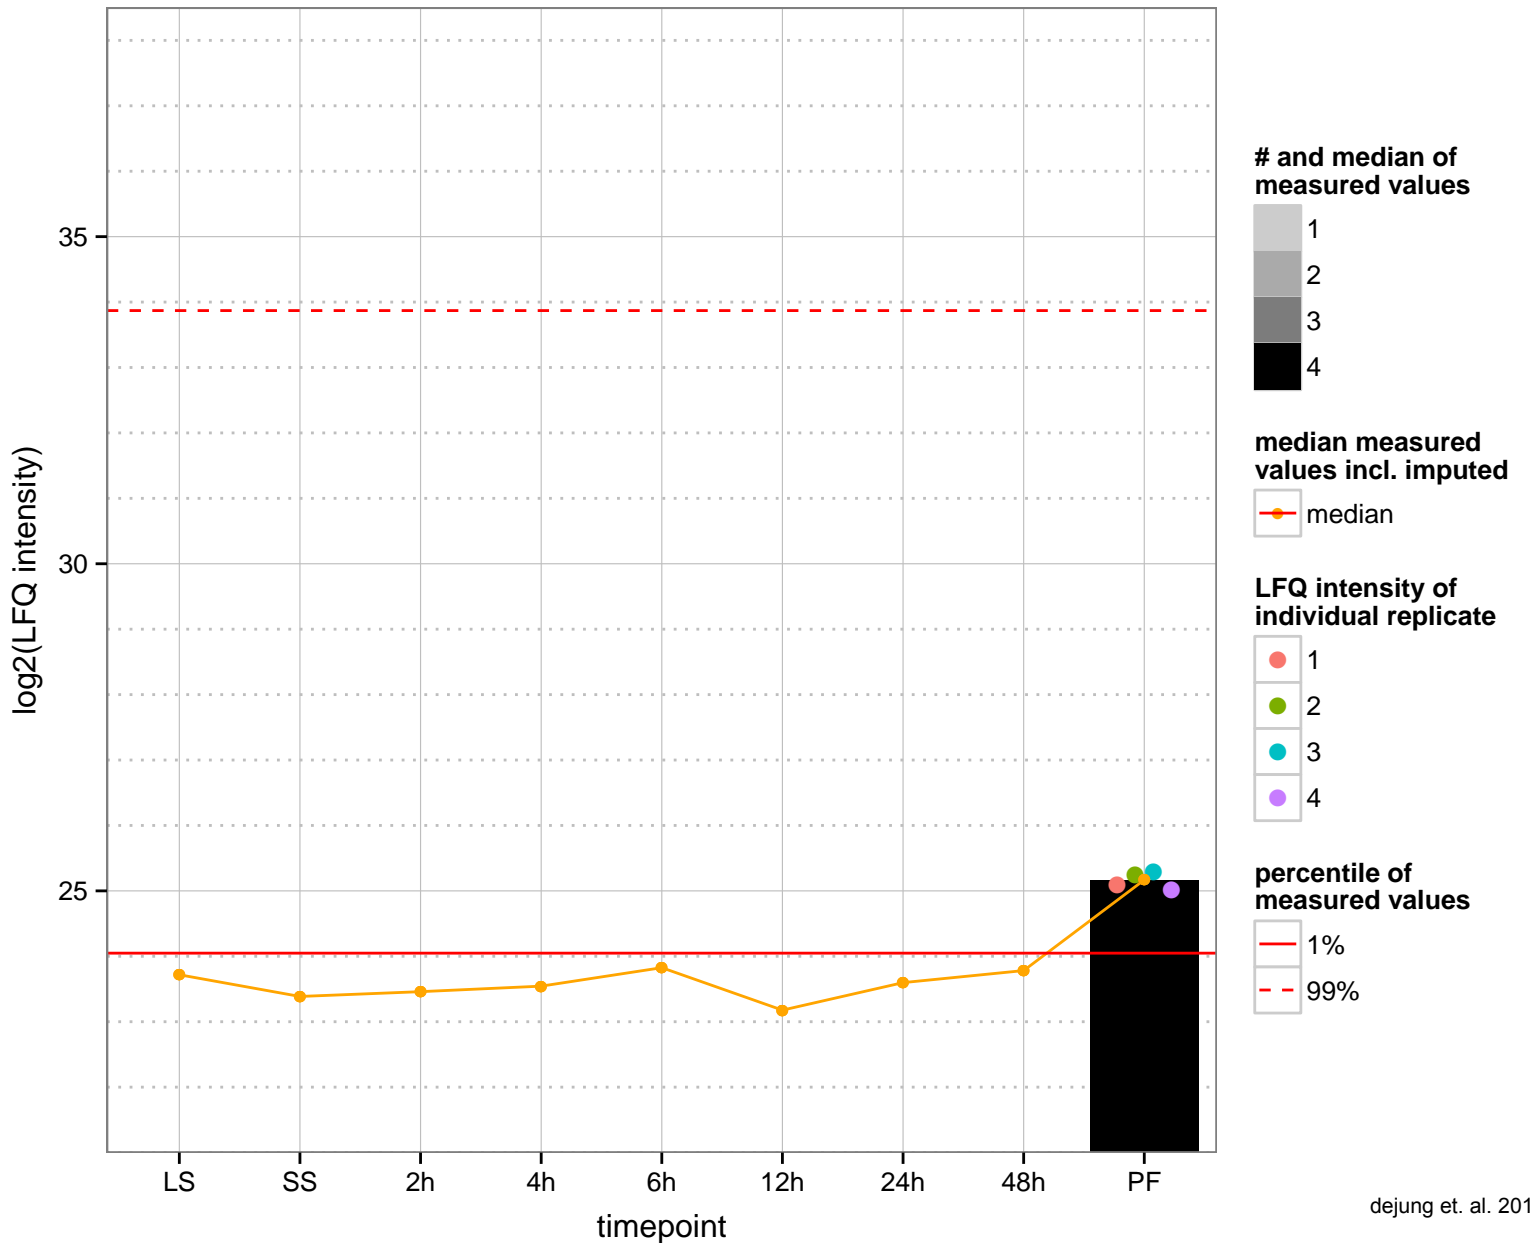

hypothetical protein, conserved  
 Tb927.11.13870  
 AGOF: null  
 AGOC: null  
 AGOP: null  
 PGOF: null  
 PGO: null  
 PGOP: null

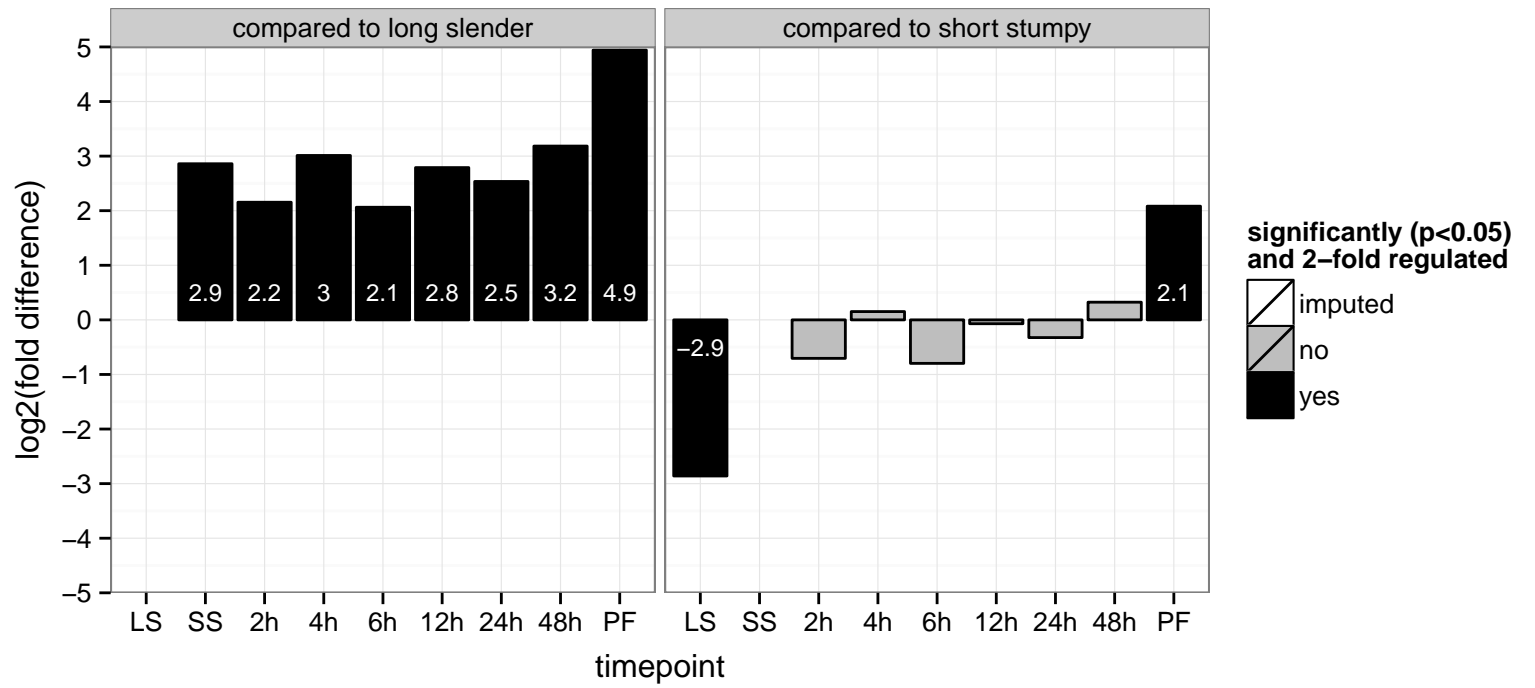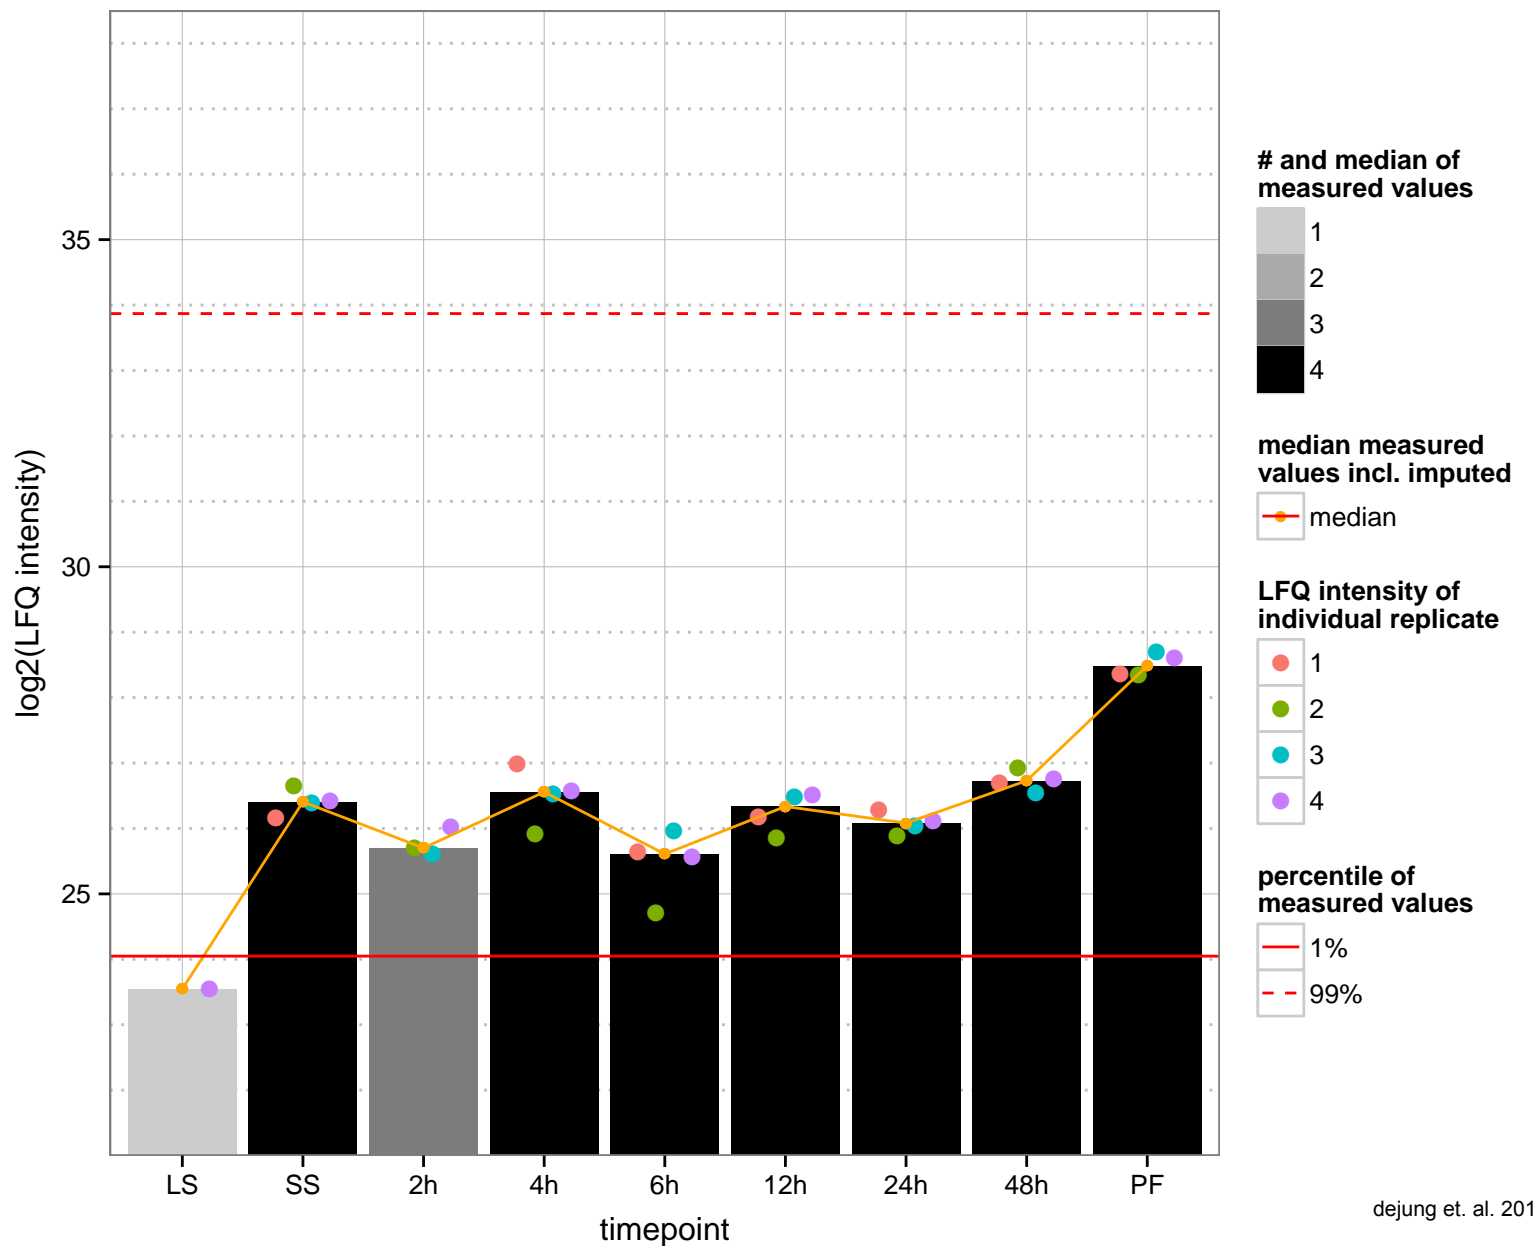

Pab1p-dependent poly(A) ribonuclease subunit, putative, PAN3  
 Tb927.11.13970  
 AGOF: null  
 AGOC: null  
 AGOP: null  
 PGO: transferase activity, transferring phosphorus-containing groups  
 PGOC: null  
 PGOP: null

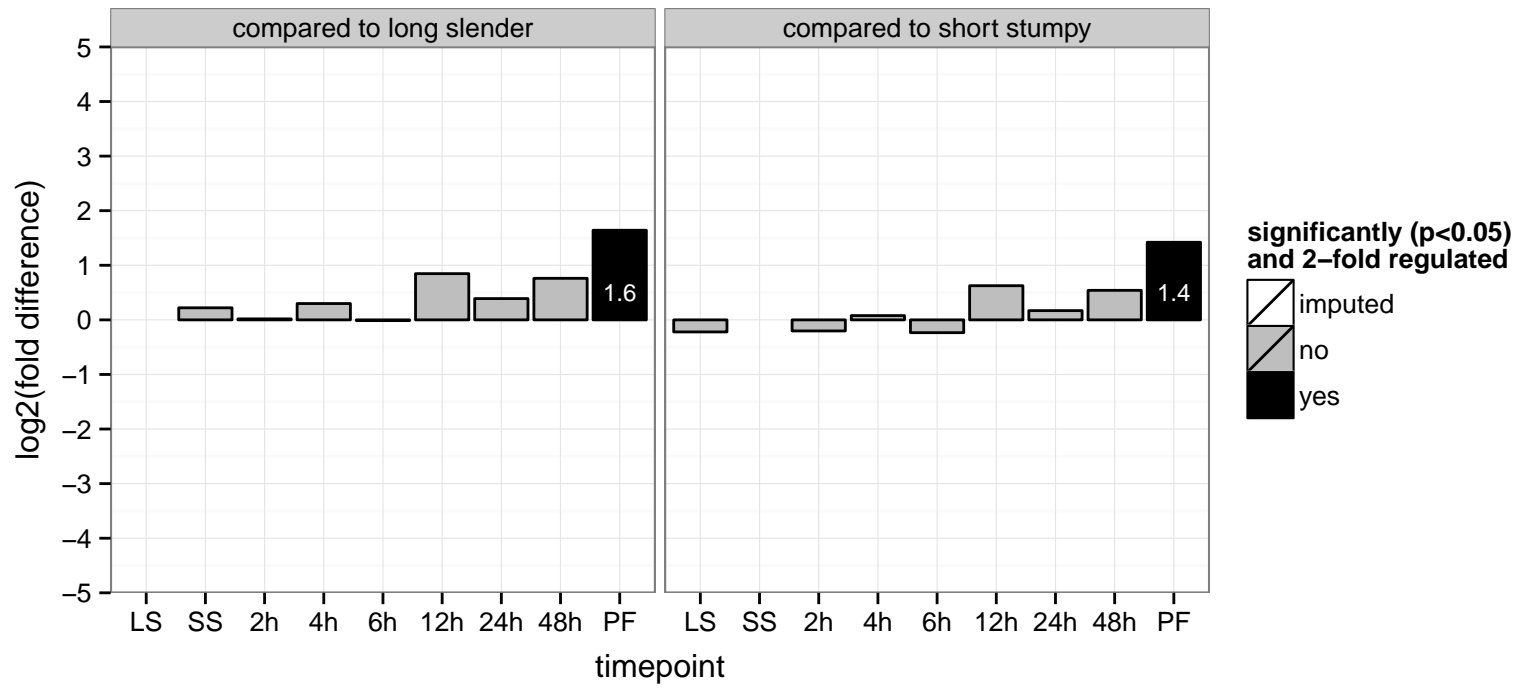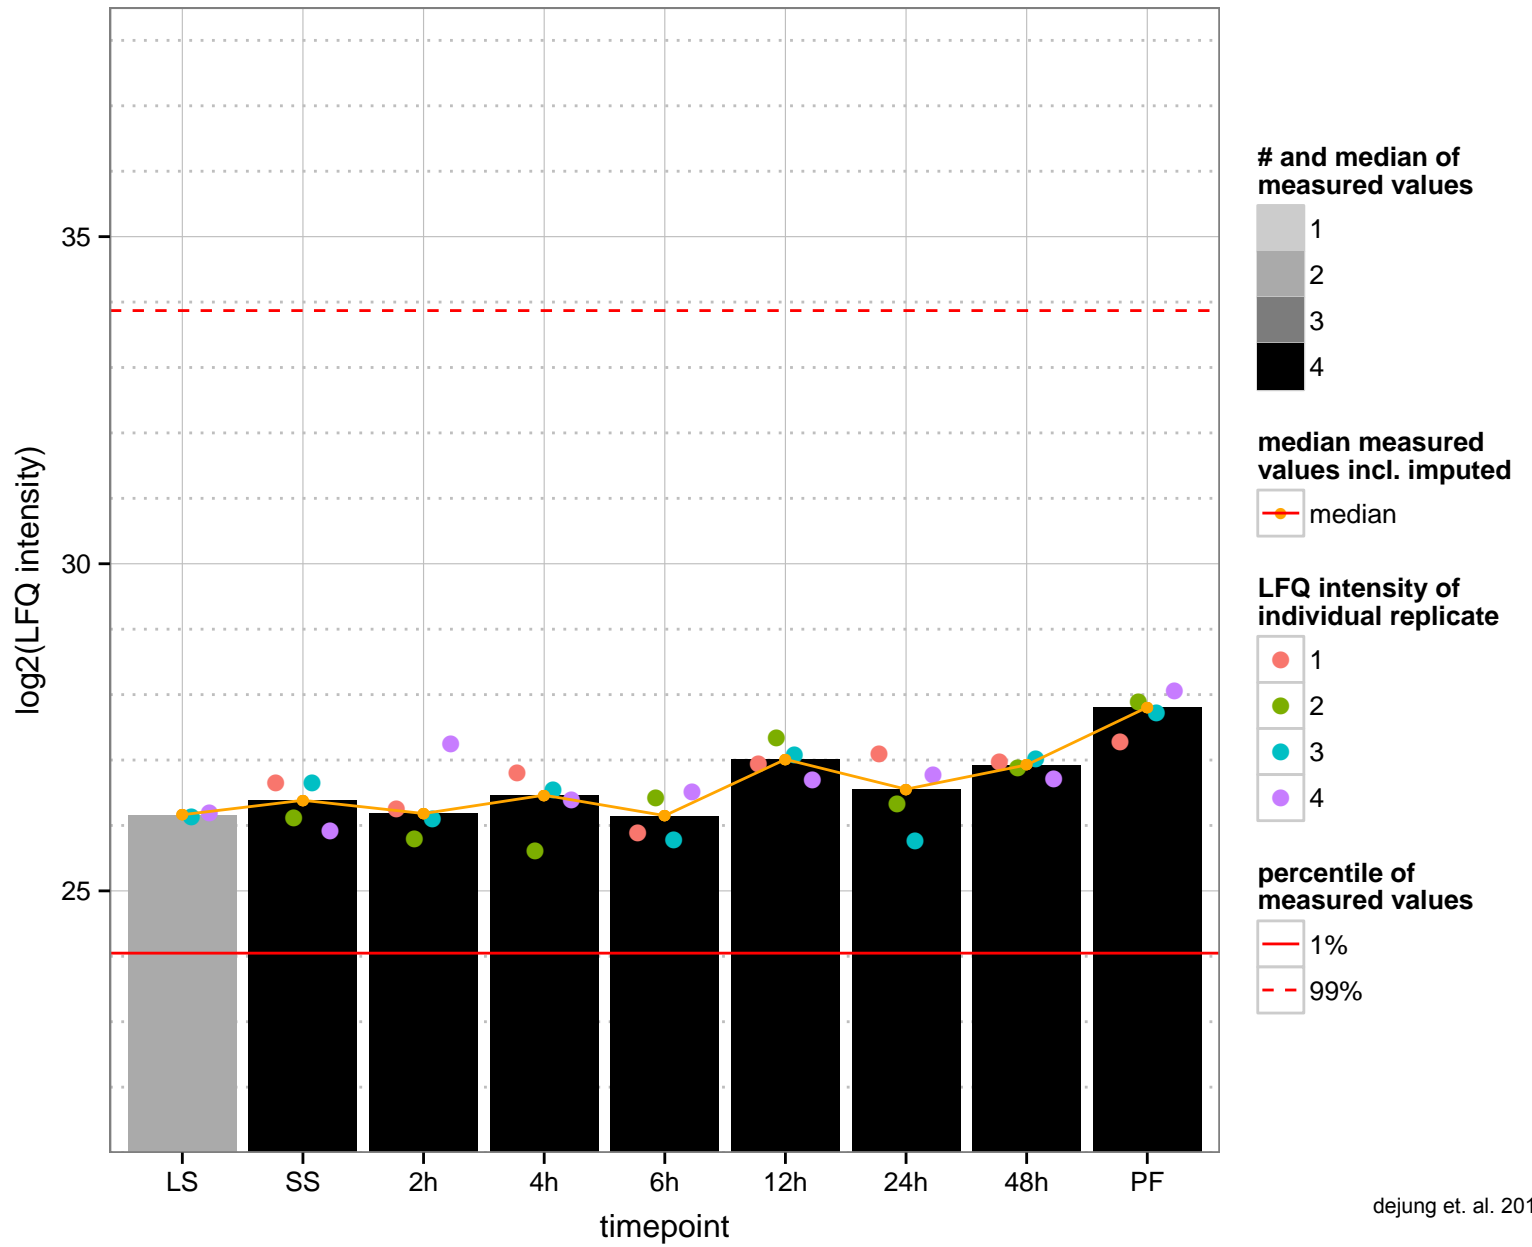

Repressor of differentiation kinase 1 (RDK1)

Tb927.11.14070

AGOF: ATP binding, protein serine/threonine kinase activity, protein tyrosine kinase activity

AGOC: cilium, integral to membrane, plasma membrane

AGOP: growth, modulation of development of symbiont involved in interaction with host, protein phosphorylation

PGOF: ATP binding, protein kinase activity, transferase activity, transferring phosphorus-containing groups

PGOC: null

PGOP: protein phosphorylation

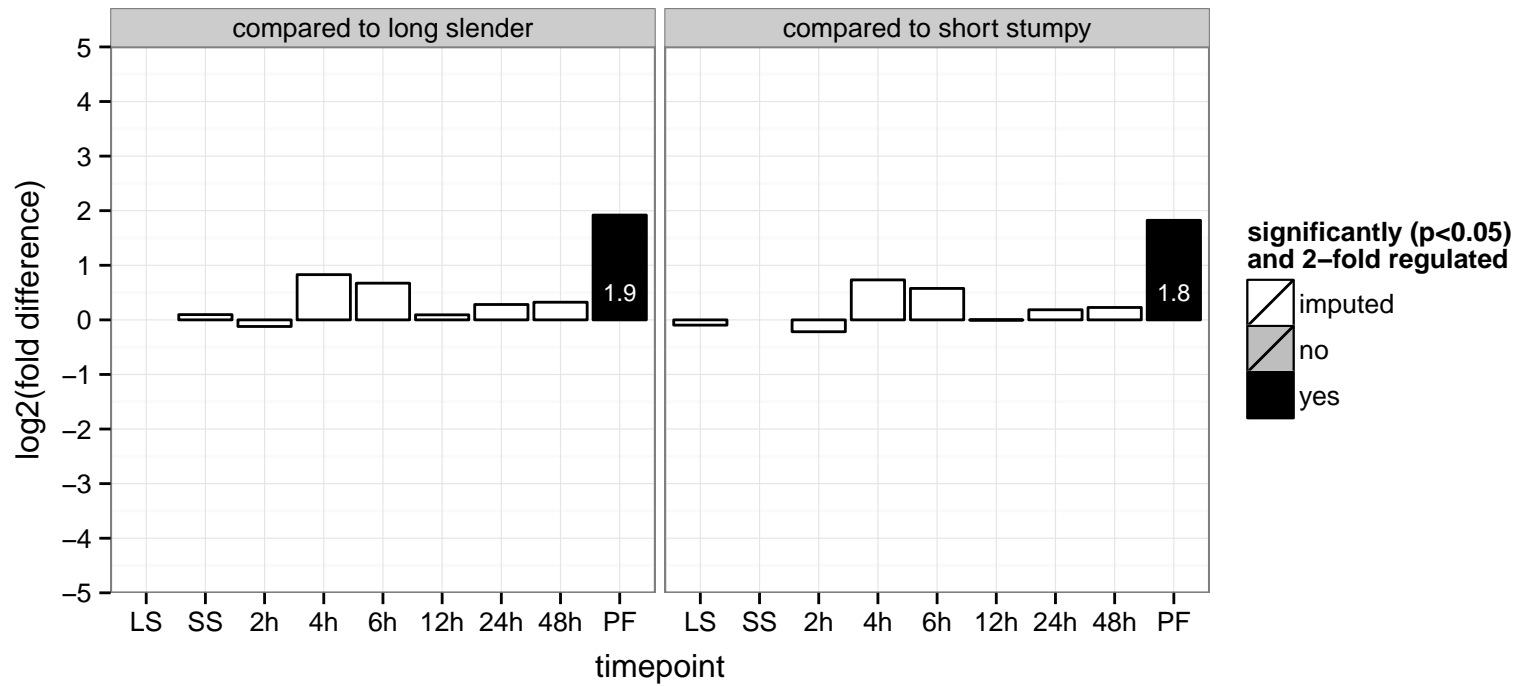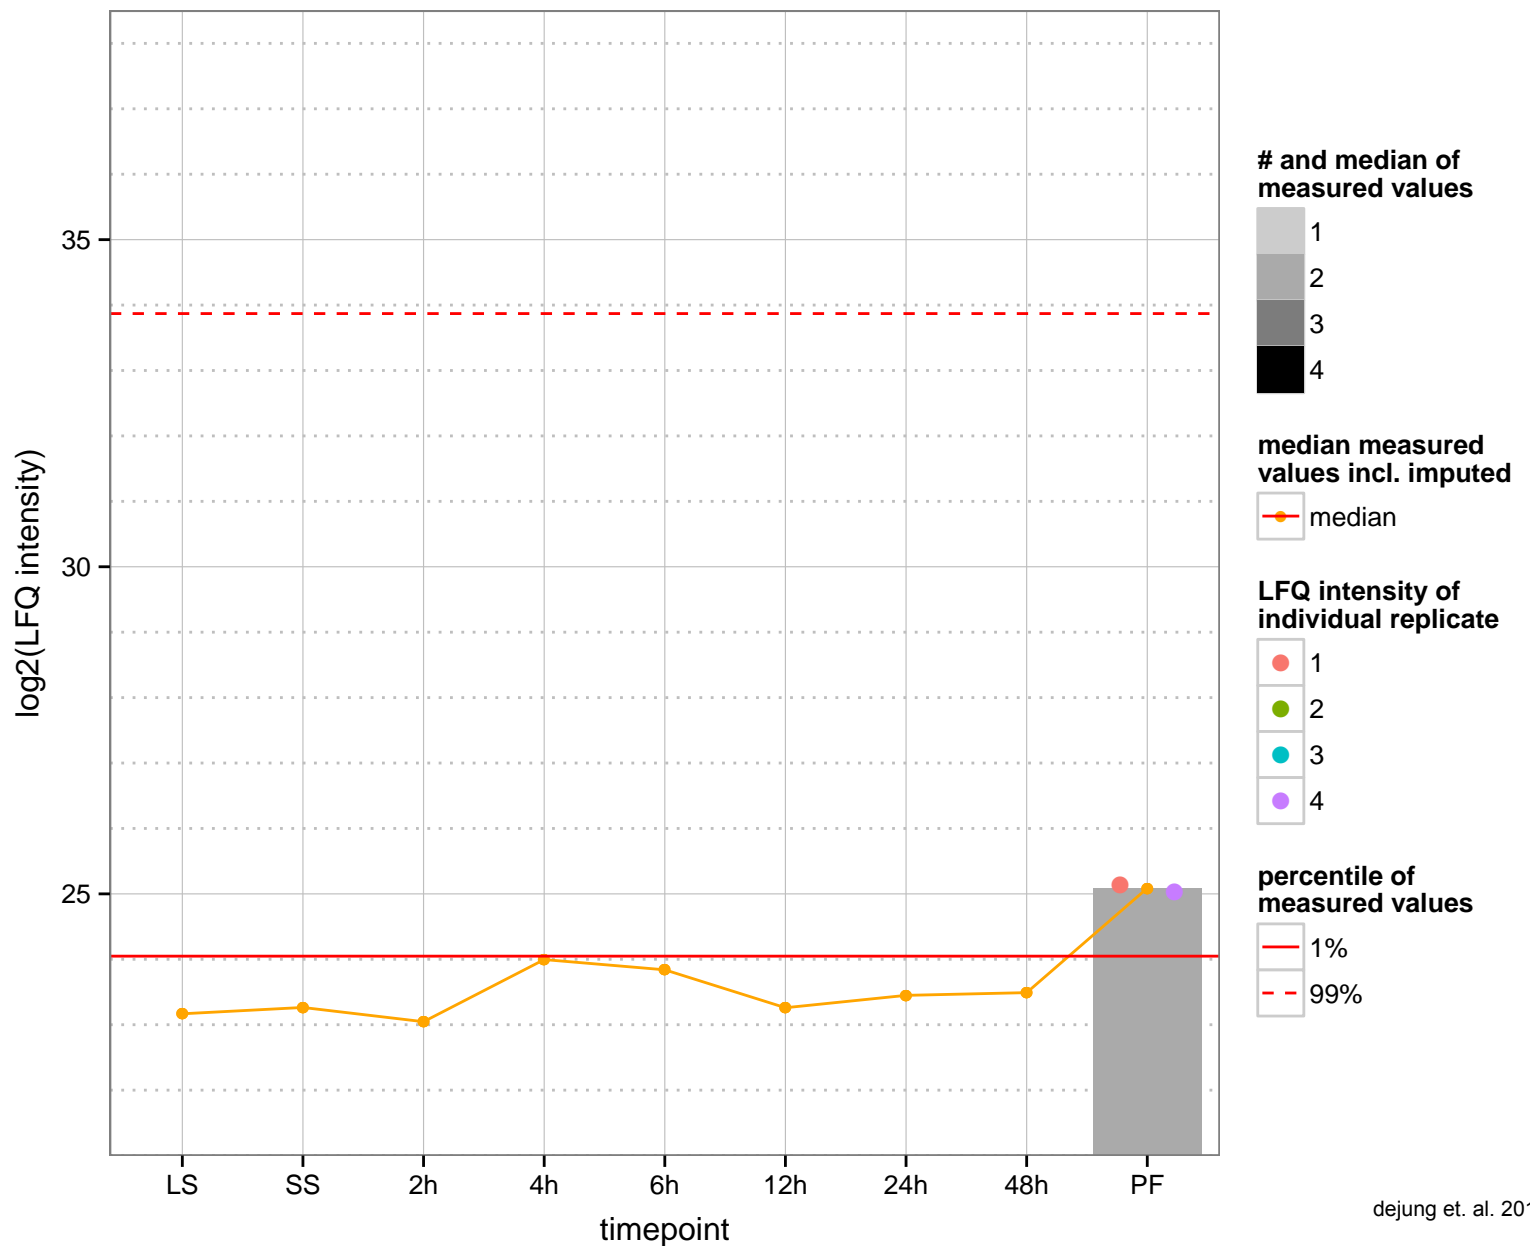

conserved protein  
 Tb927.11.14210  
 AGOF: calcium-dependent cysteine-type endopeptidase activity  
 AGOC: intracellular  
 AGOP: proteolysis  
 PGOF: calcium-dependent cysteine-type endopeptidase activity  
 PGOC: intracellular  
 PGOP: proteolysis

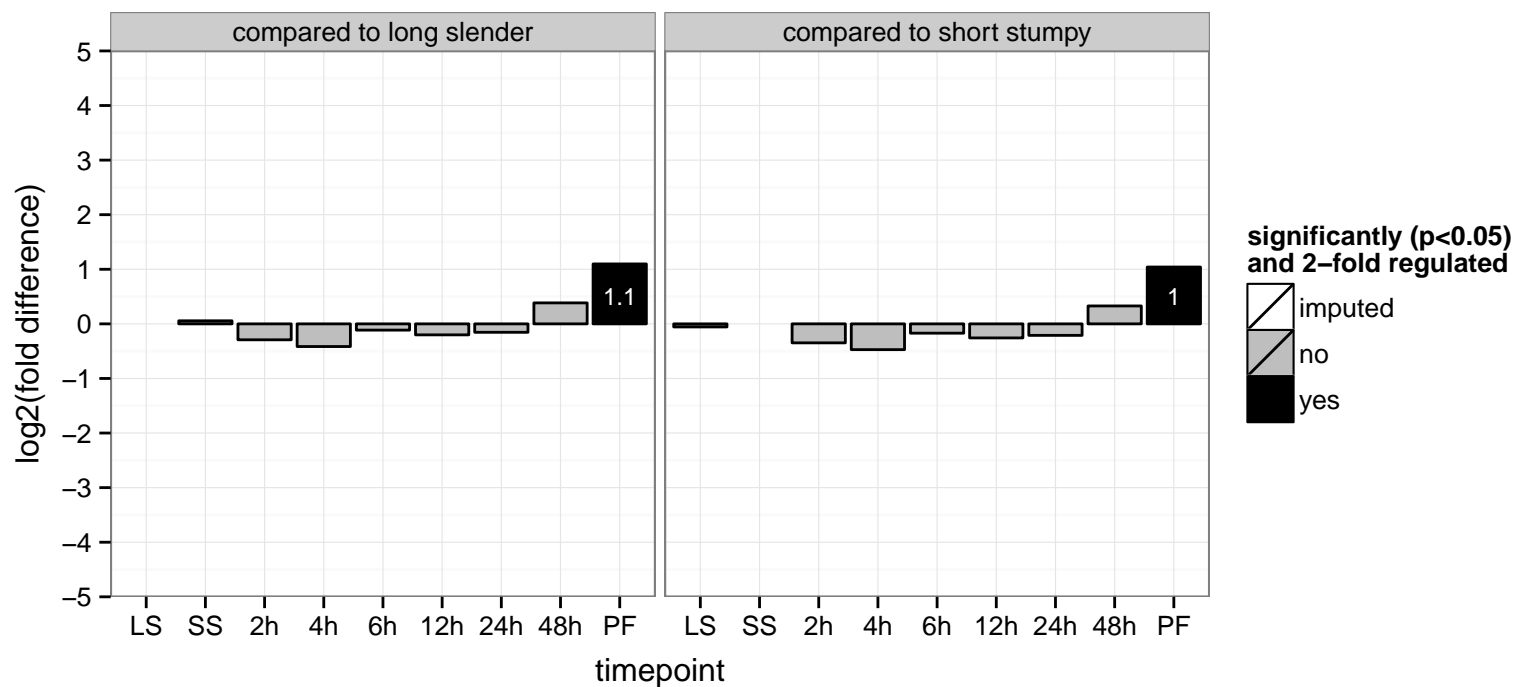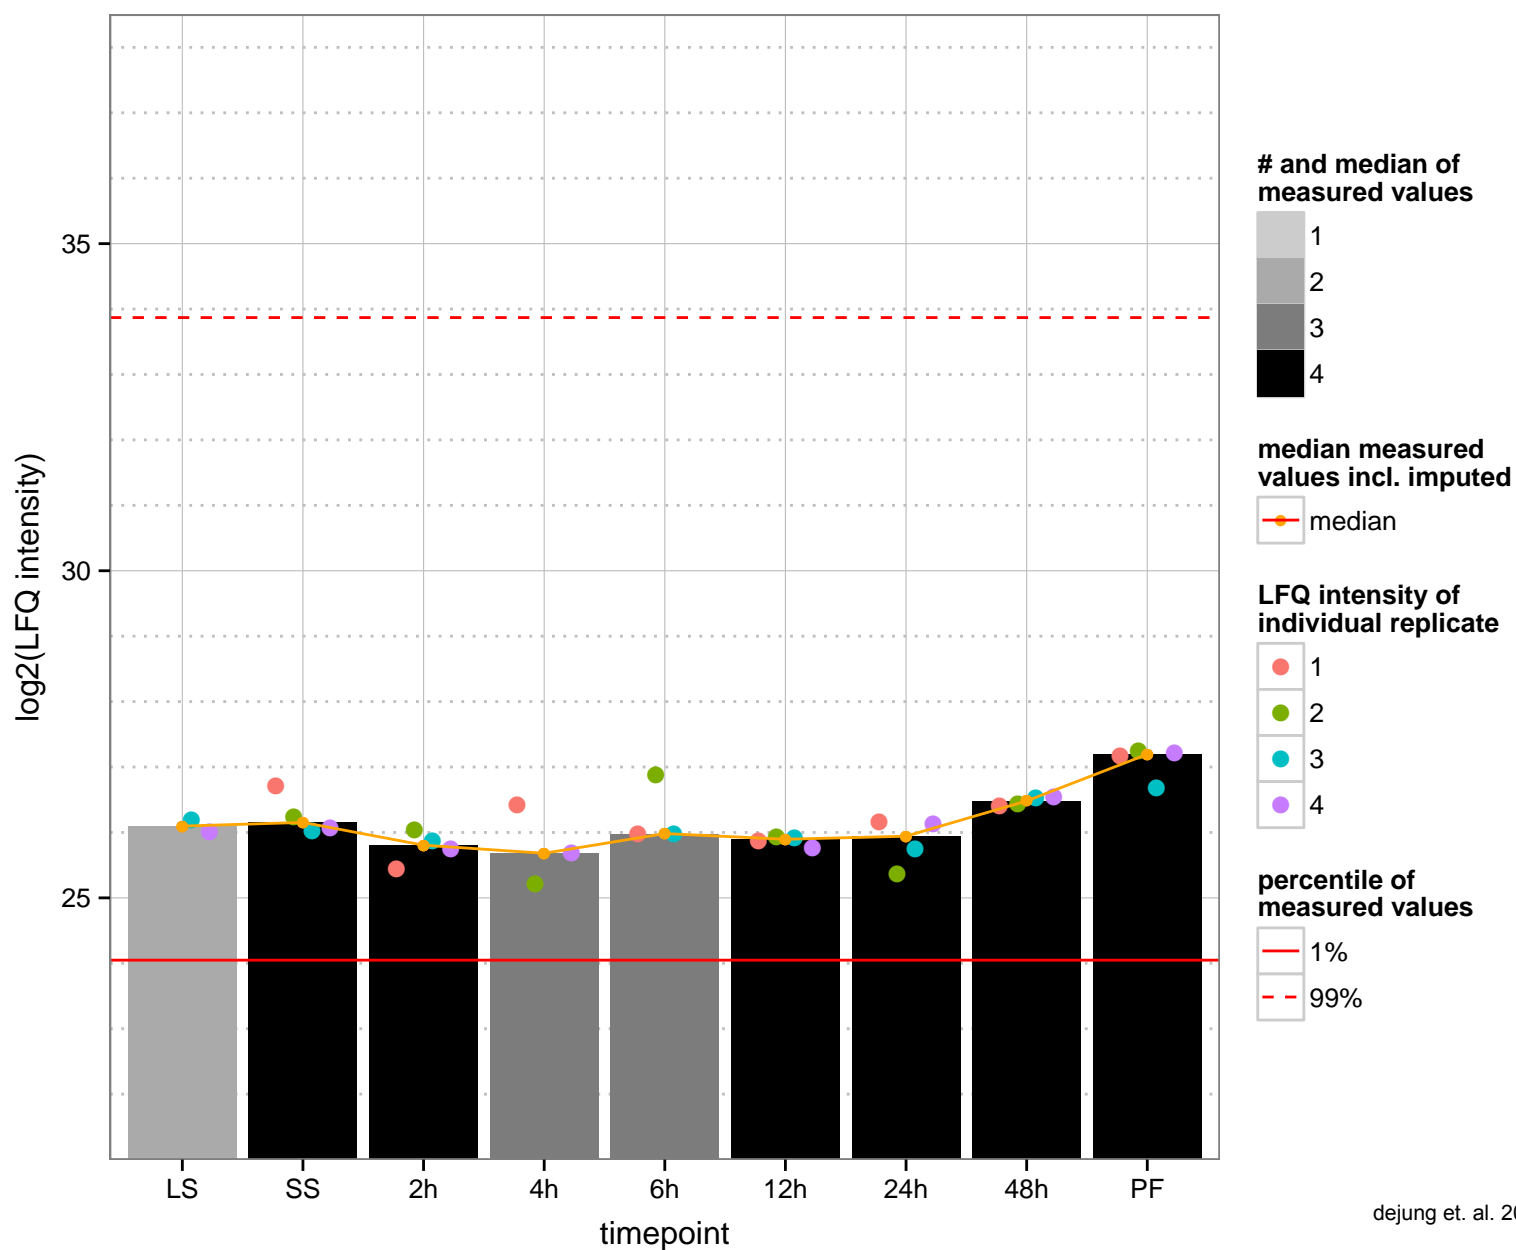

RNA guanylyltransferase  
 Tb927.11.14580  
 AGOF: mRNA guanylyltransferase activity  
 AGOC: nucleus  
 AGOP: 7-methylguanosine mRNA capping  
 PGO: mRNA guanylyltransferase activity  
 PGOC: null  
 PGOP: 7-methylguanosine mRNA capping, mRNA processing

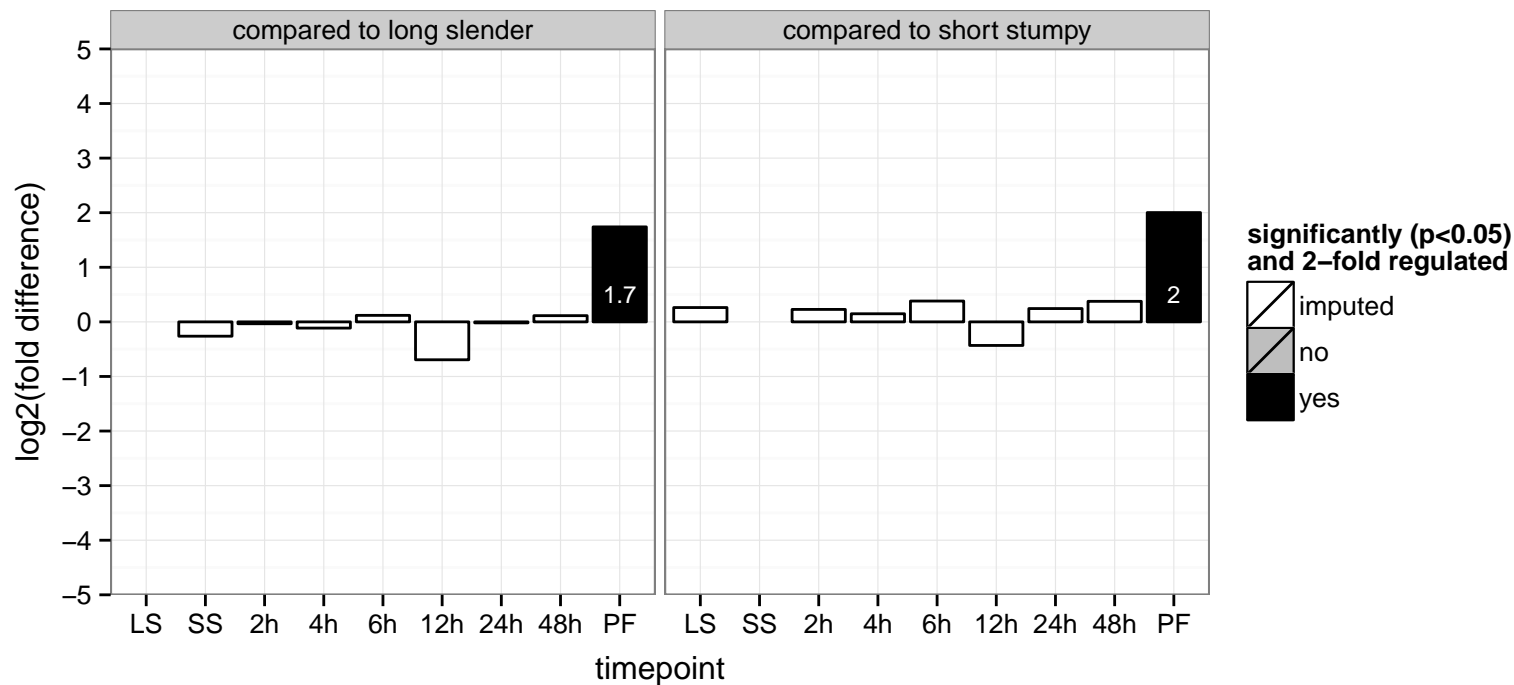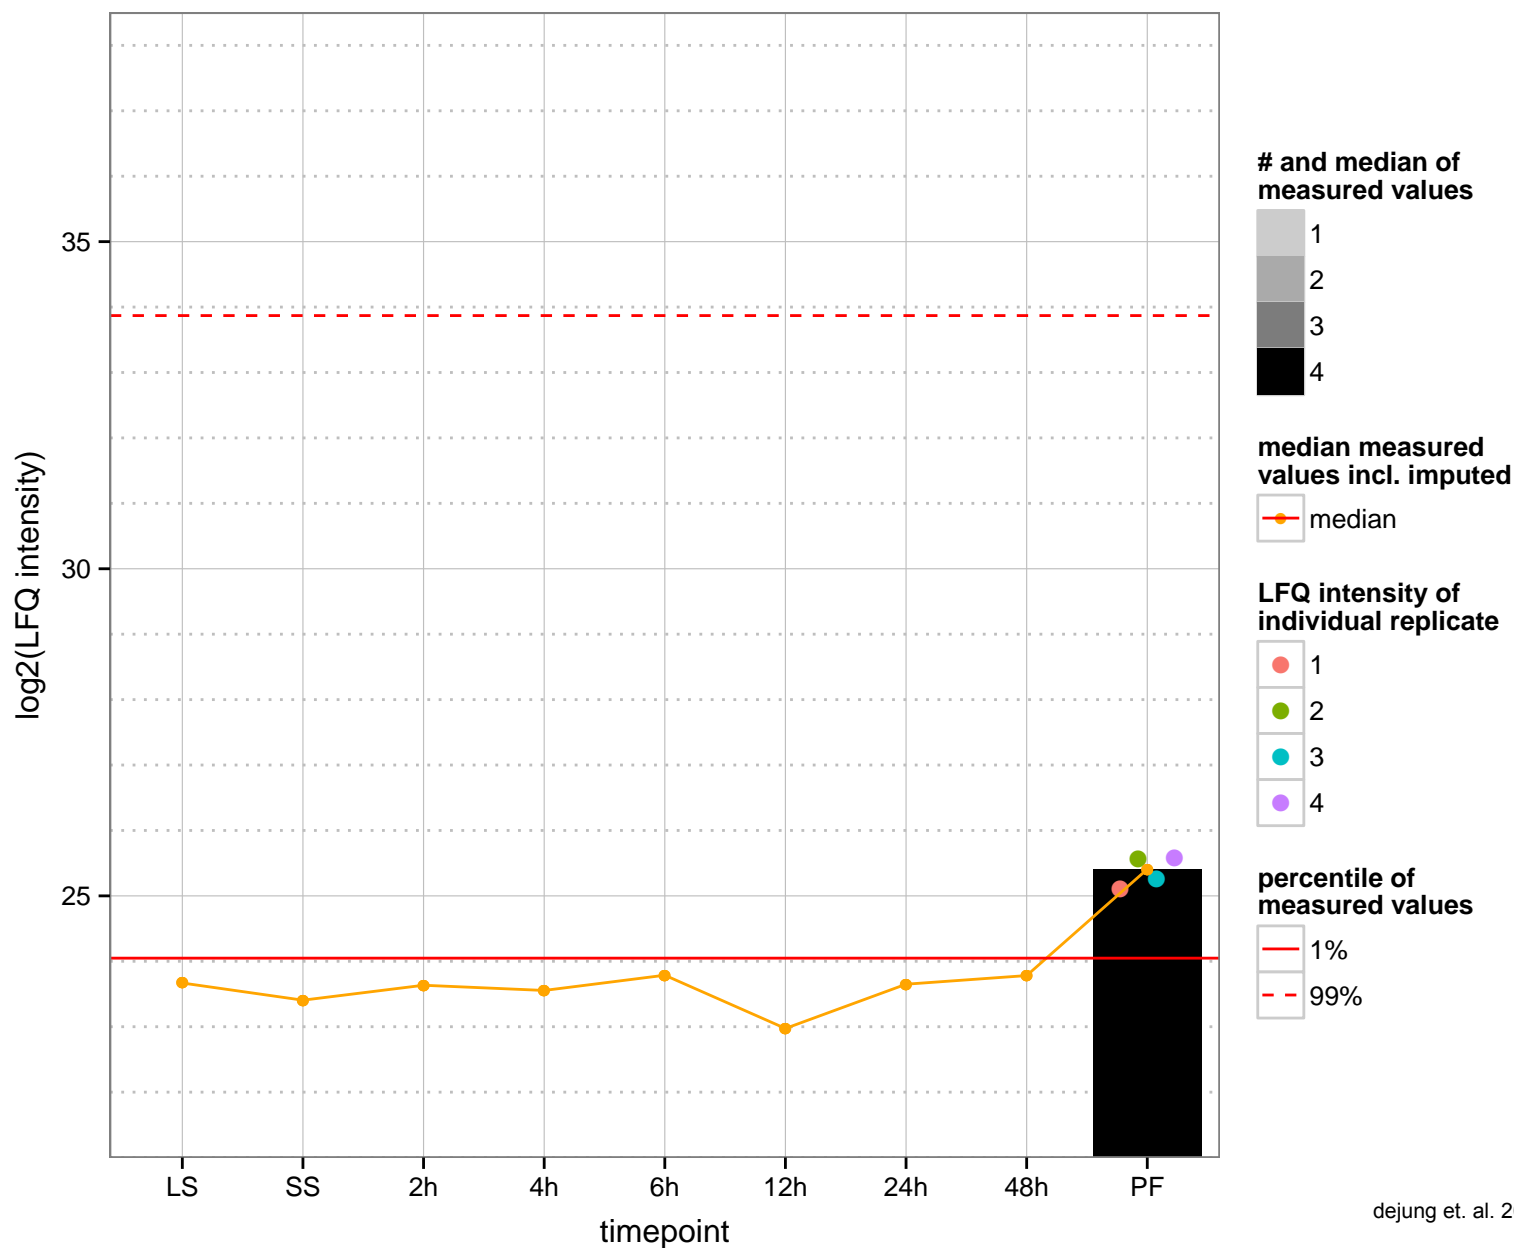

pumilio/PUF RNA binding protein 7, putative (PUF7)  
 Tb927.11.14960  
 AGOF: RNA binding, protein binding  
 AGOC: nucleolus  
 AGOP: mRNA metabolic process, rRNA processing  
 PGO: RNA binding, binding  
 PGO: null  
 PGO: null

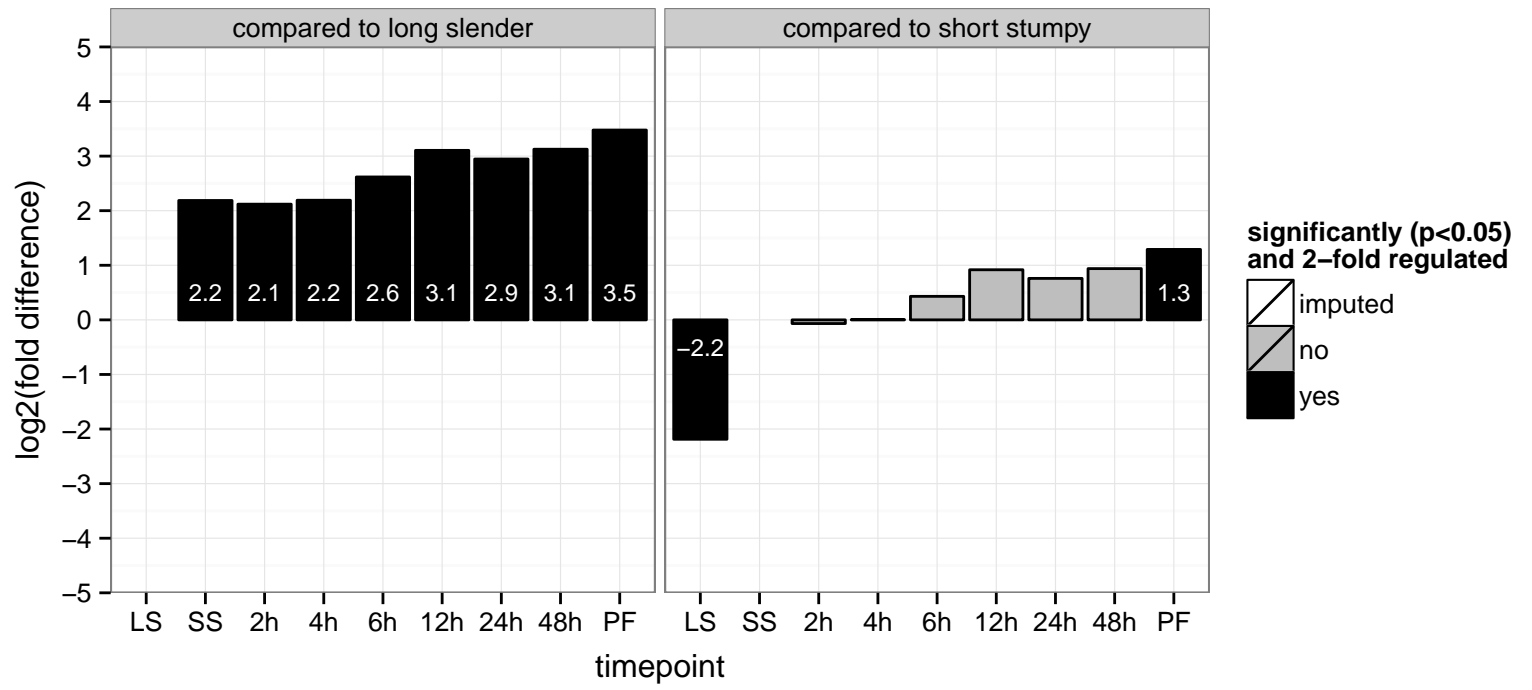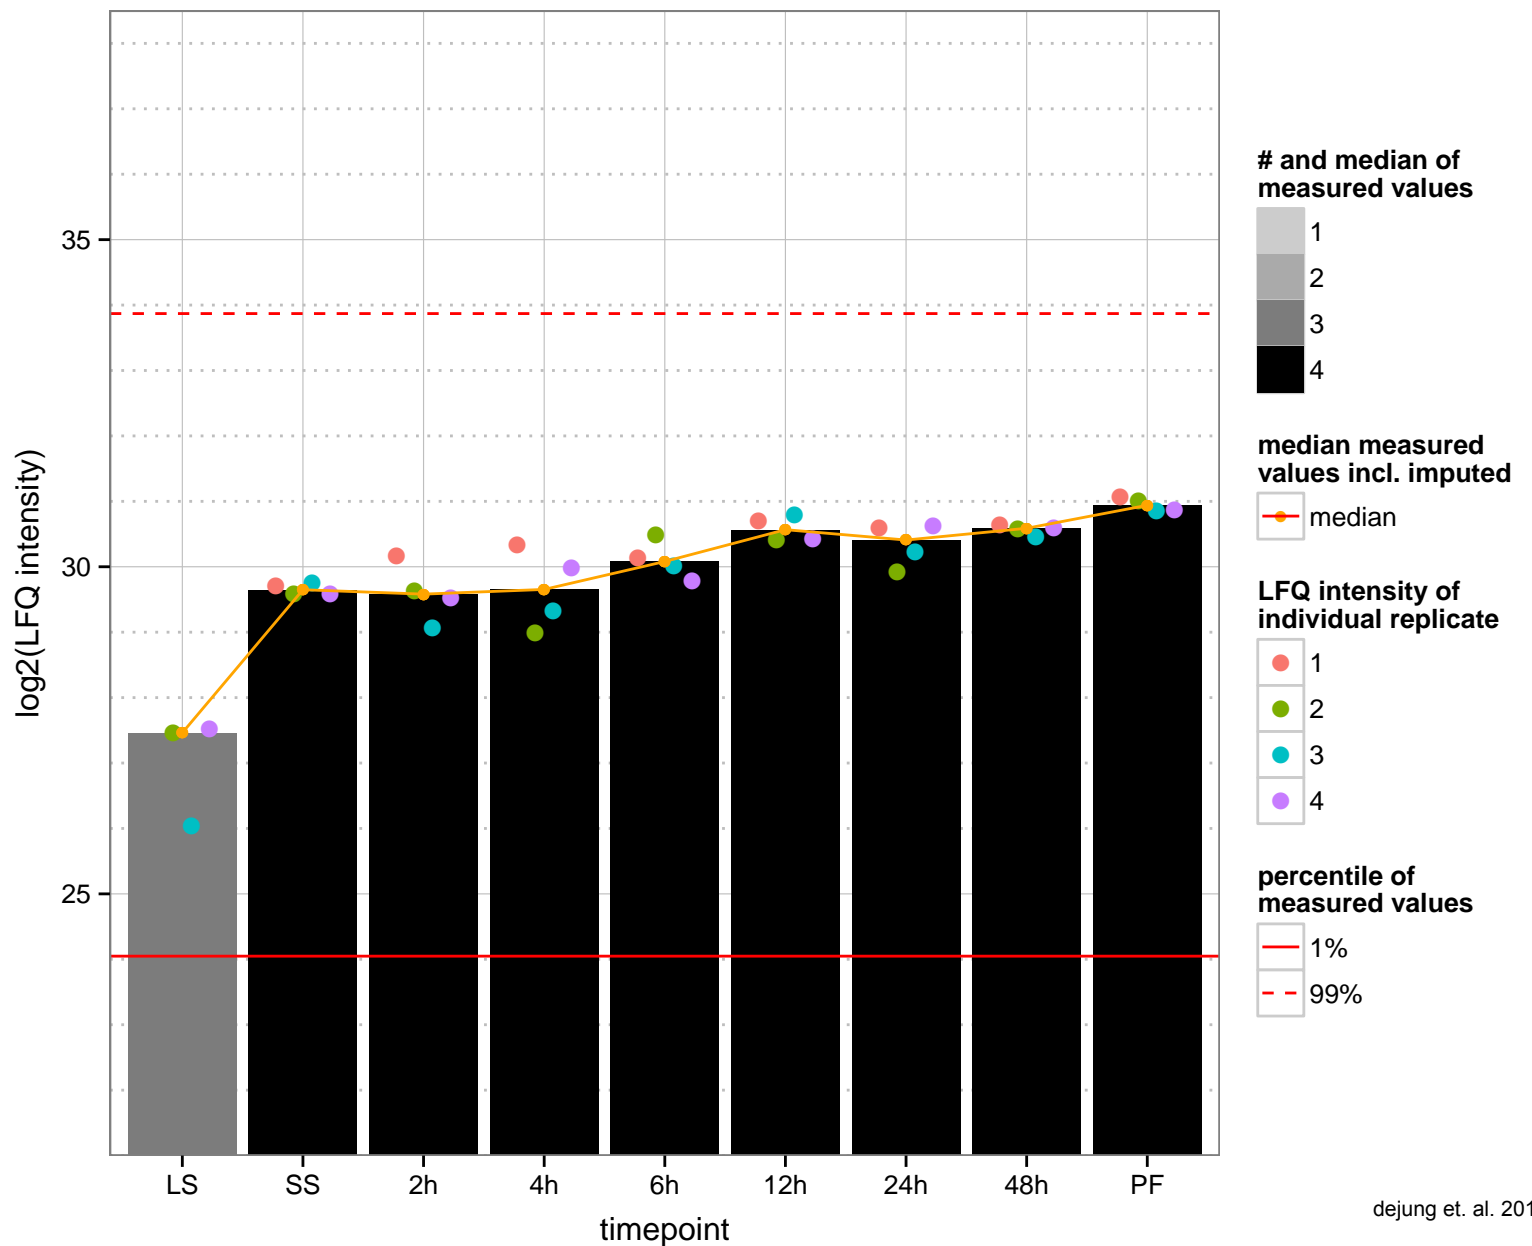

hypothetical protein, conserved  
 Tb927.11.15050  
 AGOF: null  
 AGOC: null  
 AGOP: null  
 PGOF: cation transmembrane transporter activity  
 PGO: integral to membrane  
 PGO: cation transport, transmembrane transport

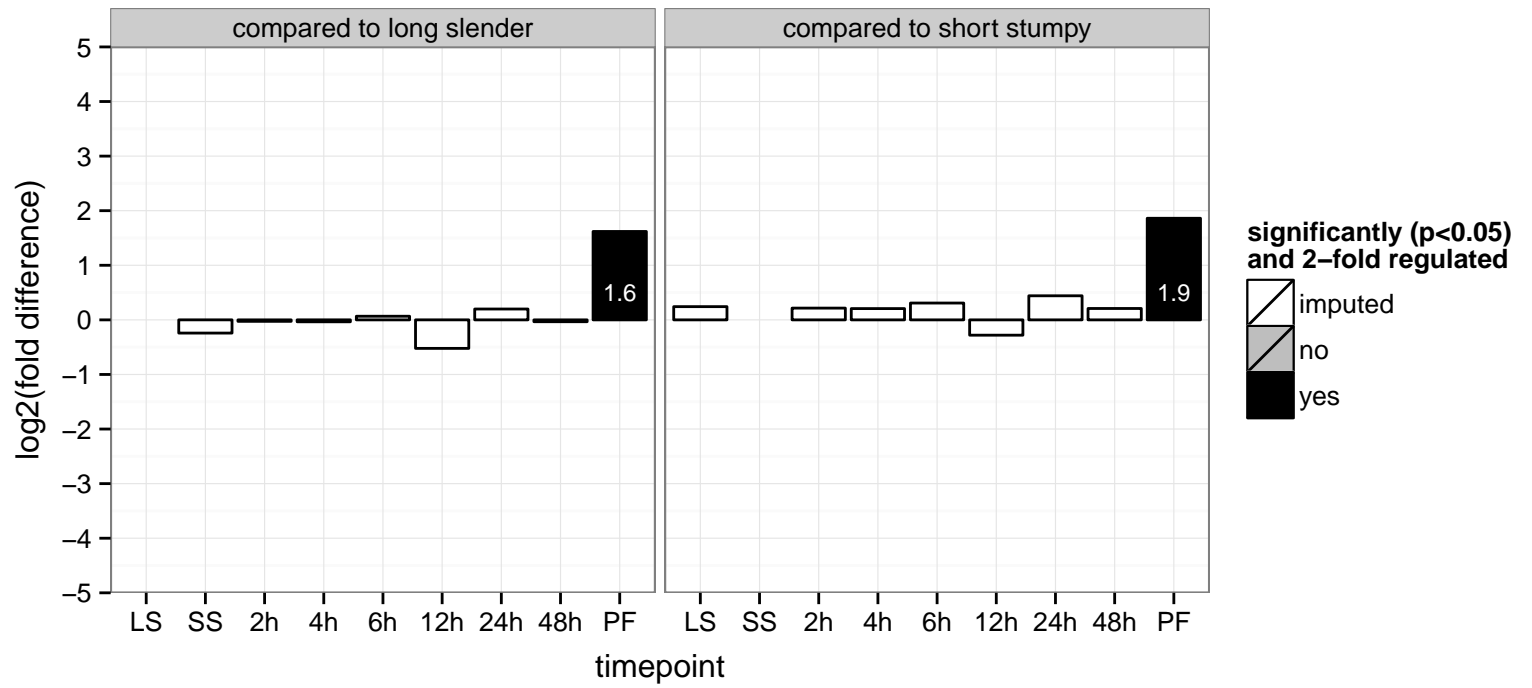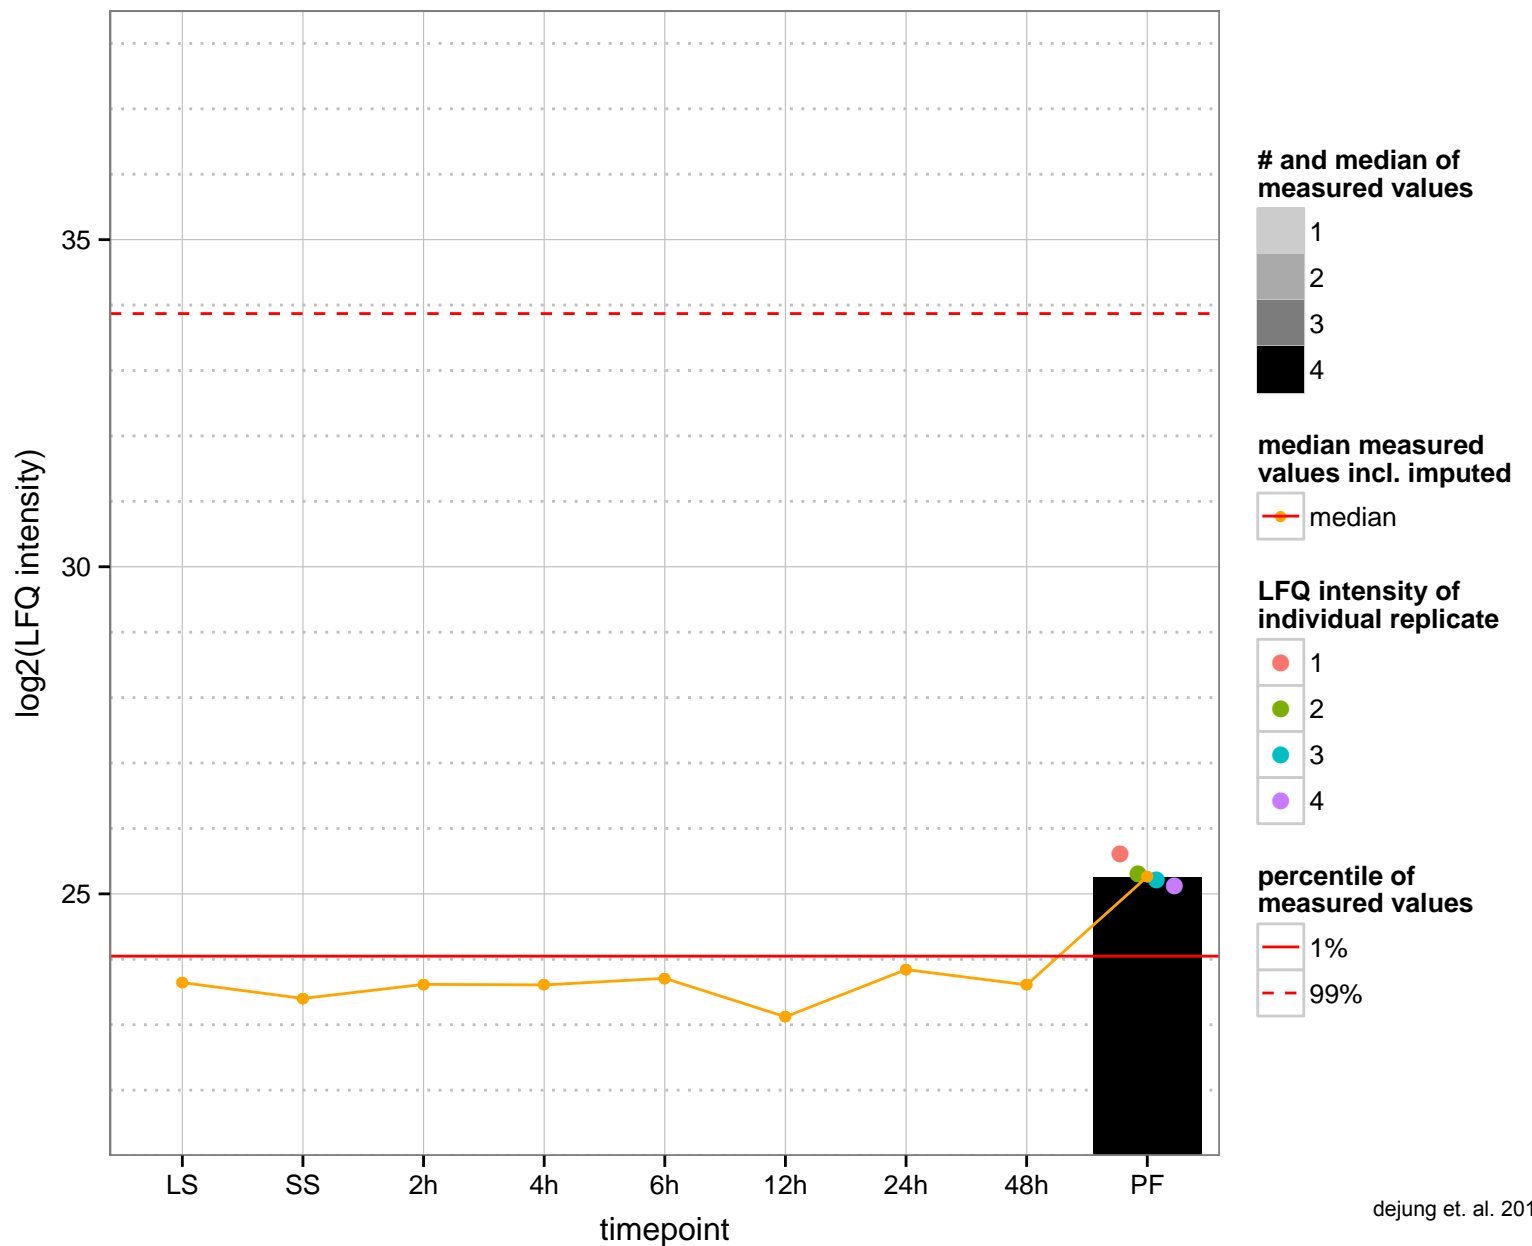



hypothetical protein, conserved  
 Tb927.11.15220  
 AGOF: null  
 AGOC: null  
 AGOP: null  
 PGOF: null  
 PGO: null  
 PGOP: null

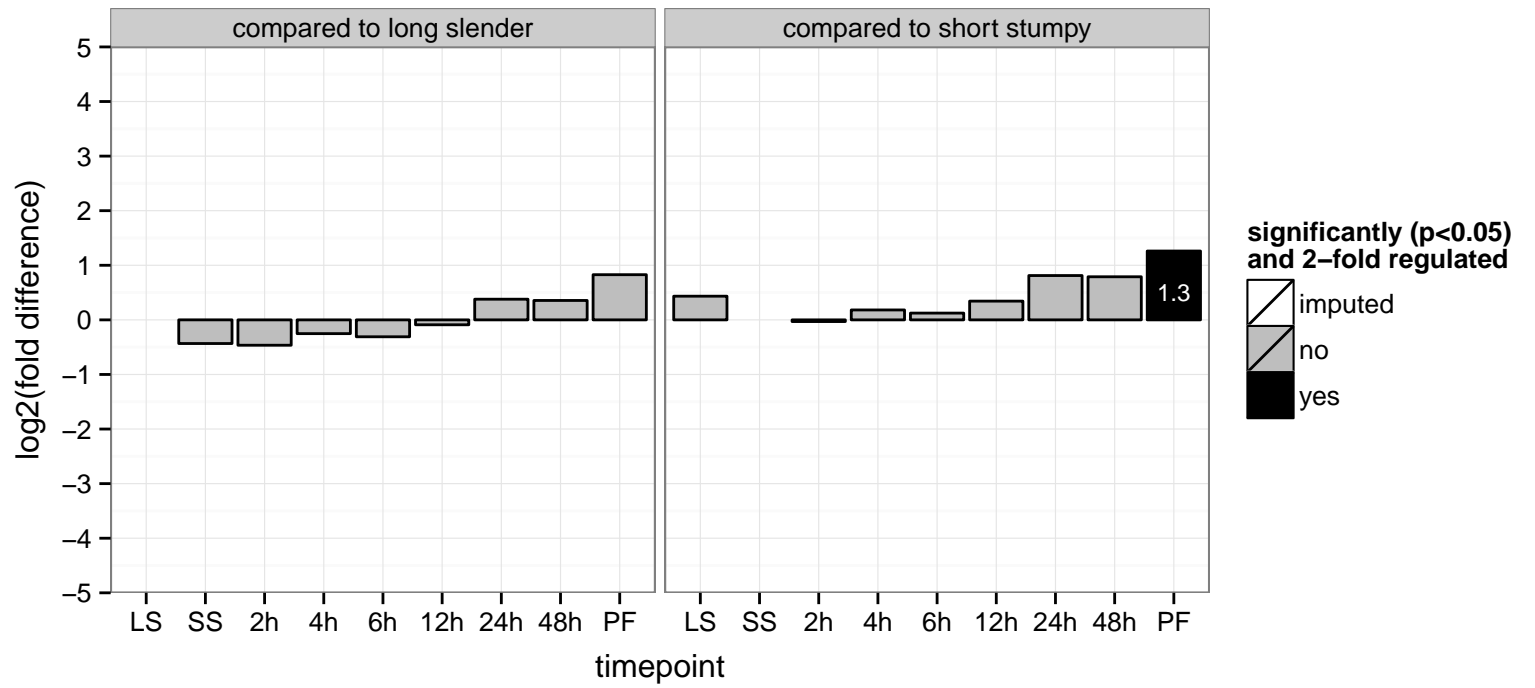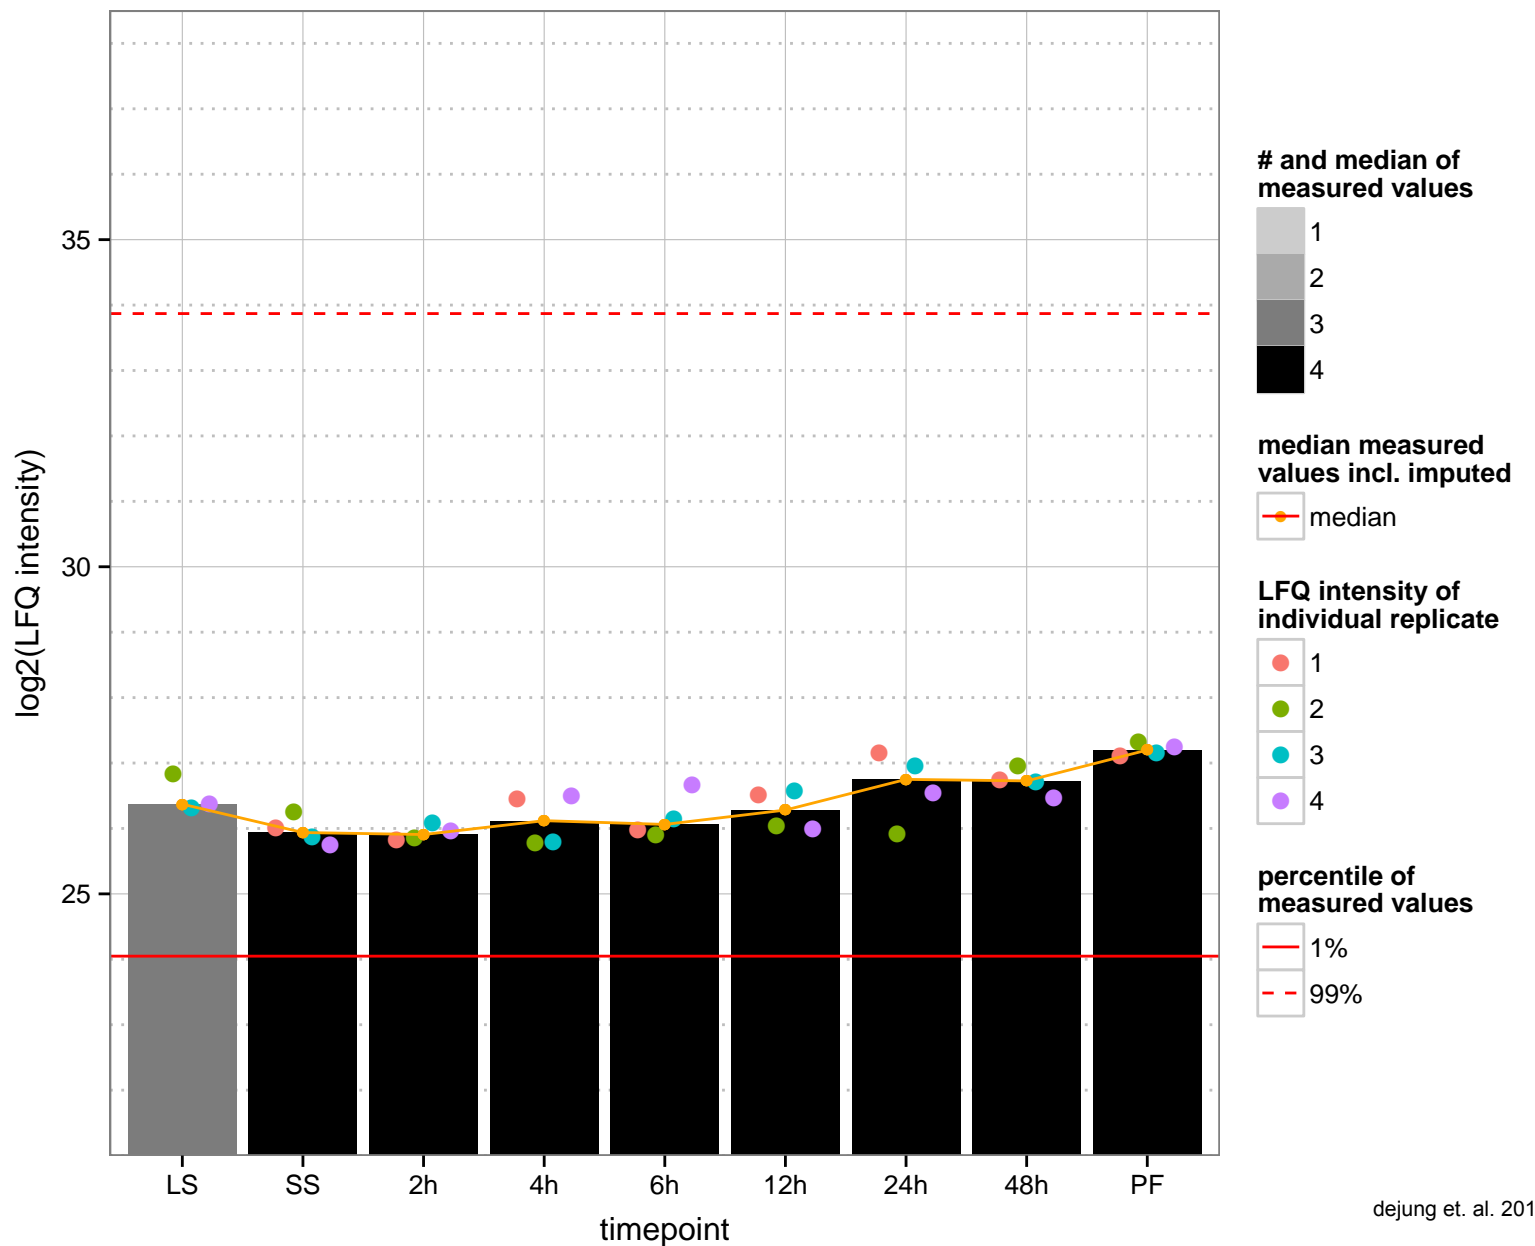

eRF1 methyltransferase catalytic subunit, putative  
 Tb927.11.15290  
 AGOF: protein methyltransferase activity  
 AGOC: cytoplasm  
 AGOP: regulation of translation  
 PGO: null  
 PGOC: null  
 PGOP: null

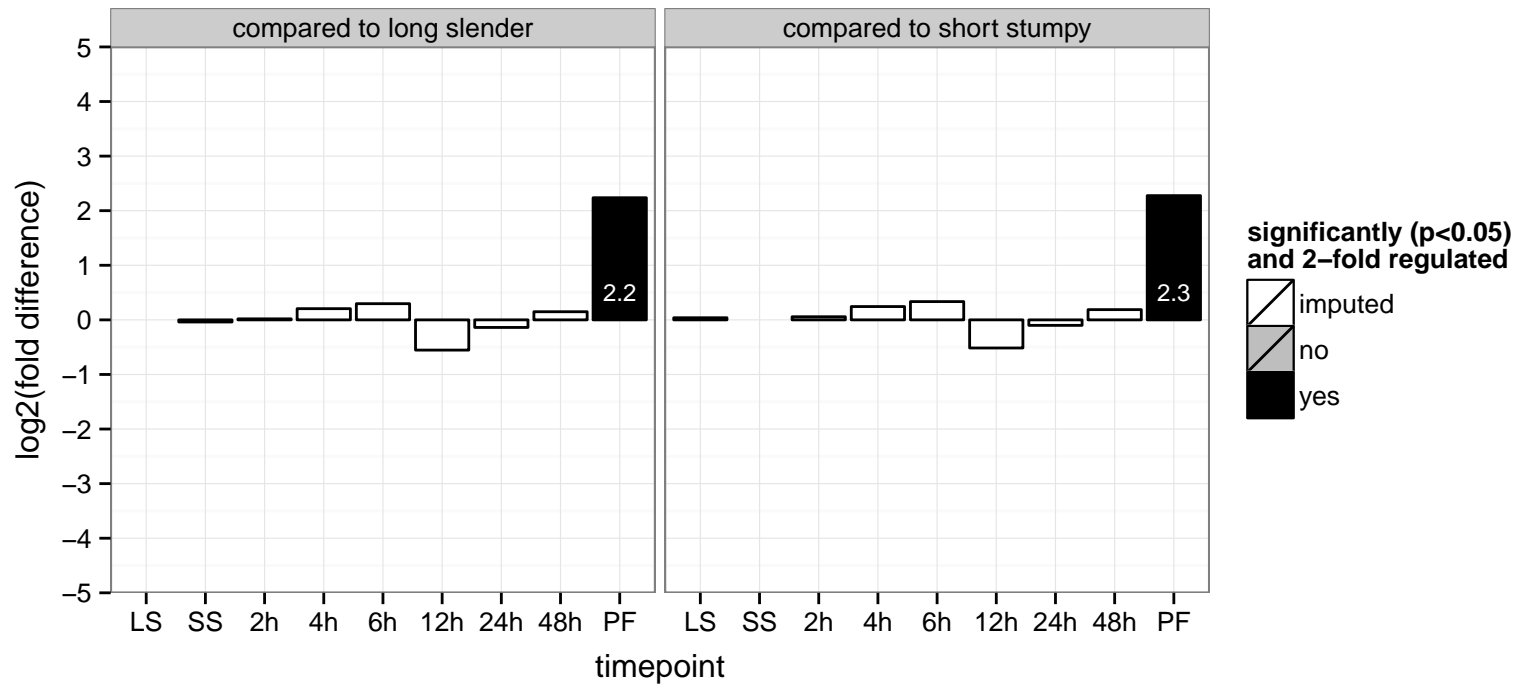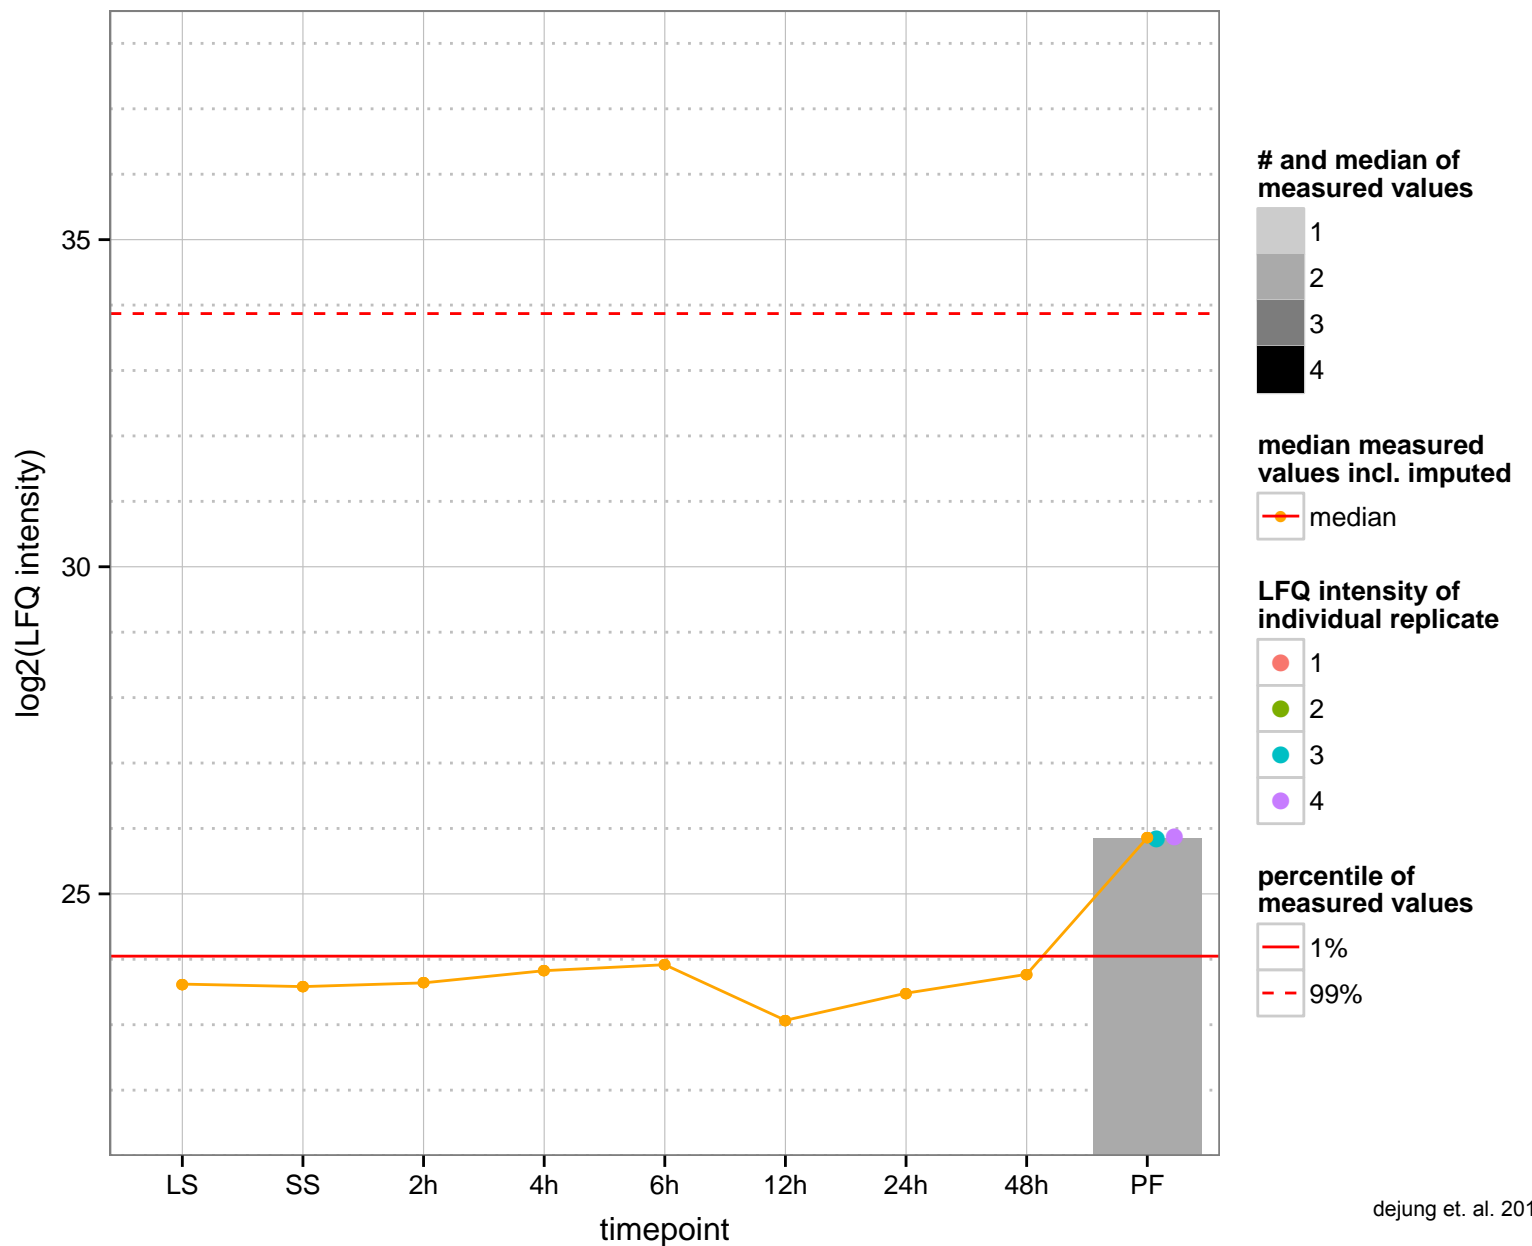

hypothetical protein, conserved (TbKap123)  
 Tb927.11.15370  
 AGOF: null  
 AGOC: null  
 AGOP: null  
 PGOF: binding  
 PGO: membrane coat  
 PGO: intracellular protein transport, vesicle-mediated transport

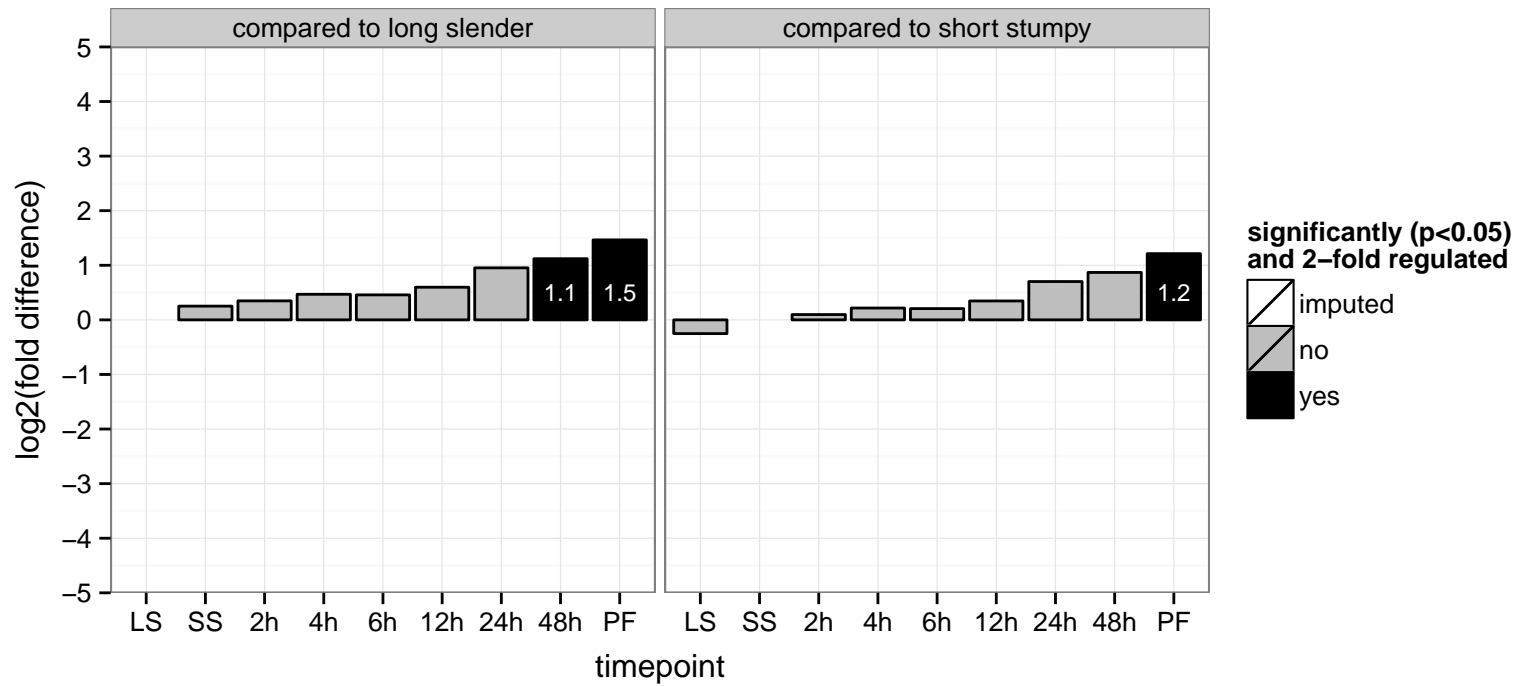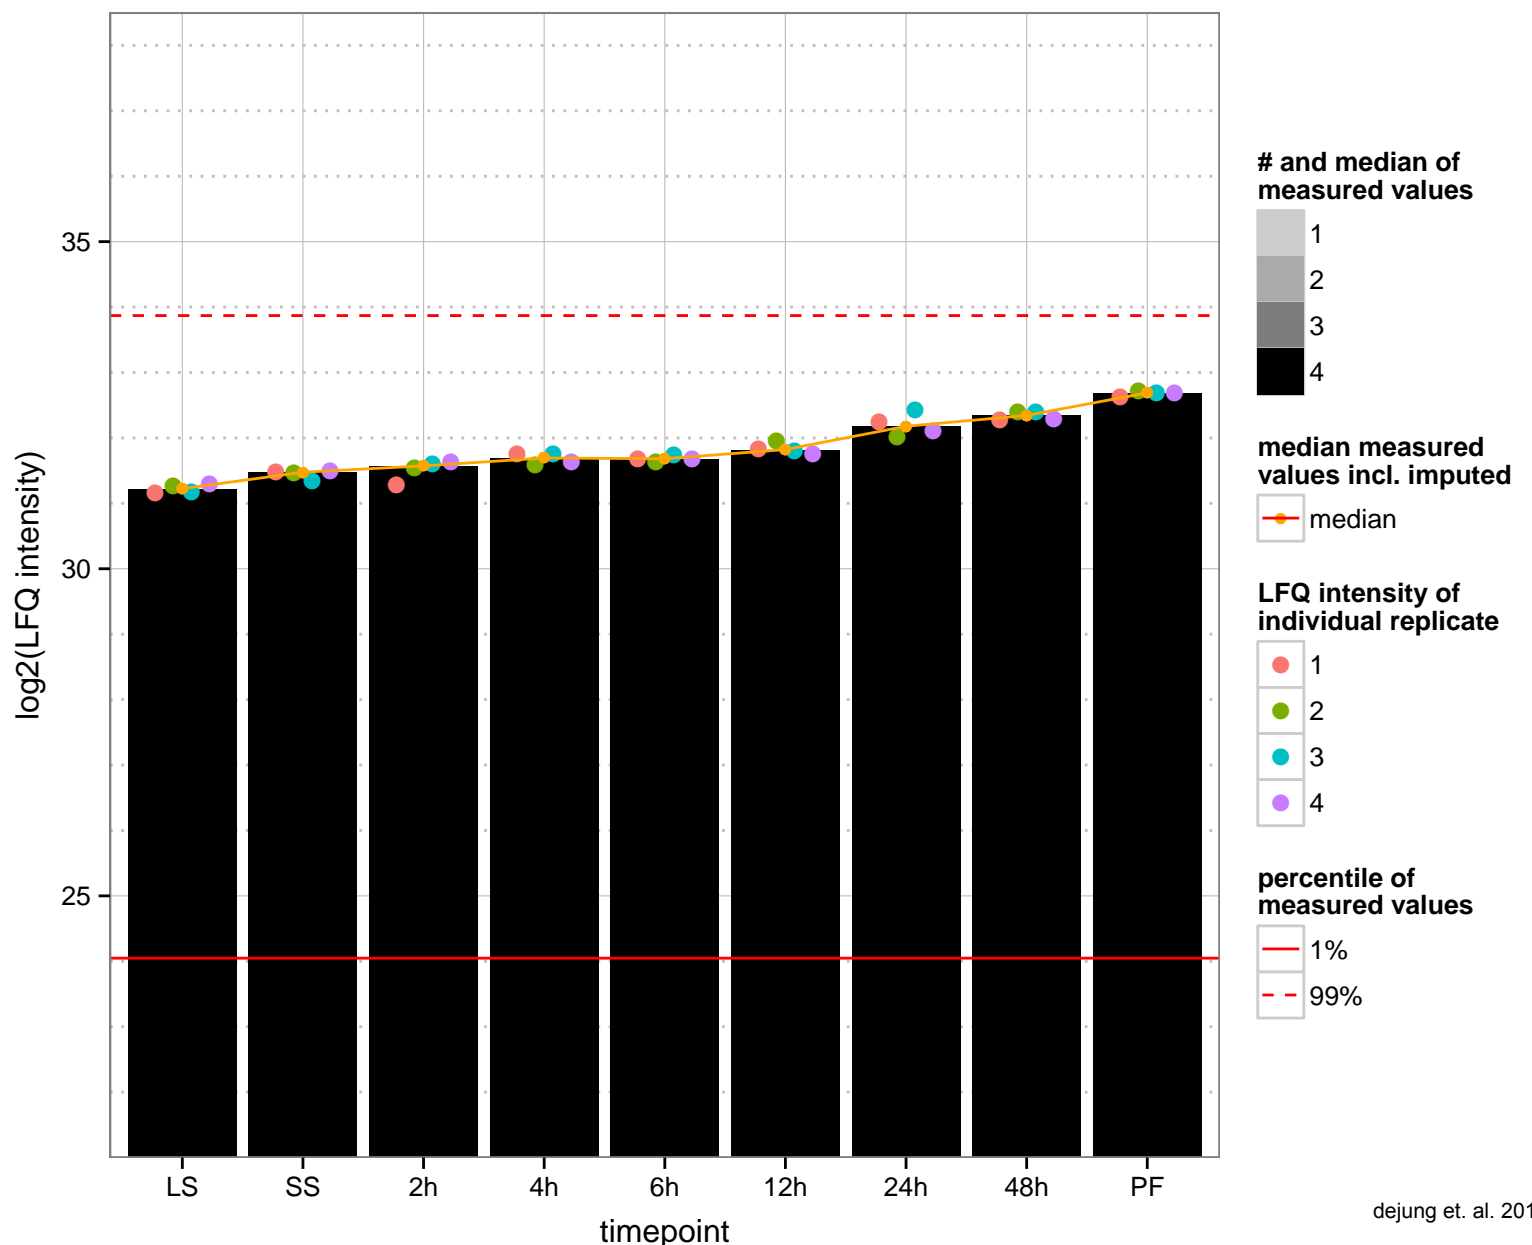

poly(A) polymerase, putative  
 Tb927.11.15650;Tb11.v5.0667  
 AGOF: null  
 AGOC: null, mitochondrion  
 AGOP: null  
 PGO: null  
 PGOC: null  
 PGOP: null

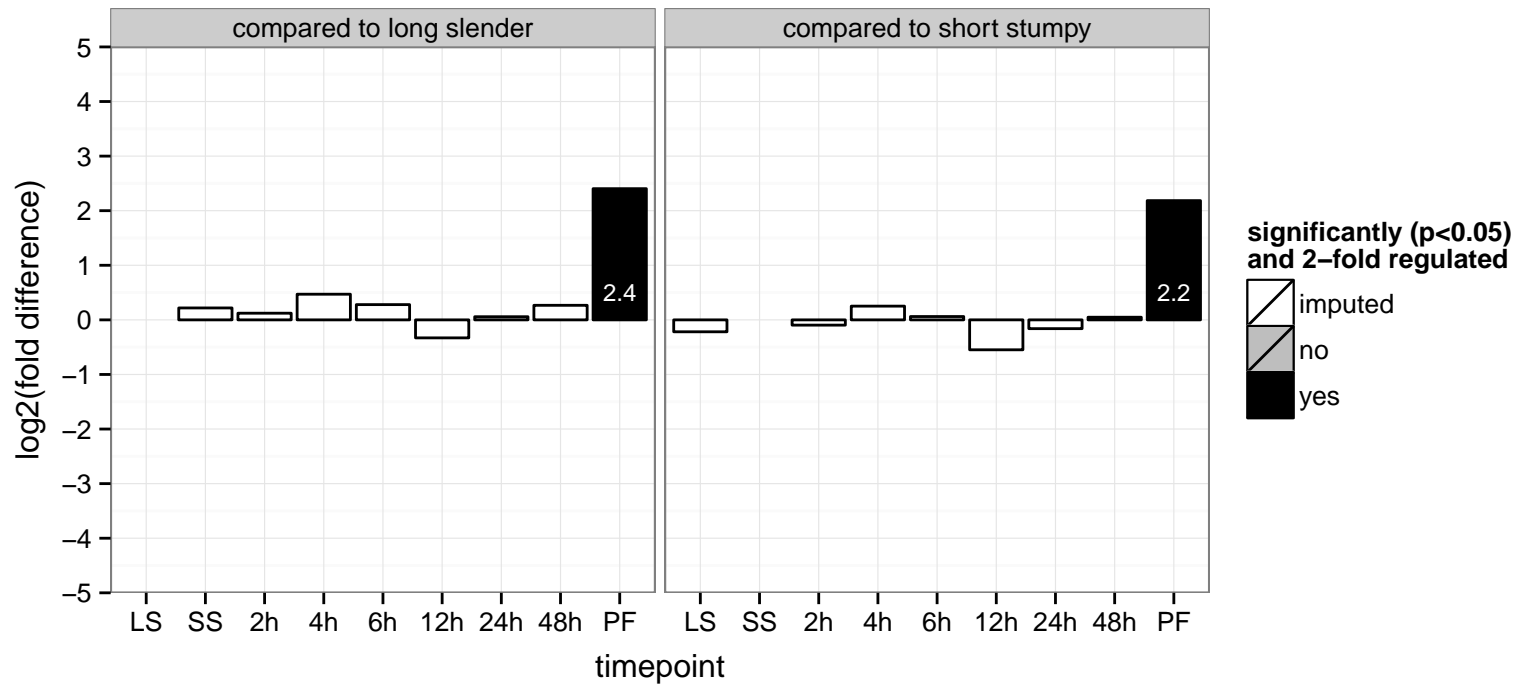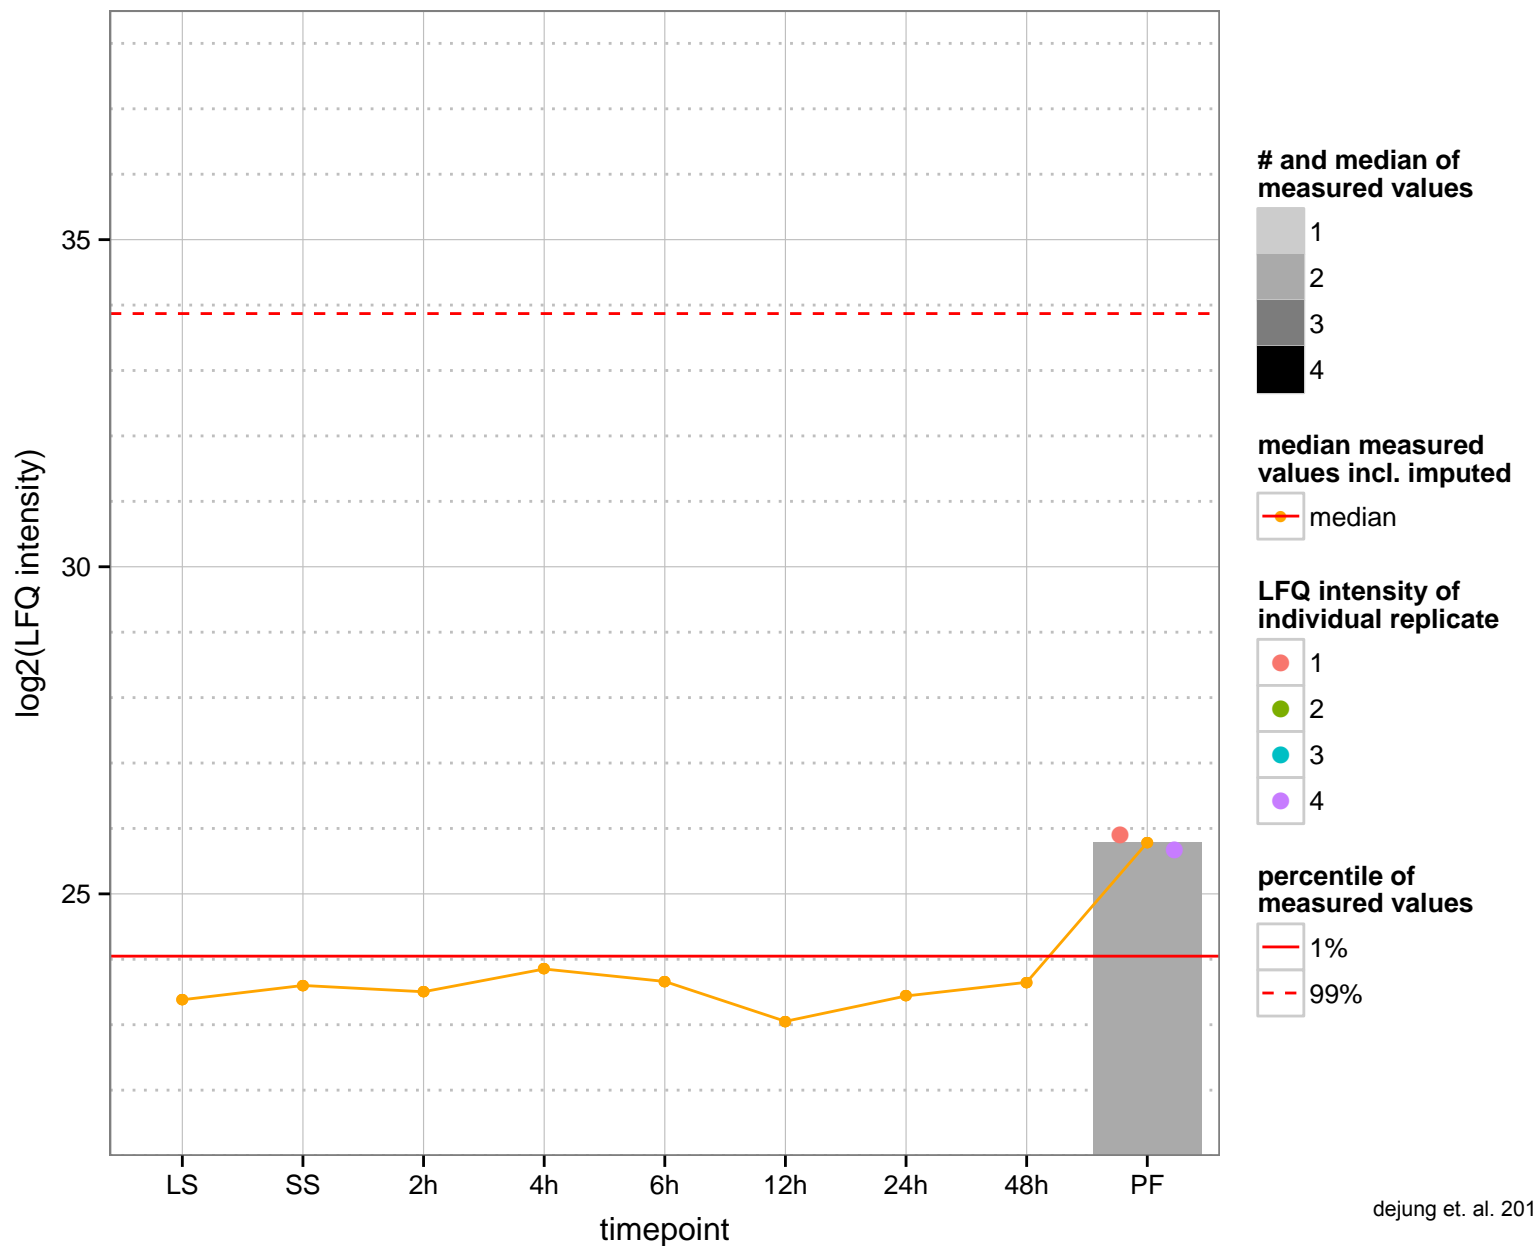

microtubule-associated protein, corset-associated protein 17 (CAP17)

Tb927.11.16200

AGOF: null

AGOC: microtubule cytoskeleton

AGOP: cytoskeleton organization

PGOF: null

PGOC: null

PGOP: null

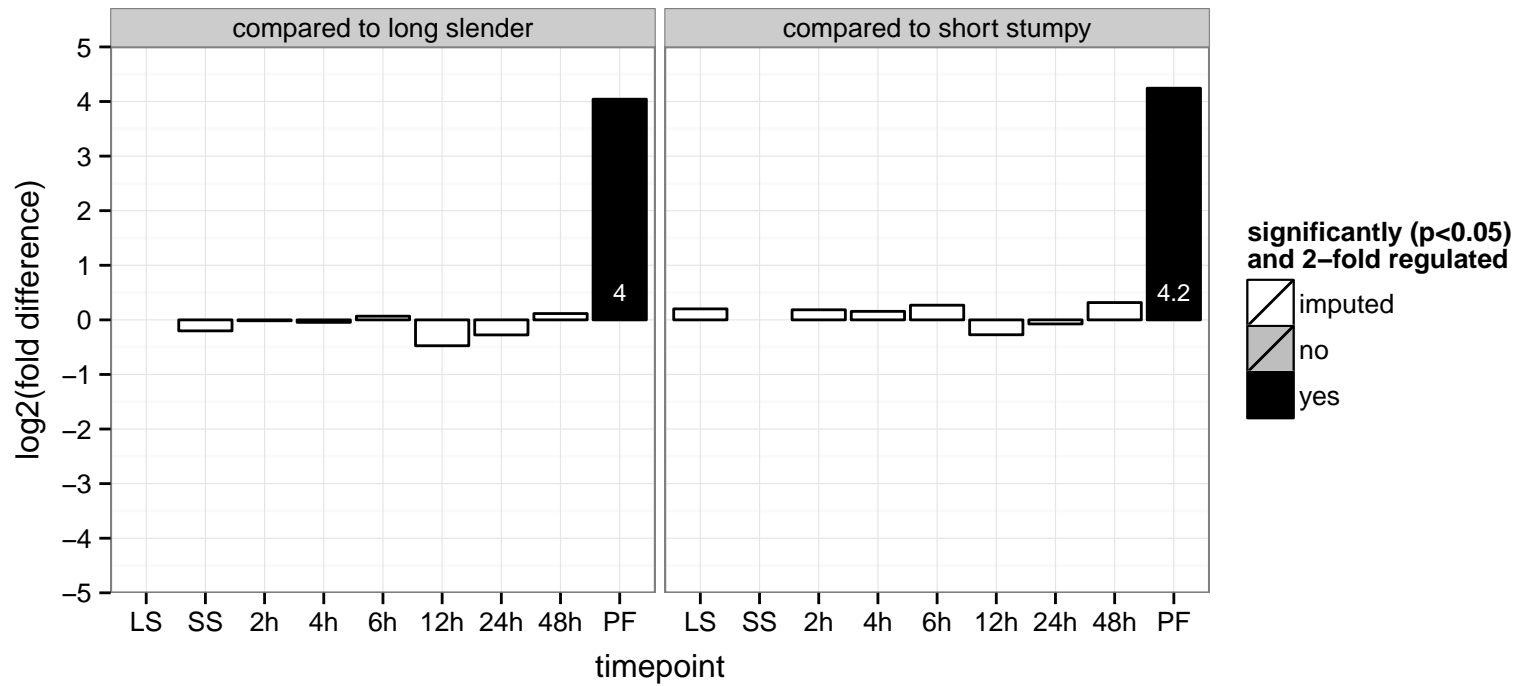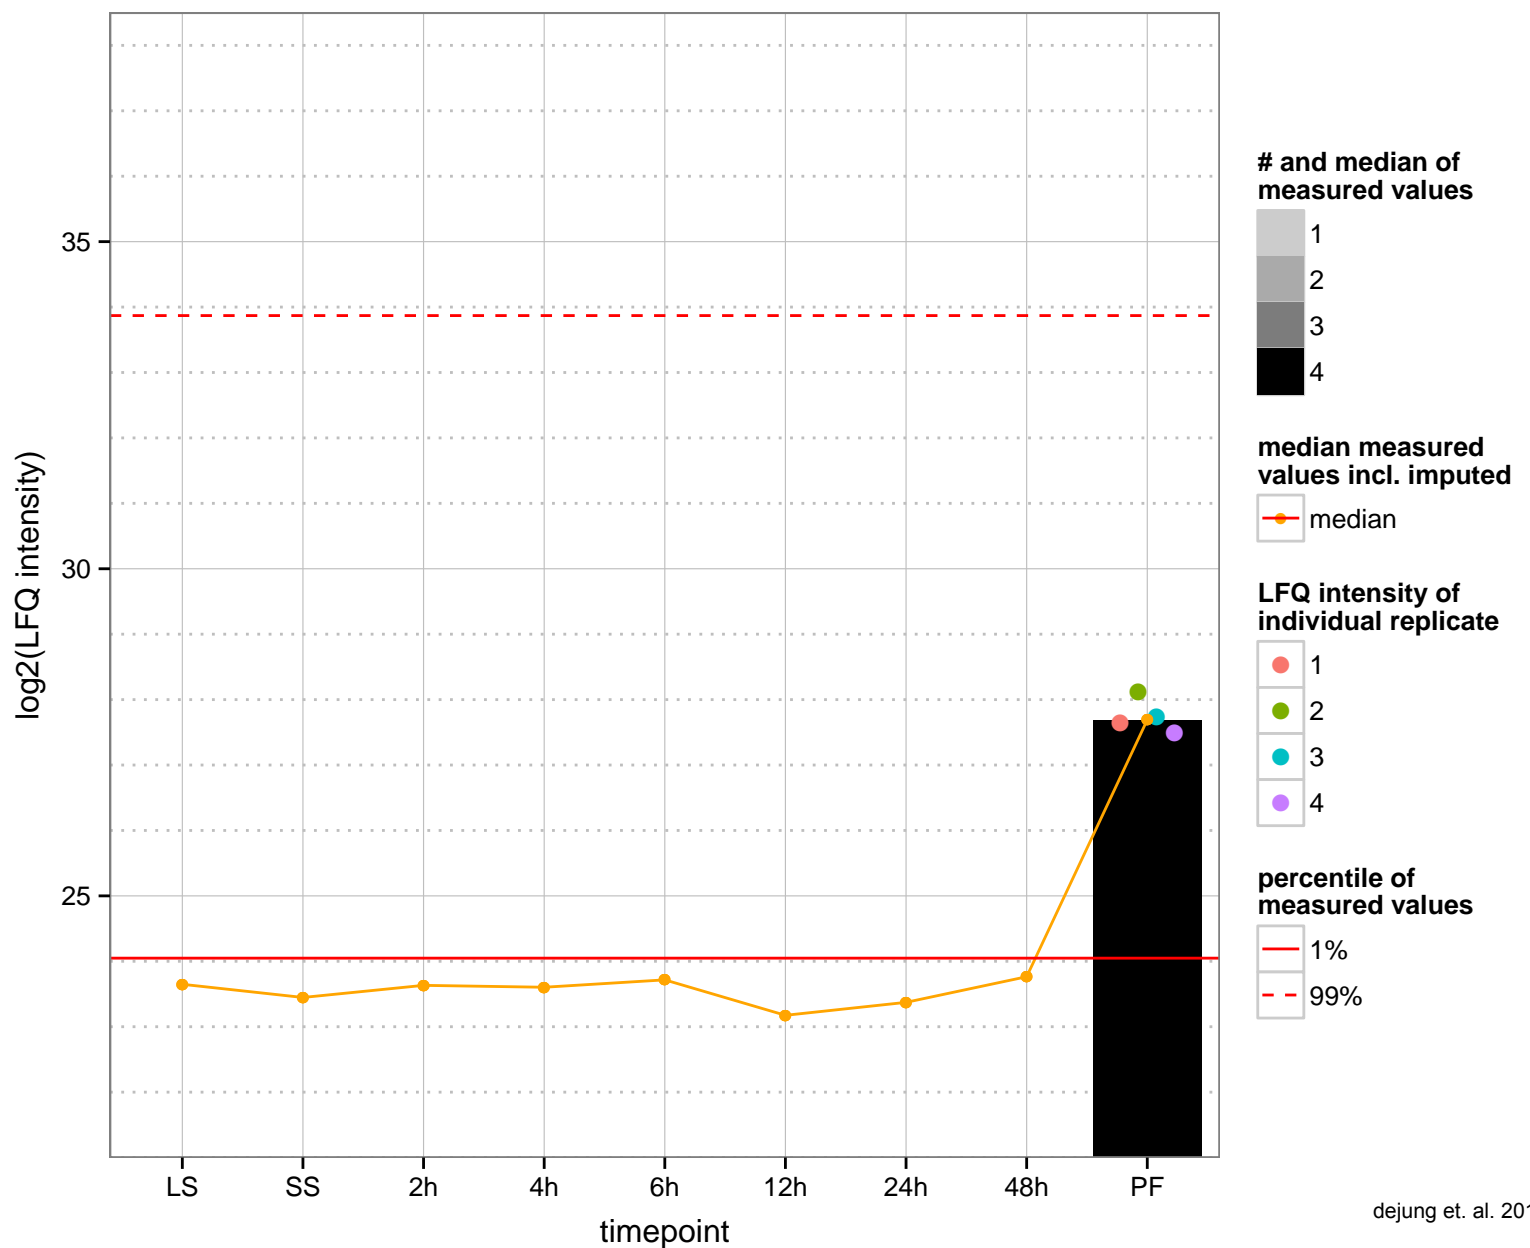

60S ribosomal protein L2, putative, 60S ribosomal protein L8  
 Tb927.5.1110;Tb927.11.16280  
 AGOF: structural constituent of ribosome  
 AGOC: intracellular, ribosome  
 AGOP: translation  
 PGOF: structural constituent of ribosome  
 PGO: intracellular, ribosome  
 PGOP: translation

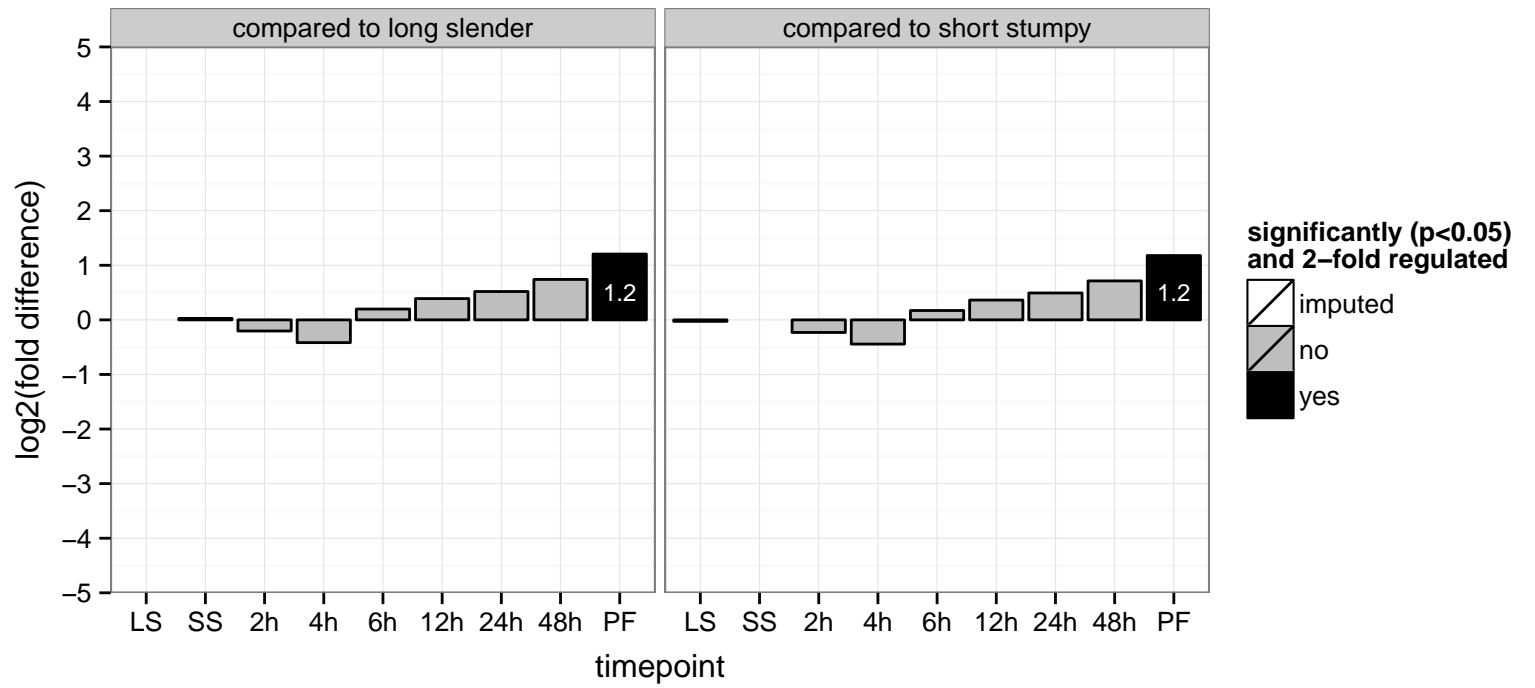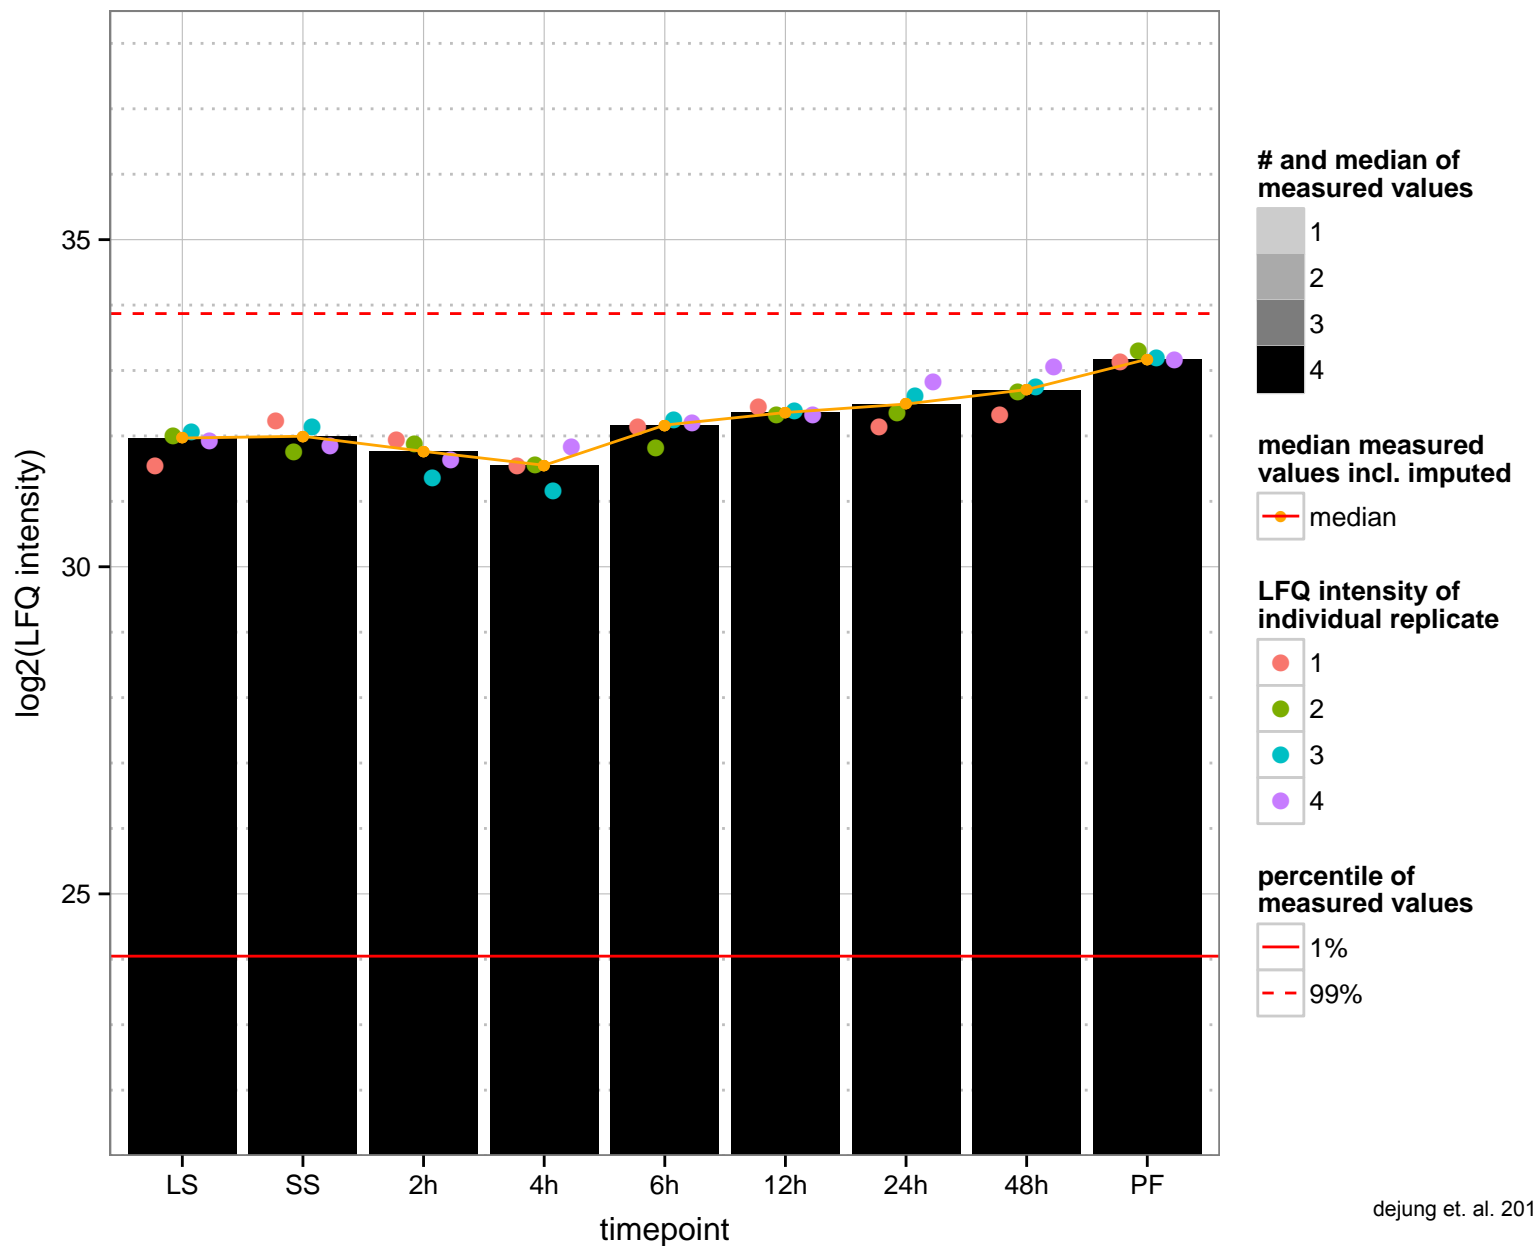

hypothetical protein, conserved  
 Tb927.11.16530  
 AGOF: null  
 AGOC: mitochondrion  
 AGOP: null  
 PGO: null  
 PGO: null  
 PGO: null

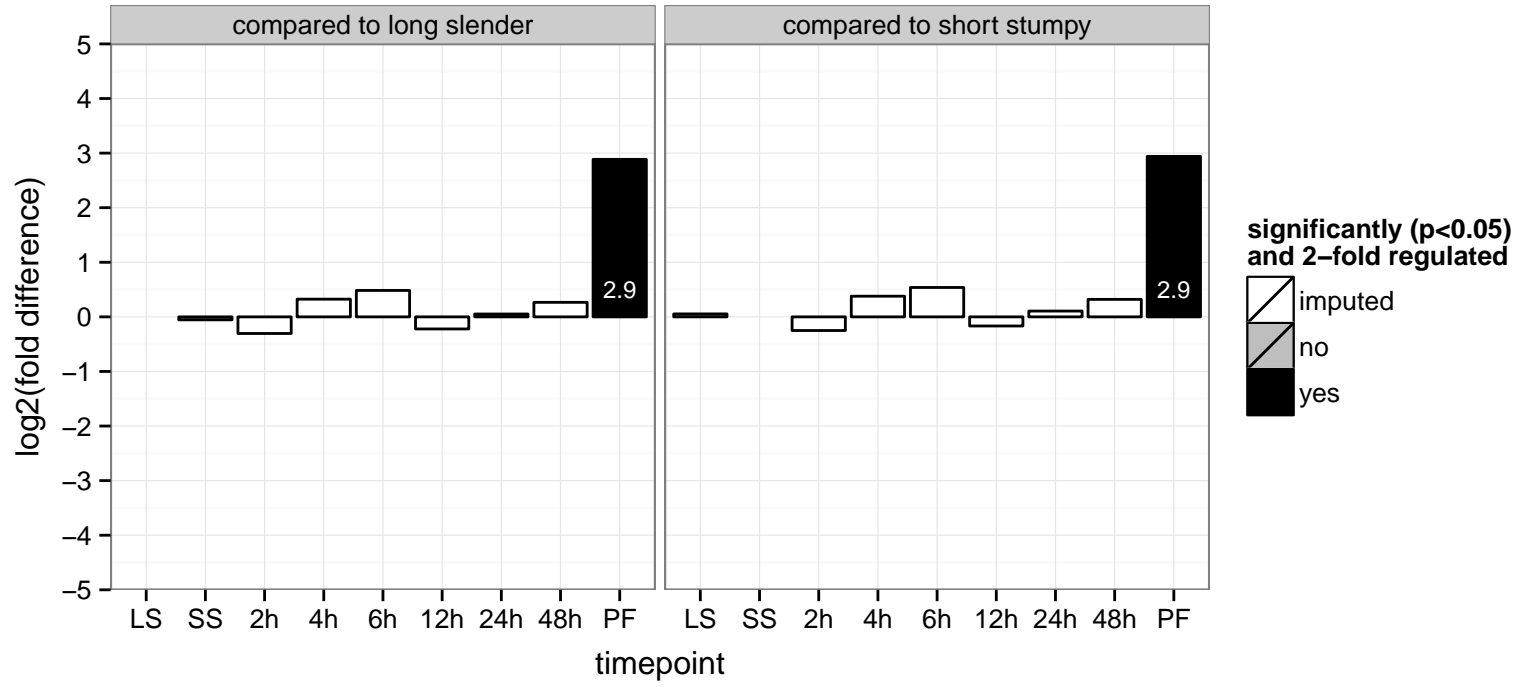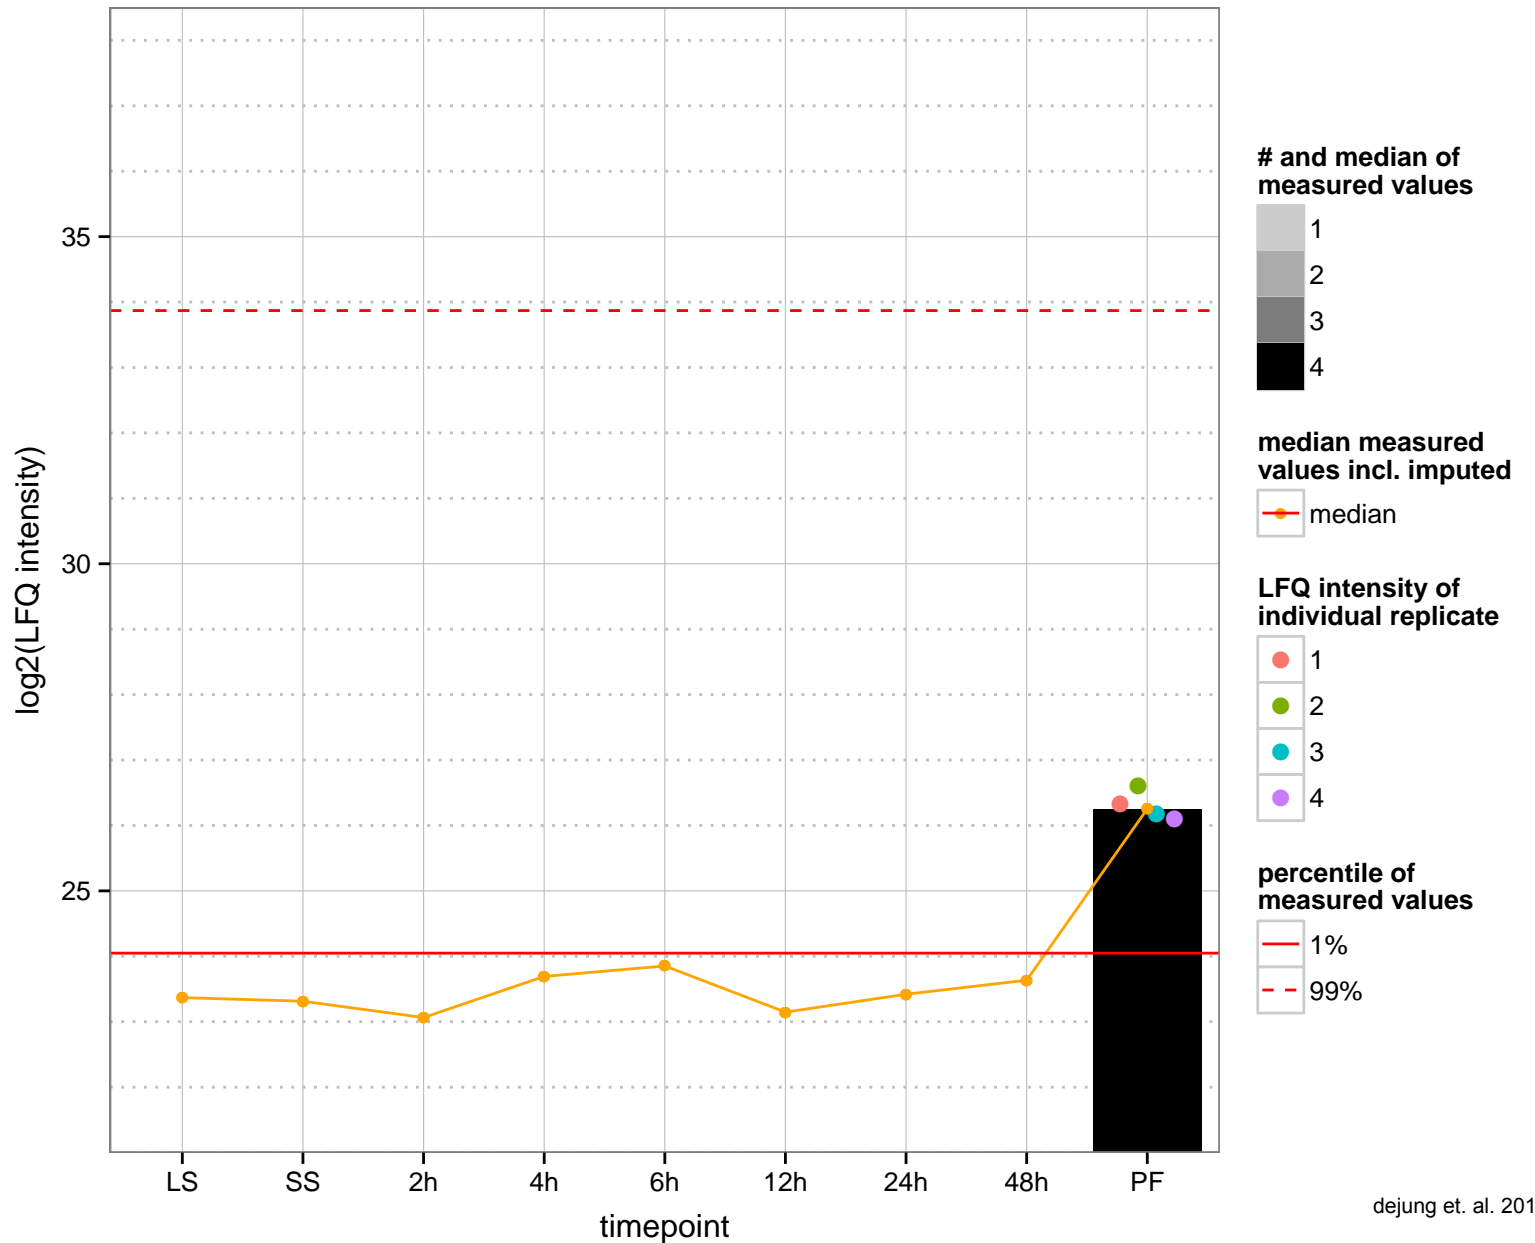

hypothetical protein, conserved  
 Tb927.11.16670  
 AGOF: zinc ion binding  
 AGOC: null  
 AGOP: null  
 PGOF: zinc ion binding  
 PGOC: null  
 PGOP: null

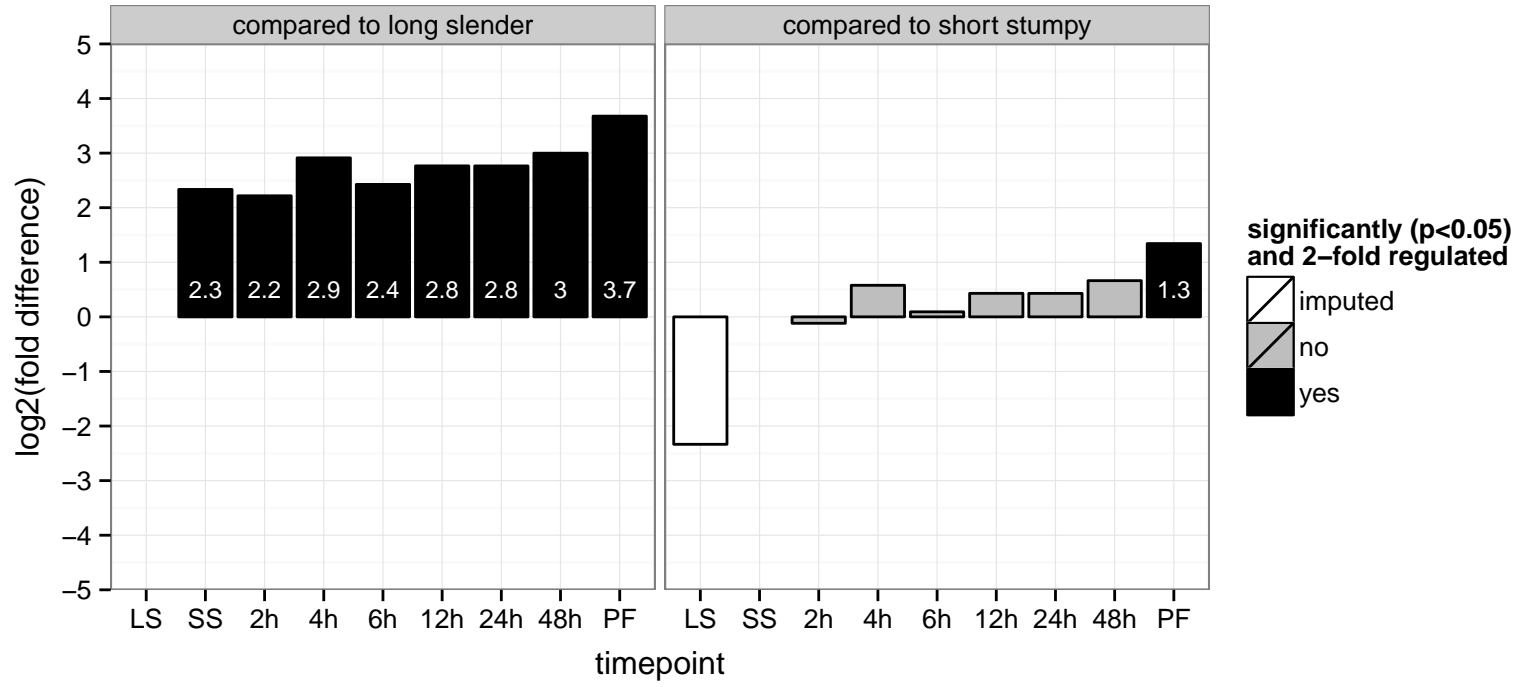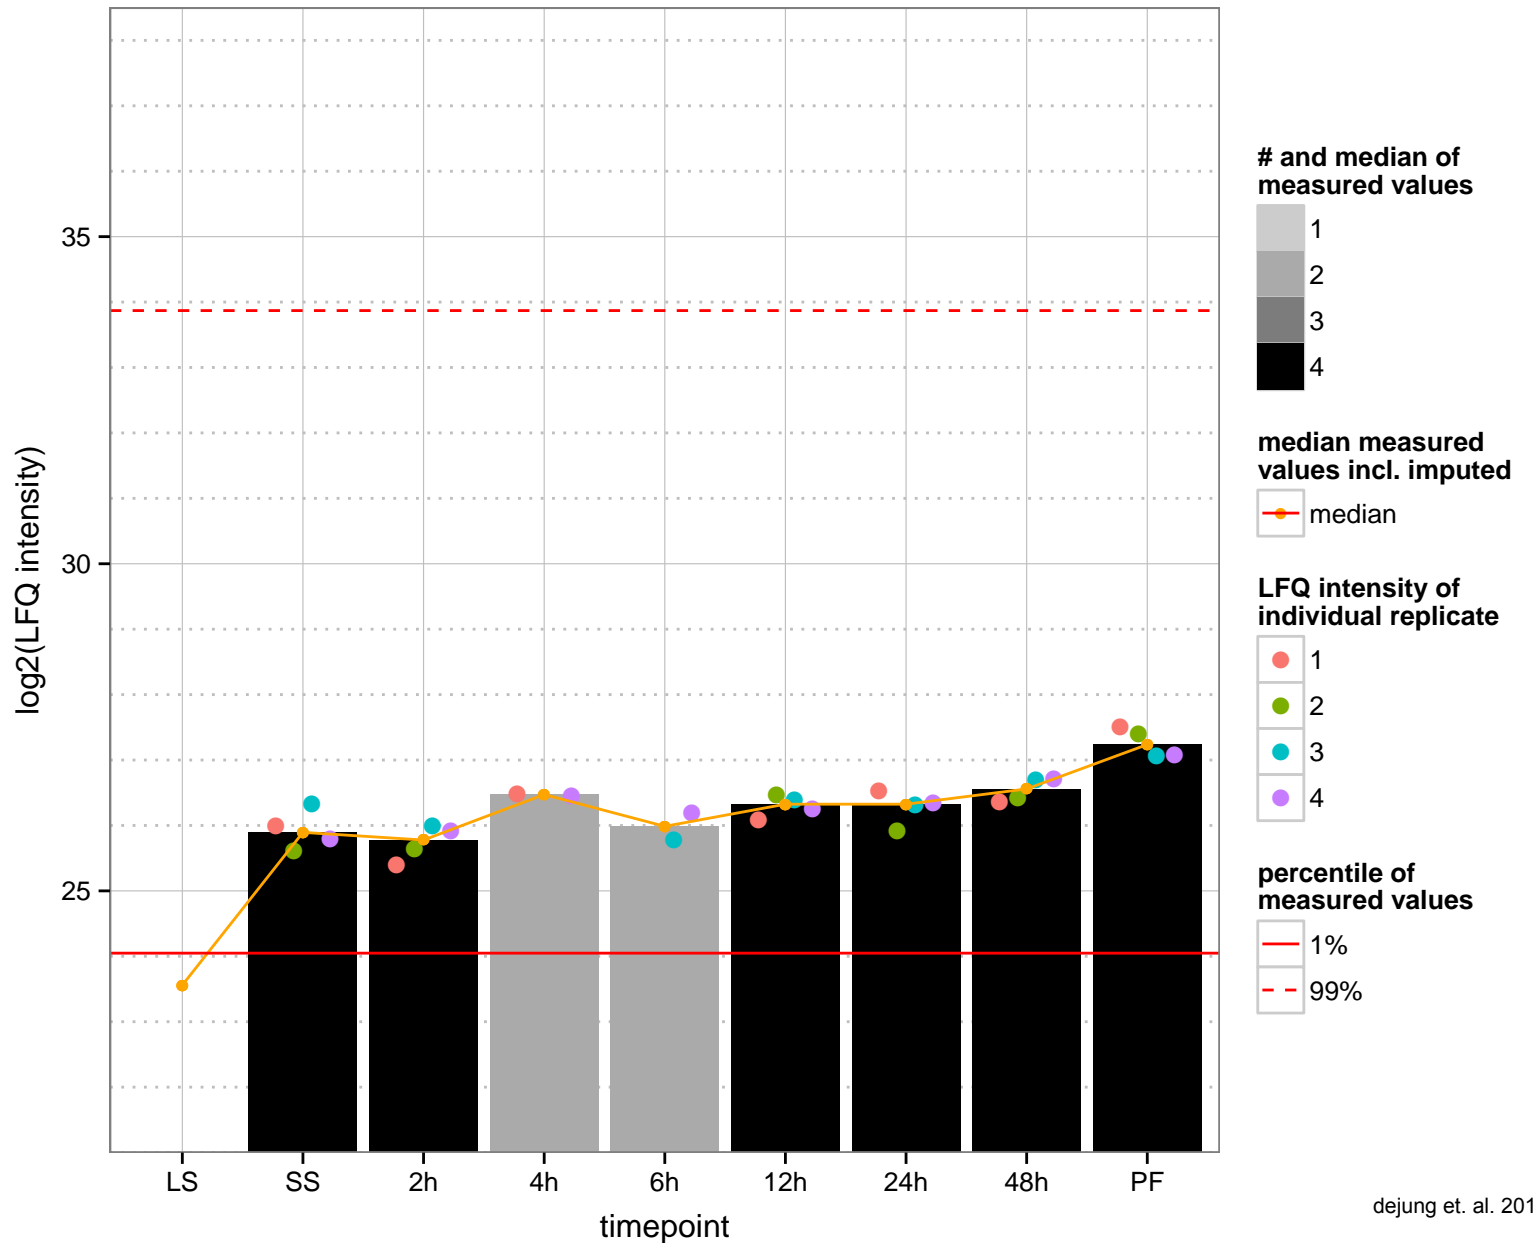



mitotic cyclin 6, cyclin 6 (CYC6)

Tb927.11.16720

AGOF: protein binding

AGOC: nuclear cyclin-dependent protein kinase holoenzyme complex, nucleus

AGOP: cytokinesis, regulation of cell cycle

PGOF: protein kinase binding

PGOC: nucleus

PGOP: regulation of cell cycle, regulation of cyclin-dependent protein kinase activity

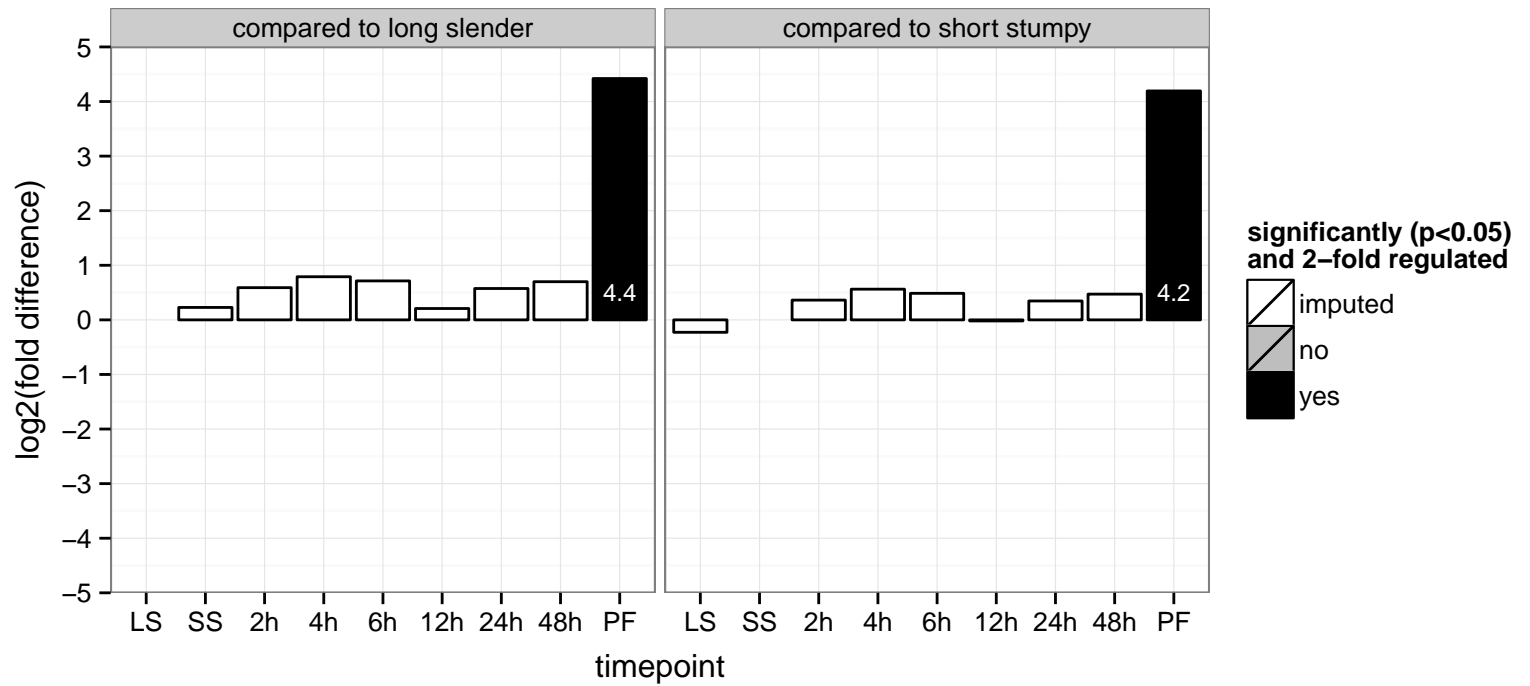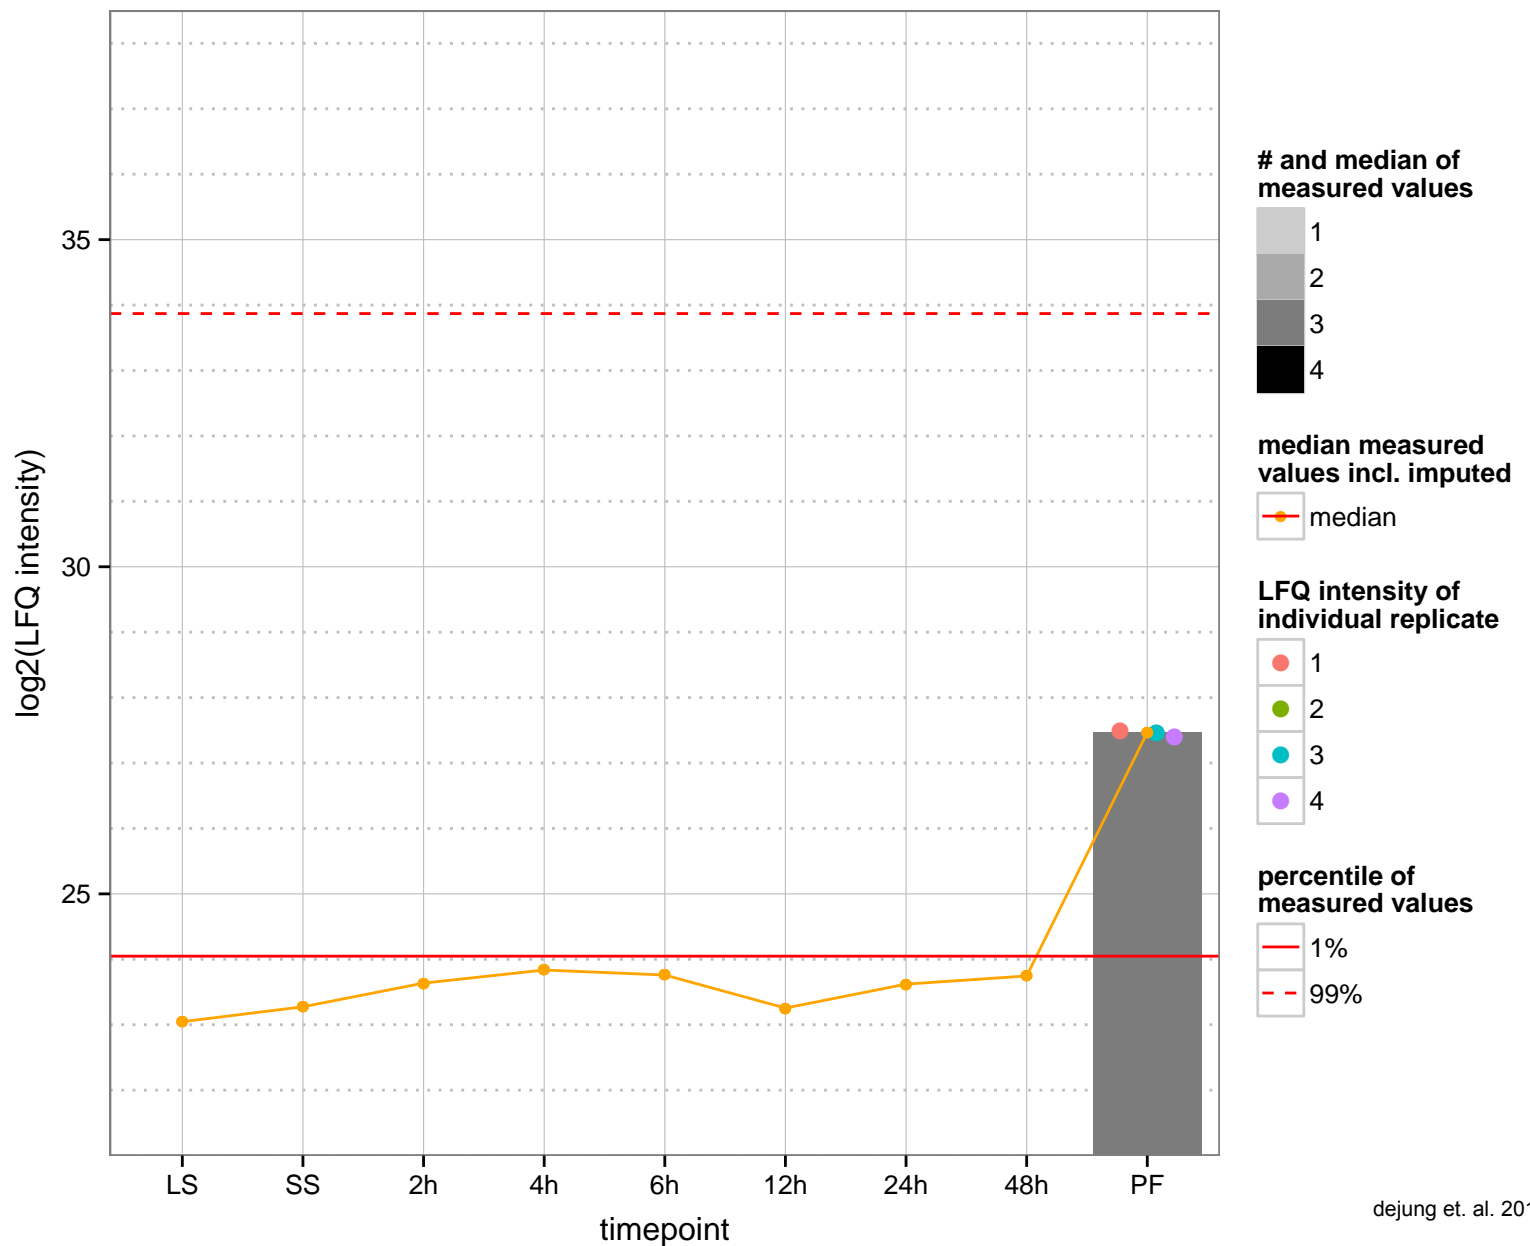

hypothetical protein, conserved  
 Tb927.11.16840.1;Tb927.11.16840.2  
 AGOF: null  
 AGOC: null  
 AGOP: null  
 PGO: null  
 PGOC: null  
 PGOP: null

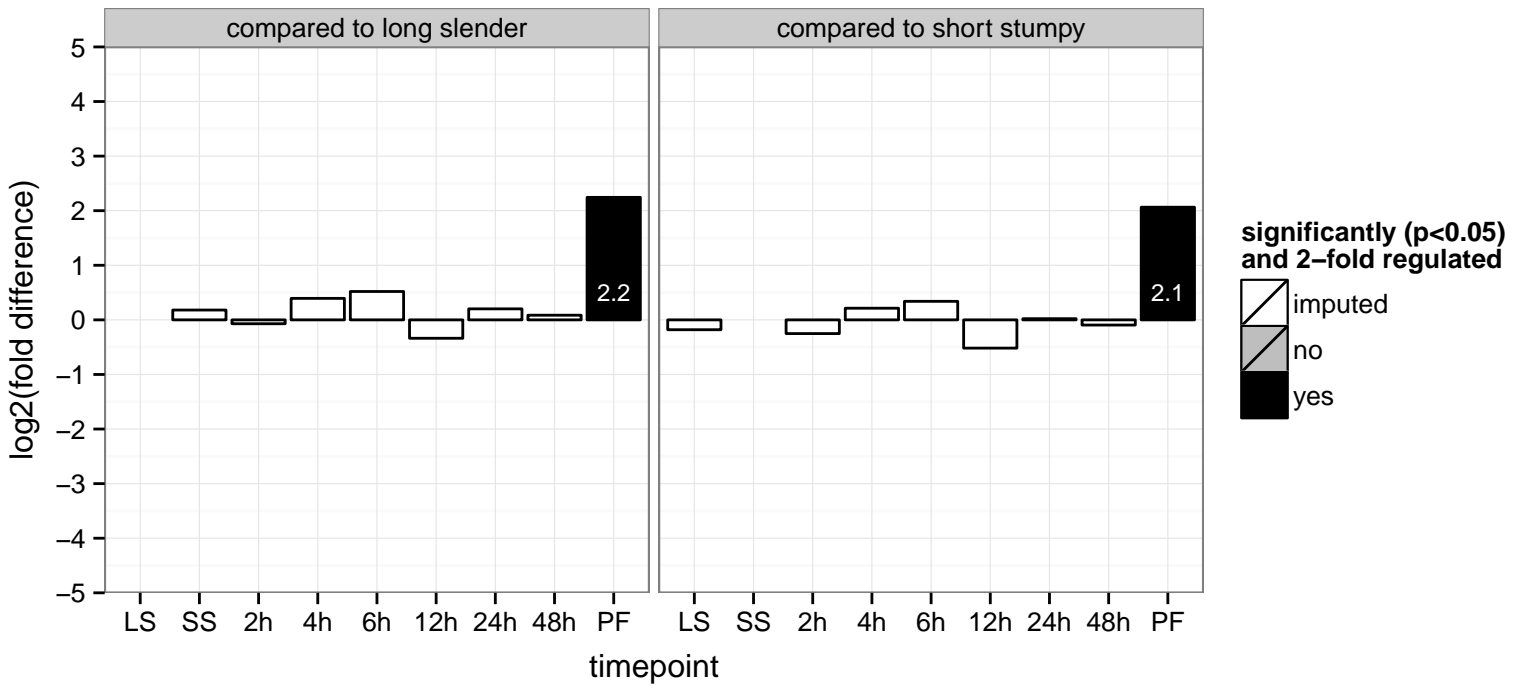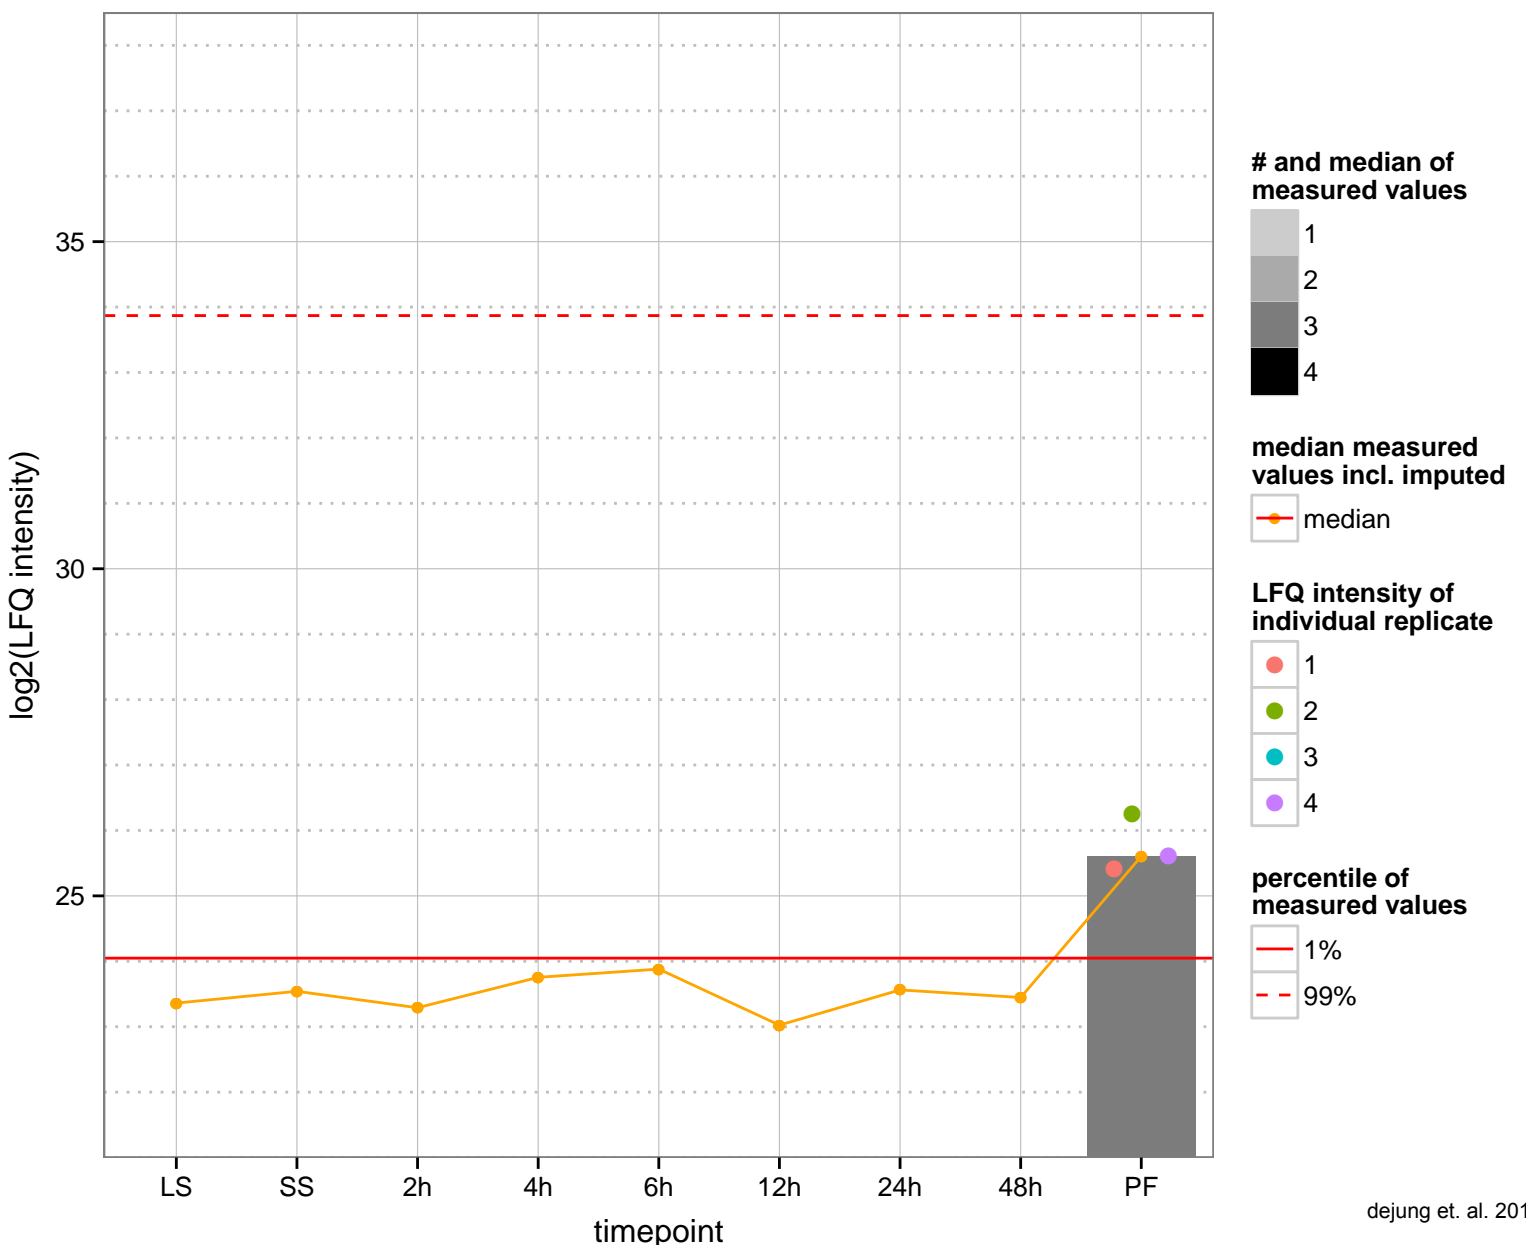

hypothetical protein  
 Tb927.11.1730  
 AGOF: null  
 AGOC: null  
 AGOP: null  
 PGO: null  
 PGOC: null  
 PGOP: null

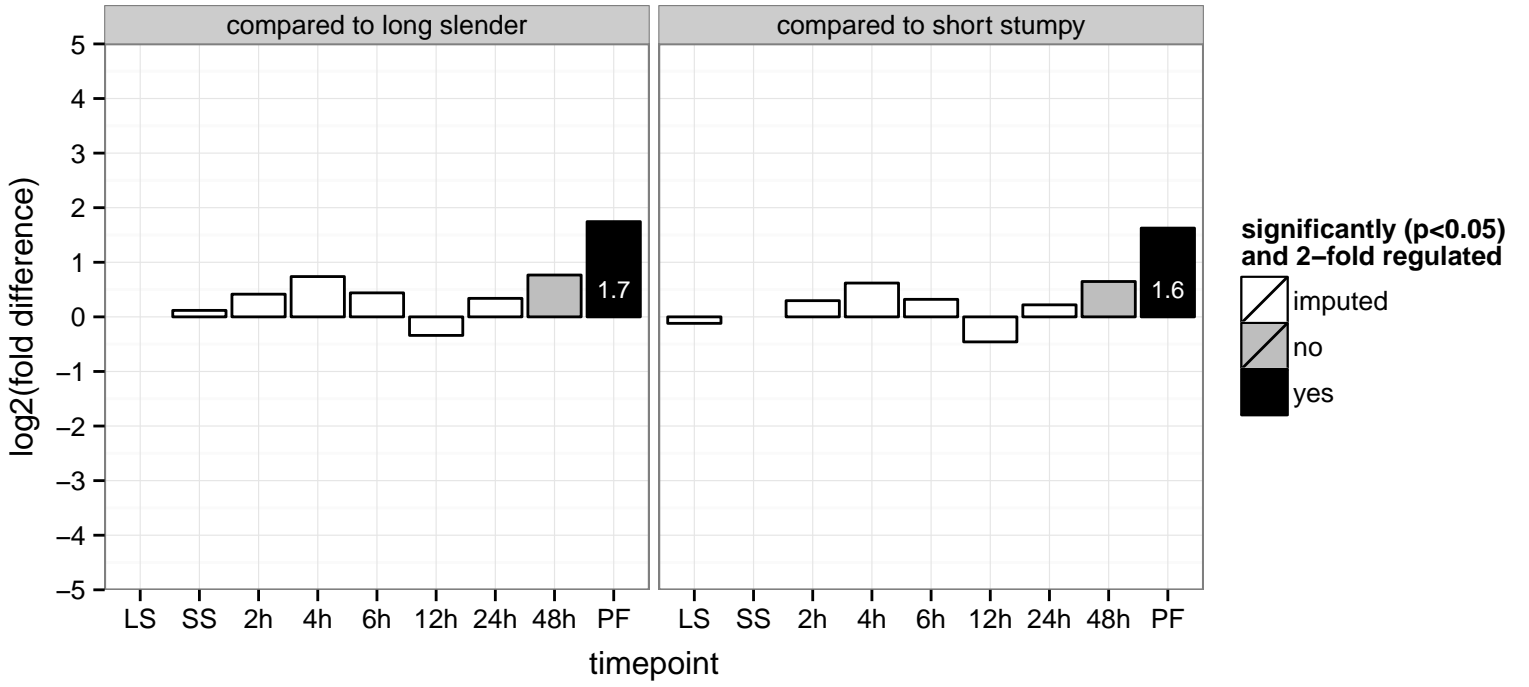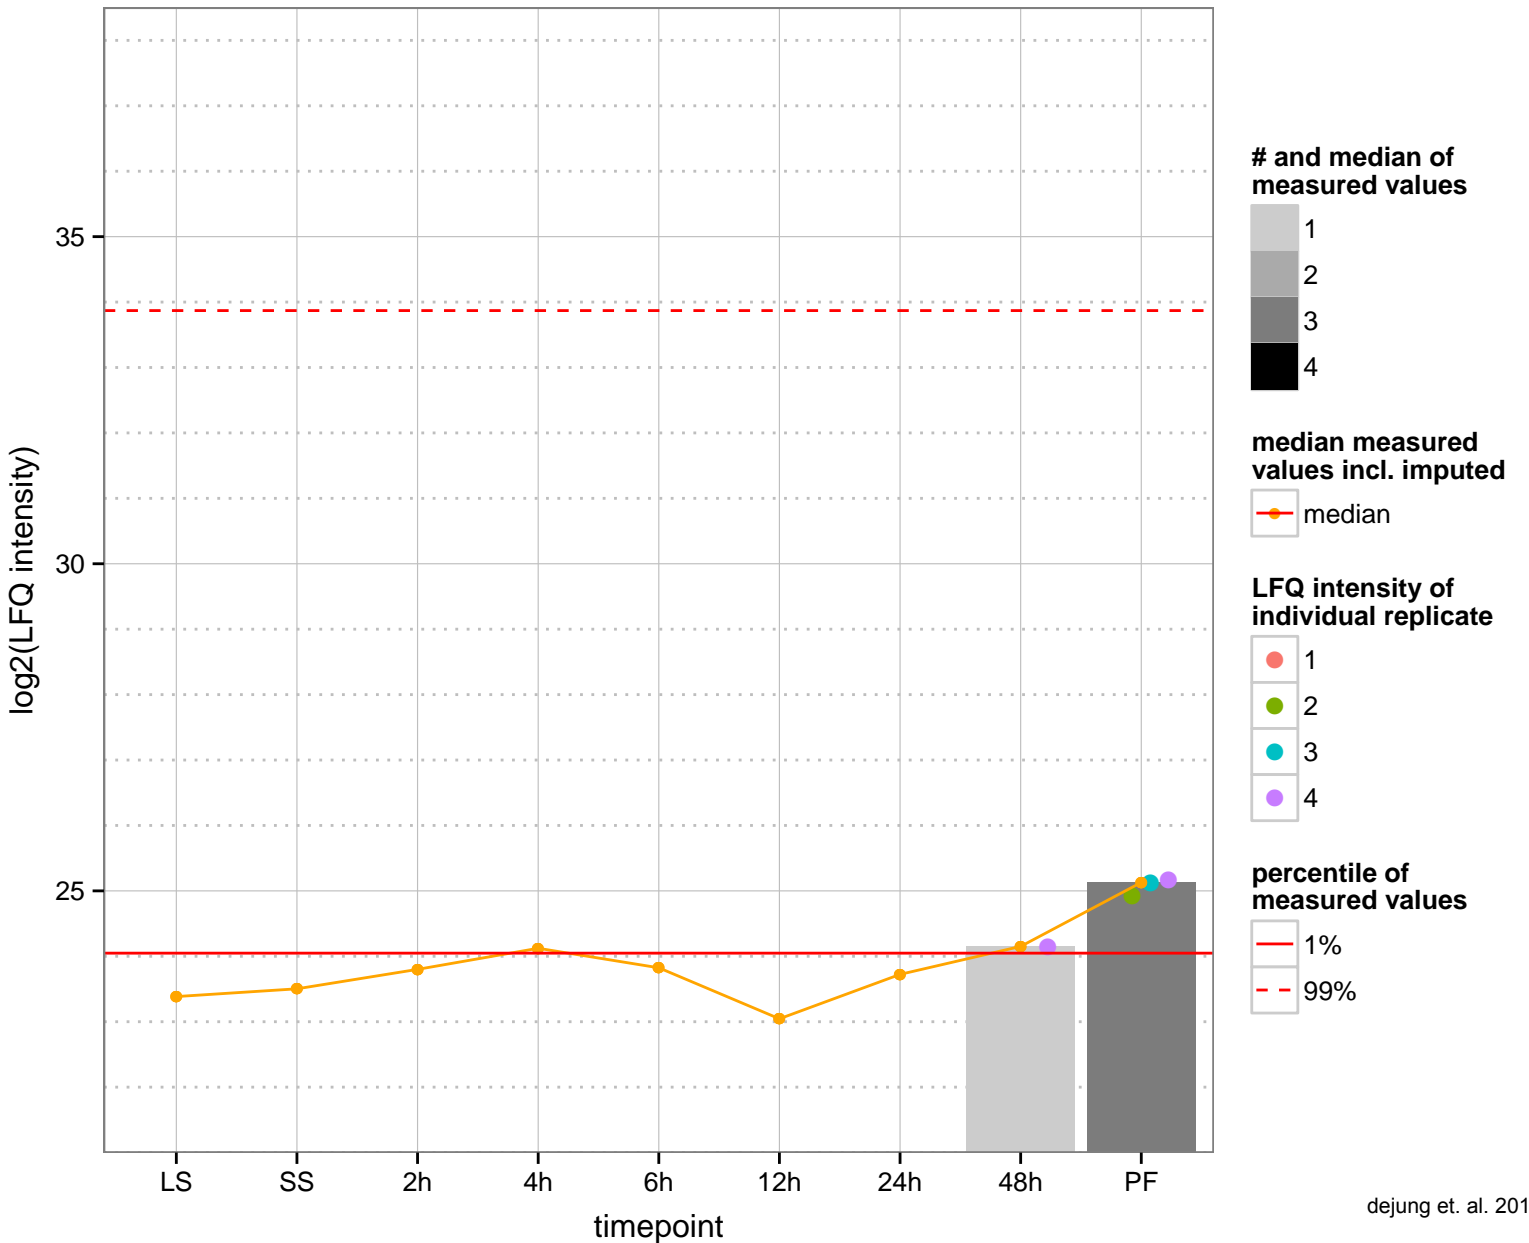

hypothetical protein, conserved  
 Tb927.11.2000  
 AGOF: null  
 AGOC: mitochondrion  
 AGOP: null  
 PGO: protein binding  
 PGOC: null  
 PGOP: null

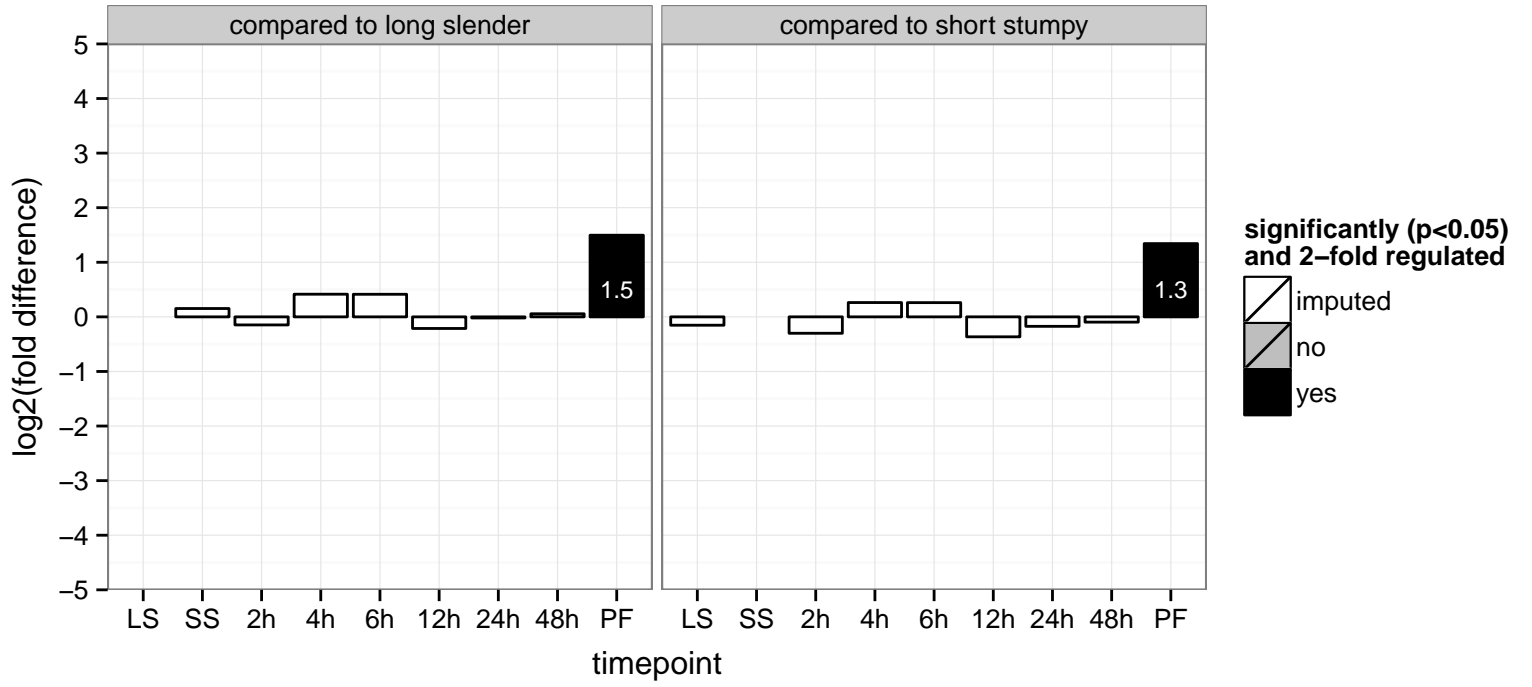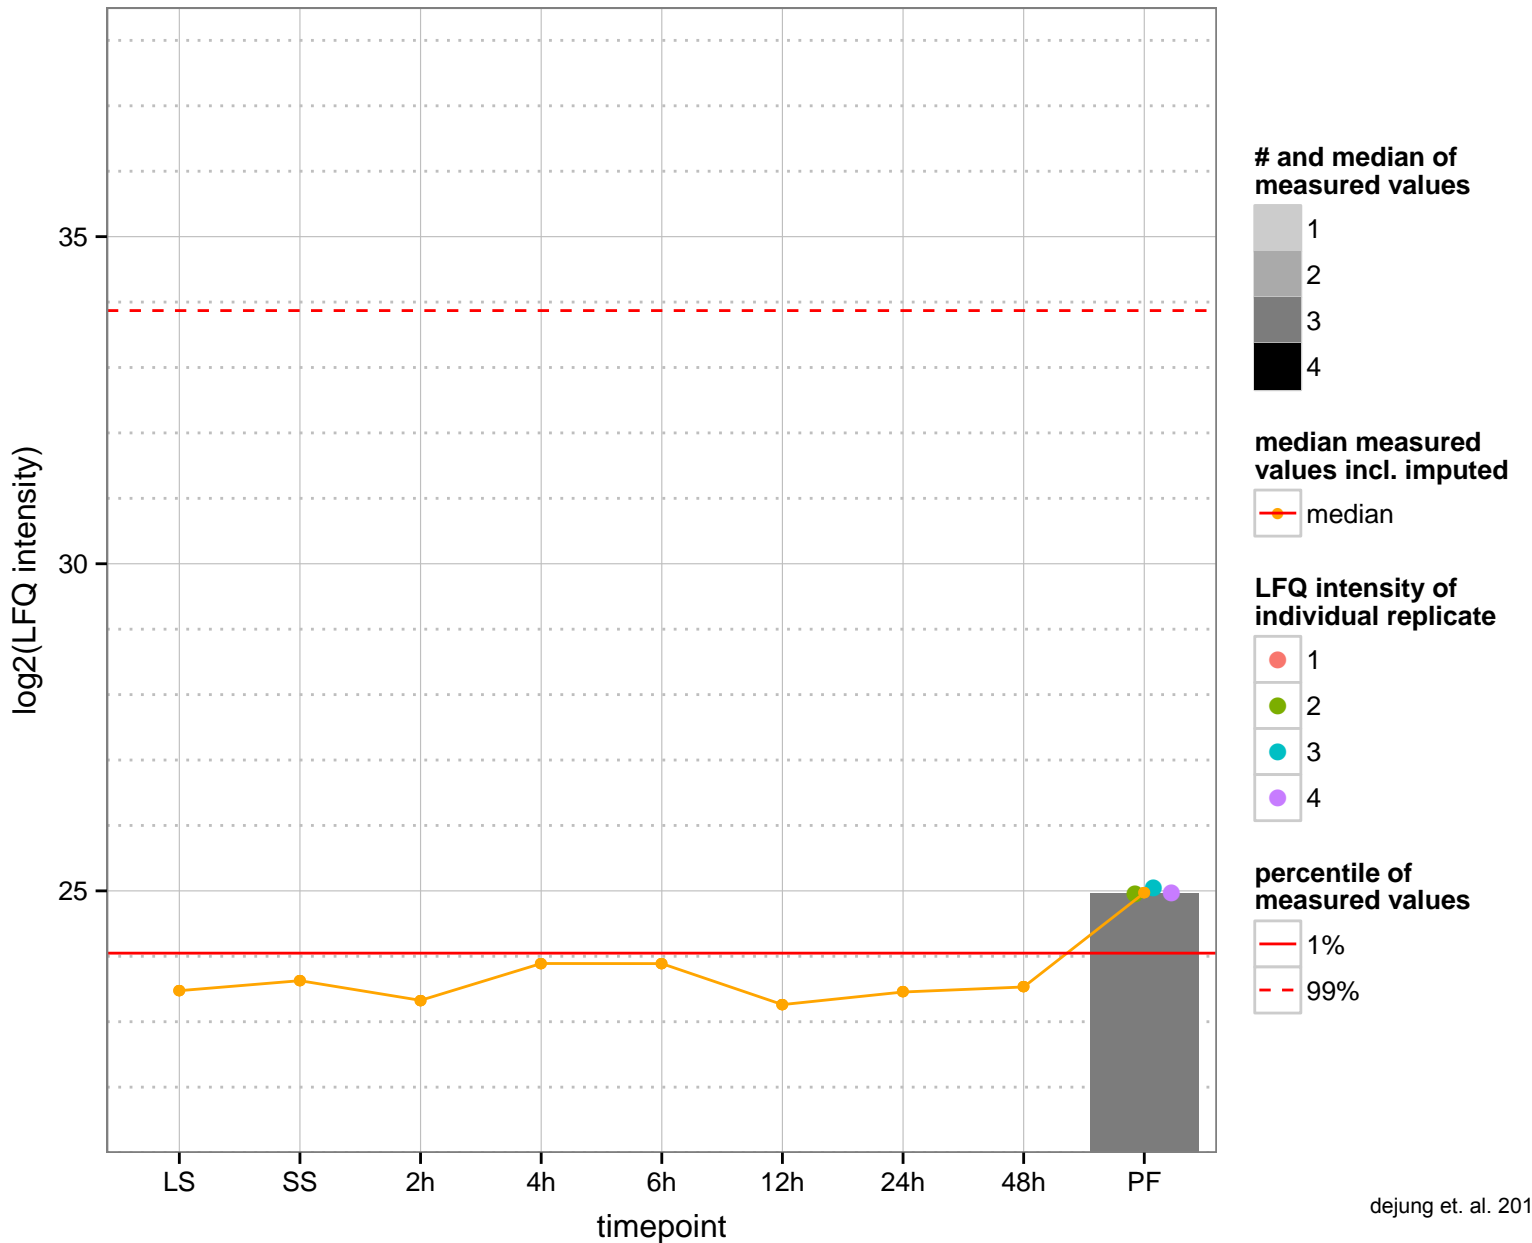

carnitine O-acetyltransferase, putative (CAT)  
 Tb927.11.2230  
 AGOF: carnitine O-acetyltransferase activity  
 AGOC: integral to membrane  
 AGOP: generation of precursor metabolites and energy  
 PGOF: transferase activity, transferring acyl groups  
 PGO: null  
 PGOP: null

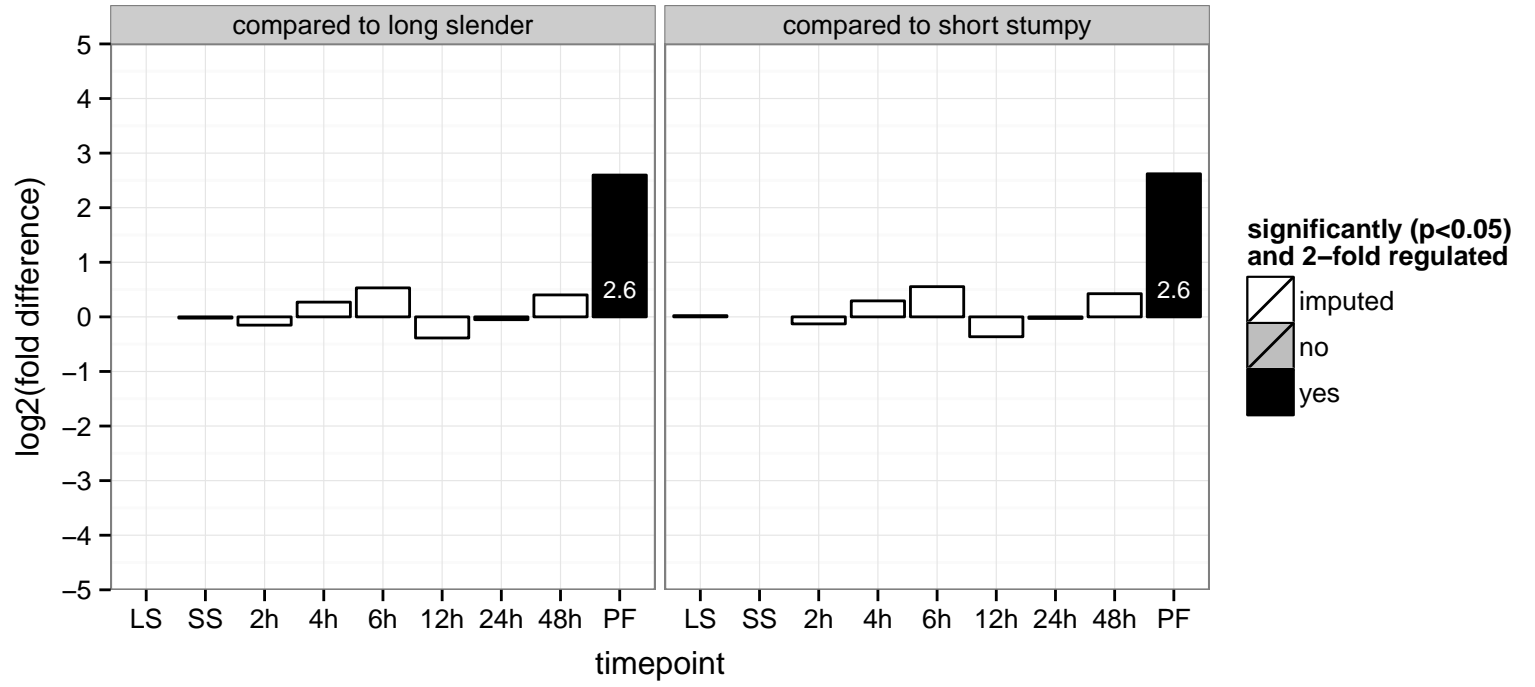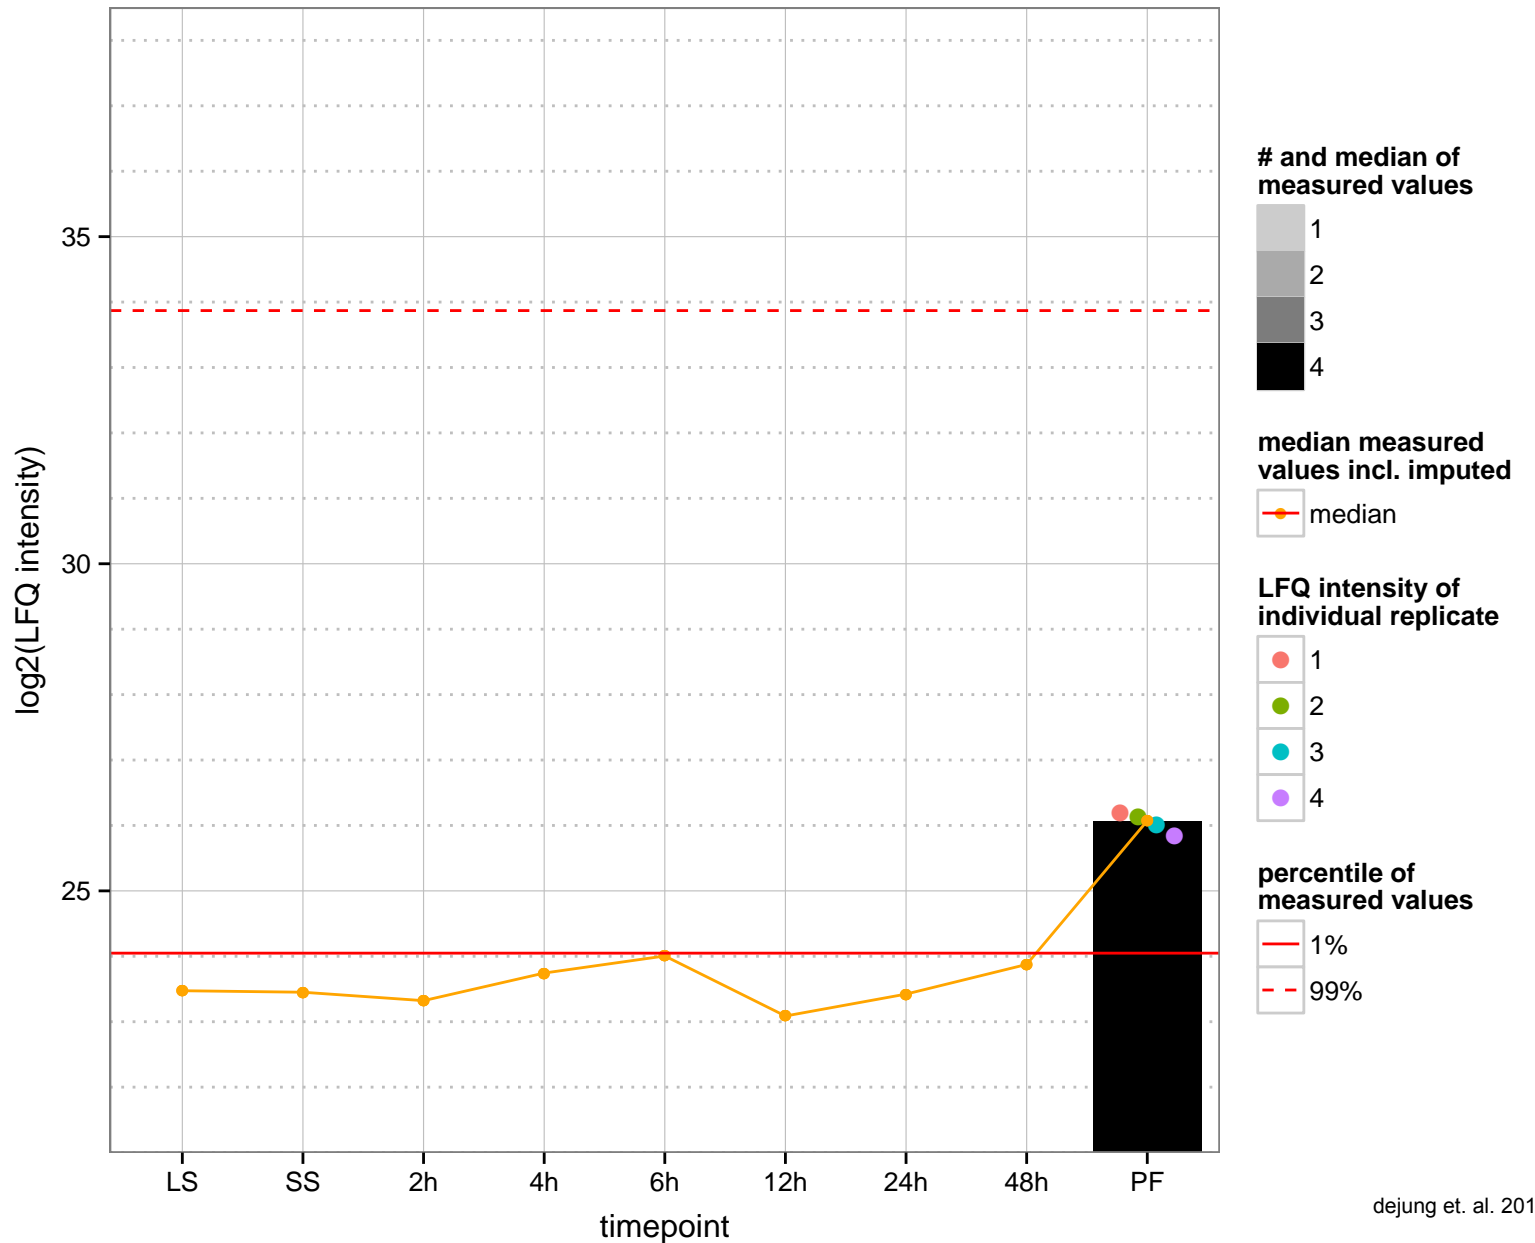

hypothetical protein, conserved

Tb927.11.2250

AGOF: null

AGOC: null

AGOP: modulation of development of symbiont involved in interaction with host, quorum sensing involved in interaction with host

PGOF: null

PGOC: null

PGOP: null

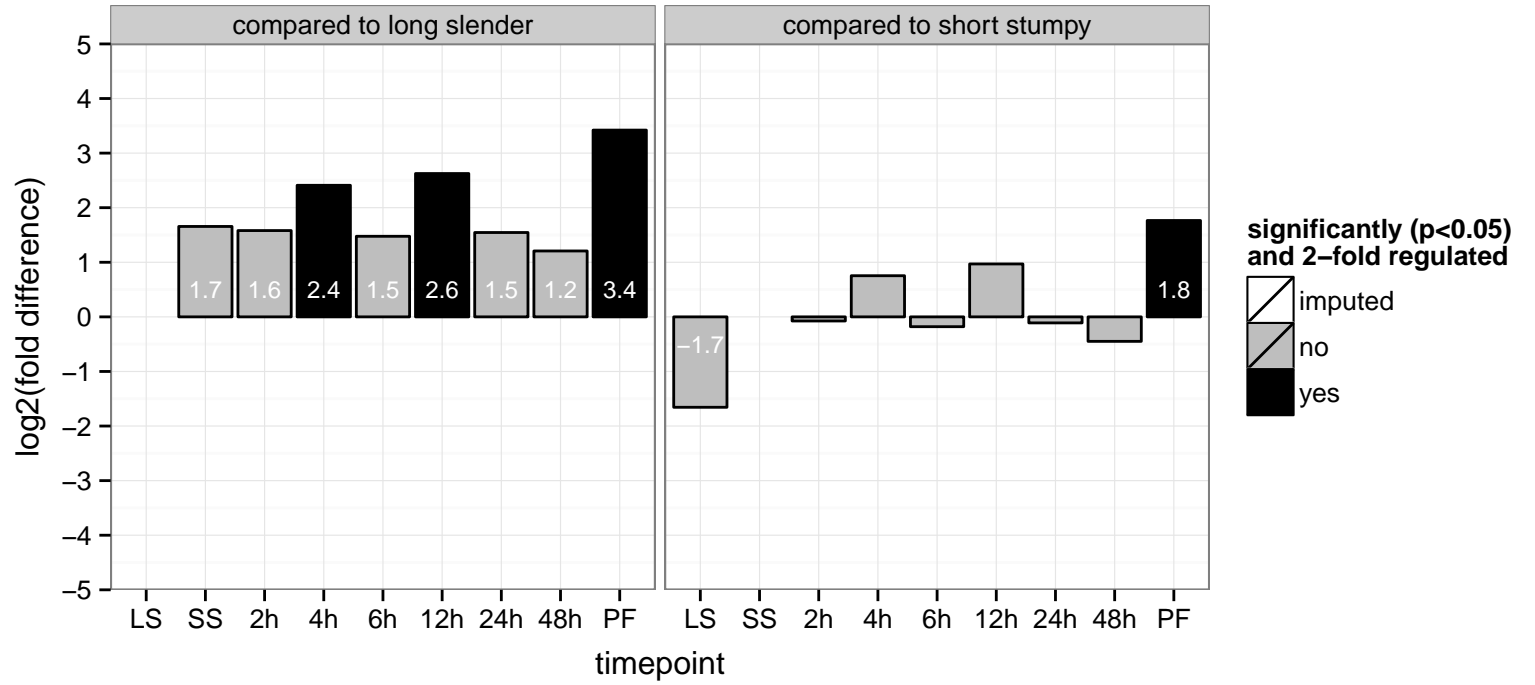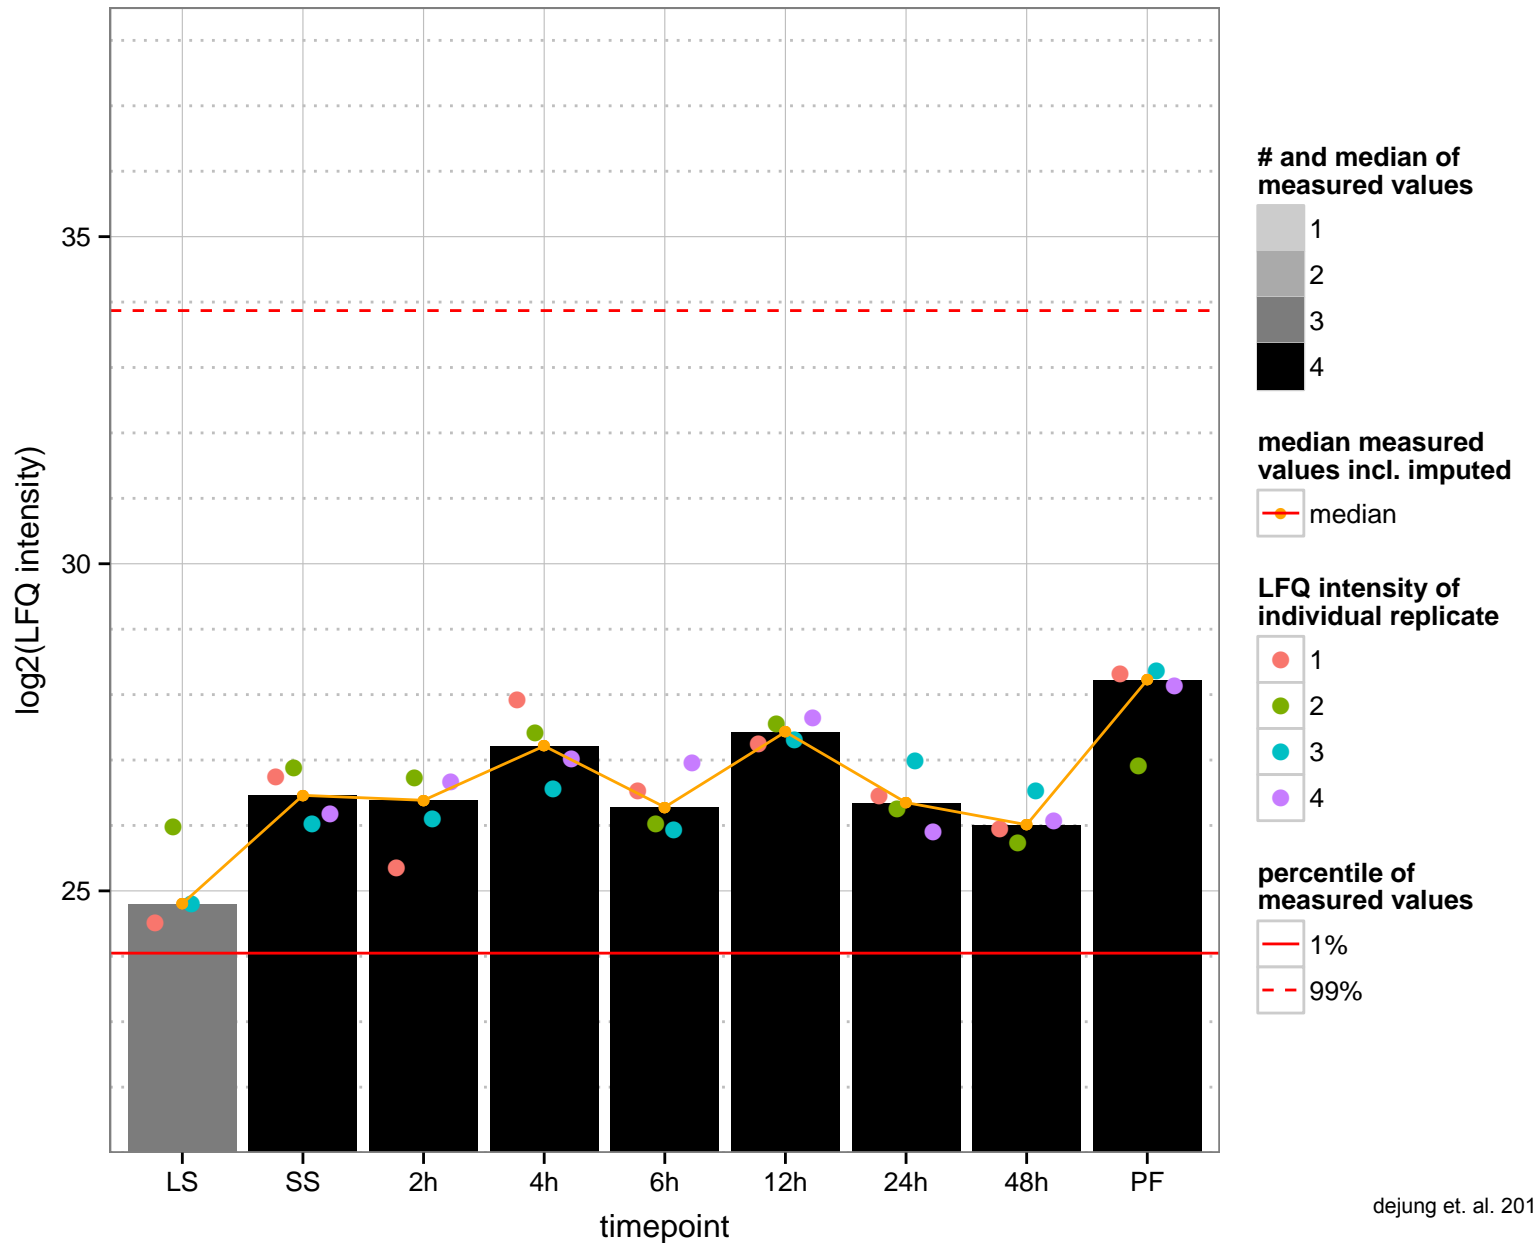

aminopeptidase, putative, metallo-peptidase, Clan MF, Family M17

Tb927.11.2470

AGOF: aminopeptidase activity

AGOC: intracellular

AGOP: proteolysis

PGOF: aminopeptidase activity

PGOC: intracellular

PGOP: proteolysis

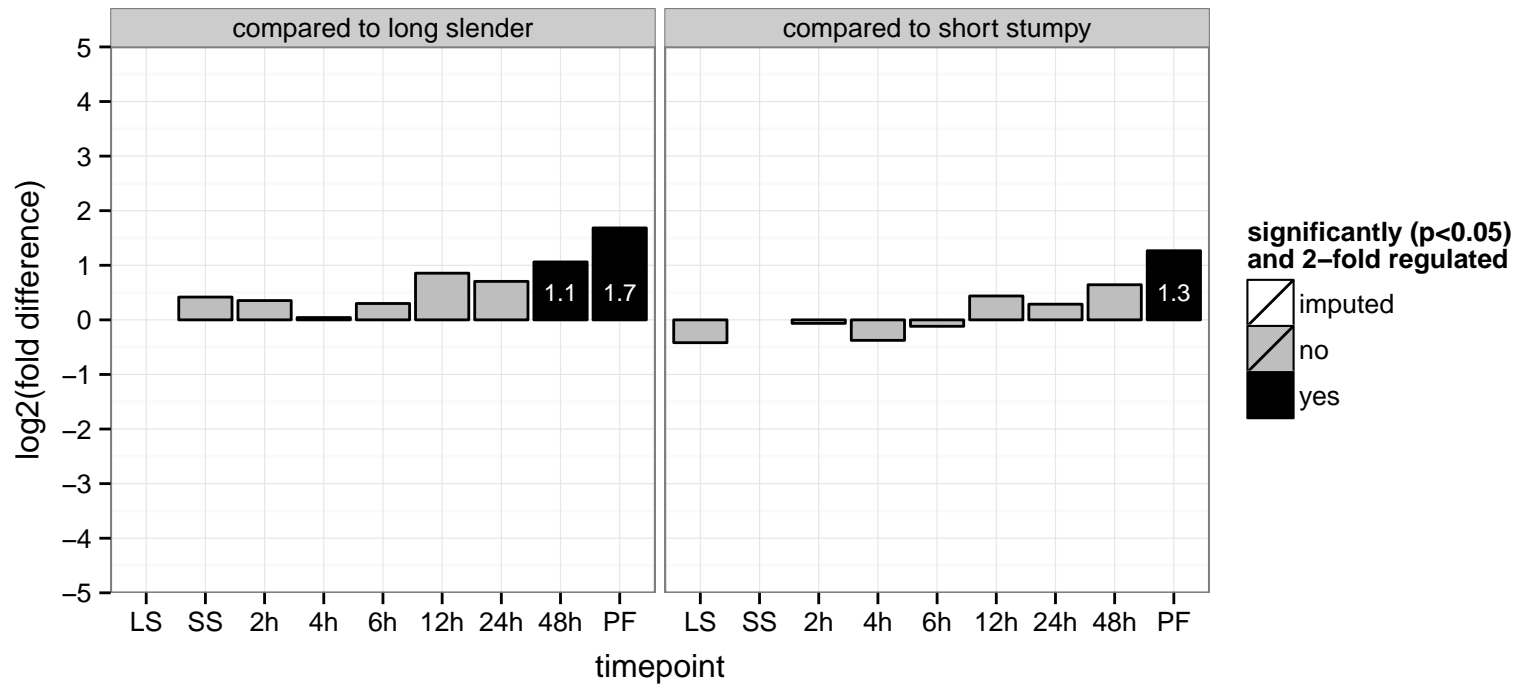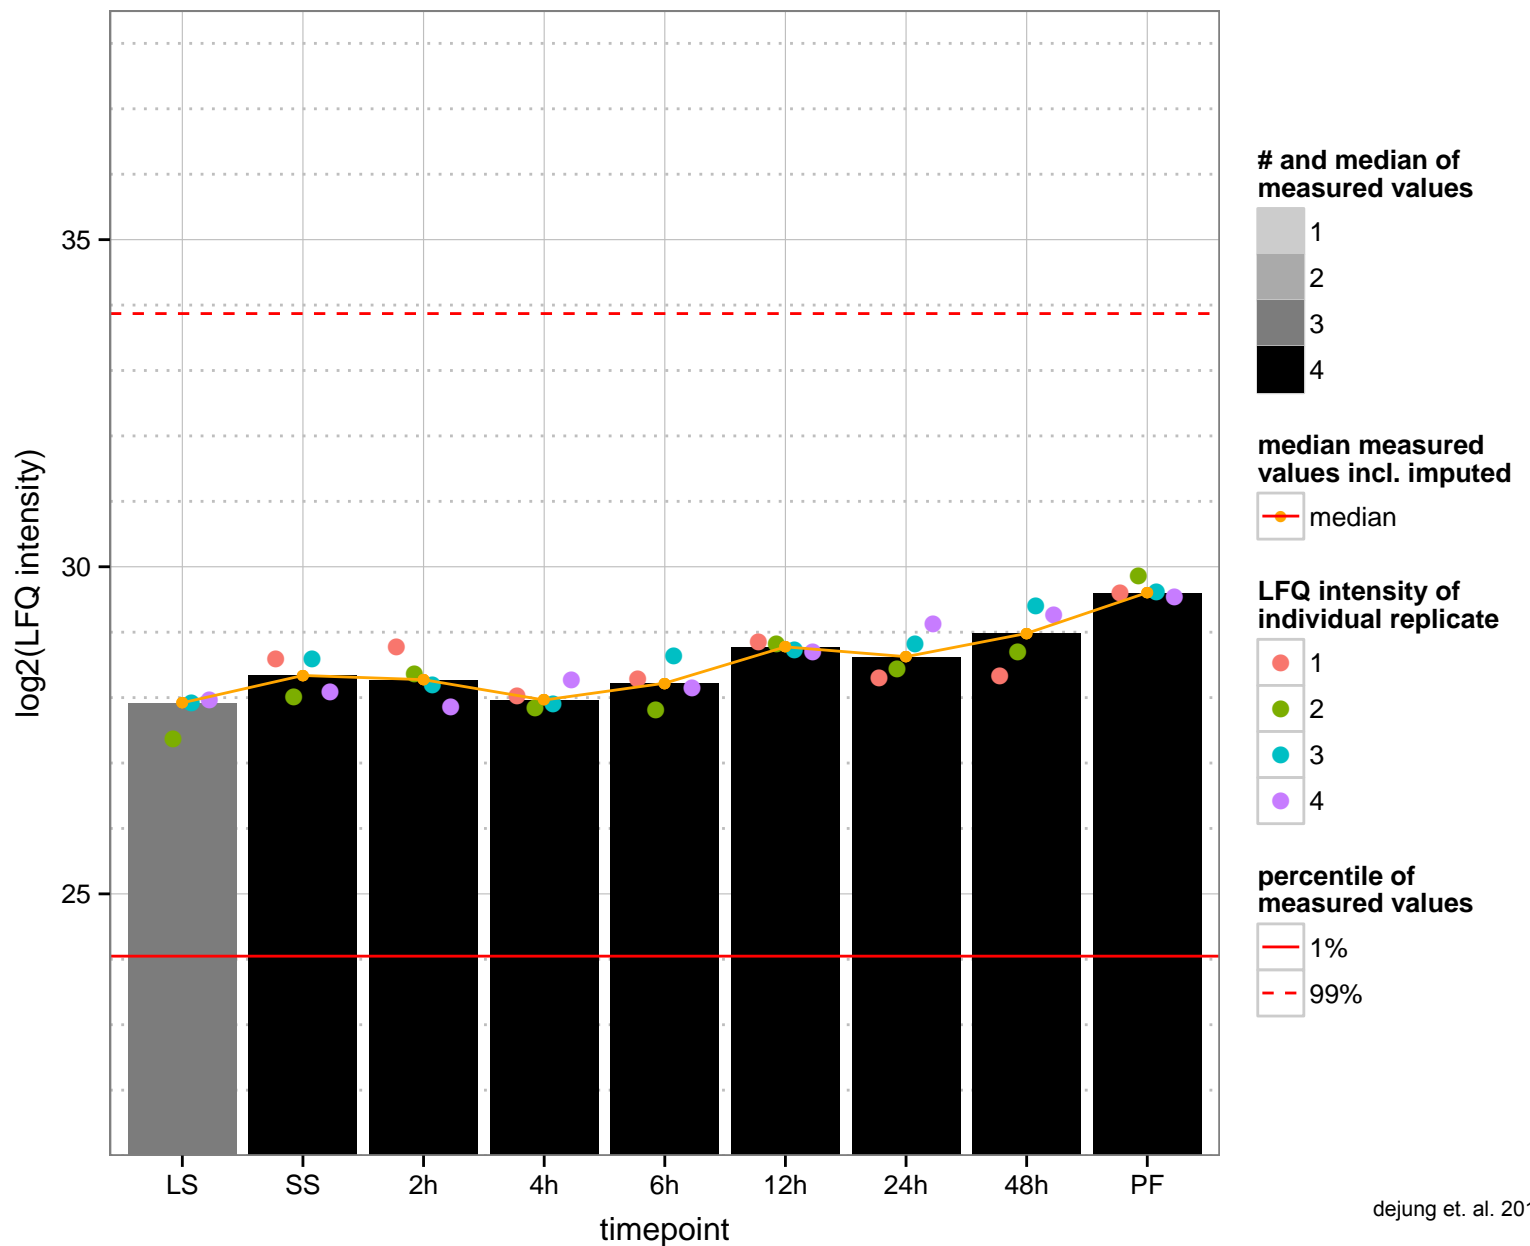

carboxypeptidase, putative, metallo-peptidase, Clan MA(E) Family M32  
 Tb927.11.2500  
 AGOF: metallopeptidase activity  
 AGOC: cytosol  
 AGOP: peptide metabolic process, proteolysis  
 PGO: metallopeptidase activity  
 PGOC: null  
 PGOP: proteolysis

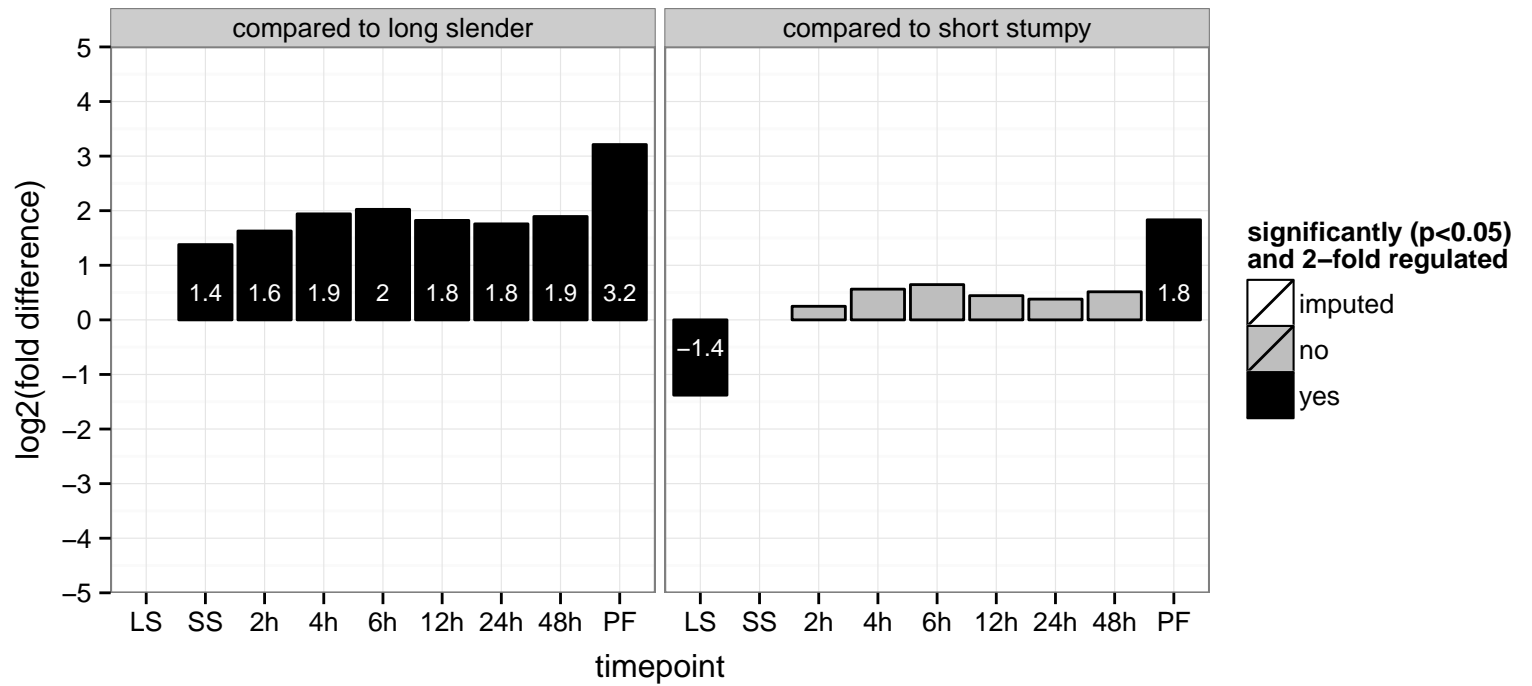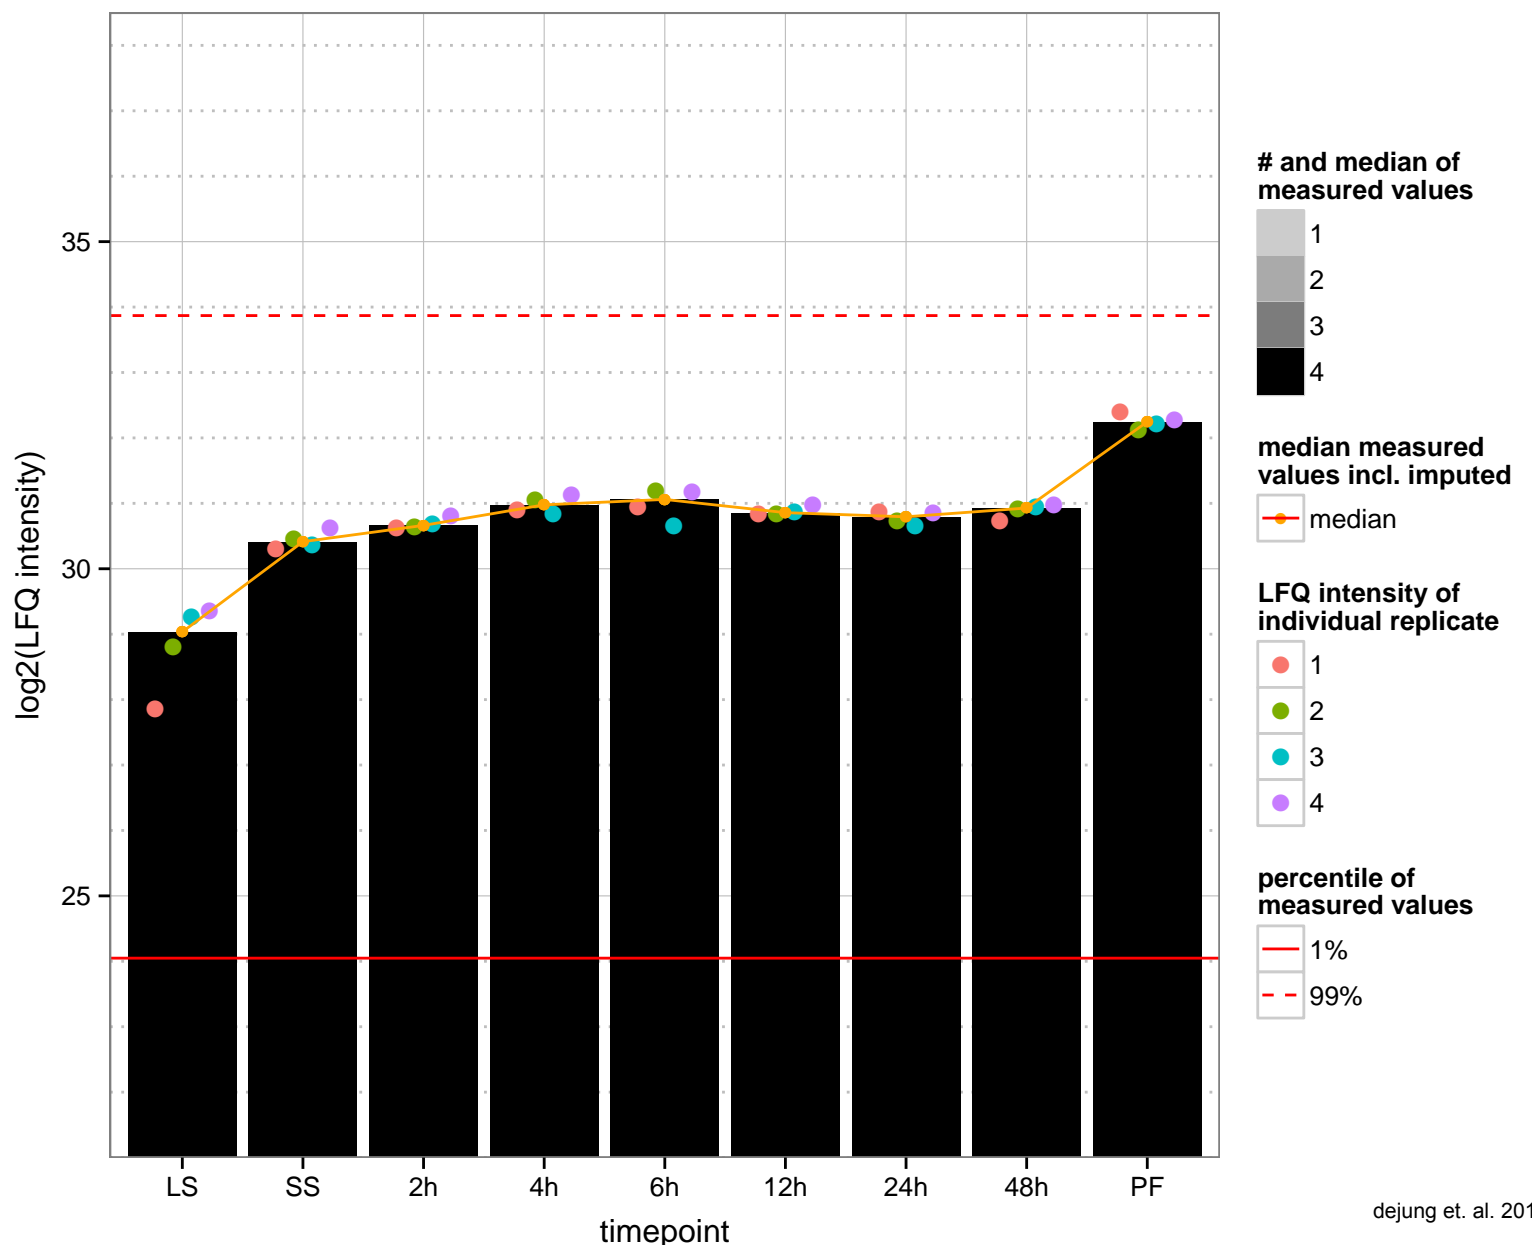



mitochondrial carrier protein (MCP10)  
 Tb927.11.270  
 AGOF: transporter activity  
 AGOC: mitochondrial inner membrane, mitochondrial part  
 AGOP: transport  
 PGO: null  
 PGO: null  
 PGO: null

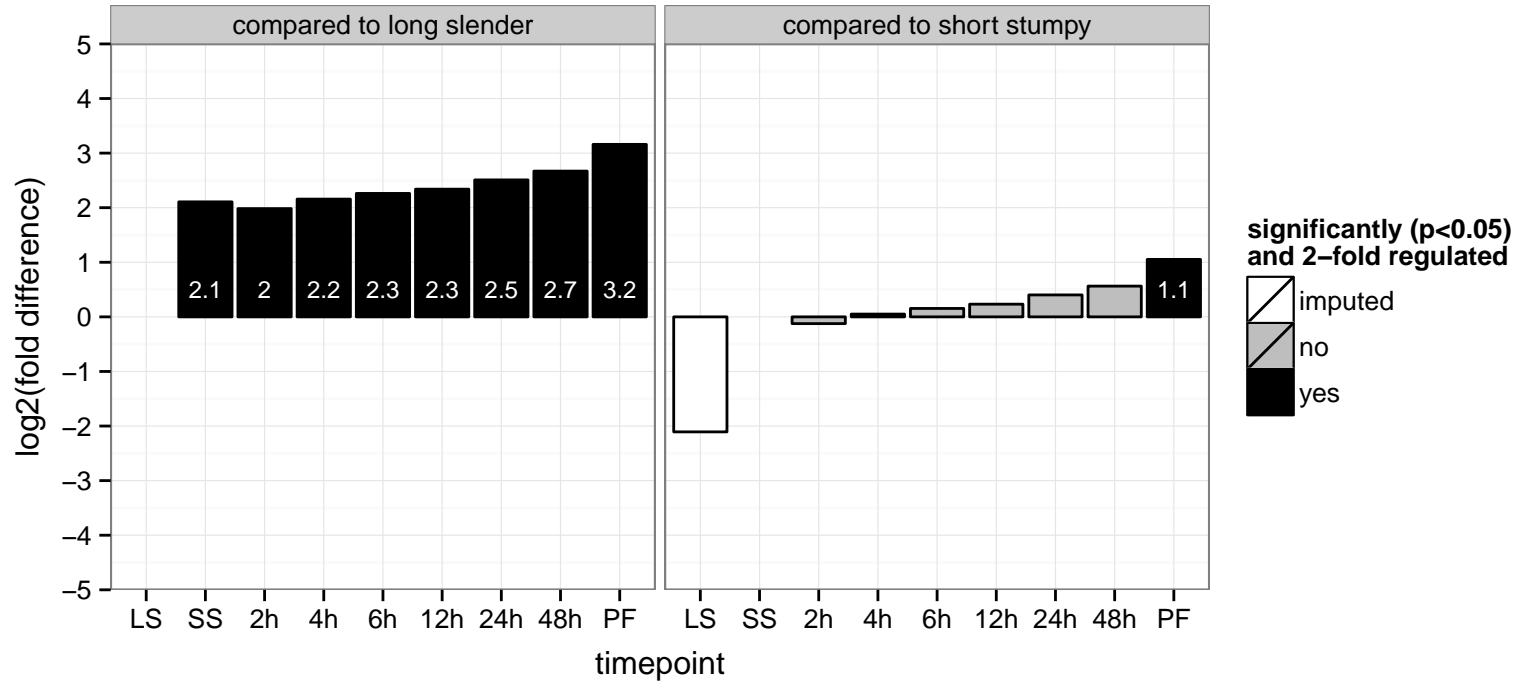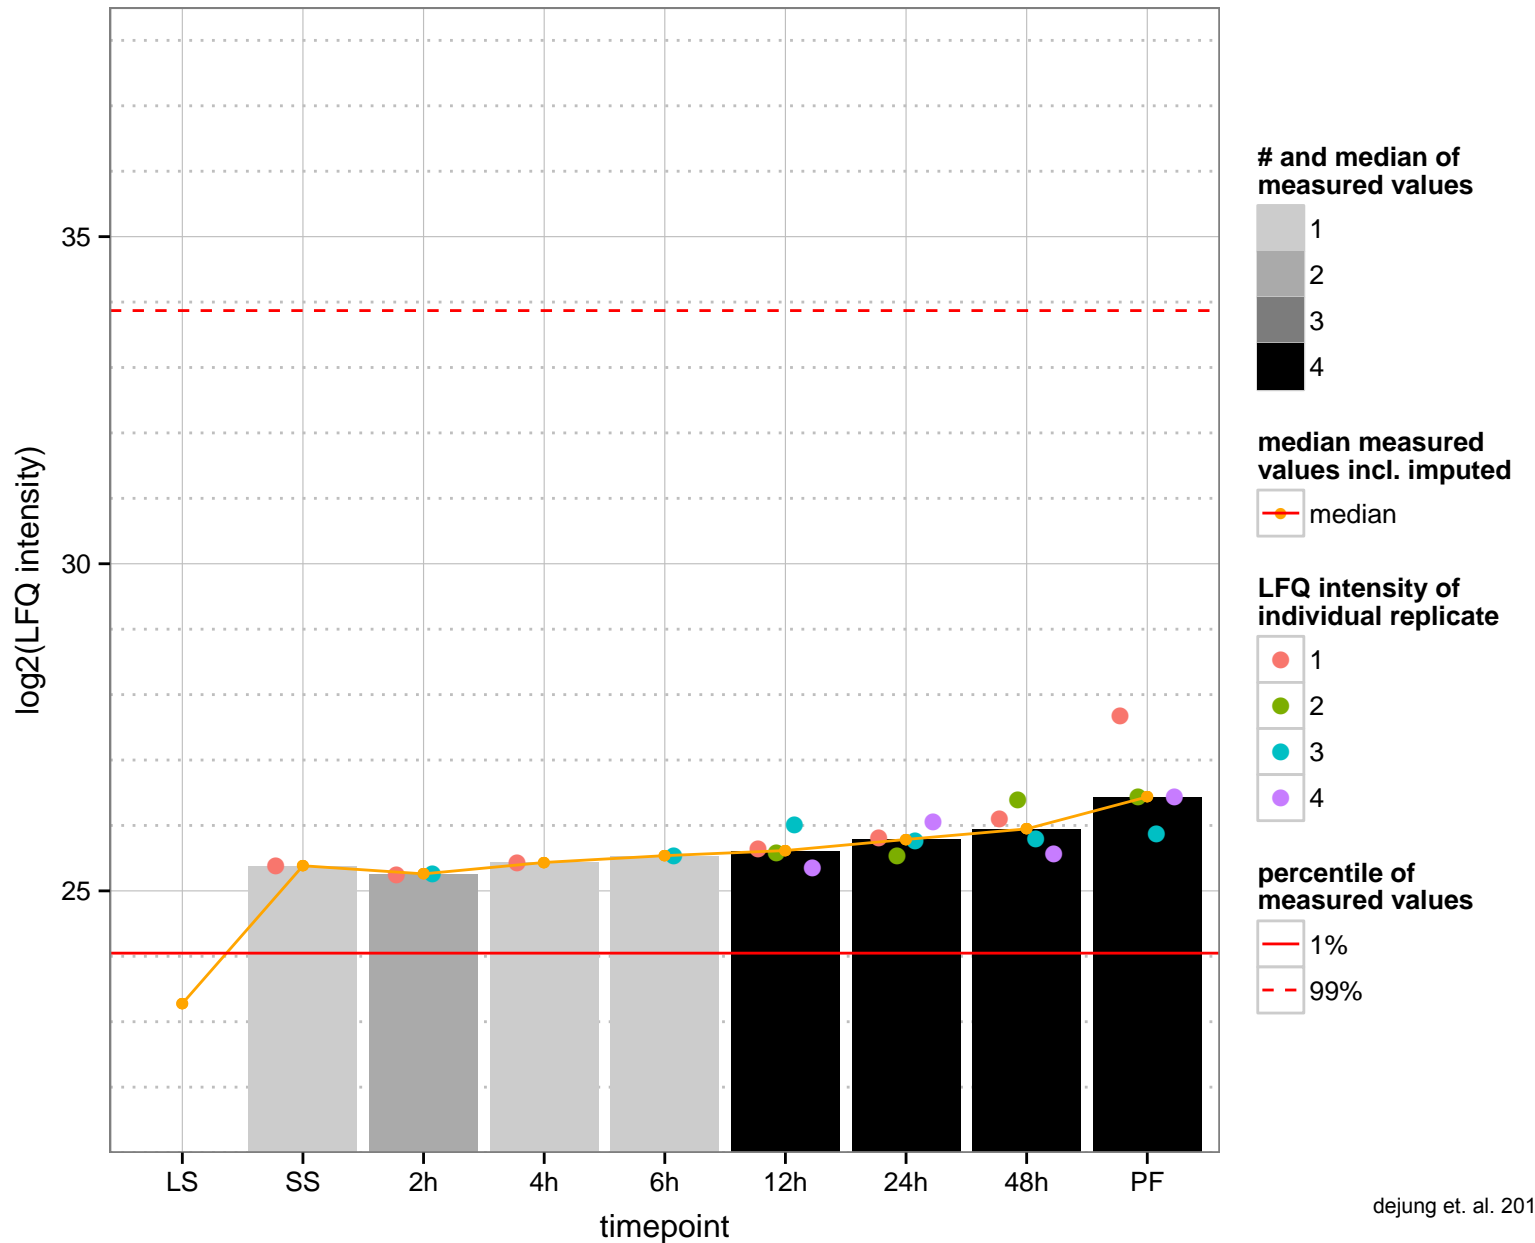

hypothetical protein, conserved  
 Tb927.11.2940  
 AGOF: null  
 AGOC: null  
 AGOP: null  
 PGOF: binding  
 PGO: null  
 PGOP: null

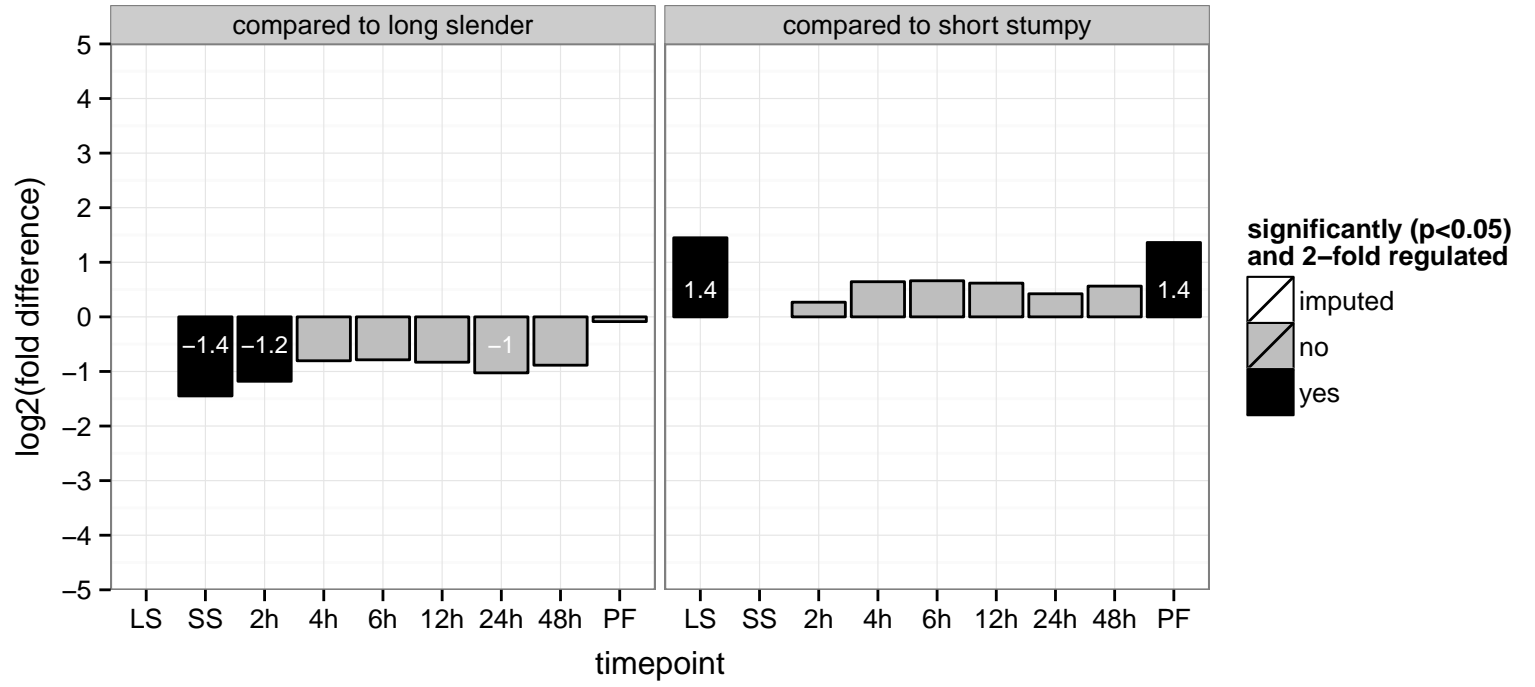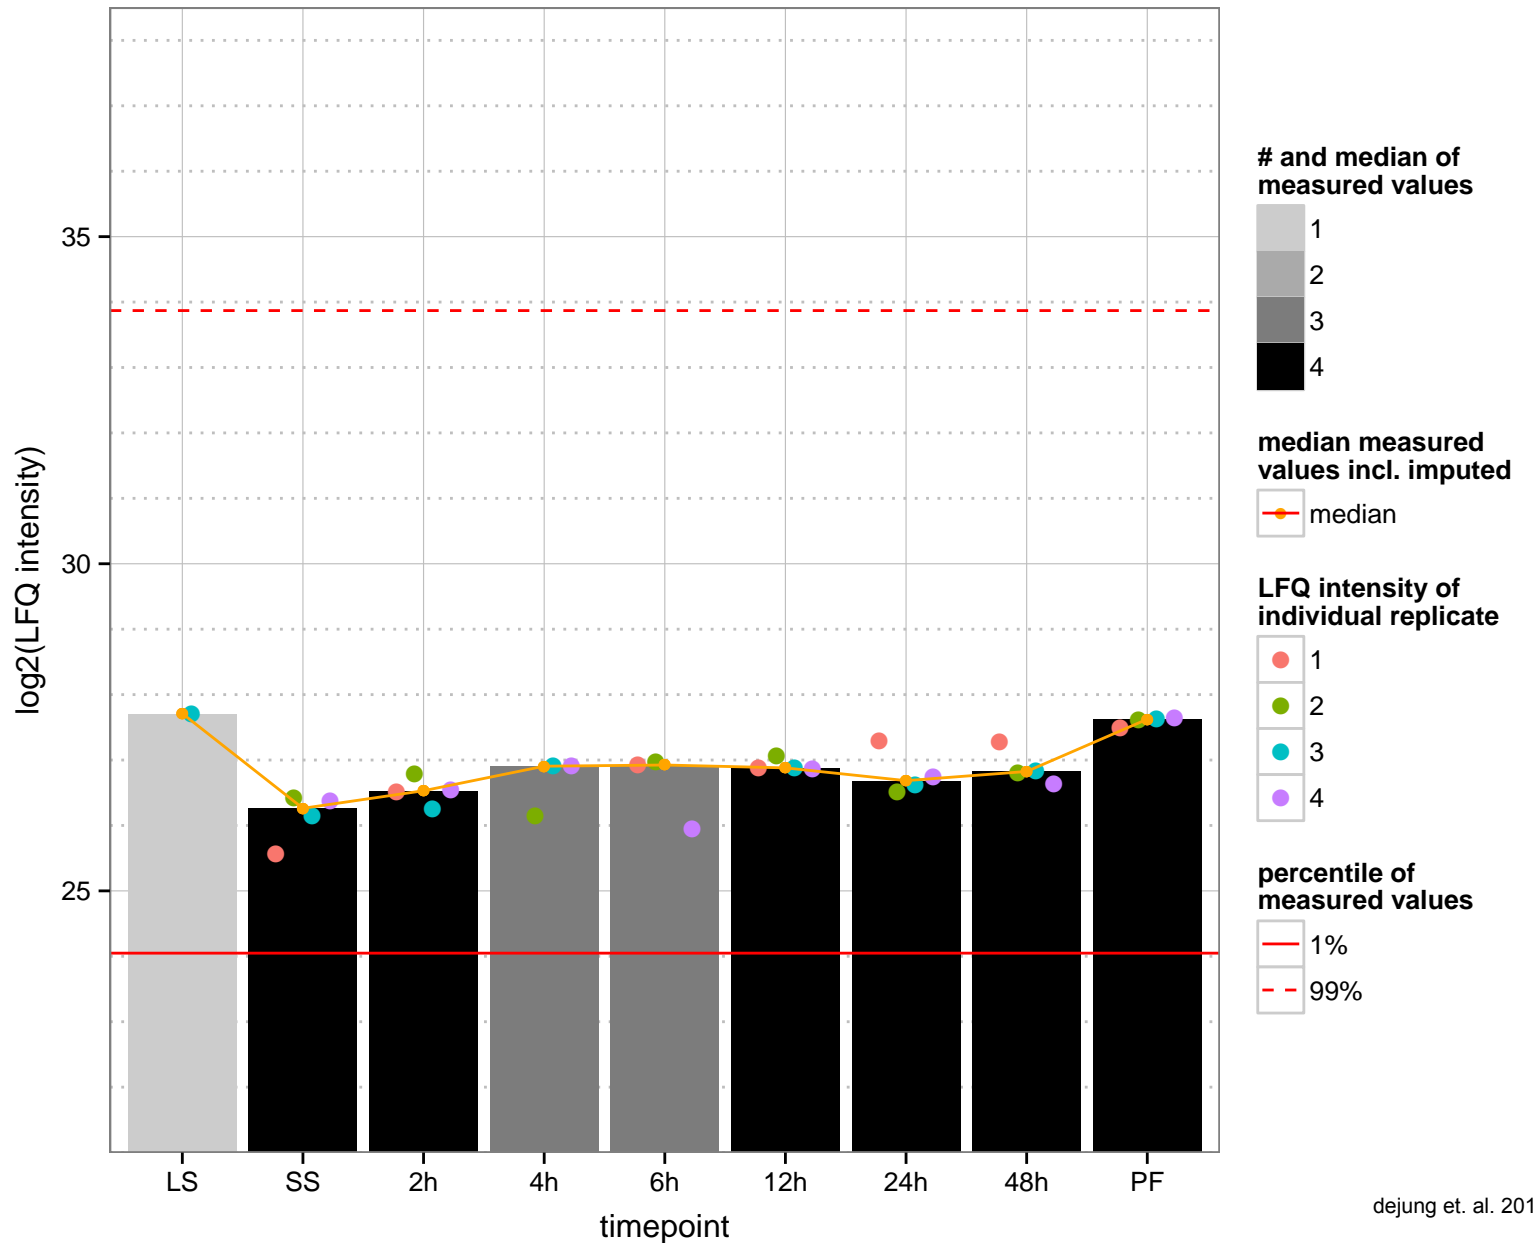

hypothetical protein, conserved  
 Tb927.11.3060  
 AGOF: null  
 AGOC: null  
 AGOP: null  
 PGOF: null  
 PGOE: null  
 PGOP: null

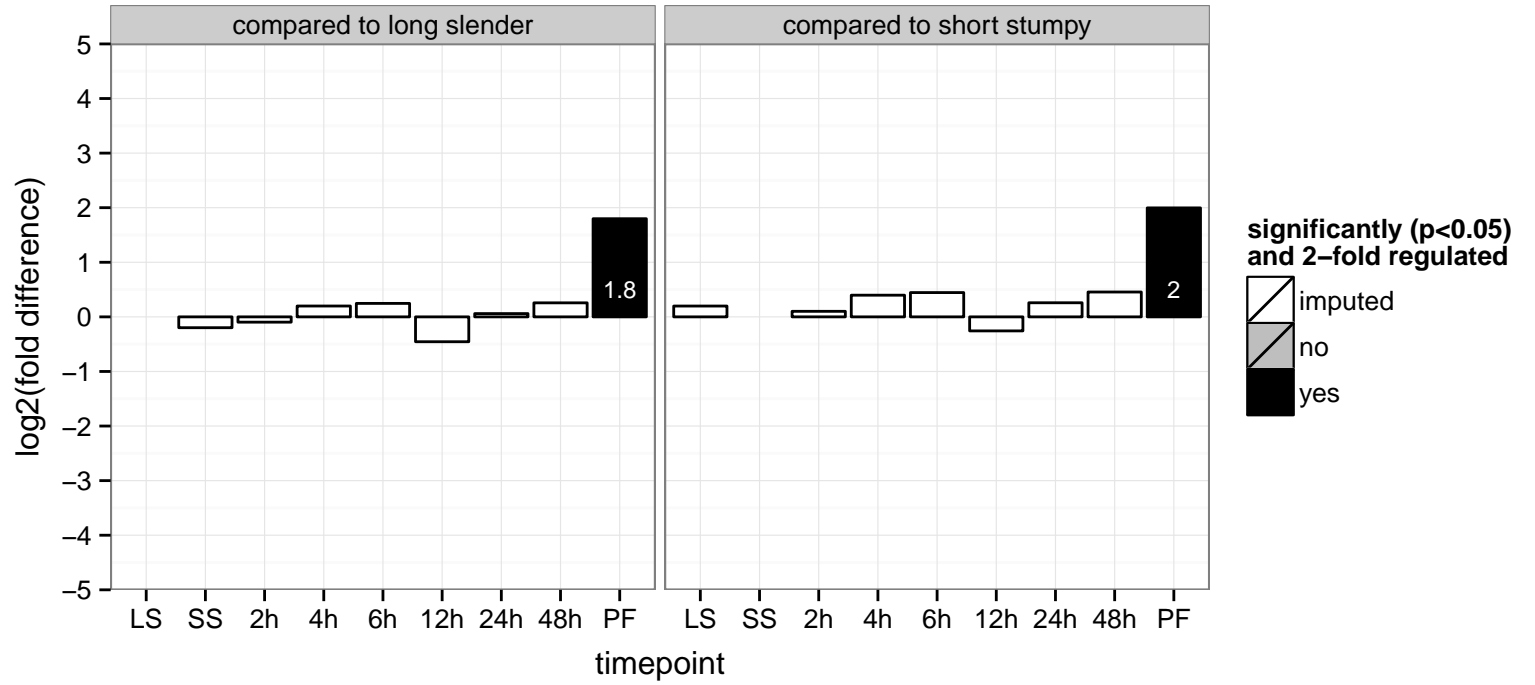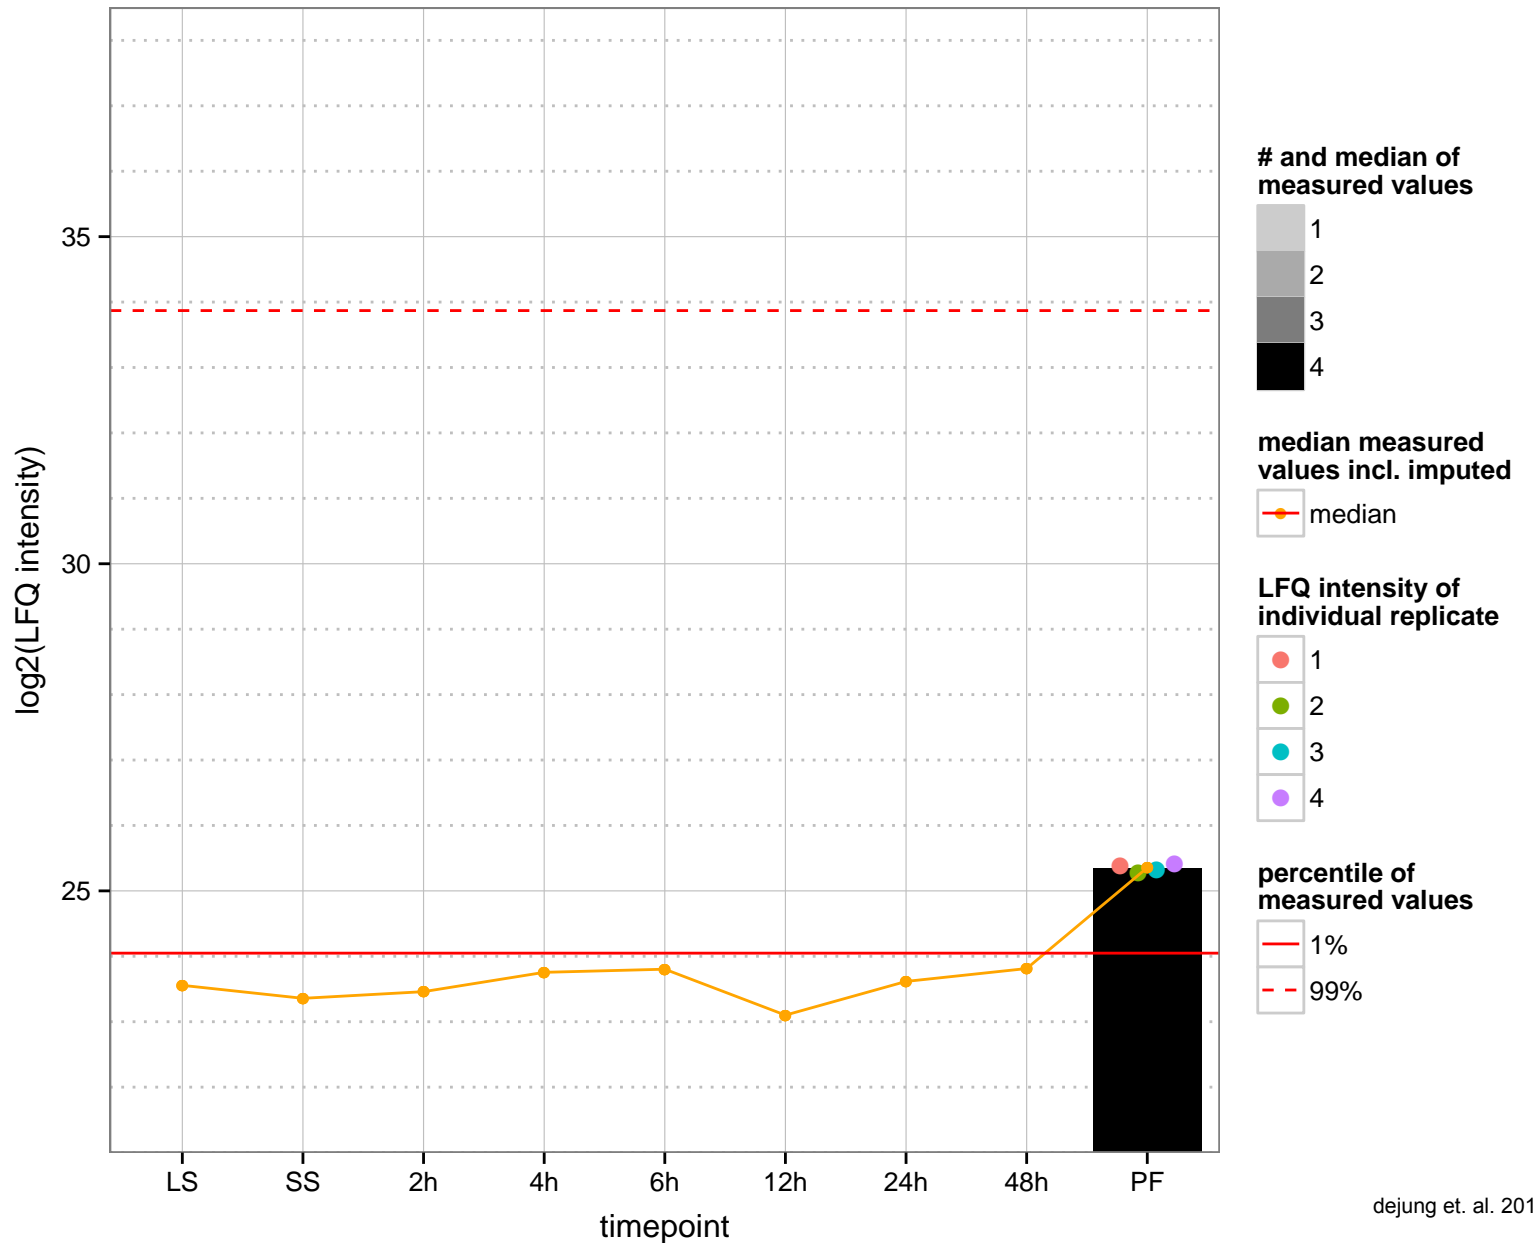

hypothetical protein, conserved  
 Tb927.11.3110  
 AGOF: null  
 AGOC: null  
 AGOP: null  
 PGO: protein binding  
 PGOC: null  
 PGOP: null

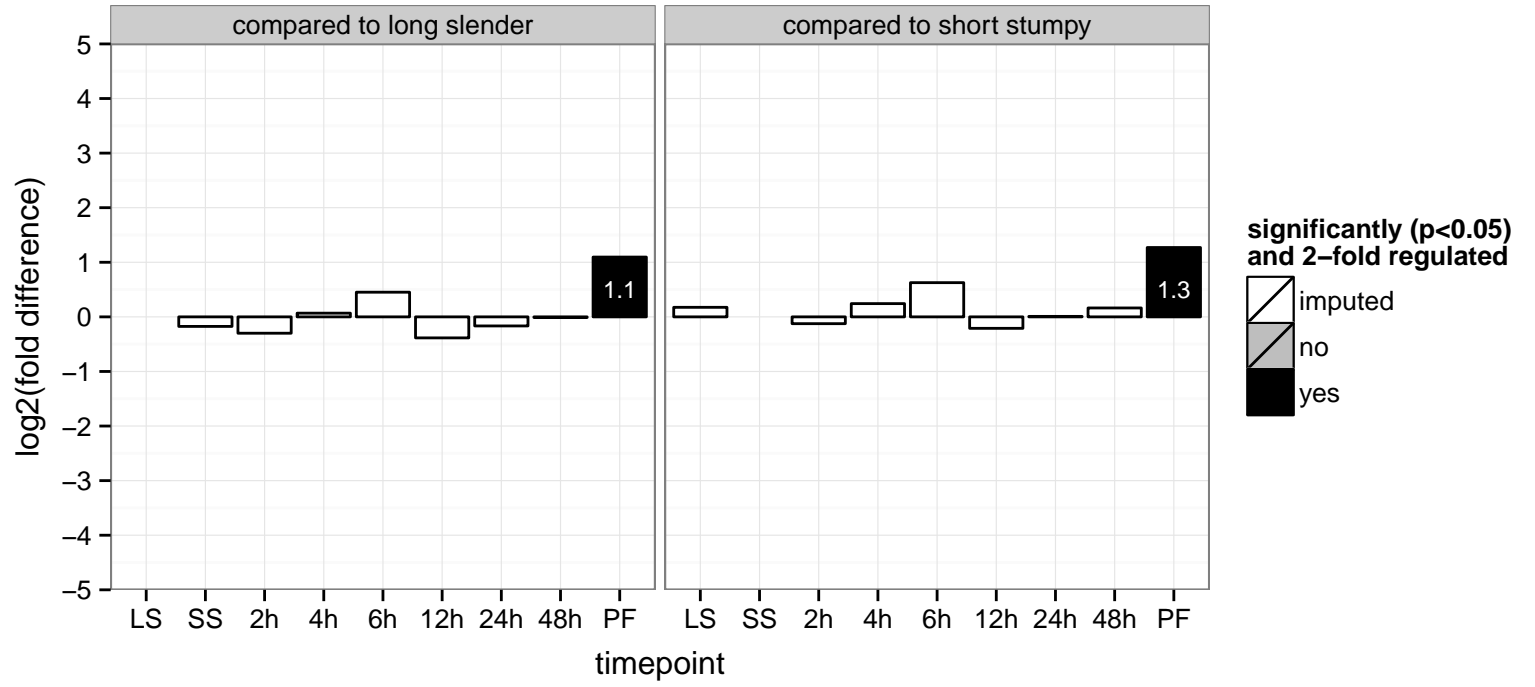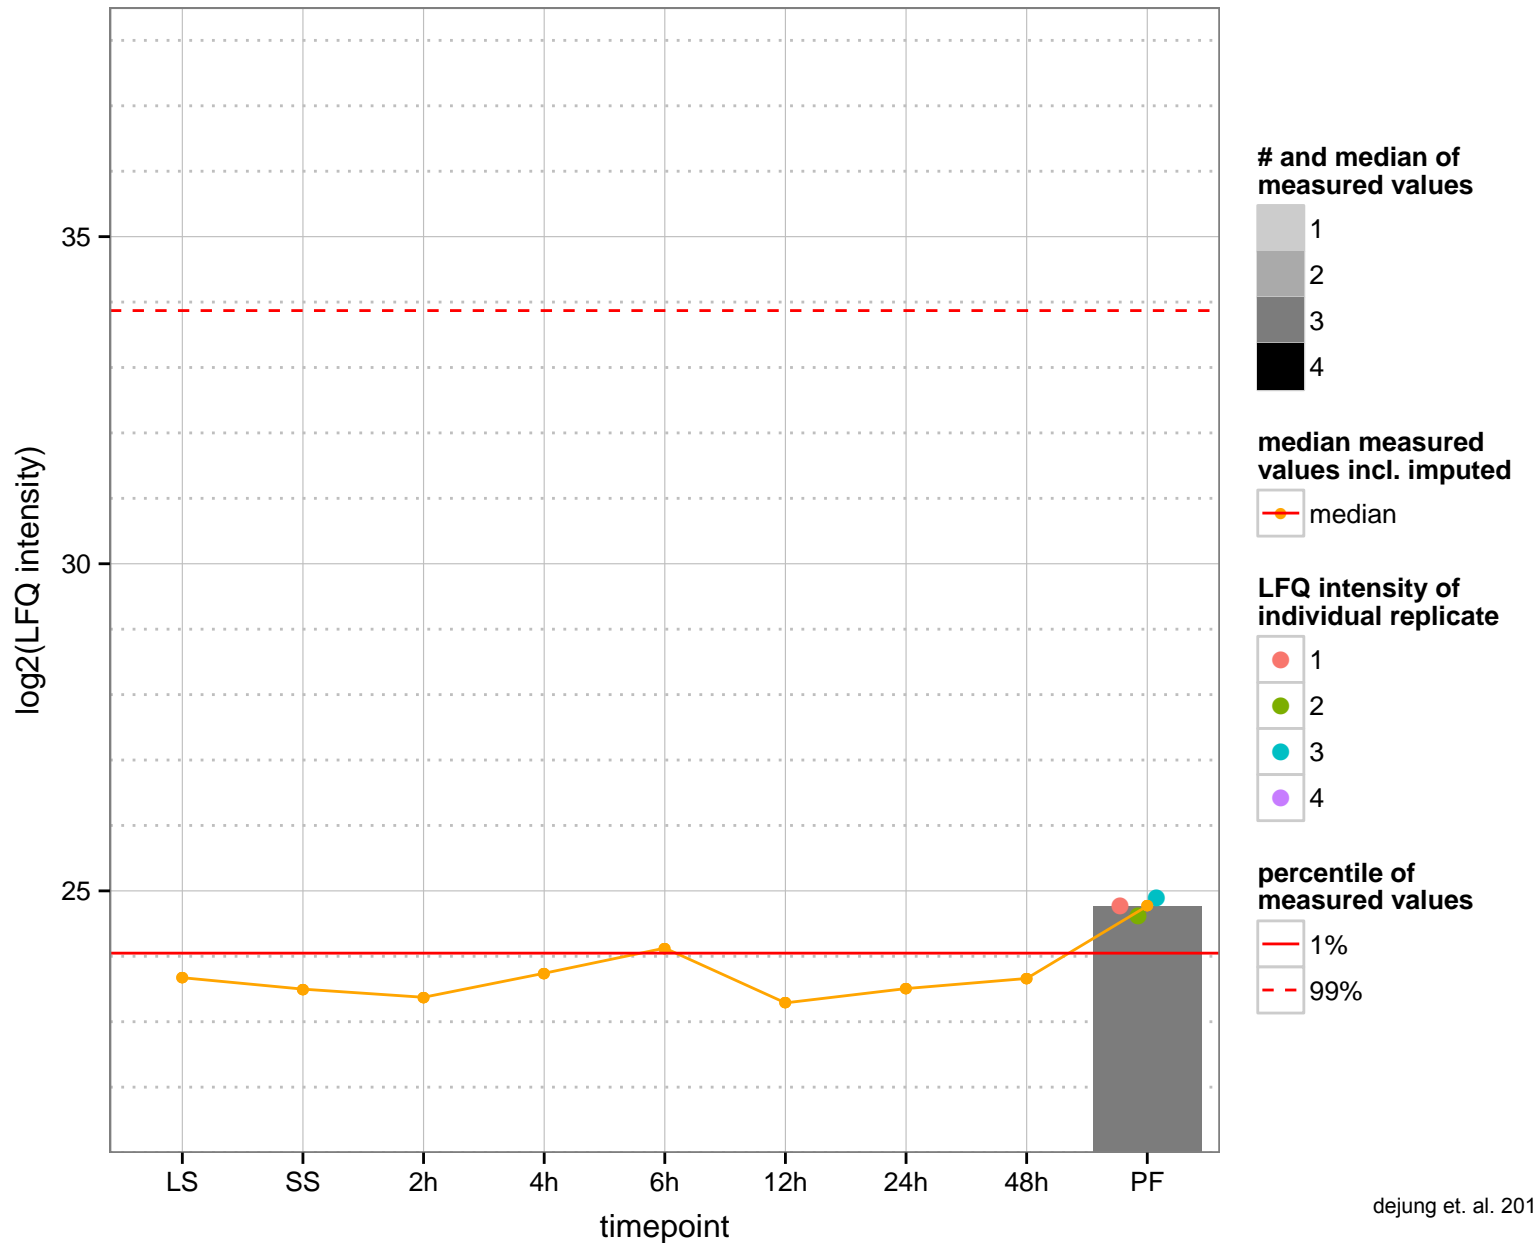

Nucleoporin, Myosin-like protein (TbMlp-1)  
 Tb927.11.330  
 AGOF: null  
 AGOC: nuclear pore  
 AGOP: null  
 PGO: null  
 PGOC: null  
 PGOP: null

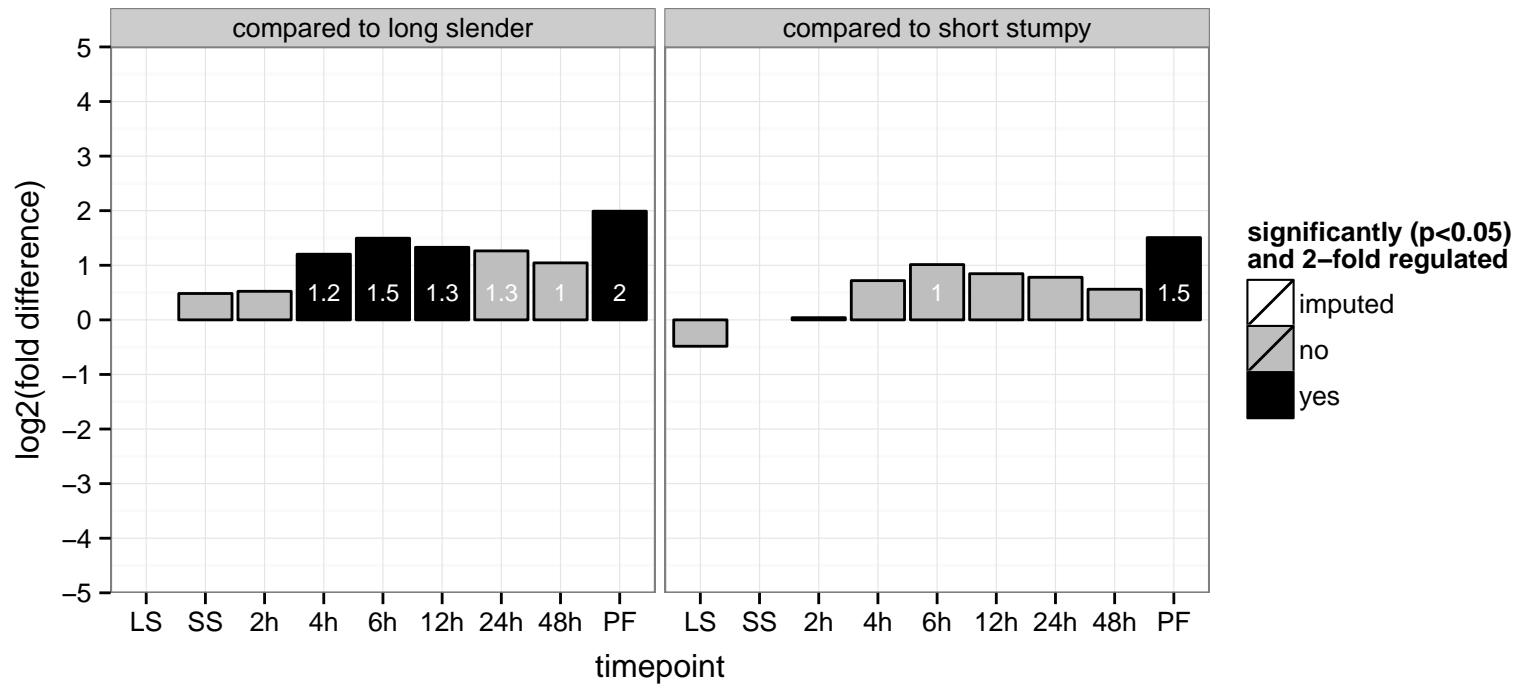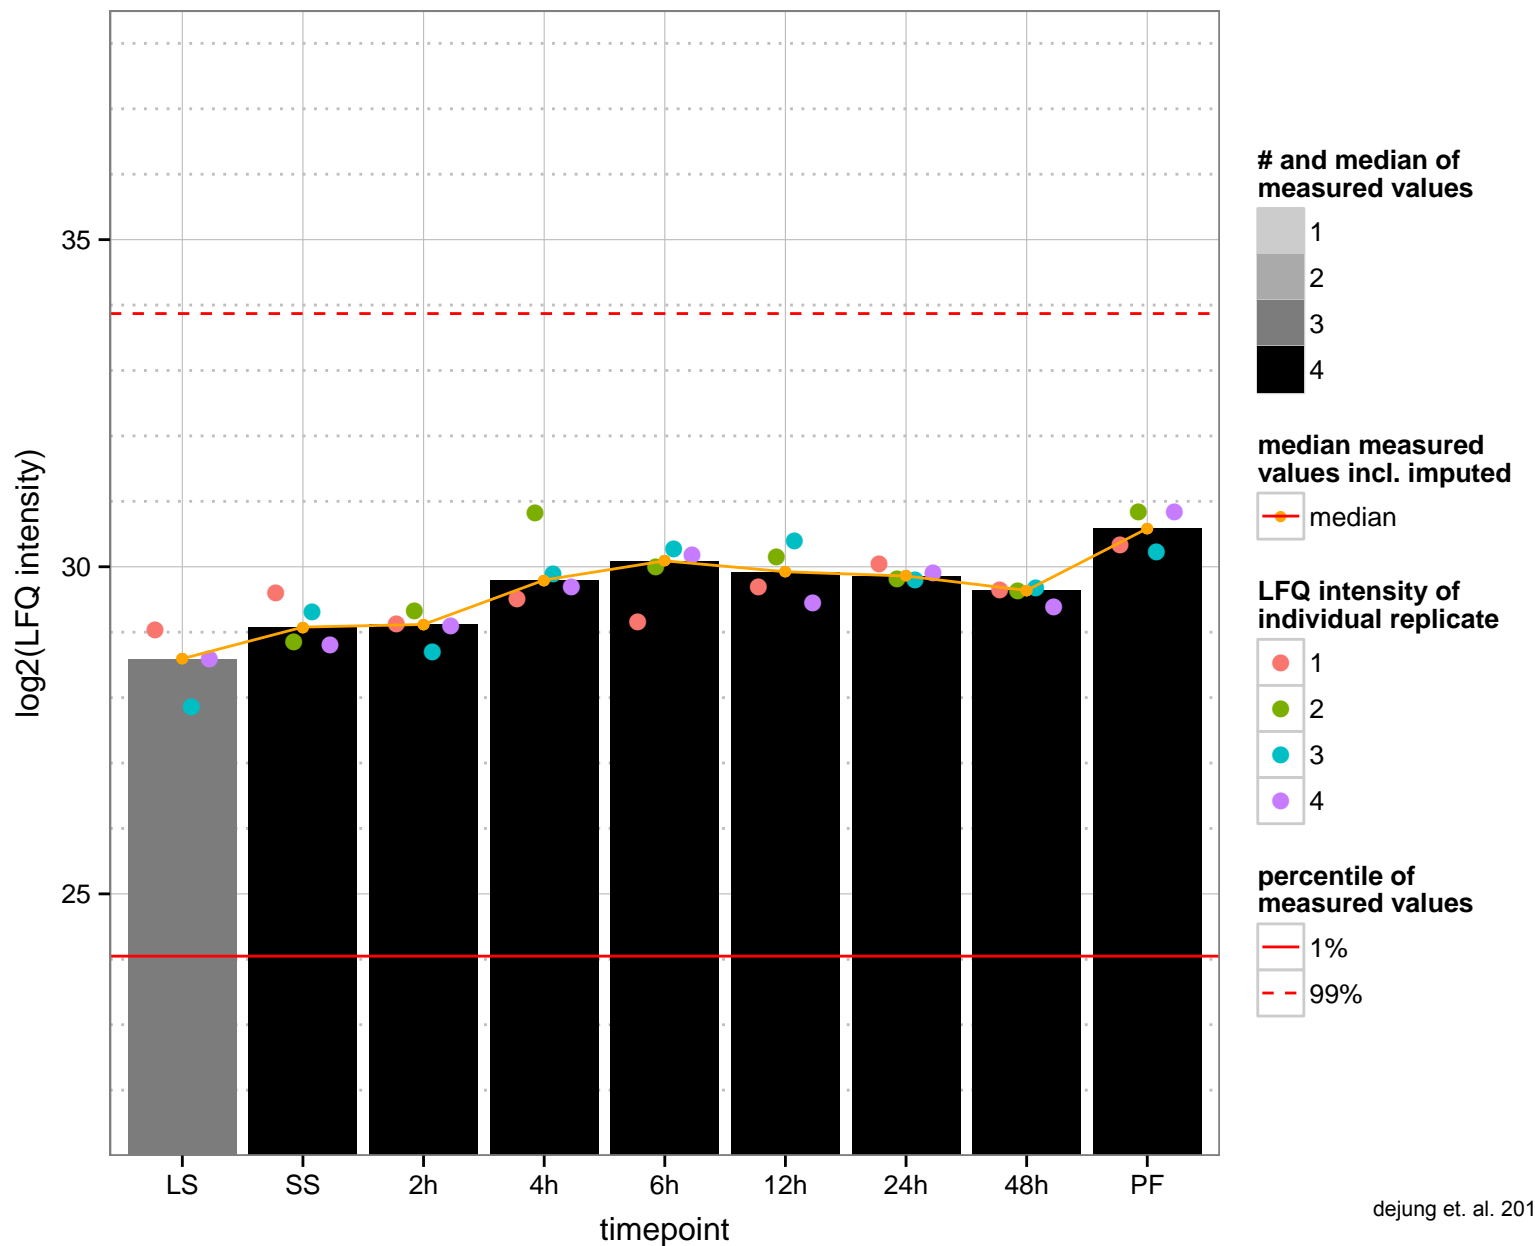

hypothetical protein, conserved  
 Tb927.11.3460  
 AGOF: null  
 AGOC: null  
 AGOP: null  
 PGOF: null  
 PGOC: null  
 PGOP: null

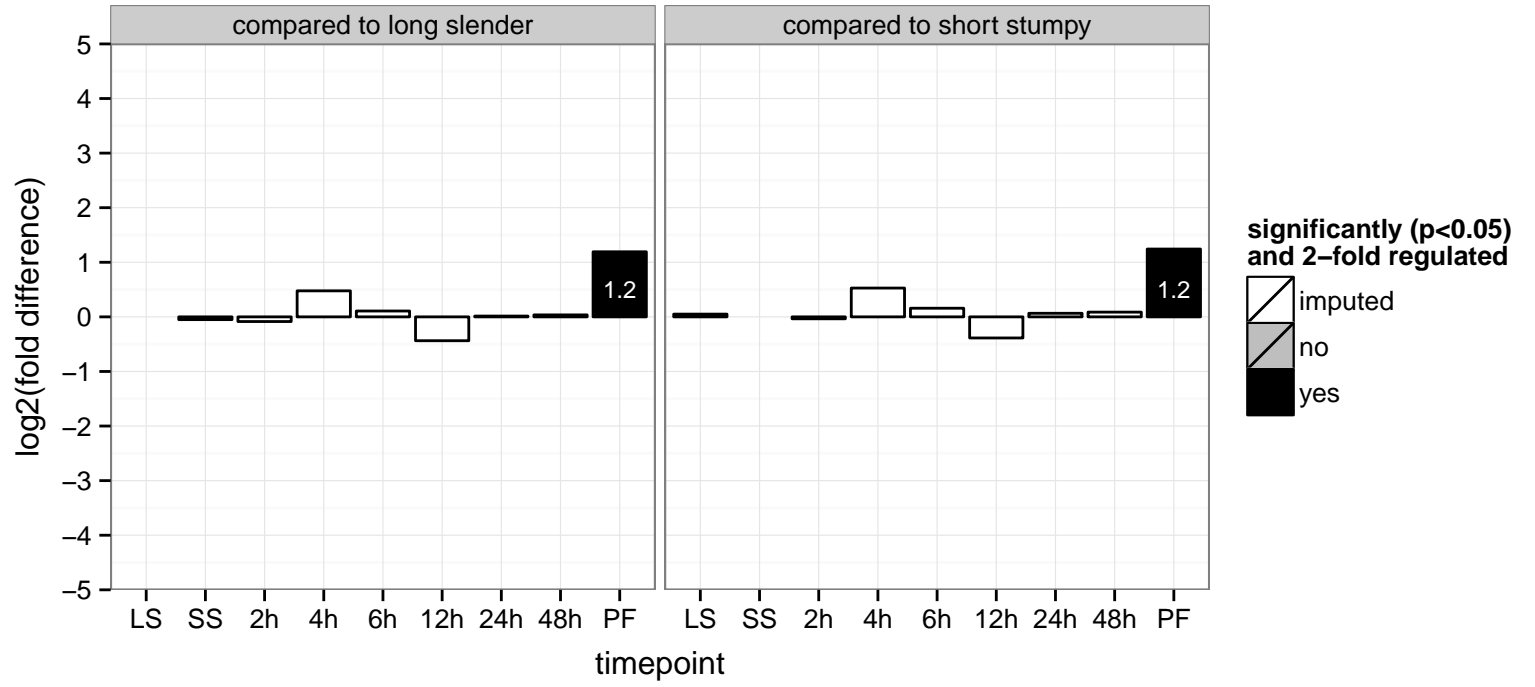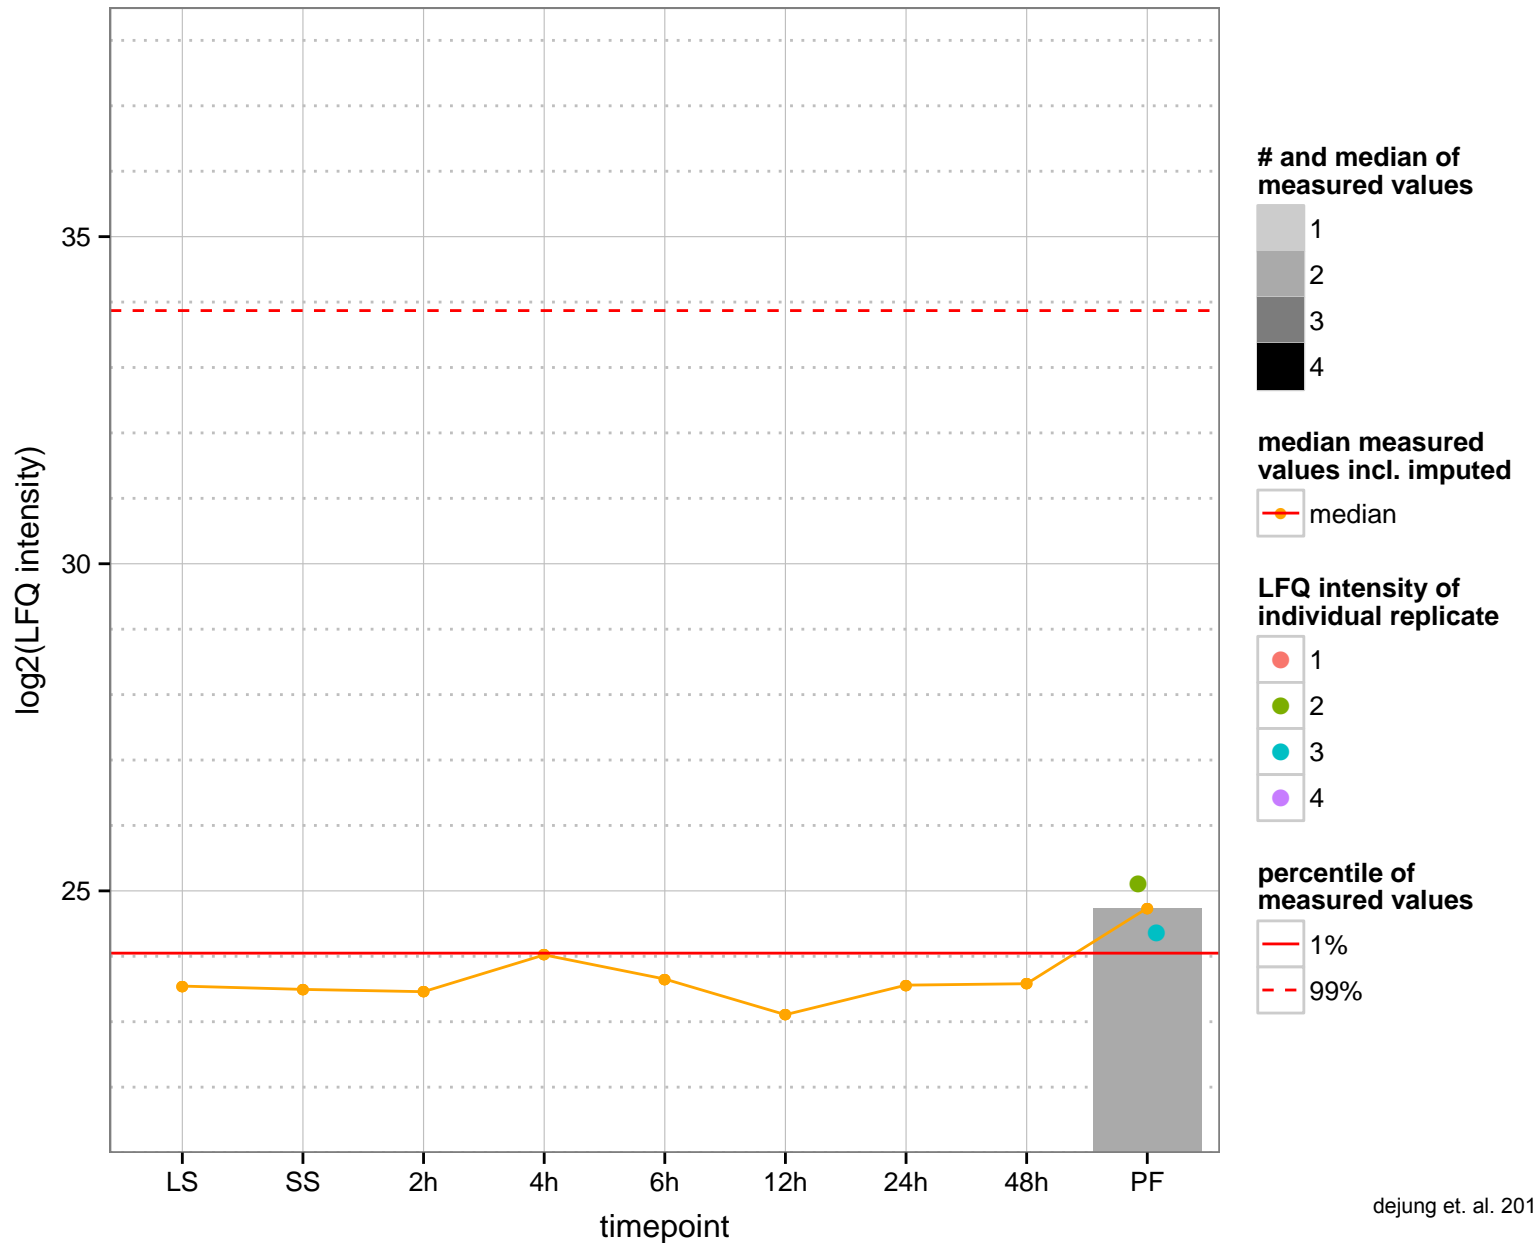

predicted C2 domain protein  
 Tb927.11.4160  
 AGOF: null  
 AGOC: null  
 AGOP: null  
 PGO: protein binding  
 PGOC: null  
 PGOP: null

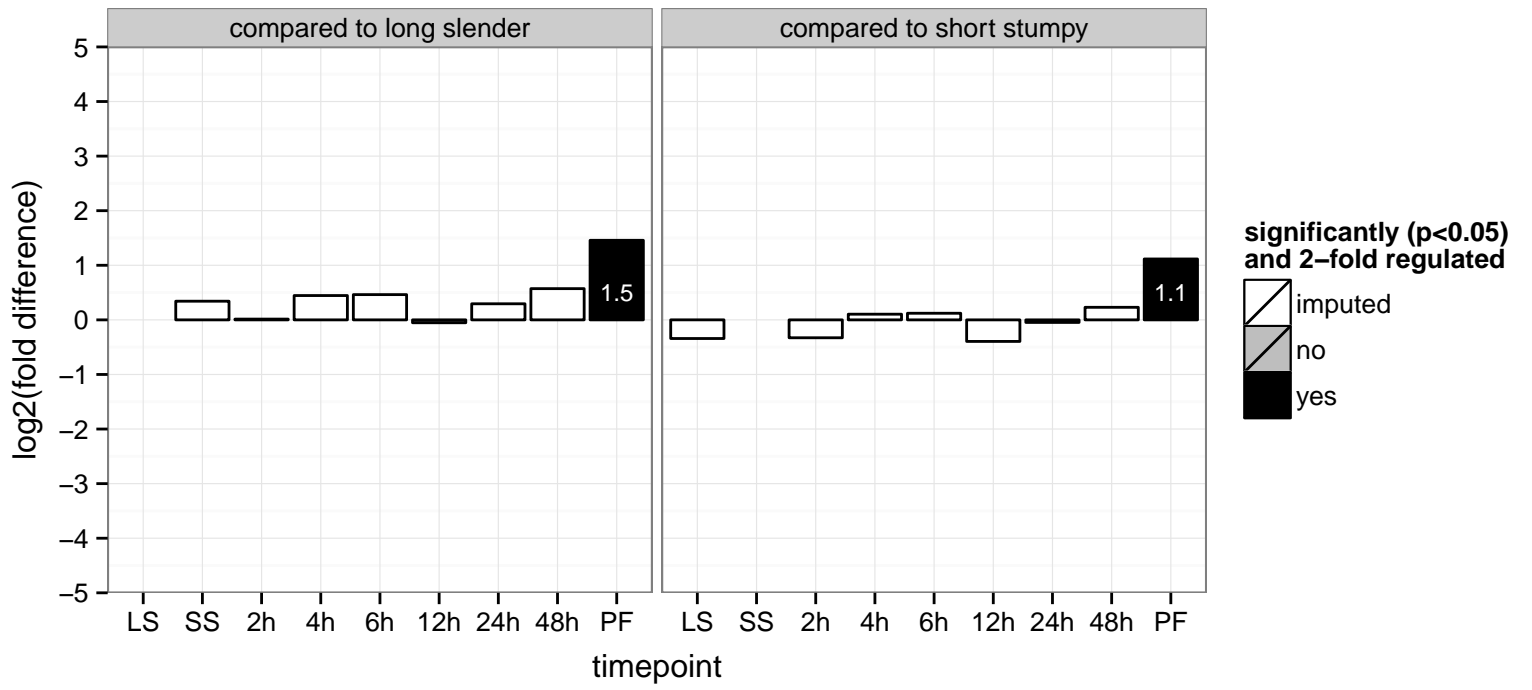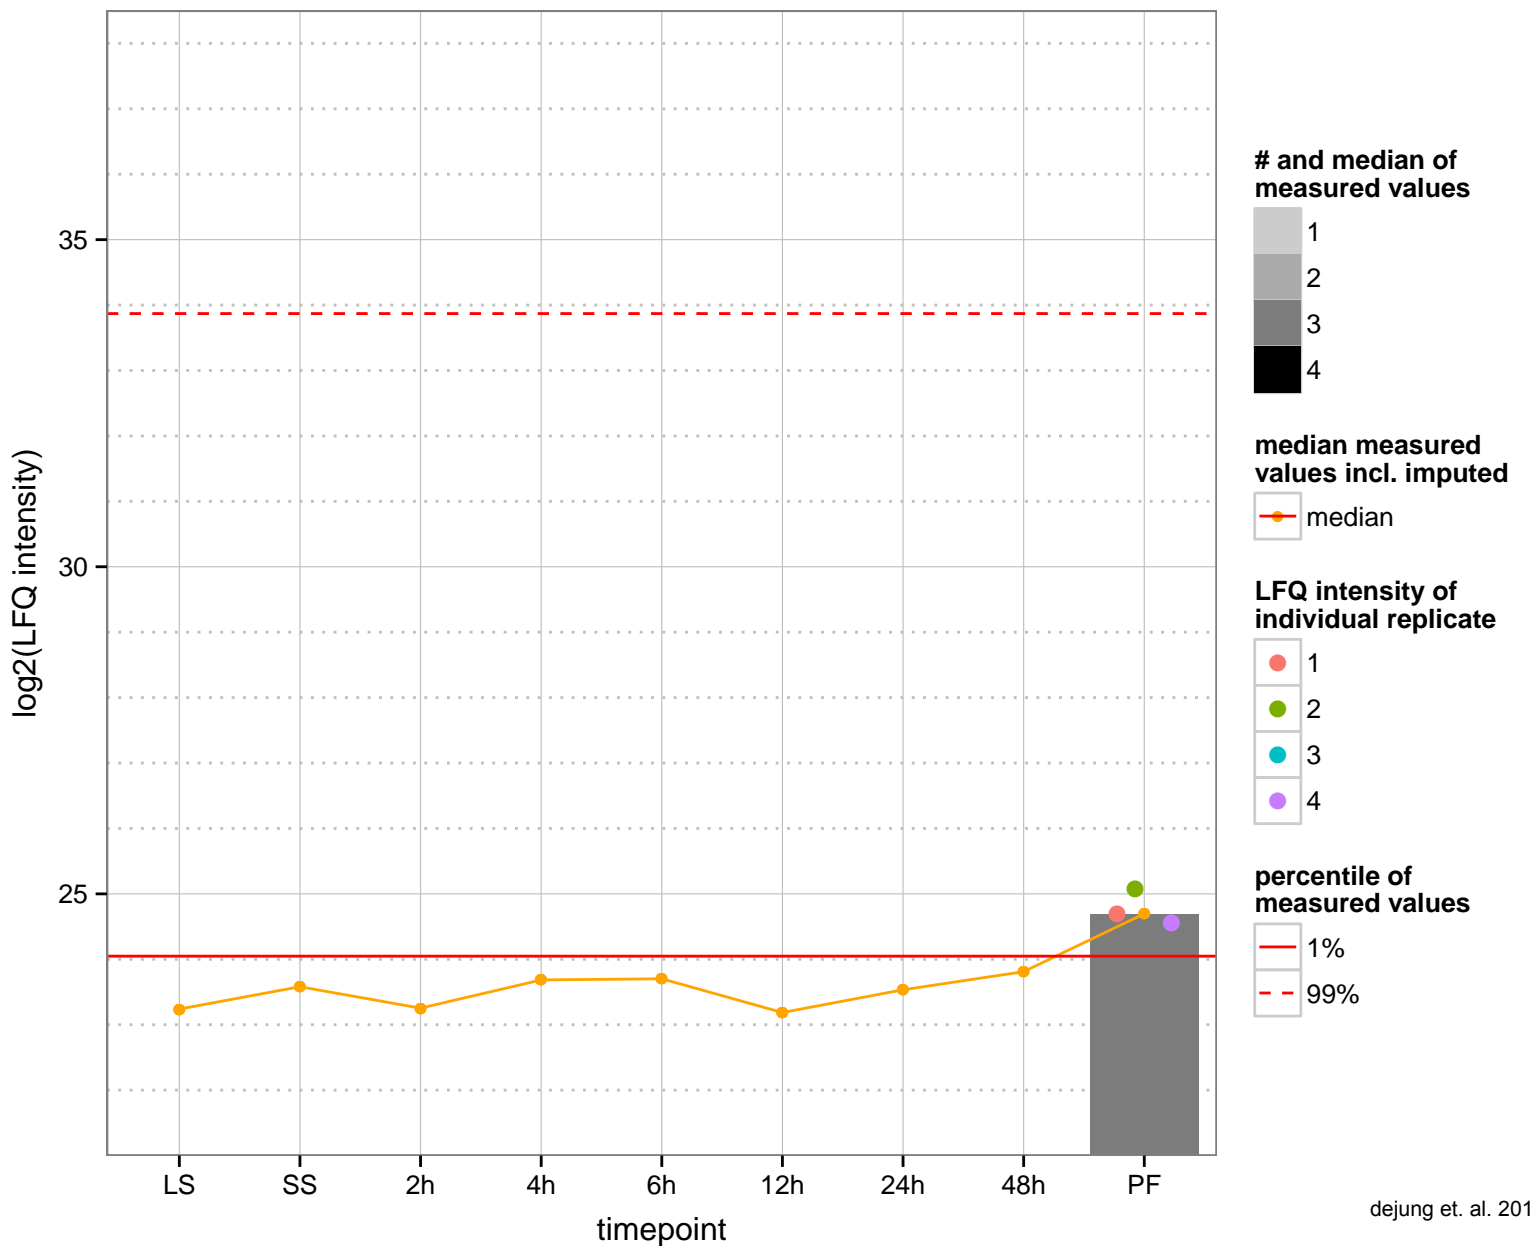

conserved protein  
 Tb927.11.440  
 AGOF: translation initiation factor activity  
 AGOC: integral to membrane  
 AGOP: translational initiation  
 PGO: translation initiation factor activity  
 PGOC: null  
 PGOP: translational initiation

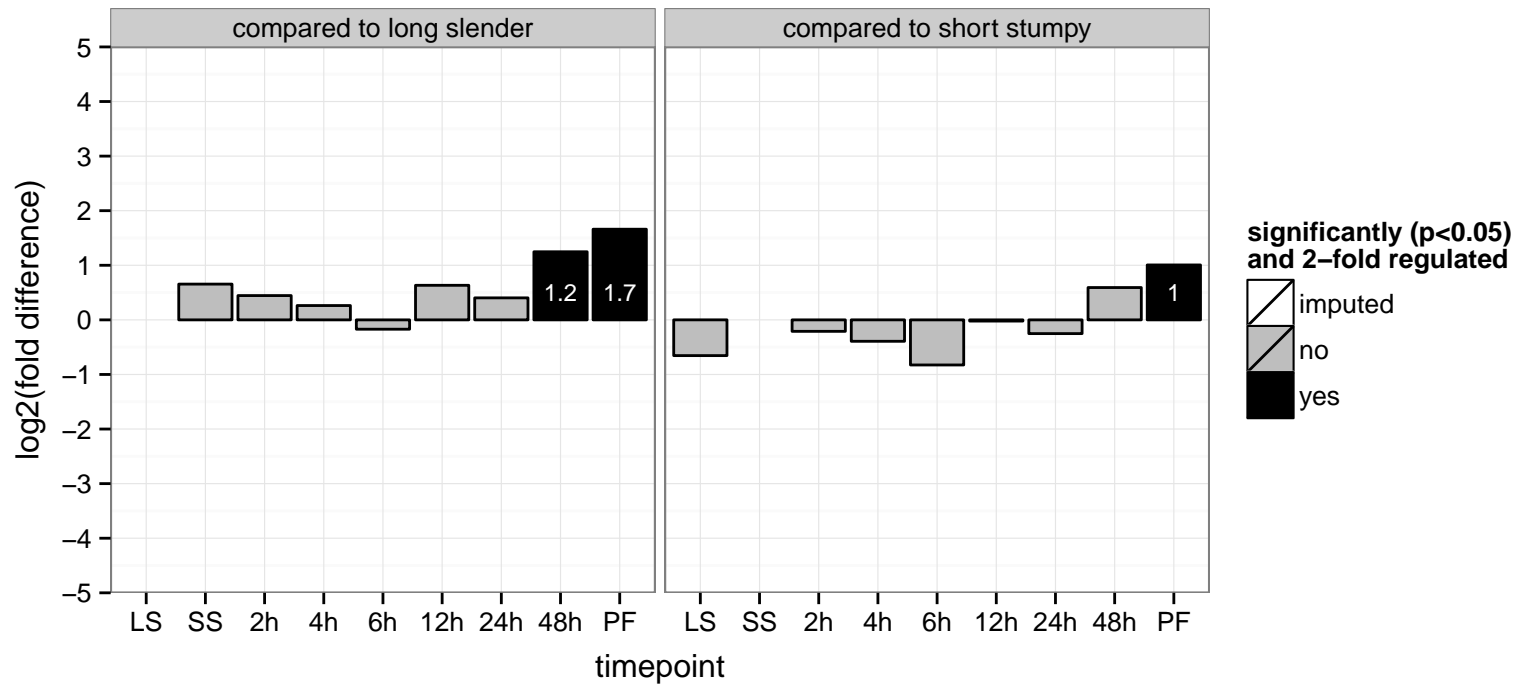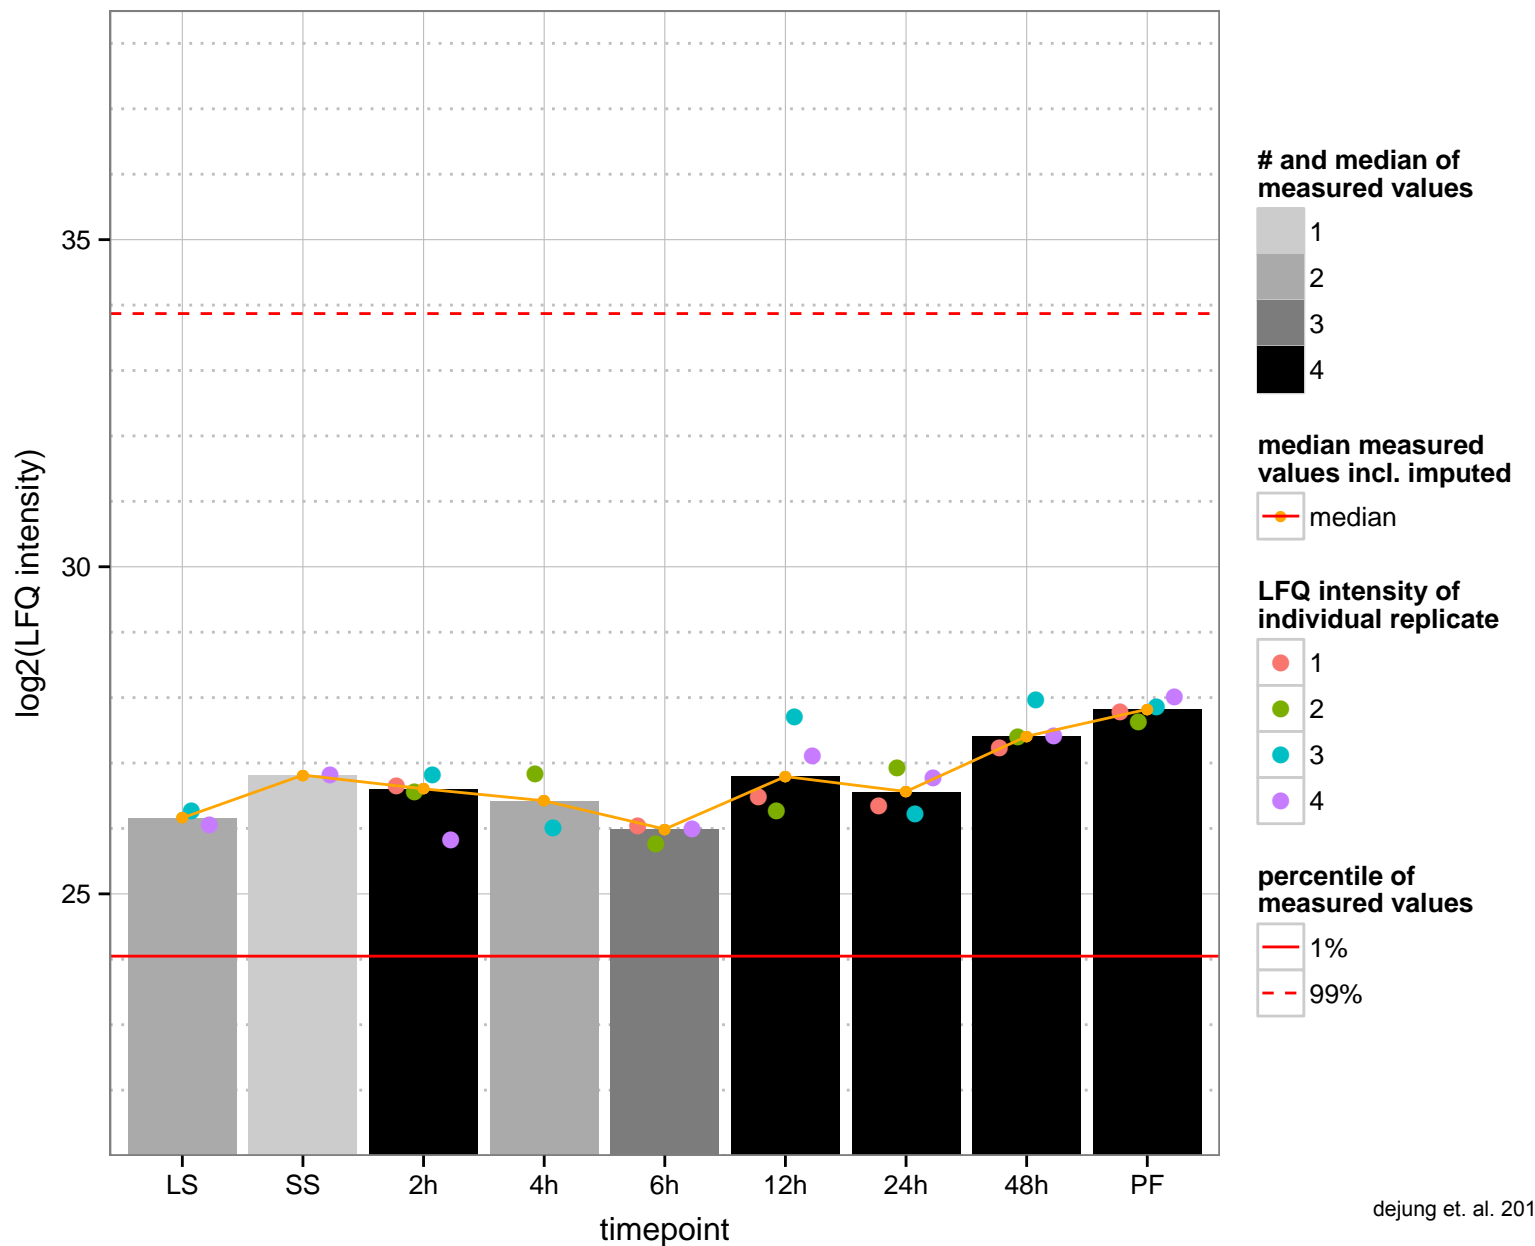



hypothetical protein, conserved  
 Tb927.11.4500  
 AGOF: null  
 AGOC: null  
 AGOP: null  
 PGOF: null  
 PGOE: null  
 PGOP: null

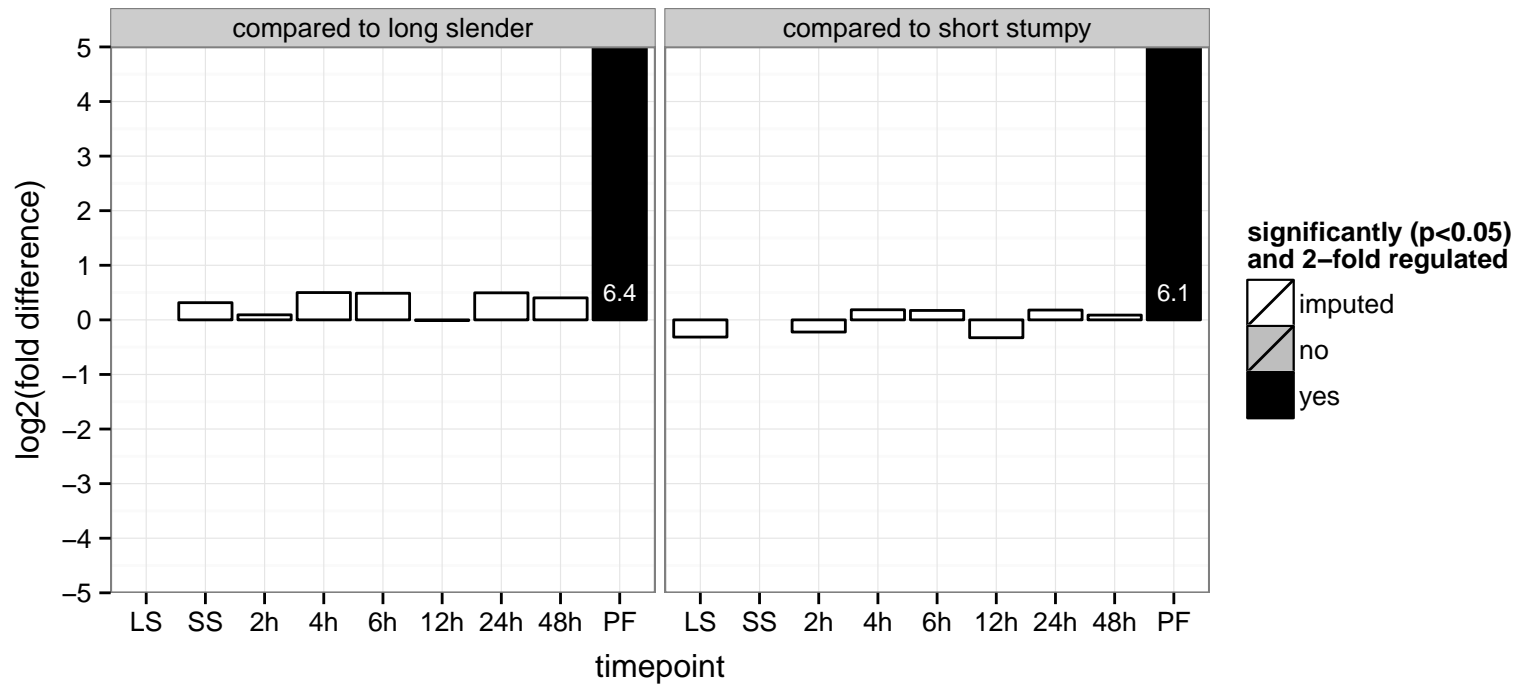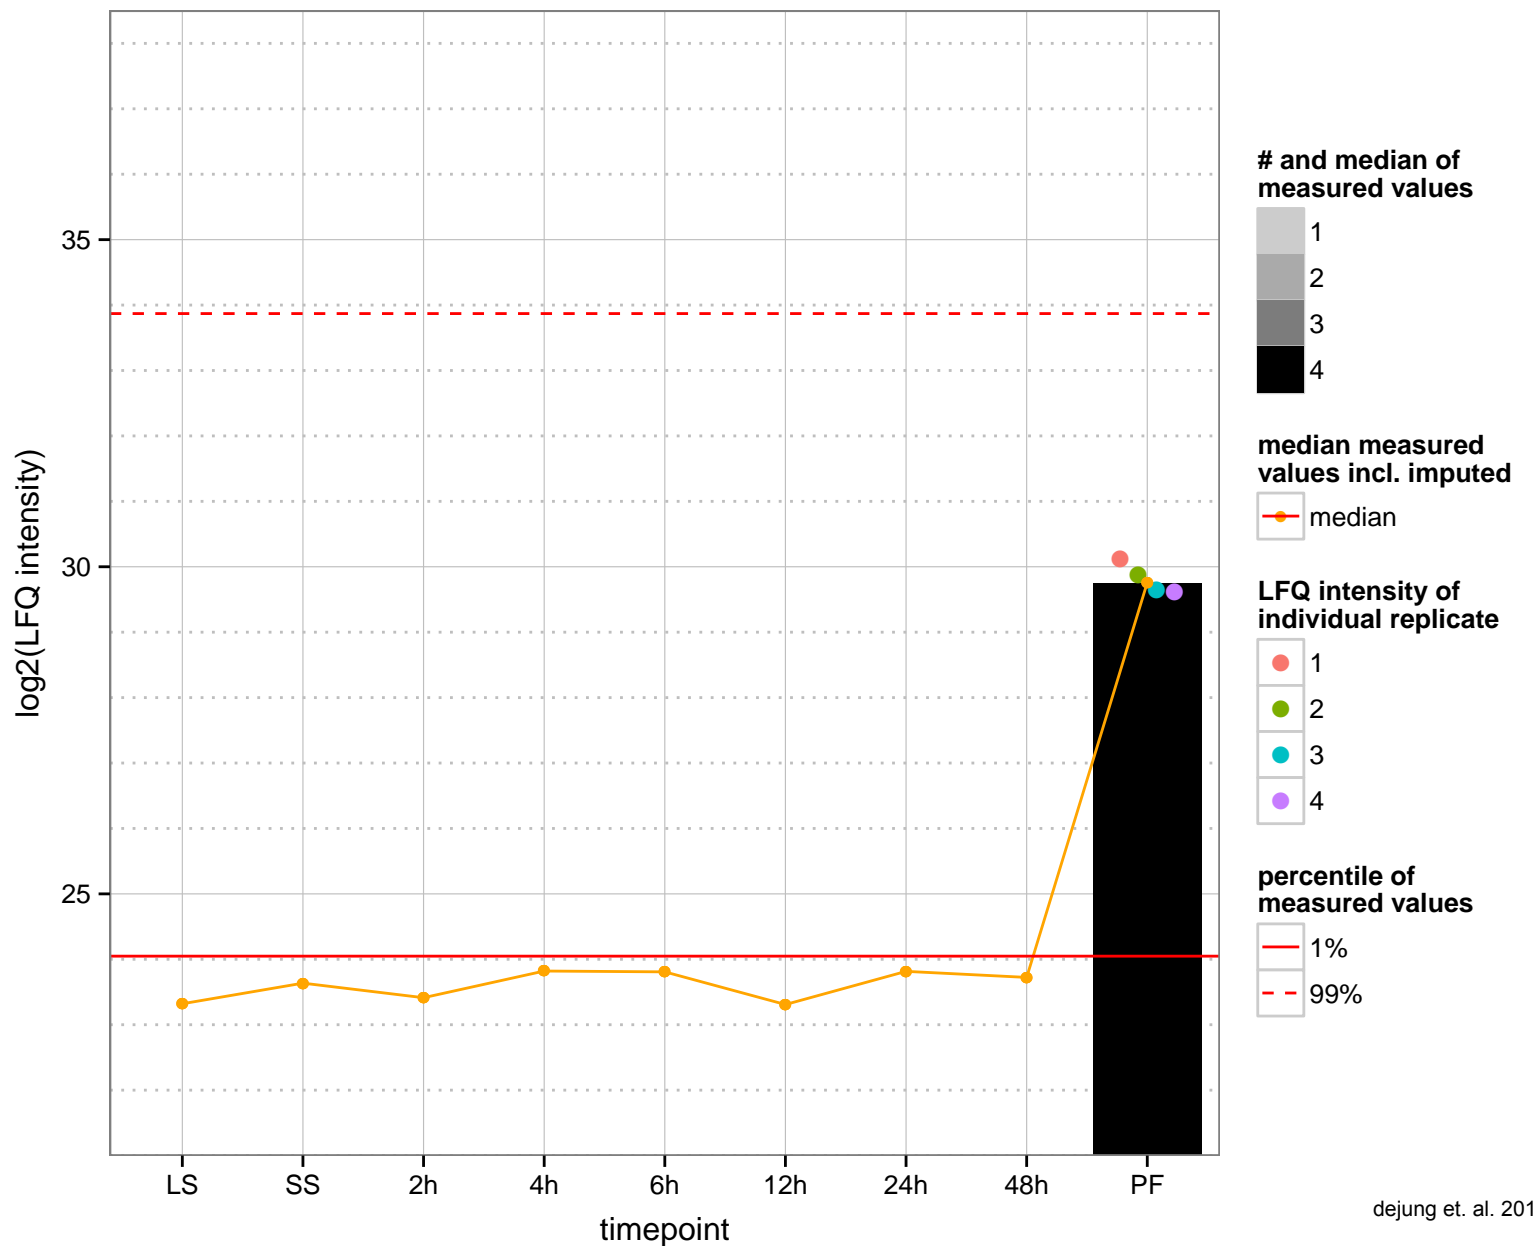

N-acetyltransferase subunit ARD1 (ARD1)  
 Tb927.11.4530  
 AGOF: N-acetyltransferase activity, catalytic activity  
 AGOC: null  
 AGOP: N-terminal protein amino acid acetylation, cell growth  
 PGO: N-acetyltransferase activity  
 PGO: null  
 PGO: null

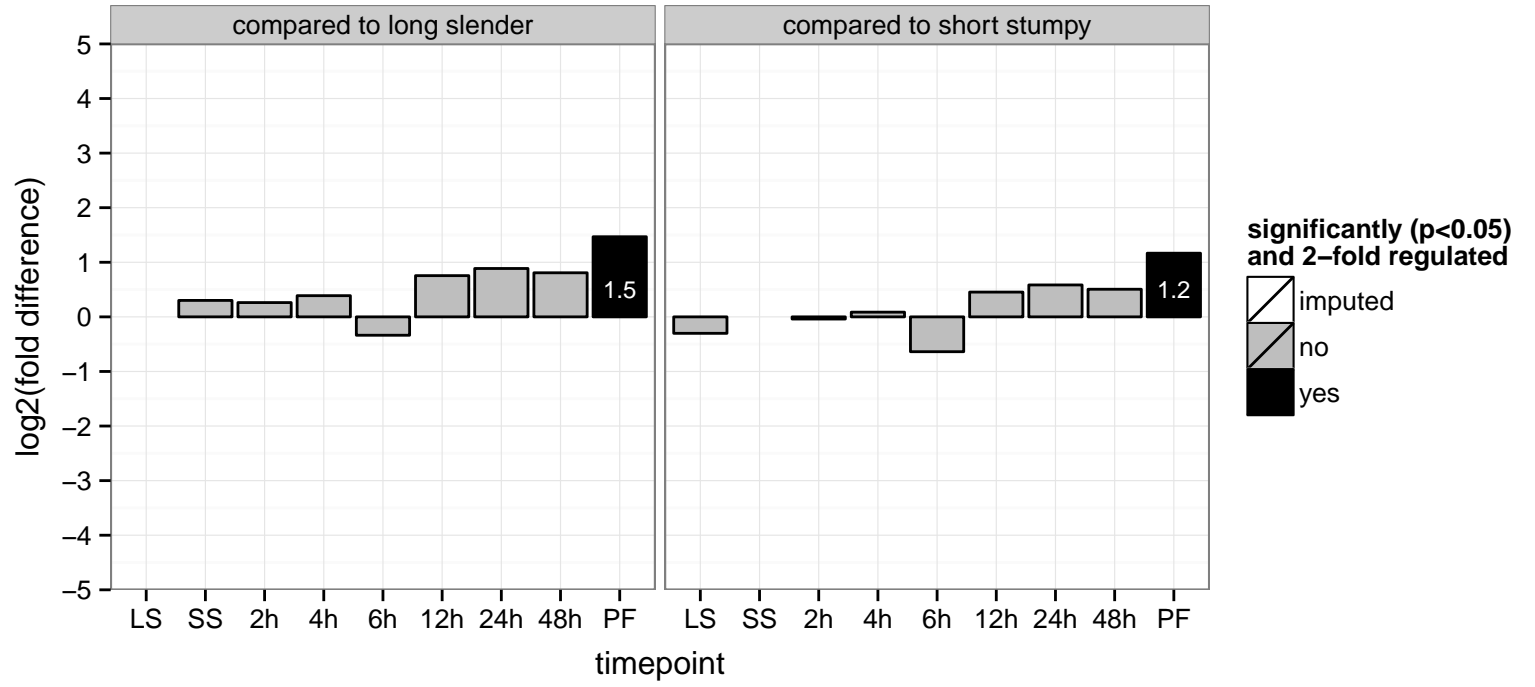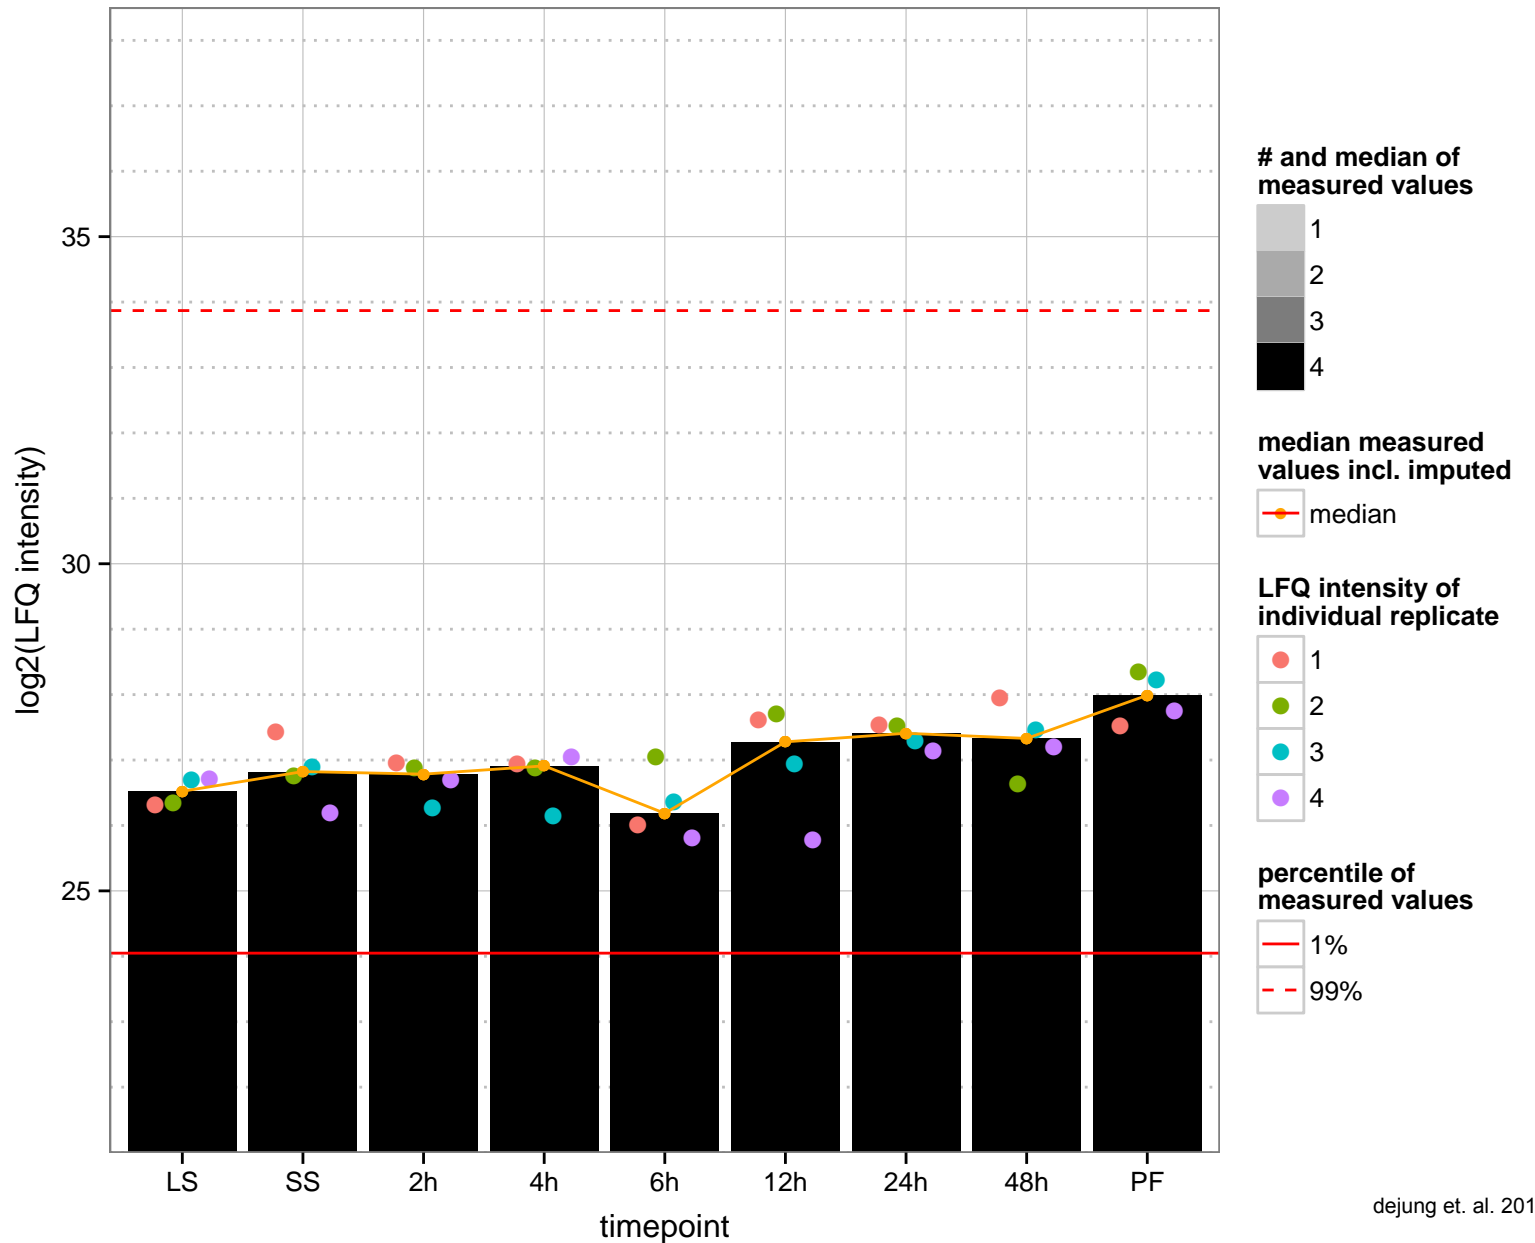

hypothetical protein, conserved, predicted WD40 repeat protein  
 Tb927.11.460;Tb11.v5.0726  
 AGOF: null  
 AGOC: null, small-subunit processome  
 AGOP: null, rRNA processing  
 PGO: protein binding  
 PGO: small-subunit processome  
 PGO: rRNA processing

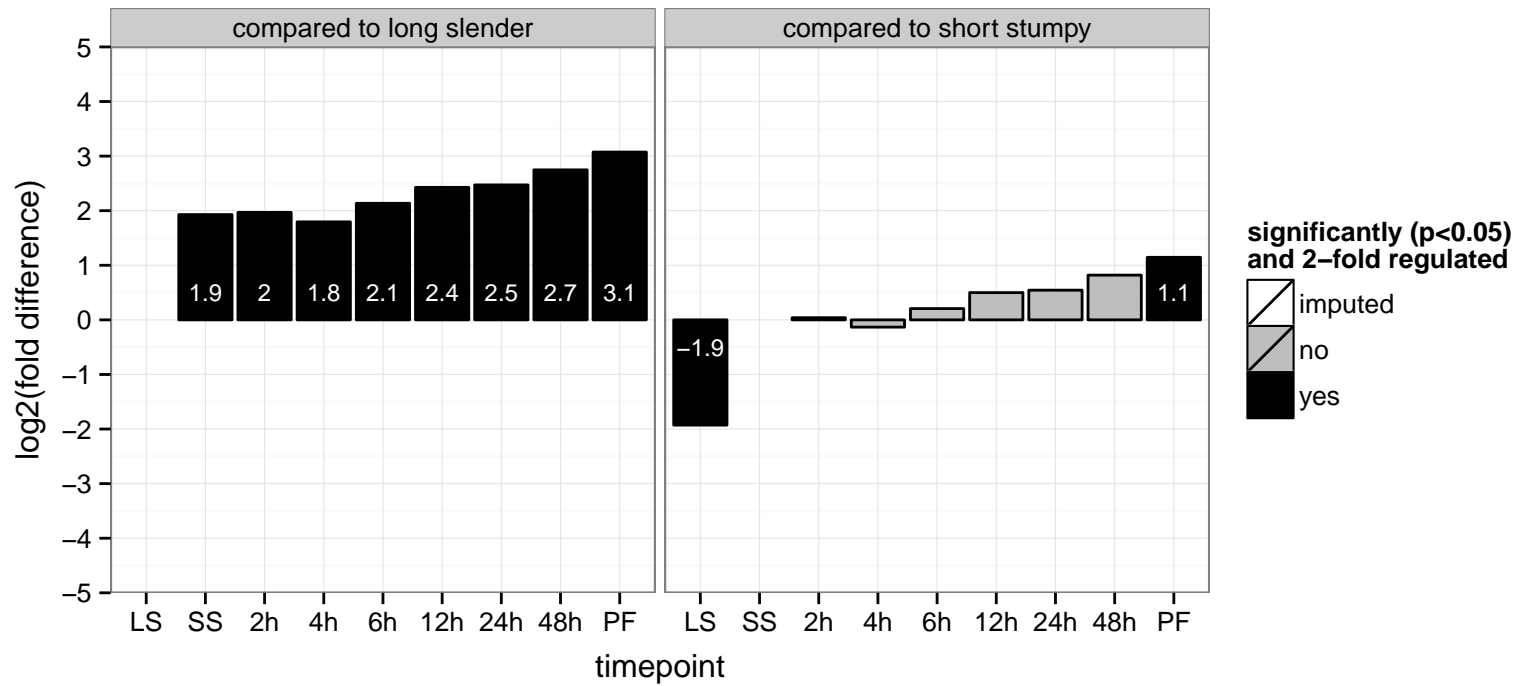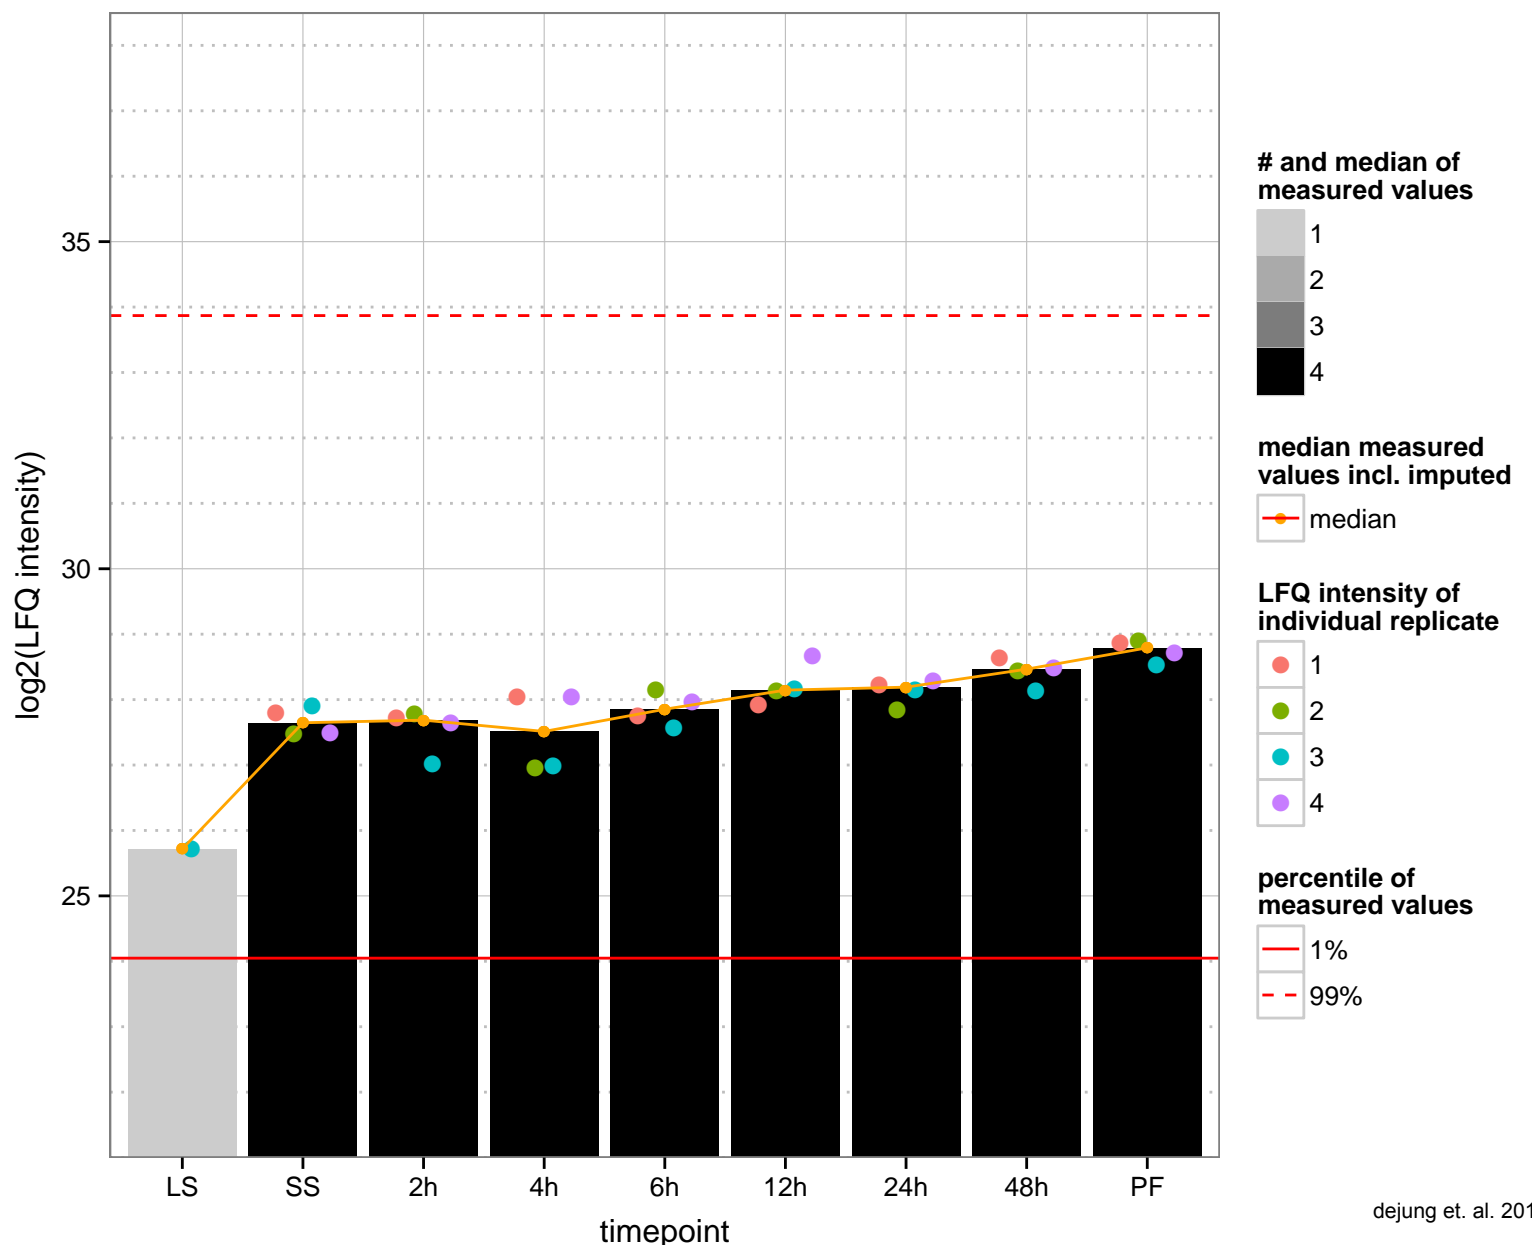

hypothetical protein, conserved  
 Tb927.11.4870  
 AGOF: null  
 AGOC: mitochondrion  
 AGOP: null  
 PGO: null  
 PGOC: null  
 PGOP: null

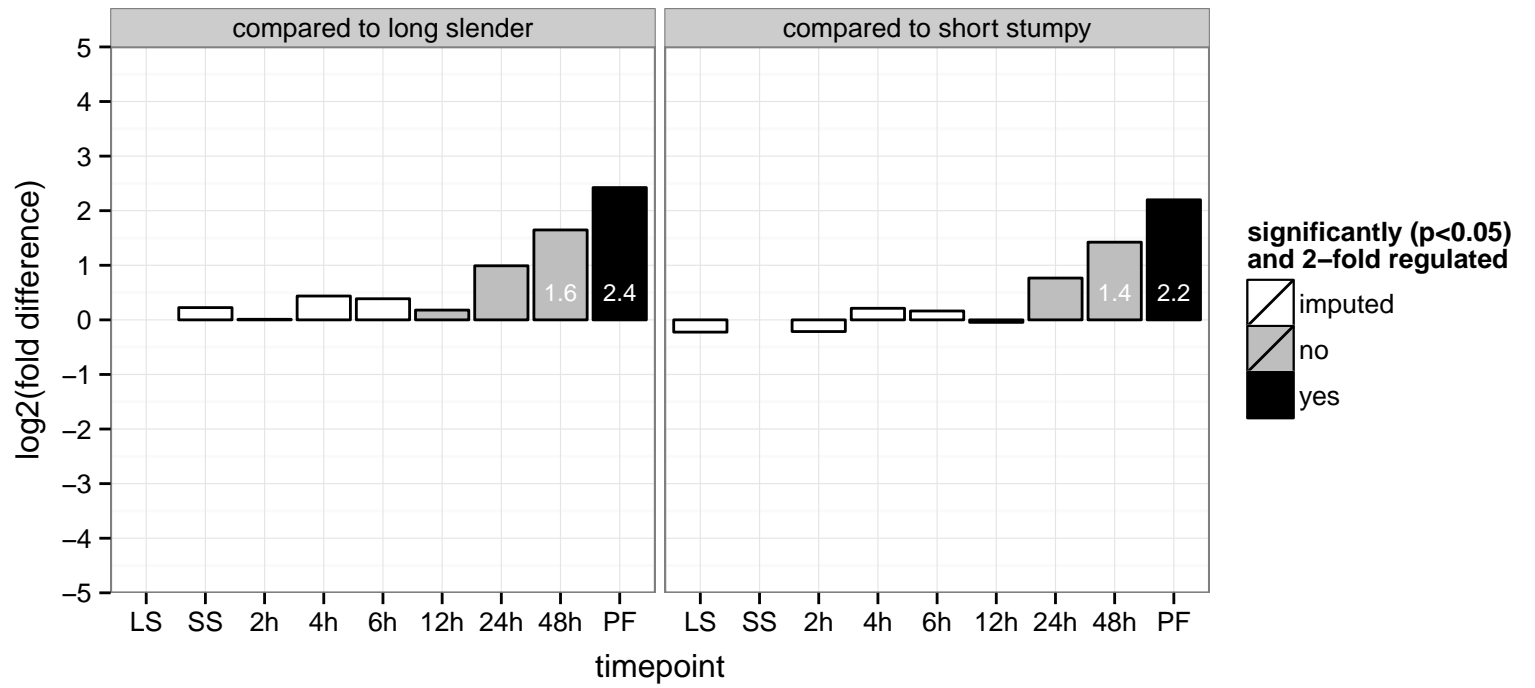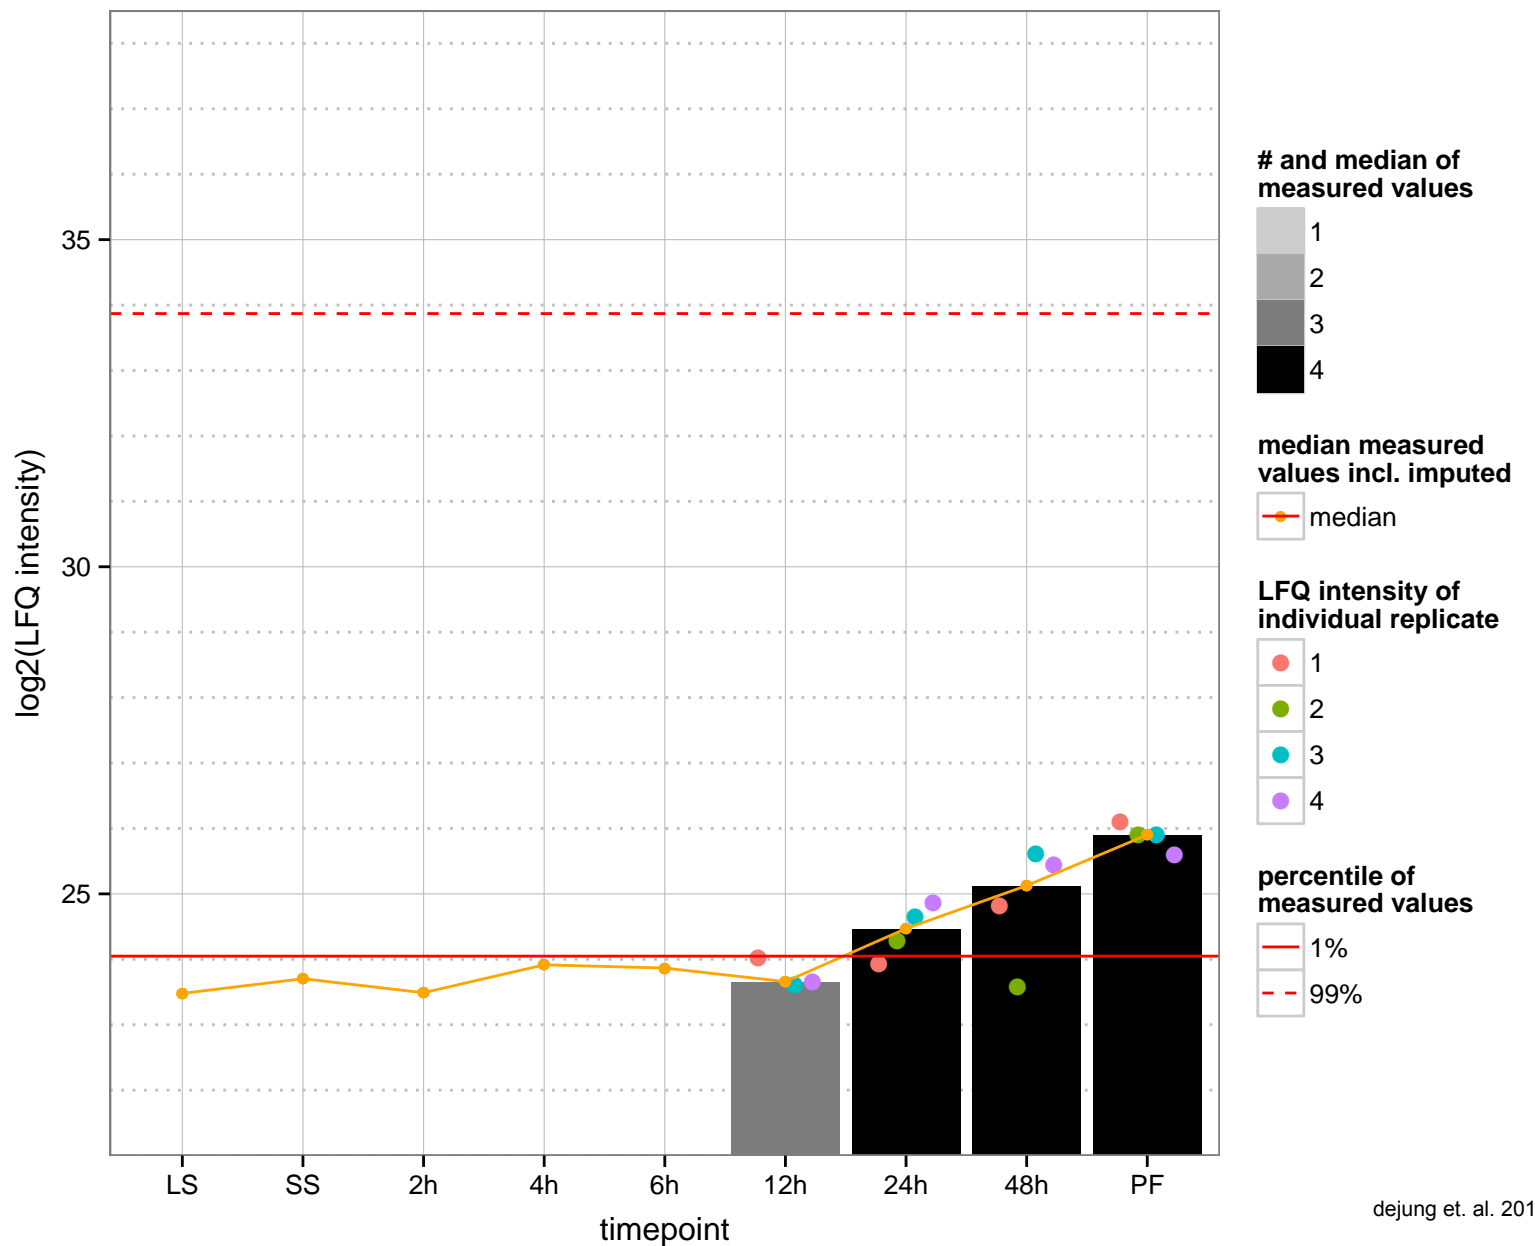

hypothetical protein, conserved  
 Tb927.11.5020  
 AGOF: zinc ion binding  
 AGOC: null  
 AGOP: null  
 PGOF: binding, protein binding, zinc ion binding  
 PGO: null  
 PGOP: null

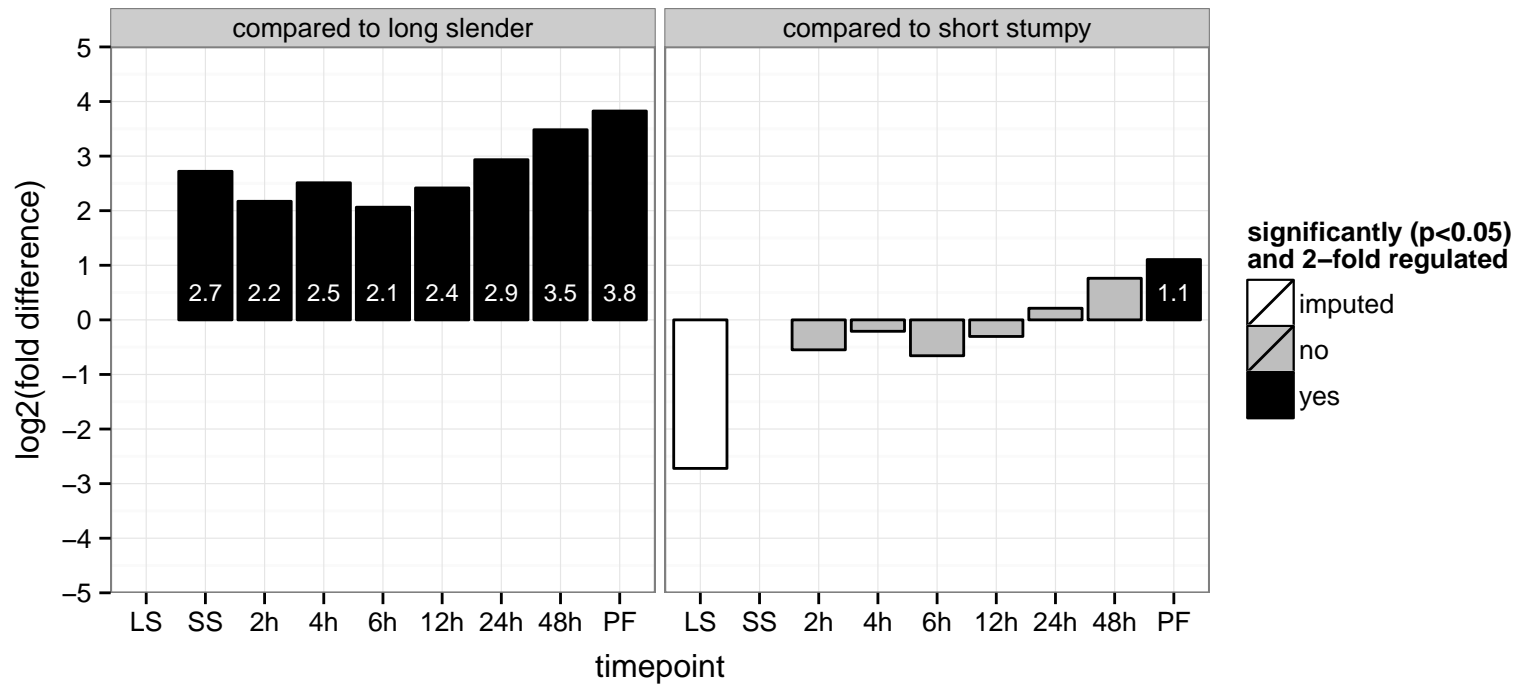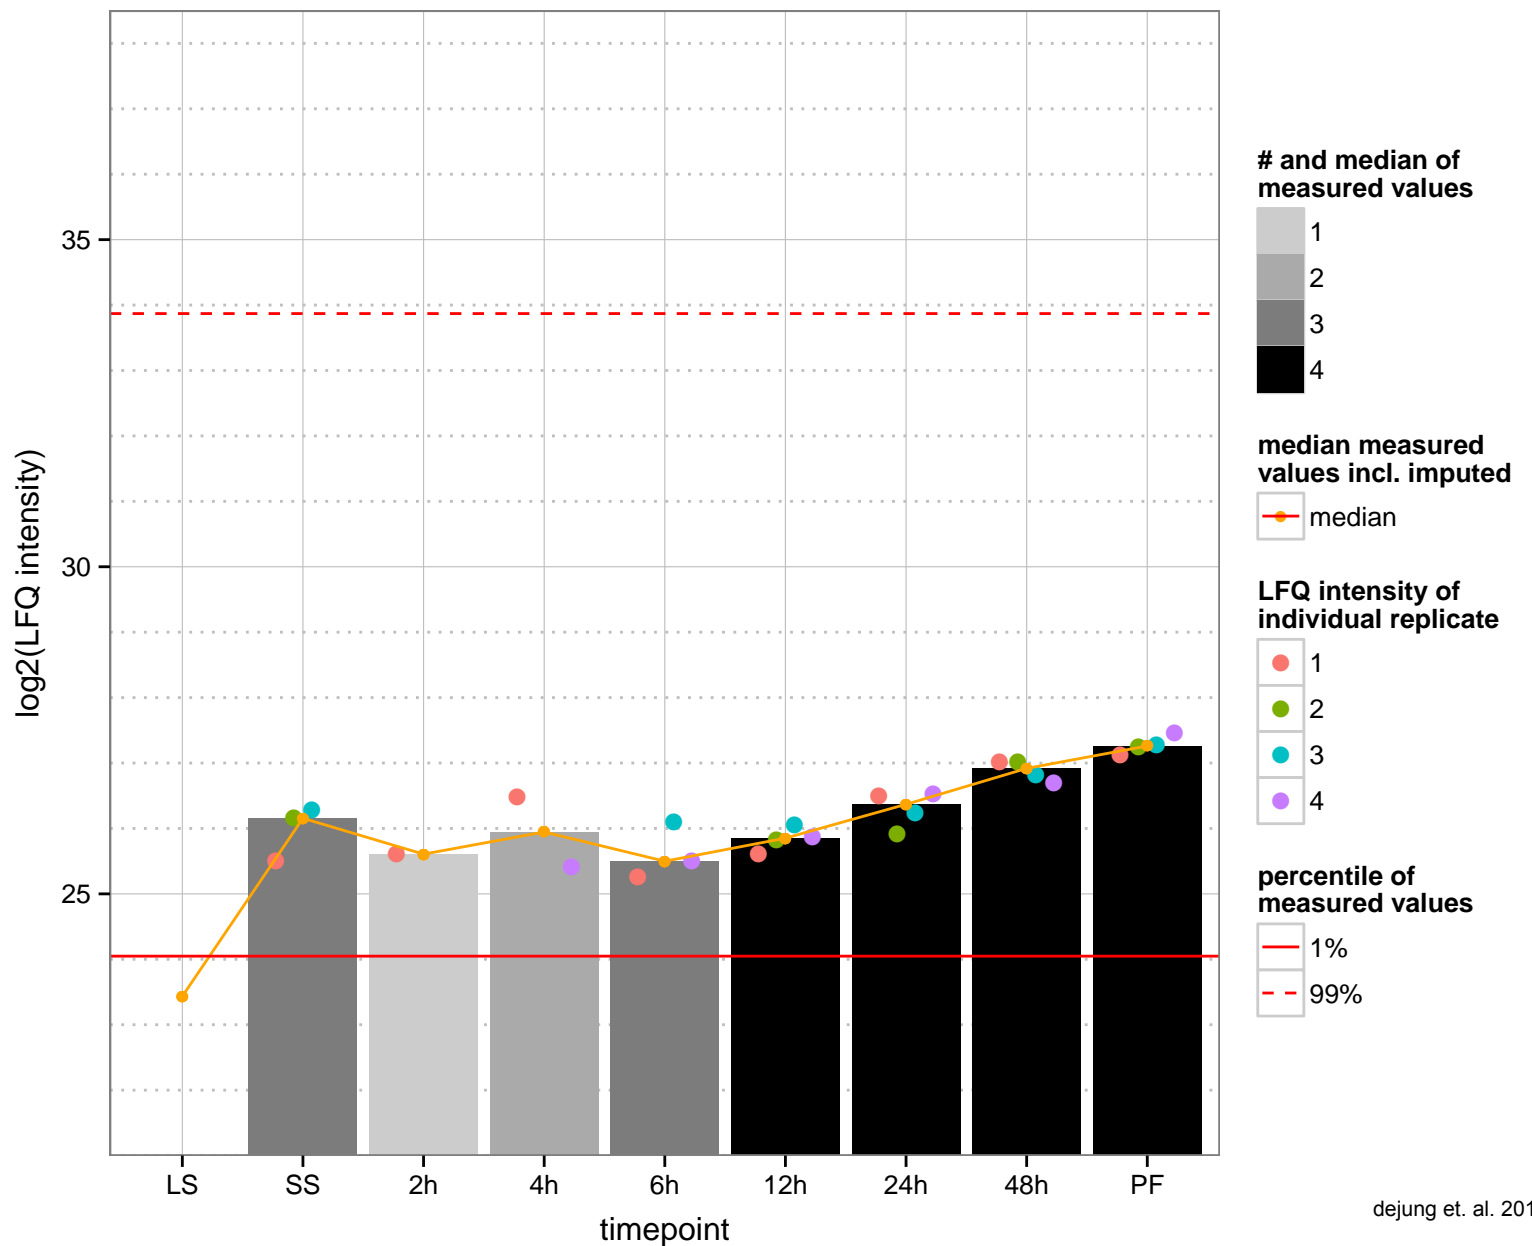

ubiquitin carboxyl-terminal hydrolase, putative, cysteine peptidase, Clan CA, family C12

Tb927.11.5140

AGOF: ubiquitin thiolesterase activity

AGOC: cytoplasm, intracellular, proteasome regulatory particle

AGOP: ubiquitin-dependent protein catabolic process

PGOF: omega peptidase activity, ubiquitin thiolesterase activity

PGOC: intracellular

PGOP: ubiquitin-dependent protein catabolic process

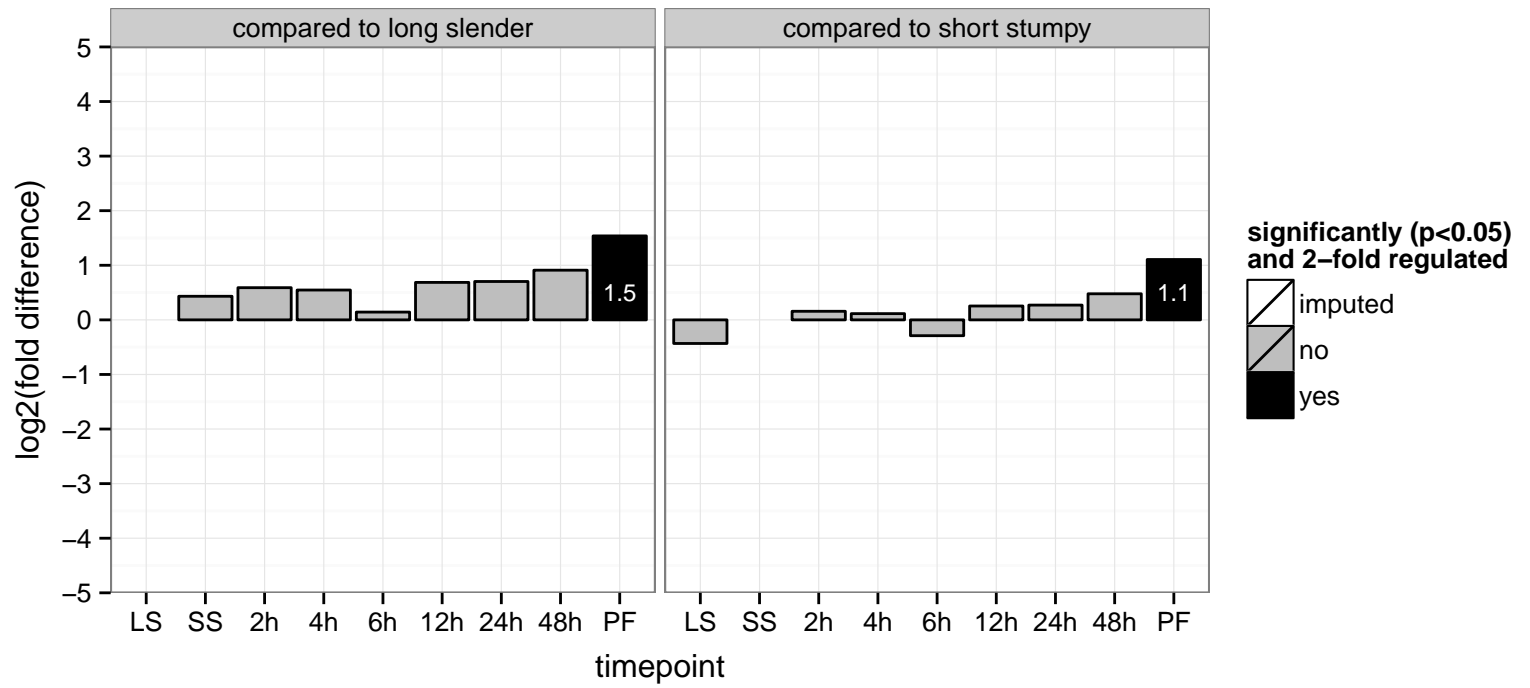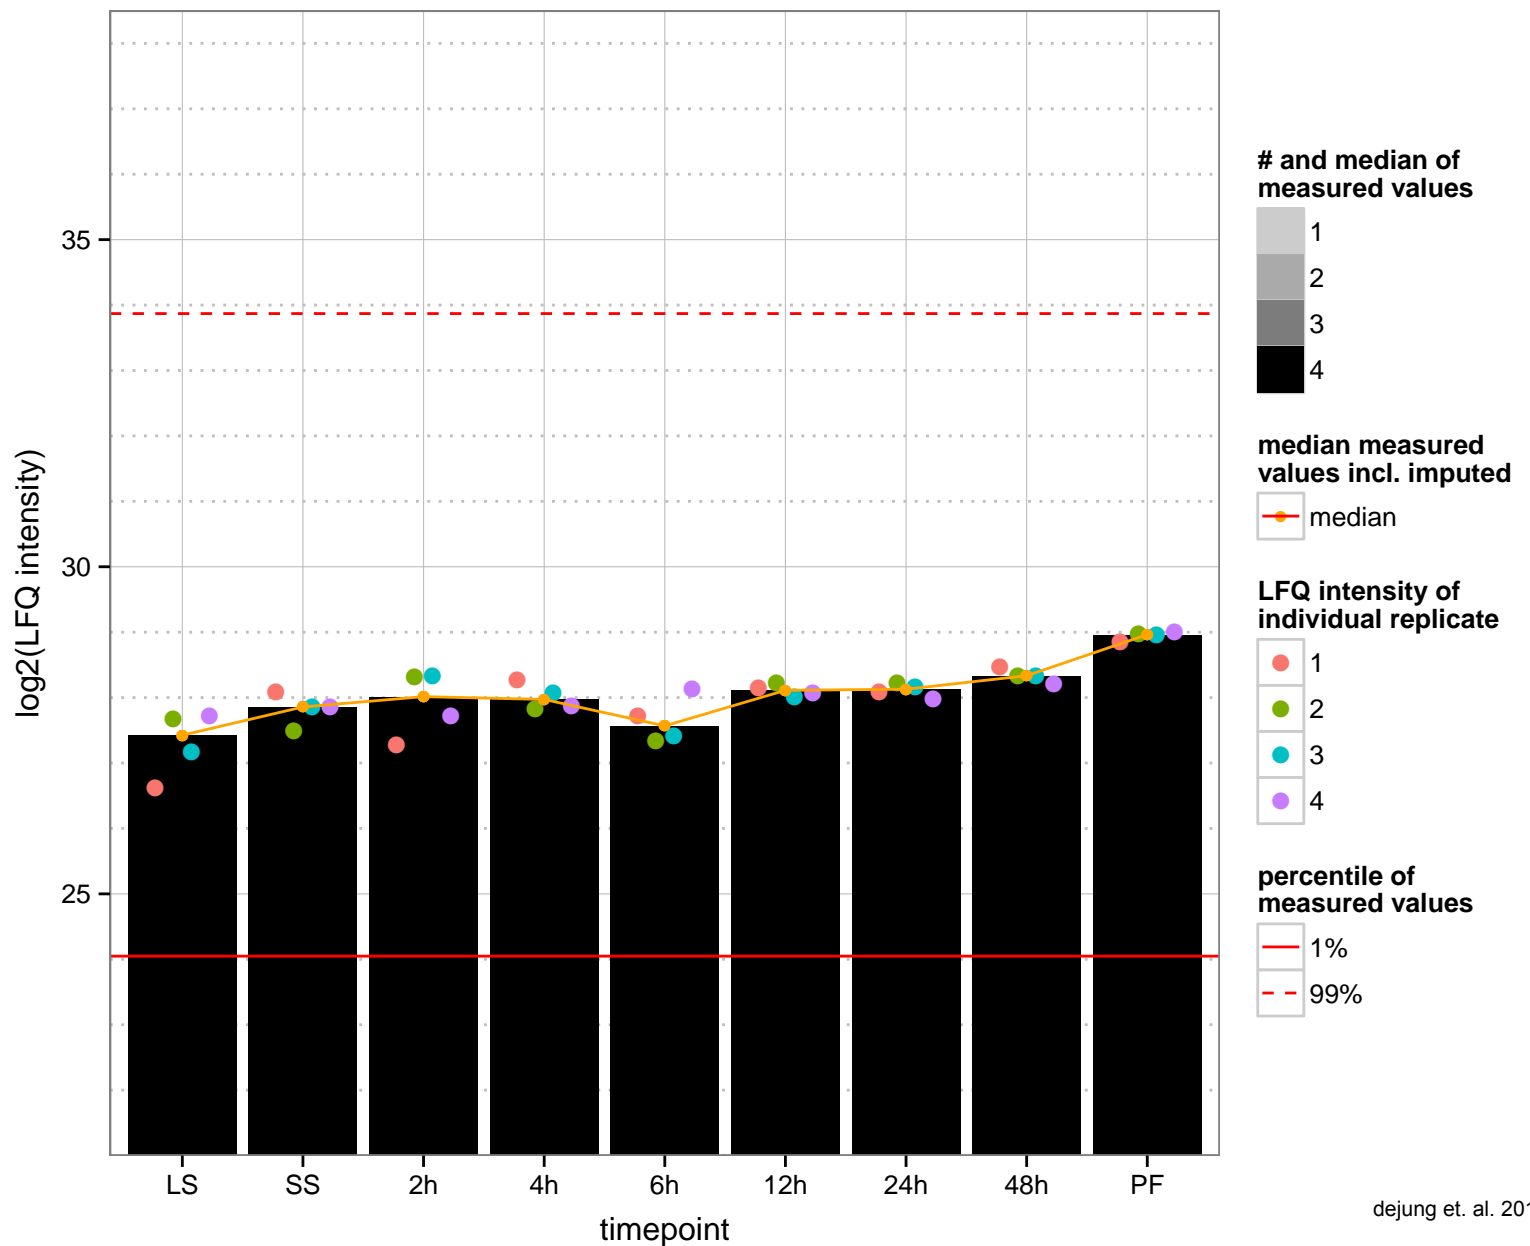

hypothetical protein, conserved  
 Tb927.11.5250  
 AGOF: null  
 AGOC: null  
 AGOP: null  
 PGO: null  
 PGOC: null  
 PGOP: null

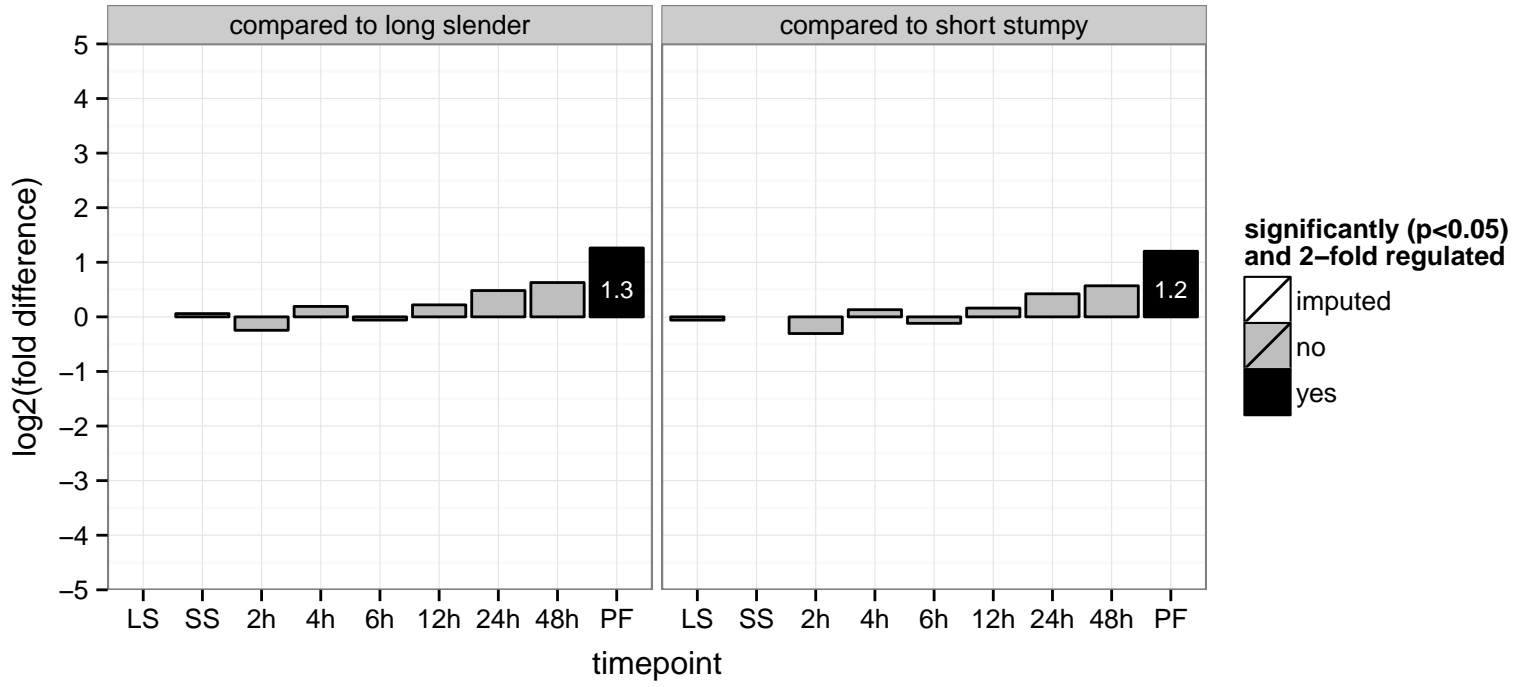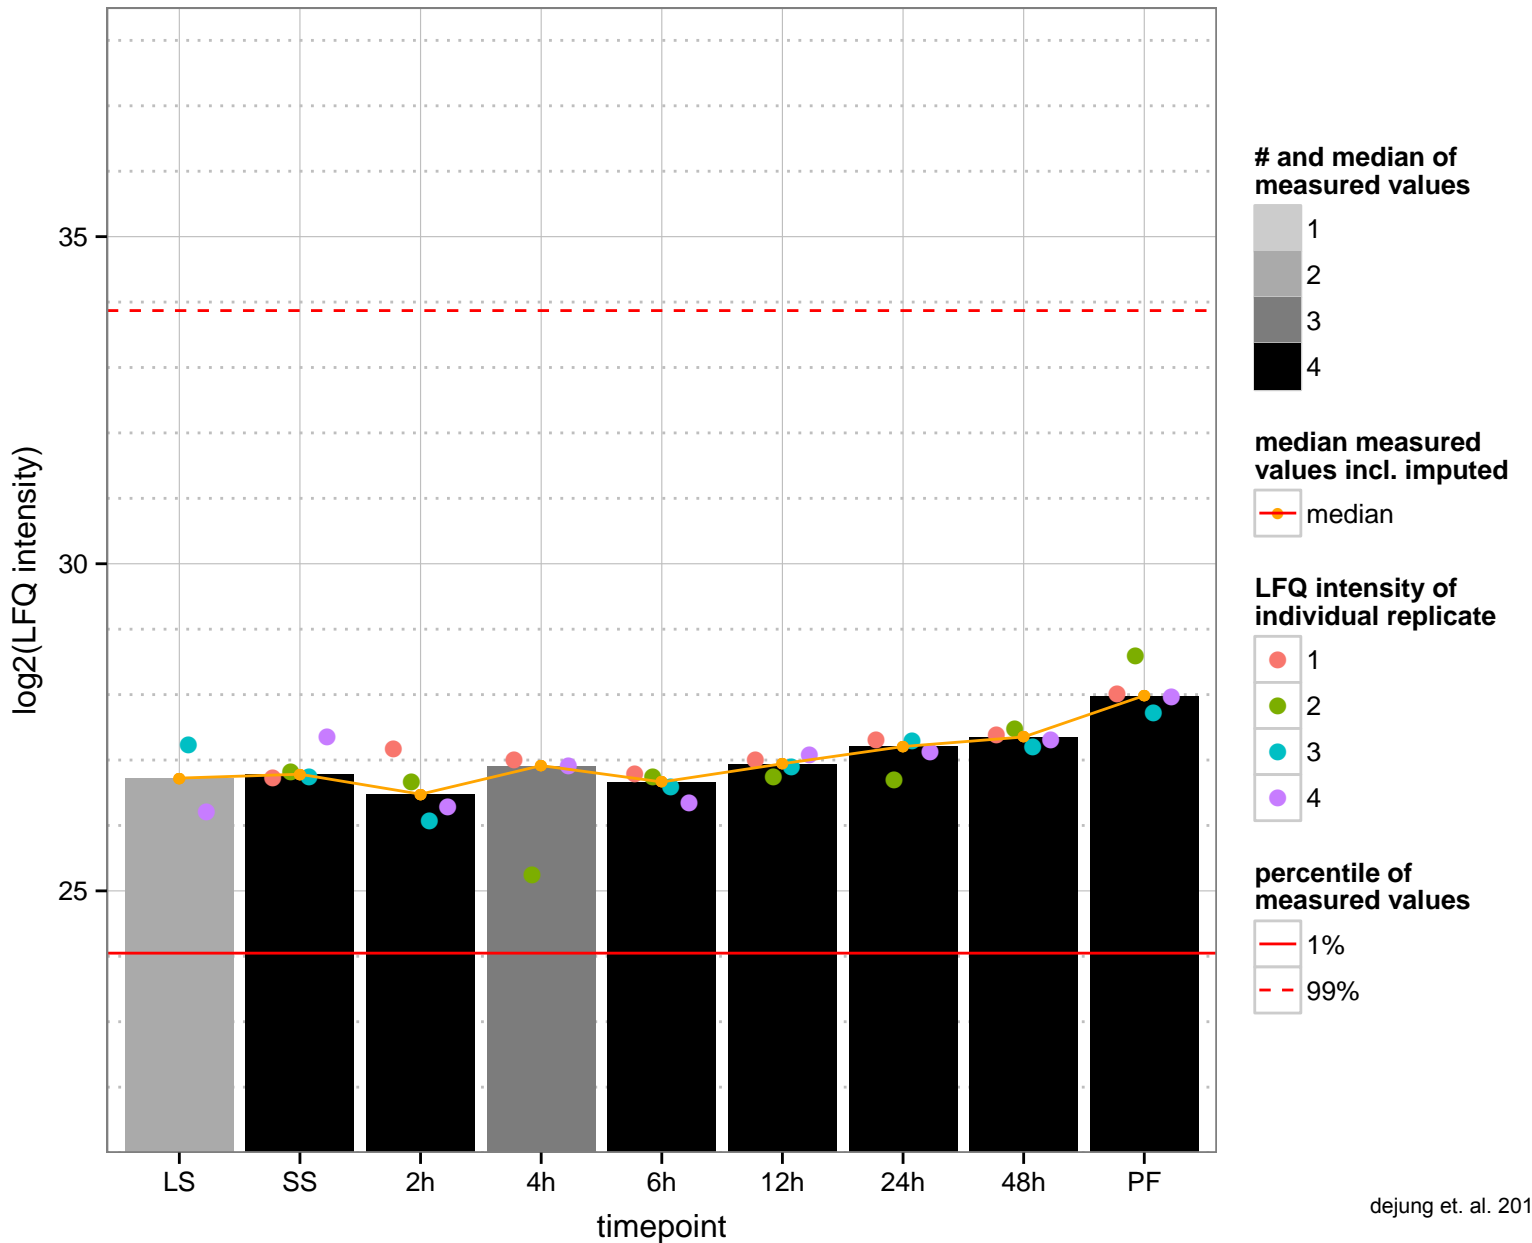

hypothetical protein, conserved  
 Tb927.11.560  
 AGOF: null  
 AGOC: null  
 AGOP: null  
 PGO: binding  
 PGOC: null  
 PGOP: null

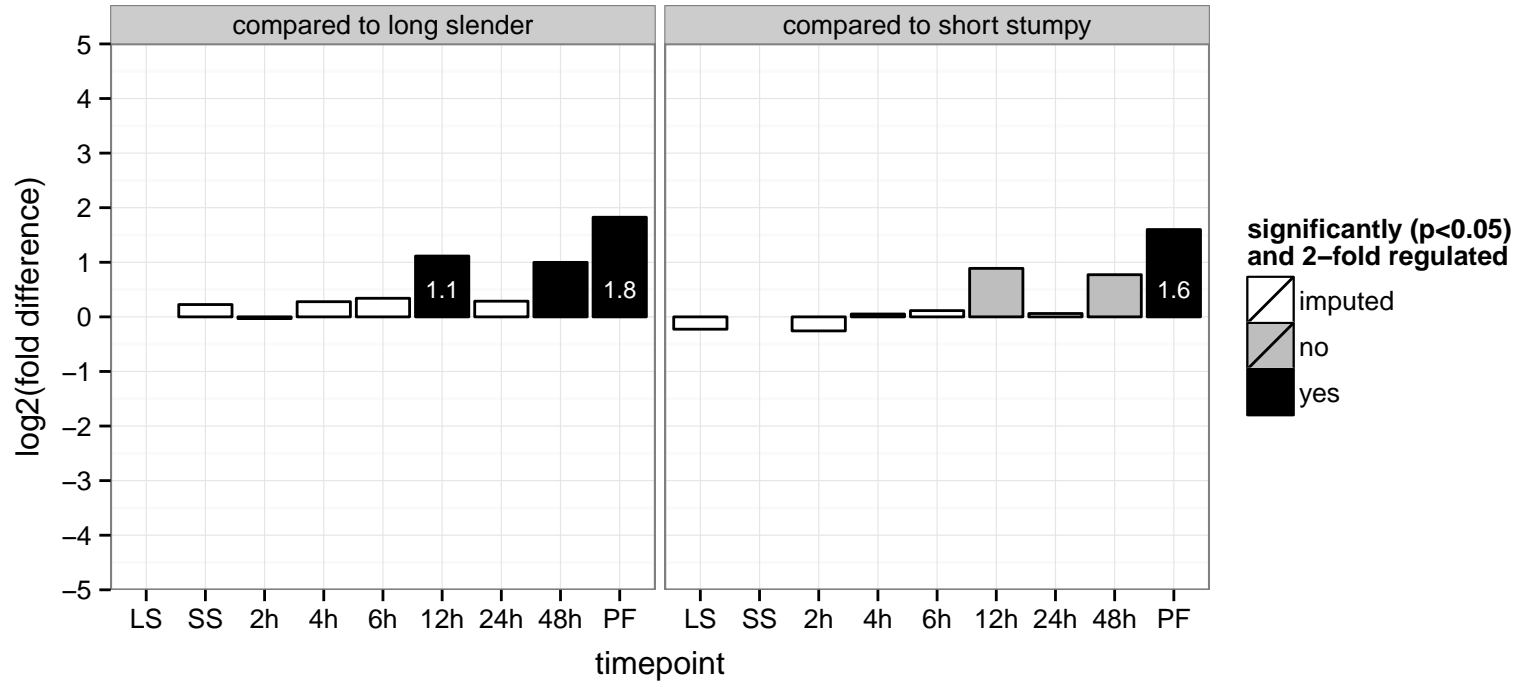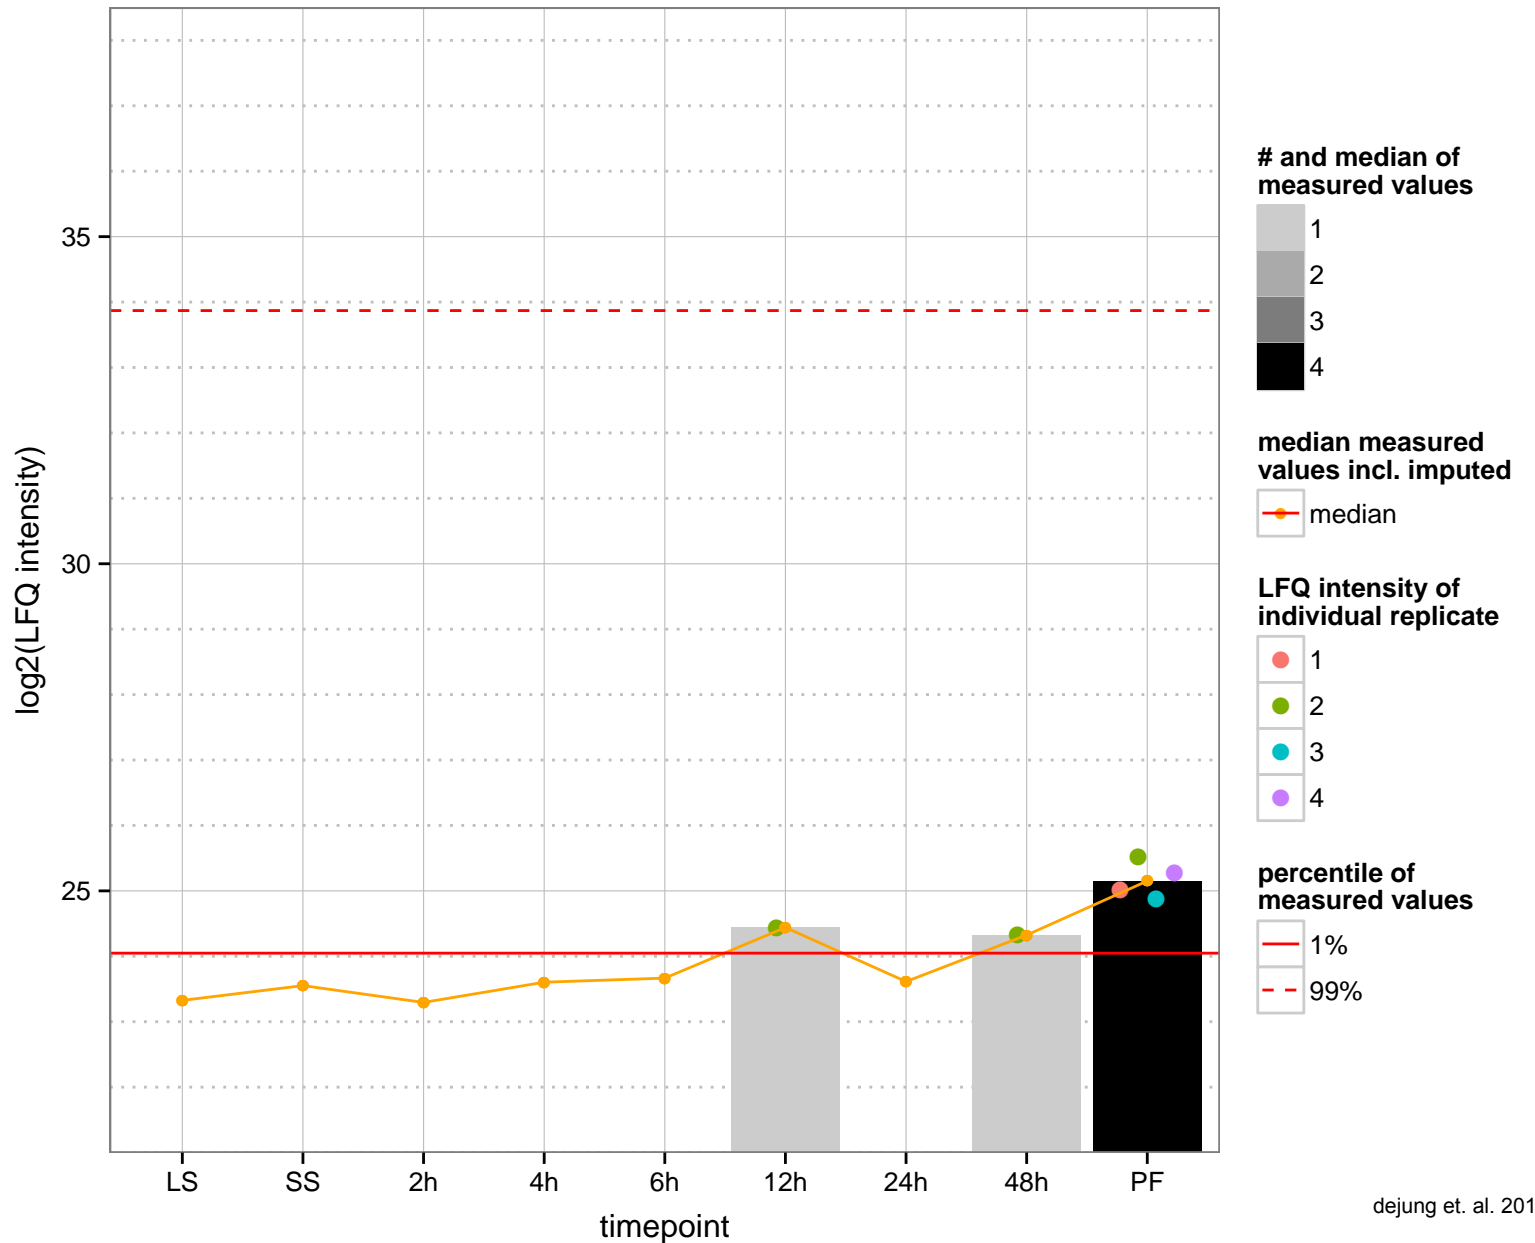



dynein light chain, putative  
 Tb927.11.5680  
 AGOF: motor activity  
 AGOC: dynein complex  
 AGOP: microtubule-based movement  
 PGO: protein binding  
 PGO: null  
 PGO: null

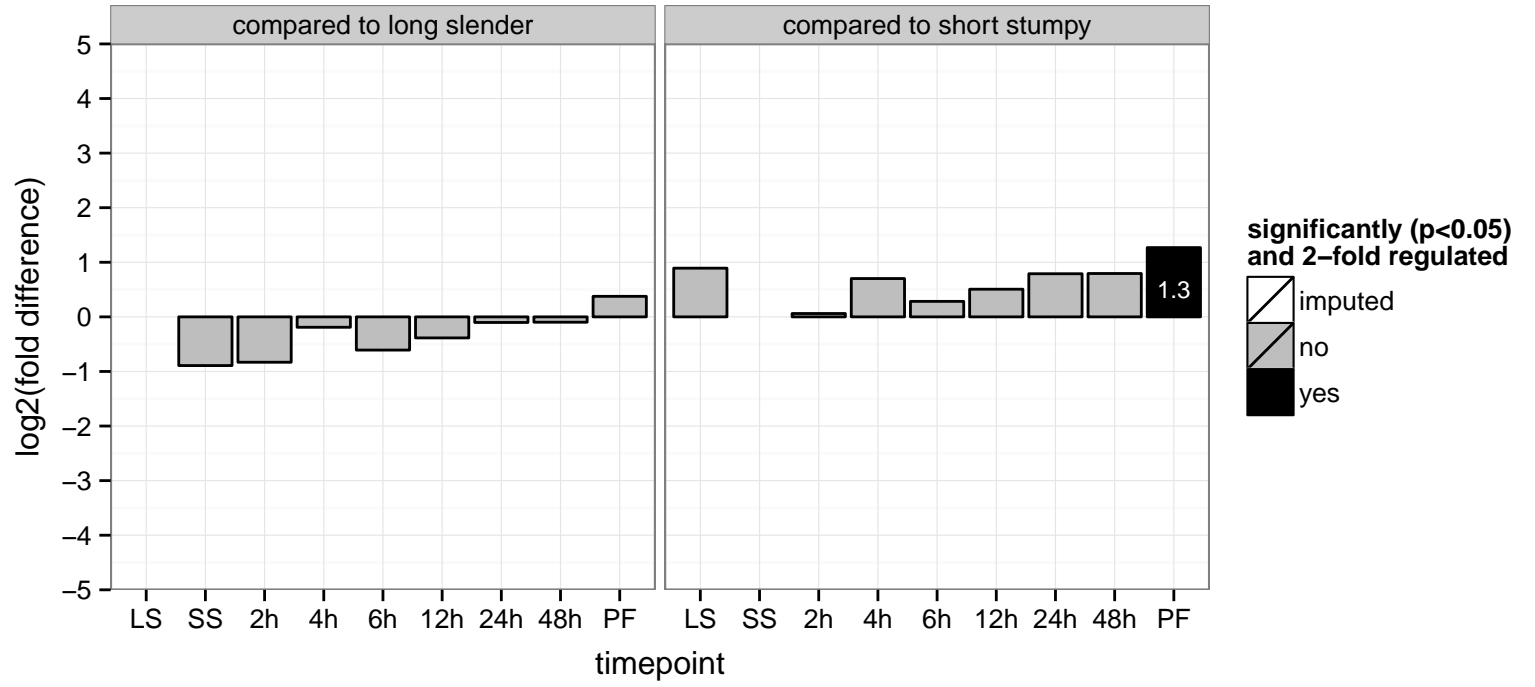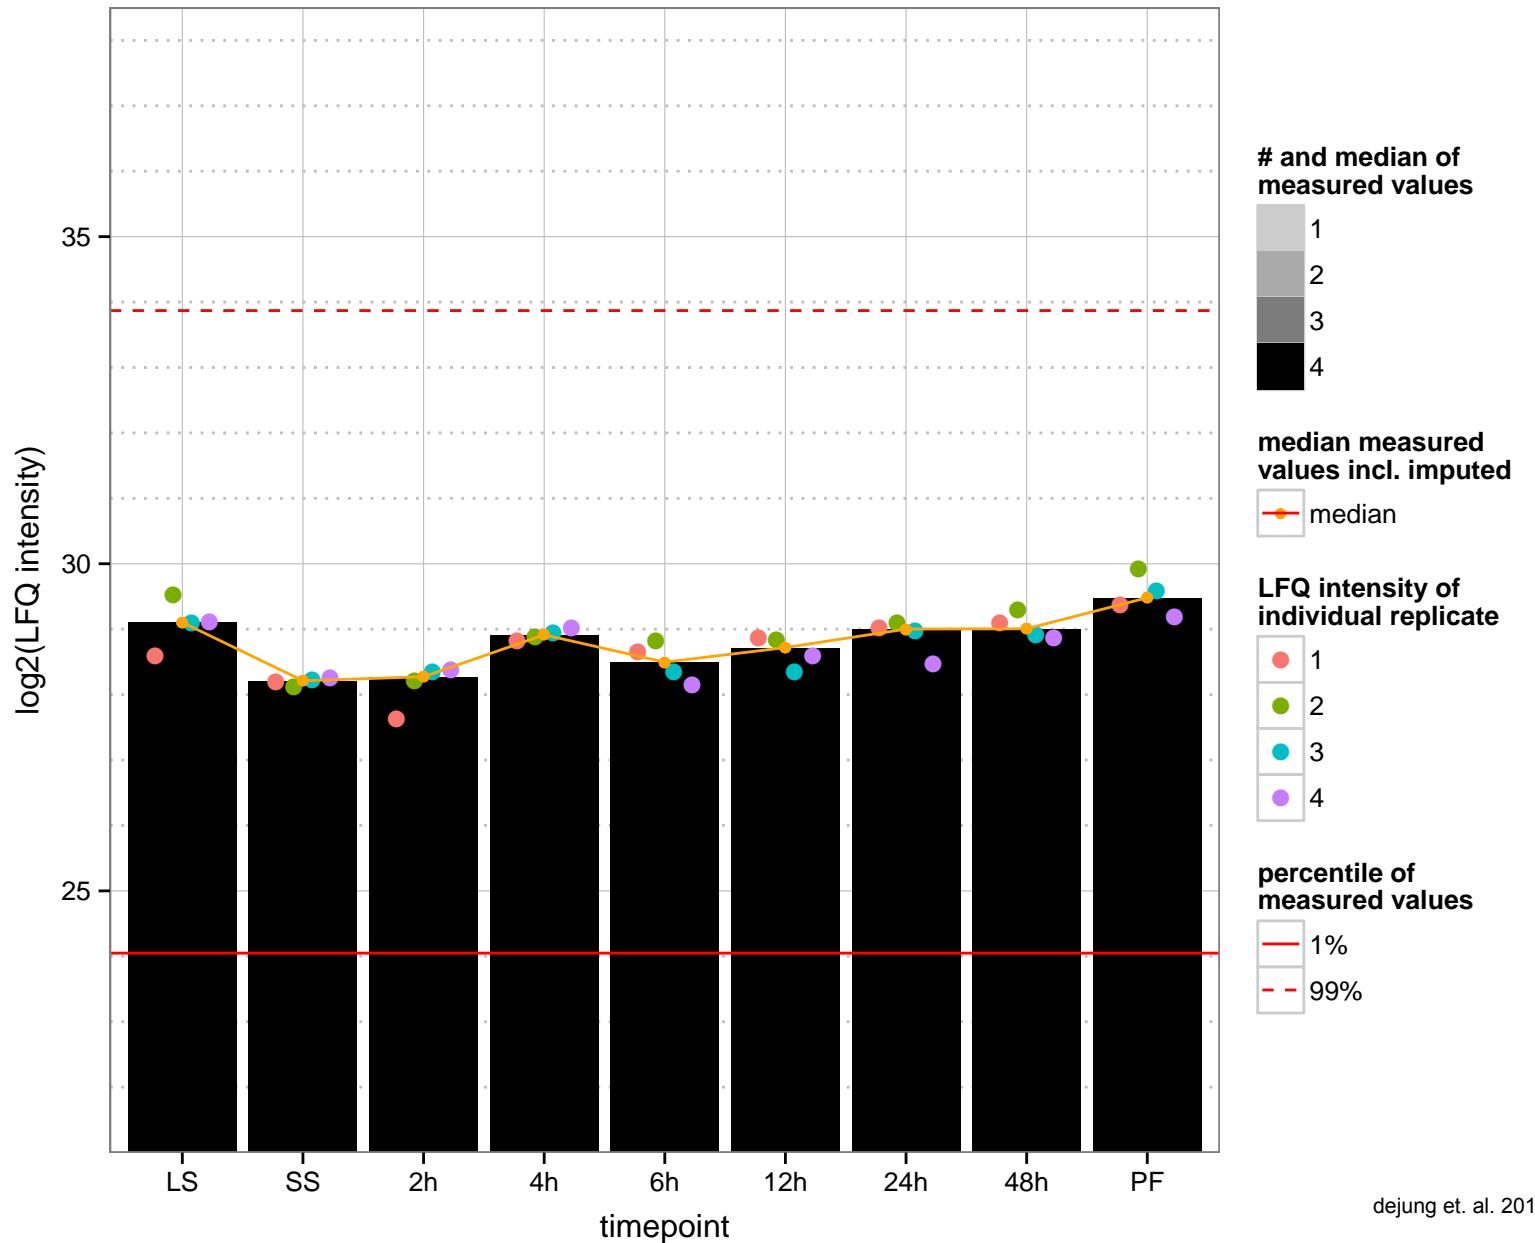

hypothetical protein, conserved  
 Tb927.11.5900  
 AGOF: null  
 AGOC: null  
 AGOP: null  
 PGO: null  
 PGOC: null  
 PGOP: null

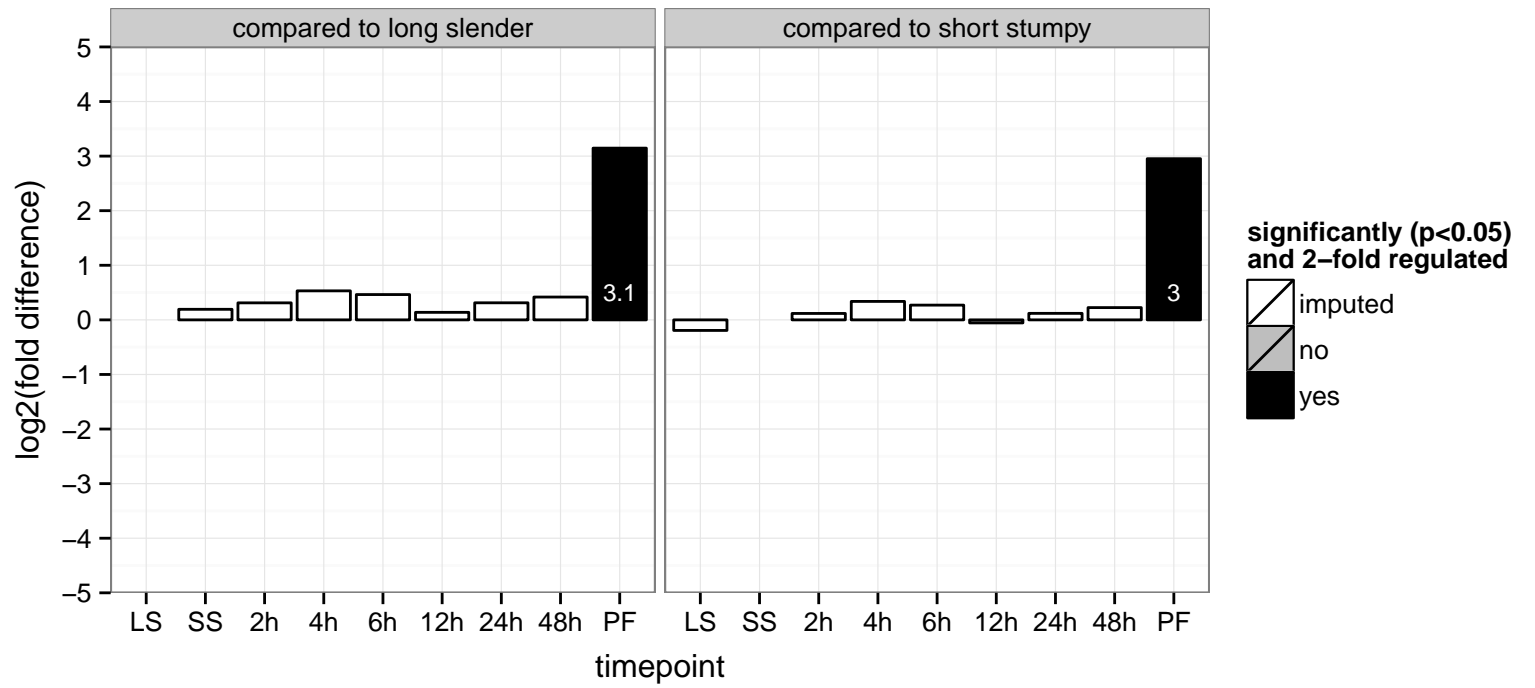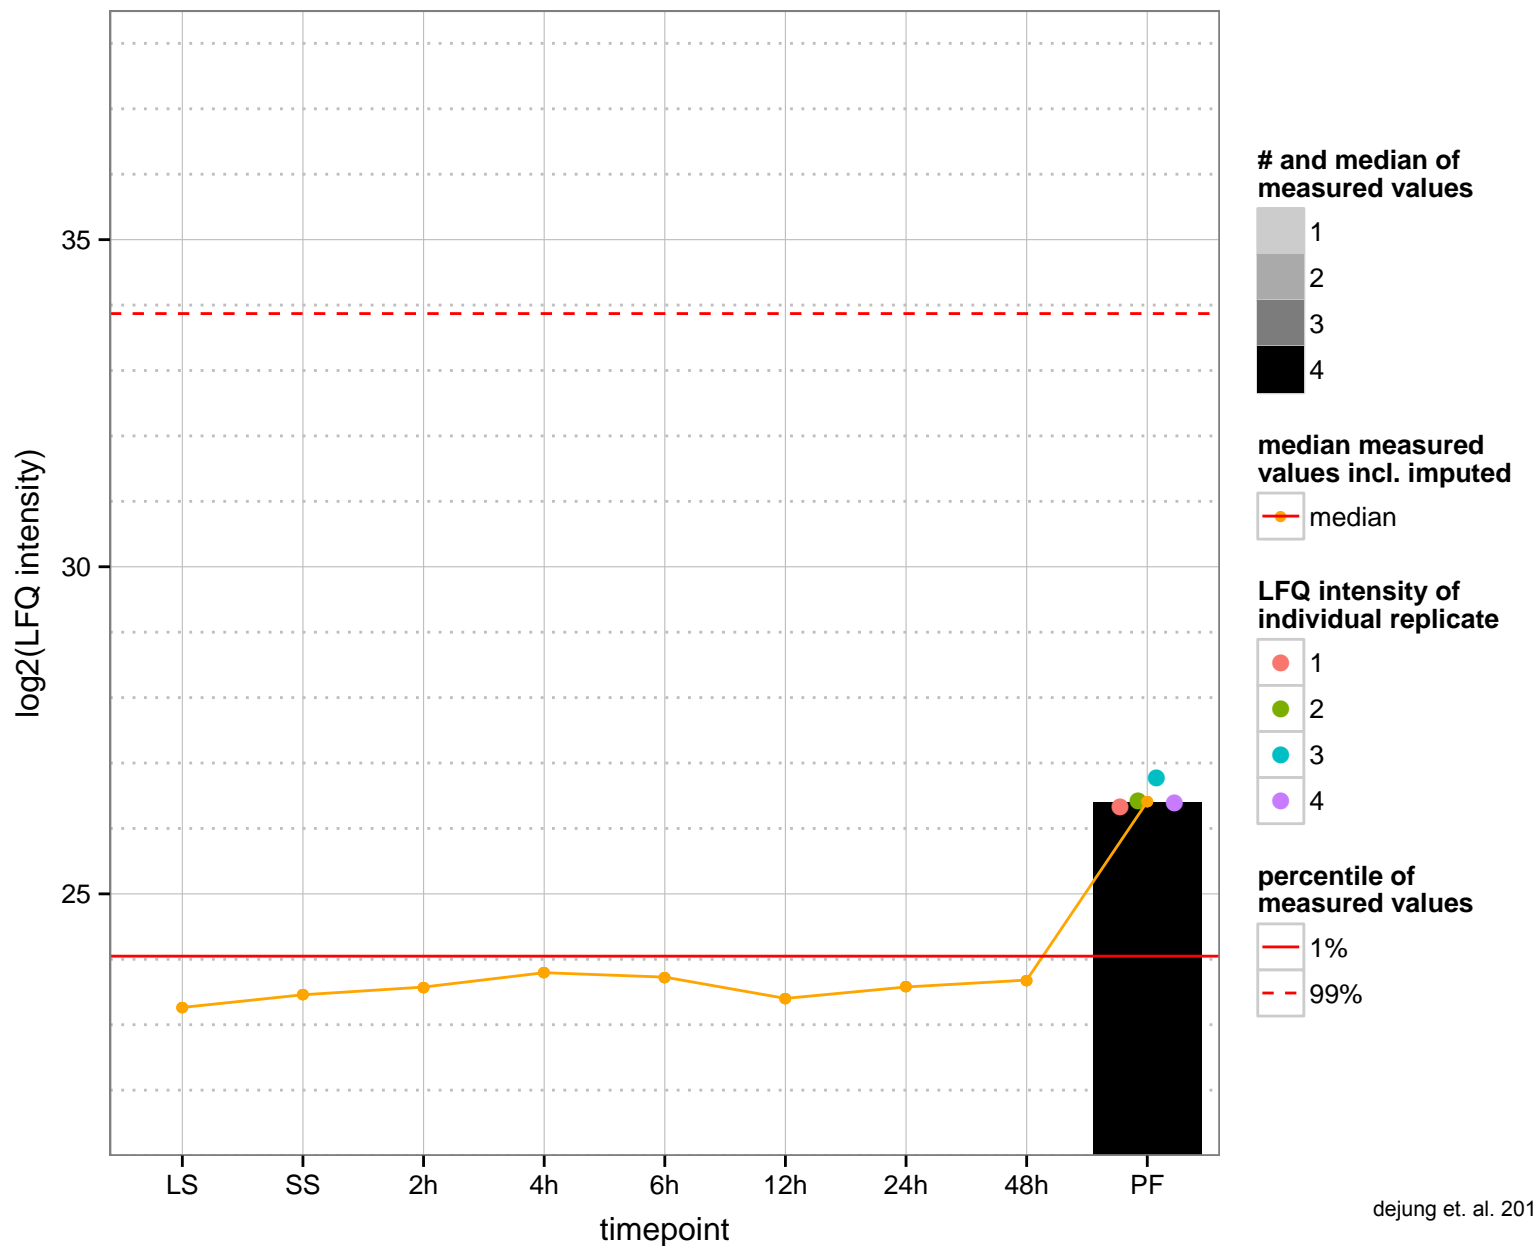

hypothetical protein, conserved  
 Tb927.11.5990  
 AGOF: RNA binding, pseudouridine synthase activity  
 AGOC: mitochondrion  
 AGOP: pseudouridine synthesis  
 PGO: RNA binding, pseudouridine synthase activity  
 PGO: null  
 PGO: RNA modification, pseudouridine synthesis

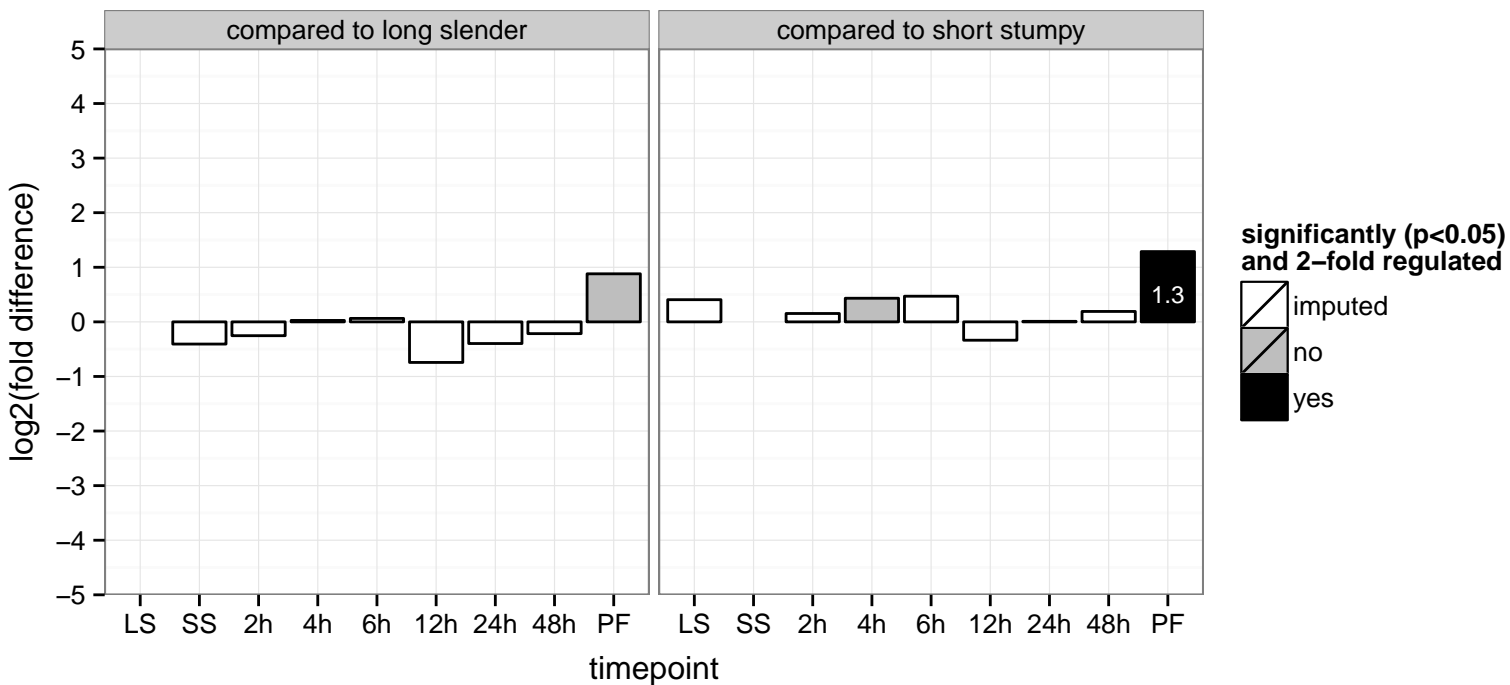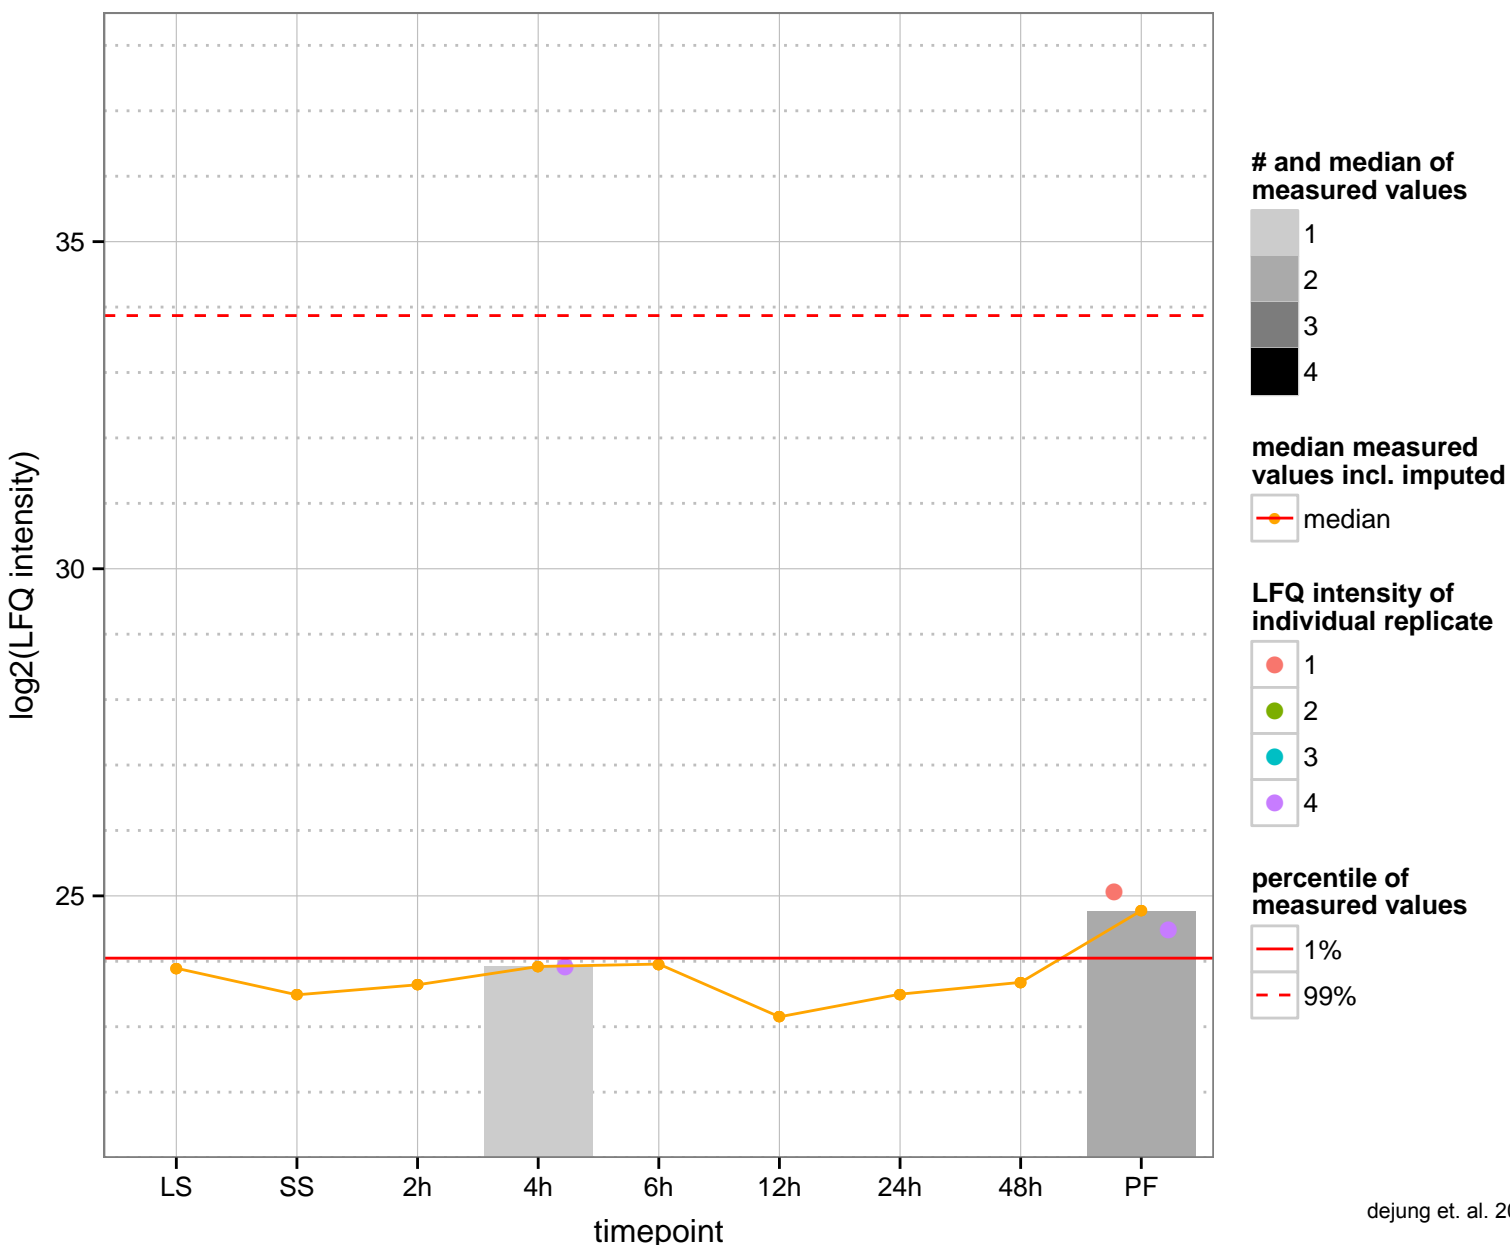

hypothetical protein, conserved  
 Tb927.11.6150  
 AGOF: null  
 AGOC: integral to membrane, mitochondrion  
 AGOP: protein insertion into membrane  
 PGO: null  
 PGOC: integral to membrane  
 PGOP: protein insertion into membrane

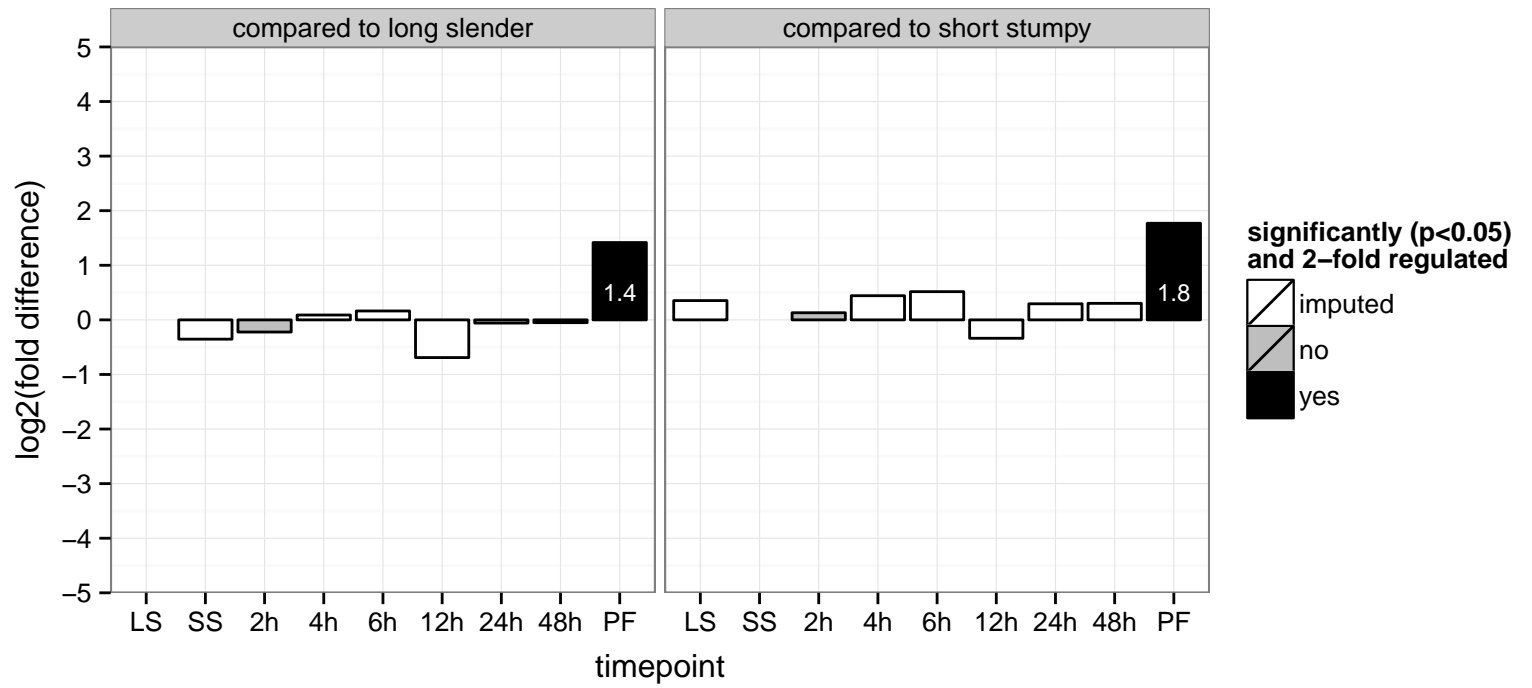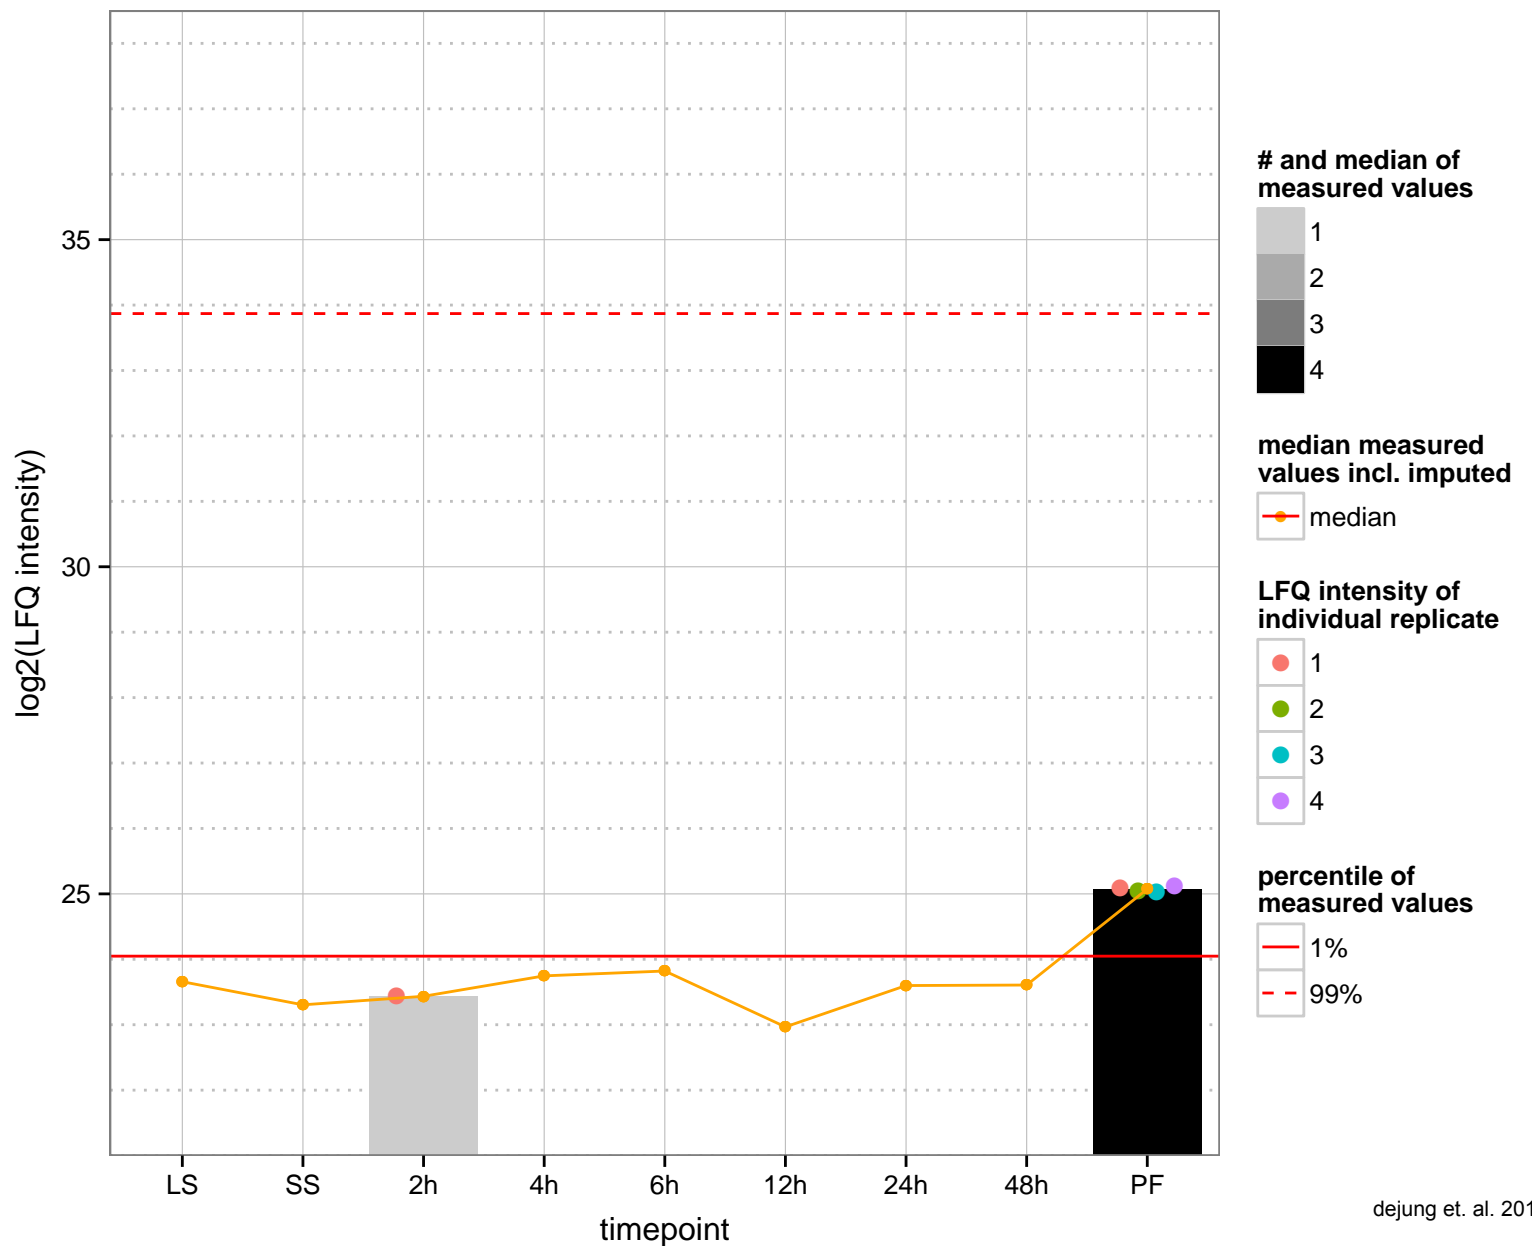

eukaryotic release factor 3, putative (ERF3)

Tb927.11.6160

AGOF: GTP binding, GTPase activity, translation elongation factor activity

AGOC: null

AGOP: translation, translational elongation

PGOF: GTP binding, GTPase activity

PGOC: null

PGOP: null

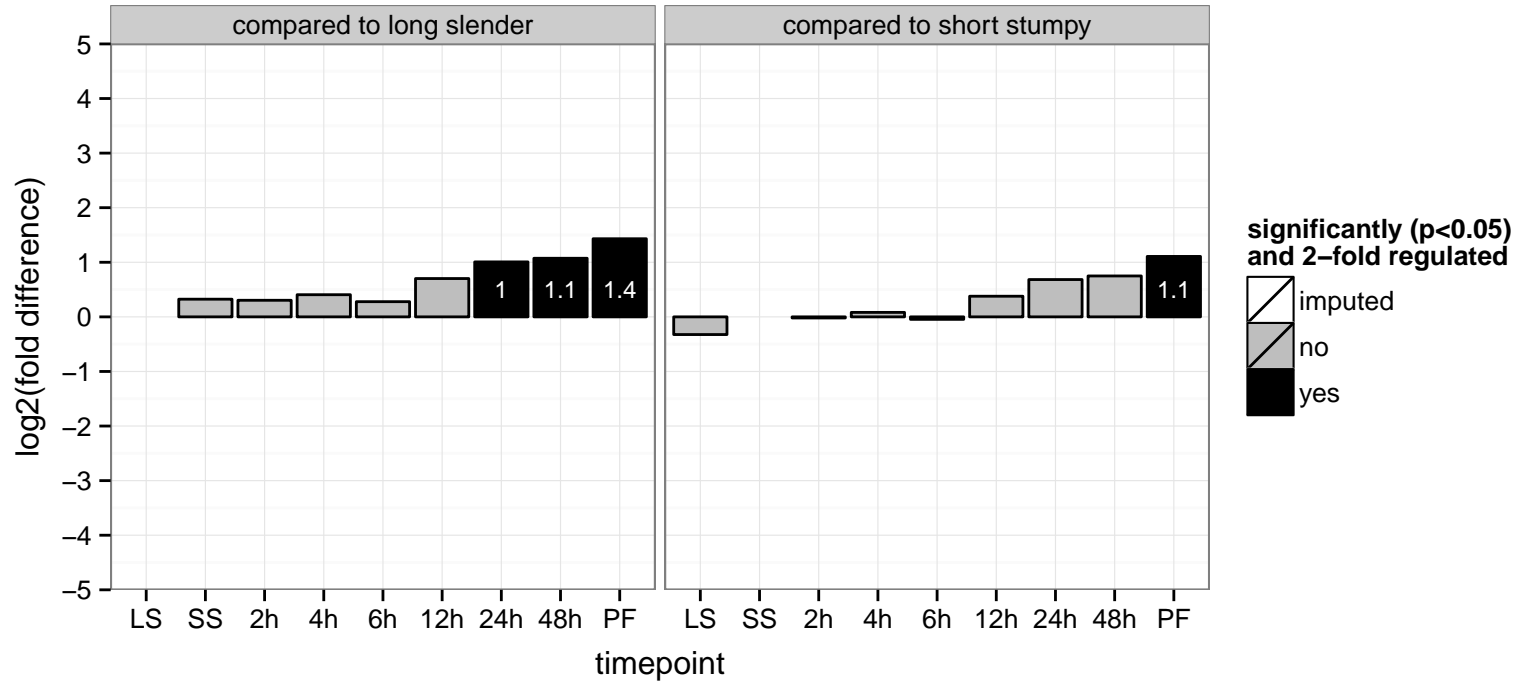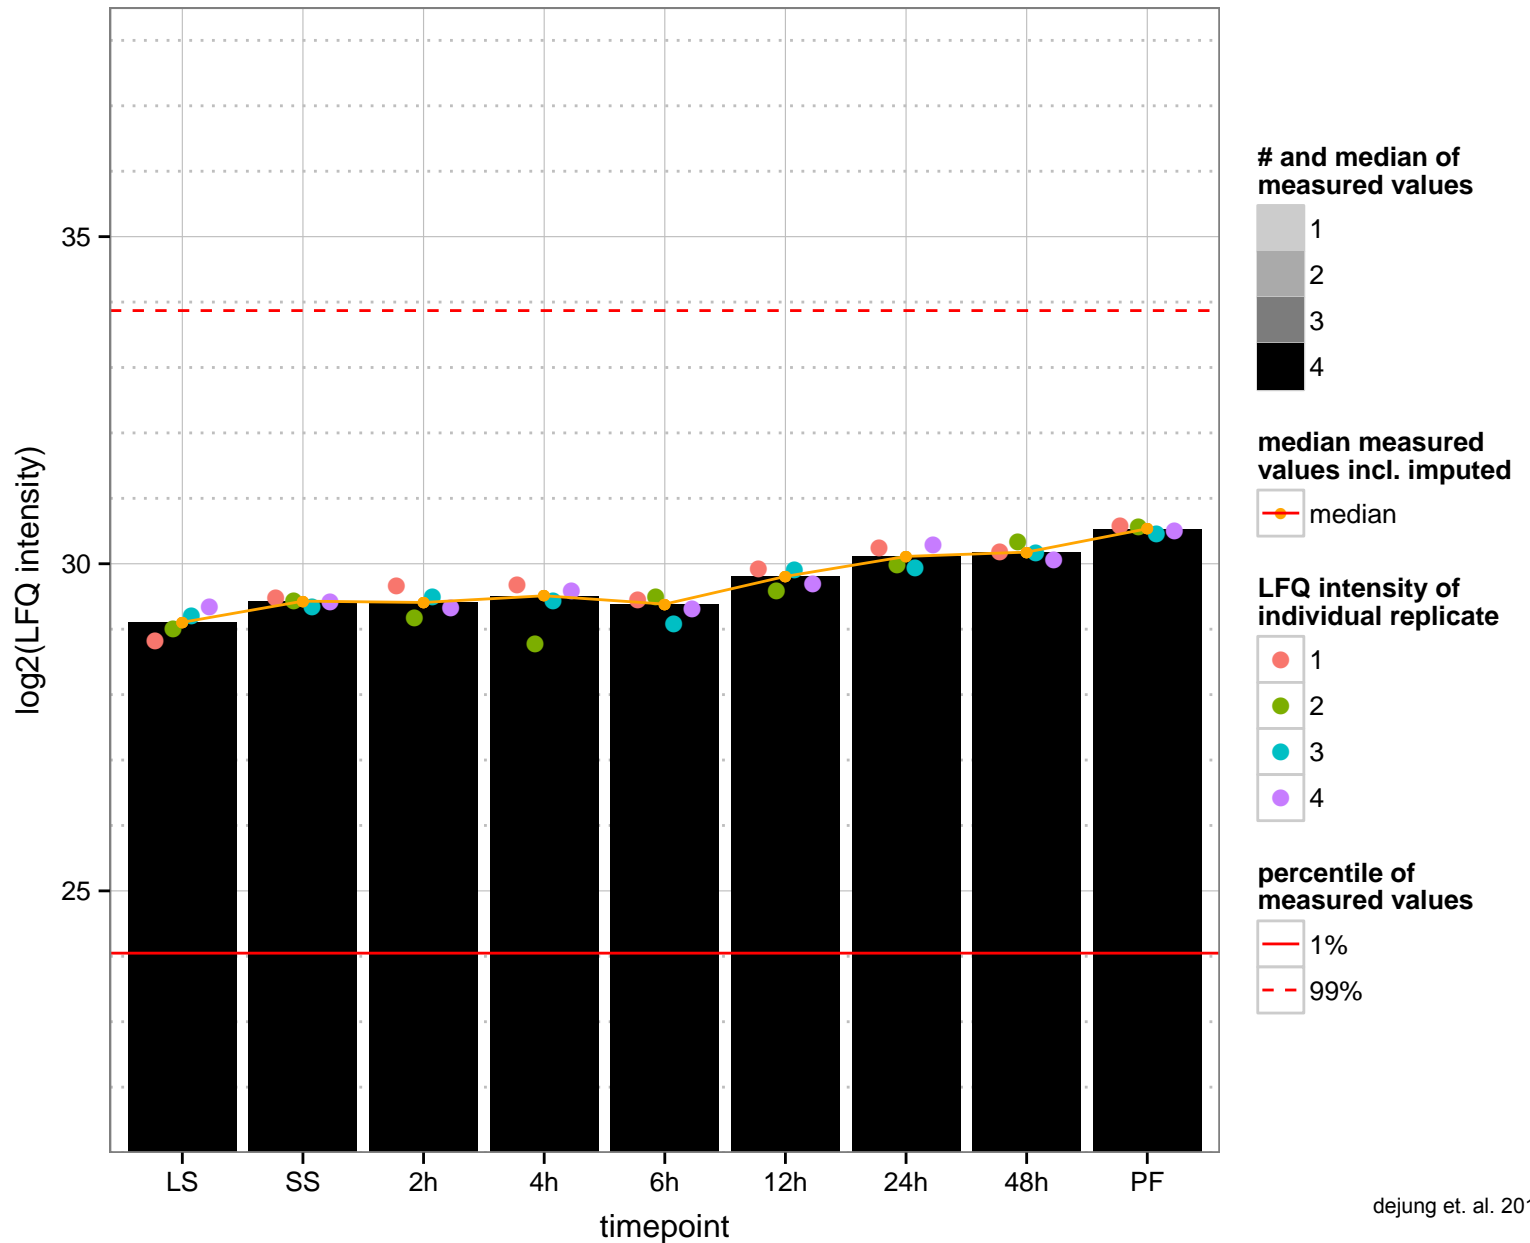

inositol-1, 4, 5-trisphosphate (IP3) 5-phosphatase, putative  
 Tb927.11.6270  
 AGOF: inositol-polyphosphate 5-phosphatase activity  
 AGOC: null  
 AGOP: intracellular signal transduction  
 PGOF: null  
 PGO: null  
 PGOP: phosphatidylinositol phosphorylation

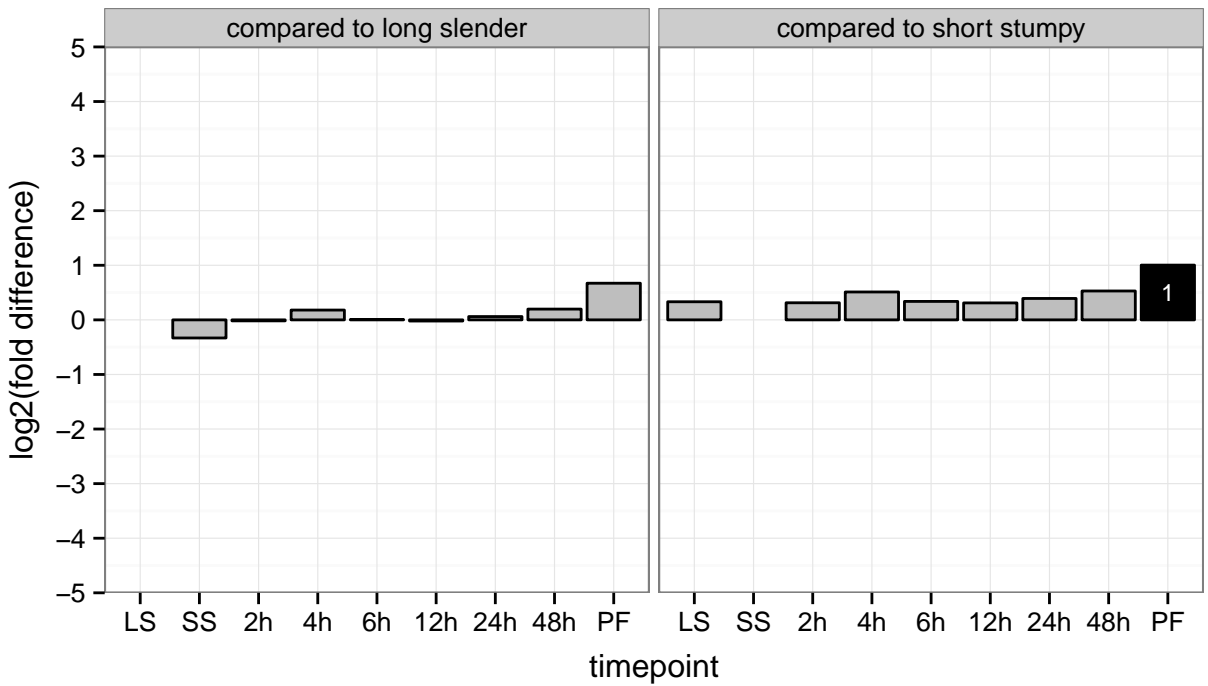

**significantly ( $p < 0.05$ ) and 2-fold regulated**

imputed

no

yes

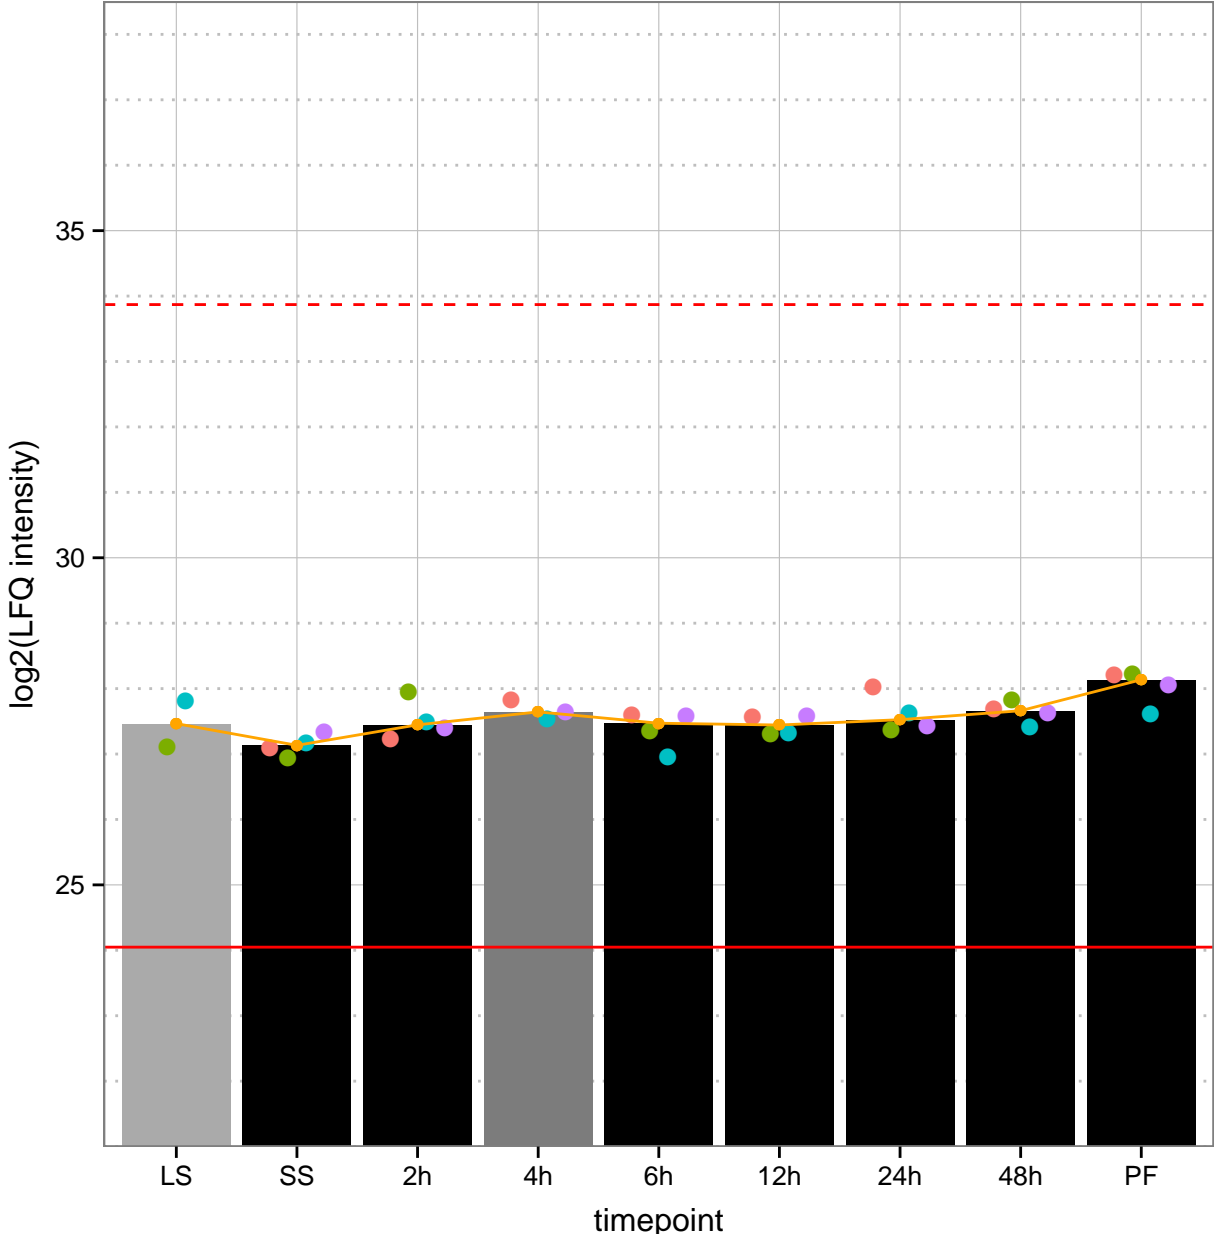

hypothetical protein, conserved  
 Tb927.11.6490  
 AGOF: null  
 AGOC: null  
 AGOP: null  
 PGO: null  
 PGOC: null  
 PGOP: null

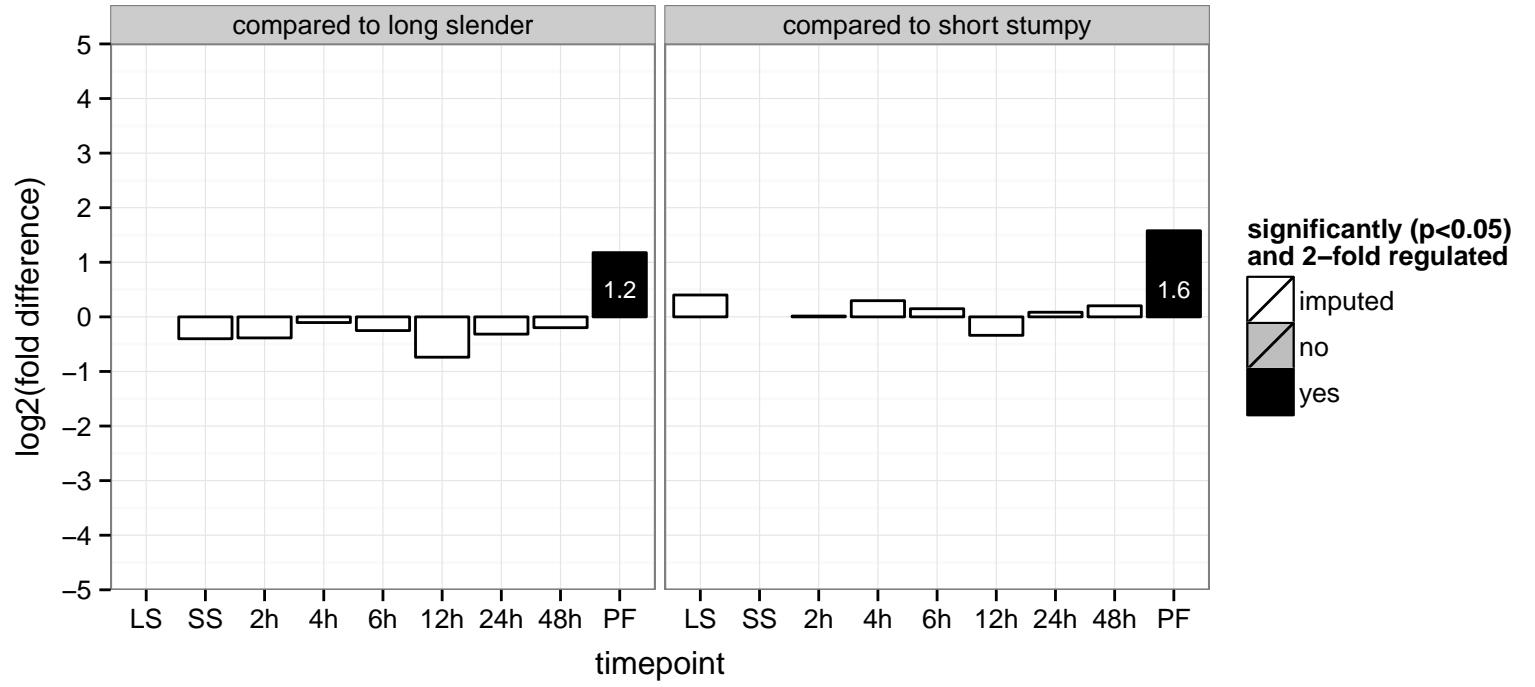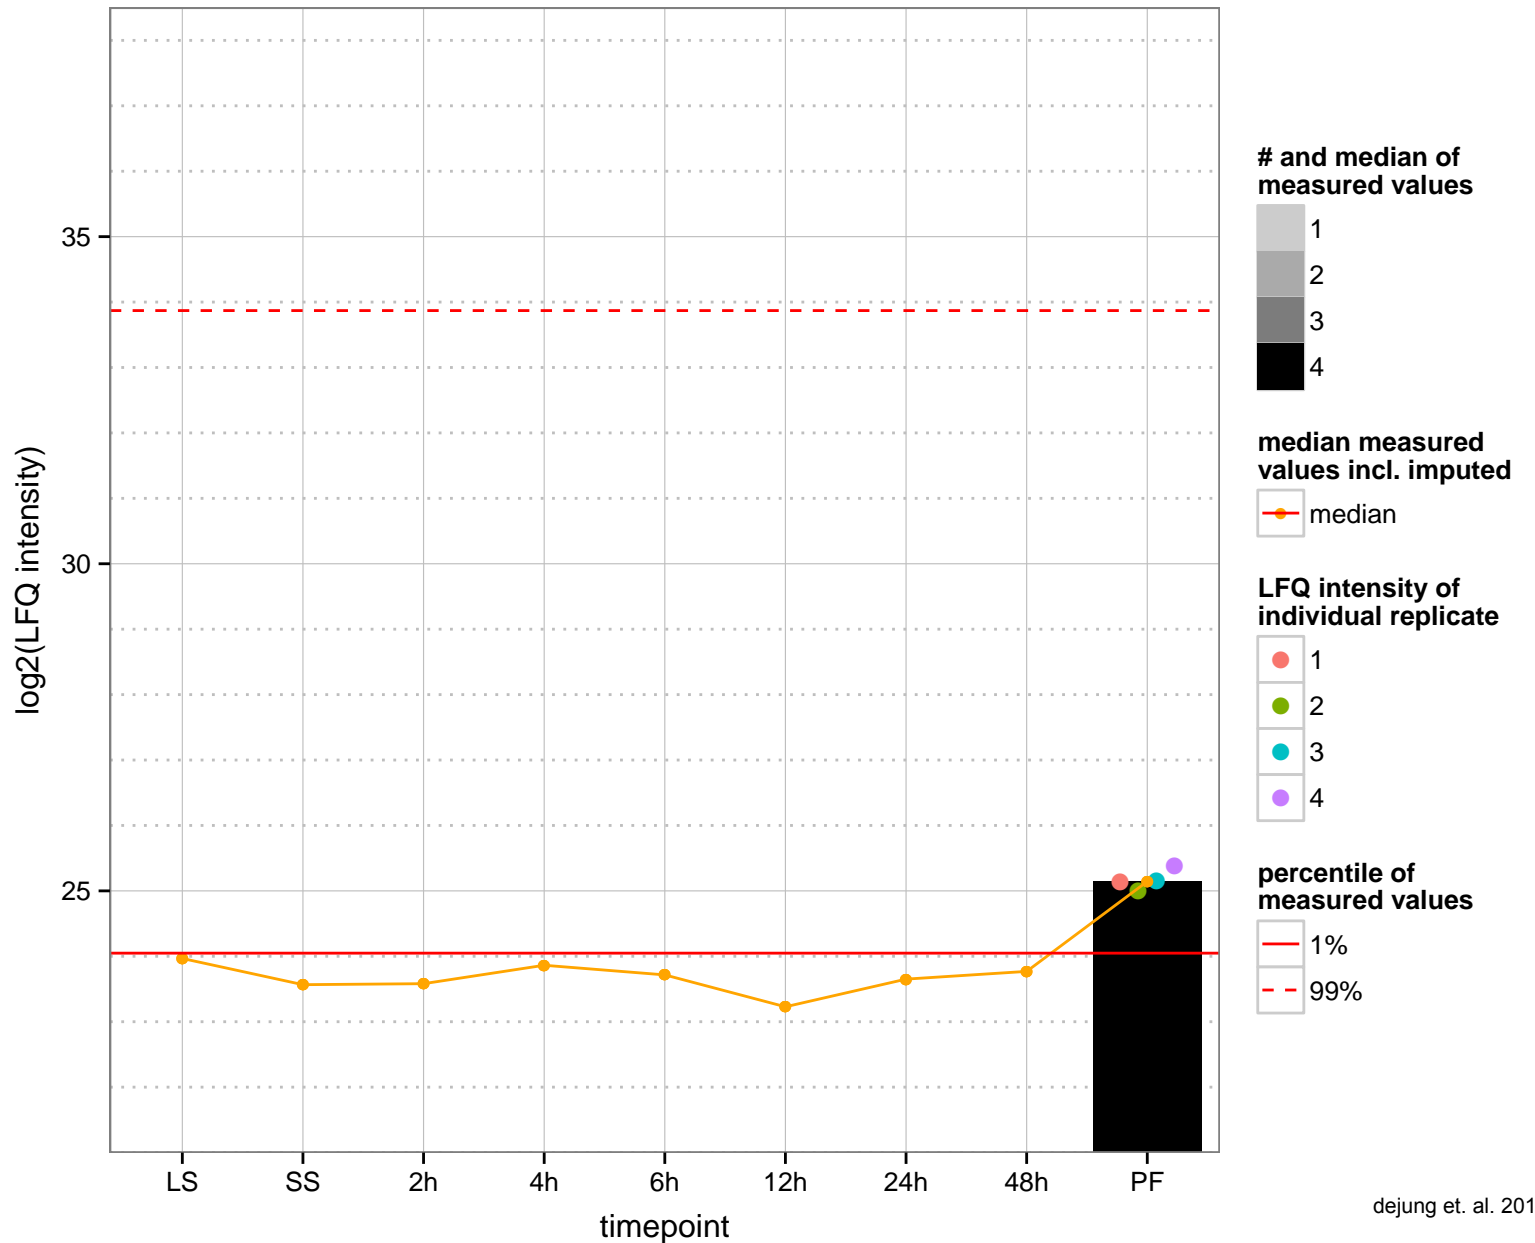

aminopeptidase, putative, metallo-peptidase, Clan MF, Family M17  
 Tb927.11.6590  
 AGOF: null, aminopeptidase activity  
 AGOC: null, intracellular  
 AGOP: null, proteolysis  
 PGOF: aminopeptidase activity  
 PGO: intracellular  
 PGOP: proteolysis

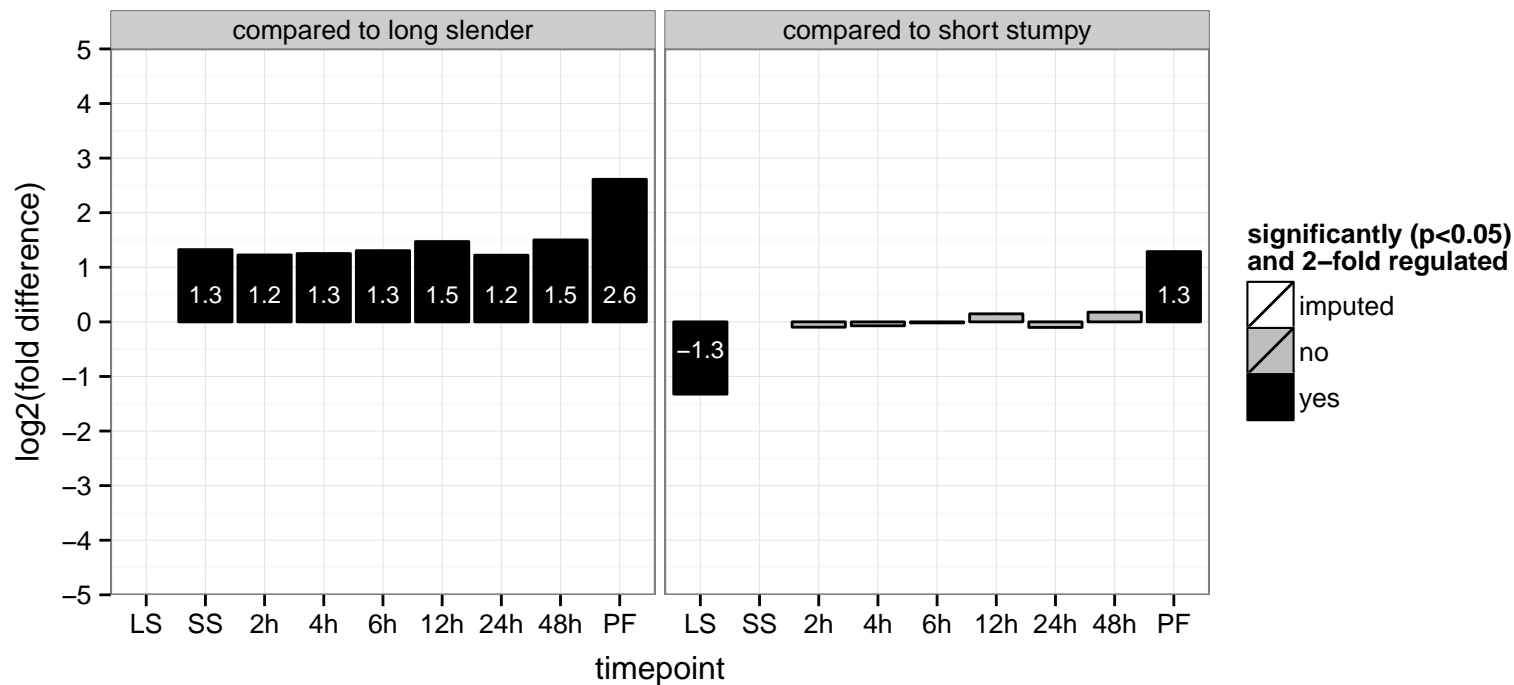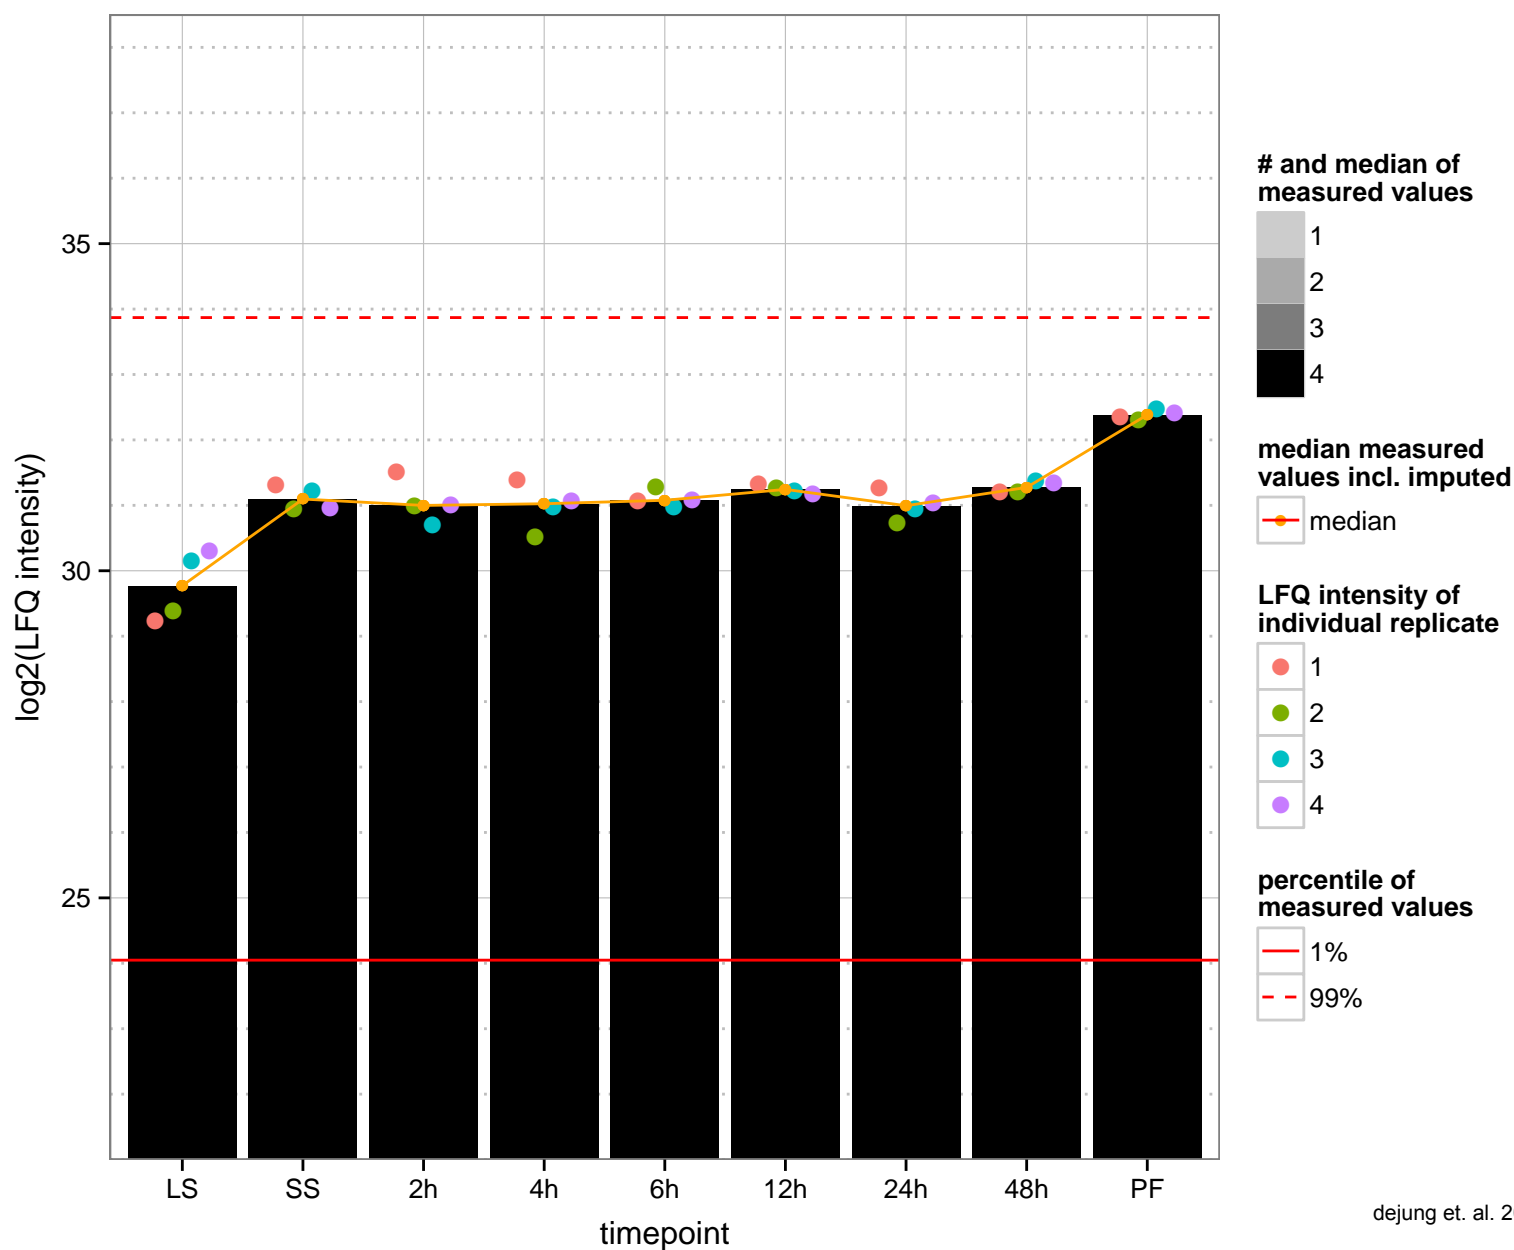



hypothetical protein, conserved  
 Tb927.11.6980  
 AGOF: phosphoenolpyruvate carboxykinase activity, purine nucleotide binding  
 AGOC: mitochondrion  
 AGOP: gluconeogenesis  
 PGOF: phosphoenolpyruvate carboxykinase activity, purine nucleotide binding  
 PGOC: null  
 PGOP: gluconeogenesis

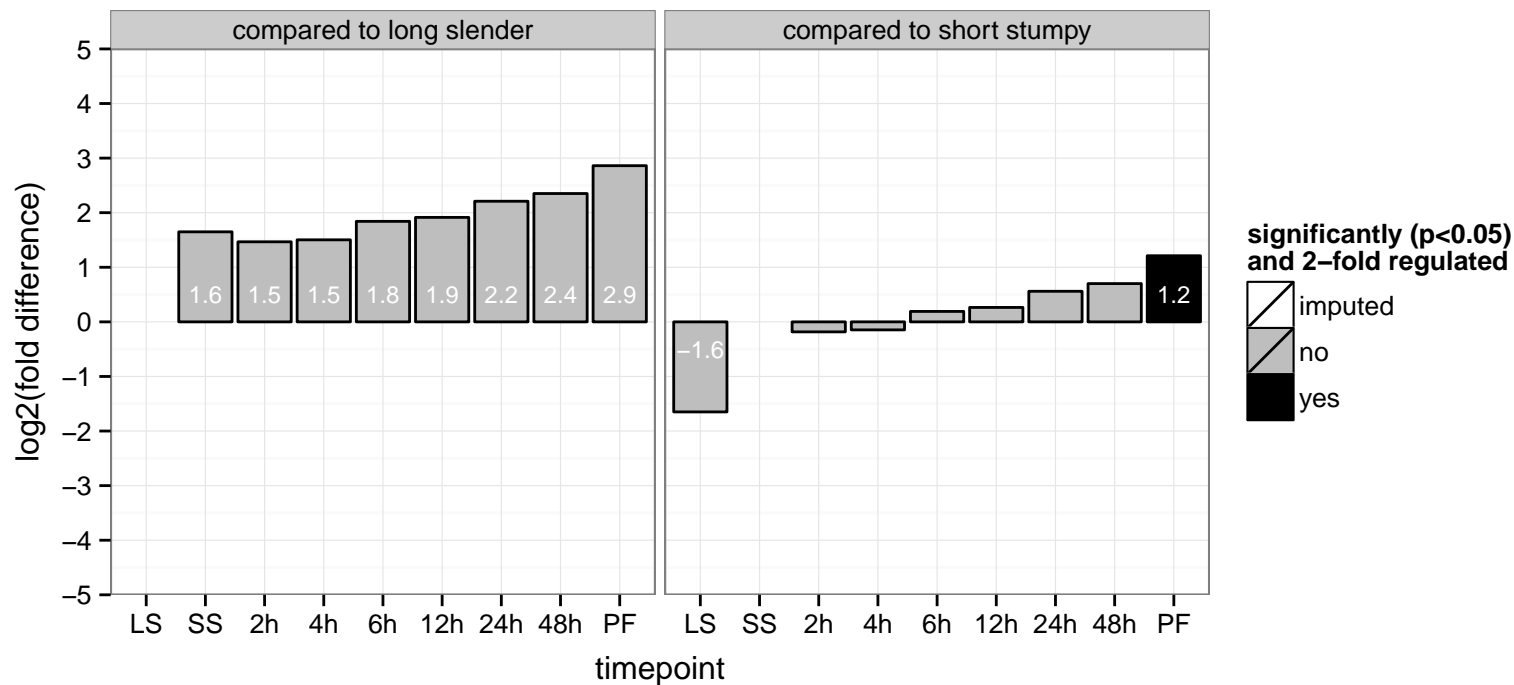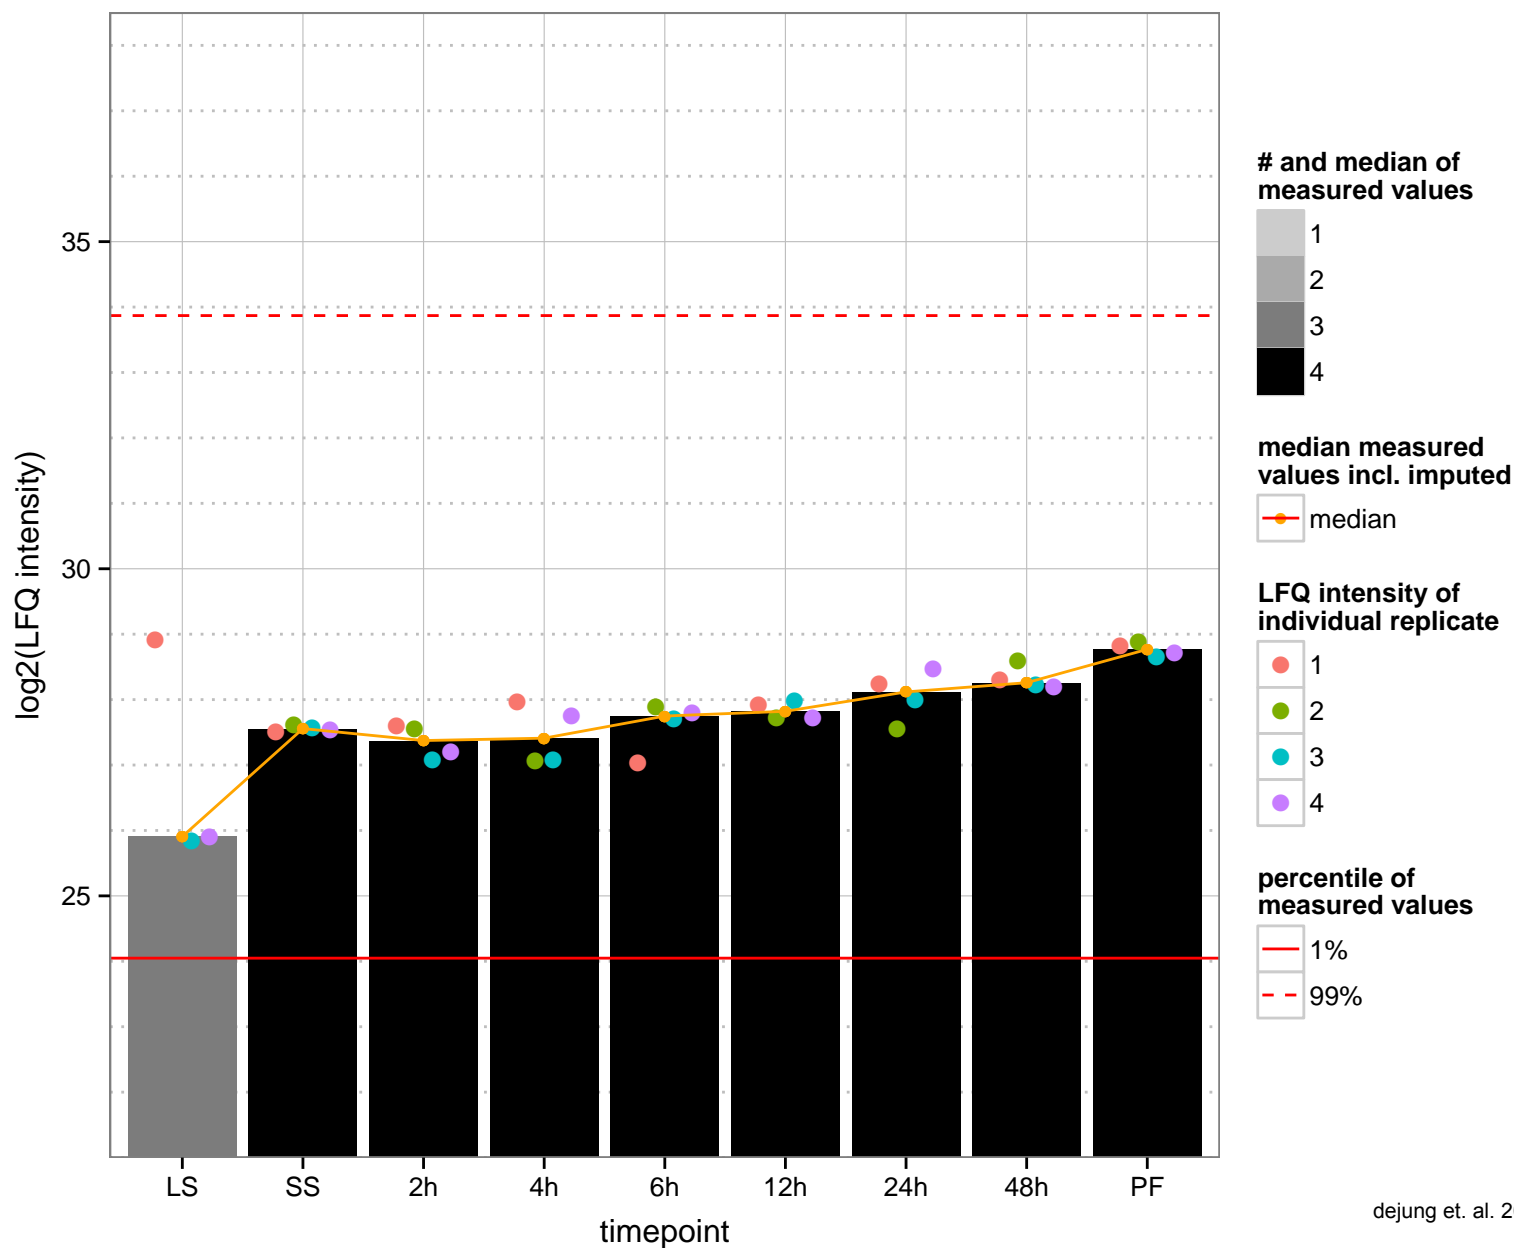

hypothetical protein, conserved  
 Tb927.11.7050  
 AGOF: null  
 AGOC: null  
 AGOP: null  
 PGO: null  
 PGOC: null  
 PGOP: null

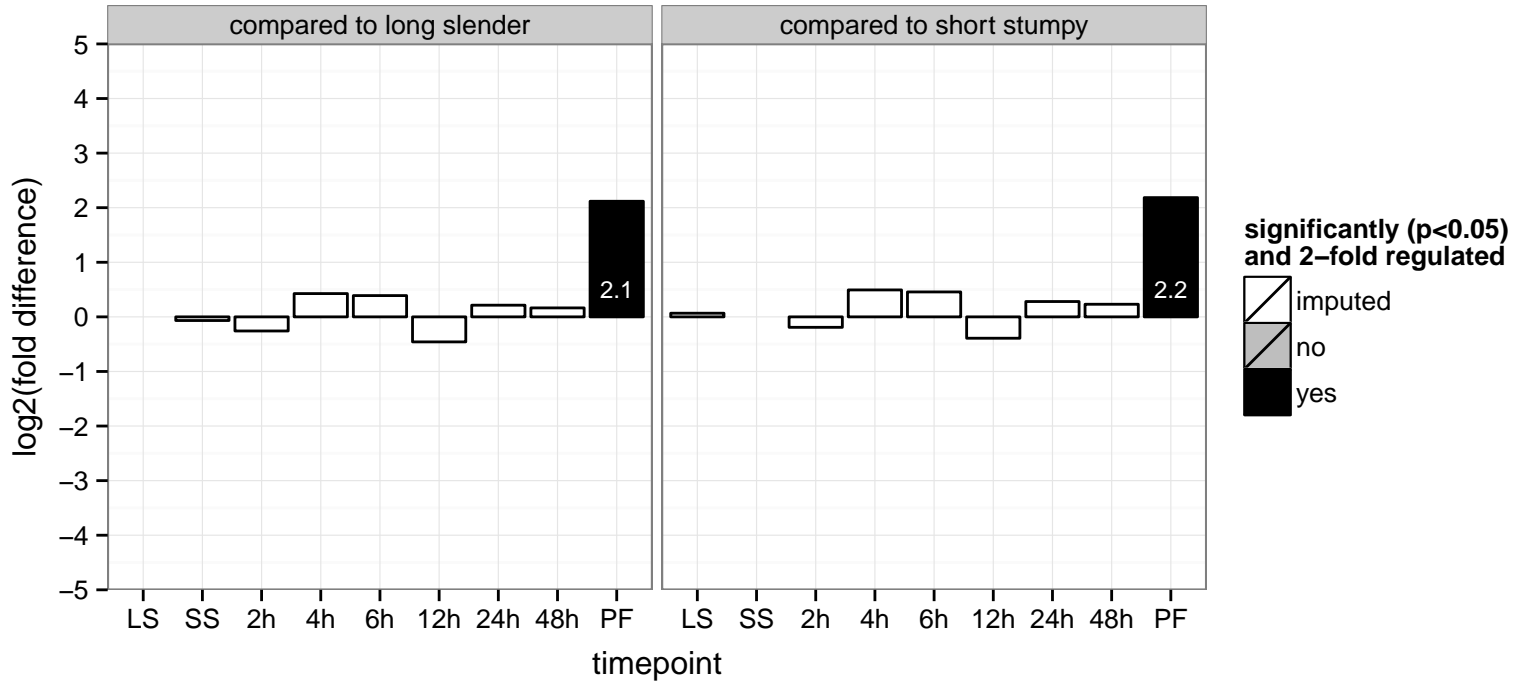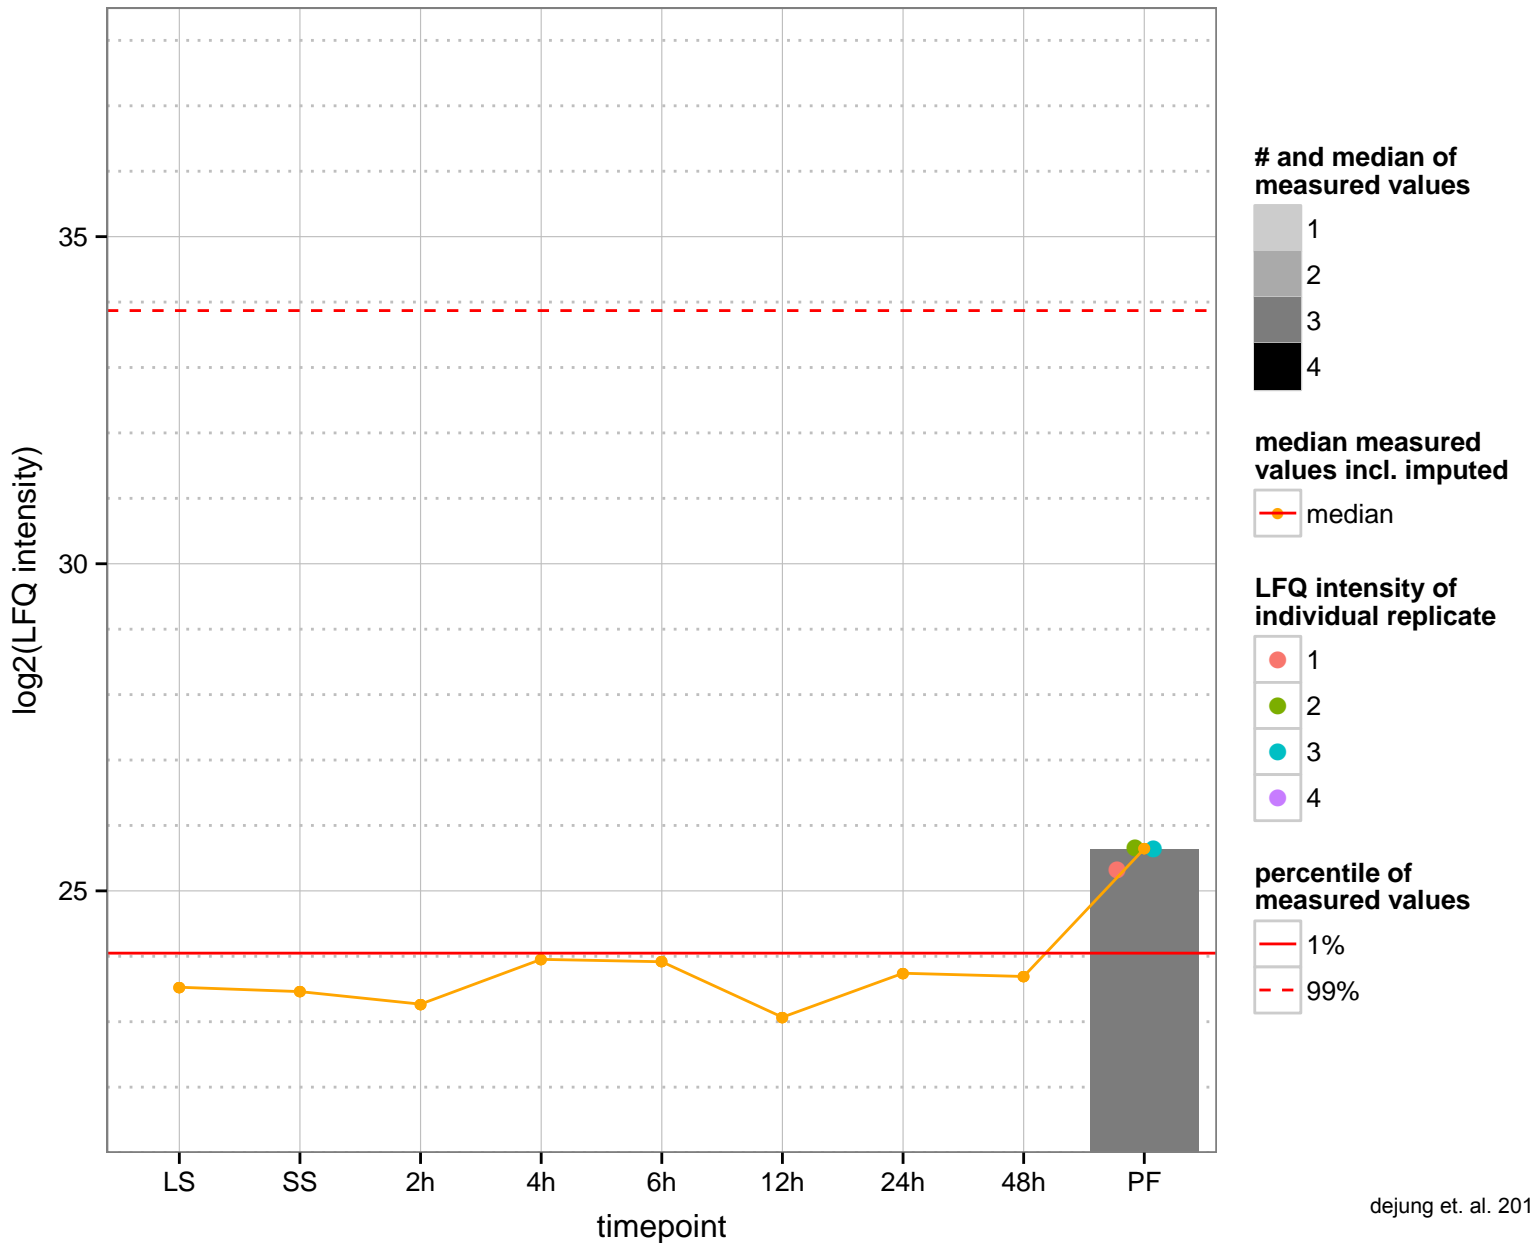

protein phosphatase 1, putative  
 Tb927.11.8090  
 AGOF: hydrolase activity, protein serine/threonine phosphatase activity  
 AGOC: null  
 AGOP: cellular process  
 PGO: hydrolase activity  
 PGOC: null  
 PGOP: null

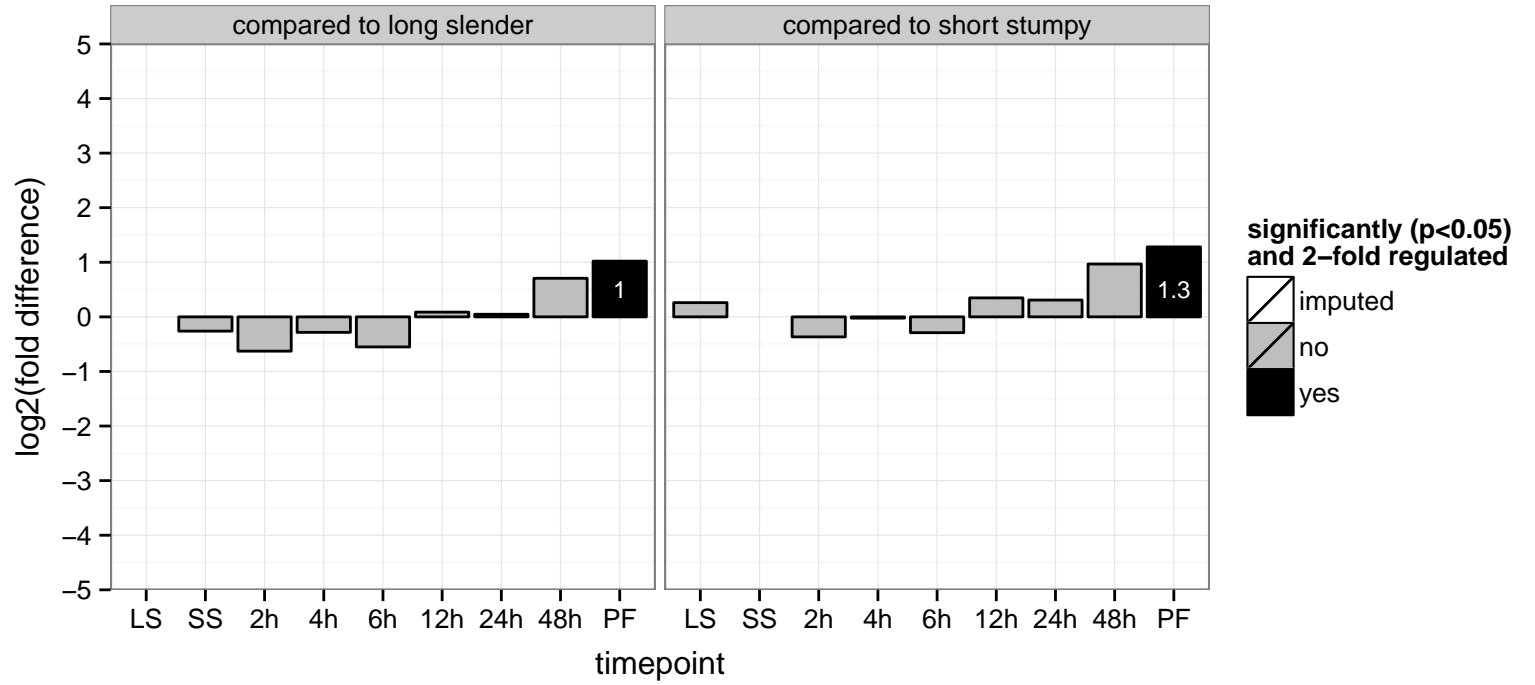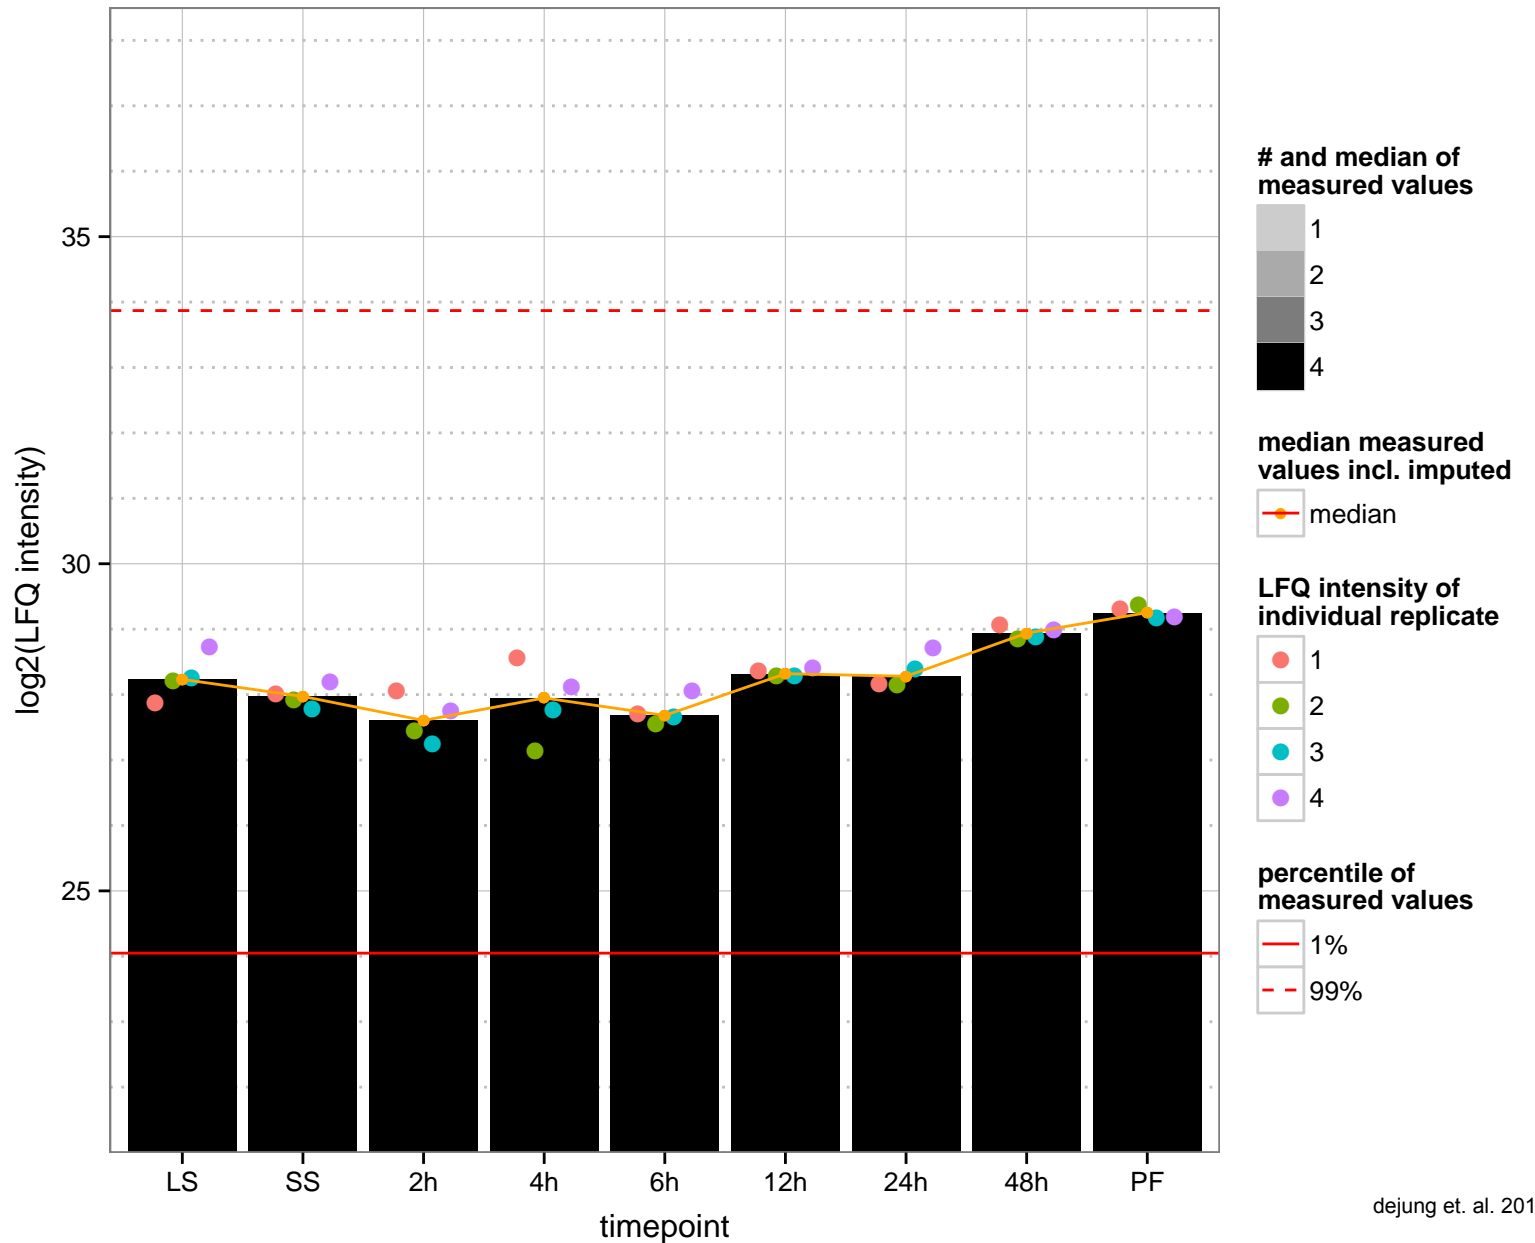

DNA repair protein RAD51 (RAD51)

Tb927.11.8190

AGOF: ATP binding, ATPase activity, damaged DNA binding, double-stranded DNA binding, double-stranded DNA-dependent

AGOC: nucleus, site of double-strand break

AGOP: DNA recombination, double-strand break repair via homologous recombination, evasion or tolerance of host immune

PGOF: ATP binding, DNA binding, DNA-dependent ATPase activity, damaged DNA binding, nucleoside-triphosphatase activity

PGOC: null

PGOP: DNA metabolic process, DNA repair

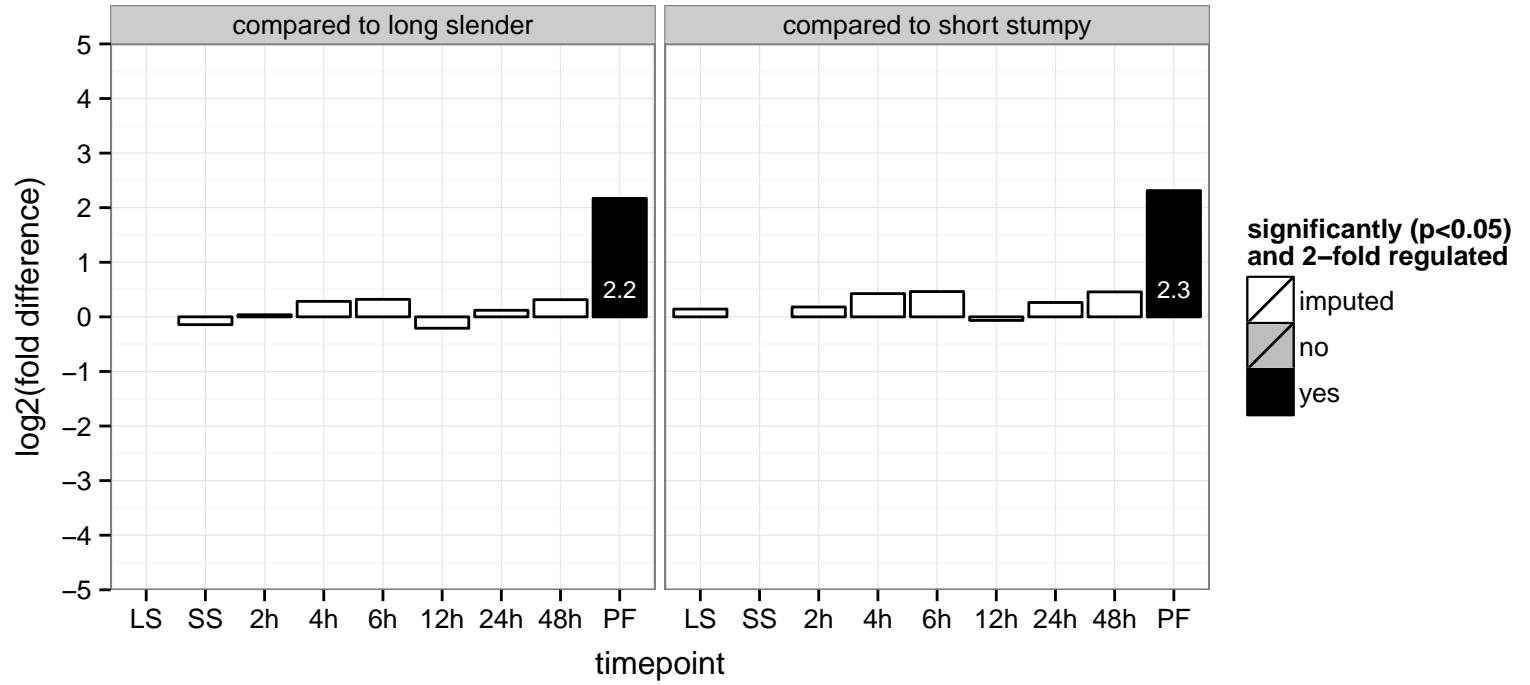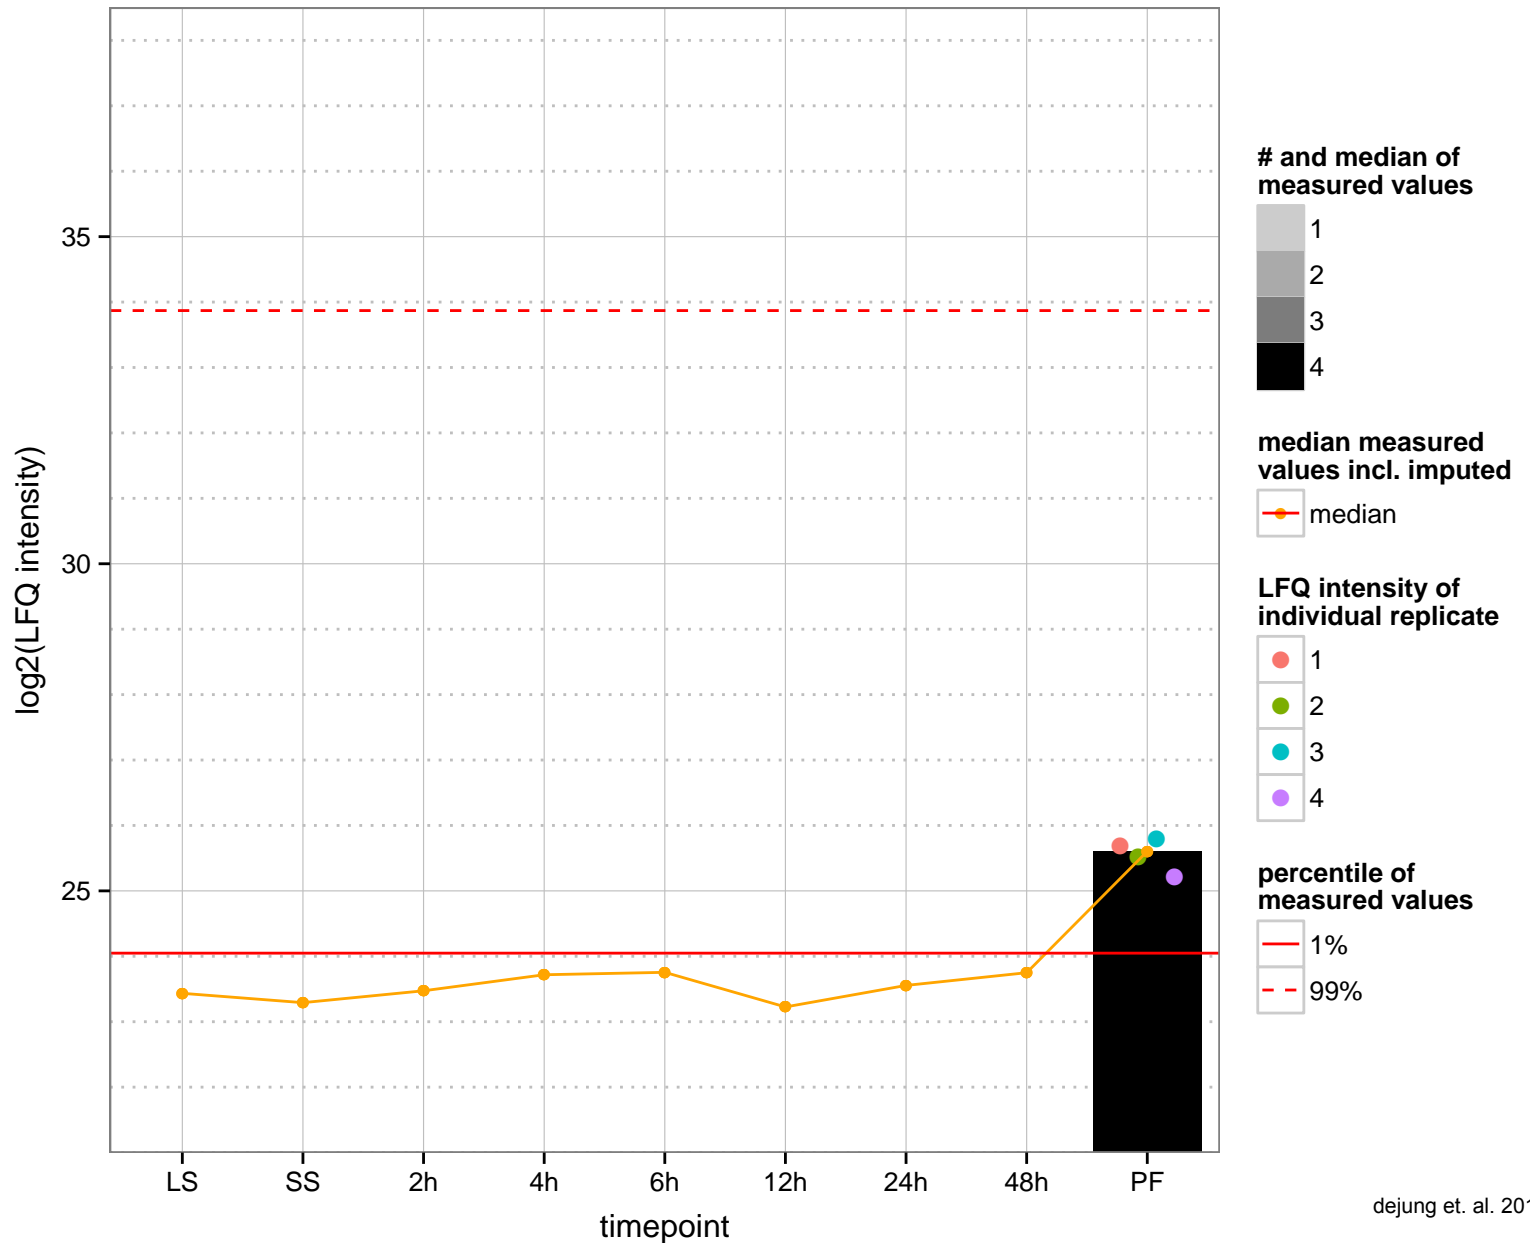

hypothetical protein, conserved  
 Tb927.11.8230  
 AGOF: null  
 AGOC: null  
 AGOP: null  
 PGO: null  
 PGOC: null  
 PGOP: null

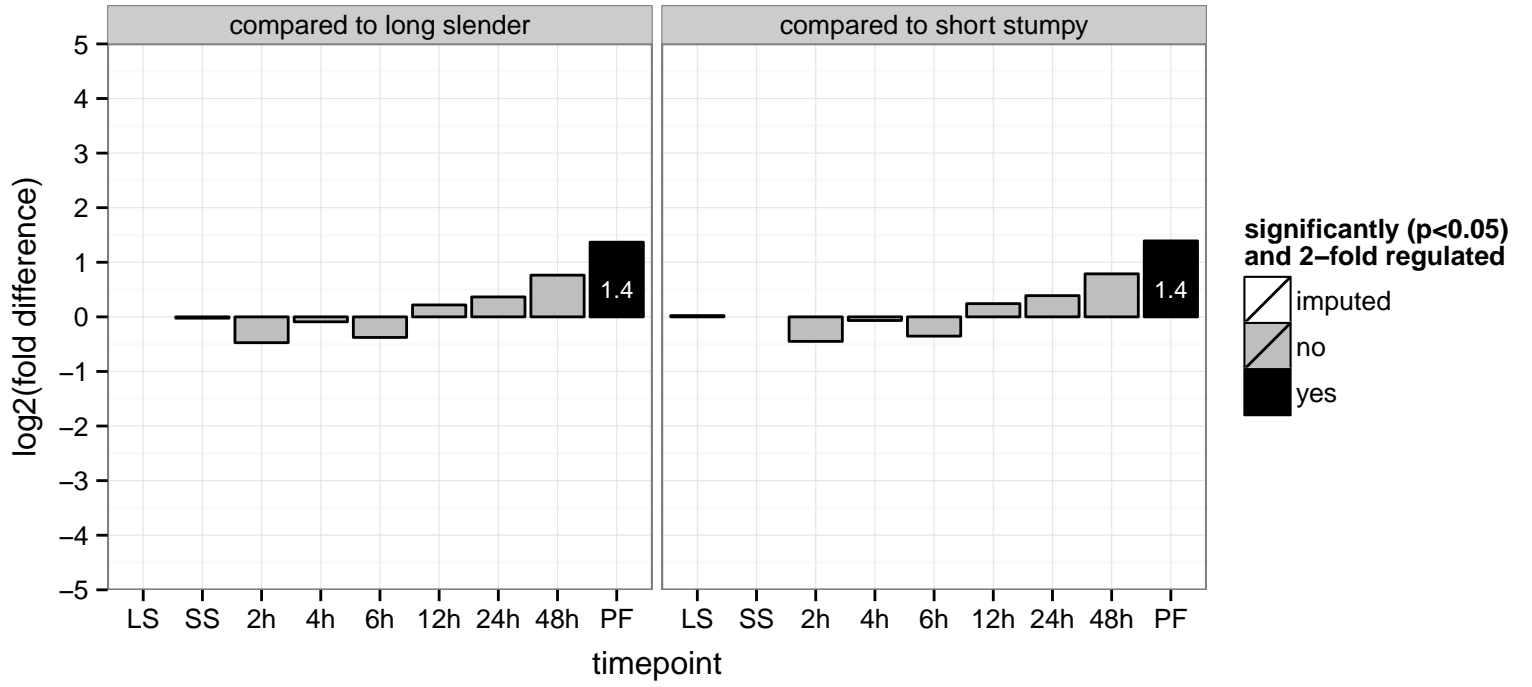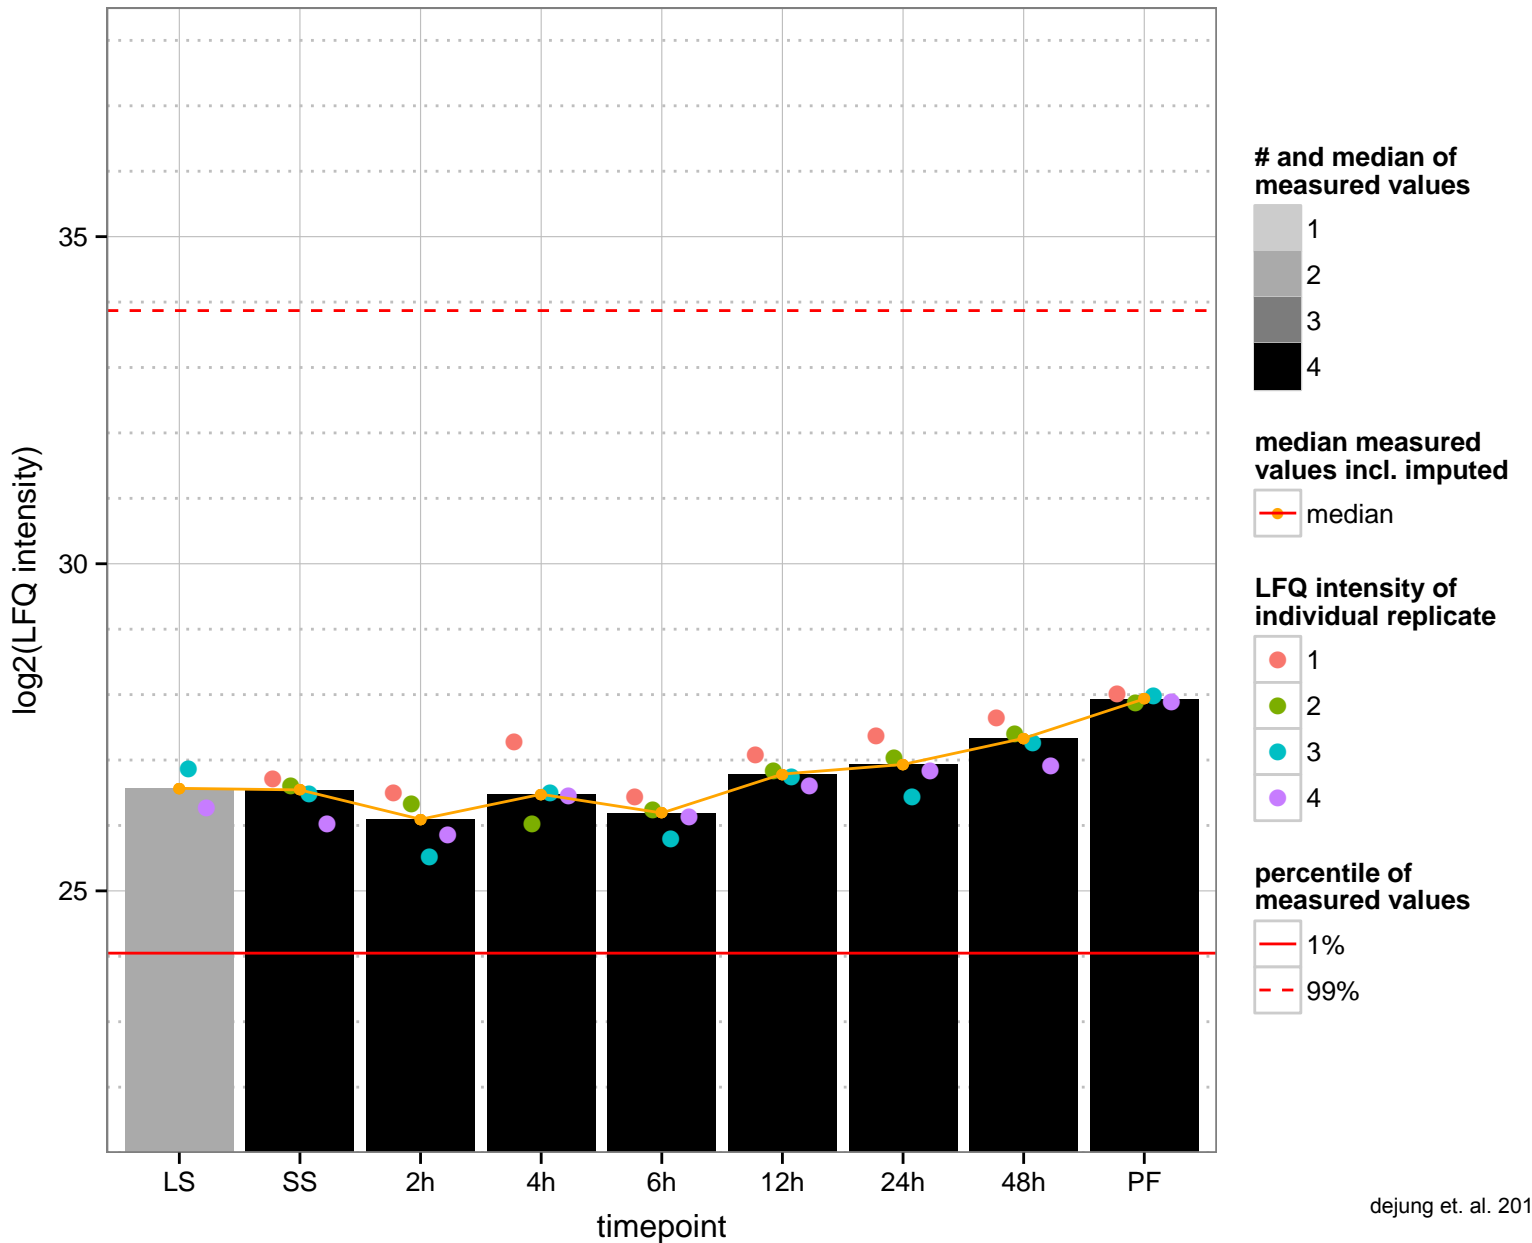

hypothetical protein, conserved  
 Tb927.11.8270  
 AGOF: null  
 AGOC: null  
 AGOP: null  
 PGO: protein binding  
 PGOC: null  
 PGOP: null

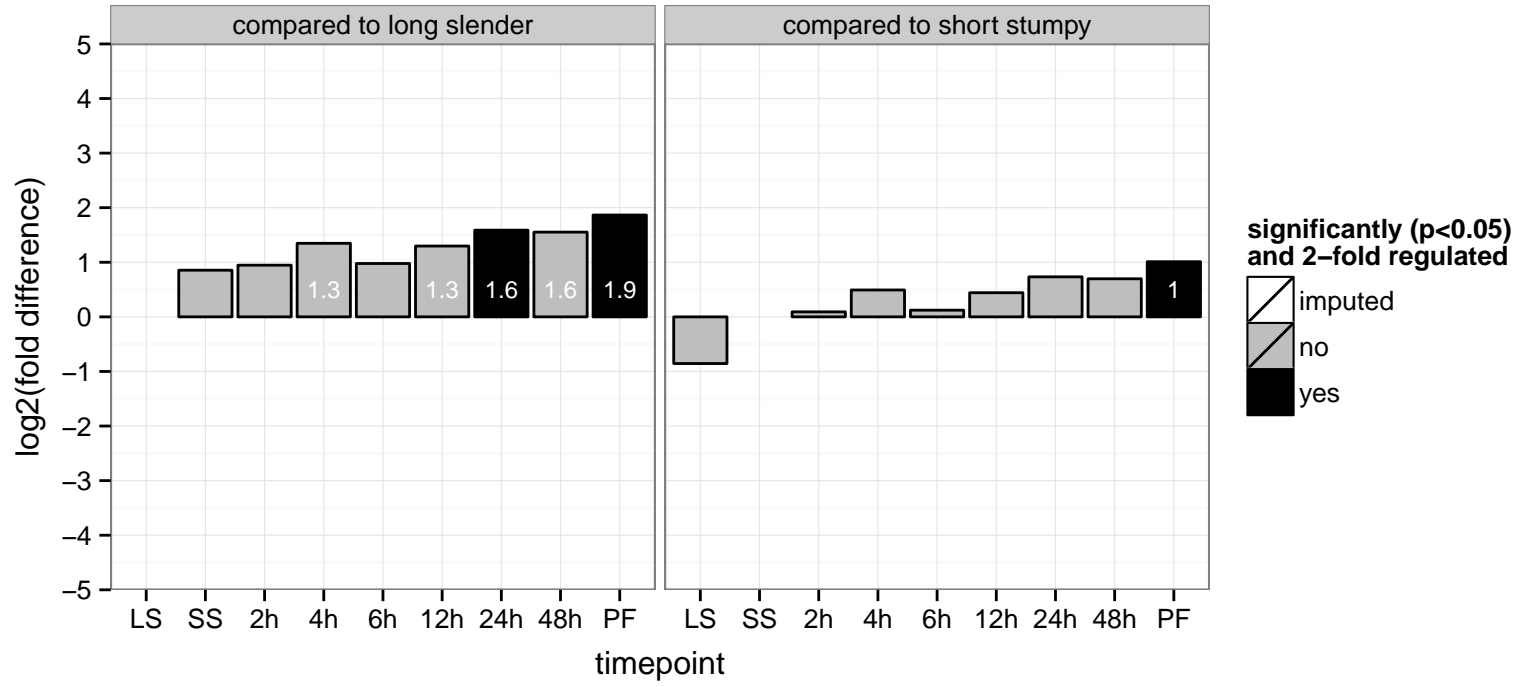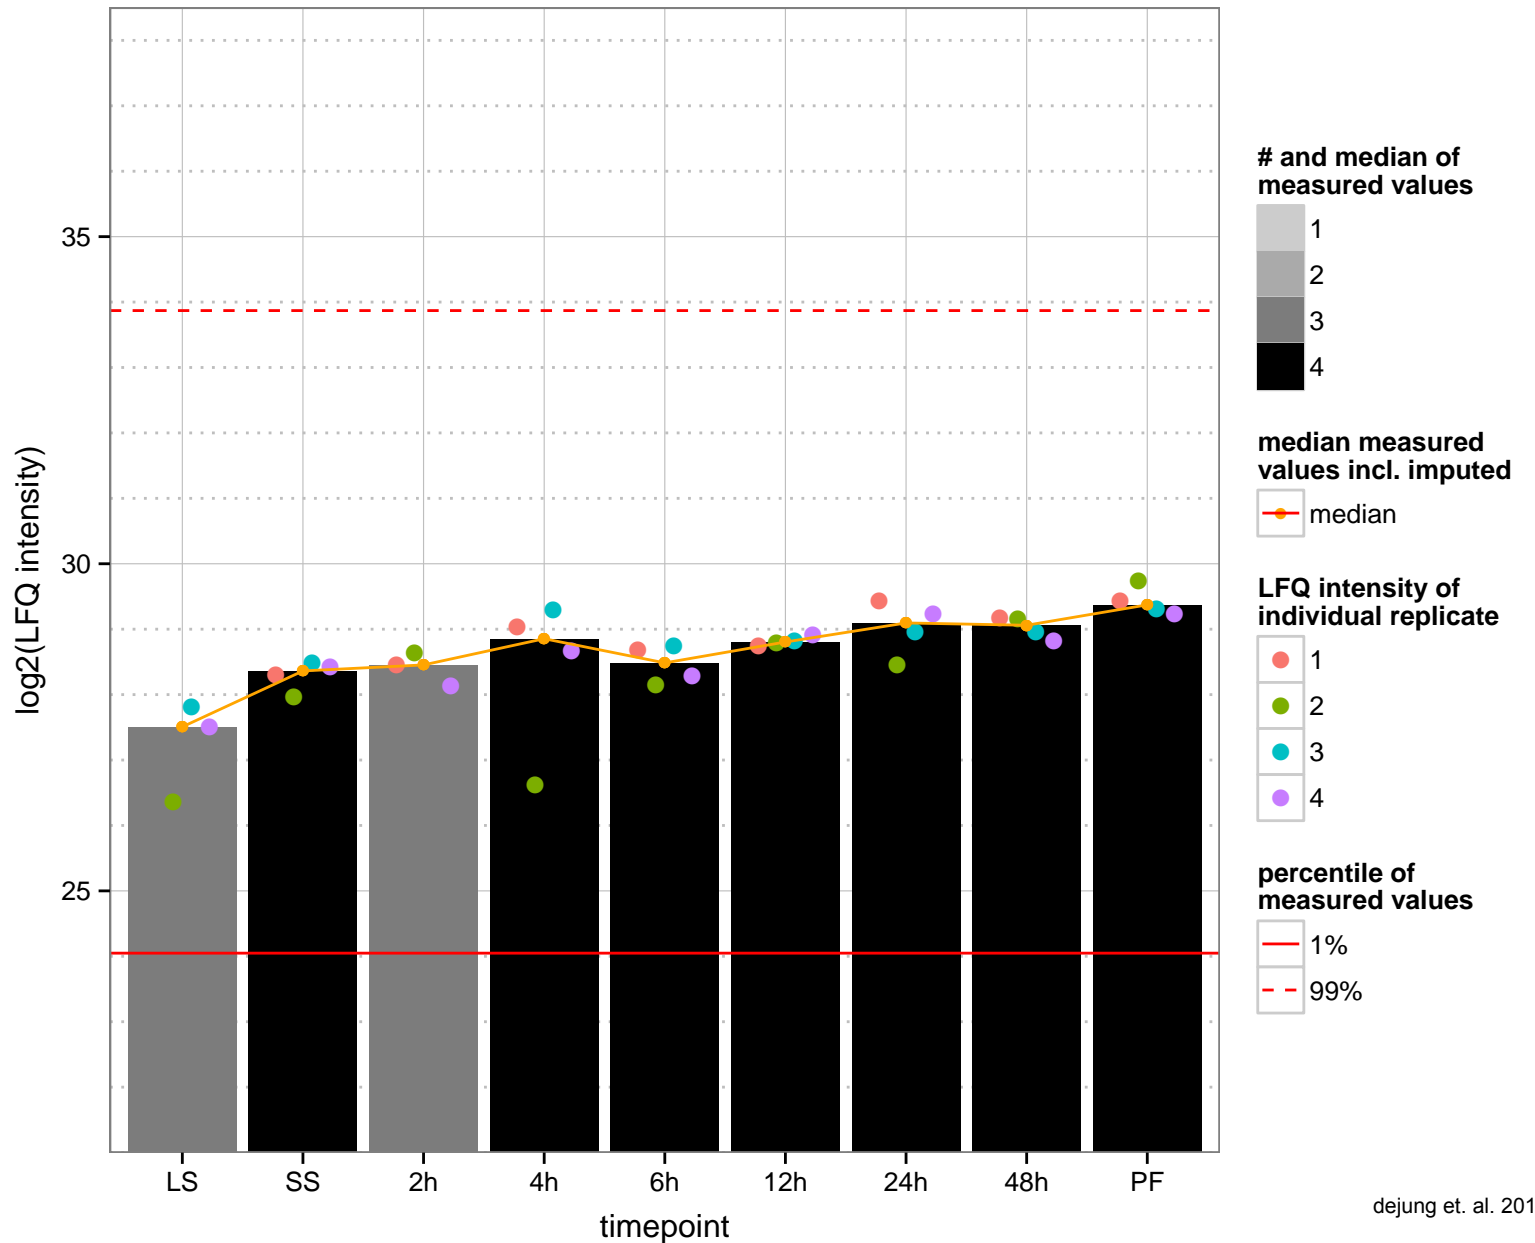

hypothetical protein, conserved  
 Tb927.11.9120  
 AGOF: zinc ion binding  
 AGOC: null  
 AGOP: null  
 PGO: ATP binding, DNA binding, protein binding, zinc ion binding  
 PGOC: null  
 PGOP: null

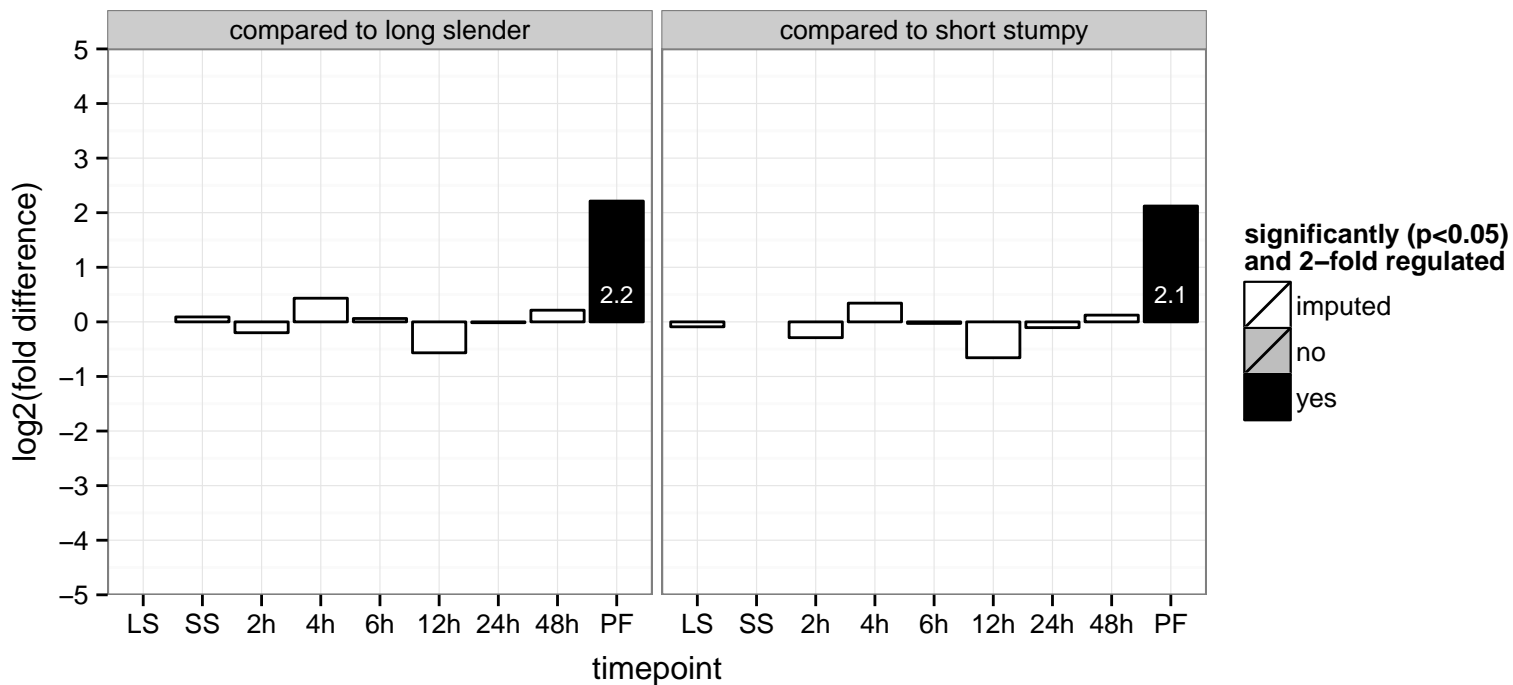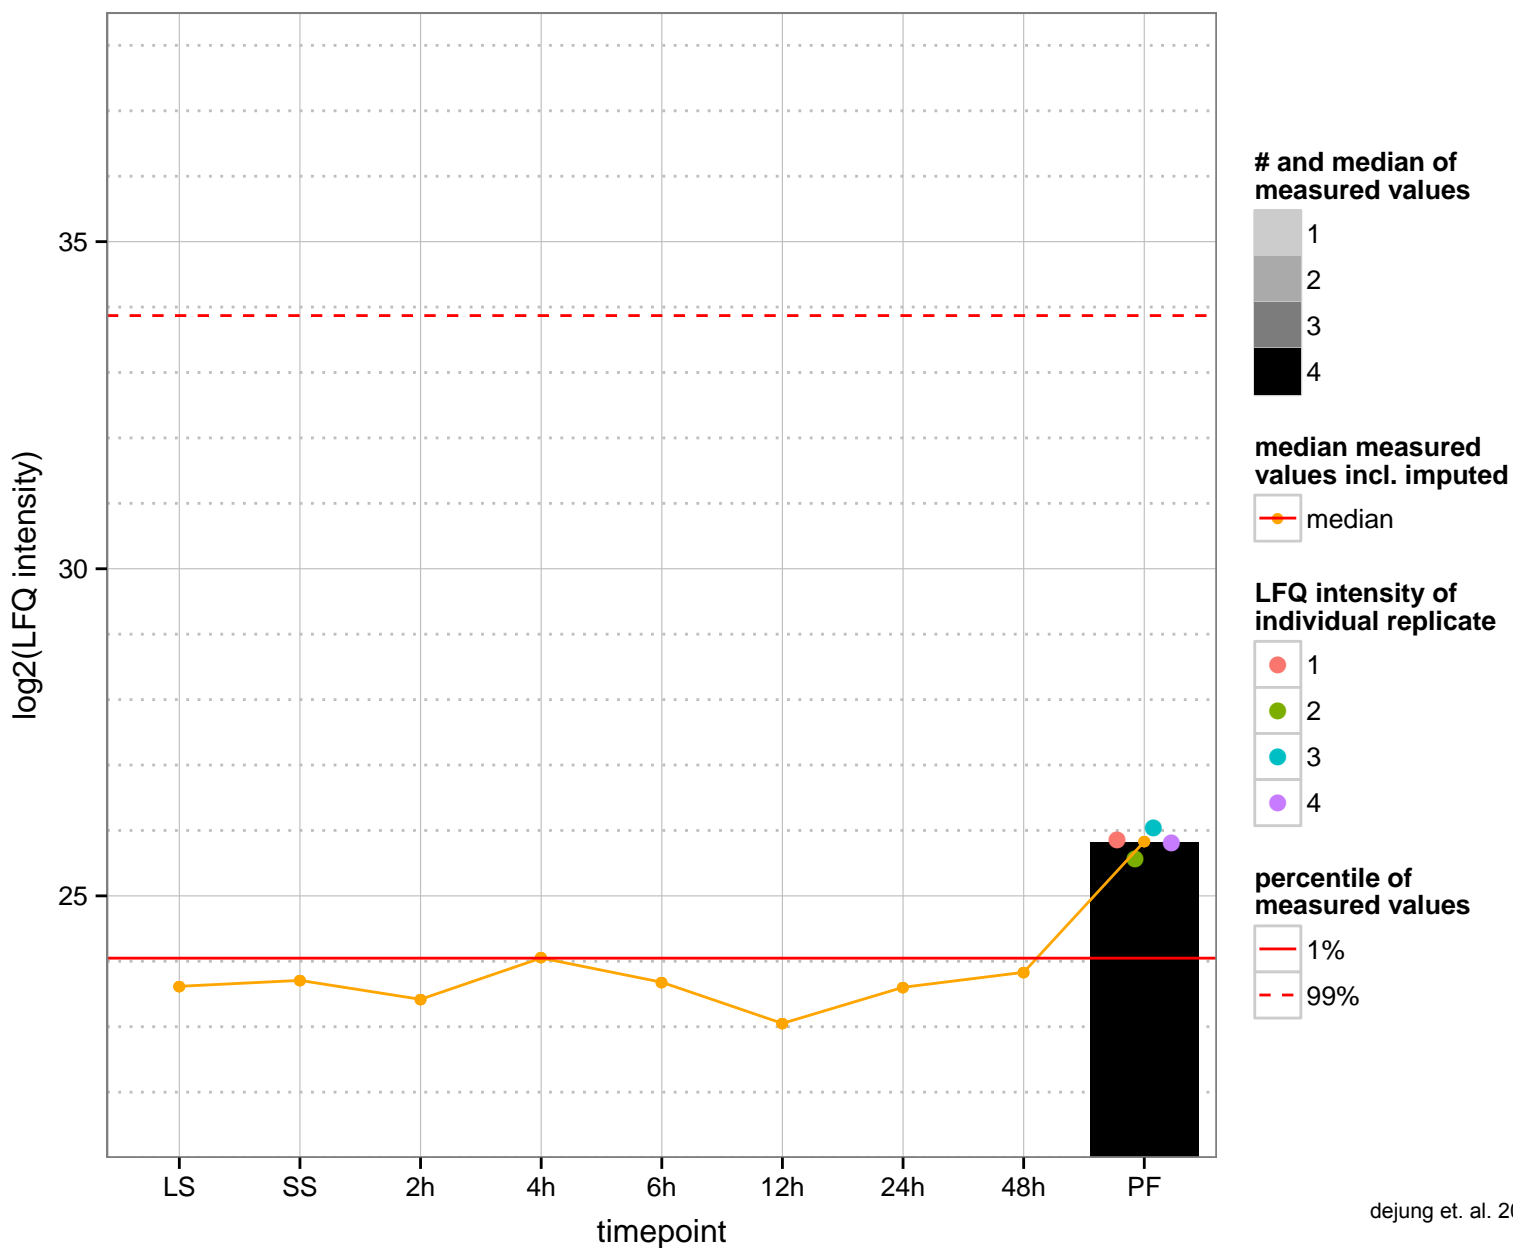

cyclophilin type peptidyl-prolyl cis-trans isomerase, putative (PPIase)  
 Tb927.11.9450  
 AGOF: peptidyl-prolyl cis-trans isomerase activity  
 AGOC: null  
 AGOP: protein folding  
 PGOF: peptidyl-prolyl cis-trans isomerase activity  
 PGO: null  
 PGOP: protein folding

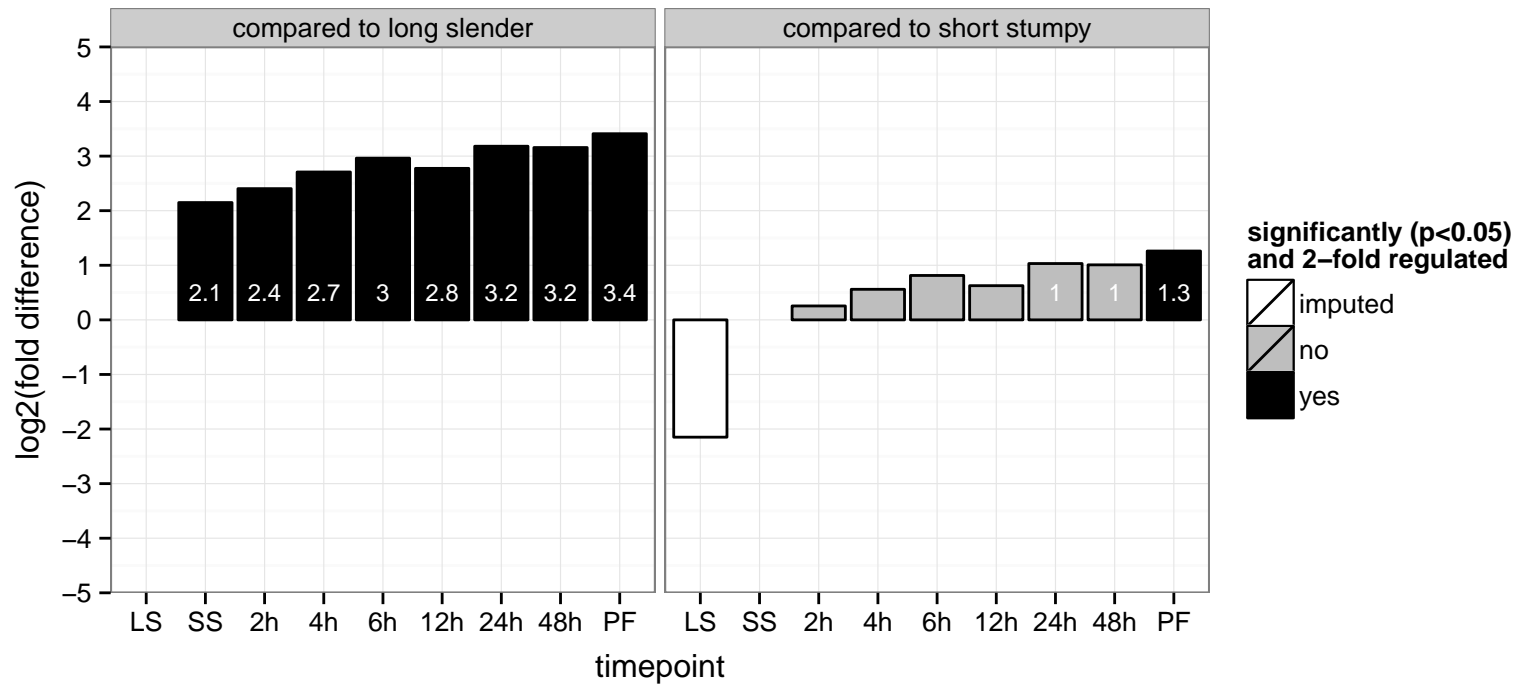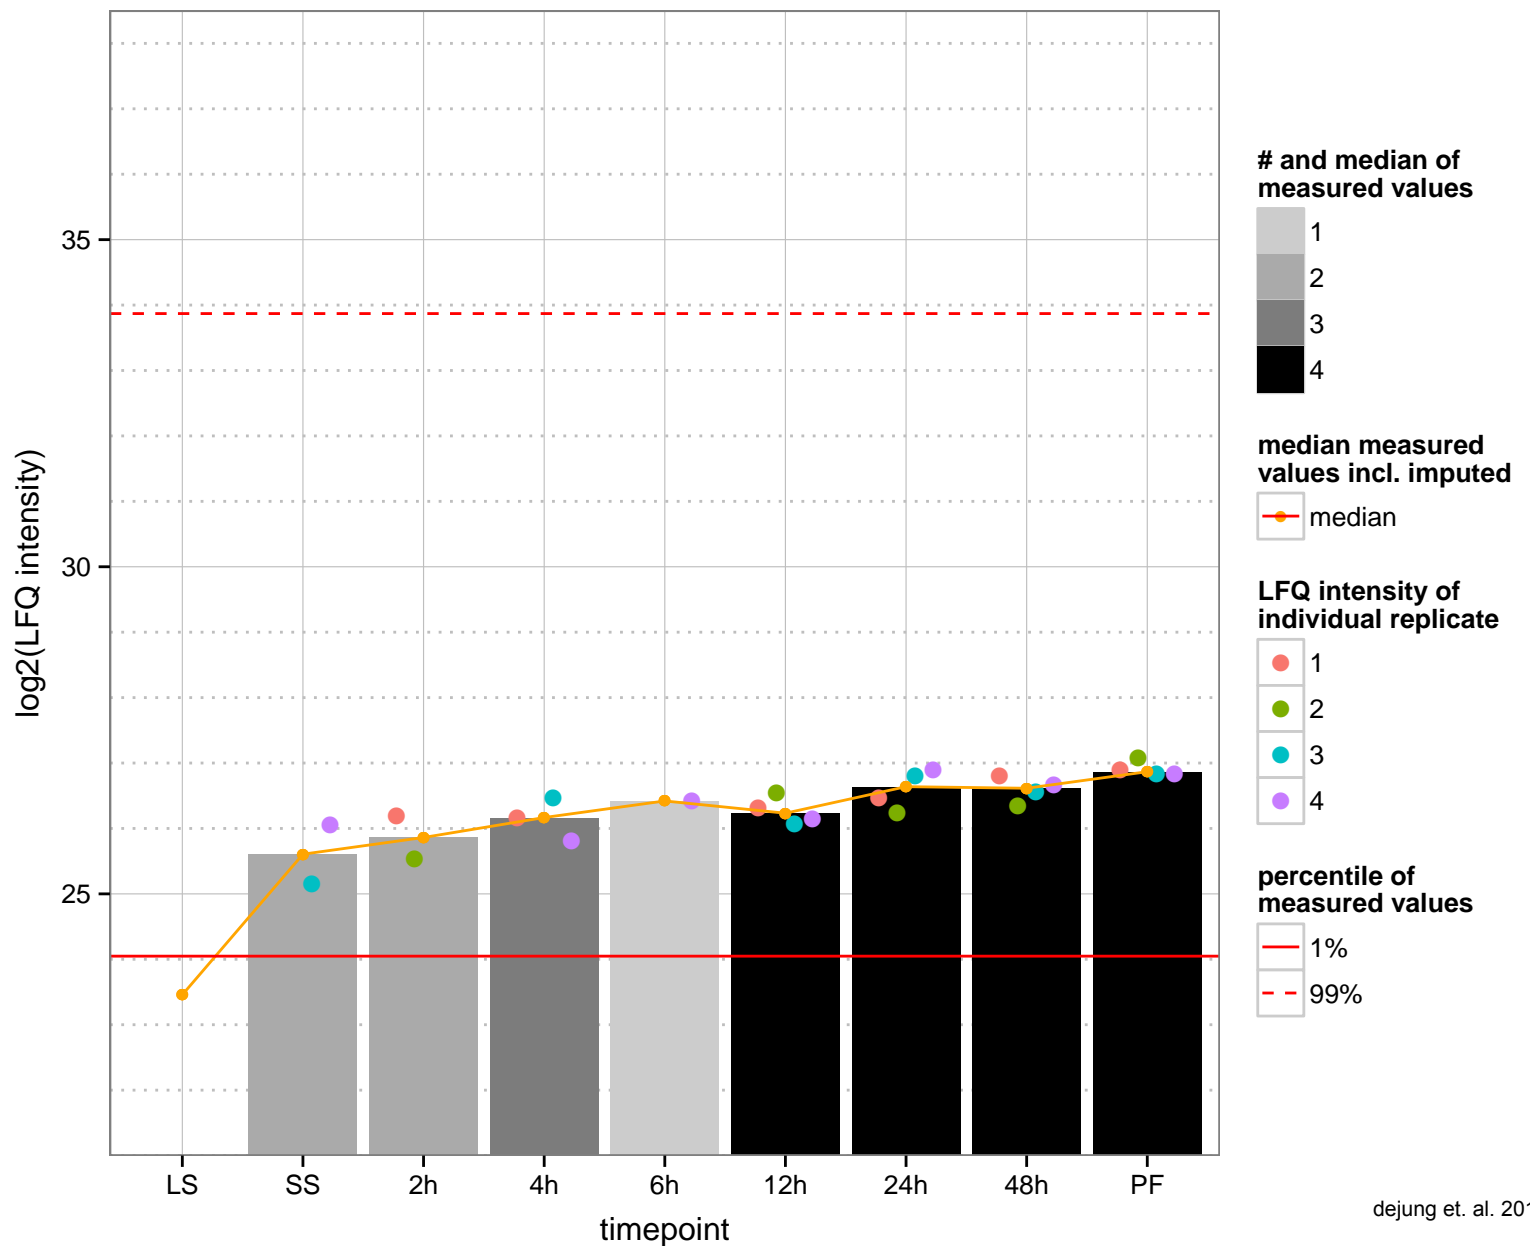



S-adenosylhomocysteine hydrolase, putative  
 Tb927.11.9590  
 AGOF: adenosylhomocysteinase activity  
 AGOC: null  
 AGOP: one-carbon metabolic process  
 PGOF: adenosylhomocysteinase activity  
 PGO: null  
 PGOP: one-carbon metabolic process

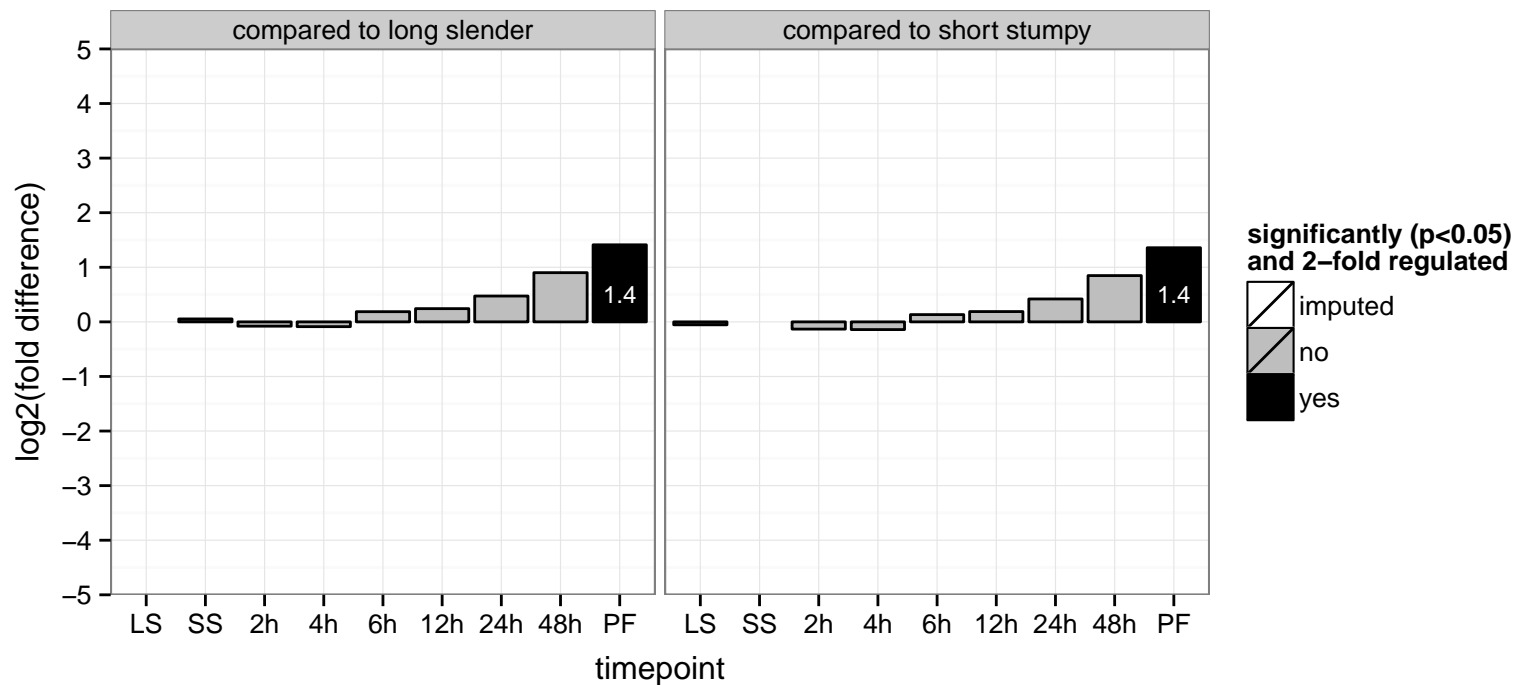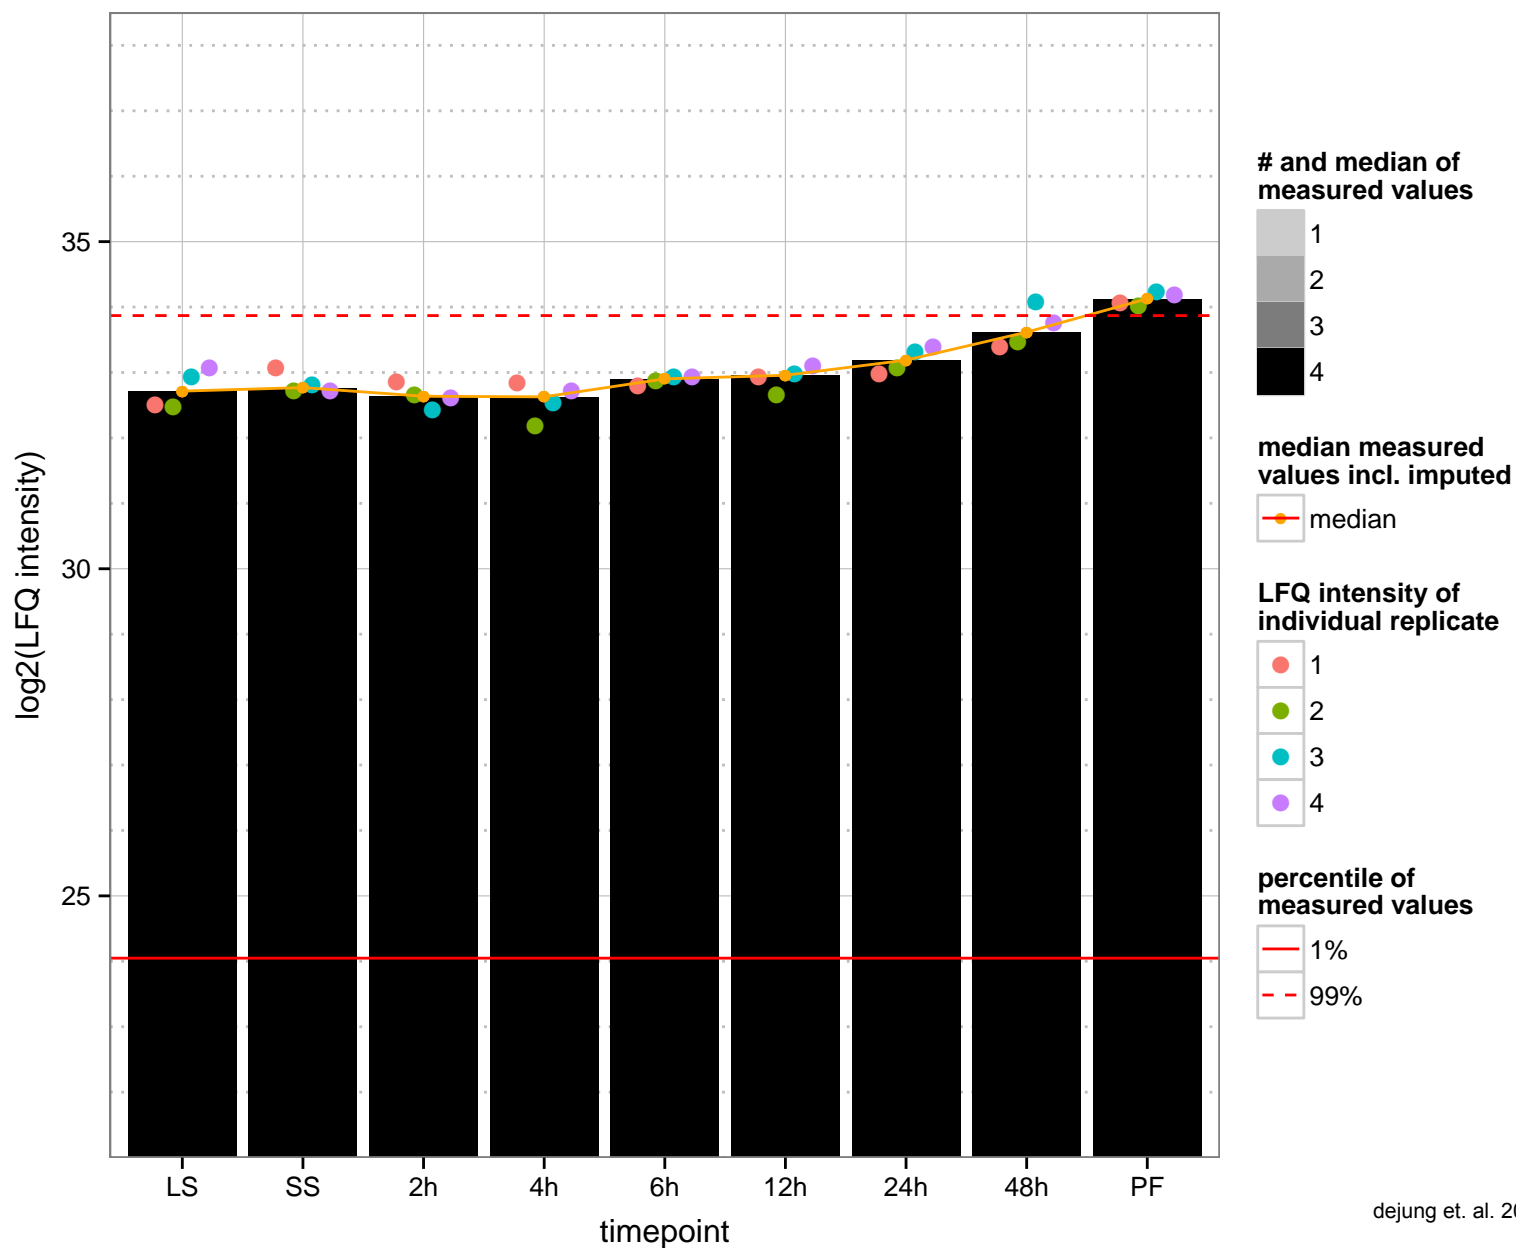

conserved protein  
 Tb927.11.9780  
 AGOF: null  
 AGOC: null  
 AGOP: null  
 PGO: null  
 PGOC: null  
 PGOP: null

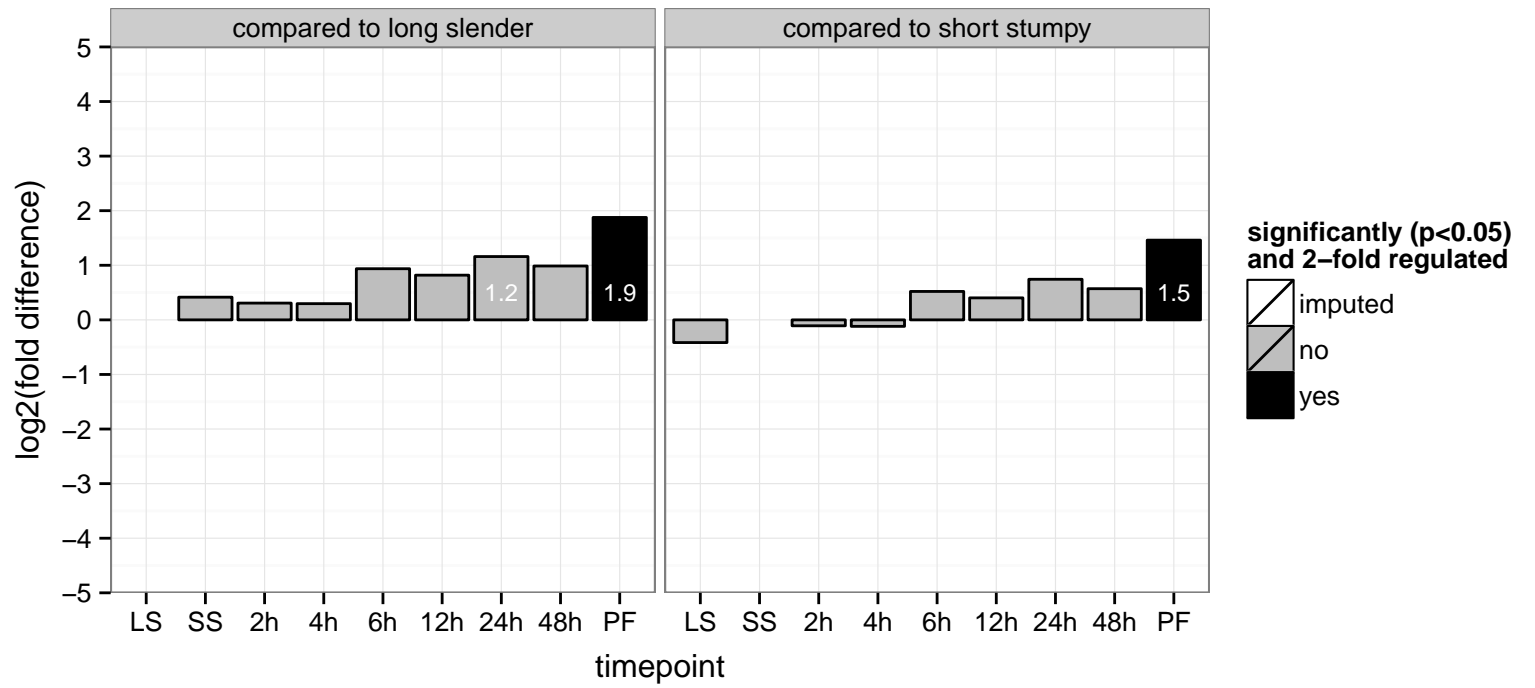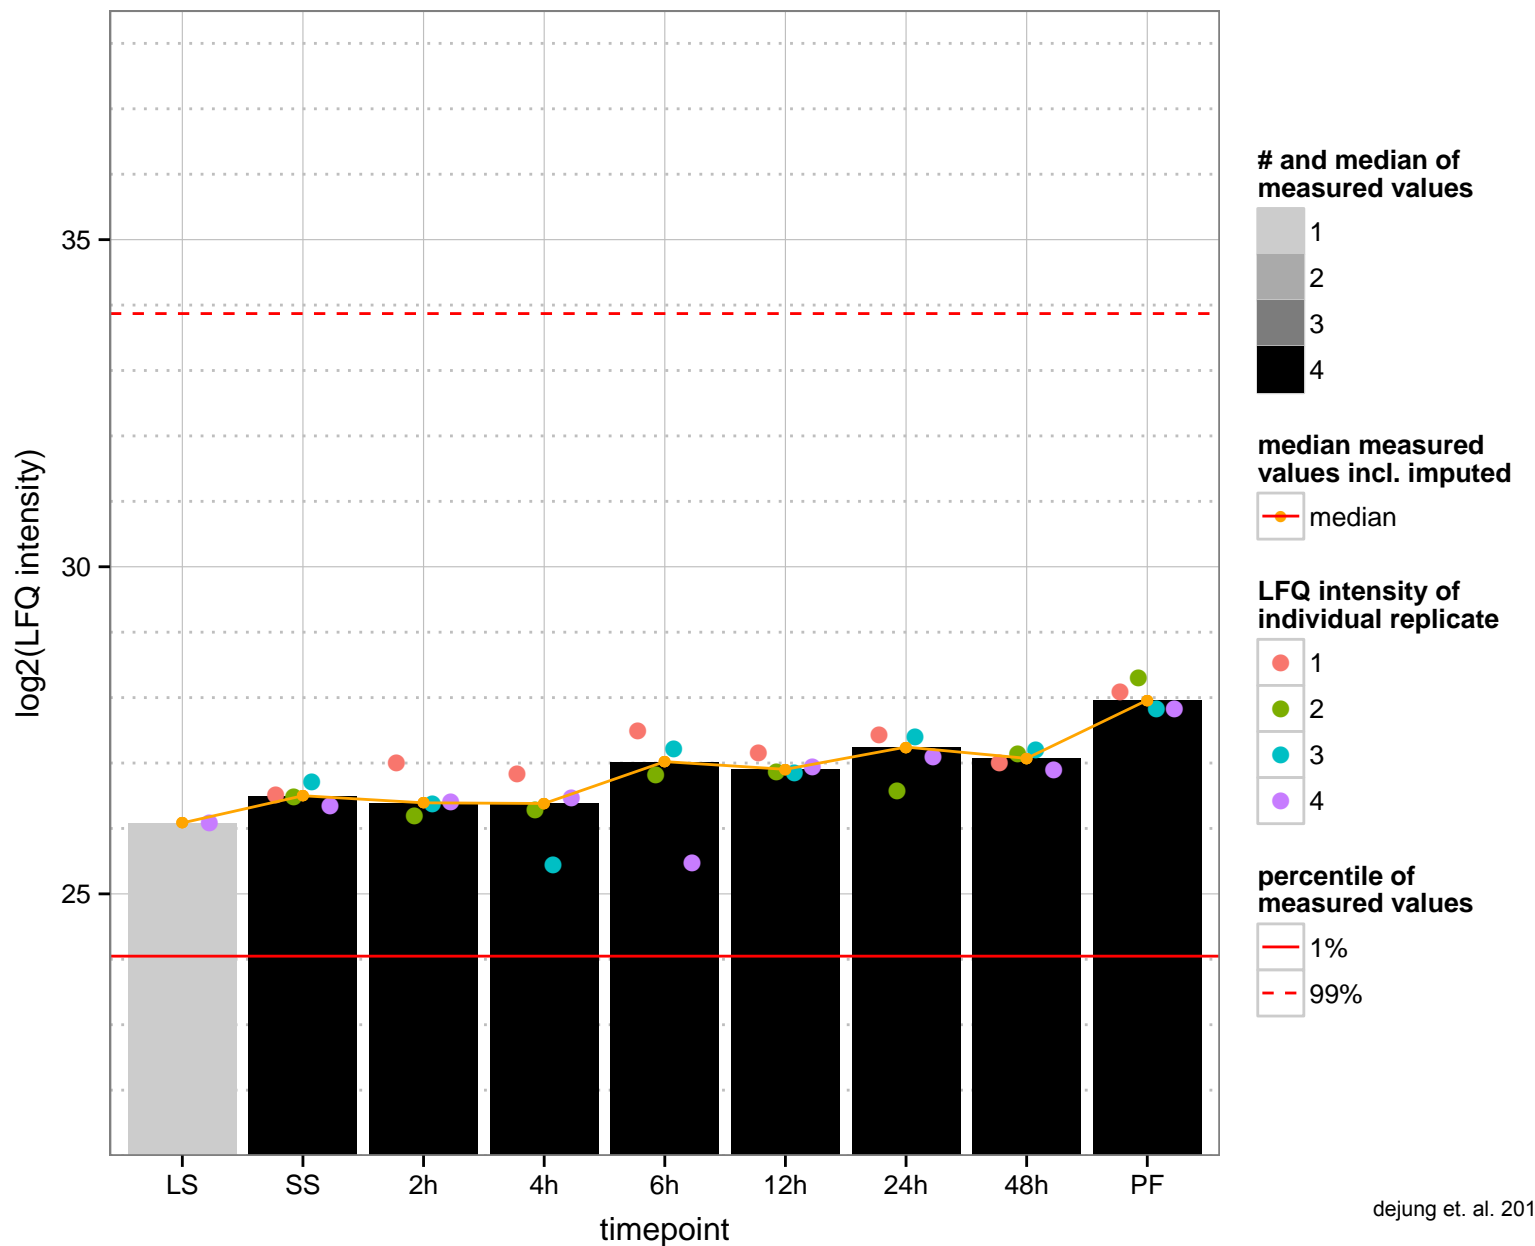

hypothetical protein, conserved  
 Tb927.11.9870  
 AGOF: null  
 AGOC: null  
 AGOP: null  
 PGO: null  
 PGOC: null  
 PGOP: null

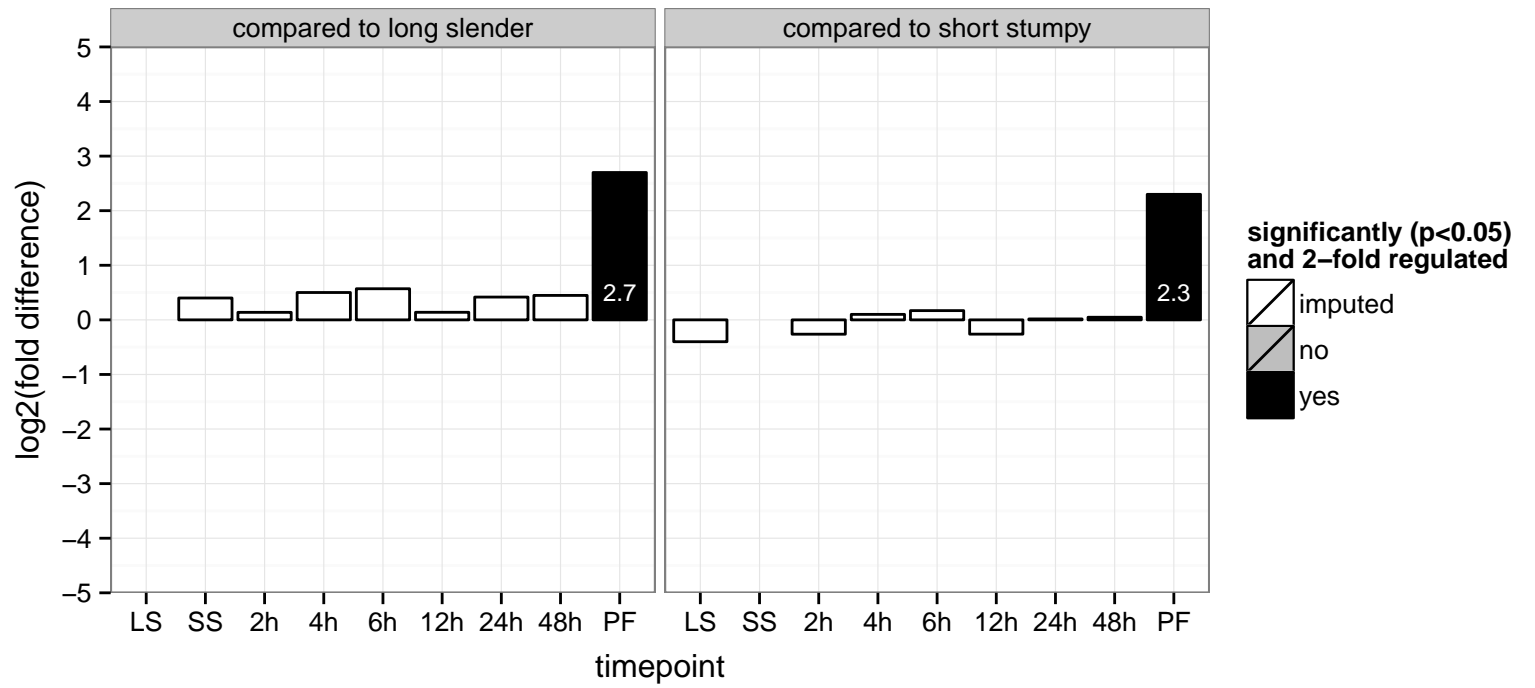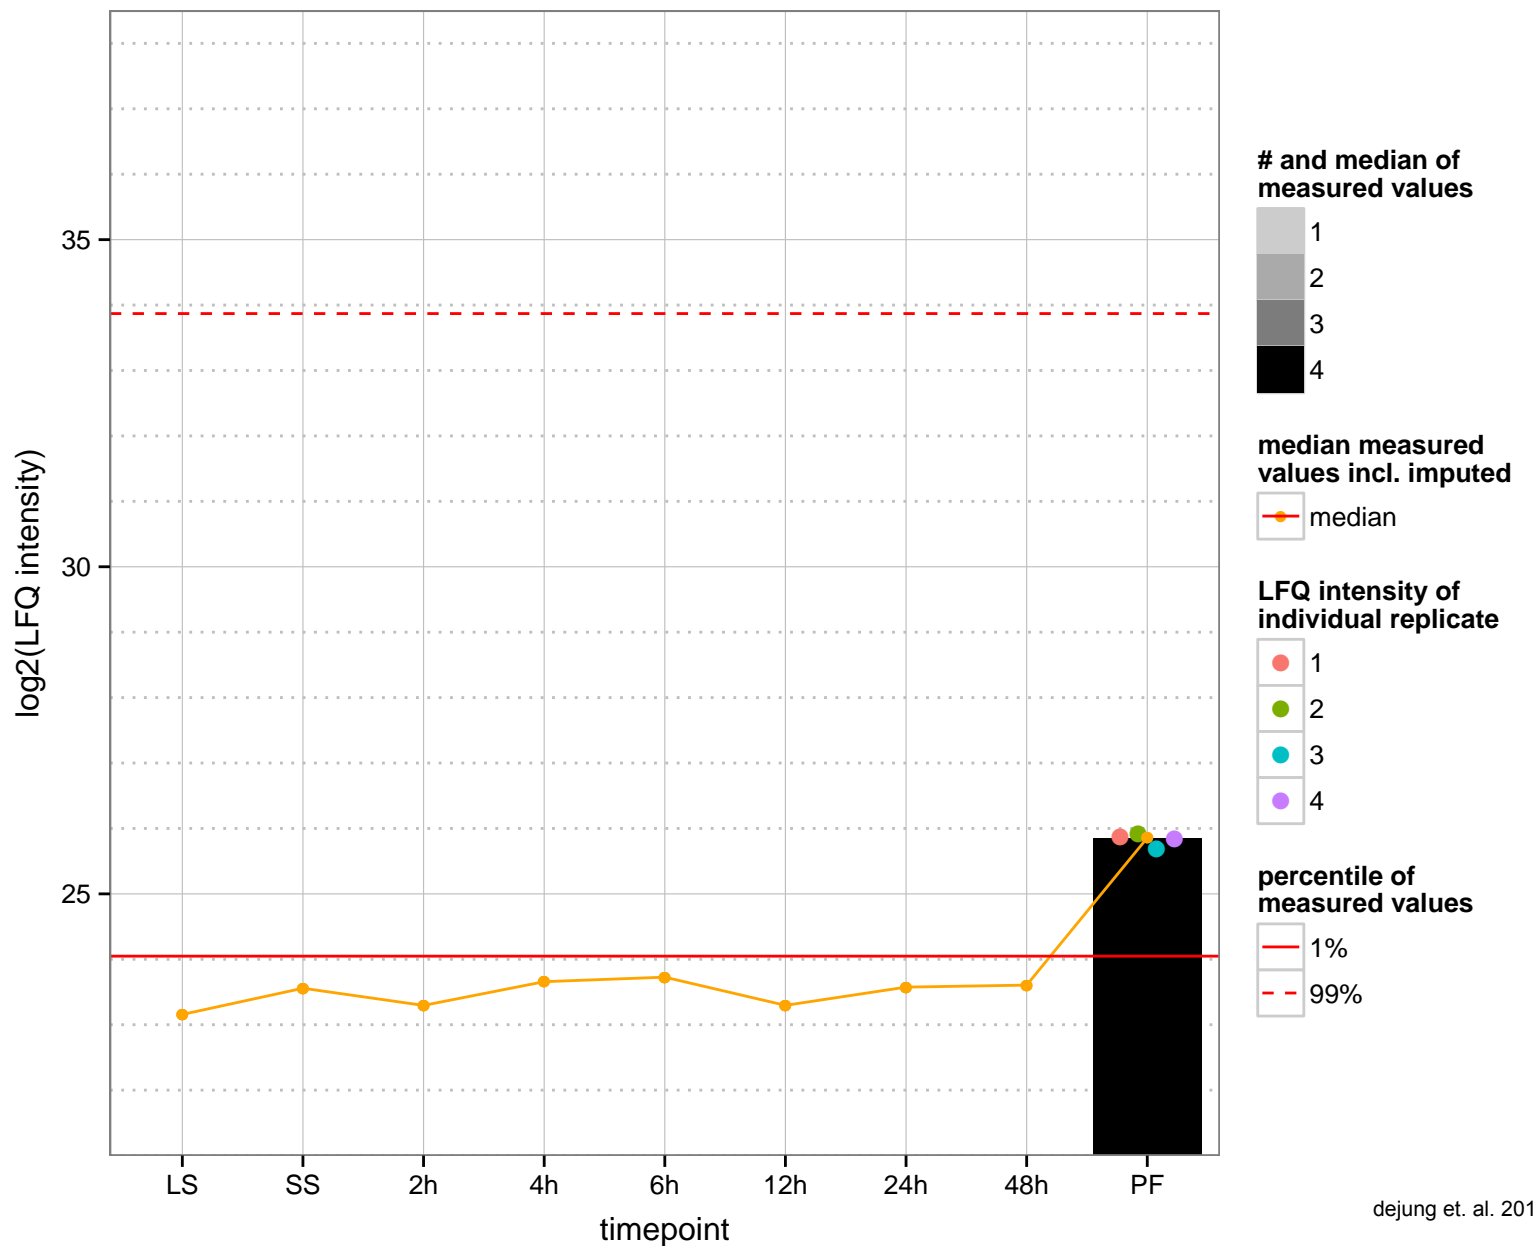

signal recognition particle receptor alpha subunit, putative

Tb927.11.9890

AGOF: GTP binding, nucleoside-triphosphatase activity, signal recognition particle binding

AGOC: signal recognition particle receptor complex

AGOP: SRP-dependent cotranslational protein targeting to membrane, cotranslational protein targeting to membrane

PGOF: GTP binding, nucleoside-triphosphatase activity, nucleotide binding

PGOC: null

PGOP: SRP-dependent cotranslational protein targeting to membrane, transport

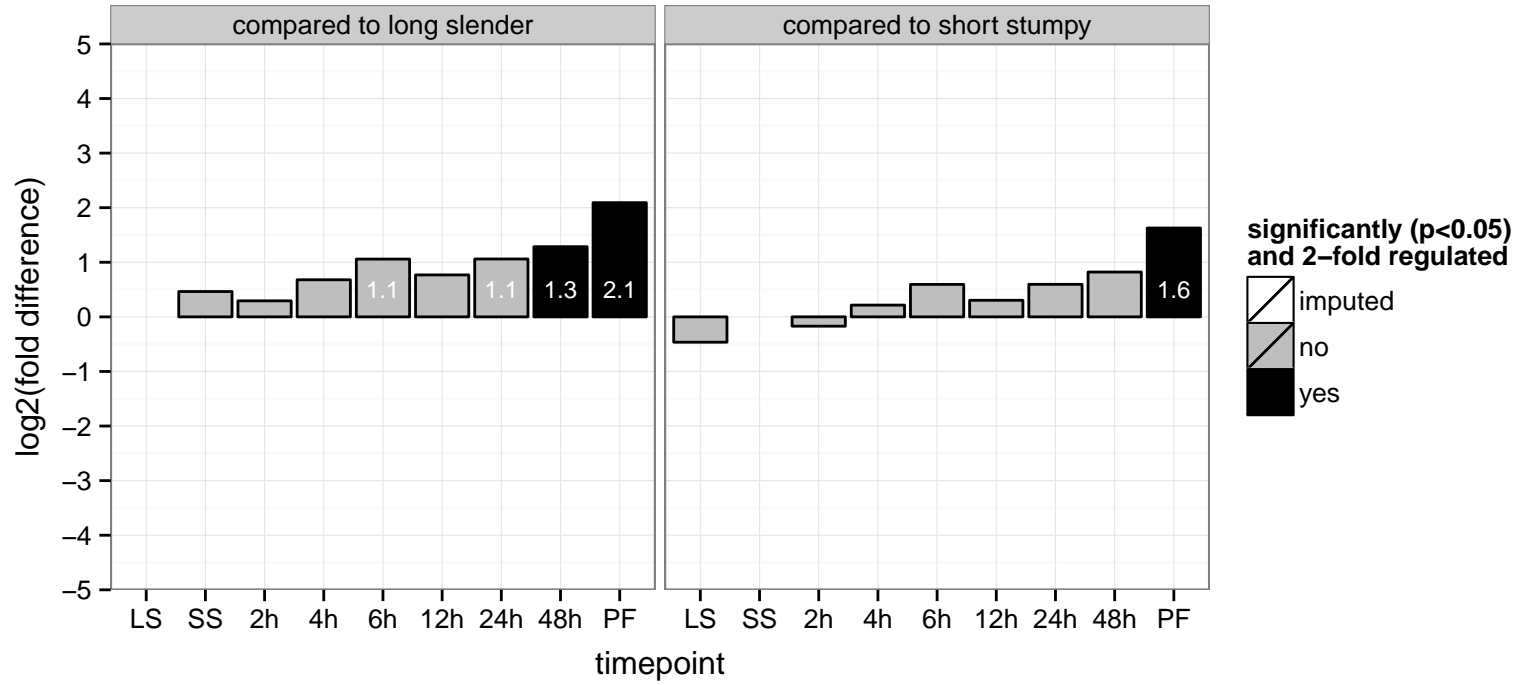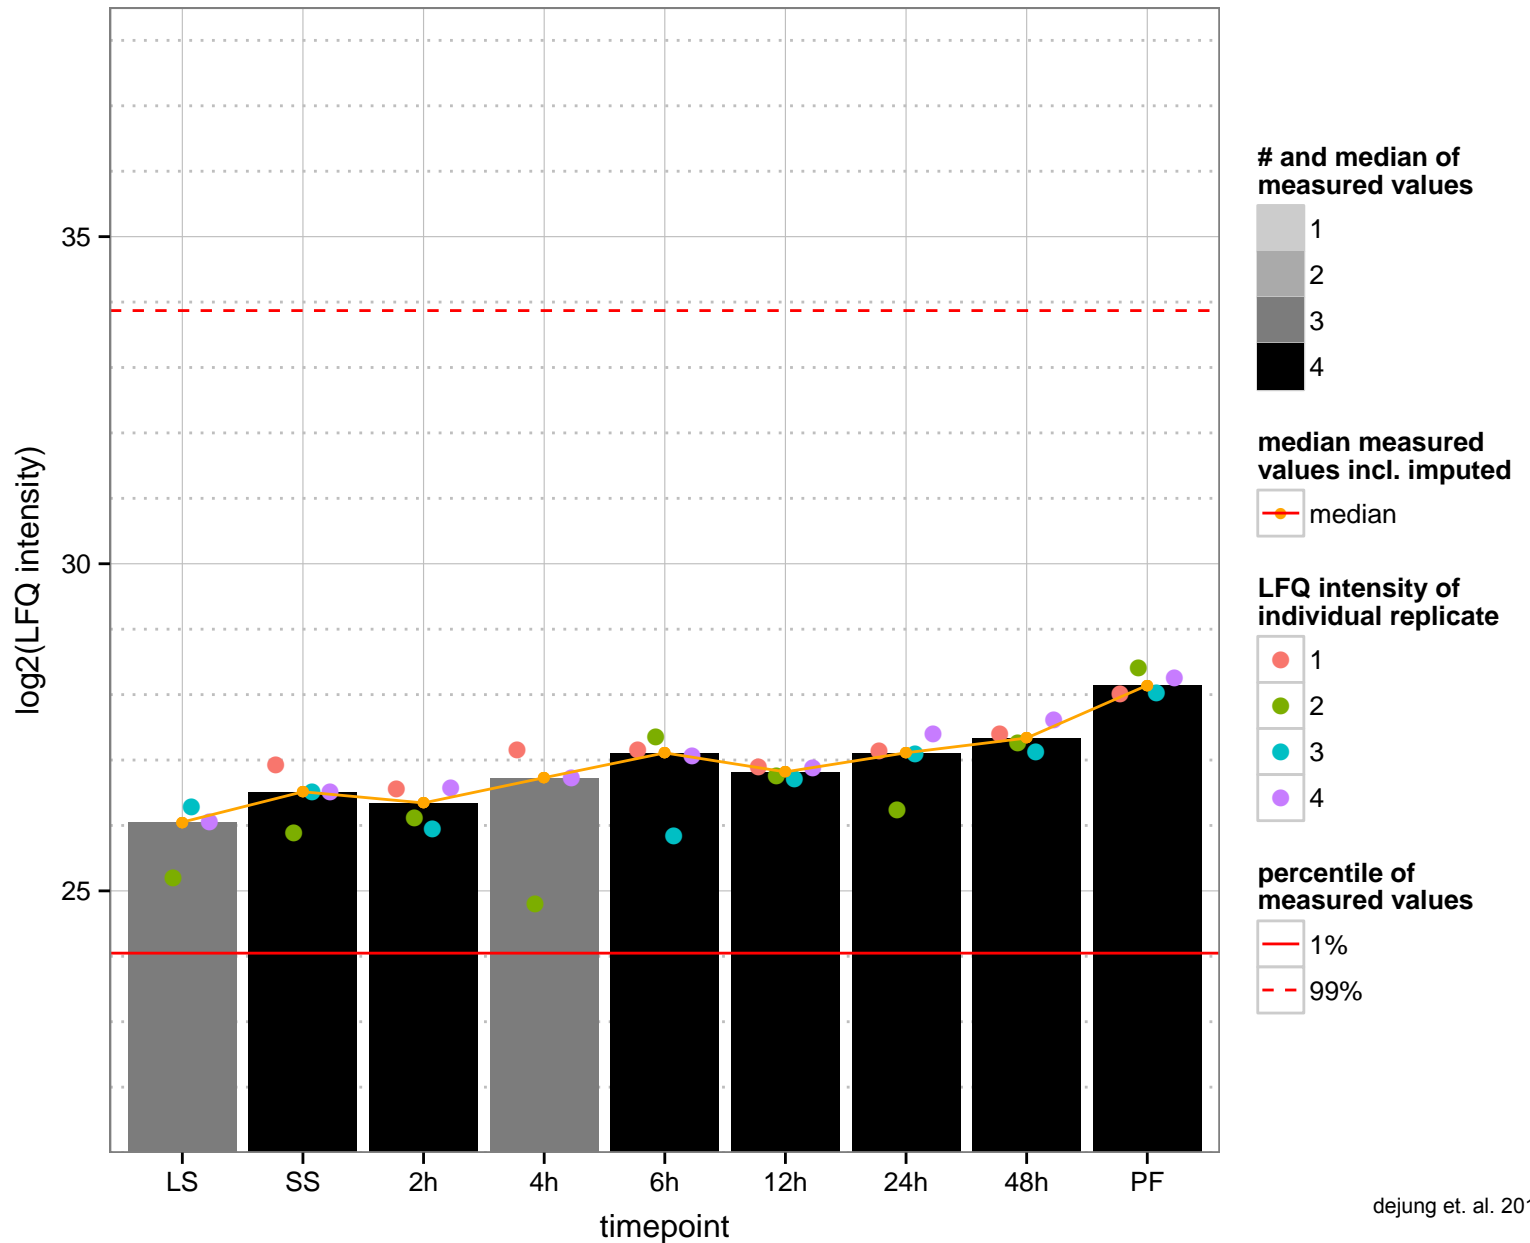

hypothetical protein, conserved  
 Tb927.2.1760  
 AGOF: null  
 AGOC: null  
 AGOP: null  
 PGO: protein binding  
 PGOC: null  
 PGOP: null

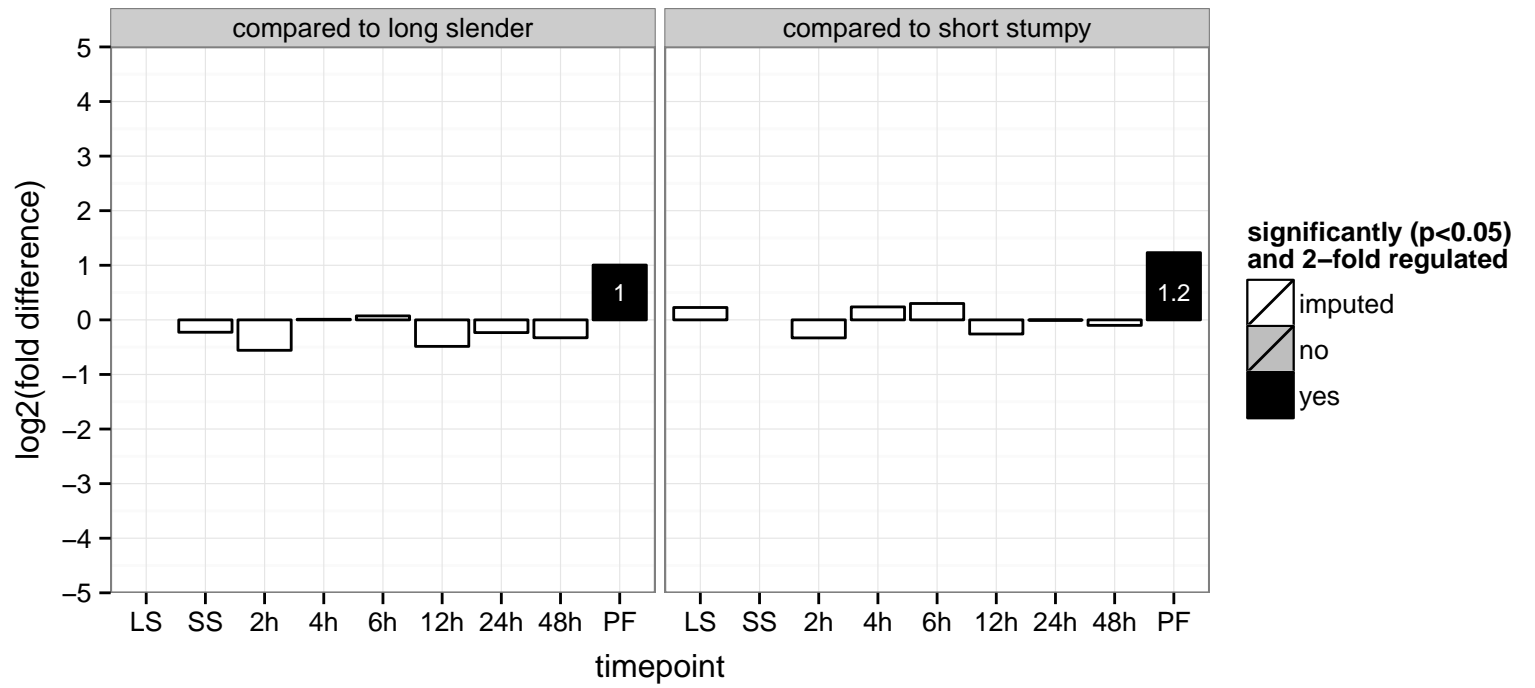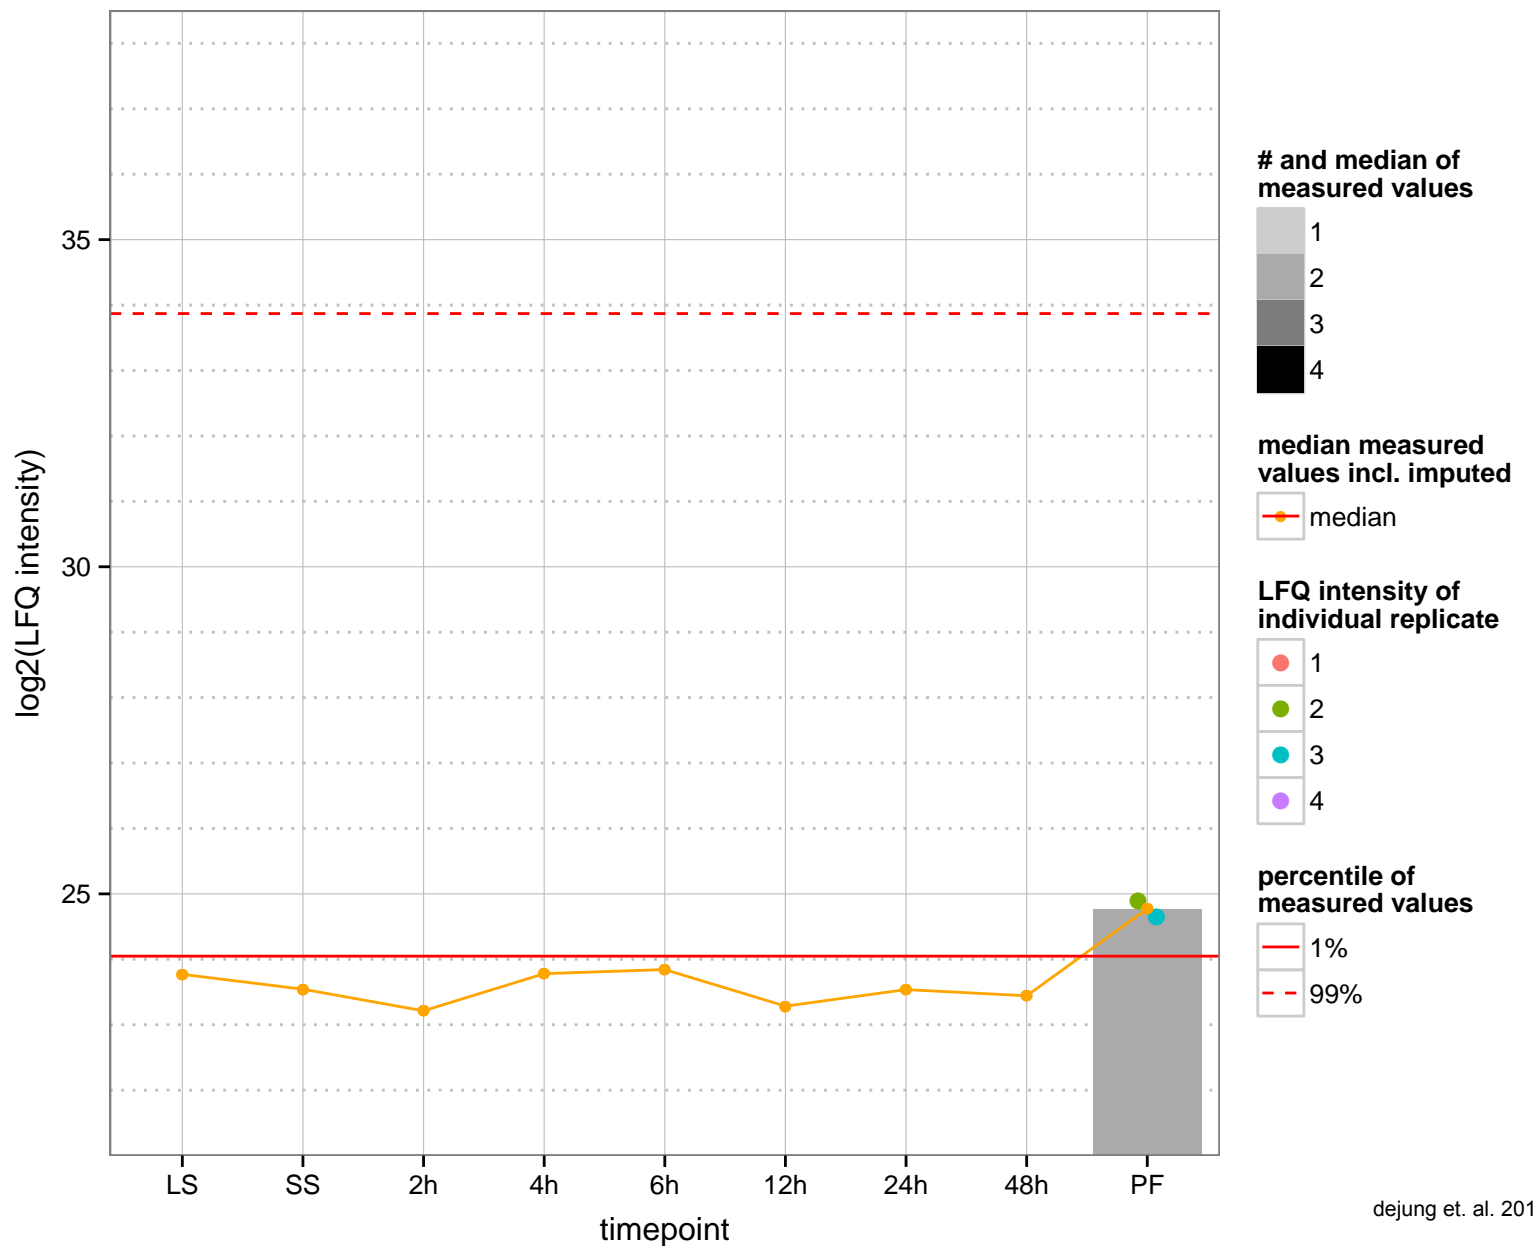

hypothetical protein, conserved  
 Tb927.2.2950  
 AGOF: null  
 AGOC: null  
 AGOP: null  
 PGO: null  
 PGOC: null  
 PGOP: null

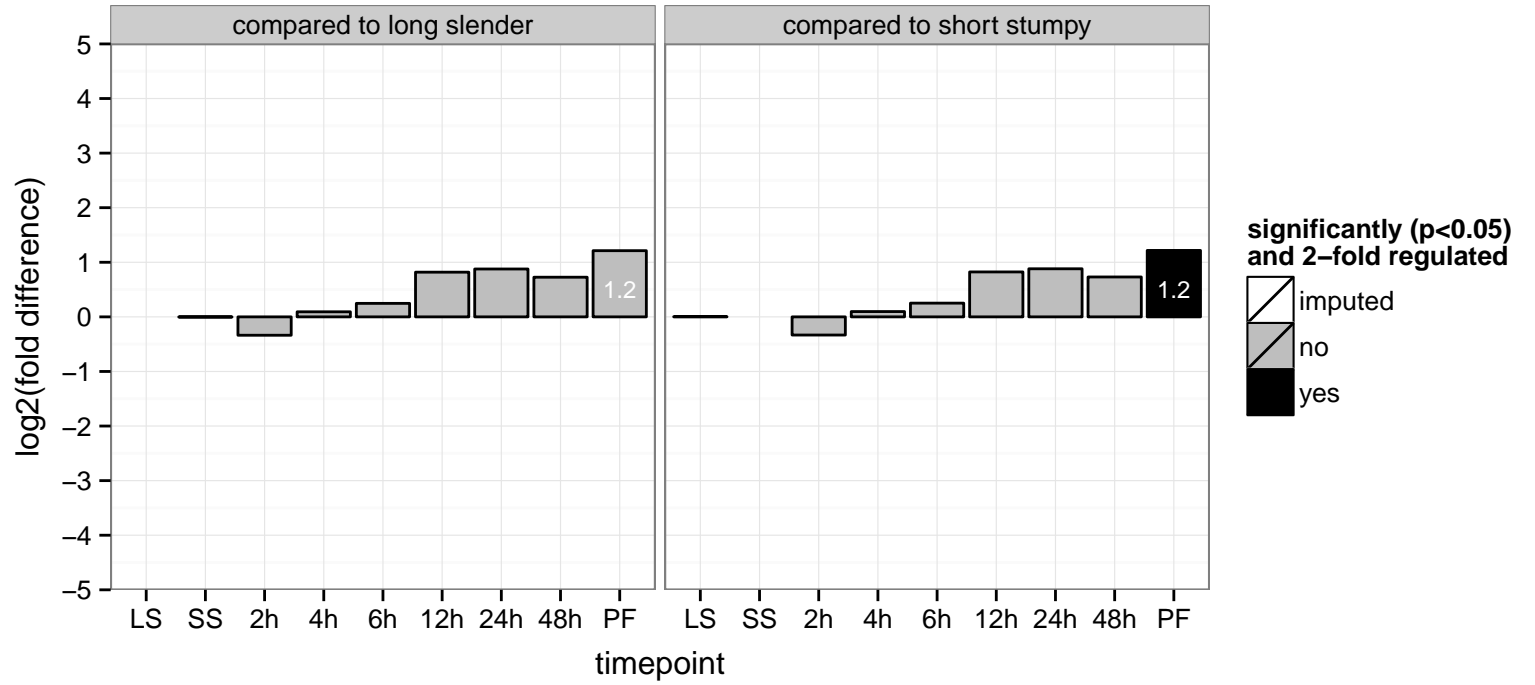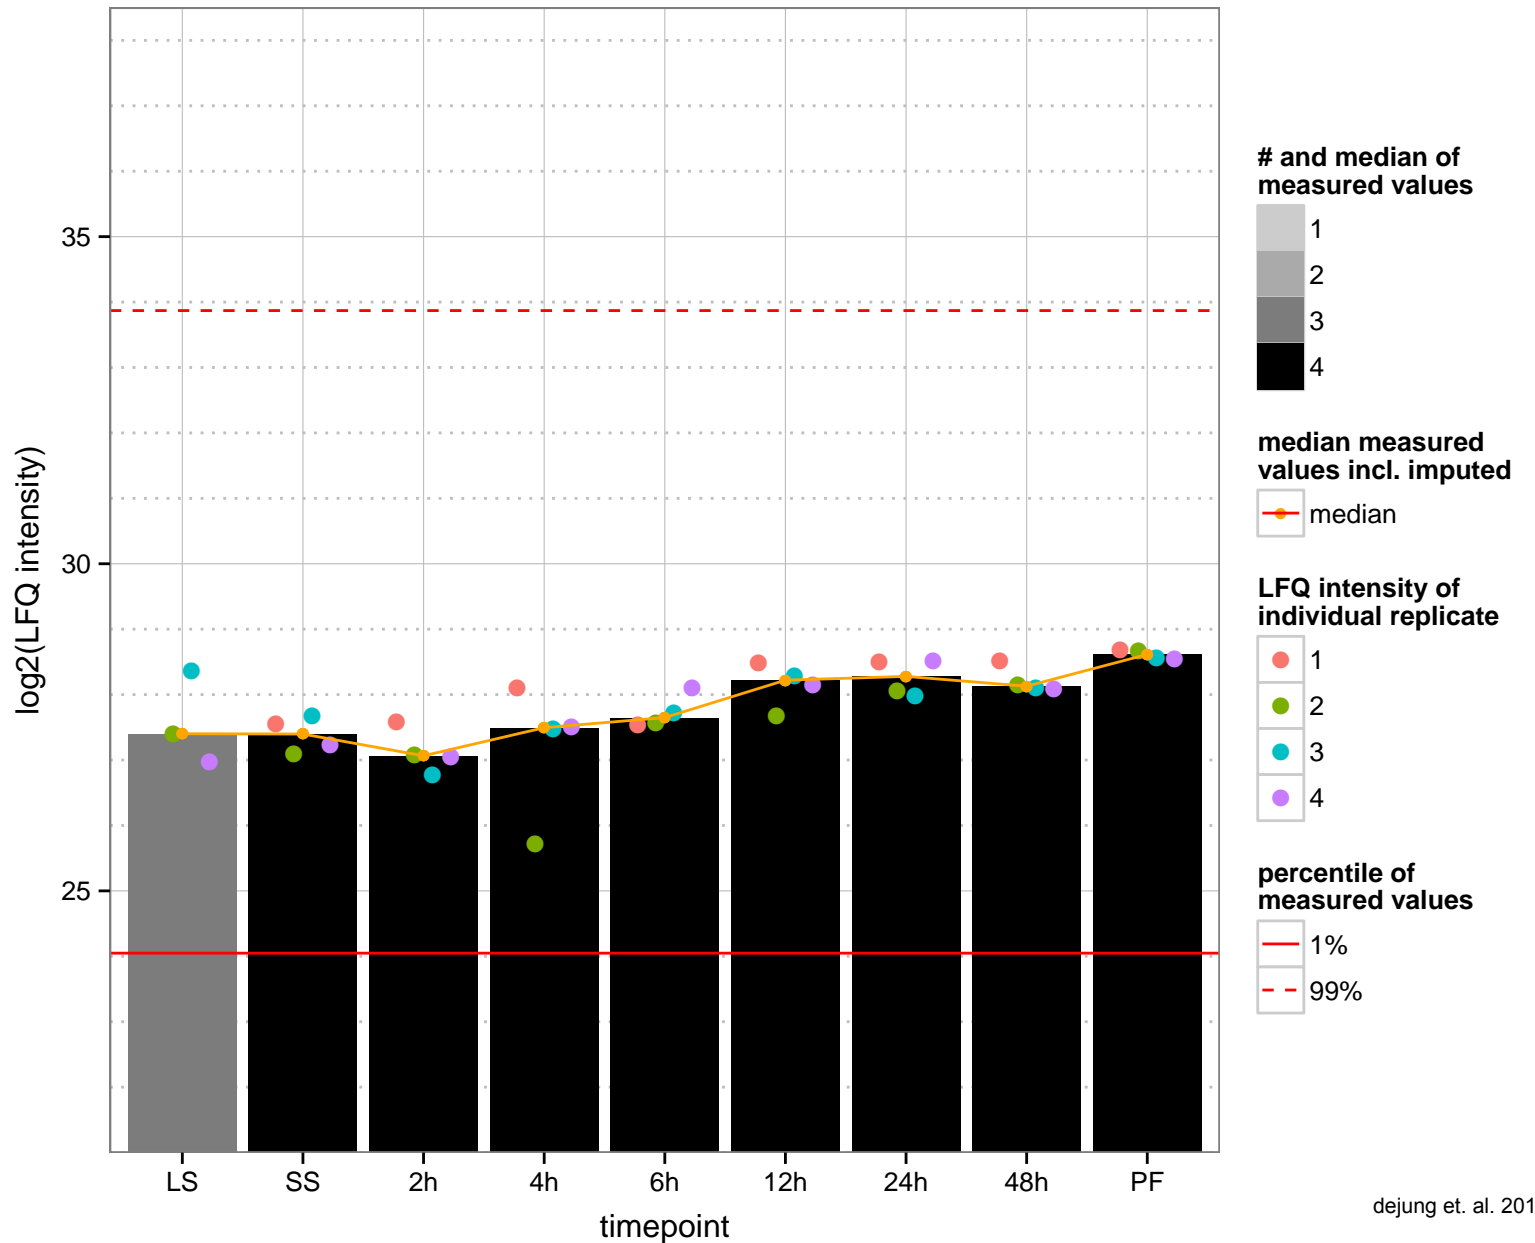

translation initiation factor IF-2, putative  
 Tb927.2.3780  
 AGOF: GTP binding, GTPase activity, translation initiation factor activity  
 AGOC: null  
 AGOP: translation  
 PGO: GTP binding, GTPase activity  
 PGO: null  
 PGO: null

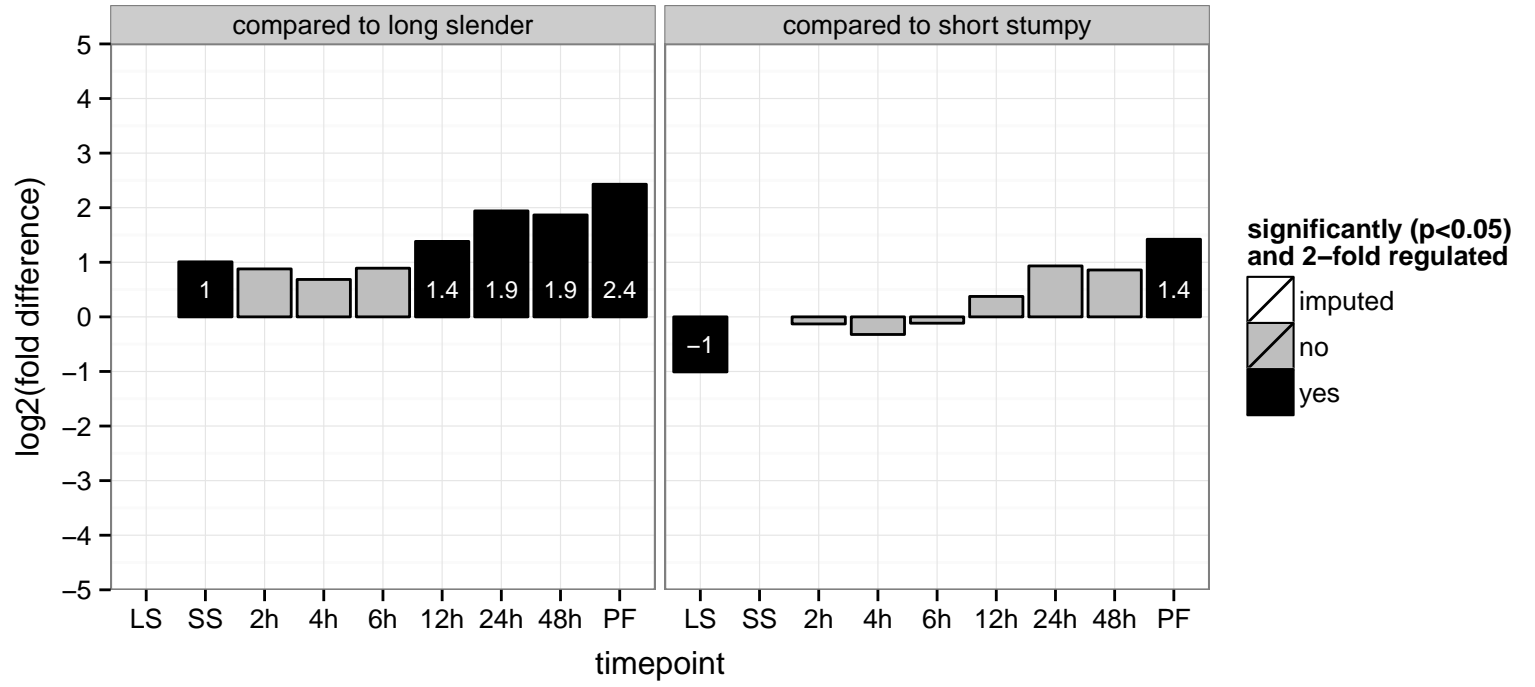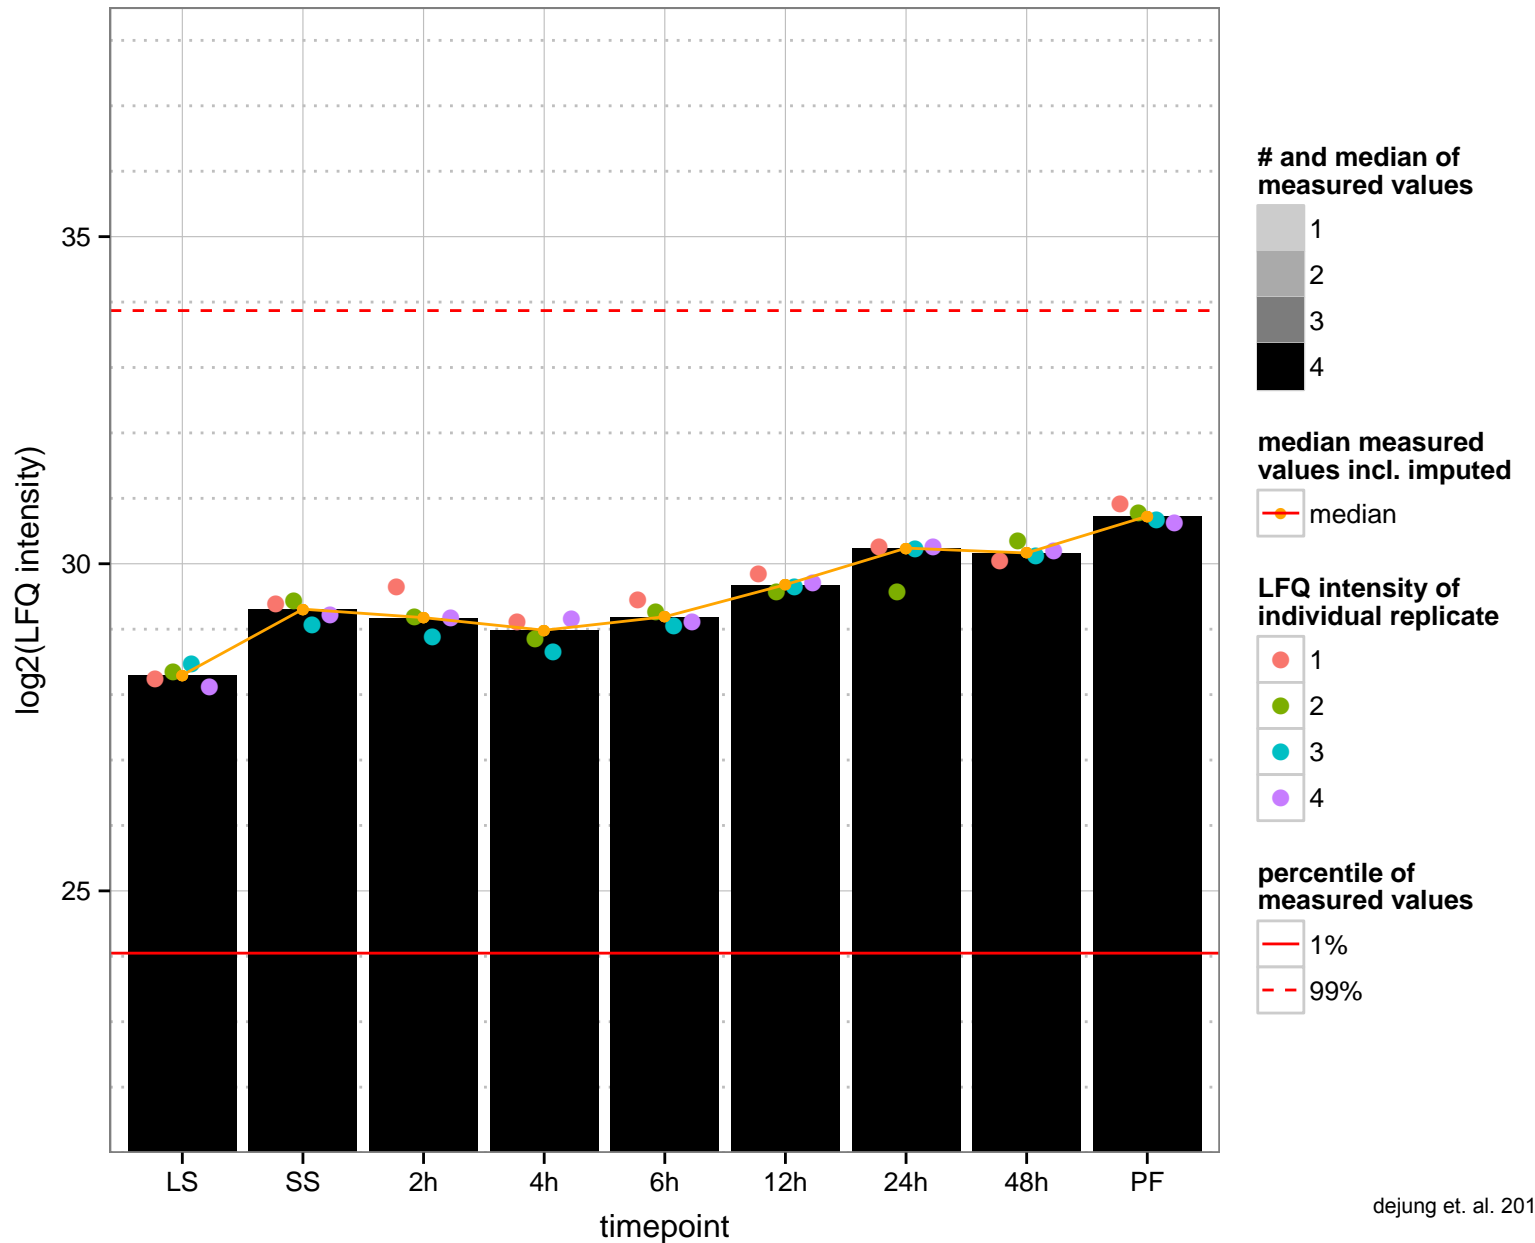

TFIIF-stimulated CTD phosphatase, putative  
 Tb927.2.4830  
 AGOF: null  
 AGOC: integral to membrane, mitochondrion  
 AGOP: null  
 PGO: protein binding  
 PGOC: null  
 PGOP: null

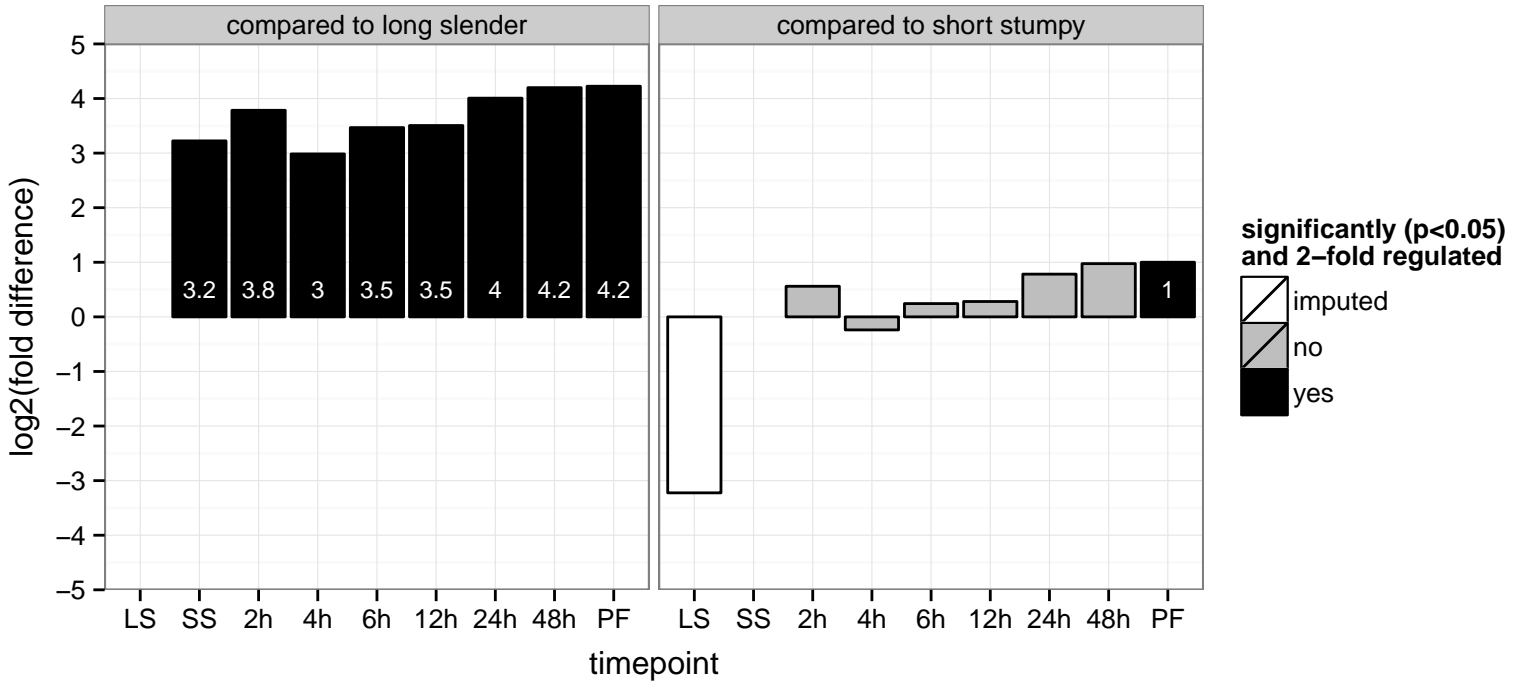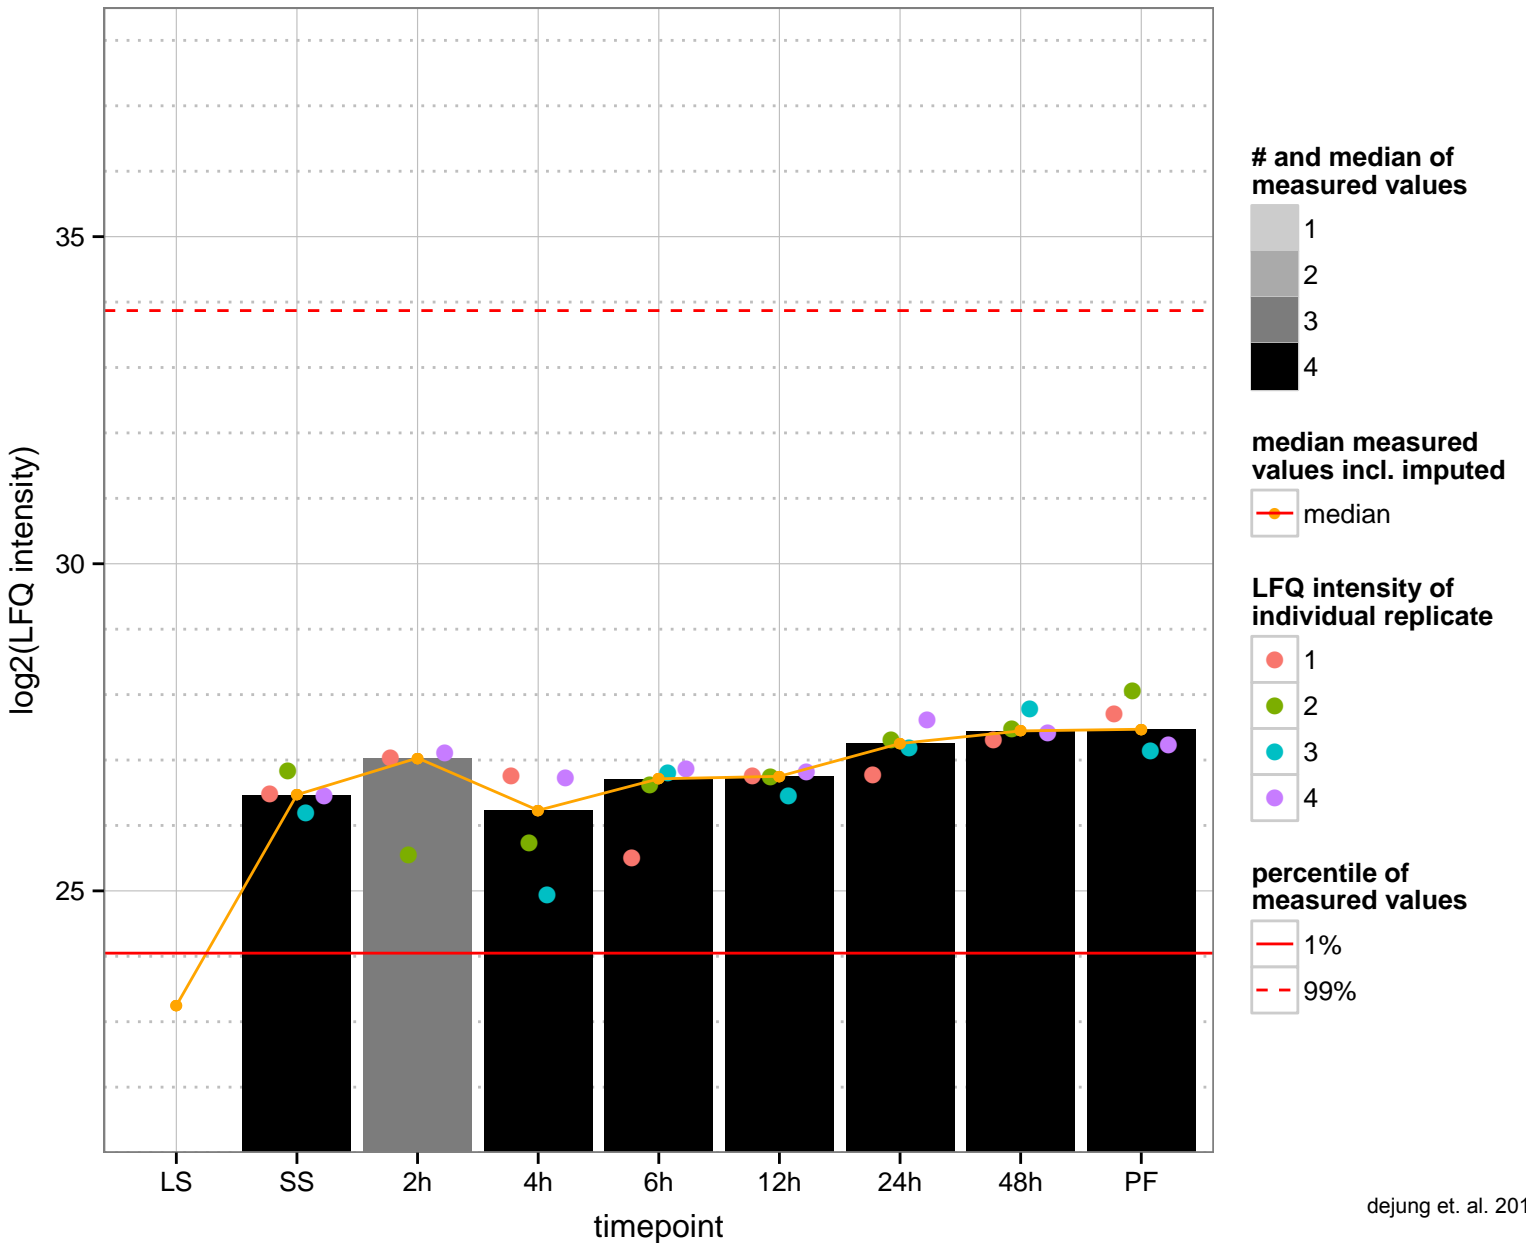



hypothetical protein, conserved  
 Tb927.2.5130  
 AGOF: null  
 AGOC: null  
 AGOP: null  
 PGOF: null  
 PGO: null  
 PGOP: null

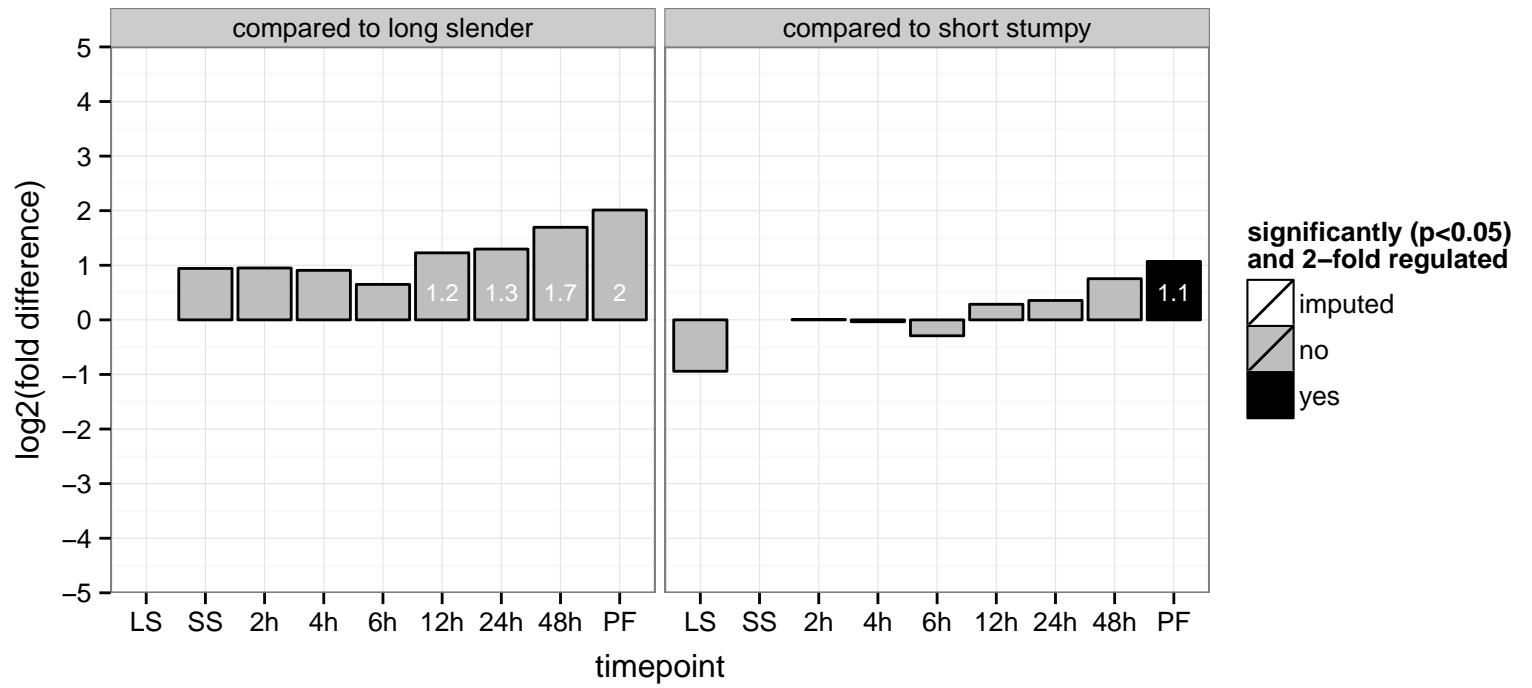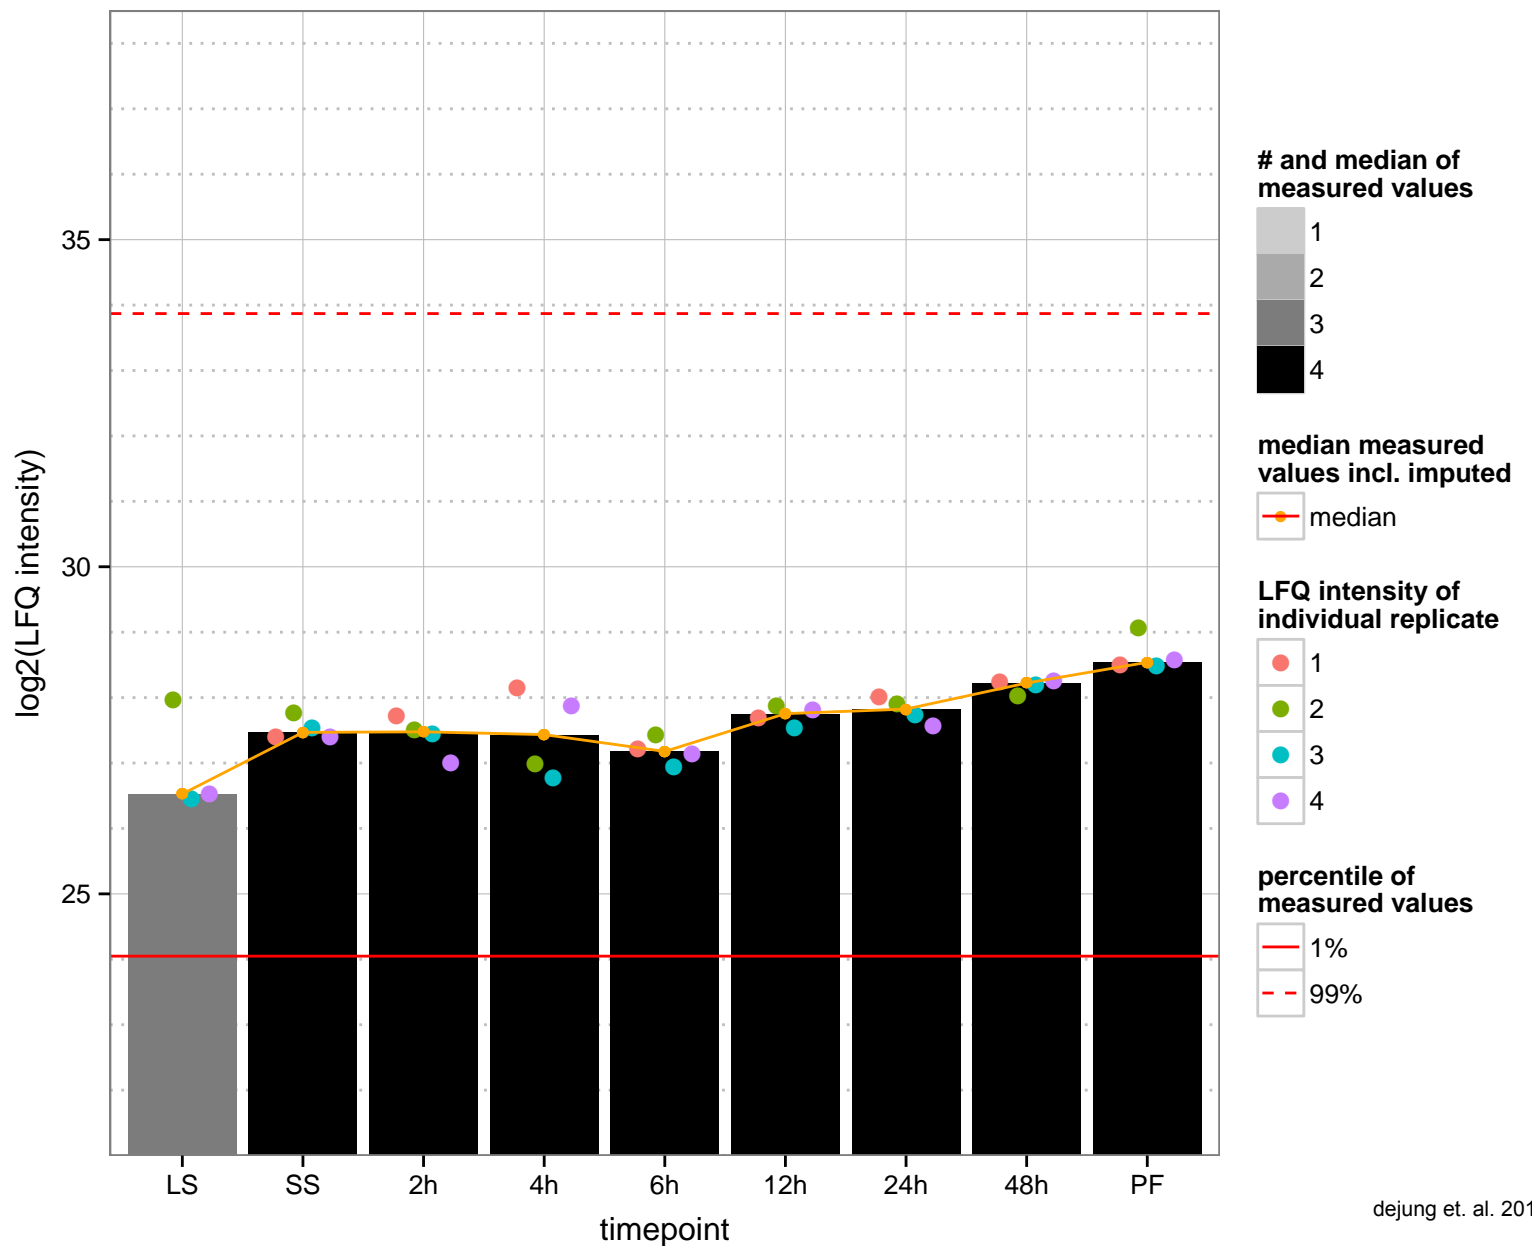

trans-sialidase, putative  
 Tb927.2.5280  
 AGOF: exo-alpha-sialidase activity  
 AGOC: null  
 AGOP: pathogenesis  
 PGO: null  
 PGOC: null  
 PGOP: null

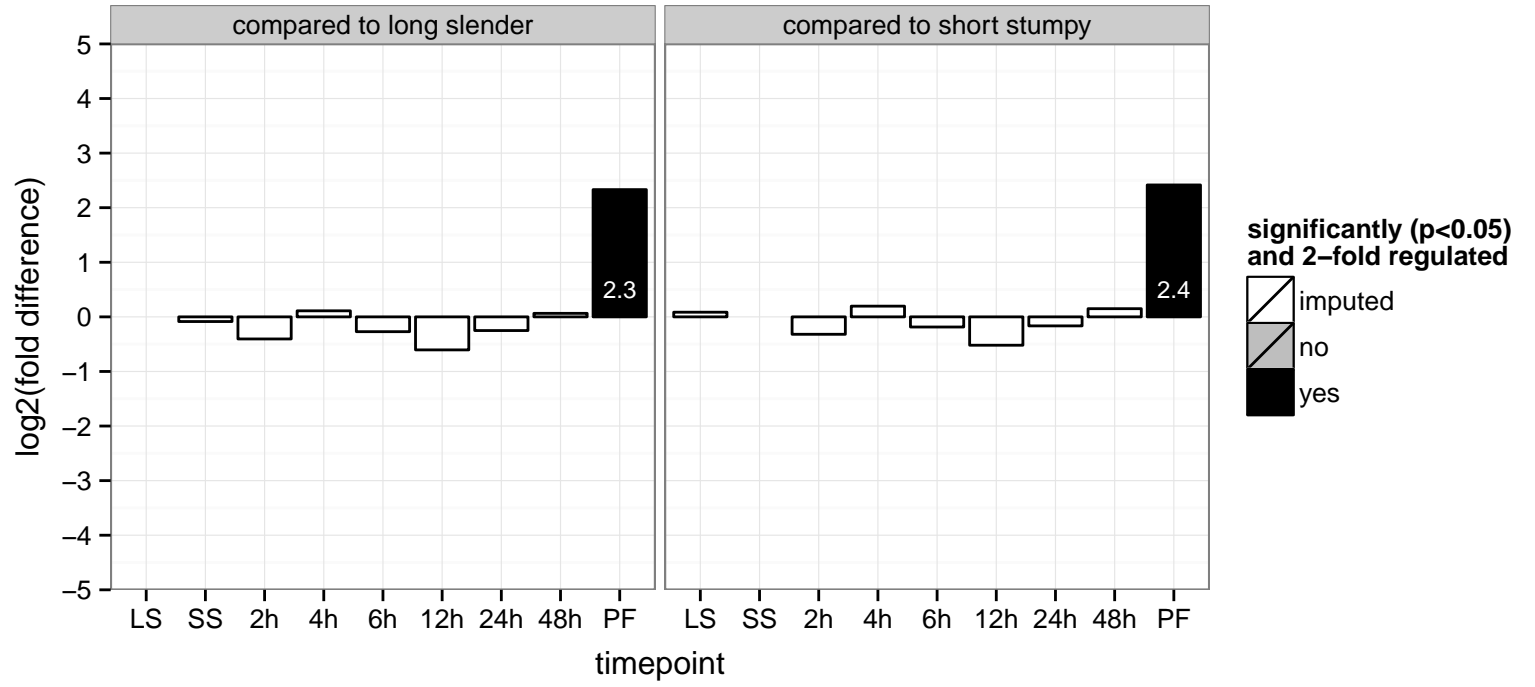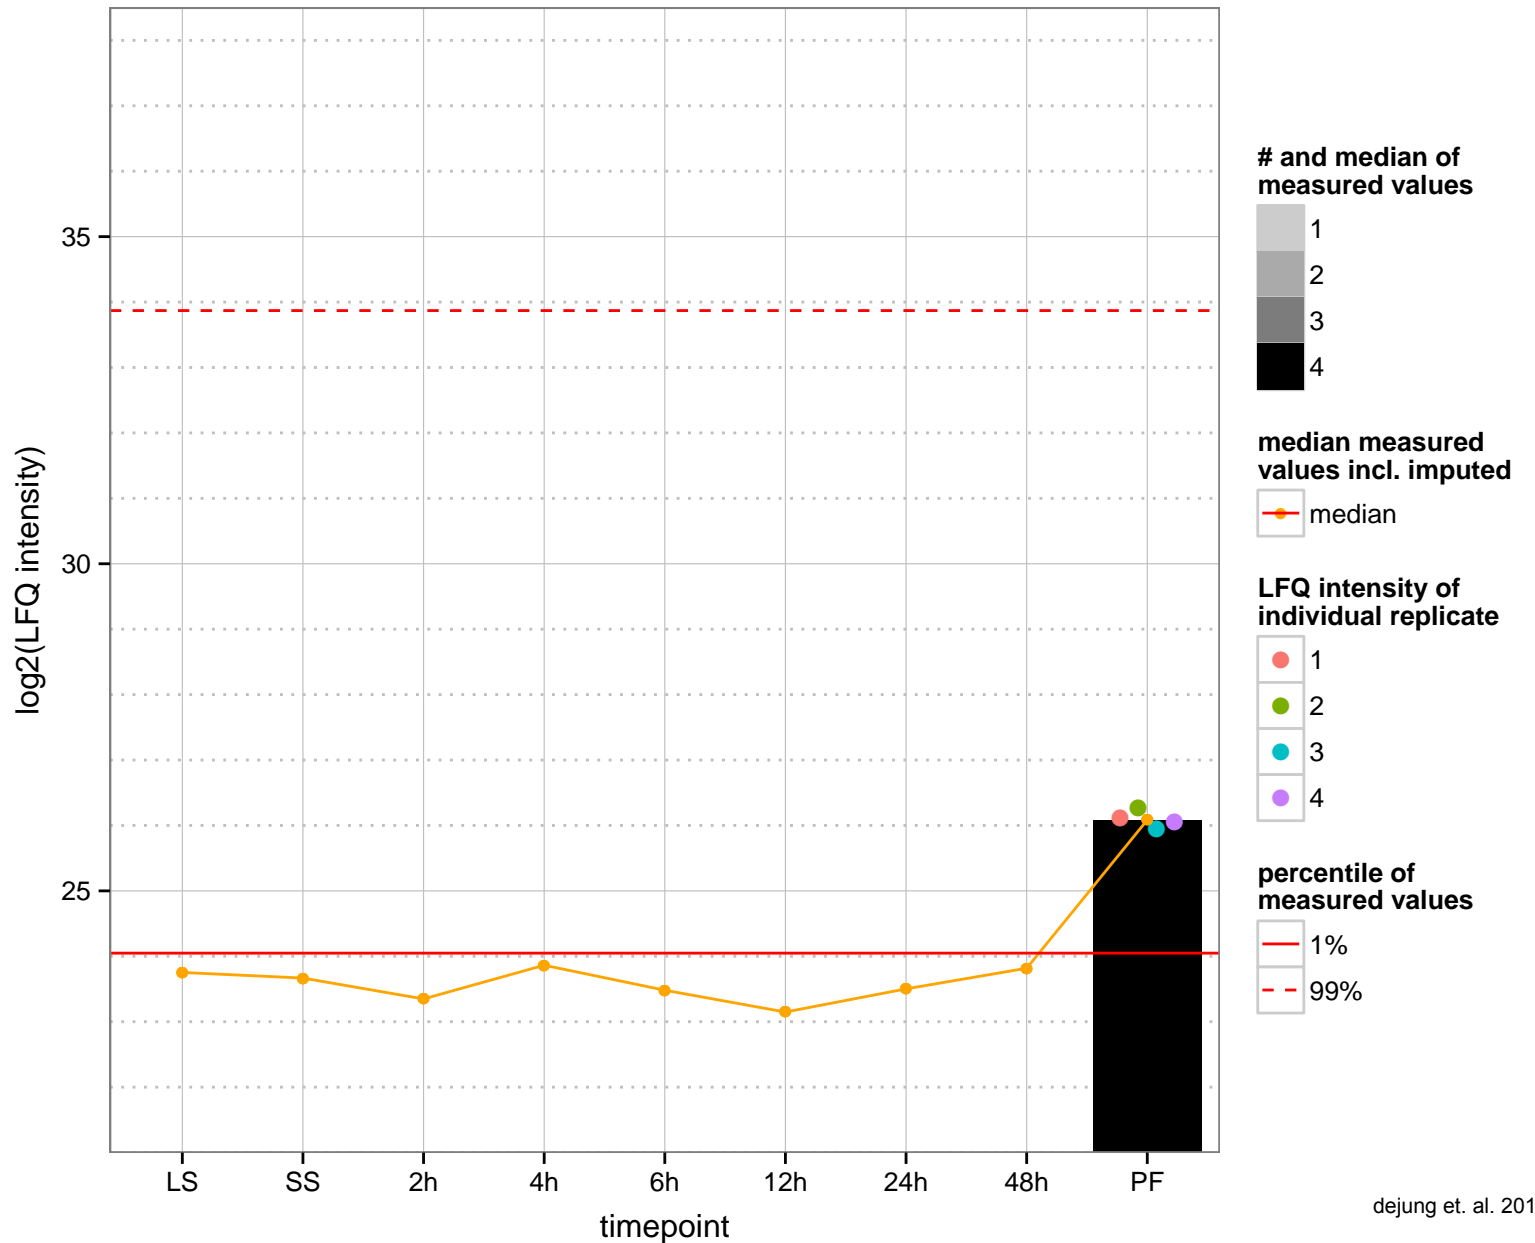

hypothetical protein, conserved  
 Tb927.3.1020  
 AGOF: null  
 AGOC: null  
 AGOP: null  
 PGOF: null  
 PGOE: null  
 PGOP: null

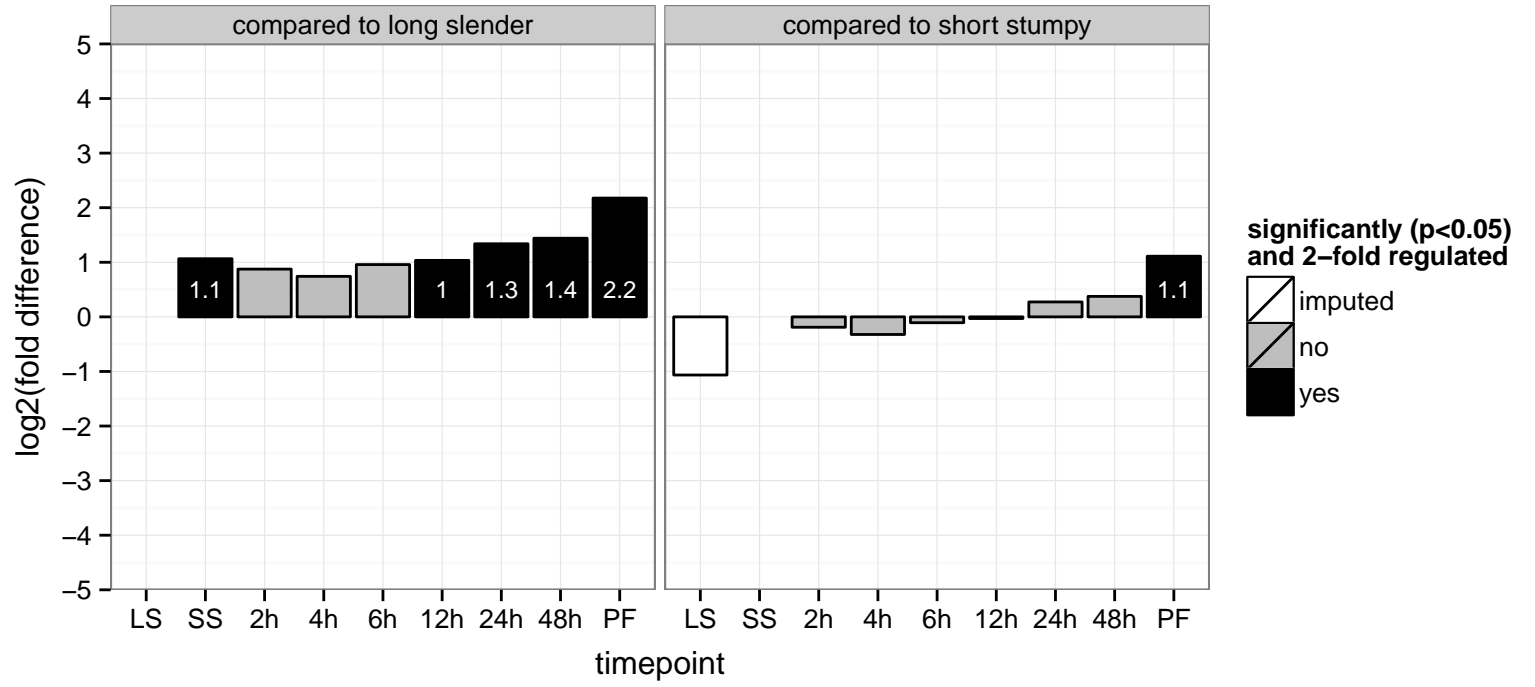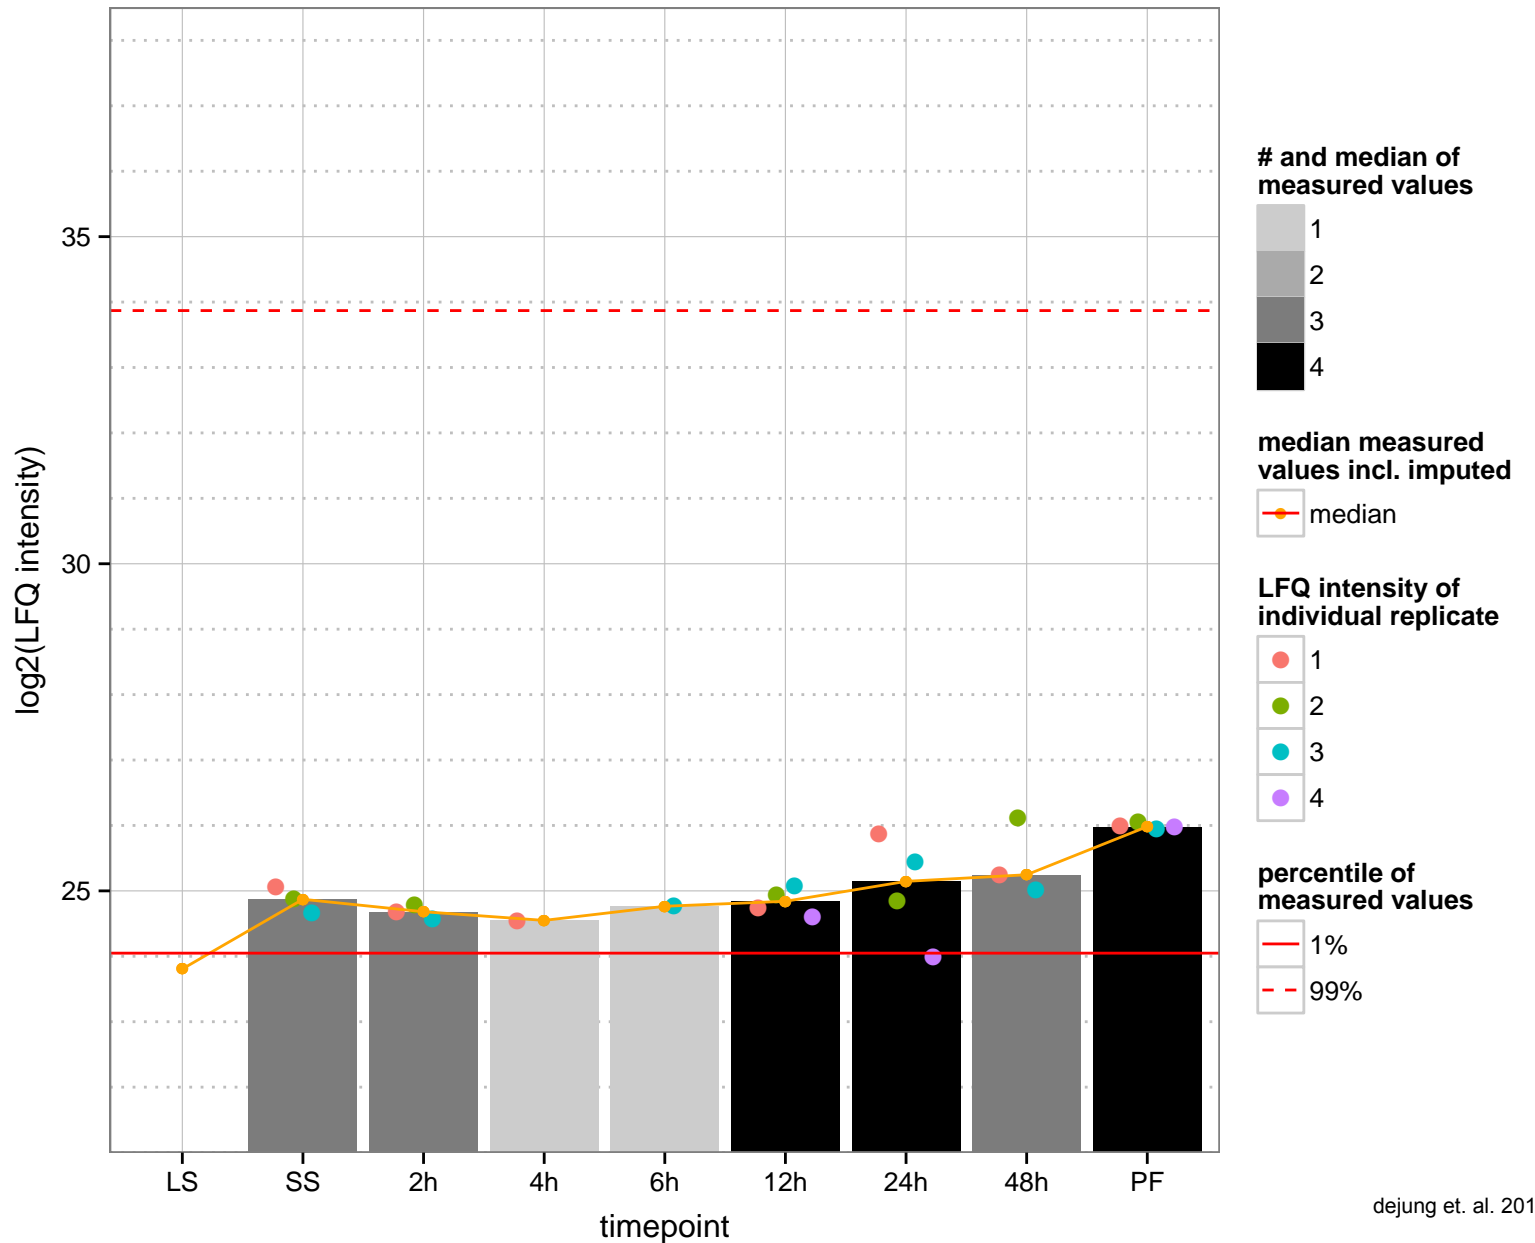

protein phosphatase 2A, putative  
 Tb927.3.1240  
 AGOF: hydrolase activity, protein serine/threonine phosphatase activity  
 AGOC: null  
 AGOP: protein dephosphorylation  
 PGO: hydrolase activity  
 PGOC: null  
 PGOP: null

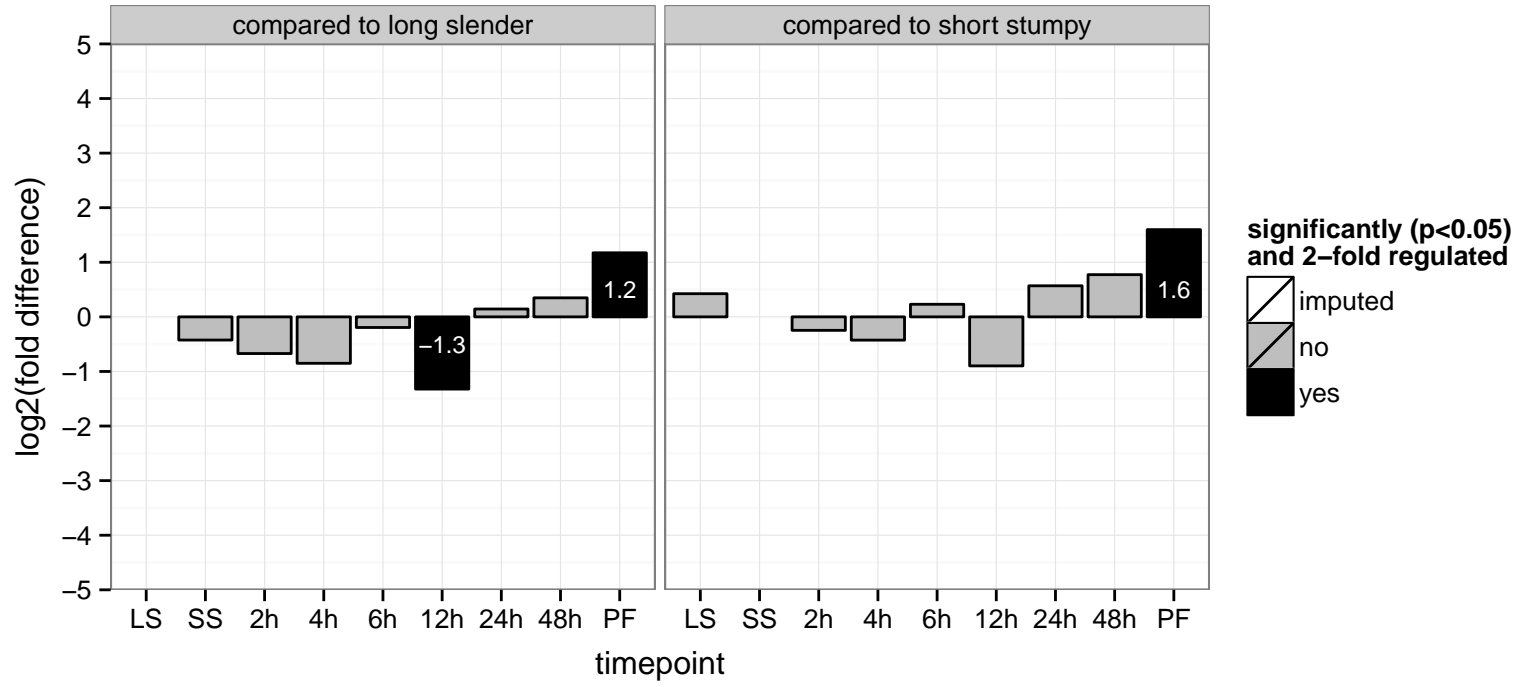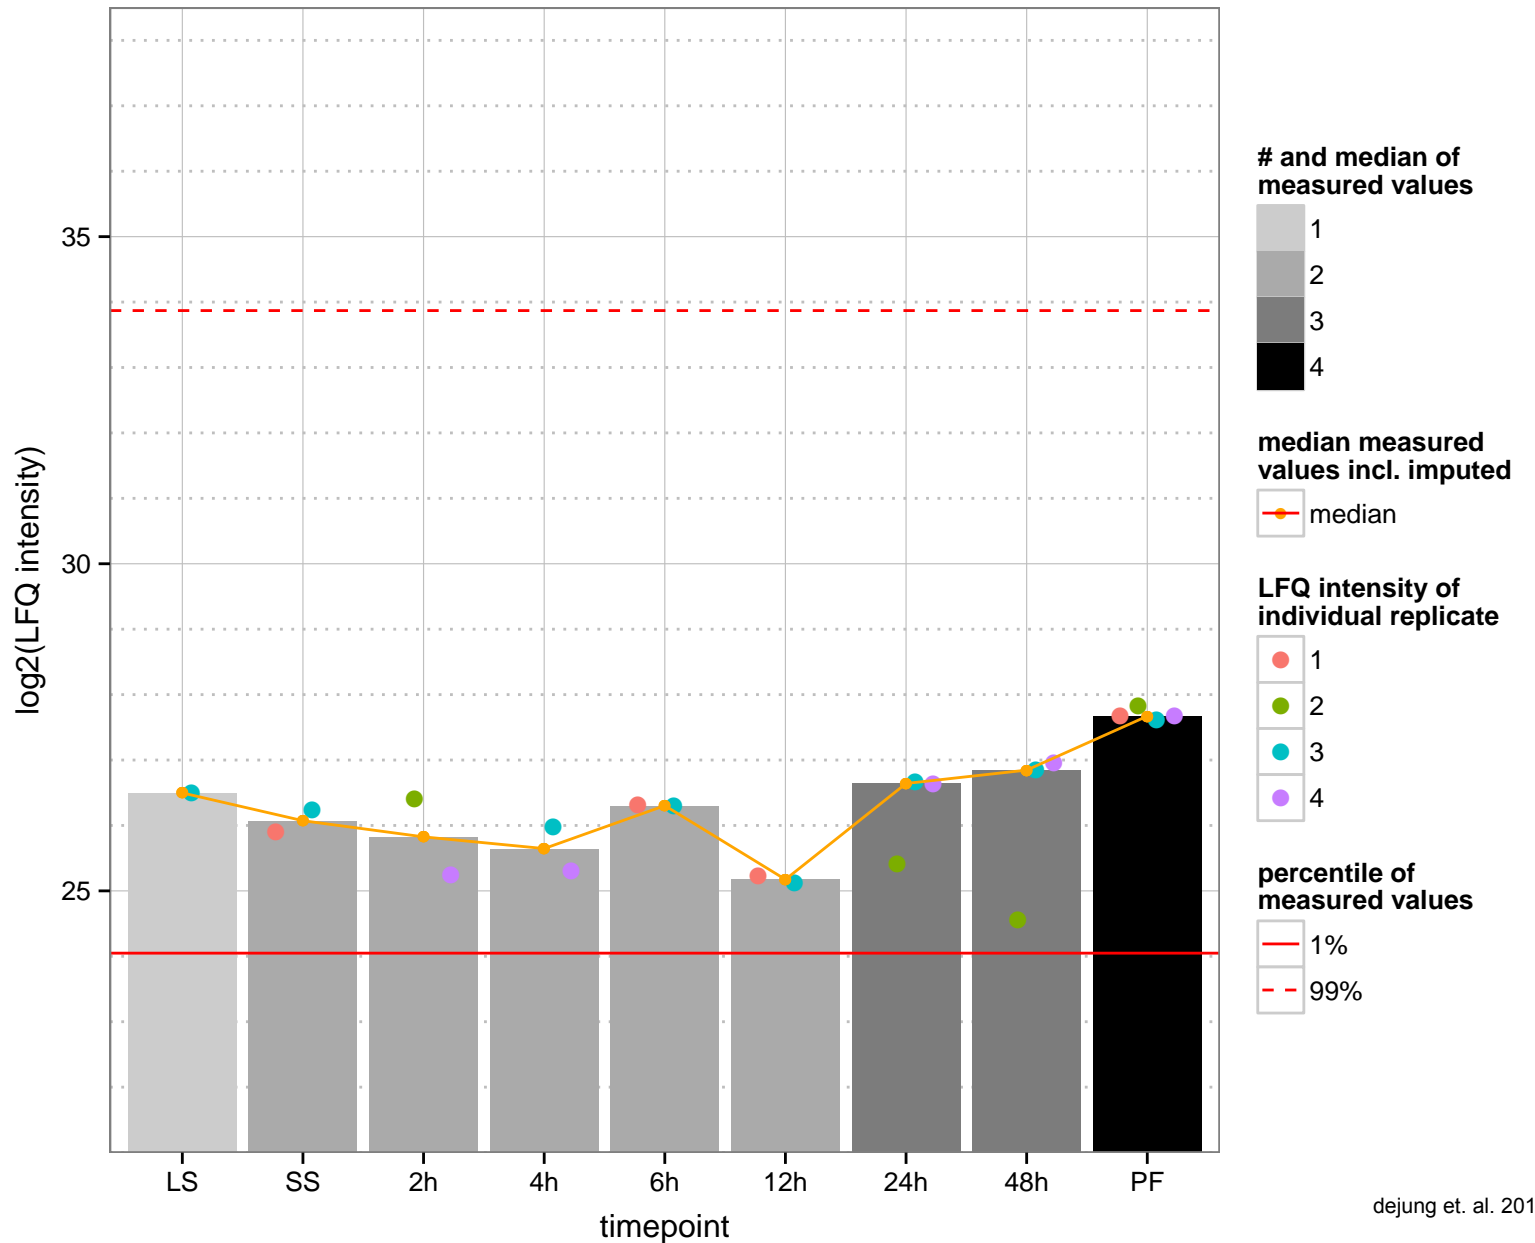

hypothetical protein, conserved  
 Tb927.3.1350  
 AGOF: null  
 AGOC: null  
 AGOP: null  
 PGO: protein binding  
 PGOC: null  
 PGOP: null

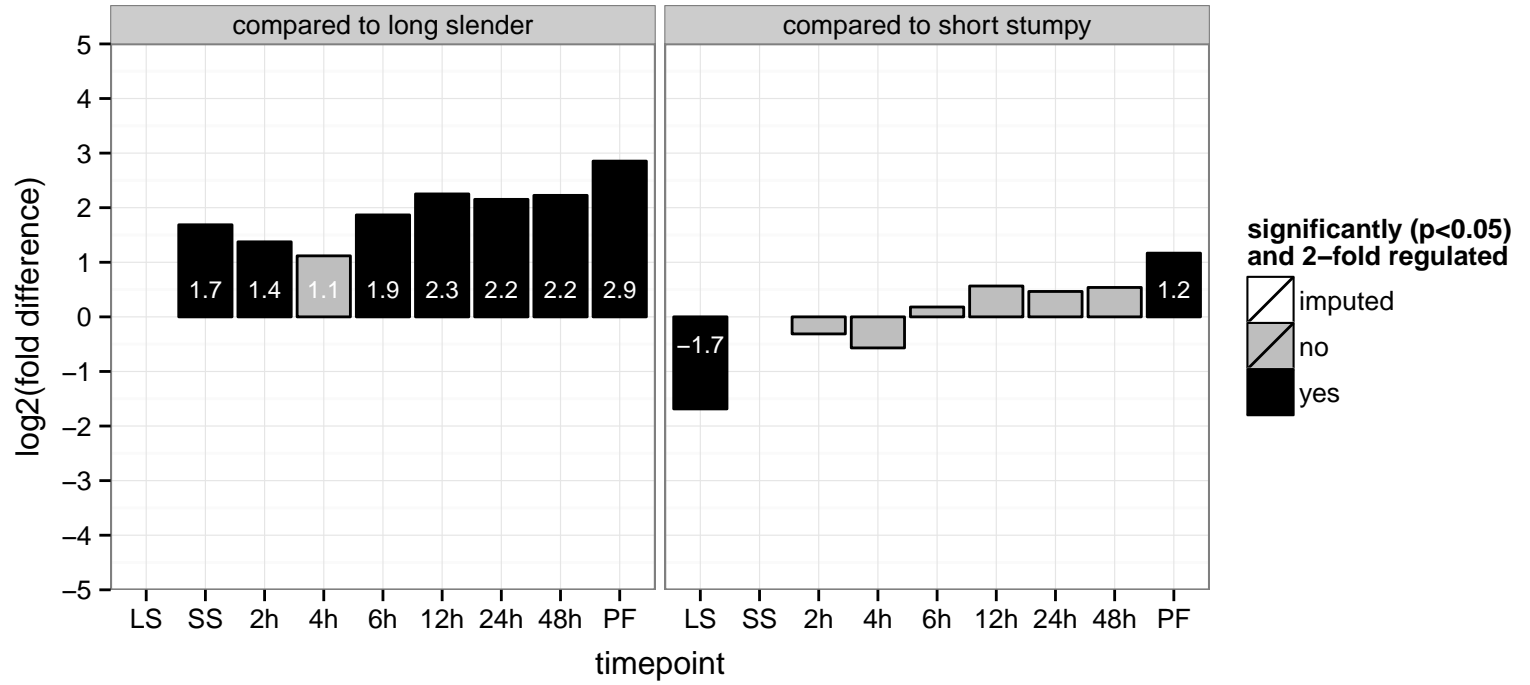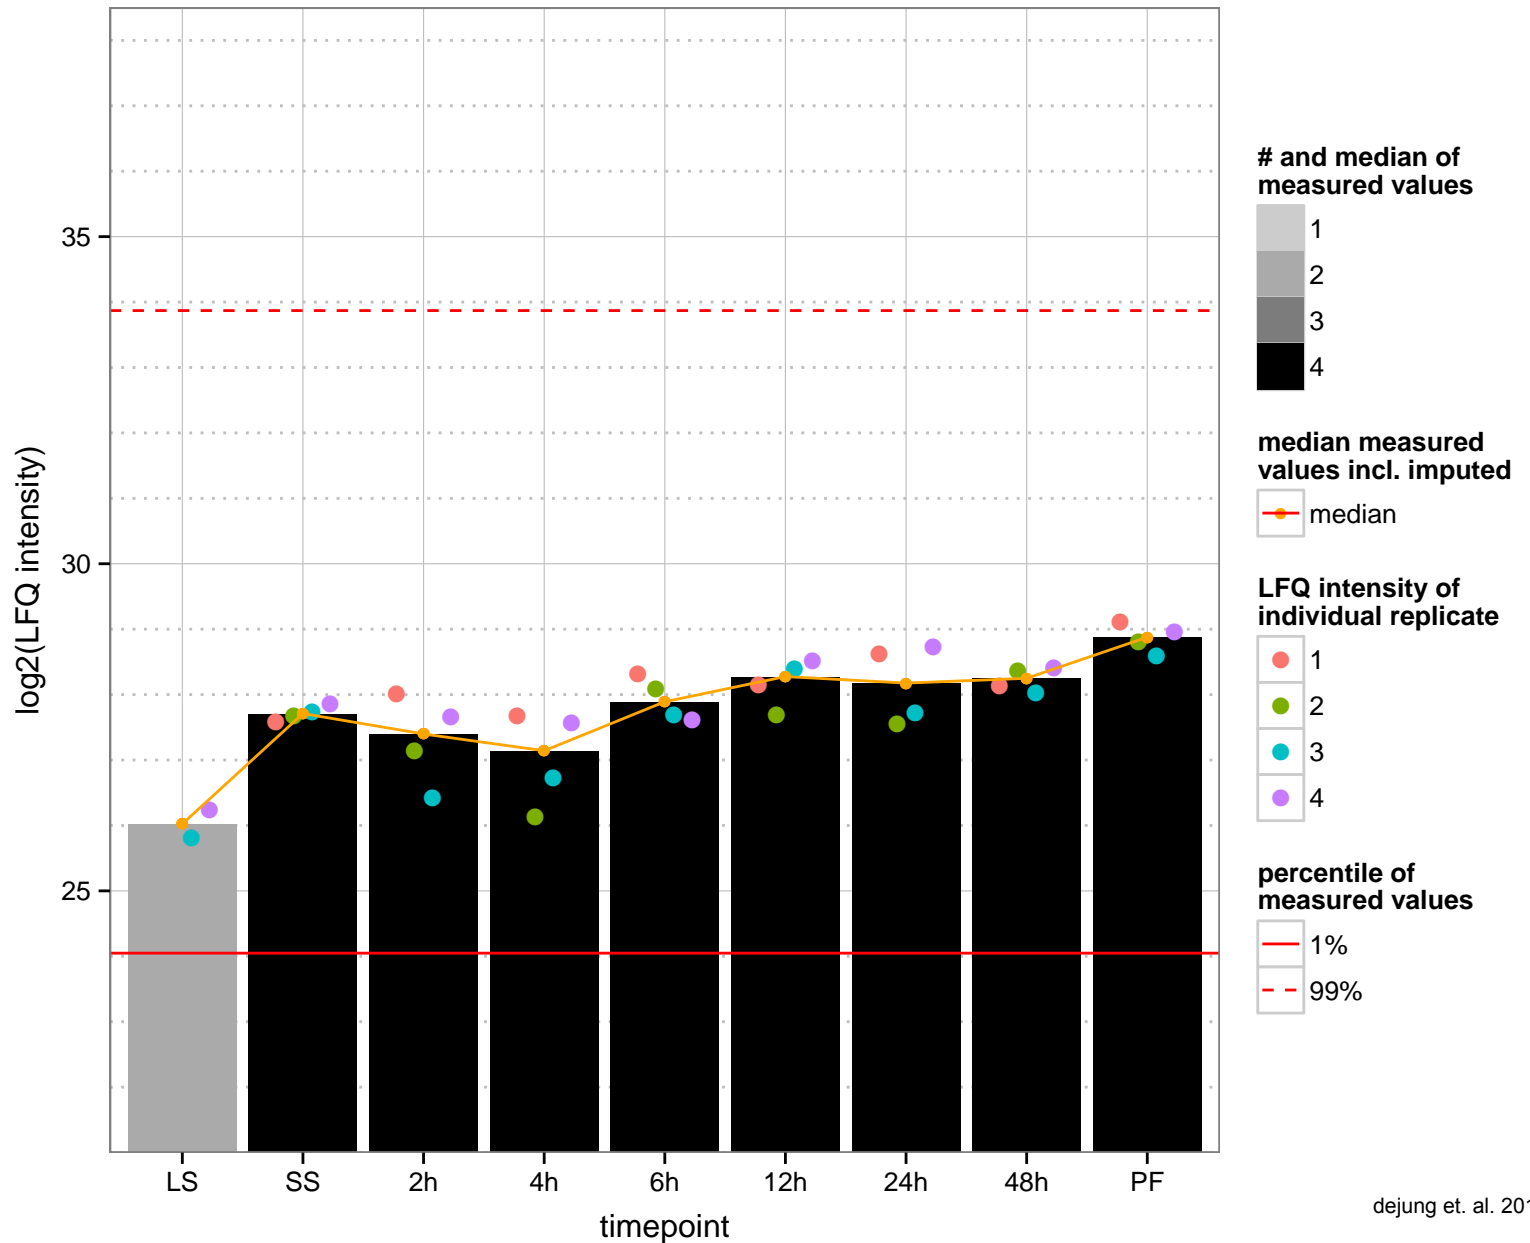

hypothetical protein, conserved  
 Tb927.3.1550  
 AGOF: null  
 AGOC: null  
 AGOP: null  
 PGOF: null  
 PGO C: null  
 PGOP: null

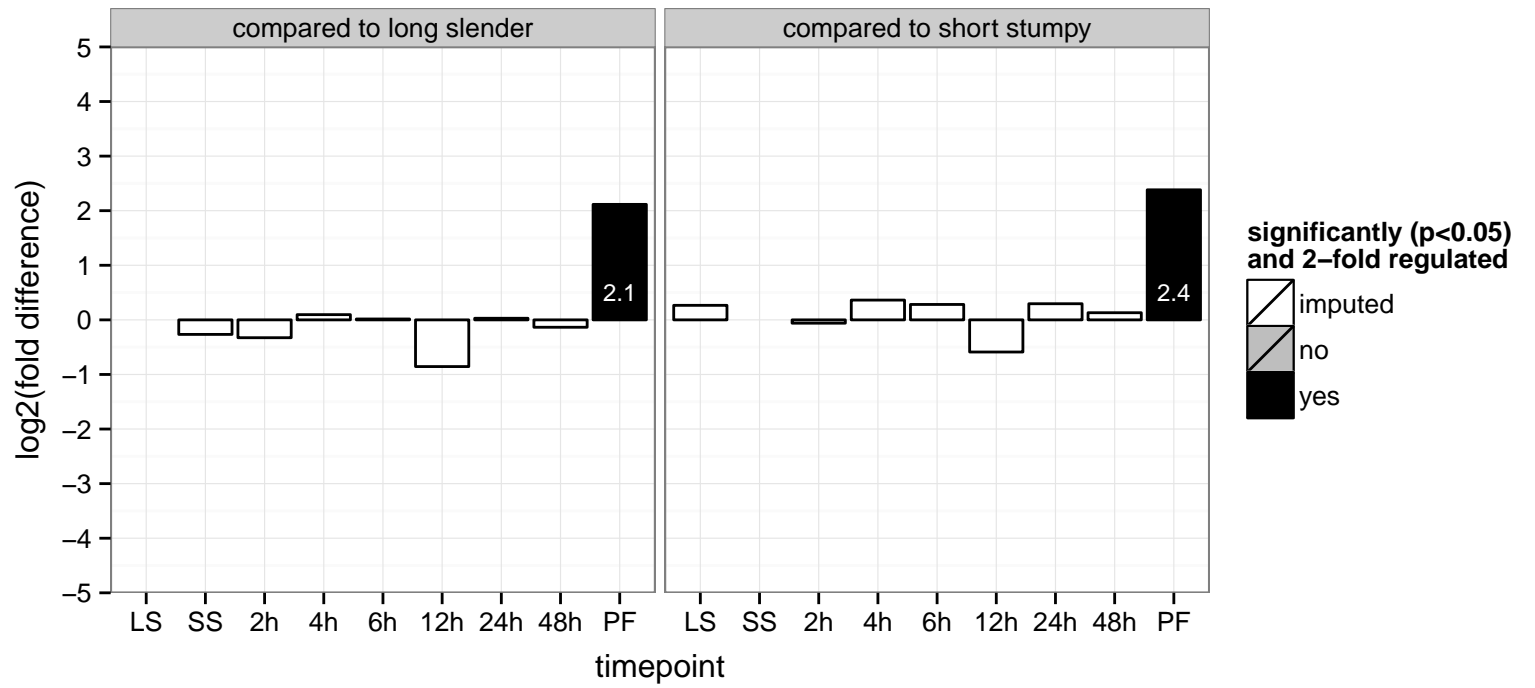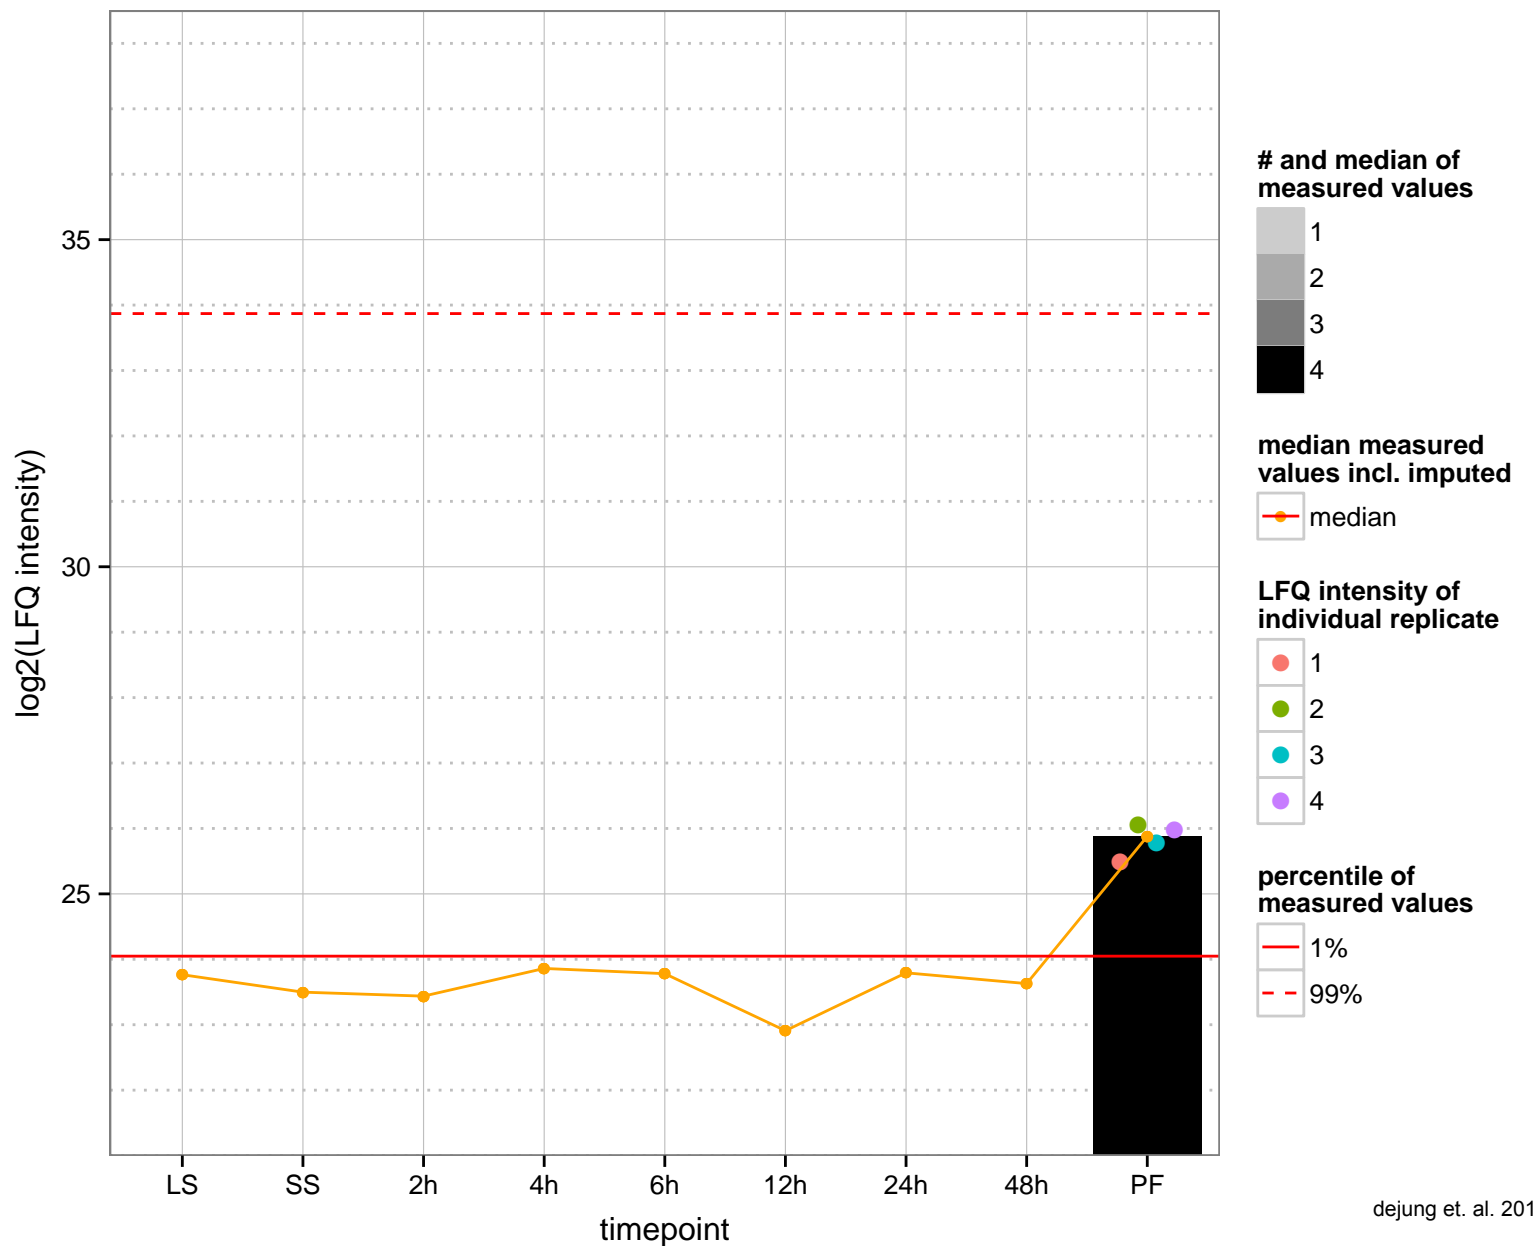

pumilio RNA binding protein, putative (PUF8)  
 Tb927.3.2470  
 AGOF: RNA binding  
 AGOC: null  
 AGOP: null  
 PGO: RNA binding, binding  
 PGOC: null  
 PGOP: null

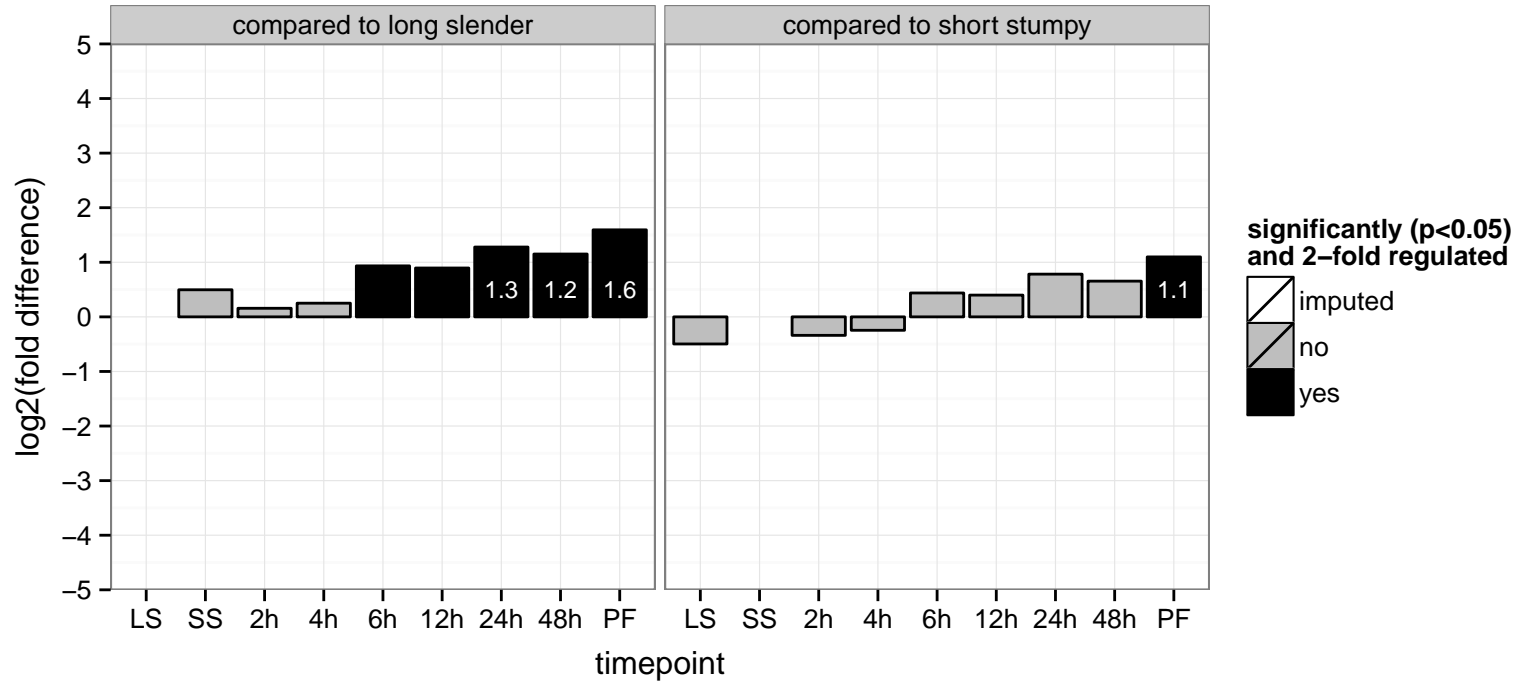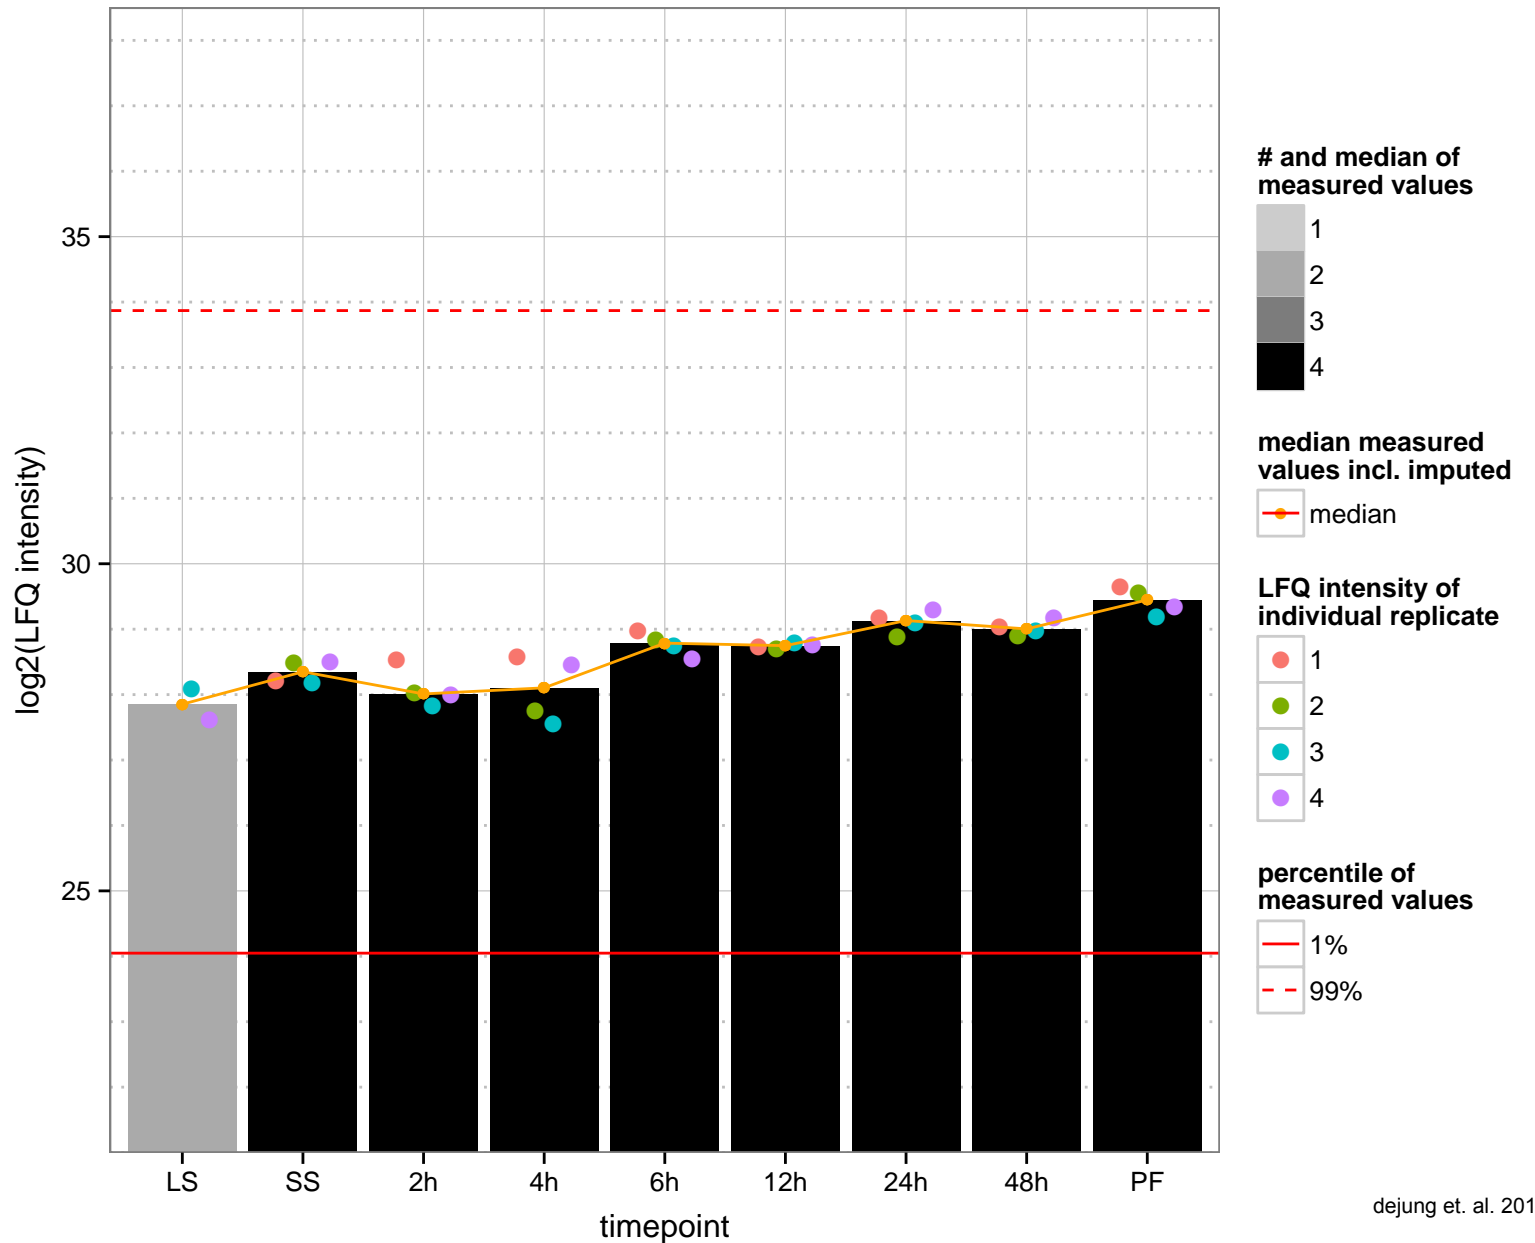

hypothetical protein, conserved  
 Tb927.3.2670  
 AGOF: null  
 AGOC: mitochondrion  
 AGOP: null  
 PGO: null  
 PGO: null  
 PGO: null

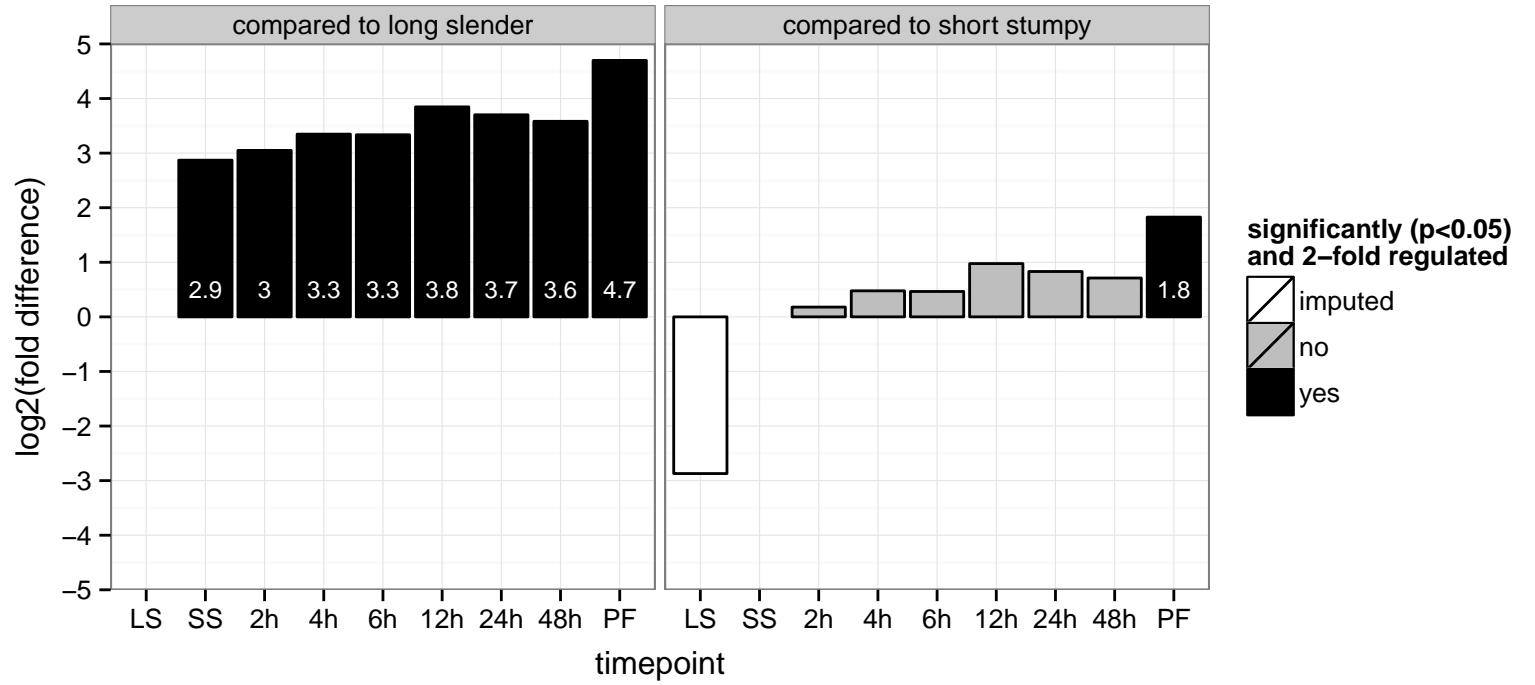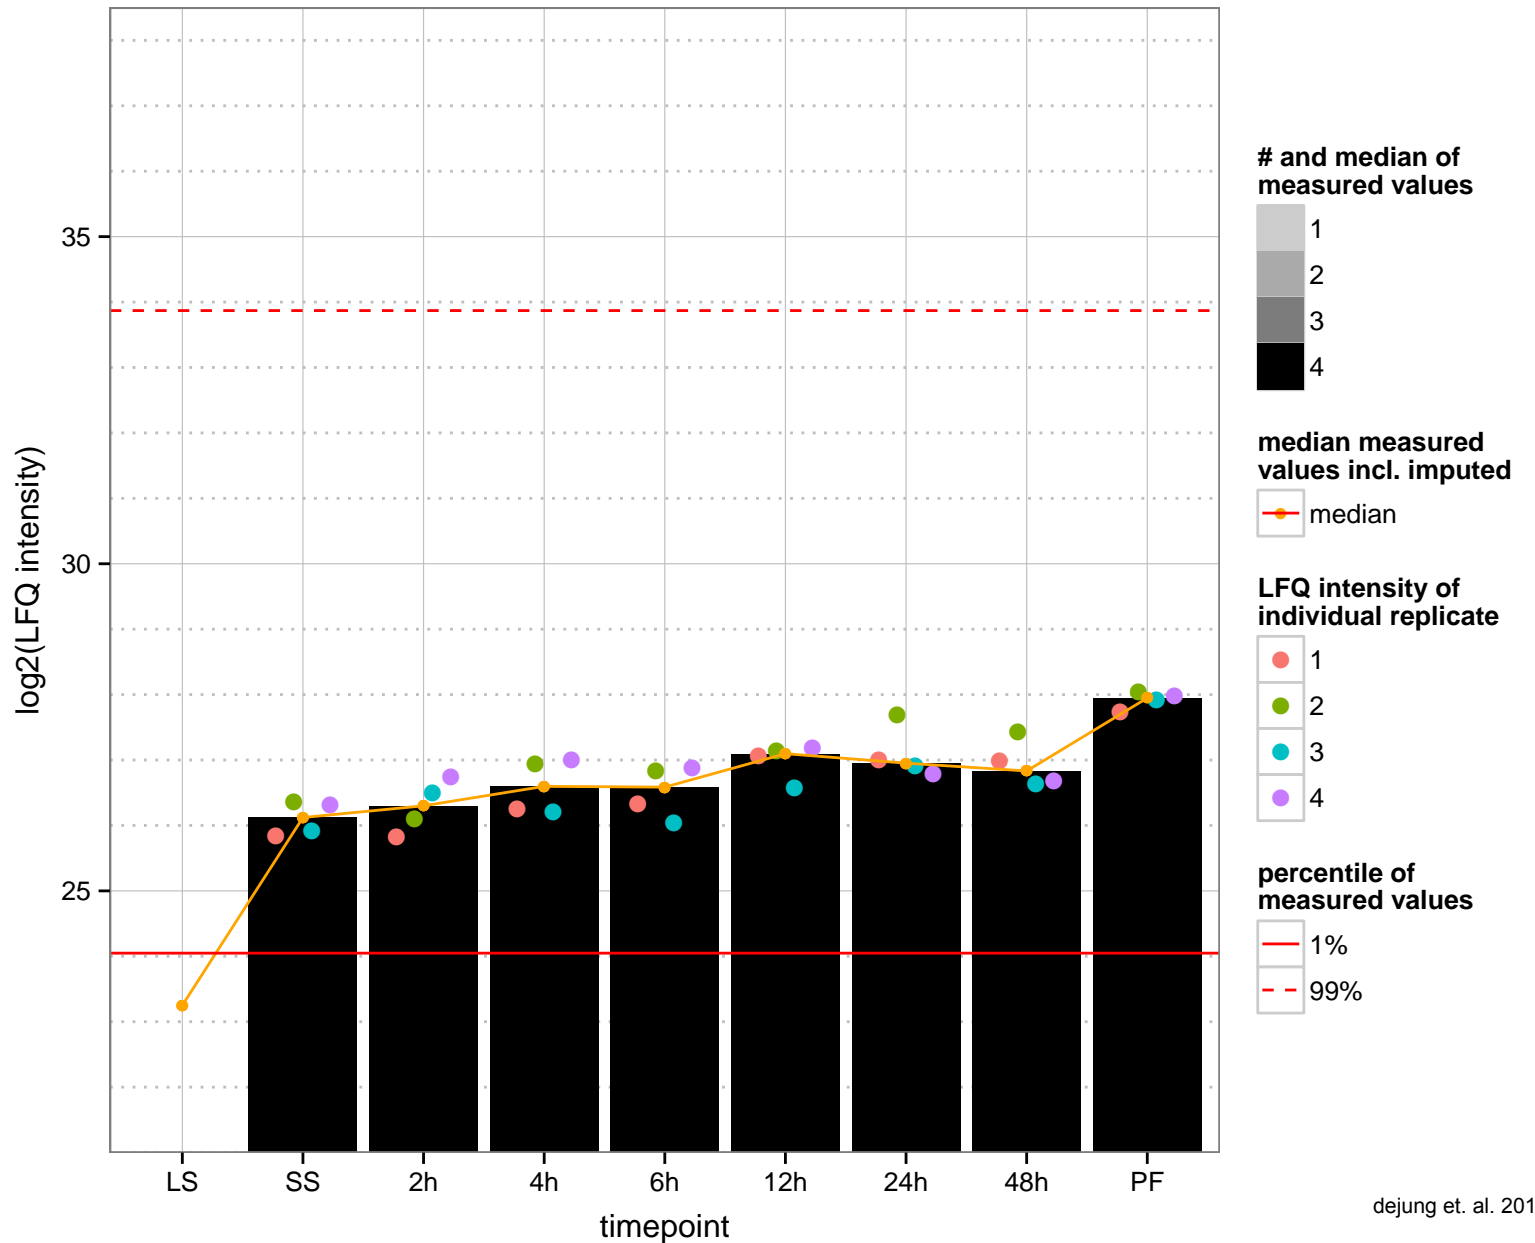



hypothetical protein, conserved  
 Tb927.3.3370  
 AGOF: null  
 AGOC: null  
 AGOP: null  
 PGO: protein binding  
 PGOC: null  
 PGOP: null

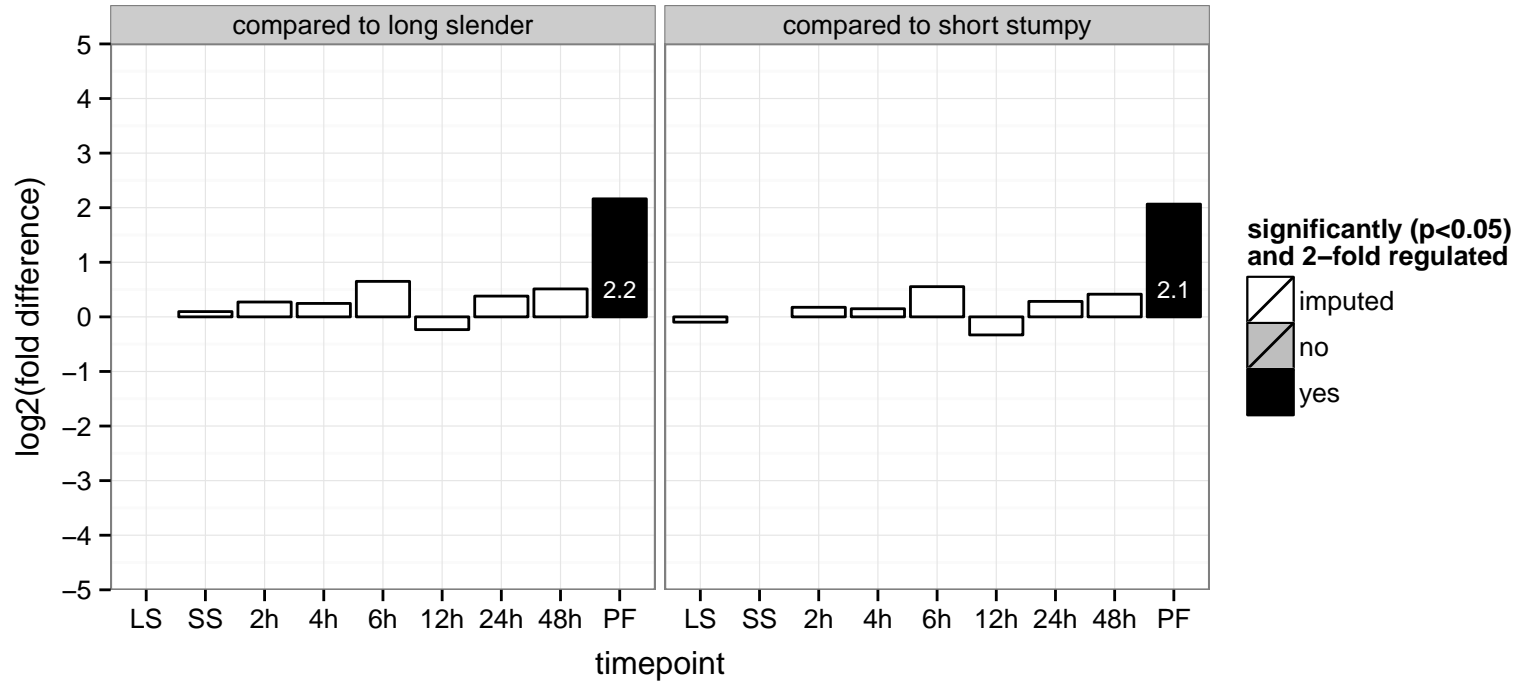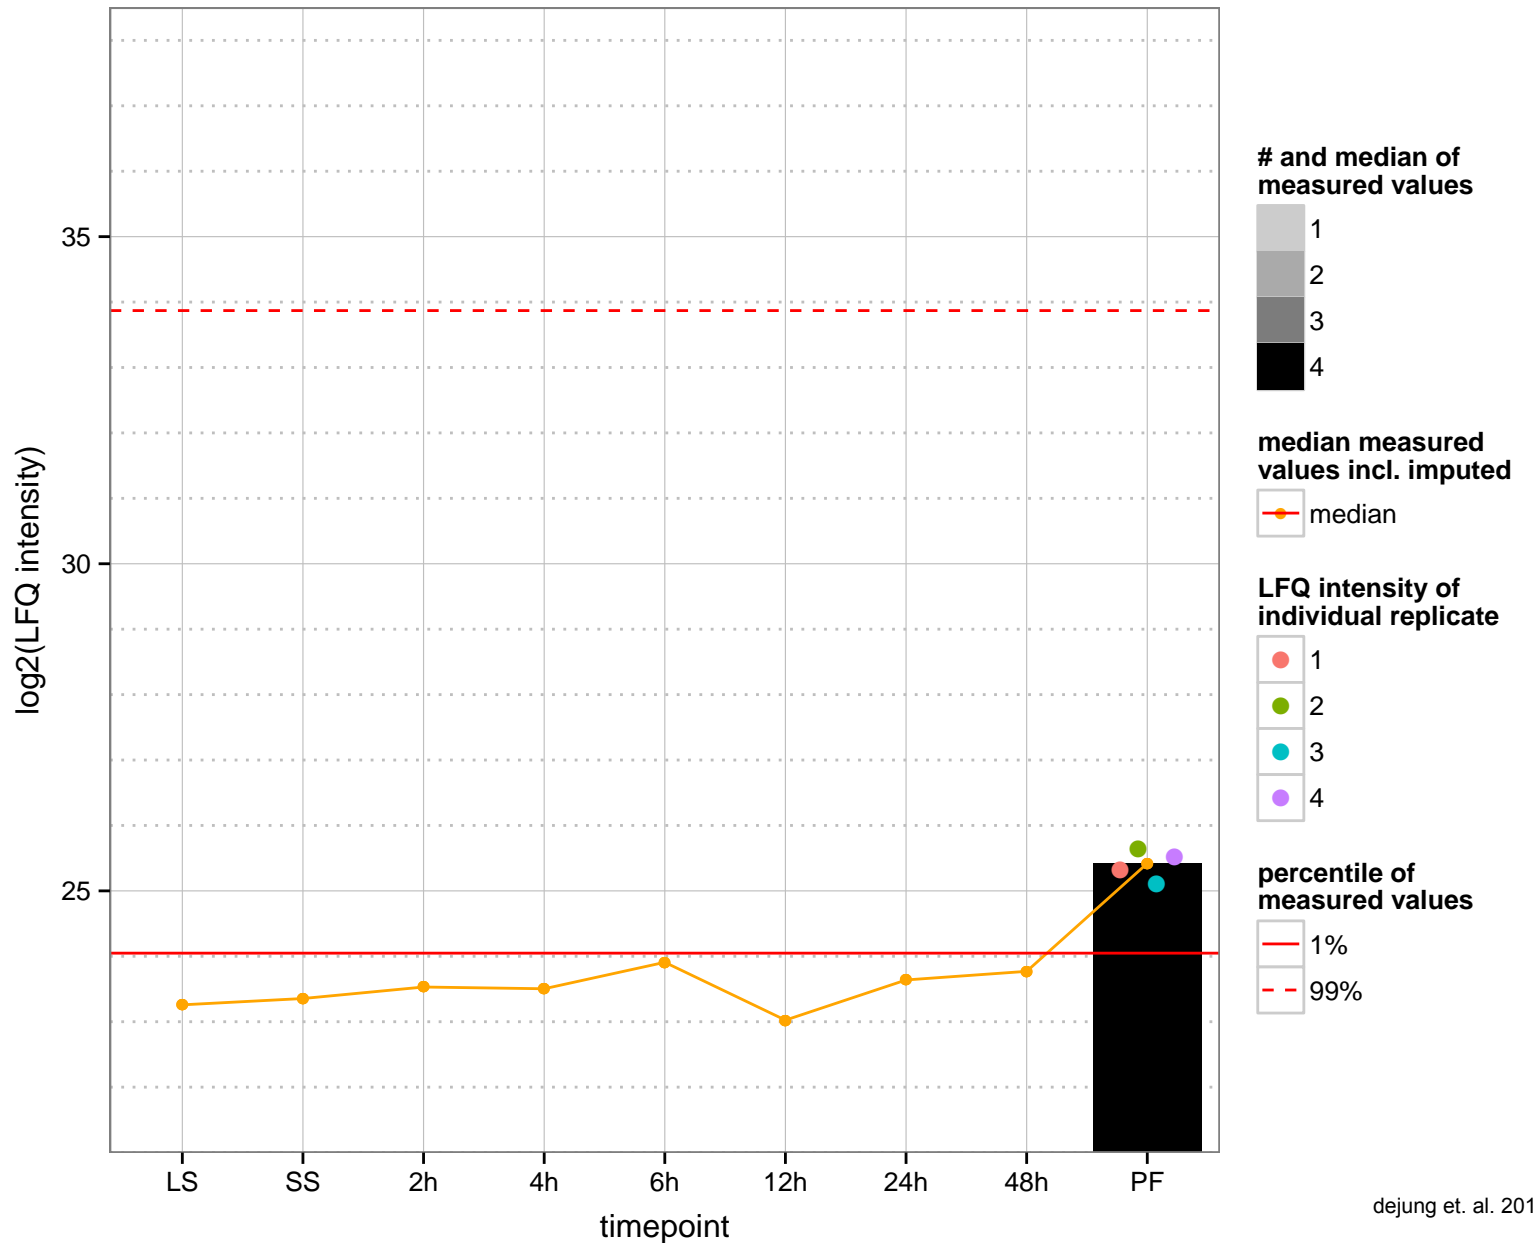

hypothetical protein, conserved  
 Tb927.3.3510  
 AGOF: null  
 AGOC: null  
 AGOP: null  
 PGOF: null  
 PGO C: null  
 PGOP: null

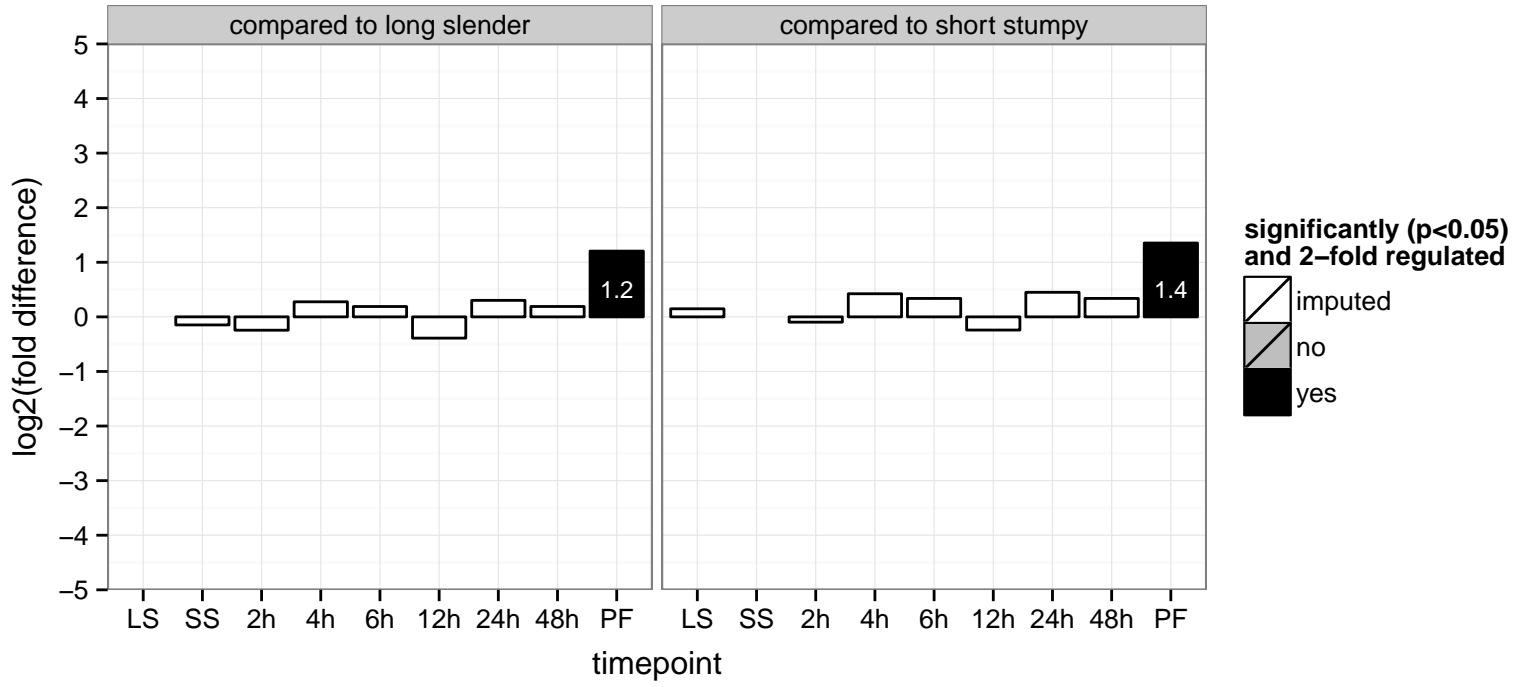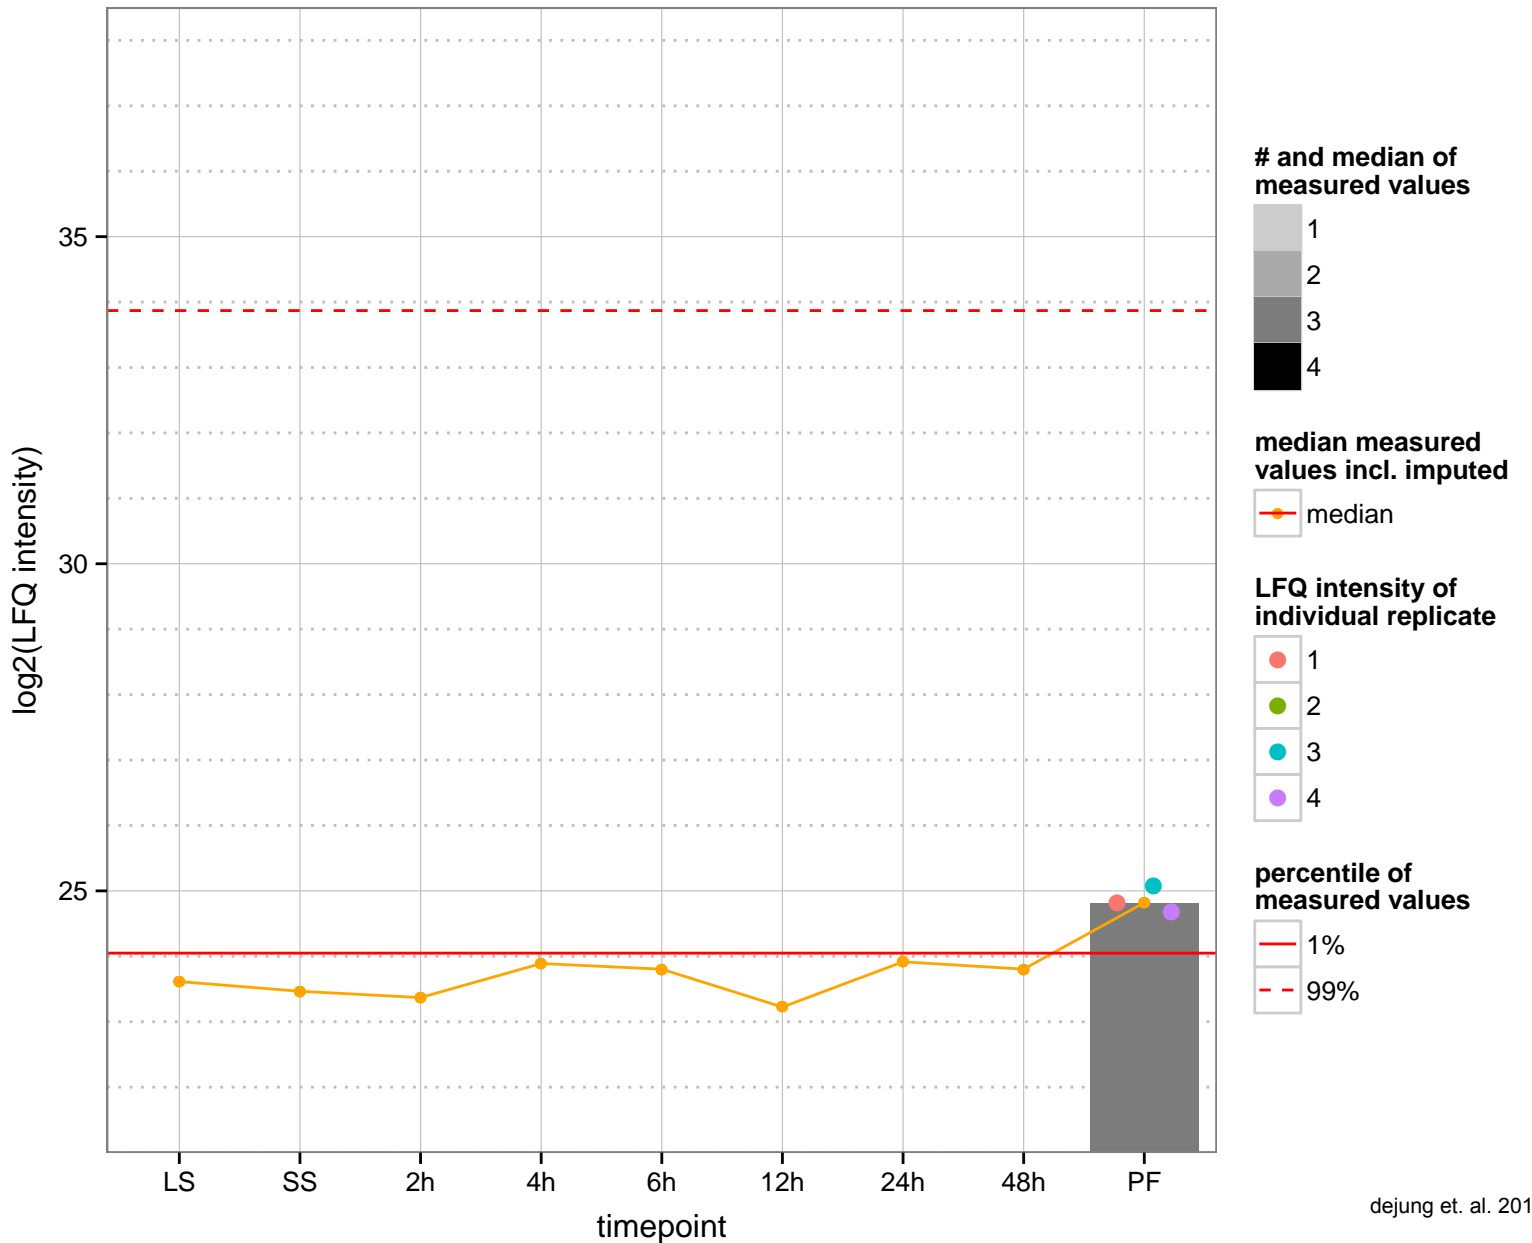

hypothetical protein, conserved  
 Tb927.3.3710  
 AGOF: catalytic activity  
 AGOC: null  
 AGOP: null  
 PGO: catalytic activity  
 PGOC: null  
 PGOP: null

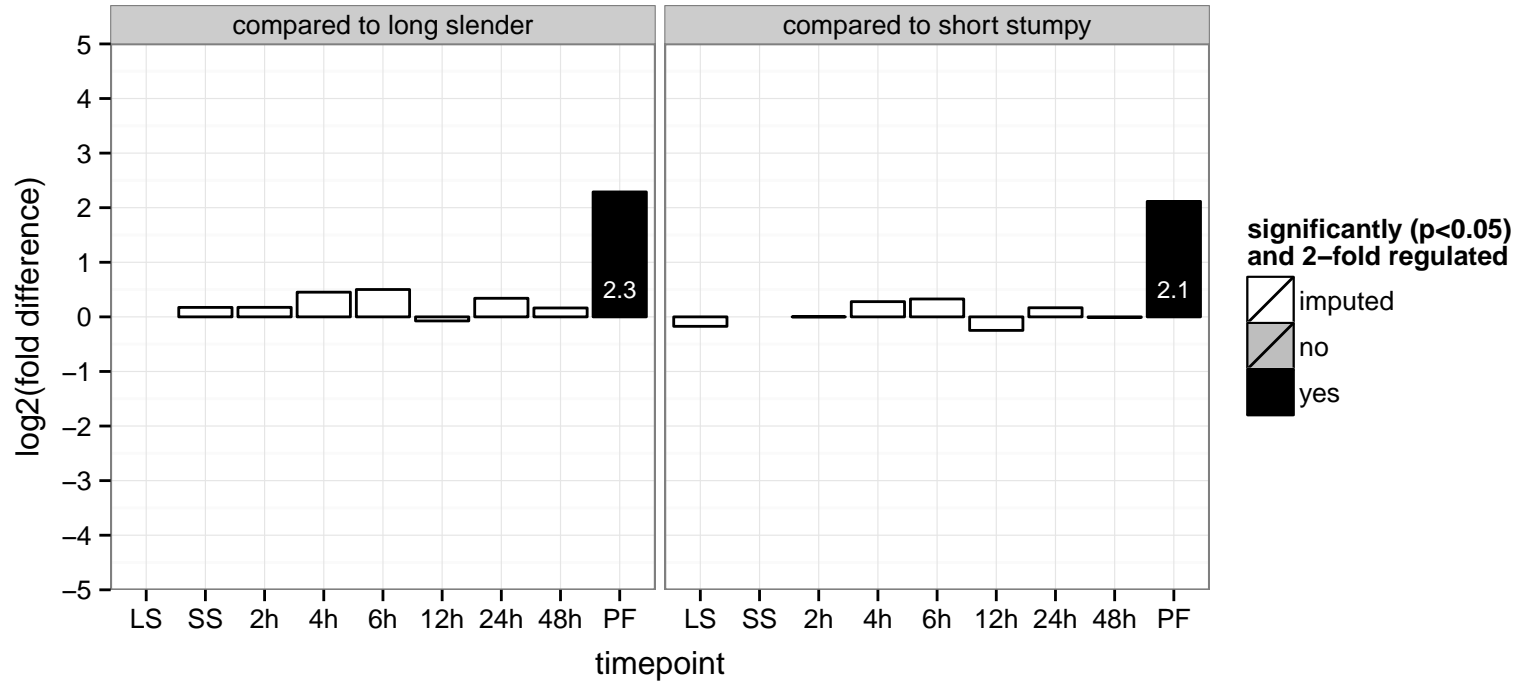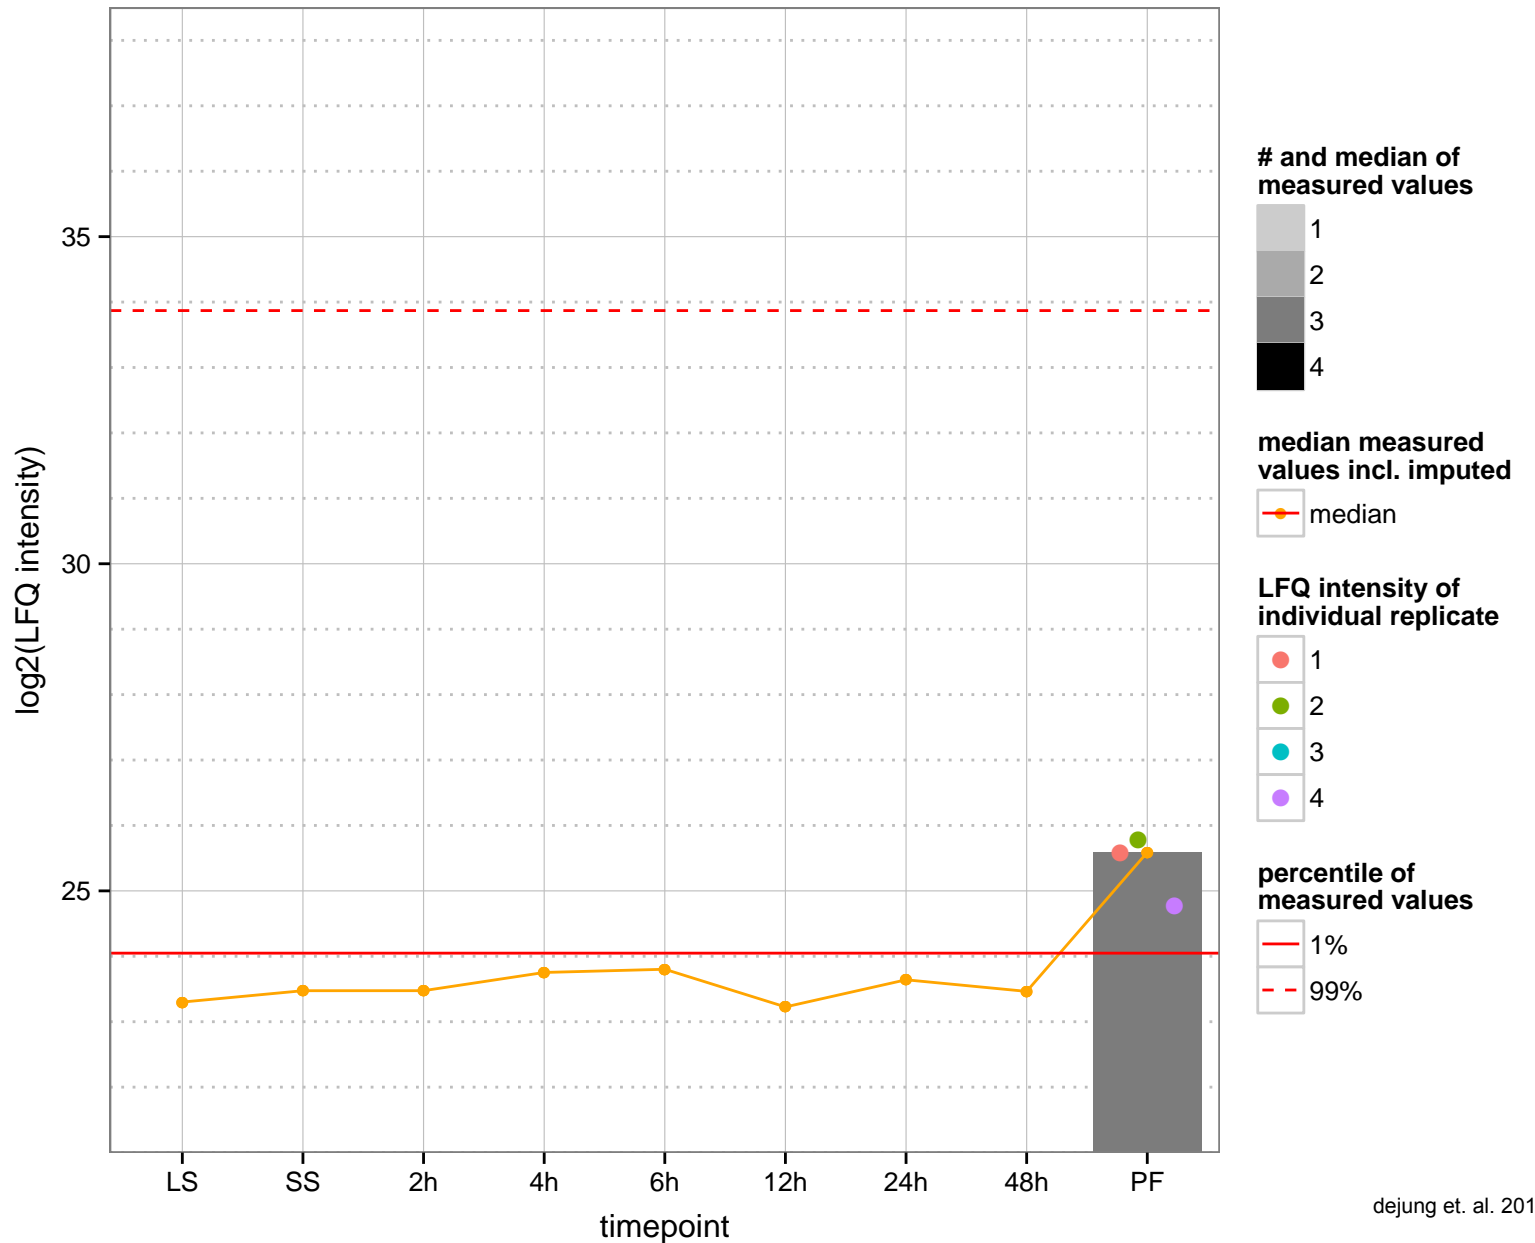

hypothetical protein, conserved  
 Tb927.3.3880  
 AGOF: null  
 AGOC: null  
 AGOP: null  
 PGOF: null  
 PGO C: null  
 PGOP: null

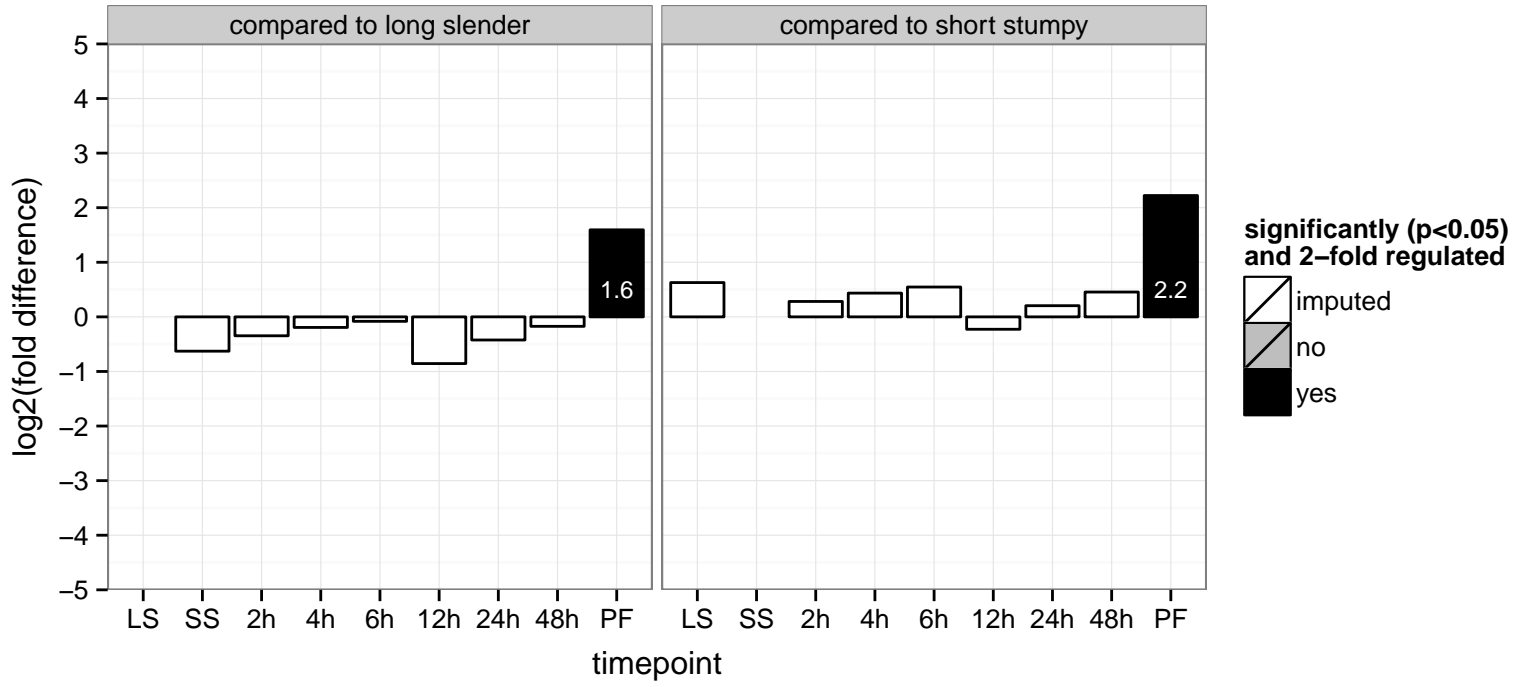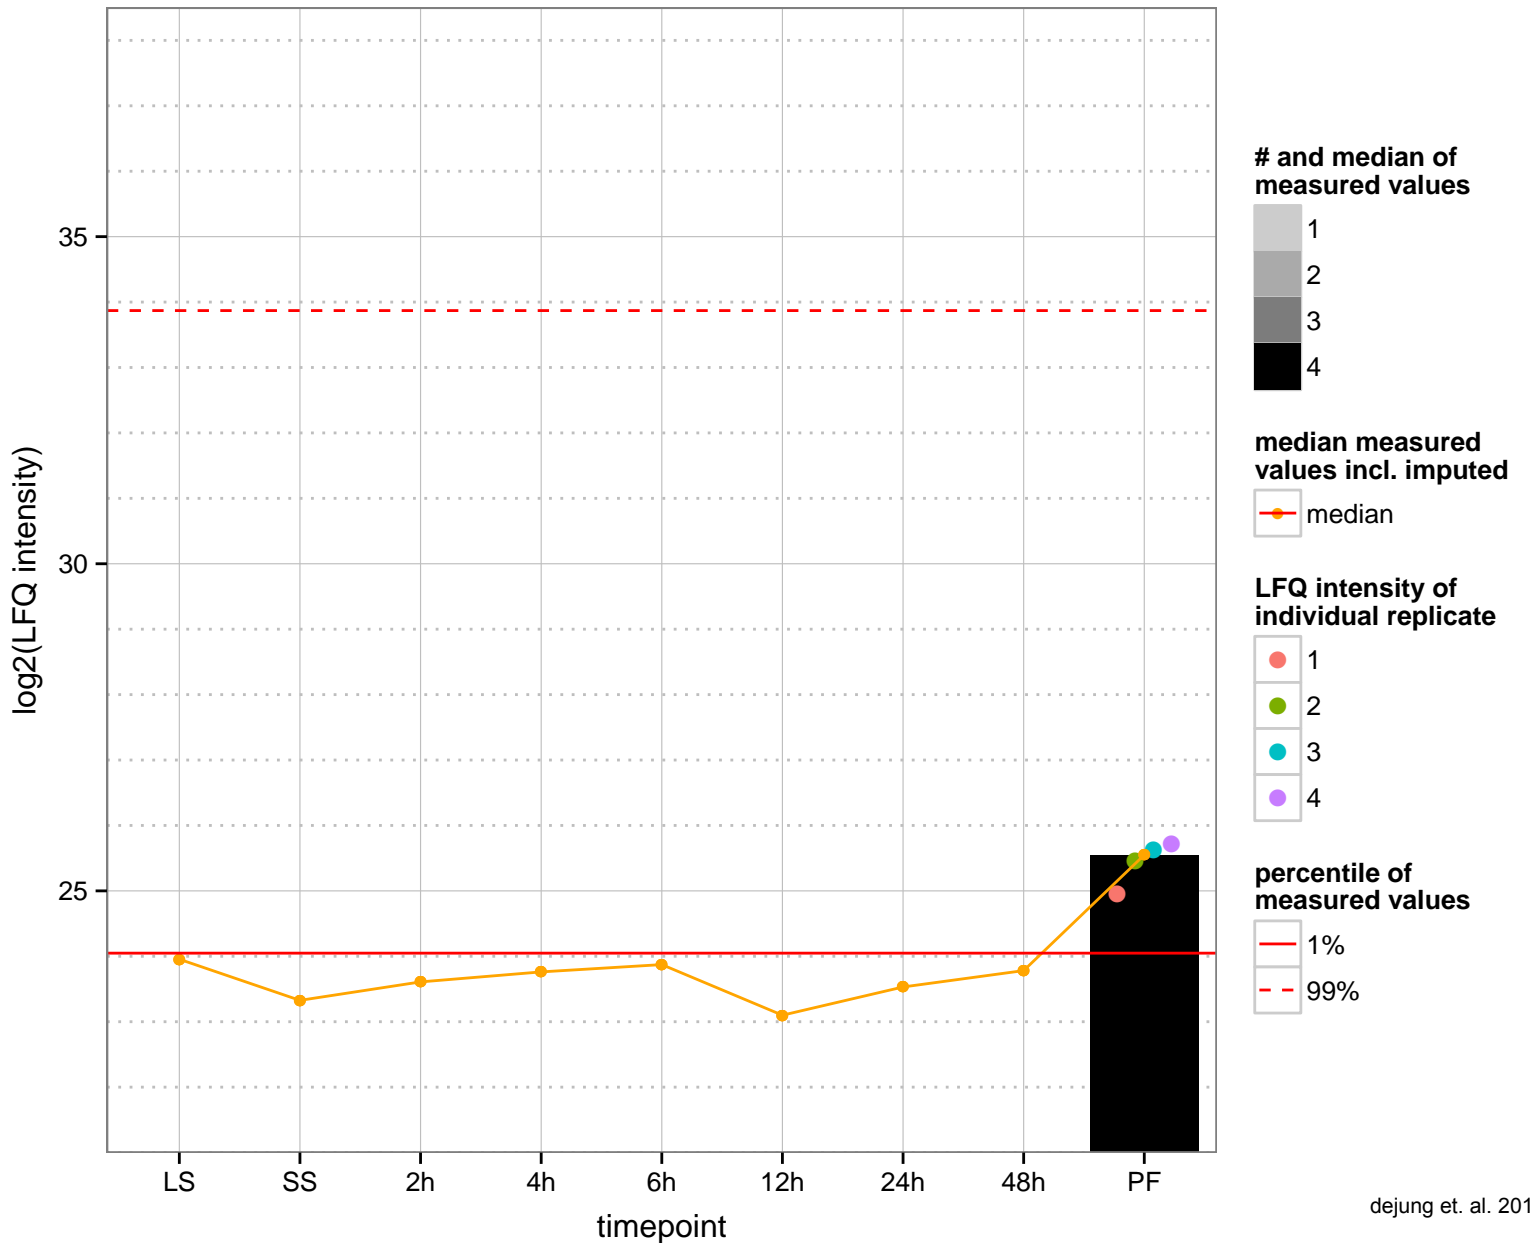

protein farnesyltransferase alpha subunit, putative  
 Tb927.3.4490  
 AGOF: protein farnesyltransferase activity  
 AGOC: null  
 AGOP: protein prenylation  
 PGO: protein prenylation activity  
 PGOC: null  
 PGOP: protein prenylation

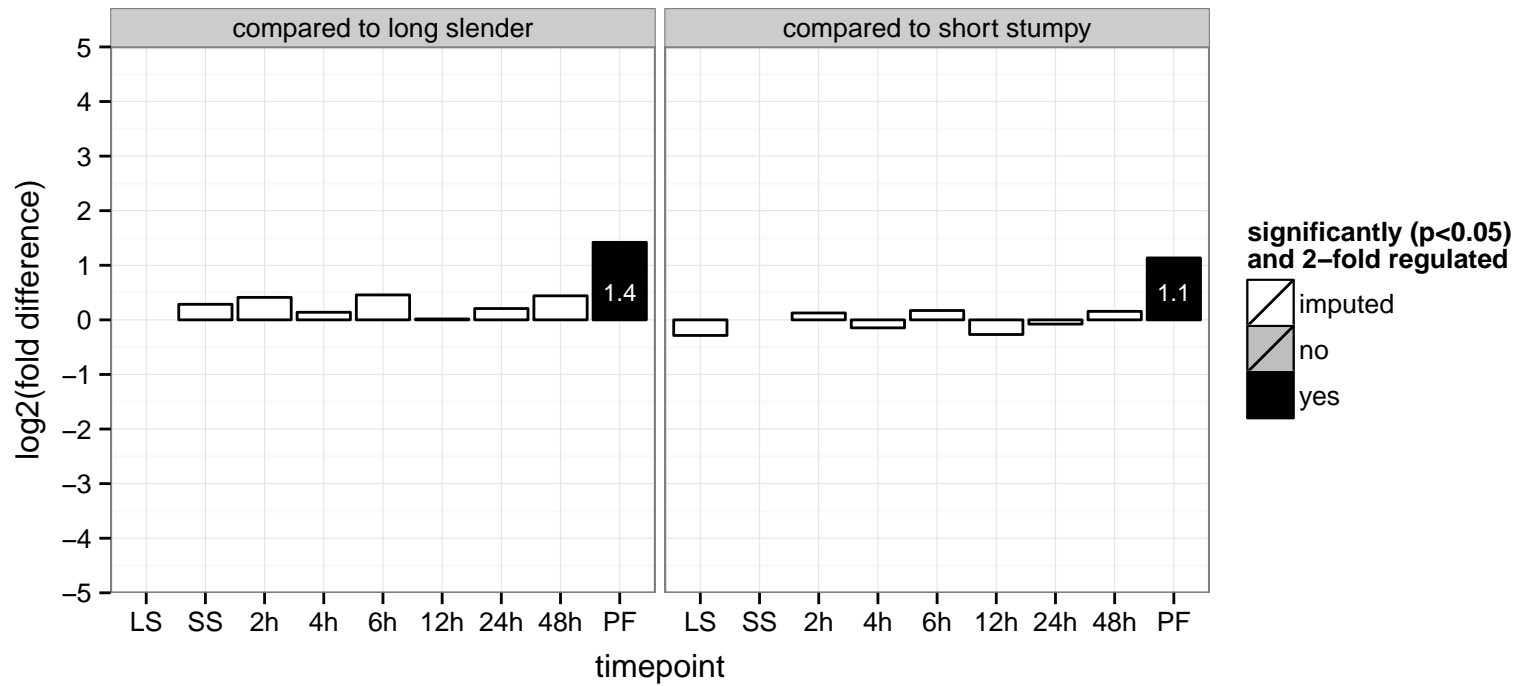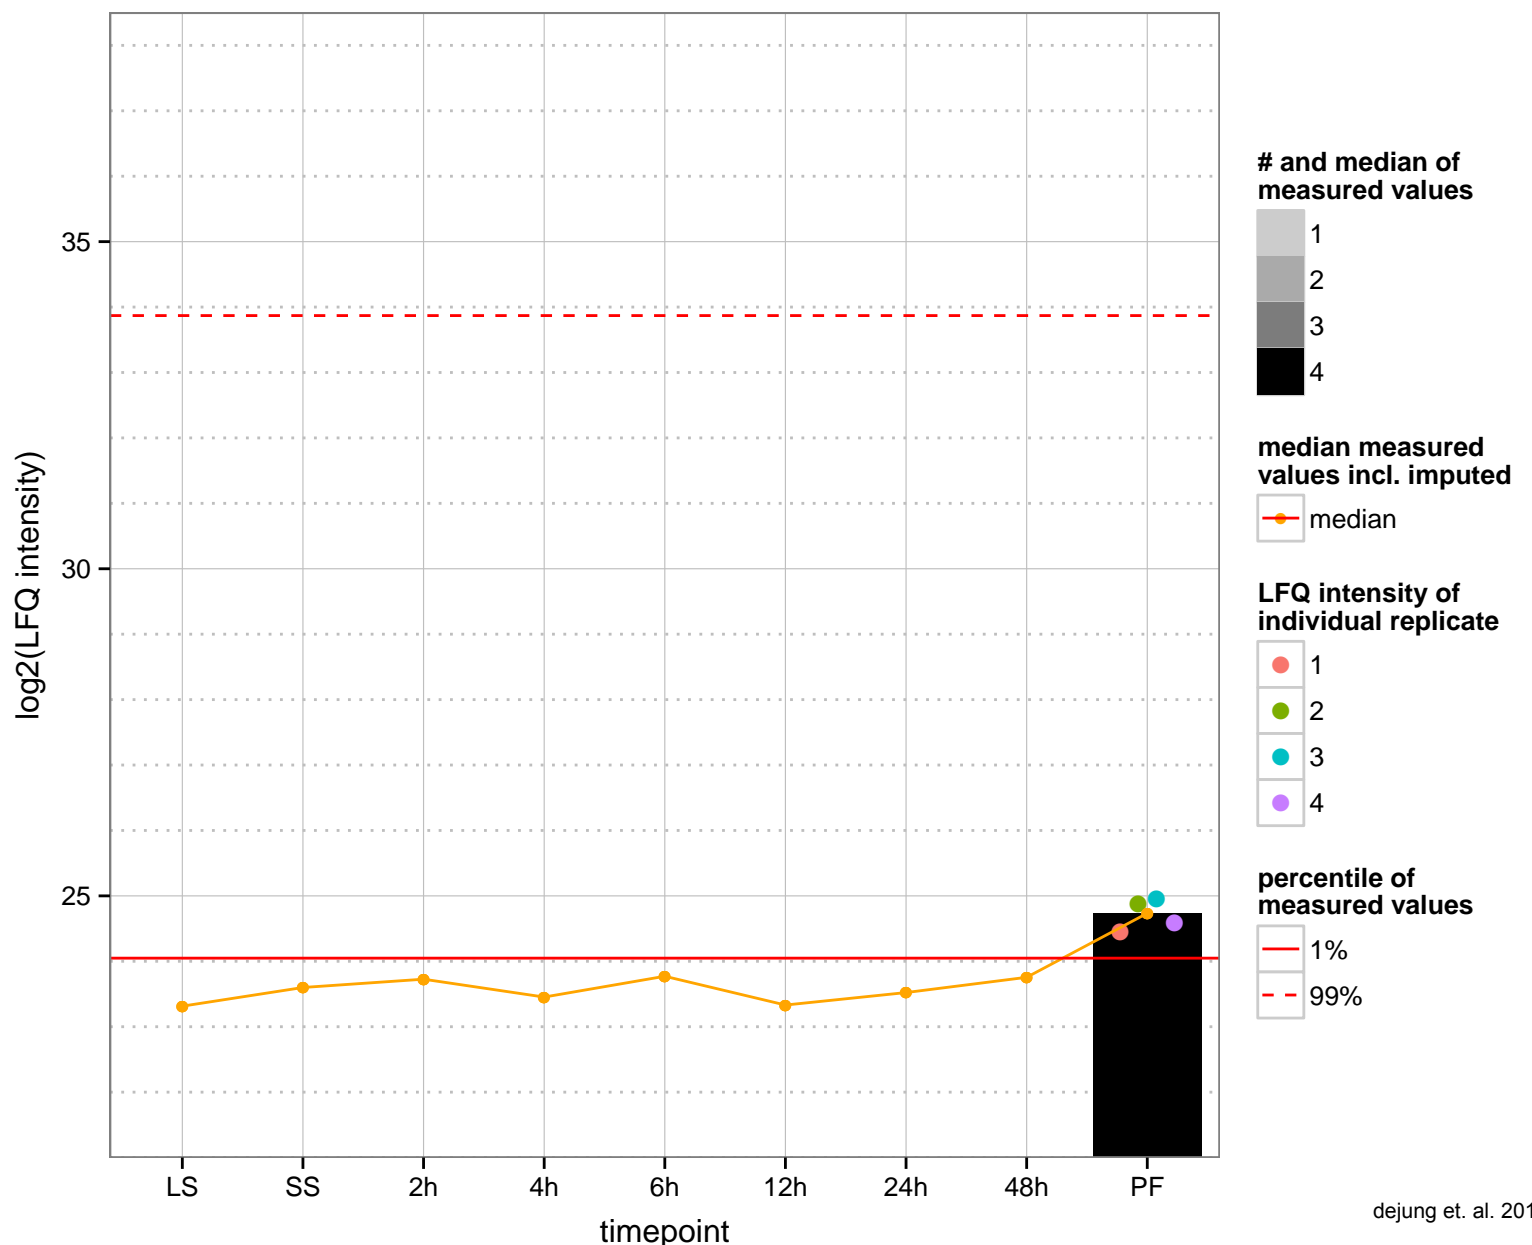

hypothetical protein, conserved  
 Tb927.3.4950  
 AGOF: null  
 AGOC: mitochondrion  
 AGOP: null  
 PGO: null  
 PGOC: null  
 PGOP: null

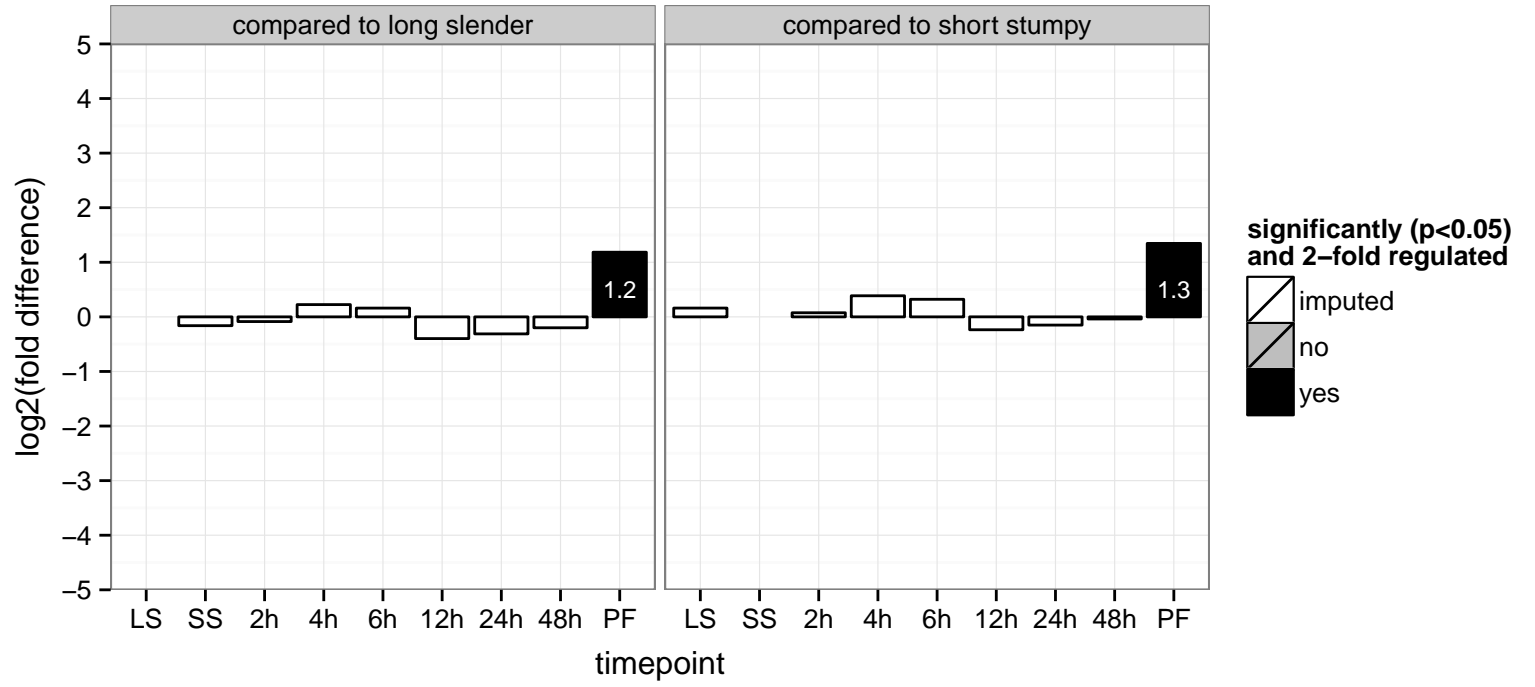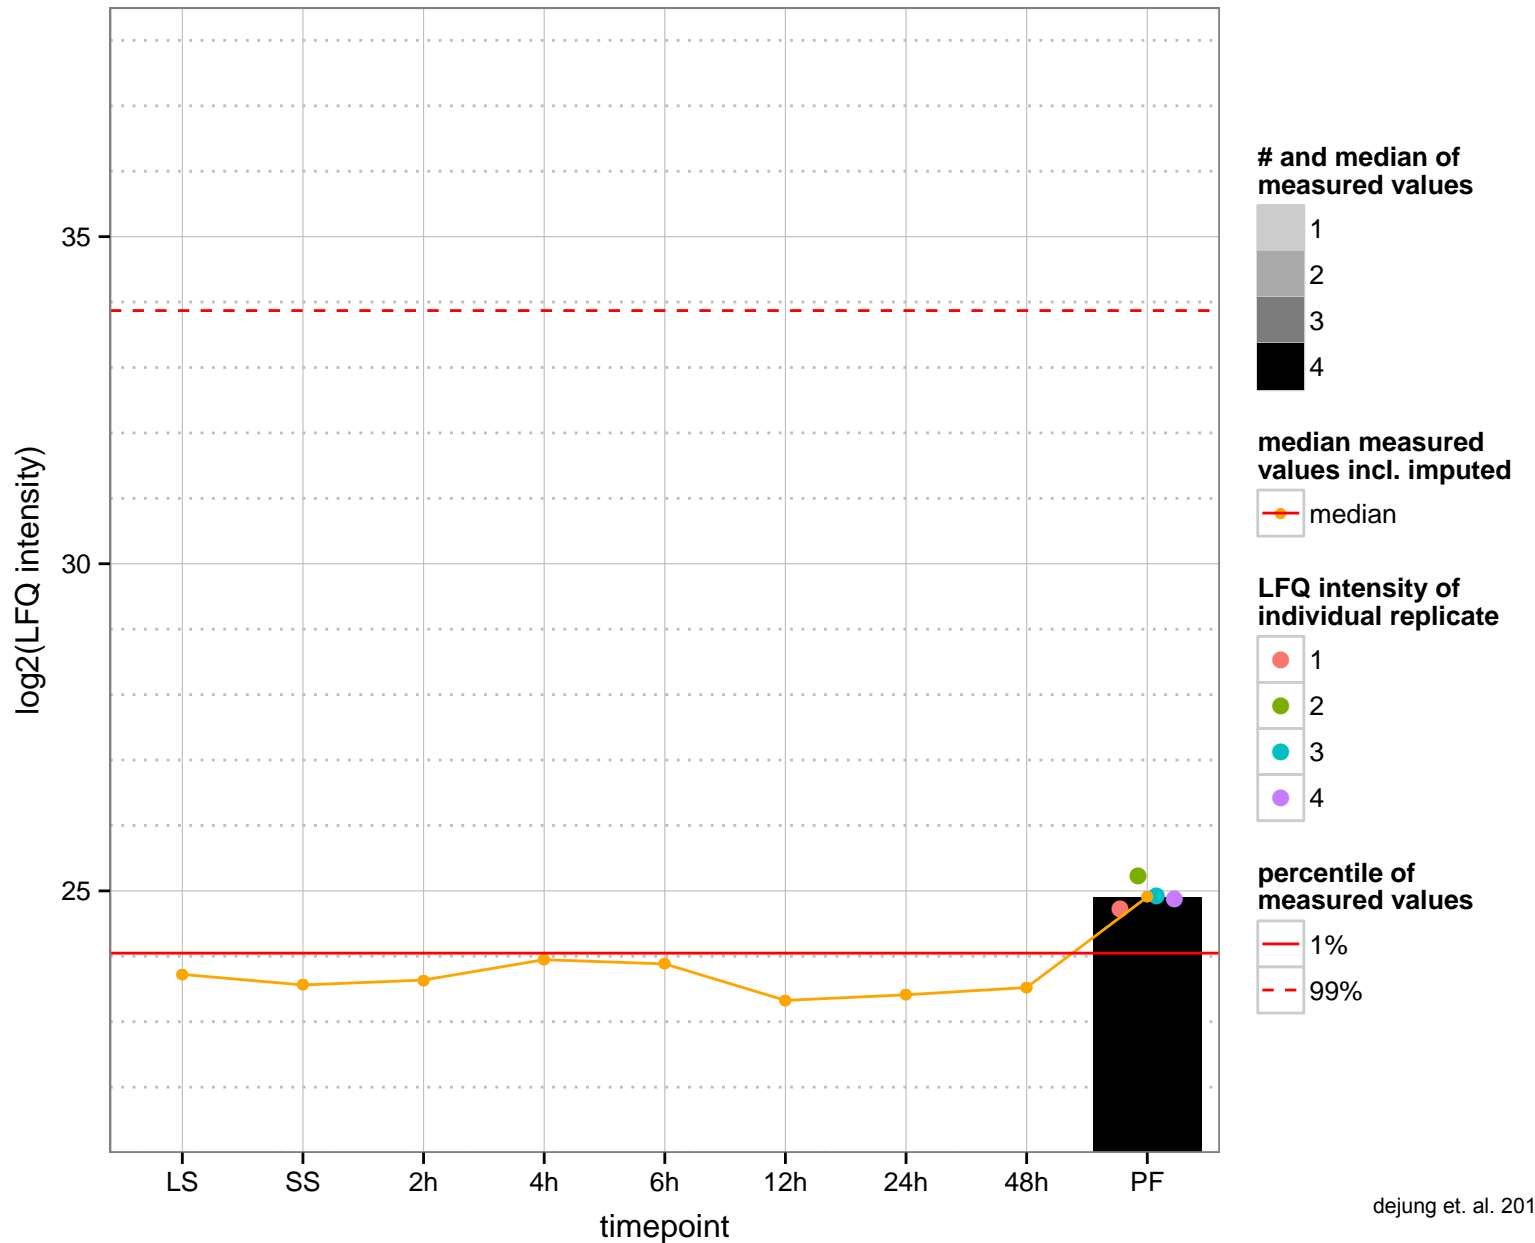

60S ribosomal protein L4  
 Tb927.3.5050  
 AGOF: structural constituent of ribosome  
 AGOC: intracellular, ribosome  
 AGOP: translation  
 PGOF: structural constituent of ribosome  
 PGO: ribosome  
 PGOP: translation

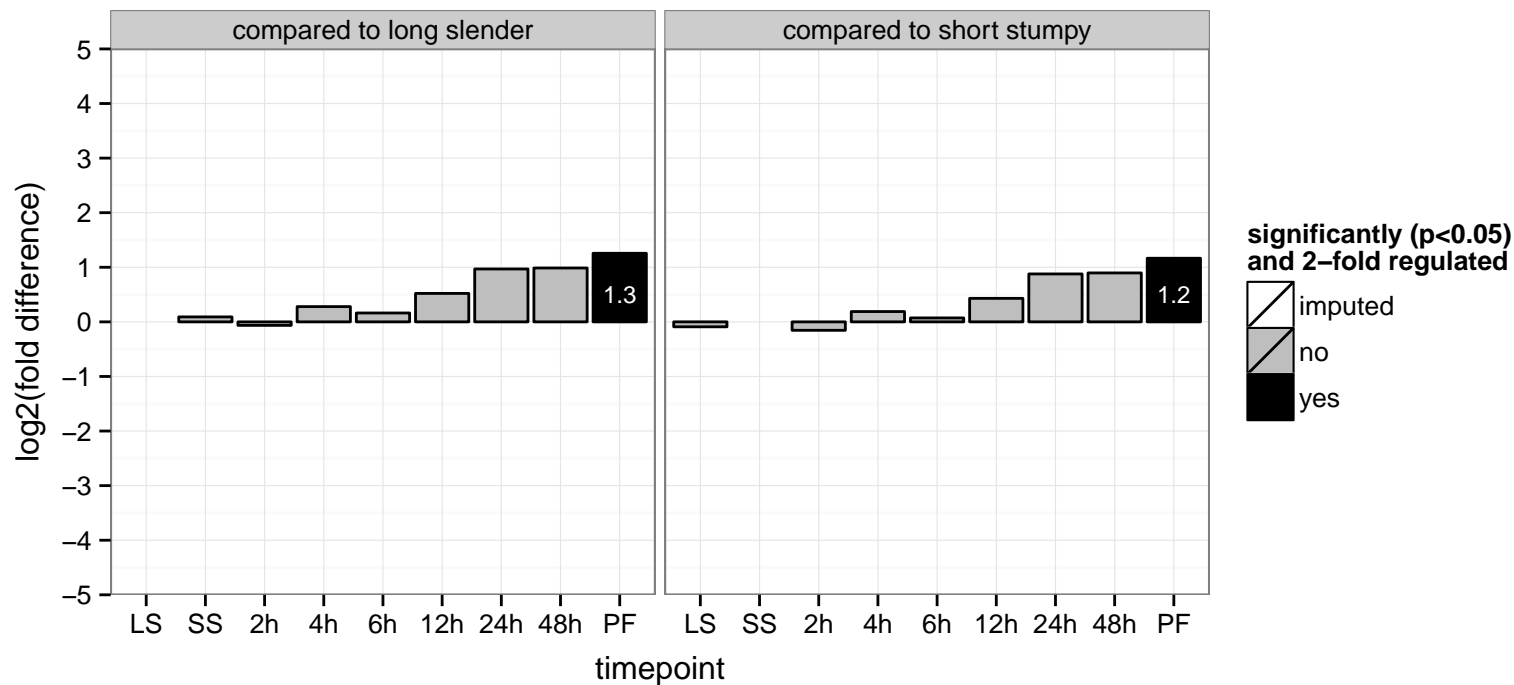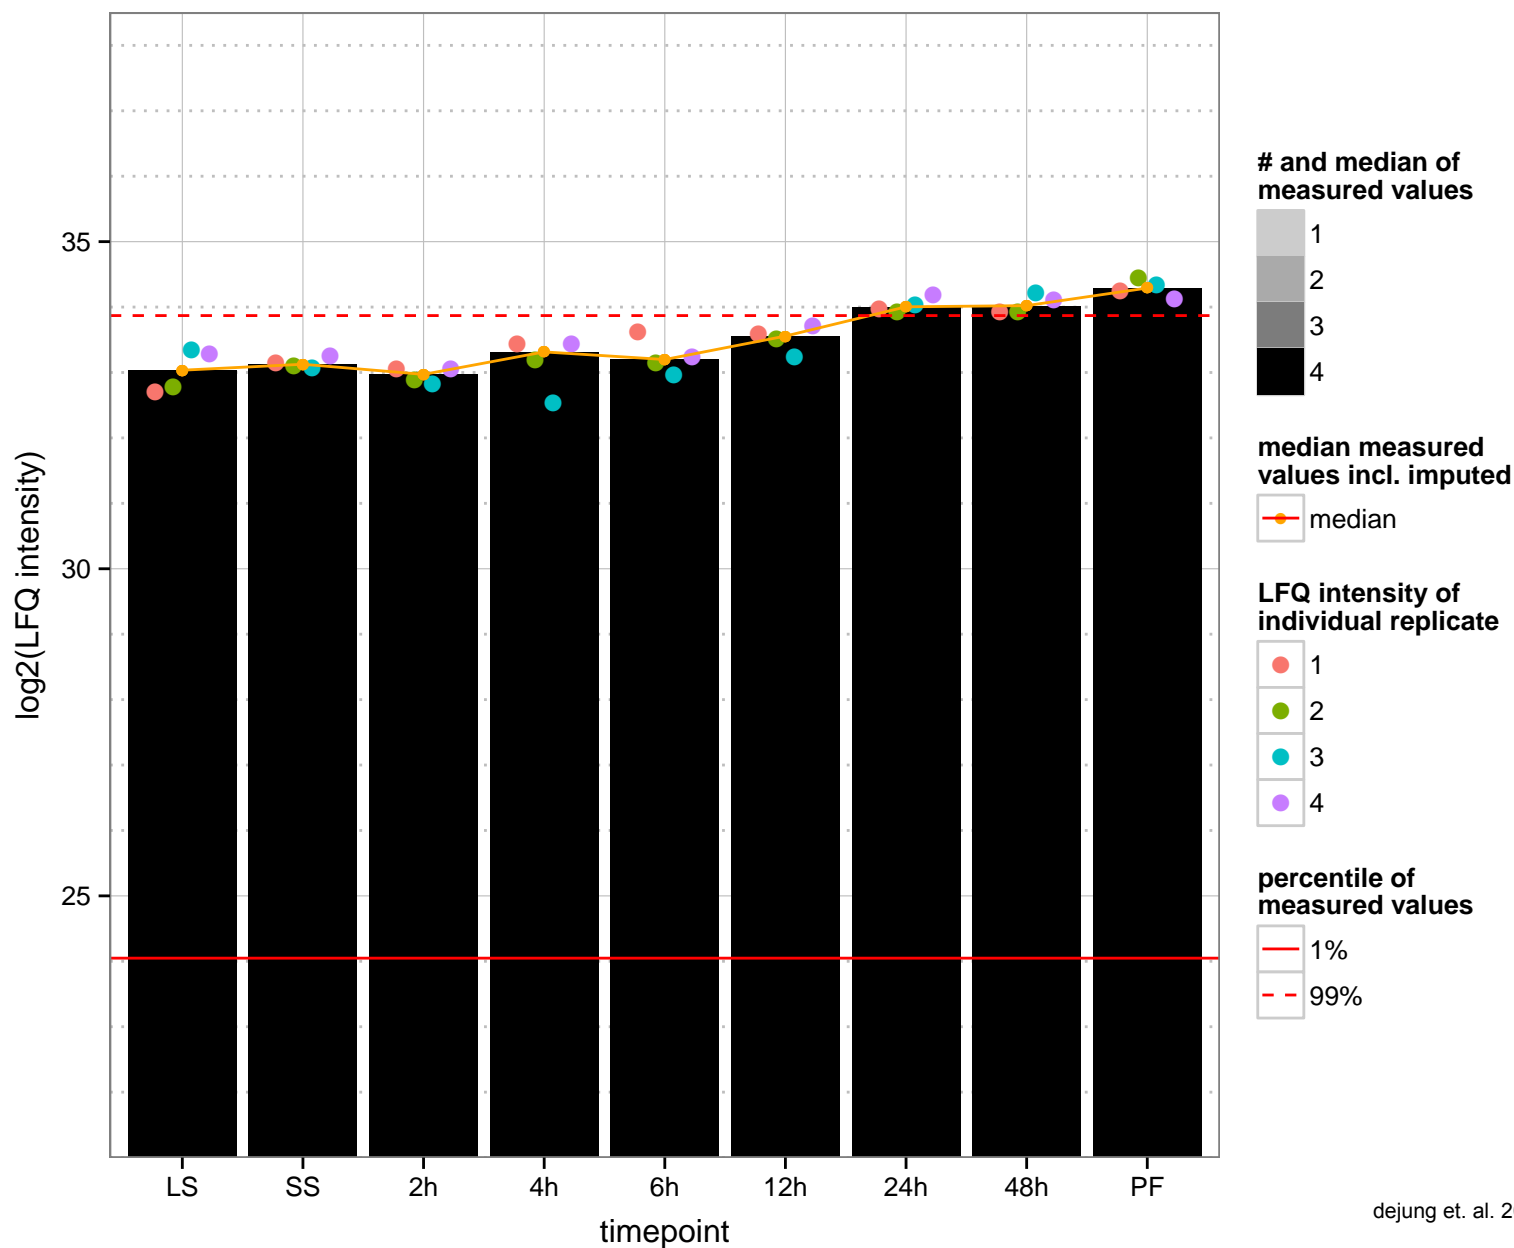

UBX domain-containing protein  
 Tb927.3.5320  
 AGOF: ubiquitin binding, ubiquitin protein ligase binding  
 AGOC: cytoplasm, nucleus  
 AGOP: null  
 PGO: null  
 PGOC: null  
 PGOP: null

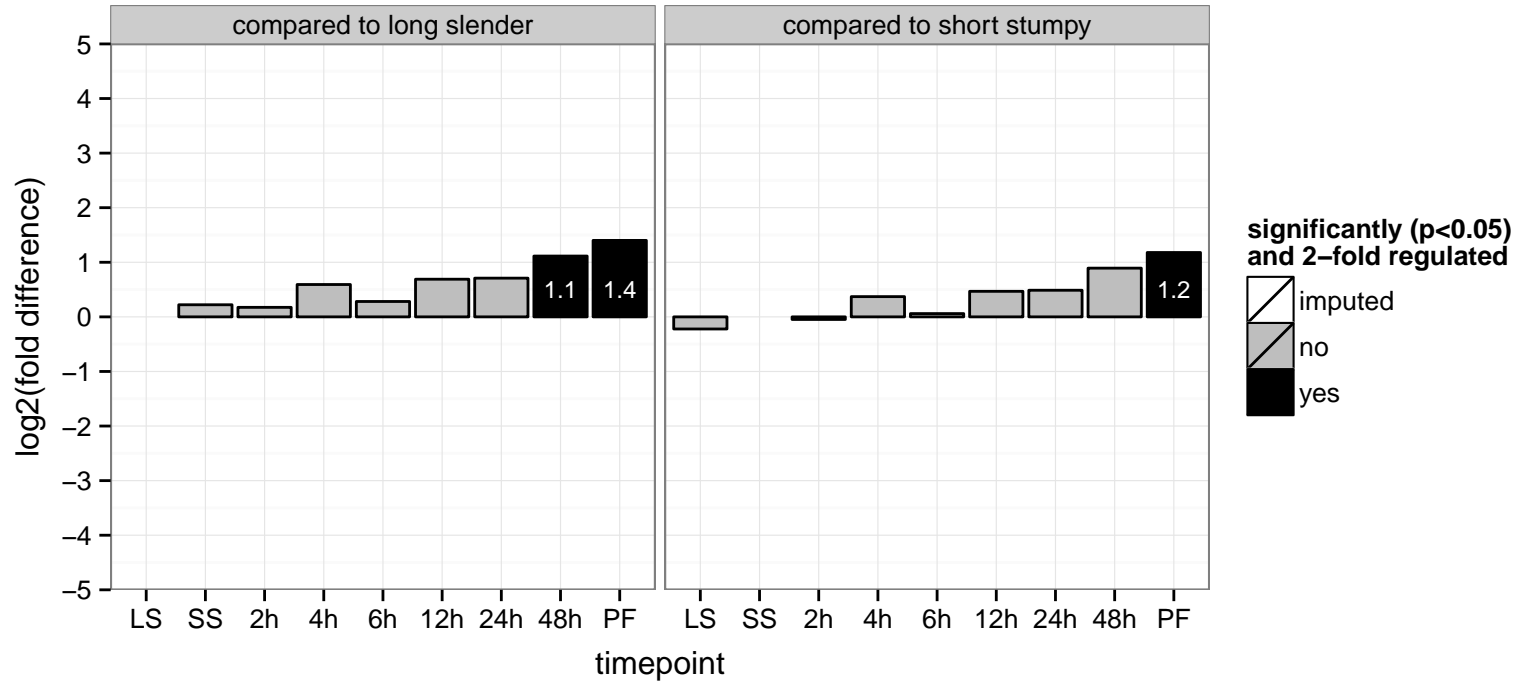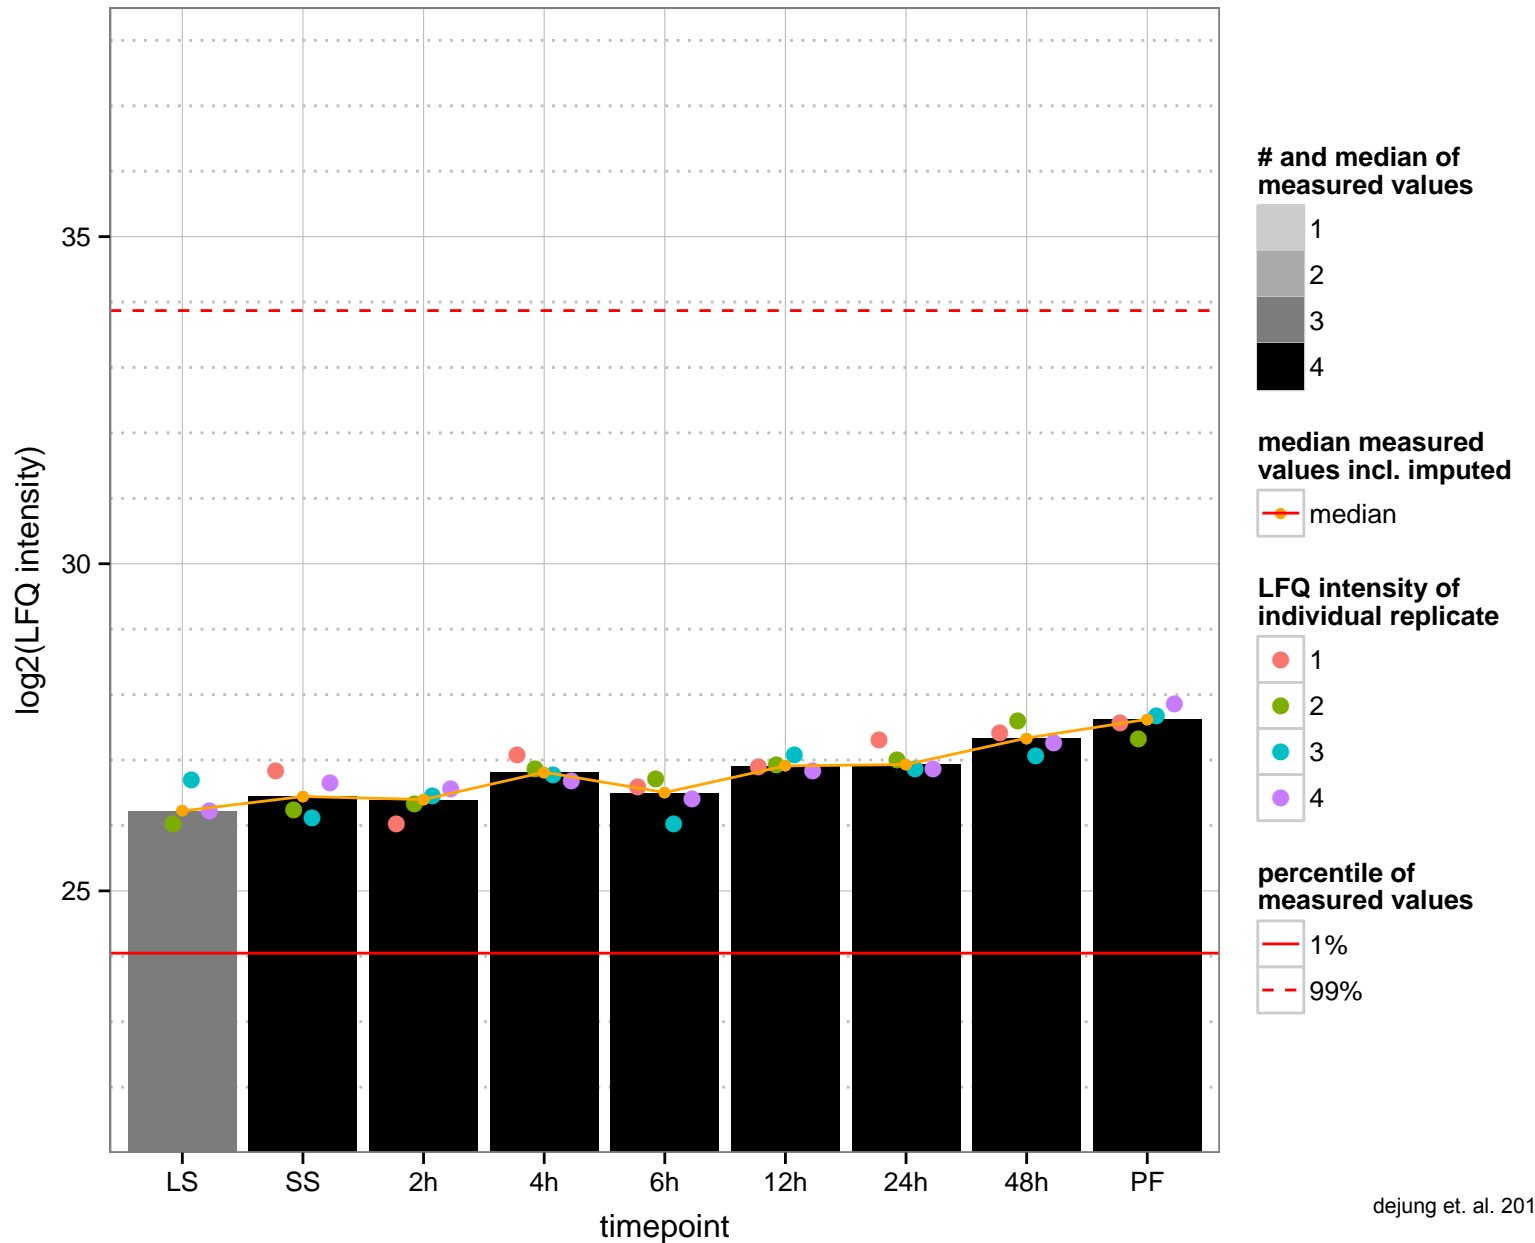



hypothetical protein, conserved  
 Tb927.3.5430  
 AGOF: null  
 AGOC: null  
 AGOP: null  
 PGOF: null  
 PGO: null  
 PGOP: null

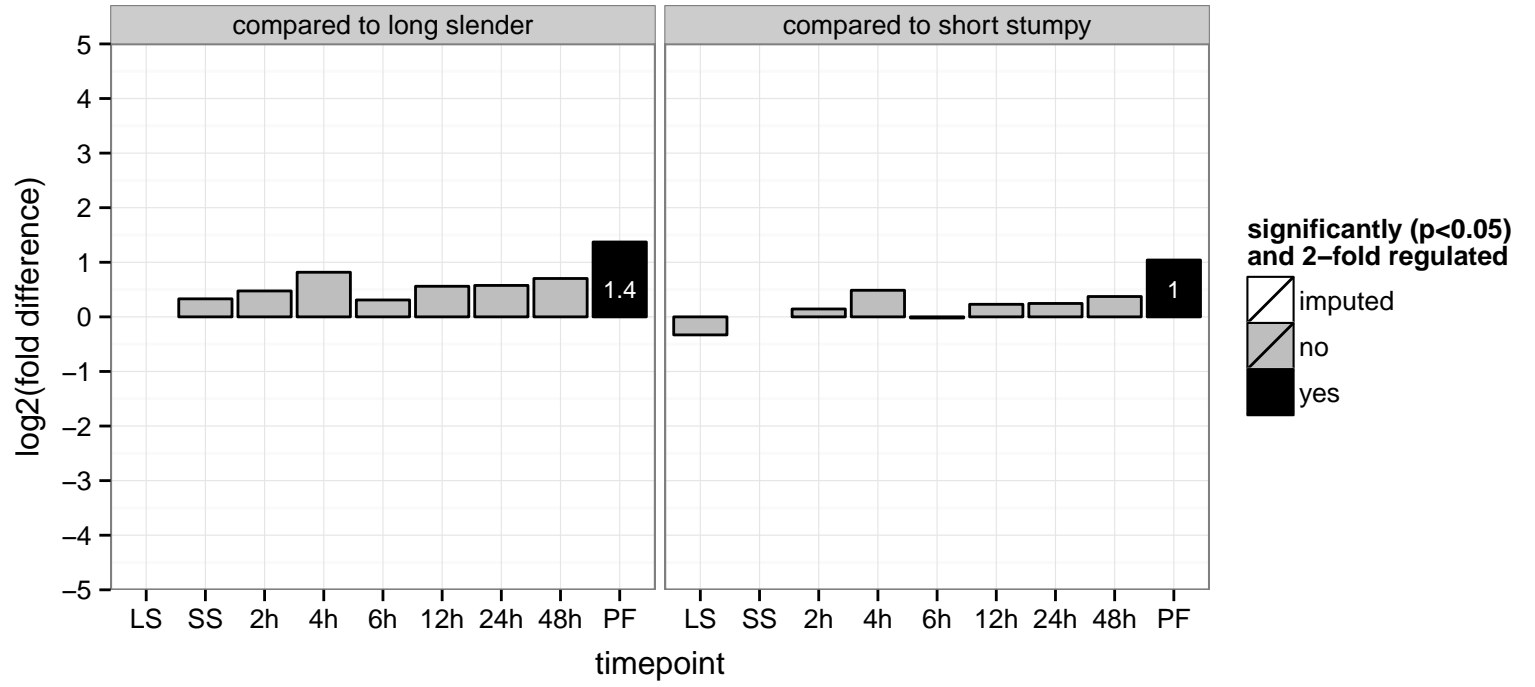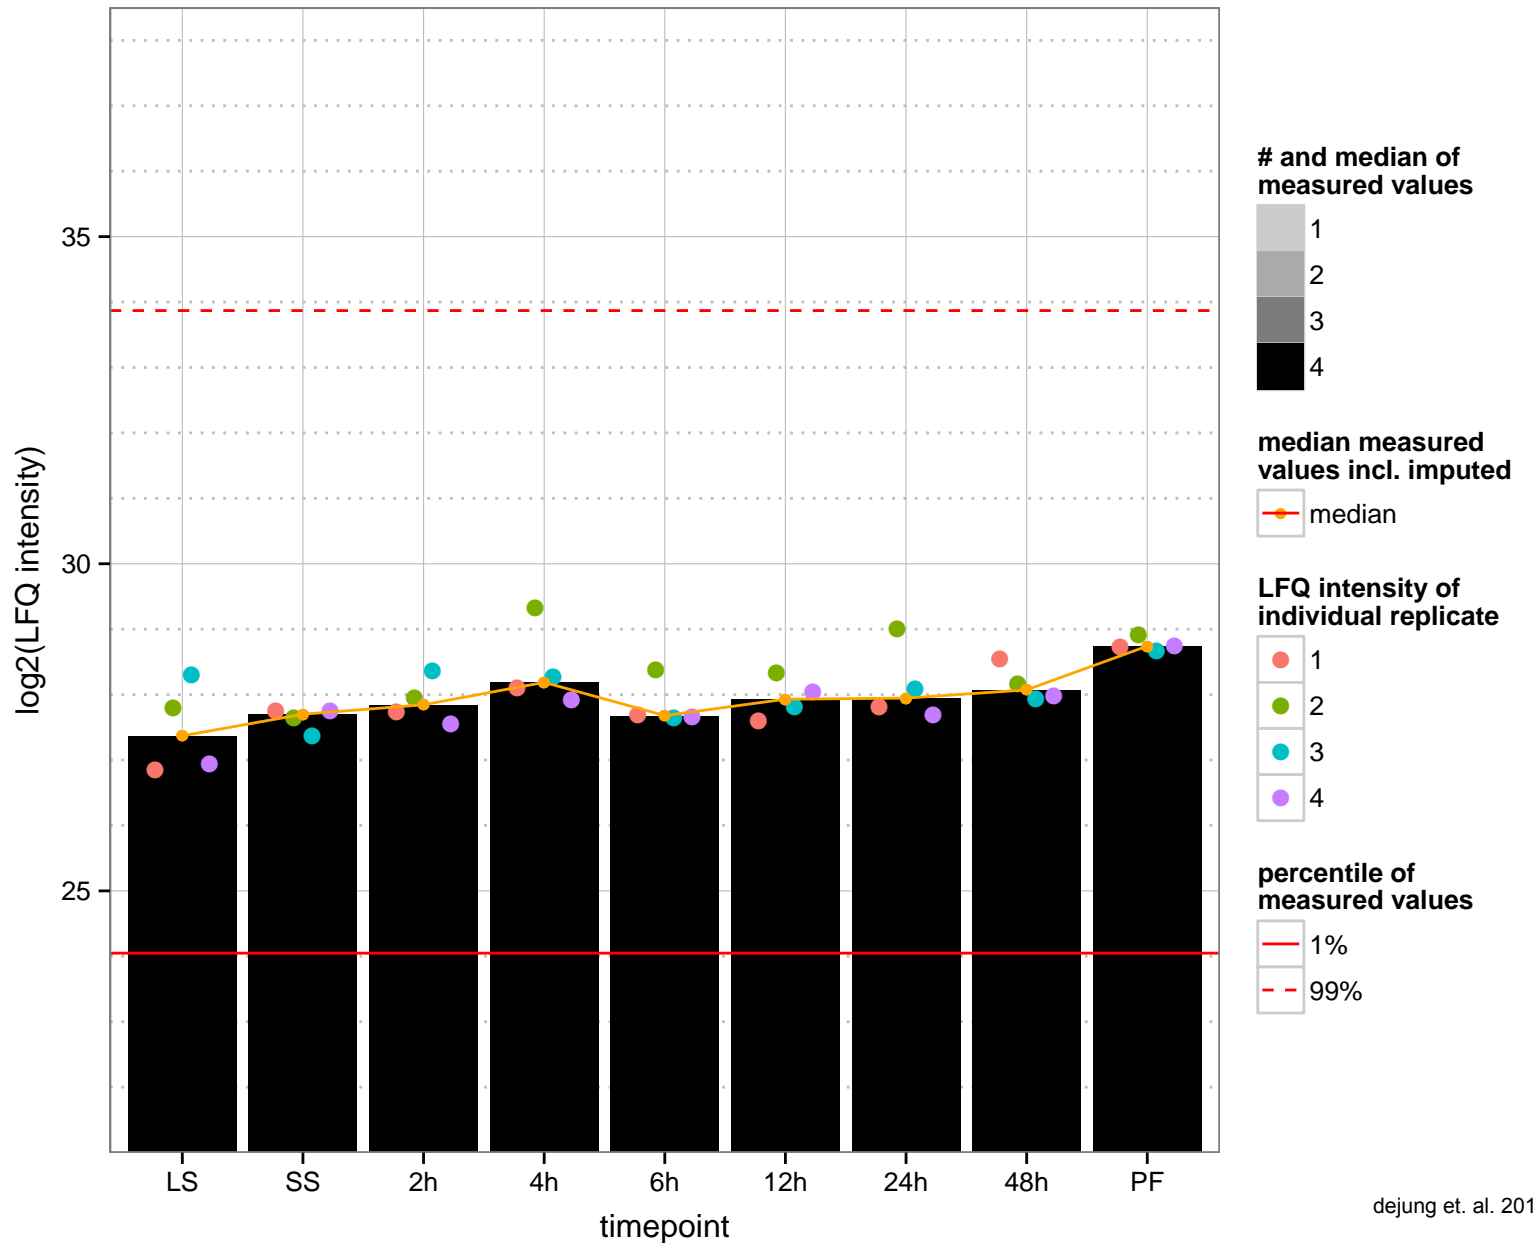

hypothetical protein, conserved  
 Tb927.3.5600  
 AGOF: null  
 AGOC: mitochondrion  
 AGOP: null  
 PGO: null  
 PGO: null  
 PGO: null

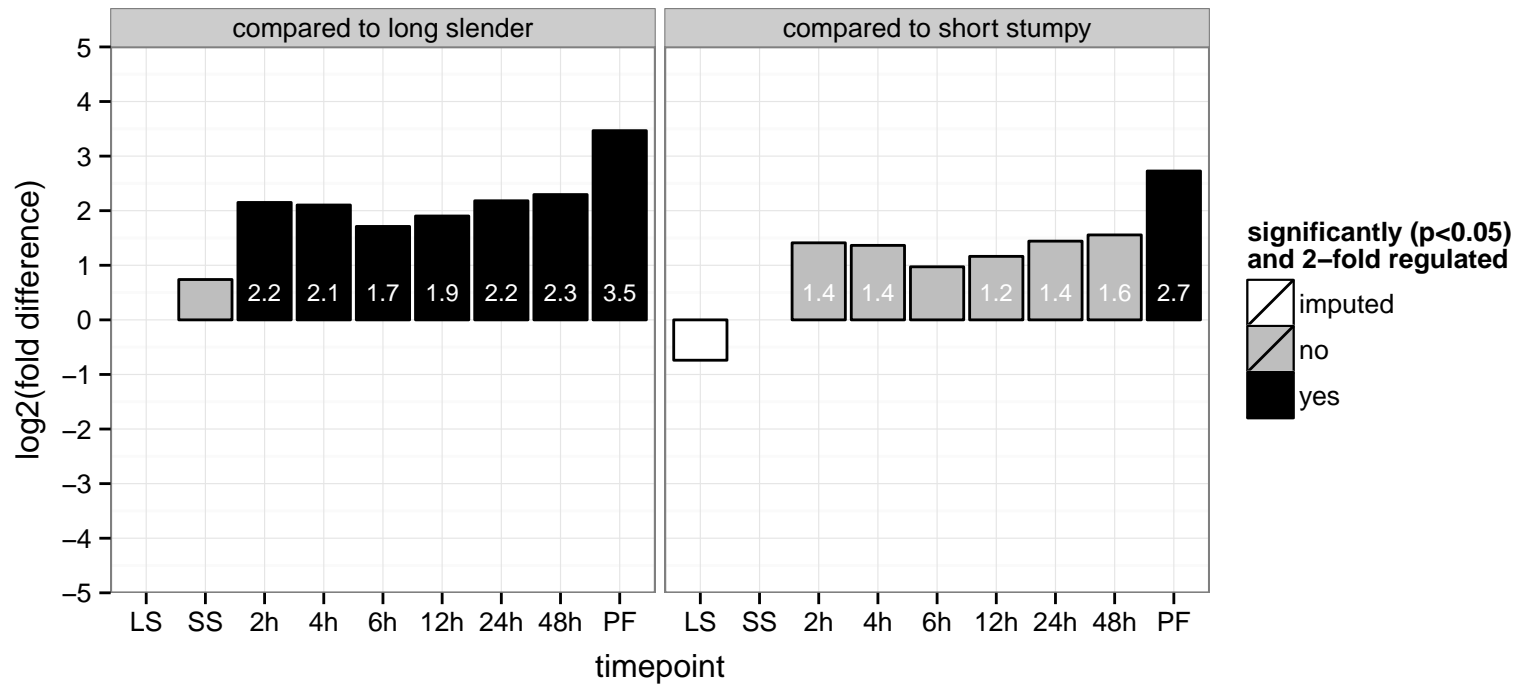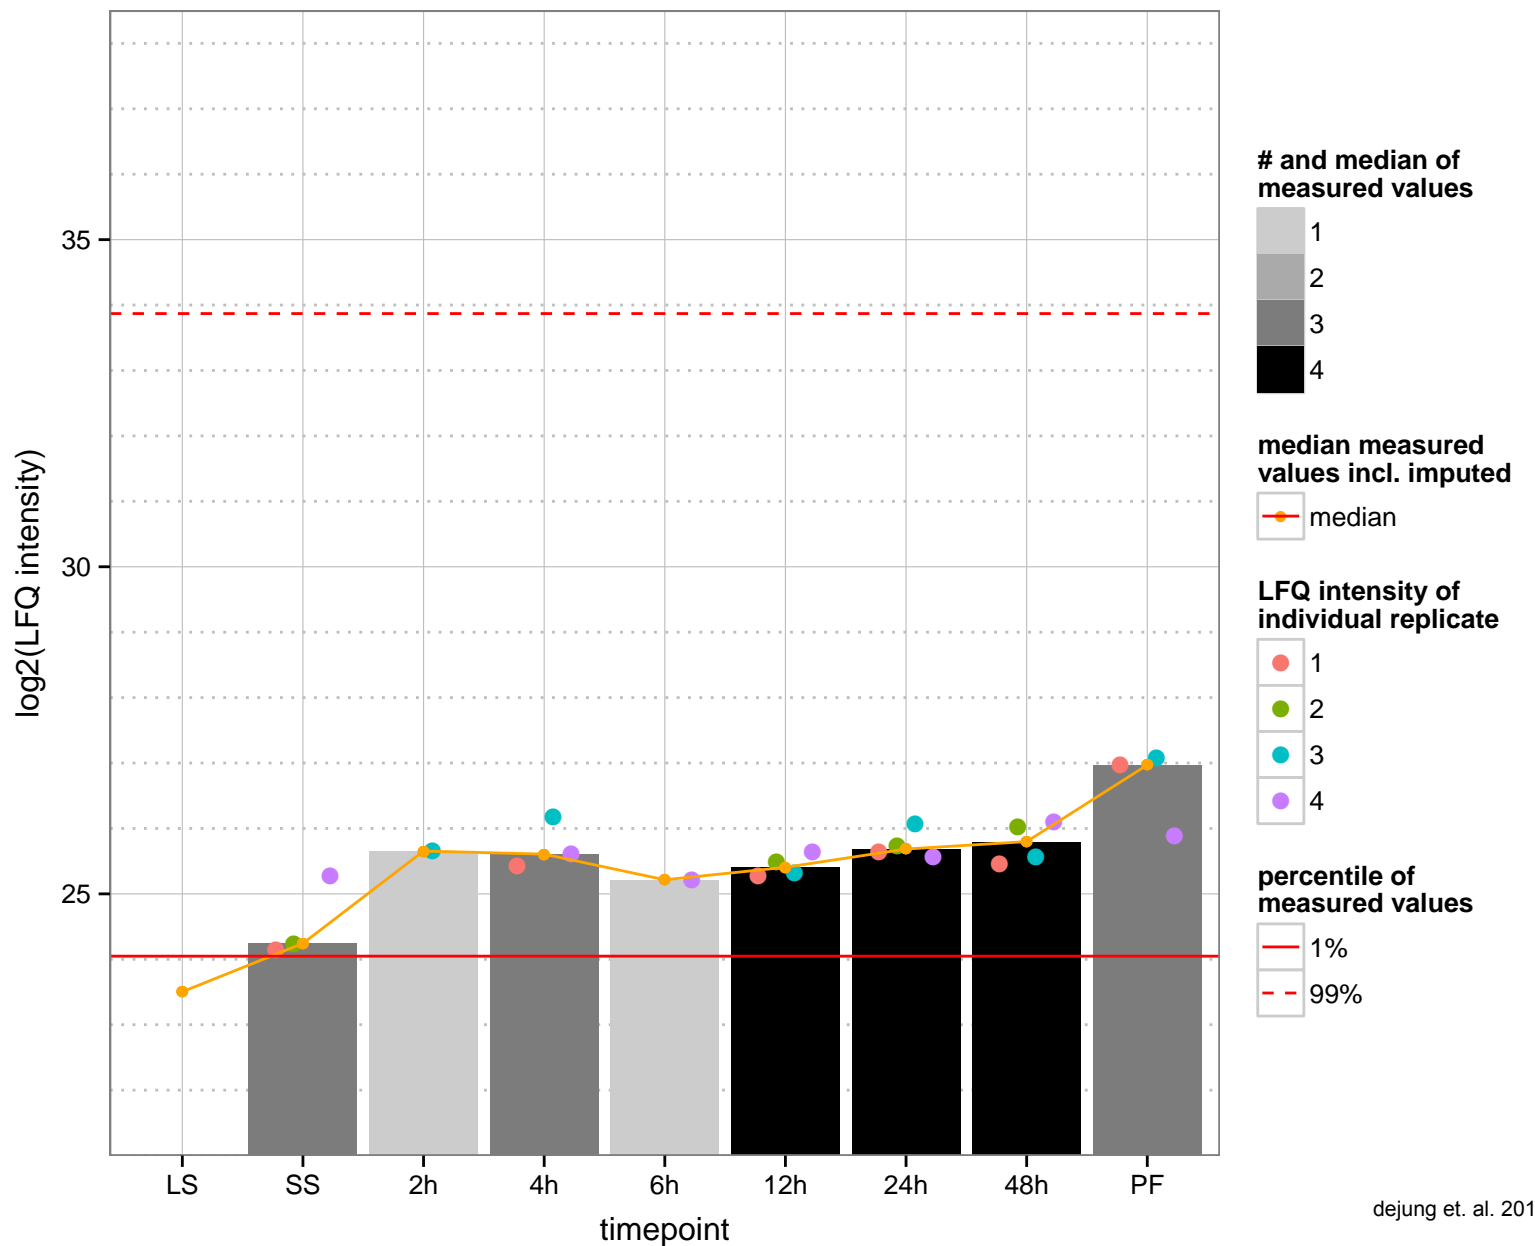

ATP-dependent DEAD/H RNA helicase, putative

Tb927.3.620

AGOF: ATP binding, ATP-dependent helicase activity, helicase activity, nucleic acid binding

AGOC: null

AGOP: nucleobase-containing compound metabolic process

PGOF: ATP binding, ATP-dependent helicase activity, helicase activity, nucleic acid binding

PGOC: null

PGOP: null

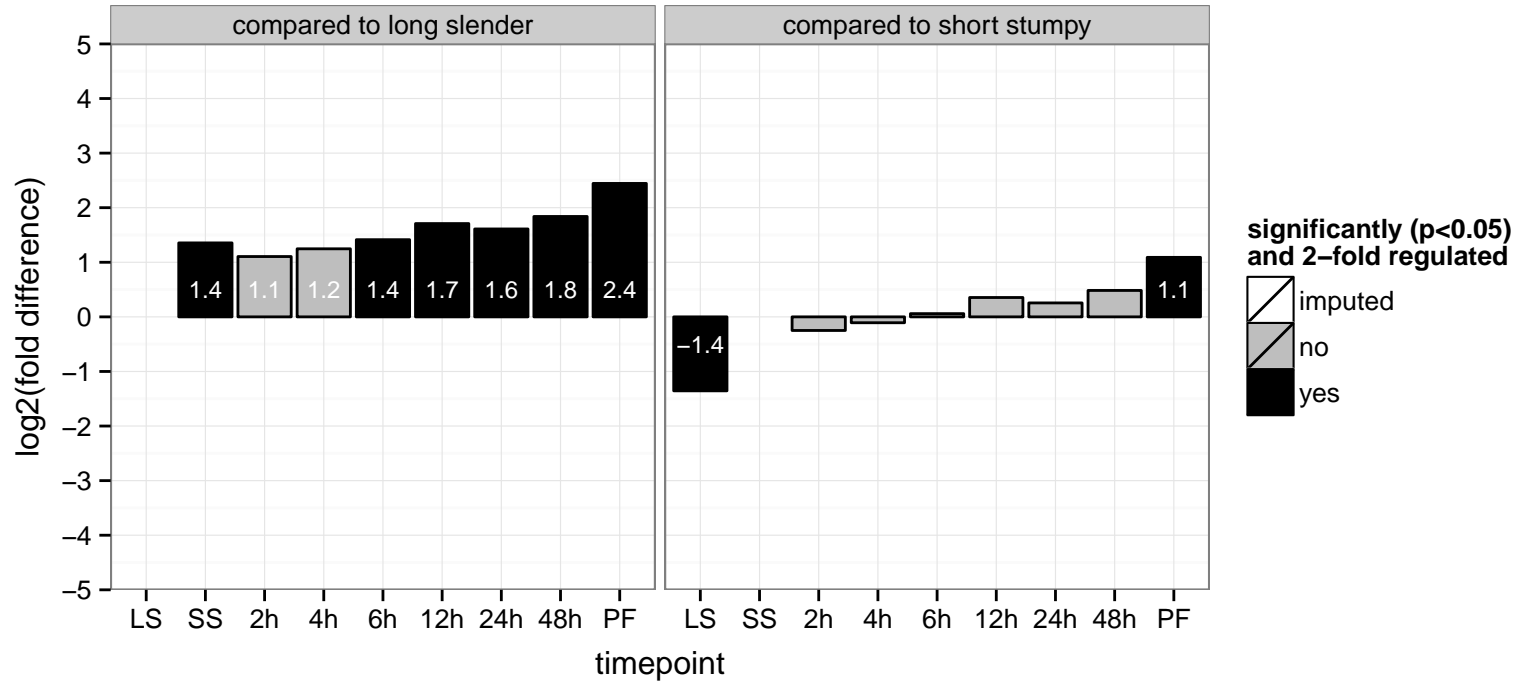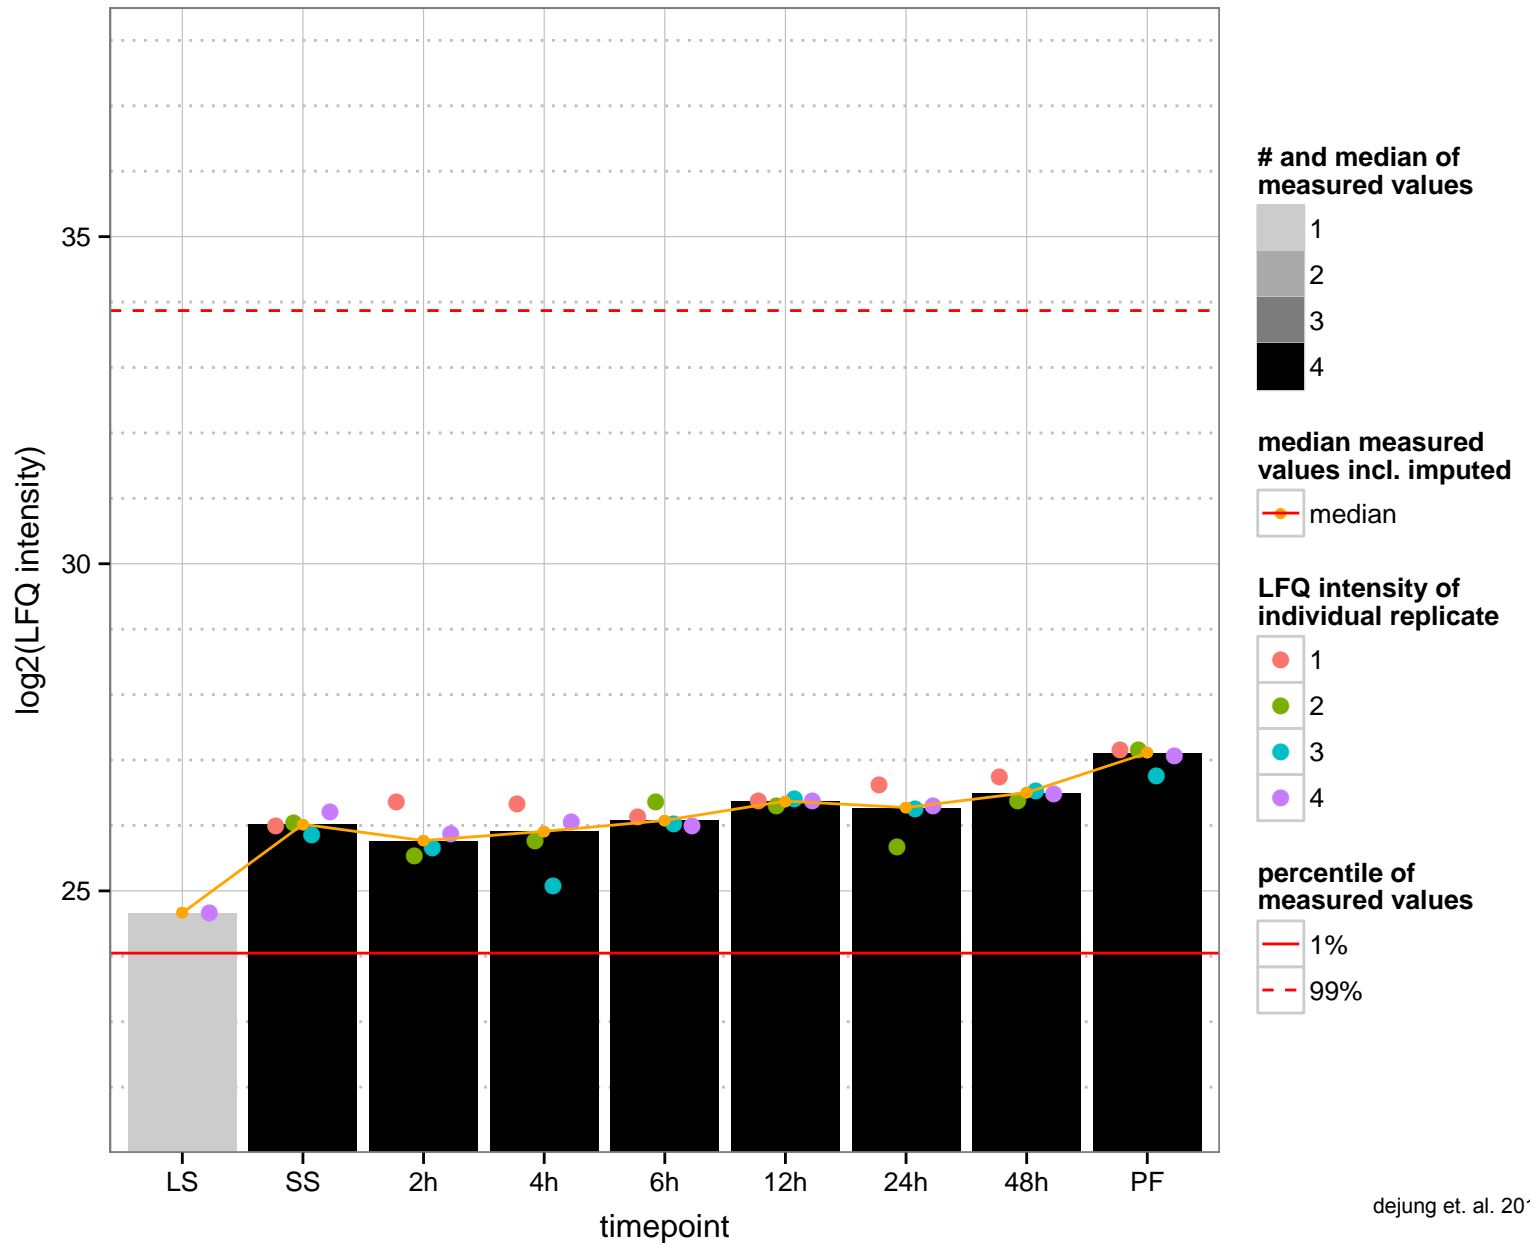

ZFP family member, putative (ZC3H5)  
 Tb927.3.740  
 AGOF: RNA binding, zinc ion binding  
 AGOC: null  
 AGOP: null  
 PGOF: nucleic acid binding, zinc ion binding  
 PGO: null  
 PGOP: null

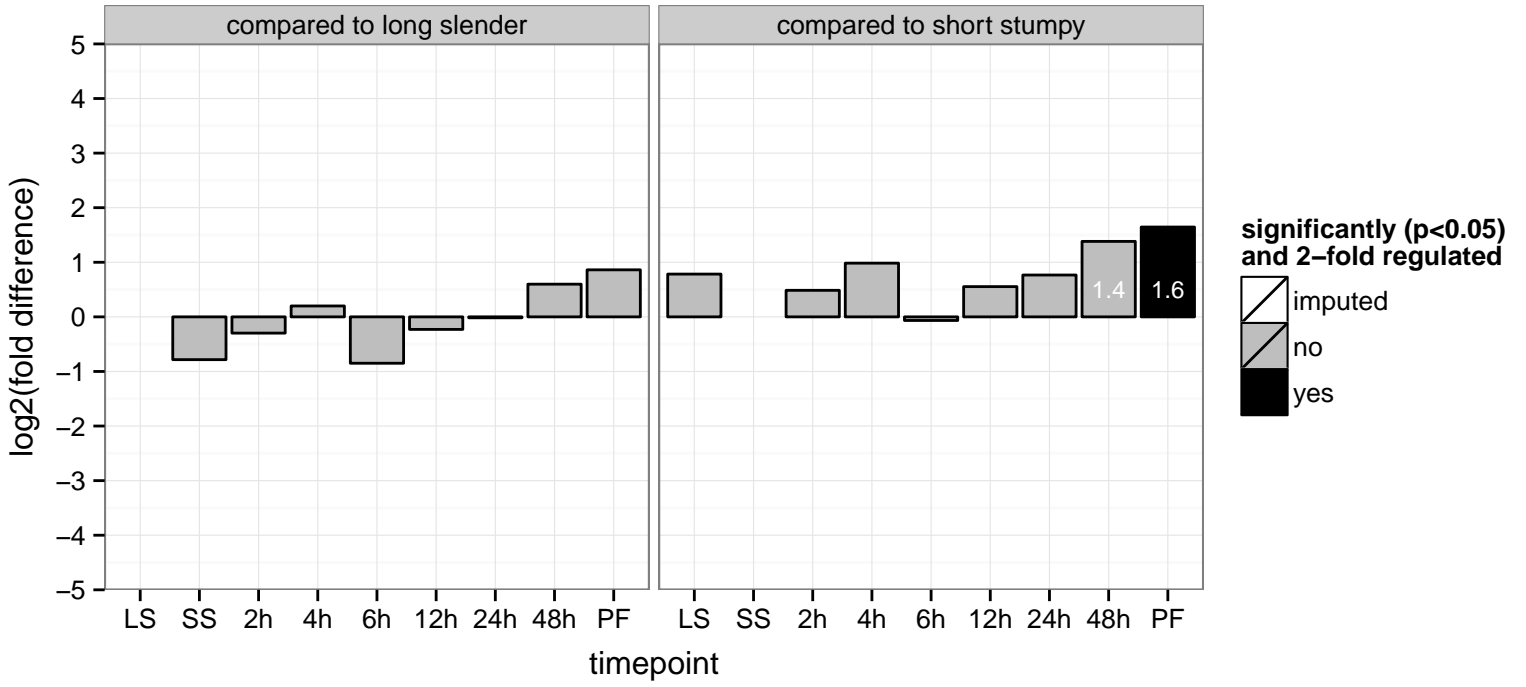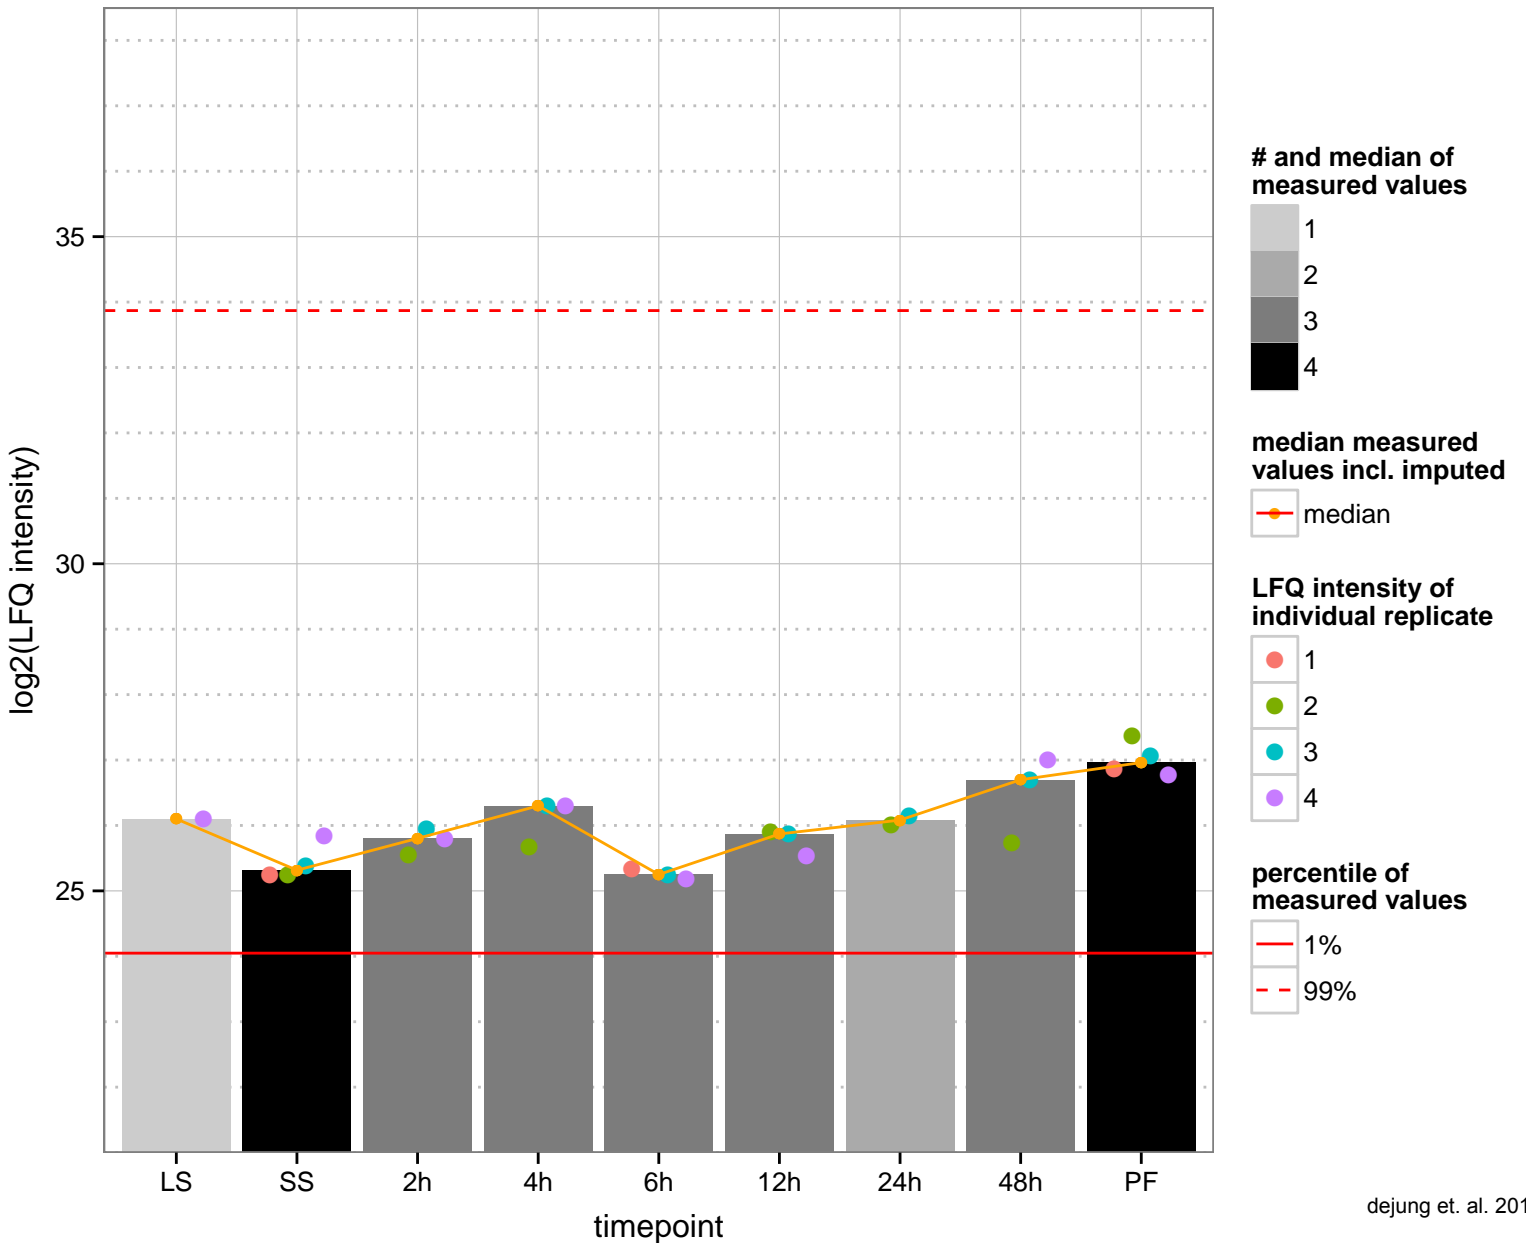

flap endonuclease-1 (FEN-1), putative  
 Tb927.3.830  
 AGOF: DNA binding, nuclease activity  
 AGOC: null  
 AGOP: DNA repair  
 PGOF: DNA binding, catalytic activity, nuclease activity  
 PGO: null  
 PGOP: DNA repair

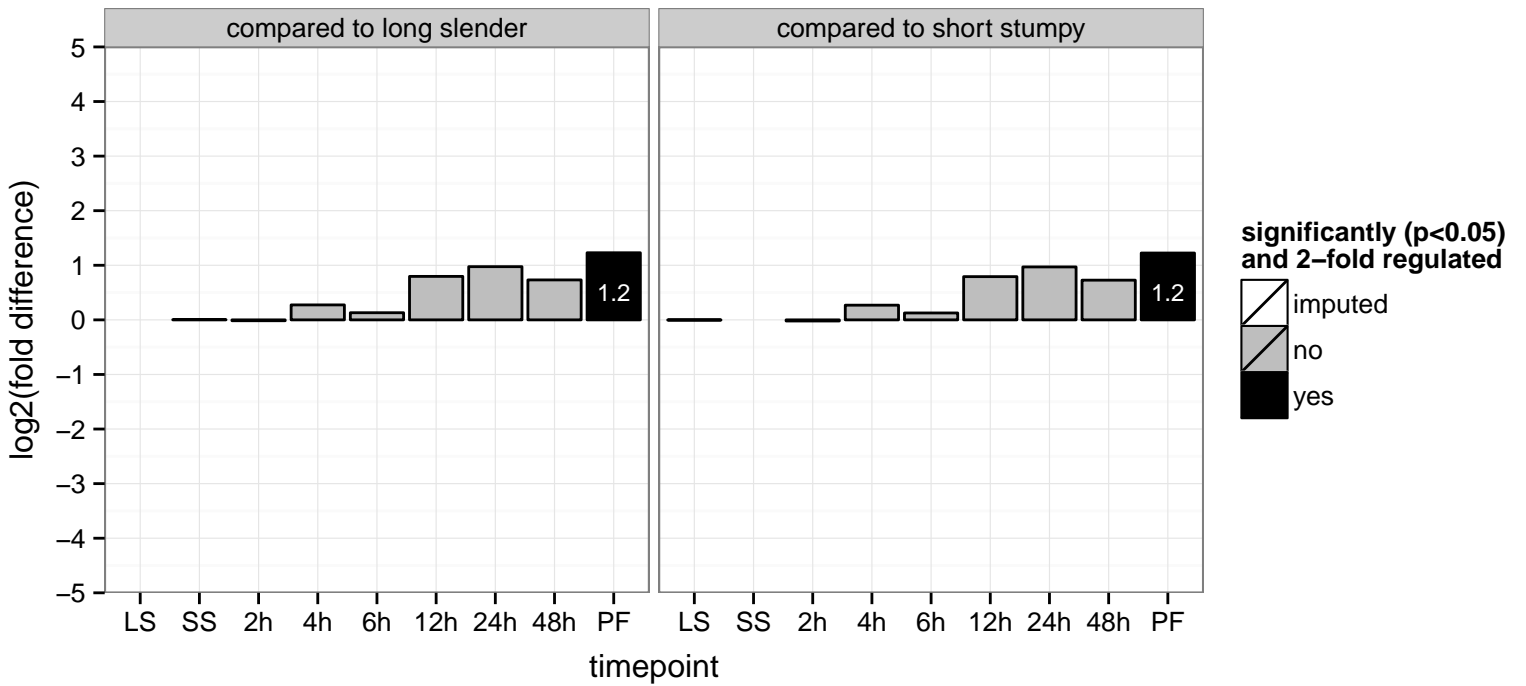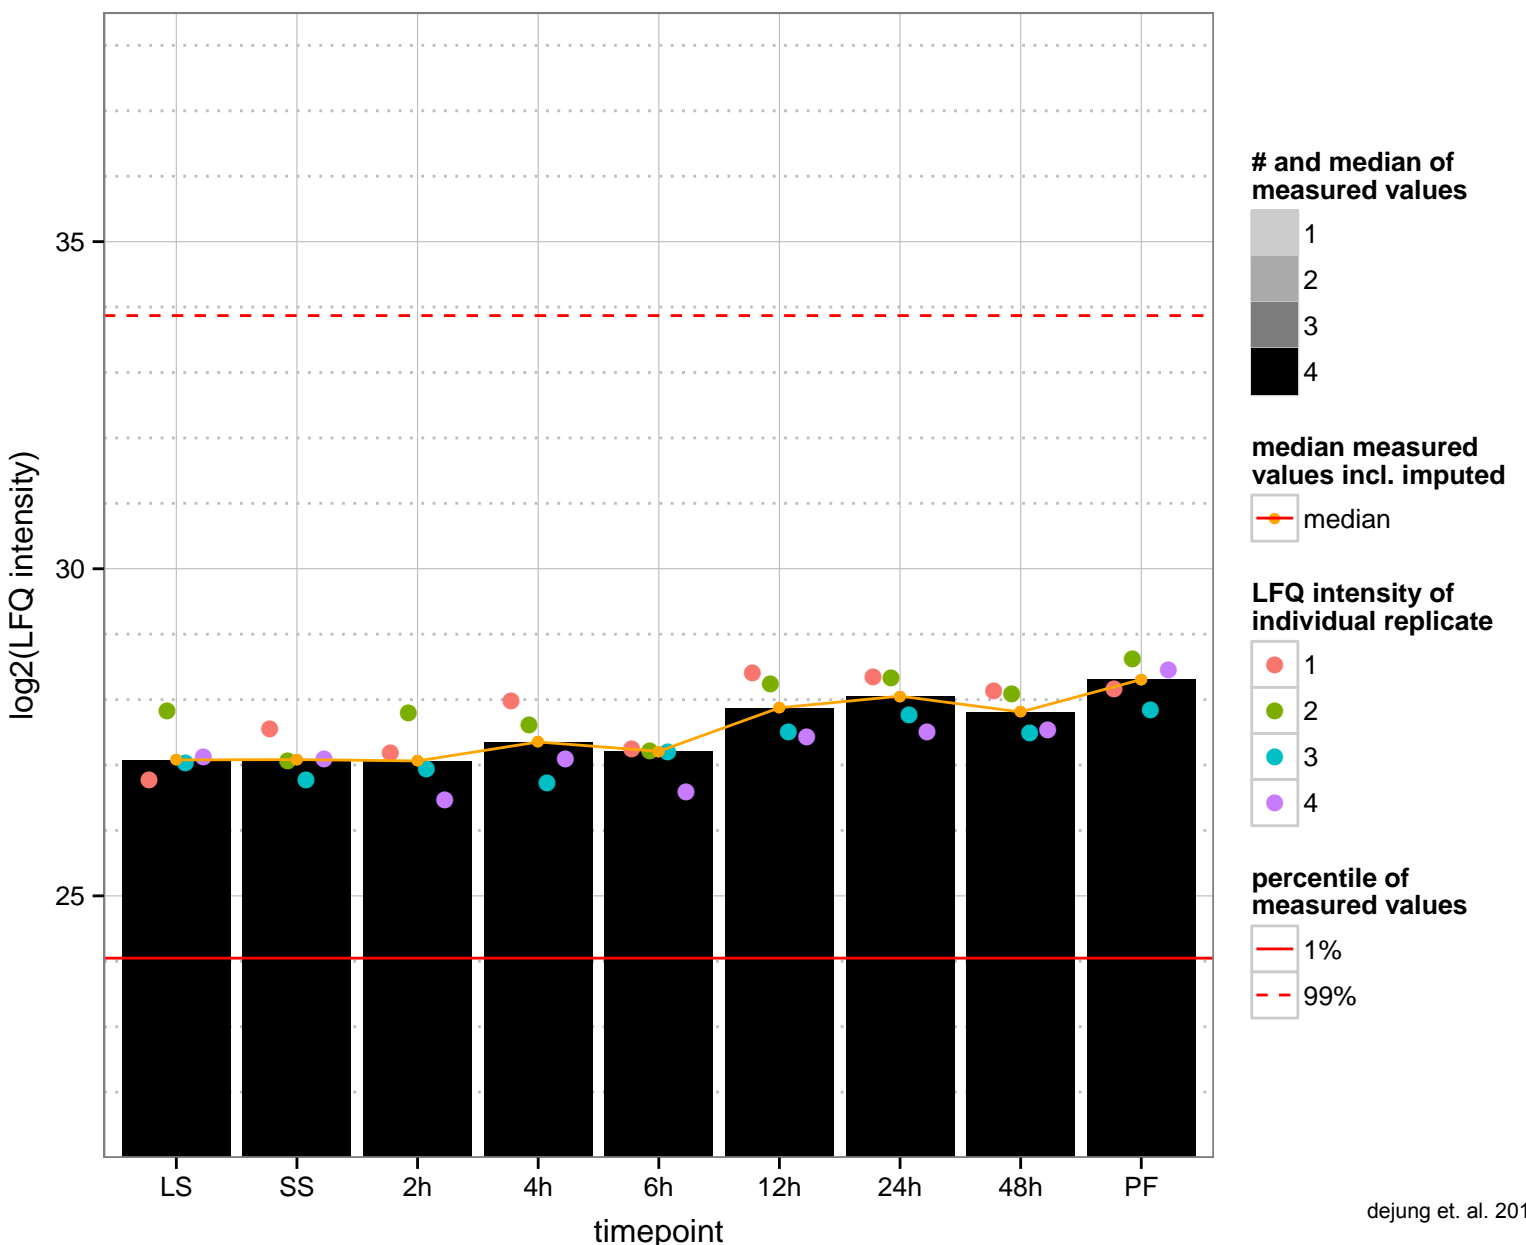

protein transport protein Sec61 gamma subunit, putative  
 Tb927.3.960  
 AGOF: P-P-bond-hydrolysis-driven protein transmembrane transporter activity  
 AGOC: membrane  
 AGOP: protein targeting  
 PGOF: P-P-bond-hydrolysis-driven protein transmembrane transporter activity  
 PGO: membrane  
 PGO: intracellular protein transport, protein targeting, protein transport

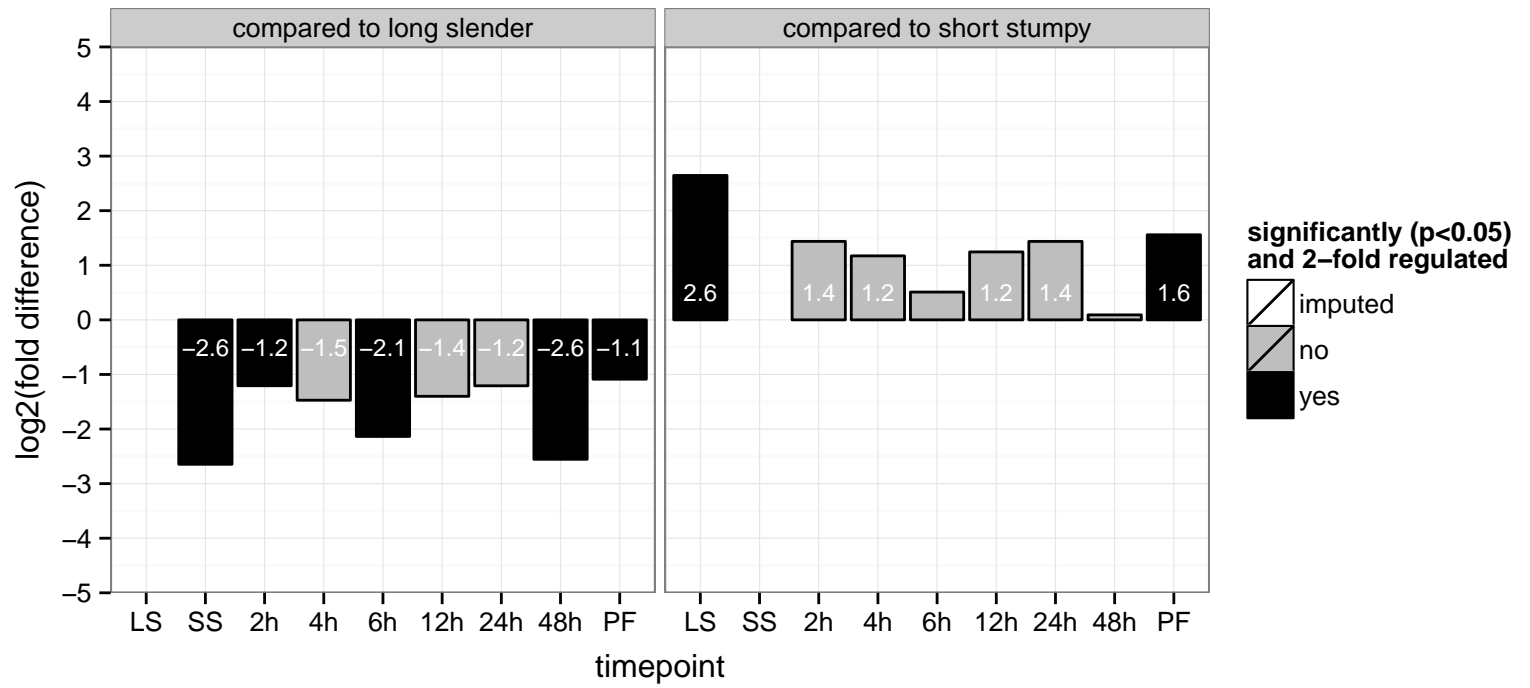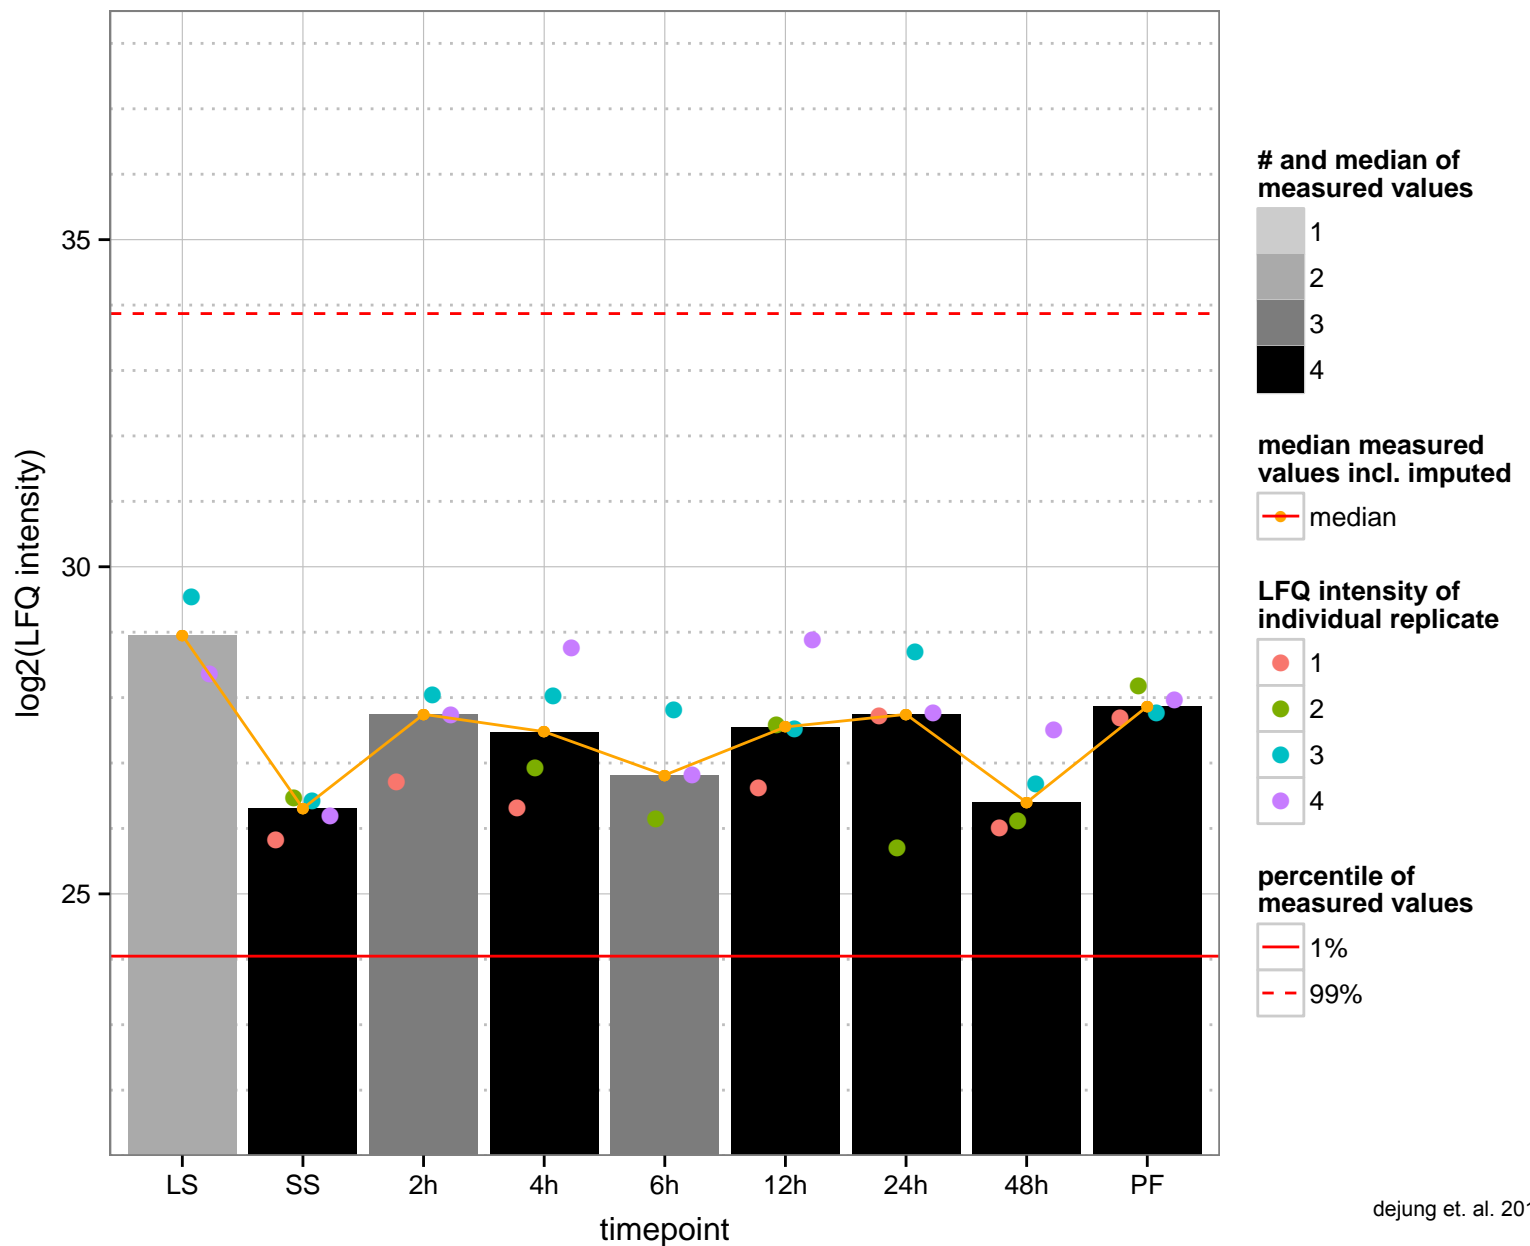

serine-palmitoyl-CoA transferase, putative

Tb927.4.1020

AGOF: pyridoxal phosphate binding, transferase activity, transferring nitrogenous groups

AGOC: endoplasmic reticulum

AGOP: biosynthetic process, membrane lipid metabolic process

PGOF: pyridoxal phosphate binding, transferase activity

PGOC: null

PGOP: biosynthetic process

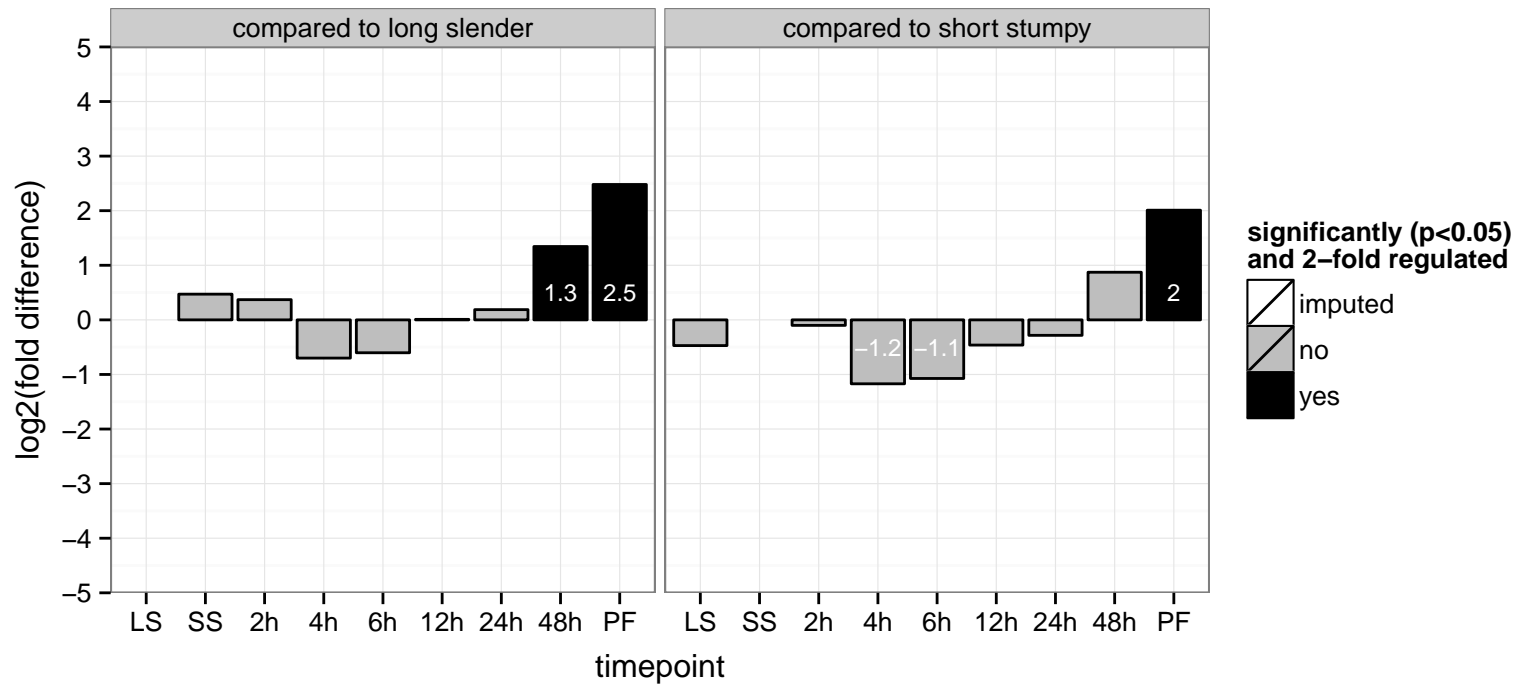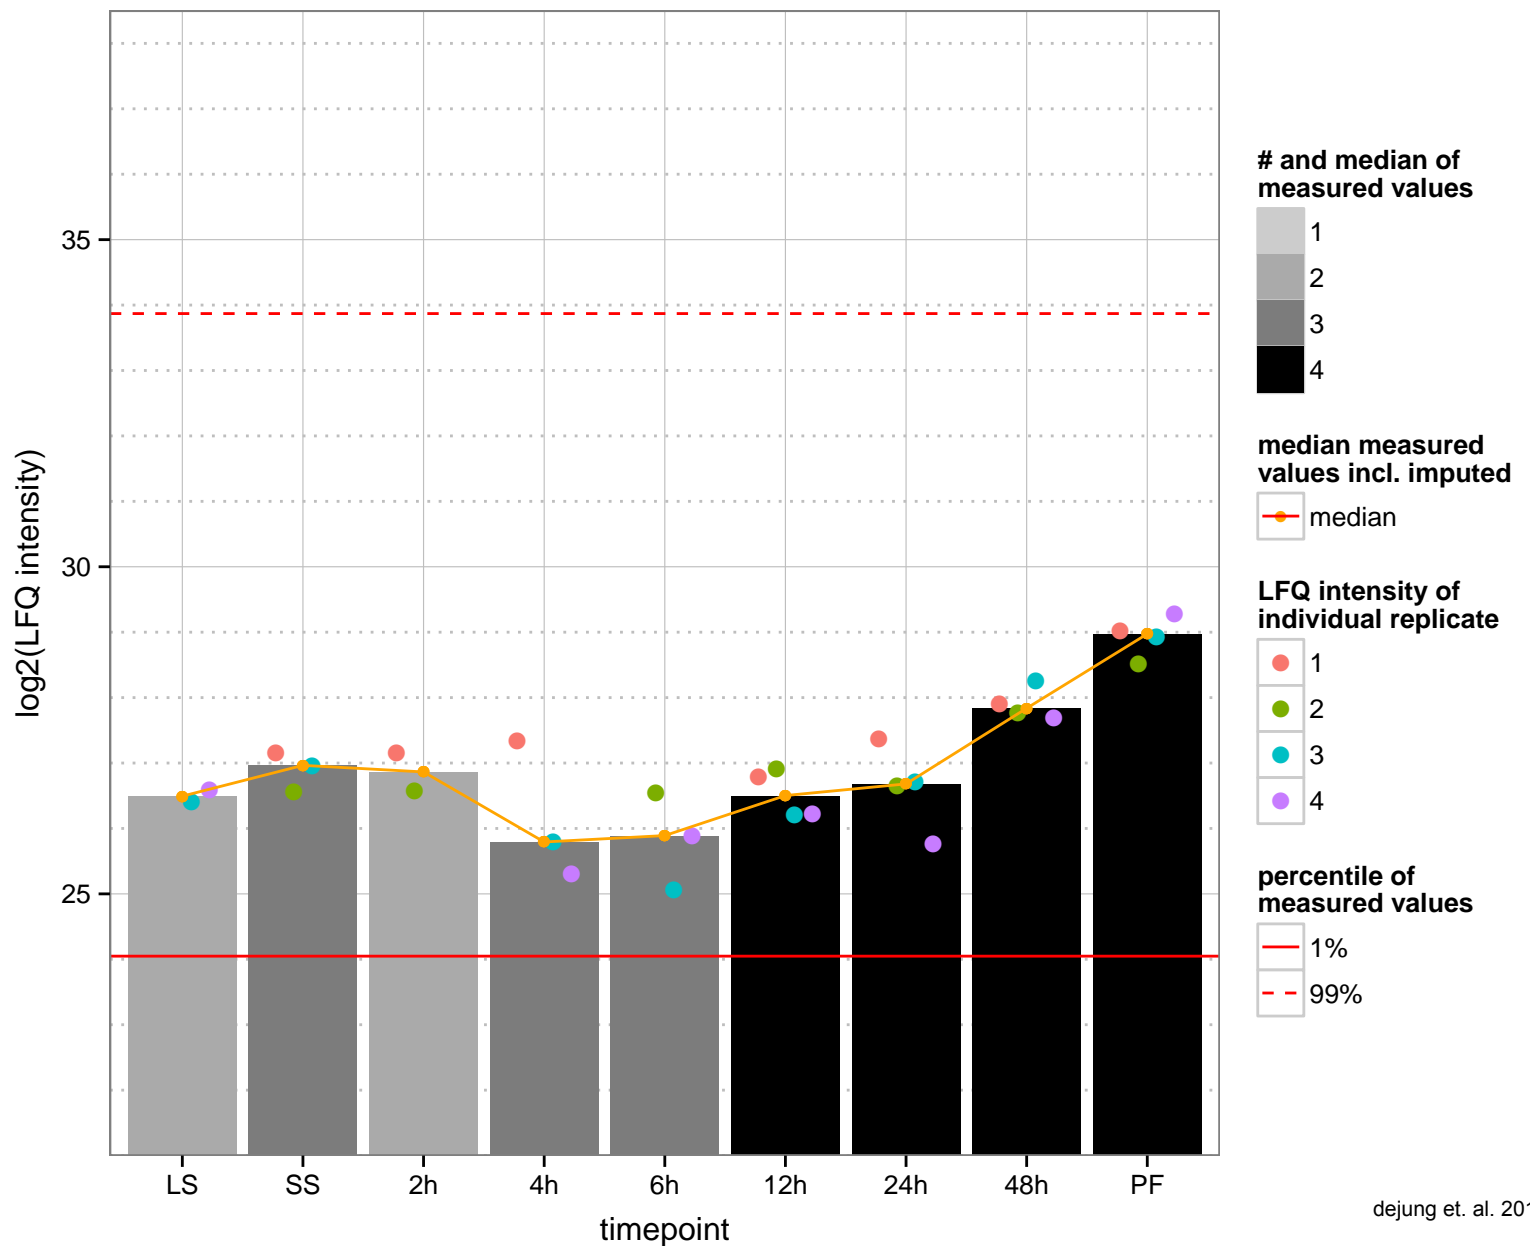

endosomal integral membrane protein, putative  
 Tb927.4.1090  
 AGOF: null  
 AGOC: integral to membrane  
 AGOP: null  
 PGO: null  
 PGO: null  
 PGO: integral to membrane  
 PGO: null

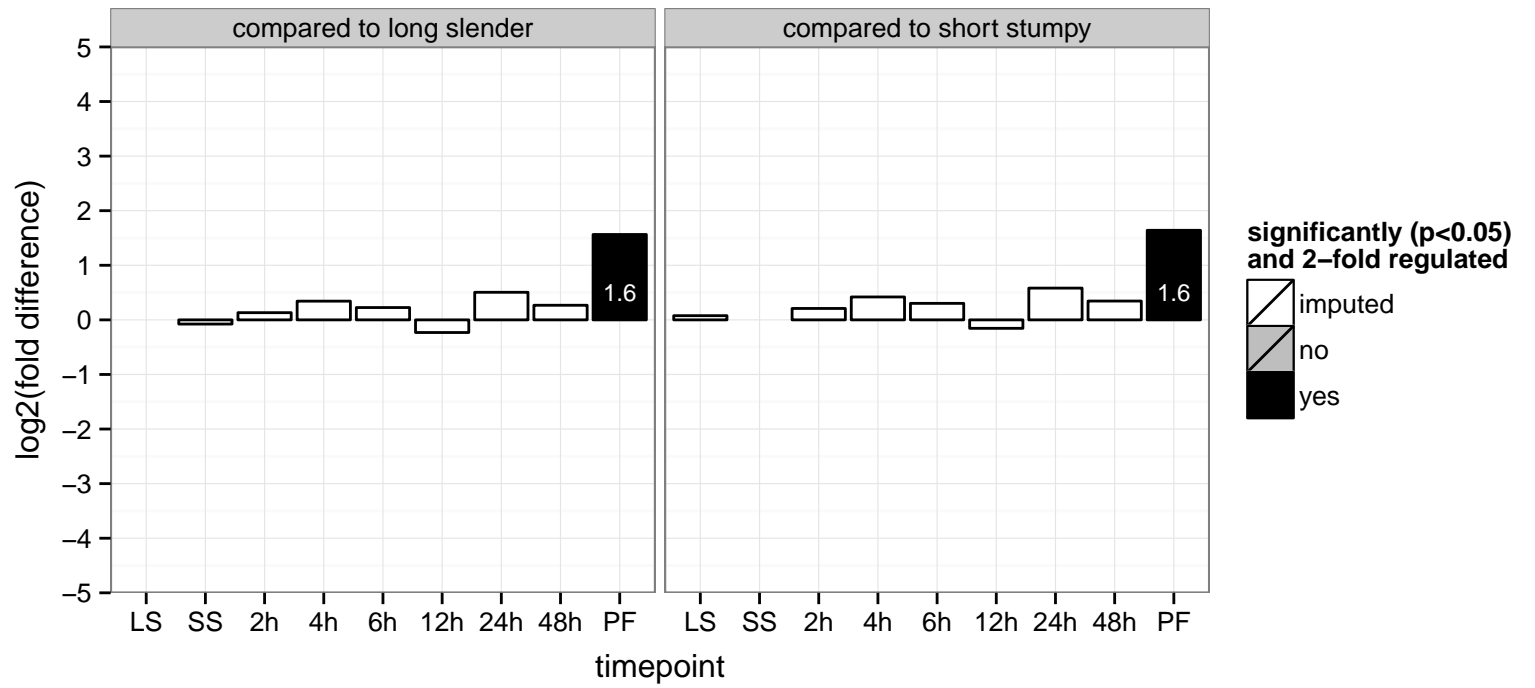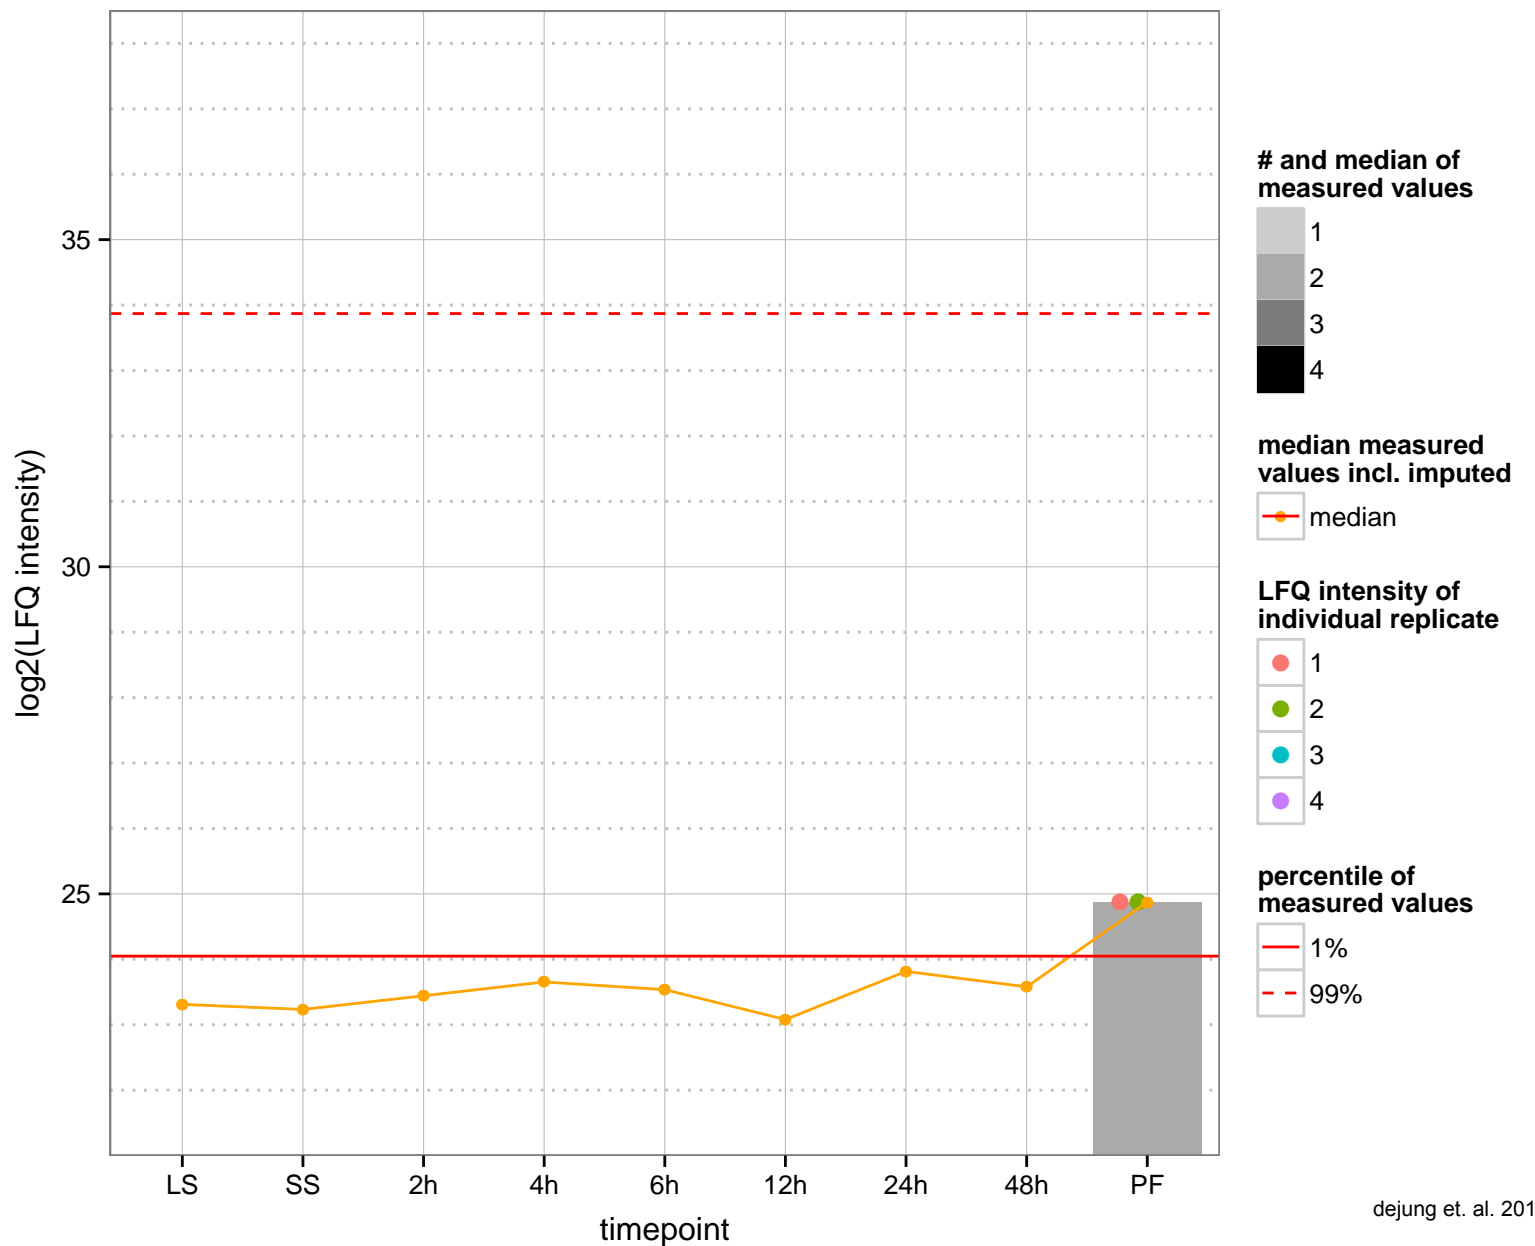



ZFP family member, putative (ZC3H9)  
 Tb927.4.1310  
 AGOF: RNA binding, zinc ion binding  
 AGOC: intracellular  
 AGOP: null  
 PGOF: nucleic acid binding, zinc ion binding  
 PGO: intracellular  
 PGOP: null

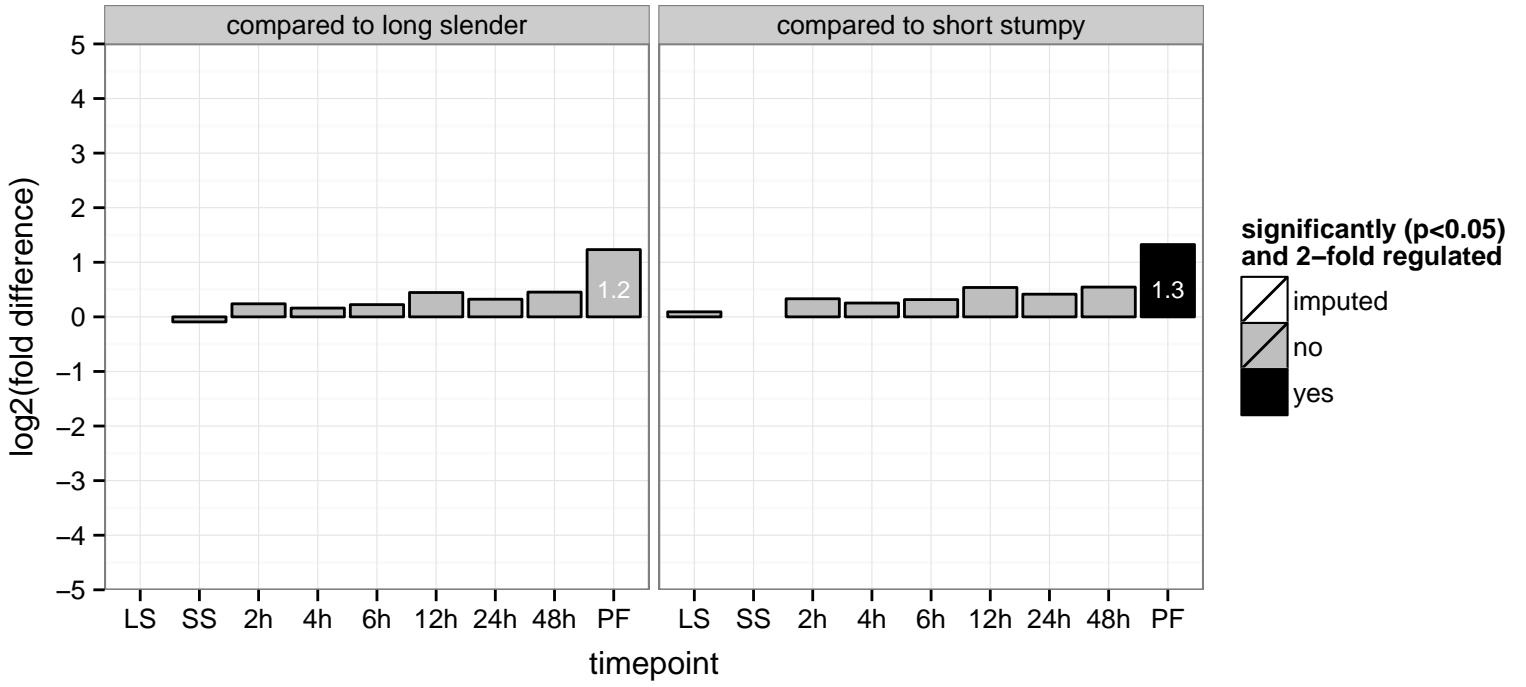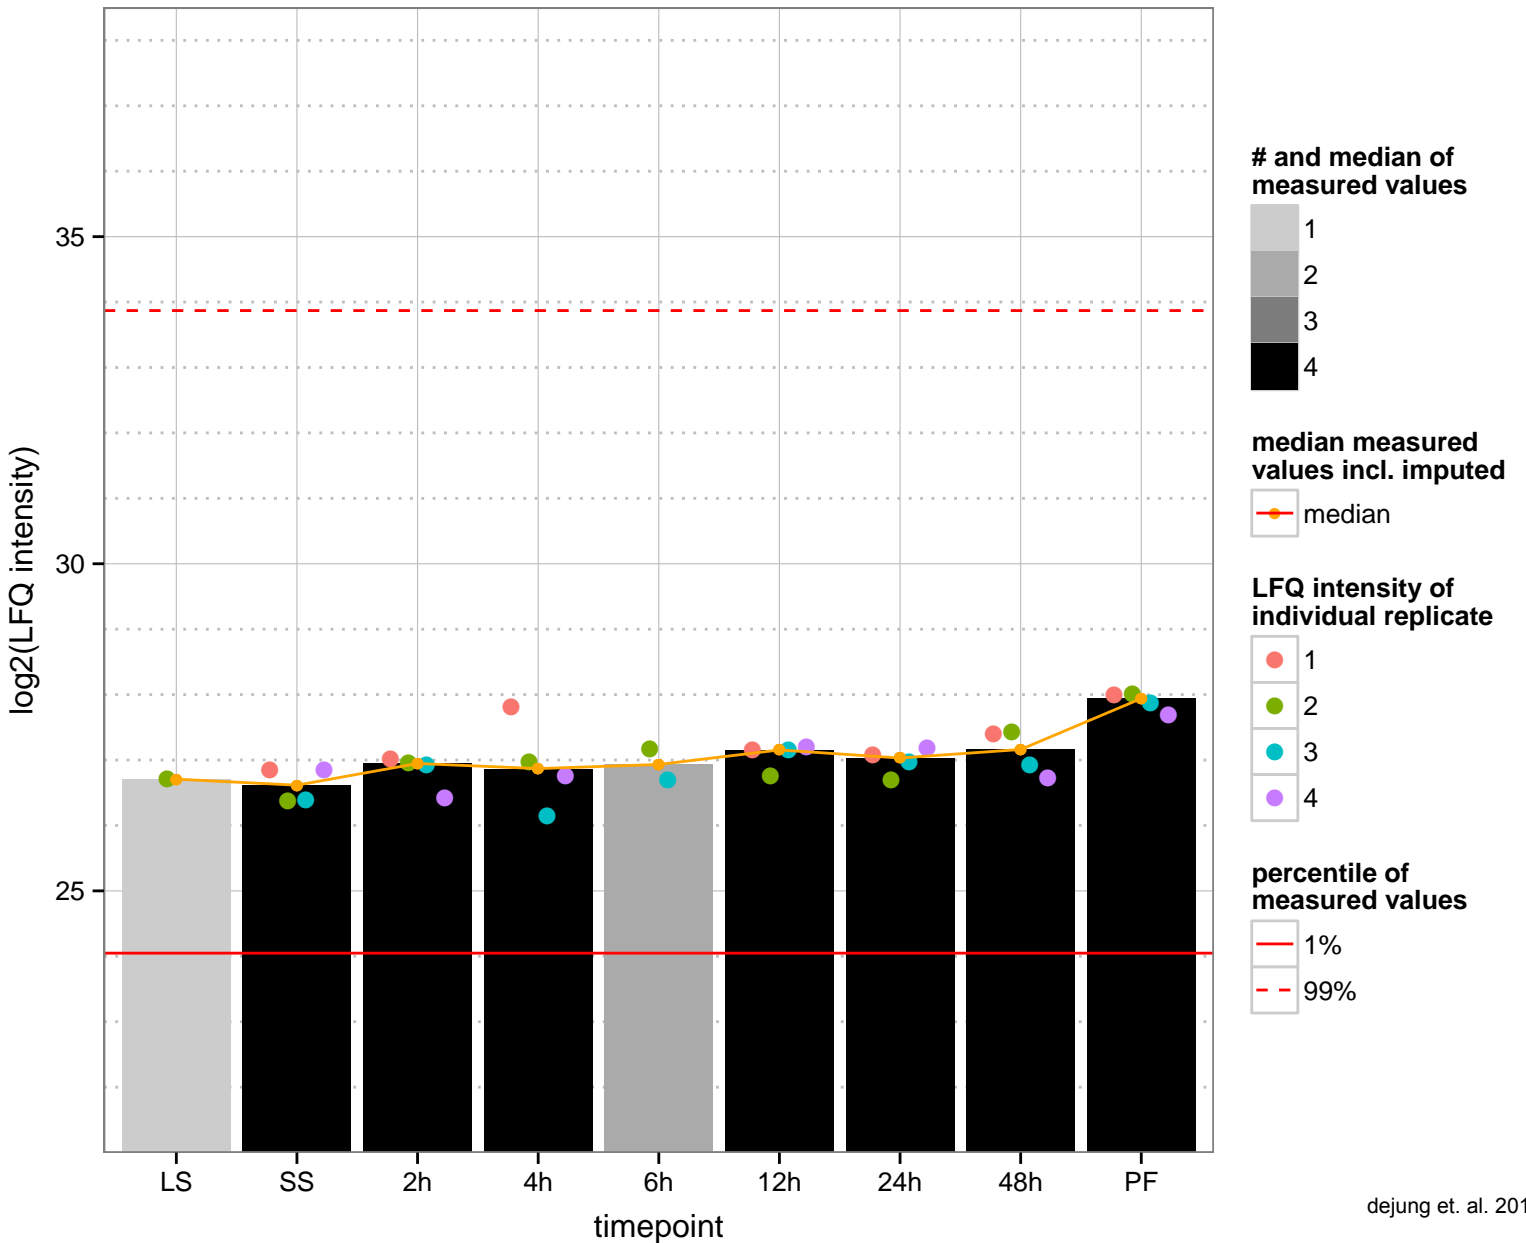

hypothetical protein, conserved  
 Tb927.4.1380  
 AGOF: hydrolase activity, acting on ester bonds  
 AGOC: cytoplasm  
 AGOP: D-amino acid catabolic process  
 PGO: hydrolase activity, acting on ester bonds  
 PGOC: cytoplasm  
 PGOP: D-amino acid catabolic process

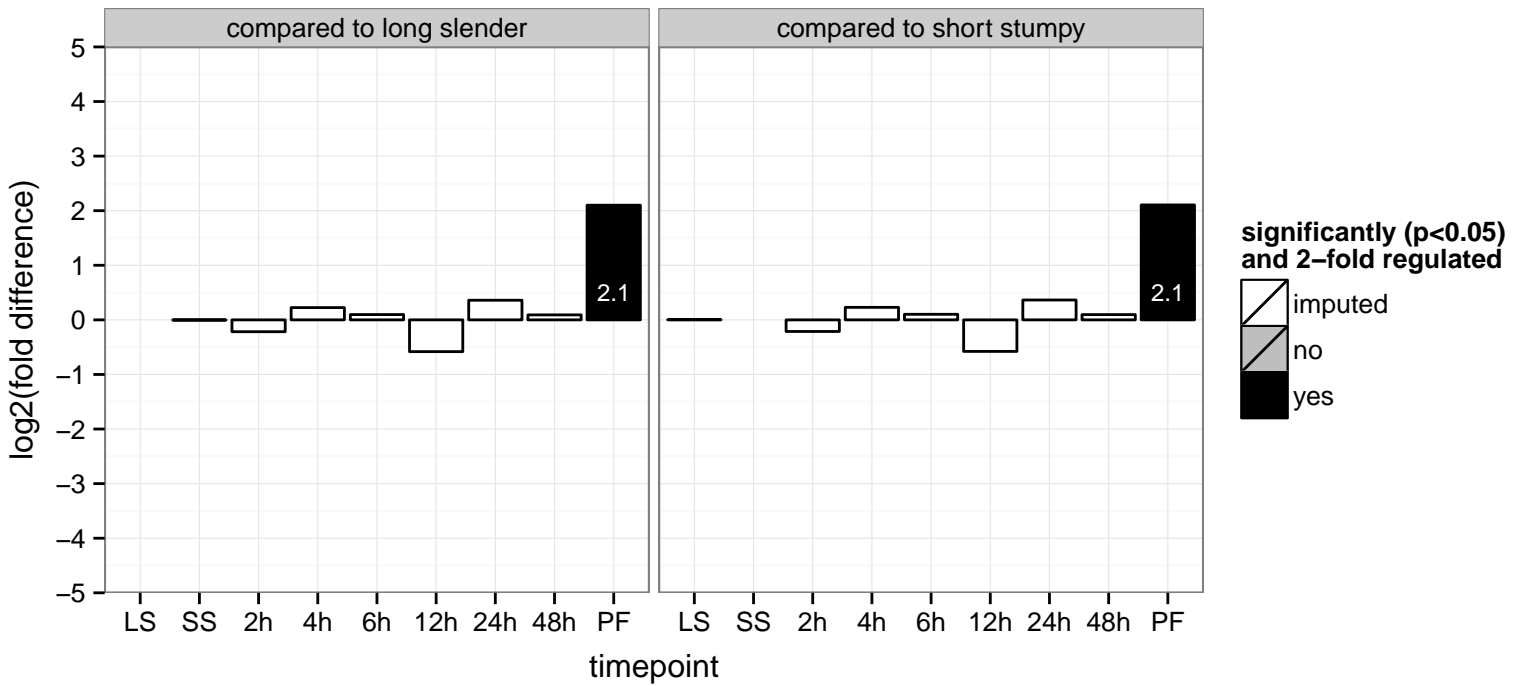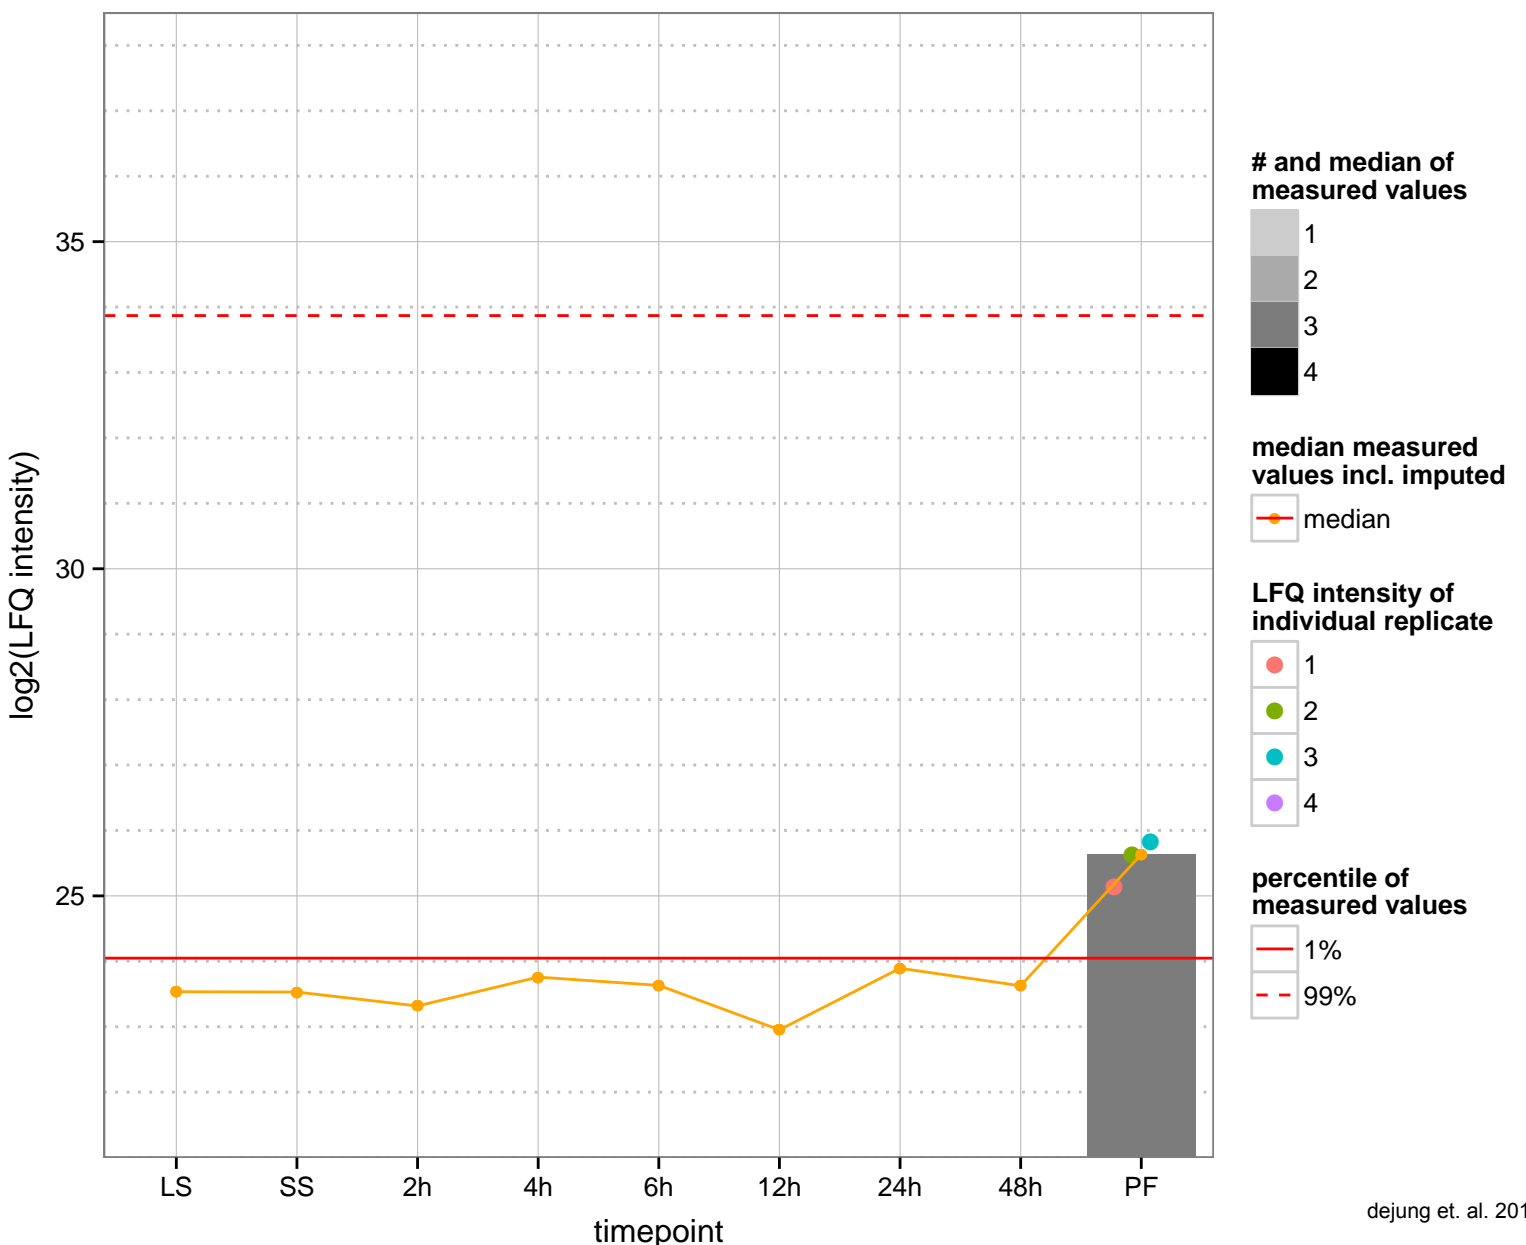

hypothetical protein, conserved  
 Tb927.4.1440  
 AGOF: null  
 AGOC: mitochondrion  
 AGOP: null  
 PGO: metal ion binding  
 PGOC: null  
 PGOP: null

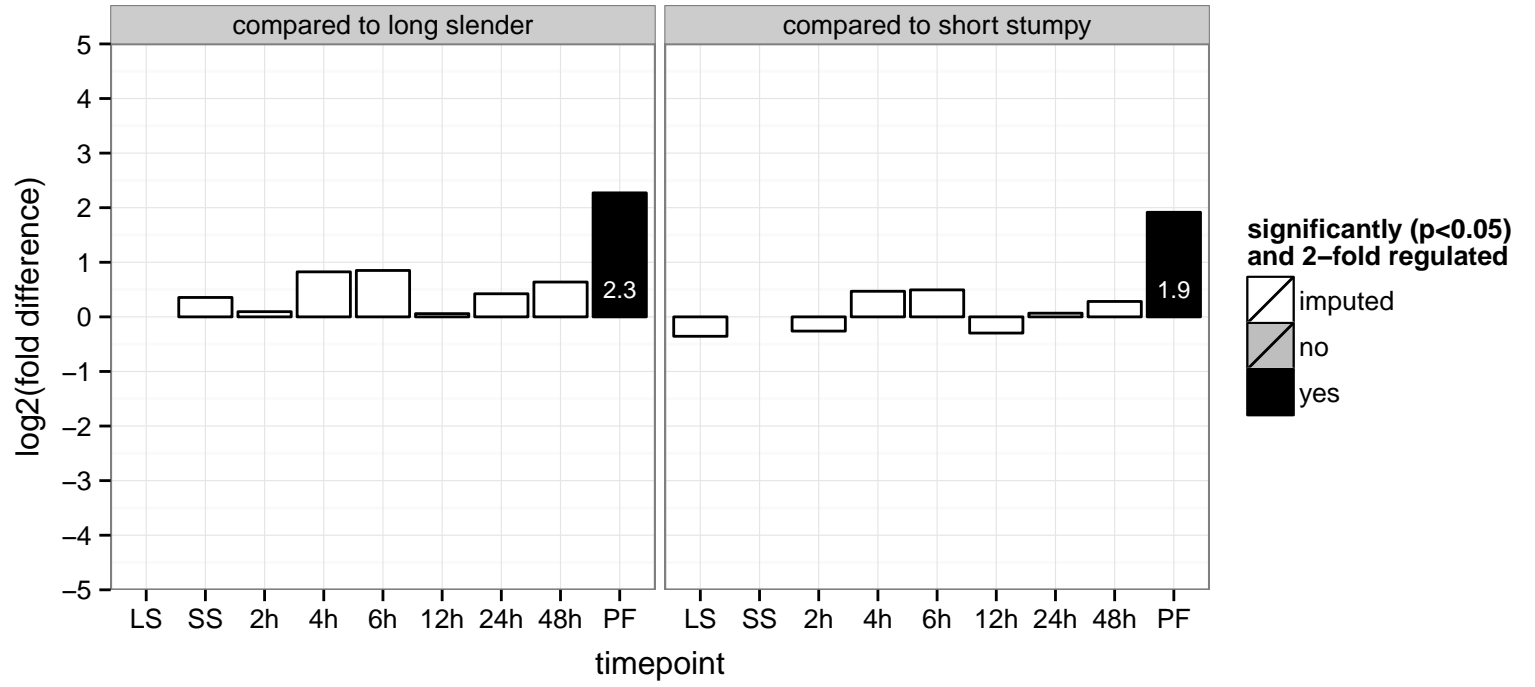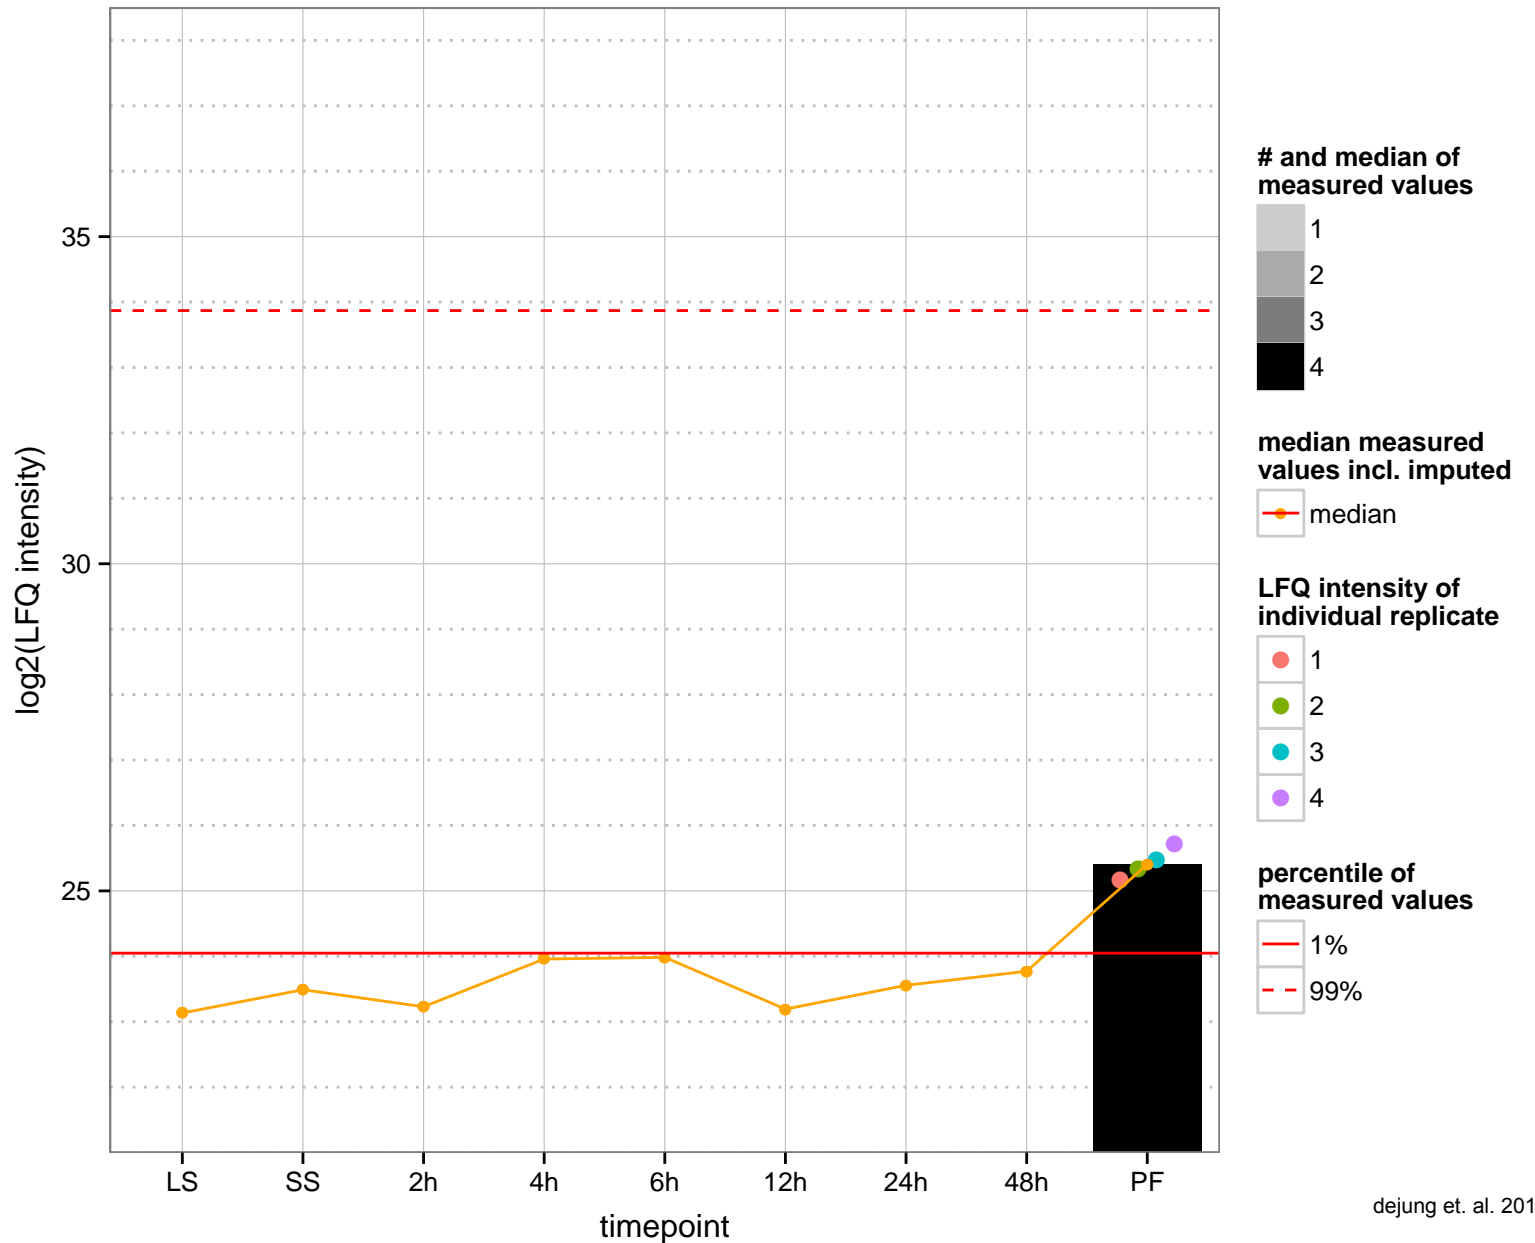

hypothetical protein, conserved  
 Tb927.4.1590.1;Tb927.4.1590.2  
 AGOF: null  
 AGOC: null  
 AGOP: null  
 PGO: null  
 PGOC: null  
 PGOP: null

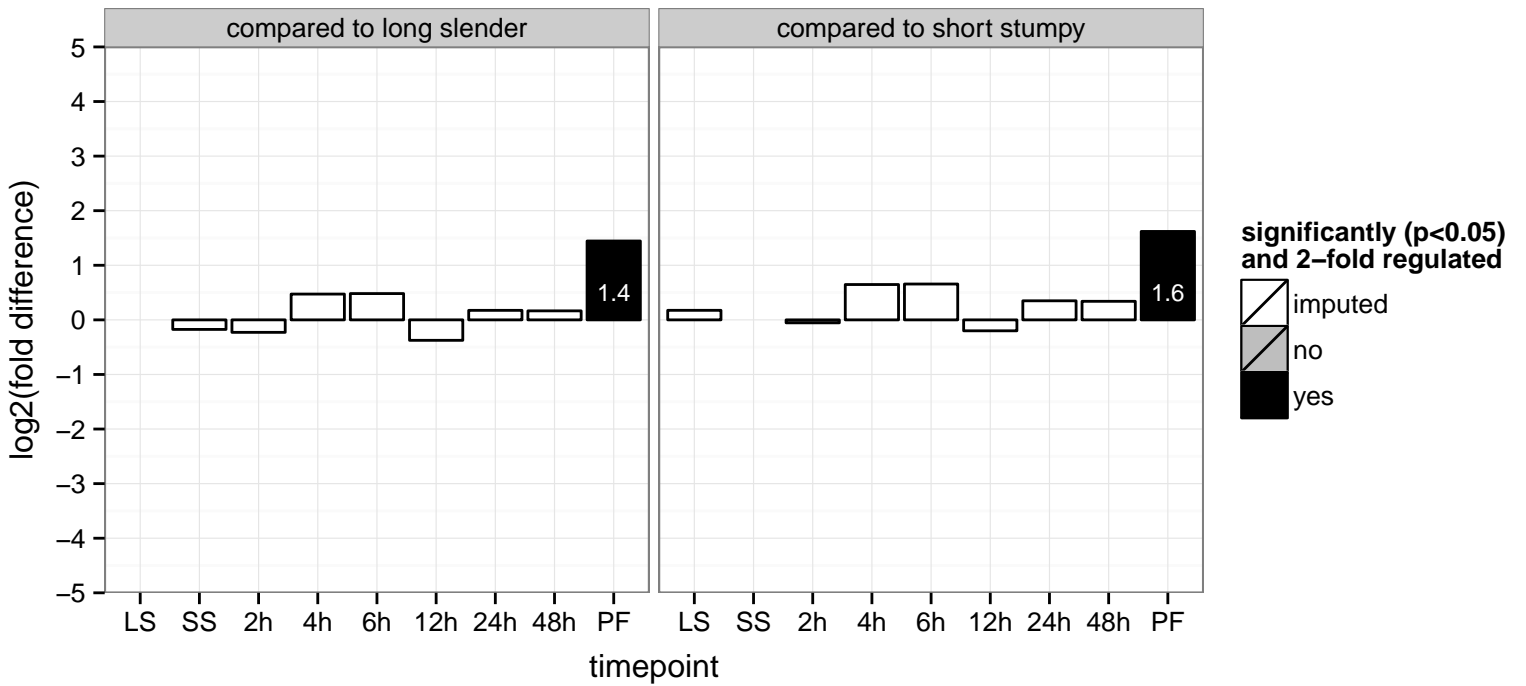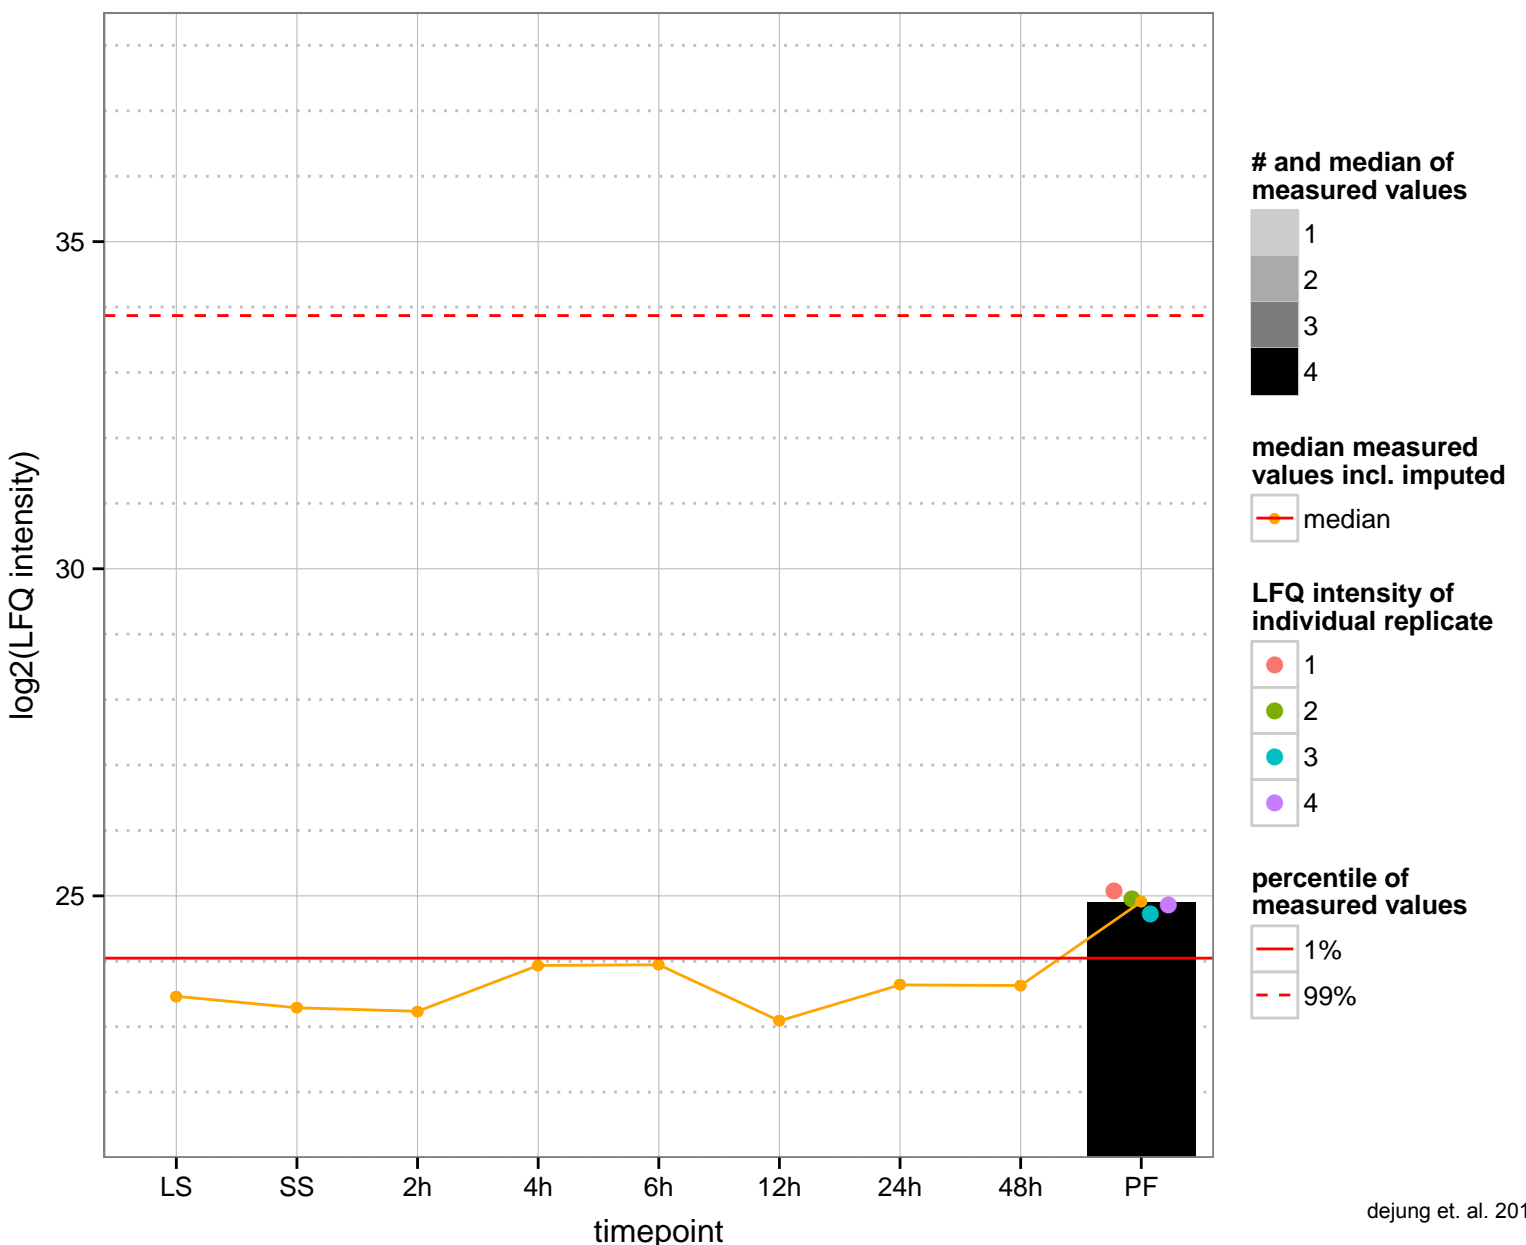

hypothetical protein, conserved  
 Tb927.4.1690  
 AGOF: null  
 AGOC: null  
 AGOP: null  
 PGO: null  
 PGOC: null  
 PGOP: null

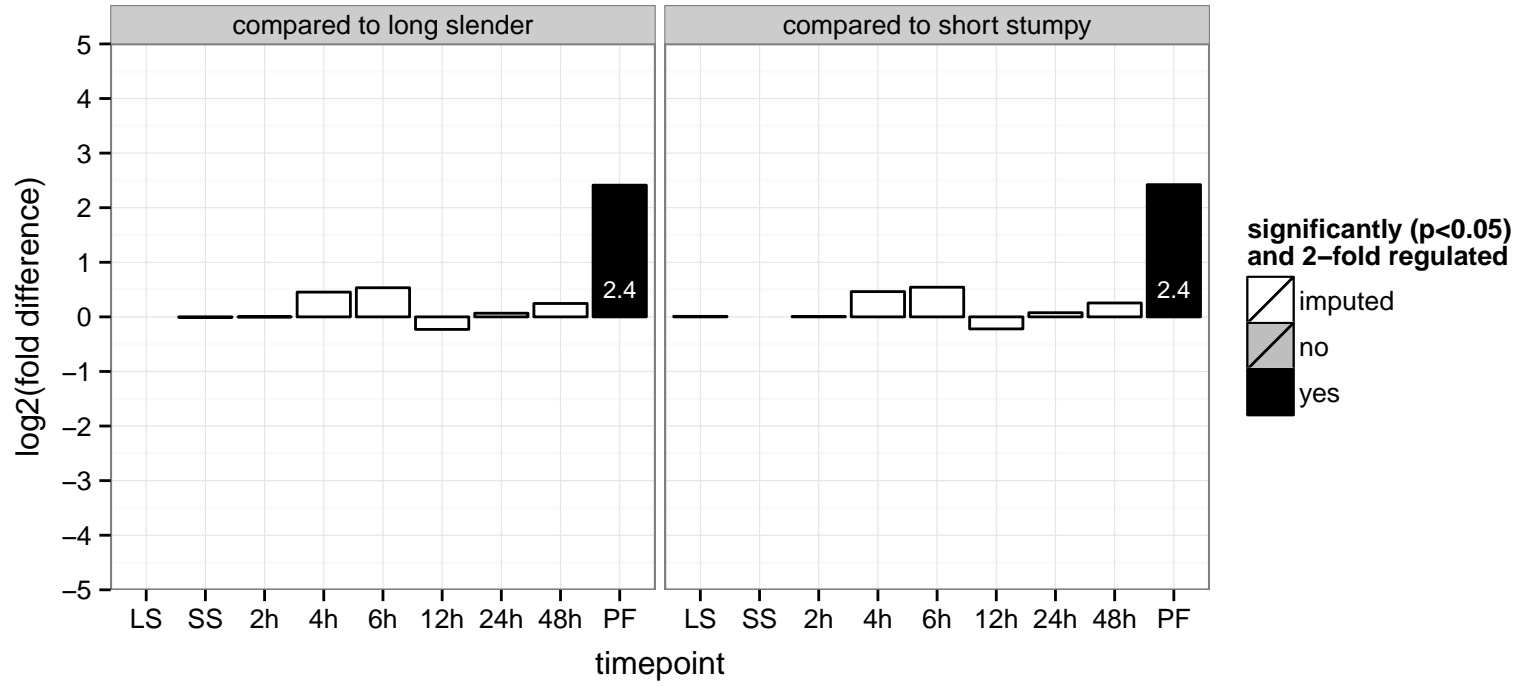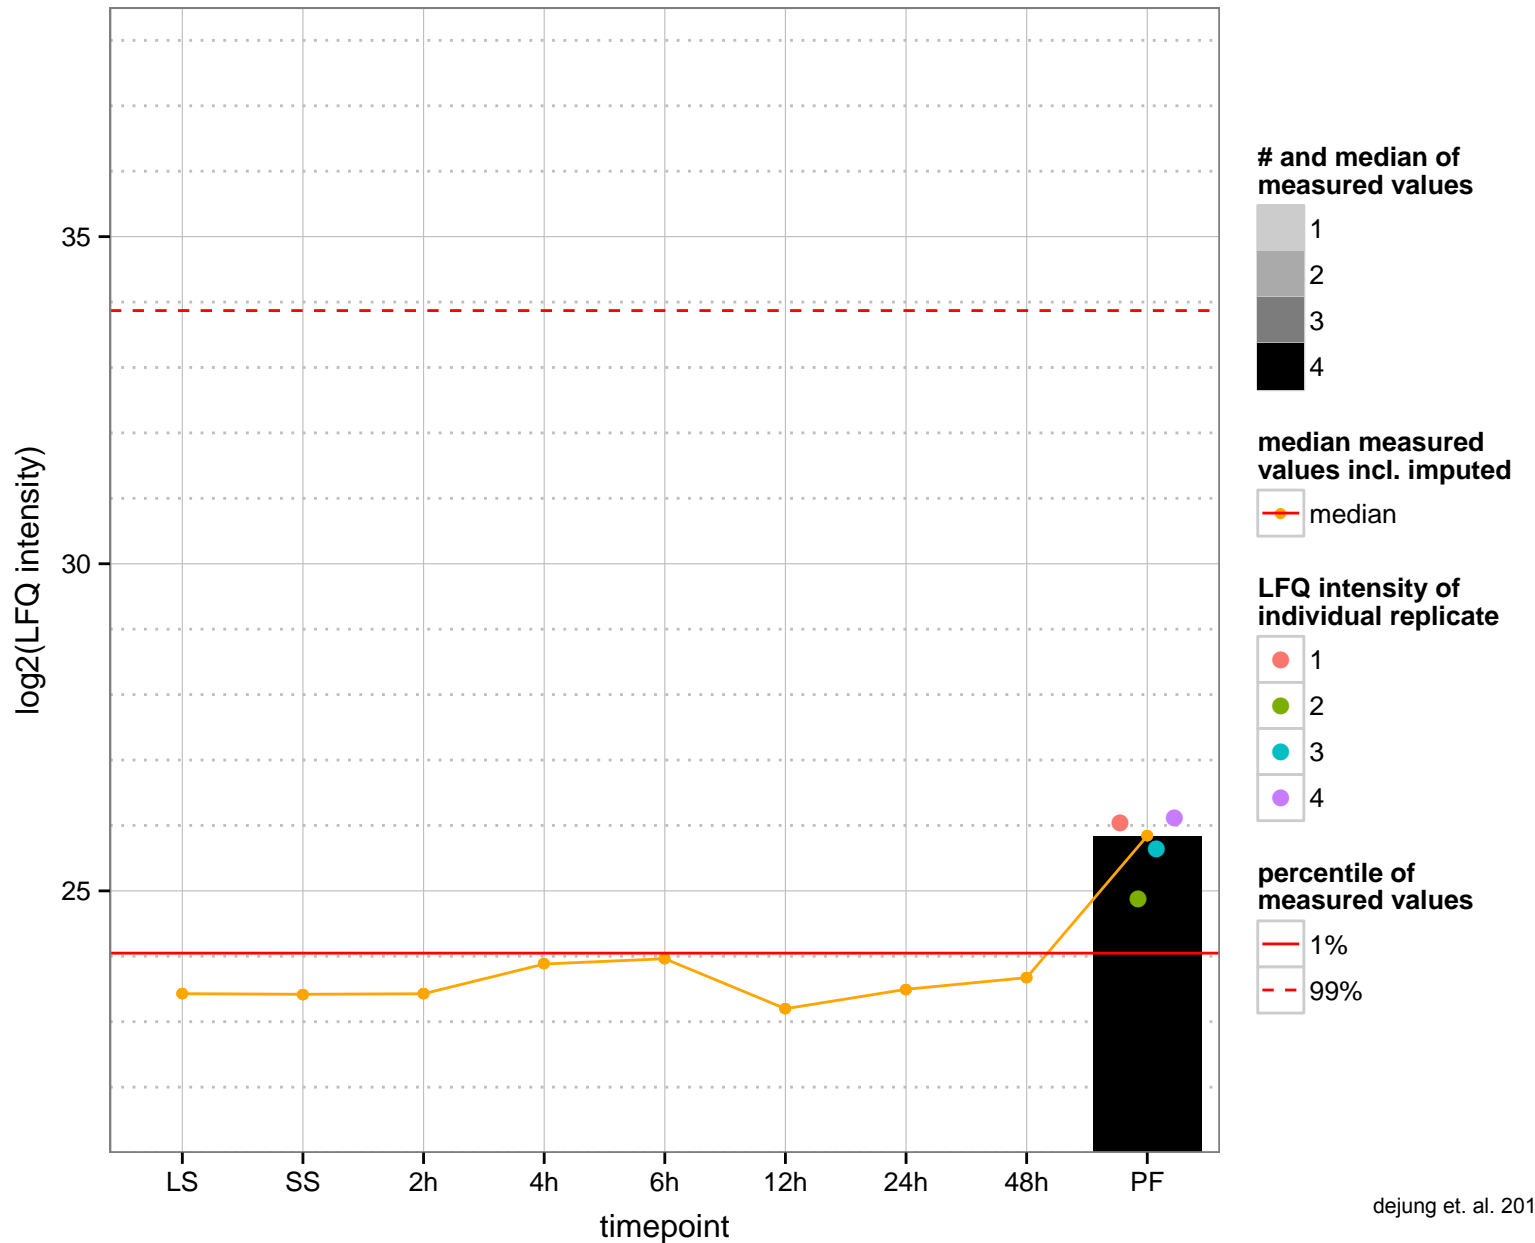

hypothetical protein, conserved  
 Tb927.4.1710  
 AGOF: null  
 AGOC: null  
 AGOP: null  
 PGOF: null  
 PGO C: null  
 PGOP: null

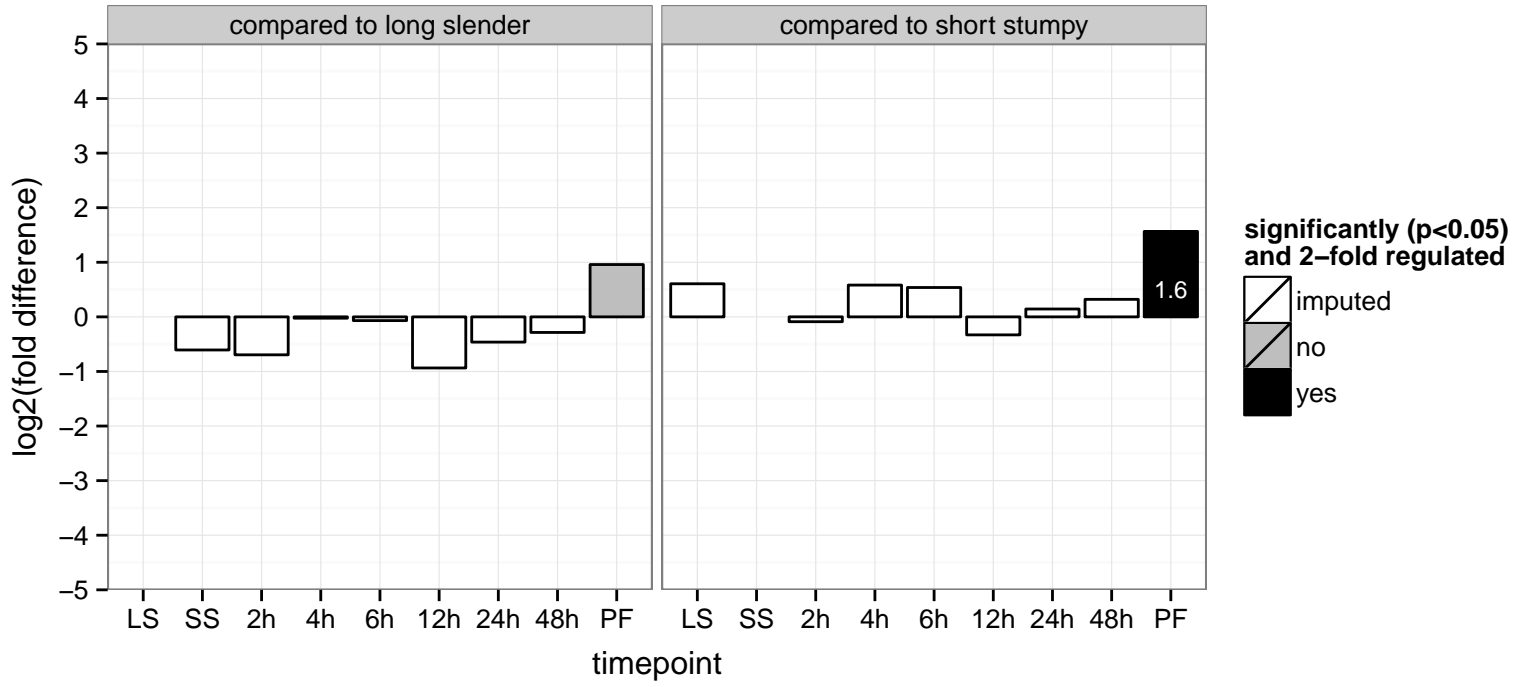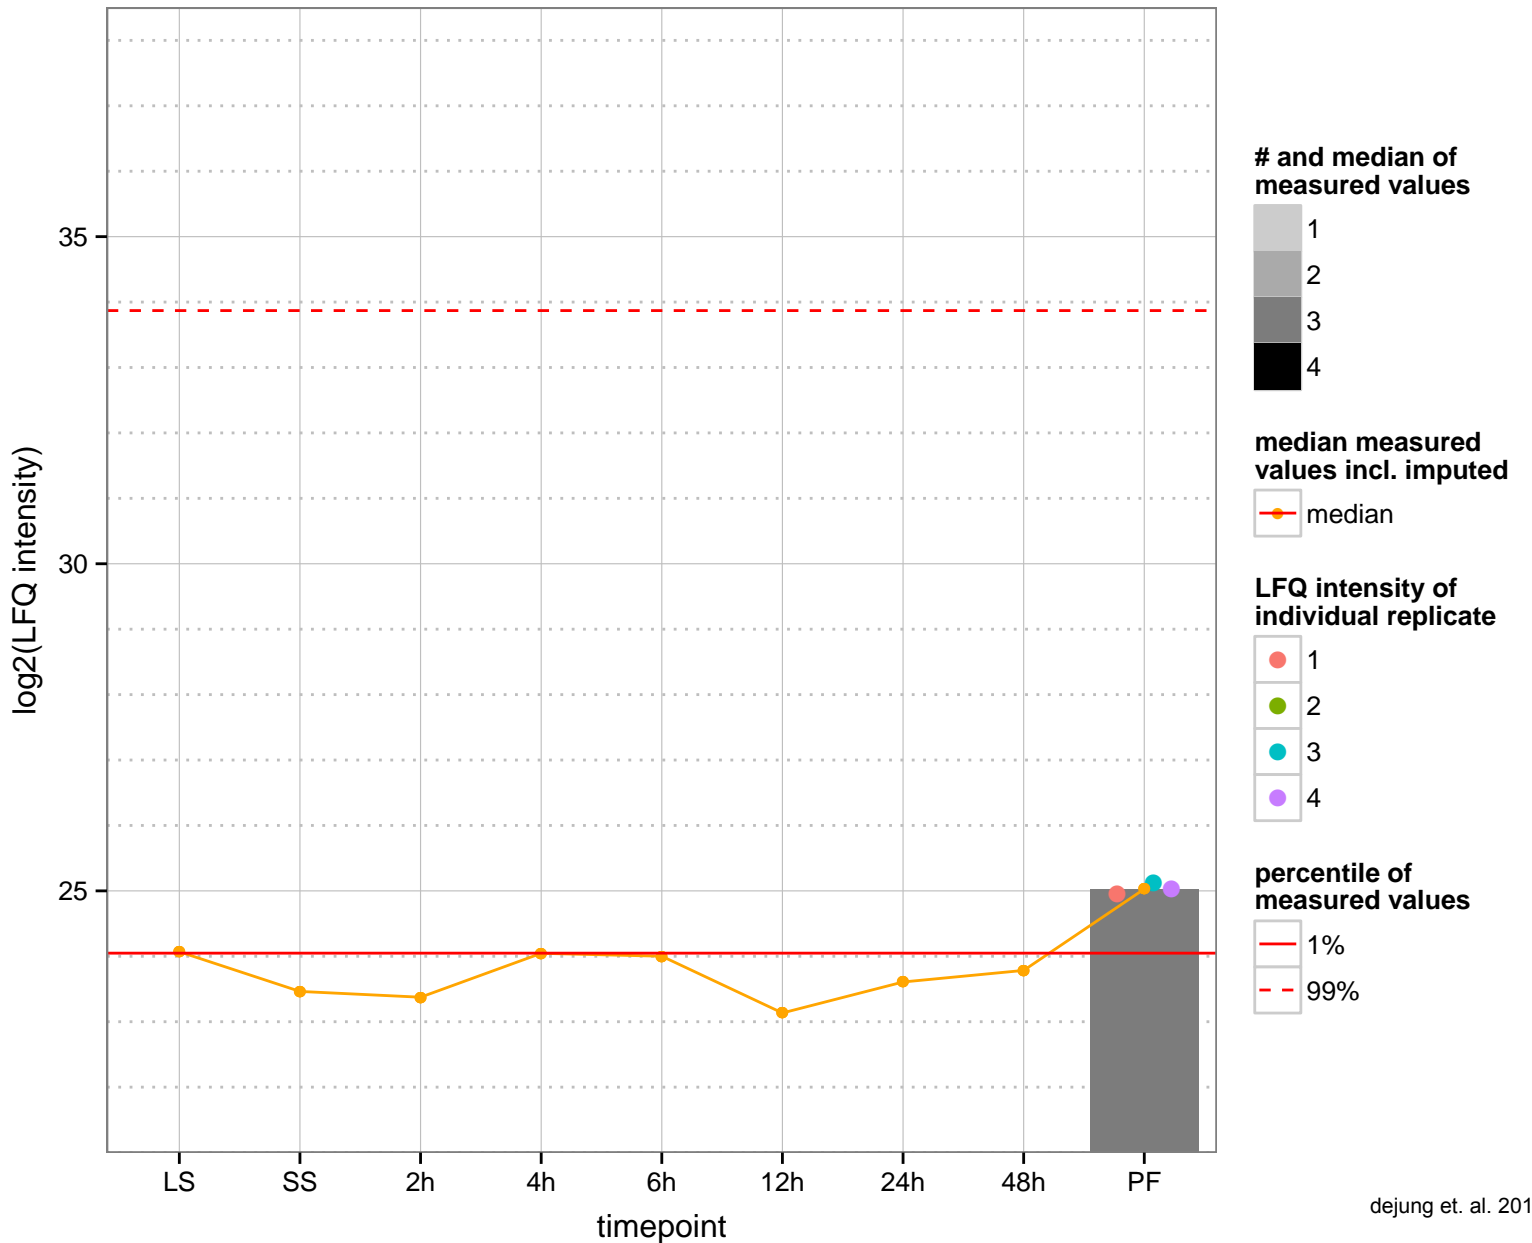

retrotransposon hot spot protein 1 (RHS1), putative  
 Tb927.4.200  
 AGOF: null  
 AGOC: null  
 AGOP: null  
 PGO: null  
 PGOC: null  
 PGOP: null

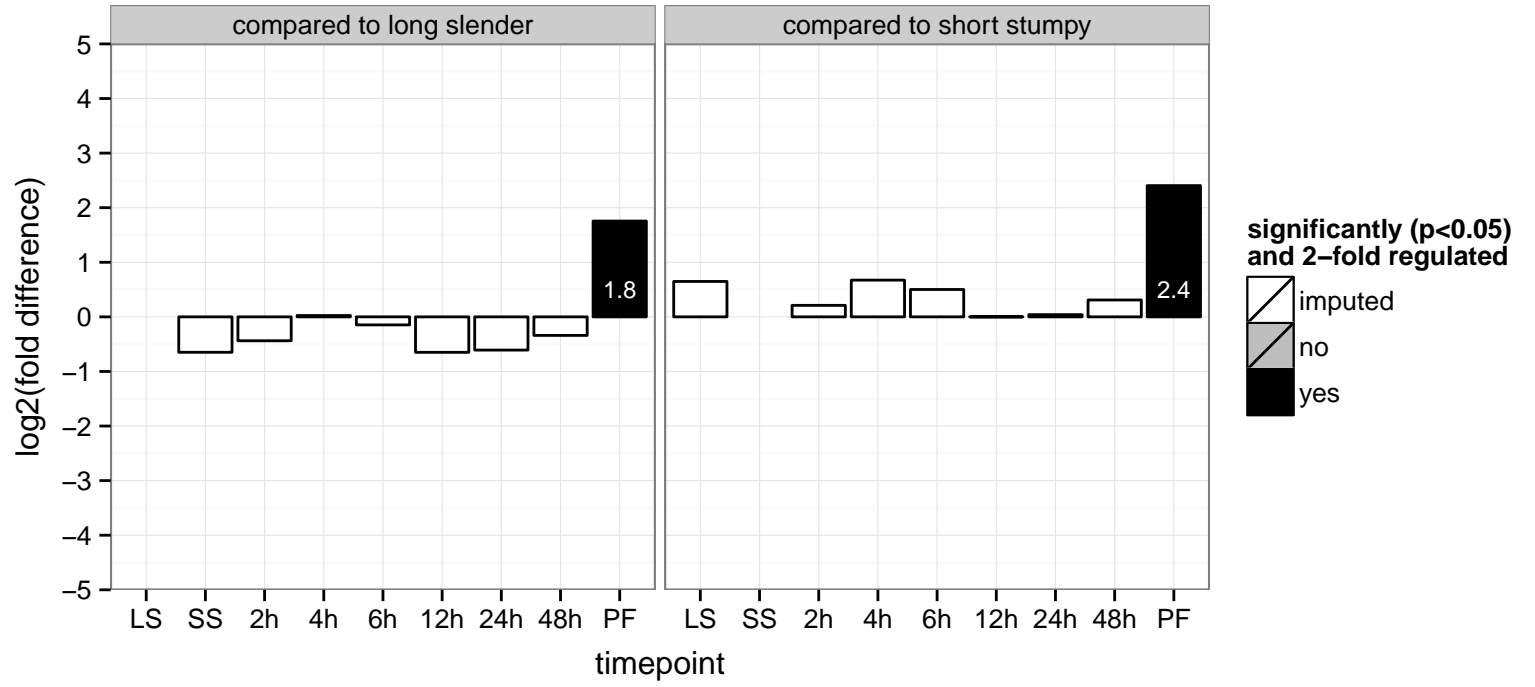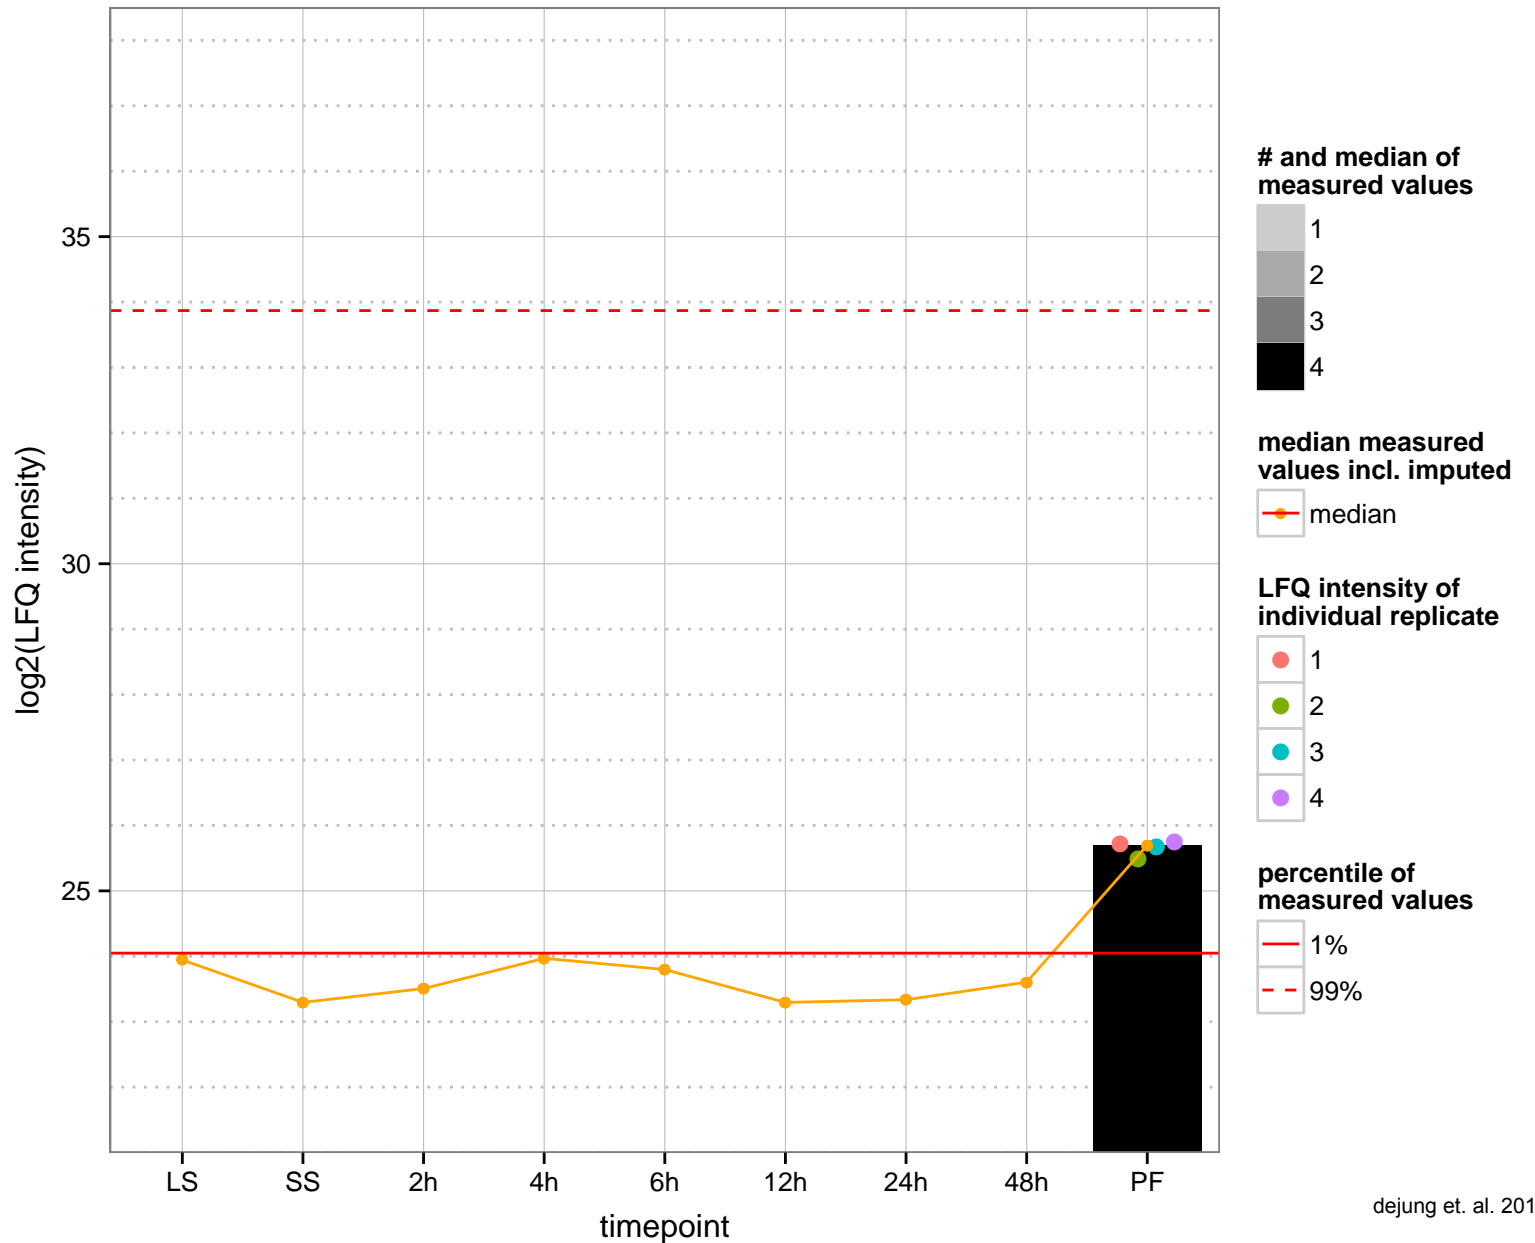

hypothetical protein, conserved  
 Tb927.4.2410  
 AGOF: catalytic activity  
 AGOC: null  
 AGOP: carbohydrate metabolic process  
 PGO: catalytic activity  
 PGOC: null  
 PGOP: carbohydrate metabolic process

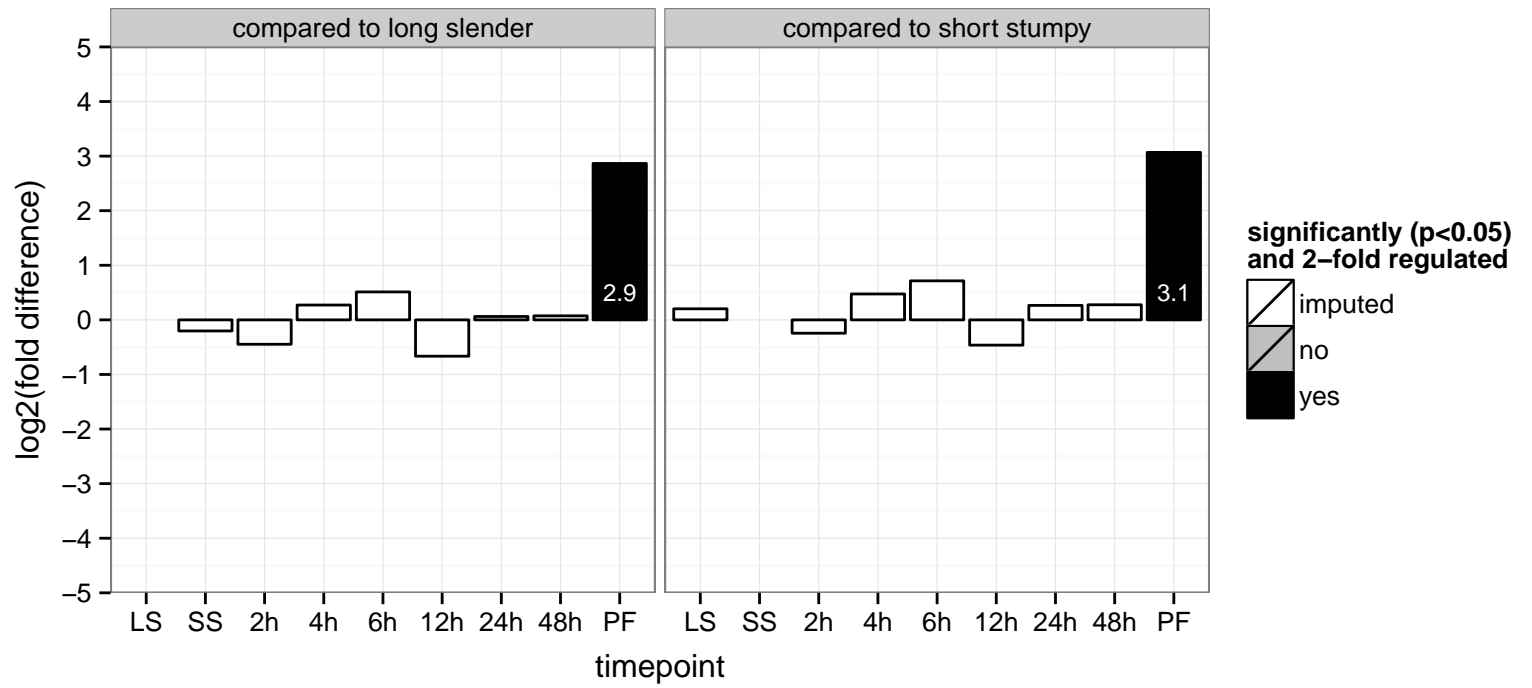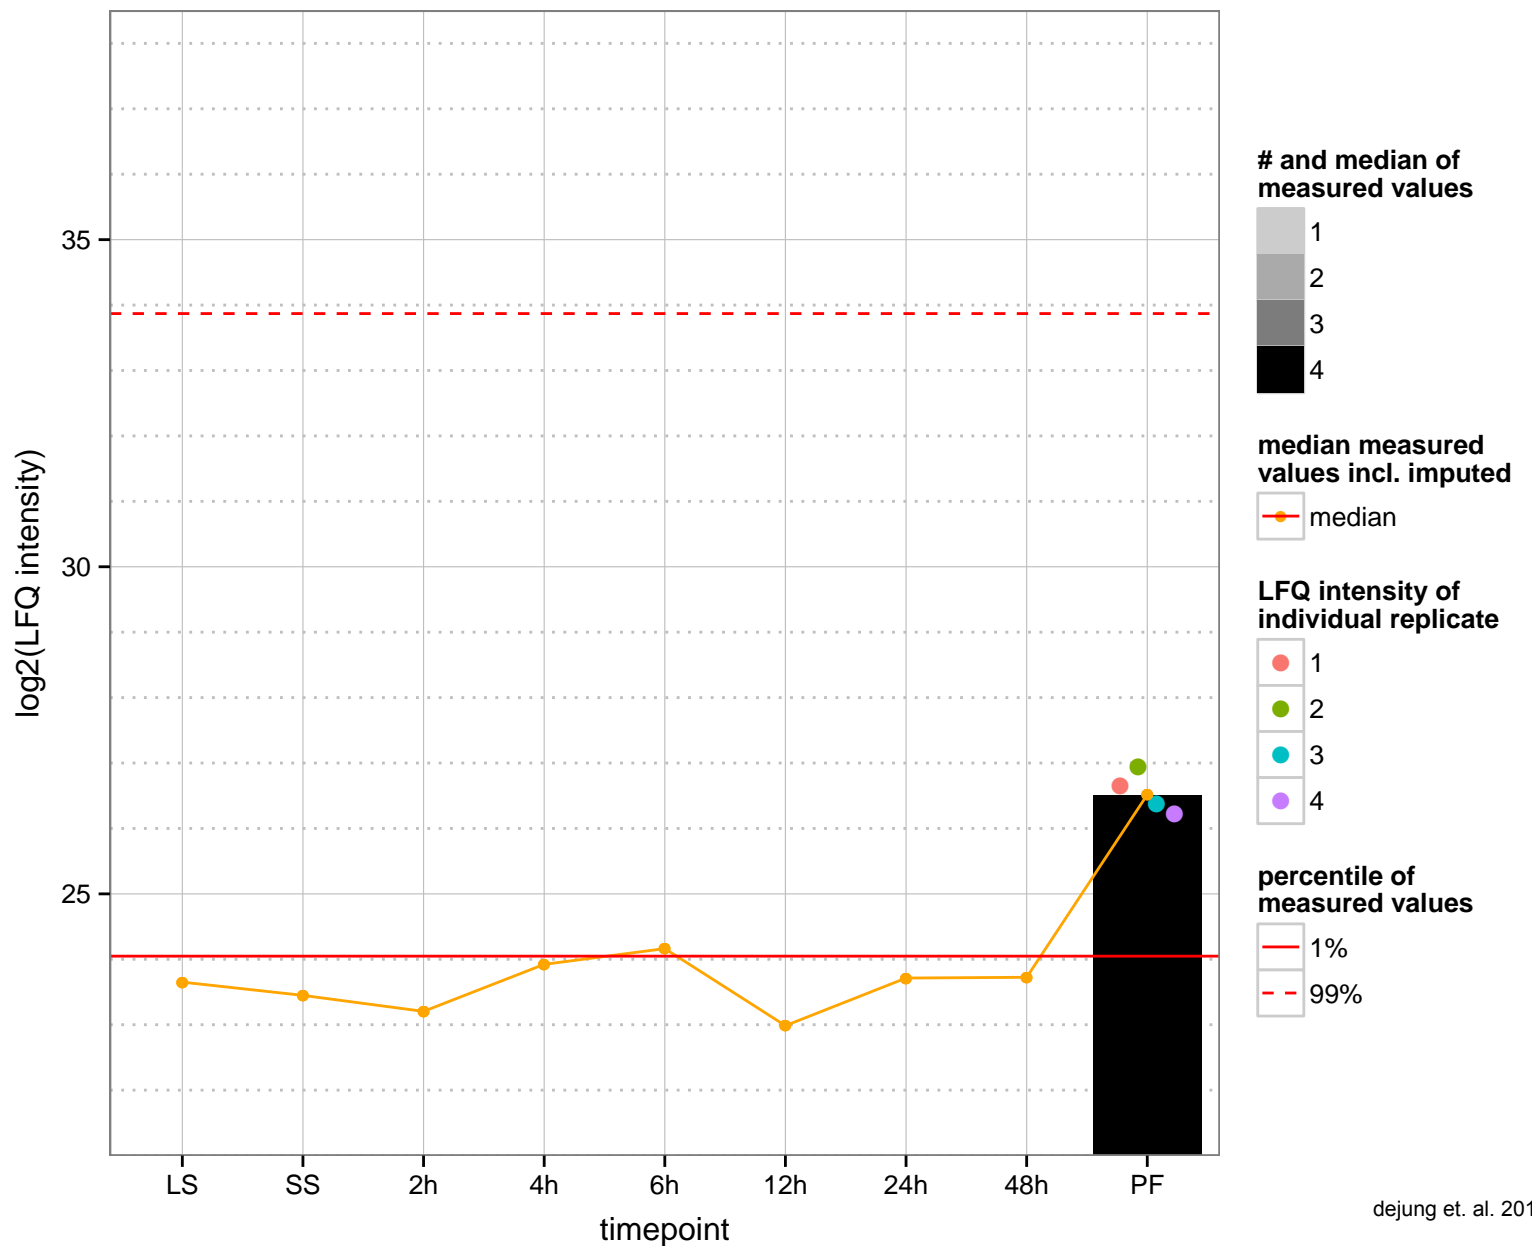



pyroglutamyl-peptidase I (PGP), putative, cysteine peptidase, Clan CF, family C15  
 Tb927.4.2670  
 AGOF: null  
 AGOC: null  
 AGOP: null  
 PGO: null  
 PGOC: null  
 PGOP: proteolysis

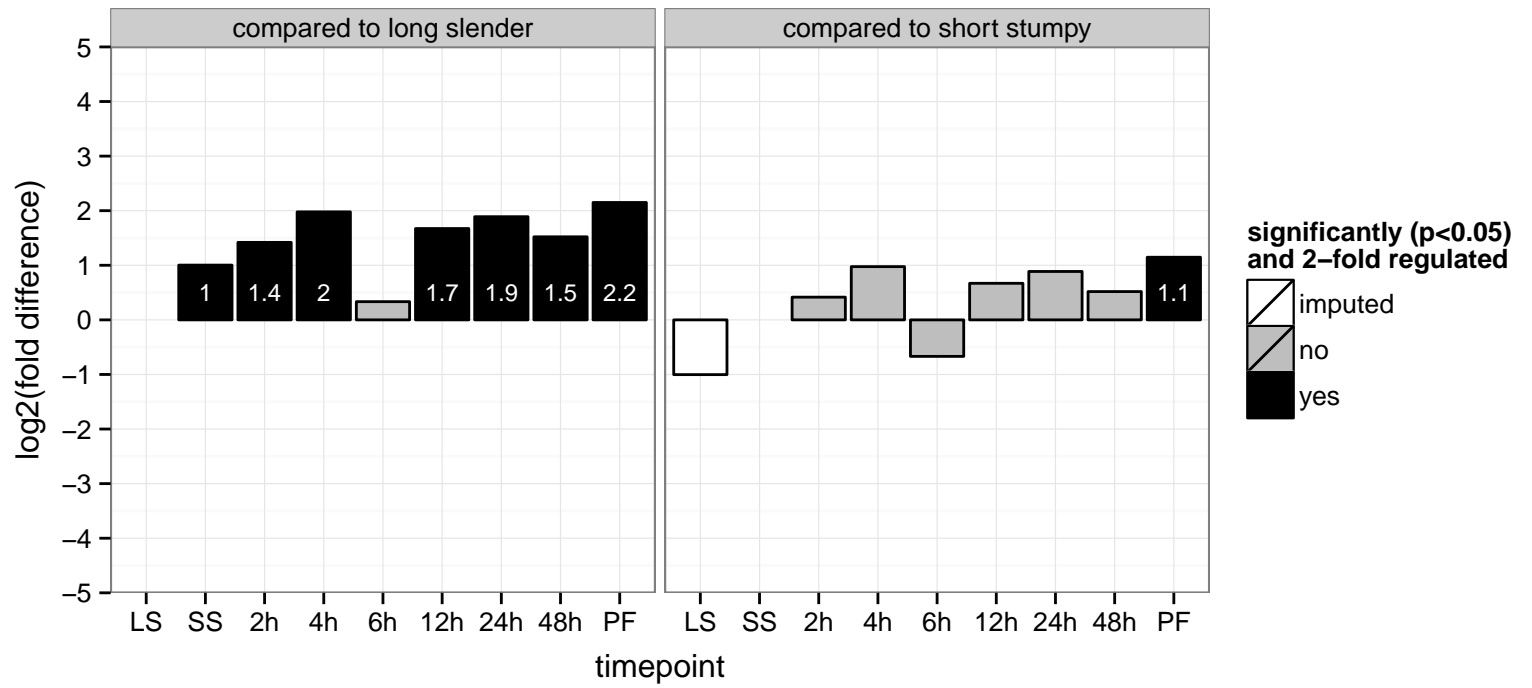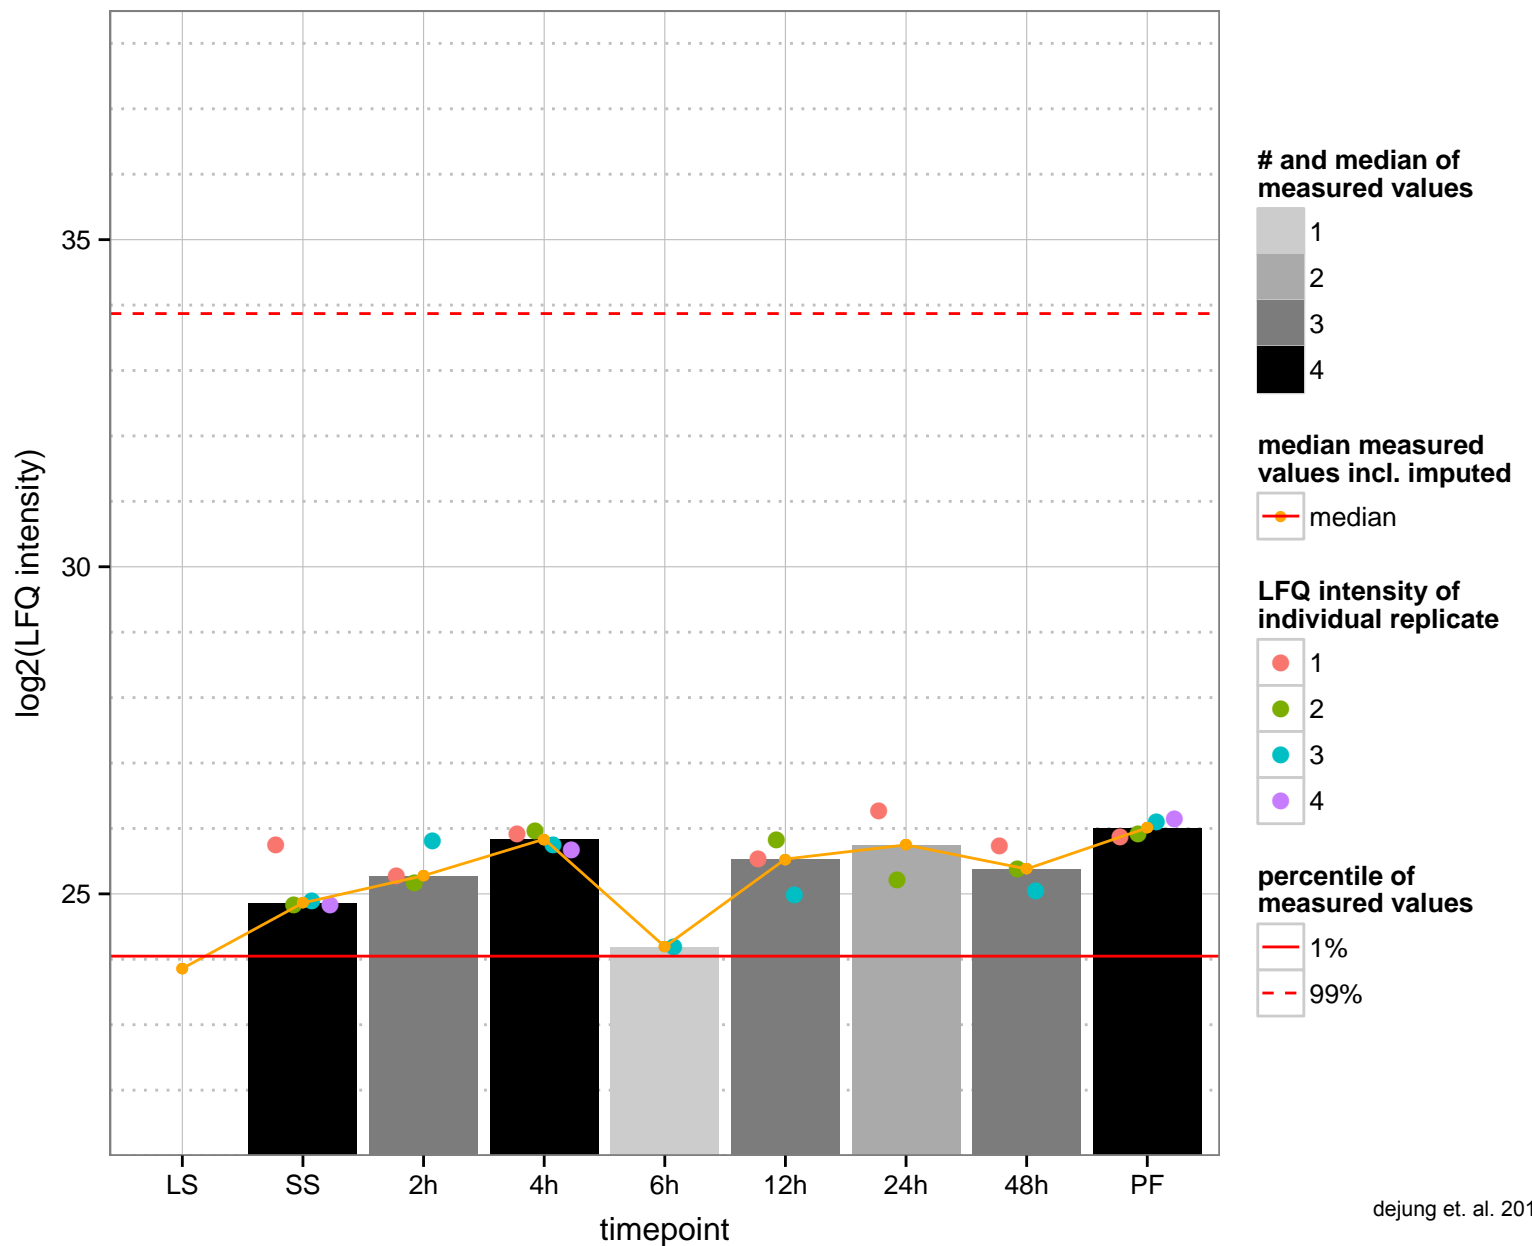

hypothetical protein, conserved  
 Tb927.4.2790  
 AGOF: null  
 AGOC: mitochondrion  
 AGOP: null  
 PGO: null  
 PGO: null  
 PGO: null

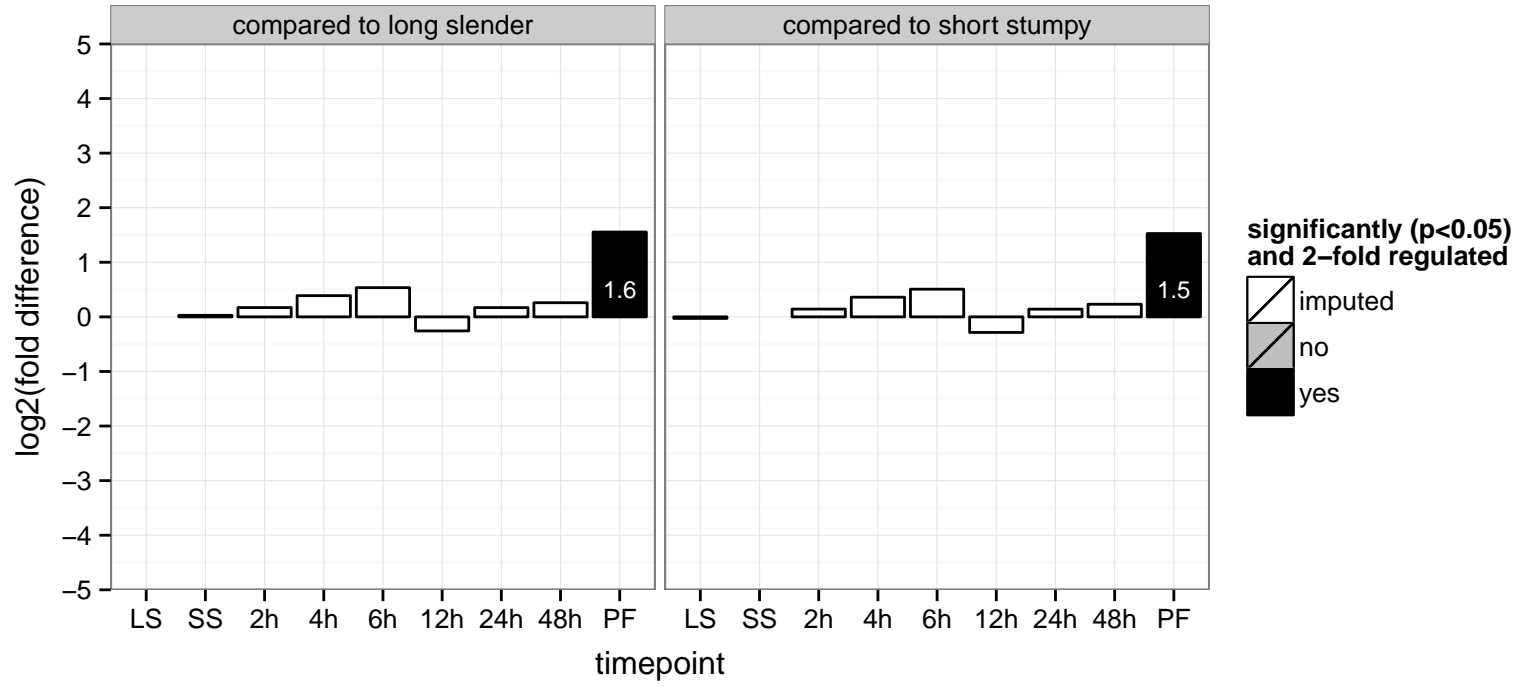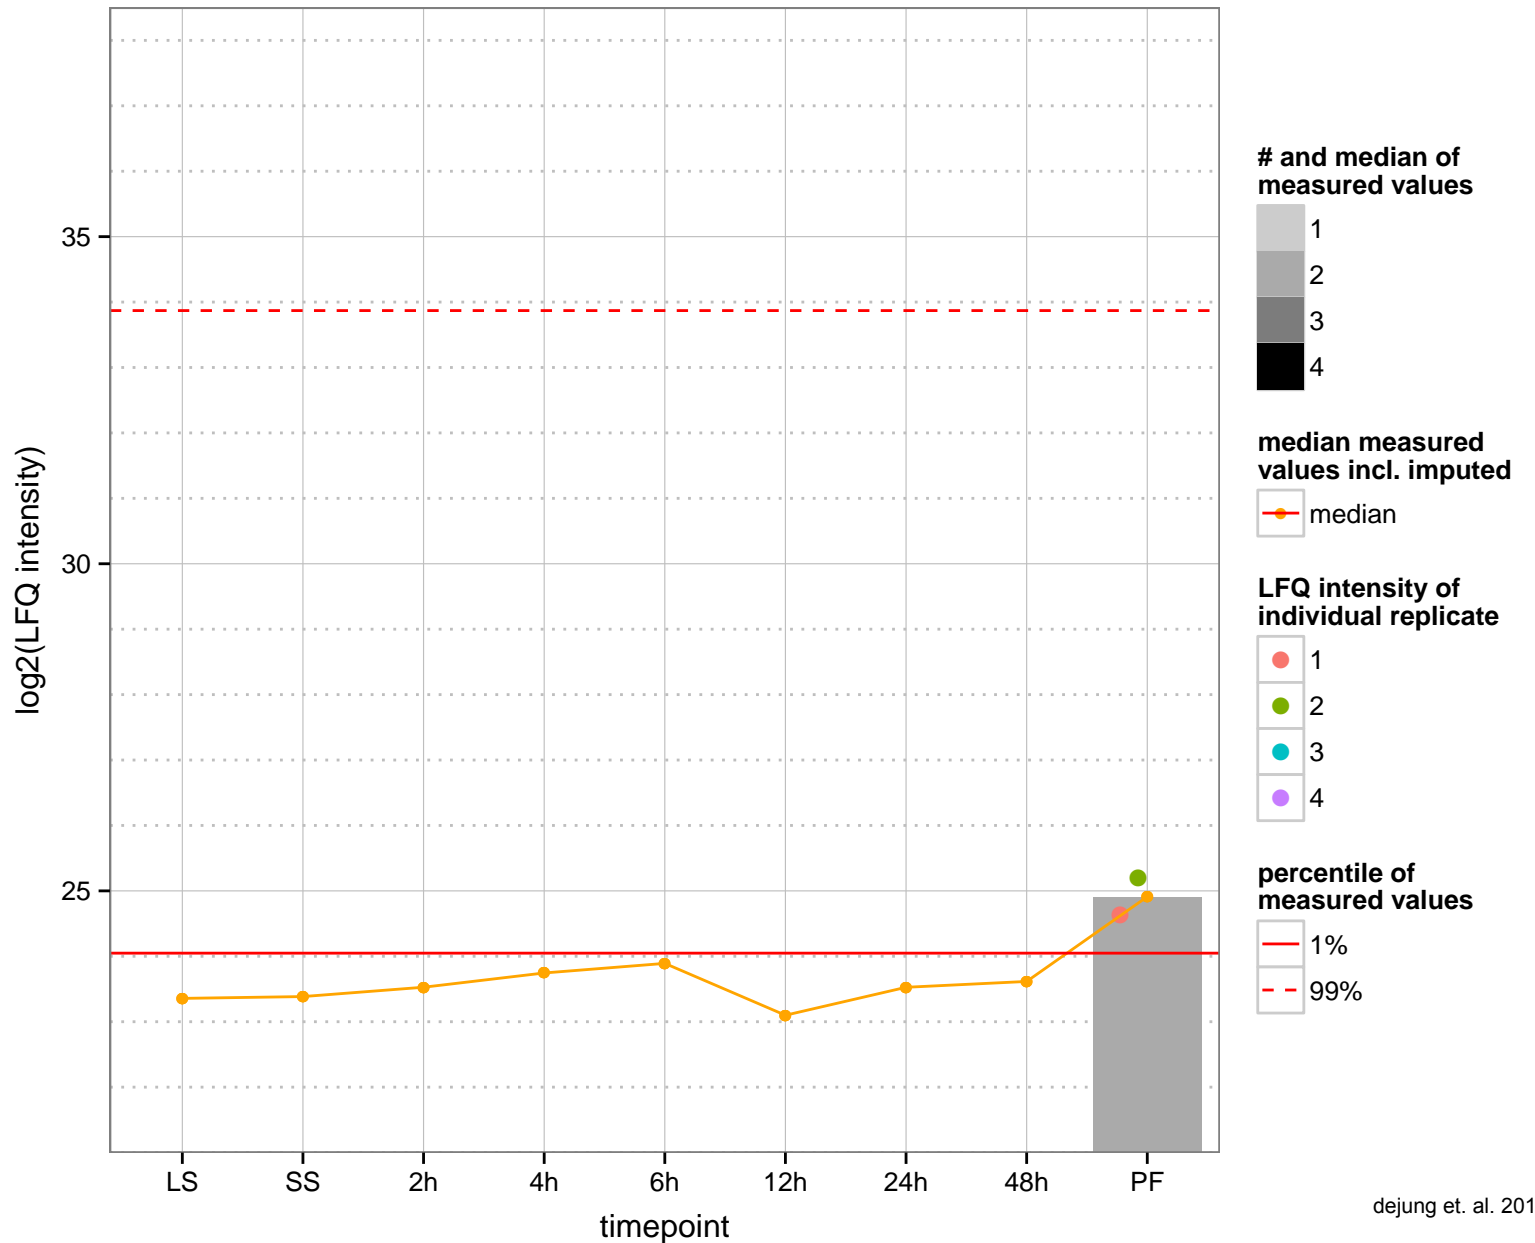

Nucleoporin (TbNup225)  
 Tb927.4.2880  
 AGOF: null  
 AGOC: nuclear pore  
 AGOP: null  
 PGO: null  
 PGO: null  
 PGO: null

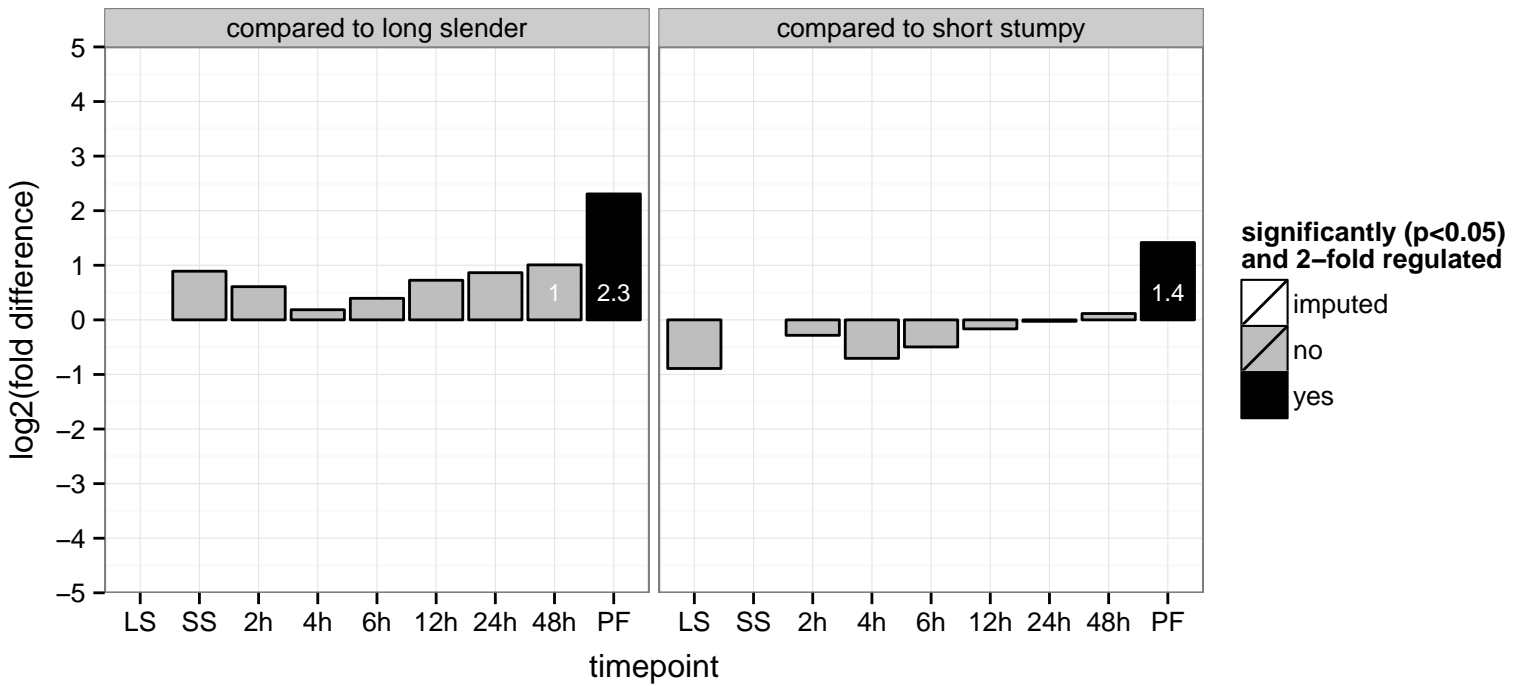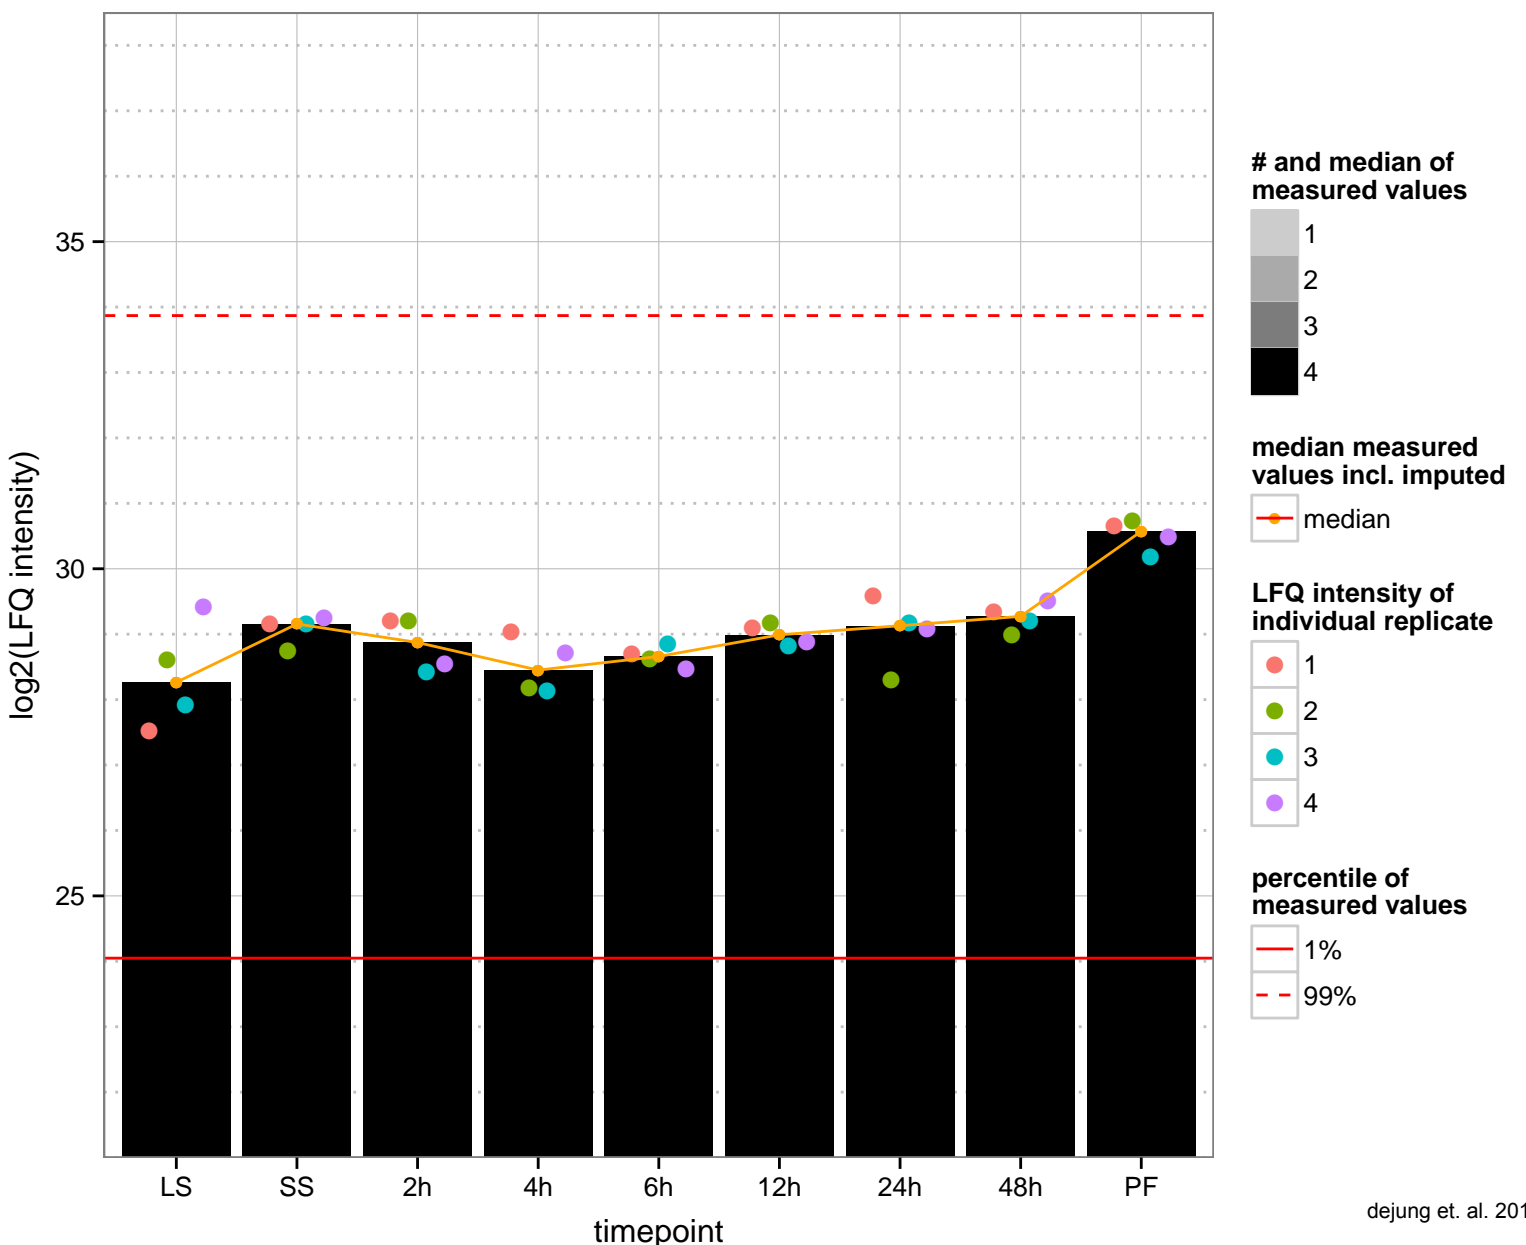

hypothetical protein, conserved  
 Tb927.4.3330  
 AGOF: calcium ion binding  
 AGOC: null  
 AGOP: null  
 PGOF: calcium ion binding  
 PGOC: null  
 PGOP: null

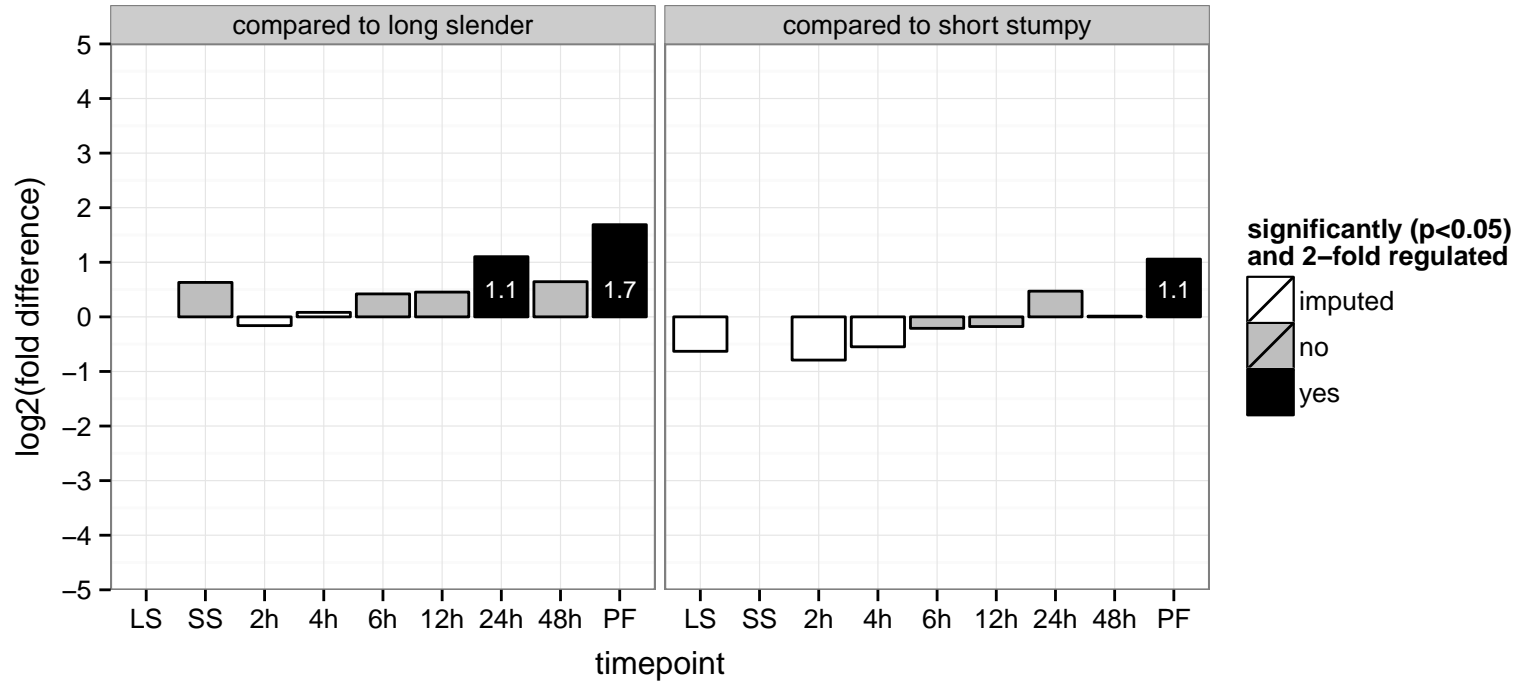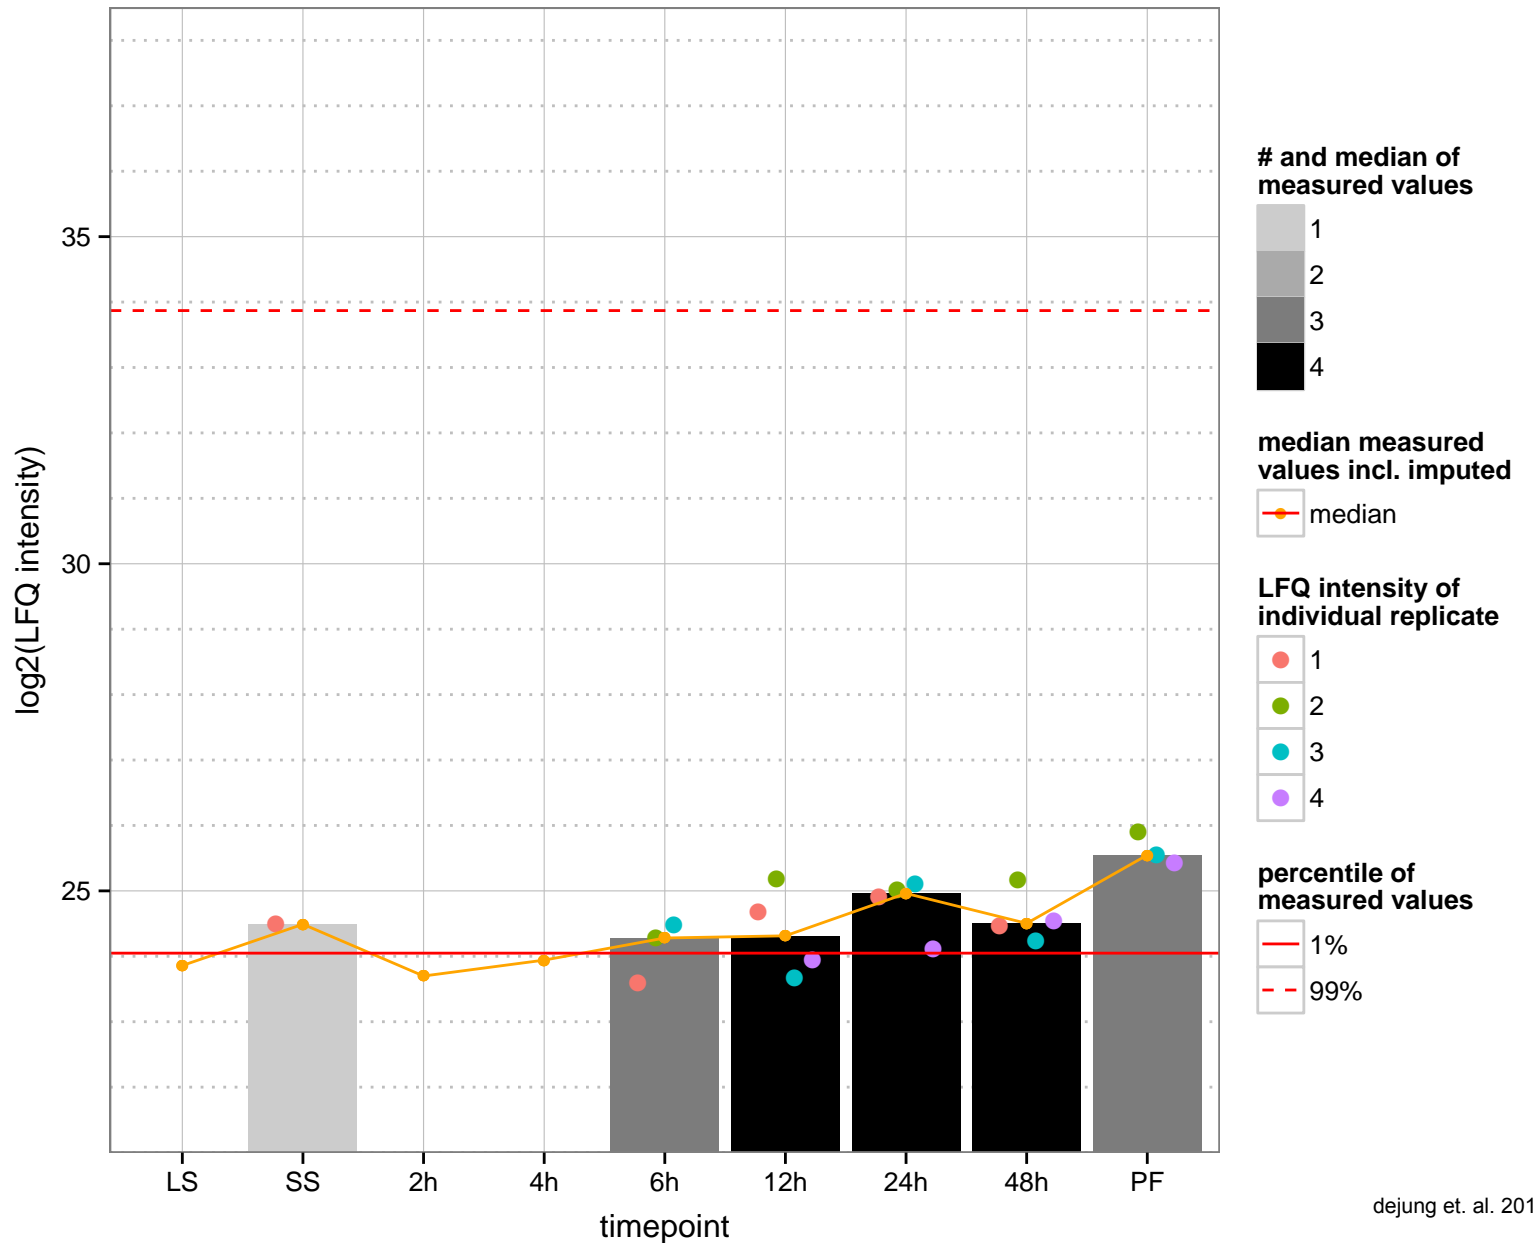

translation elongation factor 1-beta, putative  
 Tb927.4.3590;Tb927.4.3570  
 AGOF: translation elongation factor activity  
 AGOC: eukaryotic translation elongation factor 1 complex  
 AGOP: translational elongation  
 PGOF: translation elongation factor activity  
 PGOC: eukaryotic translation elongation factor 1 complex  
 PGOP: translational elongation

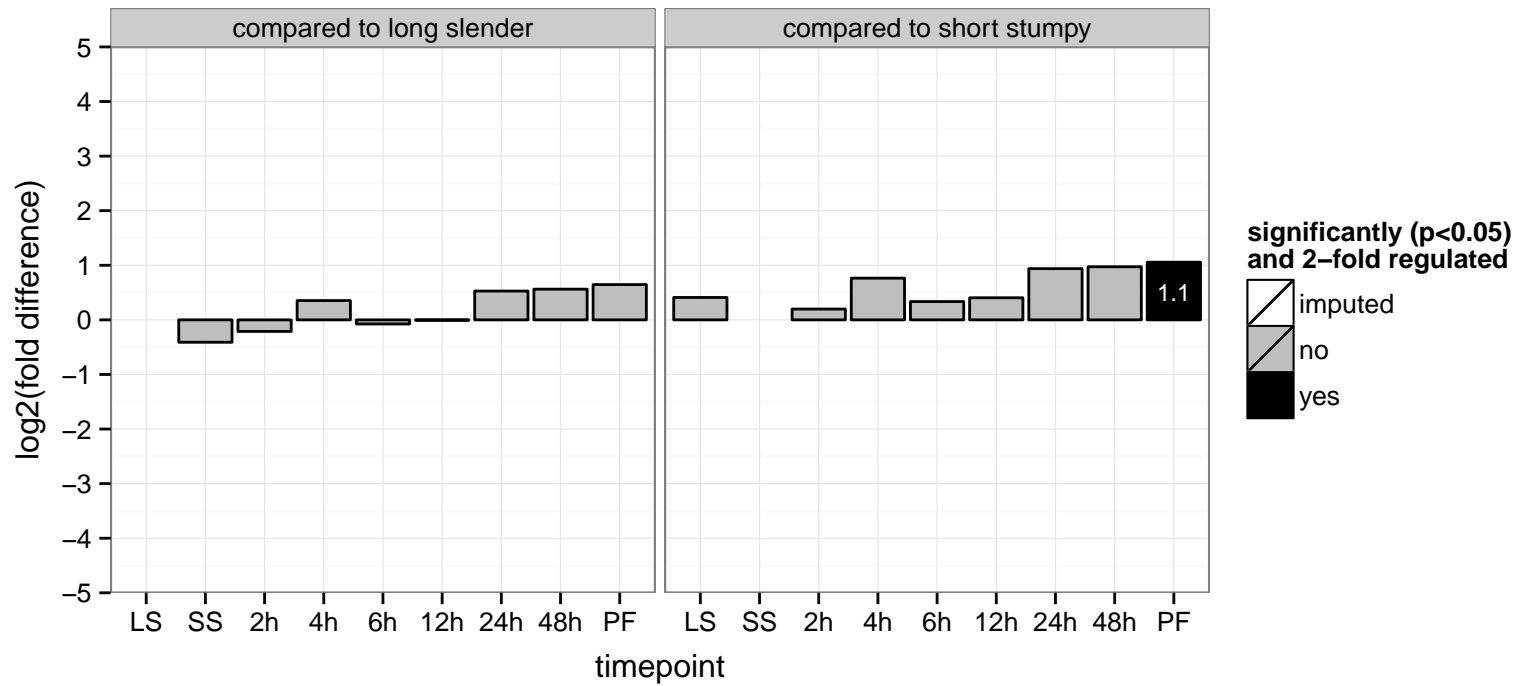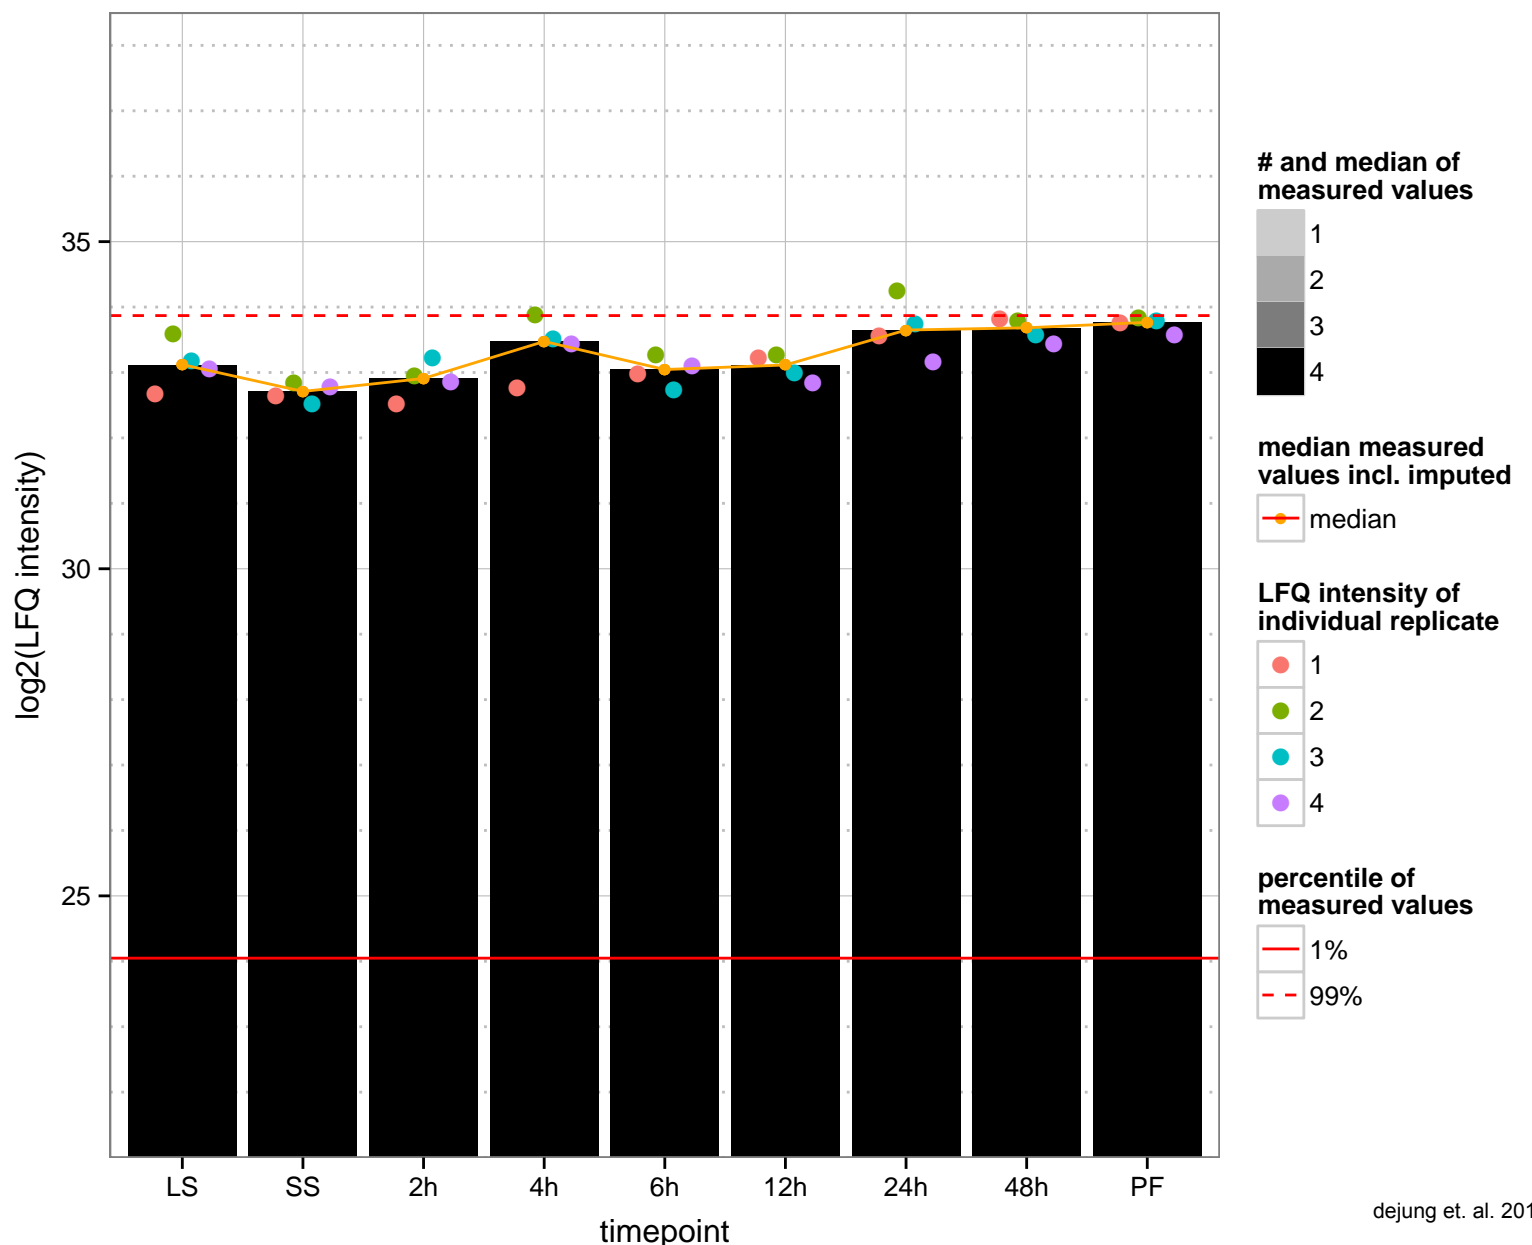

hypothetical protein, conserved  
 Tb927.4.3690  
 AGOF: metal ion binding, superoxide dismutase activity  
 AGOC: mitochondrion  
 AGOP: oxidation–reduction process, superoxide metabolic process  
 PGOF: metal ion binding, superoxide dismutase activity  
 PGO: null  
 PGOP: oxidation–reduction process, superoxide metabolic process

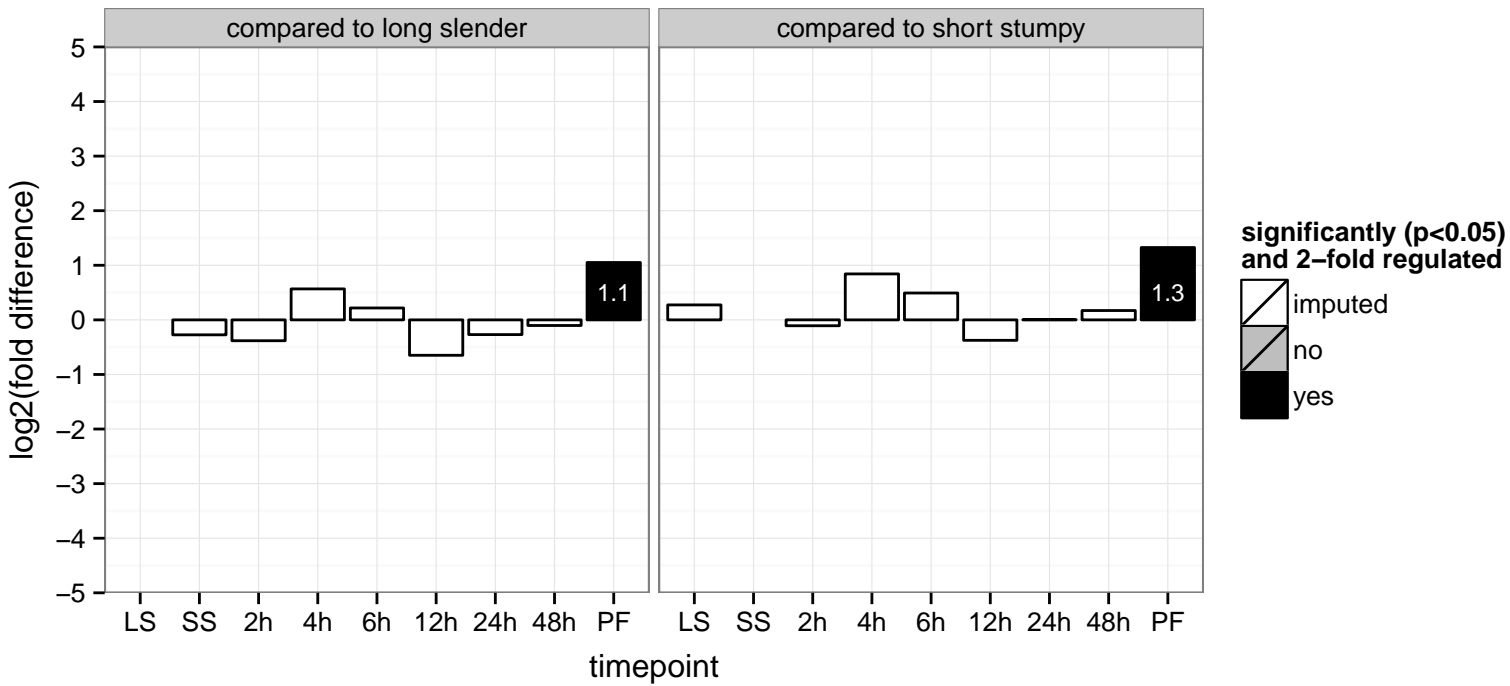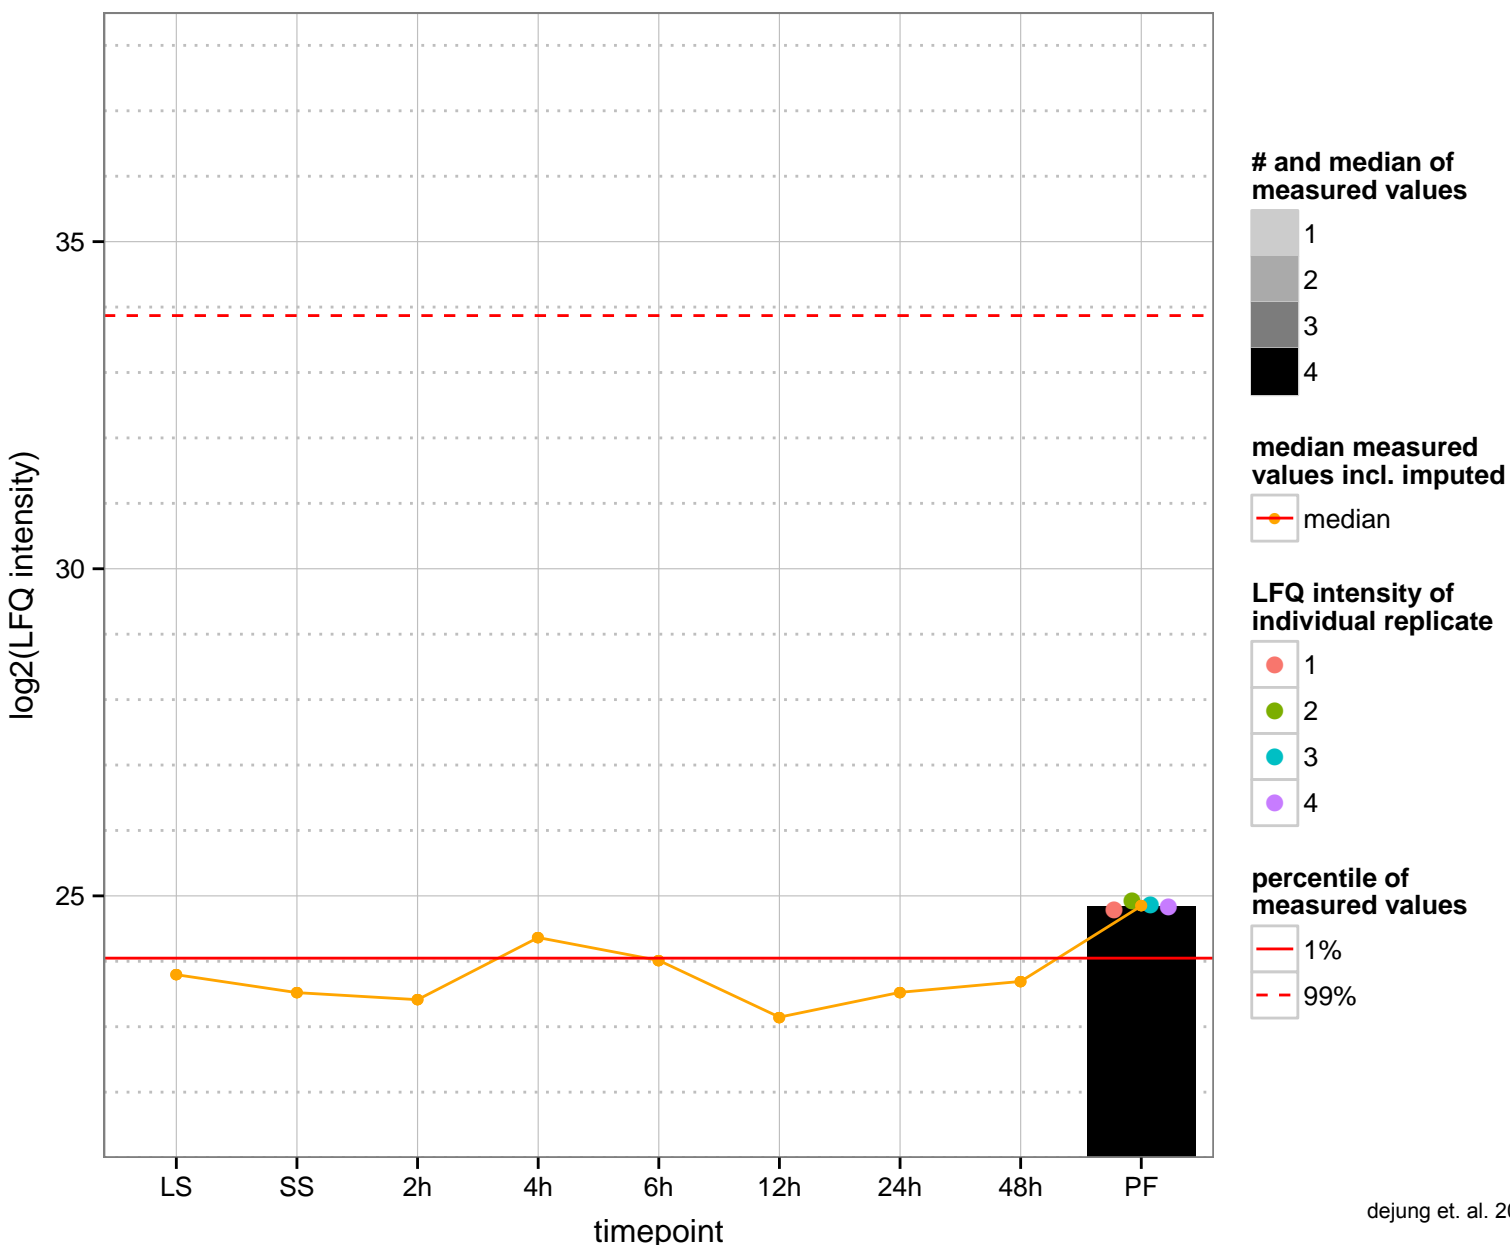

protein kinase, putative

Tb927.4.3770

AGOF: ATP binding, protein kinase activity, protein serine/threonine kinase activity, protein tyrosine kinase activity, zinc ion binding

AGOC: null

AGOP: protein phosphorylation

PGOF: ATP binding, protein kinase activity, transferase activity, transferring phosphorus-containing groups, zinc ion binding

PGOC: null

PGOP: protein phosphorylation

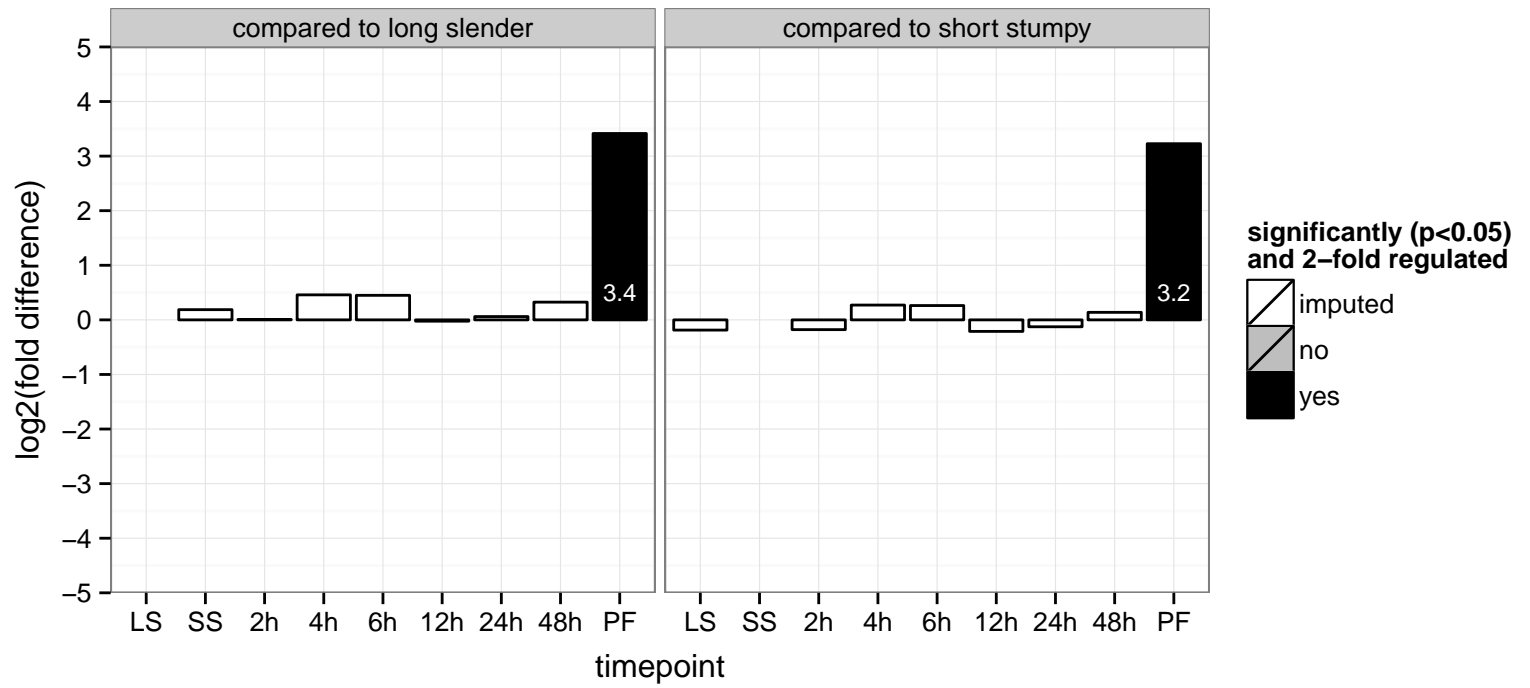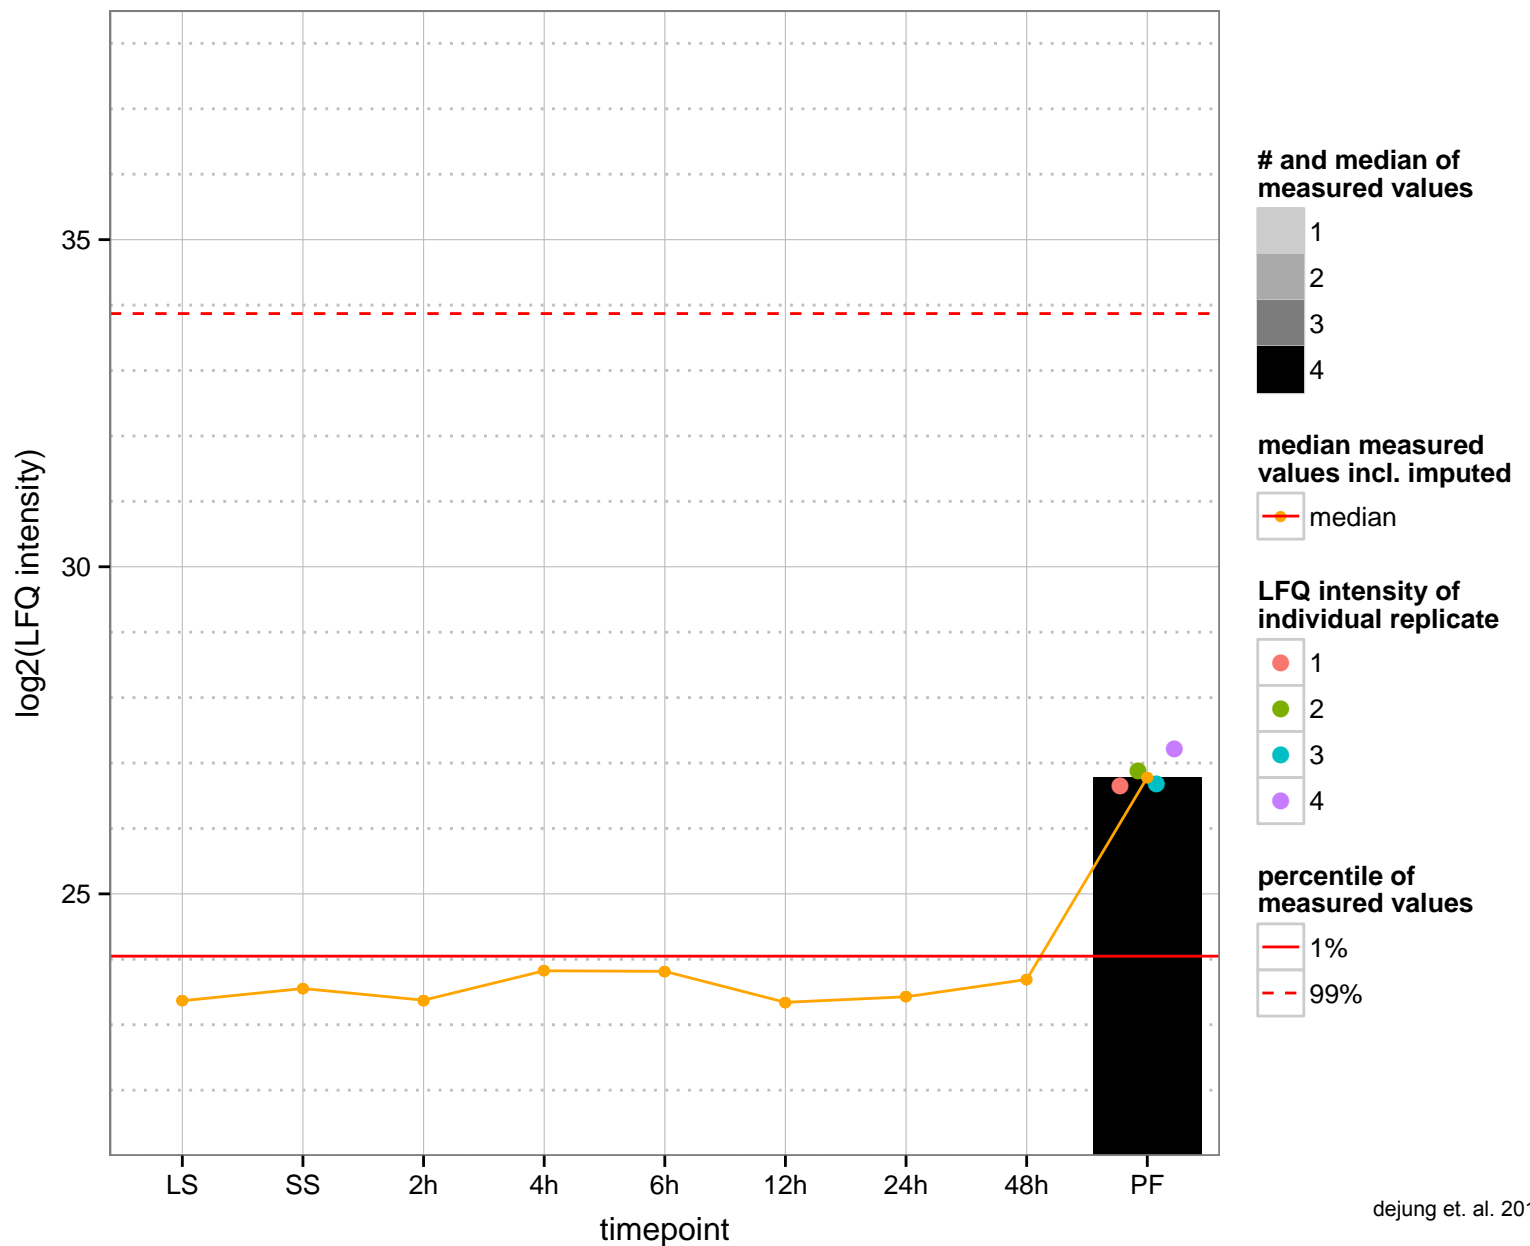

calpain-like cysteine peptidase, putative, cysteine peptidase, Clan CA, family C2, putative (TbCALP2)  
 Tb927.4.3940  
 AGOF: calcium-dependent cysteine-type endopeptidase activity  
 AGOC: intracellular  
 AGOP: proteolysis  
 PGOF: calcium-dependent cysteine-type endopeptidase activity  
 PGOC: intracellular  
 PGOP: proteolysis

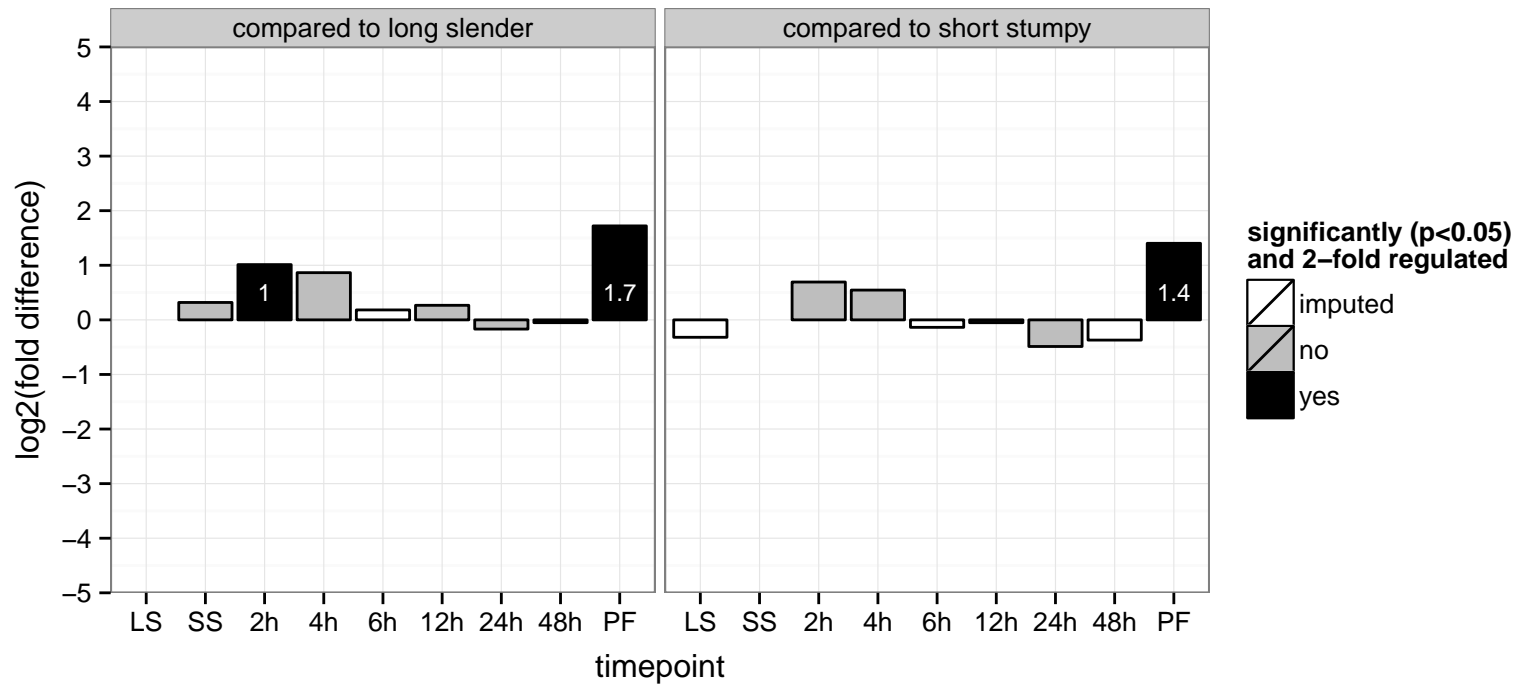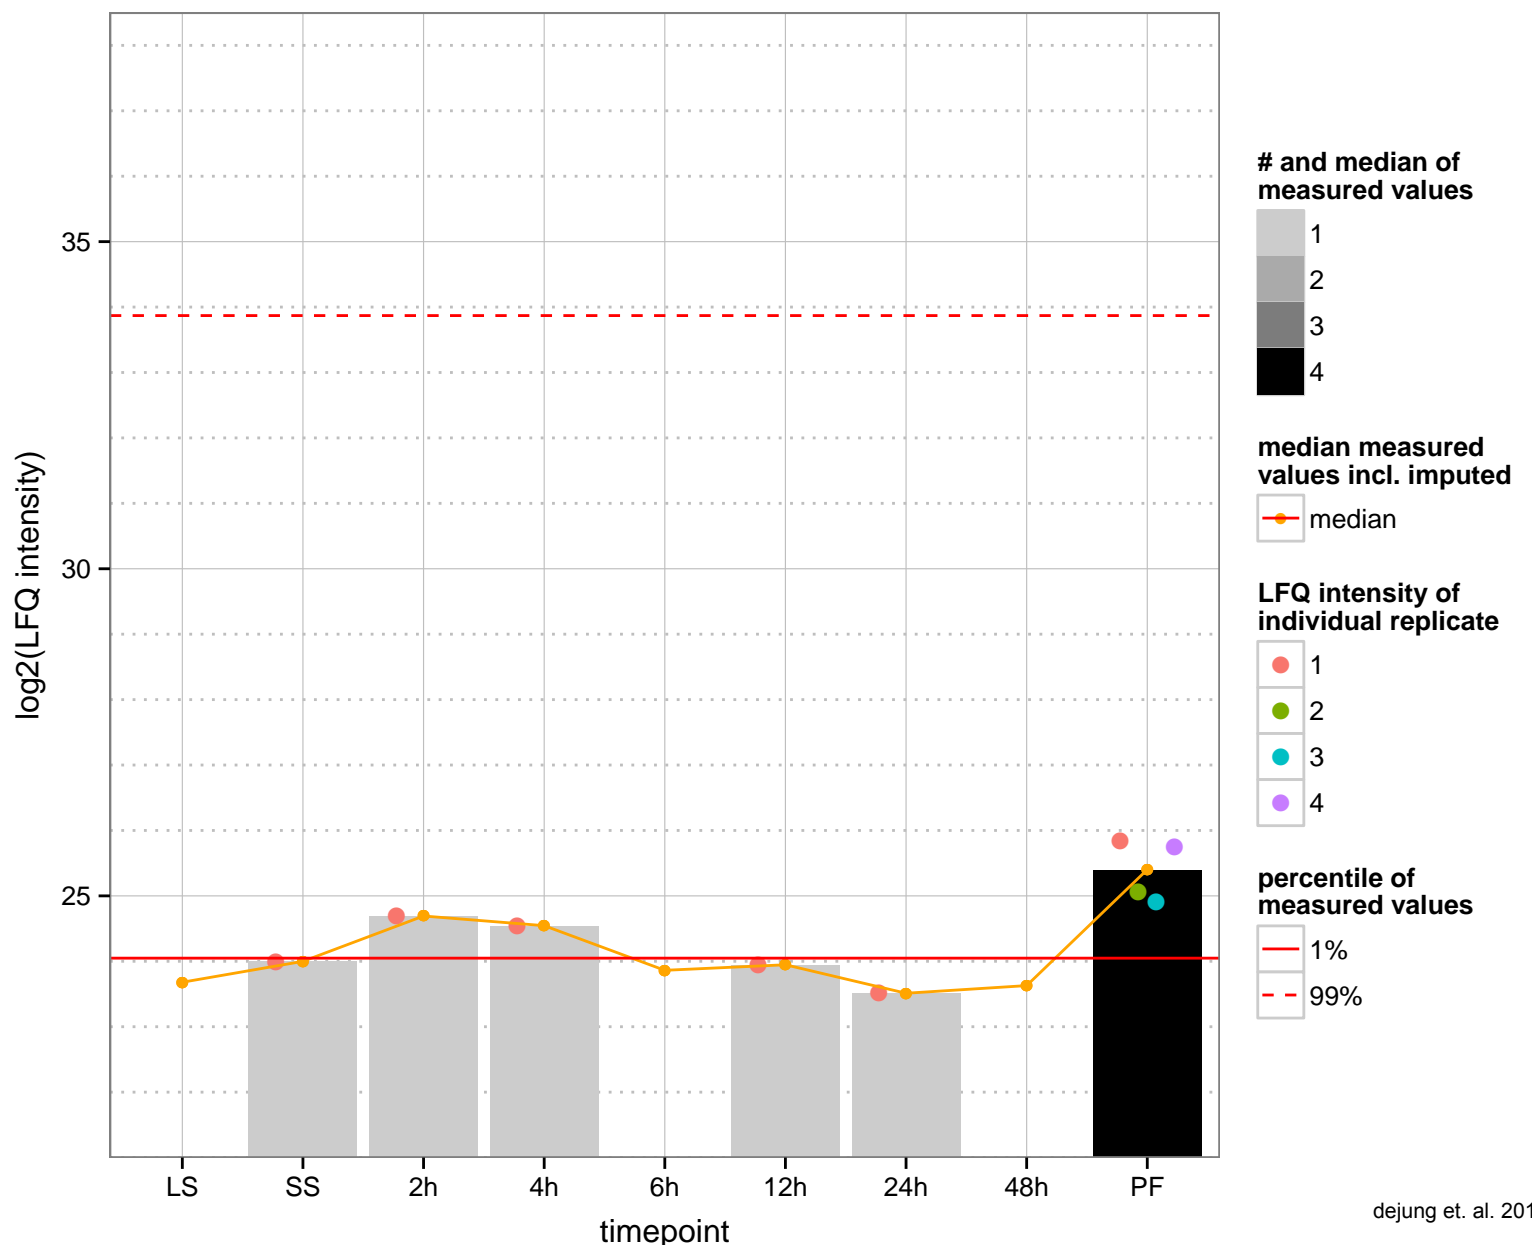



proteasome beta 7 subunit

Tb927.4.430

AGOF: endopeptidase activity, threonine-type endopeptidase activity

AGOC: proteasome core complex, proteasome core complex, beta-subunit complex

AGOP: protein metabolic process, proteolysis involved in cellular protein catabolic process

PGOF: threonine-type endopeptidase activity

PGOC: proteasome core complex

PGOP: proteolysis involved in cellular protein catabolic process

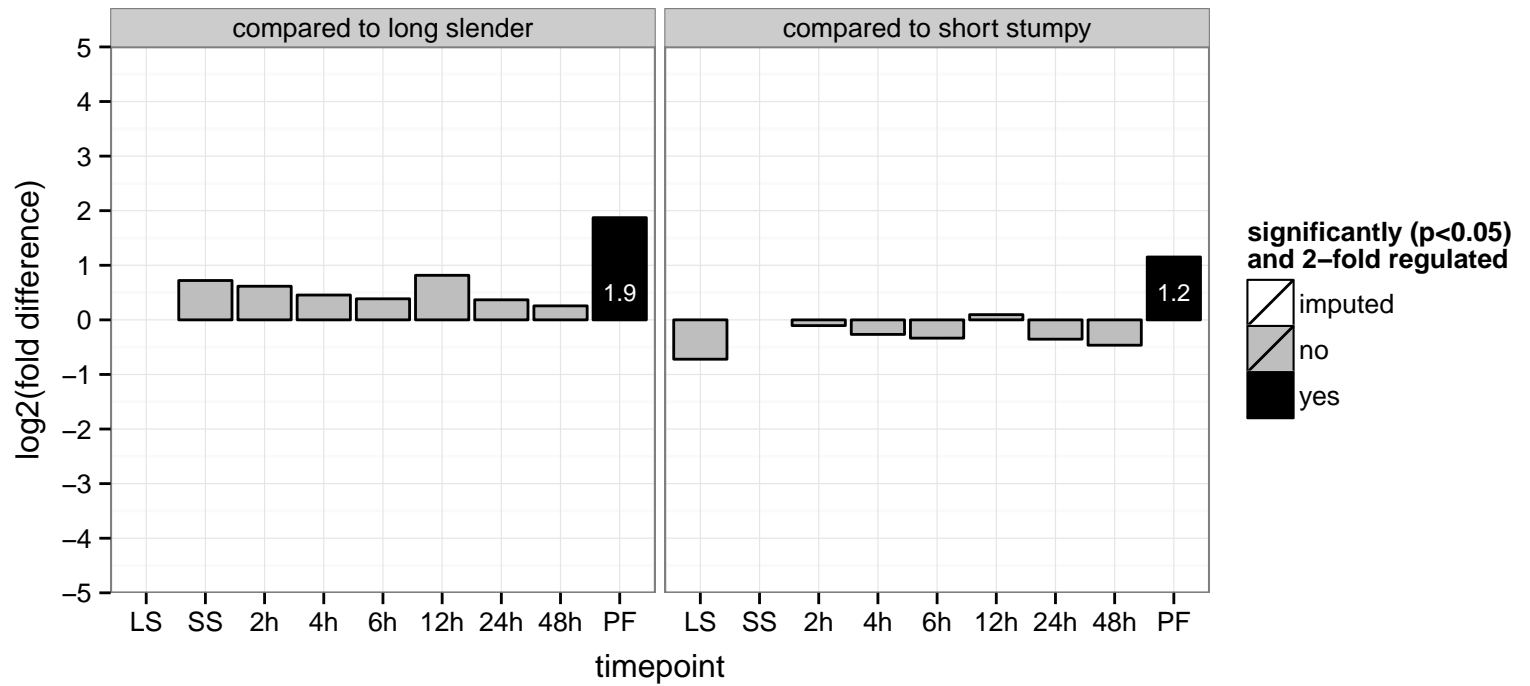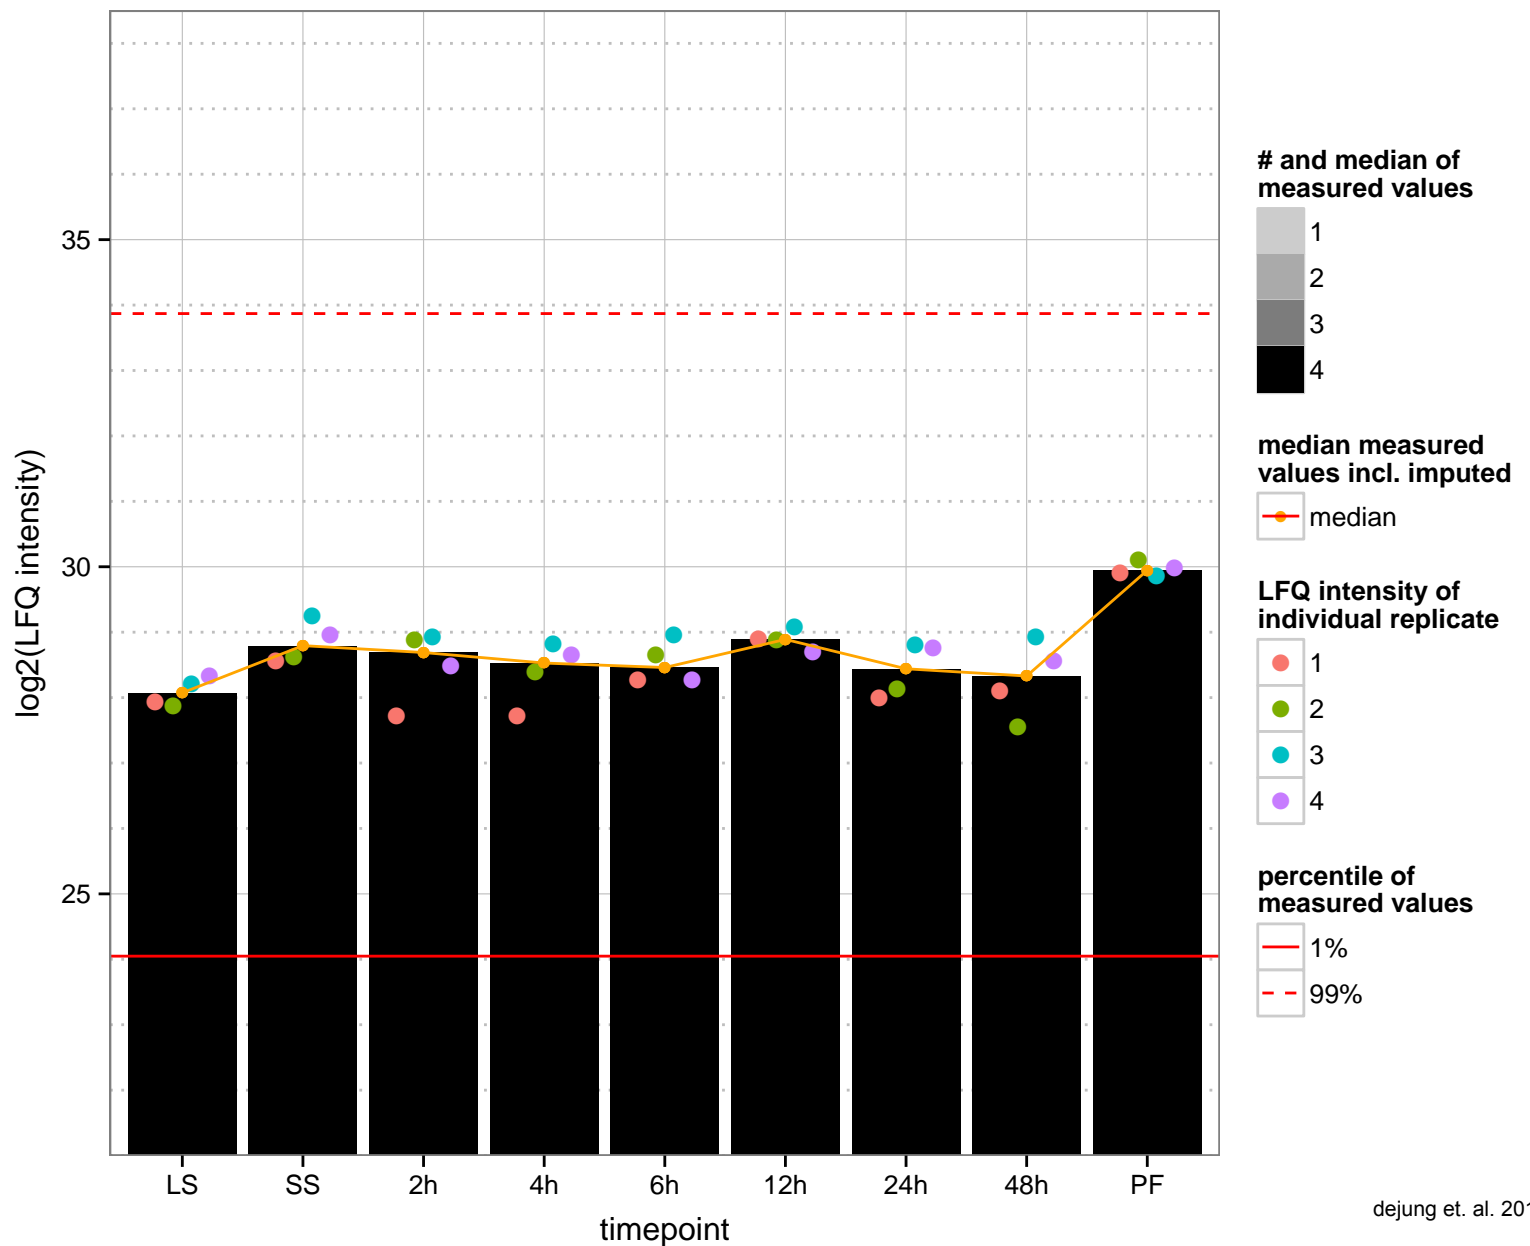

hypothetical protein, conserved  
 Tb927.4.4350  
 AGOF: null  
 AGOC: integral to membrane  
 AGOP: transport  
 PGO: null  
 PGO: integral to membrane  
 PGO: transport

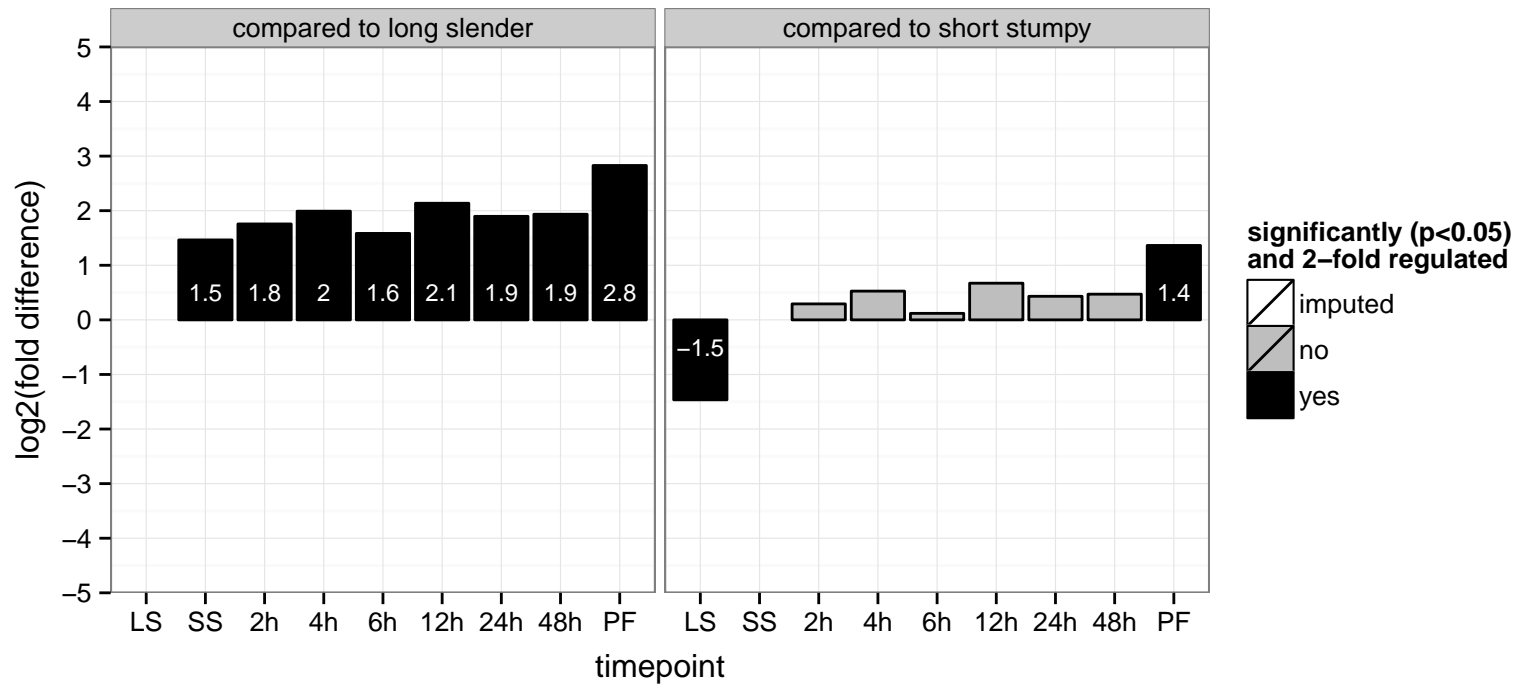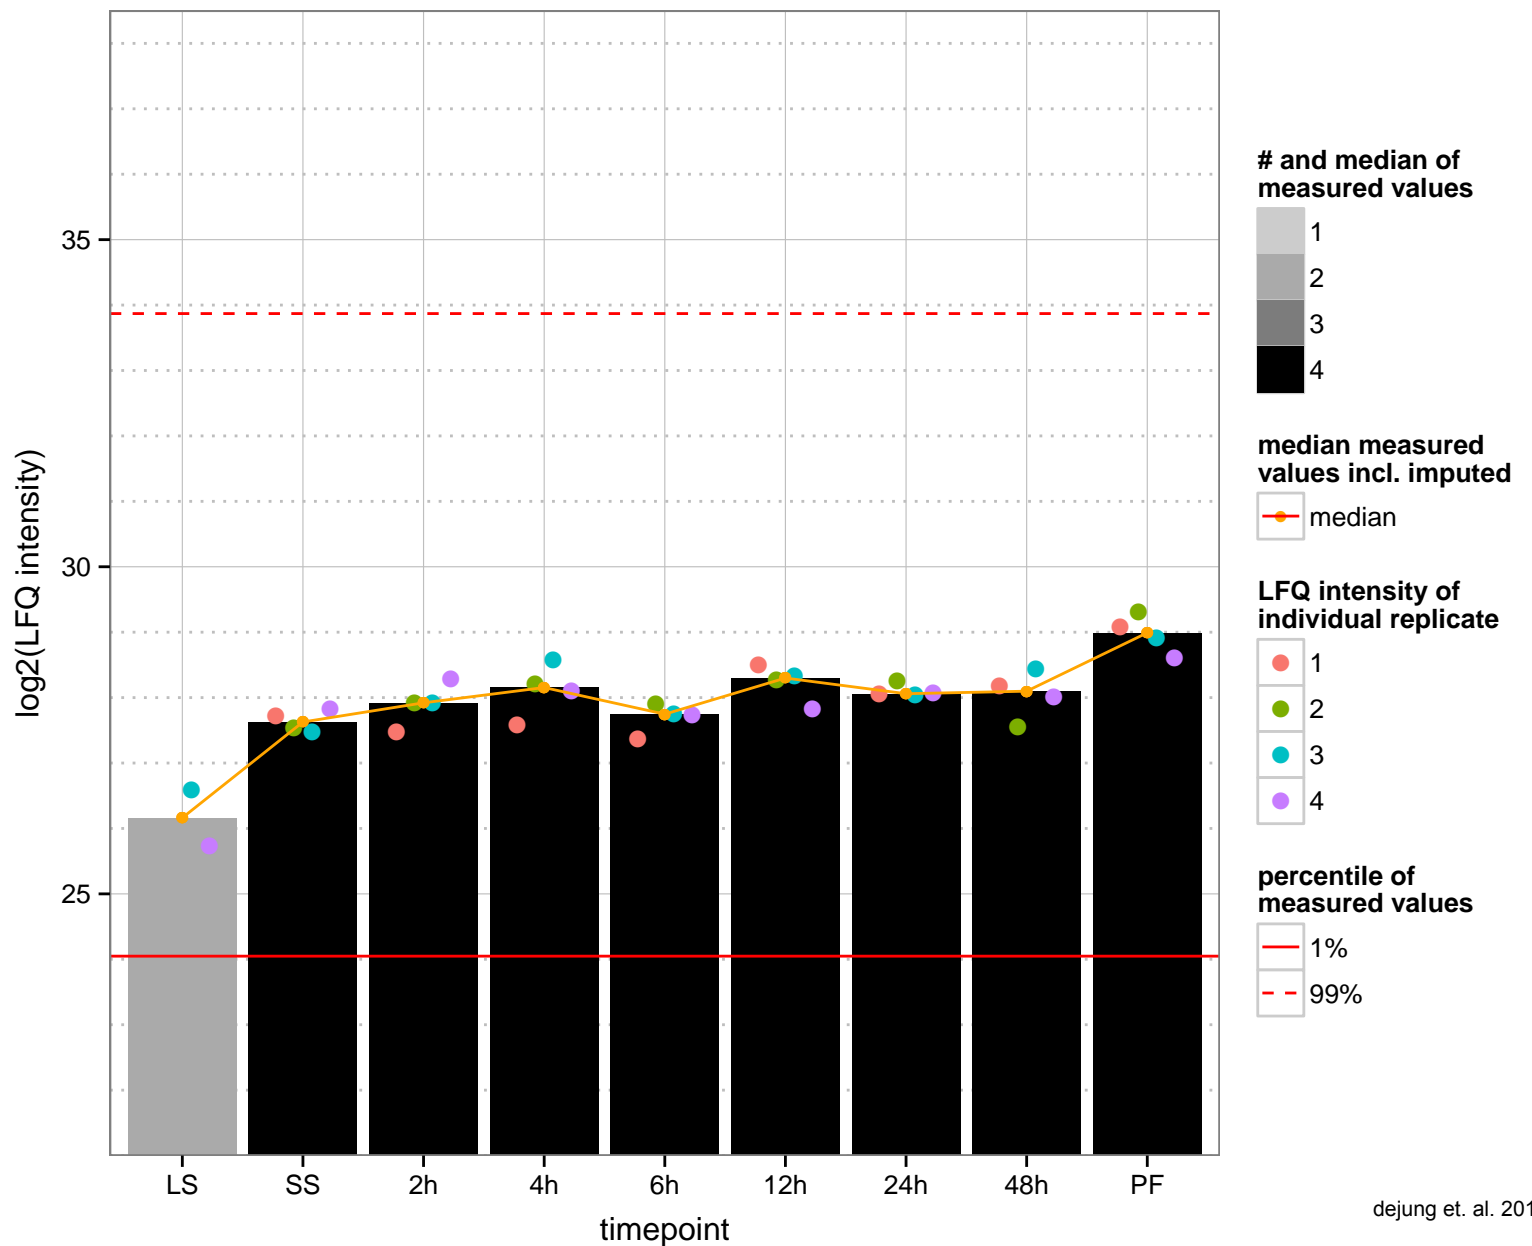

hypothetical protein, conserved  
 Tb927.4.4600  
 AGOF: null  
 AGOC: mitochondrion  
 AGOP: null  
 PGO: null  
 PGO: null  
 PGO: null

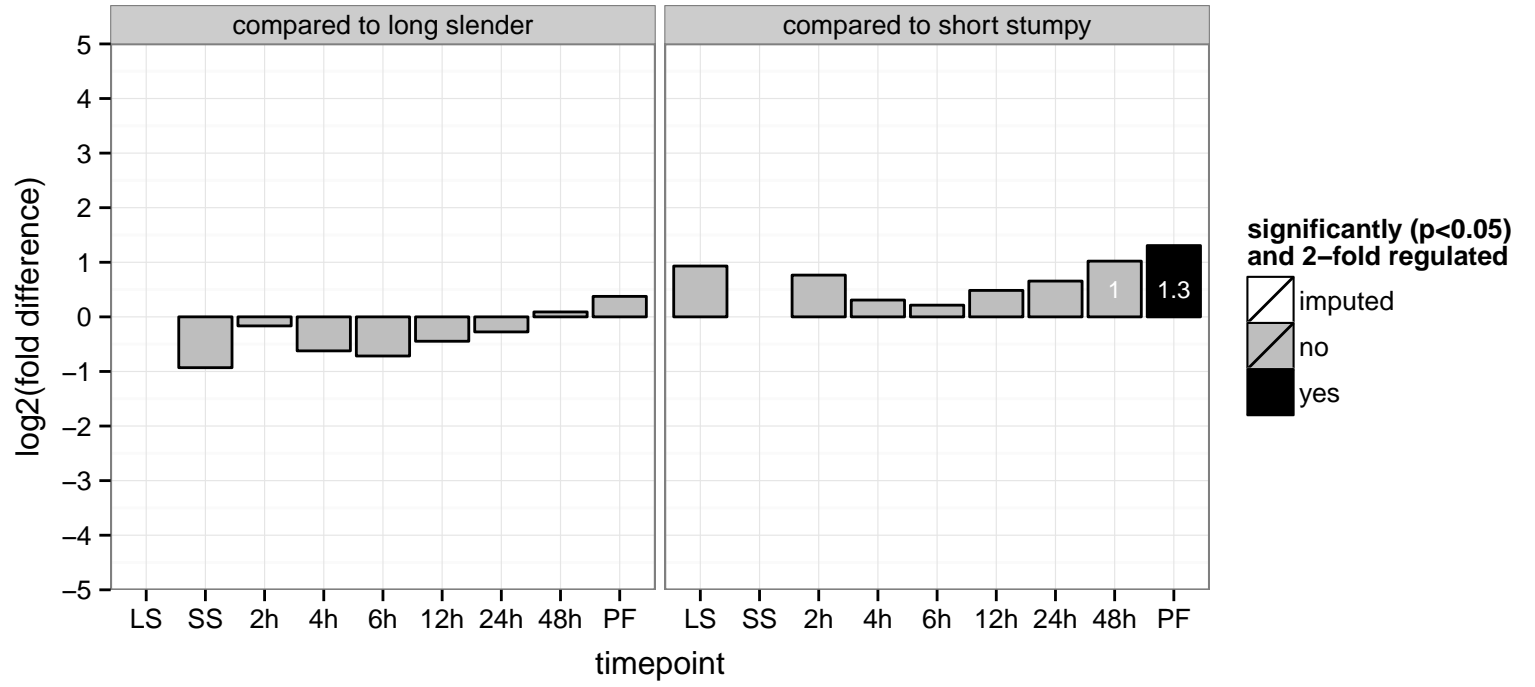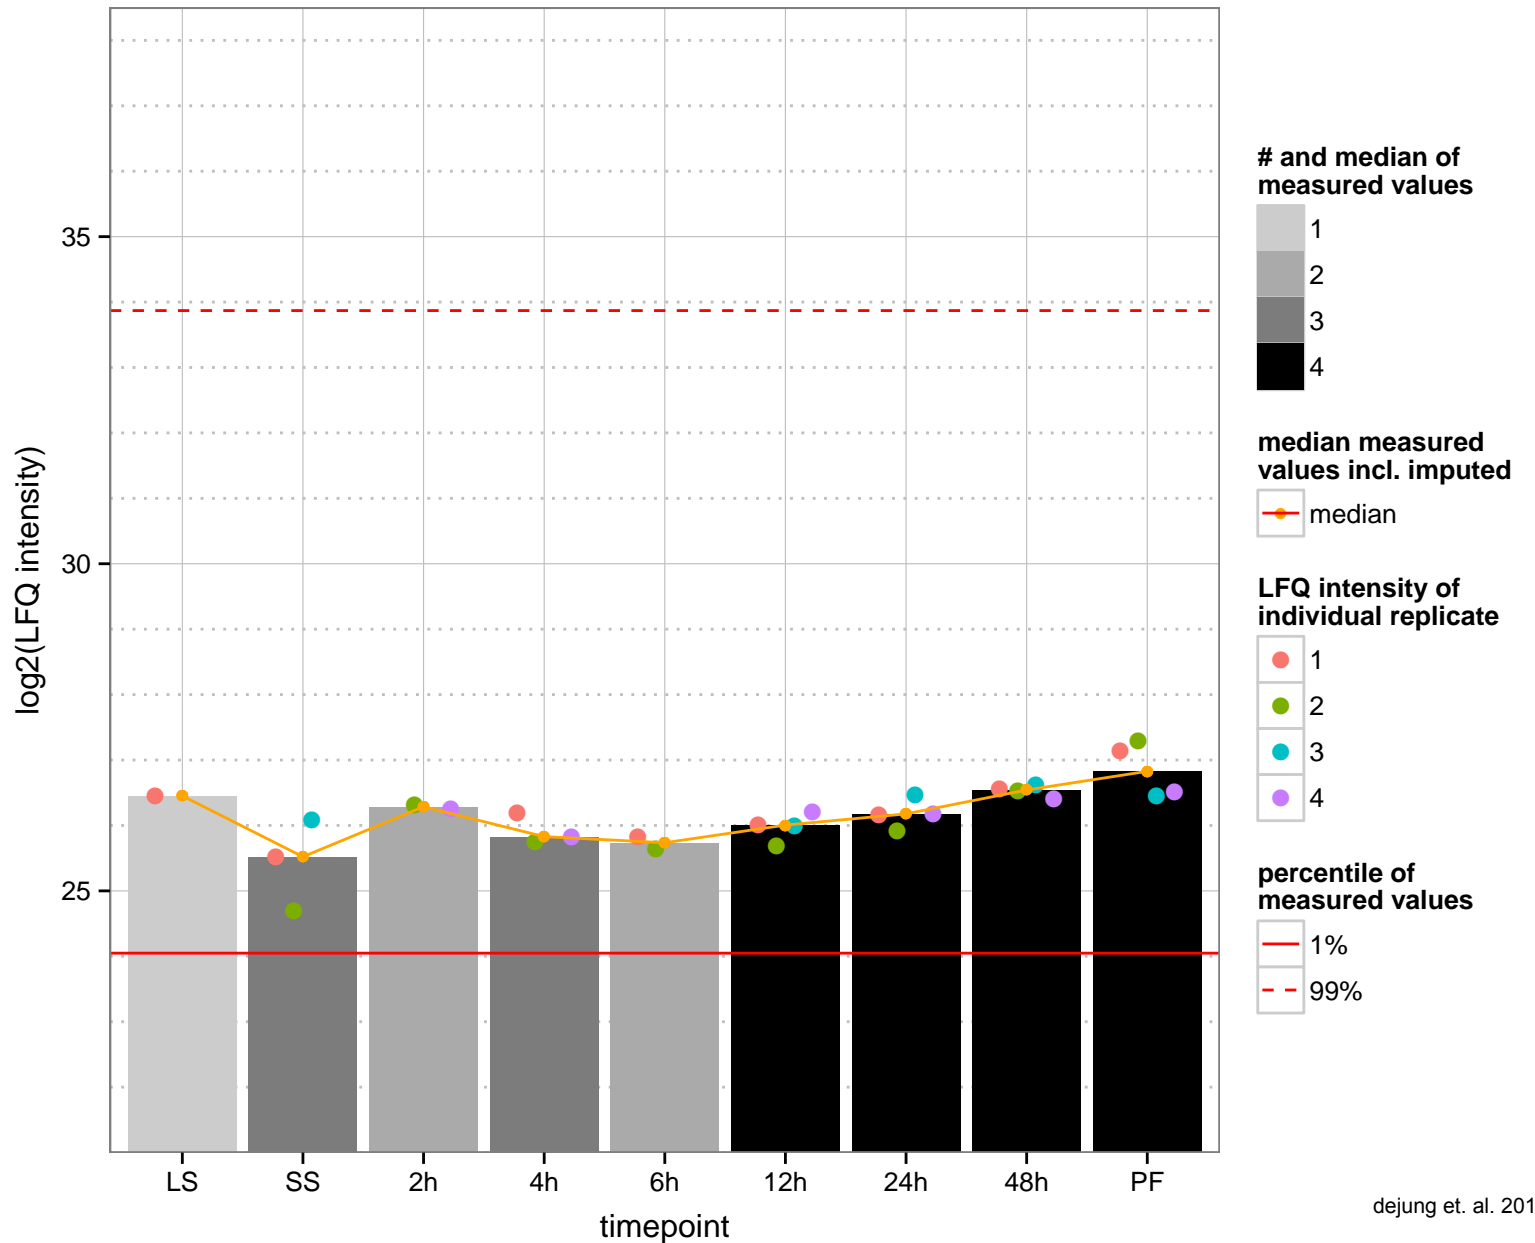

hypothetical protein, conserved  
 Tb927.4.590  
 AGOF: null  
 AGOC: null  
 AGOP: null  
 PGO: null  
 PGOC: null  
 PGOP: null

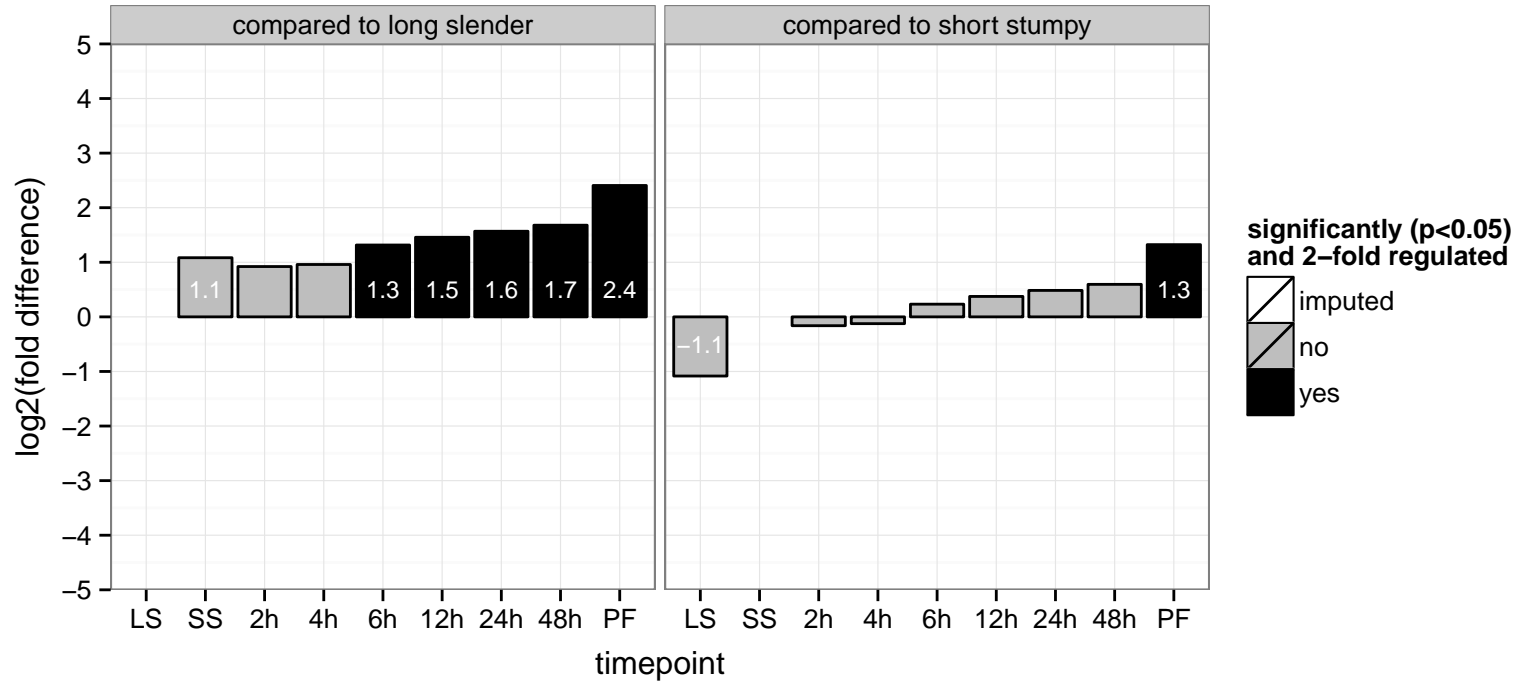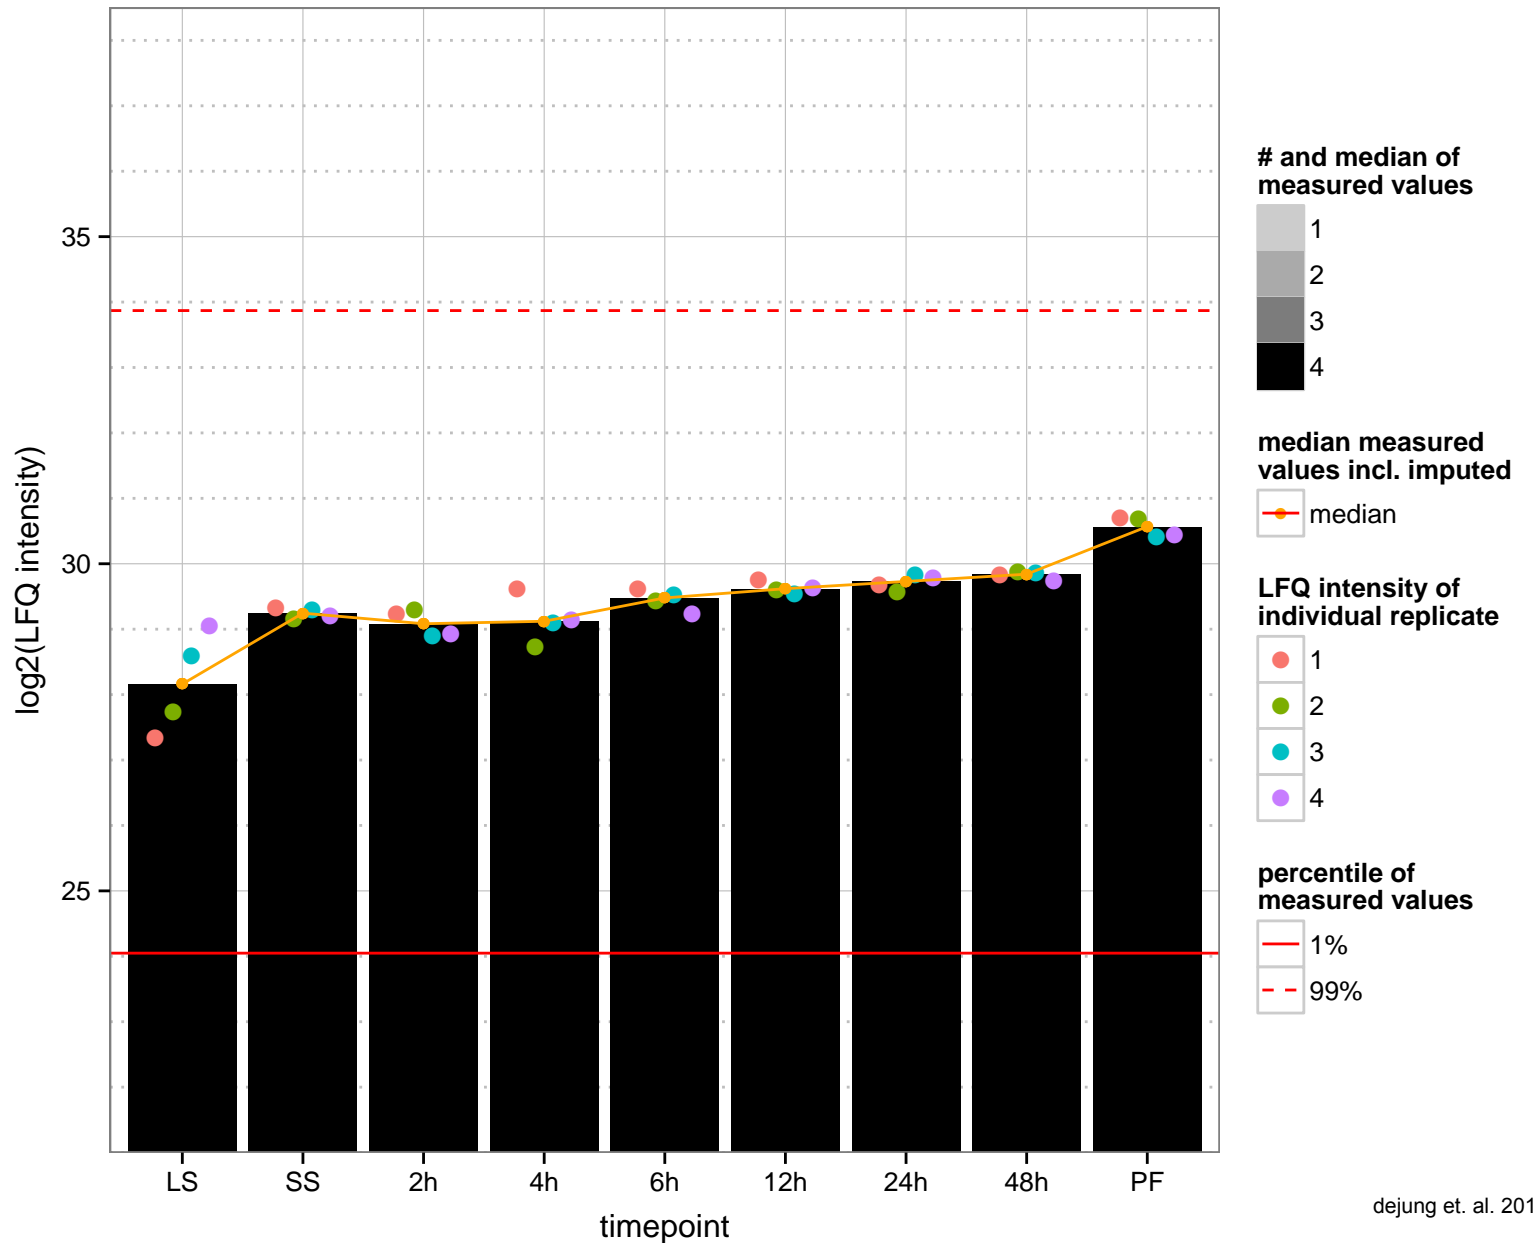

hypothetical protein, conserved  
 Tb927.4.790  
 AGOF: null  
 AGOC: null  
 AGOP: null  
 PGOF: null  
 PGO C: null  
 PGOP: null

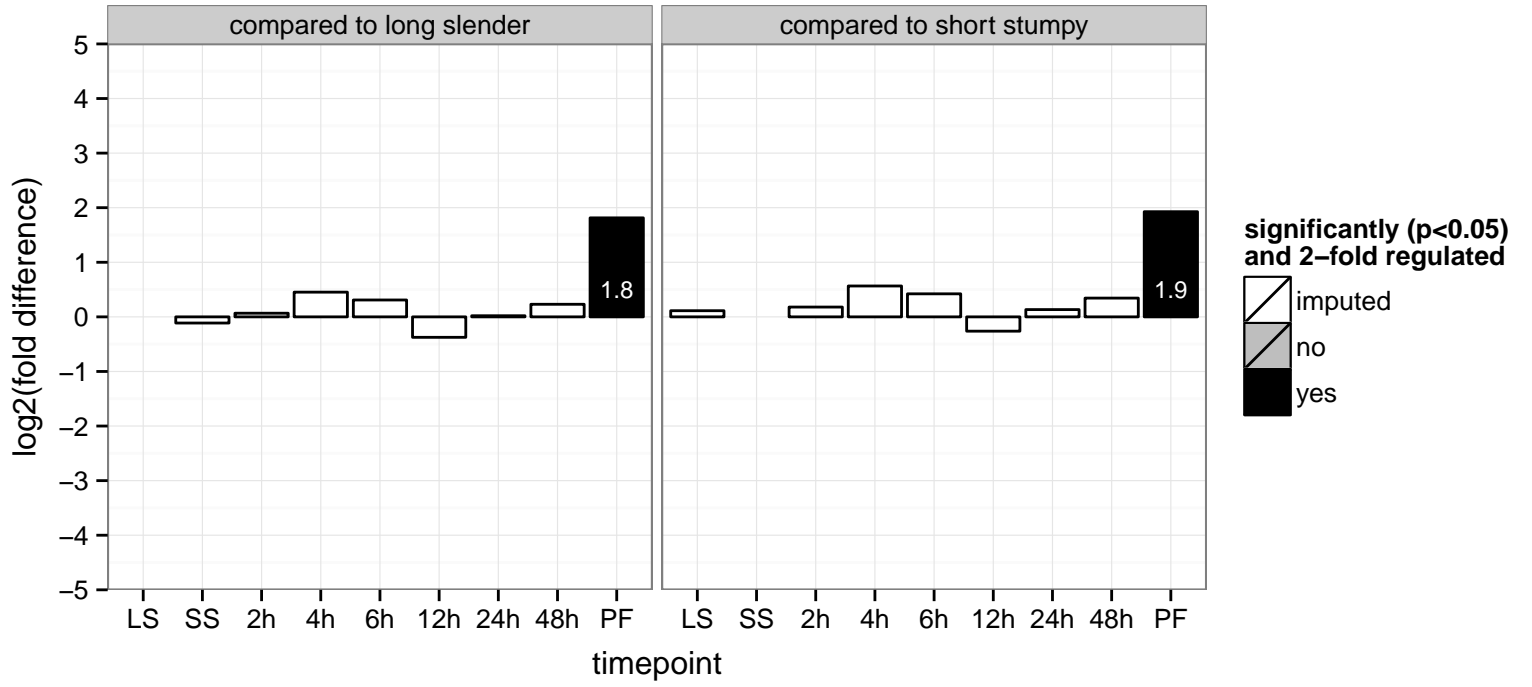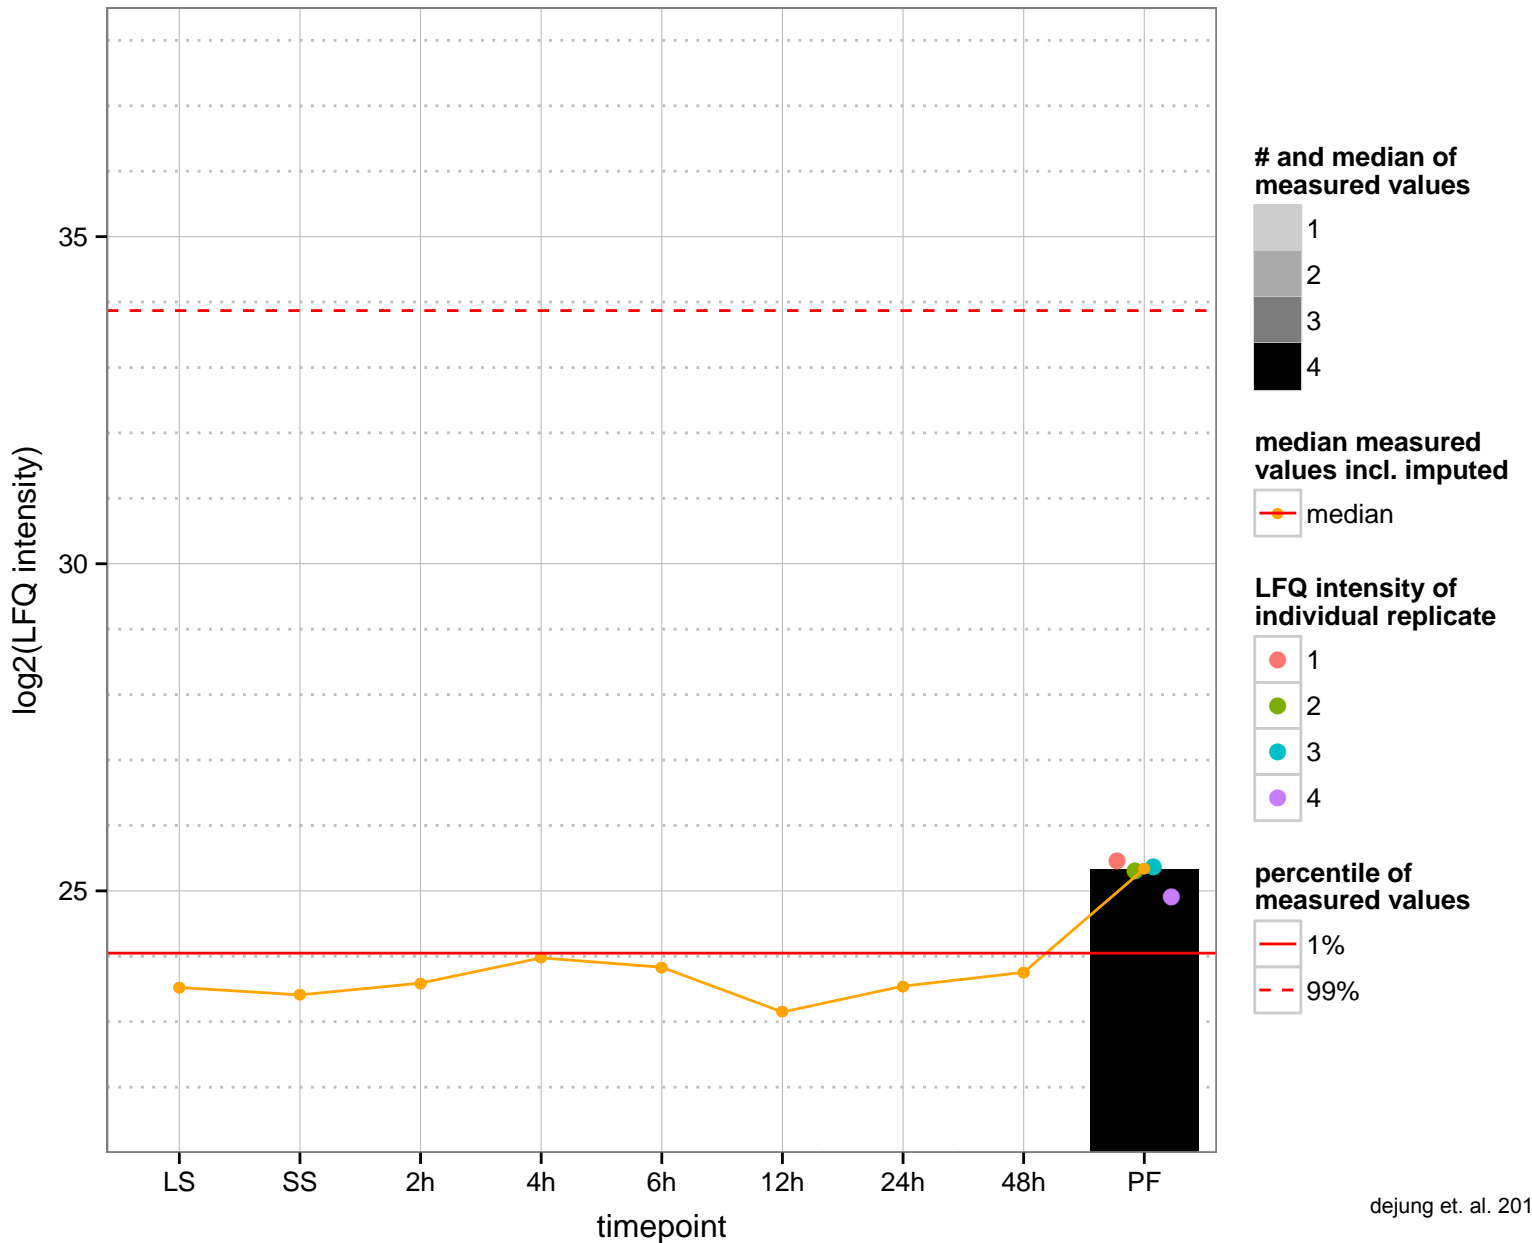

actin, putative  
 Tb927.4.980  
 AGOF: null  
 AGOC: null  
 AGOP: null  
 PGO: null  
 PGO: null  
 PGO: null

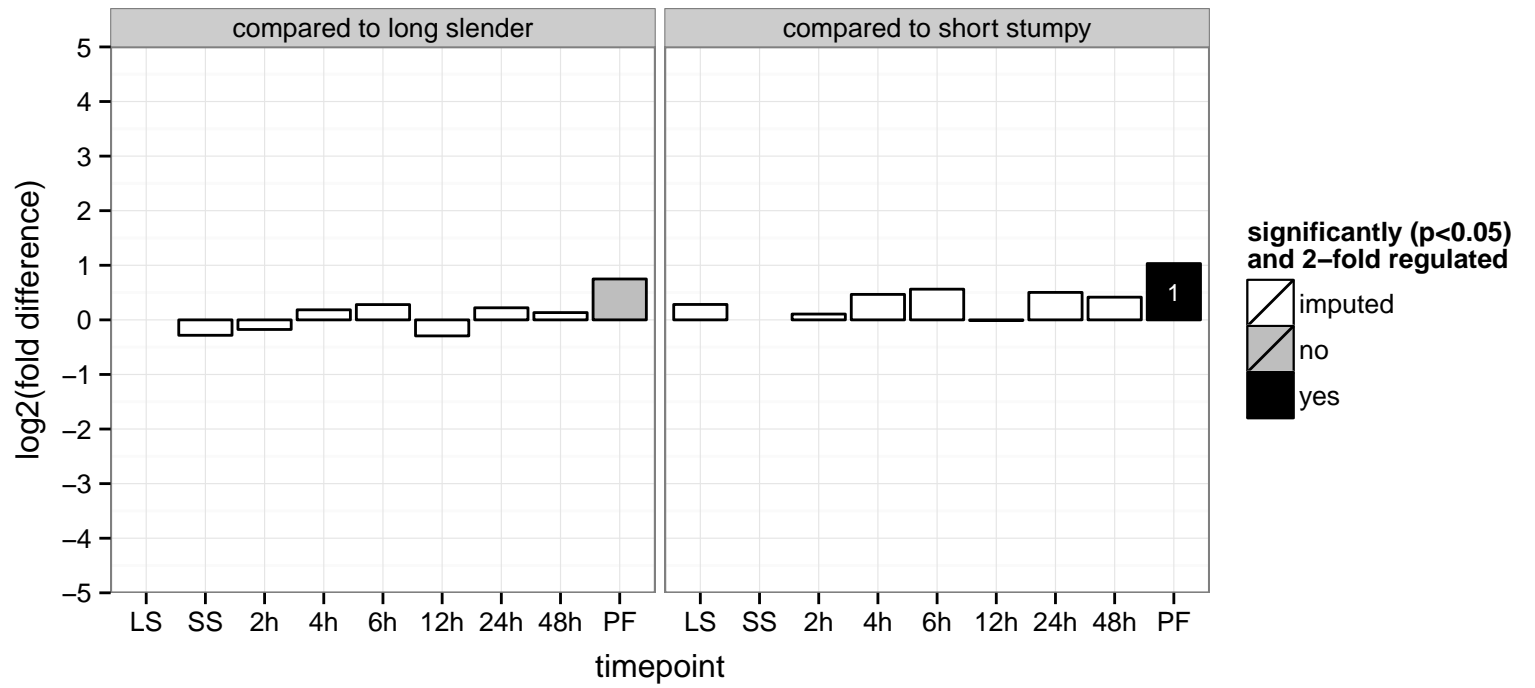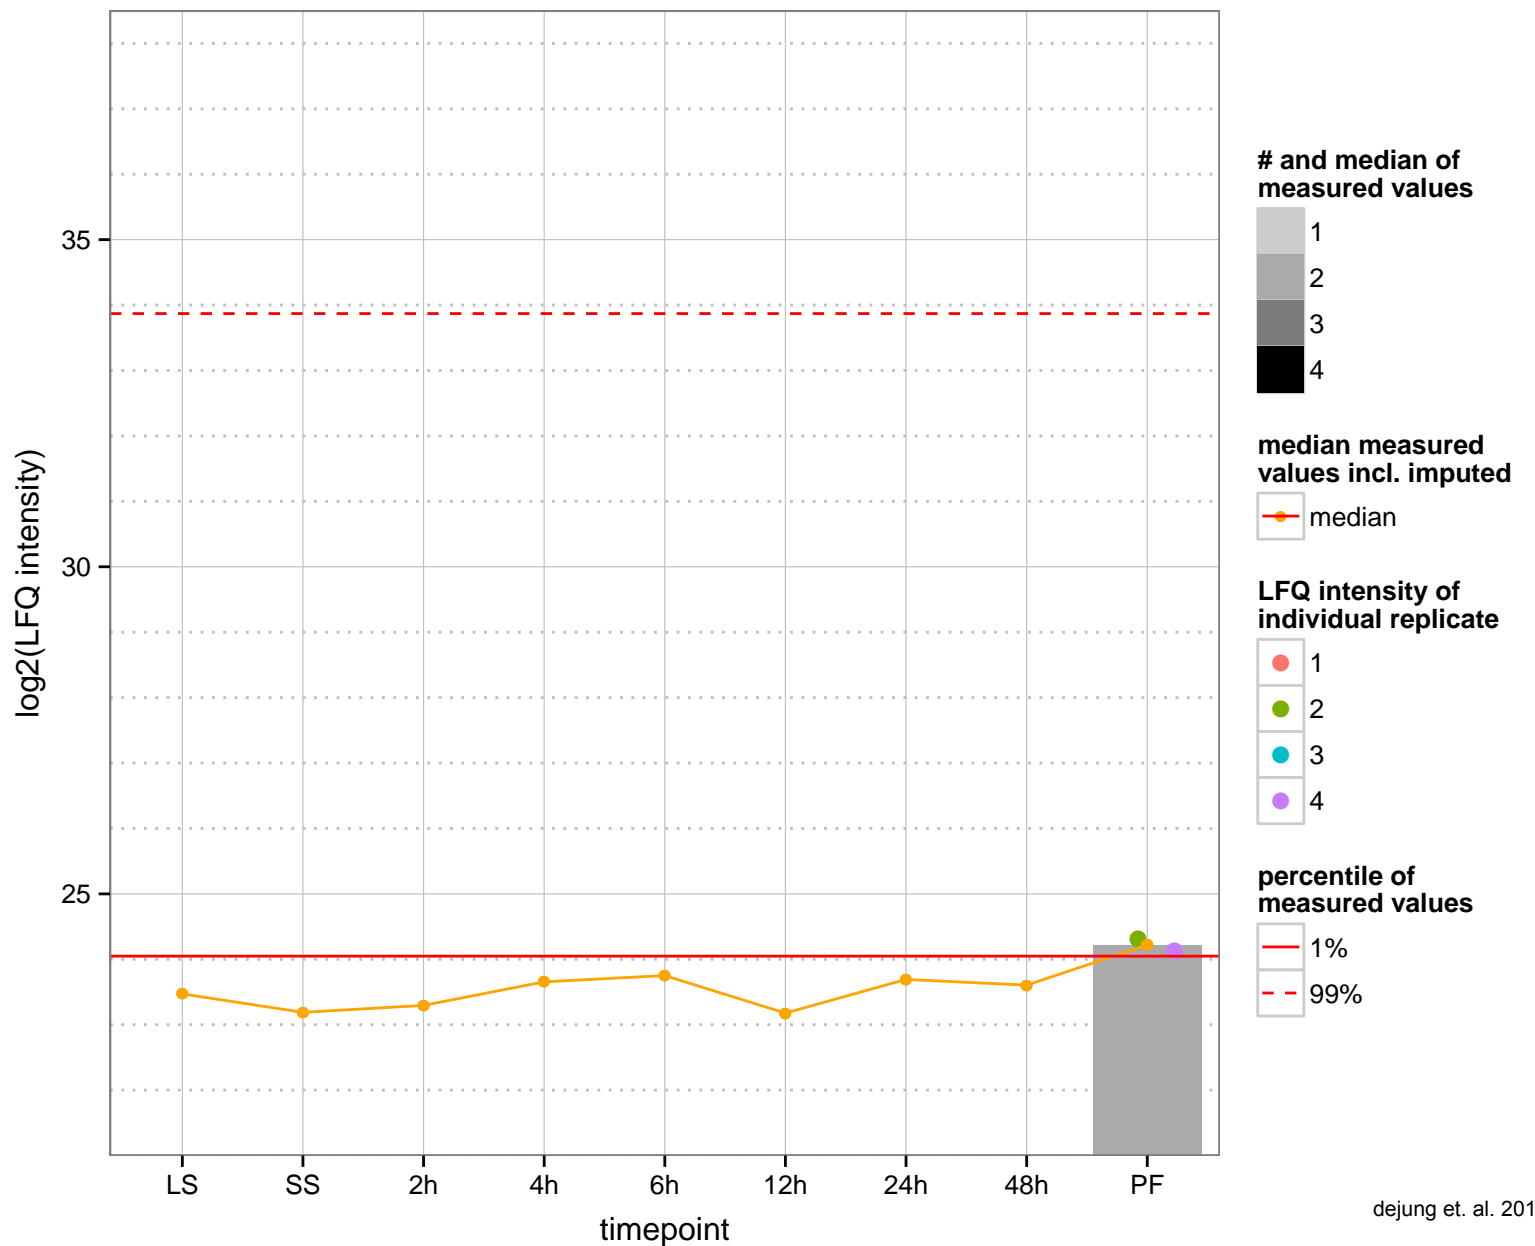

threonyl-tRNA synthetase, putative

Tb927.5.1090

AGOF: ATP binding, aminoacyl-tRNA ligase activity, threonine-tRNA ligase activity

AGOC: null

AGOP: threonyl-tRNA aminoacylation, translation

PGOF: ATP binding, aminoacyl-tRNA ligase activity, ligase activity, forming aminoacyl-tRNA and related compounds, nucleot

PGOC: cytoplasm

PGOP: tRNA aminoacylation, tRNA aminoacylation for protein translation, threonyl-tRNA aminoacylation

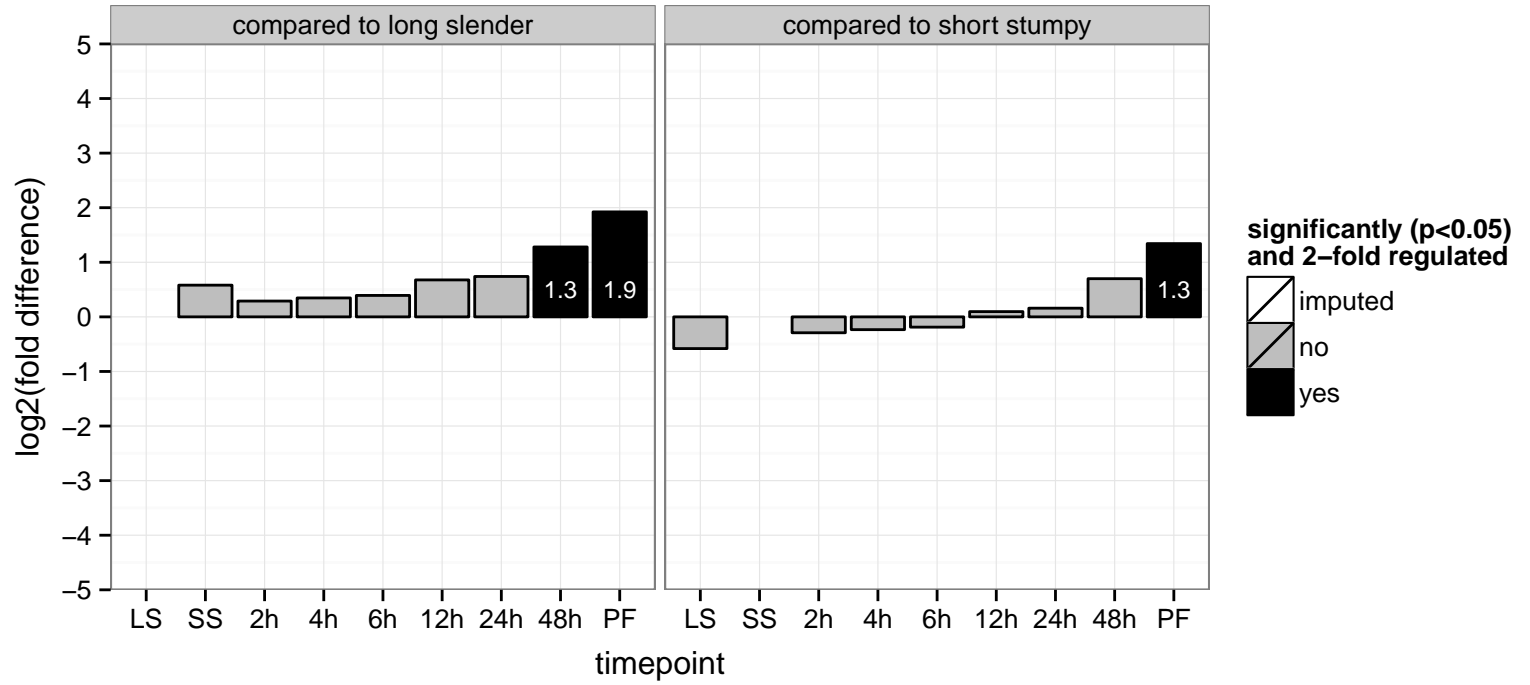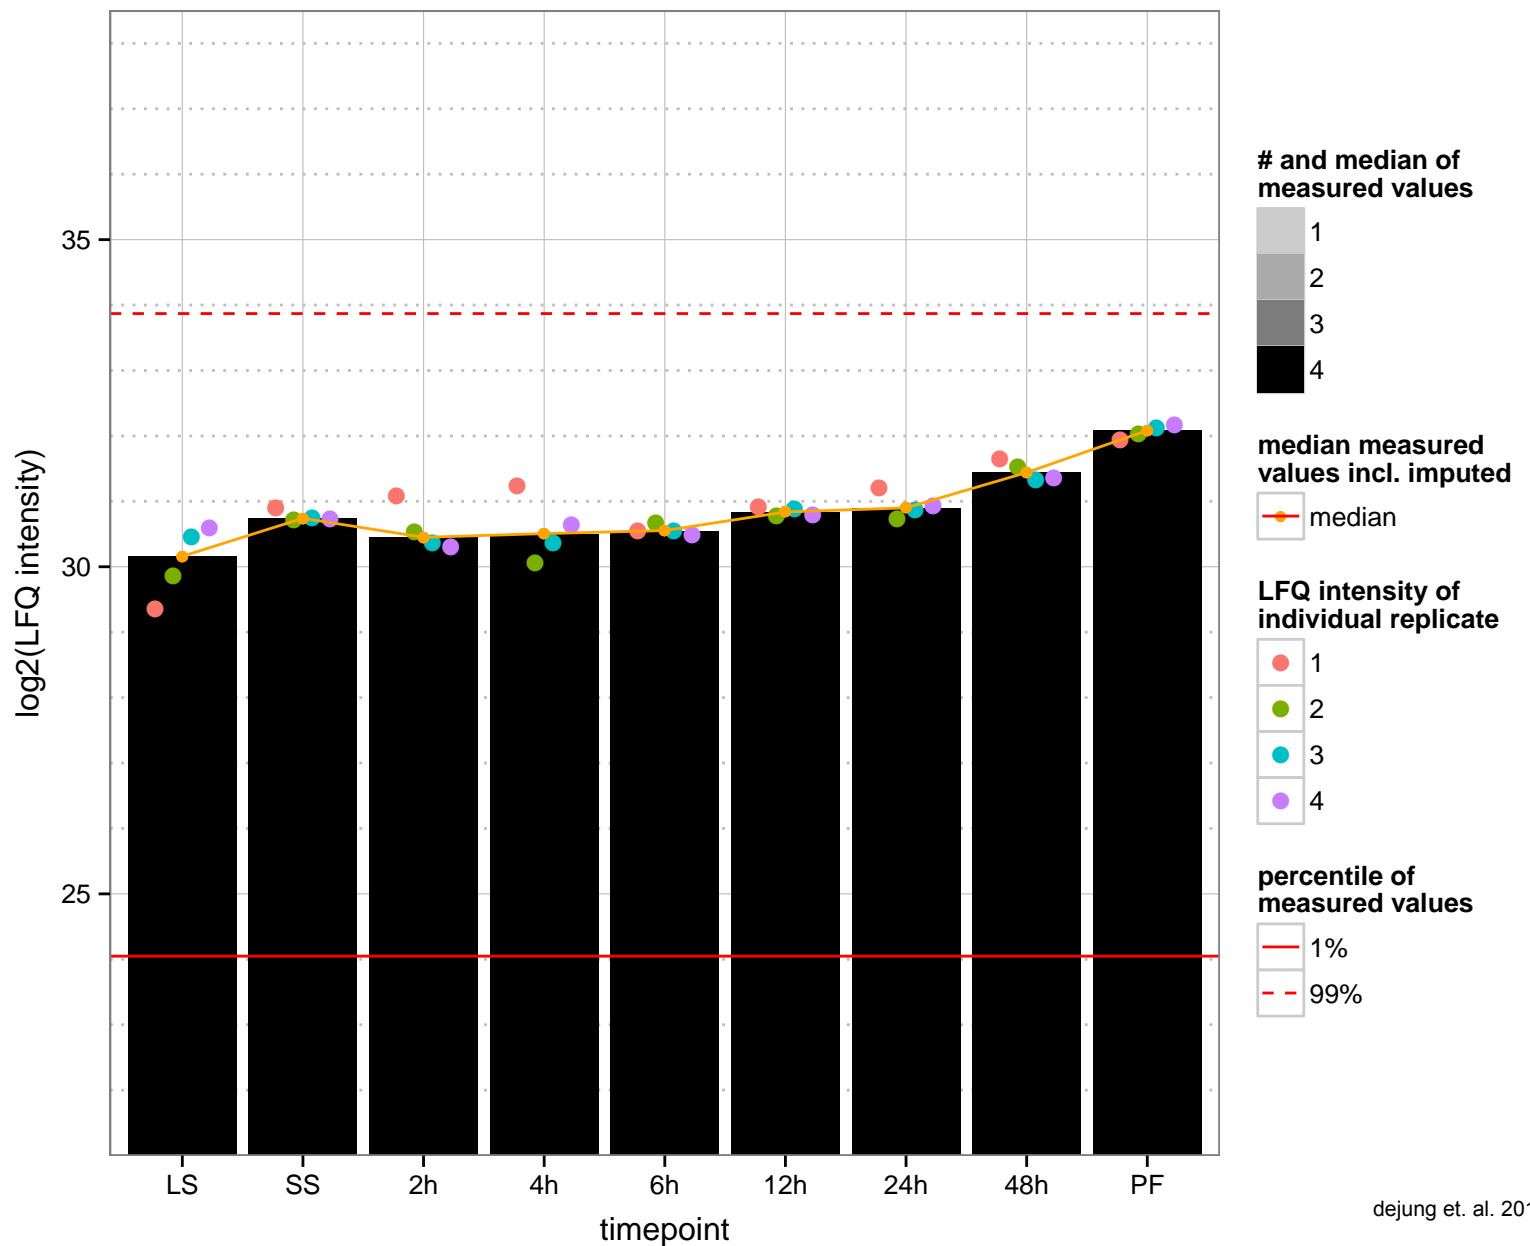

hypothetical protein, conserved  
 Tb927.5.1240  
 AGOF: null  
 AGOC: mitochondrion  
 AGOP: null  
 PGO: null  
 PGO: null  
 PGO: null

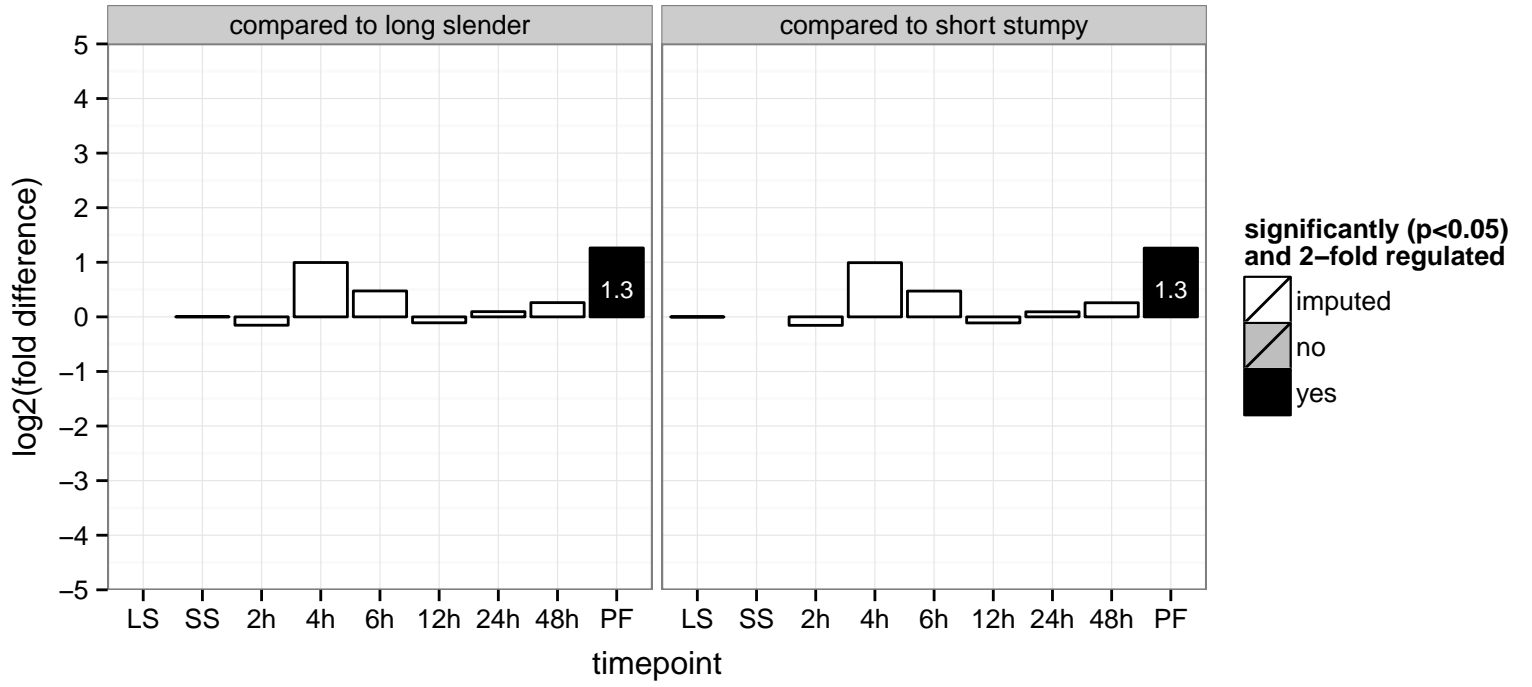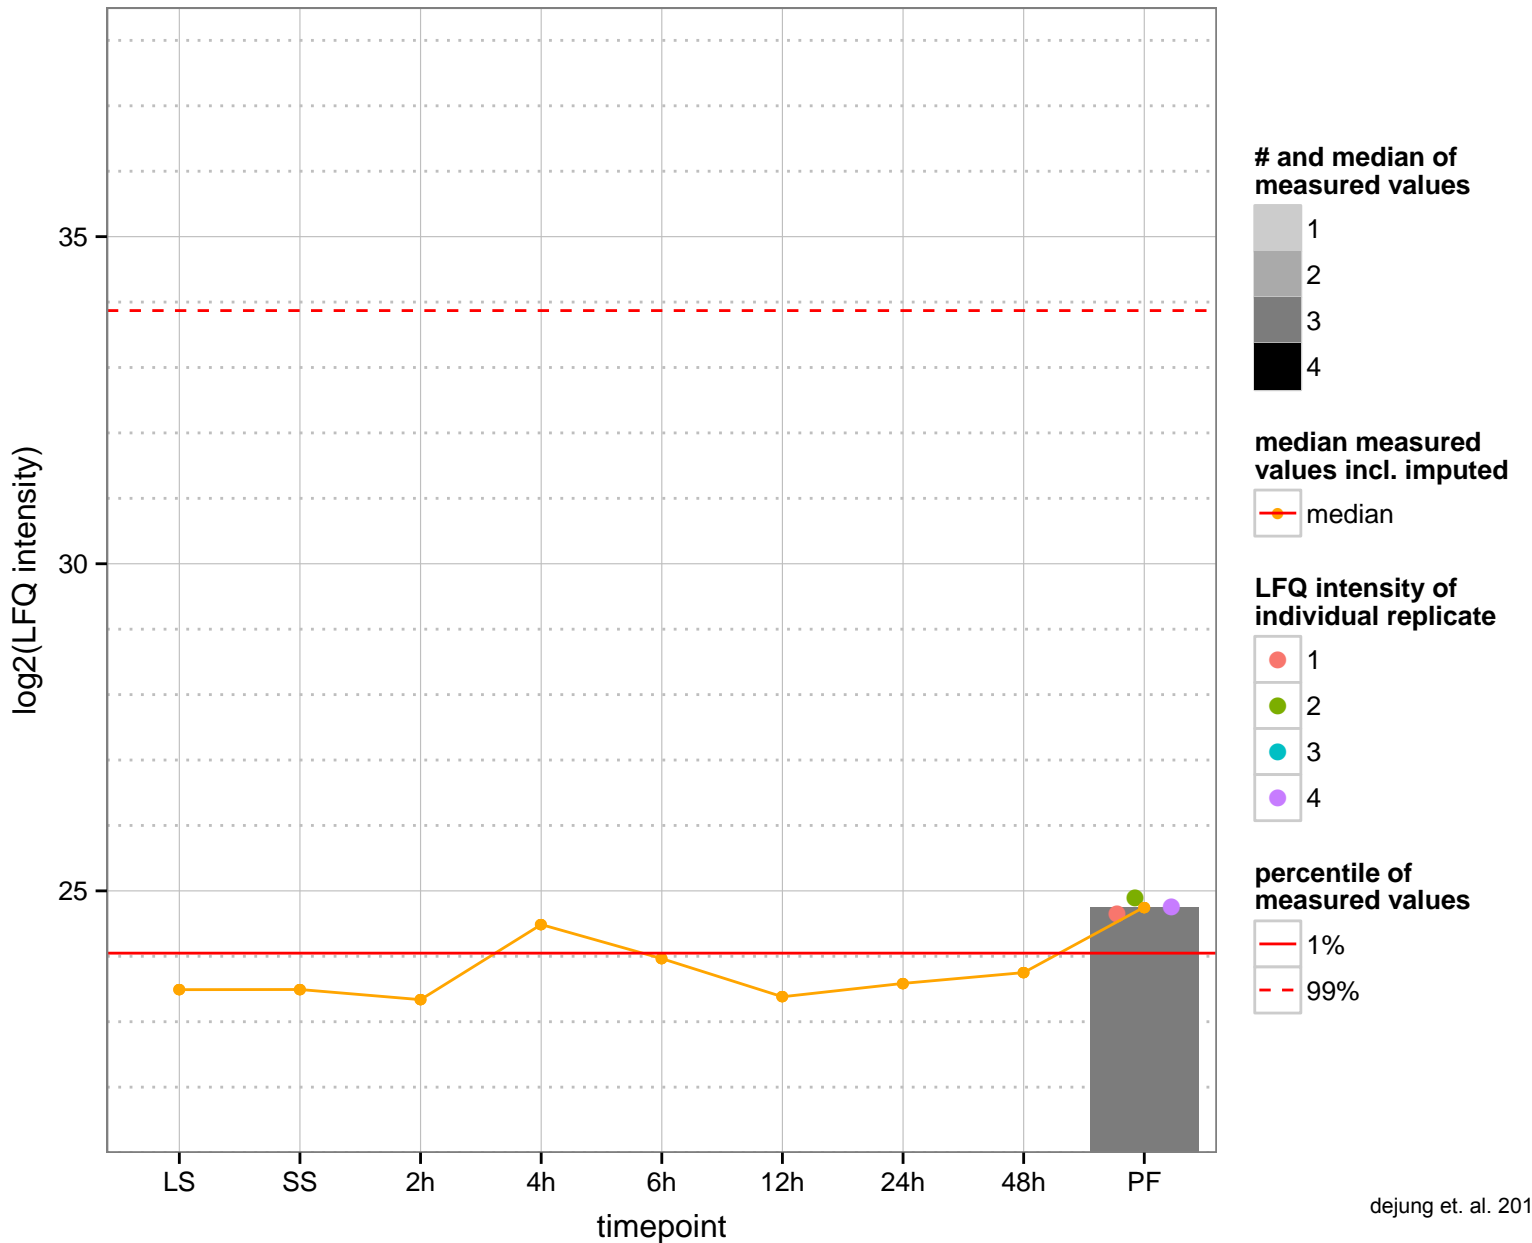



heat shock protein HslVU, ATPase subunit HslU, putative  
Tb927.5.1520

AGOF: ATP binding, ATPase activity, peptidase activity, acting on L-amino acid peptides

AGOC: HslUV protease complex, cytoplasm, mitochondrion

AGOP: rolling circle DNA replication

PGOF: ATP binding, ATPase activity, nucleoside-triphosphatase activity, nucleotide binding, peptidase activity, acting on L-amino acid peptides

PGOC: HslUV protease complex, cytoplasm

PGOP: null

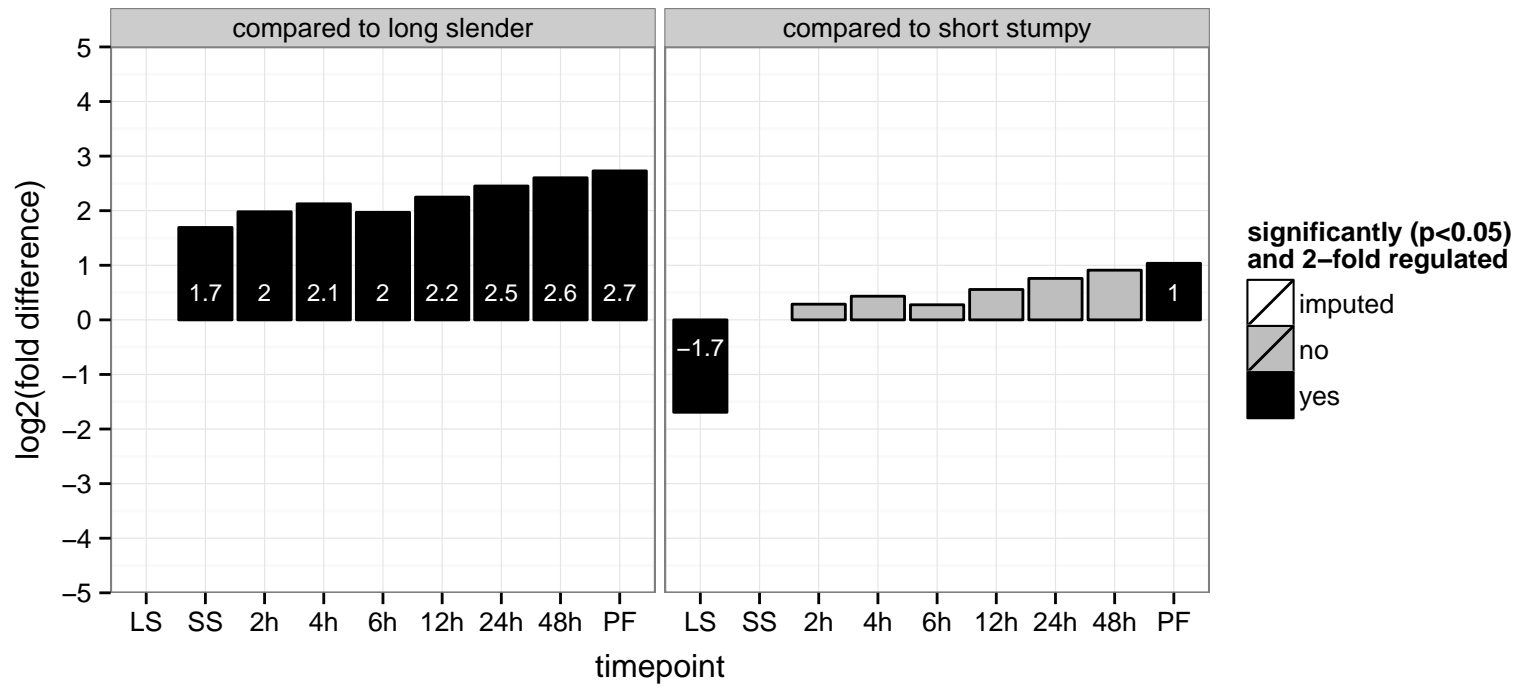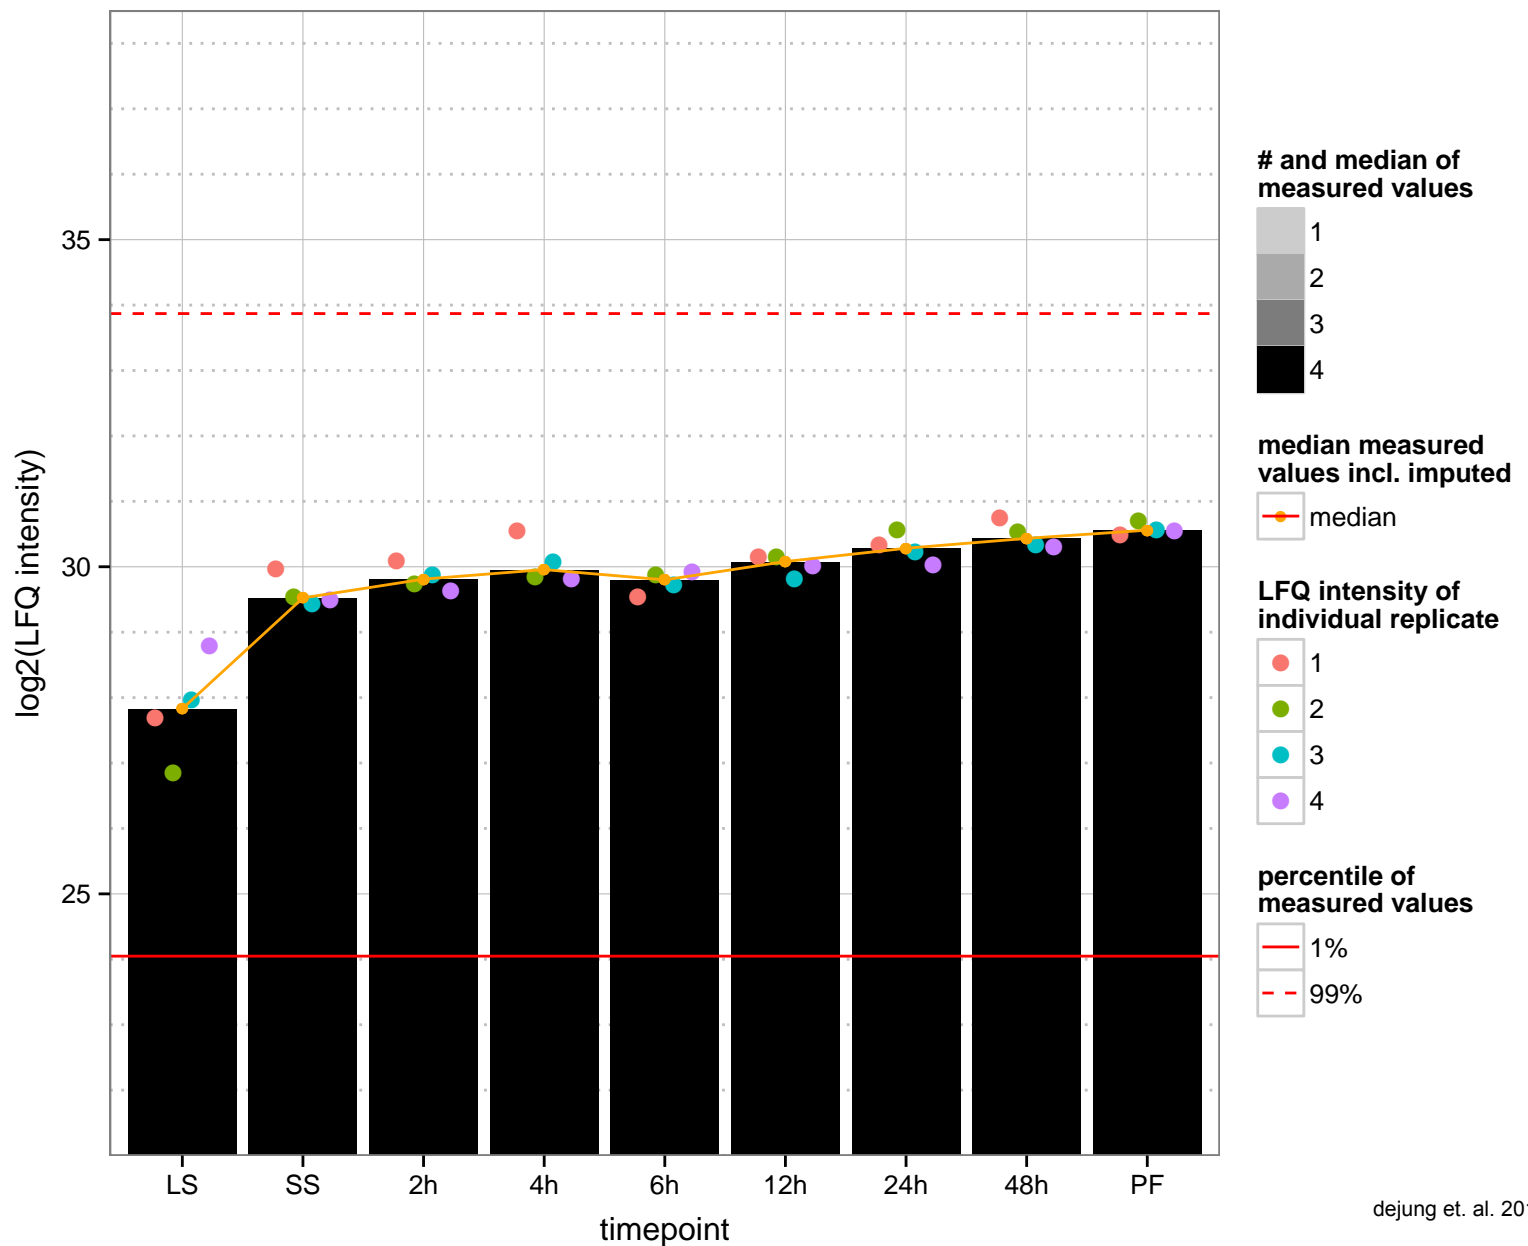

hypothetical protein, conserved  
 Tb927.5.1670  
 AGOF: null  
 AGOC: null  
 AGOP: null  
 PGOF: protein binding  
 PGO: null  
 PGOP: null

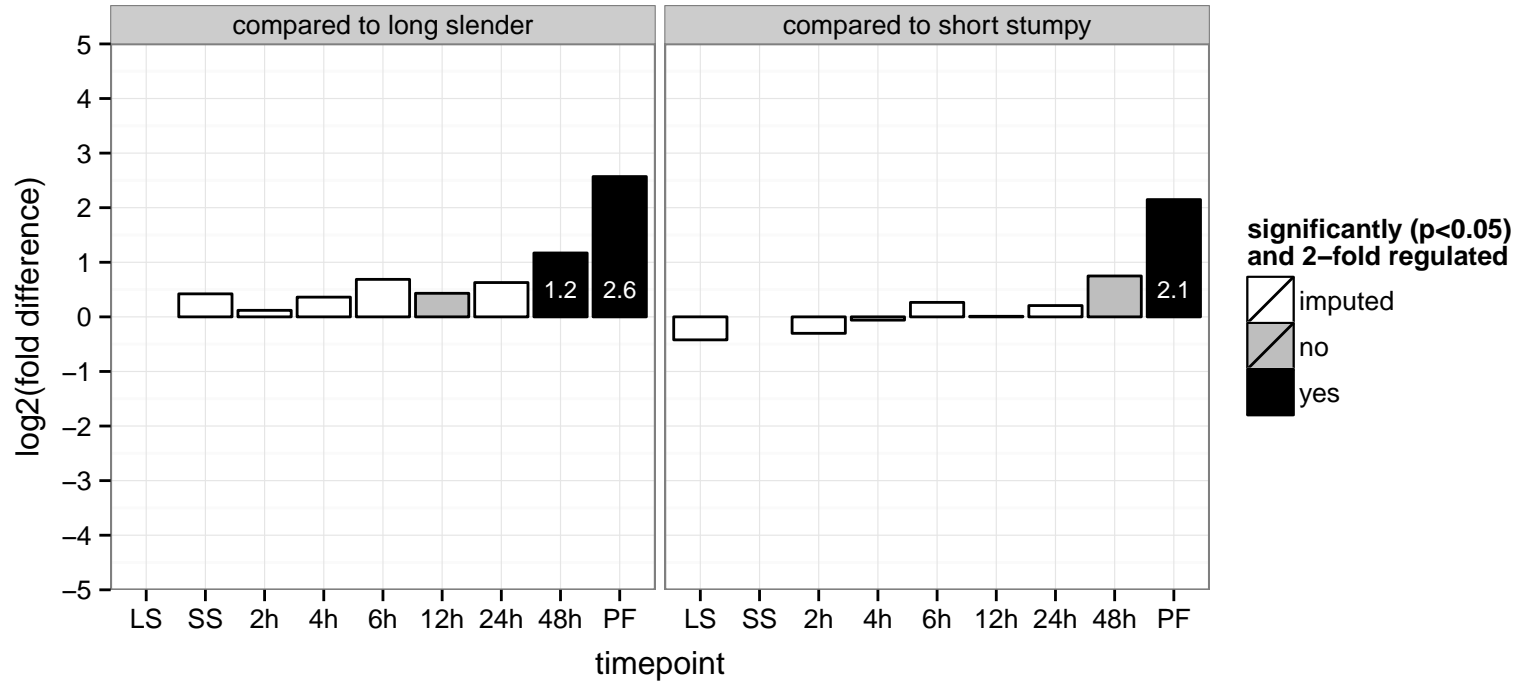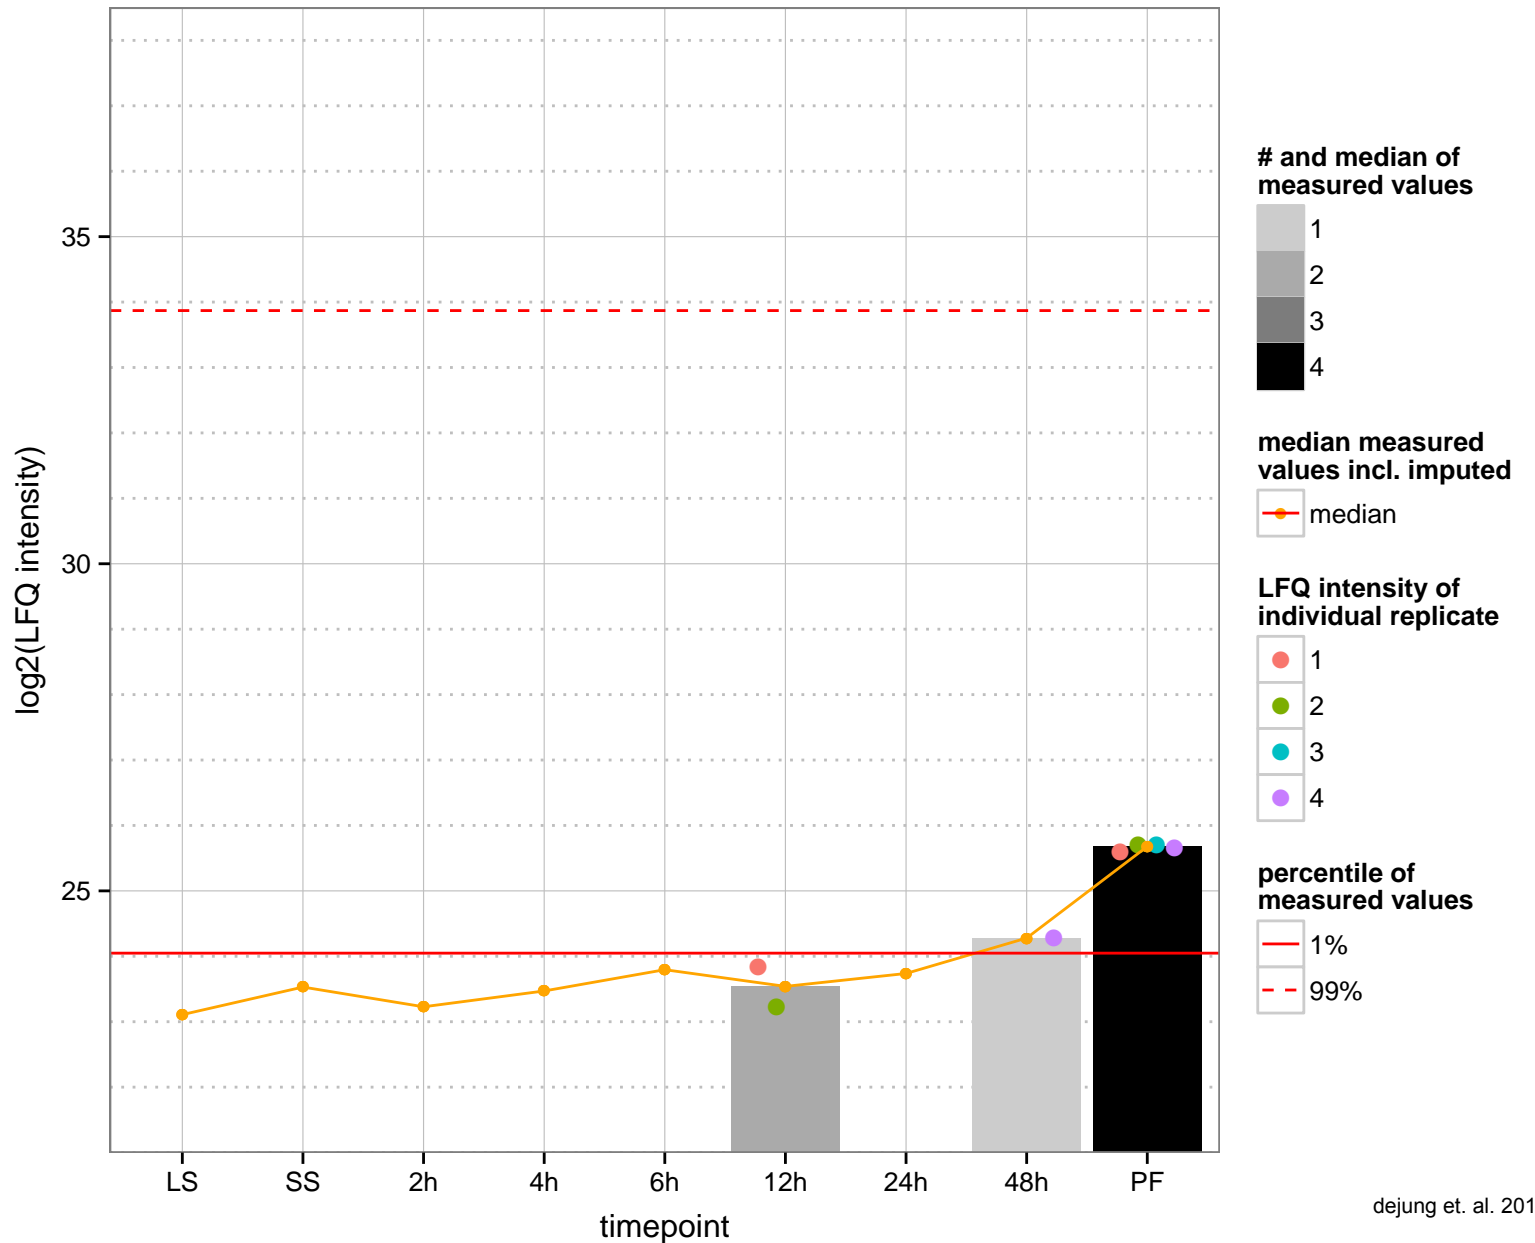

hypothetical protein, conserved  
 Tb927.5.1720  
 AGOF: null  
 AGOC: mitochondrion  
 AGOP: null  
 PGO: null  
 PGOC: null  
 PGOP: null

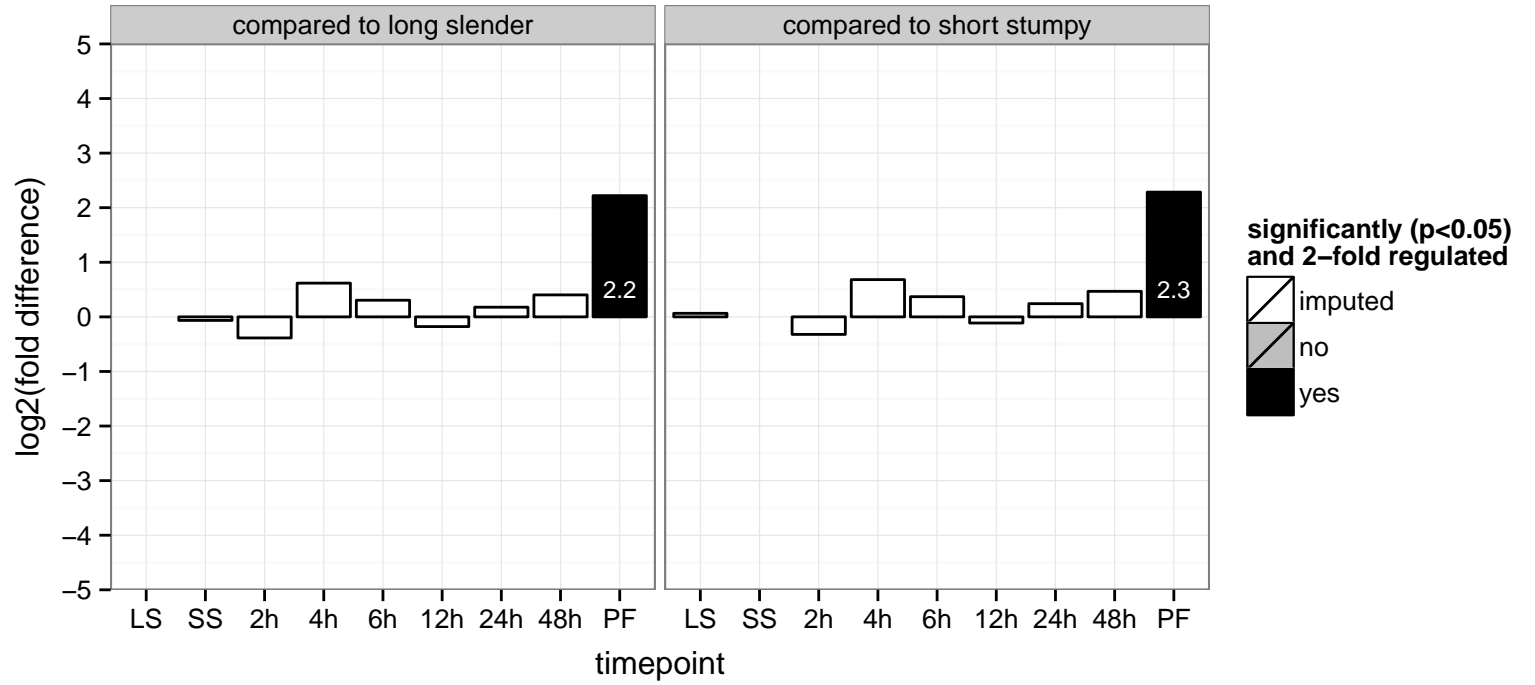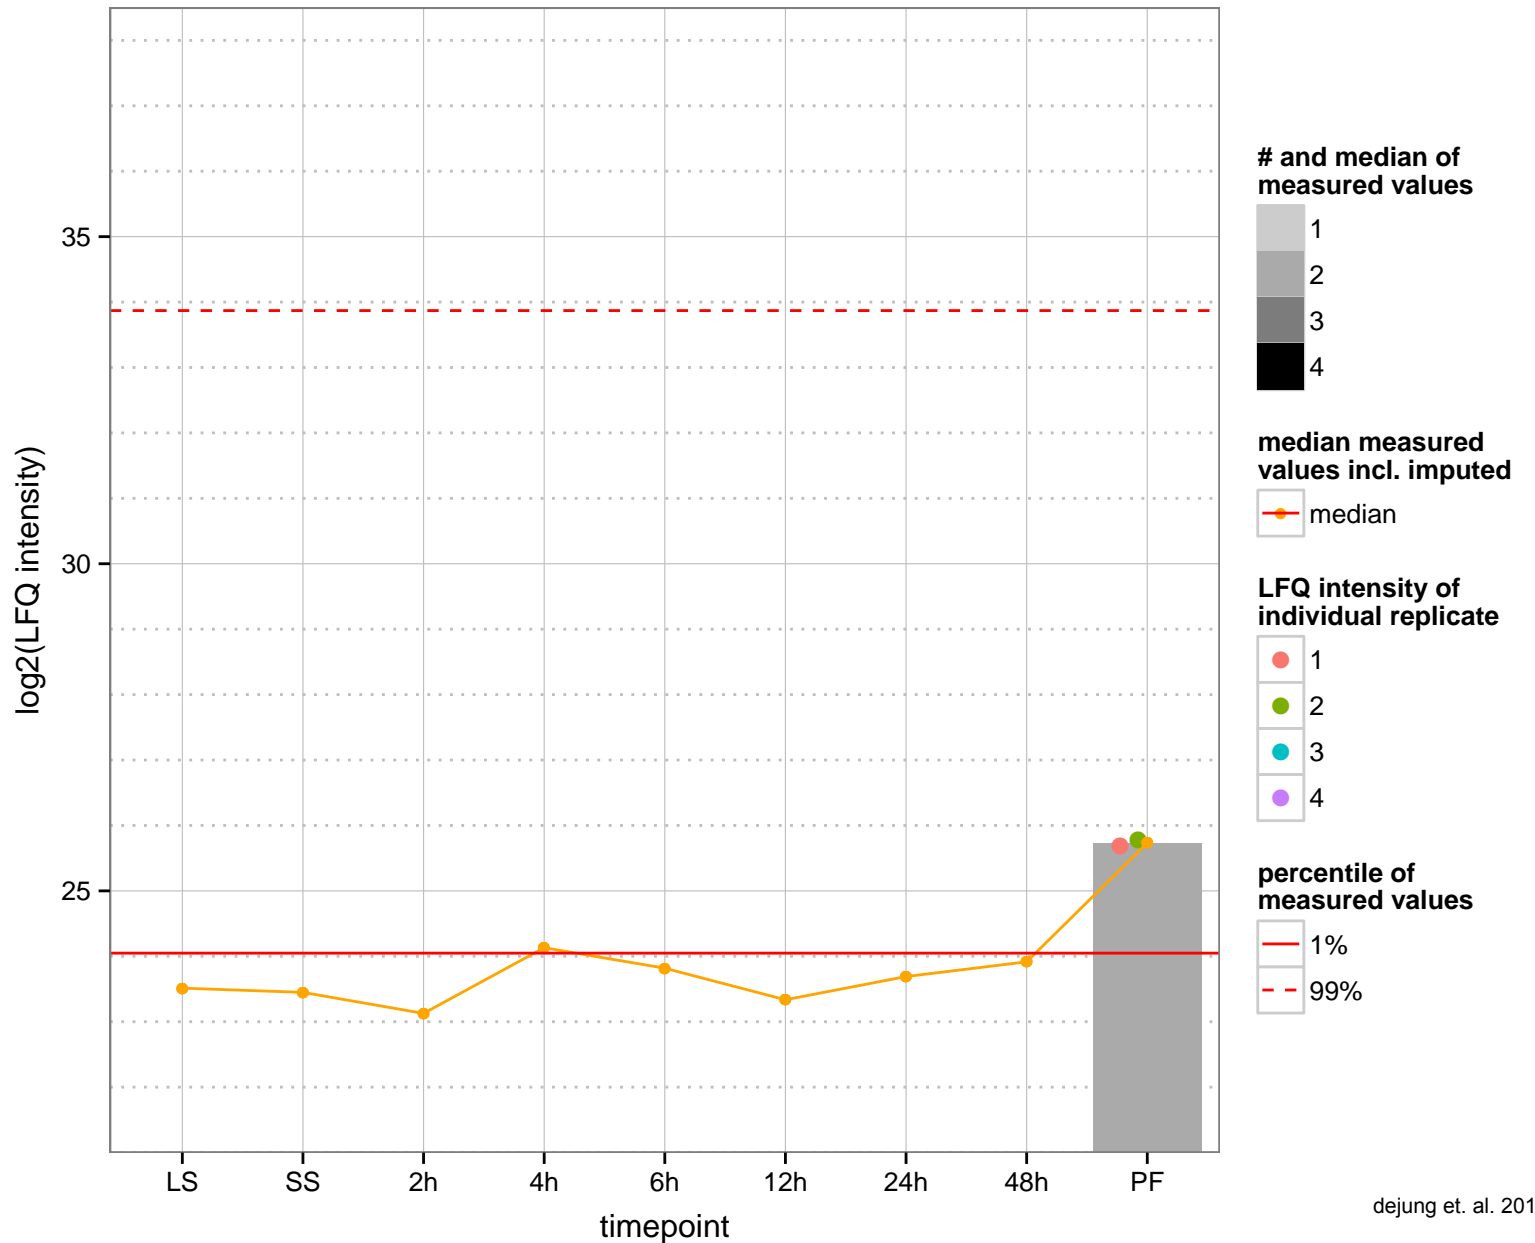

hypothetical protein, conserved  
 Tb927.5.2130  
 AGOF: hydrolase activity  
 AGOC: null  
 AGOP: null  
 PGOF: hydrolase activity, acting on ester bonds  
 PGOC: null  
 PGOP: mRNA processing

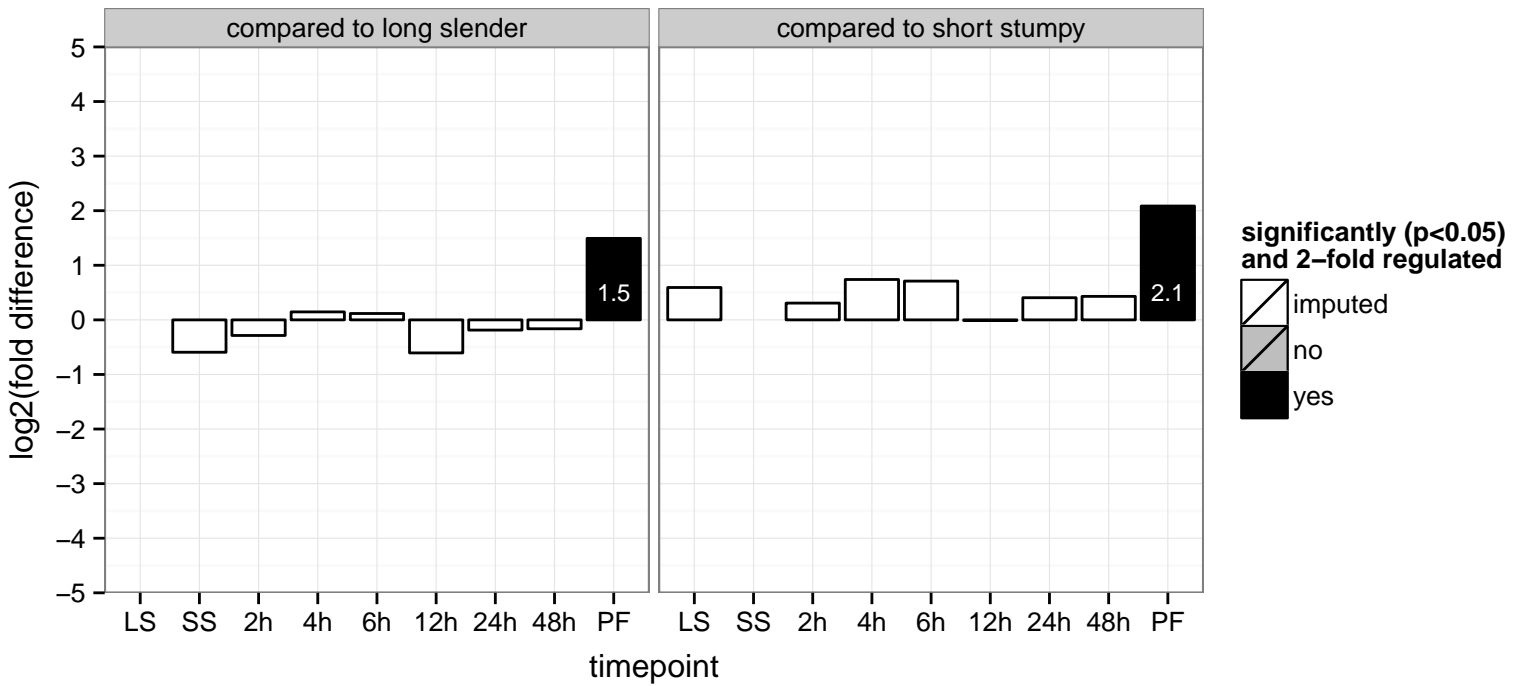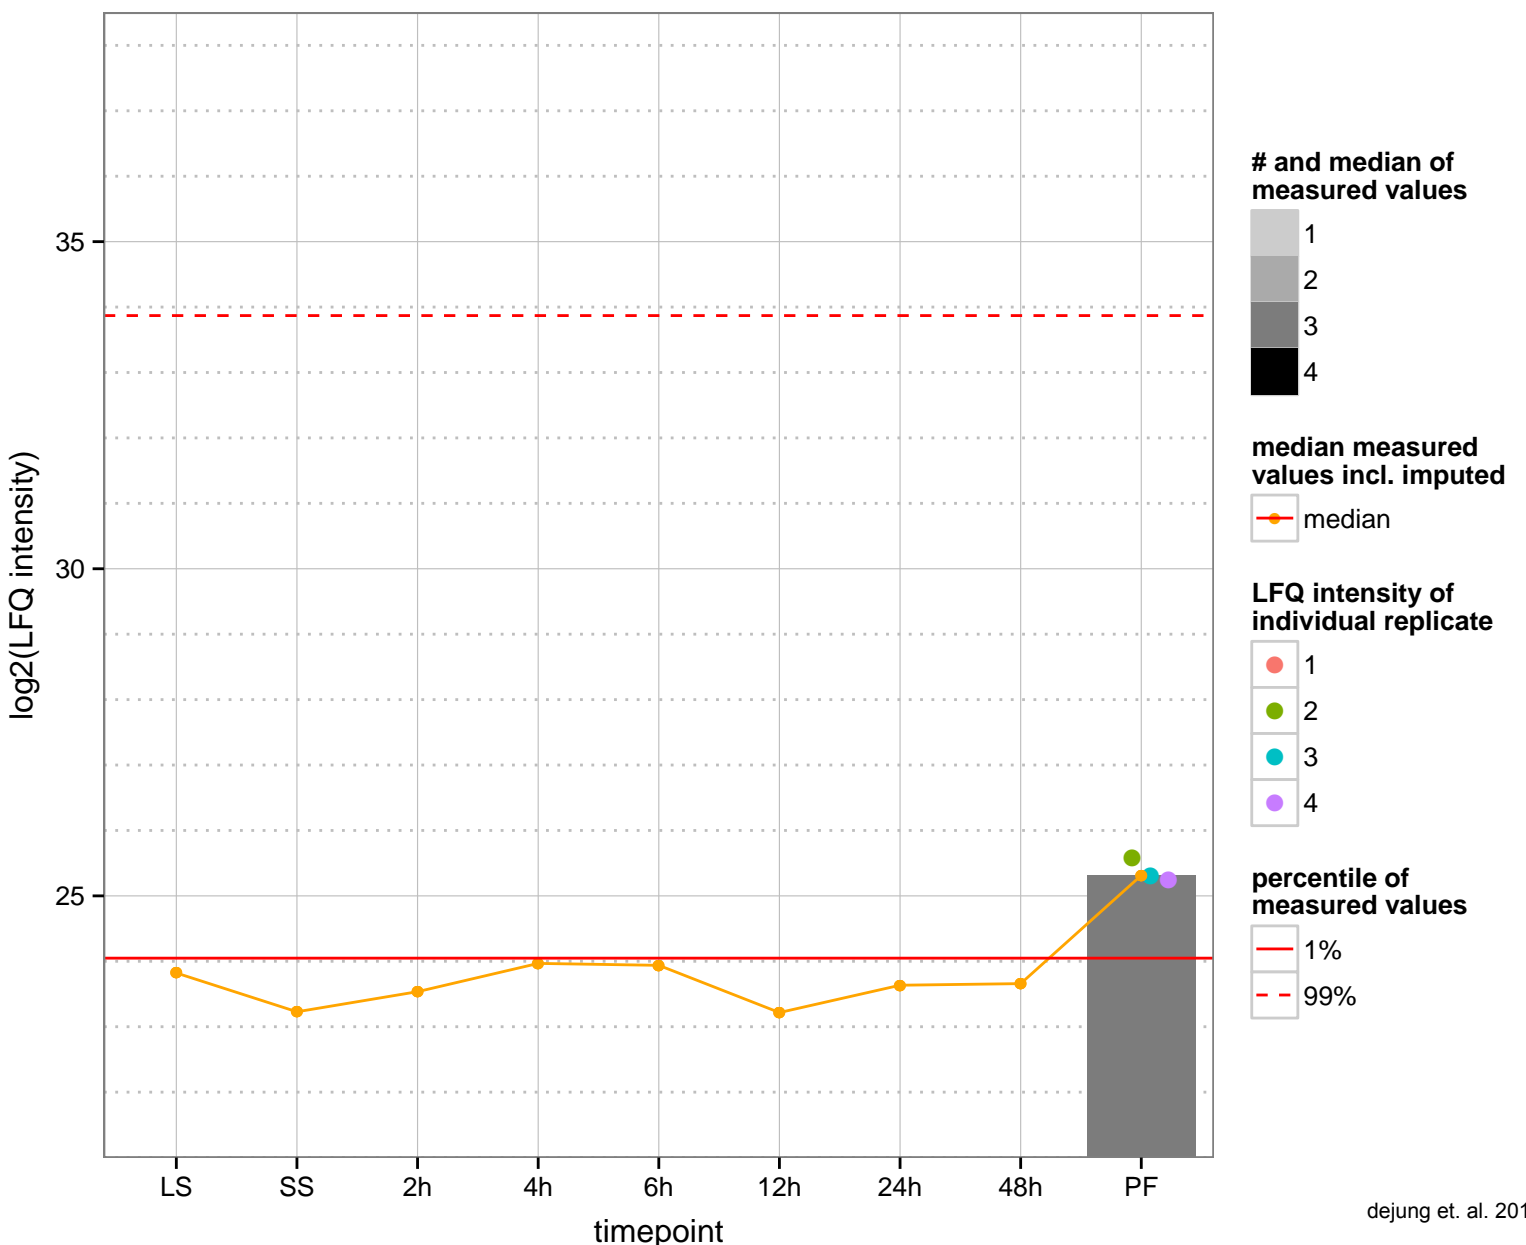

ATP-dependent RNA helicase, putative

Tb927.5.2290

AGOF: ATP binding, ATP-dependent helicase activity, helicase activity, nucleic acid binding

AGOC: null

AGOP: null

PGOF: ATP binding, ATP-dependent helicase activity, helicase activity, nucleic acid binding

PGOC: null

PGOP: null

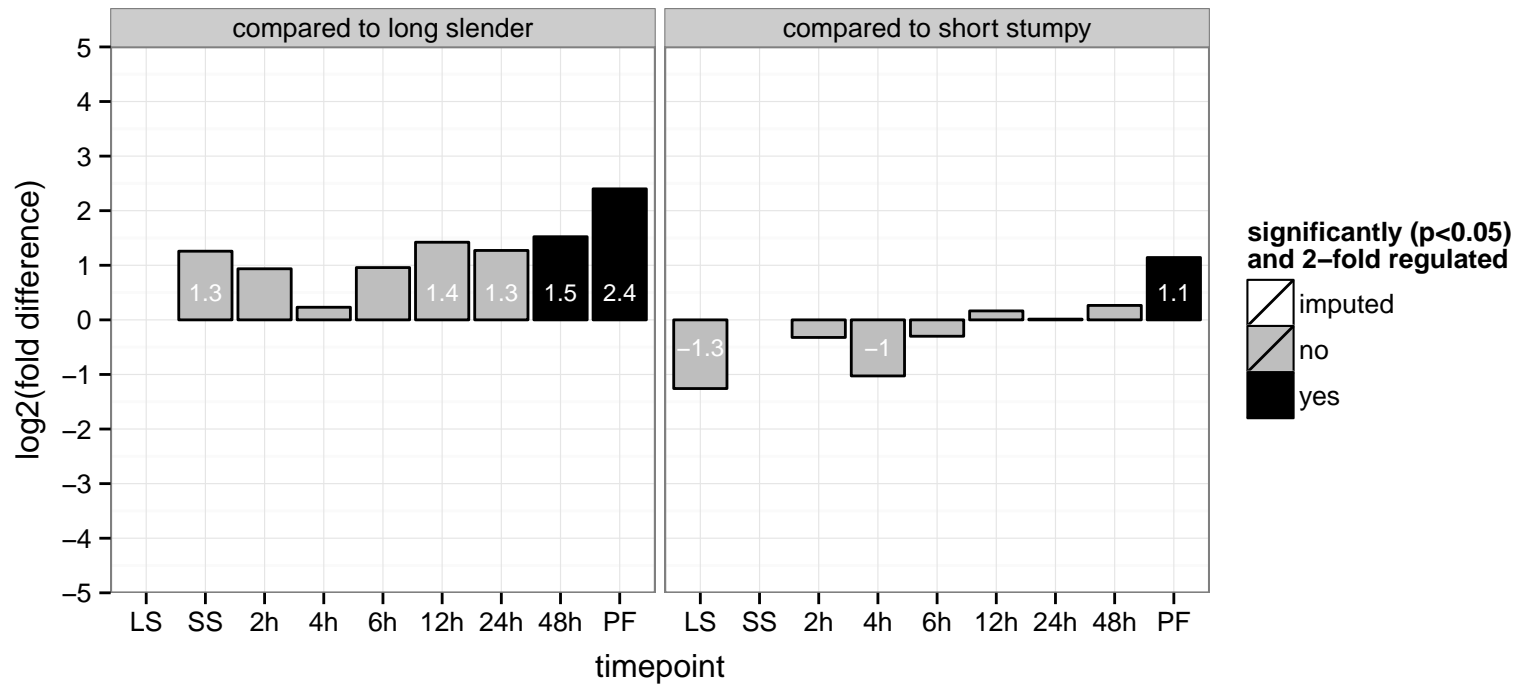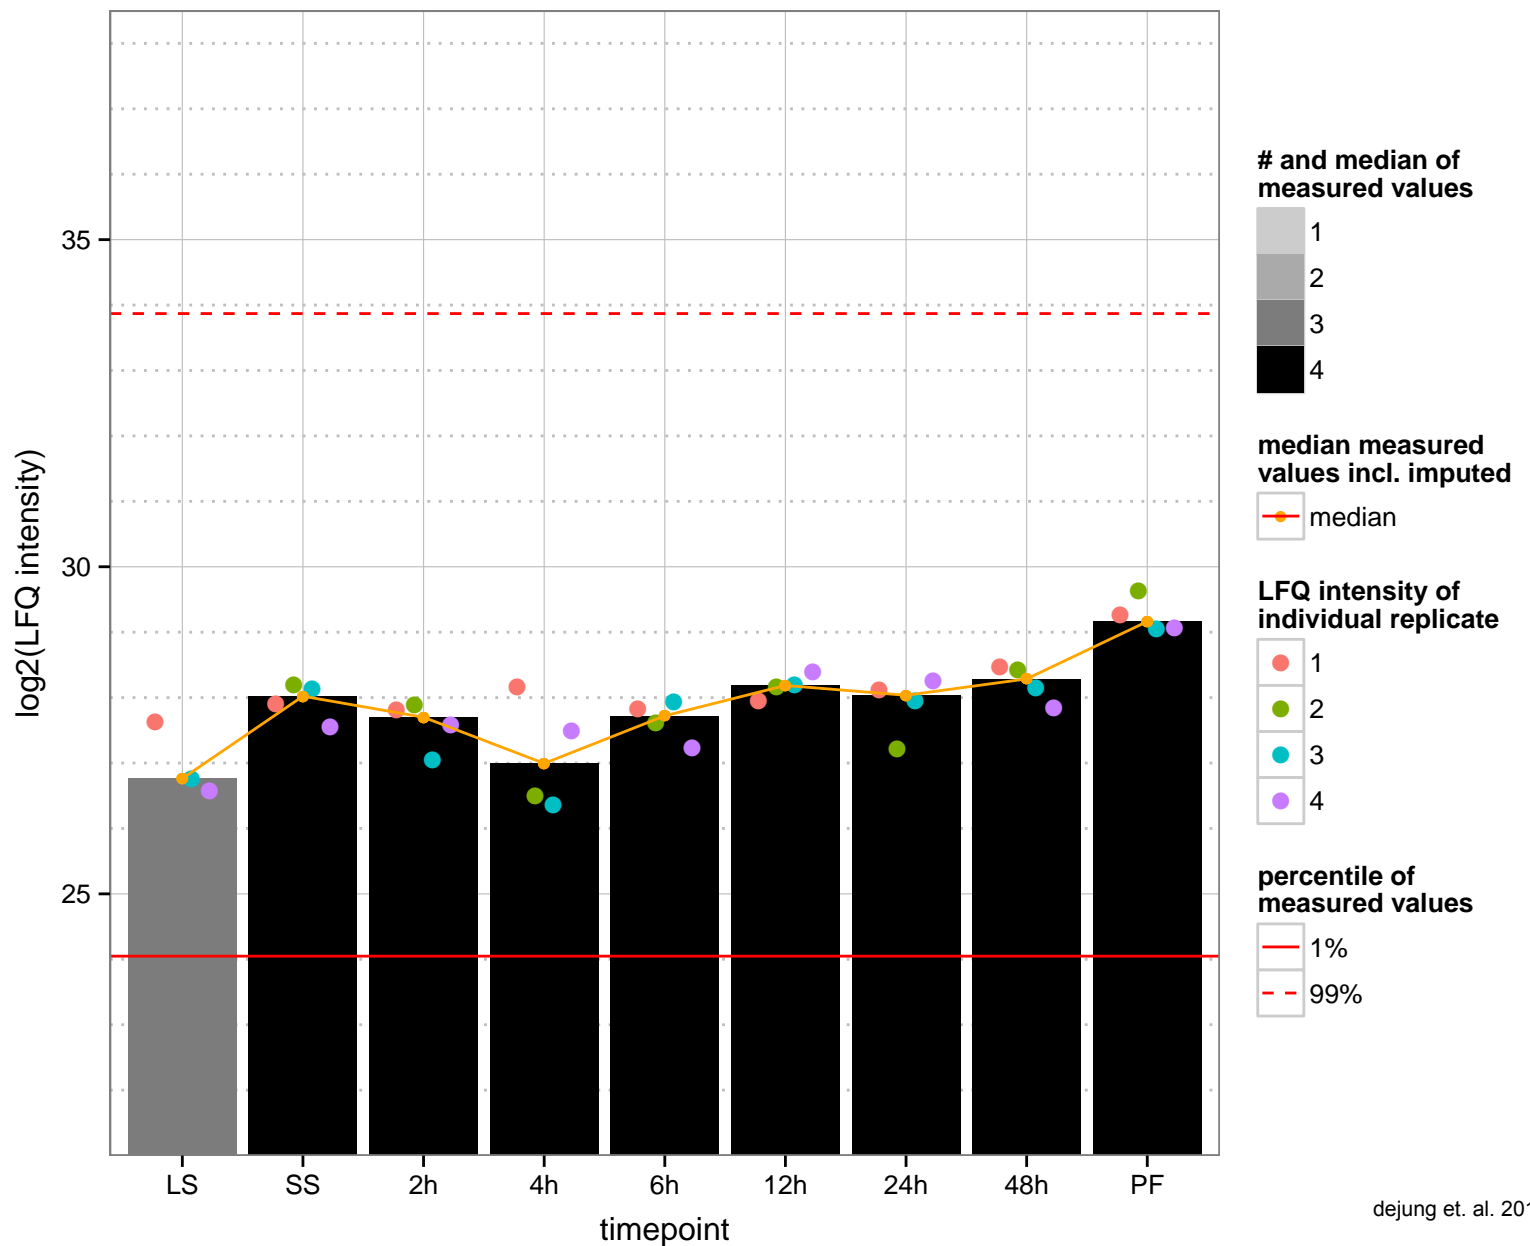

hypothetical protein, conserved  
 Tb927.5.2530  
 AGOF: null  
 AGOC: null  
 AGOP: null  
 PGO: null  
 PGOC: null  
 PGOP: null

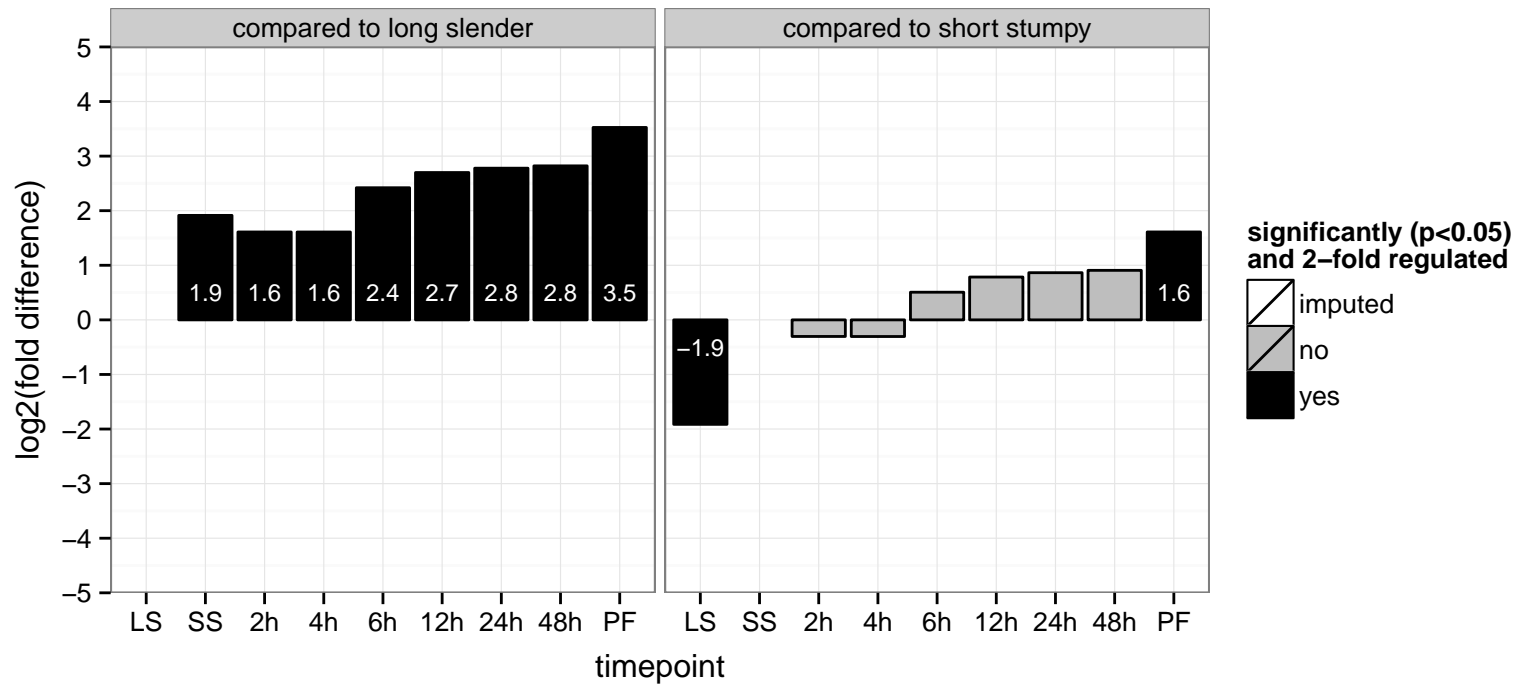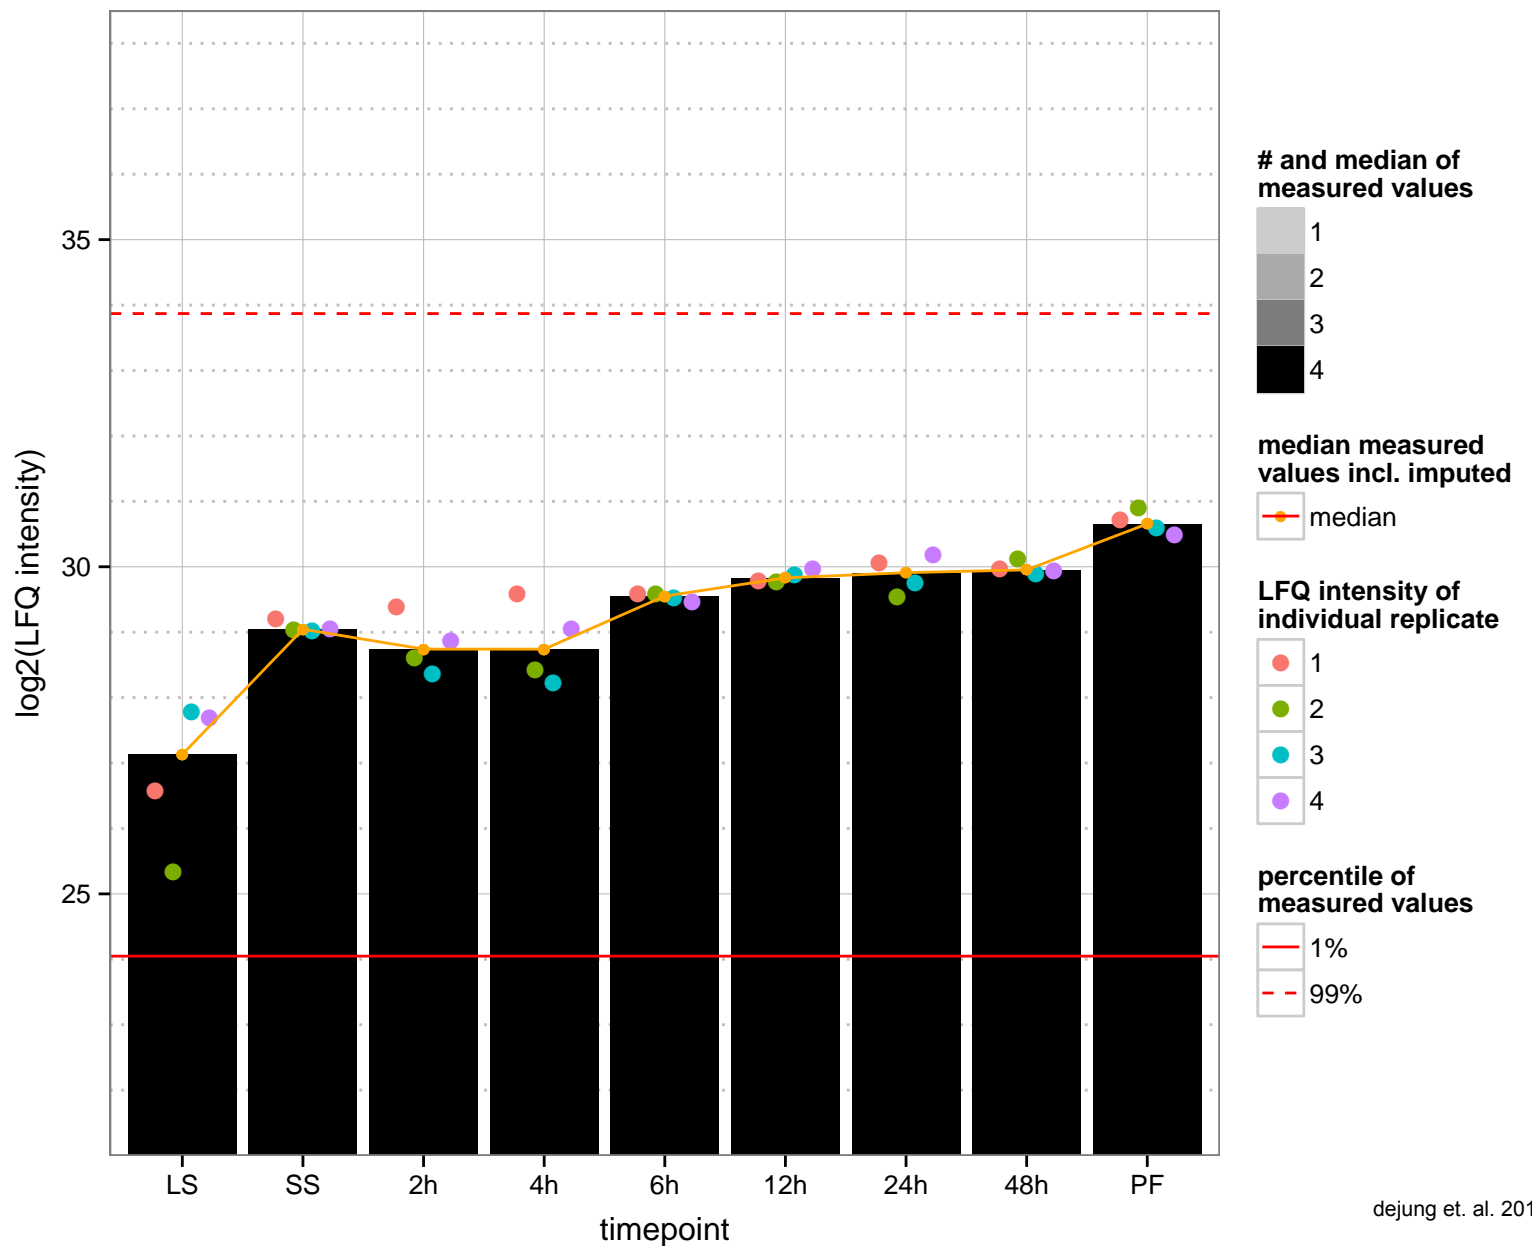

hypothetical protein, conserved  
 Tb927.5.2550  
 AGOF: null  
 AGOC: mitochondrion  
 AGOP: null  
 PGO: null  
 PGO: null  
 PGO: null

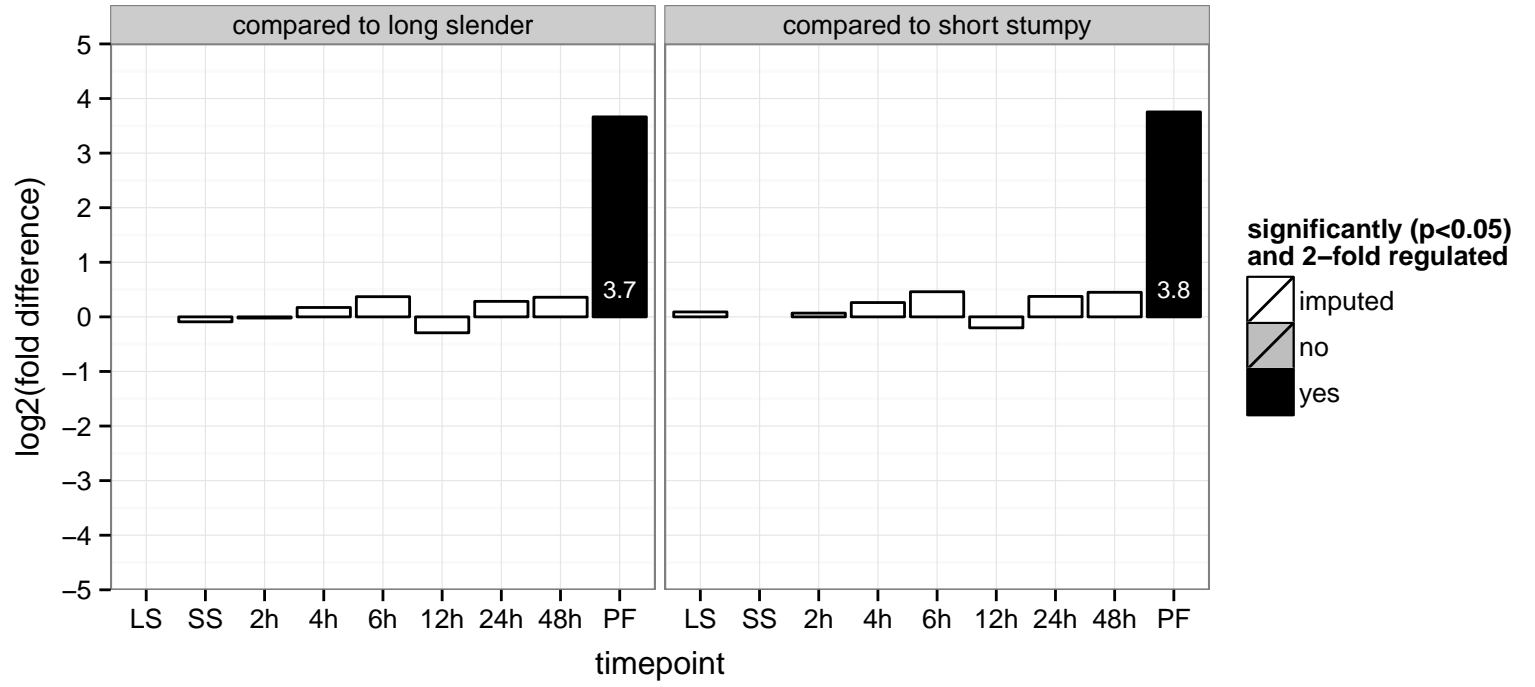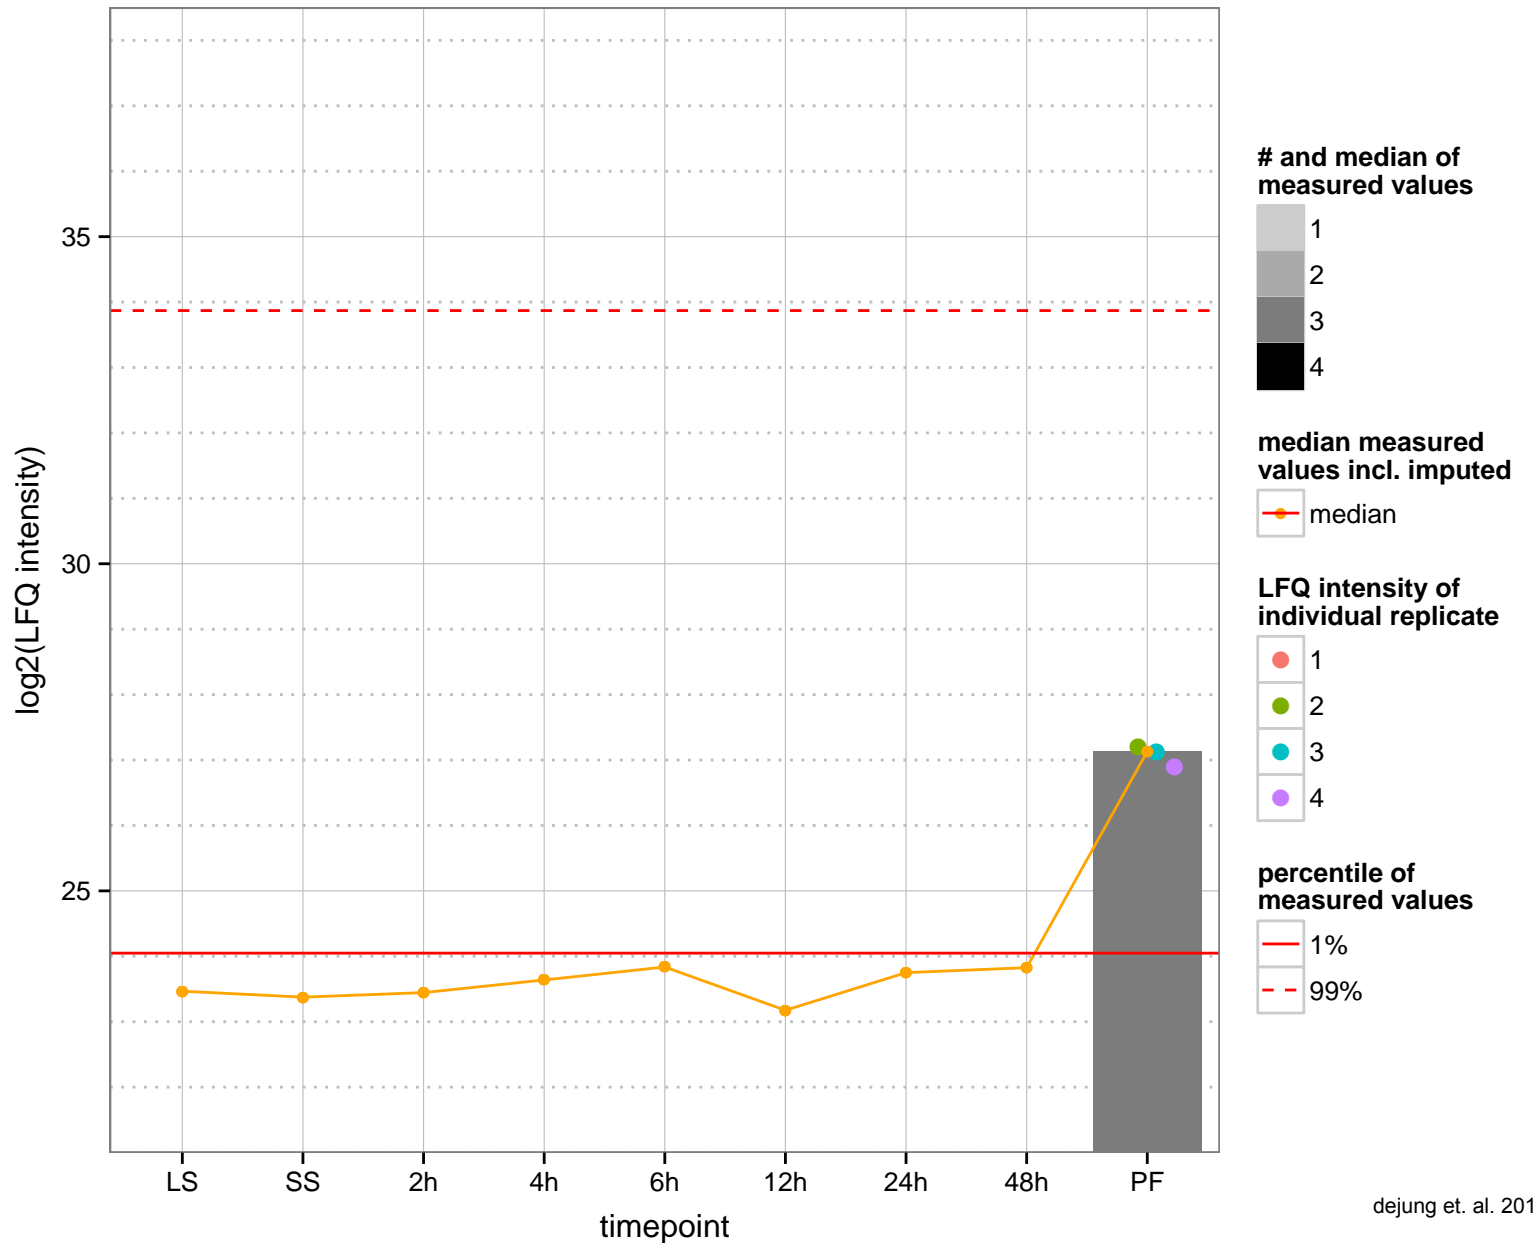

zinc-finger protein ZPR1, putative  
 Tb927.5.2720  
 AGOF: zinc ion binding  
 AGOC: null  
 AGOP: null  
 PGOF: zinc ion binding  
 PGOC: null  
 PGOP: null

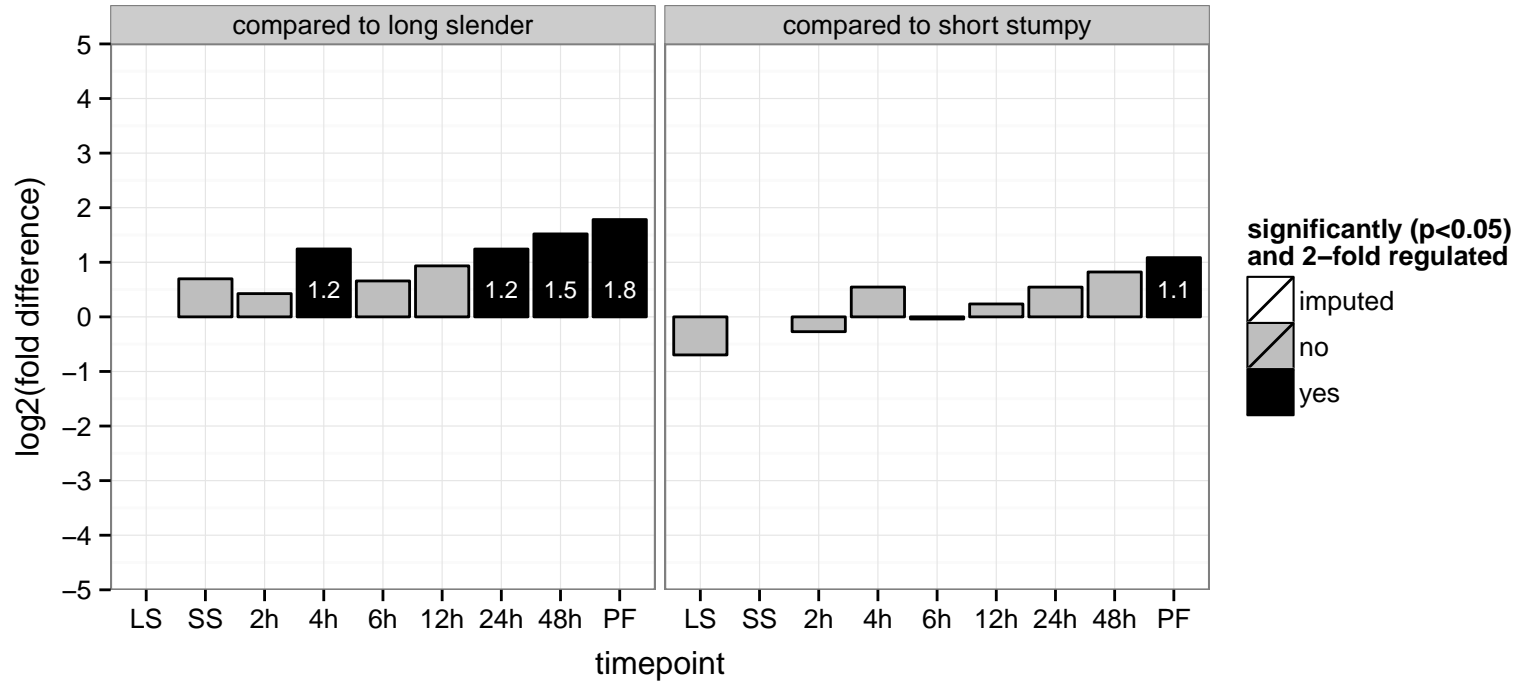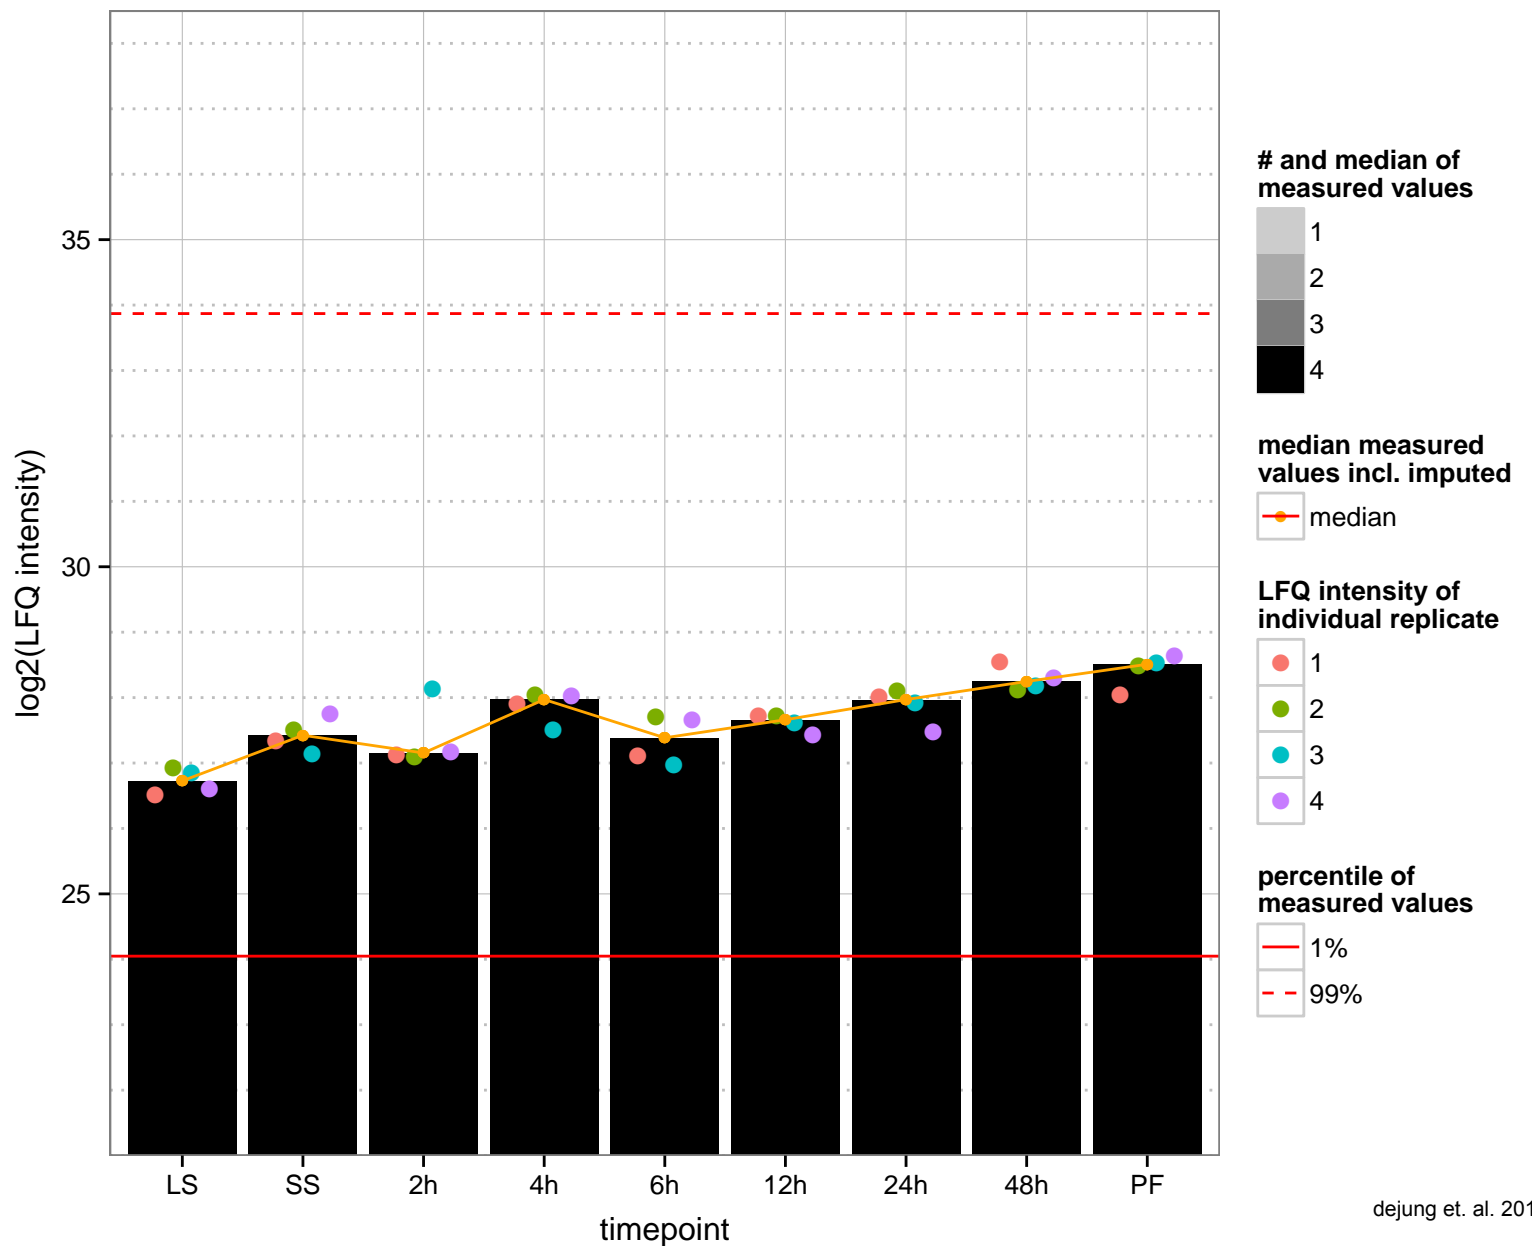



hypothetical protein, conserved

Tb927.5.2890

AGOF: ATP binding, ATPase activity

AGOC: null

AGOP: null

PGOF: ATP binding, ATPase activity, nucleoside-triphosphatase activity, nucleotide binding, protein binding

PGOC: null

PGOP: null

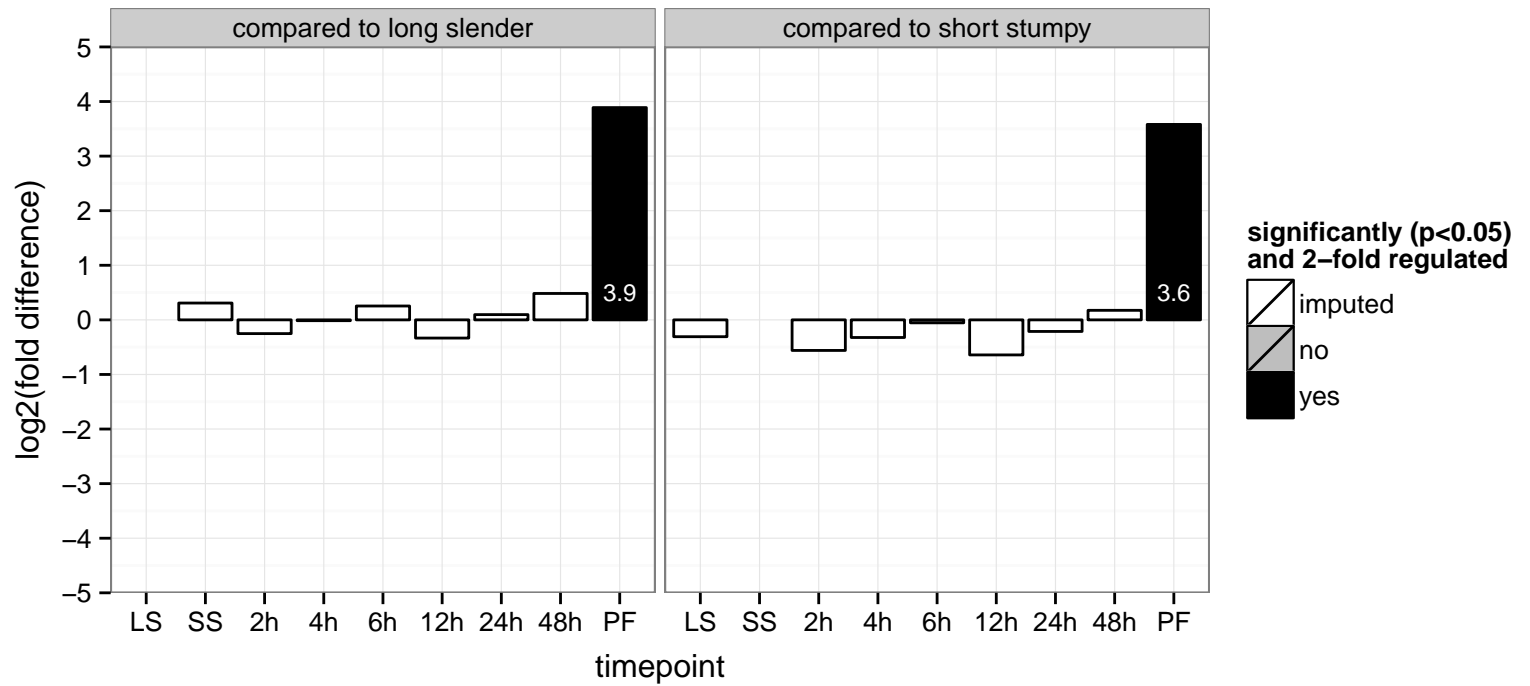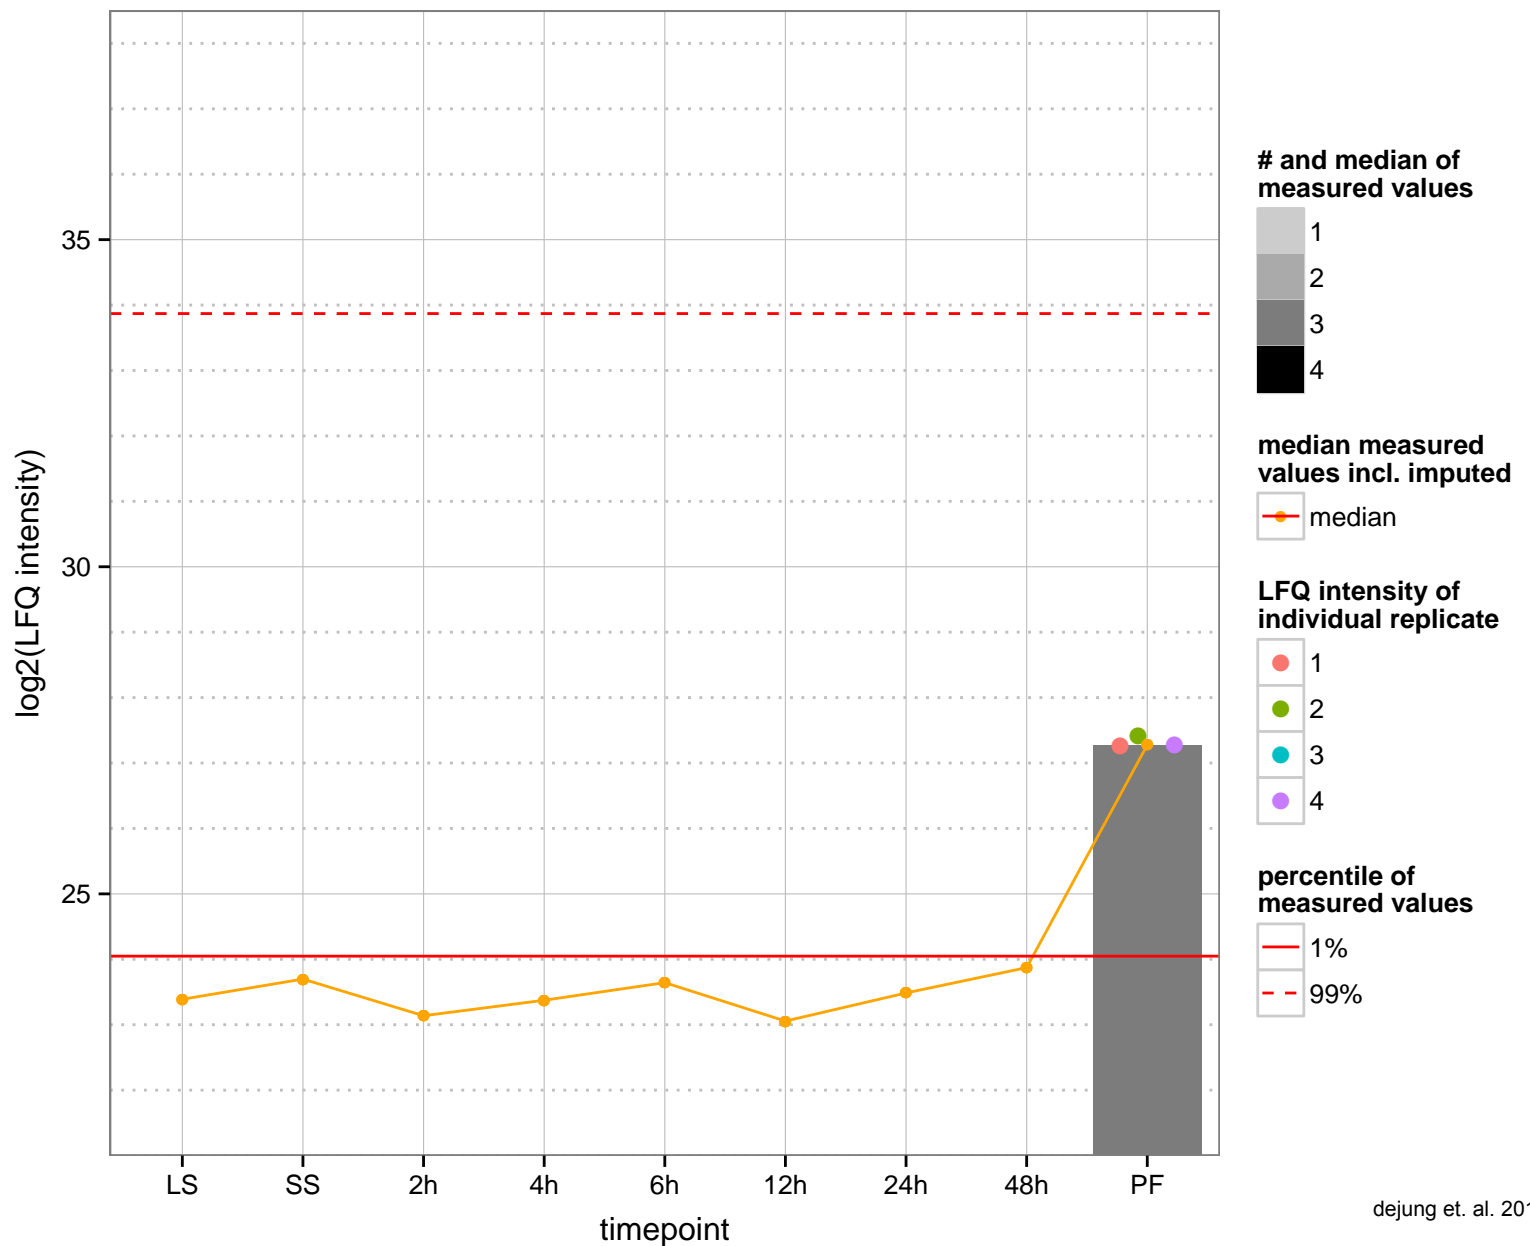

hypothetical protein, conserved  
 Tb927.5.3230  
 AGOF: null  
 AGOC: null  
 AGOP: null  
 PGOF: null  
 PGO: null  
 PGOP: null

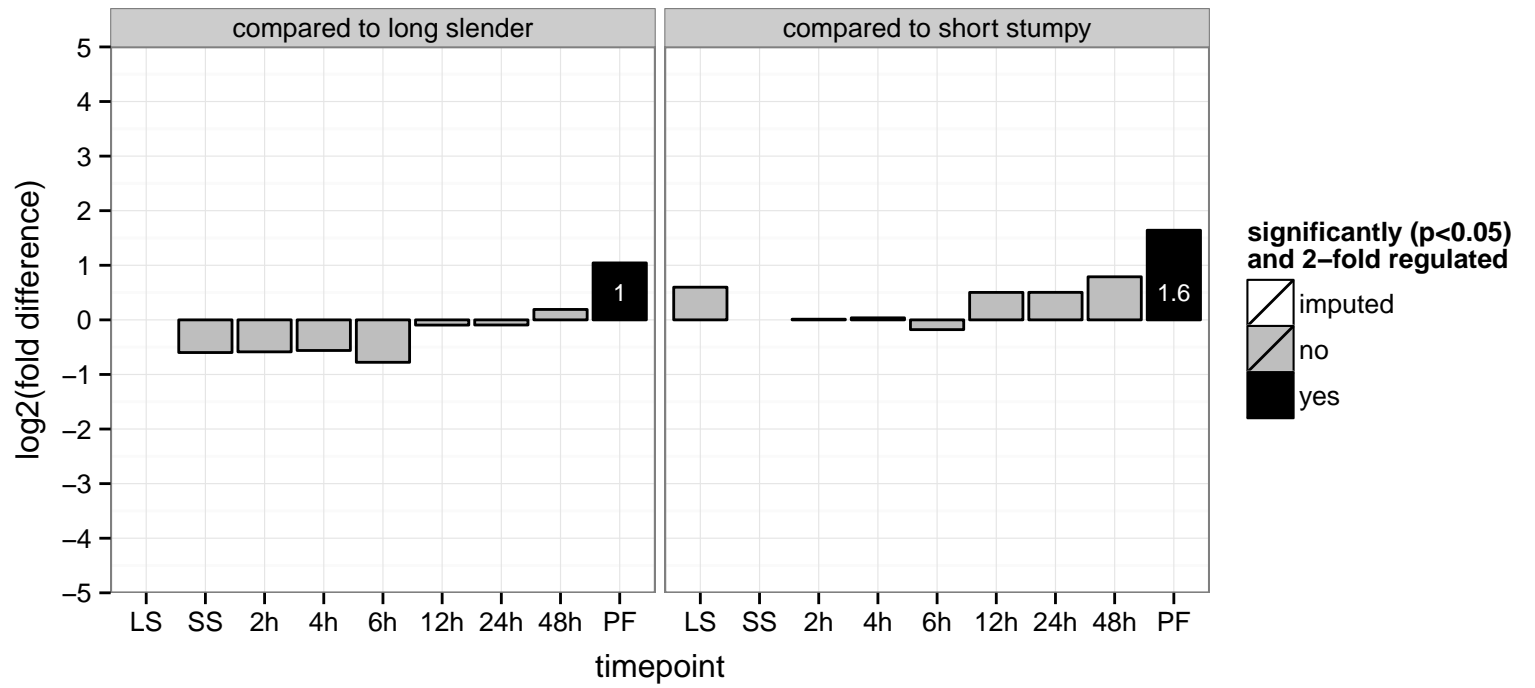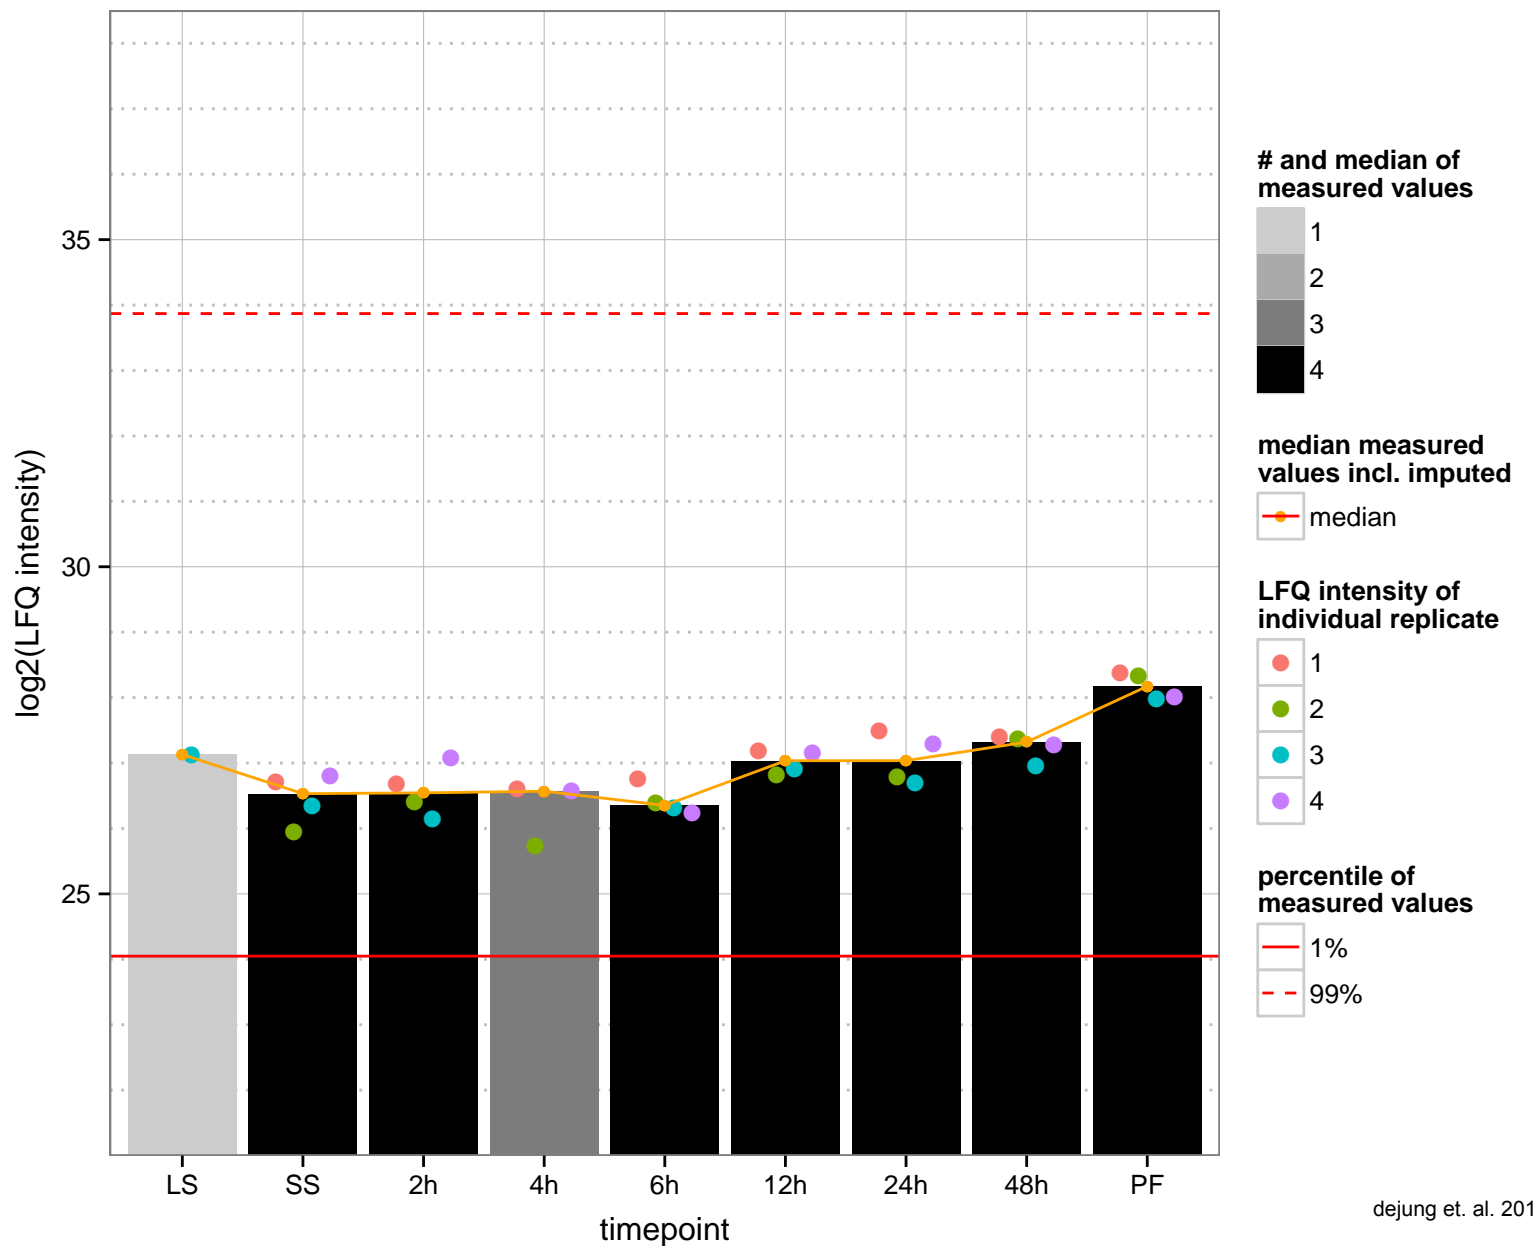

queuine tRNA-ribosyltransferase, putative  
 Tb927.5.3520  
 AGOF: queuine tRNA-ribosyltransferase activity  
 AGOC: null  
 AGOP: queuosine biosynthetic process  
 PGOF: queuine tRNA-ribosyltransferase activity  
 PGO: null  
 PGOP: queuosine biosynthetic process, tRNA modification

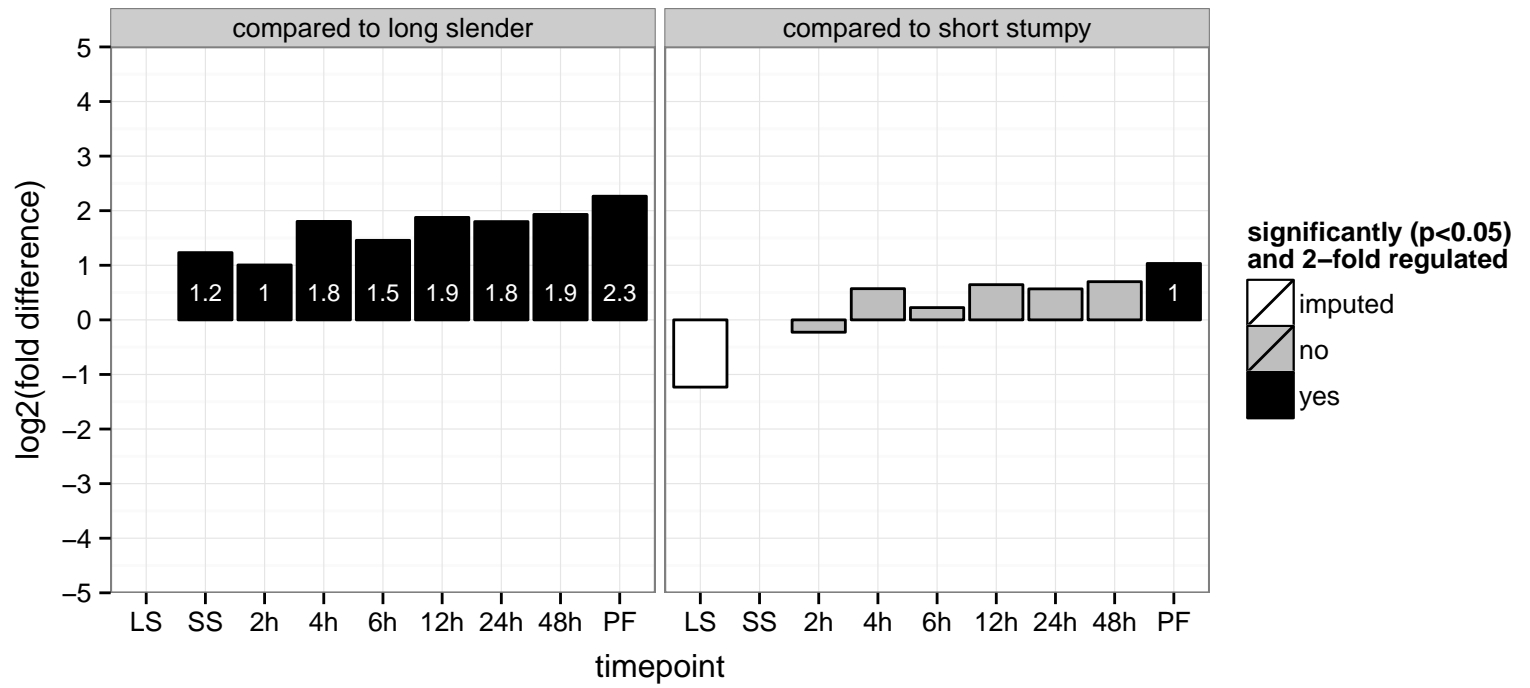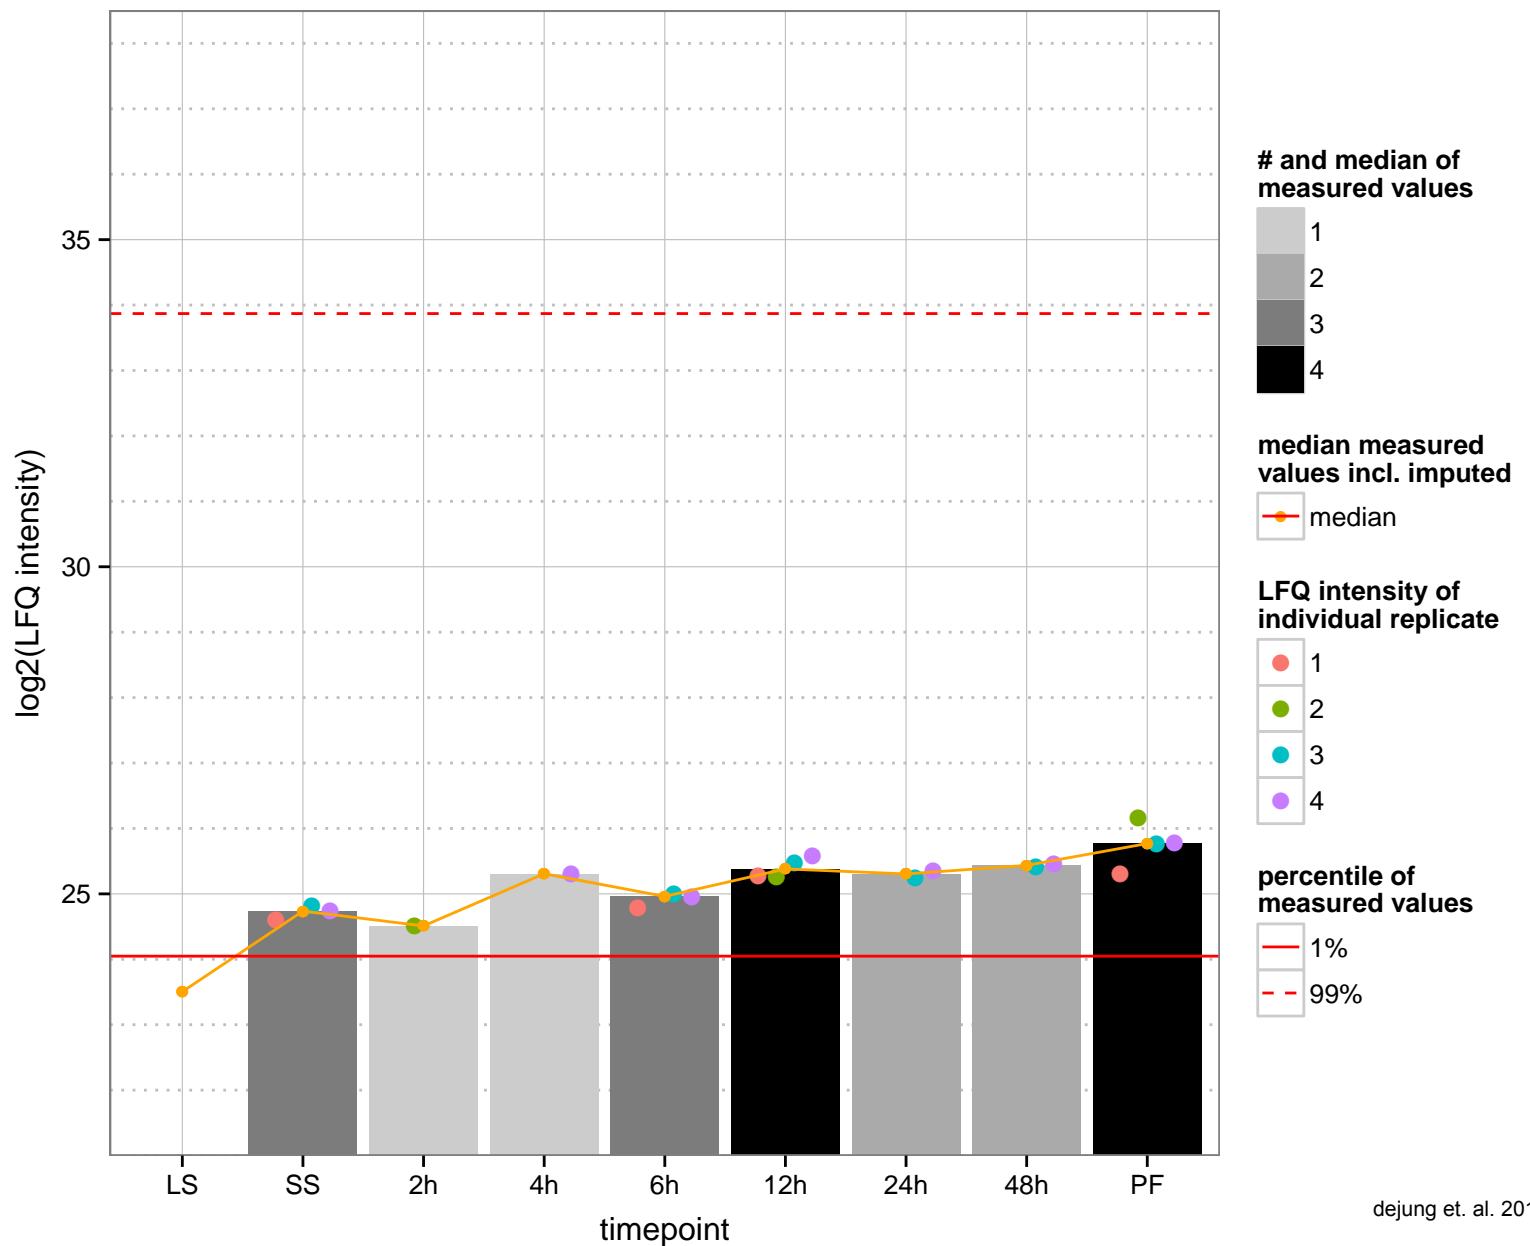

glutamine hydrolysing (not ammonia-dependent) carbomoyl phosphate synthase, putative  
Tb927.5.3800

AGOF: ATP binding, argininosuccinate synthase activity

AGOC: null

AGOP: arginine biosynthetic process, glutamine metabolic process, nitrogen compound metabolic process

PGOF: ATP binding, argininosuccinate synthase activity, catalytic activity, metal ion binding

PGOC: null

PGOP: arginine biosynthetic process, carbomoyl phosphate biosynthetic process, glutamine catabolic process, metabolic process

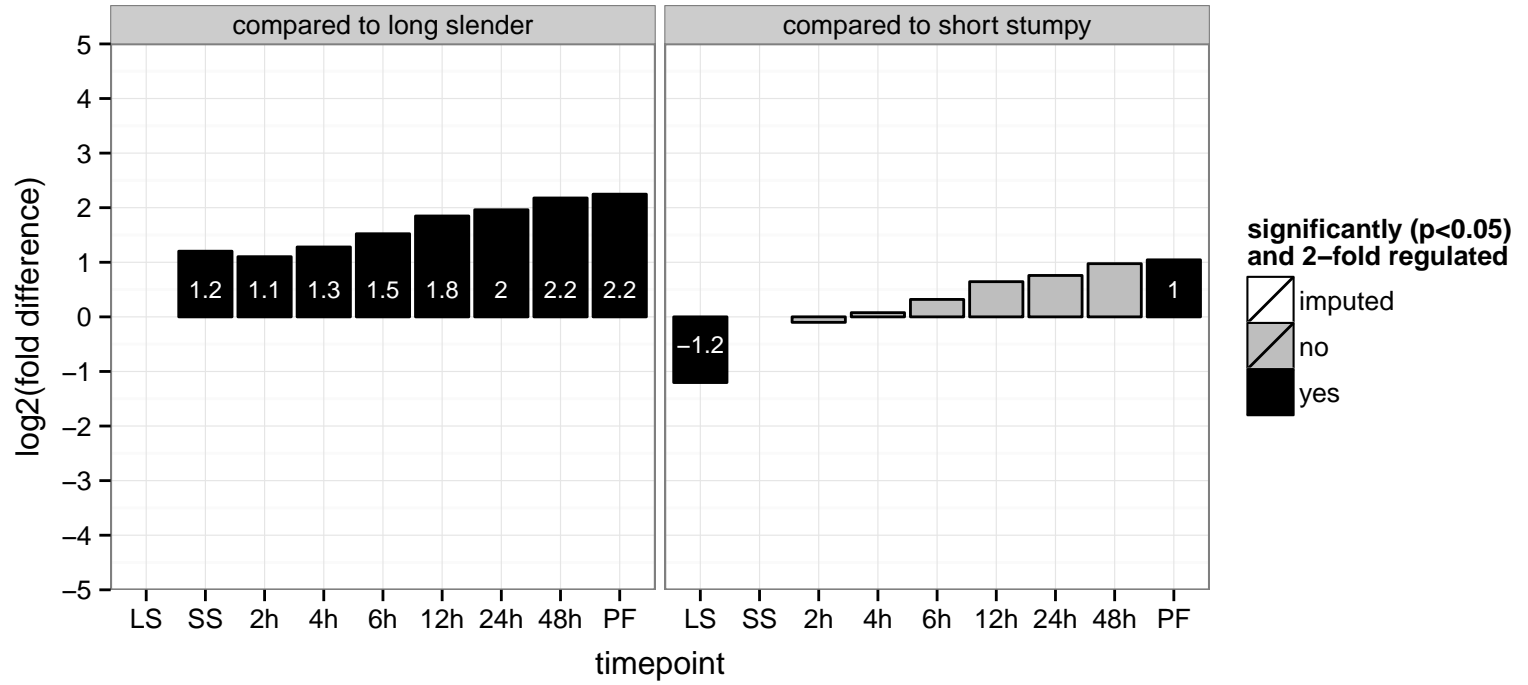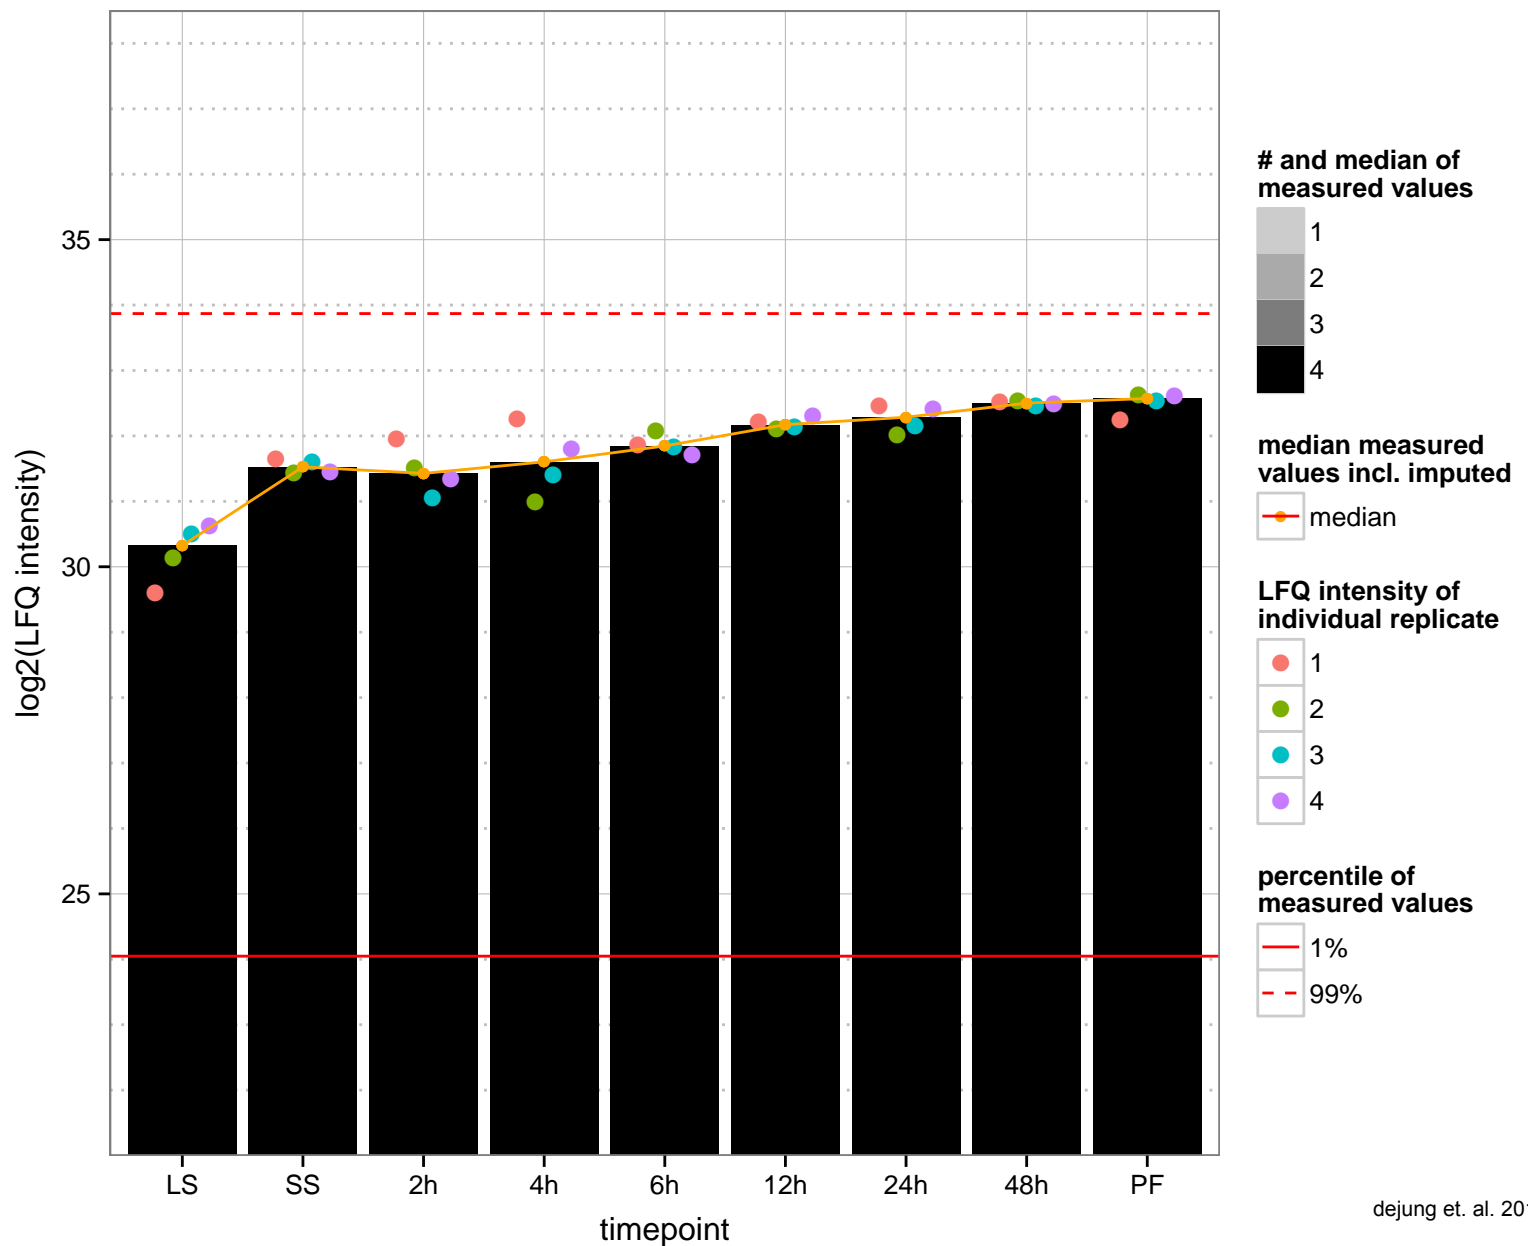

tubulin tyrosine ligase, putative  
 Tb927.5.3860  
 AGOF: tubulin-tyrosine ligase activity  
 AGOC: null  
 AGOP: cellular protein modification process  
 PGO: tubulin-tyrosine ligase activity  
 PGOC: null  
 PGOP: cellular protein modification process

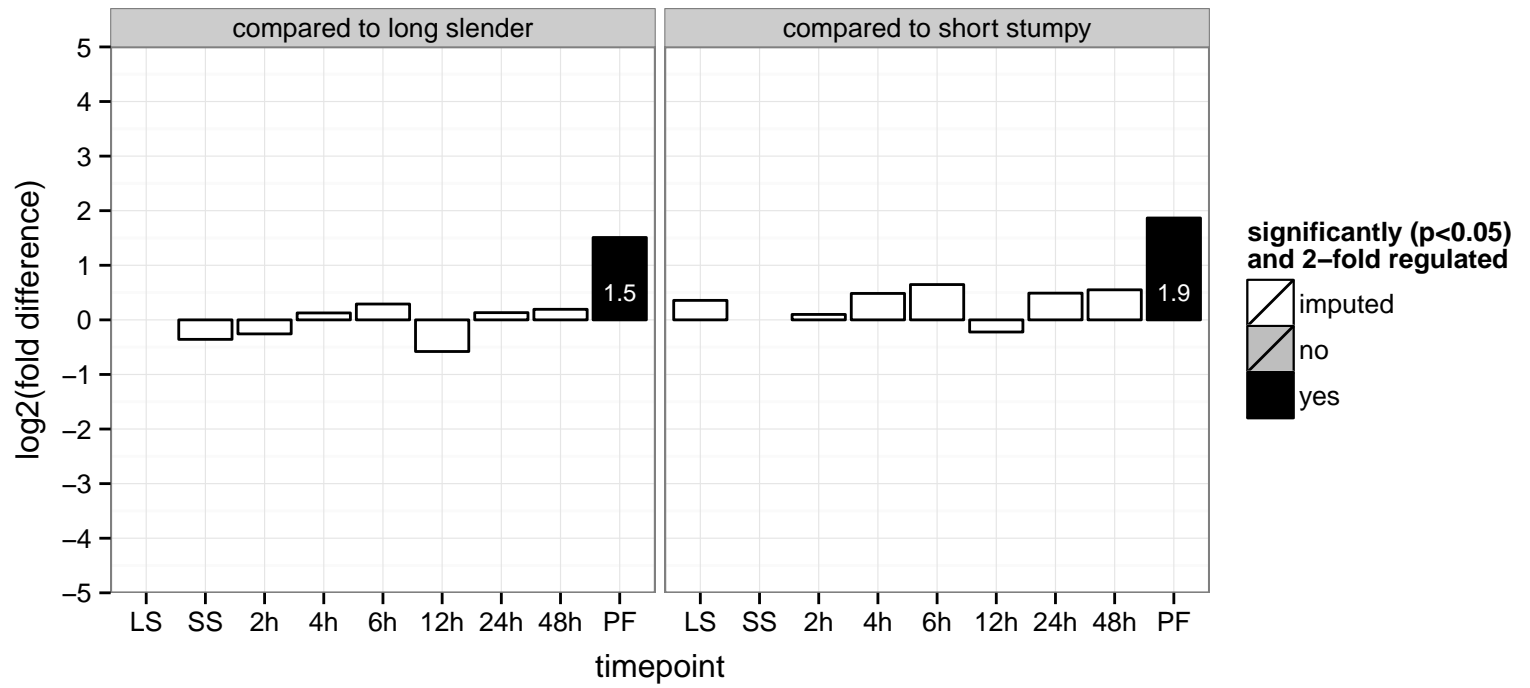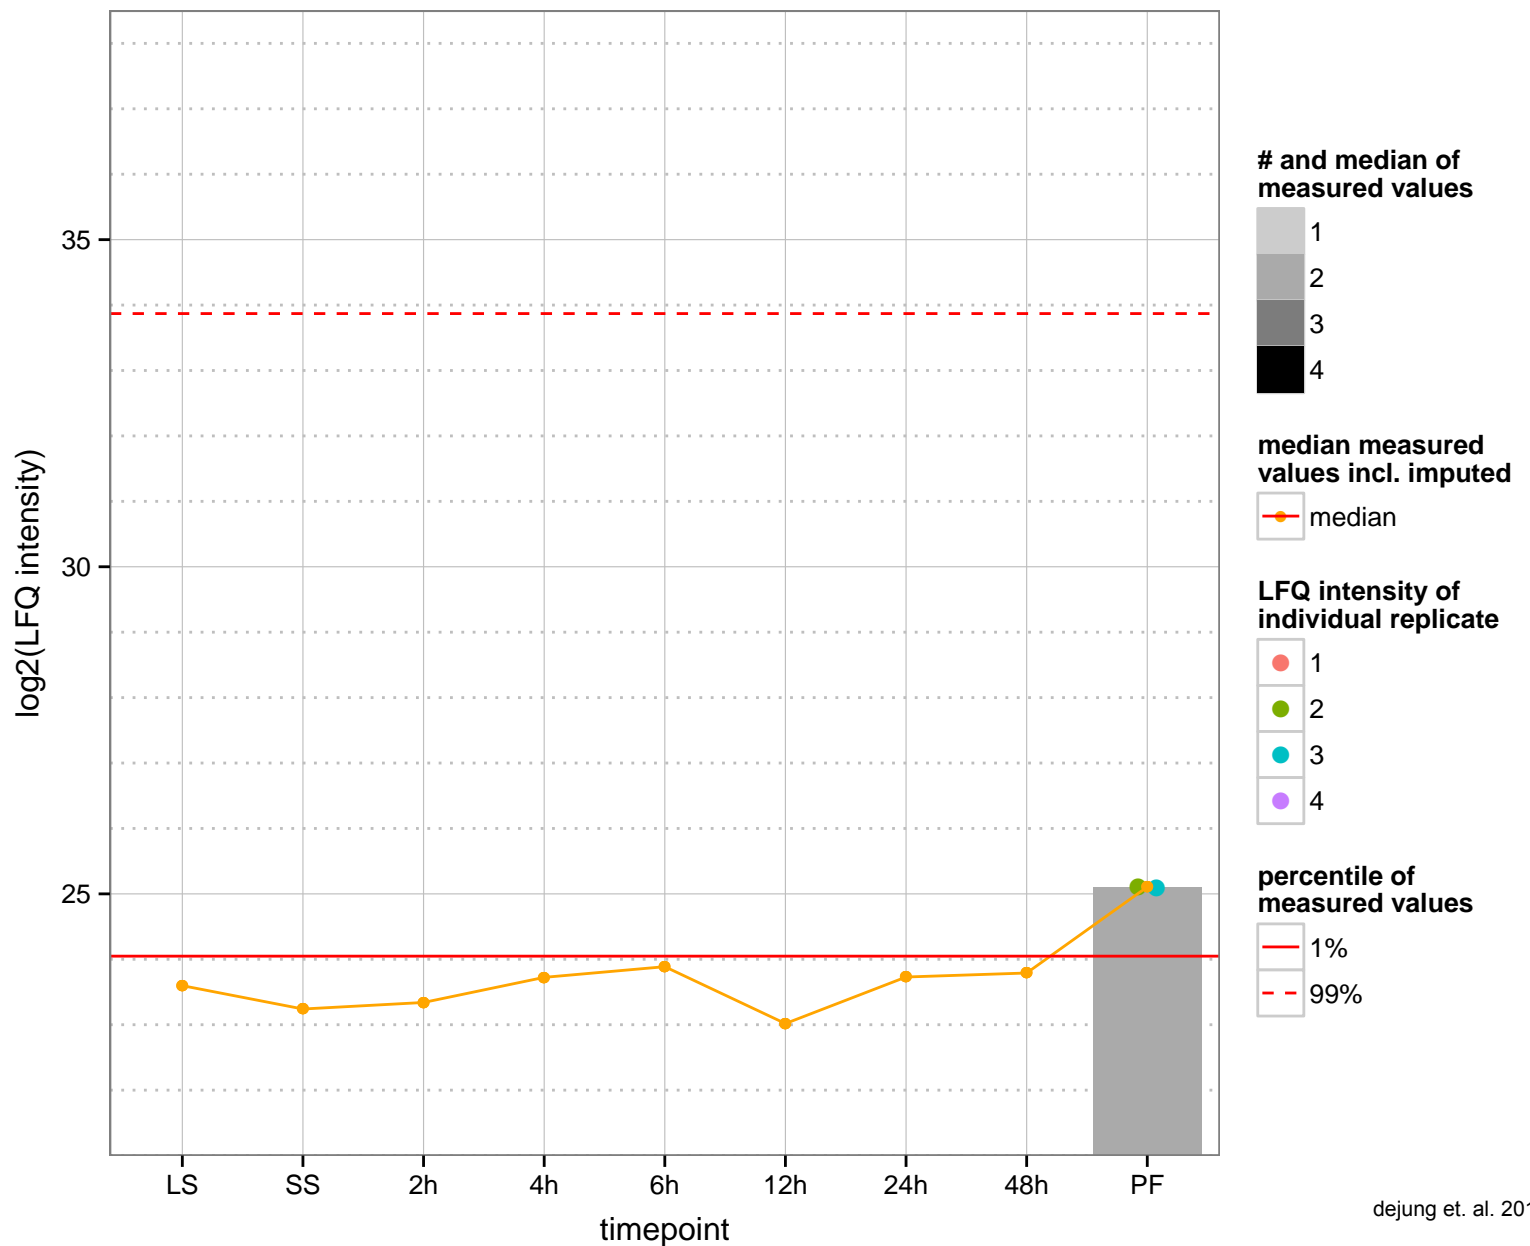

hypothetical protein, conserved  
 Tb927.5.4060  
 AGOF: null  
 AGOC: integral to membrane  
 AGOP: protein processing  
 PGO: null  
 PGO: integral to membrane  
 PGO: protein processing

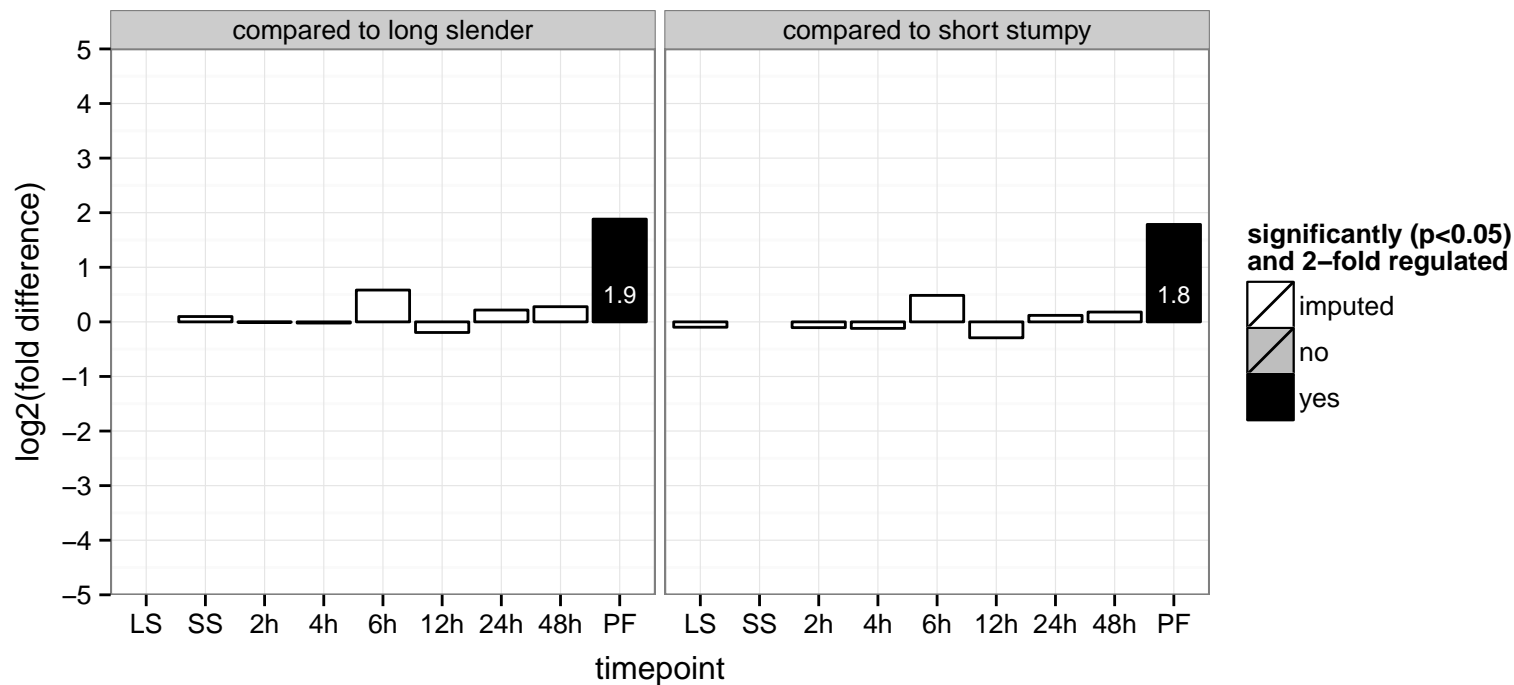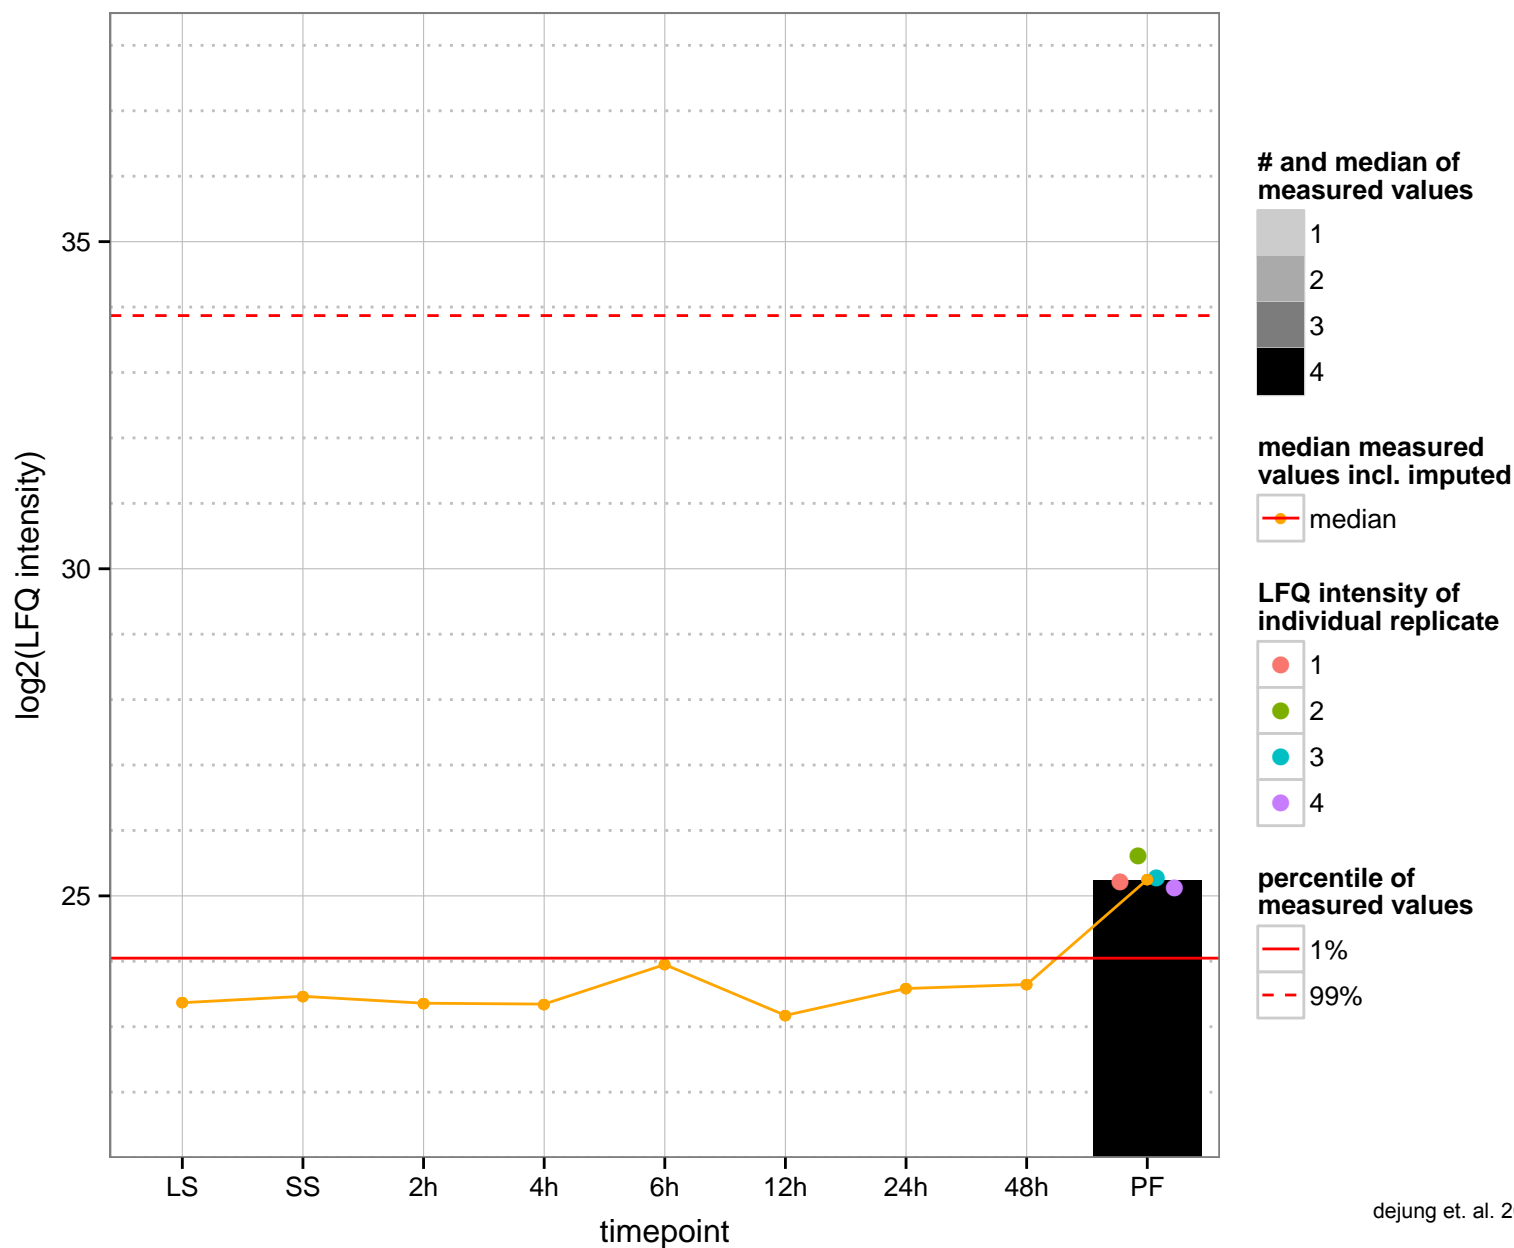

stomatin-like protein, putative  
 Tb927.5.520  
 AGOF: null  
 AGOC: integral to membrane, membrane  
 AGOP: null  
 PGO: null  
 PGO: null  
 PGO: null

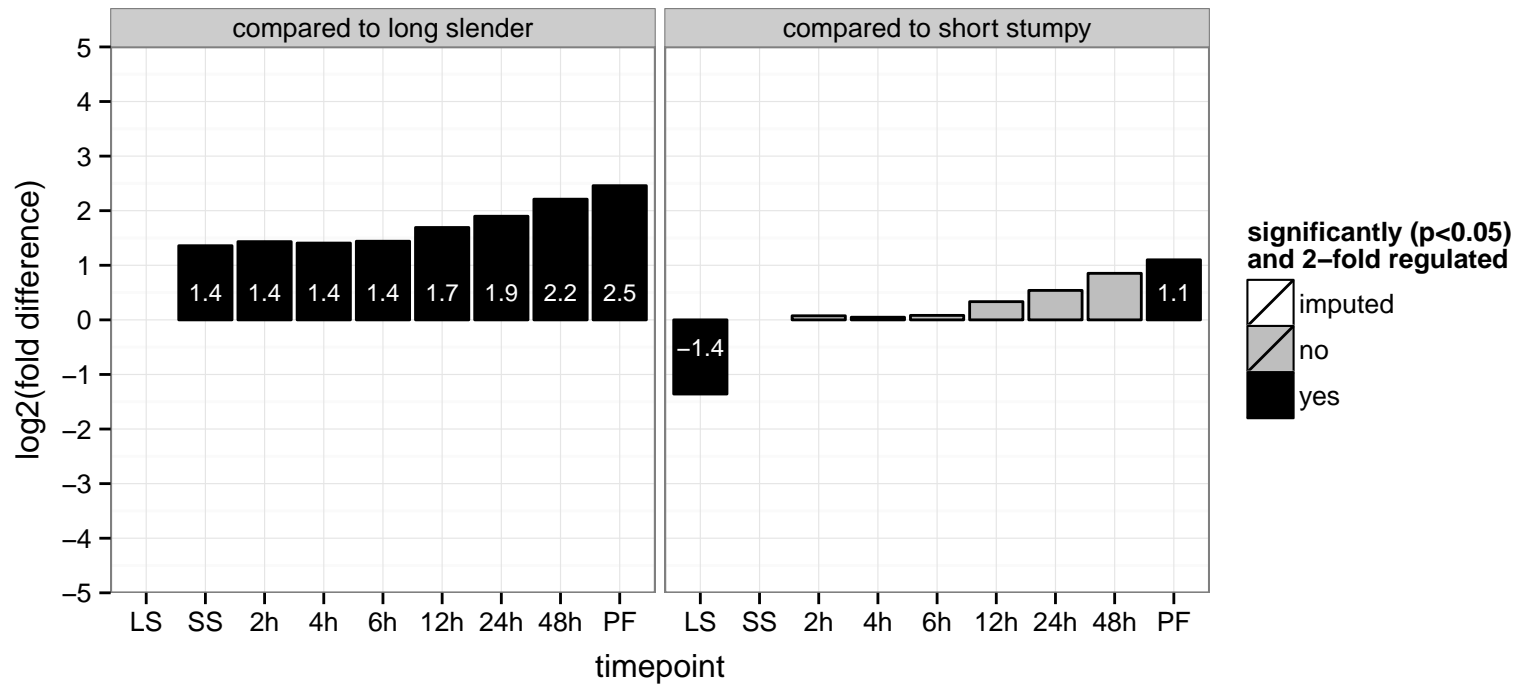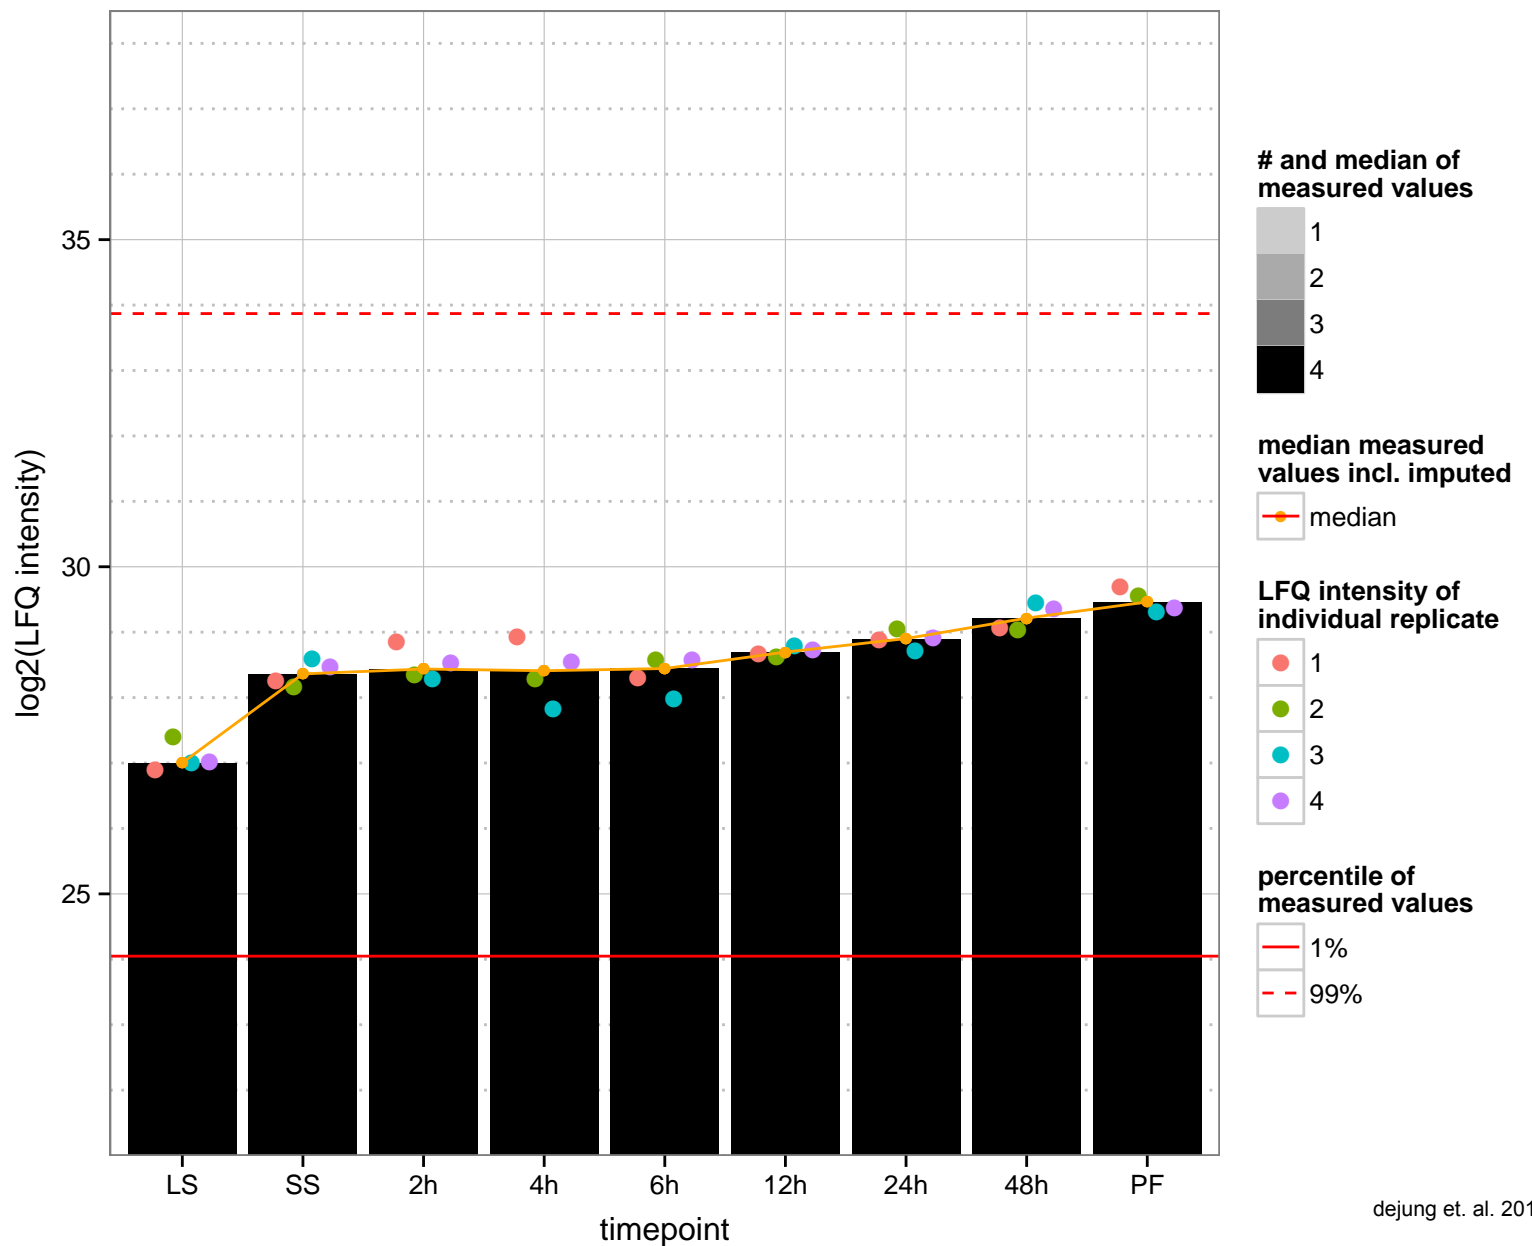

hypothetical protein, conserved  
 Tb927.5.600  
 AGOF: null  
 AGOC: null  
 AGOP: null  
 PGOF: null  
 PGO C: null  
 PGOP: null

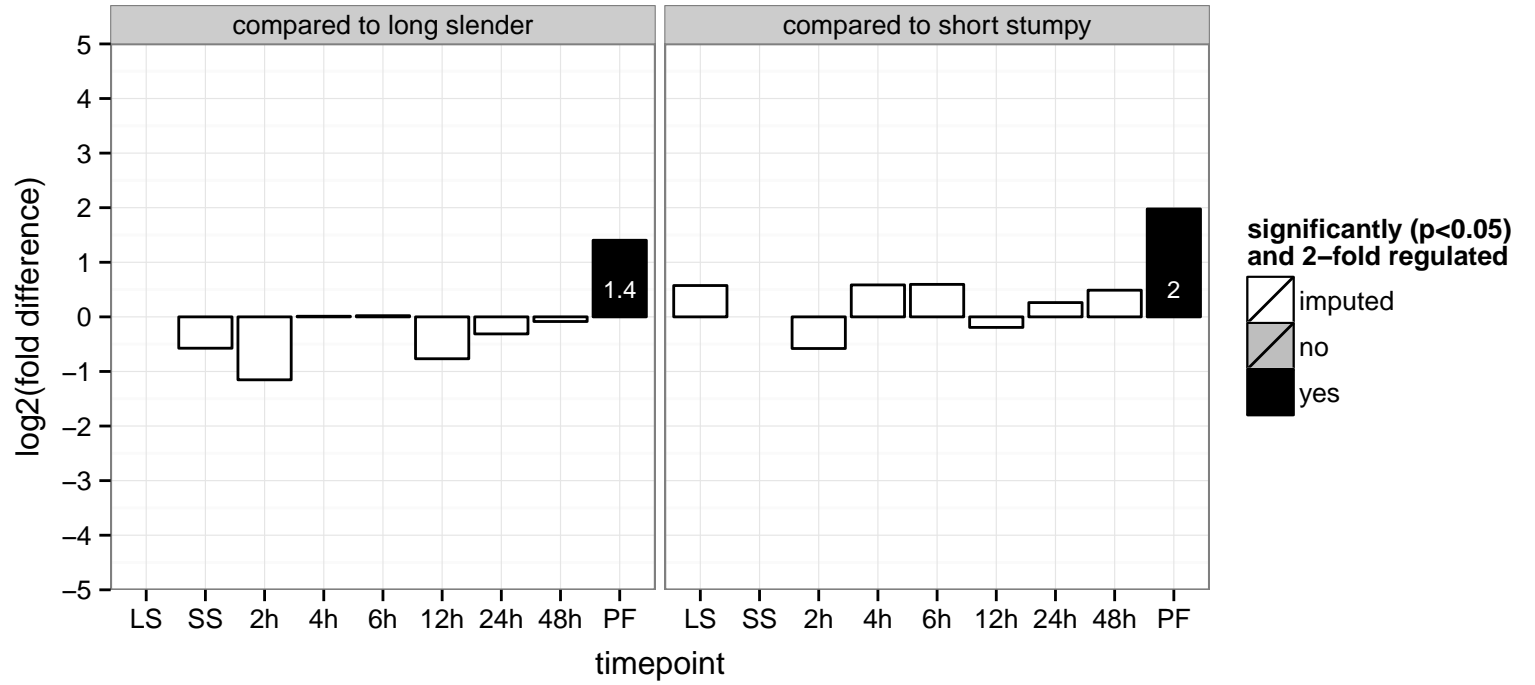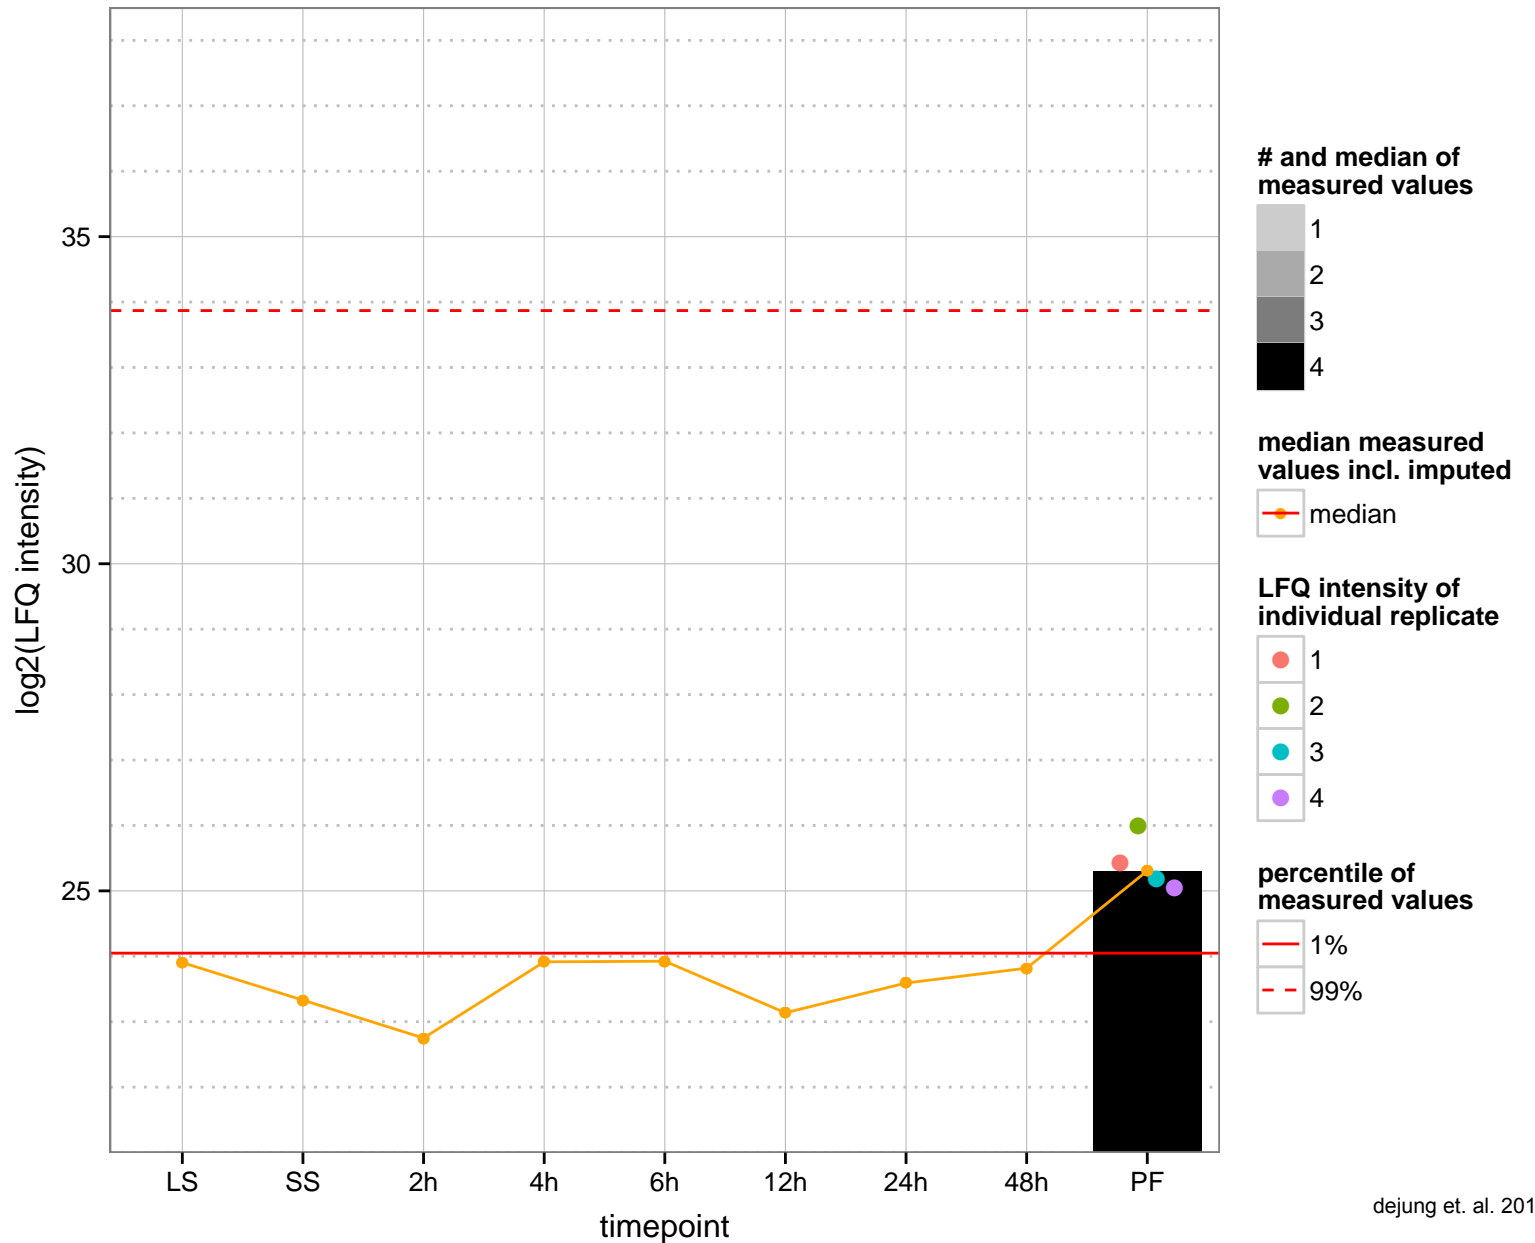



hypothetical protein, conserved  
 Tb927.6.1200  
 AGOF: null  
 AGOC: mitochondrion  
 AGOP: null  
 PGO: null  
 PGO: null  
 PGO: null

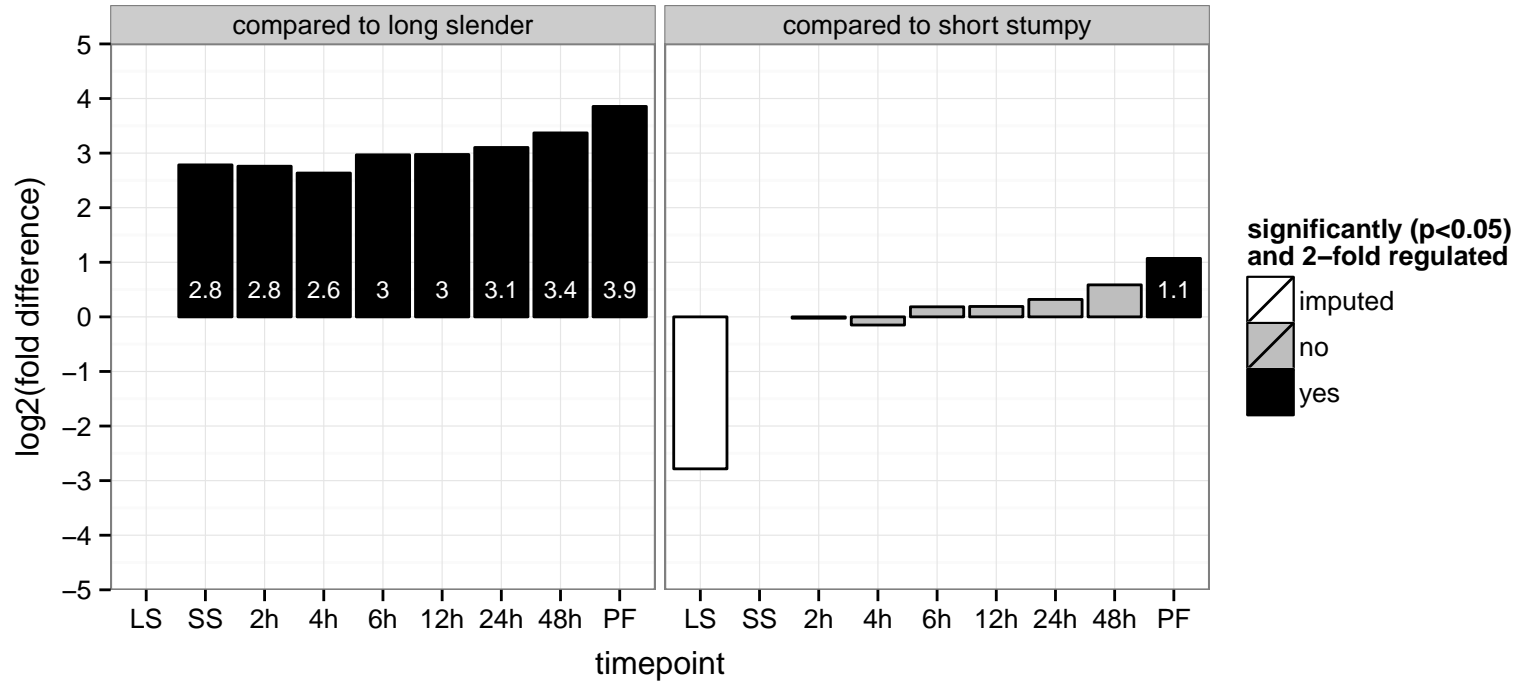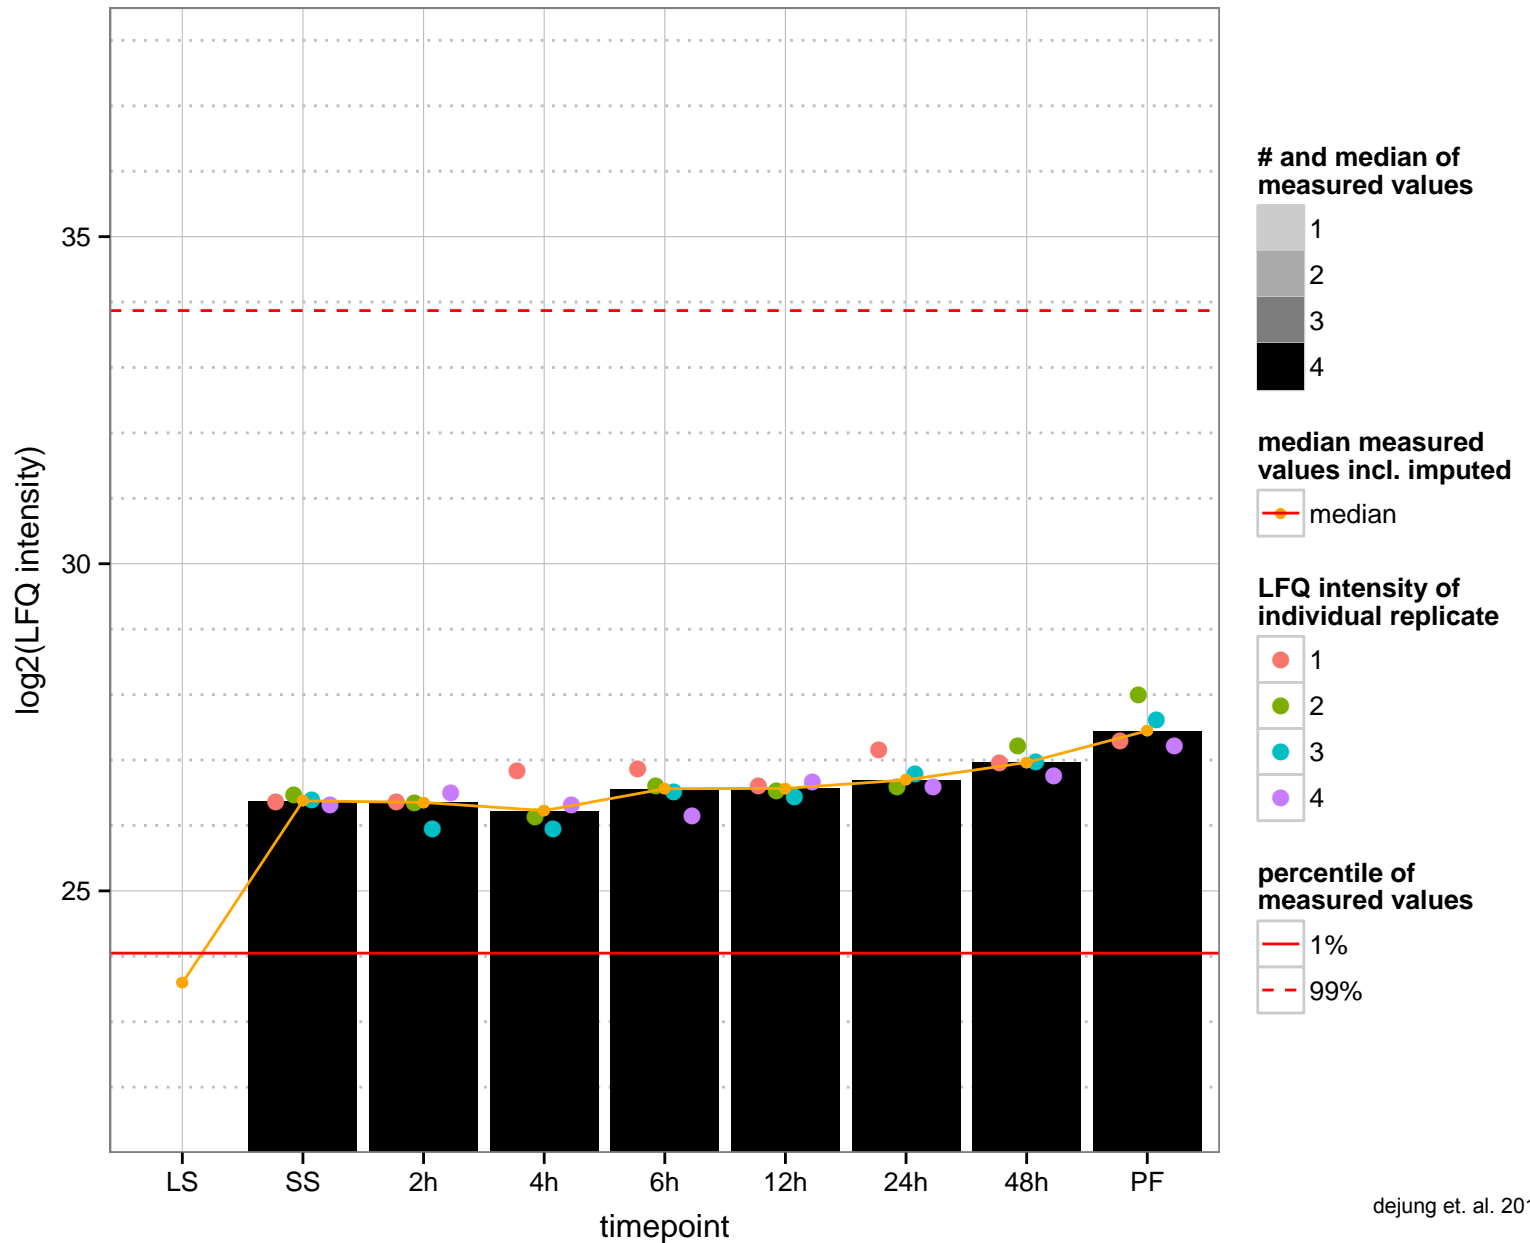

hypothetical protein, conserved  
 Tb927.6.1290  
 AGOF: null  
 AGOC: null  
 AGOP: null  
 PGOF: binding  
 PGO: null  
 PGOP: null

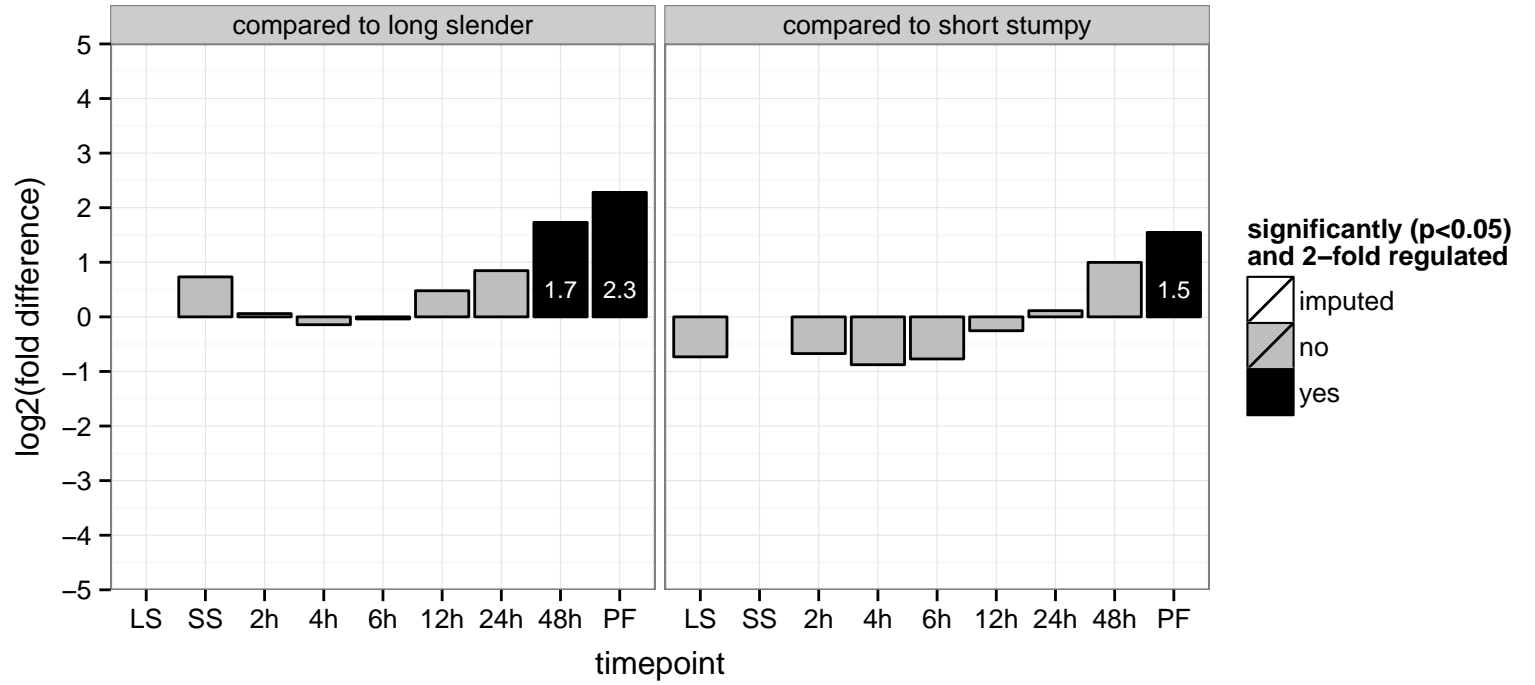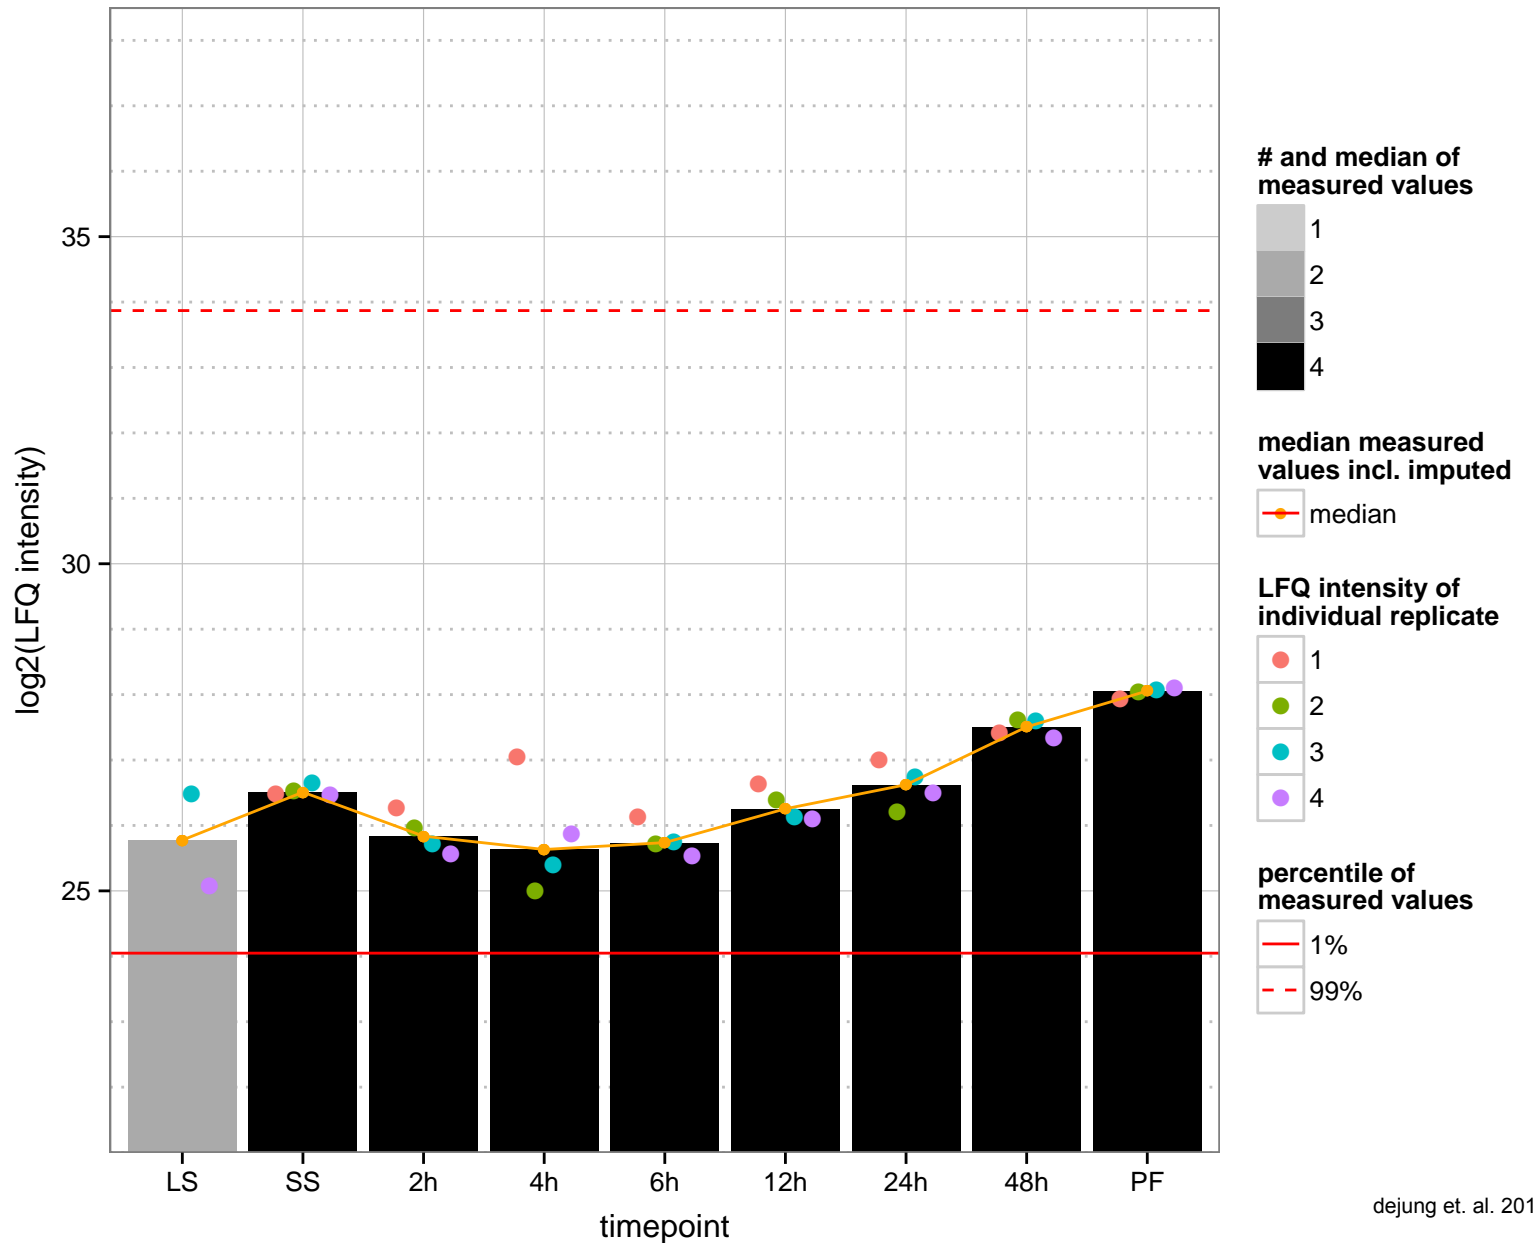

cyclophilin-type peptidyl-prolyl cis-trans isomerase, putative (PPIase)  
 Tb927.6.1400;Tb927.6.1380;Tb927.6.1360;Tb927.6.1320;Tb927.6.1340  
 AGOF: peptidyl-prolyl cis-trans isomerase activity  
 AGOC: null  
 AGOP: protein folding  
 PGO: peptidyl-prolyl cis-trans isomerase activity  
 PGOC: null  
 PGOP: protein folding

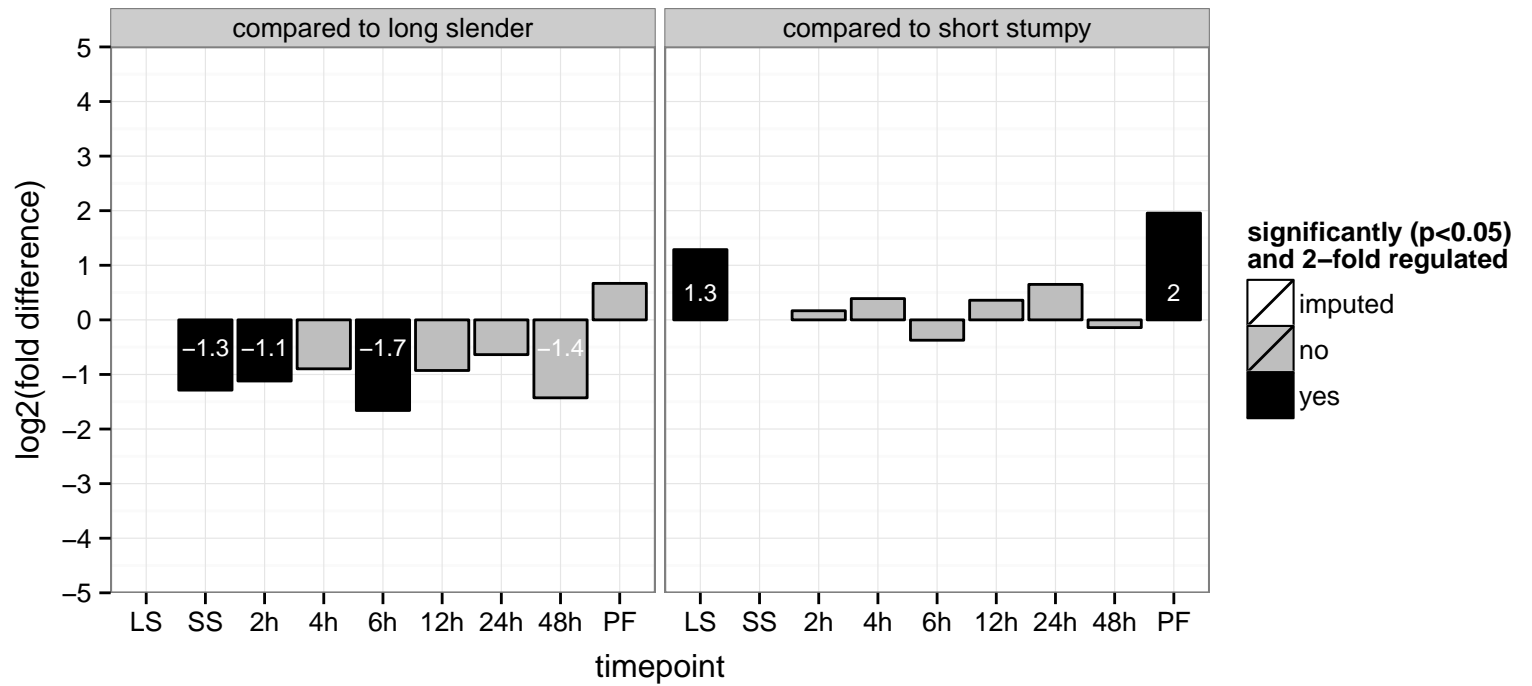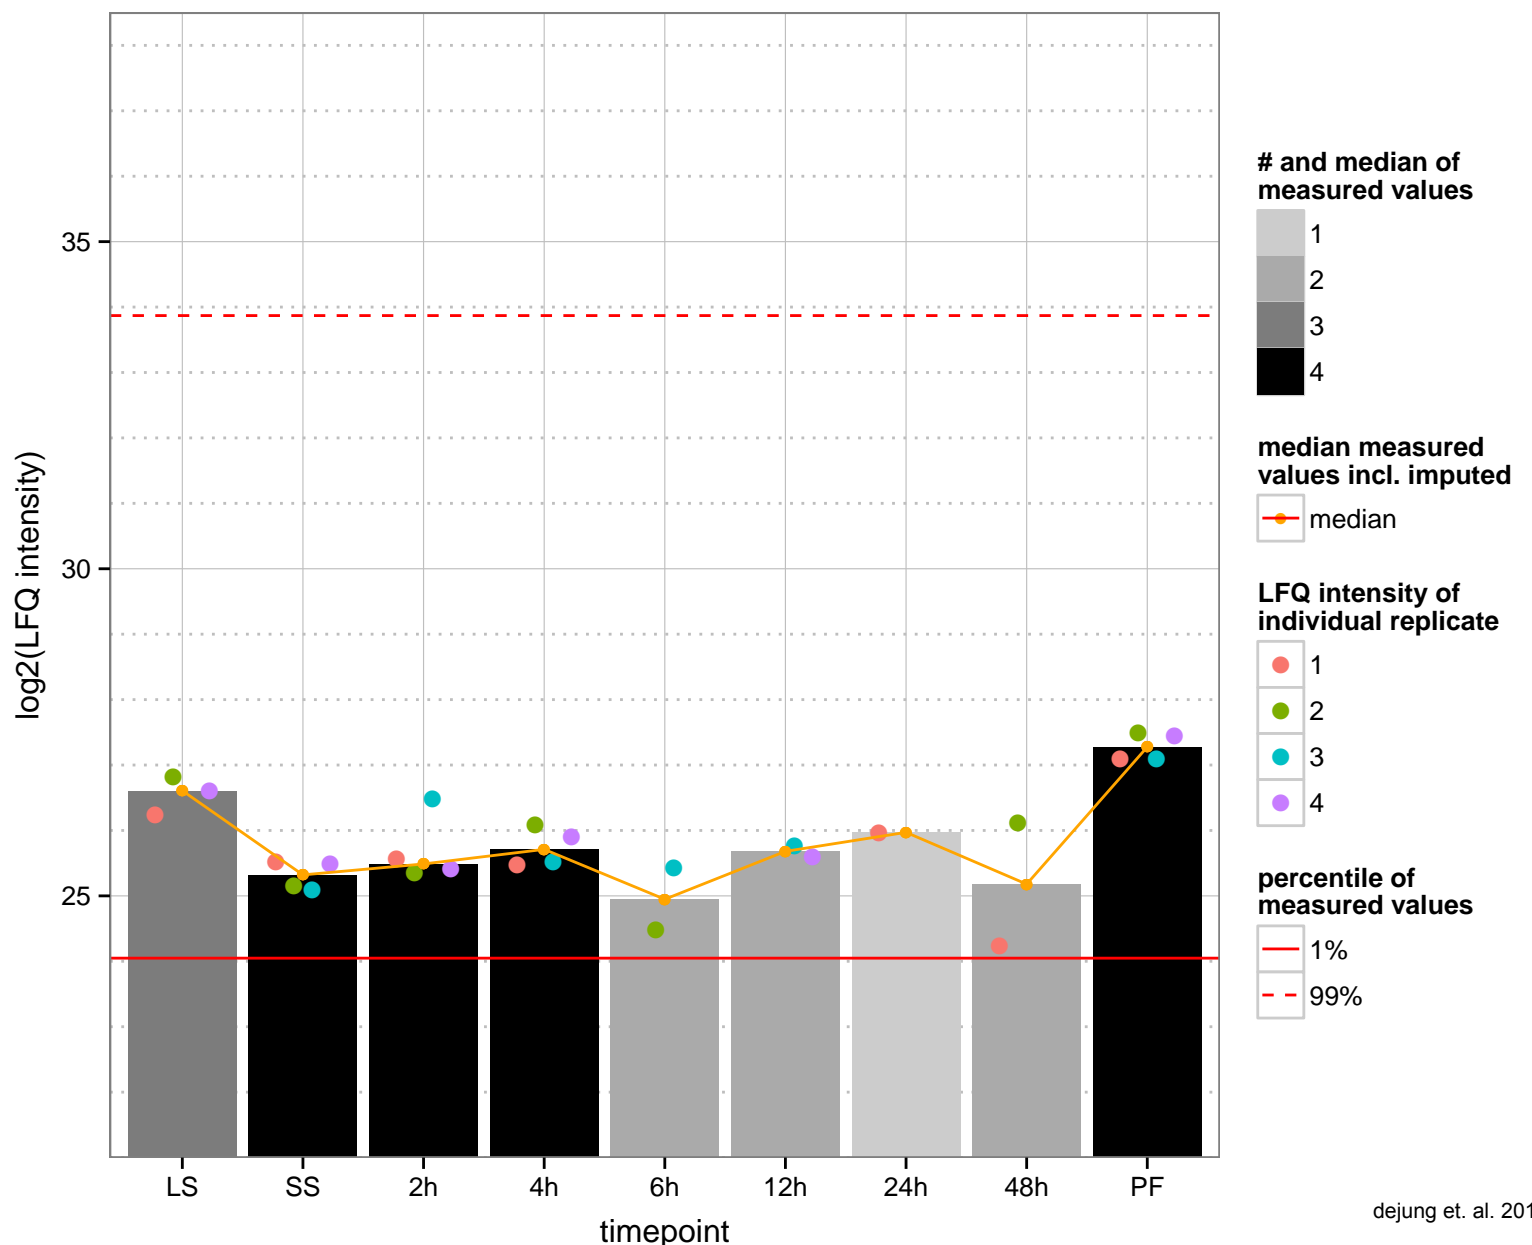

alkyl-dihydroxyacetone phosphate synthase, alkylglycerone-phosphate synthase, alkyl-DHAP synthase (DHAP)  
Tb927.6.1500

AGOF: alkylglycerone-phosphate synthase activity, flavin adenine dinucleotide binding, oxidoreductase activity

AGOC: glycosome

AGOP: ether lipid biosynthetic process

PGOF: UDP-N-acetylmuramate dehydrogenase activity, catalytic activity, flavin adenine dinucleotide binding, oxidoreductase

PGOC: null

PGOP: oxidation-reduction process

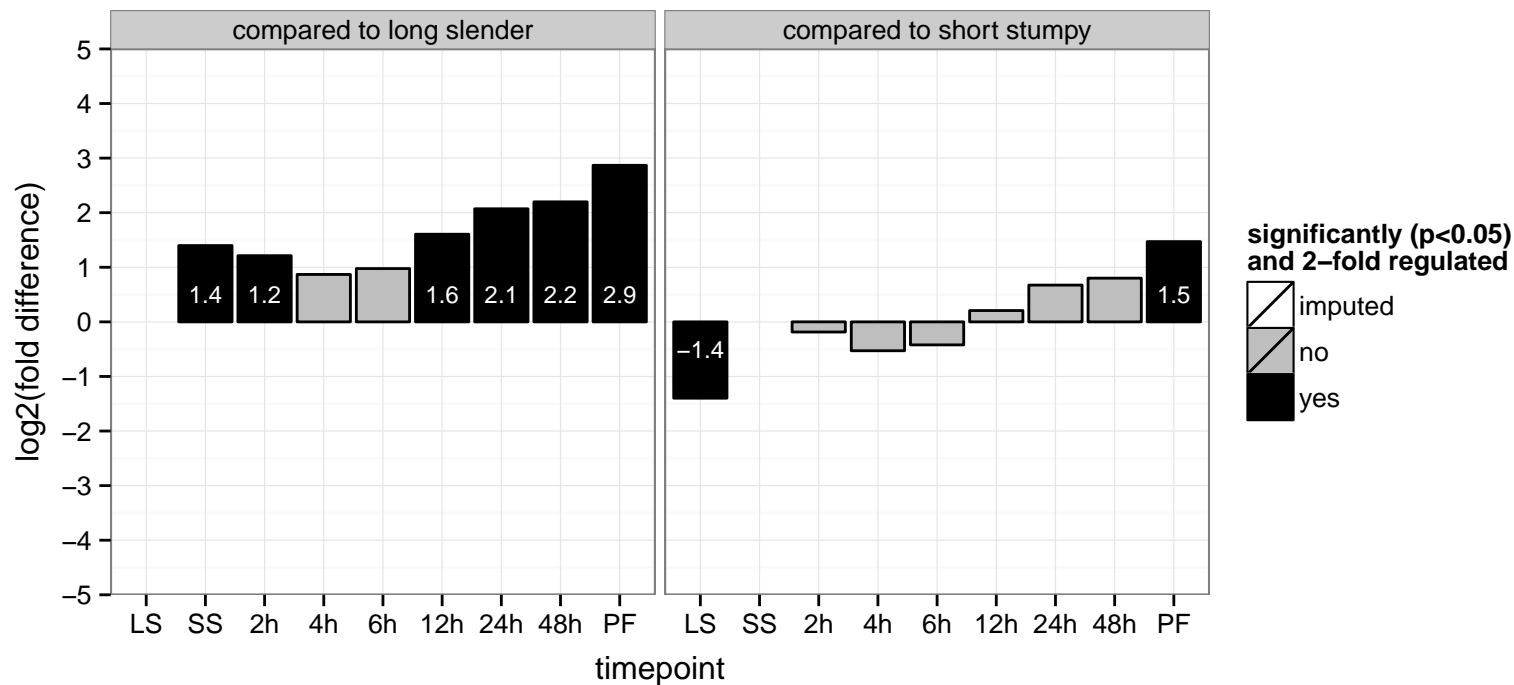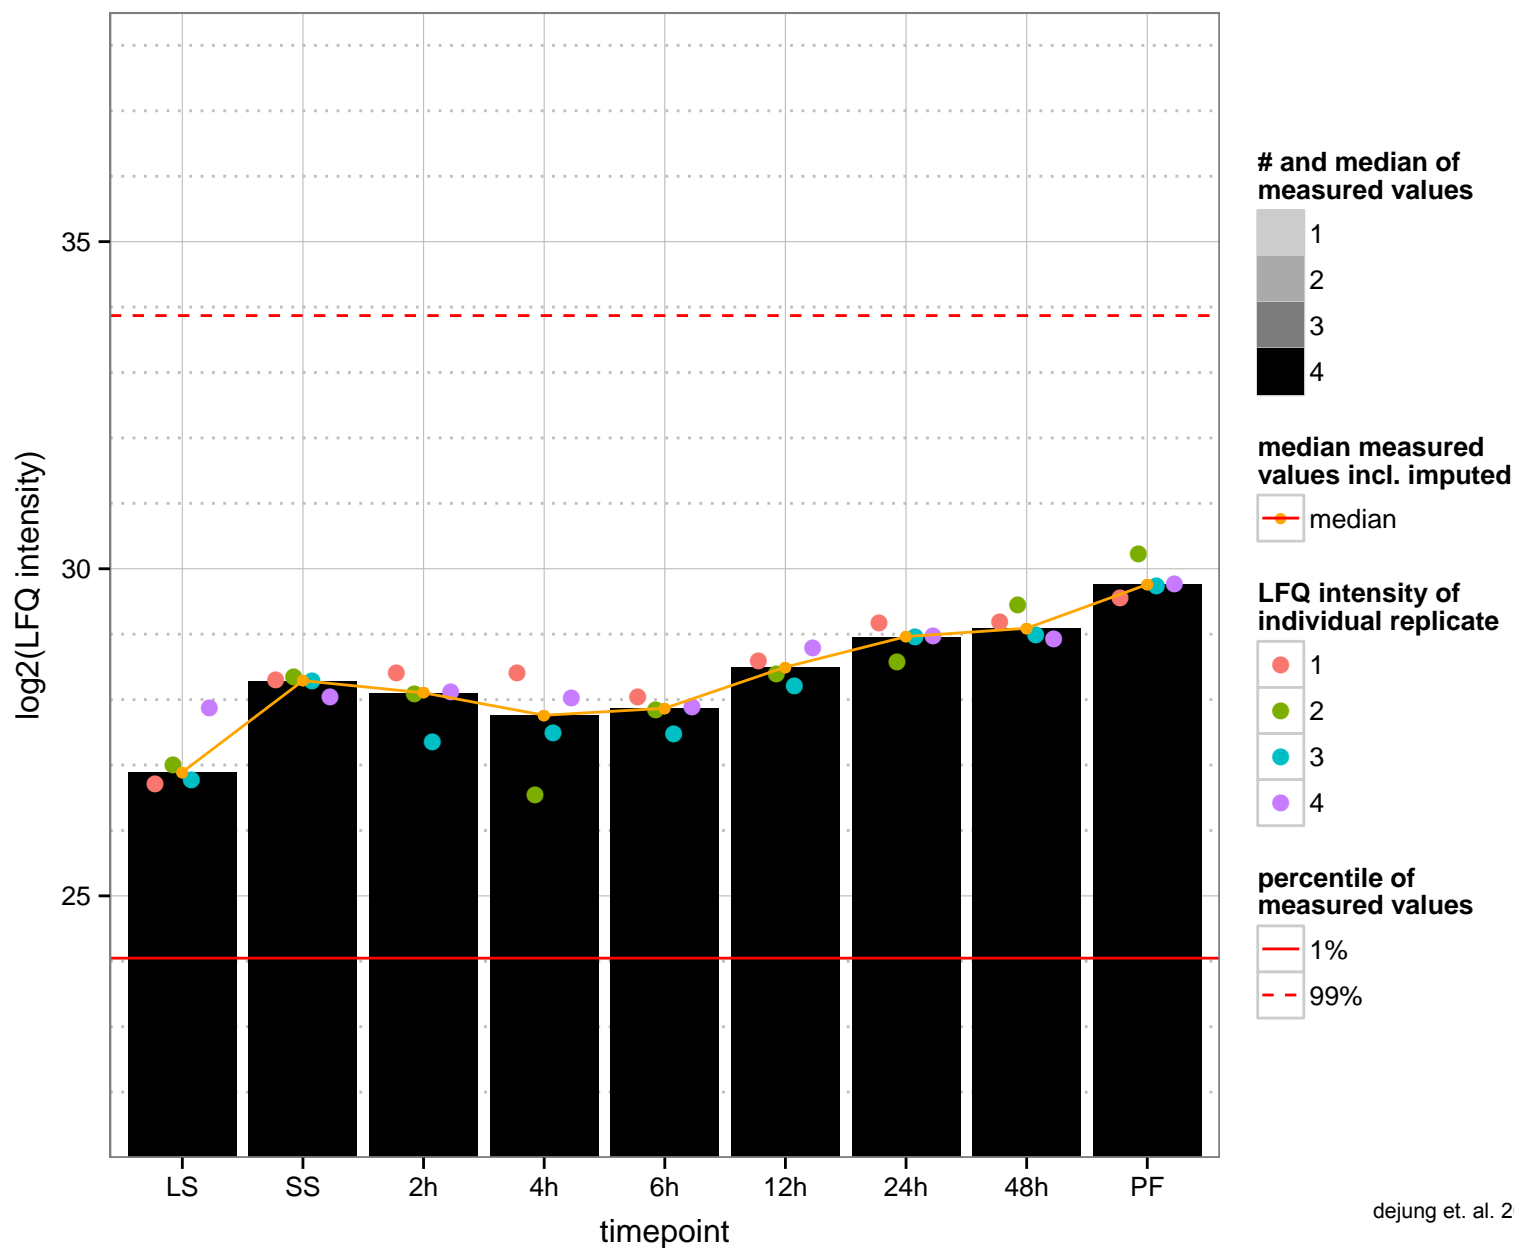

hypothetical protein, conserved  
 Tb927.6.1700  
 AGOF: zinc ion binding  
 AGOC: null  
 AGOP: null  
 PGOF: zinc ion binding  
 PGOC: null  
 PGOP: null

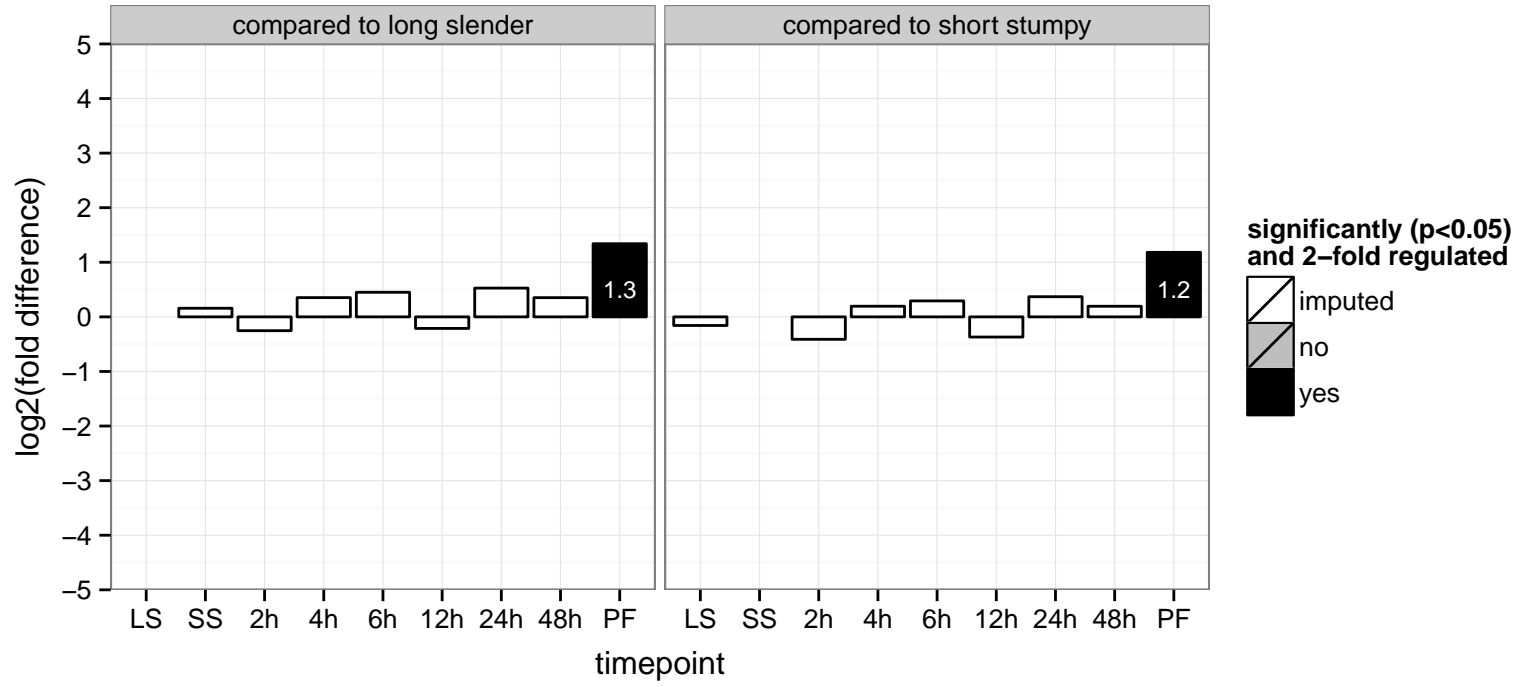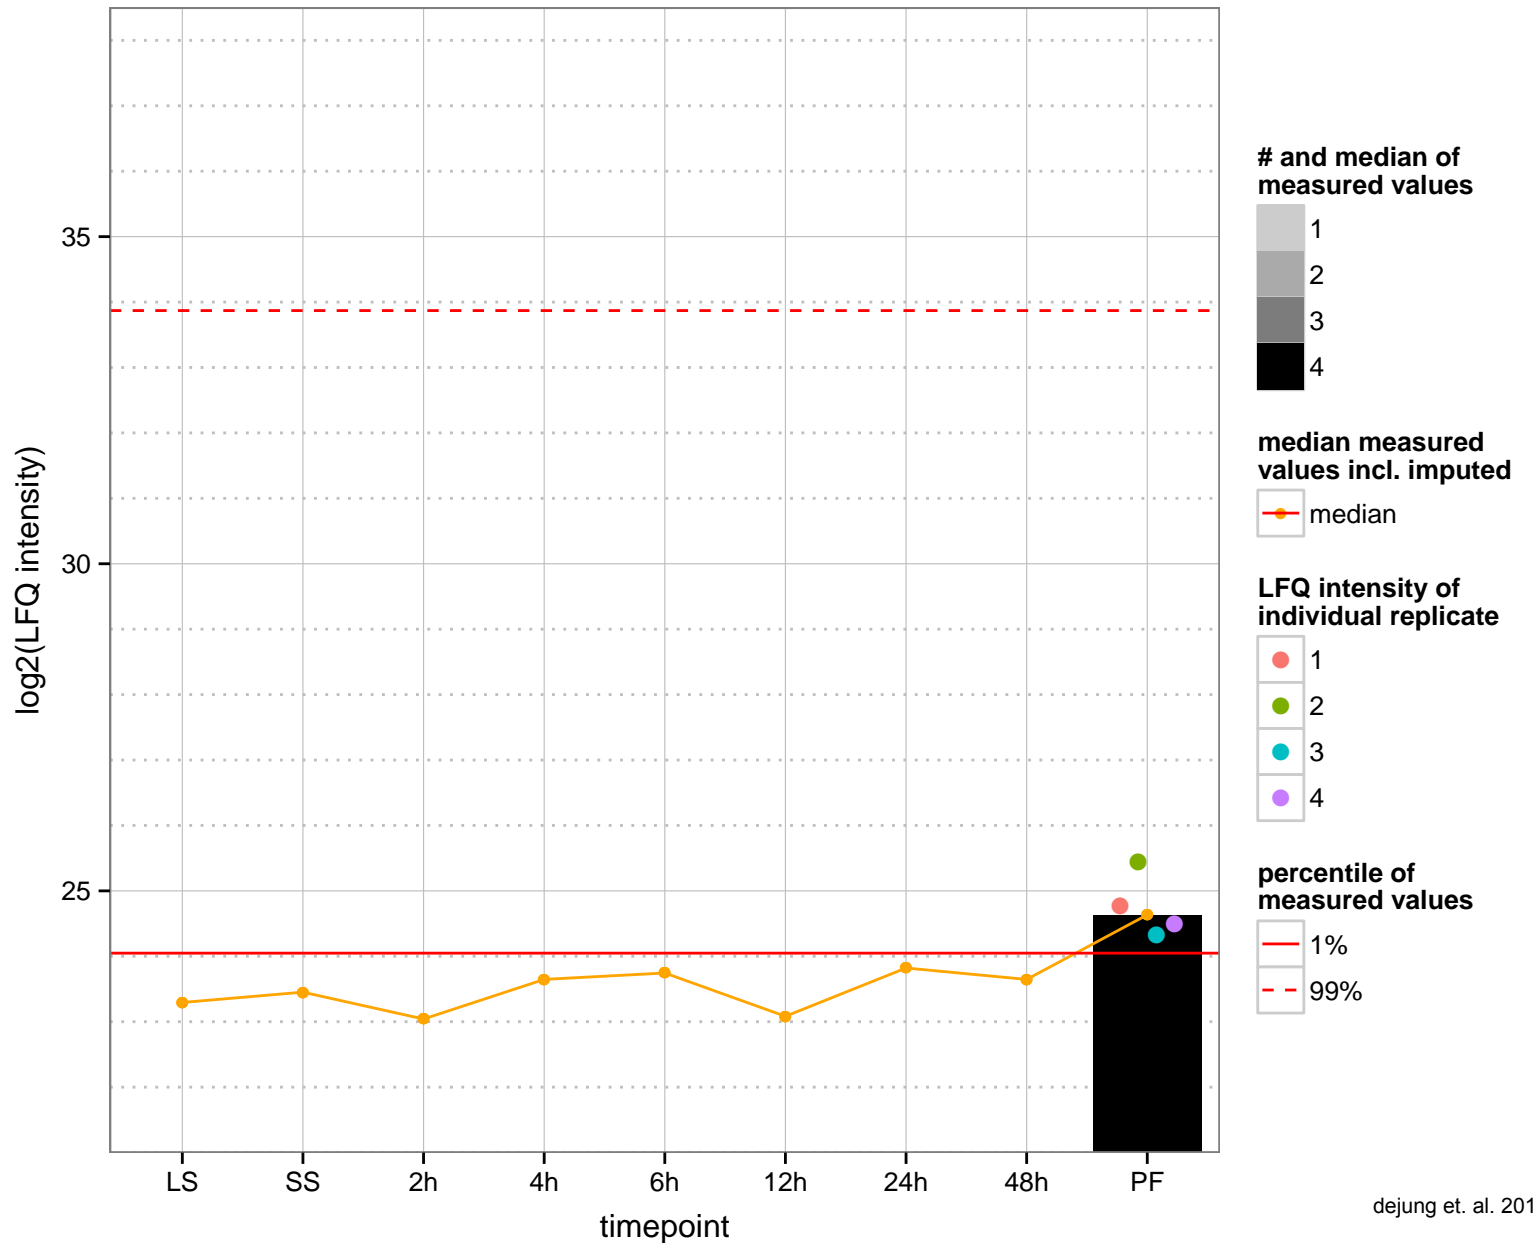

hypothetical protein, conserved  
 Tb927.6.1810  
 AGOF: null  
 AGOC: null  
 AGOP: null  
 PGO: null  
 PGOC: null  
 PGOP: null

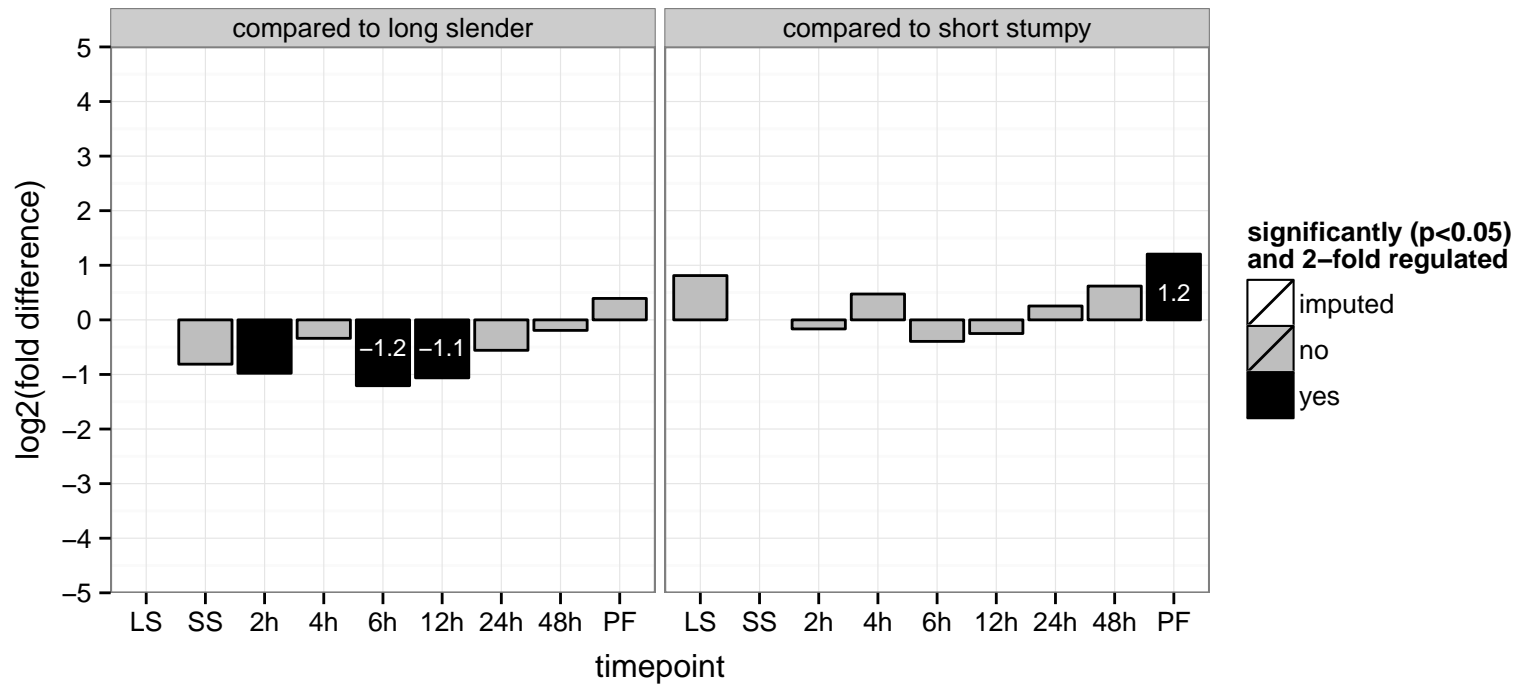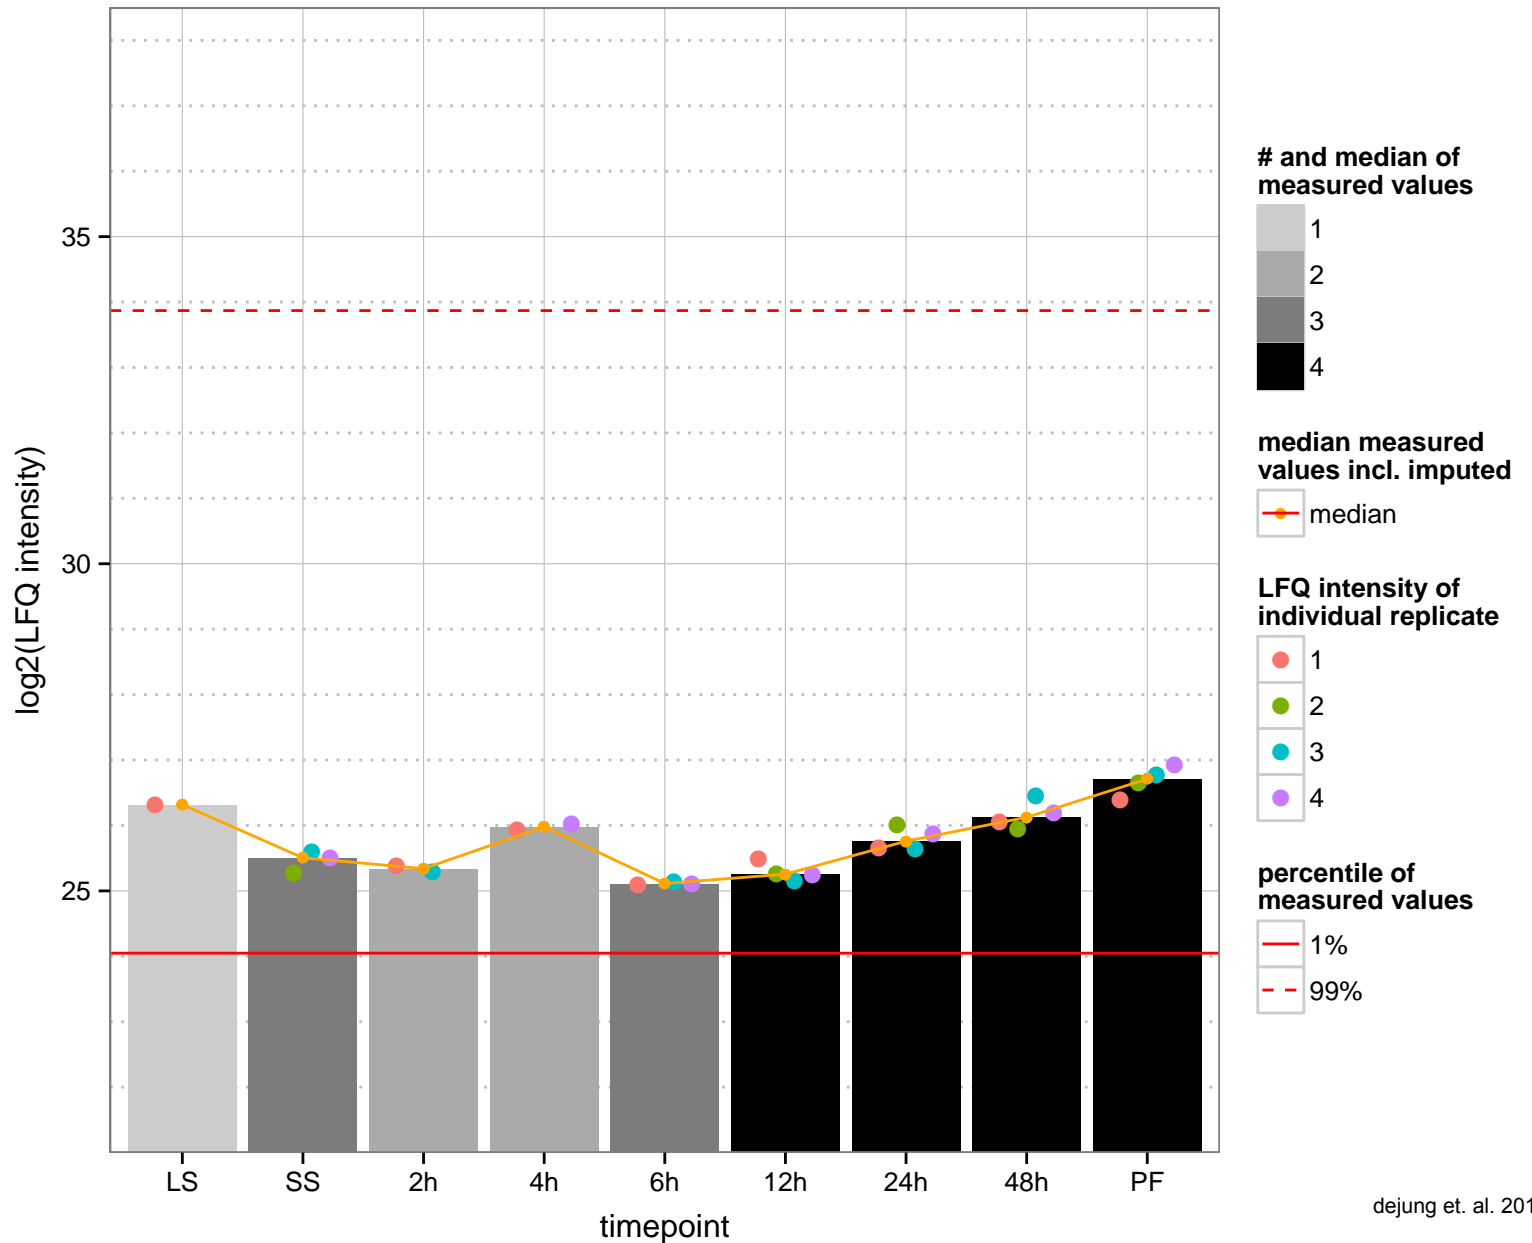

quiescin sulfhydryl oxidase (QSOX)  
 Tb927.6.1850  
 AGOF: flavin-linked sulfhydryl oxidase activity, thiol oxidase activity  
 AGOC: null  
 AGOP: cell redox homeostasis, oxidation-reduction process, protein folding  
 PGO: thiol oxidase activity  
 PGOC: null  
 PGO: cell redox homeostasis, oxidation-reduction process

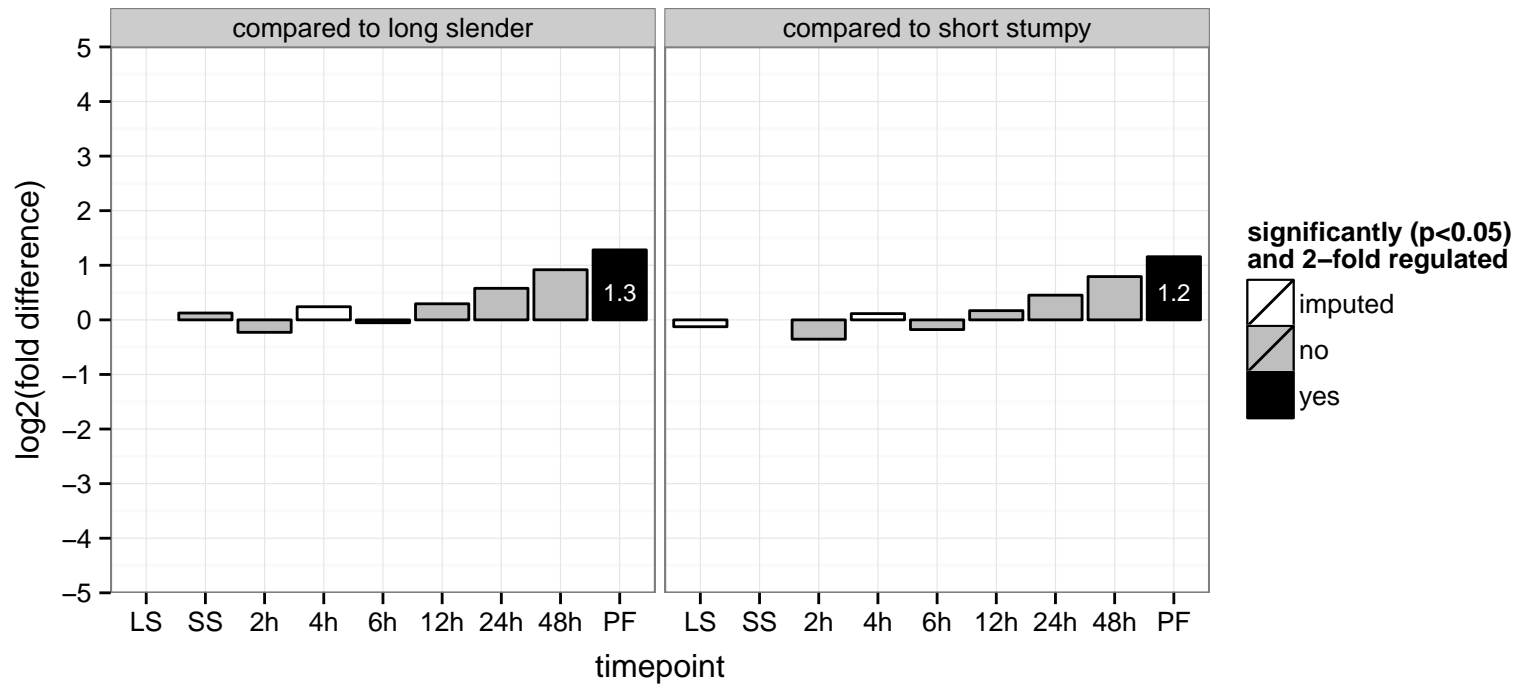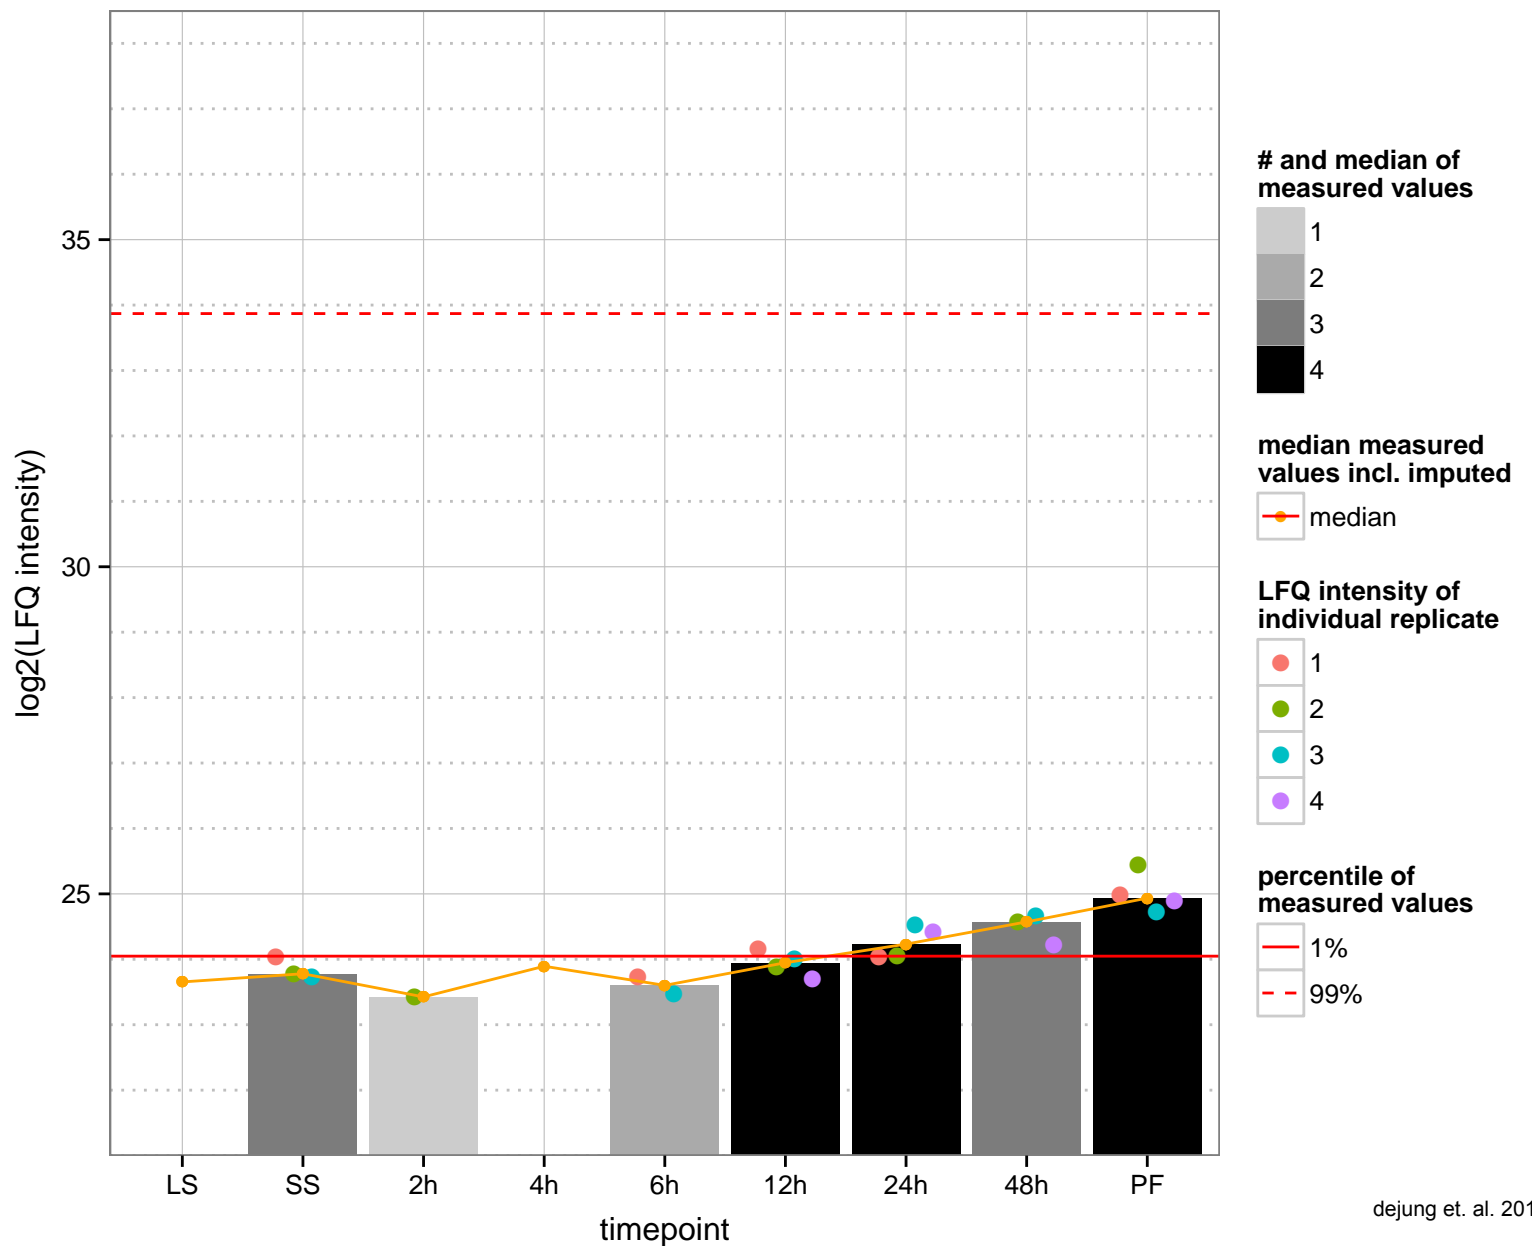

eukaryotic translation initiation factor 4e, putative  
 Tb927.6.1870  
 AGOF: RNA cap binding, translation initiation factor activity  
 AGOC: cytoplasm  
 AGOP: translational initiation  
 PGOF: RNA binding, translation initiation factor activity  
 PGO: cytoplasm  
 PGOP: translational initiation

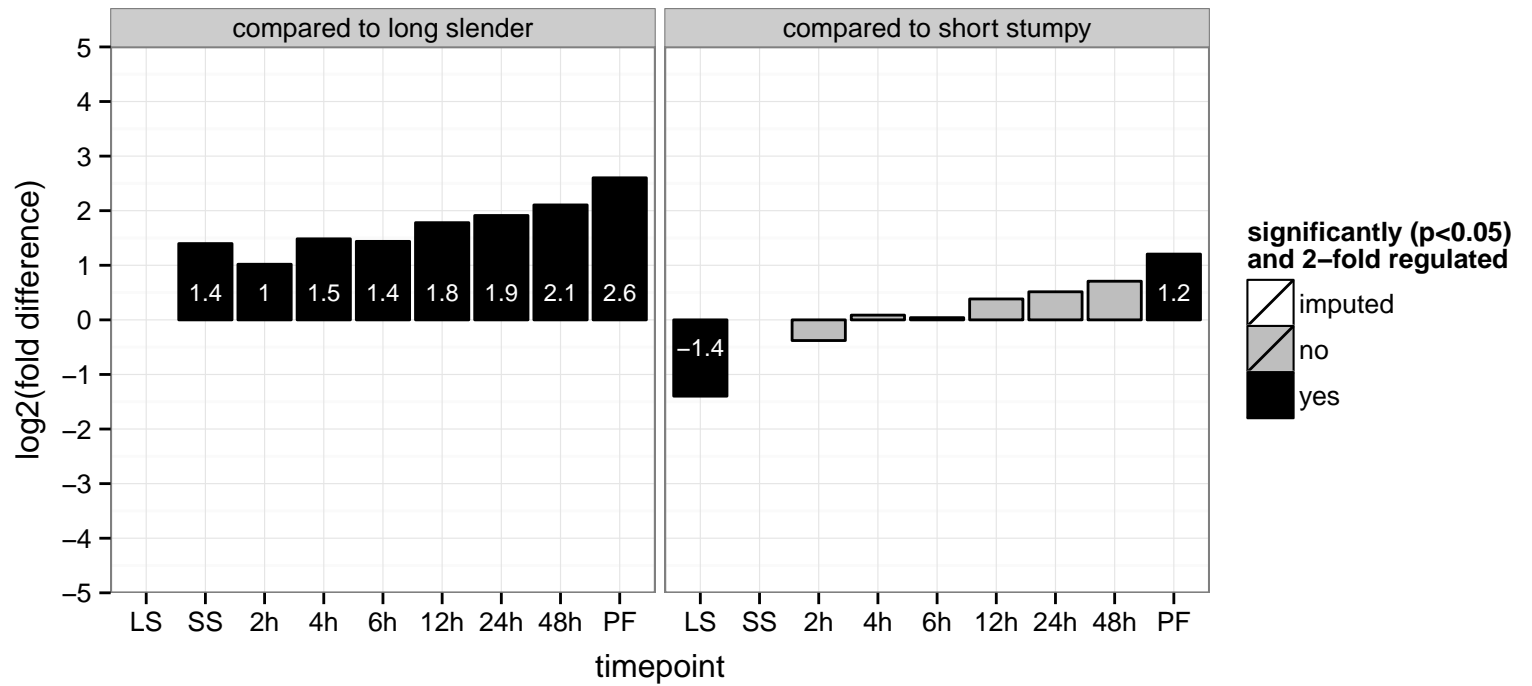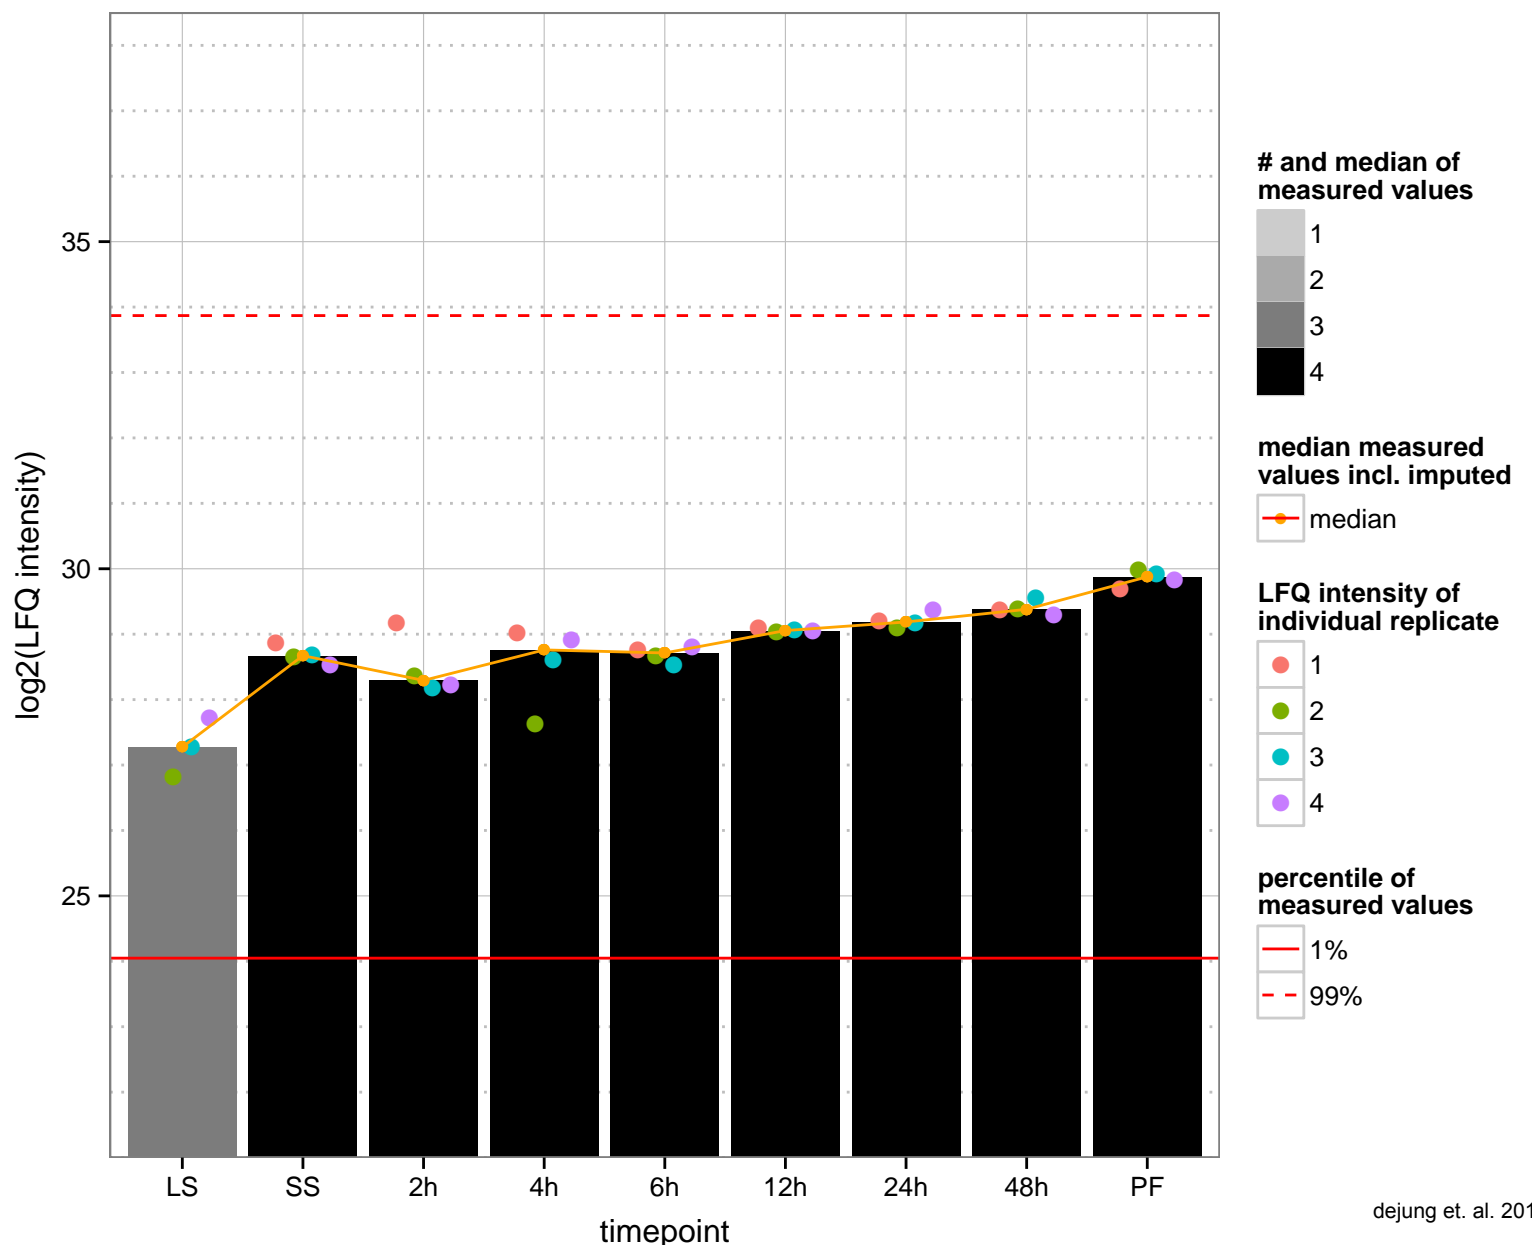



hypothetical protein, conserved  
 Tb927.6.2140  
 AGOF: catalytic activity  
 AGOC: mitochondrion  
 AGOP: metabolic process  
 PGO: catalytic activity  
 PGOC: null  
 PGOP: metabolic process

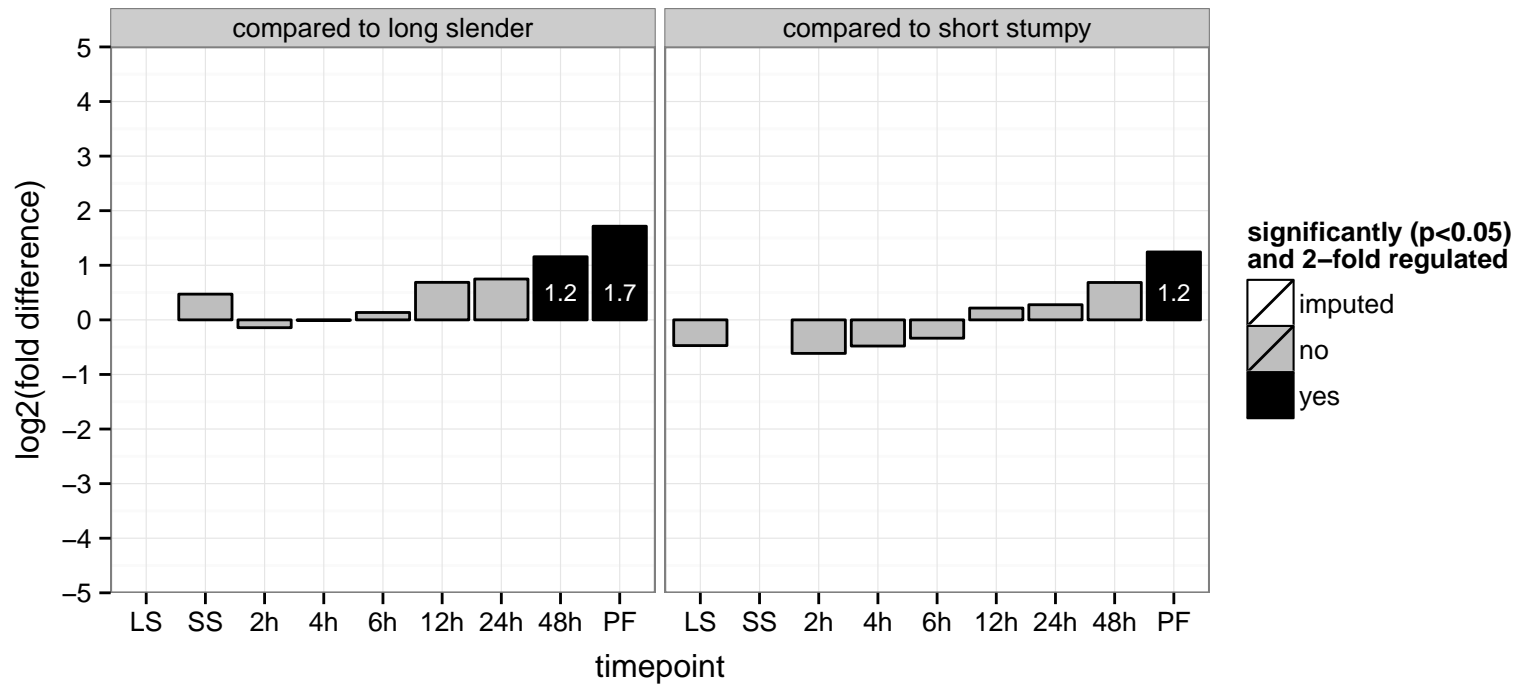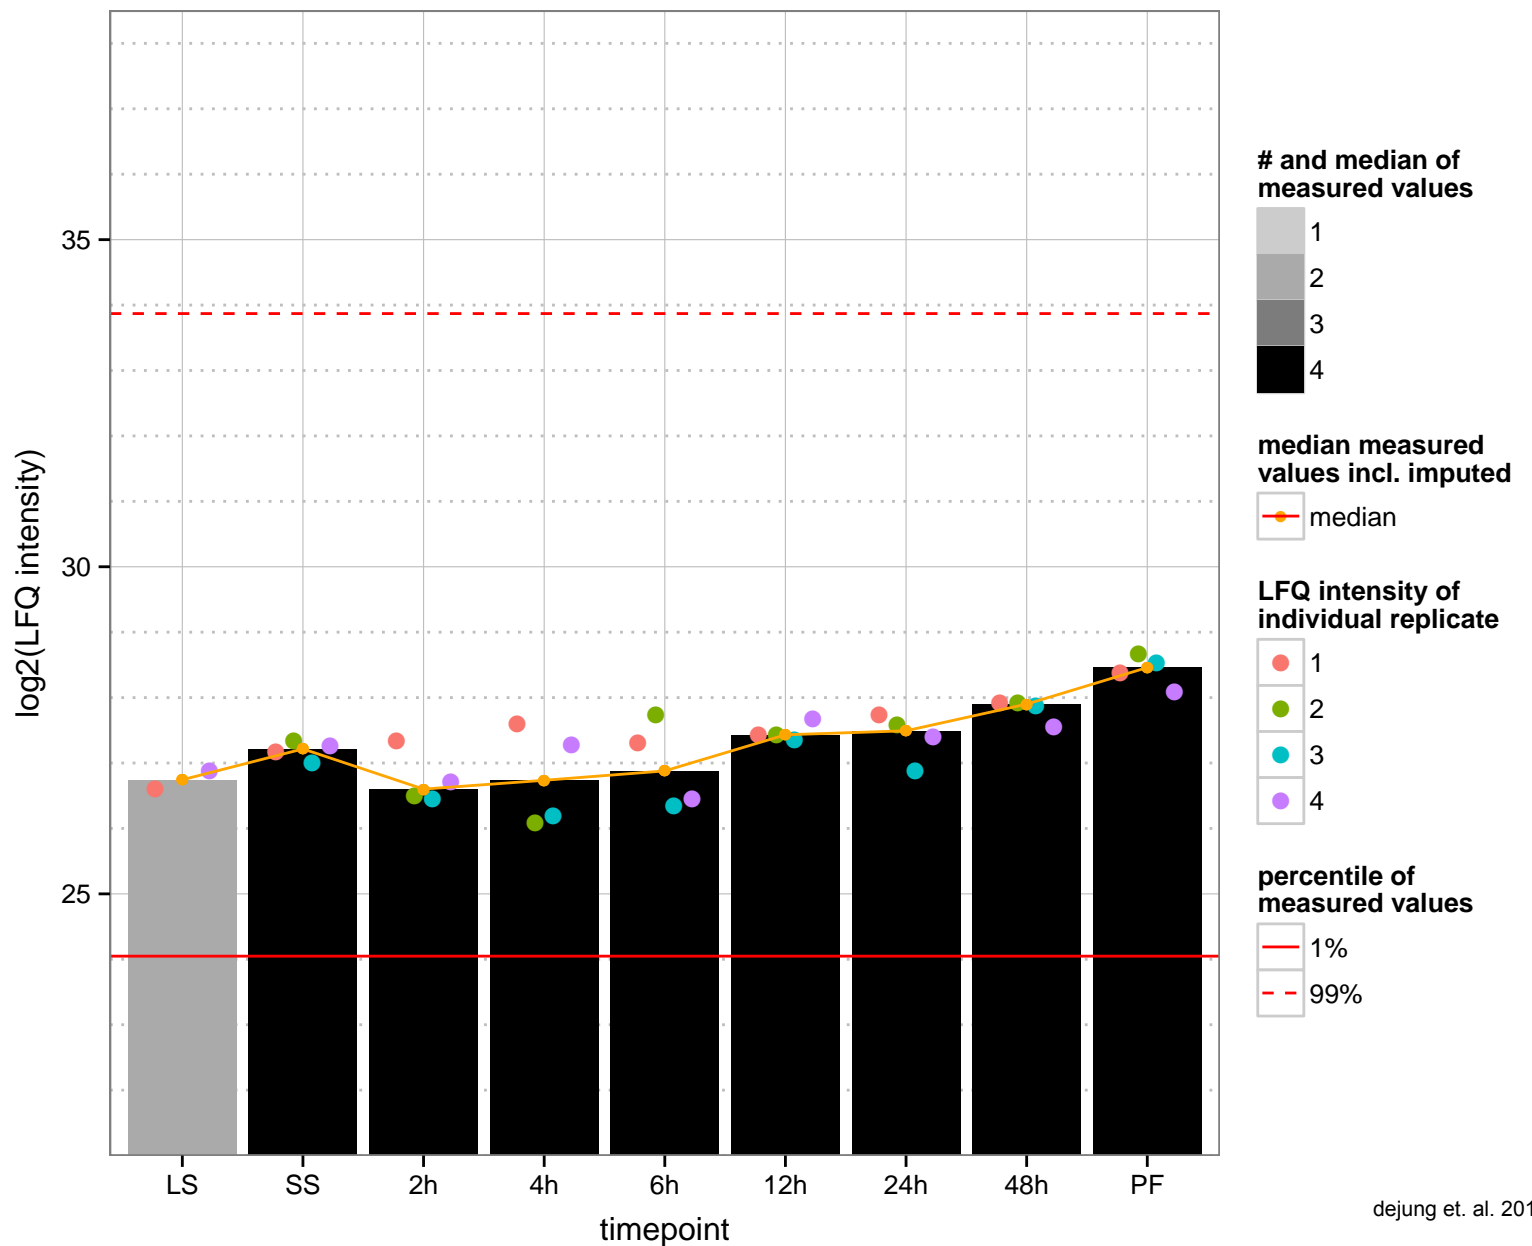

hypothetical protein, conserved, RGG protein (RGG1)  
 Tb927.6.2330;Tb927.6.2270  
 AGOF: methyltransferase activity, protein binding  
 AGOC: null  
 AGOP: null  
 PGOF: methyltransferase activity  
 PGOC: null  
 PGOP: null

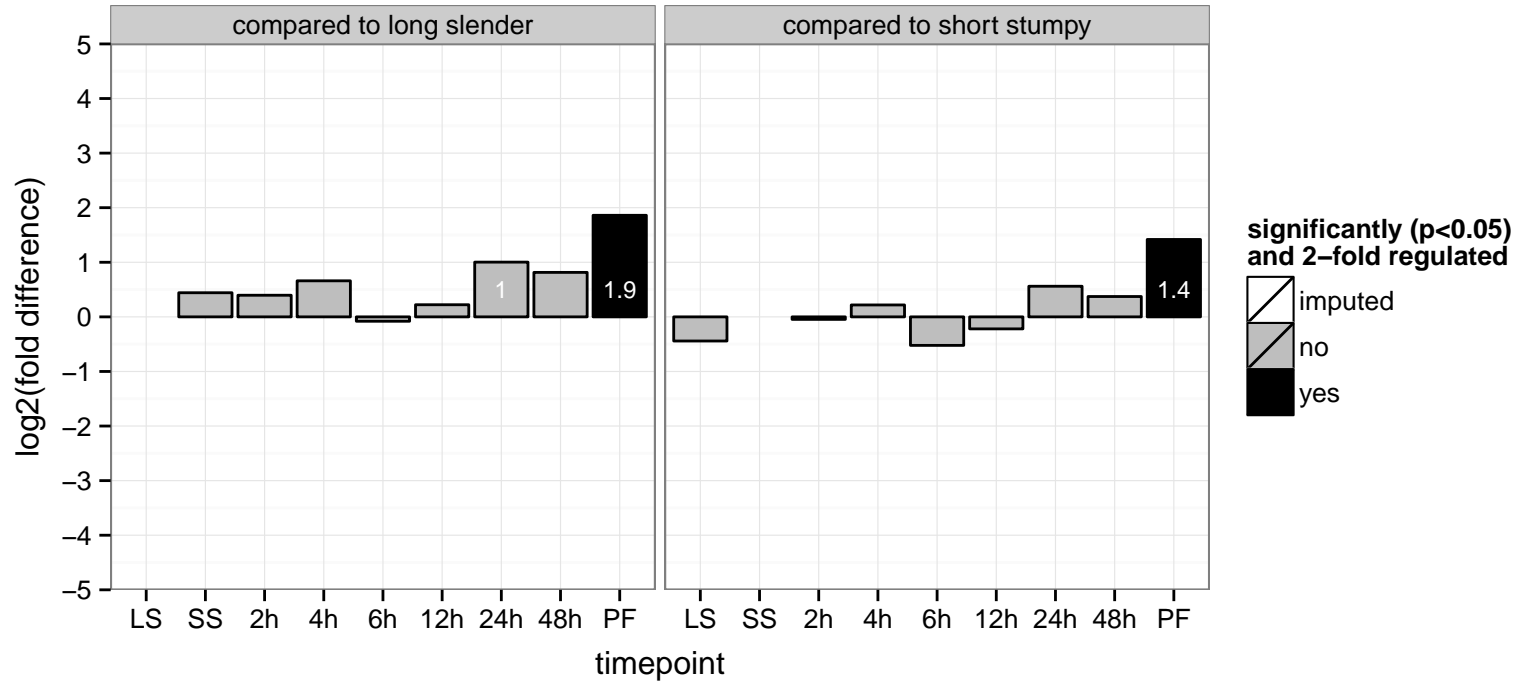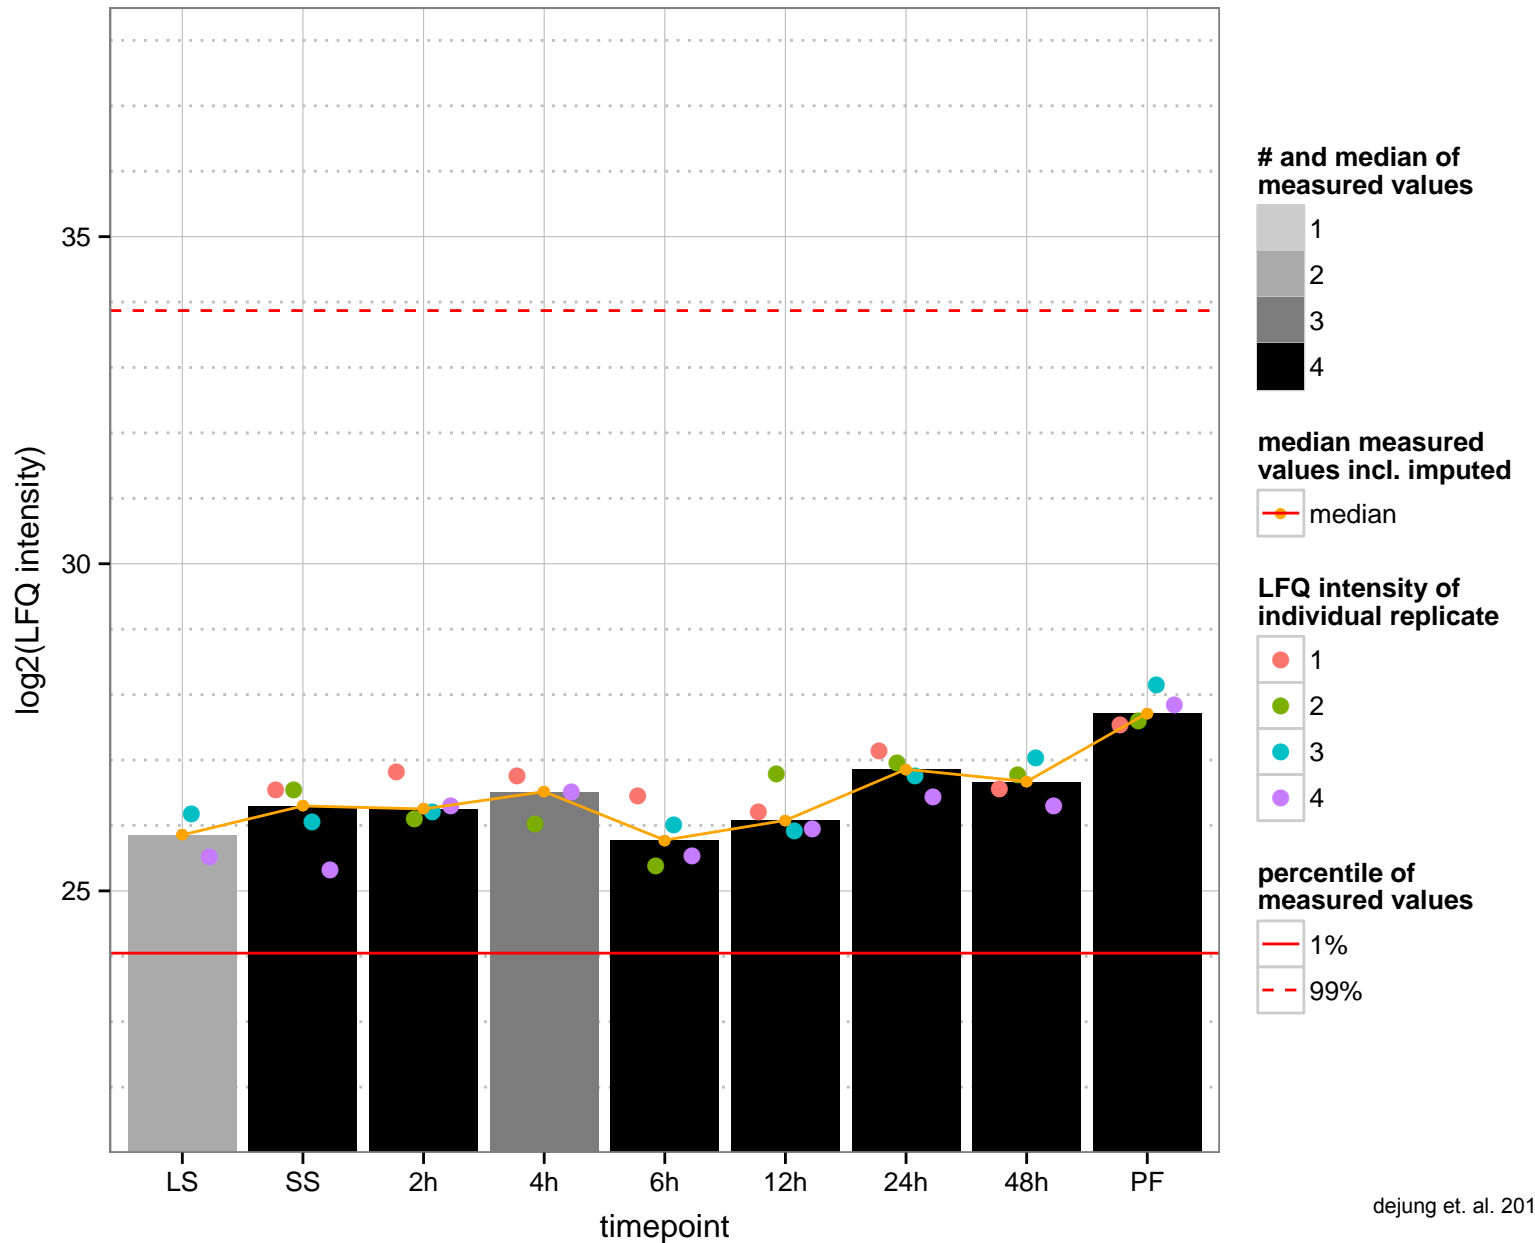

DREV methyltransferase, putative  
 Tb927.6.2540  
 AGOF: null  
 AGOC: mitochondrion  
 AGOP: null  
 PGO: null  
 PGOC: null  
 PGOP: null

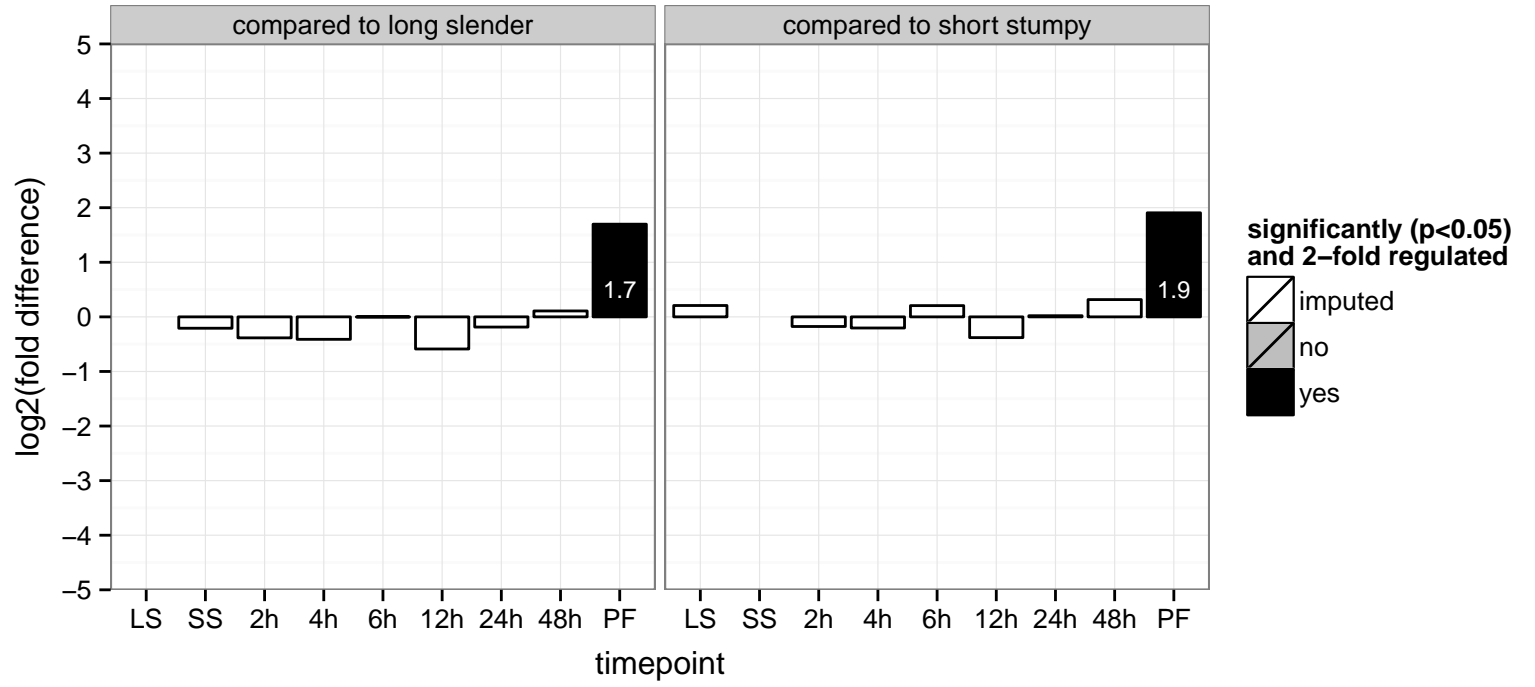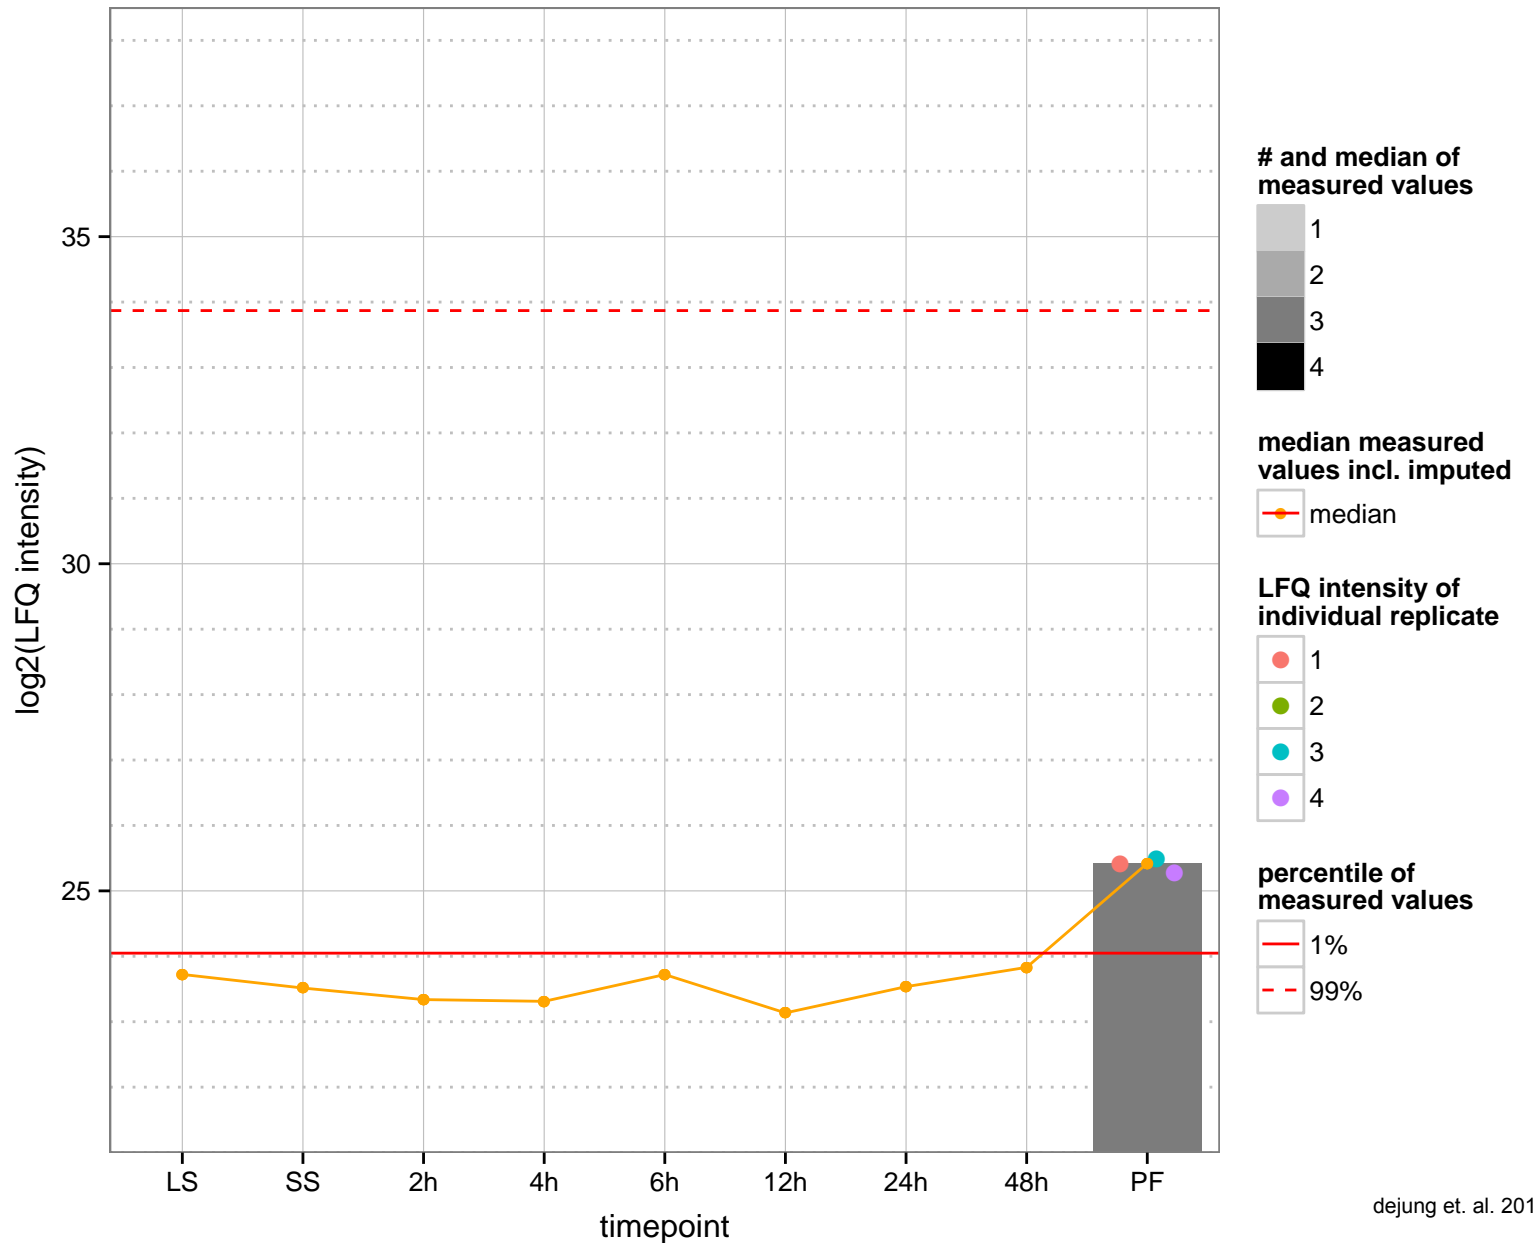

dendritic cell–derived IFNG–induced protein, SAM domain and HD domain–containing protein 1  
 Tb927.6.2900  
 AGOF: catalytic activity  
 AGOC: null  
 AGOP: null  
 PGO: catalytic activity, metal ion binding, phosphoric diester hydrolase activity  
 PGOC: null  
 PGOP: null

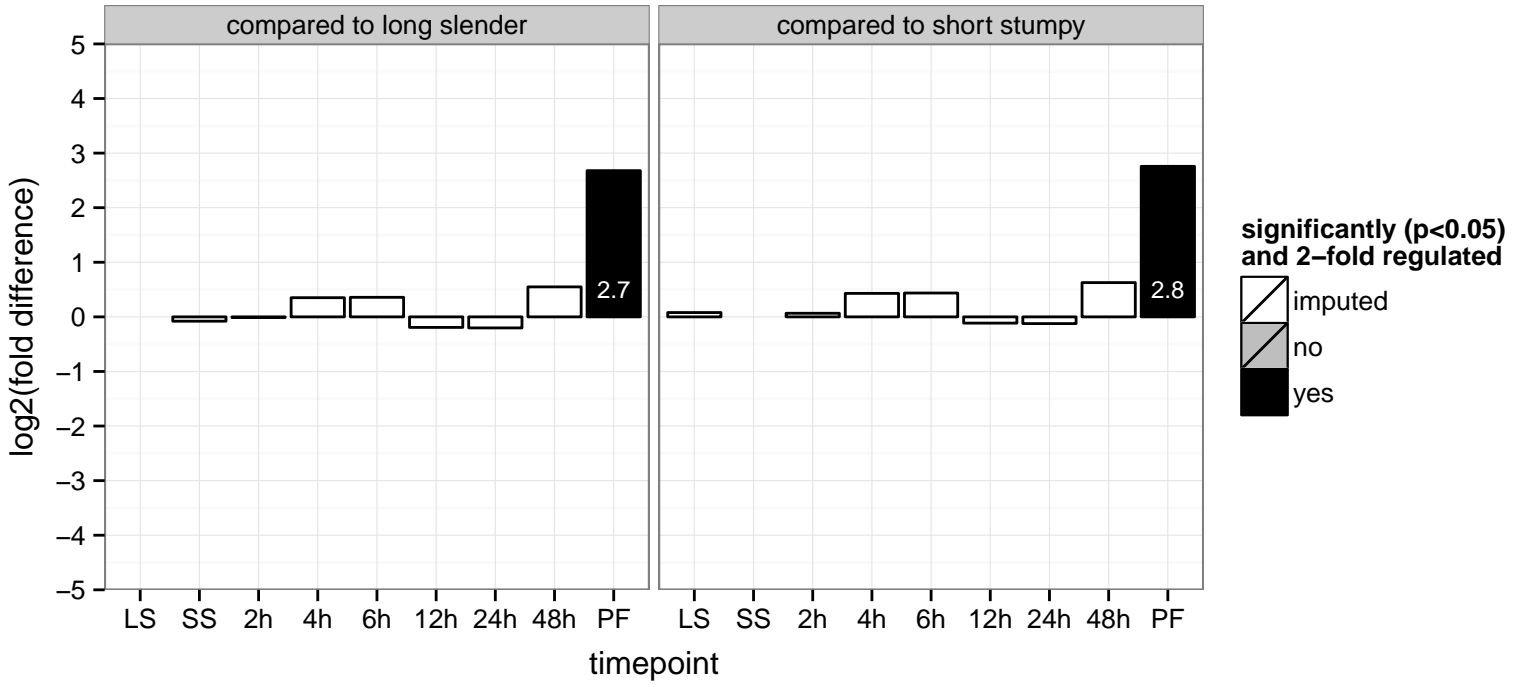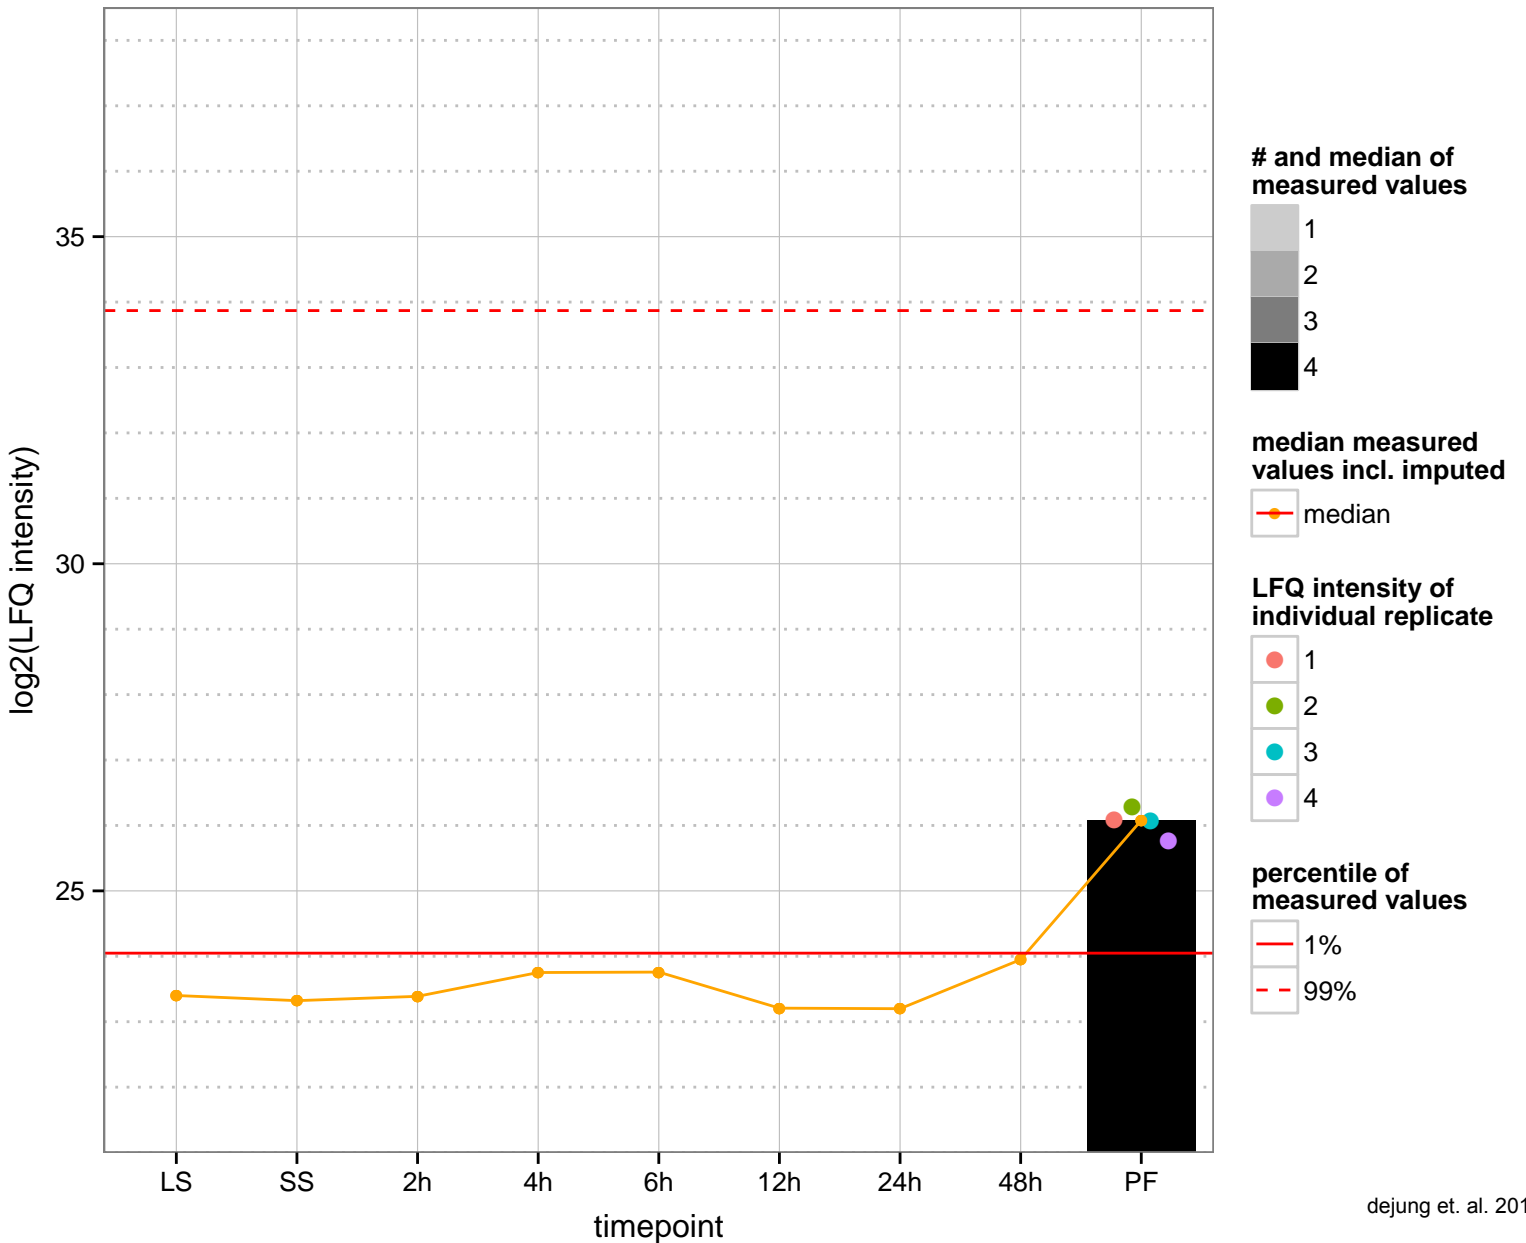

sphingosine 1-phosphate lyase, putative, sphingosine phosphate lyase-like protein, putative (SPL)  
 Tb927.6.3630  
 AGOF: carboxy-lyase activity, pyridoxal phosphate binding, sphinganine-1-phosphate aldolase activity  
 AGOC: null  
 AGOP: carboxylic acid metabolic process, ethanolamine biosynthetic process  
 PGO: carboxy-lyase activity, pyridoxal phosphate binding  
 PGO: null  
 PGO: carboxylic acid metabolic process

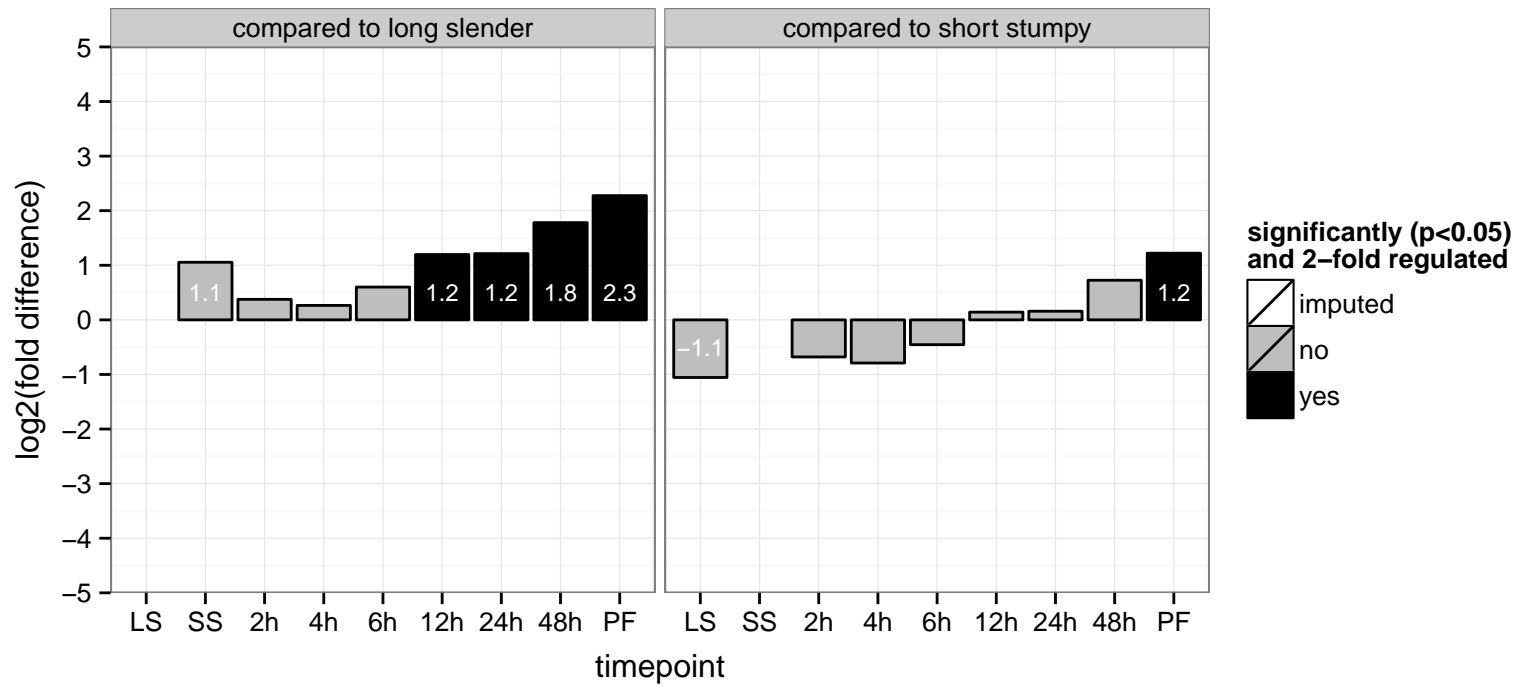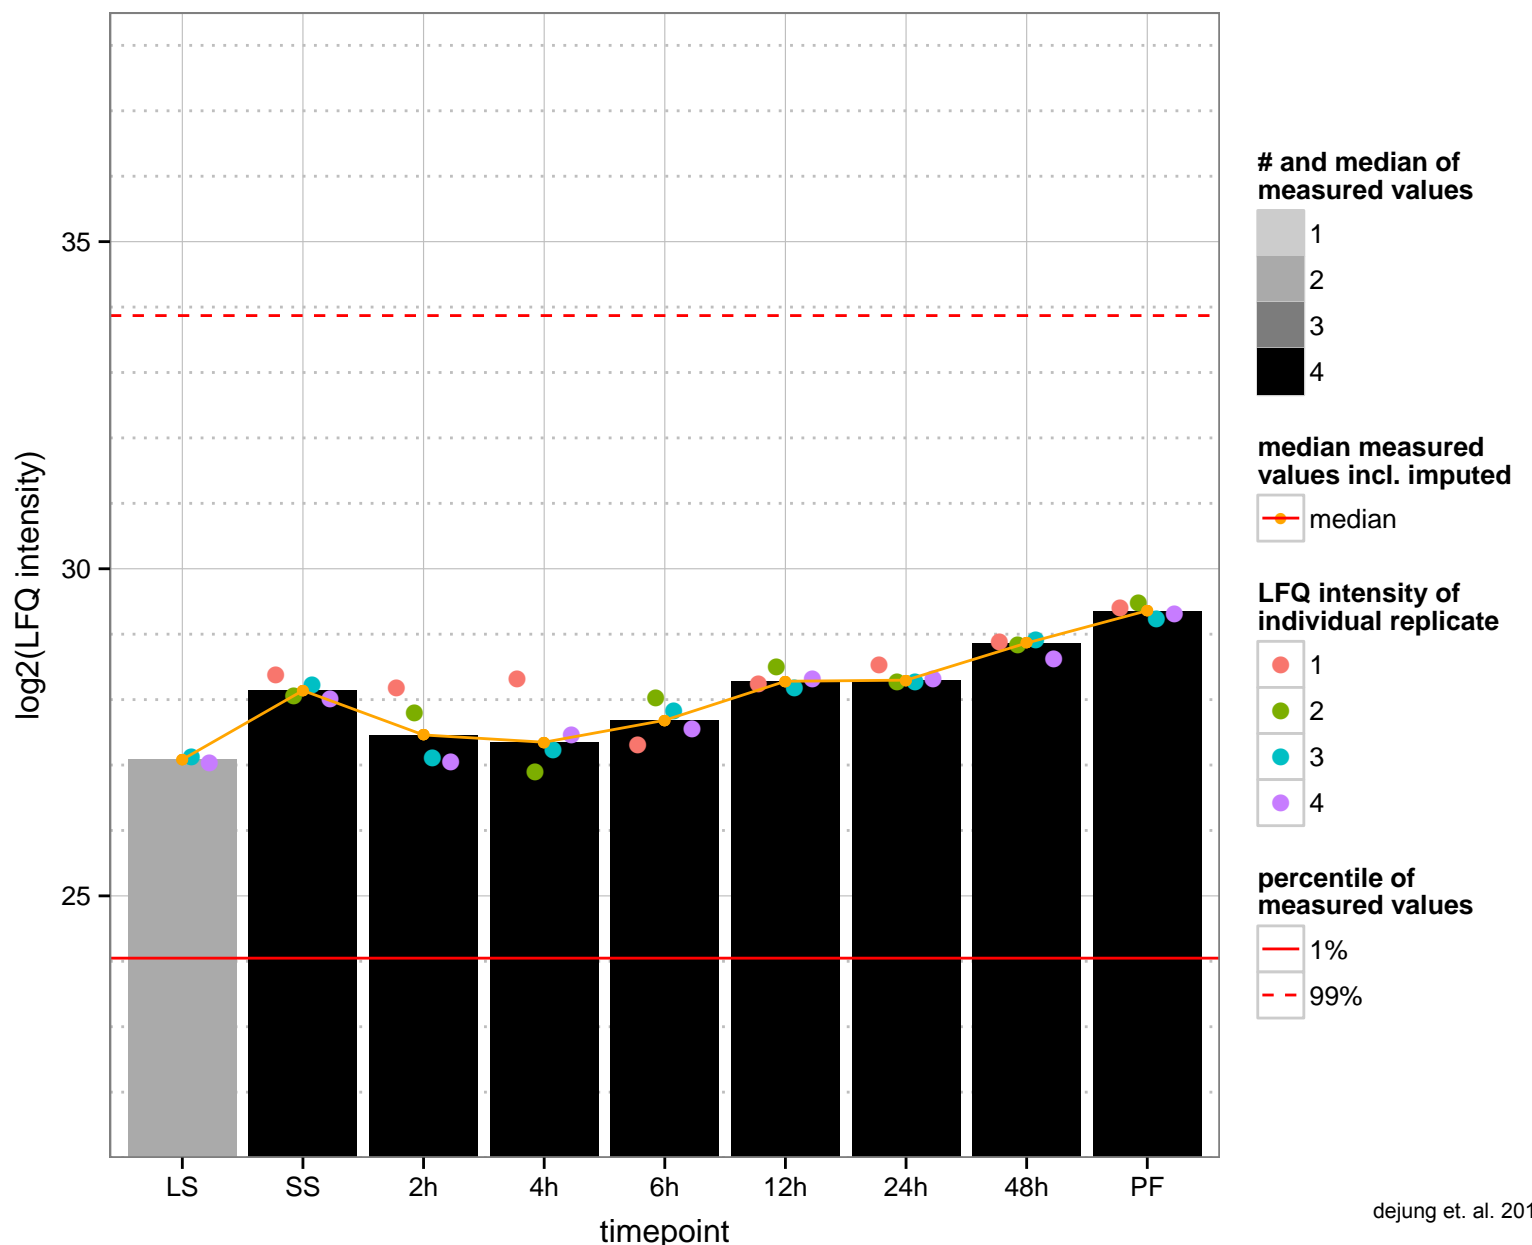

hypothetical protein, conserved  
 Tb927.6.4360  
 AGOF: null  
 AGOC: null  
 AGOP: null  
 PGO: null  
 PGOC: null  
 PGOP: null

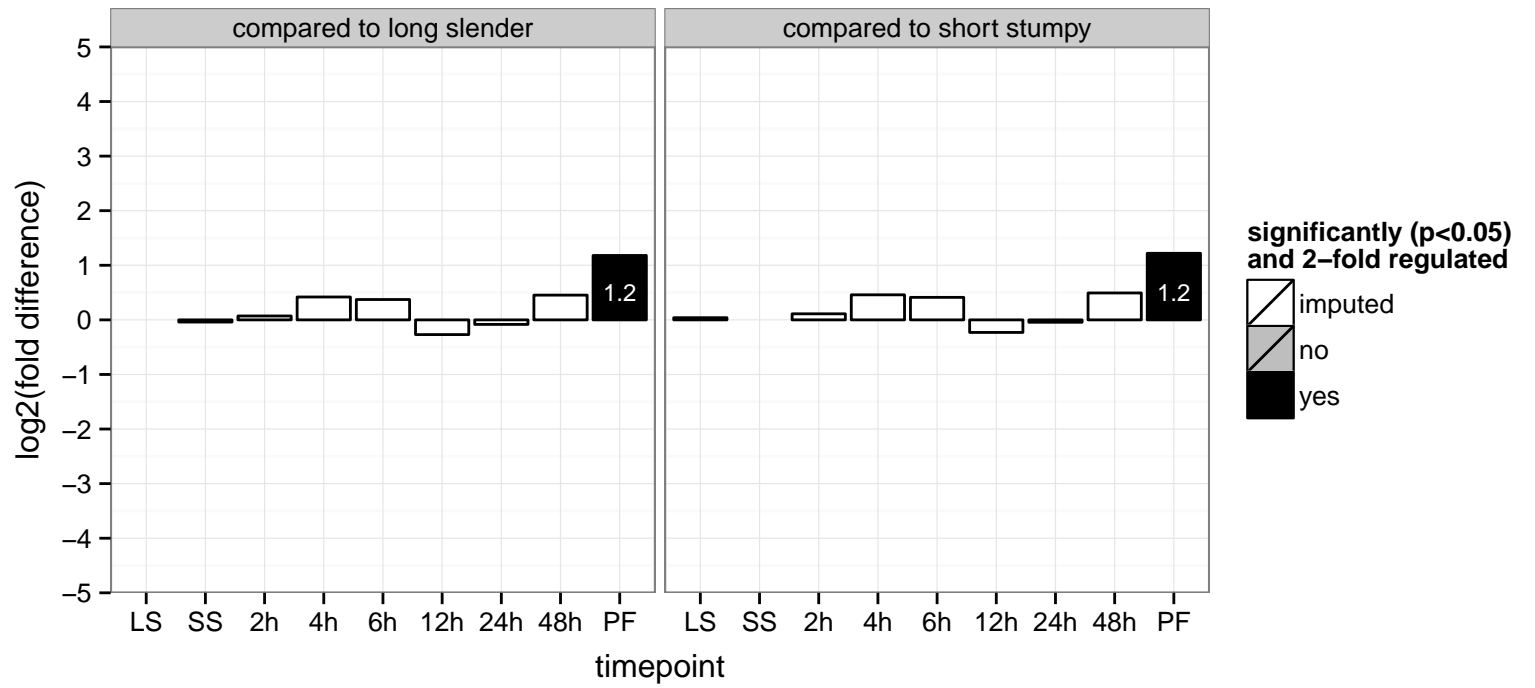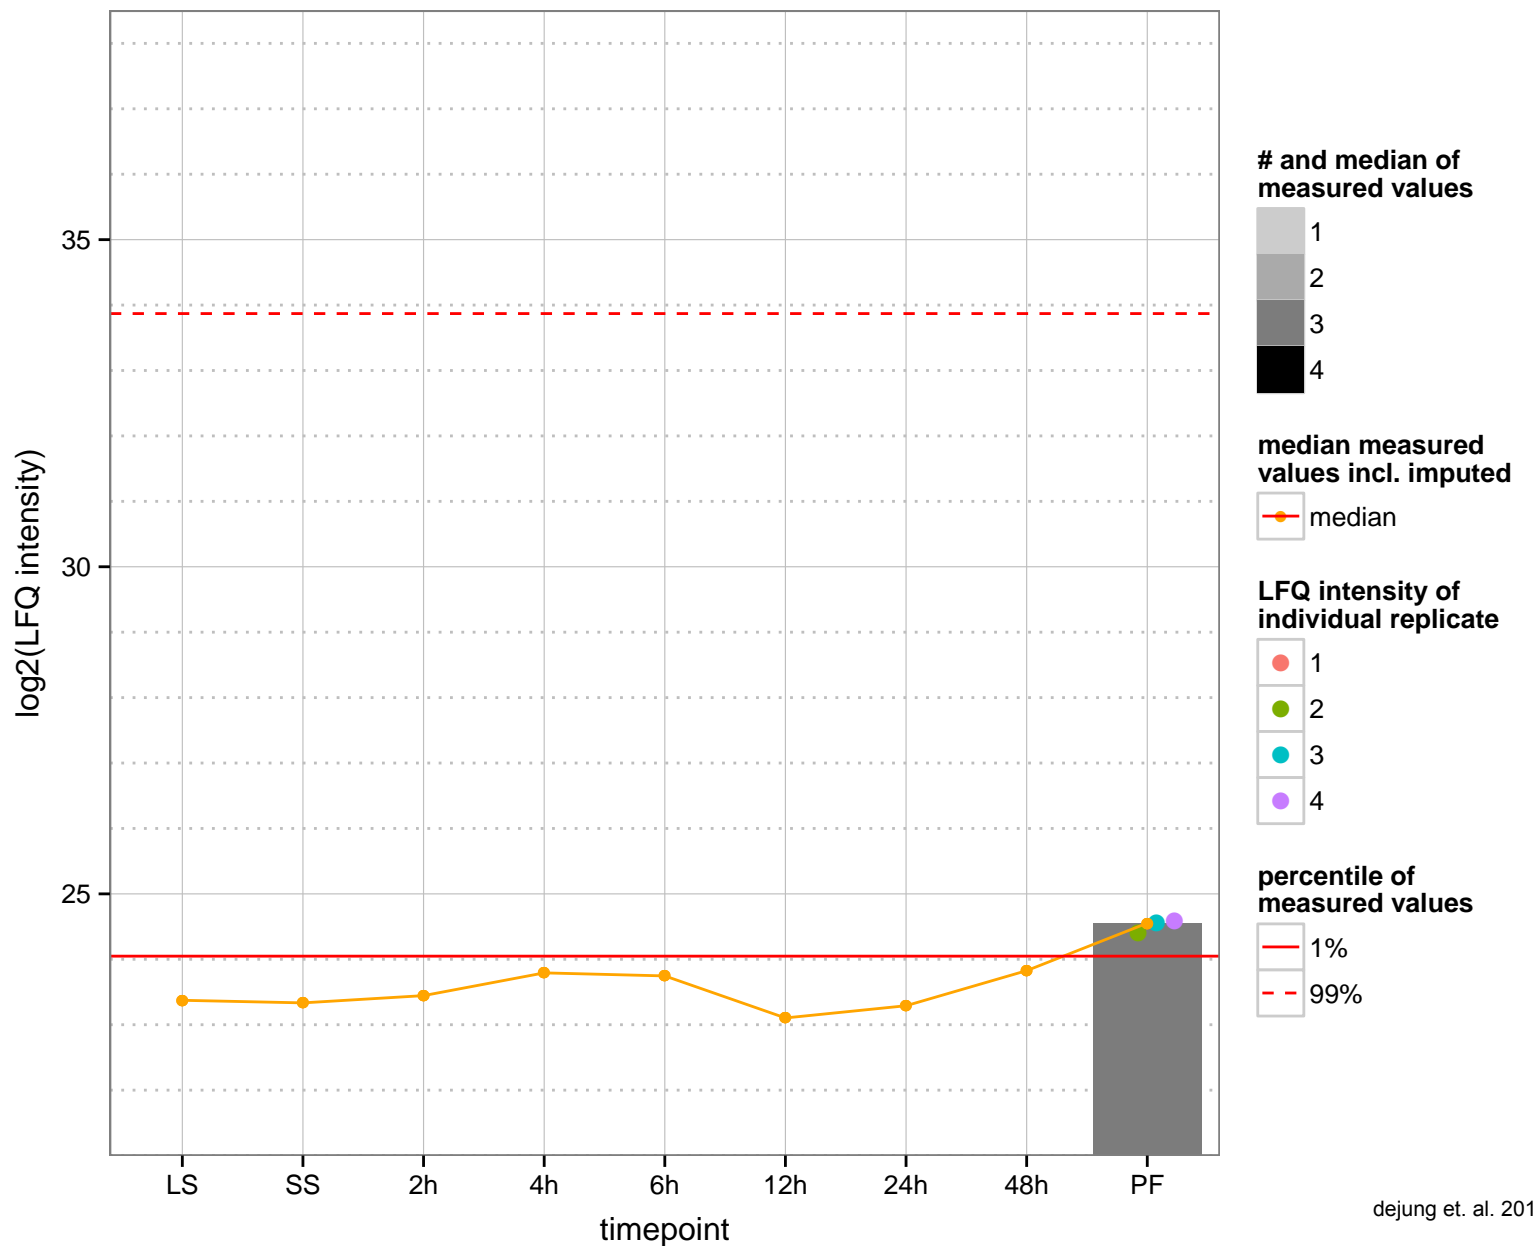

hypothetical protein, conserved  
 Tb927.6.4380  
 AGOF: null  
 AGOC: null  
 AGOP: null  
 PGO: null  
 PGOC: null  
 PGOP: null

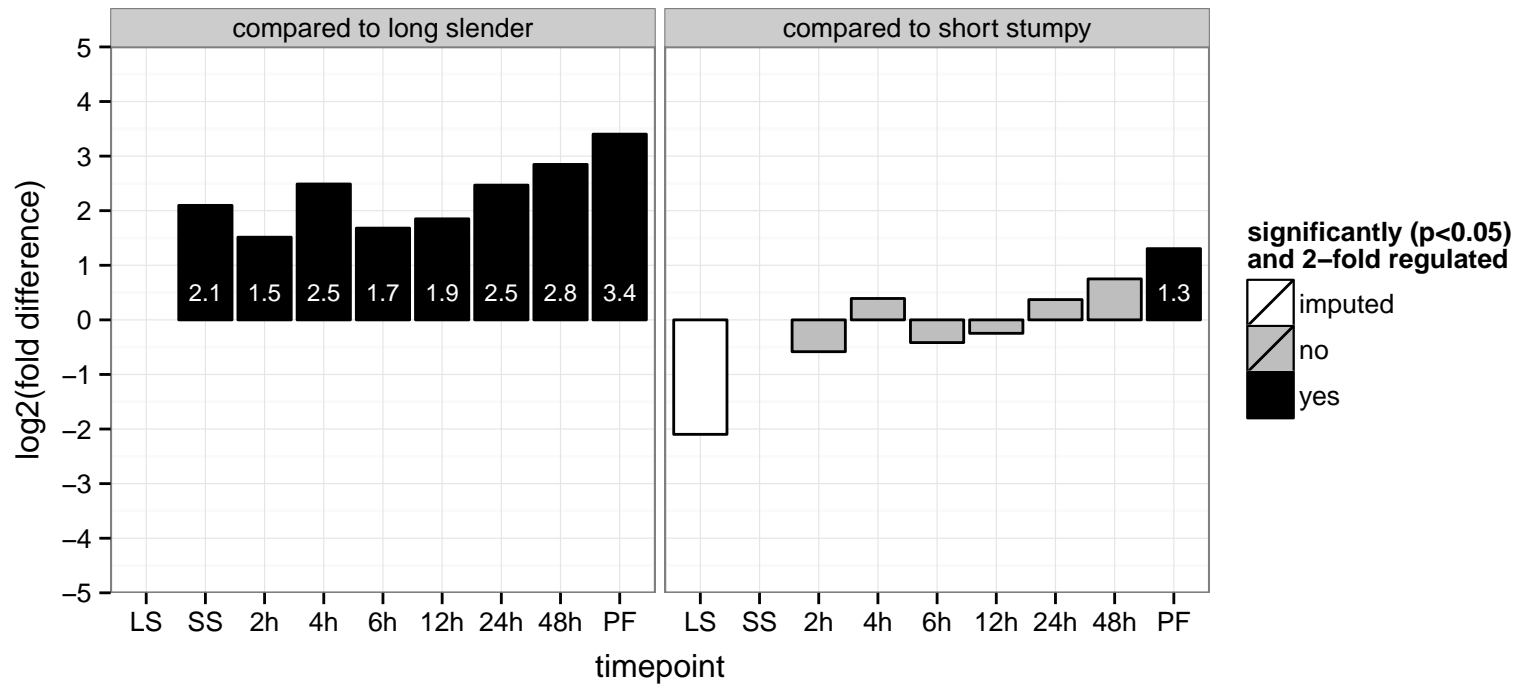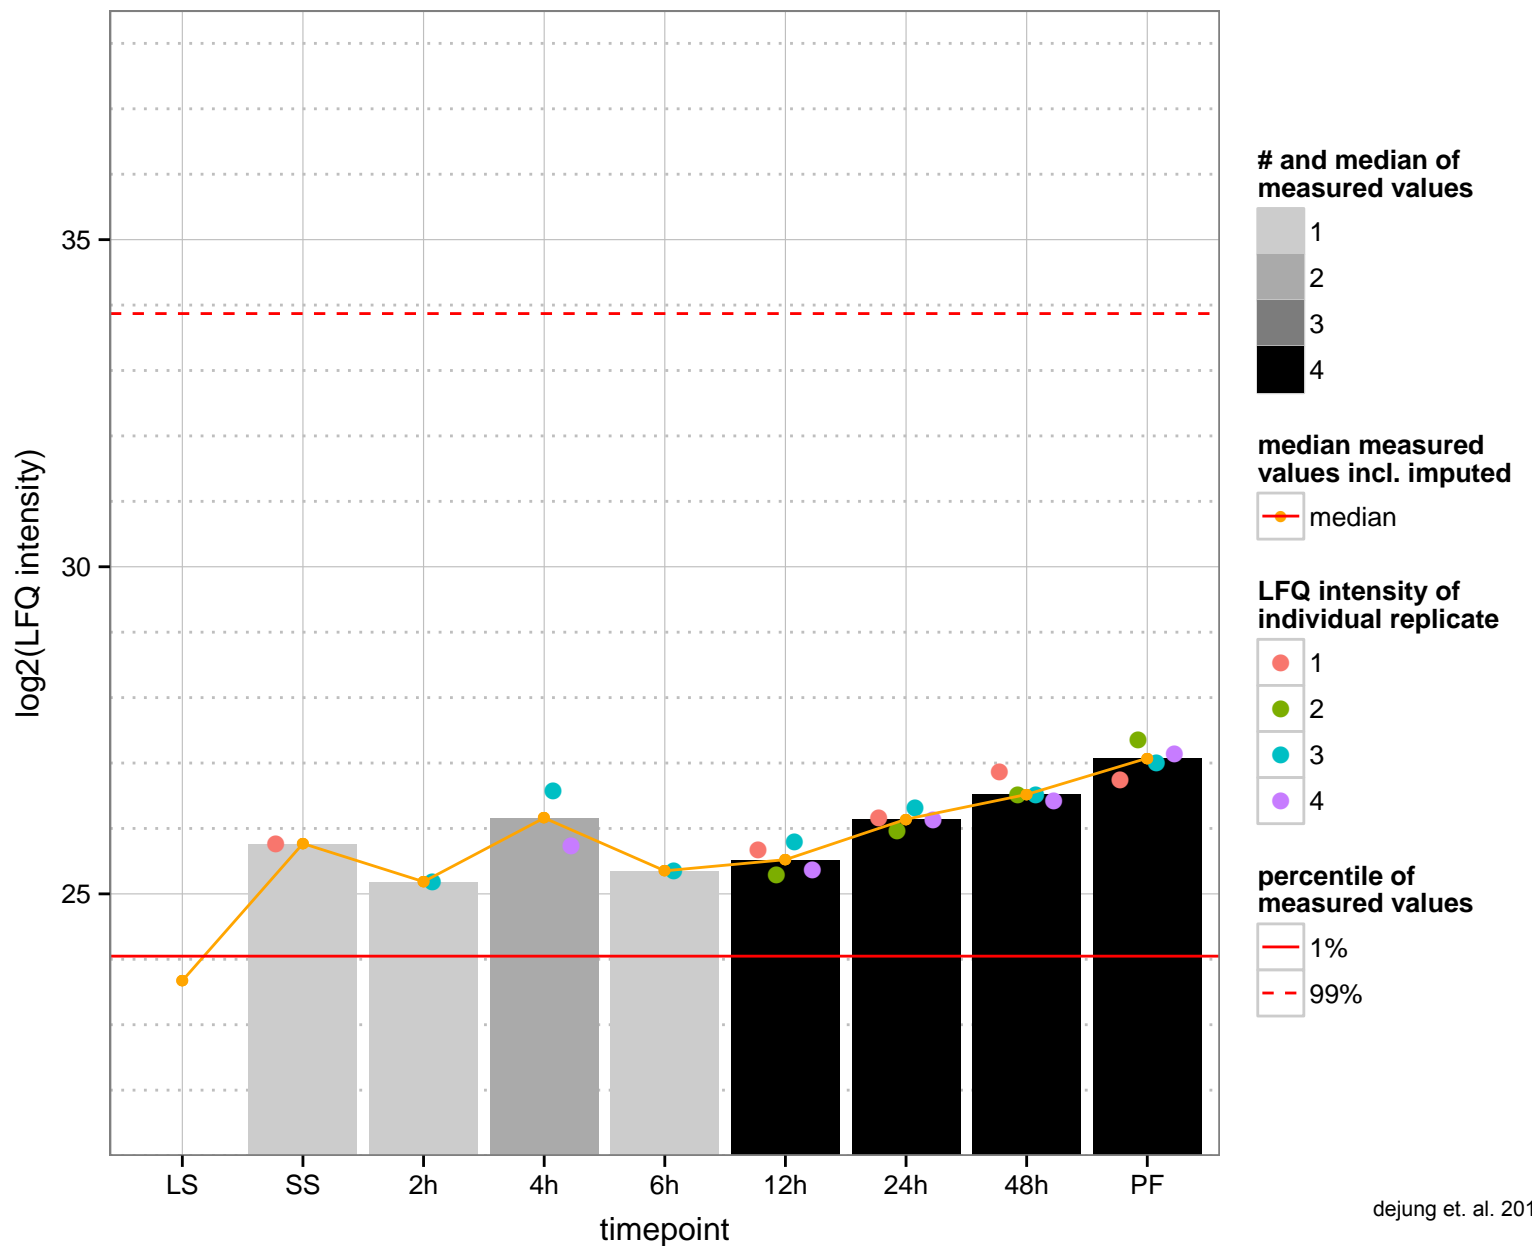

hypothetical protein, conserved  
 Tb927.6.4510  
 AGOF: null  
 AGOC: null  
 AGOP: null  
 PGO: null  
 PGOC: null  
 PGOP: null

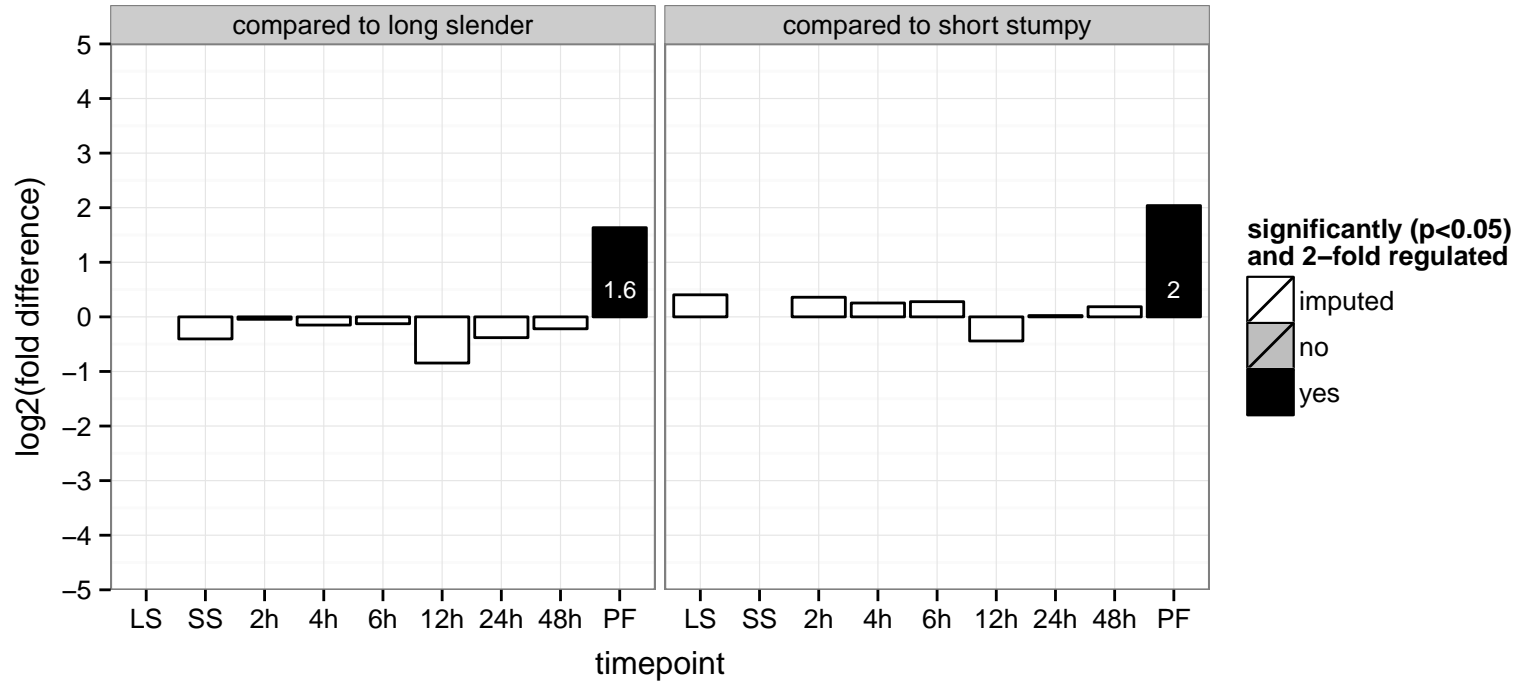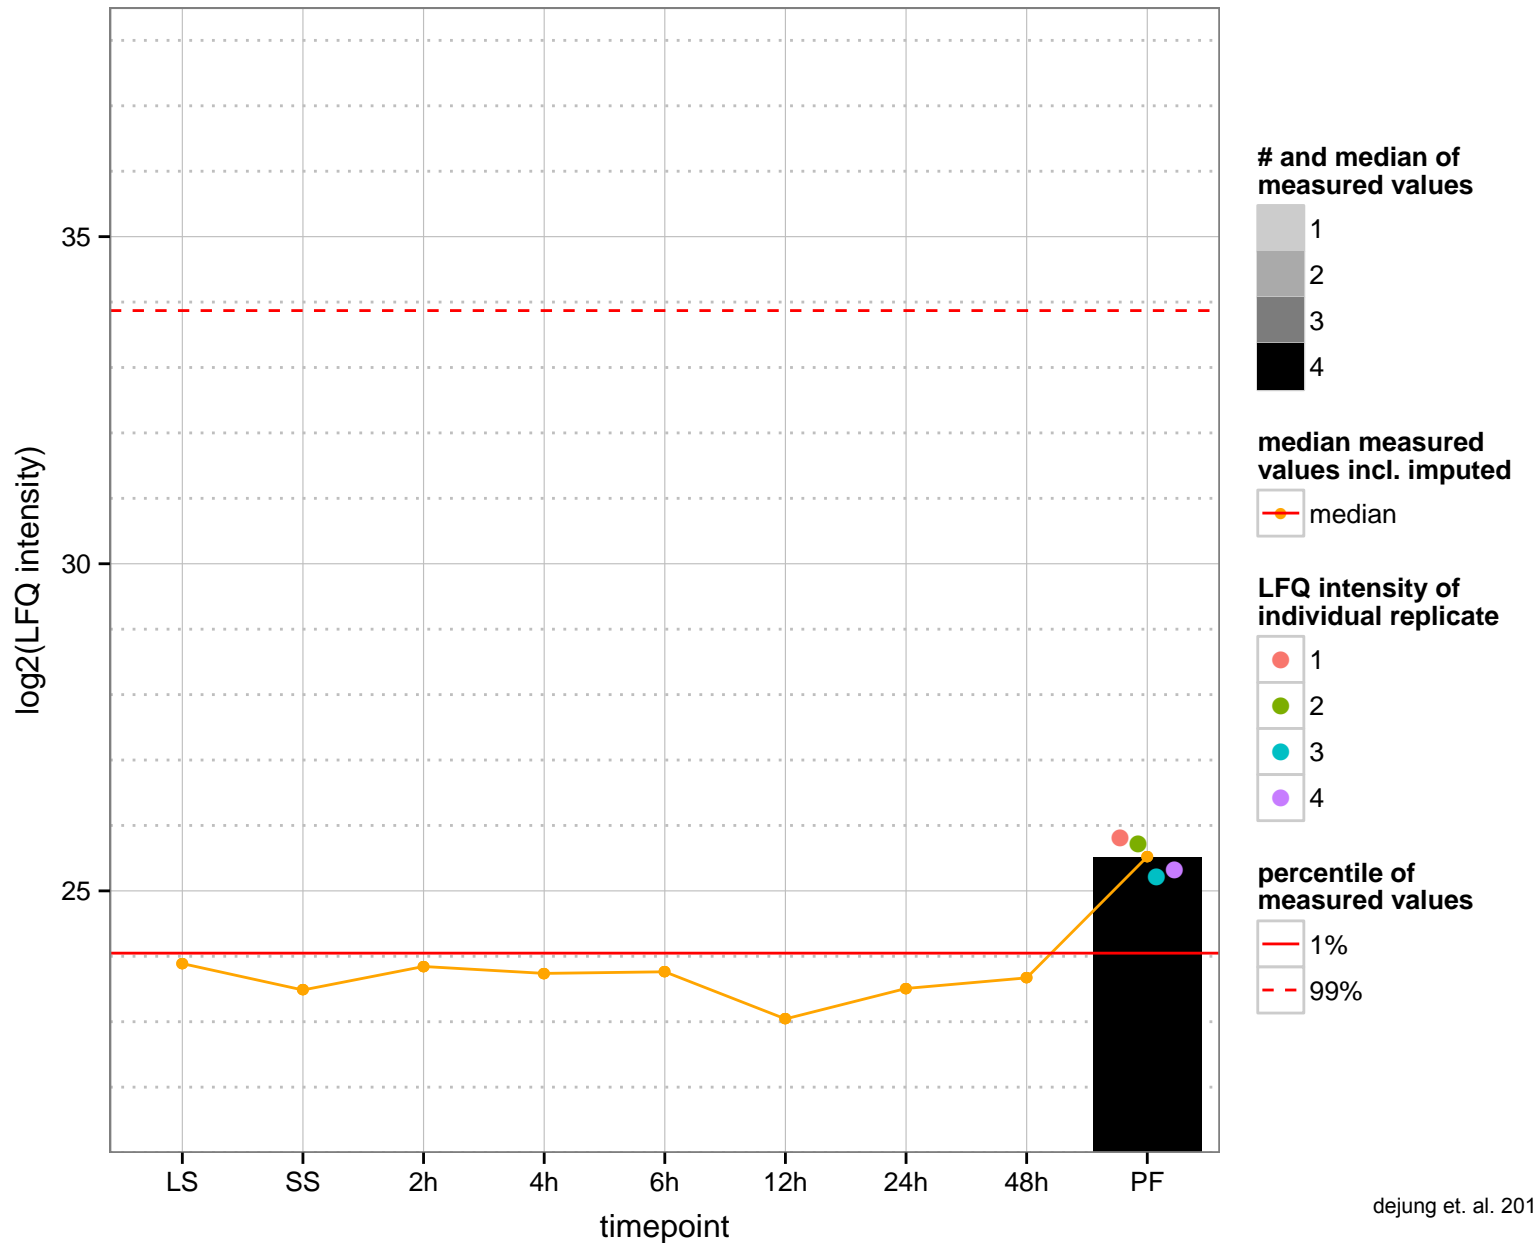



kinetoplastid-specific phospho-protein phosphatase, putative  
 Tb927.6.4630  
 AGOF: hydrolase activity, protein serine/threonine phosphatase activity  
 AGOC: null  
 AGOP: protein dephosphorylation  
 PGOF: hydrolase activity  
 PGO: null  
 PGOP: null

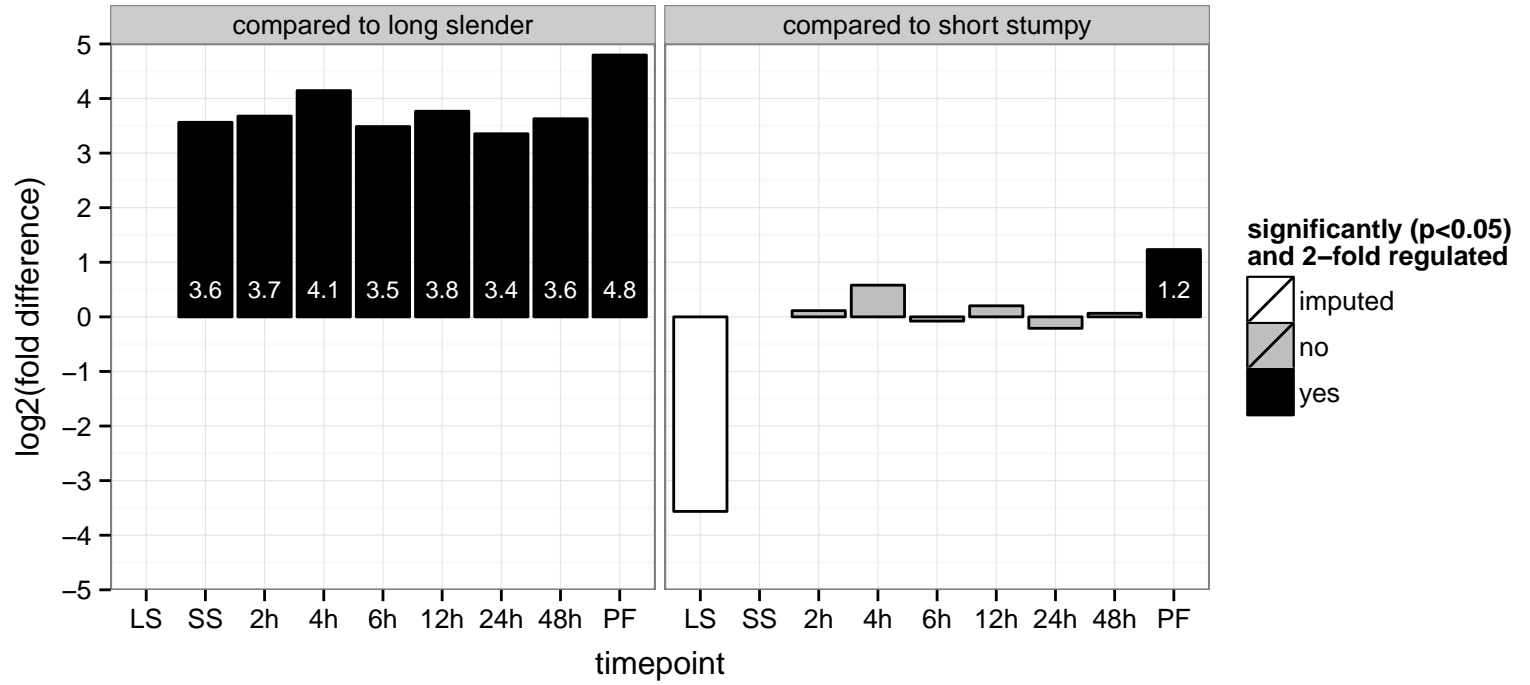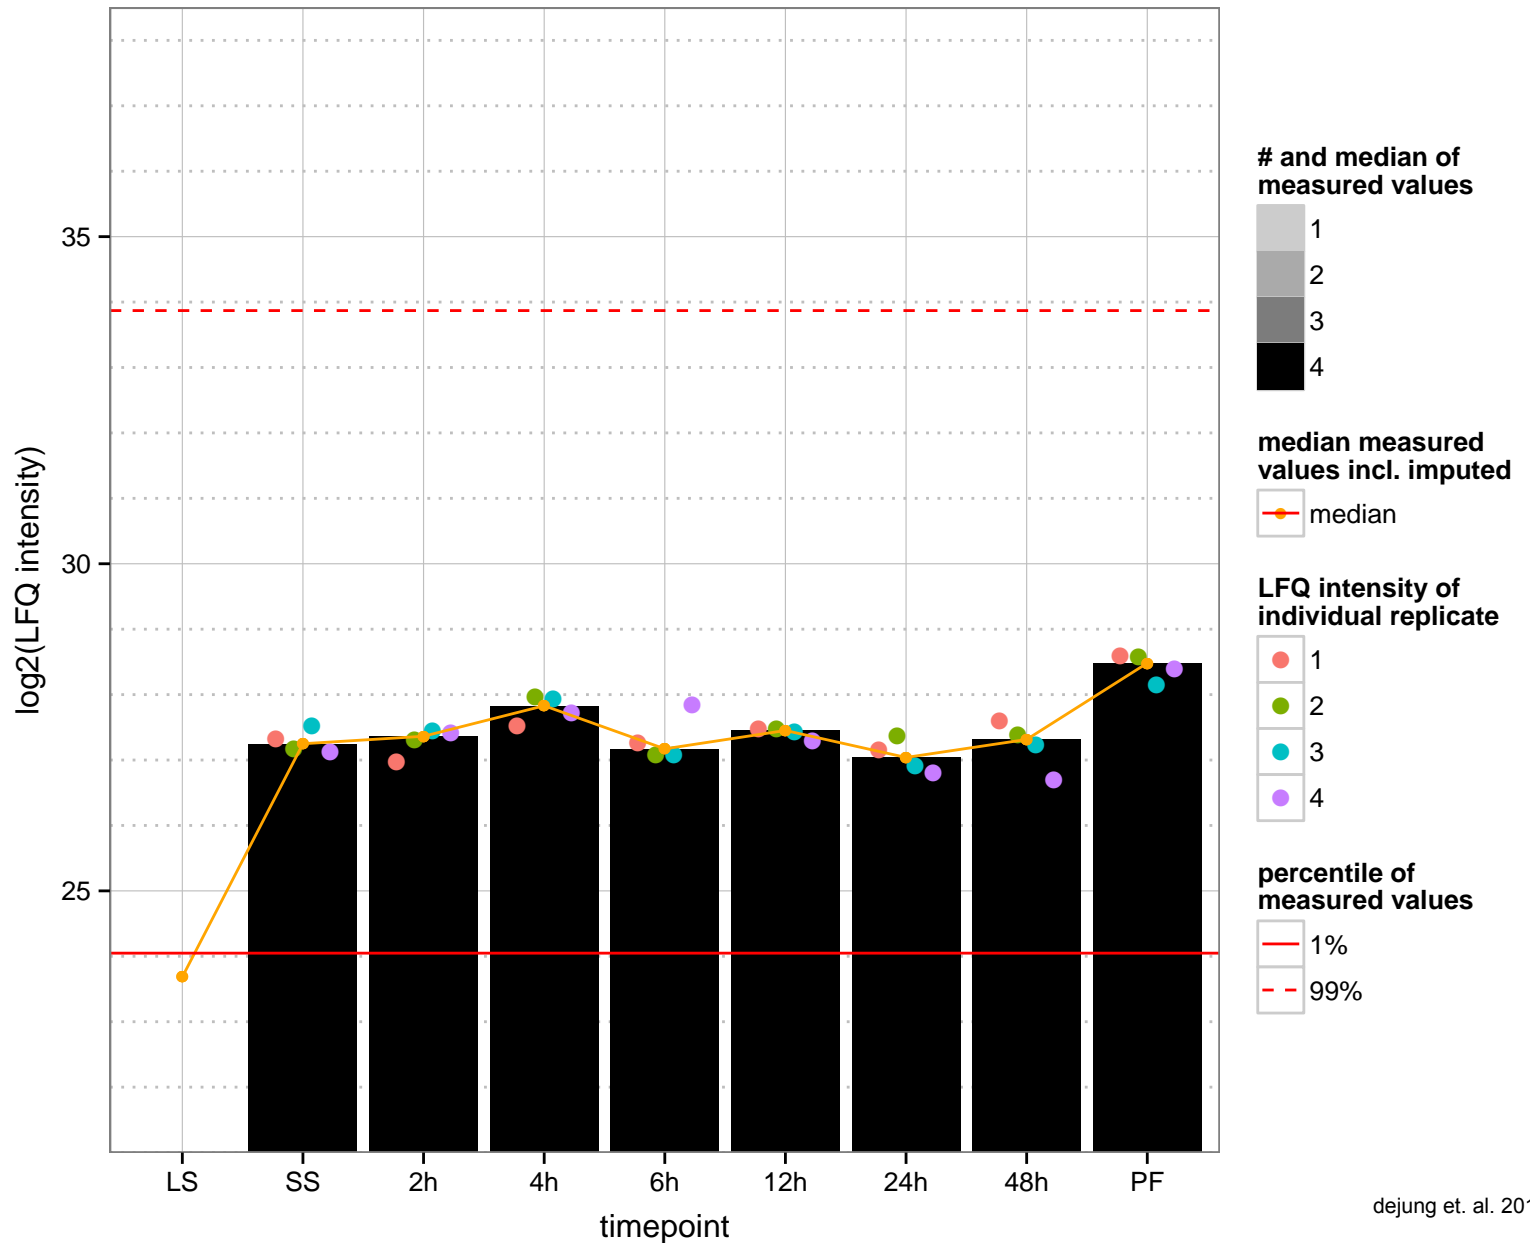

hypothetical protein, conserved  
 Tb927.6.4700  
 AGOF: null  
 AGOC: mitochondrion  
 AGOP: null  
 PGO: null  
 PGO: null  
 PGO: null

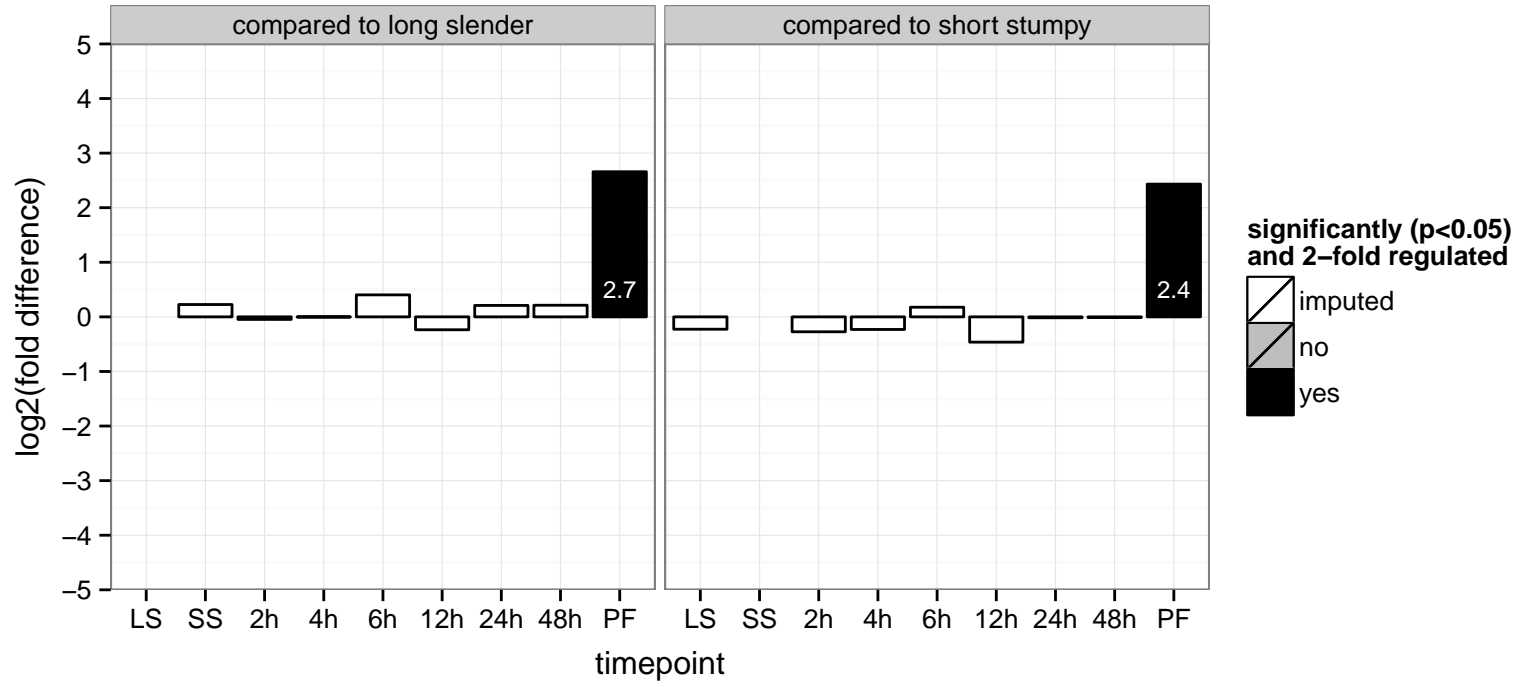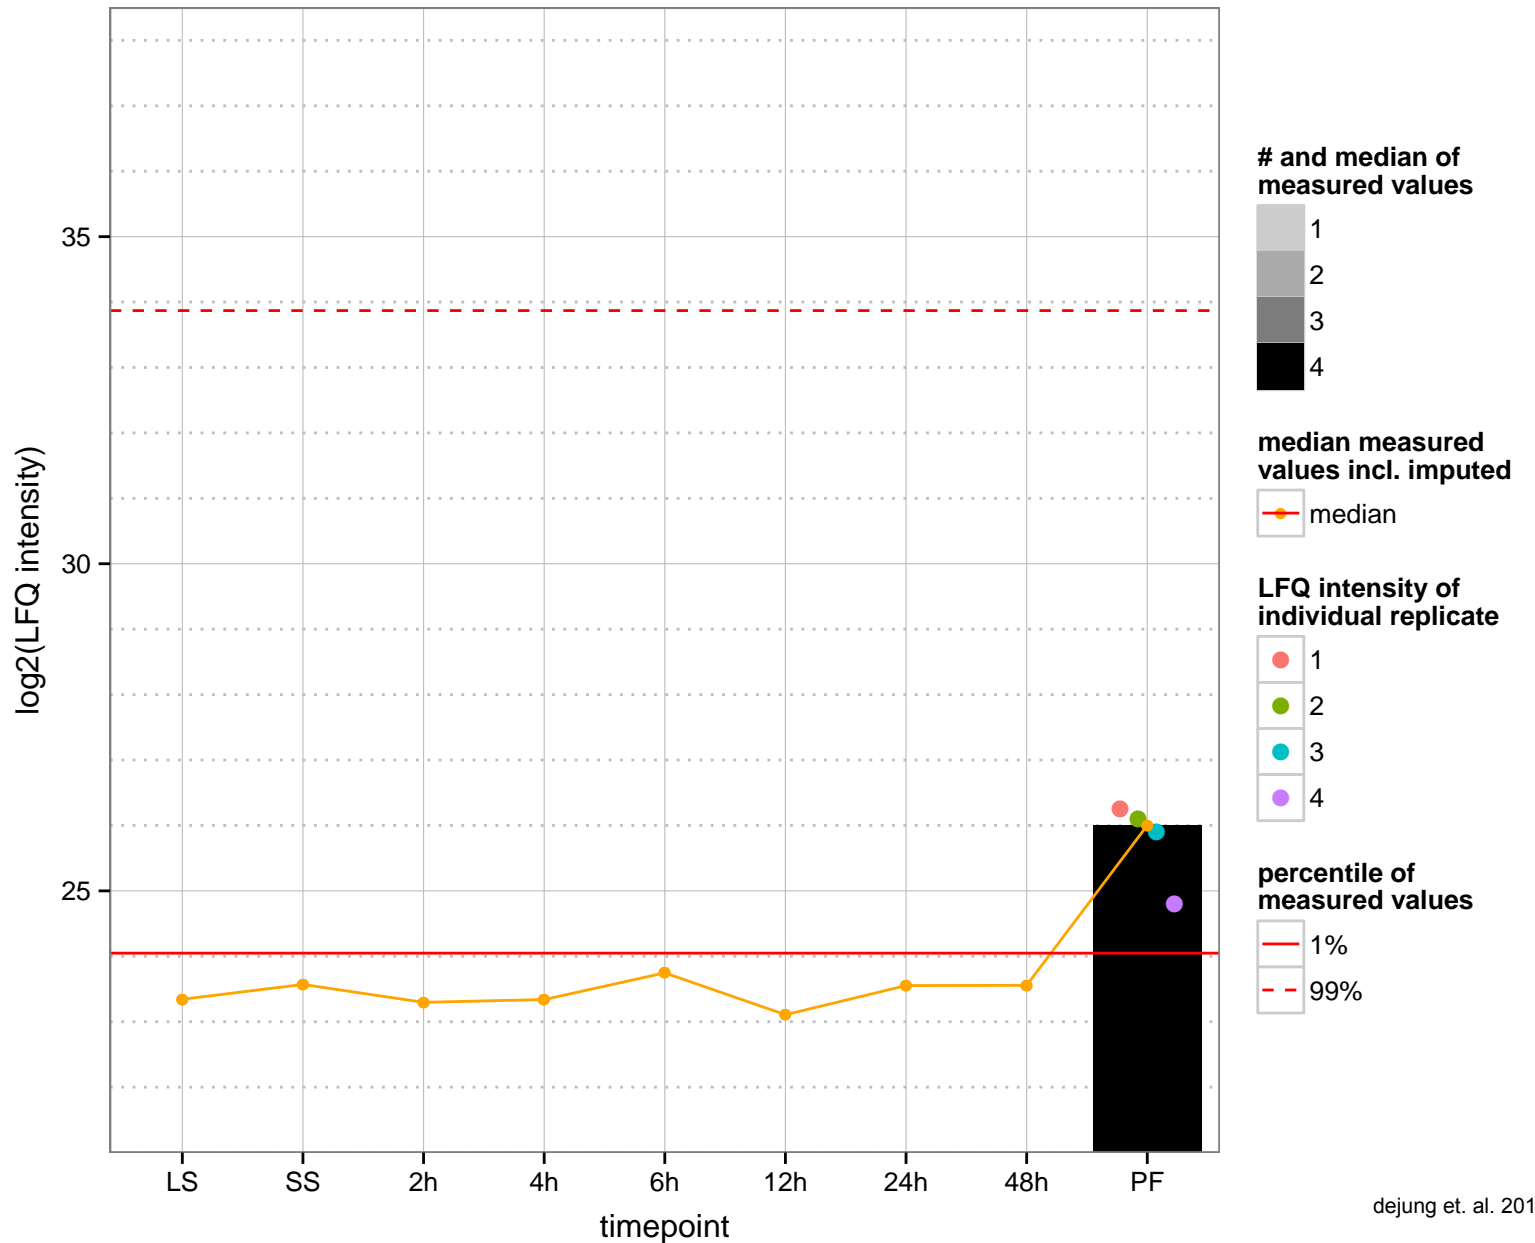

CCR4 associated factor, putative, CAF1 family ribonuclease, putative (CAF1)

Tb927.6.600

AGOF: poly(A) RNA binding

AGOC: cytoplasm, nucleus

AGOP: mRNA catabolic process

PGOF: nucleic acid binding

PGOC: nucleus

PGOP: null

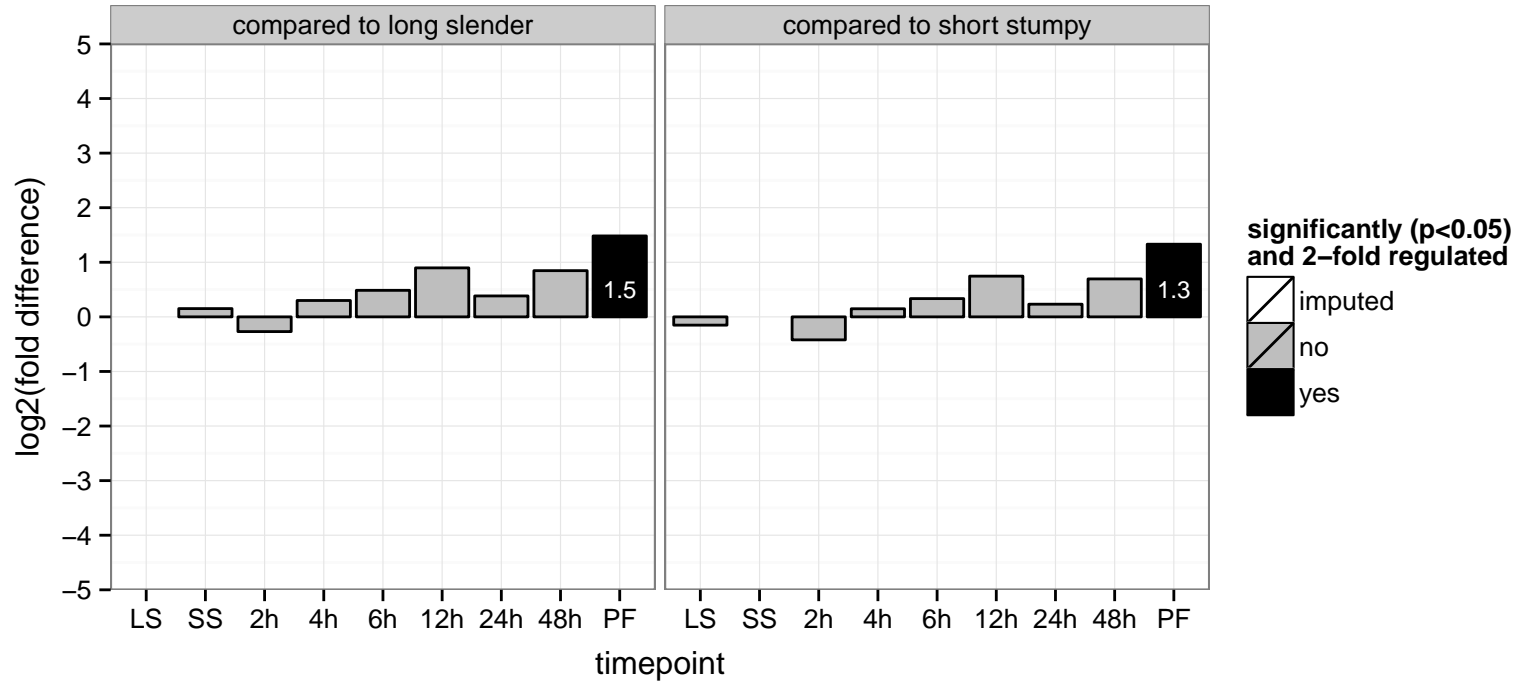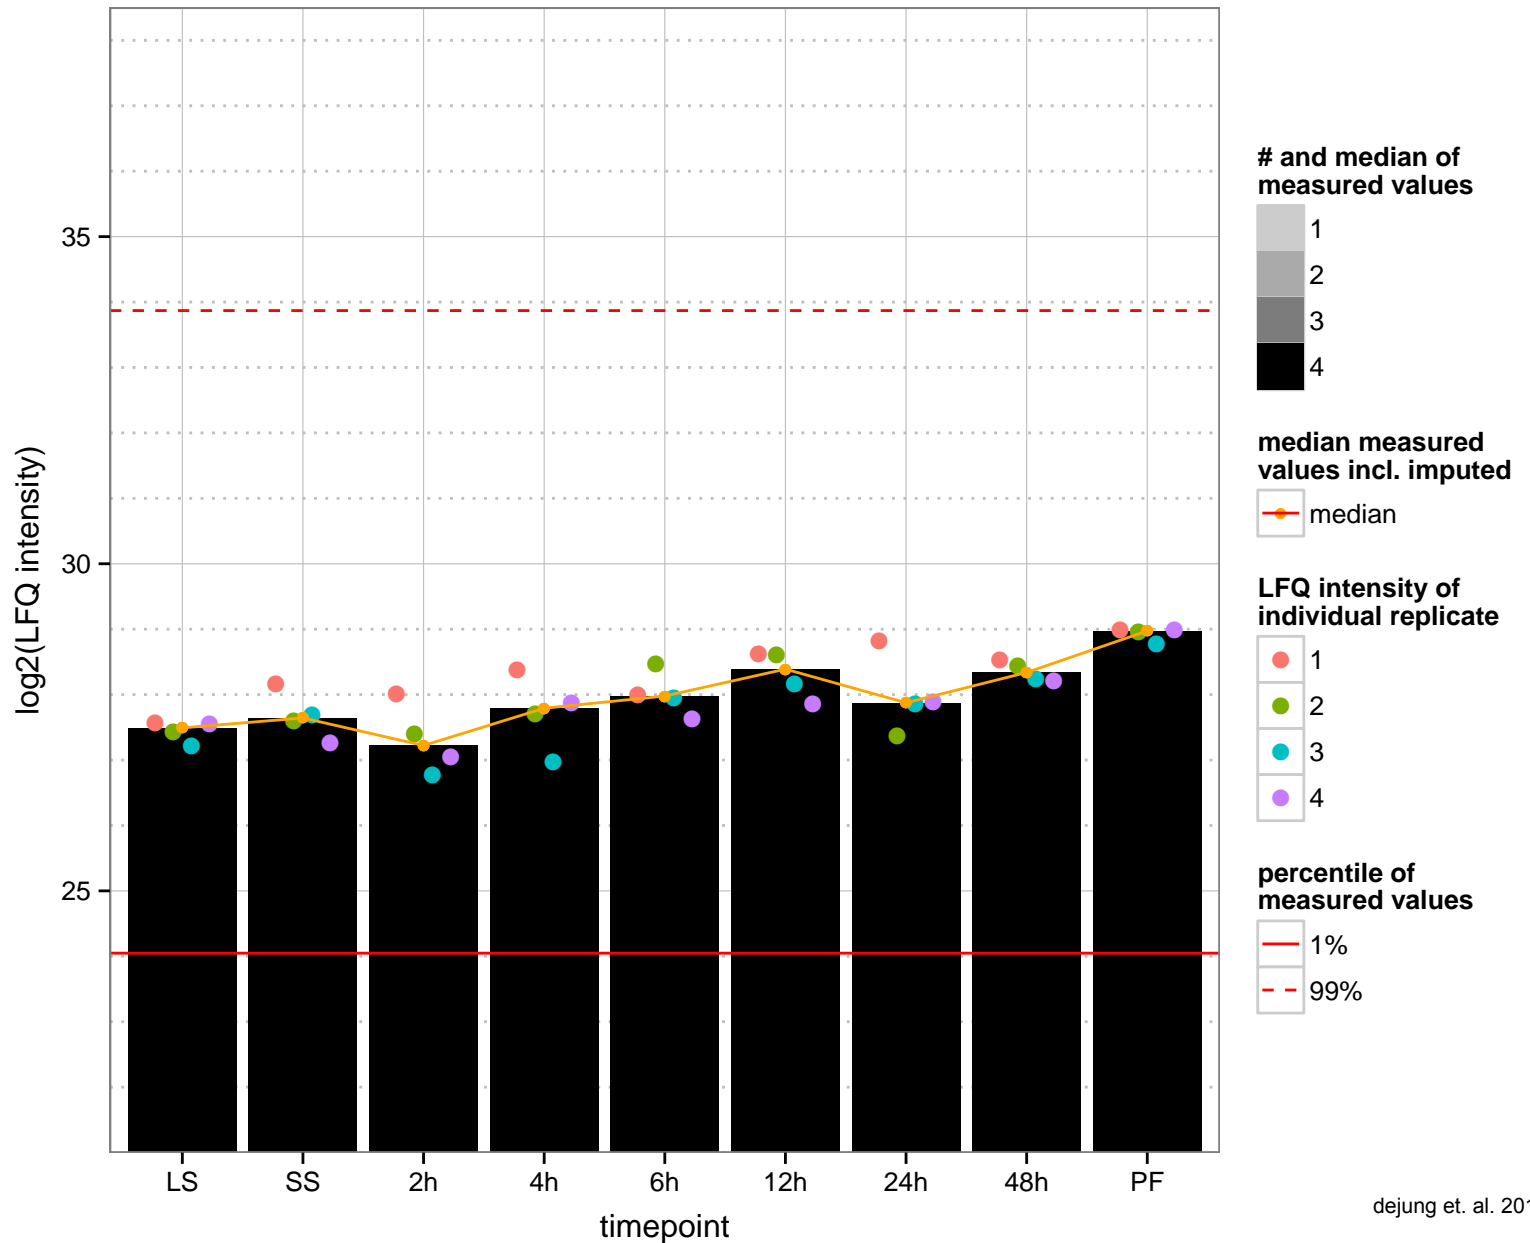

hypothetical protein, conserved  
 Tb927.6.890  
 AGOF: null  
 AGOC: null  
 AGOP: null  
 PGO: null  
 PGOC: null  
 PGOP: null

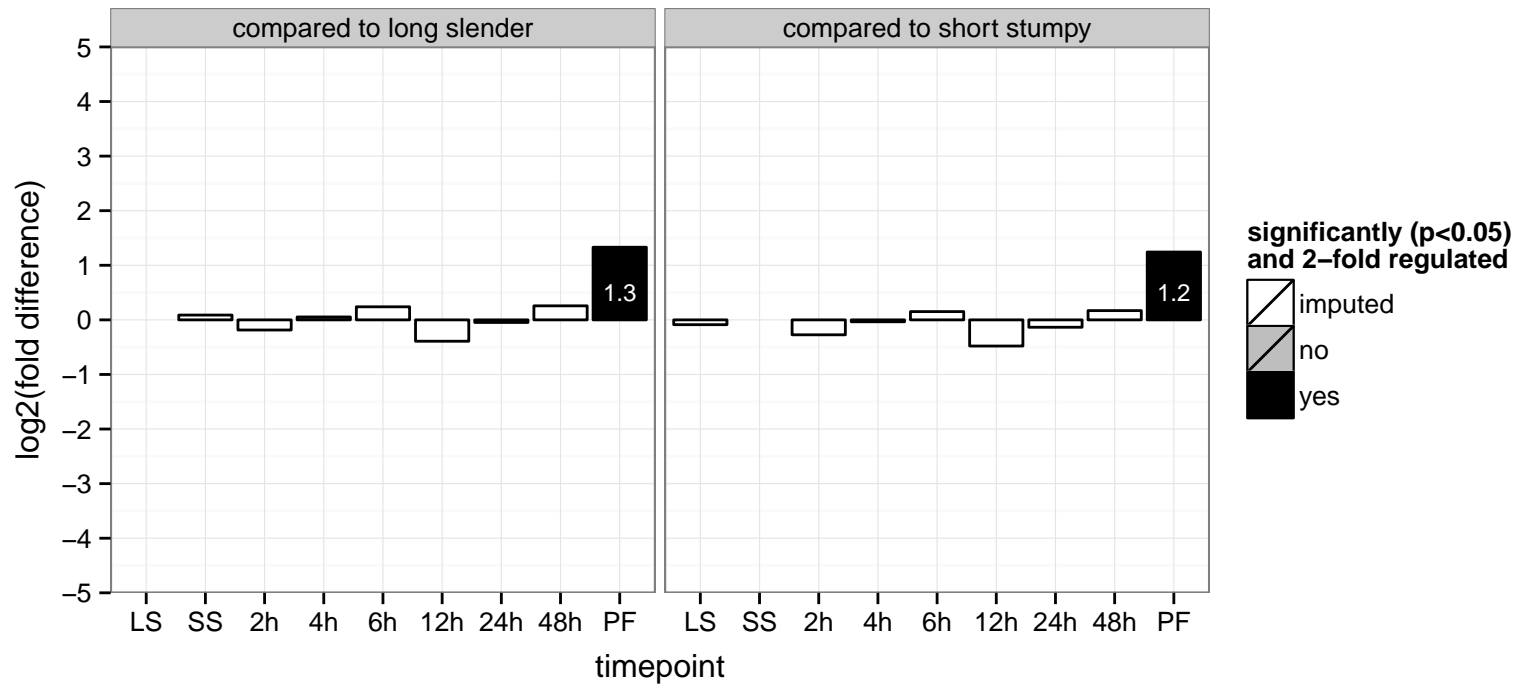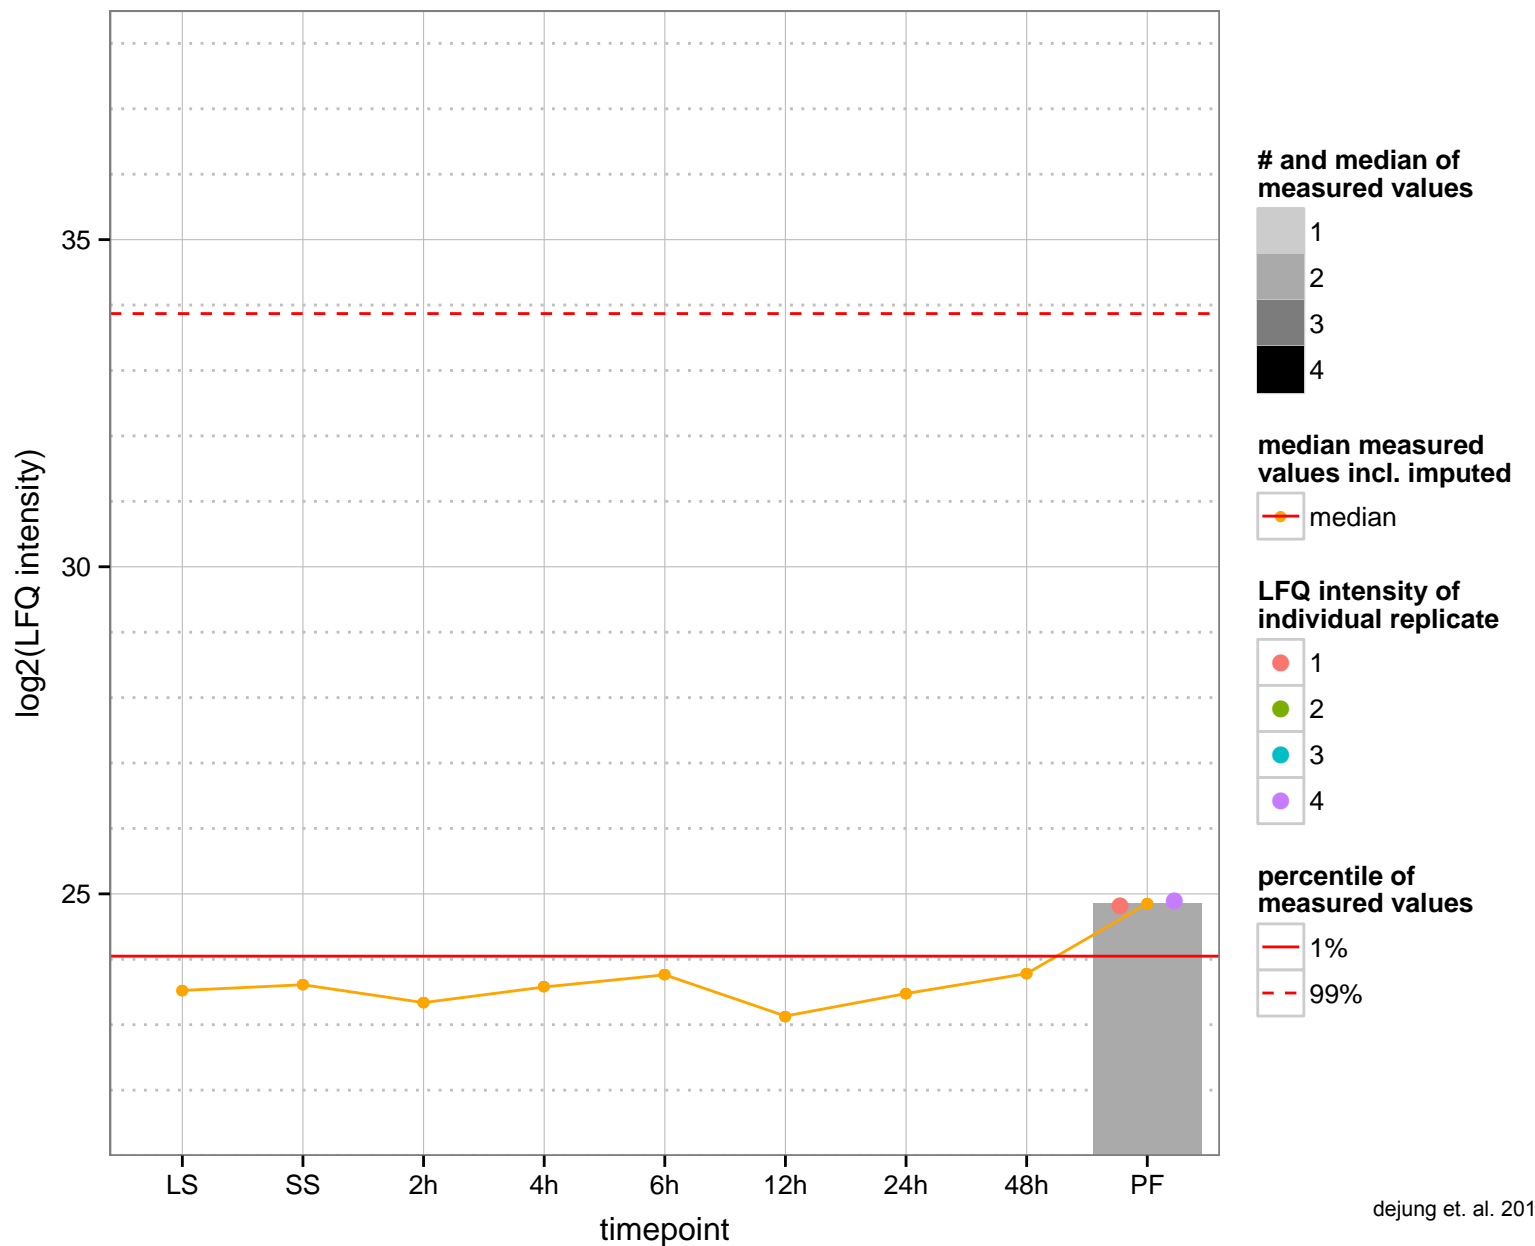

cysteinyl-tRNA synthetase, putative

Tb927.6.950

AGOF: ATP binding, cysteine-tRNA ligase activity

AGOC: cytoplasm

AGOP: cysteinyl-tRNA aminoacylation, translation

PGOF: ATP binding, aminoacyl-tRNA ligase activity, cysteine-tRNA ligase activity, nucleotide binding

PGOC: cytoplasm

PGOP: cysteinyl-tRNA aminoacylation, tRNA aminoacylation for protein translation

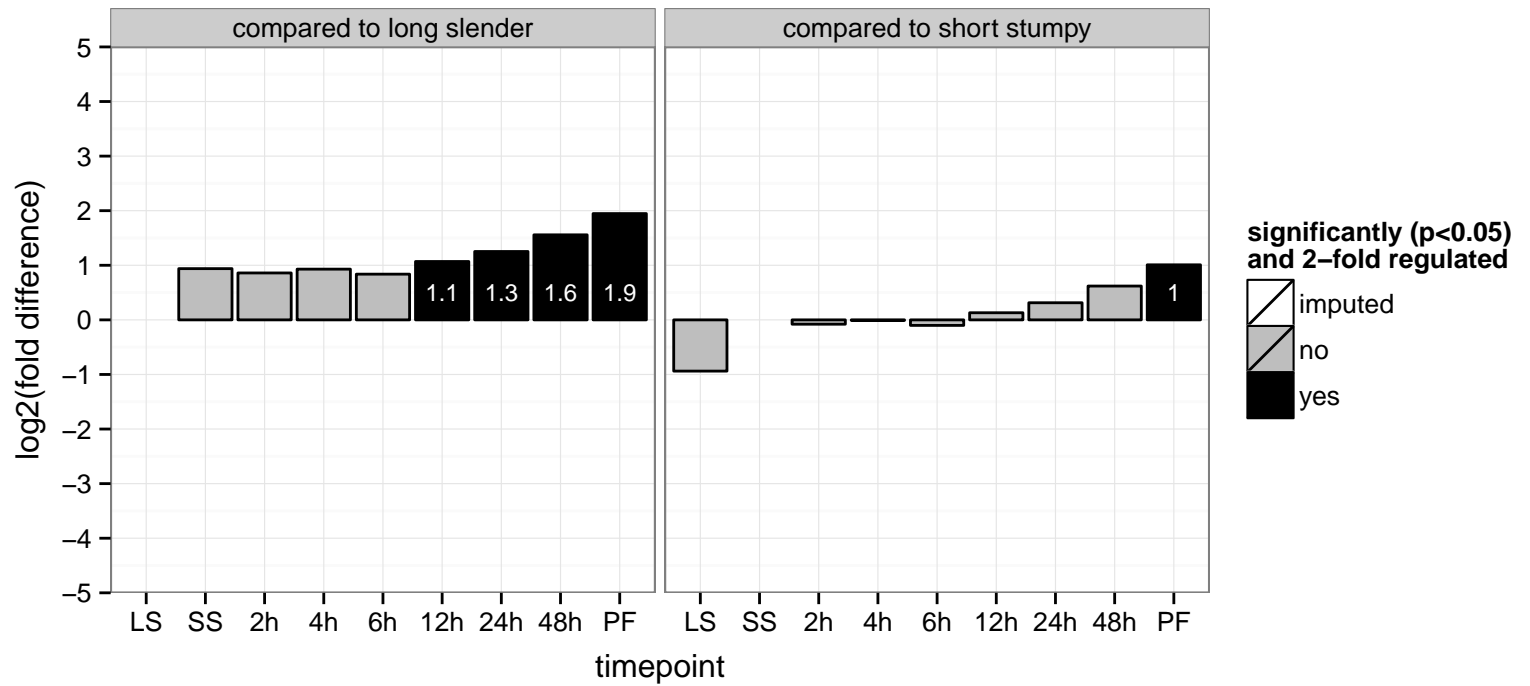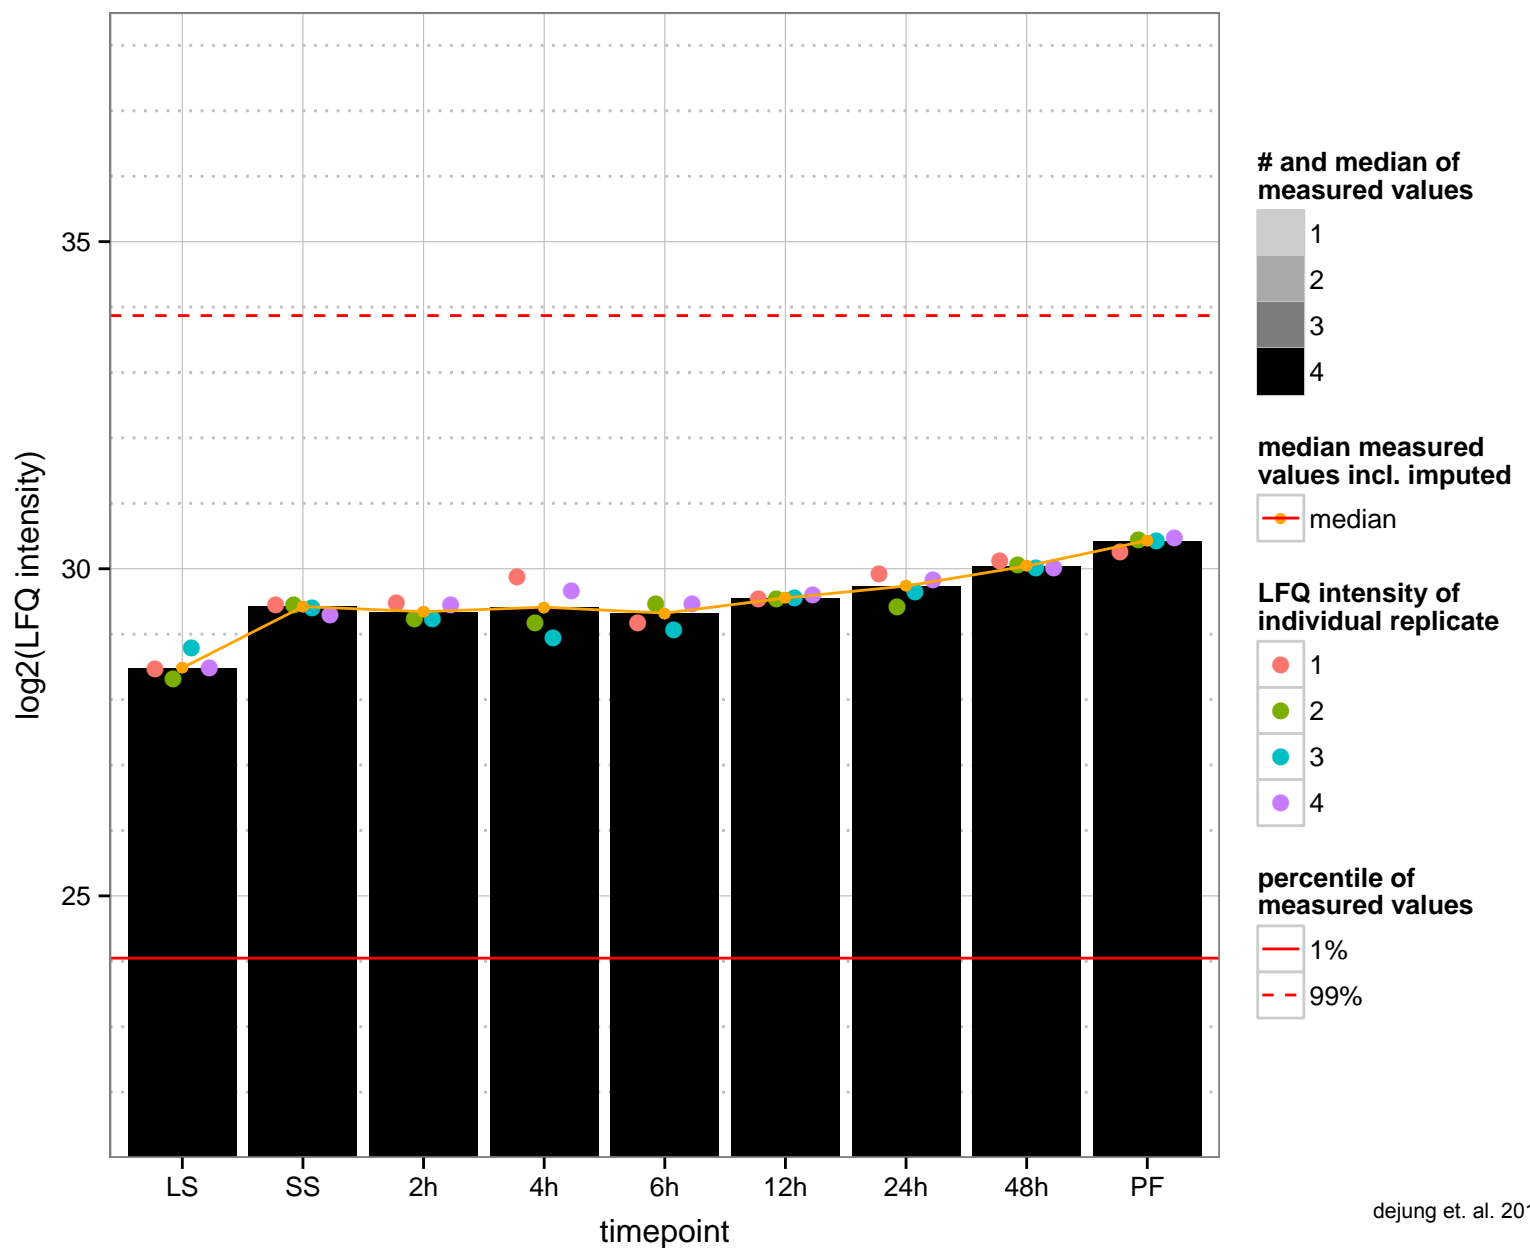

hypothetical protein, conserved  
 Tb927.7.1220  
 AGOF: null  
 AGOC: null  
 AGOP: null  
 PGOF: null  
 PGO: null  
 PGOP: null

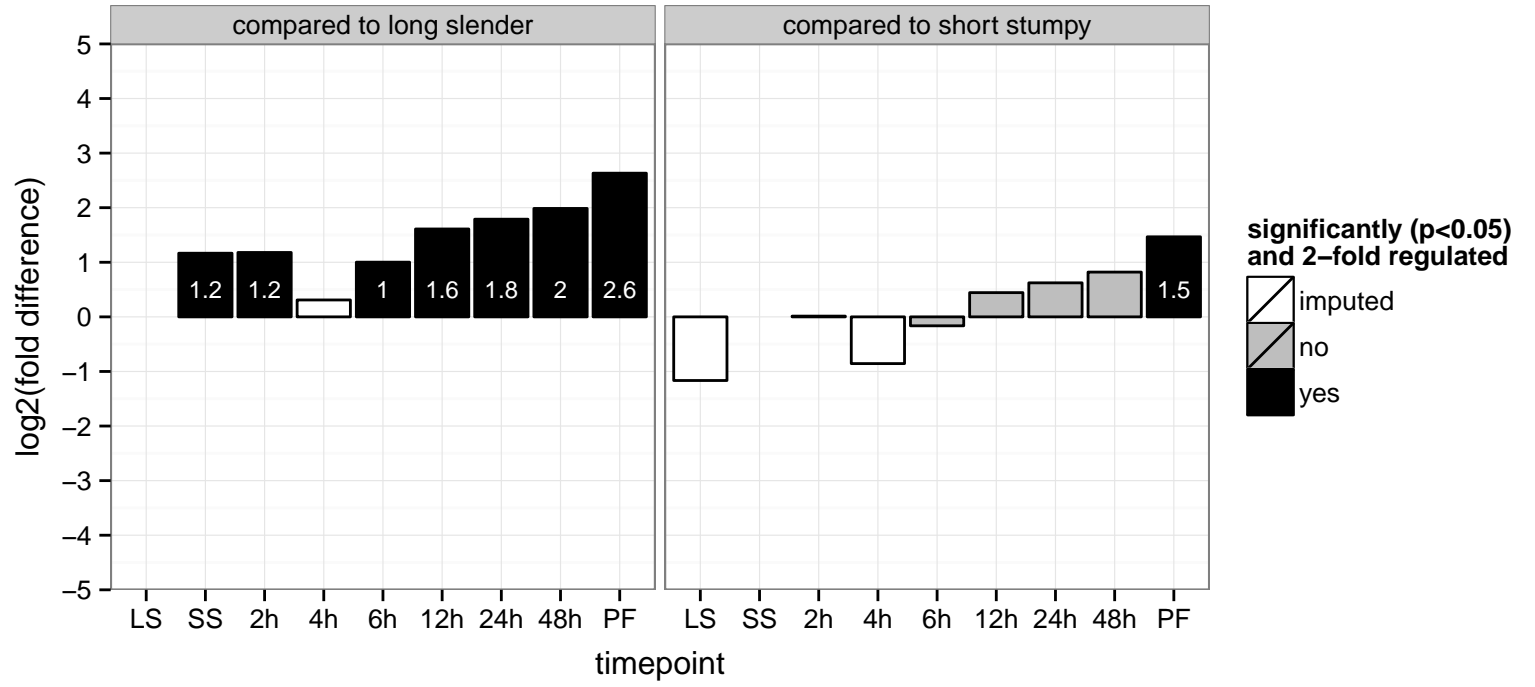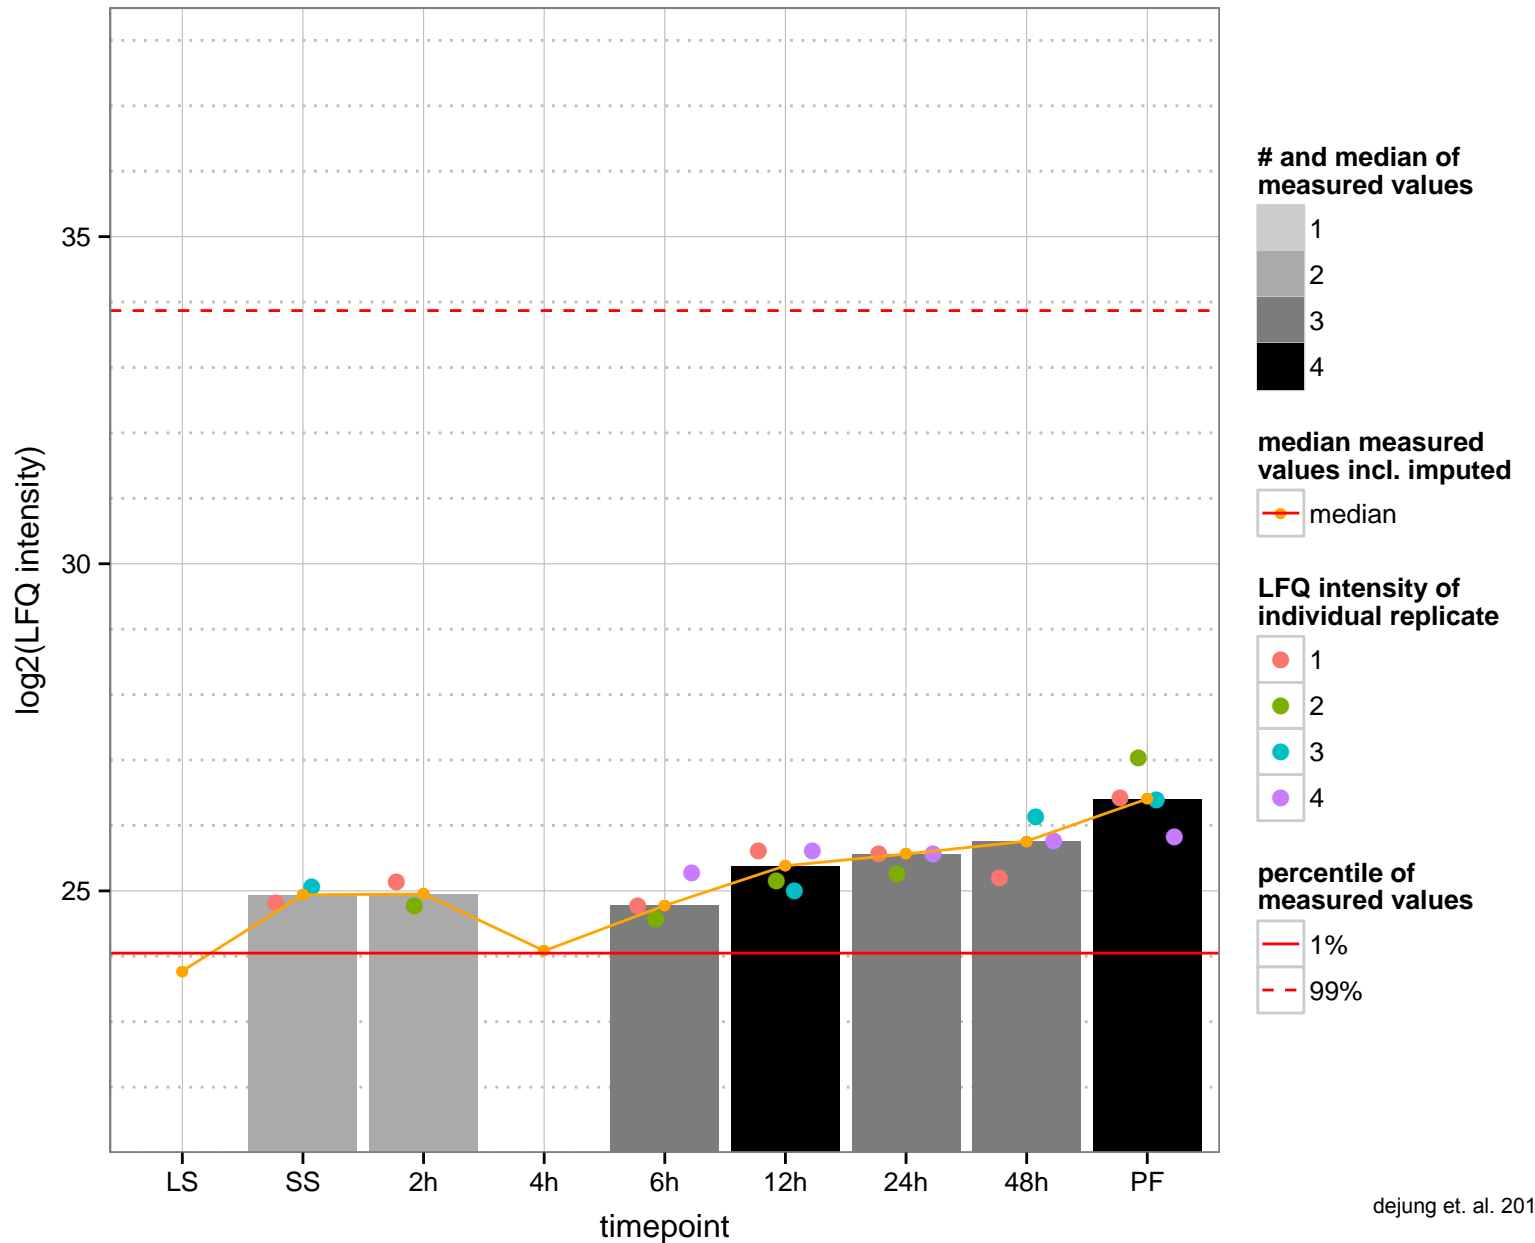

hypothetical protein, conserved  
 Tb927.7.1460  
 AGOF: protein transporter activity  
 AGOC: cytoplasm, nuclear pore, nucleus  
 AGOP: intracellular protein transport, protein import into nucleus, docking  
 PGO: binding, protein transporter activity  
 PGOC: null  
 PGOP: intracellular protein transport

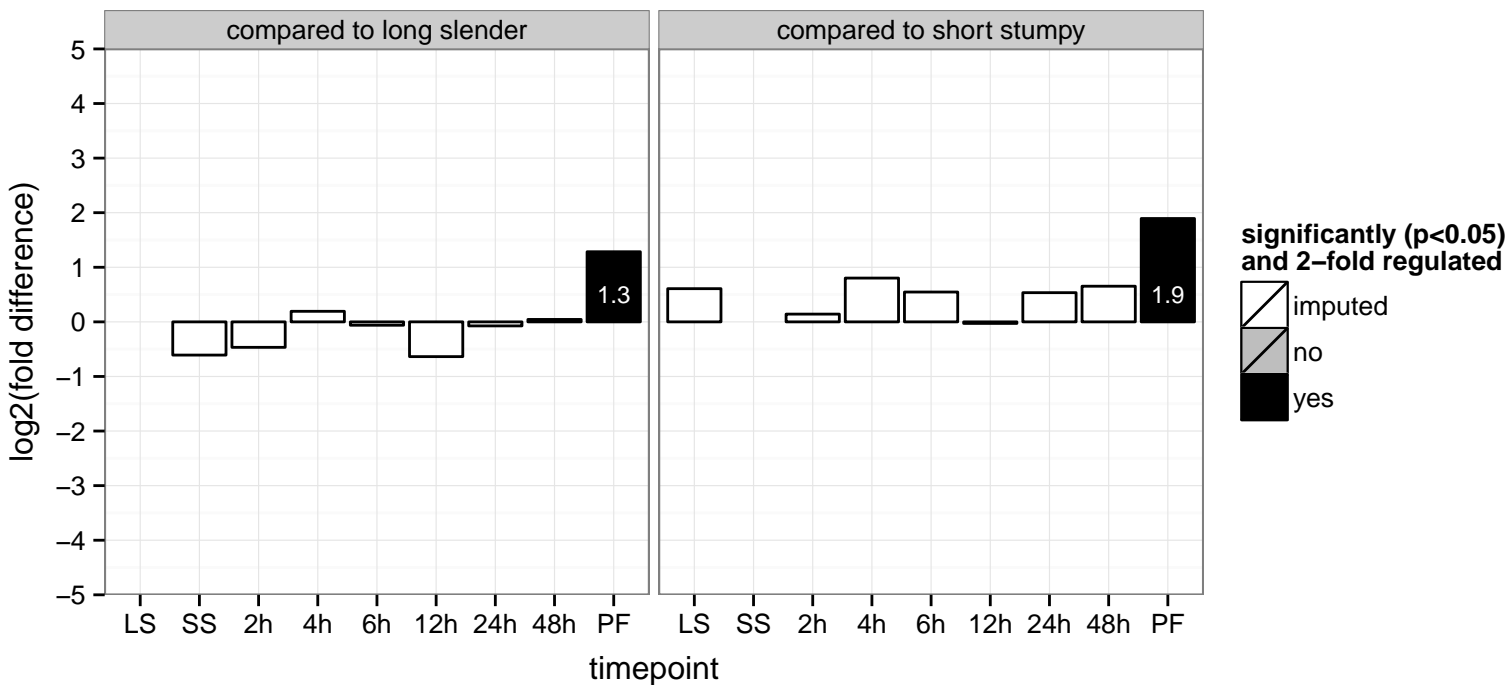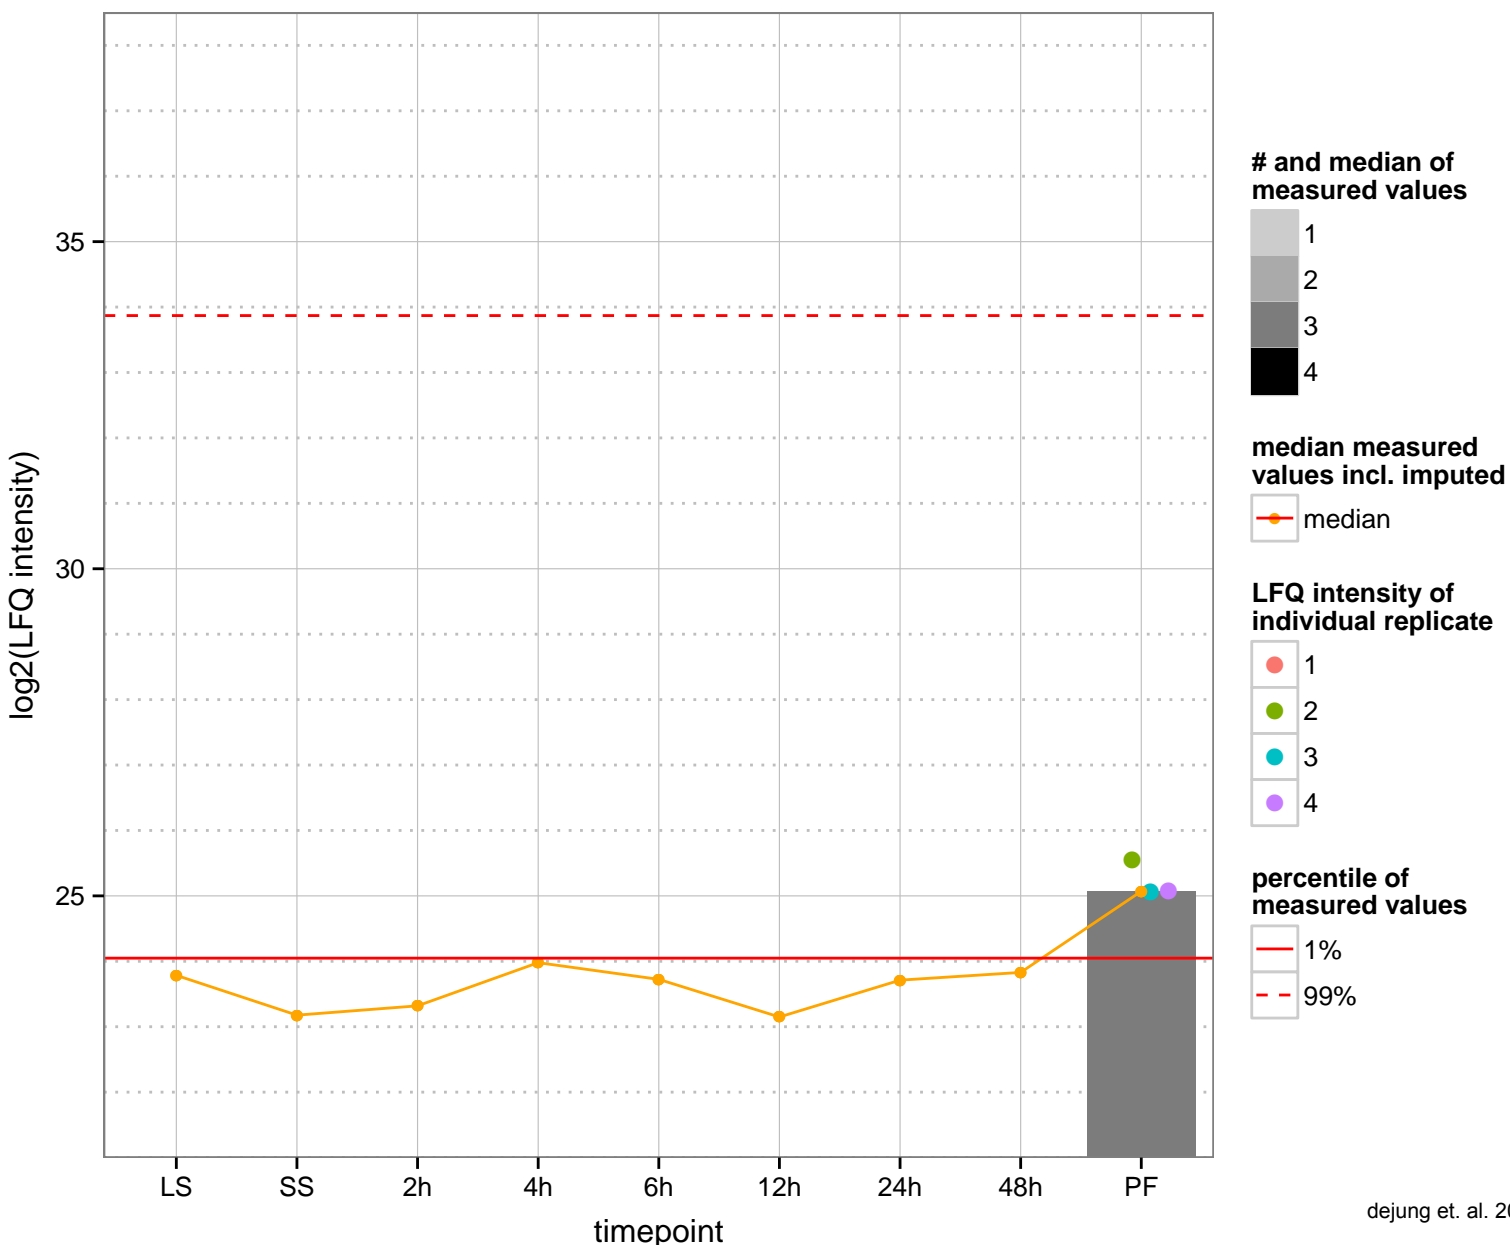

KRET2, RNA-editing 3' terminal uridylyl transferase 2, RNA-editing complex protein (KRET2)  
 Tb927.7.1550  
 AGOF: null  
 AGOC: mitochondrial mRNA editing complex, mitochondrion  
 AGOP: null  
 PGO: nucleotidyltransferase activity  
 PGOC: null  
 PGOP: null

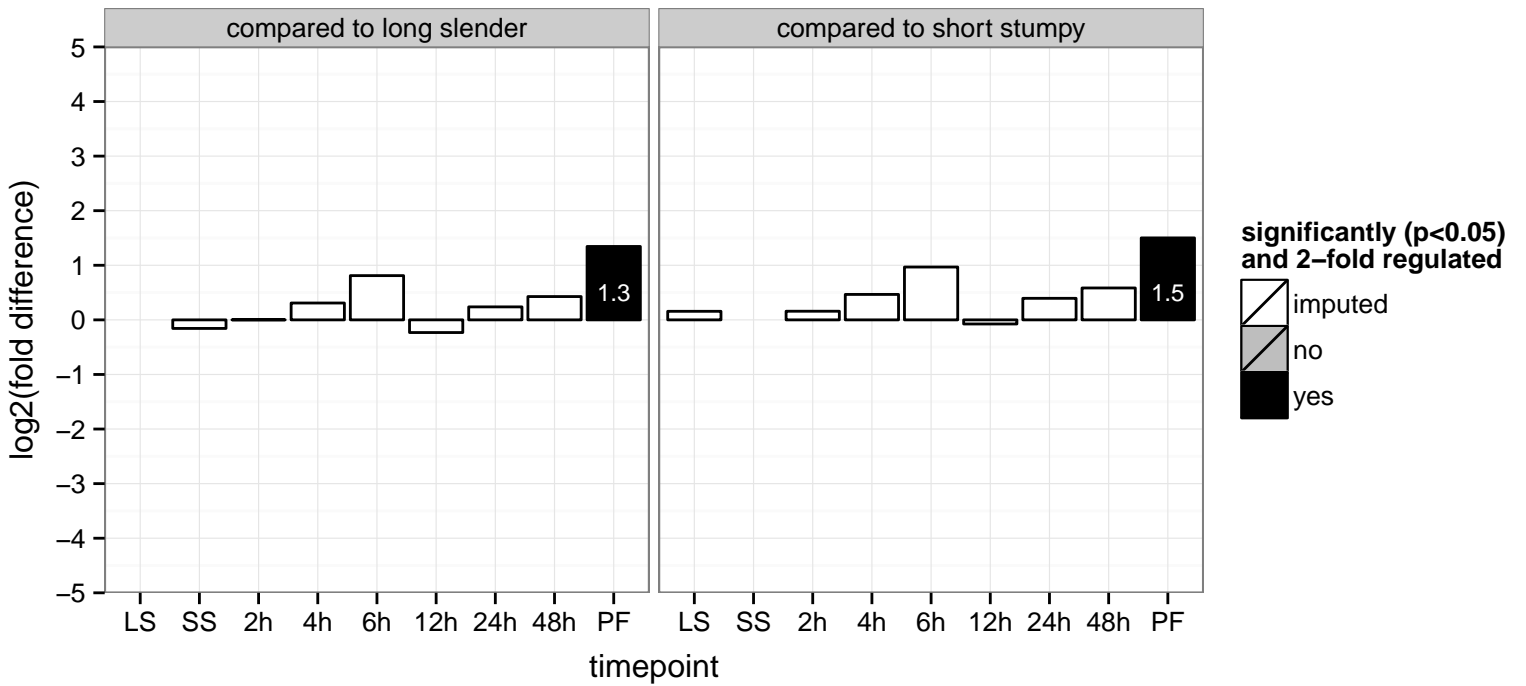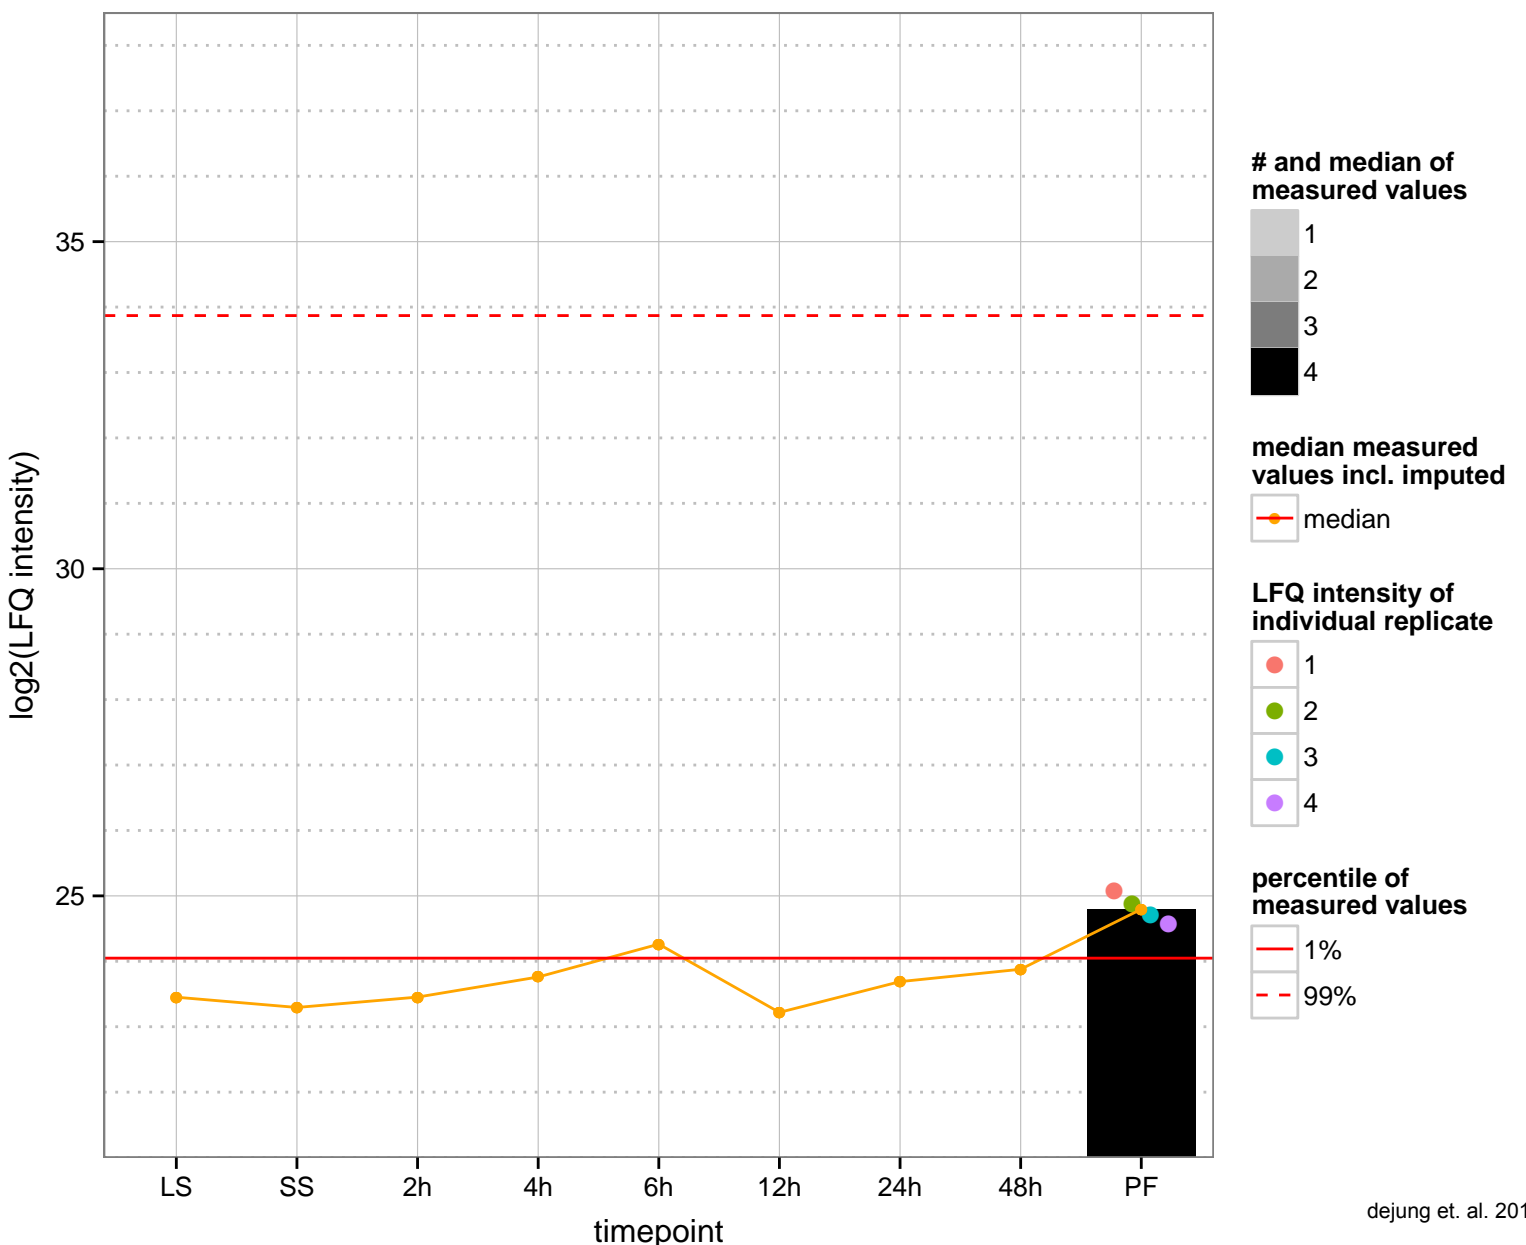



hypothetical protein, conserved  
 Tb927.7.1700  
 AGOF: null  
 AGOC: null  
 AGOP: null  
 PGO: null  
 PGOC: null  
 PGOP: null

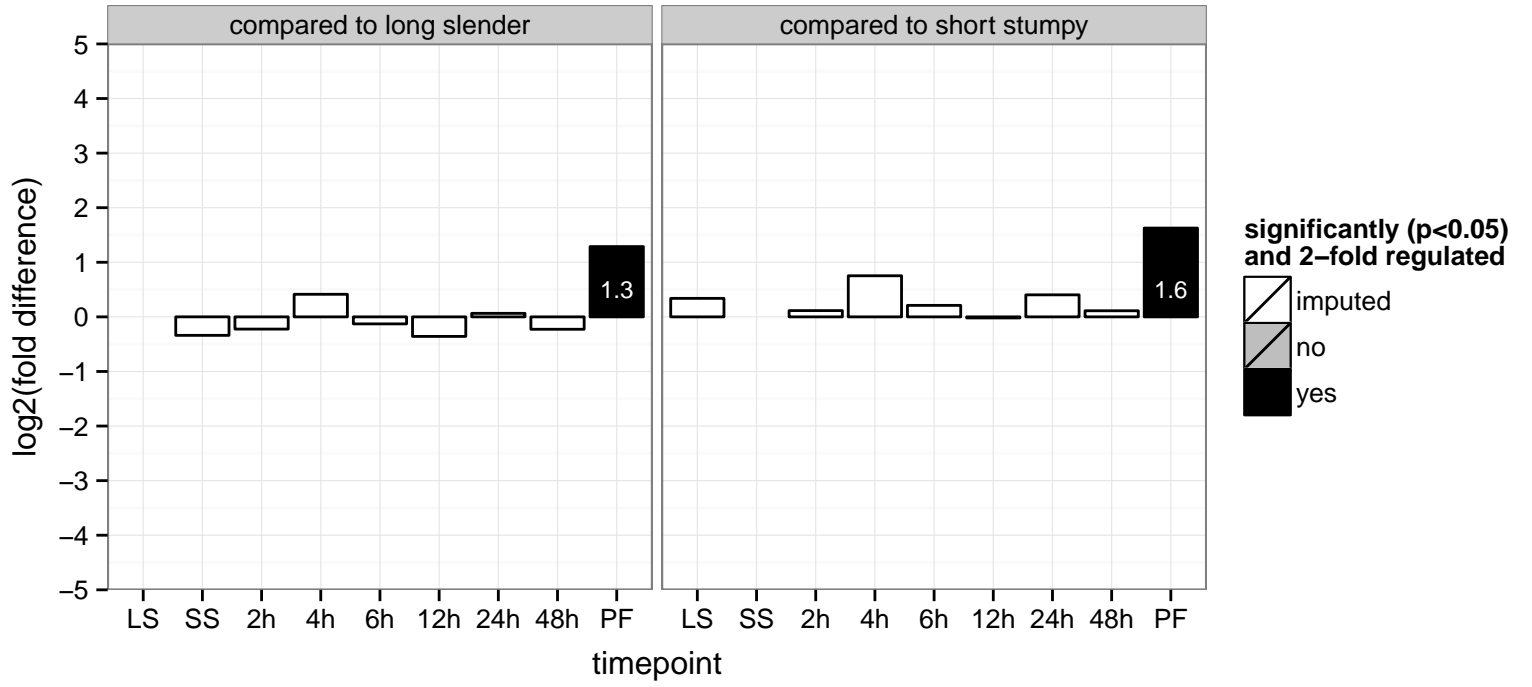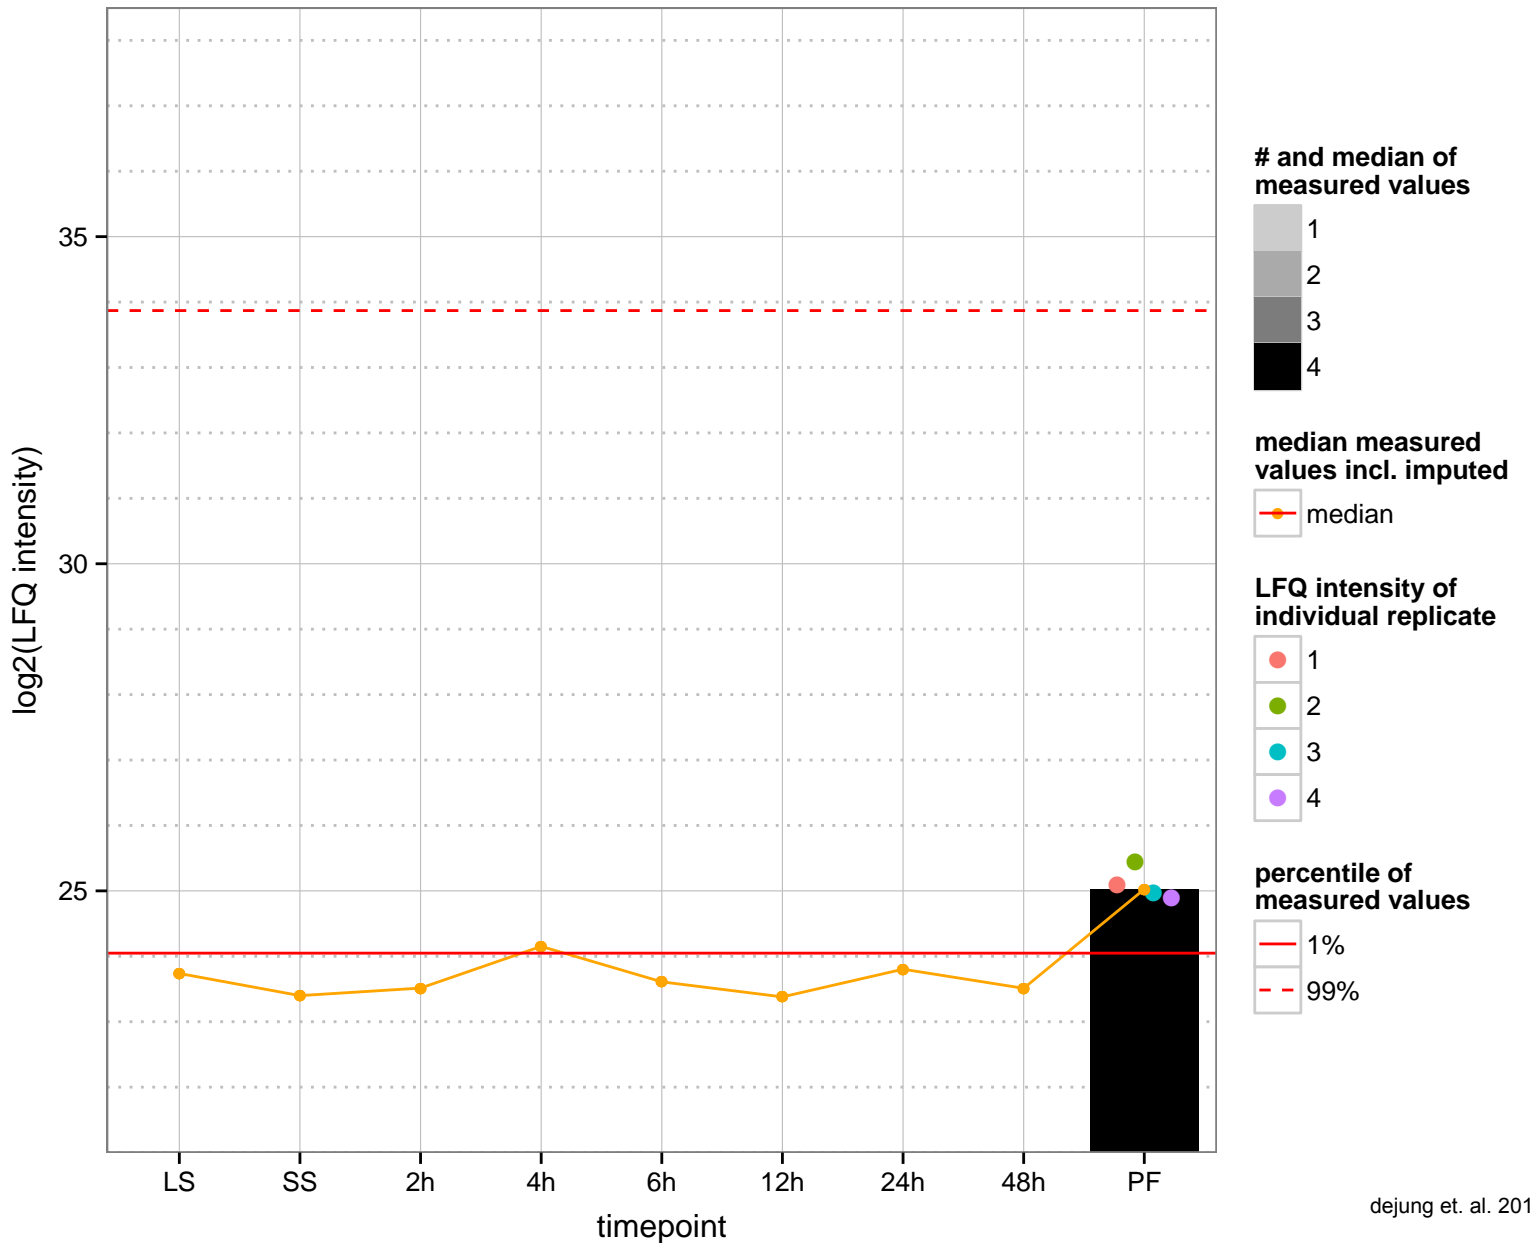

hypothetical protein, conserved  
 Tb927.7.1860;Tb927.7.1820  
 AGOF: null  
 AGOC: null  
 AGOP: null  
 PGO: null  
 PGOC: null  
 PGOP: null

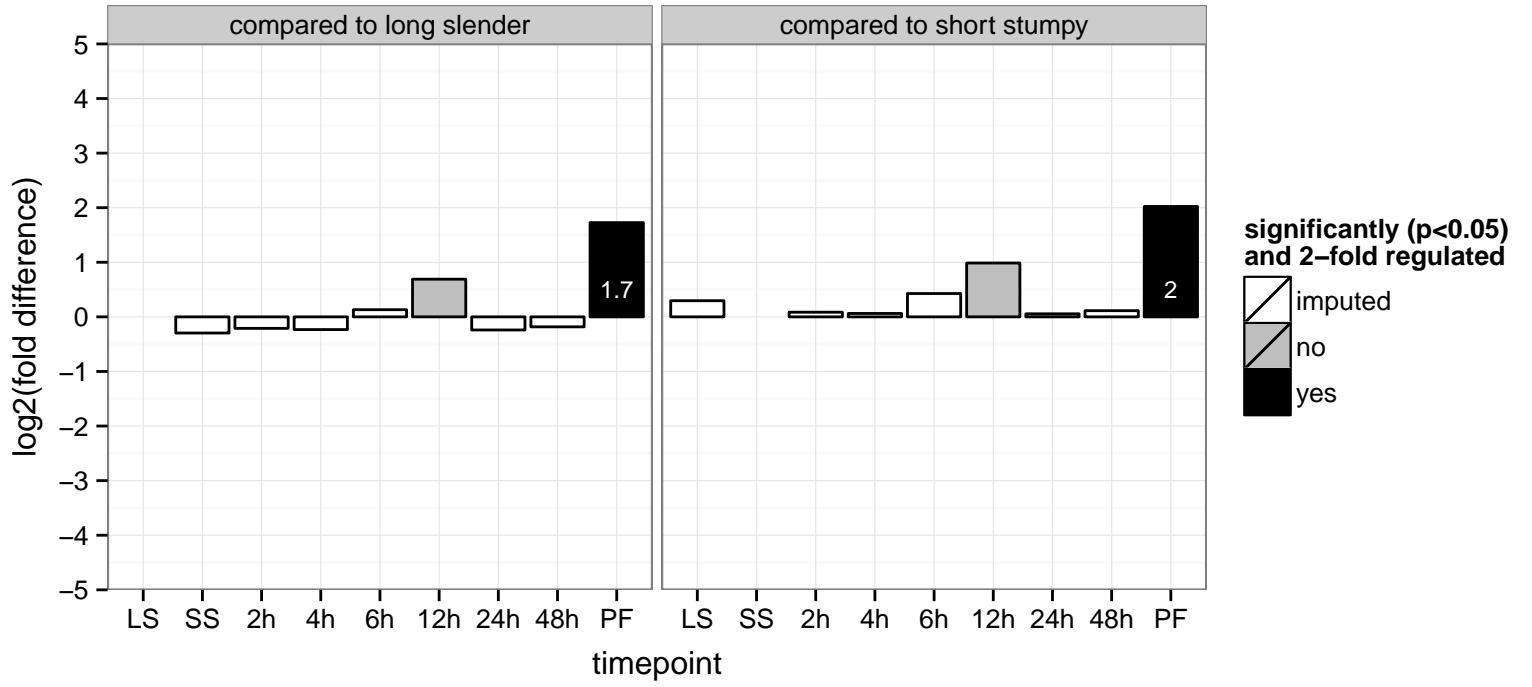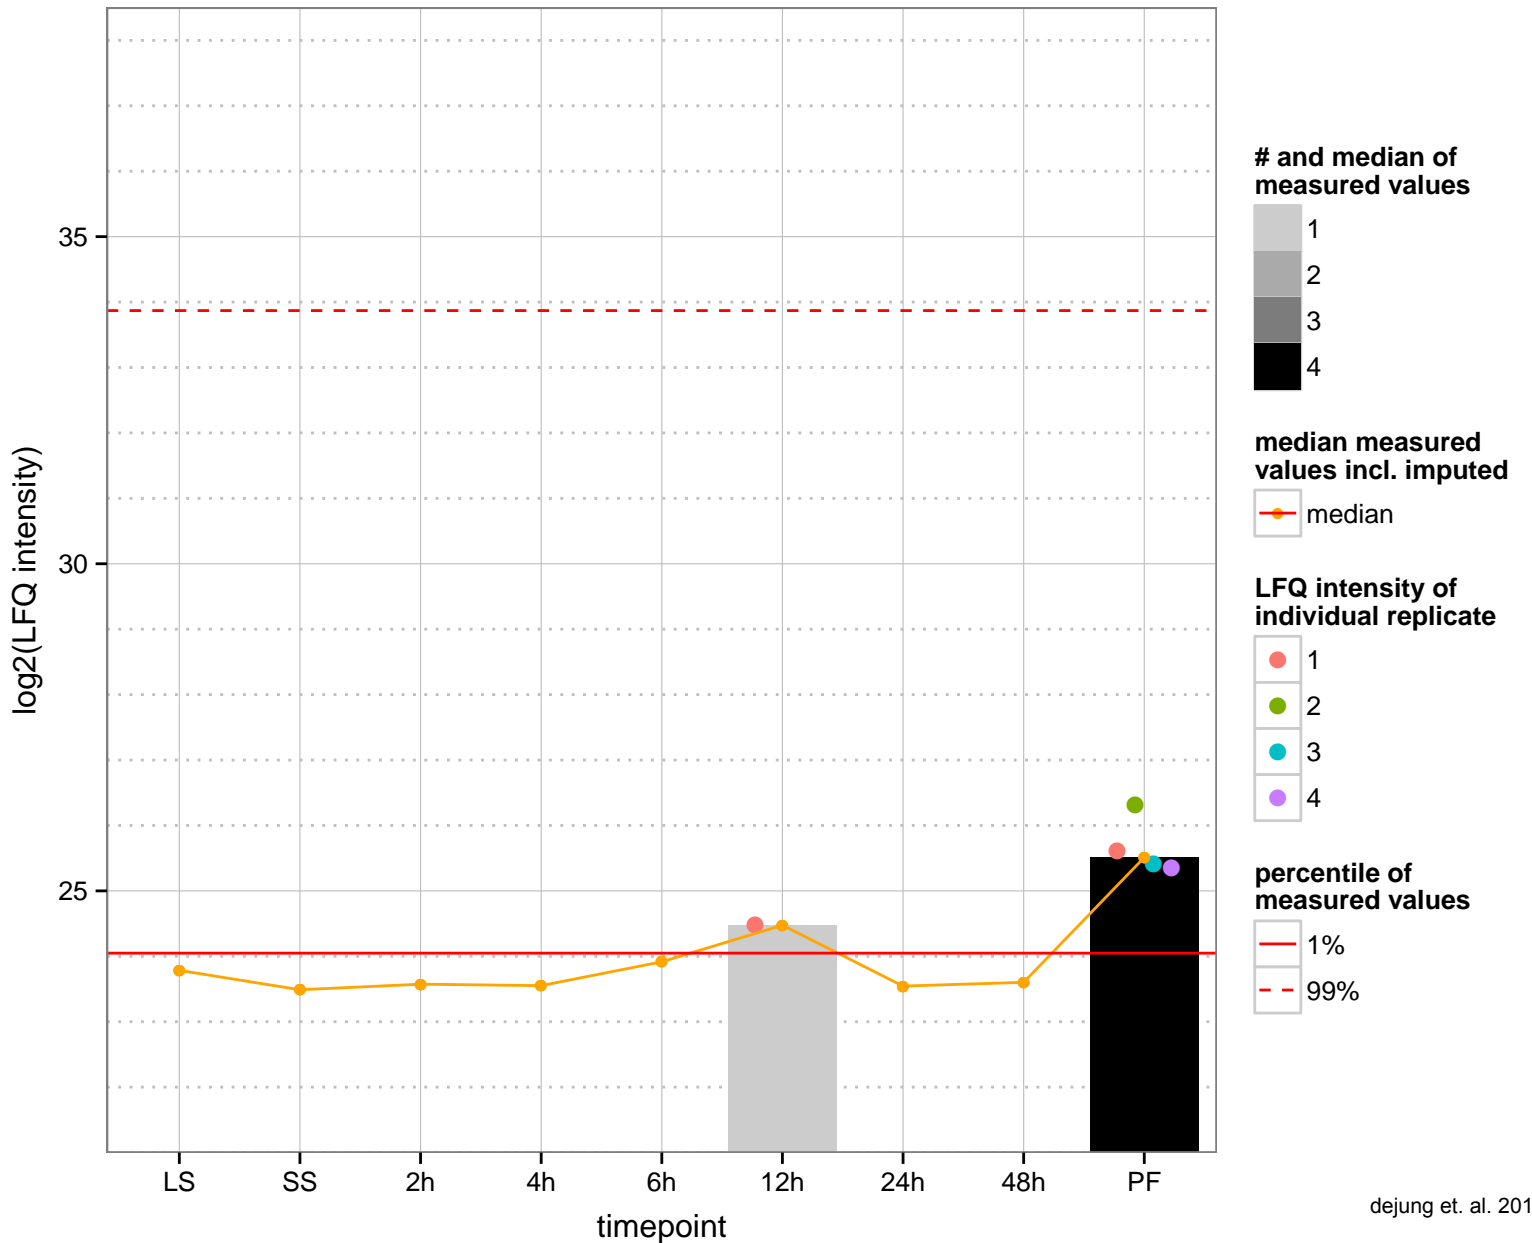

hypothetical protein, conserved  
 Tb927.7.1870;Tb927.7.1830  
 AGOF: null  
 AGOC: null  
 AGOP: null  
 PGOF: null  
 PGOC: null  
 PGOP: null

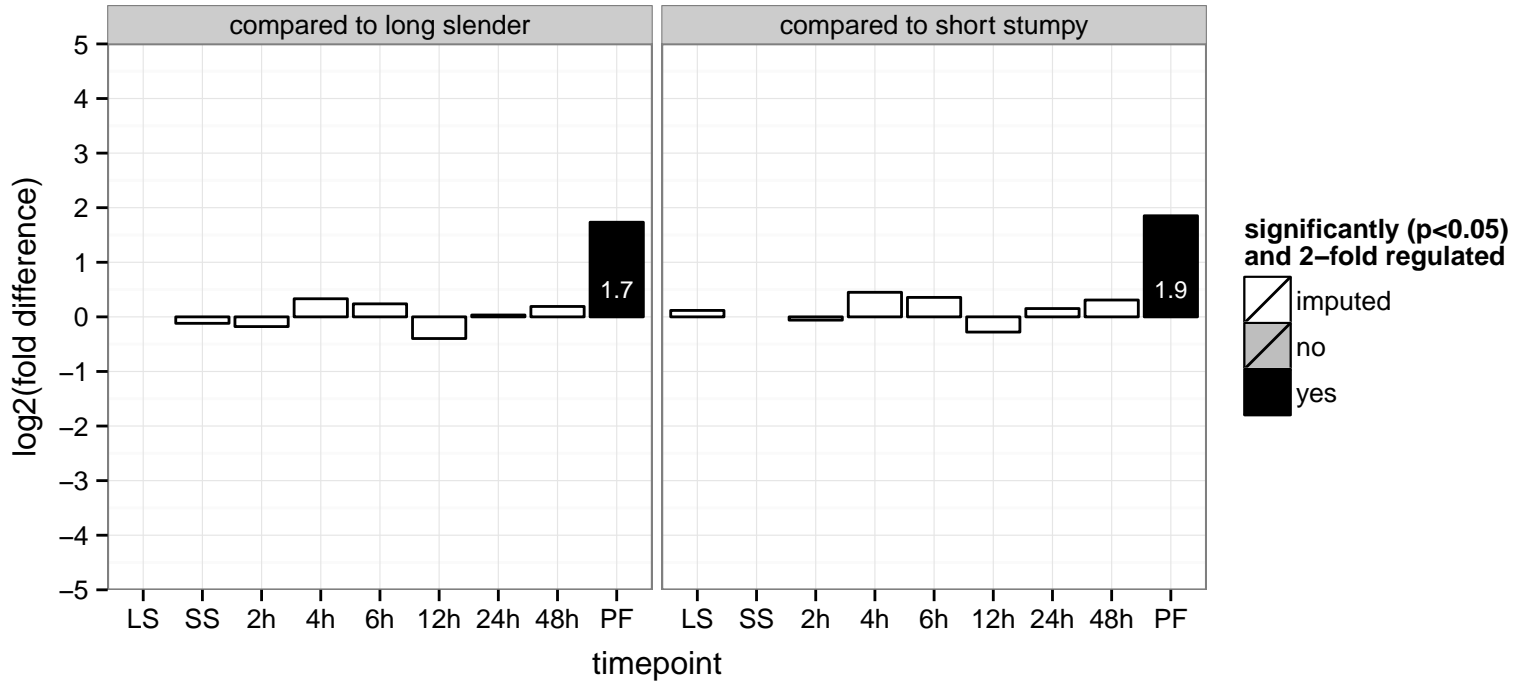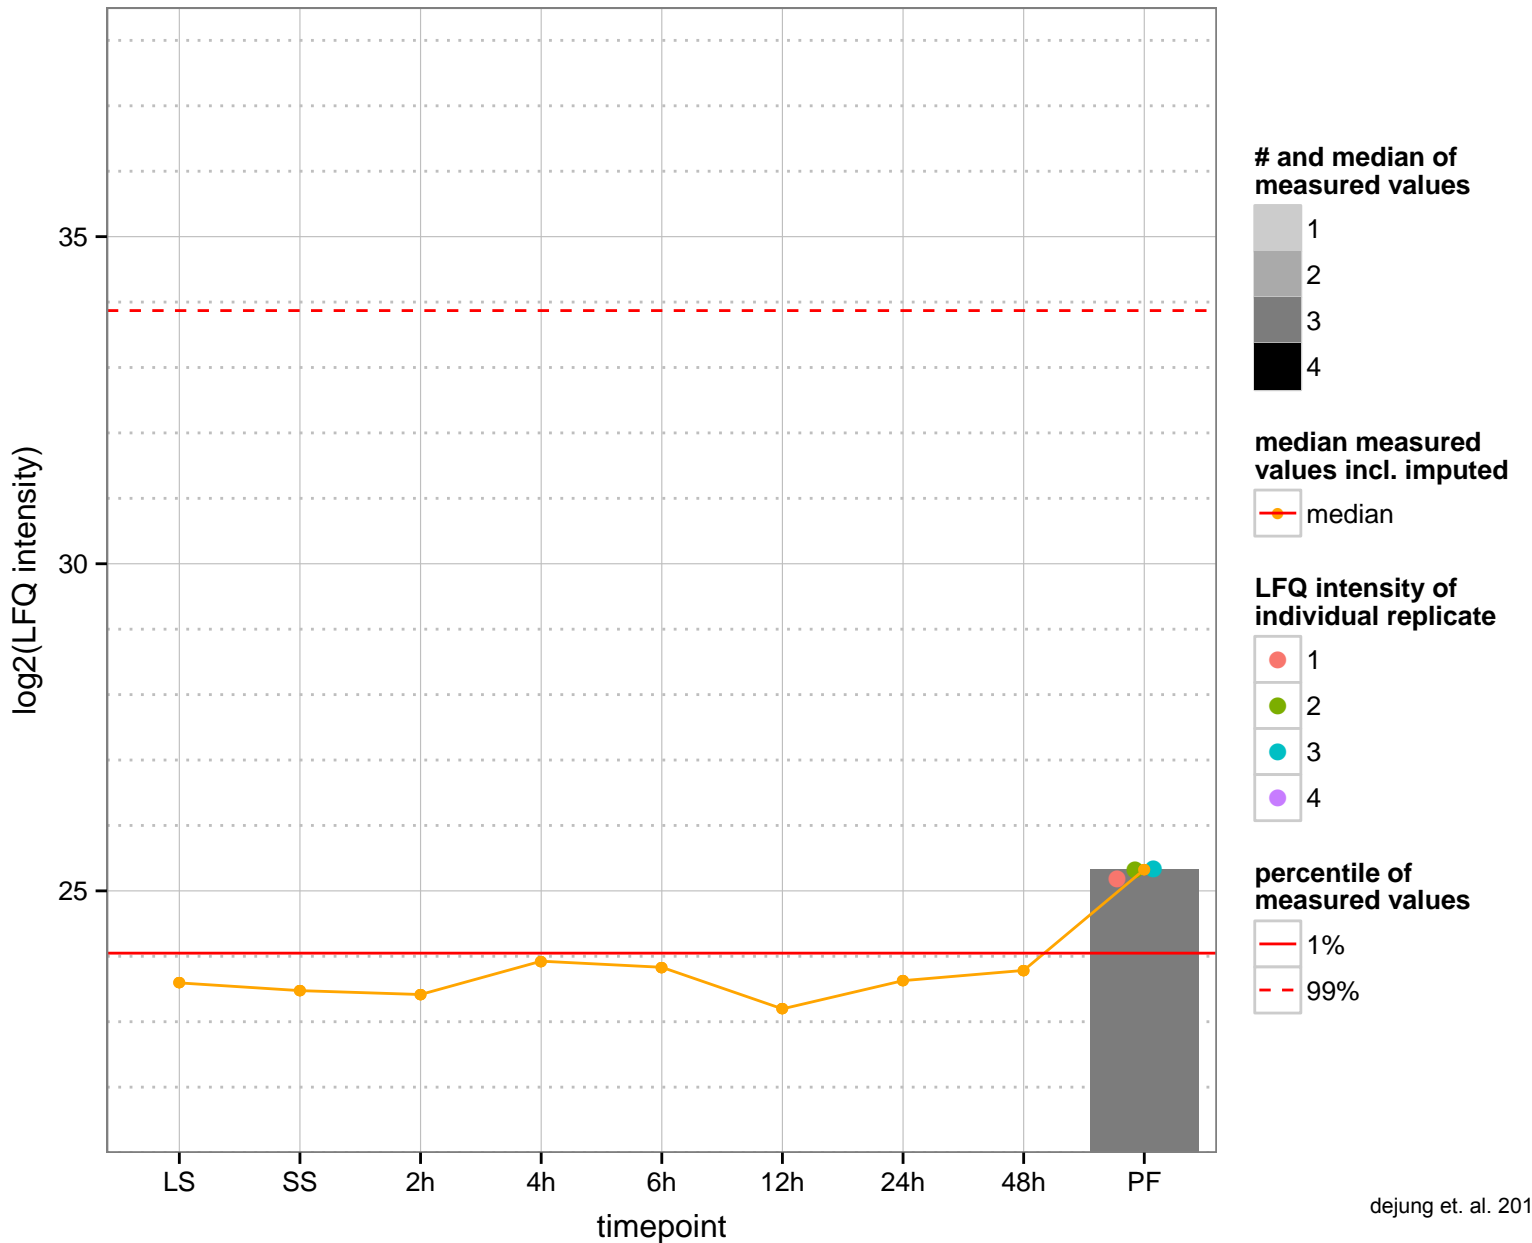

pyridoxal phosphate containing glycine decarboxylase, putative, glycine dehydrogenase, putative (GCVP)  
Tb927.7.1910  
AGOF: glycine dehydrogenase (decarboxylating) activity  
AGOC: mitochondrion  
AGOP: glycine decarboxylation via glycine cleavage system, oxidation–reduction process  
PGOF: glycine dehydrogenase (decarboxylating) activity, lyase activity  
PGOC: null  
PGOP: cellular amino acid metabolic process, glycine metabolic process, oxidation–reduction process

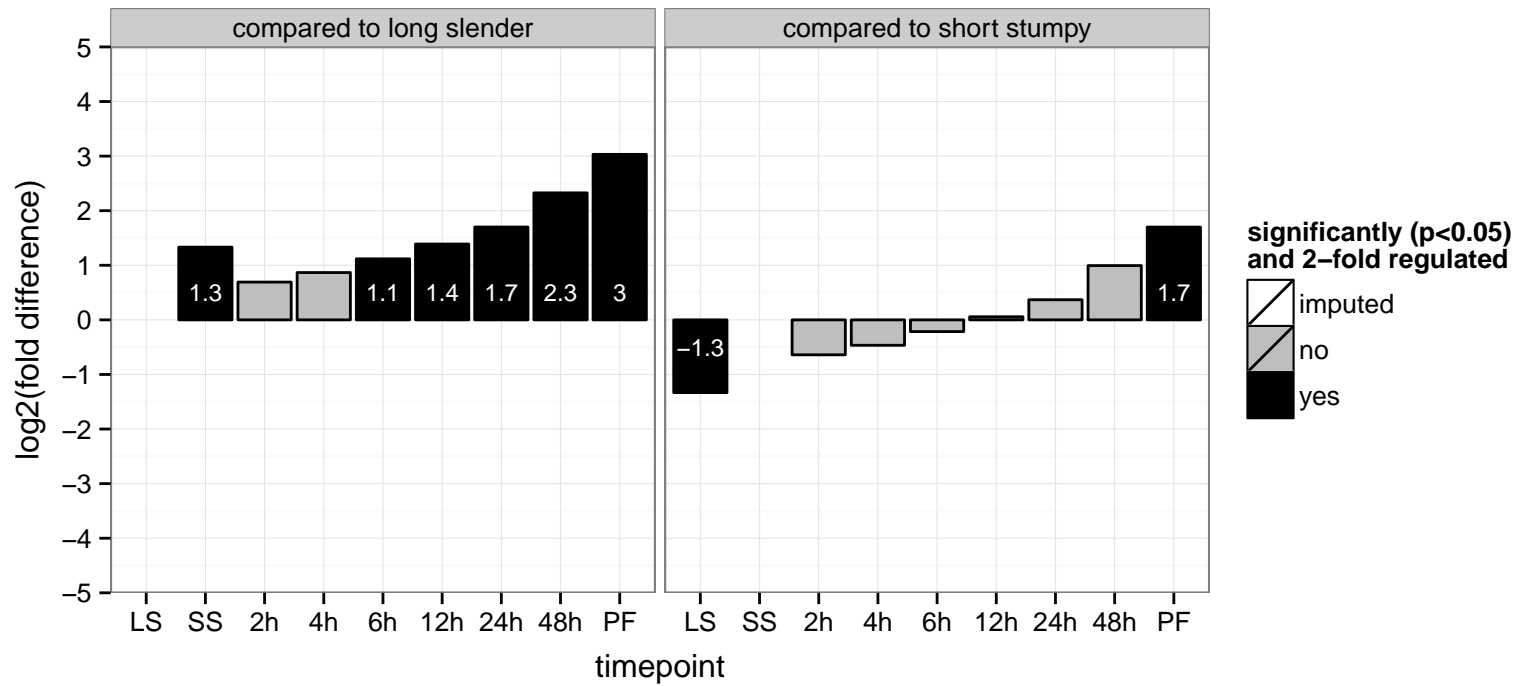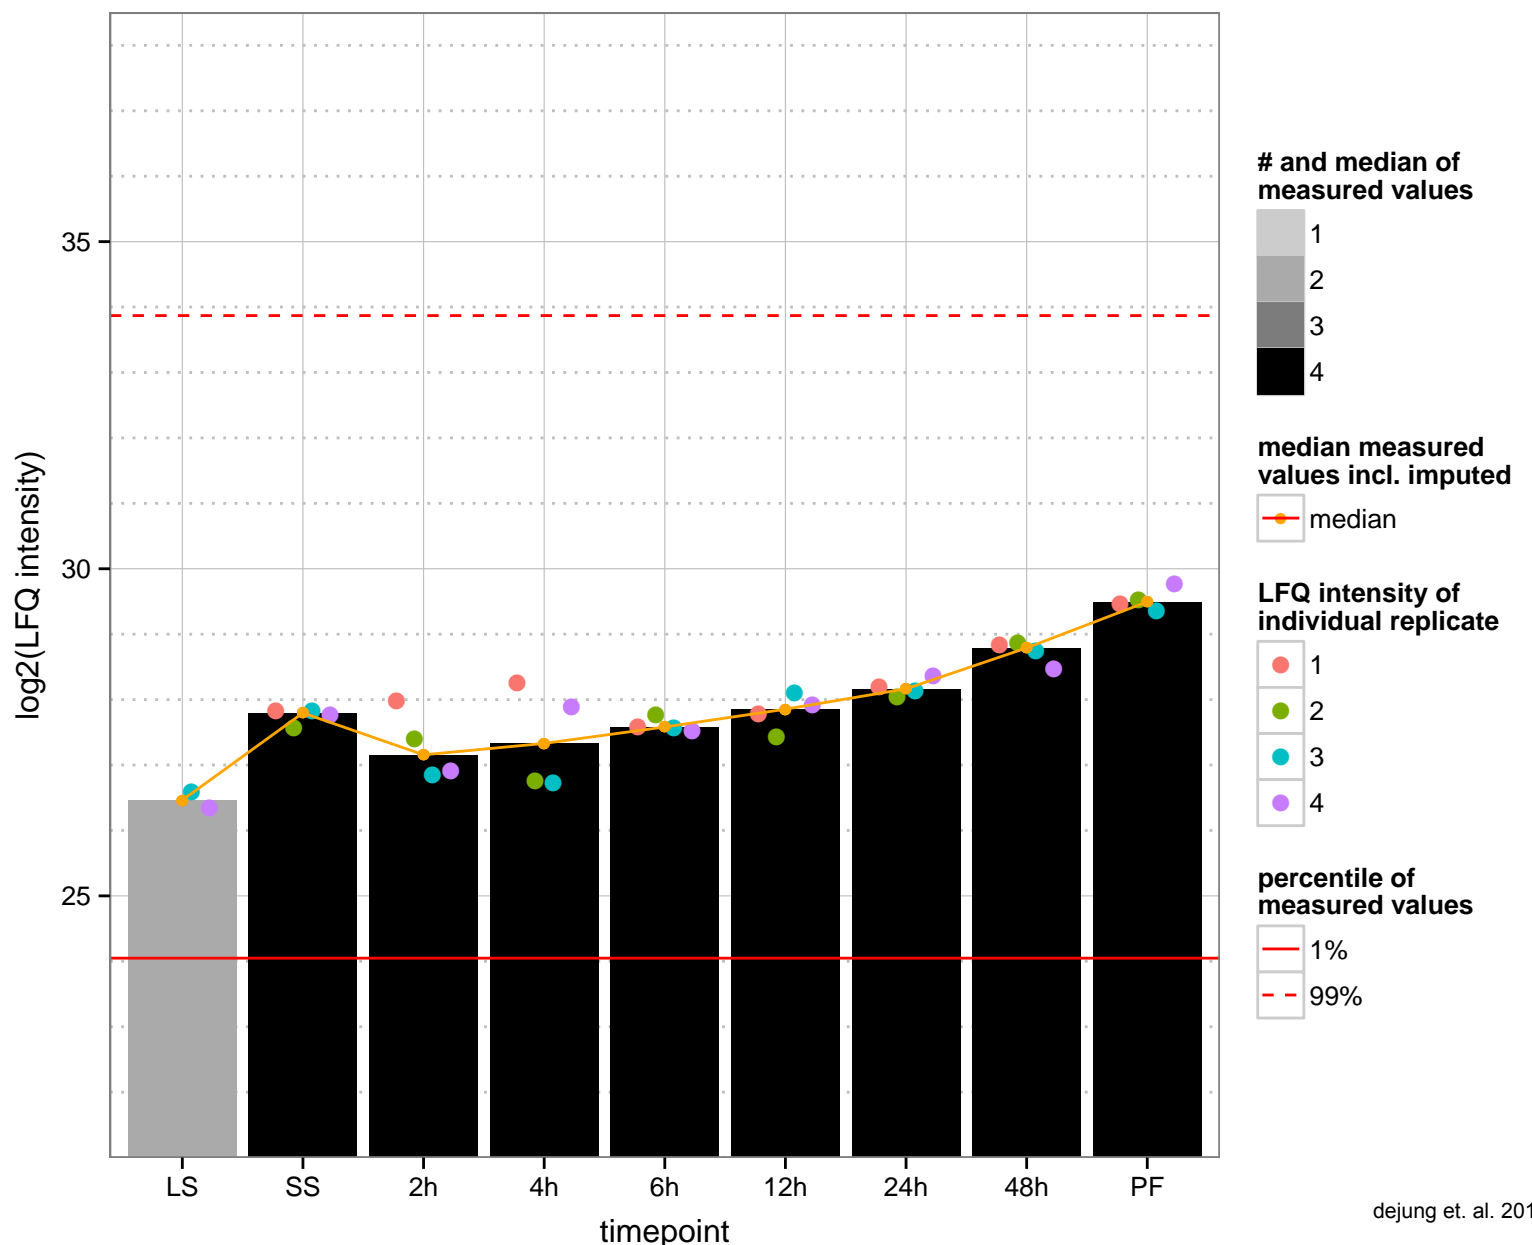

retrotransposon hot spot protein 7 (RHS7), putative, retrotransposon hot spot protein (RHS, pseudogene), point mutation  
 Tb927.7.1970;Tb927.7.1950;Tb927.7.1990;Tb927.7.1980;Tb927.7.1960

AGOF: null  
 AGOC: null  
 AGOP: null  
 PGO: null  
 PGOC: null  
 PGOP: null

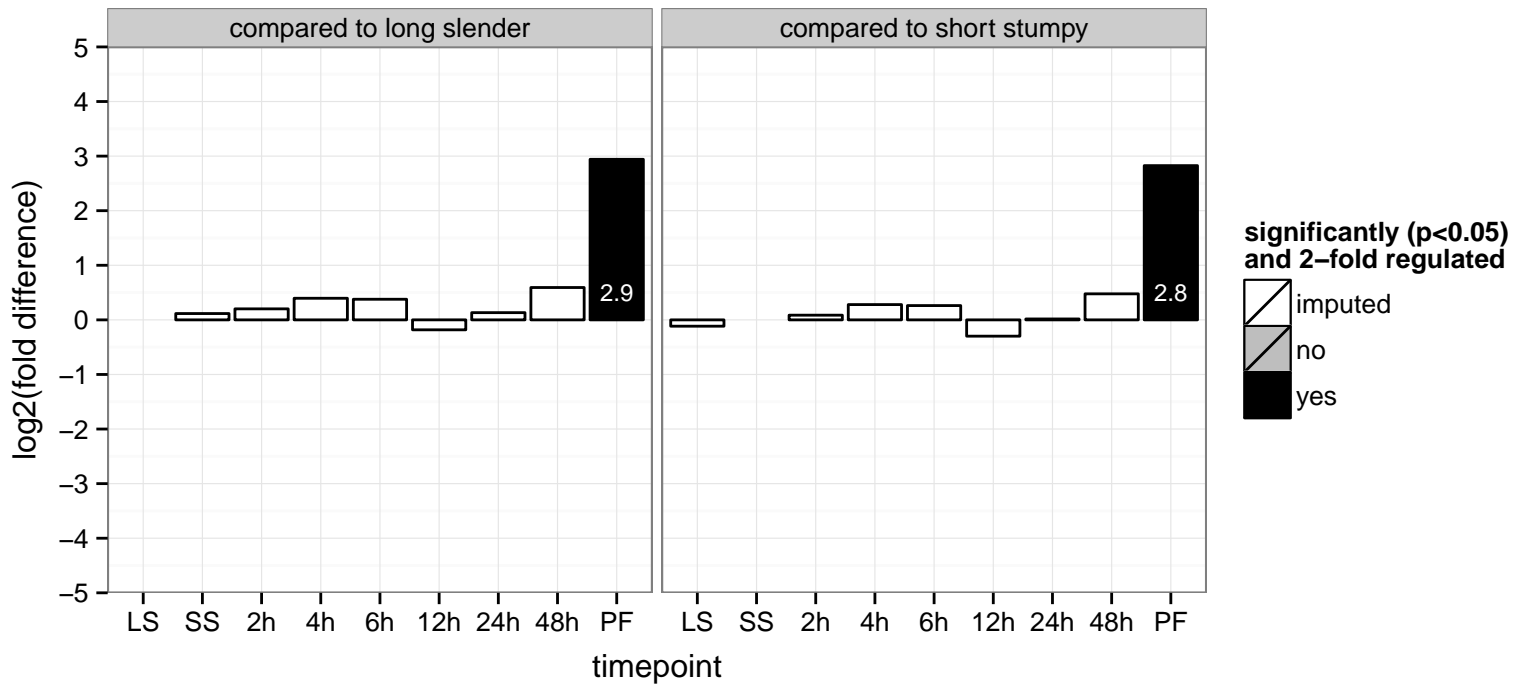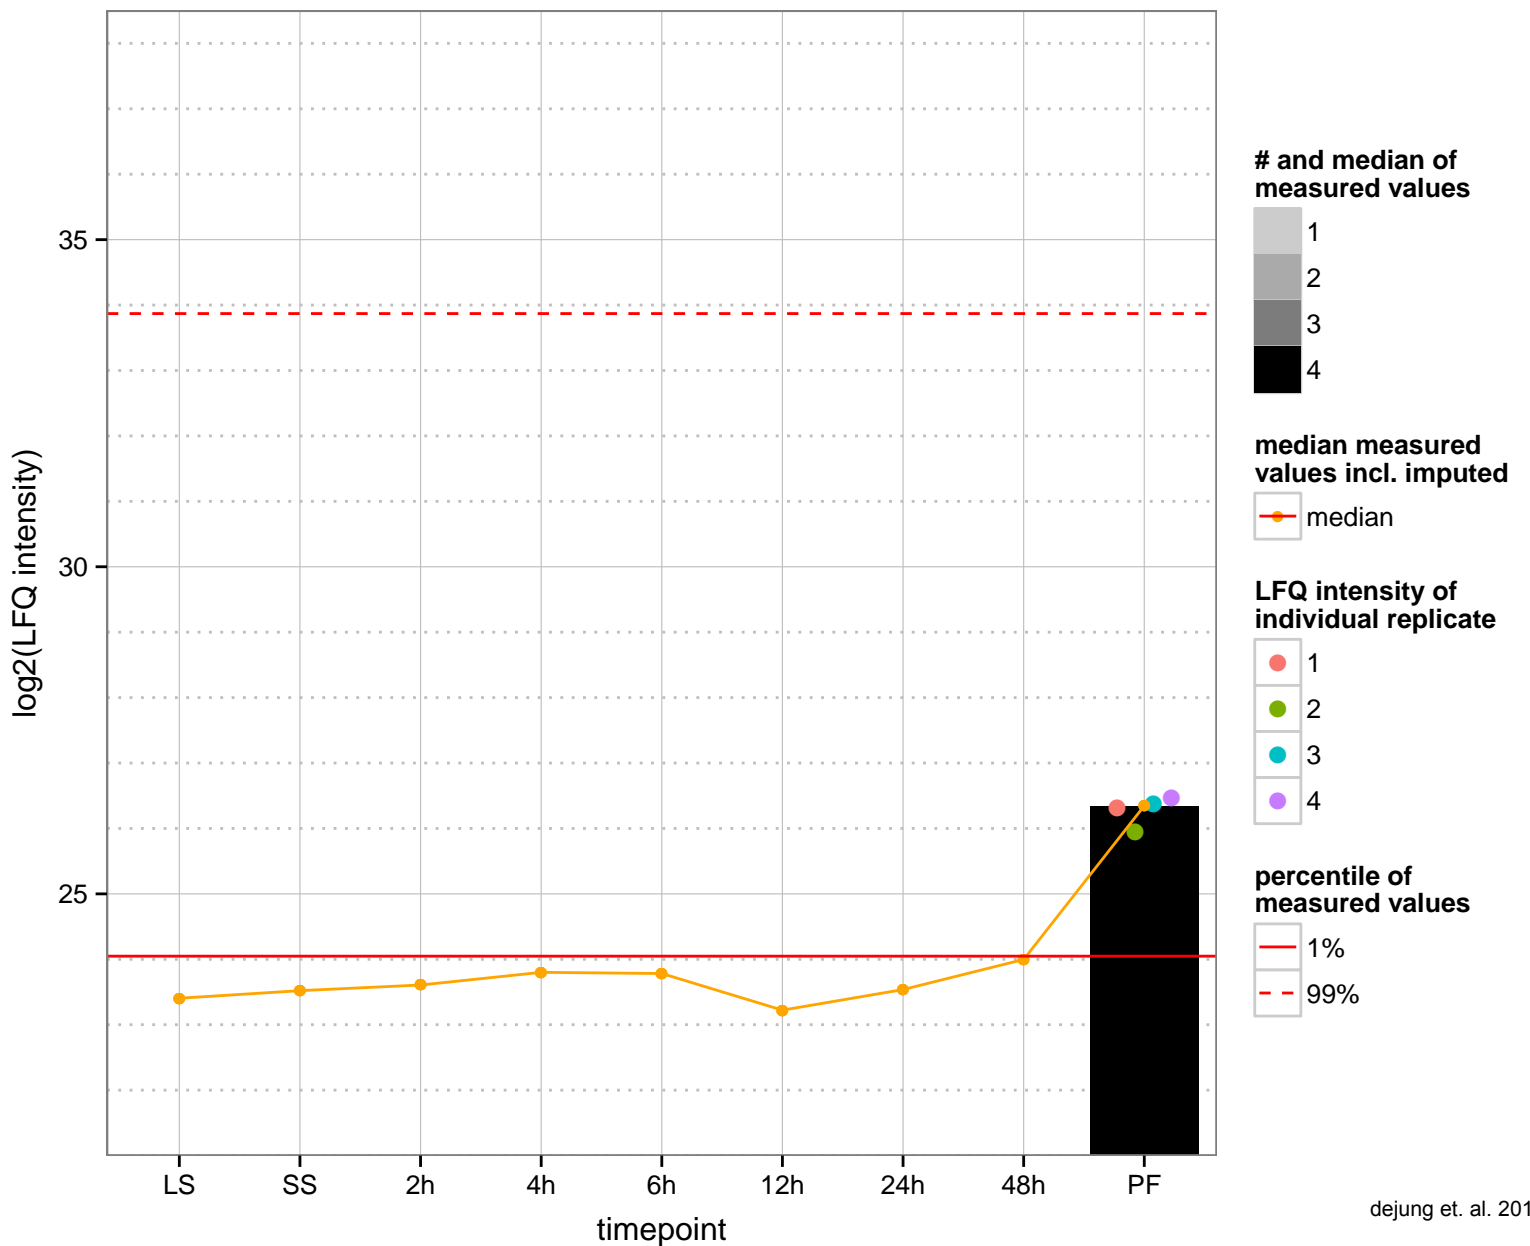

hypothetical protein, conserved  
 Tb927.7.2170  
 AGOF: null  
 AGOC: null  
 AGOP: null  
 PGO: null  
 PGO: null  
 PGO: null

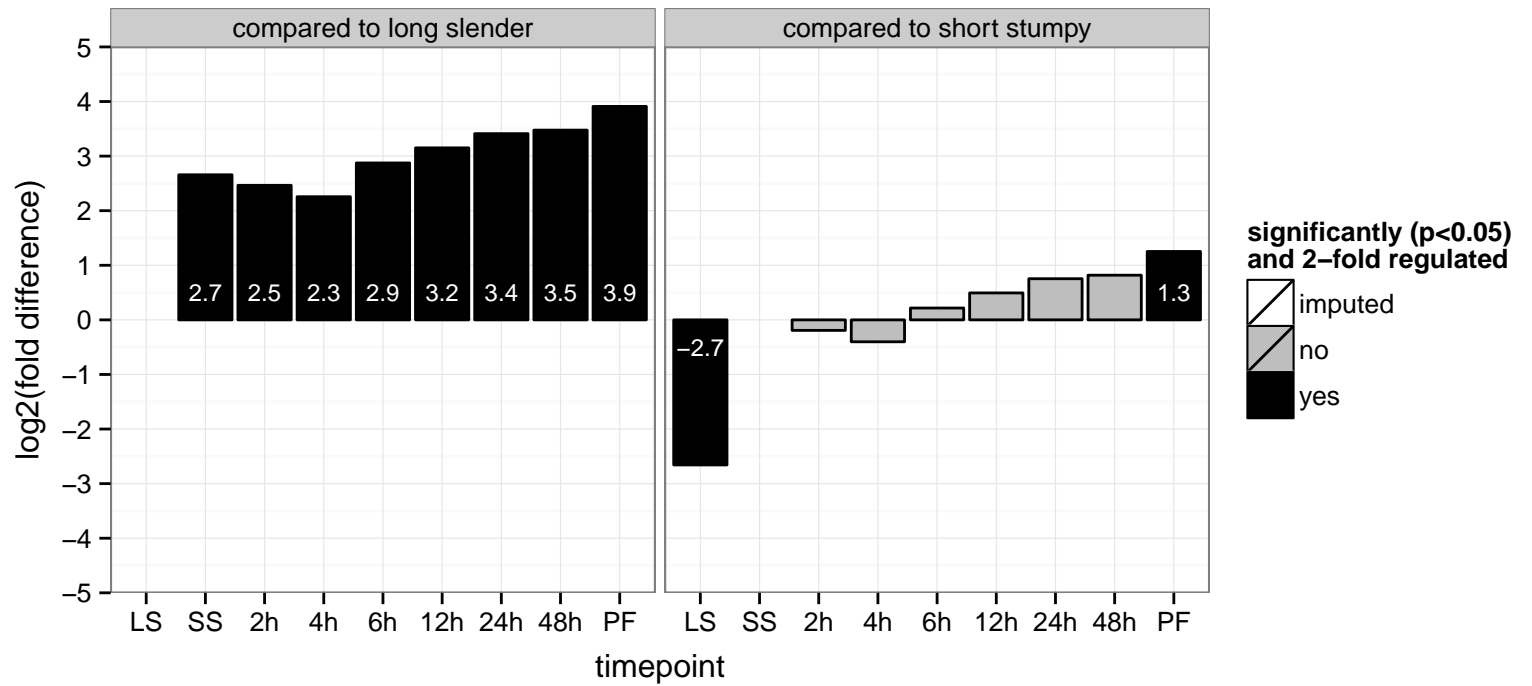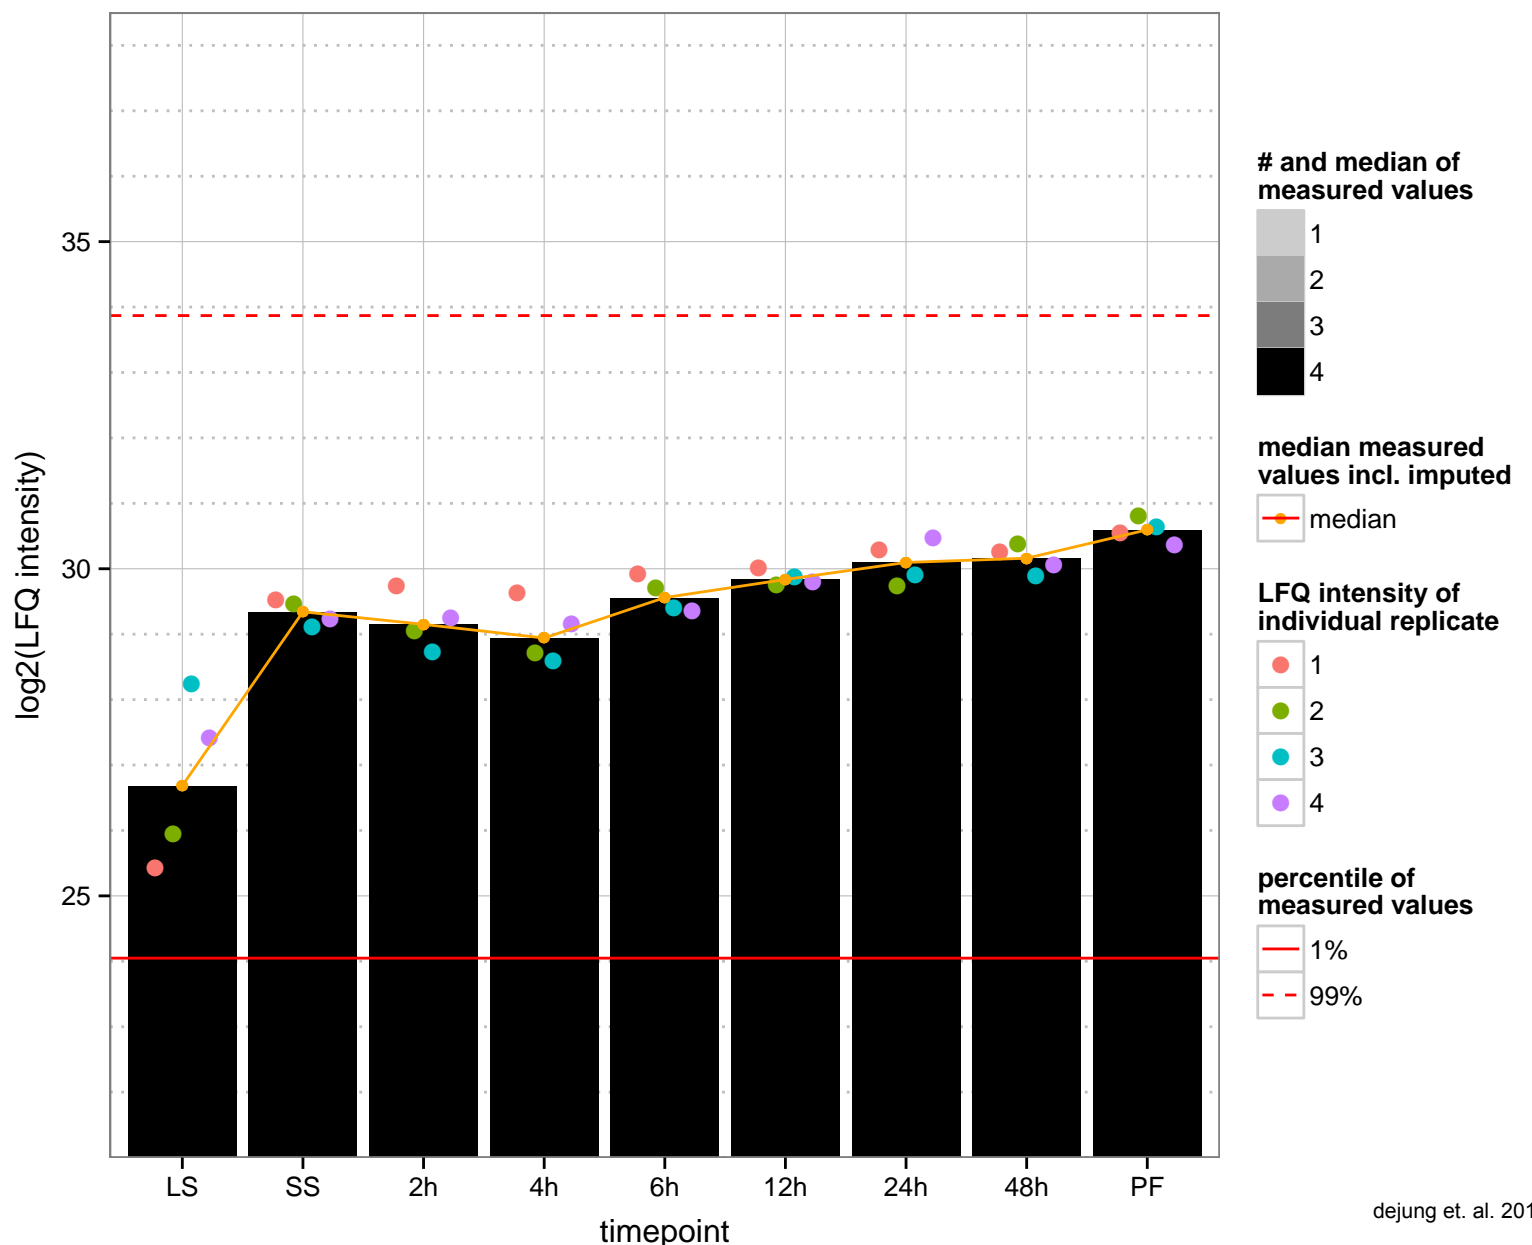

40S ribosomal protein S15, putative  
 Tb927.7.2340;Tb927.7.2370  
 AGOF: structural constituent of ribosome  
 AGOC: intracellular, ribosome, small ribosomal subunit  
 AGOP: translation  
 PGO: structural constituent of ribosome  
 PGOC: ribosome, small ribosomal subunit  
 PGOP: translation

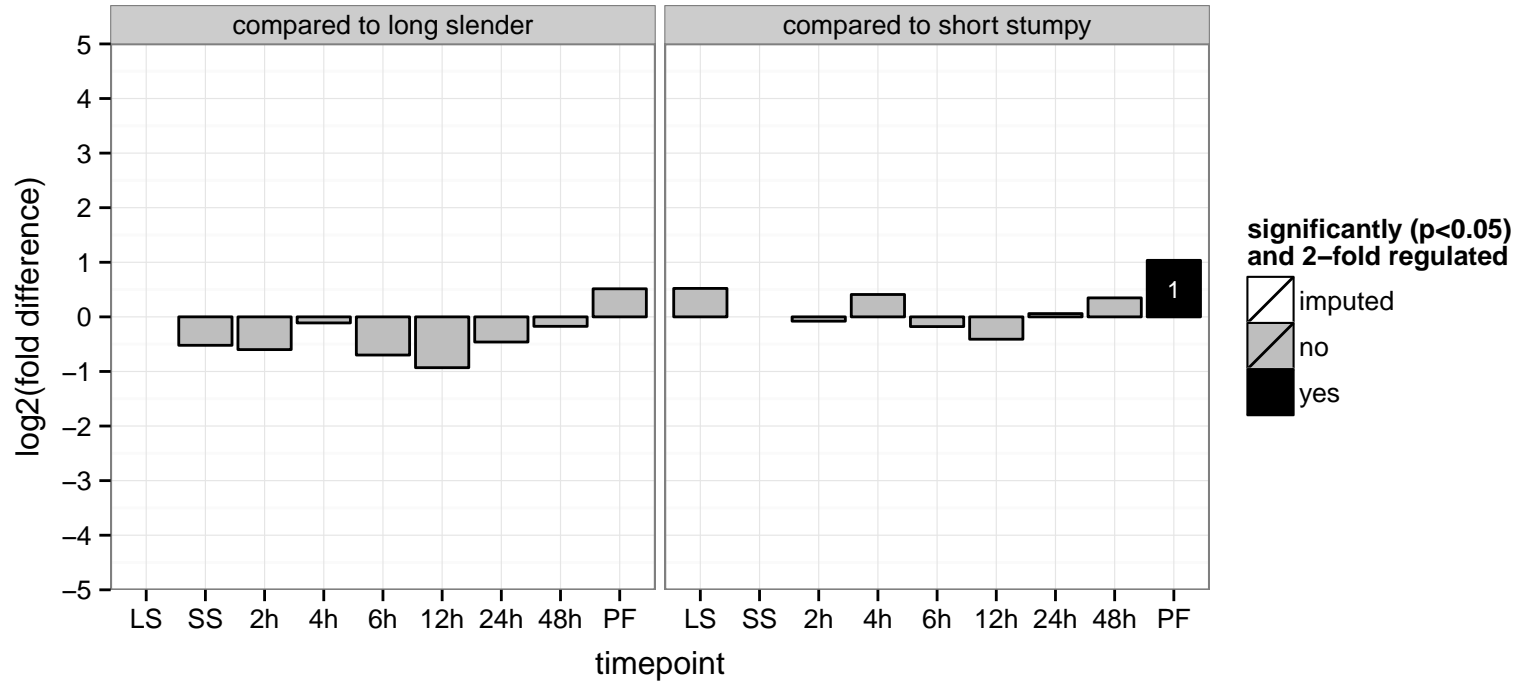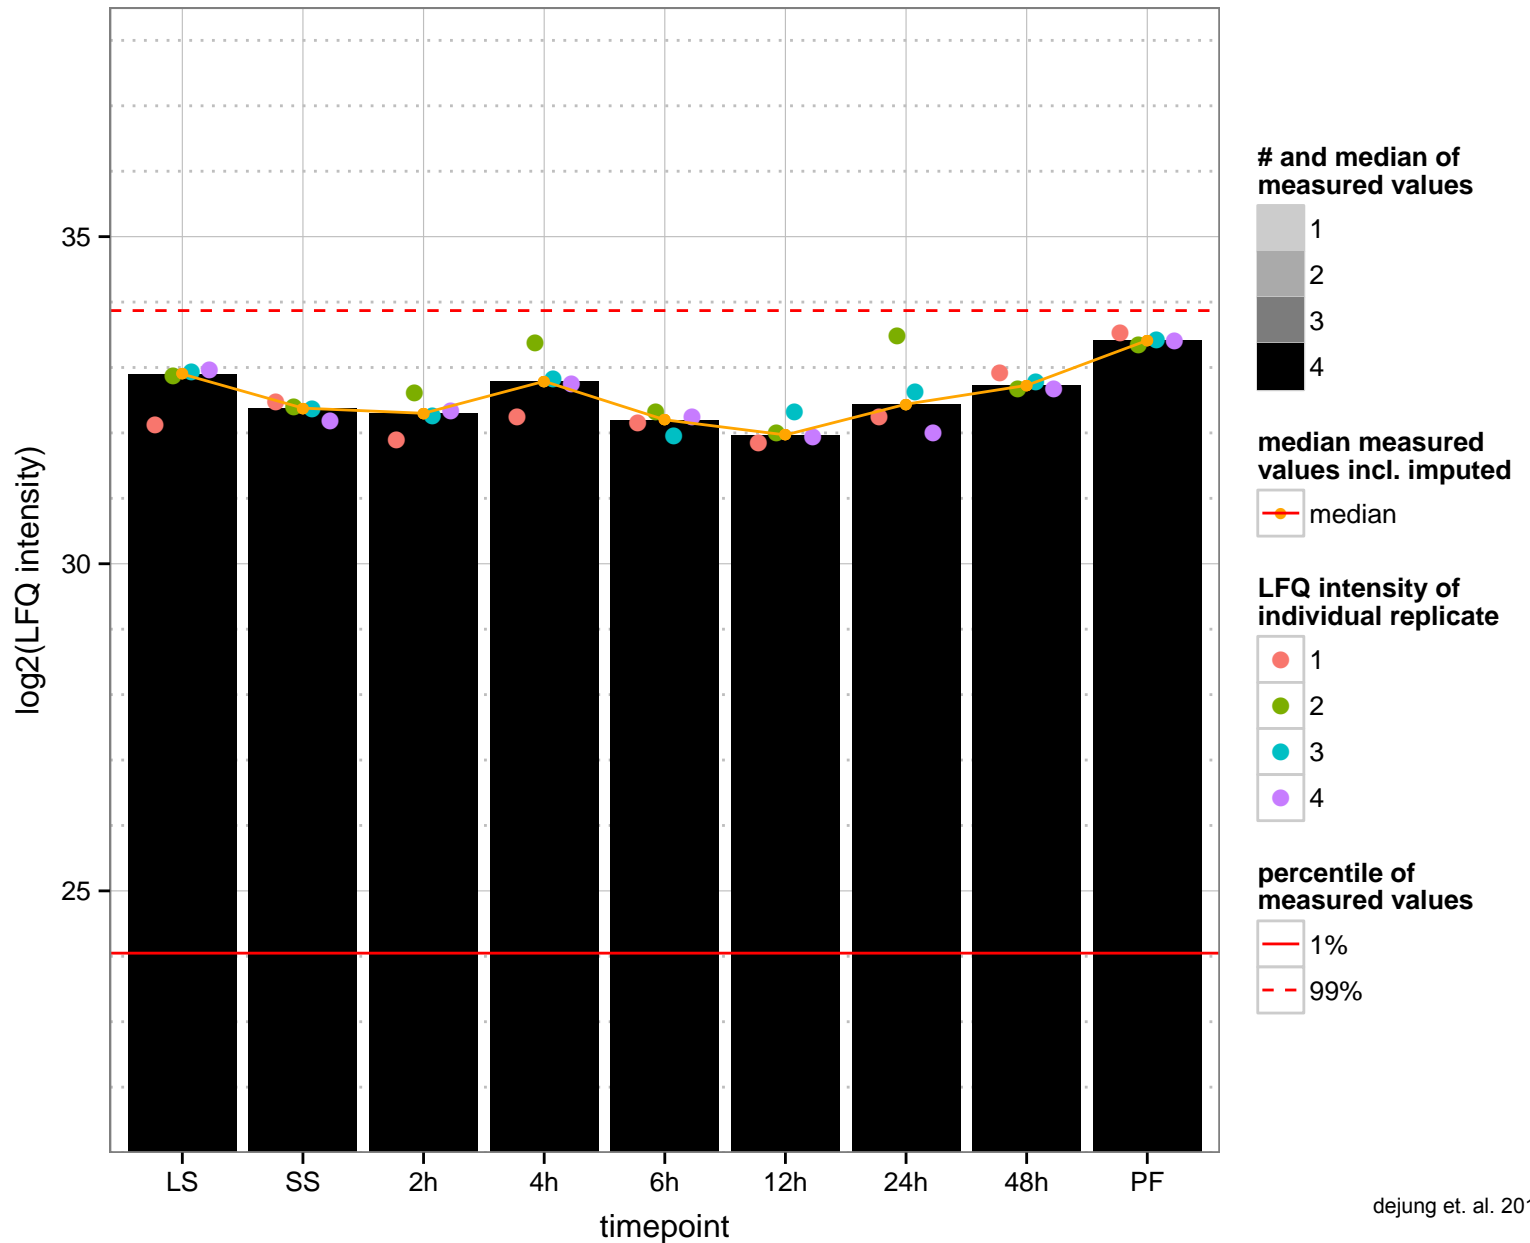

hypothetical protein, conserved  
 Tb927.7.3050  
 AGOF: null  
 AGOC: mitochondrion  
 AGOP: null  
 PGO: null  
 PGO: null  
 PGO: null

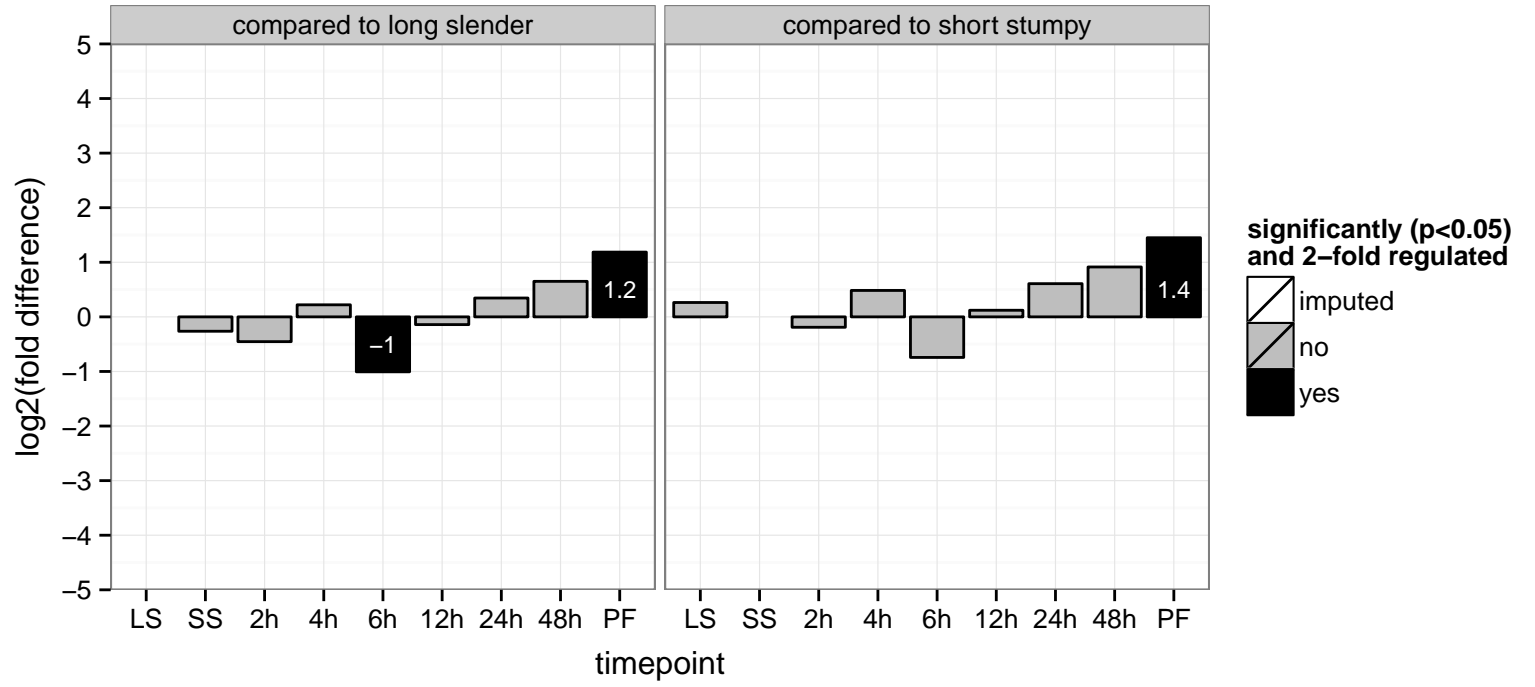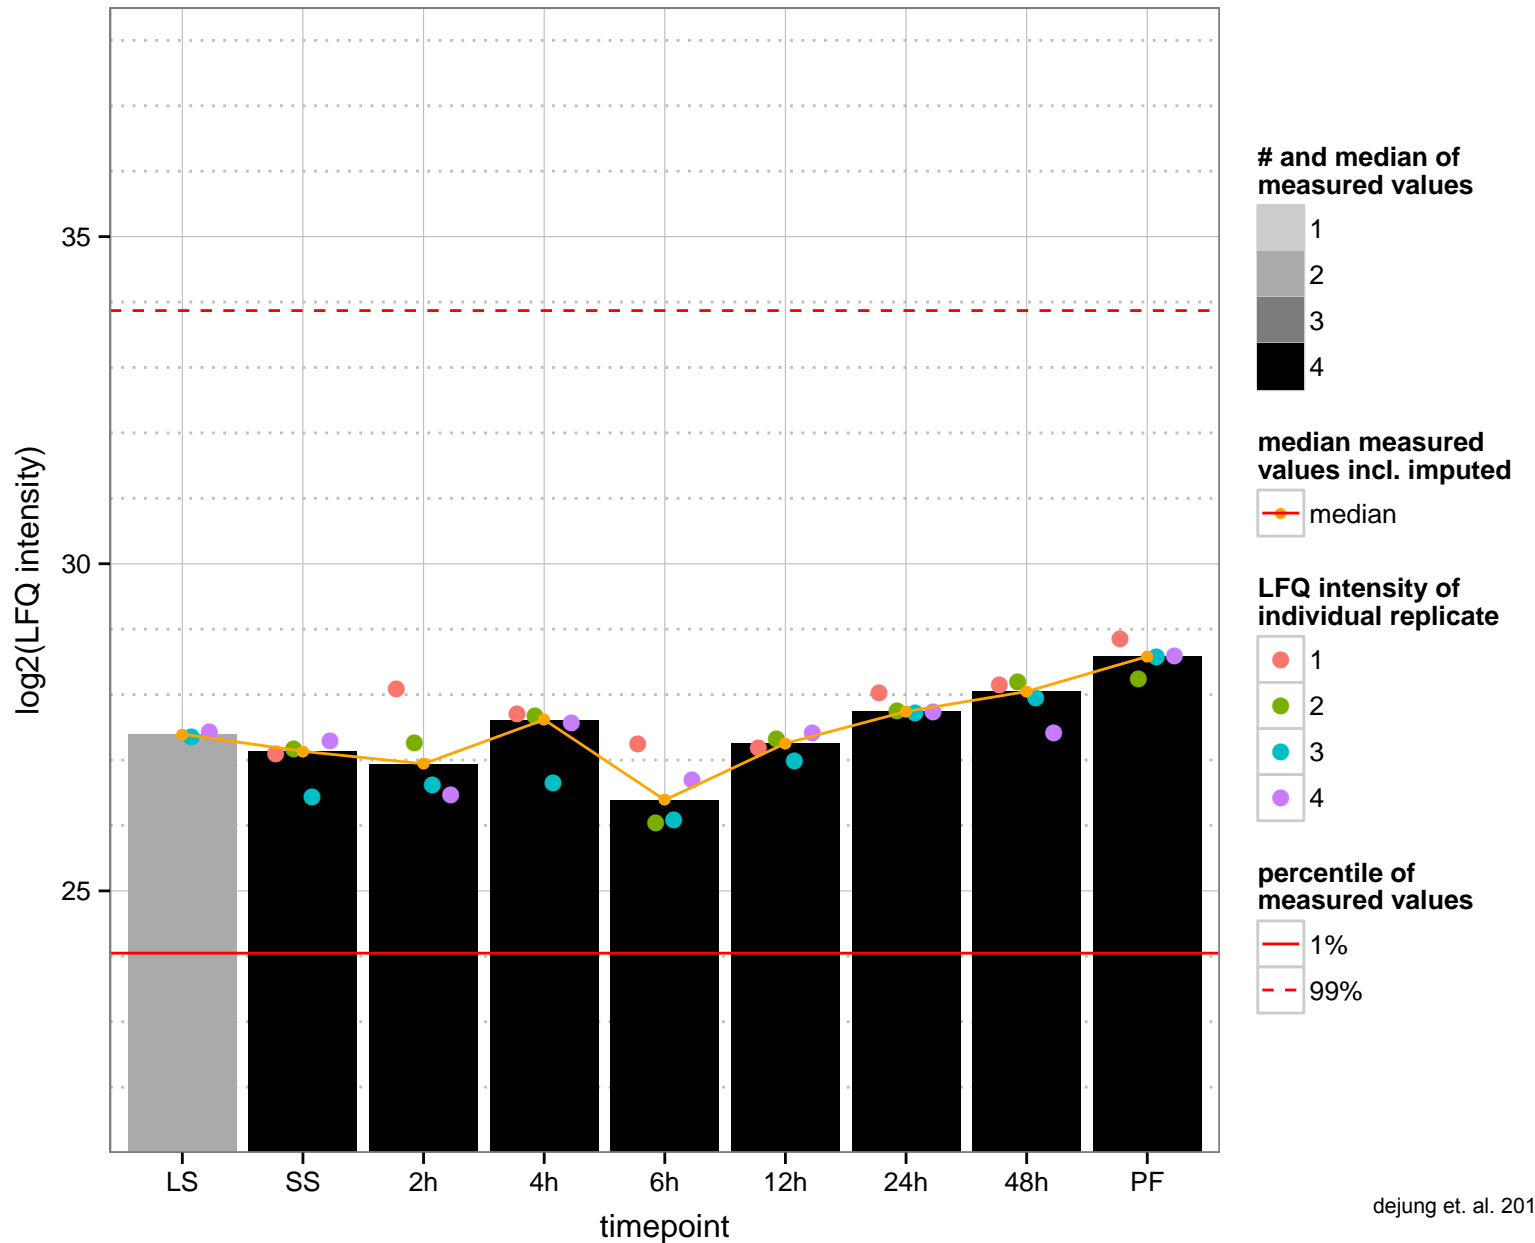



hypothetical protein, conserved  
 Tb927.7.3220  
 AGOF: null  
 AGOC: null  
 AGOP: null  
 PGOF: null  
 PGO C: null  
 PGOP: null

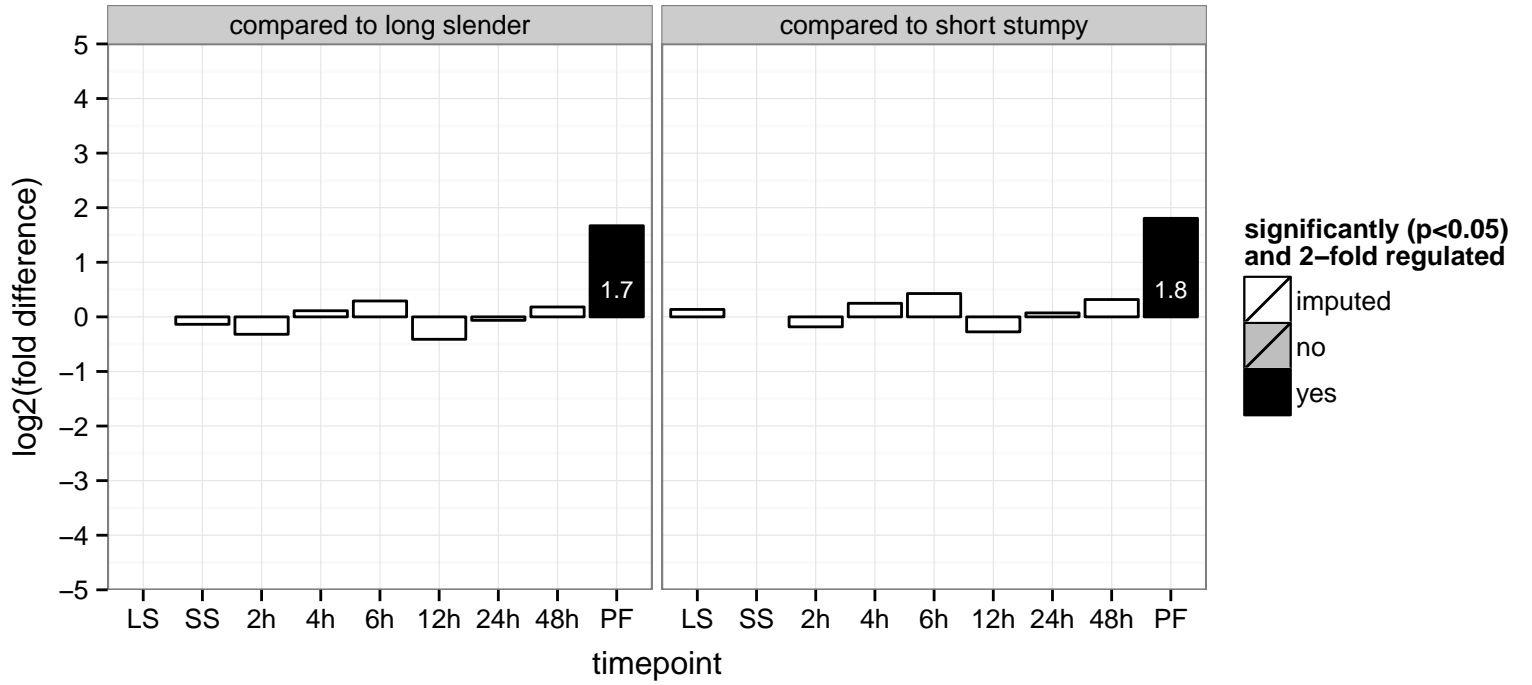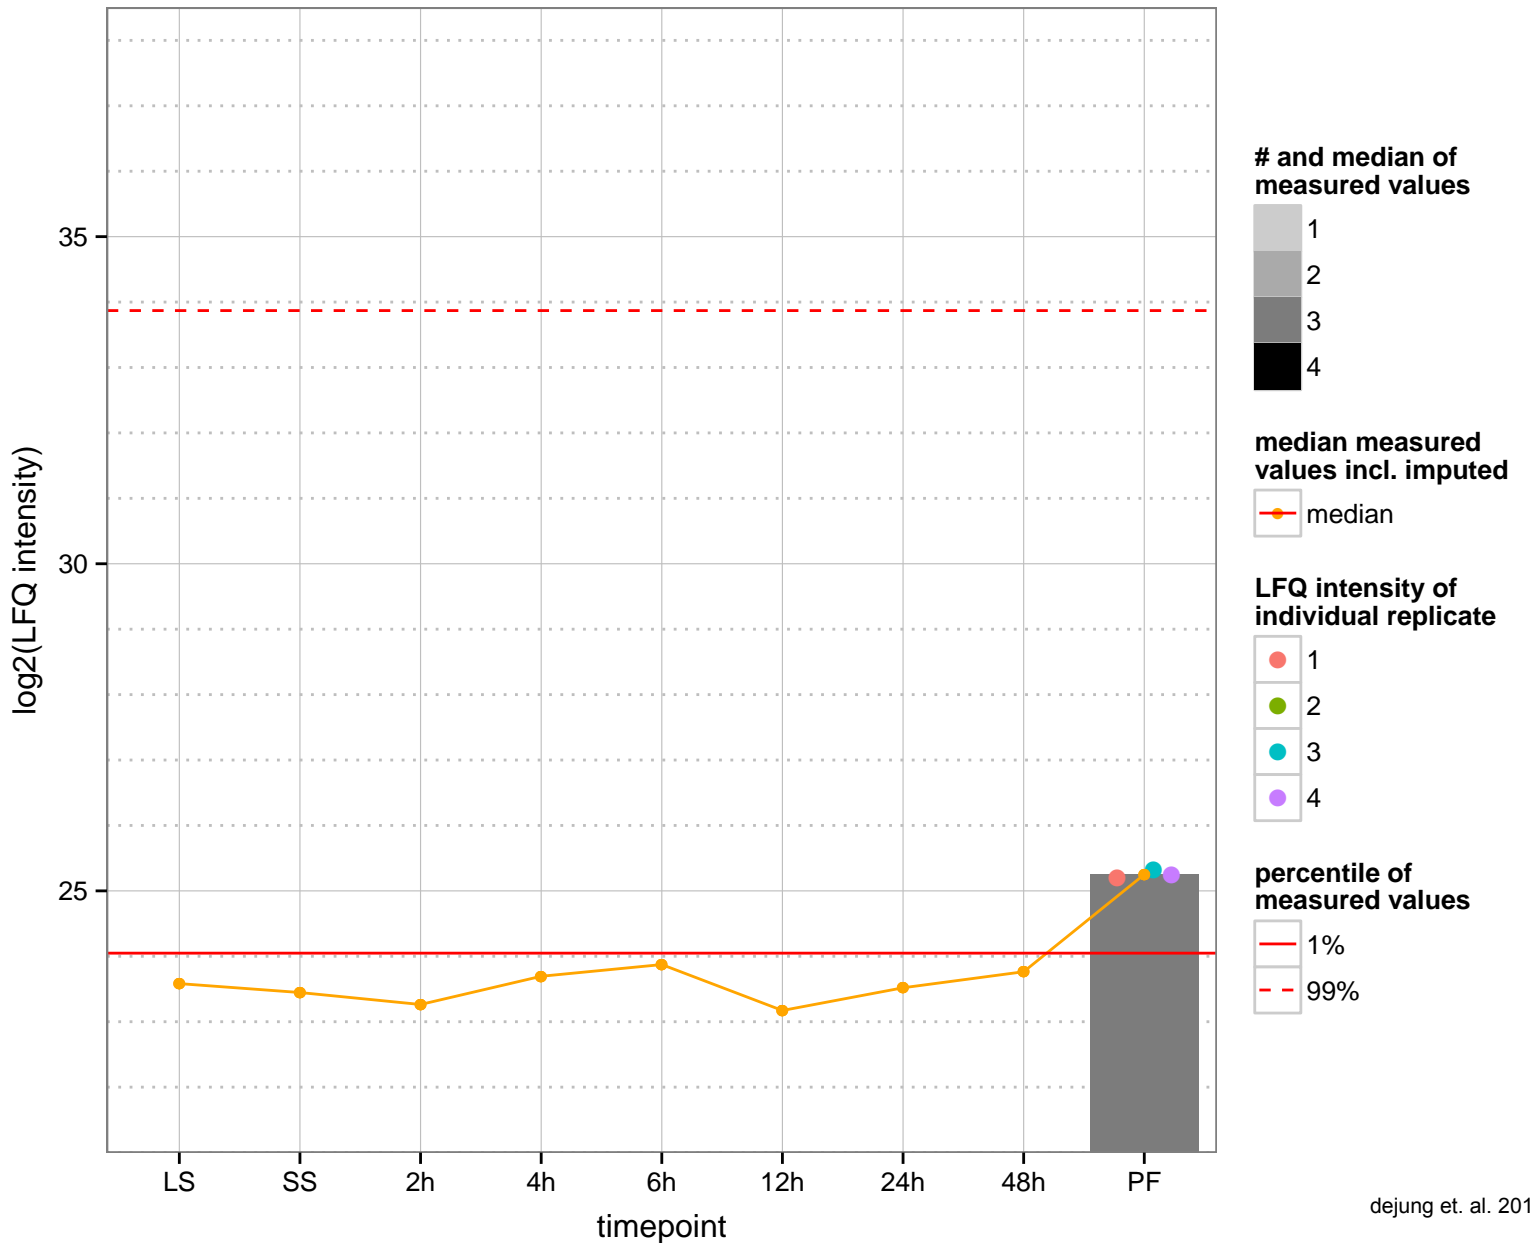

hypothetical protein, conserved  
 Tb927.7.3240  
 AGOF: null  
 AGOC: mitochondrion  
 AGOP: null  
 PGO: null  
 PGO: null  
 PGO: null

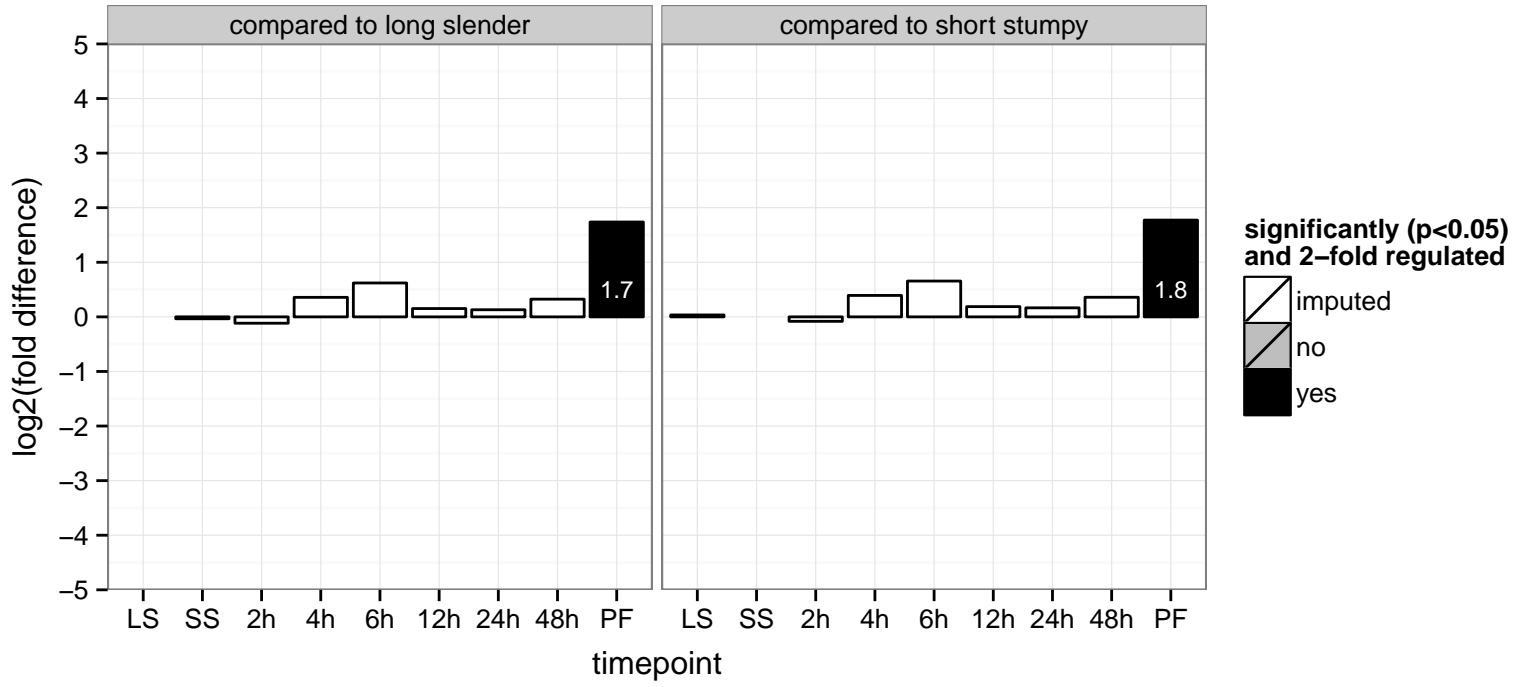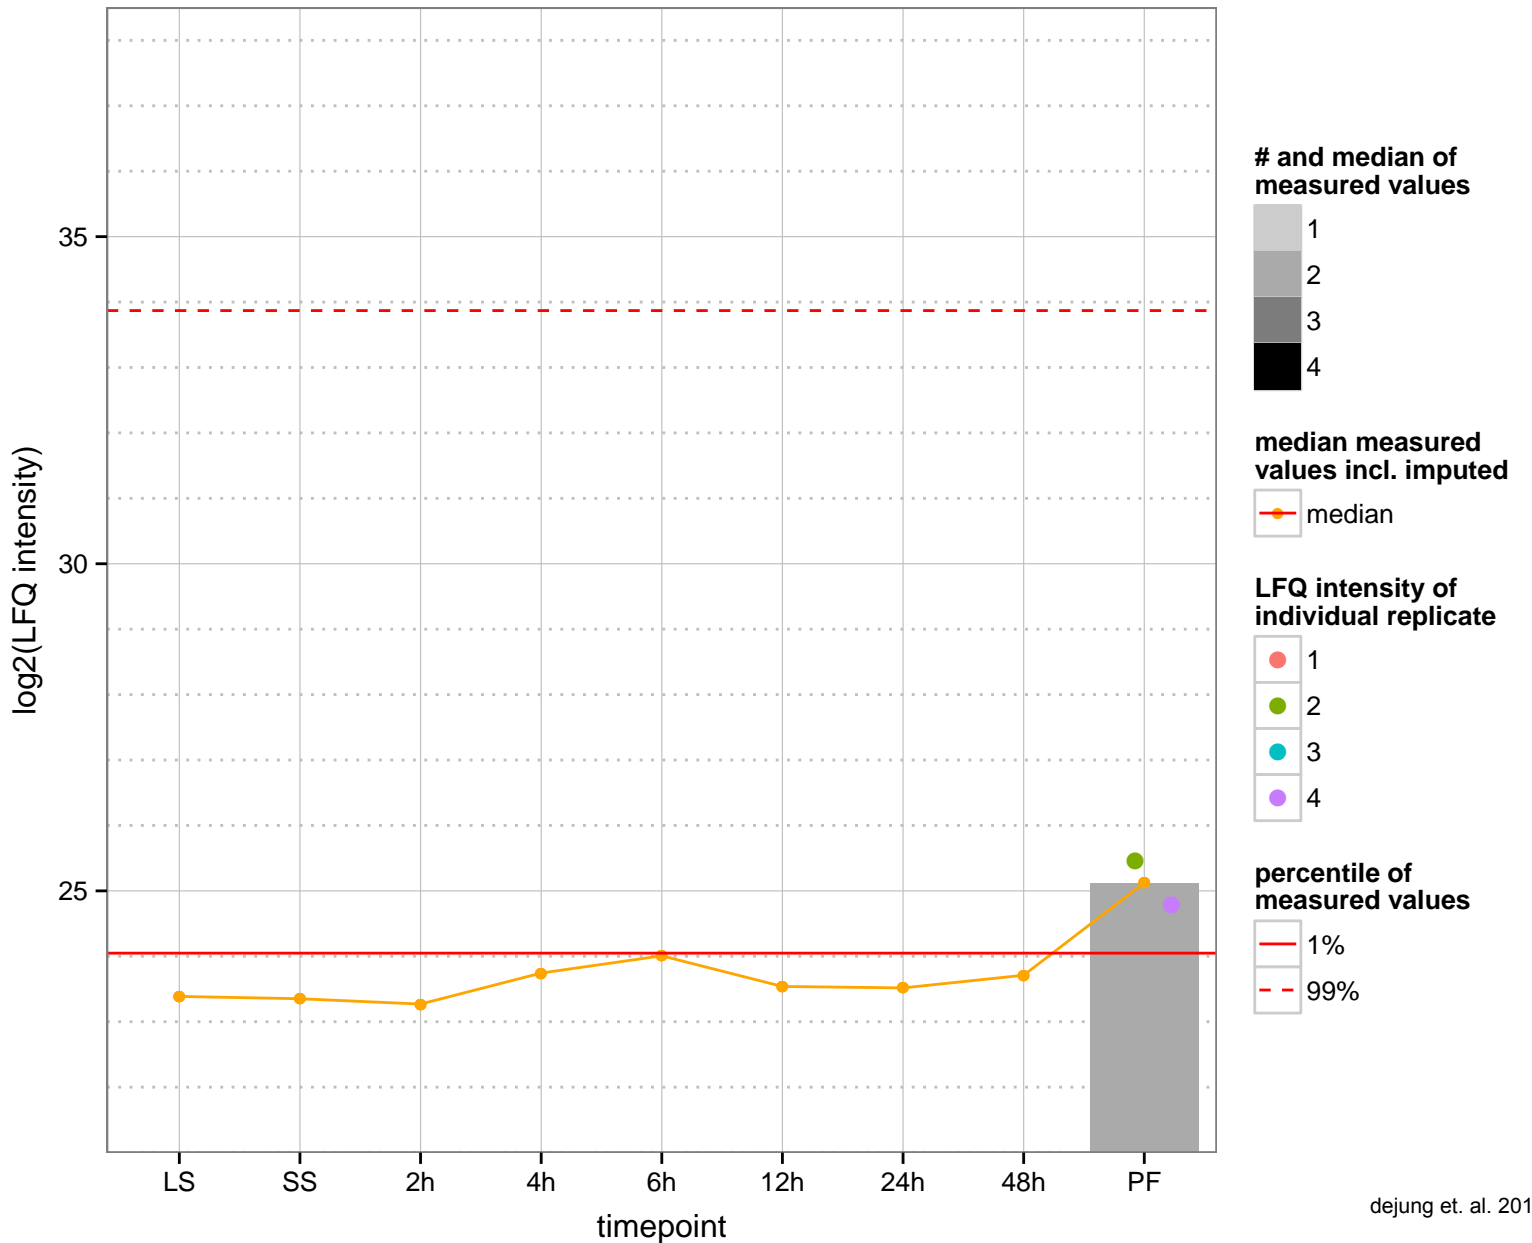

cyclophilin-type peptidyl-prolyl cis-trans isomerase, putative (PPlase)  
 Tb927.7.3430  
 AGOF: peptidyl-prolyl cis-trans isomerase activity  
 AGOC: null  
 AGOP: protein folding  
 PGOF: peptidyl-prolyl cis-trans isomerase activity  
 PGO: null  
 PGOP: protein folding

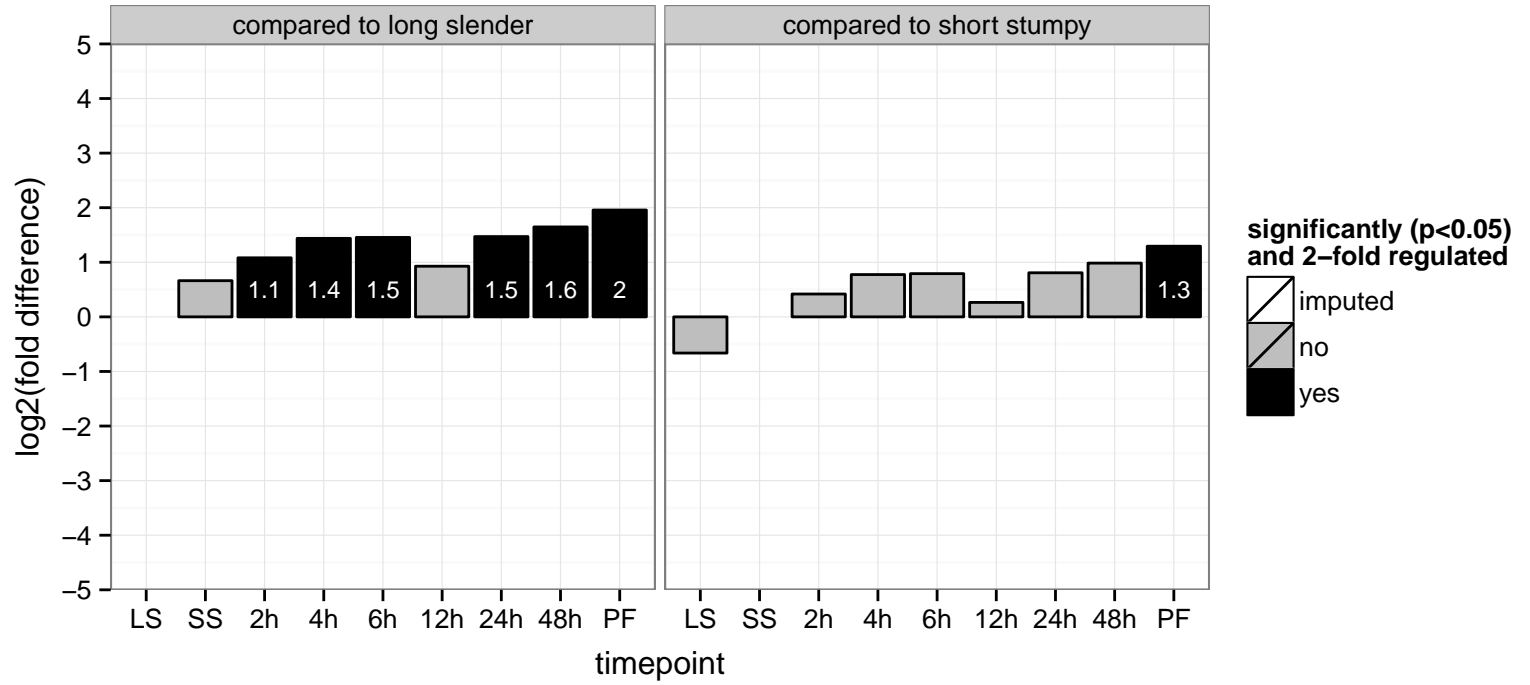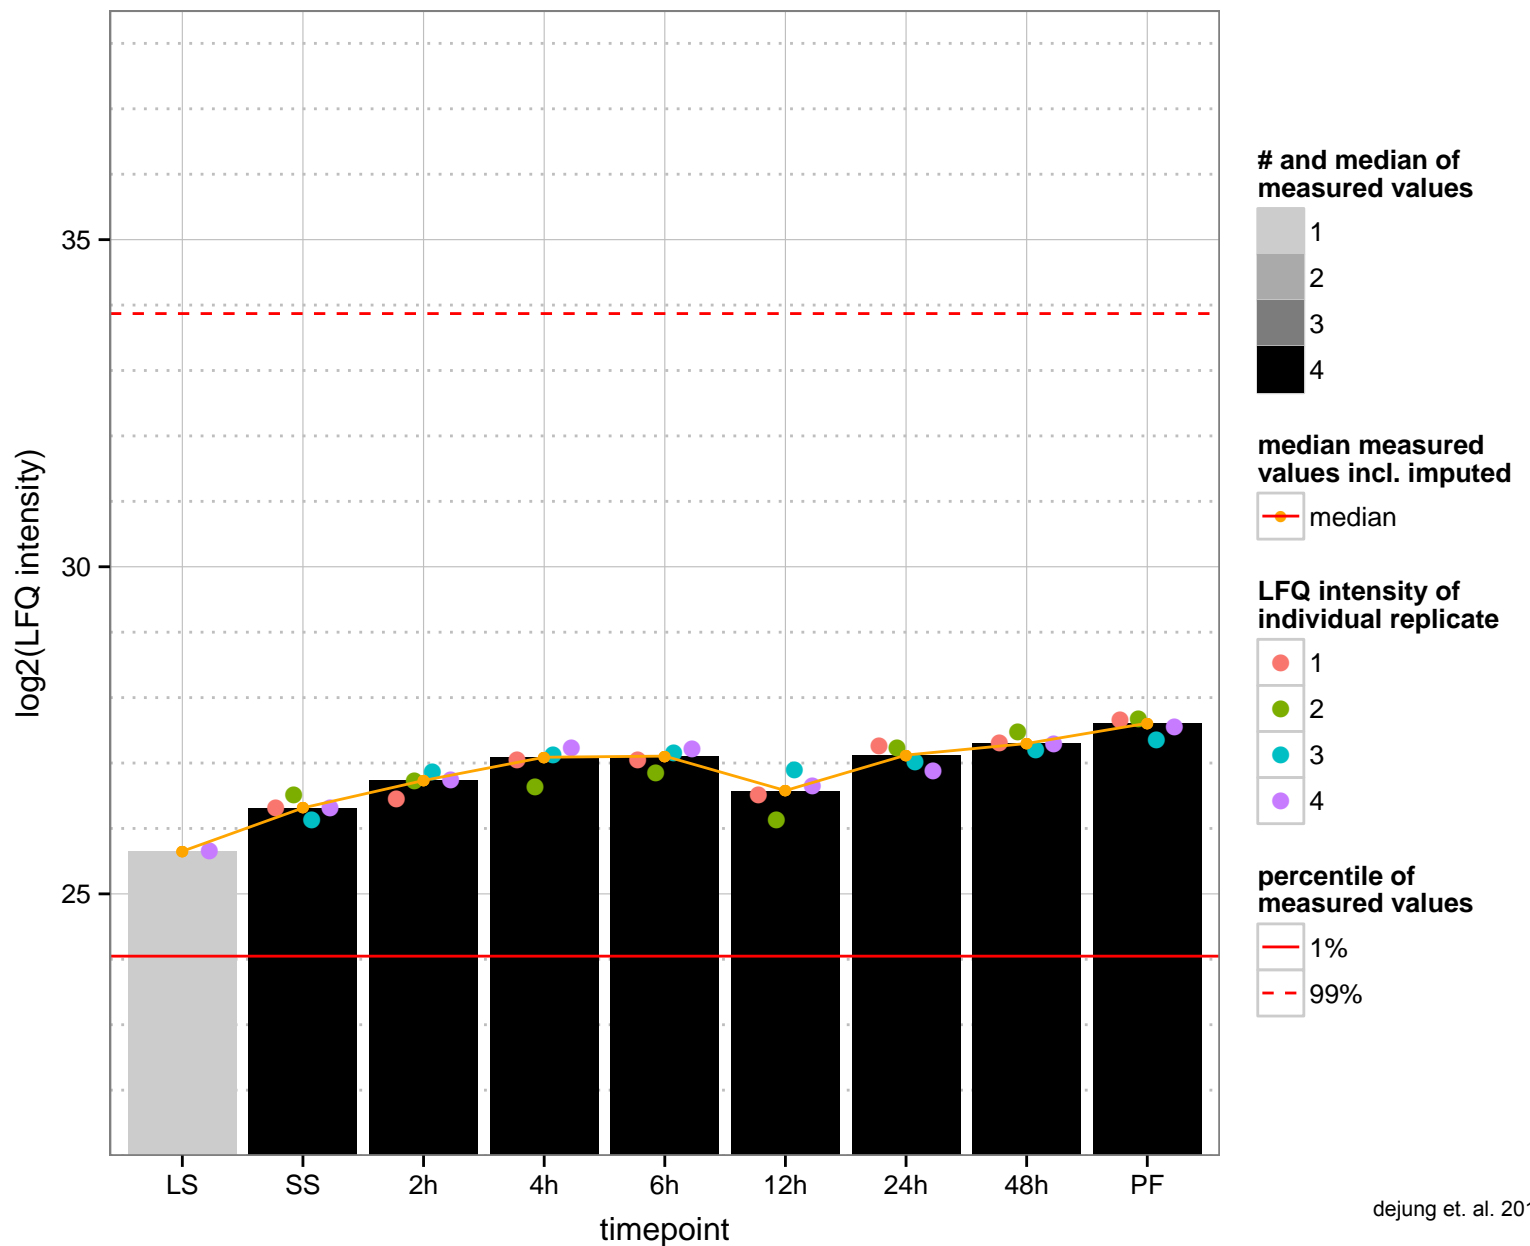

hypothetical protein, conserved  
 Tb927.7.3460  
 AGOF: null  
 AGOC: mitochondrion  
 AGOP: null  
 PGO: null  
 PGOC: null  
 PGOP: null

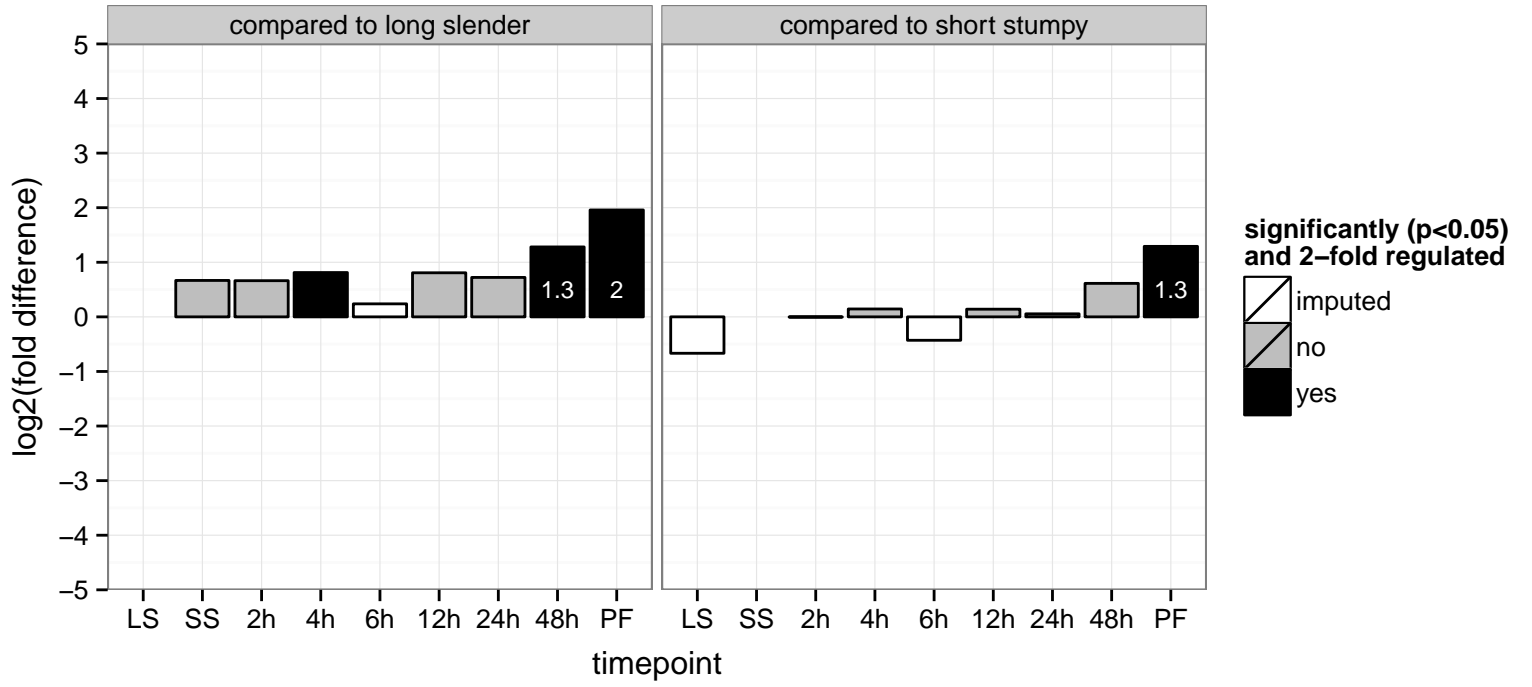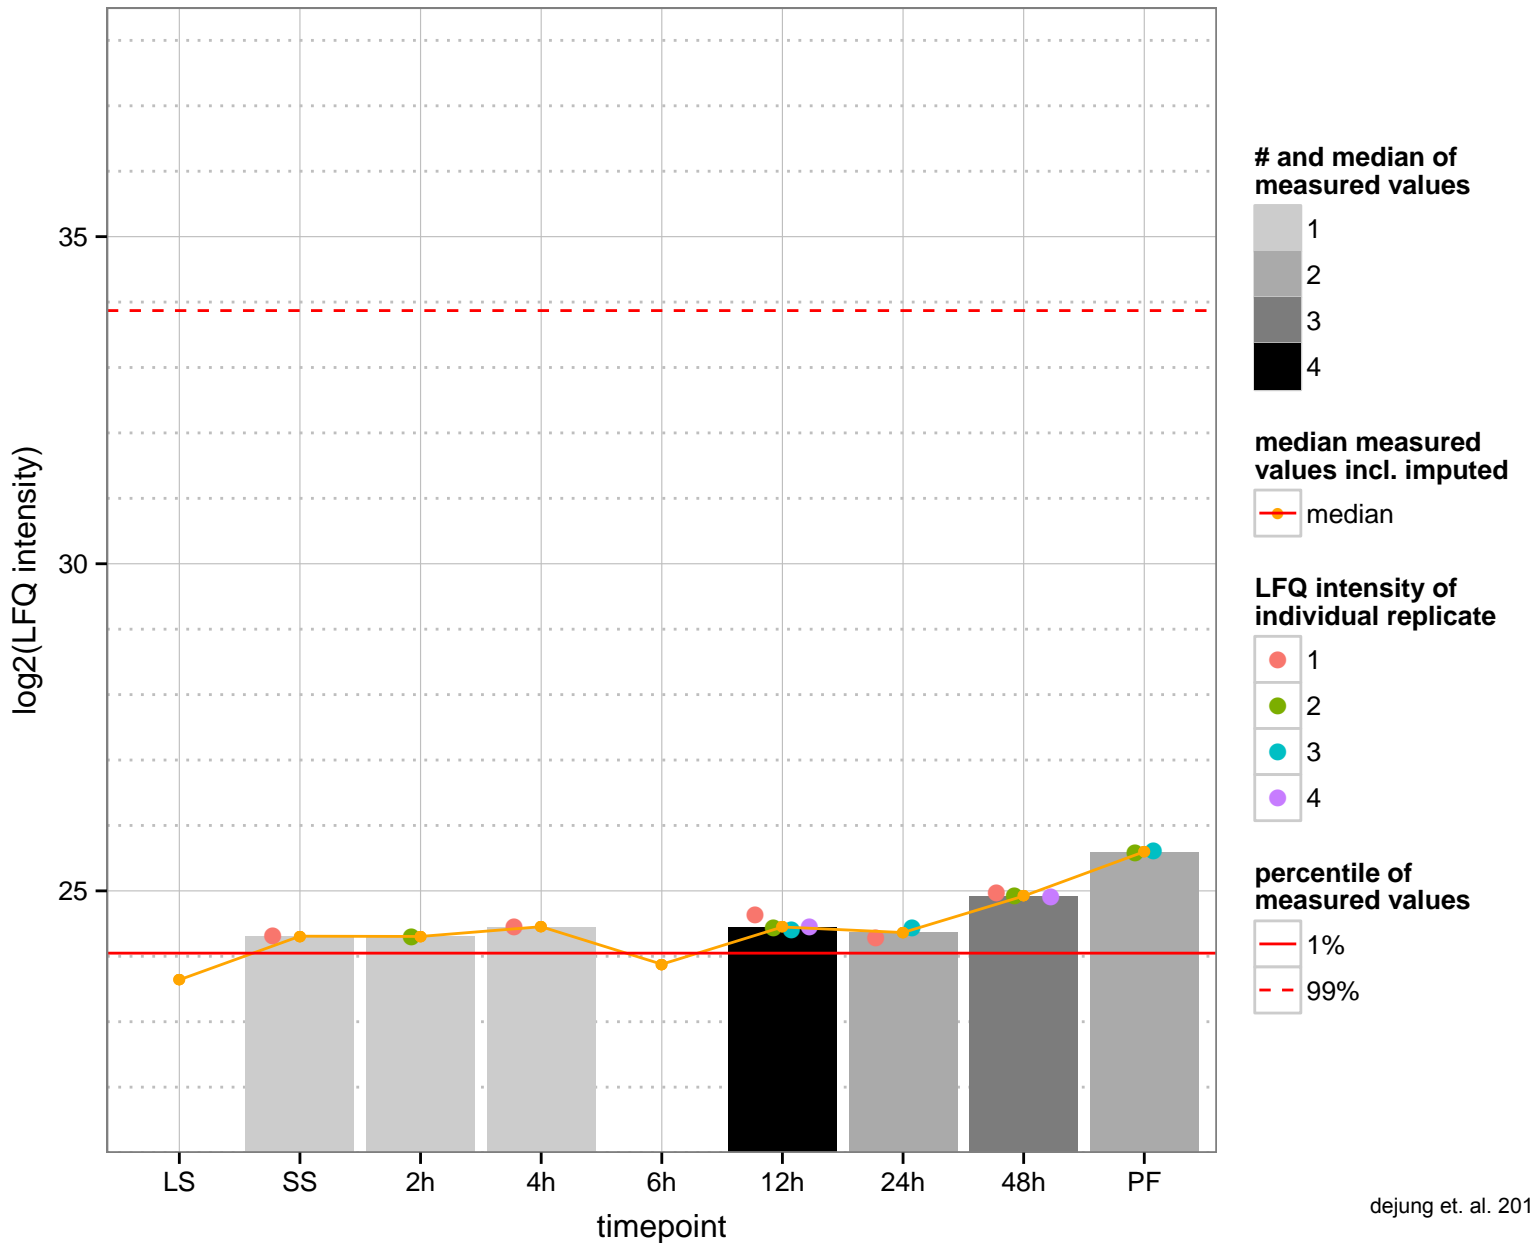

poly(A) polymerase, putative

Tb927.7.3780

AGOF: RNA binding, nucleotidyltransferase activity, polynucleotide adenylyltransferase activity

AGOC: nucleus

AGOP: RNA polyadenylation, transcription, DNA-dependent

PGOF: RNA binding, nucleotidyltransferase activity, polynucleotide adenylyltransferase activity

PGOC: nucleus

PGOP: RNA 3'-end processing, RNA polyadenylation, transcription, DNA-dependent

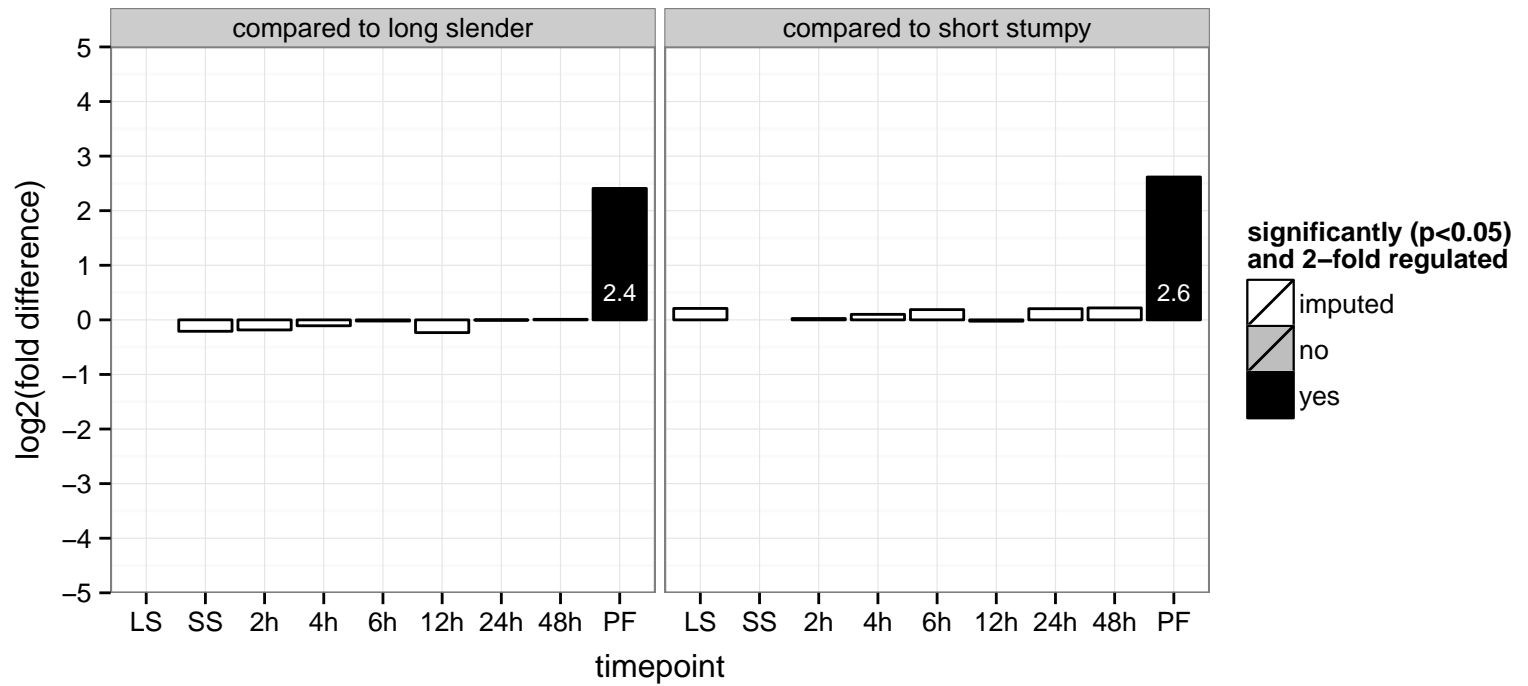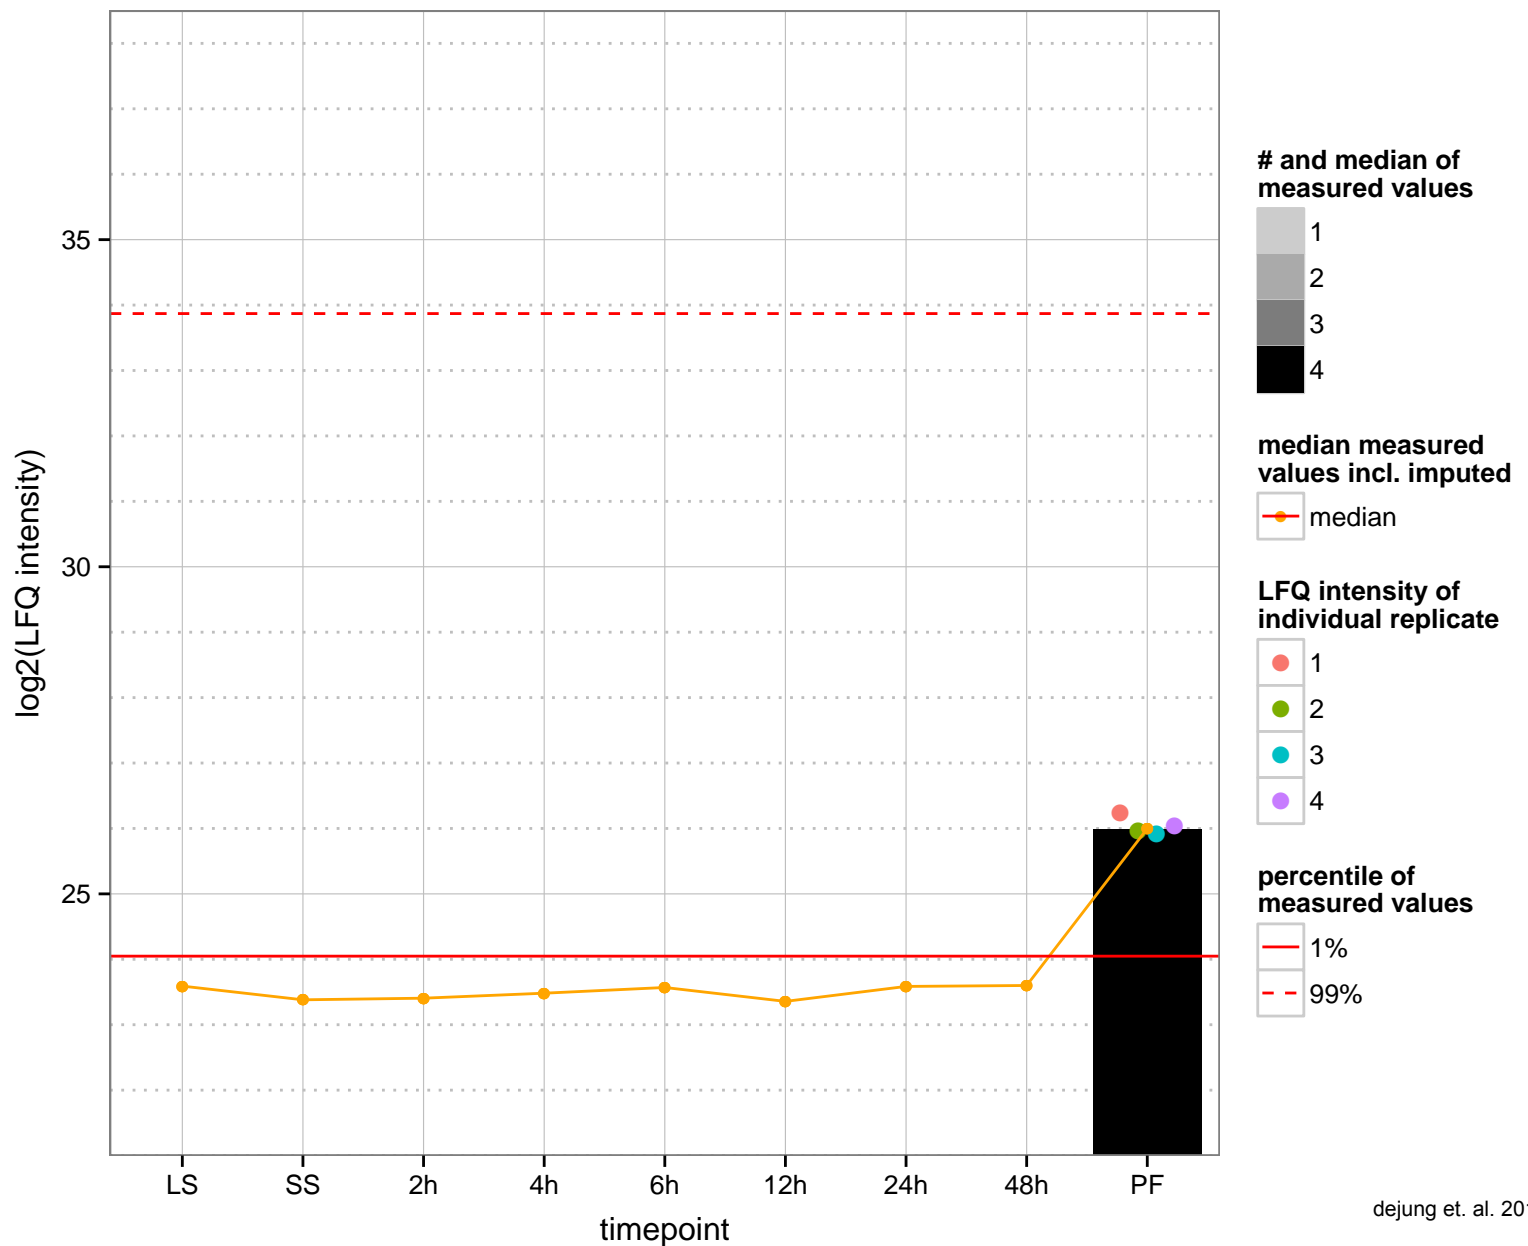

hypothetical protein, conserved  
 Tb927.7.4120  
 AGOF: null  
 AGOC: null  
 AGOP: null  
 PGO: null  
 PGOC: null  
 PGOP: null

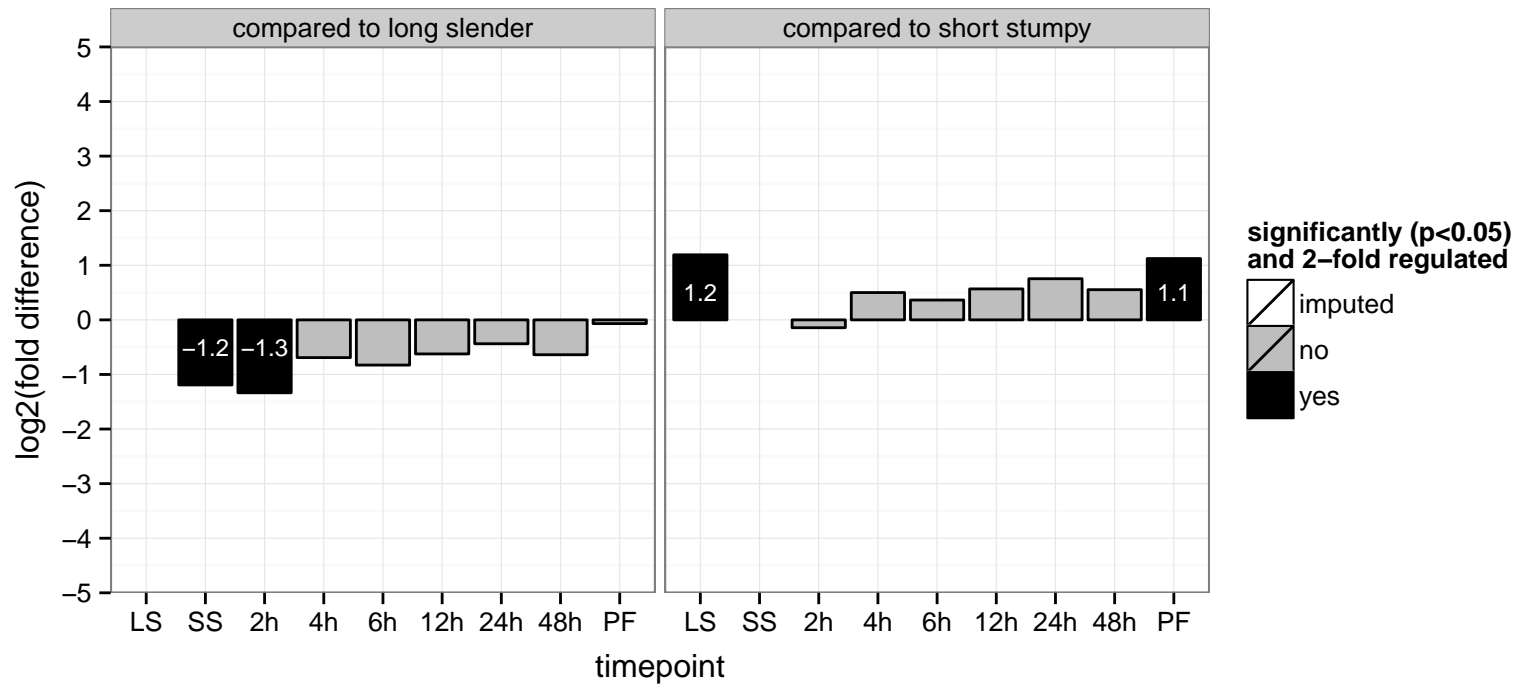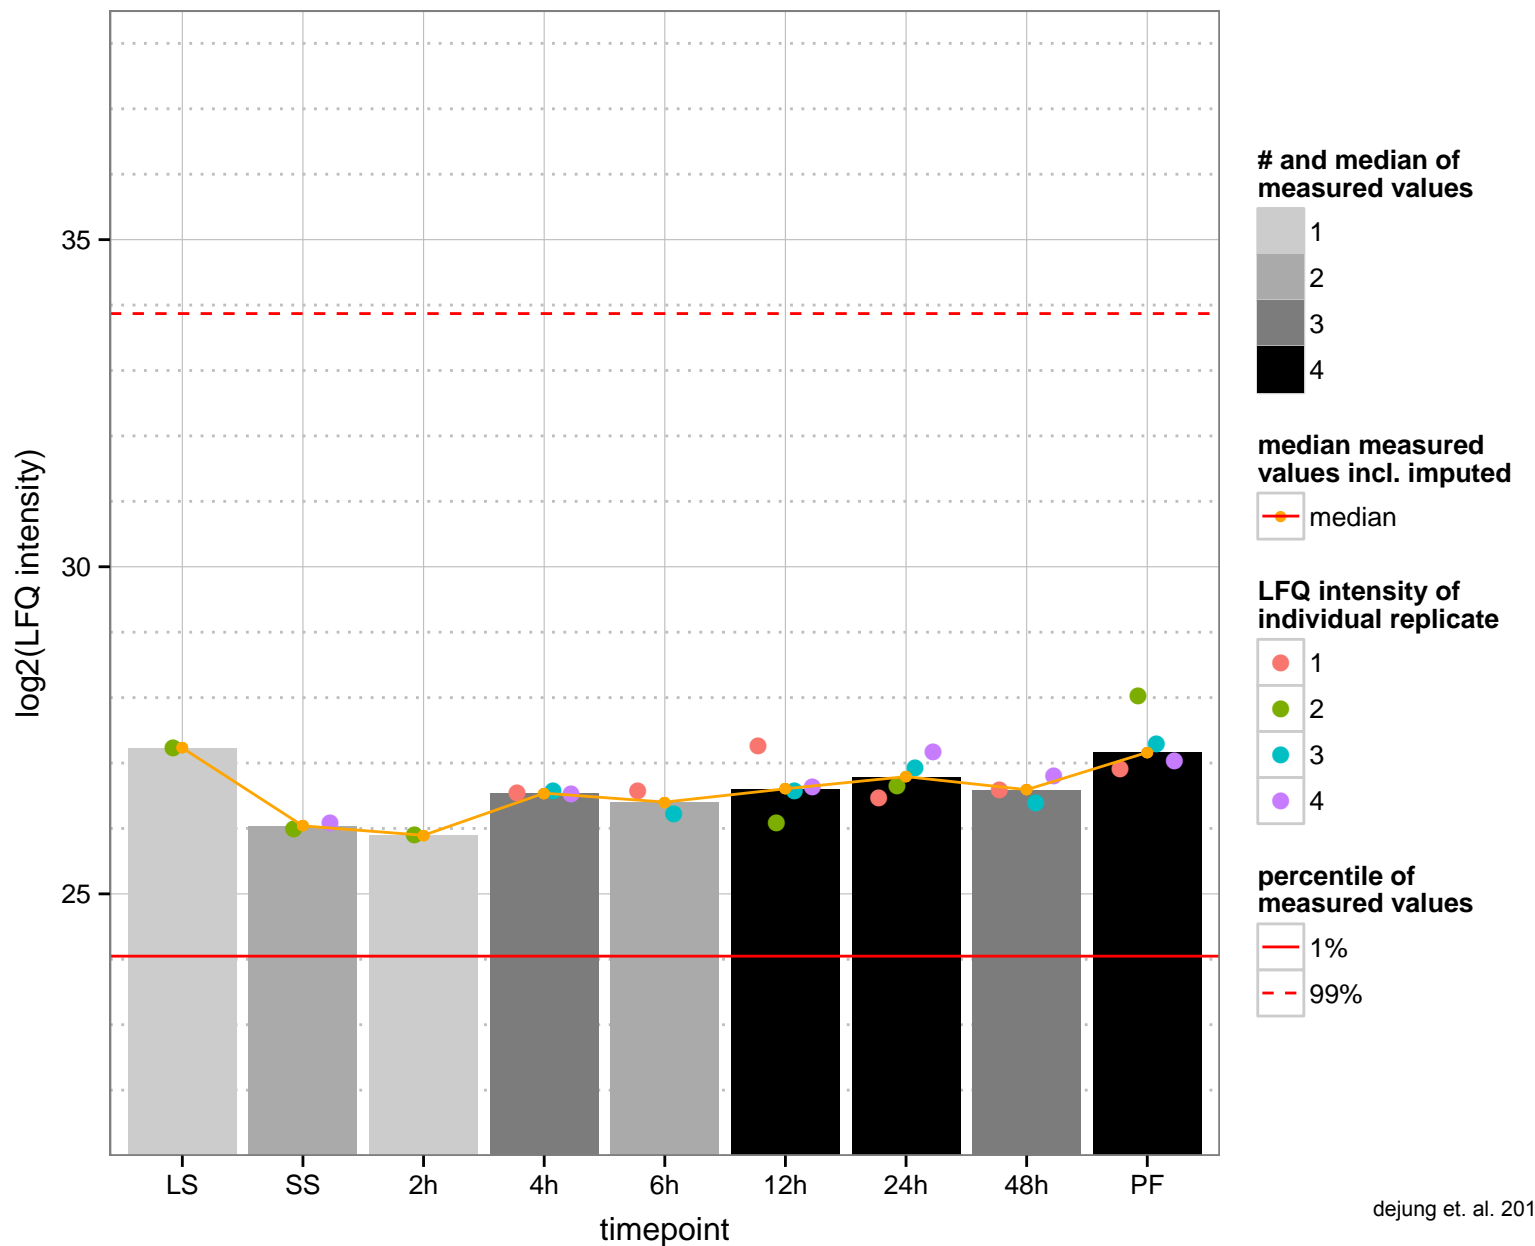

hypothetical protein, conserved  
 Tb927.7.5090;Tb11.v5.0189  
 AGOF: null  
 AGOC: null  
 AGOP: null  
 PGOF: null  
 PGOC: null  
 PGOP: null

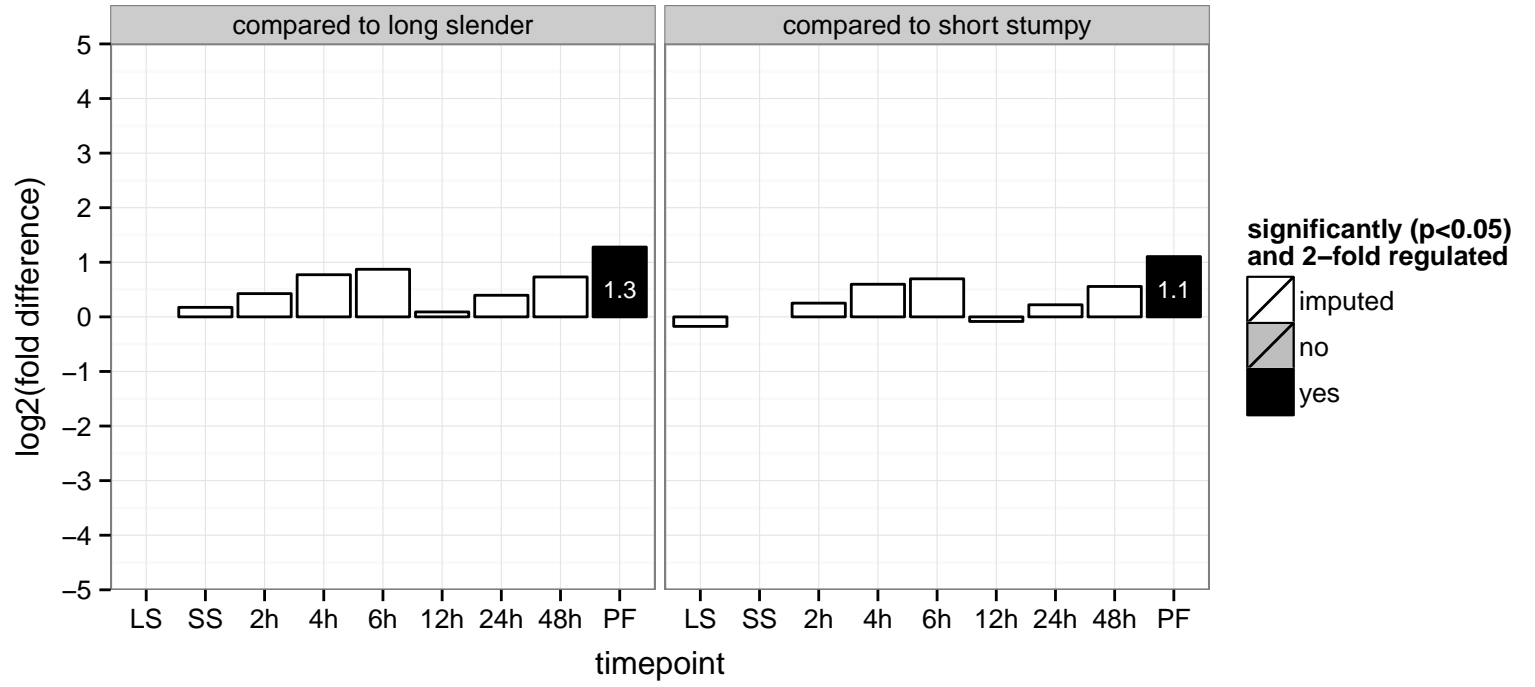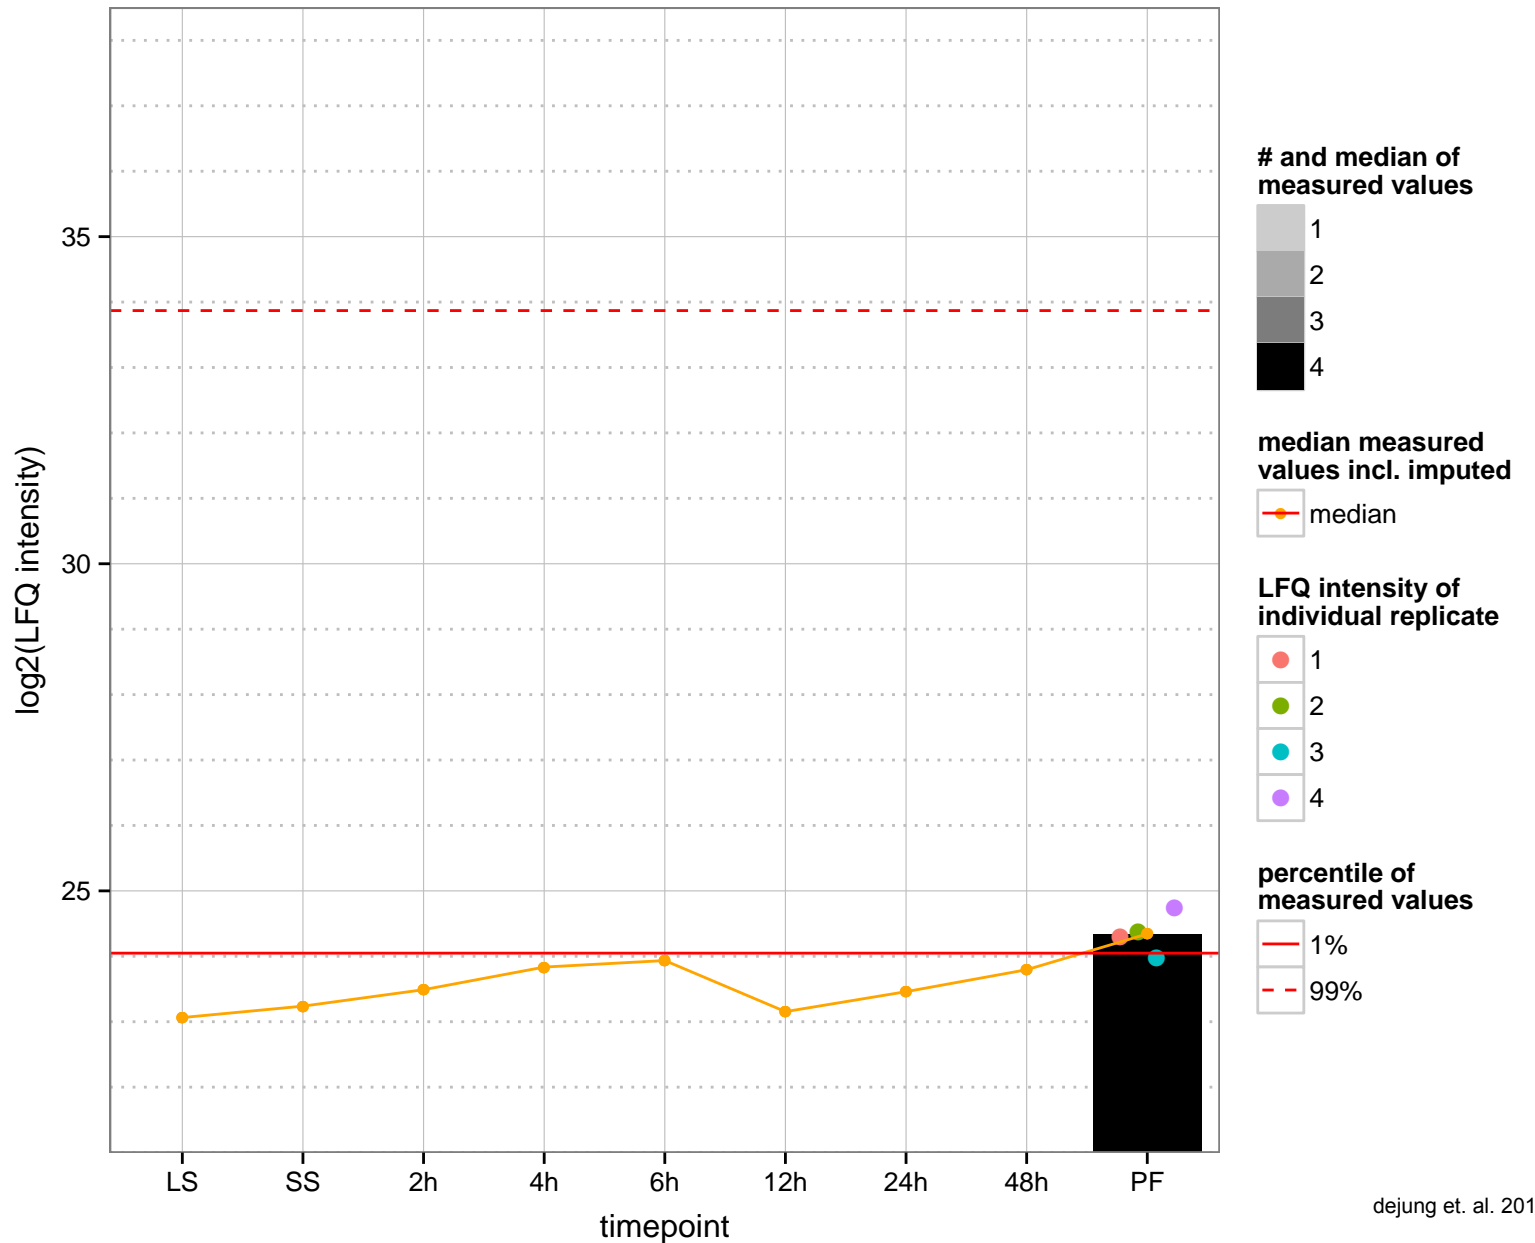

hypothetical protein, conserved  
 Tb927.7.5130  
 AGOF: null  
 AGOC: mitochondrion  
 AGOP: null  
 PGO: null  
 PGOC: null  
 PGOP: null

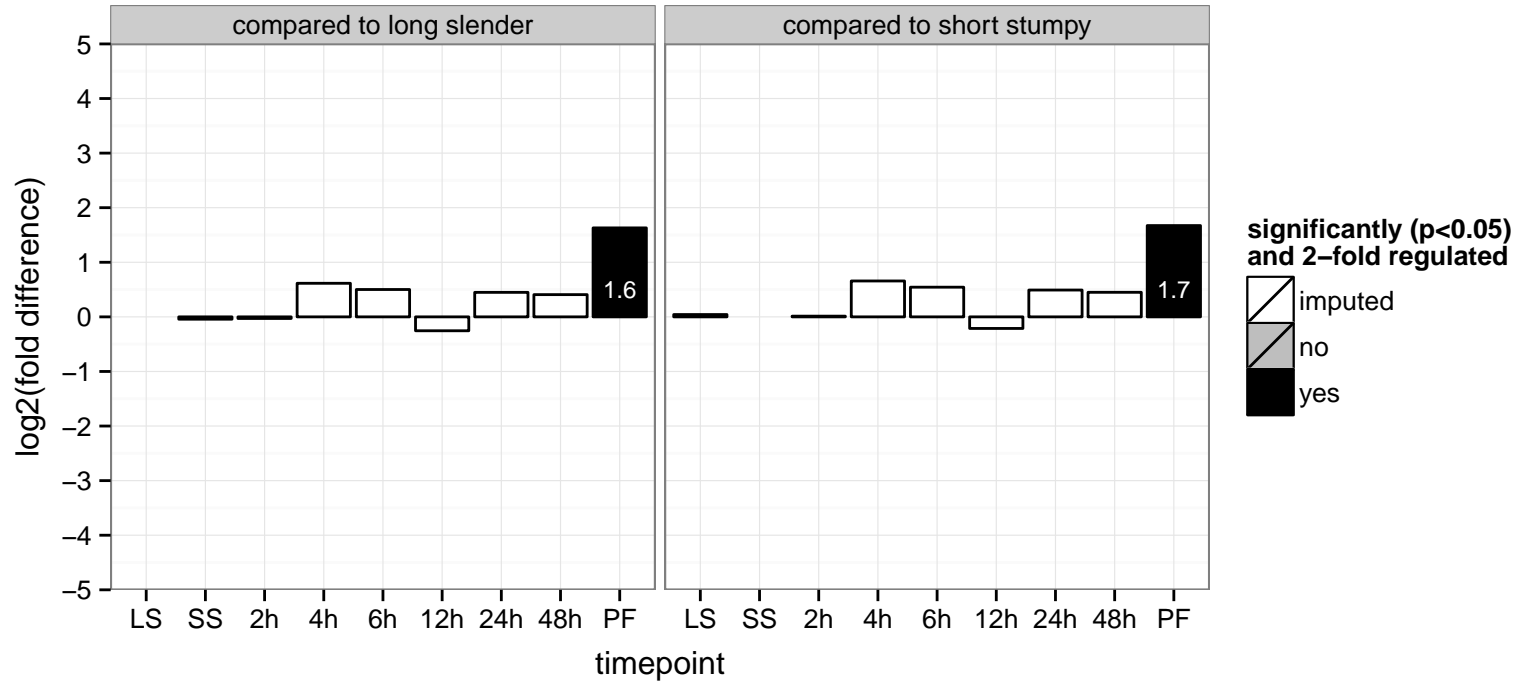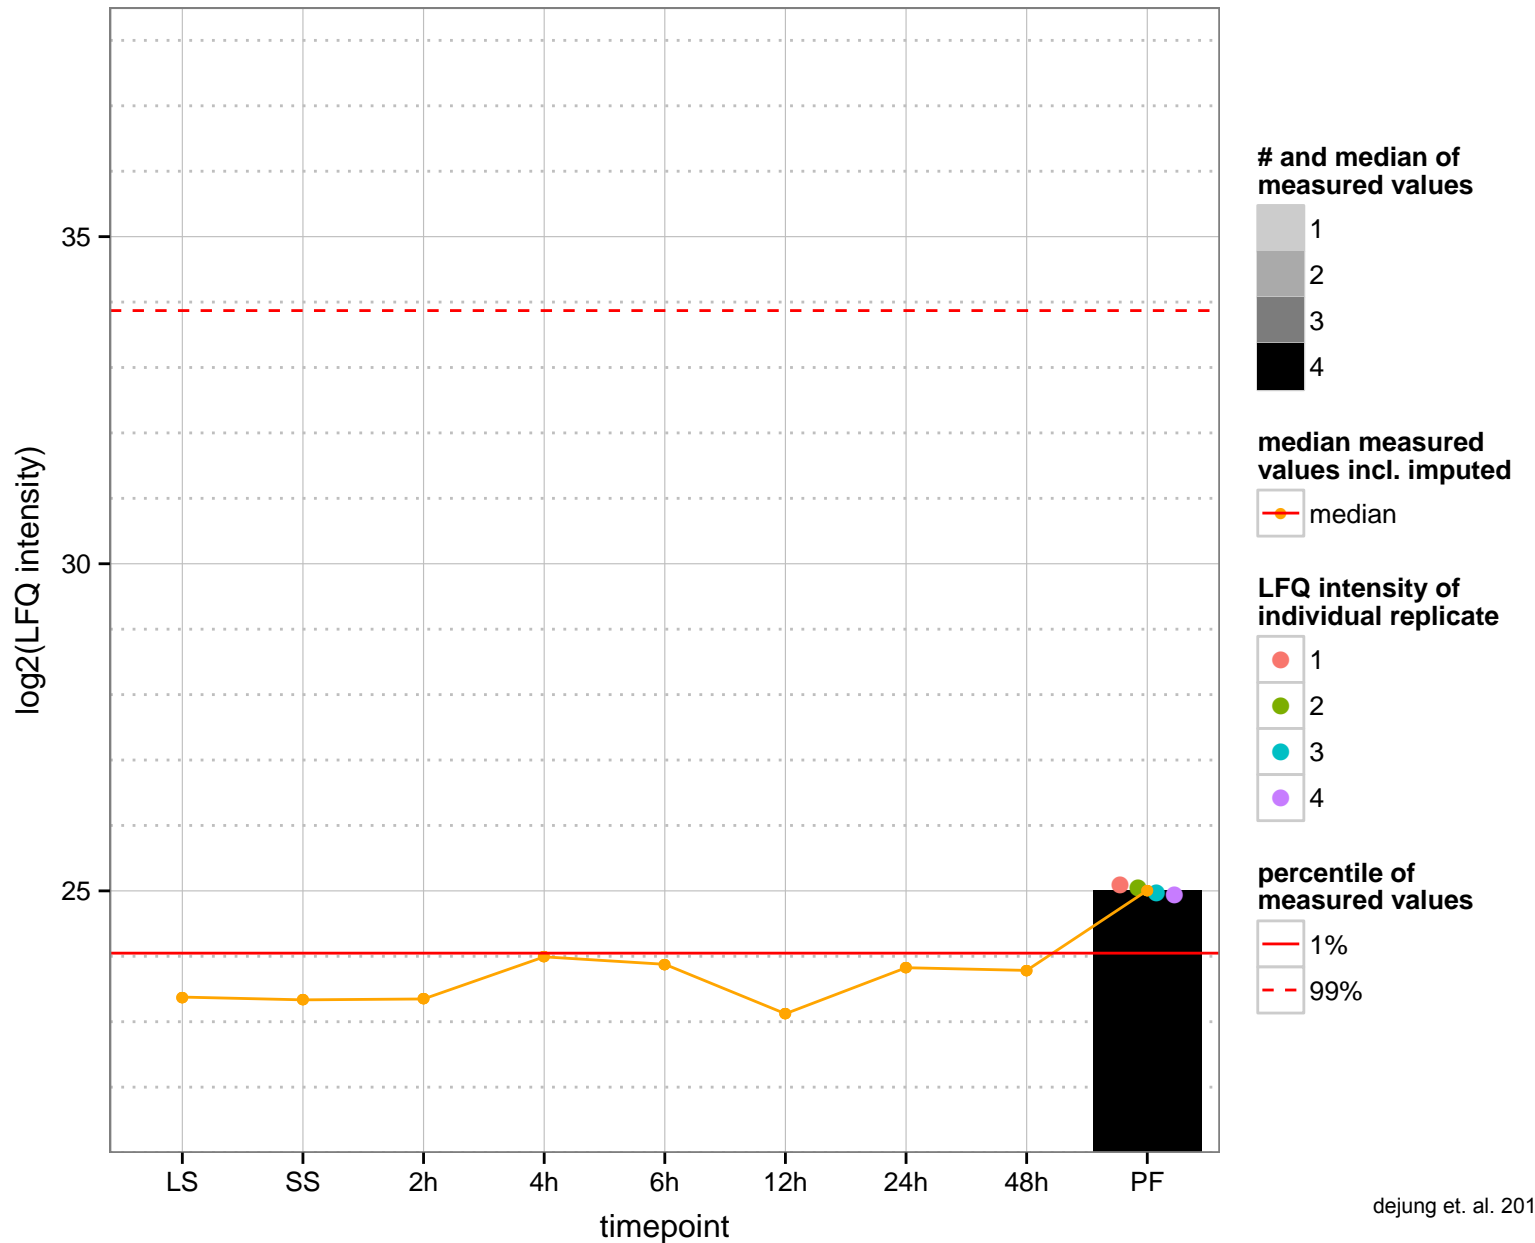



hypothetical protein, conserved  
 Tb927.7.5260  
 AGOF: null  
 AGOC: mitochondrion  
 AGOP: null  
 PGO: null  
 PGOC: null  
 PGOP: null

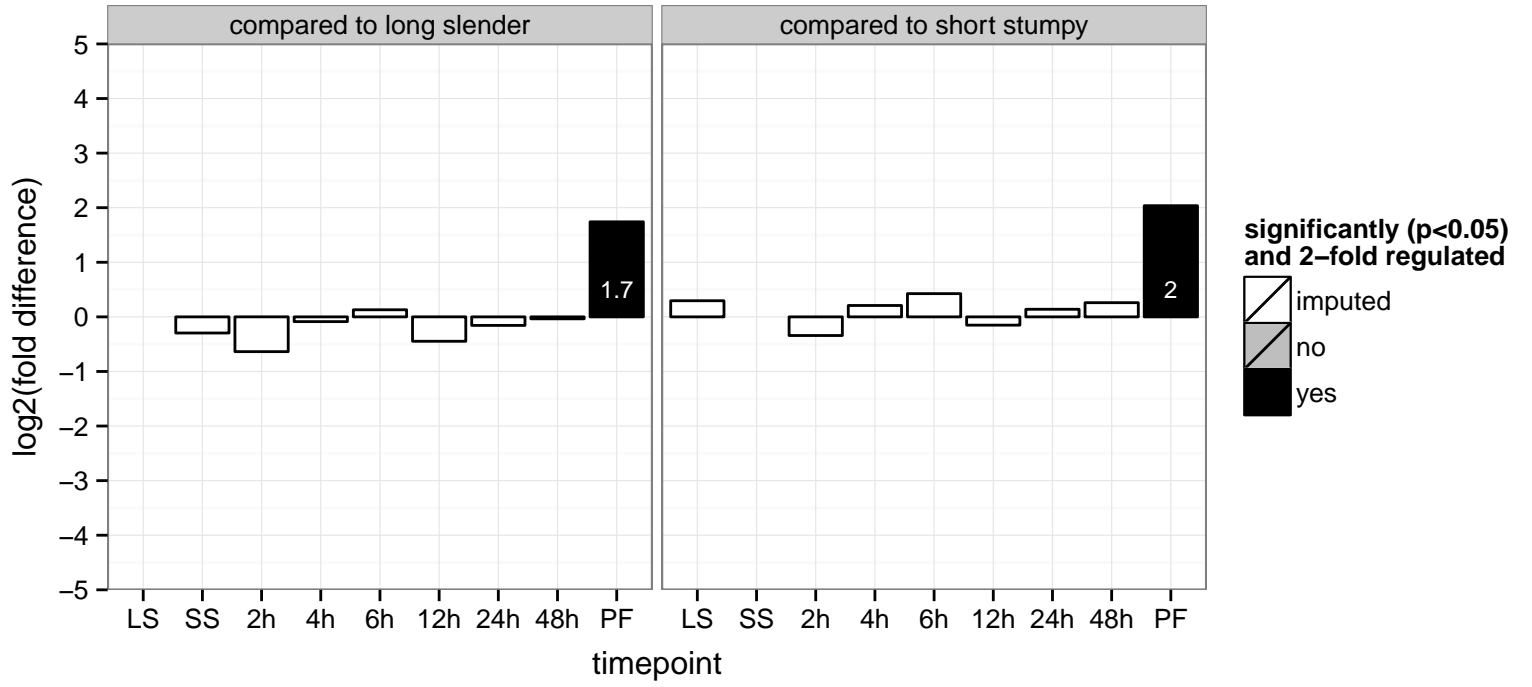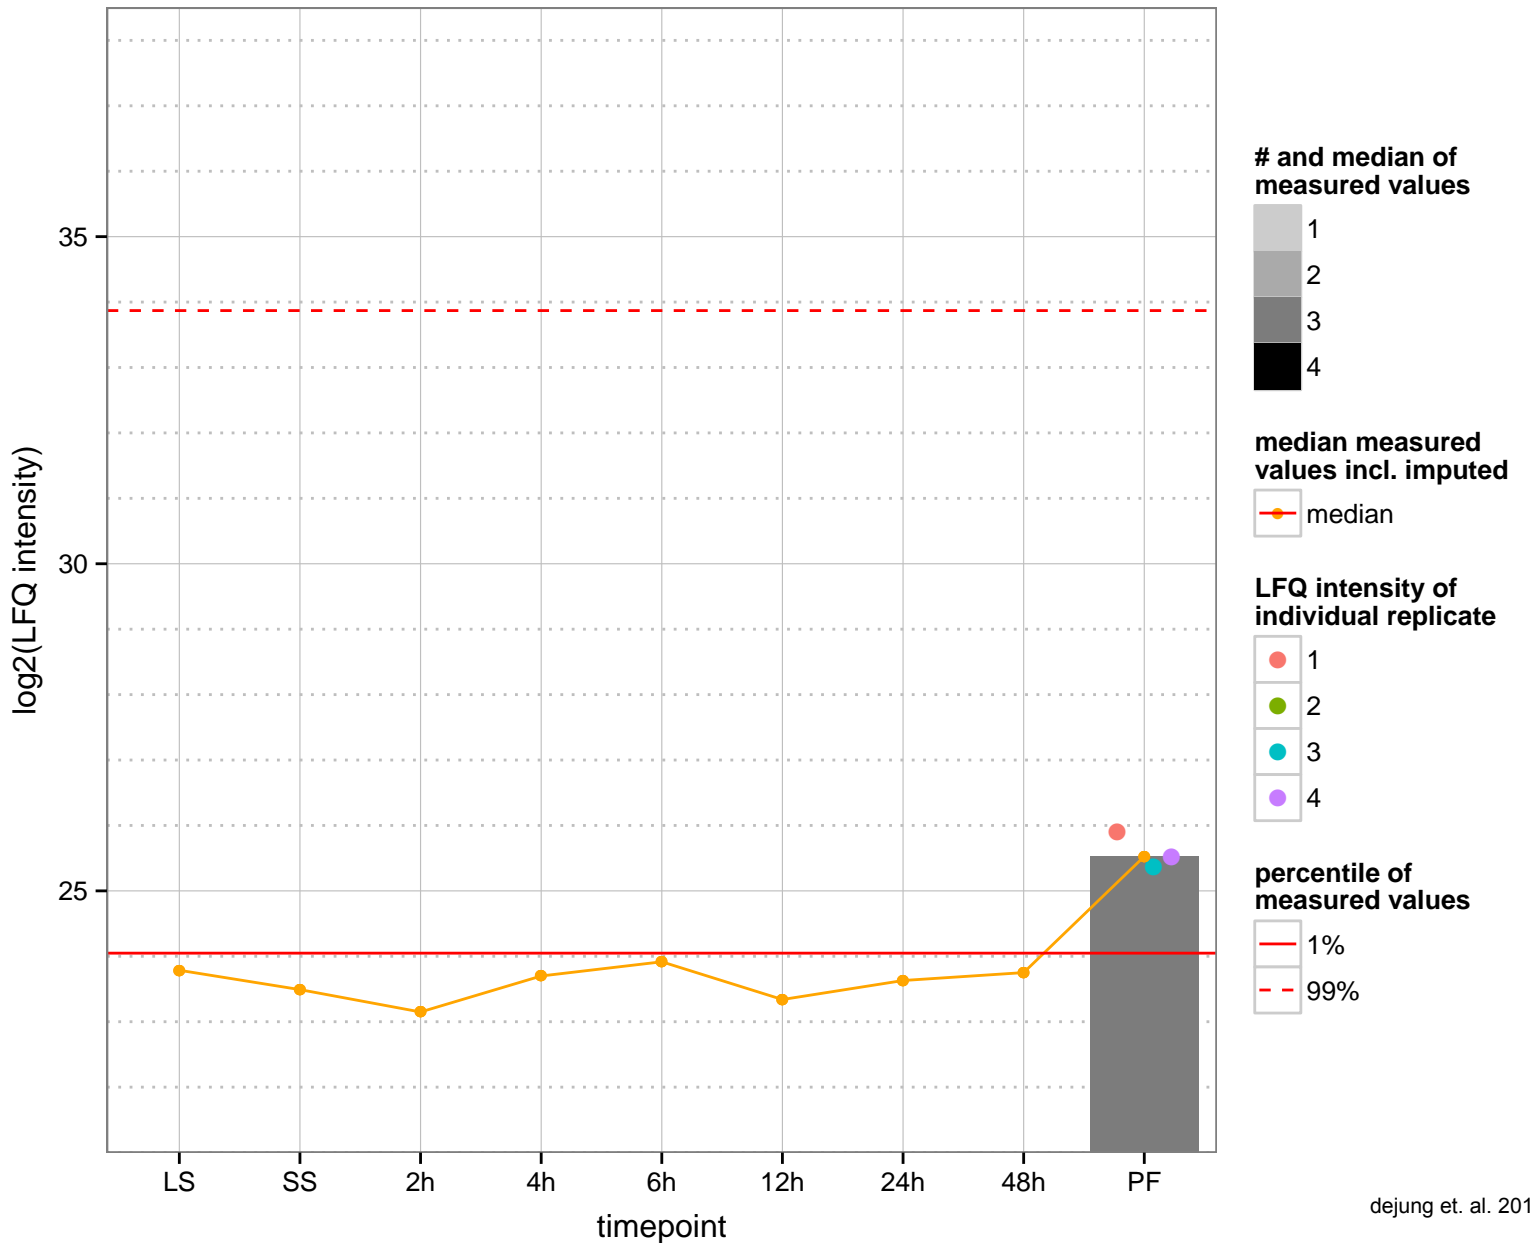

hypothetical protein, conserved  
 Tb927.7.5300  
 AGOF: null  
 AGOC: null  
 AGOP: null  
 PGOF: protein binding  
 PGO: null  
 PGOP: null

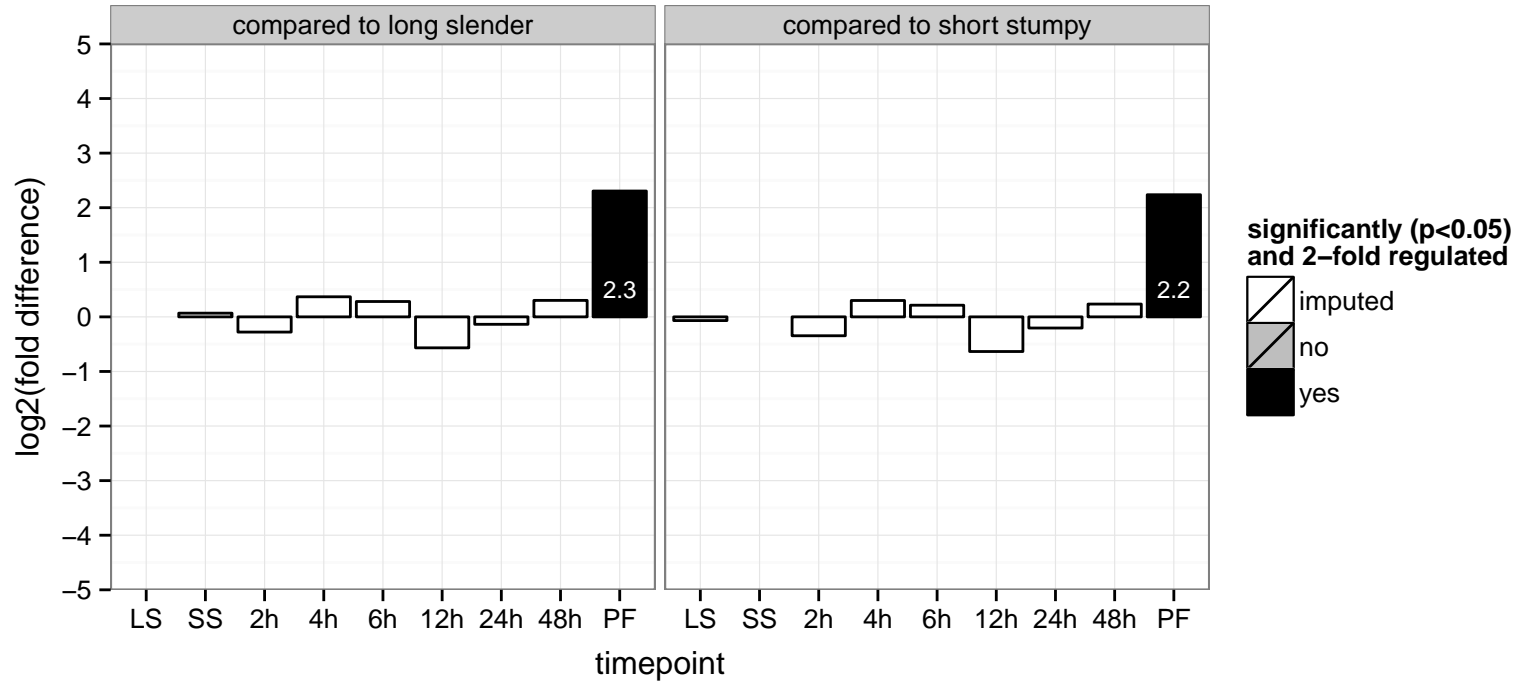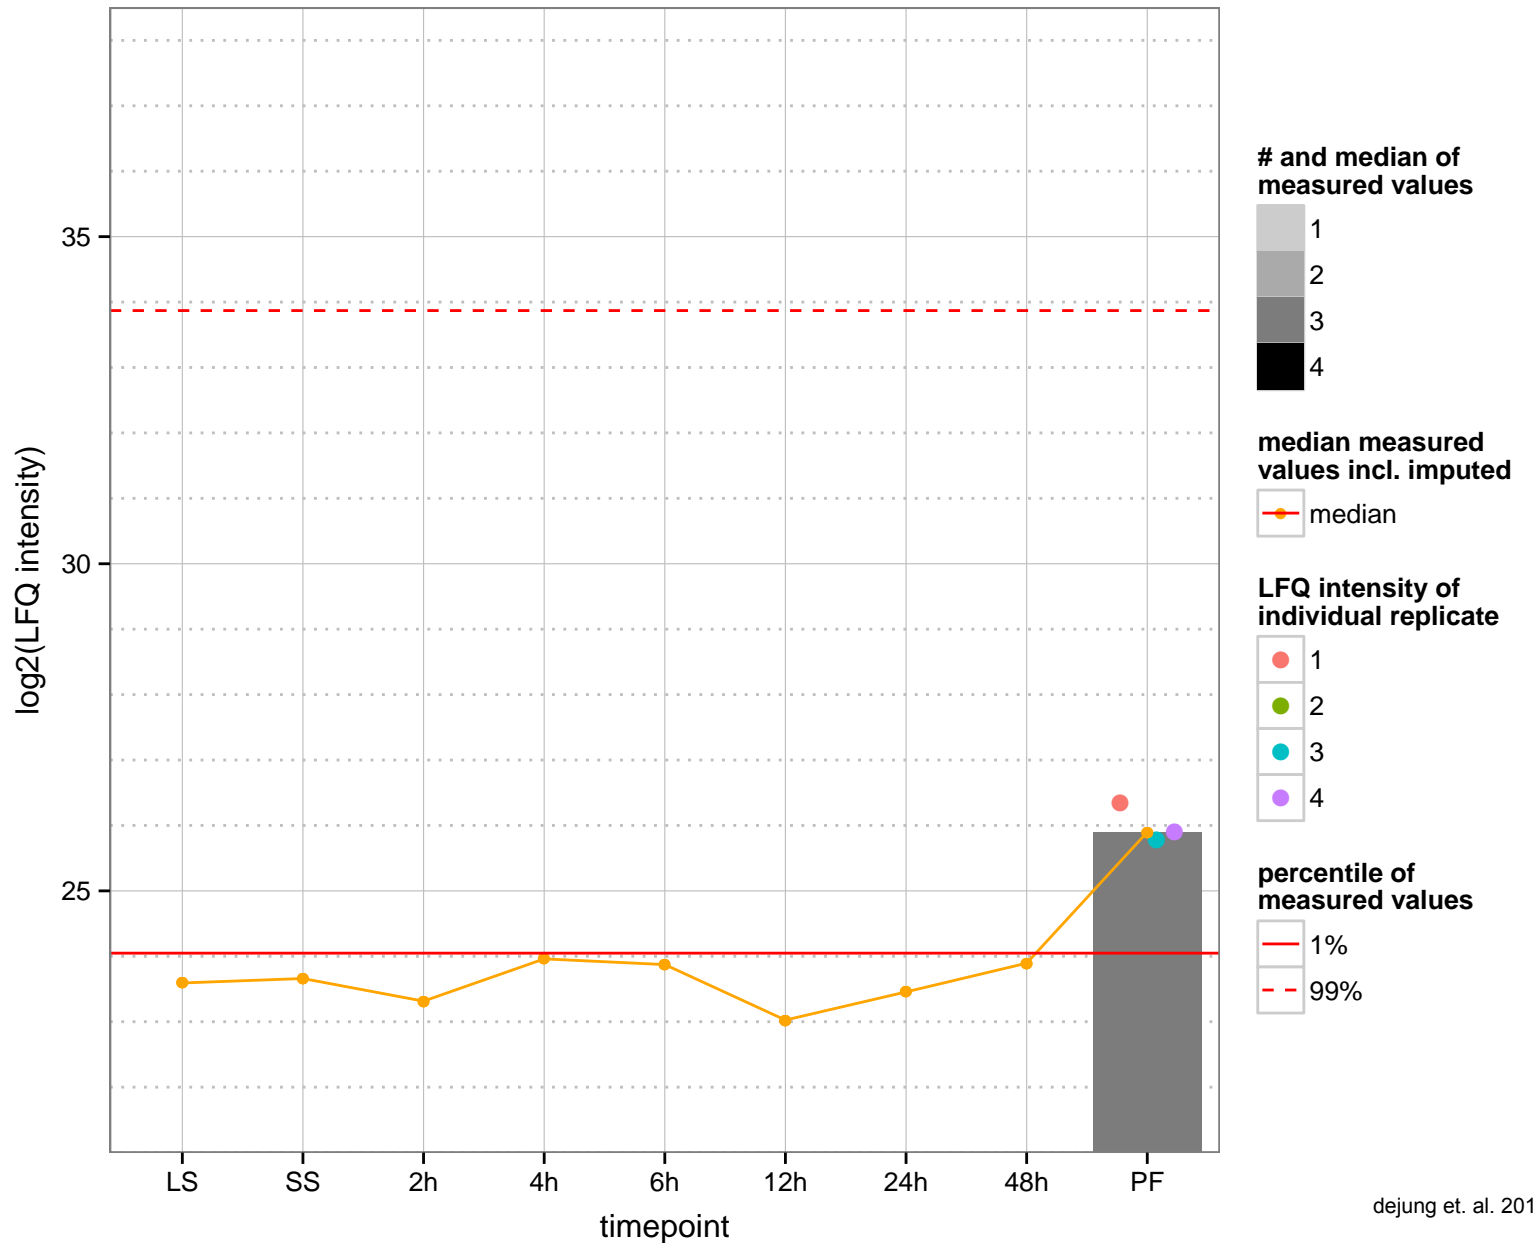

prefoldin, putative  
 Tb927.7.570  
 AGOF: unfolded protein binding  
 AGOC: prefoldin complex  
 AGOP: protein folding  
 PGOF: unfolded protein binding  
 PGOC: prefoldin complex  
 PGOP: protein folding

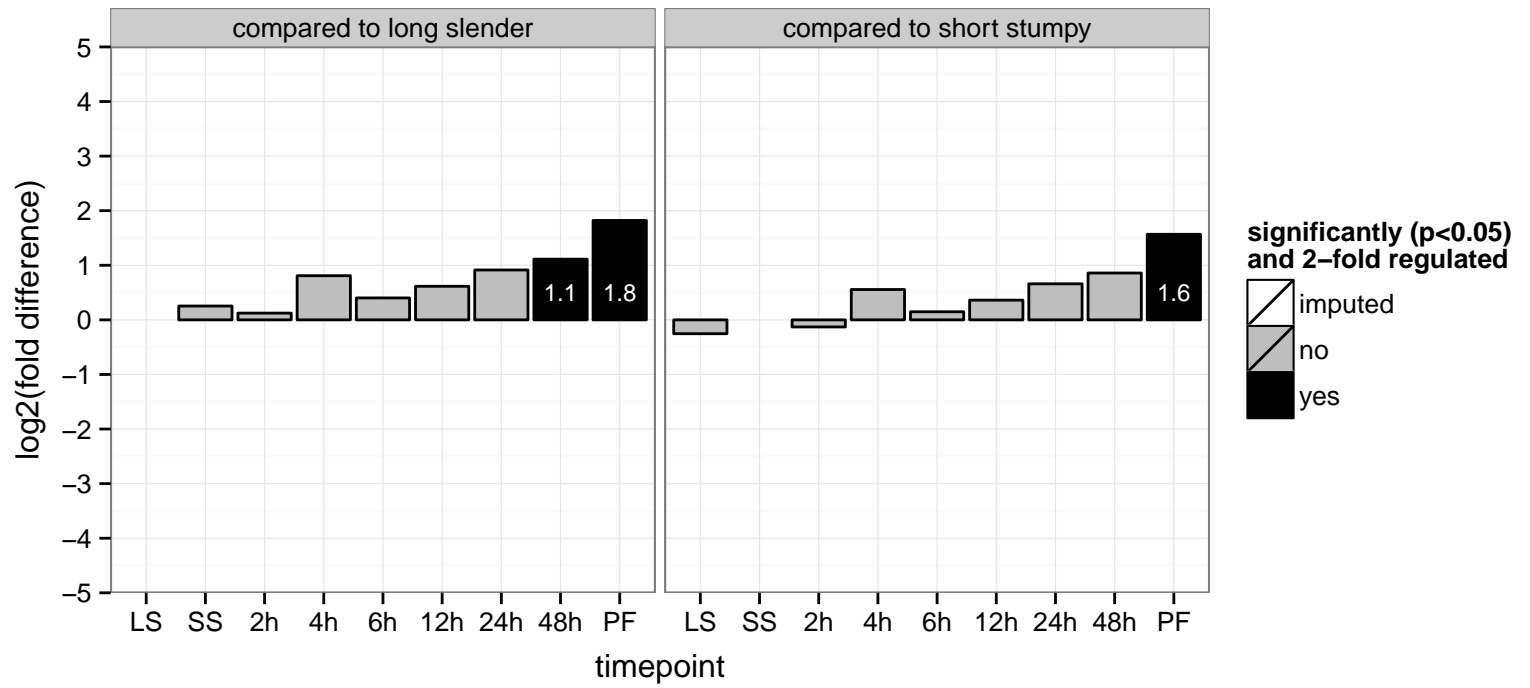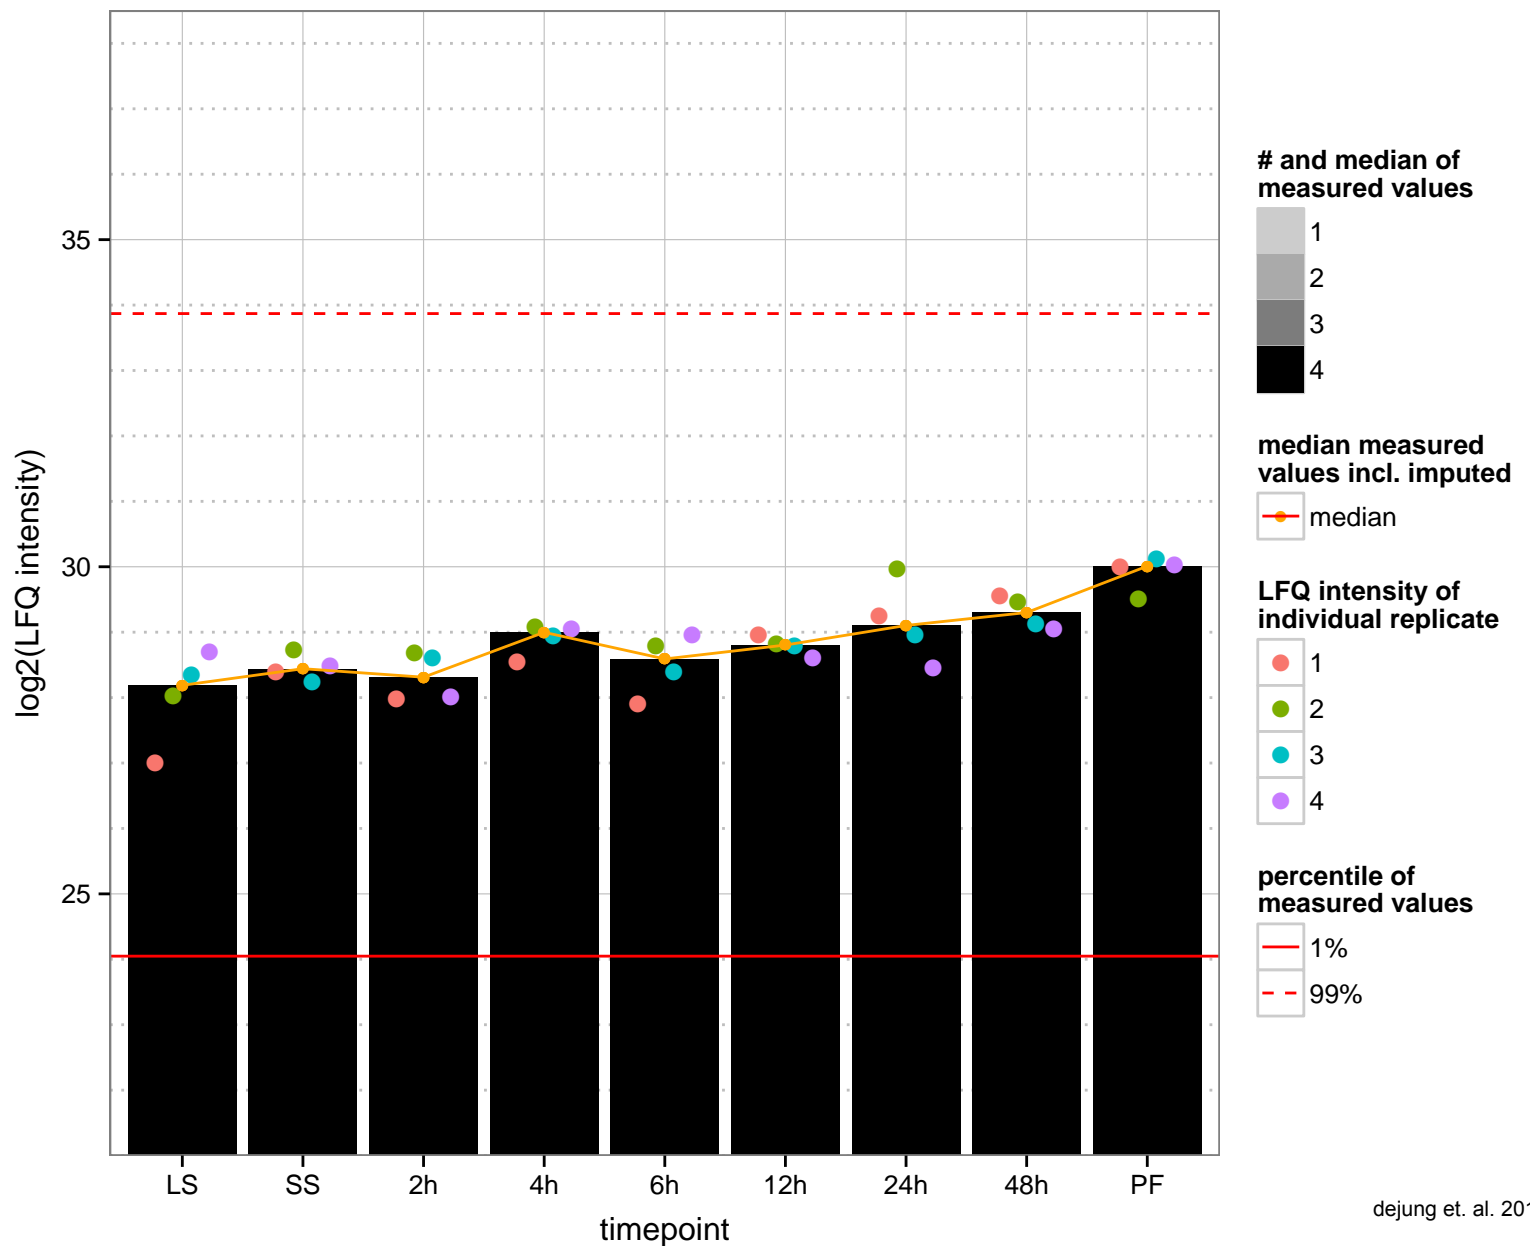

hypothetical protein, conserved  
 Tb927.7.6260  
 AGOF: null  
 AGOC: null  
 AGOP: null  
 PGOF: protein binding  
 PGO: null  
 PGOP: null

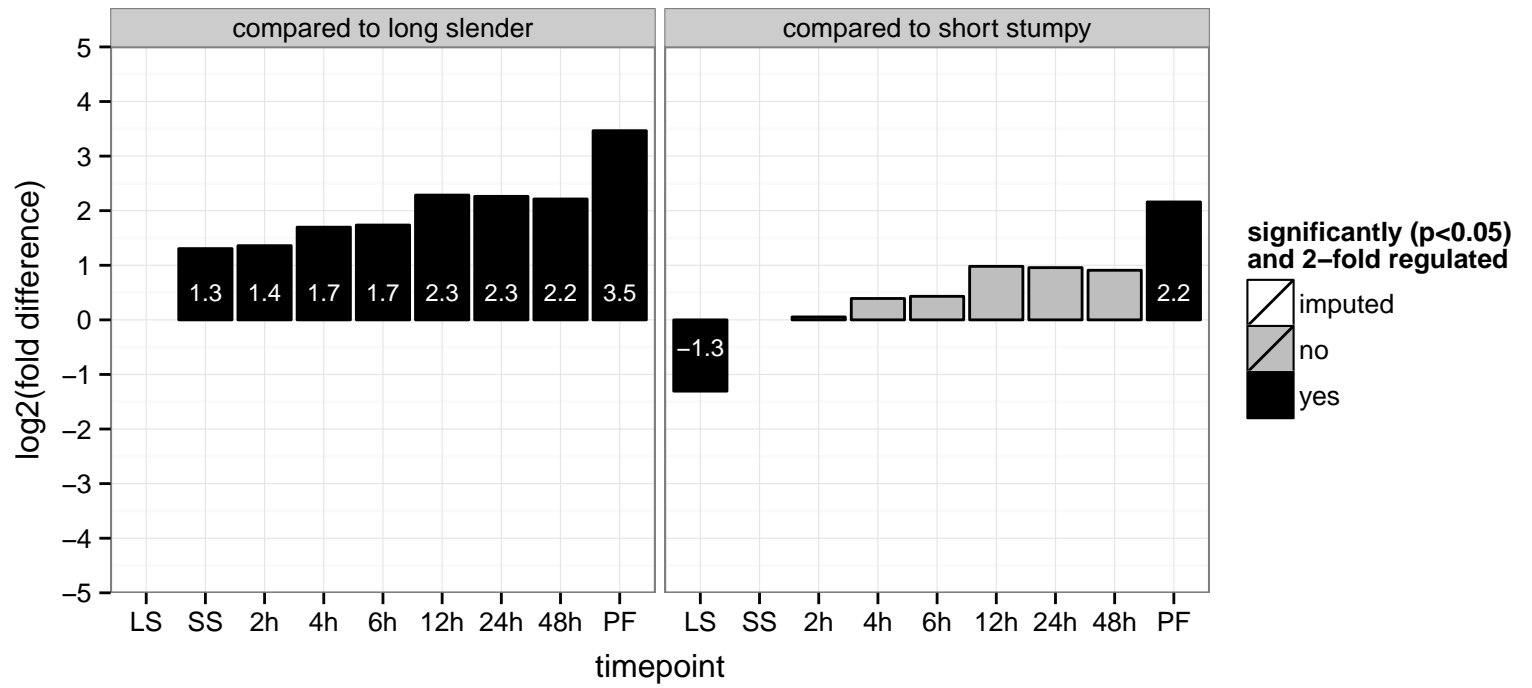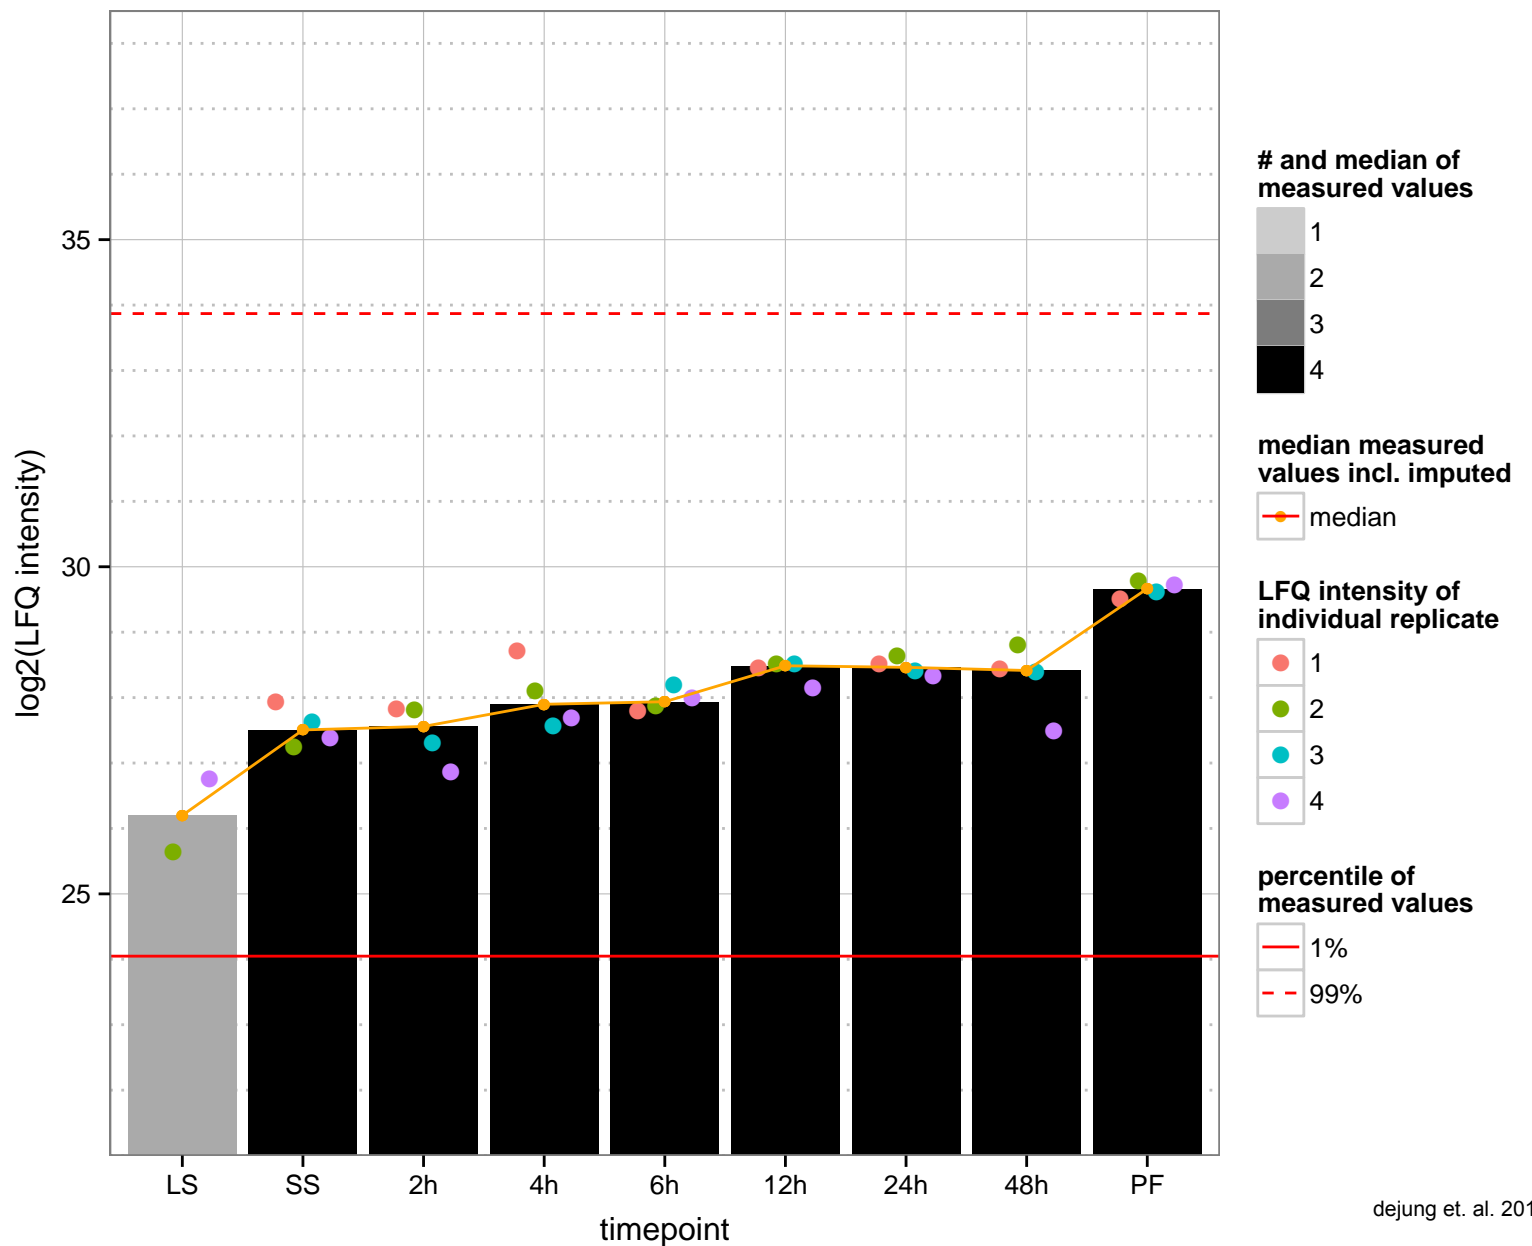

FG-GAP repeat protein, putative, intergrin alpha chain protein  
 Tb927.7.6460  
 AGOF: null  
 AGOC: null  
 AGOP: null  
 PGOF: null  
 PGO C: null  
 PGOP: null

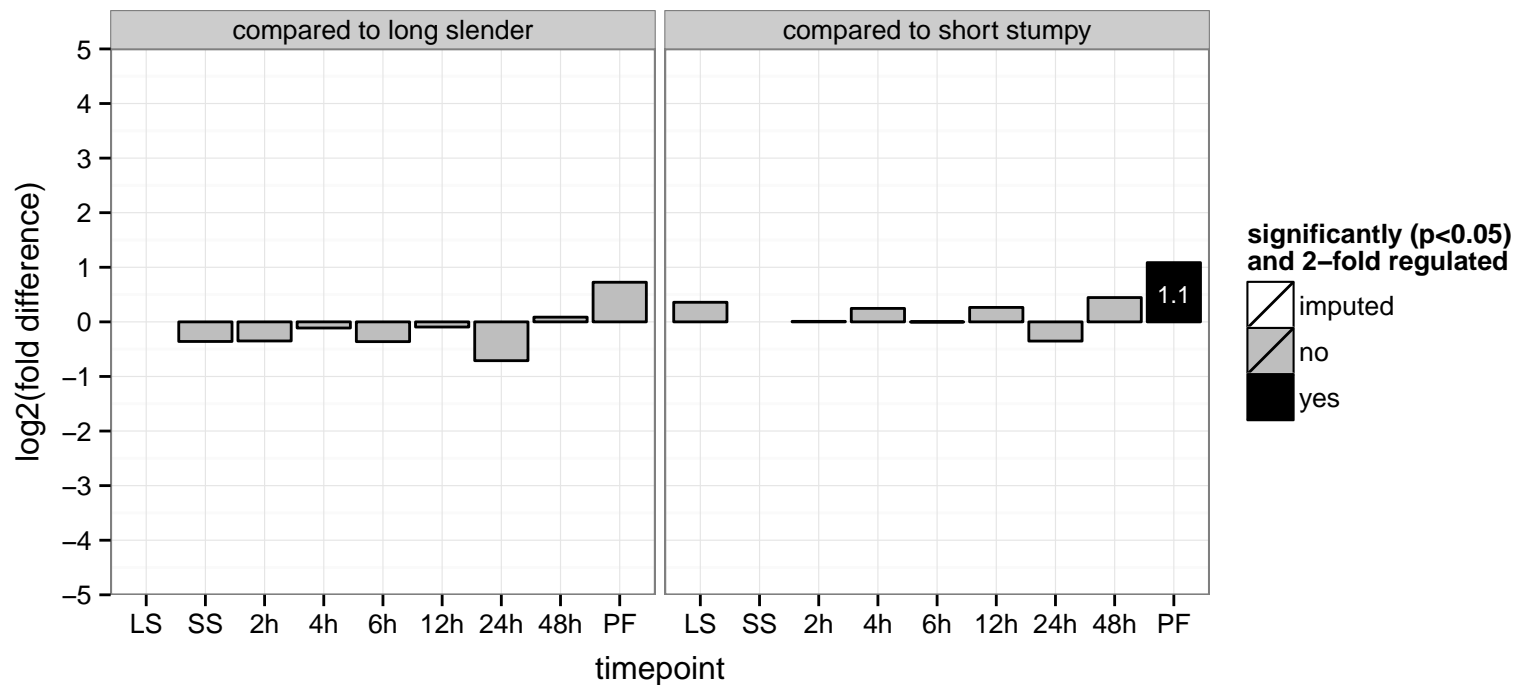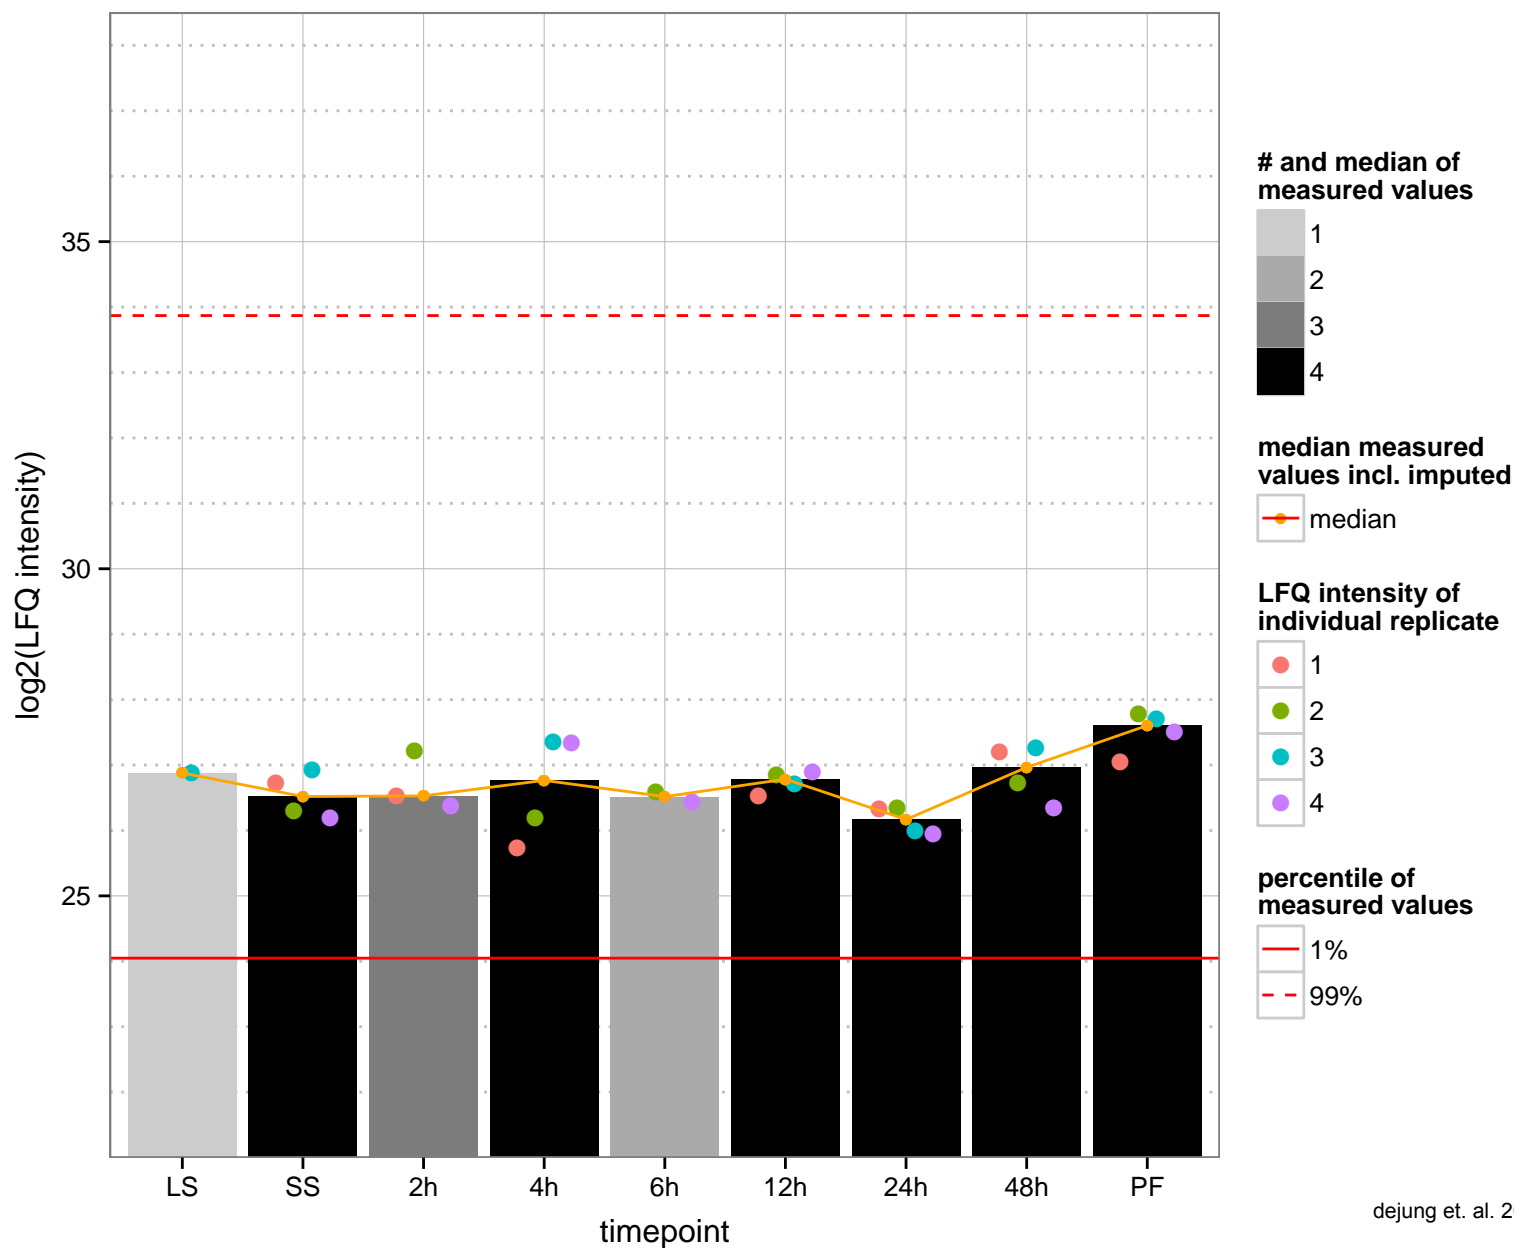

hypothetical protein, conserved  
 Tb927.7.650  
 AGOF: null  
 AGOC: null  
 AGOP: null  
 PGOF: null  
 PGO: null  
 PGOP: null

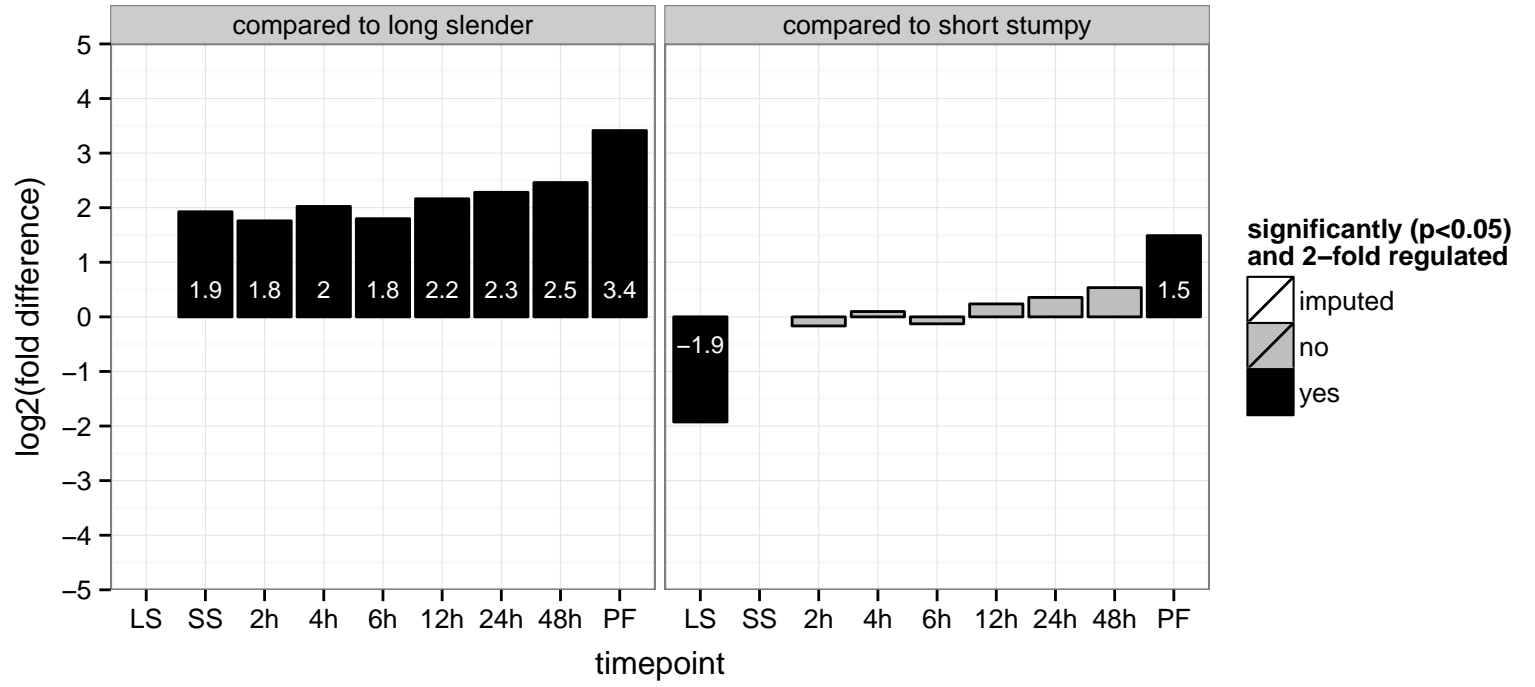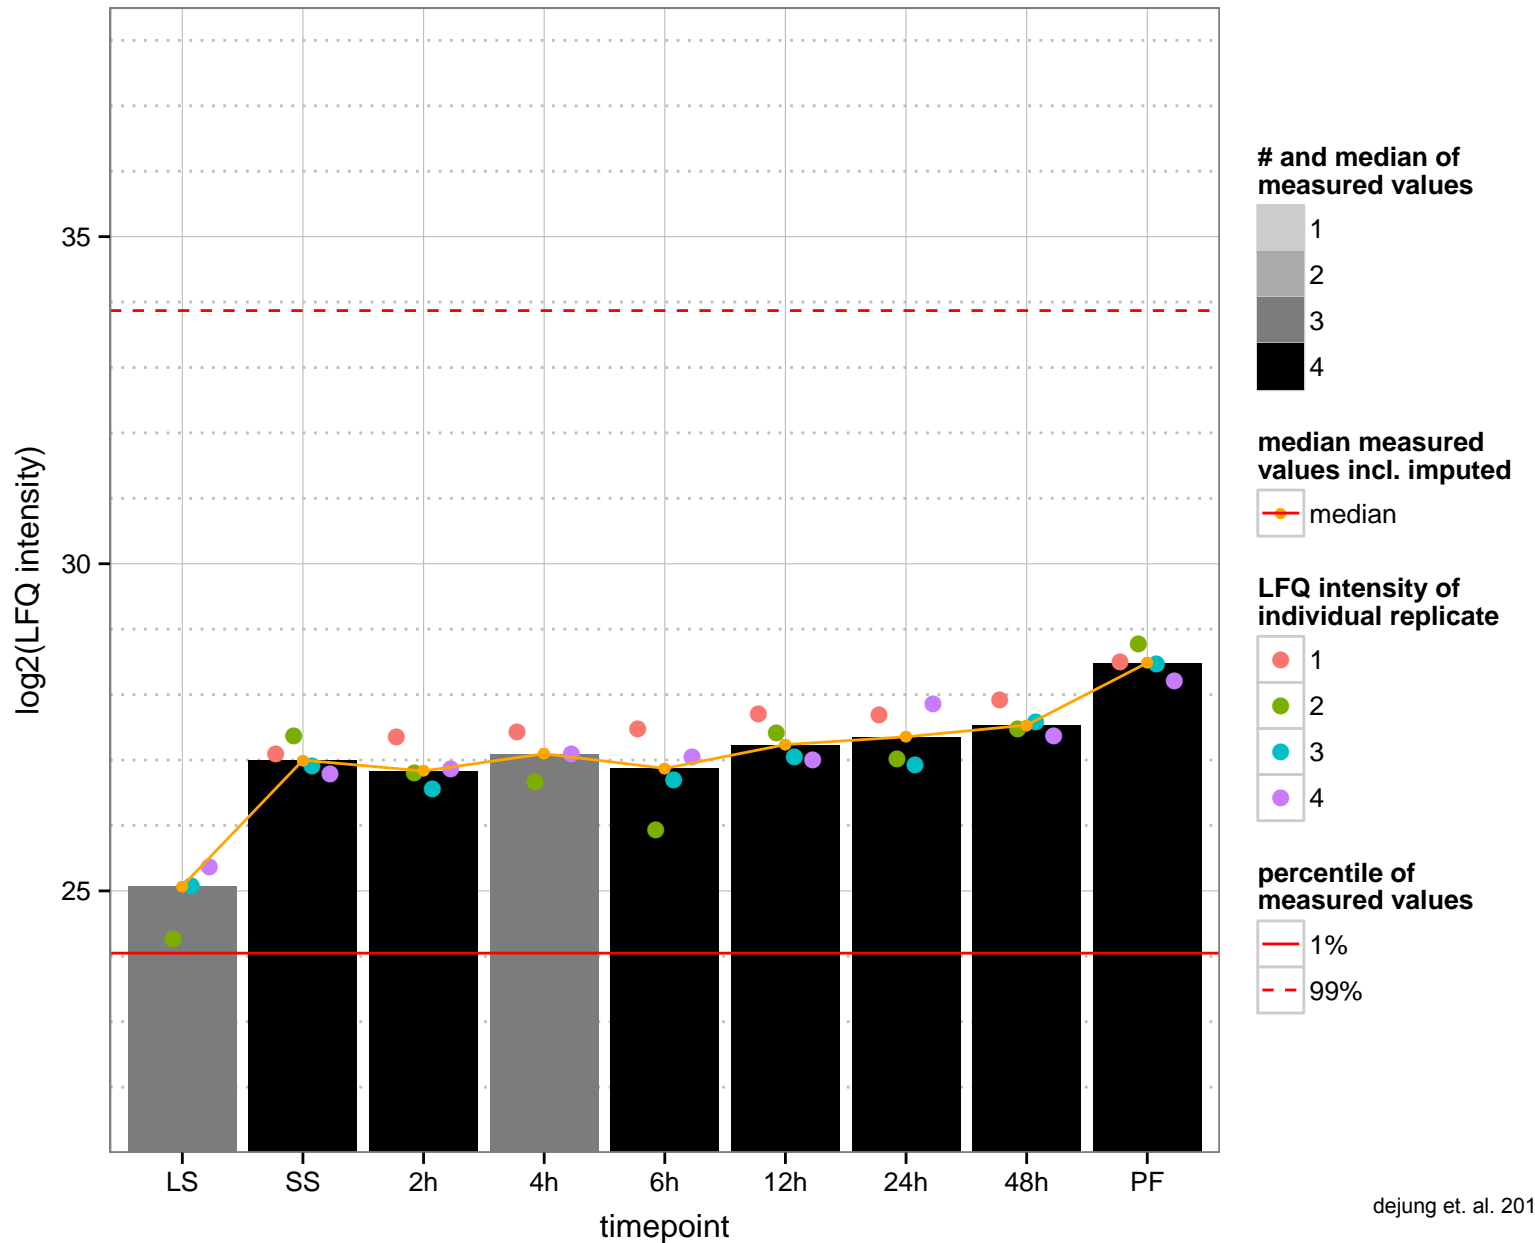

trans-sialidase, putative  
 Tb927.7.6830  
 AGOF: exo-alpha-sialidase activity  
 AGOC: null  
 AGOP: pathogenesis  
 PGO: null  
 PGOC: null  
 PGOP: null

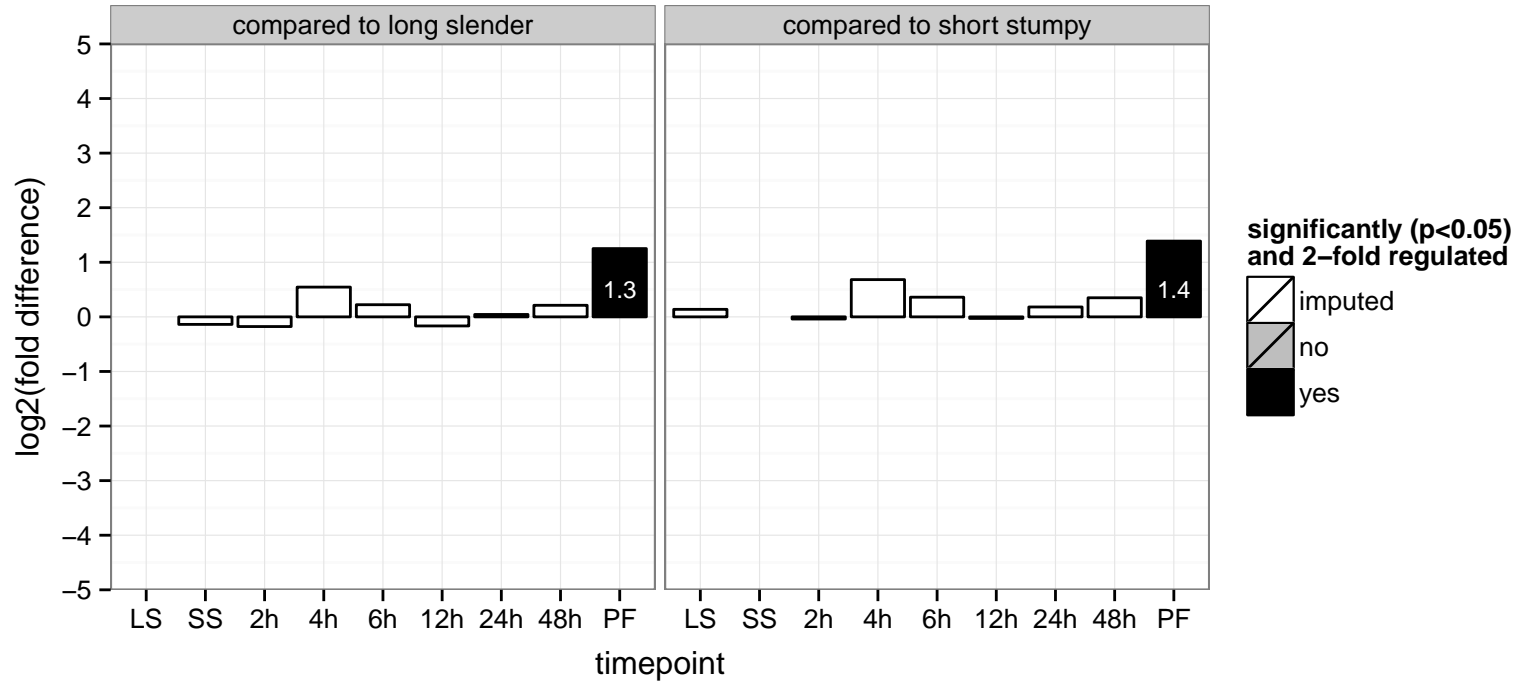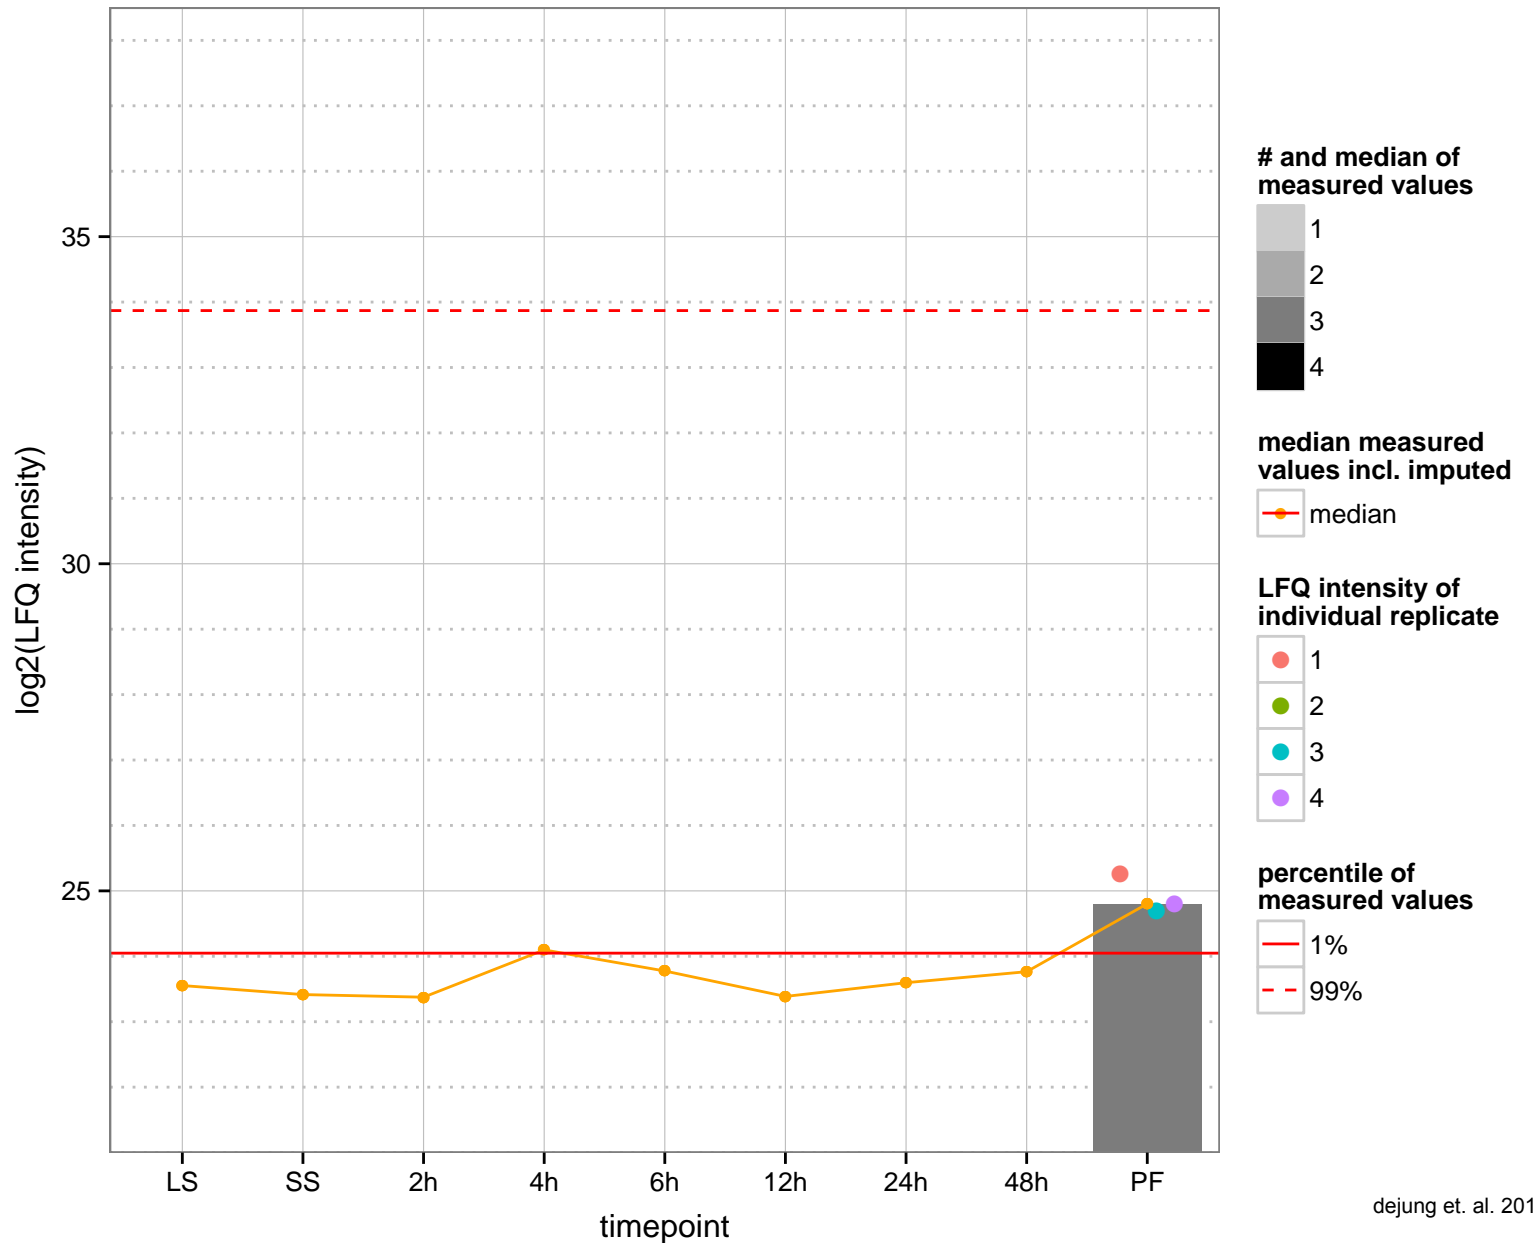

hypothetical protein, conserved  
 Tb927.7.6890  
 AGOF: null  
 AGOC: null  
 AGOP: null  
 PGO: null  
 PGOC: null  
 PGOP: null

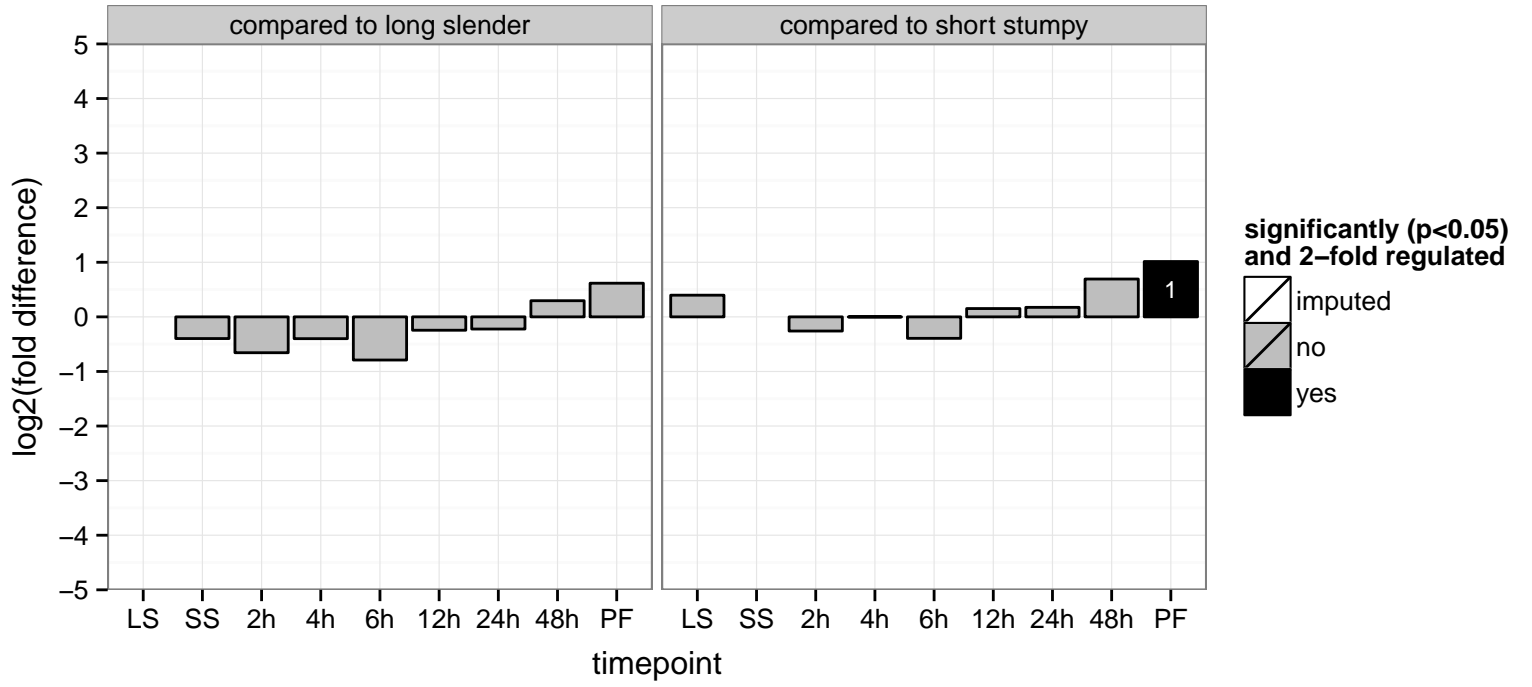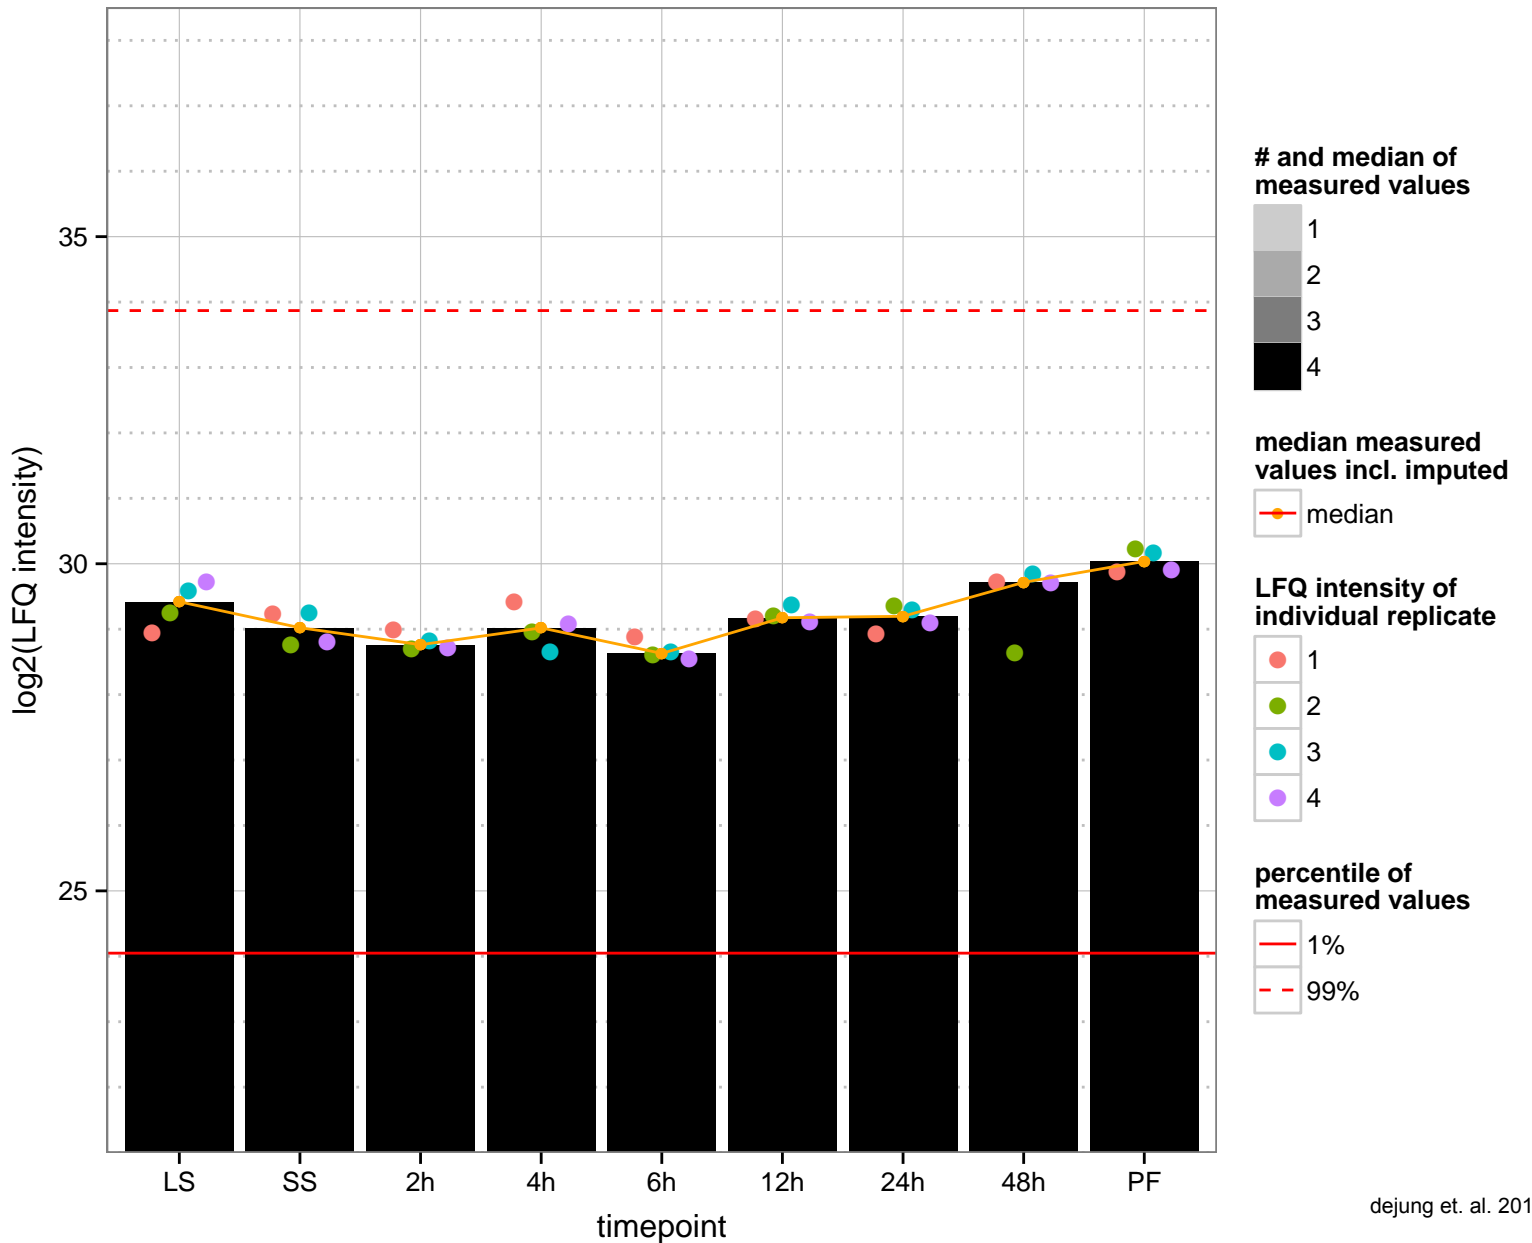



RNA-binding protein, putative  
 Tb927.7.7280  
 AGOF: RNA binding  
 AGOC: null  
 AGOP: RNA processing  
 PGO: RNA binding  
 PGOC: null  
 PGOP: RNA processing

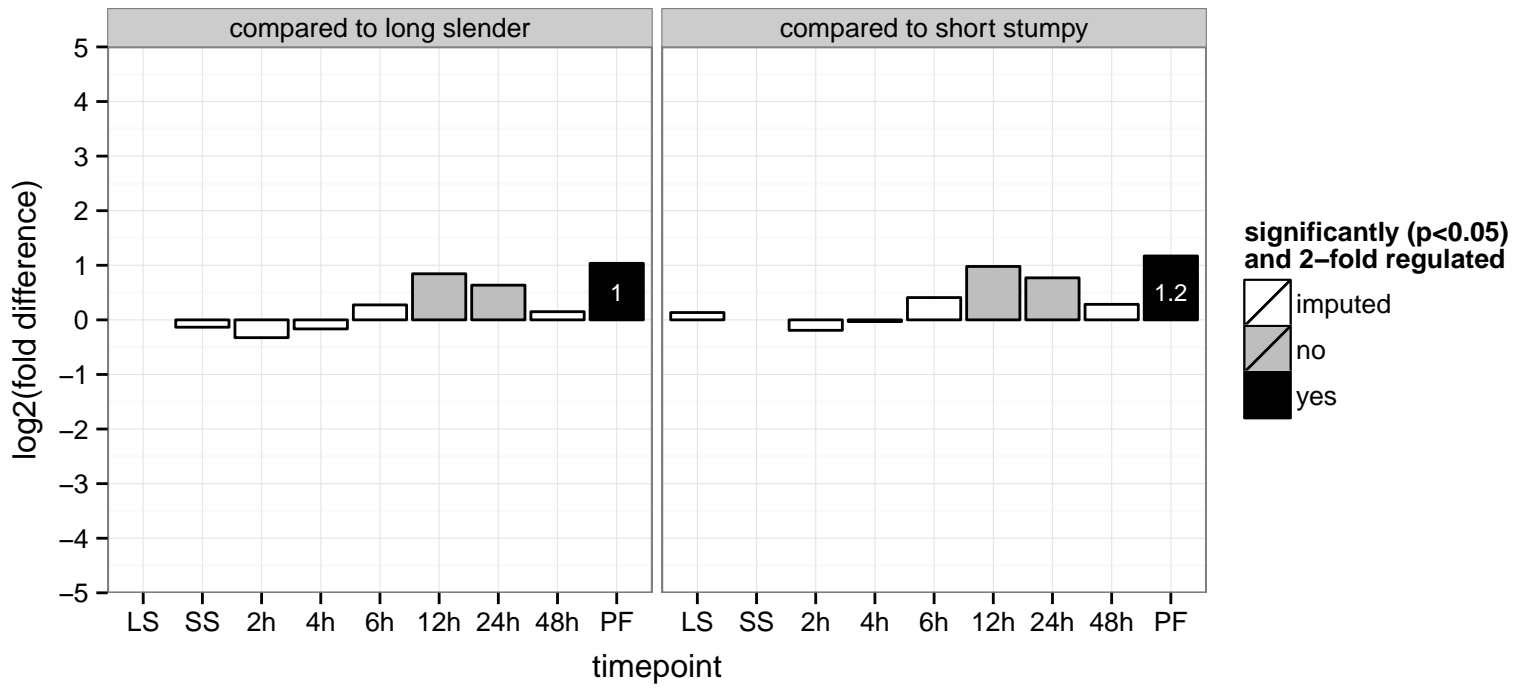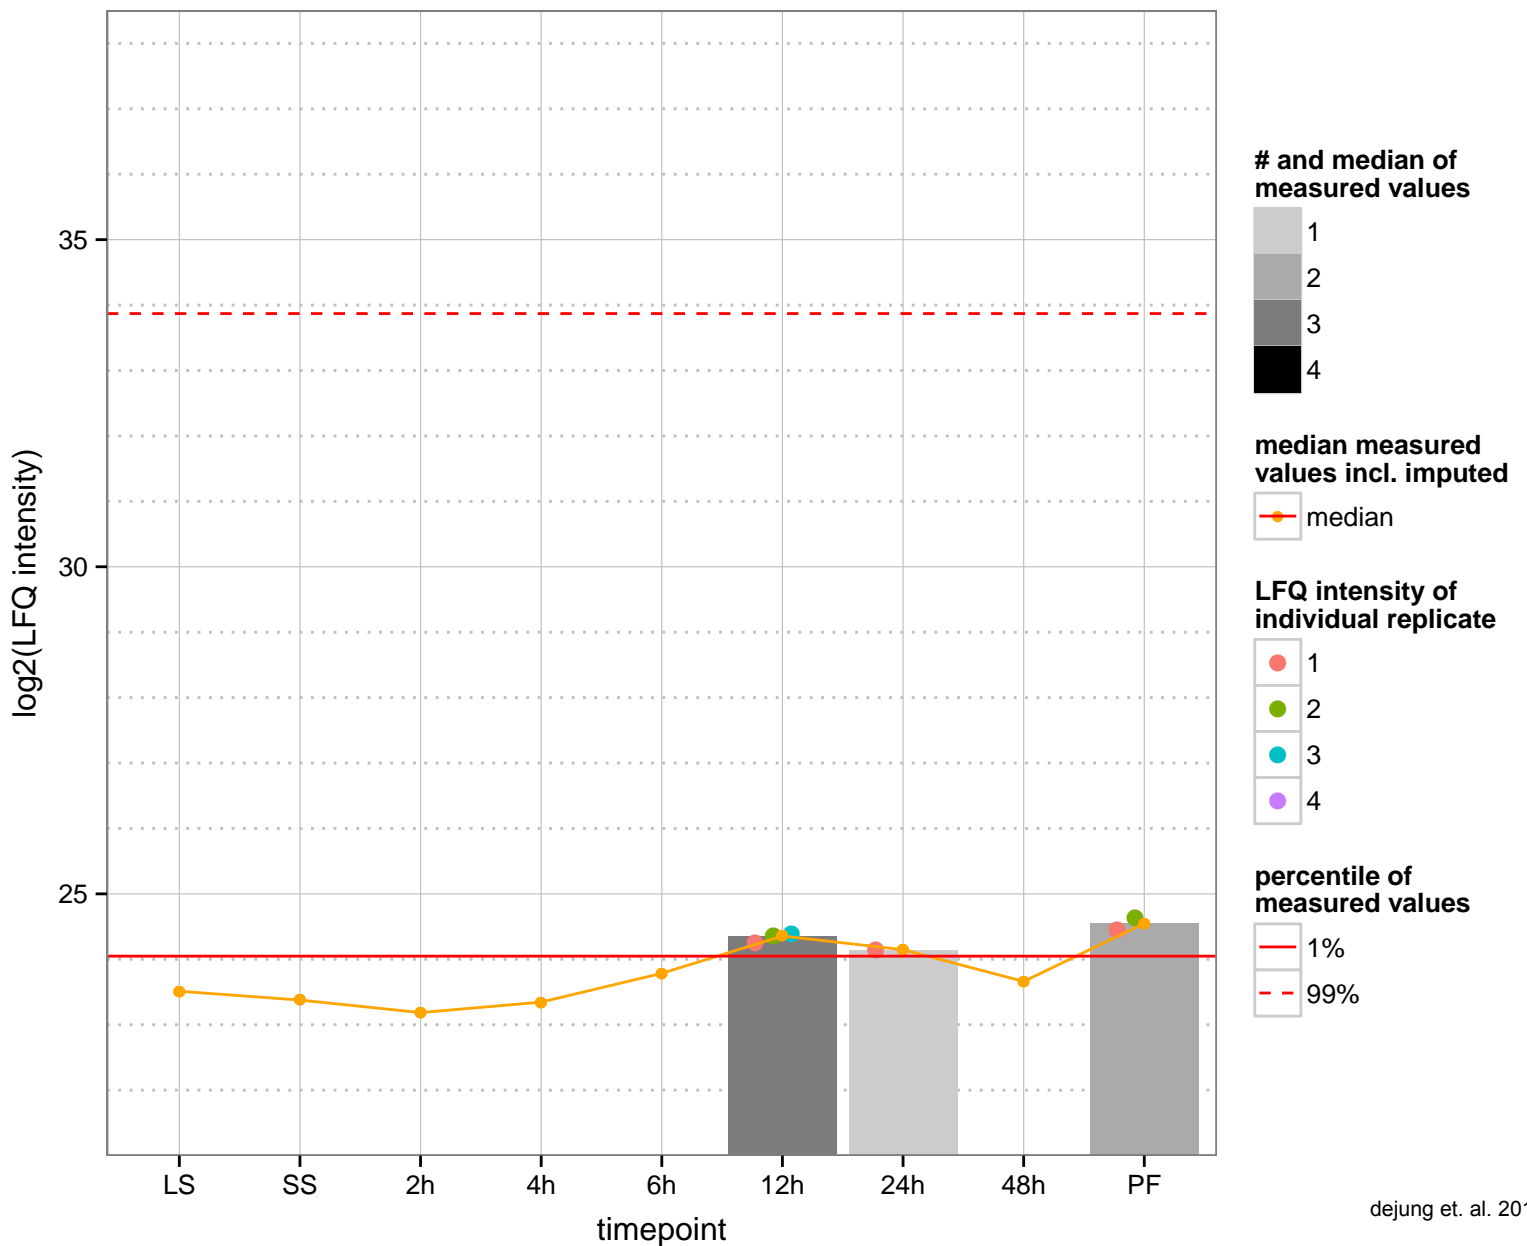

cdc2-related kinase 2, cell division control protein 2 homolog 2 (CRK2)

Tb927.7.7360

AGOF: ATP binding, protein serine/threonine kinase activity, protein tyrosine kinase activity

AGOC: mitochondrion

AGOP: cell cycle, growth, protein phosphorylation

PGOF: ATP binding, protein kinase activity, transferase activity, transferring phosphorus-containing groups

PGOC: null

PGOP: protein phosphorylation

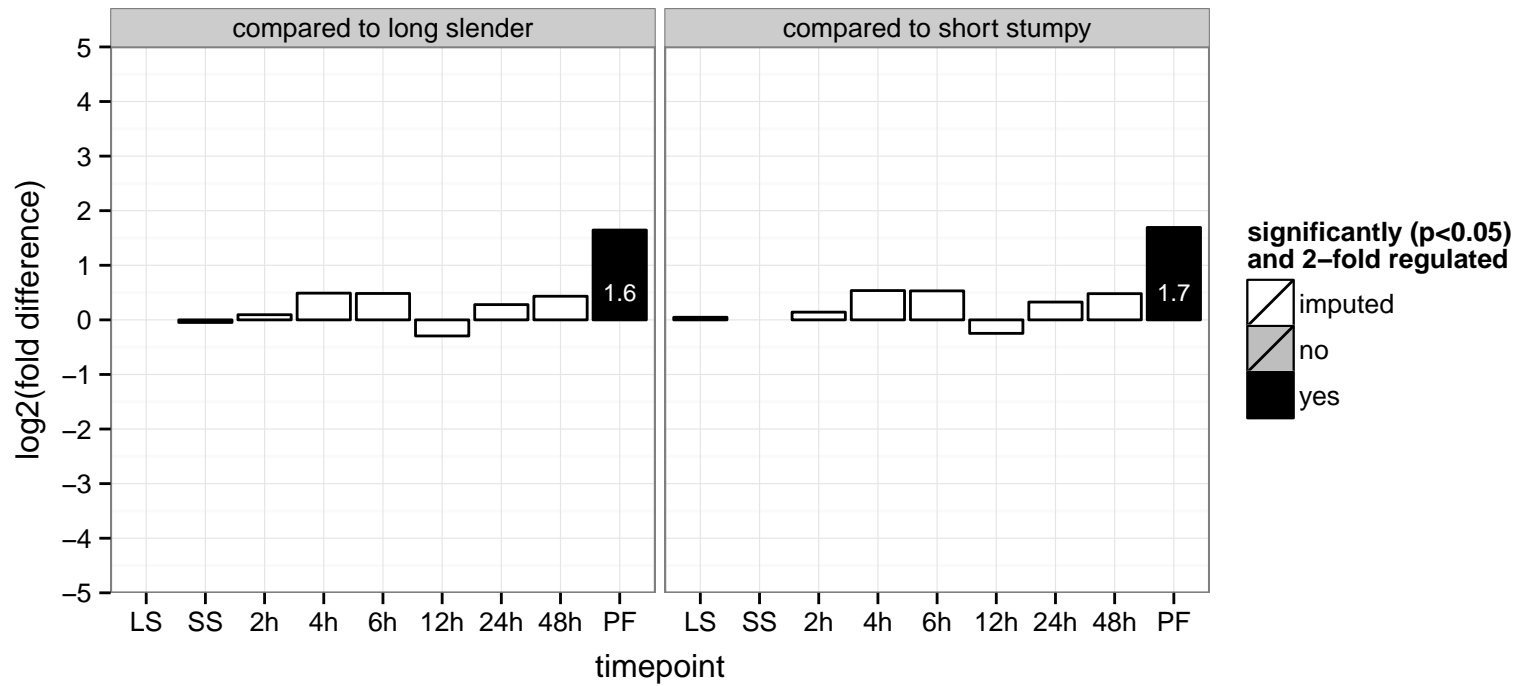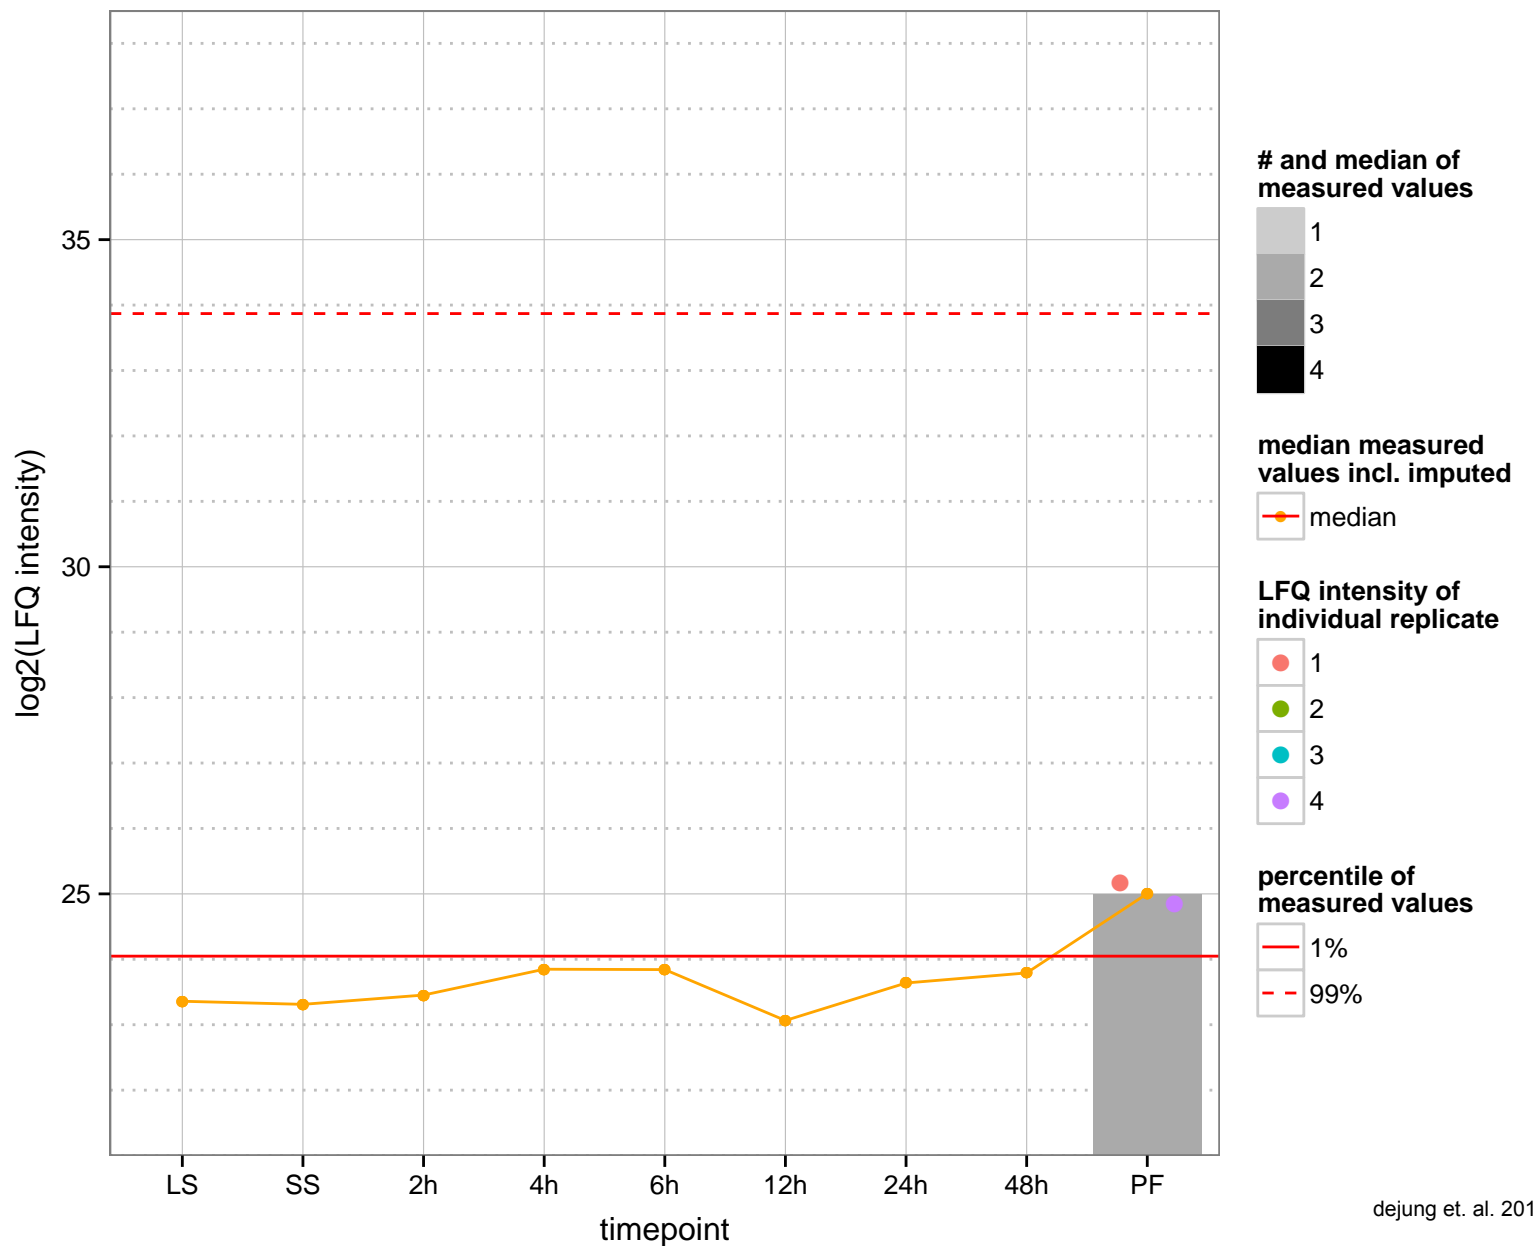

mitochondrial RNA binding complex 1 subunit (MRB800)  
 Tb927.7.800  
 AGOF: RNA binding  
 AGOC: mitochondrion  
 AGOP: cytidine to uridine editing, mRNA stabilization  
 PGO: null  
 PGO: null  
 PGO: null

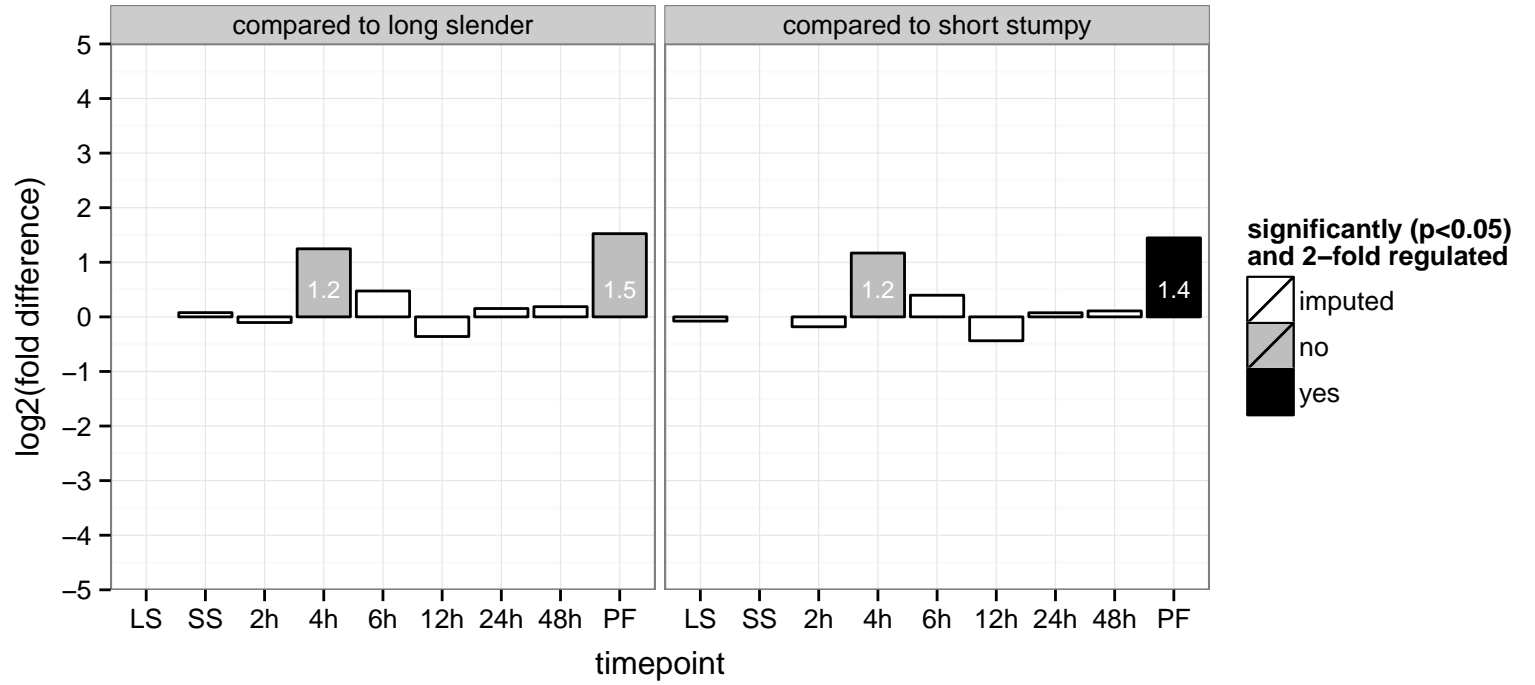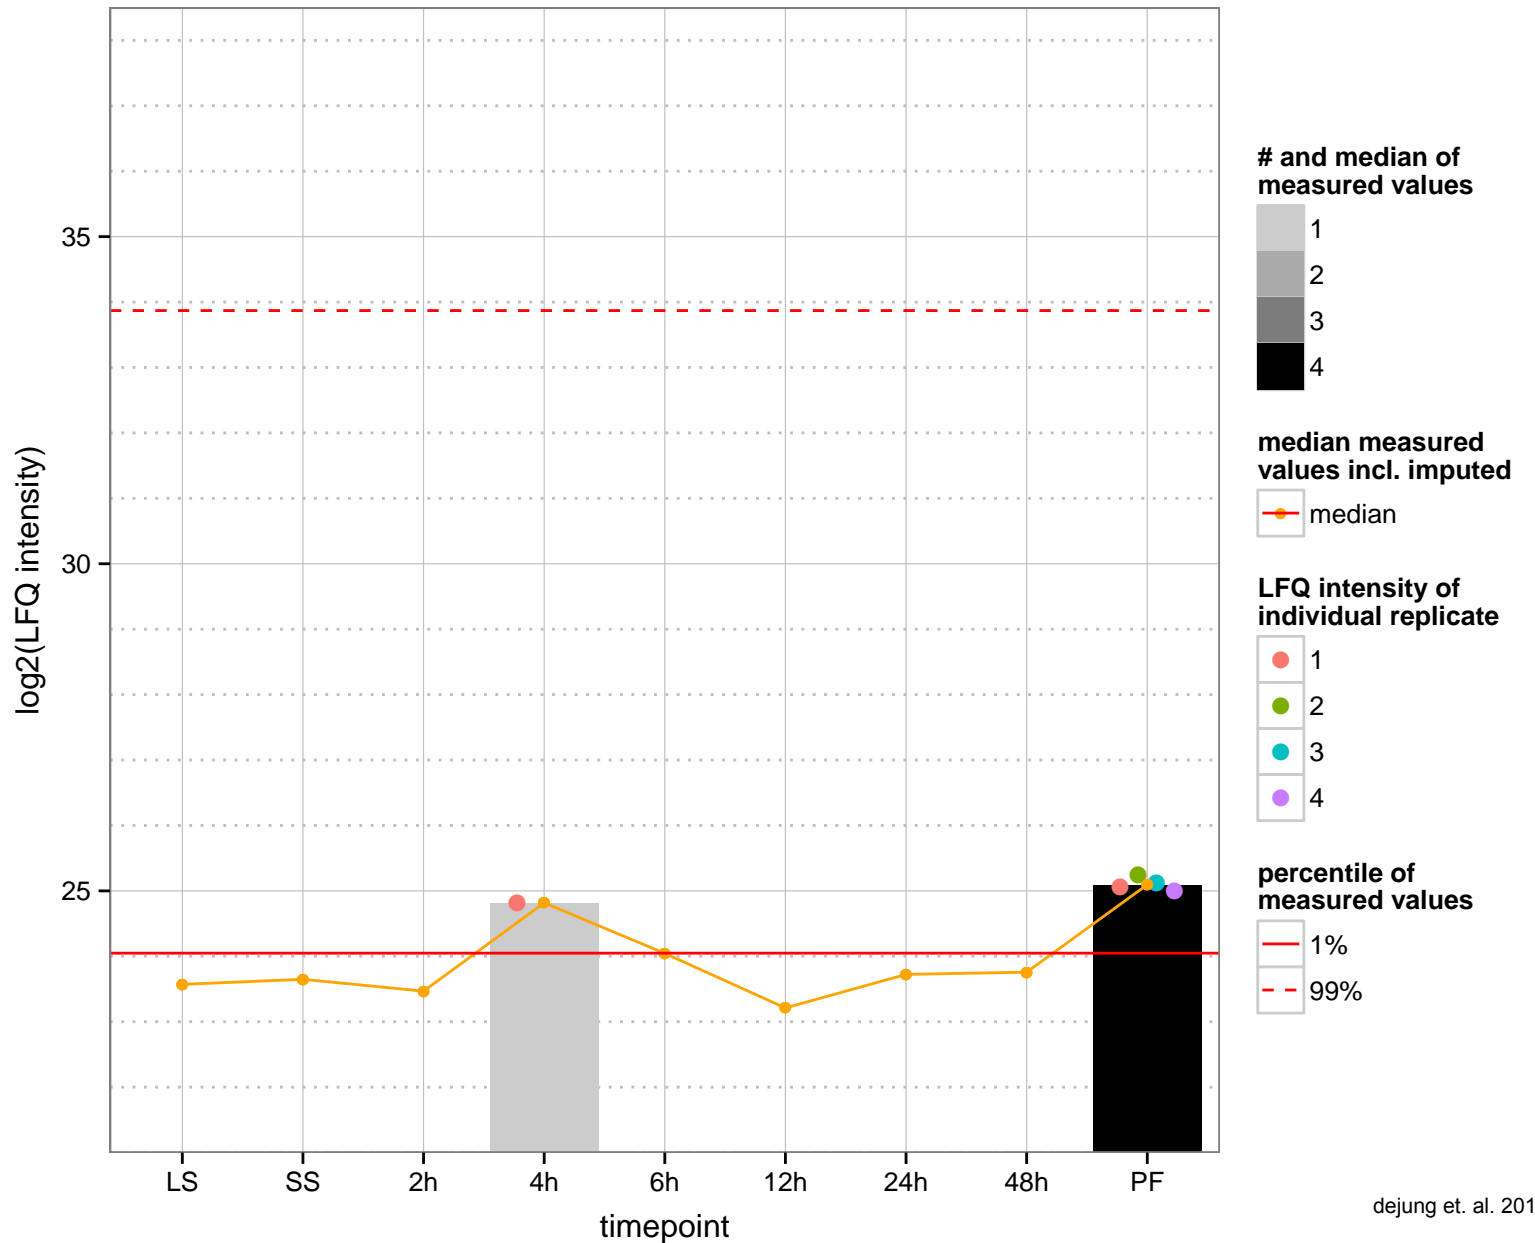

hypothetical protein, conserved  
 Tb927.7.910;Tb11.v5.0841  
 AGOF: null  
 AGOC: null, mitochondrion  
 AGOP: null  
 PGO: null  
 PGO: null  
 PGO: null

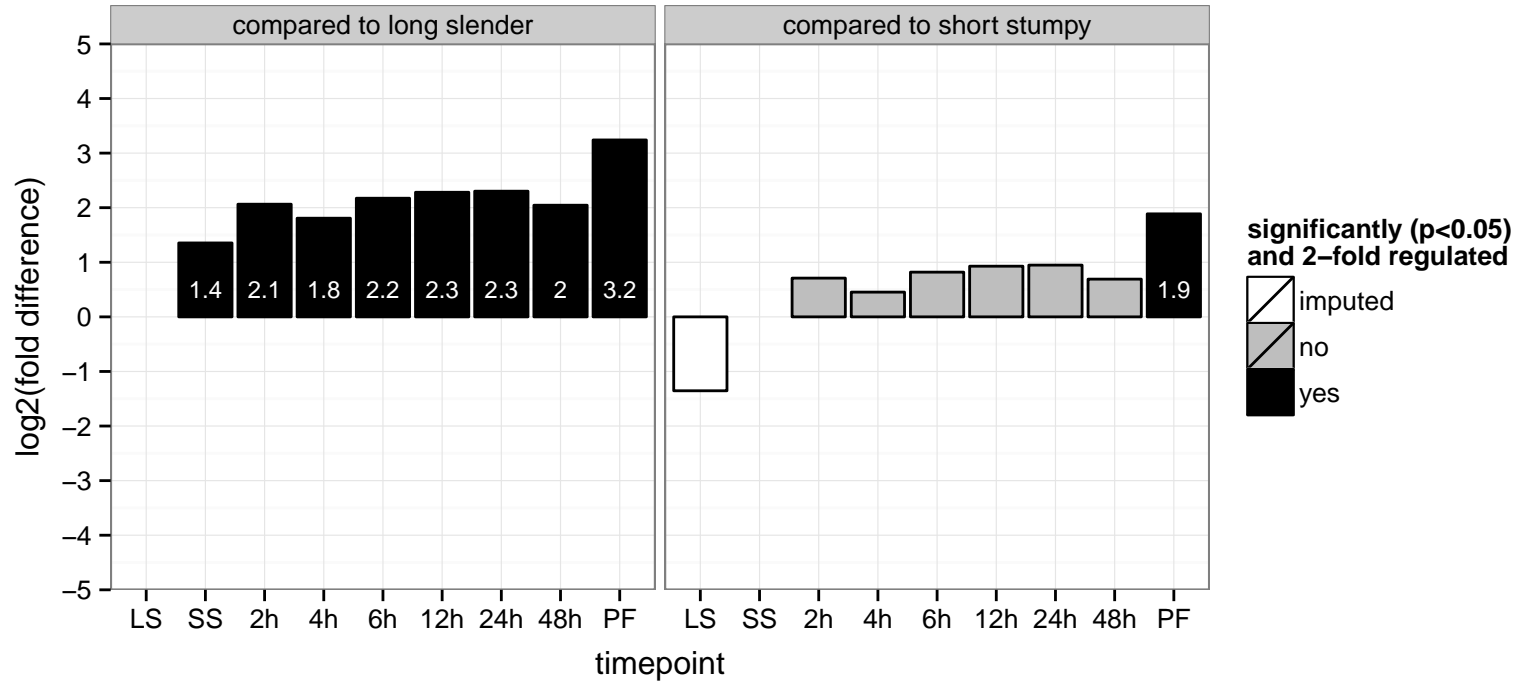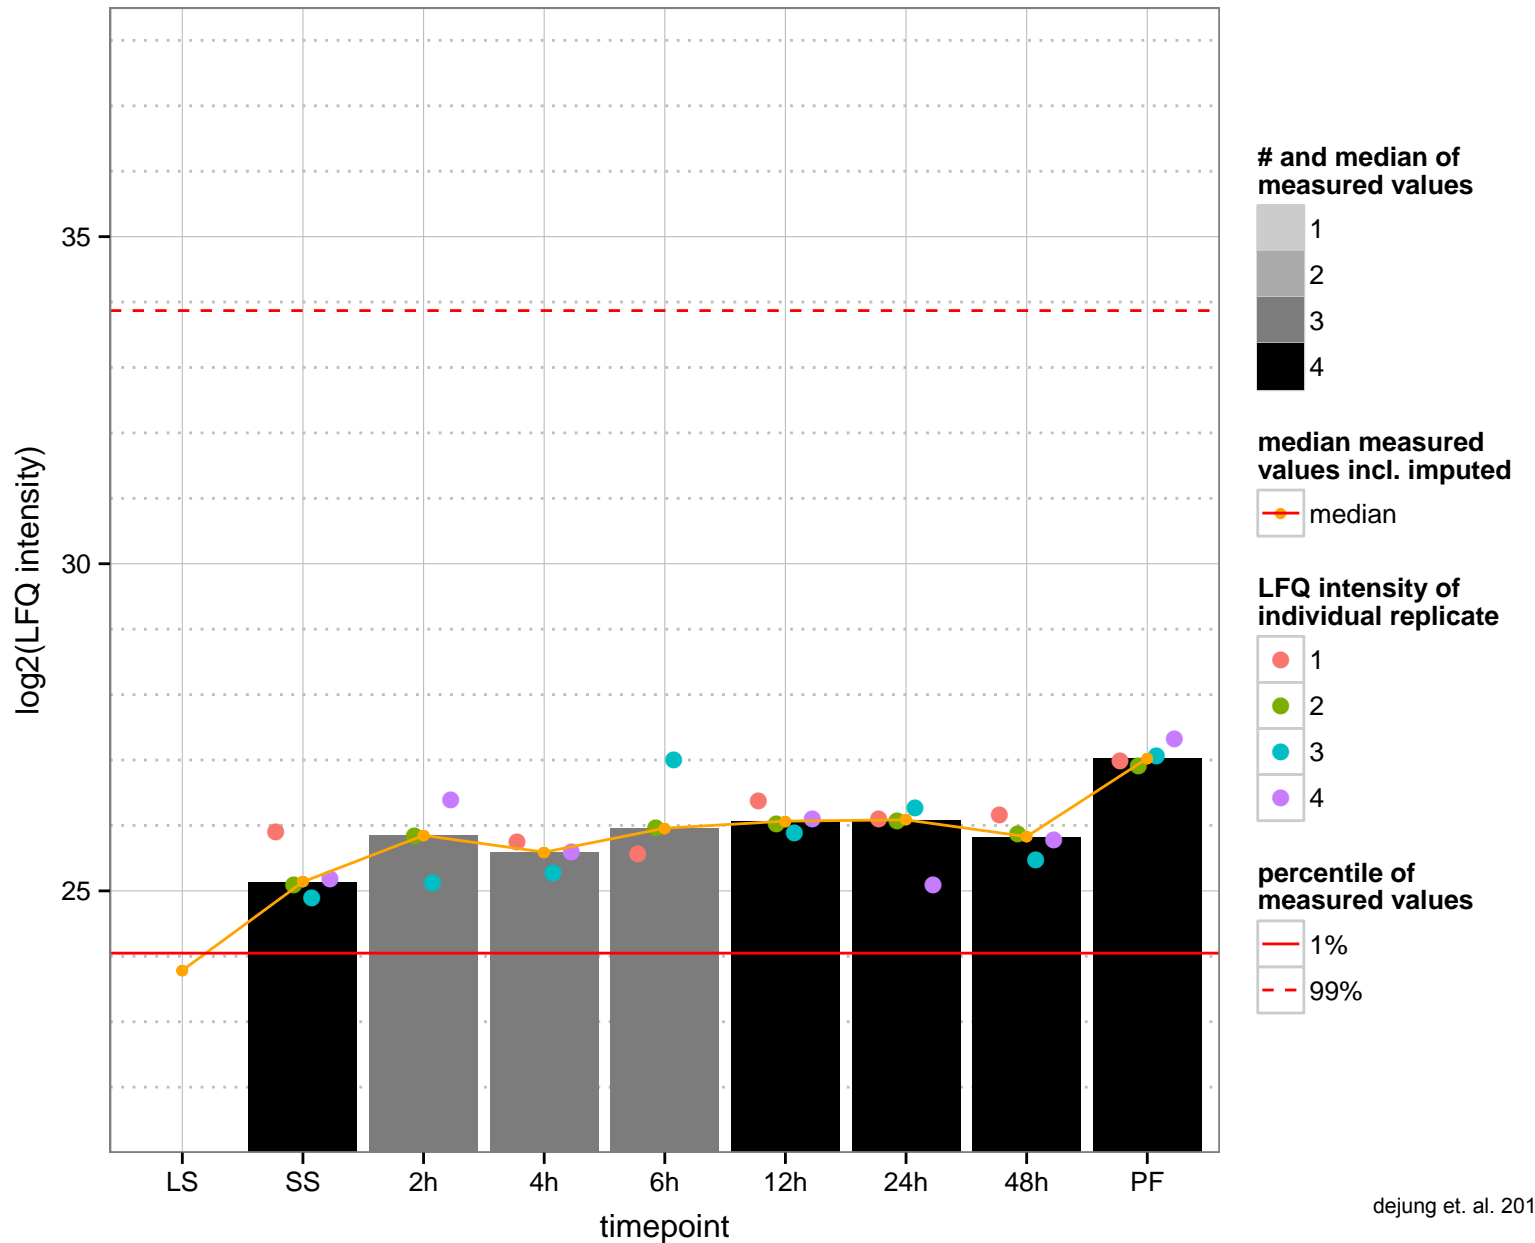

hypothetical protein, conserved  
 Tb927.7.970  
 AGOF: null  
 AGOC: null  
 AGOP: null  
 PGO: null  
 PGOC: null  
 PGOP: null

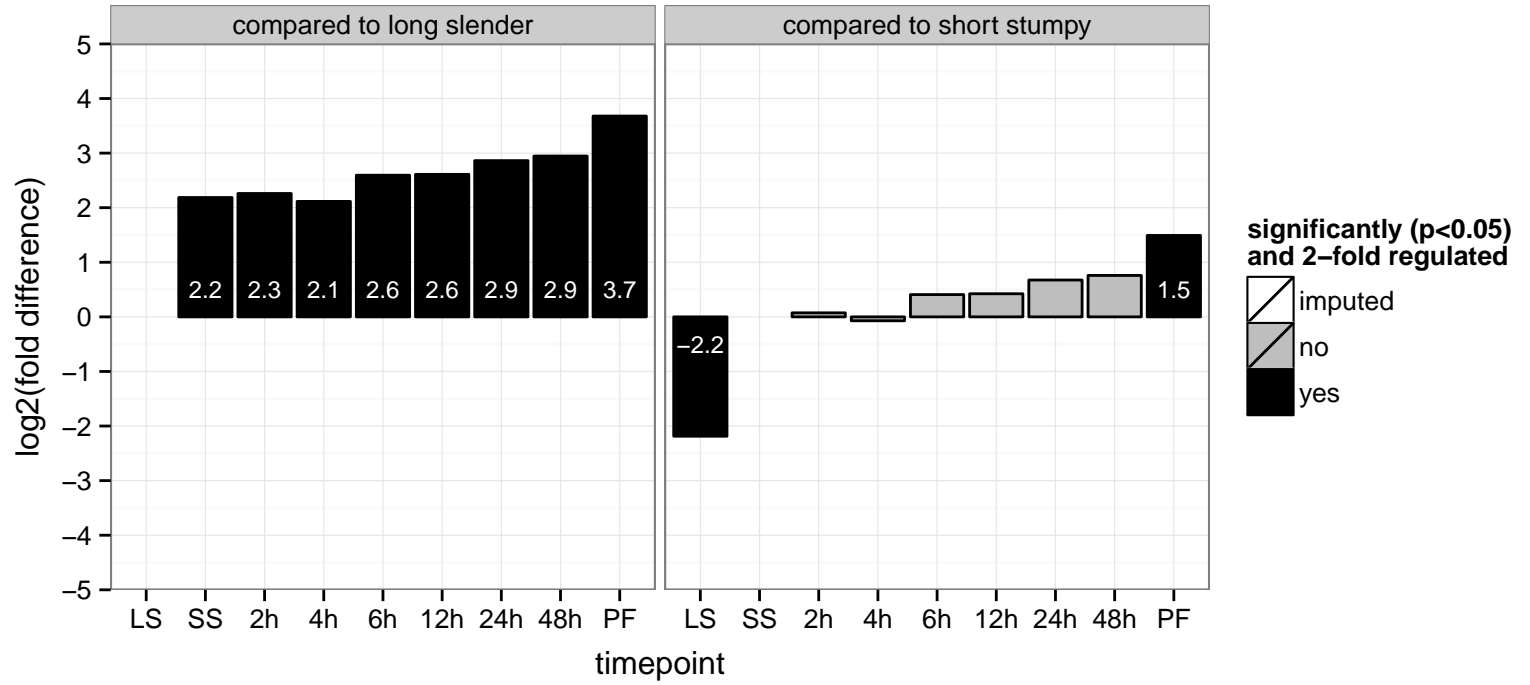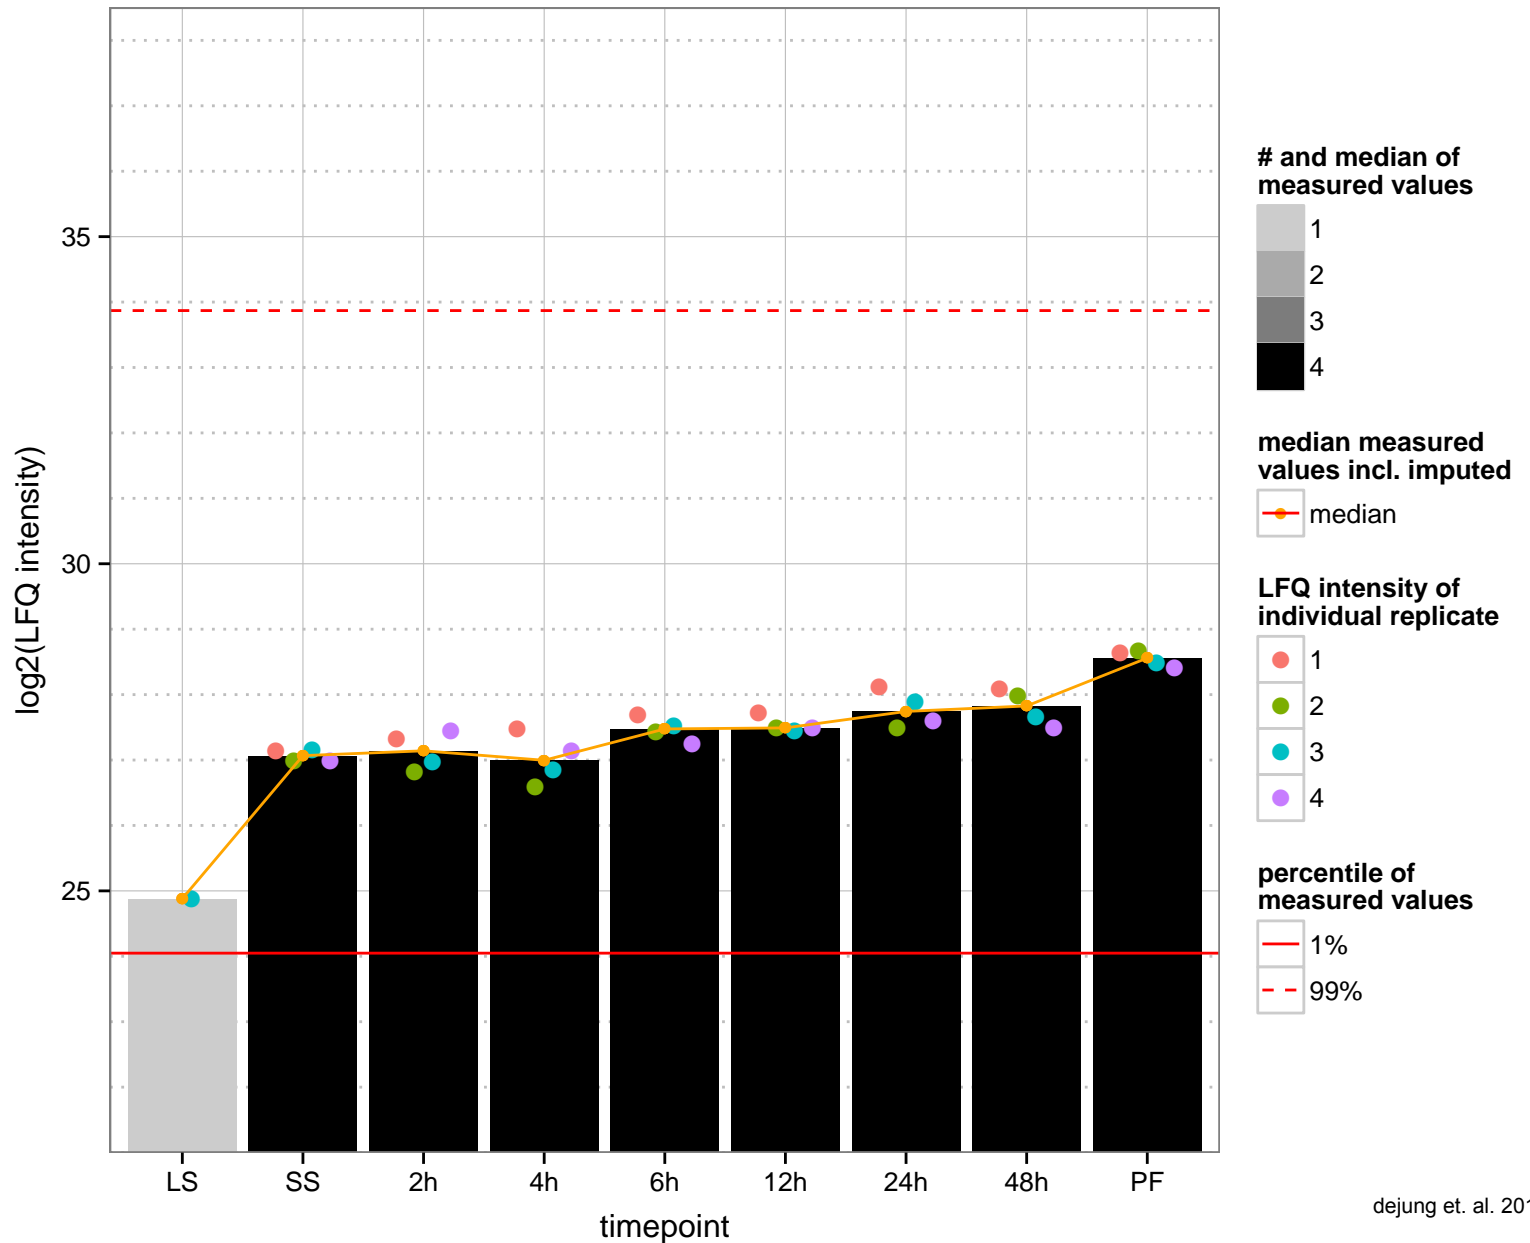

chaperone protein DNAj, putative  
 Tb927.7.990  
 AGOF: heat shock protein binding, unfolded protein binding  
 AGOC: null  
 AGOP: null  
 PGOF: heat shock protein binding  
 PGO: null  
 PGOP: null

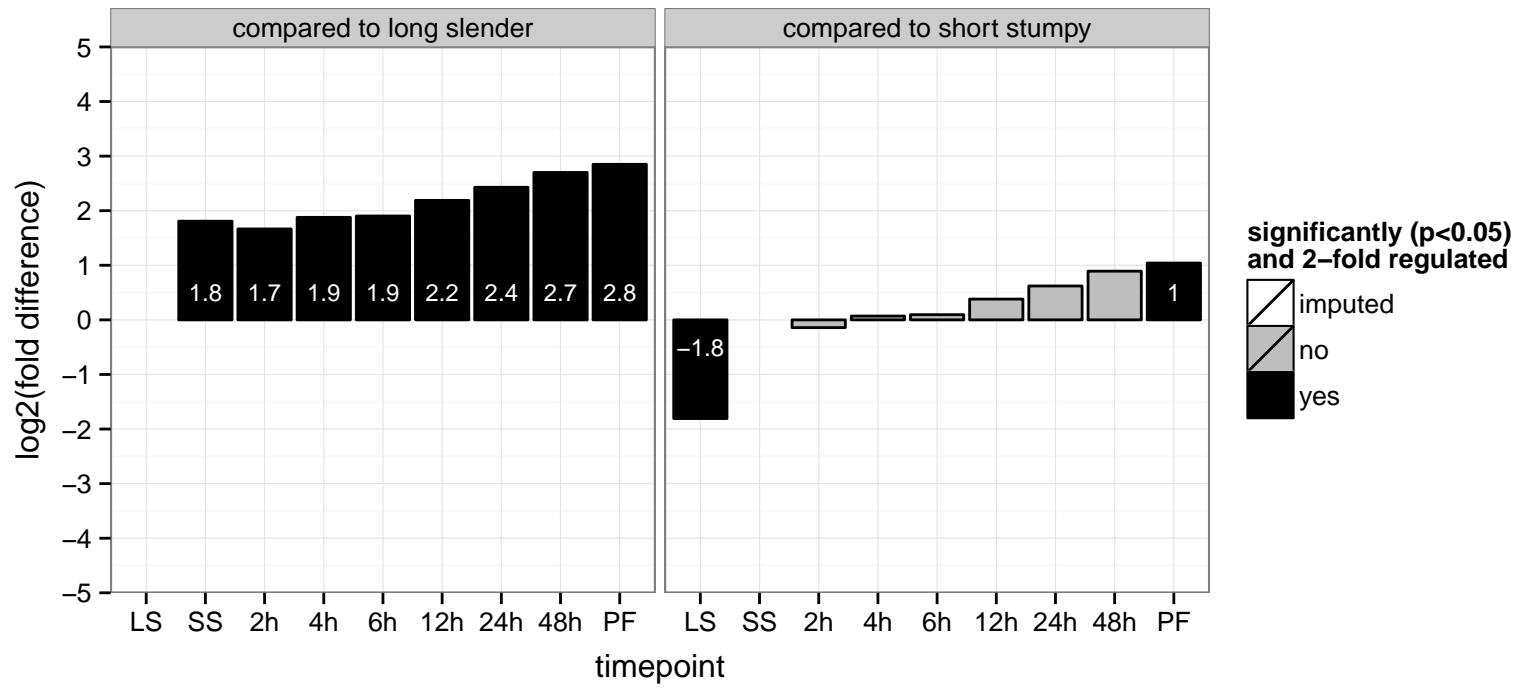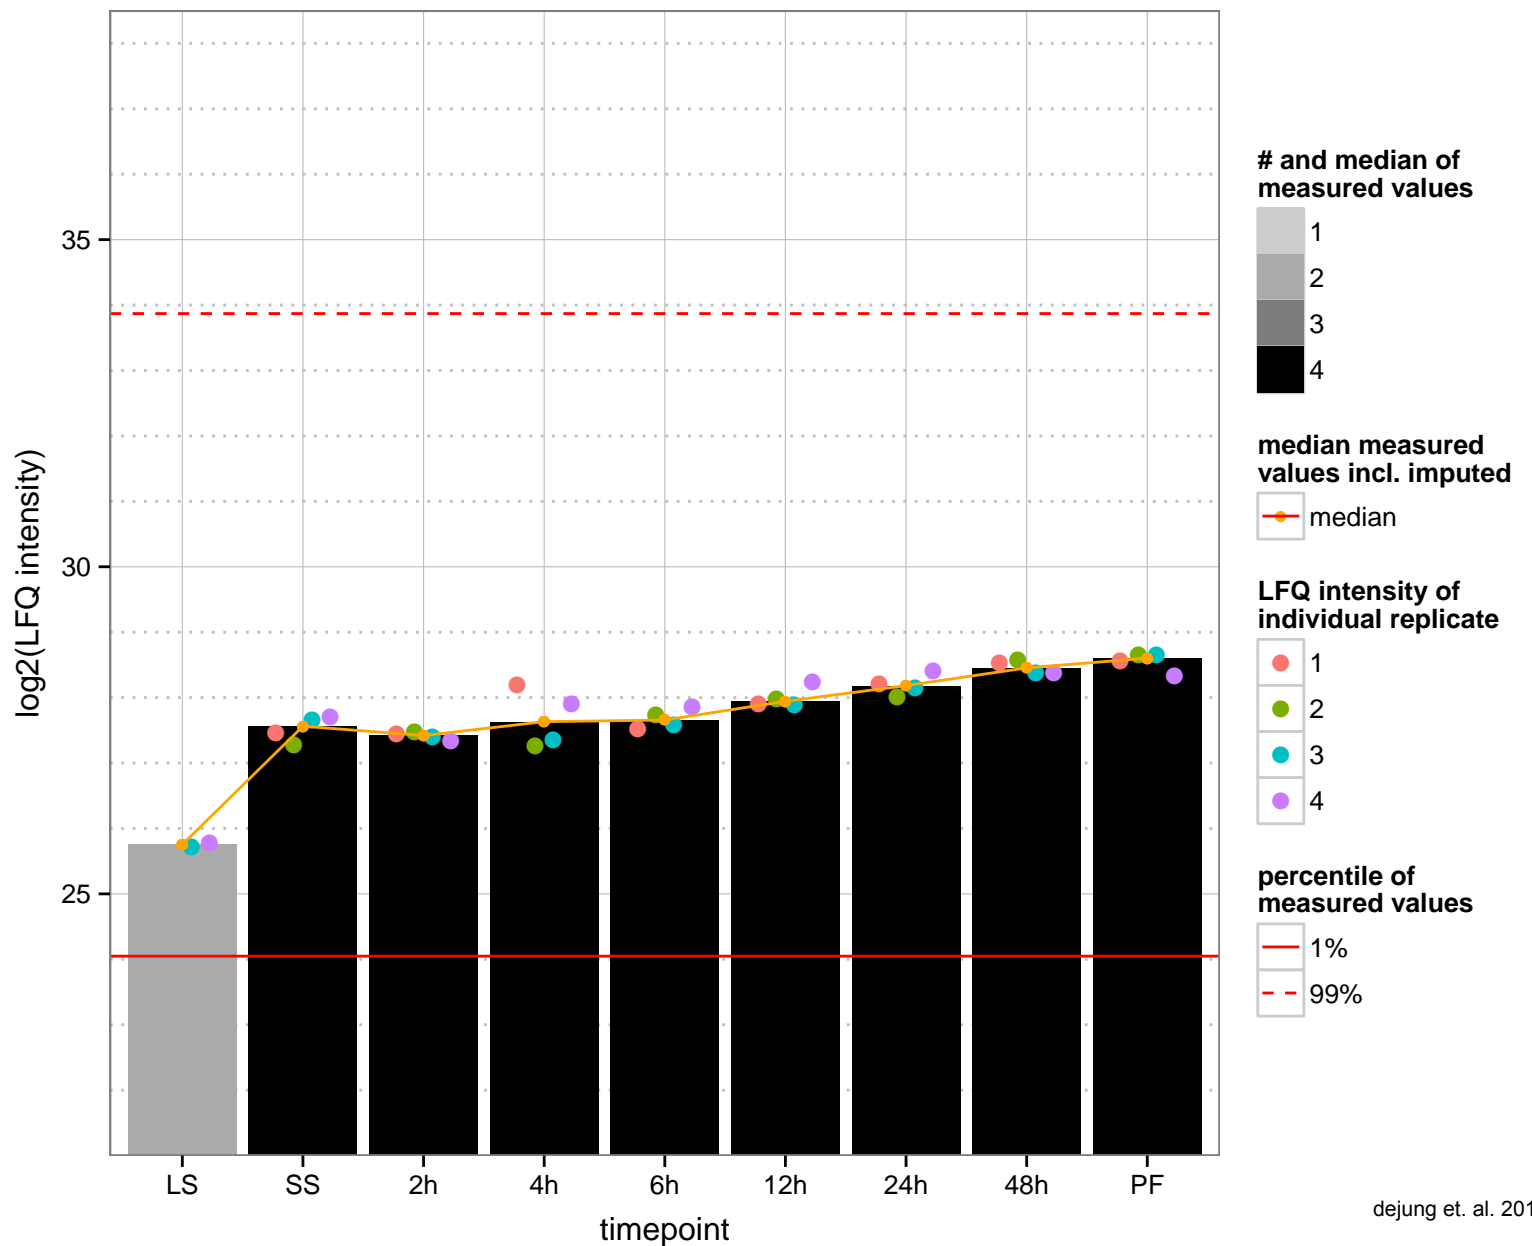

hypothetical protein, conserved  
 Tb927.8.1230  
 AGOF: null  
 AGOC: null  
 AGOP: null  
 PGO: null  
 PGOC: null  
 PGOP: null

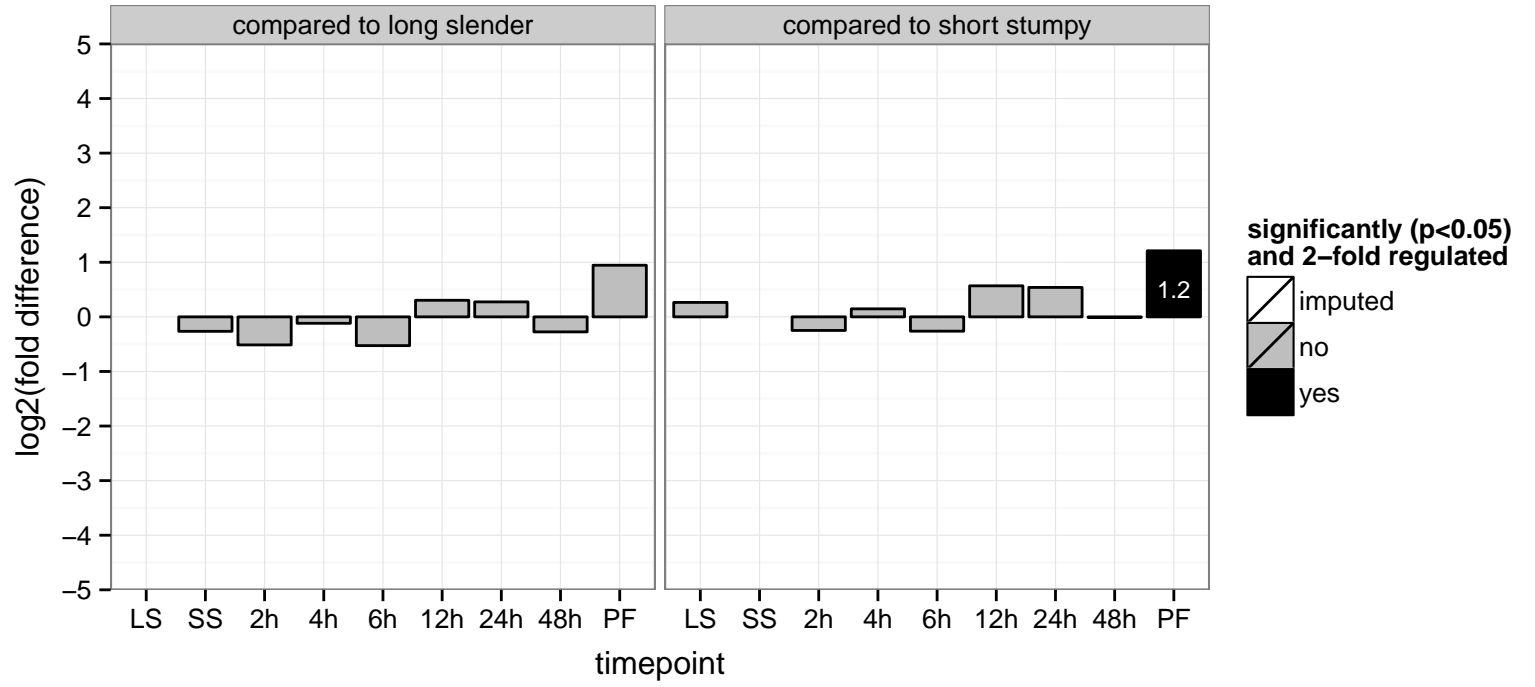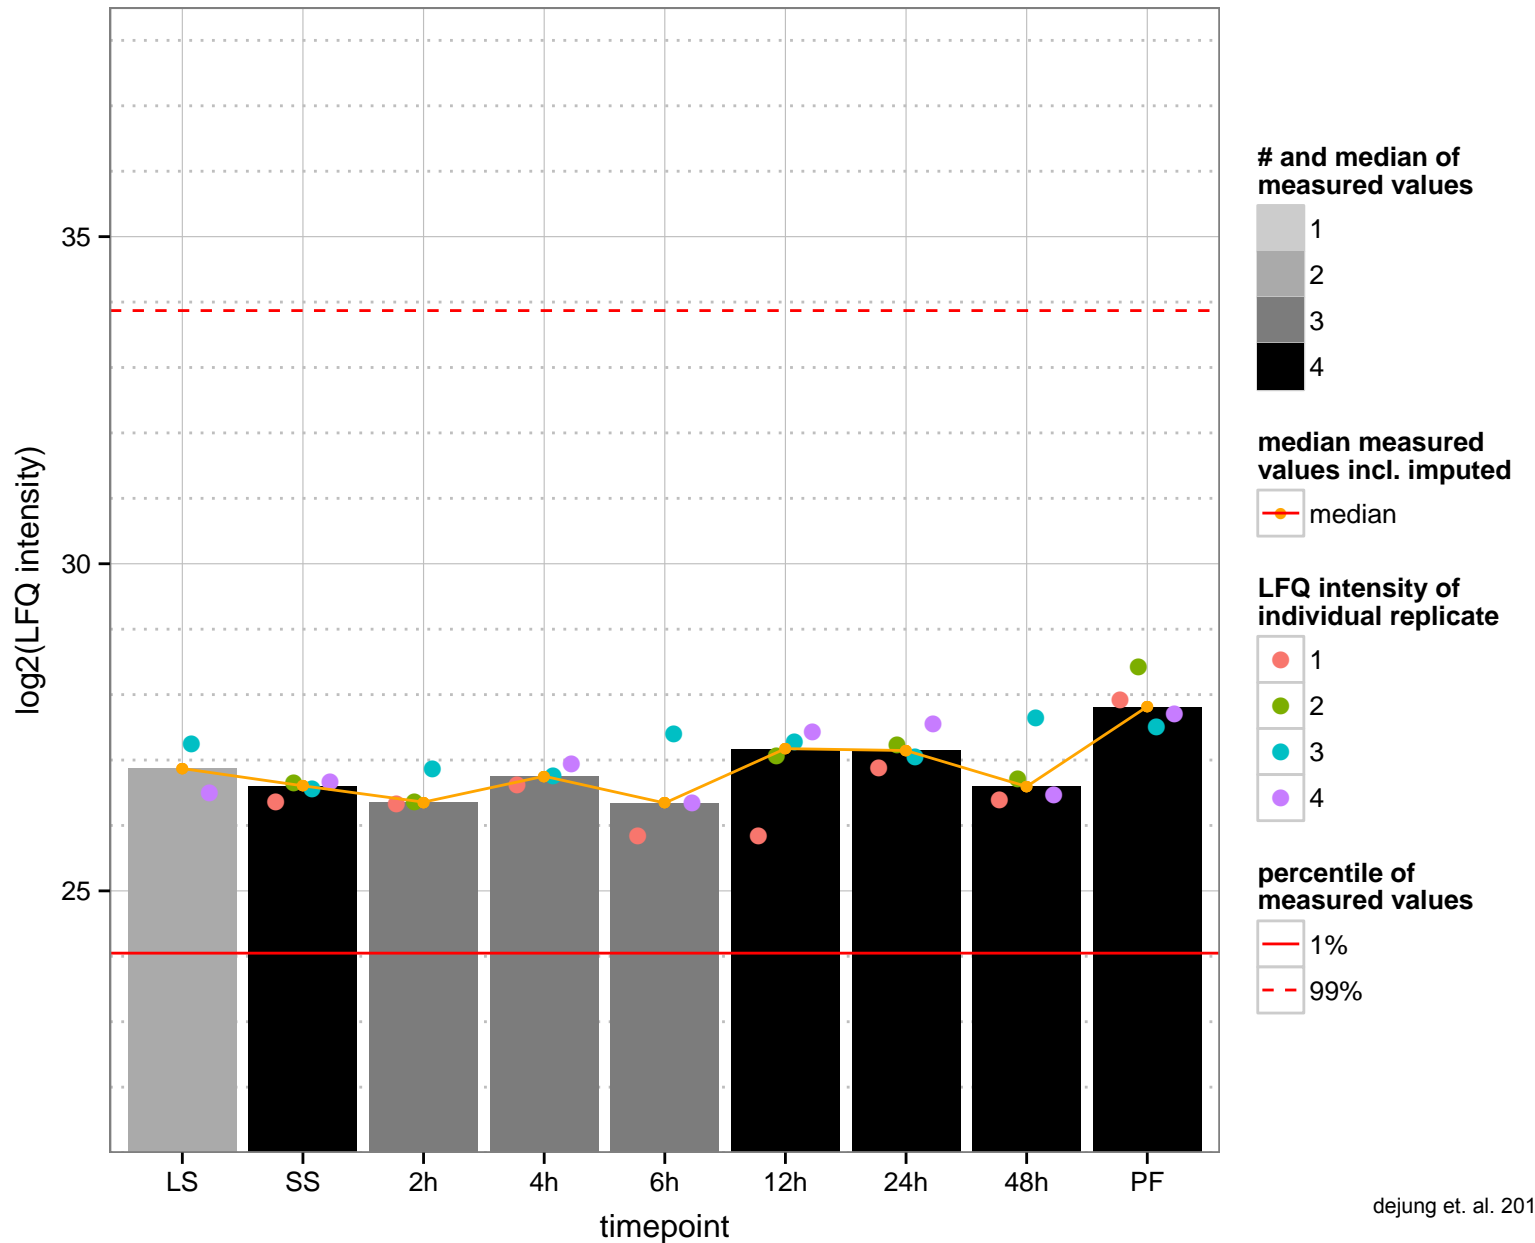

hypothetical protein, conserved  
 Tb927.8.1430  
 AGOF: null  
 AGOC: mitochondrion  
 AGOP: null  
 PGO: null  
 PGO: null  
 PGO: null

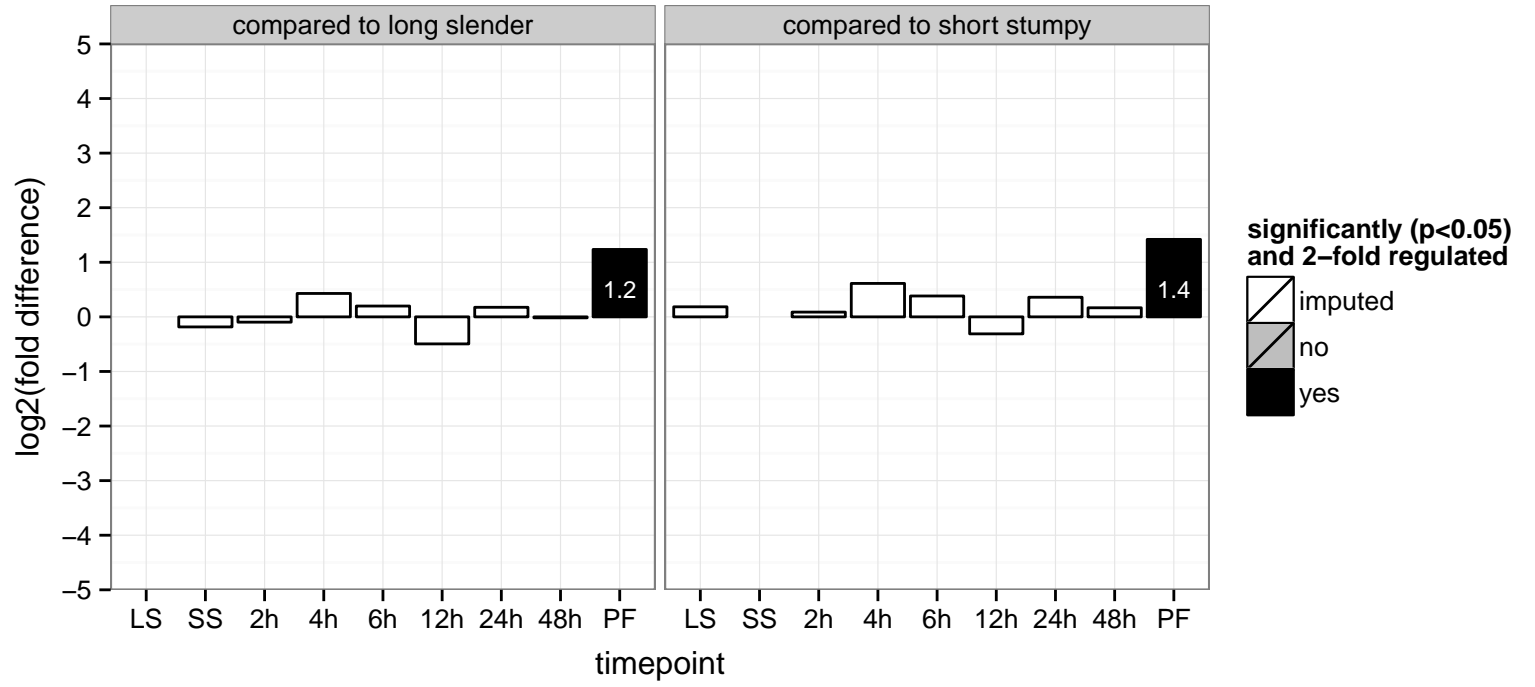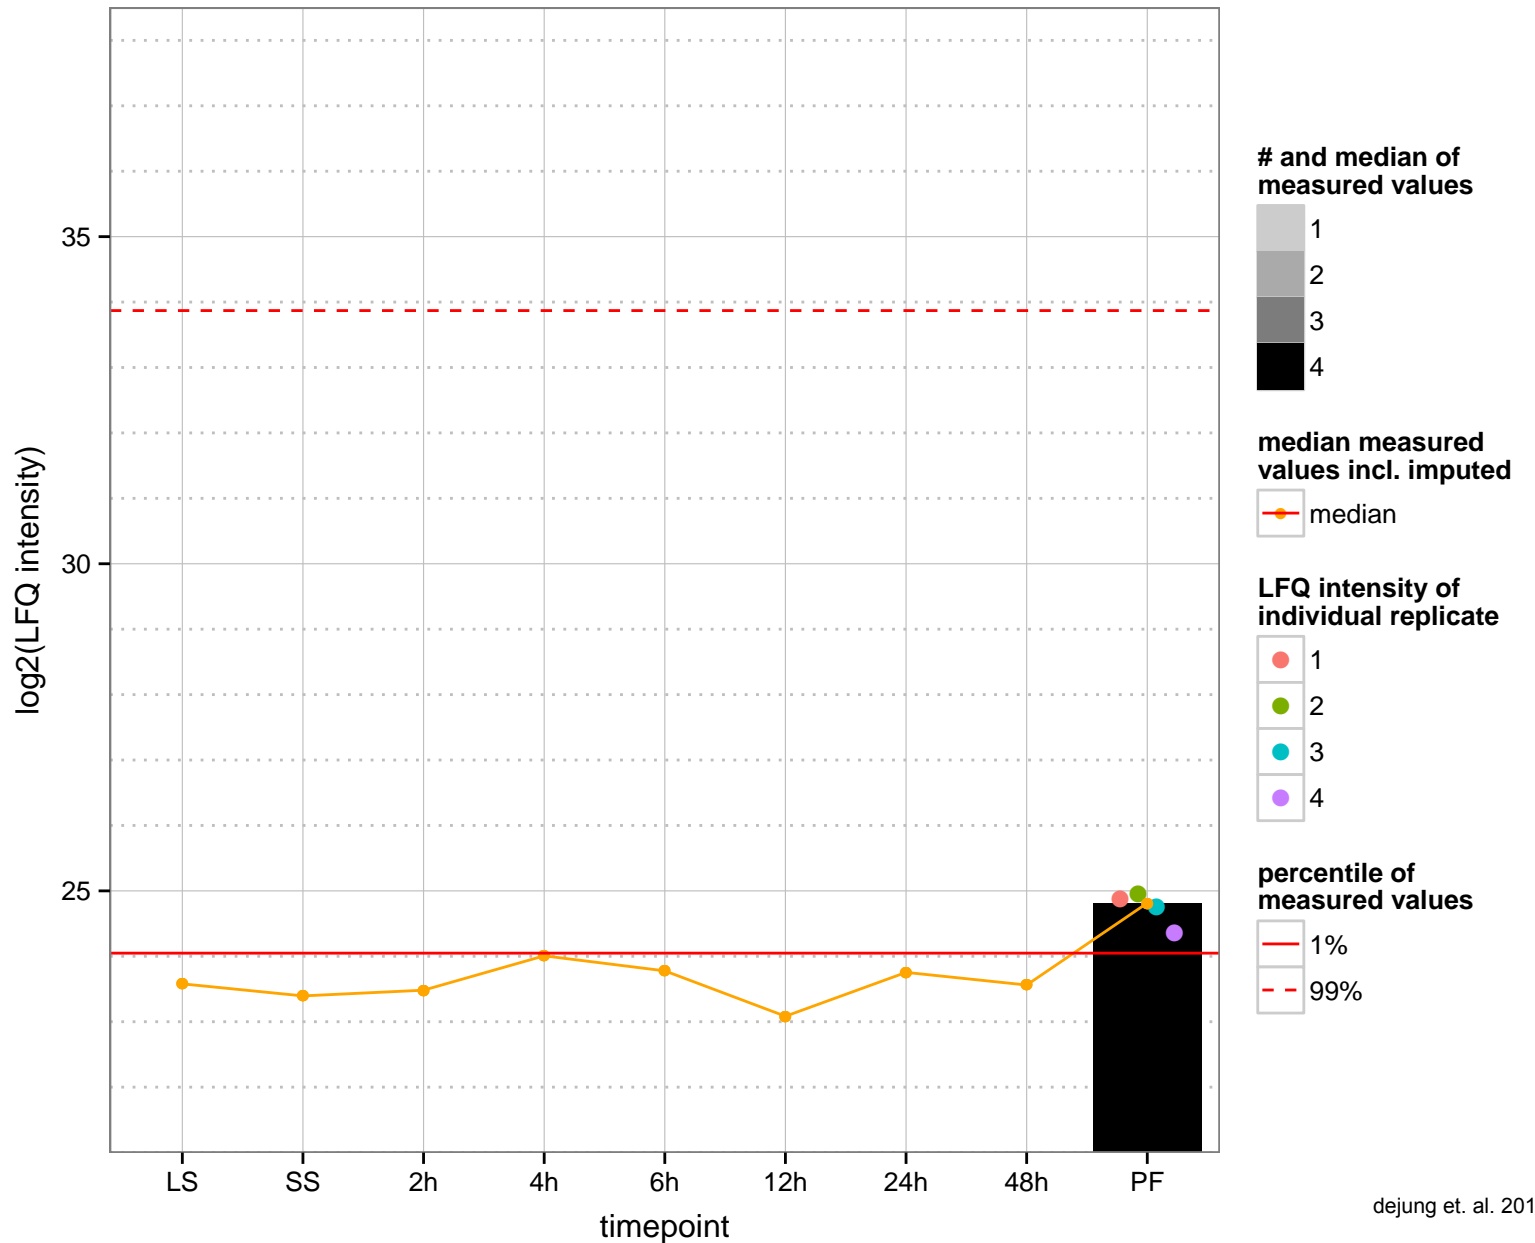



ubiquitin–protein ligase, putative (upl3)  
 Tb927.8.1590  
 AGOF: RNA binding, ubiquitin–protein ligase activity, zinc ion binding  
 AGOC: intracellular, mitochondrion  
 AGOP: cellular protein modification process  
 PGO: acid–amino acid ligase activity  
 PGO: intracellular  
 PGO: cellular protein modification process

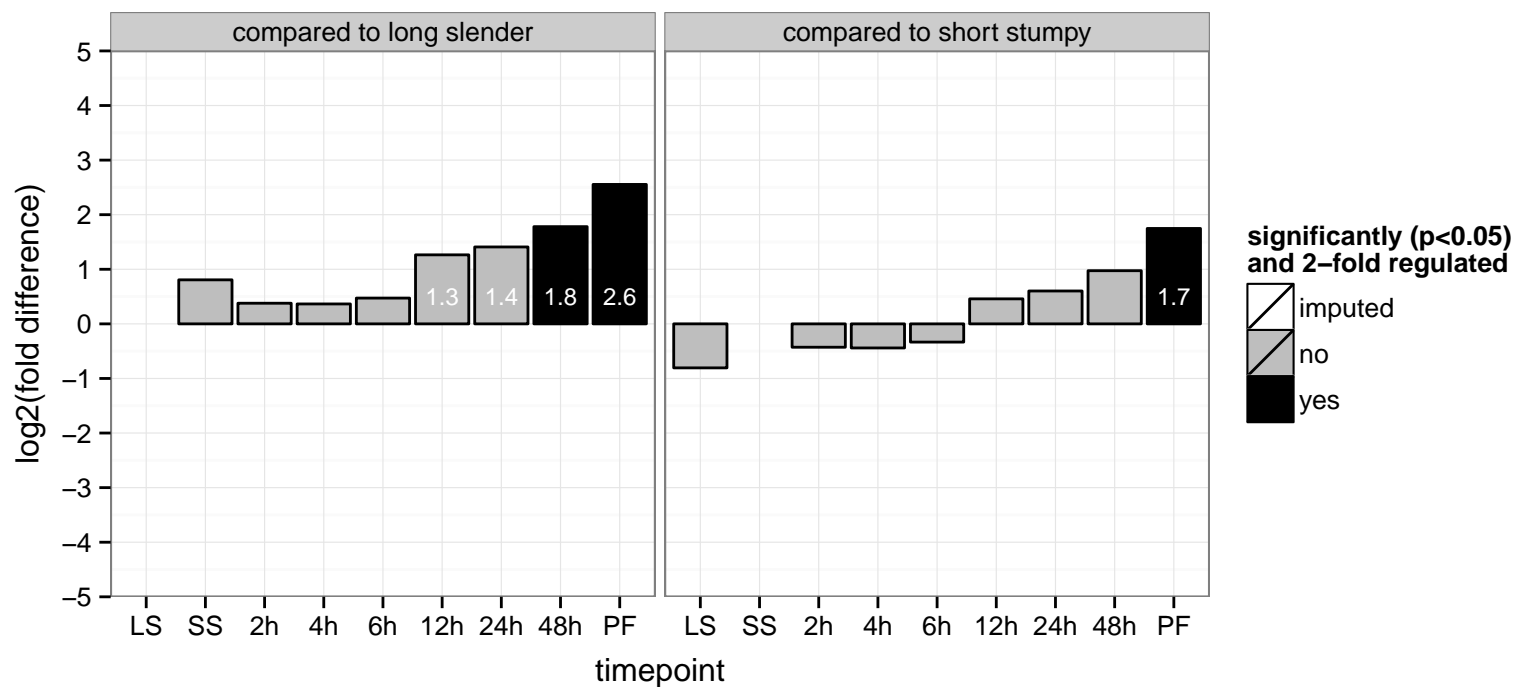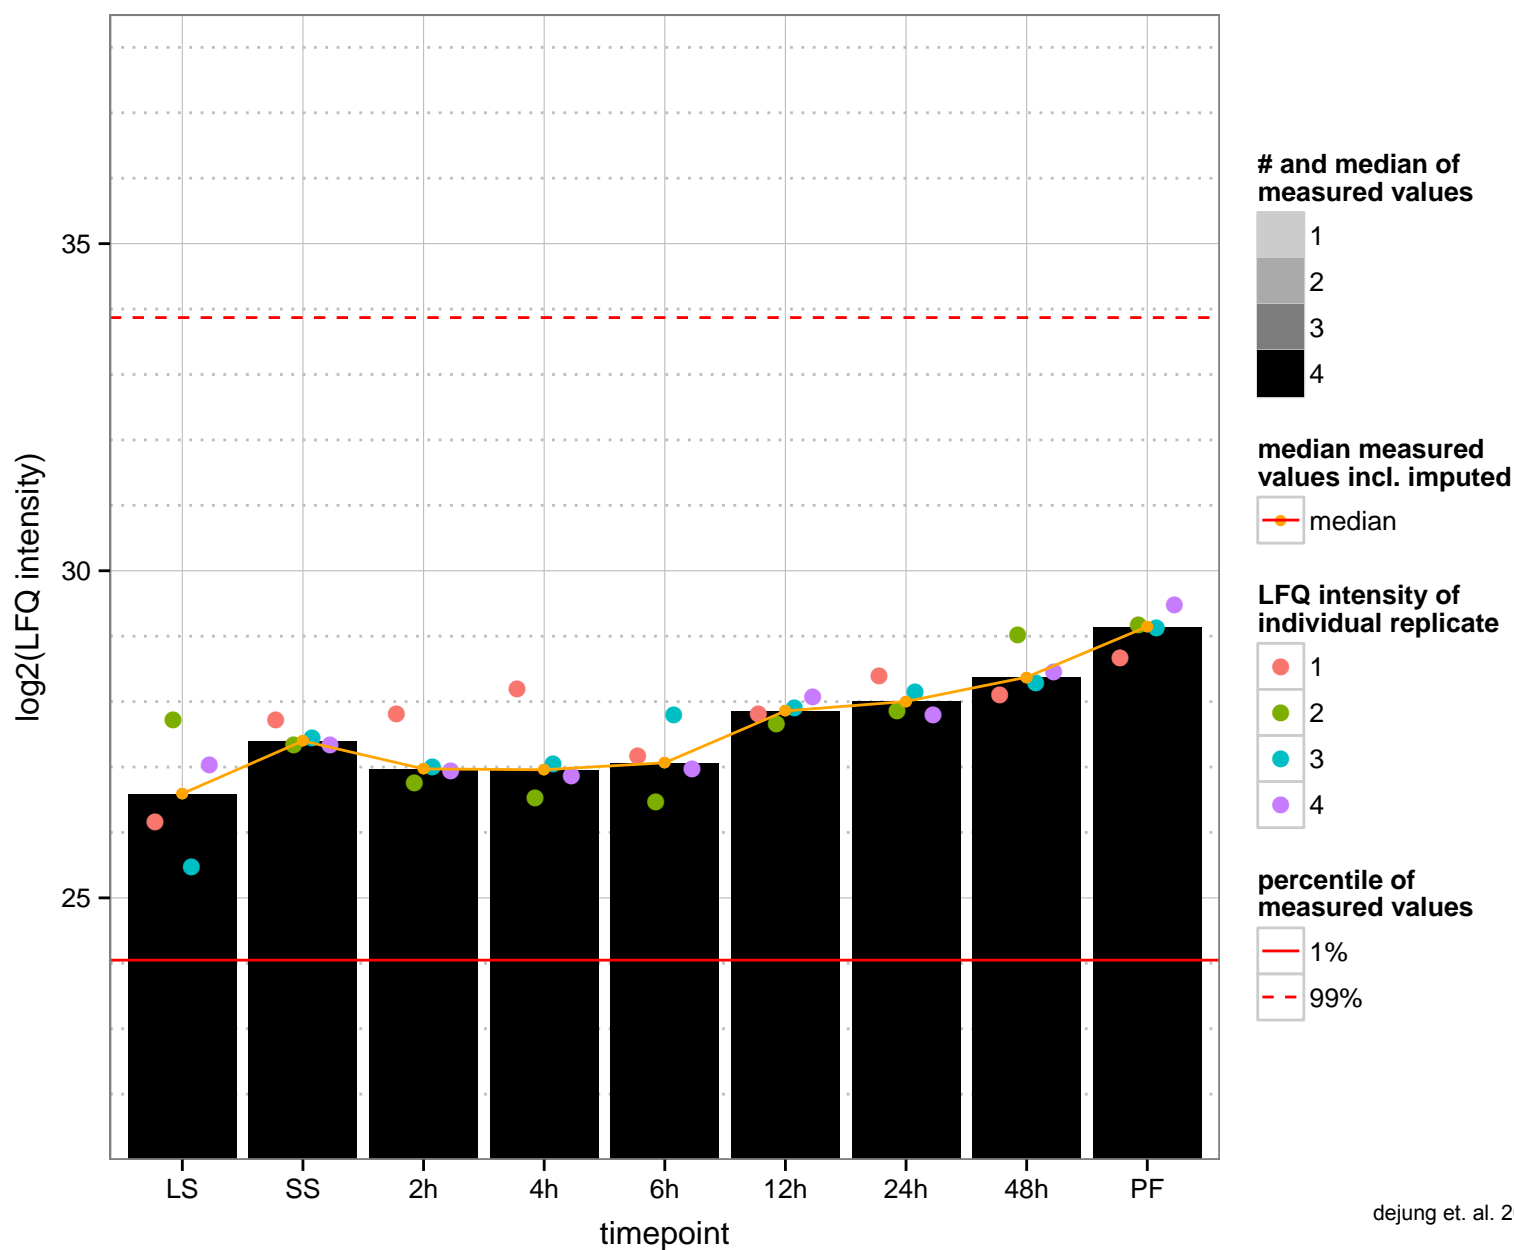

pitrilysin-like metalloprotease, metallo-peptidase, Clan ME, Family M16C

Tb927.8.1860

AGOF: catalytic activity, metalloendopeptidase activity, zinc ion binding

AGOC: mitochondrion

AGOP: proteolysis

PGOF: catalytic activity, metal ion binding, metalloendopeptidase activity, metallopeptidase activity, zinc ion binding

PGOC: null

PGOP: proteolysis

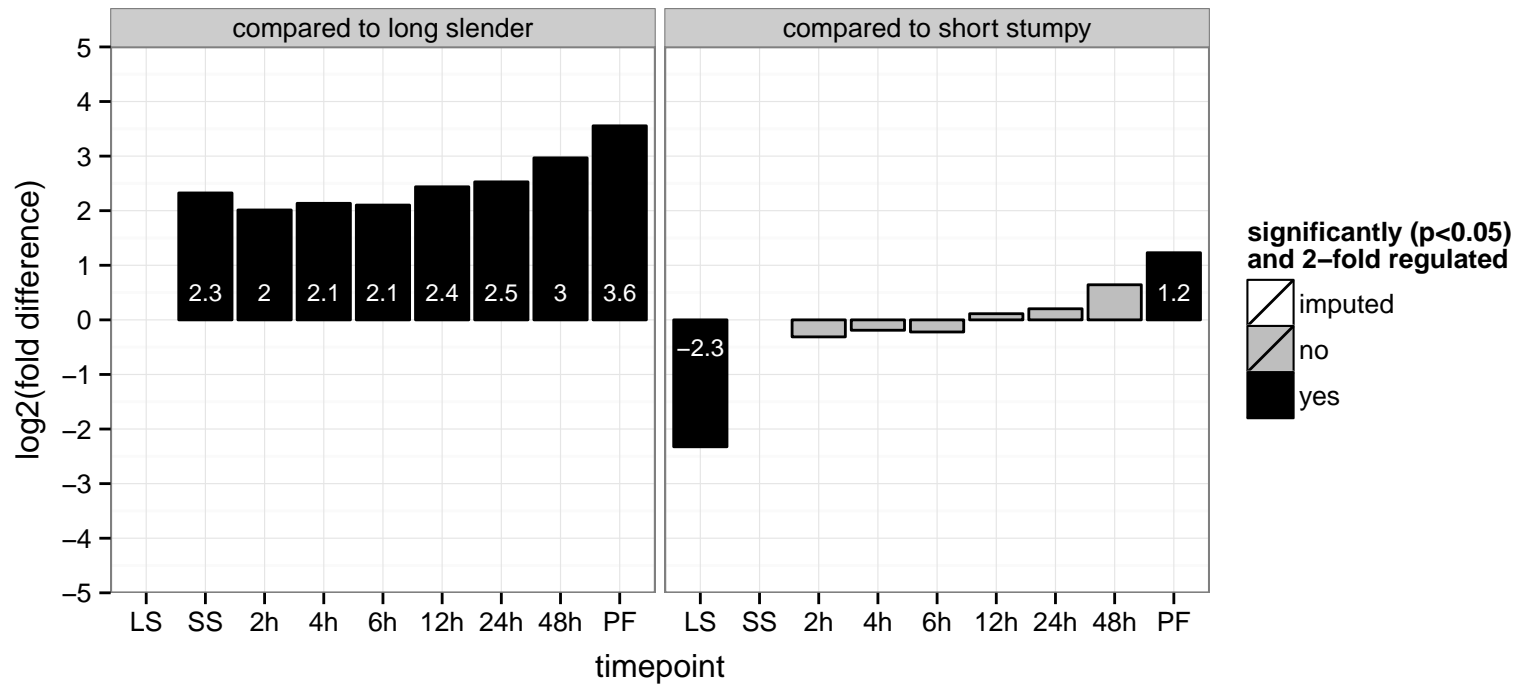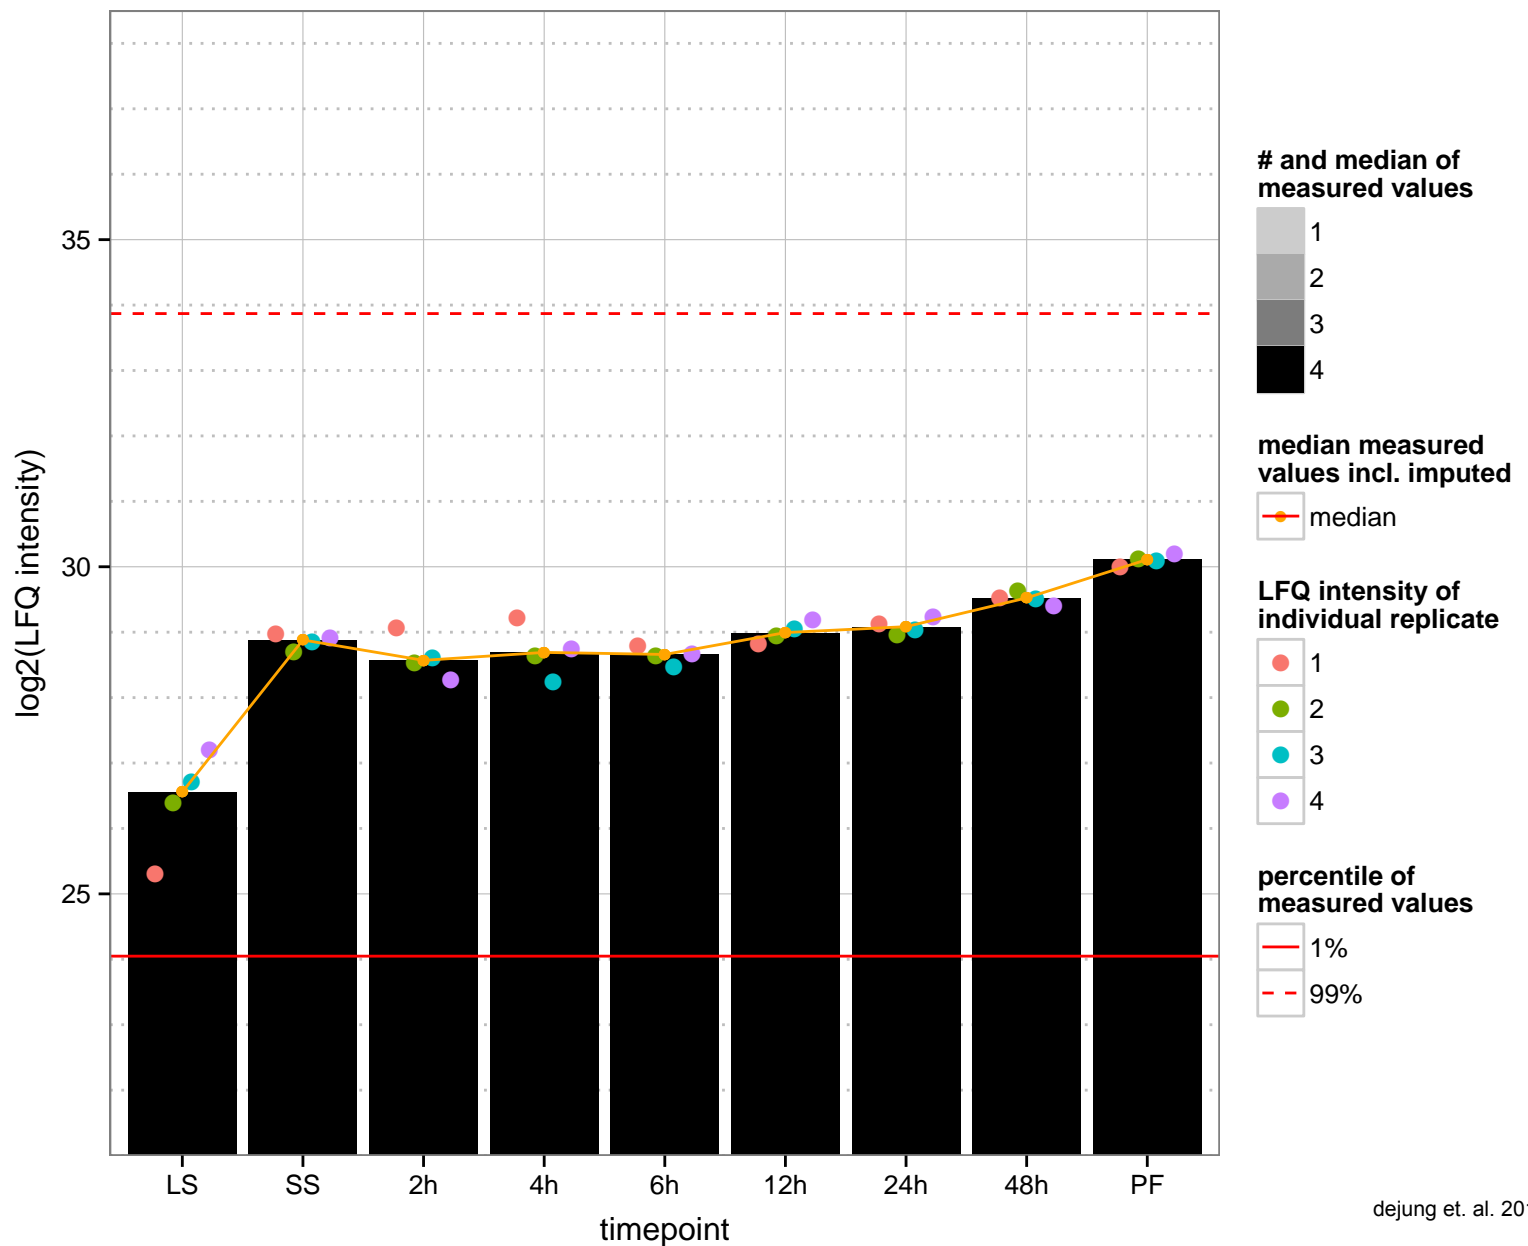

hypothetical protein, conserved  
 Tb927.8.2130  
 AGOF: null  
 AGOC: null  
 AGOP: null  
 PGOF: null  
 PGO: null  
 PGOP: null

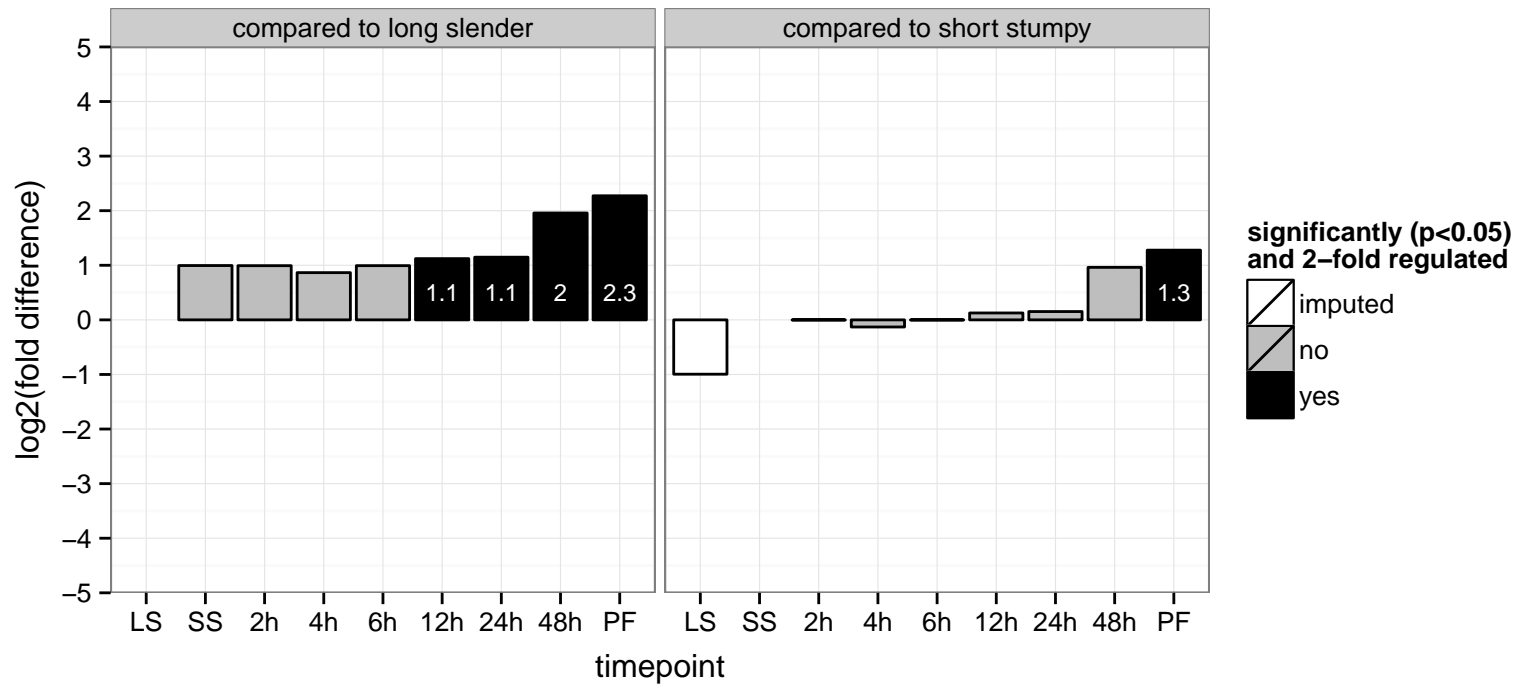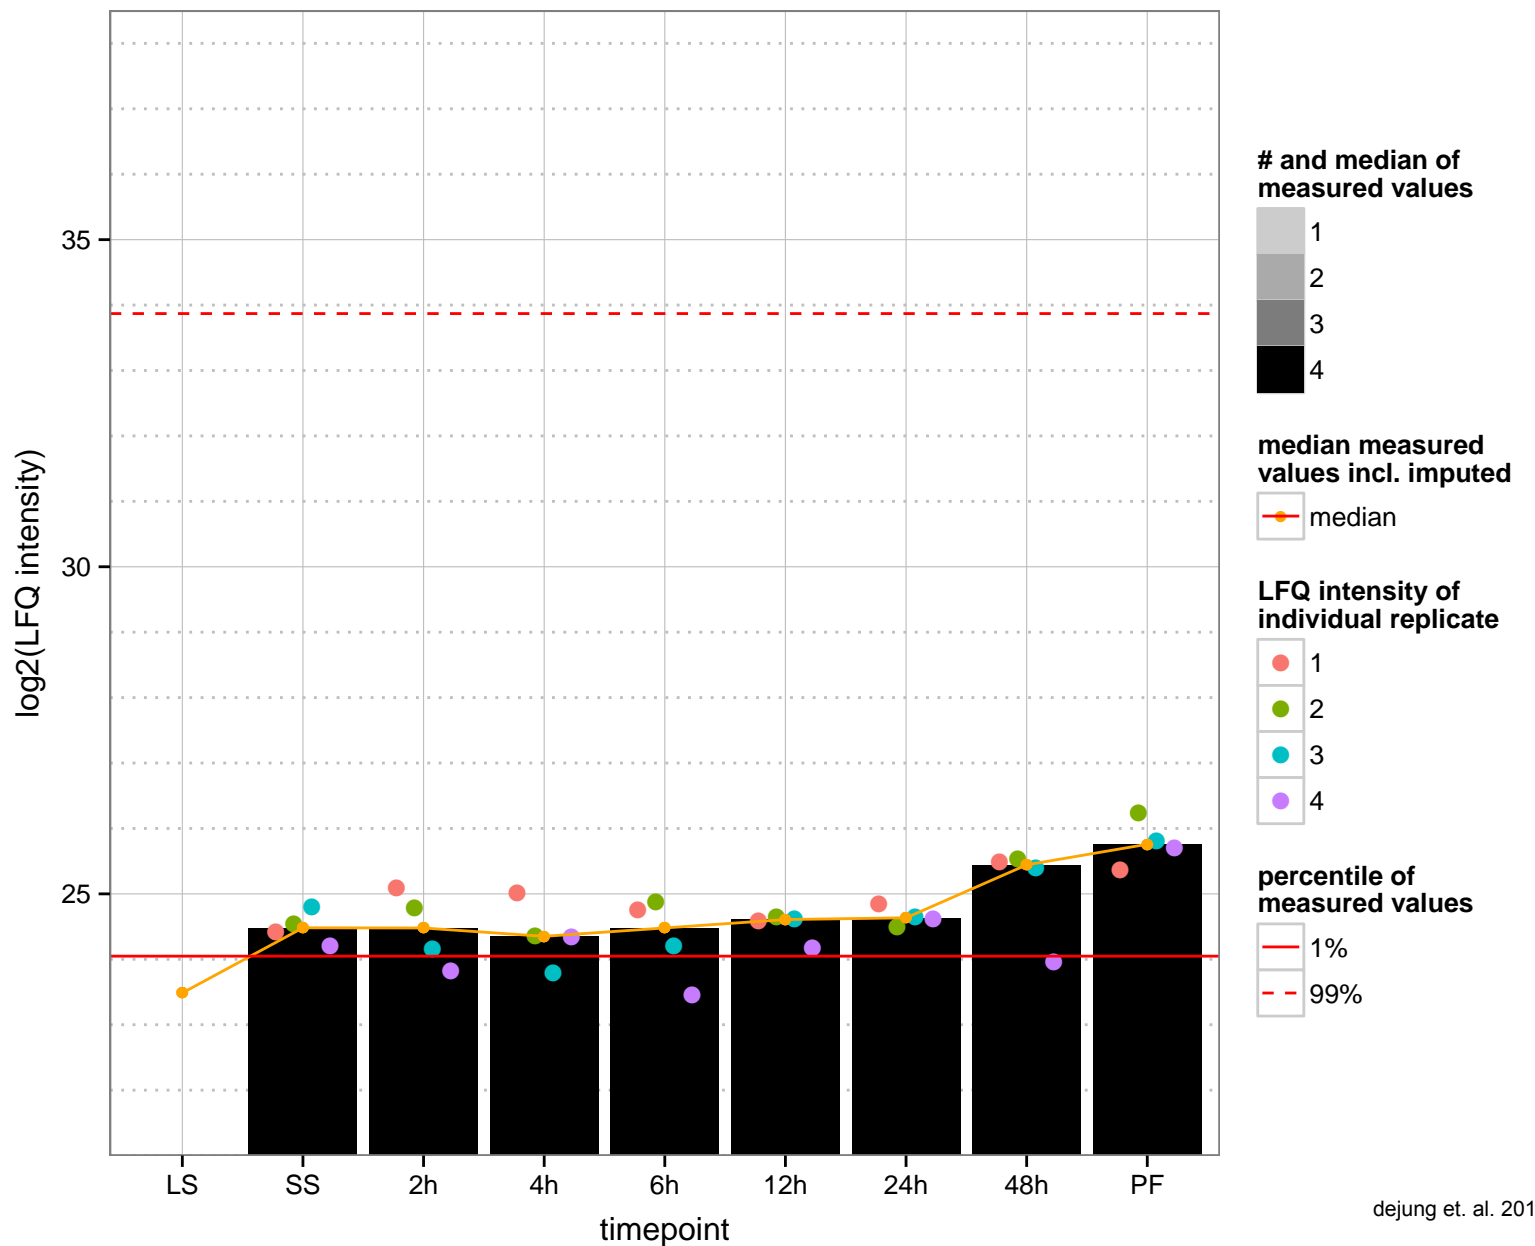

hypothetical protein, conserved  
 Tb927.8.2300  
 AGOF: null  
 AGOC: mitochondrion  
 AGOP: null  
 PGO: null  
 PGO: null  
 PGO: null

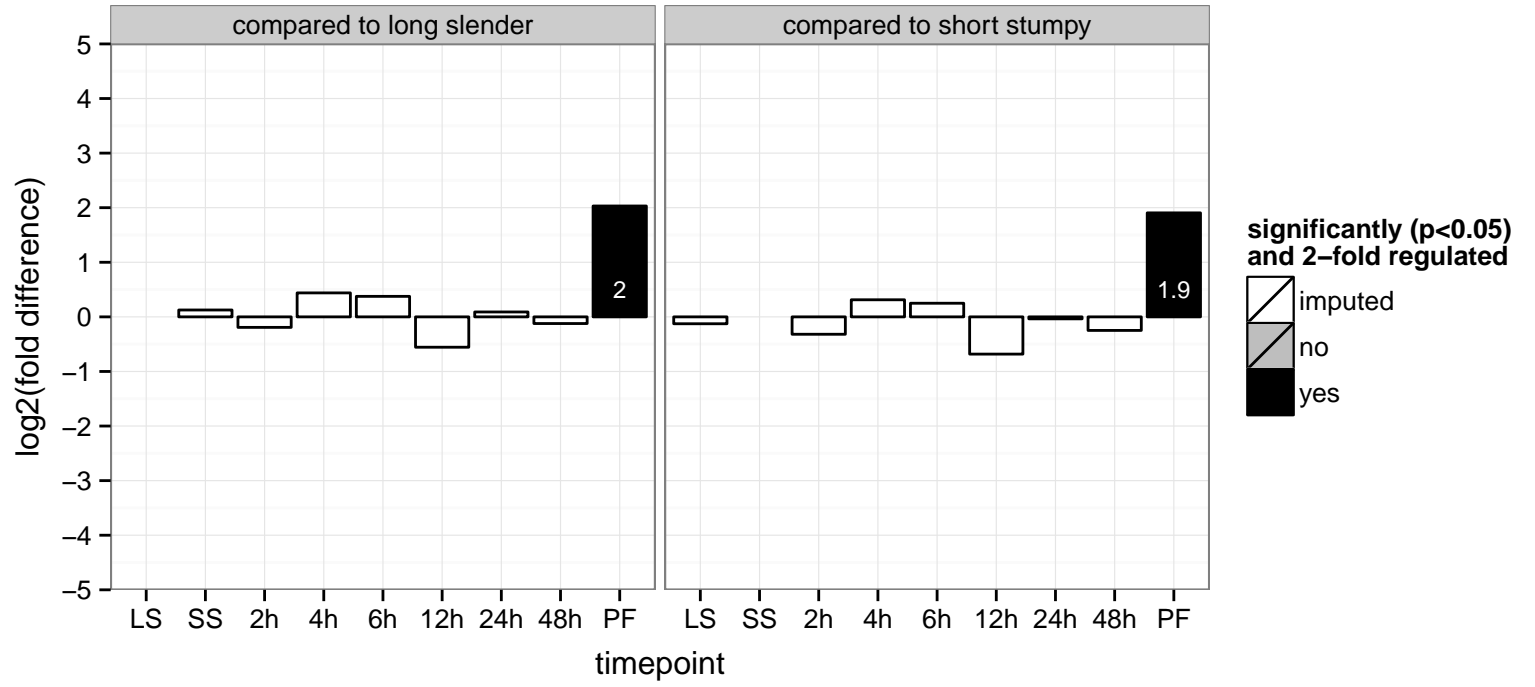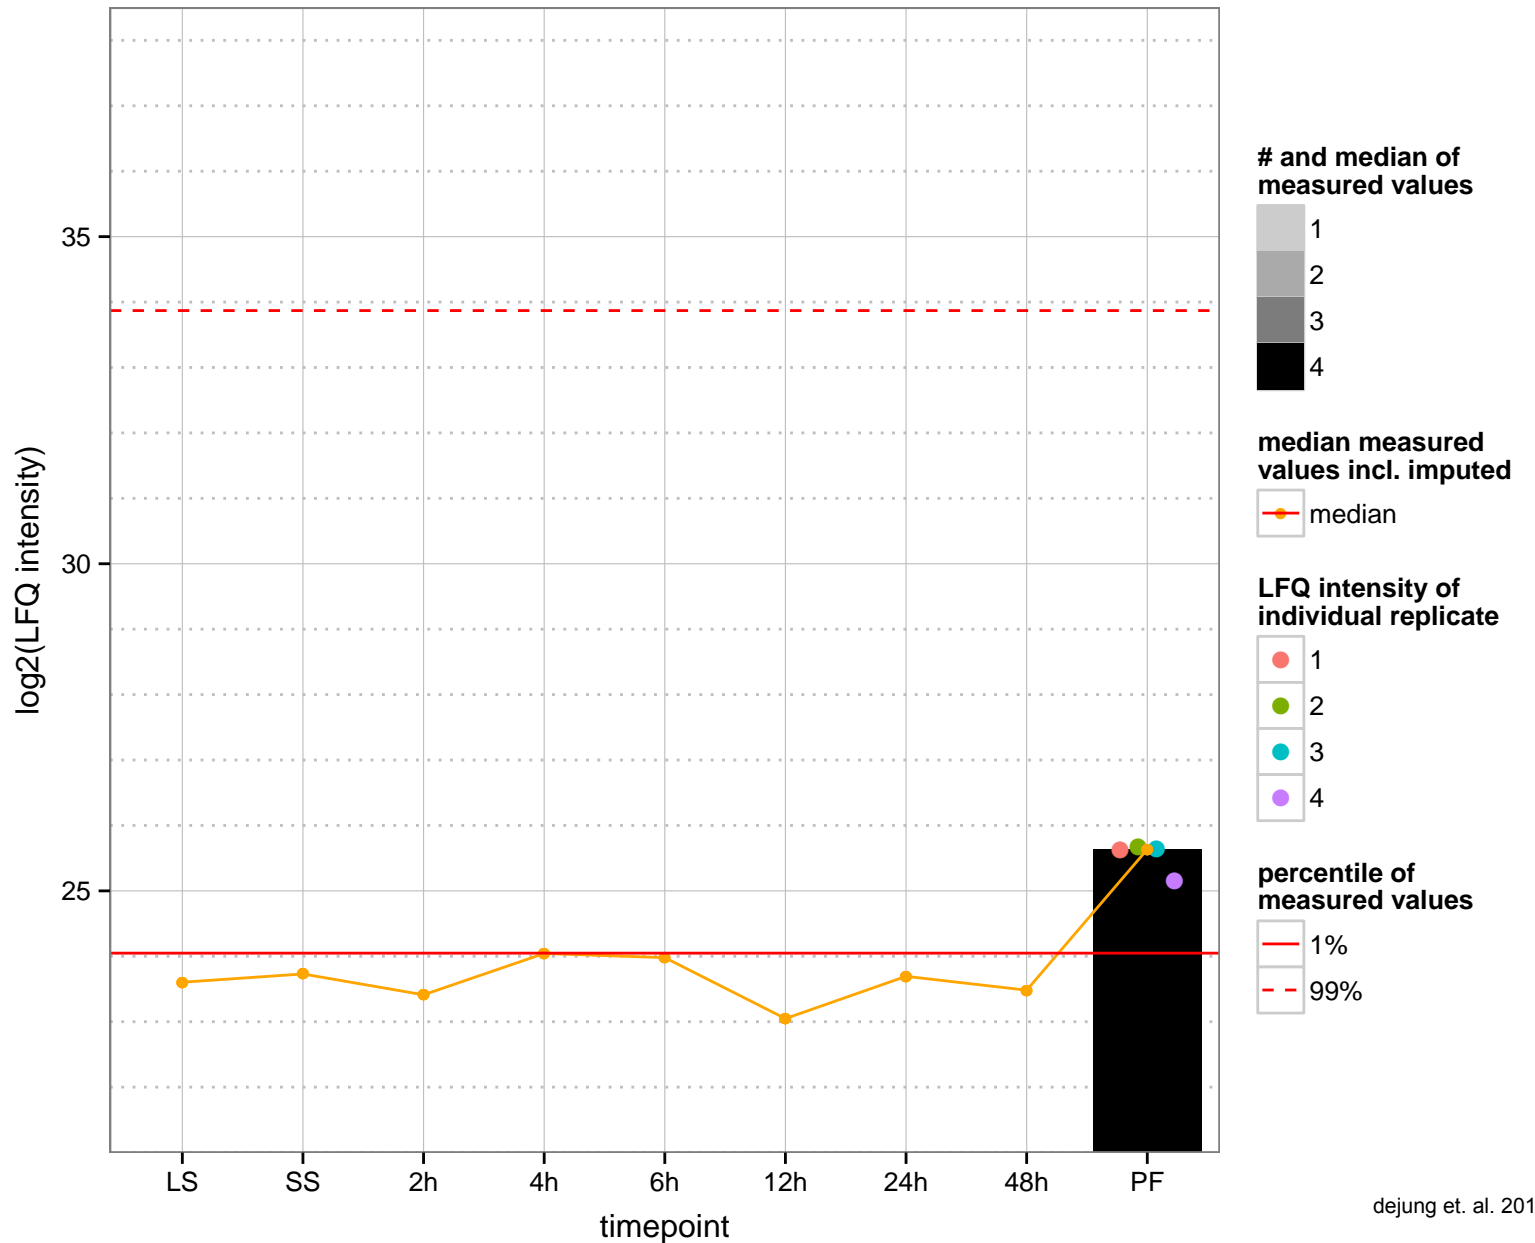

acetyl-CoA synthetase, putative, acetyl-CoA synthetase (pseudogene), truncated  
 Tb927.8.2520  
 AGOF: AMP binding, acetate-CoA ligase activity, catalytic activity, catalytic activity  
 AGOC: integral to membrane, null  
 AGOP: metabolic process  
 PGO: AMP binding, acetate-CoA ligase activity, catalytic activity, catalytic activity  
 PGOC: null  
 PGO: metabolic process

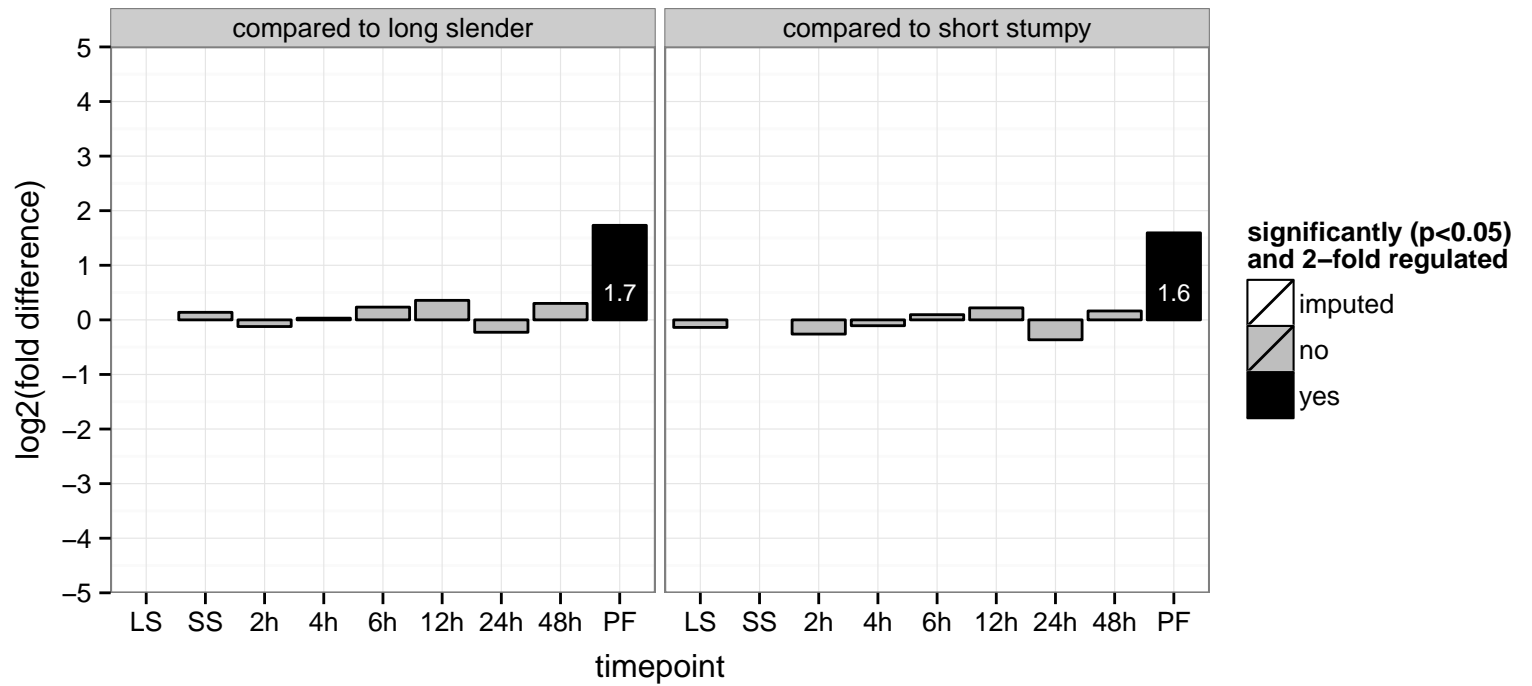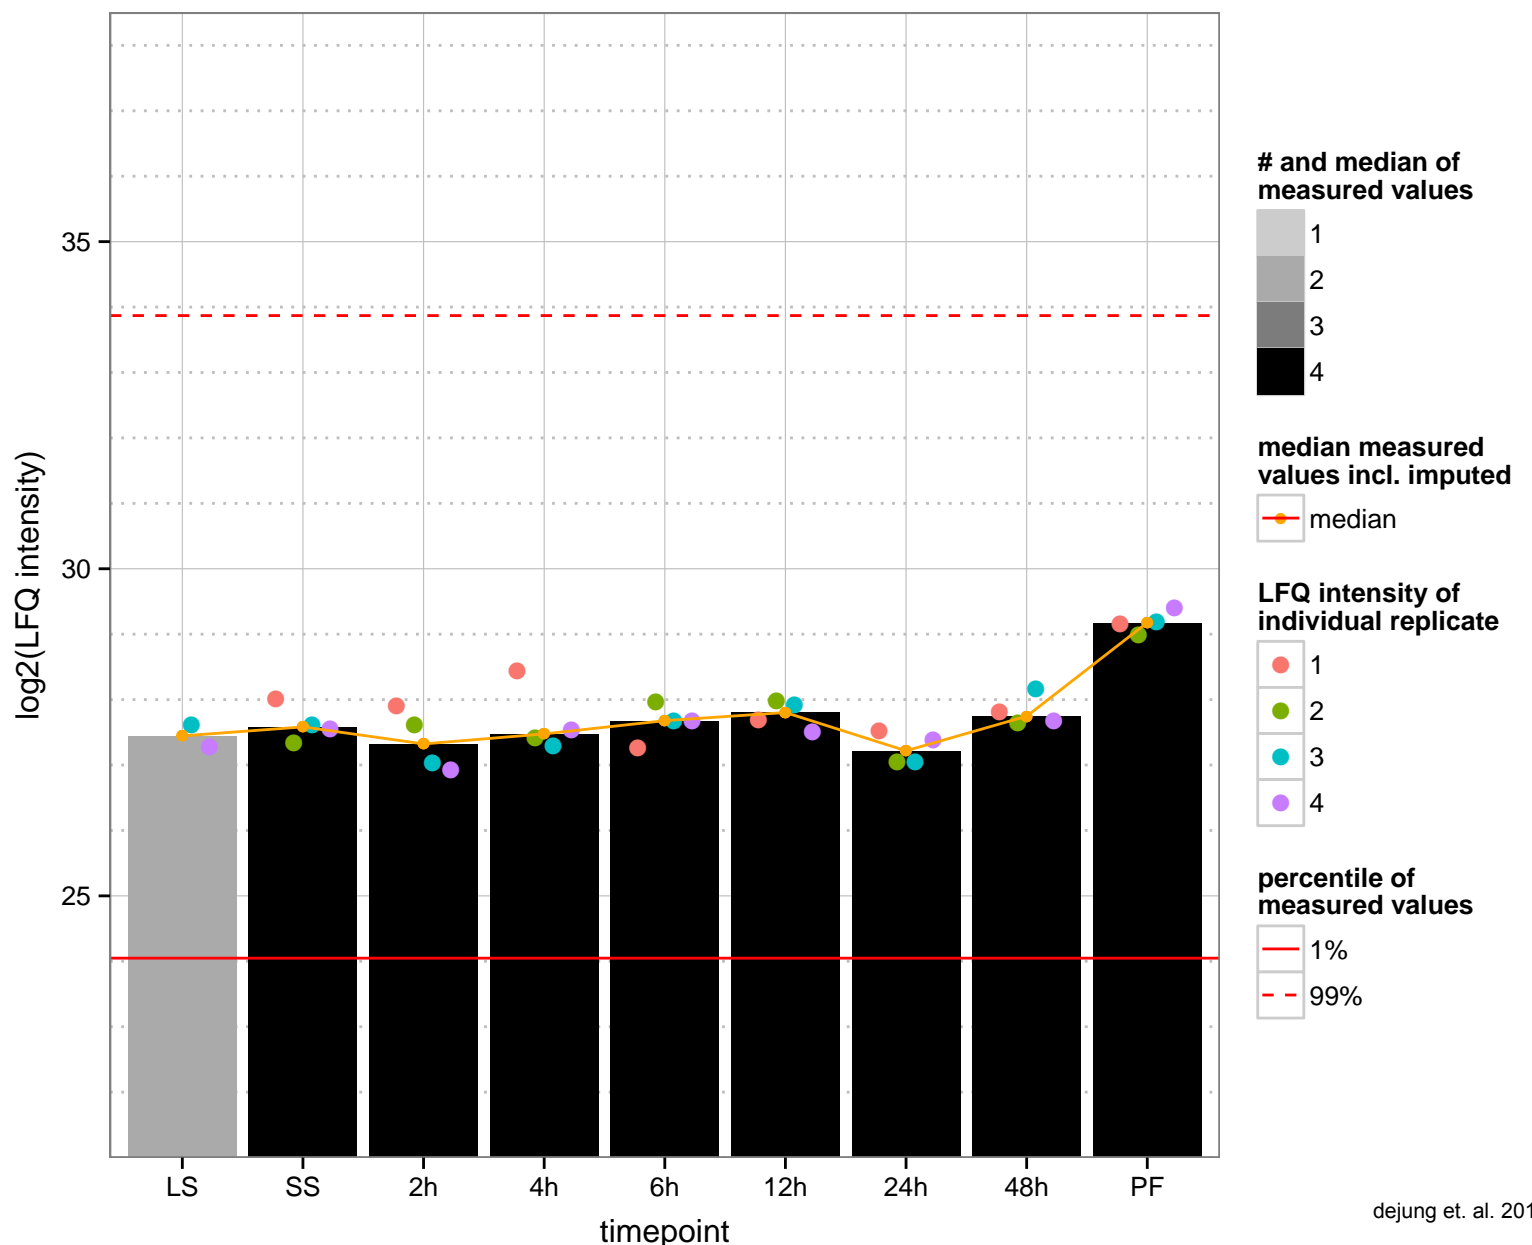

hypothetical protein, conserved  
 Tb927.8.2750  
 AGOF: null  
 AGOC: mitochondrion  
 AGOP: null  
 PGO: null  
 PGOC: null  
 PGOP: null

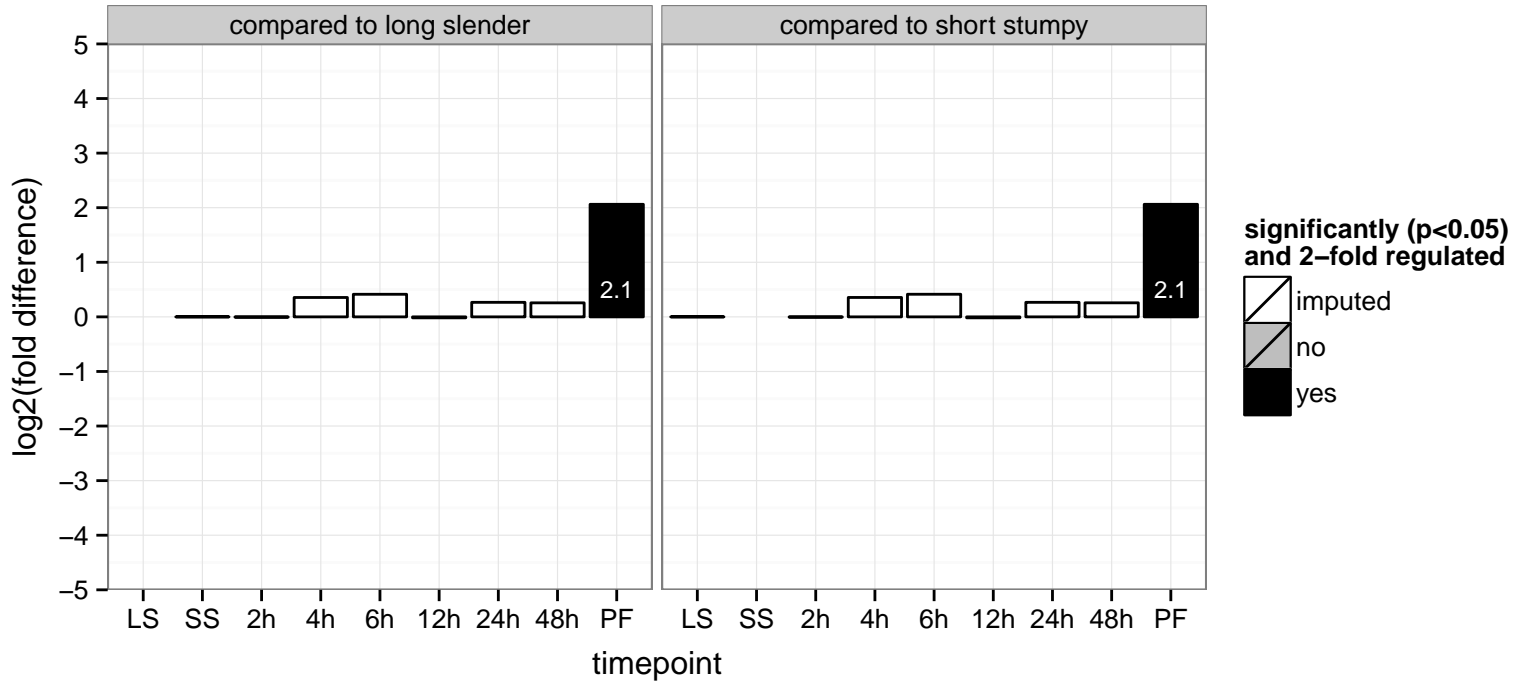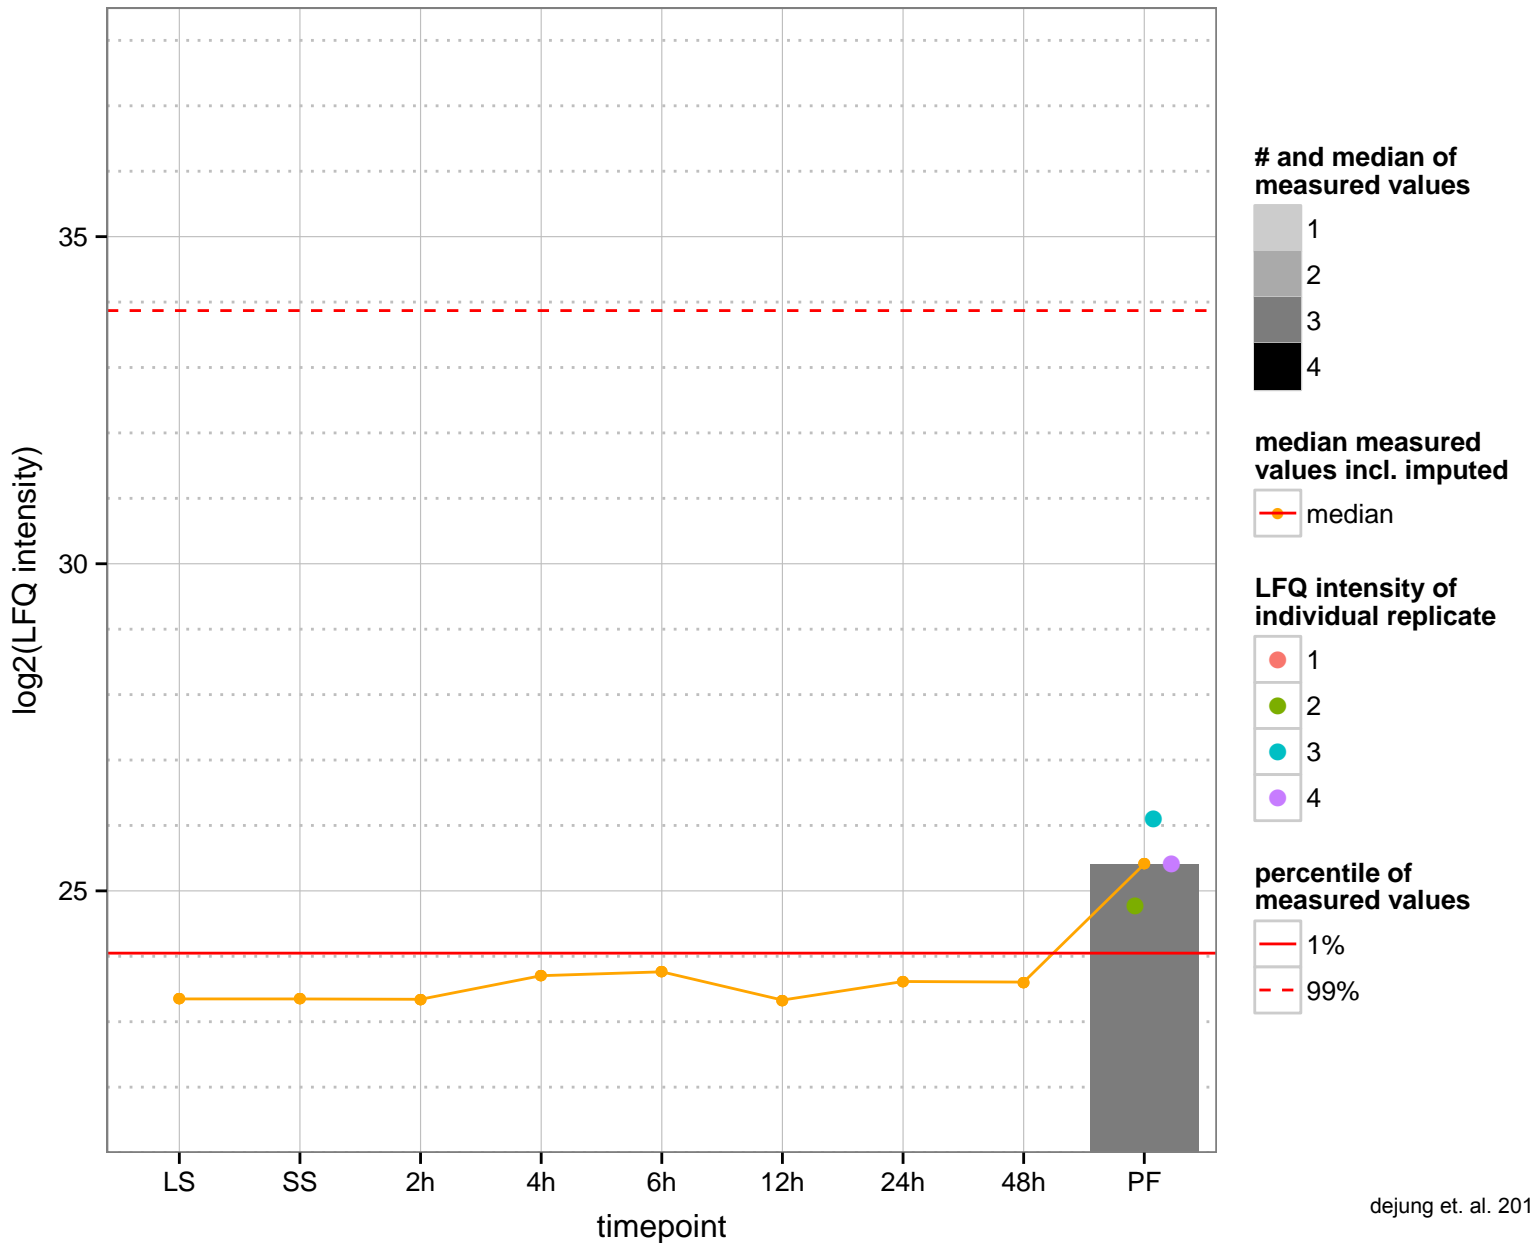

mannosyl-oligosaccharide 1, 2- $\alpha$ -mannosidase IB, putative

Tb927.8.2920;Tb927.8.2930;Tb927.8.2940

AGOF: calcium ion binding, mannosyl-oligosaccharide 1, 2- $\alpha$ -mannosidase activity

AGOC: endoplasmic reticulum, membrane

AGOP: protein N-linked glycosylation

PGOF: calcium ion binding, mannosyl-oligosaccharide 1, 2- $\alpha$ -mannosidase activity

PGOC: membrane

PGOP: null

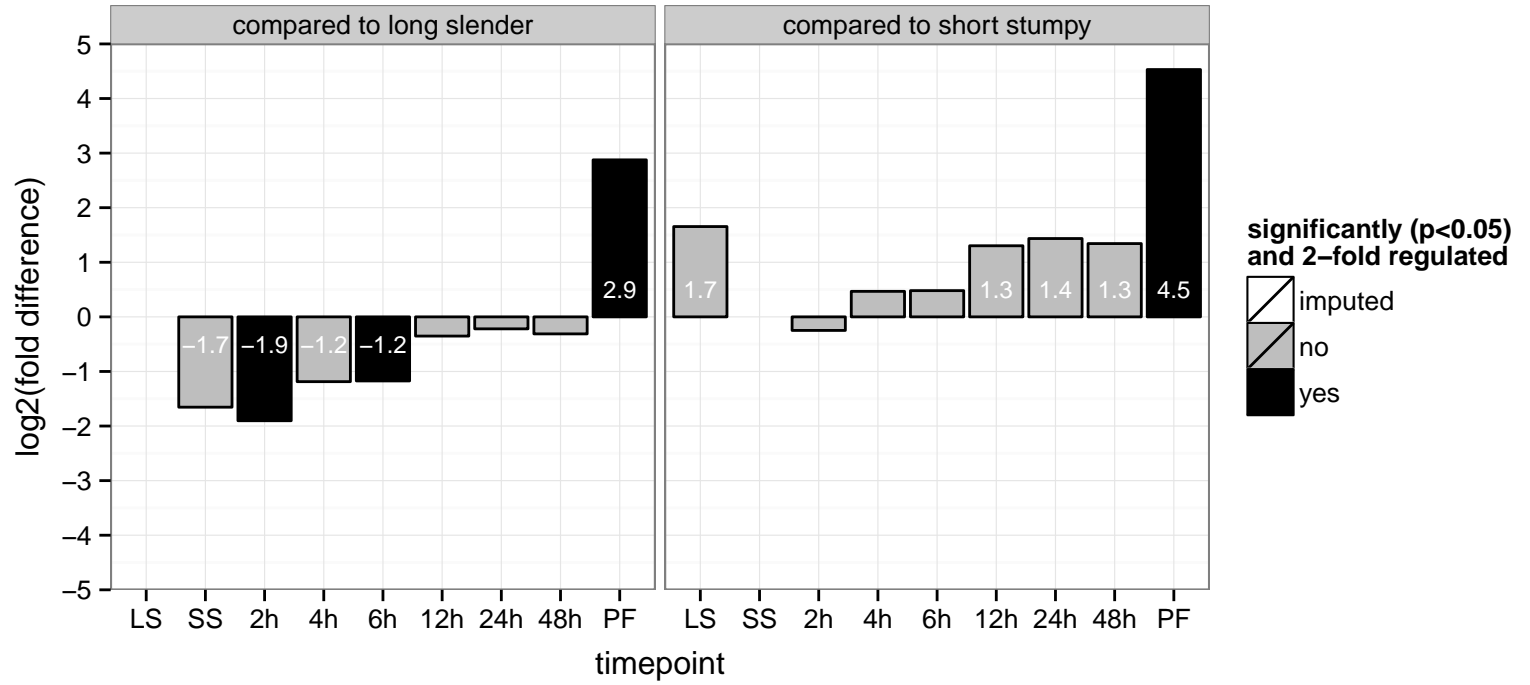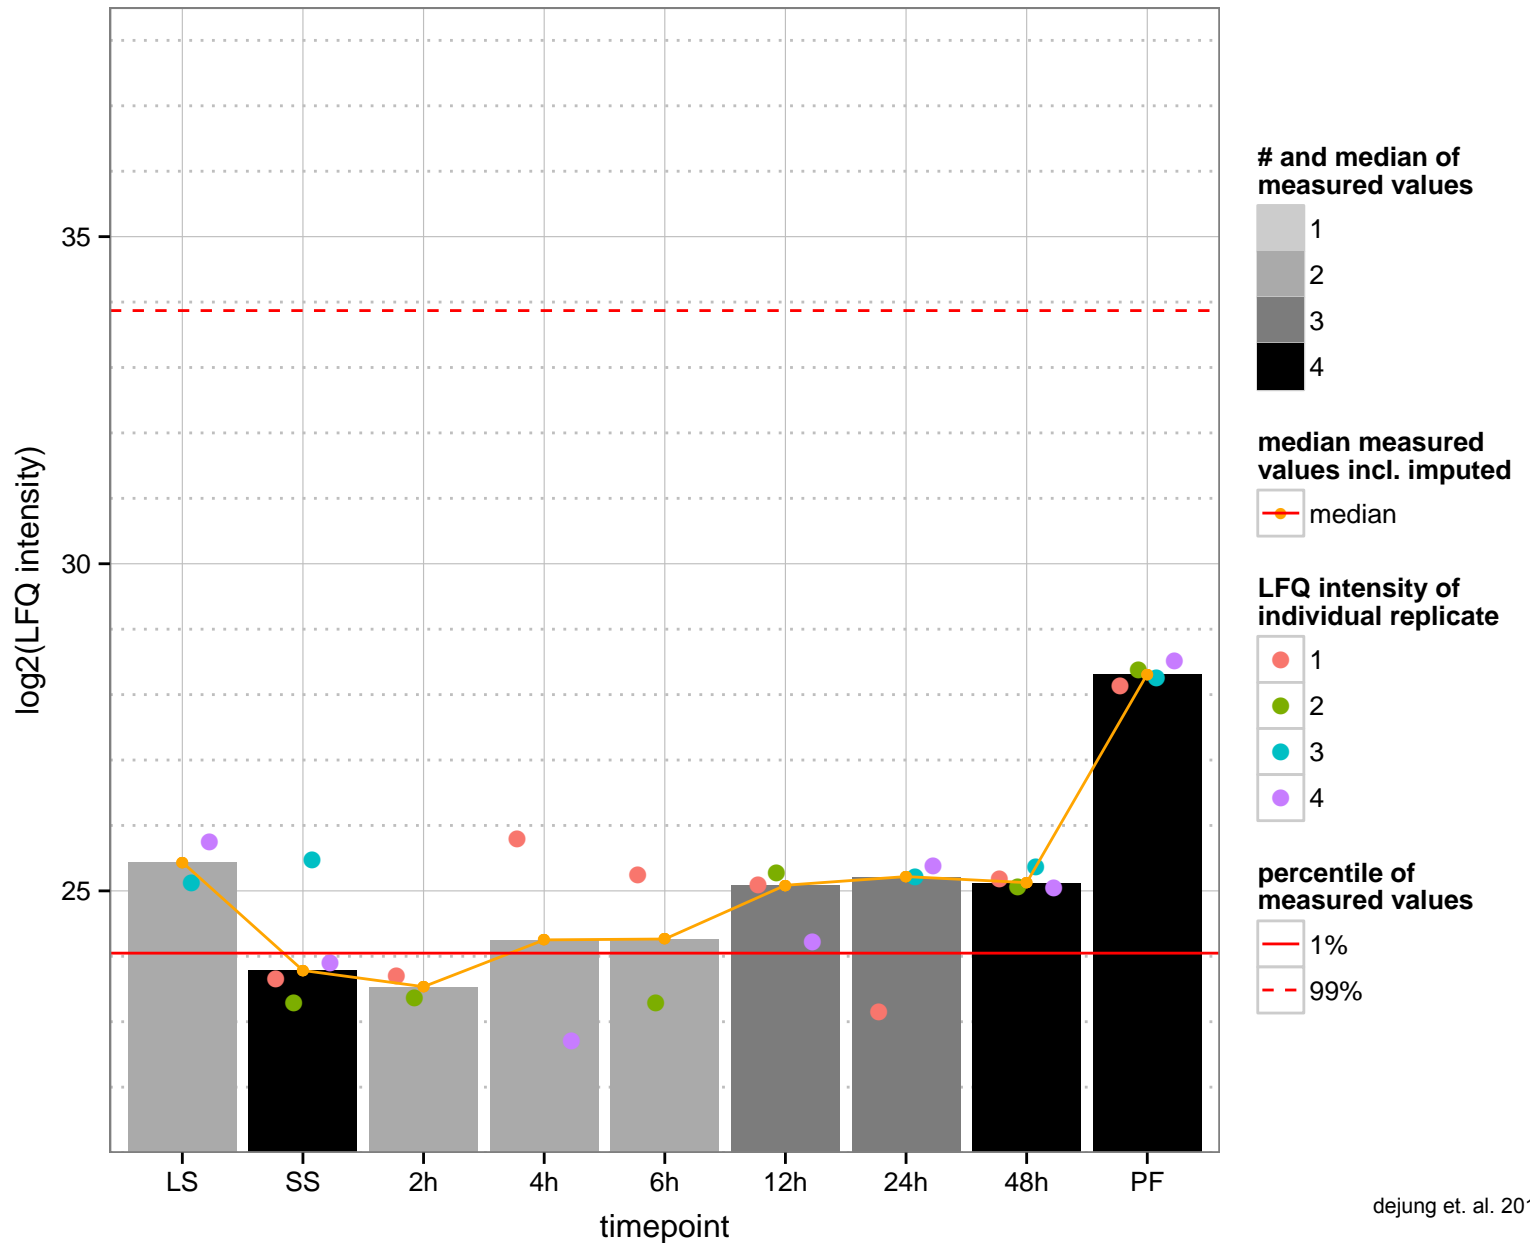

hypothetical protein, conserved  
 Tb927.8.2950  
 AGOF: null  
 AGOC: null  
 AGOP: null  
 PGO: null  
 PGOC: null  
 PGOP: null

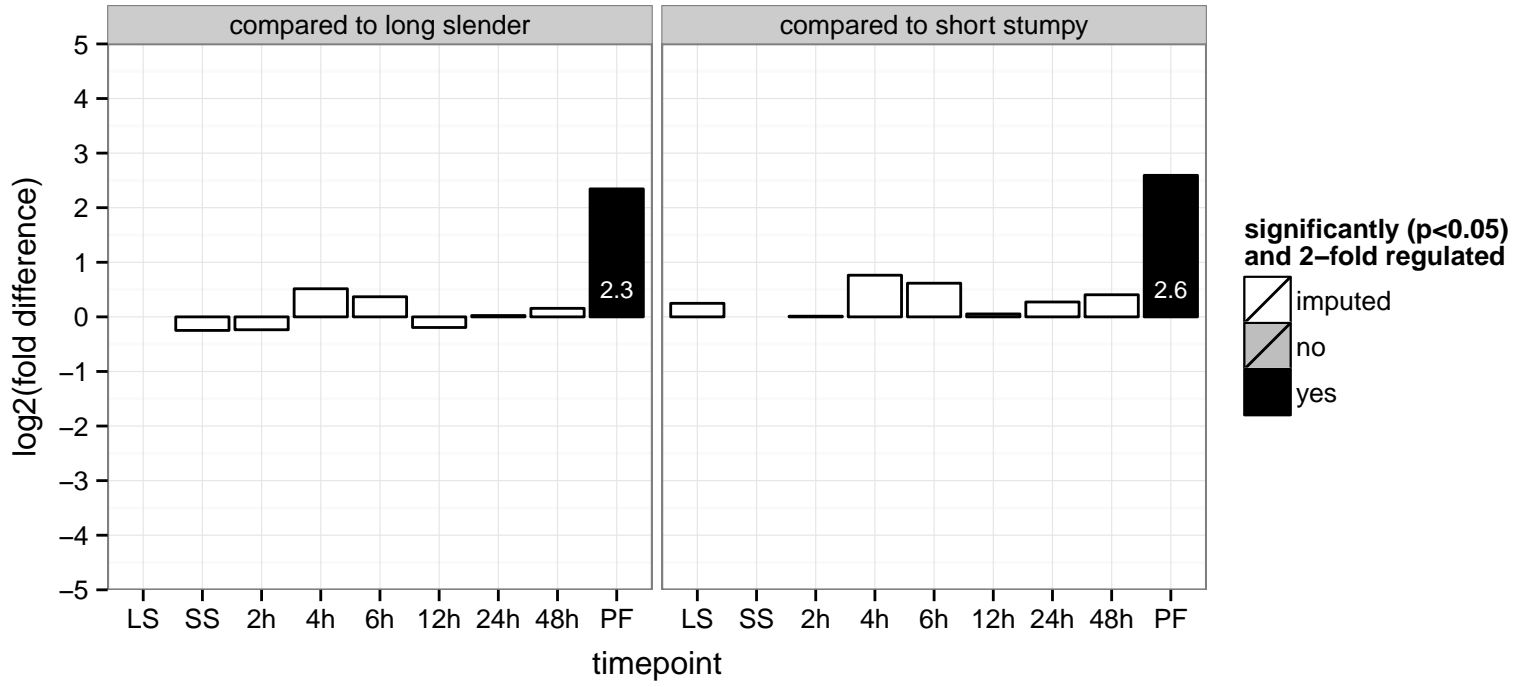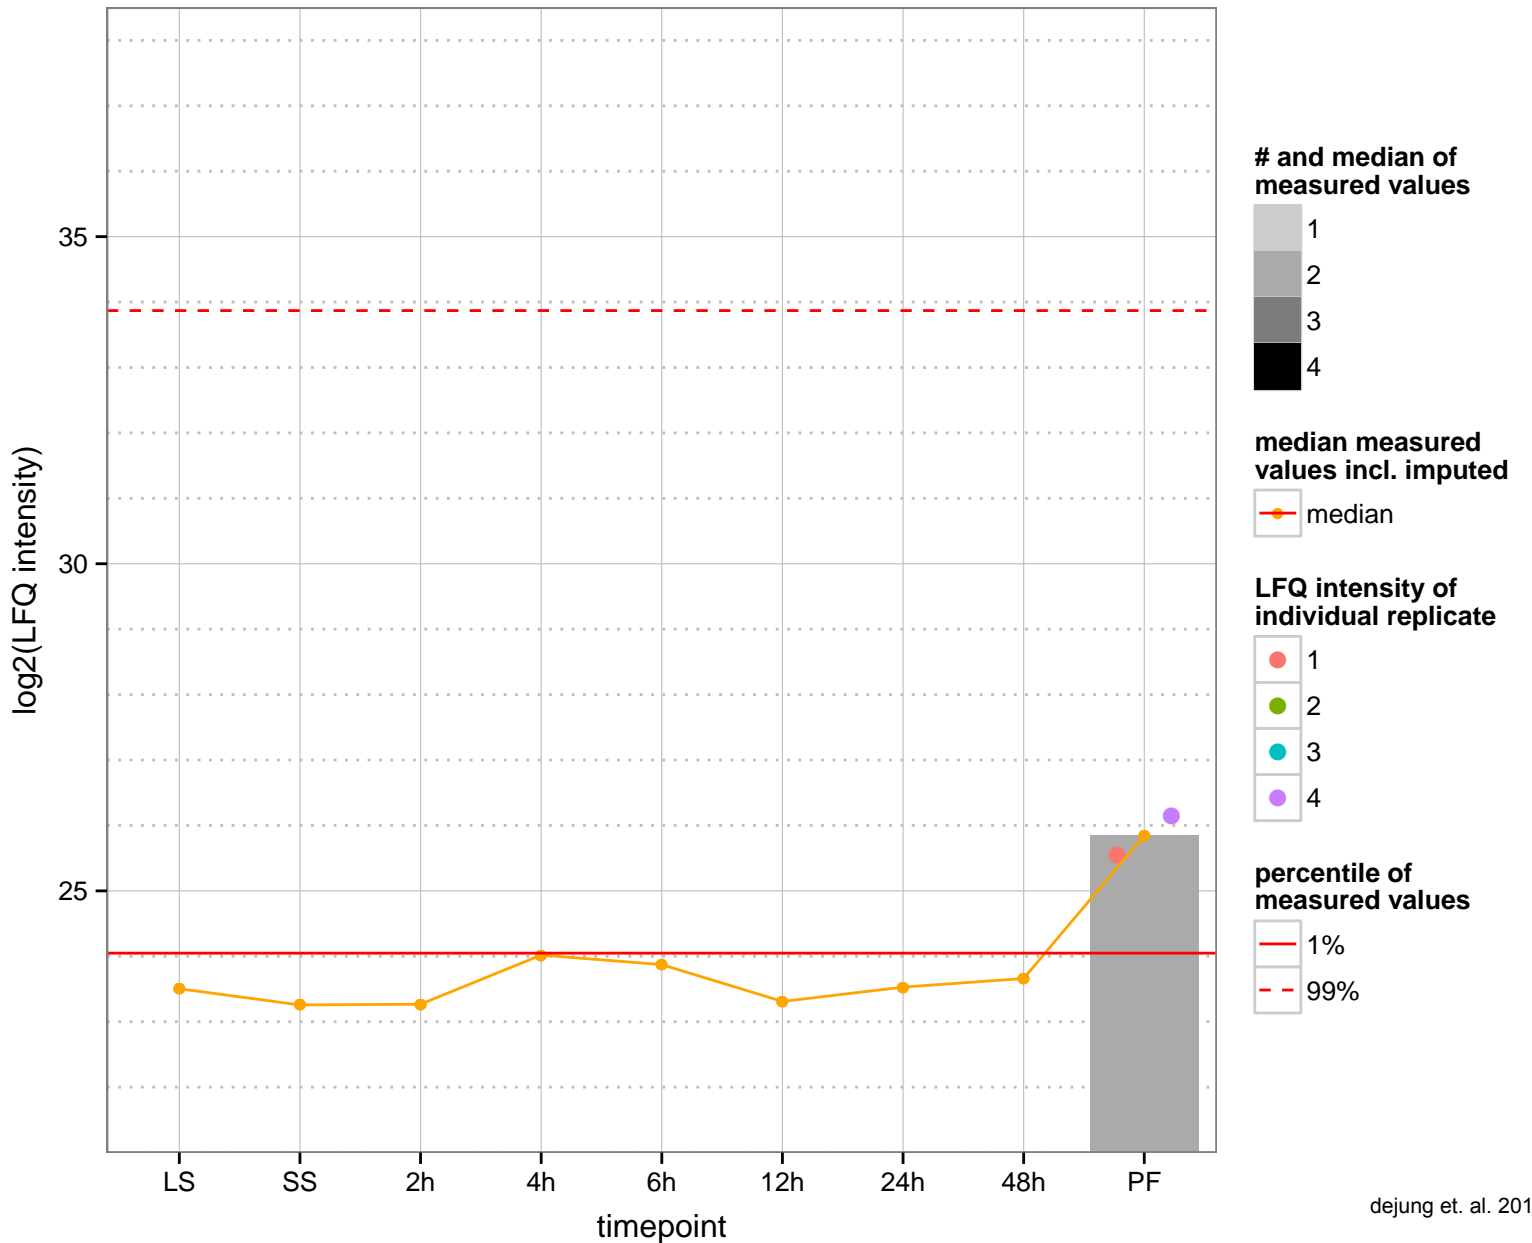



hypothetical protein, conserved  
 Tb927.8.3090  
 AGOF: null  
 AGOC: mitochondrion  
 AGOP: null  
 PGO: null  
 PGO: null  
 PGO: null

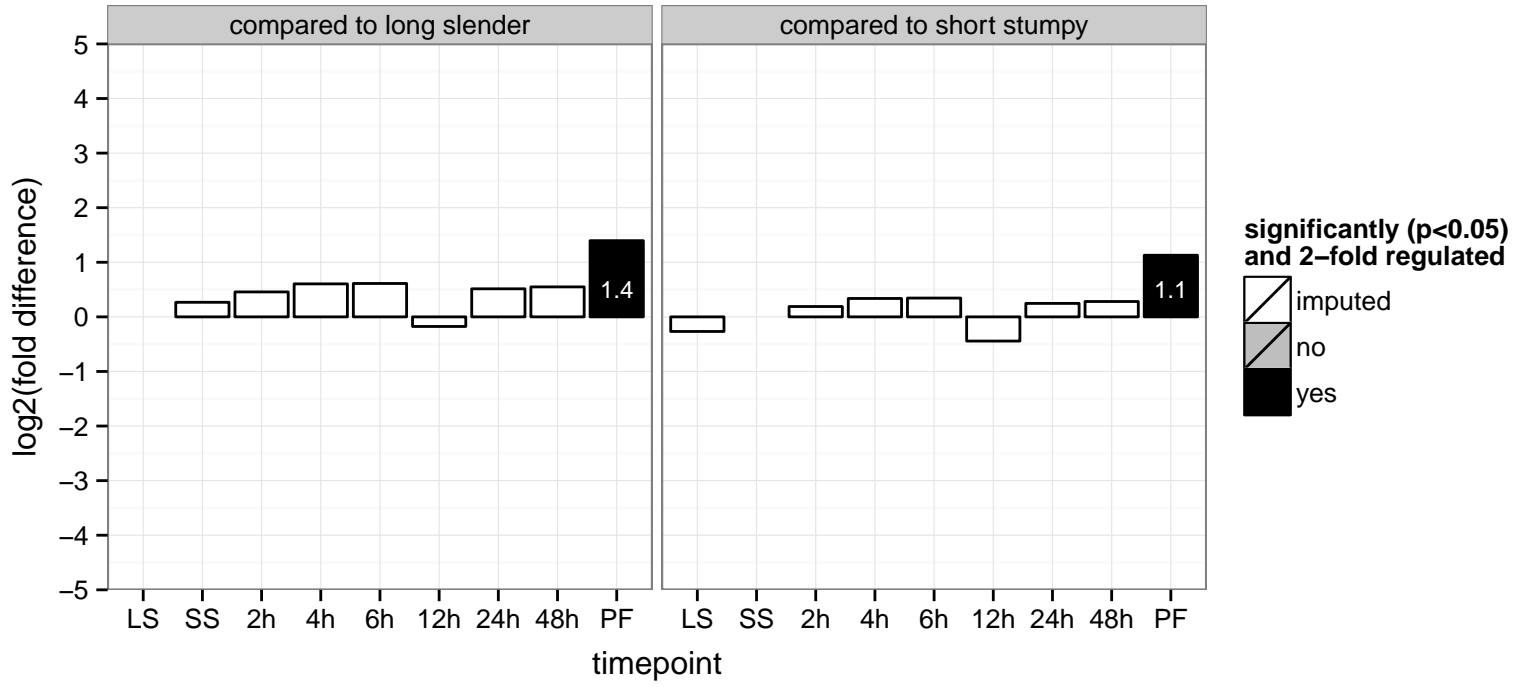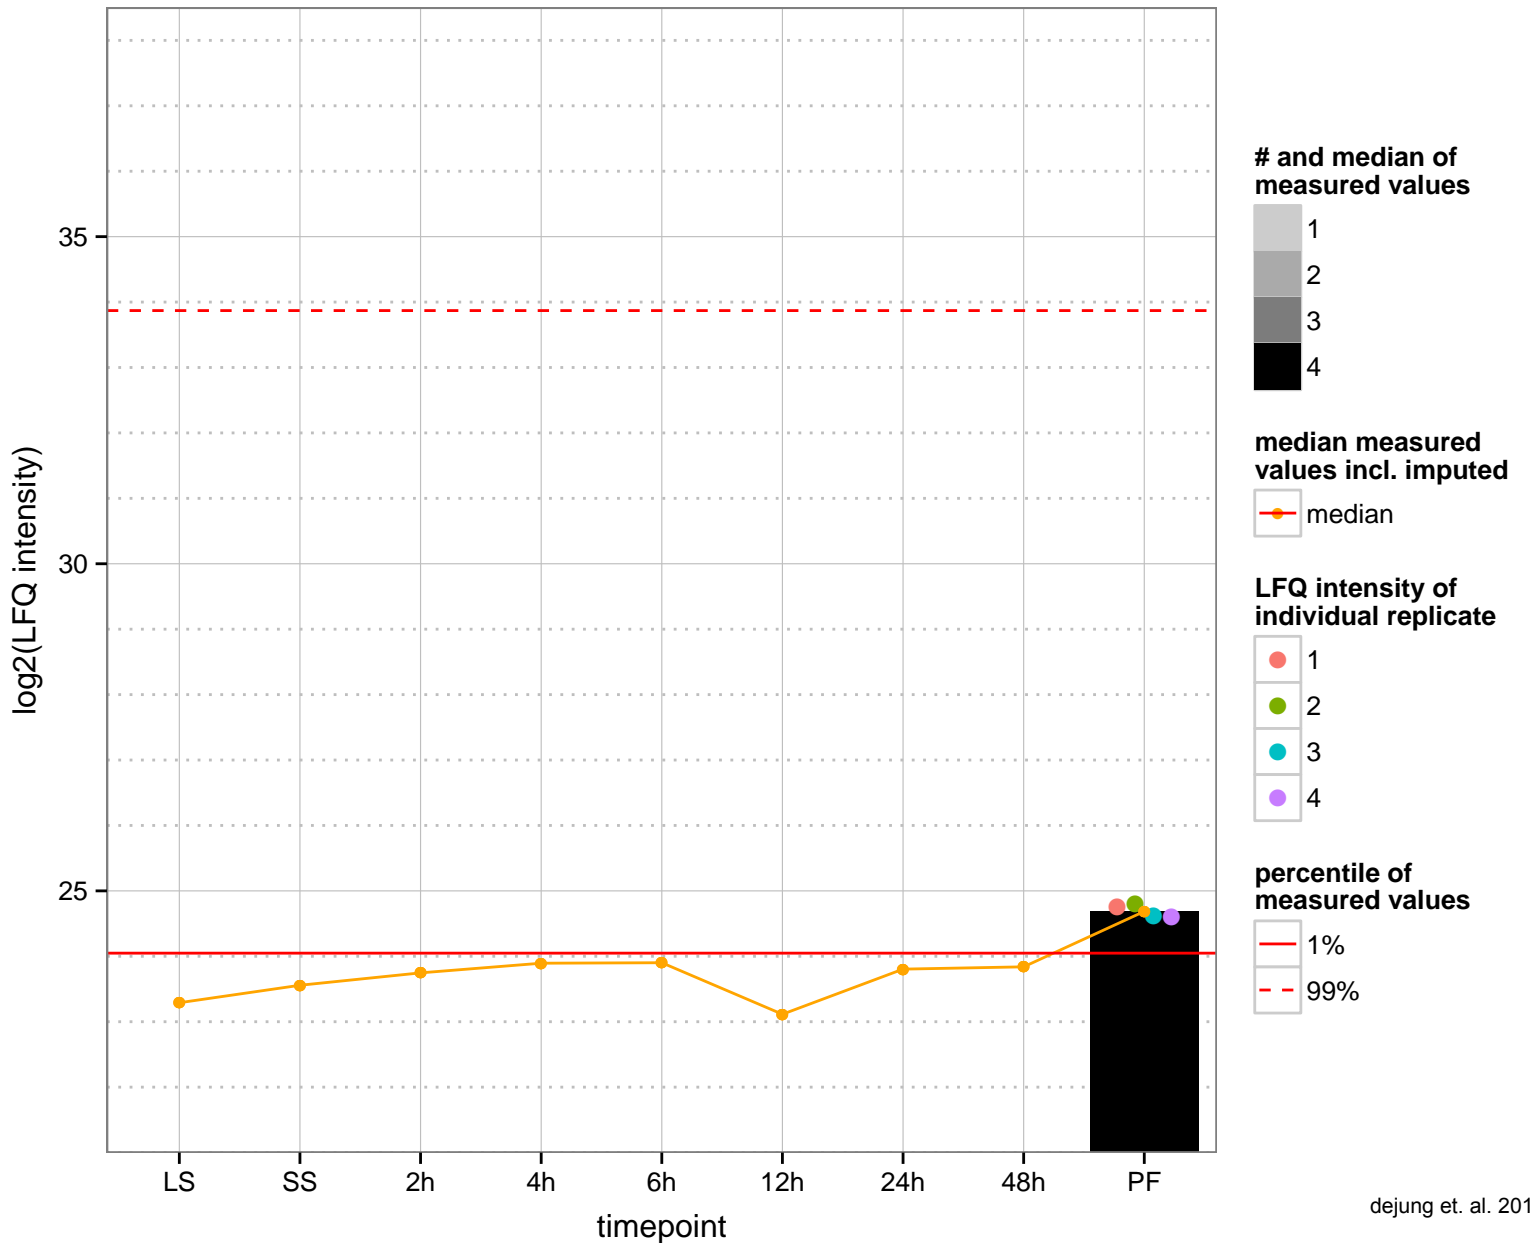

lathosterol oxidase, putative

Tb927.8.3240

AGOF: C-5 sterol desaturase activity, iron ion binding, oxidoreductase activity

AGOC: endoplasmic reticulum, integral to membrane

AGOP: fatty acid biosynthetic process, lipid metabolic process, oxidation-reduction process

PGOF: iron ion binding, oxidoreductase activity

PGOC: null

PGOP: fatty acid biosynthetic process, oxidation-reduction process

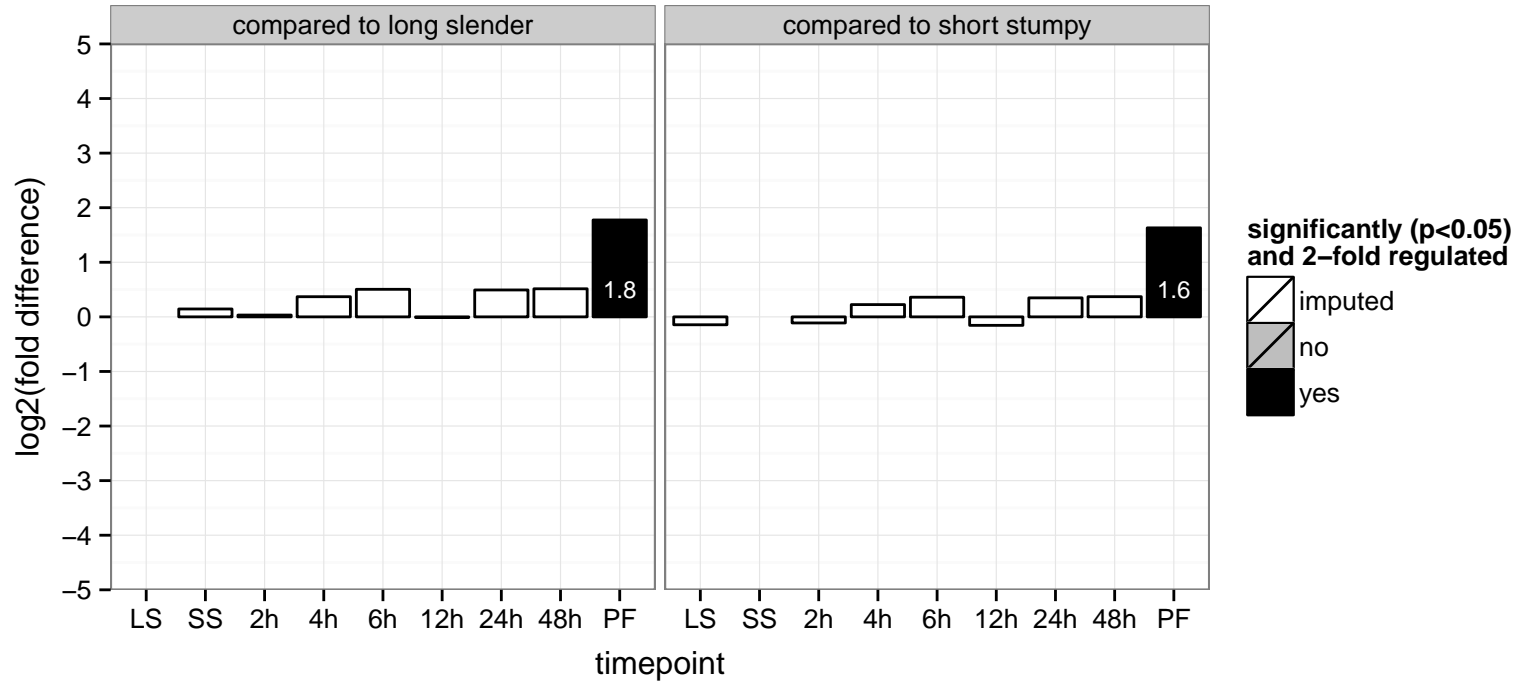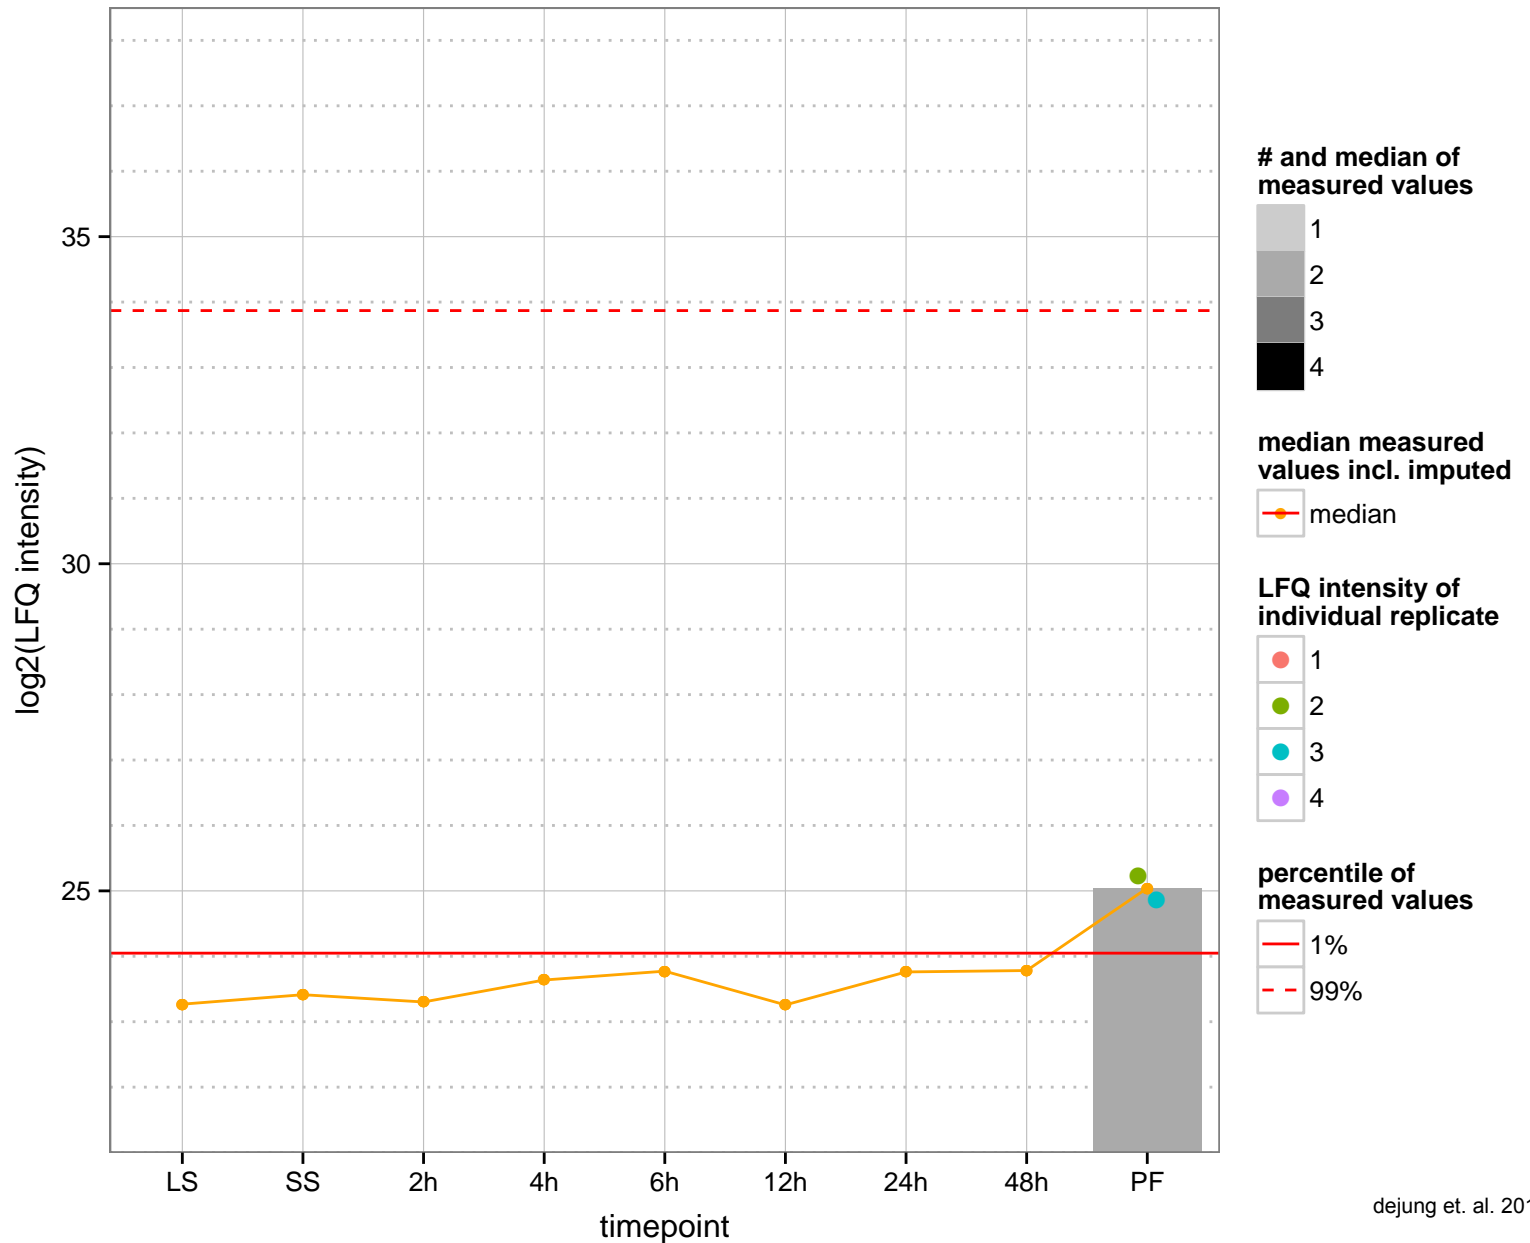

hypothetical protein, conserved  
 Tb927.8.3490  
 AGOF: null  
 AGOC: null  
 AGOP: null  
 PGOF: null  
 PGOE: null  
 PGOP: null

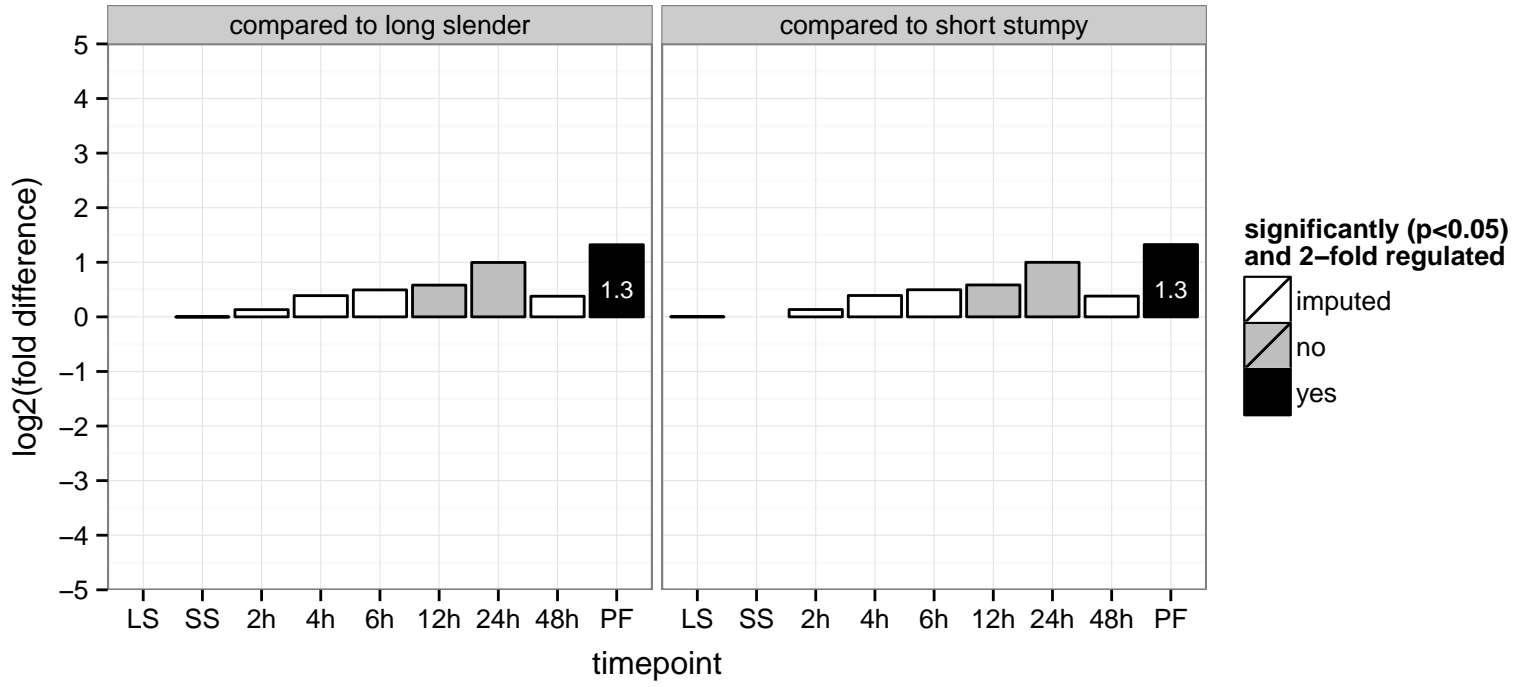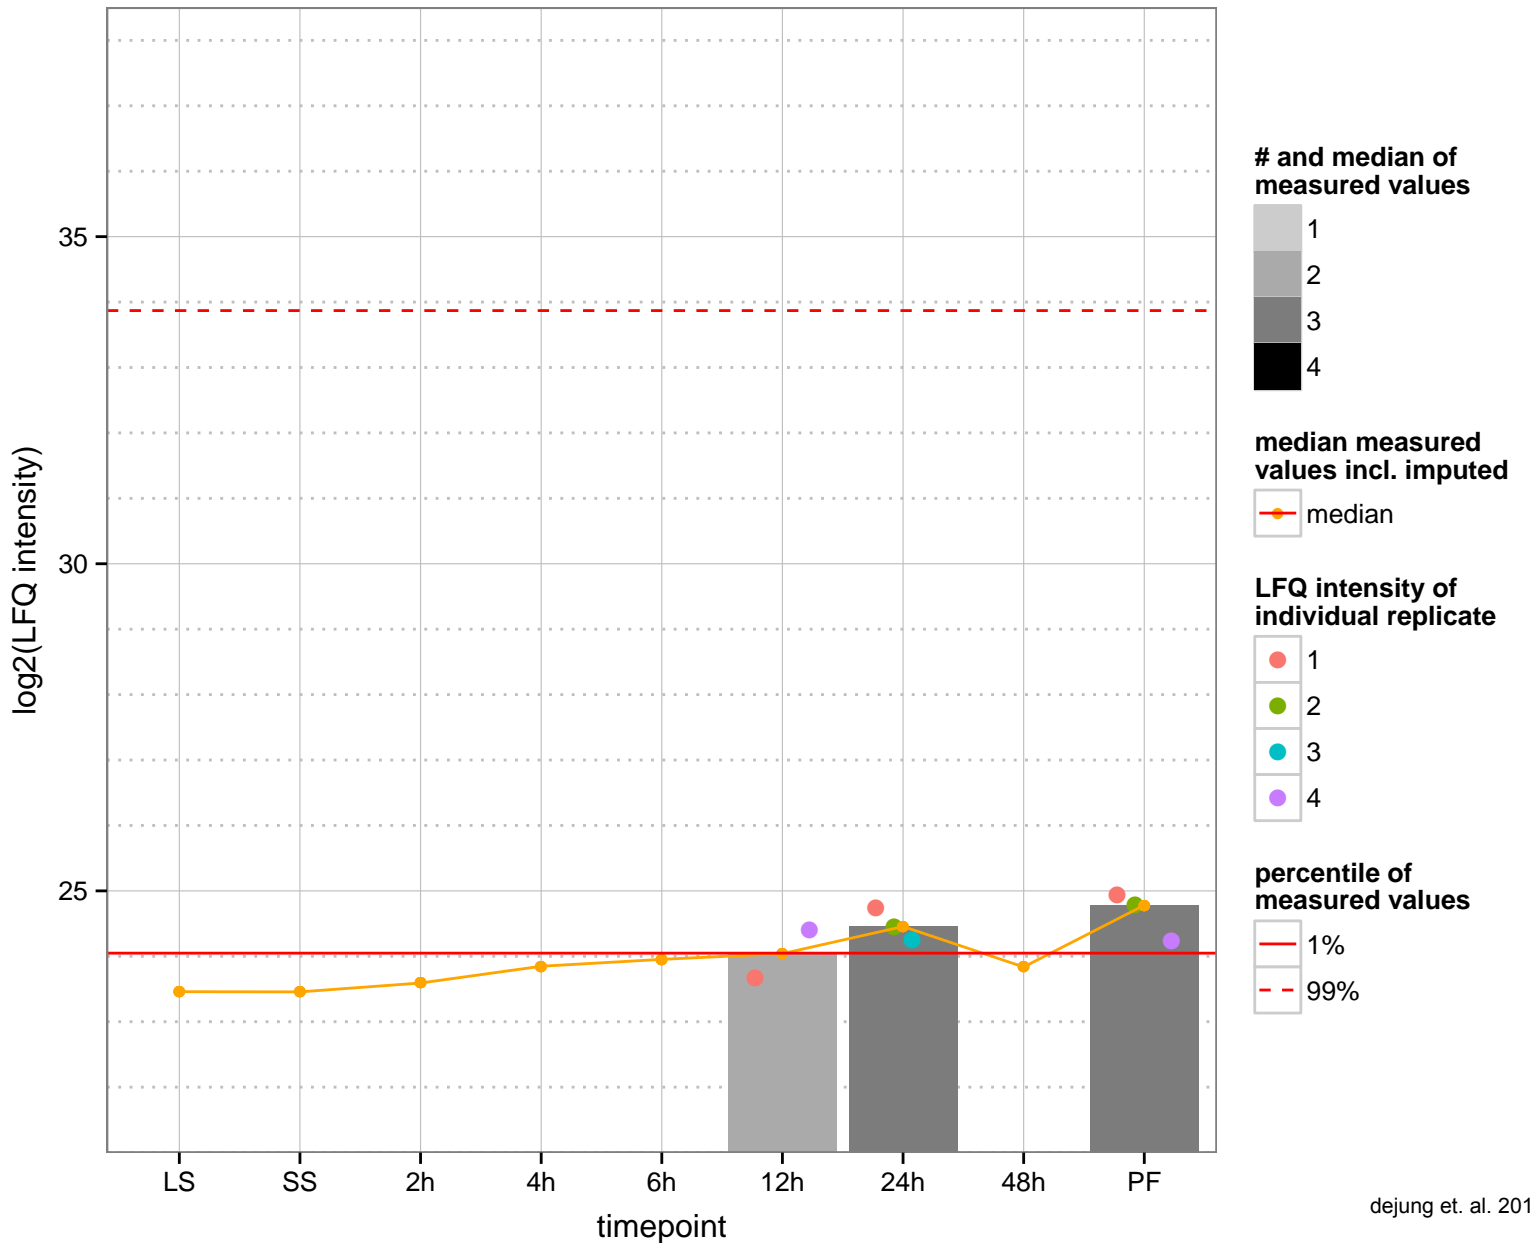

hypothetical protein, conserved  
 Tb927.8.3590  
 AGOF: null  
 AGOC: null  
 AGOP: null  
 PGOF: null  
 PGO C: null  
 PGOP: null

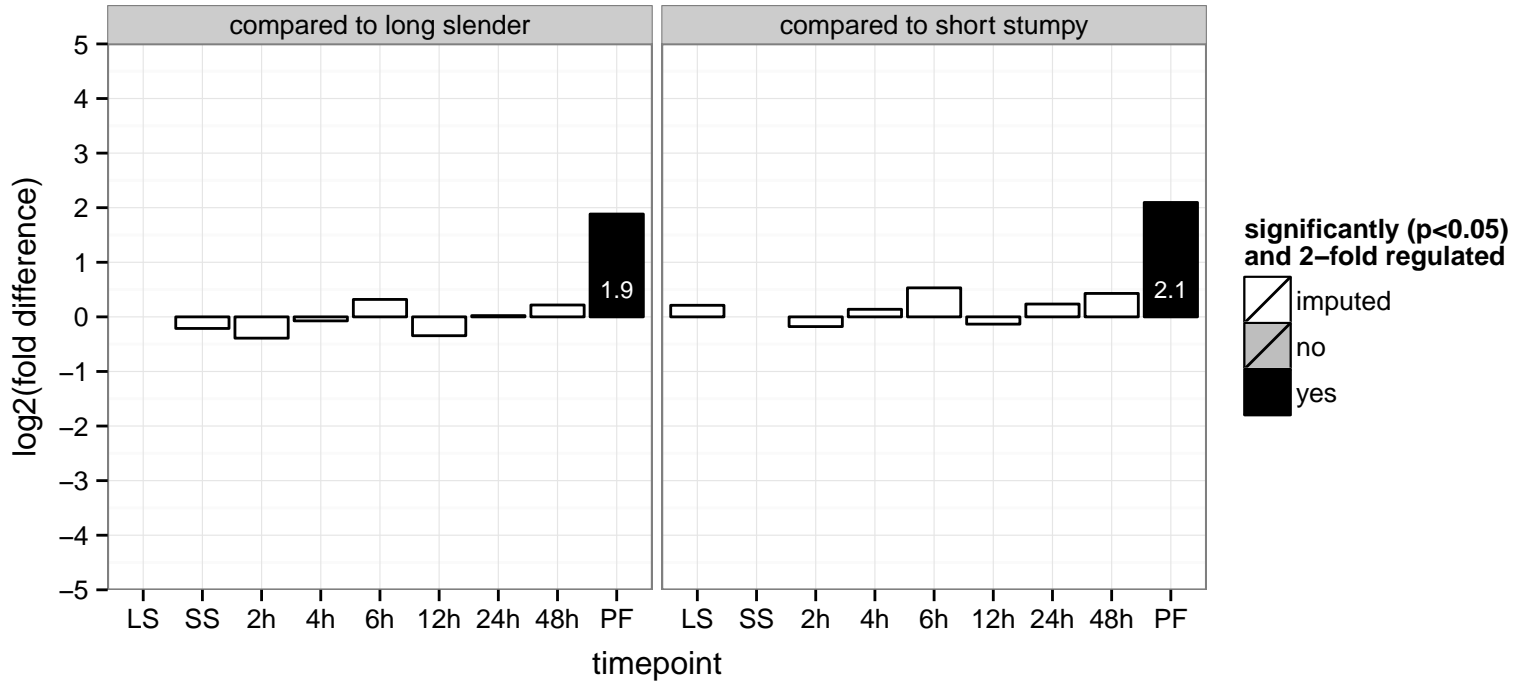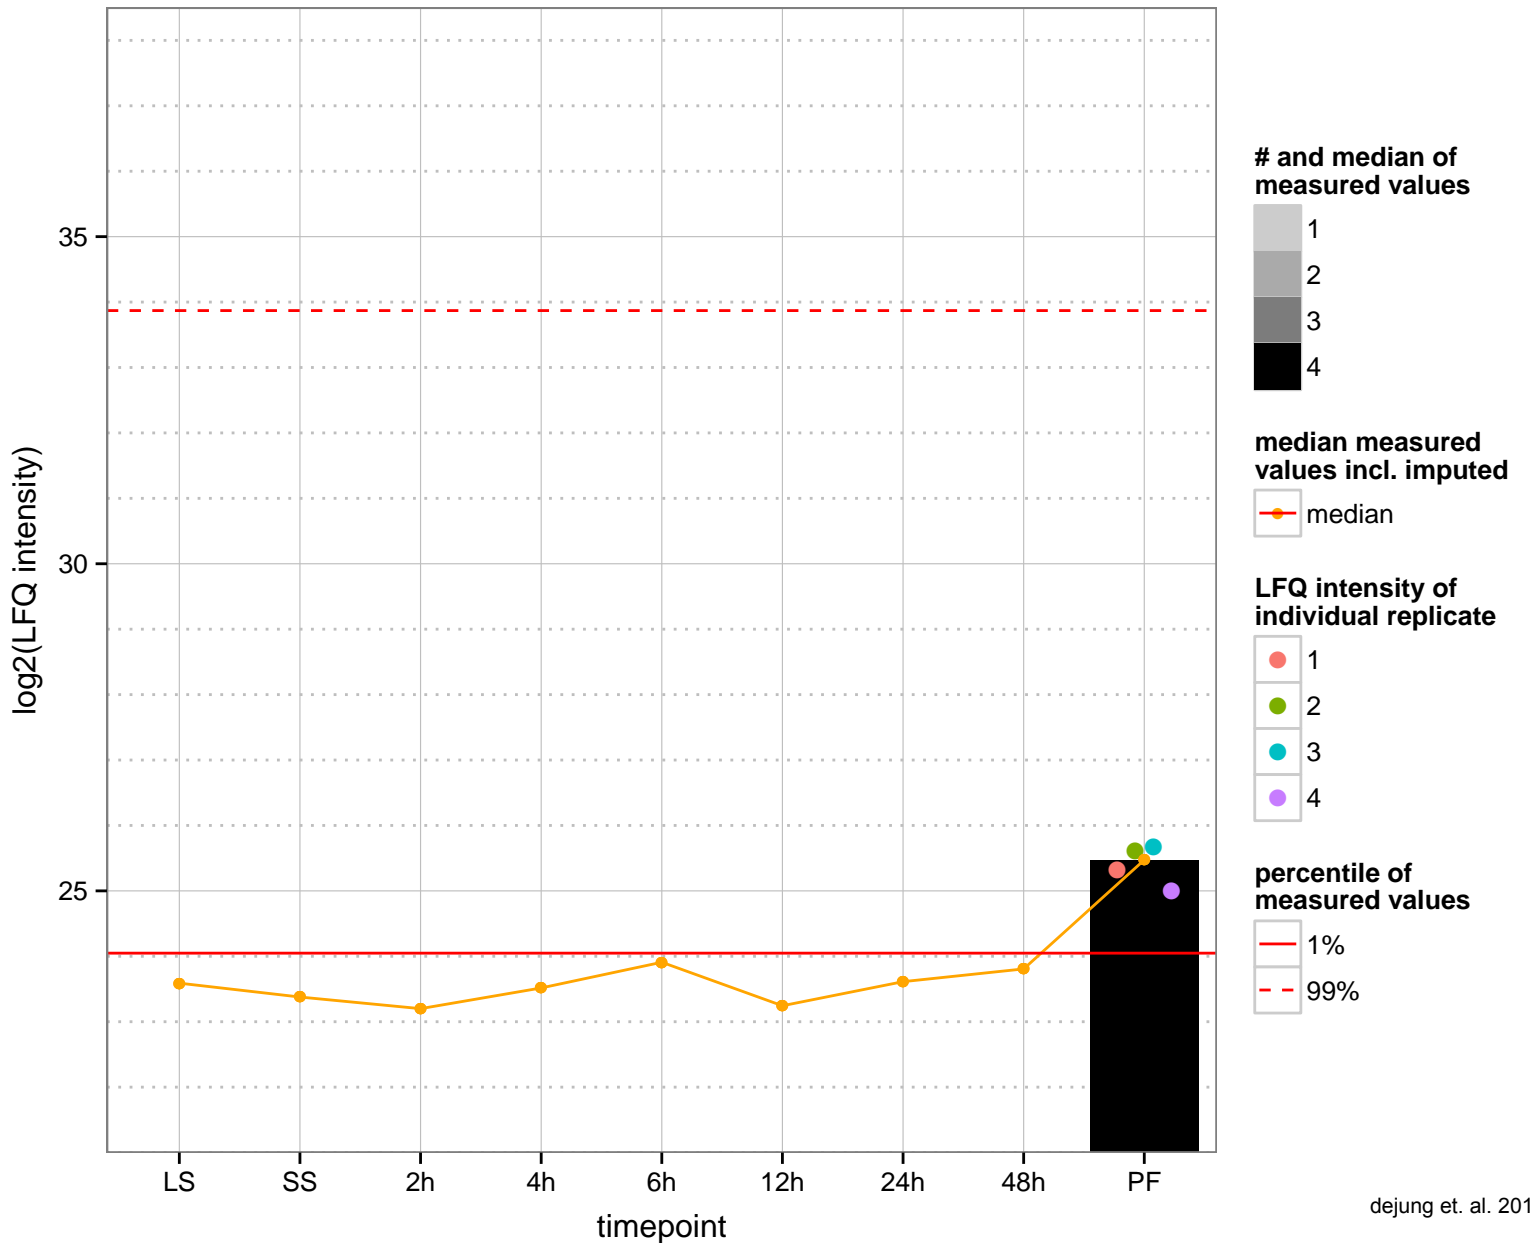

hypothetical protein, conserved  
 Tb927.8.3820  
 AGOF: null  
 AGOC: null  
 AGOP: null  
 PGO: null  
 PGOC: null  
 PGOP: null

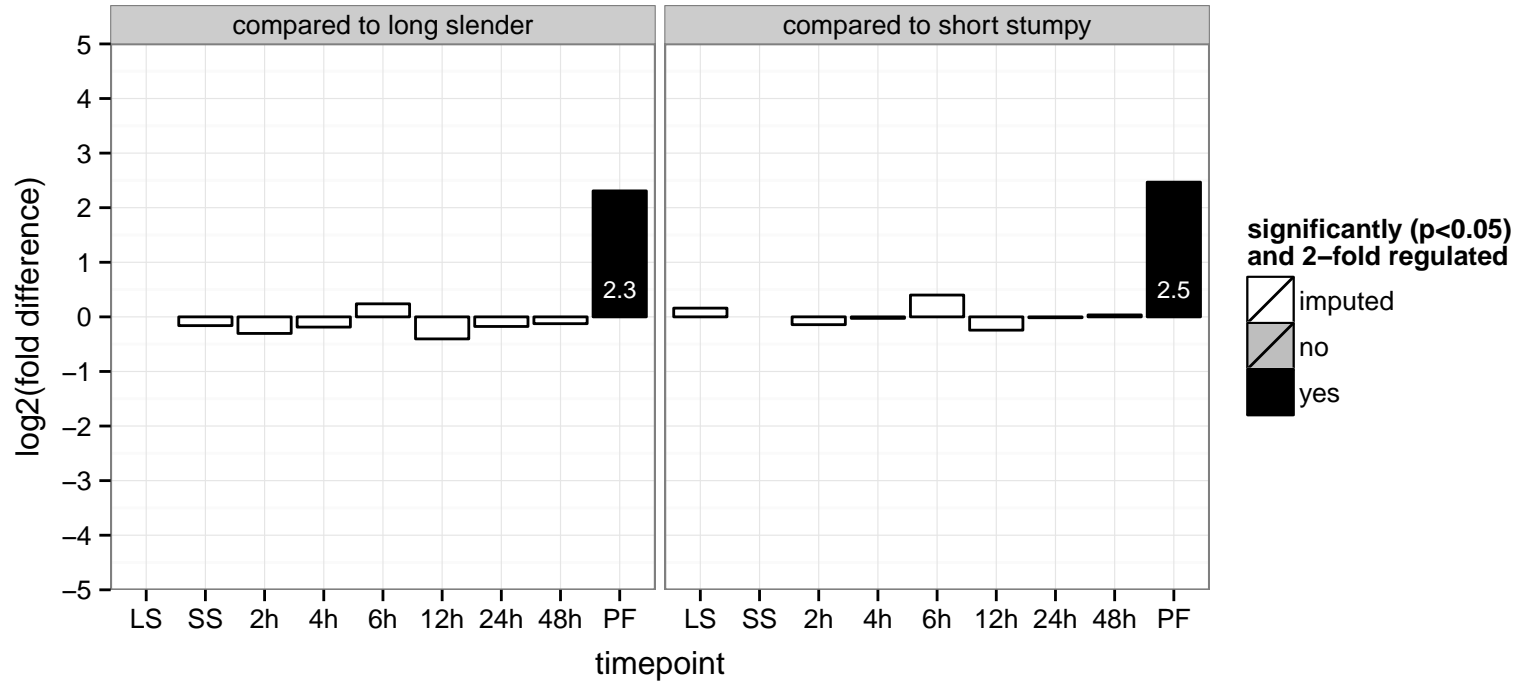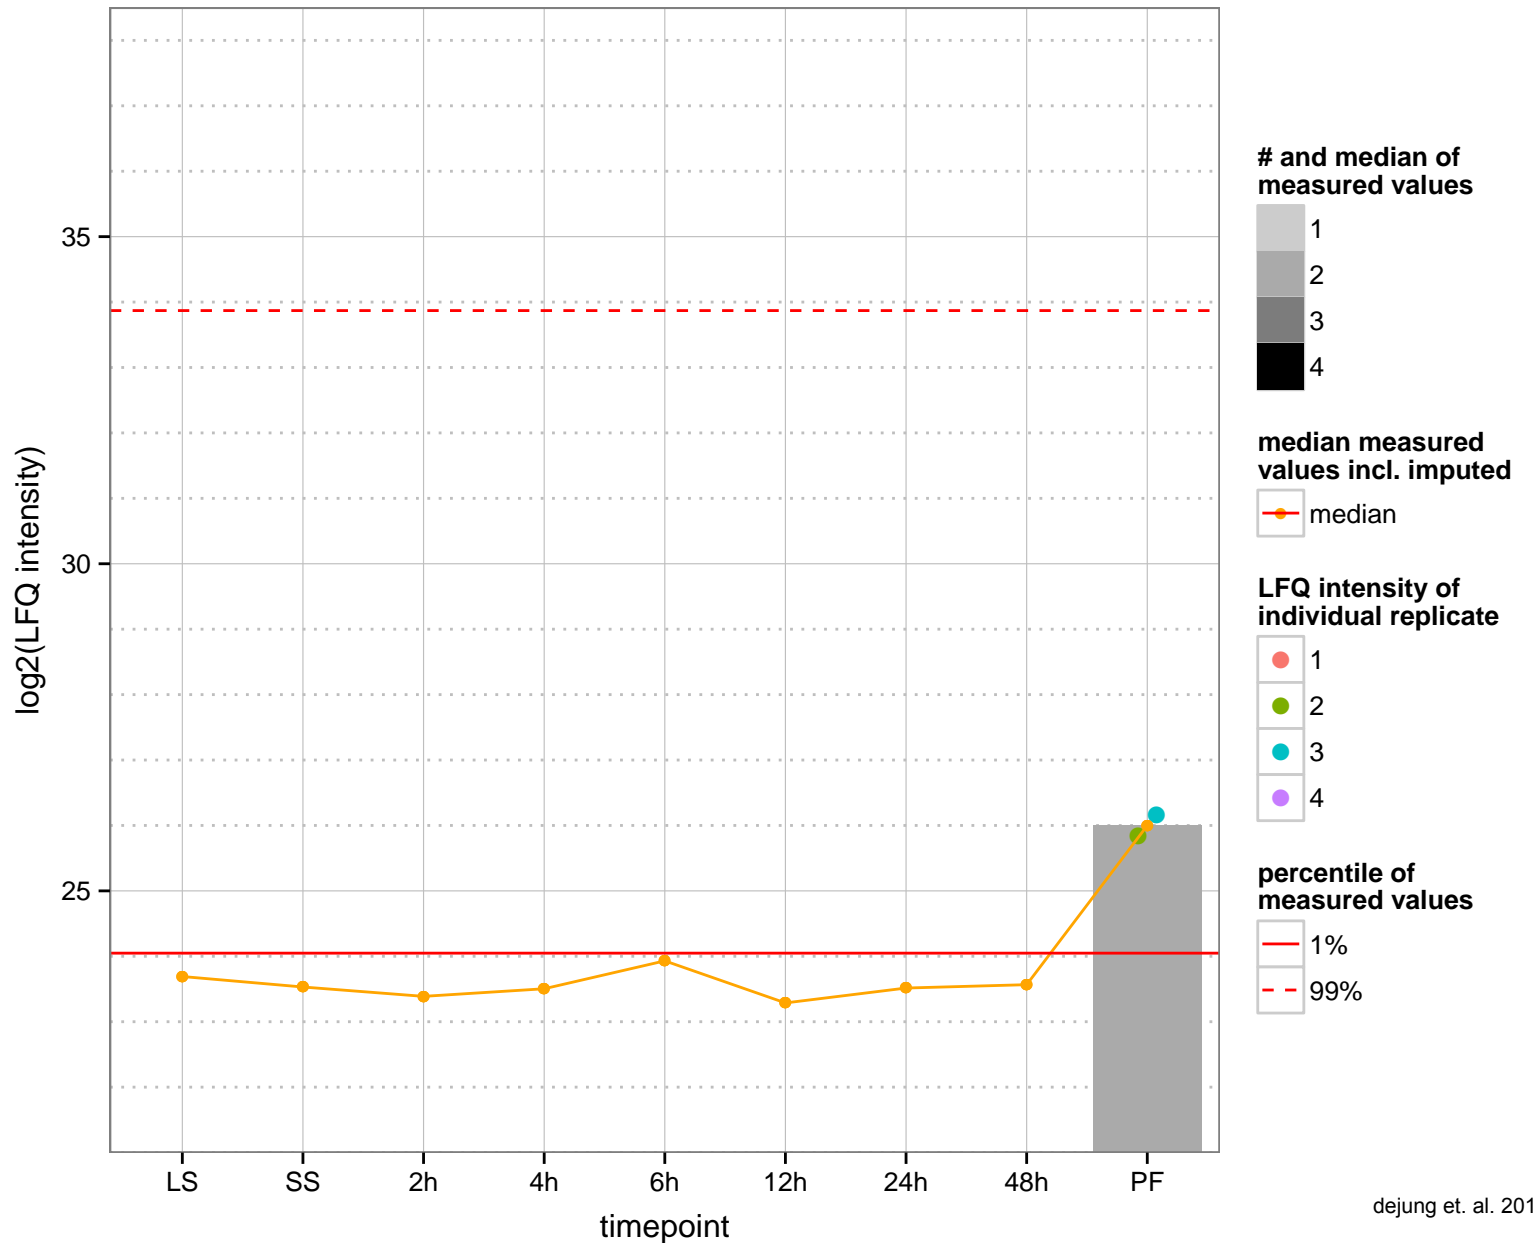

hypothetical protein, conserved  
 Tb927.8.4240  
 AGOF: null  
 AGOC: mitochondrion  
 AGOP: null  
 PGO: null  
 PGO: null  
 PGO: null

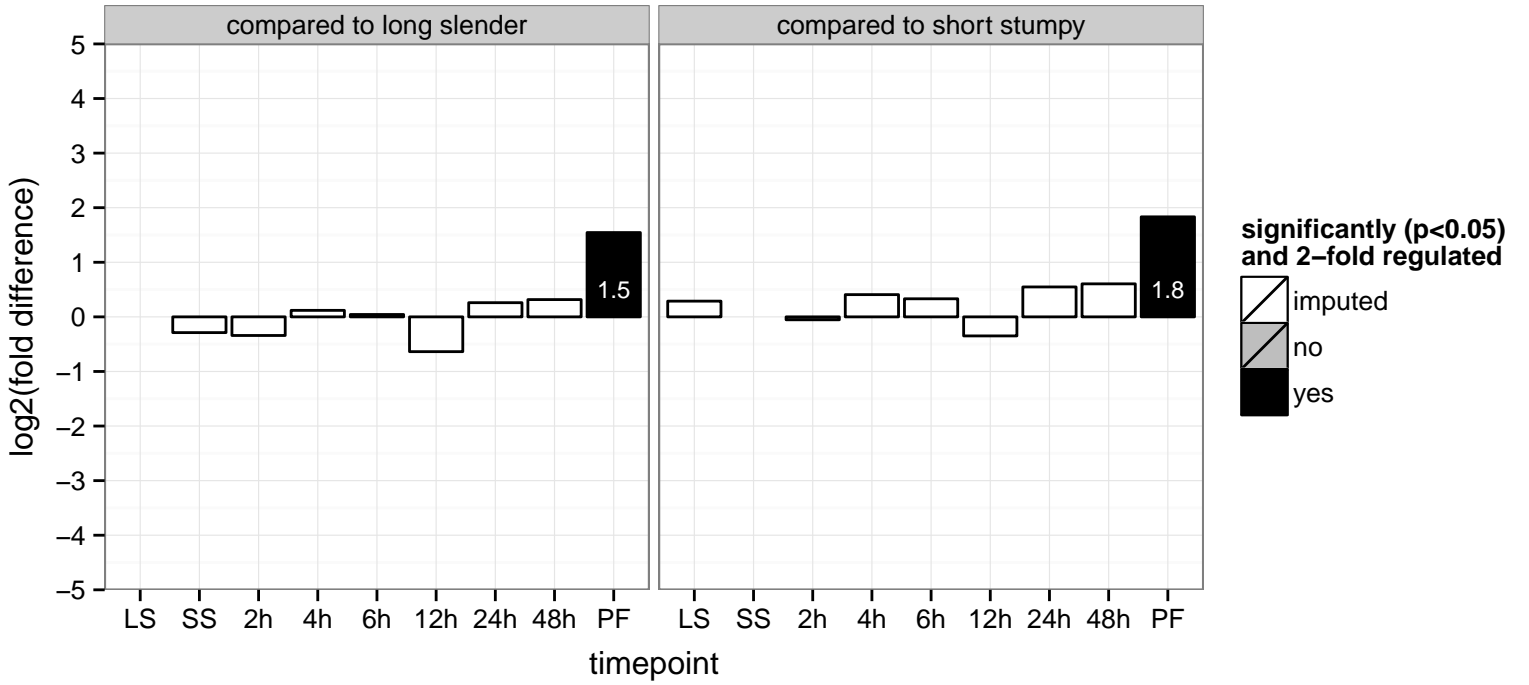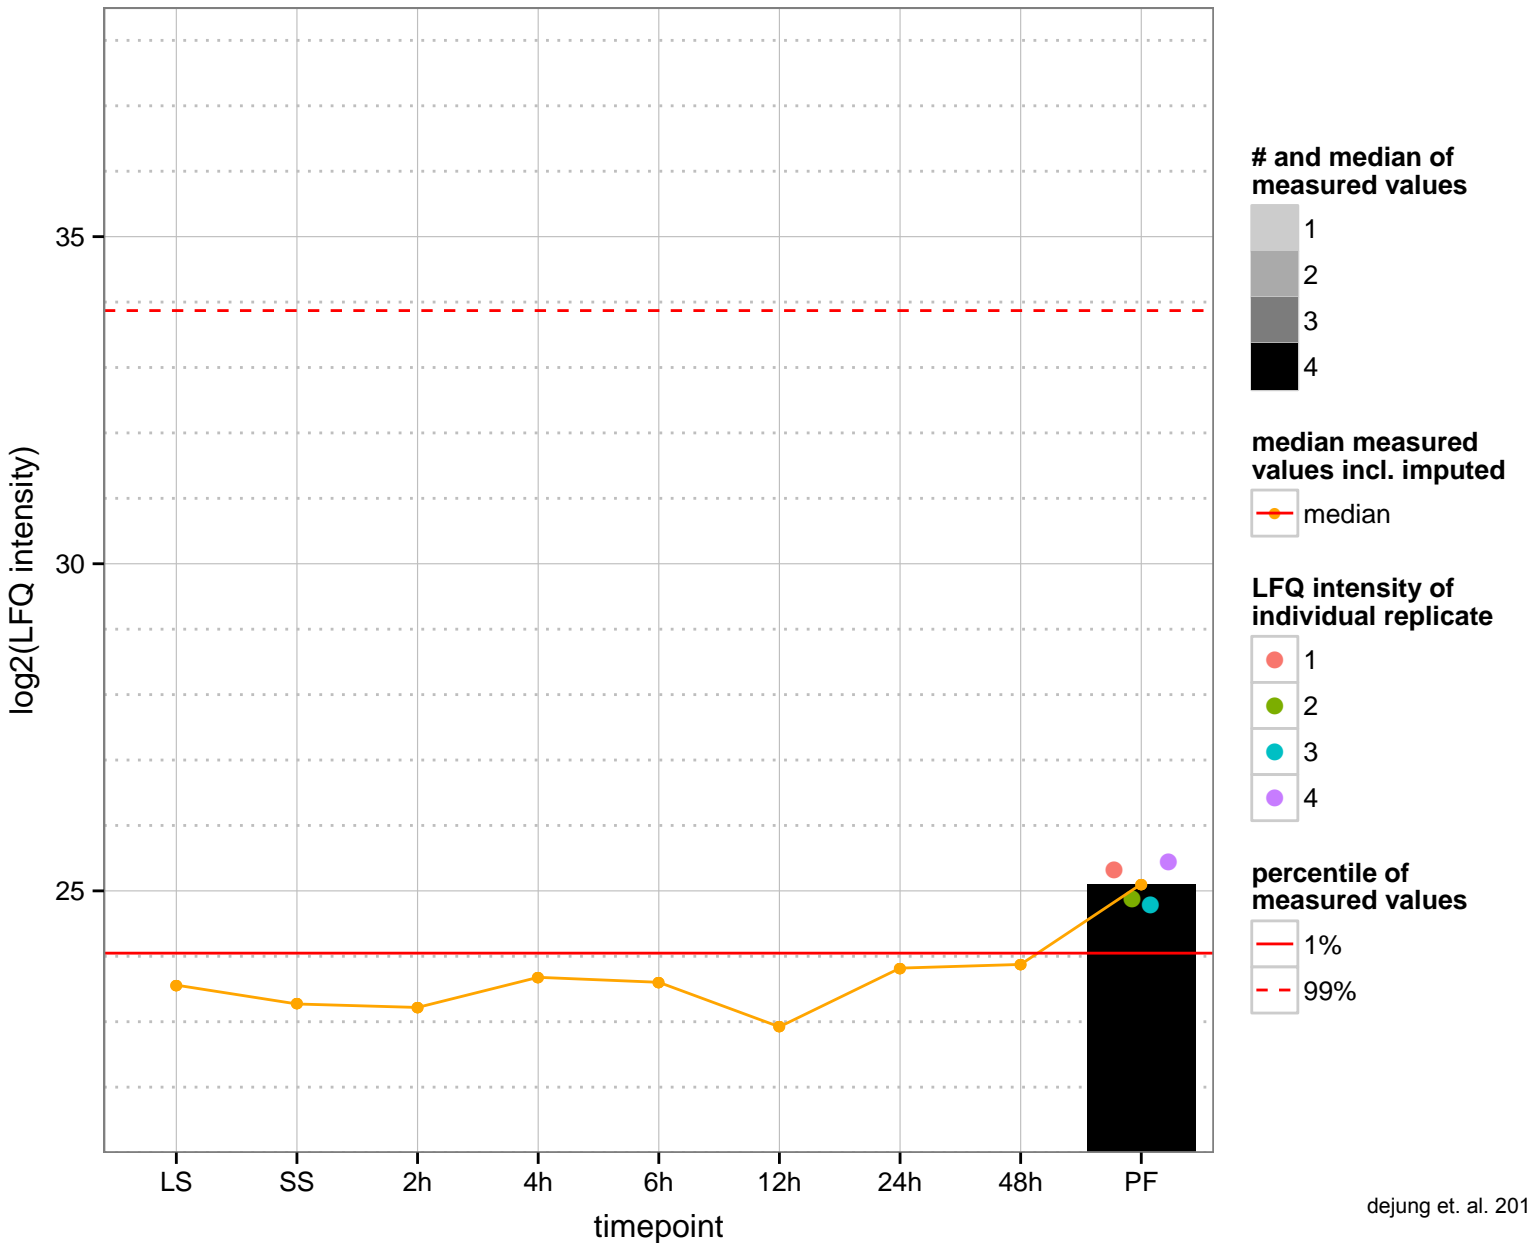

Translation initiation factor eIF-2B subunit beta, putative (EIF2BB)

Tb927.8.4390

AGOF: GTP binding, translation initiation factor activity

AGOC: eukaryotic translation initiation factor 2B complex

AGOP: cellular metabolic process, translational initiation

PGOF: null

PGOC: null

PGOP: cellular metabolic process

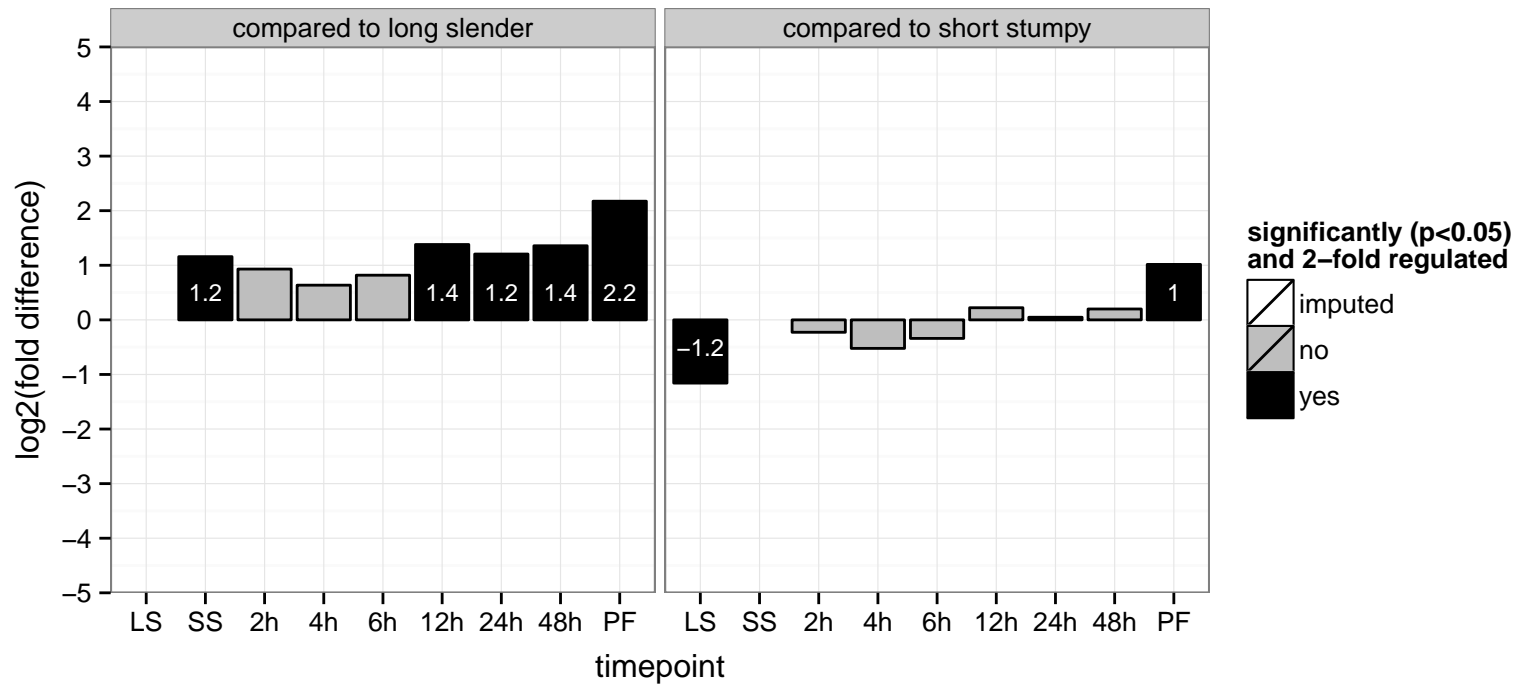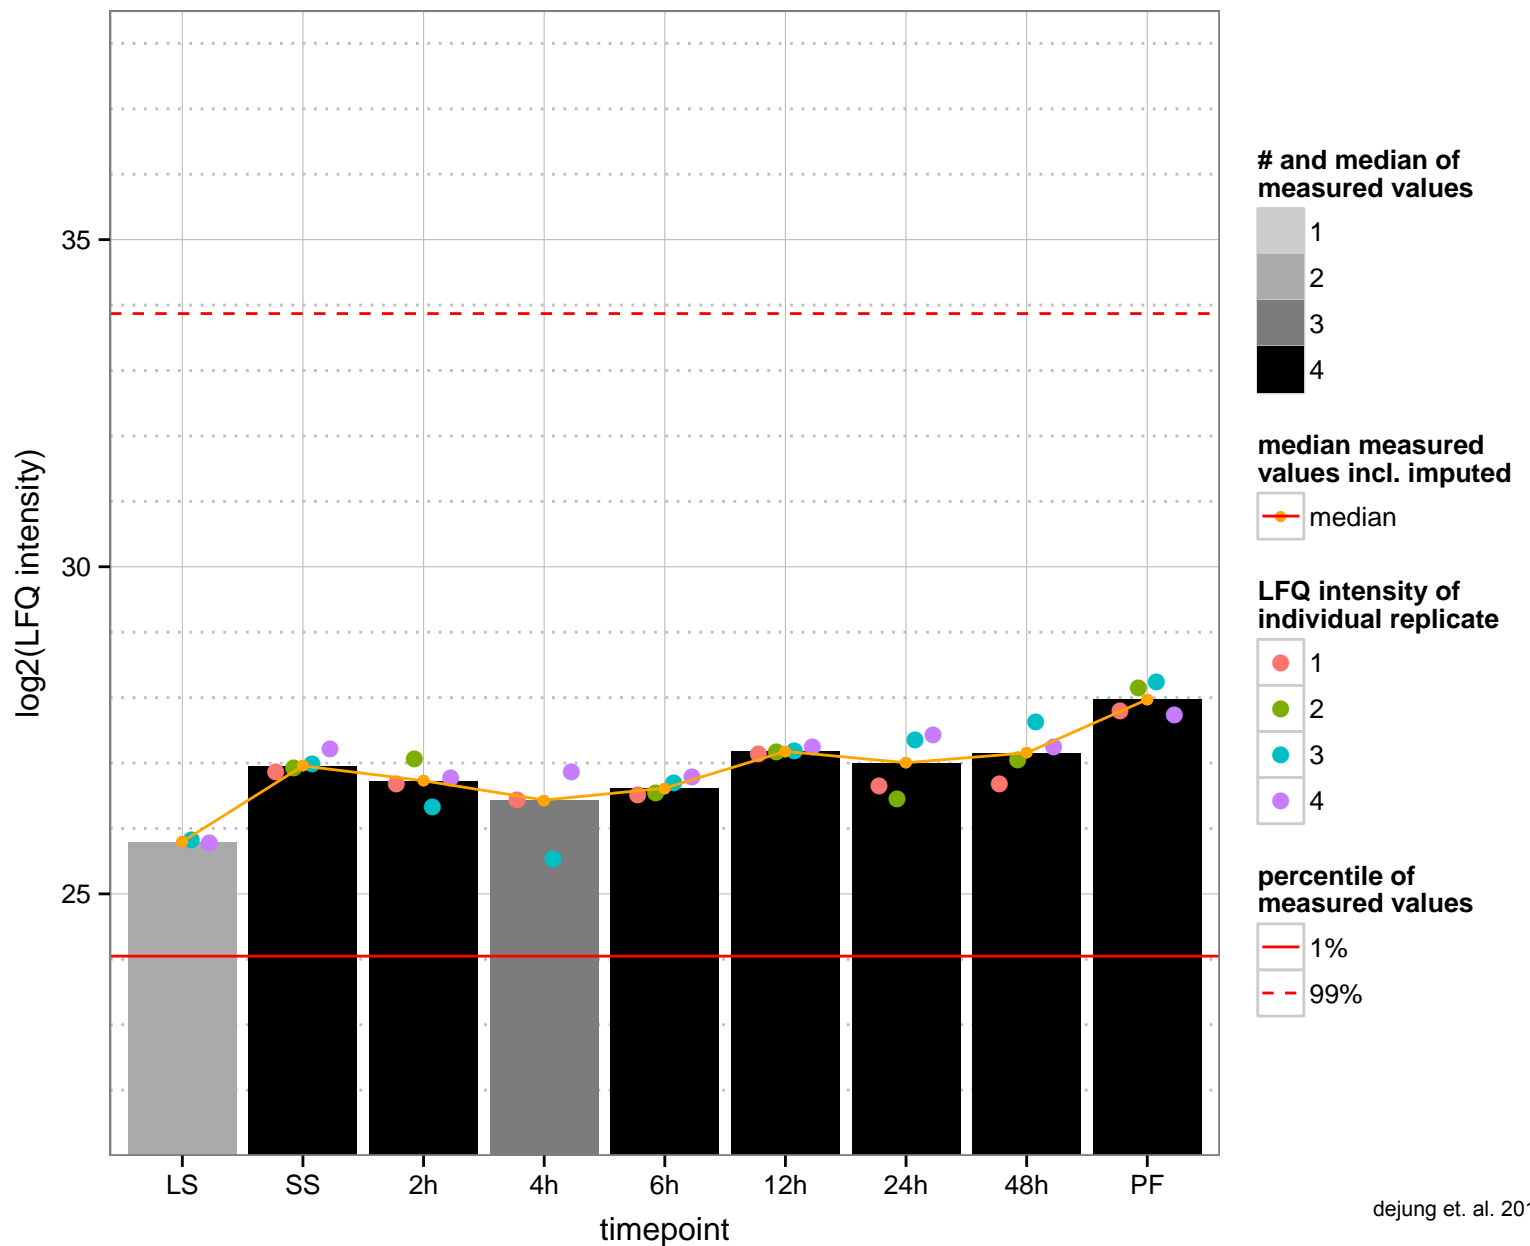

hypothetical protein, conserved  
 Tb927.8.4800  
 AGOF: null  
 AGOC: null  
 AGOP: null  
 PGO: protein binding  
 PGOC: null  
 PGOP: null

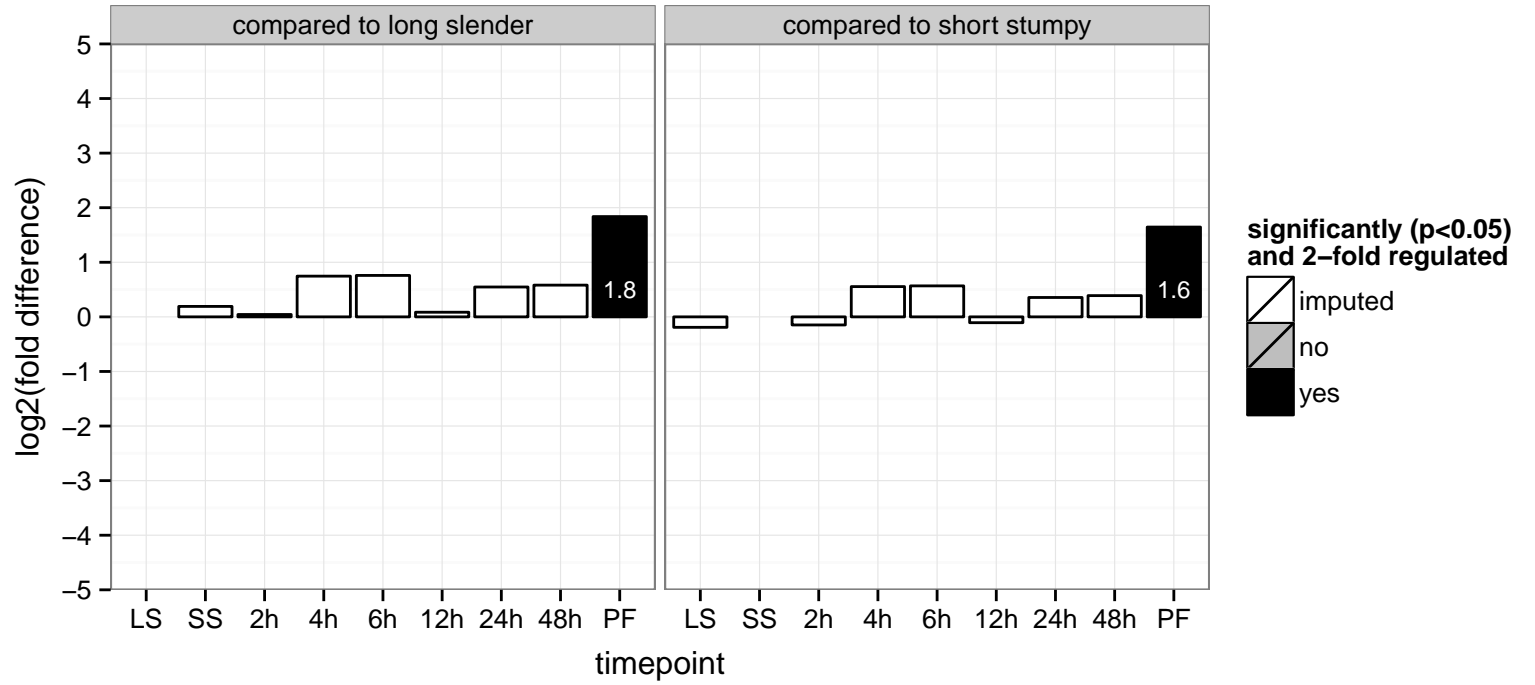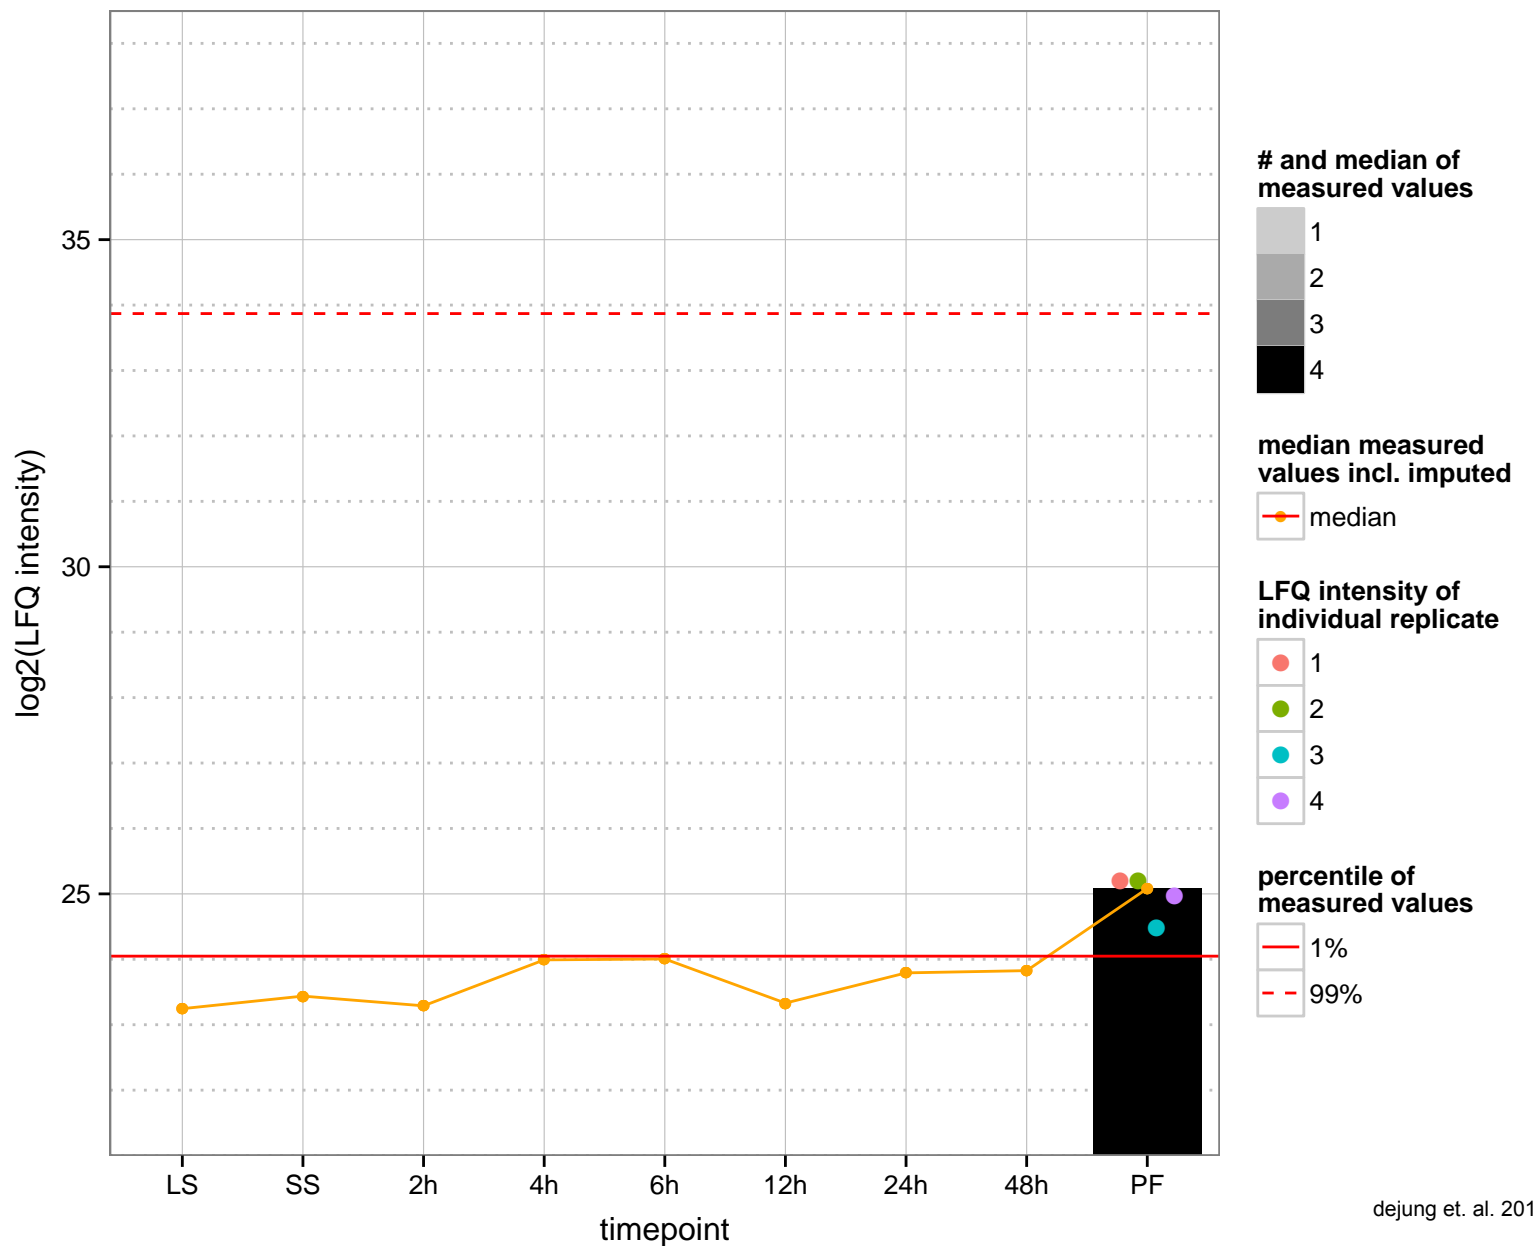



hypothetical protein, conserved  
 Tb927.8.4930  
 AGOF: null  
 AGOC: mitochondrion  
 AGOP: null  
 PGO: null  
 PGO: null  
 PGO: null

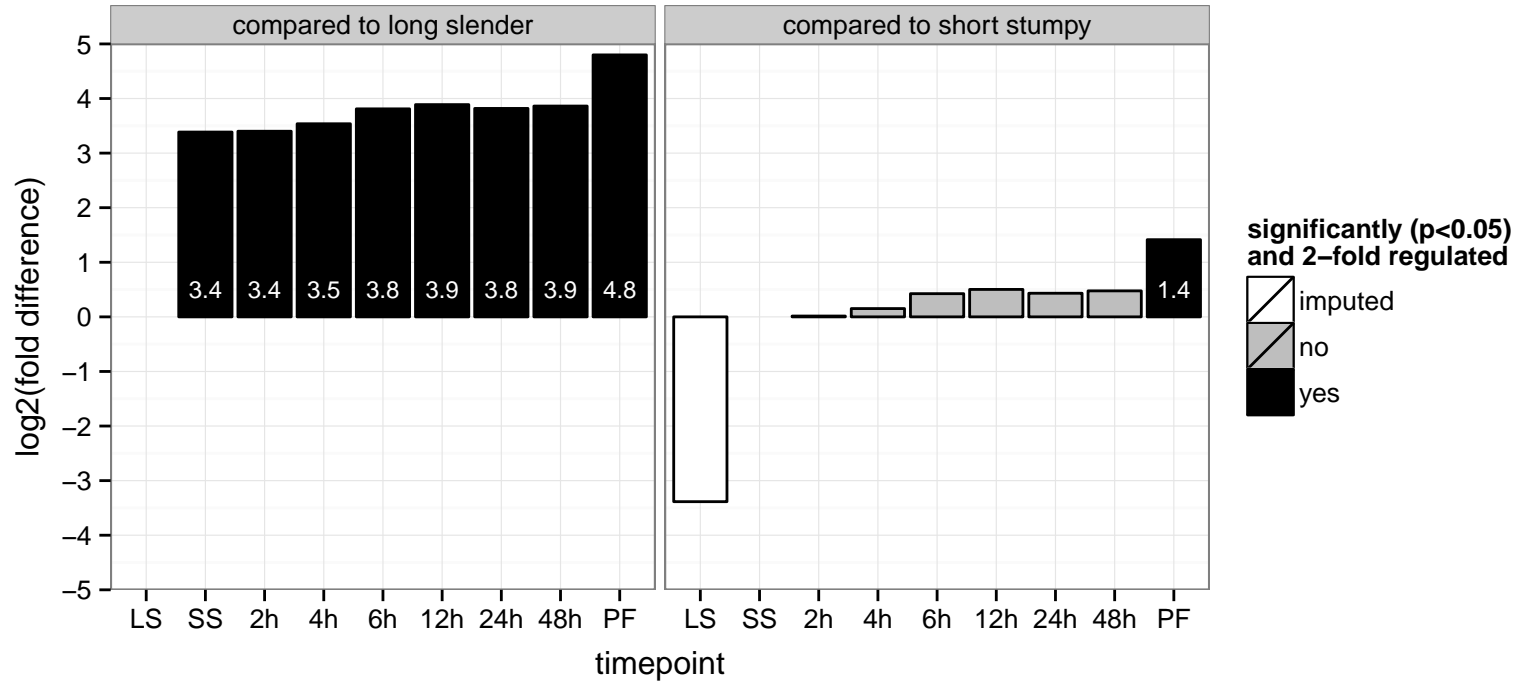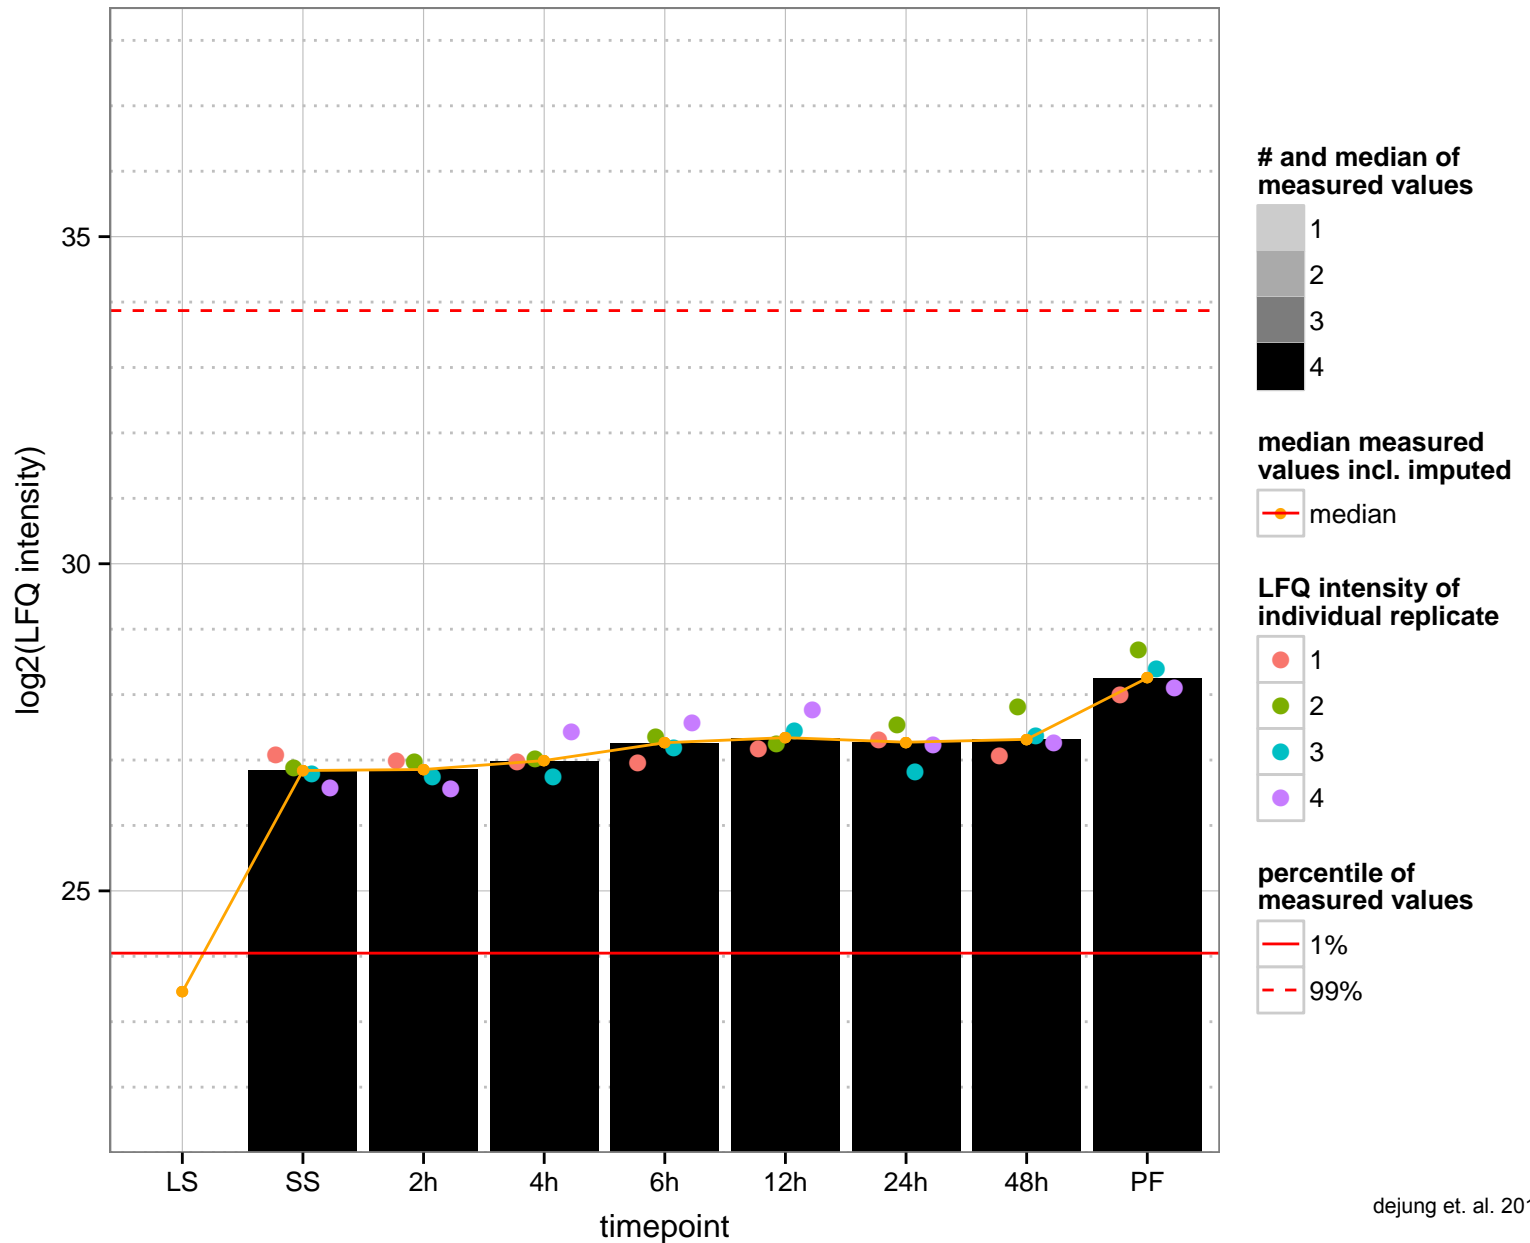

hypothetical protein, conserved  
 Tb927.8.5040  
 AGOF: null  
 AGOC: nucleus  
 AGOP: null  
 PGO: methyltransferase activity  
 PGO: null  
 PGO: null

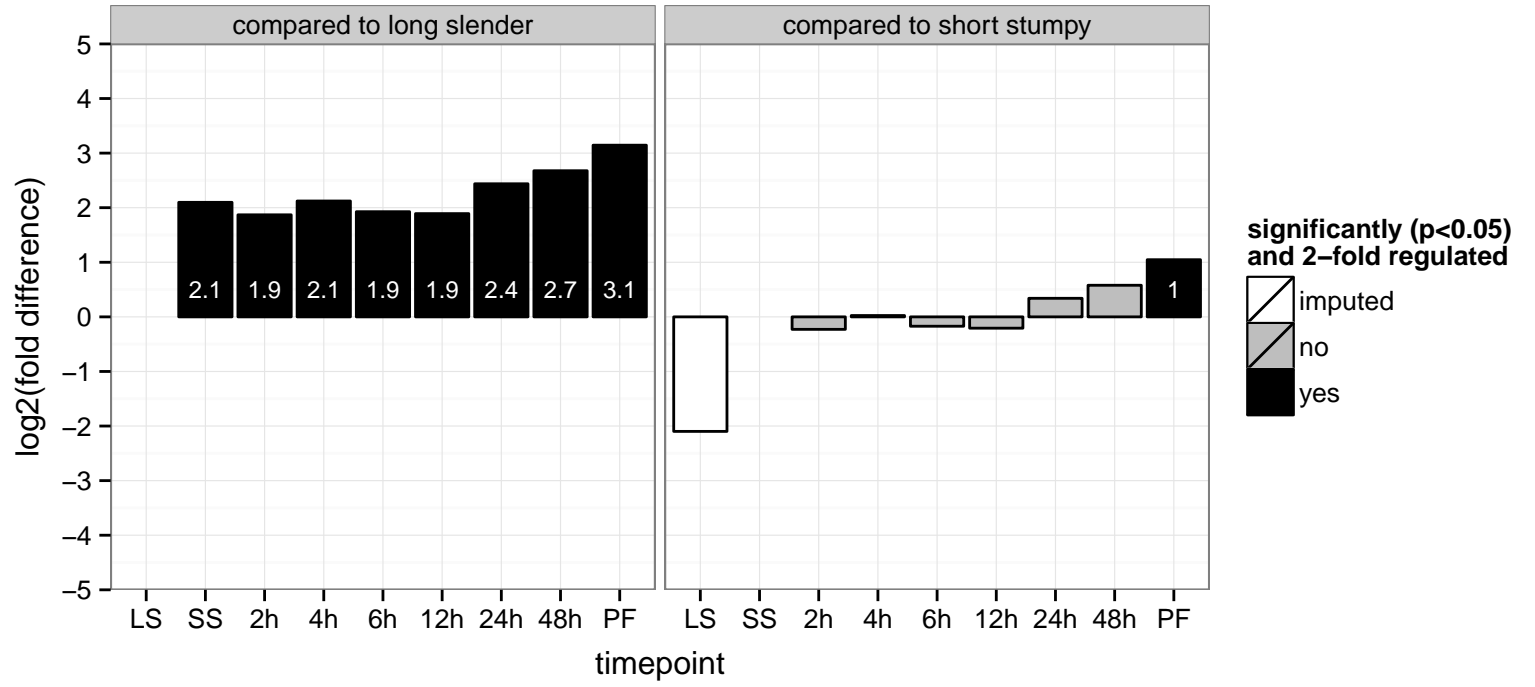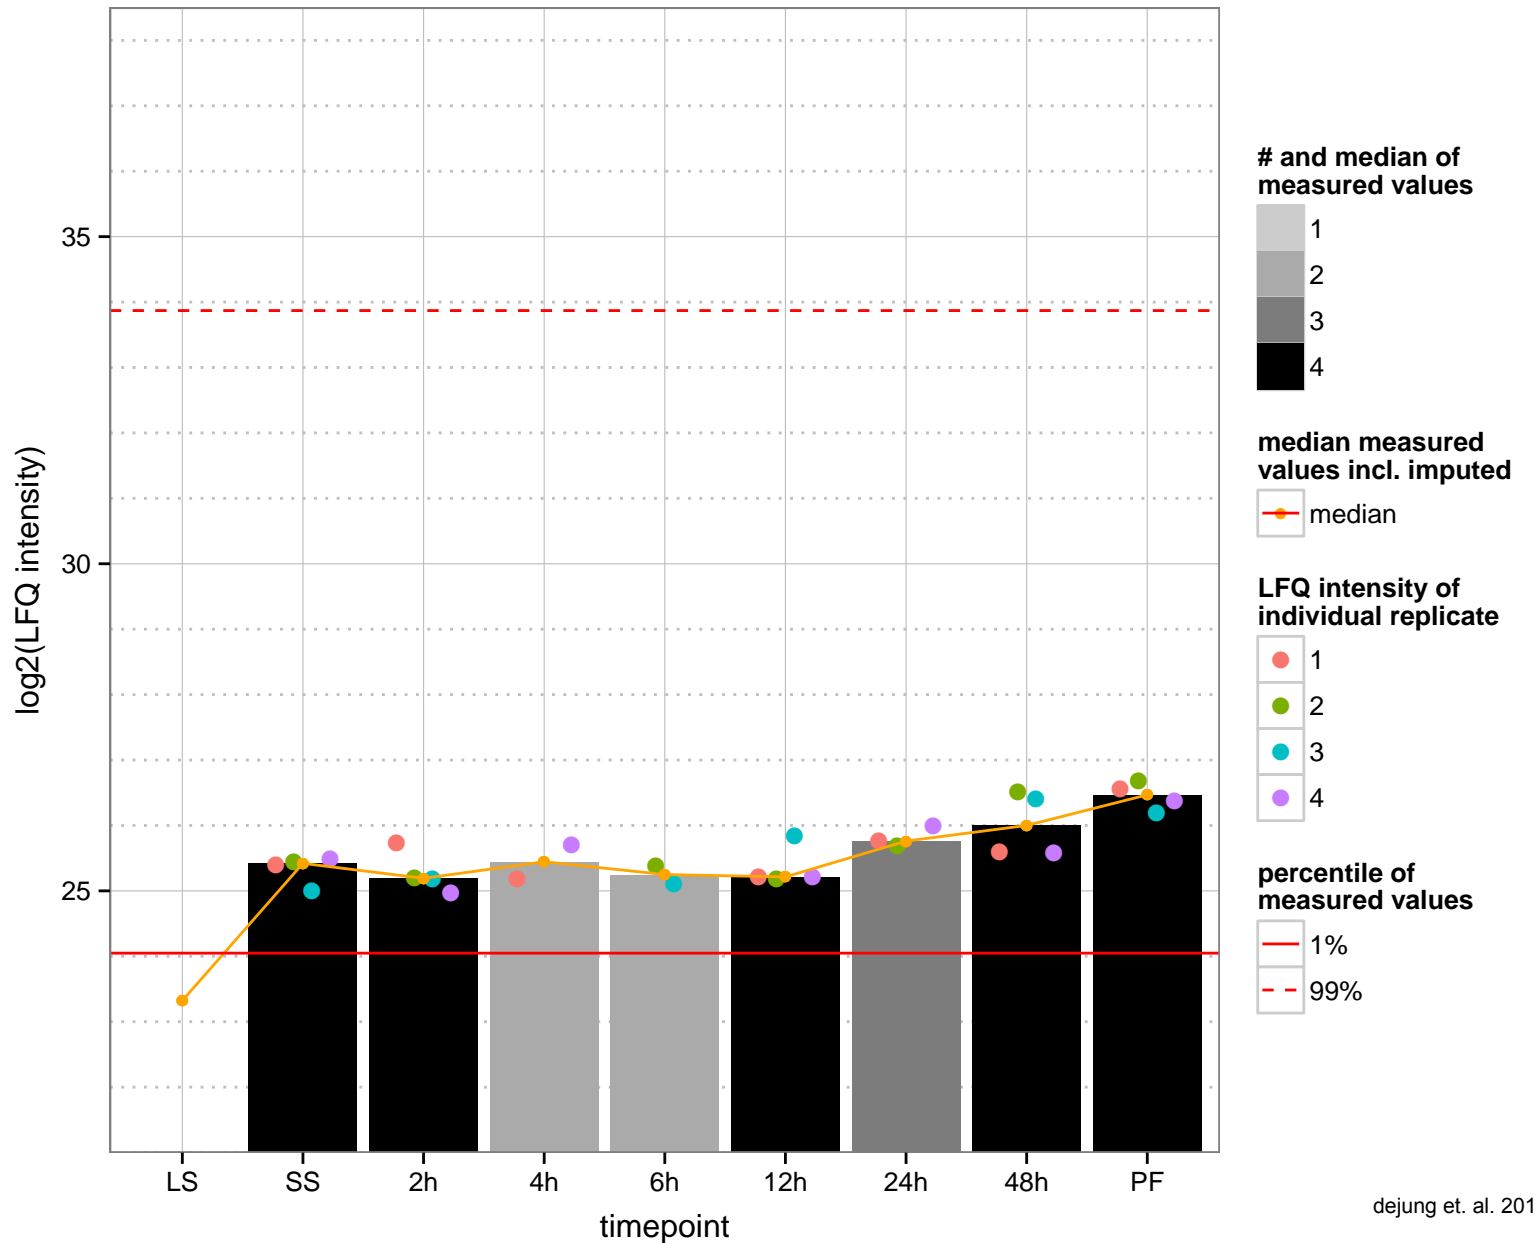

hypothetical protein, conserved  
 Tb927.8.5100  
 AGOF: null  
 AGOC: mitochondrion  
 AGOP: null  
 PGO: null  
 PGO: null  
 PGO: null

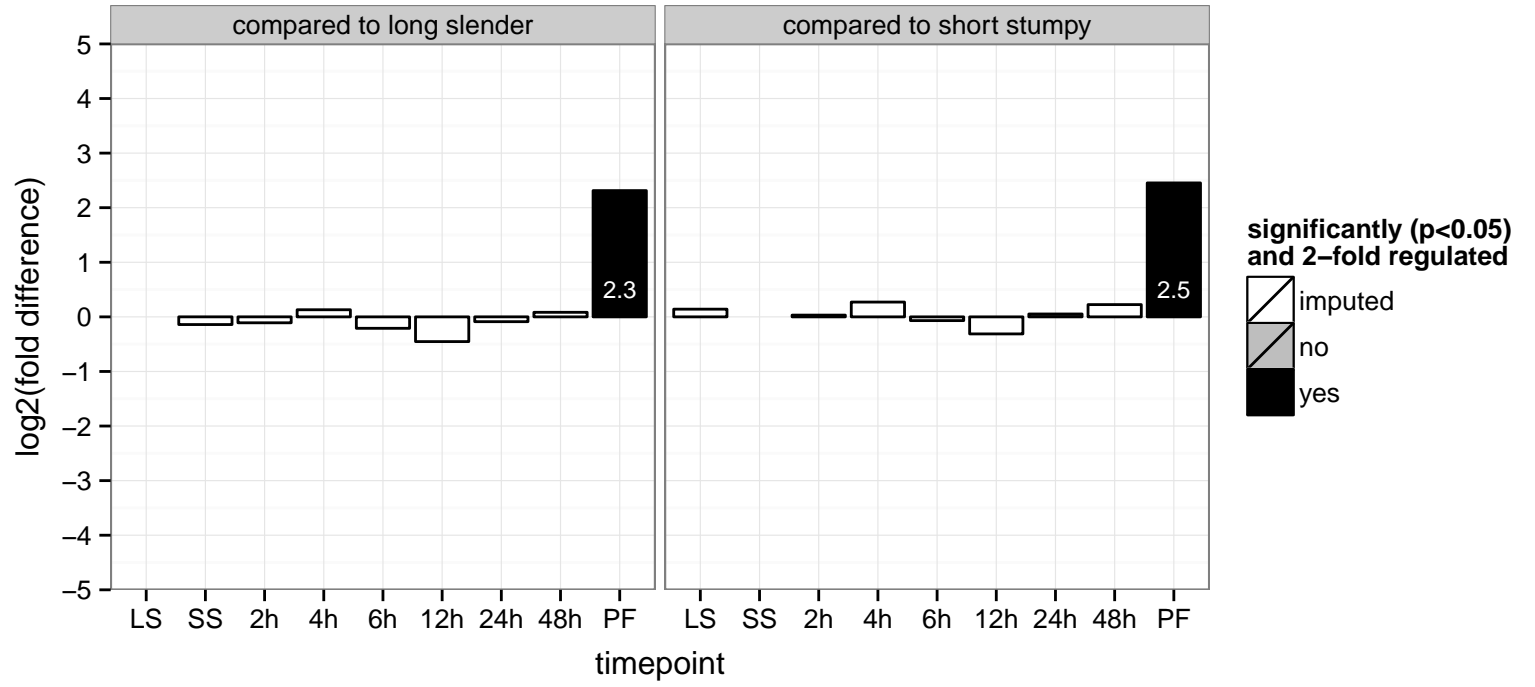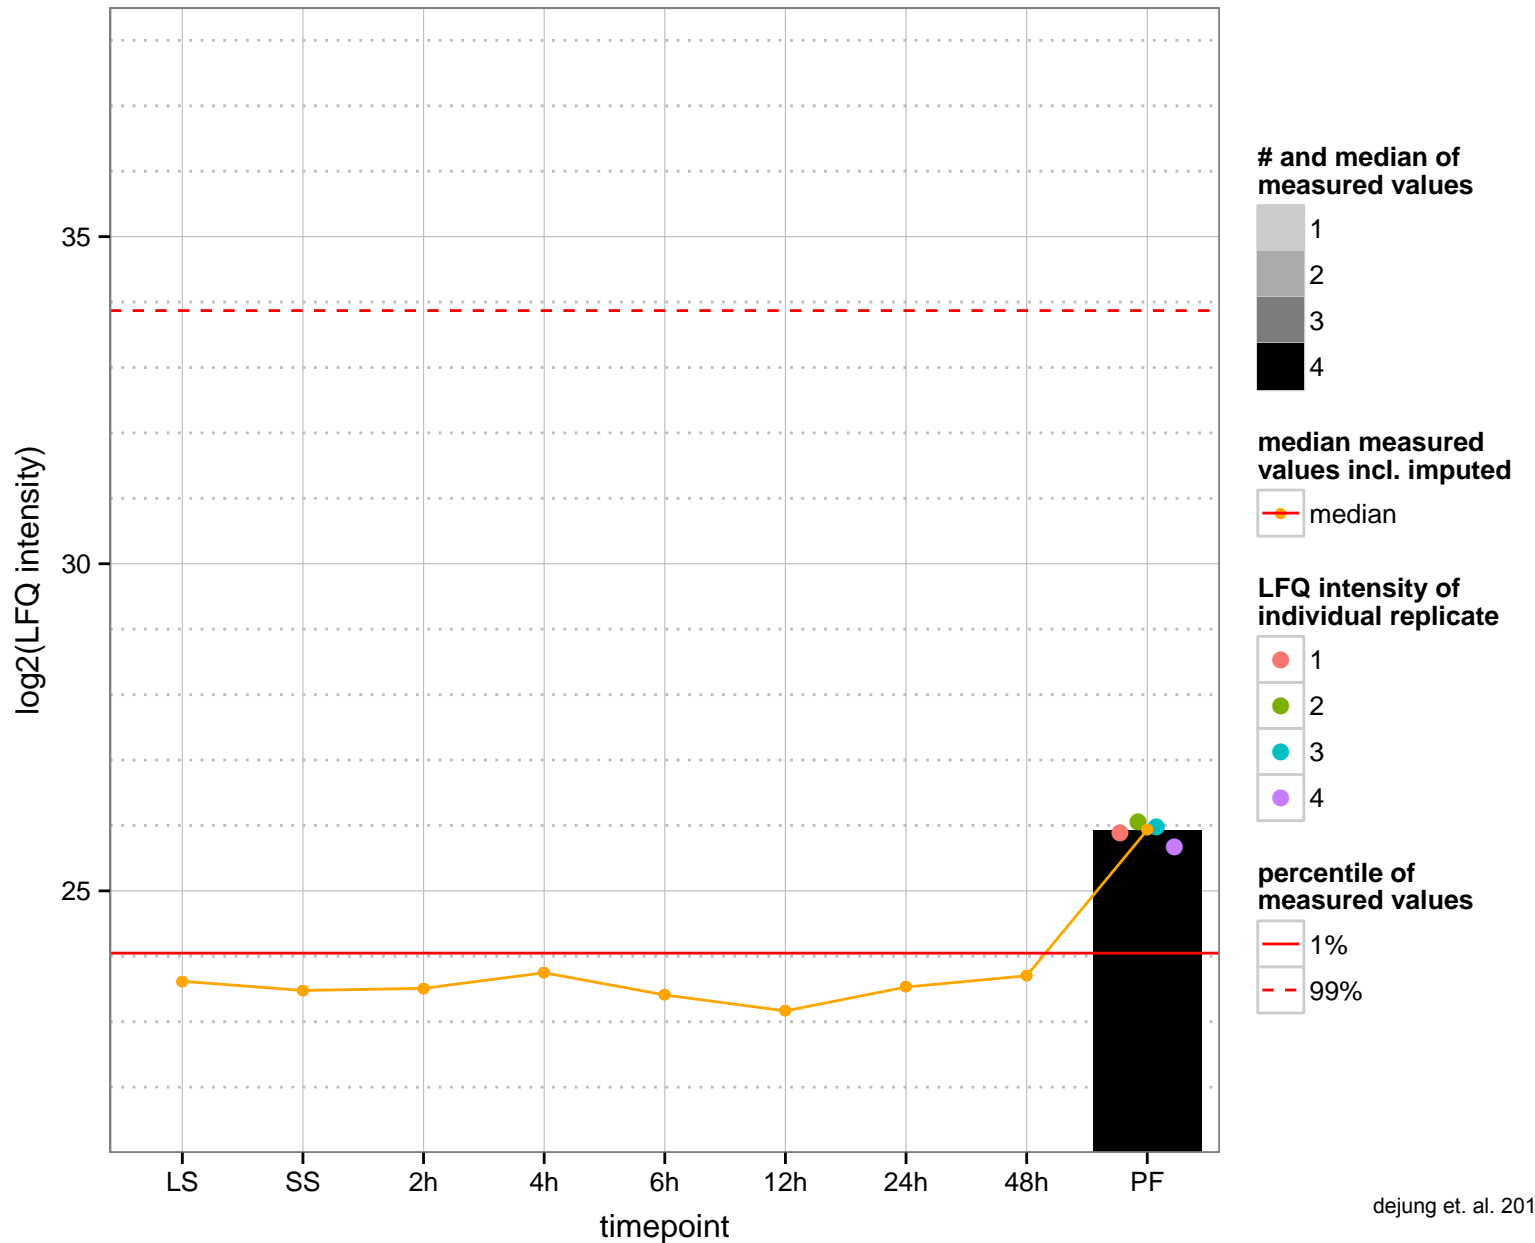

hypothetical protein, conserved  
 Tb927.8.5320  
 AGOF: null  
 AGOC: null  
 AGOP: null  
 PGOF: null  
 PGO C: null  
 PGOP: null

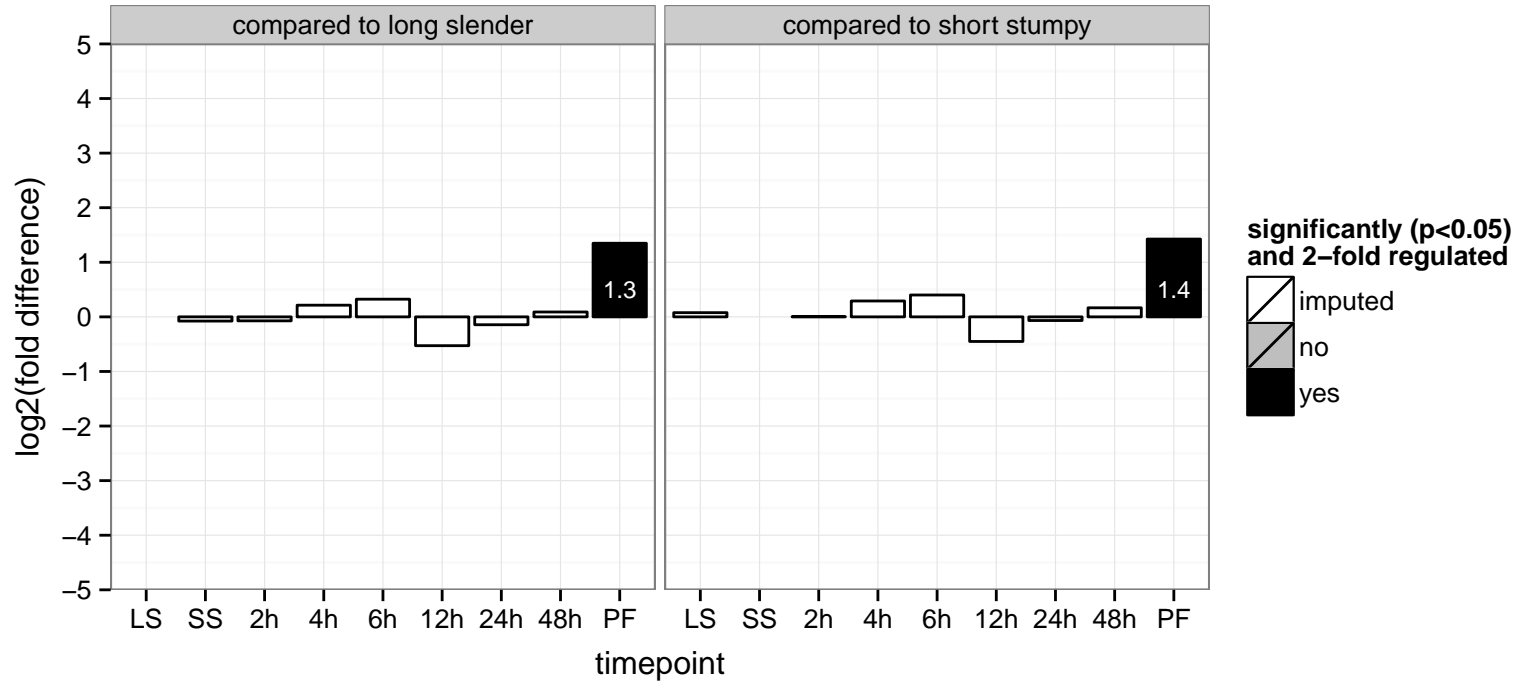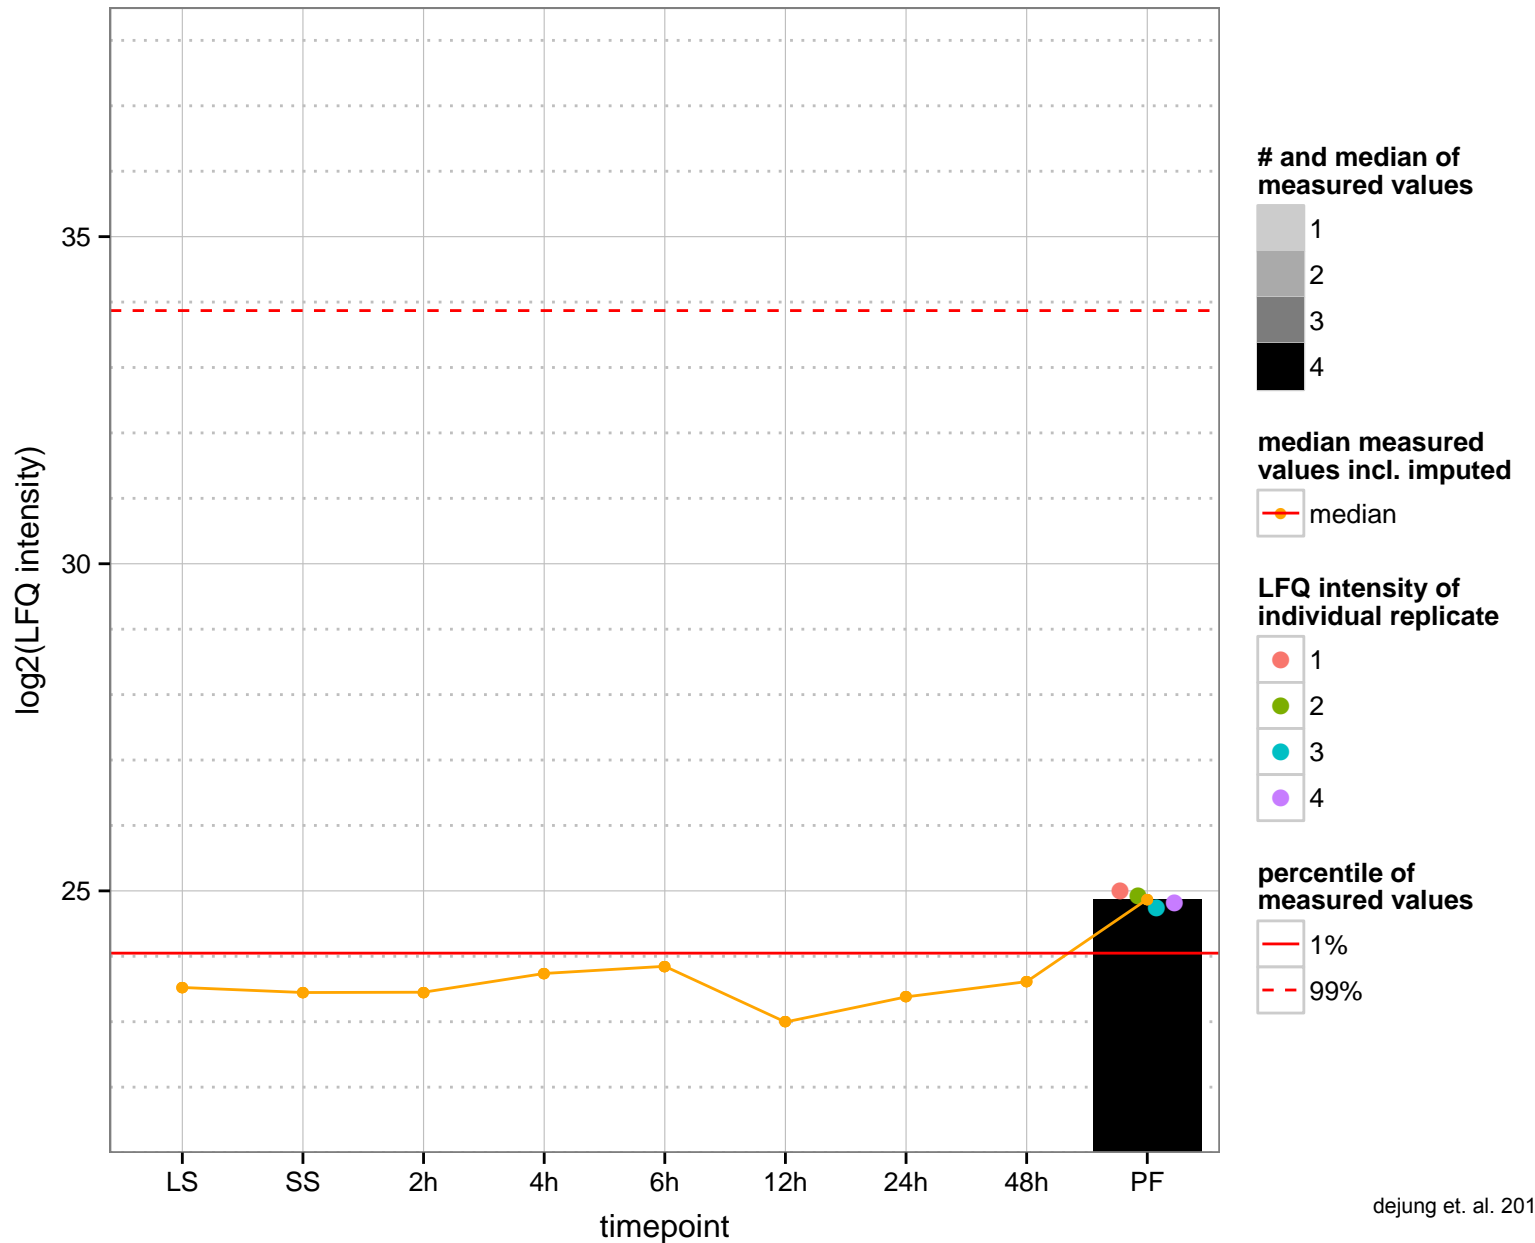

amino acid permease 24 (AAT6)

Tb927.8.5450

AGOF: L-proline transmembrane transporter activity, alanine transmembrane transporter activity, drug transmembrane transport

AGOC: integral to membrane, plasma membrane

AGOP: amino acid homeostasis, drug transport, hypotonic response, proline transmembrane transport, regulation of L-glutamate

PGOF: null

PGOC: null

PGOP: null

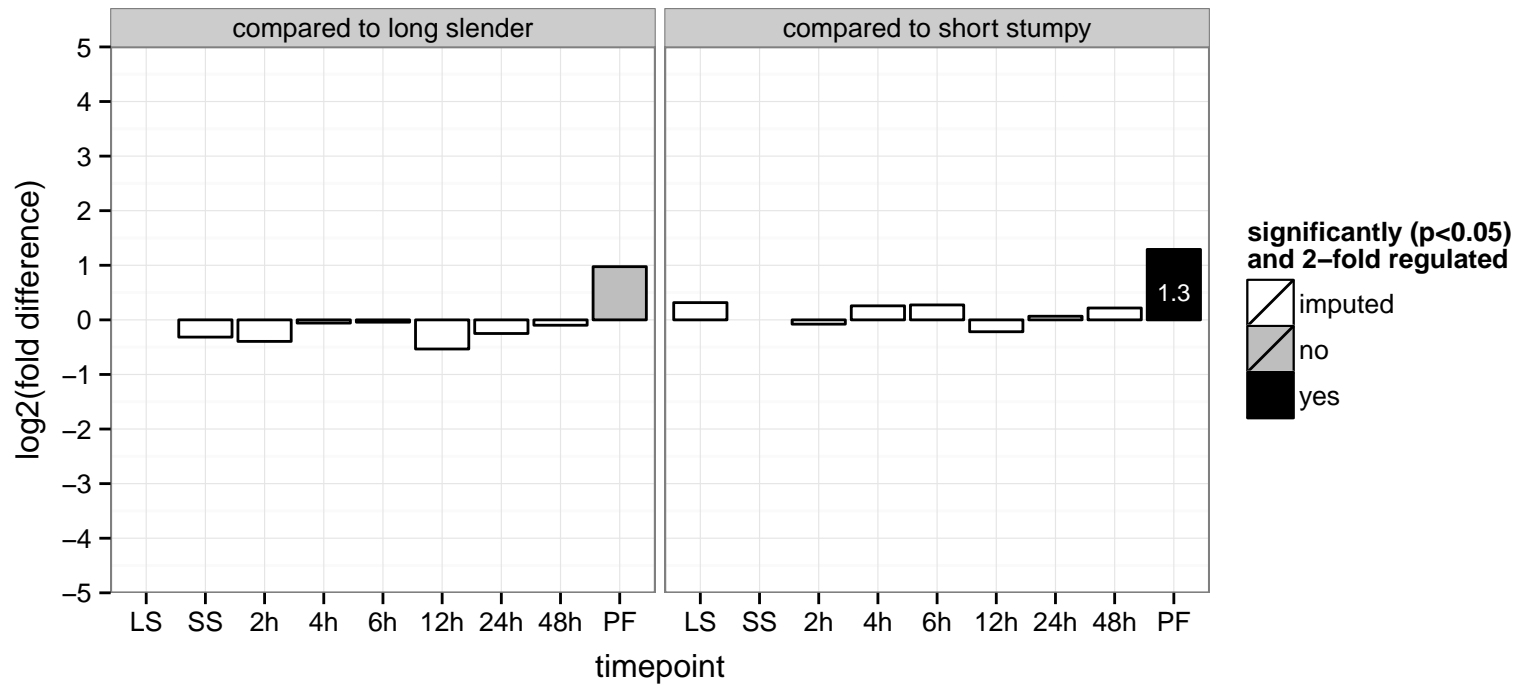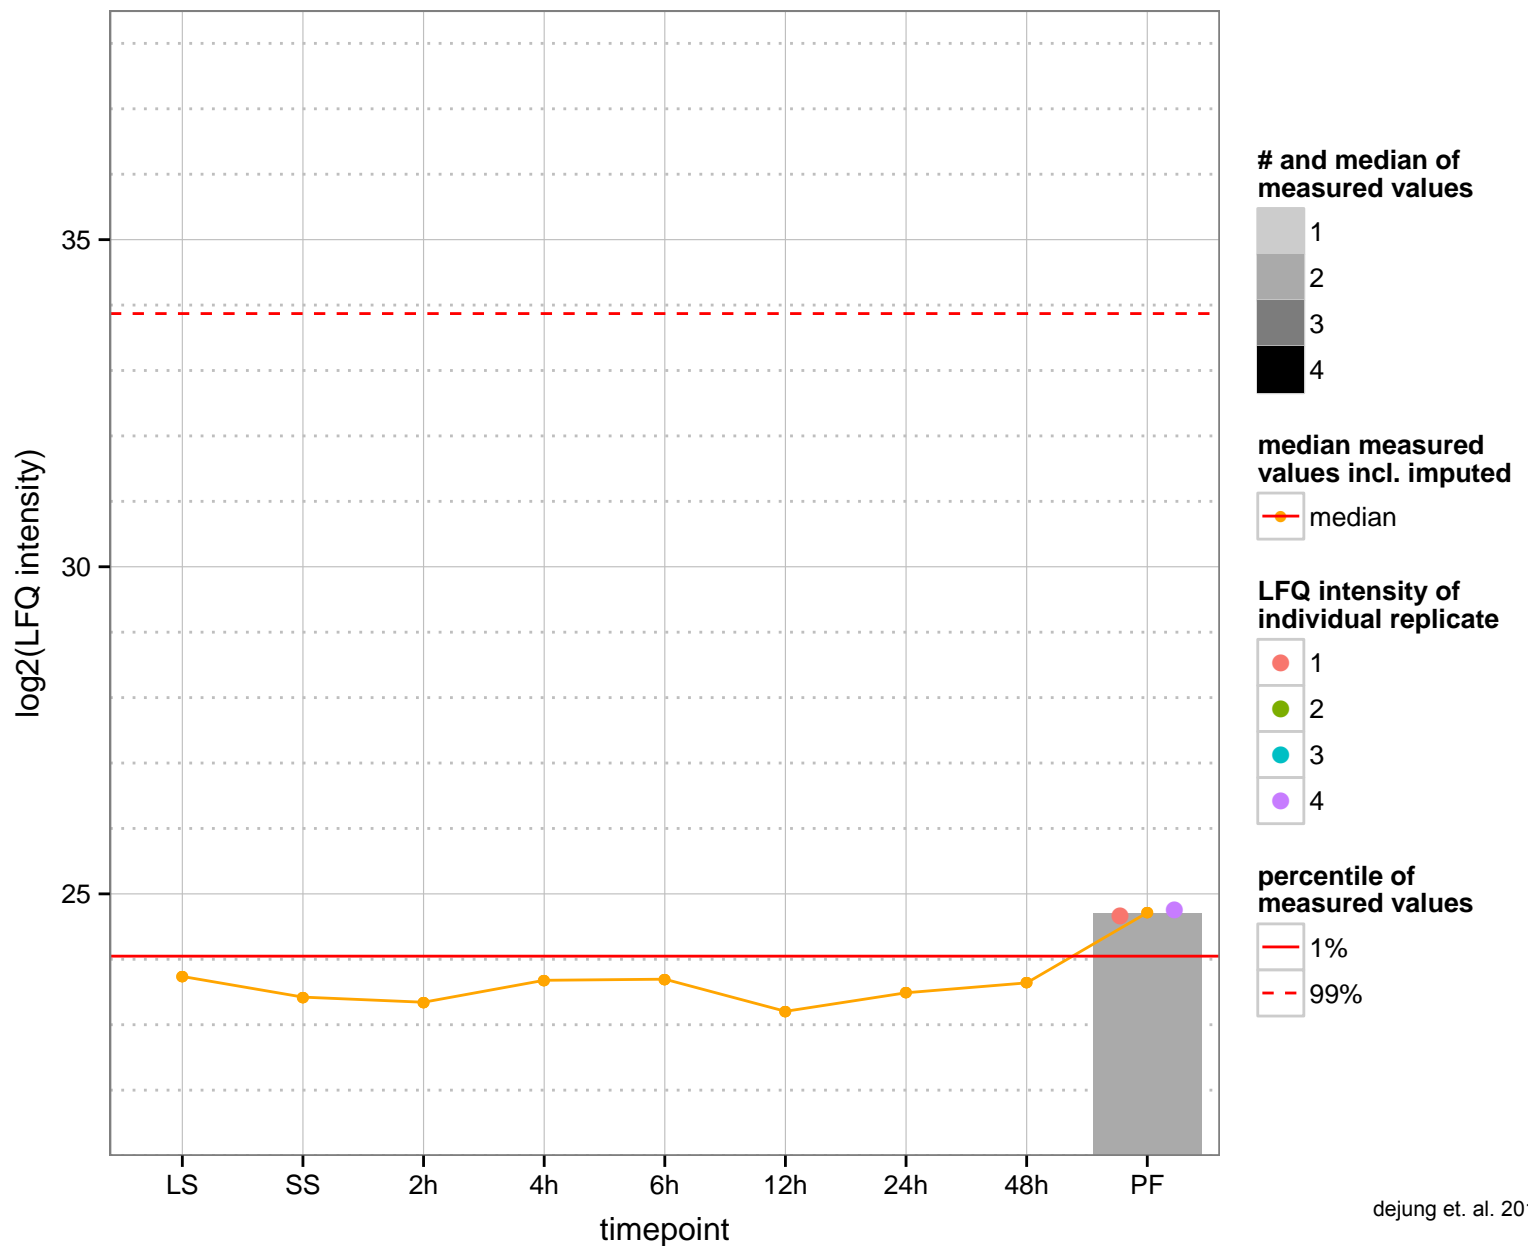

hypothetical protein, conserved  
 Tb927.8.560  
 AGOF: calcium ion binding  
 AGOC: integral to membrane  
 AGOP: null  
 PGOF: null  
 PGOC: null  
 PGOP: null

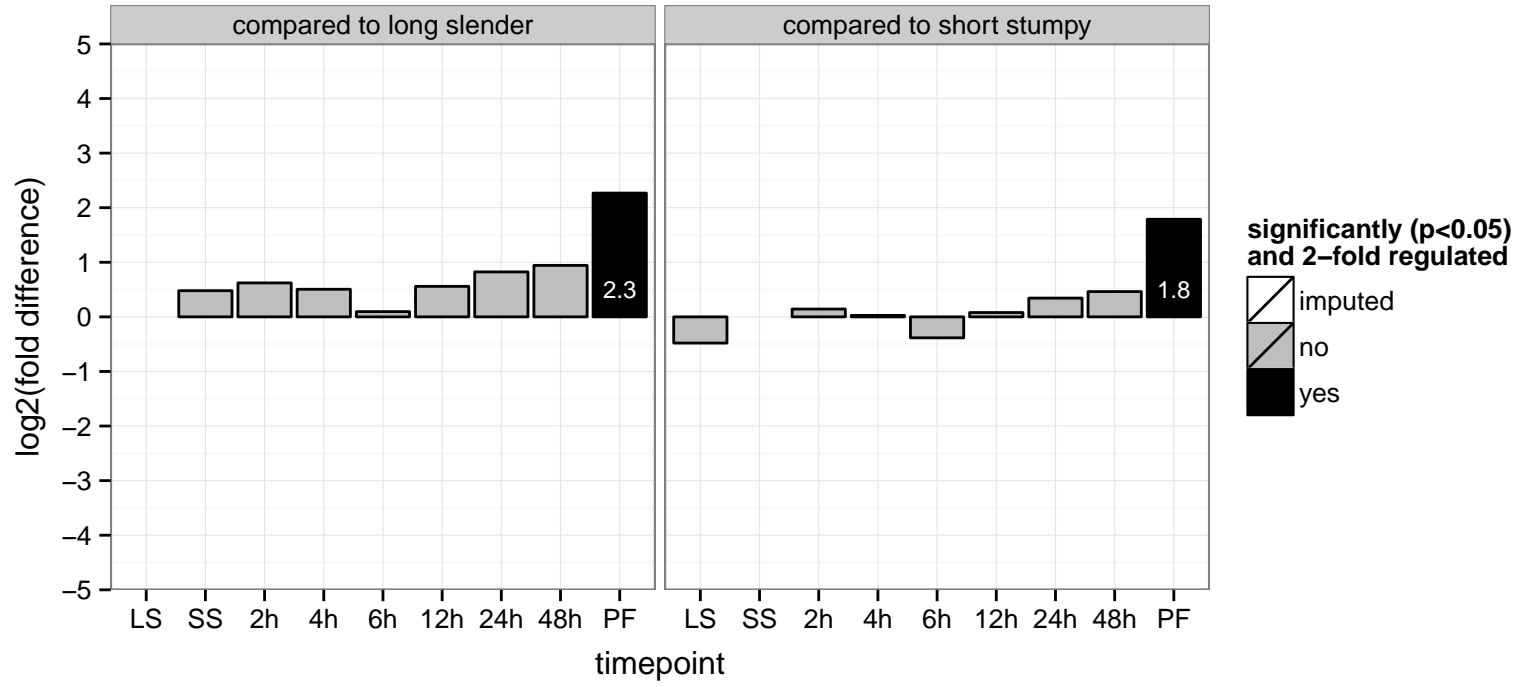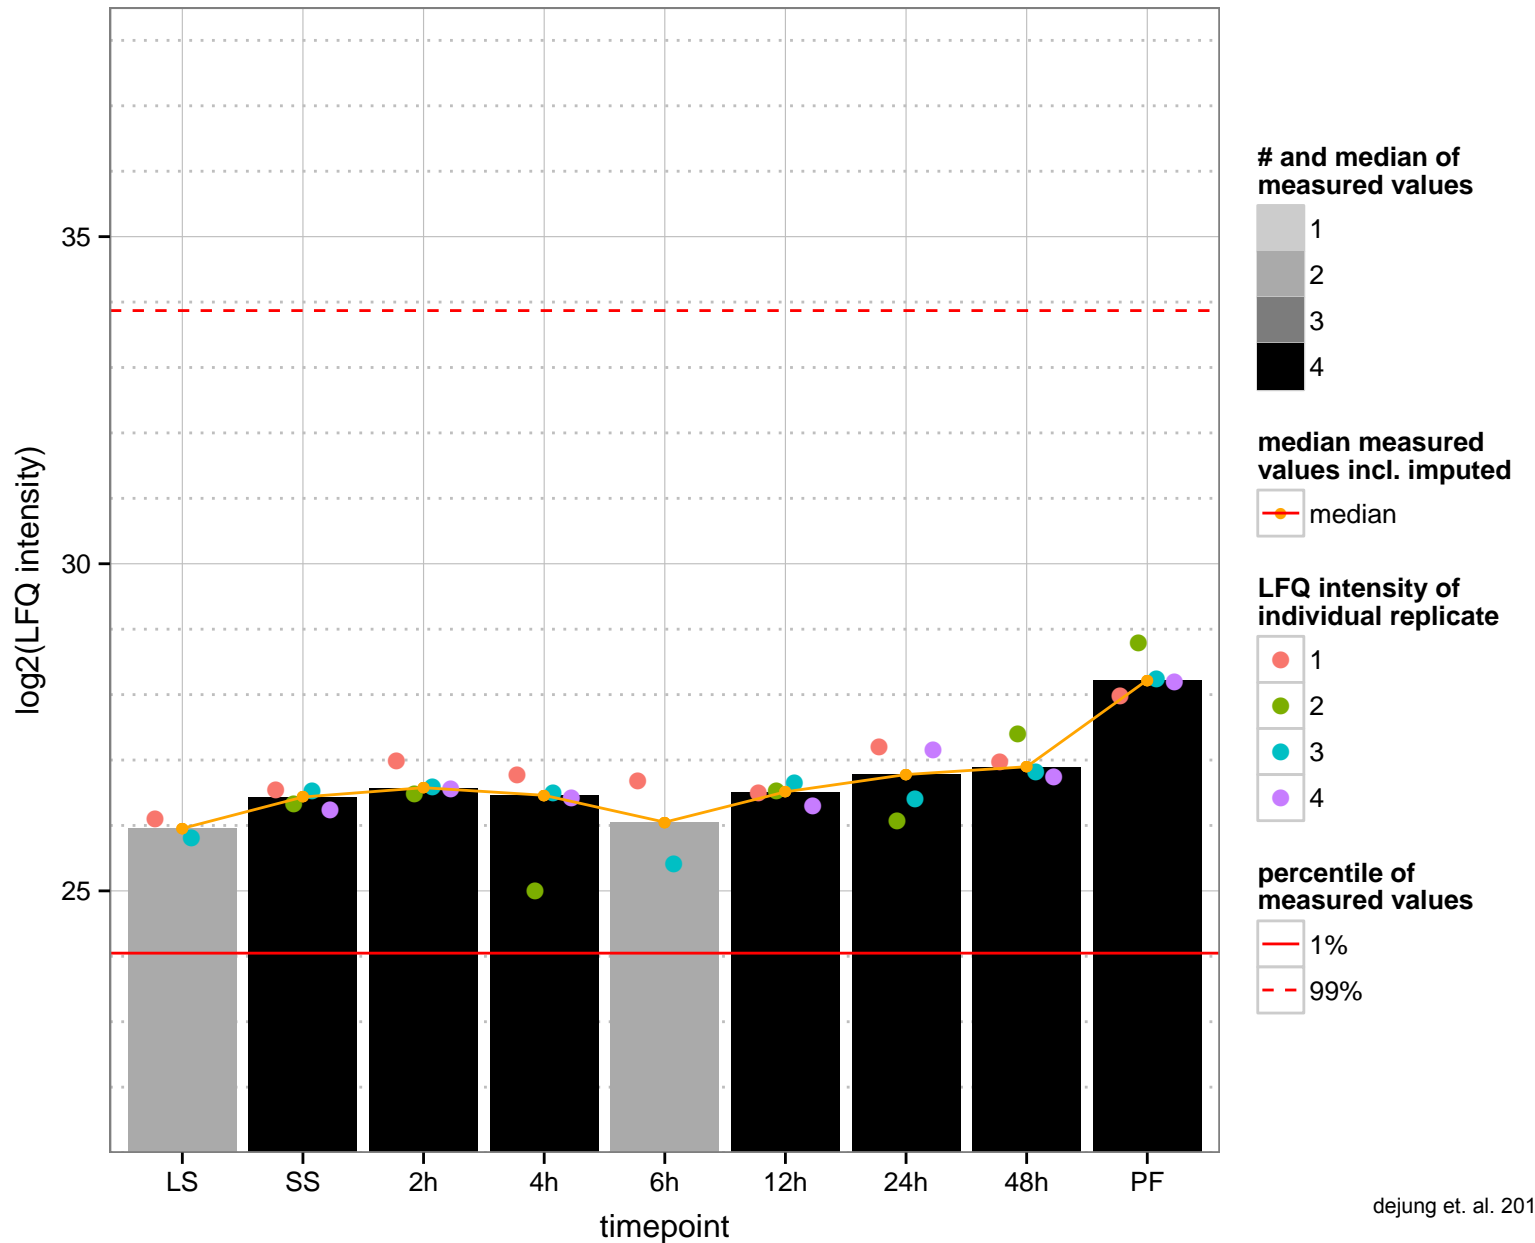

ubiquitin carboxyl-terminal hydrolase, putative

Tb927.8.5620

AGOF: cysteine-type endopeptidase activity, ubiquitin thiolesterase activity, zinc ion binding

AGOC: intracellular

AGOP: ubiquitin-dependent protein catabolic process

PGOF: ubiquitin thiolesterase activity, zinc ion binding

PGOC: intracellular

PGOP: ubiquitin-dependent protein catabolic process

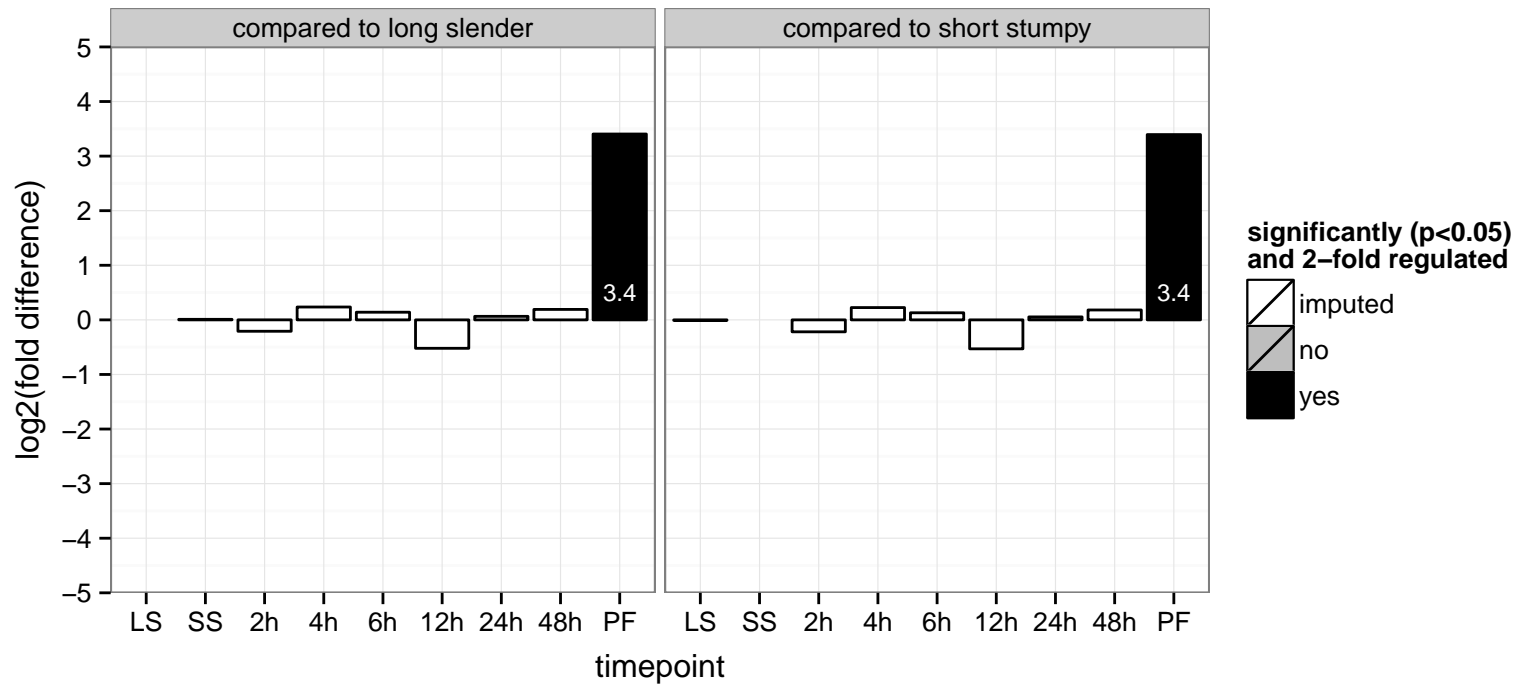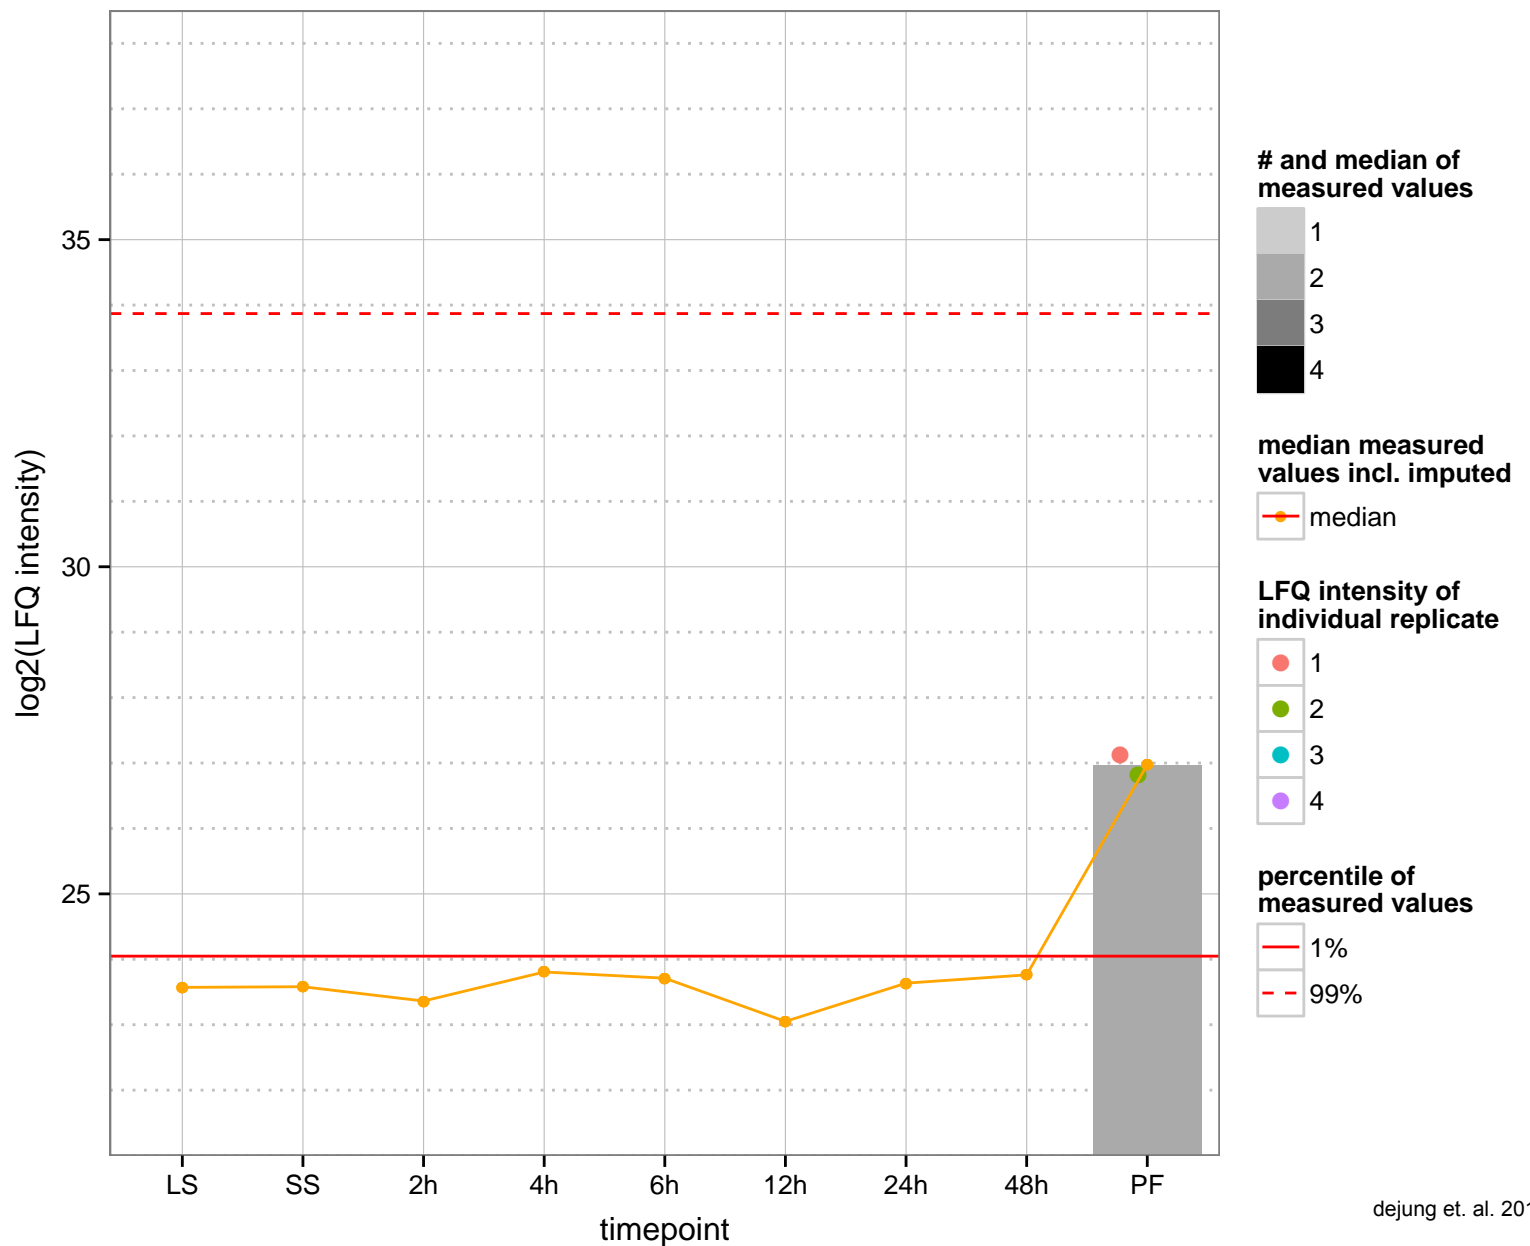

hypothetical protein, conserved  
 Tb927.8.580  
 AGOF: null  
 AGOC: mitochondrial inner membrane, mitochondrion  
 AGOP: null  
 PGO: null  
 PGO: null  
 PGO: null

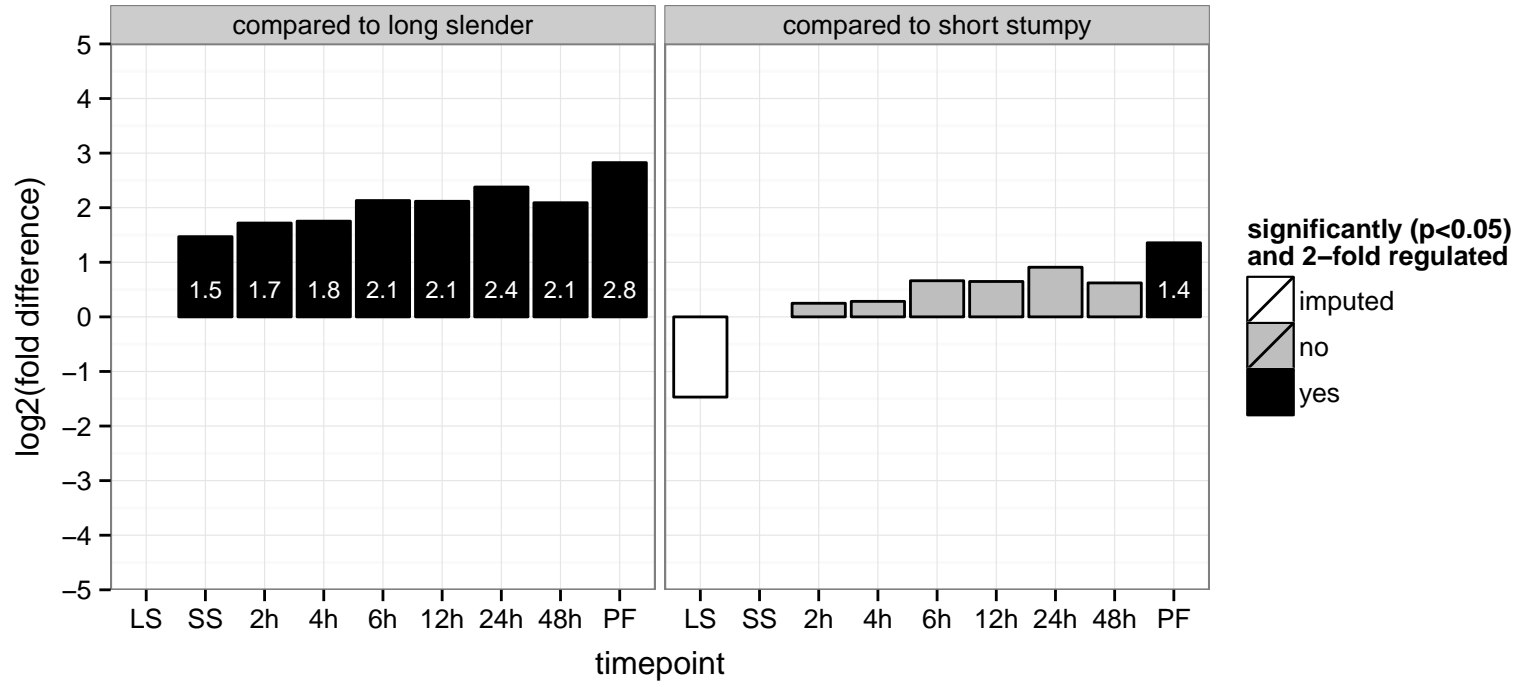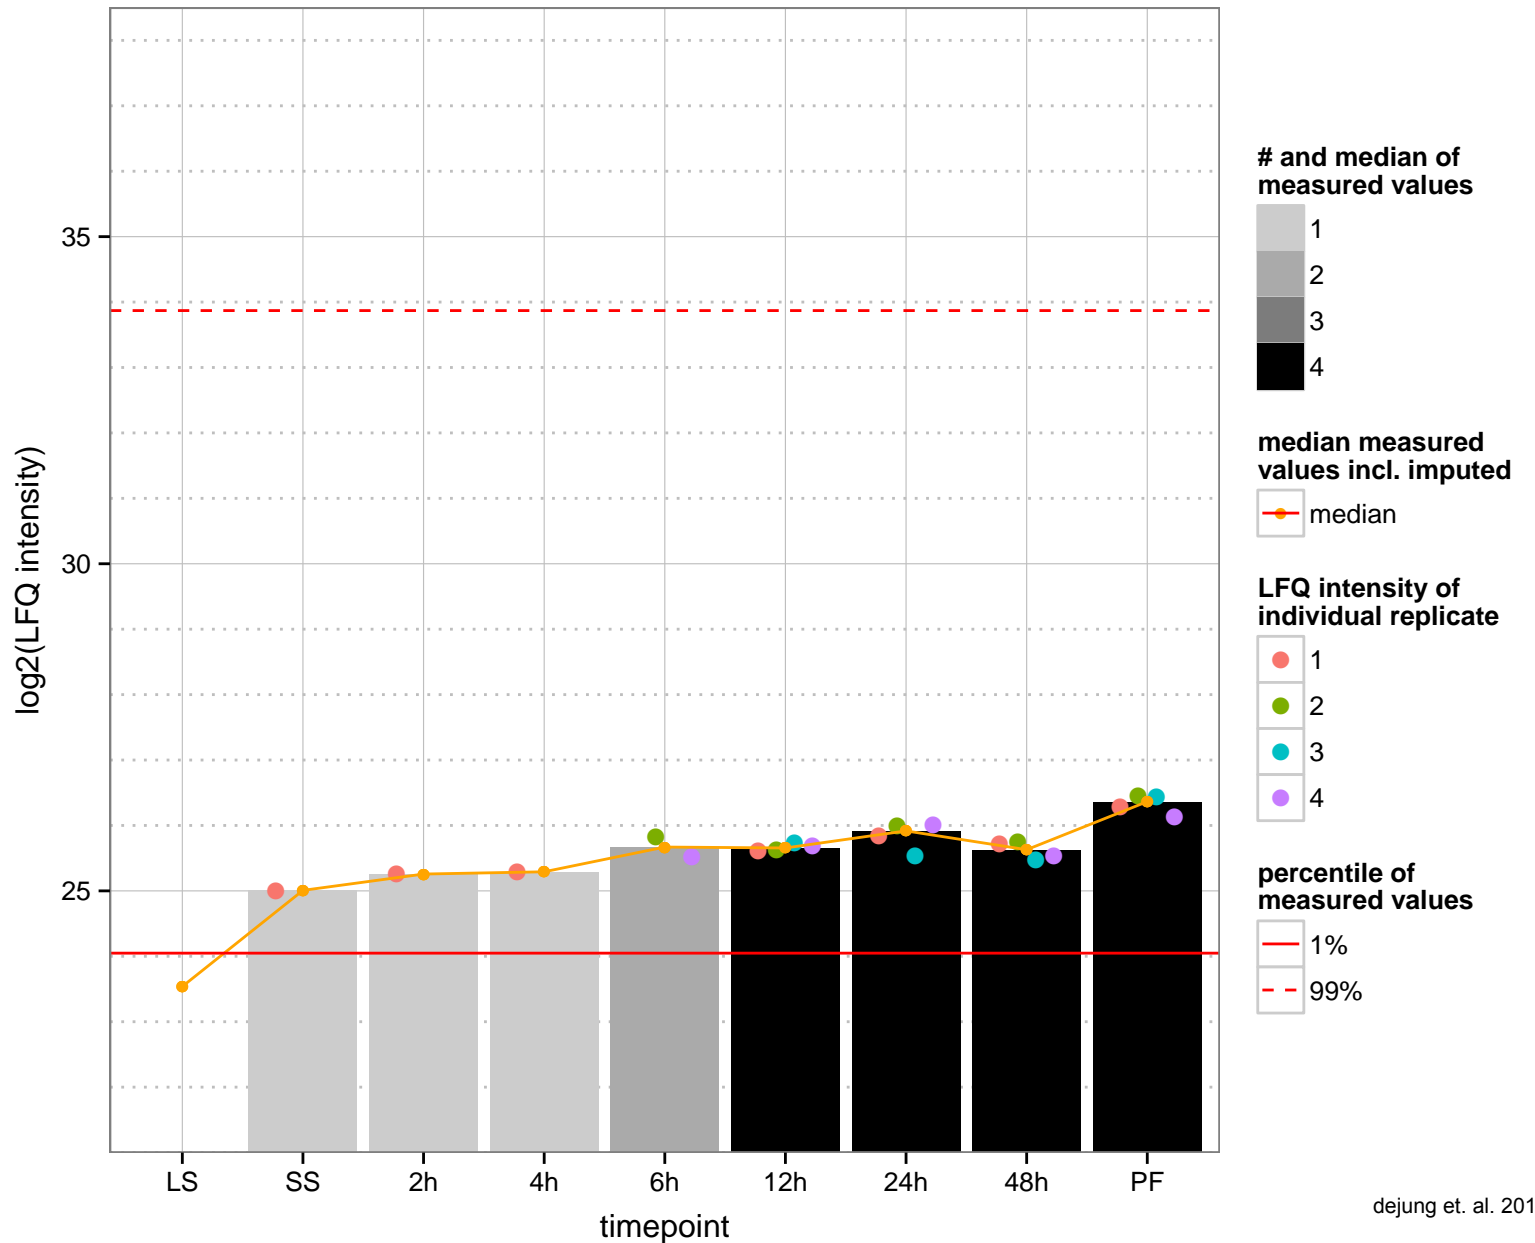



hypothetical protein, conserved  
 Tb927.8.5800  
 AGOF: null  
 AGOC: null  
 AGOP: null  
 PGOF: null  
 PGO C: null  
 PGOP: null

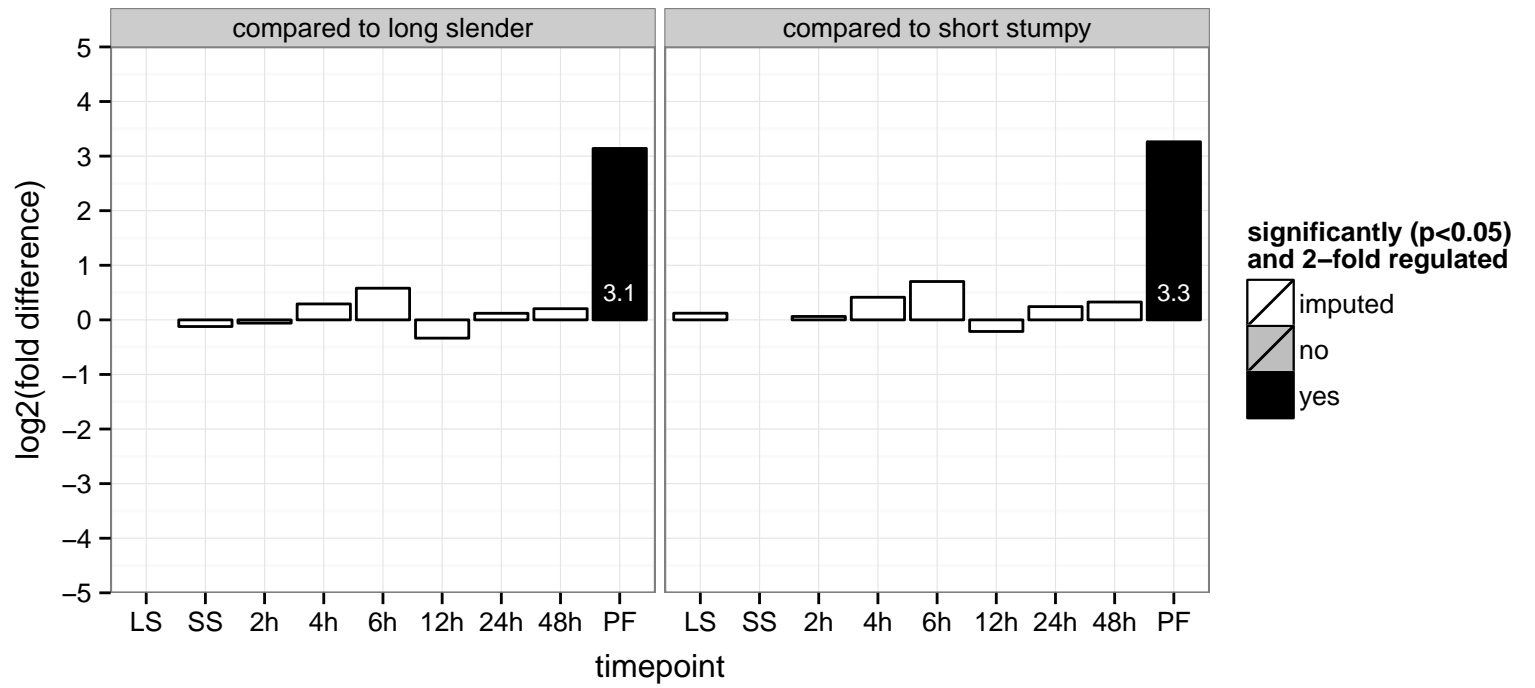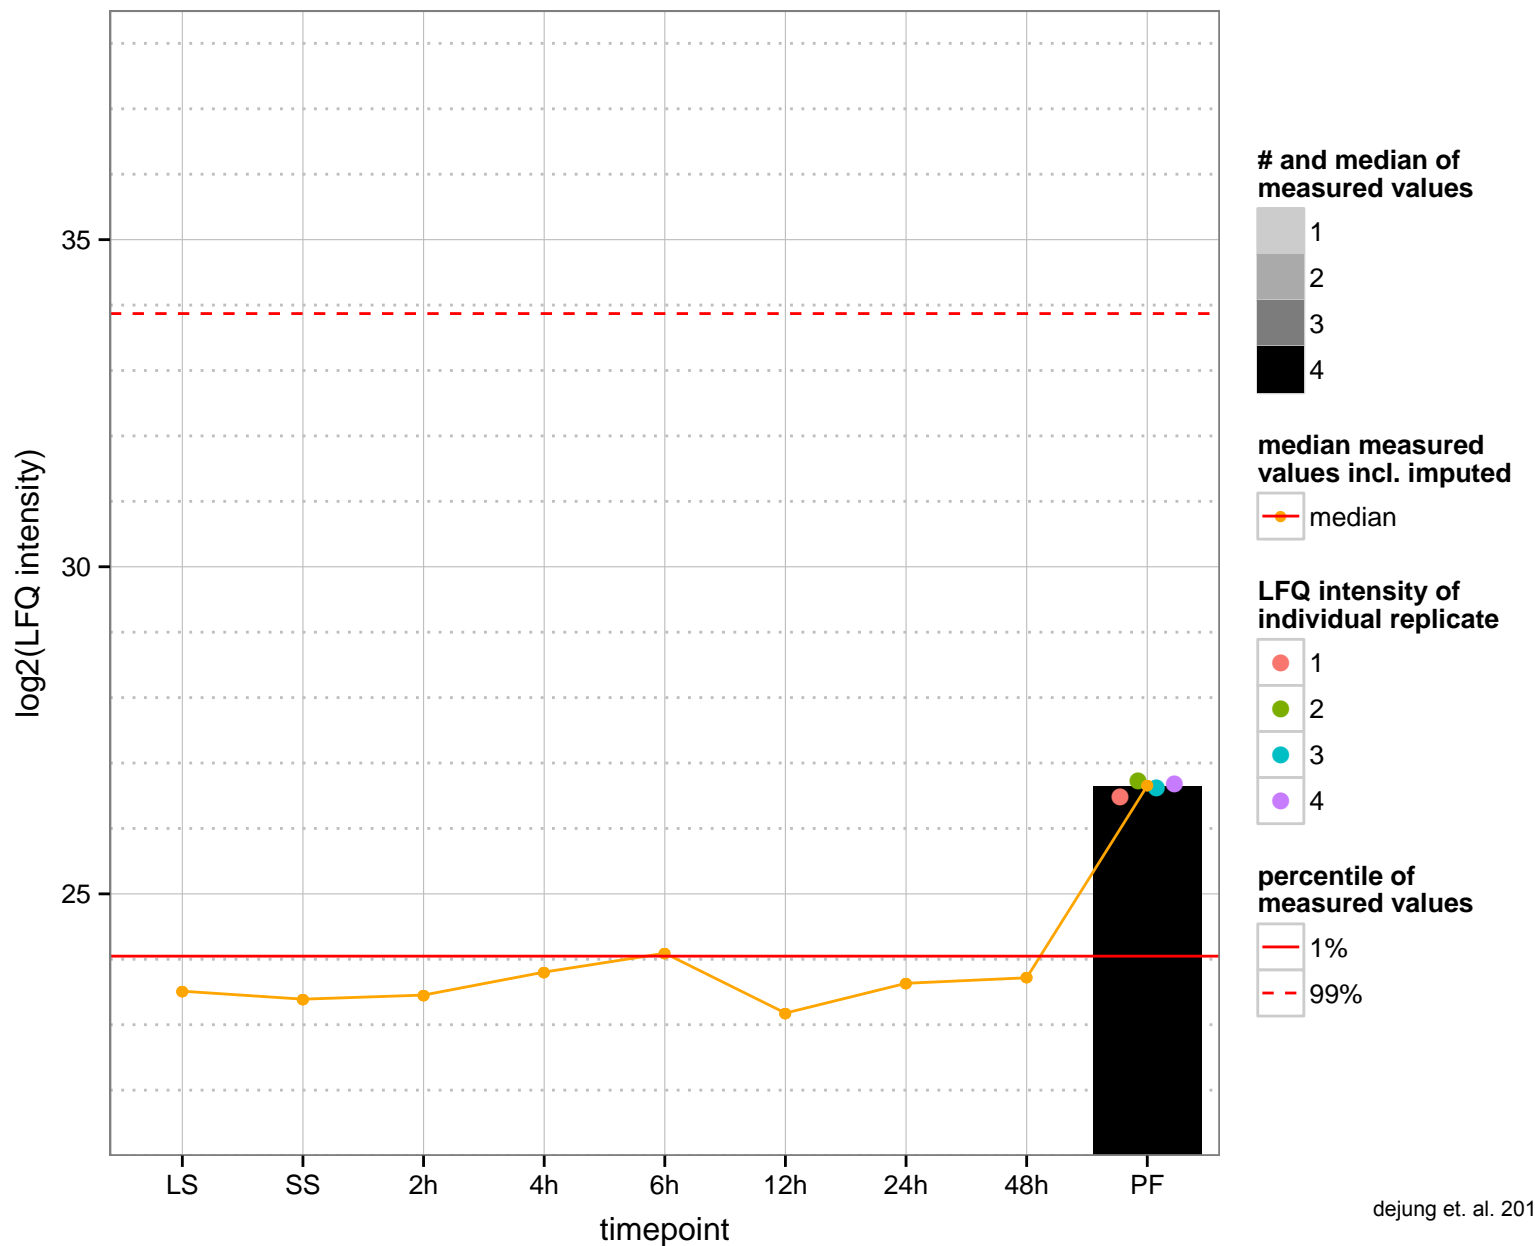

protein kinase, putative

Tb927.8.5950

AGOF: ATP binding, protein kinase activity, protein serine/threonine kinase activity, protein tyrosine kinase activity

AGOC: null

AGOP: protein phosphorylation

PGOF: ATP binding, protein kinase activity, transferase activity, transferring phosphorus-containing groups

PGOC: null

PGOP: protein phosphorylation

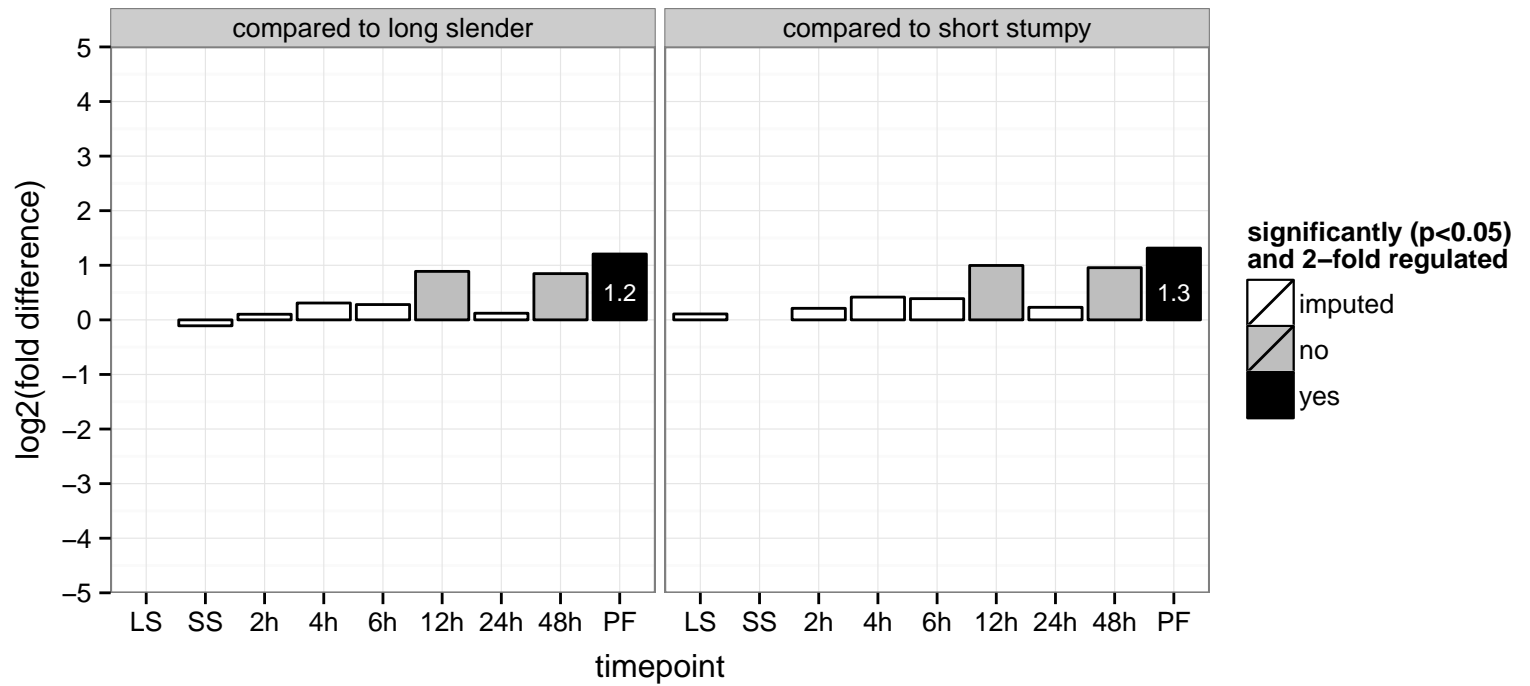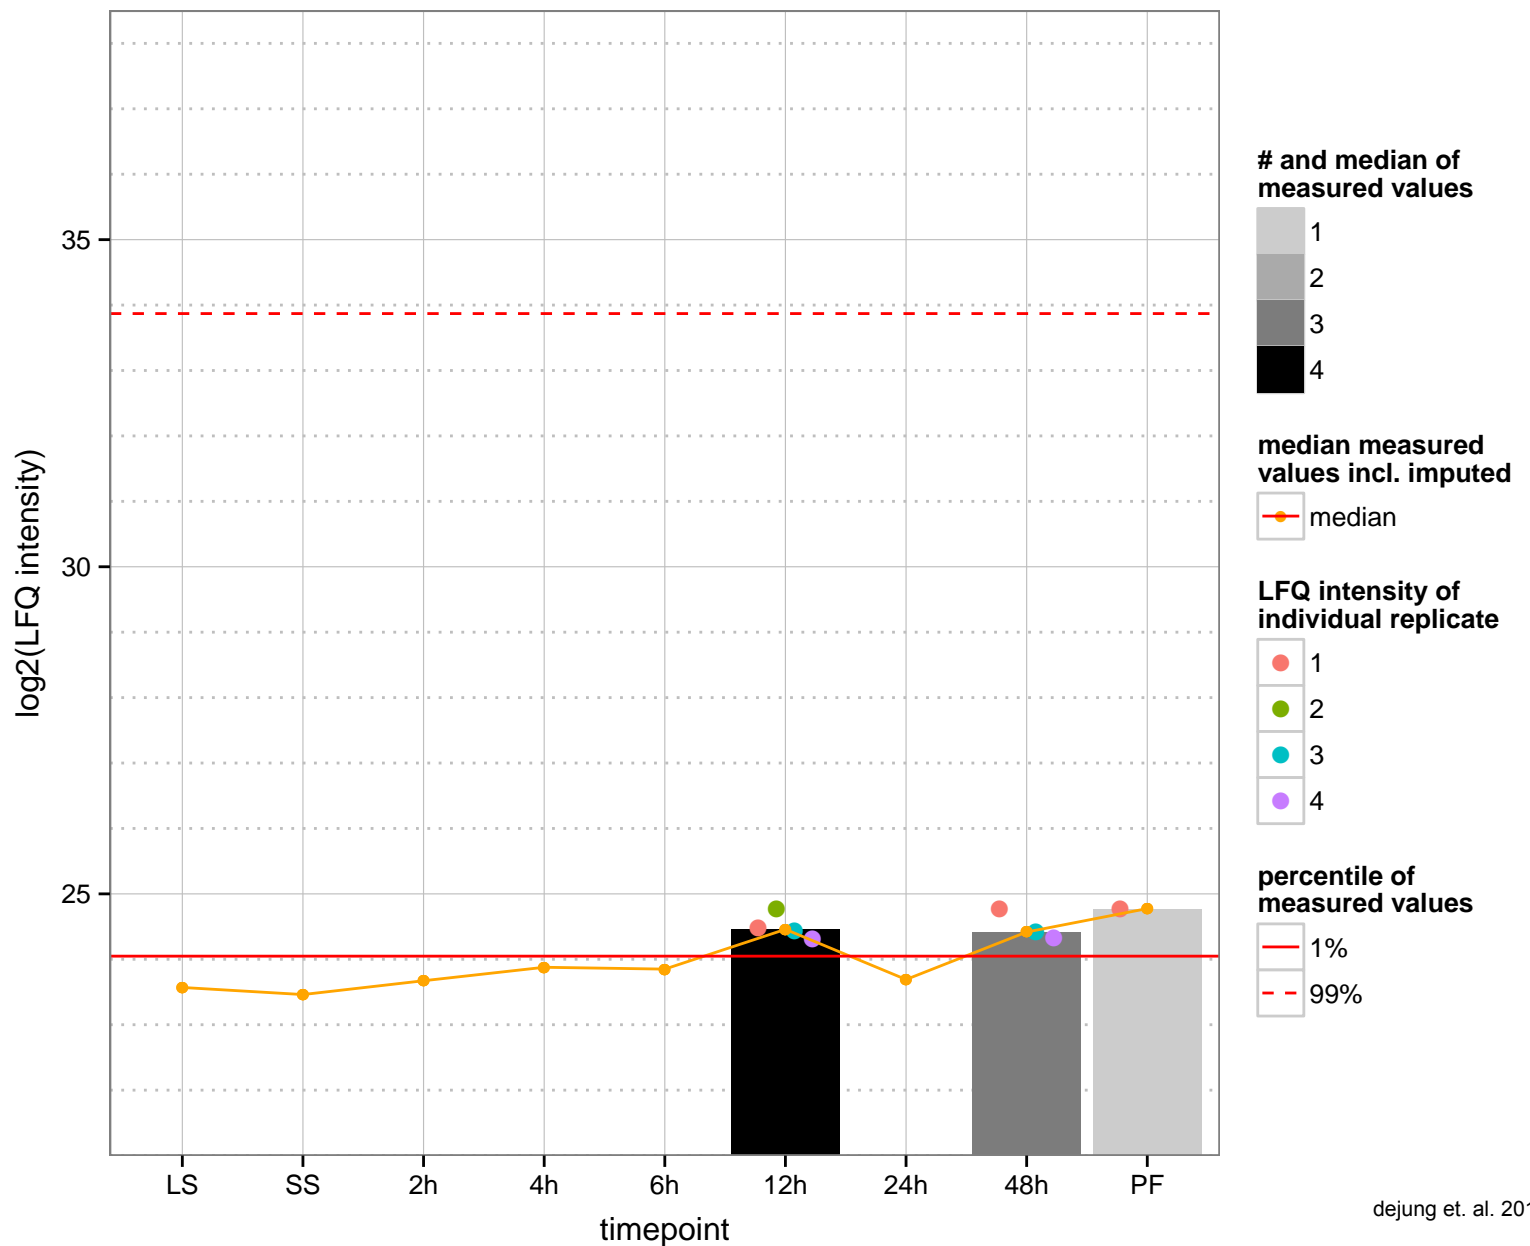

60S ribosomal protein L26, putative  
 Tb927.9.14370;Tb927.8.6180  
 AGOF: structural constituent of ribosome  
 AGOC: large ribosomal subunit, ribosome  
 AGOP: translation  
 PGOF: structural constituent of ribosome  
 PGOC: large ribosomal subunit  
 PGOP: translation

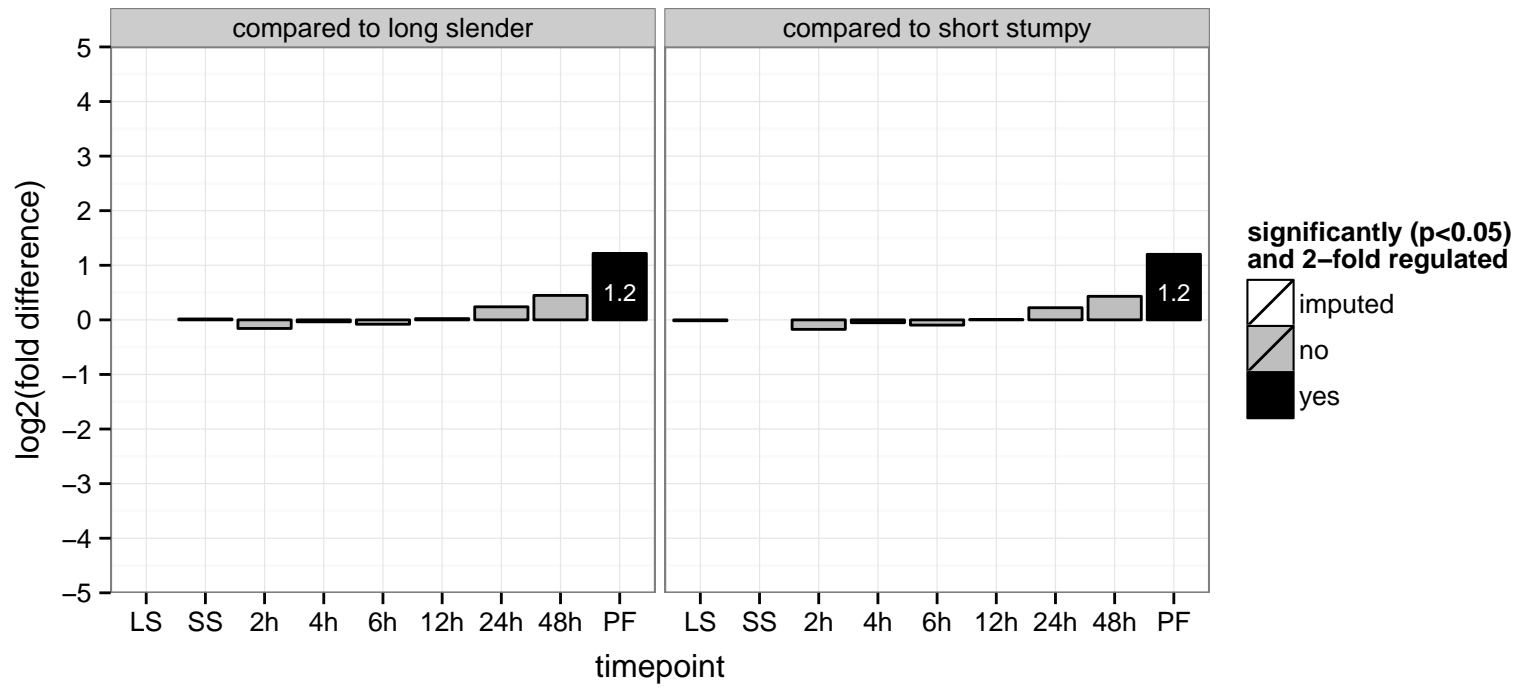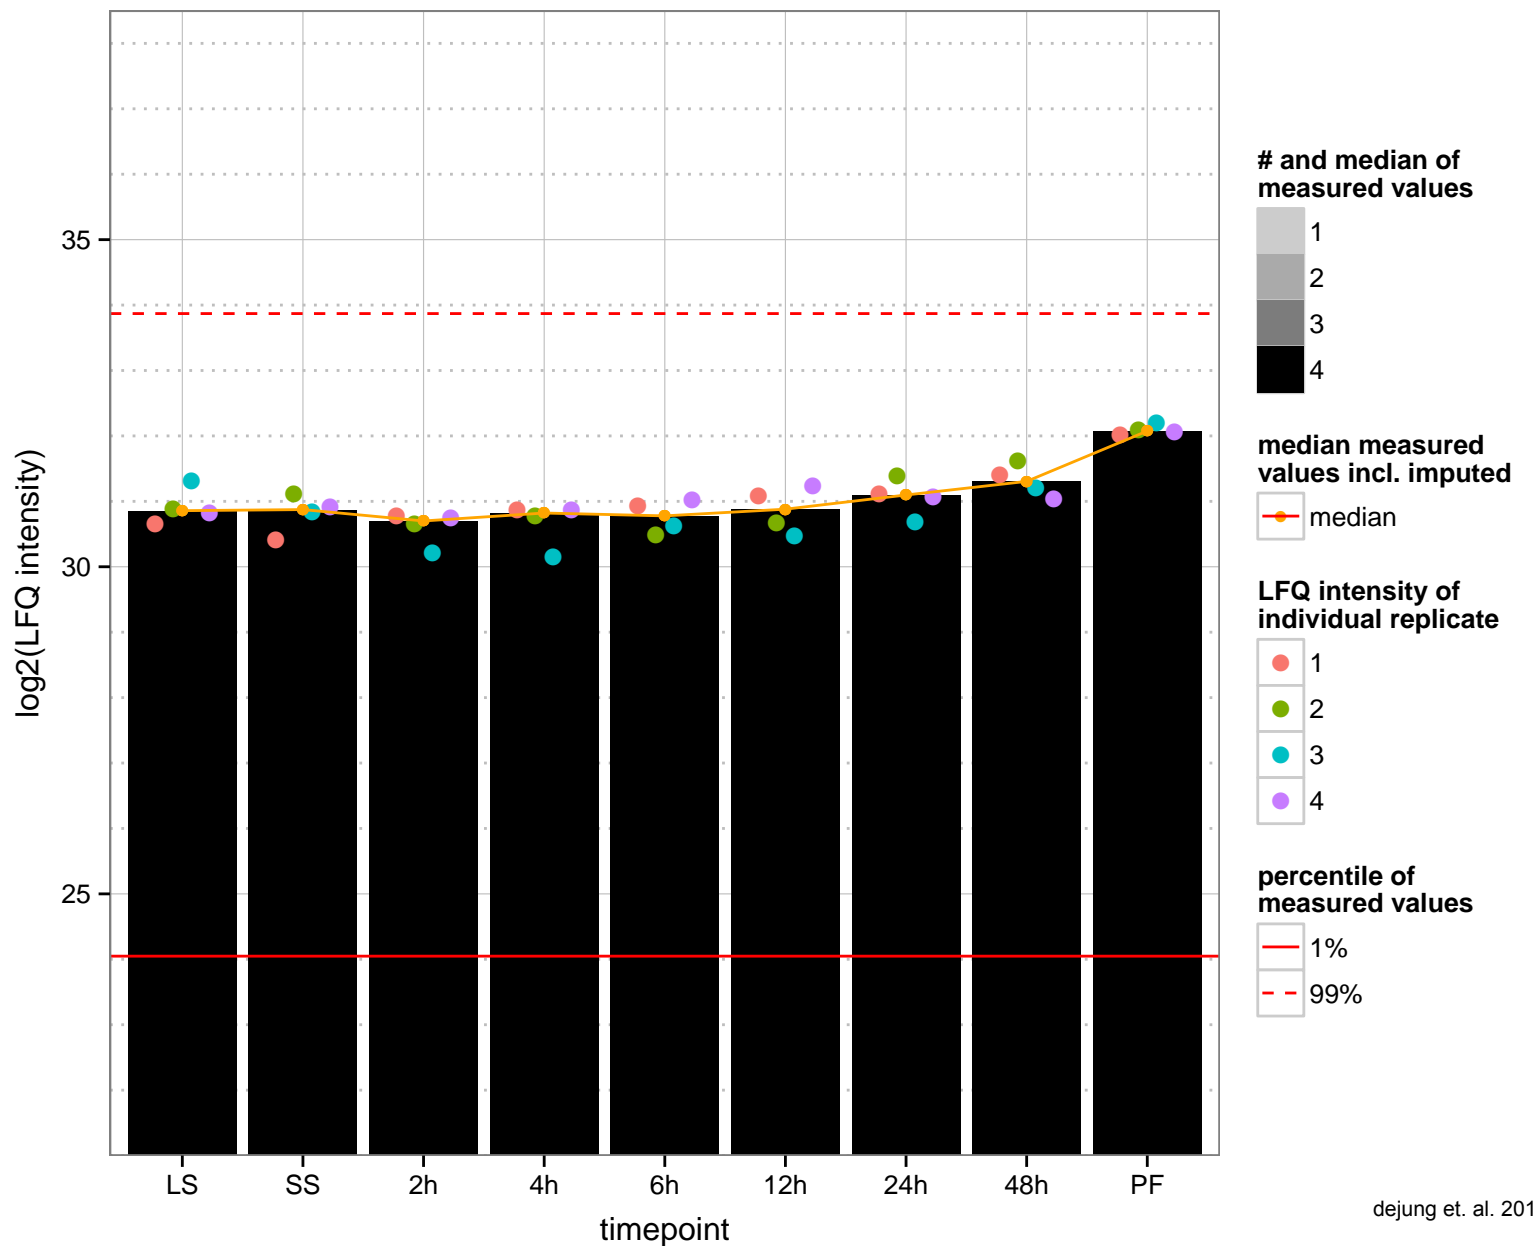

tubulin folding cofactor D, putative  
 Tb927.8.6200  
 AGOF: microtubule binding  
 AGOC: null  
 AGOP: protein folding  
 PGOF: binding  
 PGOC: null  
 PGOP: null

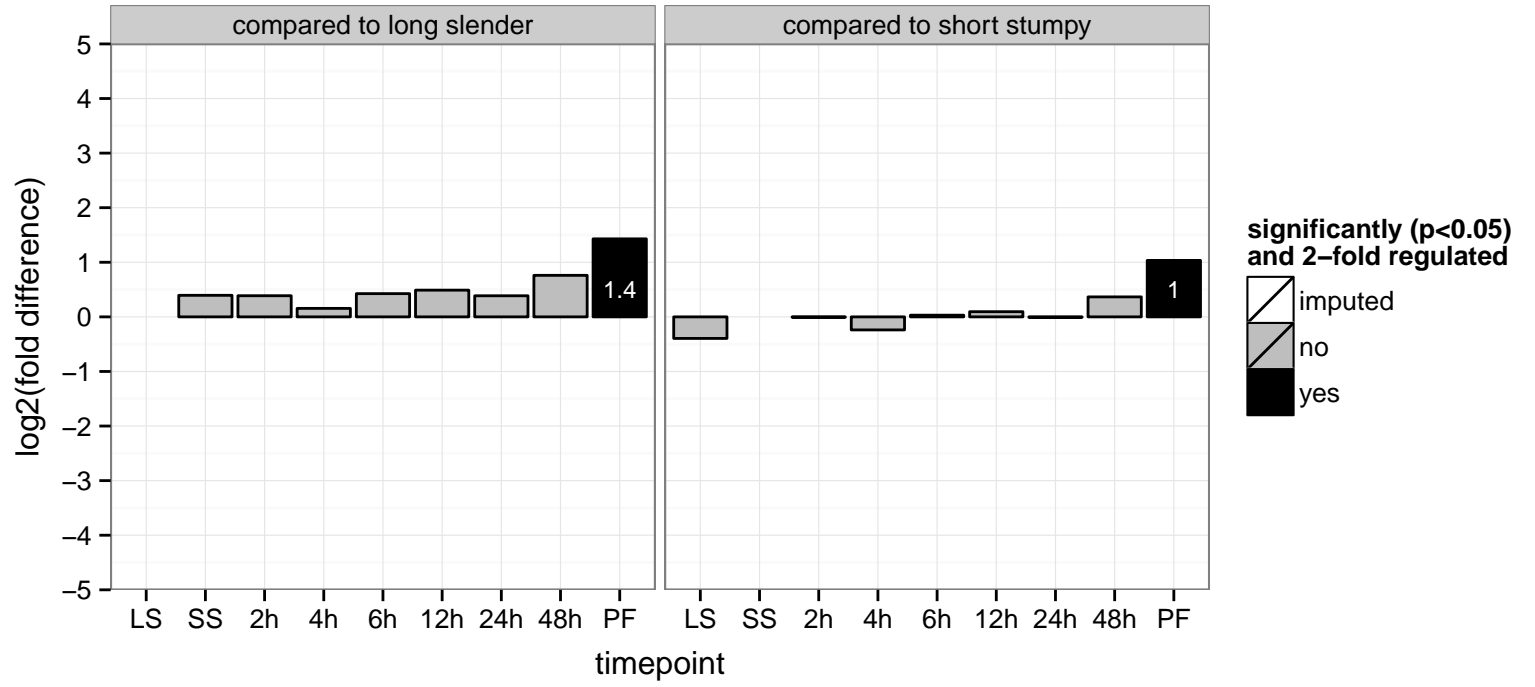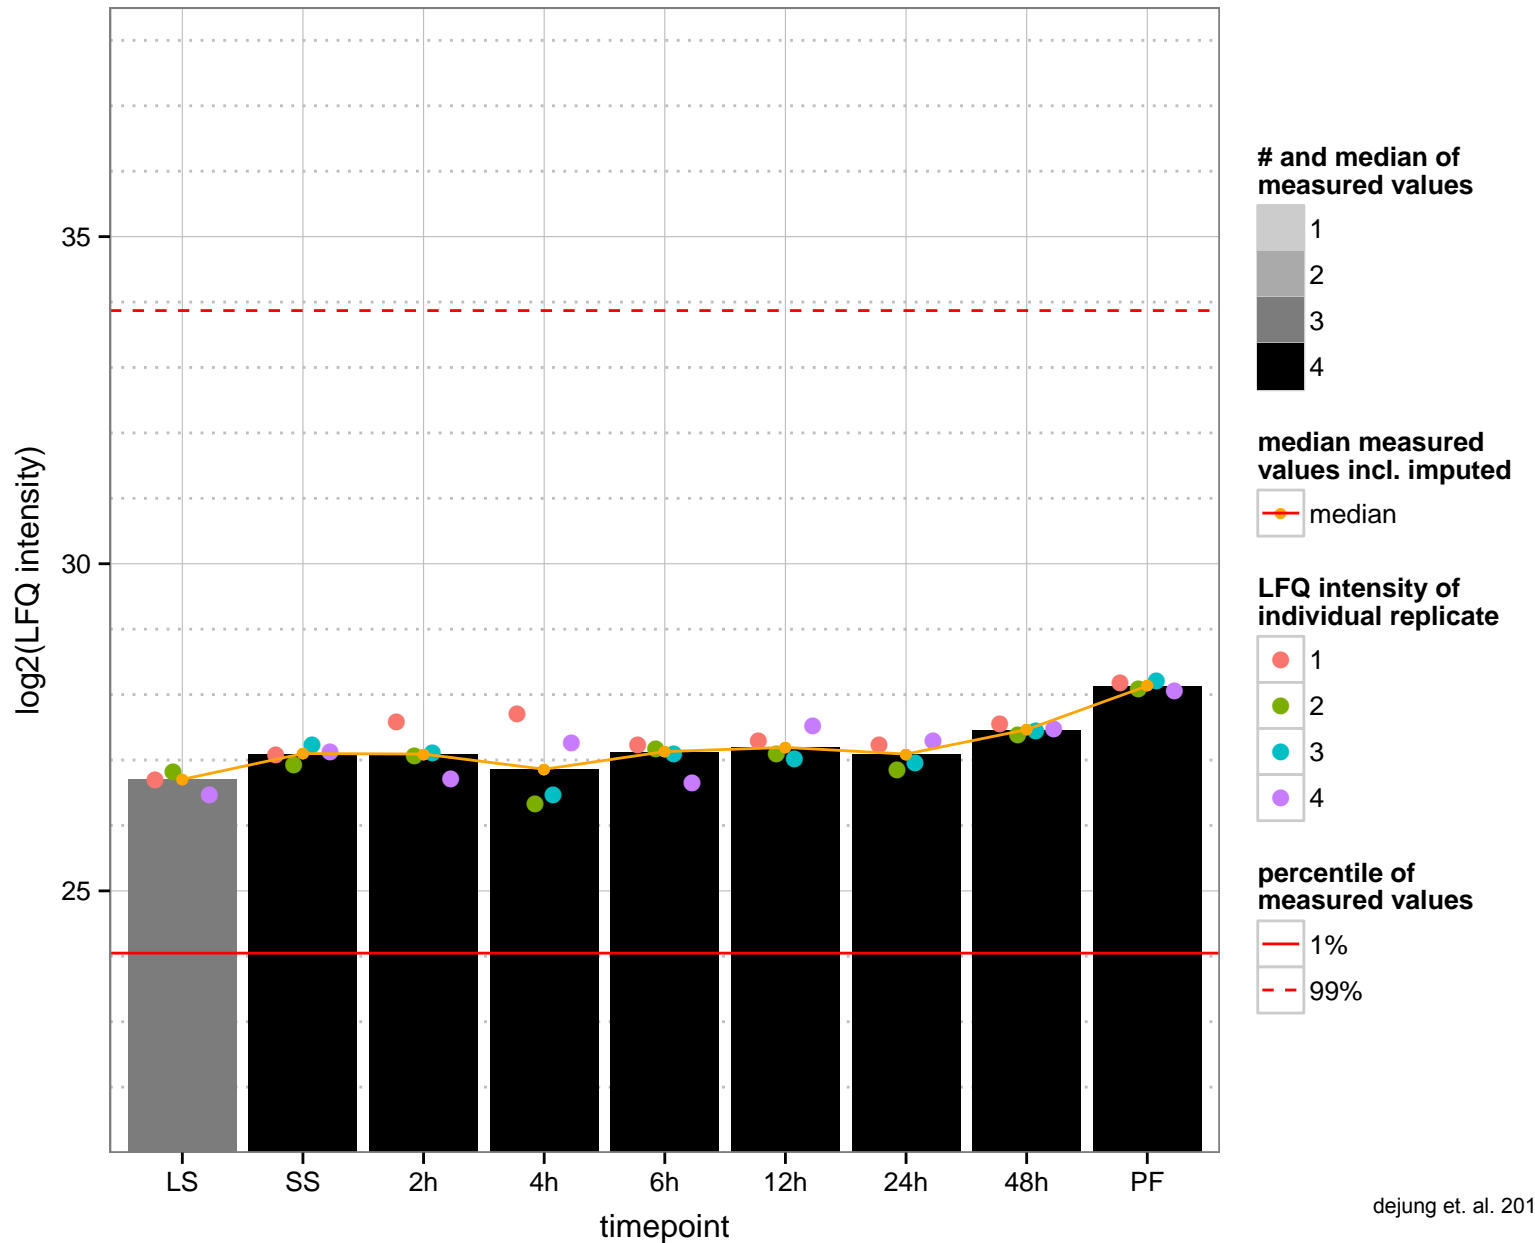

hypothetical protein, conserved  
 Tb927.8.6220  
 AGOF: null  
 AGOC: null  
 AGOP: null  
 PGOF: null  
 PGO C: null  
 PGOP: null

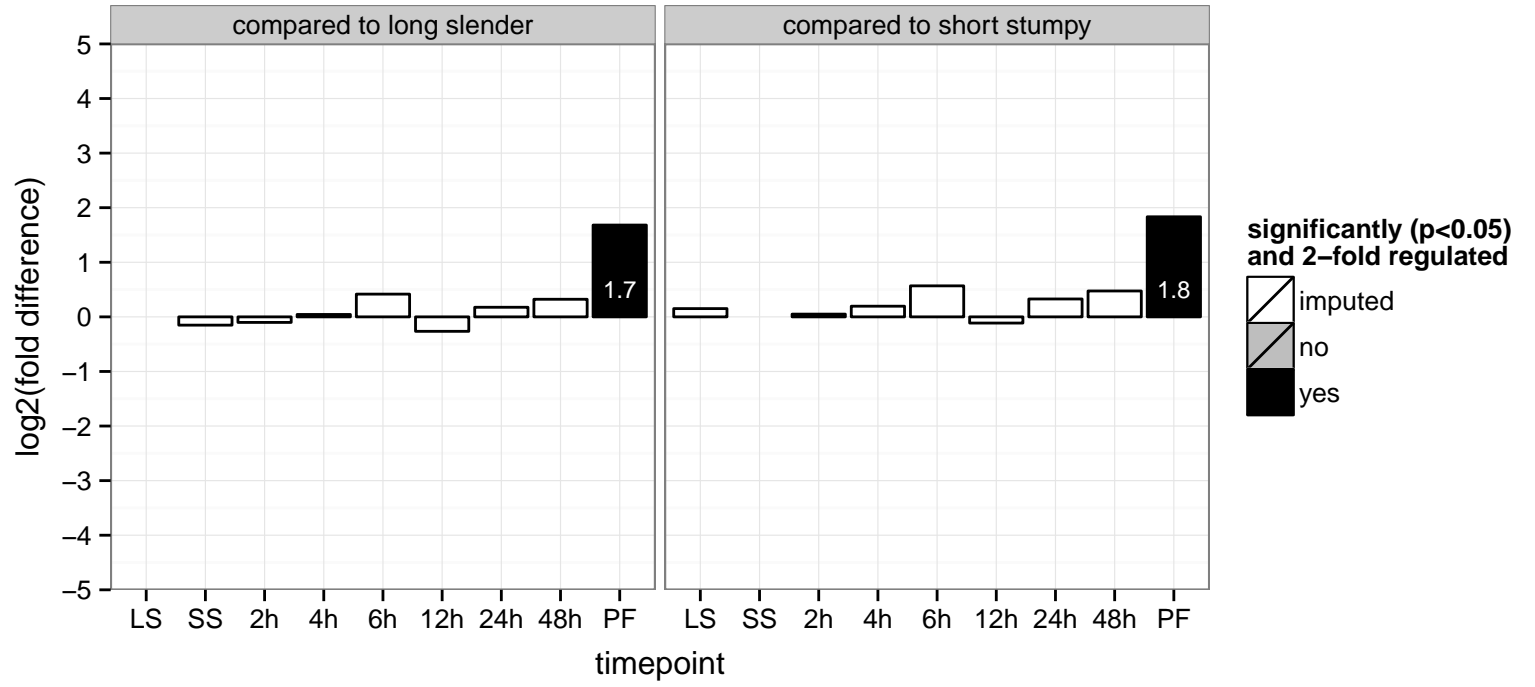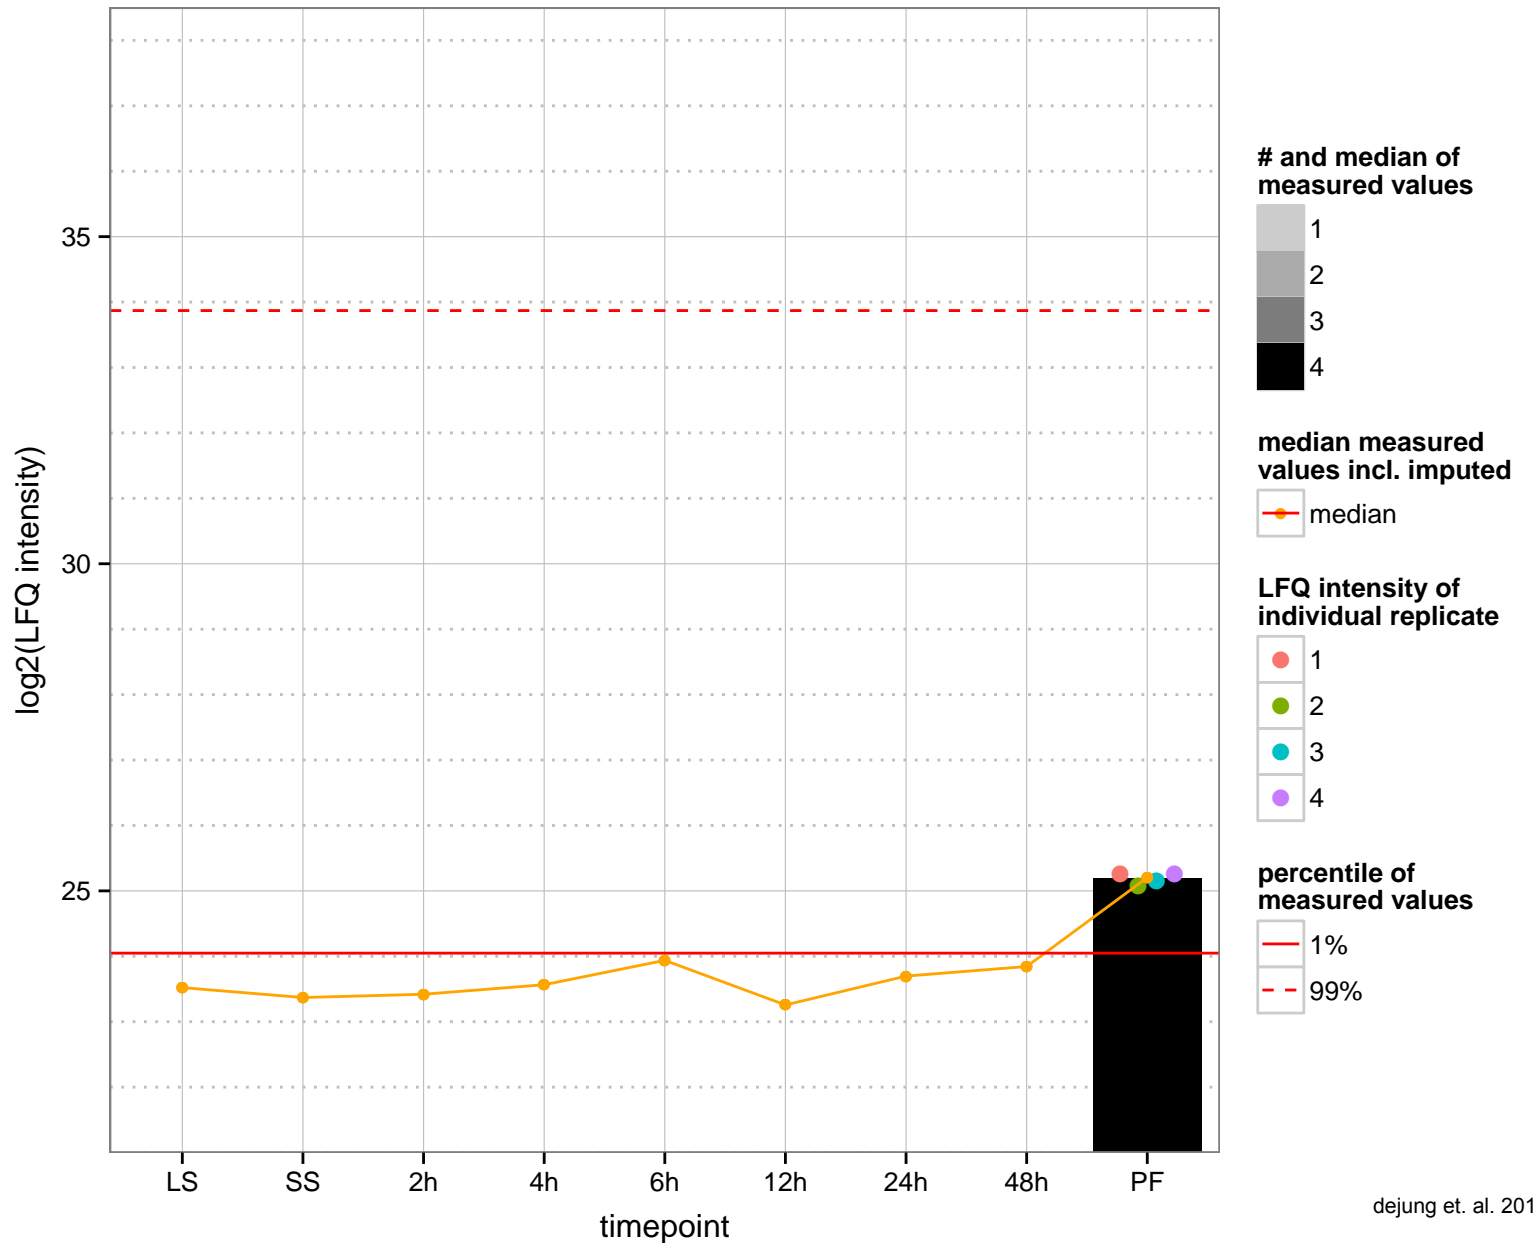

cation-transporting ATPase, putative

Tb927.8.650

AGOF: ATP binding, ATPase activity, coupled to transmembrane movement of ions, phosphorylative mechanism, hydrolase ac

AGOC: integral to membrane, membrane

AGOP: ATP biosynthetic process, cation transport, metabolic process

PGOF: ATPase activity, hydrolase activity, acting on acid anhydrides, catalyzing transmembrane movement of substances, me

PGOC: integral to membrane

PGOP: cation transport

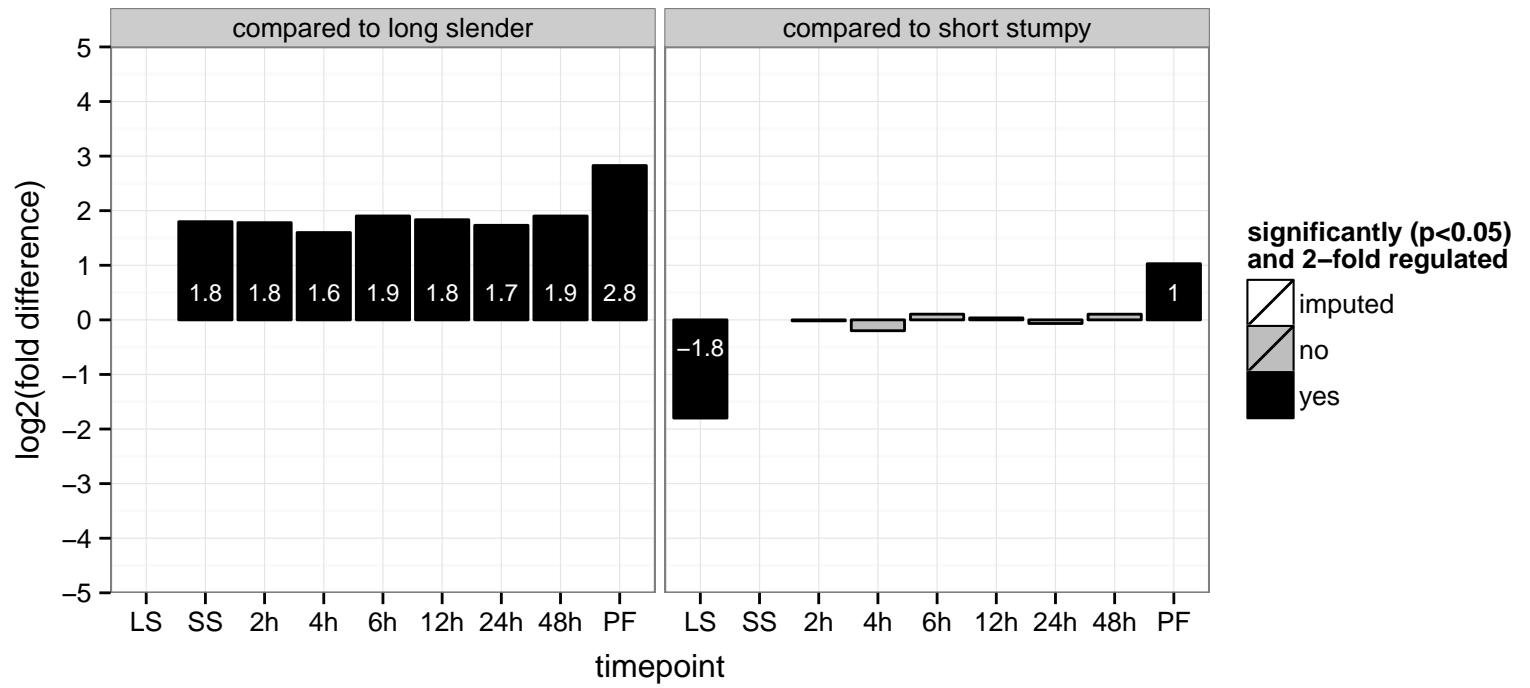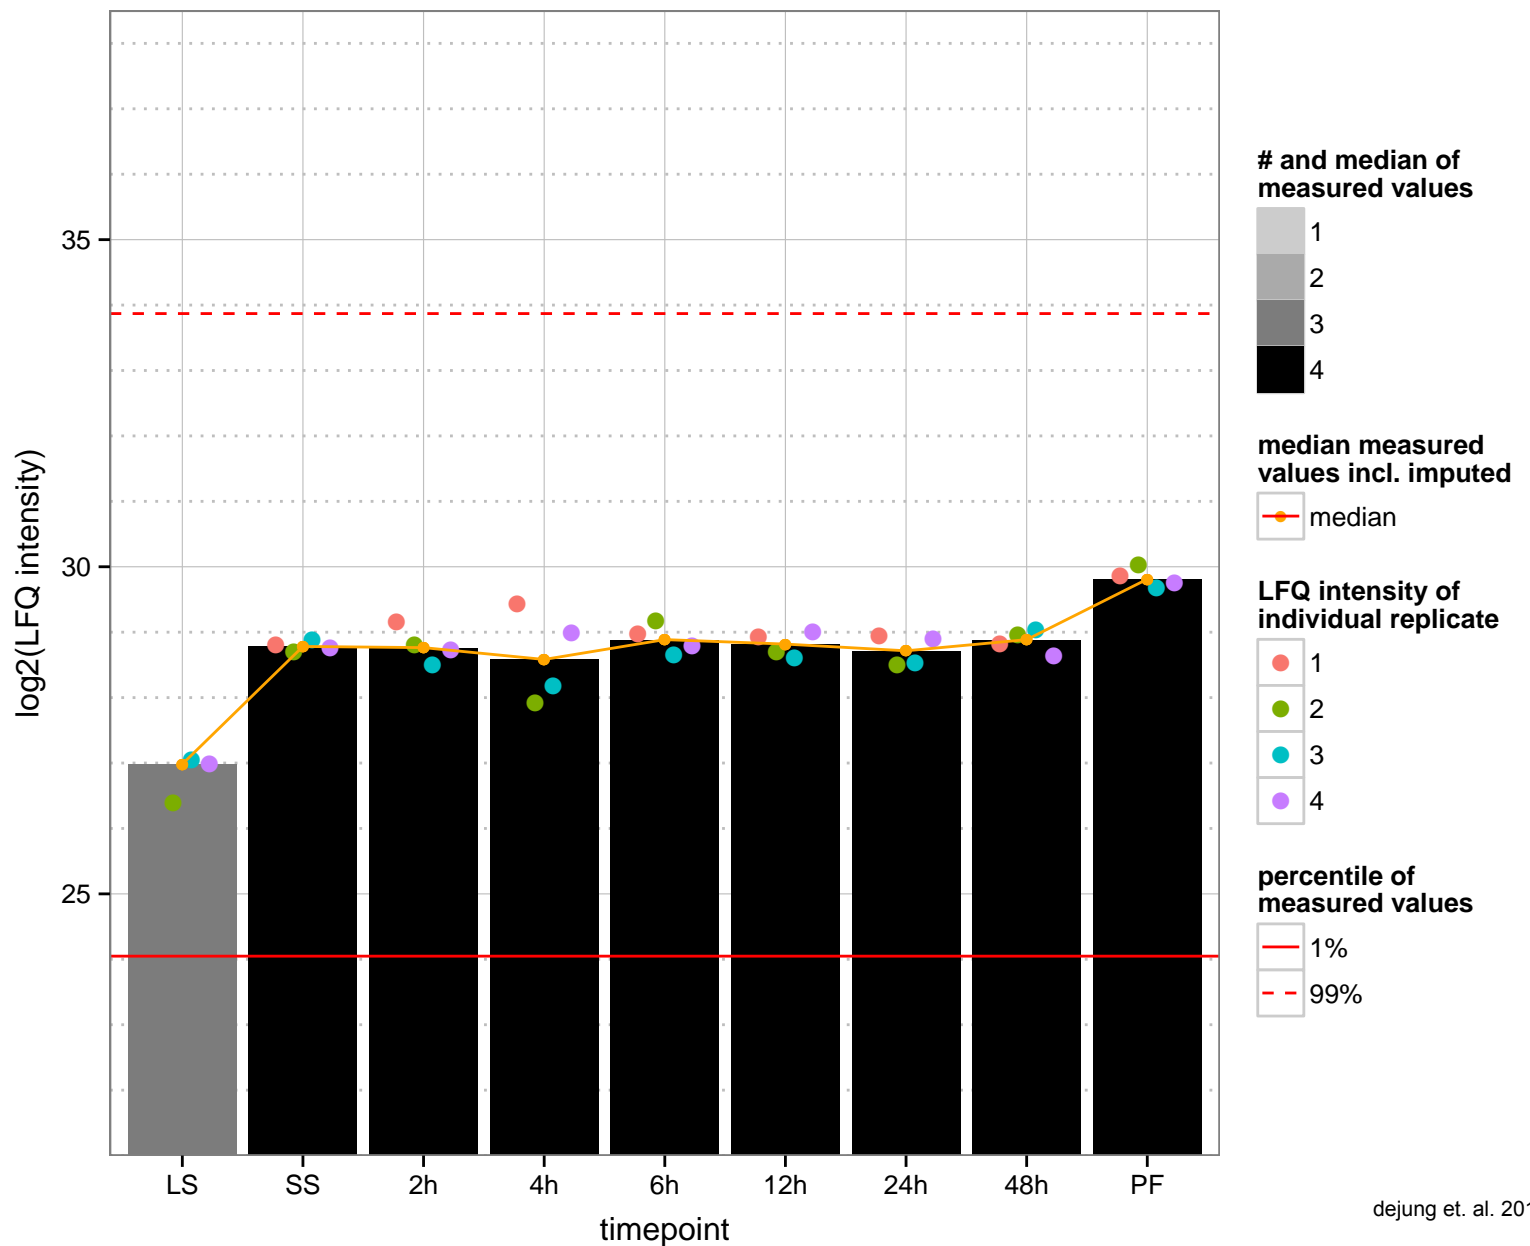

hypothetical protein, conserved  
 Tb927.8.6820  
 AGOF: carbon-carbon lyase activity  
 AGOC: mitochondrion  
 AGOP: cellular aromatic compound metabolic process  
 PGO: carbon-carbon lyase activity, catalytic activity  
 PGOC: null  
 PGOP: cellular aromatic compound metabolic process

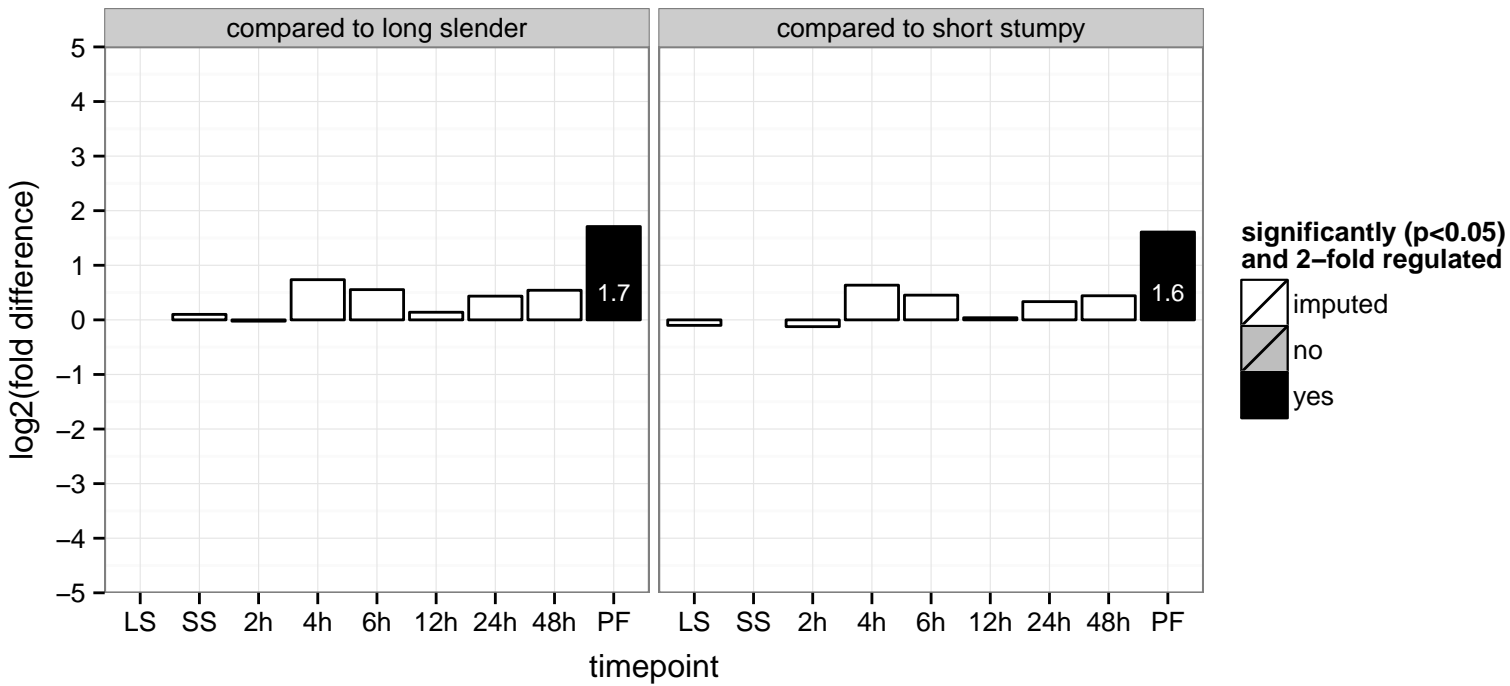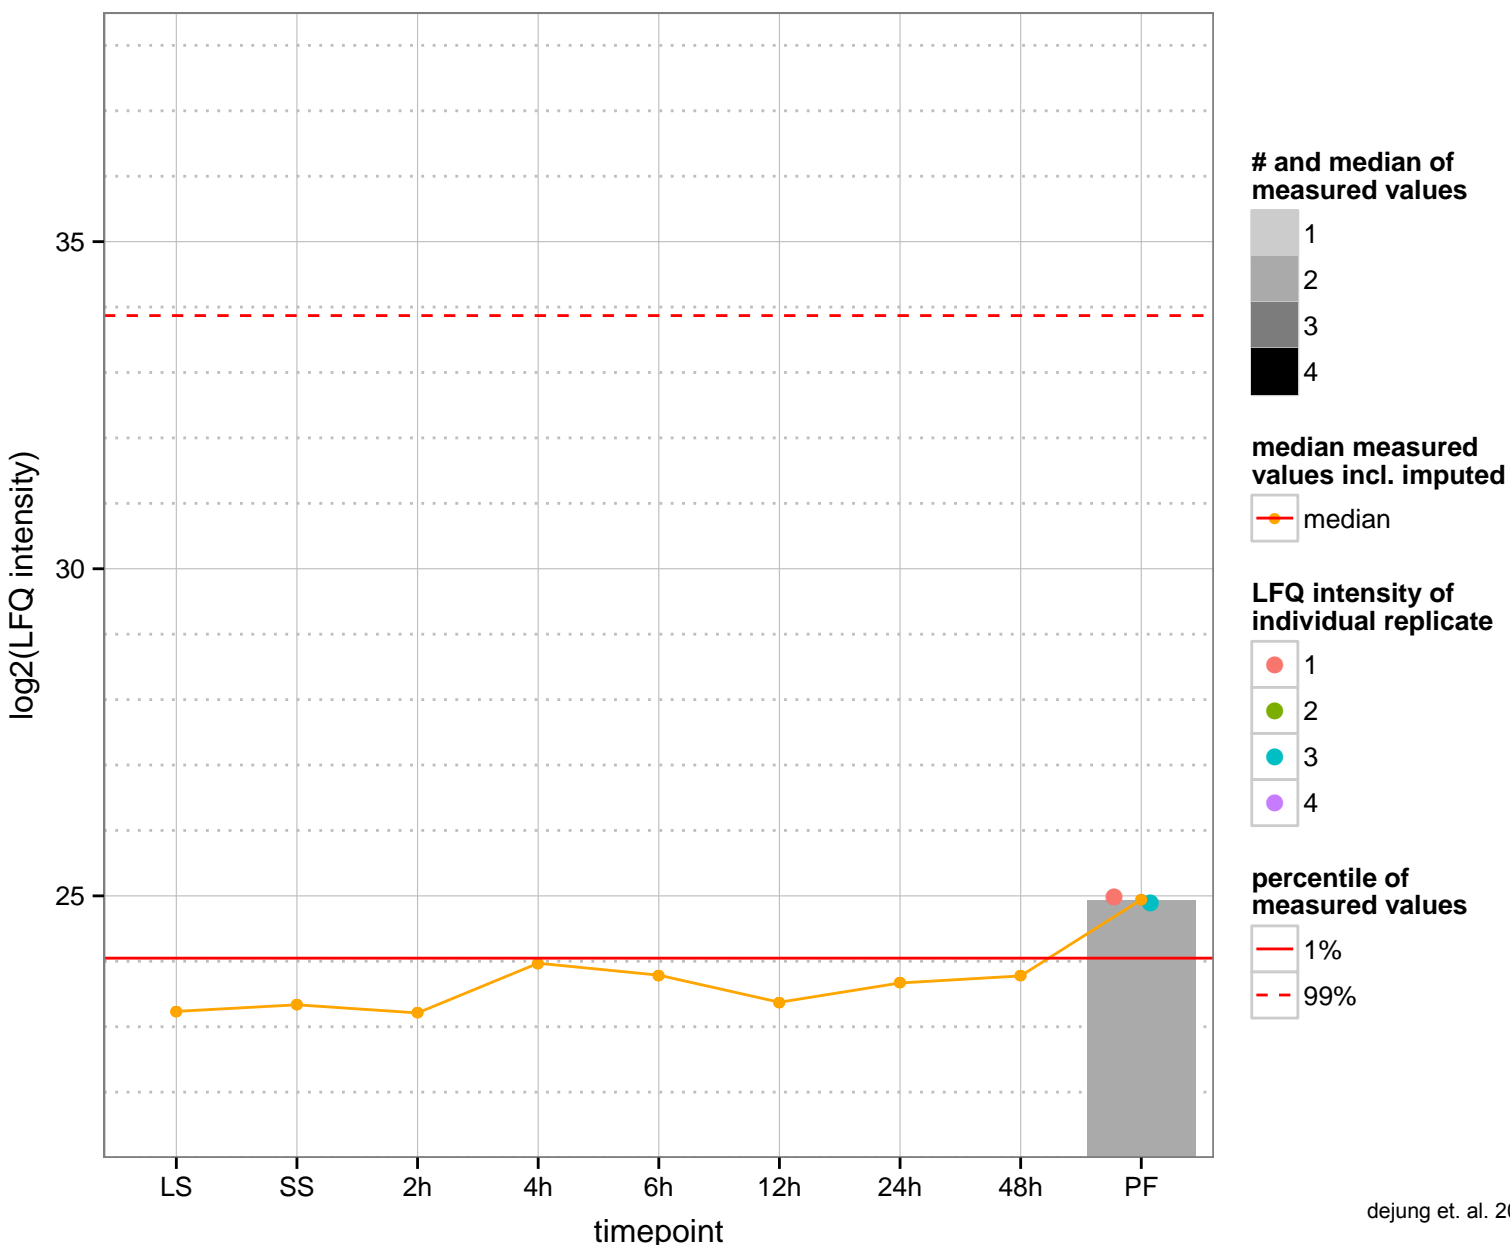

chaperone protein DNAj, putative  
 Tb927.8.7010  
 AGOF: heat shock protein binding, unfolded protein binding  
 AGOC: null  
 AGOP: protein folding  
 PGOF: heat shock protein binding  
 PGO: null  
 PGOP: null

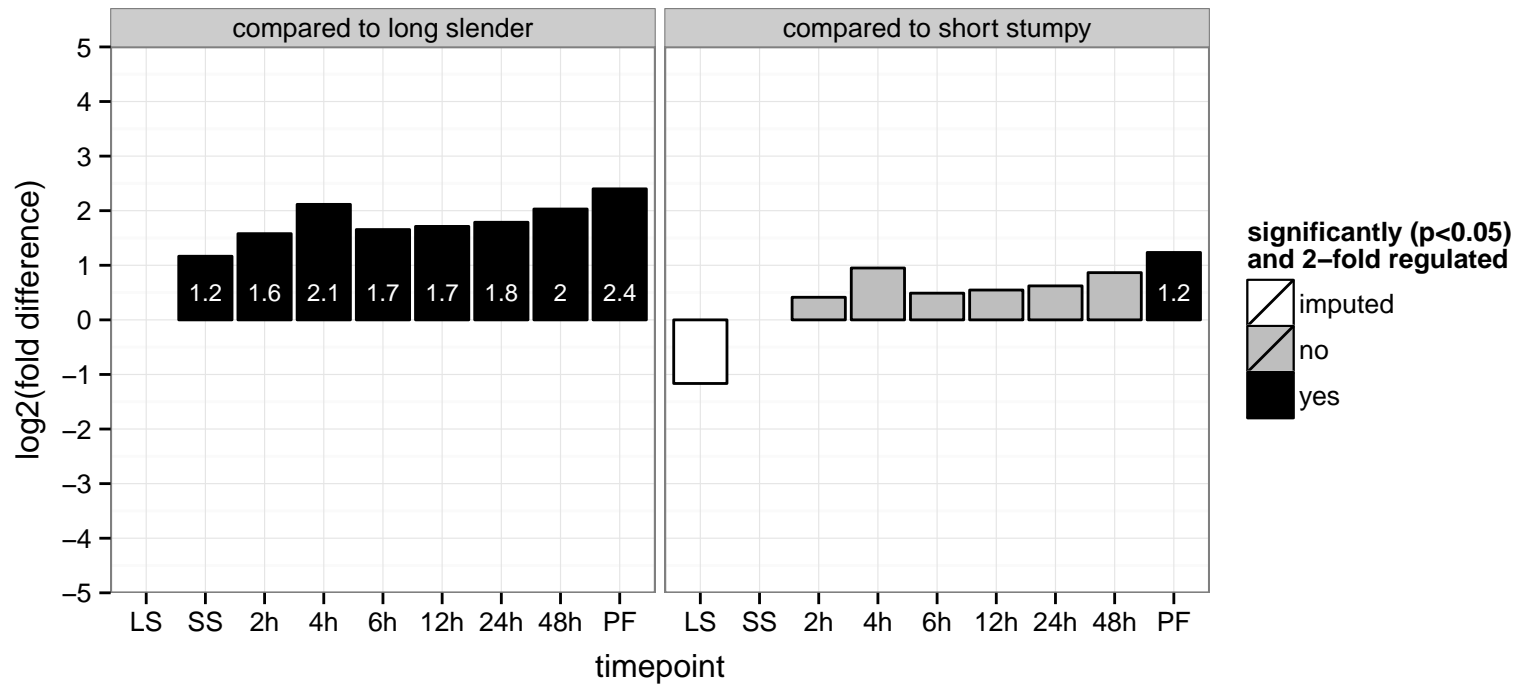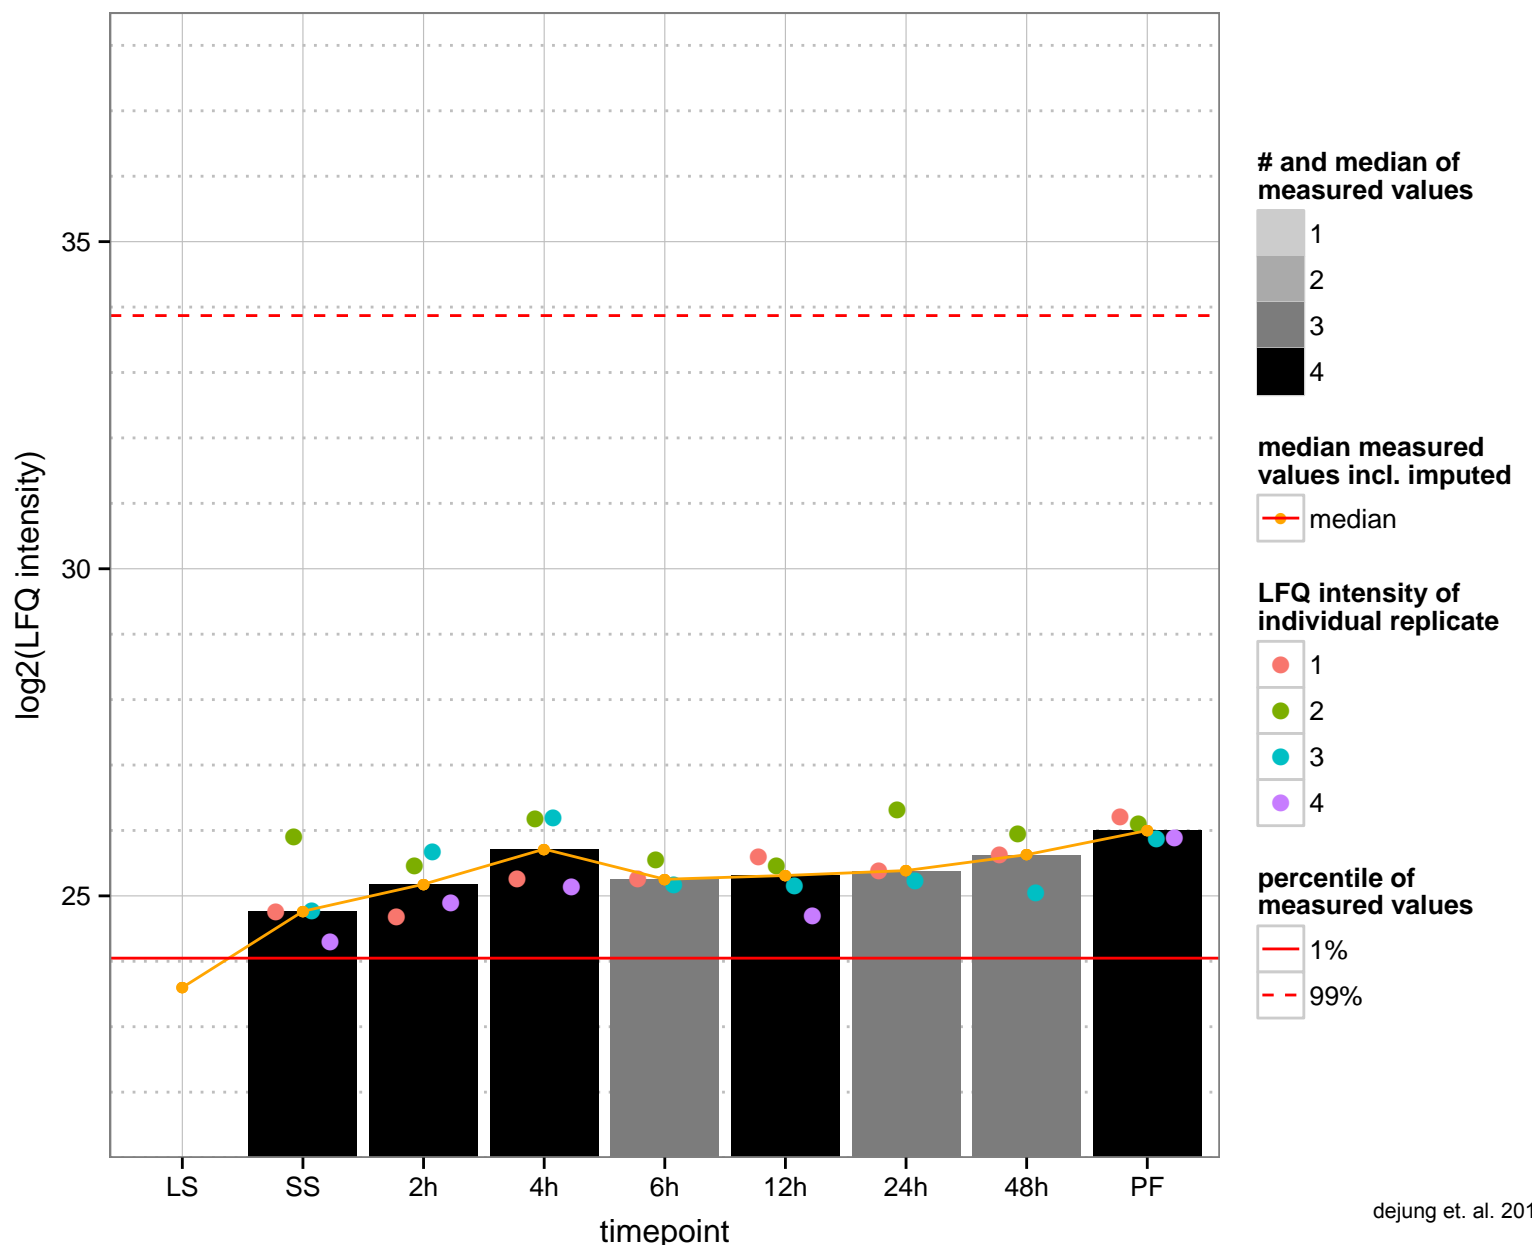



hypothetical protein, conserved  
 Tb927.8.7090  
 AGOF: null  
 AGOC: null  
 AGOP: null  
 PGO: null  
 PGO: null  
 PGO: null

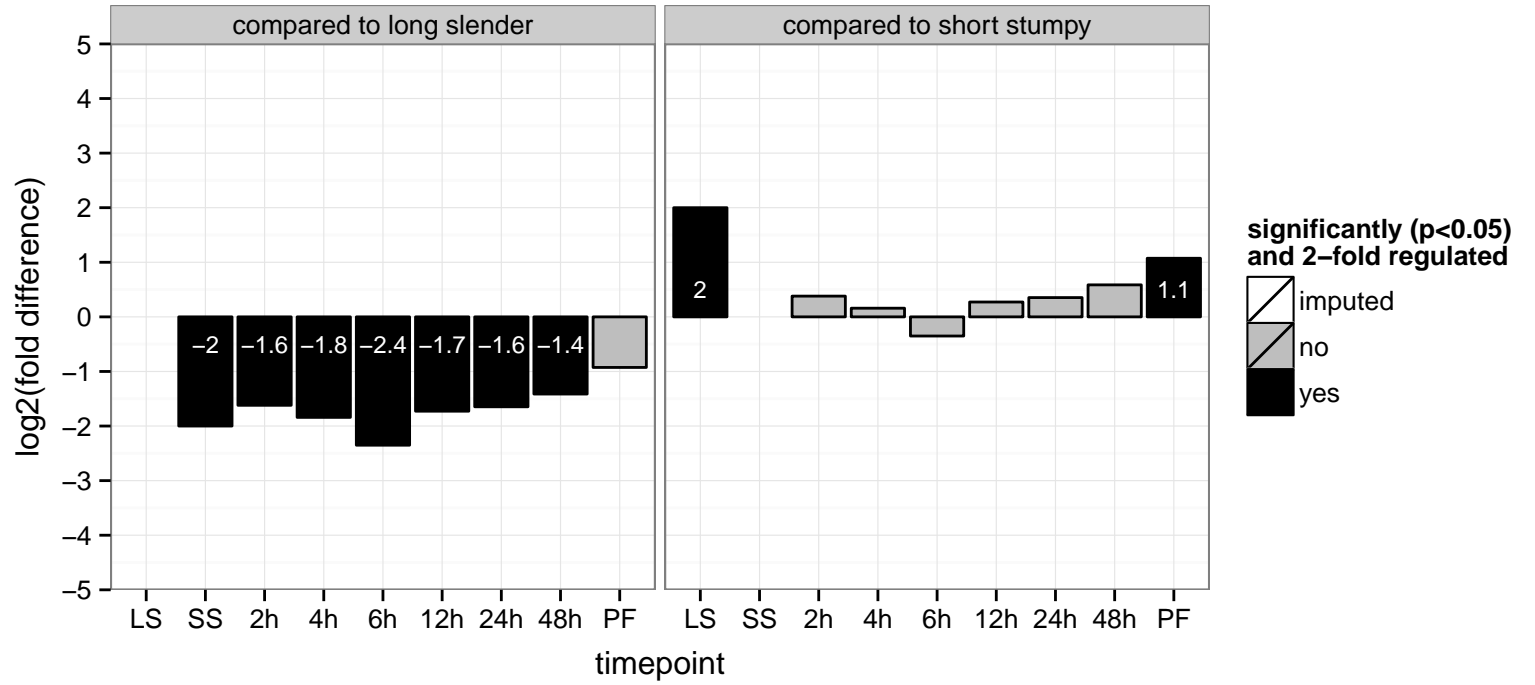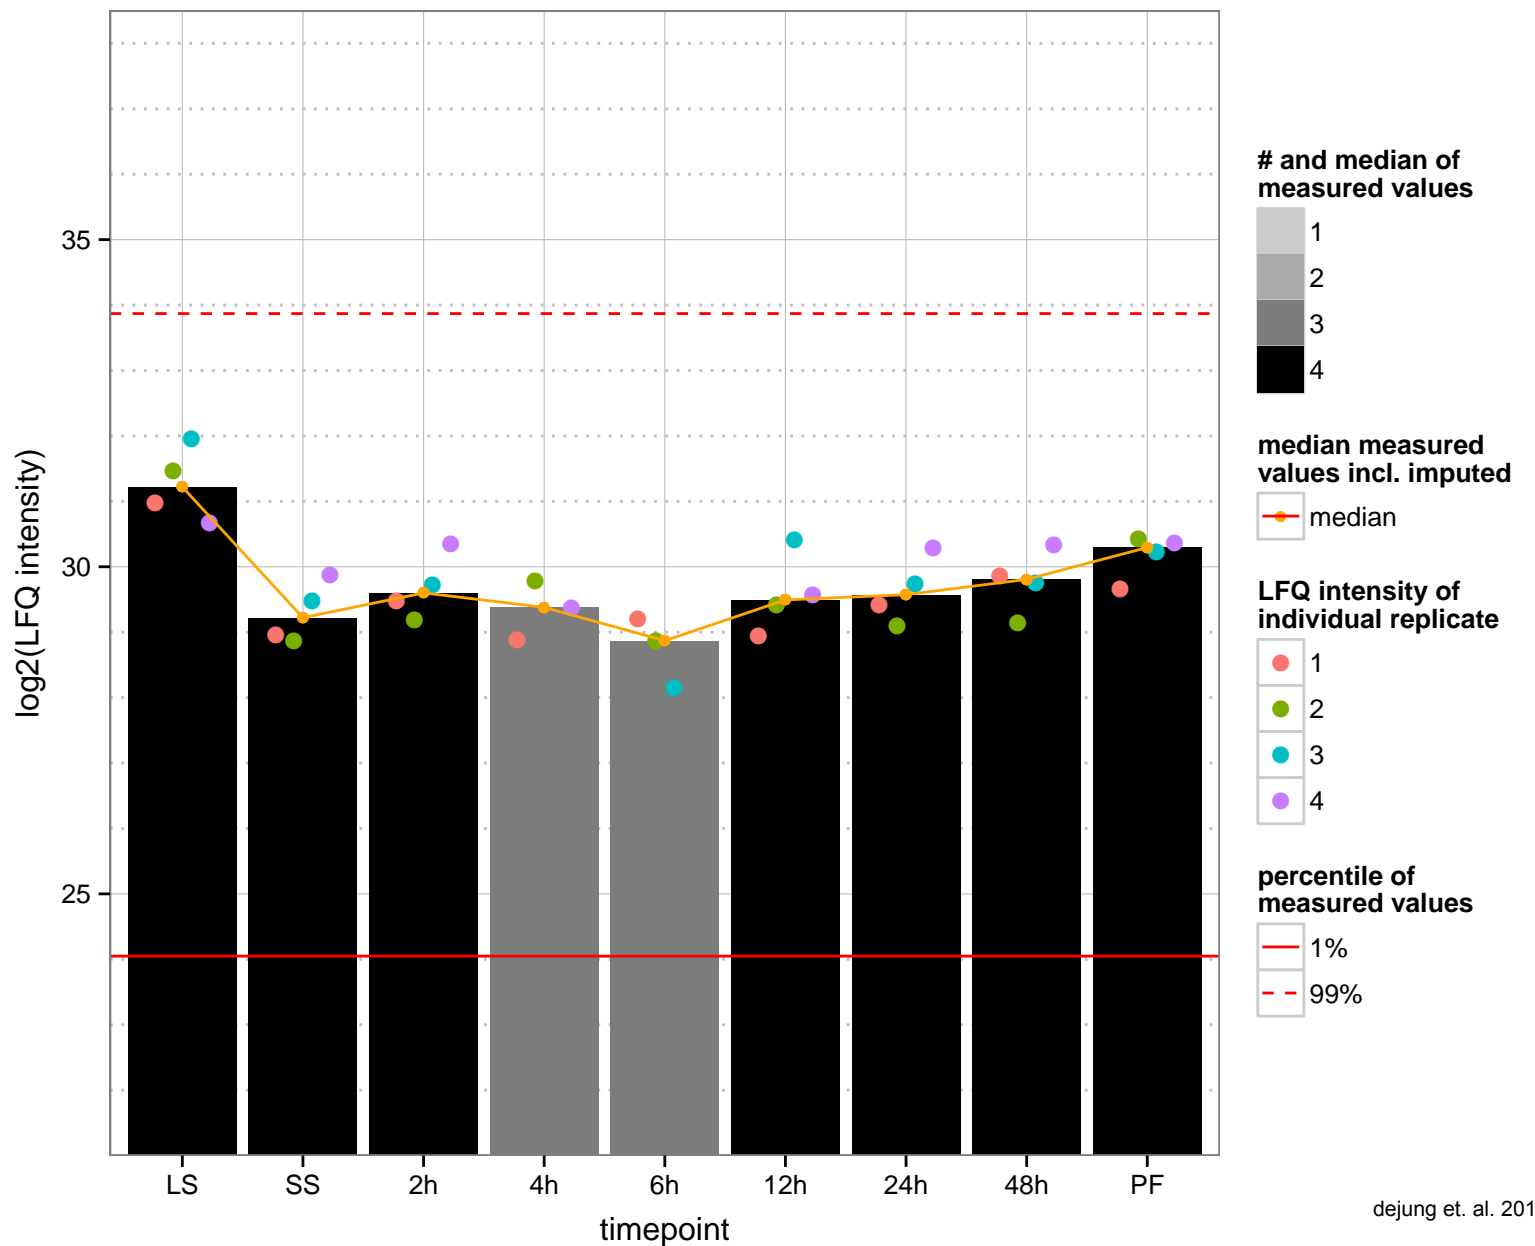

RNA-binding protein, putative (DRBD17)  
 Tb927.8.710  
 AGOF: RNA binding  
 AGOC: null  
 AGOP: RNA processing  
 PGO: nucleic acid binding  
 PGO: null  
 PGOP: null

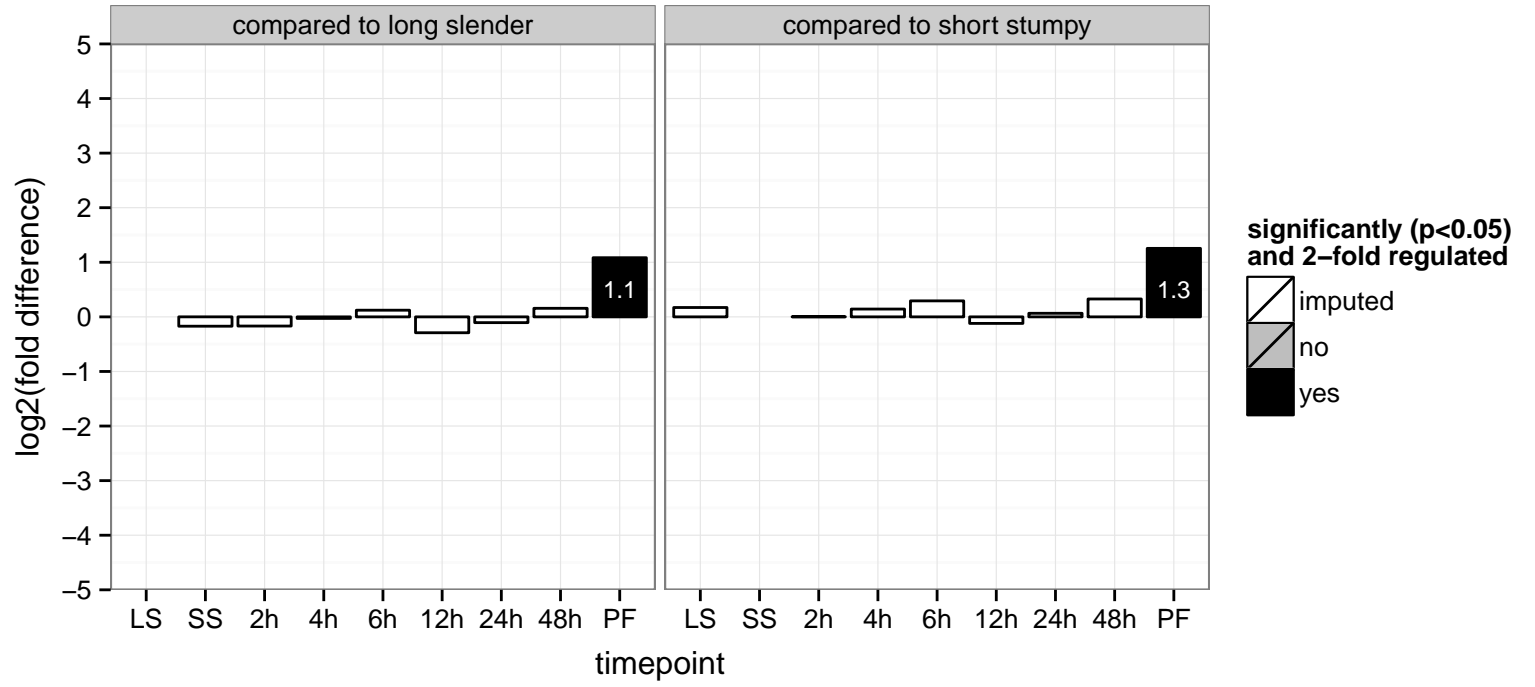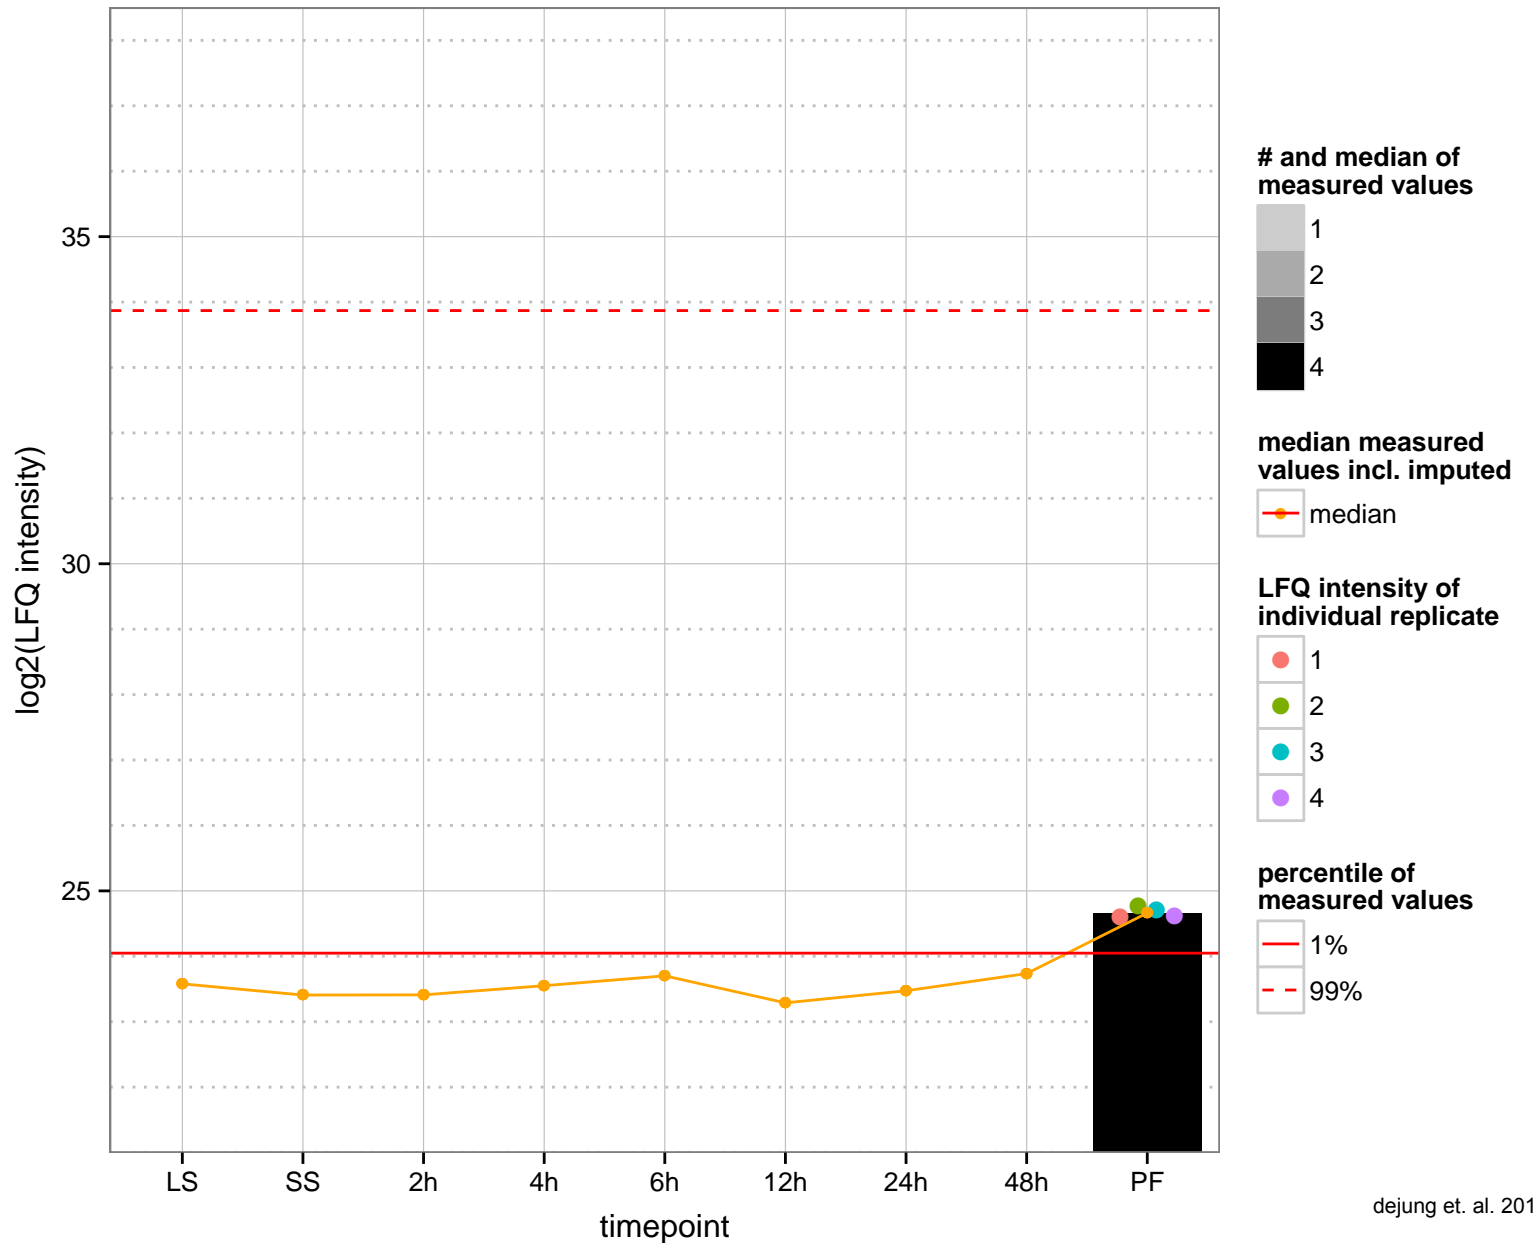

hypothetical protein  
 Tb927.8.7370  
 AGOF: null  
 AGOC: null  
 AGOP: null  
 PGO: null  
 PGOC: null  
 PGOP: null

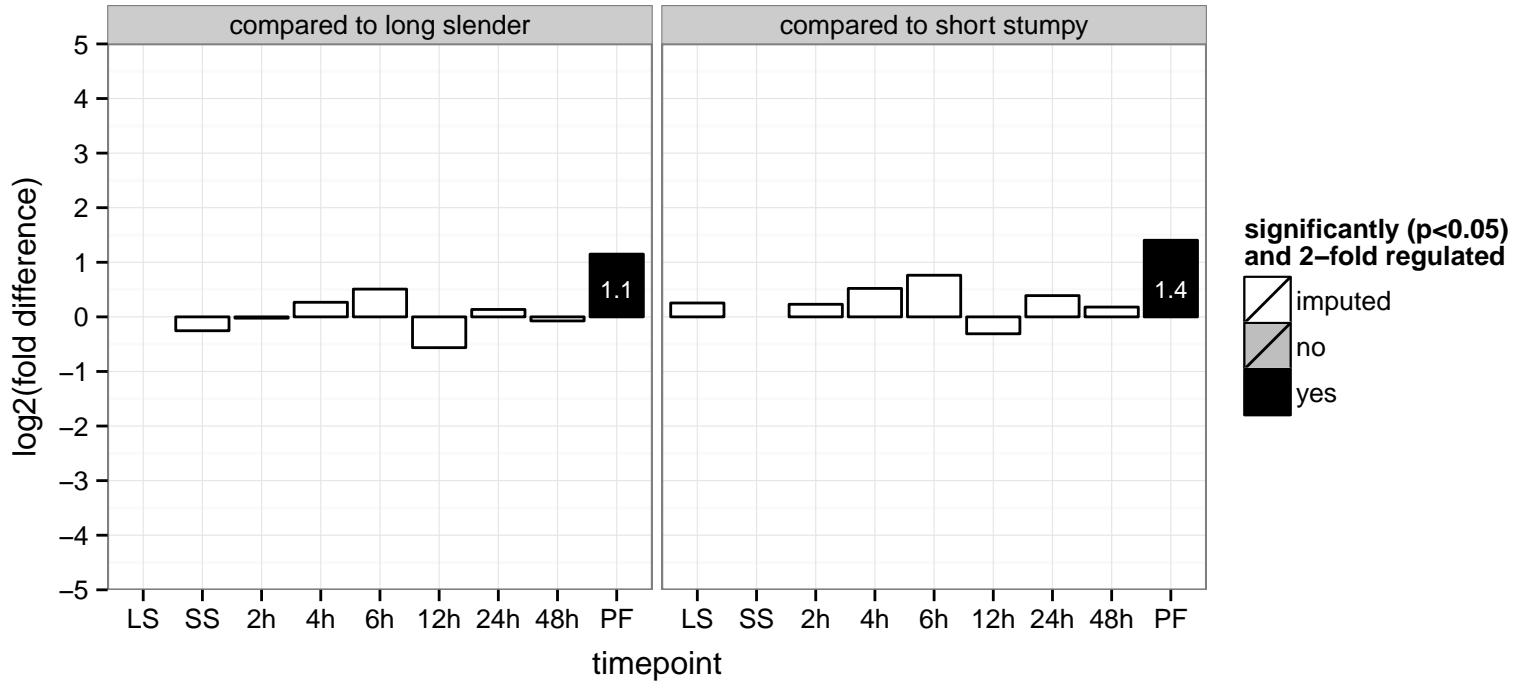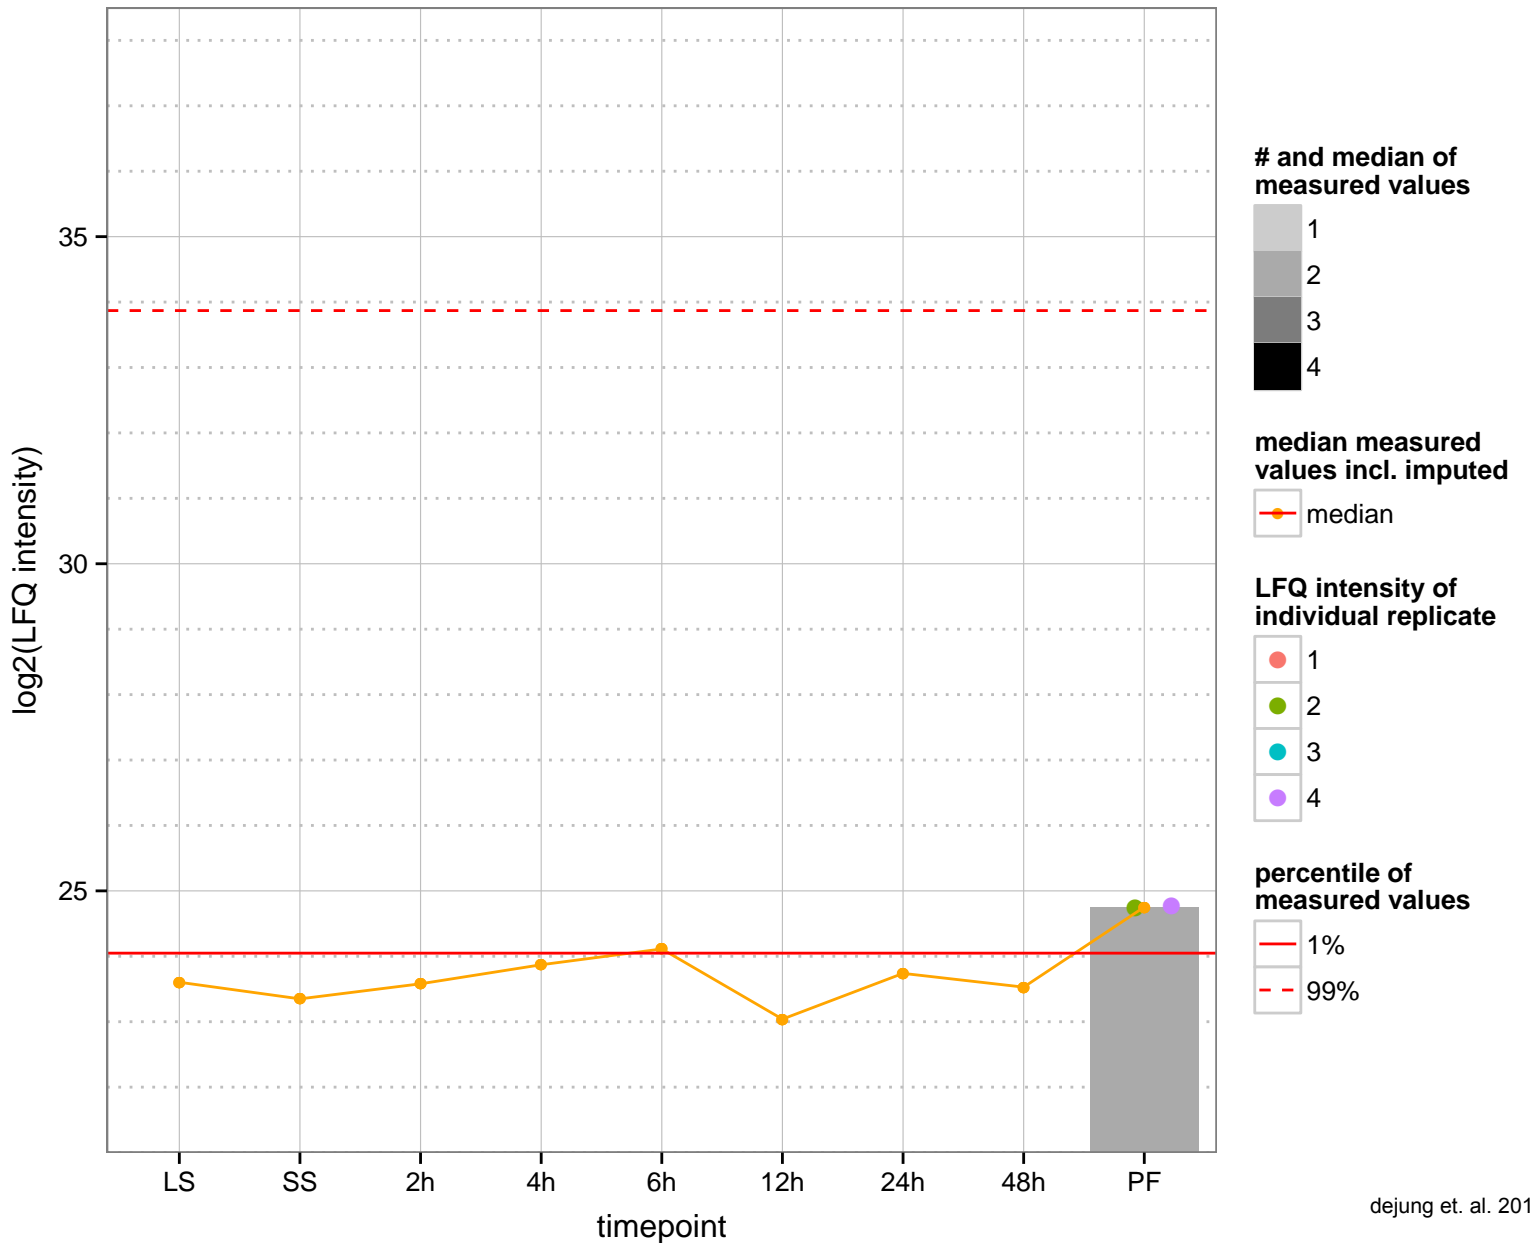

amino acid transporter 1, putative (AATP1)  
 Tb927.8.7640;Tb927.8.7610  
 AGOF: amine transmembrane transporter activity  
 AGOC: membrane, null  
 AGOP: amino acid transport  
 PGO: null  
 PGOC: null  
 PGOP: null

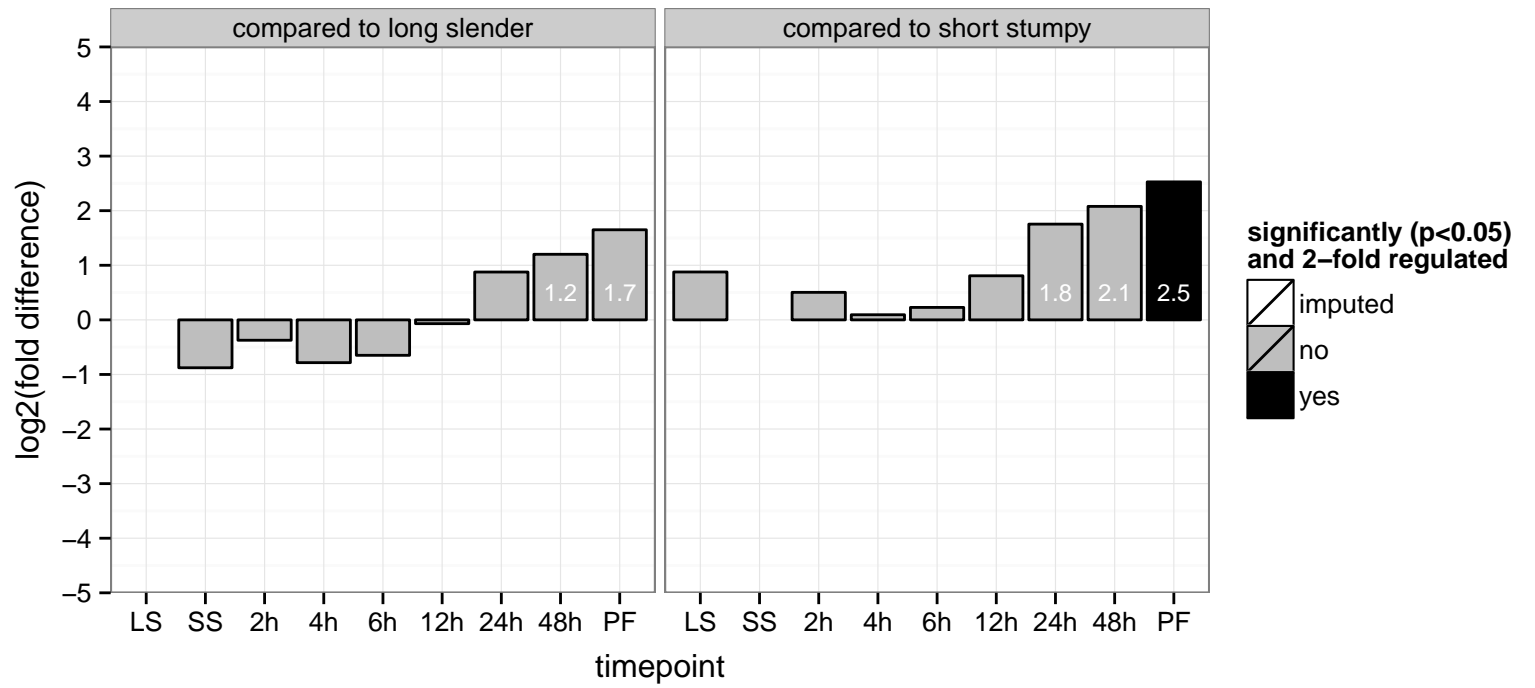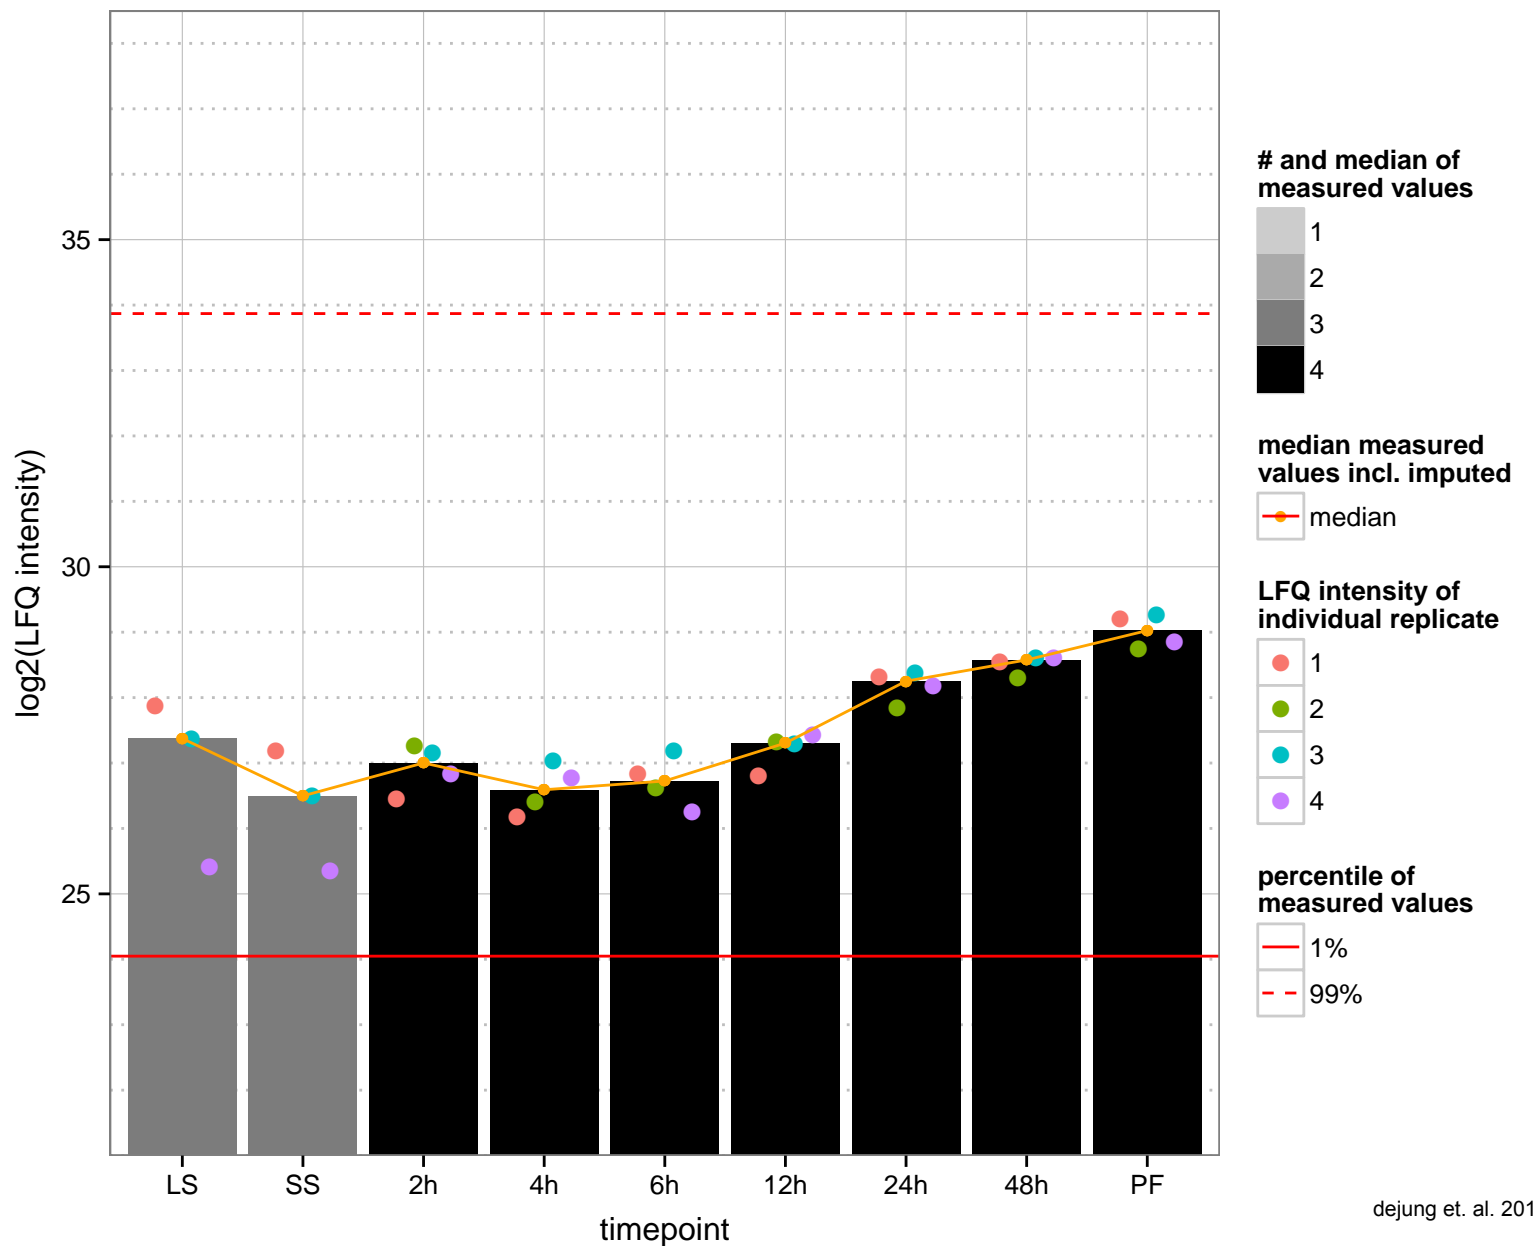

amino acid transporter, putative, amino acid transporter (pseudogene)  
 Tb927.8.7670;Tb927.8.7650  
 AGOF: amine transmembrane transporter activity, null  
 AGOC: membrane, null  
 AGOP: null, amino acid transport  
 PGO: null  
 PGOC: null  
 PGOP: null

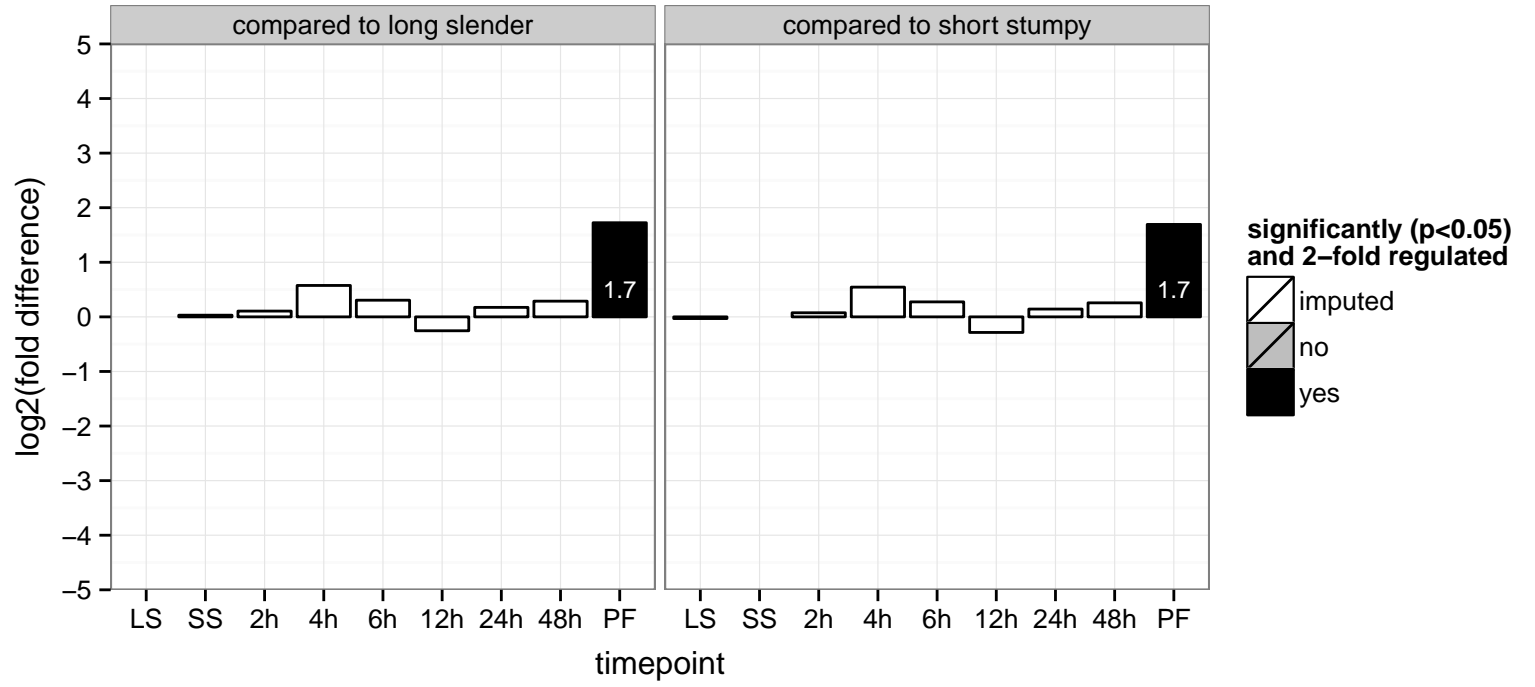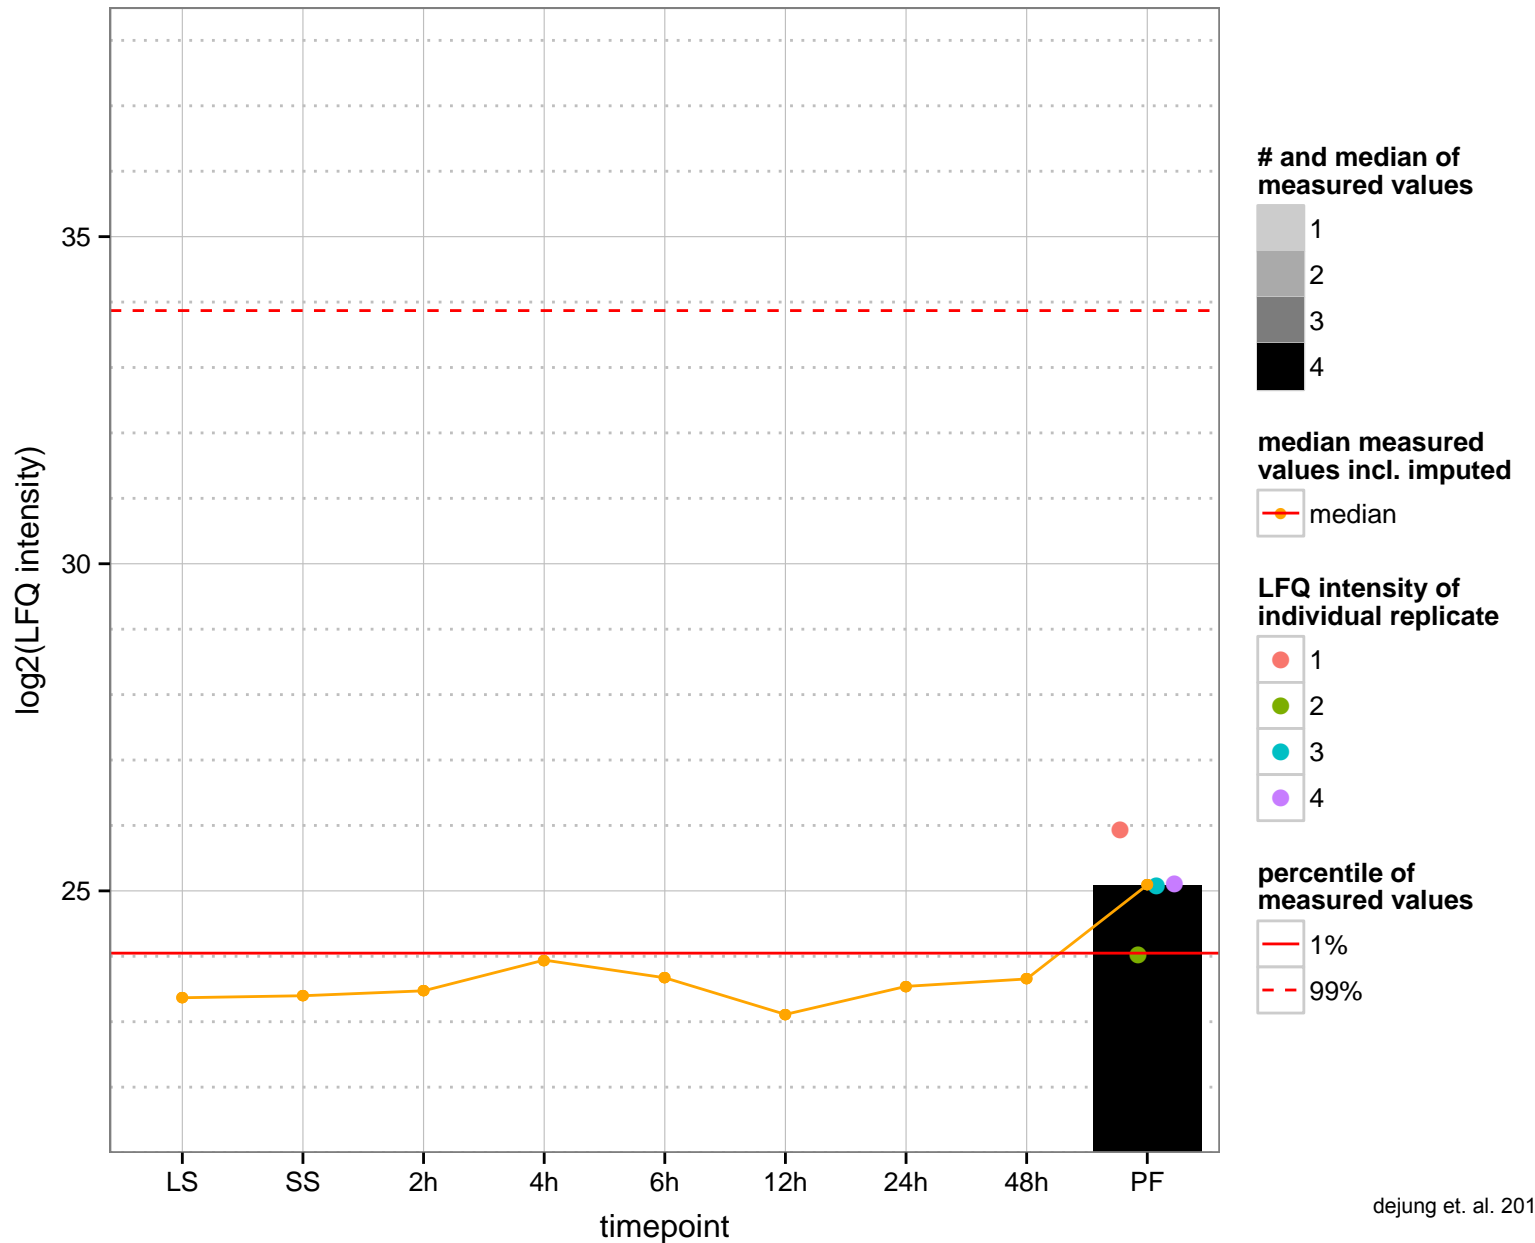

hypothetical protein, conserved  
 Tb927.8.820  
 AGOF: null  
 AGOC: null  
 AGOP: null  
 PGO: null  
 PGOC: null  
 PGOP: null

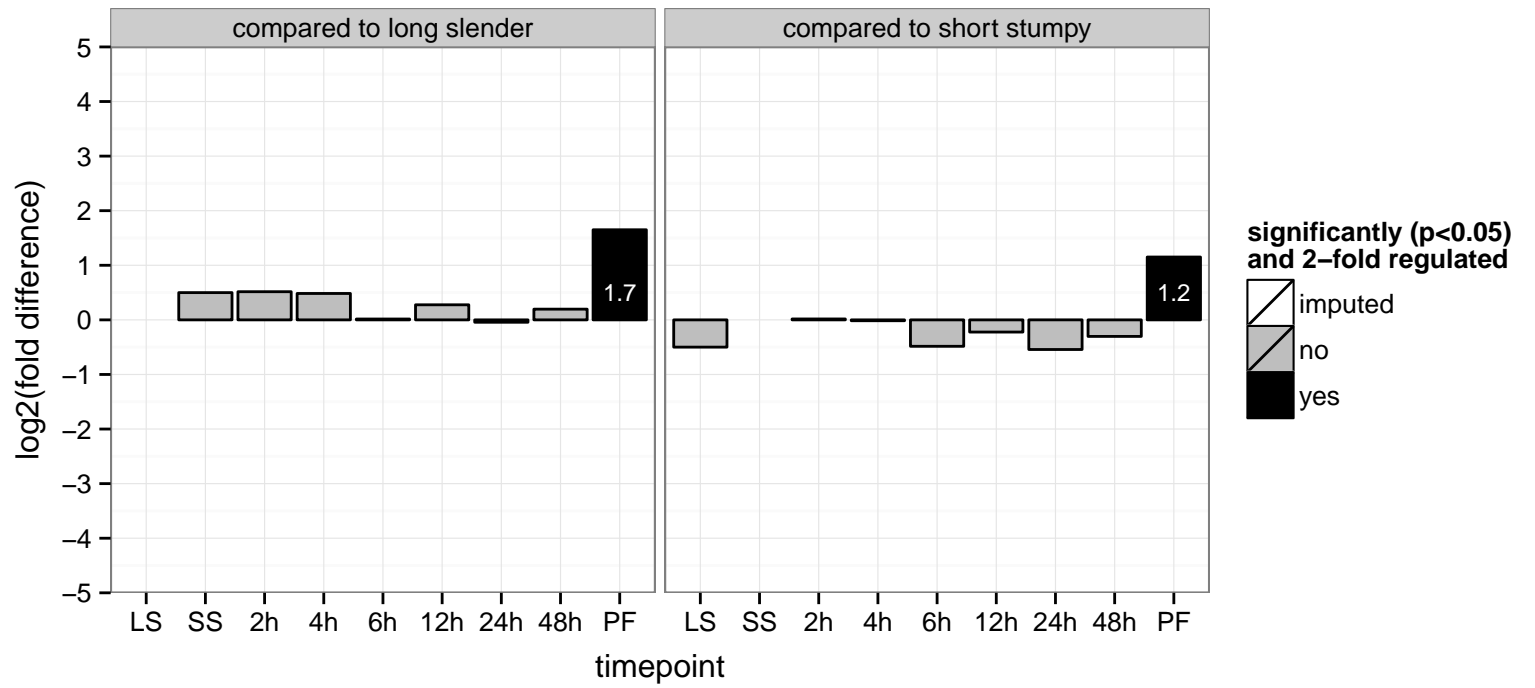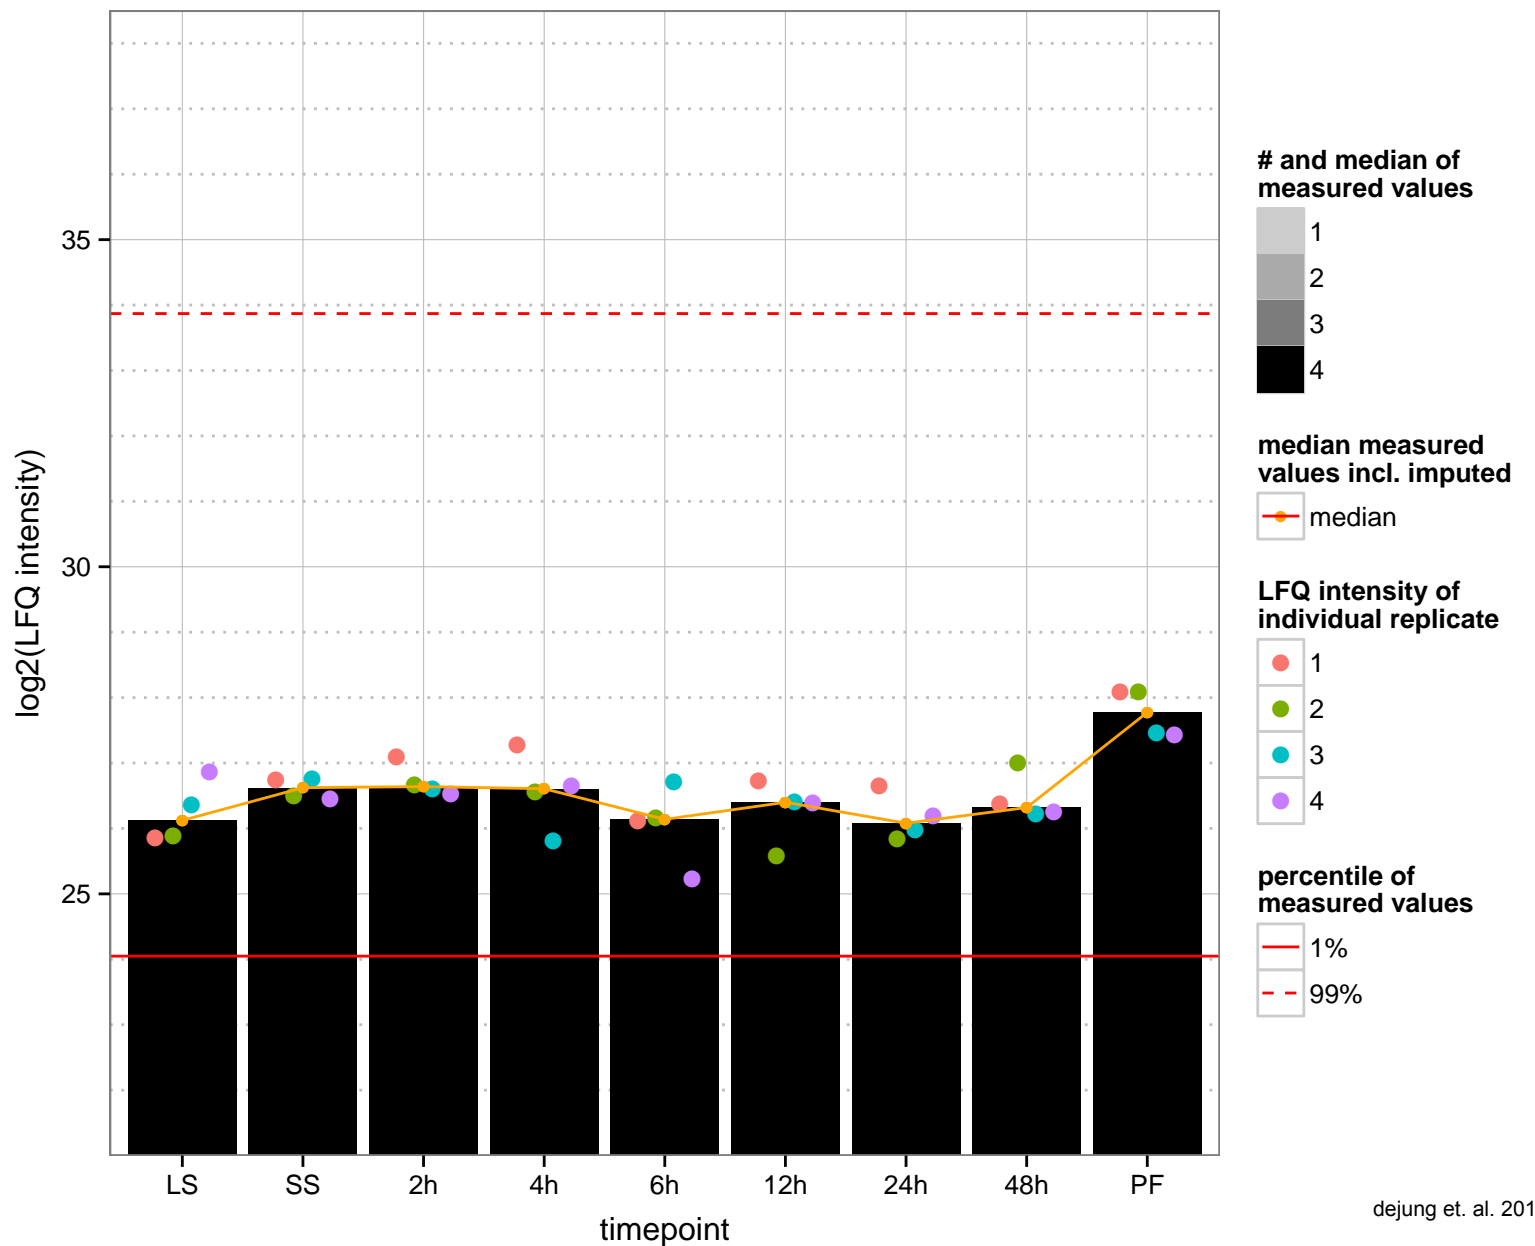

hypothetical protein, conserved  
 Tb927.9.10050  
 AGOF: null  
 AGOC: integral to membrane  
 AGOP: protein insertion into membrane  
 PGO: null  
 PGOC: integral to membrane  
 PGOP: protein insertion into membrane

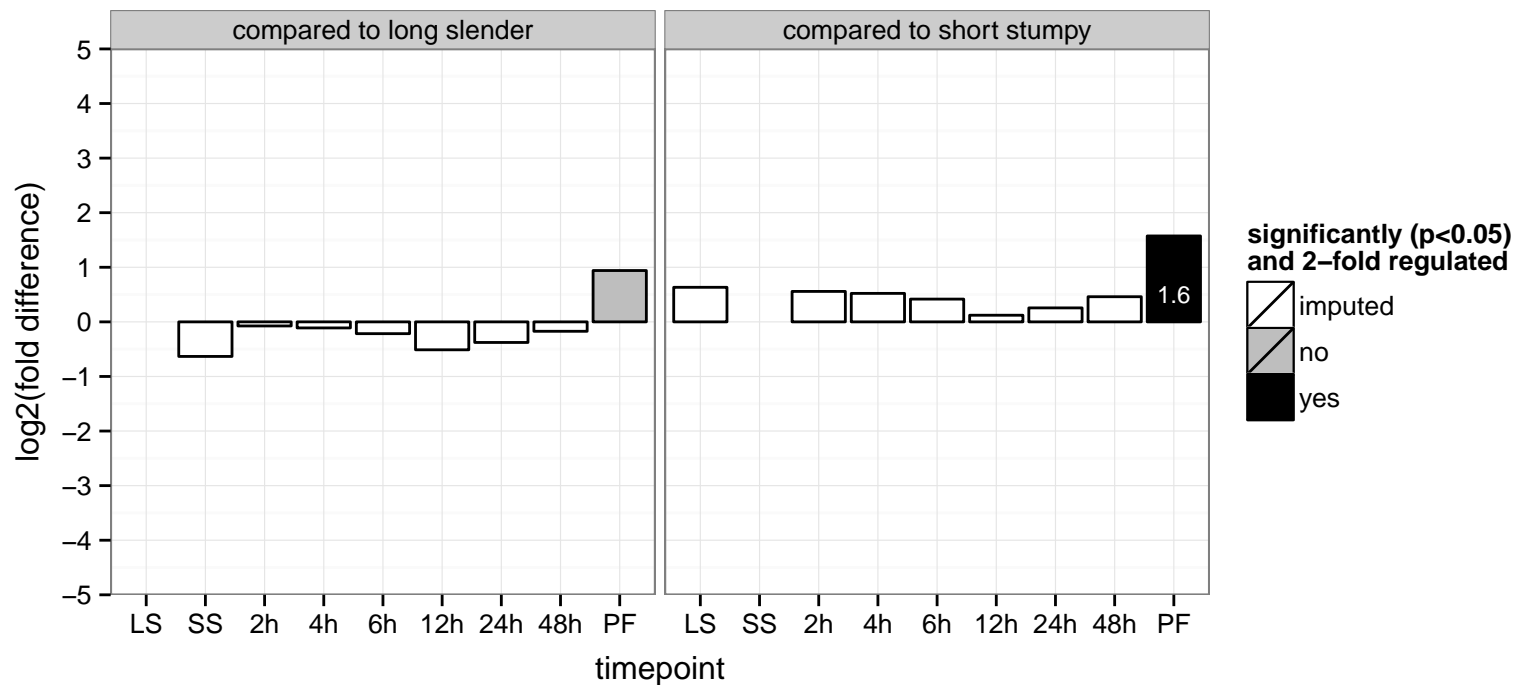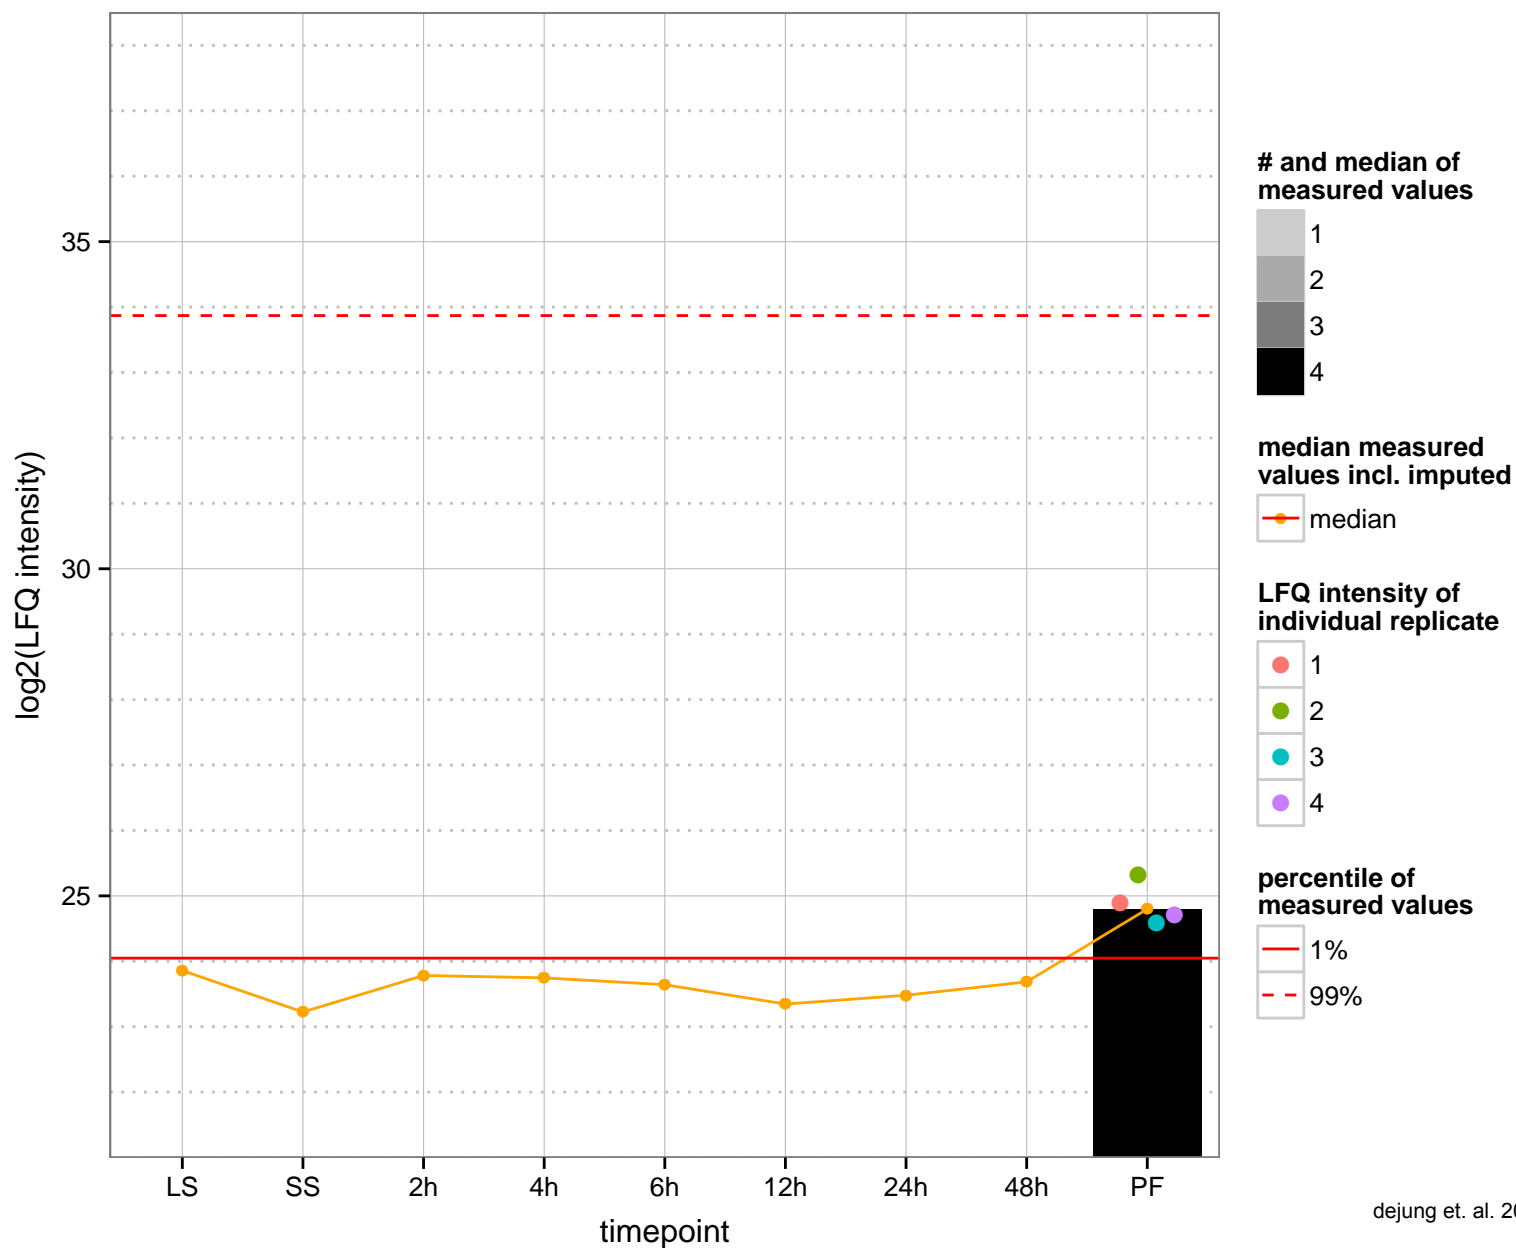

hypothetical protein, conserved  
 Tb927.9.10200  
 AGOF: null  
 AGOC: null  
 AGOP: null  
 PGO: null  
 PGOC: null  
 PGOP: null

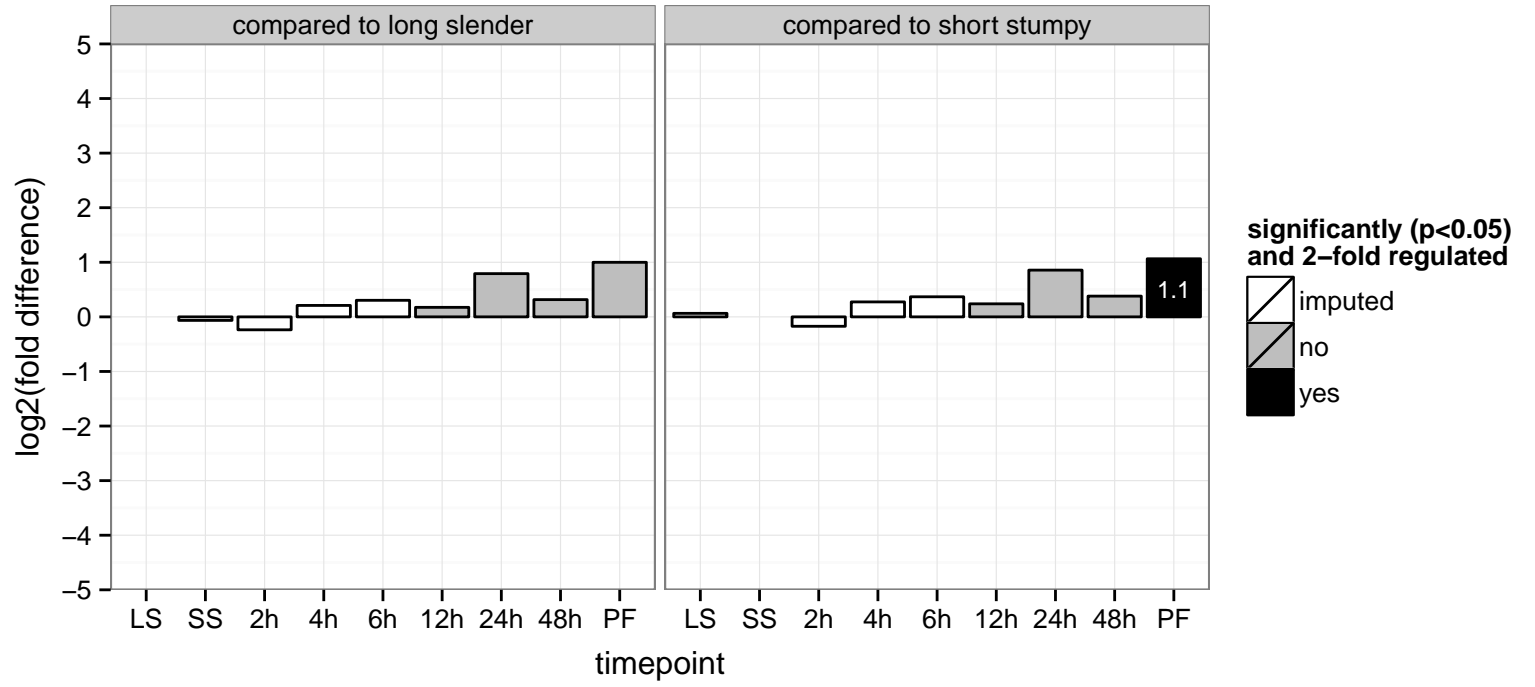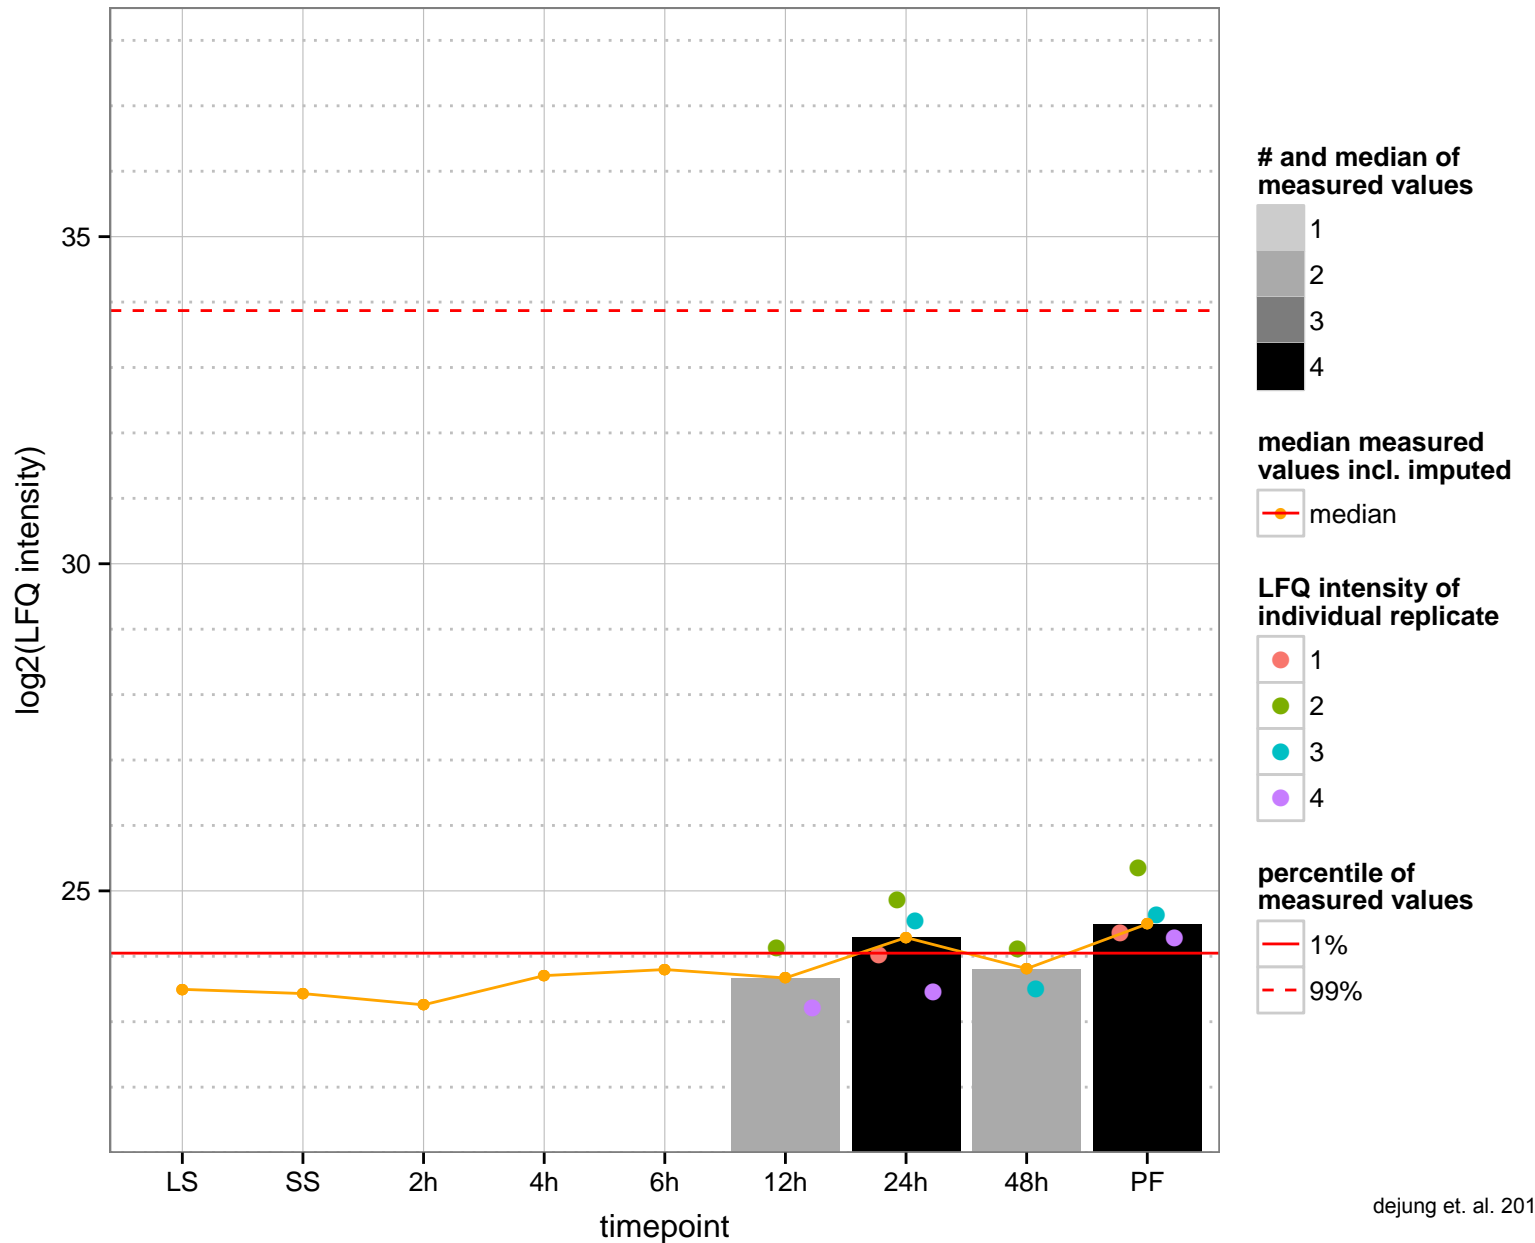



TAX-1  
 Tb927.9.10370  
 AGOF: null  
 AGOC: cilium part  
 AGOP: null  
 PGO: null  
 PGO: null  
 PGO: null

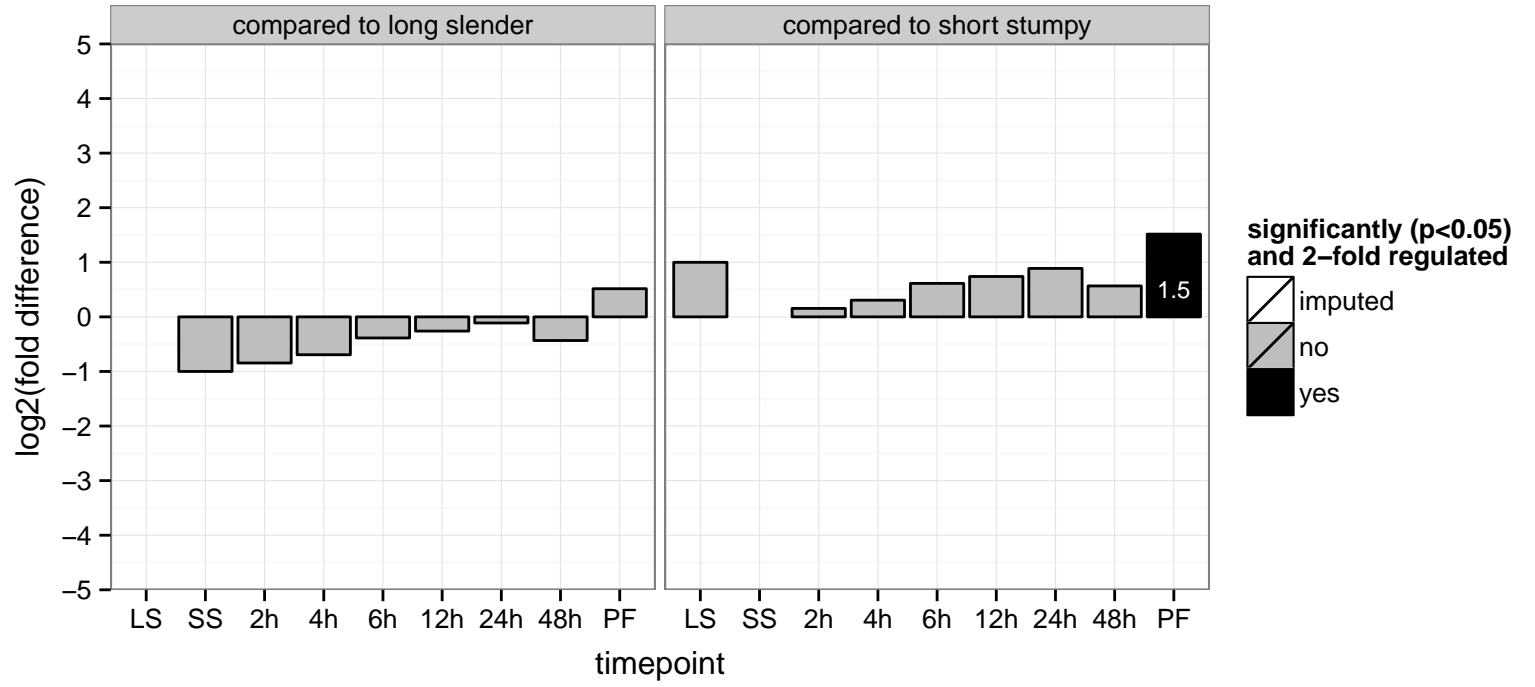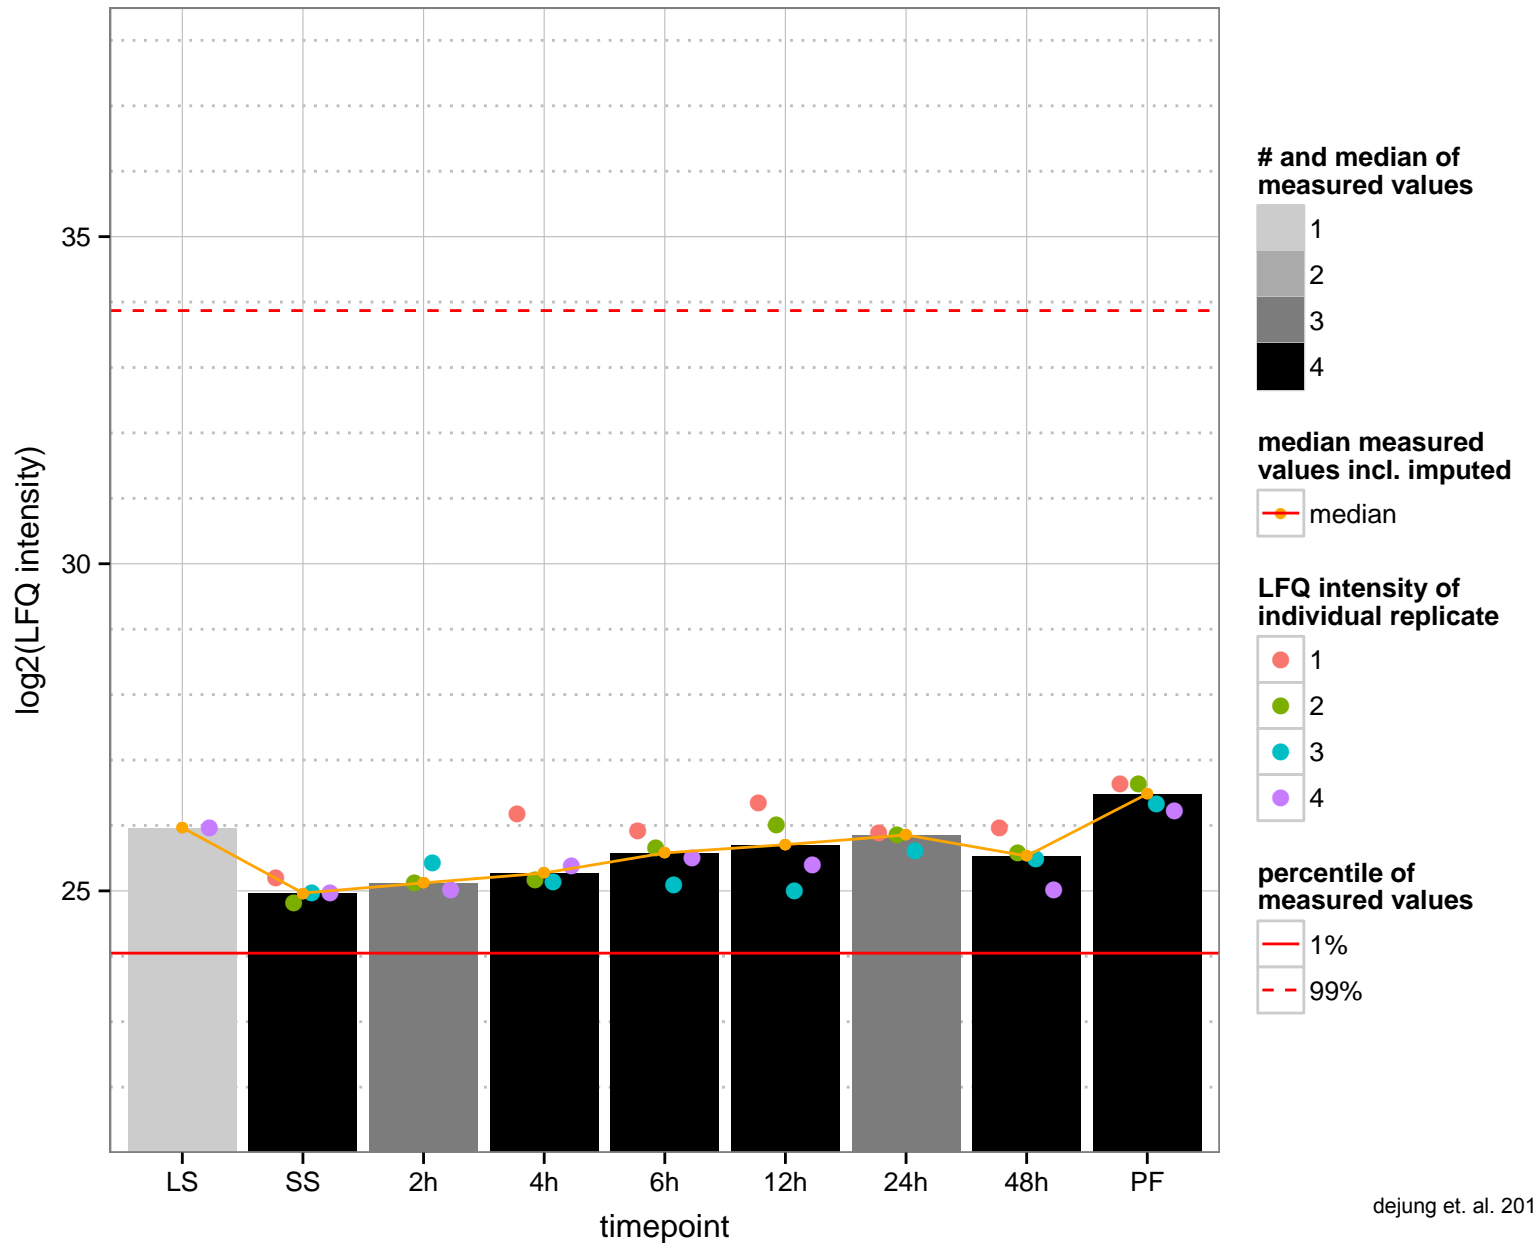

hypothetical protein, conserved  
 Tb927.9.10830  
 AGOF: null  
 AGOC: null  
 AGOP: null  
 PGO: null  
 PGOC: null  
 PGOP: null

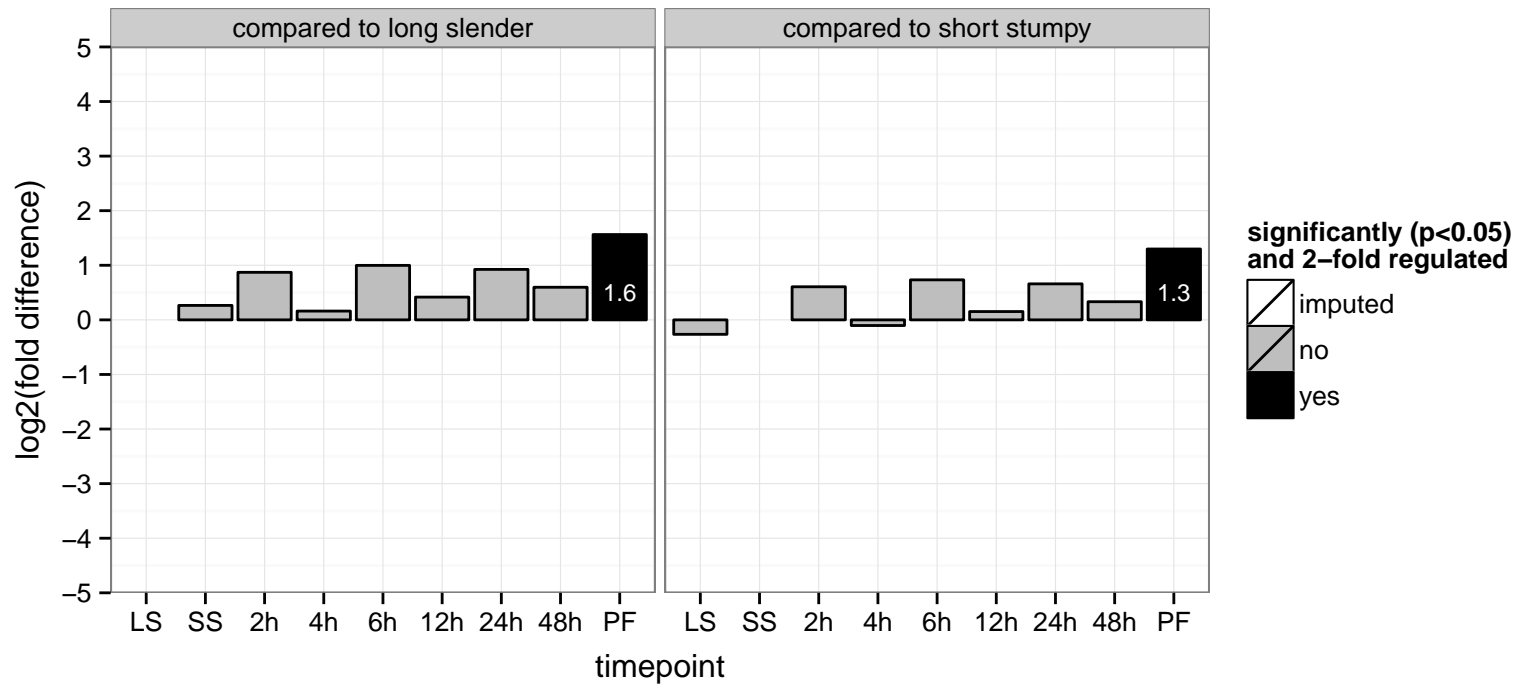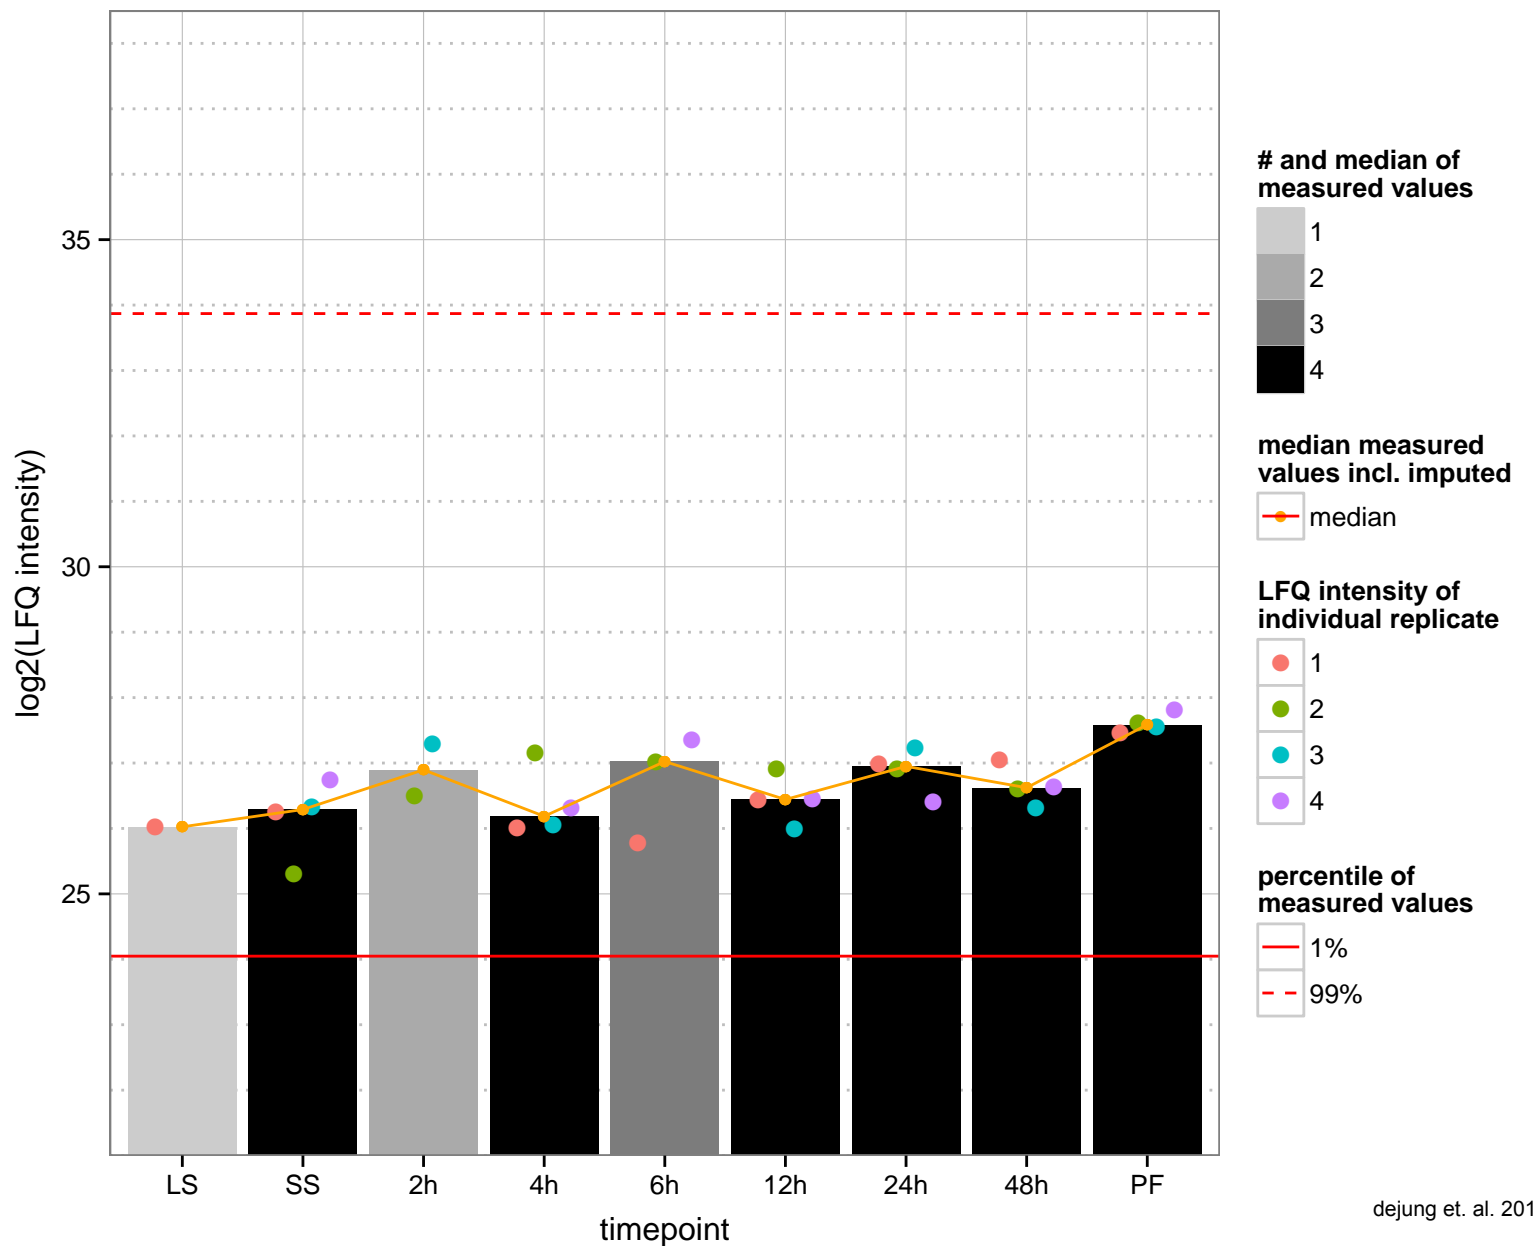

T-complex protein 1, eta subunit, putative, t-complex protein 1 (eta subunit), putative (TCP-1-eta)  
 Tb927.9.11270  
 AGOF: ATP binding, unfolded protein binding  
 AGOC: chaperonin-containing T-complex  
 AGOP: protein folding, regulation of cell cycle  
 PGO: ATP binding, unfolded protein binding  
 PGO: null  
 PGO: cellular protein metabolic process, protein folding

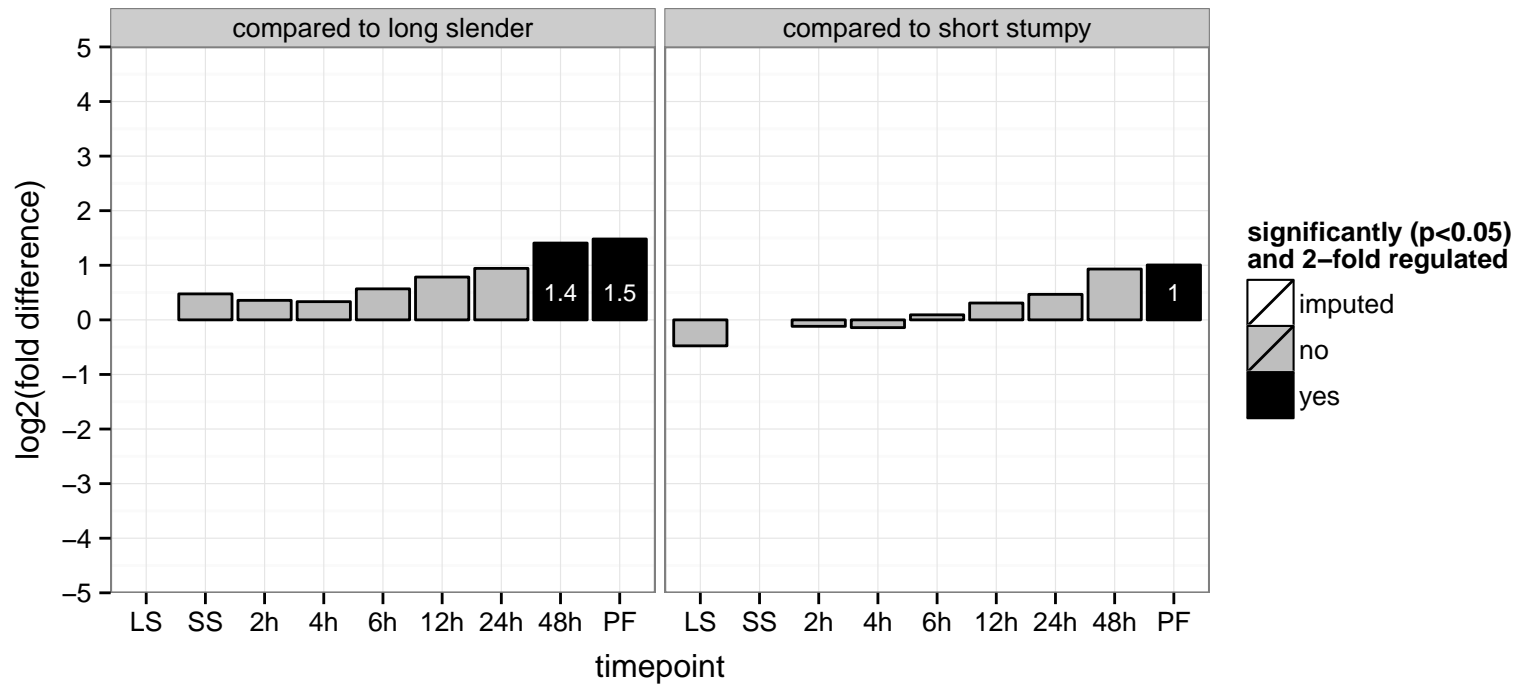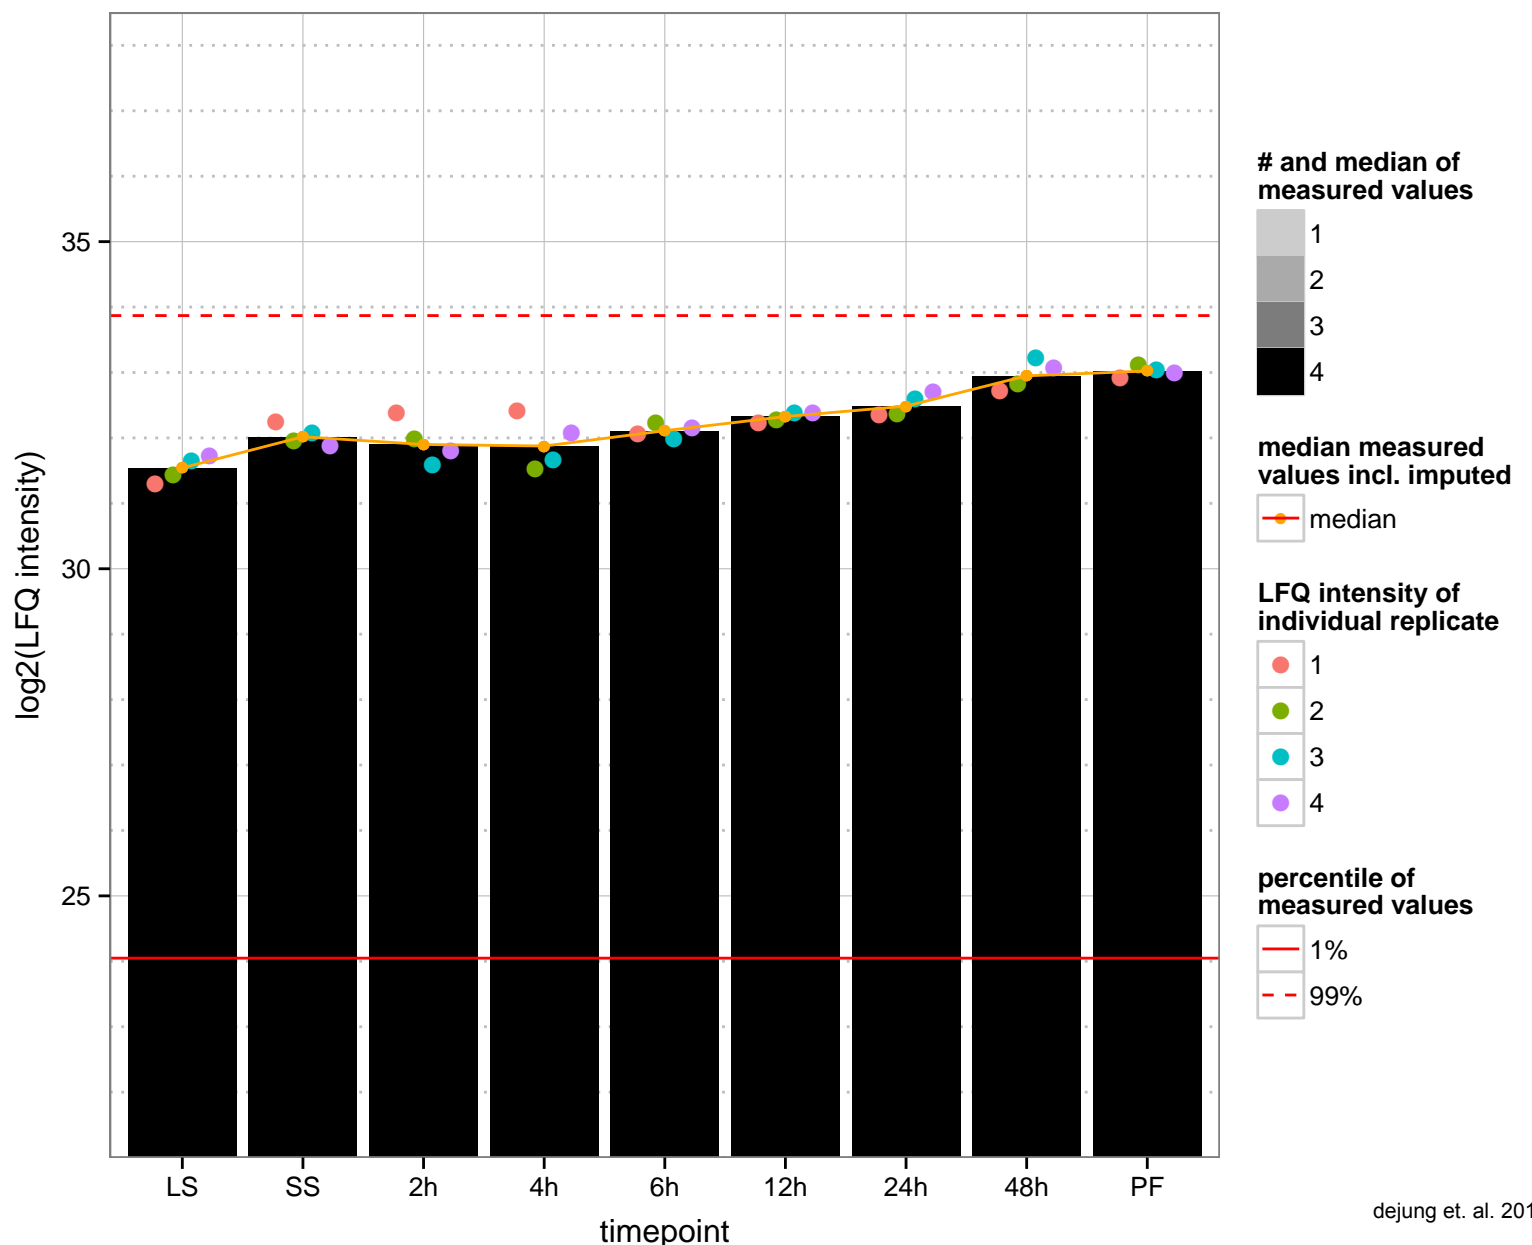

hypothetical protein, conserved  
 Tb927.9.11500  
 AGOF: ubiquitin protein ligase binding  
 AGOC: cullin-RING ubiquitin ligase complex  
 AGOP: ubiquitin-dependent protein catabolic process  
 PGO: ubiquitin protein ligase binding  
 PGOC: cullin-RING ubiquitin ligase complex  
 PGOP: ubiquitin-dependent protein catabolic process

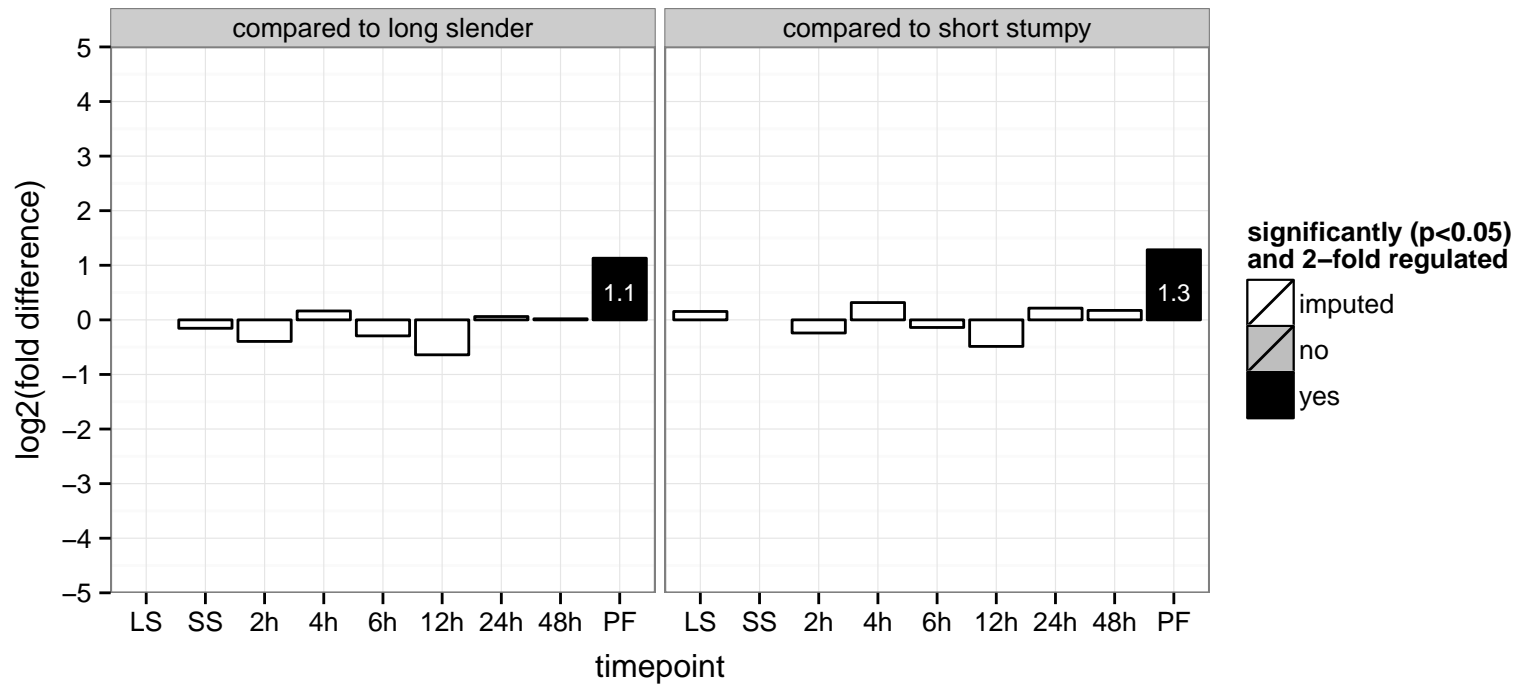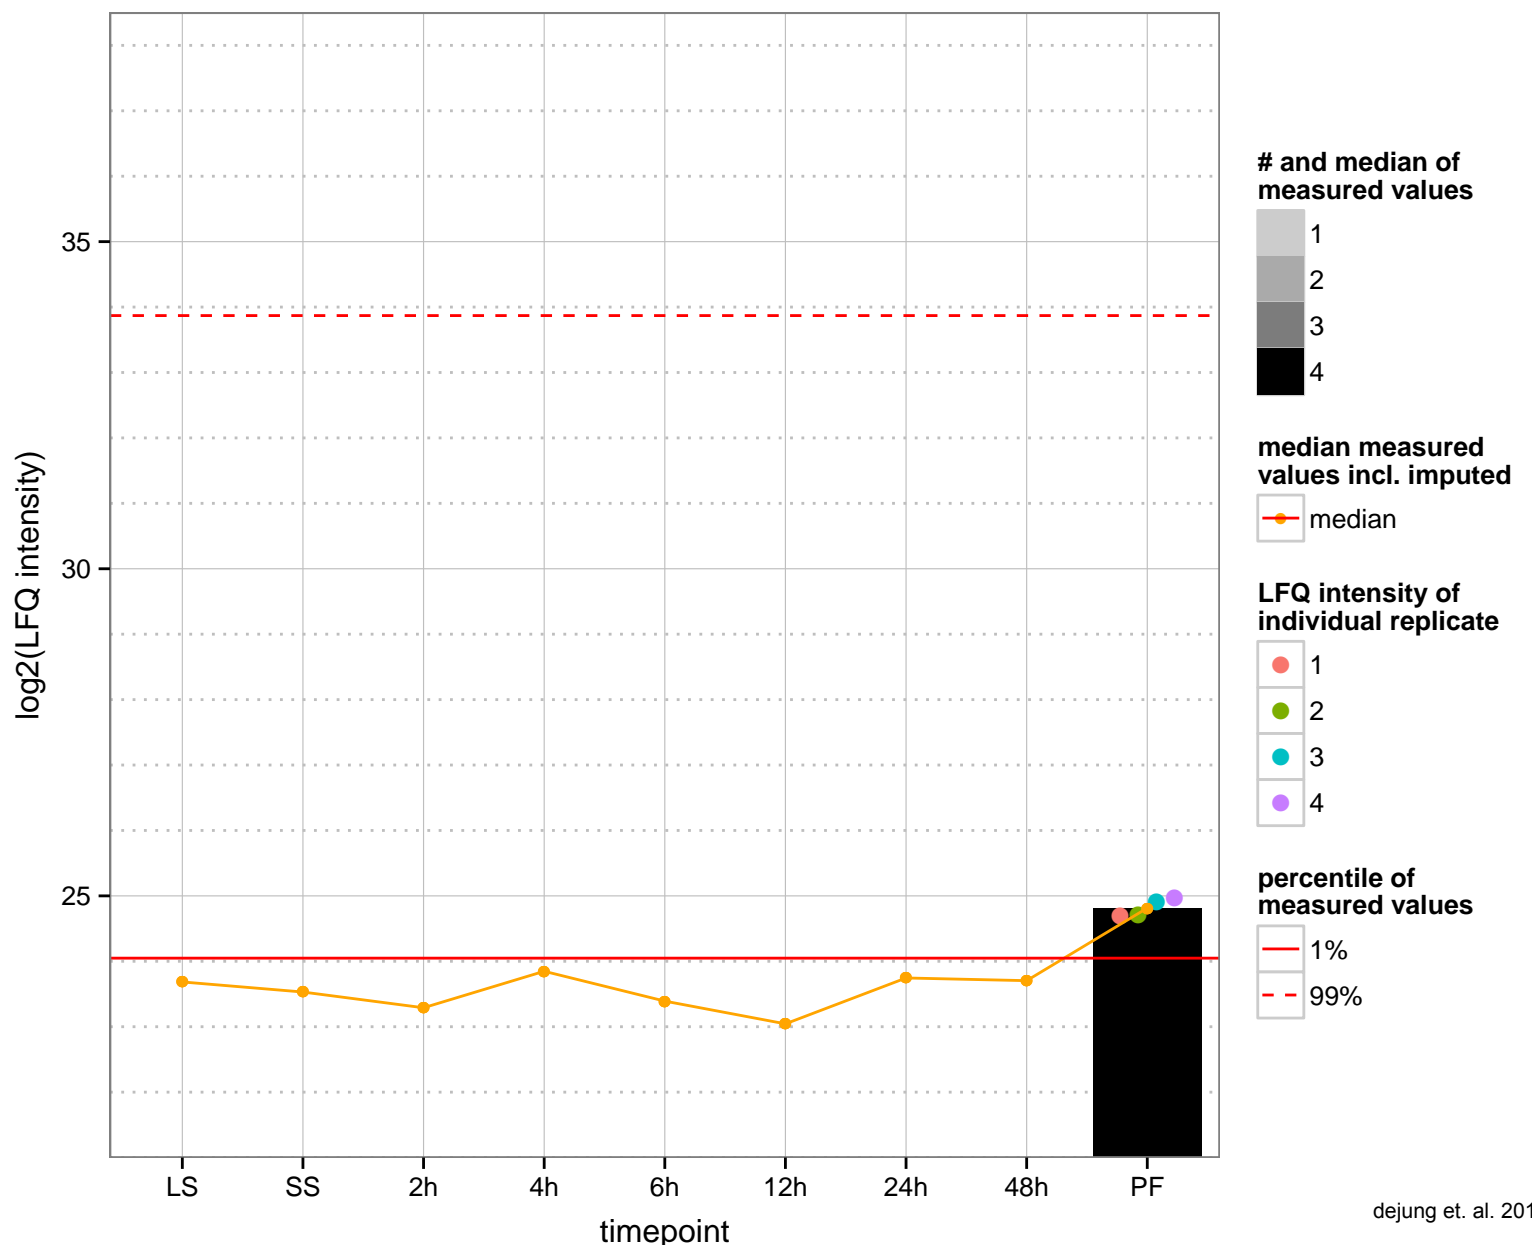

Pre-rRNA-processing protein PNO1, putative (PNO1)  
 Tb927.9.11840  
 AGOF: RNA binding  
 AGOC: nucleolus  
 AGOP: null  
 PGO: RNA binding  
 PGOC: null  
 PGOP: null

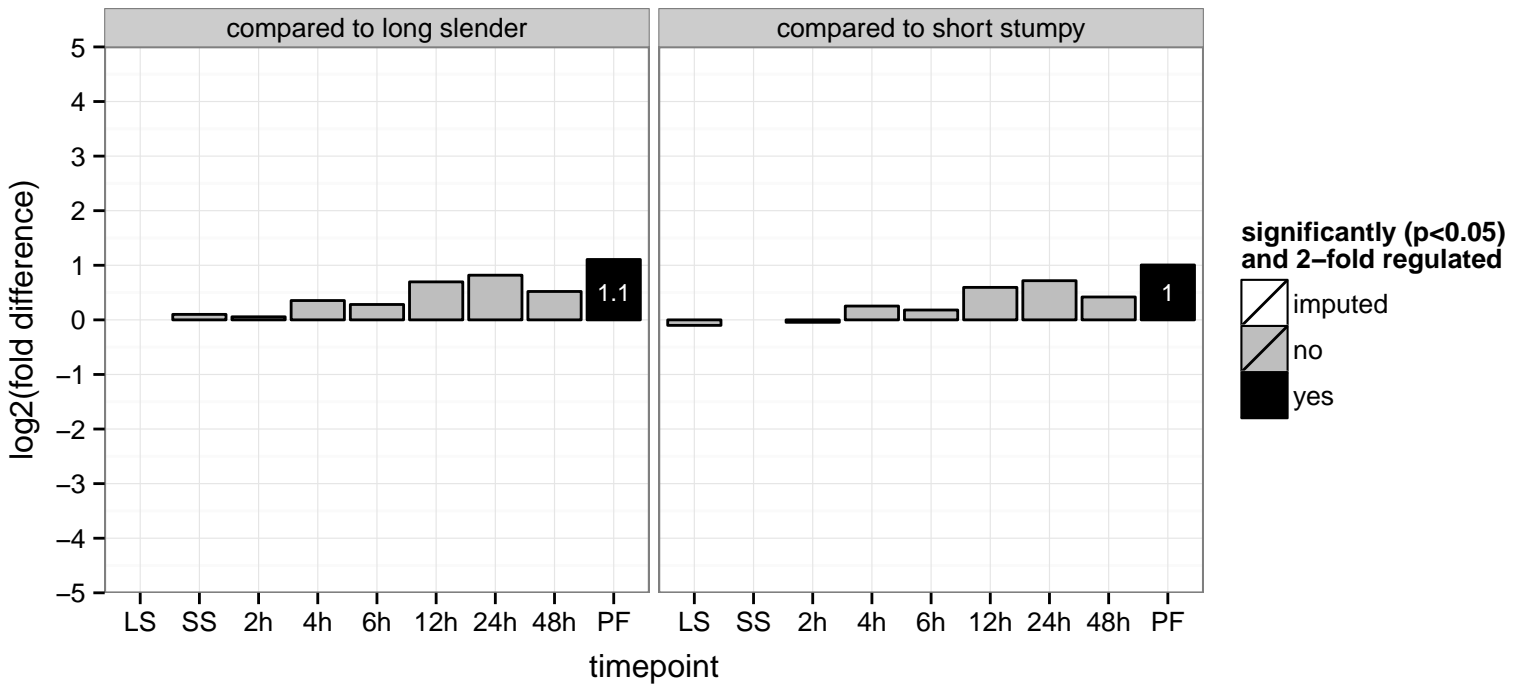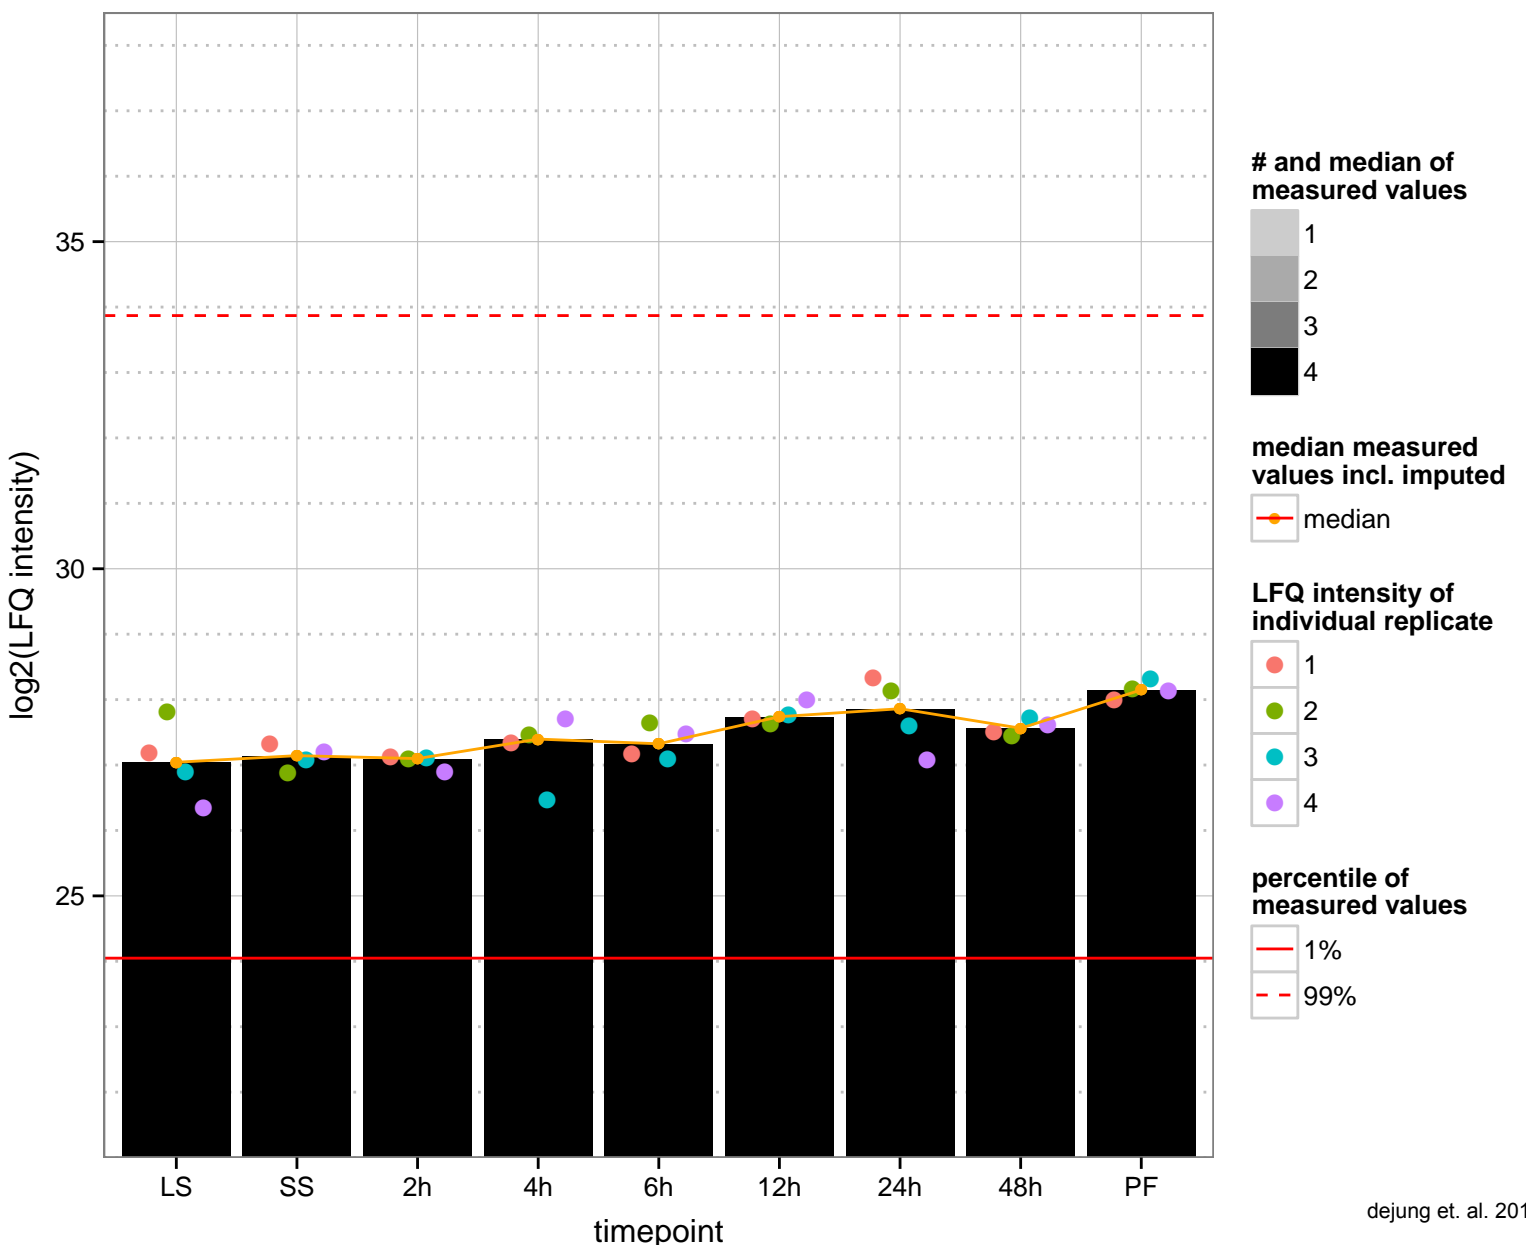

hypothetical protein, conserved  
 Tb927.9.12070  
 AGOF: null  
 AGOC: null  
 AGOP: null  
 PGO: null  
 PGOC: null  
 PGOP: null

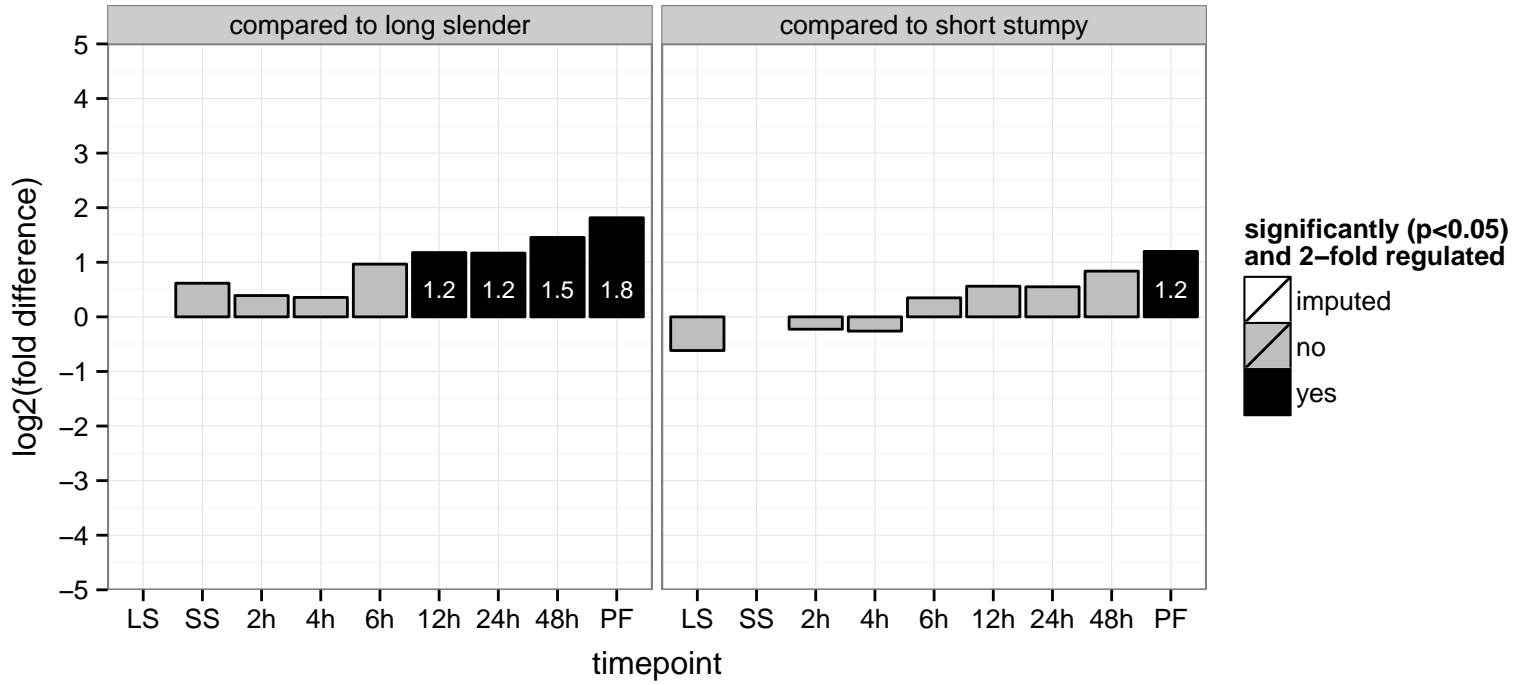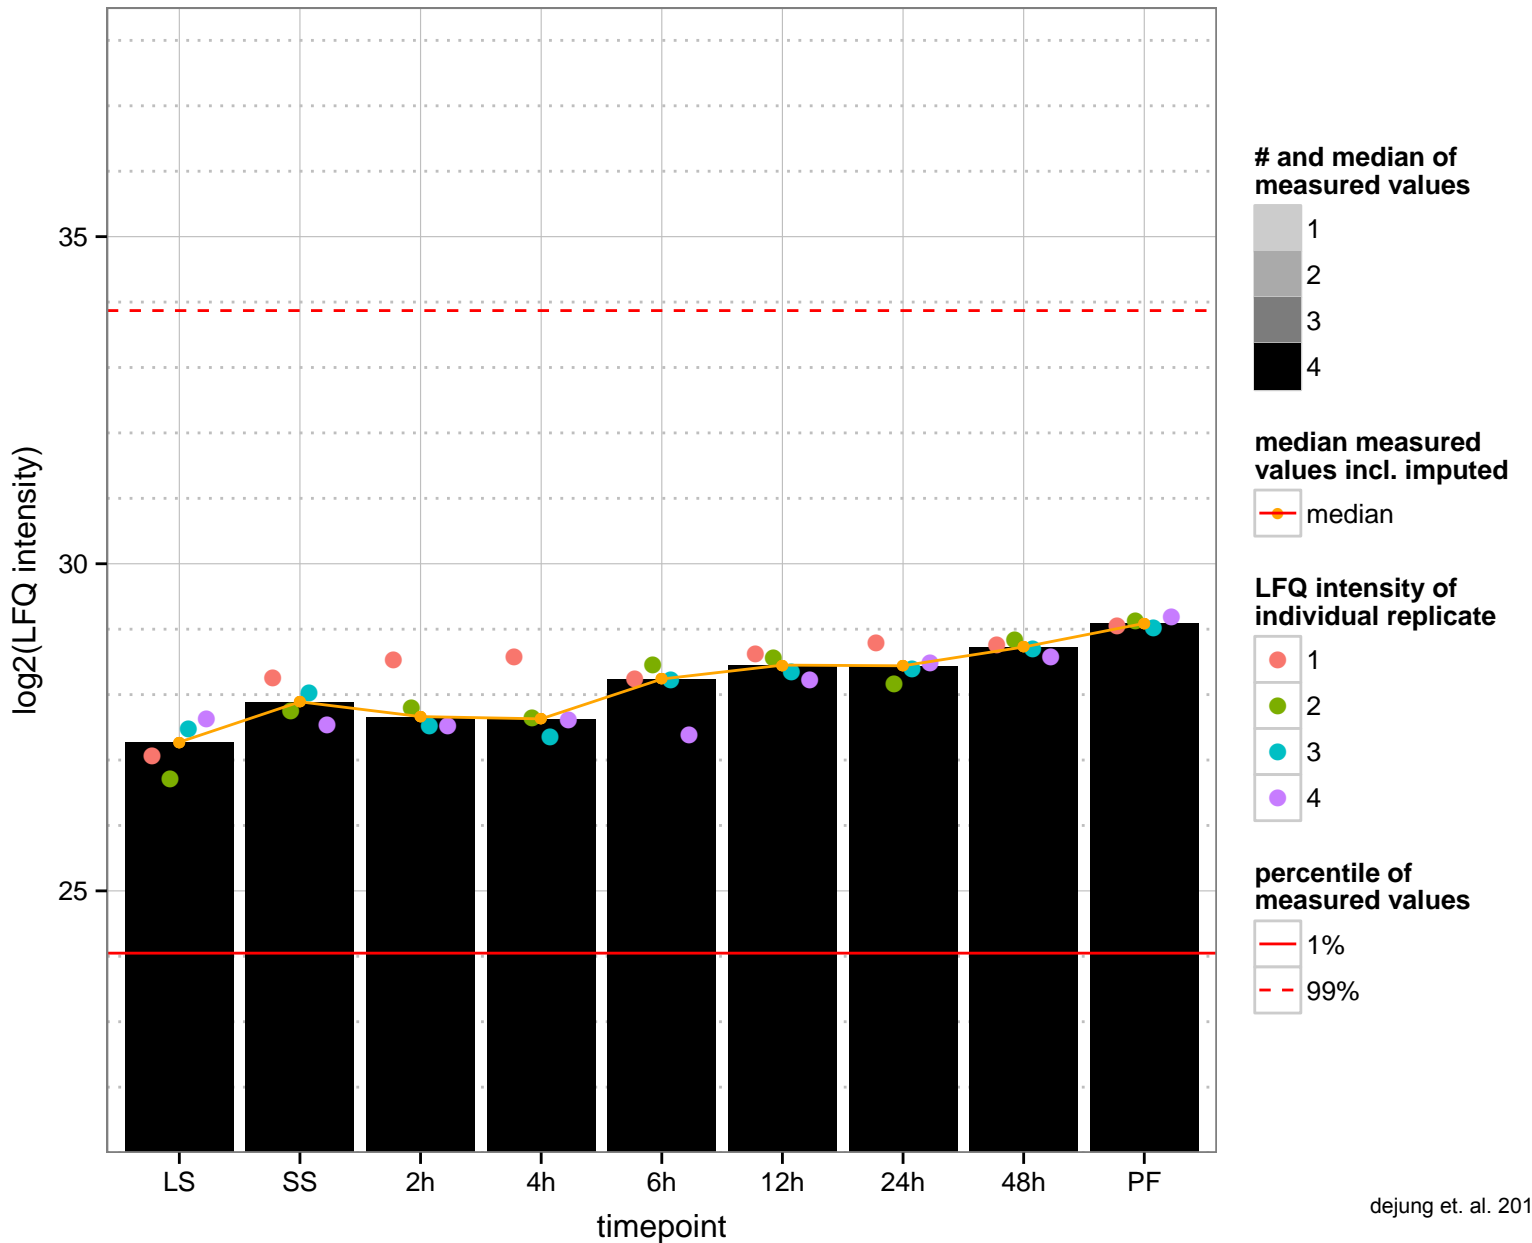

class I transcription factor A, subunit 2 (CITFA-2)  
 Tb927.9.12450  
 AGOF: null  
 AGOC: null  
 AGOP: null  
 PGOF: null  
 PGOC: null  
 PGOP: null

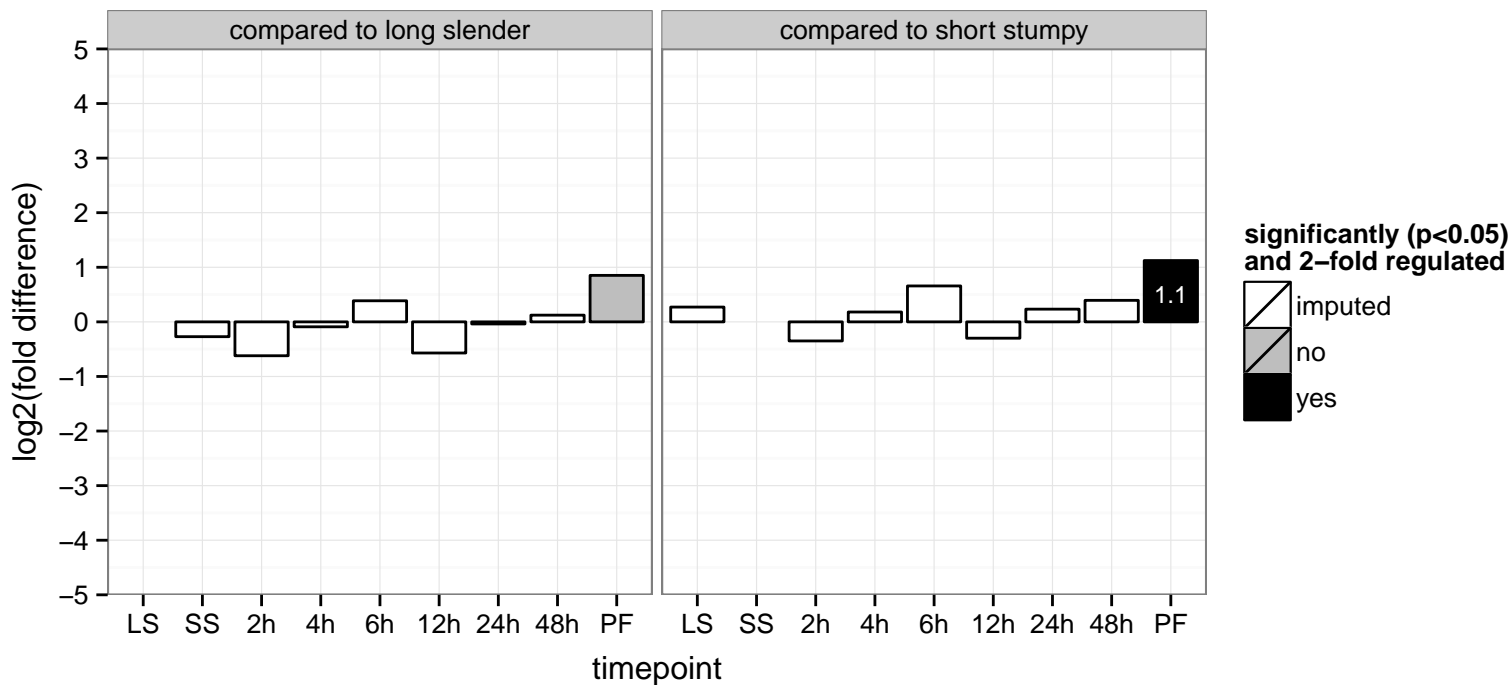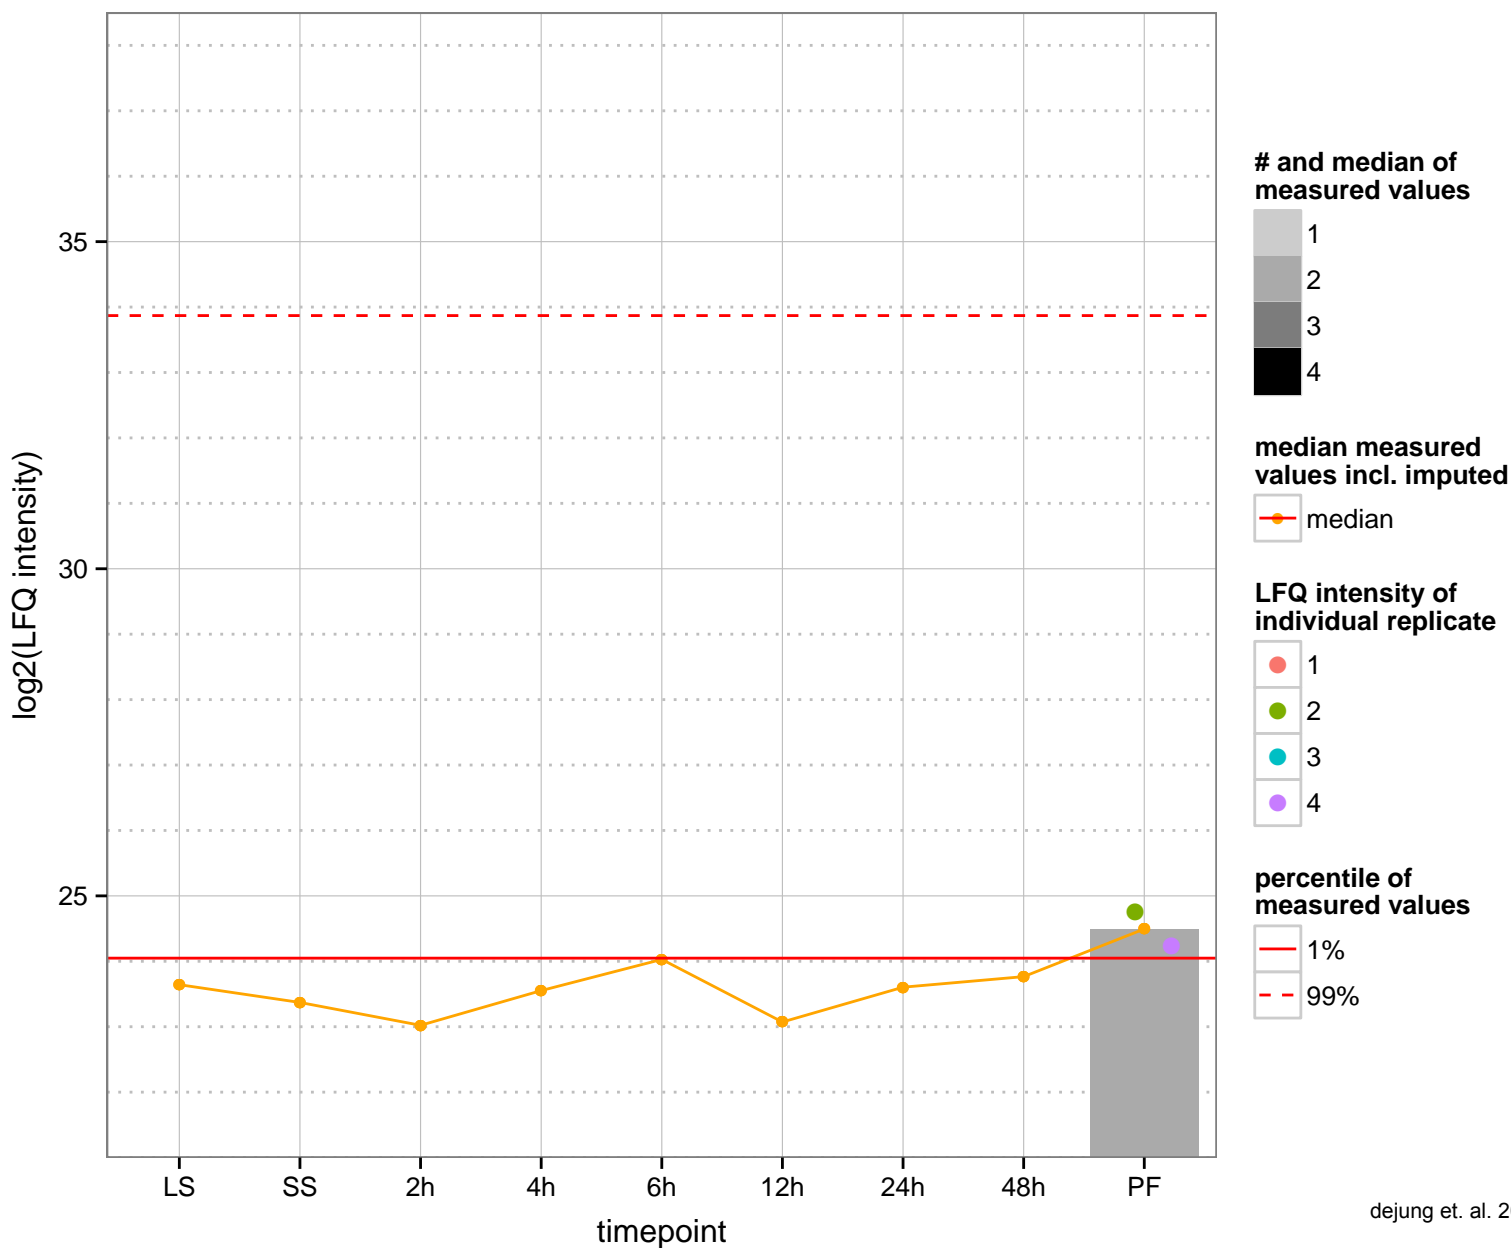

hypothetical protein, conserved  
 Tb927.9.12830  
 AGOF: null  
 AGOC: null  
 AGOP: null  
 PGO: null  
 PGOC: null  
 PGOP: null

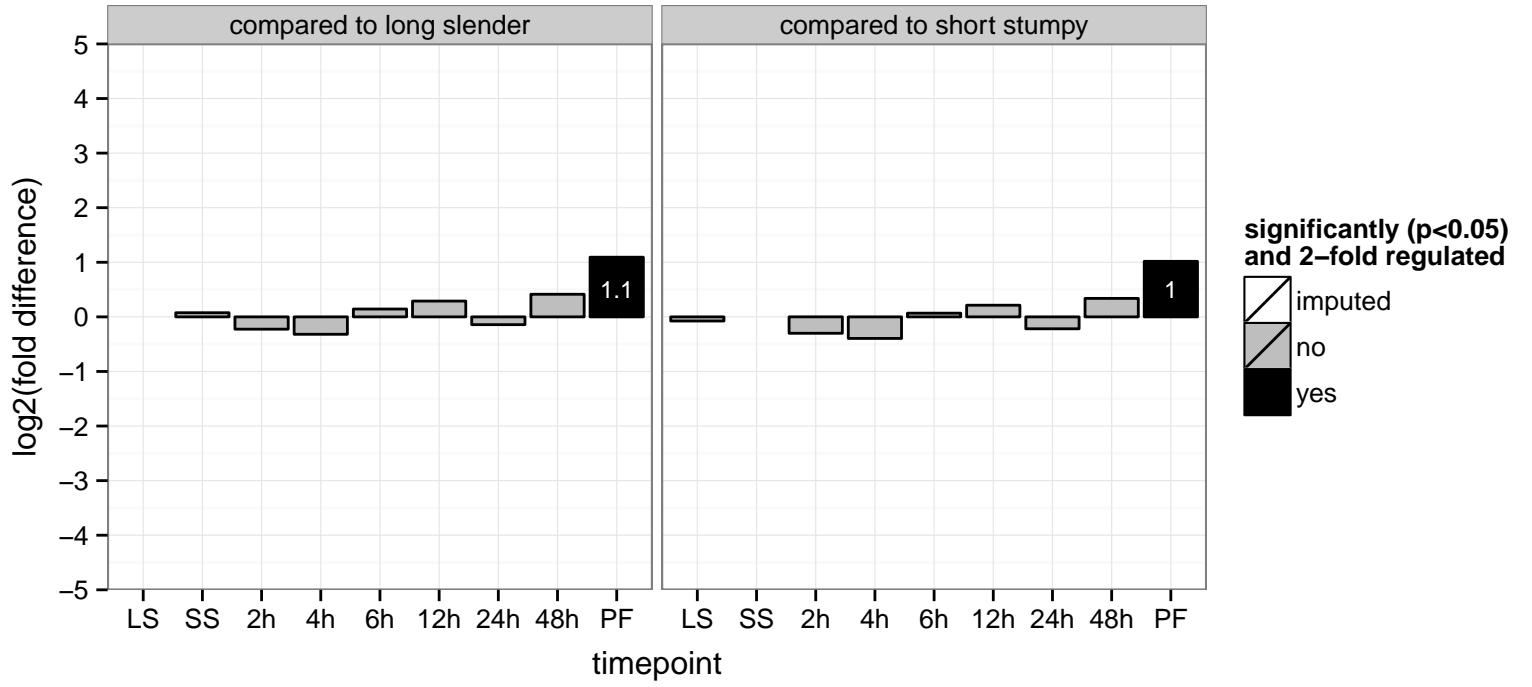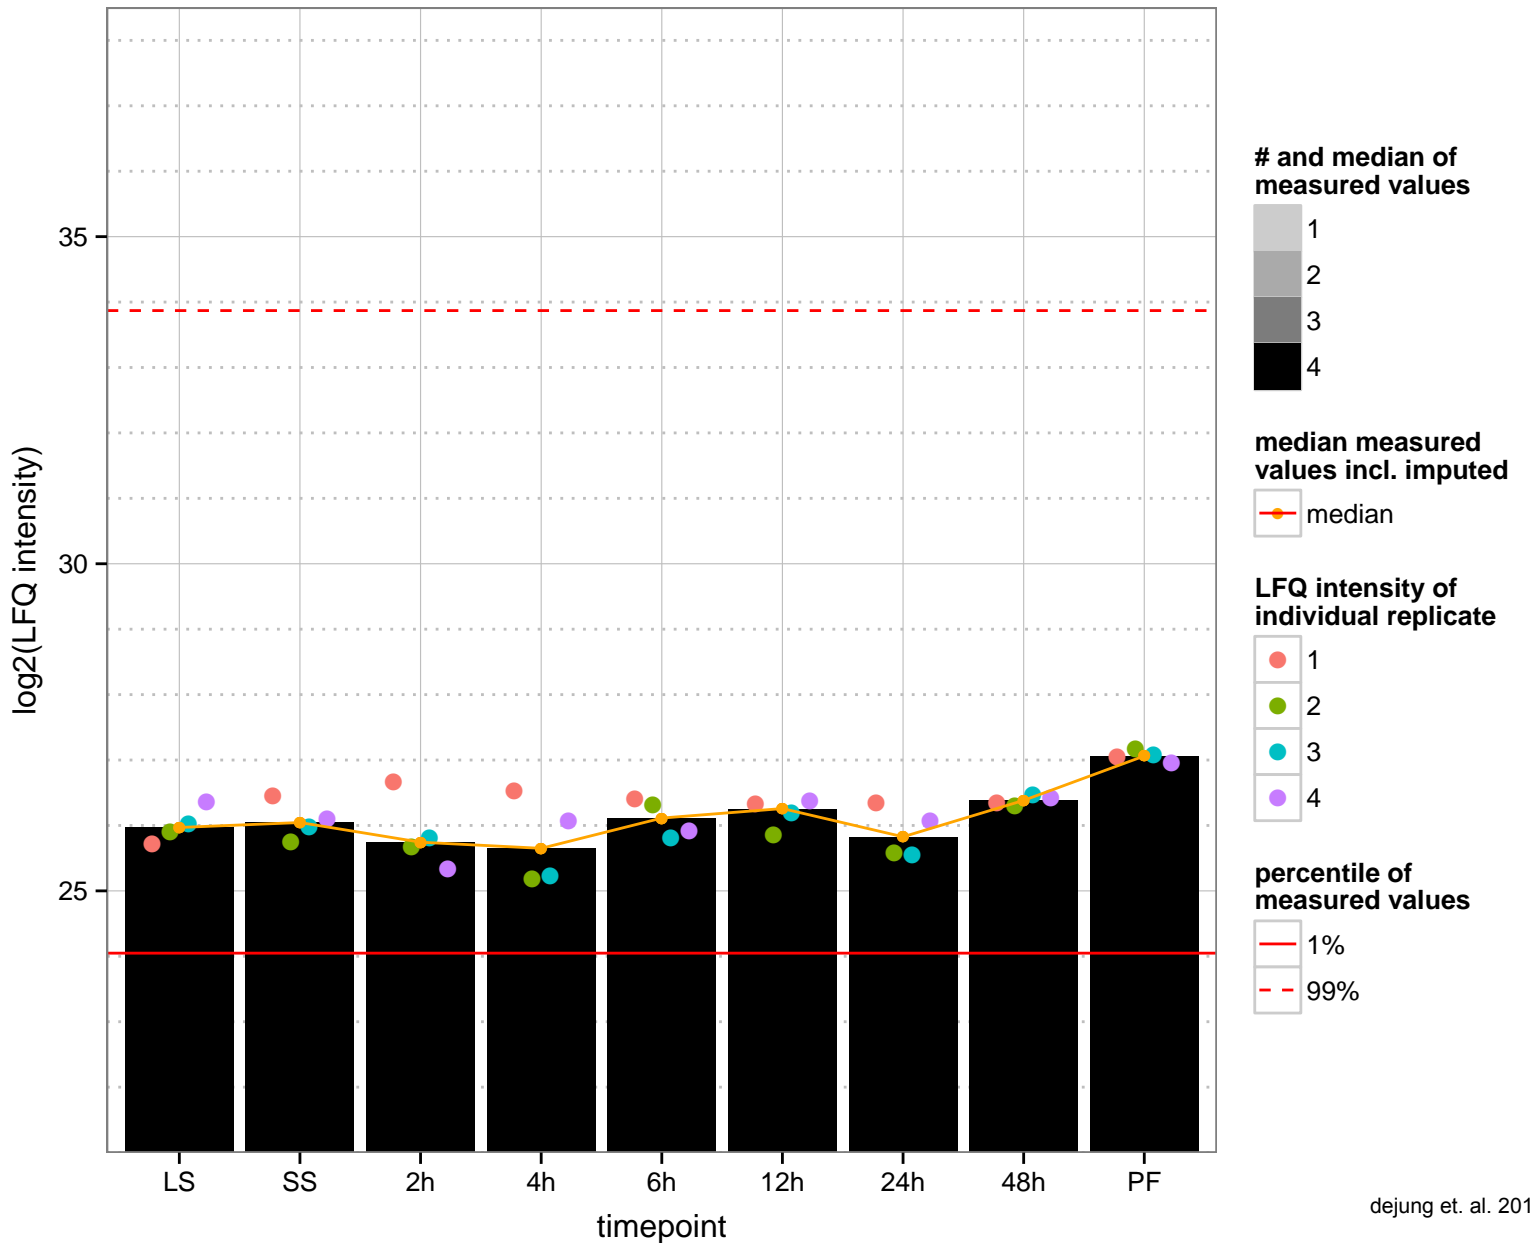



hypothetical protein, conserved  
 Tb927.9.12980  
 AGOF: null  
 AGOC: null  
 AGOP: null  
 PGOF: null  
 PGO: null  
 PGOP: null

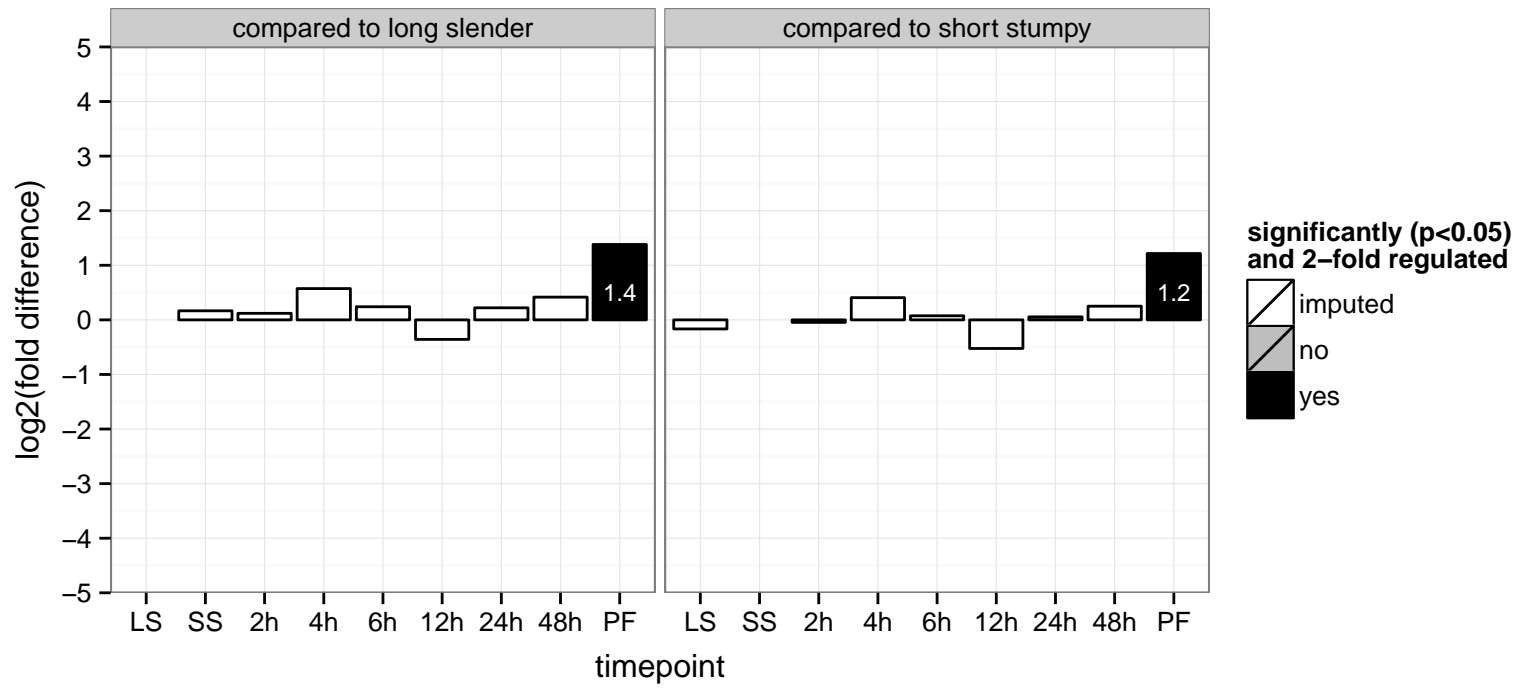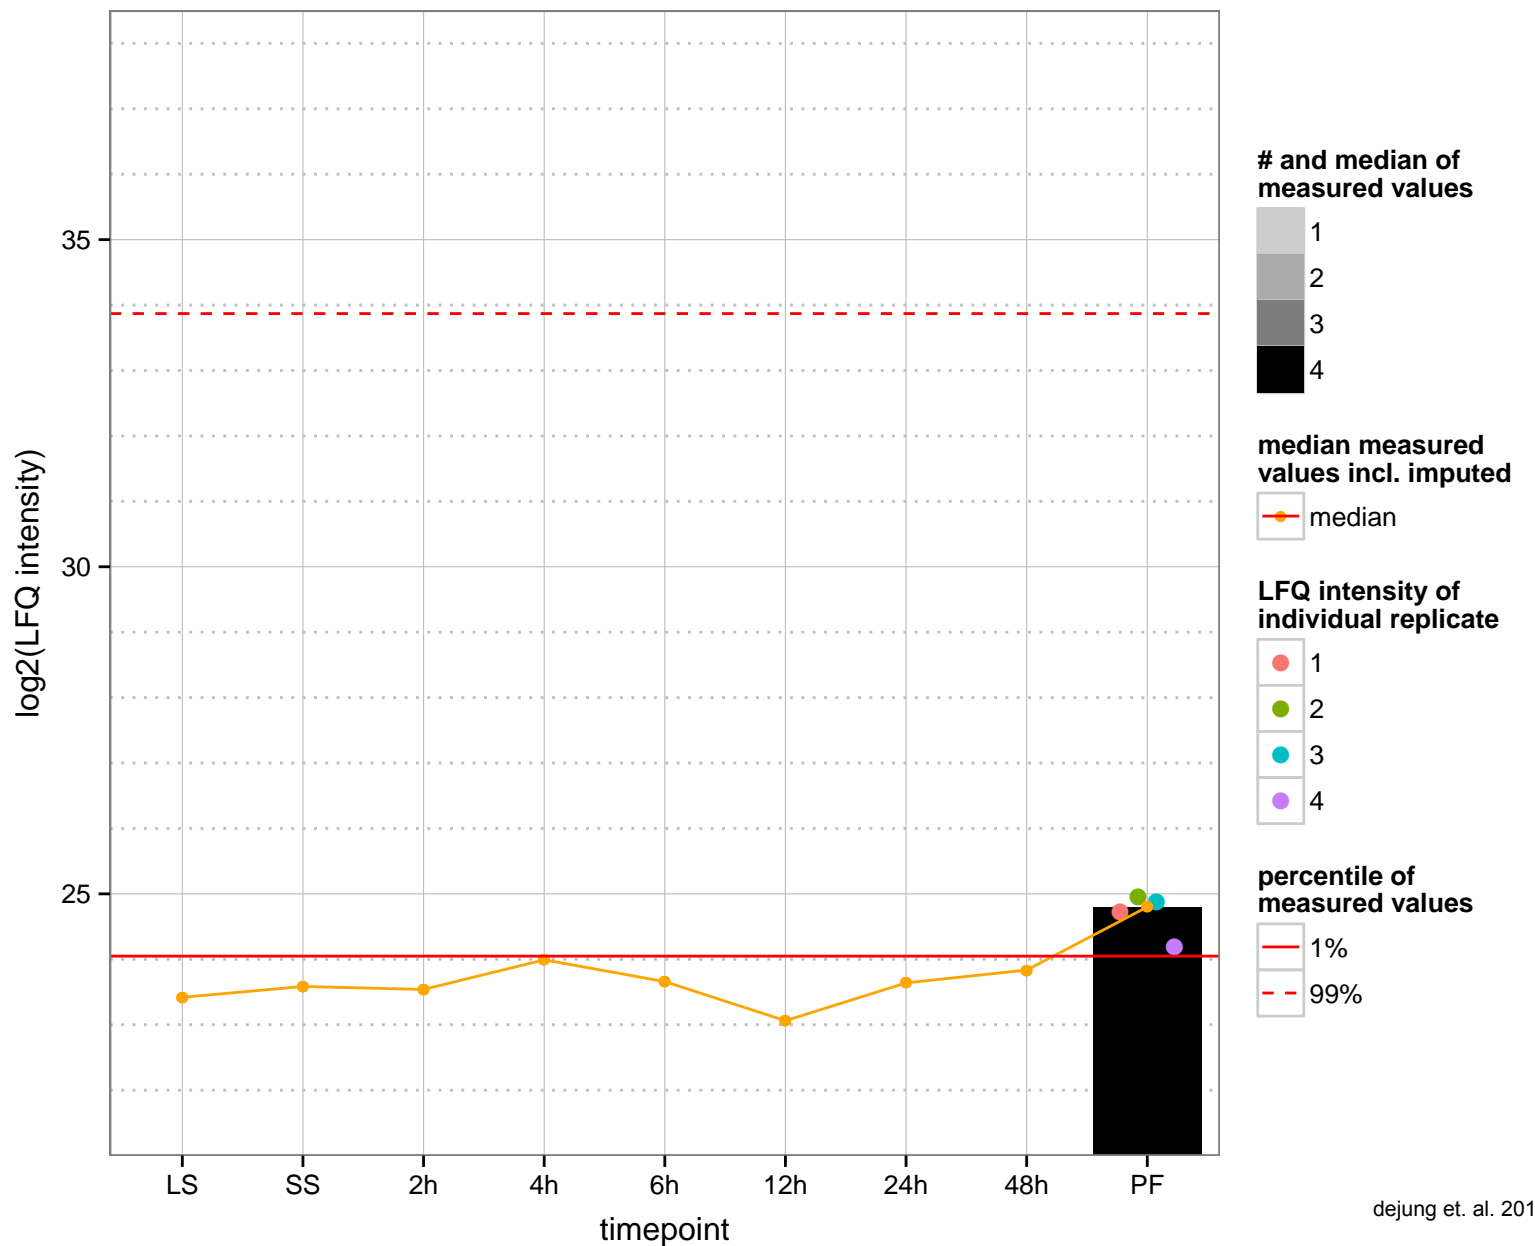

hypothetical protein, conserved  
 Tb927.9.13350  
 AGOF: null  
 AGOC: null  
 AGOP: null  
 PGOF: null  
 PGO C: null  
 PGOP: null

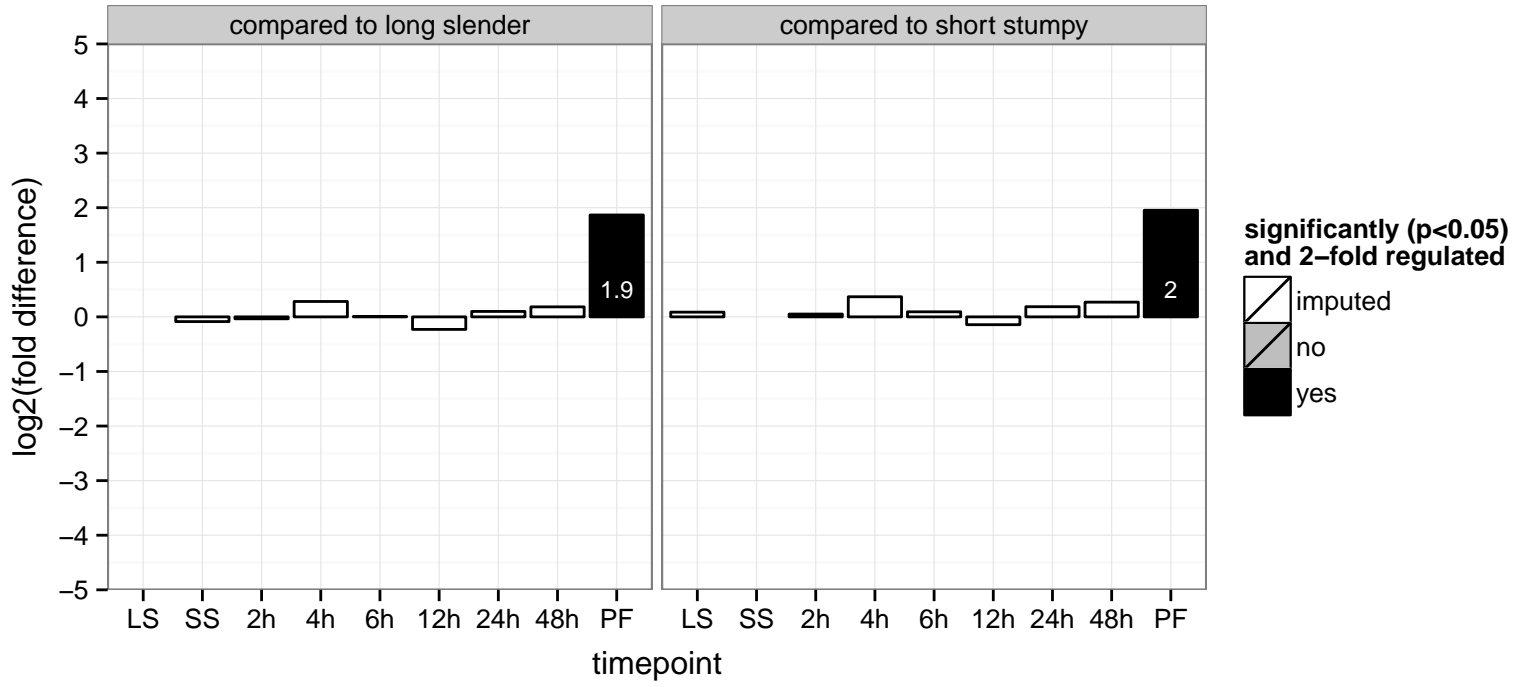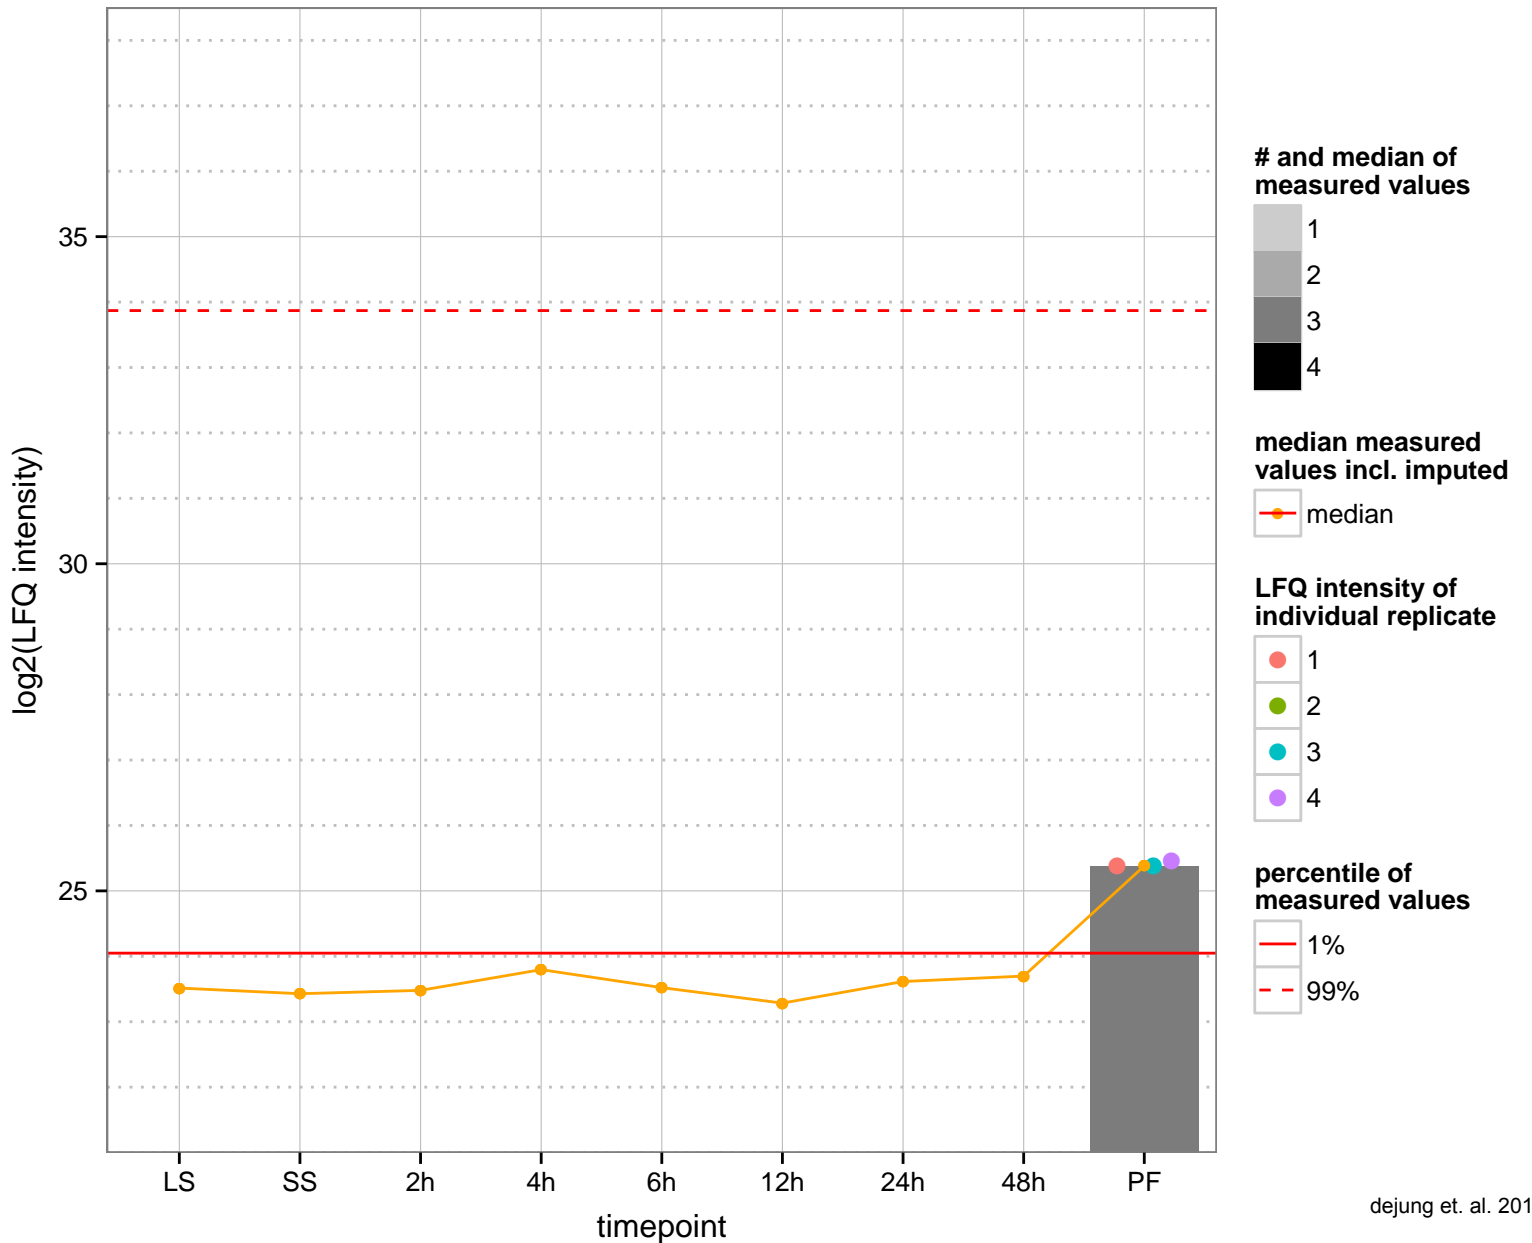

Myosin-like protein, Nucleoporin (TbMlp-2)  
 Tb927.9.1340  
 AGOF: null  
 AGOC: intracellular, nuclear pore  
 AGOP: null  
 PGO: null  
 PGOC: null  
 PGOP: null

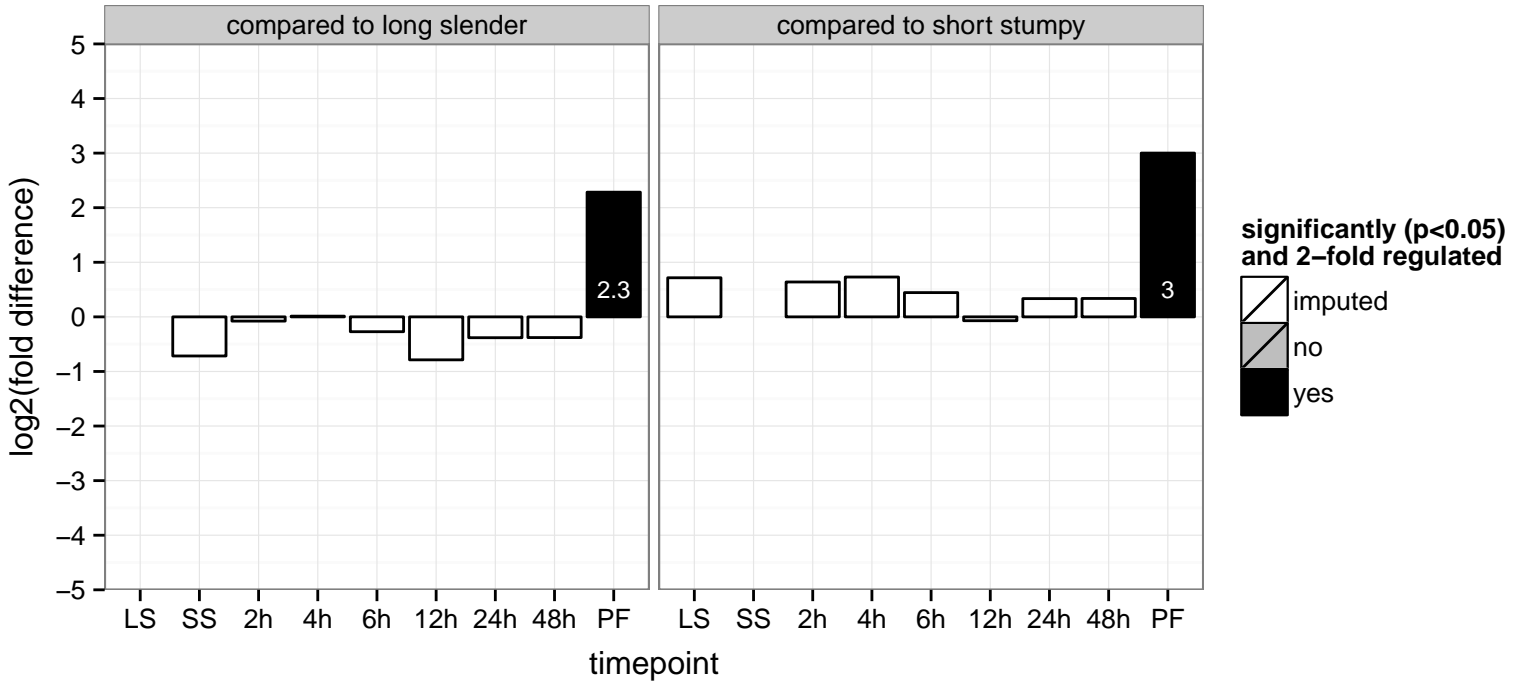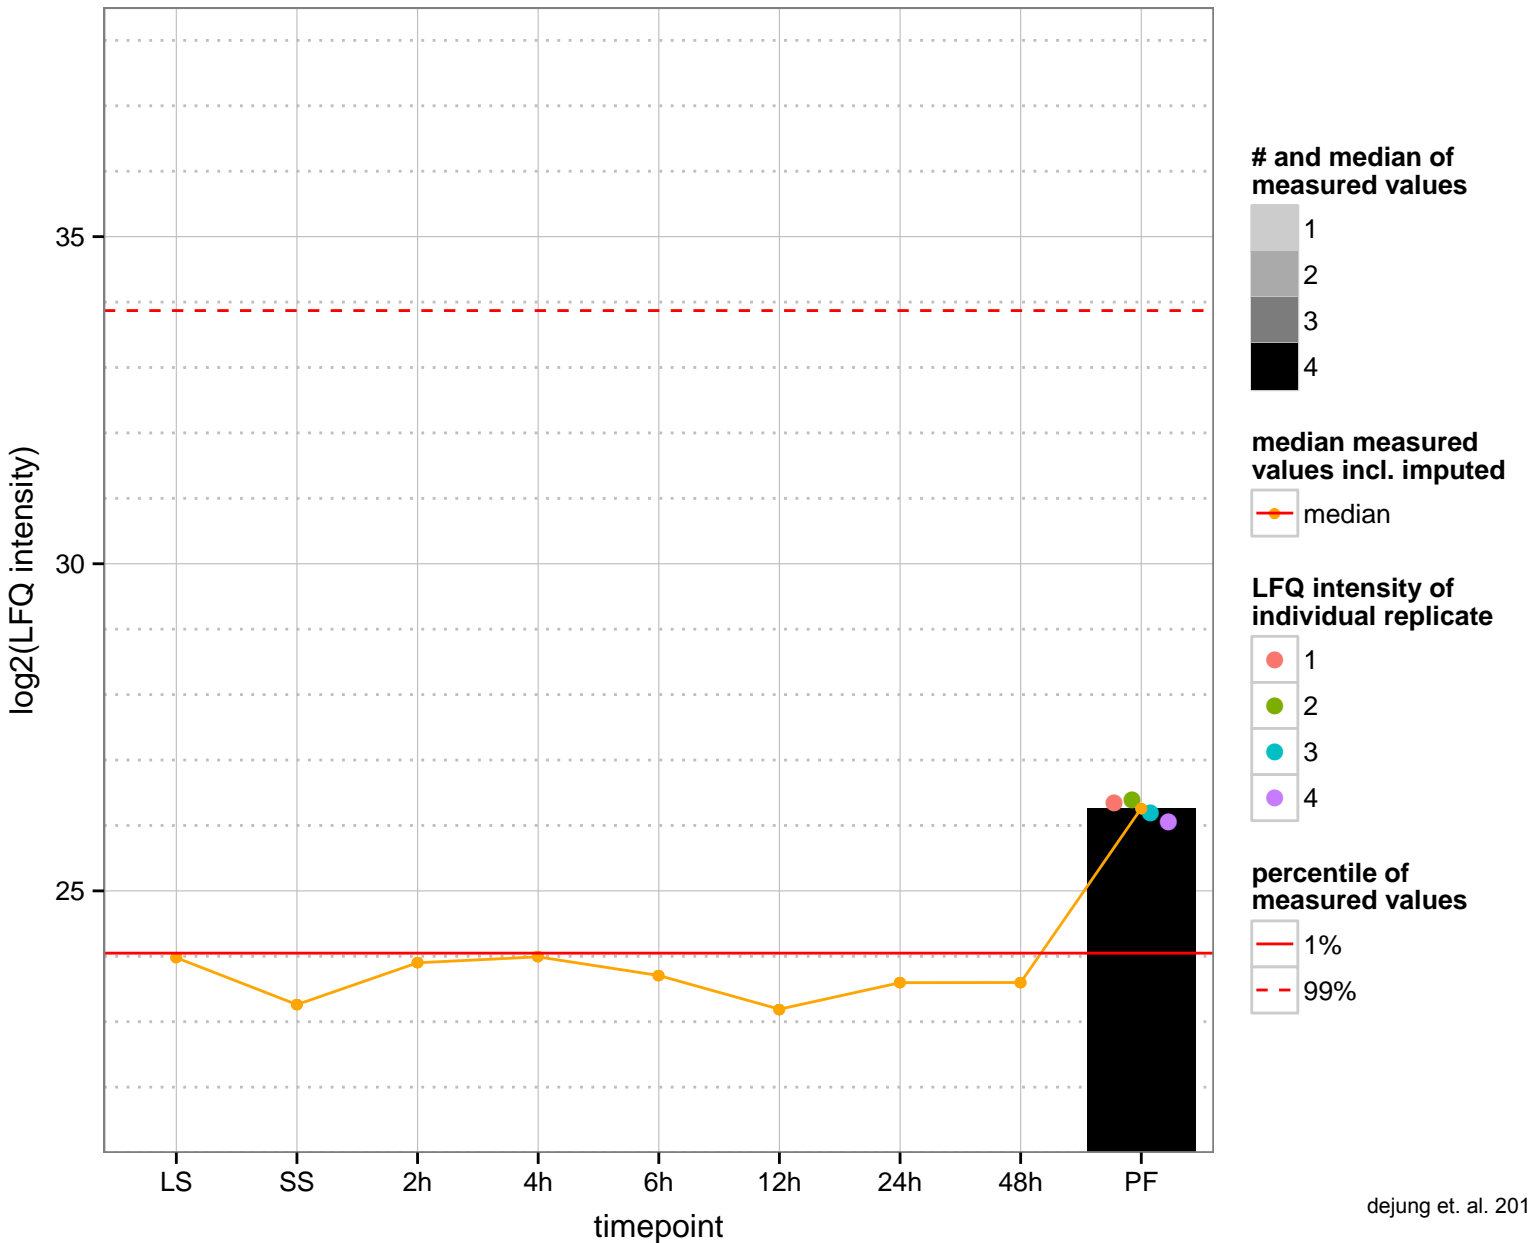

hypothetical protein, conserved  
 Tb927.9.13970  
 AGOF: null  
 AGOC: null  
 AGOP: null  
 PGO: null  
 PGOC: null  
 PGOP: null

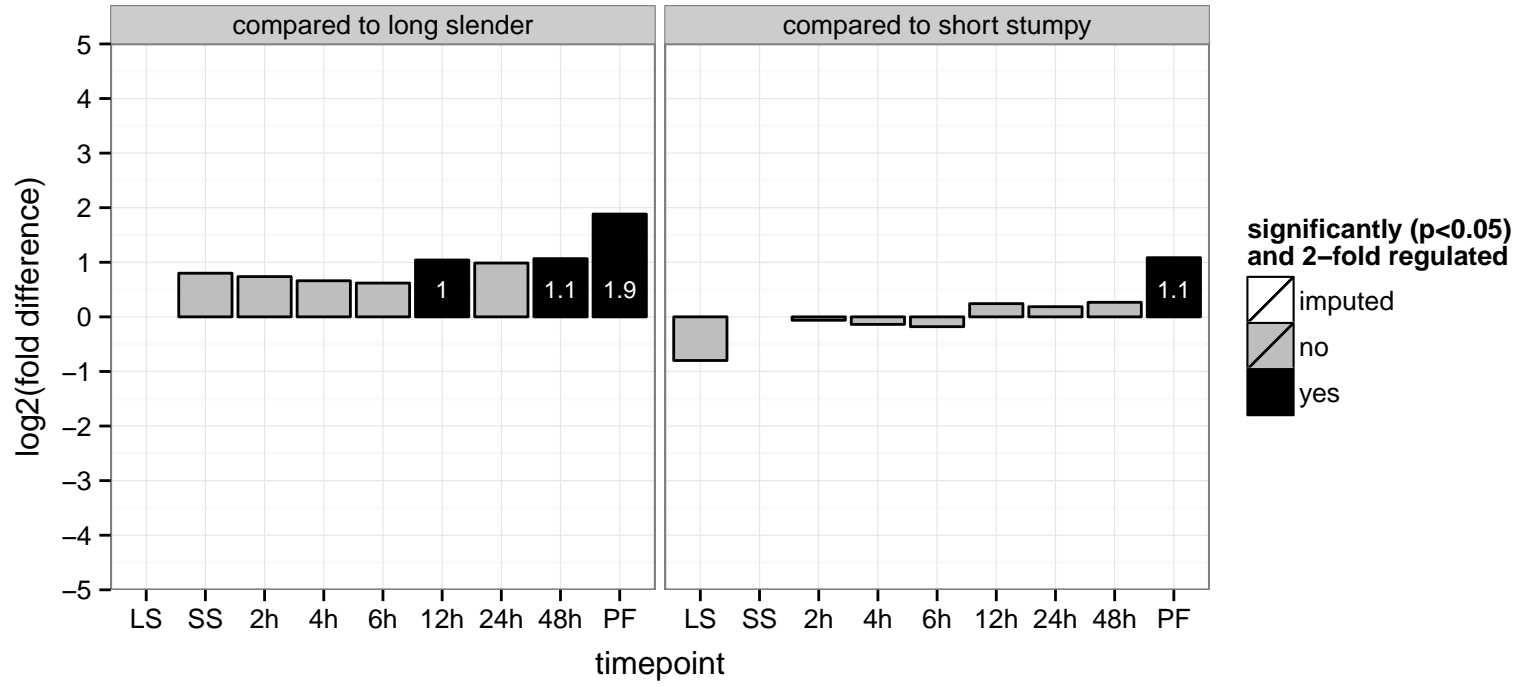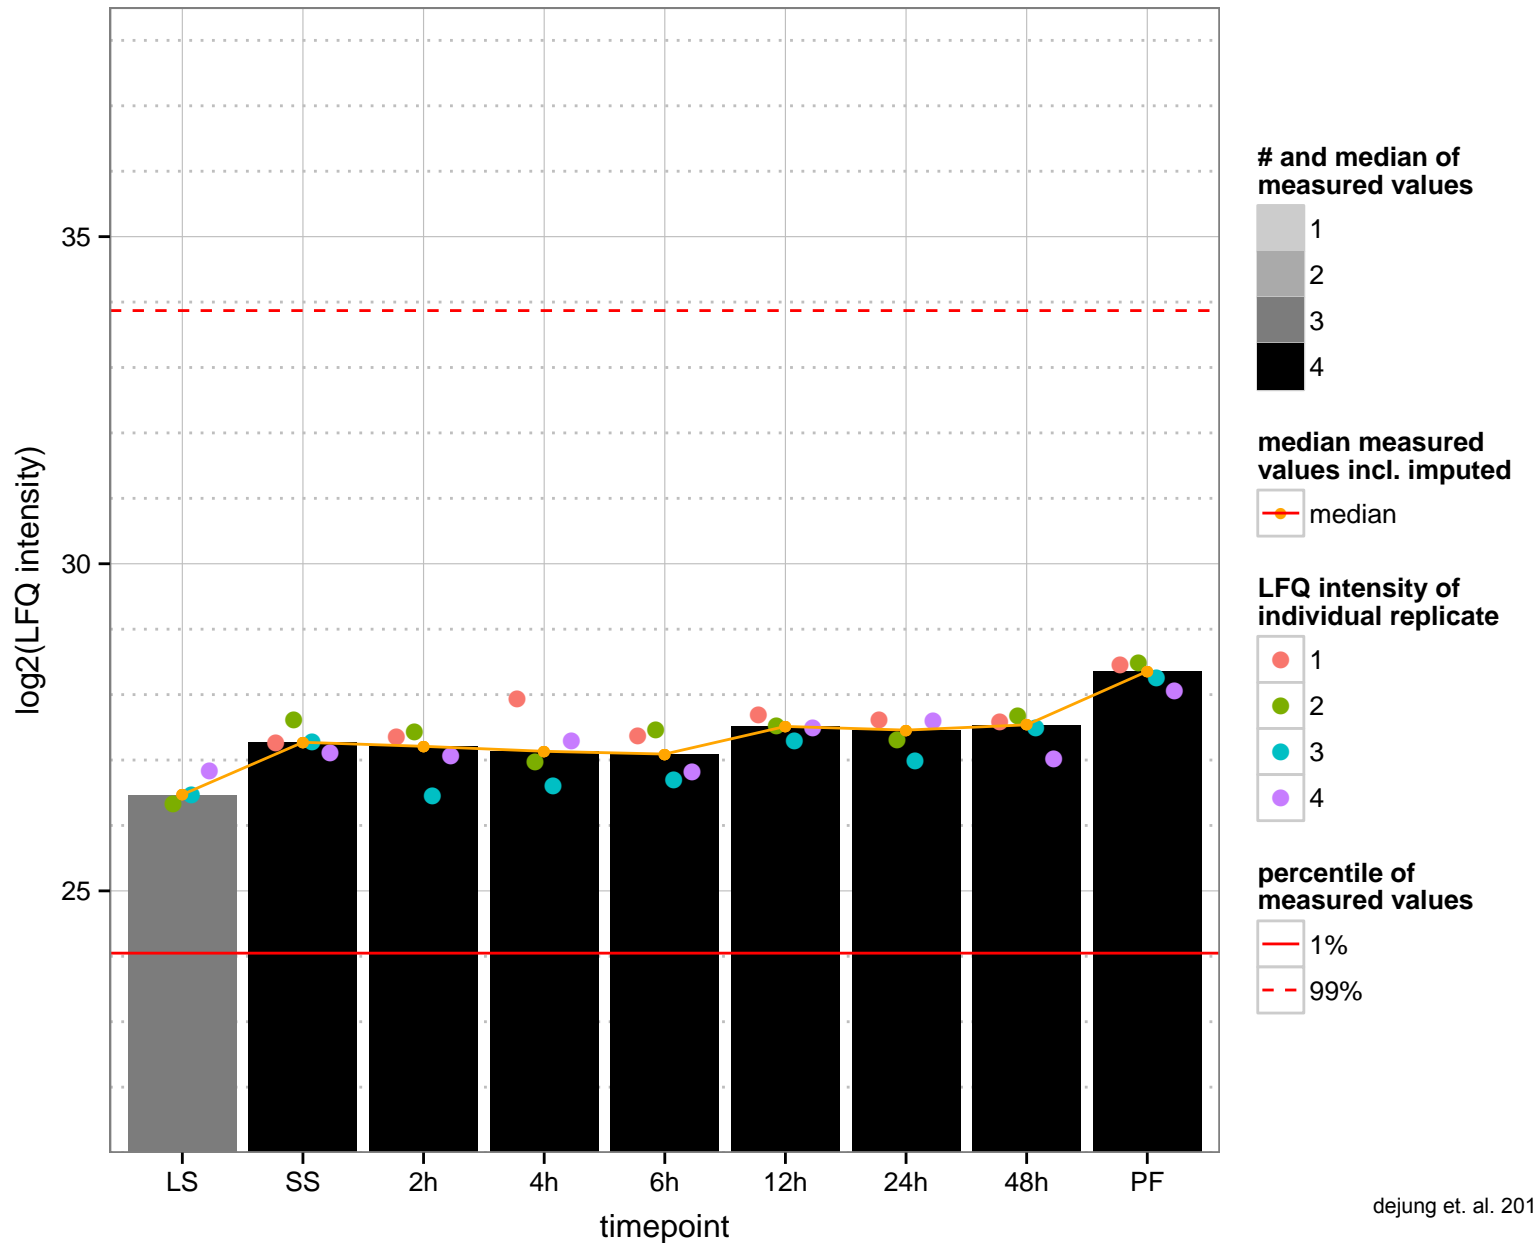

hypothetical protein, conserved  
 Tb927.9.1410  
 AGOF: null  
 AGOC: null  
 AGOP: null  
 PGO: null  
 PGOC: null  
 PGOP: null

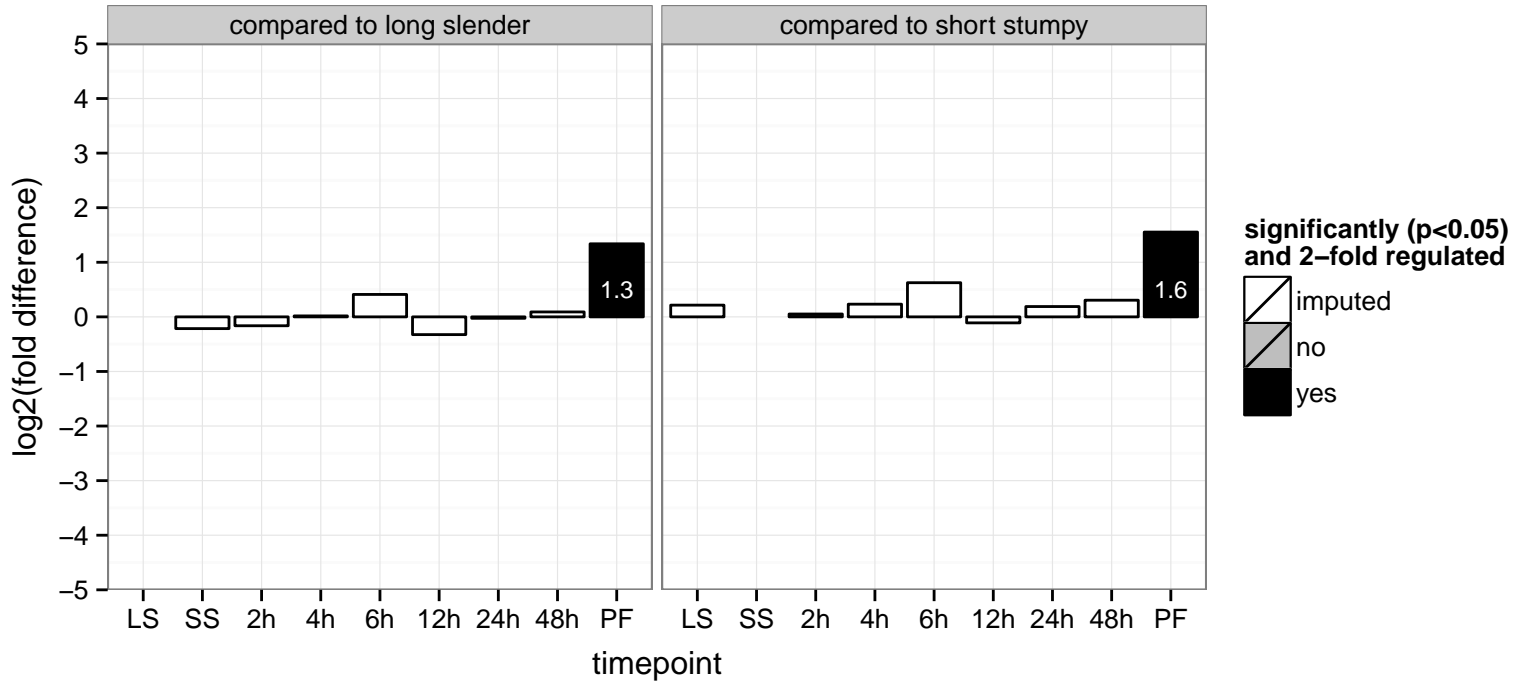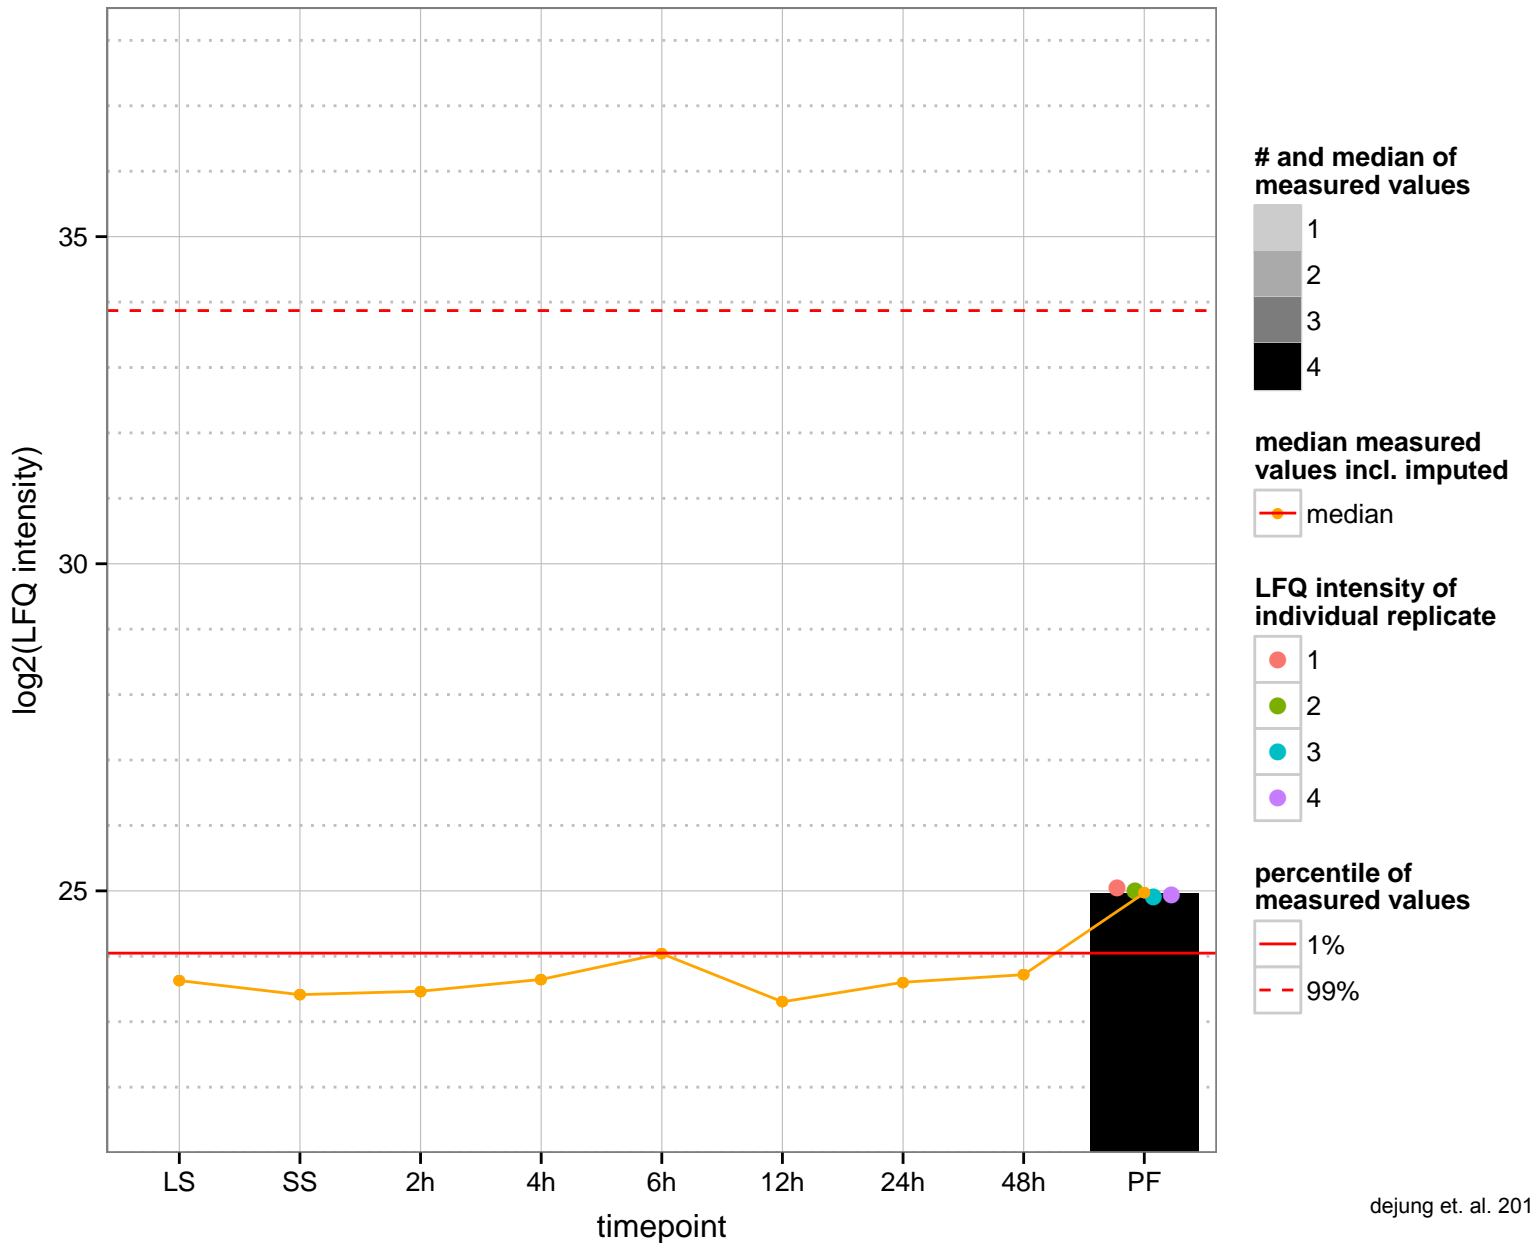

hypothetical protein, conserved  
 Tb927.9.15000  
 AGOF: null  
 AGOC: cytoplasm, nucleus  
 AGOP: null  
 PGO: null  
 PGO: cytoplasm, nucleus  
 PGO: null

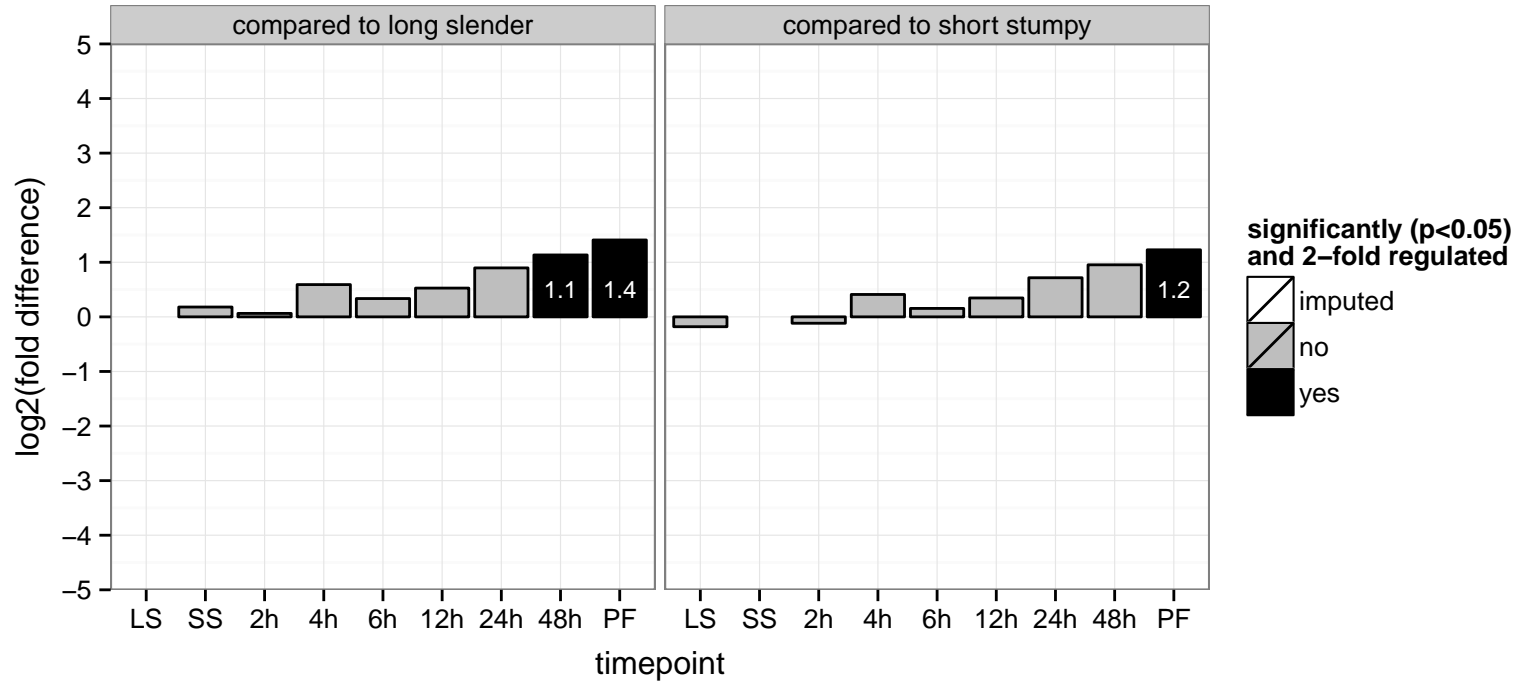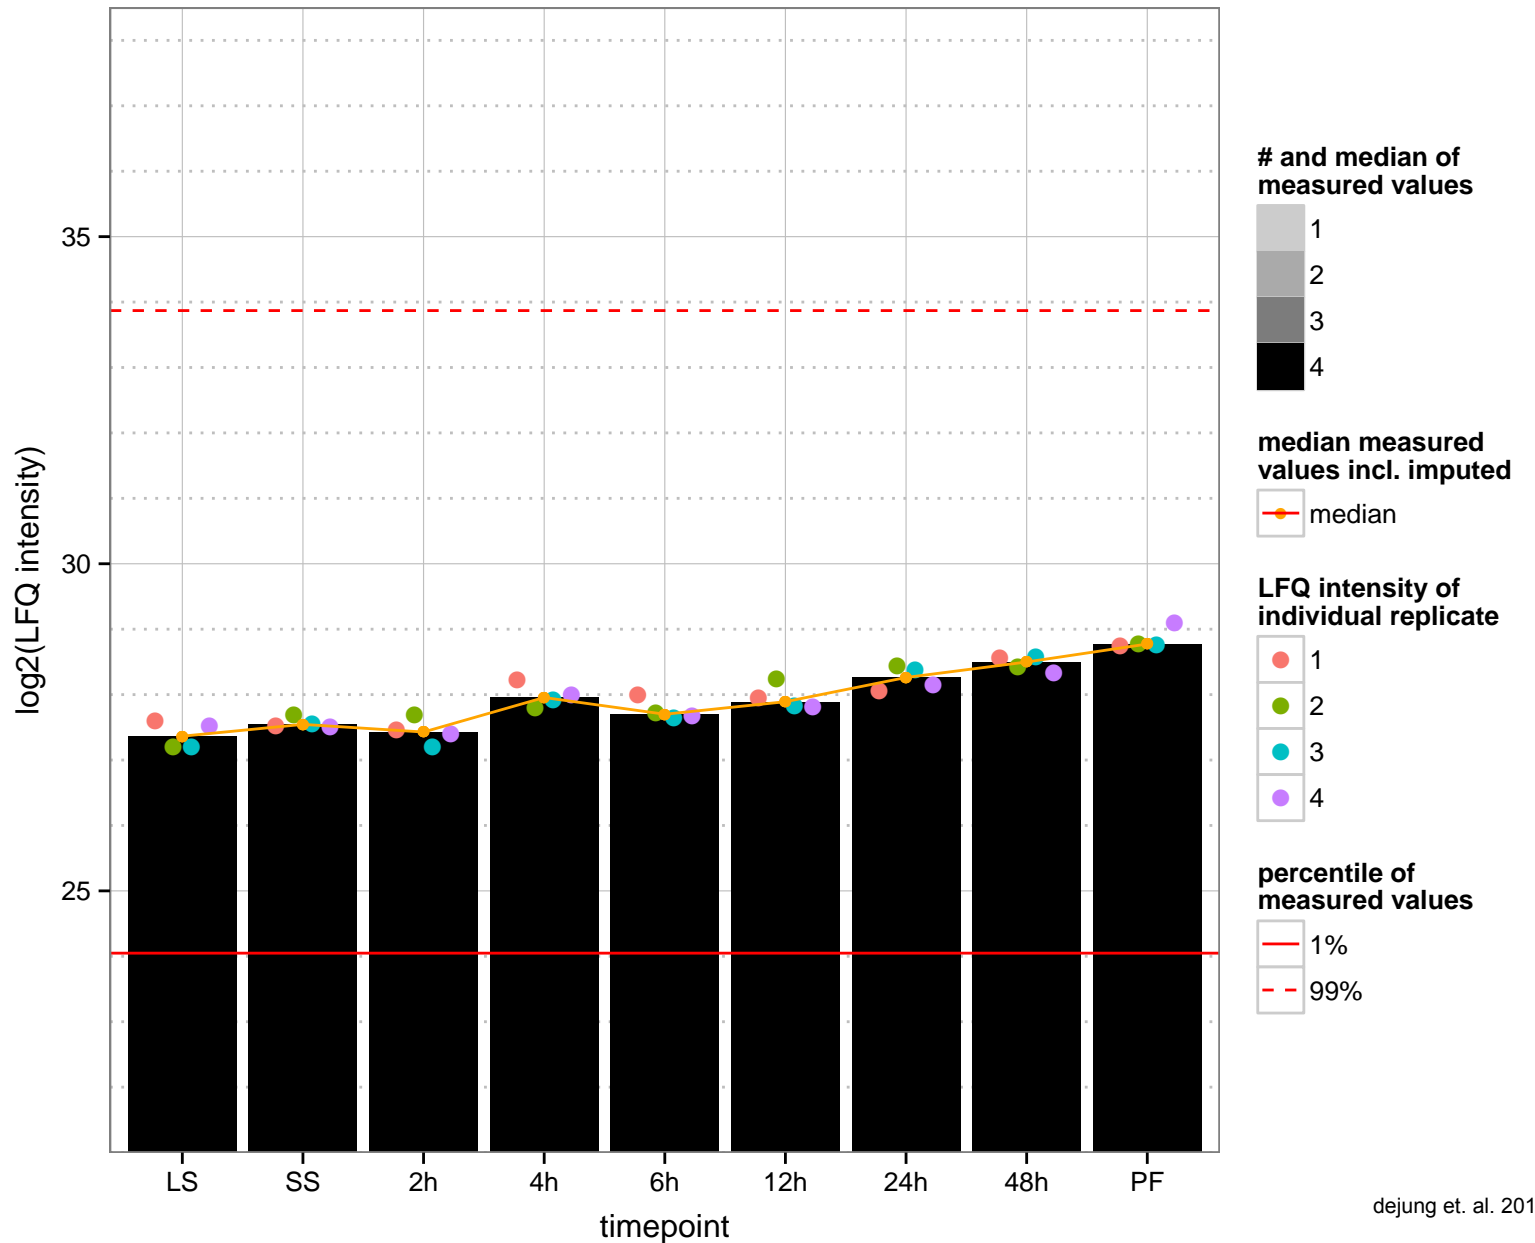

unspecified product  
 Tb927.9.15150;Tb927.9.15110  
 AGOF: 5S rRNA binding, structural constituent of ribosome, null  
 AGOC: intracellular, ribosome, null  
 AGOP: ribosome assembly, translation, null  
 PGO: null, structural constituent of ribosome  
 PGO: null, intracellular, ribosome  
 PGO: null, translation

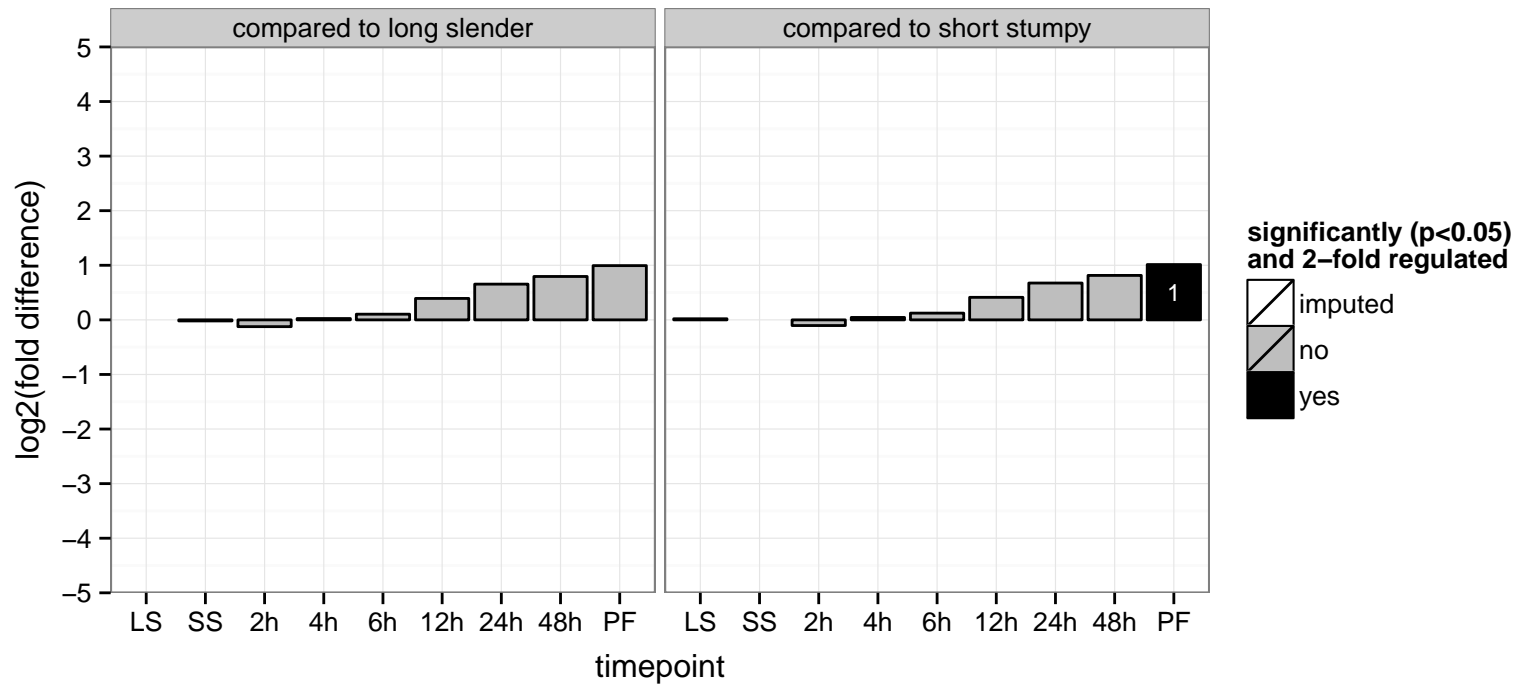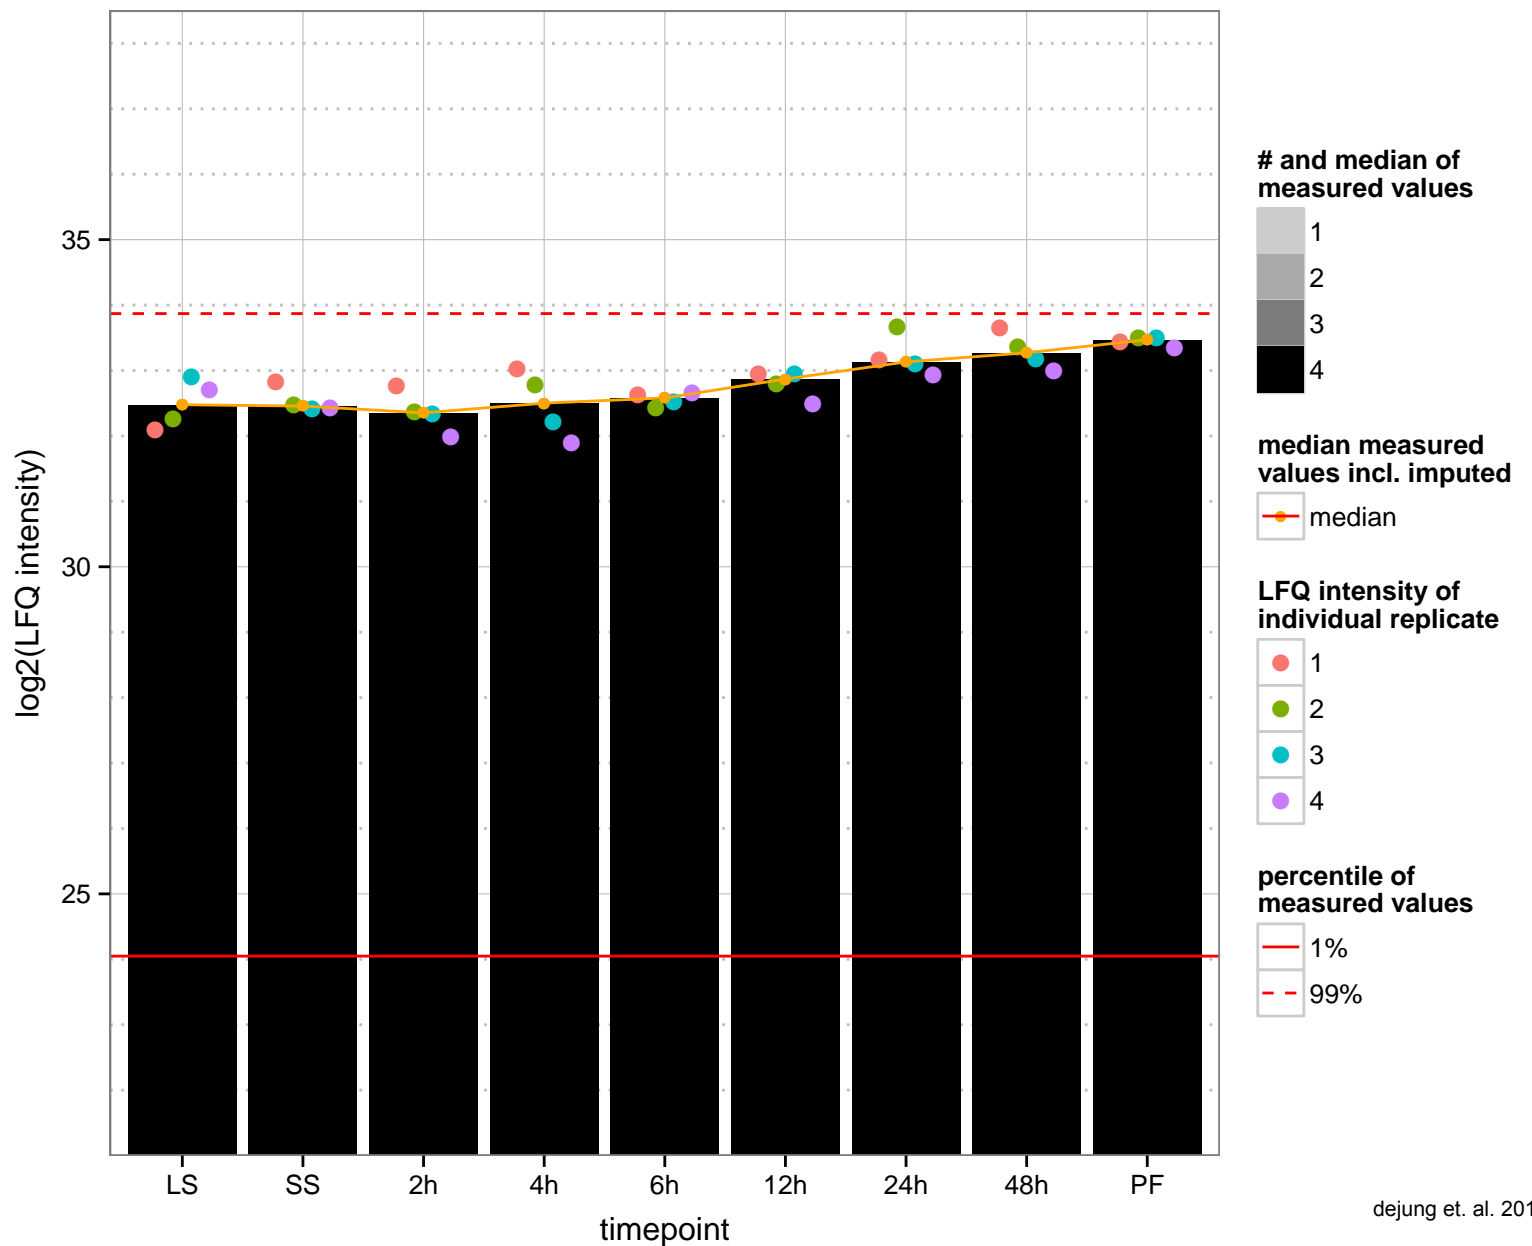

nitrilase, putative  
 Tb927.9.1960  
 AGOF: hydrolase activity, acting on carbon–nitrogen (but not peptide) bonds  
 AGOC: null  
 AGOP: nitrogen compound metabolic process  
 PGOF: hydrolase activity, acting on carbon–nitrogen (but not peptide) bonds  
 PGO: null  
 PGO: null  
 PGO: nitrogen compound metabolic process

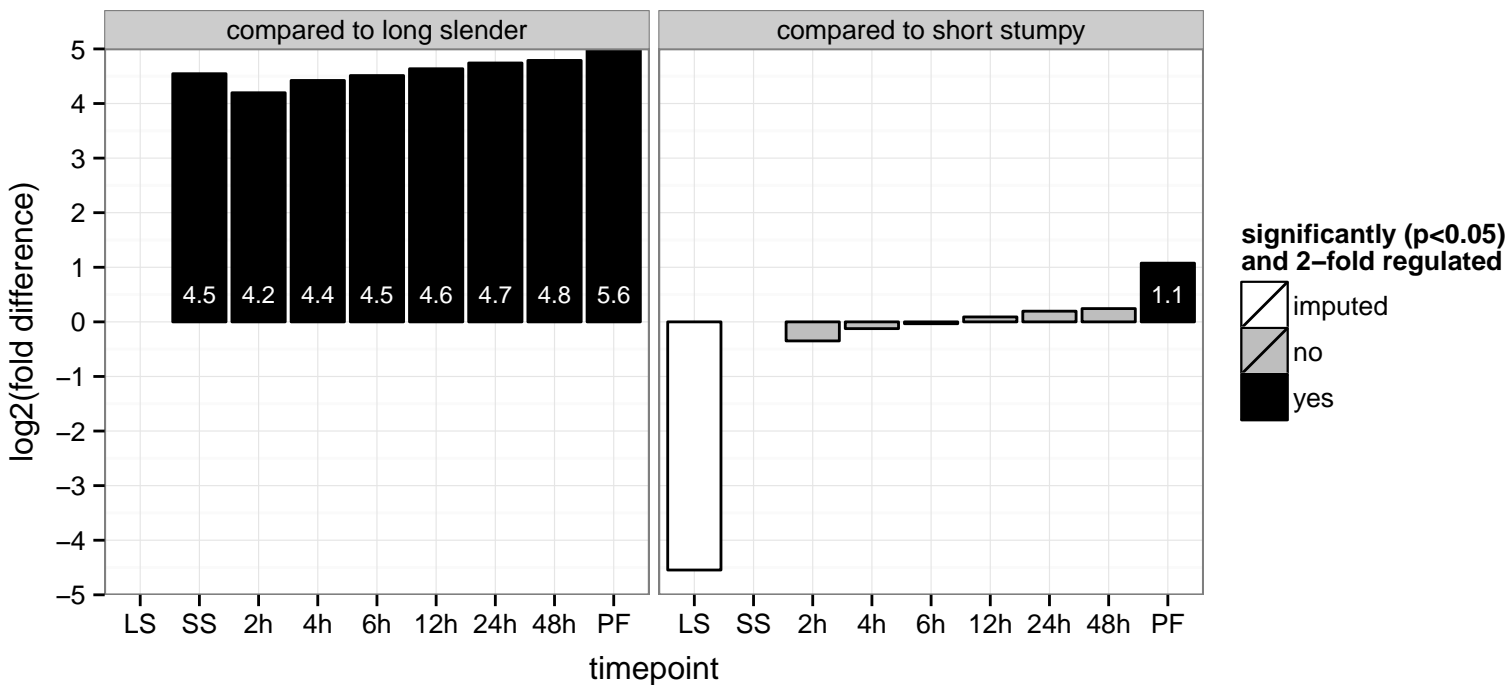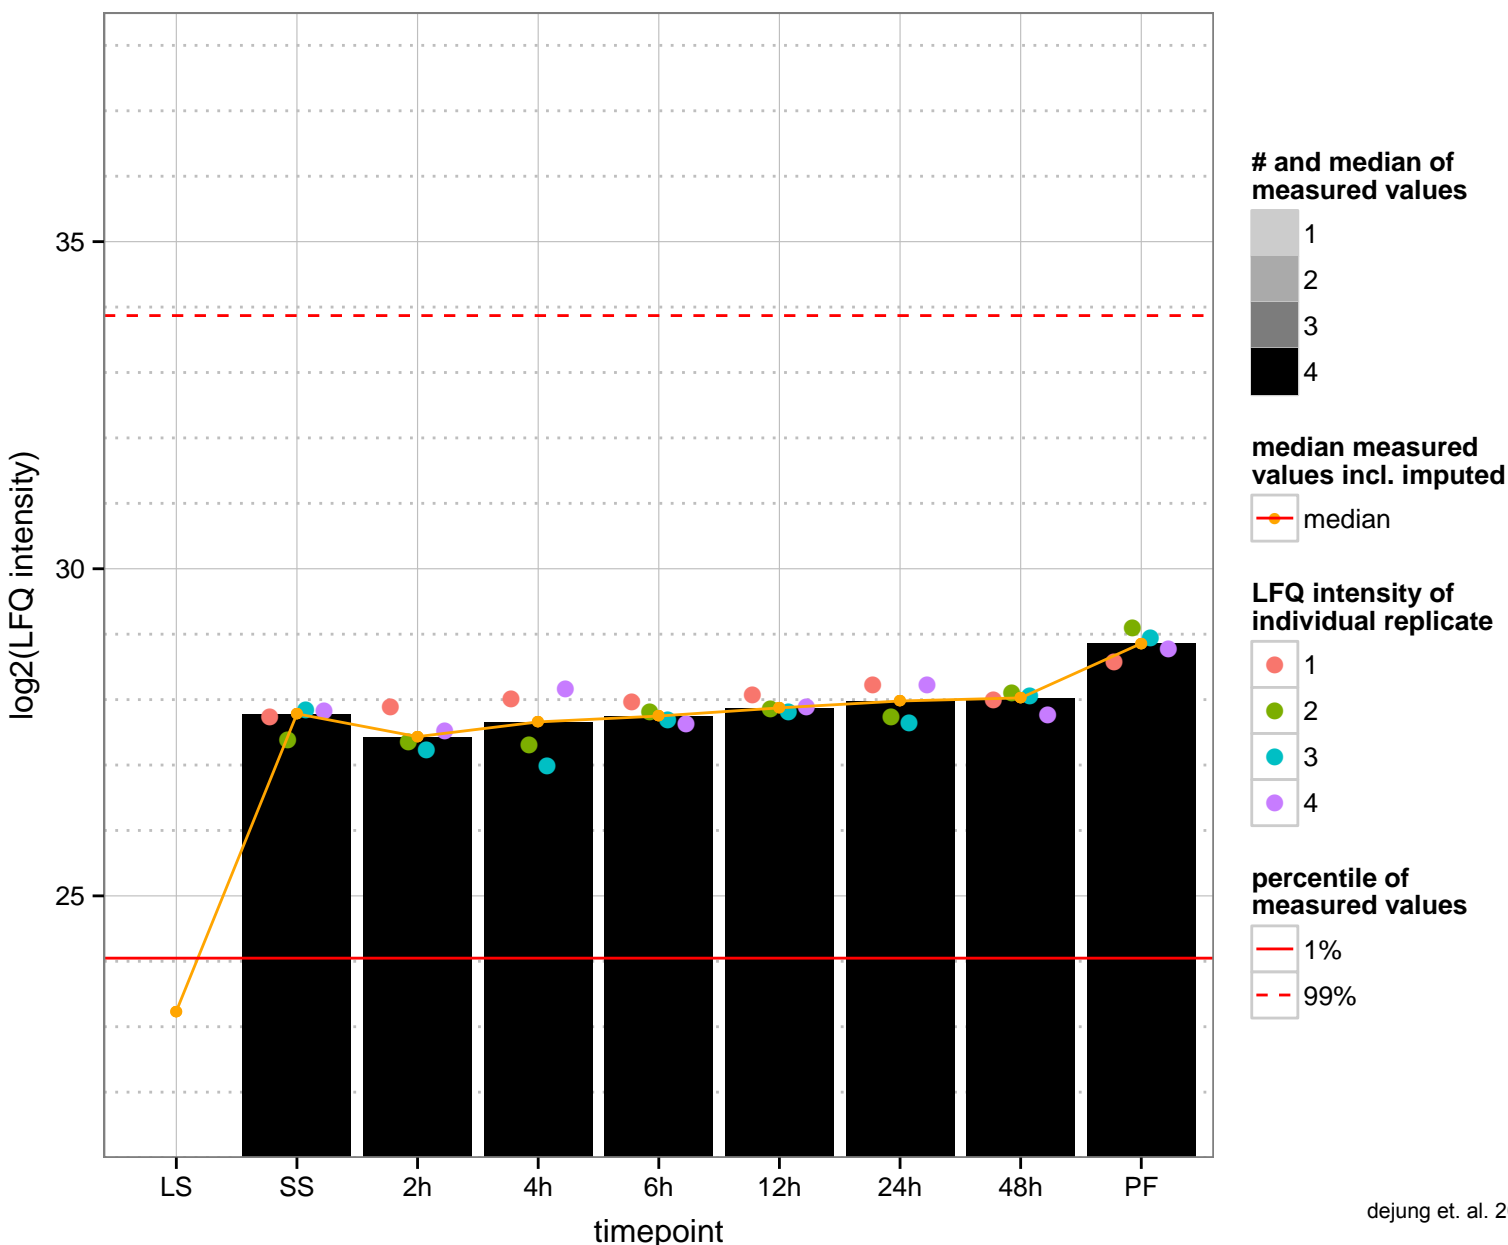



membrane protein YIP1, putative  
 Tb927.9.2050  
 AGOF: null  
 AGOC: Golgi apparatus, integral to membrane  
 AGOP: vesicle-mediated transport  
 PGO: null  
 PGOC: null  
 PGOP: null

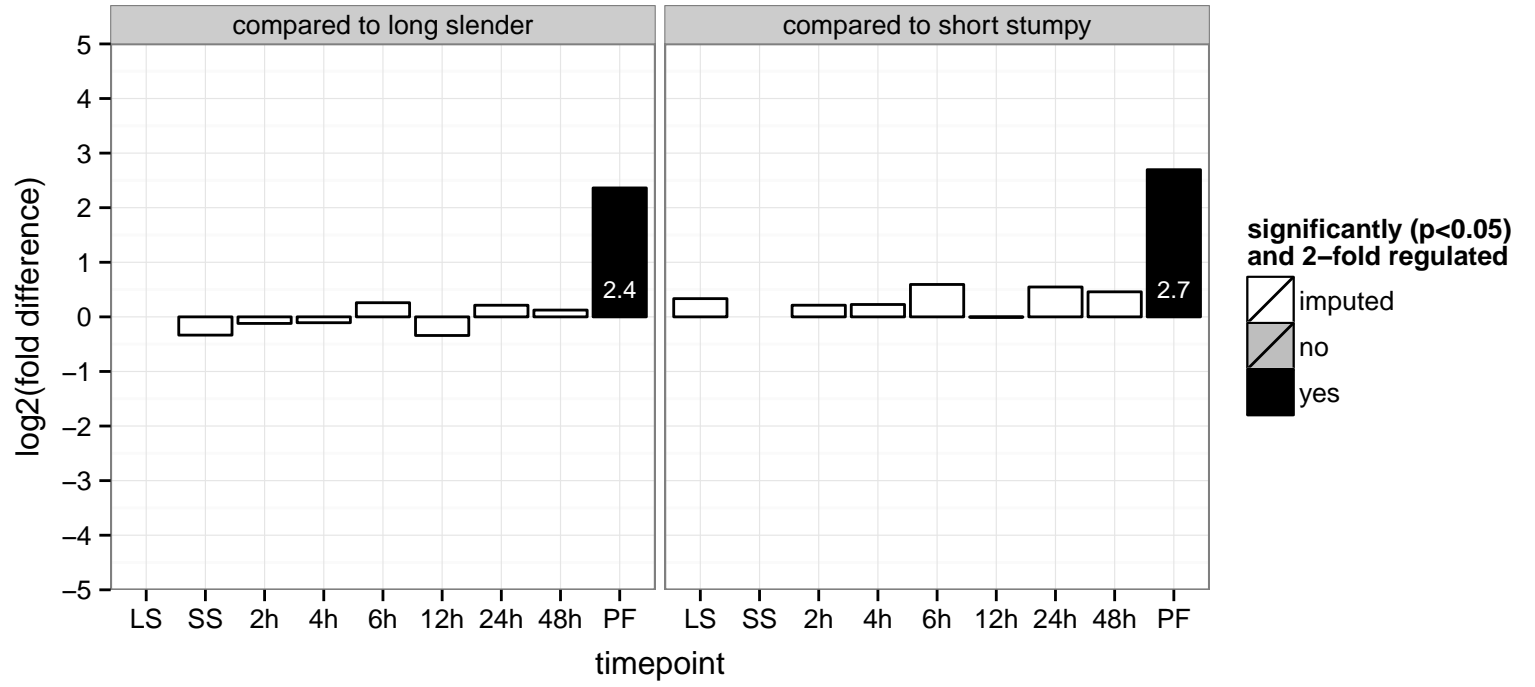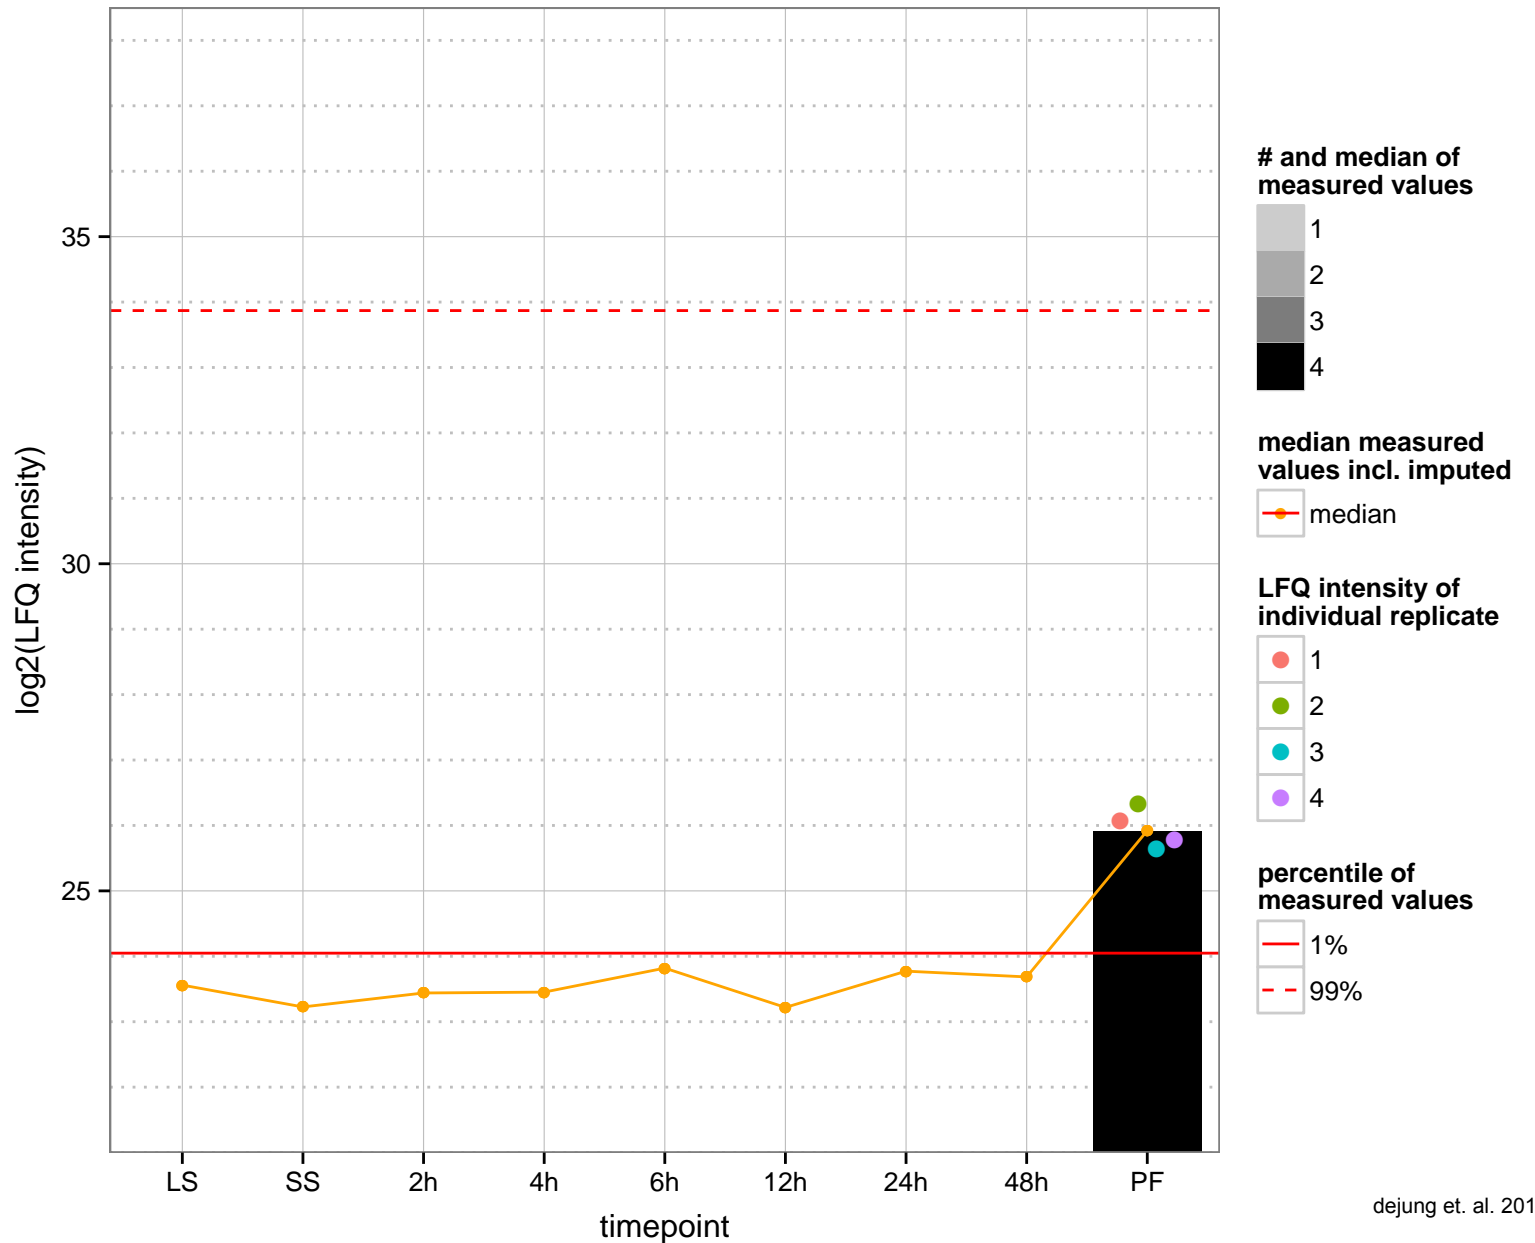

hypothetical protein, conserved  
 Tb927.9.3580  
 AGOF: null  
 AGOC: null  
 AGOP: null  
 PGOF: null  
 PGO: null  
 PGOP: null

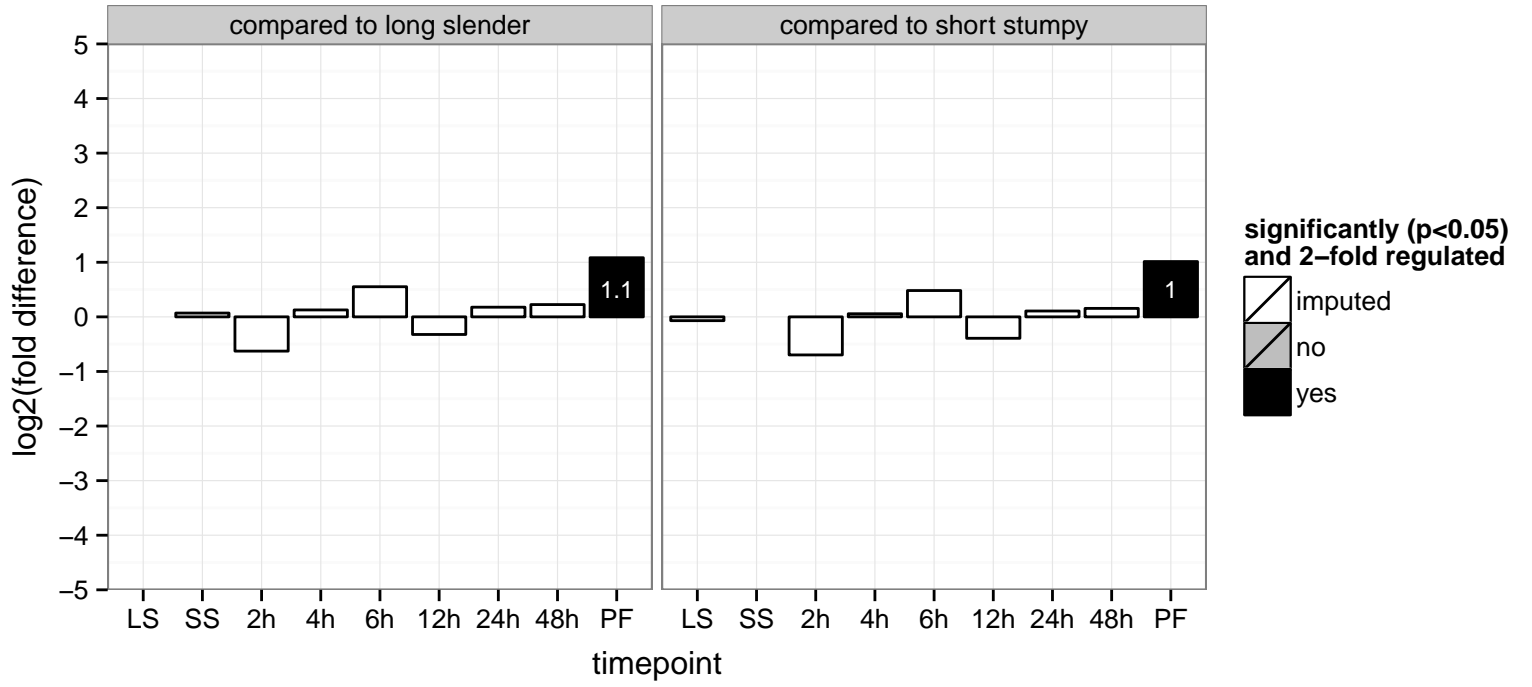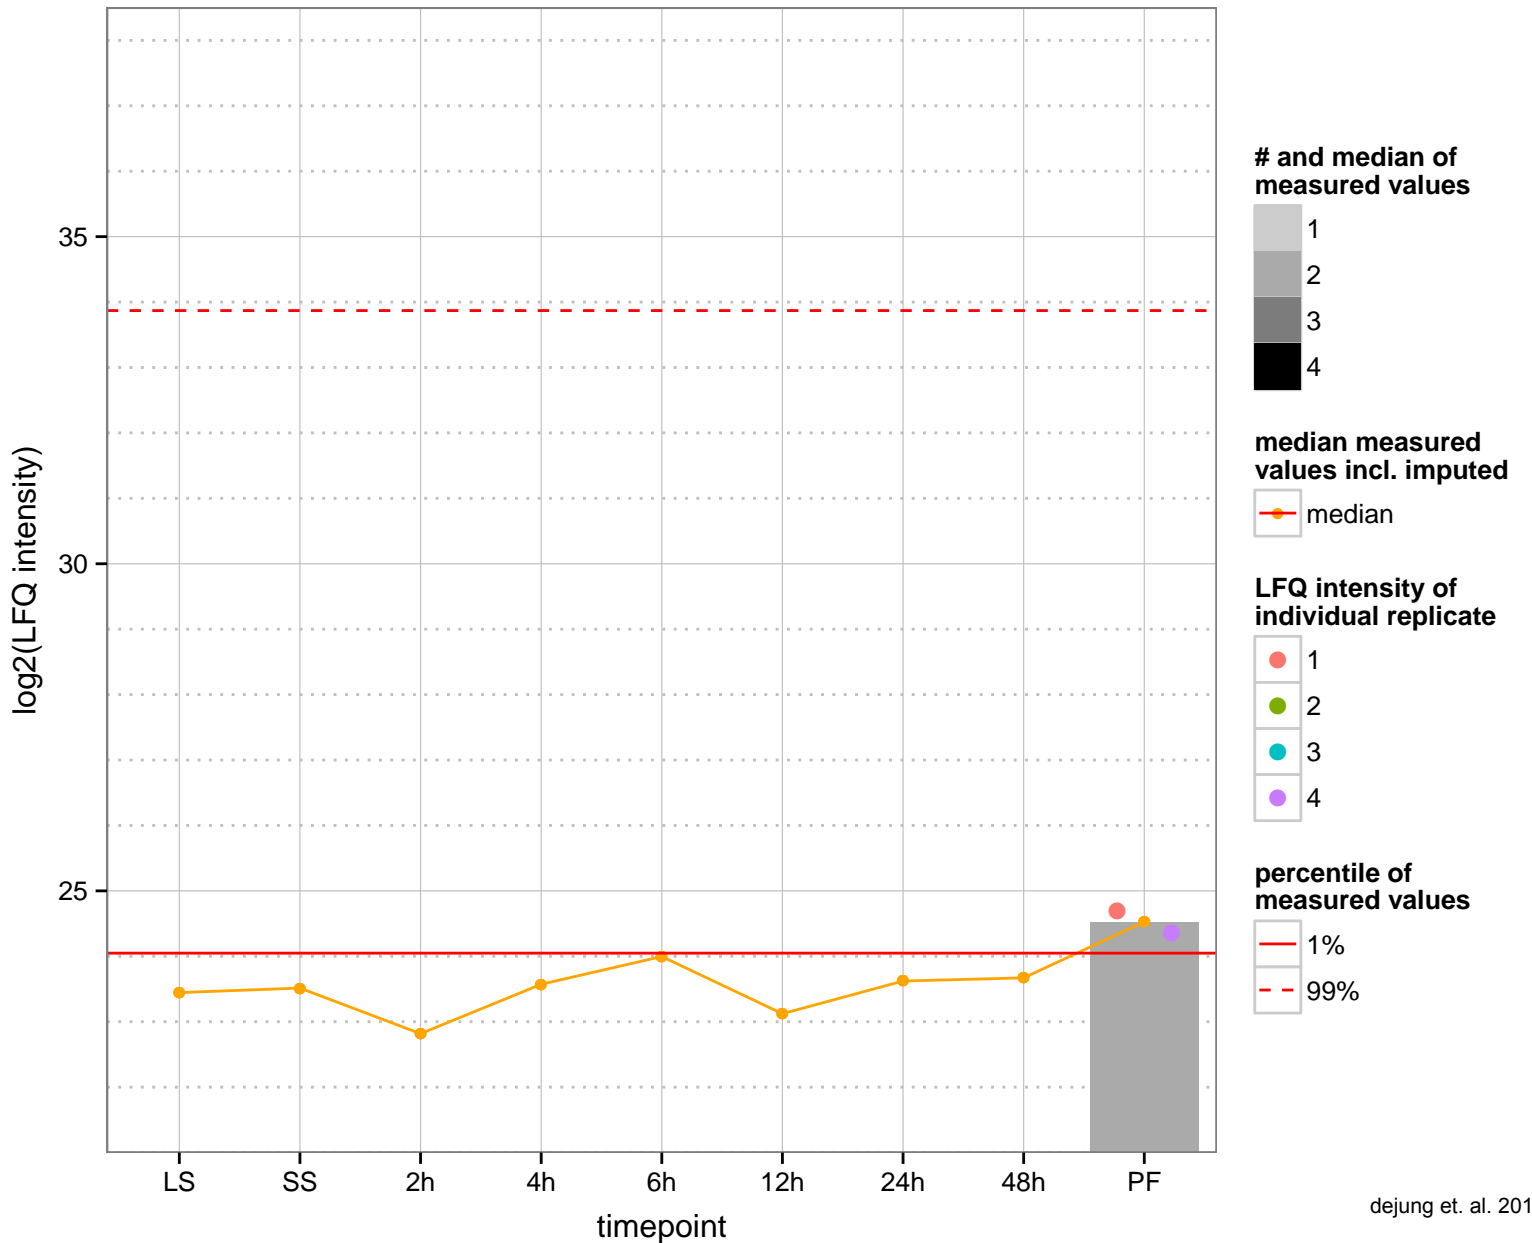

hypothetical protein, conserved  
 Tb927.9.4290  
 AGOF: null  
 AGOC: null  
 AGOP: null  
 PGOF: null  
 PGOE: null  
 PGOP: null

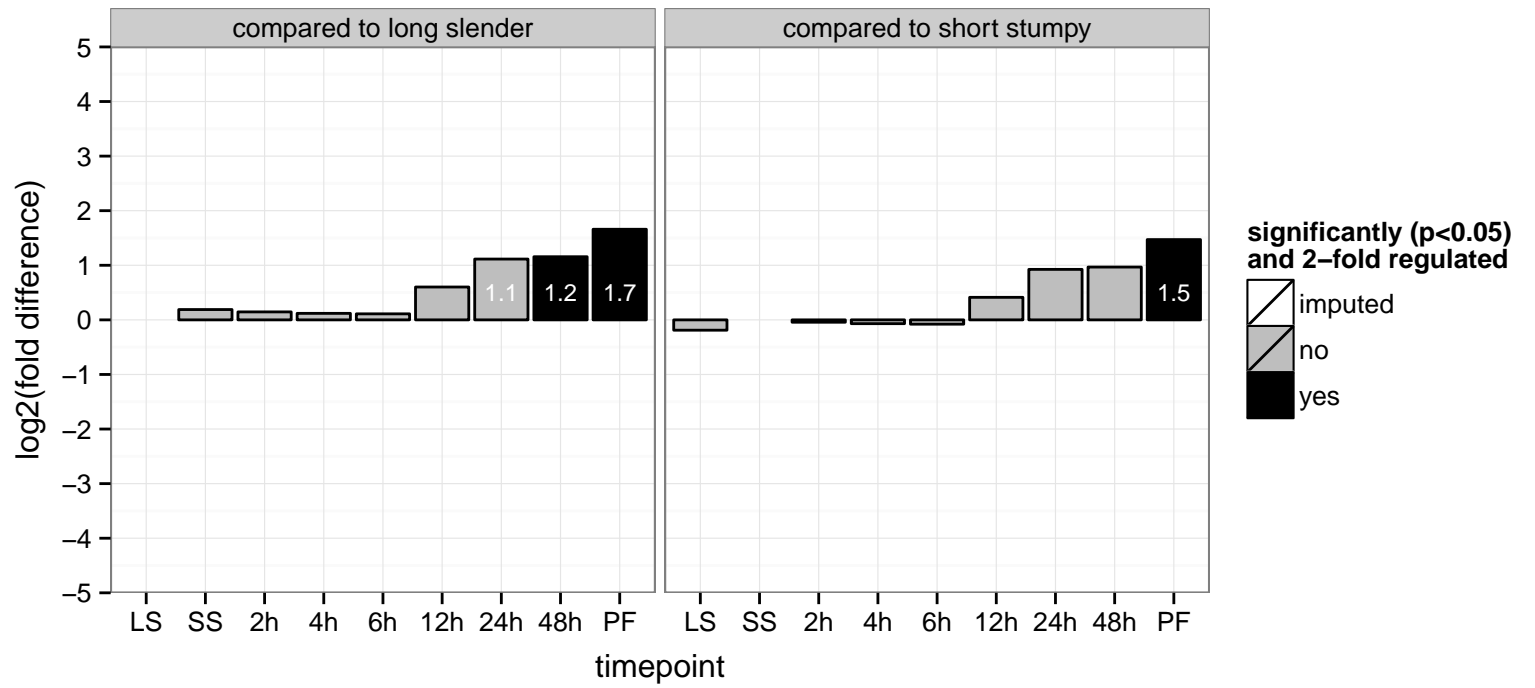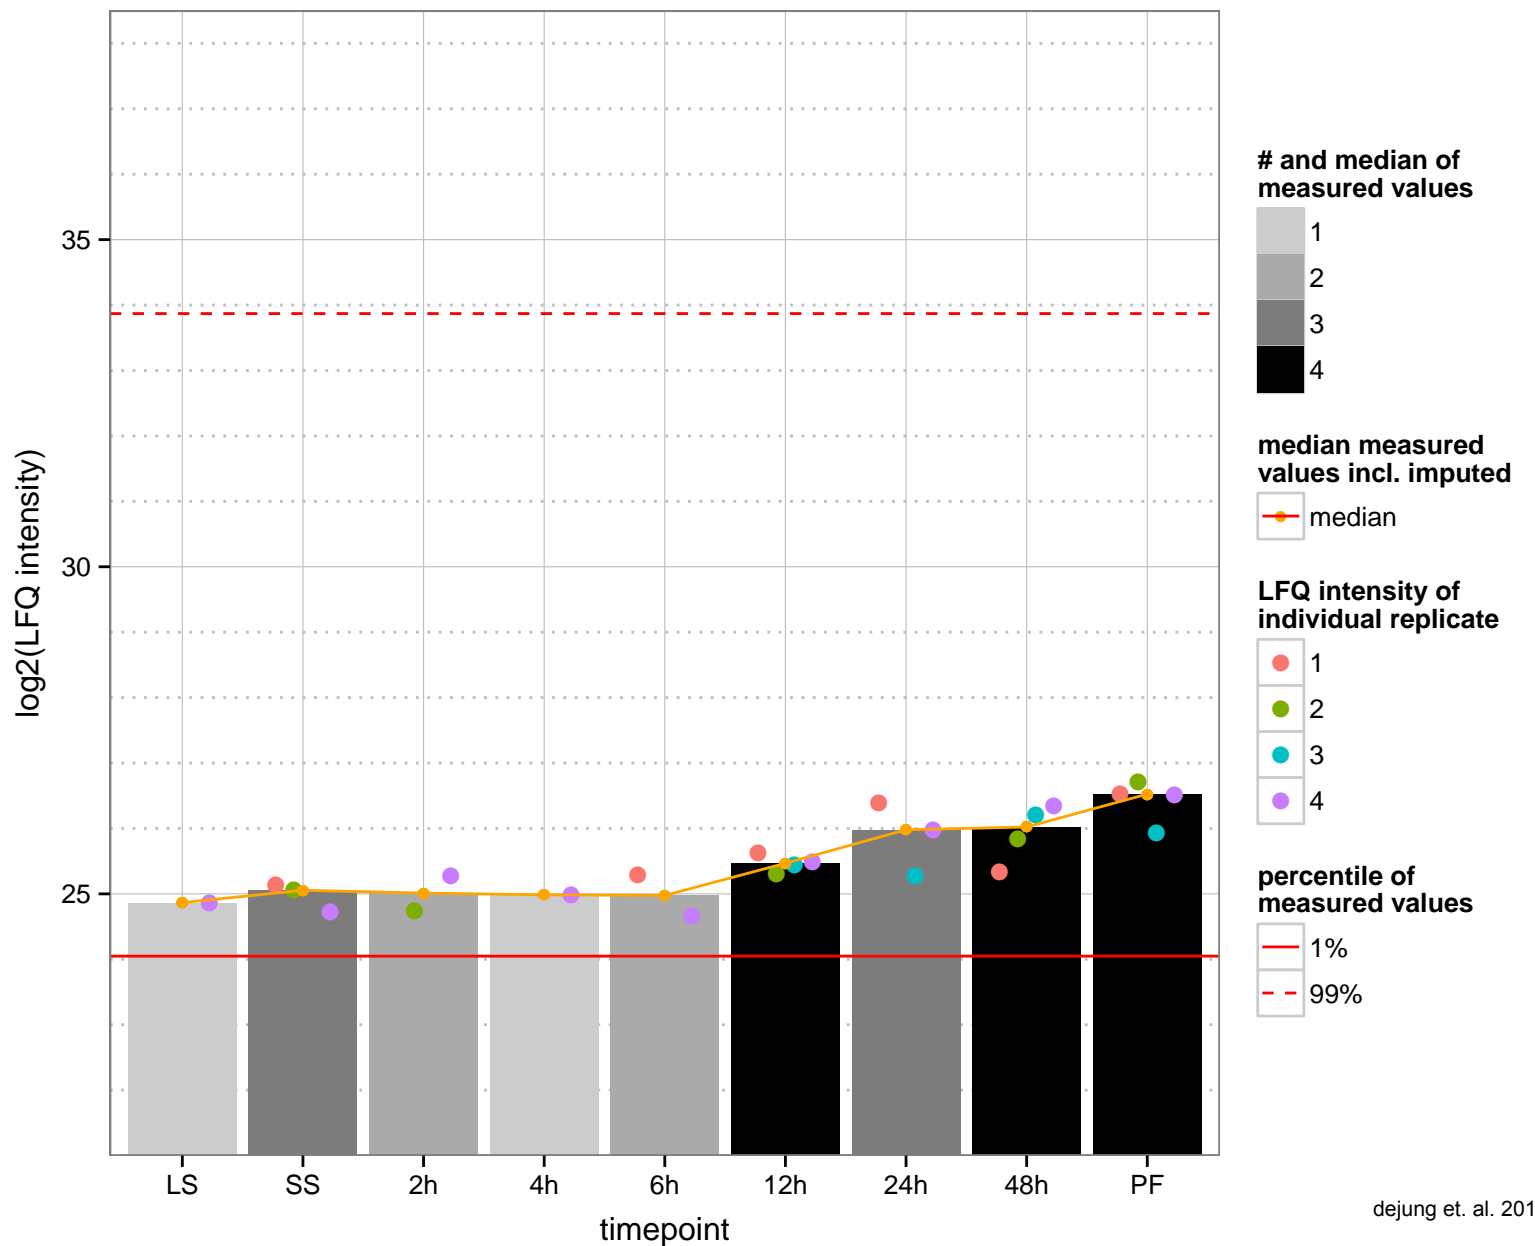

KREL1, RNA editing ligase, RNA-editing complex protein, mitochondrial RNA editing ligase 1 (KREL1)  
 Tb927.9.4360  
 AGOF: ATP binding, RNA ligase (ATP) activity  
 AGOC: mitochondrial mRNA editing complex, mitochondrion  
 AGOP: RNA modification  
 PGOF: ATP binding, RNA ligase (ATP) activity, ligase activity  
 PGO: null  
 PGOP: null

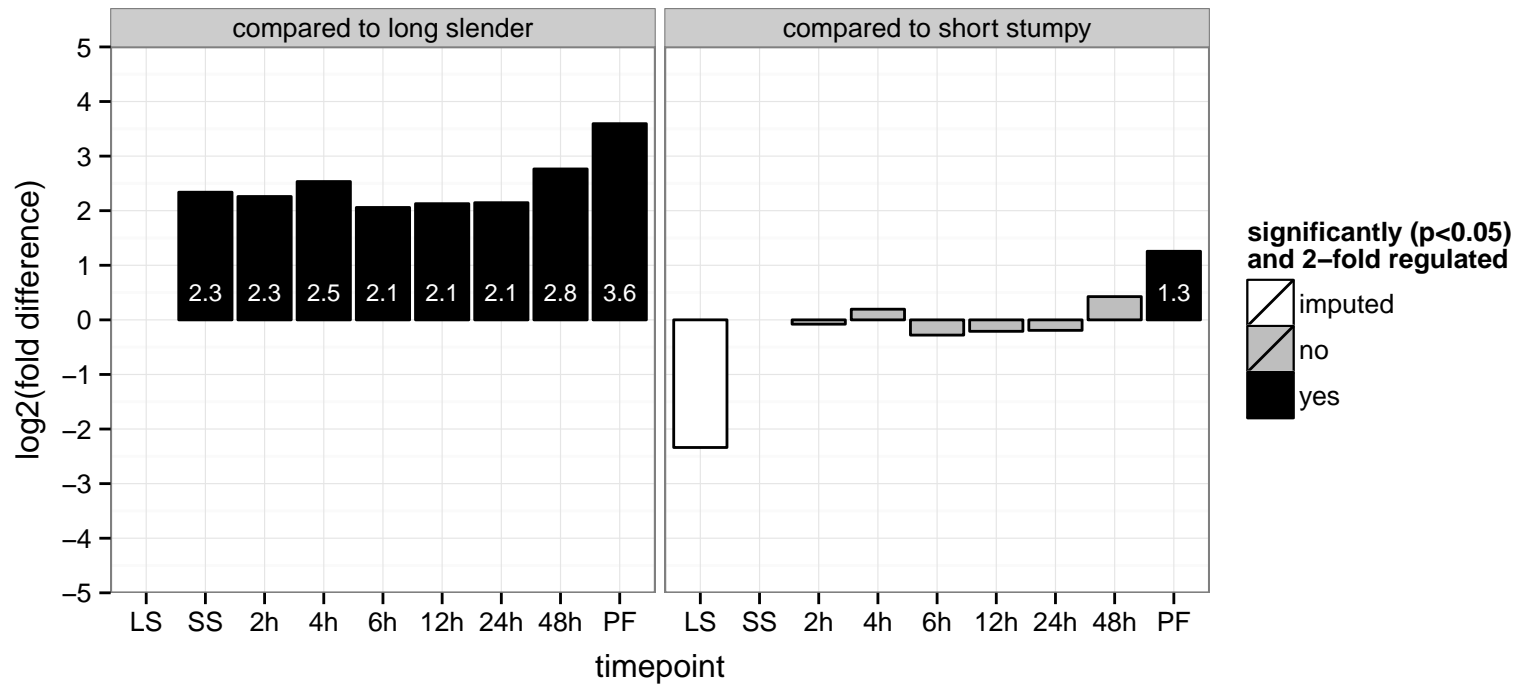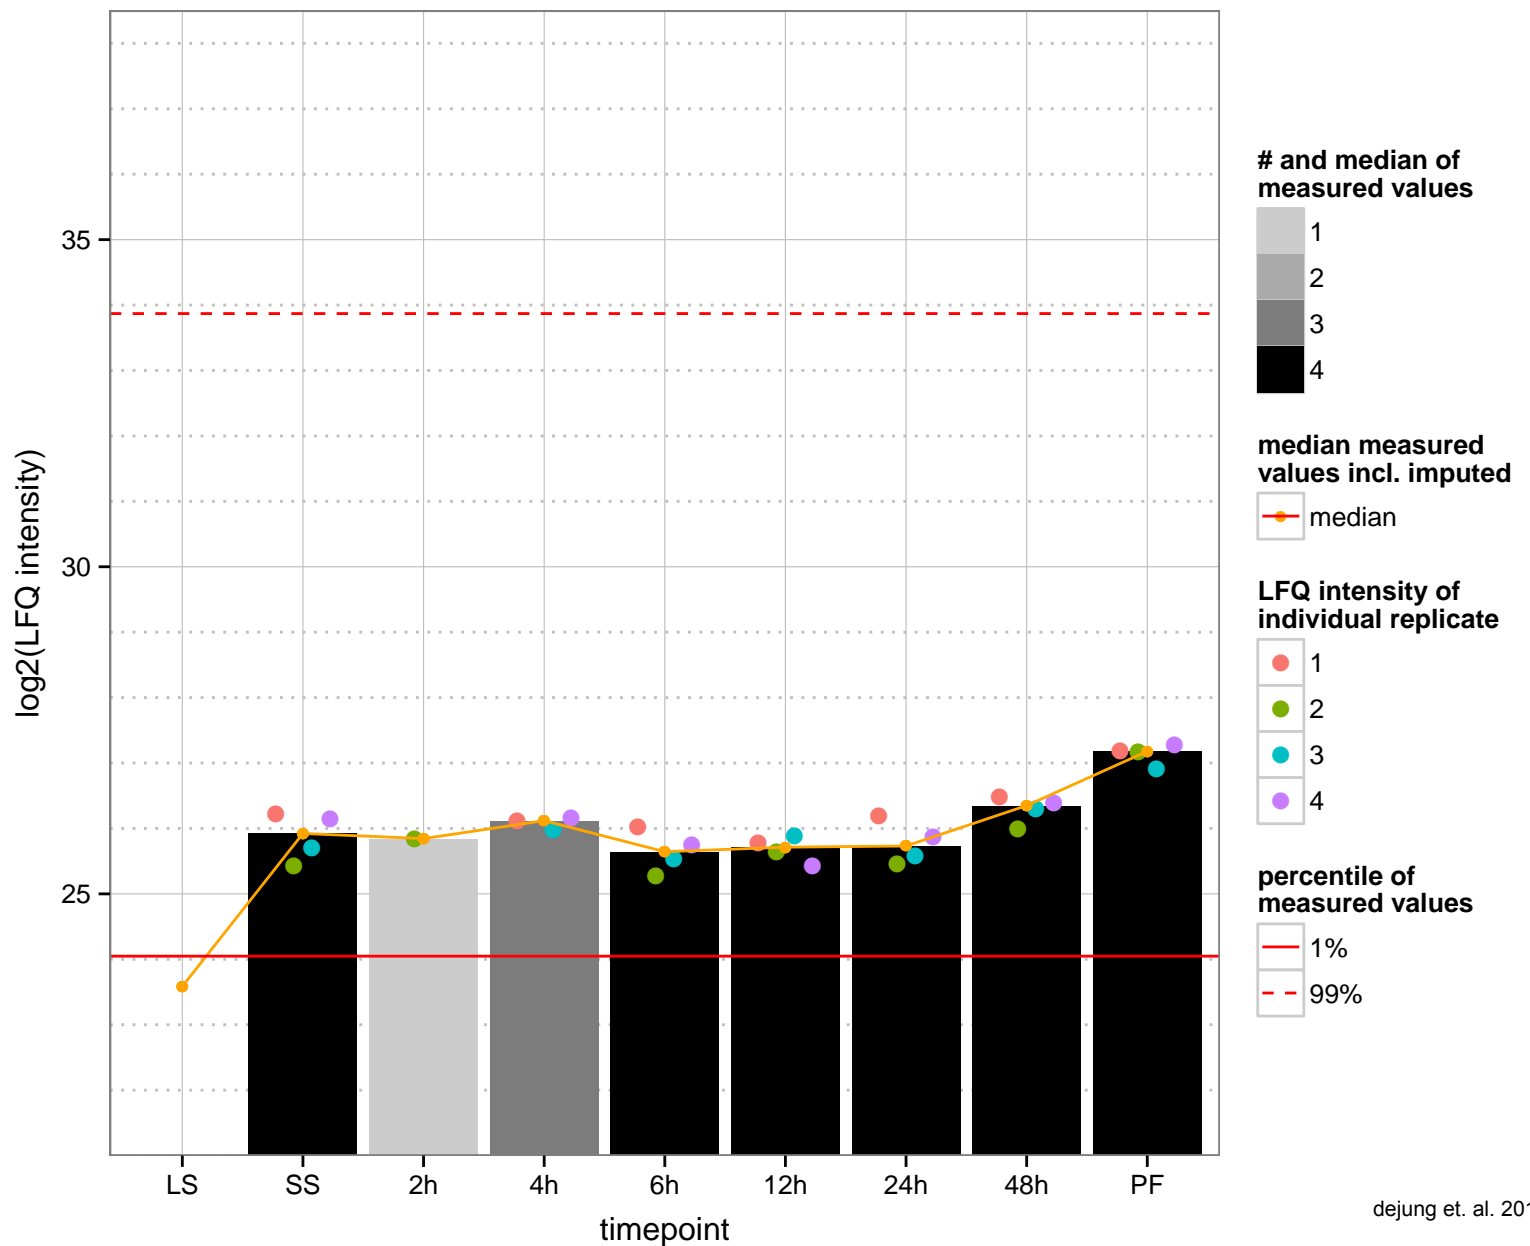

leucine-rich repeat protein (LRRP), putative  
 Tb927.9.4850  
 AGOF: null  
 AGOC: null  
 AGOP: null  
 PGO: null  
 PGOC: null  
 PGOP: null

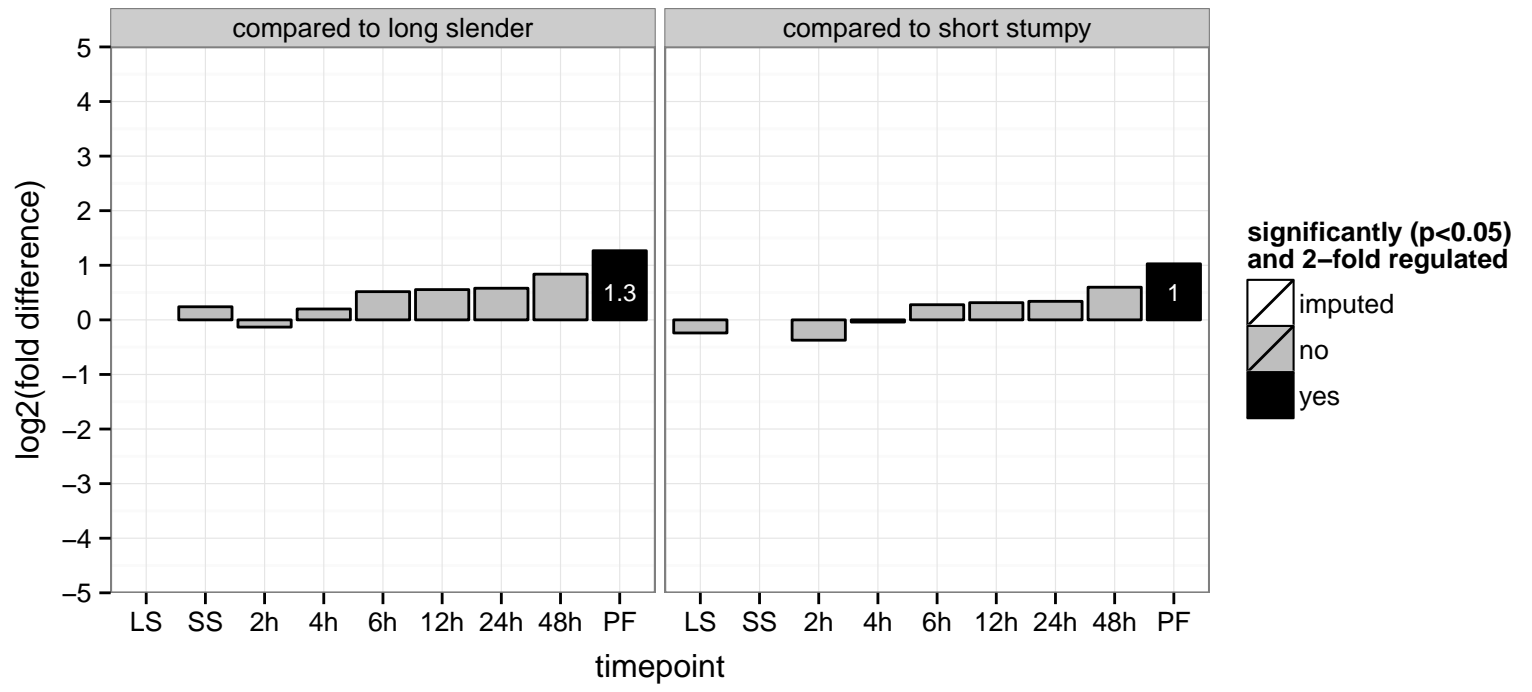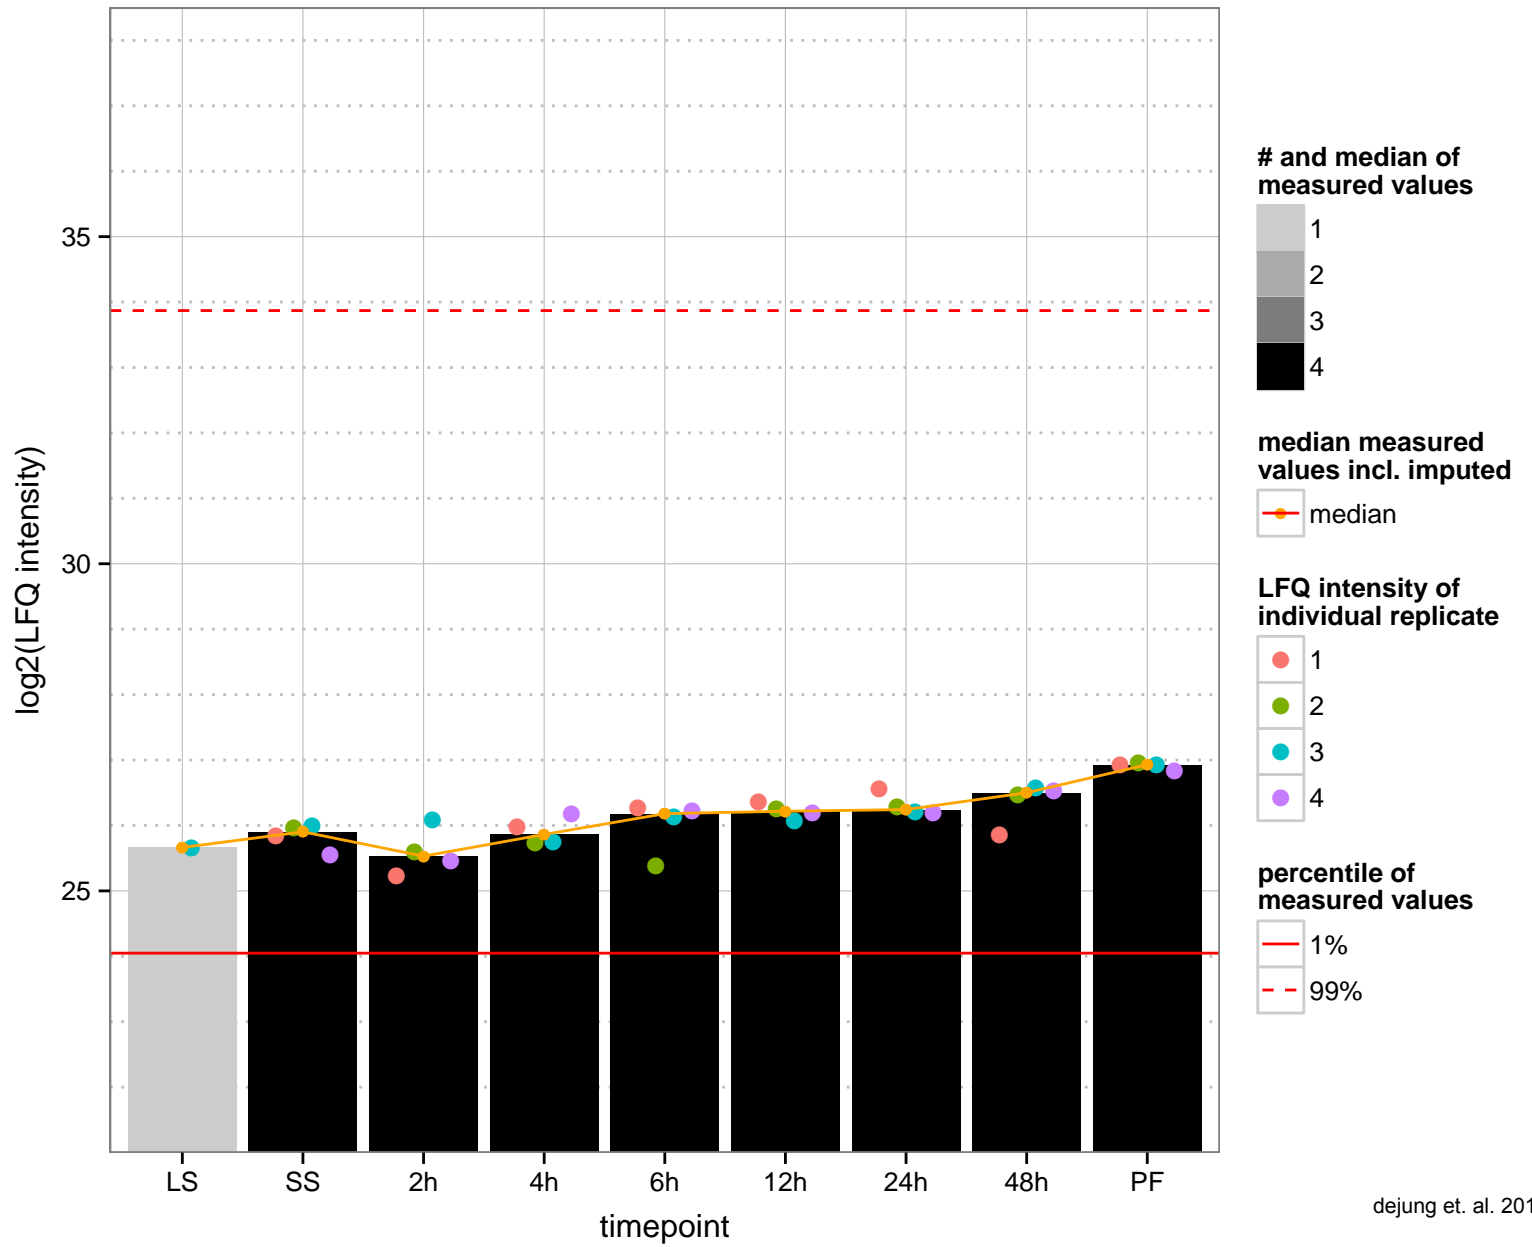

protein kinase, putative

Tb927.9.4910

AGOF: ATP binding, protein serine/threonine kinase activity, protein tyrosine kinase activity, zinc ion binding

AGOC: null

AGOP: growth, protein phosphorylation

PGOF: ATP binding, metal ion binding, protein kinase activity, transferase activity, transferring phosphorus-containing groups

PGOC: null

PGOP: protein phosphorylation

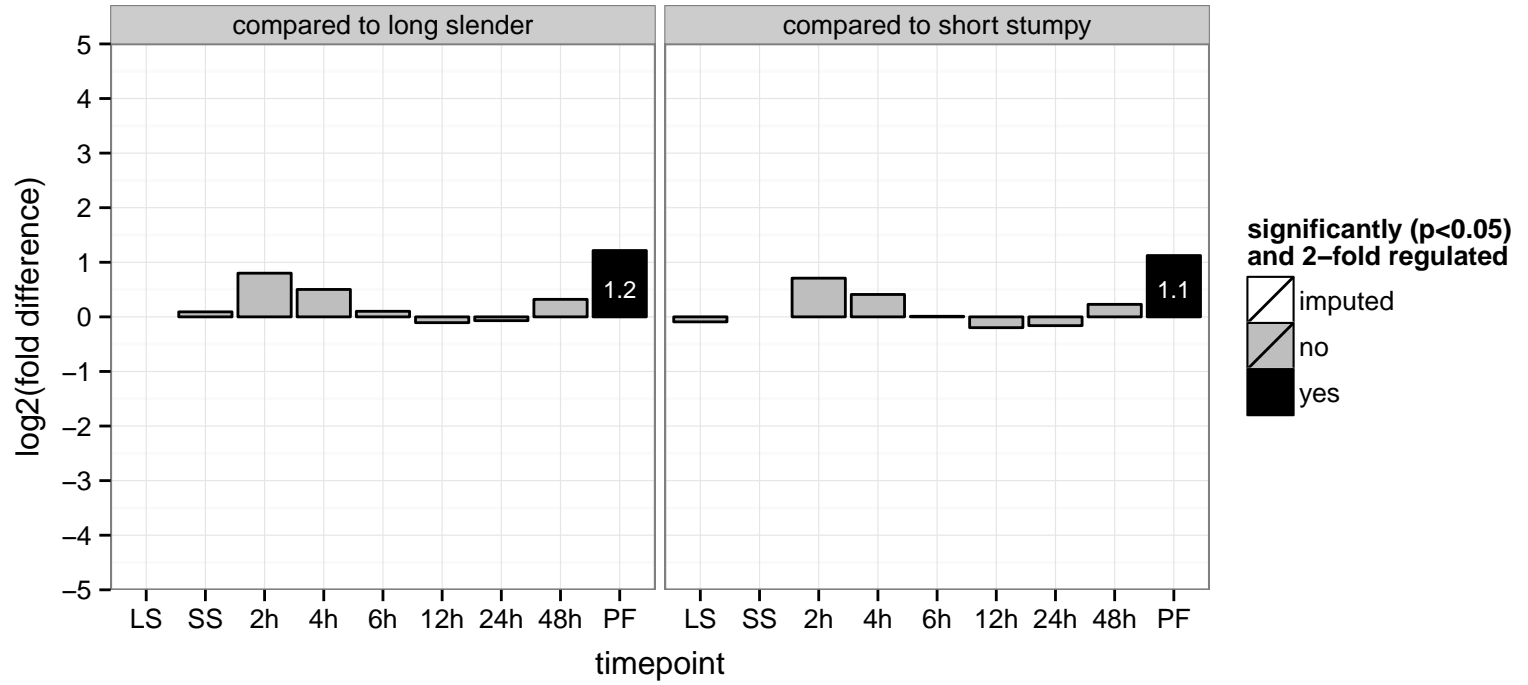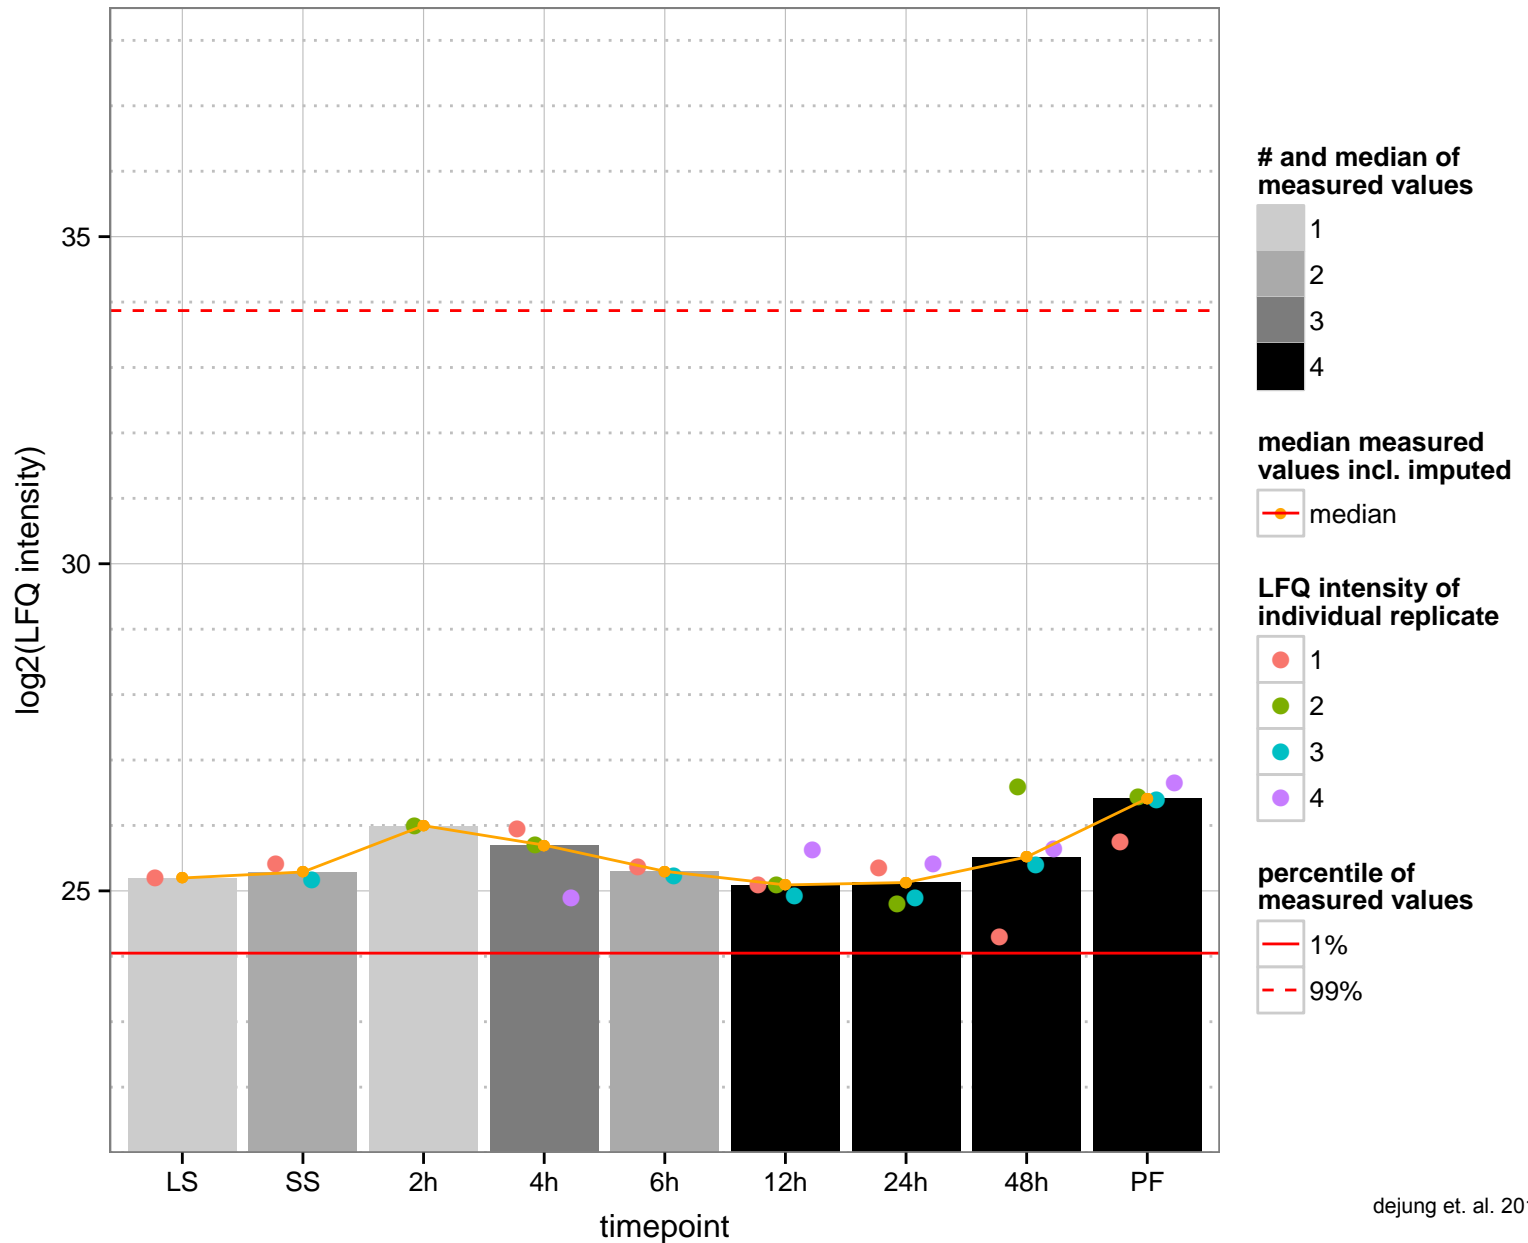

unspecified product  
 Tb927.9.5280  
 AGOF: null  
 AGOC: null  
 AGOP: null  
 PGO: null  
 PGOC: null  
 PGOP: null

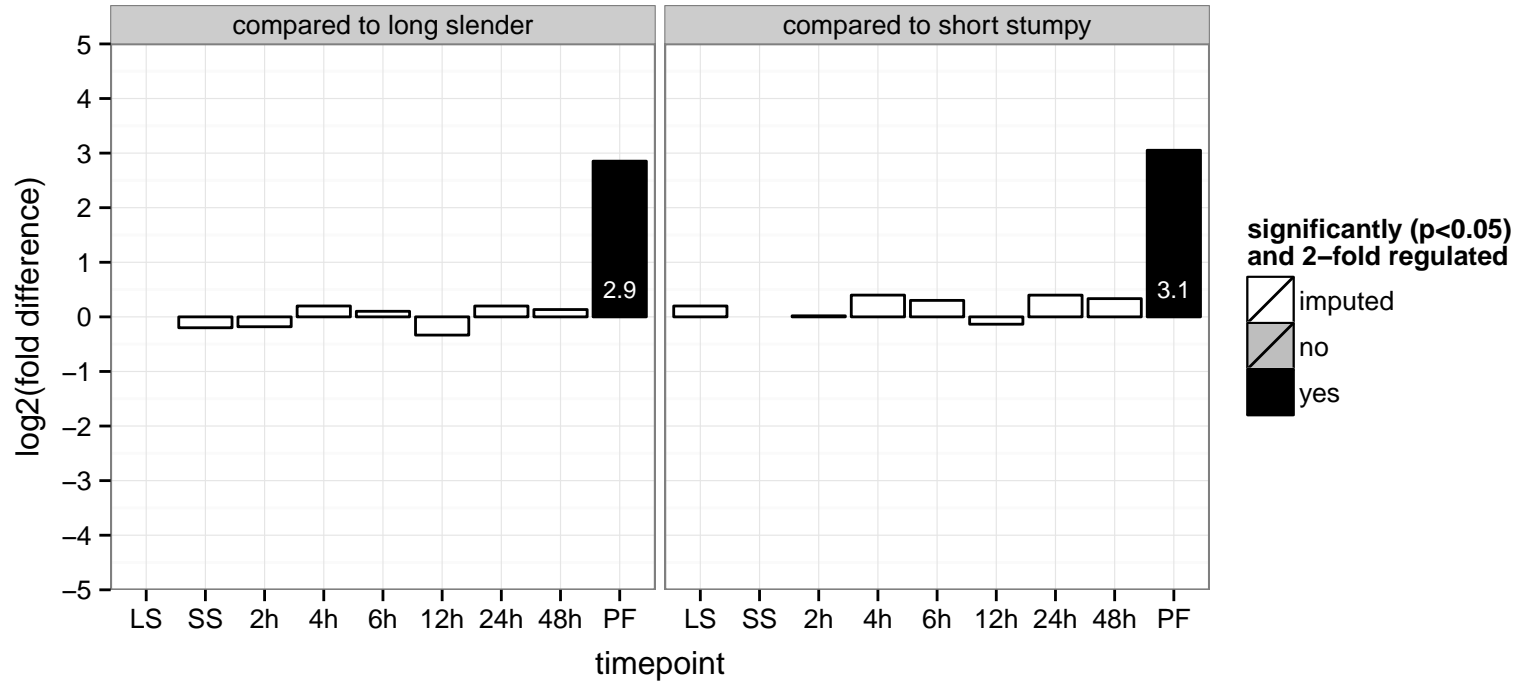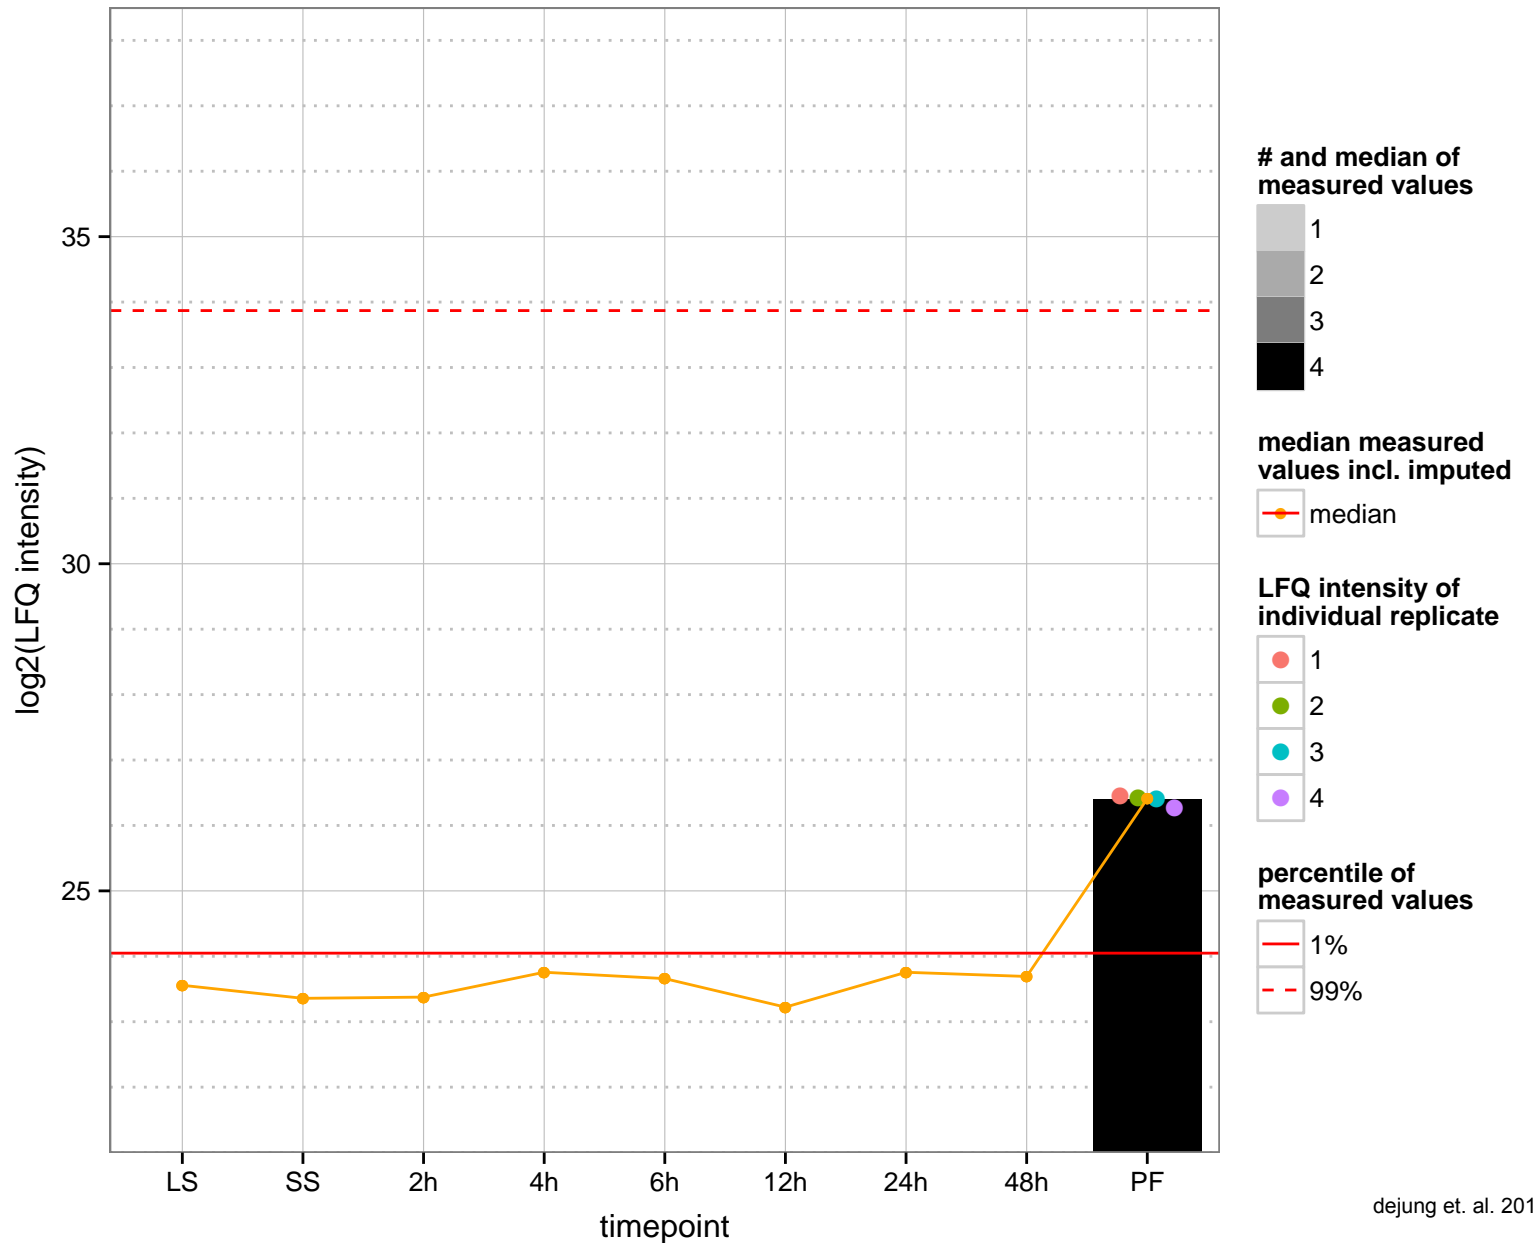

hypothetical protein, conserved  
 Tb927.9.5380  
 AGOF: Rab GTPase activator activity  
 AGOC: intracellular  
 AGOP: regulation of Rab GTPase activity  
 PGO: Rab GTPase activator activity  
 PGOC: intracellular  
 PGOP: regulation of Rab GTPase activity

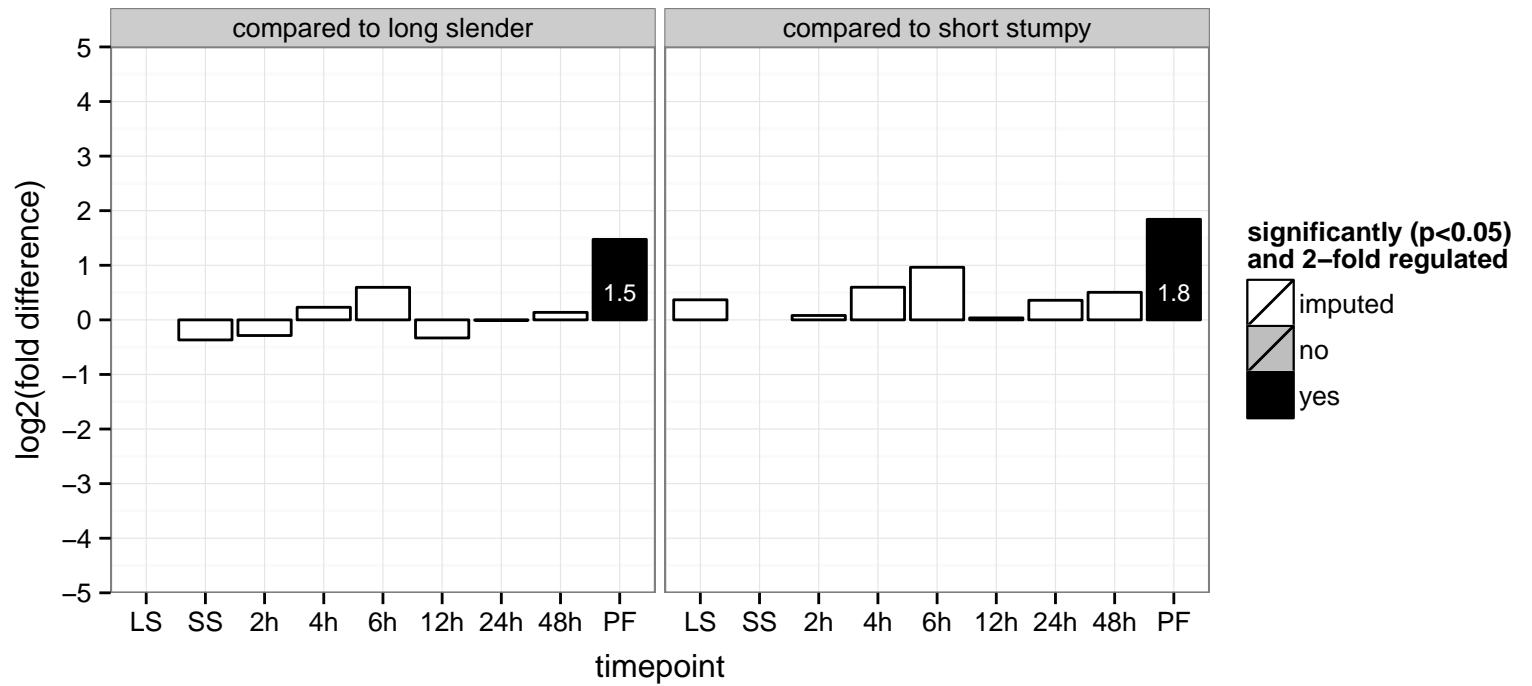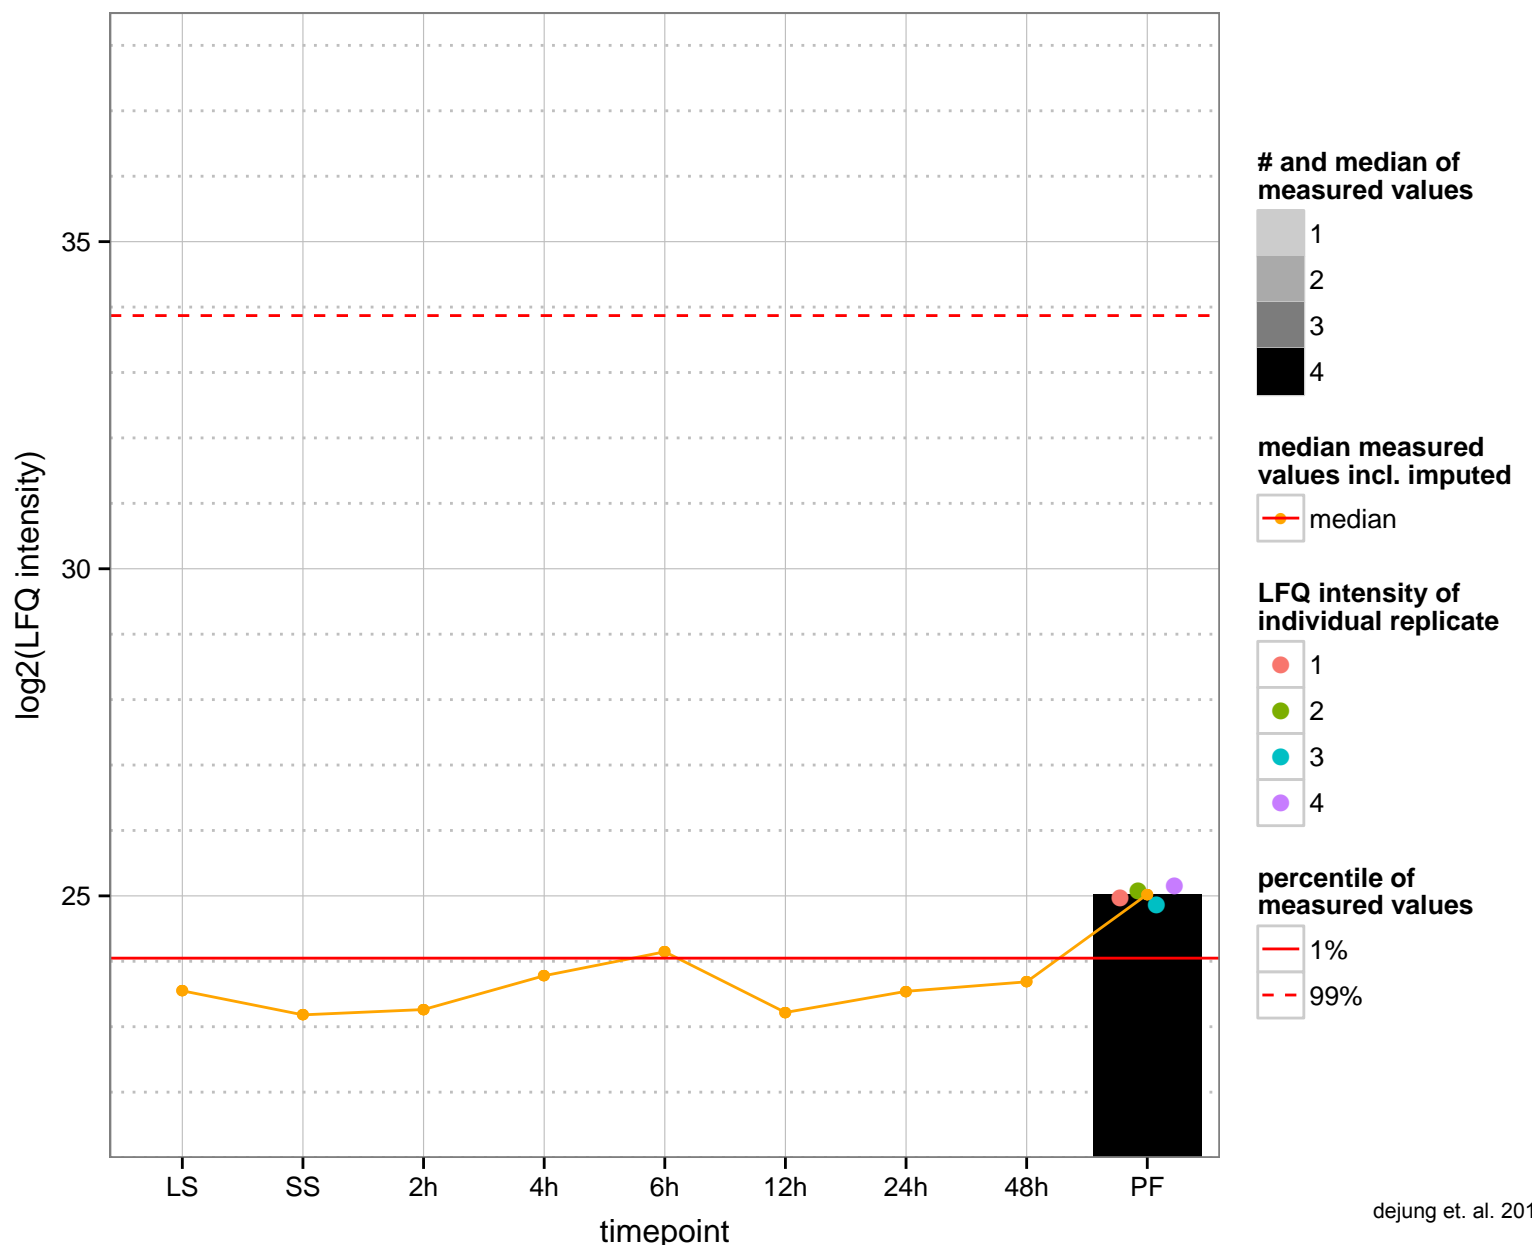



E2-like ubiquitin-conjugation enzyme, putative (UFC1)  
 Tb927.9.5650  
 AGOF: small conjugating protein binding  
 AGOC: mitochondrion  
 AGOP: null  
 PGO: null  
 PGOC: null  
 PGOP: null

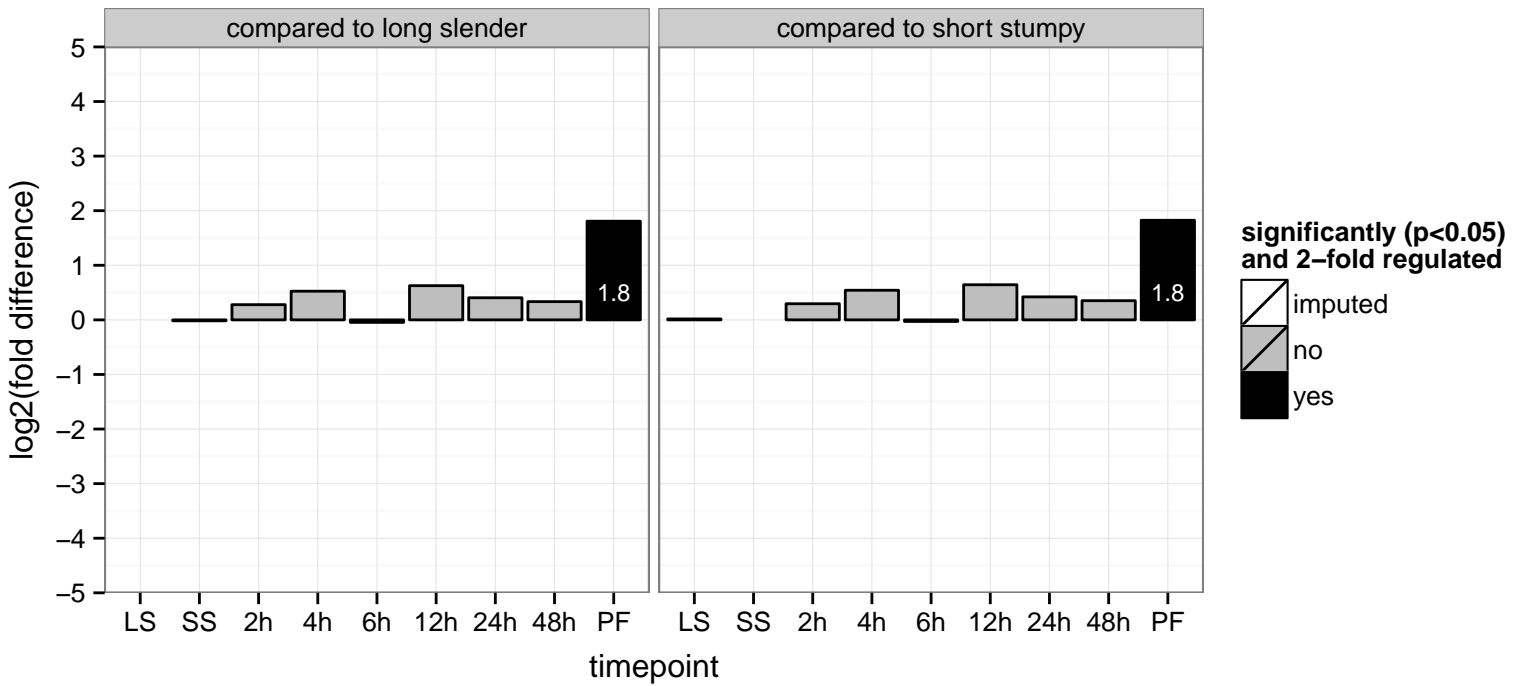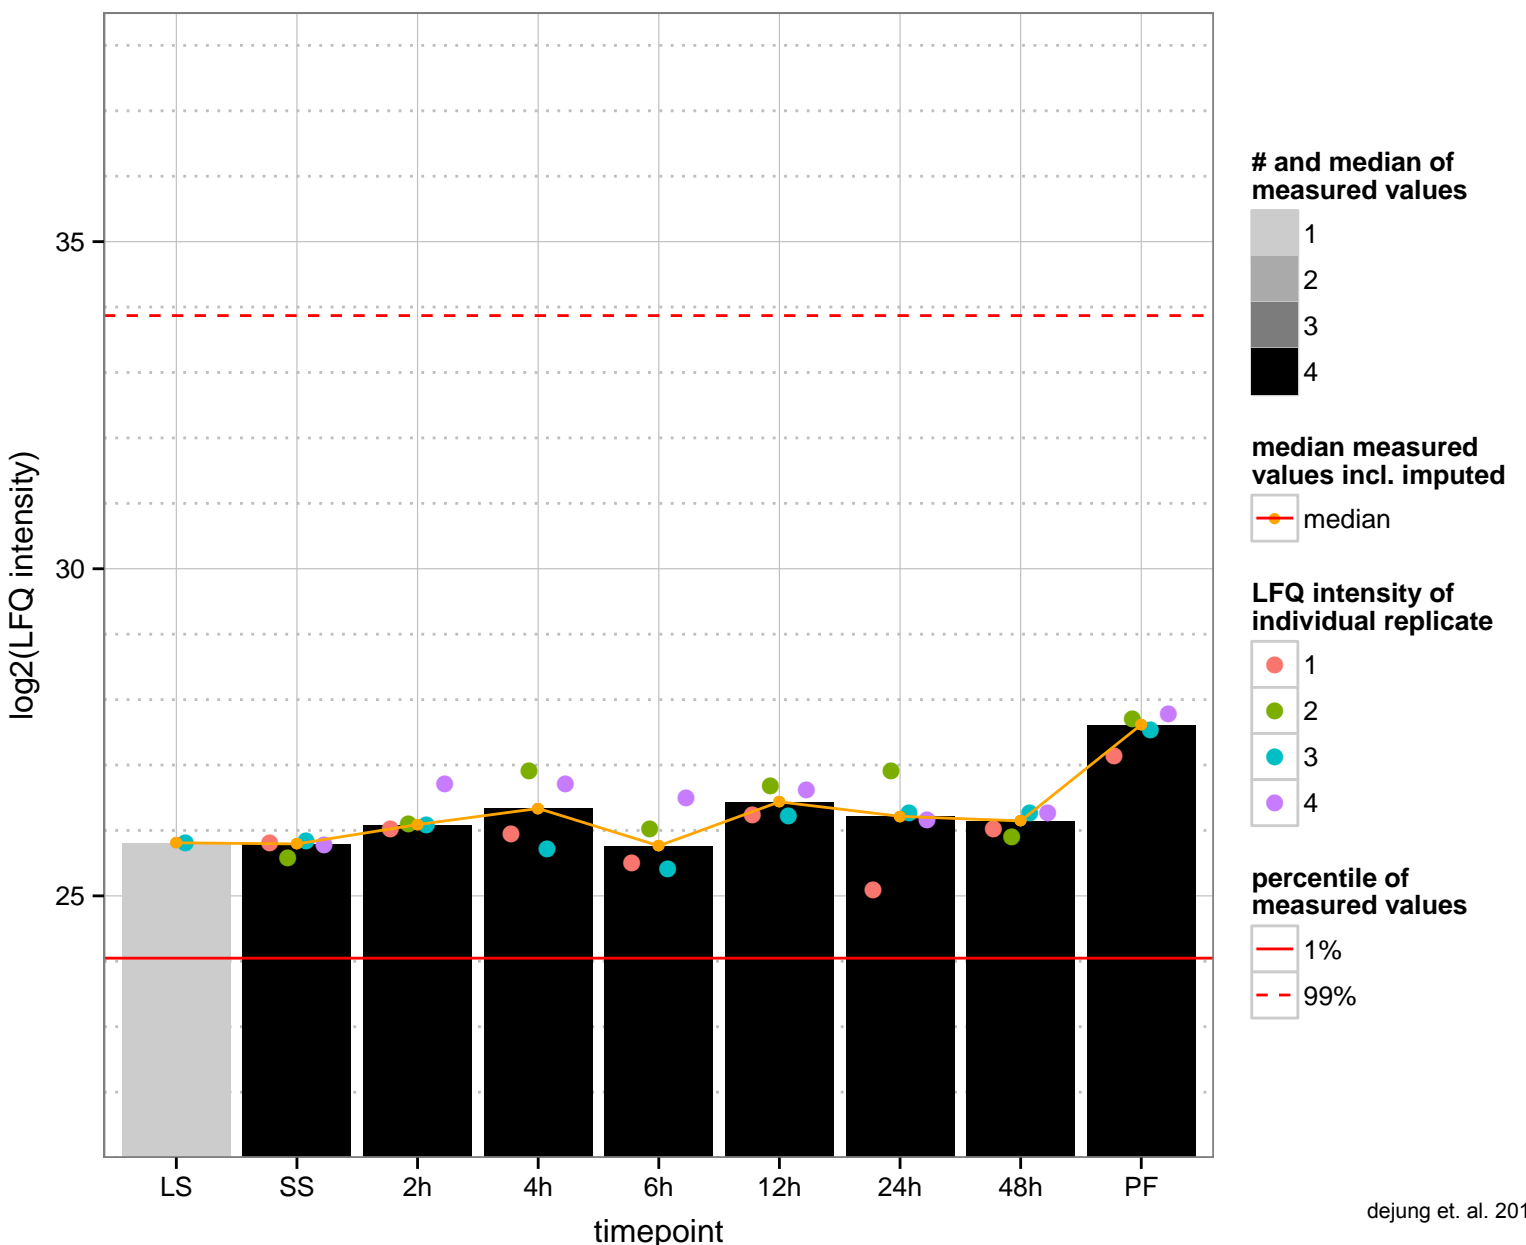

hypothetical protein, conserved  
 Tb927.9.6270  
 AGOF: null  
 AGOC: null  
 AGOP: null  
 PGOF: null  
 PGO: null  
 PGOP: null

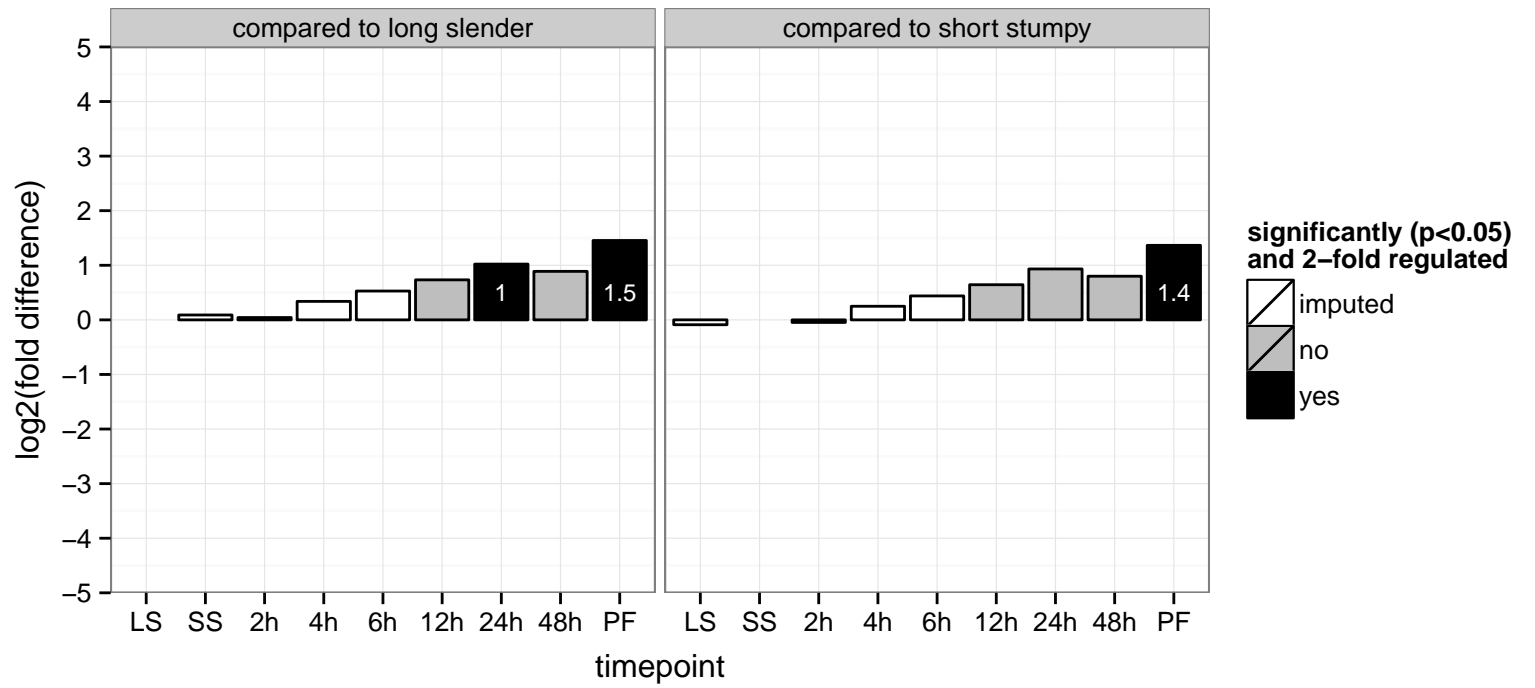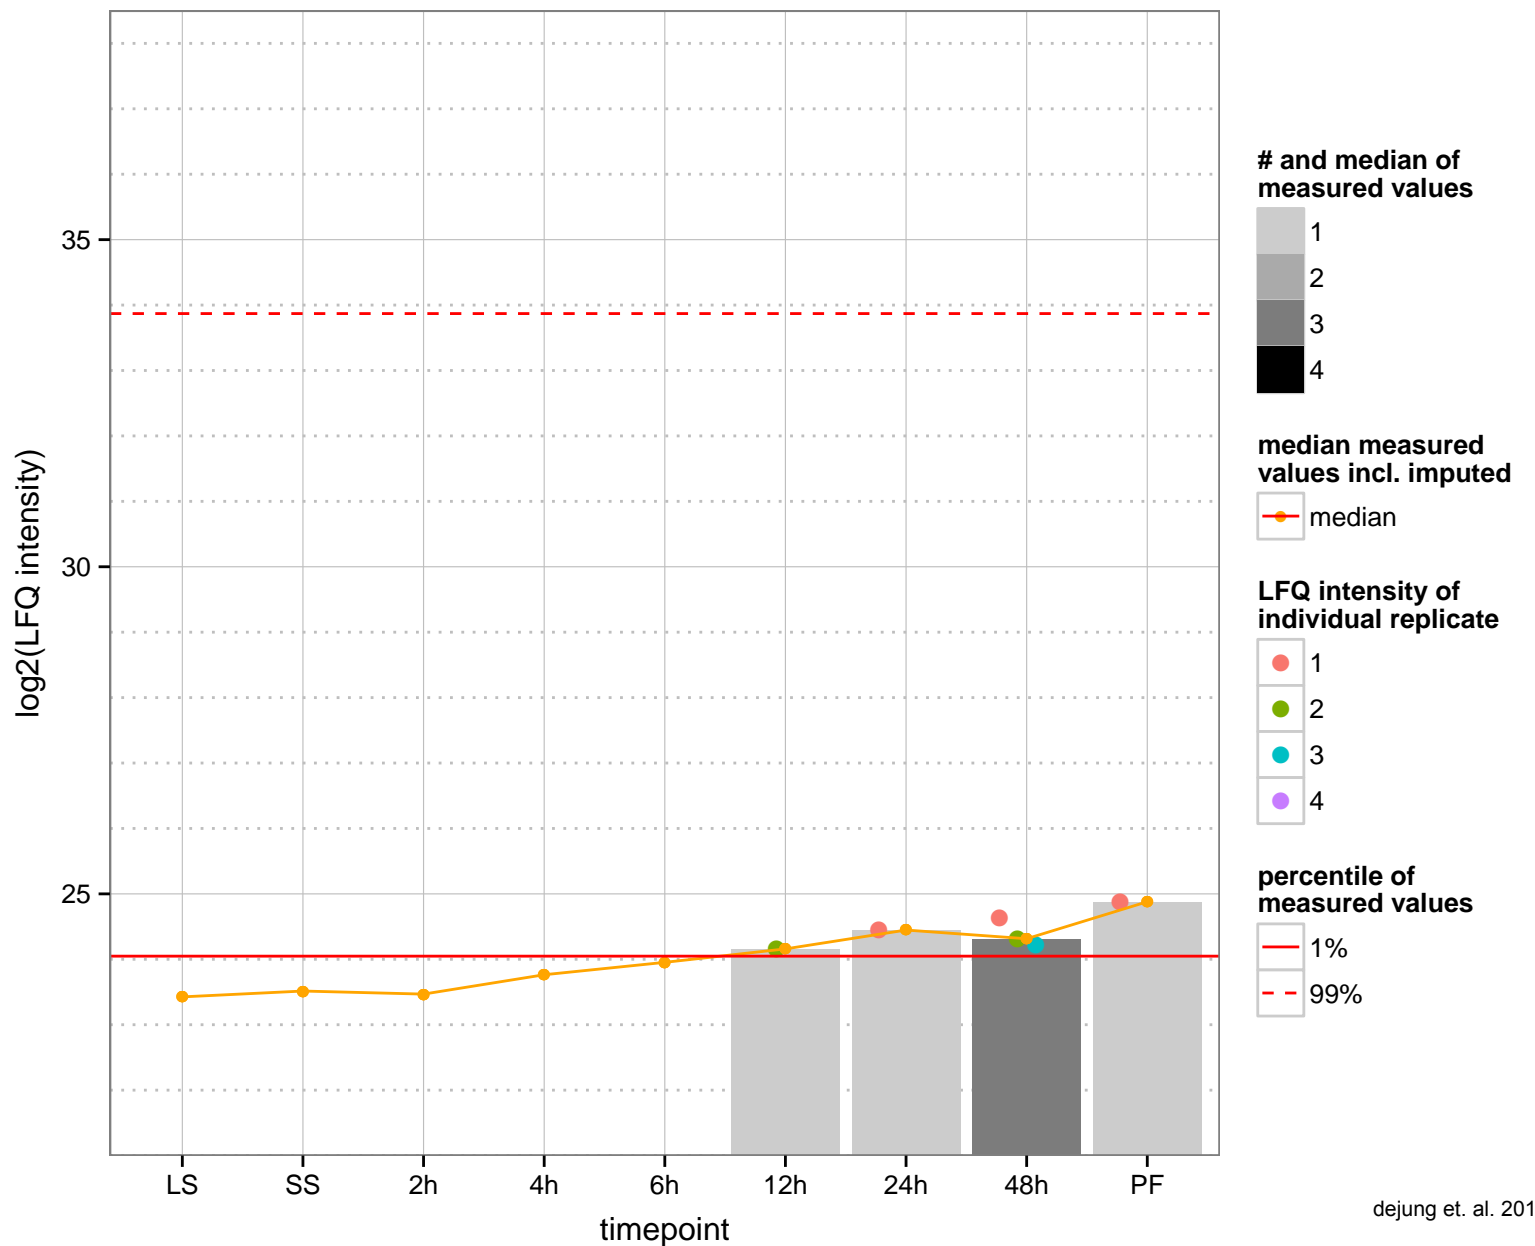

RNA-binding protein, putative (RBSR1)  
 Tb927.9.6870  
 AGOF: RNA binding  
 AGOC: null  
 AGOP: RNA processing  
 PGO: nucleic acid binding  
 PGO: null  
 PGO: null

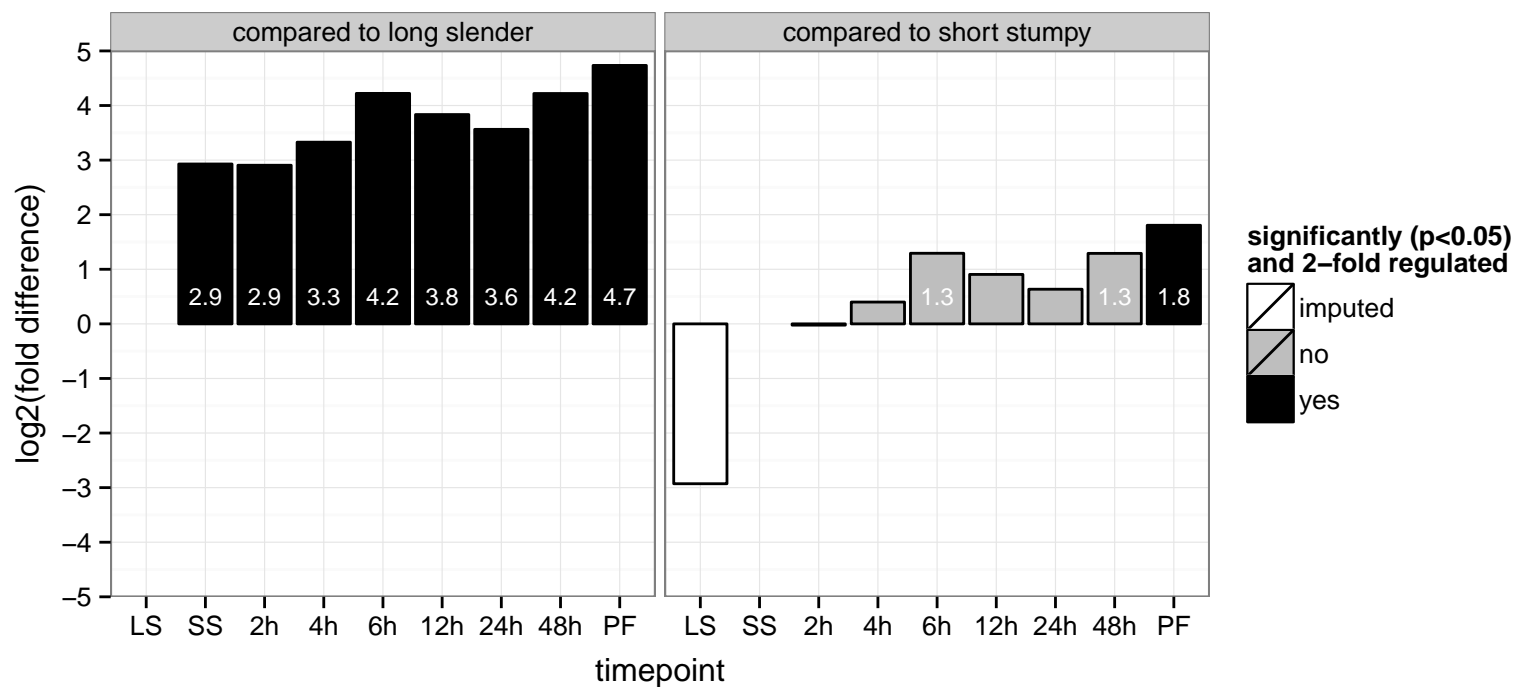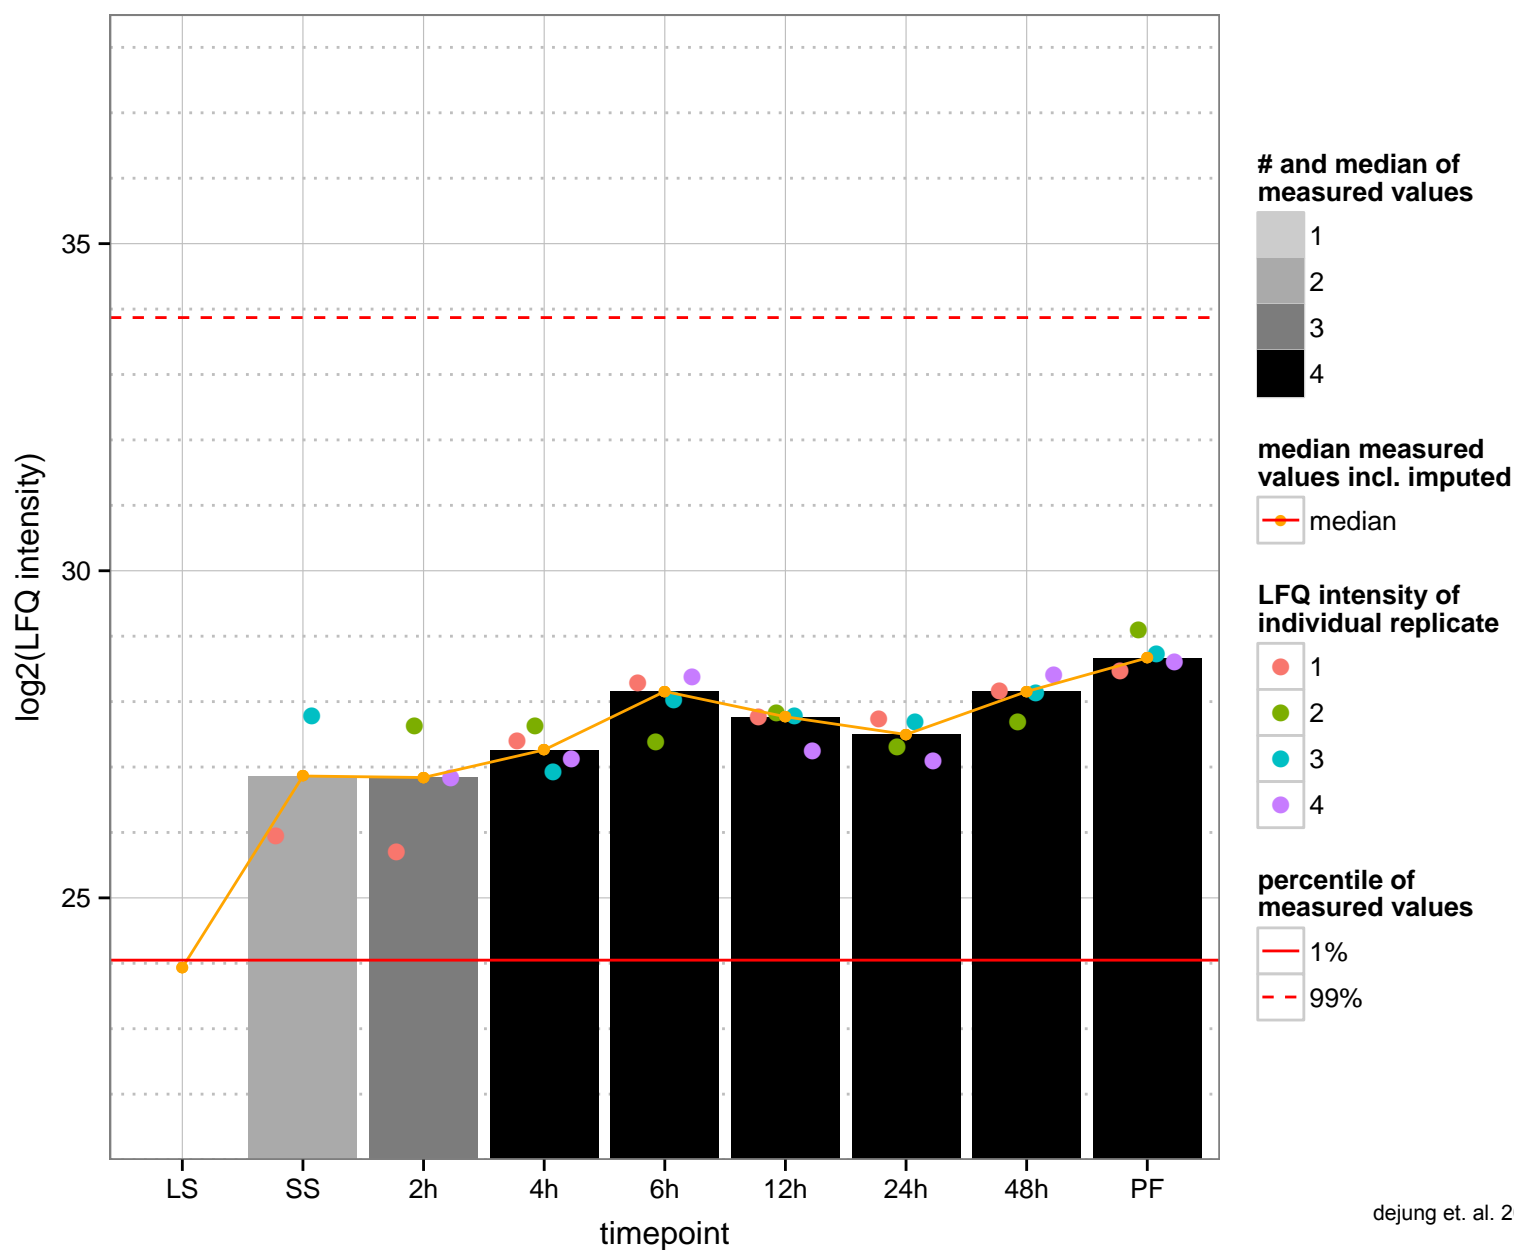

hypothetical protein, conserved  
 Tb927.9.7200  
 AGOF: null  
 AGOC: mitochondrion  
 AGOP: null  
 PGO: null  
 PGOC: null  
 PGOP: null

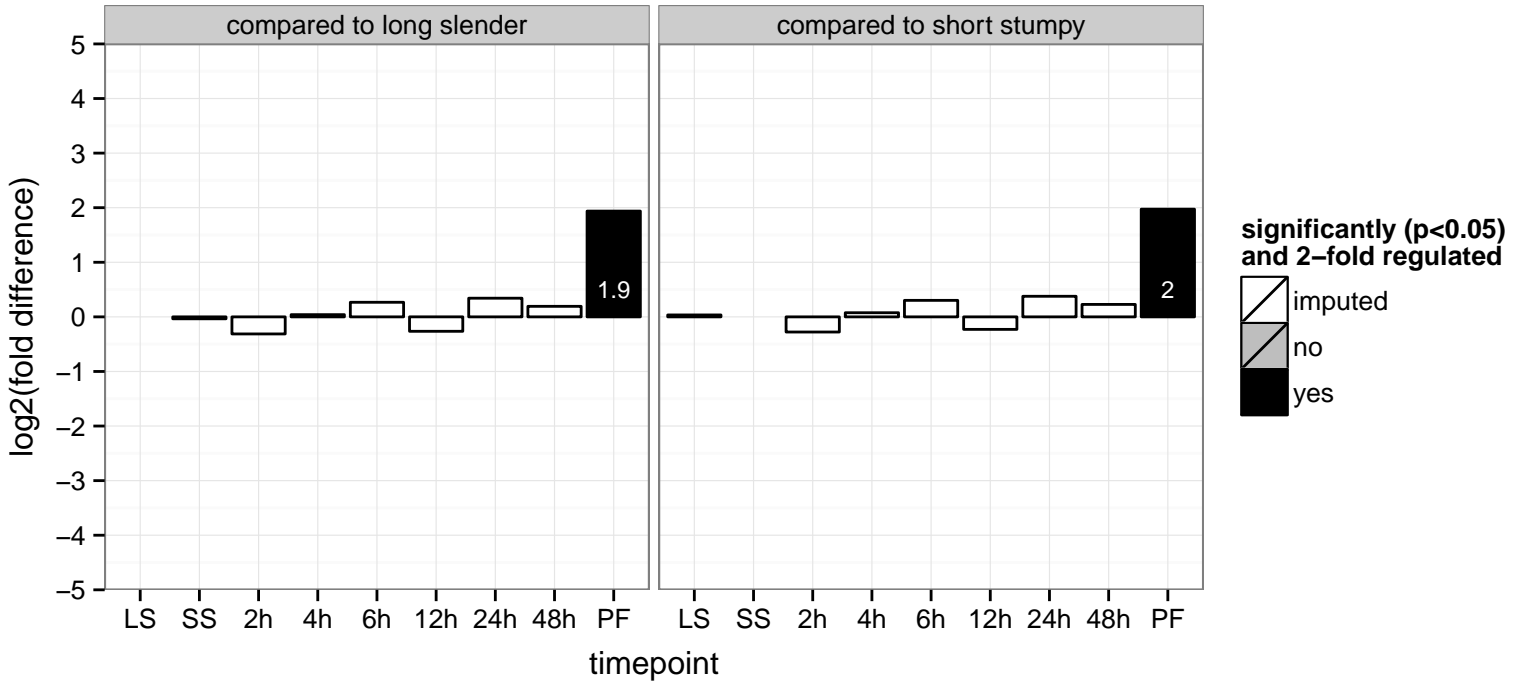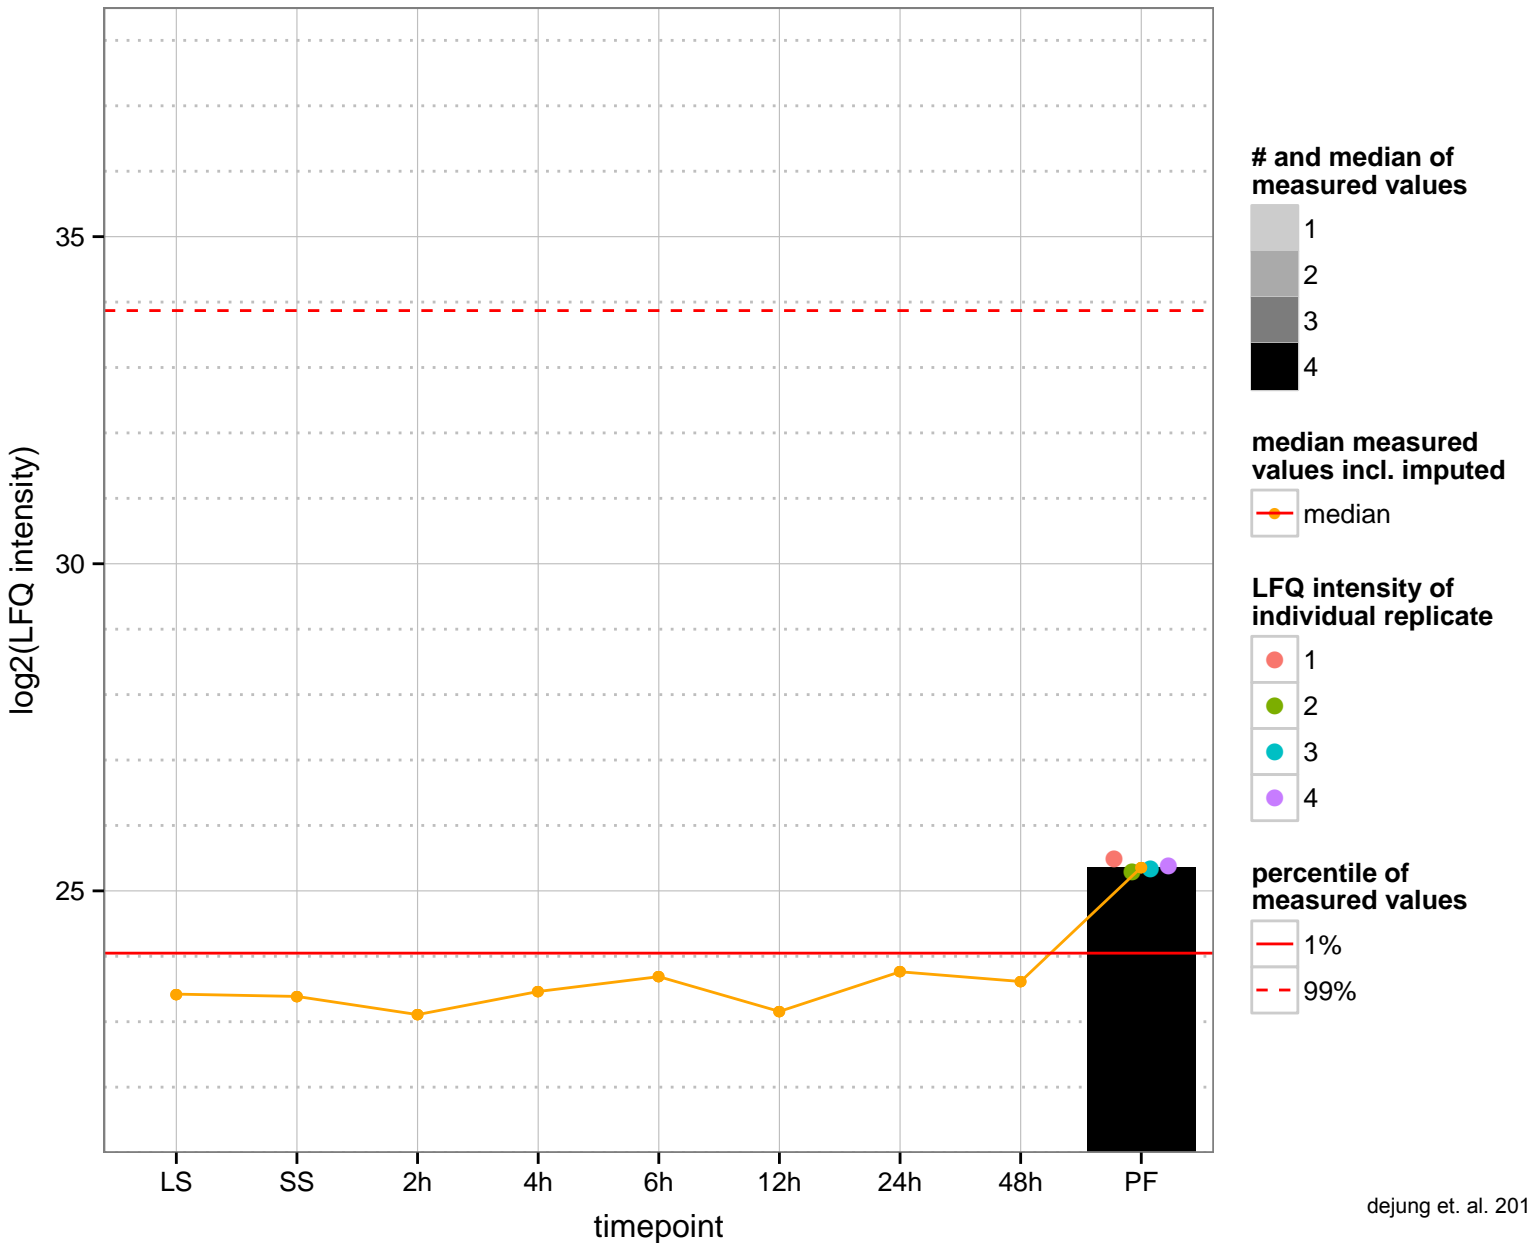

hypothetical protein, conserved  
 Tb927.9.7250  
 AGOF: null  
 AGOC: null  
 AGOP: null  
 PGOF: null  
 PGO: null  
 PGOP: null

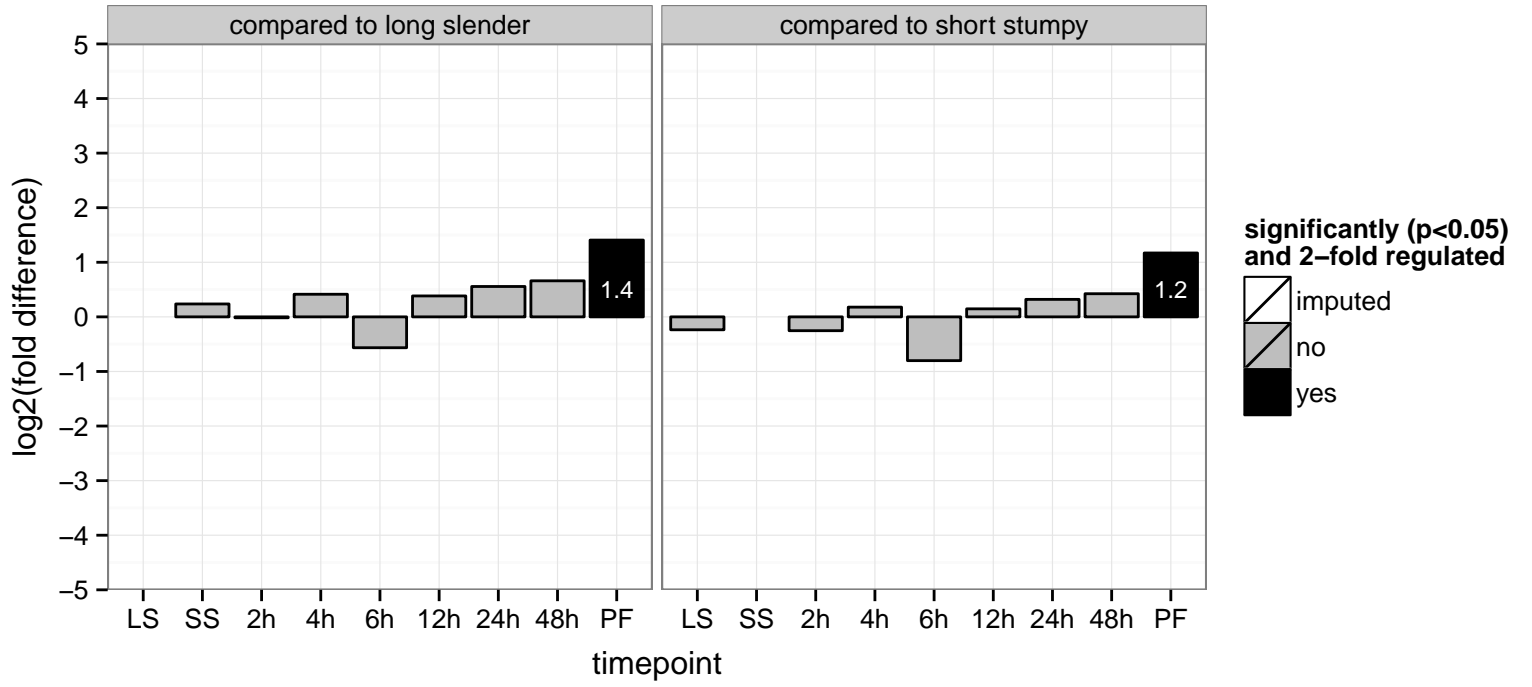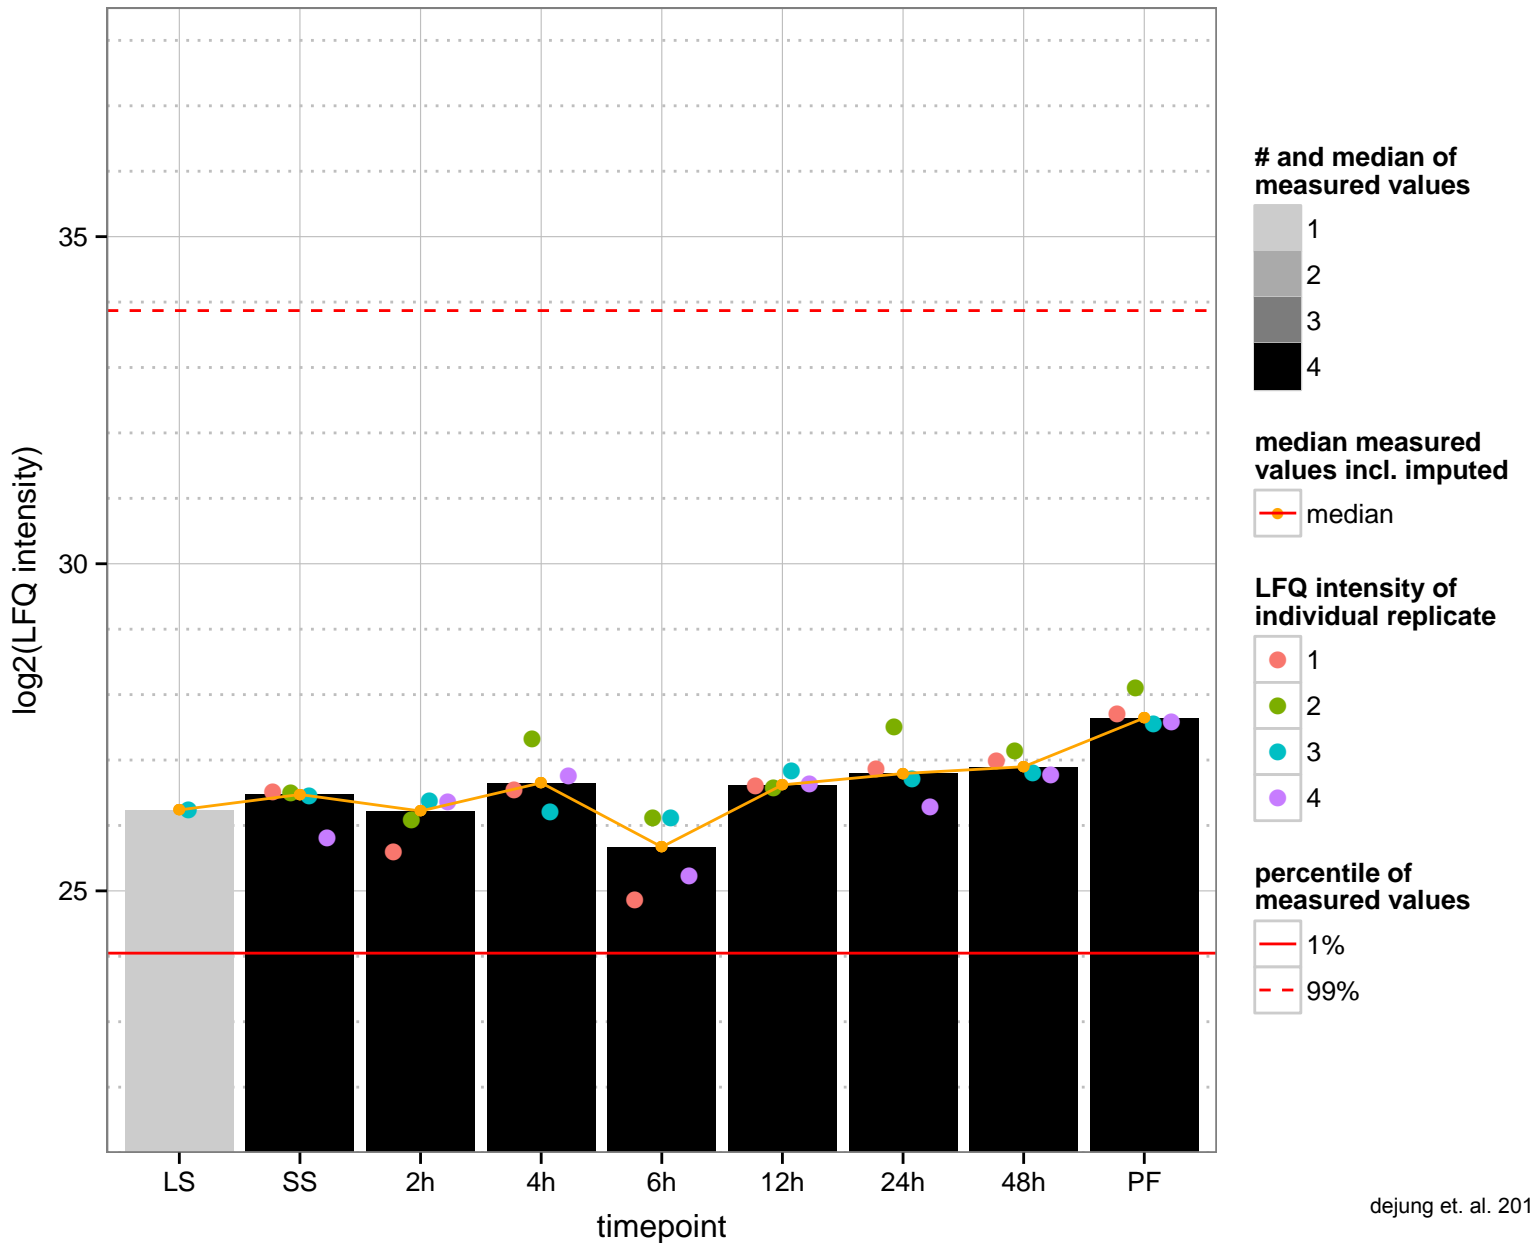

hypothetical protein, conserved  
 Tb927.9.7260  
 AGOF: null  
 AGOC: mitochondrion  
 AGOP: null  
 PGO: null  
 PGOC: null  
 PGOP: null

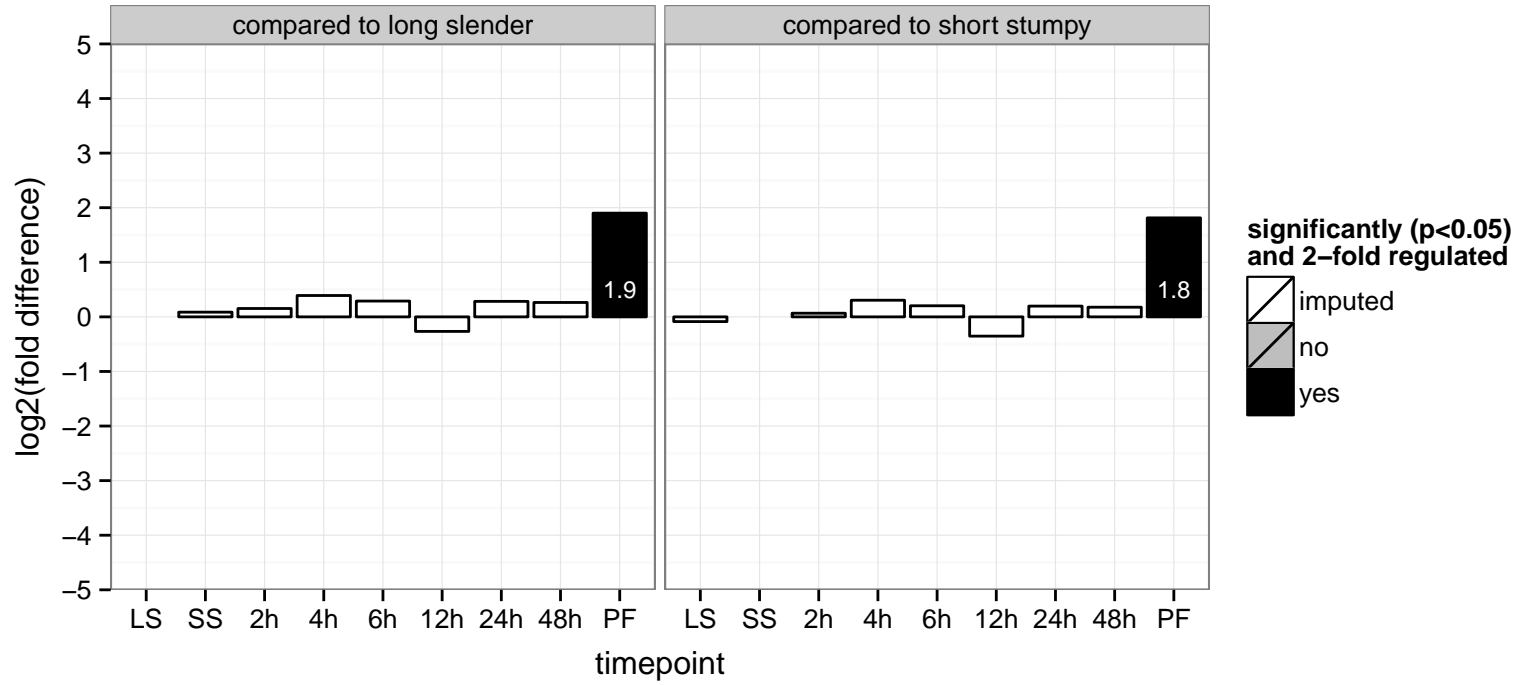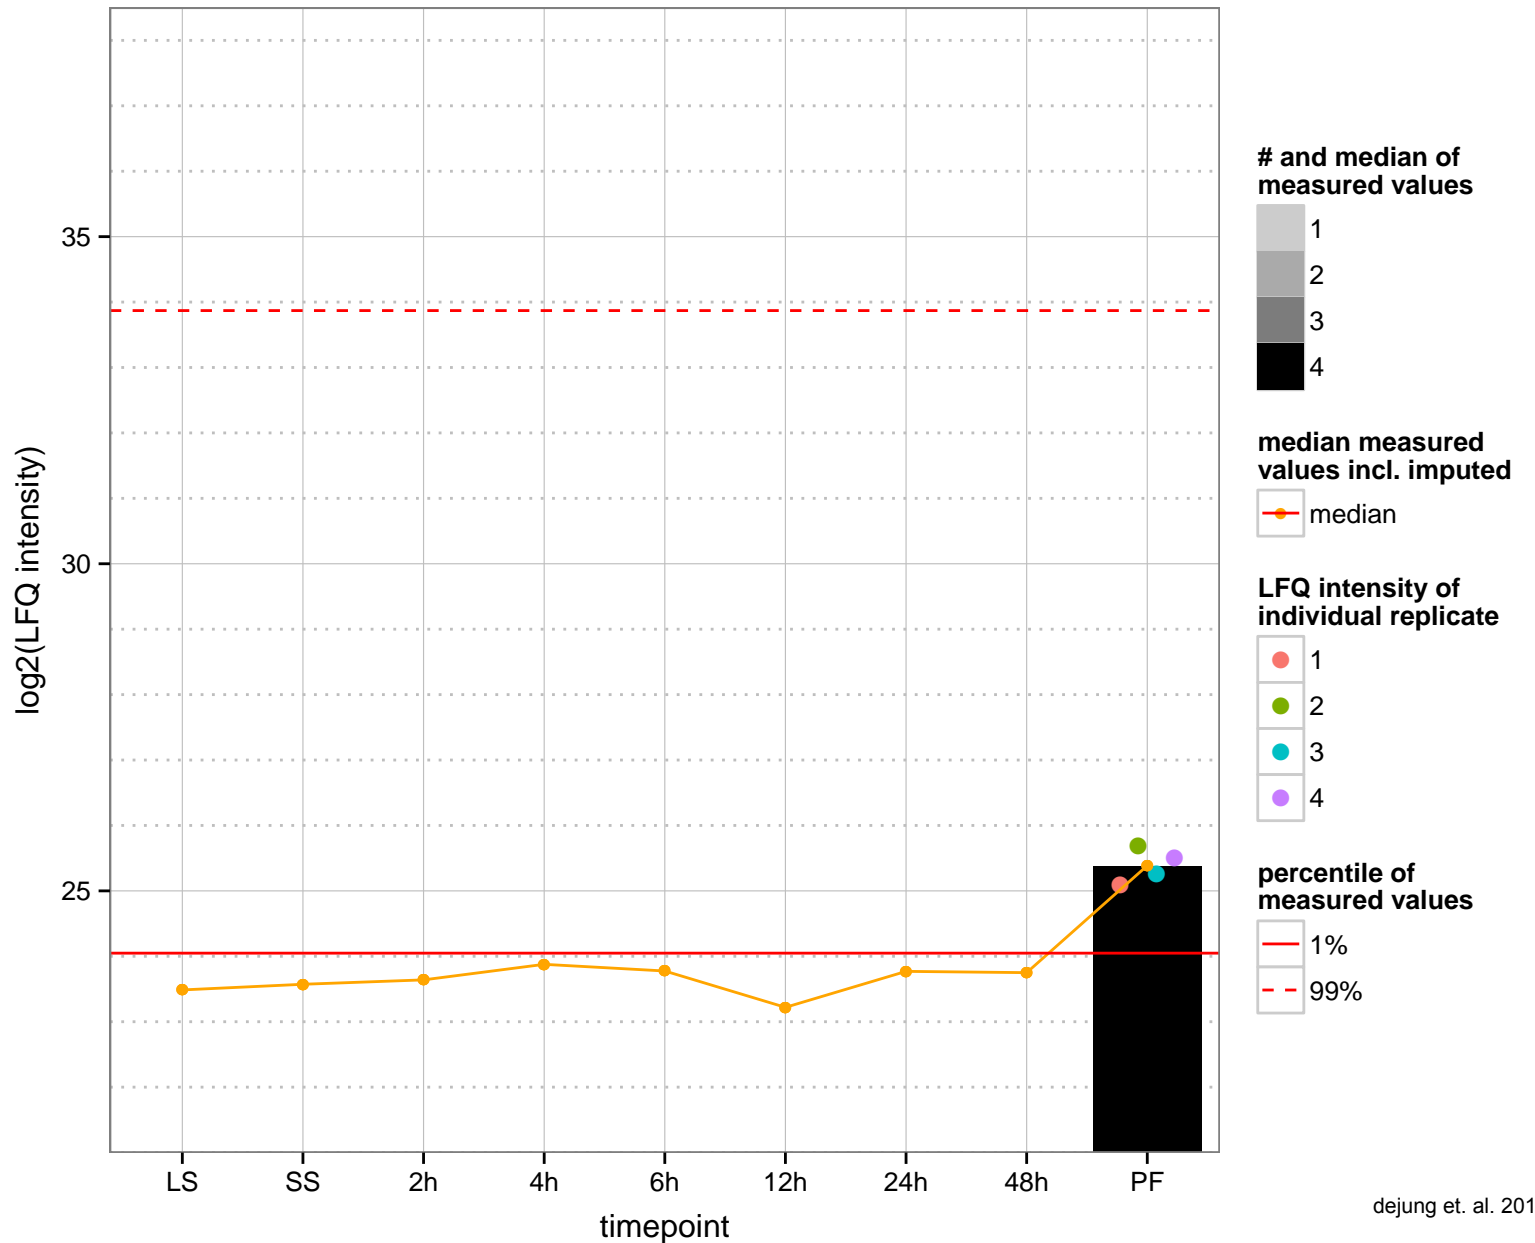

60S ribosomal protein L11, putative  
 Tb927.9.7620;Tb927.9.7590  
 AGOF: structural constituent of ribosome  
 AGOC: intracellular, organellar large ribosomal subunit, ribosome  
 AGOP: translation  
 PGO: null, structural constituent of ribosome  
 PGOC: null, intracellular, ribosome  
 PGOP: null, translation

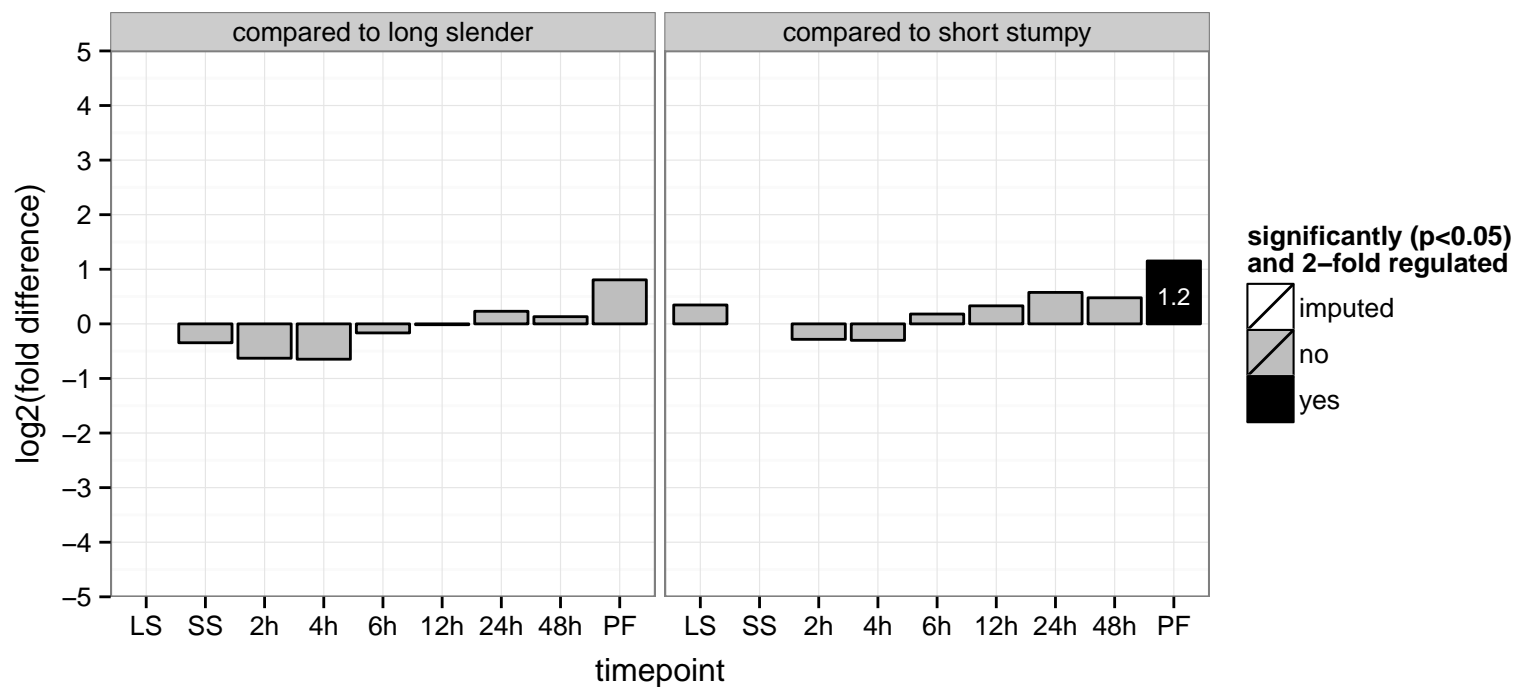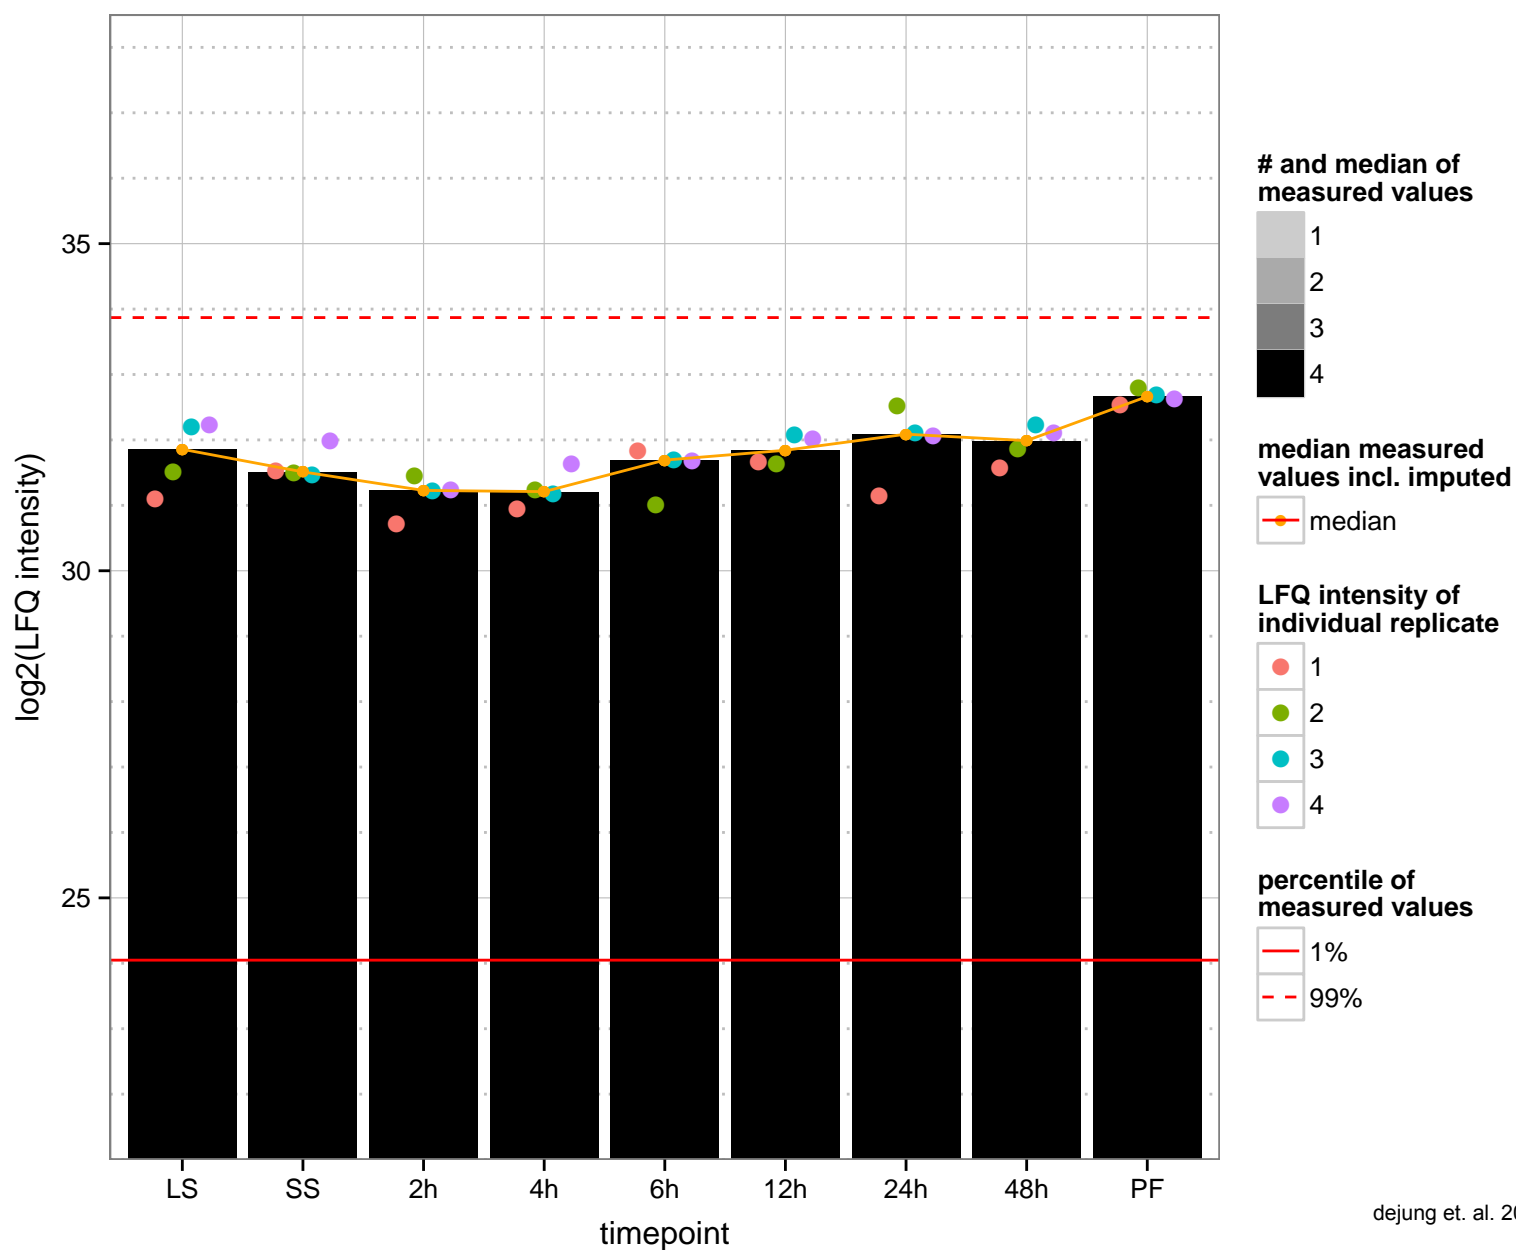

rhomboid-like protein, serine peptidase, Clan S-, family S54, putative  
 Tb927.9.8260  
 AGOF: null  
 AGOC: mitochondrial inner membrane, mitochondrion  
 AGOP: null  
 PGO: null  
 PGOC: null  
 PGOP: null

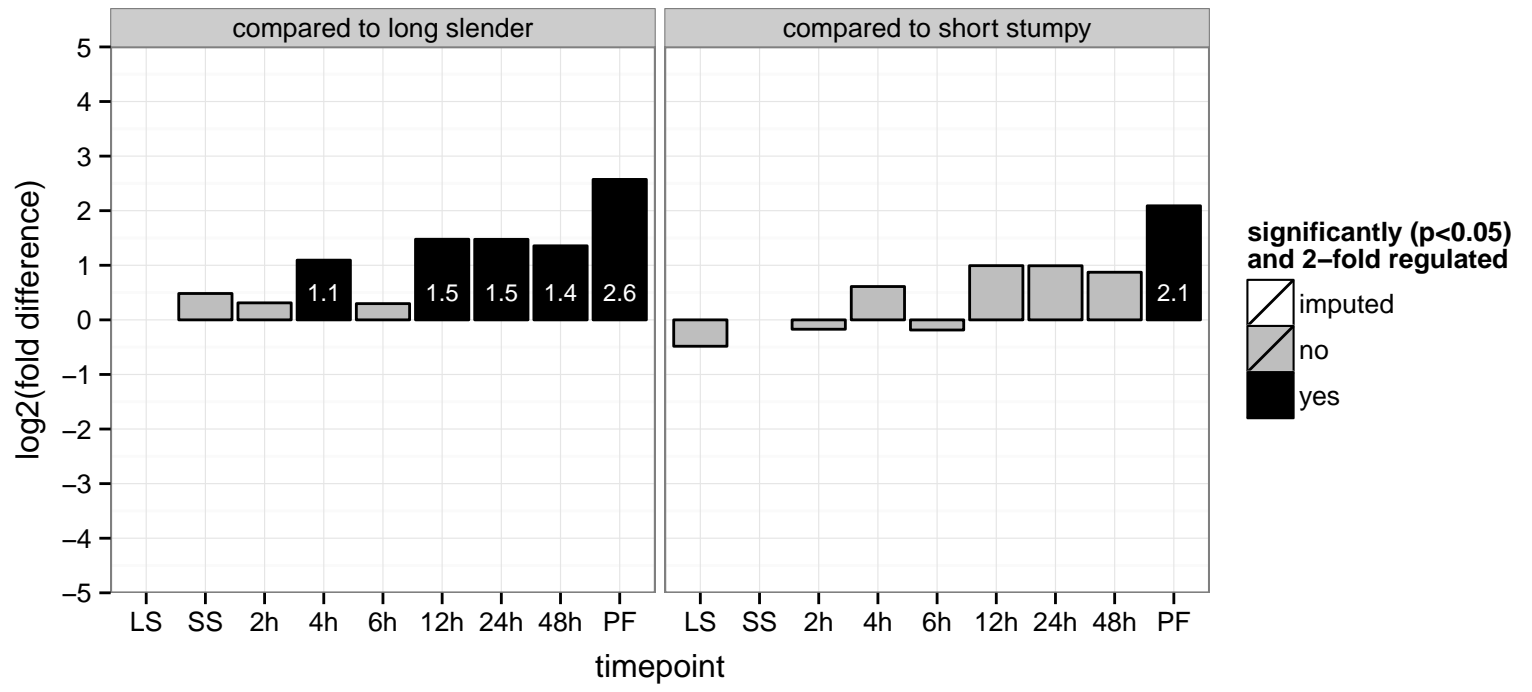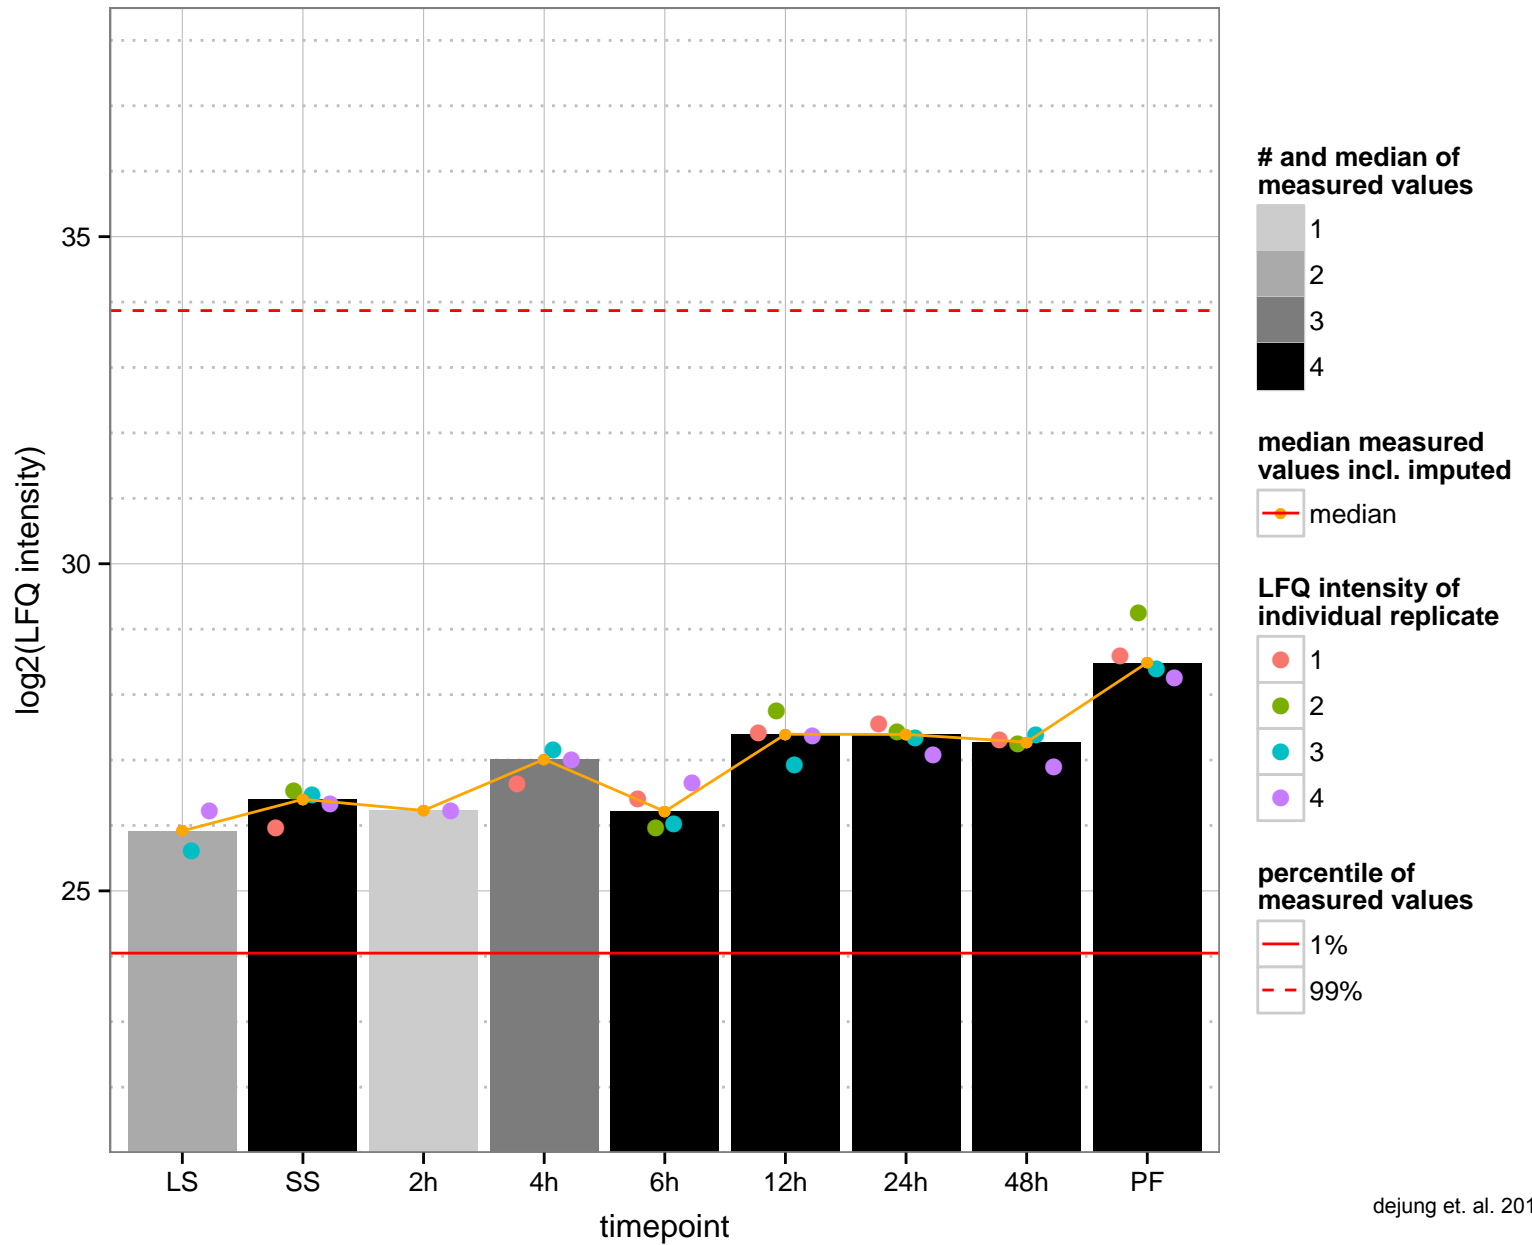



RNA-binding protein (DRBD3)  
 Tb927.9.8740  
 AGOF: mRNA 3'-UTR binding, mRNA binding  
 AGOC: cytosol, nucleus, ribonucleoprotein complex  
 AGOP: RNA processing, mRNA stabilization  
 PGO: nucleic acid binding  
 PGO: null  
 PGO: null

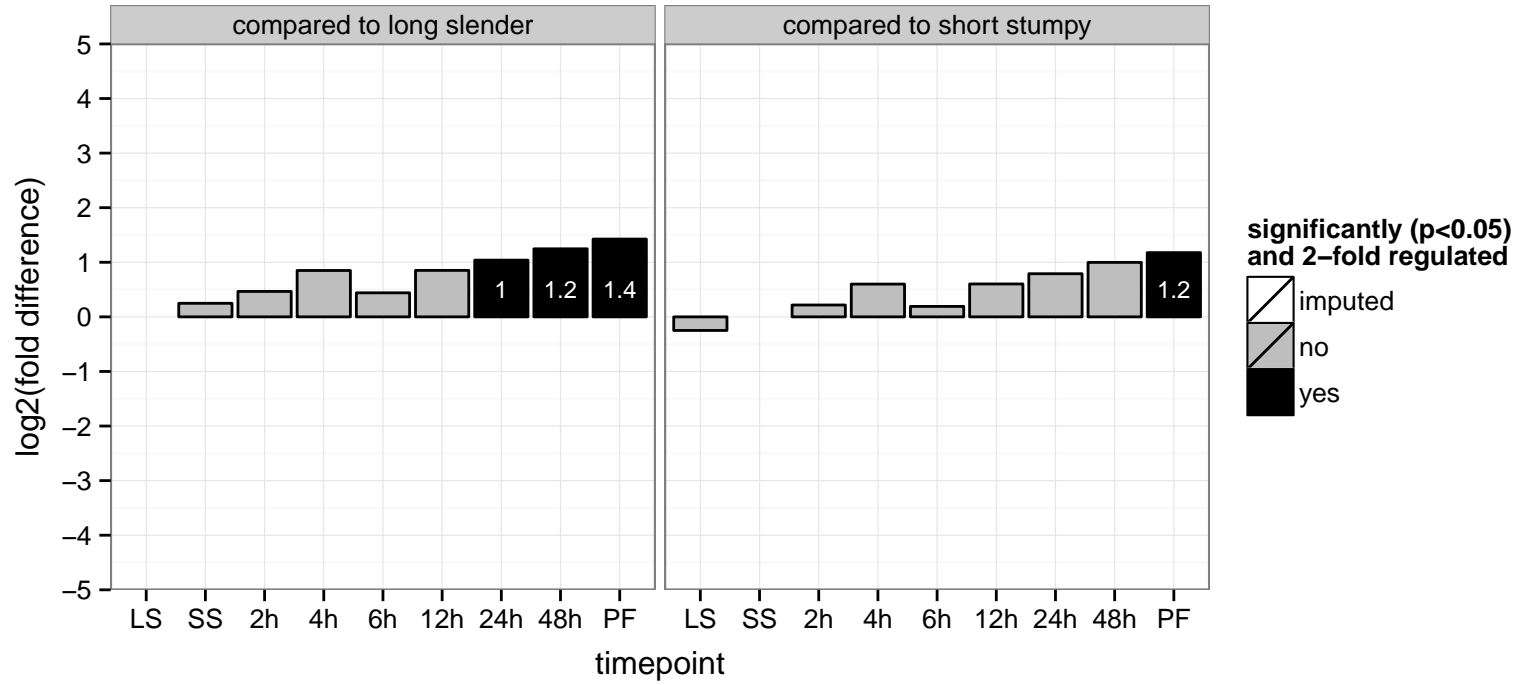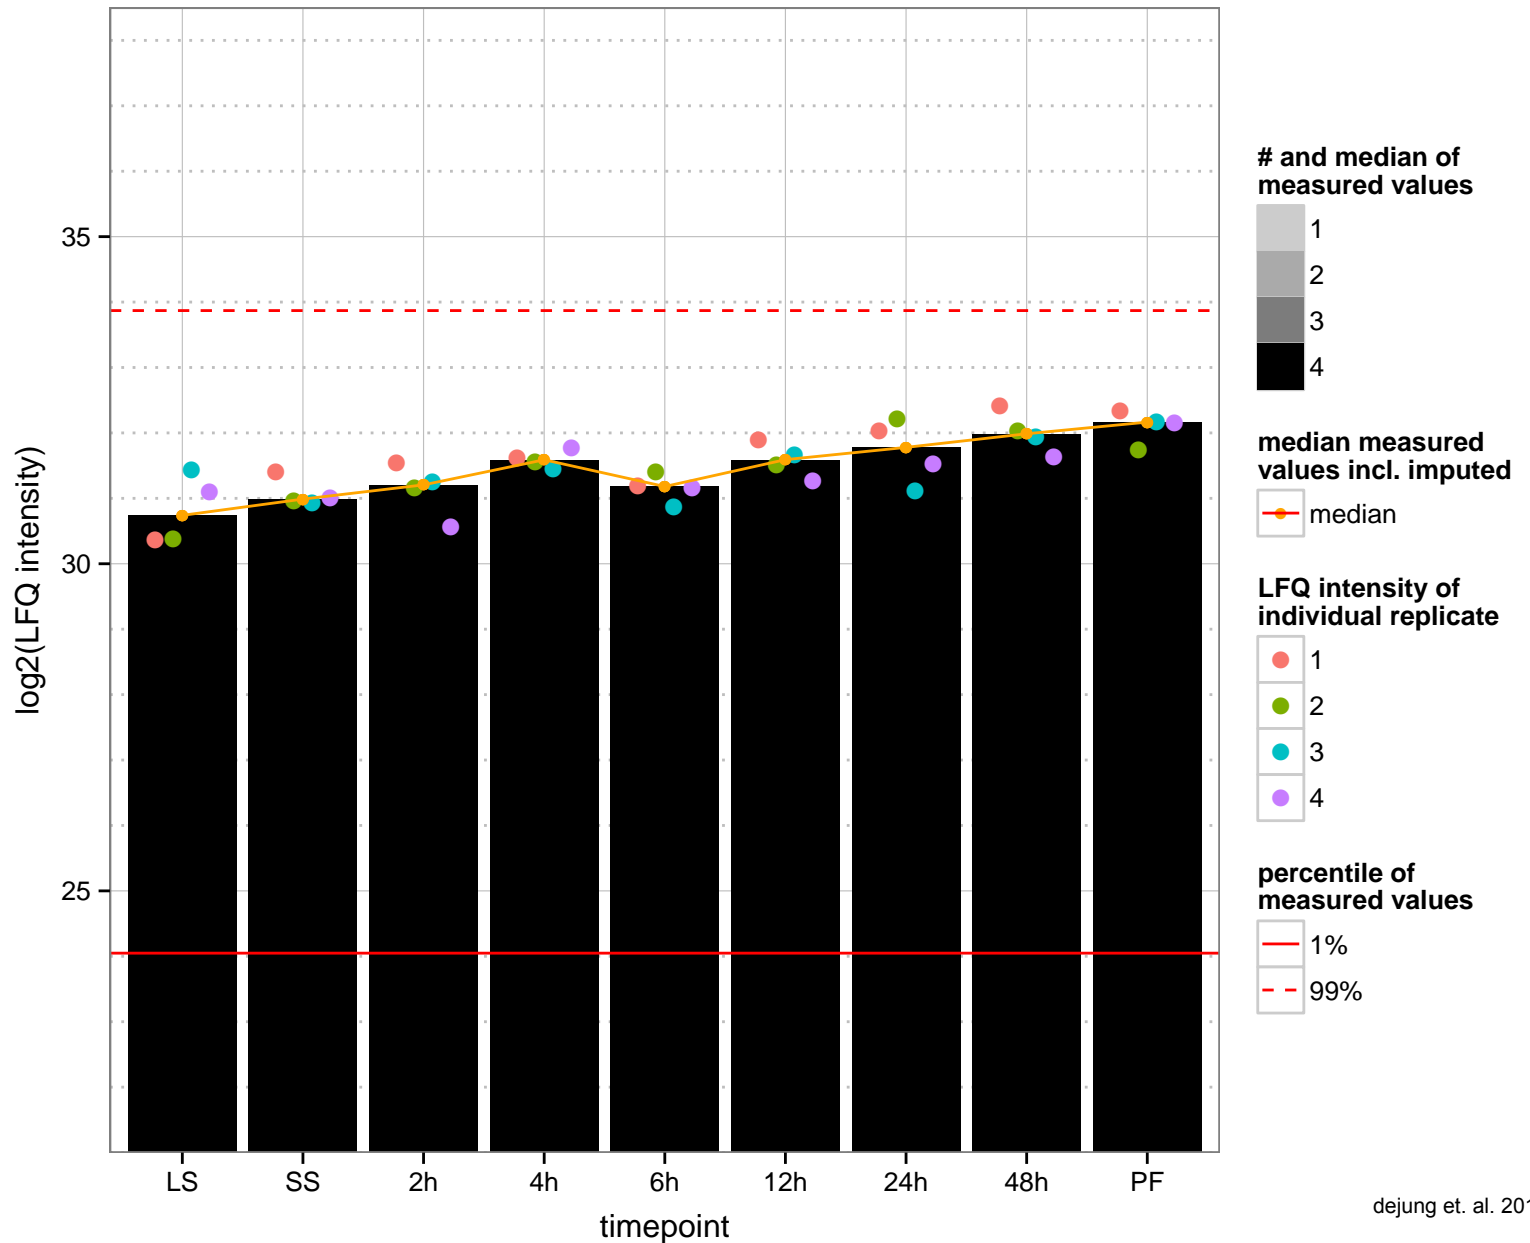

hypothetical protein, conserved  
 Tb927.9.9080  
 AGOF: null  
 AGOC: mitochondrion  
 AGOP: null  
 PGO: null  
 PGO: null  
 PGO: null

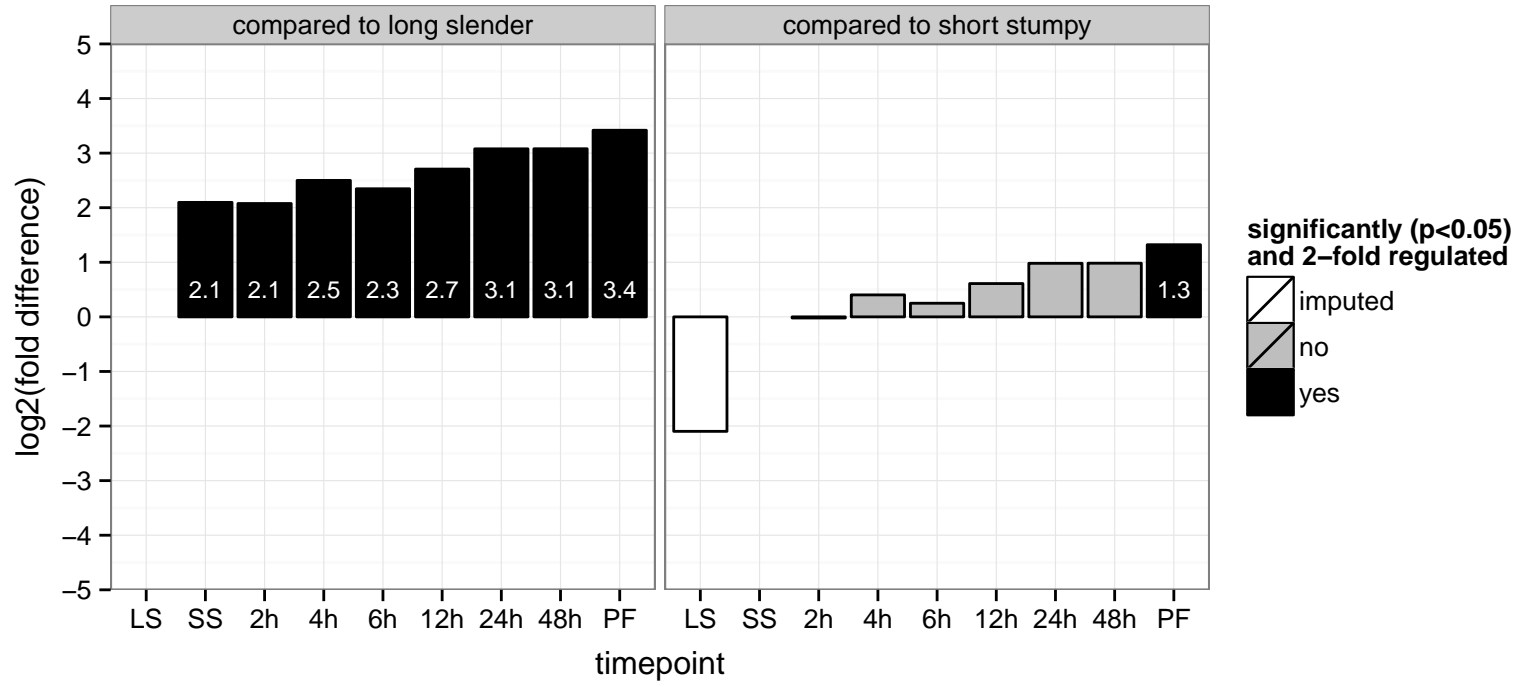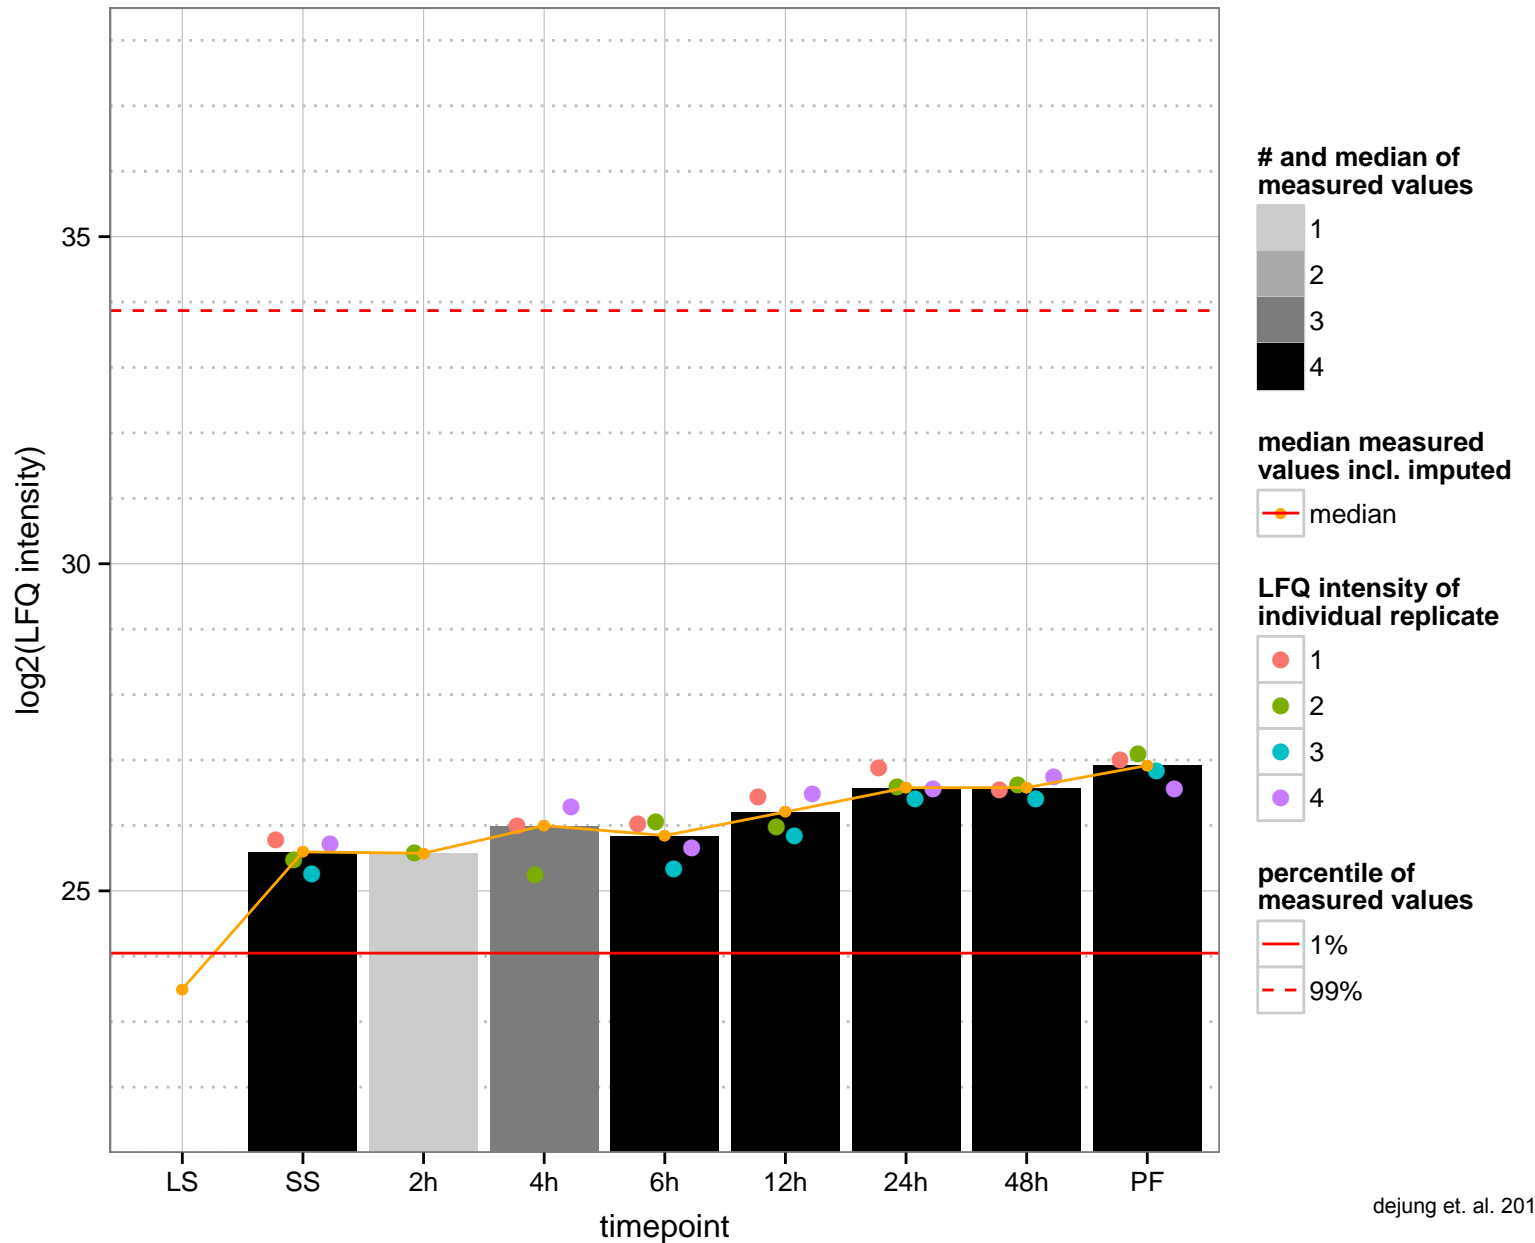

hypothetical protein, conserved  
 Tb927.9.9550  
 AGOF: null  
 AGOC: null  
 AGOP: null  
 PGOF: null  
 PGO: null  
 PGOP: null

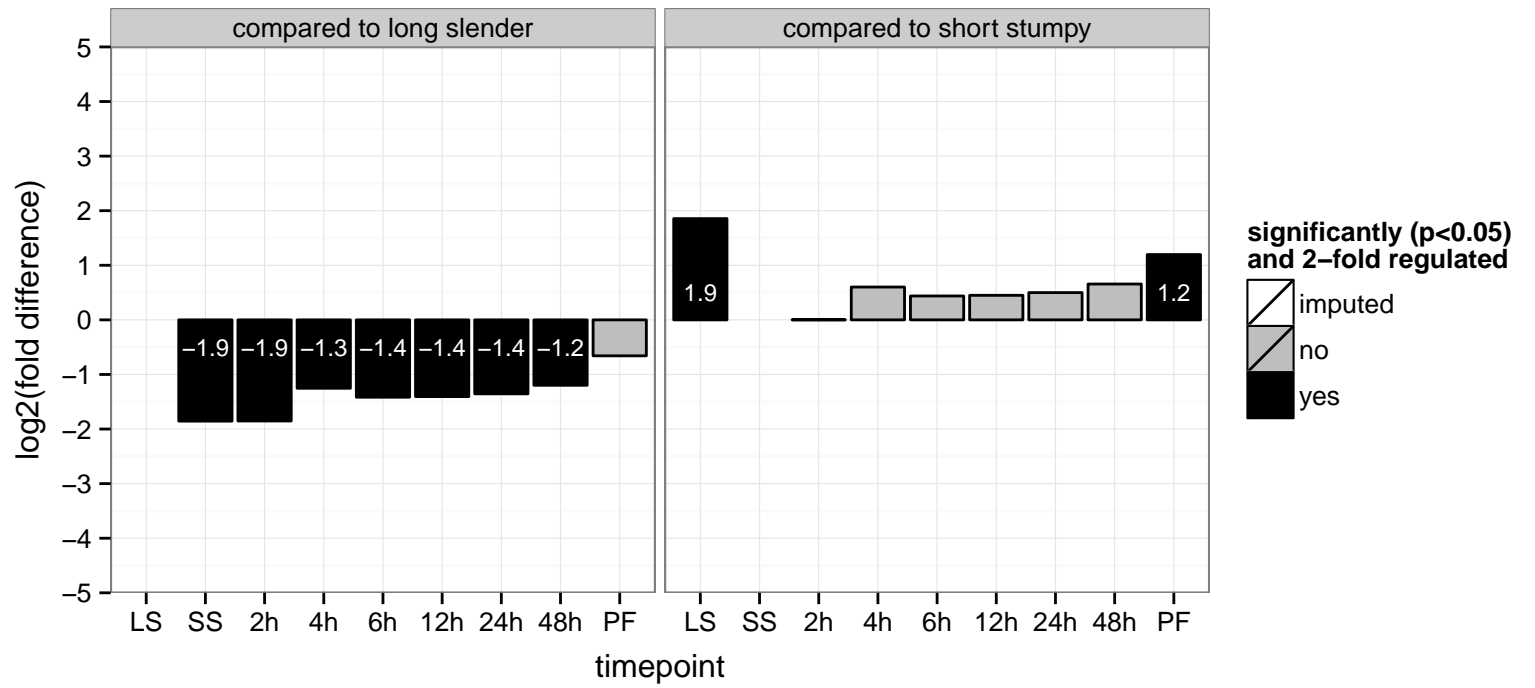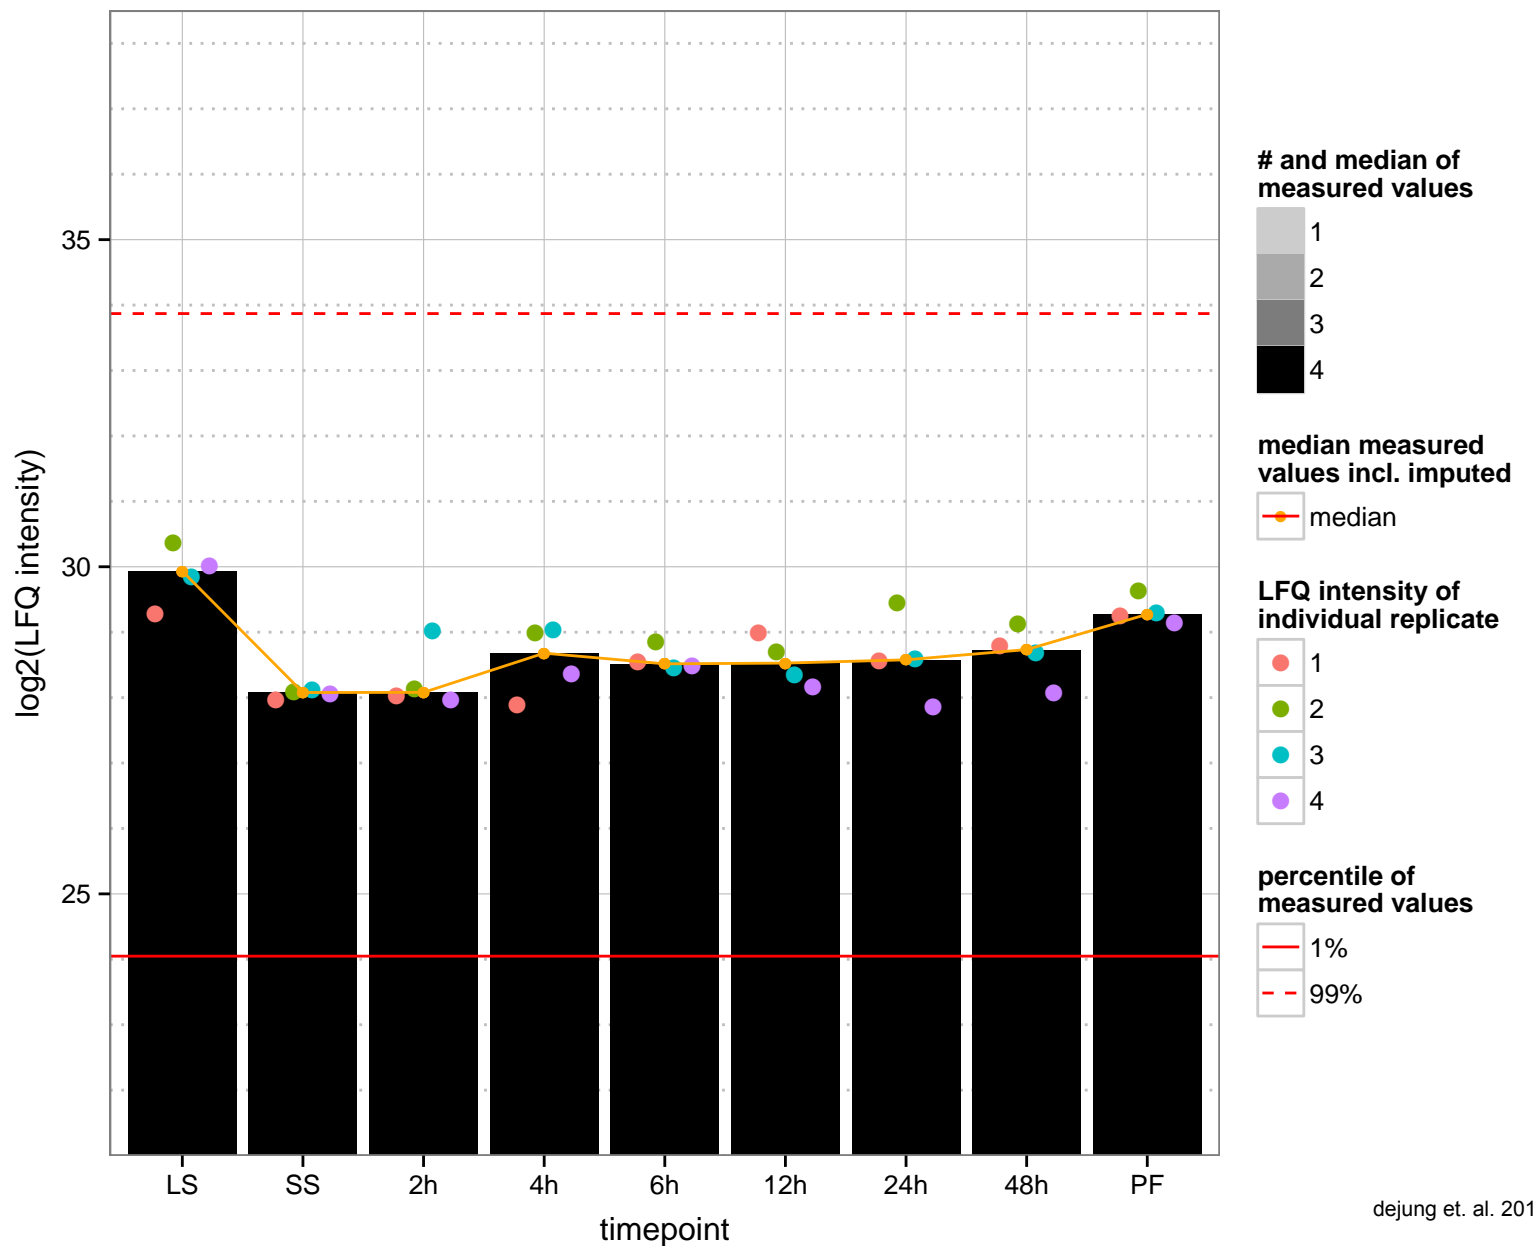

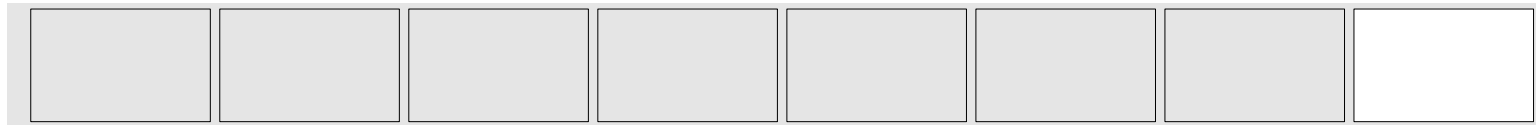

SS

2h

4h

6h

12h

24h

48h

PF

timepoint

**regulated**  **not regulated**  **significant down**  **significant up**

dejung et. al. 2015

small GTP-binding protein, putative, BAC from homologous region on chr5, ras-like small GTPase, putative (TbSAR1)  
 Tb927.5.4500;Tb05.5K5.150  
 AGOF: GTP binding  
 AGOC: intracellular  
 AGOP: intracellular protein transport, small GTPase mediated signal transduction  
 PGO: GTP binding  
 PGOC: intracellular  
 PGOP: intracellular protein transport, small GTPase mediated signal transduction

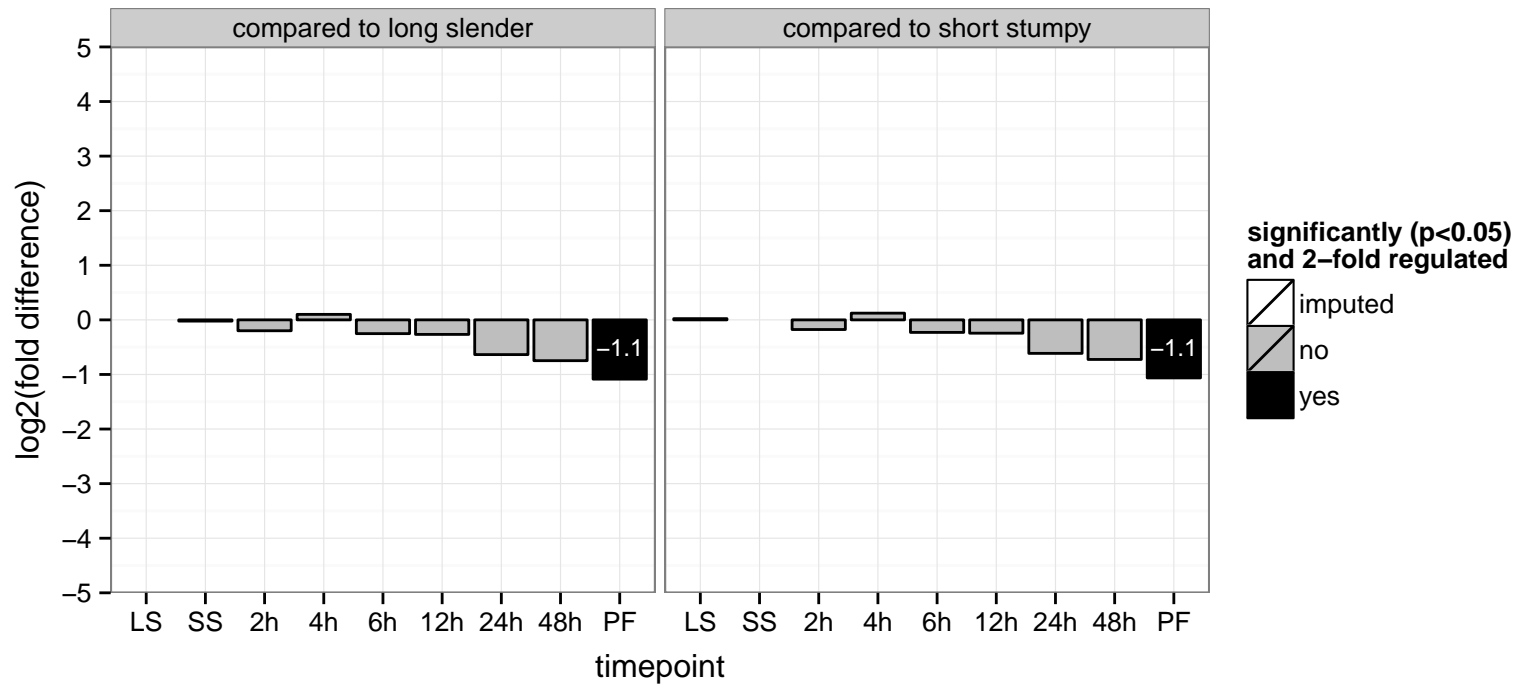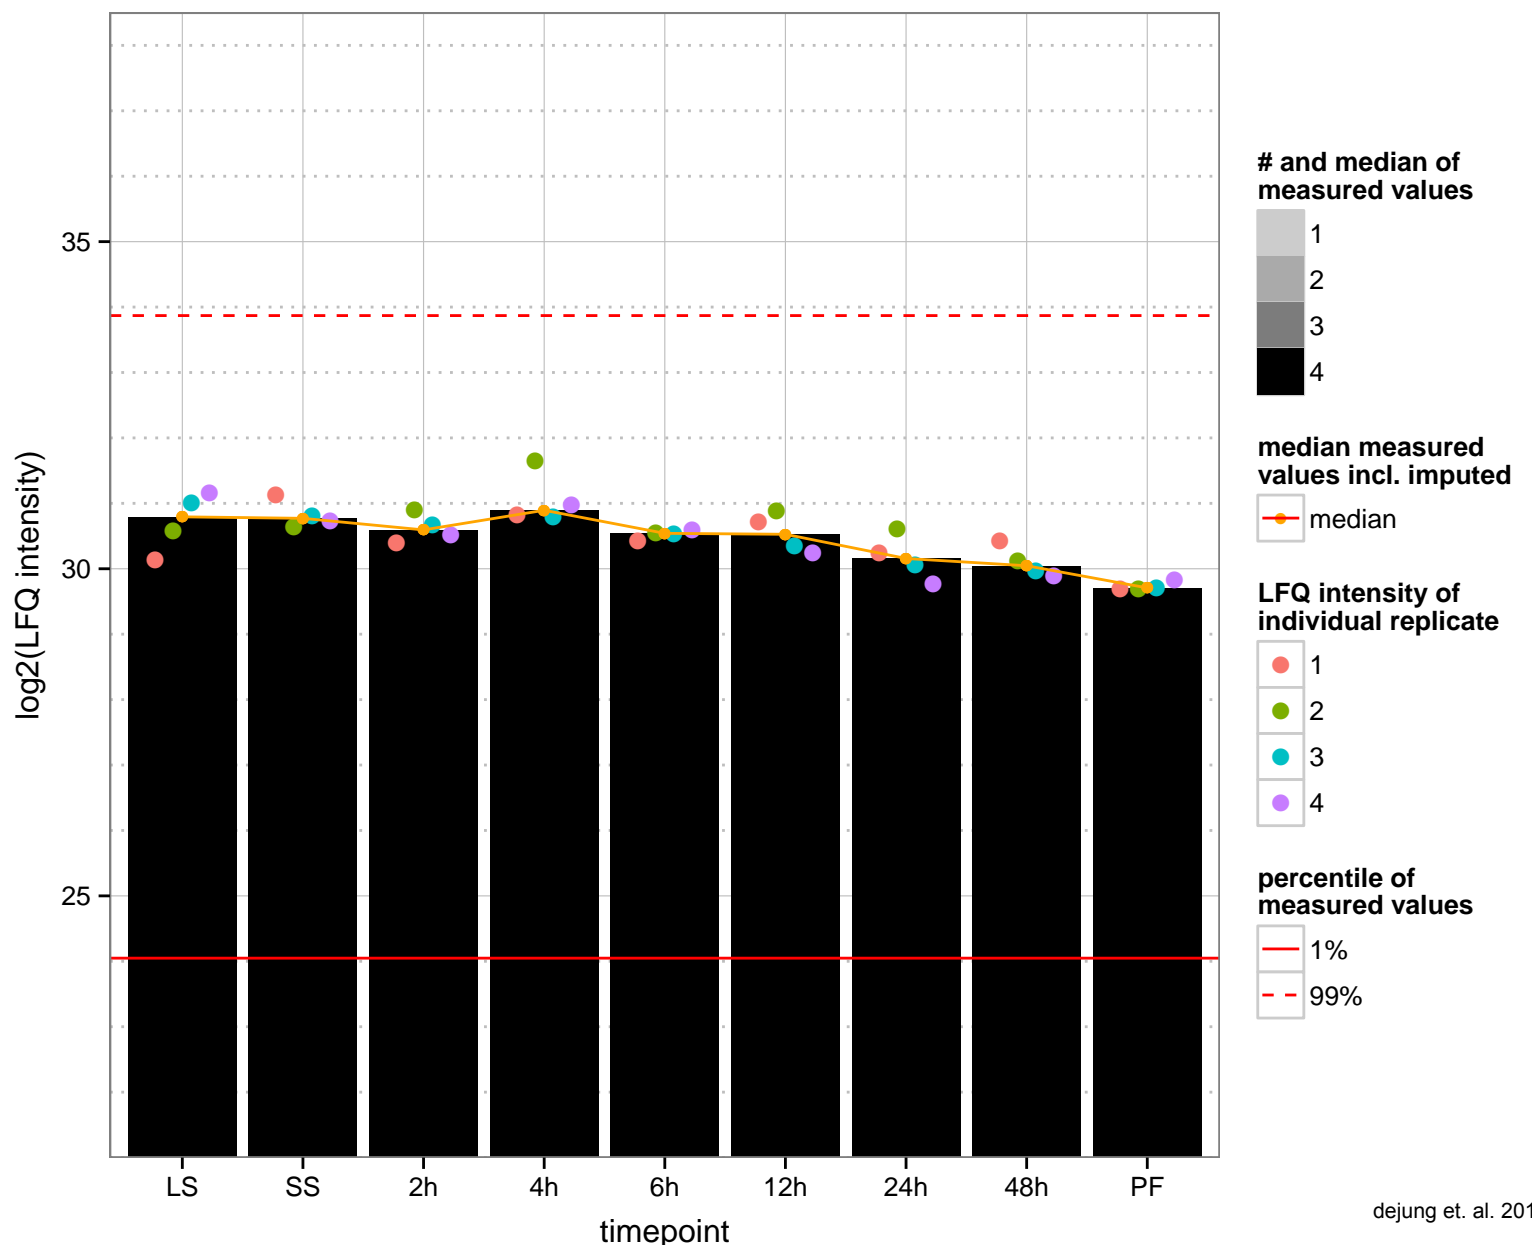

pumillo RNA binding protein PUF1, chrX additional, unordered contigs (PUF1), variant surface glycoprotein, fragment, putative  
 Tb927.10.4430;Tb10.v4.0033;Tb11.v5.0767  
 AGOF: RNA binding, null  
 AGOC: null, cytoplasm  
 AGOP: null, cell growth, mRNA metabolic process  
 PGO: RNA binding, binding, null  
 PGOC: null  
 PGOP: null

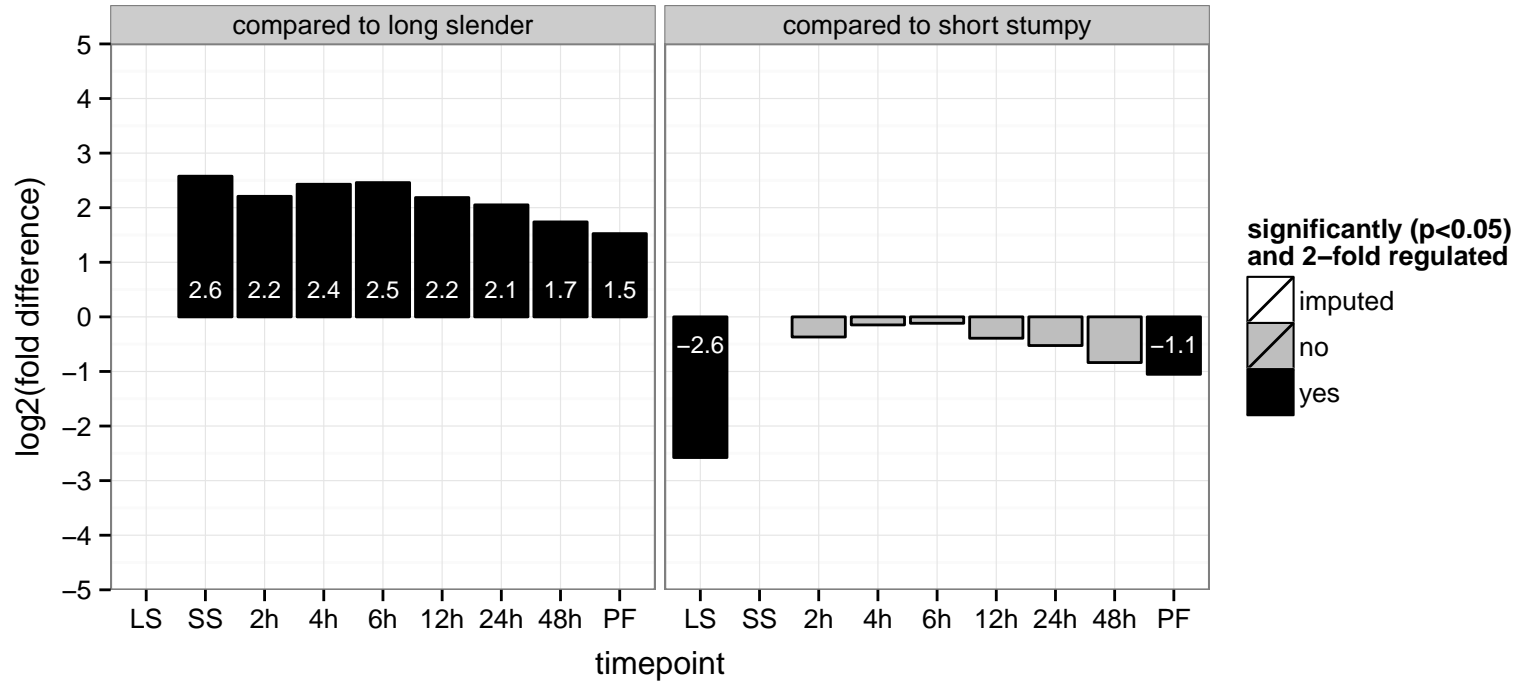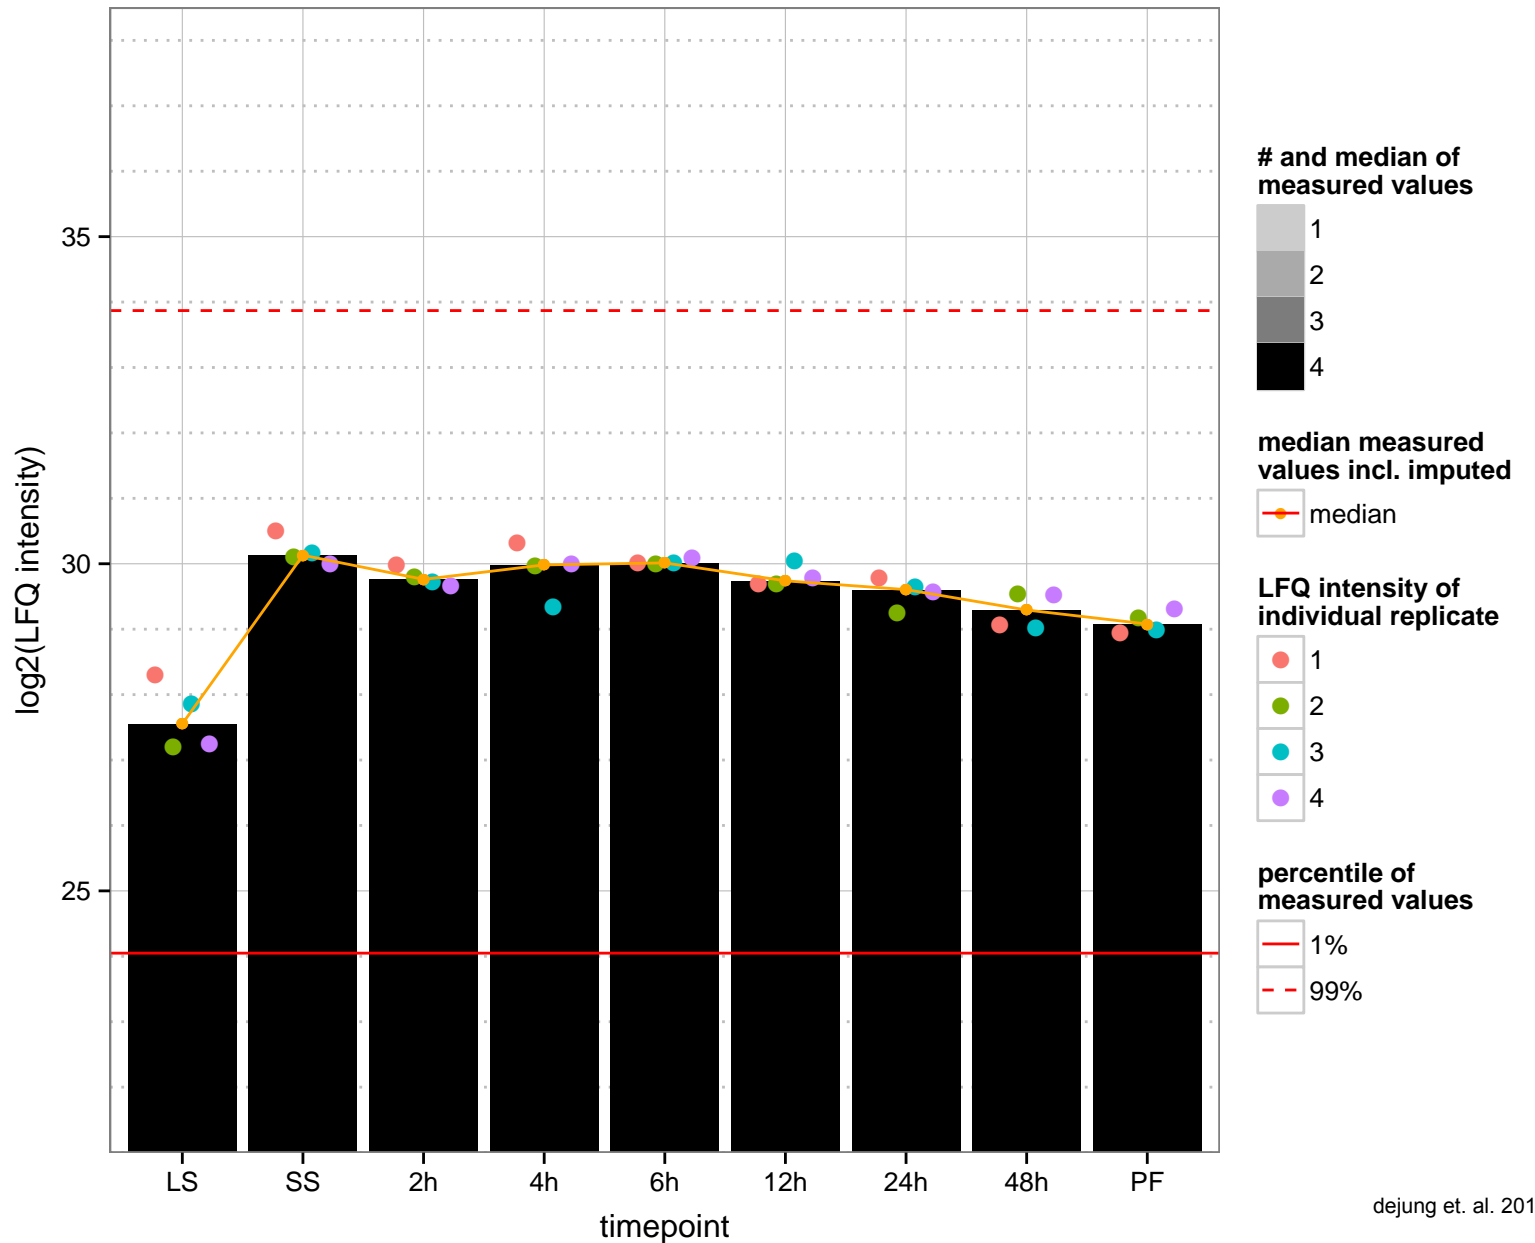

hypothetical protein, conserved  
 Tb927.11.7213;Tb11.02.5080b  
 AGOF: null  
 AGOC: null  
 AGOP: null  
 PGO: null  
 PGOC: null  
 PGOP: null

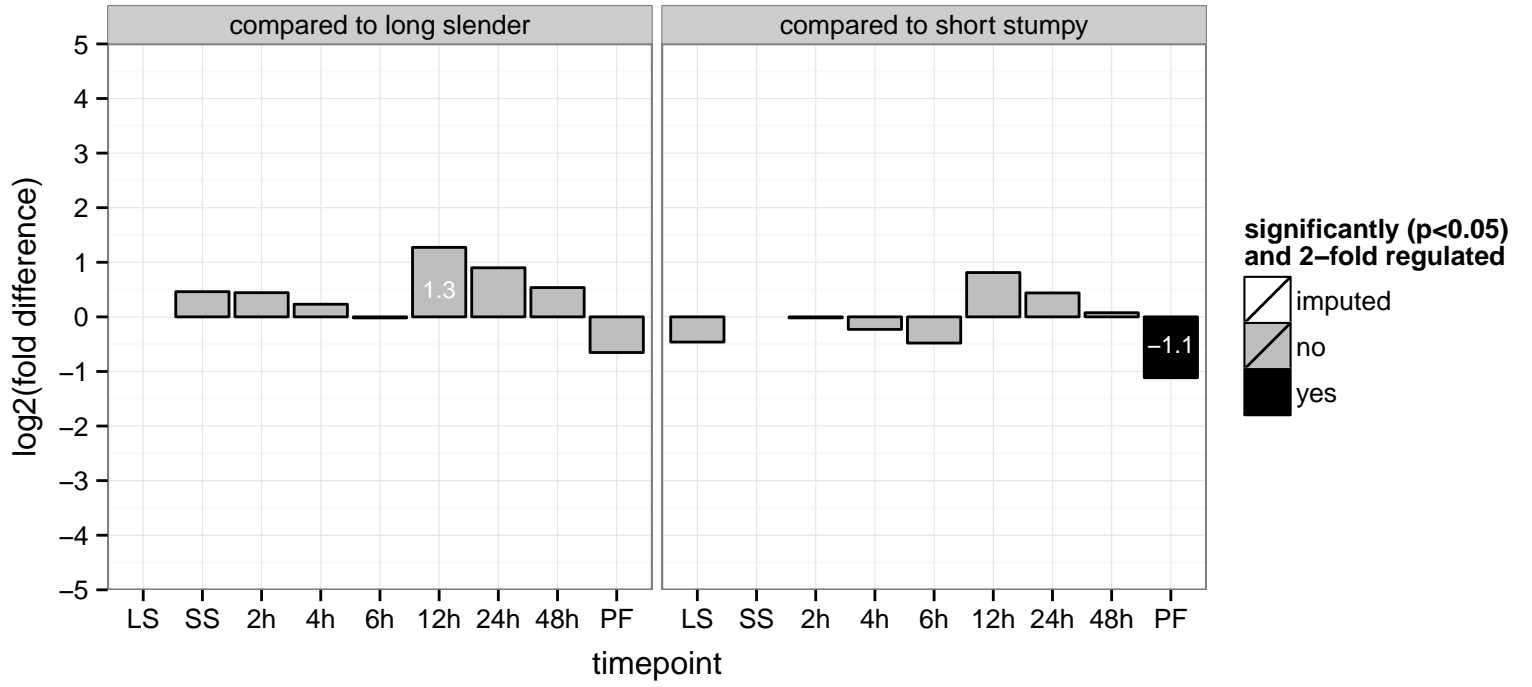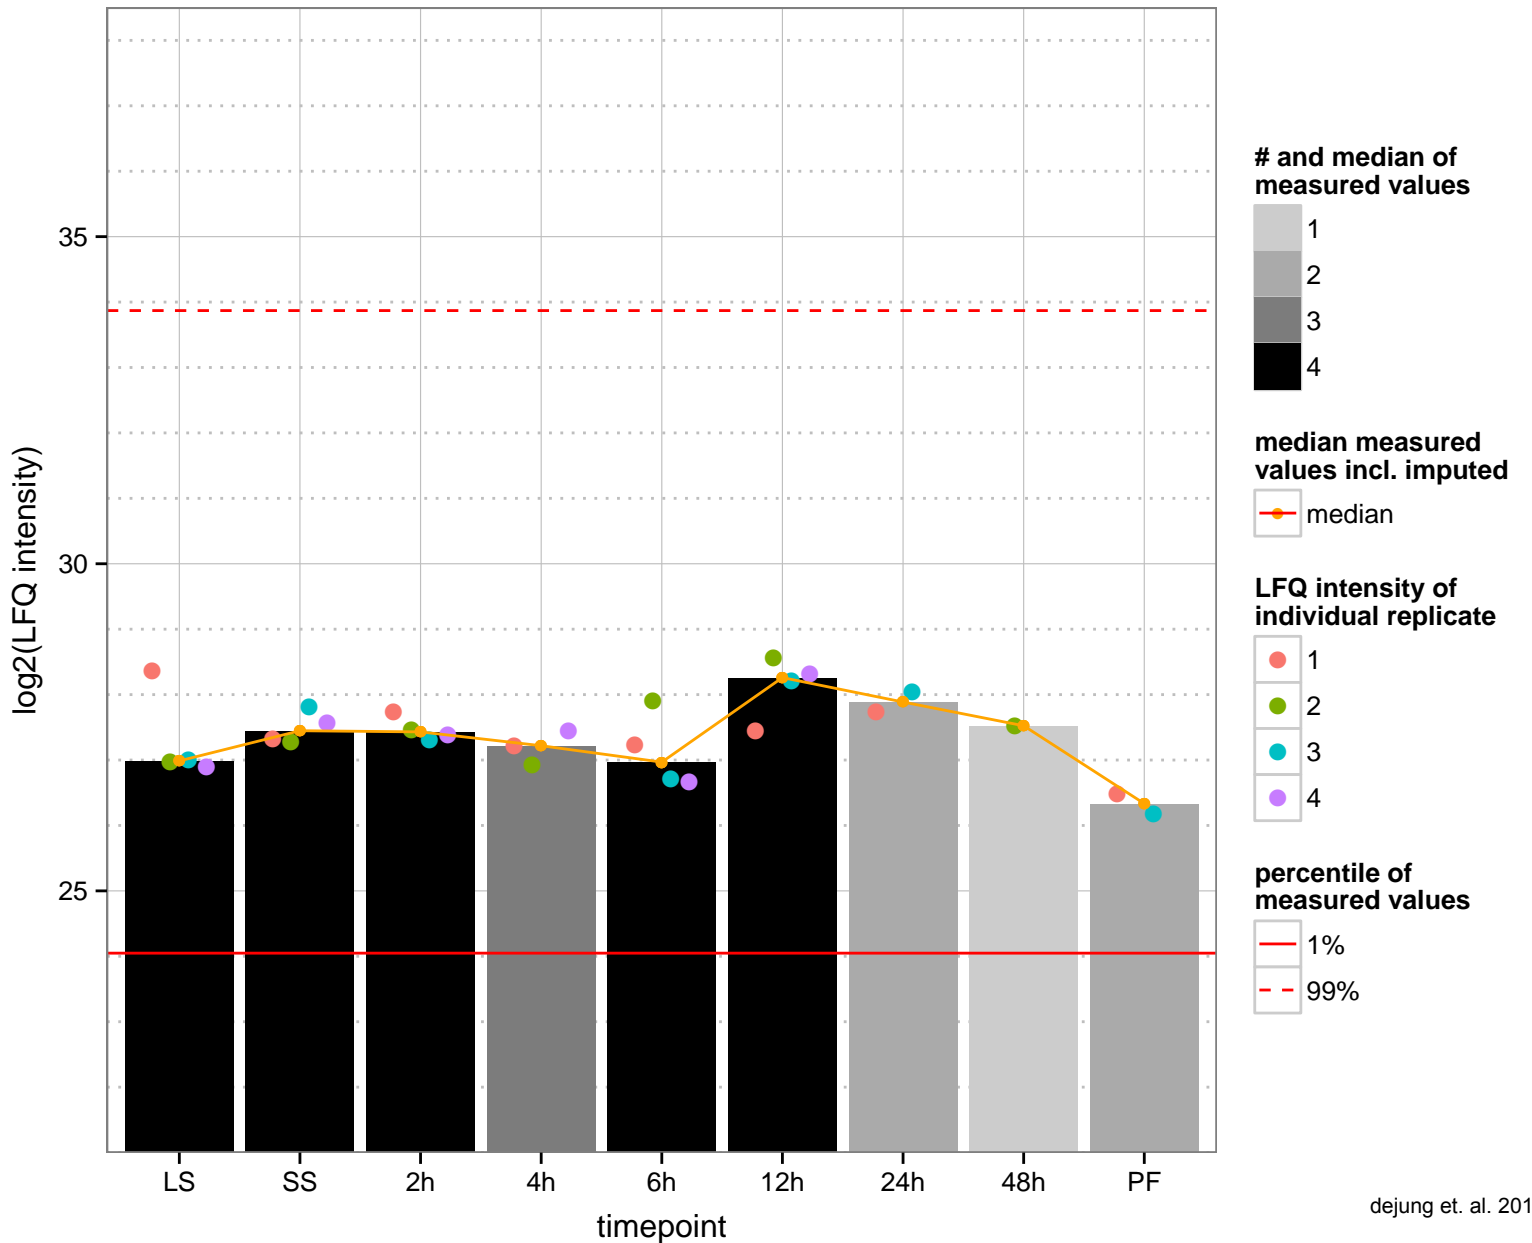

ubiquitin activating enzyme, putative  
 Tb11.02.5410b;Tb11.02.5410  
 AGOF: catalytic activity  
 AGOC: null  
 AGOP: null  
 PGO: catalytic activity  
 PGOC: null  
 PGOP: null

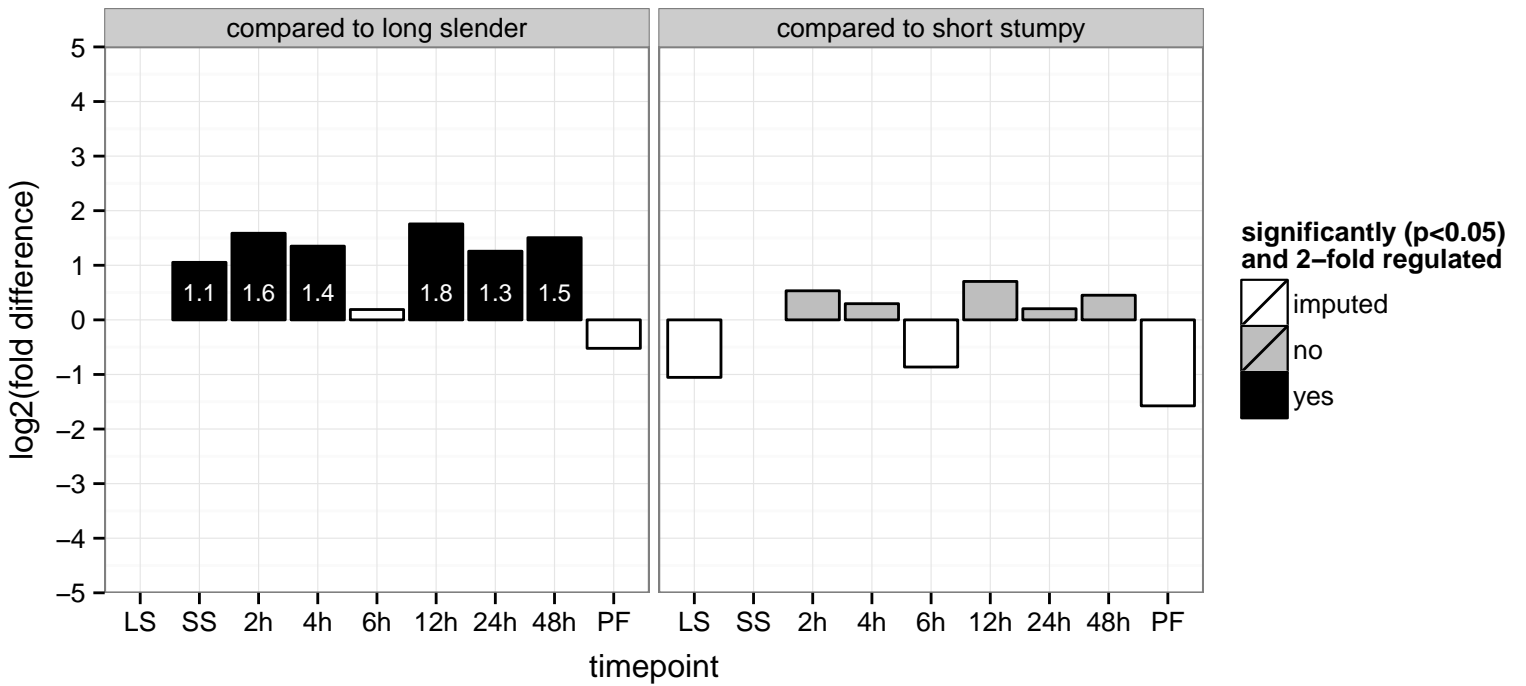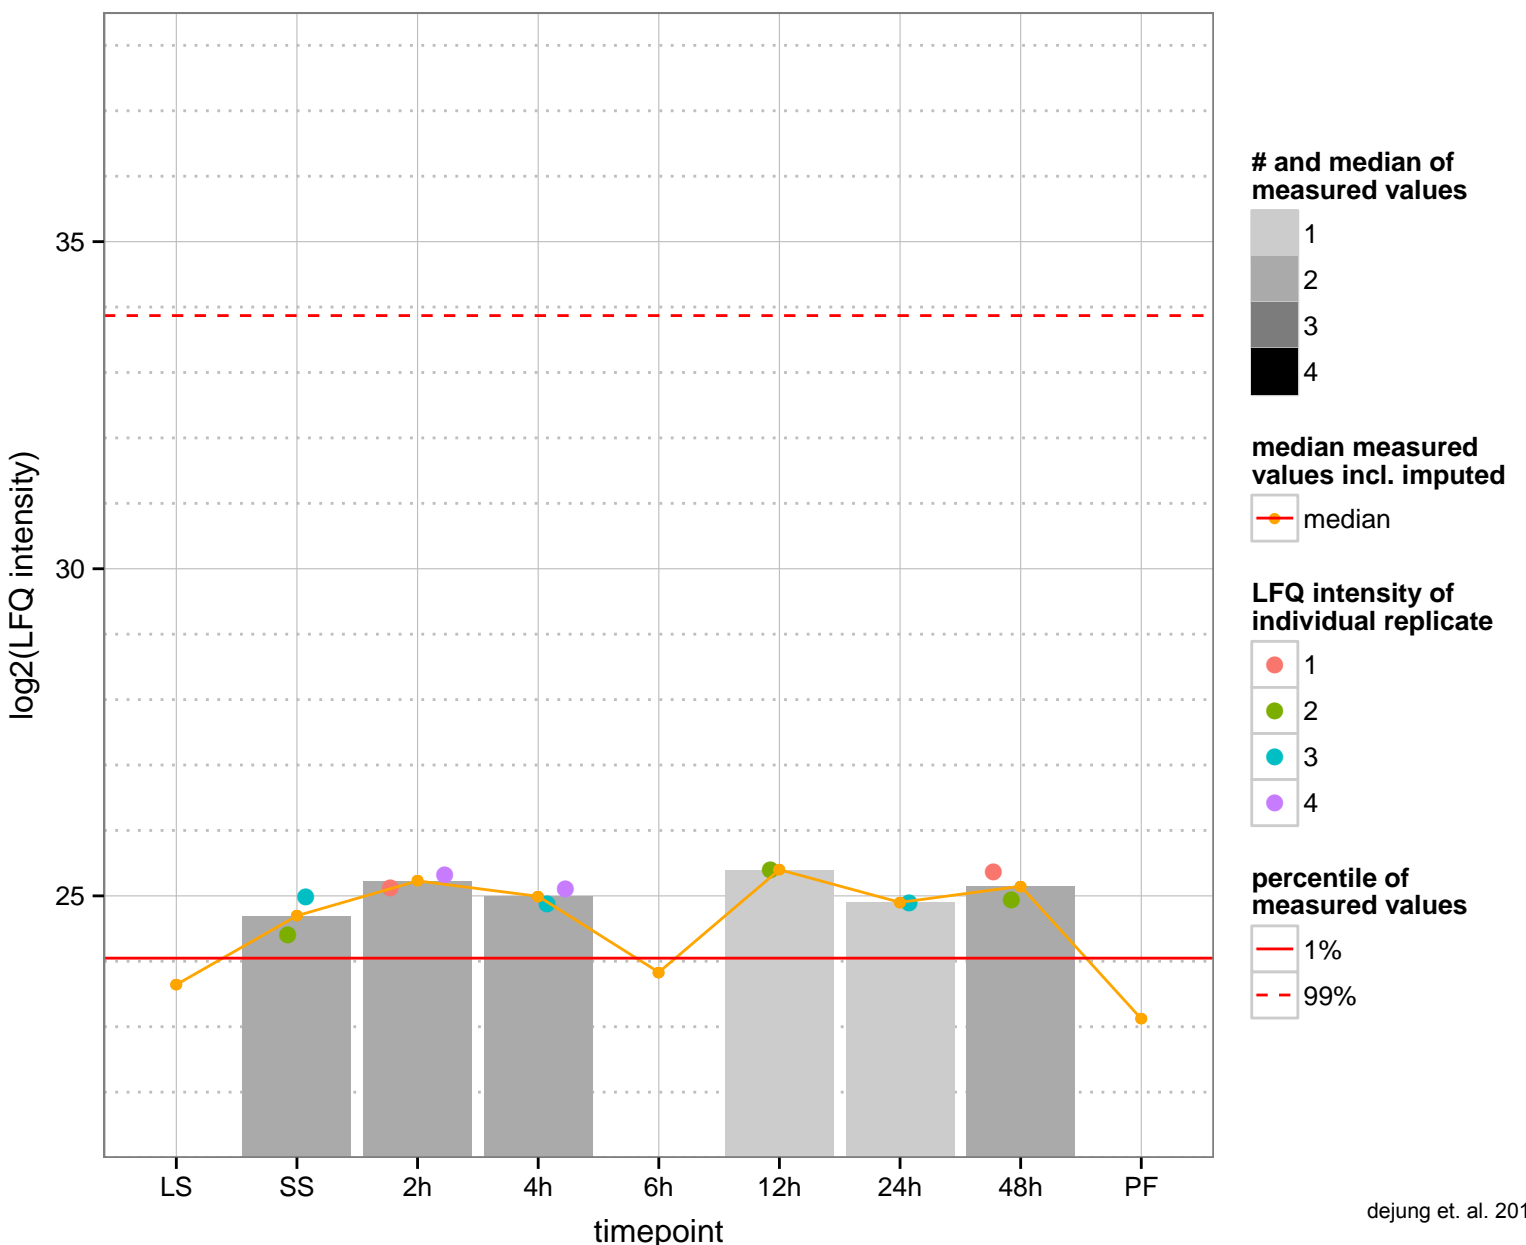



hypothetical protein, chrXI additional, unordered contigs, conserved  
 Tb11.0850;Tb927.11.710  
 AGOF: null  
 AGOC: integral to membrane  
 AGOP: protein transport  
 PGO: null  
 PGOC: integral to membrane  
 PGOP: protein transport

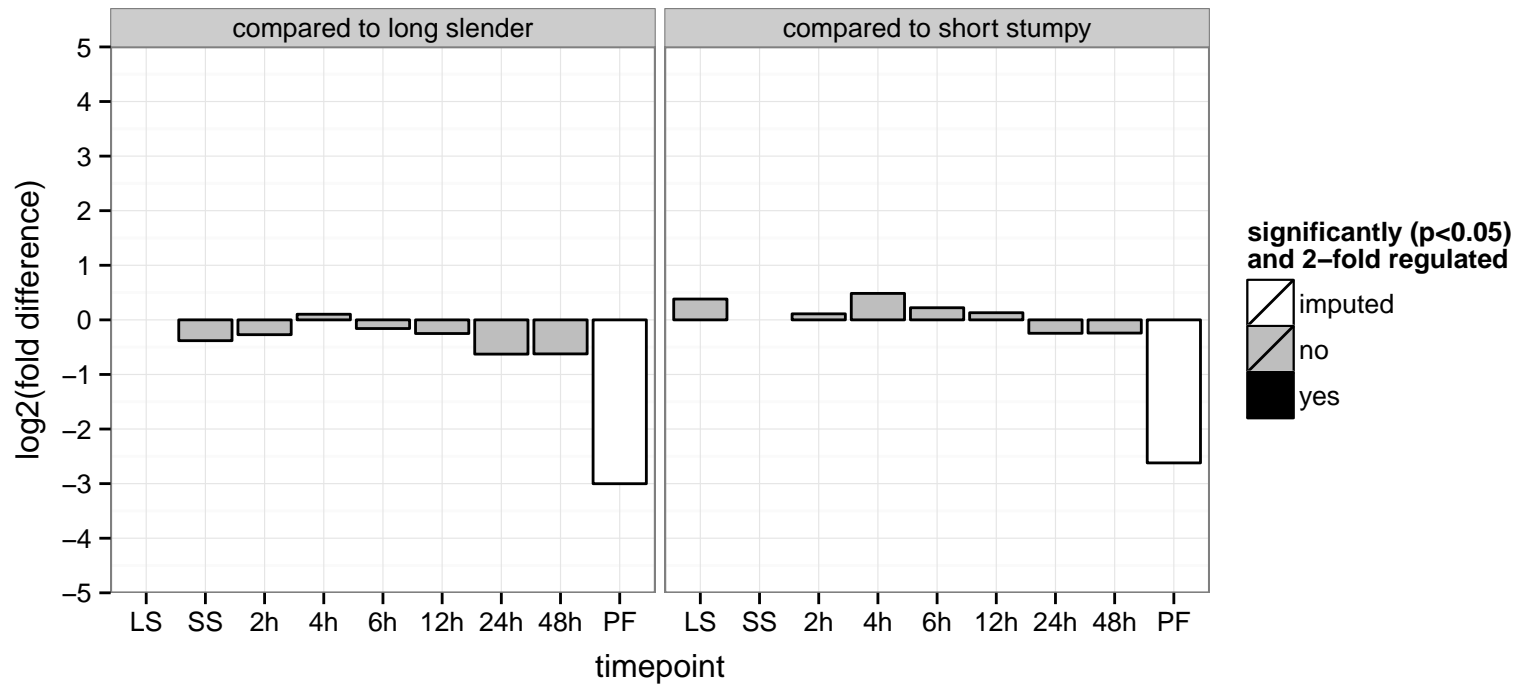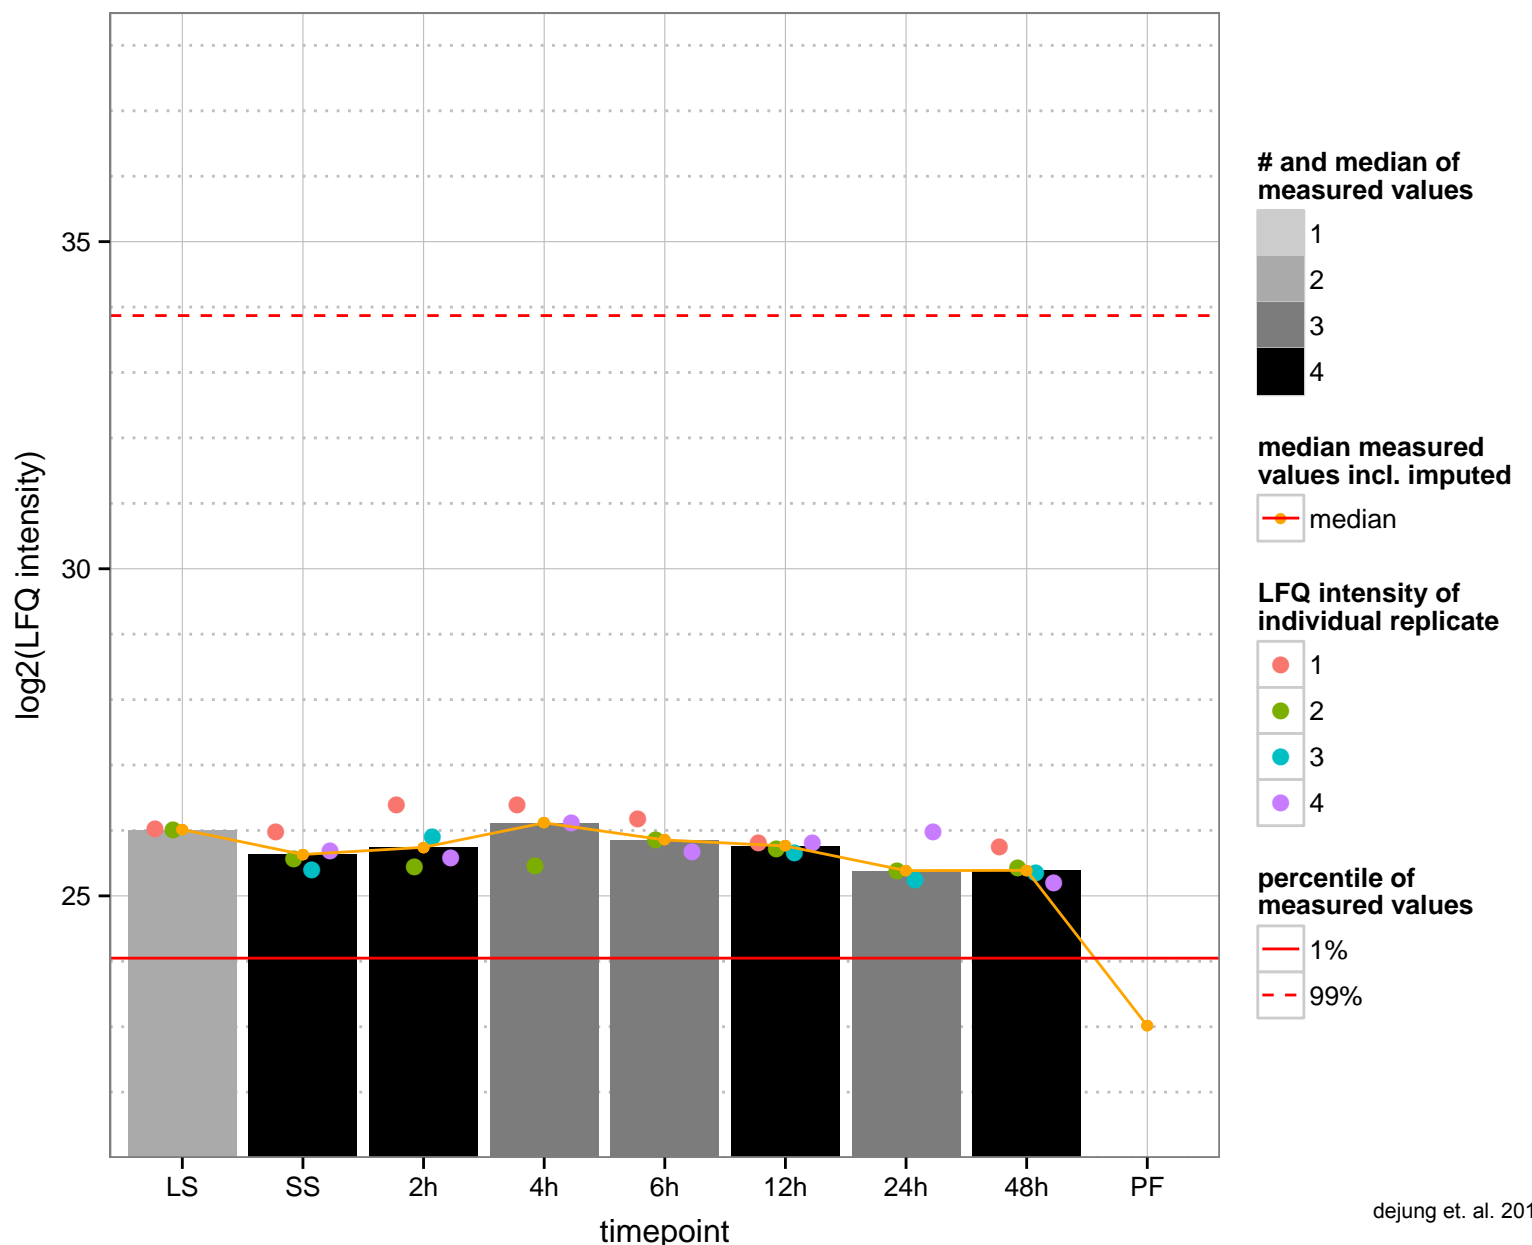

hypothetical protein, conserved  
 Tb927.7.4810;Tb11.v5.0163  
 AGOF: null, catalytic activity  
 AGOC: null  
 AGOP: null  
 PGO: catalytic activity, metal ion binding, phosphoric diester hydrolase activity  
 PGOC: null  
 PGOP: null

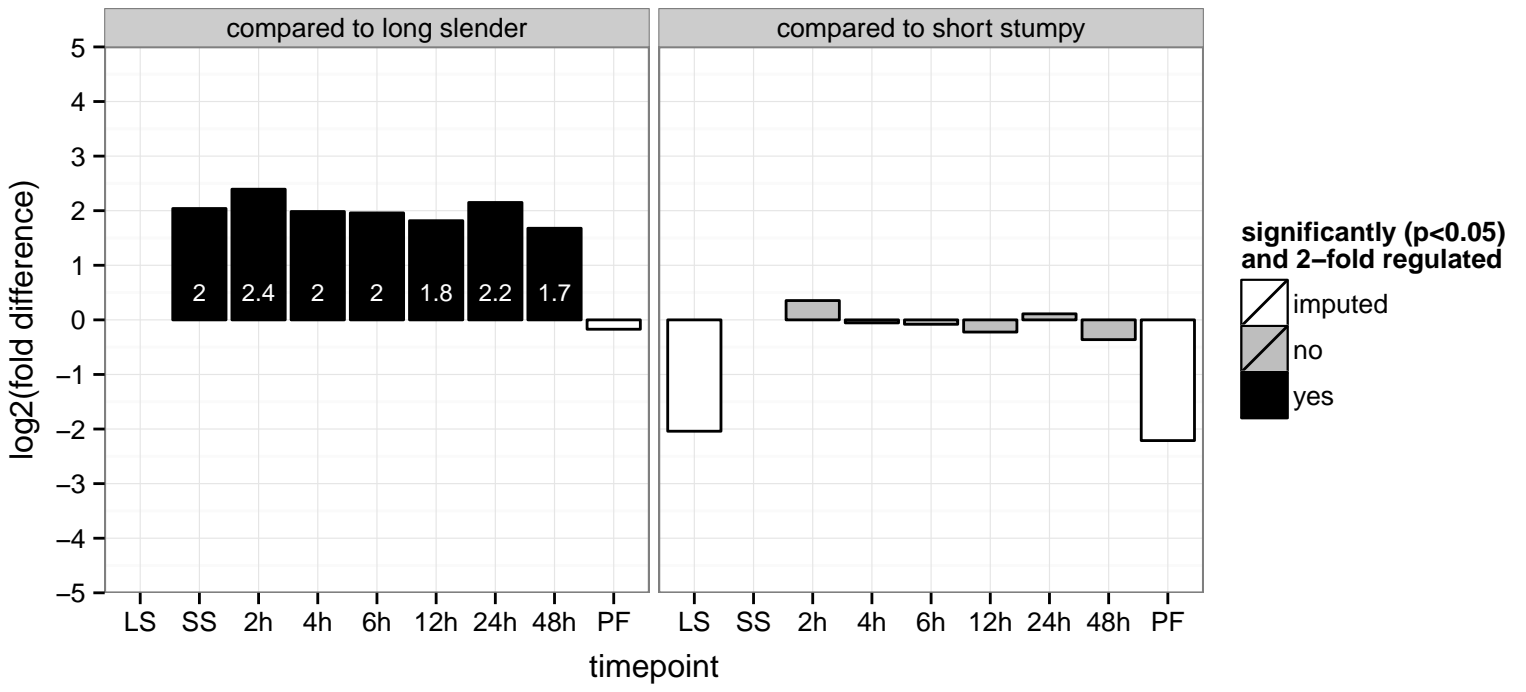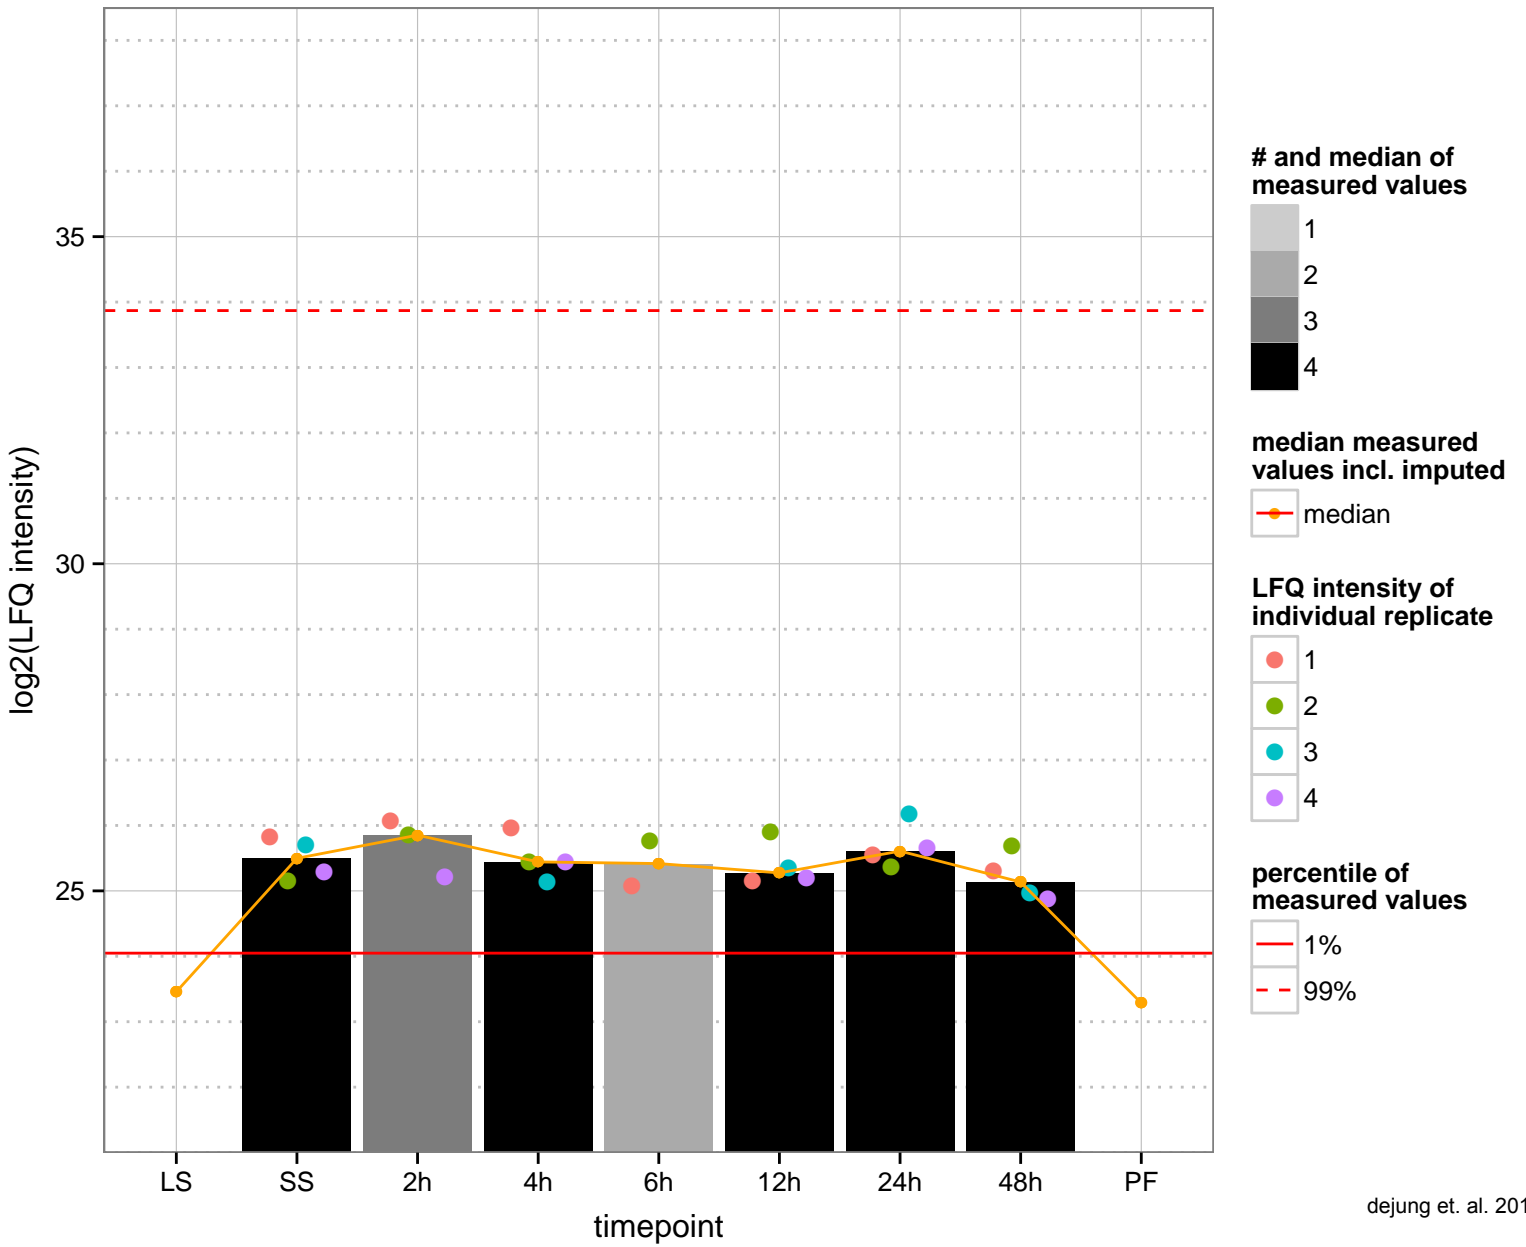

hypothetical protein, conserved  
 Tb927.10.5990;Tb11.v5.0193  
 AGOF: null  
 AGOC: null  
 AGOP: null  
 PGO: null  
 PGOC: null  
 PGOP: null

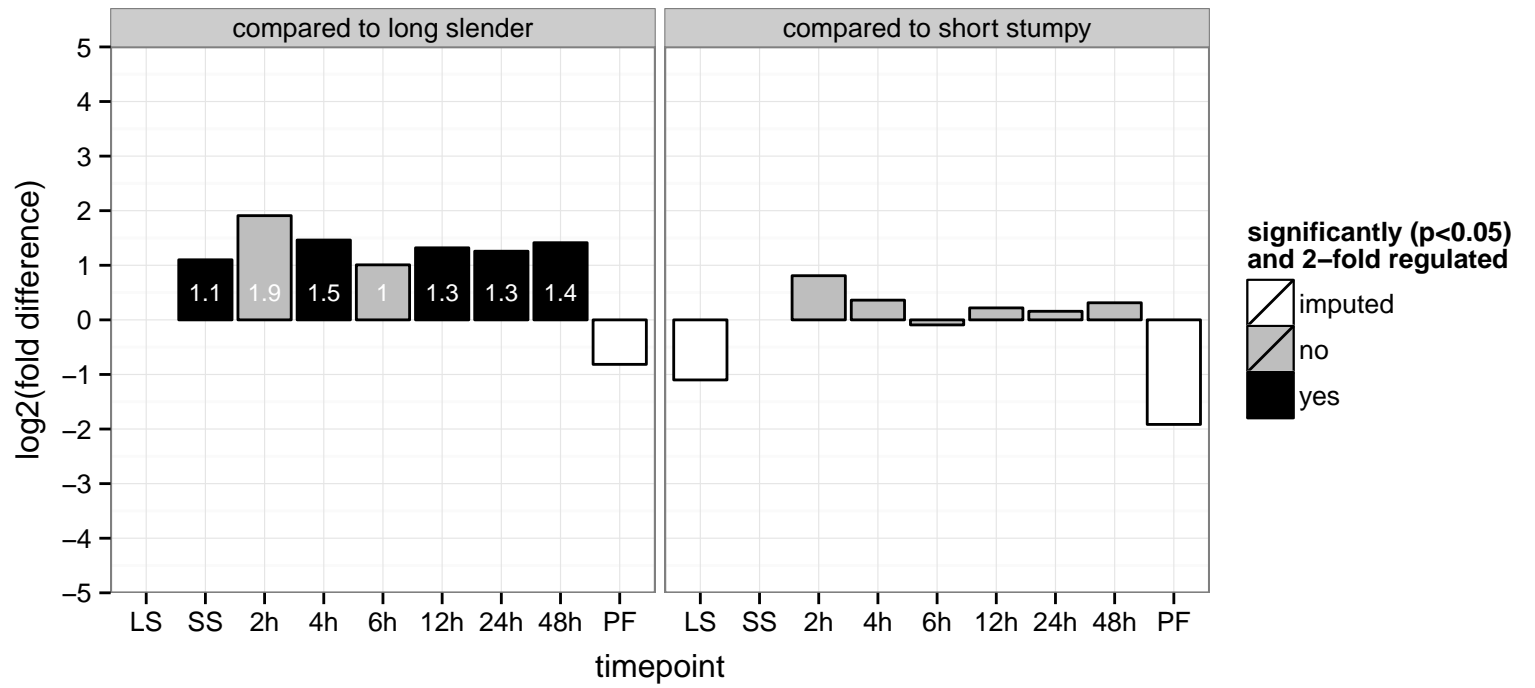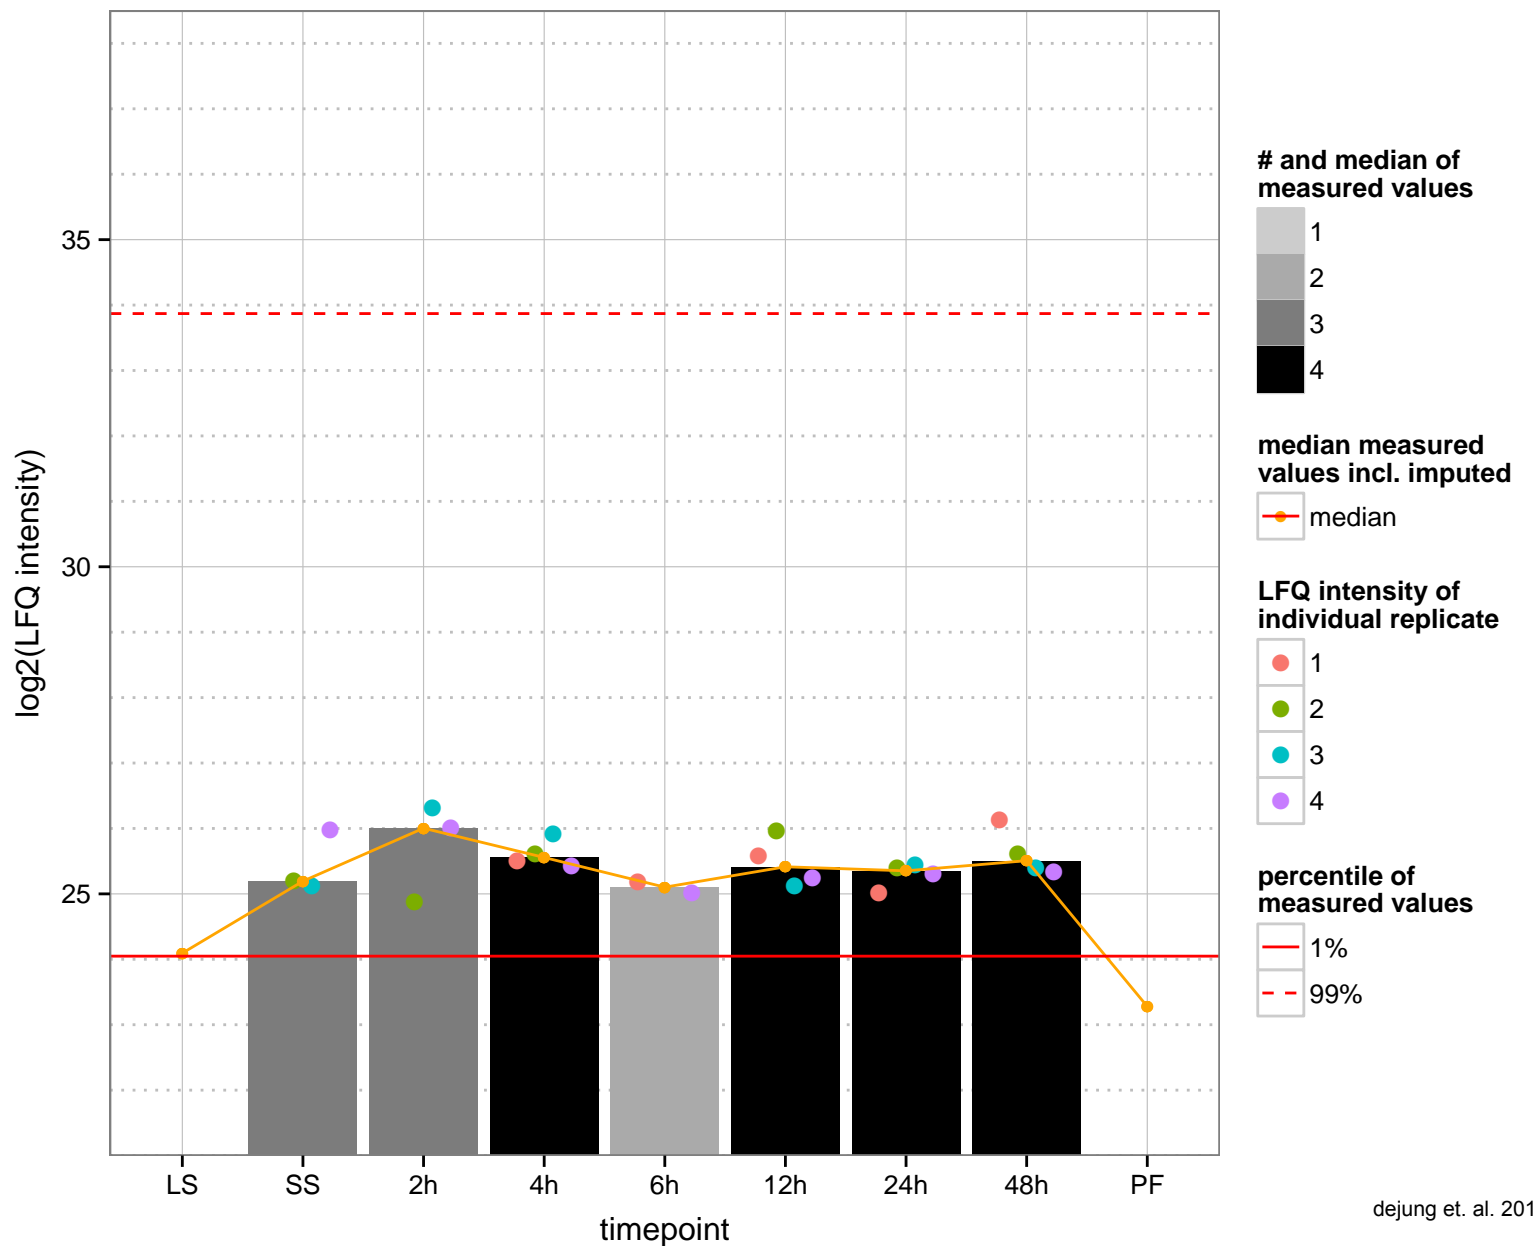

pre-mRNA splicing factor ATP-dependent RNA helicase, putative, DEAH-box RNA helicase  
 Tb927.10.5280;Tb11.v5.0248  
 AGOF: null, ATP binding, ATP-dependent RNA helicase activity, nucleic acid binding  
 AGOC: null, spliceosomal complex  
 AGOP: null, RNA splicing, RNA splicing, via transesterification reactions  
 PGOF: ATP binding, ATP-dependent helicase activity, helicase activity, nucleic acid binding  
 PGOC: null  
 PGOP: null

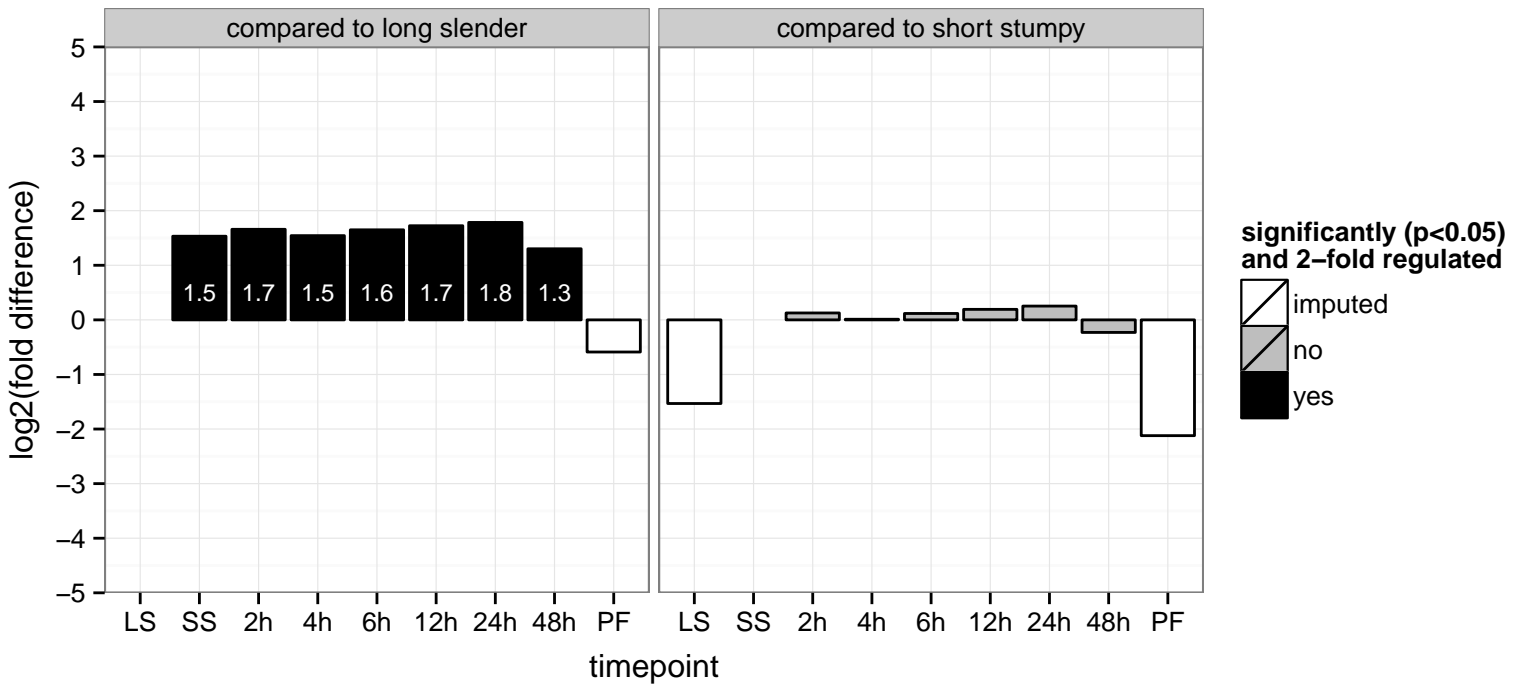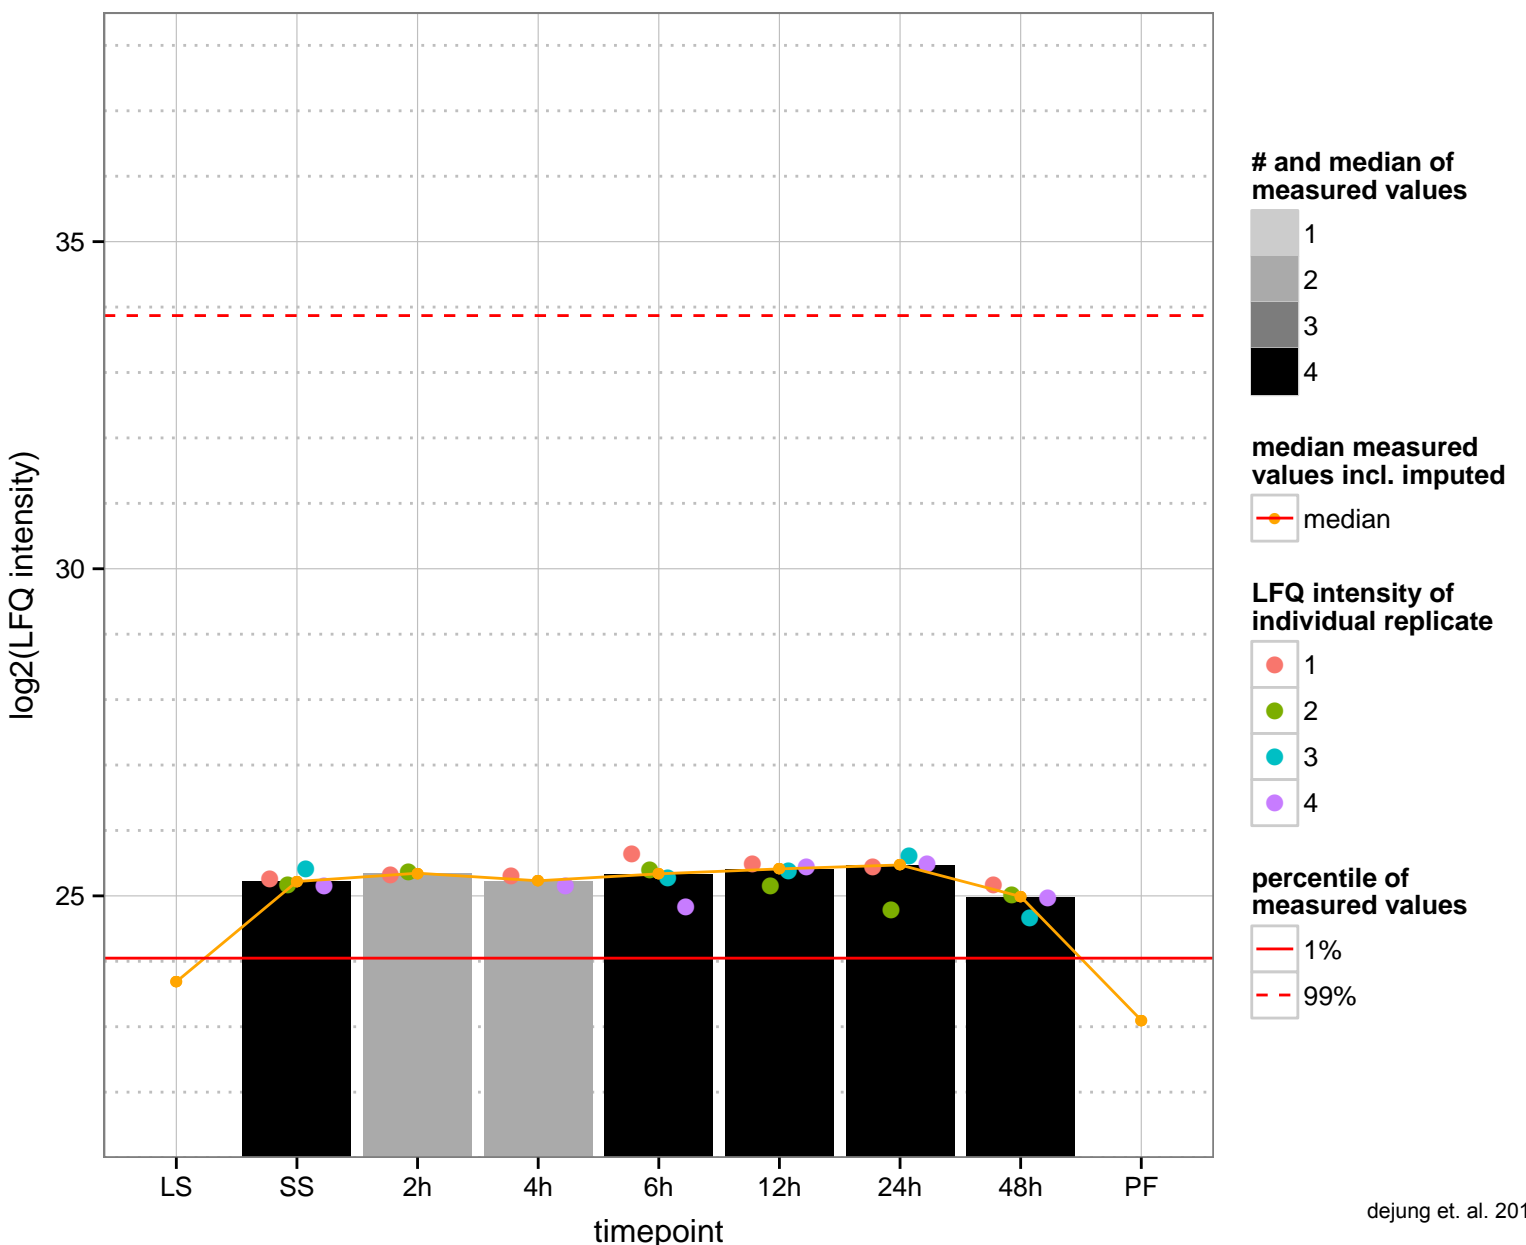

hypothetical protein, conserved  
 Tb927.11.7300;Tb11.v5.0253  
 AGOF: null, transporter activity  
 AGOC: null, integral to membrane  
 AGOP: null, transport  
 PGO: null  
 PGO: integral to membrane  
 PGO: transmembrane transport

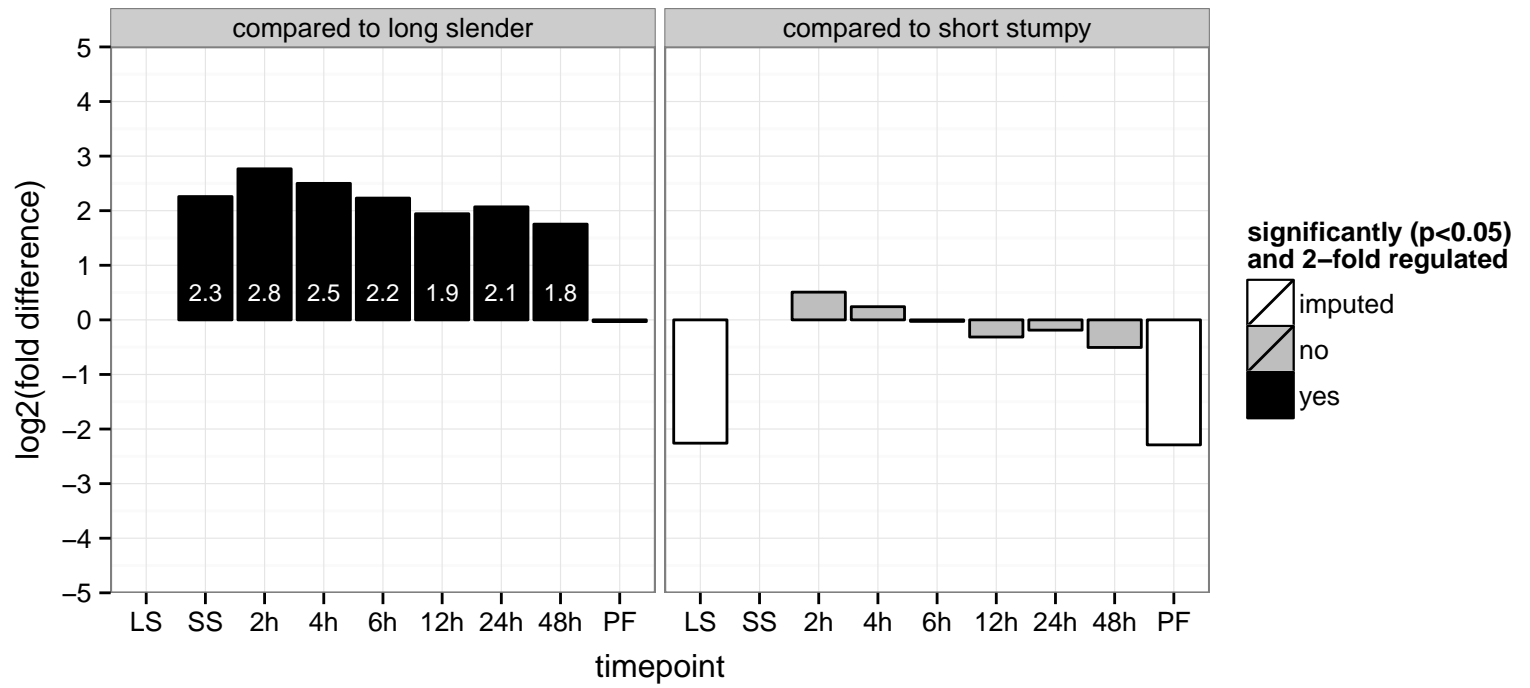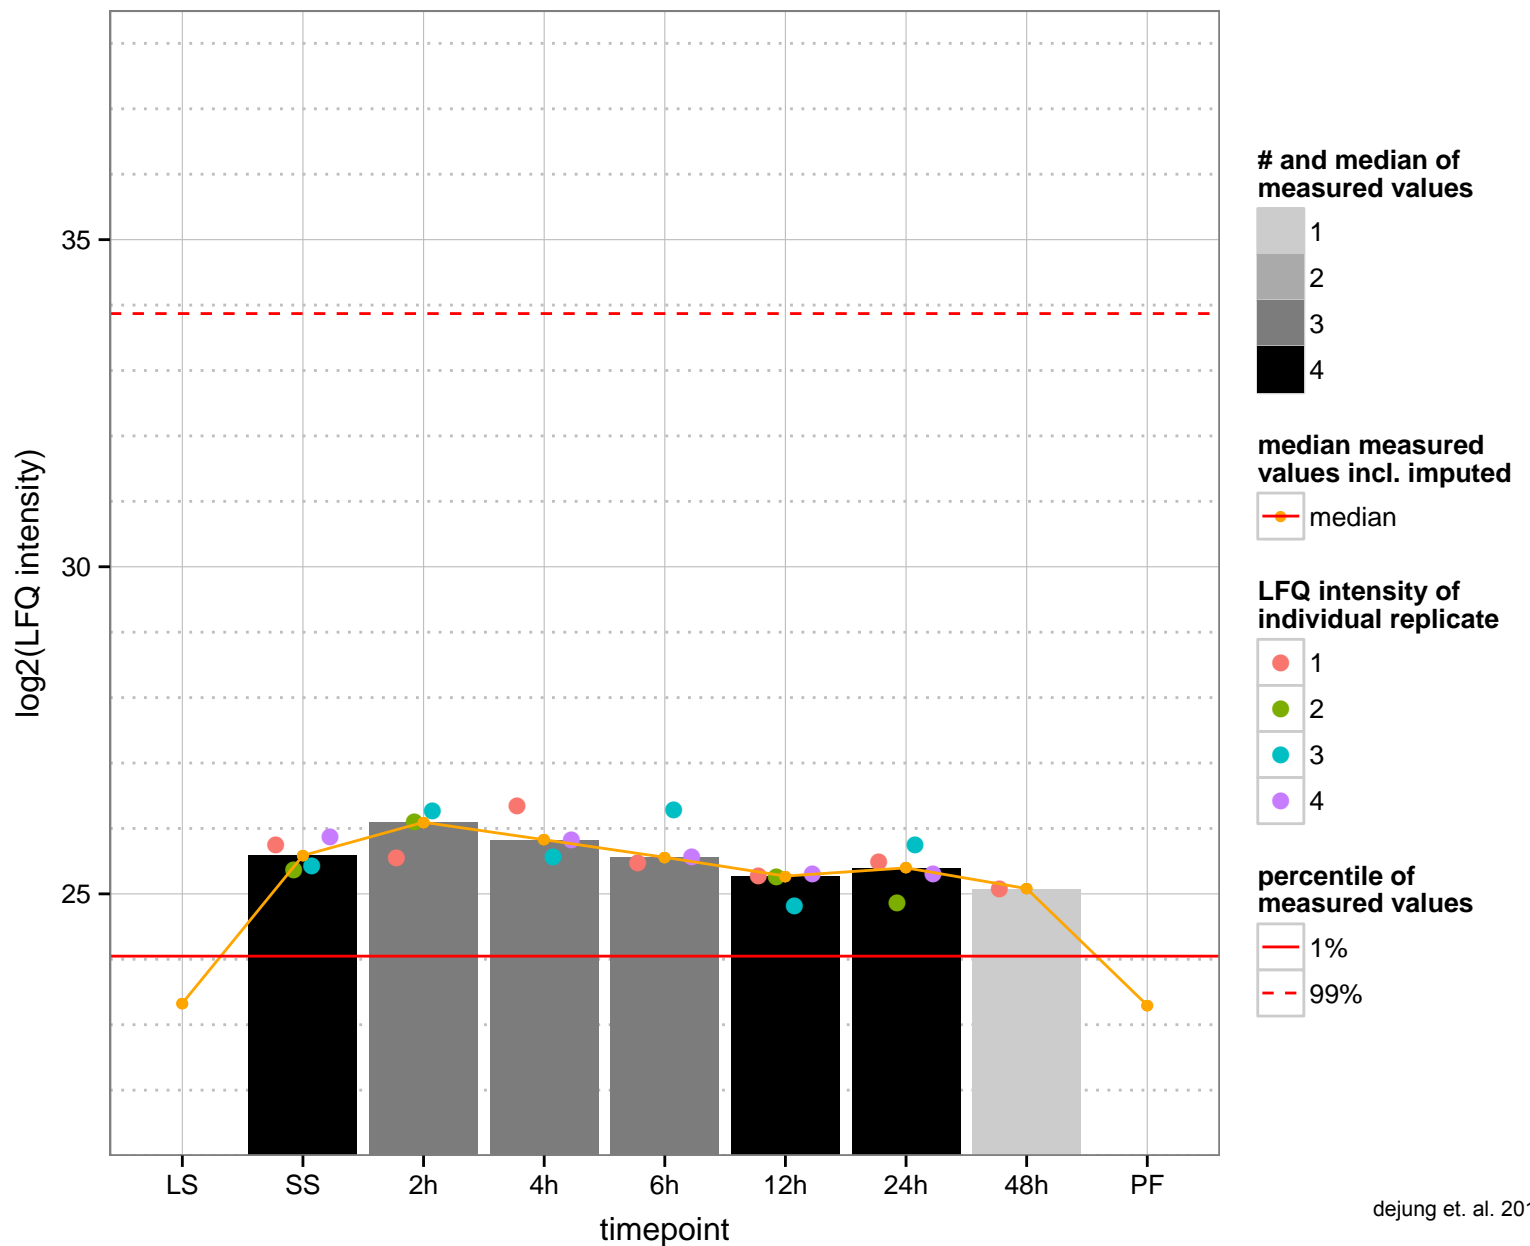

hypothetical protein, conserved, GPI transamidase component Tta2 (TTA2)  
 Tb927.10.5080;Tb11.v5.0339  
 AGOF: null, GPI-anchor transamidase activity  
 AGOC: null, GPI-anchor transamidase complex  
 AGOP: null  
 PGO: null  
 PGOC: null  
 PGOP: null

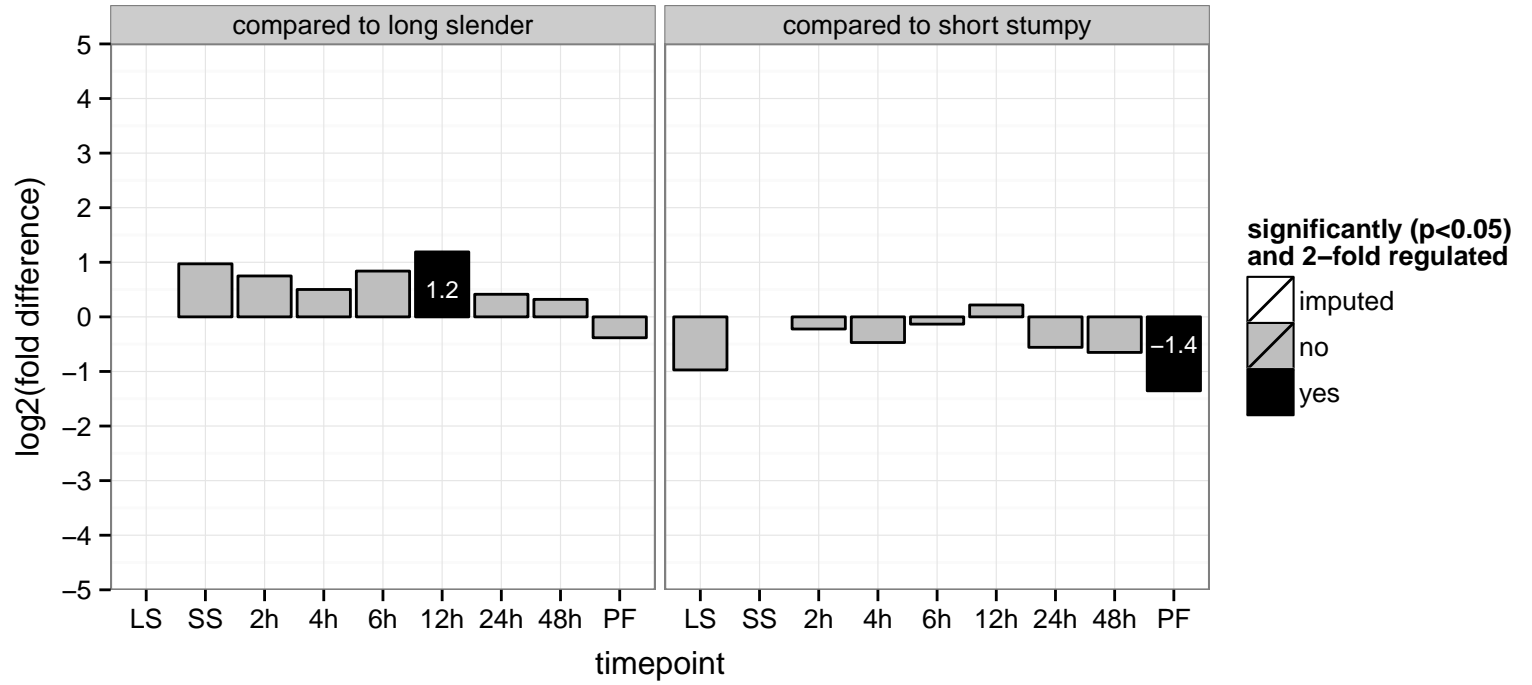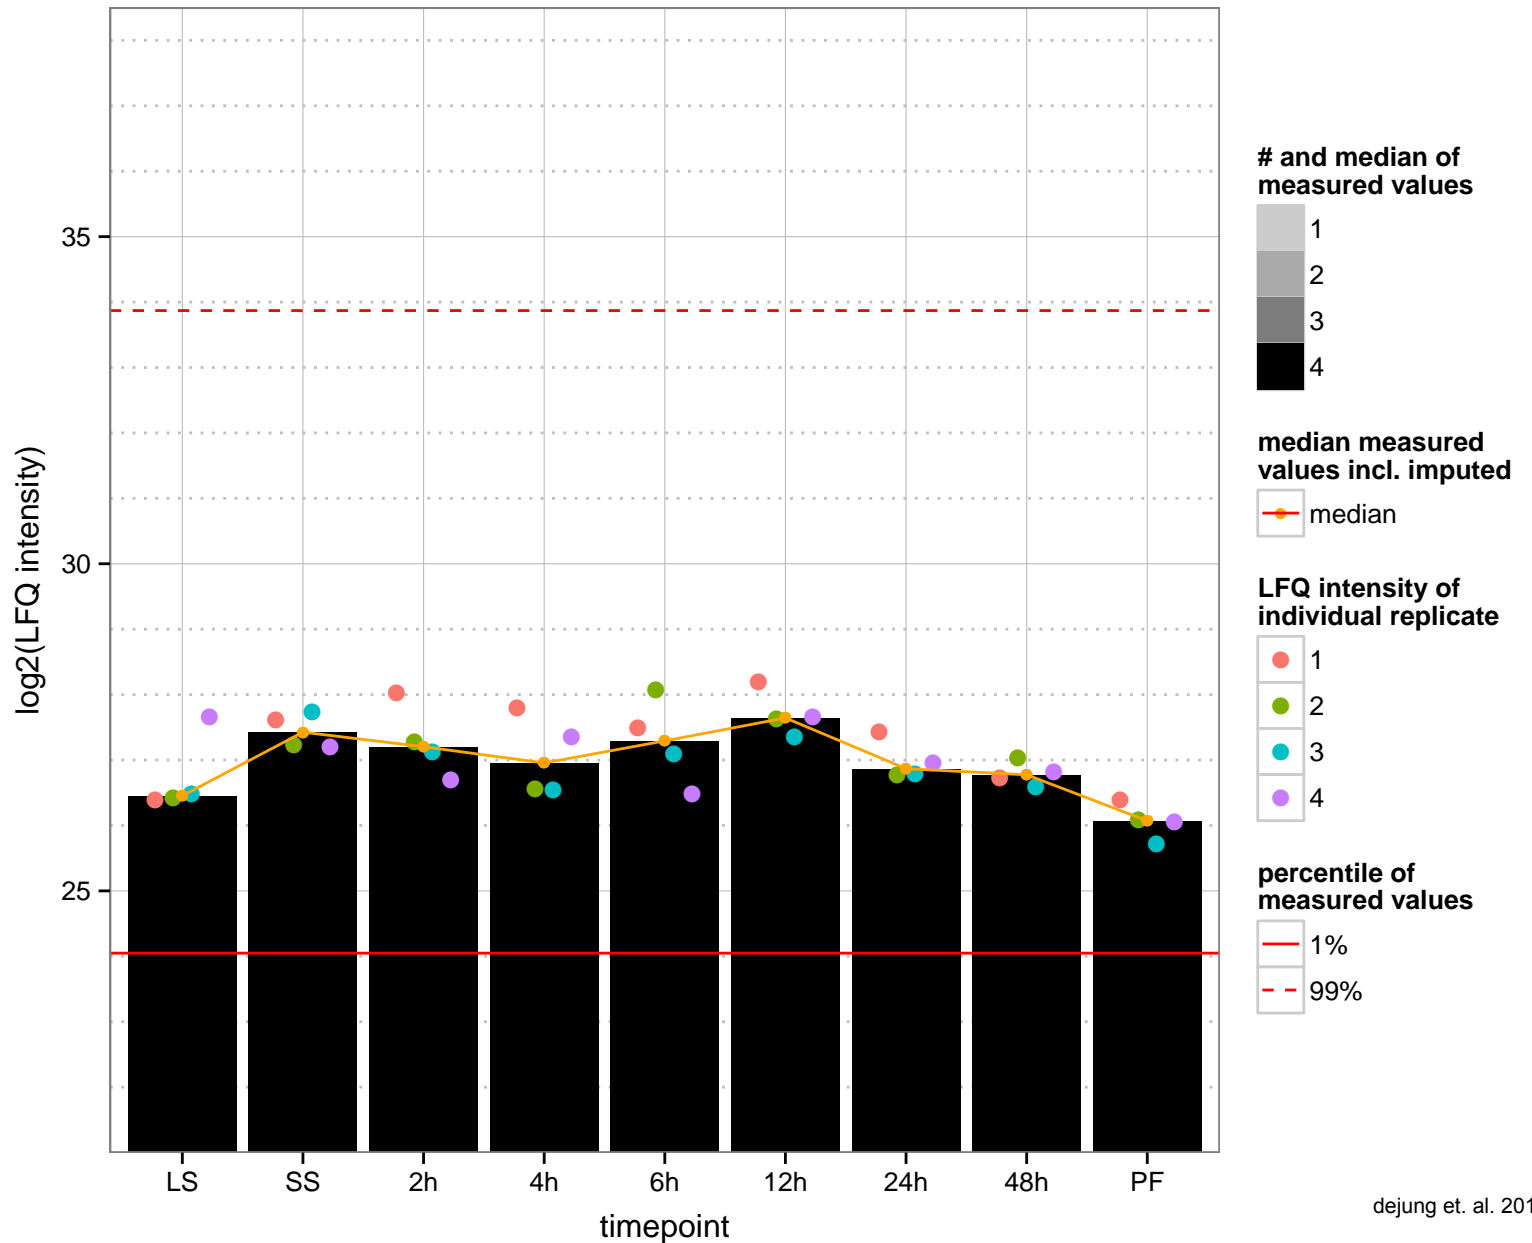

glyceraldehyde 3-phosphate dehydrogenase, cytosolic, putative, cytosolic (GAP)

Tb927.10.6880;Tb11.v5.0516

AGOF: null, glyceraldehyde-3-phosphate dehydrogenase (NAD+) (phosphorylating) activity

AGOC: null, cytosol

AGOP: null, glycolysis

PGOF: NAD binding, NADP binding, oxidoreductase activity, acting on the aldehyde or oxo group of donors, NAD or NADP as

PGOC: null

PGOP: glucose metabolic process, oxidation-reduction process

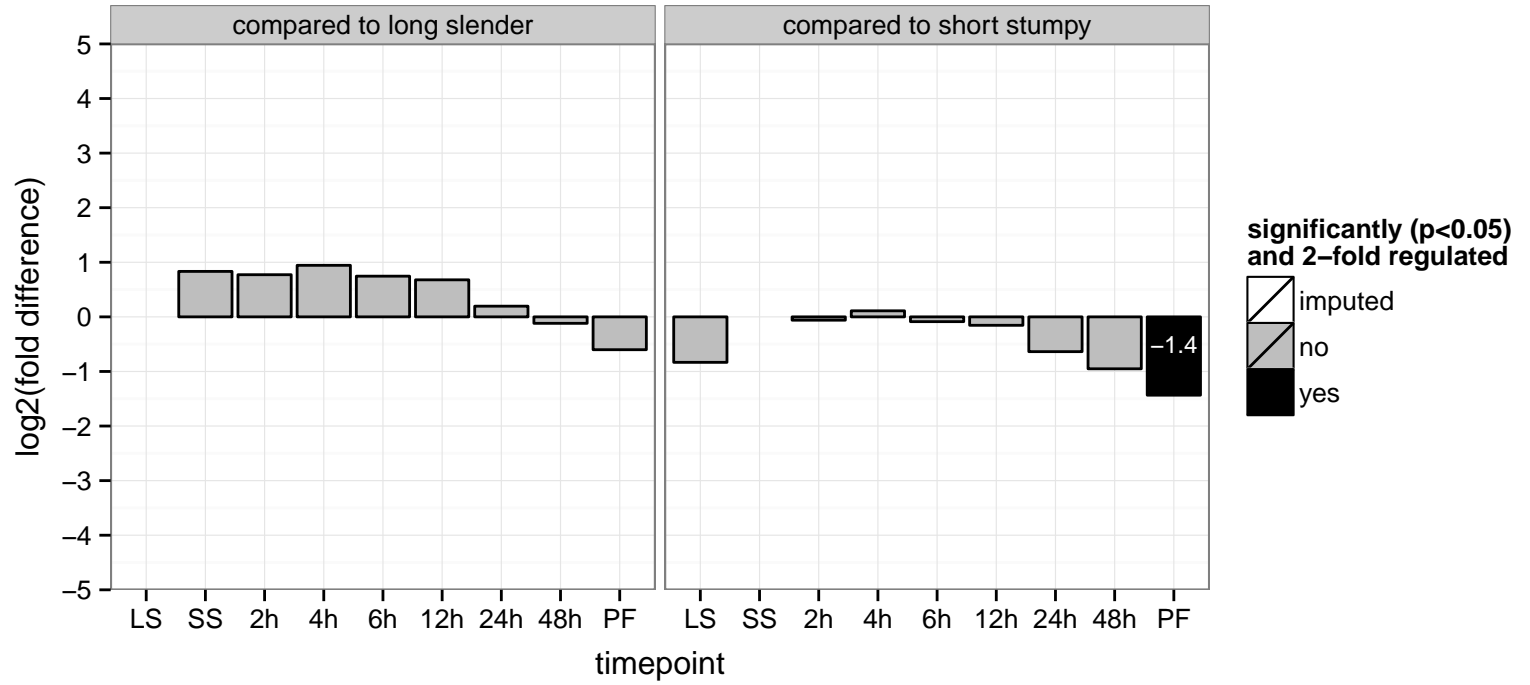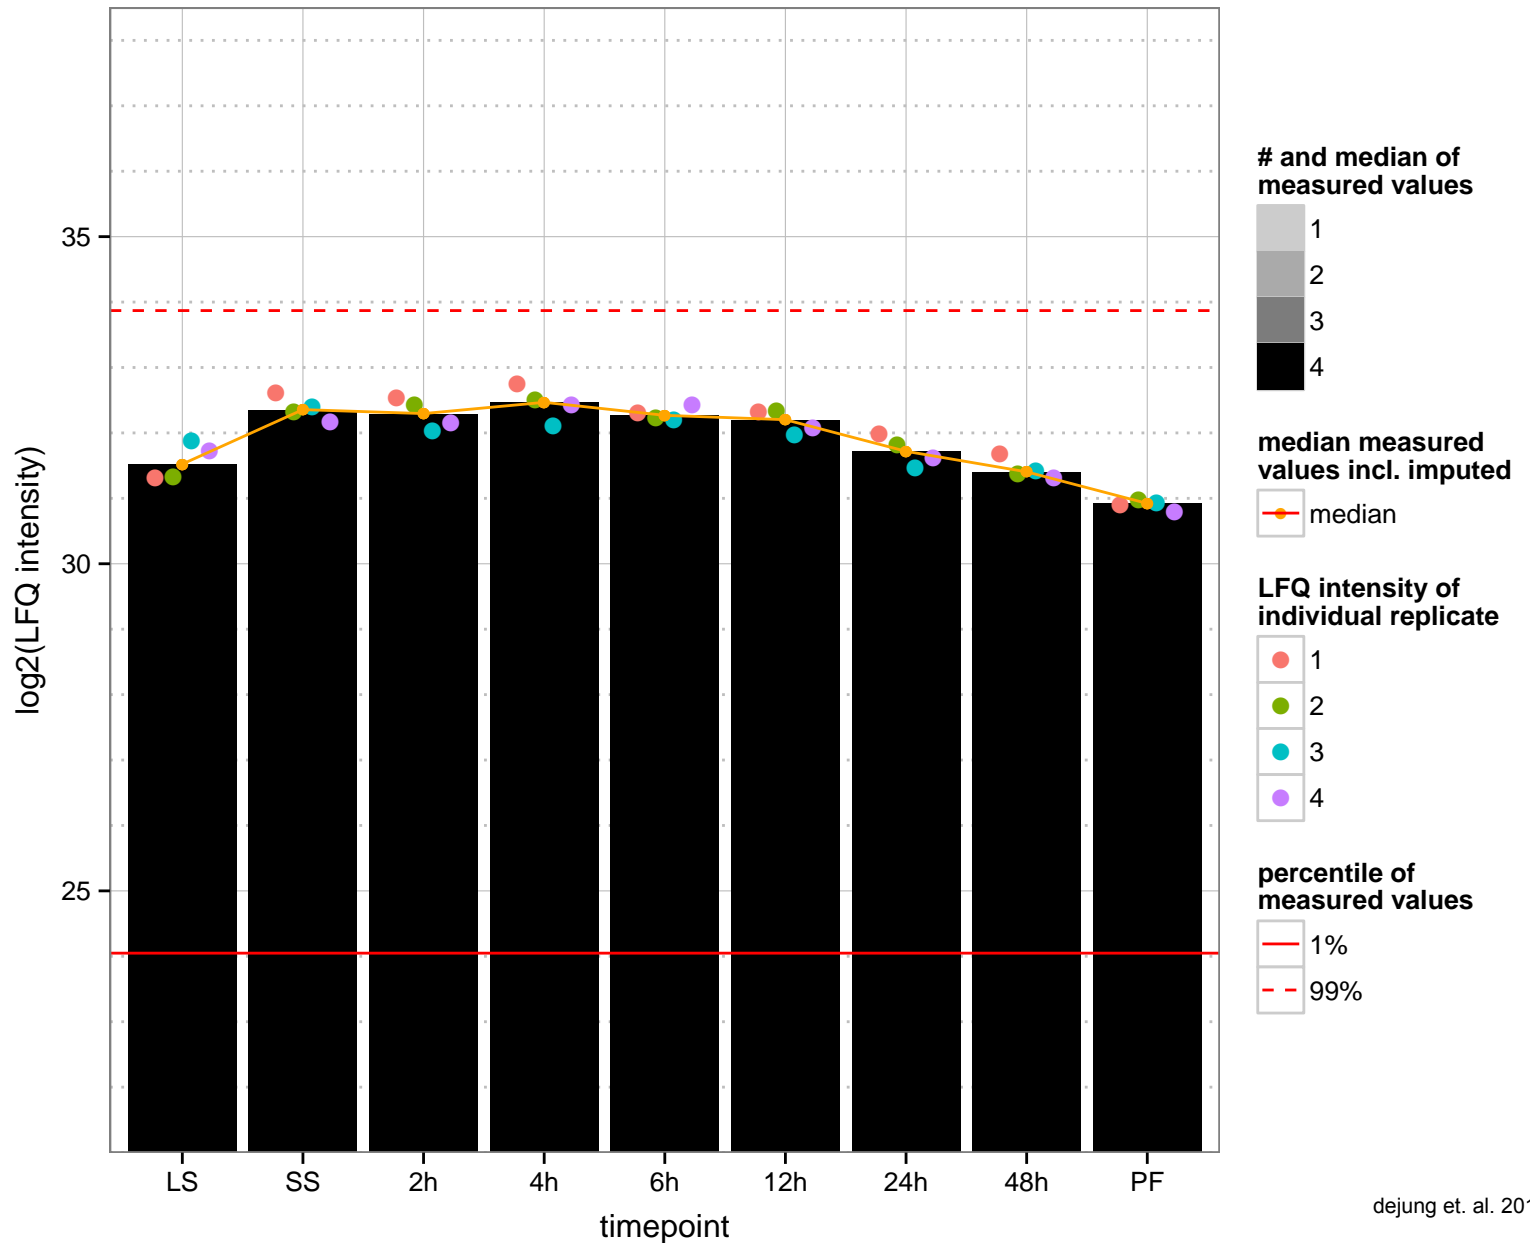

polyubiquitin, putative  
 Tb11.v5.0537;Tb927.11.9920;Tb11.01.1680.v5  
 AGOF: null  
 AGOC: null  
 AGOP: null, cellular protein modification process  
 PGO: protein binding  
 PGOC: null  
 PGOP: null

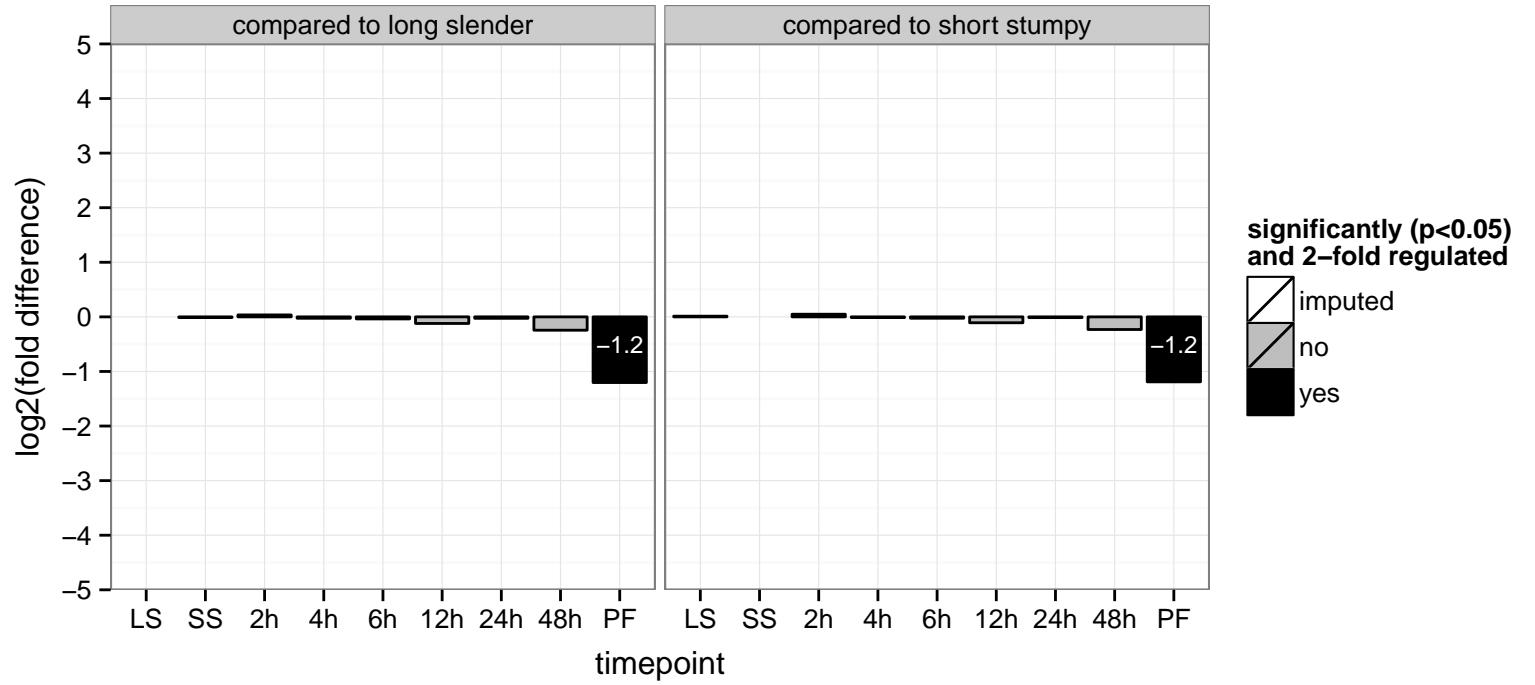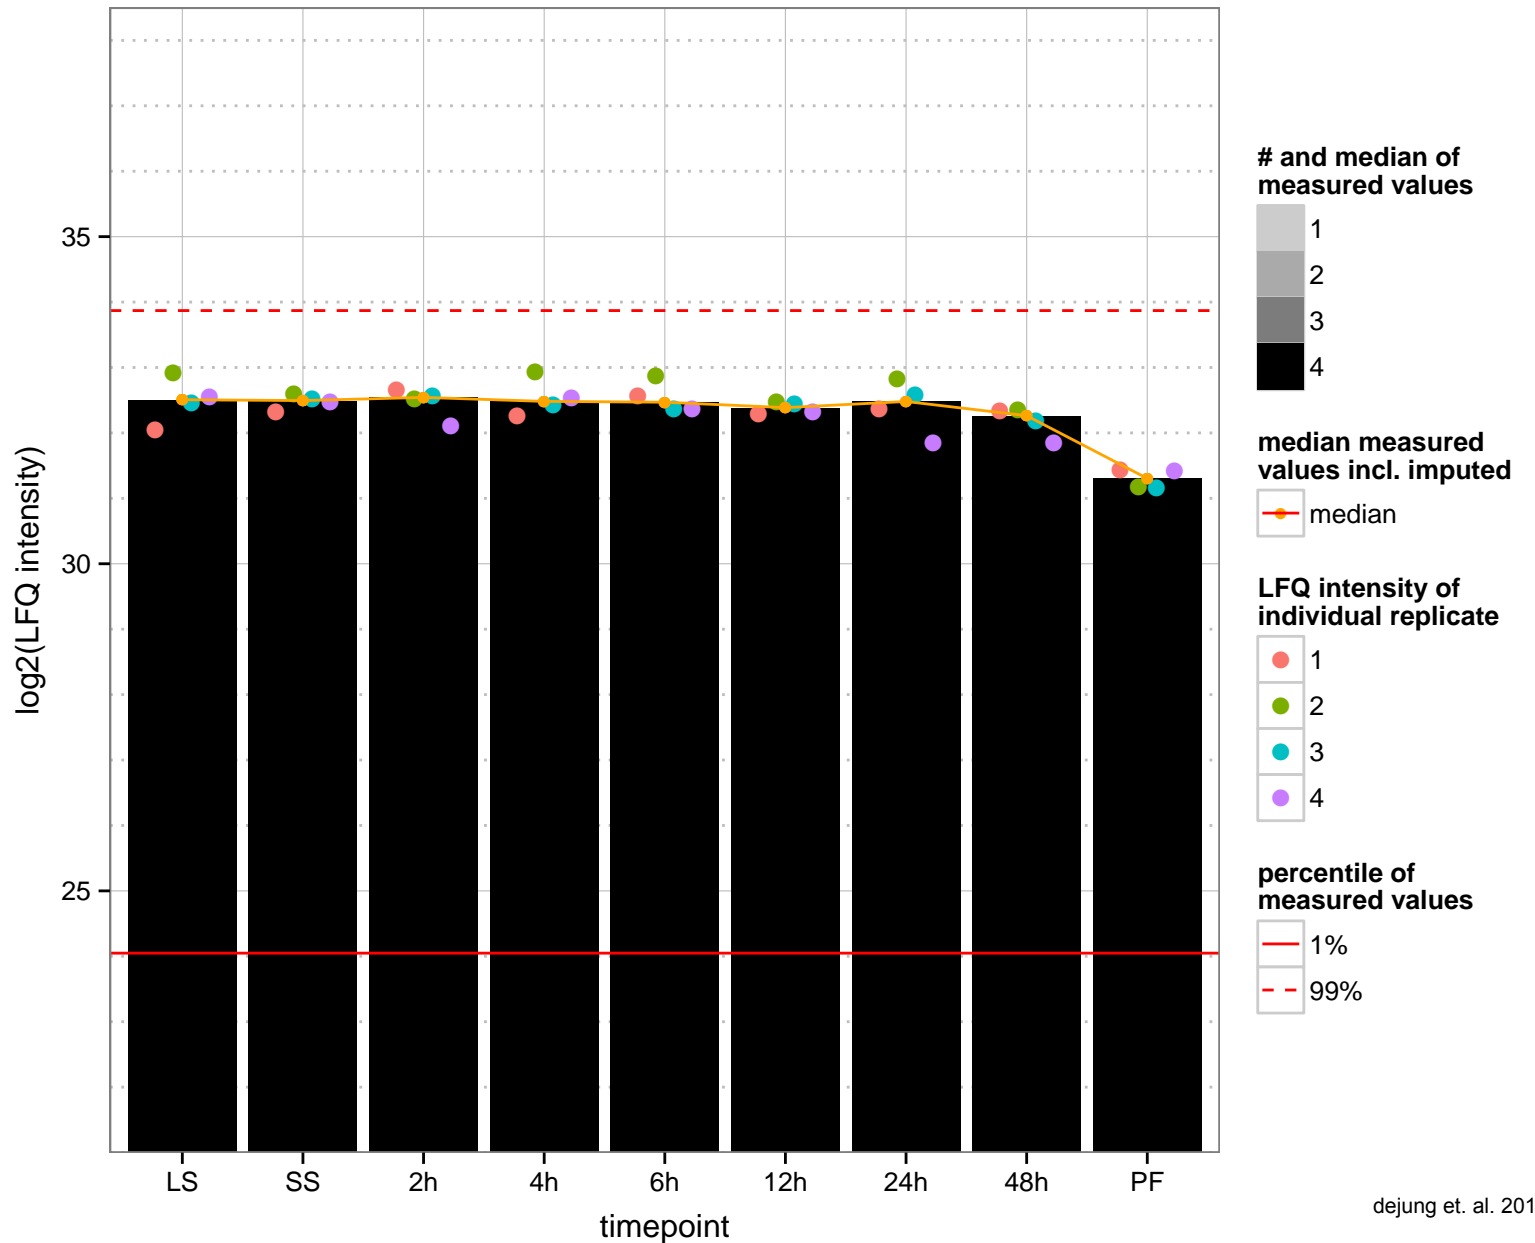



hypothetical protein, conserved, U4/U6-specific protein PRP4  
 Tb927.10.960;Tb11.v5.0631  
 AGOF: null, pre-mRNA 5'-splice site binding  
 AGOC: null, cytoplasm, nucleus  
 AGOP: null, RNA splicing  
 PGO: protein binding  
 PGO: null  
 PGO: RNA splicing

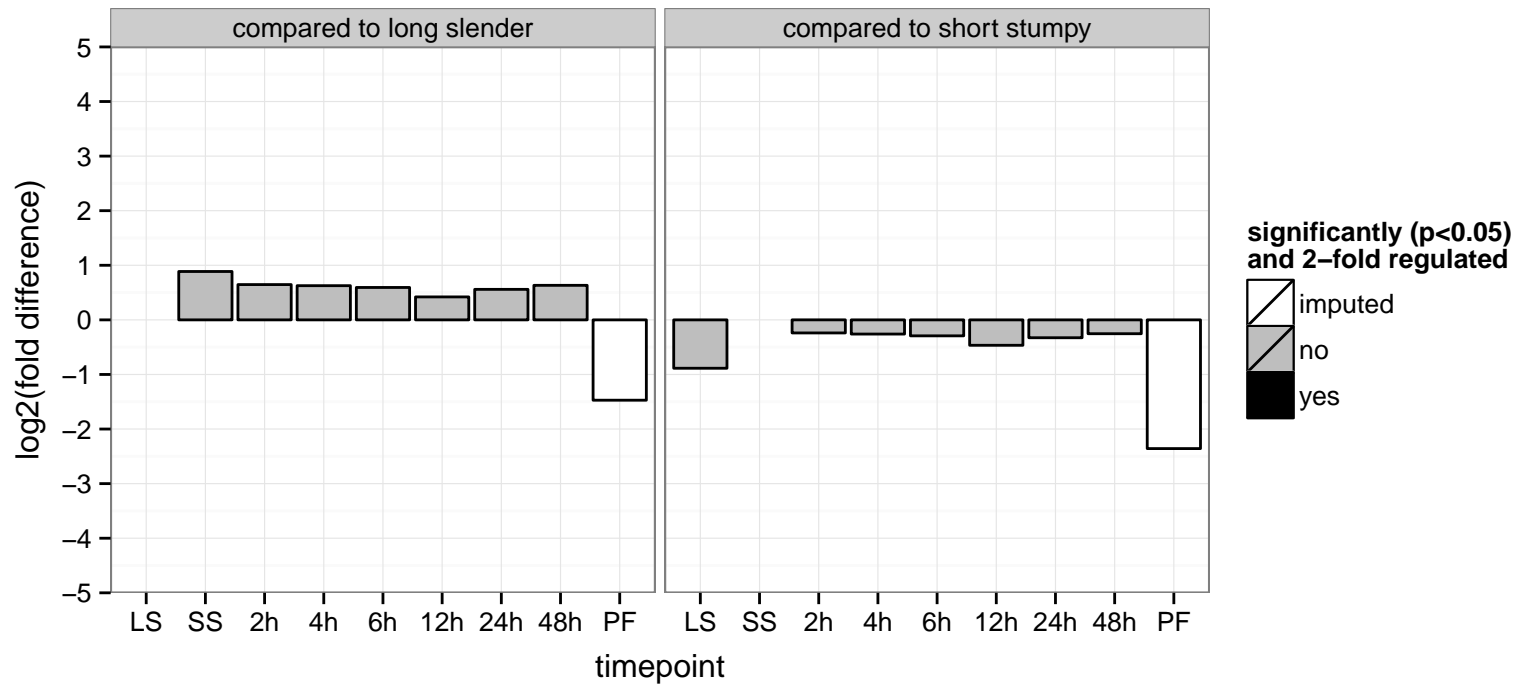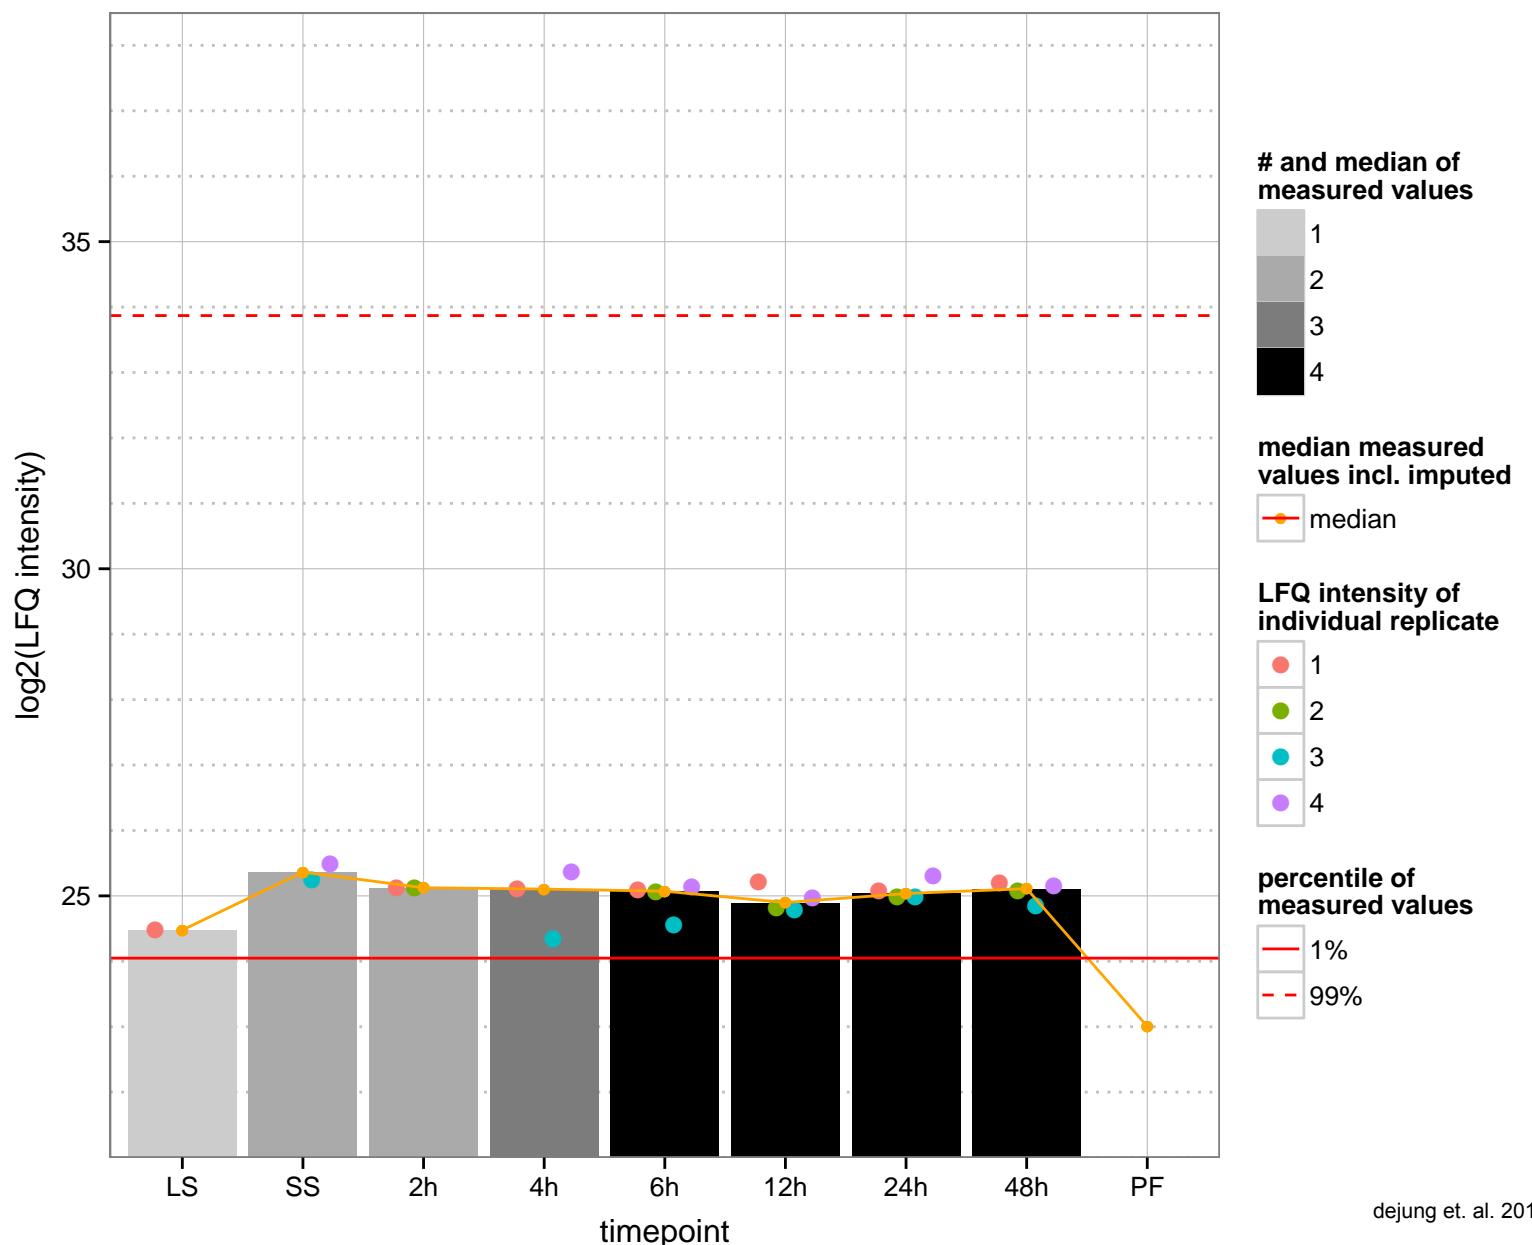

glutaredoxin-like protein, putative, monothiol glutaredoxin

Tb927.9.3590;Tb11.v5.0904

AGOF: null, electron carrier activity, glutathione-disulfide reductase activity, protein disulfide oxidoreductase activity

AGOC: null, mitochondrion

AGOP: null, cell redox homeostasis, oxidation-reduction process

PGOF: electron carrier activity, protein disulfide oxidoreductase activity

PGOC: null

PGOP: cell redox homeostasis

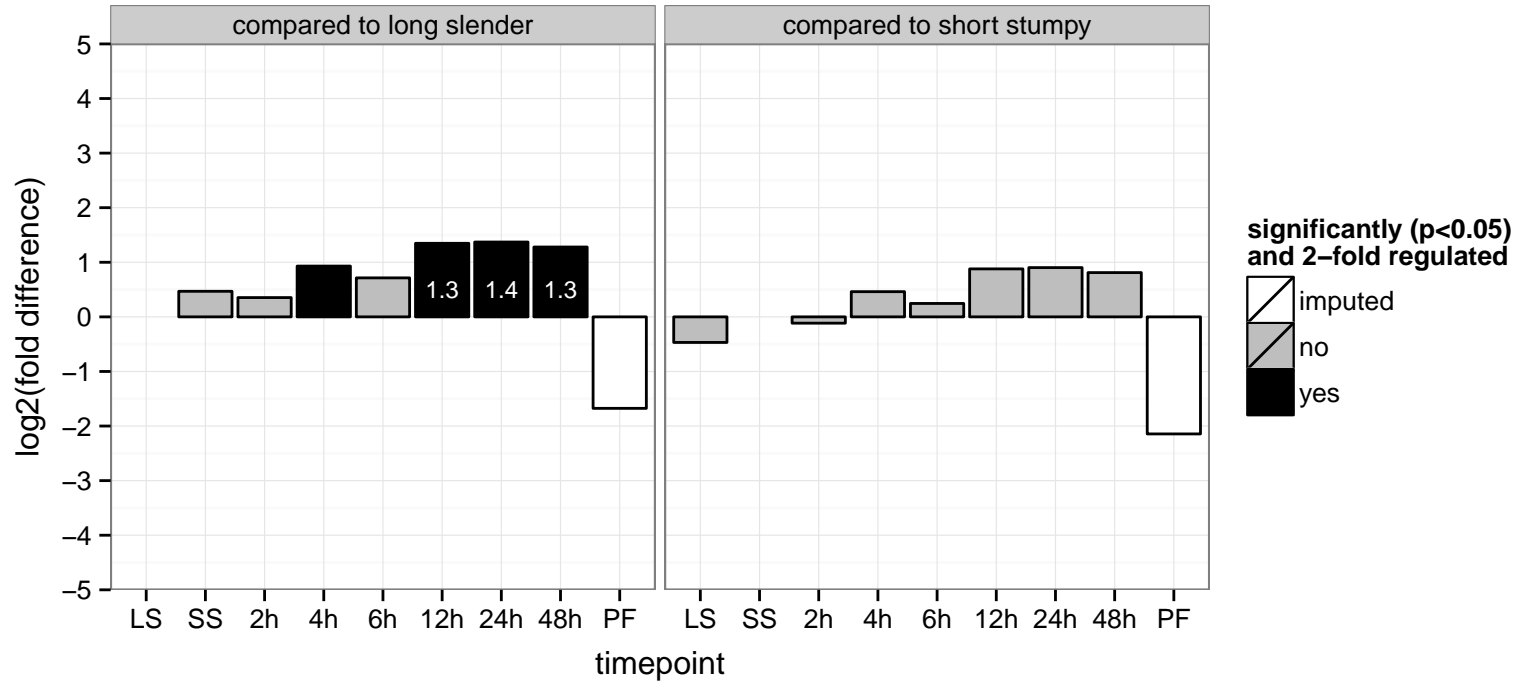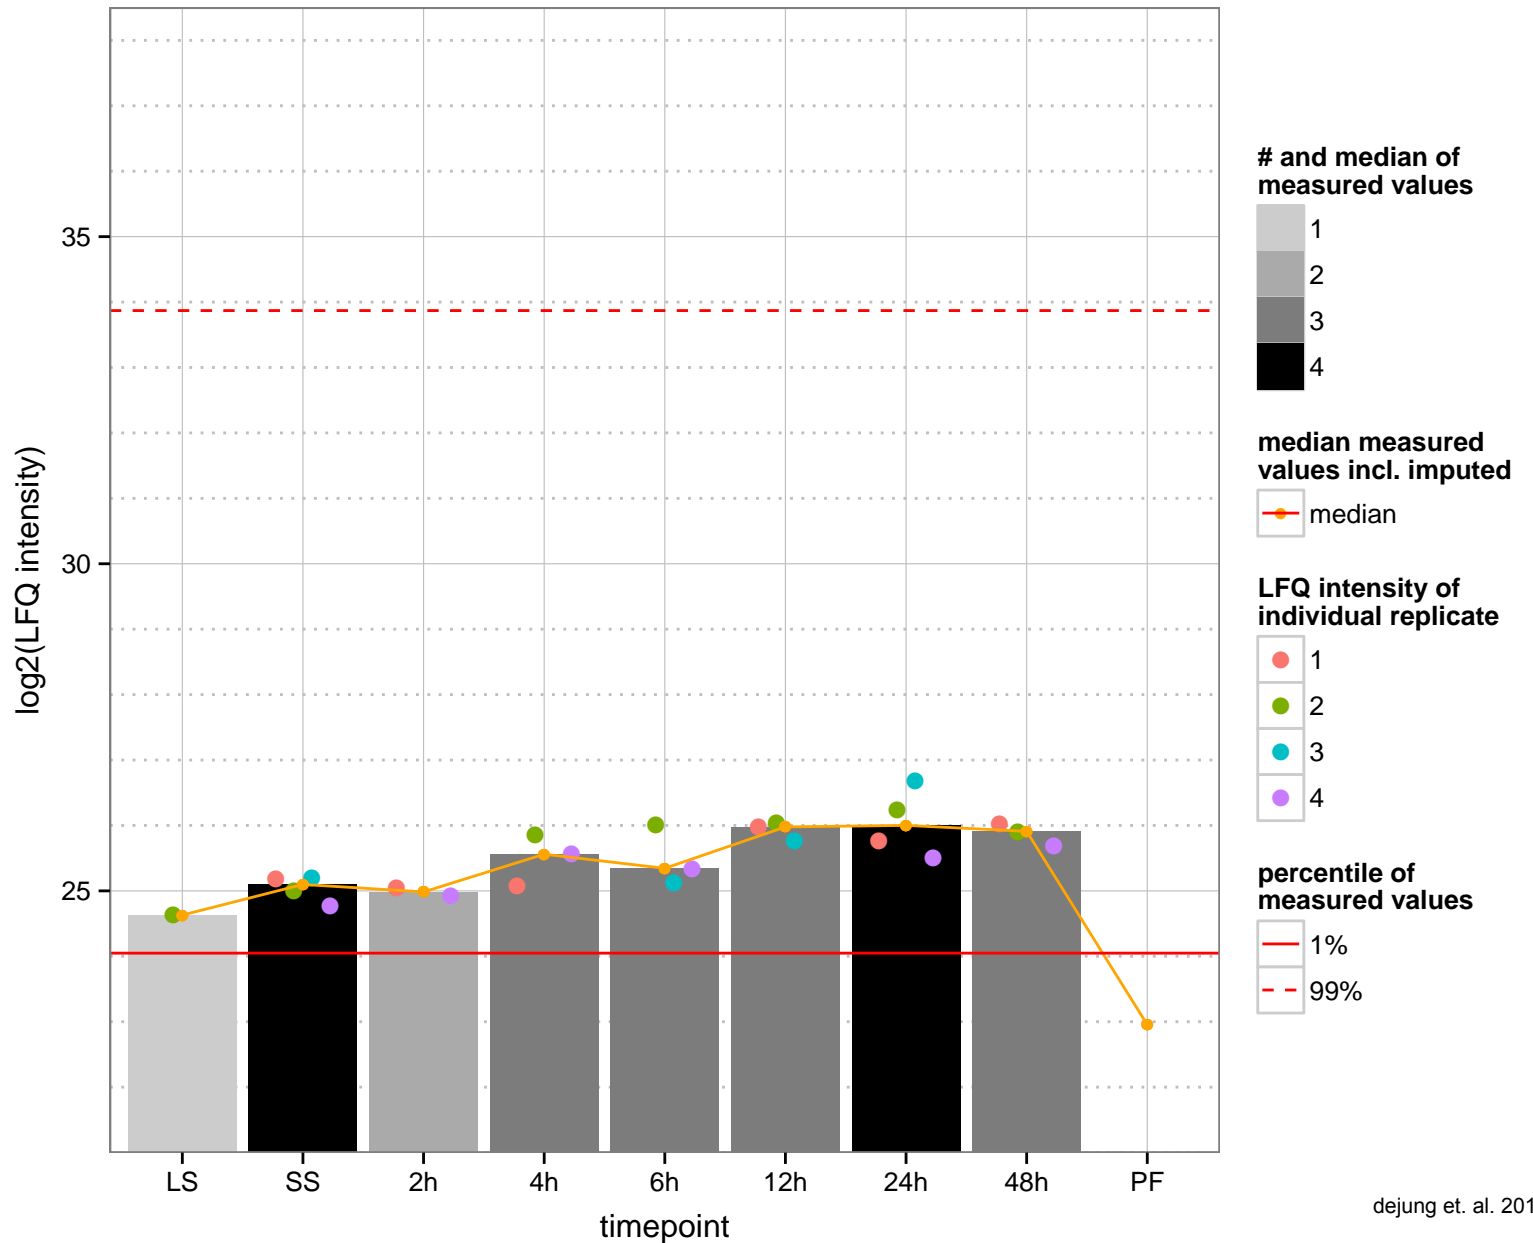

FG-GAP repeat protein, putative, intergrin alpha chain protein  
 Tb927.1.1340  
 AGOF: null  
 AGOC: null  
 AGOP: null  
 PGOF: null  
 PGO C: null  
 PGOP: null

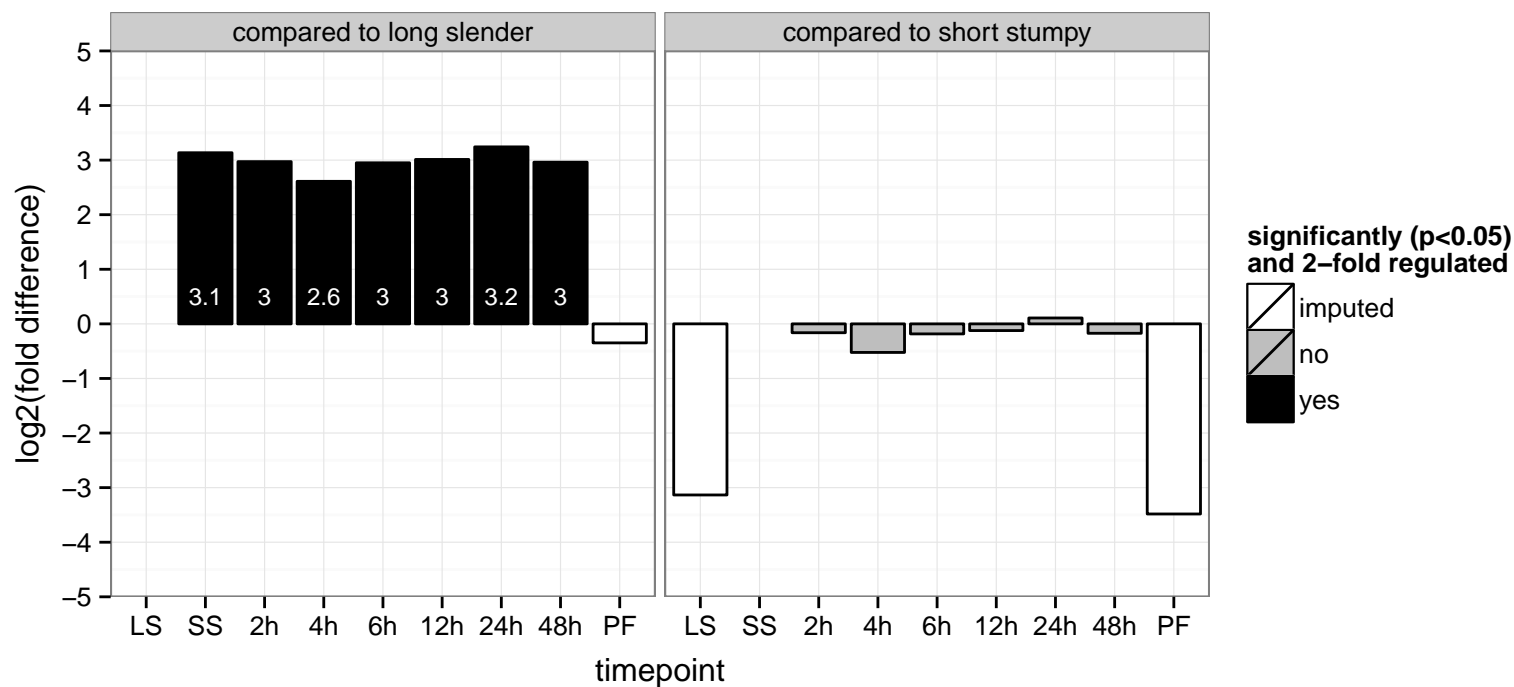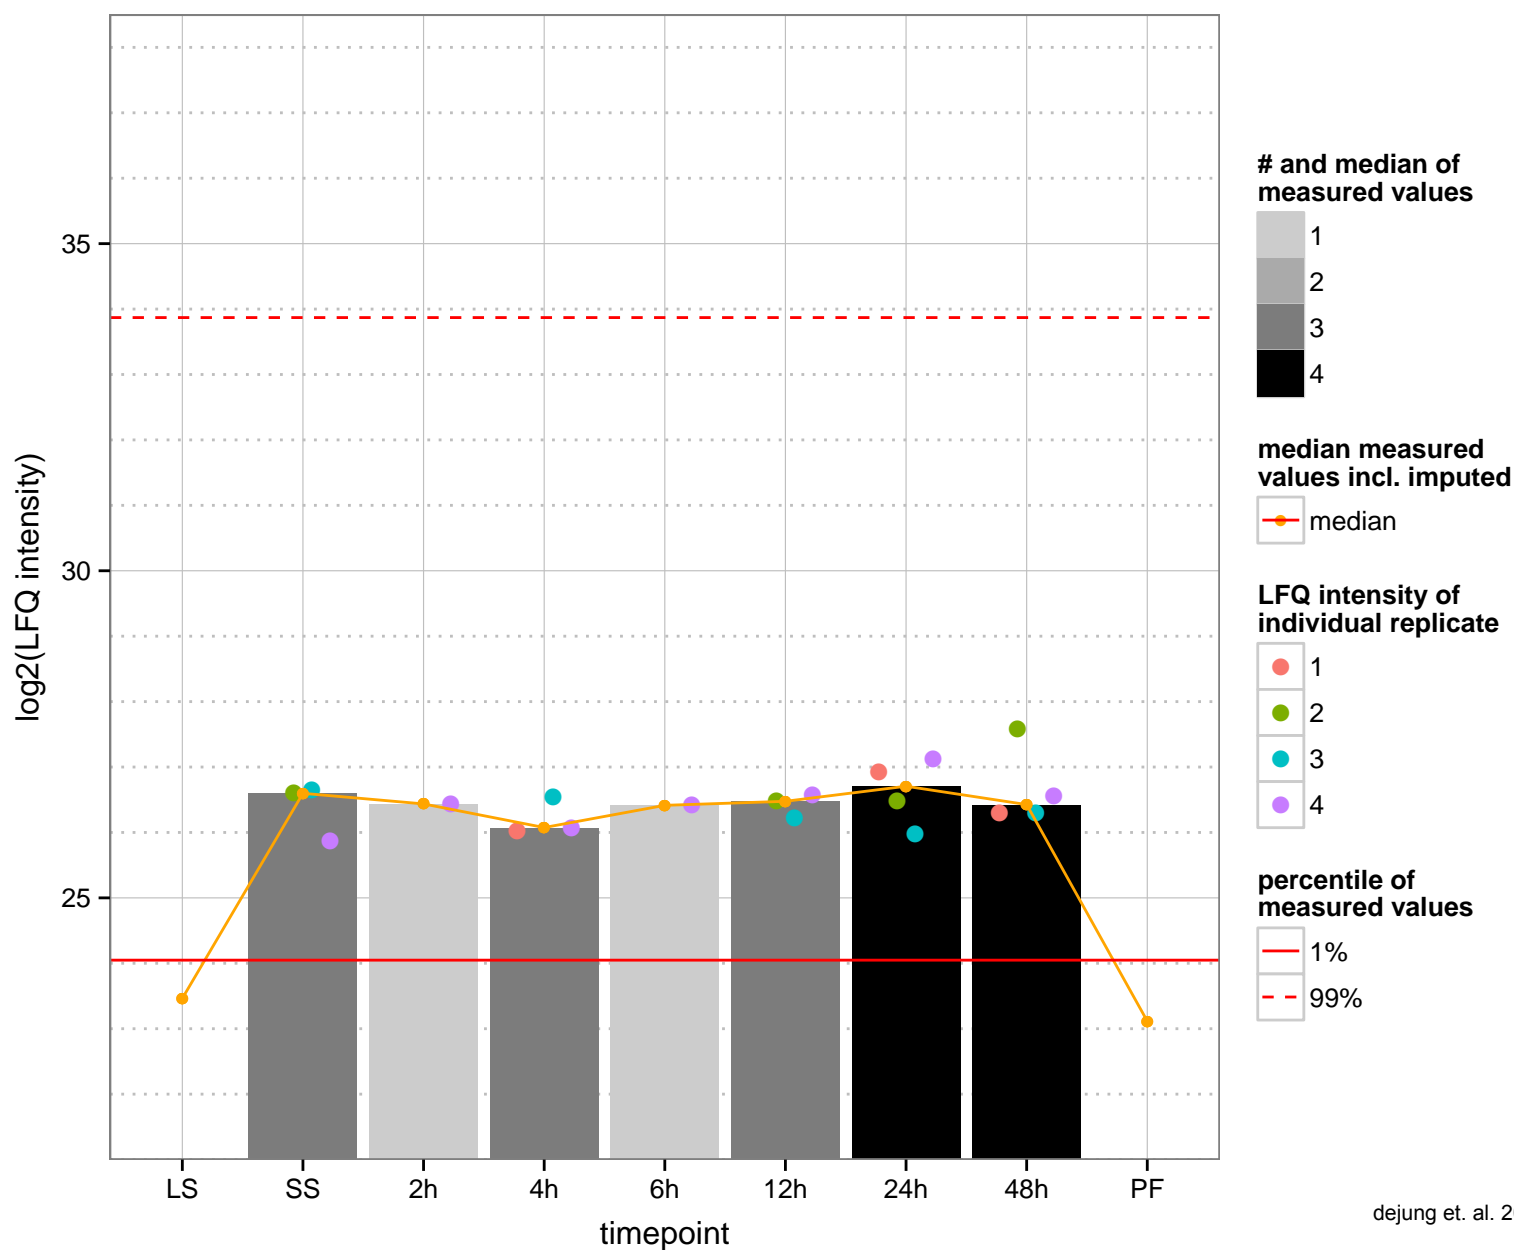

Overproducer of inositol protein 10 homolog, putative  
 Tb927.1.1400  
 AGOF: null  
 AGOC: null  
 AGOP: null  
 PGOF: null  
 PGO: null  
 PGOP: null

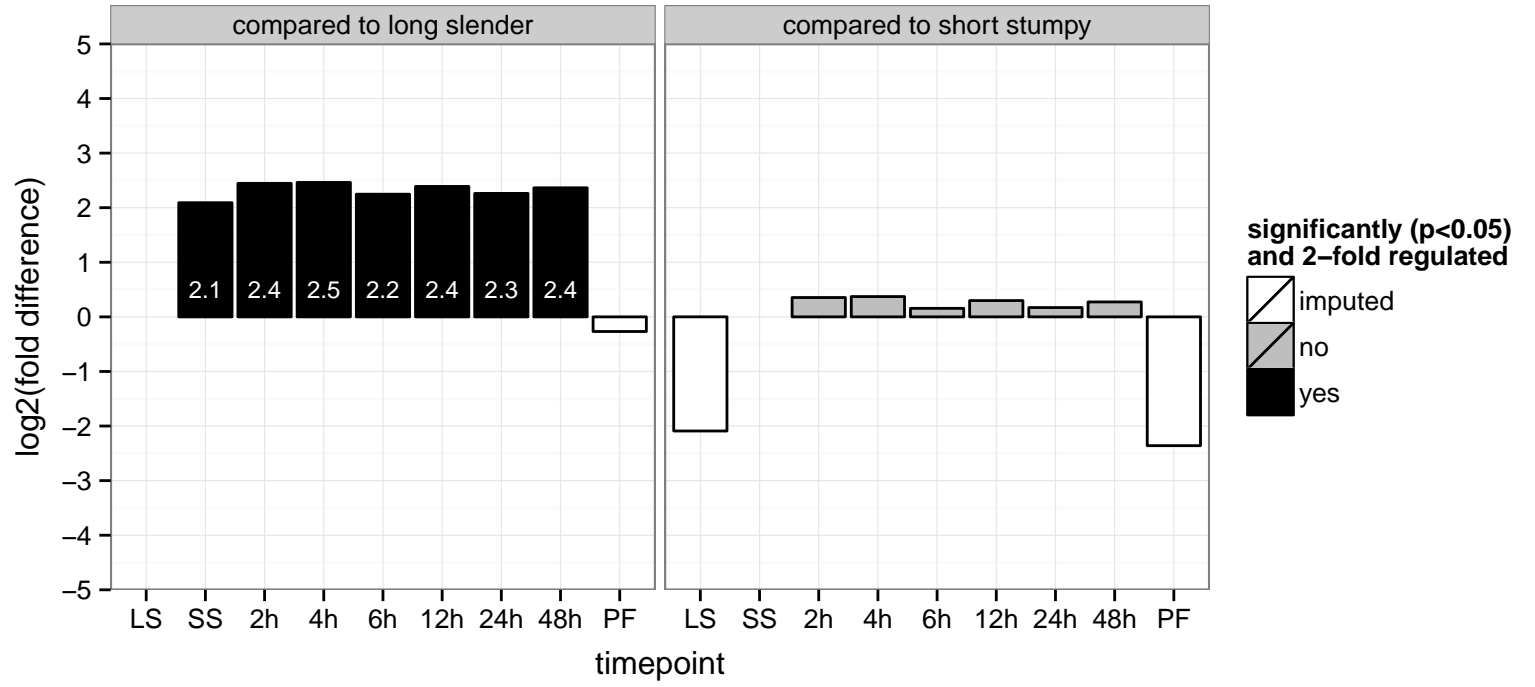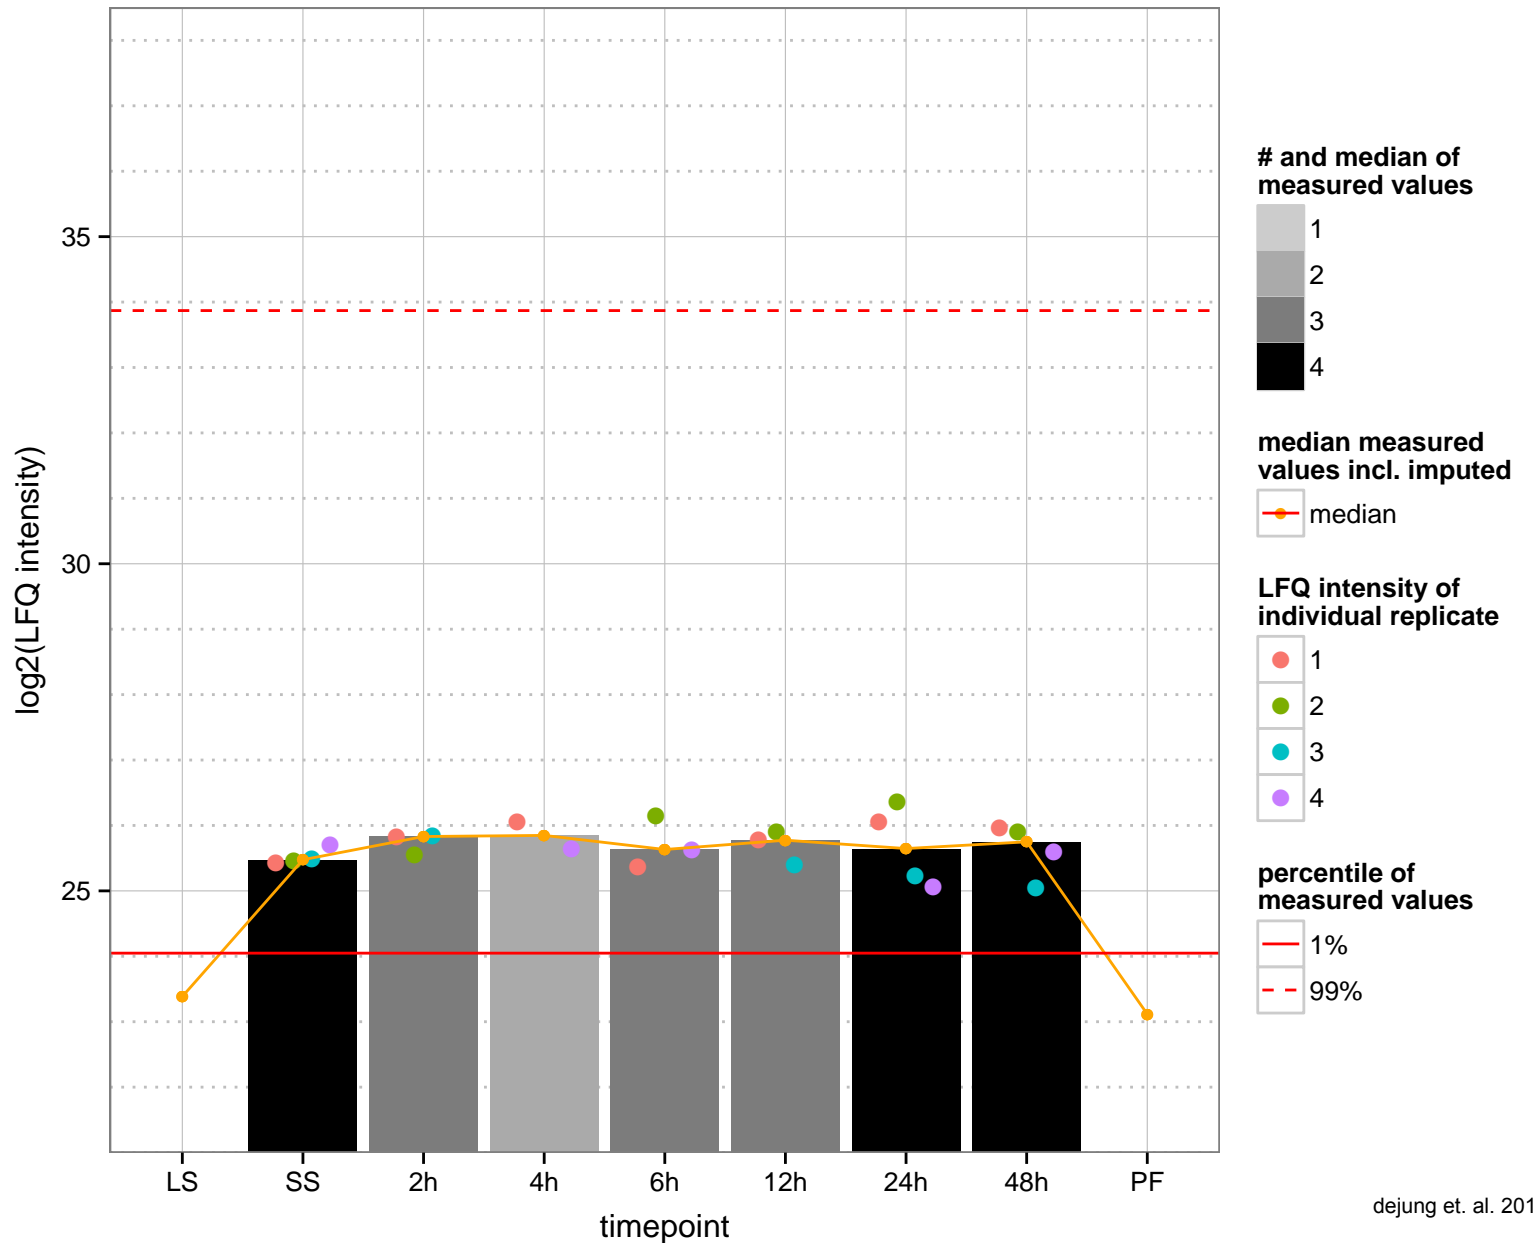

hypothetical protein, conserved  
 Tb927.1.3390  
 AGOF: null  
 AGOC: null  
 AGOP: null  
 PGO: null  
 PGOC: null  
 PGOP: null

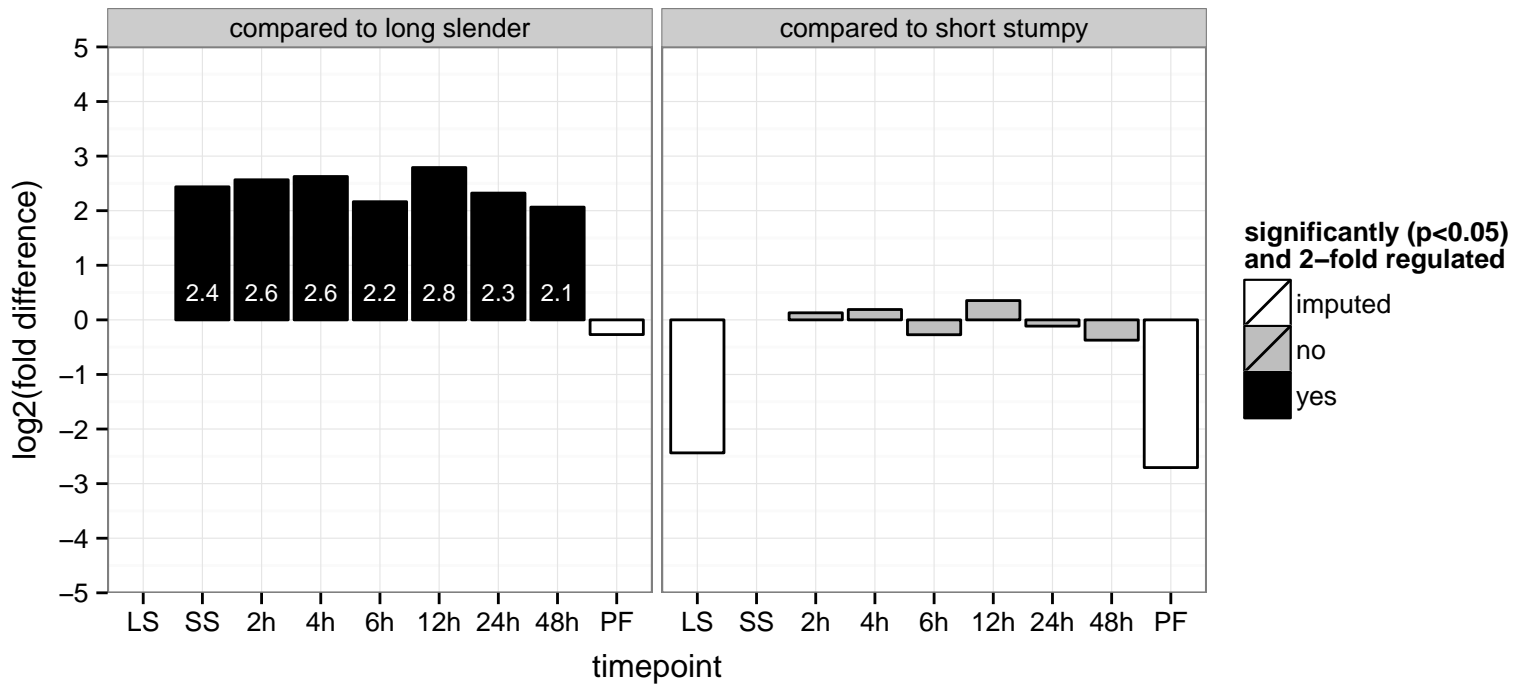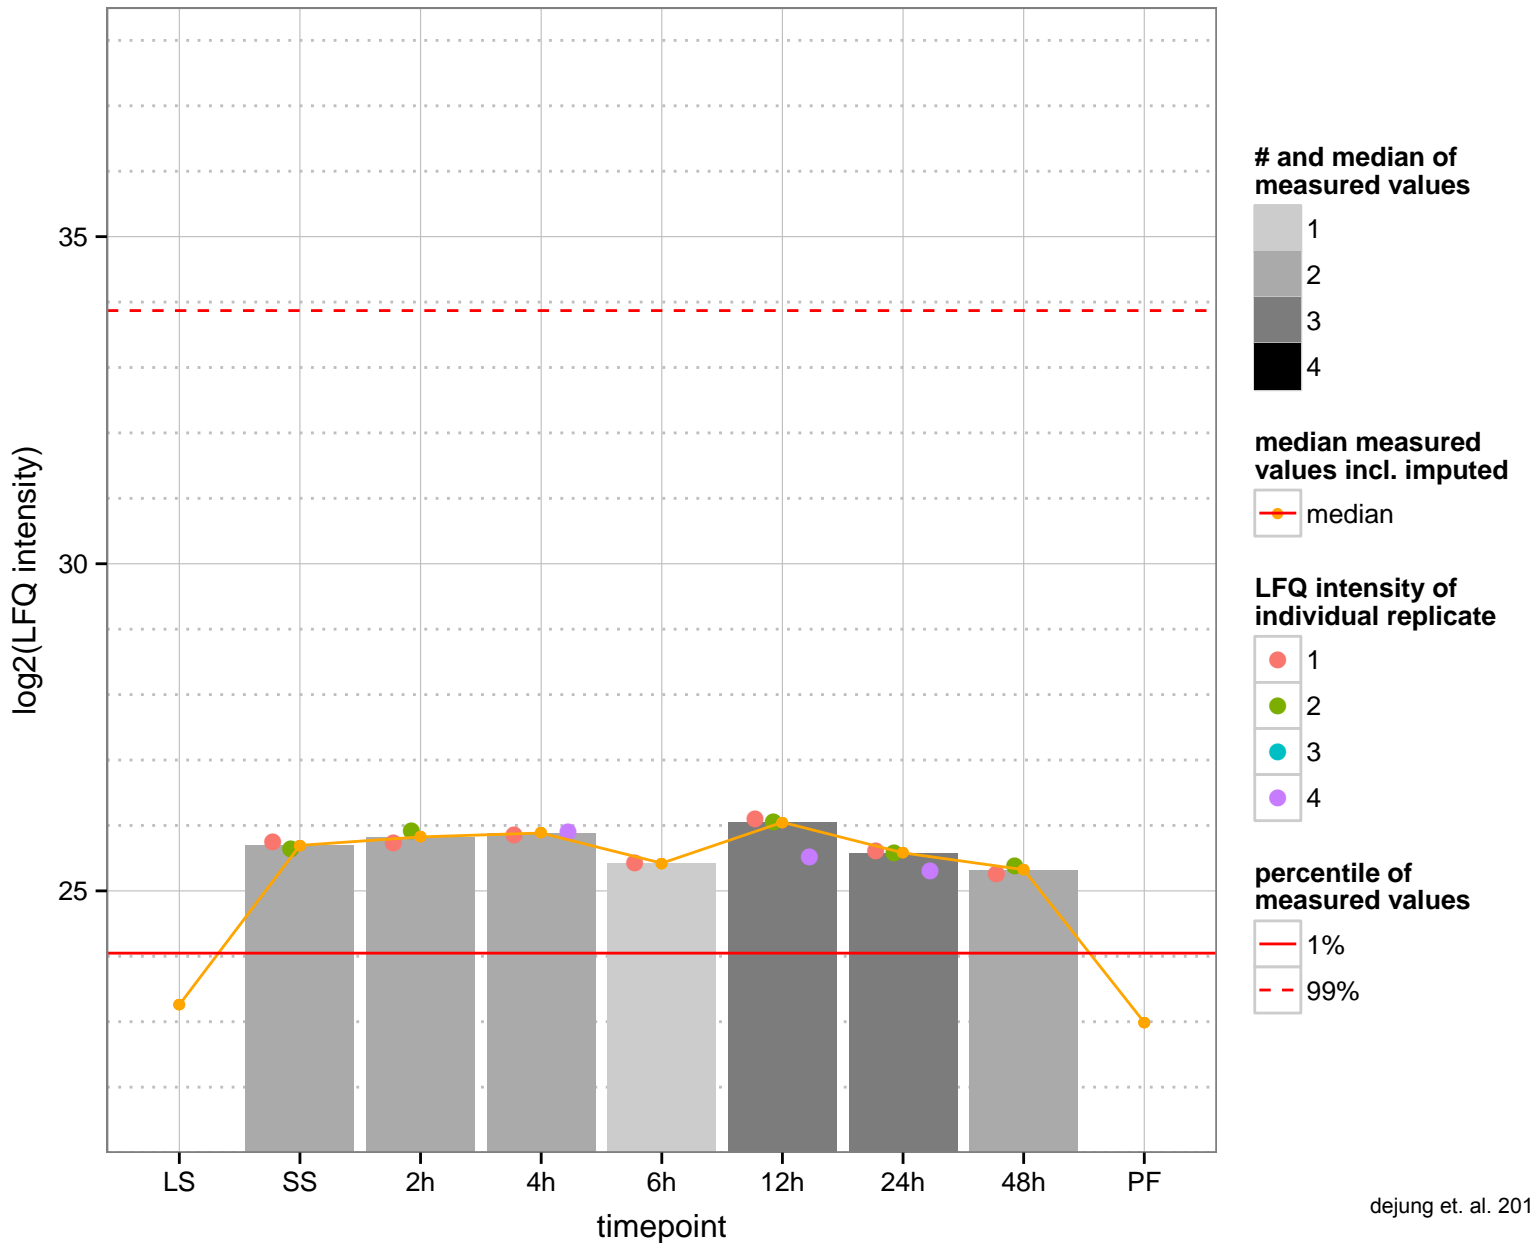

hypothetical protein, conserved  
 Tb927.1.3410  
 AGOF: null  
 AGOC: null  
 AGOP: null  
 PGOF: null  
 PGO: null  
 PGOP: null

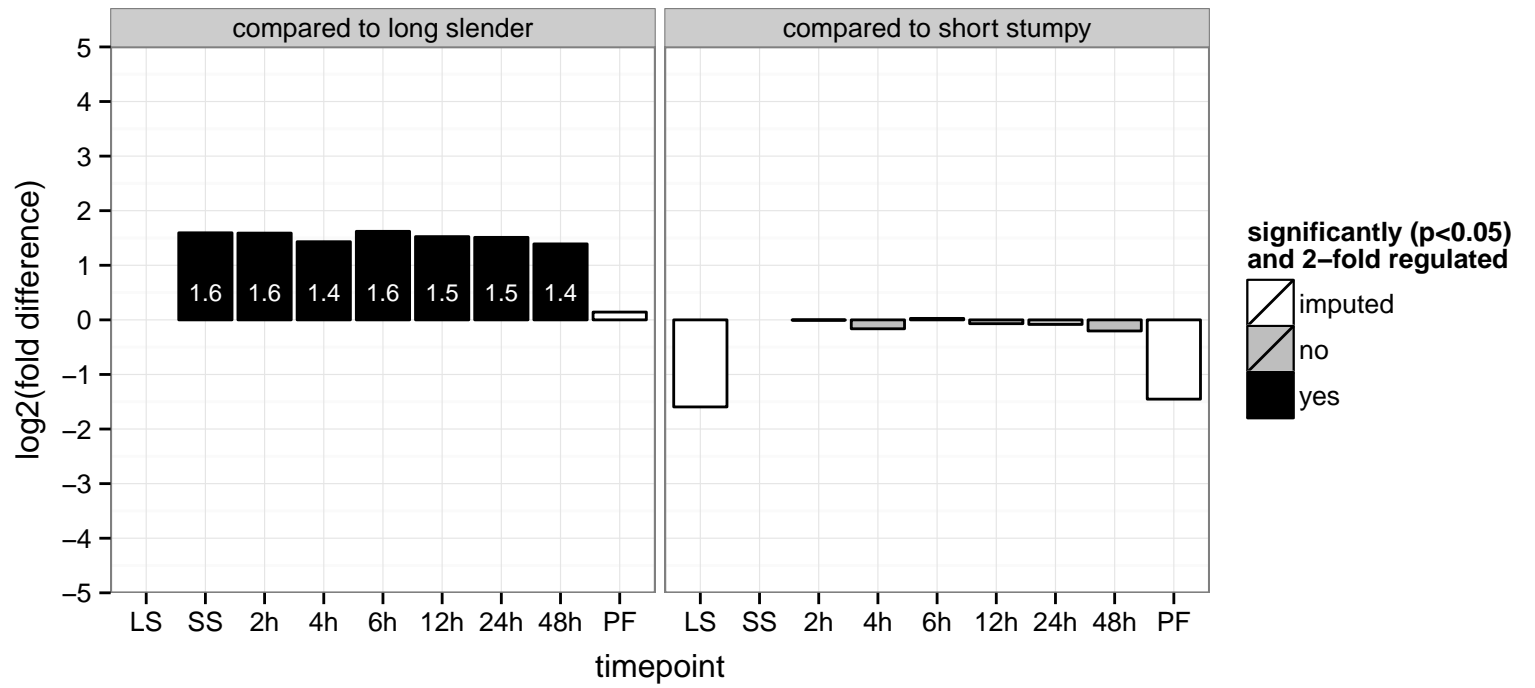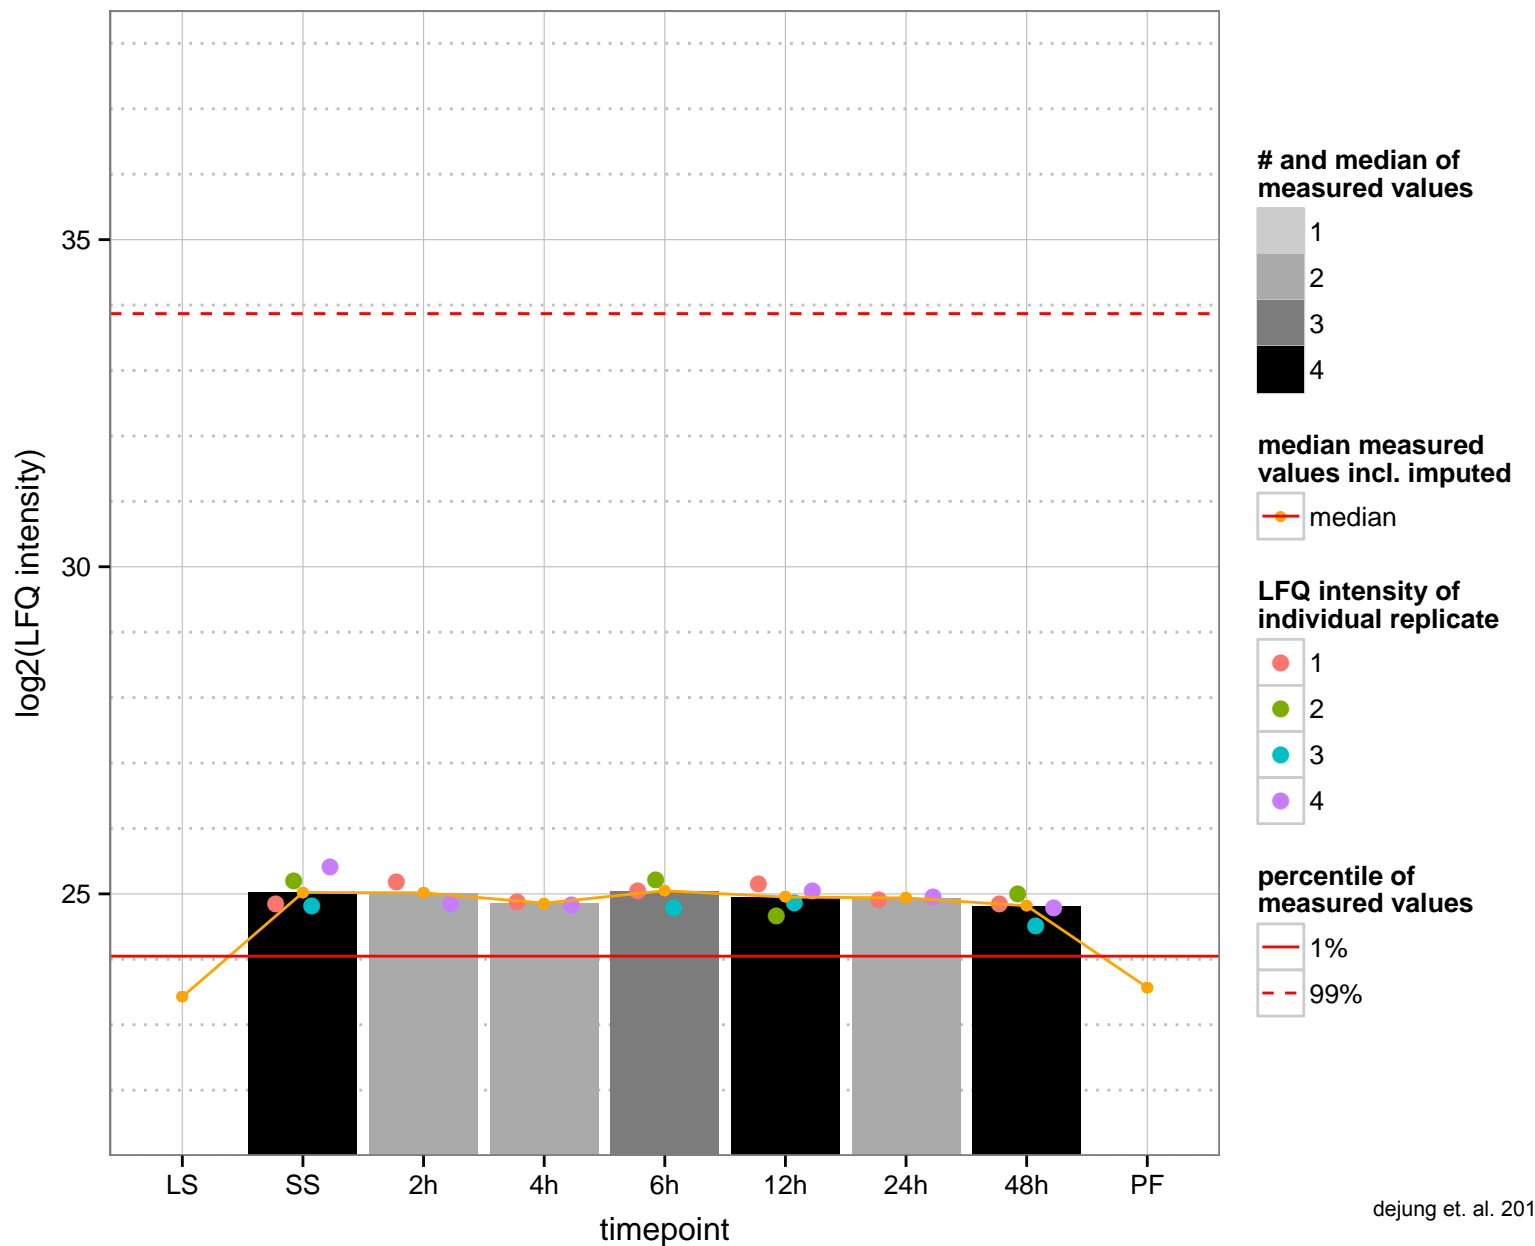

hypothetical protein, conserved  
 Tb927.1.3880  
 AGOF: null  
 AGOC: null  
 AGOP: null  
 PGOF: null  
 PGOC: null  
 PGOP: null

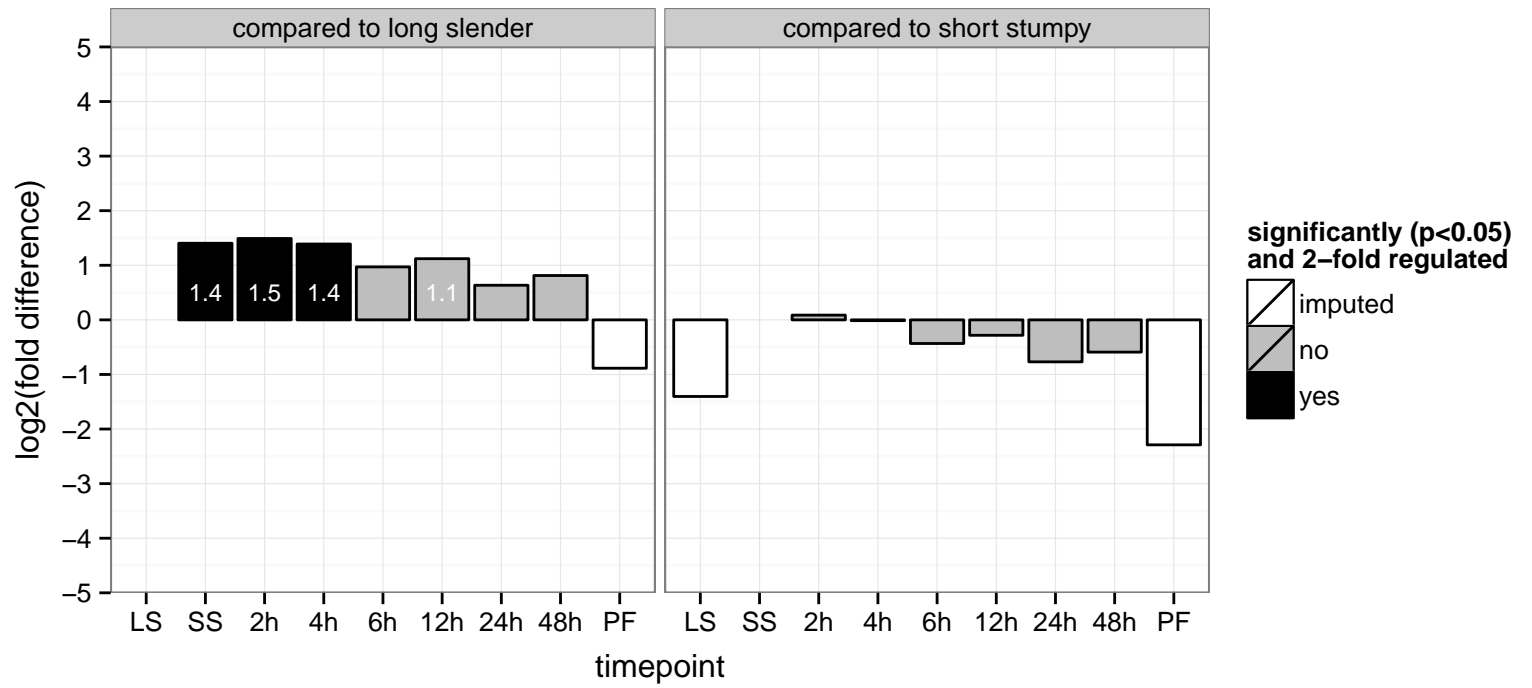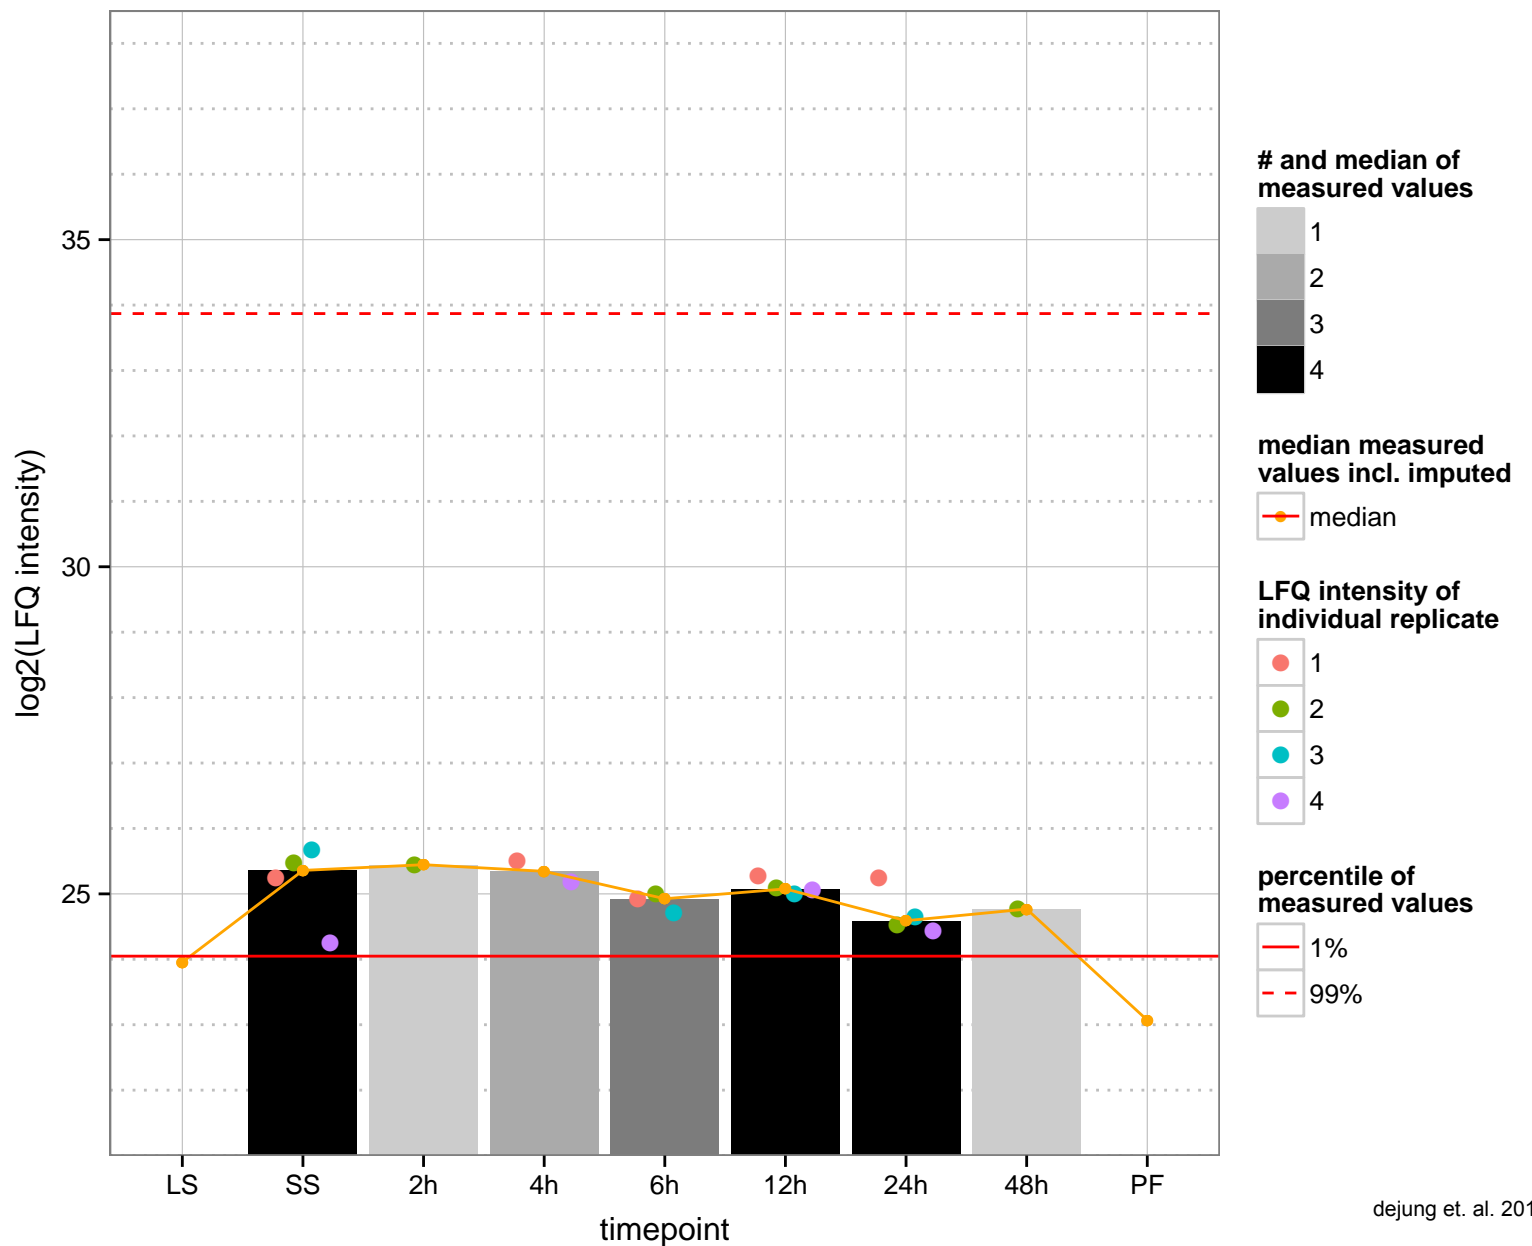

alanine aminotransferase (ALAT)

Tb927.1.3950

AGOF: 1-aminocyclopropane-1-carboxylate synthase activity, L-alanine:2-oxoglutarate aminotransferase activity, pyridoxal

AGOC: cytosol

AGOP: alanine catabolic process, biosynthetic process, proline metabolic process

PGOF: pyridoxal phosphate binding, transferase activity

PGOC: null

PGOP: biosynthetic process

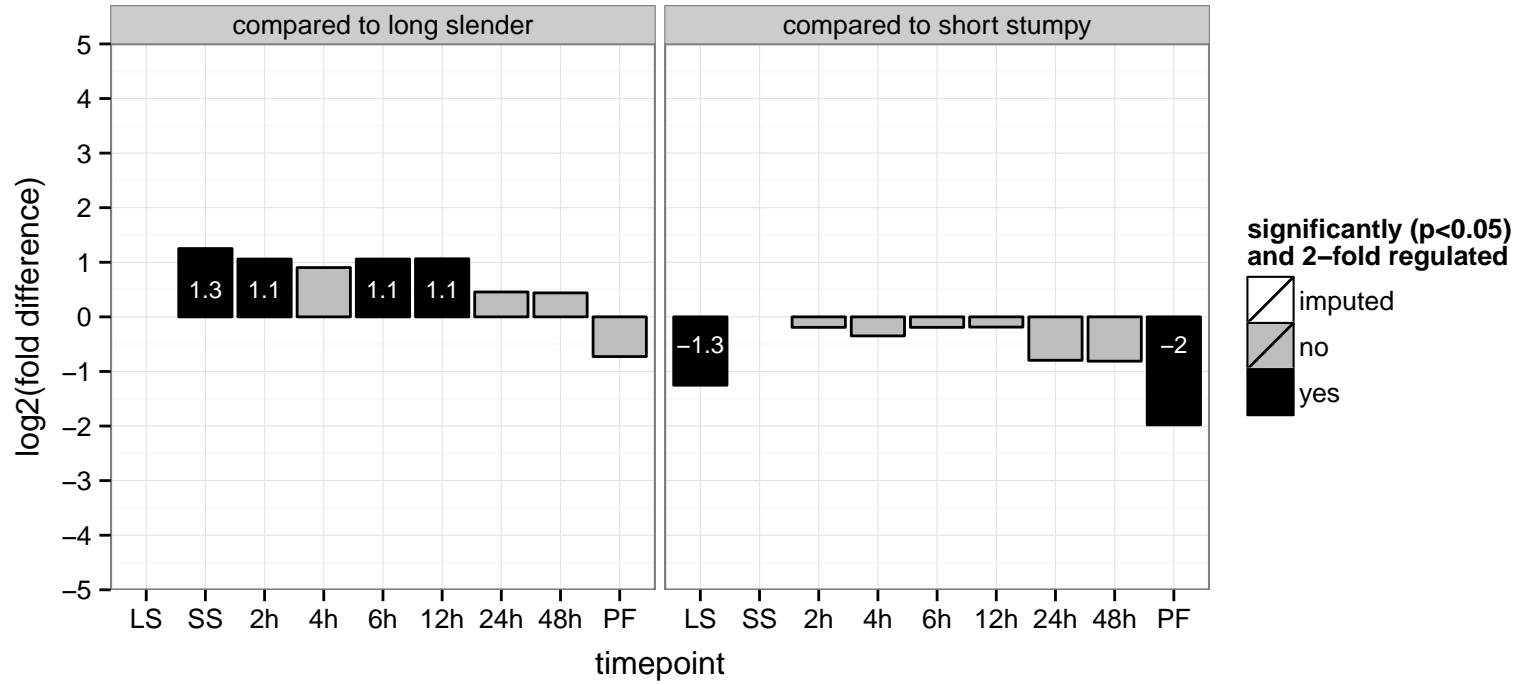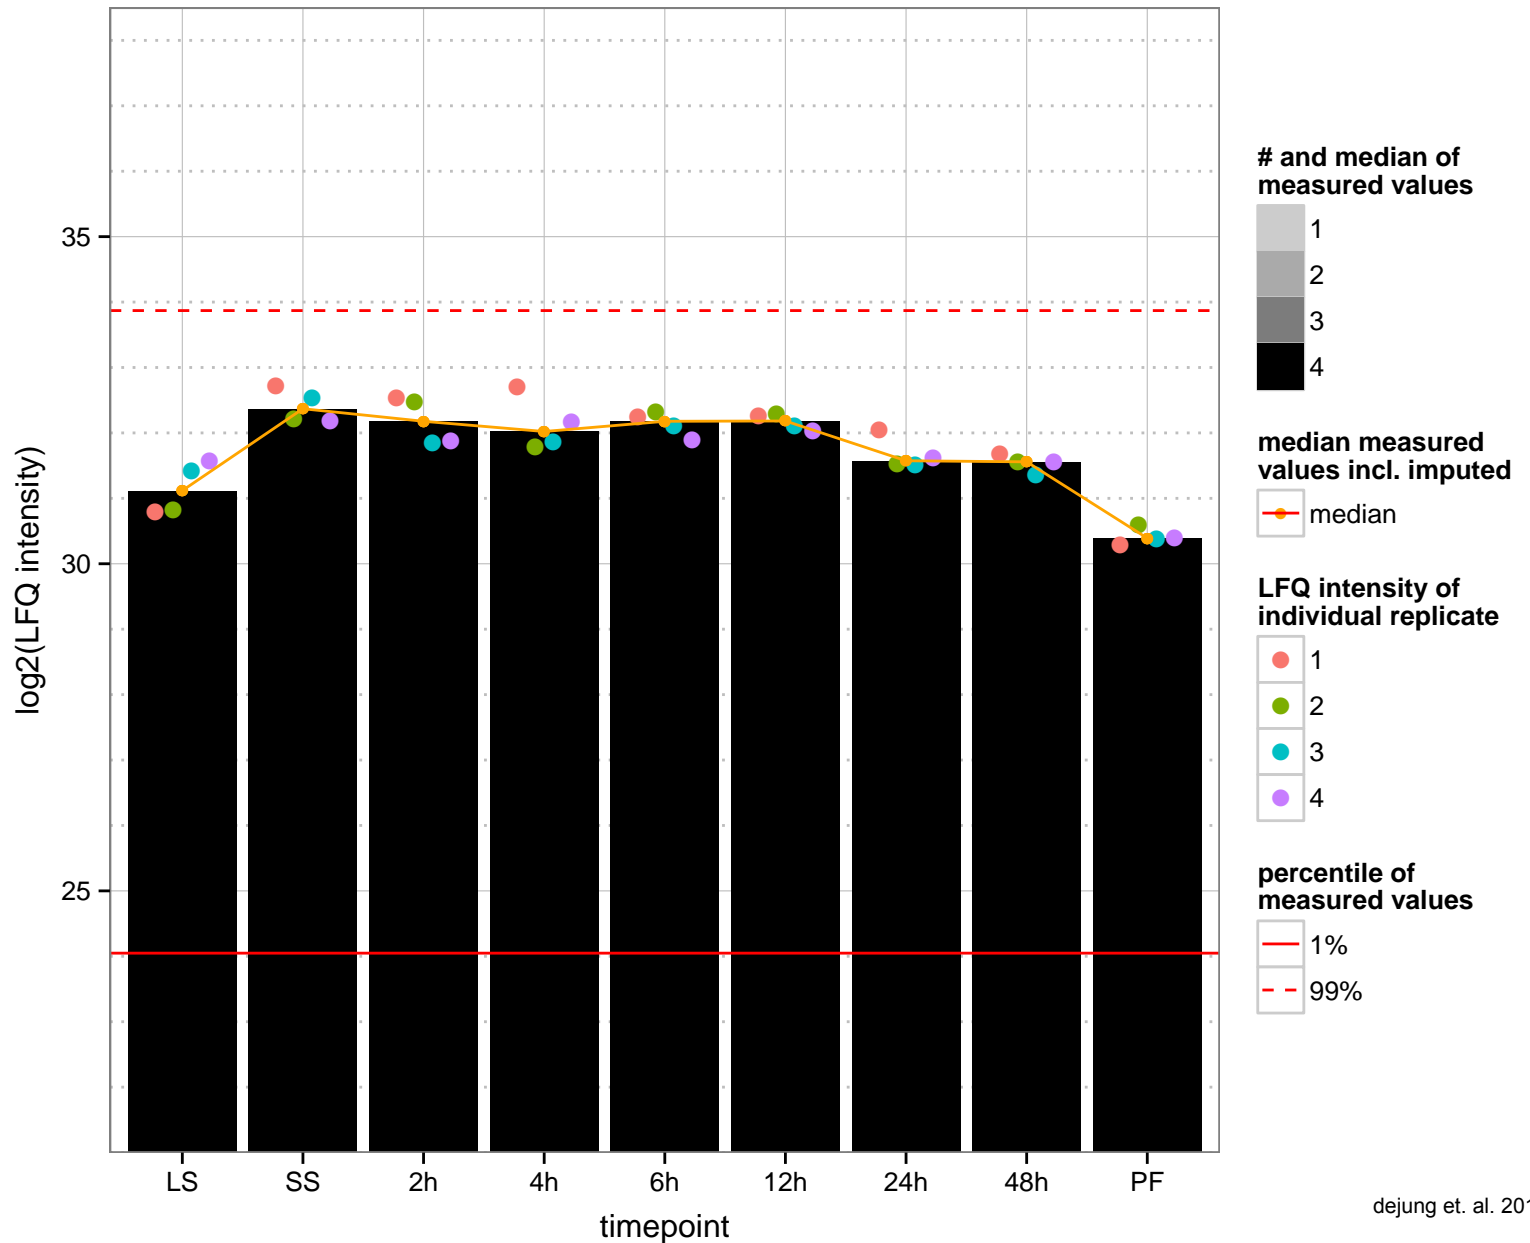



hypothetical protein, conserved  
 Tb927.1.4760  
 AGOF: null  
 AGOC: null  
 AGOP: null  
 PGOF: small GTPase regulator activity  
 PGOC: null  
 PGOP: null

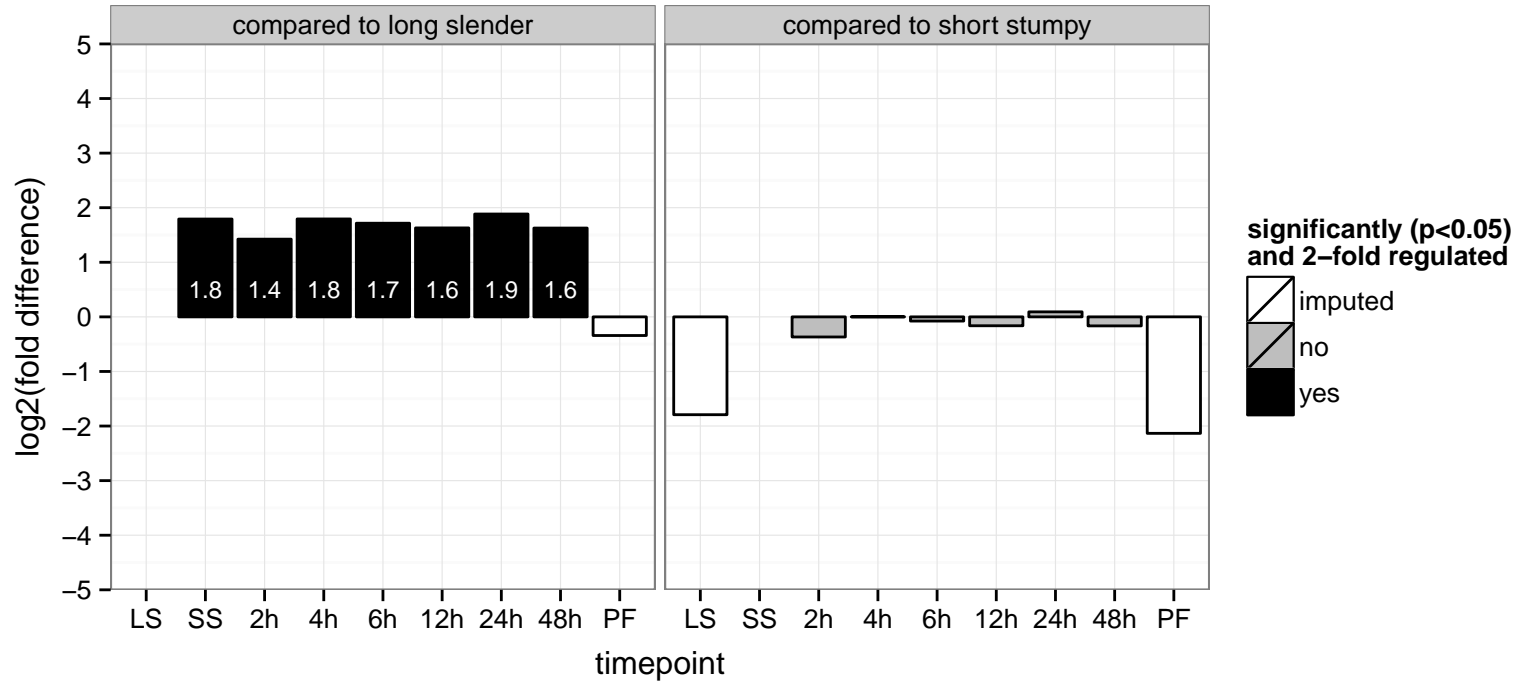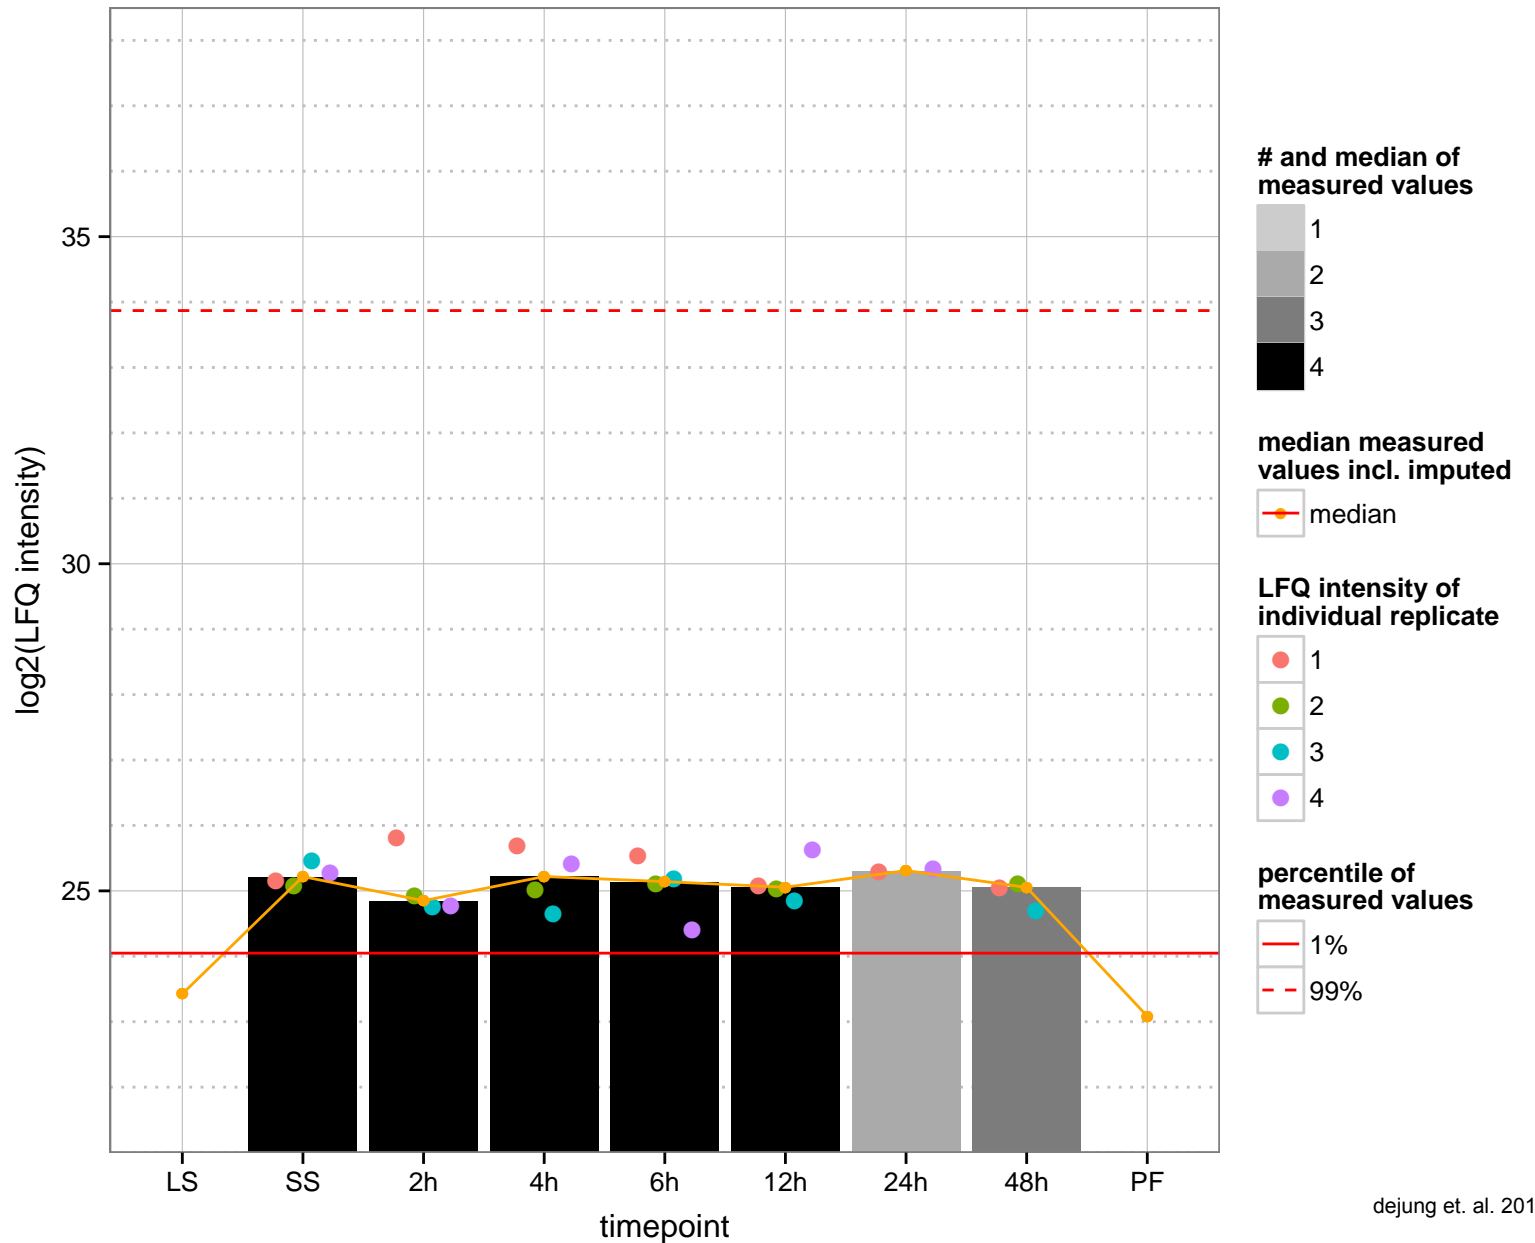

serine peptidase, putative, Clan SC, Family S9D  
 Tb927.1.4780  
 AGOF: null  
 AGOC: null  
 AGOP: null  
 PGOF: null  
 PGOE: null  
 PGOP: null

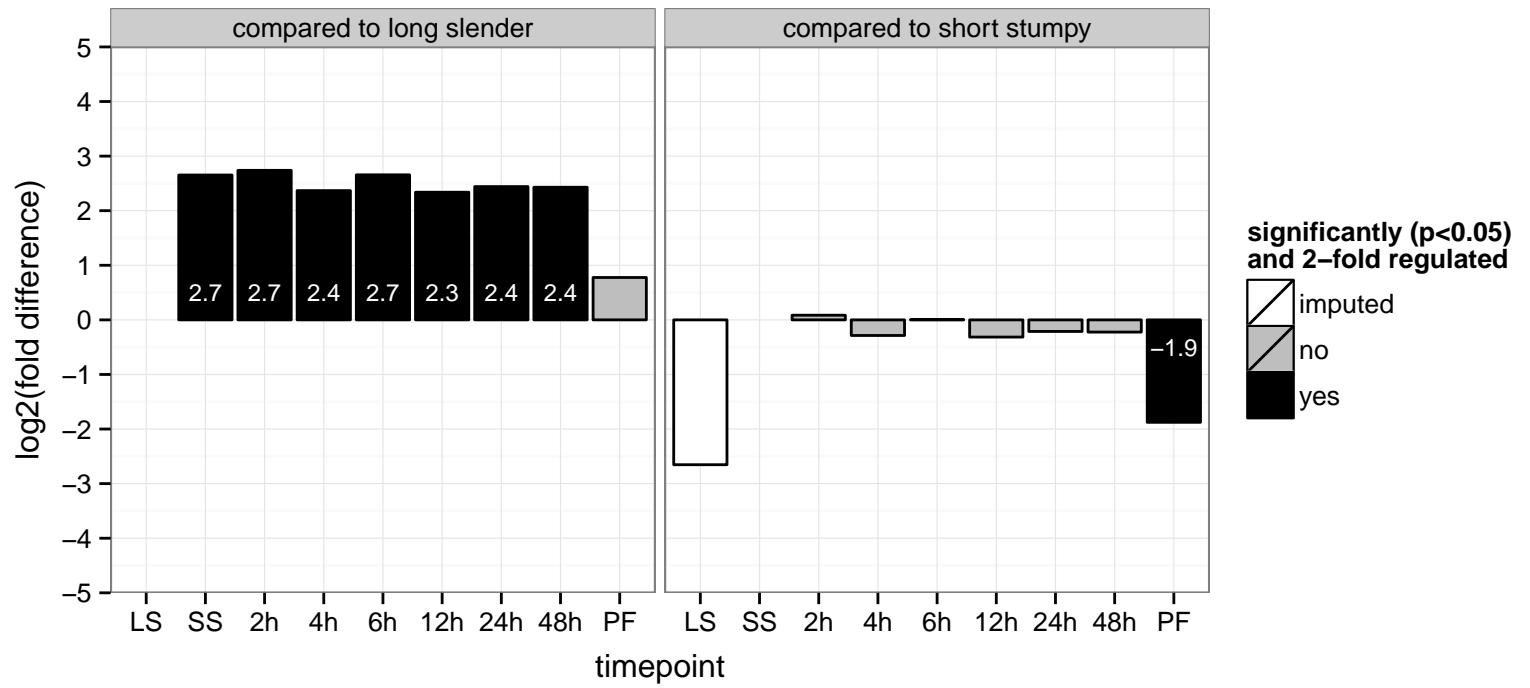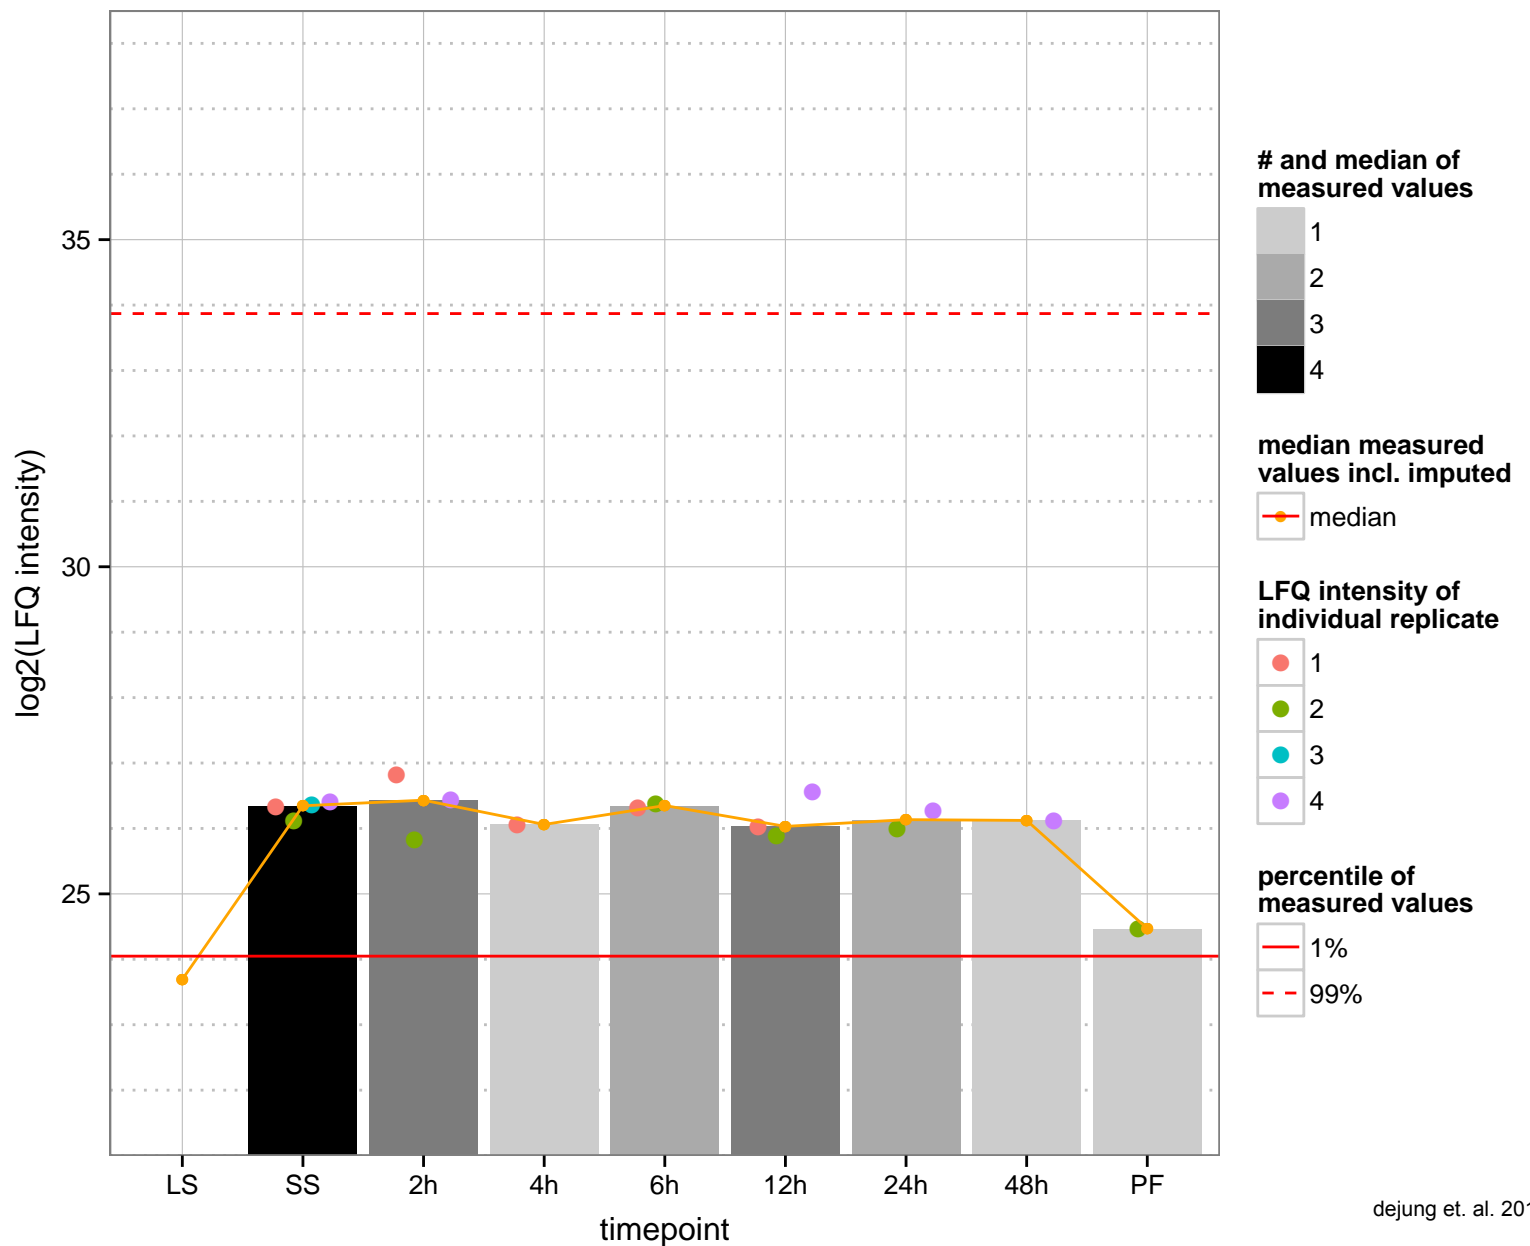

phospholipase A1 (PLA1)  
 Tb927.1.4830  
 AGOF: phosphatidylcholine 1-acylhydrolase activity  
 AGOC: null  
 AGOP: CDP-choline pathway  
 PGO: null  
 PGOC: null  
 PGOP: null

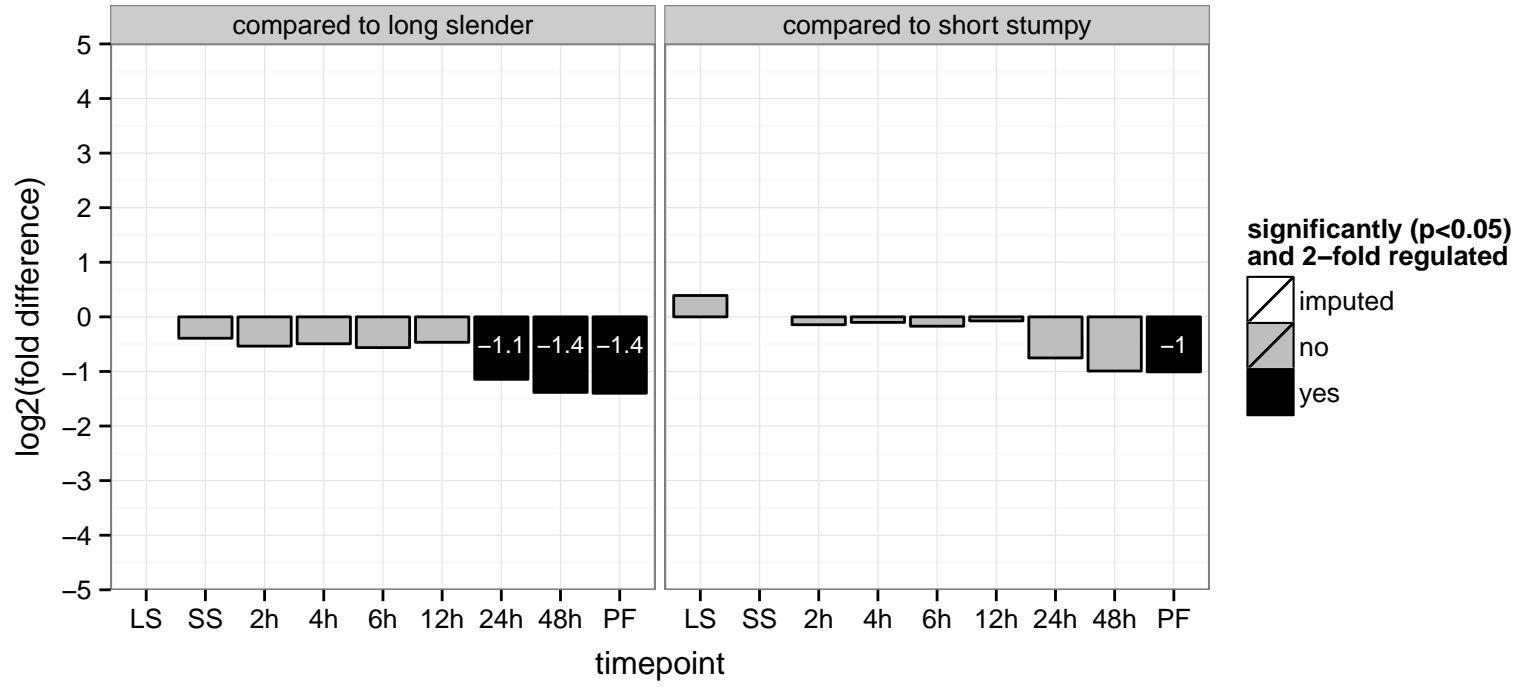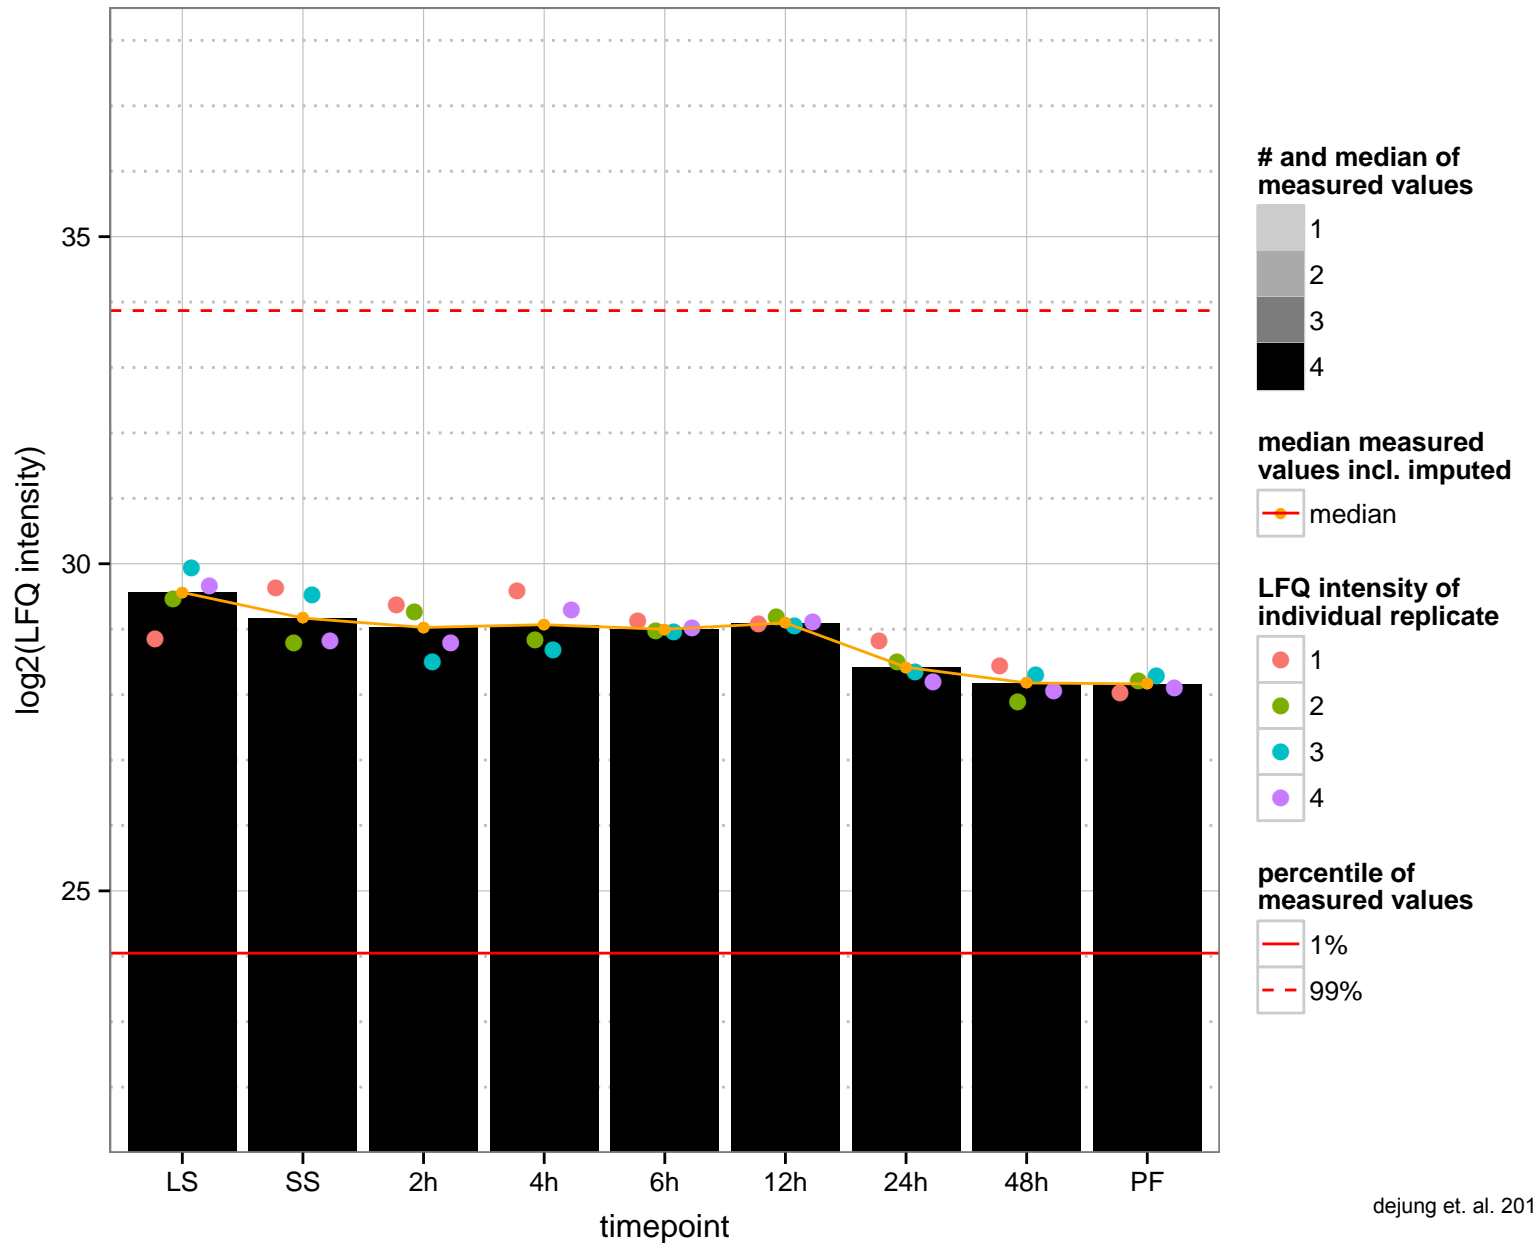

hypothetical protein, conserved  
 Tb927.1.690  
 AGOF: null  
 AGOC: null  
 AGOP: null  
 PGO: null  
 PGOC: null  
 PGOP: null

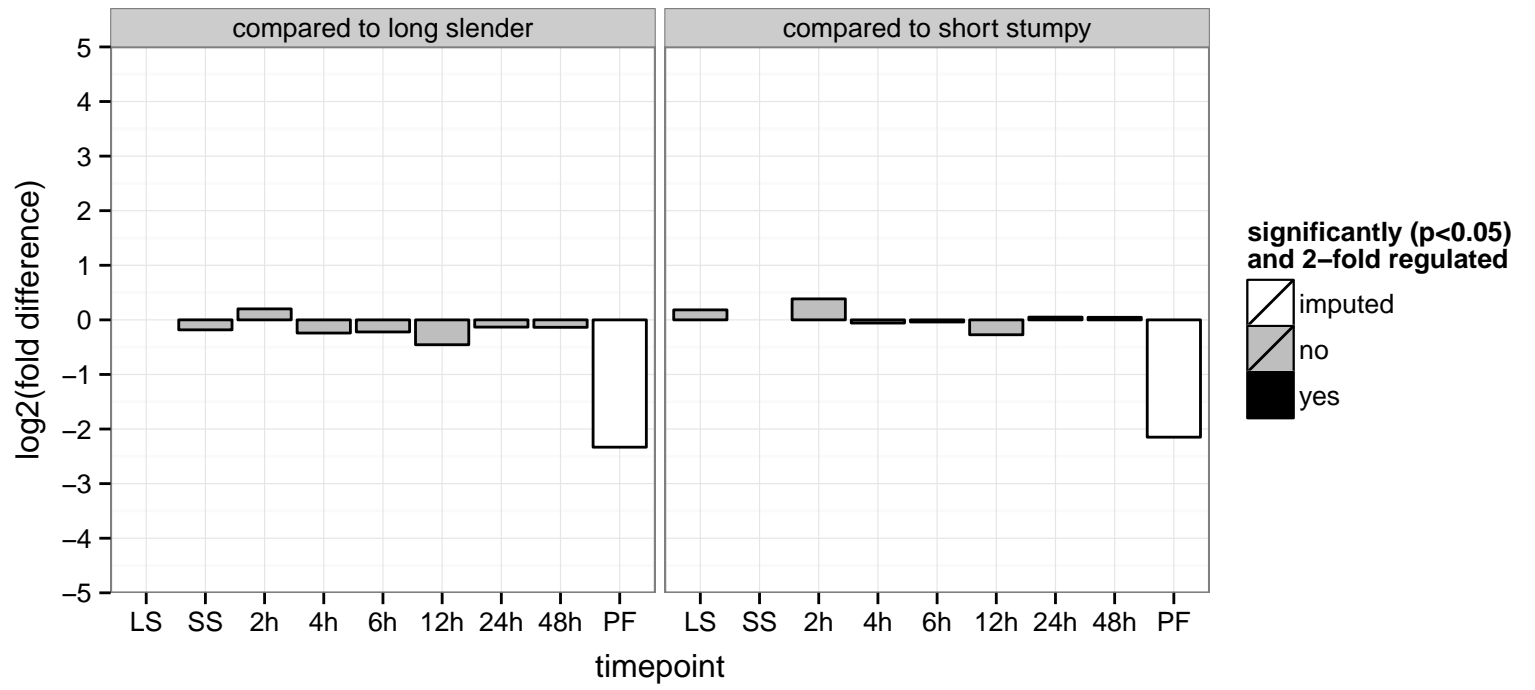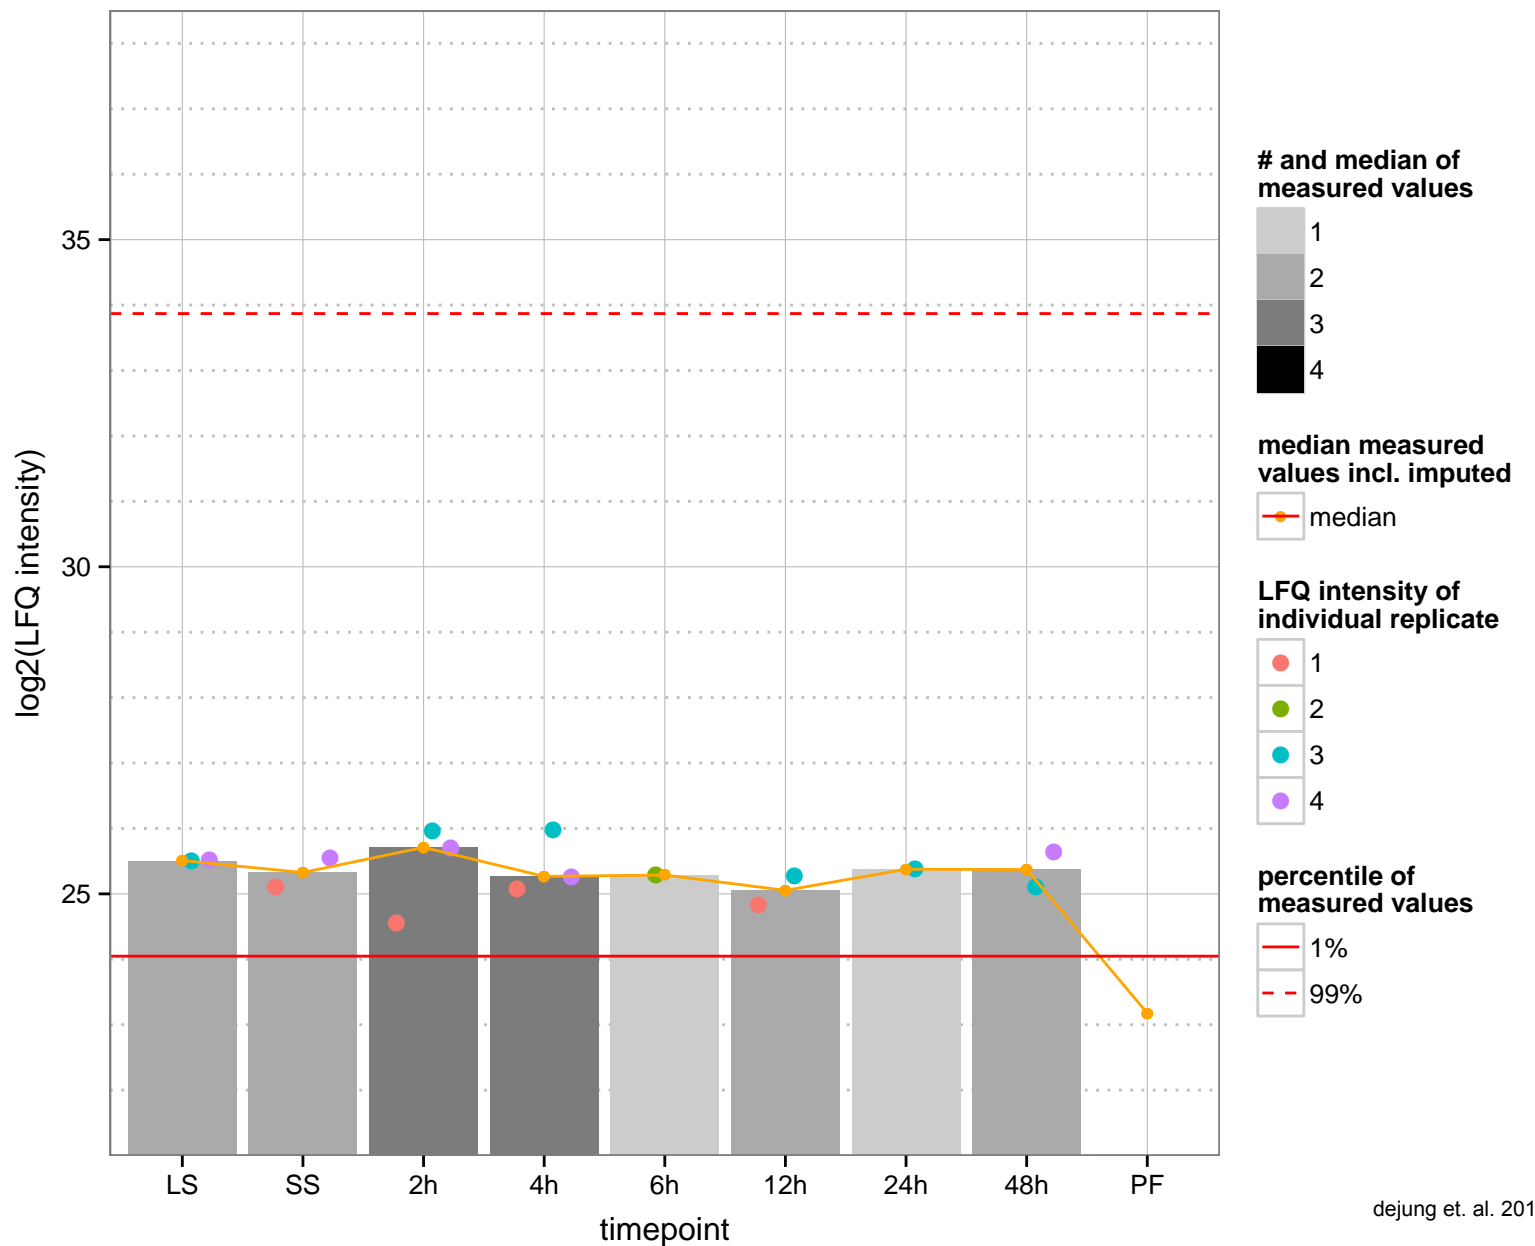

retrotransposon hot spot protein (RHS, pseudogene), putative  
 Tb927.1.90  
 AGOF: null  
 AGOC: null  
 AGOP: null  
 PGO: null  
 PGOC: null  
 PGOP: null

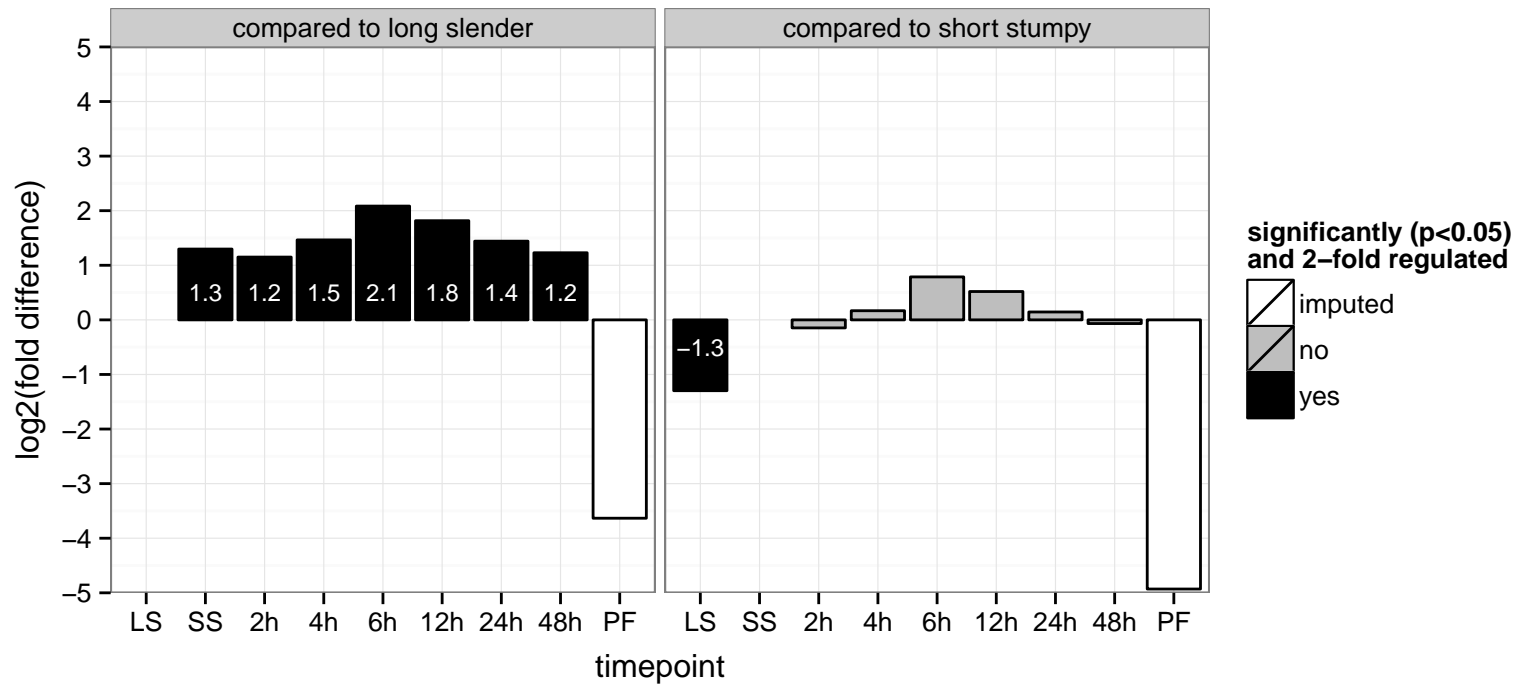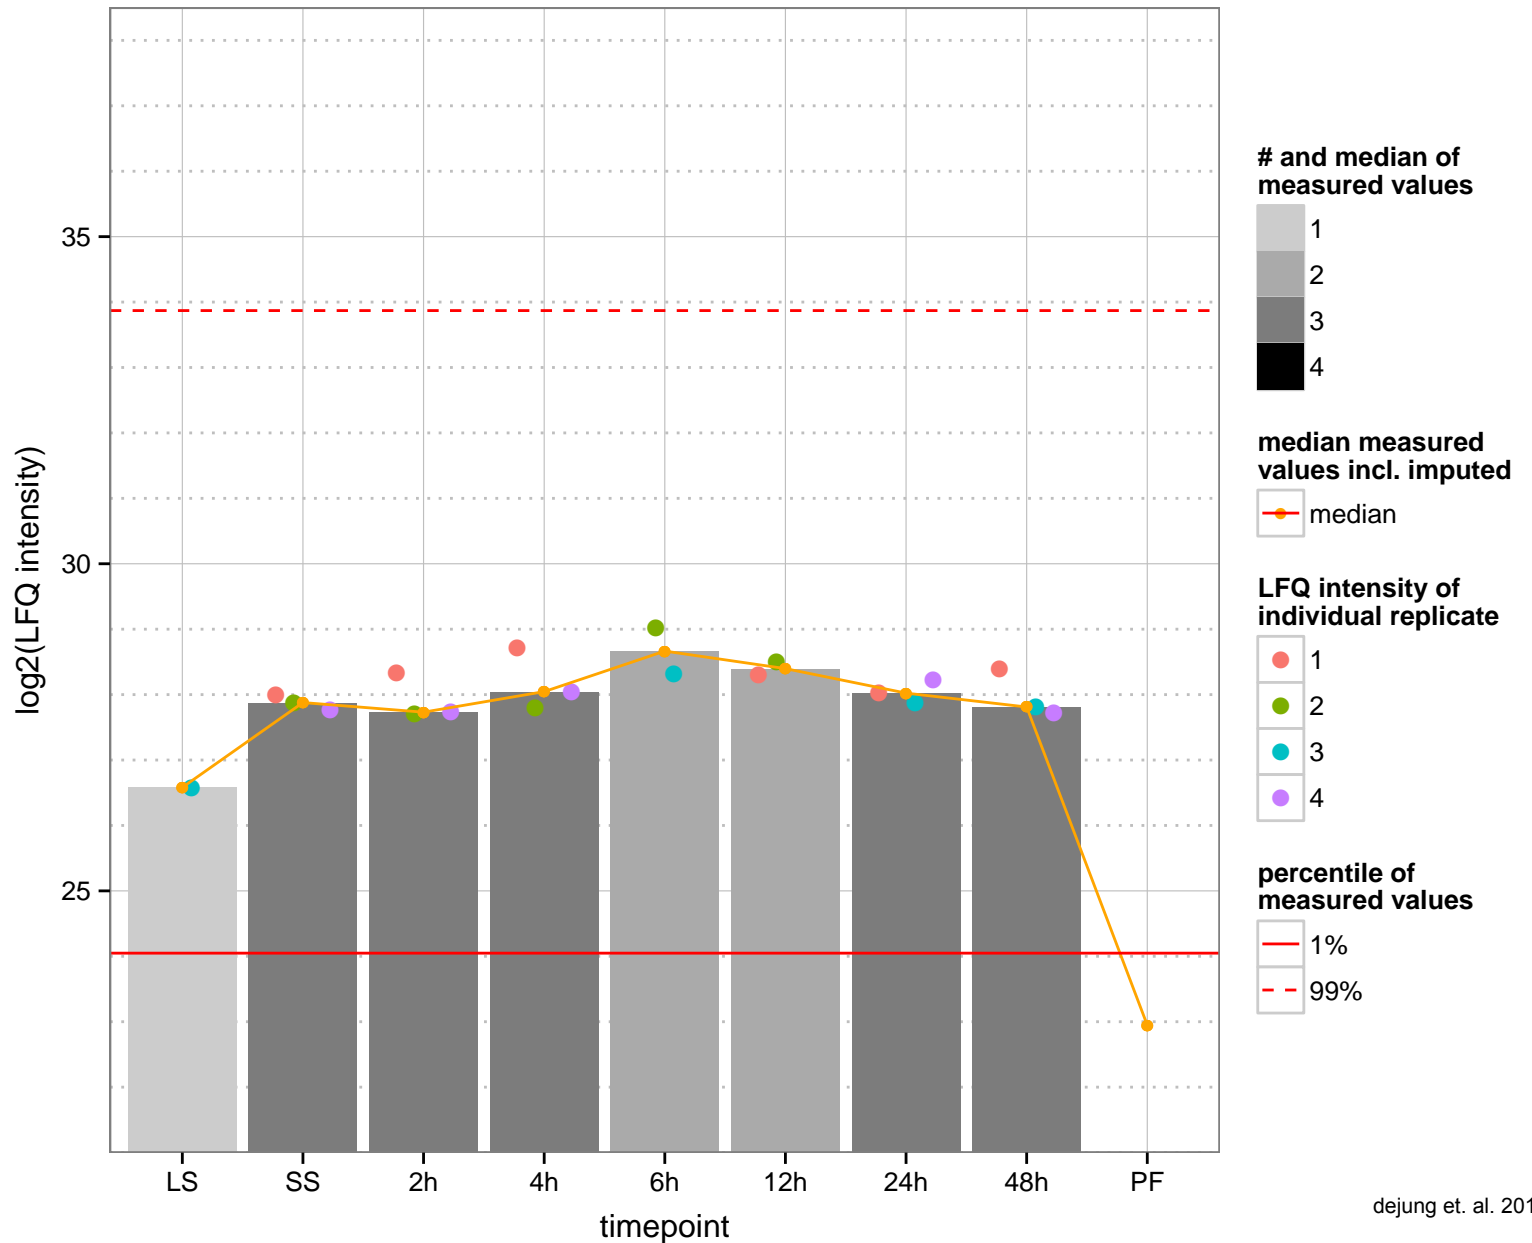

hypothetical protein, conserved  
 Tb927.10.10020;Tb11.v5.0853  
 AGOF: null  
 AGOC: null  
 AGOP: null  
 PGO: null  
 PGOC: null  
 PGOP: null

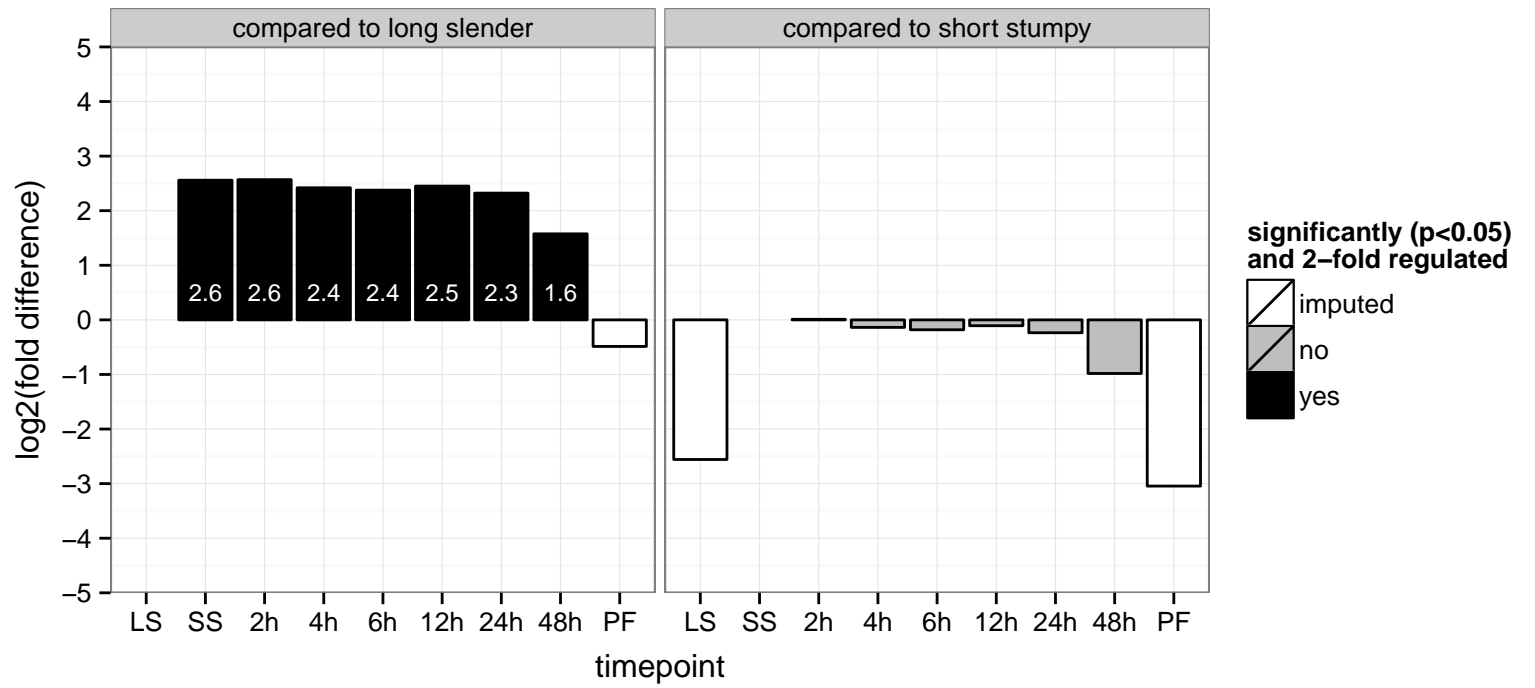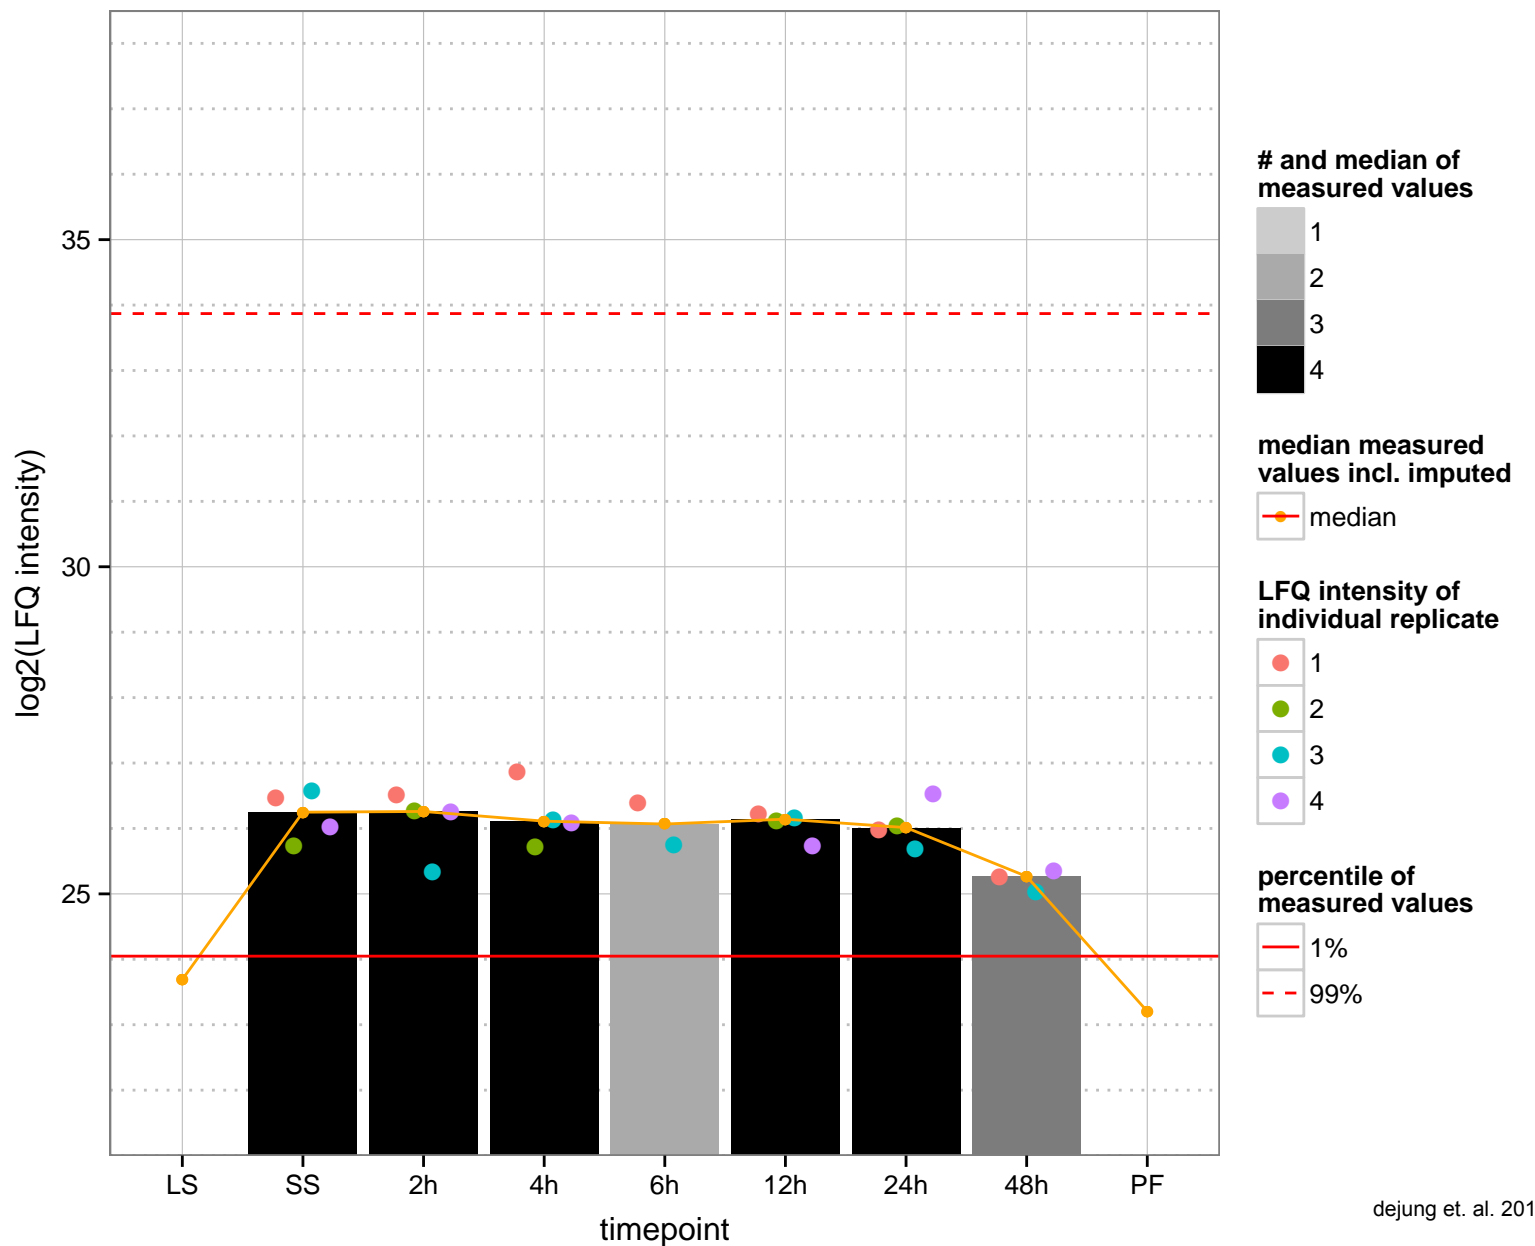

microtubule-associated protein, putative  
 Tb927.10.10280  
 AGOF: microtubule binding  
 AGOC: cytoplasm  
 AGOP: null  
 PGO: null  
 PGOC: null  
 PGOP: null

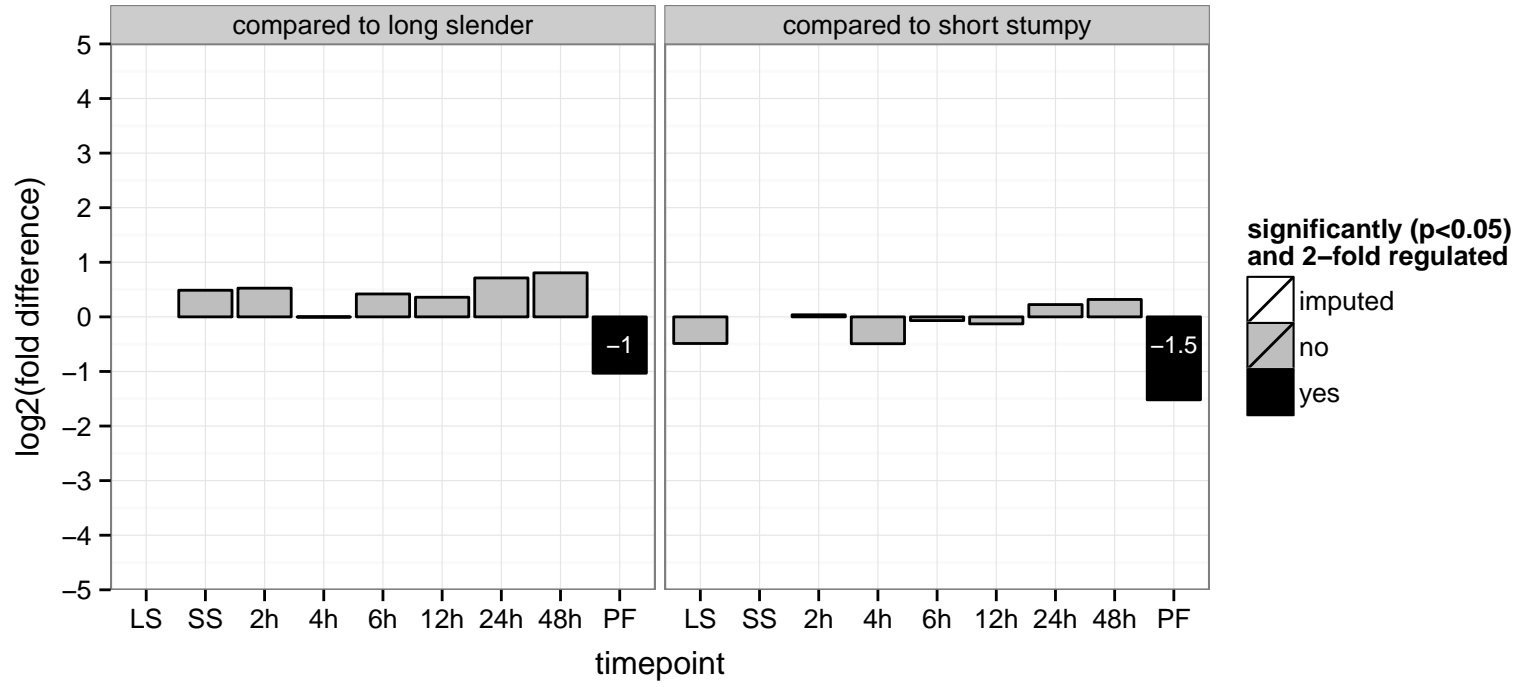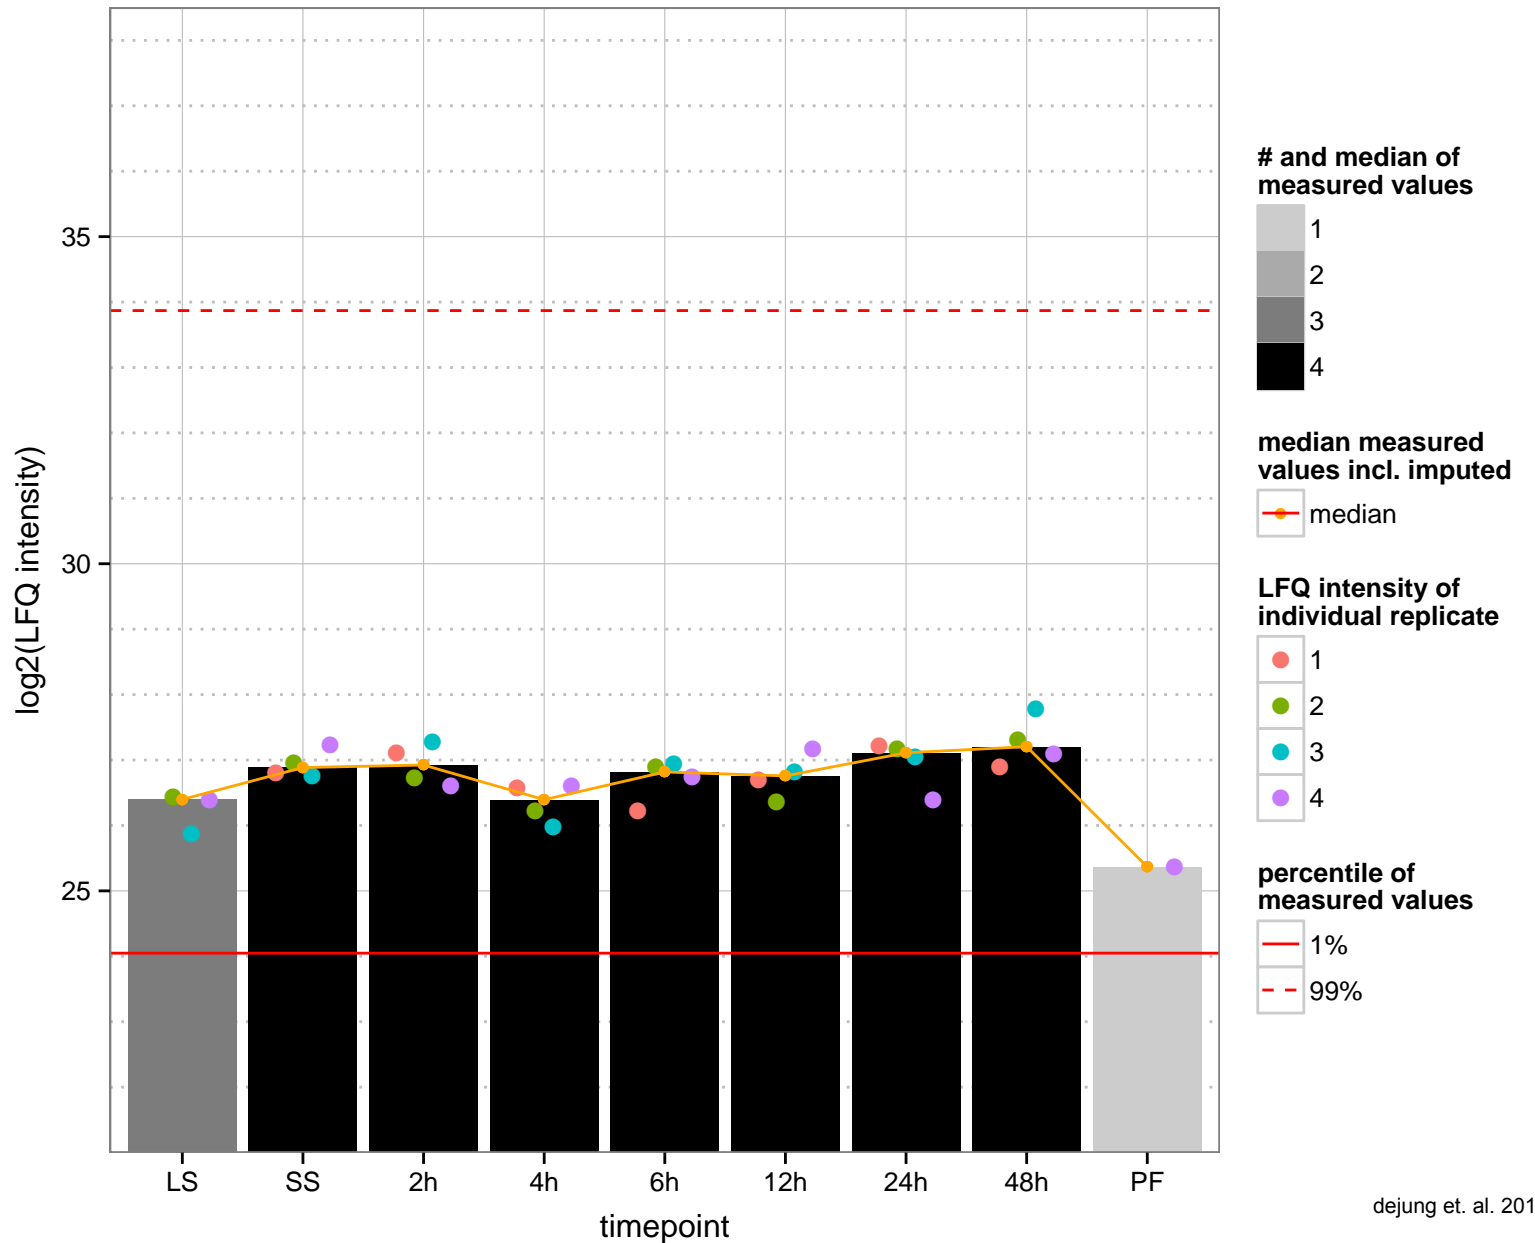

hypothetical protein, conserved  
 Tb927.10.12030  
 AGOF: null  
 AGOC: null  
 AGOP: null  
 PGOF: null  
 PGOC: null  
 PGOP: null

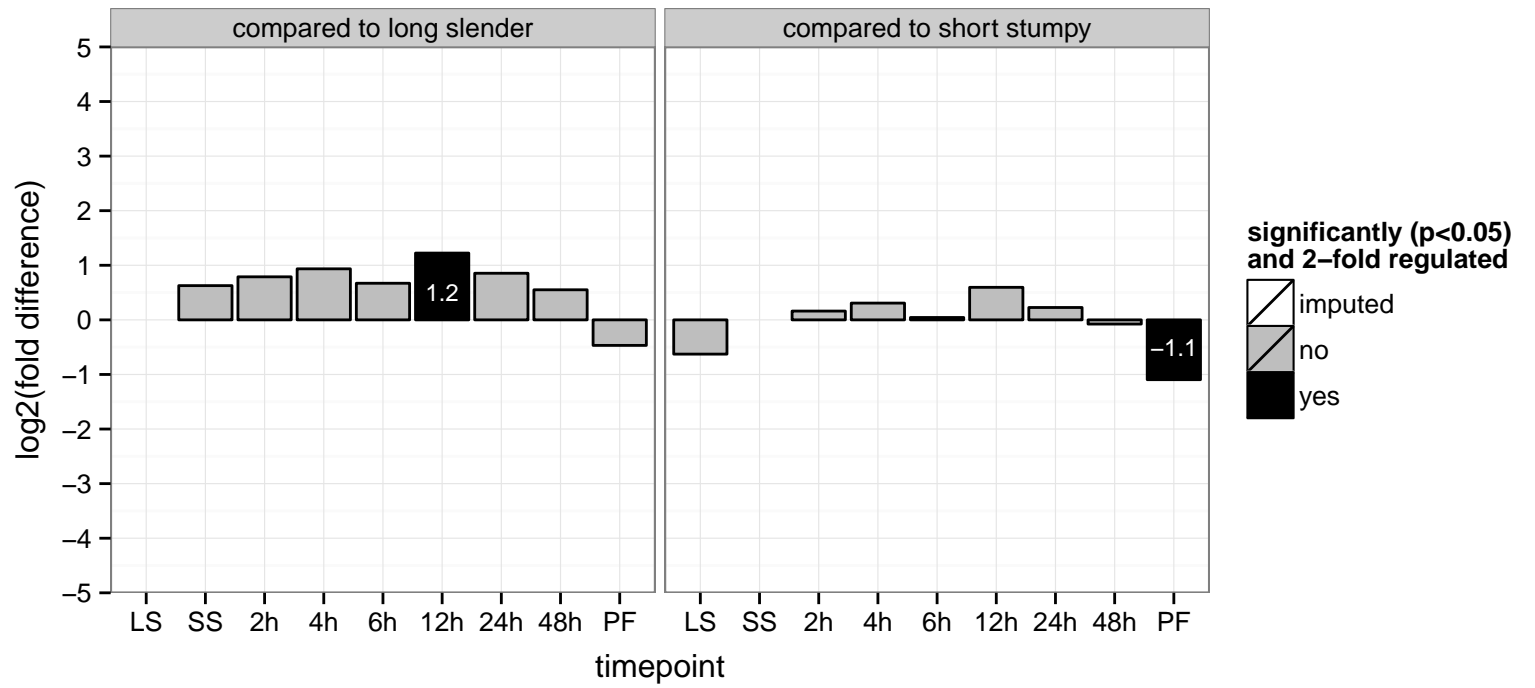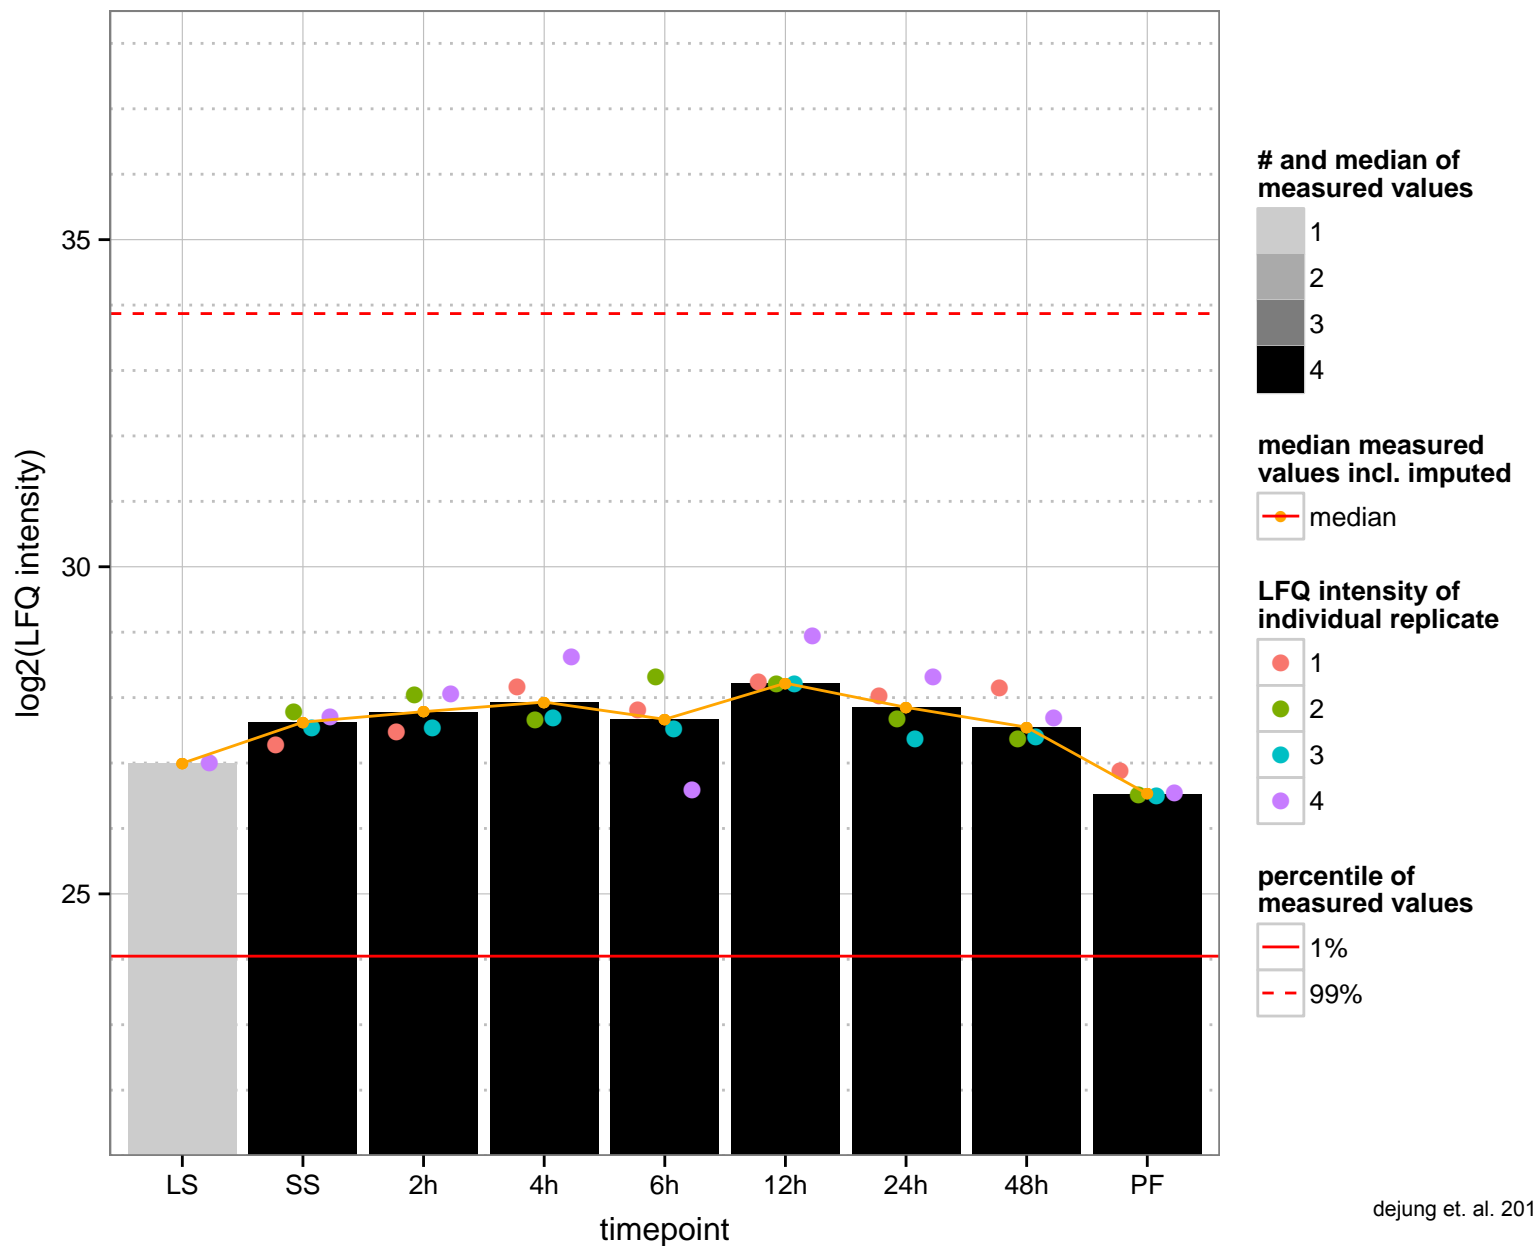



SNARE domain-containing protein, putative  
 Tb927.10.12450  
 AGOF: null  
 AGOC: contractile vacuole, integral to membrane  
 AGOP: vesicle-mediated transport  
 PGO: null  
 PGOC: null  
 PGOP: transport

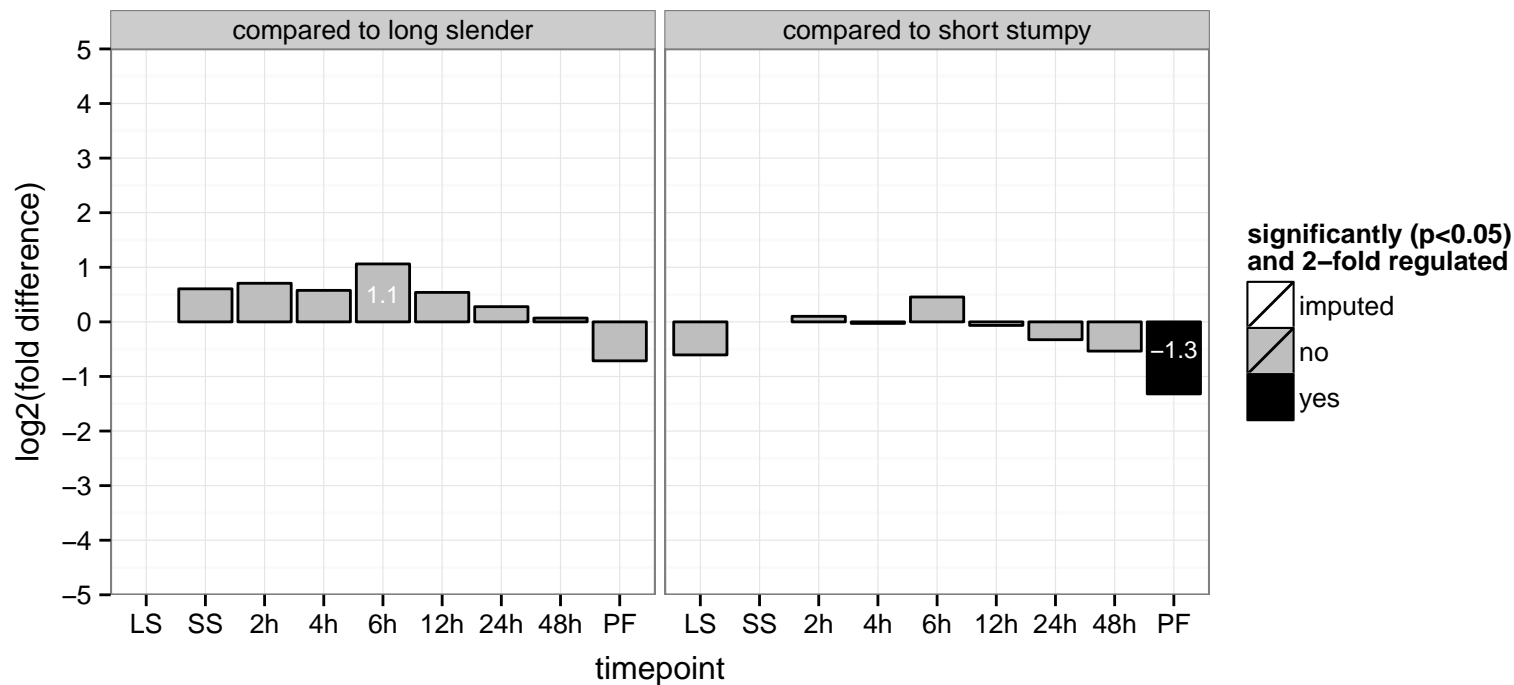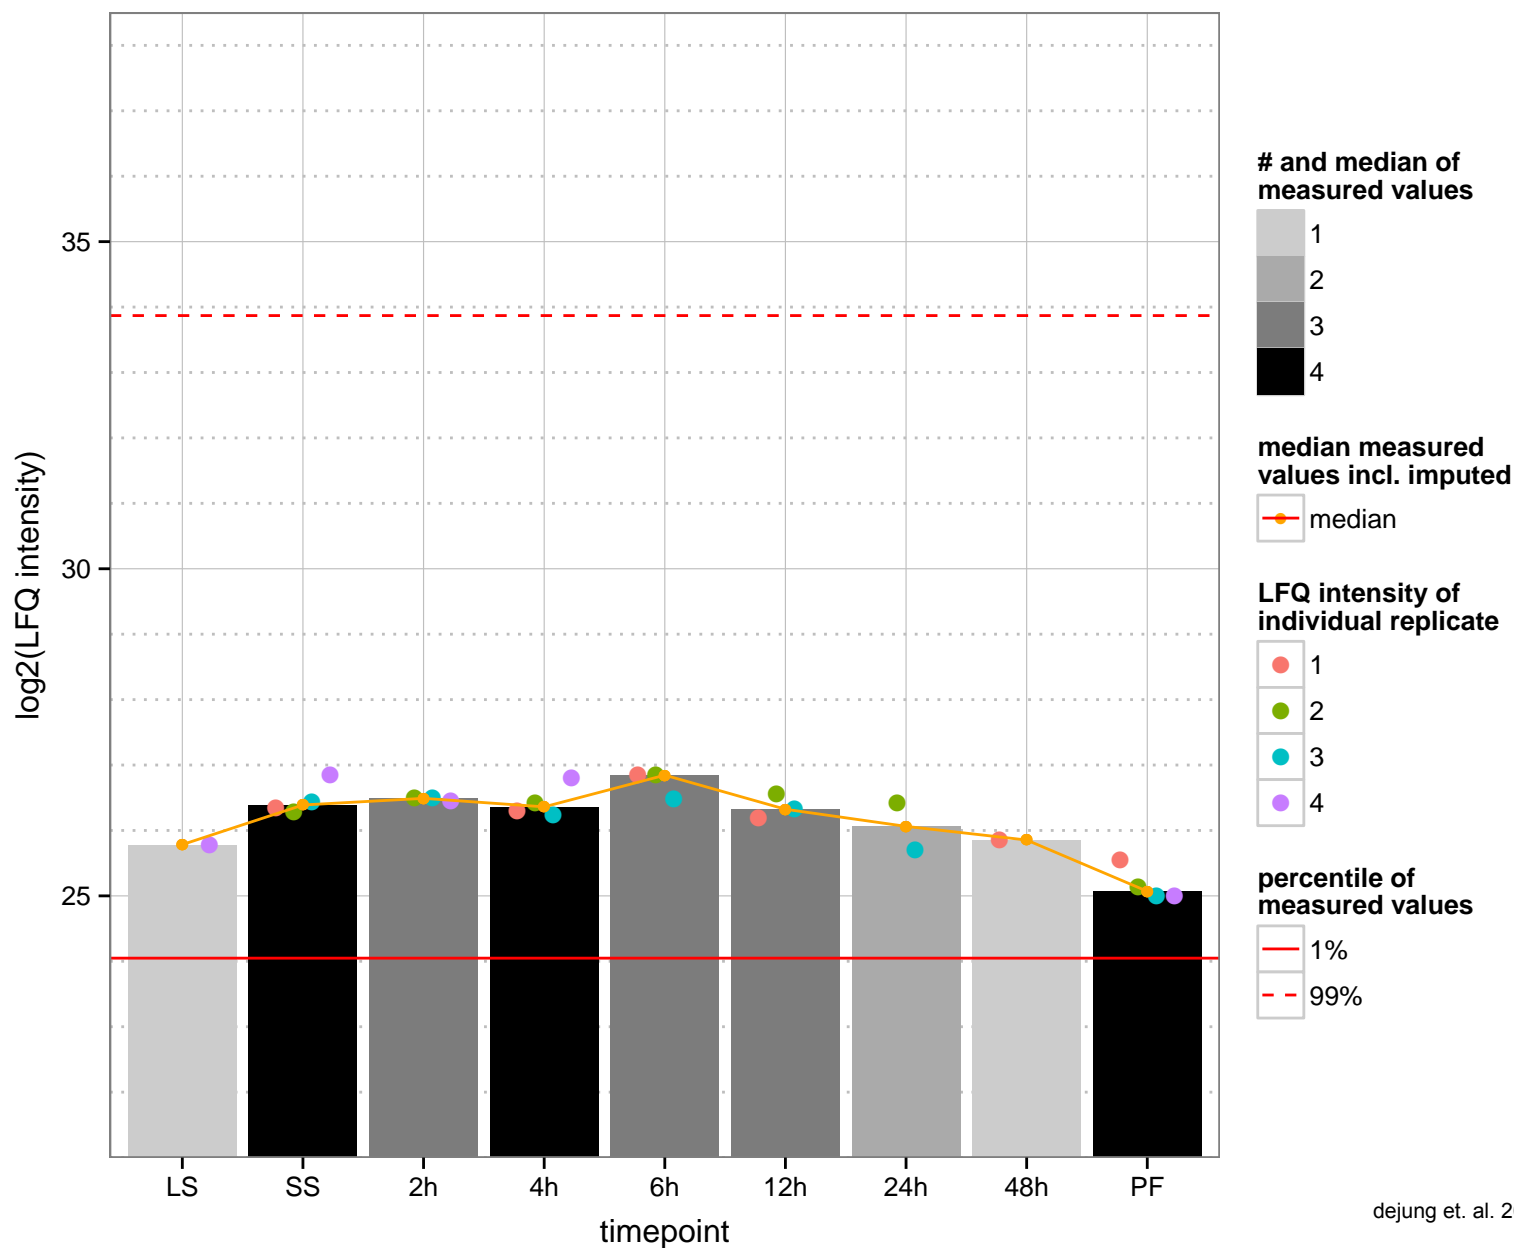

hypothetical protein, conserved  
 Tb927.10.12720  
 AGOF: null  
 AGOC: null  
 AGOP: null  
 PGO: null  
 PGOC: null  
 PGOP: null

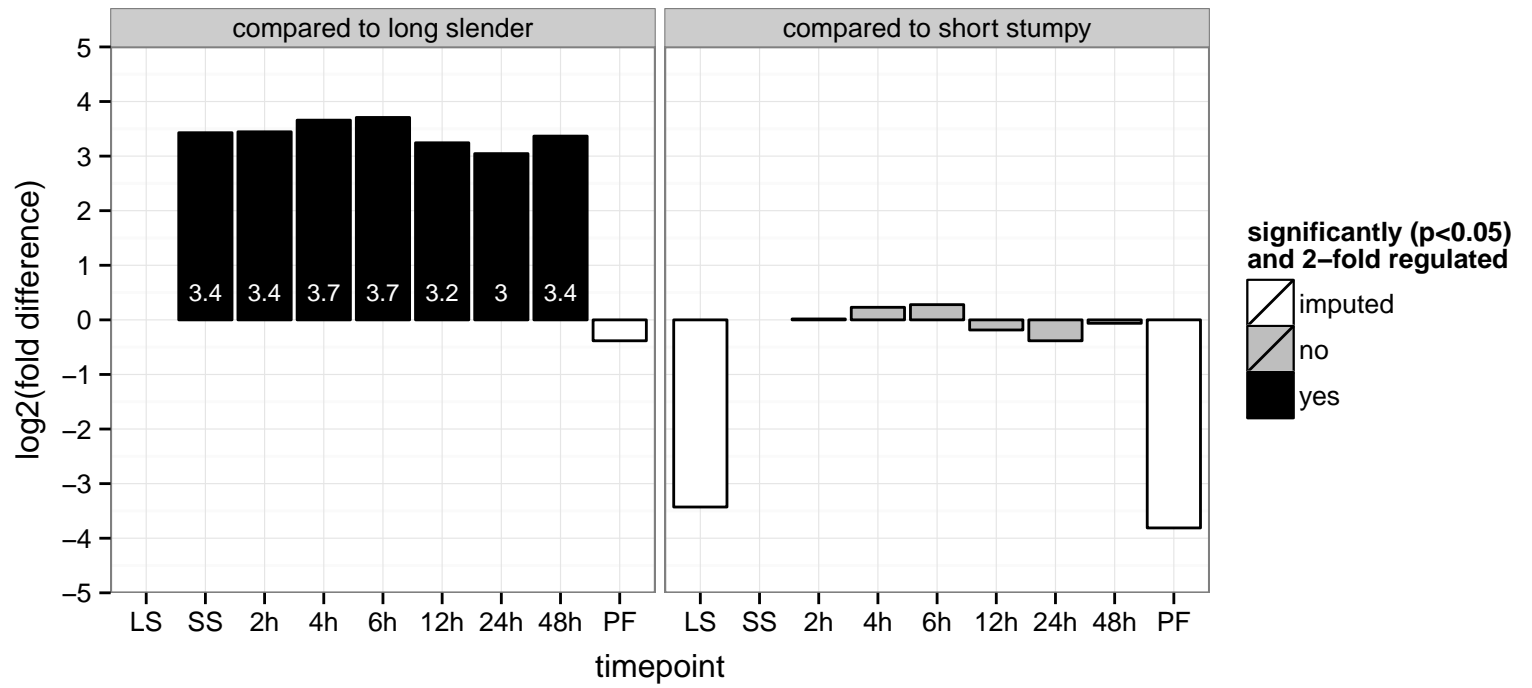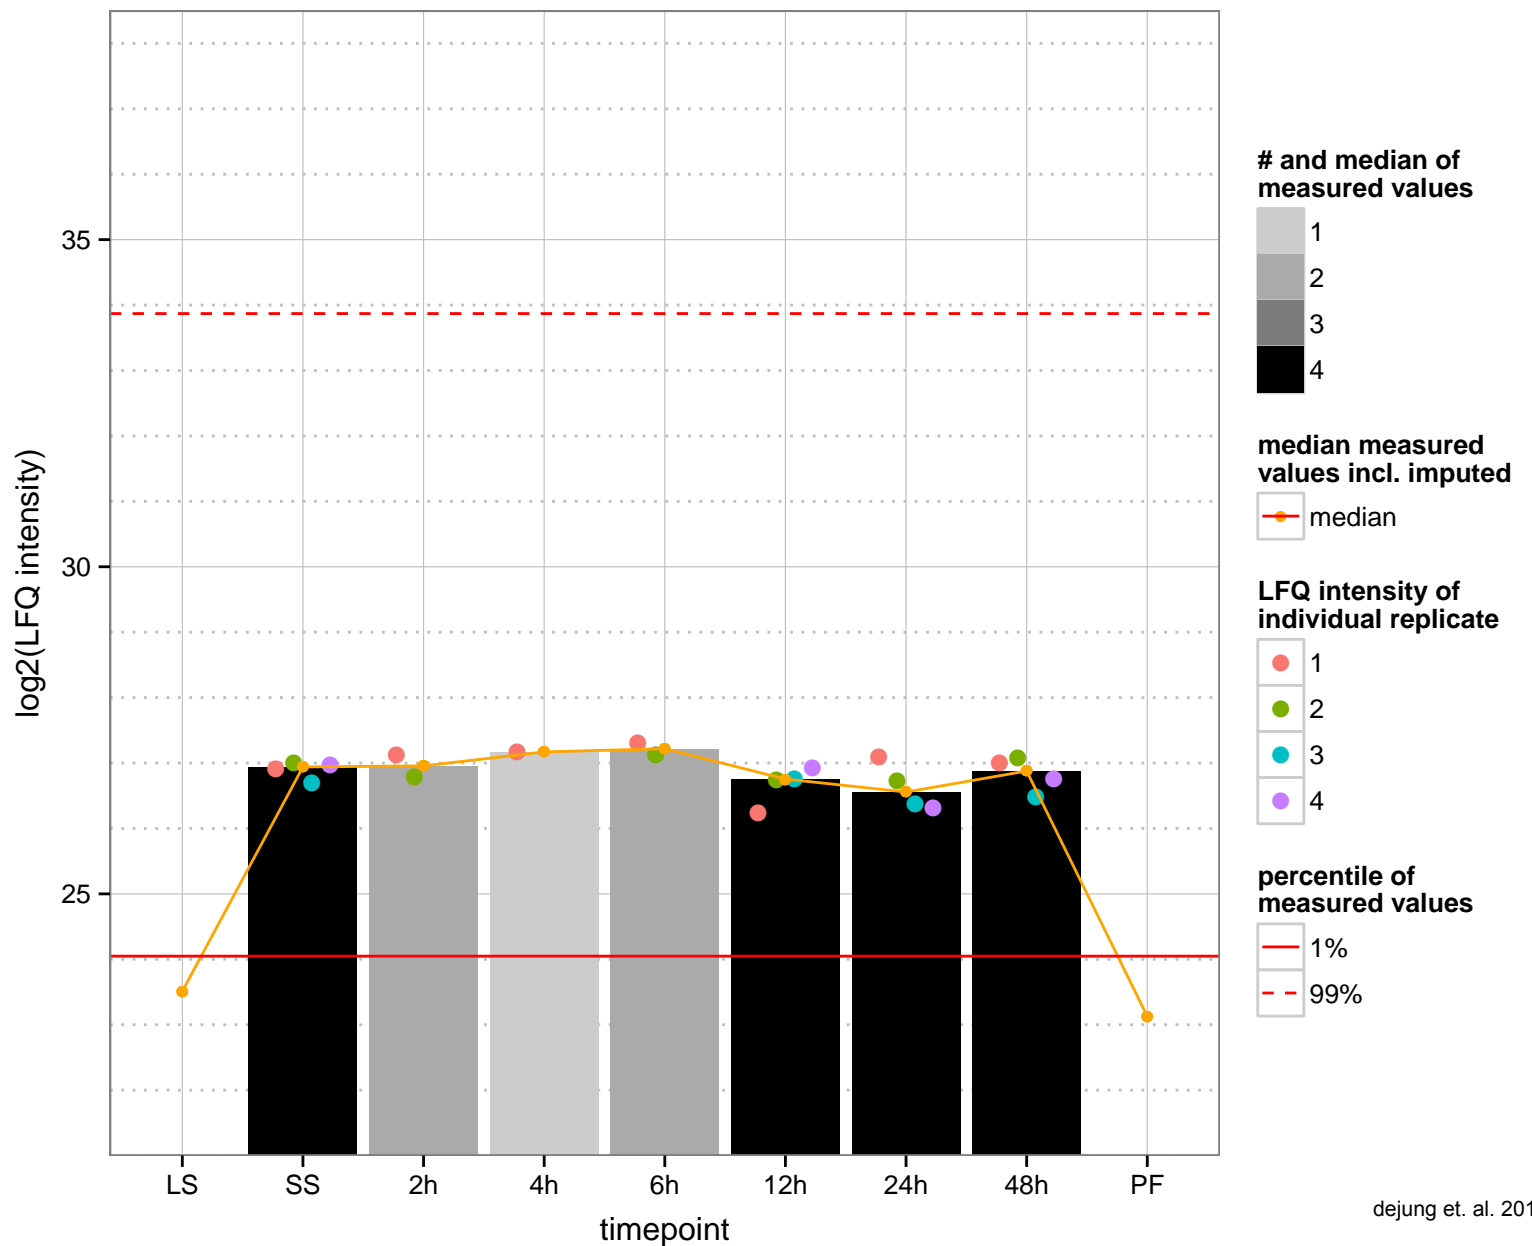

hypothetical protein, conserved  
 Tb927.10.12970  
 AGOF: zinc ion binding  
 AGOC: null  
 AGOP: null  
 PGOF: zinc ion binding  
 PGOC: null  
 PGOP: null

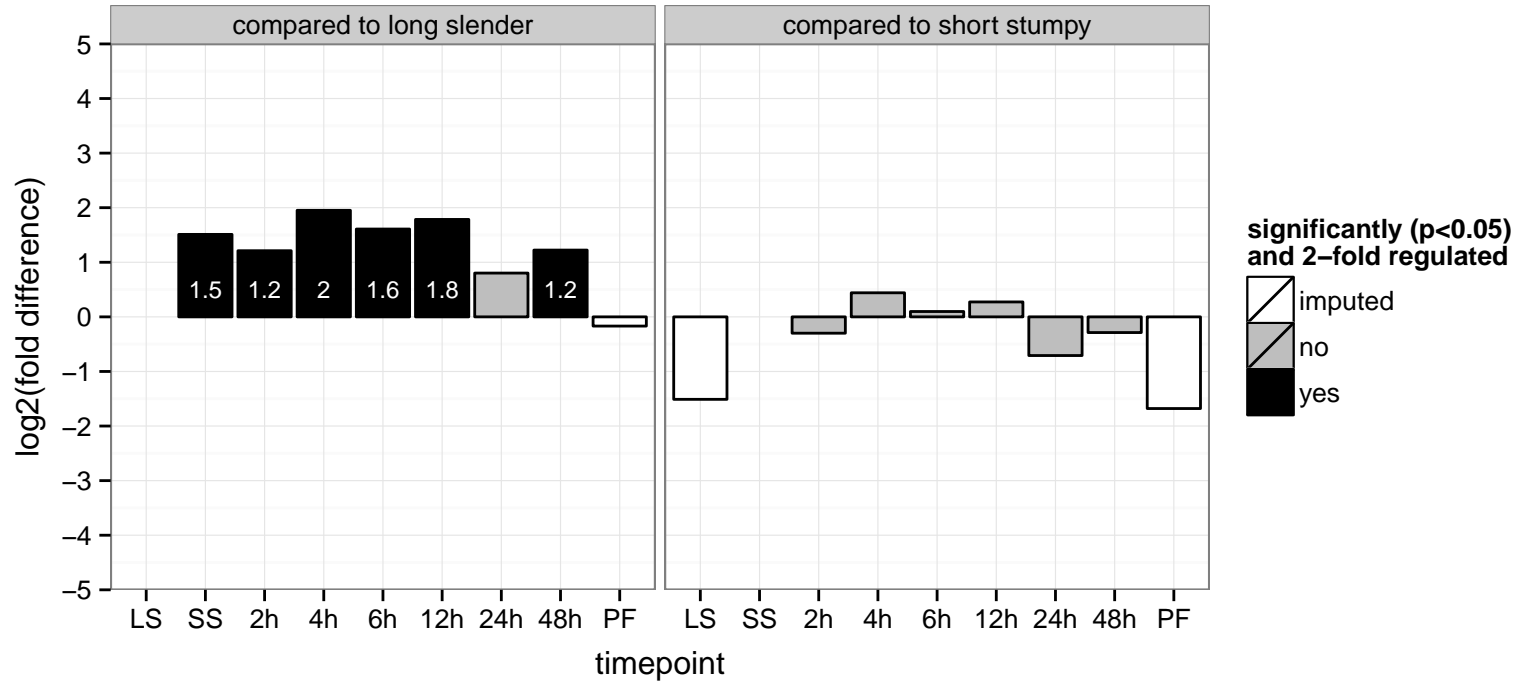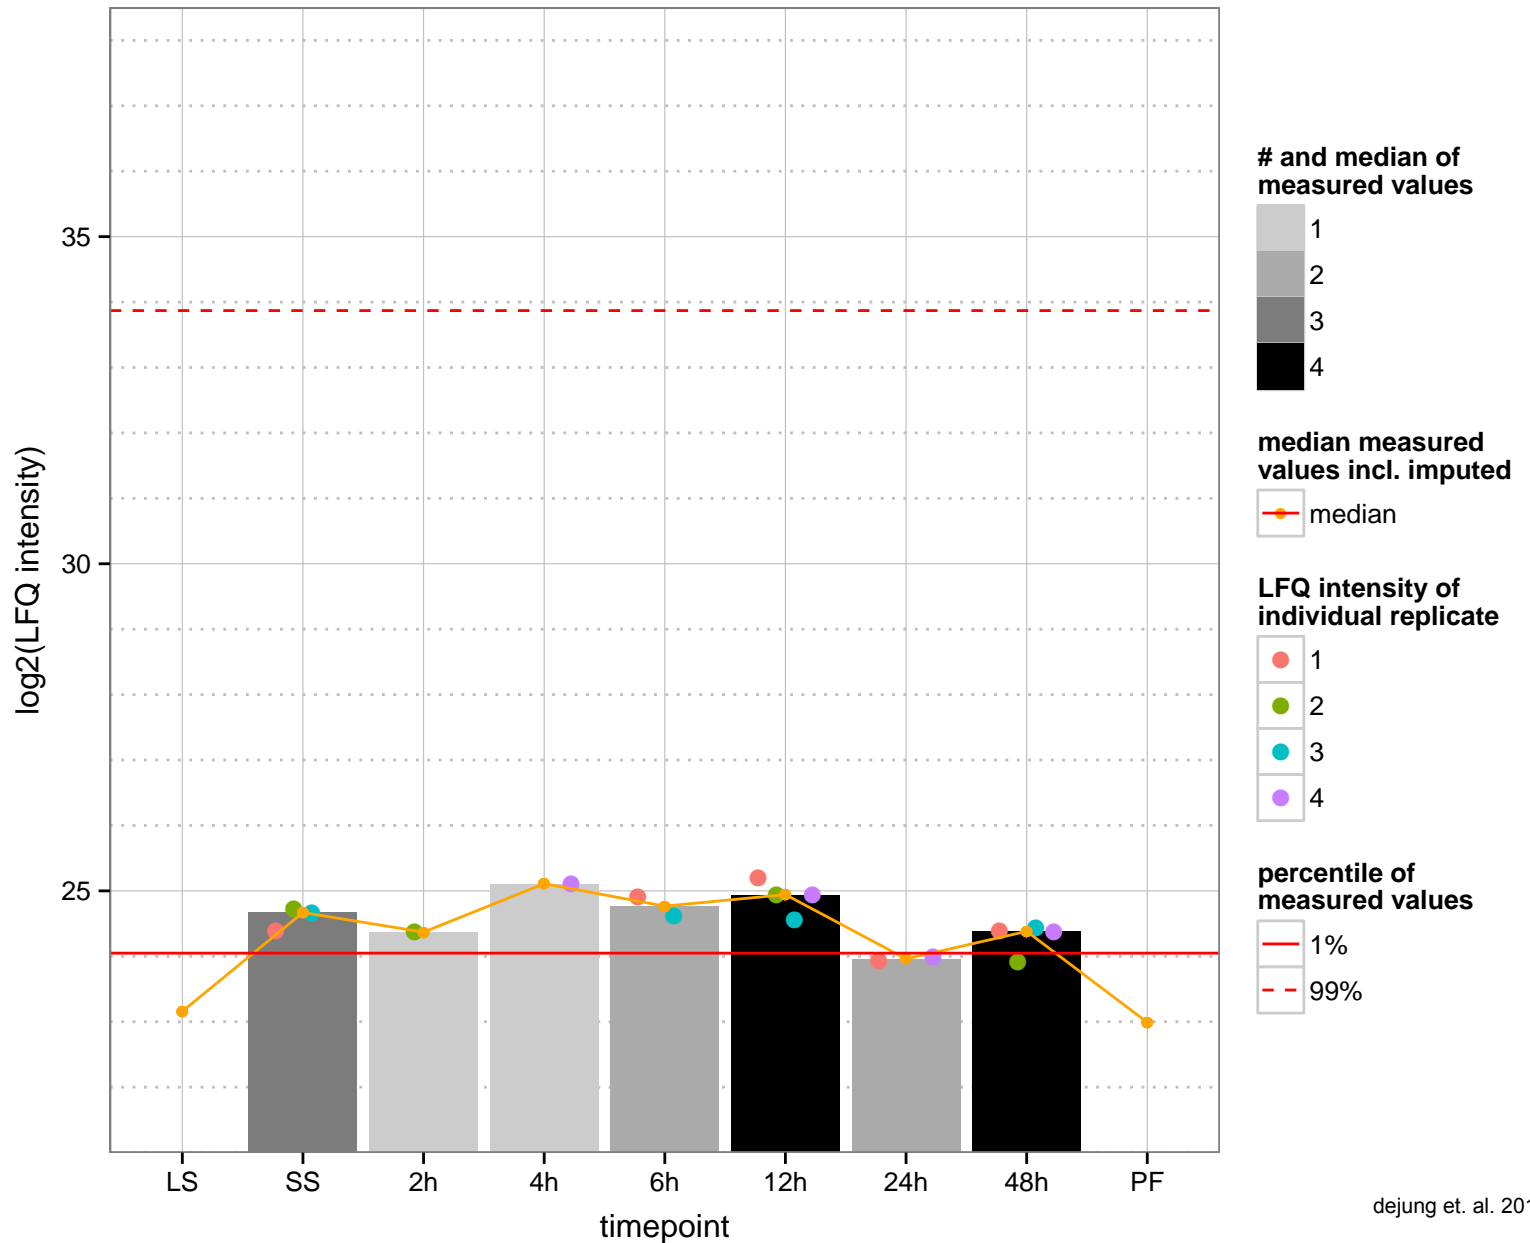

Vacuolar protein sorting–associated protein 16 homolog, putative  
 Tb927.10.13020  
 AGOF: null  
 AGOC: cytoplasm  
 AGOP: intracellular protein transport  
 PGO: null  
 PGO: cytoplasm  
 PGO: intracellular protein transport

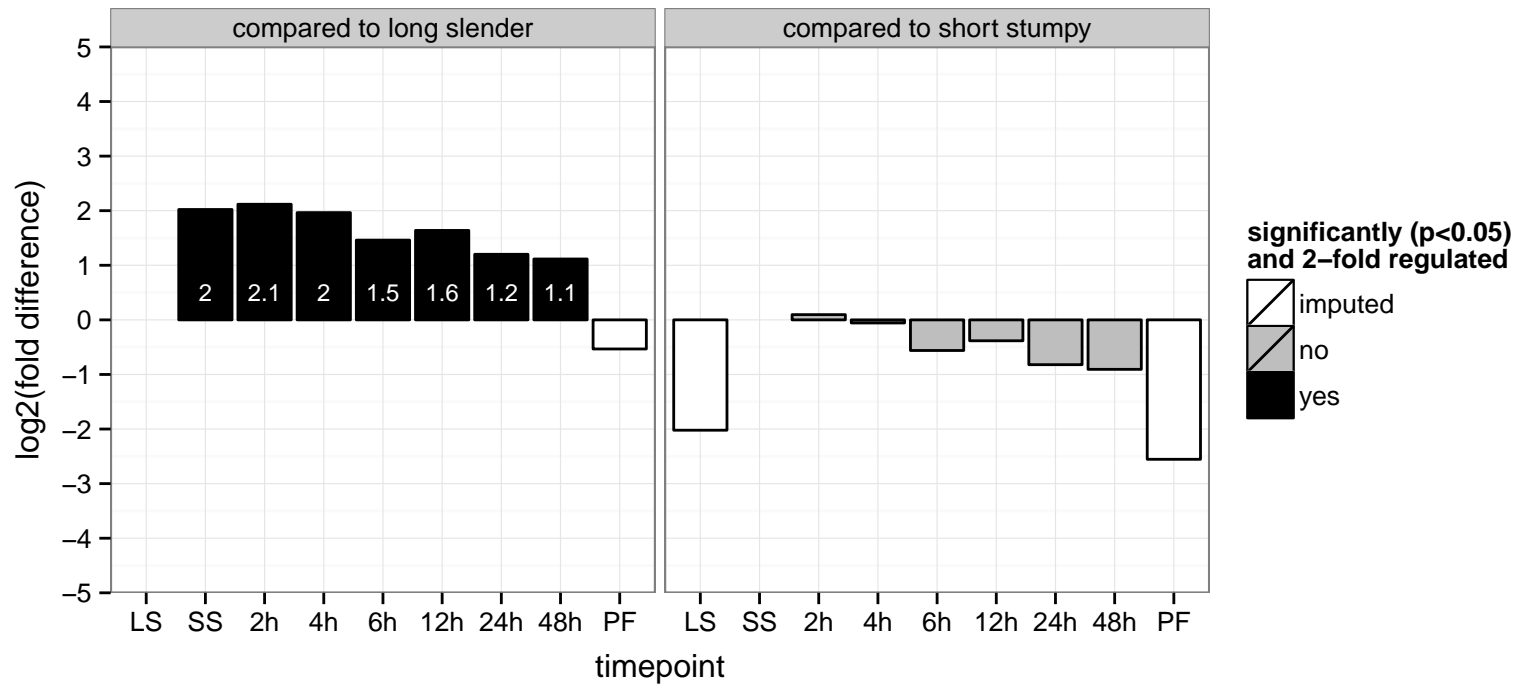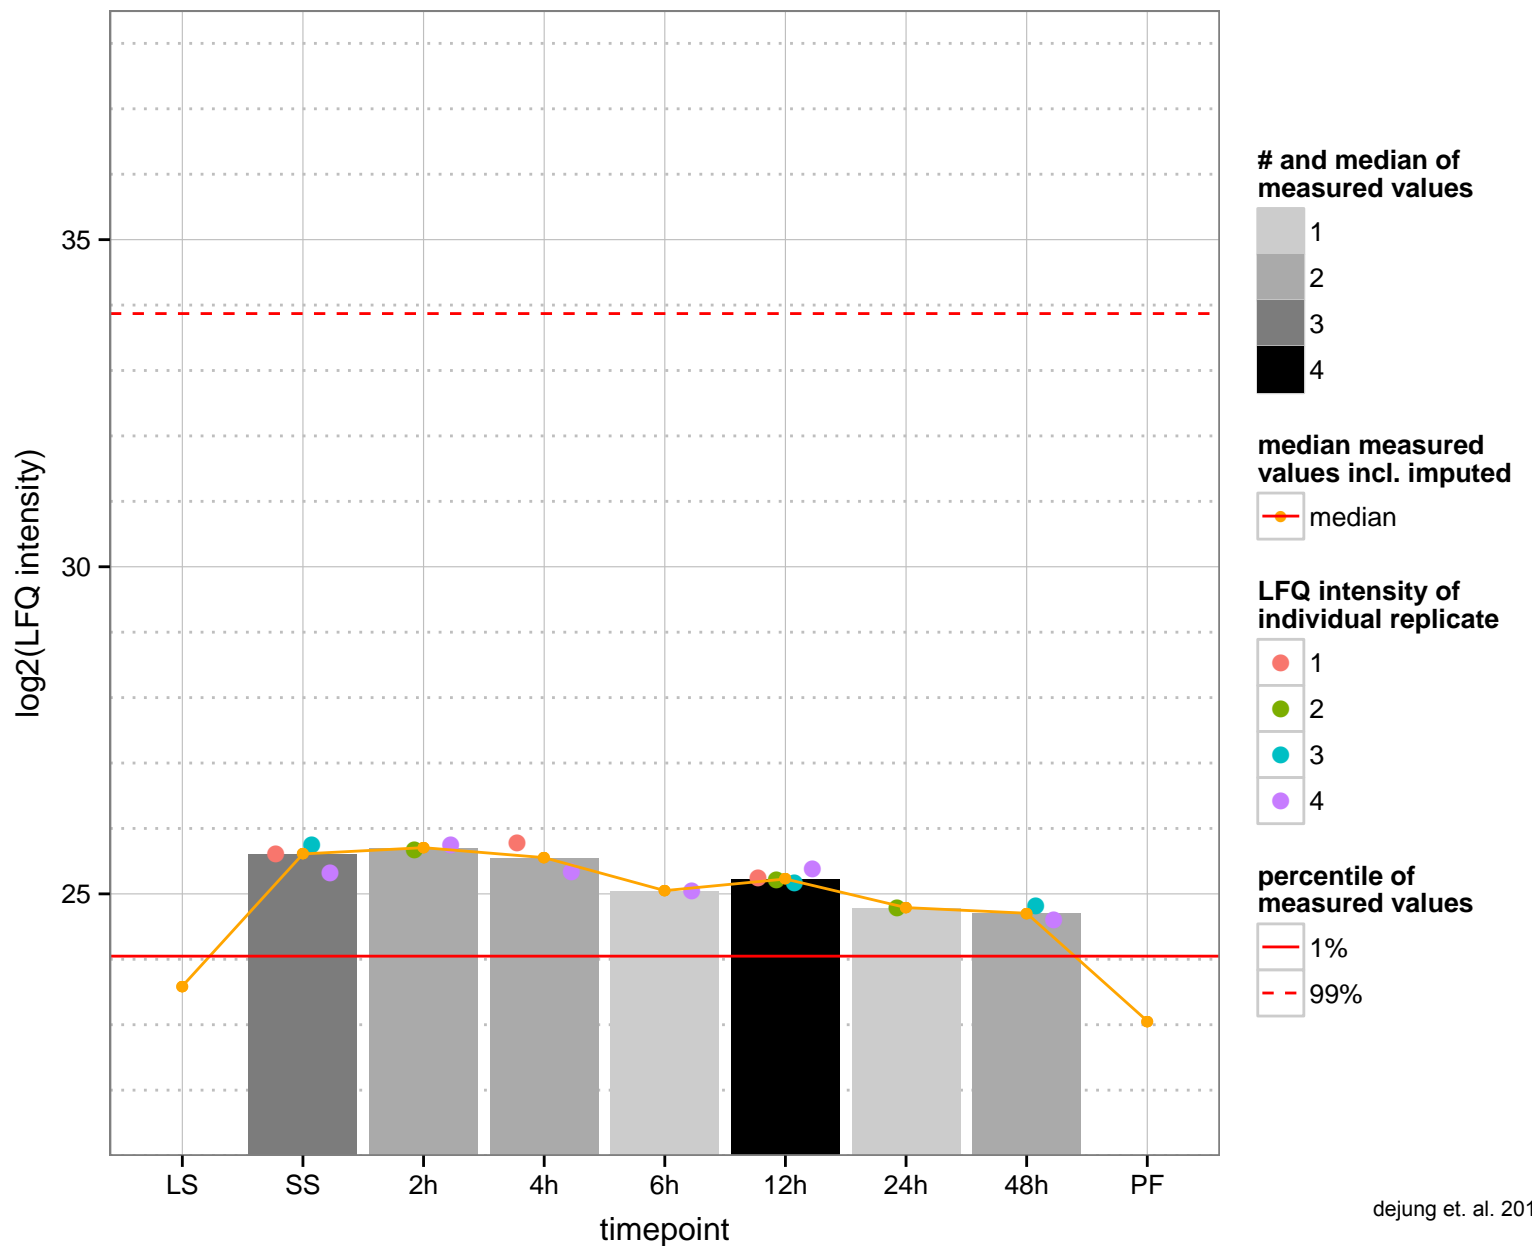

cysteine peptidase, Clan CA, family C2, putative, calpain-like cysteine peptidase  
 Tb927.10.13030  
 AGOF: calcium-dependent cysteine-type endopeptidase activity  
 AGOC: intracellular  
 AGOP: proteolysis  
 PGOF: calcium-dependent cysteine-type endopeptidase activity  
 PGOC: intracellular  
 PGOP: proteolysis

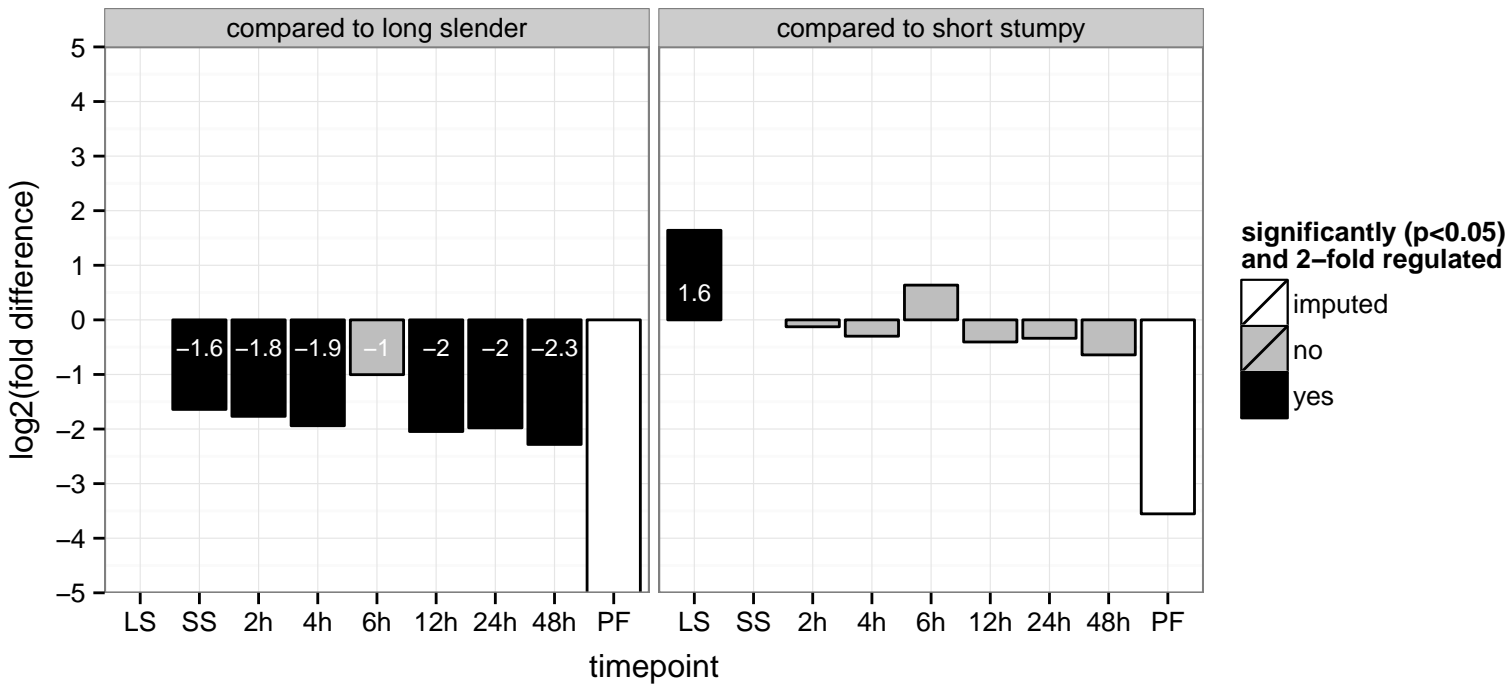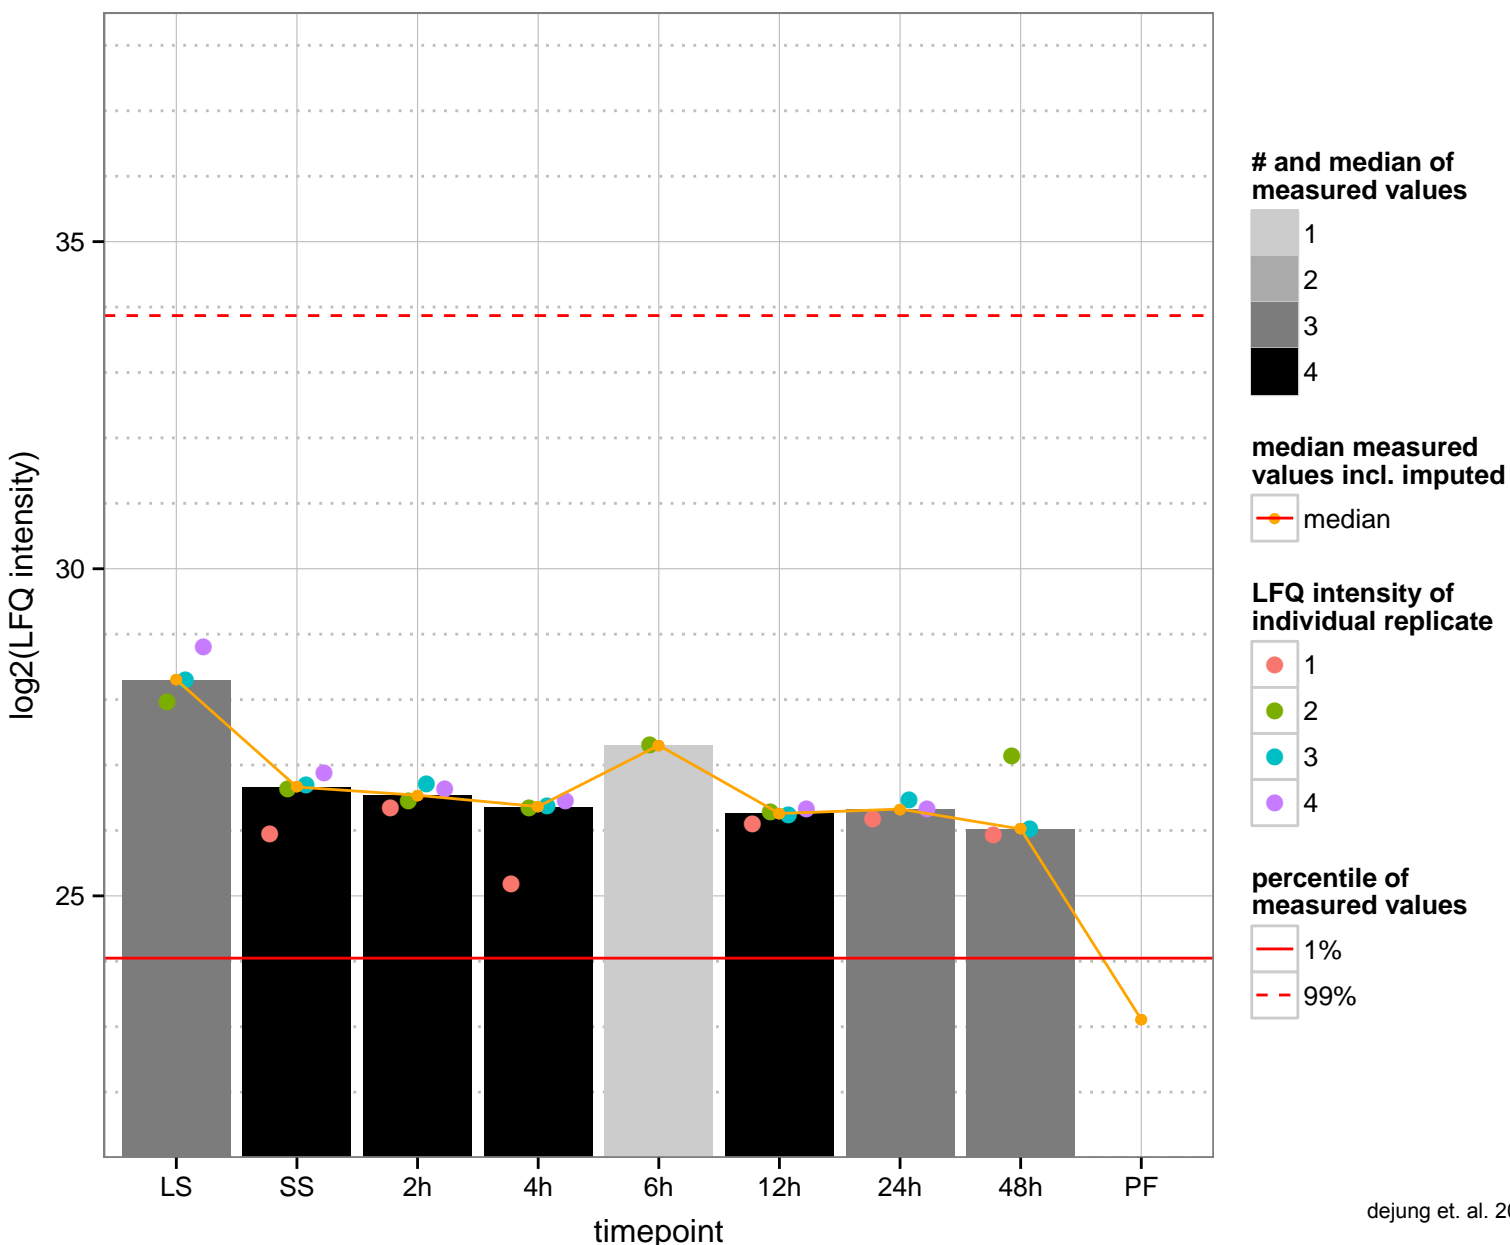

flagellar protein PF20  
 Tb927.10.13960  
 AGOF: null  
 AGOC: axoneme  
 AGOP: ciliary or flagellar motility  
 PGO: protein binding  
 PGOC: null  
 PGOP: null

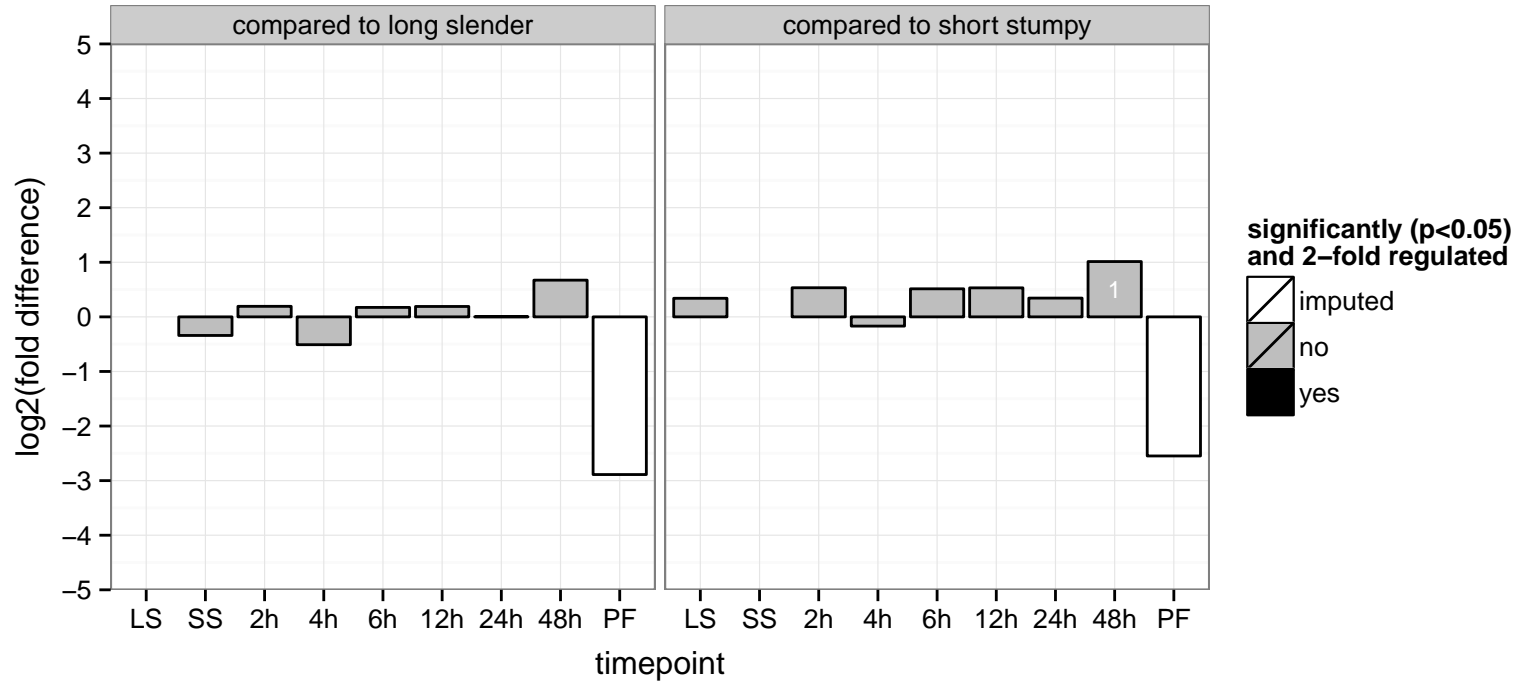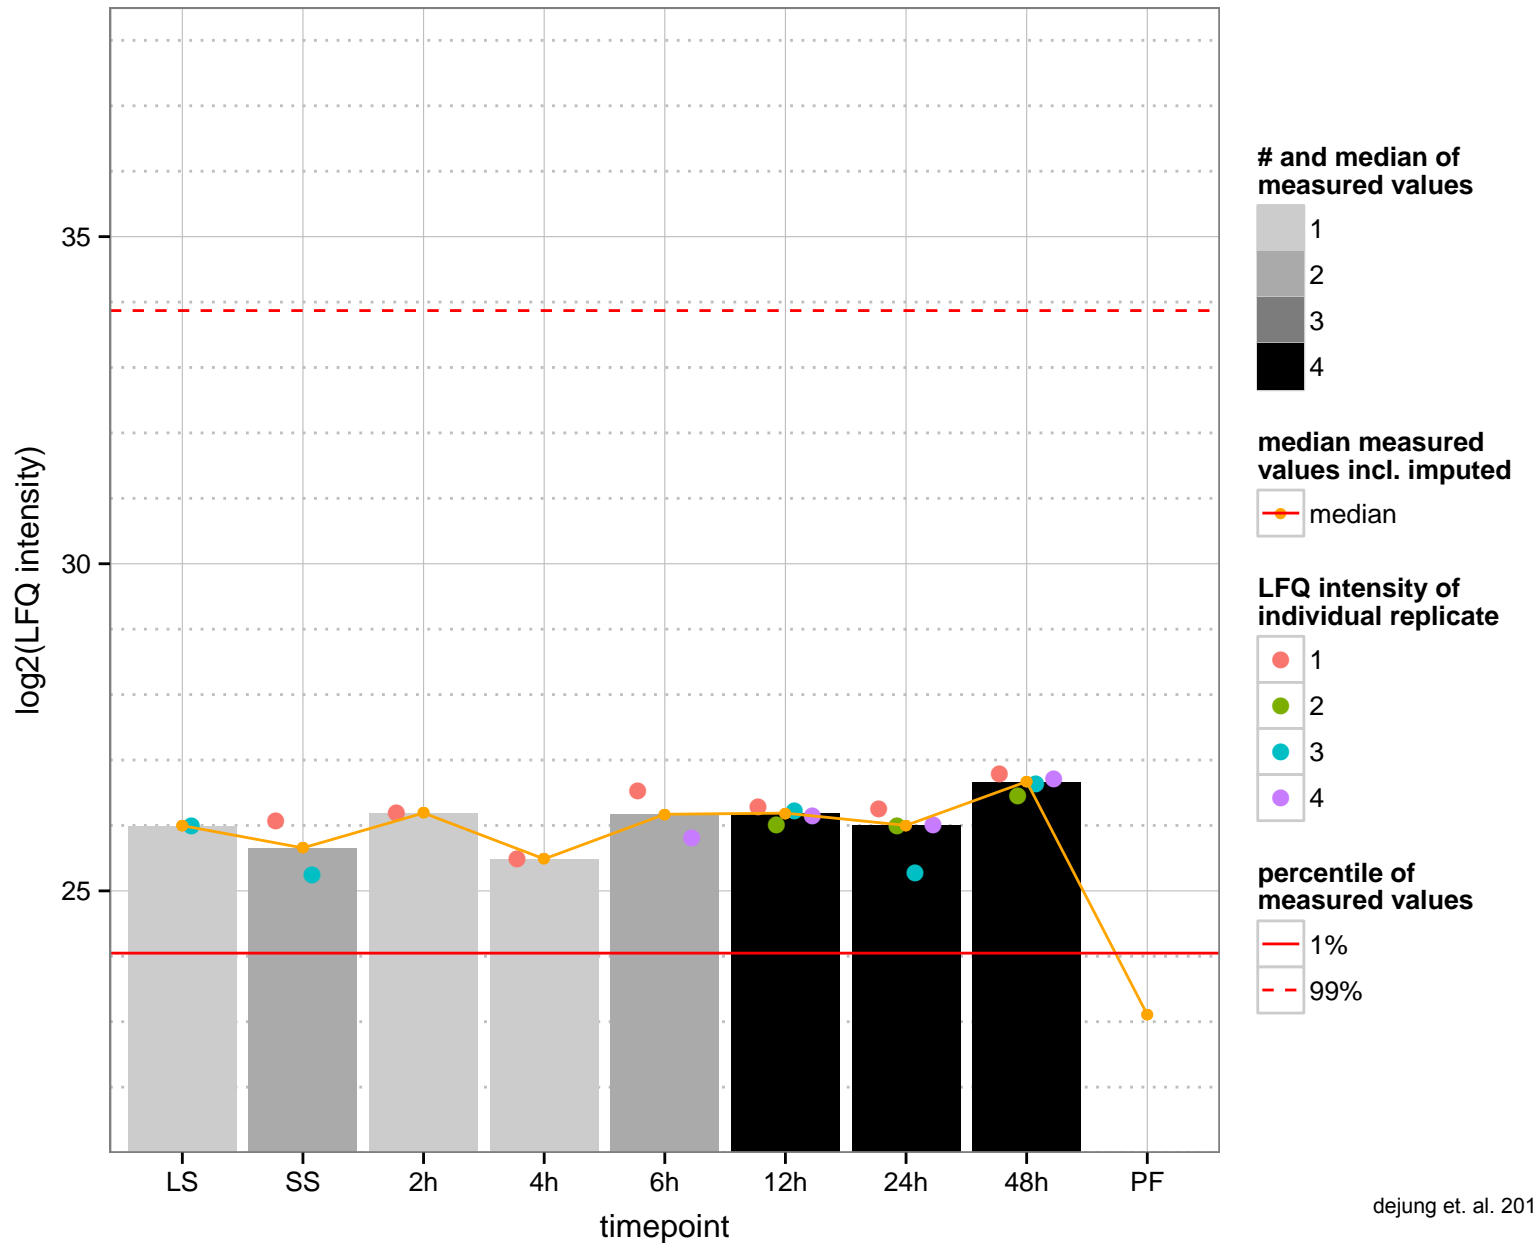

hypothetical protein, conserved  
 Tb927.10.13990  
 AGOF: null  
 AGOC: null  
 AGOP: null  
 PGOF: null  
 PGO: null  
 PGOP: null

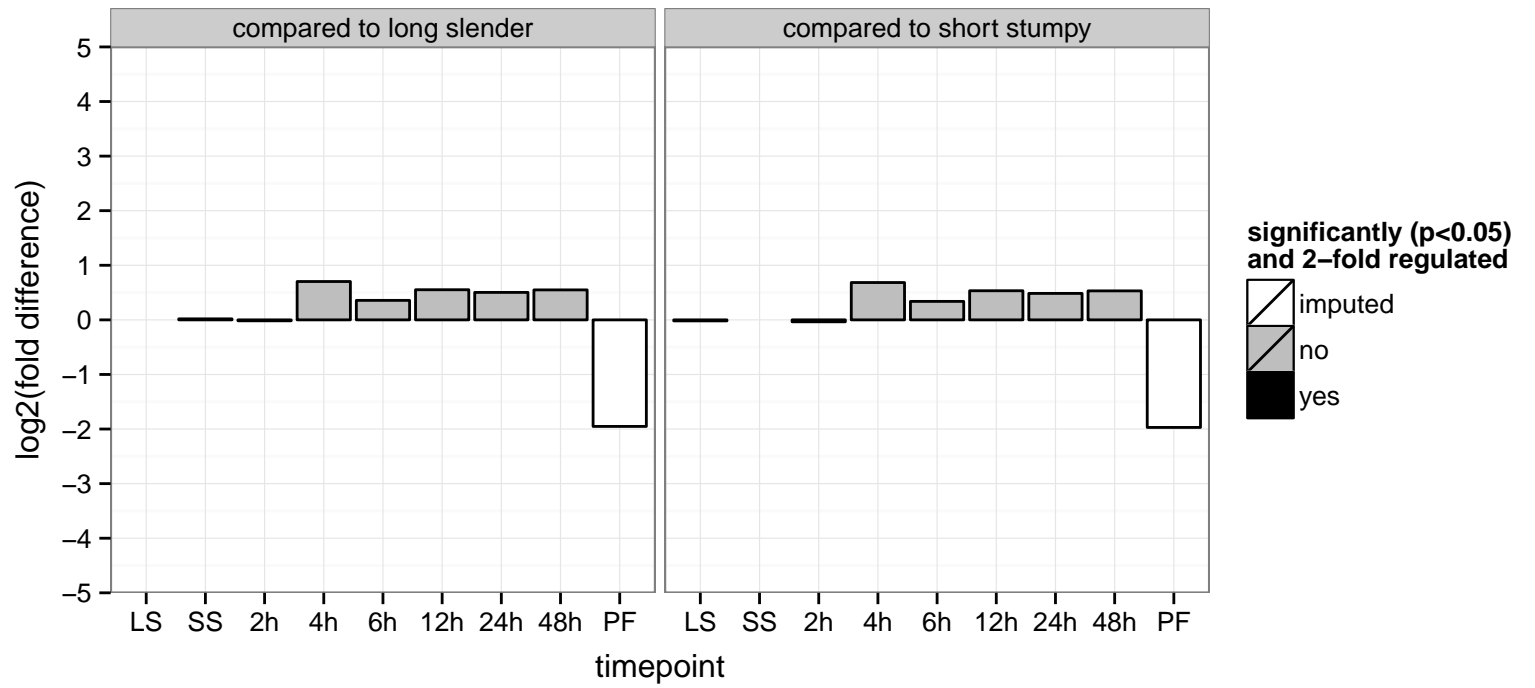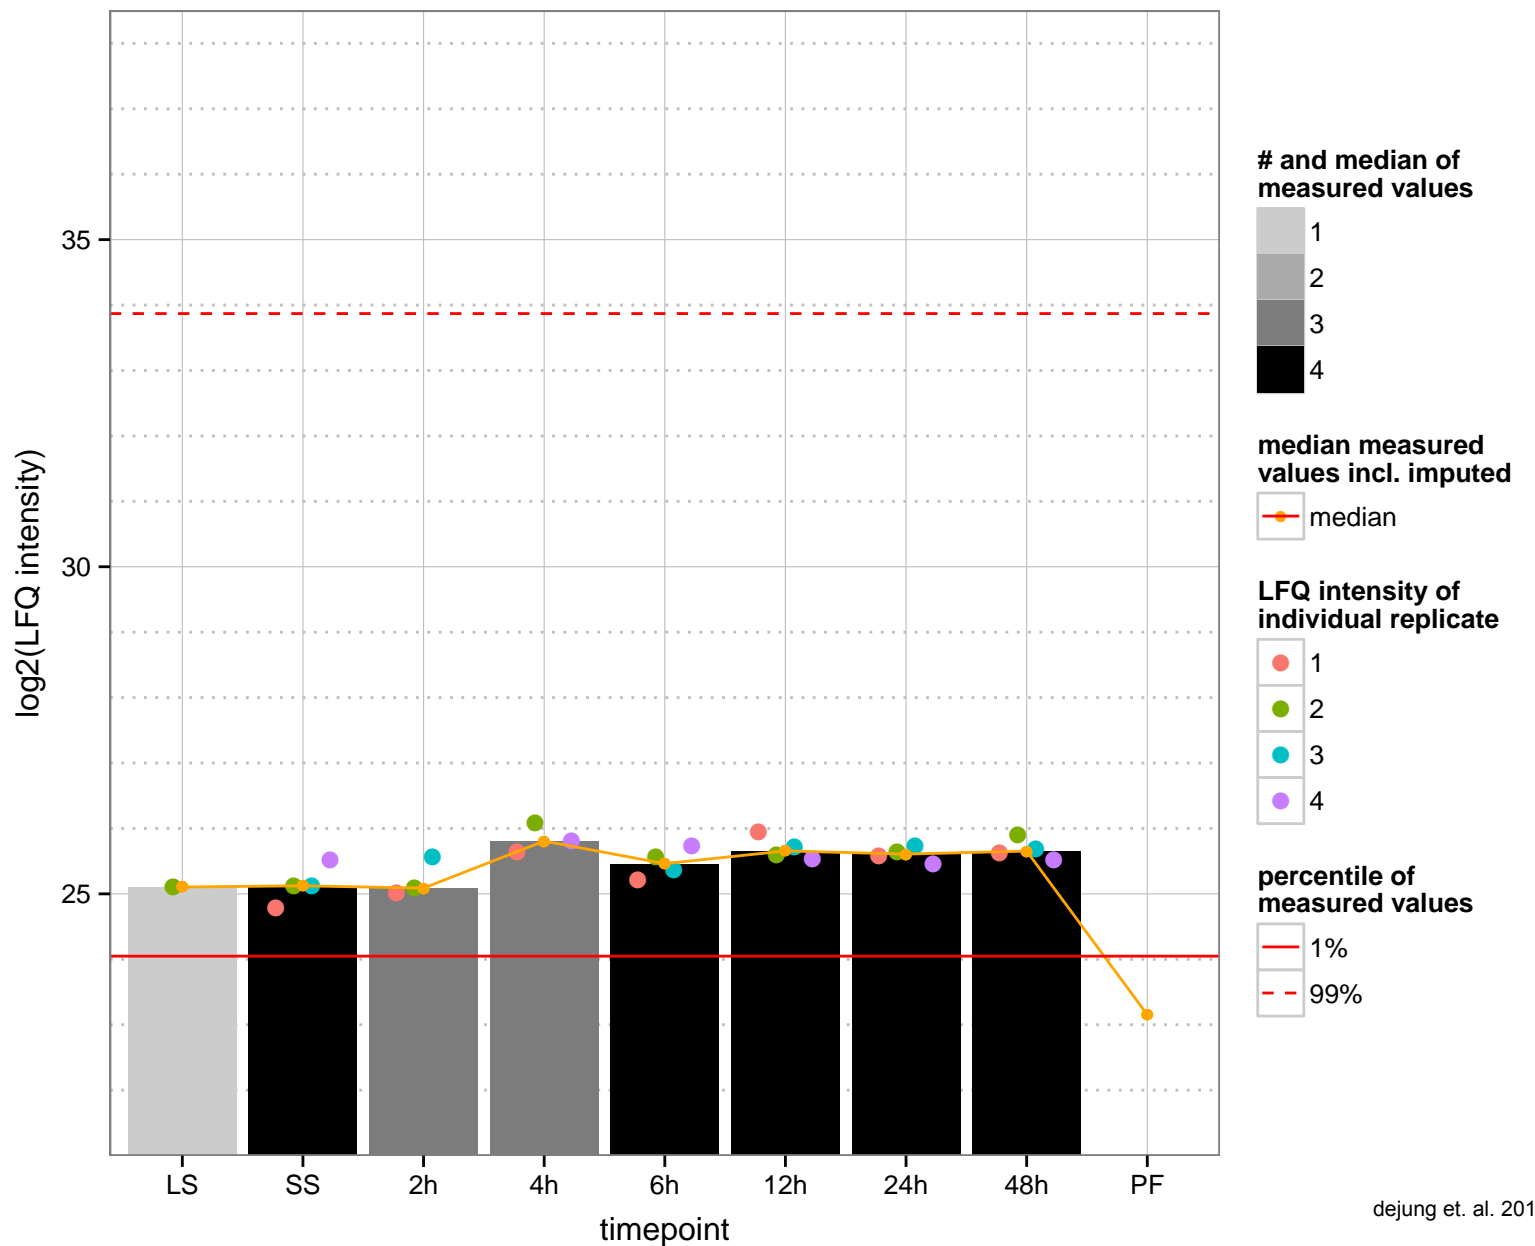

hypothetical protein, conserved  
 Tb927.10.14220  
 AGOF: null  
 AGOC: null  
 AGOP: null  
 PGO: null  
 PGOC: null  
 PGOP: null

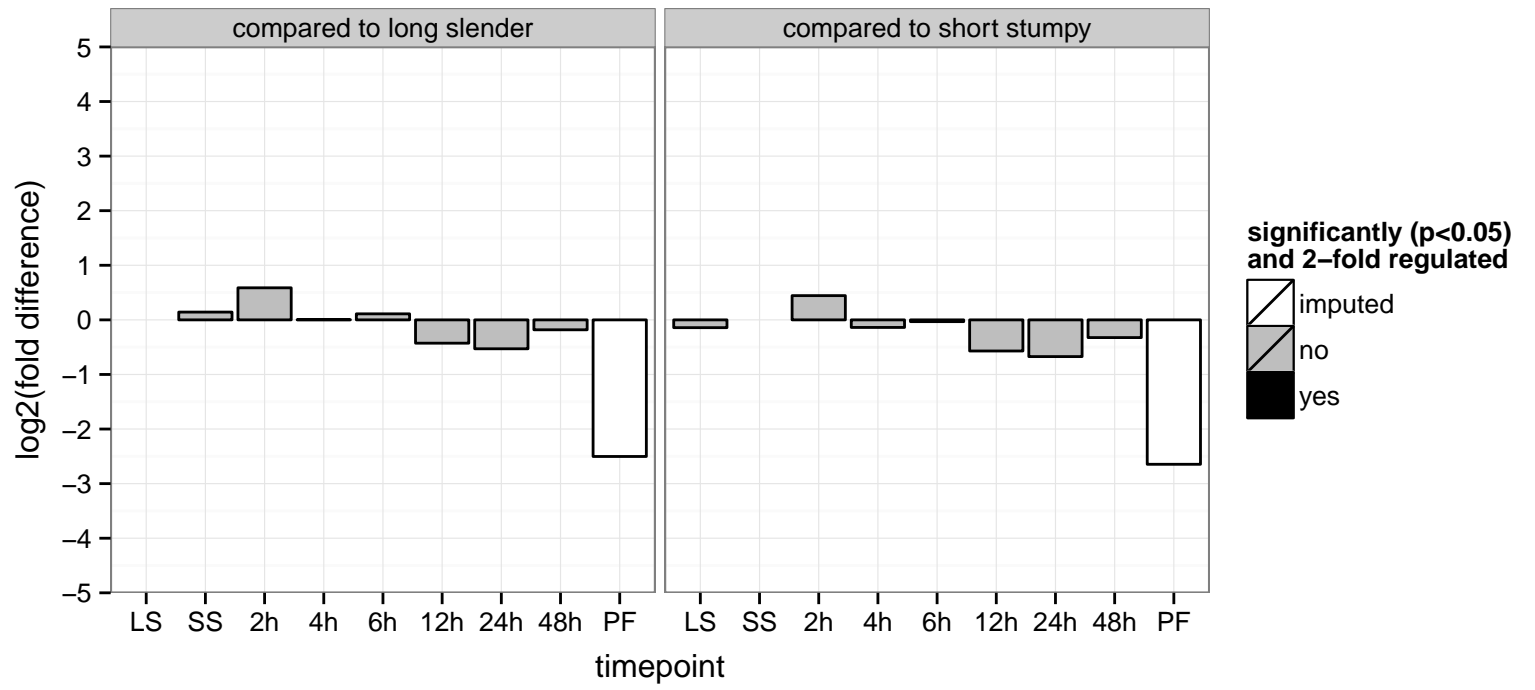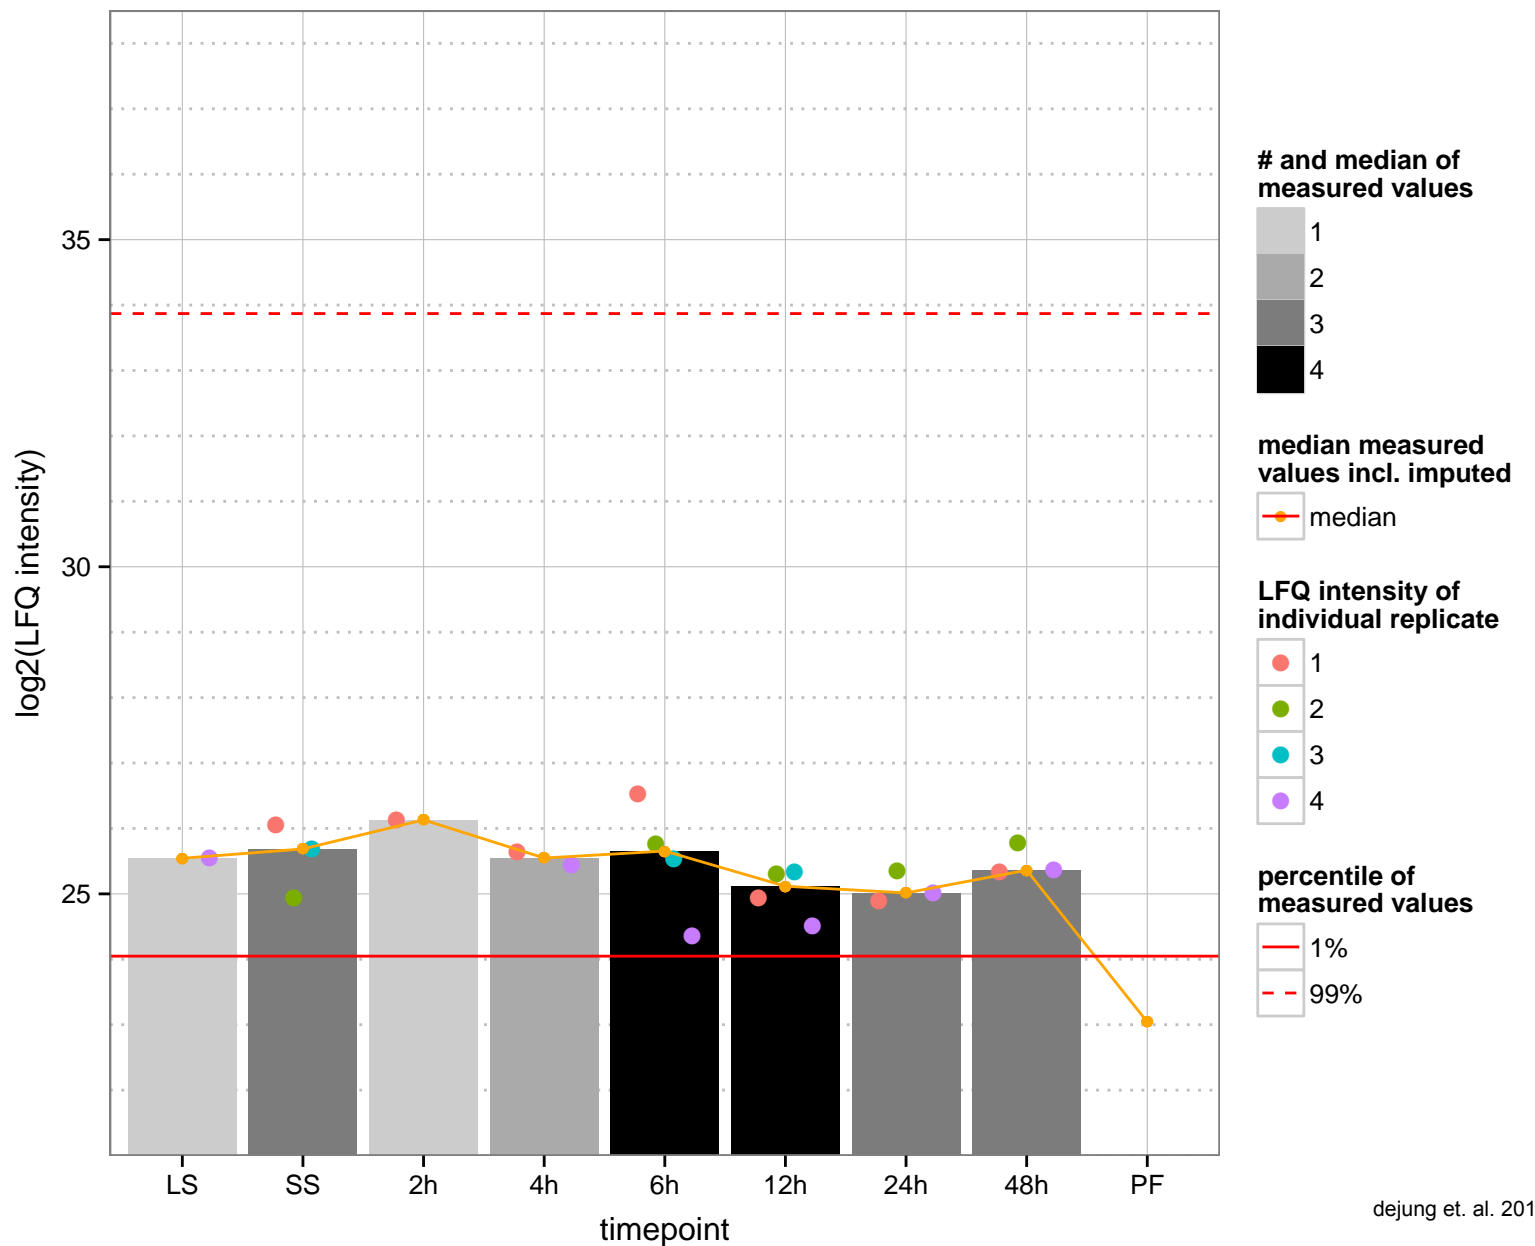



hypothetical protein, conserved  
 Tb927.10.14340  
 AGOF: null  
 AGOC: null  
 AGOP: null  
 PGOF: null  
 PGO: null  
 PGOP: null

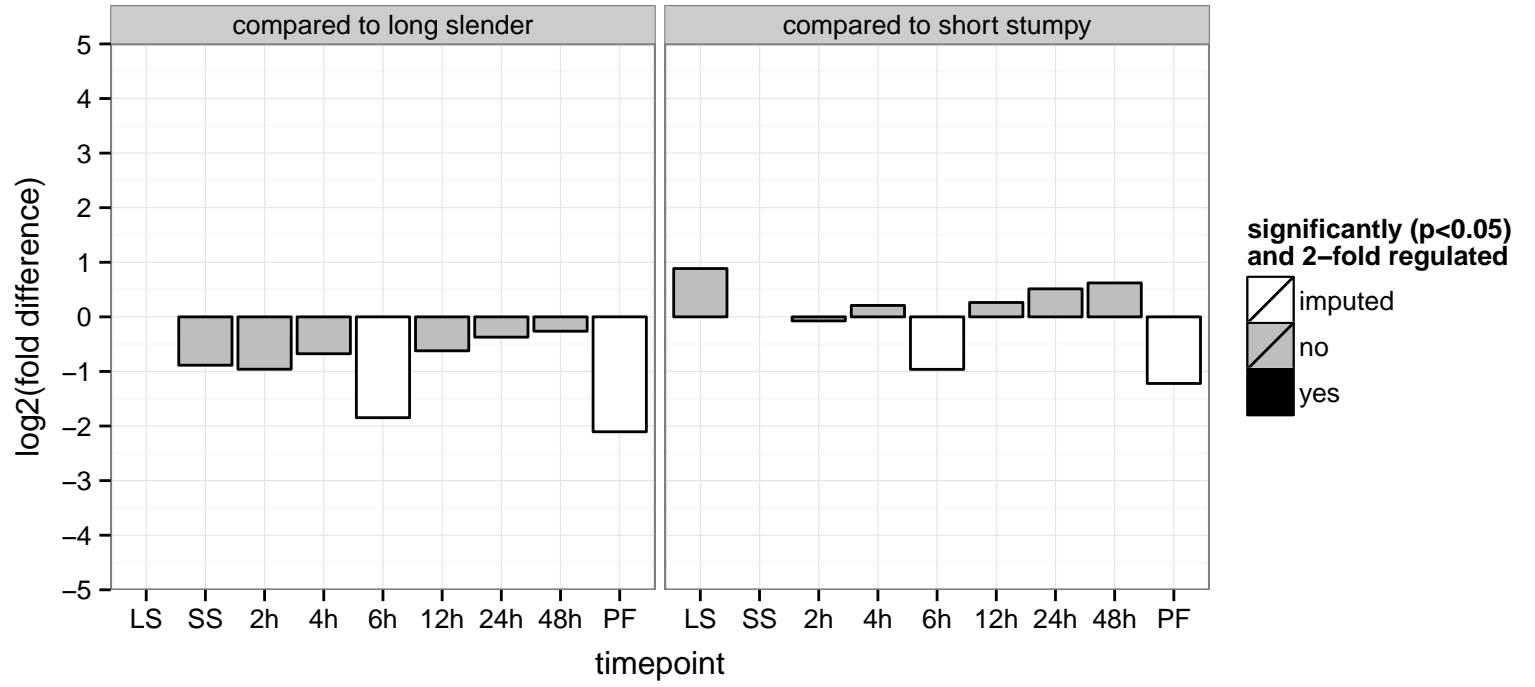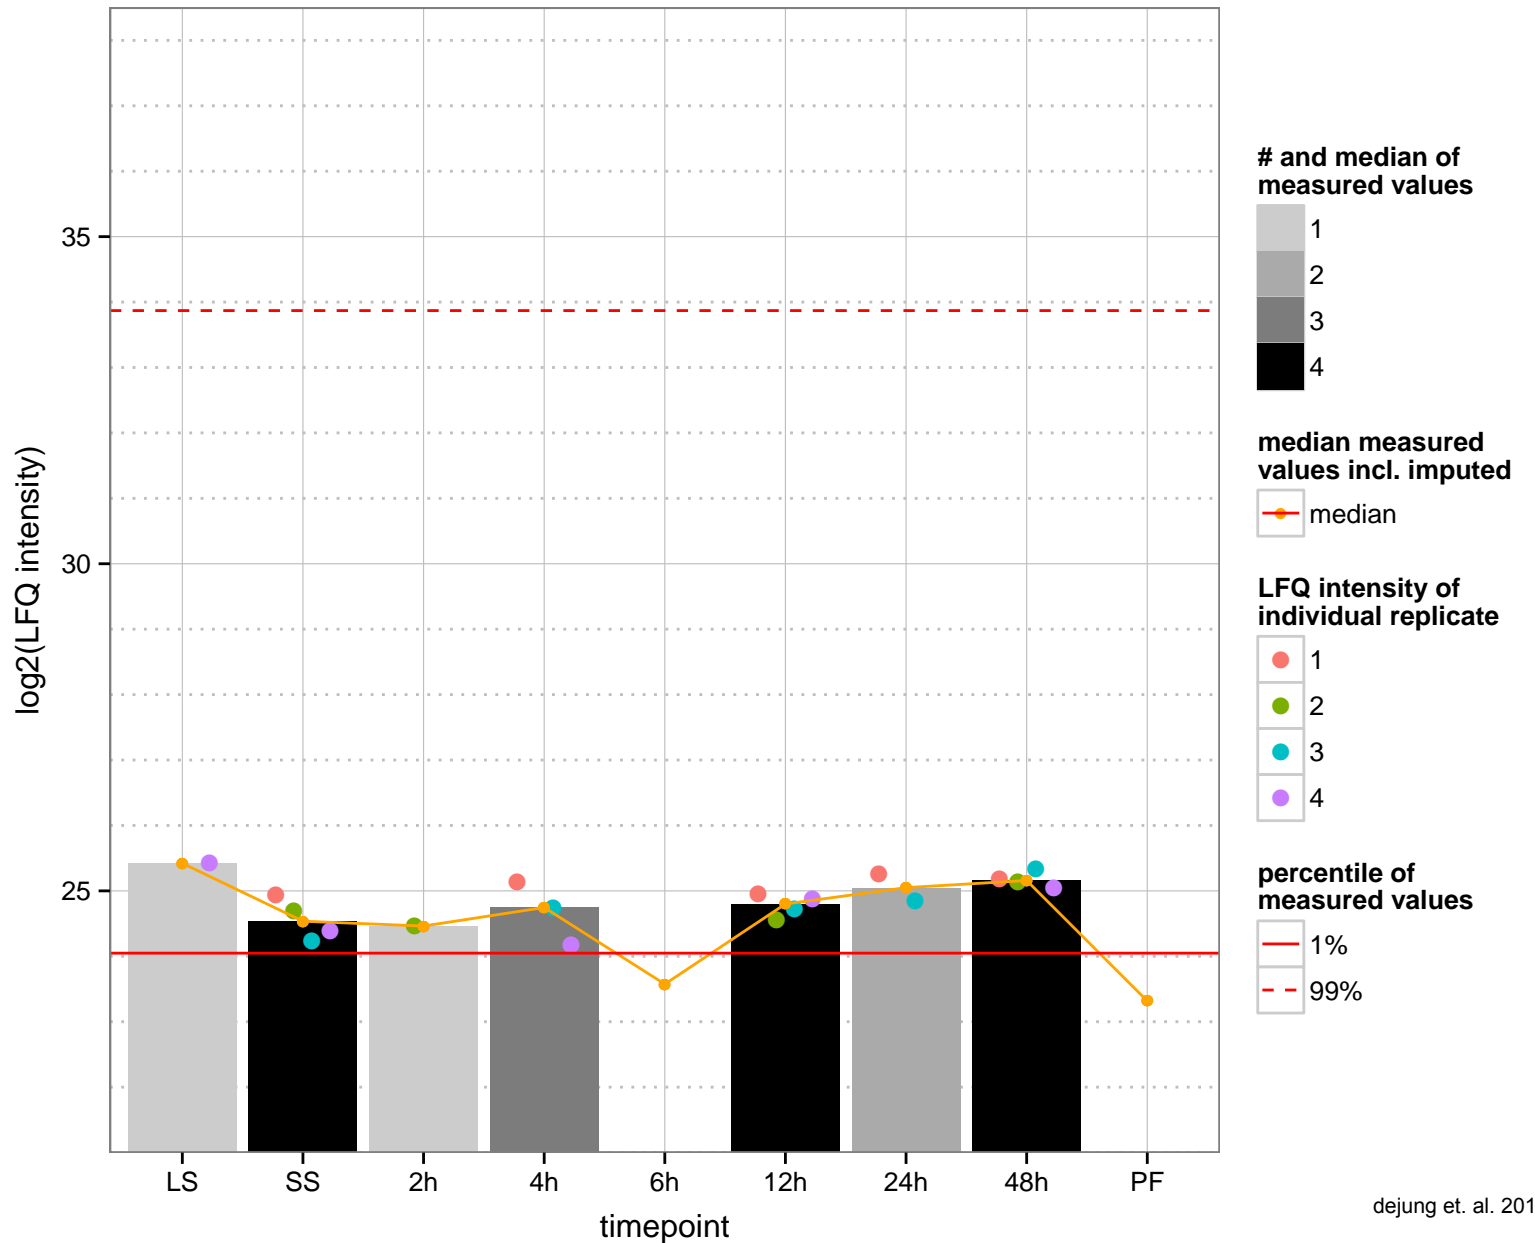

hypothetical protein, conserved  
 Tb927.10.14640  
 AGOF: null  
 AGOC: null  
 AGOP: null  
 PGOF: null  
 PGO: null  
 PGOP: null

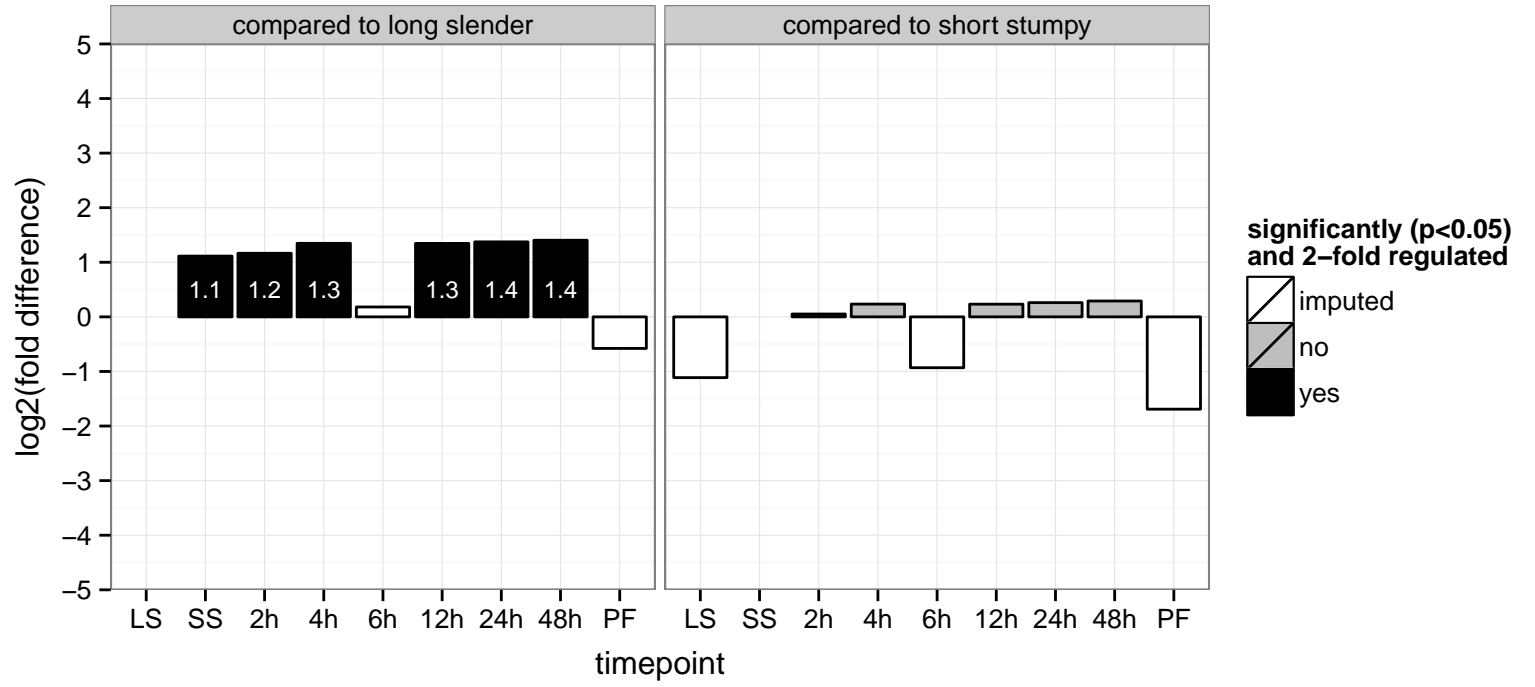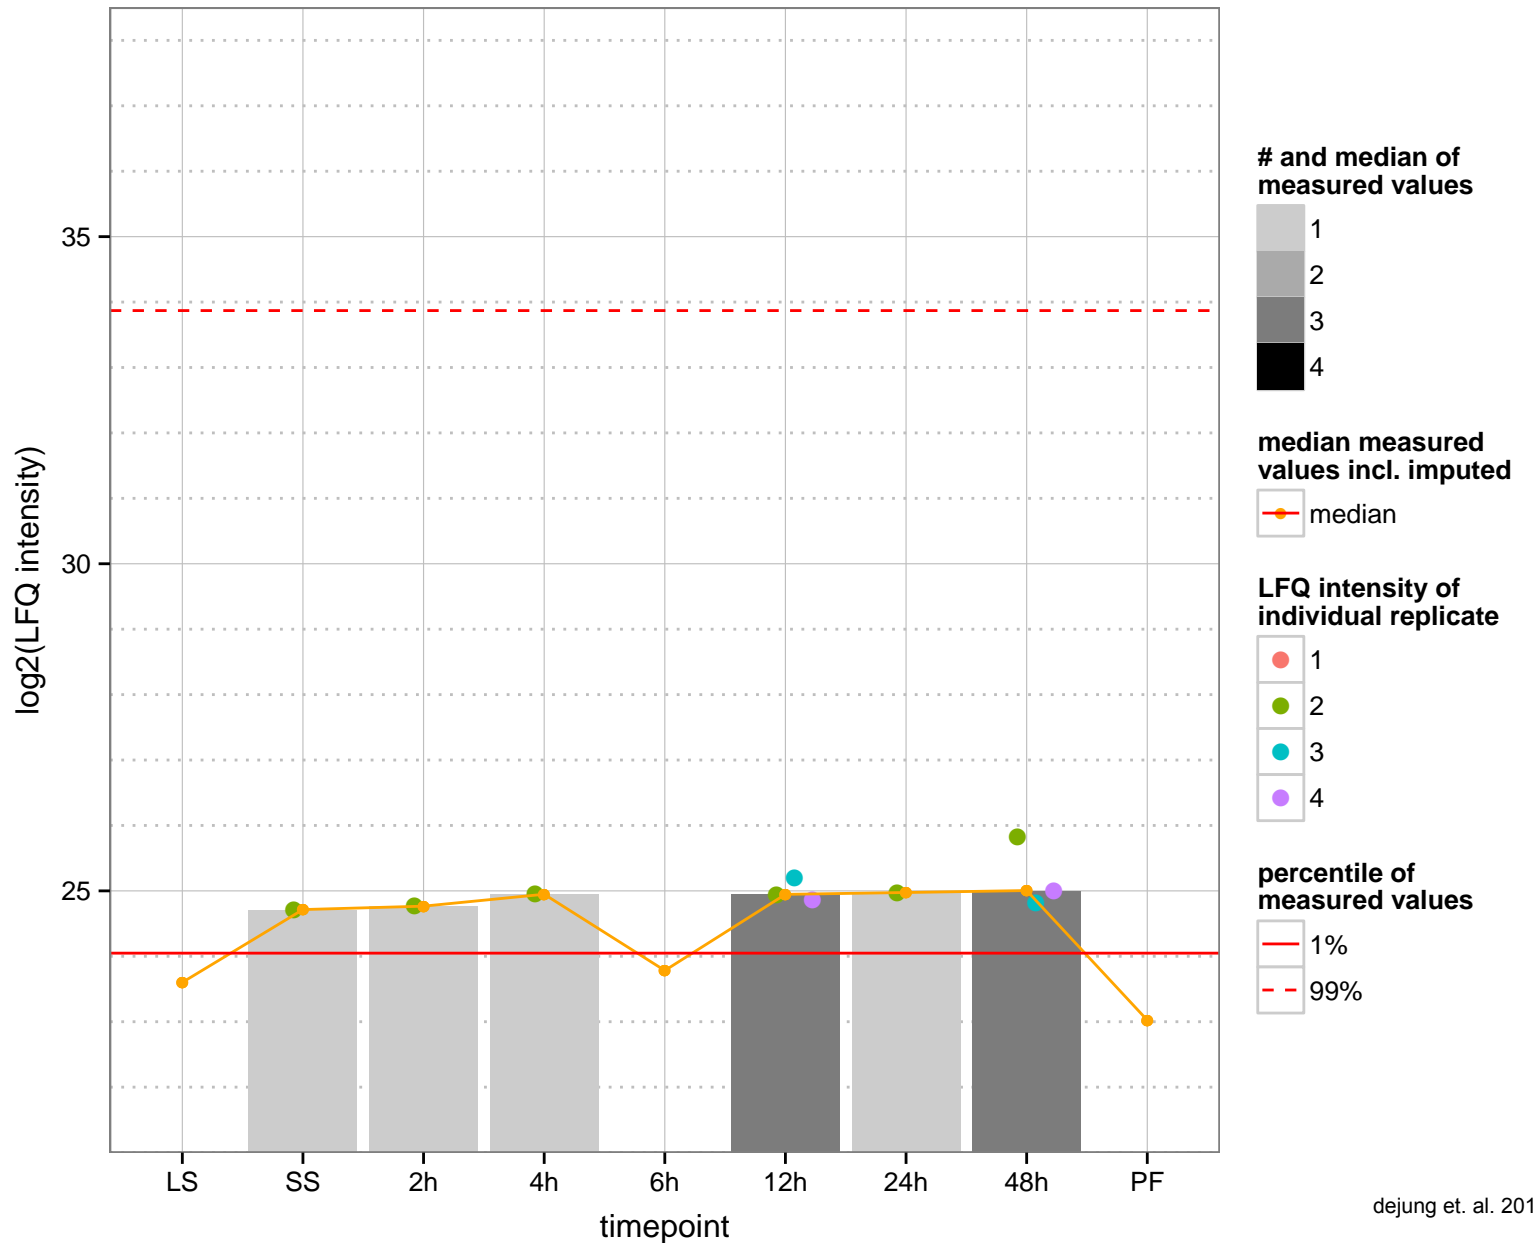

intraflagellar transport protein IFT80/CHE2, putative (IFT80)  
 Tb927.10.14990  
 AGOF: null  
 AGOC: null  
 AGOP: null  
 PGO: protein binding  
 PGO: null  
 PGO: null

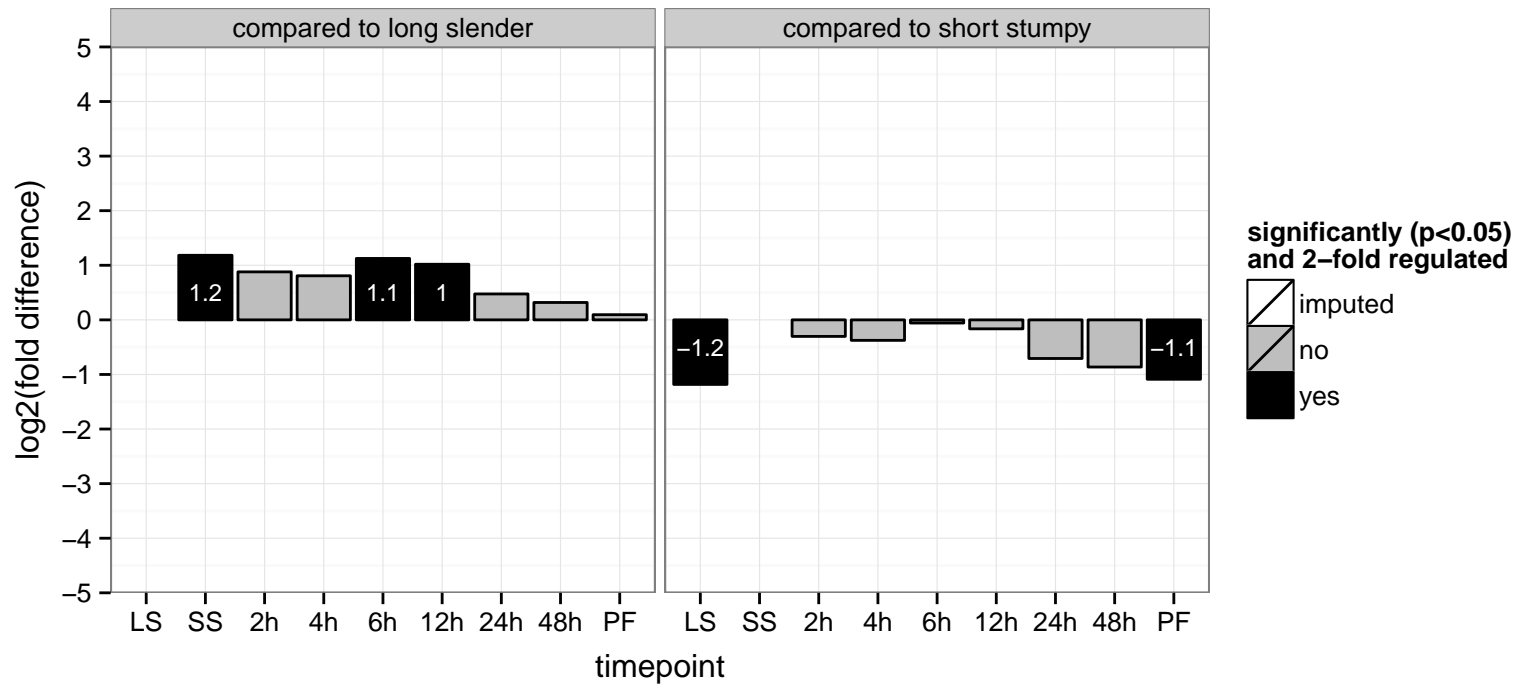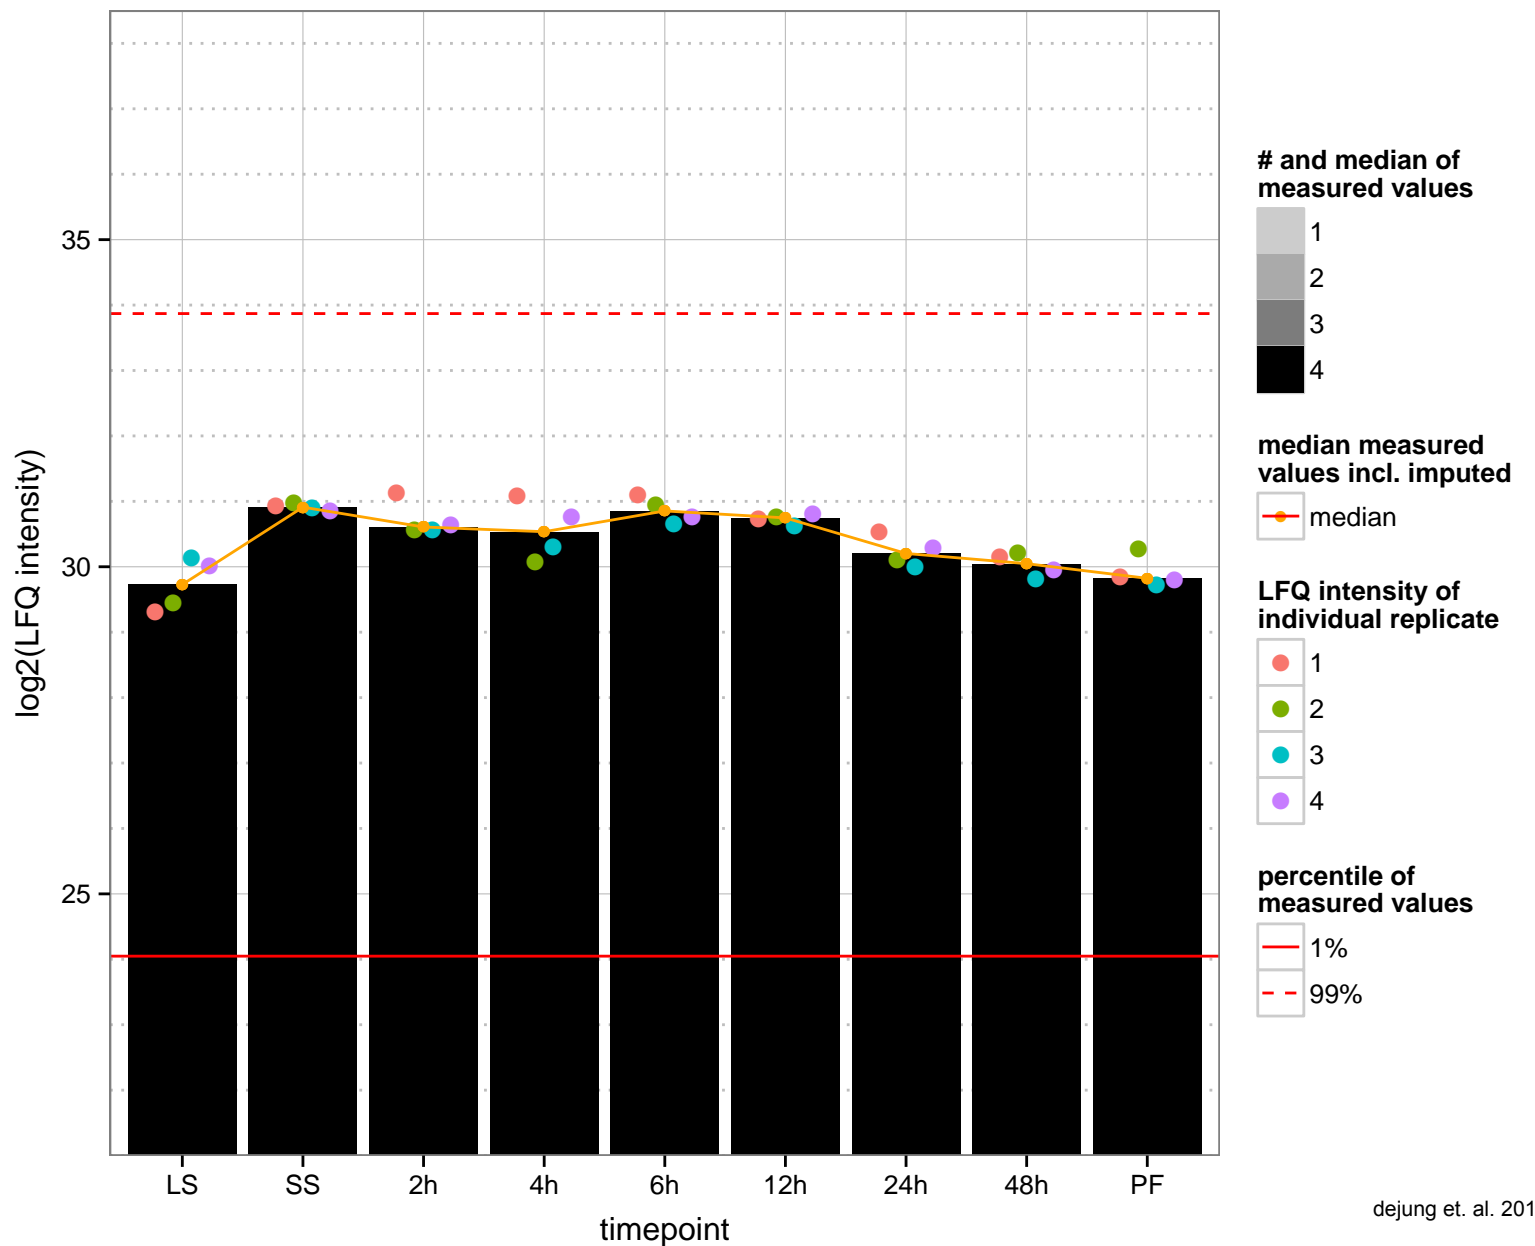

hypothetical protein, conserved, predicted VPS53-like domain protein  
 Tb927.10.15540;Tb11.v5.0651  
 AGOF: null  
 AGOC: null  
 AGOP: null  
 PGO: null  
 PGOC: null  
 PGOP: null

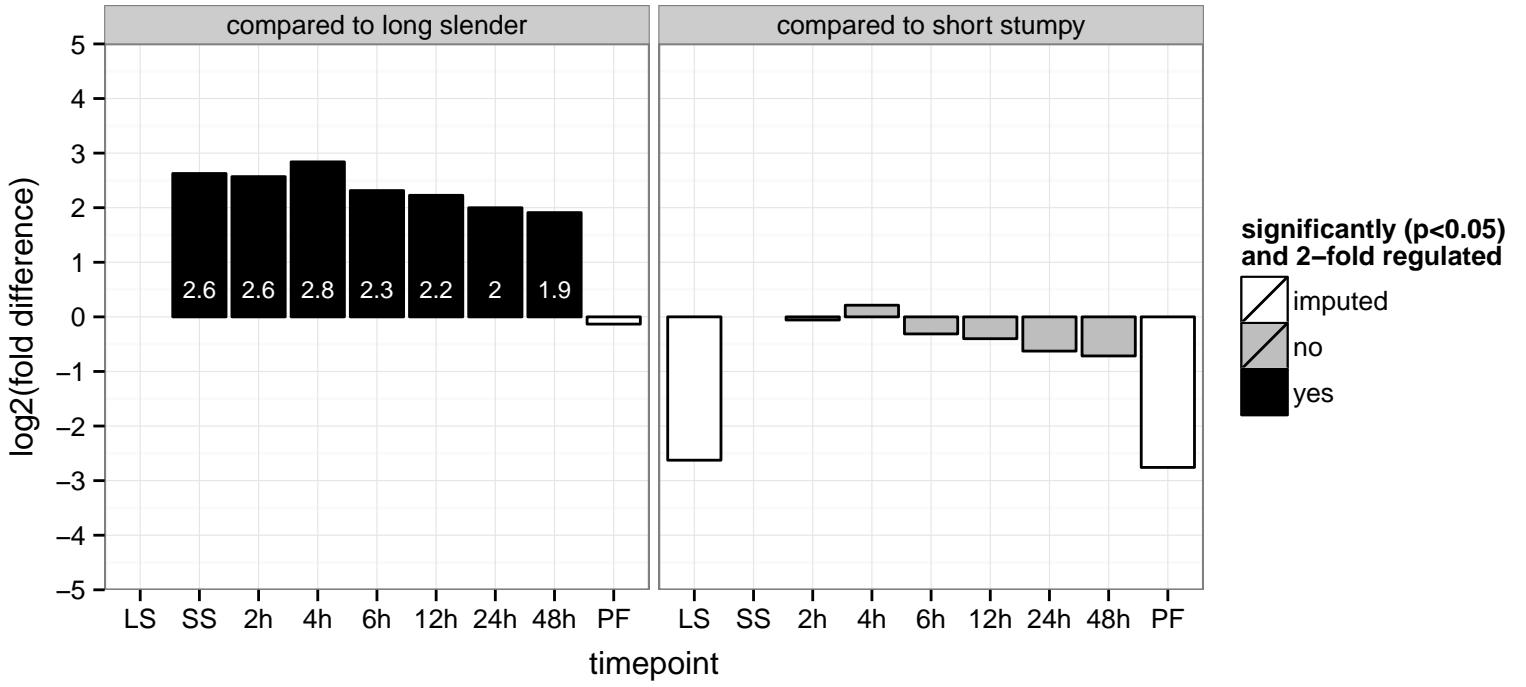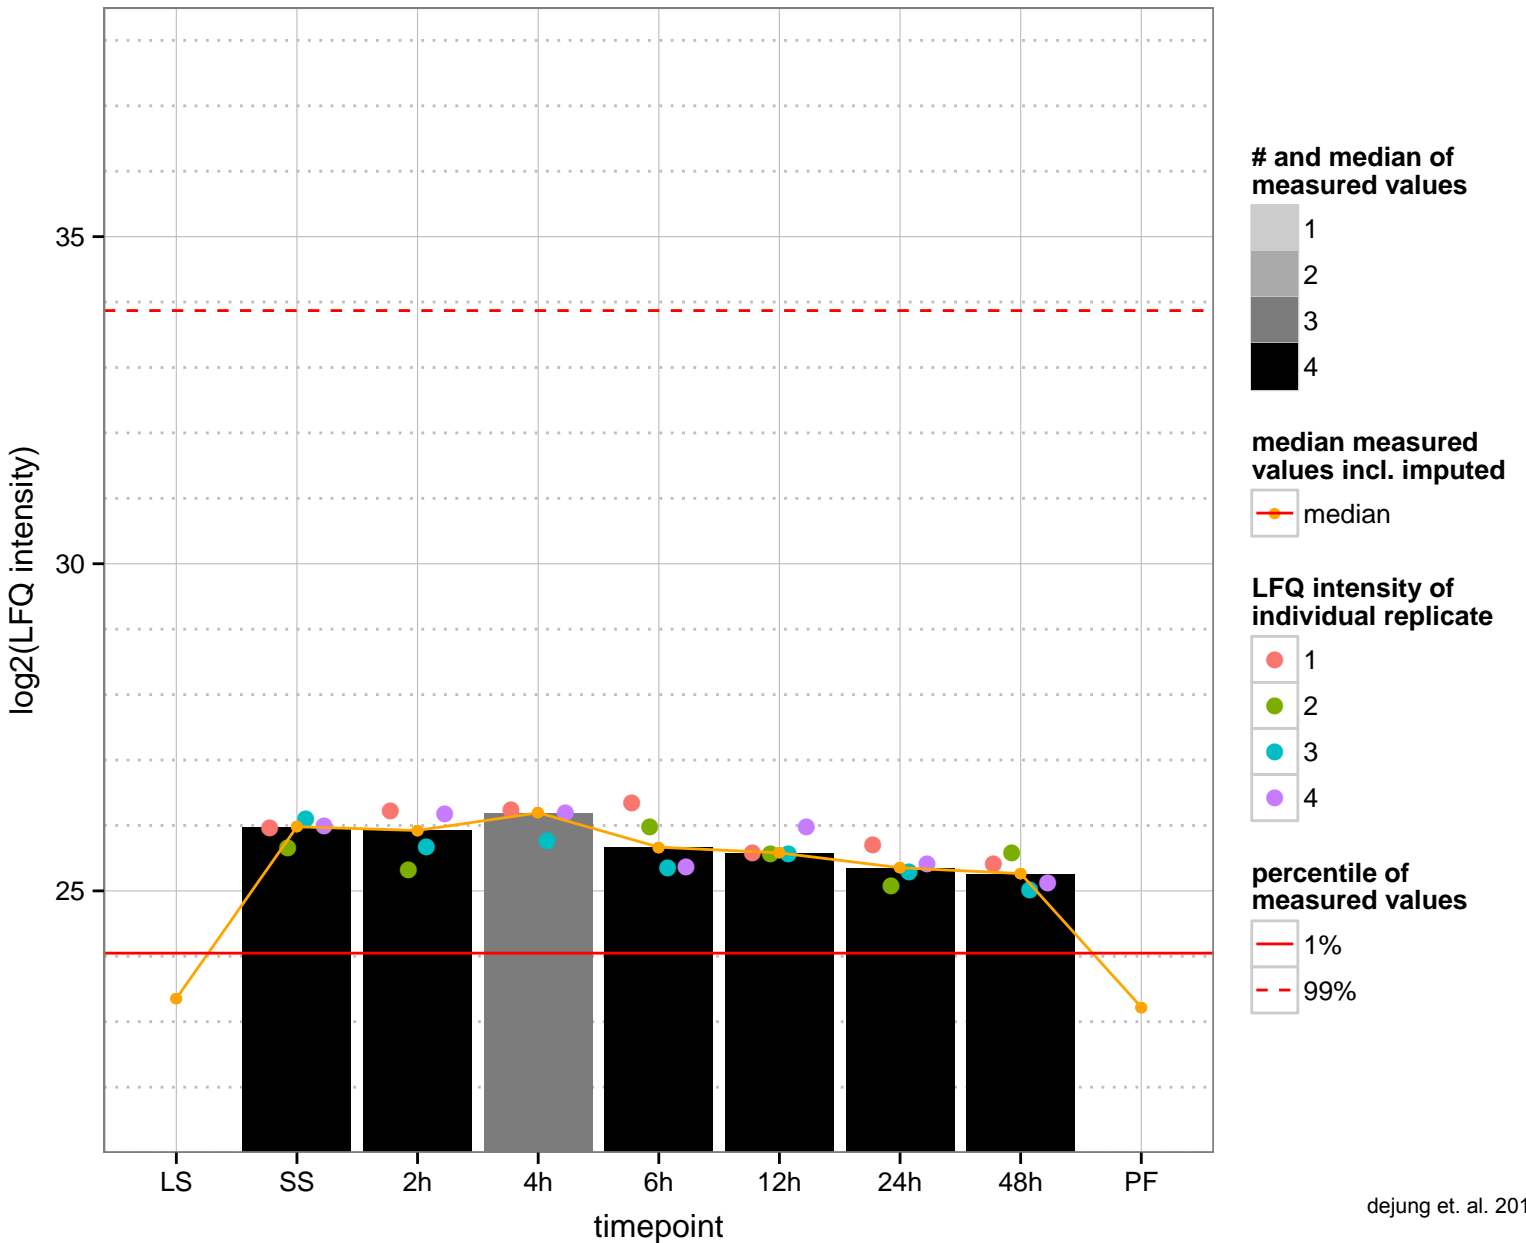

macrophage infectivity potentiator, precursor, putative, FKBP-type peptidylprolyl cis-trans isomerase, putative (MIP)  
 Tb927.10.15590  
 AGOF: FK506 binding, peptidyl-prolyl cis-trans isomerase activity  
 AGOC: null  
 AGOP: protein folding  
 PGO: null  
 PGOC: null  
 PGOP: protein folding

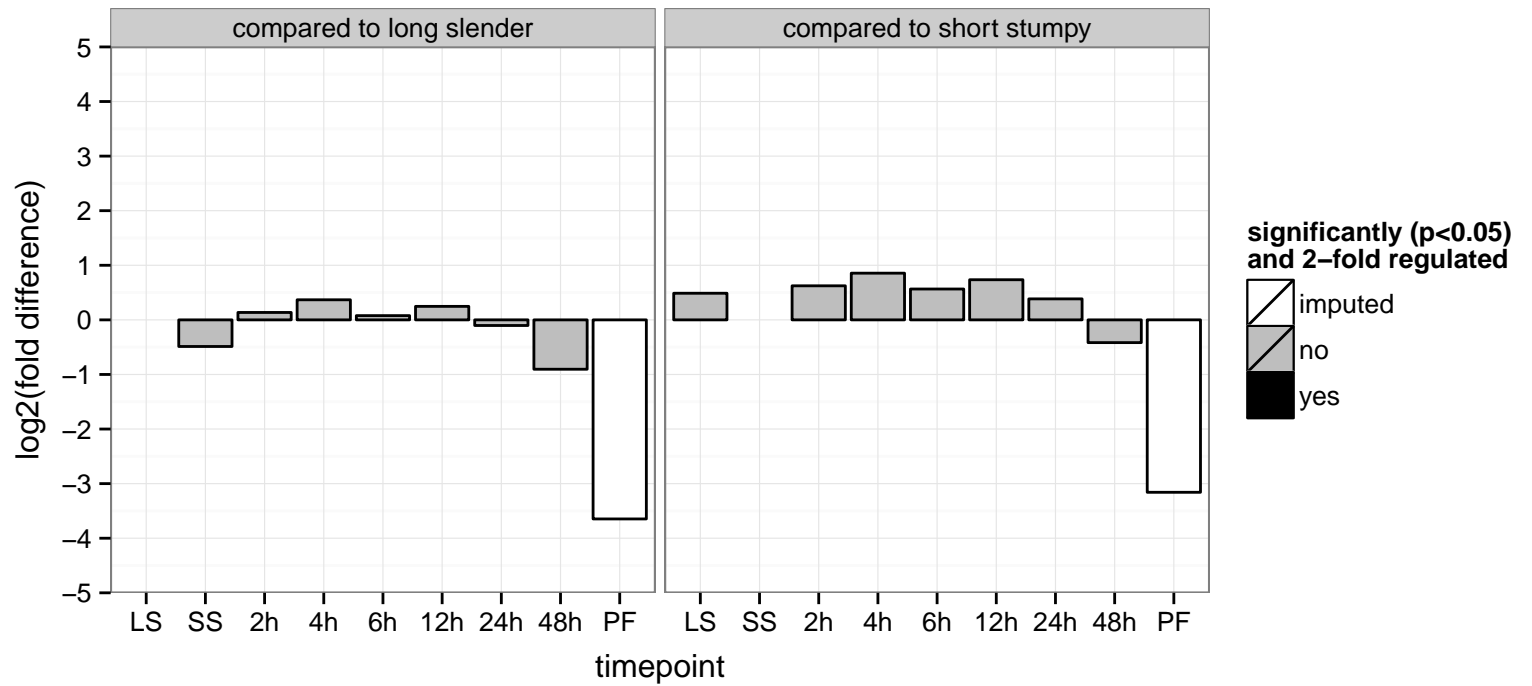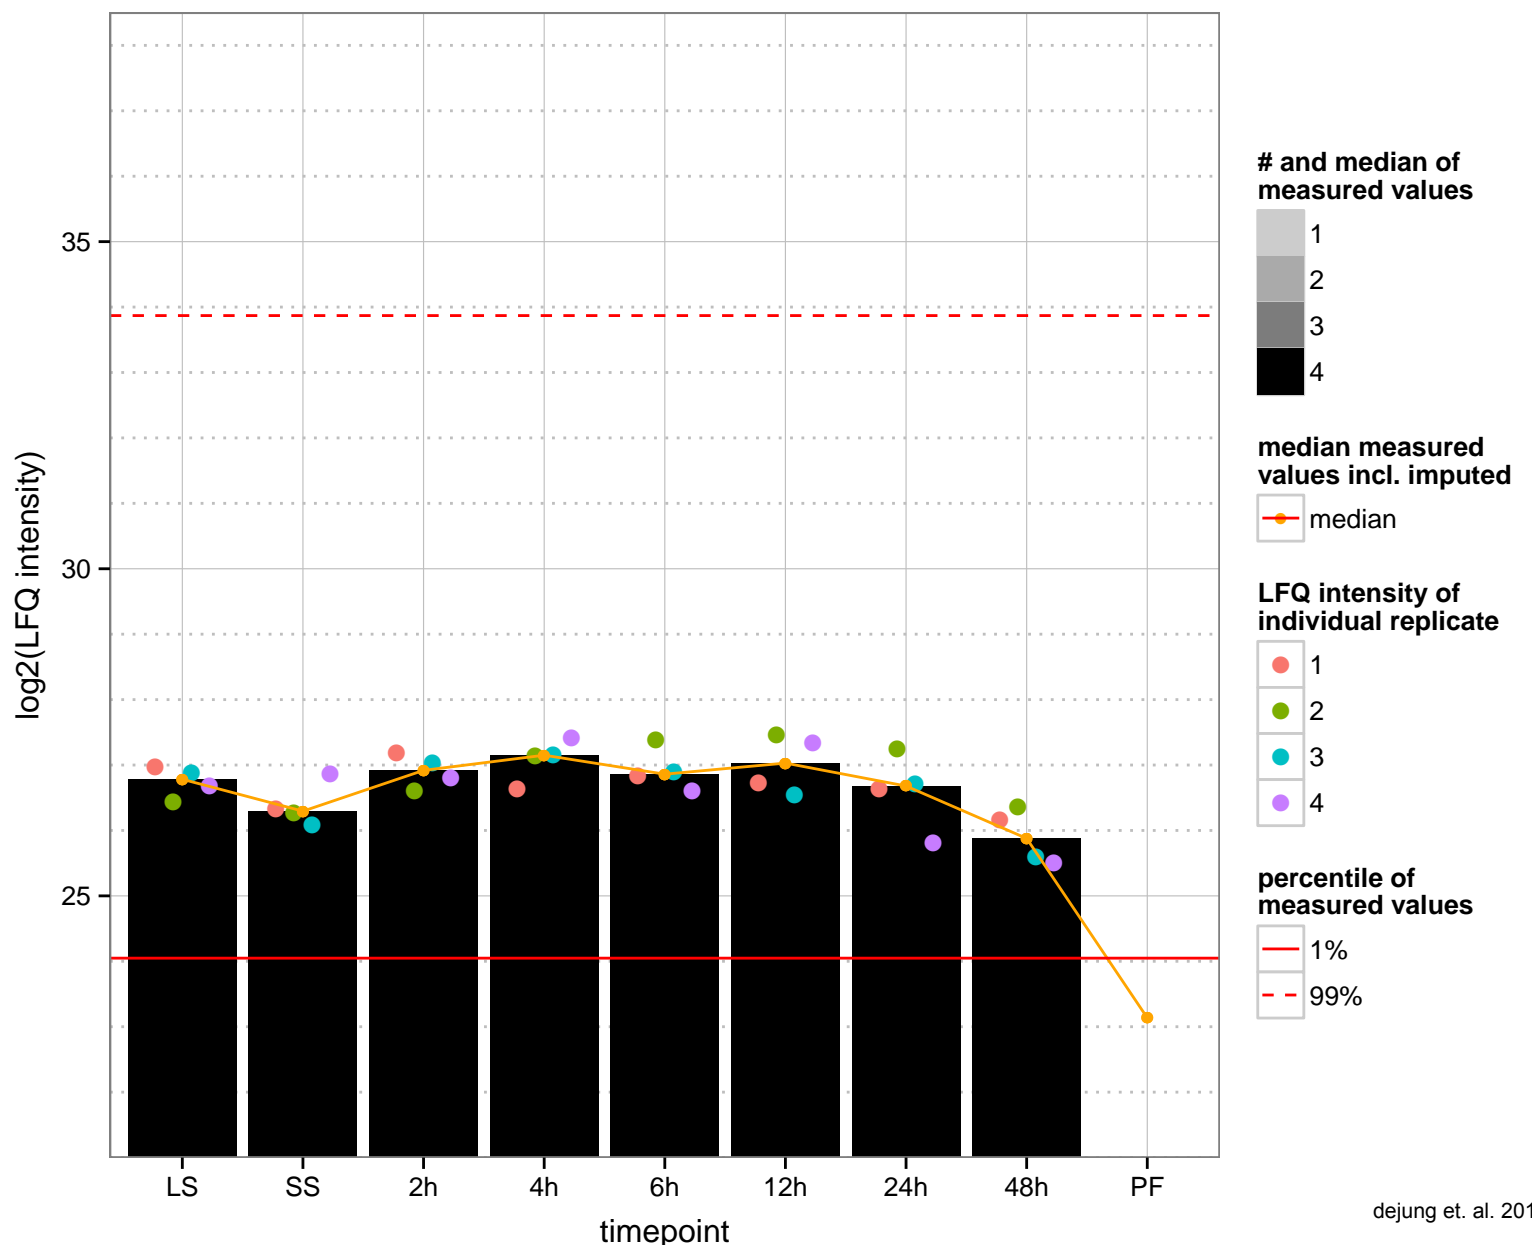

hypothetical protein, conserved  
 Tb927.10.15640  
 AGOF: null  
 AGOC: null  
 AGOP: null  
 PGO: protein binding  
 PGOC: null  
 PGOP: null

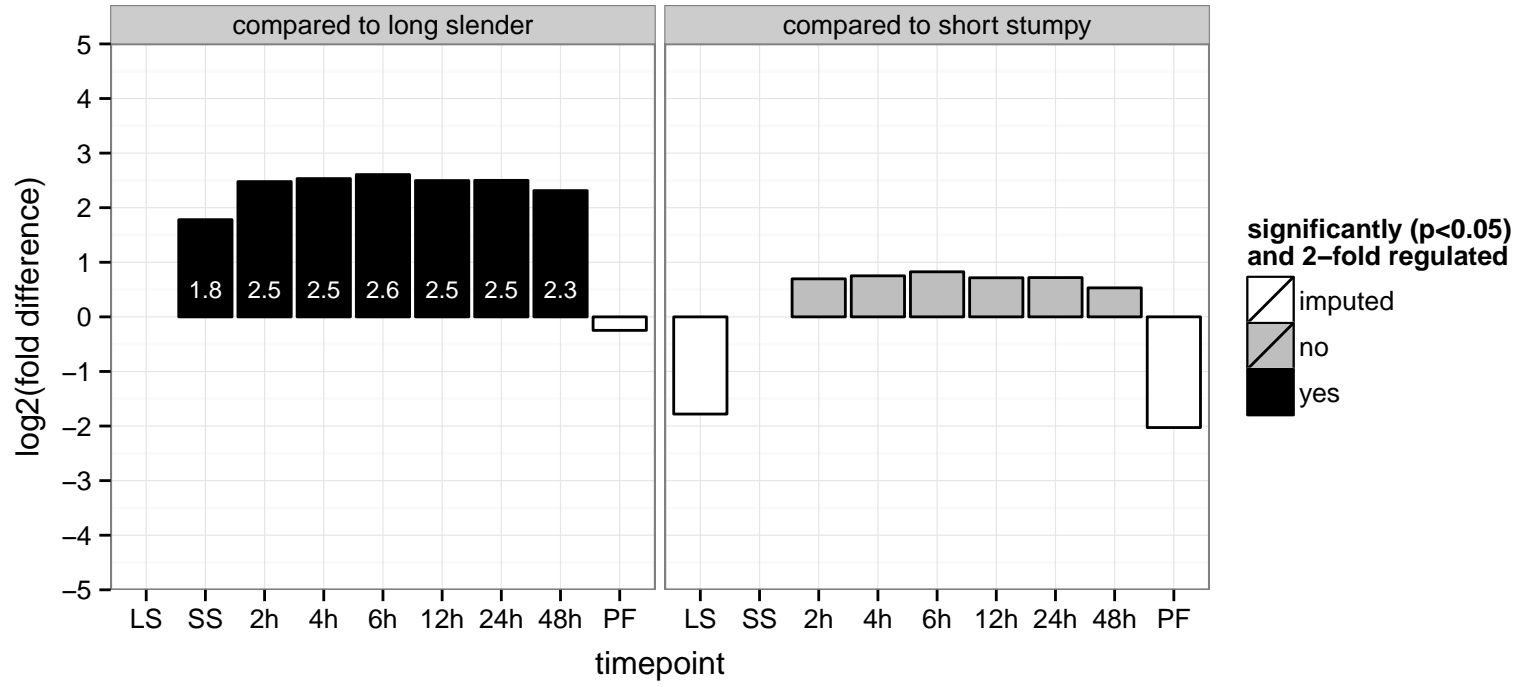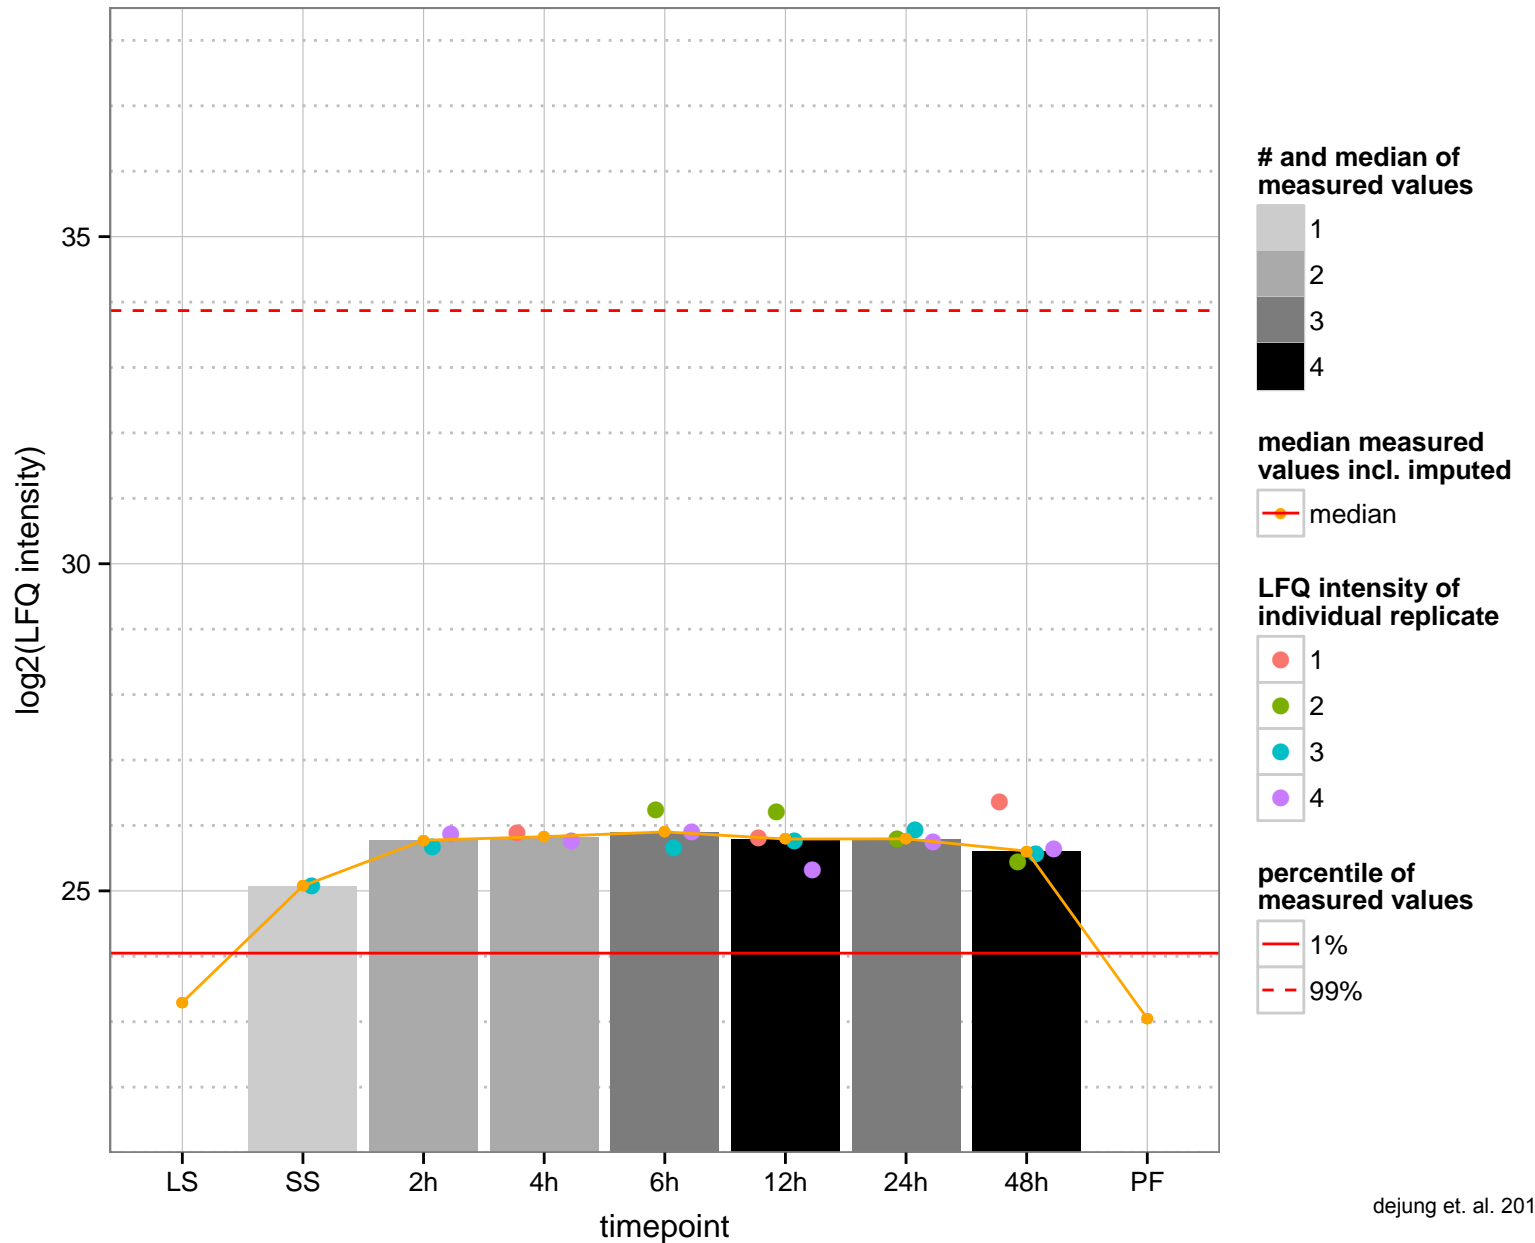

mitogen activated protein kinase 4, putative, map kinase (MAPK2)

Tb927.10.16030

AGOF: ATP binding, MAP kinase activity, kinase activity, protein serine/threonine kinase activity, protein tyrosine kinase activity

AGOC: null

AGOP: protein phosphorylation

PGOF: ATP binding, protein kinase activity, transferase activity, transferring phosphorus-containing groups

PGOC: null

PGOP: protein phosphorylation

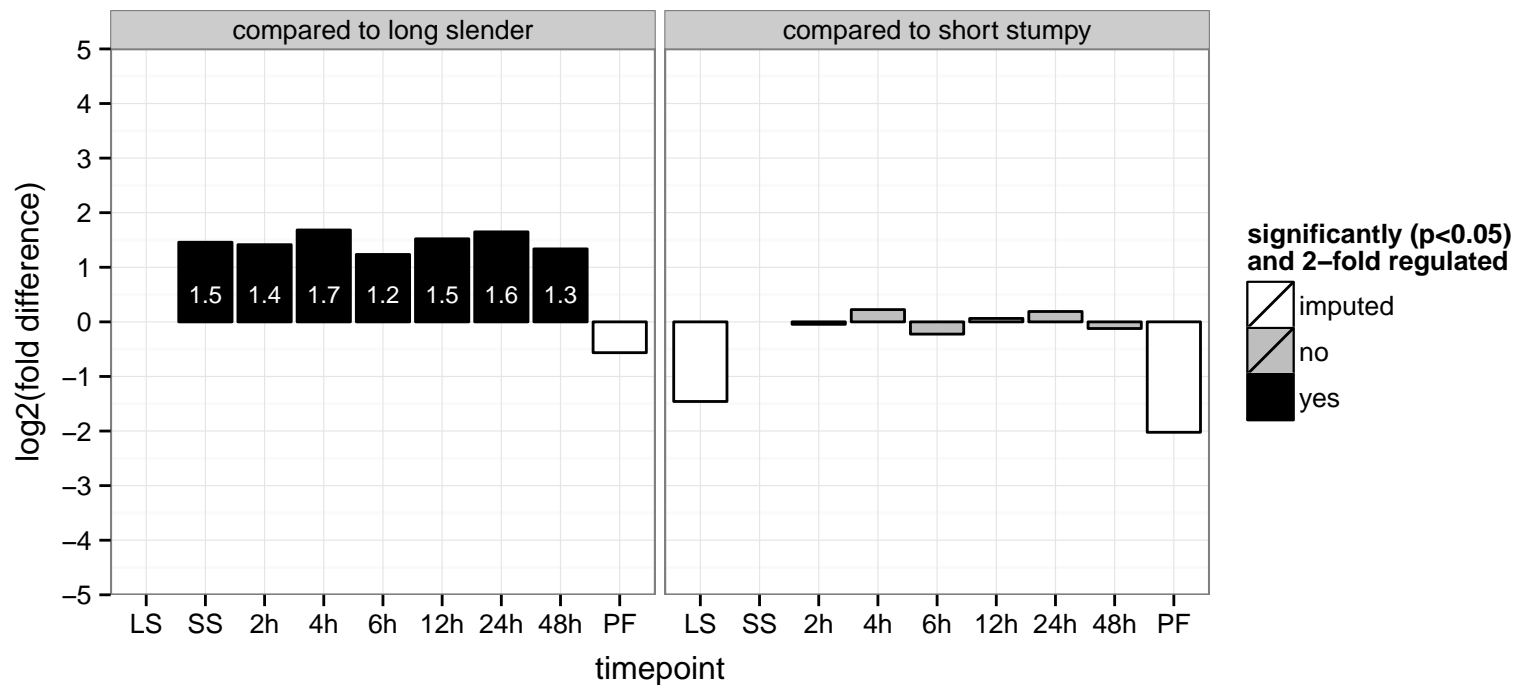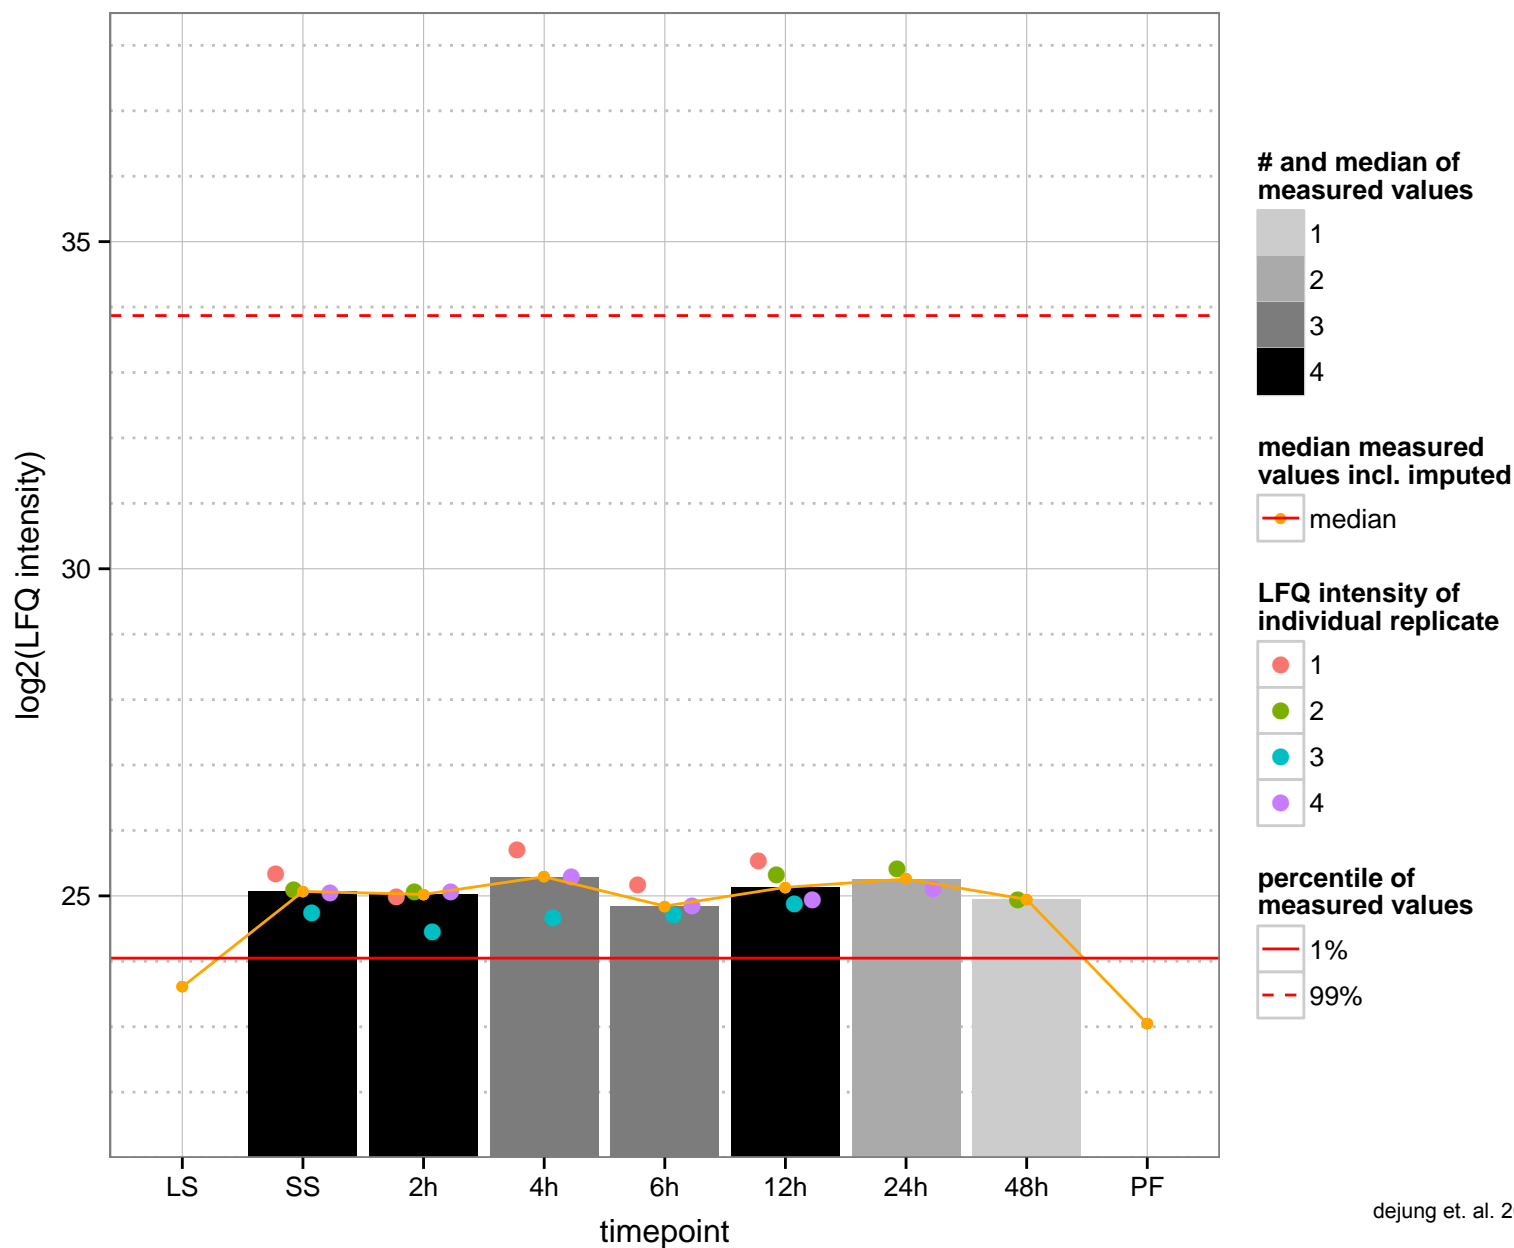

peptidylprolyl isomerase-like protein, putative, FK506-binding protein (FKBP)-type peptidyl-prolyl isomerase  
 Tb927.10.16100;Tb11.v5.0411  
 AGOF: null, heat shock protein binding, peptidyl-prolyl cis-trans isomerase activity  
 AGOC: null  
 AGOP: null, protein folding  
 PGO: protein binding  
 PGO: null  
 PGO: protein folding

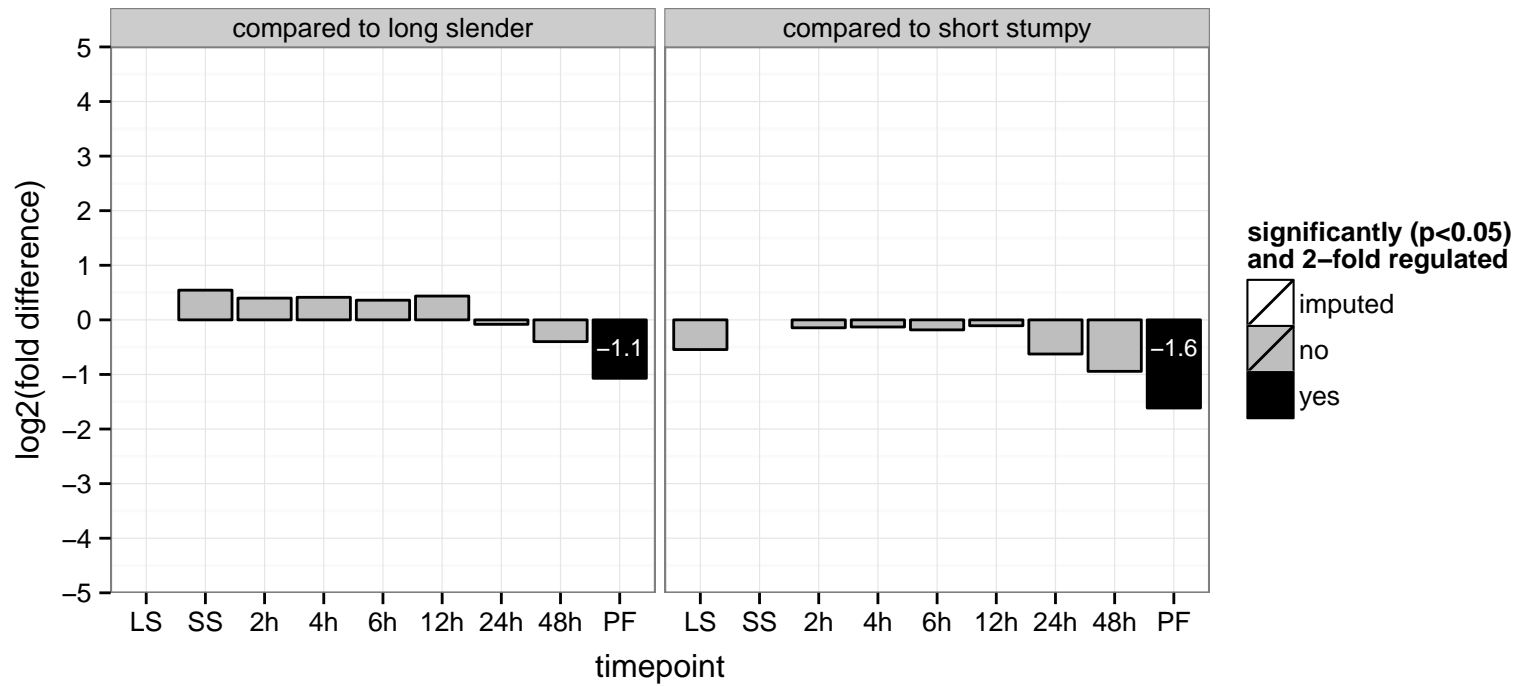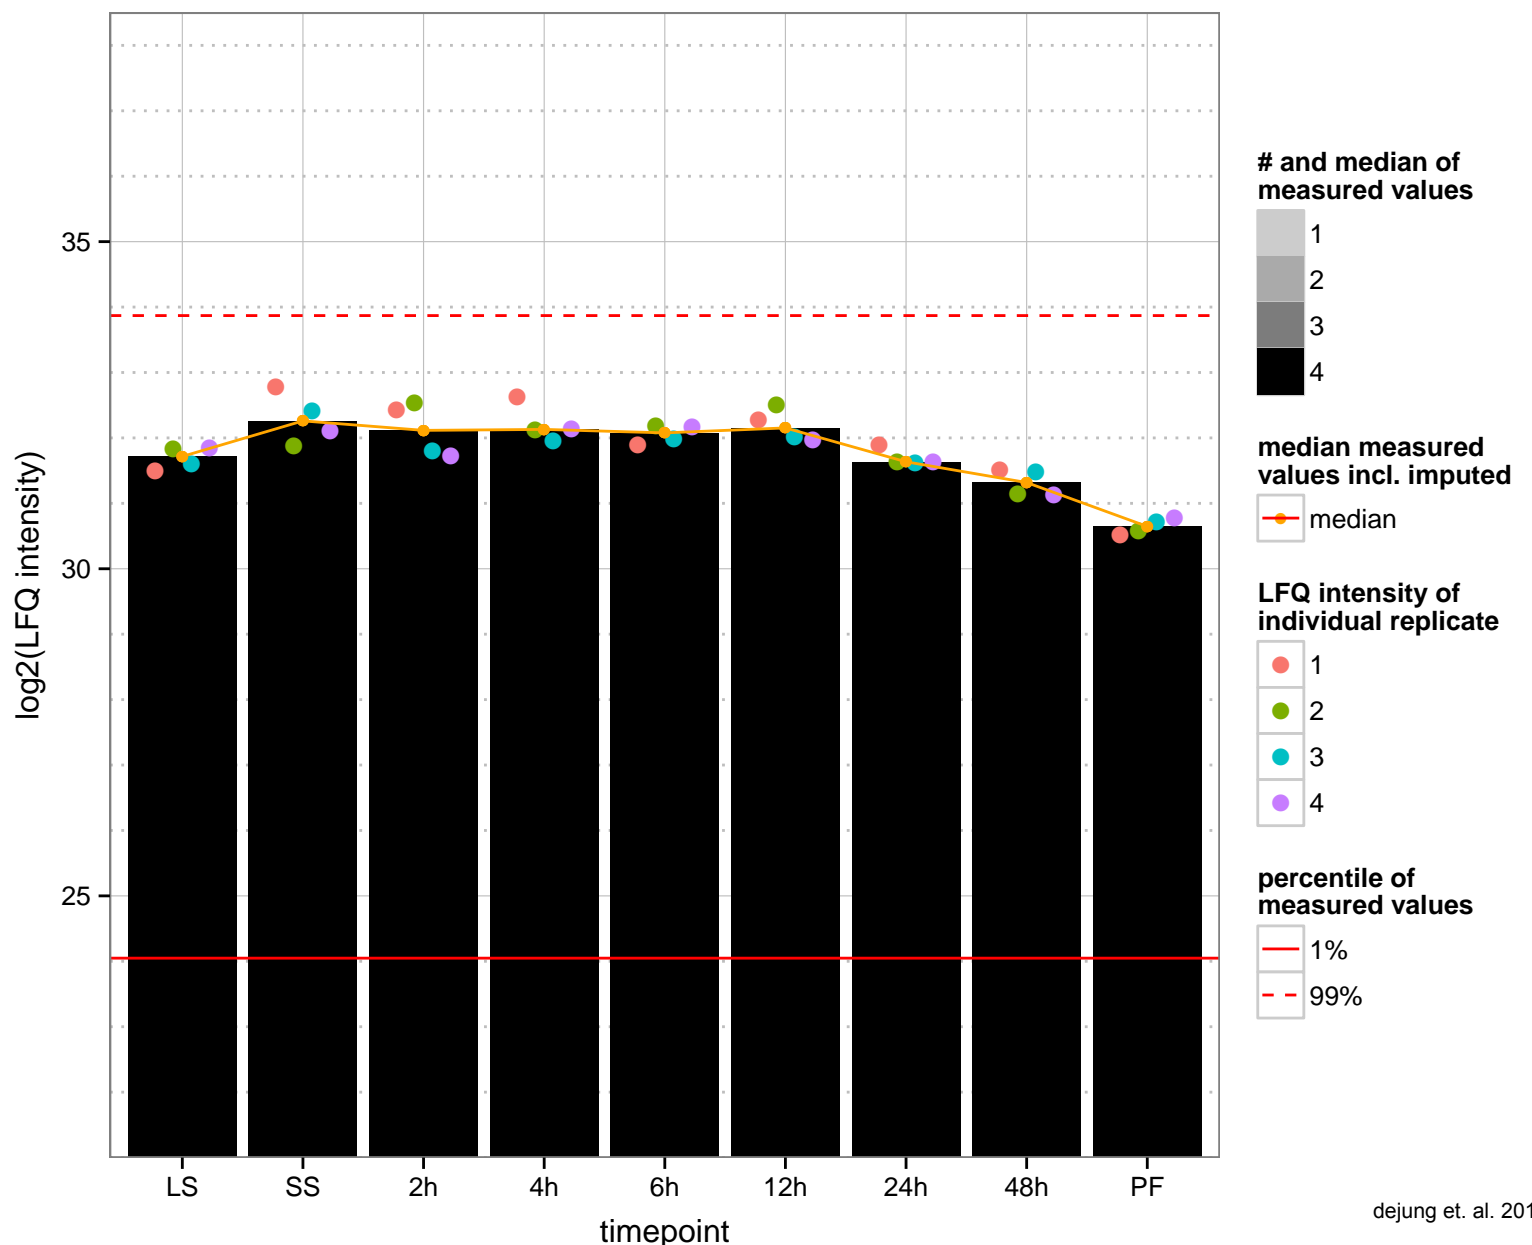



syntaxin, putative  
 Tb927.10.1830  
 AGOF: transporter activity  
 AGOC: membrane  
 AGOP: vesicle-mediated transport  
 PGO: protein binding  
 PGO: null  
 PGO: null

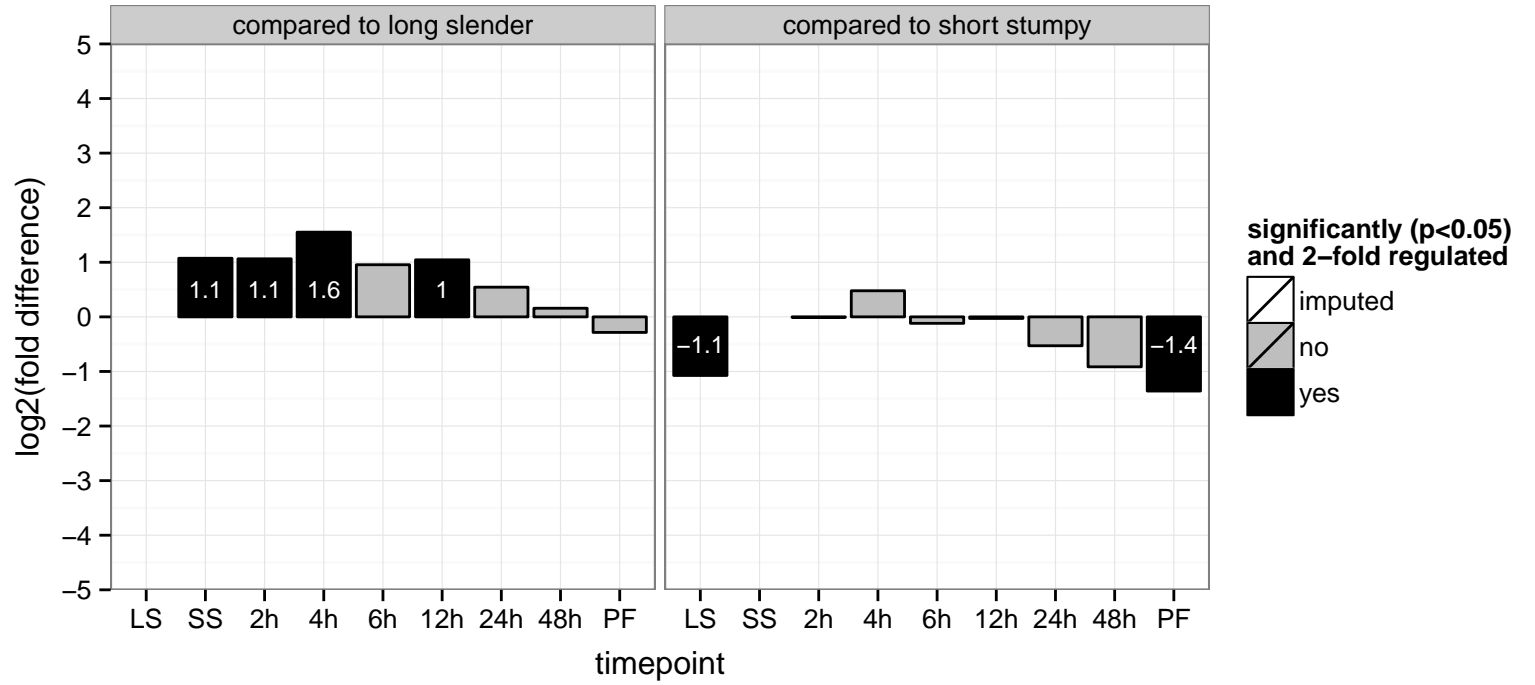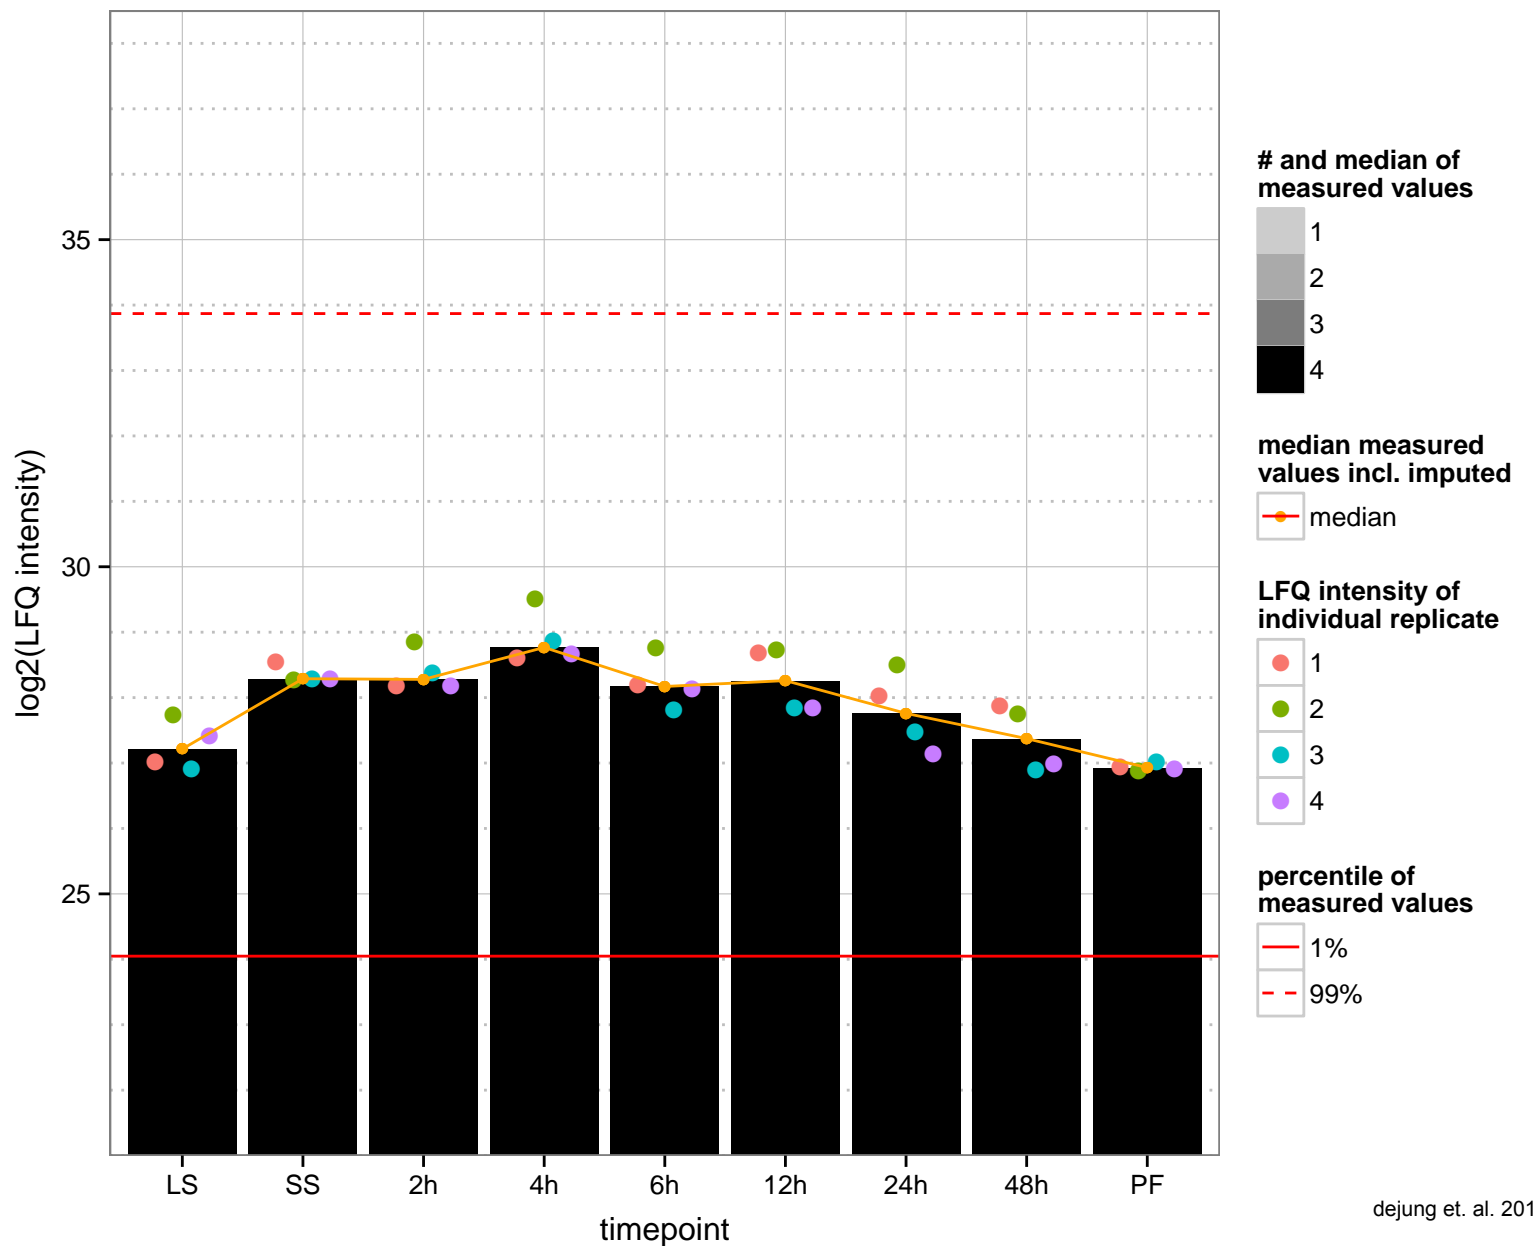

leucine-rich repeat protein (LRRP), putative  
 Tb927.10.1950  
 AGOF: null  
 AGOC: mitochondrion  
 AGOP: null  
 PGO: protein binding  
 PGOC: null  
 PGOP: null

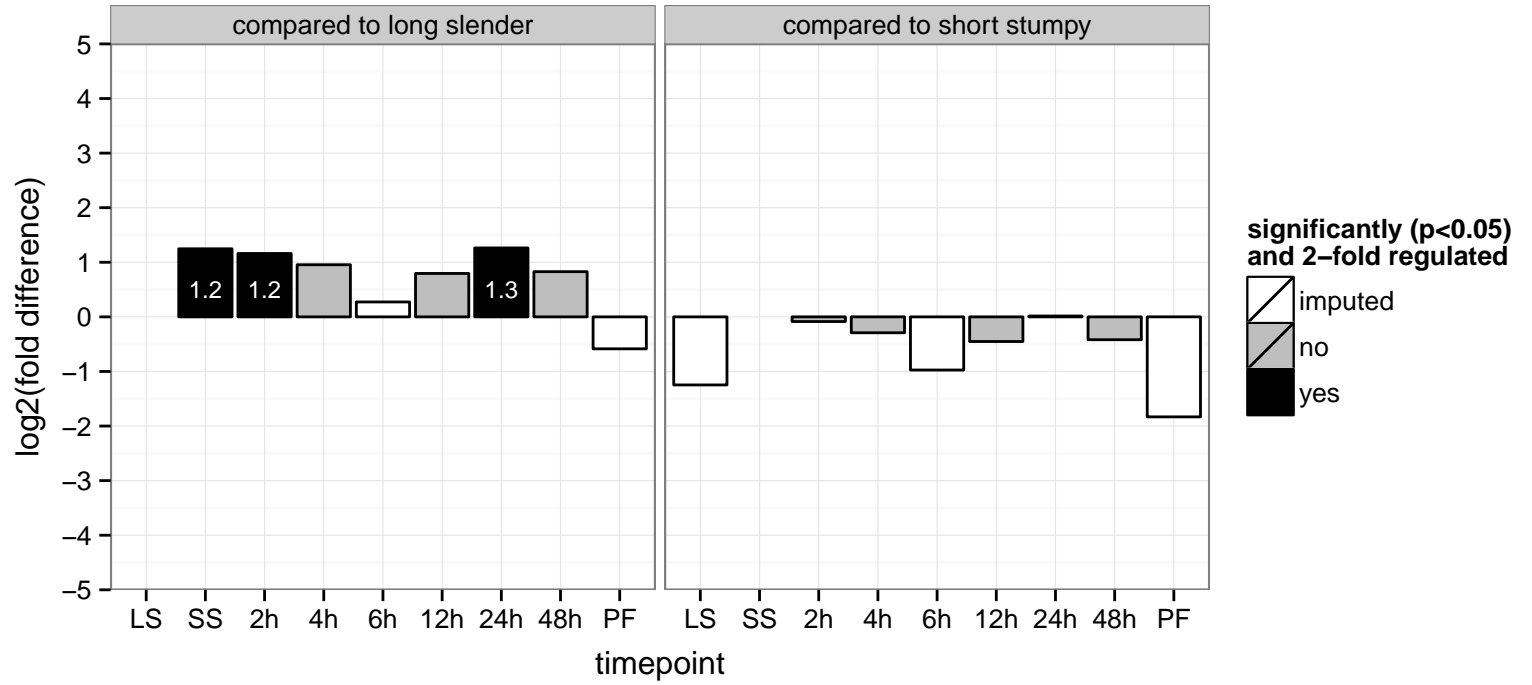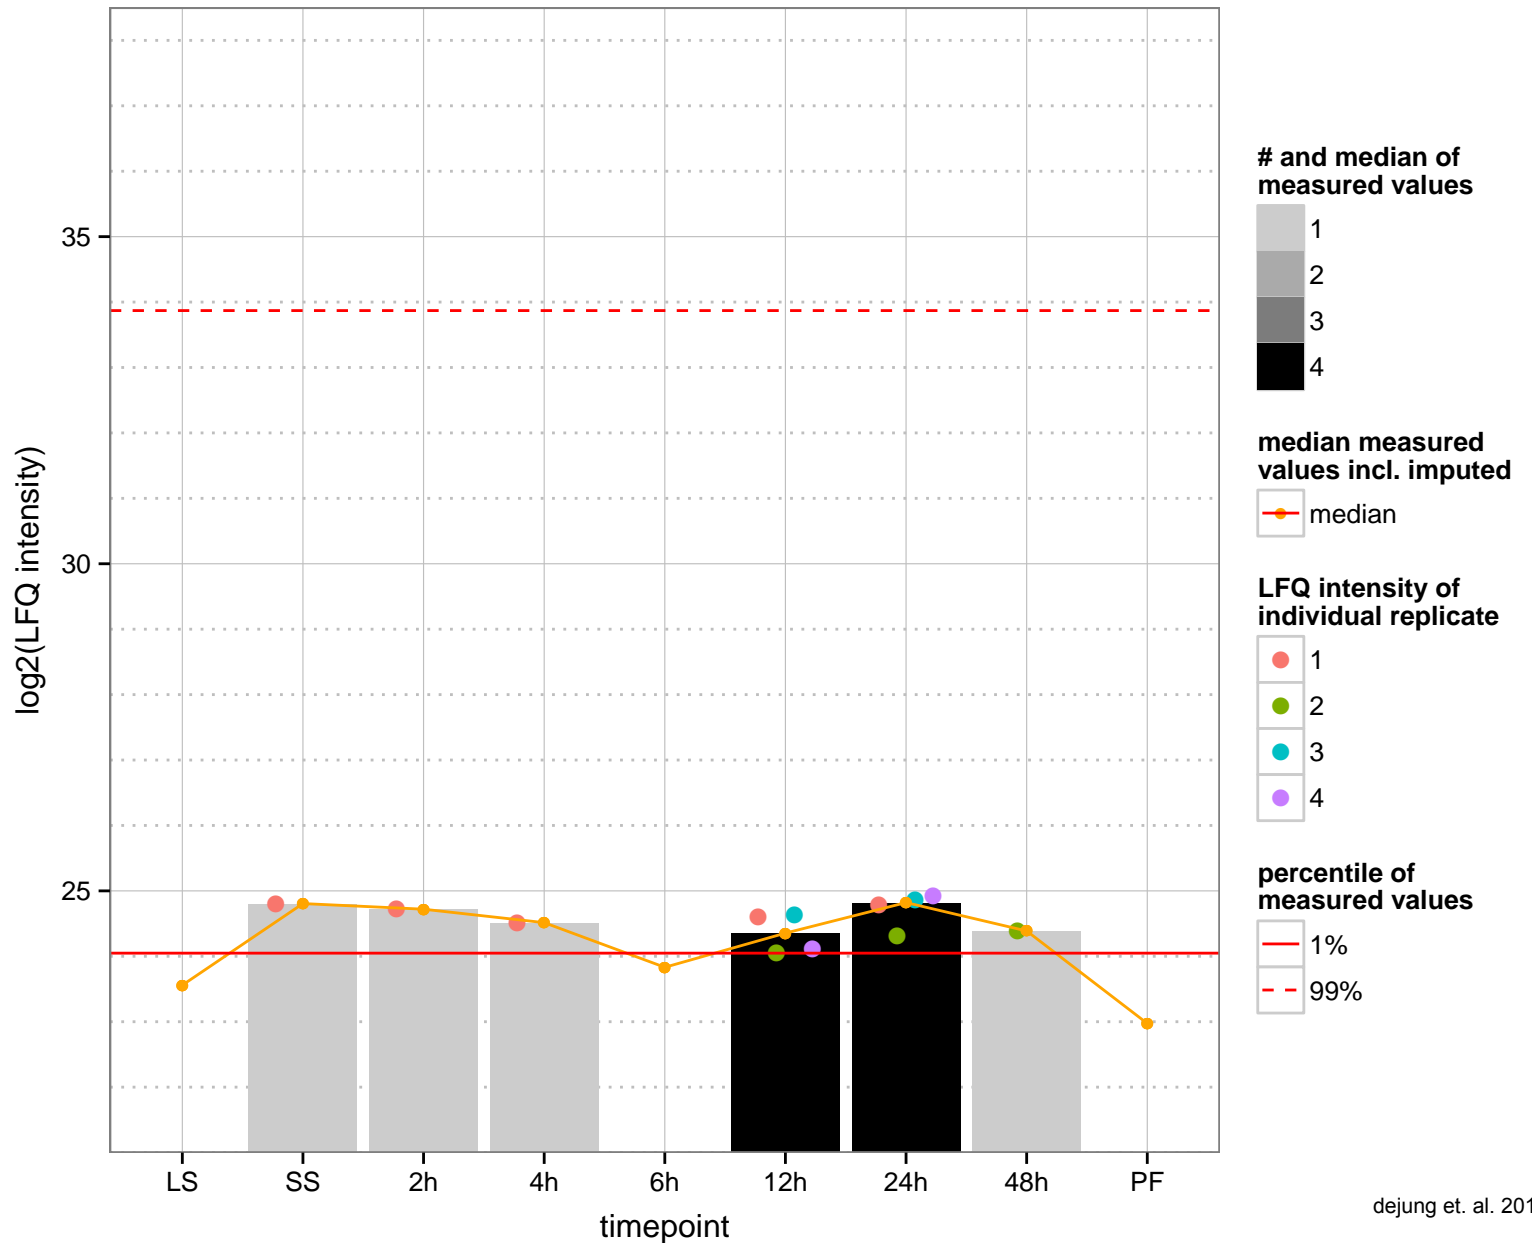

hexokinase (HK1)  
 Tb927.10.2010  
 AGOF: ATP binding, hexokinase activity  
 AGOC: glycosome  
 AGOP: carbohydrate metabolic process, glycolysis, protein hexamerization  
 PGO: ATP binding, phosphotransferase activity, alcohol group as acceptor  
 PGOC: null  
 PGO: carbohydrate metabolic process

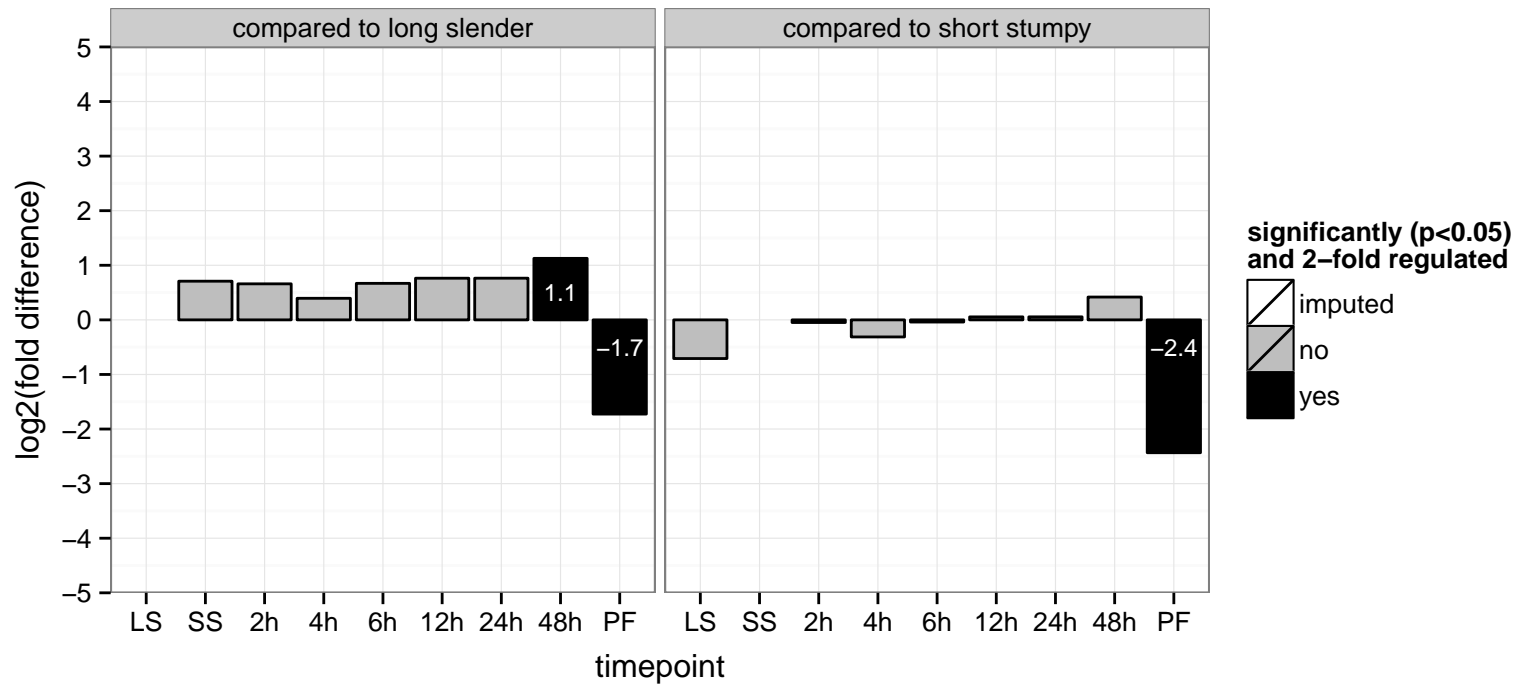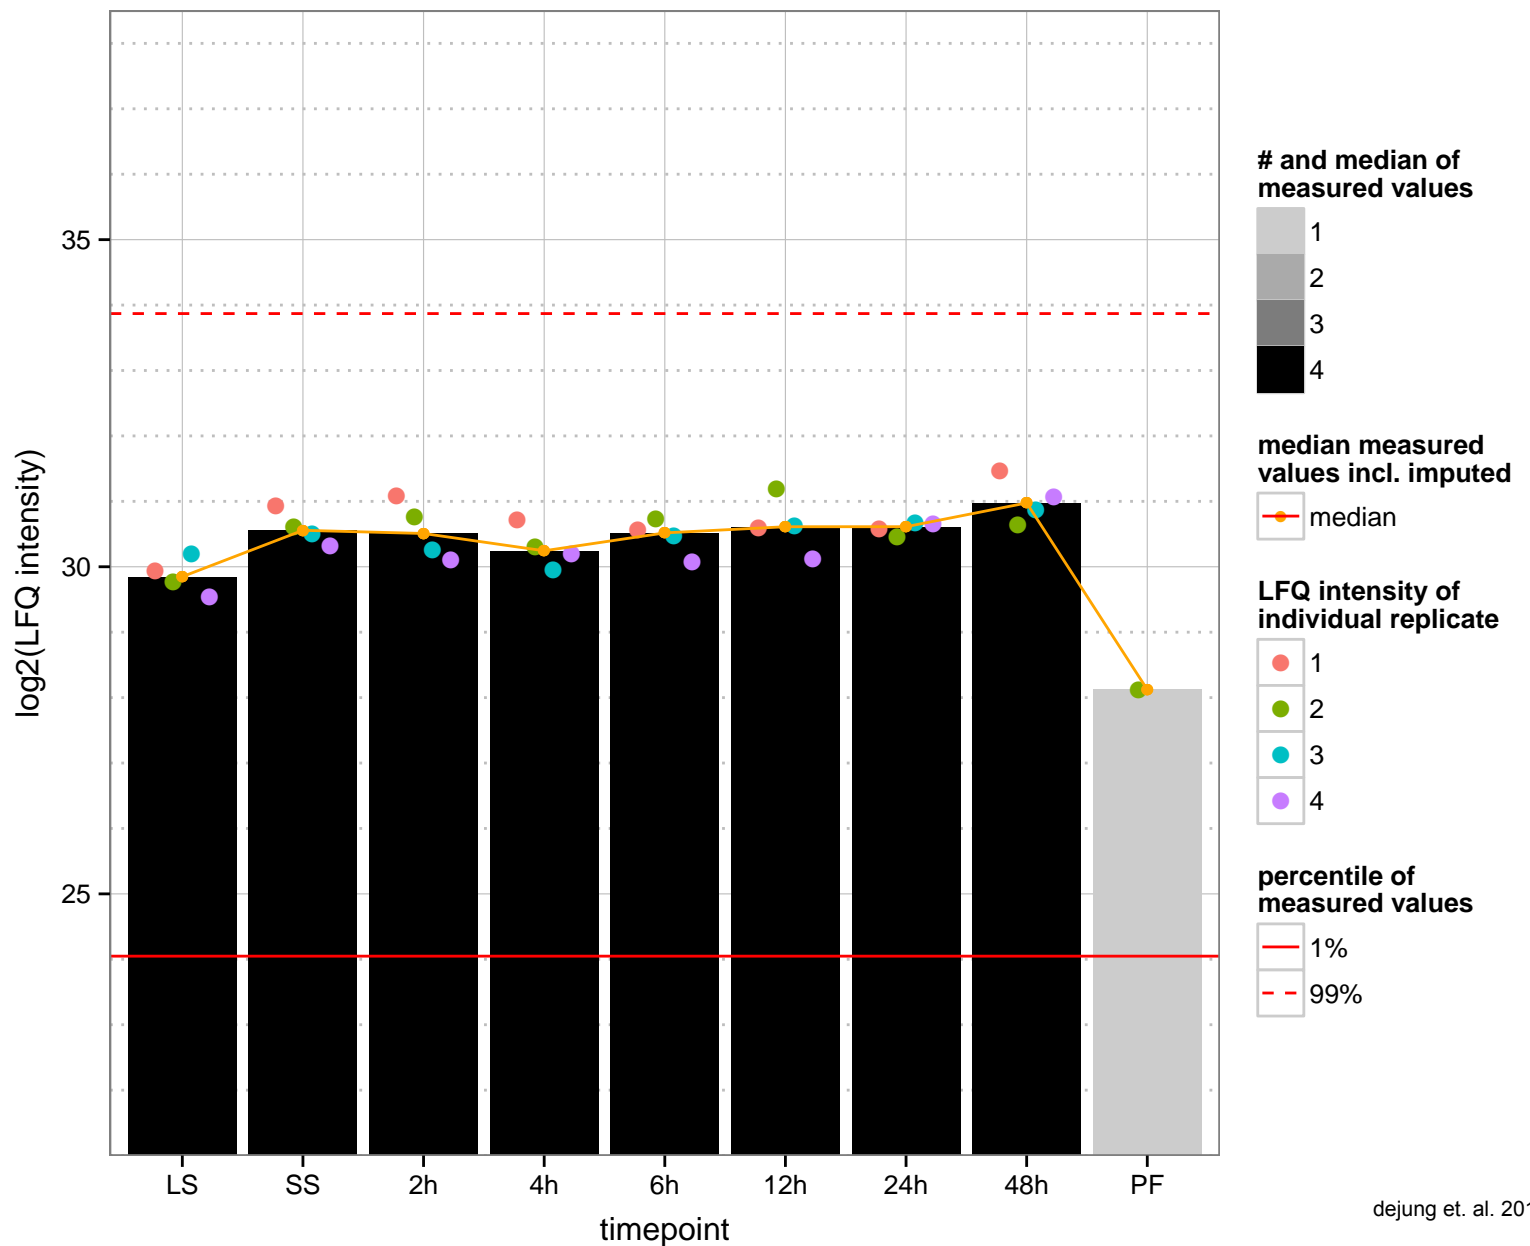

hexokinase (HK2)  
 Tb927.10.2020  
 AGOF: ATP binding, hexokinase activity  
 AGOC: glycosome  
 AGOP: carbohydrate metabolic process, glycolysis  
 PGOF: ATP binding, phosphotransferase activity, alcohol group as acceptor  
 PGO: null  
 PGO: carbohydrate metabolic process

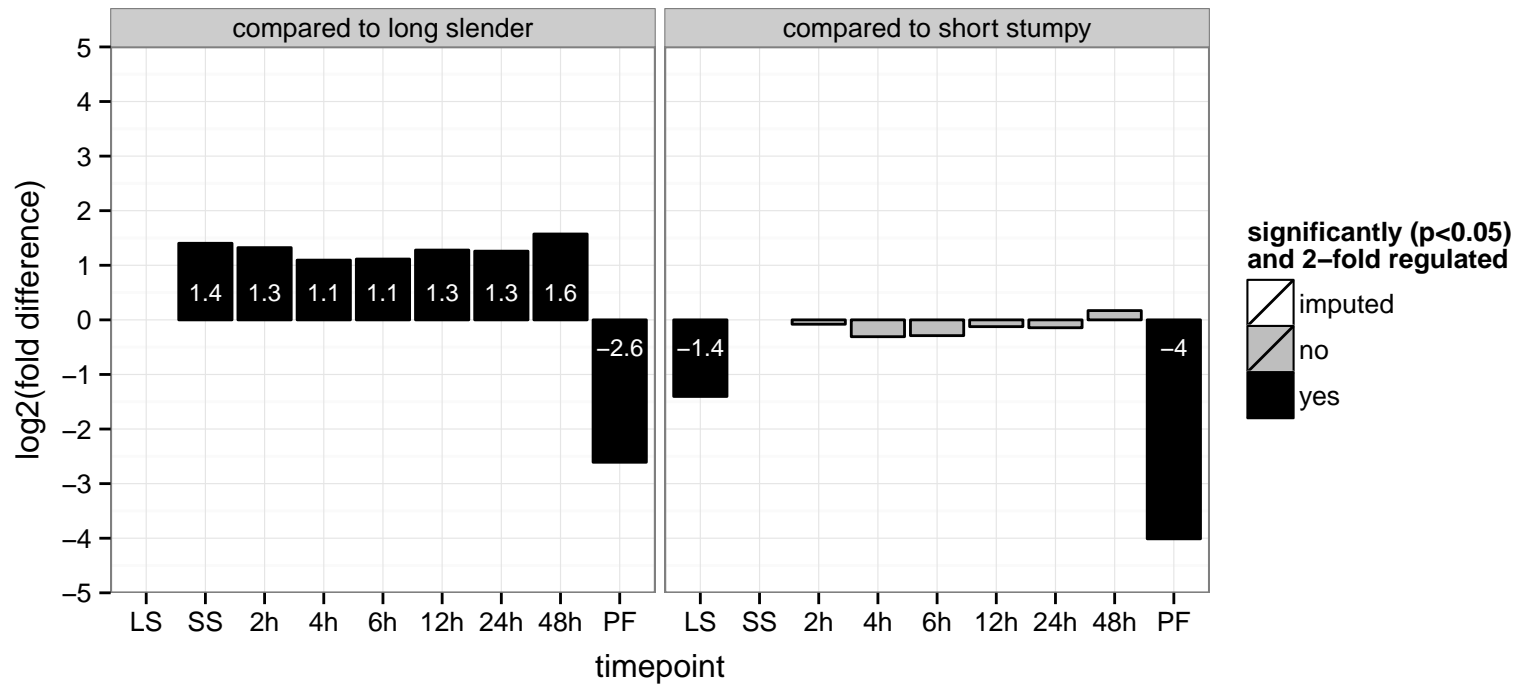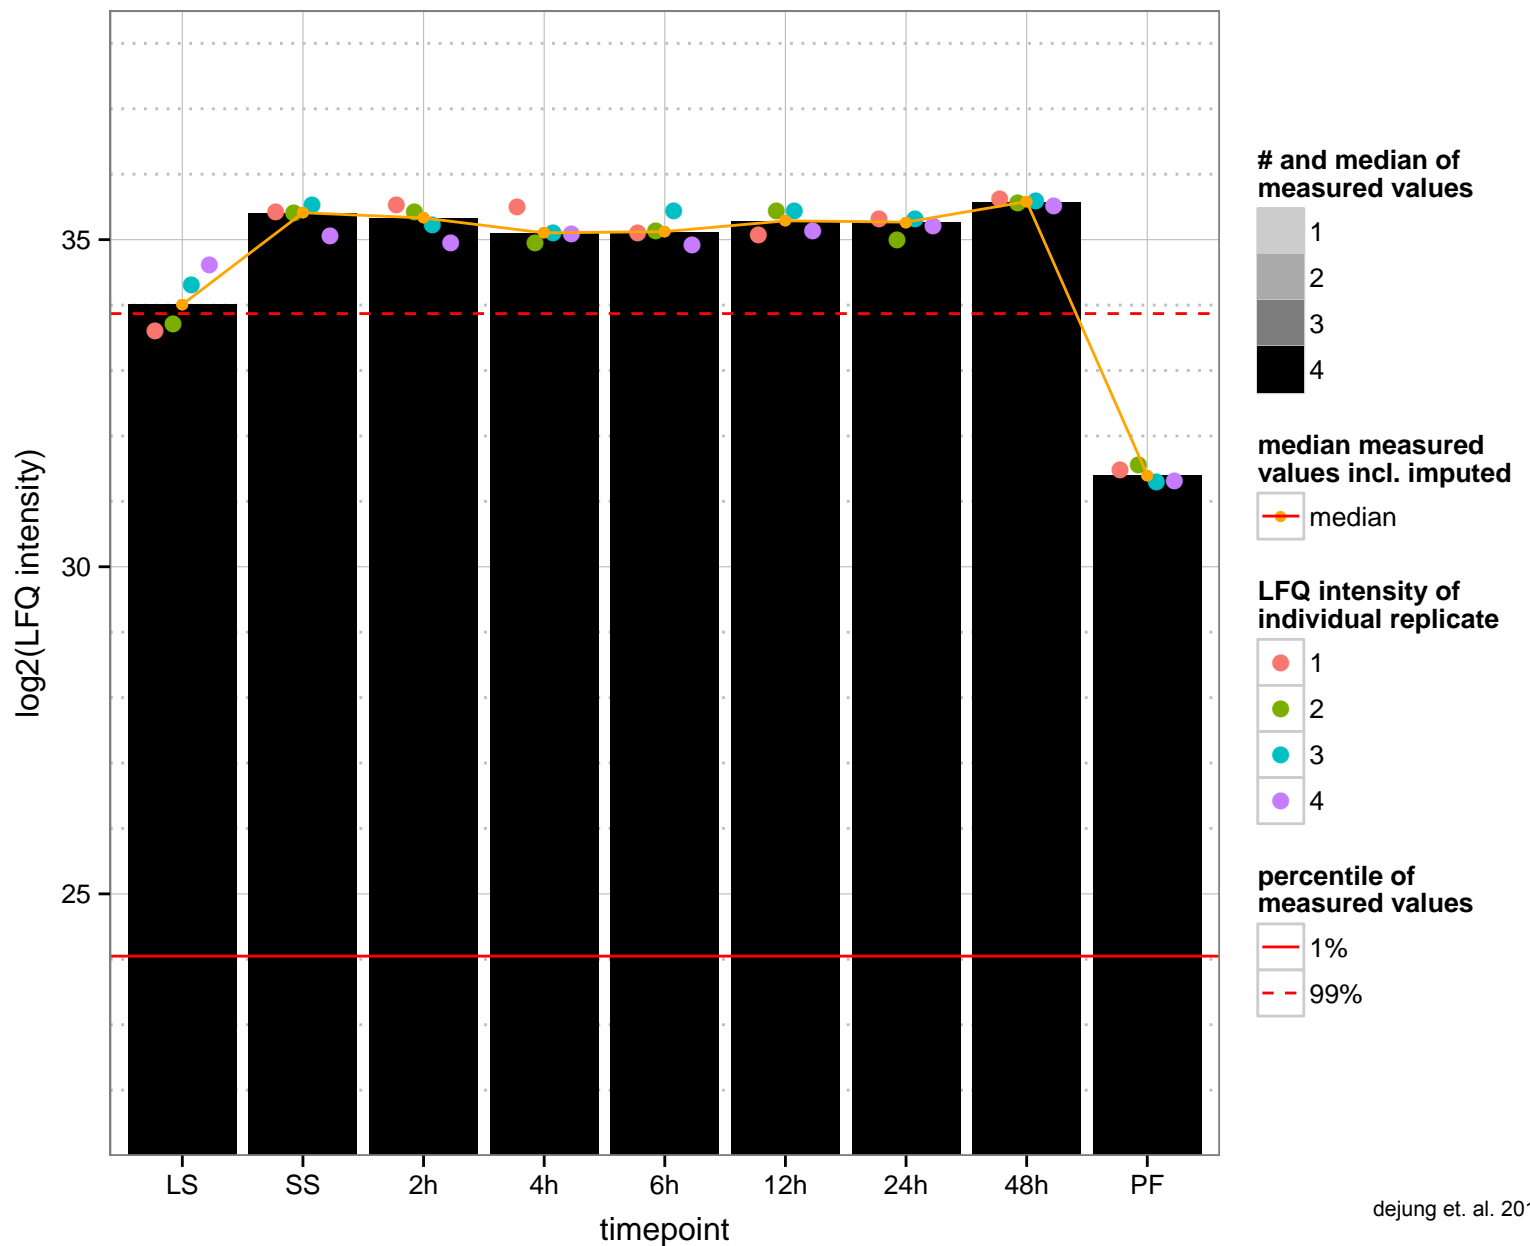

hypothetical protein, conserved  
 Tb927.10.260  
 AGOF: null  
 AGOC: null  
 AGOP: null  
 PGO: null  
 PGOC: null  
 PGOP: null

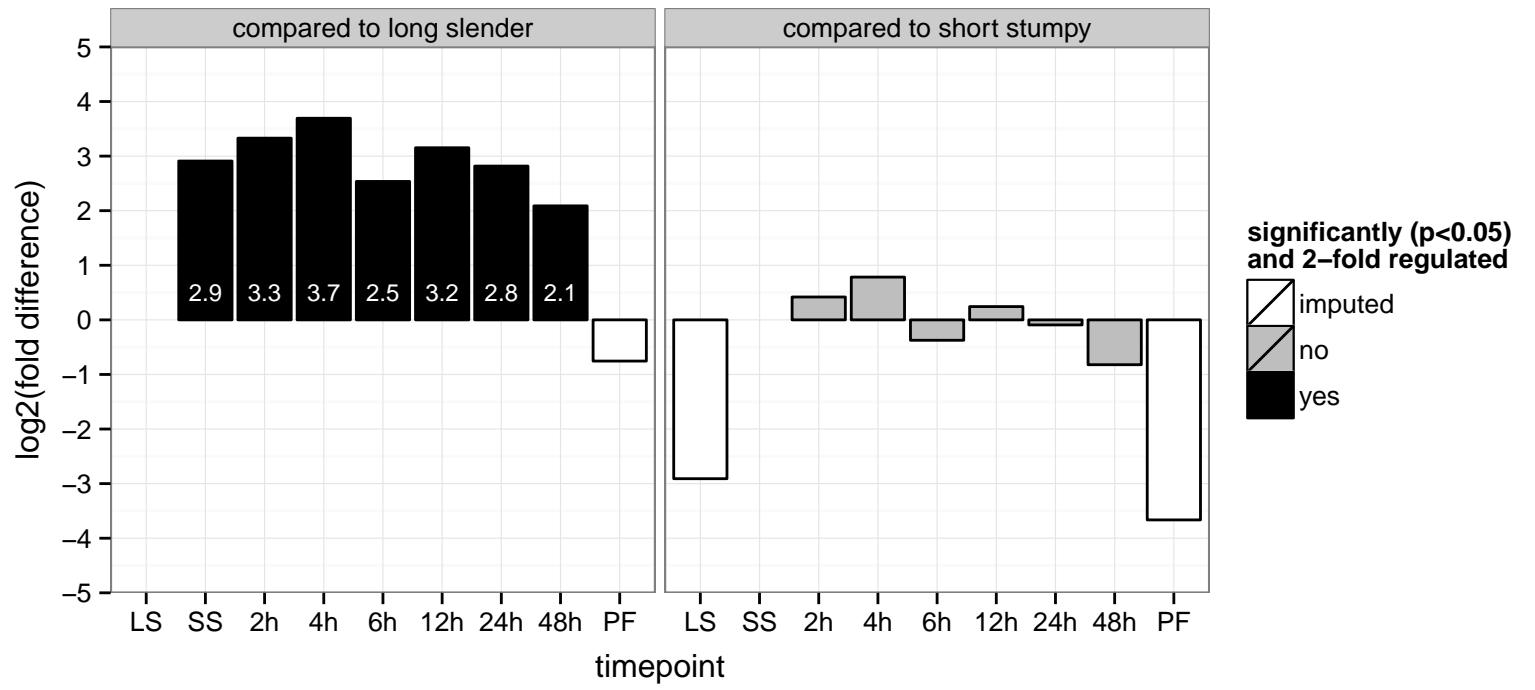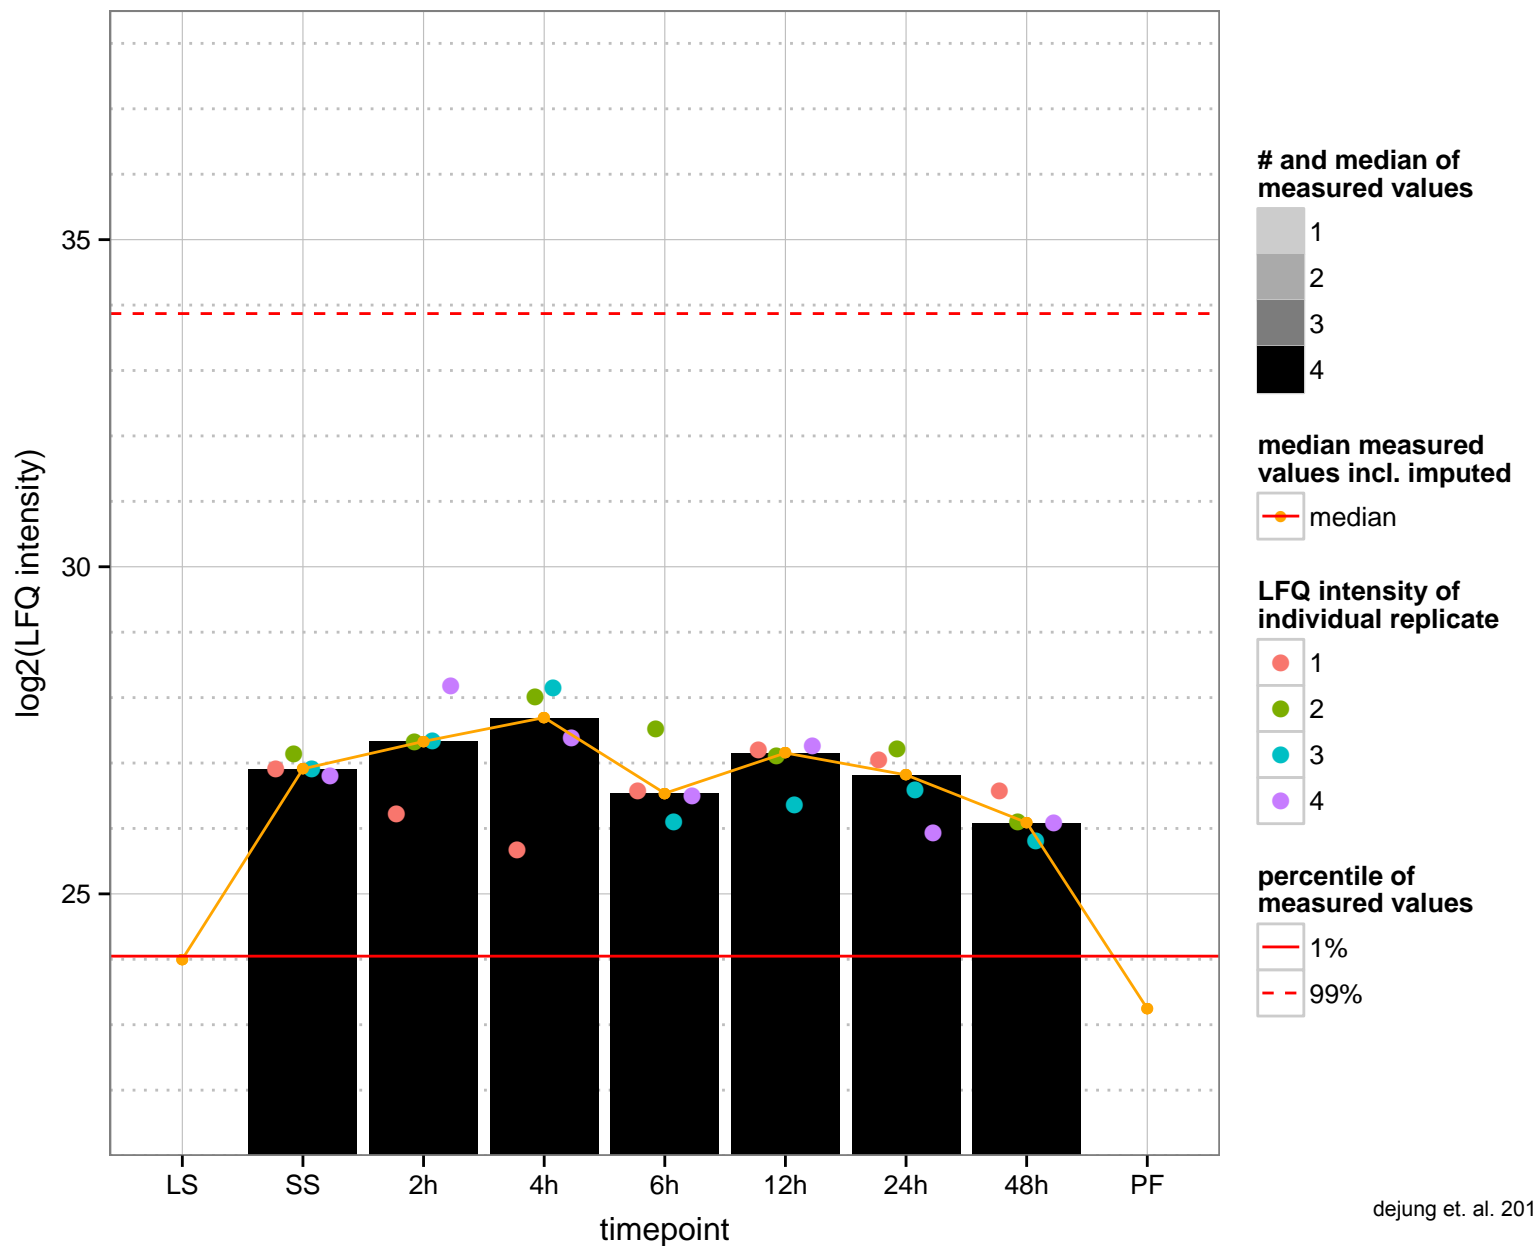

hypothetical protein, conserved  
 Tb927.10.2940  
 AGOF: null  
 AGOC: Golgi apparatus, endoplasmic reticulum  
 AGOP: intracellular protein transport  
 PGO: null  
 PGOC: null  
 PGOP: null

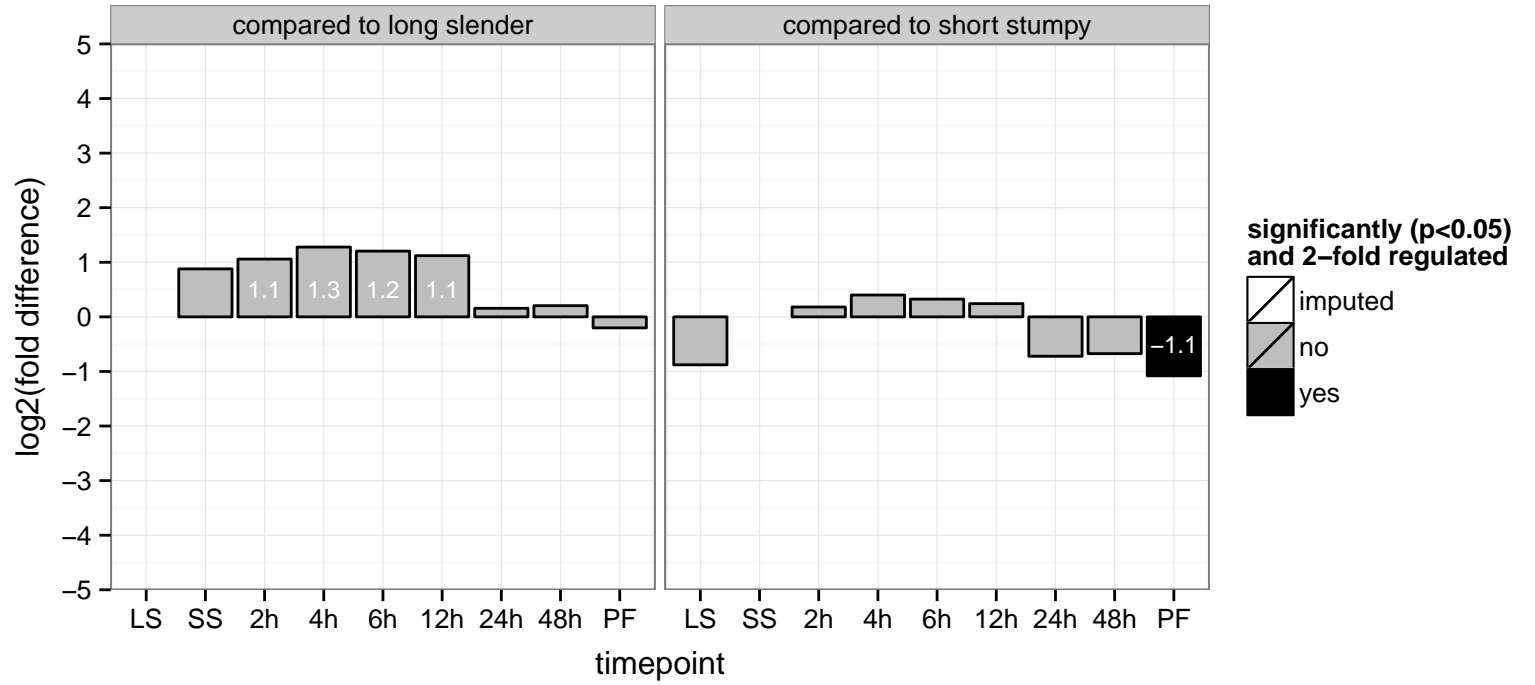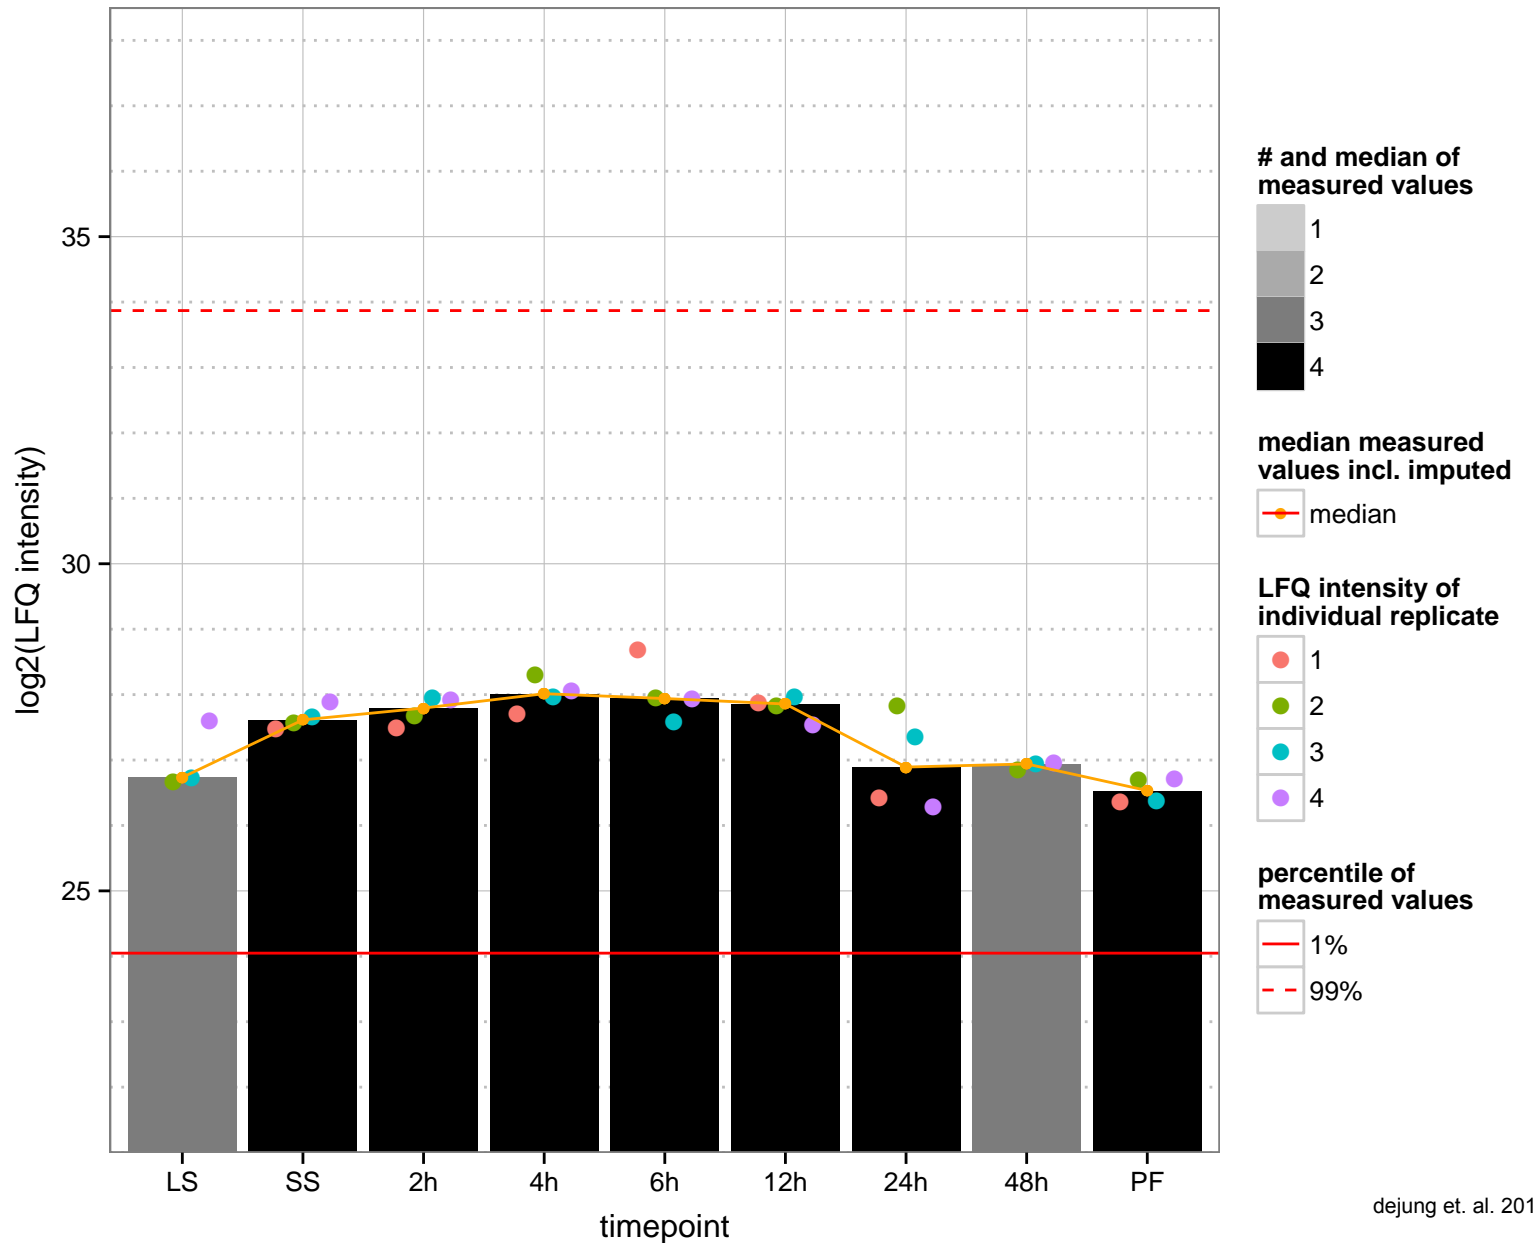

glycerol-3-phosphate acyltransferase, putative  
 Tb927.10.3100  
 AGOF: acyl-phosphate glycerol-3-phosphate acyltransferase activity  
 AGOC: null  
 AGOP: metabolic process, phospholipid biosynthetic process  
 PGOF: transferase activity, transferring acyl groups  
 PGO: null  
 PGOP: metabolic process

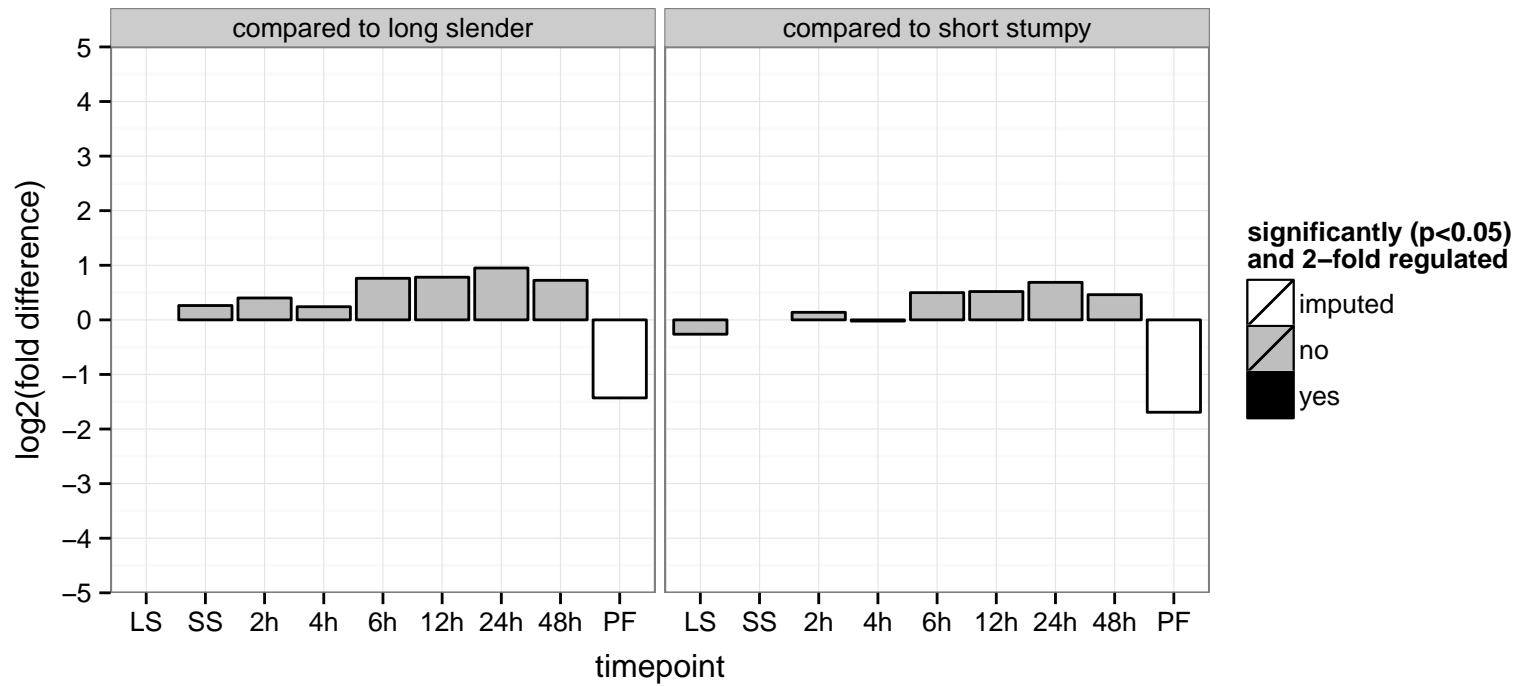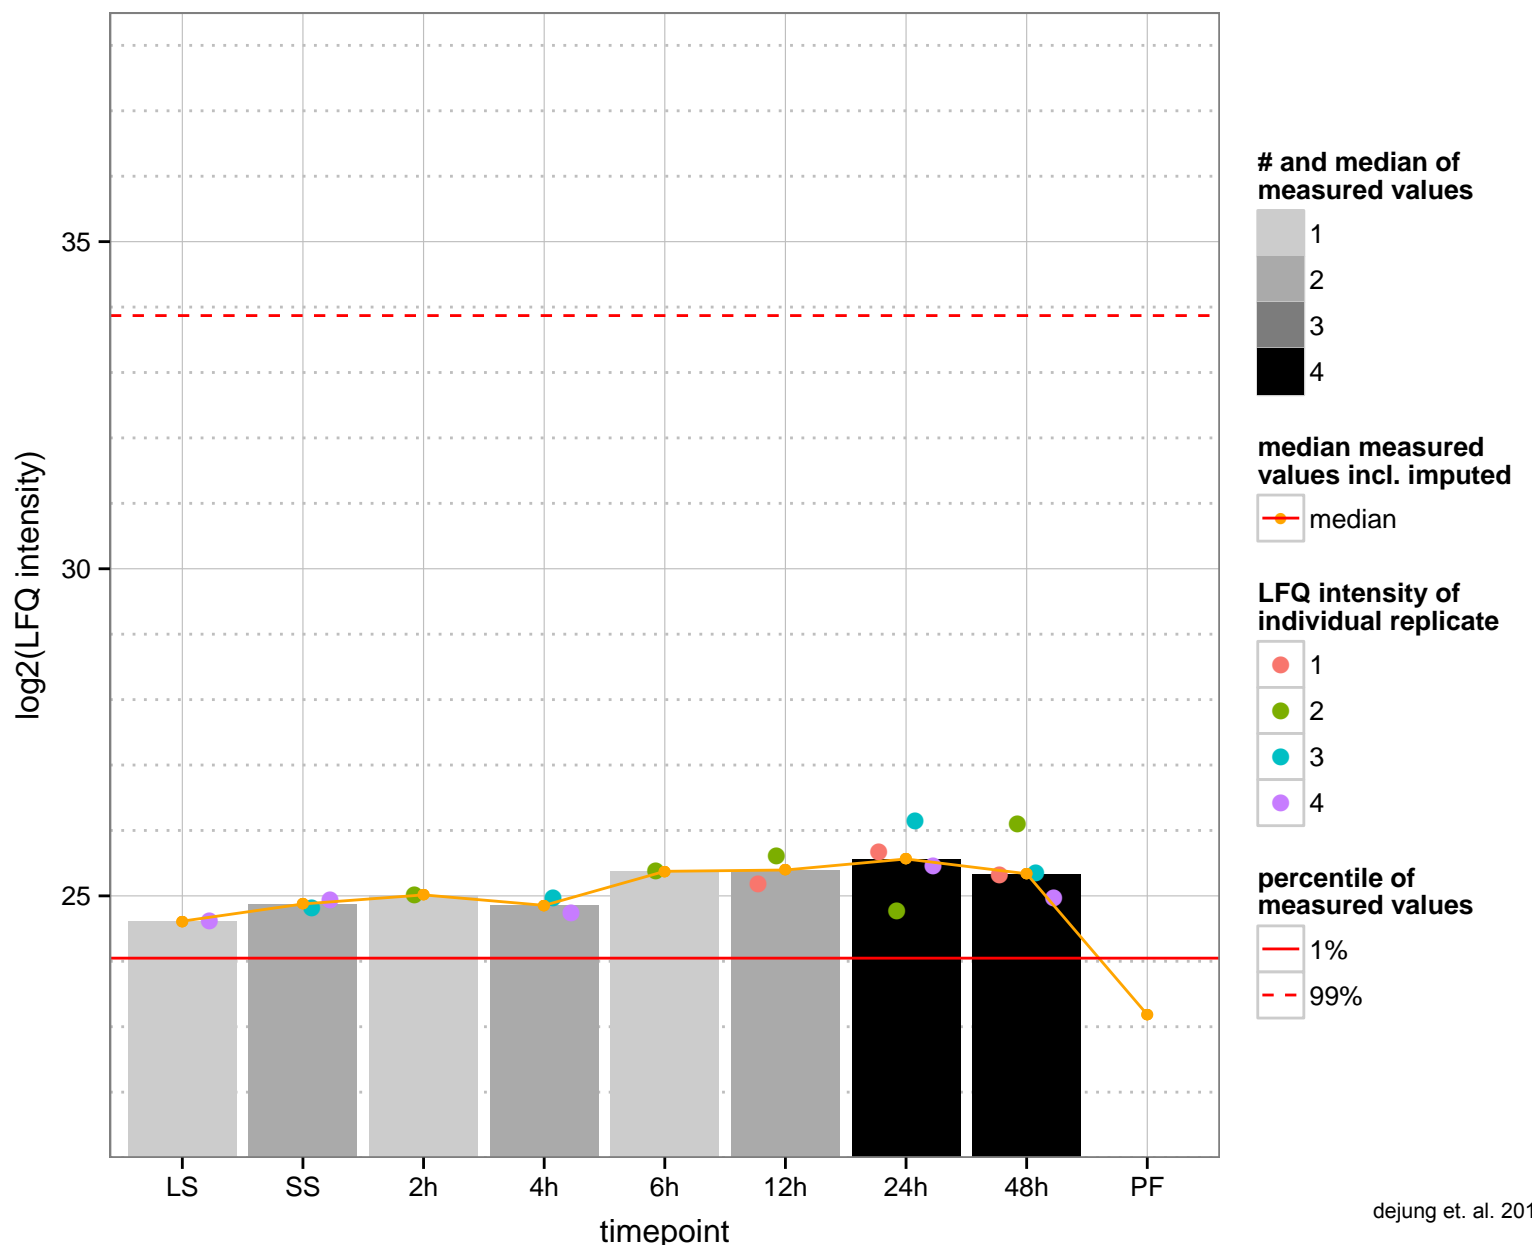

hypothetical protein, conserved  
 Tb927.10.3330  
 AGOF: null  
 AGOC: null  
 AGOP: null  
 PGO: null  
 PGOC: null  
 PGOP: null

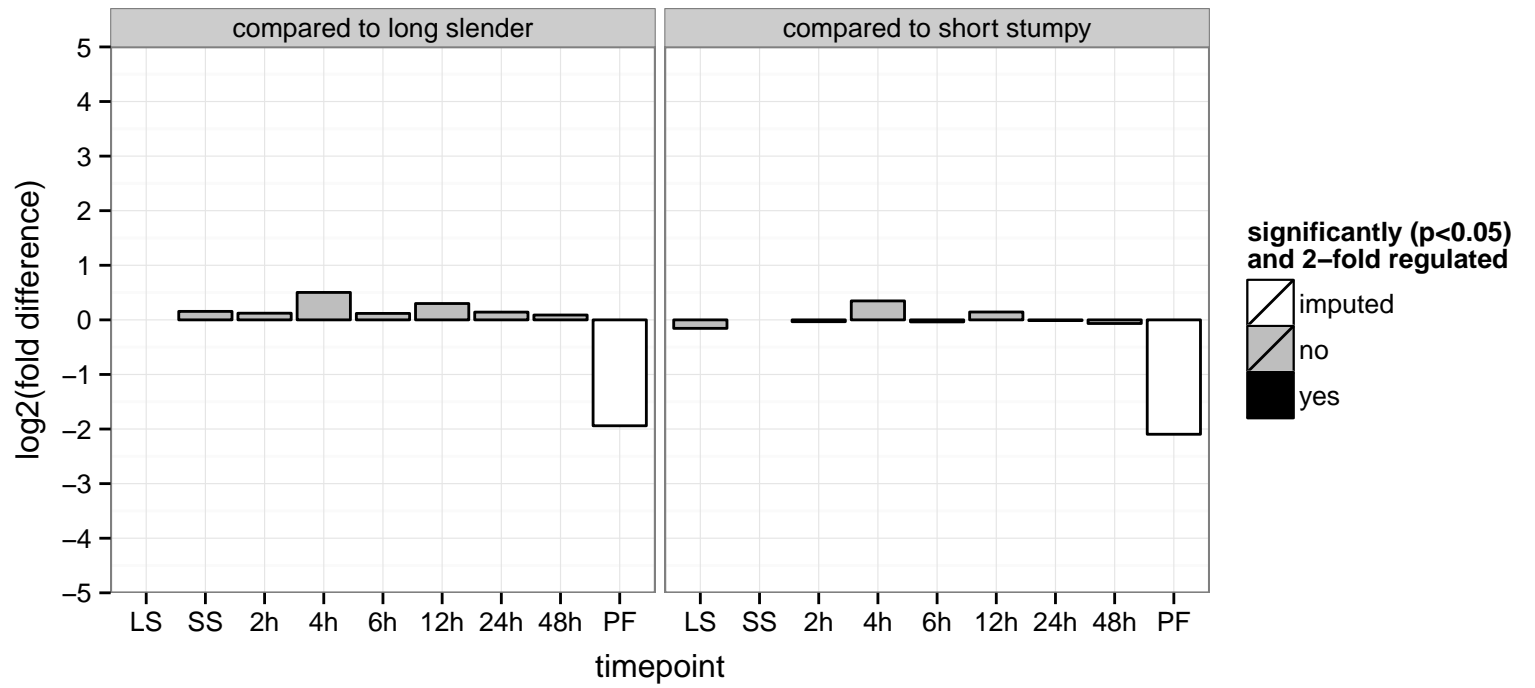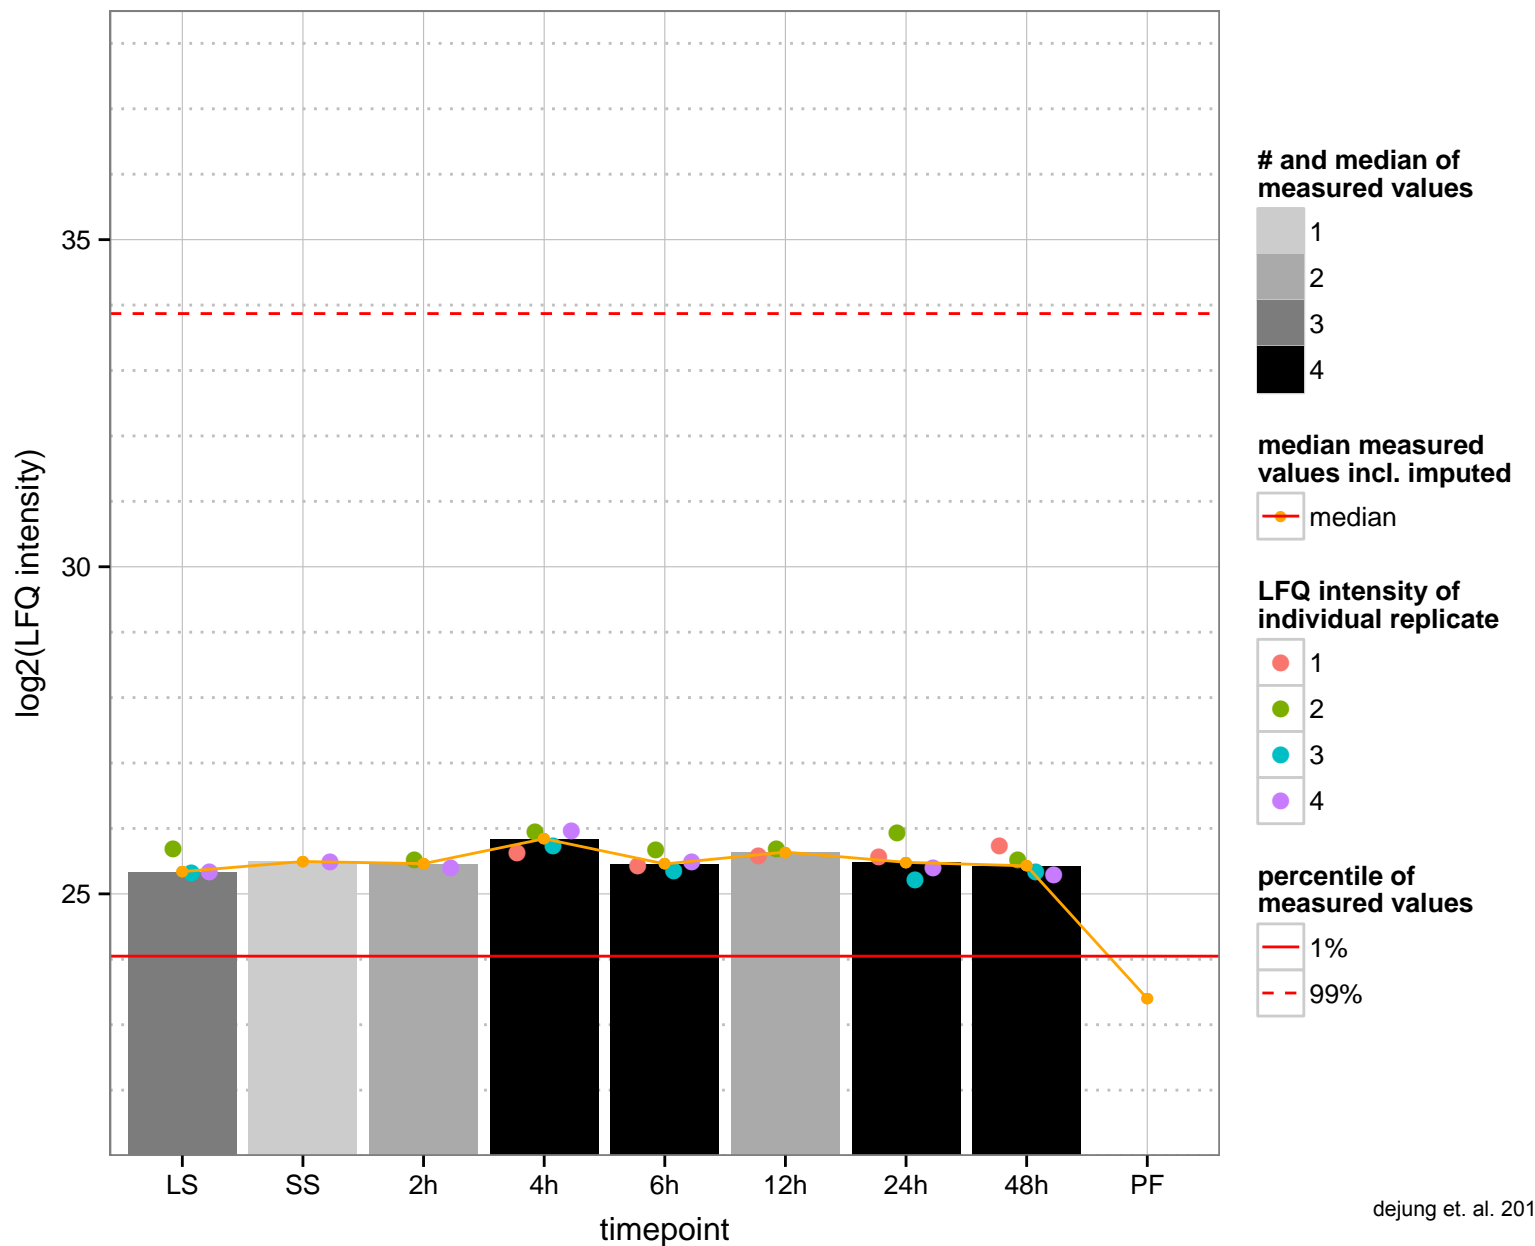



hypothetical protein, conserved  
 Tb927.10.3880  
 AGOF: null  
 AGOC: null  
 AGOP: null  
 PGO: null  
 PGO: null  
 PGO: null

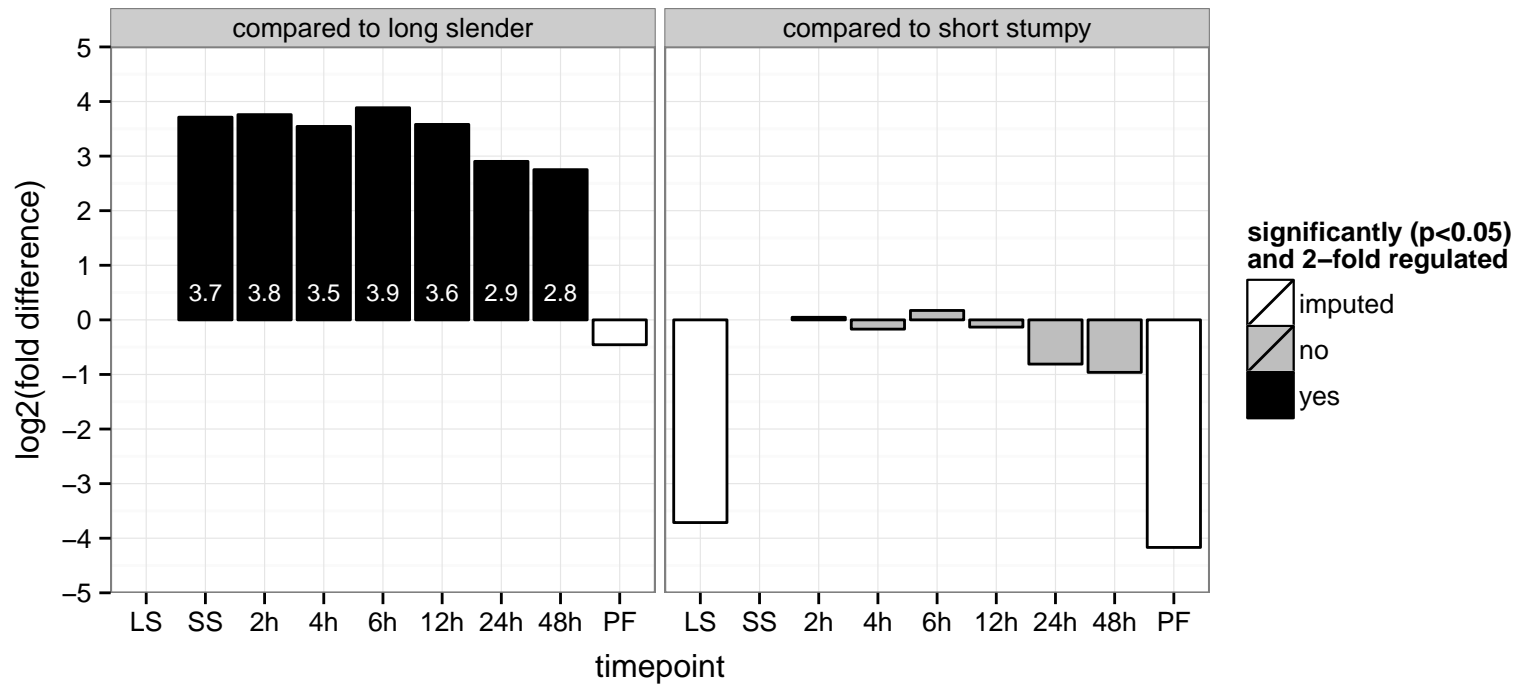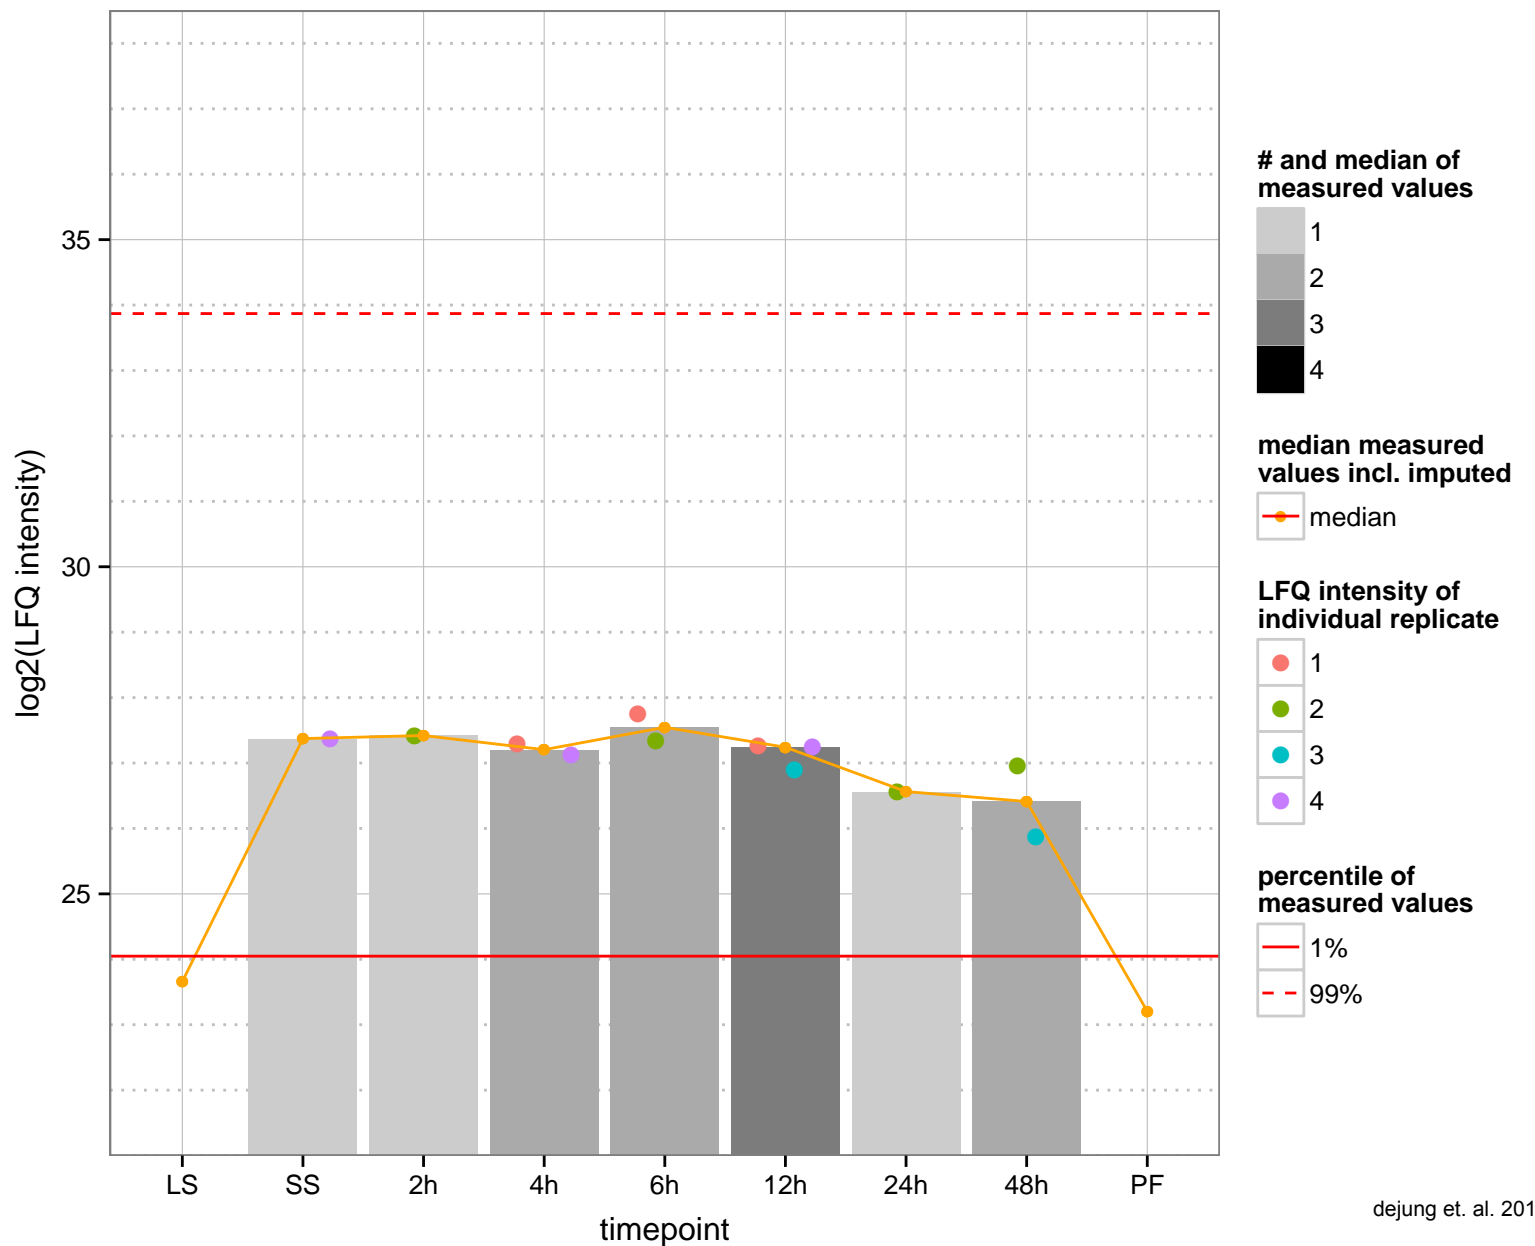

protein kinase, putative

Tb927.10.3900

AGOF: ATP binding, protein kinase activity, protein serine/threonine kinase activity, protein tyrosine kinase activity

AGOC: null

AGOP: protein phosphorylation

PGOF: ATP binding, protein kinase activity, transferase activity, transferring phosphorus-containing groups

PGOC: null

PGOP: protein phosphorylation

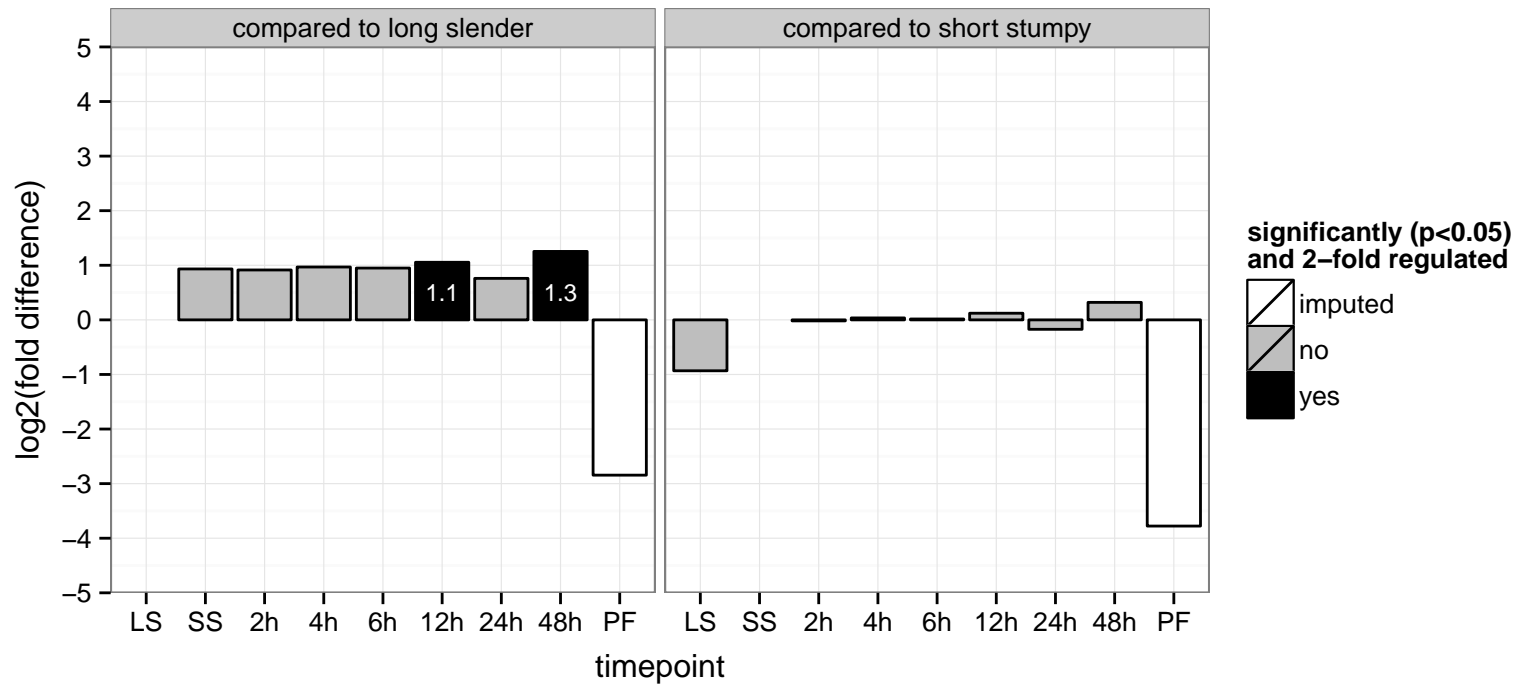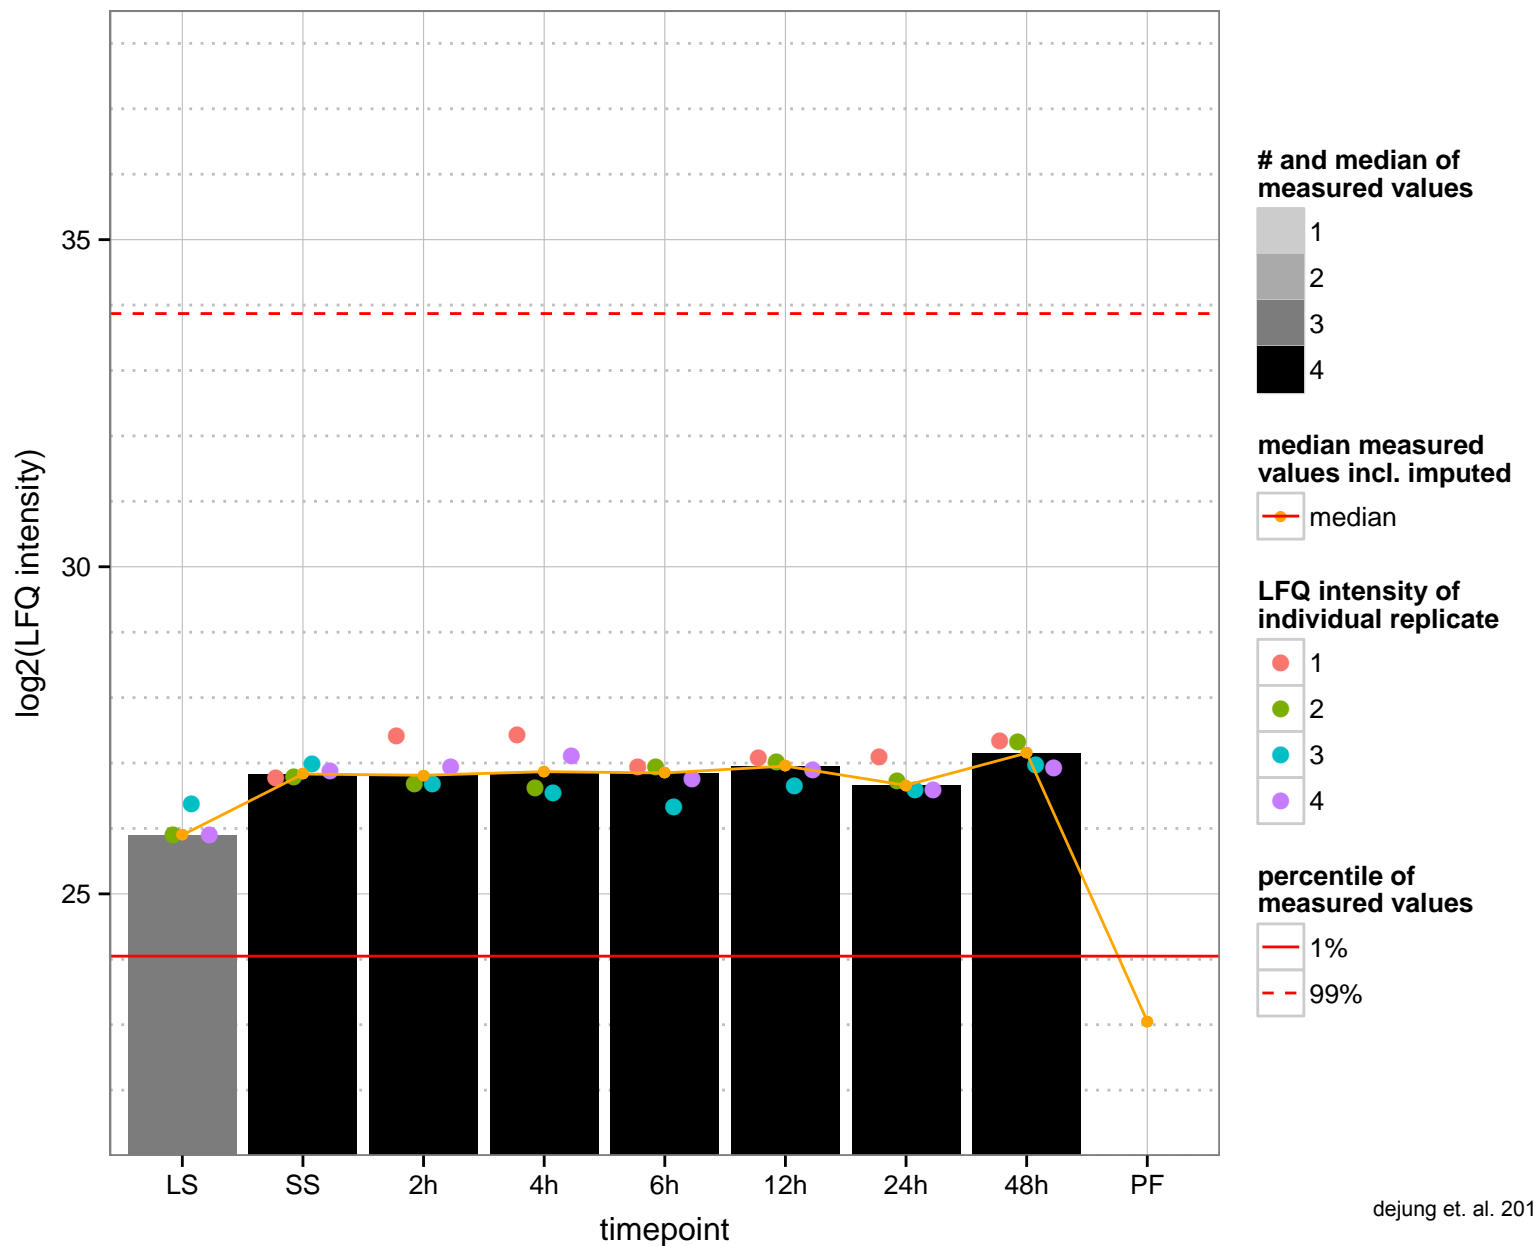

hypothetical protein, conserved  
 Tb927.10.4100  
 AGOF: null  
 AGOC: null  
 AGOP: null  
 PGO: null  
 PGOC: null  
 PGOP: null

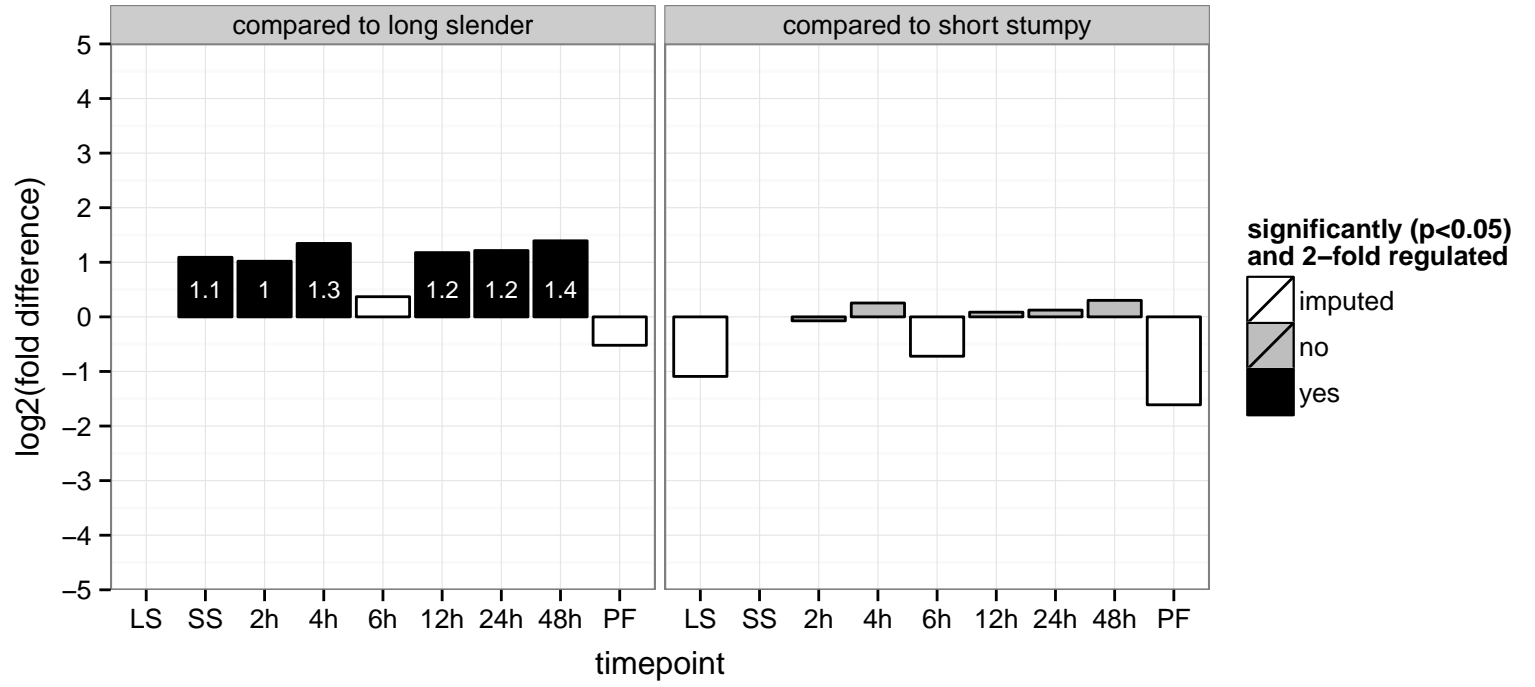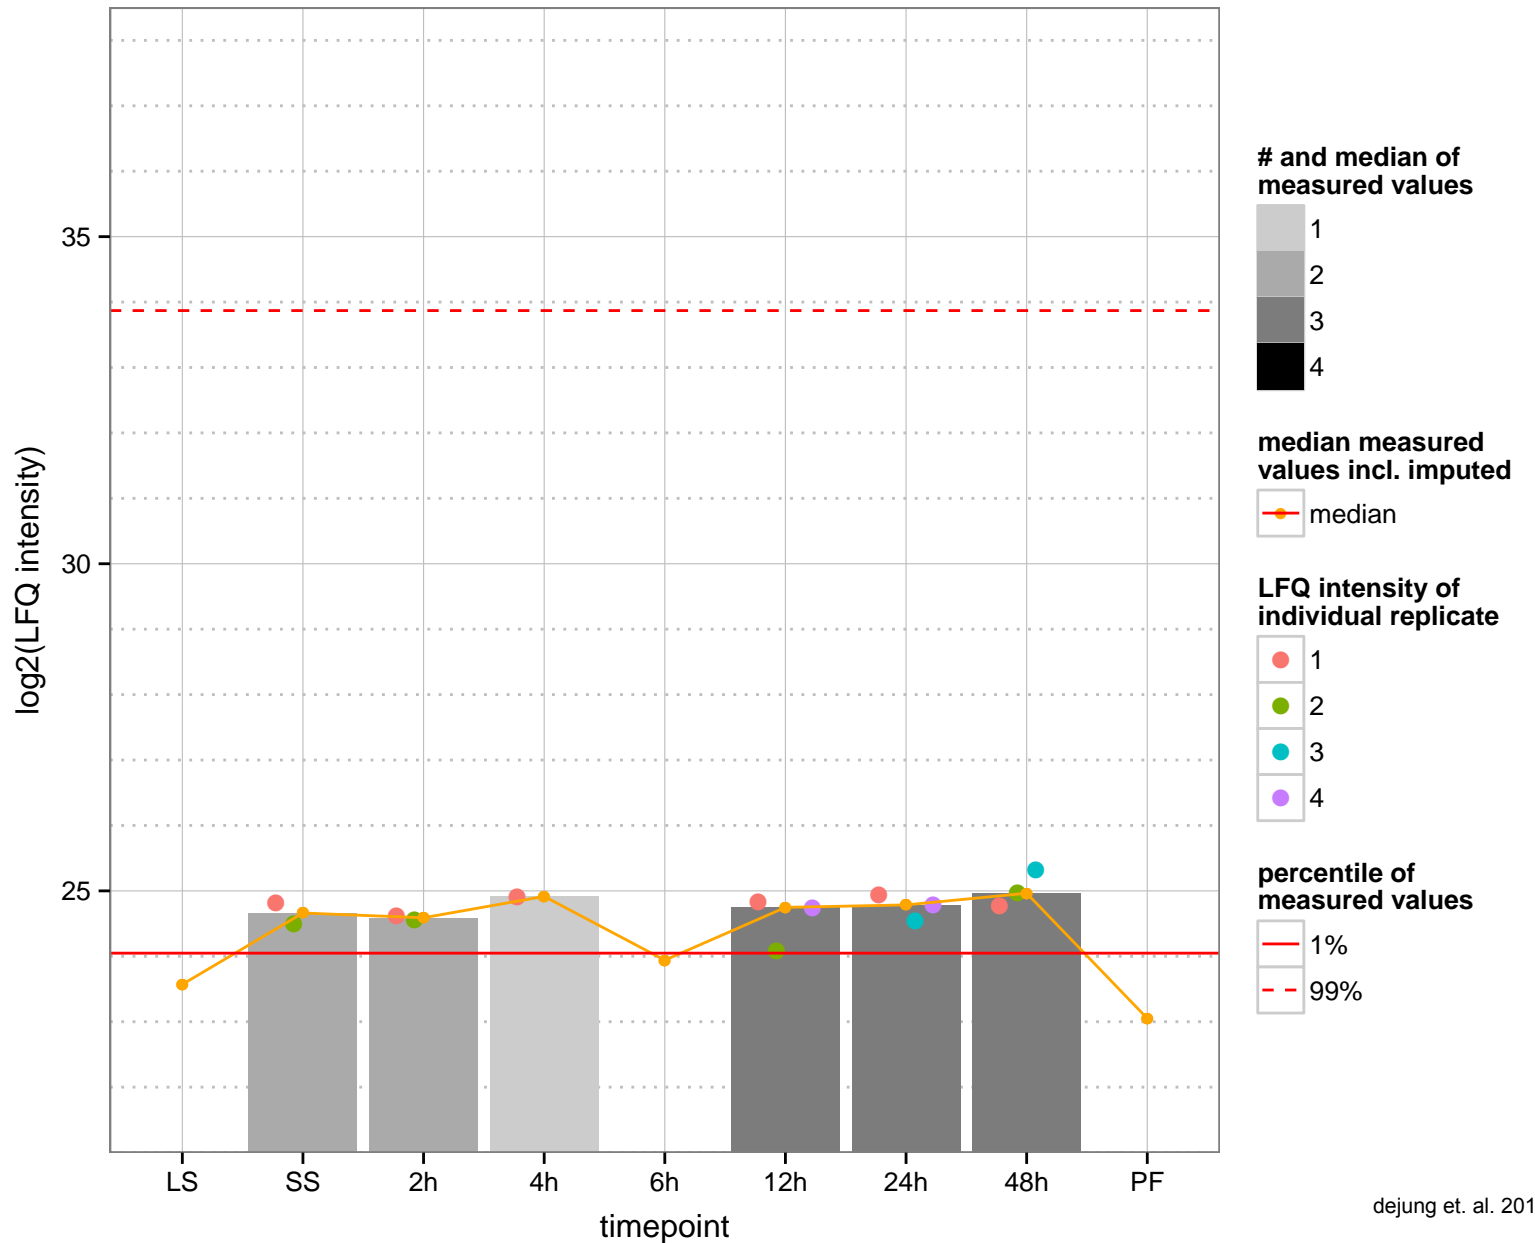

hypothetical protein, conserved  
 Tb927.10.4260  
 AGOF: null  
 AGOC: null  
 AGOP: null  
 PGO: null  
 PGOC: null  
 PGOP: null

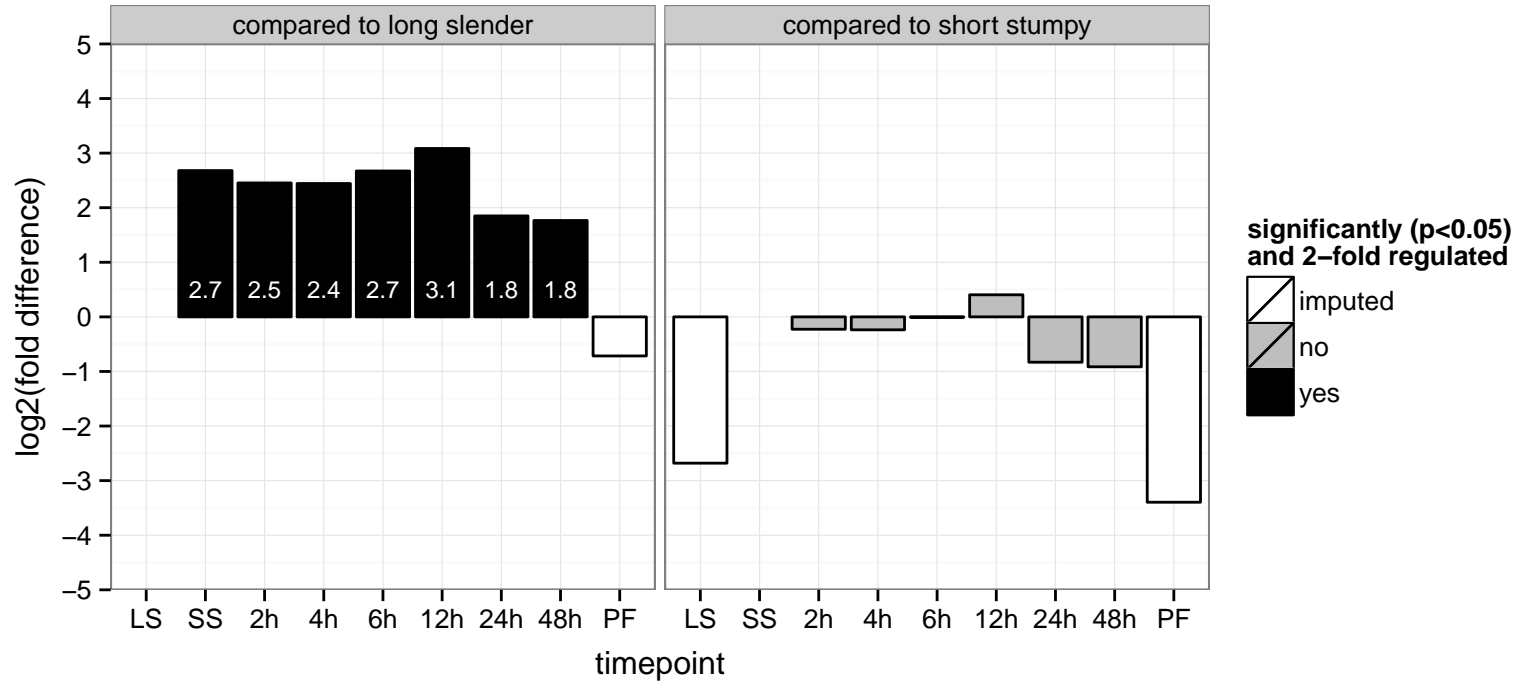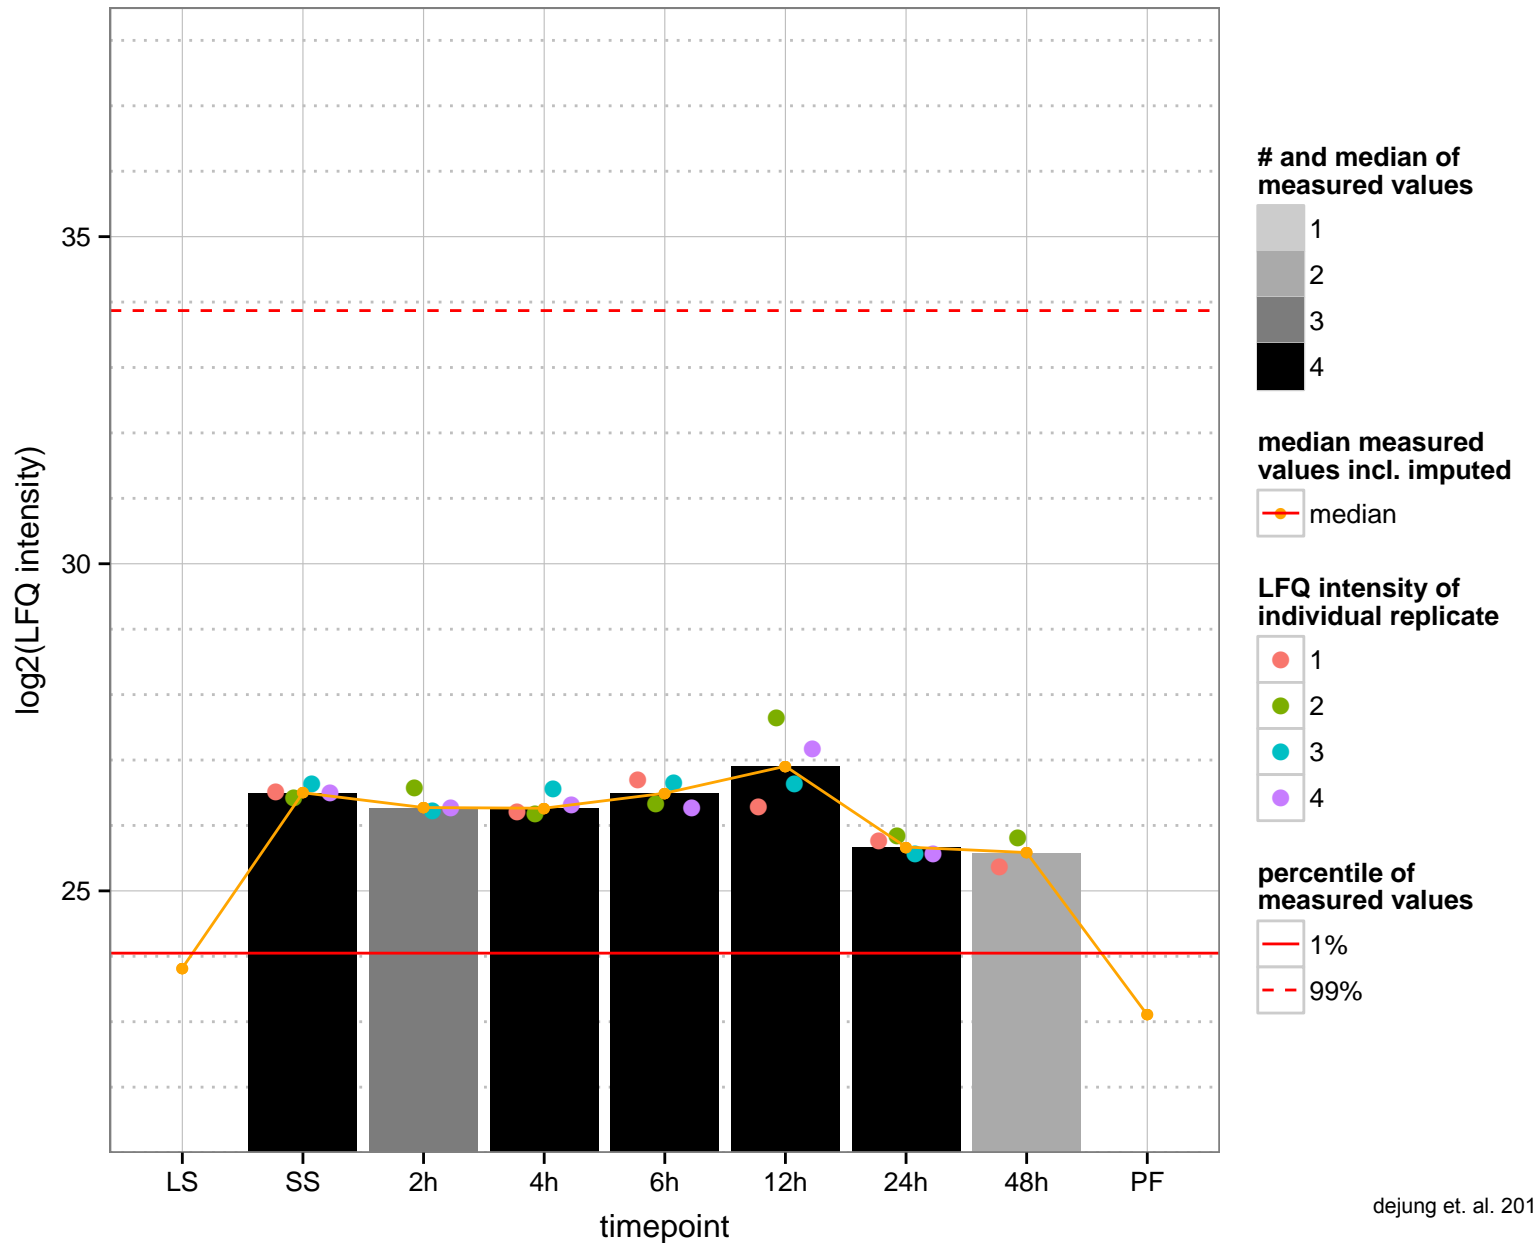

hypothetical protein, conserved  
 Tb927.10.450  
 AGOF: null  
 AGOC: null  
 AGOP: ciliary or flagellar motility  
 PGO: null  
 PGOC: null  
 PGOP: null

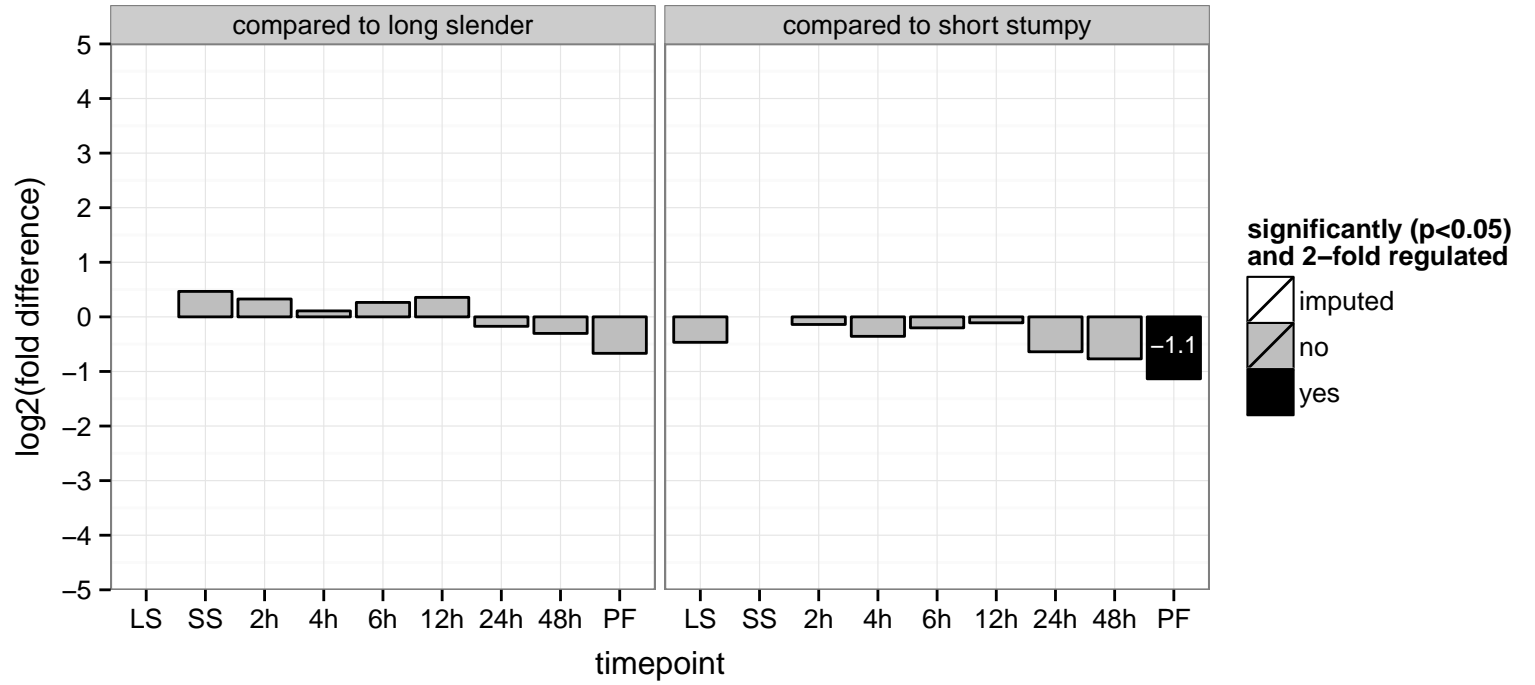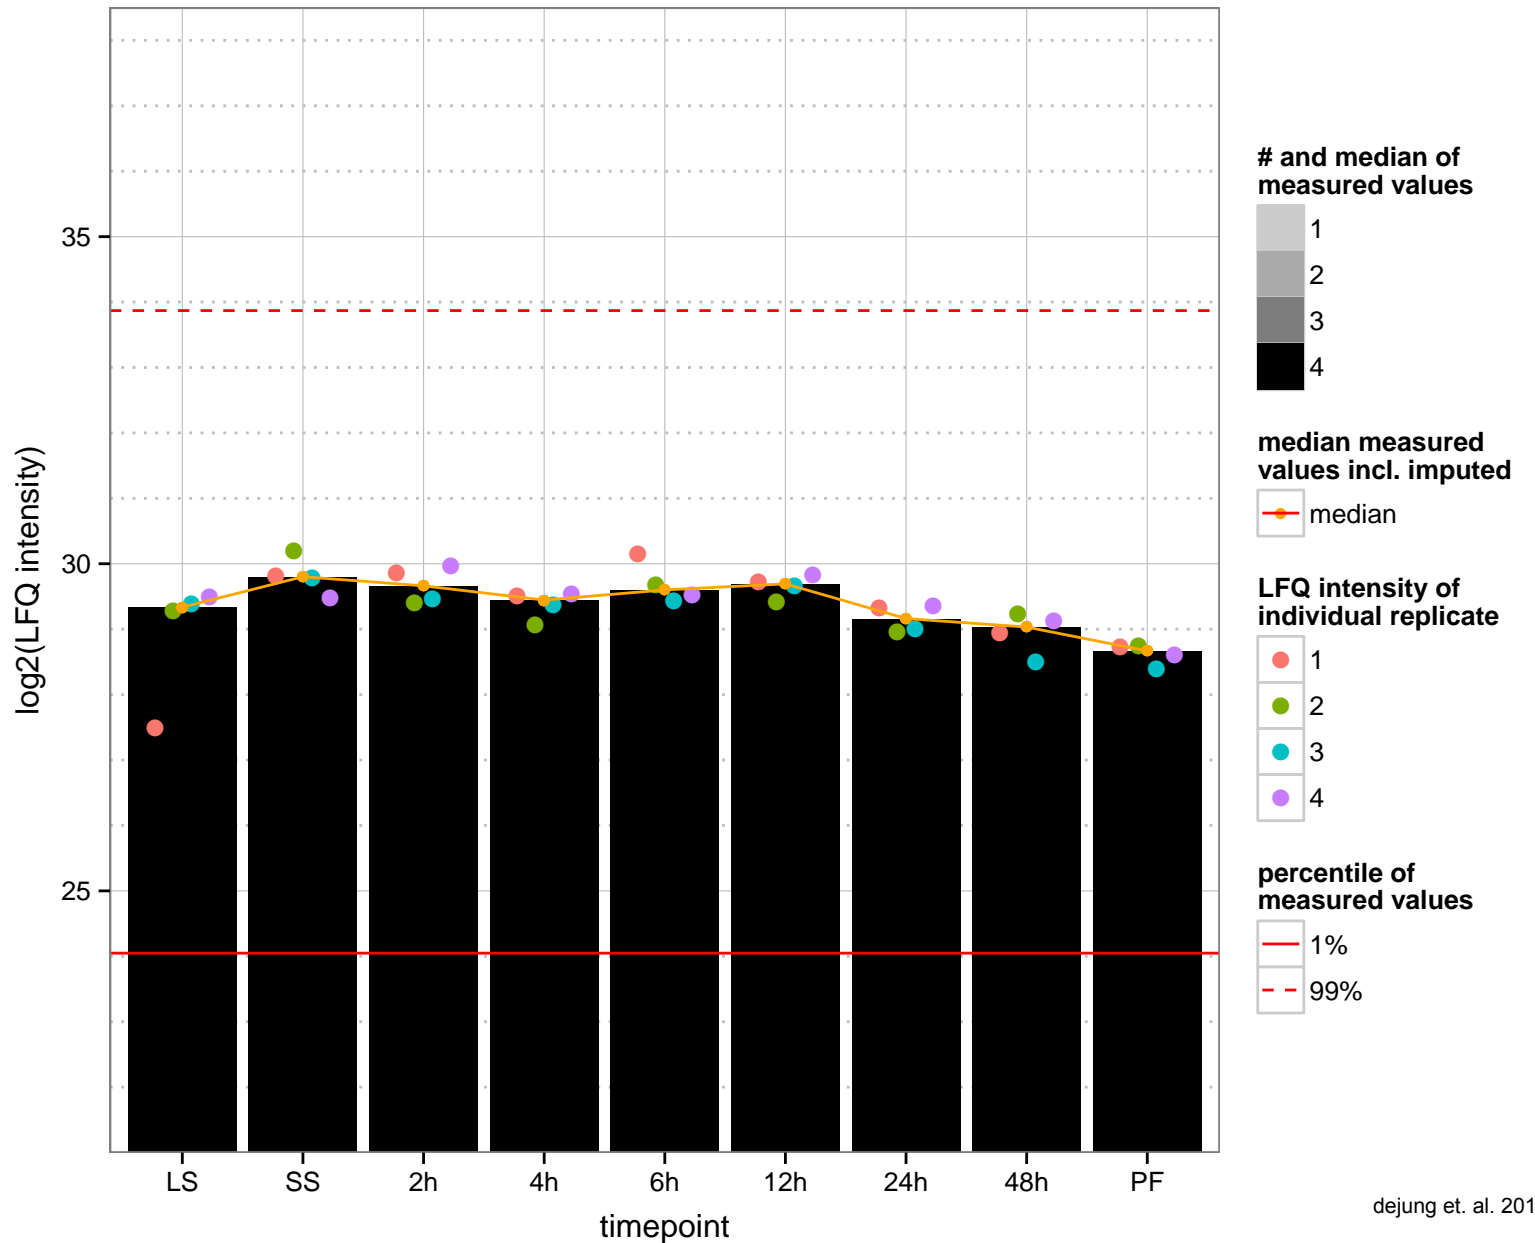

U2 small nuclear ribonucleoprotein 16.5K  
 Tb927.10.4950  
 AGOF: RNA binding  
 AGOC: U2 snRNP, nucleus  
 AGOP: alternative nuclear mRNA splicing, via spliceosome  
 PGO: null  
 PGOC: null  
 PGOP: null

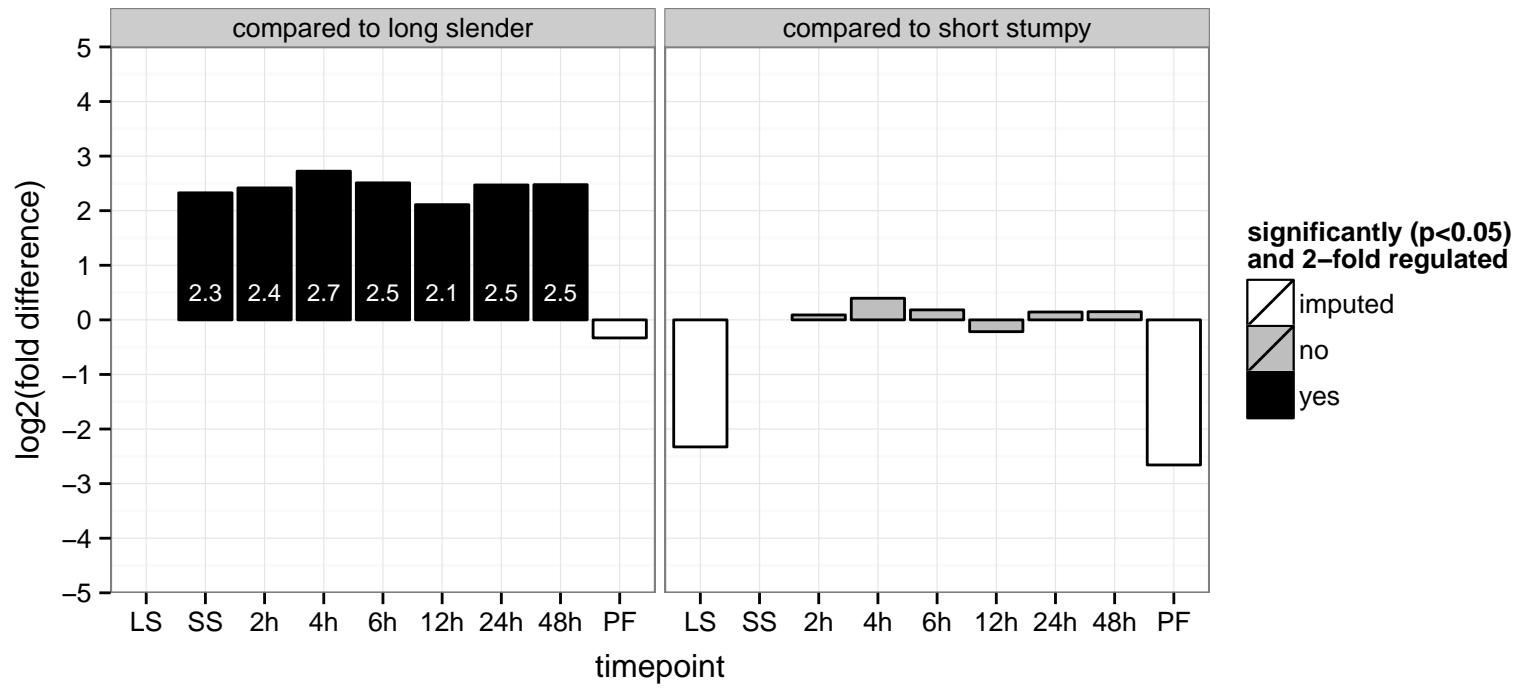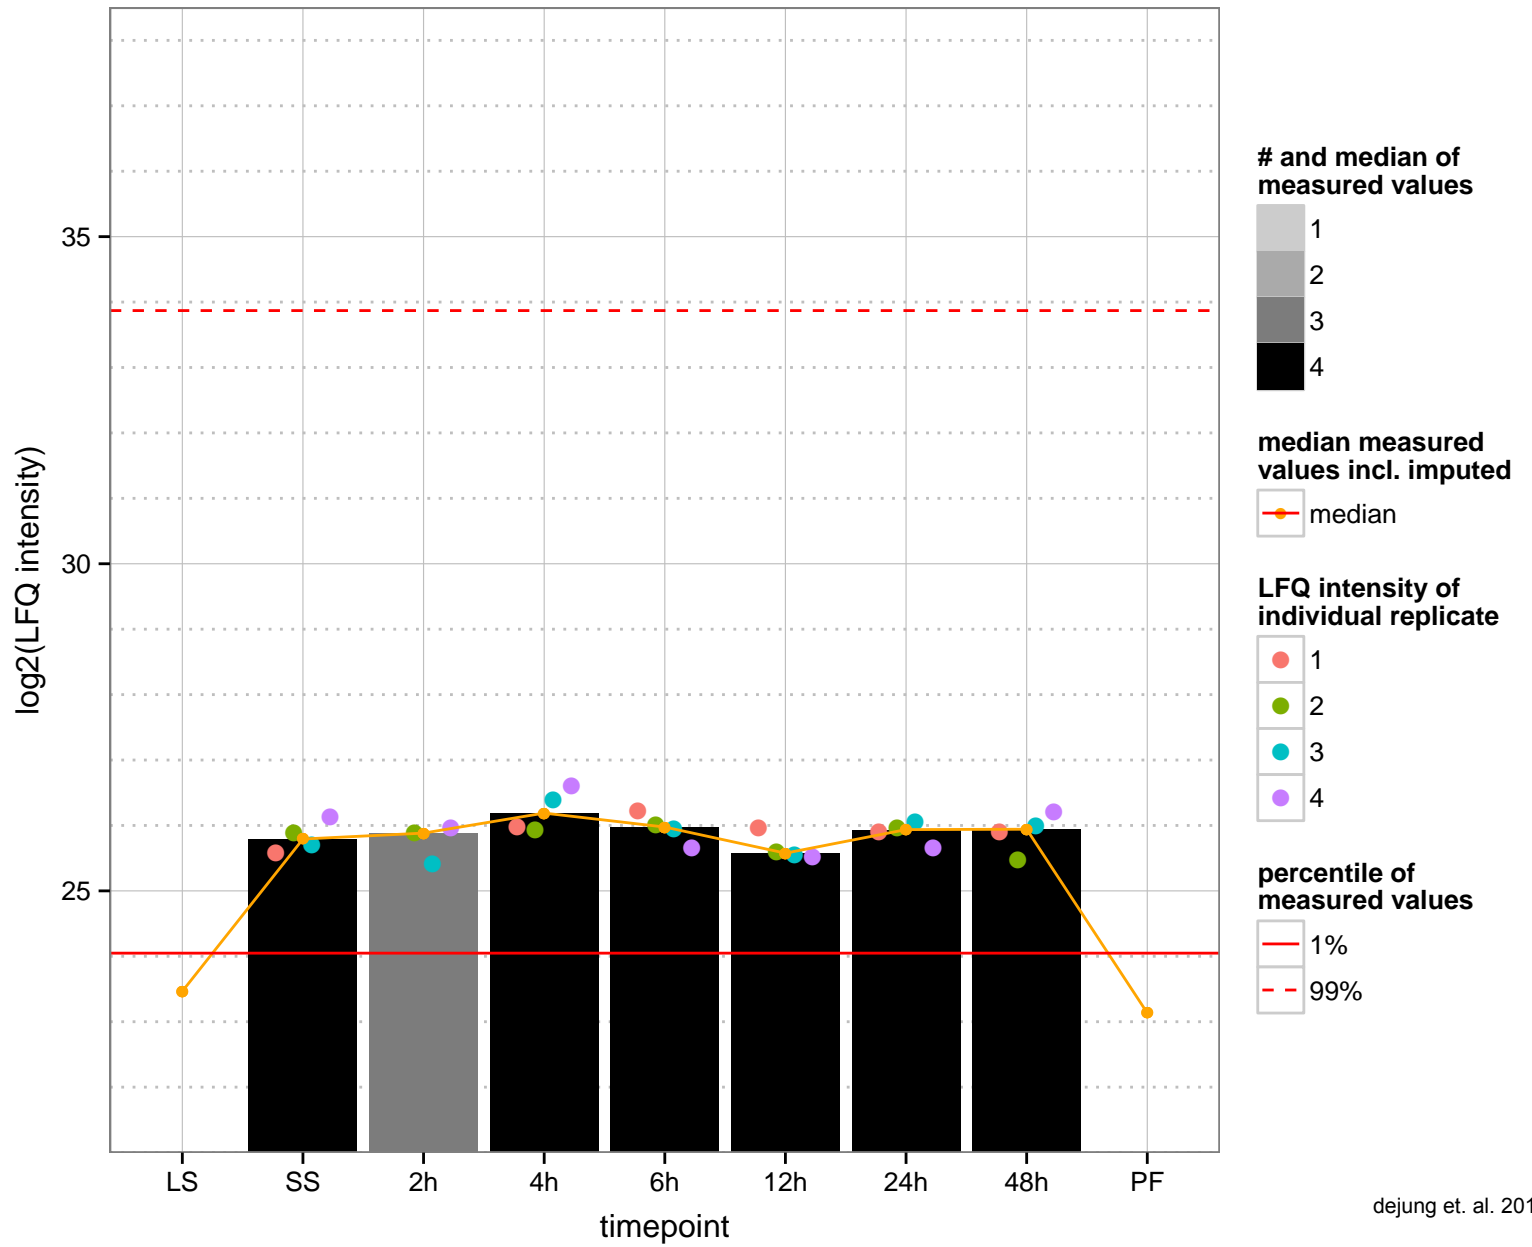

KREPA6, RNA-editing complex protein (KREPA6)  
 Tb927.10.5120  
 AGOF: RNA binding, endonuclease activity  
 AGOC: mitochondrial mRNA editing complex, mitochondrion  
 AGOP: RNA modification  
 PGO: single-stranded DNA binding  
 PGOC: null  
 PGOP: null

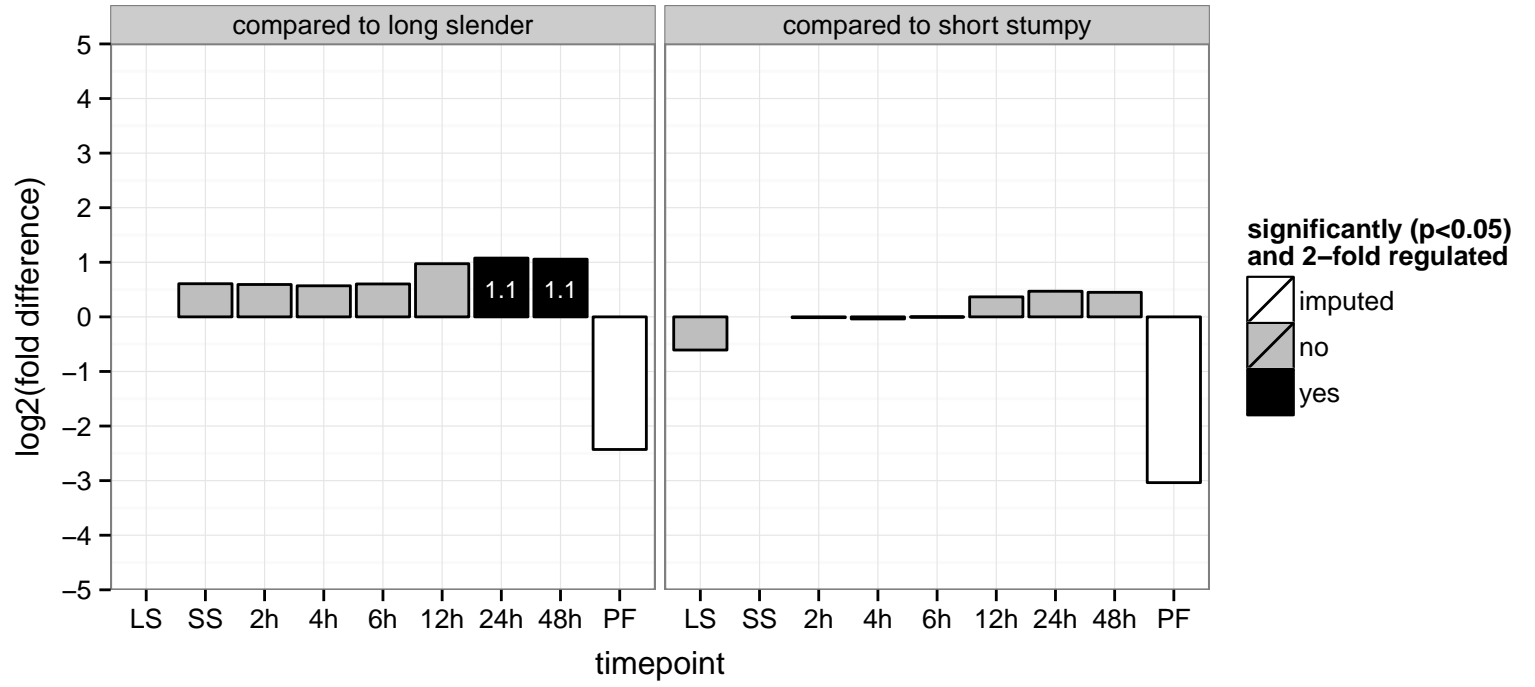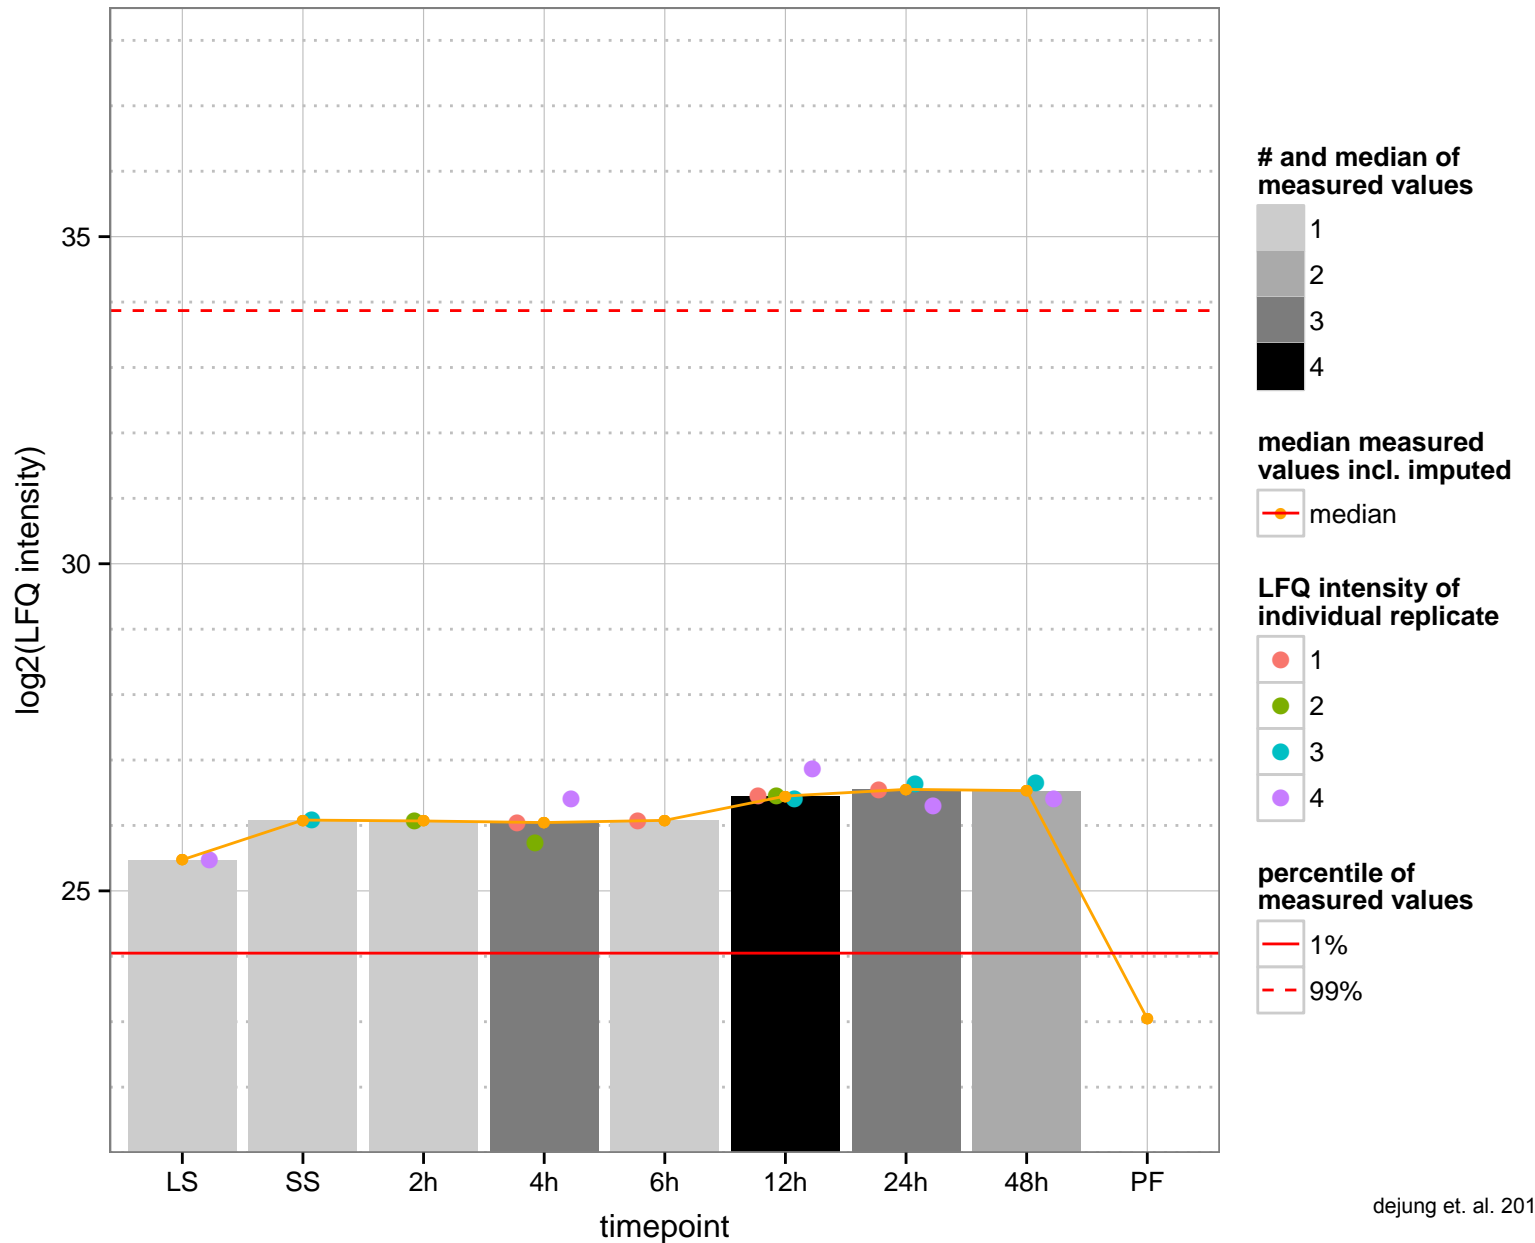

hypothetical protein, conserved  
 Tb927.10.5400  
 AGOF: null  
 AGOC: mitochondrion  
 AGOP: null  
 PGO: null  
 PGOC: null  
 PGOP: null

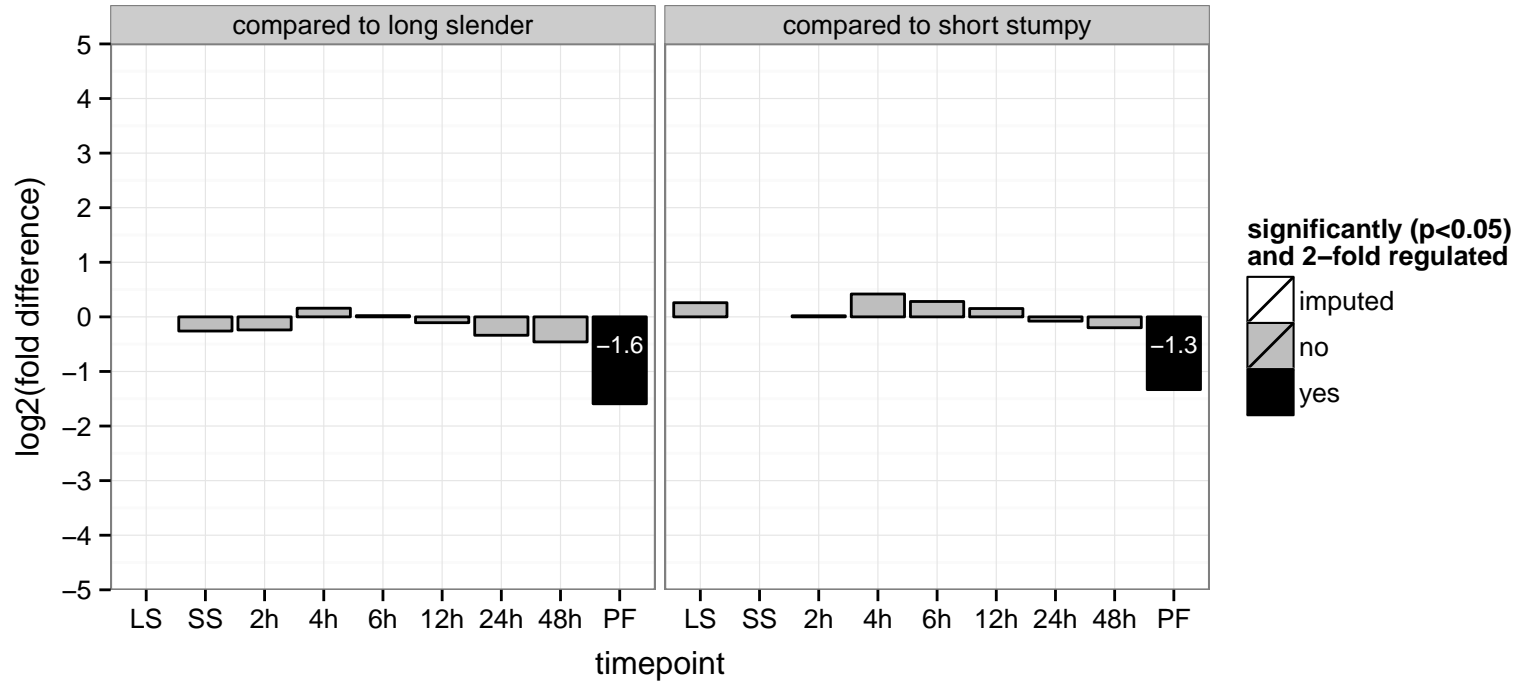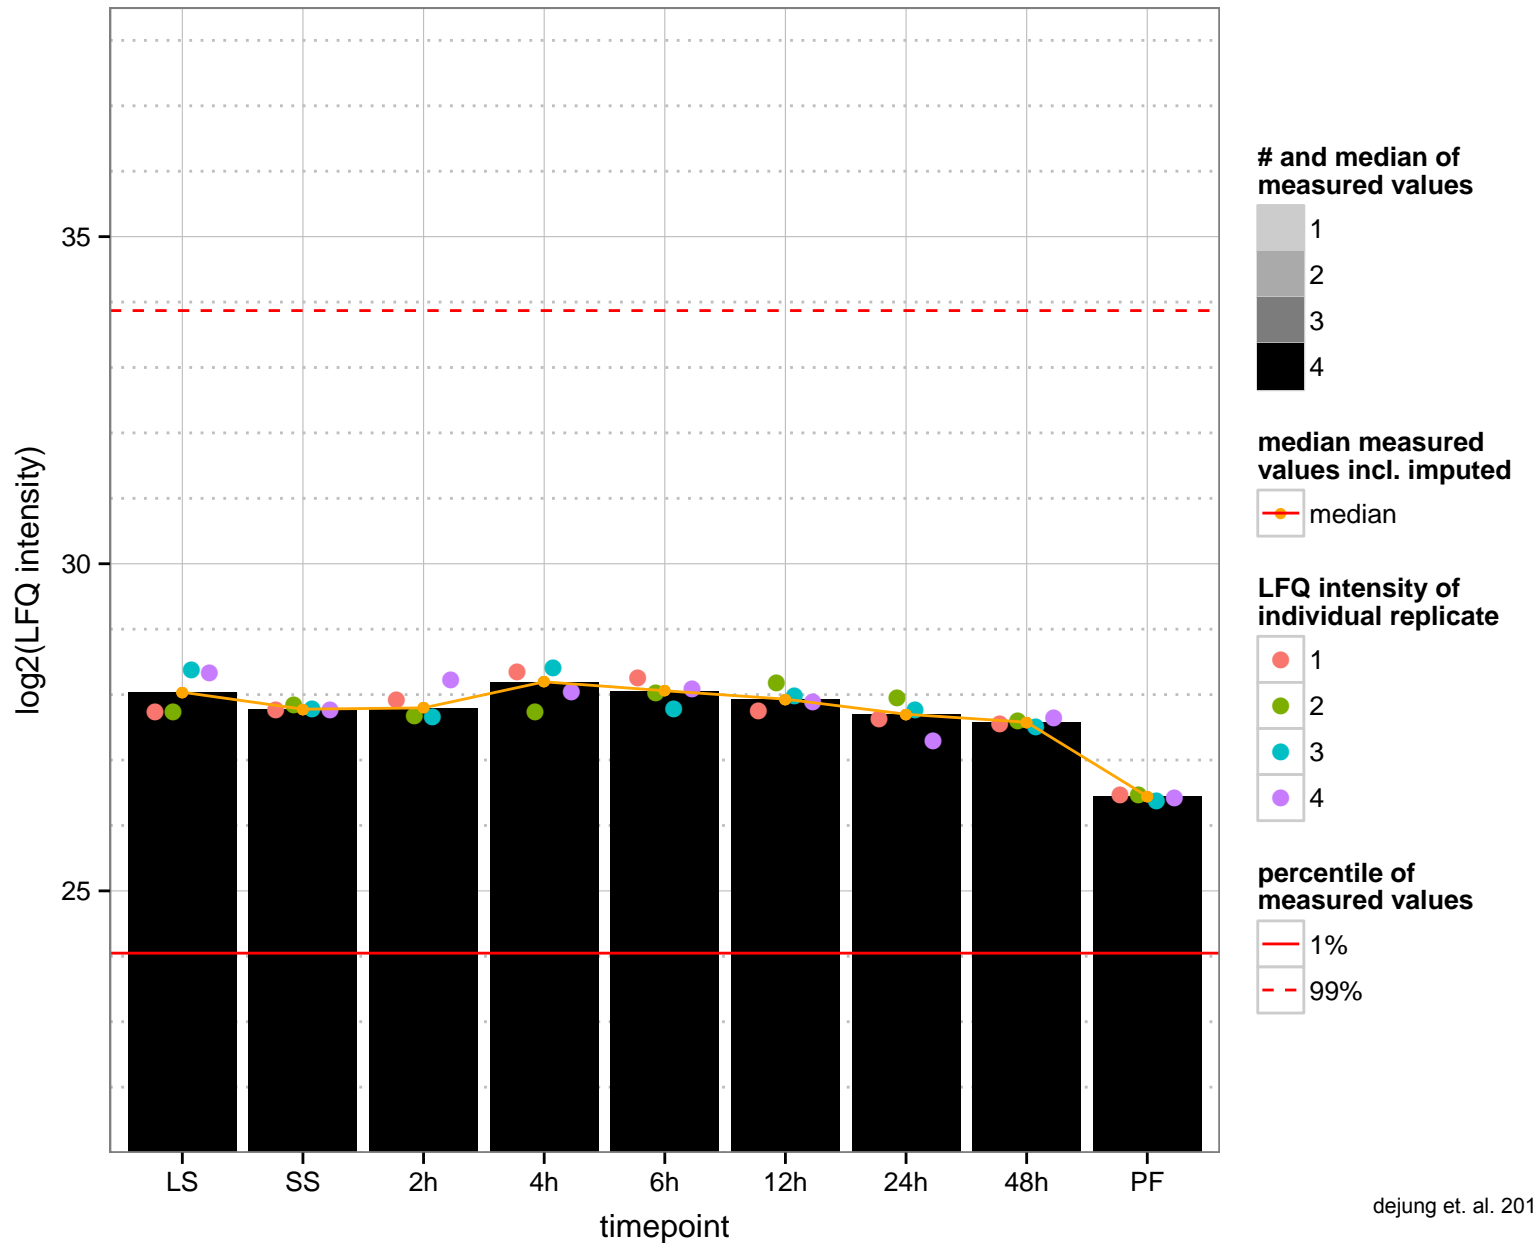



neurobeachin/beige protein, putative  
 Tb927.10.6150;Tb11.v5.0207  
 AGOF: null  
 AGOC: null  
 AGOP: null  
 PGO: protein binding  
 PGOC: null  
 PGOP: null

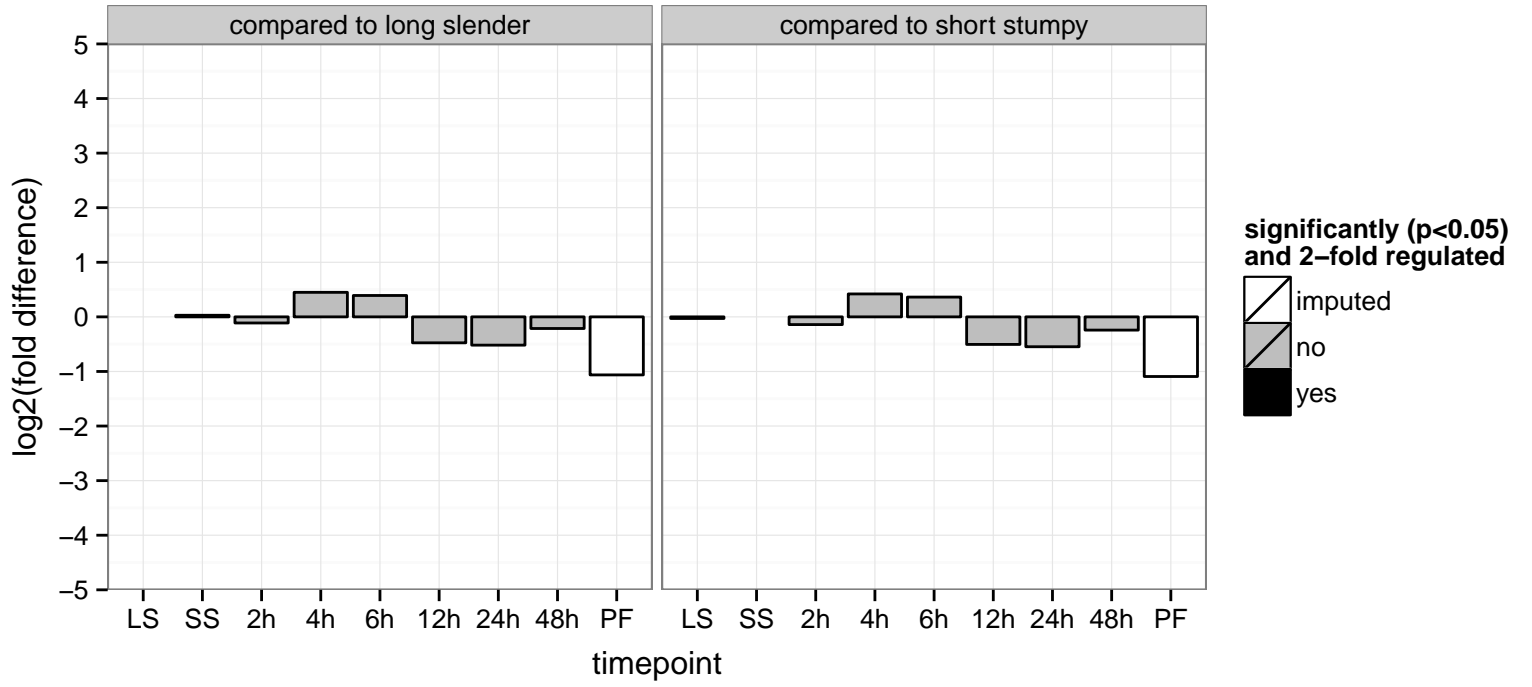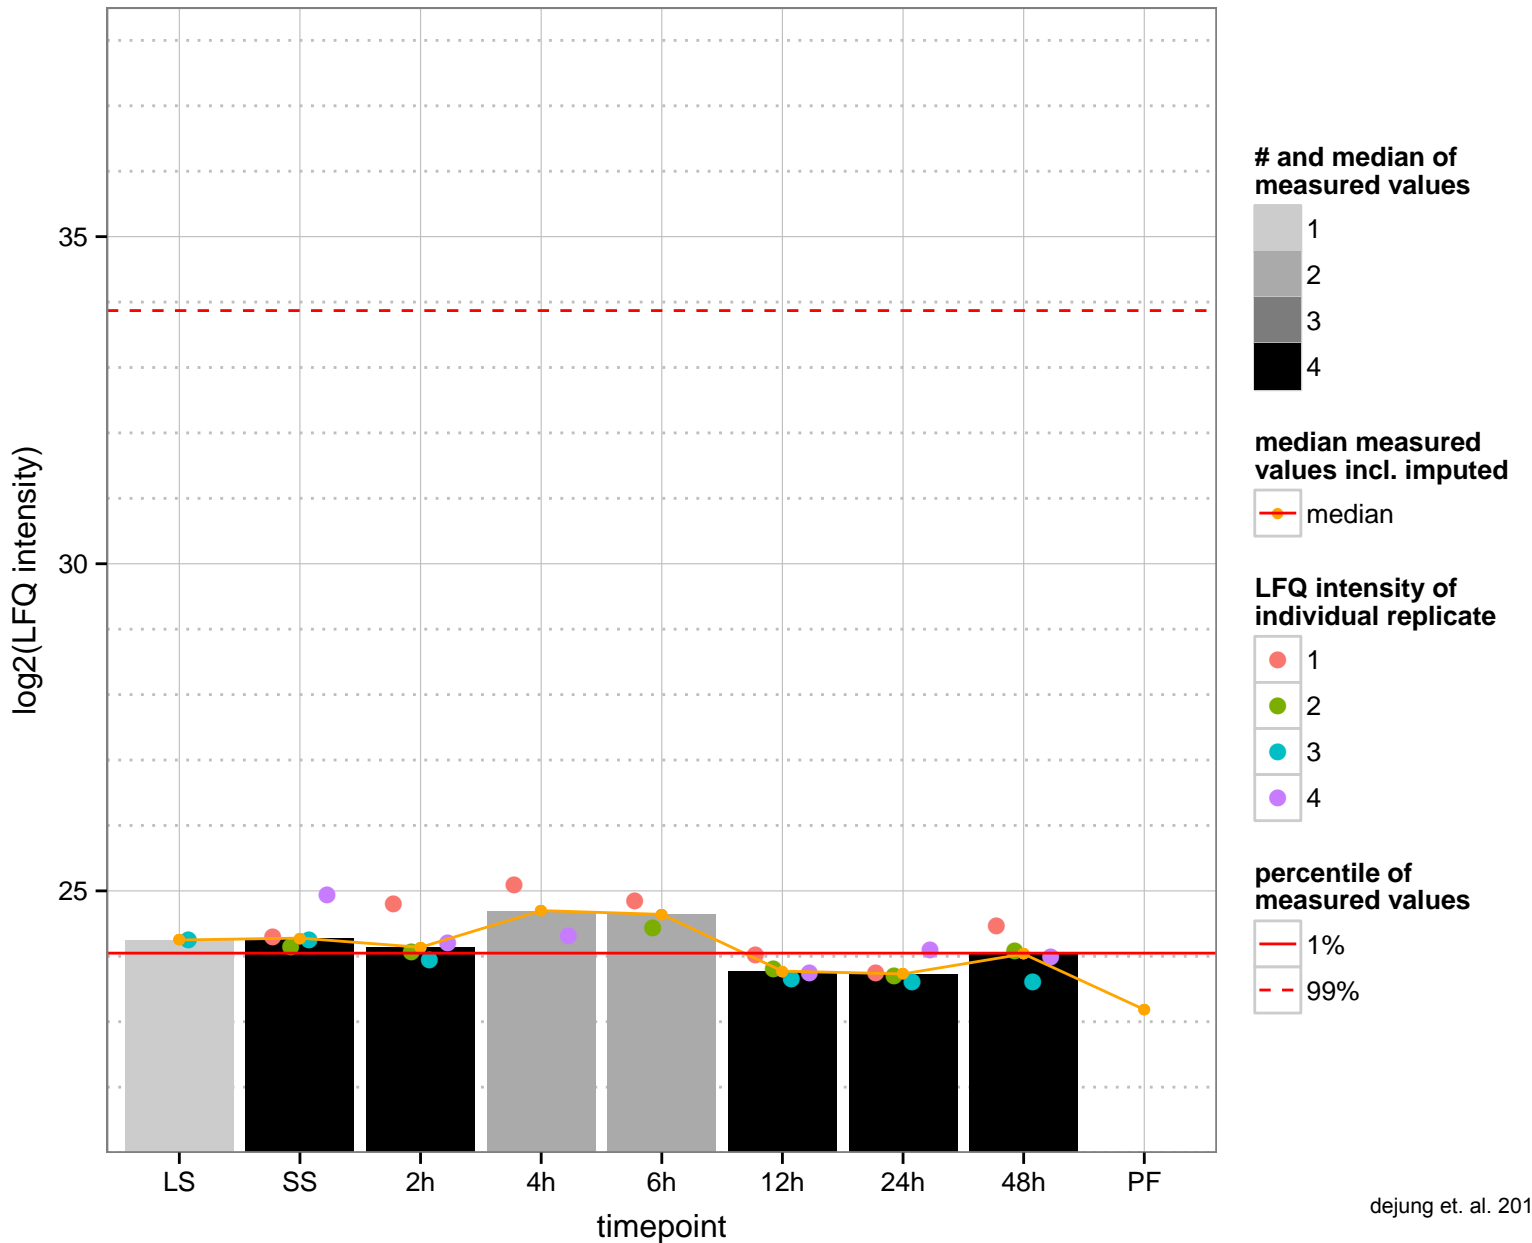

MORN repeat containing protein  
 Tb927.10.6230  
 AGOF: null  
 AGOC: null  
 AGOP: null  
 PGO: null  
 PGOC: null  
 PGOP: null

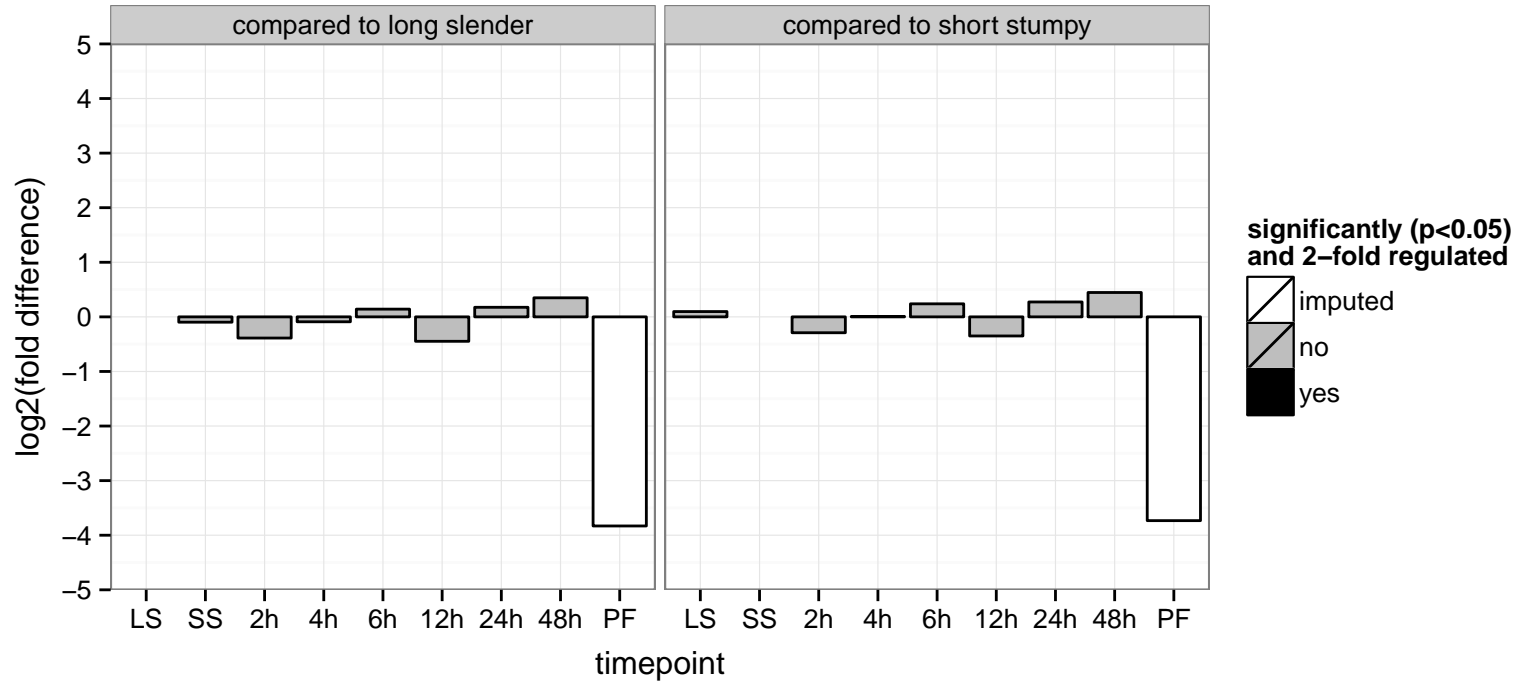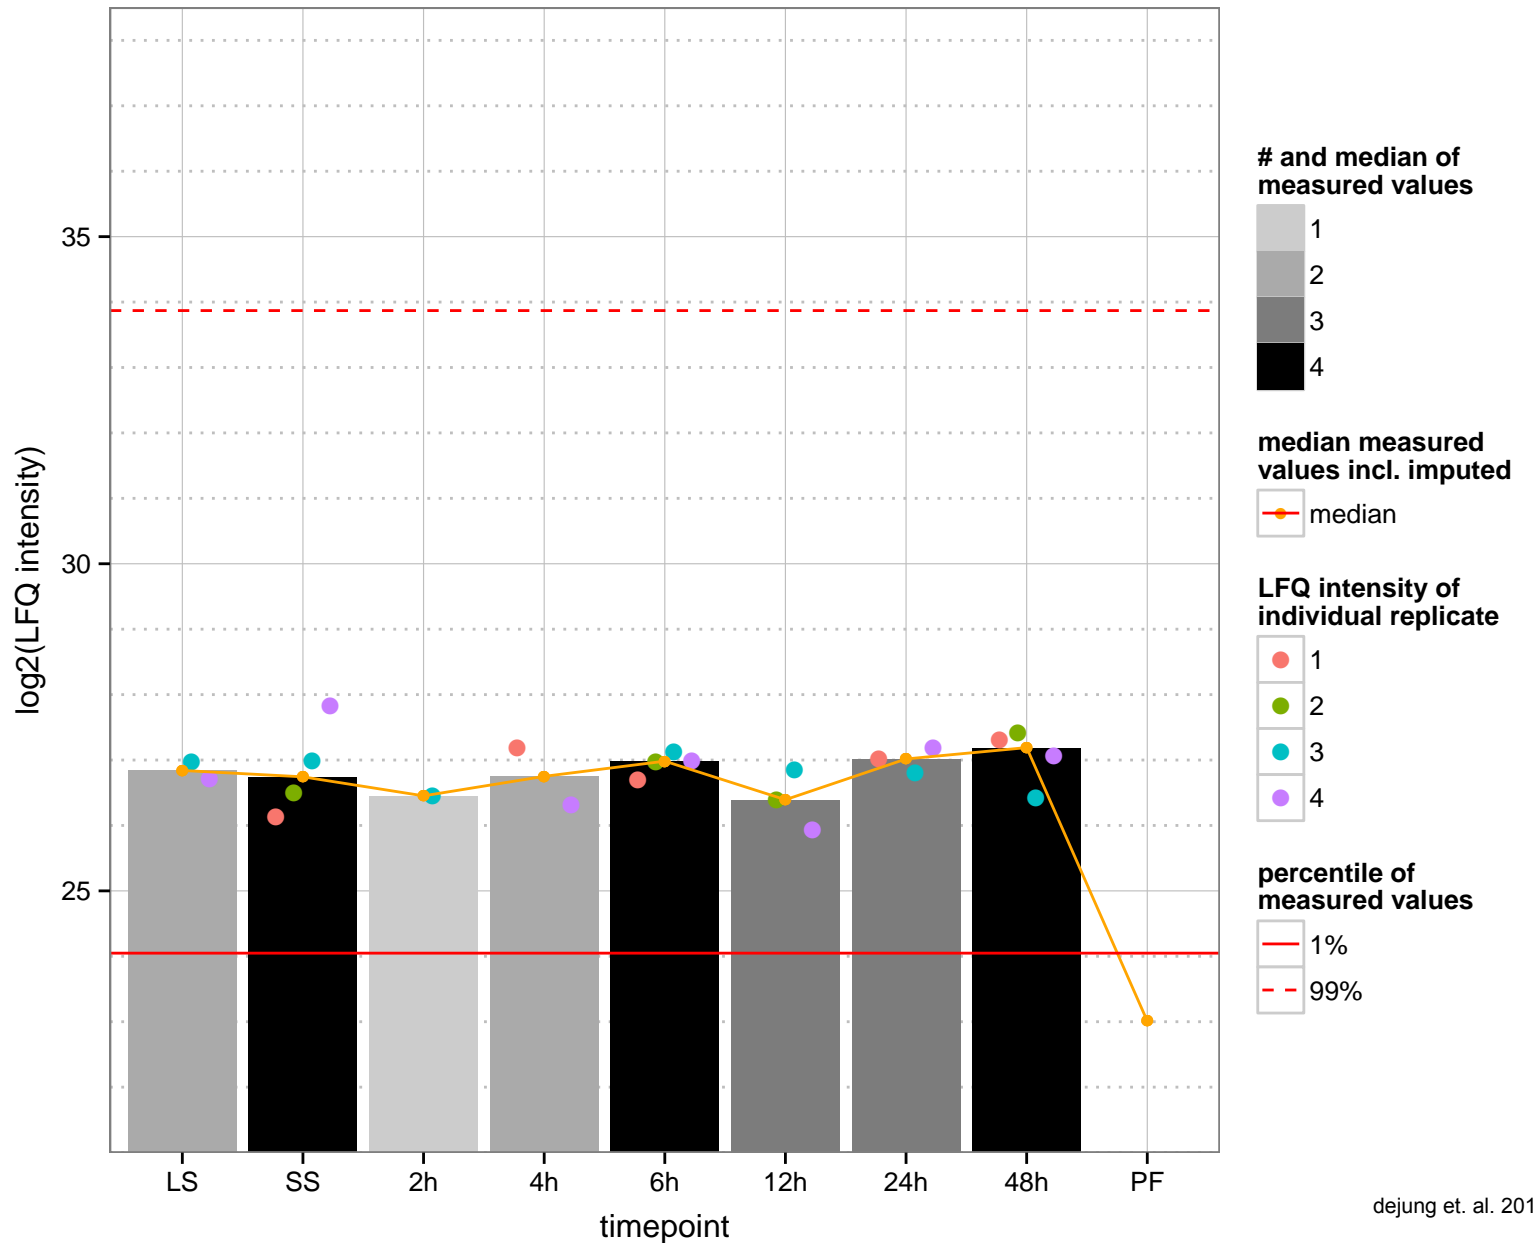

hypothetical protein, conserved  
 Tb927.10.6590  
 AGOF: null  
 AGOC: null  
 AGOP: null  
 PGO: null  
 PGOC: null  
 PGOP: null

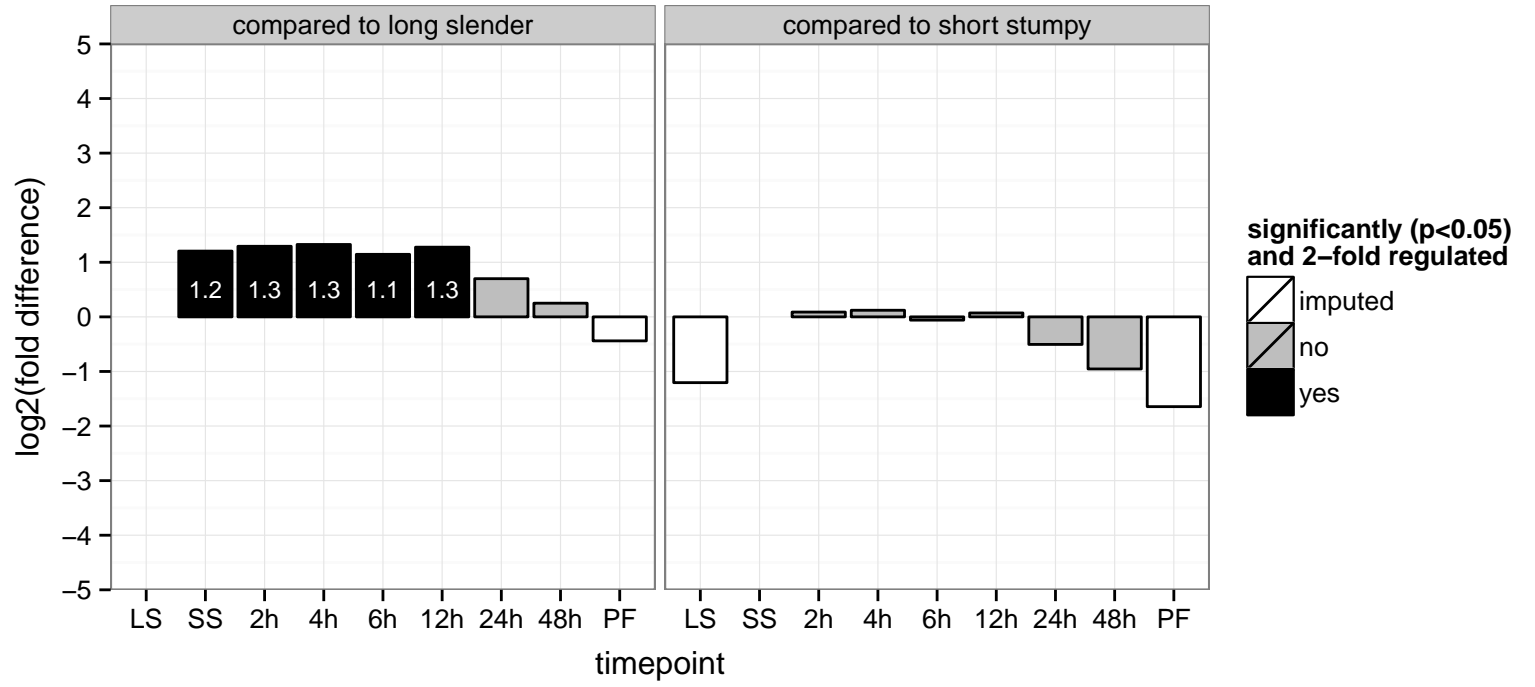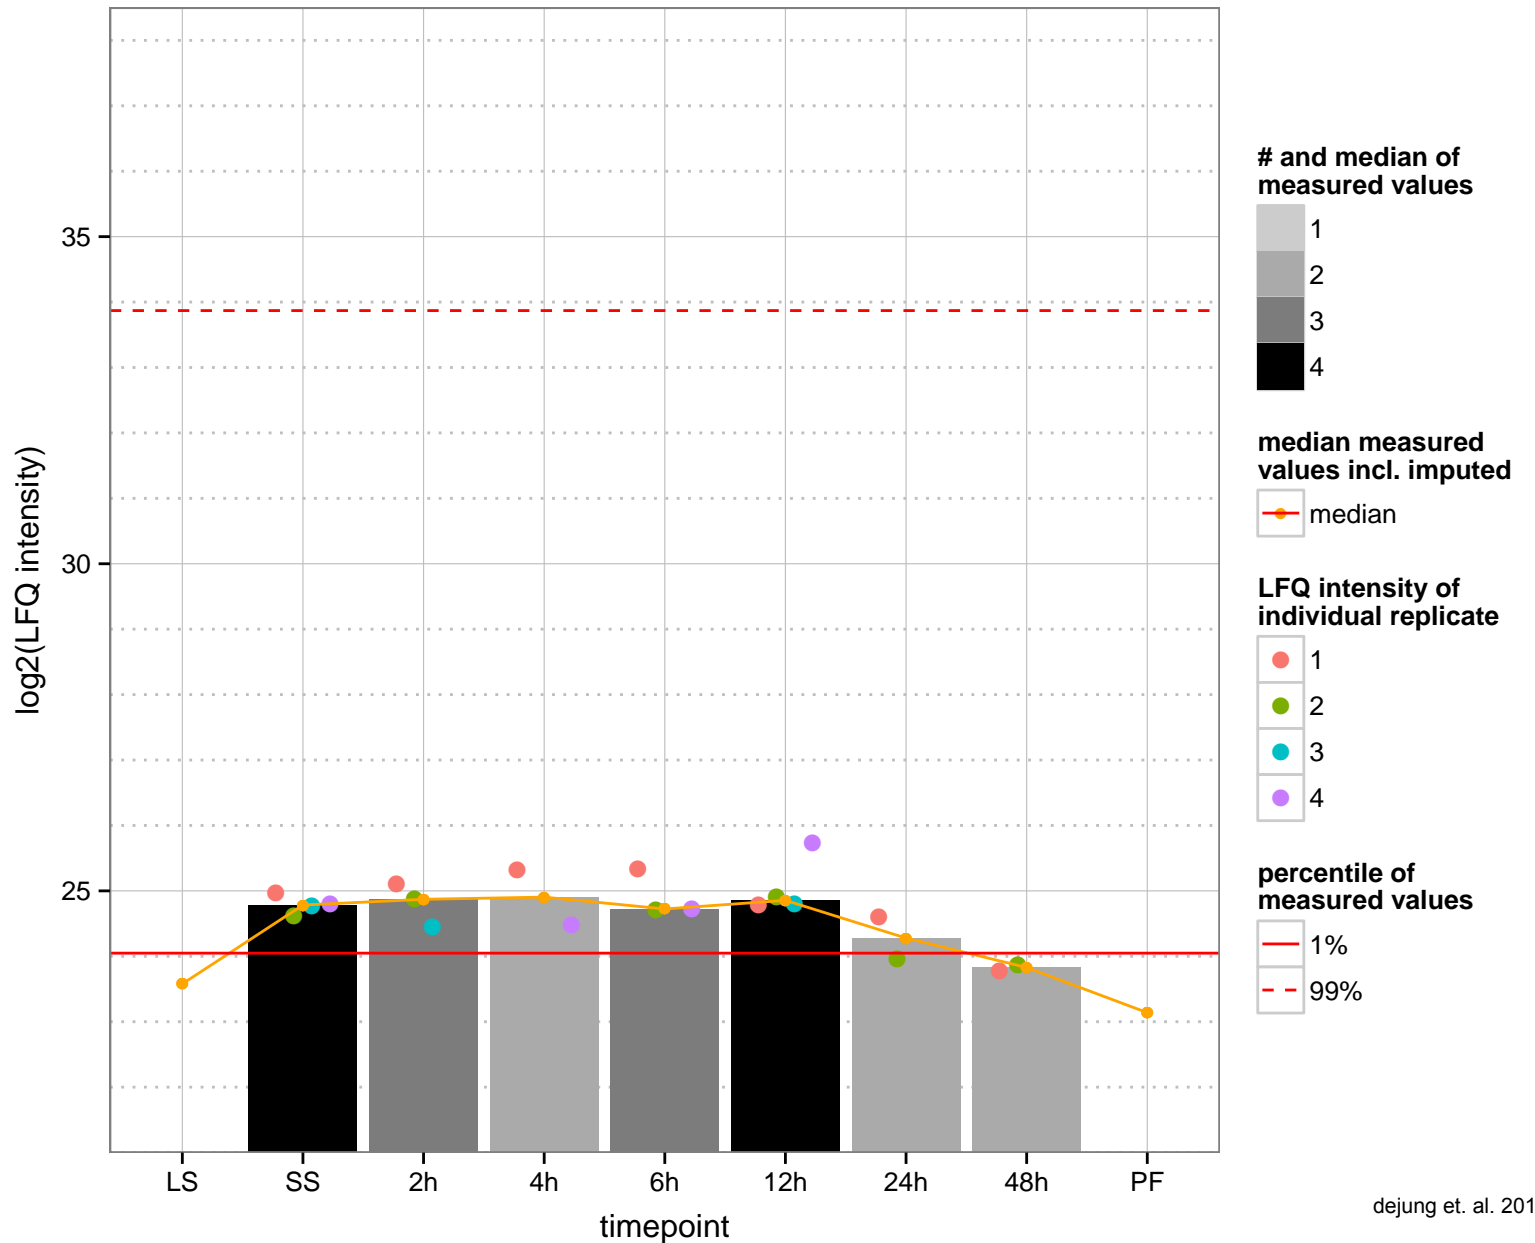

protein tyrosine phosphatase, putative (TbPTP1)  
 Tb927.10.6690  
 AGOF: protein tyrosine phosphatase activity  
 AGOC: null  
 AGOP: protein dephosphorylation  
 PGO: phosphatase activity, protein tyrosine phosphatase activity  
 PGOC: null  
 PGO: dephosphorylation, protein dephosphorylation

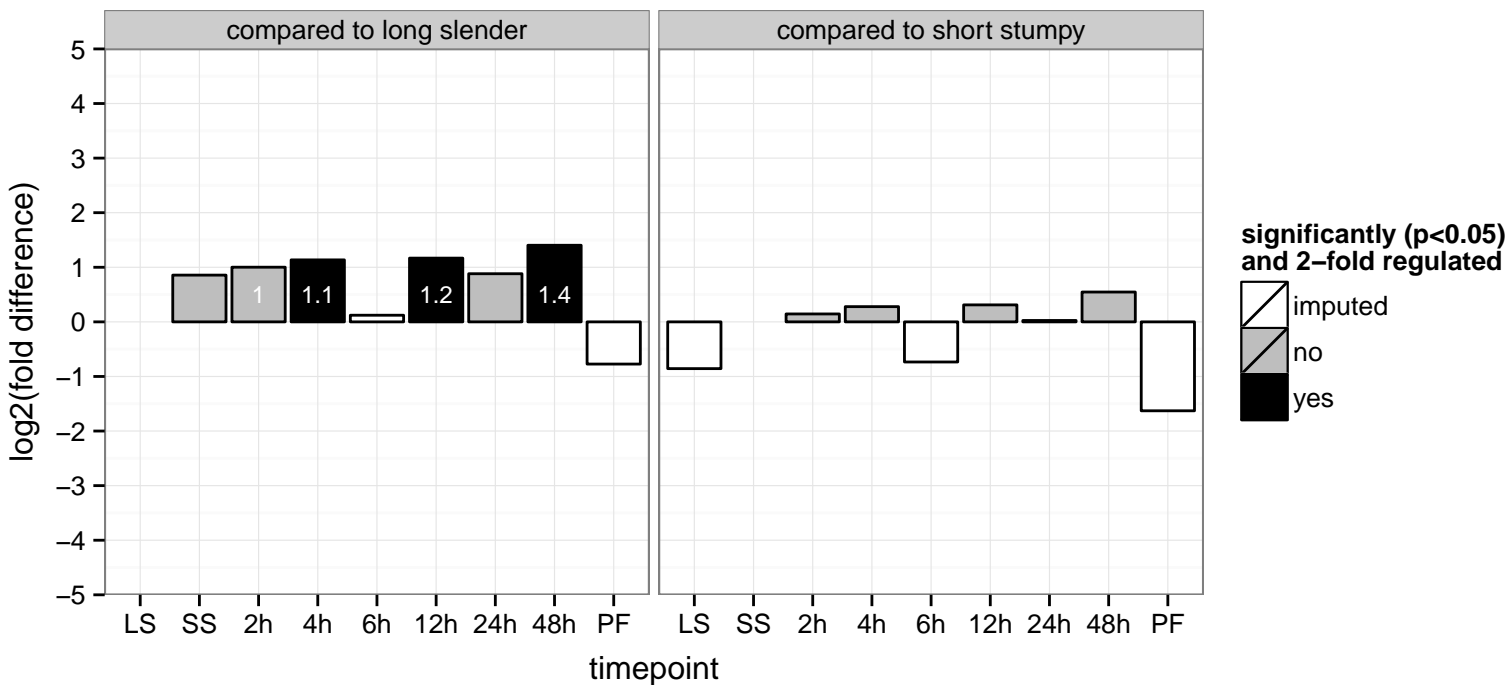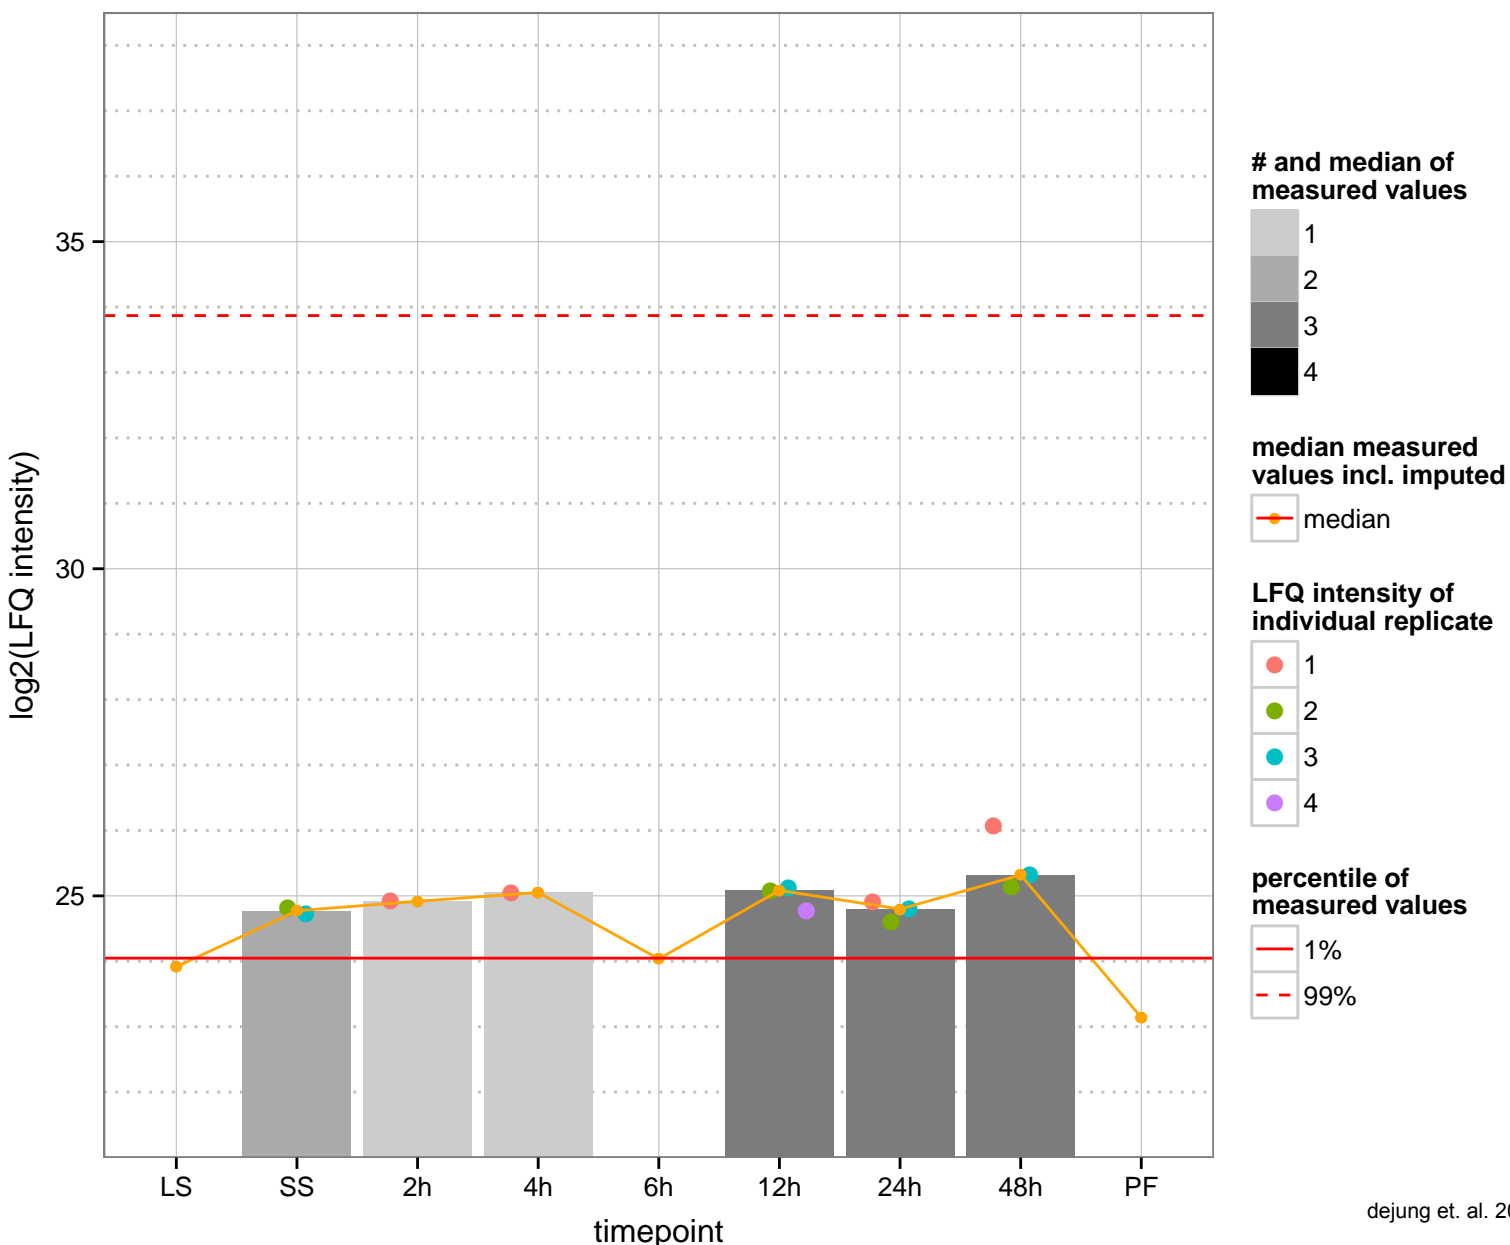

hypothetical protein, conserved  
 Tb927.10.6700;Tb11.v5.0902  
 AGOF: null  
 AGOC: null  
 AGOP: null  
 PGO: protein binding  
 PGOC: null  
 PGOP: null

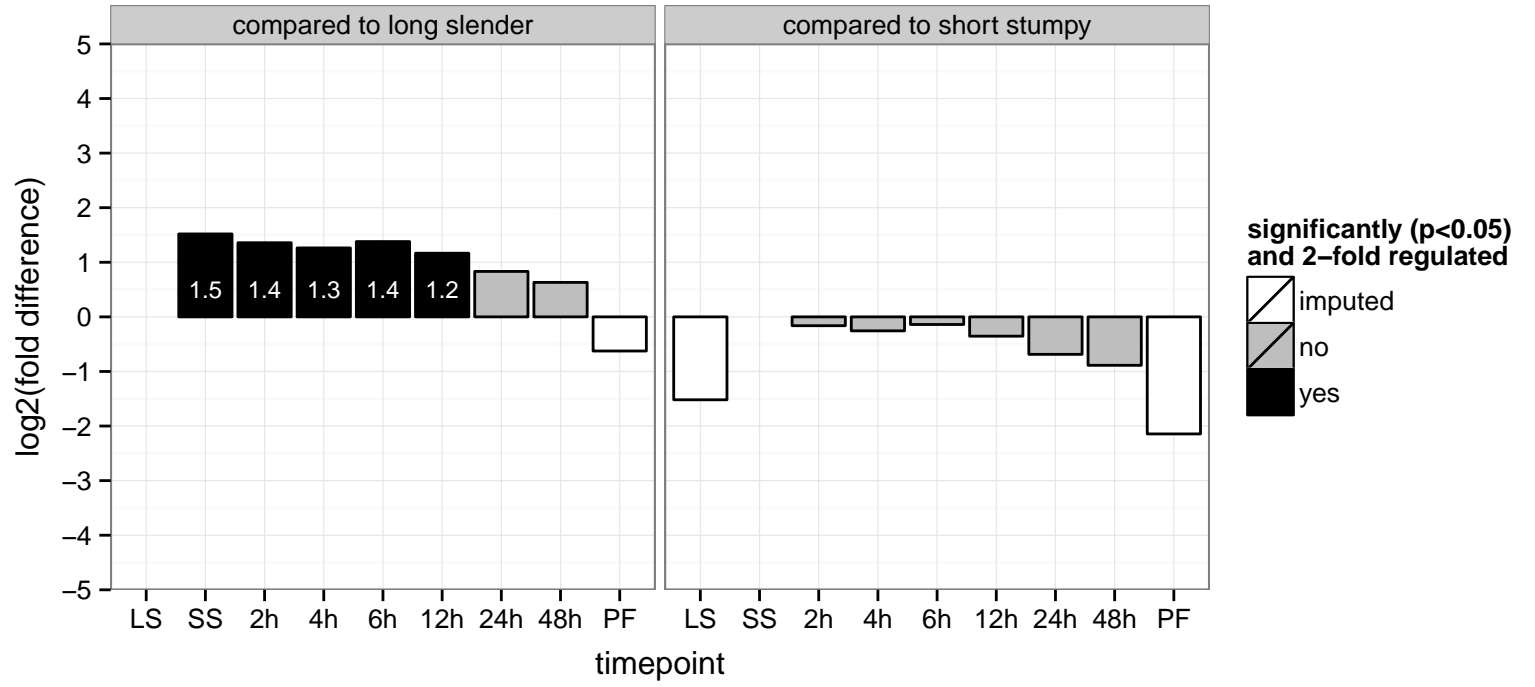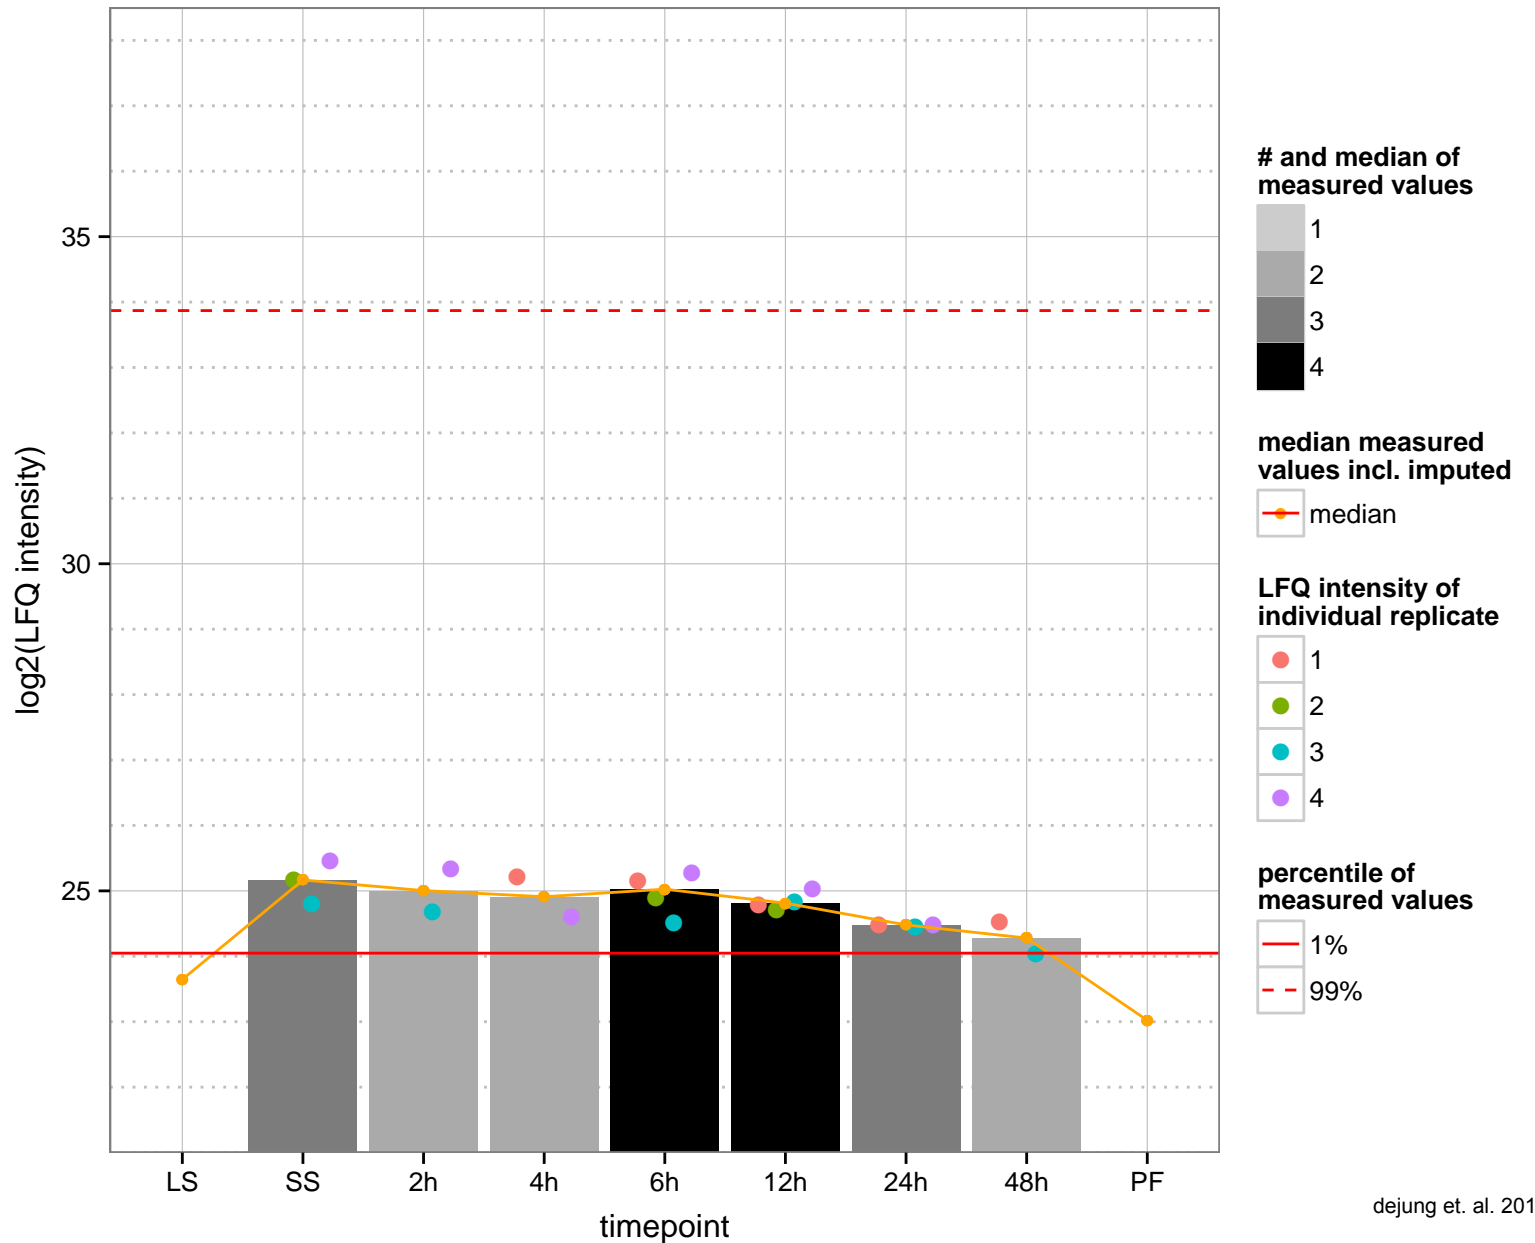

hypothetical protein, conserved  
 Tb927.10.6990  
 AGOF: zinc ion binding  
 AGOC: null  
 AGOP: null  
 PGO: null  
 PGOC: null  
 PGOP: null

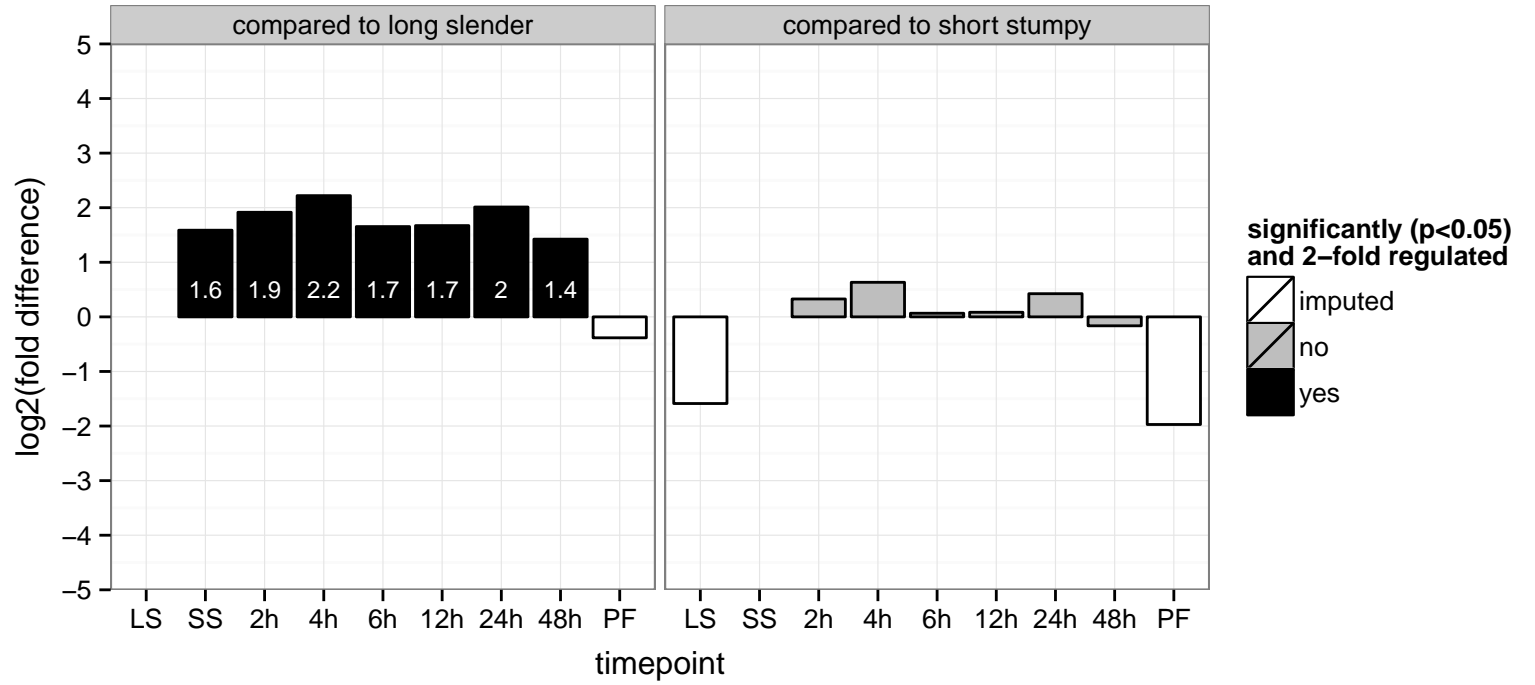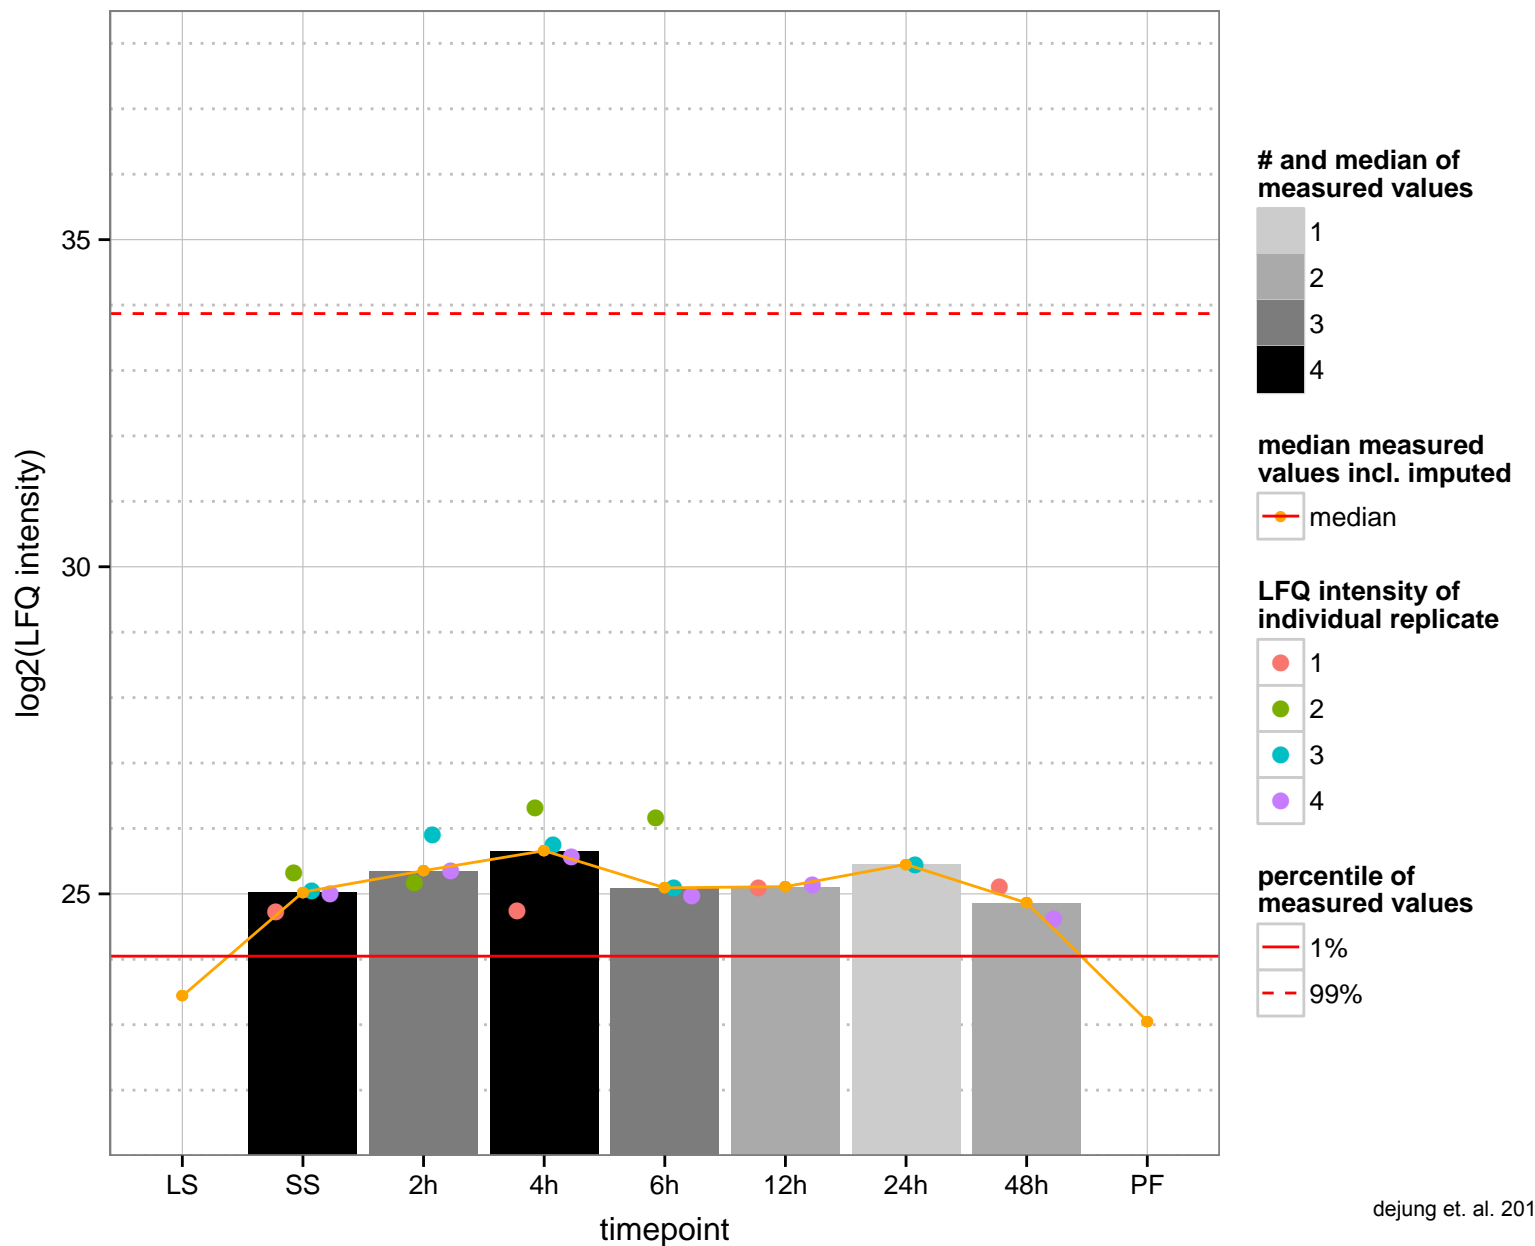

hypothetical protein, conserved  
 Tb927.10.720  
 AGOF: null  
 AGOC: null  
 AGOP: null  
 PGOF: protein binding  
 PGO: null  
 PGOP: null

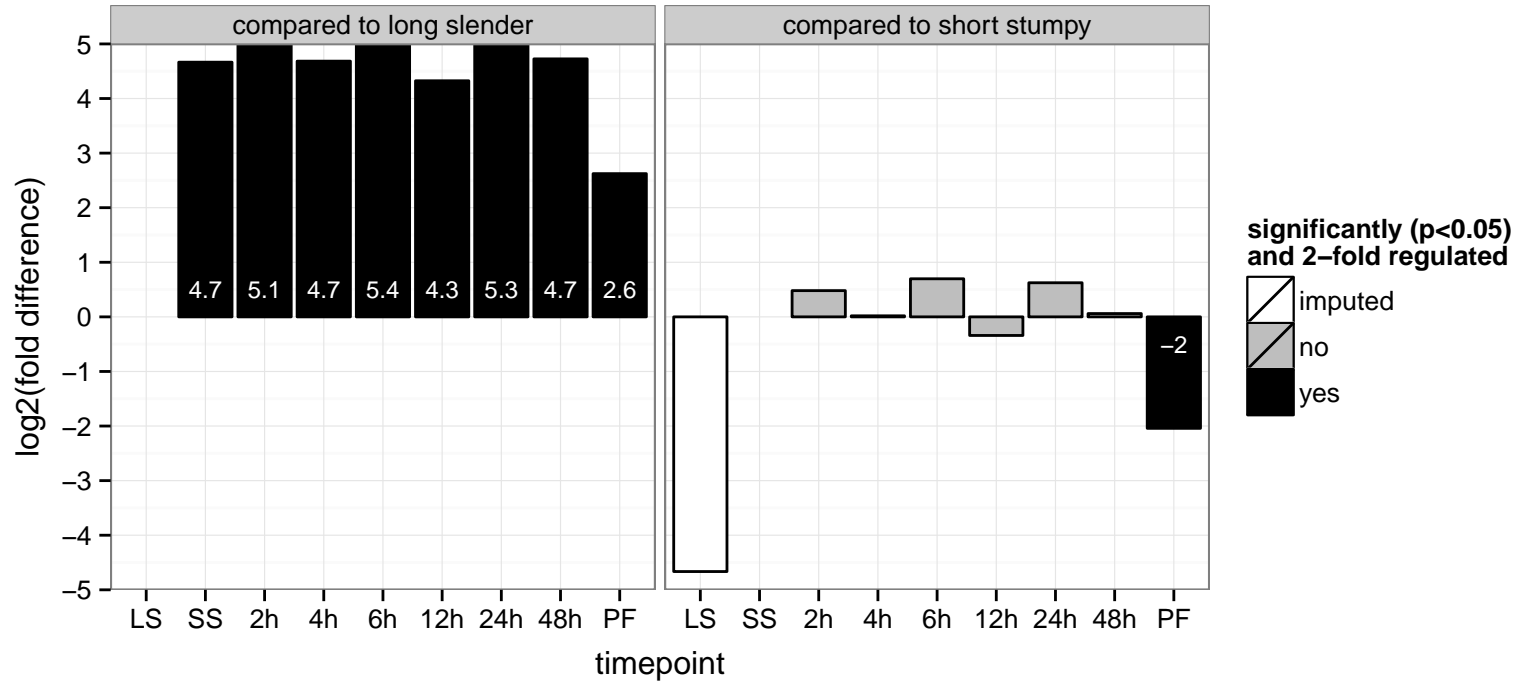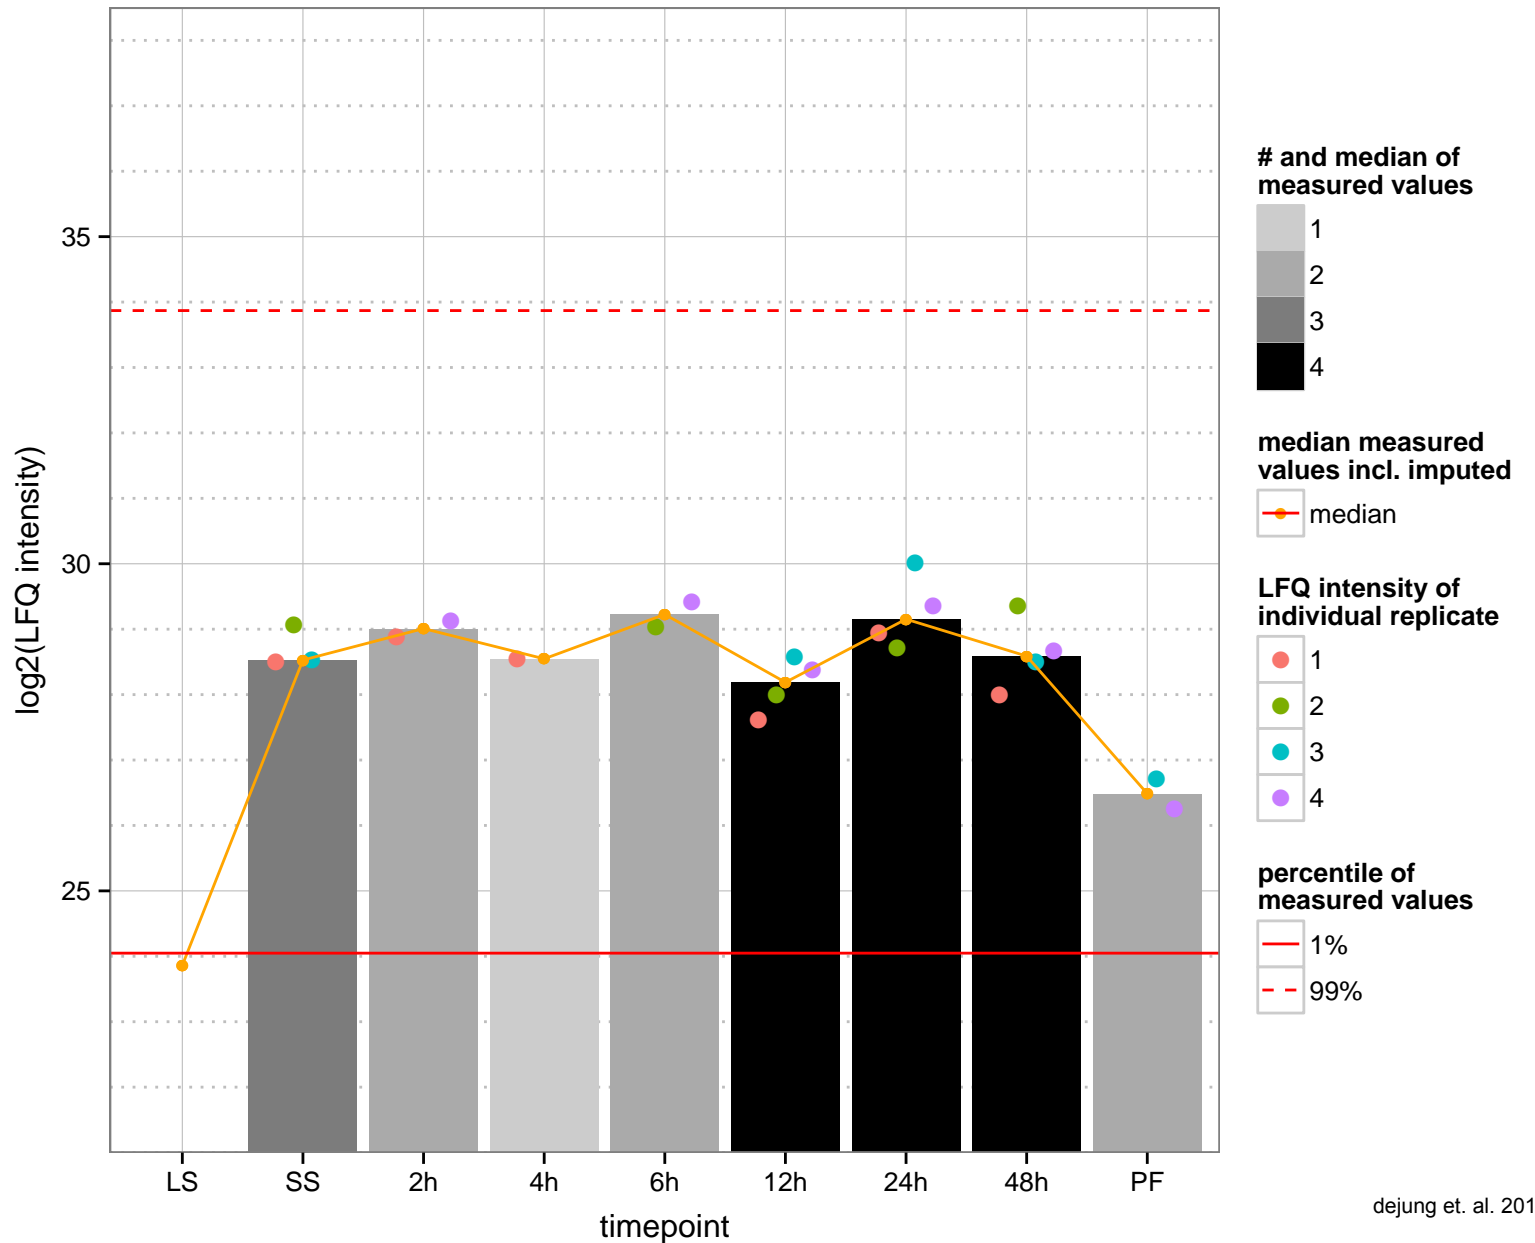

hypothetical protein, conserved  
 Tb927.10.8140  
 AGOF: null  
 AGOC: null  
 AGOP: null  
 PGO: null  
 PGO: null  
 PGO: null

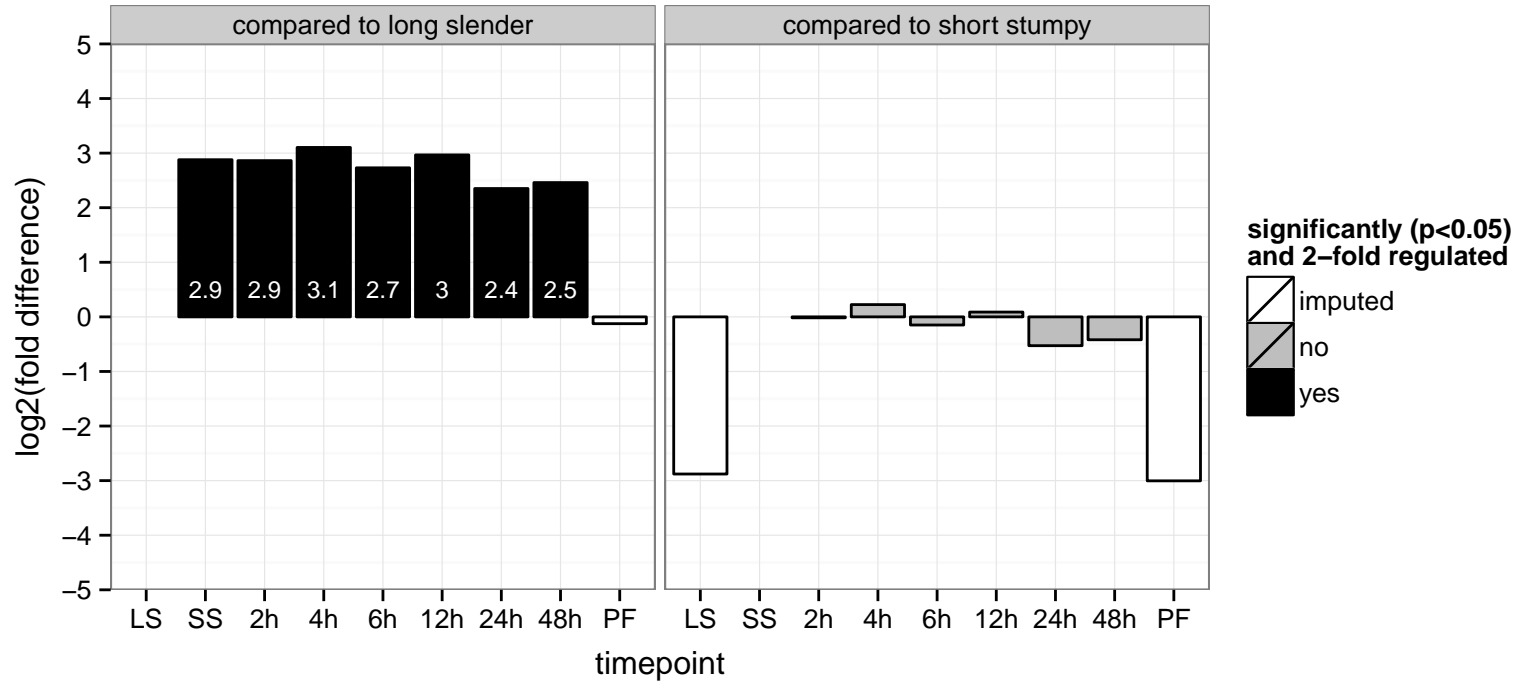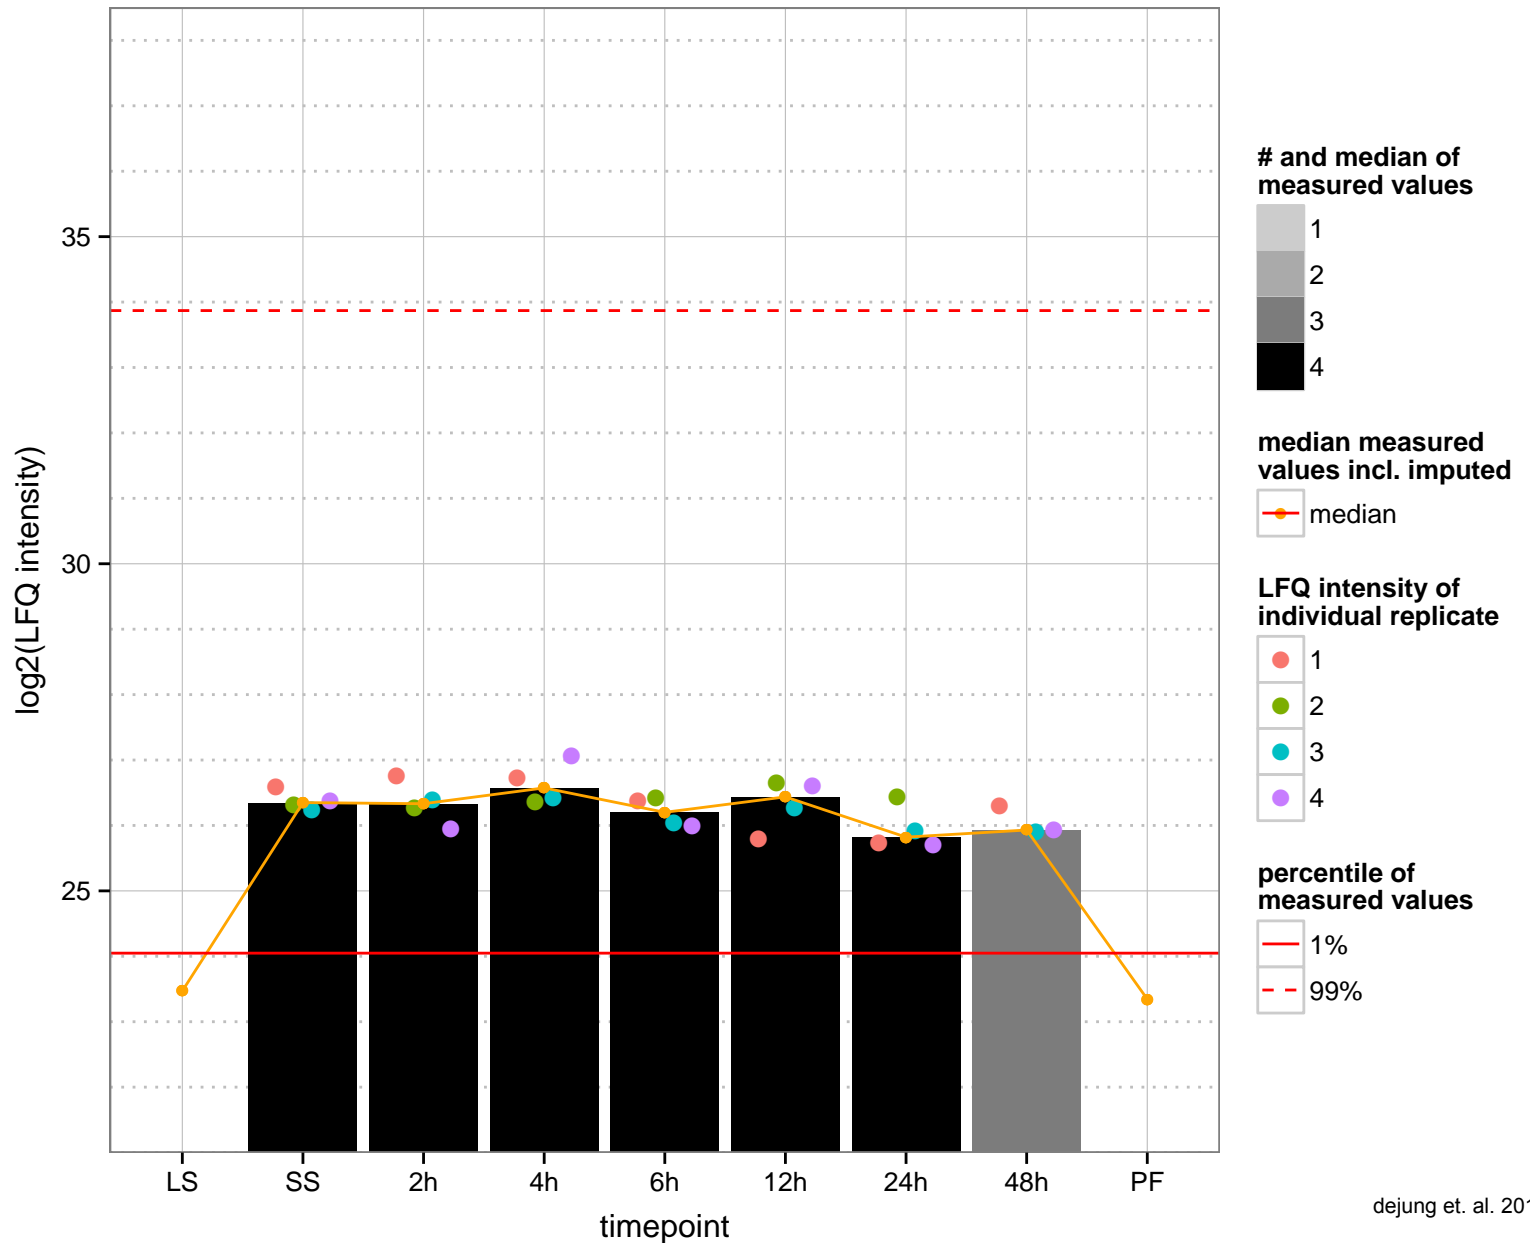



hypothetical protein, conserved  
 Tb927.10.8160  
 AGOF: null  
 AGOC: mitochondrion  
 AGOP: null  
 PGO: null  
 PGO: null  
 PGO: null

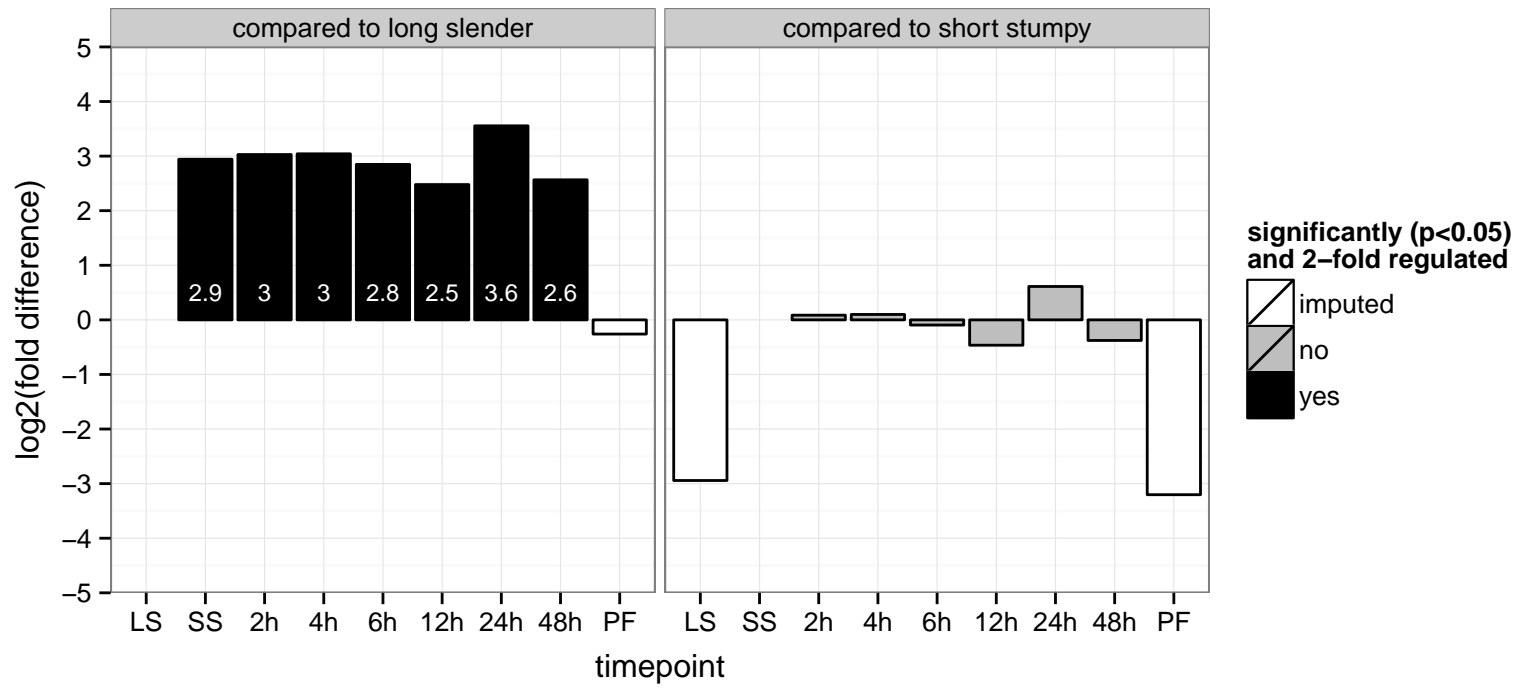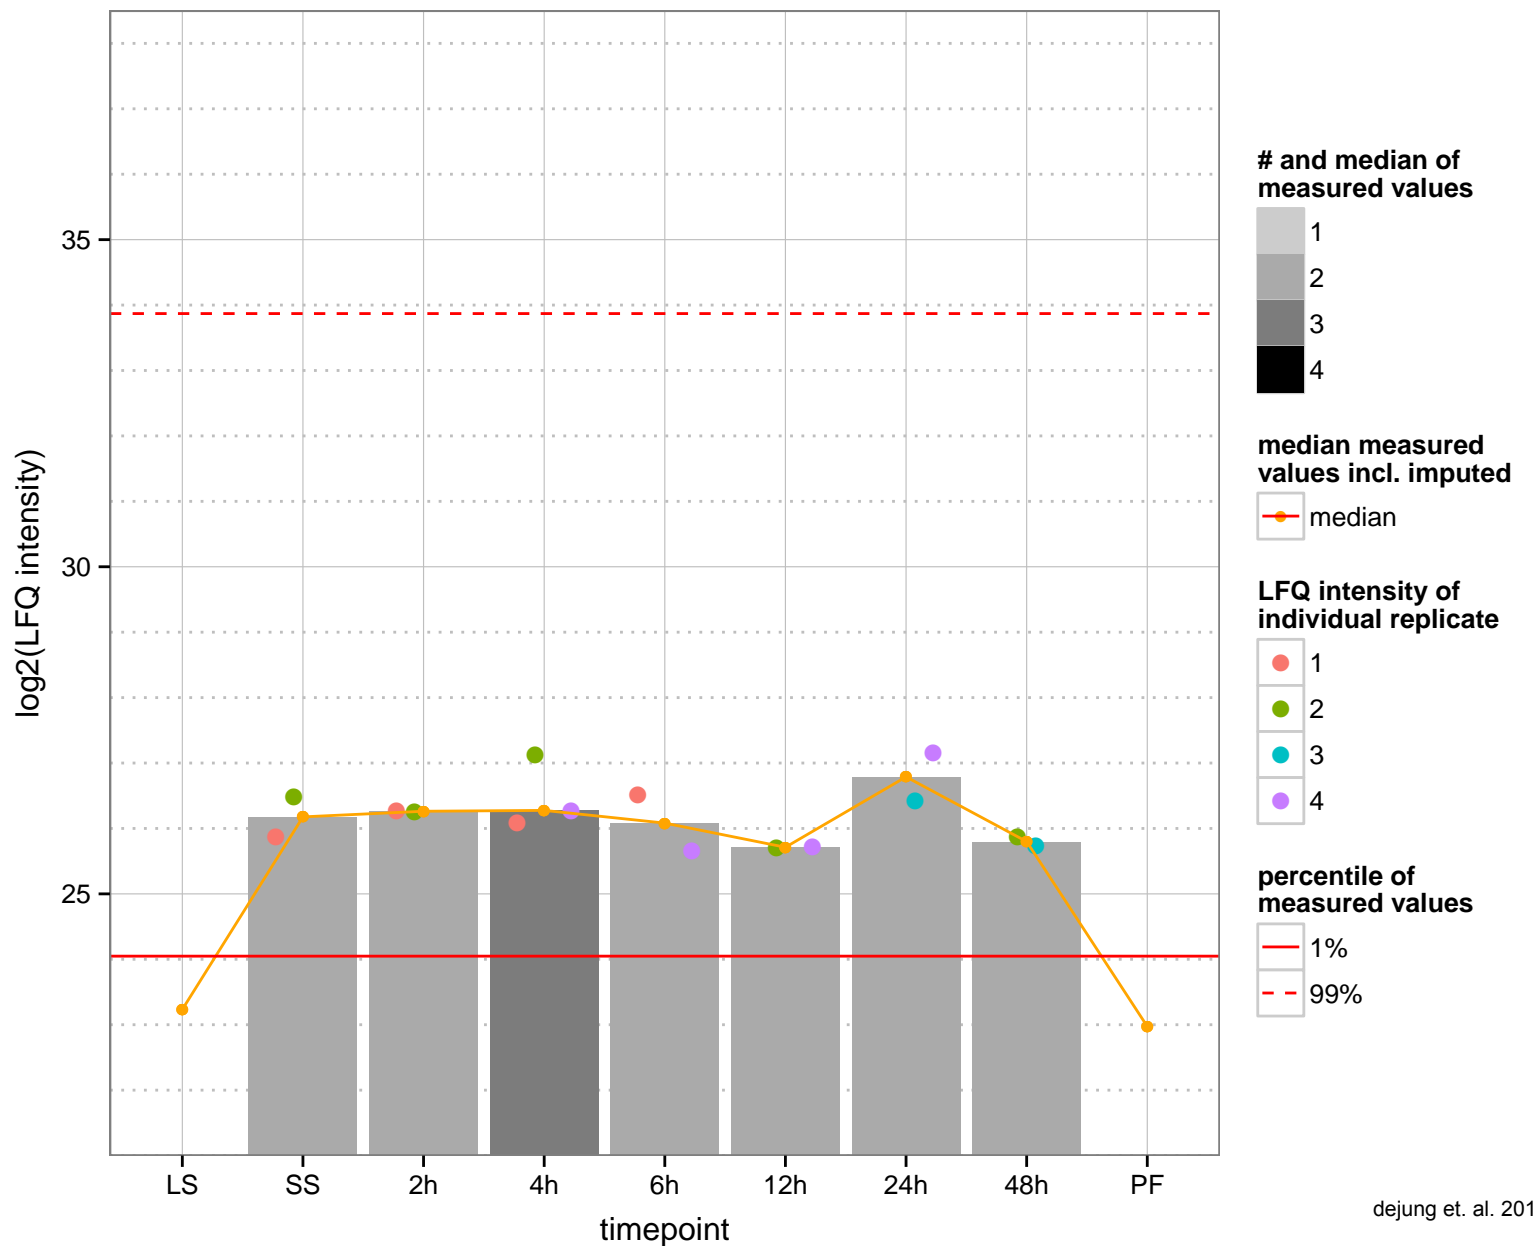

chaperone protein DNAj, putative  
 Tb927.10.8540  
 AGOF: heat shock protein binding, unfolded protein binding  
 AGOC: null  
 AGOP: protein folding, protein refolding, response to unfolded protein  
 PGO: heat shock protein binding, unfolded protein binding  
 PGOC: null  
 PGOP: protein folding

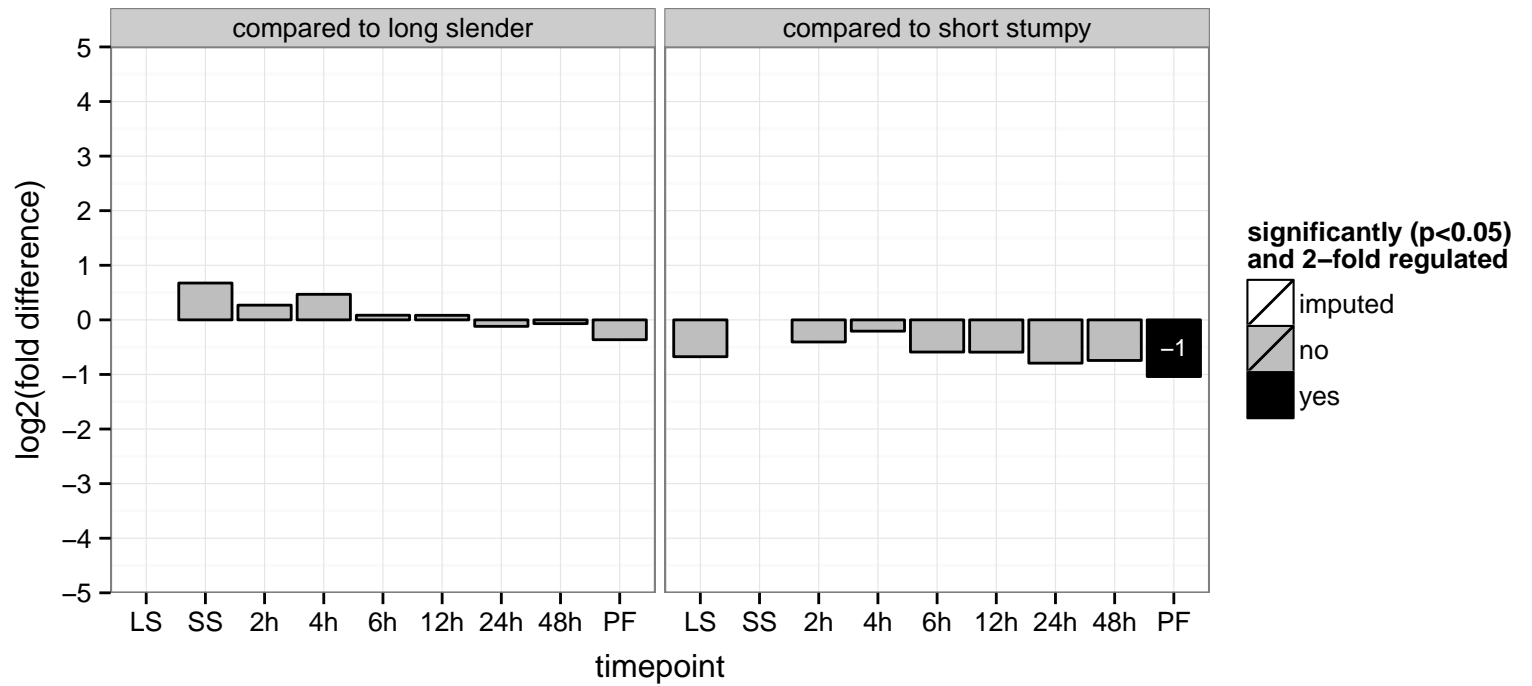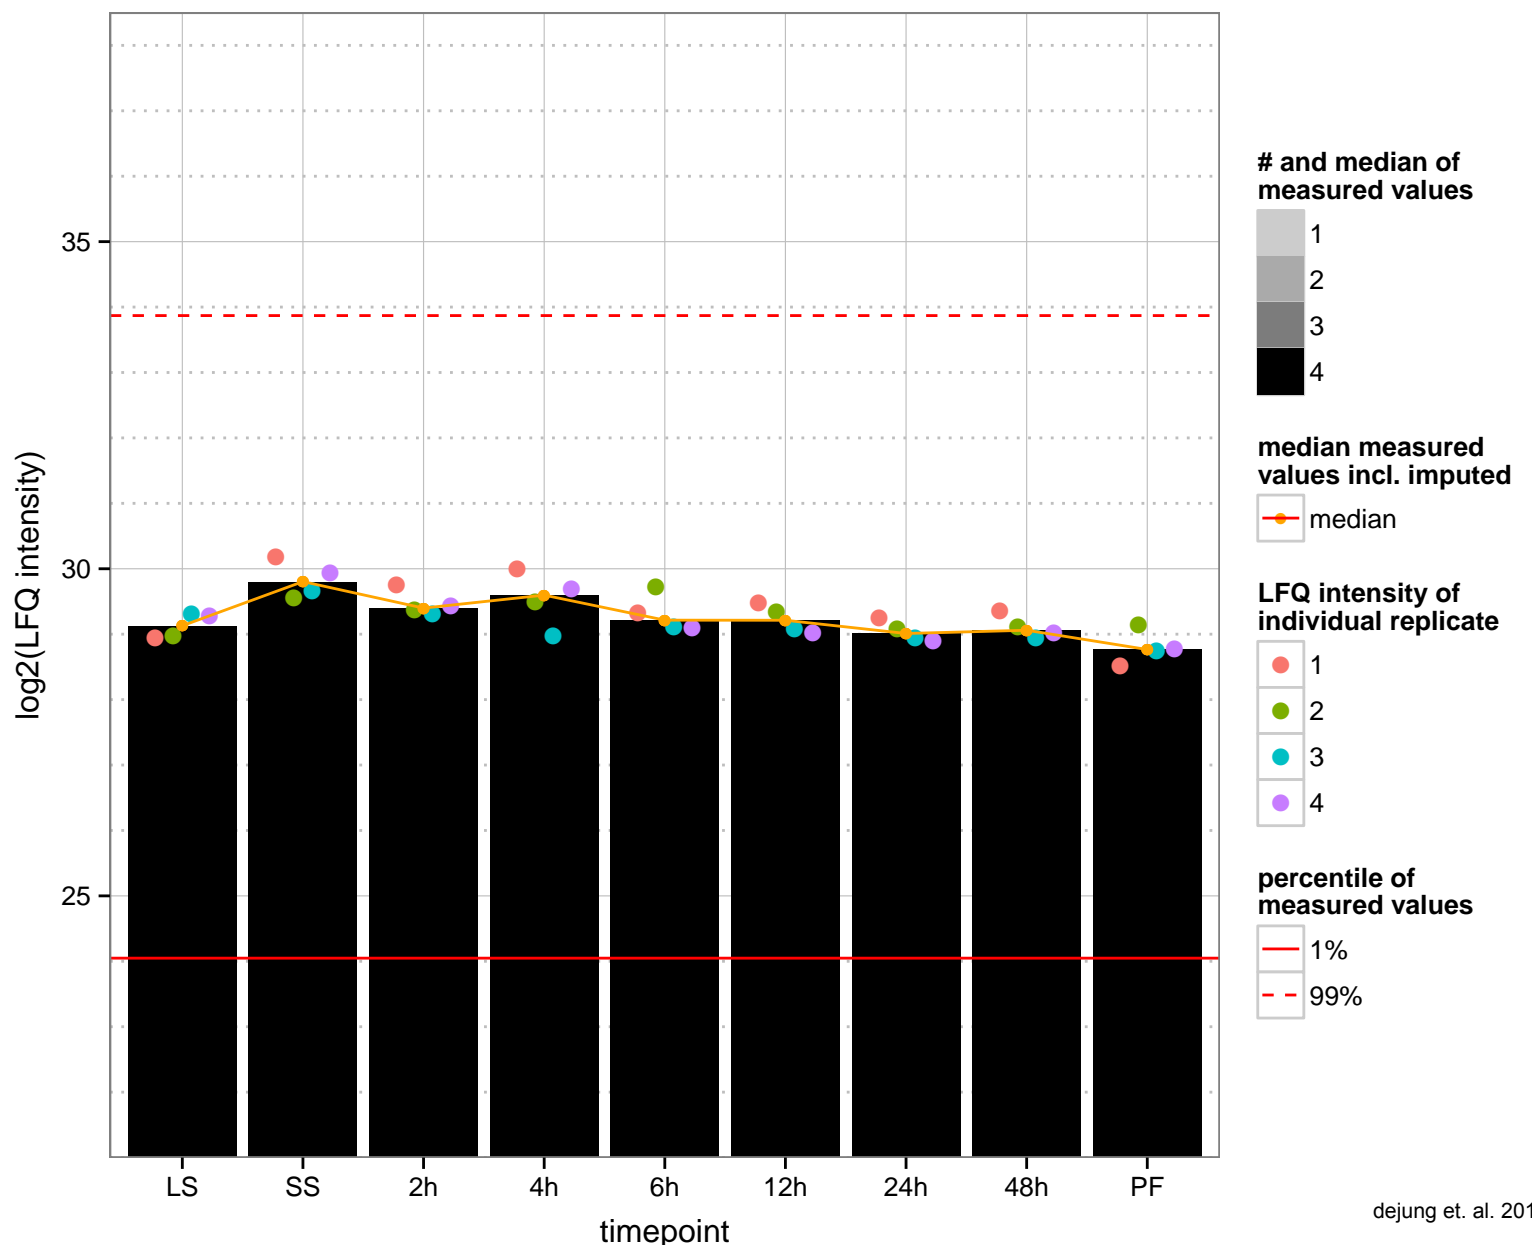

hypothetical protein, conserved  
 Tb927.10.8600  
 AGOF: null  
 AGOC: null  
 AGOP: retrograde transport, endosome to Golgi  
 PGO: null  
 PGOC: null  
 PGOP: retrograde transport, endosome to Golgi

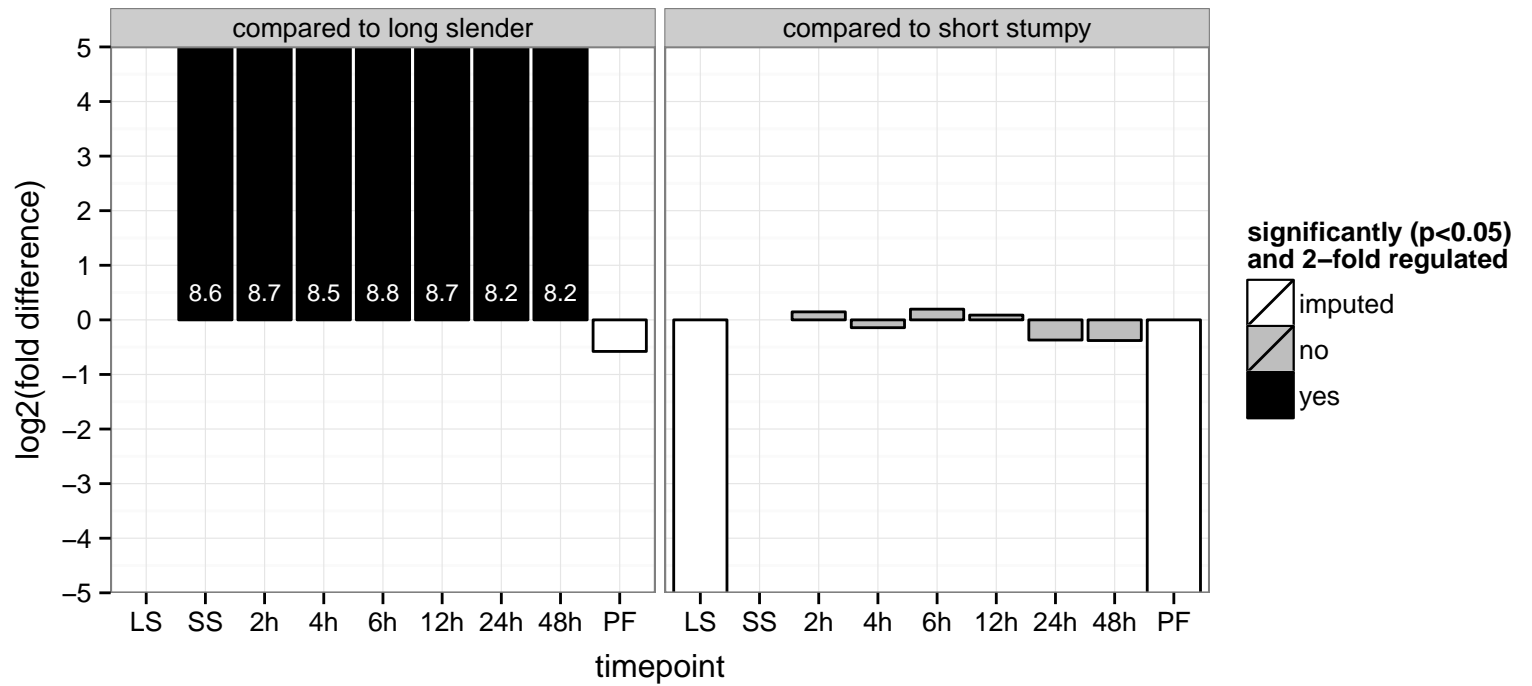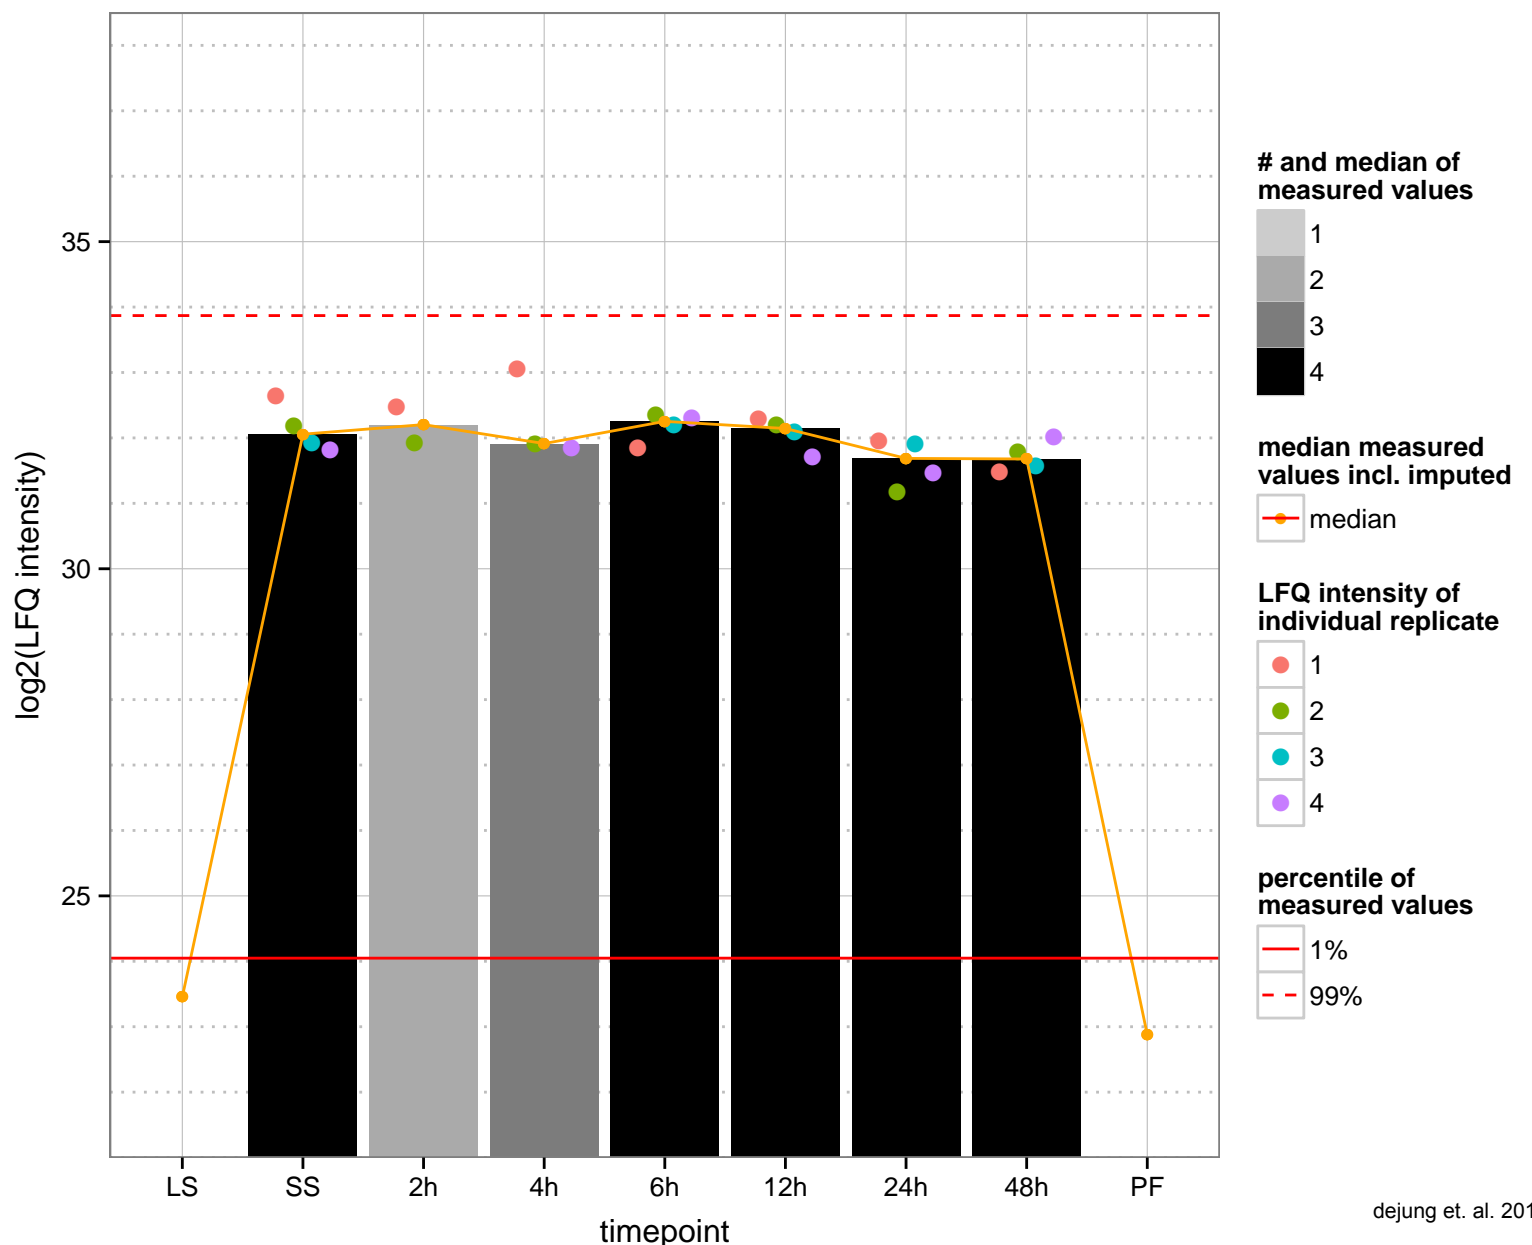

RNA polymerase-associated protein CDC73, putative

Tb927.11.10230

AGOF: RNA polymerase II core binding

AGOC: Cdc73/Paf1 complex

AGOP: positive regulation of transcription elongation from RNA polymerase II promoter

PGOF: null

PGOC: null

PGOP: null

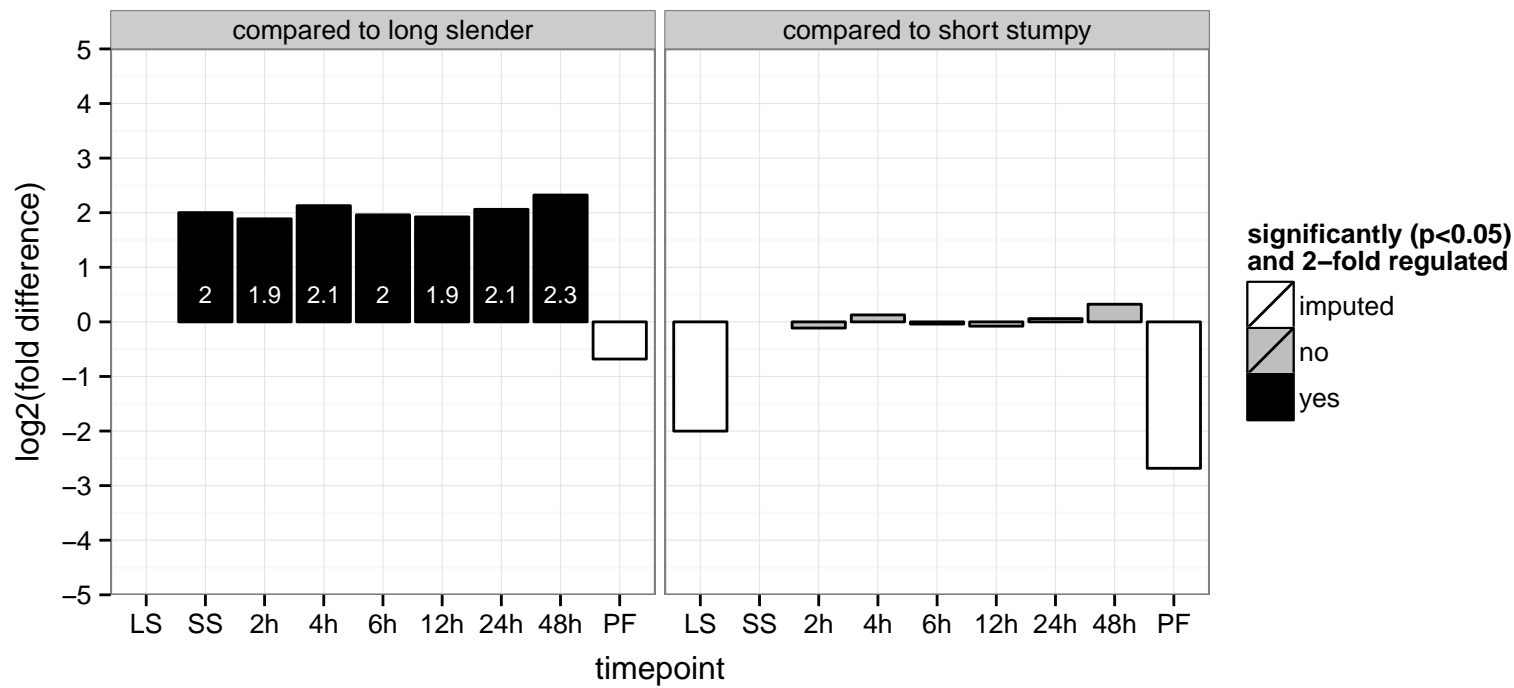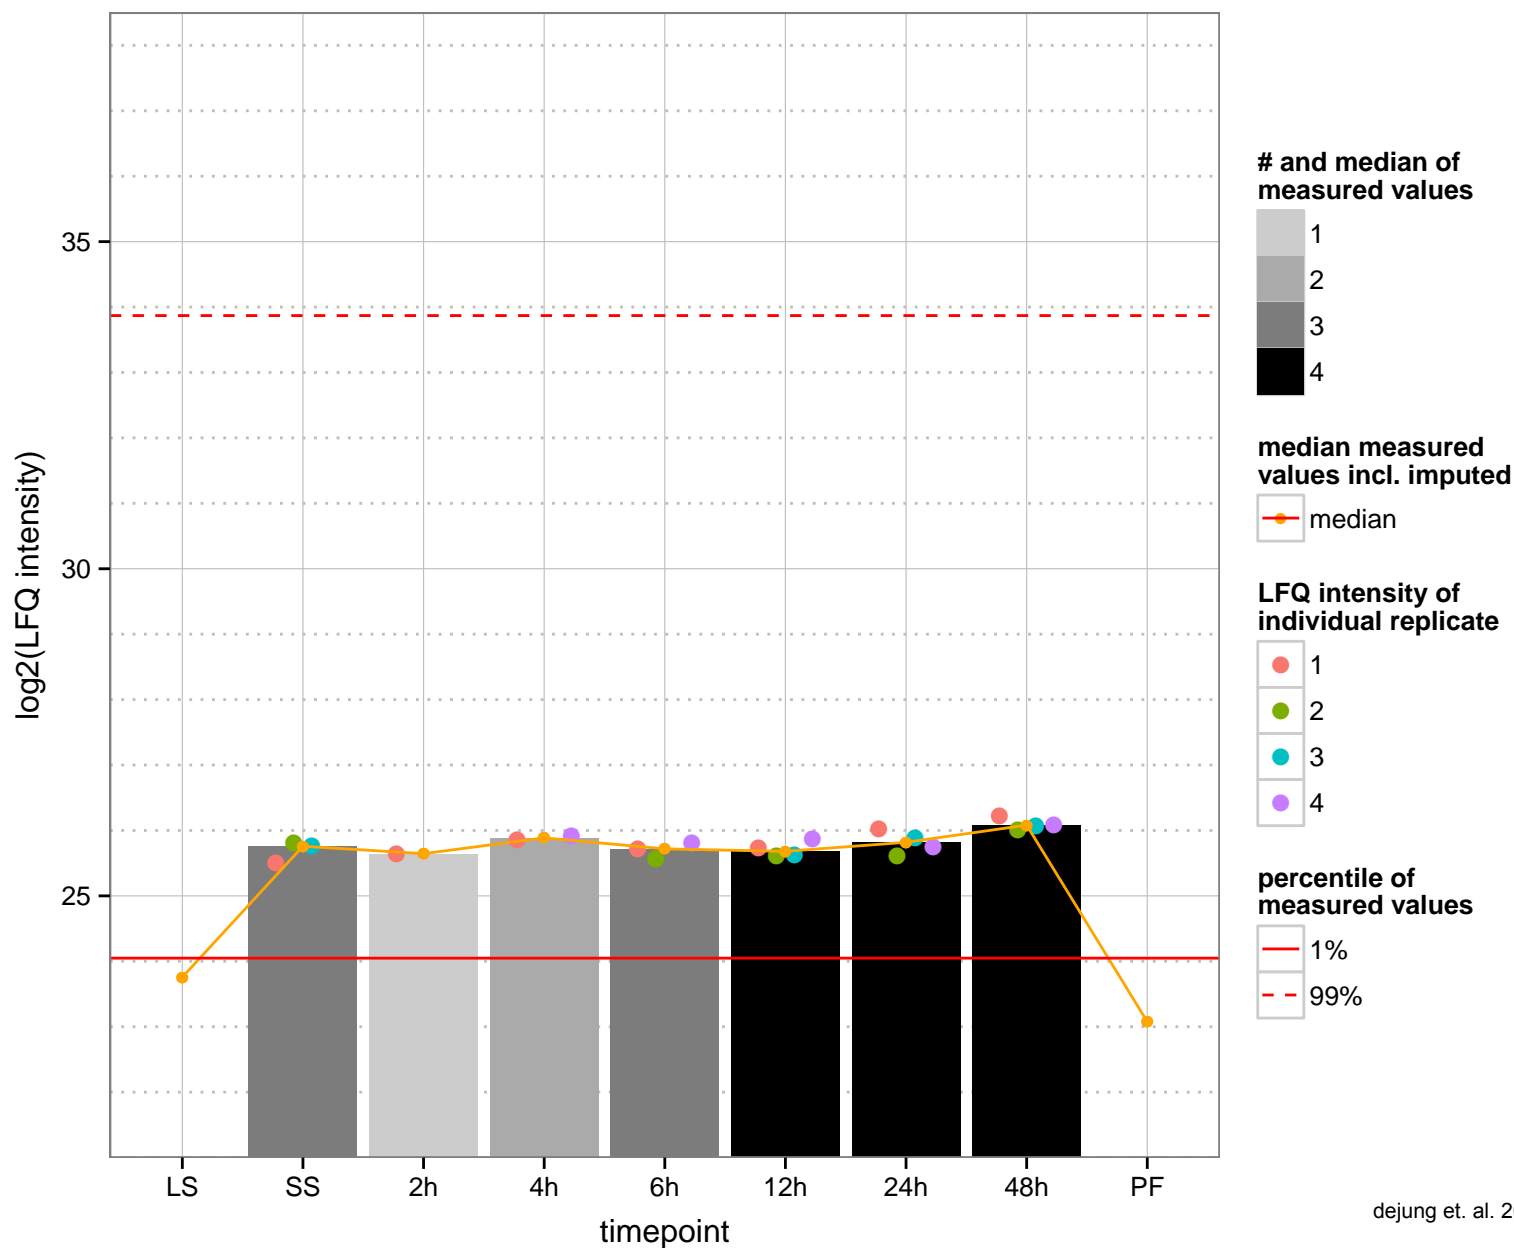

golgi SNARE protein-like, GOLGI SNAP receptor complex member, putative  
 Tb927.11.10270  
 AGOF: null  
 AGOC: membrane  
 AGOP: intracellular protein transport  
 PGO: null  
 PGOC: null  
 PGOP: null

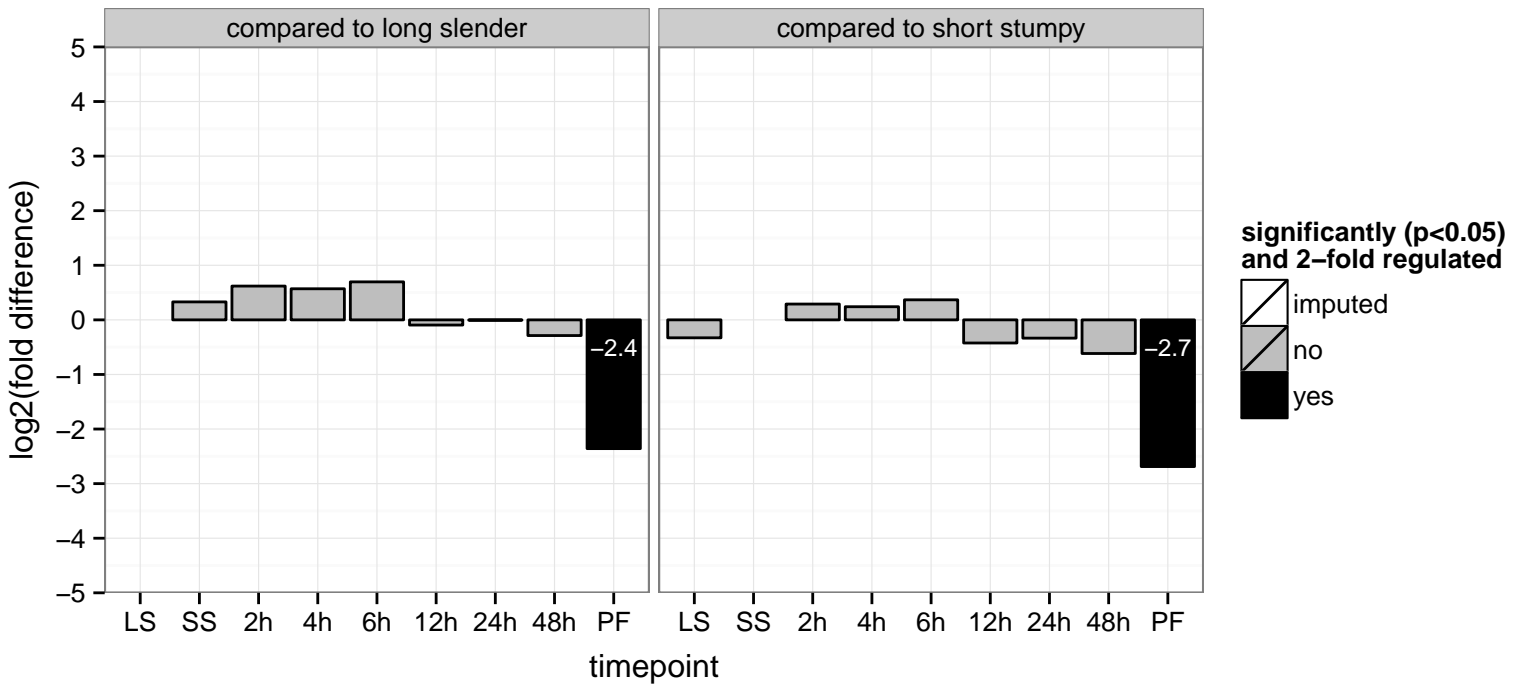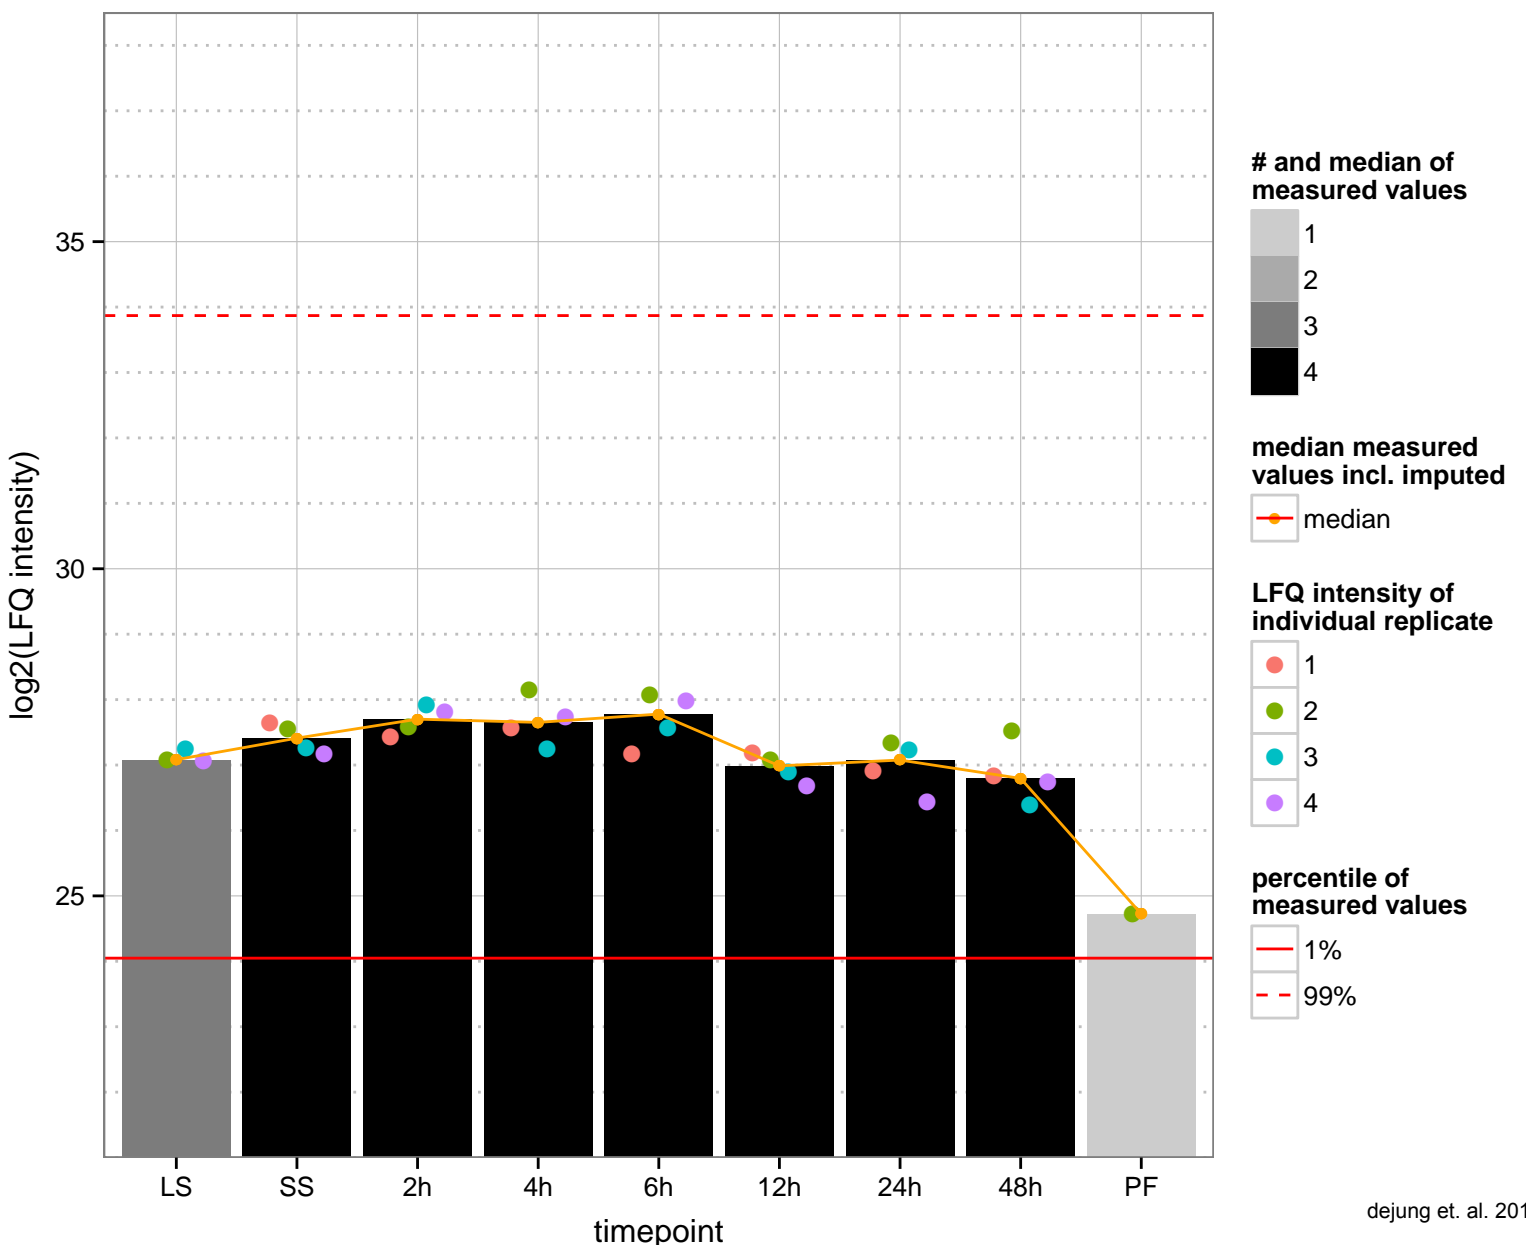

hypothetical protein, conserved  
 Tb927.11.10620  
 AGOF: null  
 AGOC: null  
 AGOP: null  
 PGO: null  
 PGOC: null  
 PGOP: null

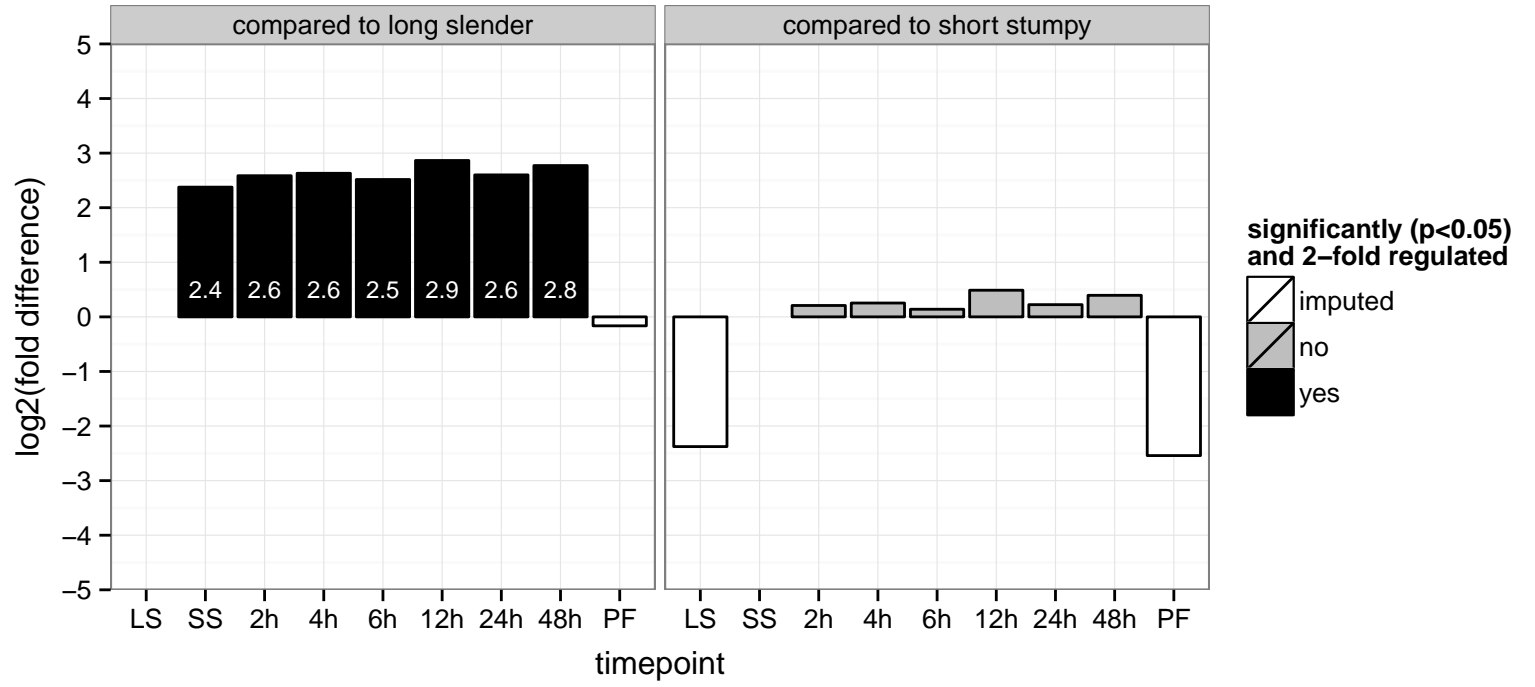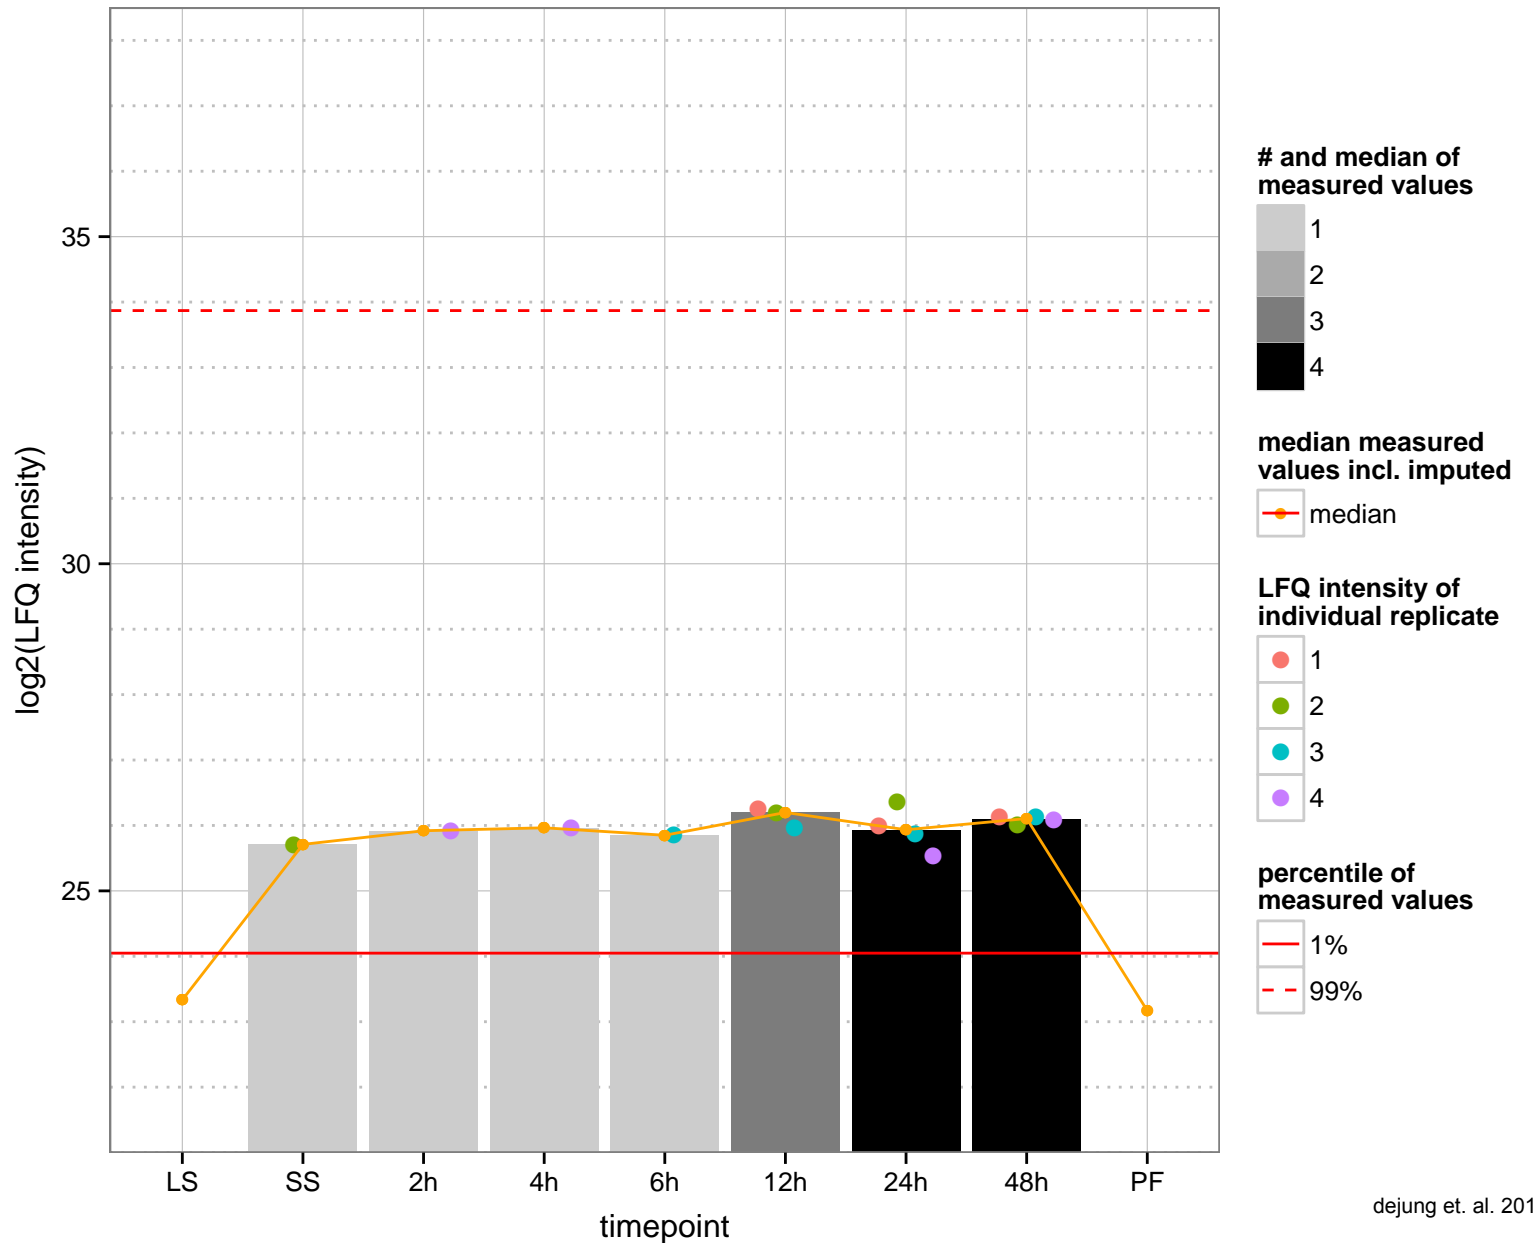

SNF2 DNA repair protein, putative, ATP-dependent helicase, SNF2 family helicase  
 Tb927.11.10730  
 AGOF: ATP binding, ATPase activity, DNA binding, helicase activity  
 AGOC: null  
 AGOP: chromatin remodeling, meiosis  
 PGO: ATP binding, DNA binding, helicase activity, nucleic acid binding  
 PGOC: null  
 PGOP: null

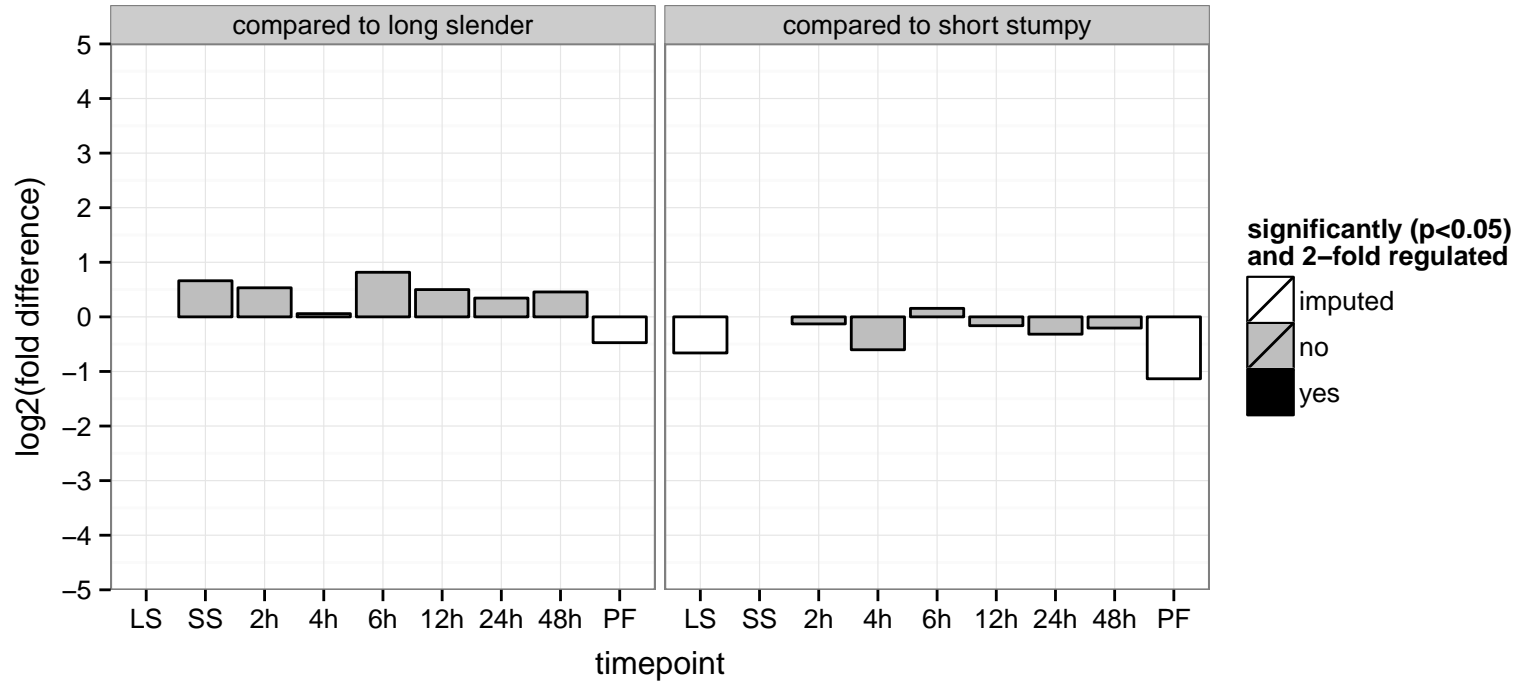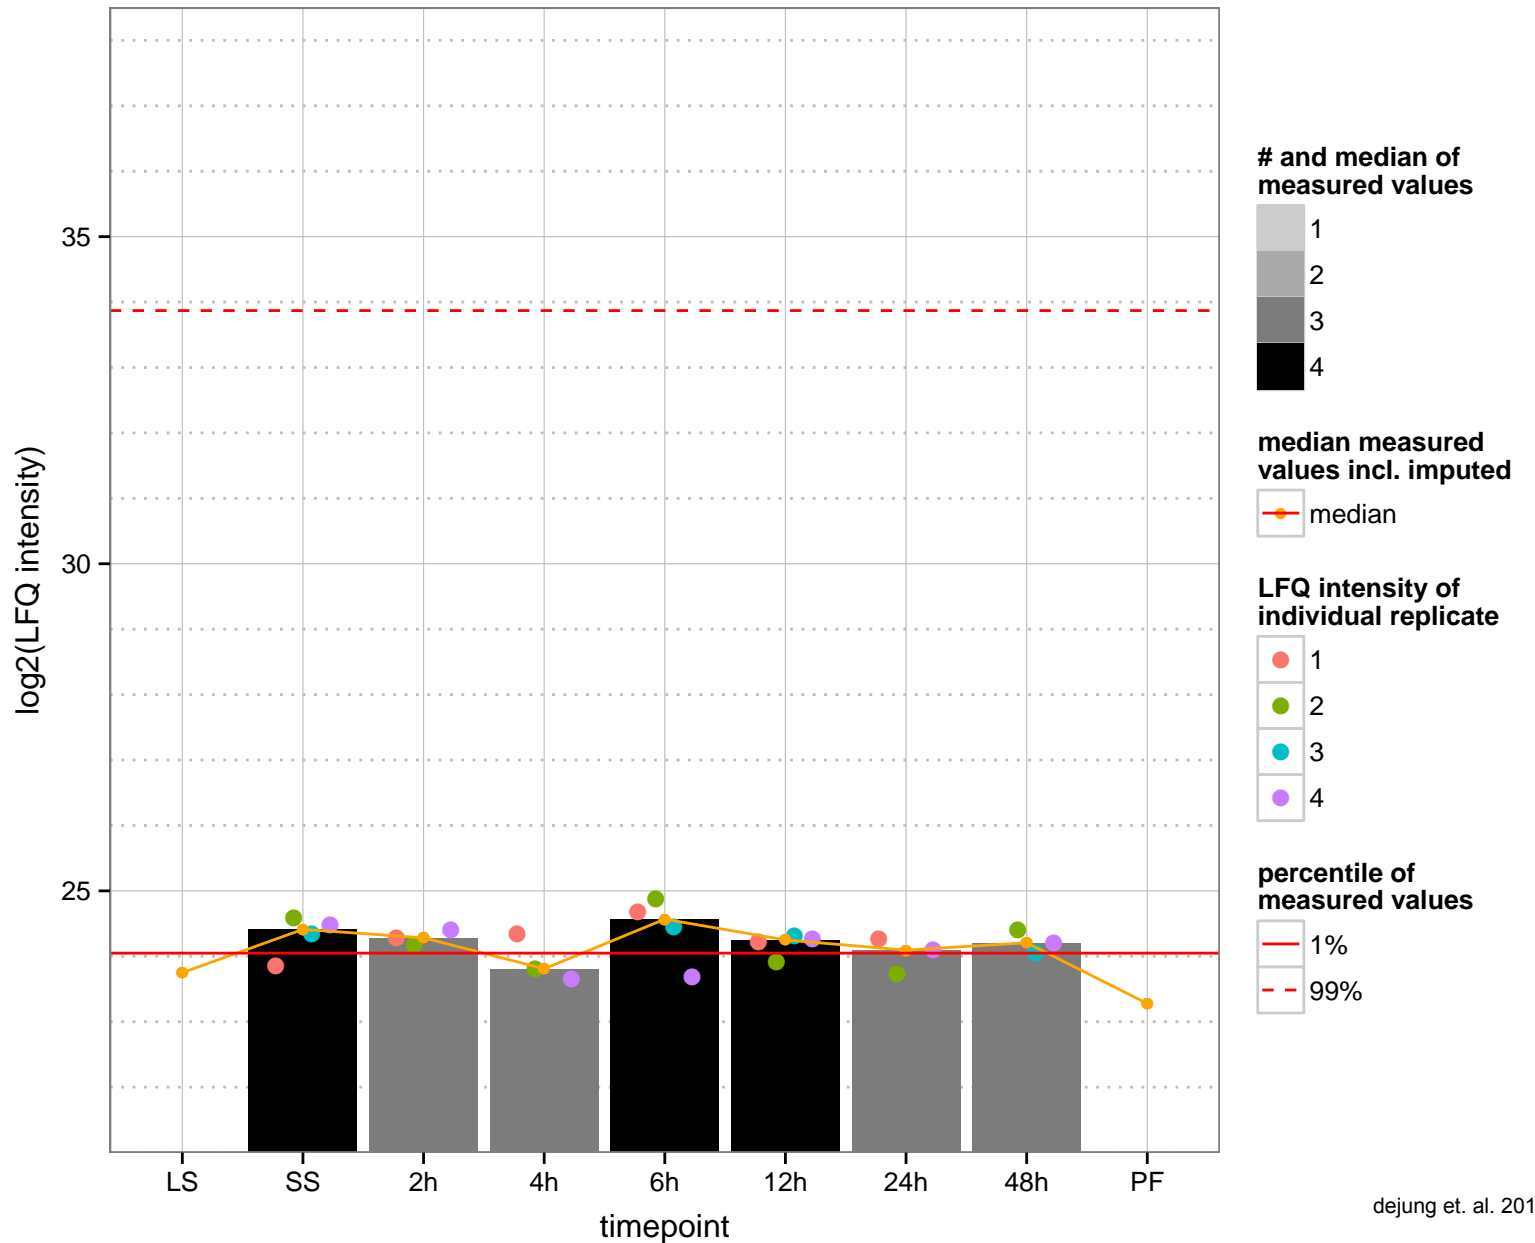

MENG  
 Tb927.11.10900  
 AGOF: null  
 AGOC: null  
 AGOP: ciliary or flagellar motility  
 PGO: null  
 PGOC: null  
 PGOP: null

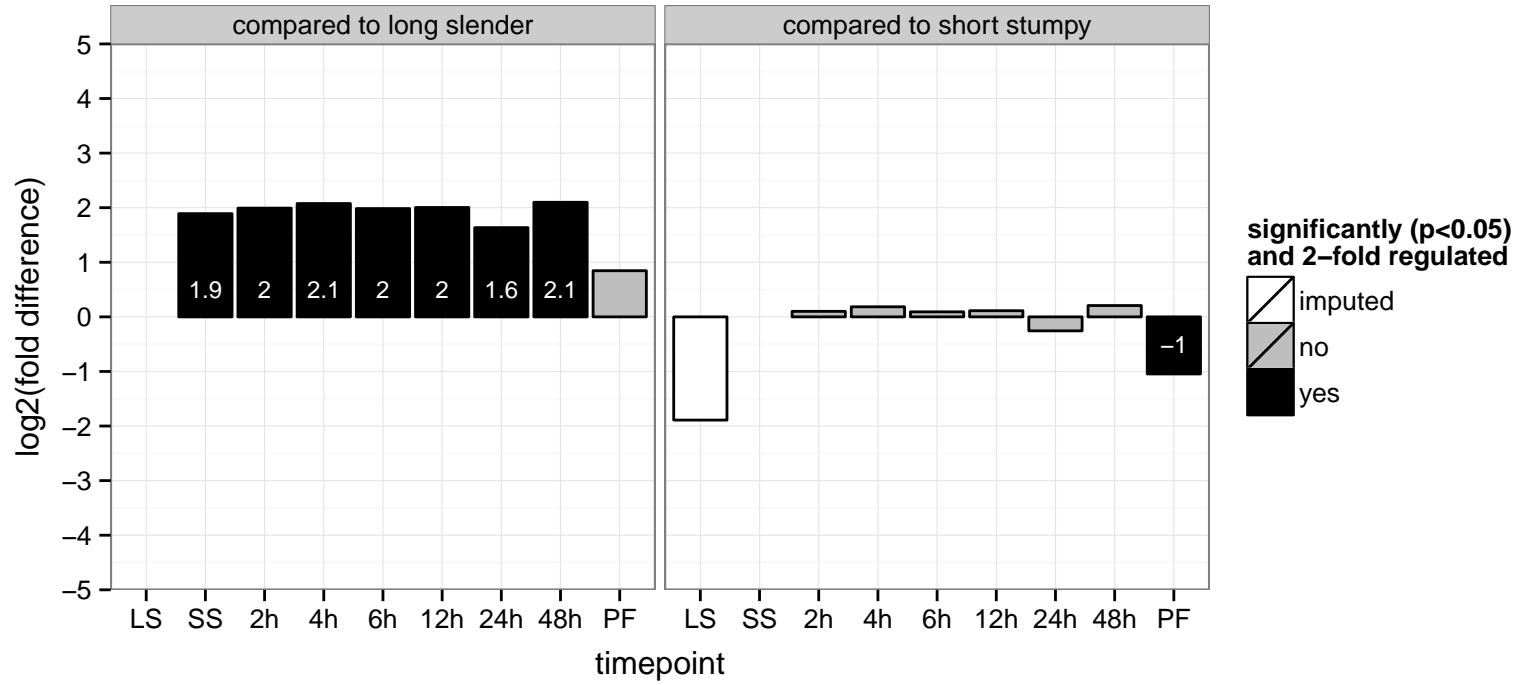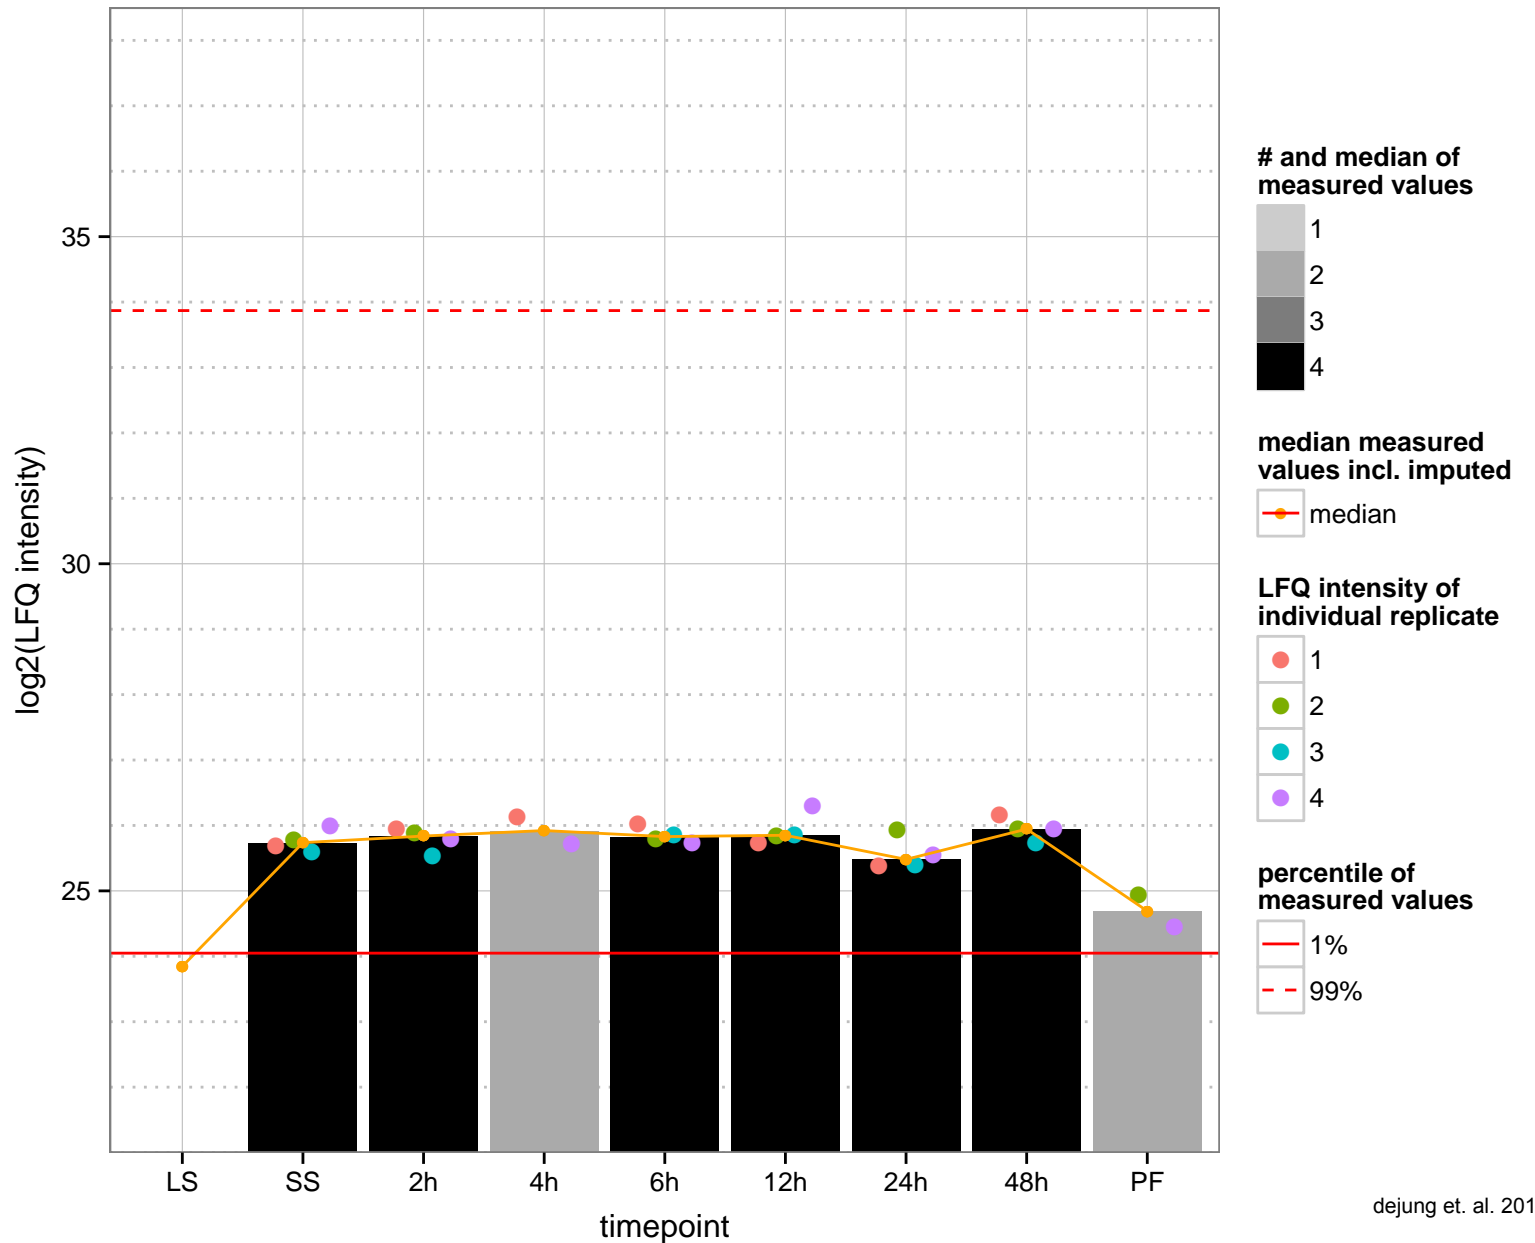



hypothetical protein, conserved  
 Tb927.11.10970  
 AGOF: null  
 AGOC: null  
 AGOP: null  
 PGO: protein binding  
 PGOC: null  
 PGOP: null

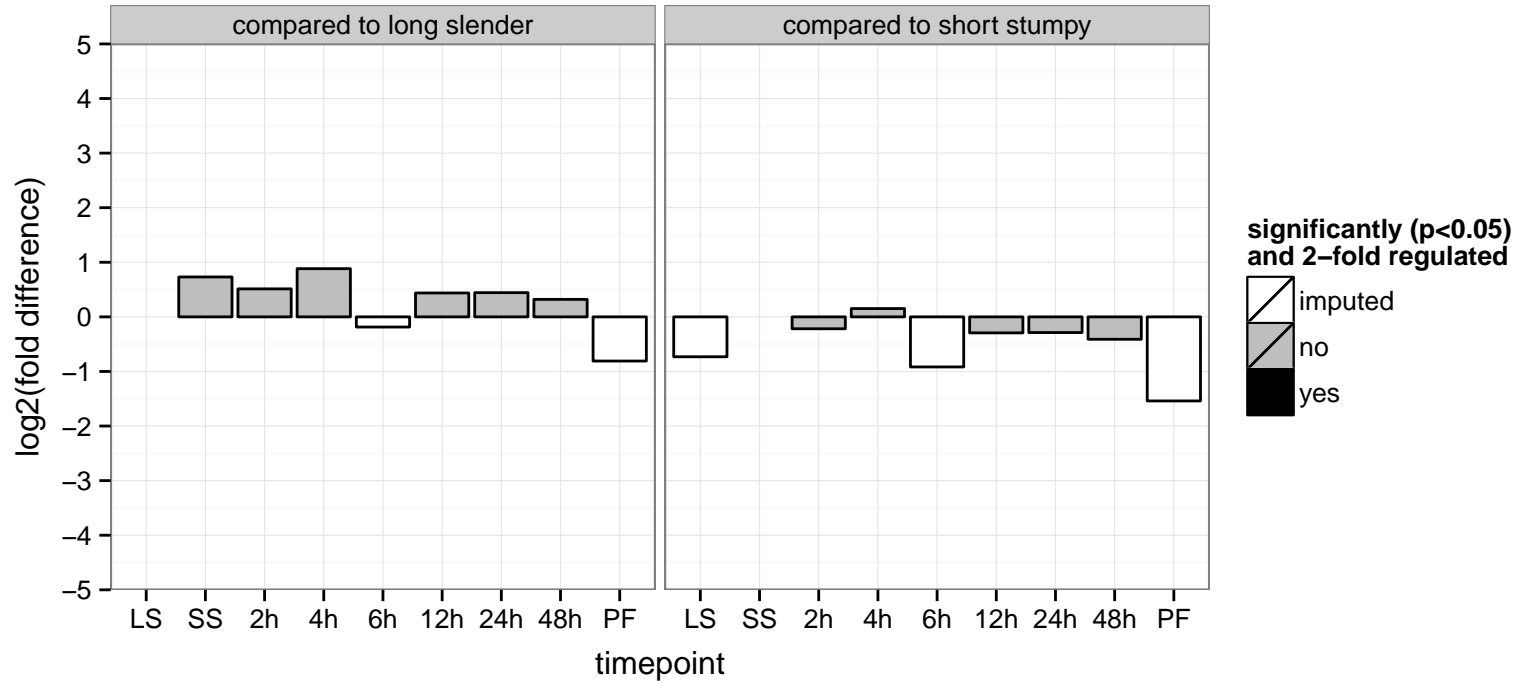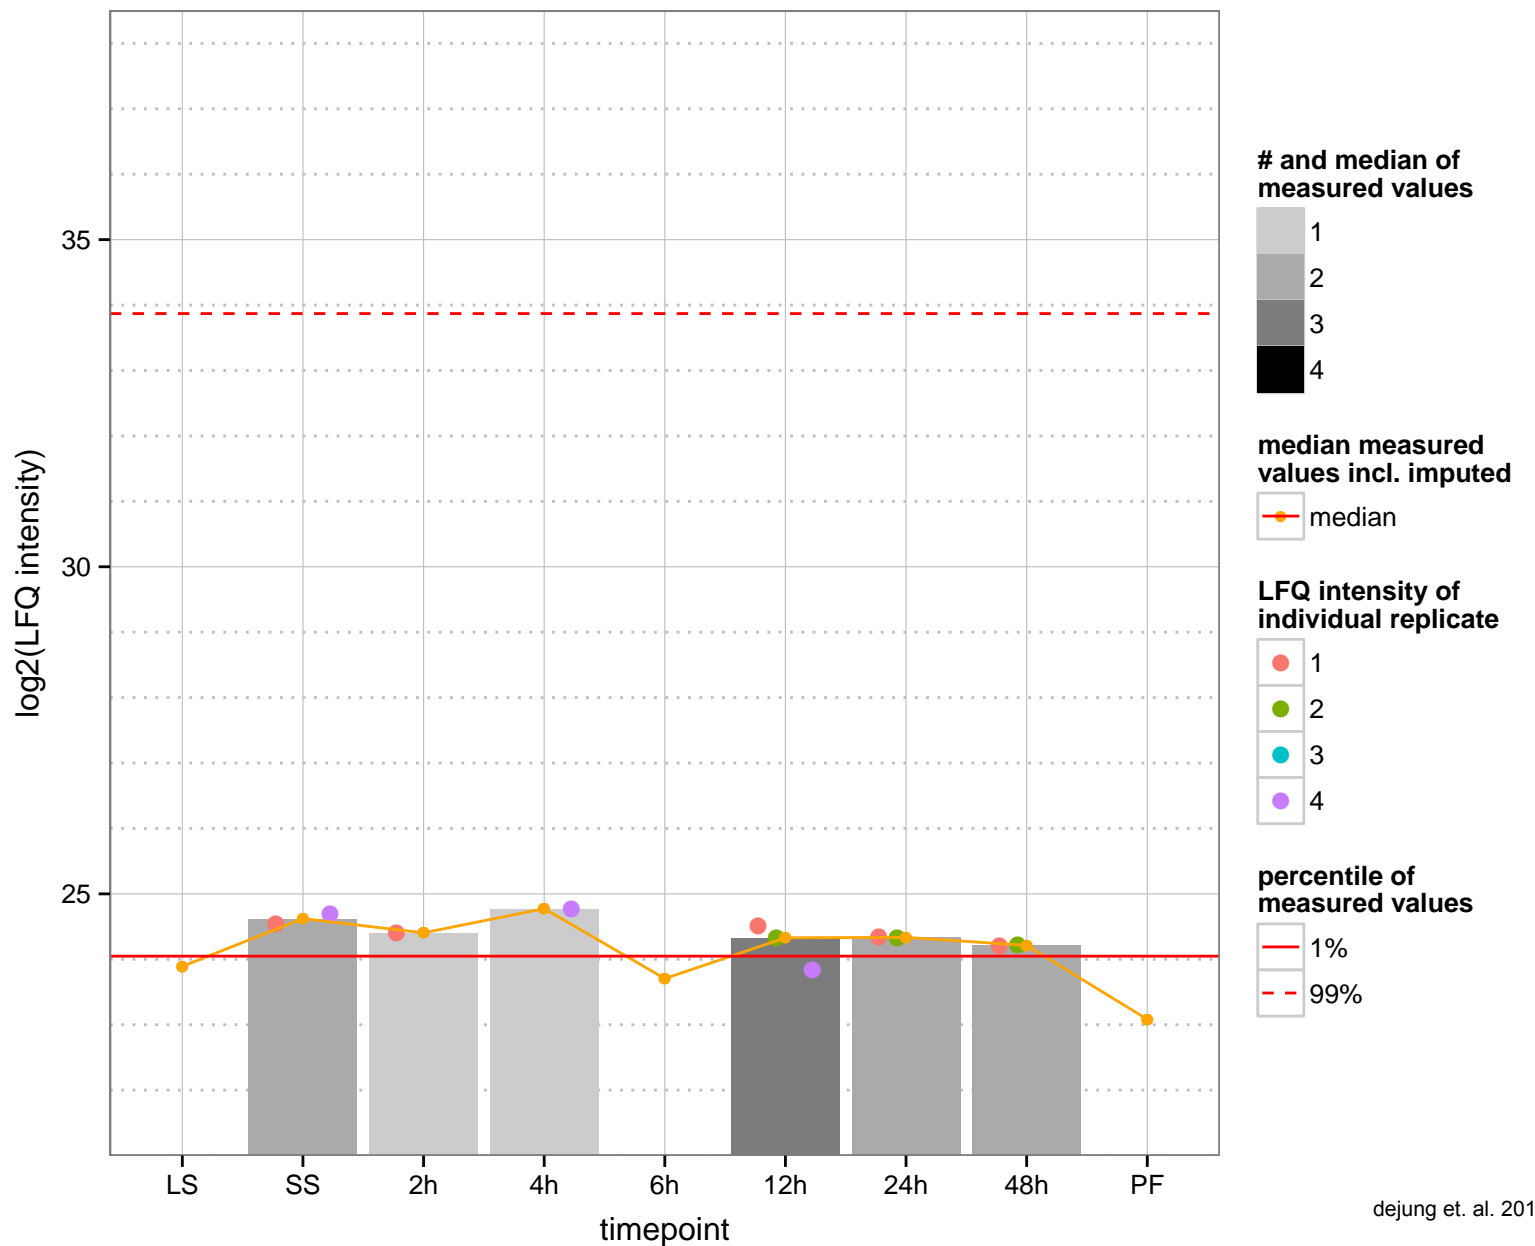

glucosamine 6-phosphate n-acetyltransferase (GNA1)  
 Tb927.11.11100  
 AGOF: glucosamine 6-phosphate N-acetyltransferase activity  
 AGOC: glycosome  
 AGOP: N-acetylglucosamine metabolic process, metabolic process  
 PGOF: N-acetyltransferase activity  
 PGO: null  
 PGOP: null

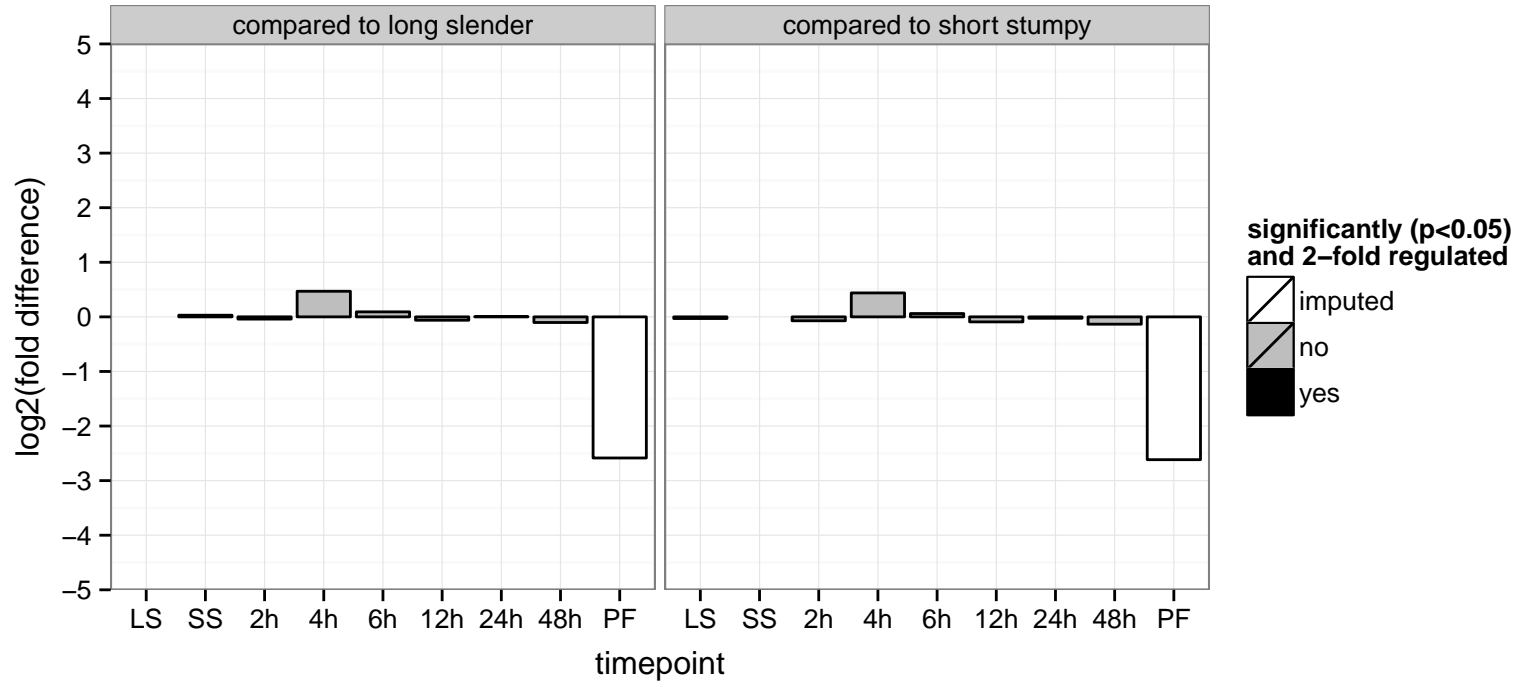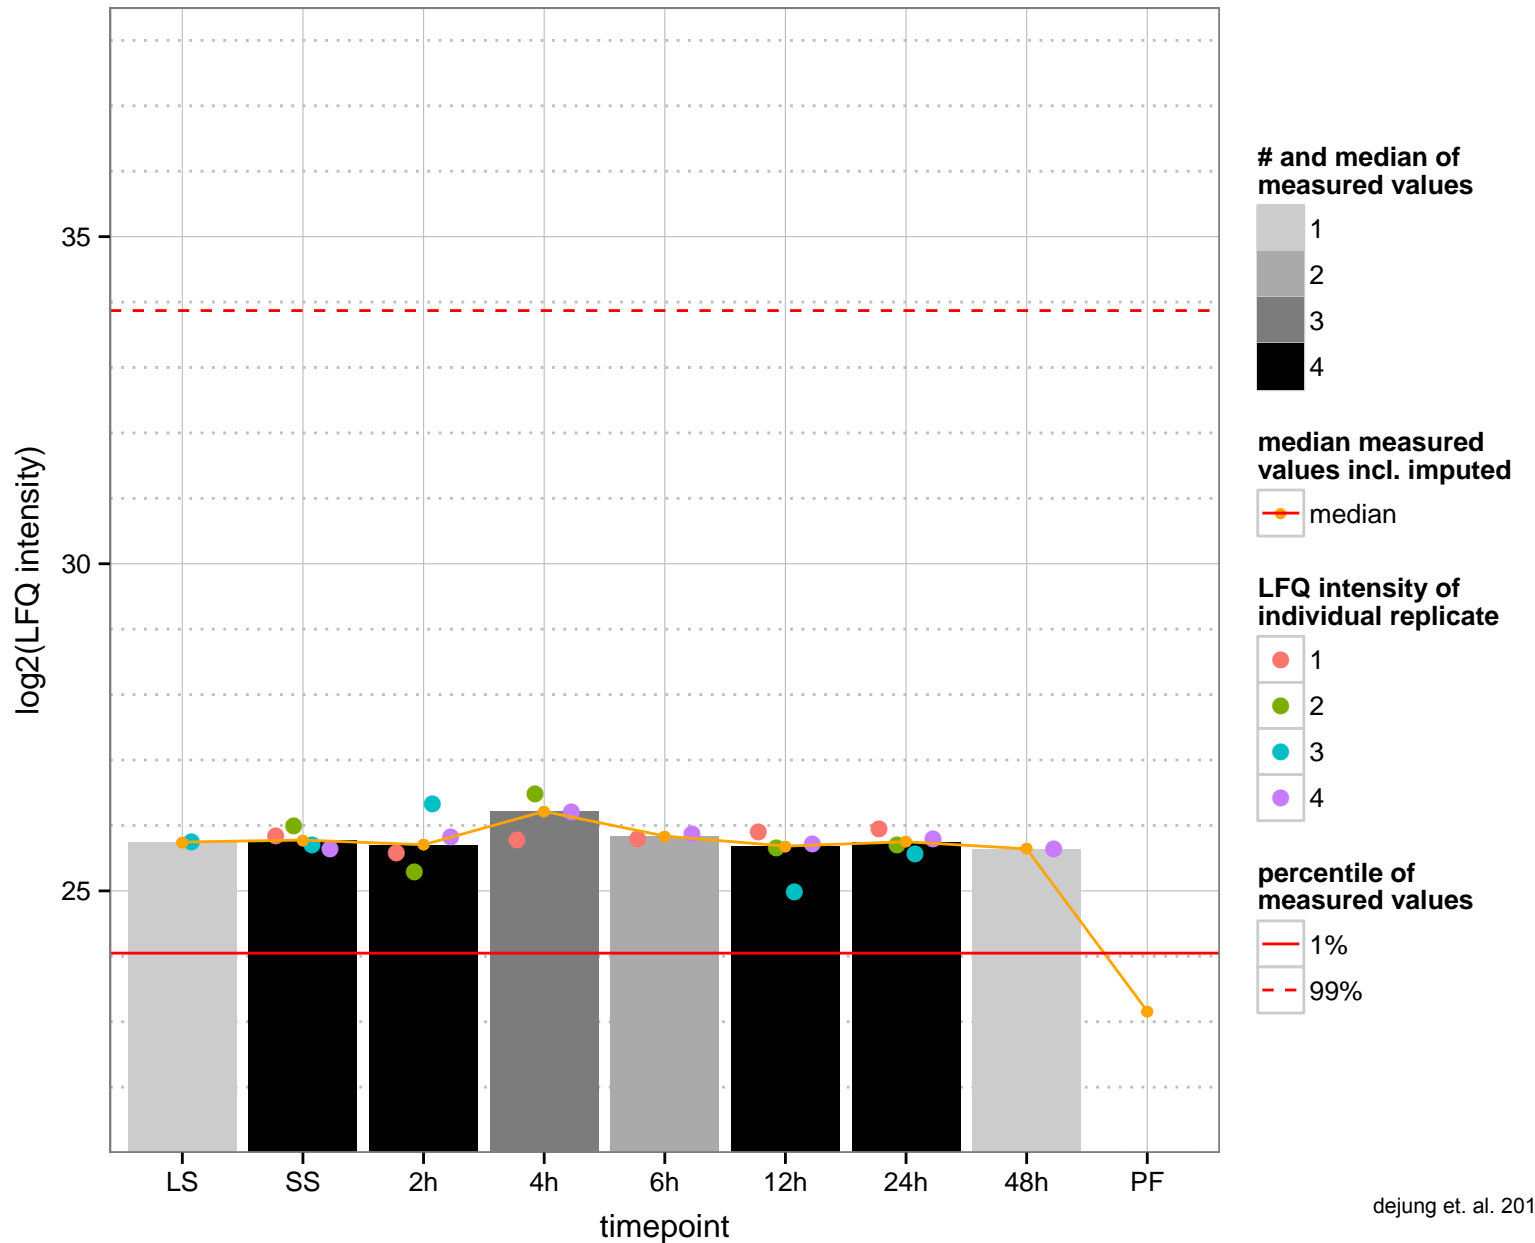

hypothetical protein  
 Tb927.11.11140  
 AGOF: null  
 AGOC: null  
 AGOP: null  
 PGO: protein binding  
 PGOC: null  
 PGOP: null

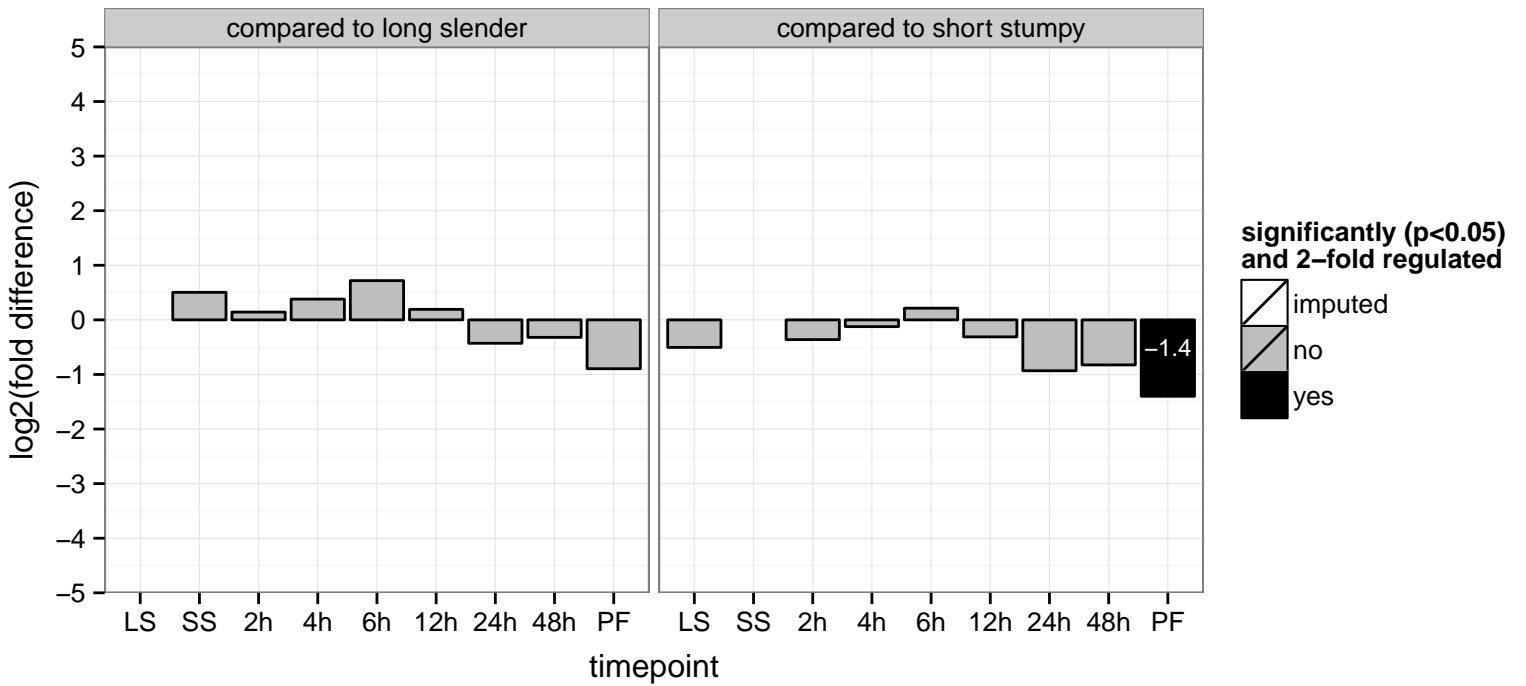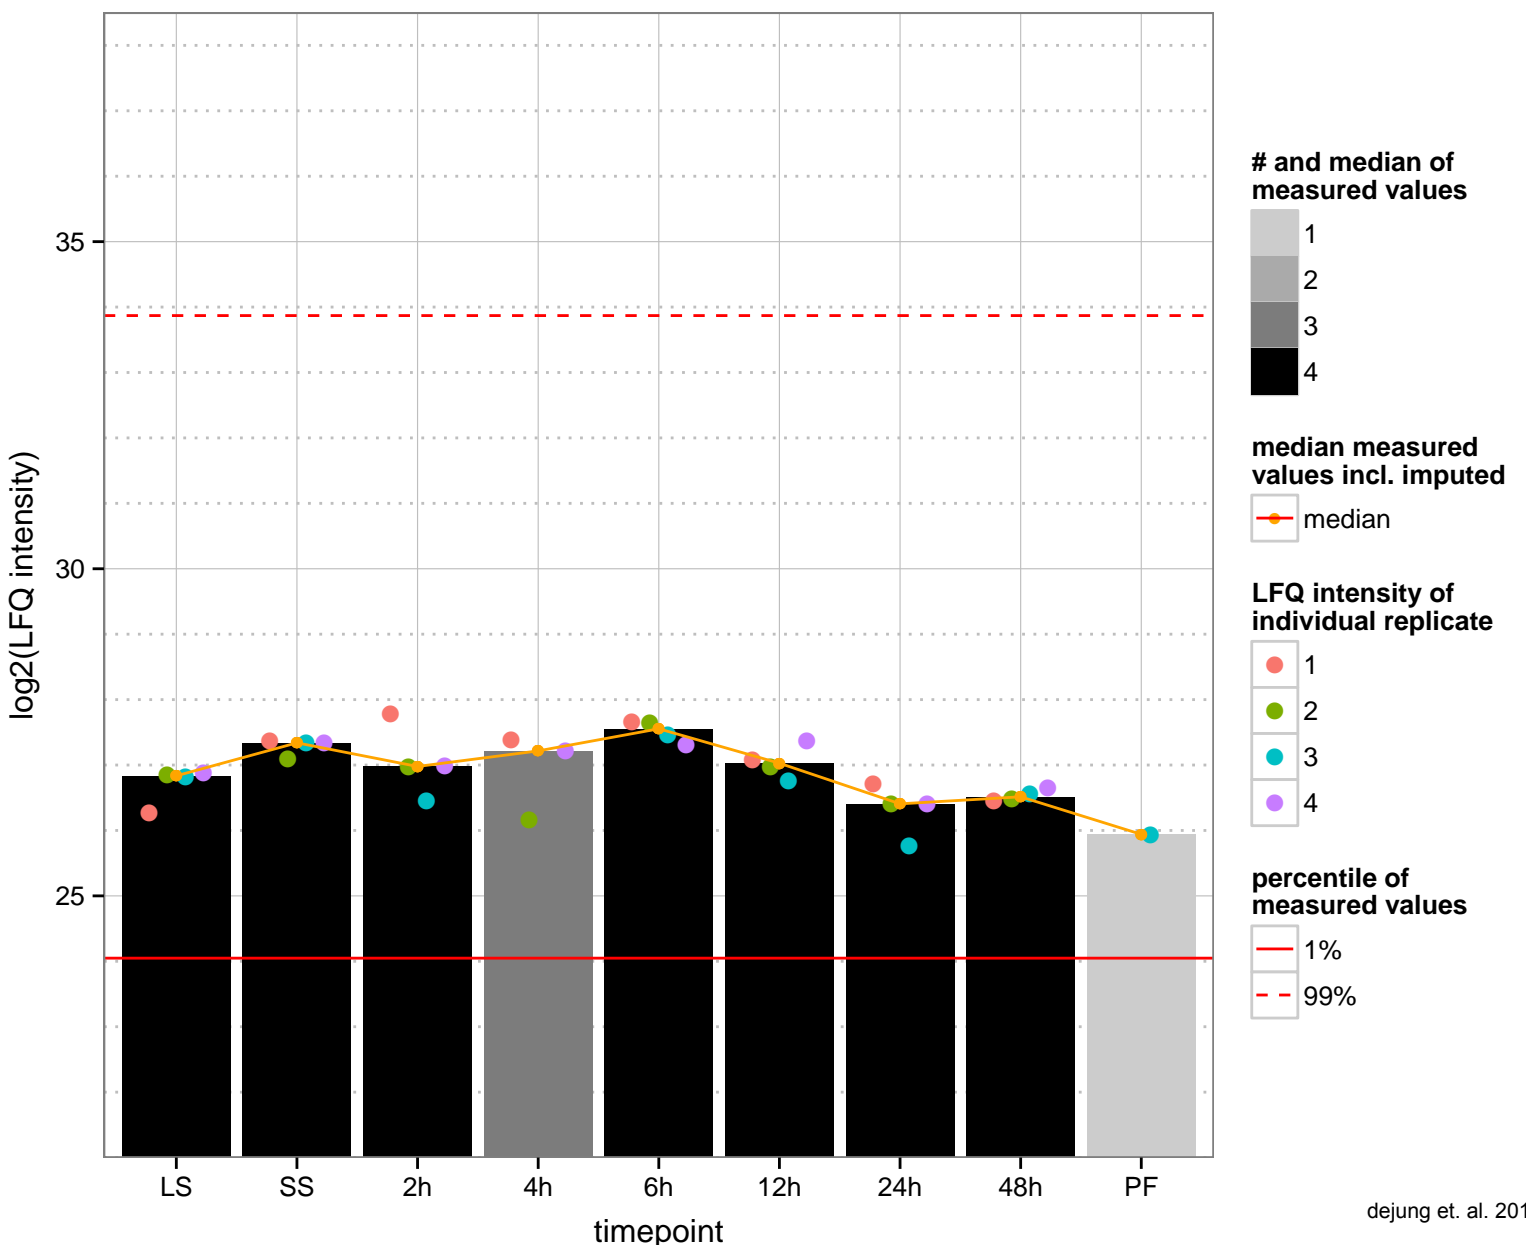

hypothetical protein, conserved  
 Tb927.11.11610  
 AGOF: null  
 AGOC: null  
 AGOP: null  
 PGOF: protein binding  
 PGO: null  
 PGOP: null

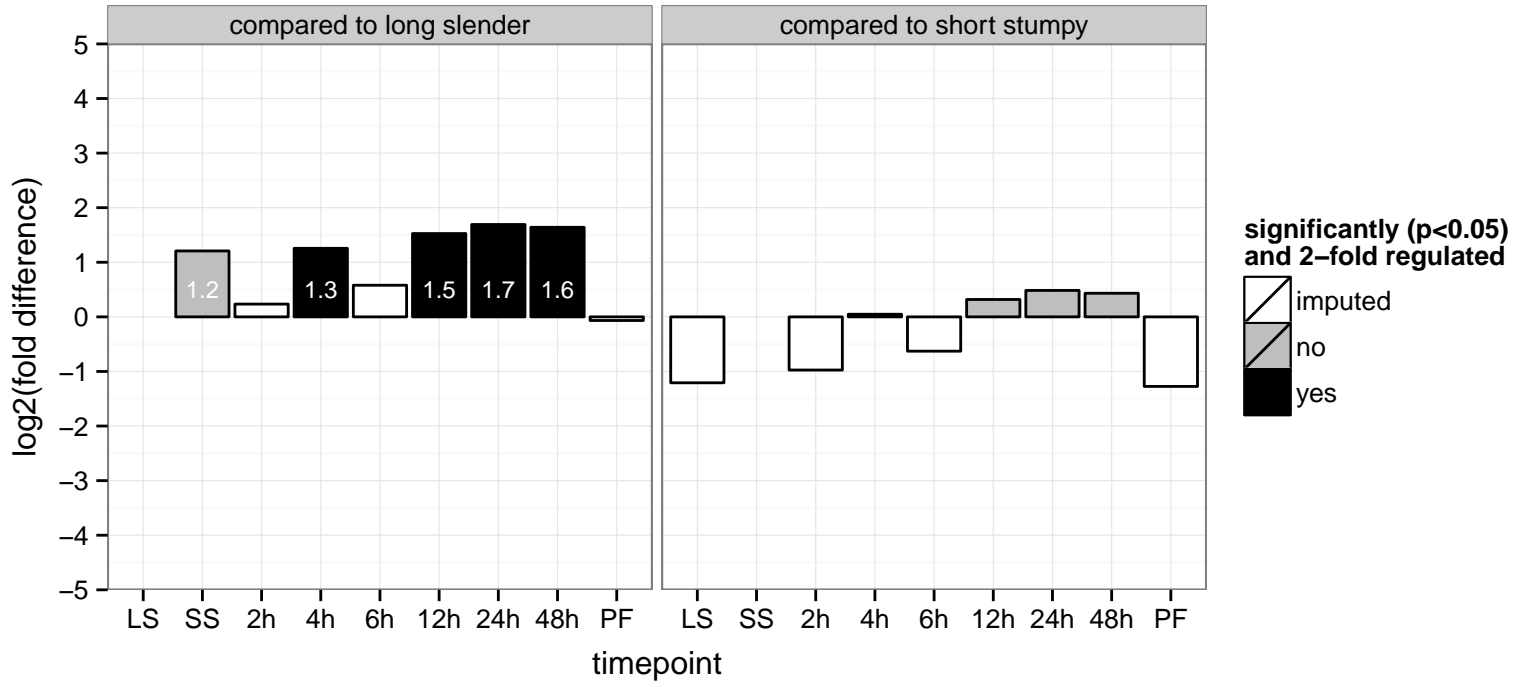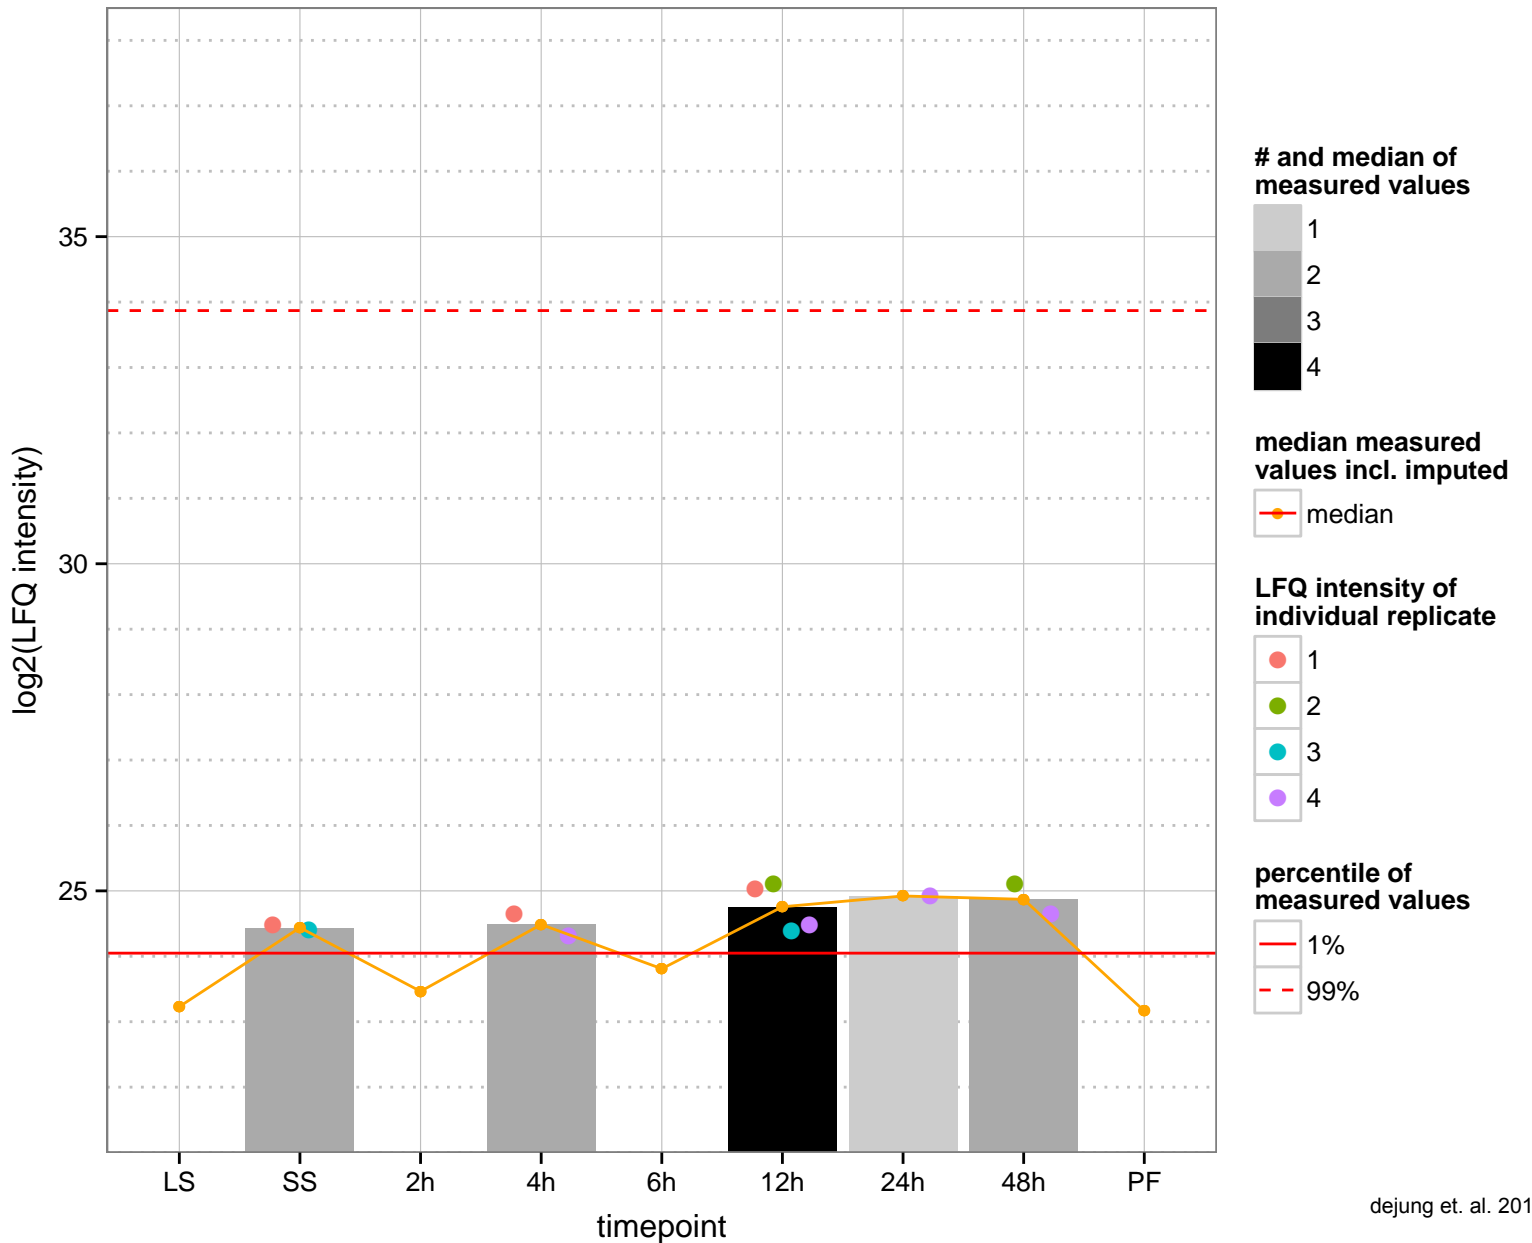

leucine-rich repeat protein (LRRP), putative  
 Tb927.11.11860  
 AGOF: null  
 AGOC: null  
 AGOP: null  
 PGO: protein binding  
 PGOC: null  
 PGOP: null

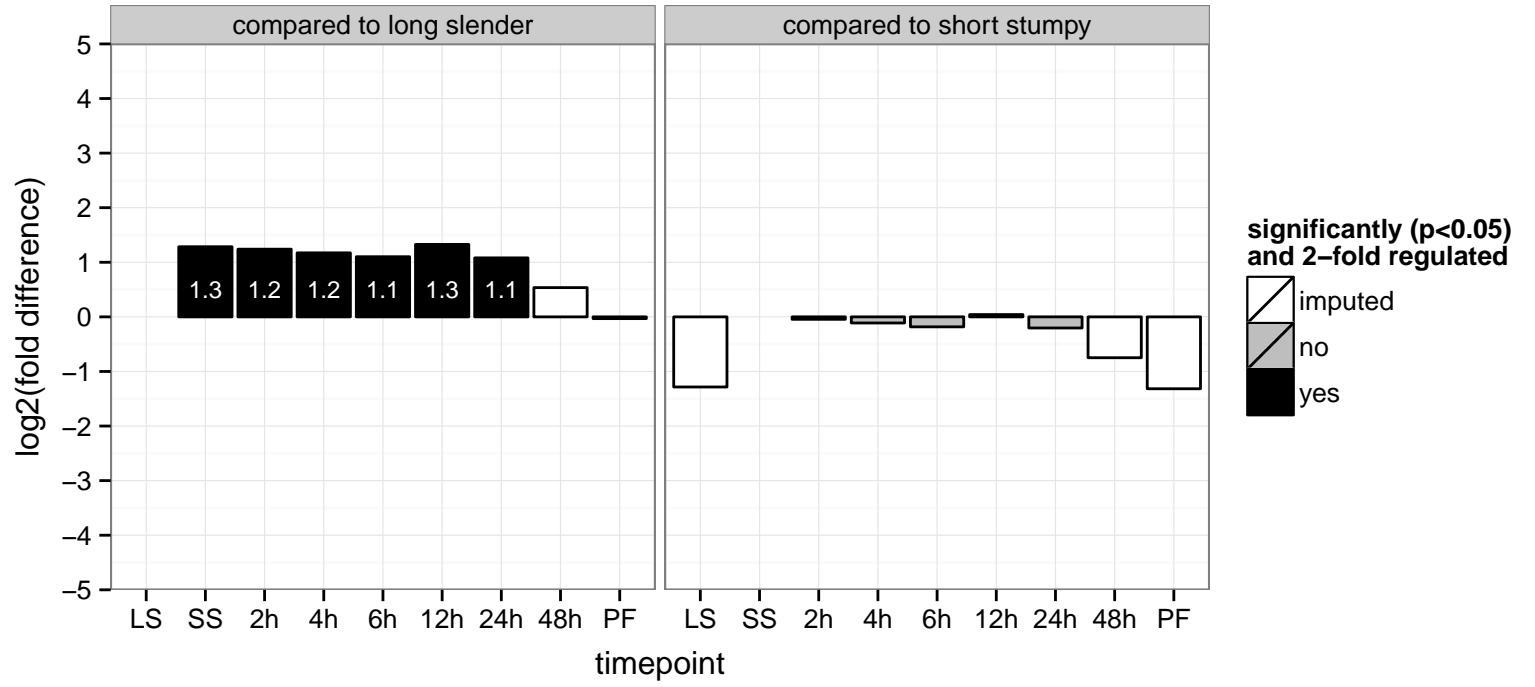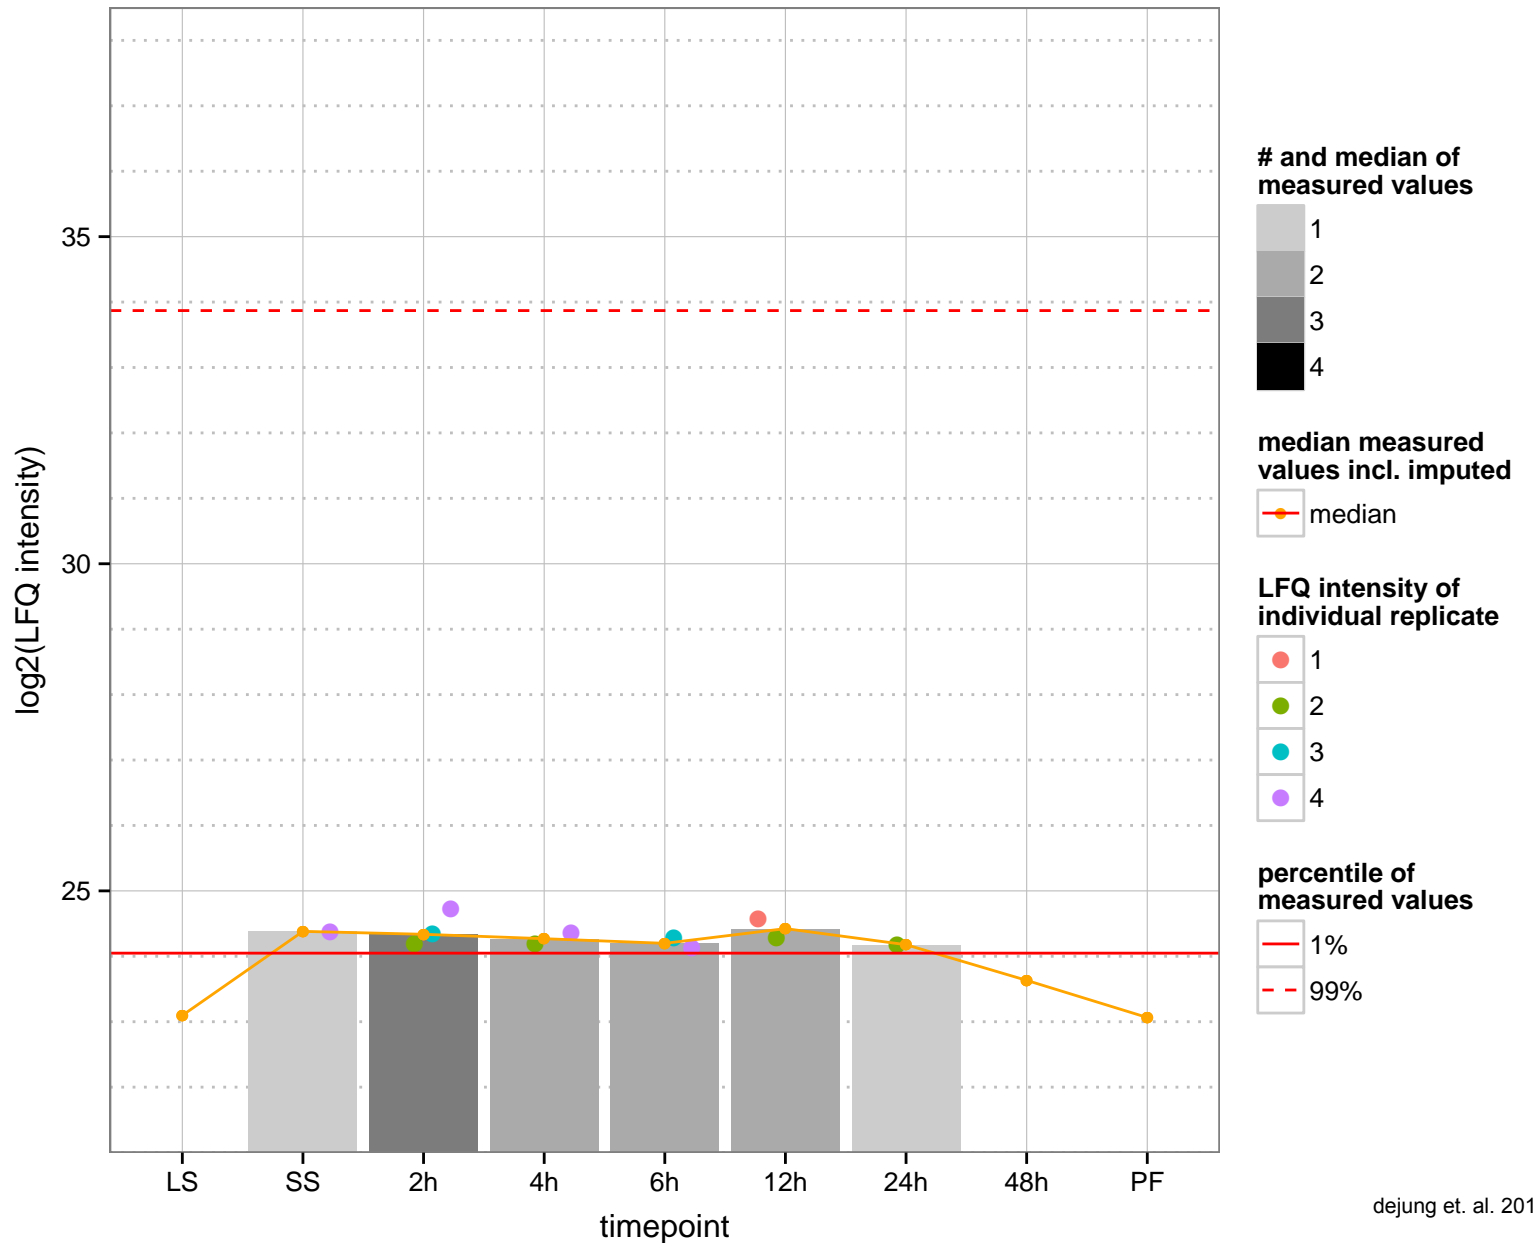

copper-transporting ATPase-like protein, putative

Tb927.11.1260

AGOF: ATP binding, copper ion transmembrane transporter activity, copper-exporting ATPase activity, metal ion binding

AGOC: integral to membrane, membrane

AGOP: ATP biosynthetic process, copper ion transport, metabolic process

PGOF: ATP binding, ATPase activity, coupled to transmembrane movement of ions, phosphorylative mechanism, catalytic activity

PGOC: integral to membrane, membrane

PGOP: ATP biosynthetic process, cation transport, metabolic process, metal ion transport

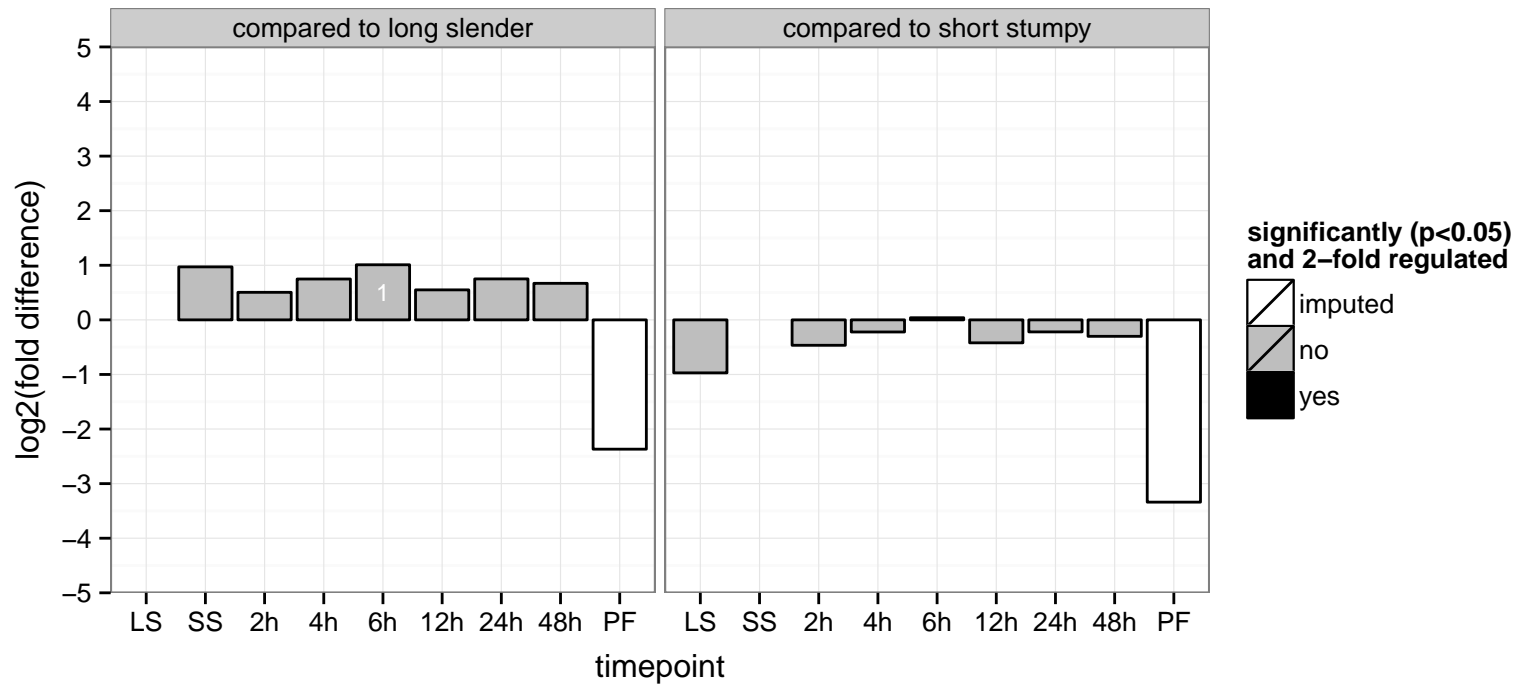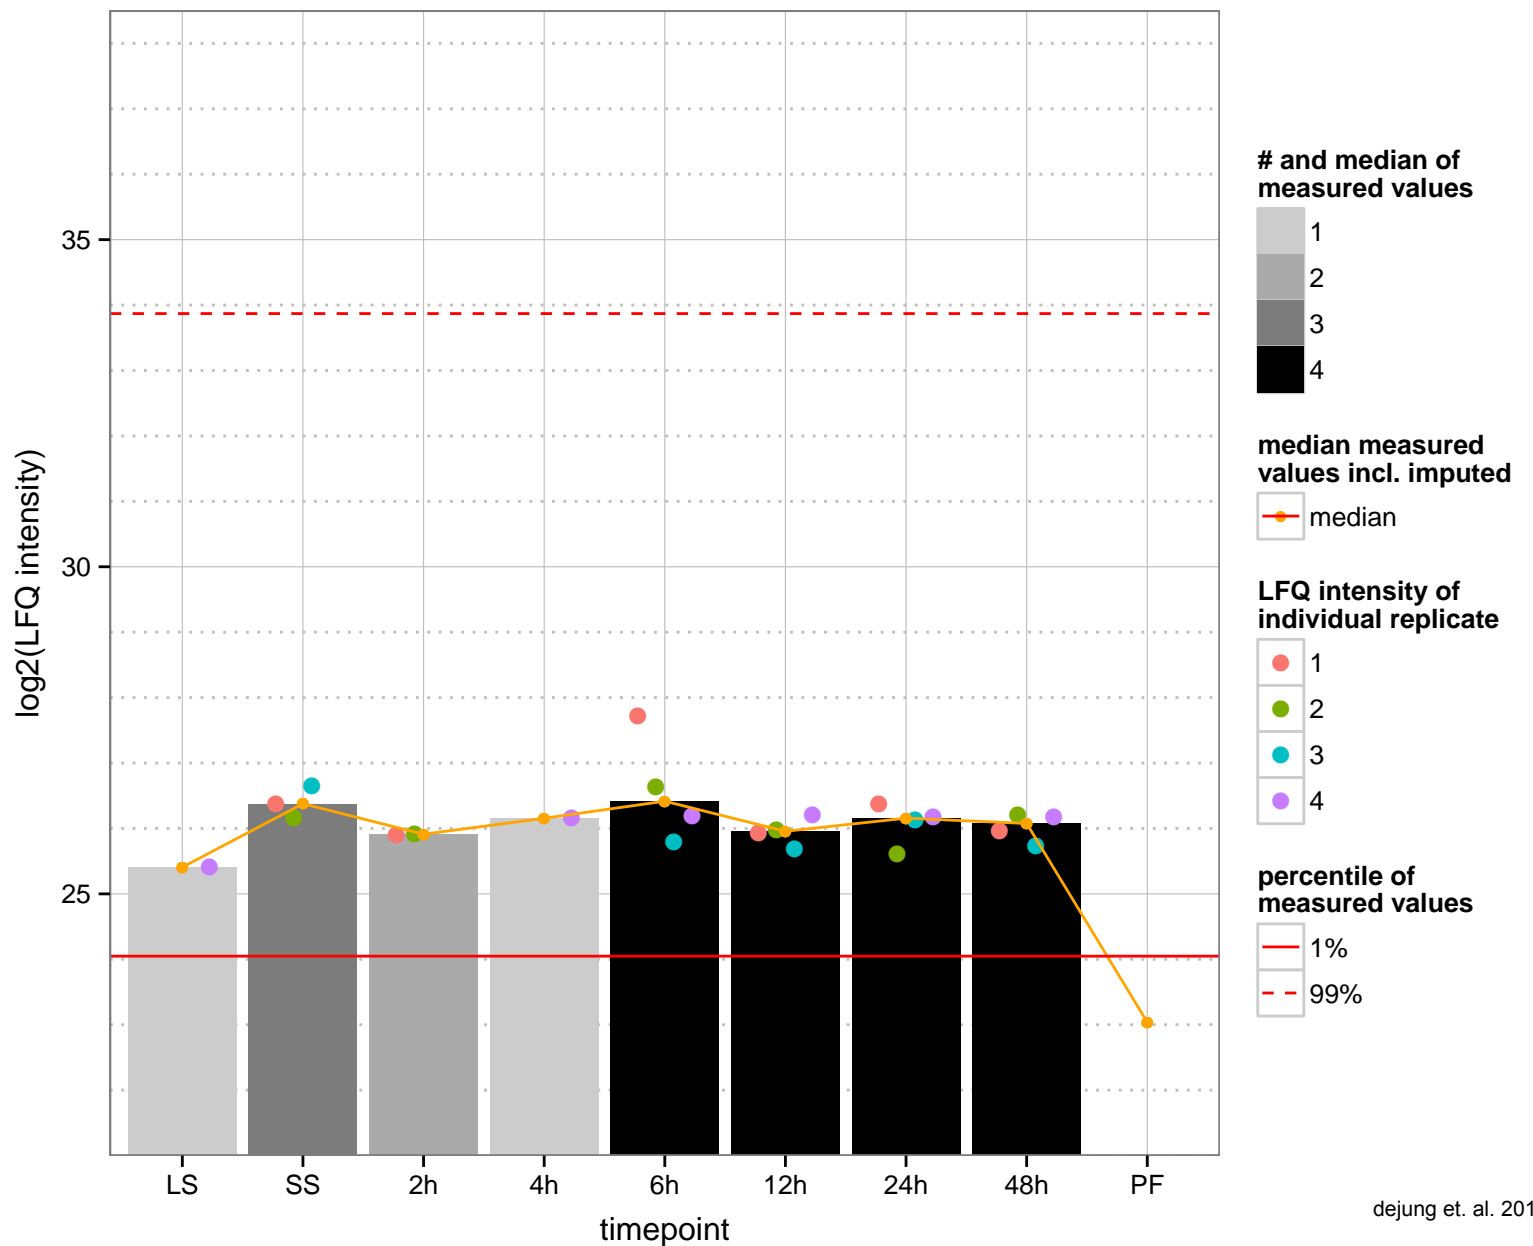

hypothetical protein, conserved  
 Tb927.11.13230  
 AGOF: structural molecule activity  
 AGOC: null  
 AGOP: null  
 PGOF: structural molecule activity  
 PGOC: null  
 PGOP: null

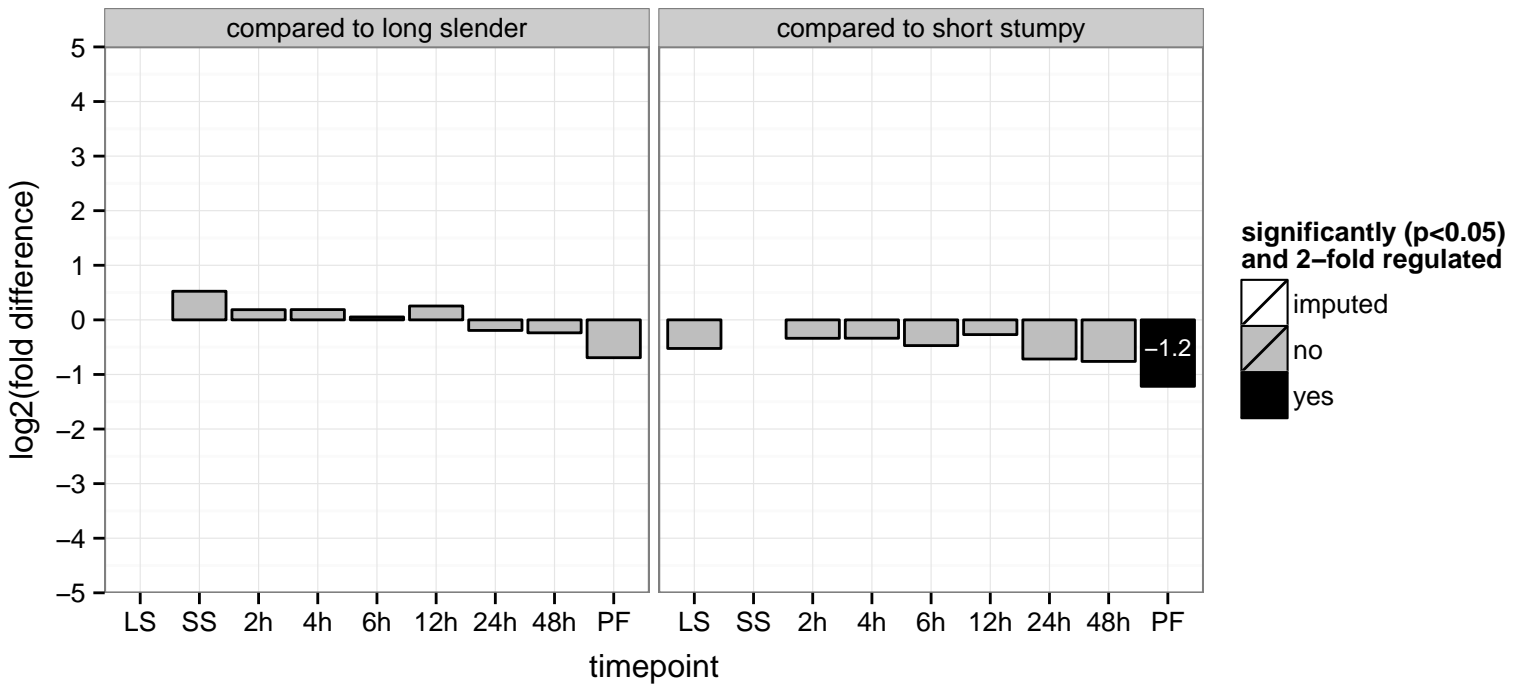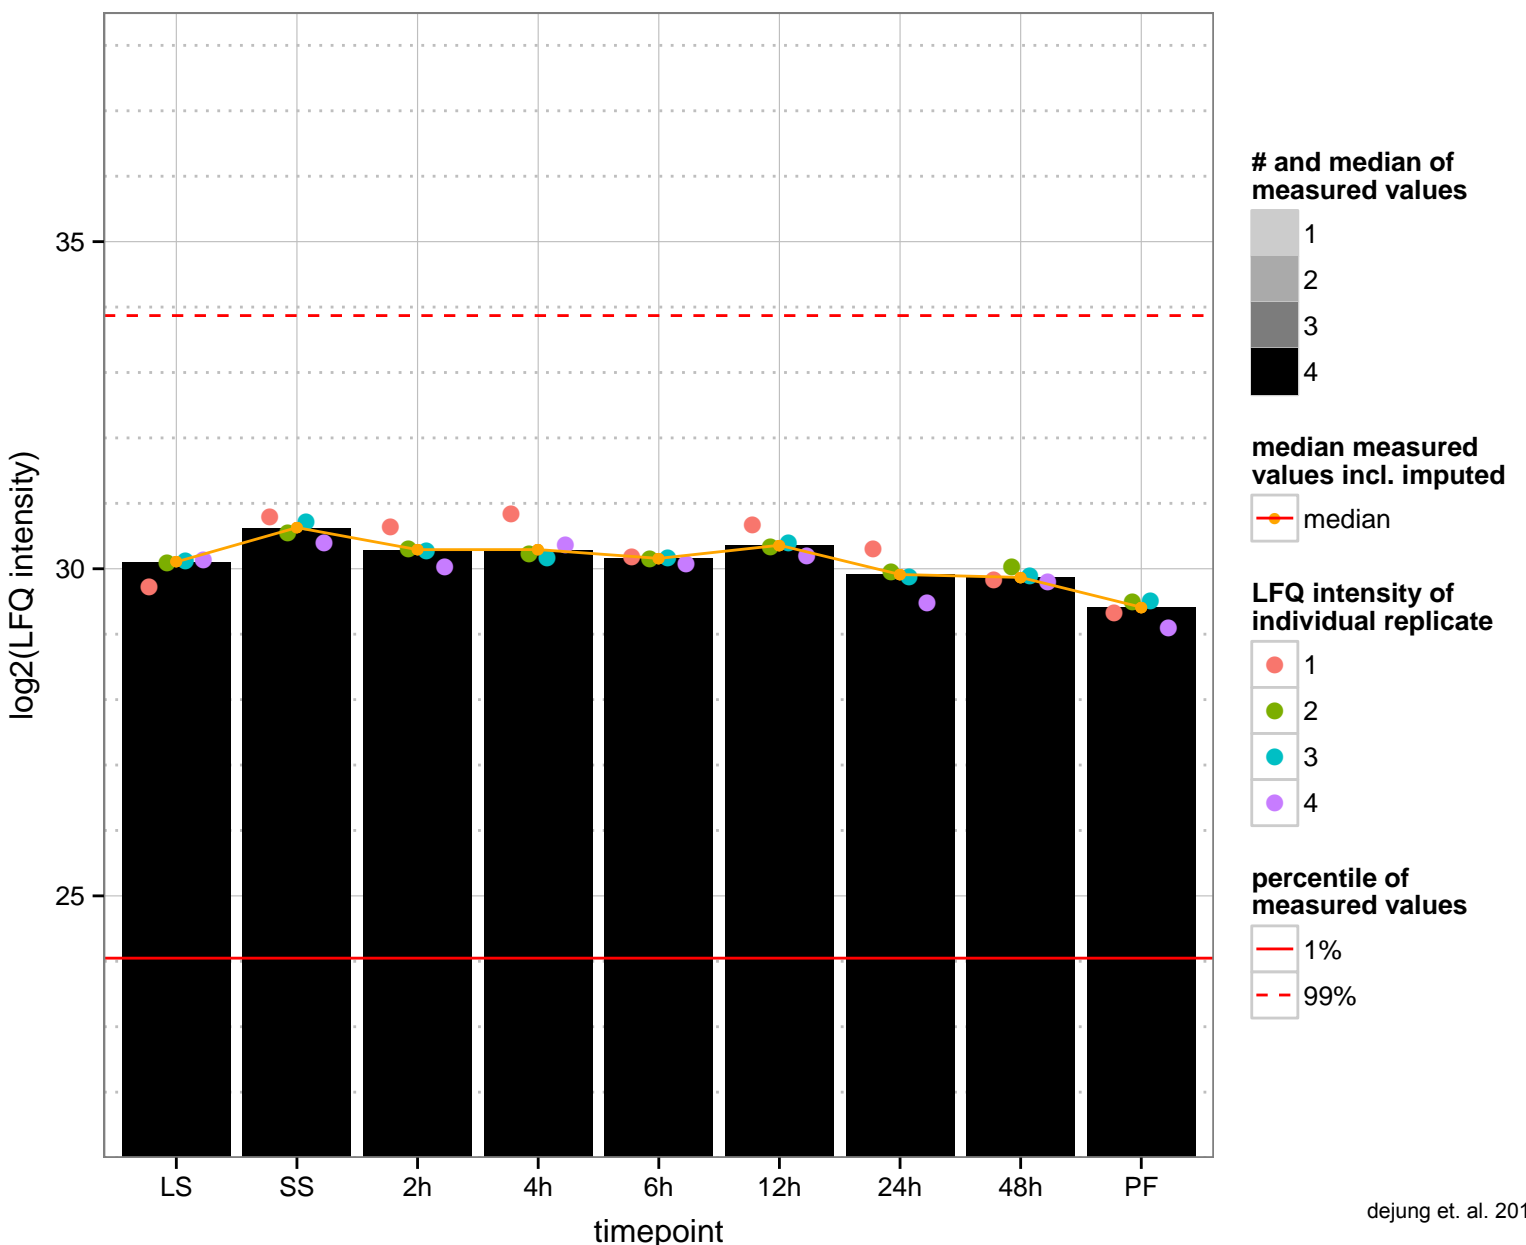

hypothetical protein, conserved  
 Tb927.11.13910  
 AGOF: null  
 AGOC: mitochondrion  
 AGOP: null  
 PGO: catalytic activity  
 PGOC: null  
 PGOP: null

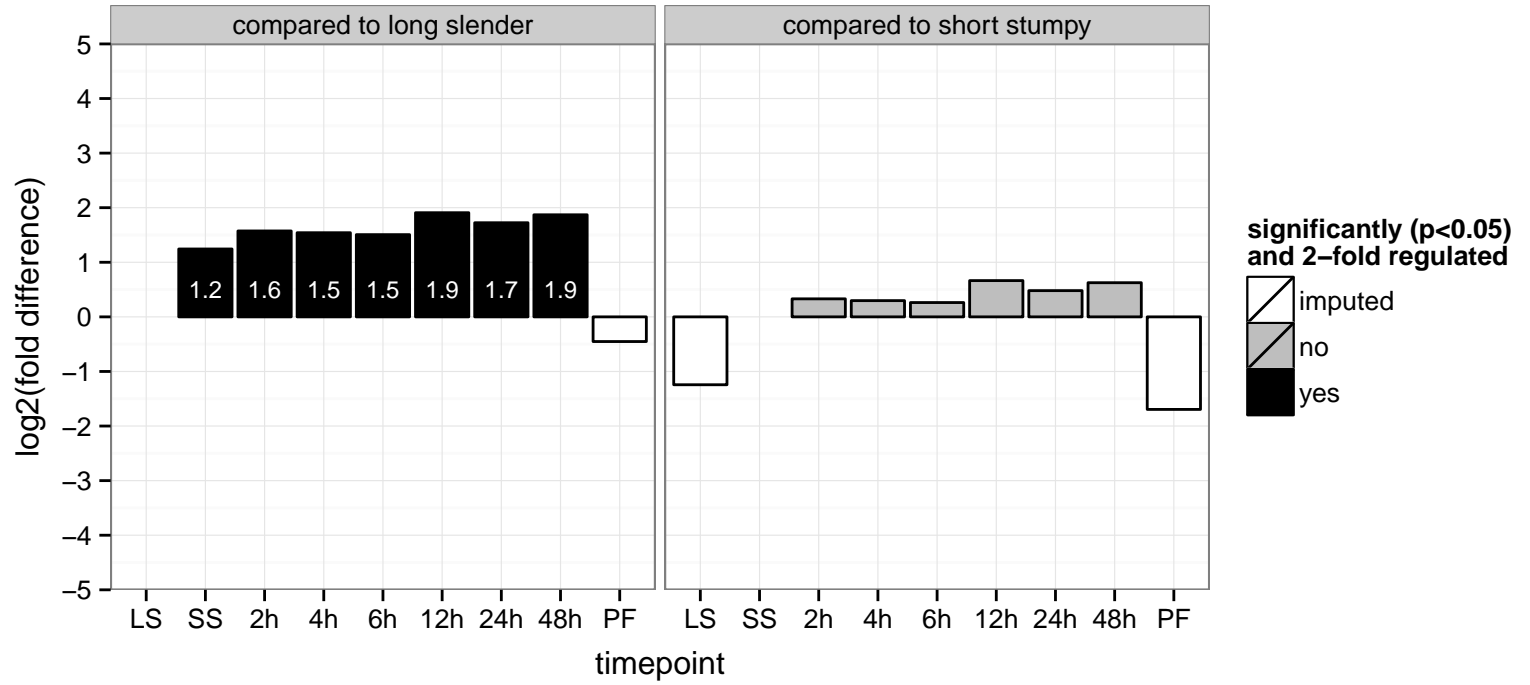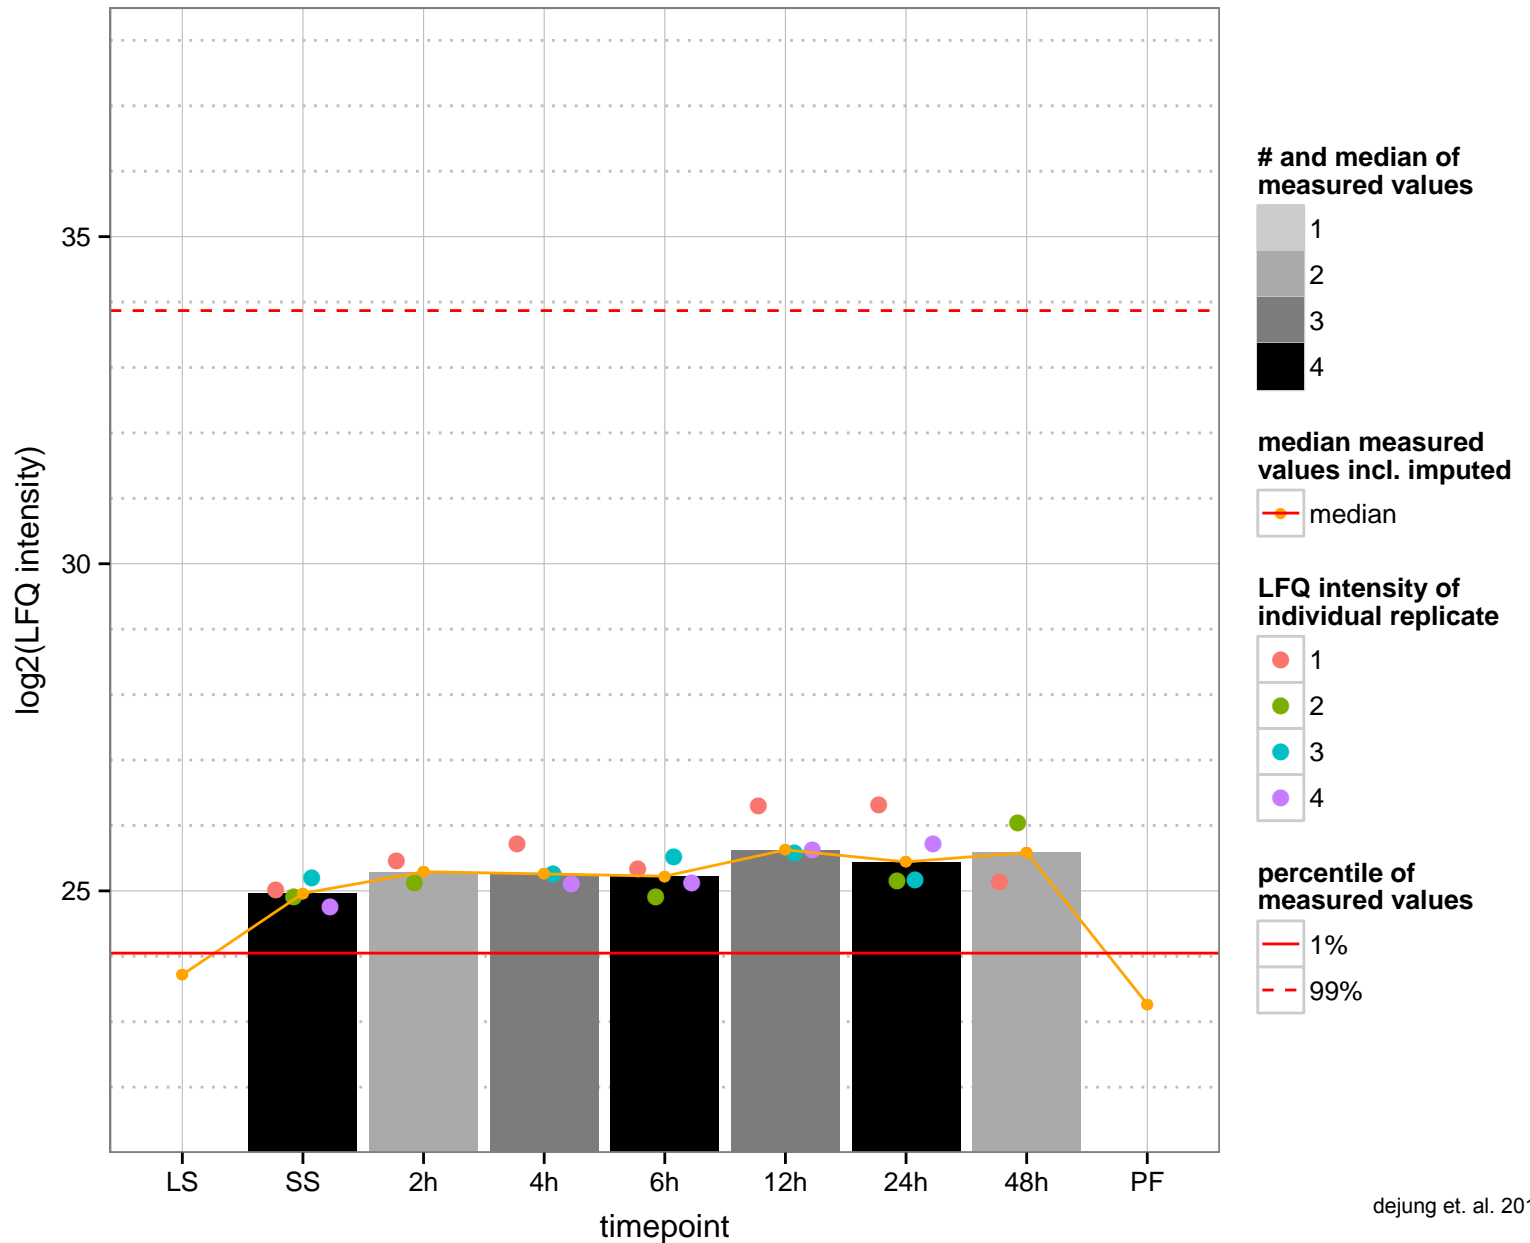



kinetoplast polyadenylation/uridylation factor 2 (KPAF2)

Tb927.11.14380

AGOF: protein binding, ribosome binding

AGOC: mitochondrion

AGOP: mRNA 3'-end processing, mRNA polyadenylation, regulation of mRNA stability

PGOF: null

PGOC: null

PGOP: null

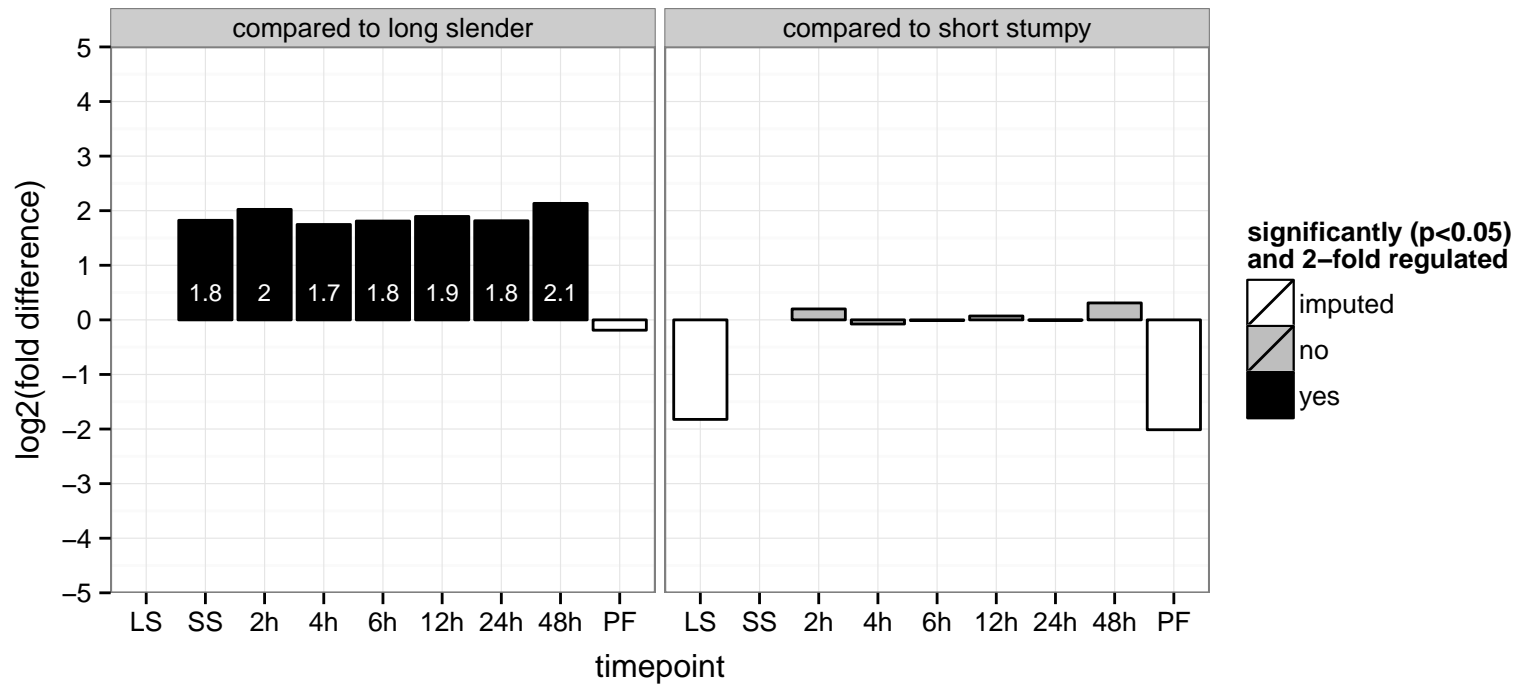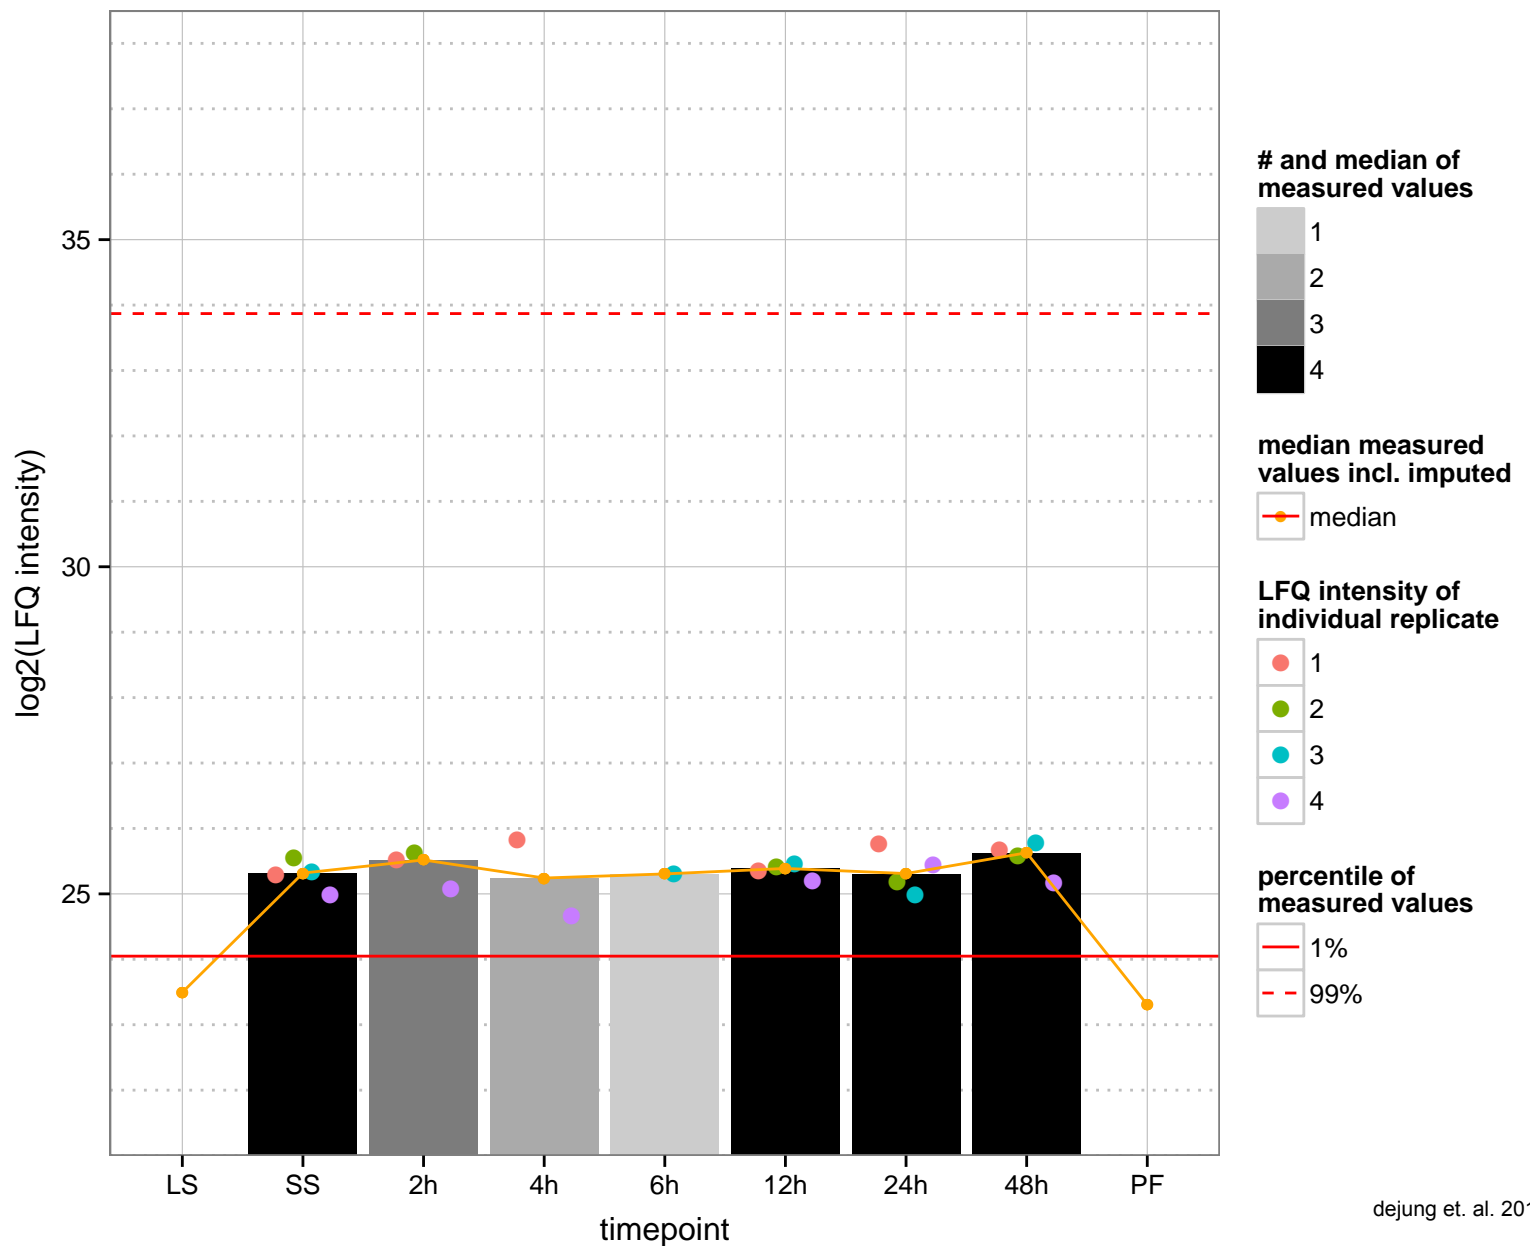

hypothetical protein, conserved  
 Tb927.11.1440  
 AGOF: null  
 AGOC: null  
 AGOP: null  
 PGO: null  
 PGOC: null  
 PGOP: null

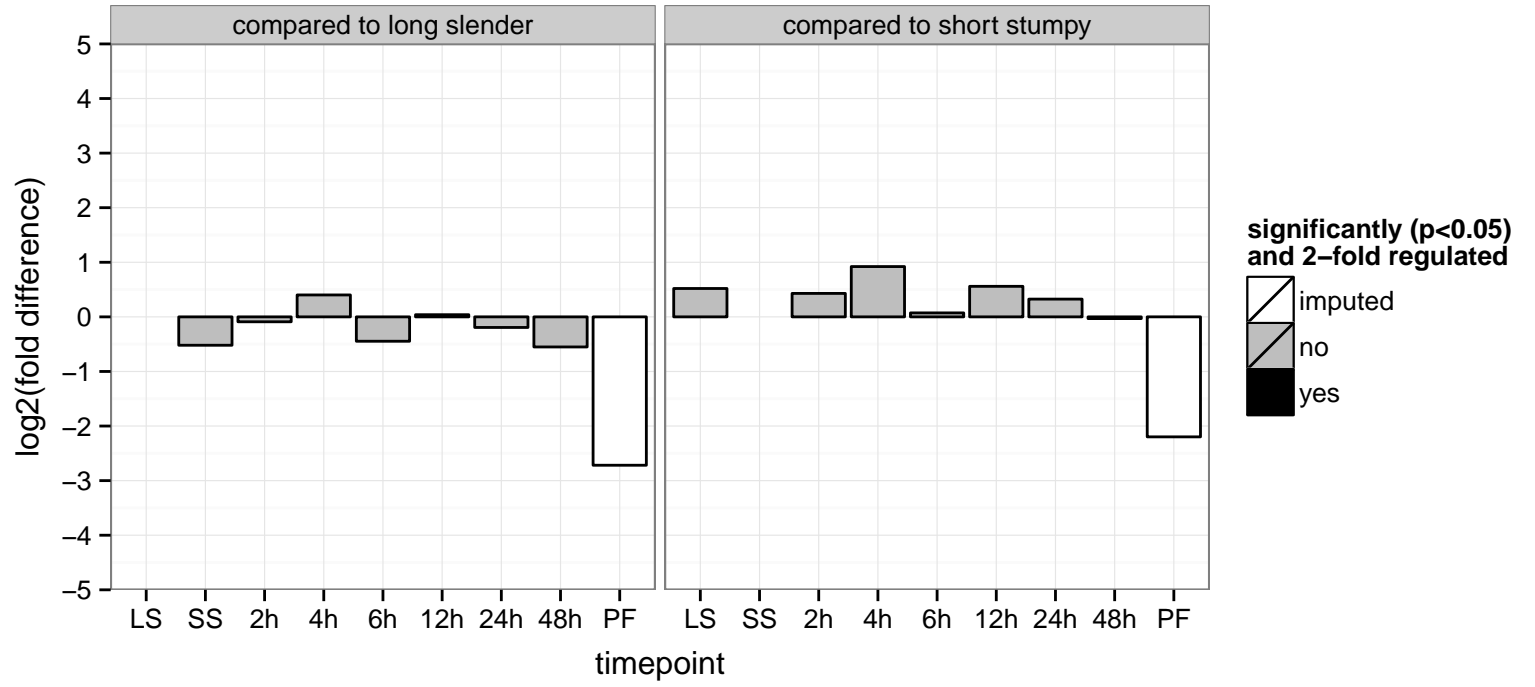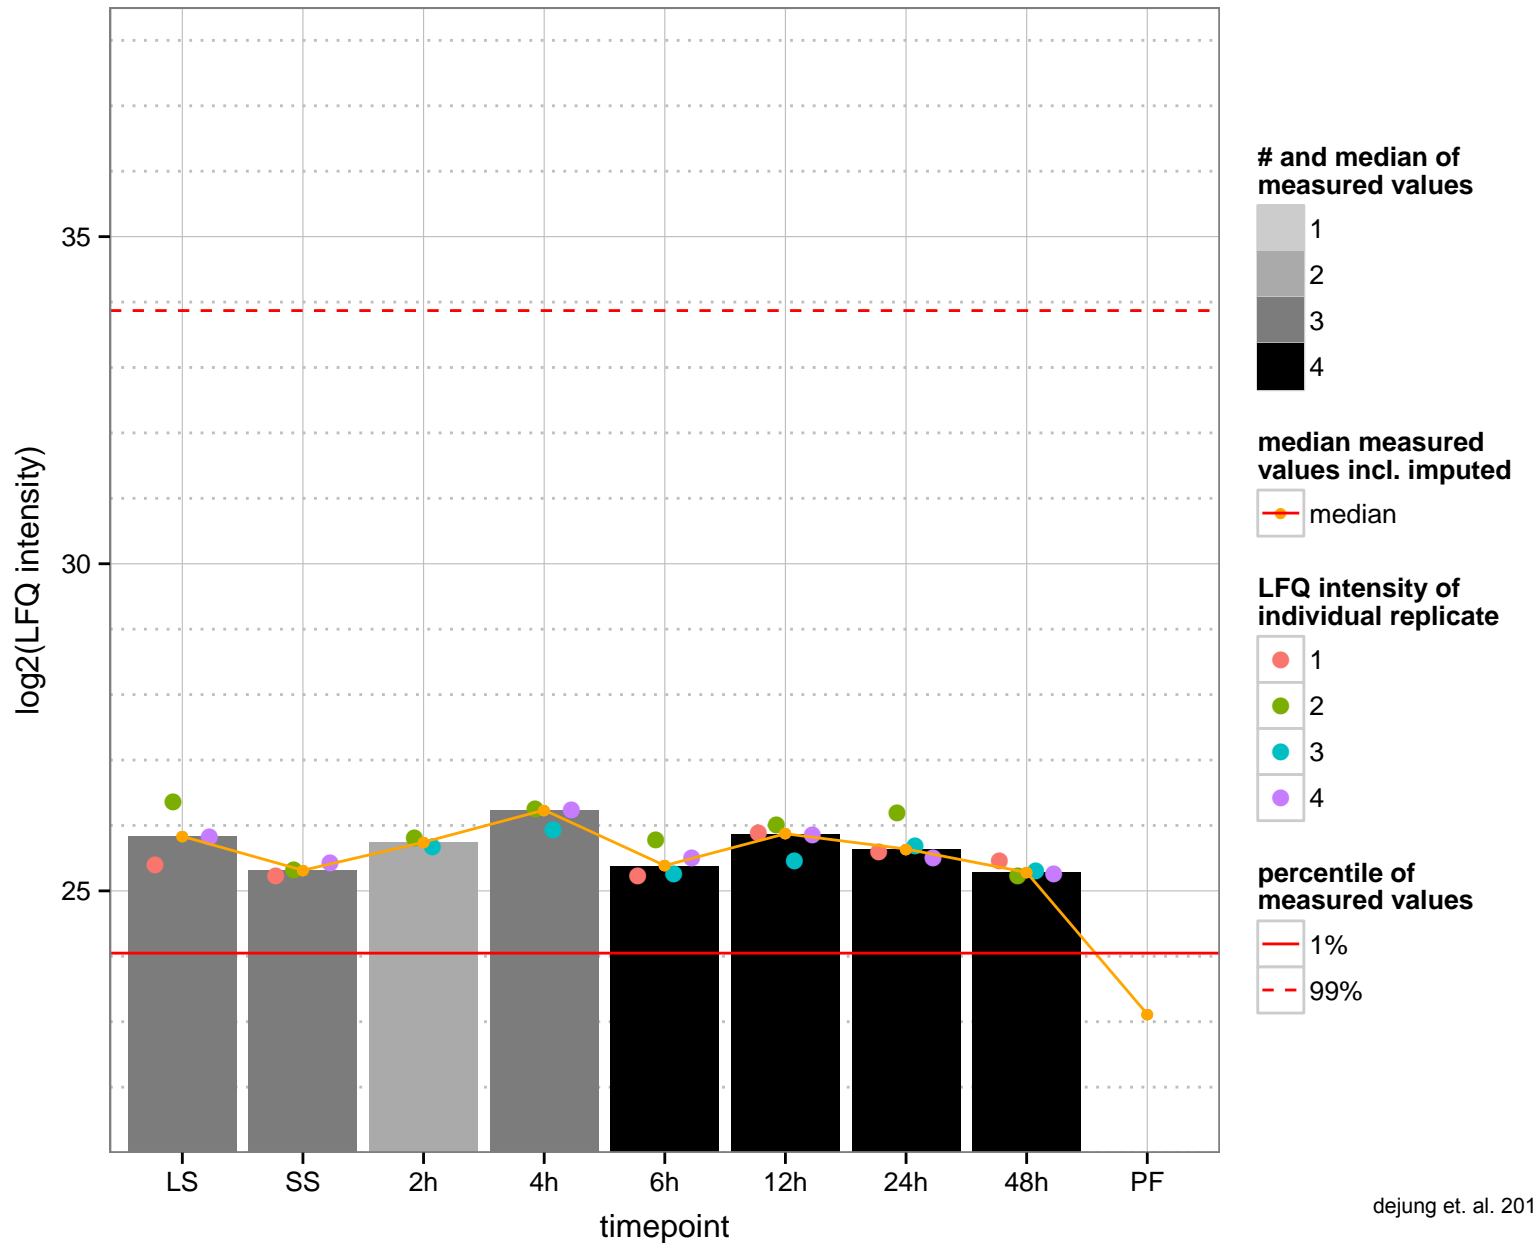

hypothetical protein, conserved  
 Tb927.11.14570  
 AGOF: null  
 AGOC: mitochondrion  
 AGOP: null  
 PGO: null  
 PGOC: null  
 PGOP: null

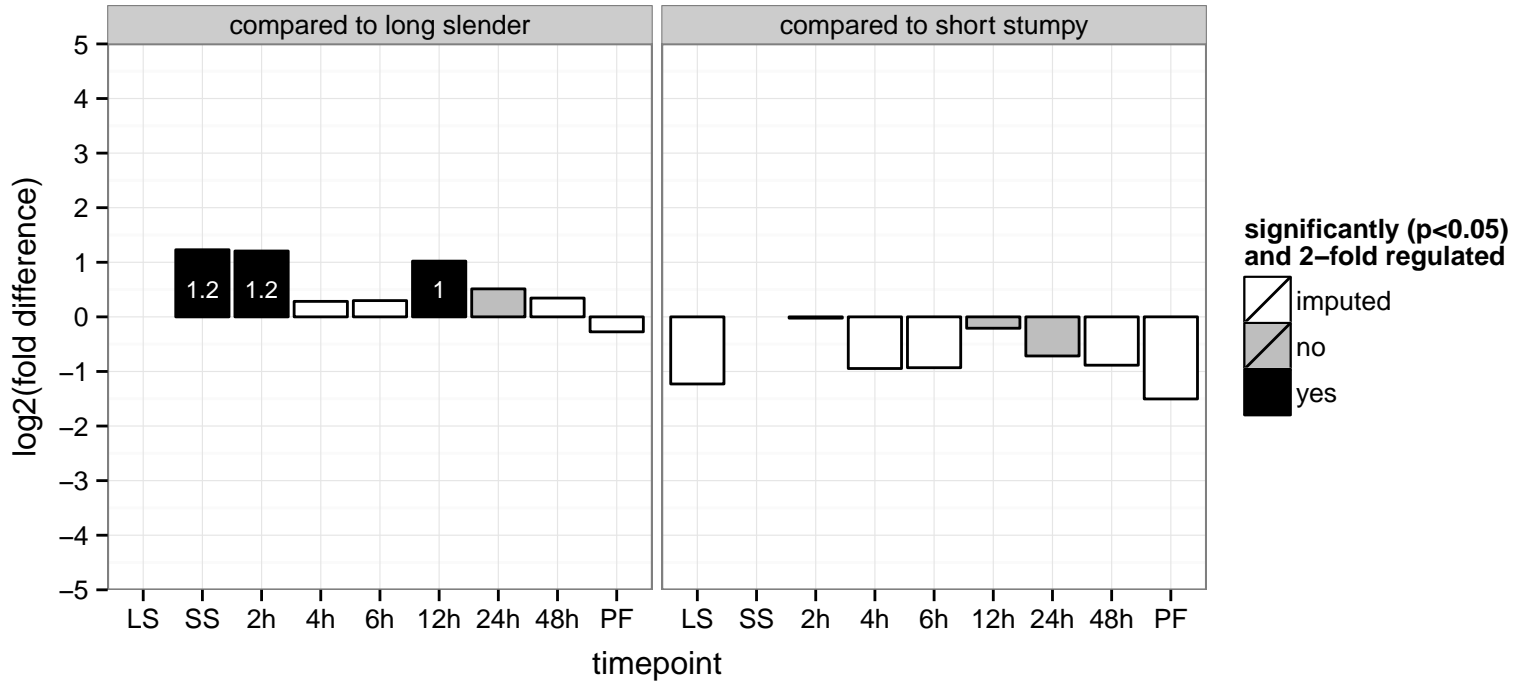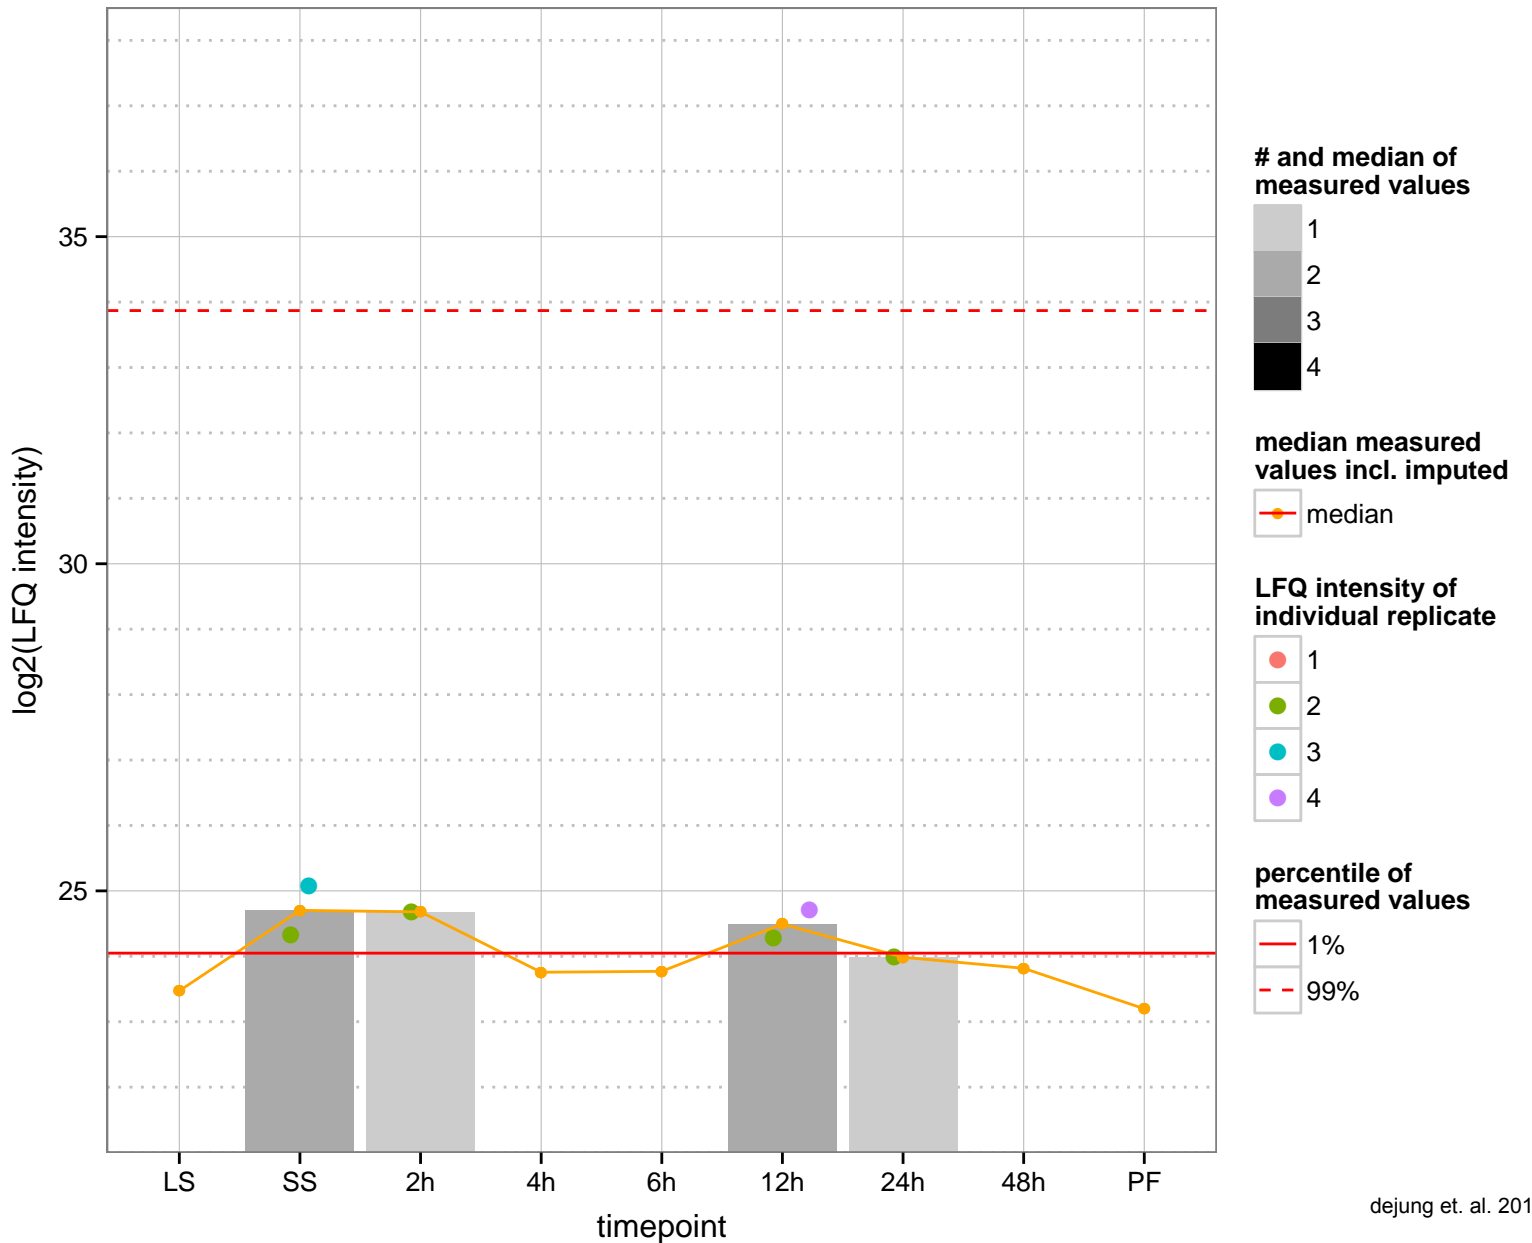

hypothetical protein, conserved  
 Tb927.11.14690  
 AGOF: null  
 AGOC: null  
 AGOP: null  
 PGO: null  
 PGOC: null  
 PGOP: null

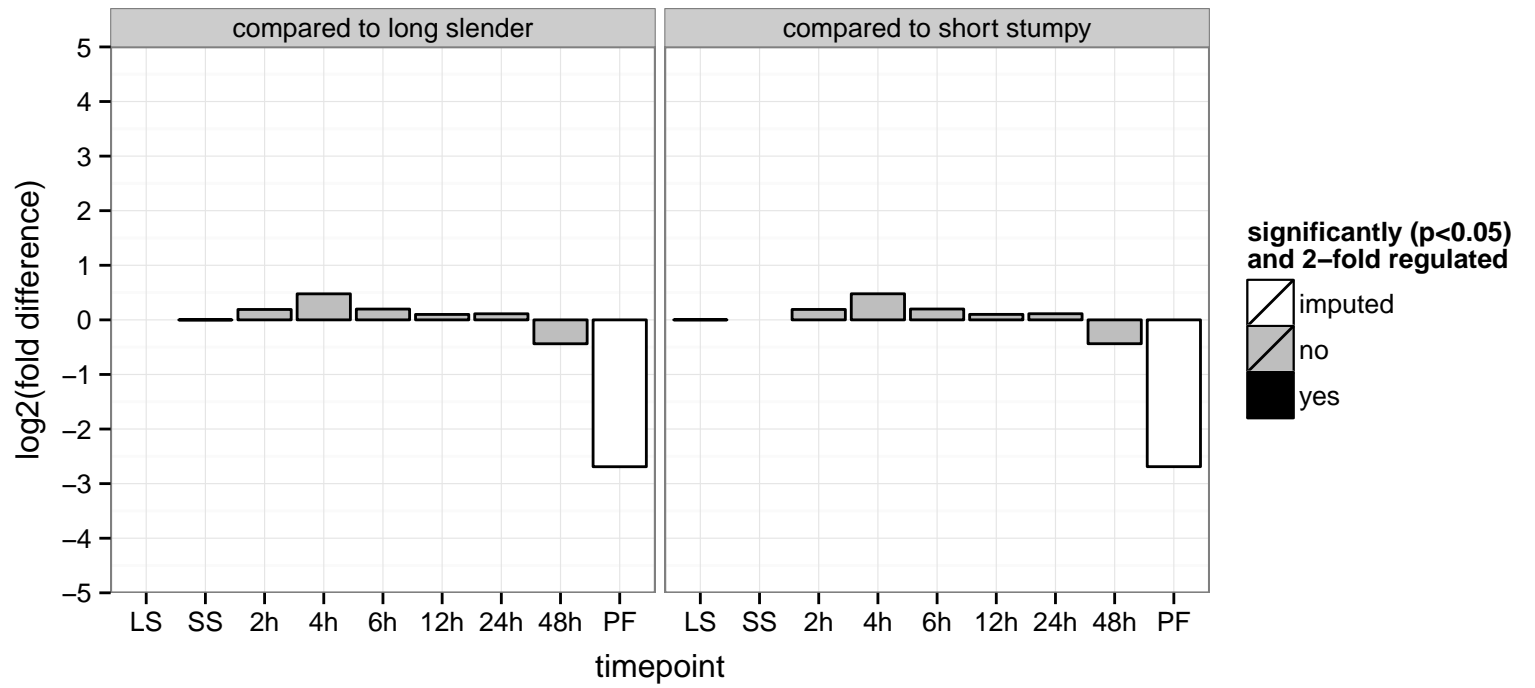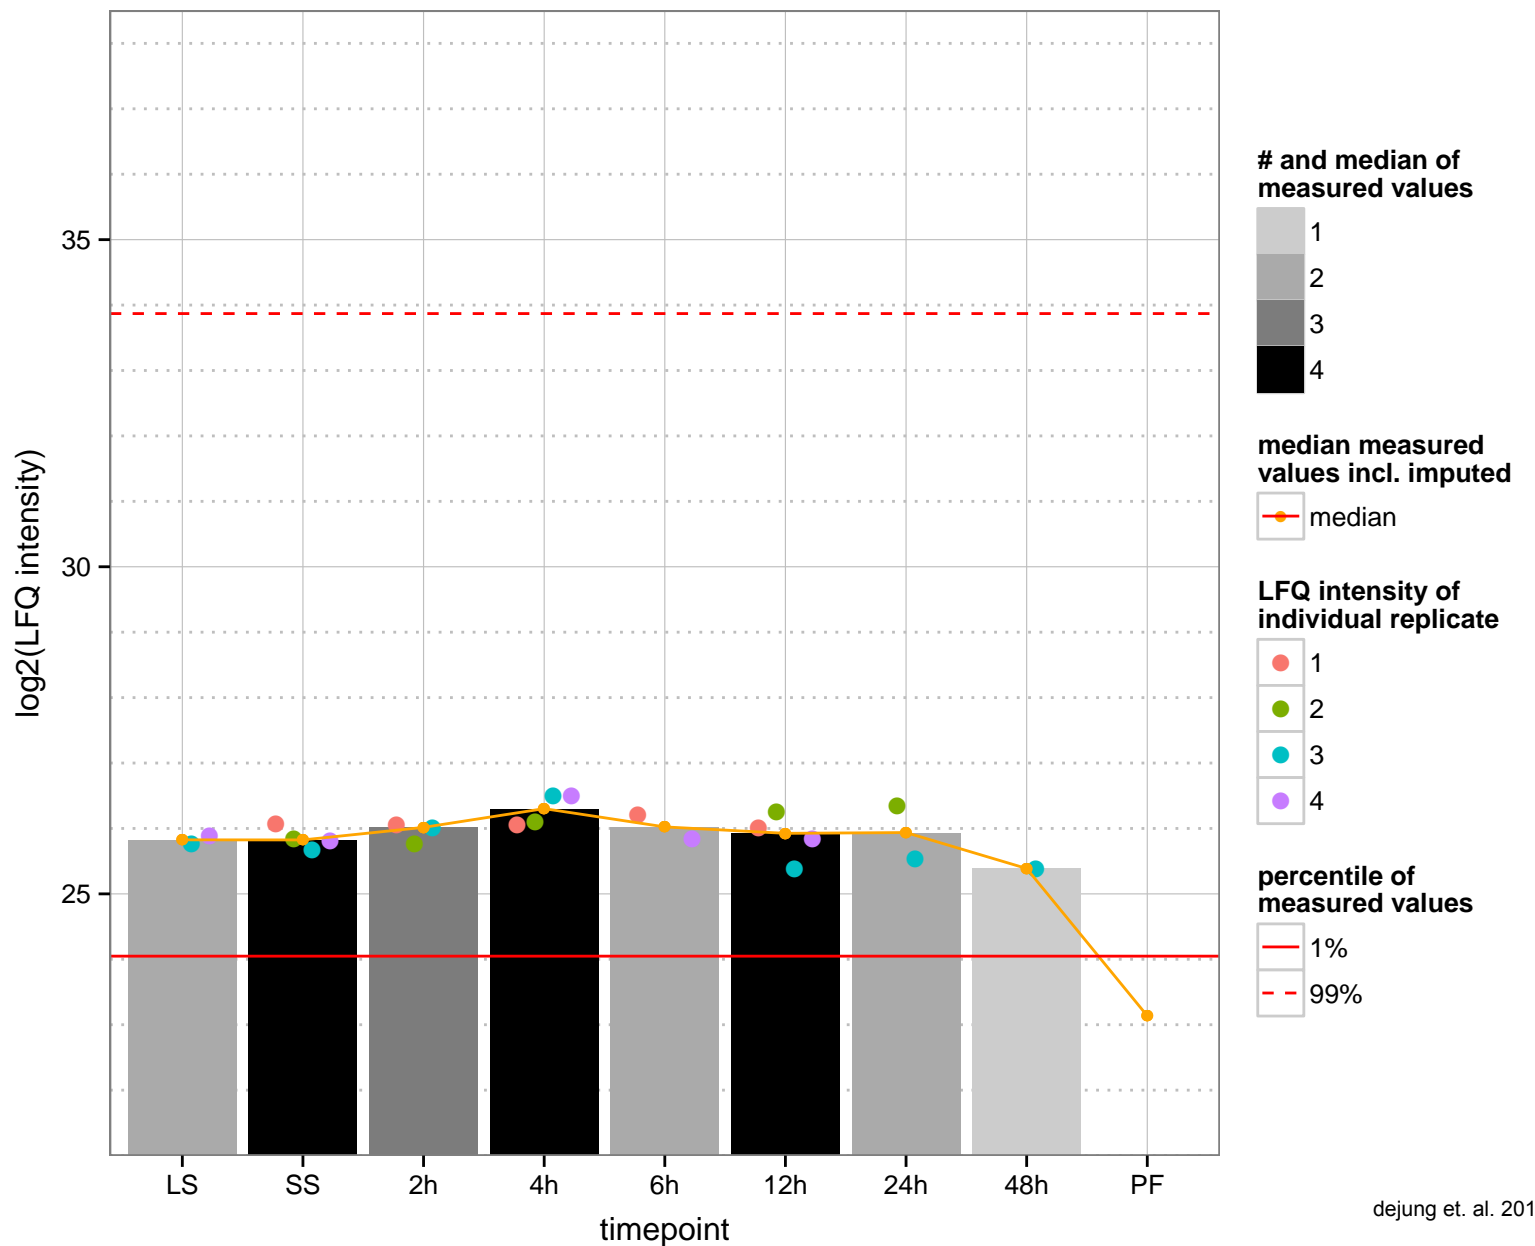

small GTPase (X3)

Tb927.11.15030

AGOF: GTP binding, GTPase activity

AGOC: intracellular

AGOP: intracellular protein transport, nucleocytoplasmic transport, small GTPase mediated signal transduction

PGOF: GTP binding, GTPase activity

PGOC: intracellular, membrane

PGOP: GTP catabolic process, intracellular protein transport, nucleocytoplasmic transport, protein transport, signal transduction

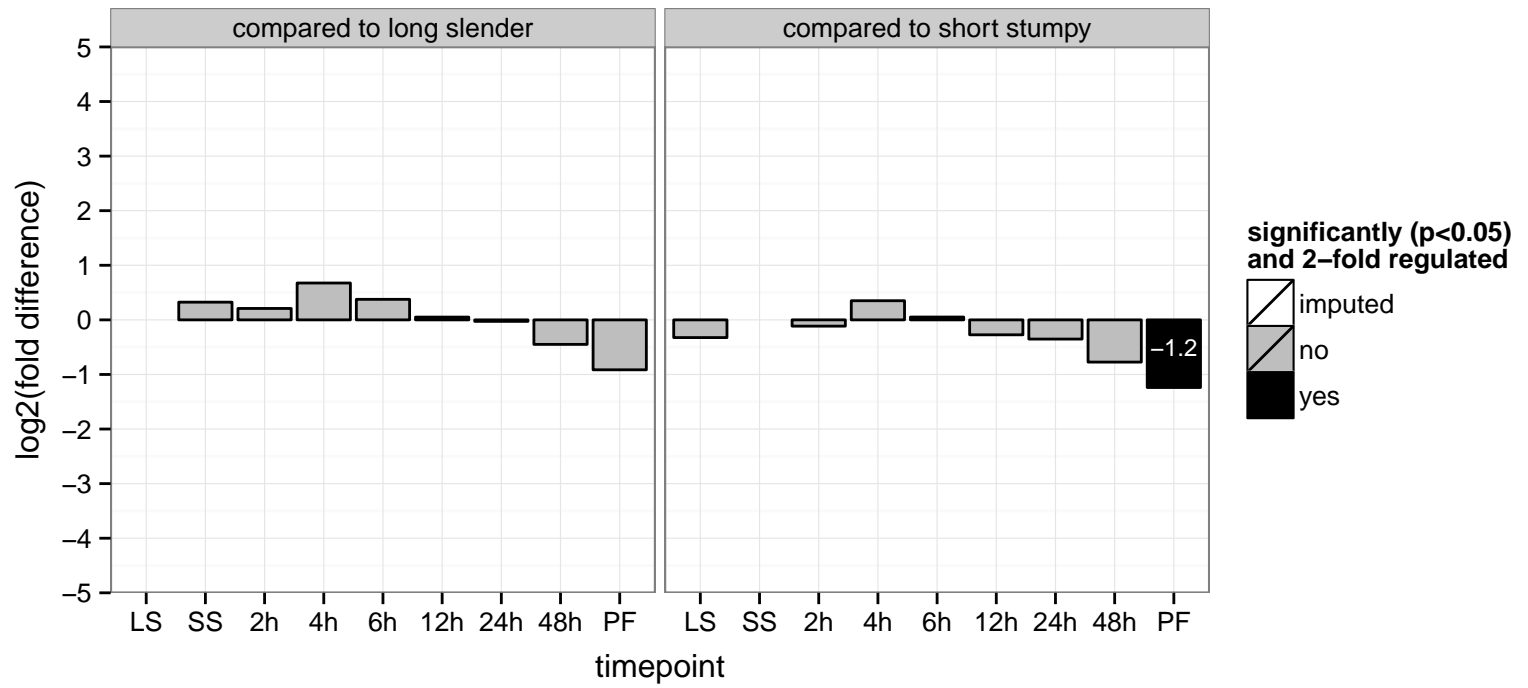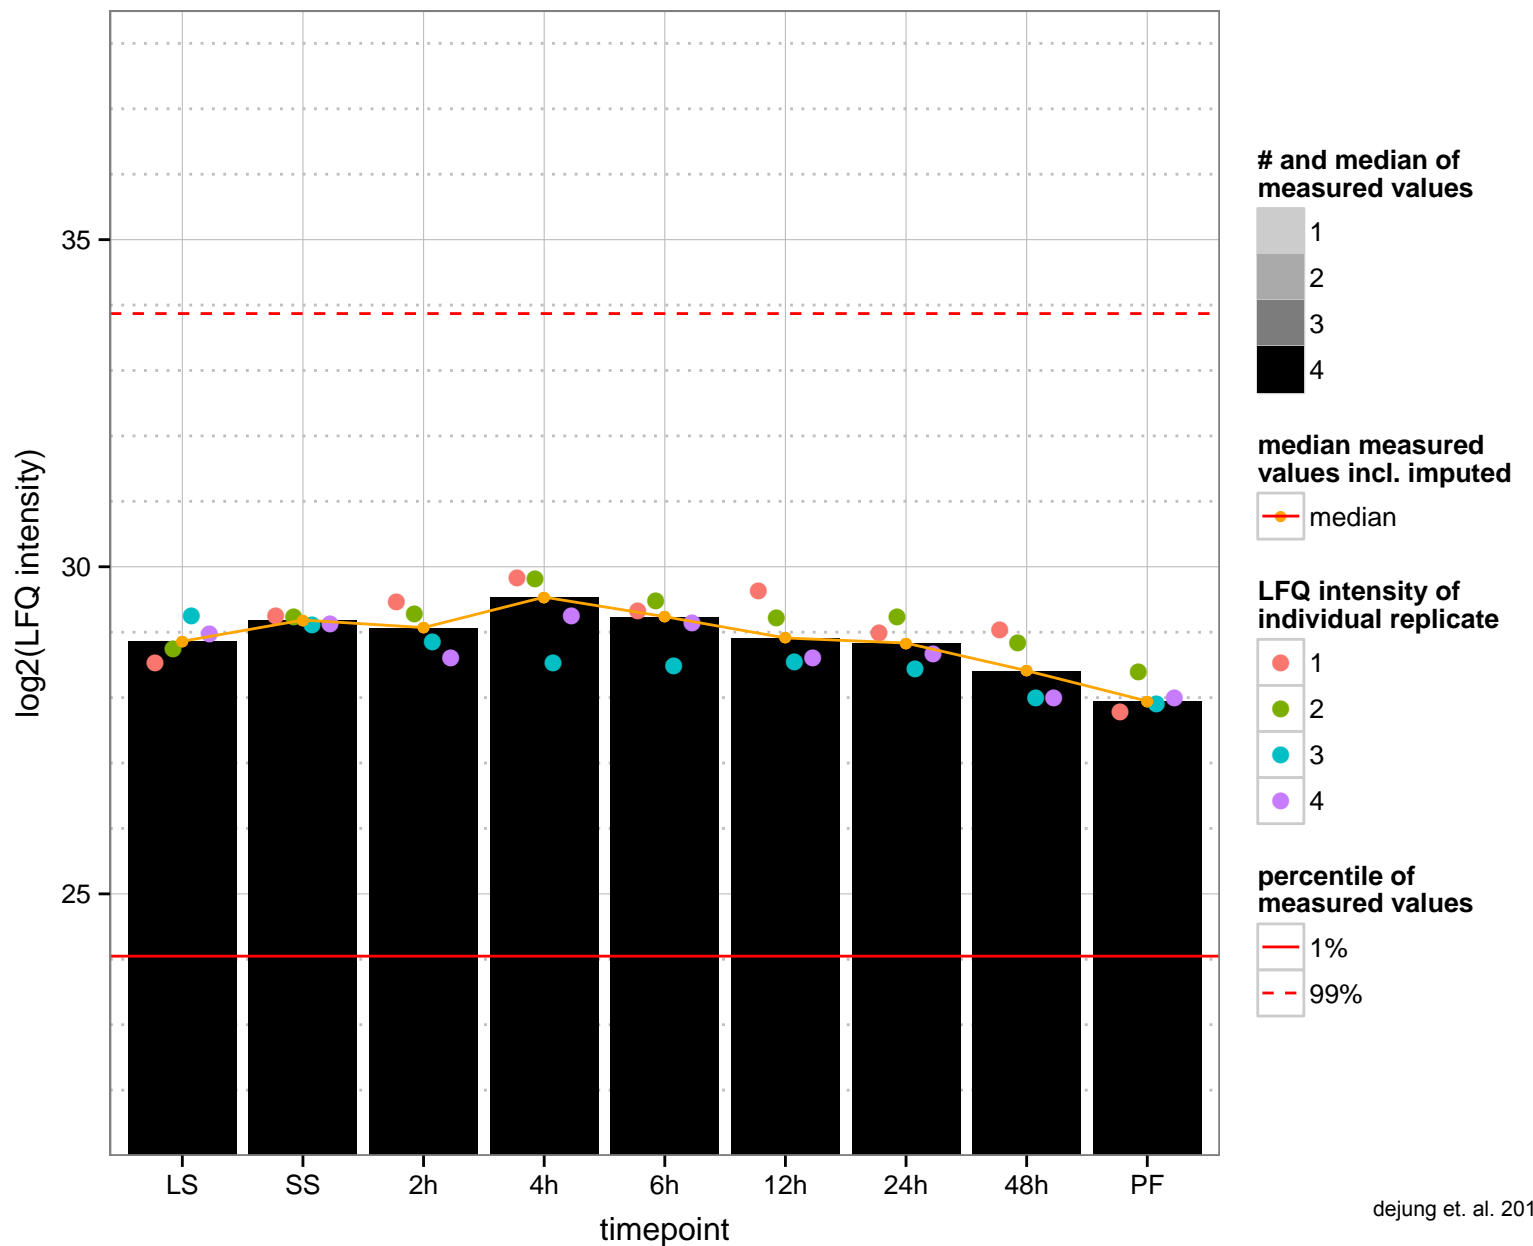

hypothetical protein, conserved  
 Tb927.11.15120  
 AGOF: null  
 AGOC: null  
 AGOP: null  
 PGOF: null  
 PGOC: null  
 PGOP: null

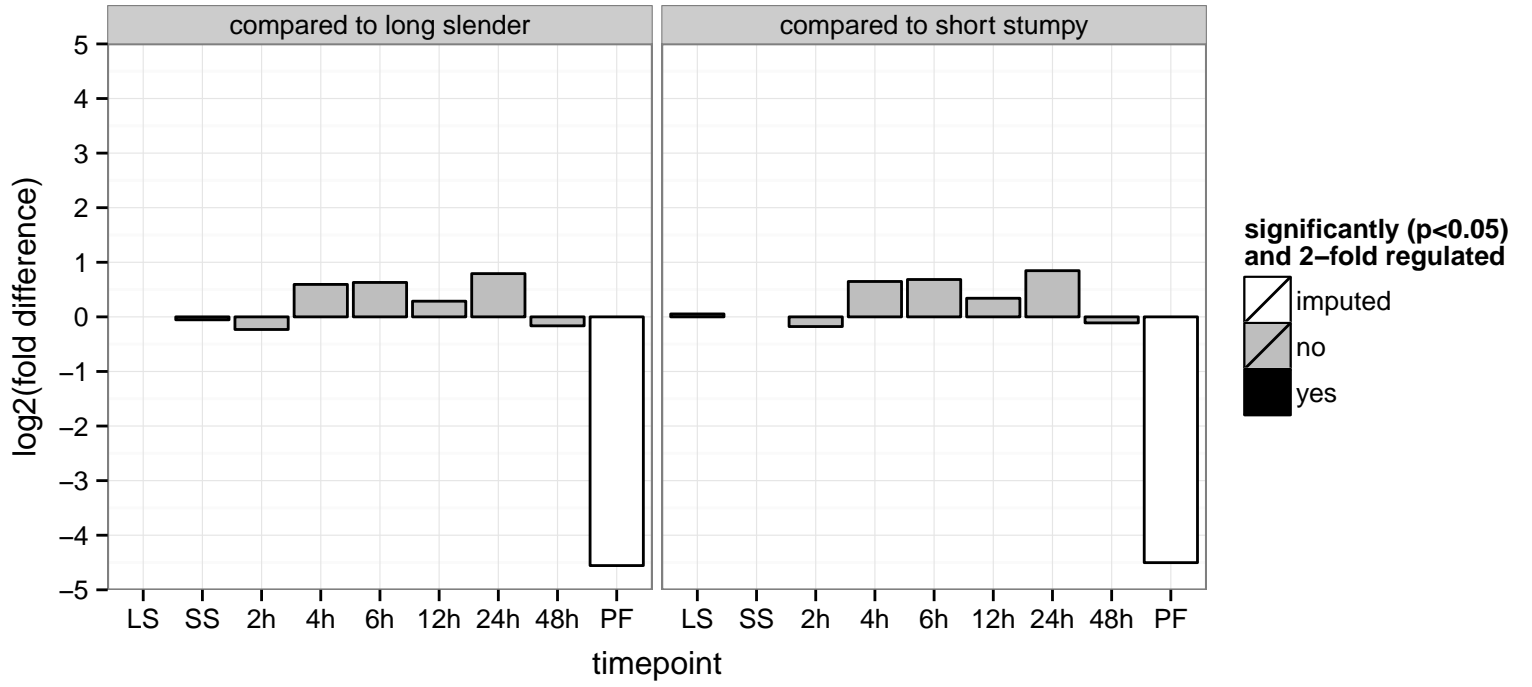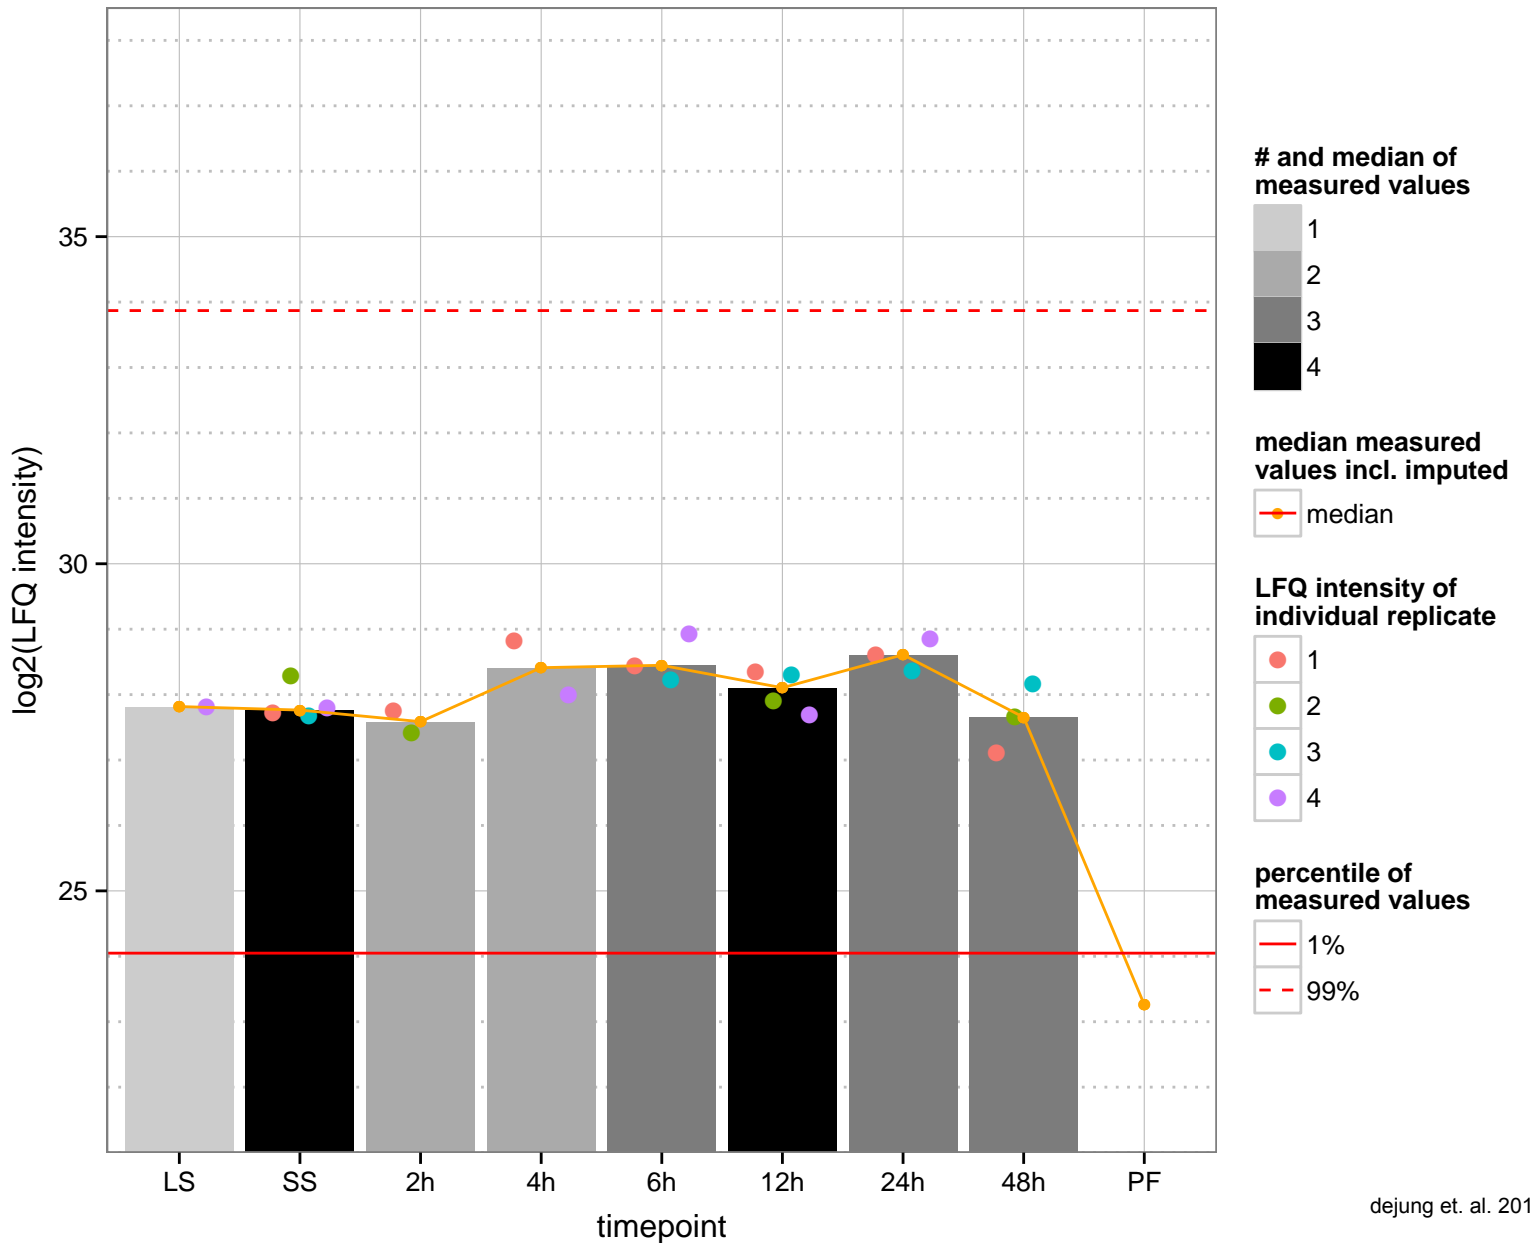

hypothetical protein, conserved  
 Tb927.11.15400  
 AGOF: null  
 AGOC: null, integral to membrane  
 AGOP: null, vesicle-mediated transport  
 PGO: null, protein binding  
 PGOC: null, integral to membrane  
 PGOP: null, vesicle-mediated transport

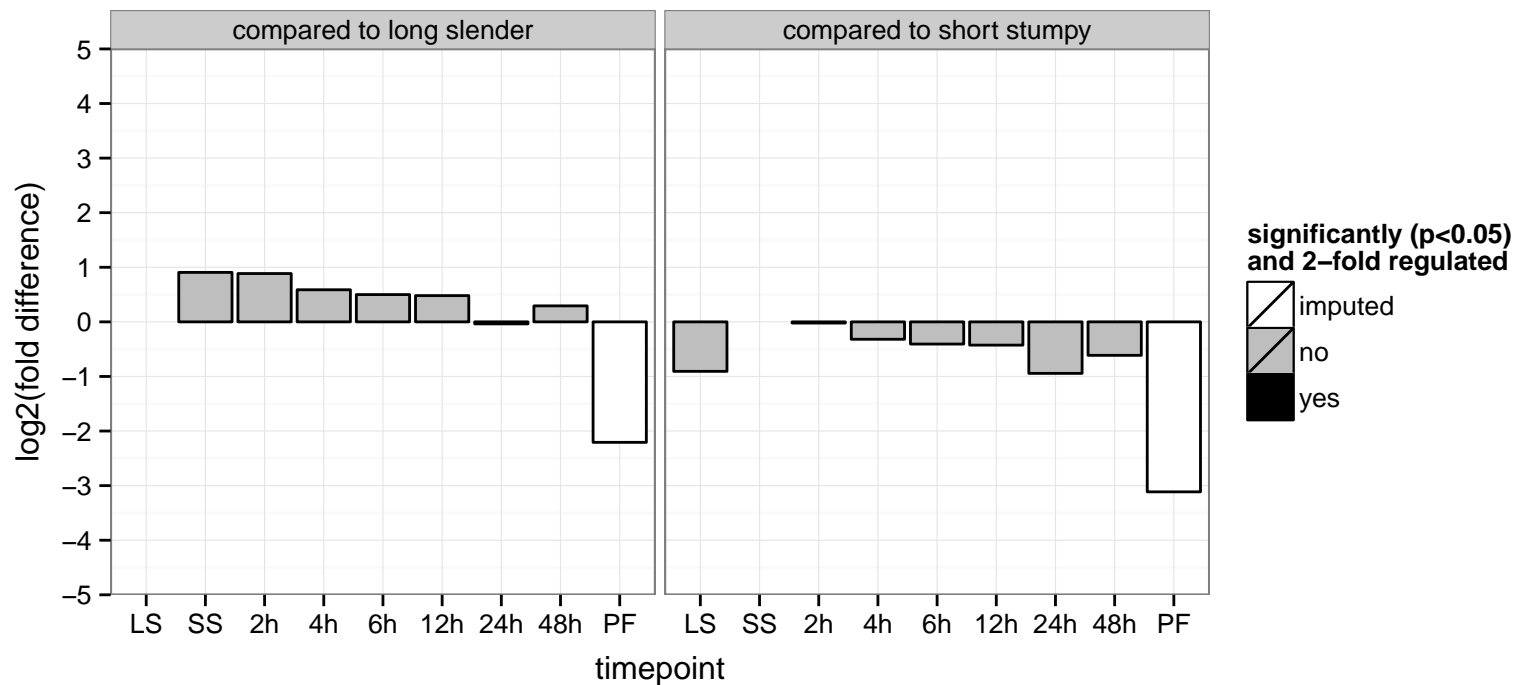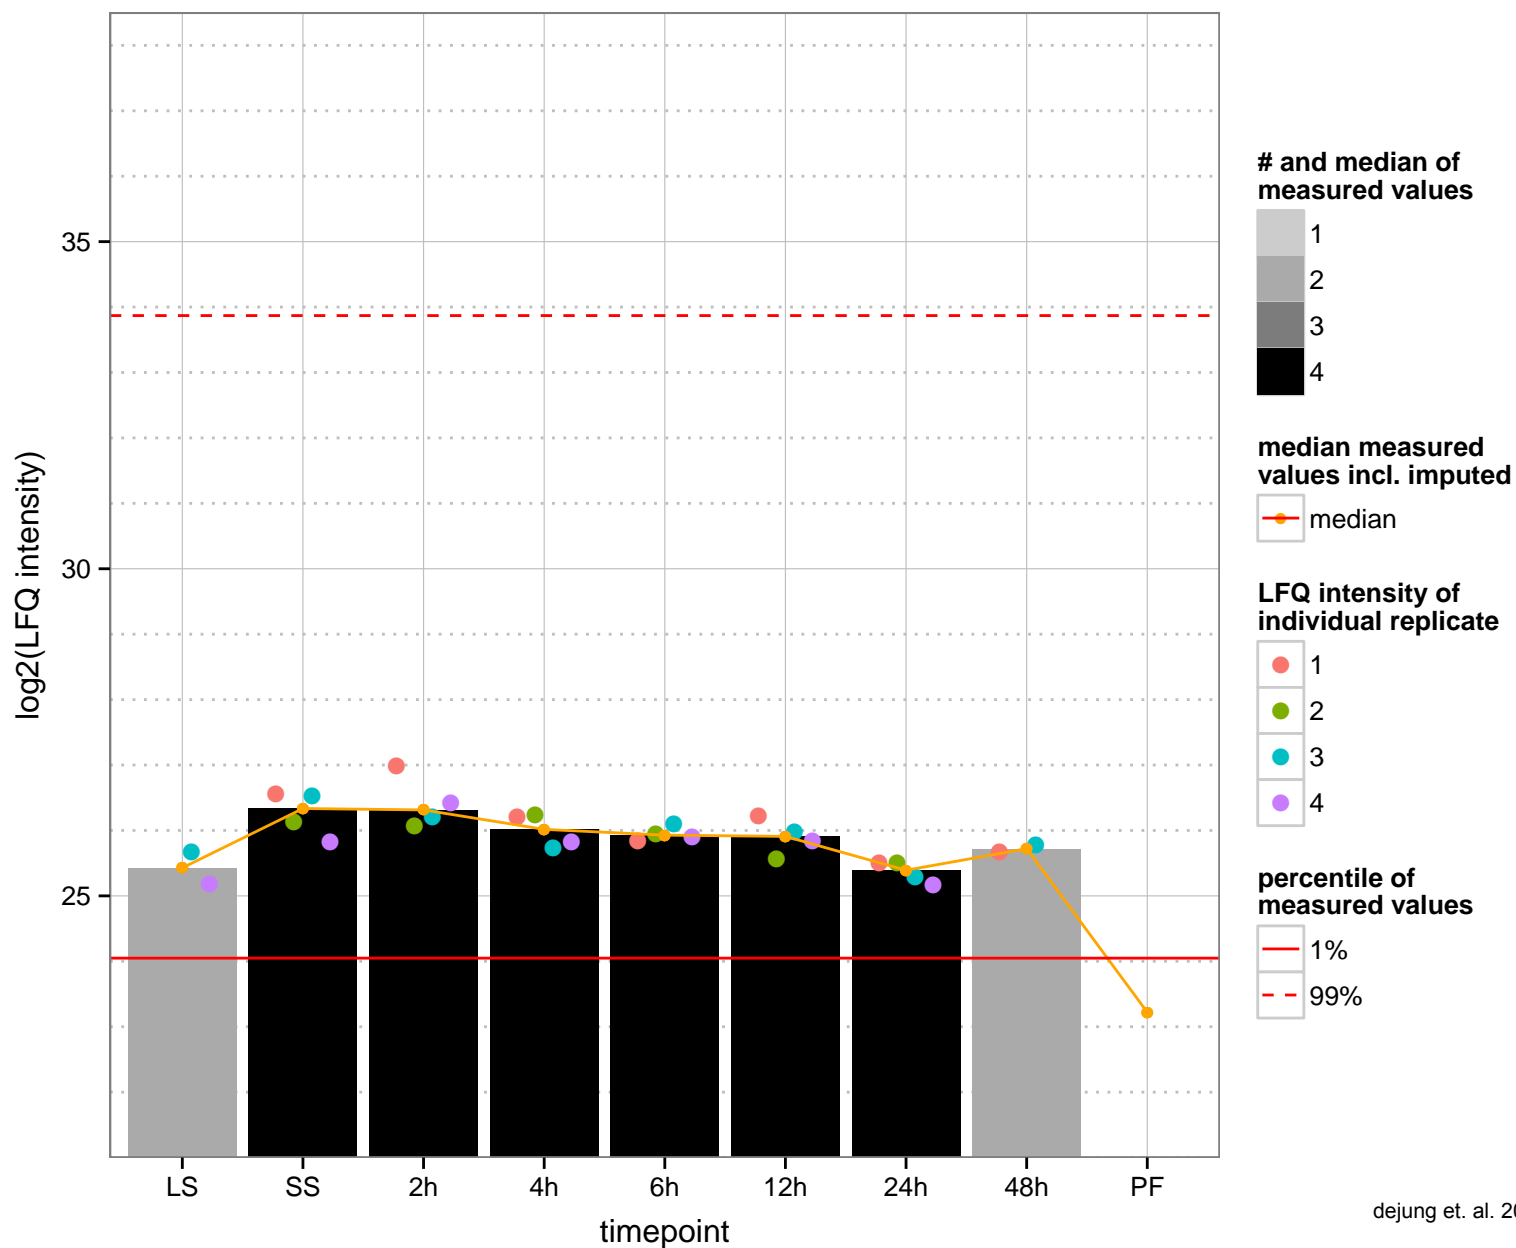

hypothetical protein, conserved  
 Tb927.11.16320  
 AGOF: null  
 AGOC: null  
 AGOP: null  
 PGO: protein binding  
 PGOC: null  
 PGOP: null

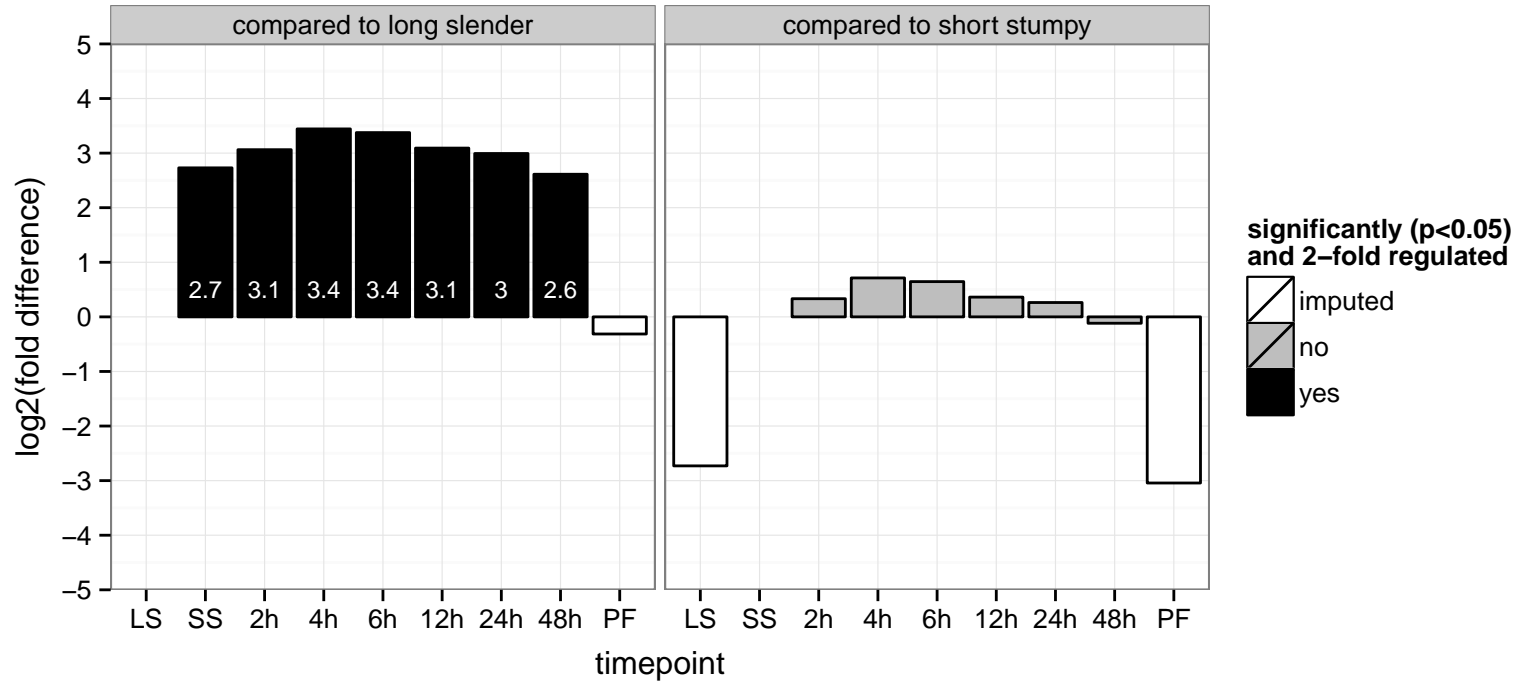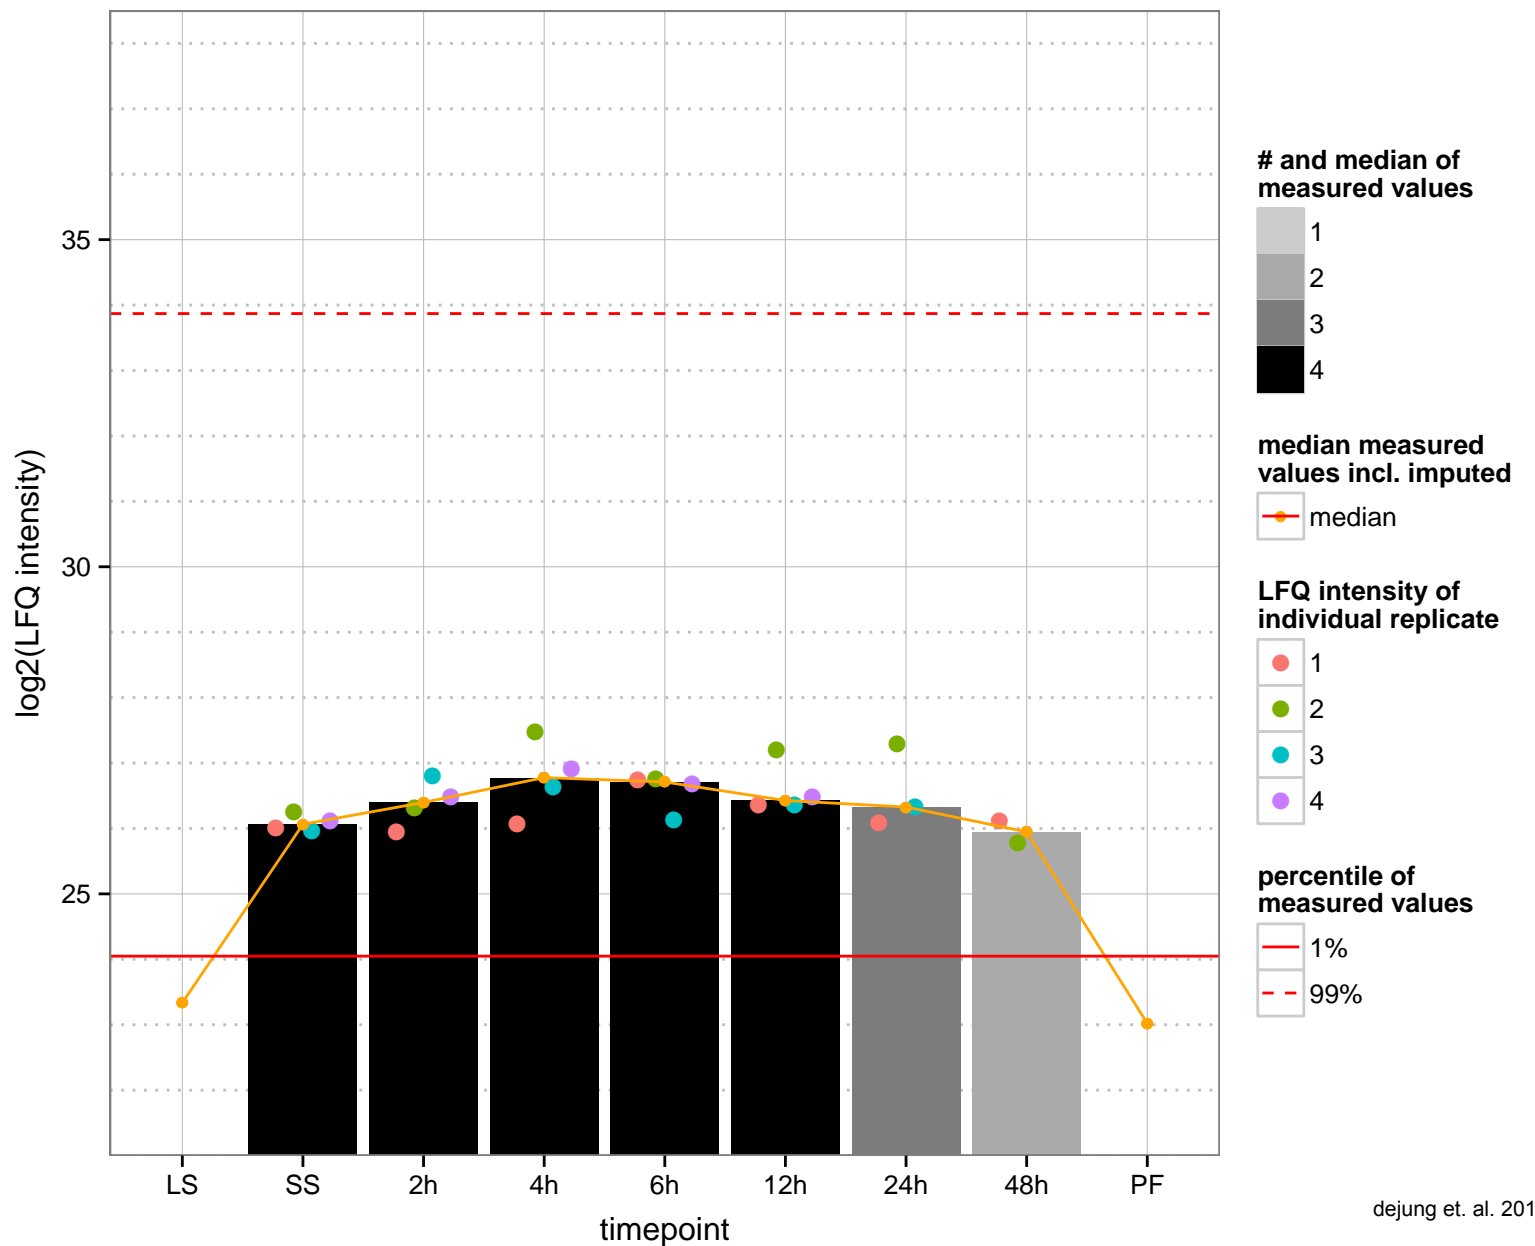



hypothetical protein, conserved  
 Tb927.11.16540  
 AGOF: null  
 AGOC: null  
 AGOP: null  
 PGOF: null  
 PGOC: null  
 PGOP: null

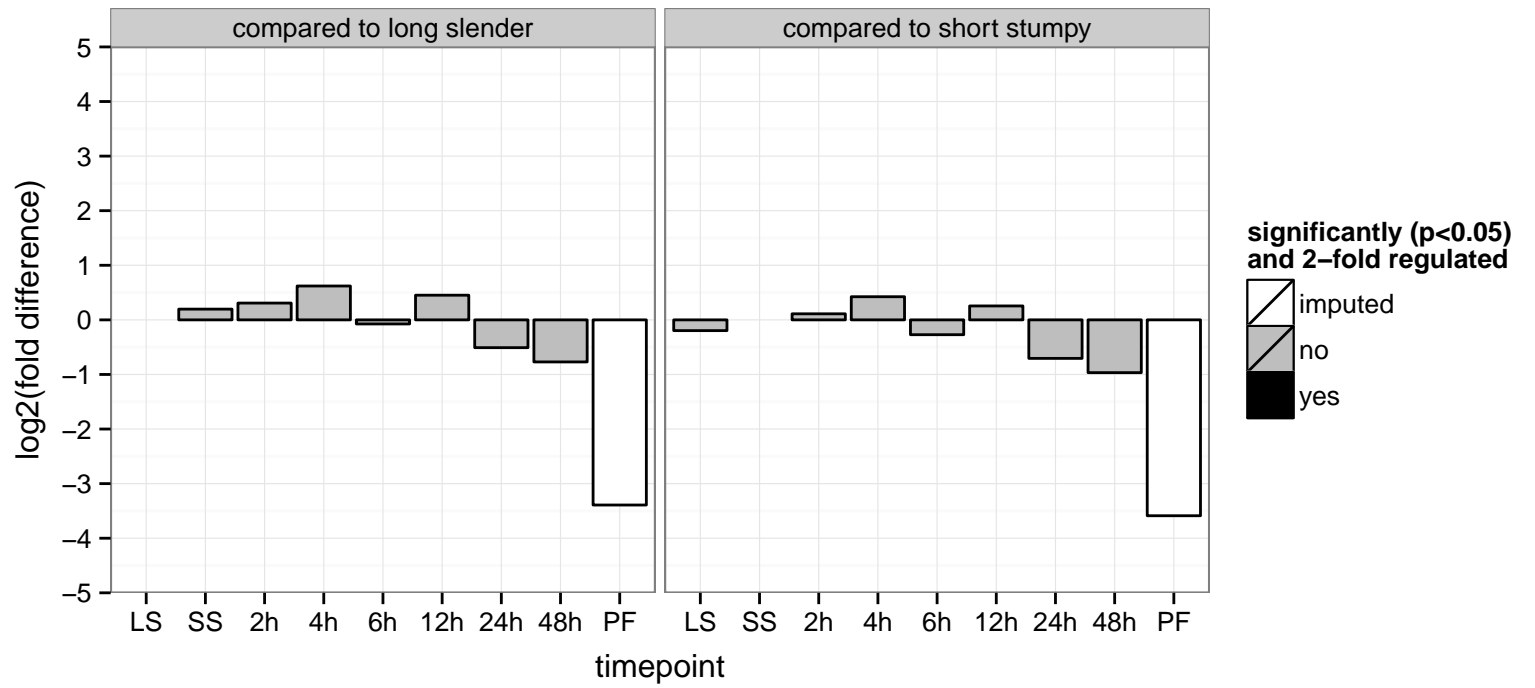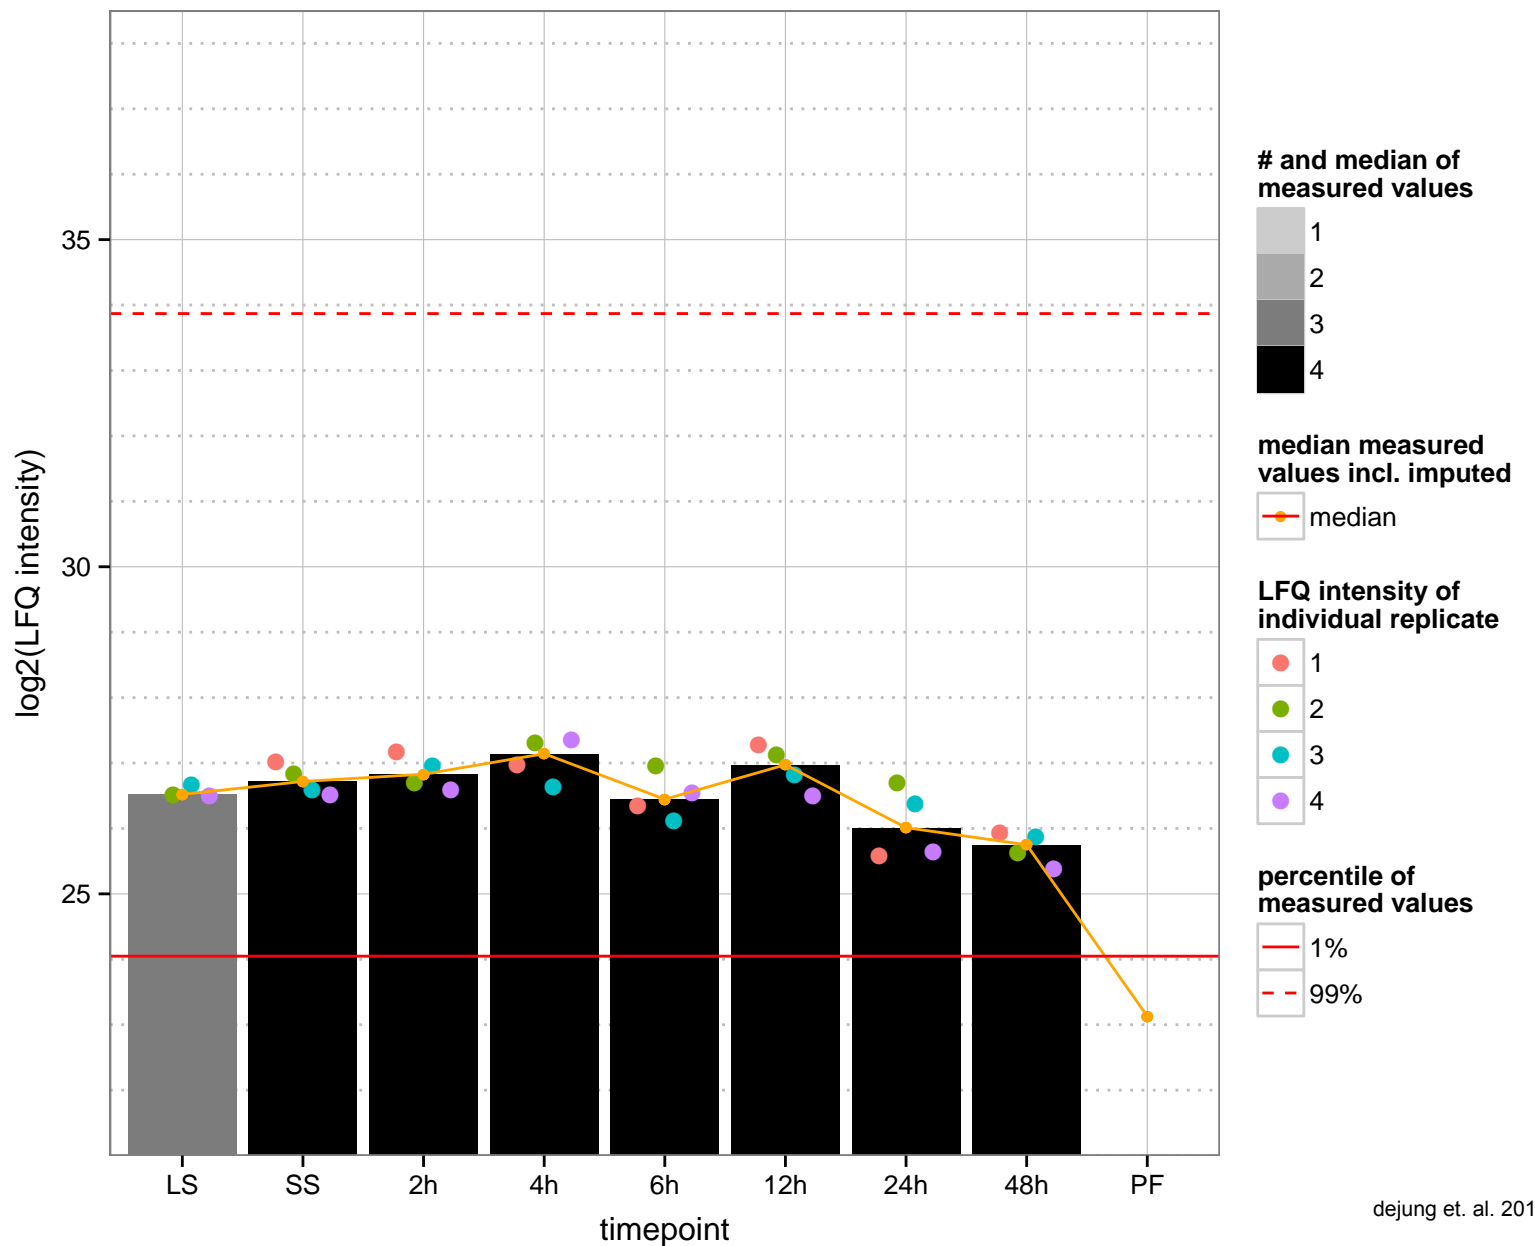

hypothetical protein, conserved  
 Tb927.11.16610  
 AGOF: null  
 AGOC: intracellular  
 AGOP: null  
 PGO: null  
 PGOC: null  
 PGOP: null

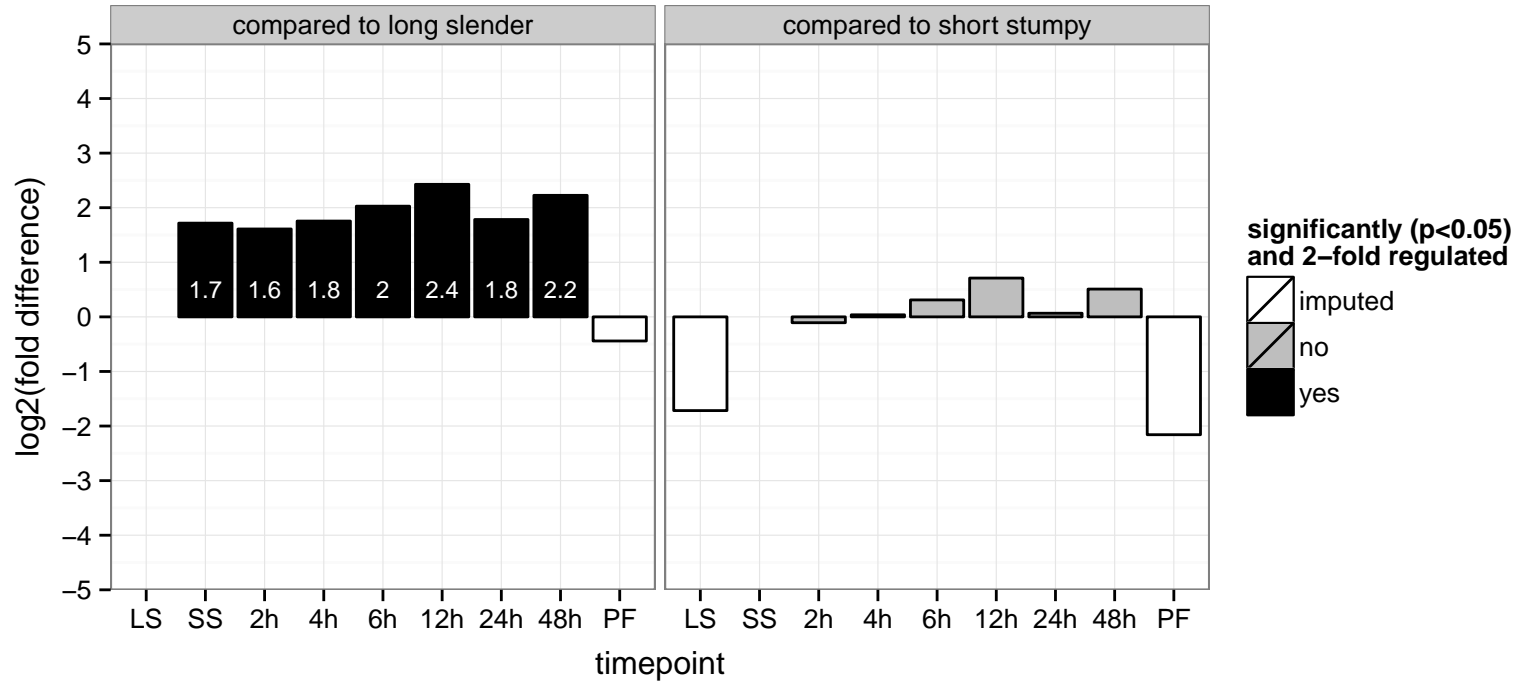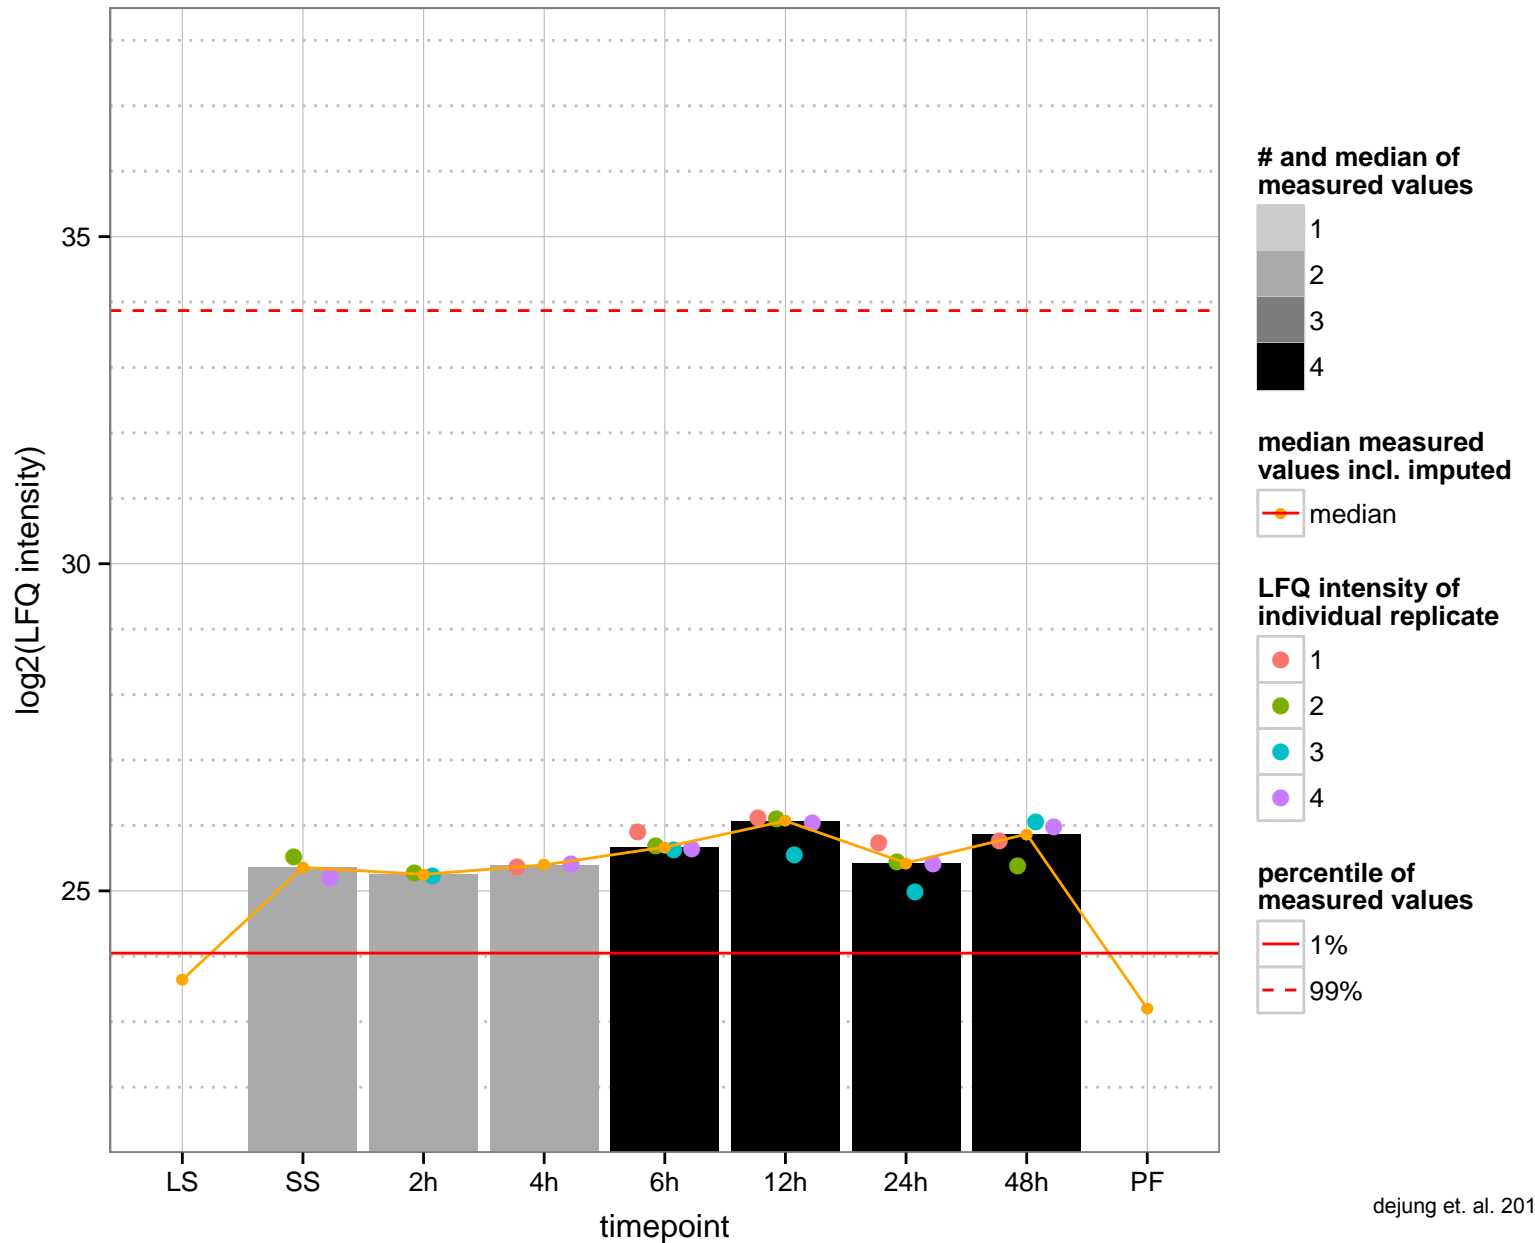

chloride channel protein, putative  
 Tb927.11.16690  
 AGOF: voltage-gated chloride channel activity  
 AGOC: membrane  
 AGOP: chloride transport  
 PGOF: ion channel activity, protein binding, voltage-gated chloride channel activity  
 PGOC: membrane  
 PGOP: chloride transport, transmembrane transport

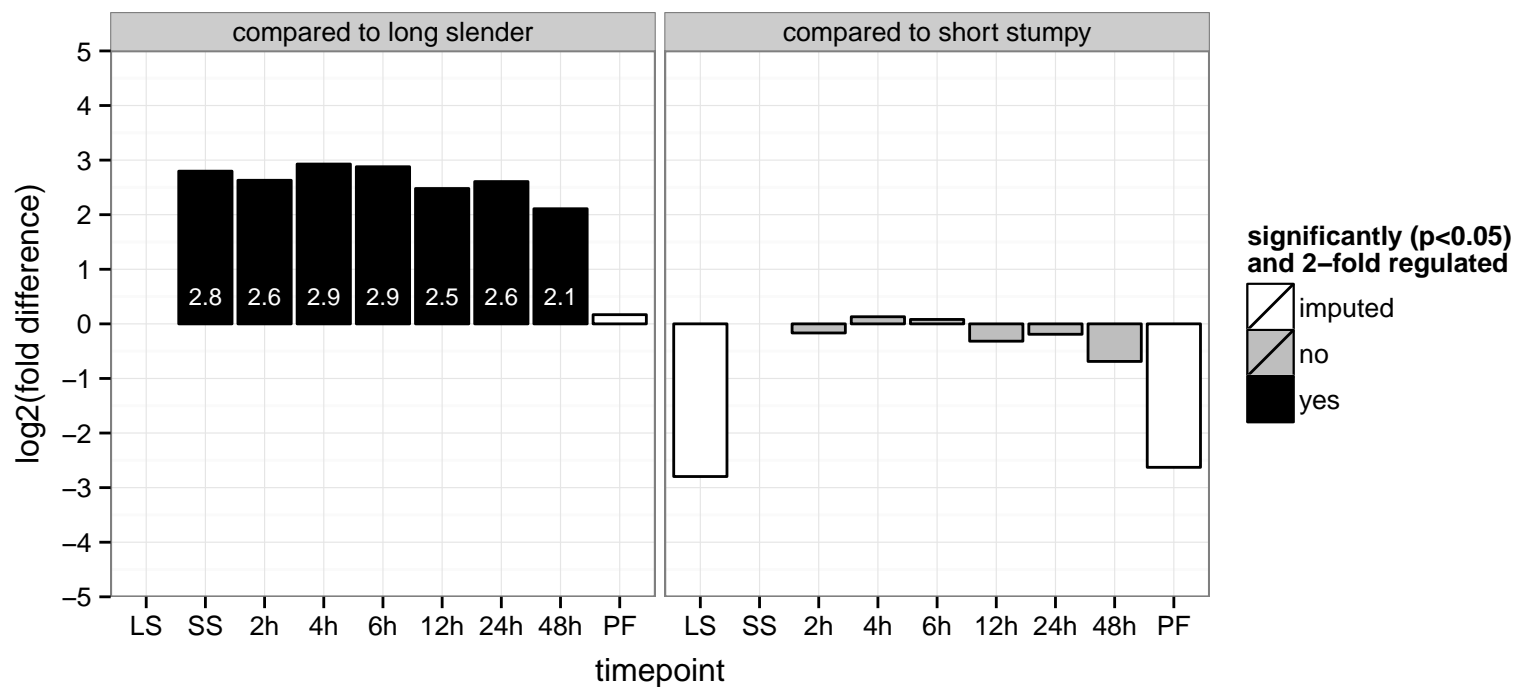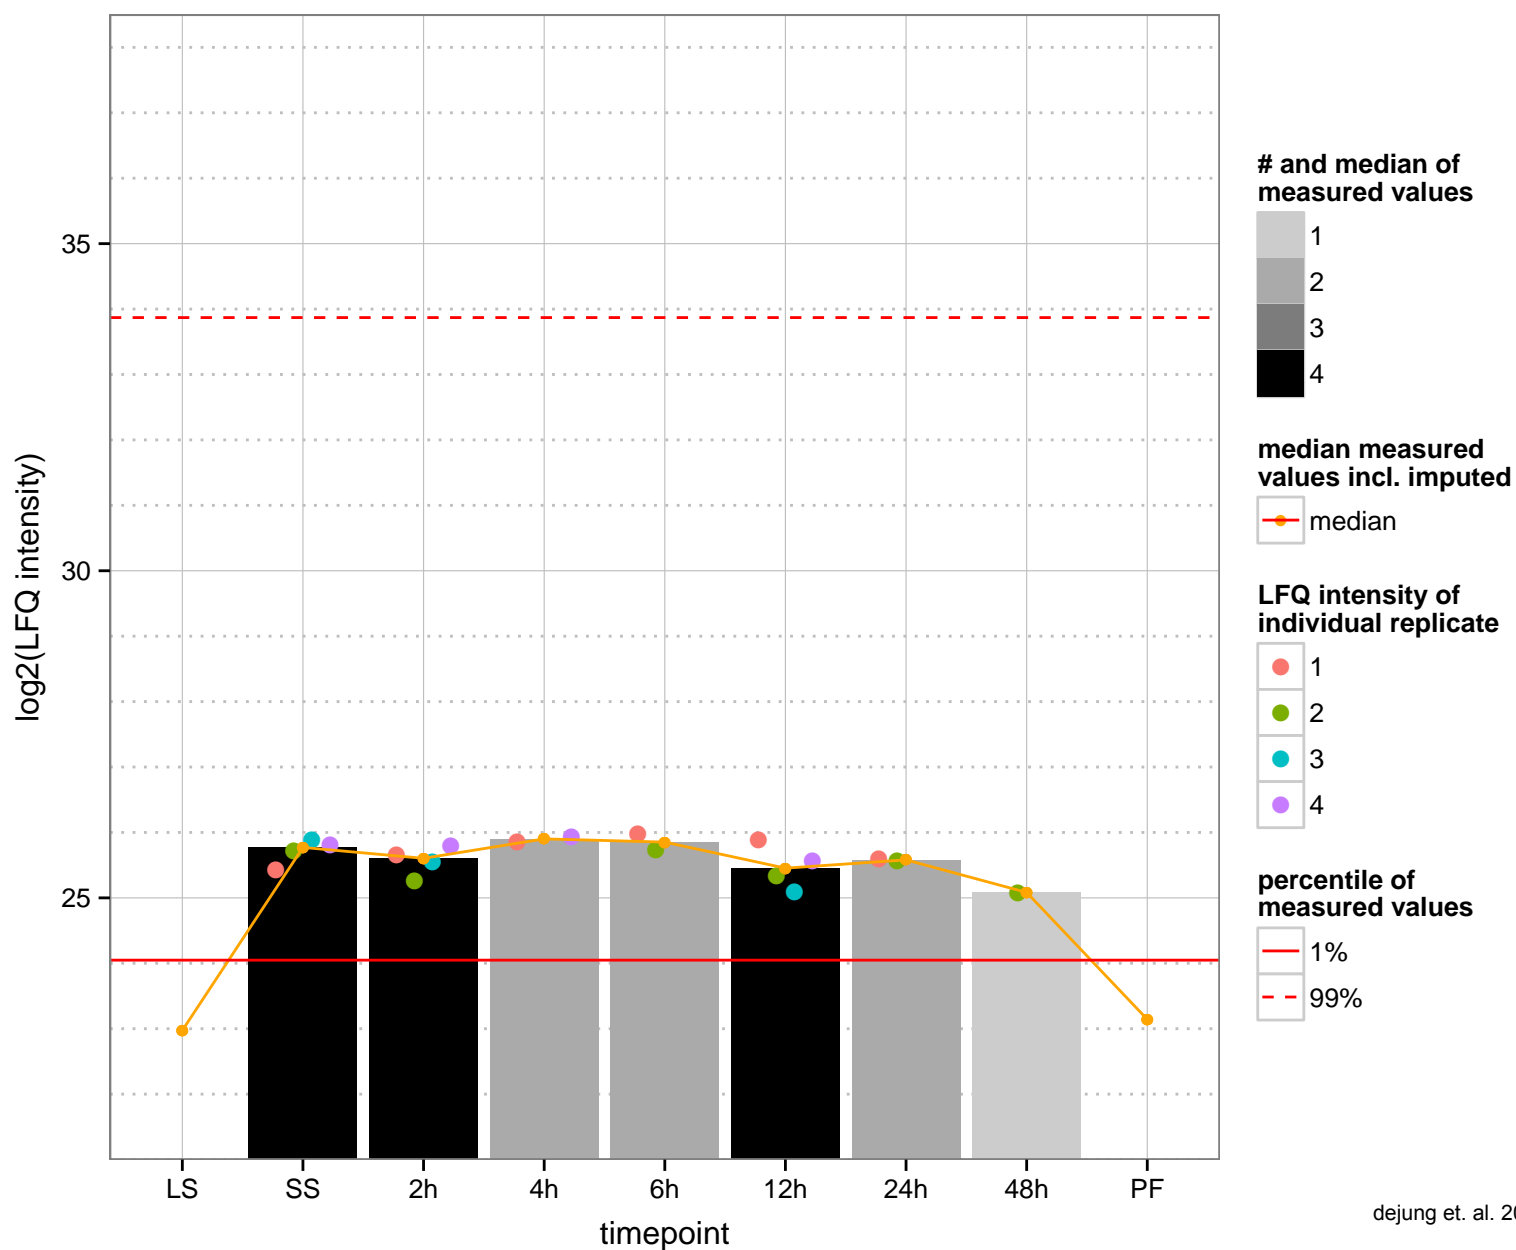

cation transporter protein, putative

Tb927.11.1910

AGOF: cation transmembrane transporter activity, efflux transmembrane transporter activity

AGOC: integral to membrane, membrane

AGOP: cation transport

PGOF: cation transmembrane transporter activity

PGOC: integral to membrane

PGOP: cation transport, transmembrane transport

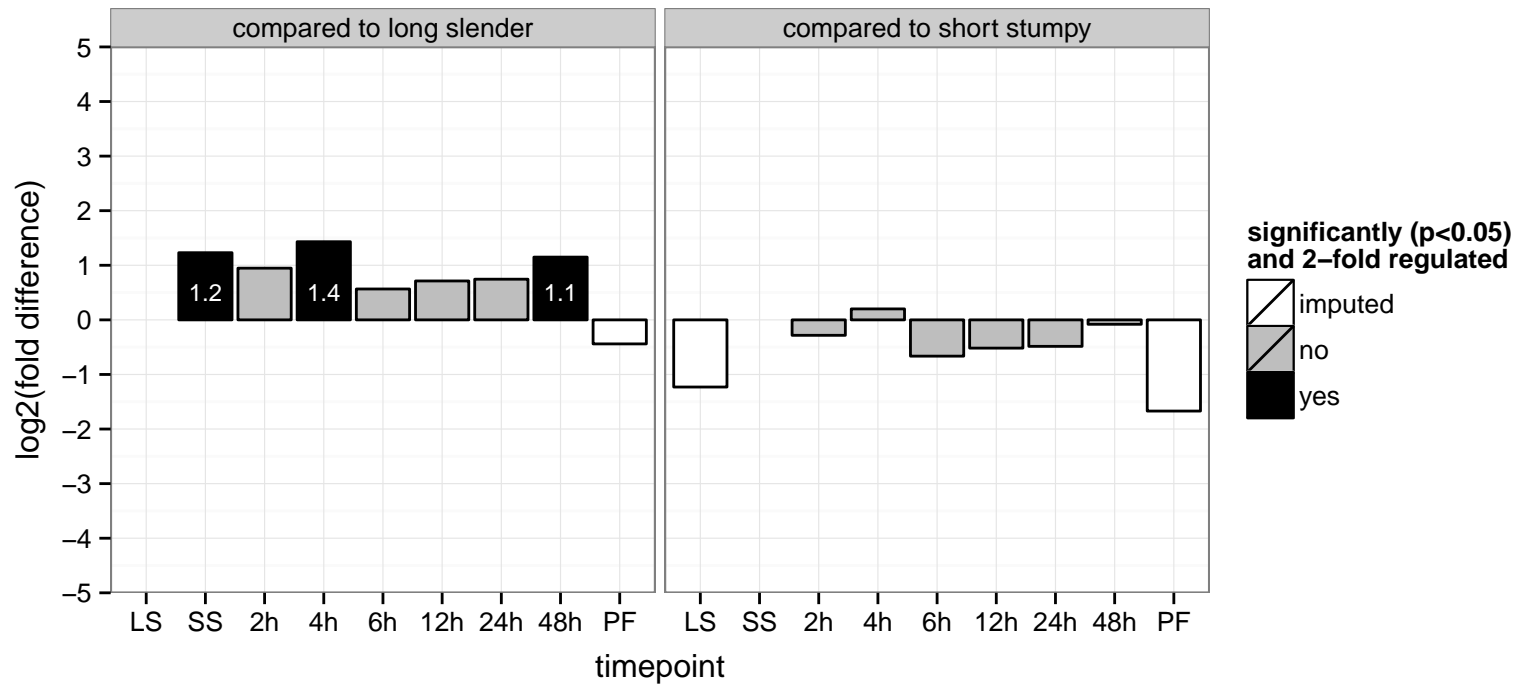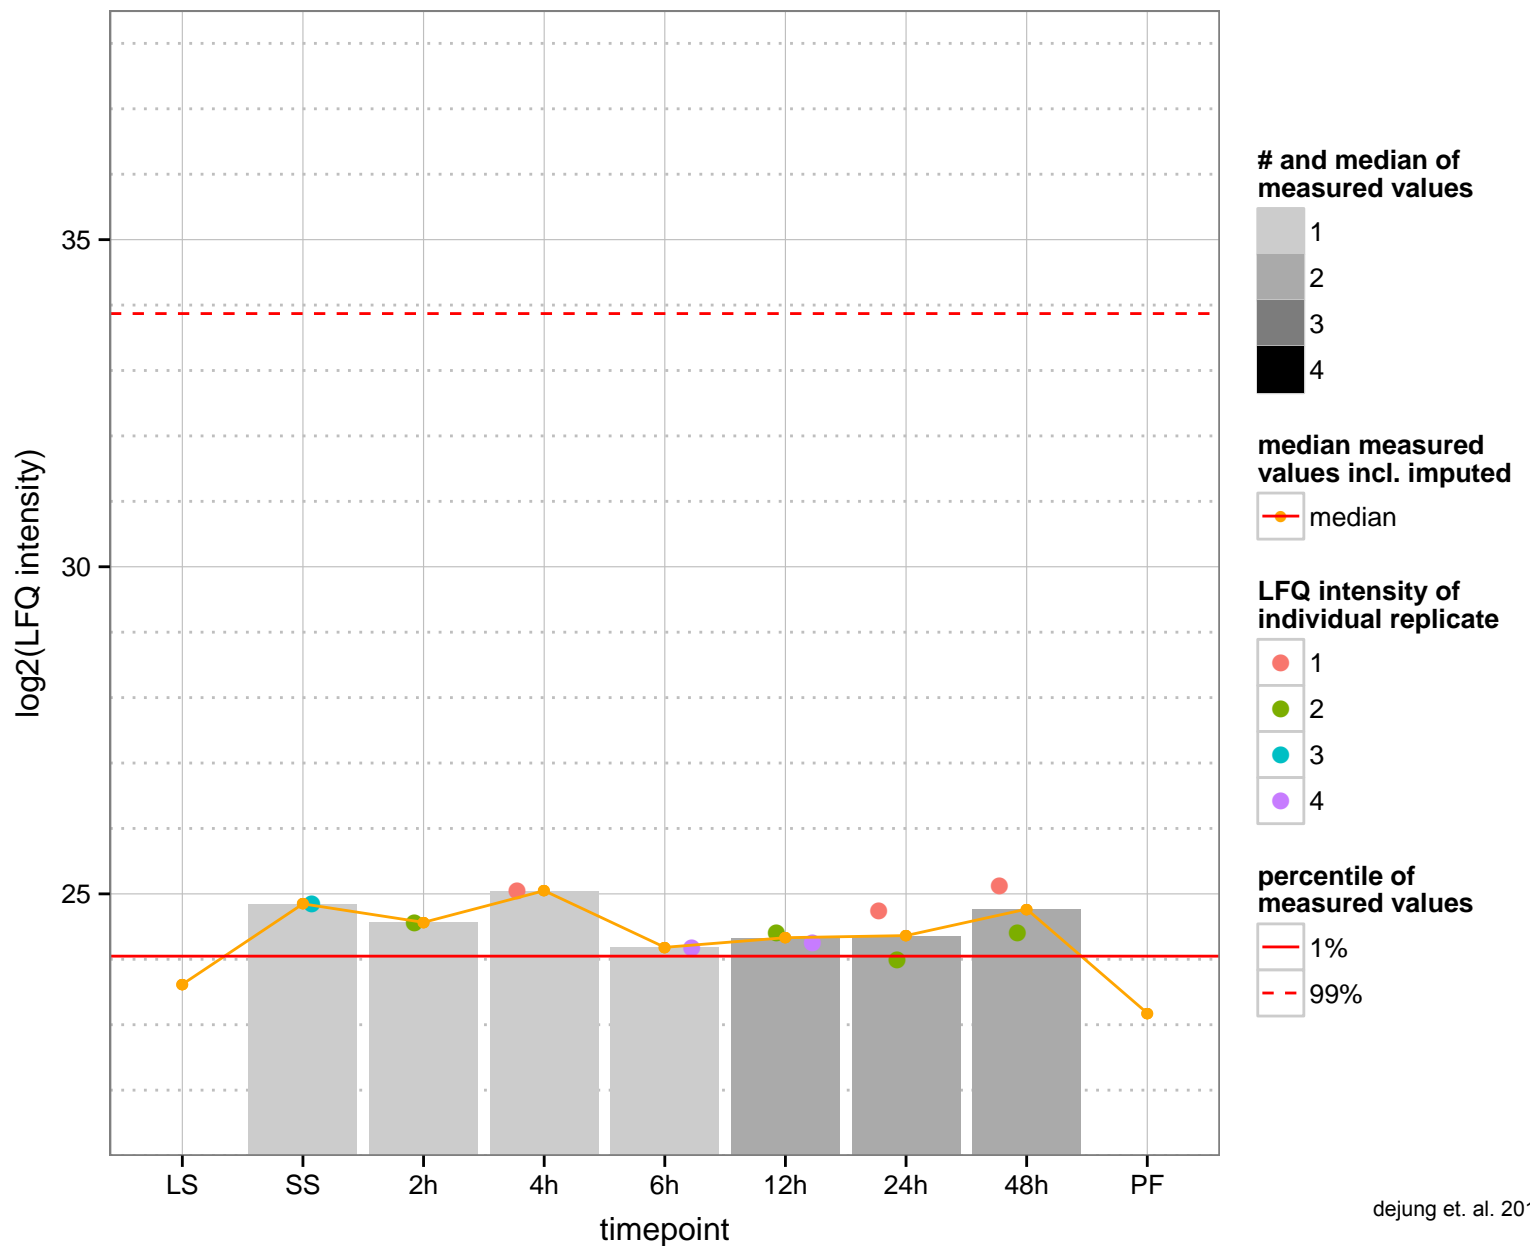

Tubulin cofactor C domain-containing protein 1 (tbccd1)

Tb927.11.2440

AGOF: null

AGOC: Golgi apparatus, apical part of cell, centriole

AGOP: Golgi inheritance, establishment of nucleus localization, mitochondrial DNA inheritance

PGOF: null

PGOC: null

PGOP: null

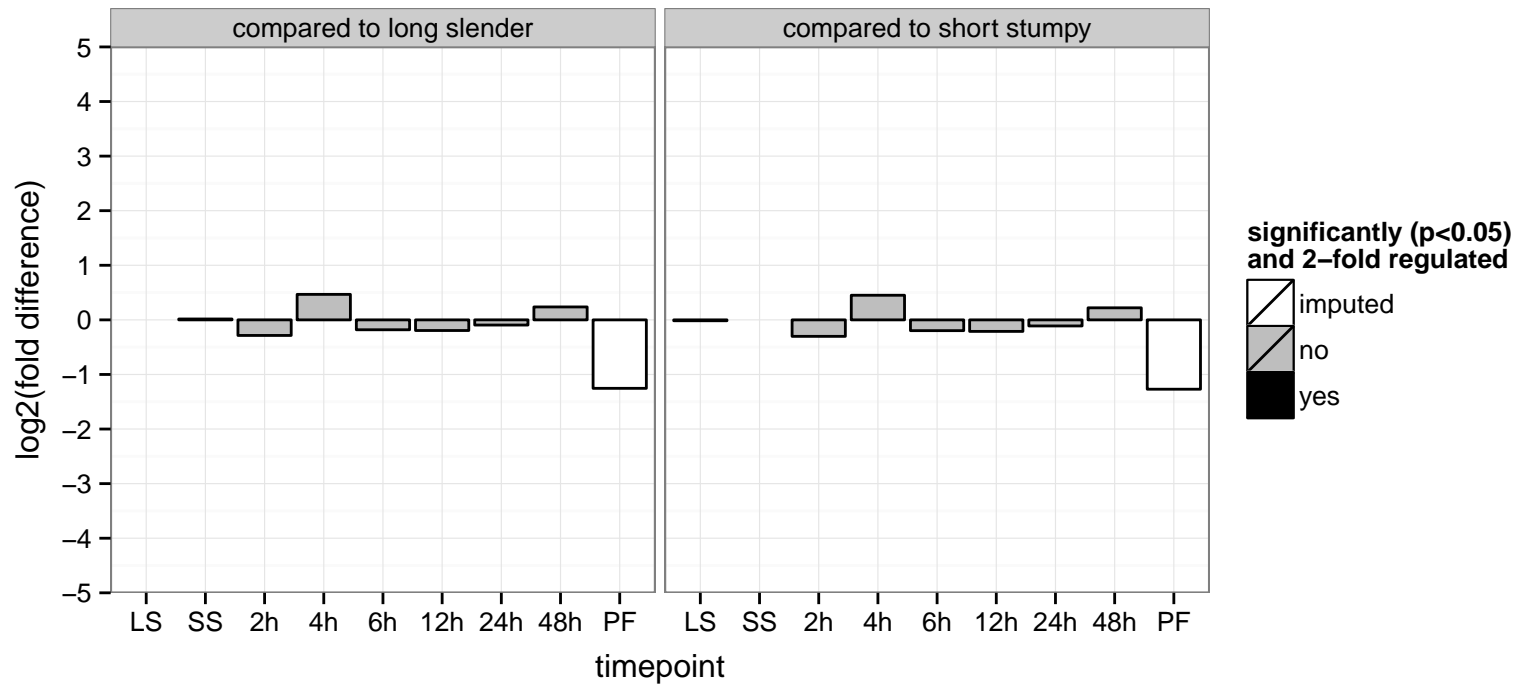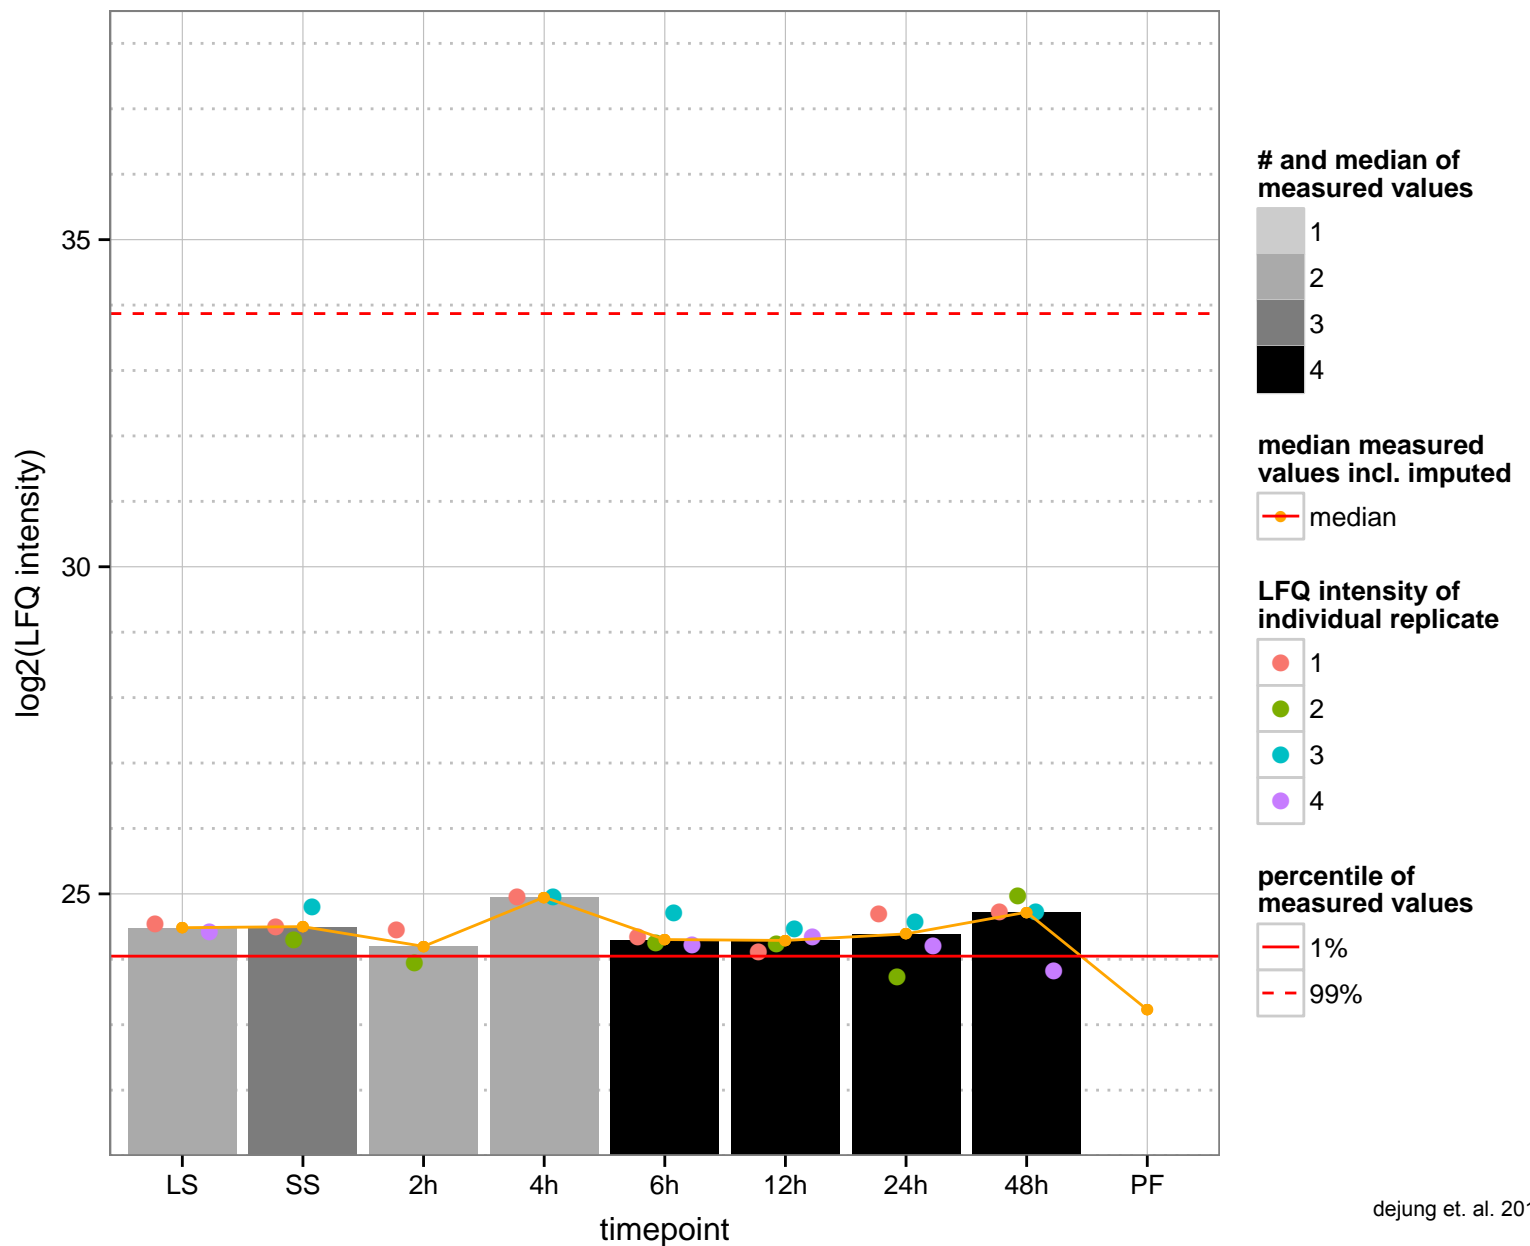

ubiquitin carboxyl-terminal hydrolase, putative, cysteine peptidase, Clan CA, family C12

Tb927.11.250

AGOF: phospholipase C activity, ubiquitin thiolesterase activity

AGOC: cytoplasm, intracellular

AGOP: intracellular signal transduction, lipid metabolic process, ubiquitin-dependent protein catabolic process

PGOF: phospholipase C activity, ubiquitin thiolesterase activity

PGOC: intracellular

PGOP: intracellular signal transduction, lipid metabolic process, ubiquitin-dependent protein catabolic process

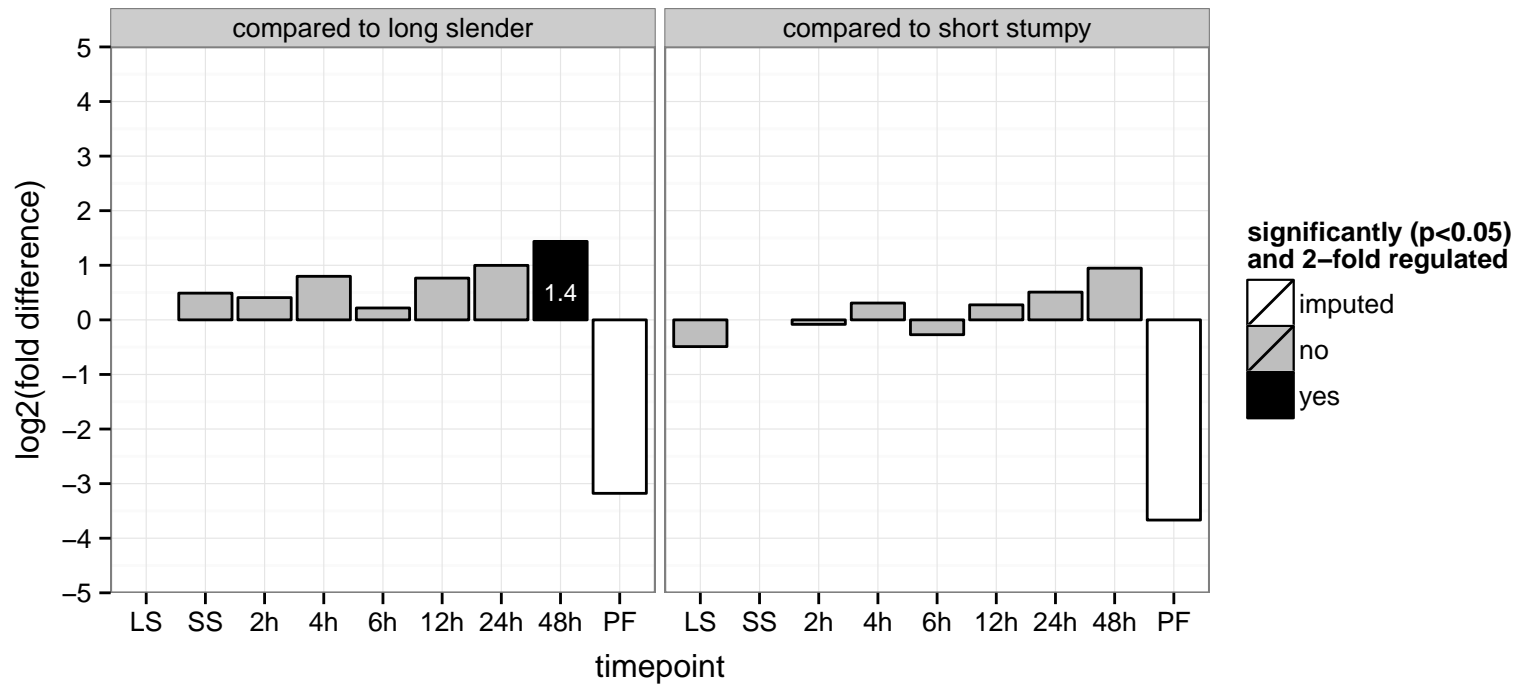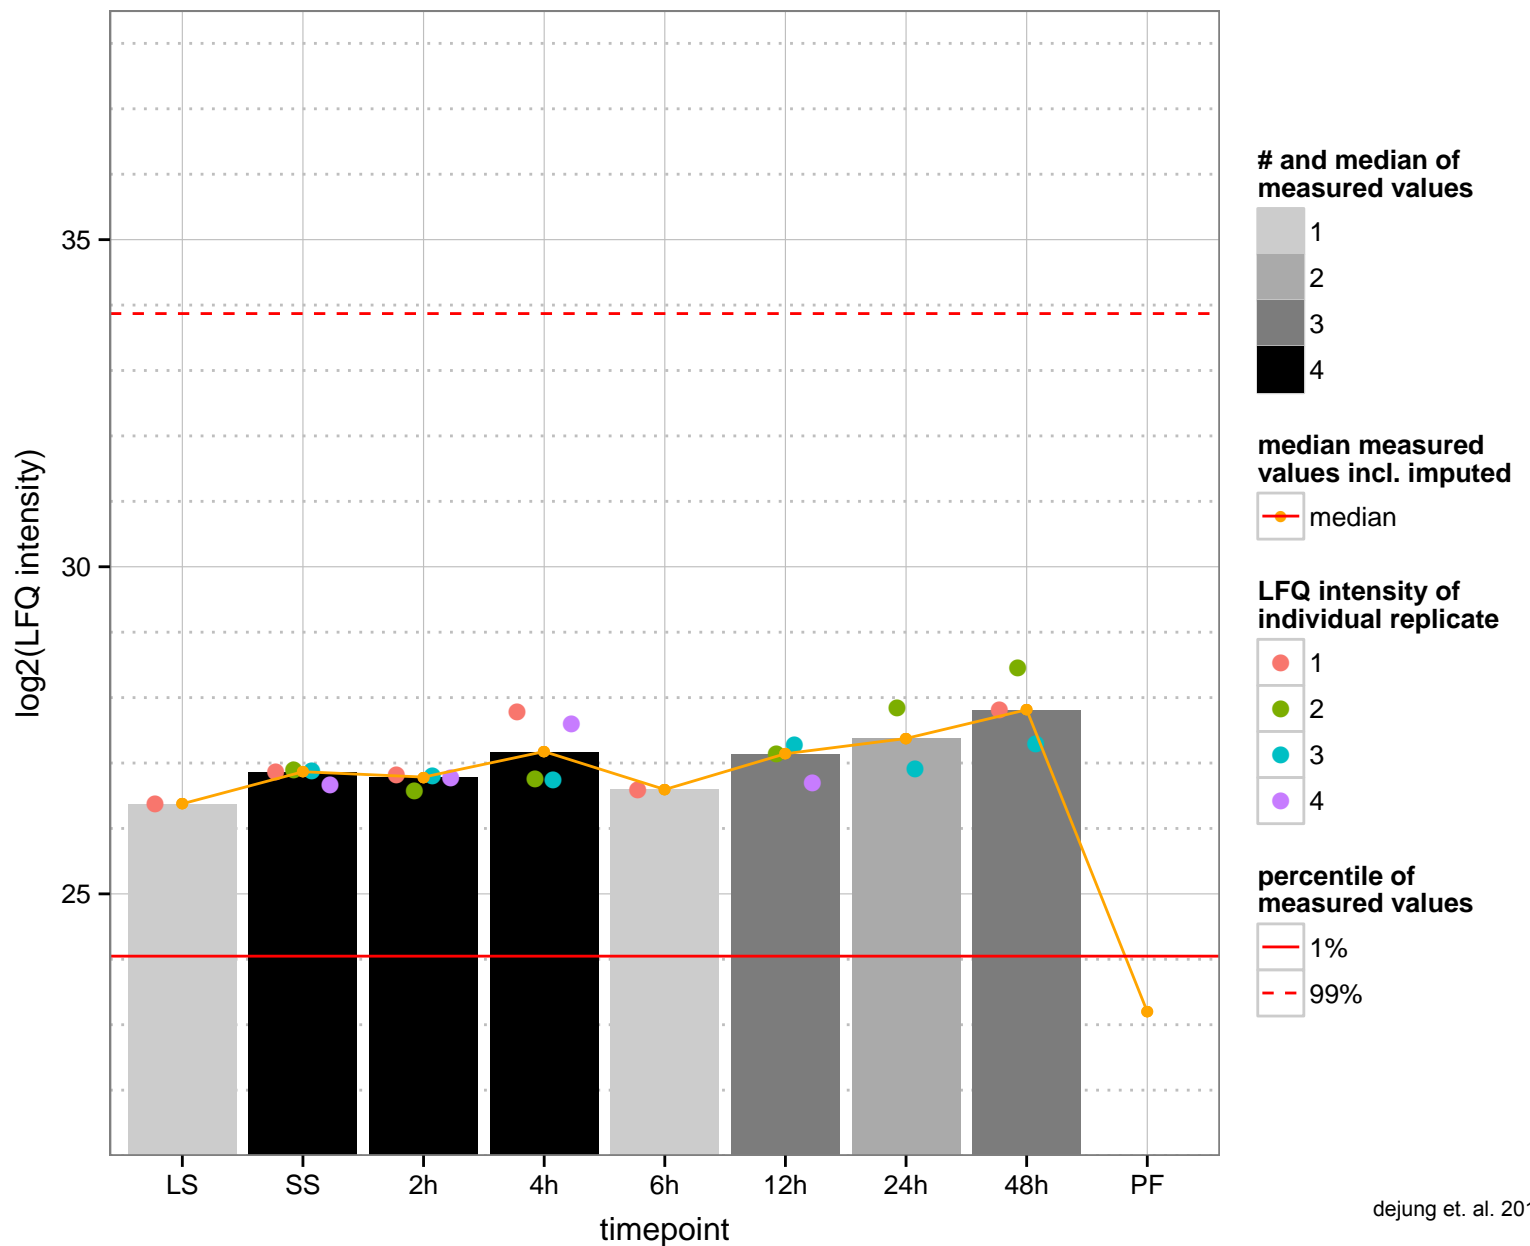

succinyl-coA:3-ketoacid-coenzyme A transferase, mitochondrial precursor, putative  
 Tb927.11.2690  
 AGOF: CoA-transferase activity  
 AGOC: mitochondrion  
 AGOP: ketone body catabolic process, metabolic process  
 PGO: CoA-transferase activity  
 PGO: null  
 PGO: ketone body catabolic process, metabolic process

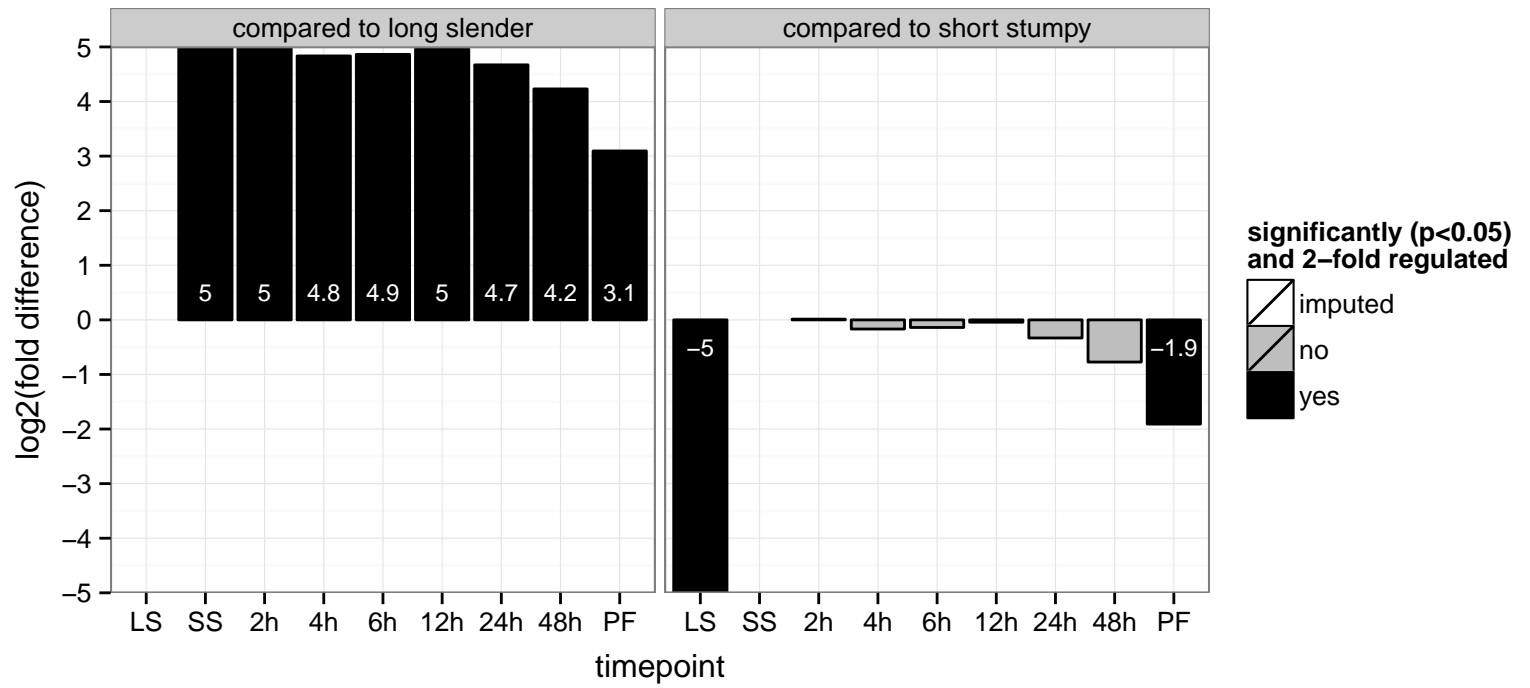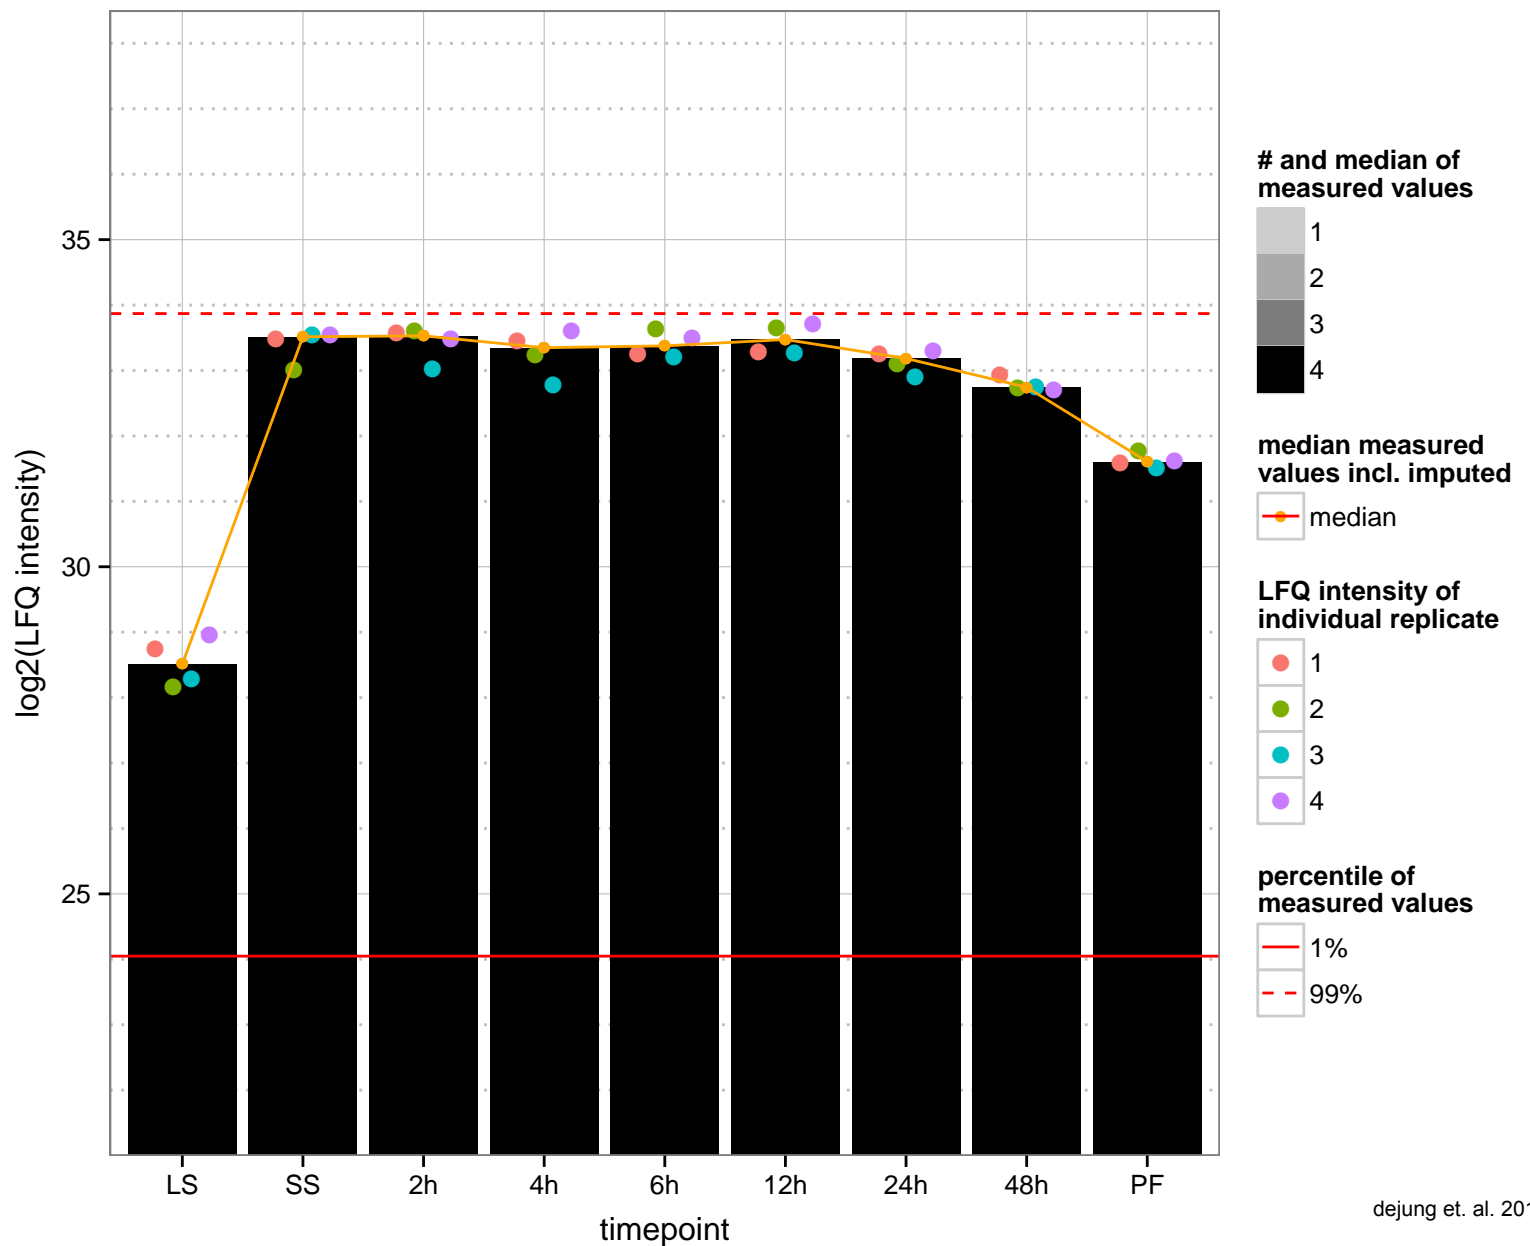

hypothetical protein, conserved  
 Tb927.11.2750  
 AGOF: null  
 AGOC: null  
 AGOP: null  
 PGO: null  
 PGOC: null  
 PGOP: null

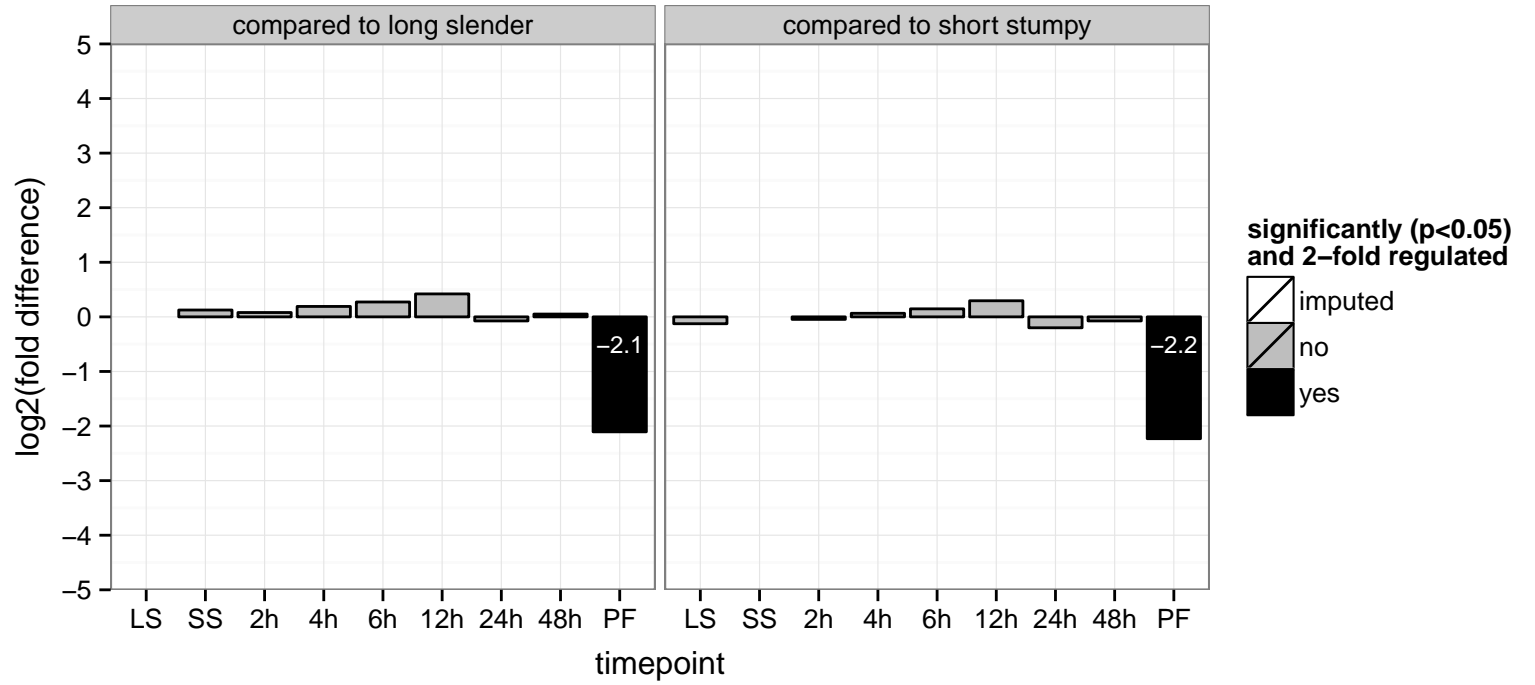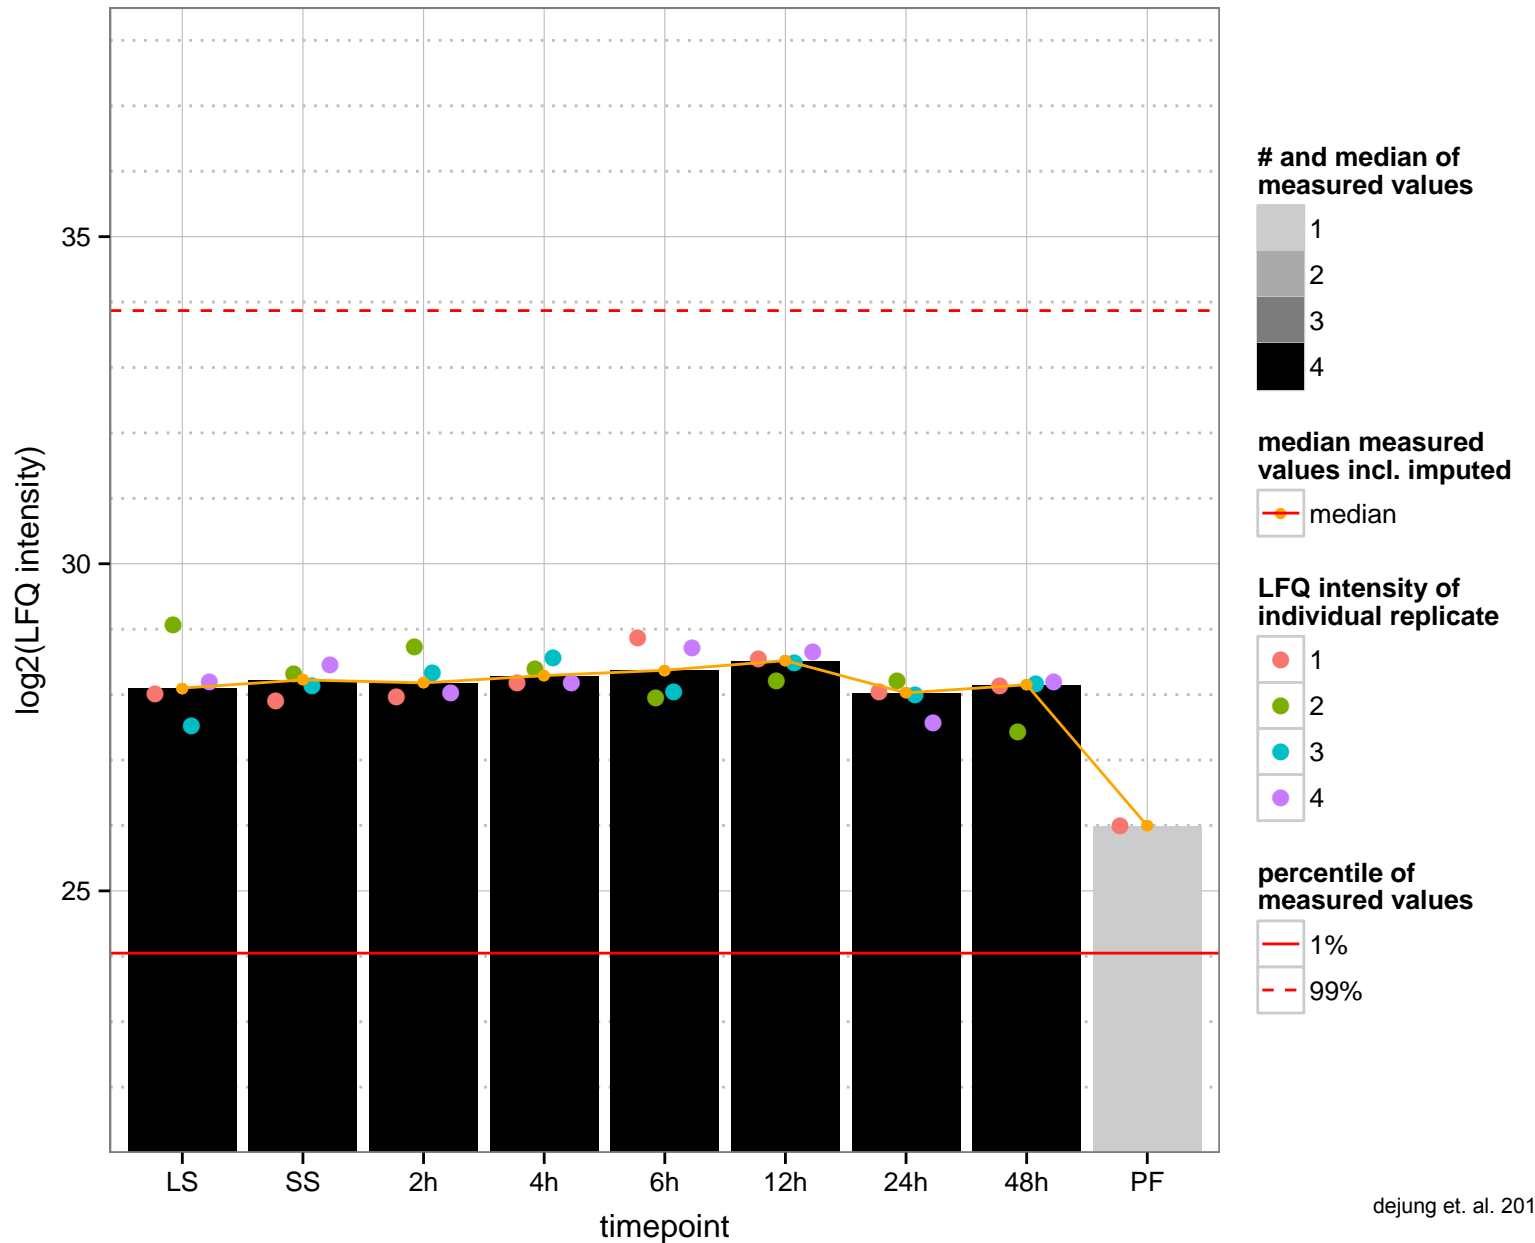



kinesin, putative, MCAK-like kinesin, putative (Kif13-5)  
 Tb927.11.3280  
 AGOF: ATP binding, microtubule motor activity, motor activity  
 AGOC: cell, microtubule associated complex  
 AGOP: microtubule-based movement  
 PGOF: ATP binding, microtubule motor activity, protein binding  
 PGO: null  
 PGOP: microtubule-based movement

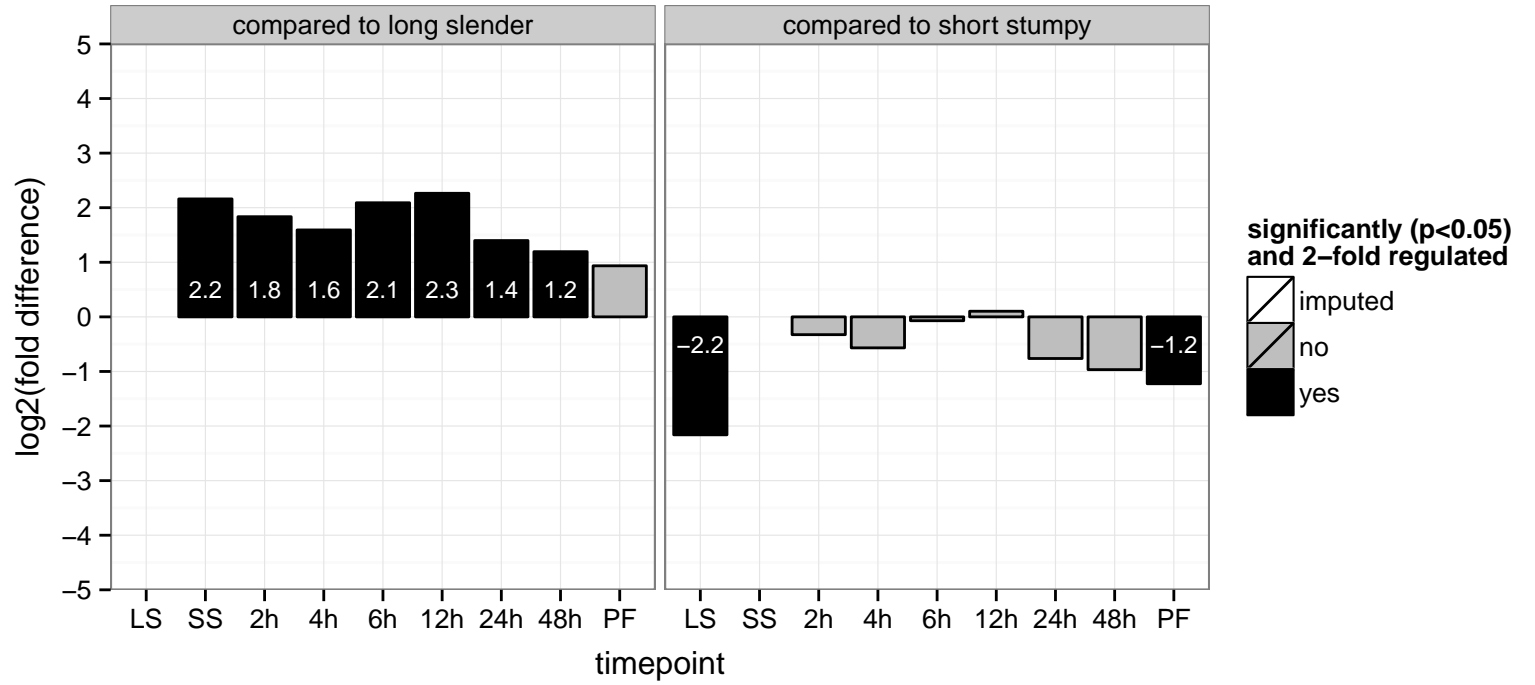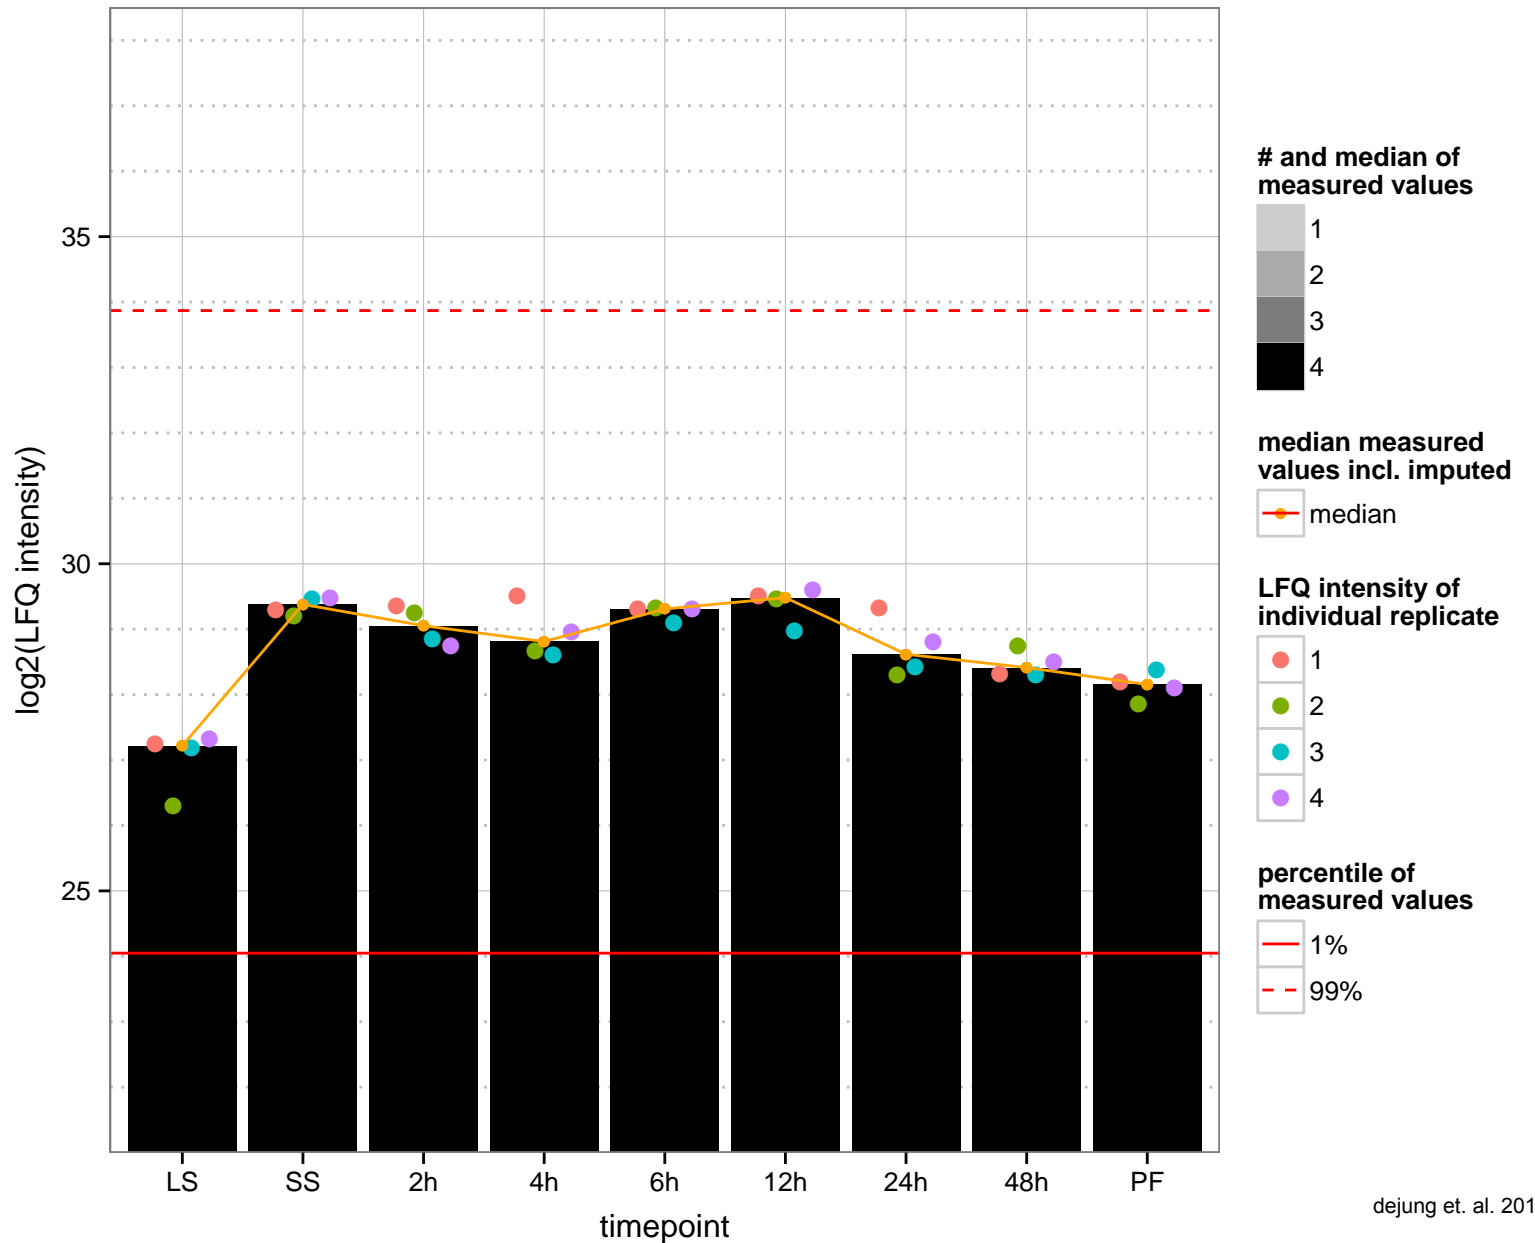

hypothetical protein, conserved  
 Tb927.11.3690  
 AGOF: catalytic activity  
 AGOC: null  
 AGOP: null  
 PGO: null  
 PGO: null  
 PGO: null

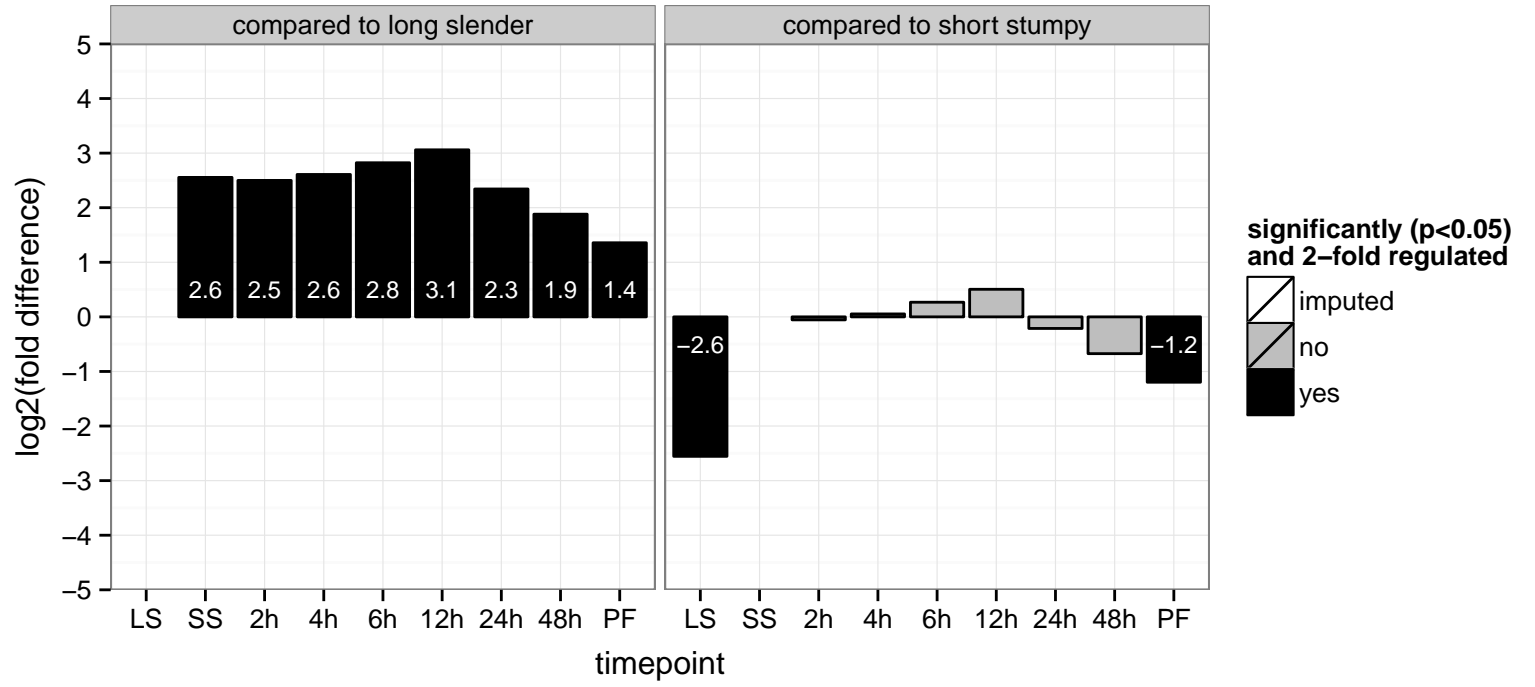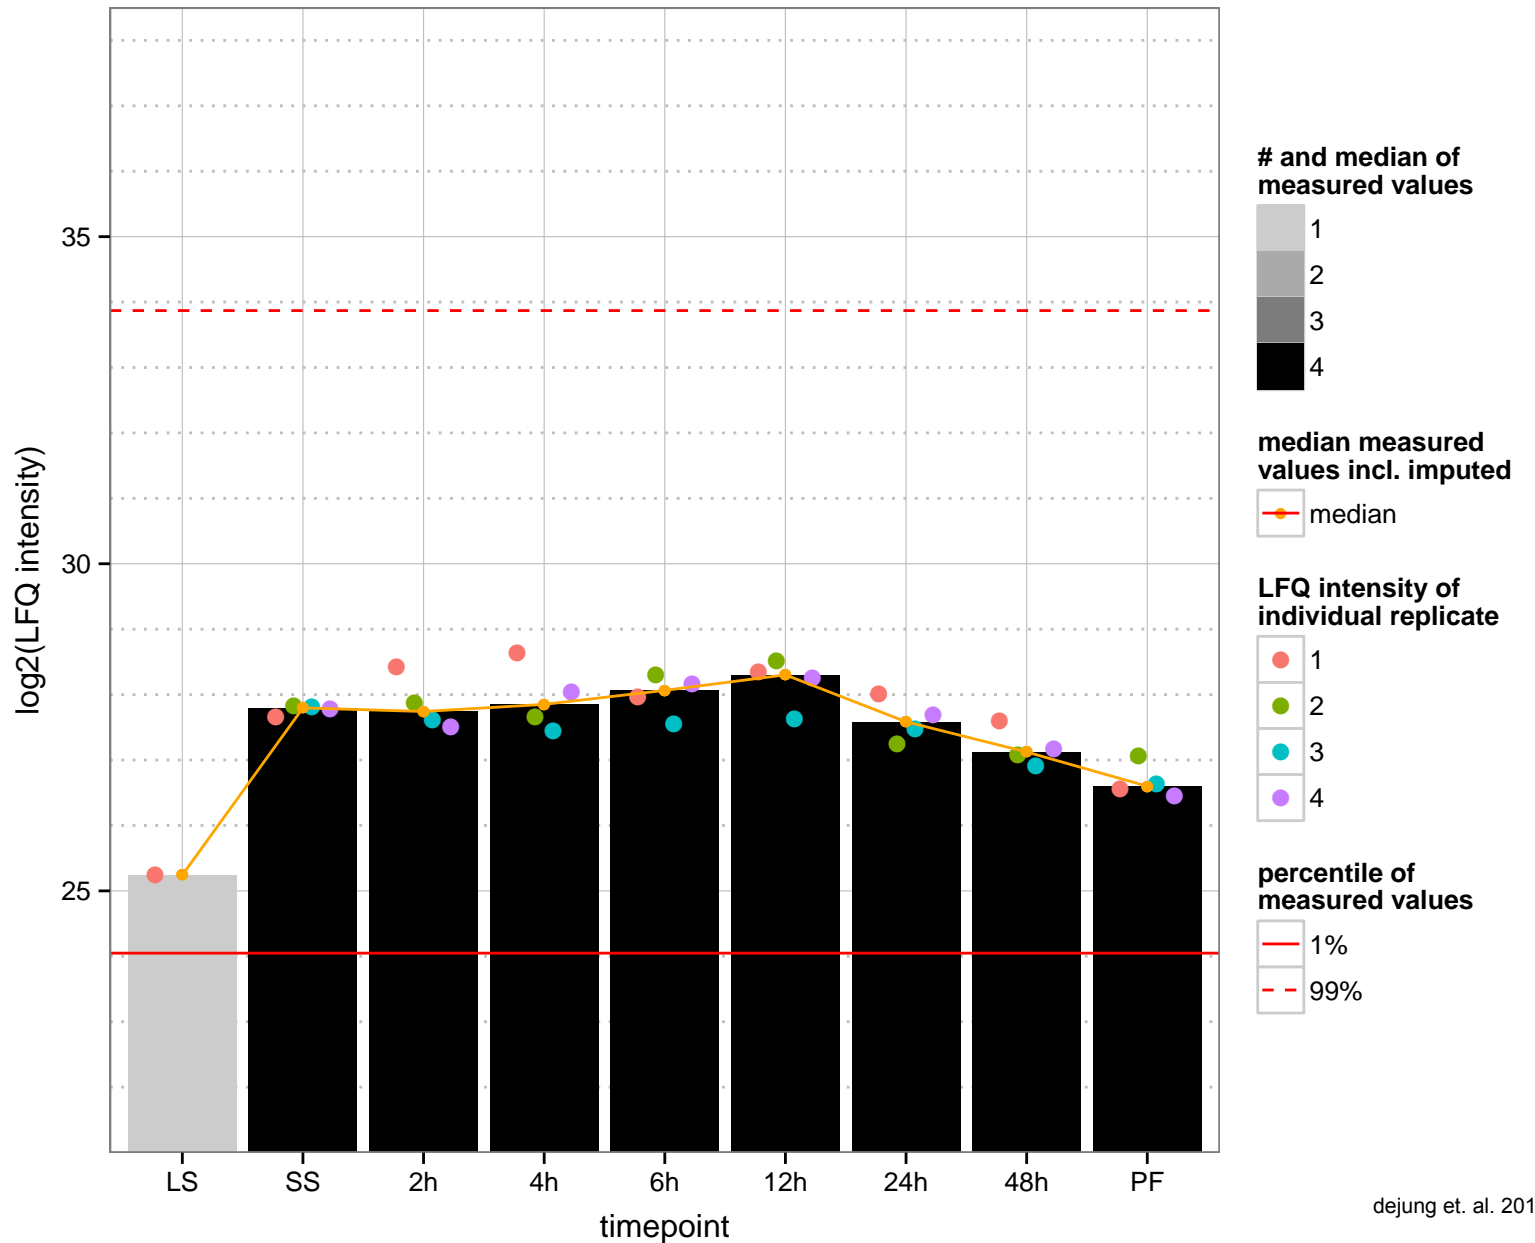

hypothetical protein, conserved  
 Tb927.11.3840  
 AGOF: null  
 AGOC: null  
 AGOP: null  
 PGOF: null  
 PGO: null  
 PGOP: null

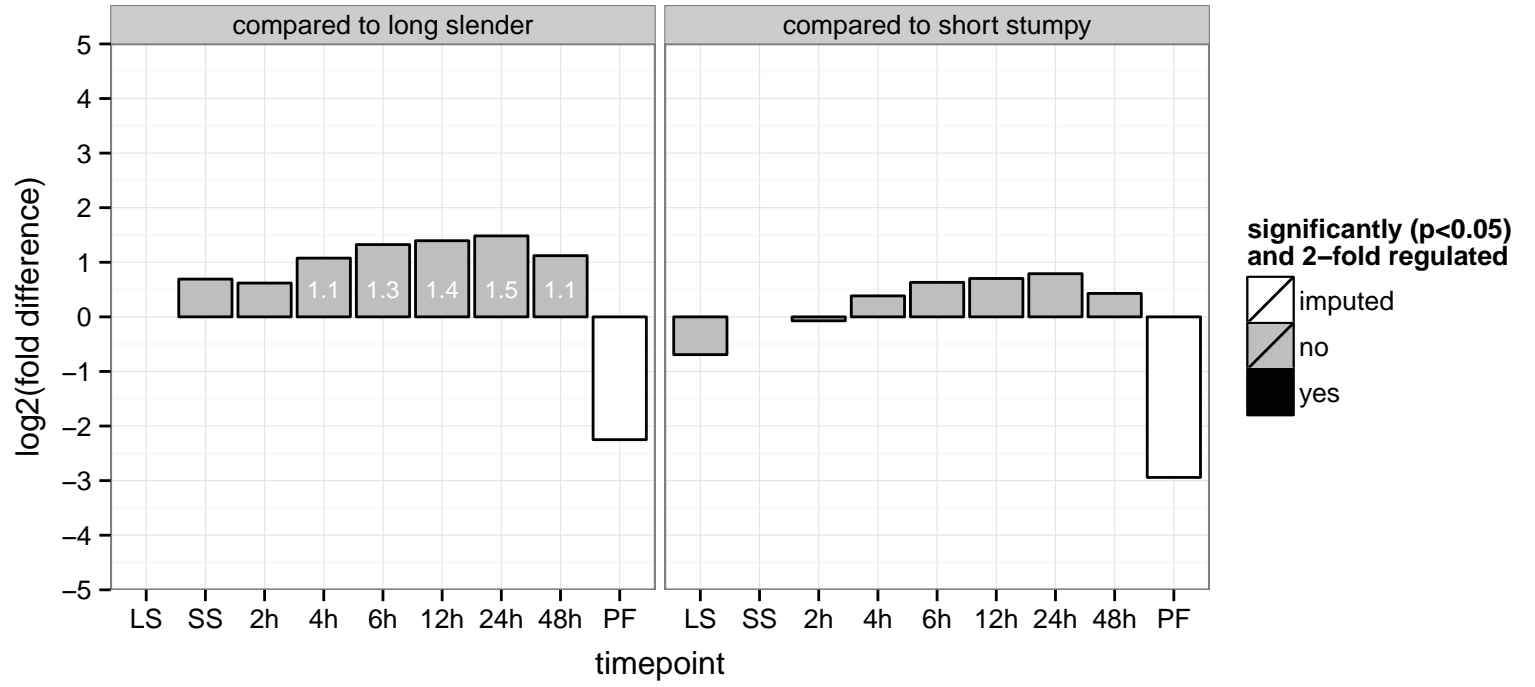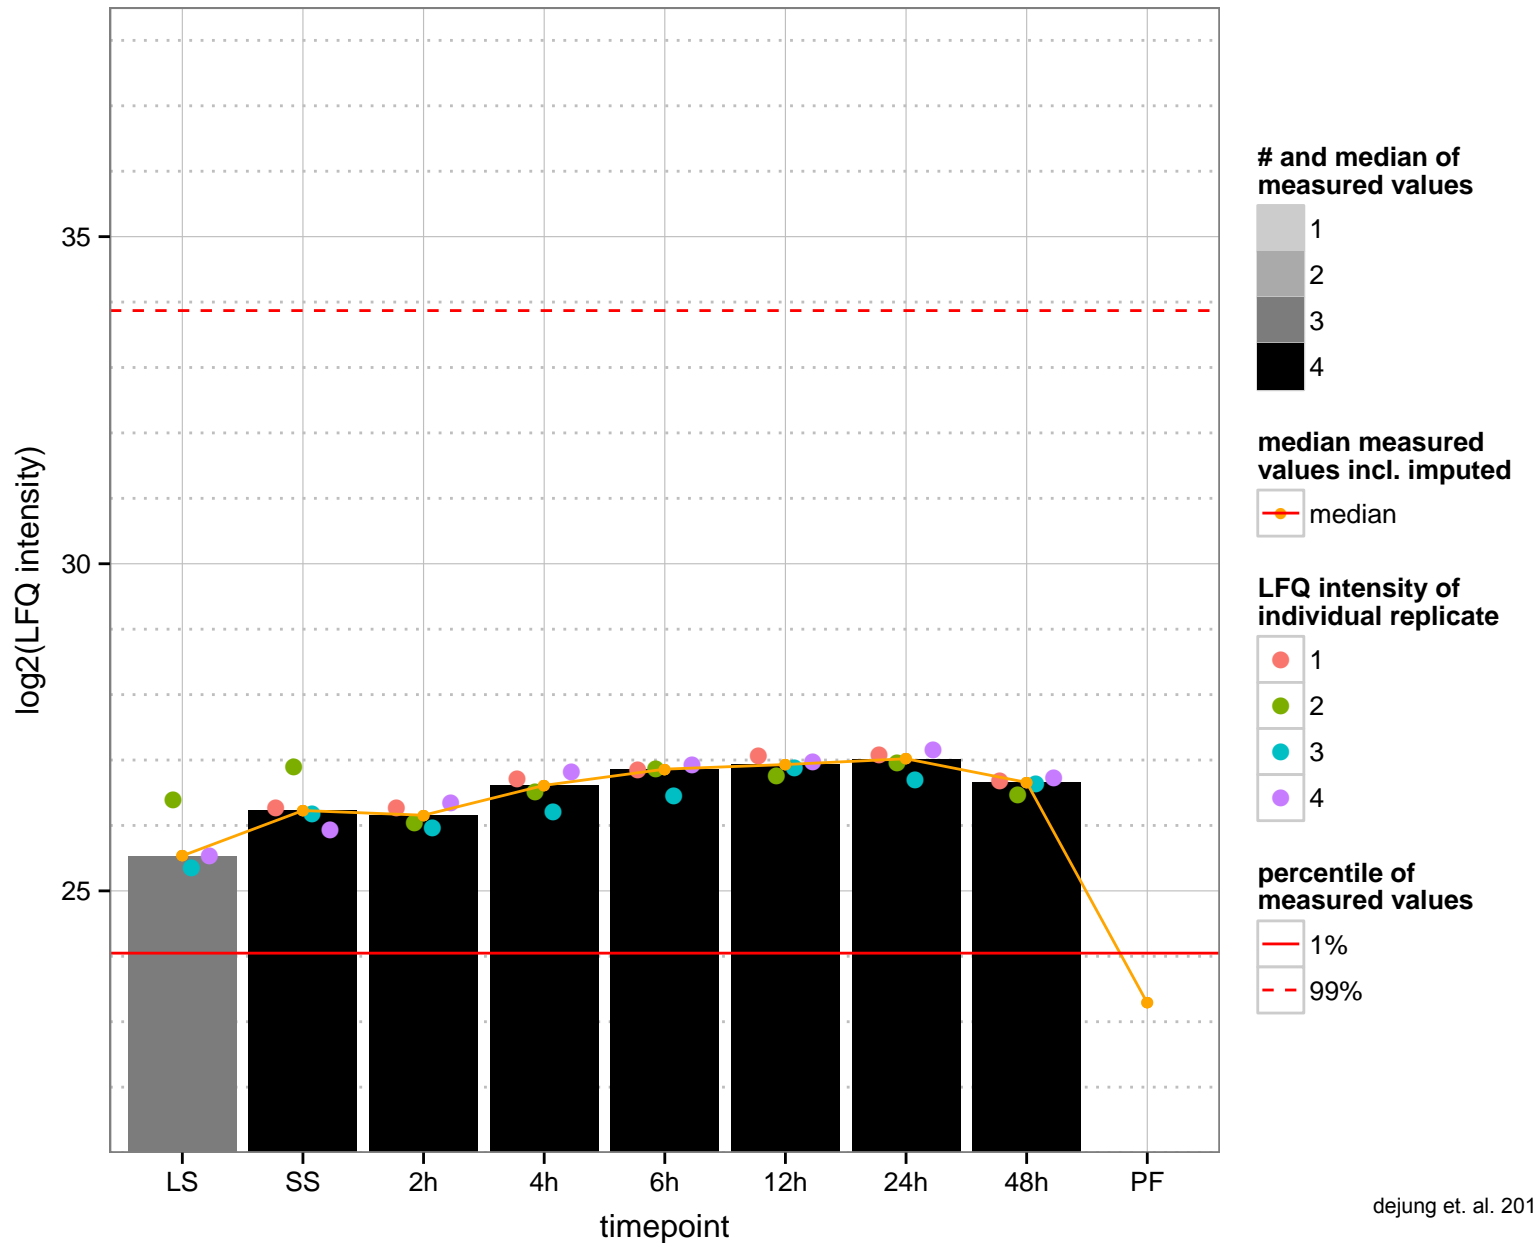

hypothetical protein, conserved  
 Tb927.11.3920  
 AGOF: null  
 AGOC: null  
 AGOP: null  
 PGOF: null  
 PGOC: null  
 PGOP: null

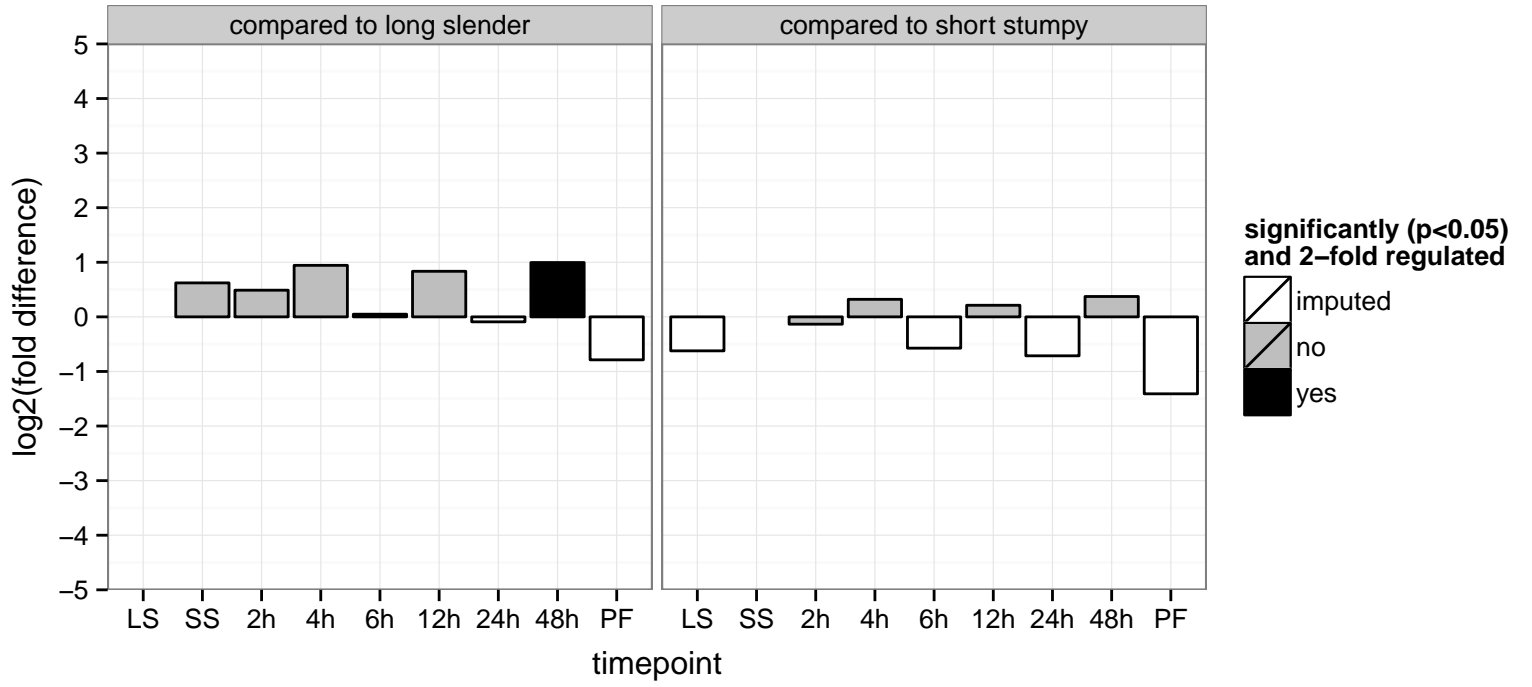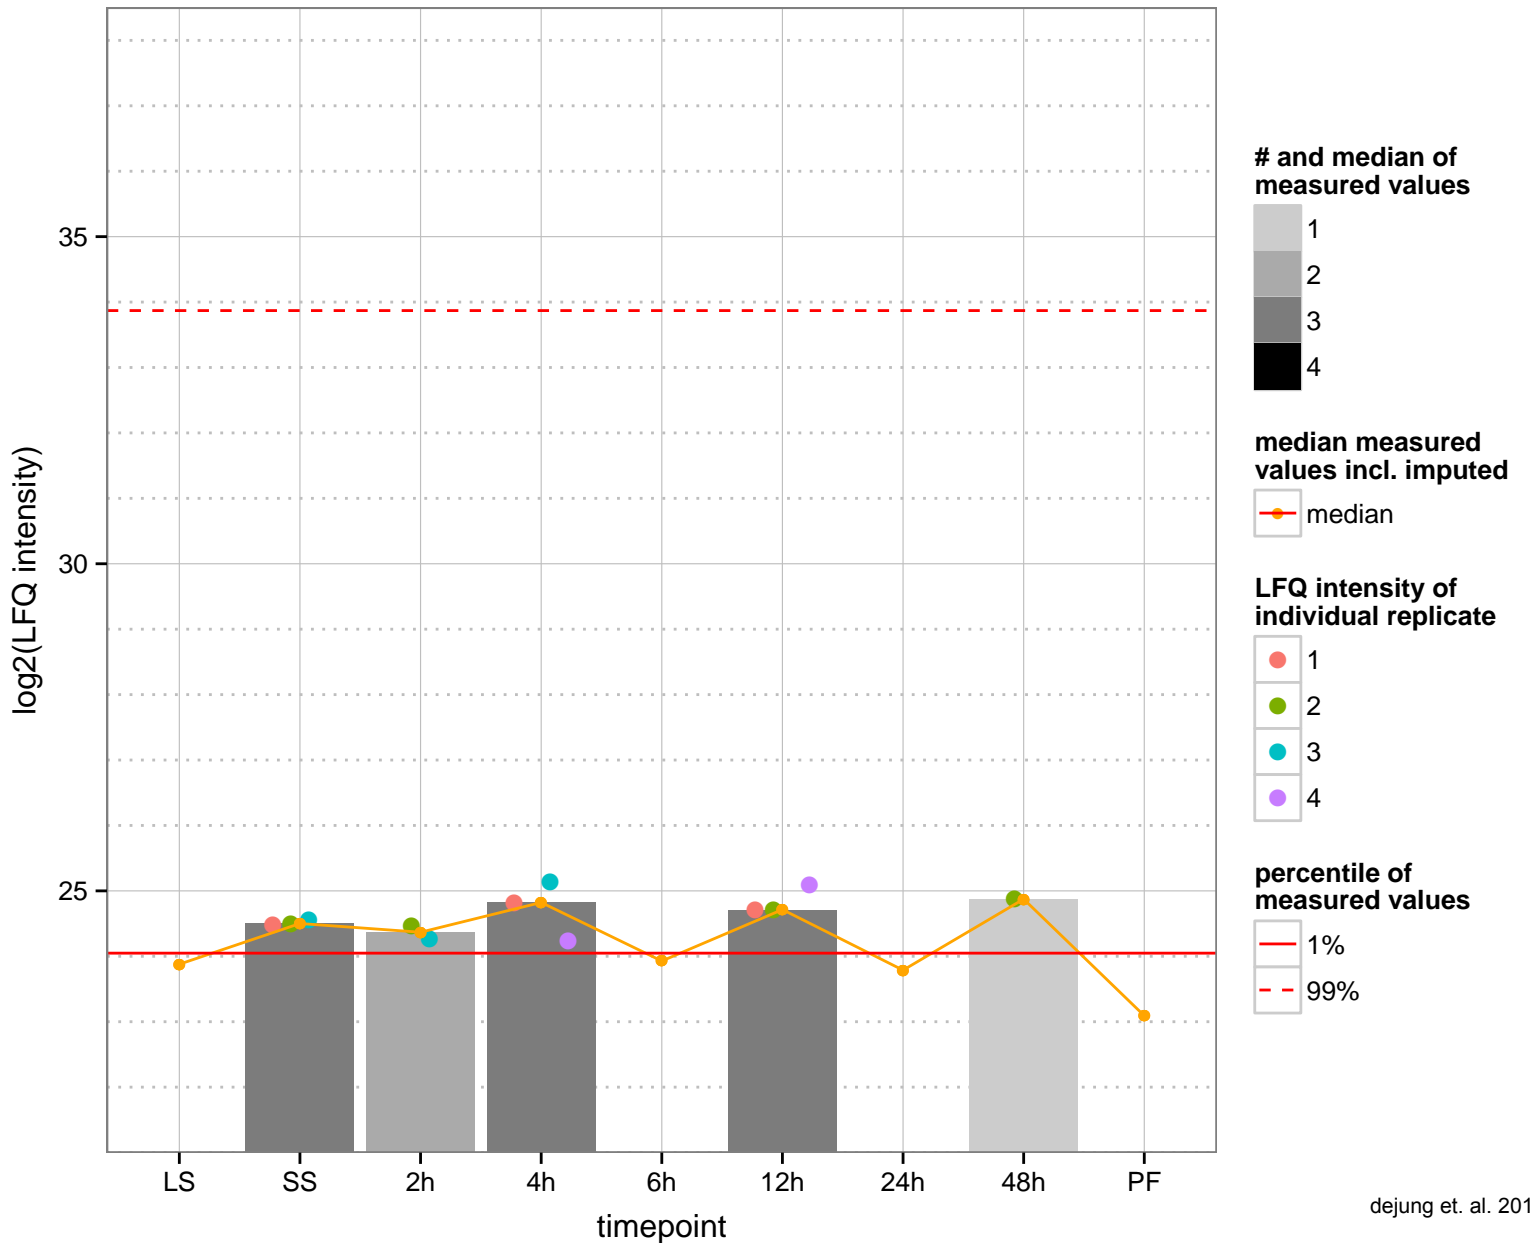

hypothetical protein, conserved  
 Tb927.11.4030  
 AGOF: null  
 AGOC: null  
 AGOP: null  
 PGO: null  
 PGO: null  
 PGO: null

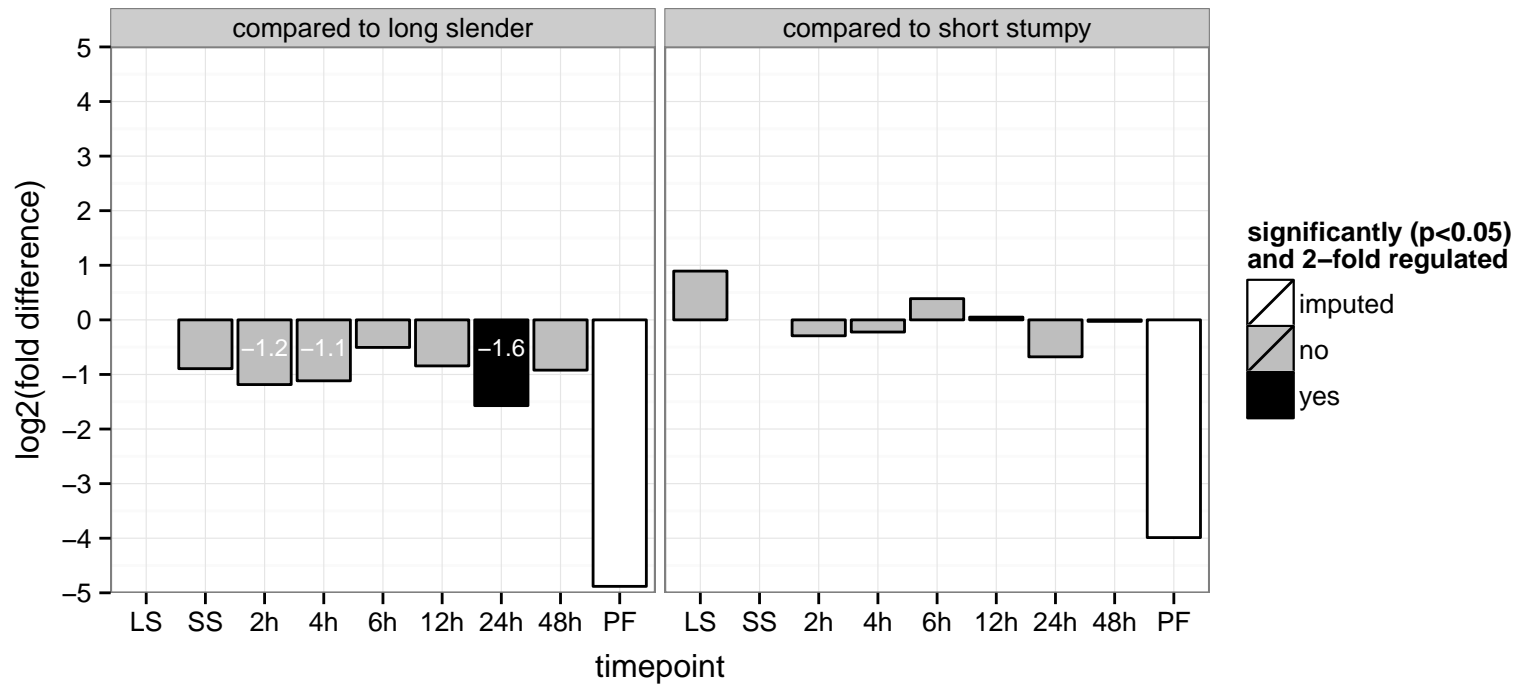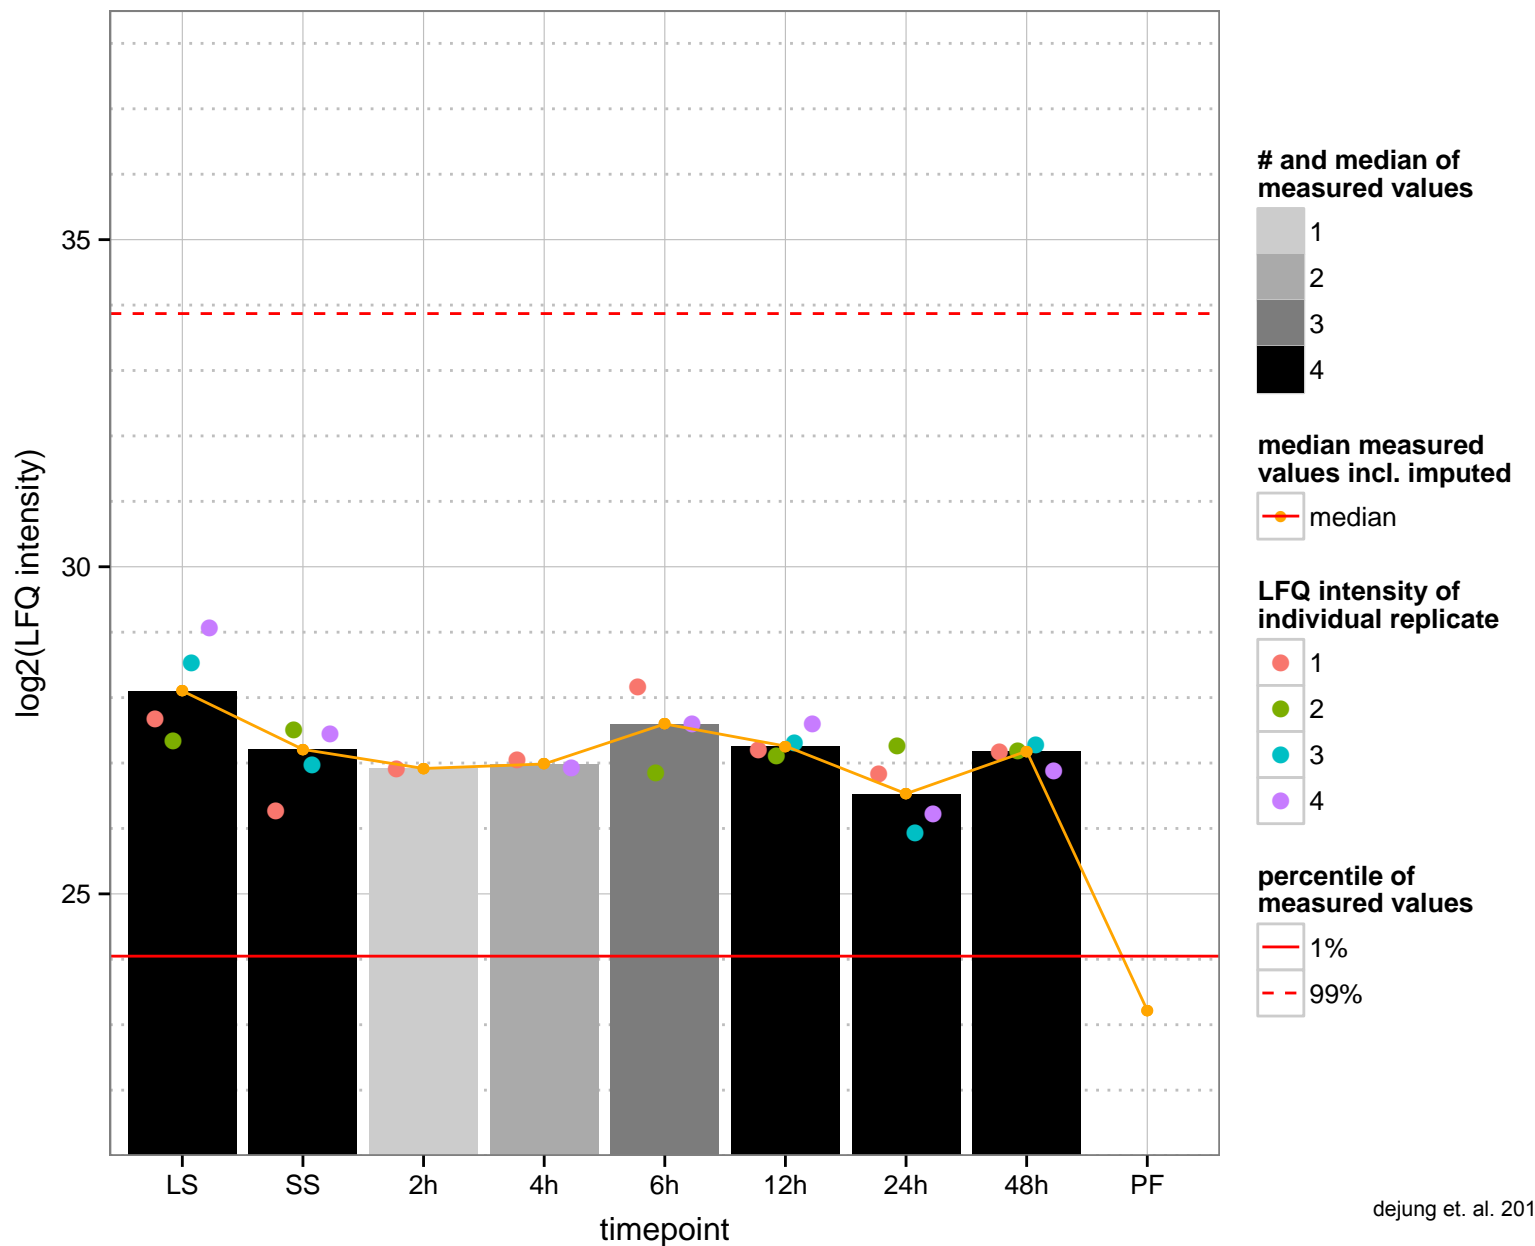

hypothetical protein, conserved  
 Tb927.11.5150  
 AGOF: null  
 AGOC: null  
 AGOP: null  
 PGOF: null  
 PGO: null  
 PGOP: null

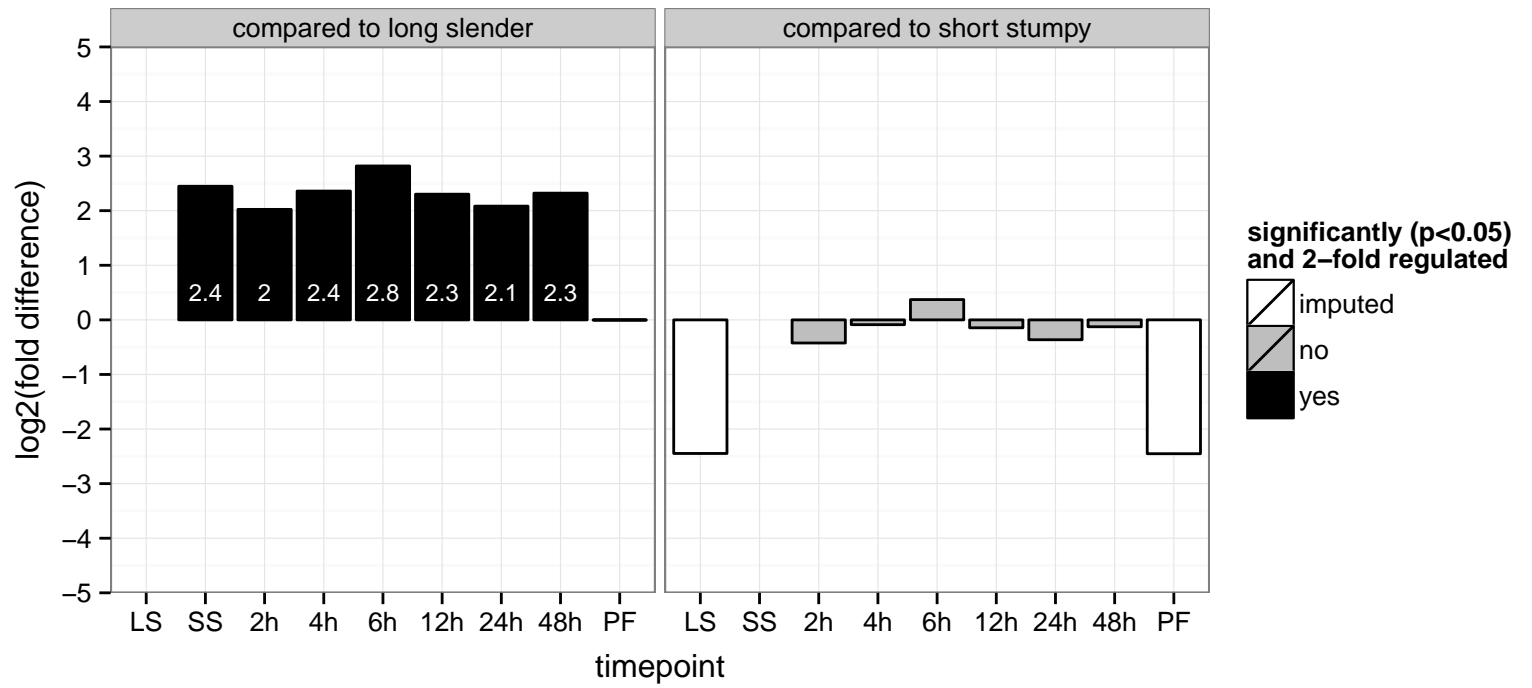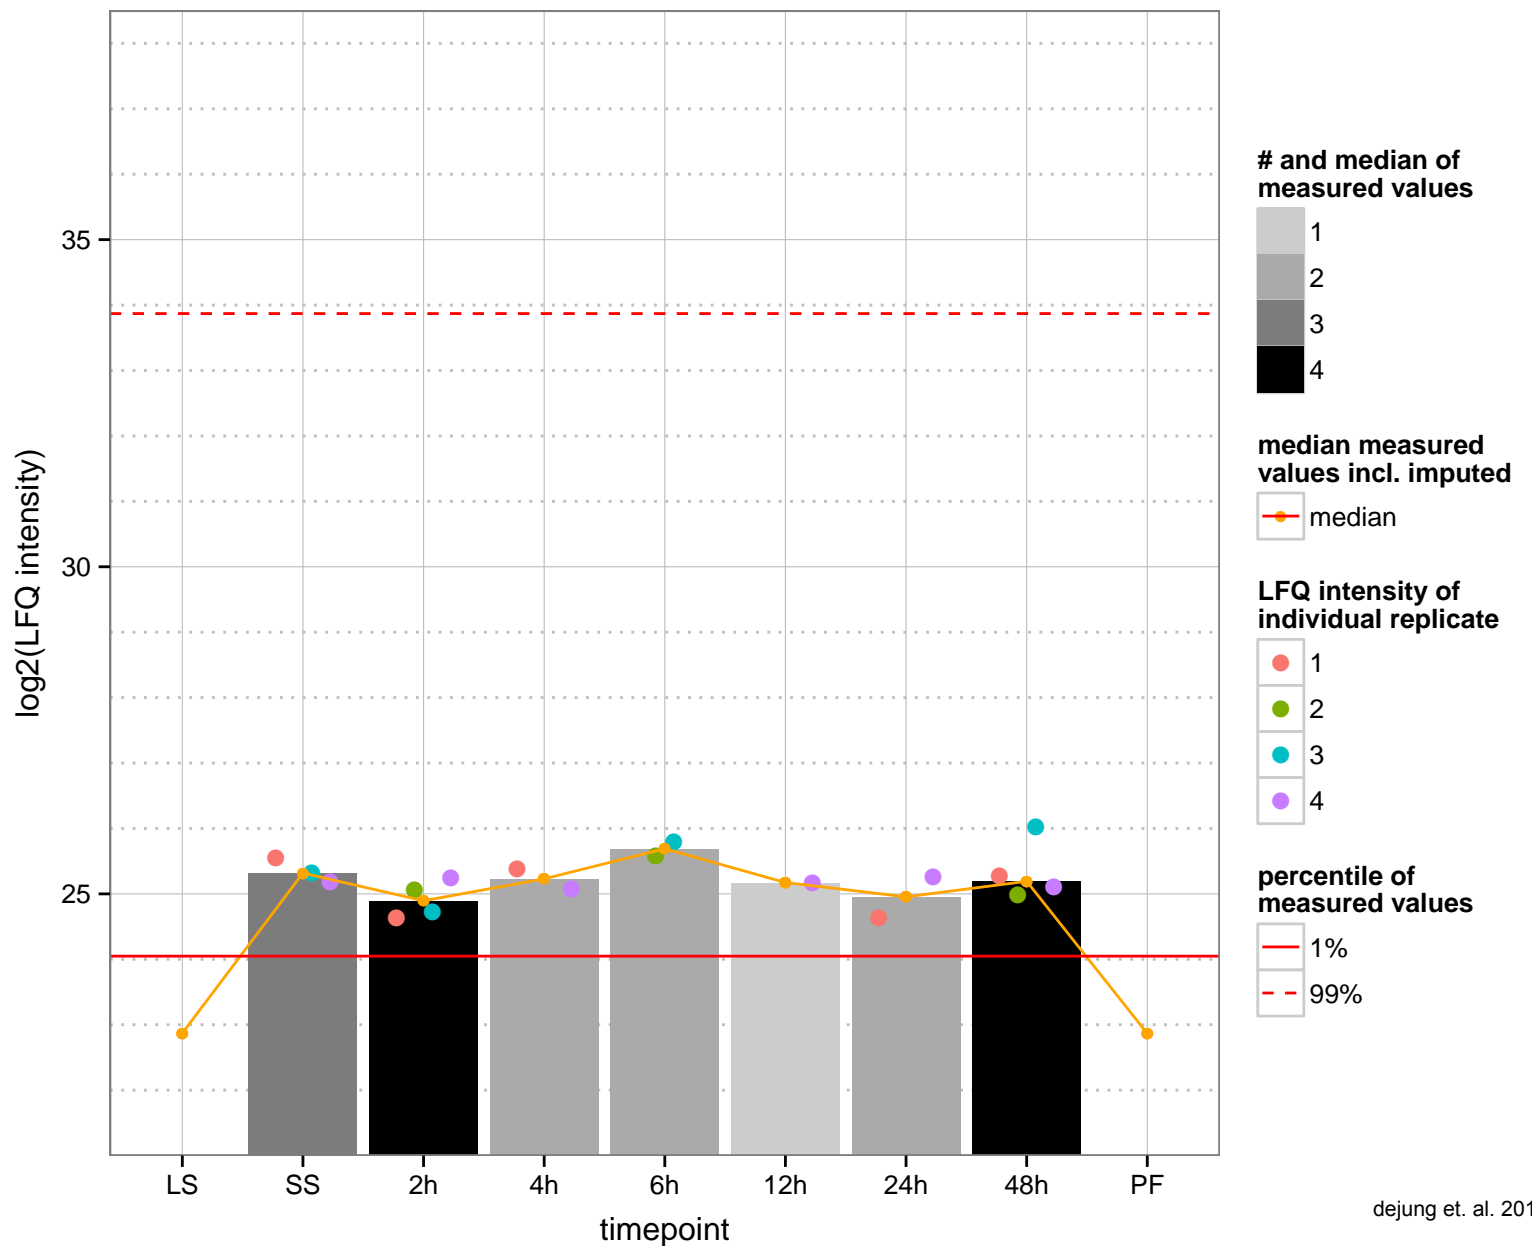

pretranslocation protein, alpha subunit, putative, SEC61-like (pretranslocation process) protein  
 Tb927.11.6230  
 AGOF: P-P-bond-hydrolysis-driven protein transmembrane transporter activity  
 AGOC: endoplasmic reticulum, integral to membrane, membrane  
 AGOP: protein secretion, protein transport  
 PGO: P-P-bond-hydrolysis-driven protein transmembrane transporter activity  
 PGOC: membrane  
 PGOP: protein transport

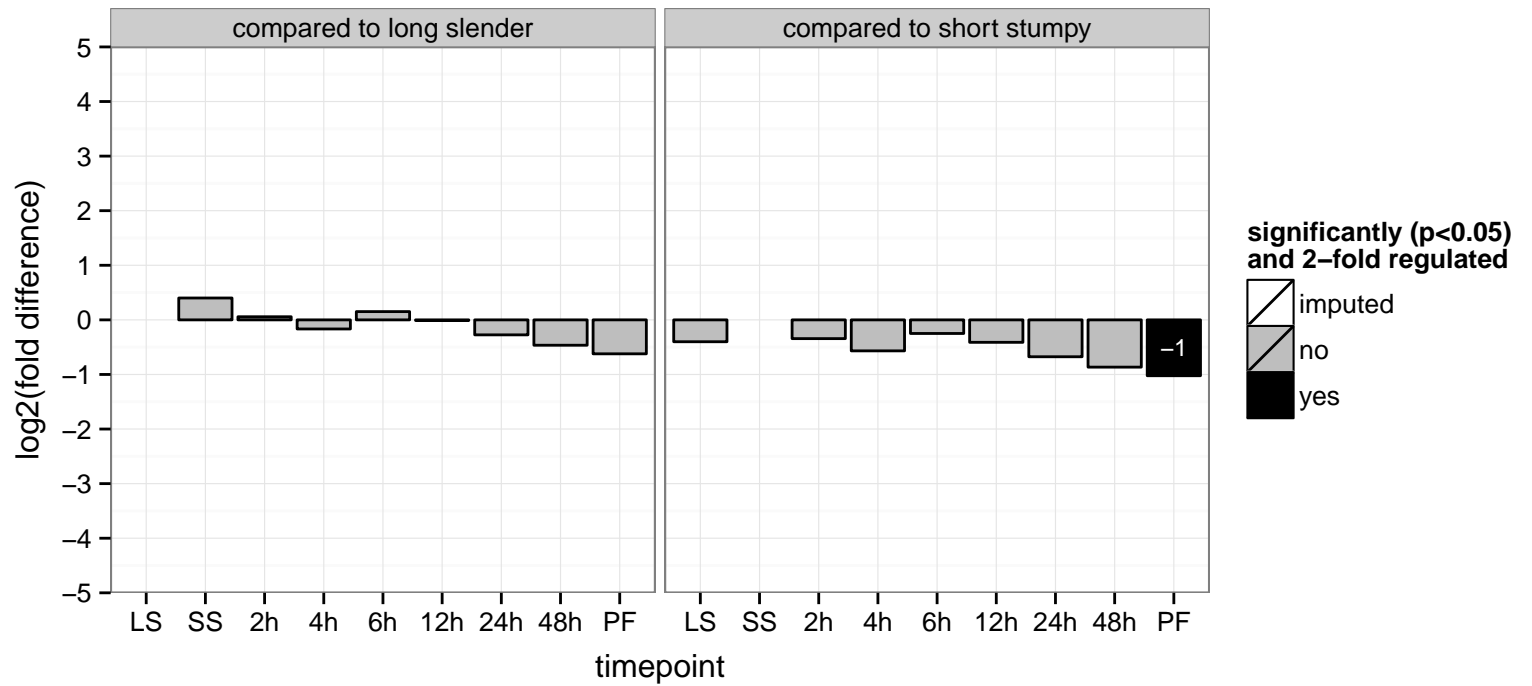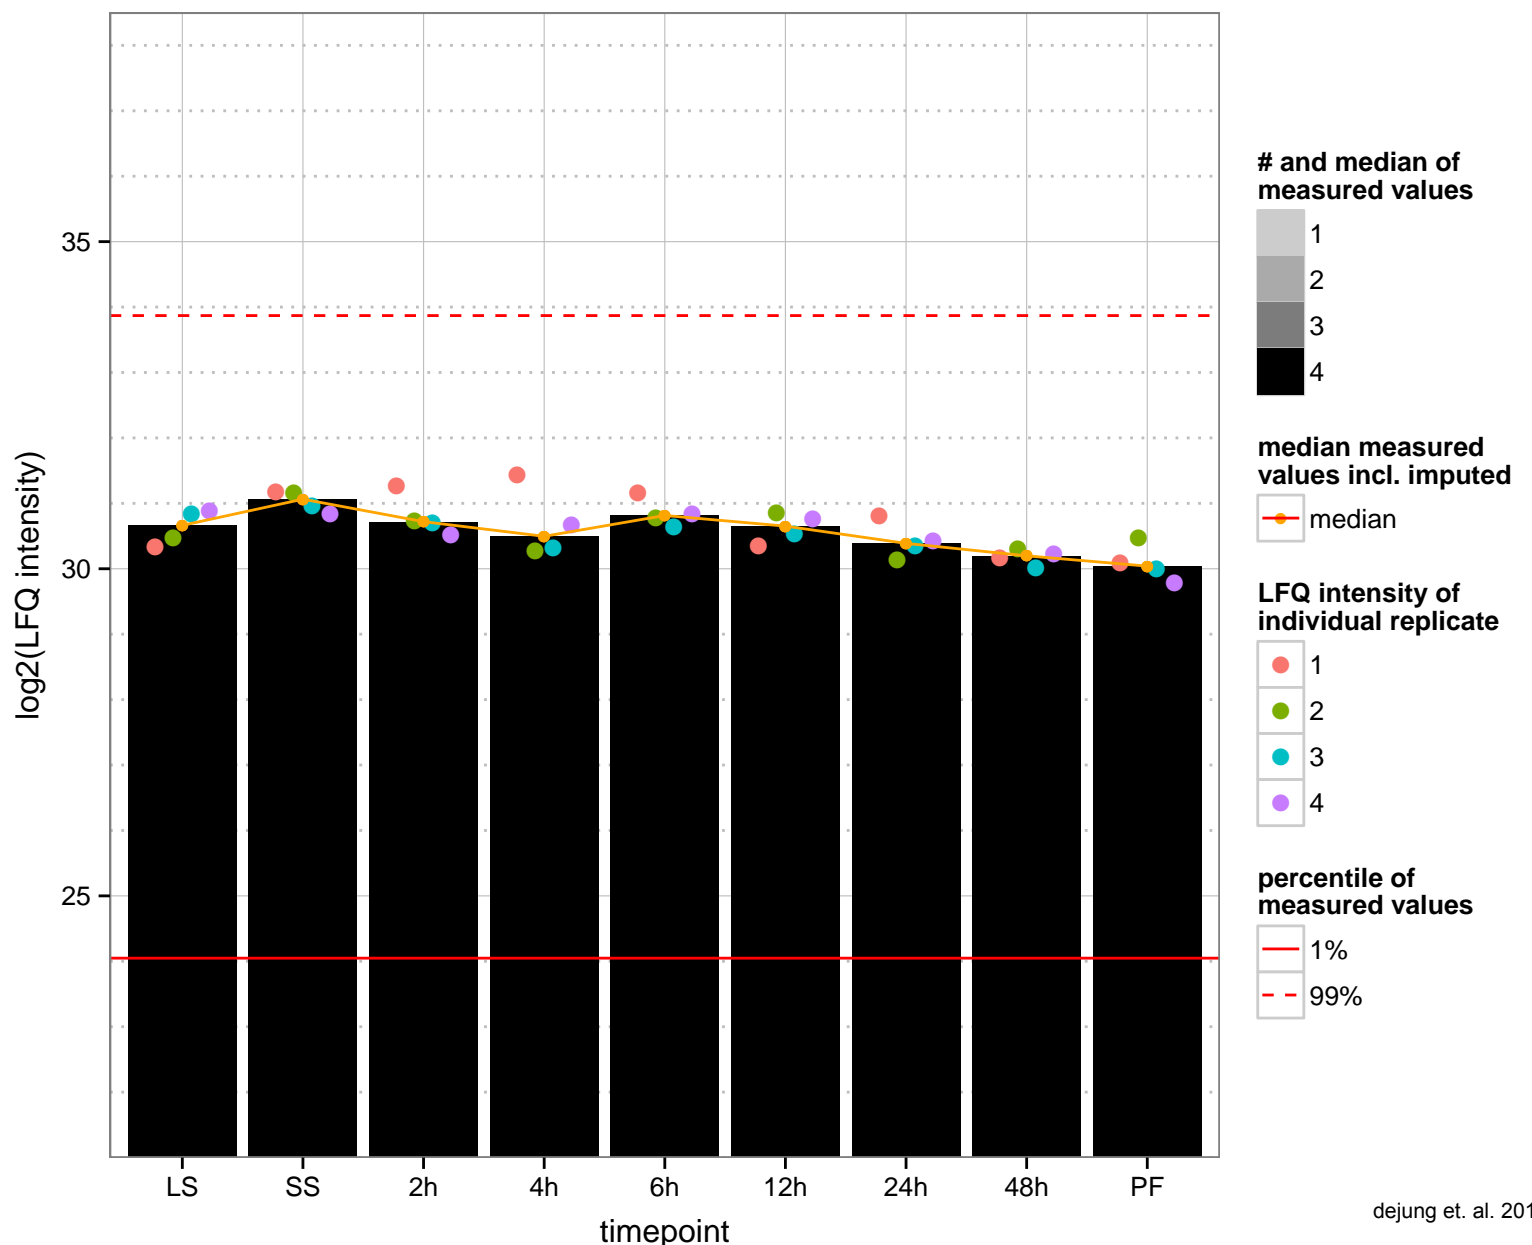

hypothetical protein, conserved  
 Tb927.11.6520  
 AGOF: null  
 AGOC: null  
 AGOP: null  
 PGOF: null  
 PGO C: null  
 PGOP: null

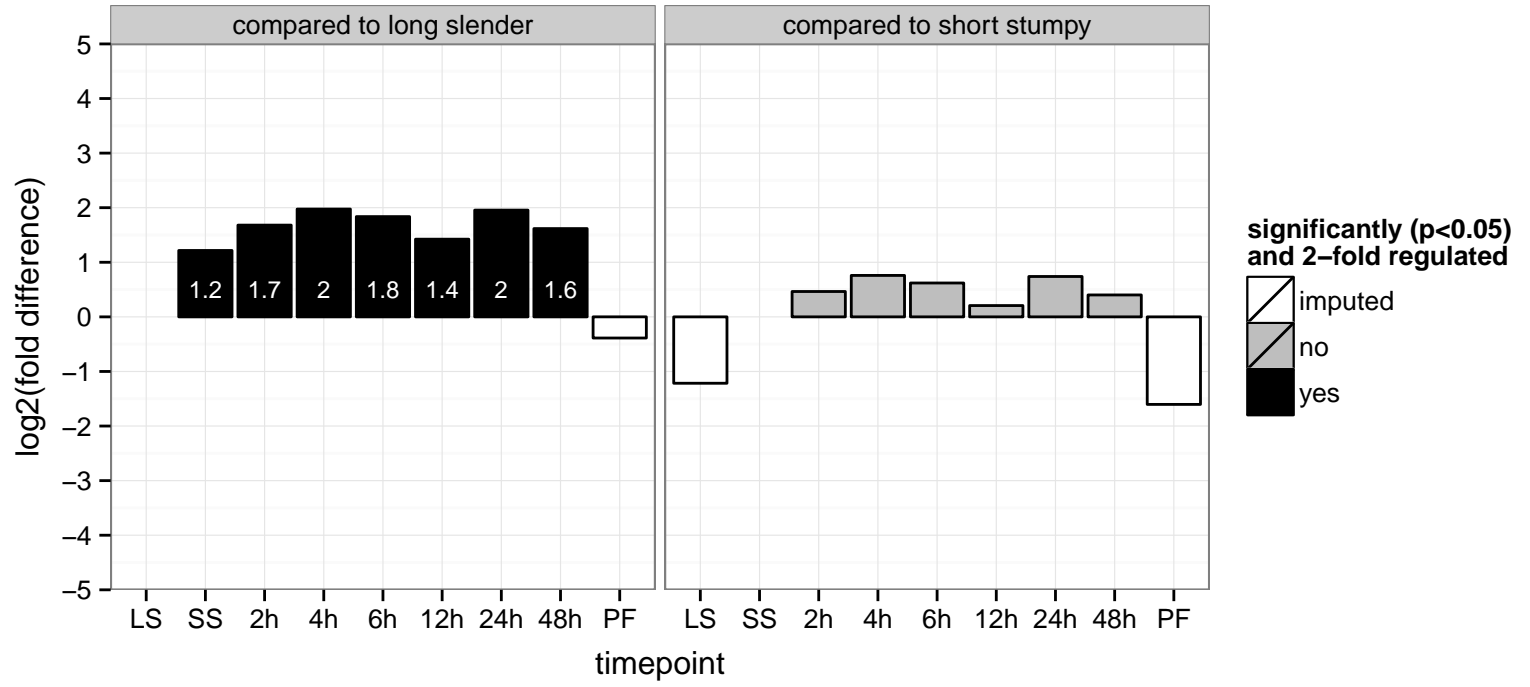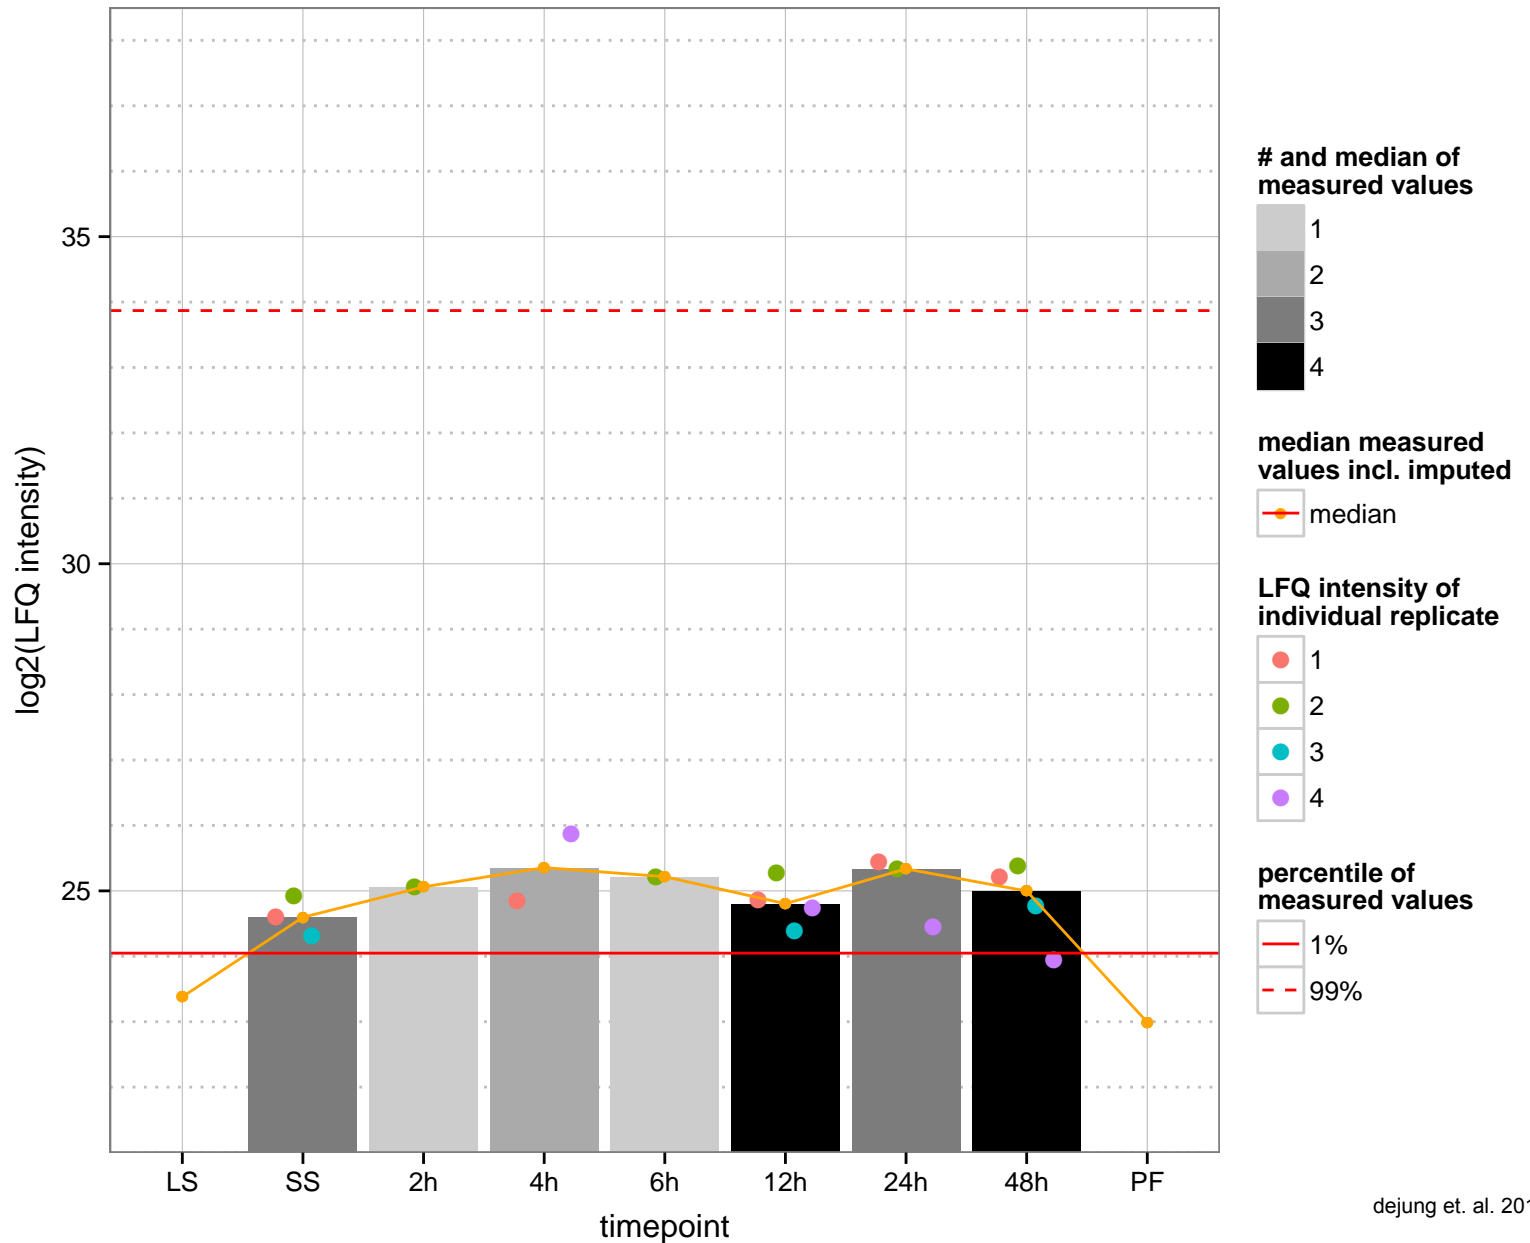



hypothetical protein, conserved  
 Tb927.11.6920  
 AGOF: null  
 AGOC: null  
 AGOP: null  
 PGO: null  
 PGOC: null  
 PGOP: null

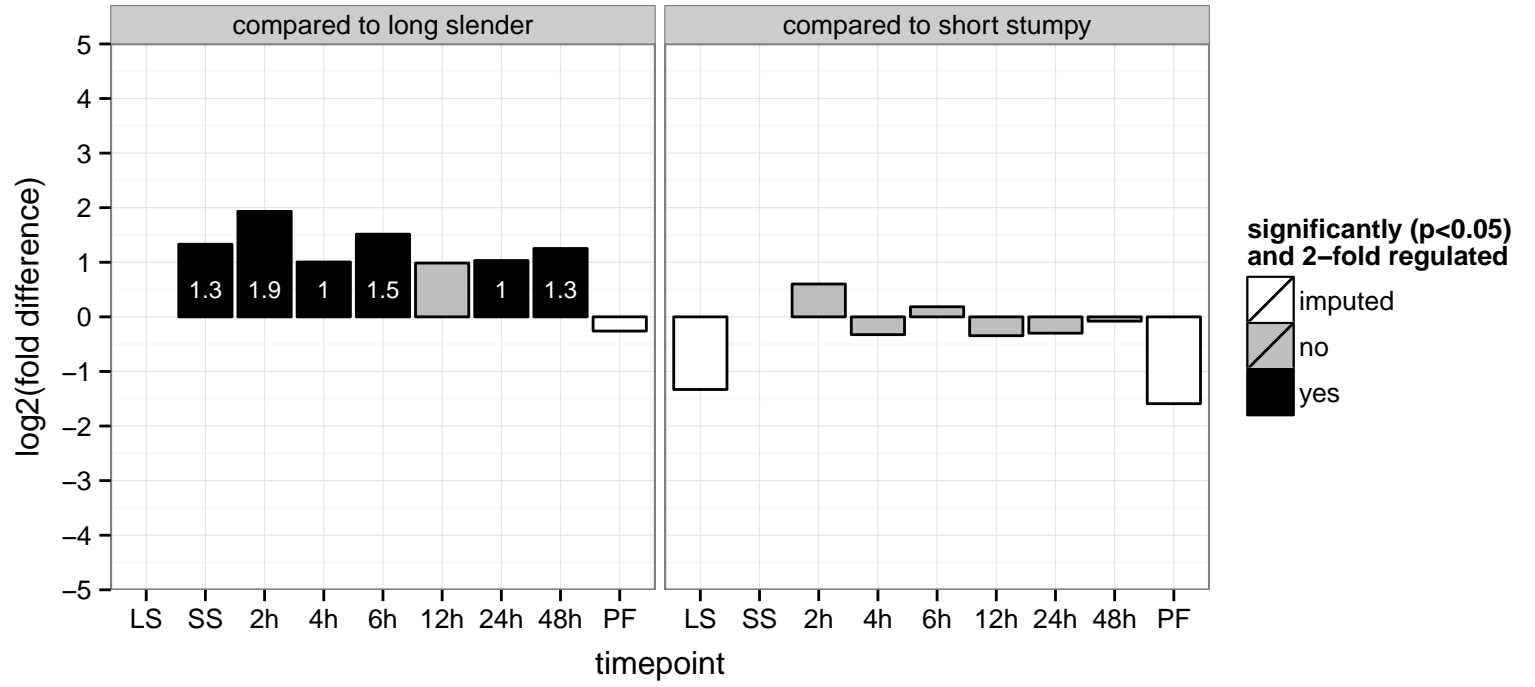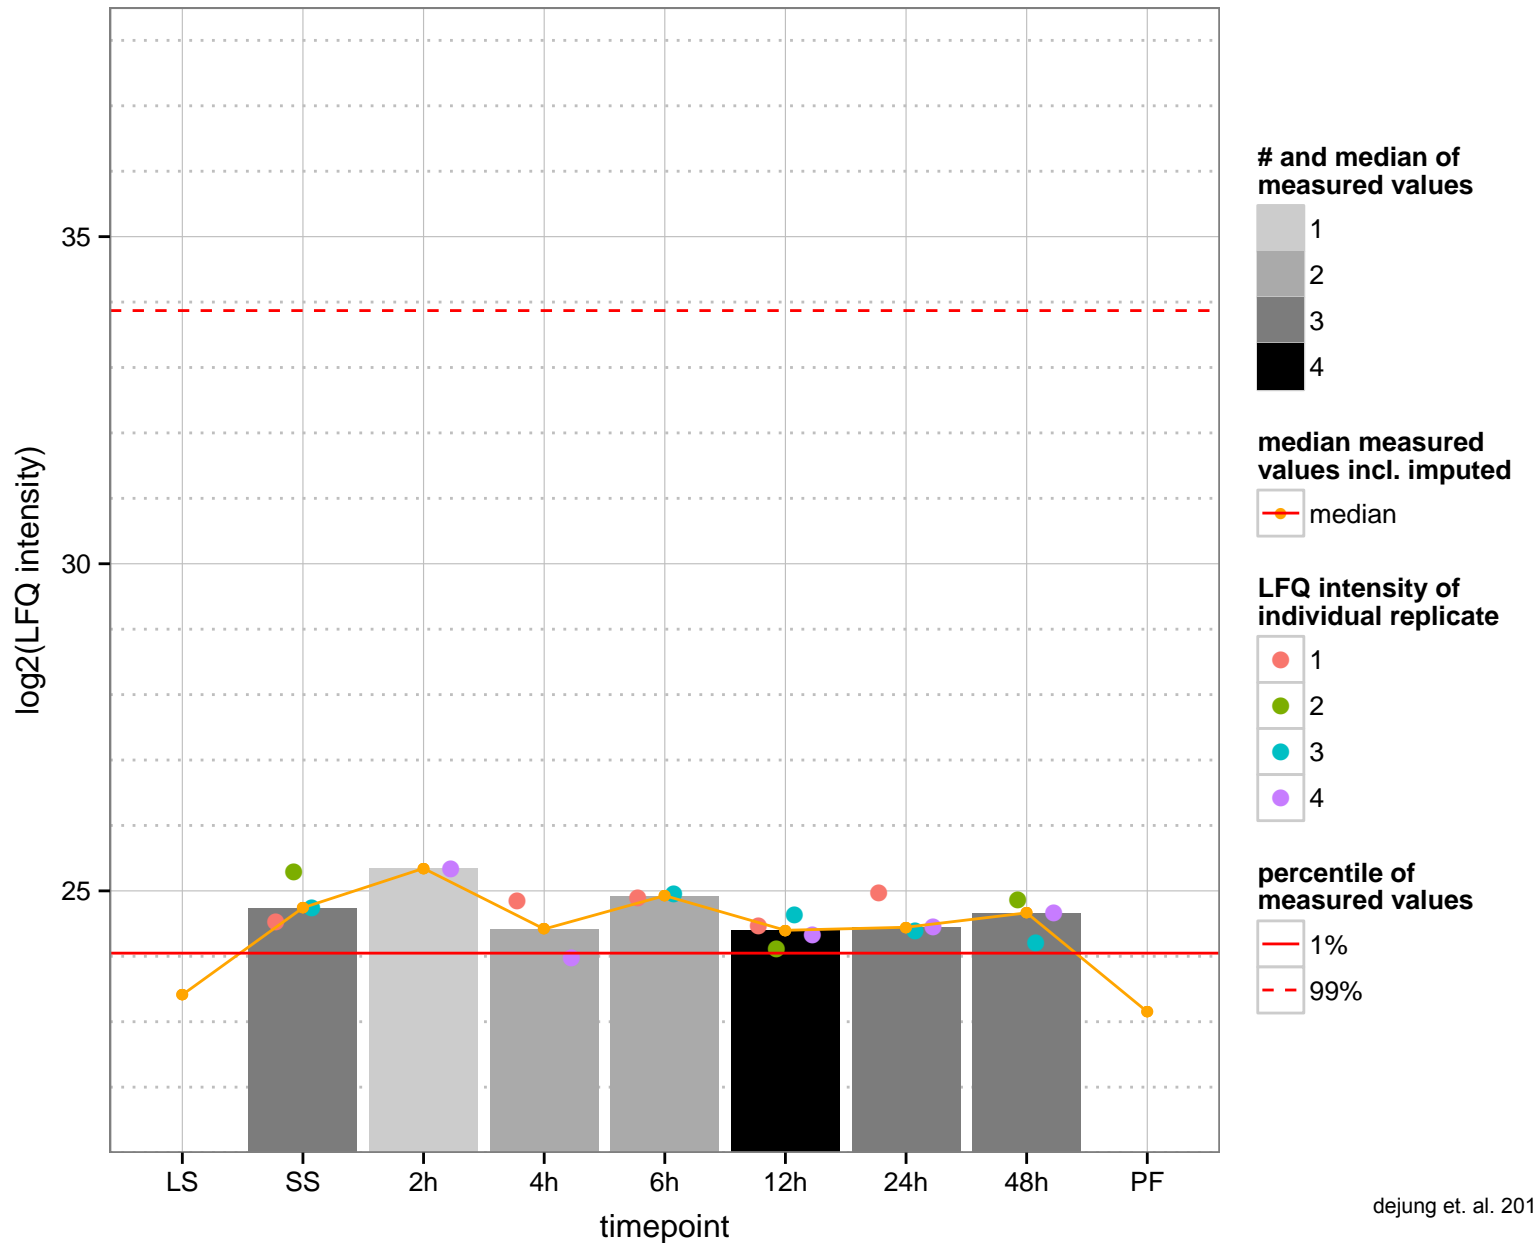

pterin-4-alpha-carbinolamine dehydratase, putative  
 Tb927.11.7040  
 AGOF: 4-alpha-hydroxytetrahydrobiopterin dehydratase activity  
 AGOC: mitochondrion  
 AGOP: tetrahydrobiopterin biosynthetic process  
 PGOF: 4-alpha-hydroxytetrahydrobiopterin dehydratase activity  
 PGO: null  
 PGOP: tetrahydrobiopterin biosynthetic process

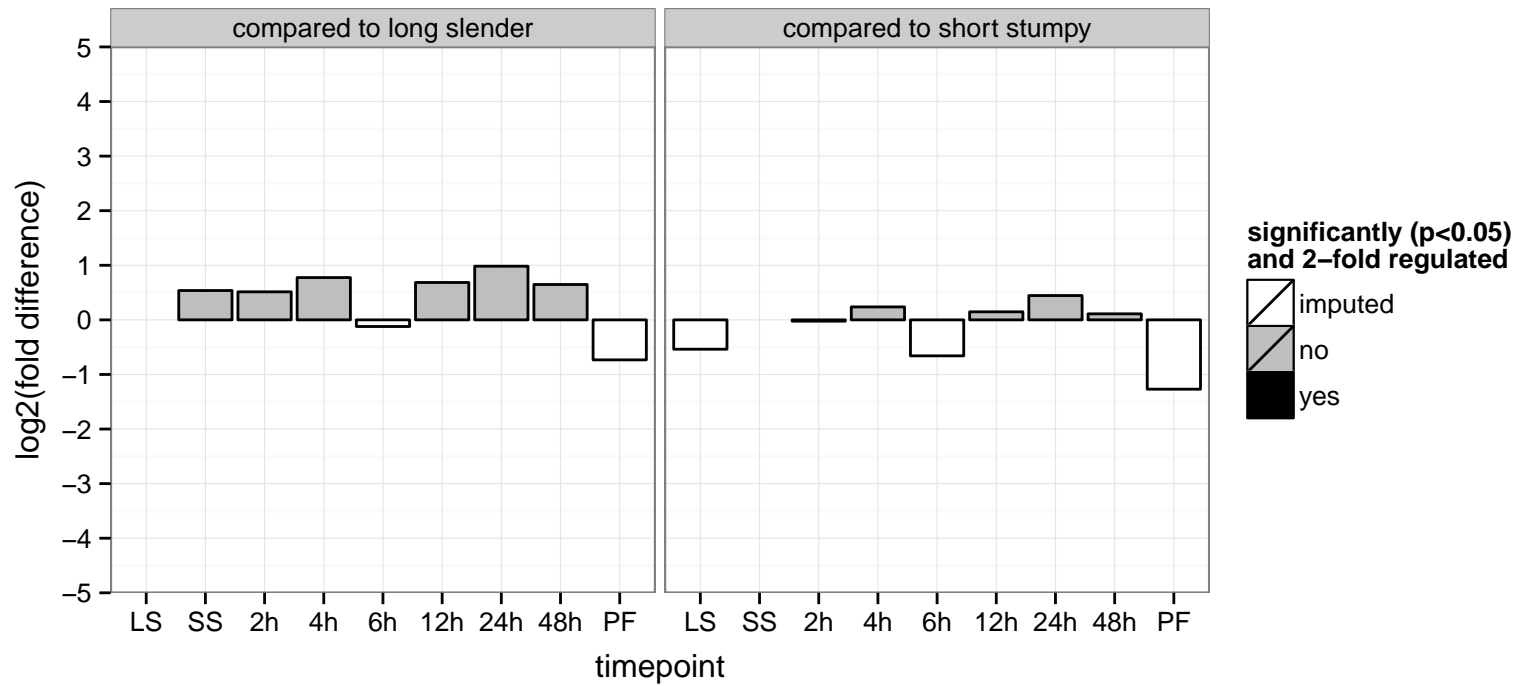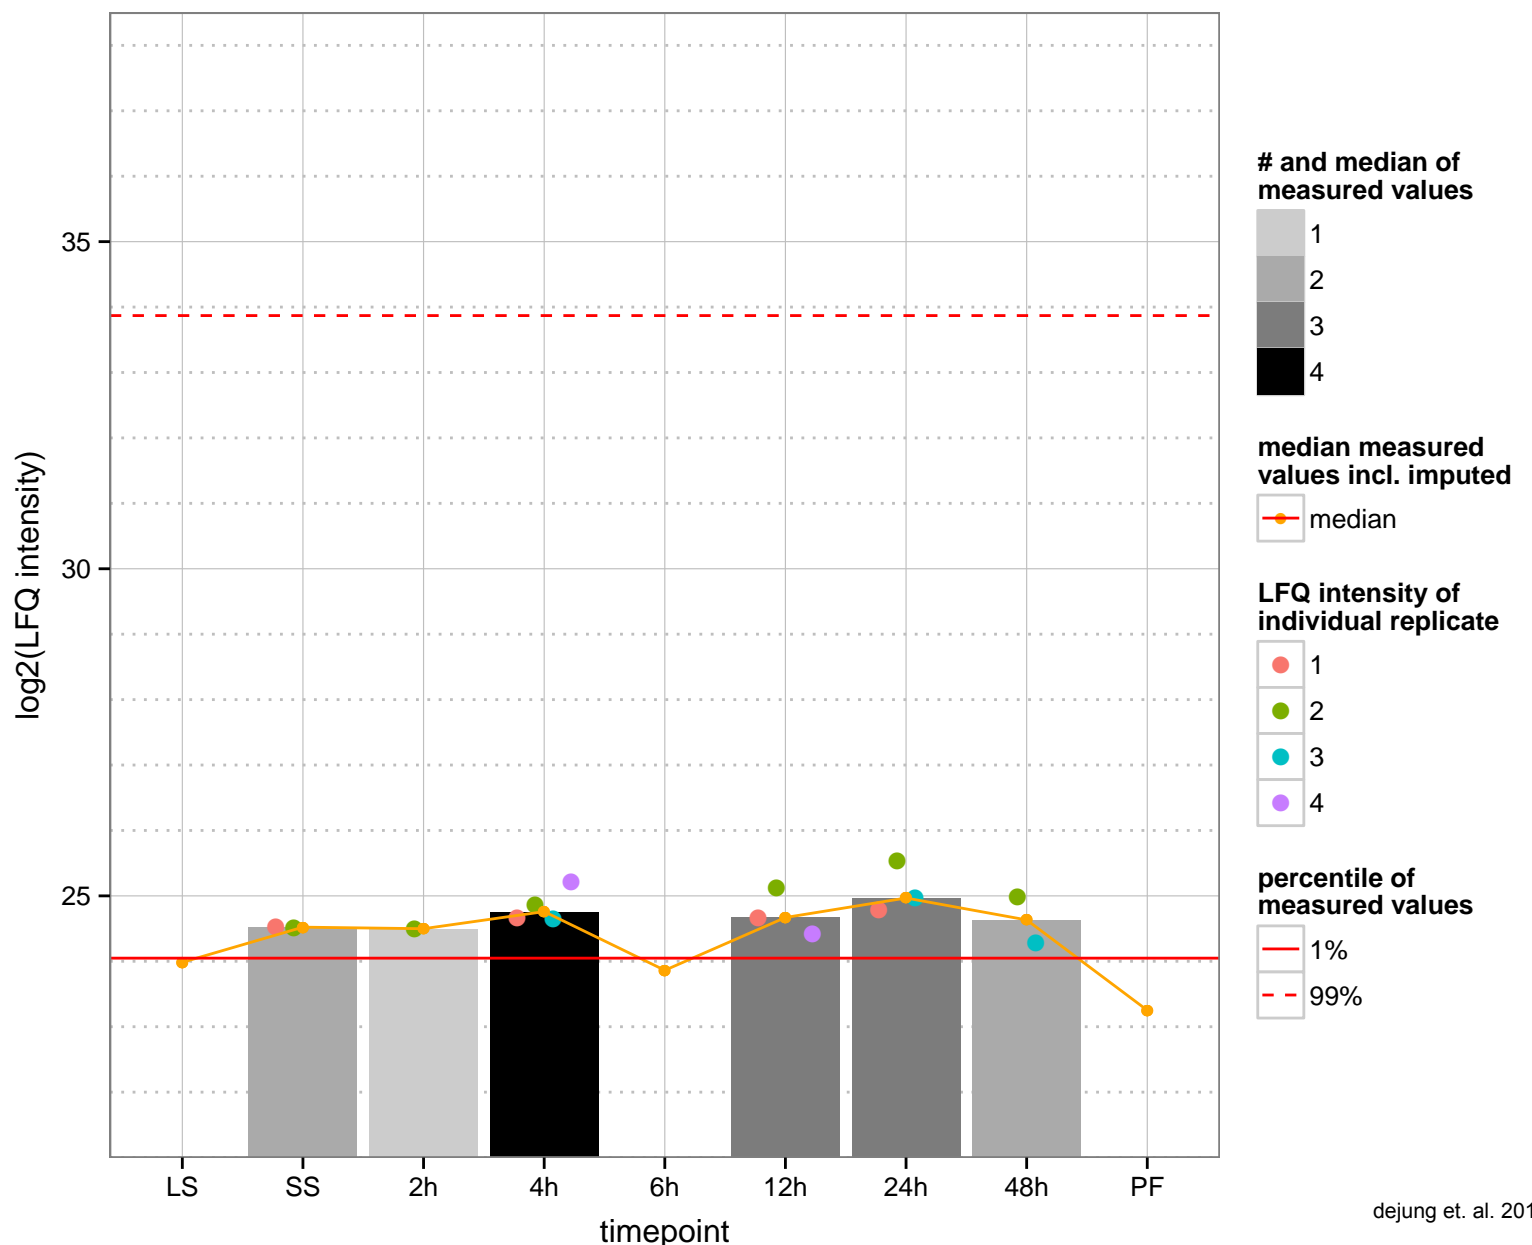

glycerol-3-phosphate dehydrogenase (FAD-dependent), mitochondrial

Tb927.11.7380

AGOF: flavin adenine dinucleotide binding, glycerol-3-phosphate dehydrogenase activity

AGOC: glycerol-3-phosphate dehydrogenase complex, mitochondrion

AGOP: glycerol catabolic process, glycerol-3-phosphate metabolic process

PGOF: oxidoreductase activity

PGOC: null

PGOP: oxidation-reduction process

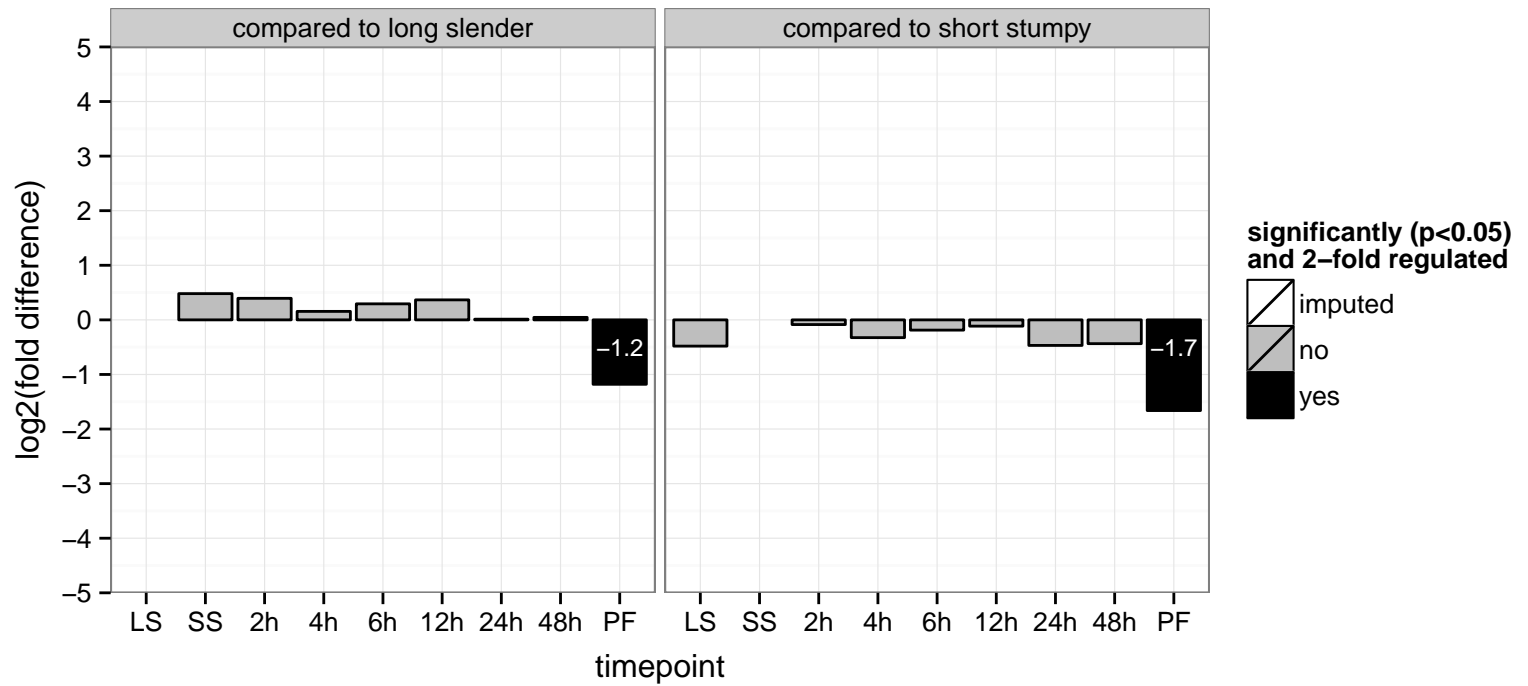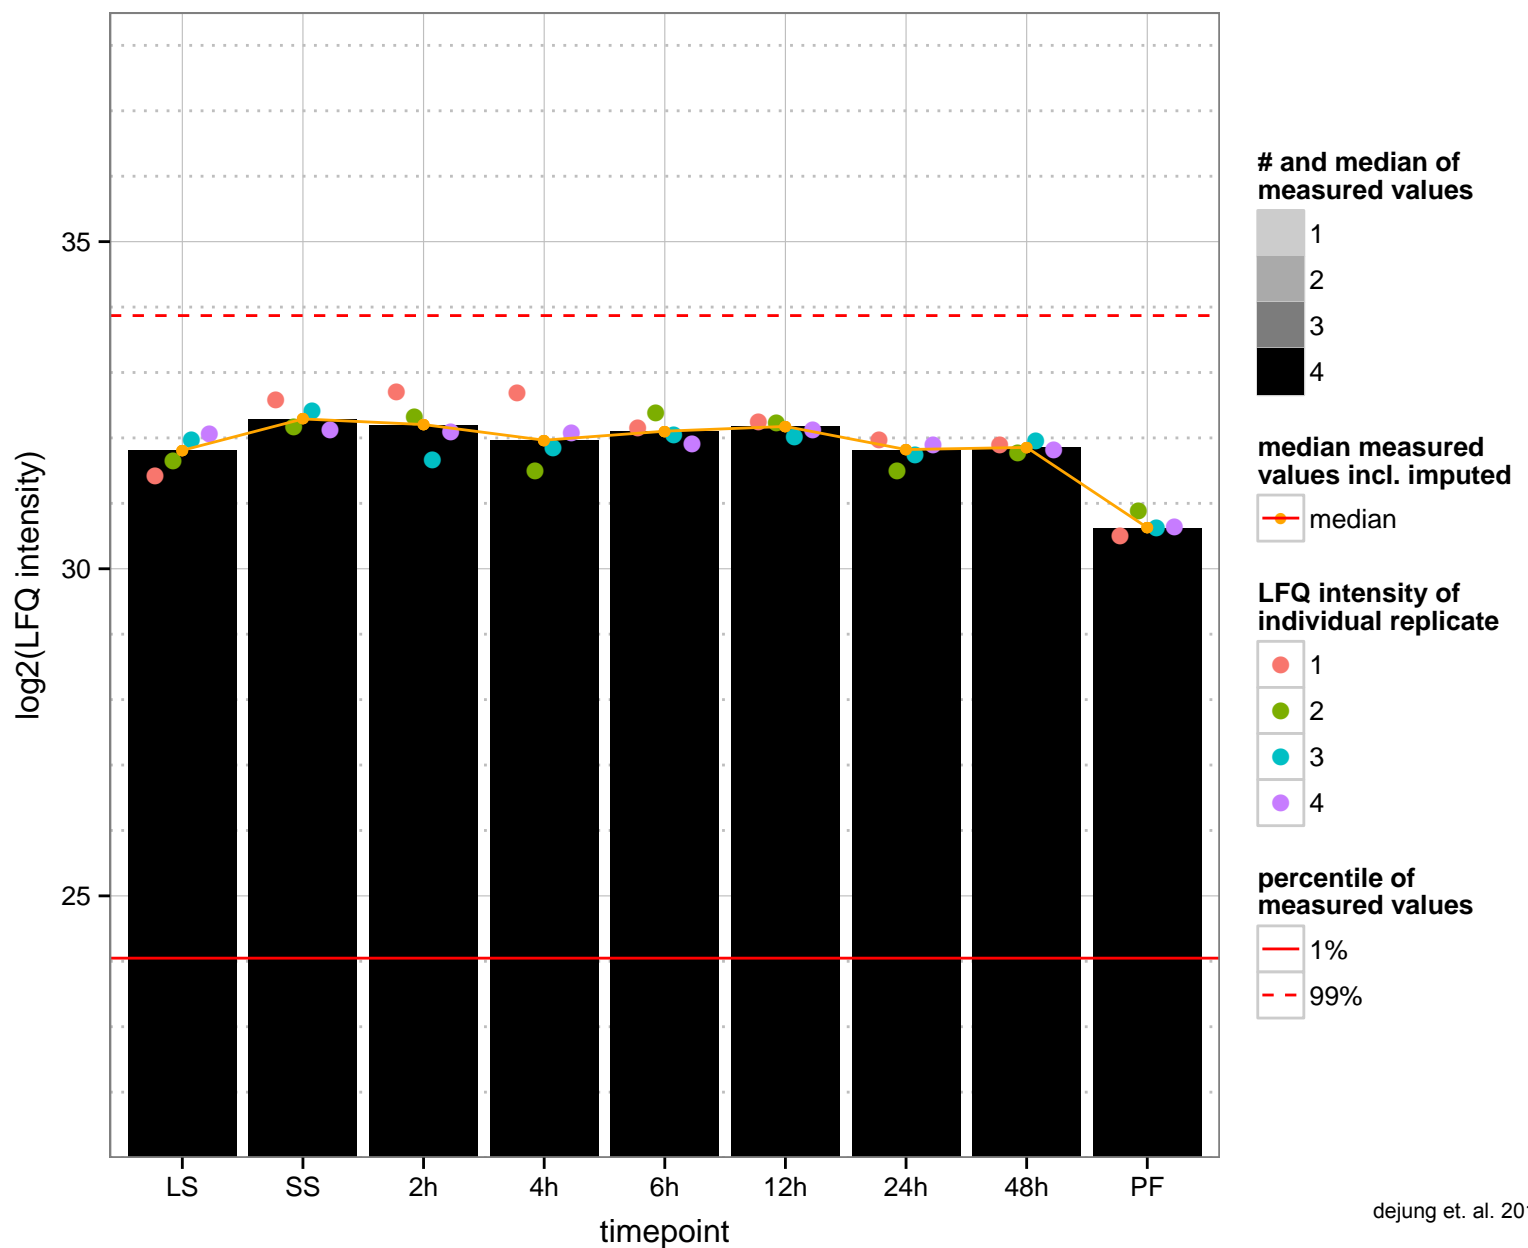

NADPH—cytochrome p450 reductase, putative (CPR)

Tb927.11.8380

AGOF: FMN binding, electron carrier activity, iron ion binding, oxidoreductase activity

AGOC: integral to membrane

AGOP: oxidation–reduction process

PGOF: FMN binding, oxidoreductase activity

PGOC: null

PGOP: oxidation–reduction process

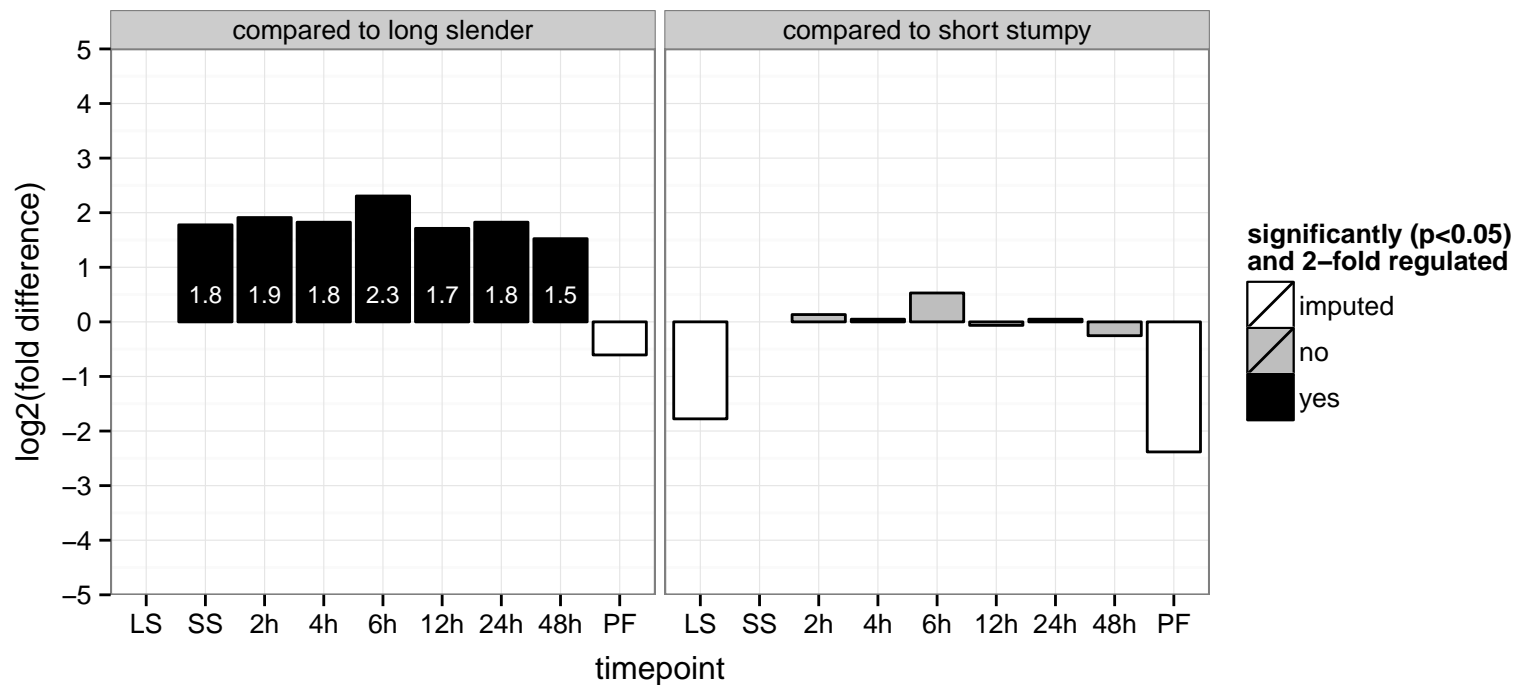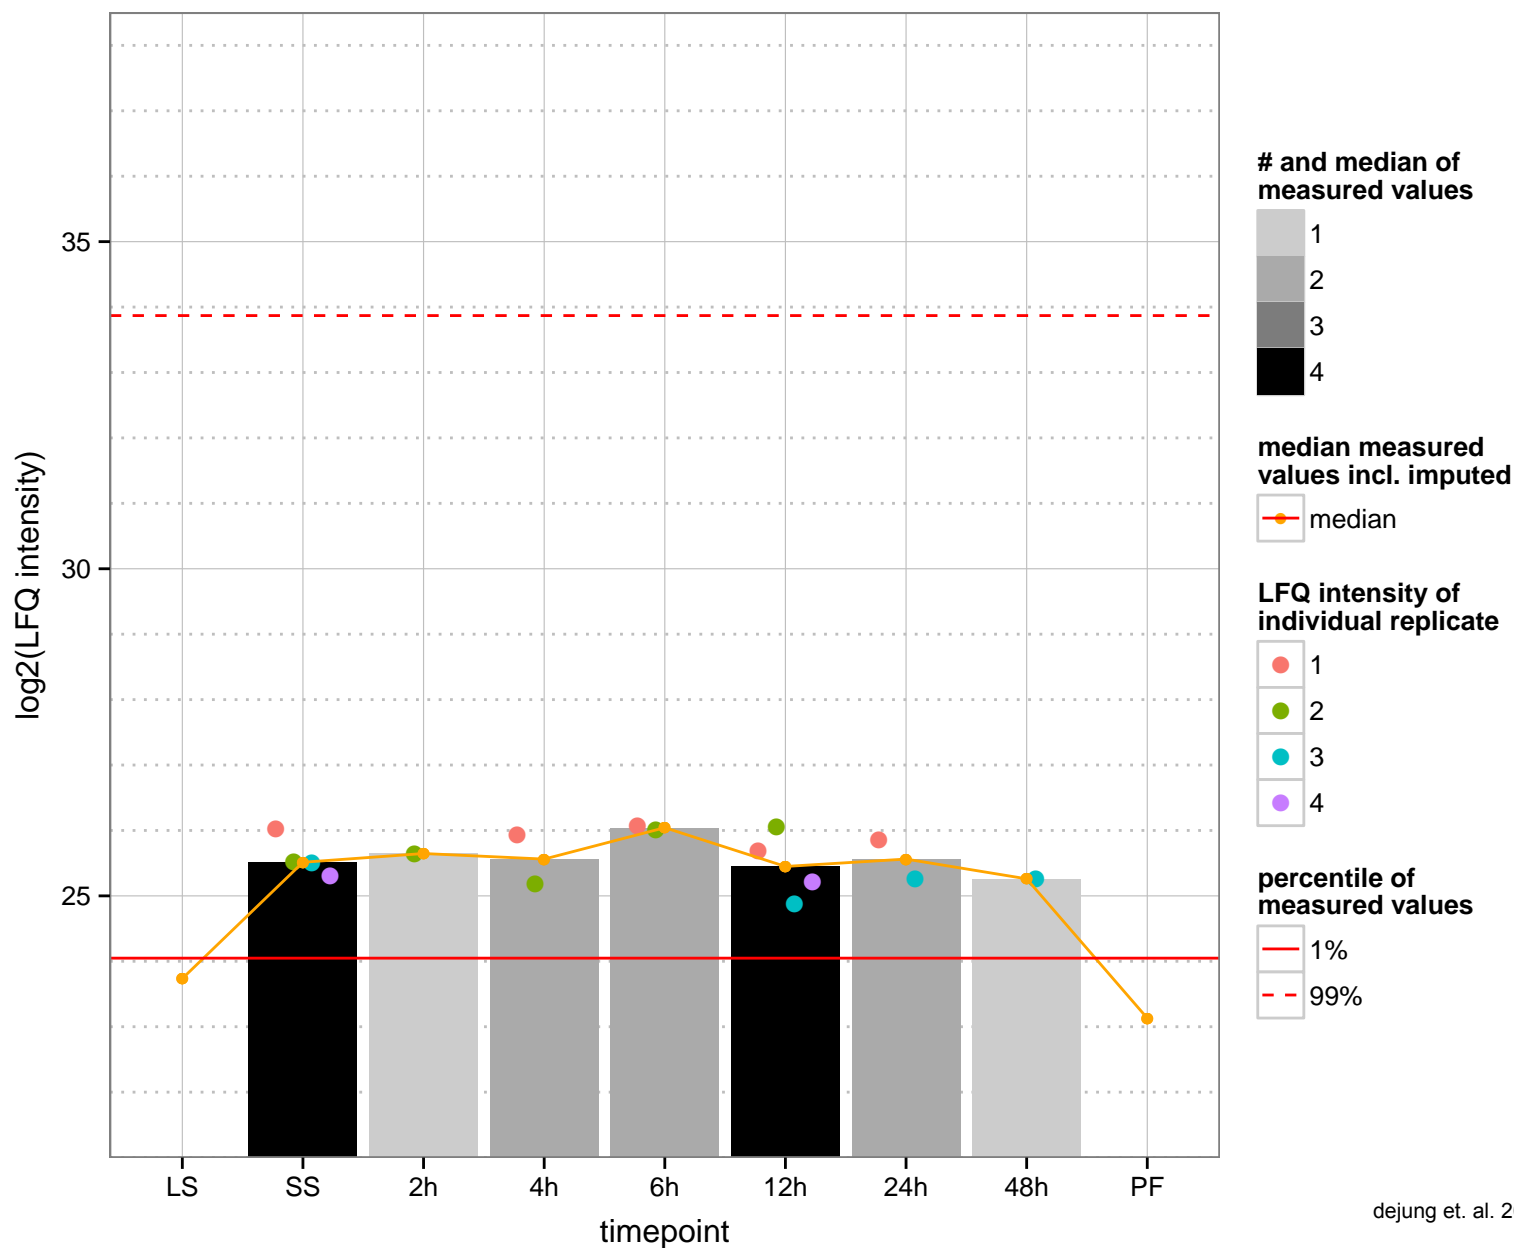

protein kinase, putative  
 Tb927.11.850  
 AGOF: ATP binding, protein kinase activity  
 AGOC: null  
 AGOP: protein phosphorylation  
 PGO: ATP binding, catalytic activity, protein kinase activity, transferase activity, transferring phosphorus-containing groups  
 PGOC: null  
 PGOP: protein phosphorylation

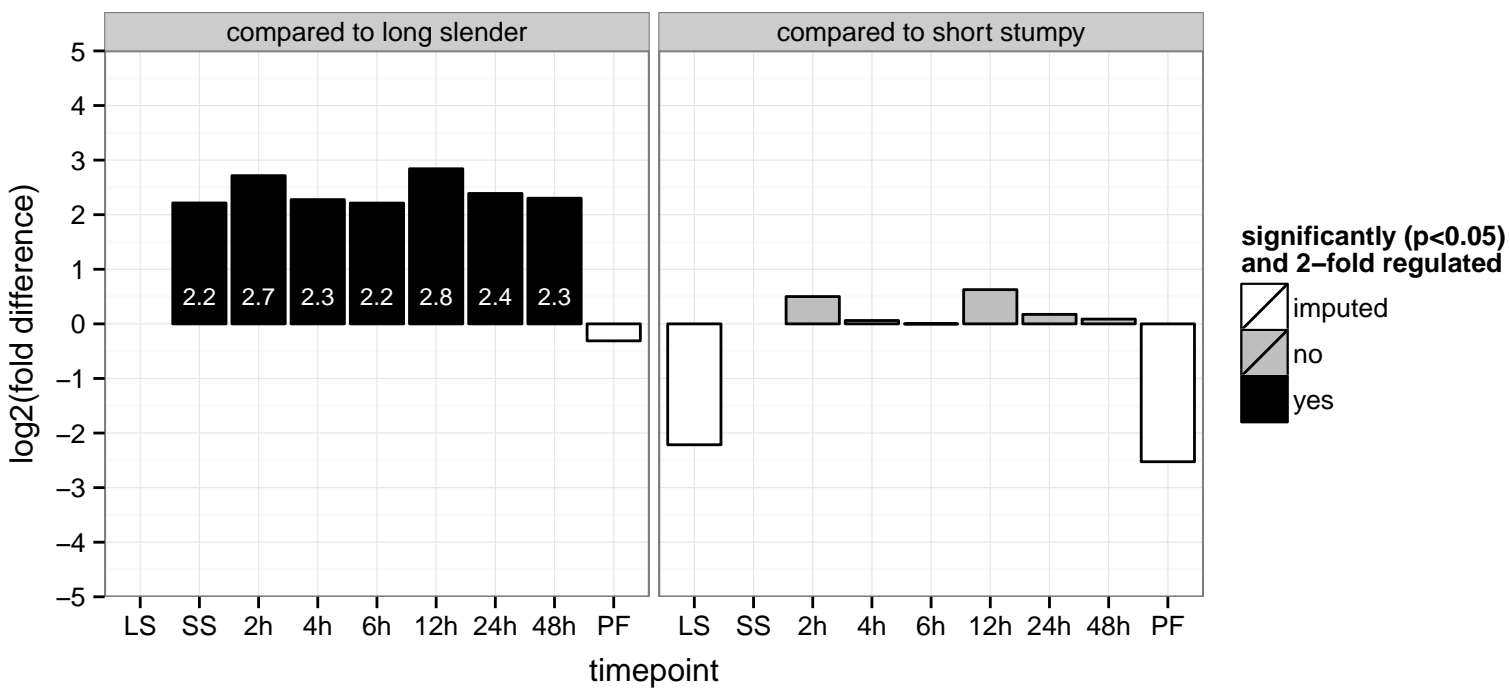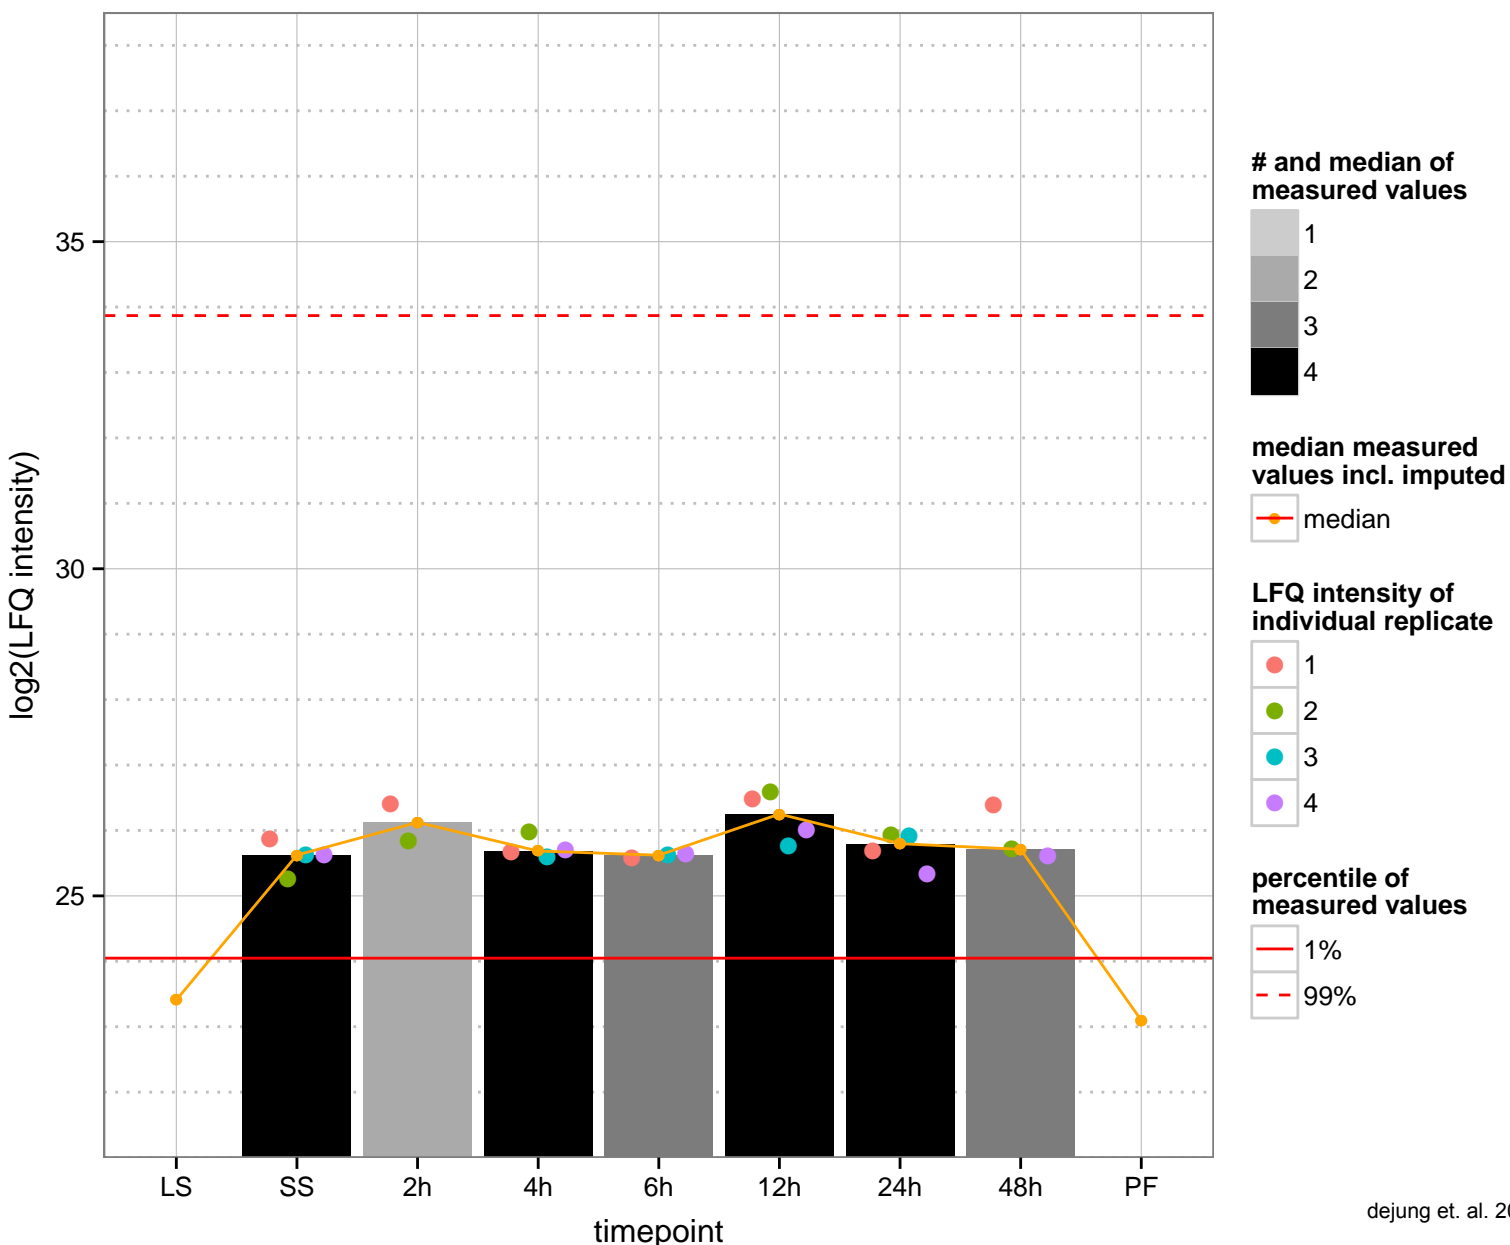

hypothetical protein, conserved  
 Tb927.11.9100  
 AGOF: null  
 AGOC: null  
 AGOP: null  
 PGOF: null  
 PGO: null  
 PGOP: null

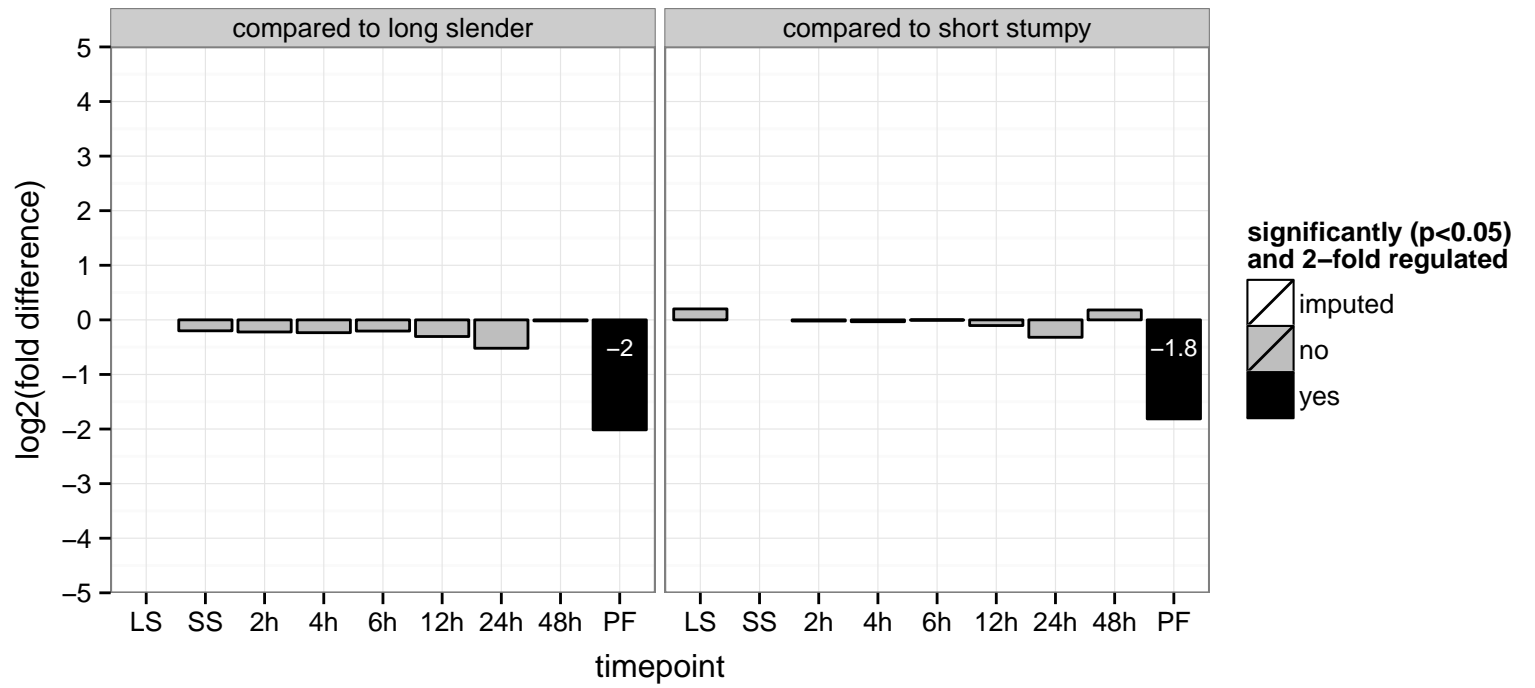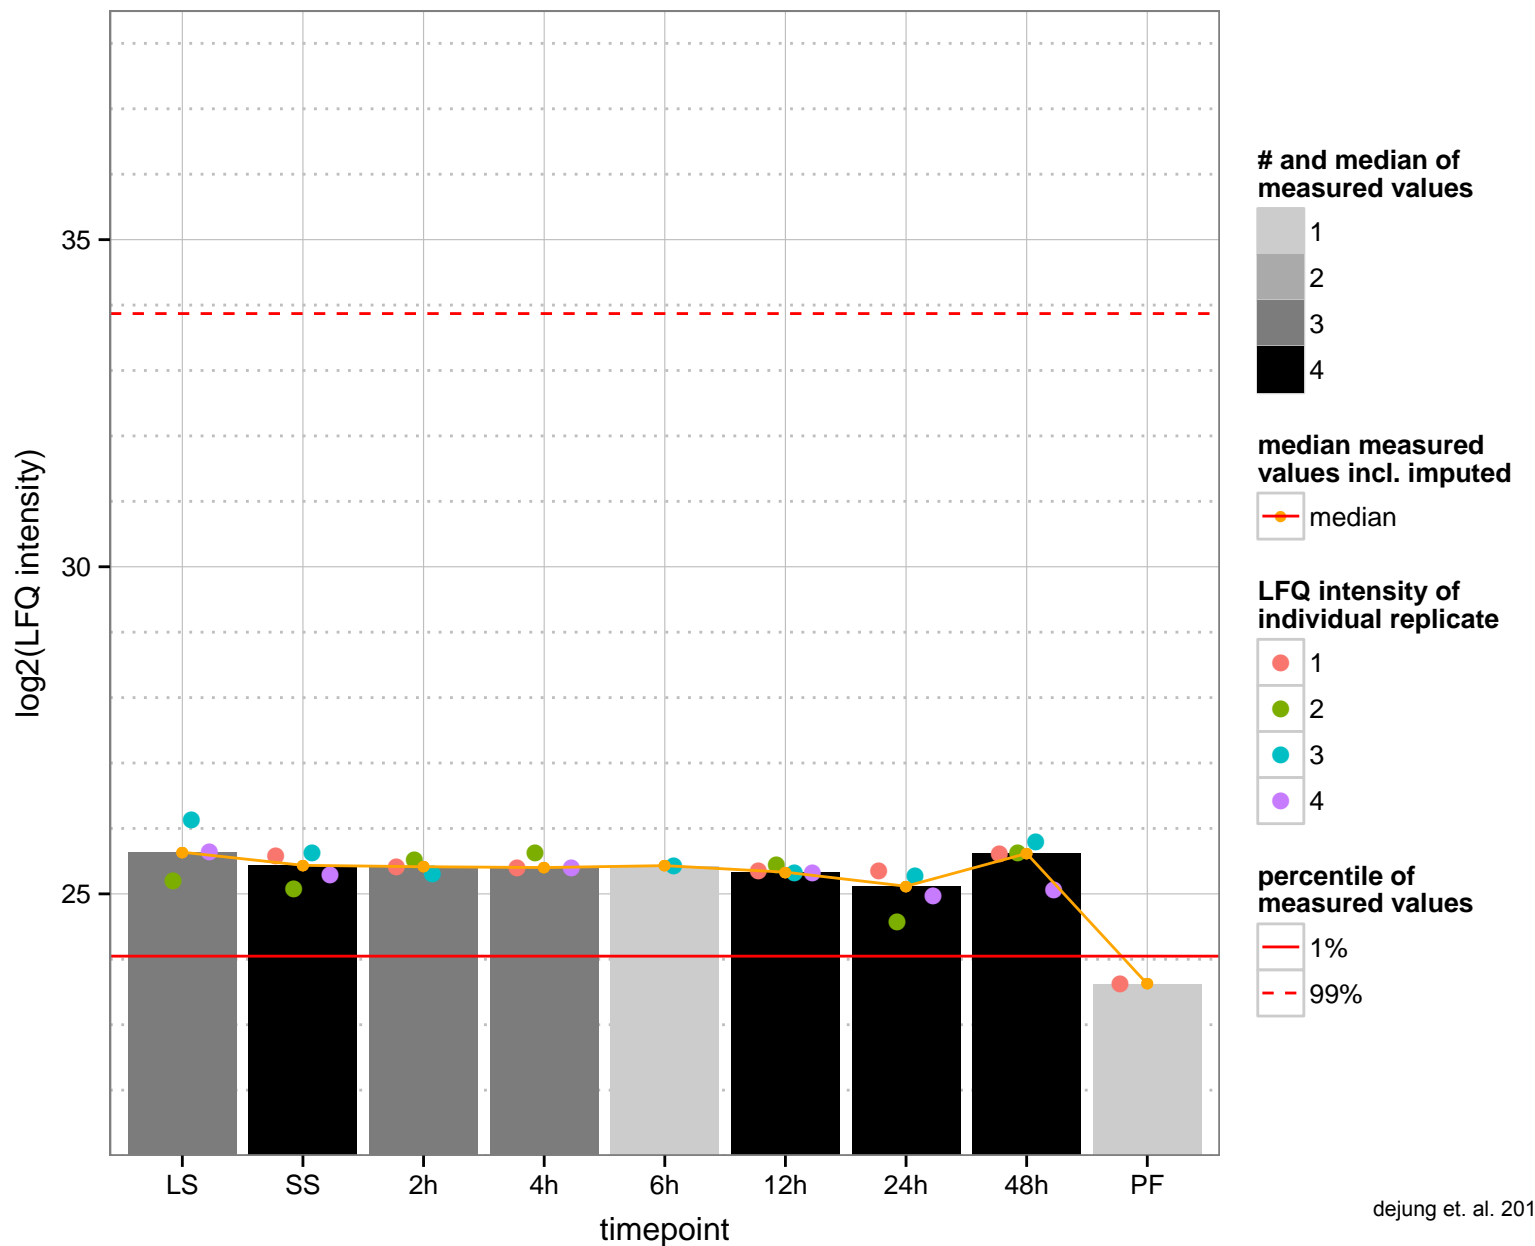

oxidoreductase, putative

Tb927.11.9560

AGOF: flavin adenine dinucleotide binding, oxidoreductase activity, acting on CH-OH group of donors

AGOC: mitochondrion

AGOP: alcohol metabolic process, oxidation-reduction process

PGOF: choline dehydrogenase activity, flavin adenine dinucleotide binding, oxidoreductase activity, acting on CH-OH group of donors

PGOC: null

PGOP: alcohol metabolic process, oxidation-reduction process

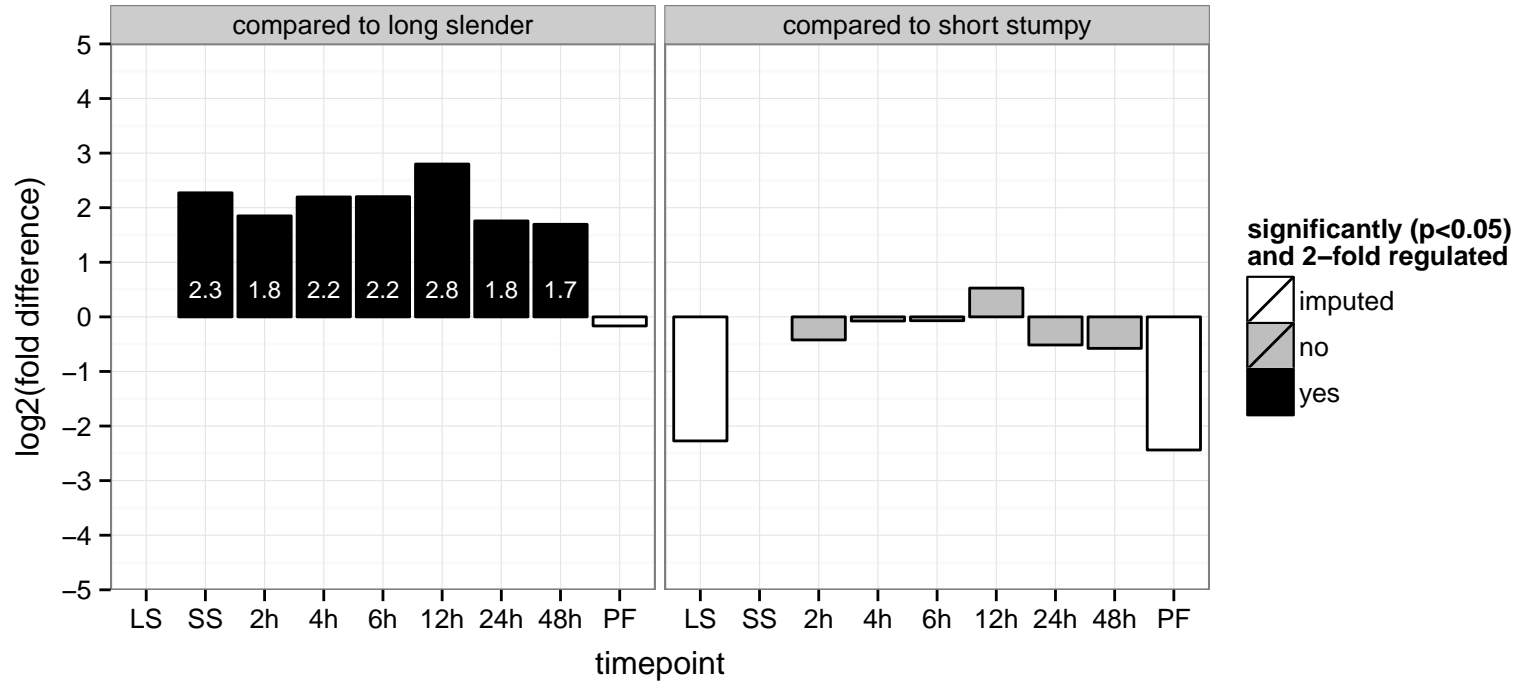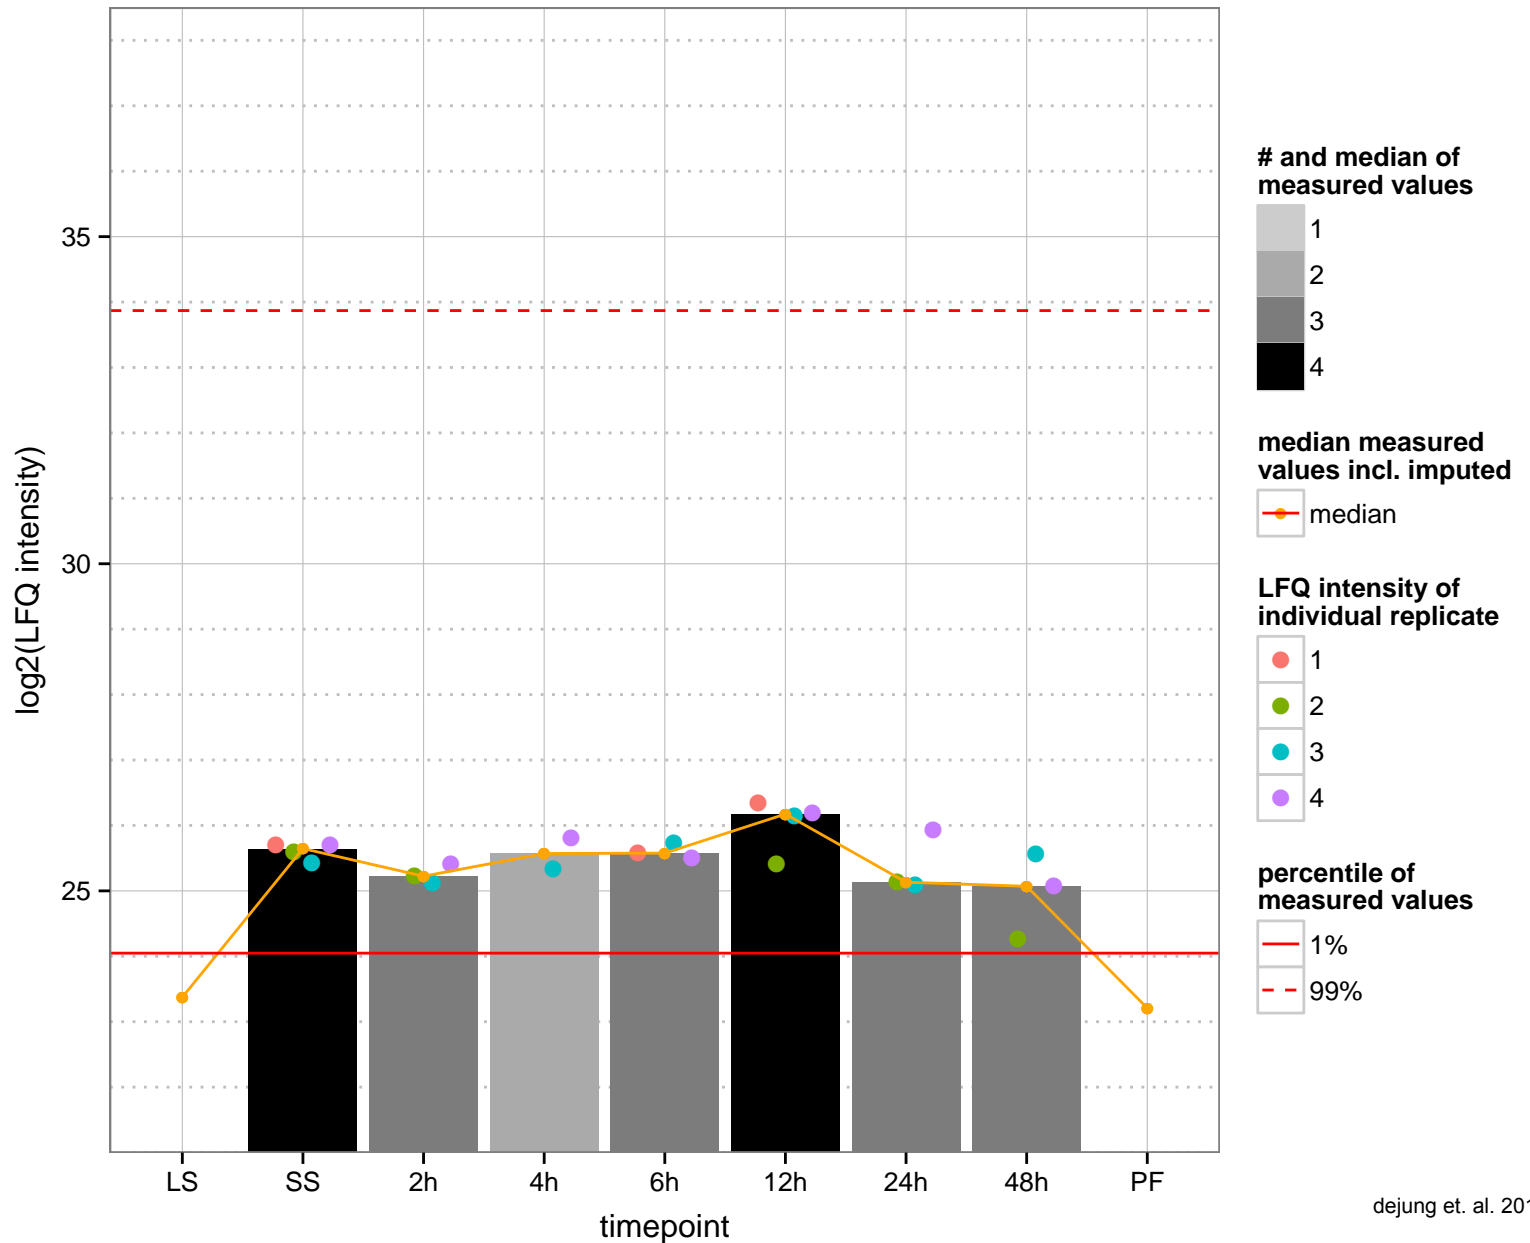

hypothetical protein, conserved  
 Tb927.11.9960  
 AGOF: null  
 AGOC: null  
 AGOP: null  
 PGO: null  
 PGOC: null  
 PGOP: null

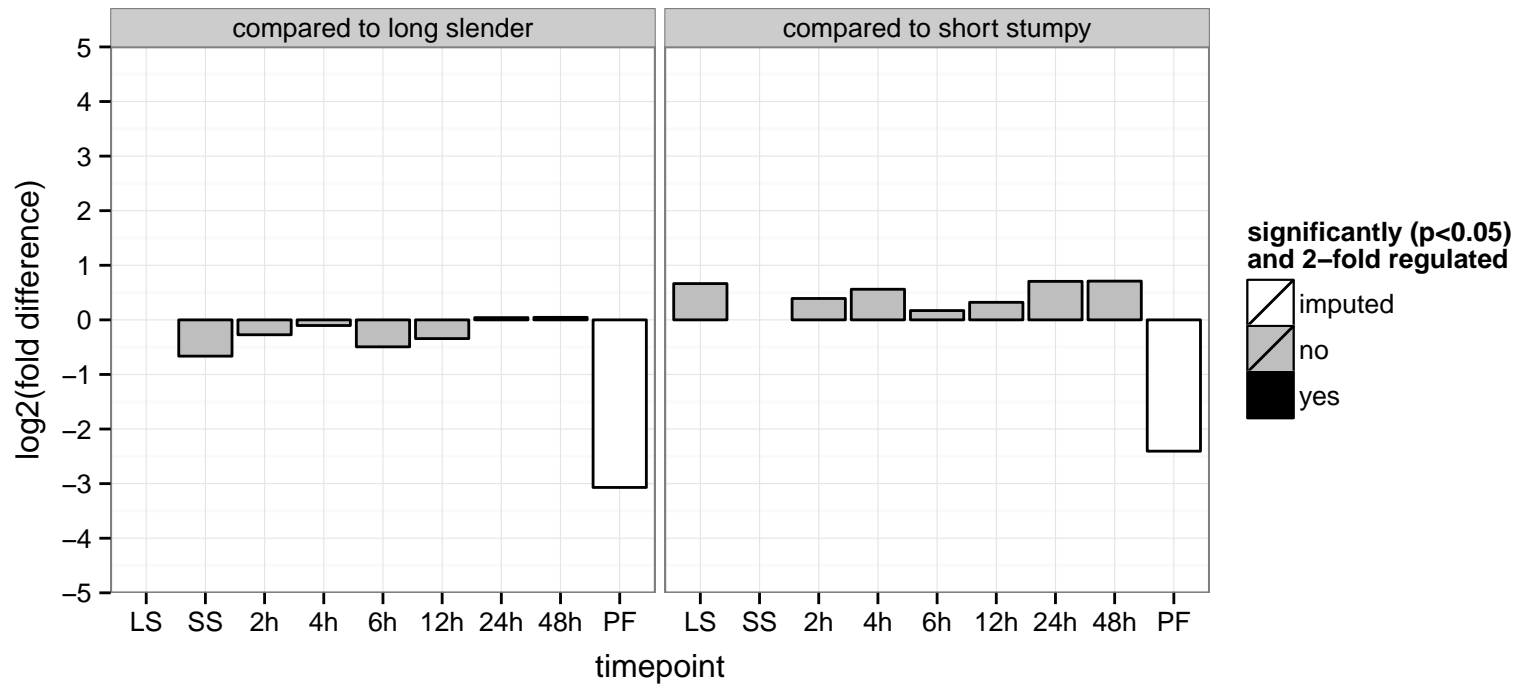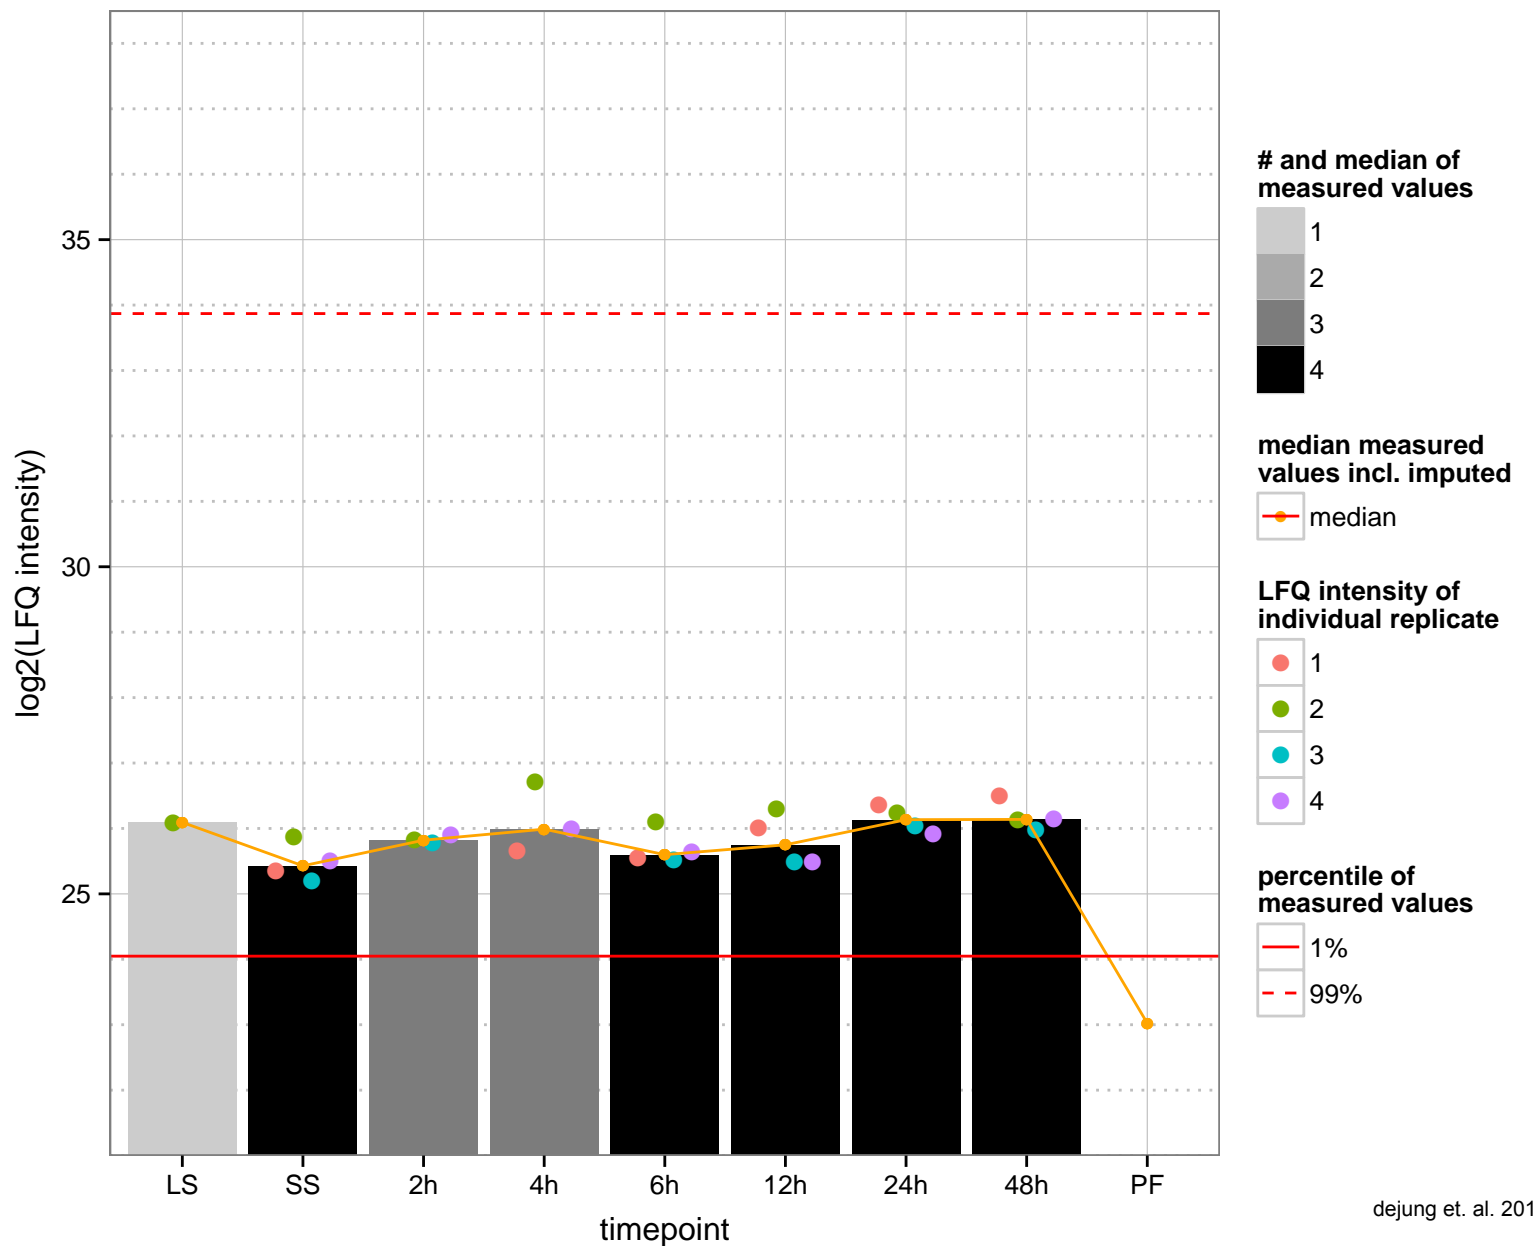



2-oxoglutarate dehydrogenase E1 component, putative

Tb927.11.9980

AGOF: oxoglutarate dehydrogenase (succinyl-transferring) activity, thiamine pyrophosphate binding

AGOC: mitochondrion, oxoglutarate dehydrogenase complex

AGOP: glycolysis, lysine catabolic process, tricarboxylic acid cycle, tryptophan metabolic process

PGOF: oxidoreductase activity, acting on the aldehyde or oxo group of donors, disulfide as acceptor, oxoglutarate dehydrogenase

PGOC: null

PGOP: metabolic process, oxidation-reduction process, tricarboxylic acid cycle

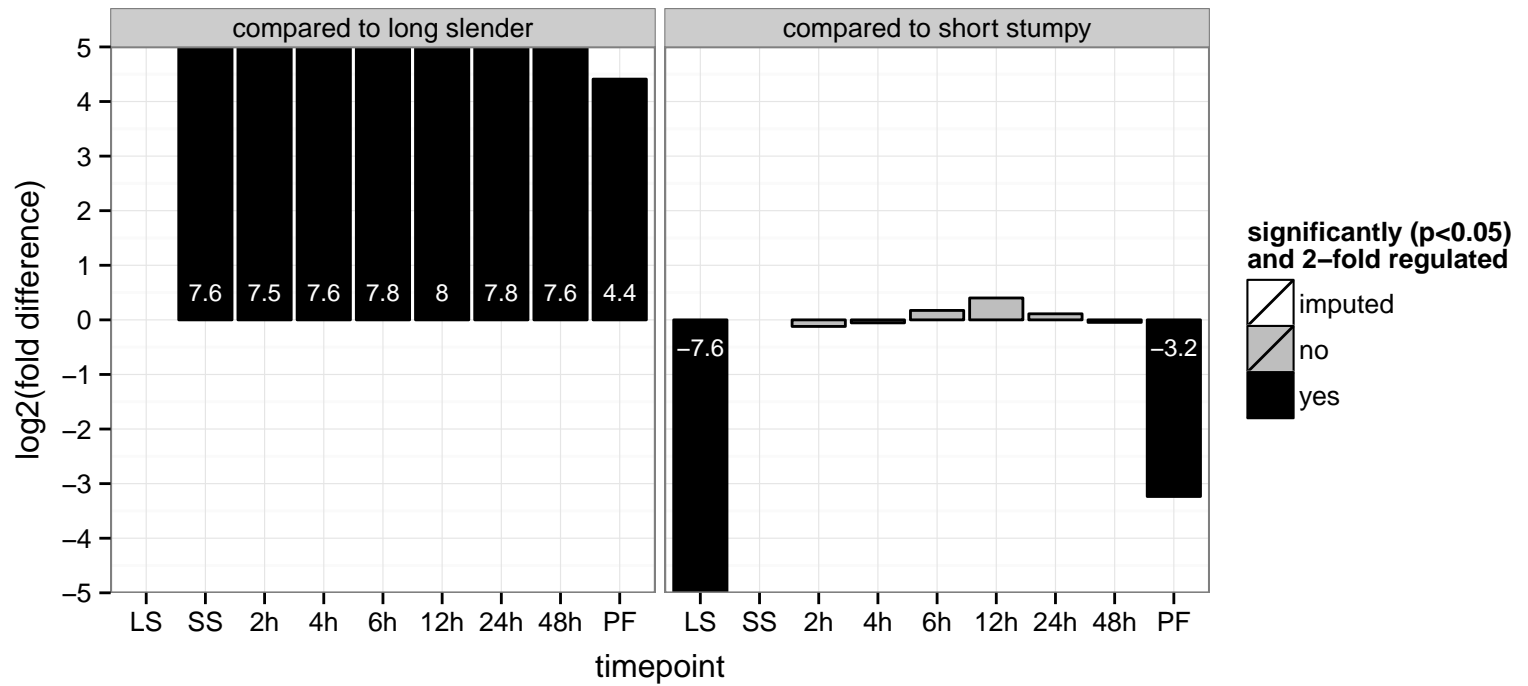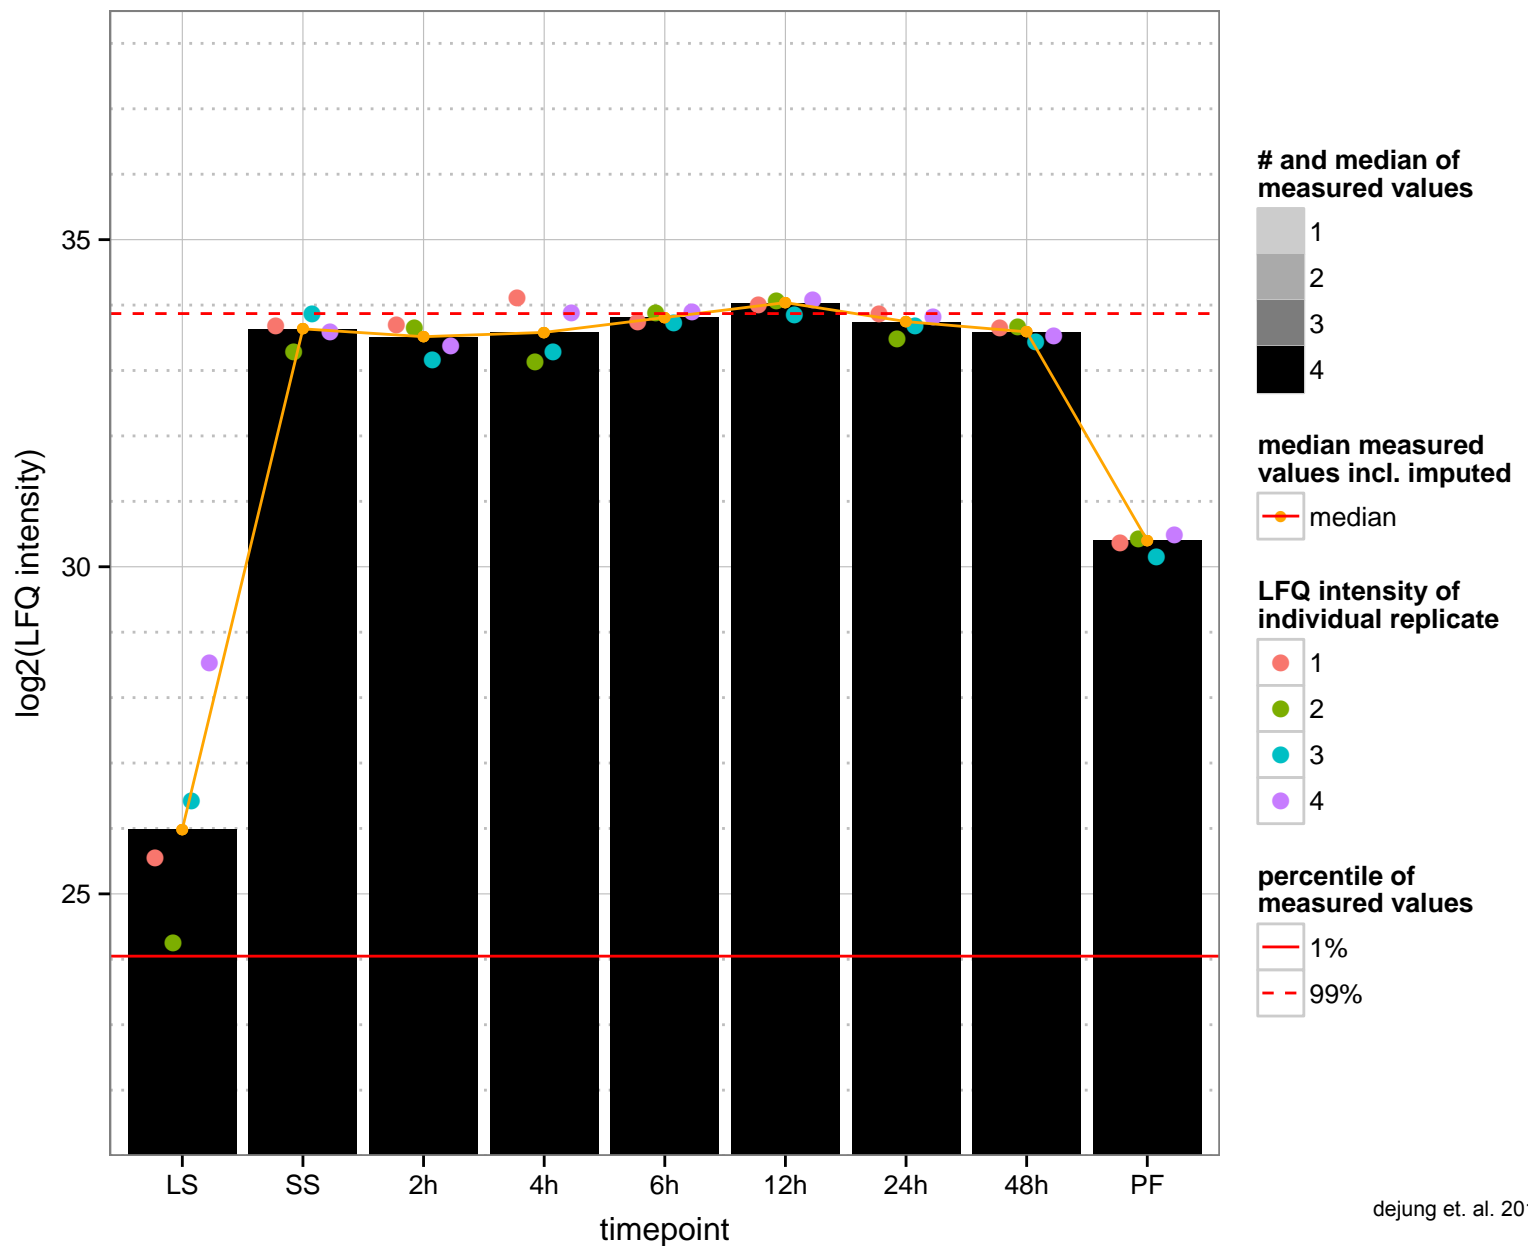

hypothetical protein, conserved  
 Tb927.2.2390  
 AGOF: null  
 AGOC: null  
 AGOP: null  
 PGO: null  
 PGOC: null  
 PGOP: null

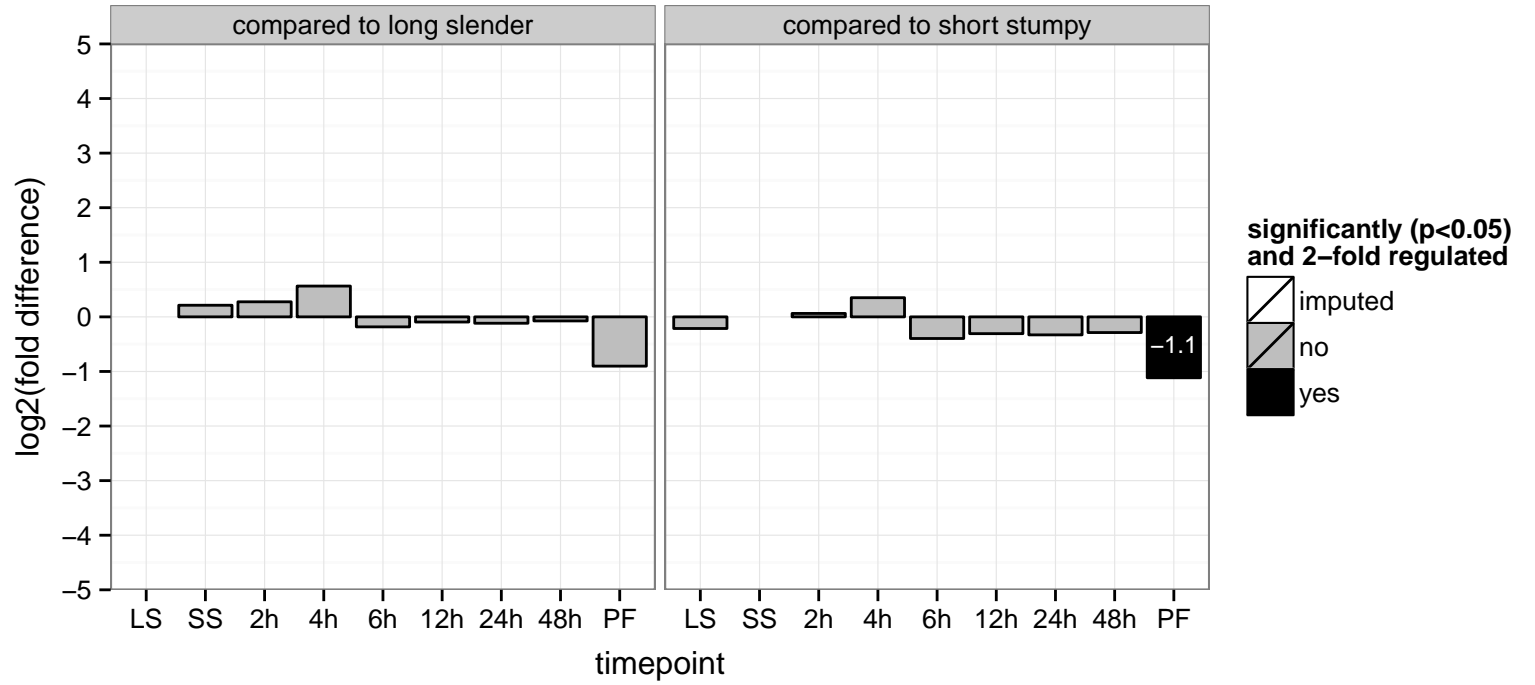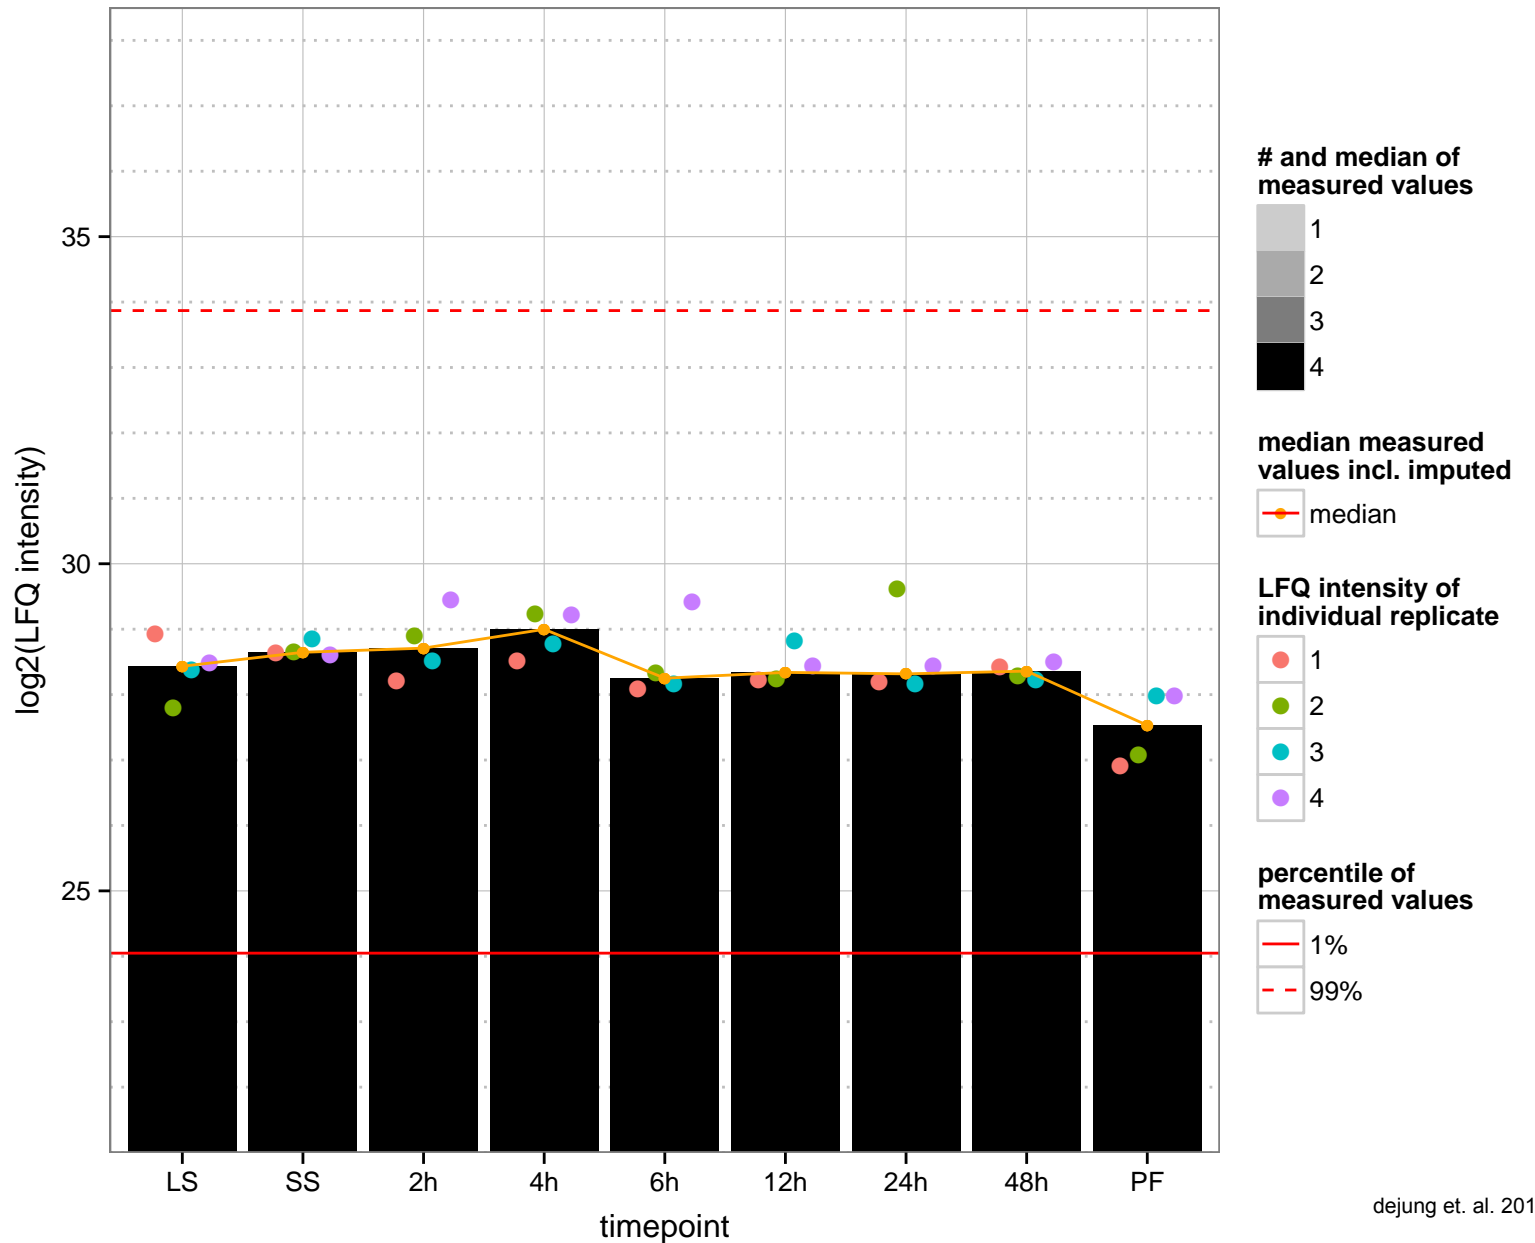

retrotransposon hot spot protein (RHS, pseudogene), putative, retrotransposon hot spot protein 3 (RHS3), frameshift  
 Tb927.2.270  
 AGOF: null  
 AGOC: null  
 AGOP: null  
 PGO: null  
 PGO: null  
 PGO: null  
 PGO: null

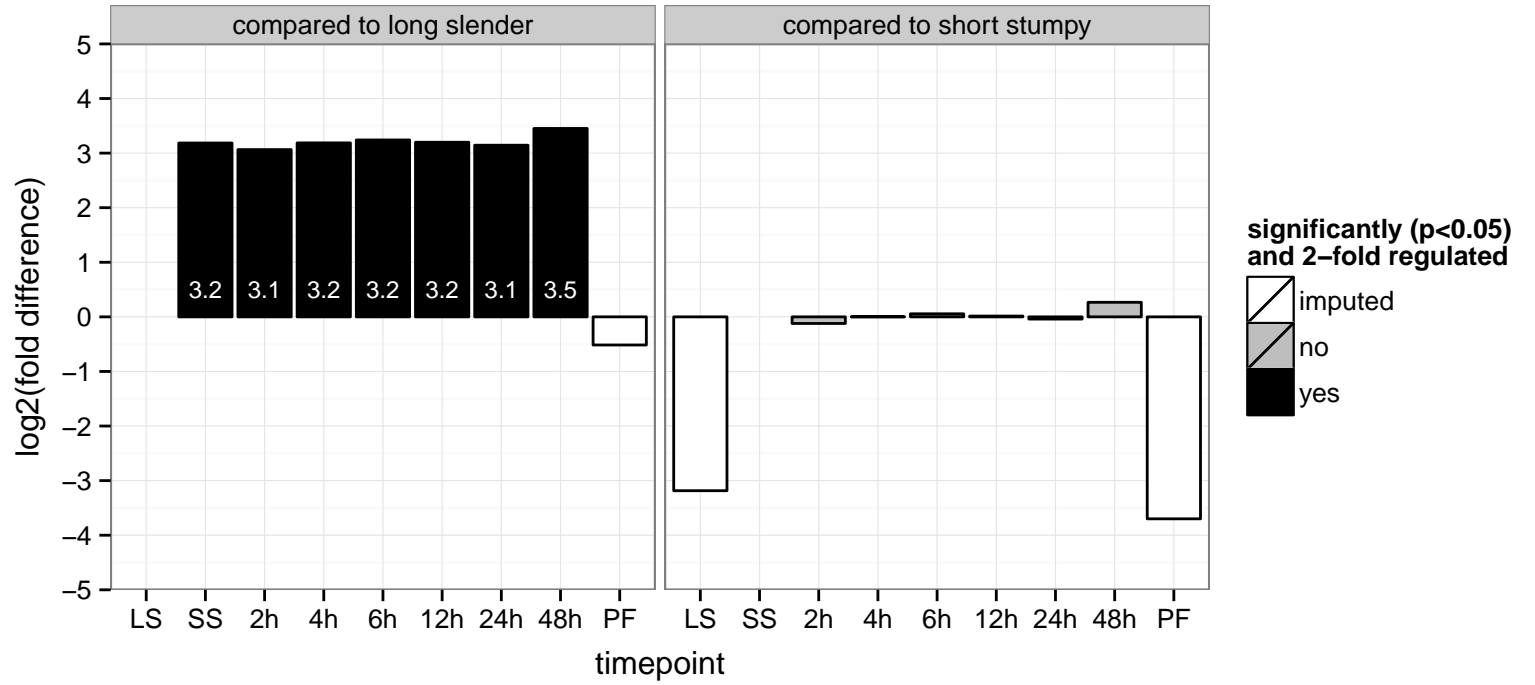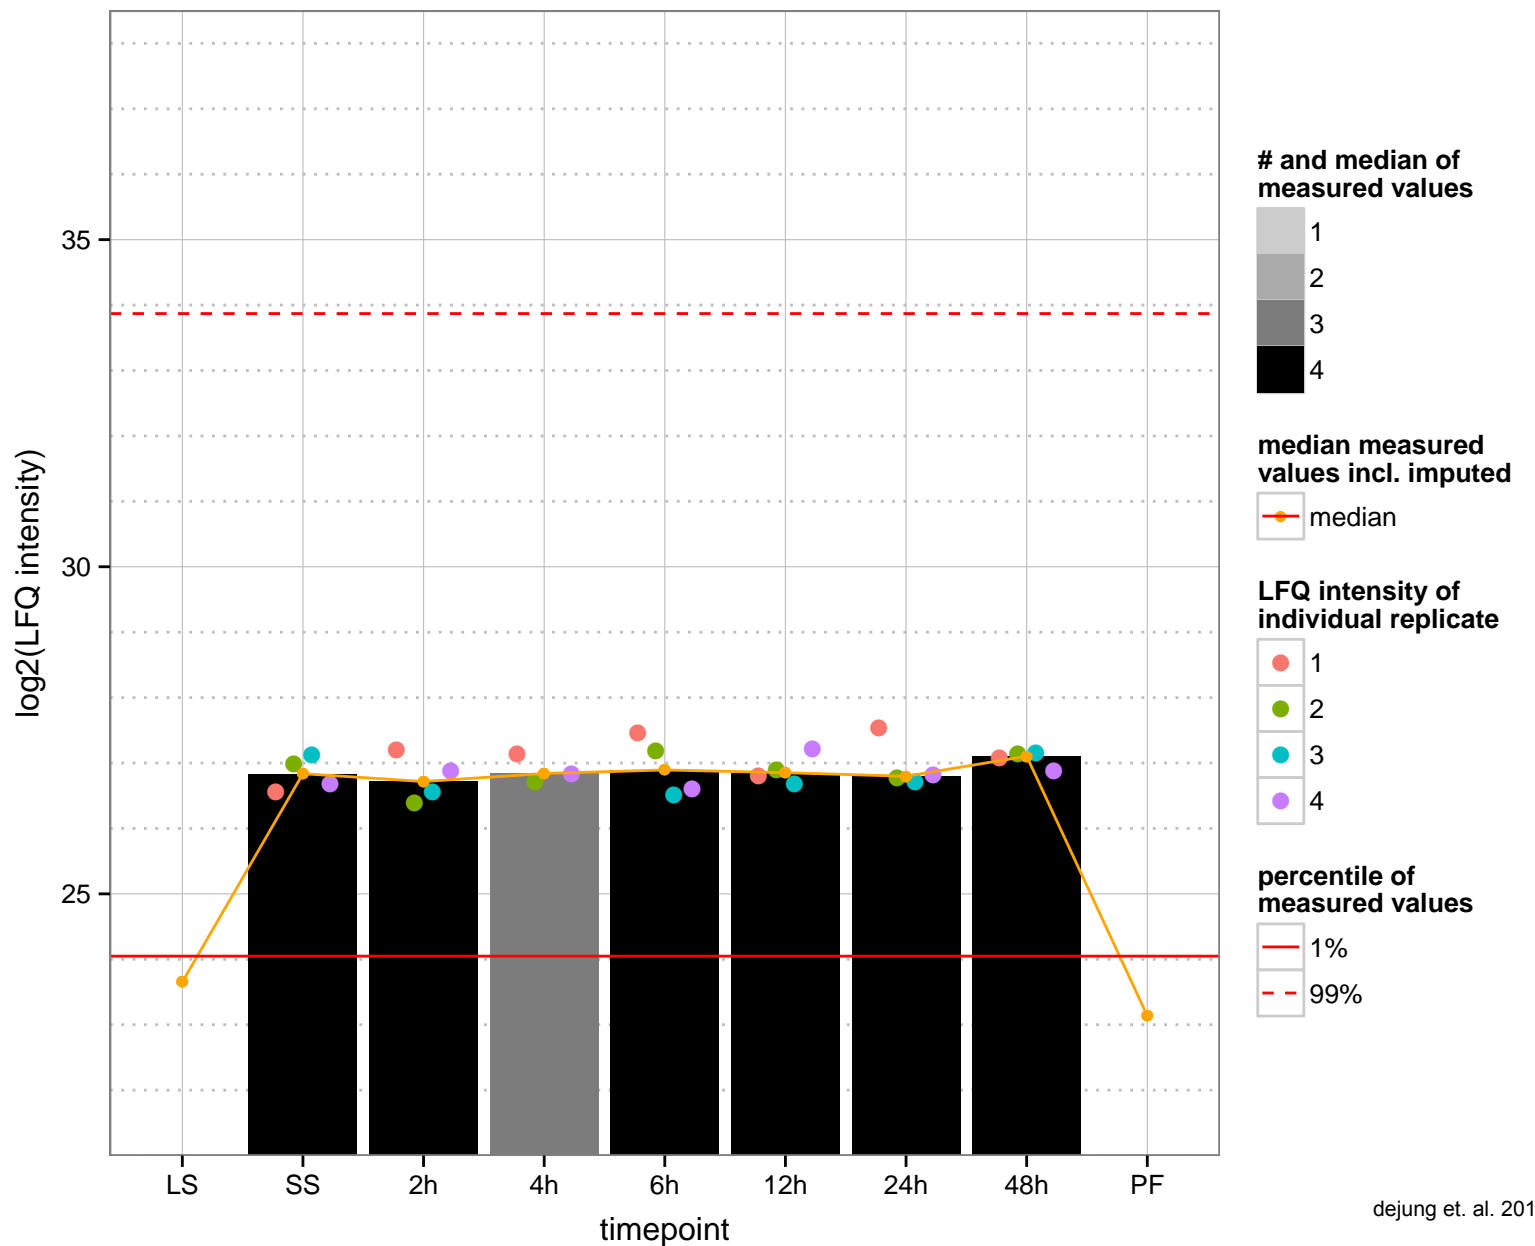

retrotransposon hot spot protein 4 (RHS4), putative  
 Tb927.2.340  
 AGOF: null  
 AGOC: nucleus  
 AGOP: null  
 PGO: null  
 PGO: null  
 PGO: null

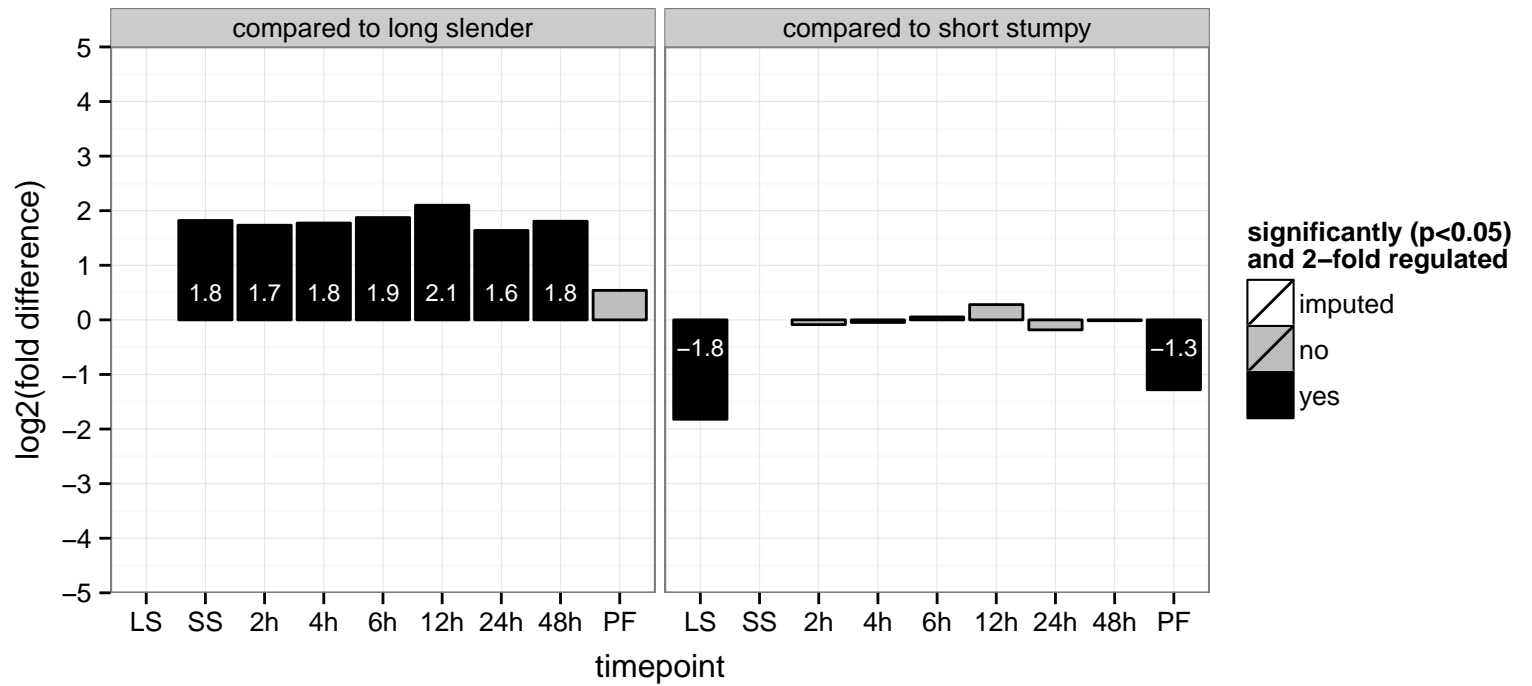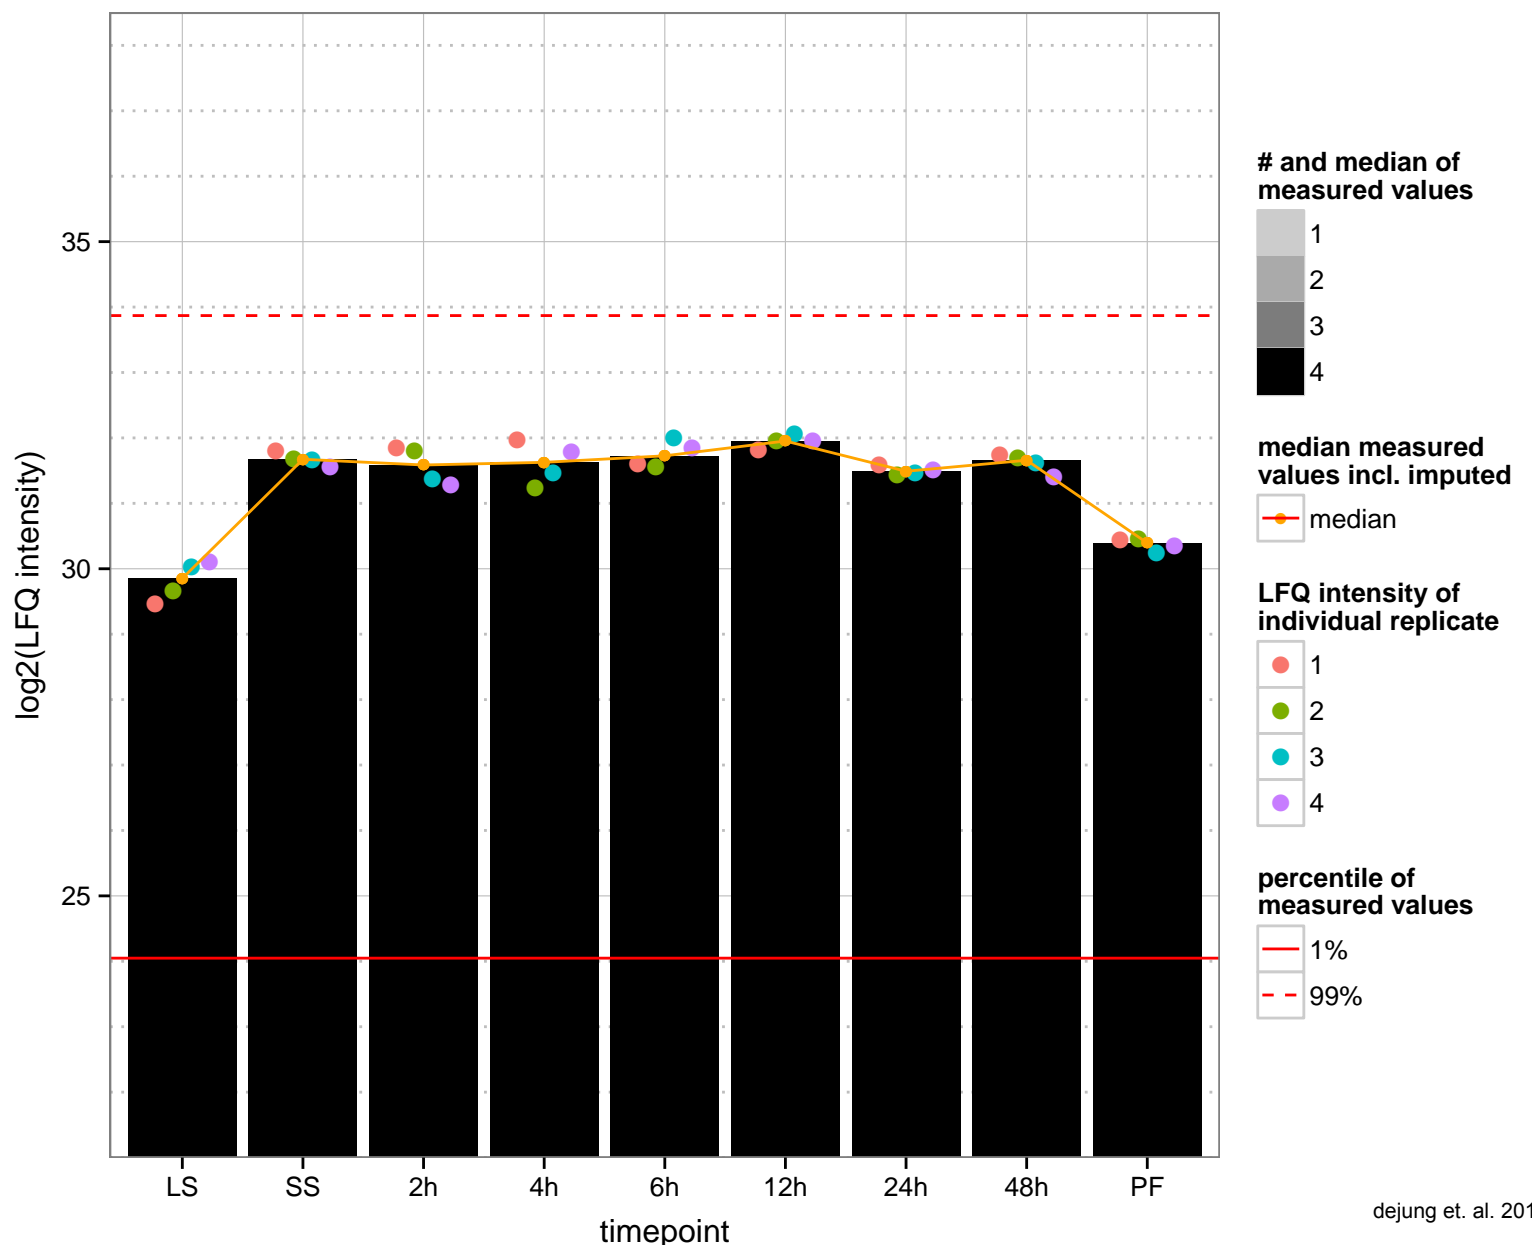

hypothetical protein, conserved  
 Tb927.2.3990  
 AGOF: null  
 AGOC: null  
 AGOP: null  
 PGO: null  
 PGOC: null  
 PGOP: null

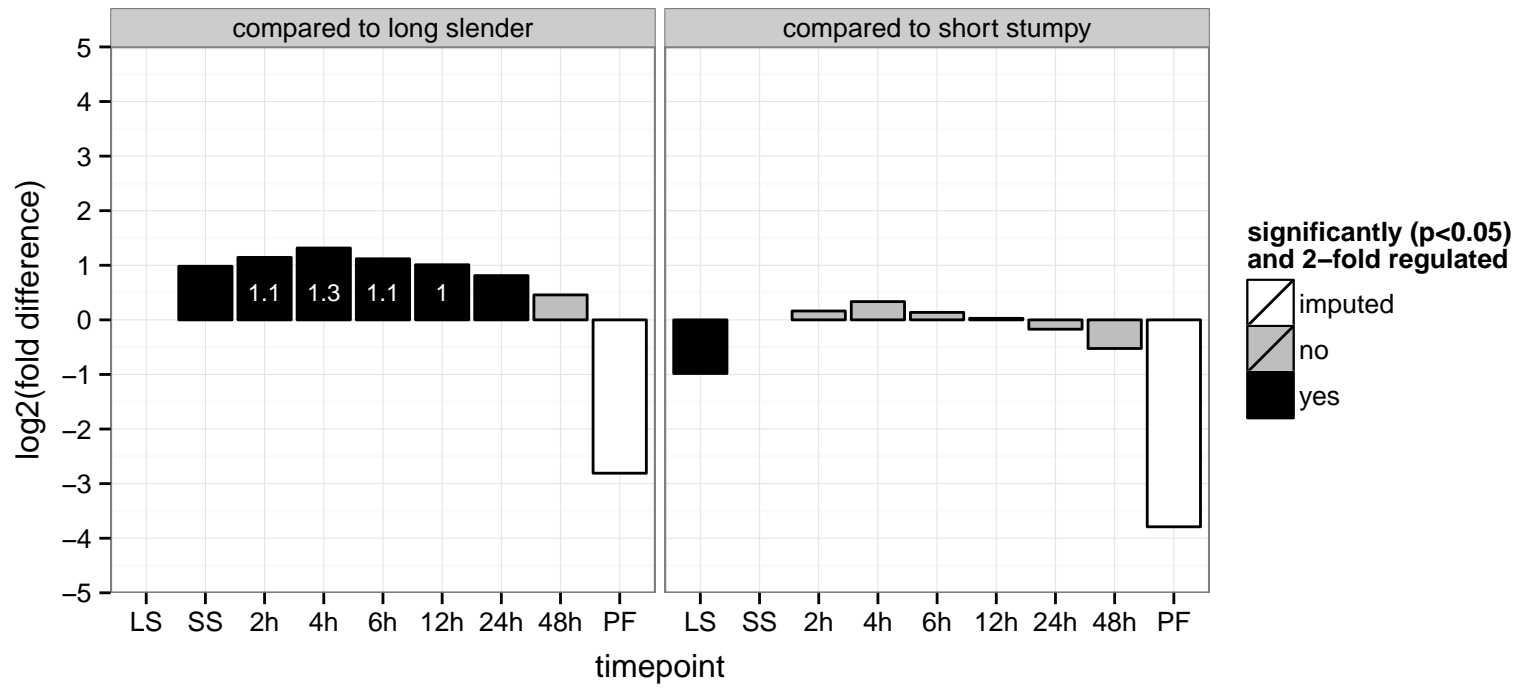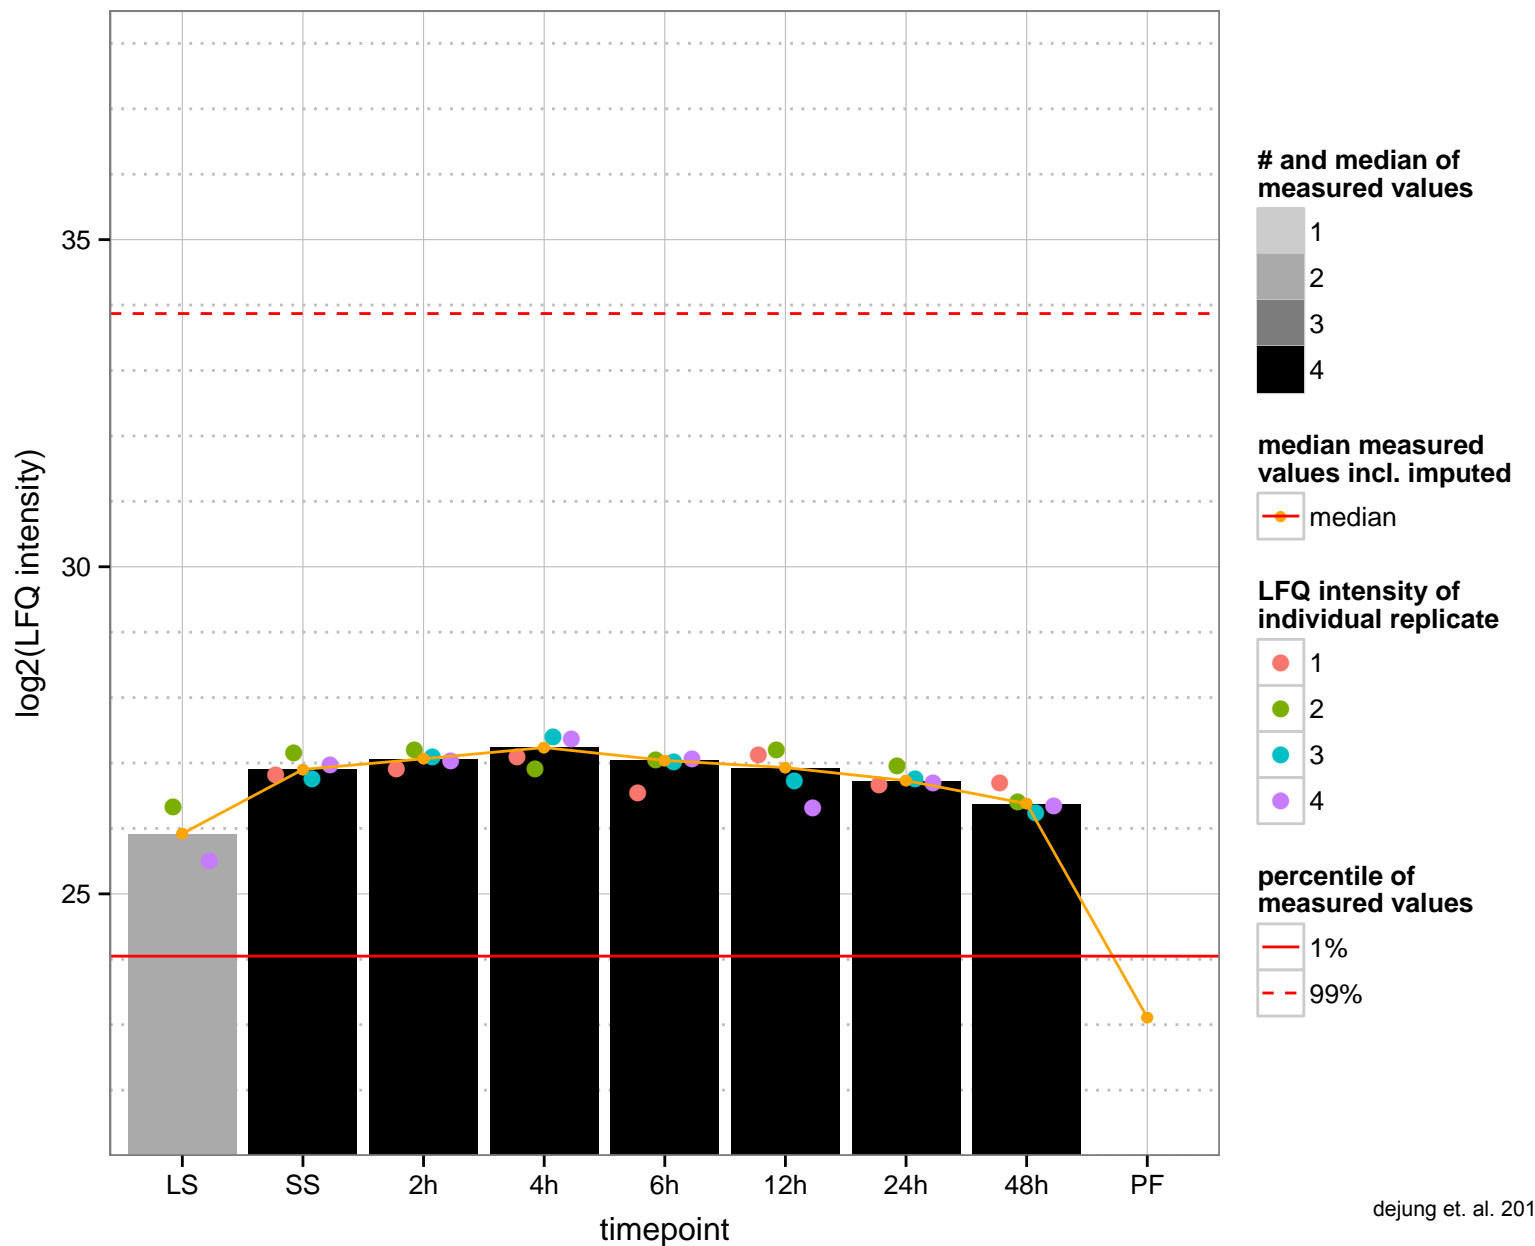

hypothetical protein, conserved  
 Tb927.2.4380  
 AGOF: null  
 AGOC: mitochondrion  
 AGOP: null  
 PGO: null  
 PGO: null  
 PGO: null

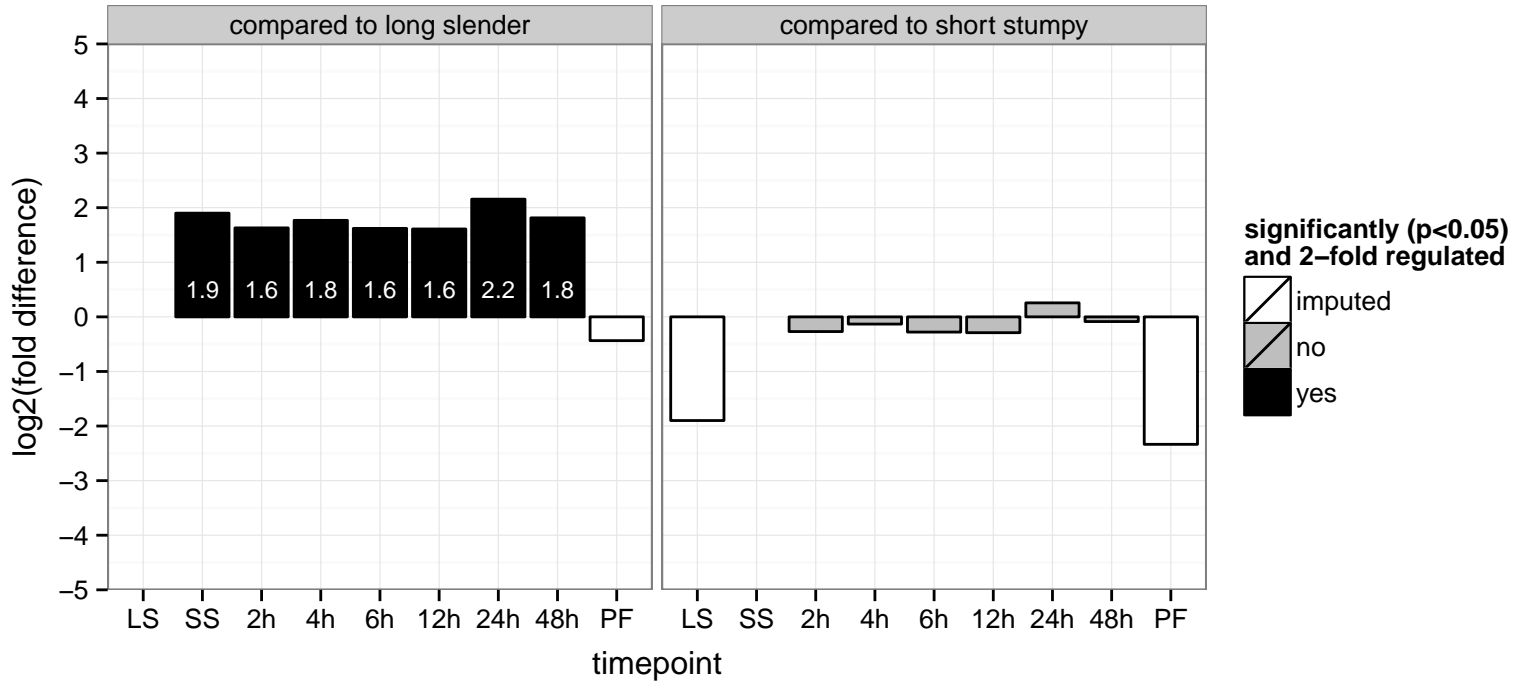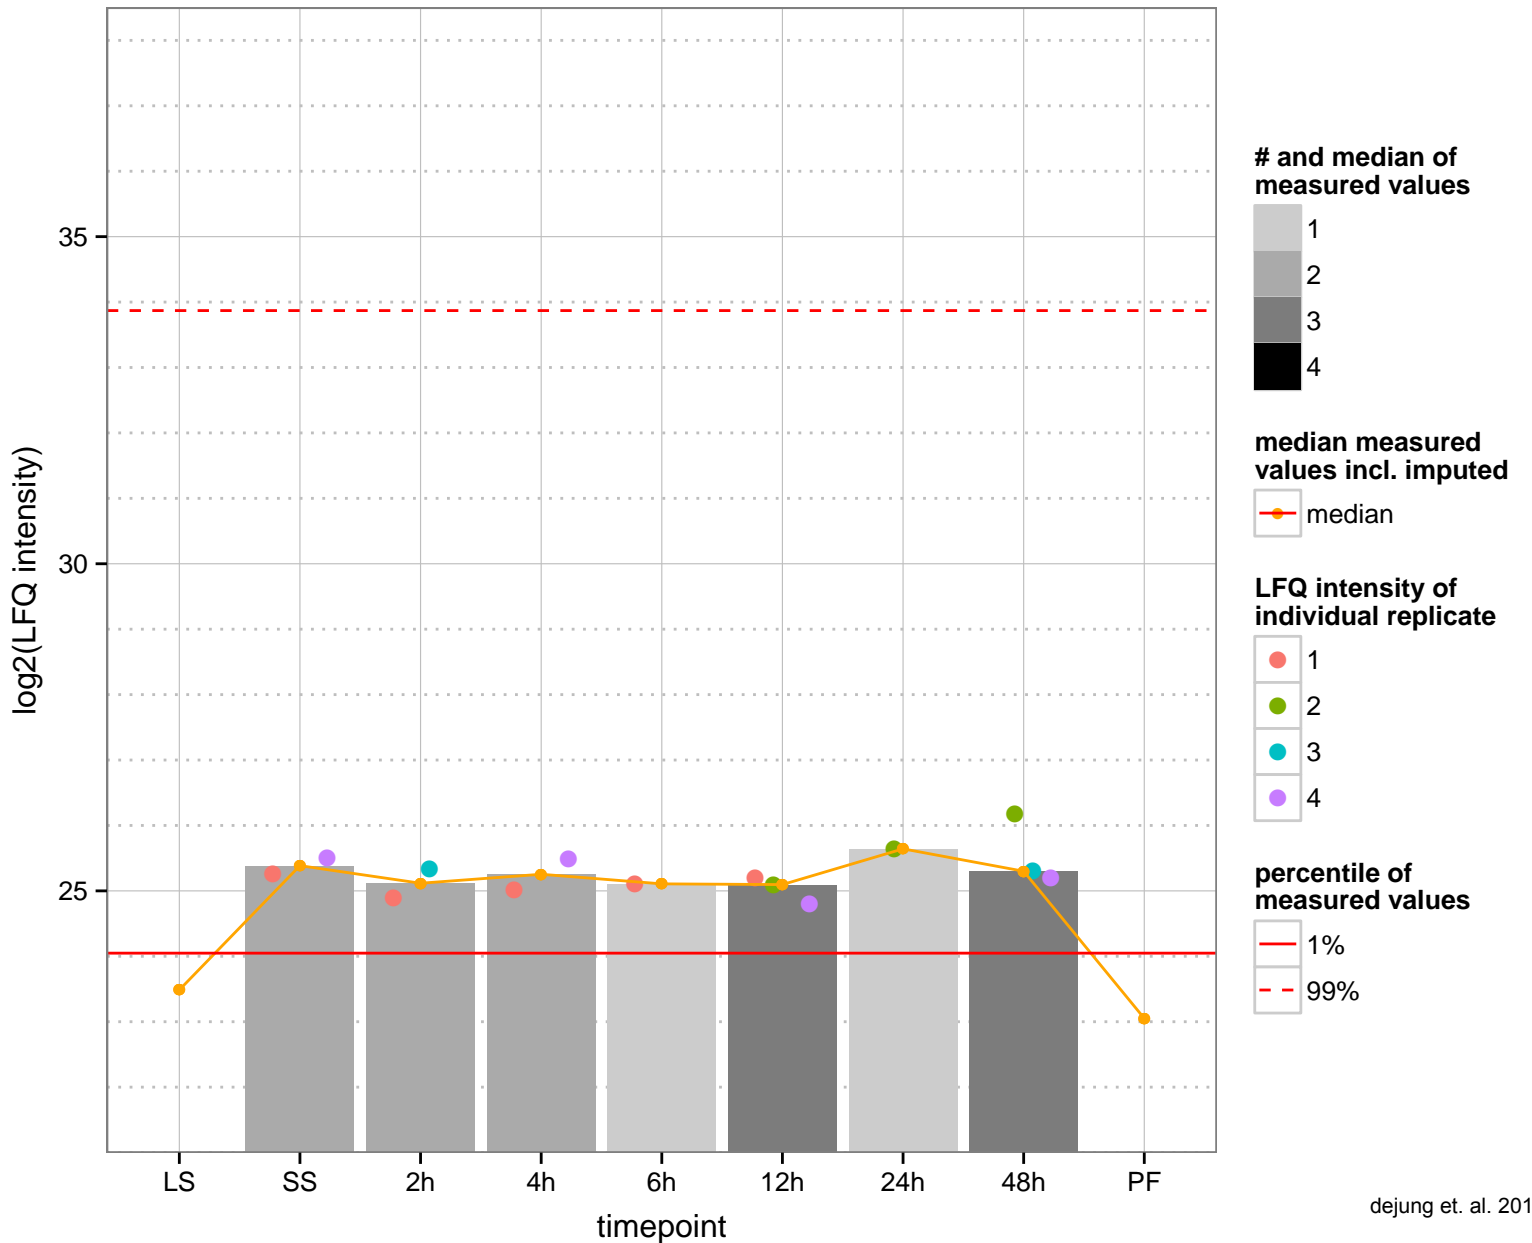

retrotransposon hot spot (RHS), putative, retrotransposon hot spot protein 4 (RHS4), retrotransposon hot spot protein (RHS, p  
 Tb927.2.470  
 AGOF: null  
 AGOC: null, nucleus  
 AGOP: null  
 PGO: null  
 PGO: null  
 PGO: null

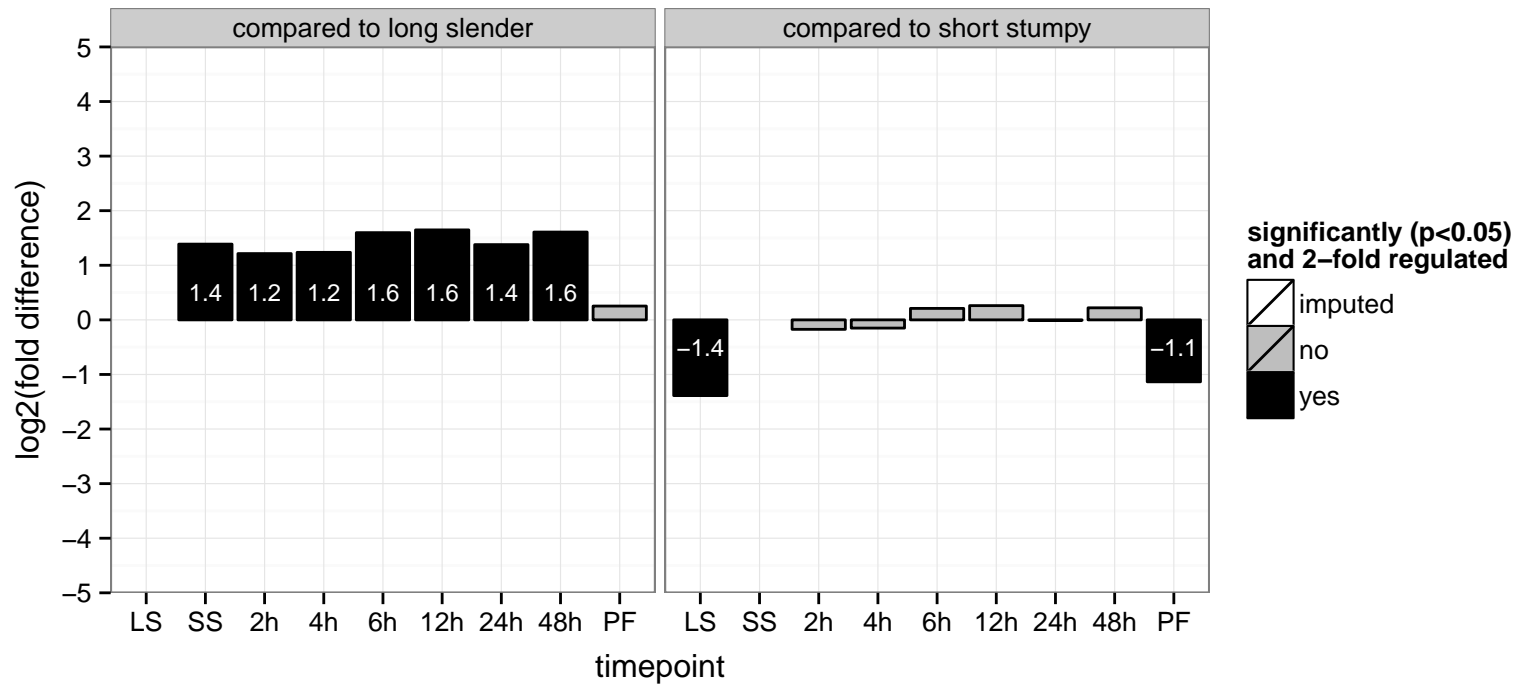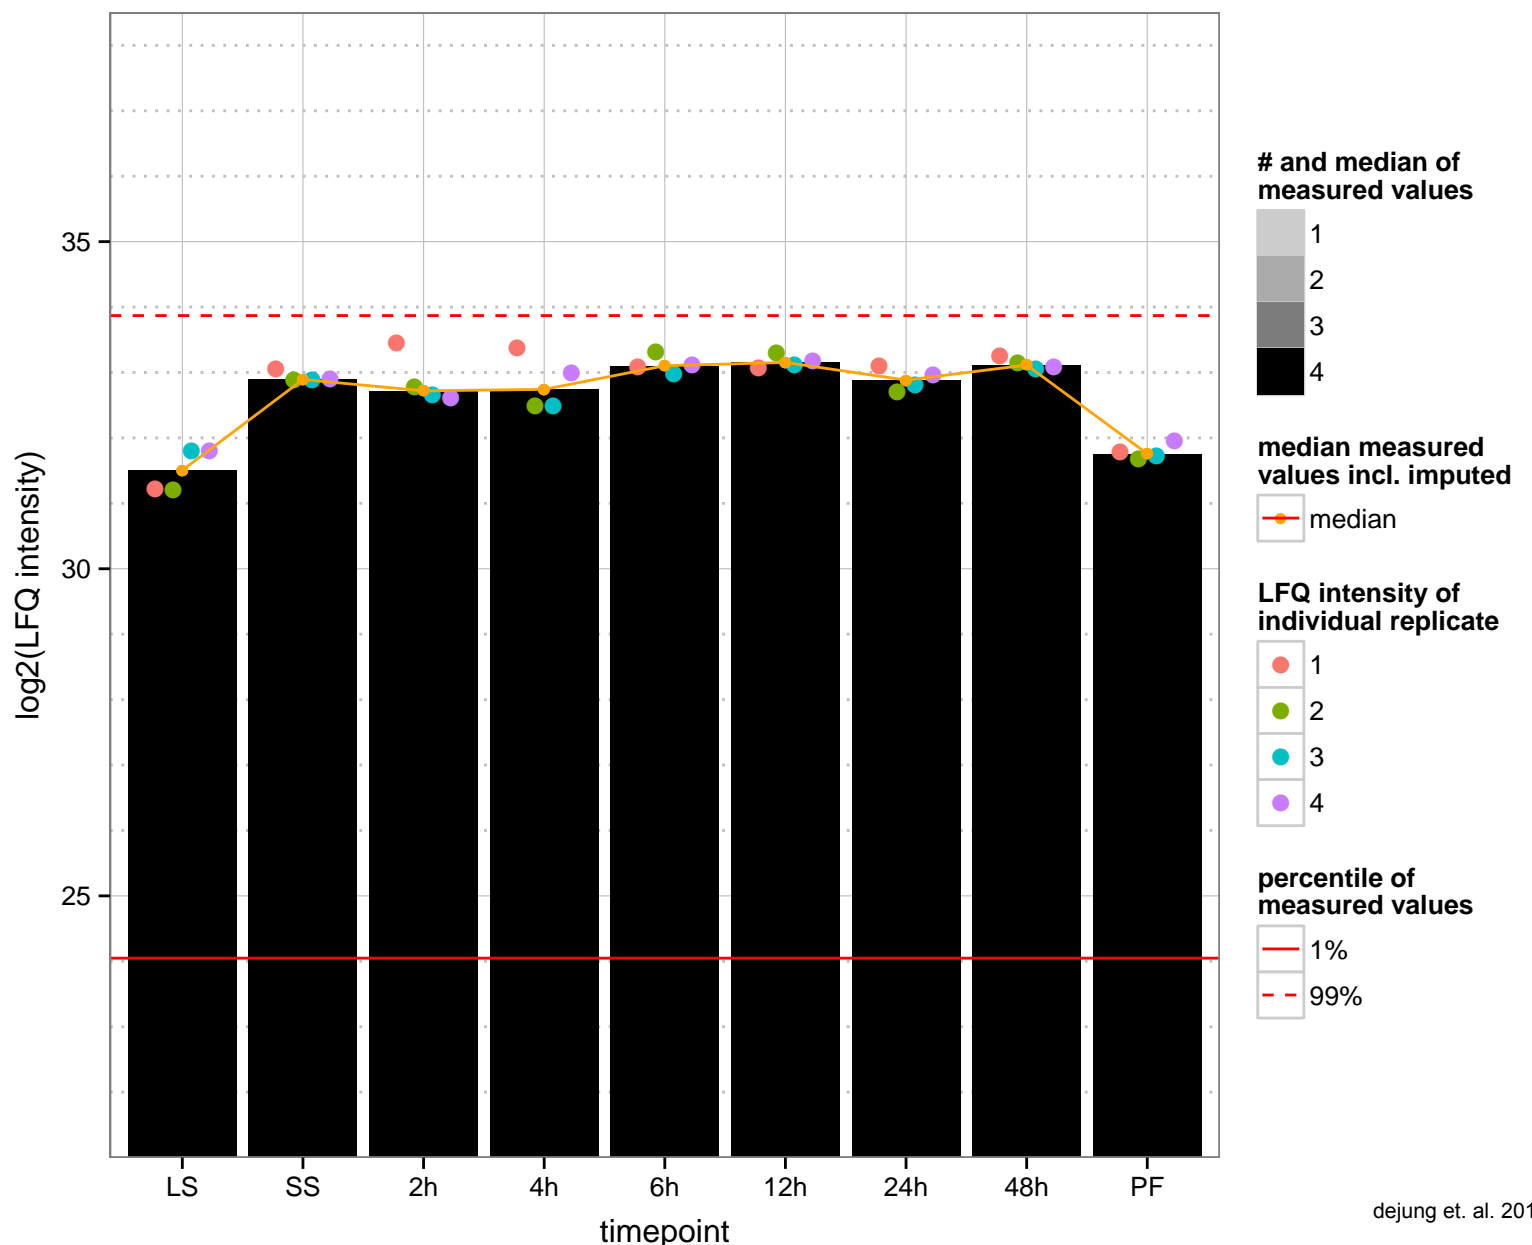

hypothetical protein, conserved  
 Tb927.2.4780  
 AGOF: null  
 AGOC: null  
 AGOP: null  
 PGO: null  
 PGOC: null  
 PGOP: null

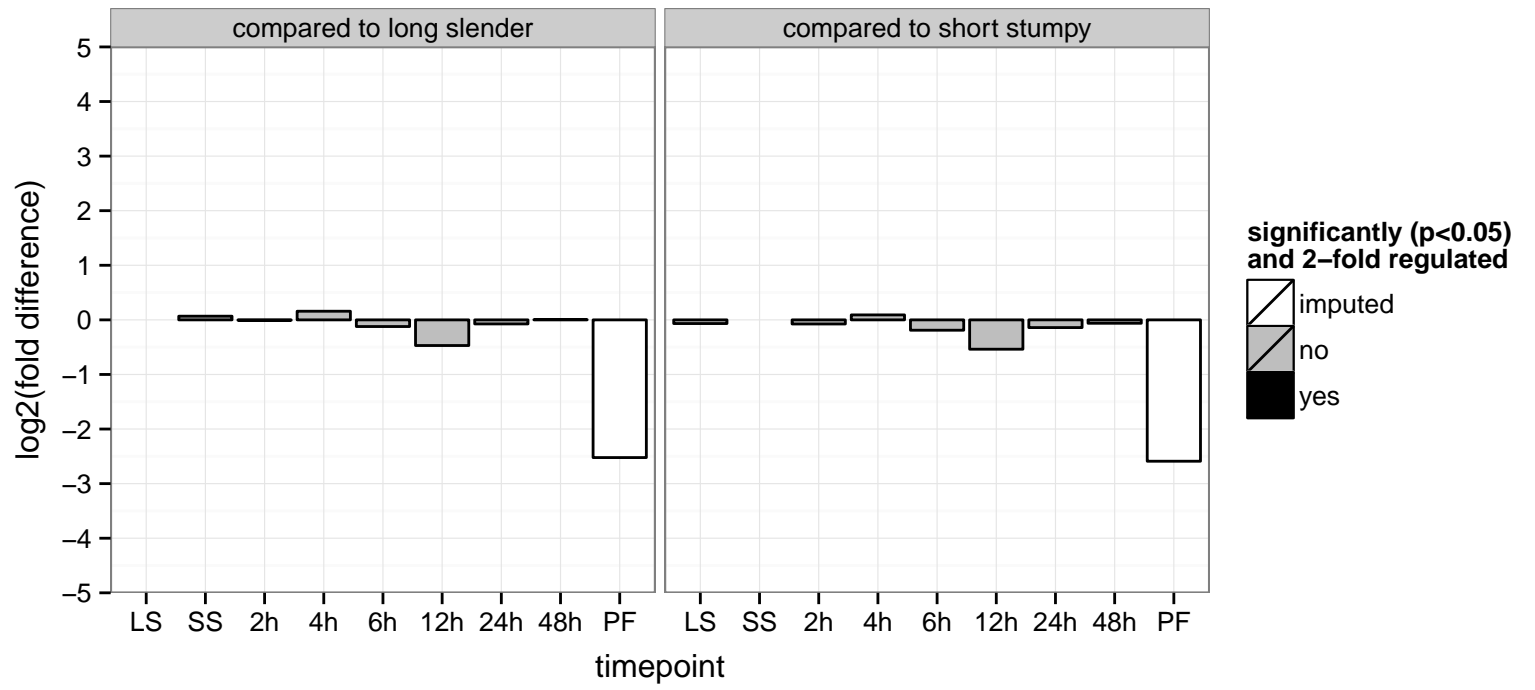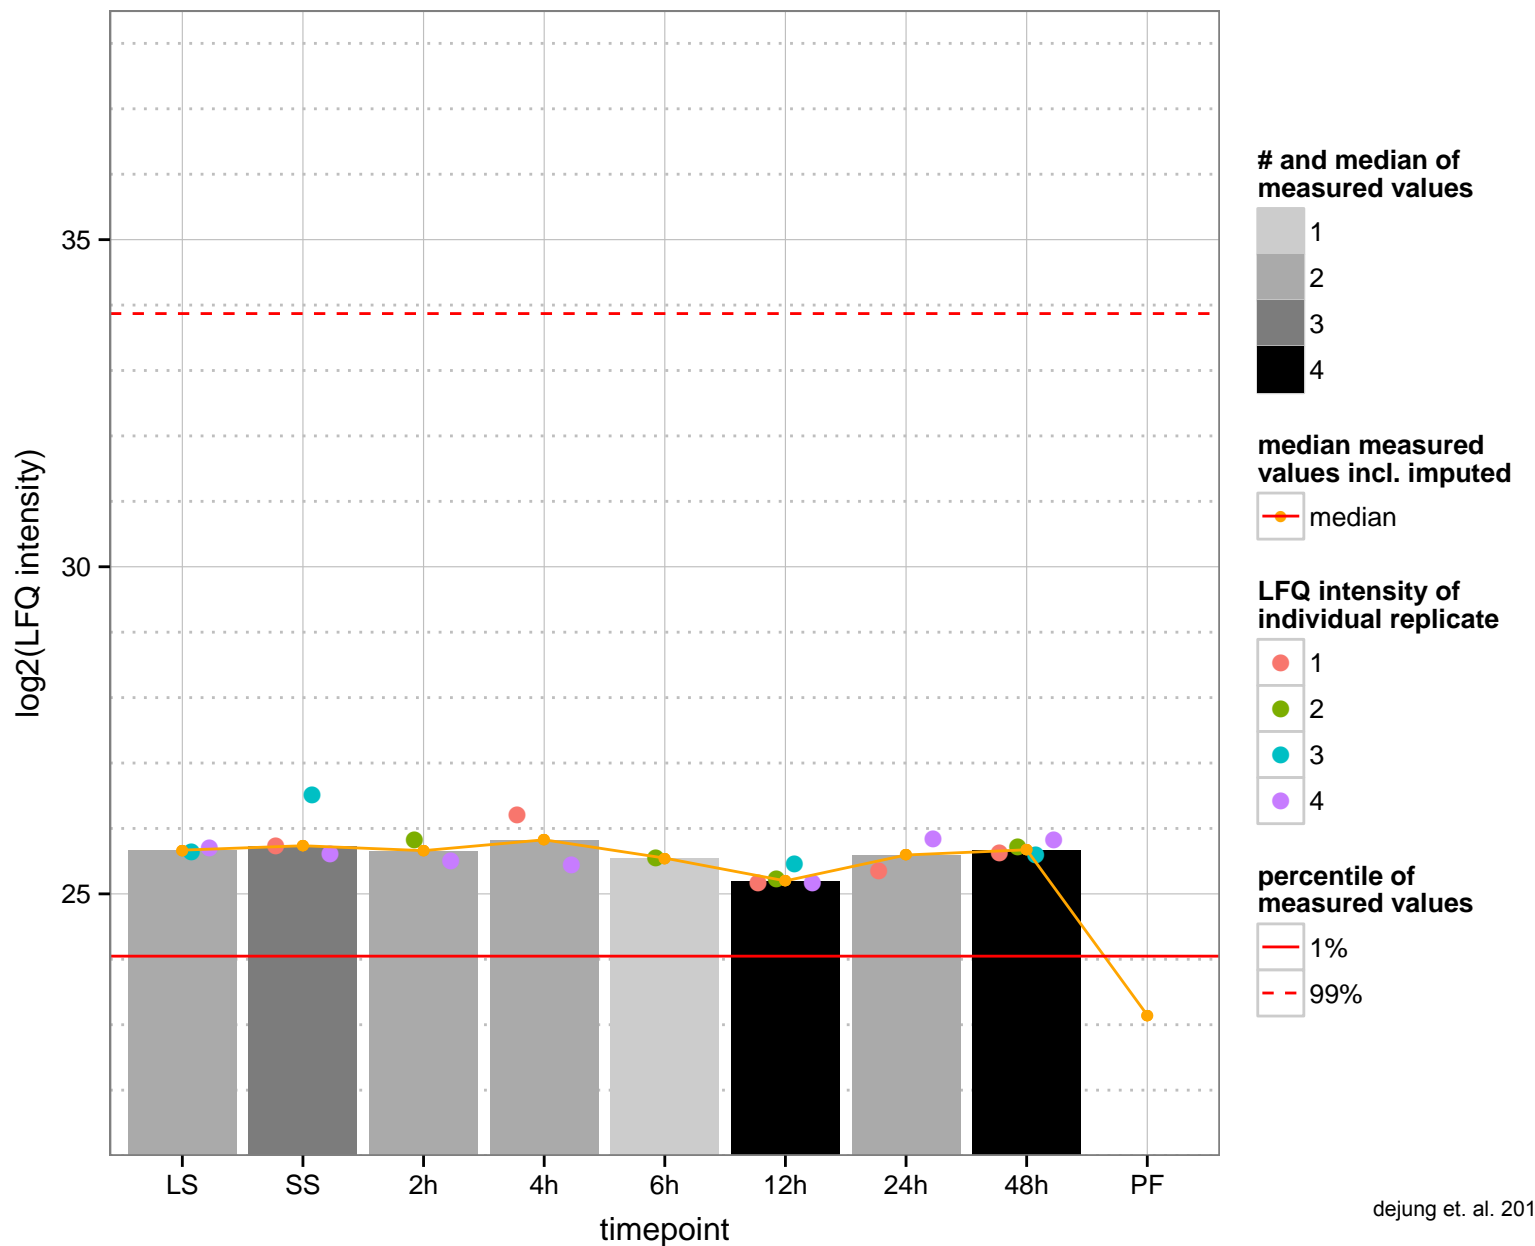



retrotransposon hot spot protein 4 (RHS4), putative, retrotransposon hot spot protein 7 (RHS7)  
 Tb927.2.560  
 AGOF: null  
 AGOC: nucleus, null  
 AGOP: null  
 PGO: null  
 PGO: null  
 PGO: null

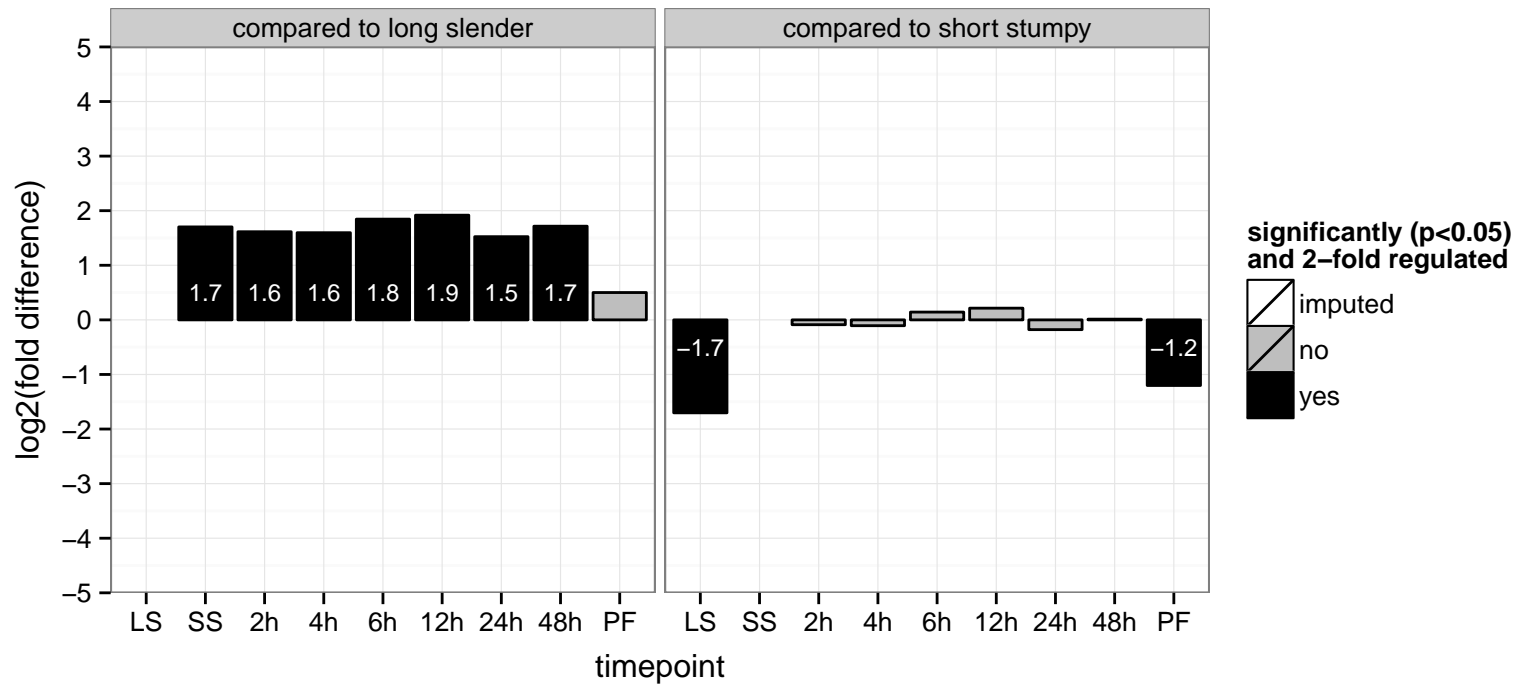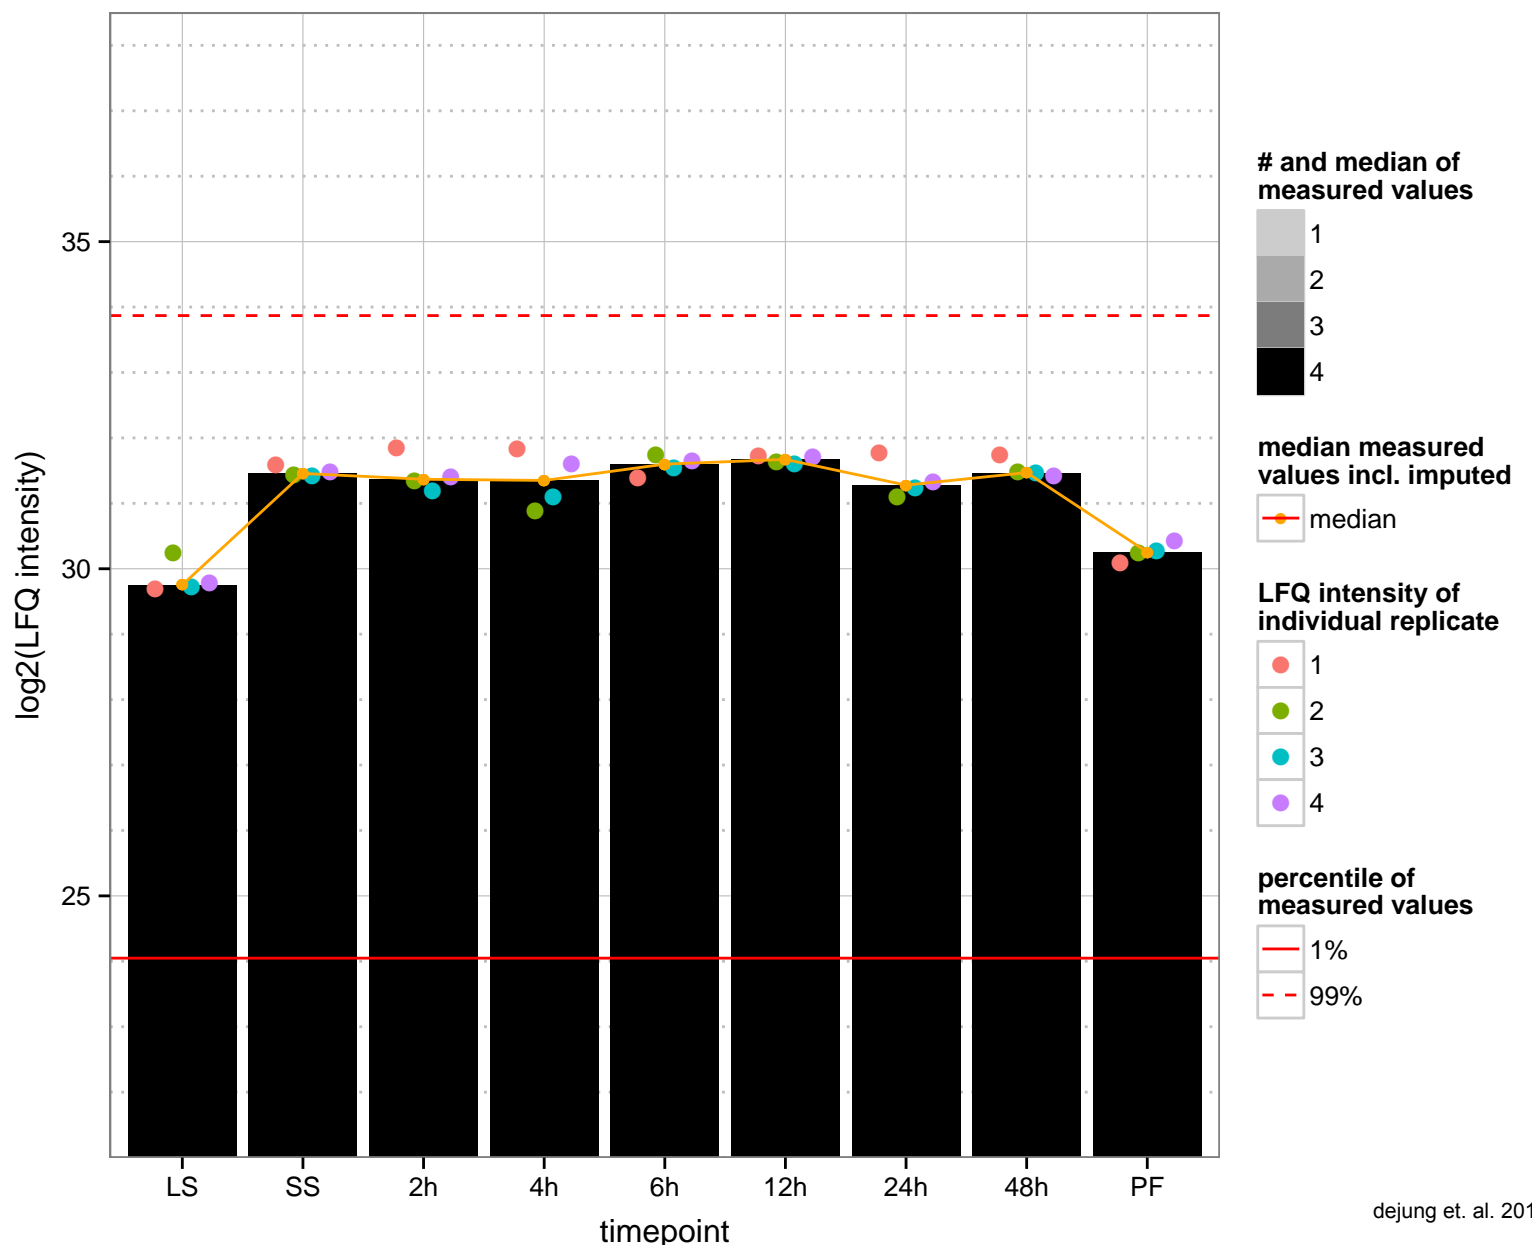

hypothetical protein, conserved  
 Tb927.3.1140  
 AGOF: RNA binding  
 AGOC: null  
 AGOP: RNA processing  
 PGOF: RNA binding  
 PGO: null  
 PGOP: RNA processing

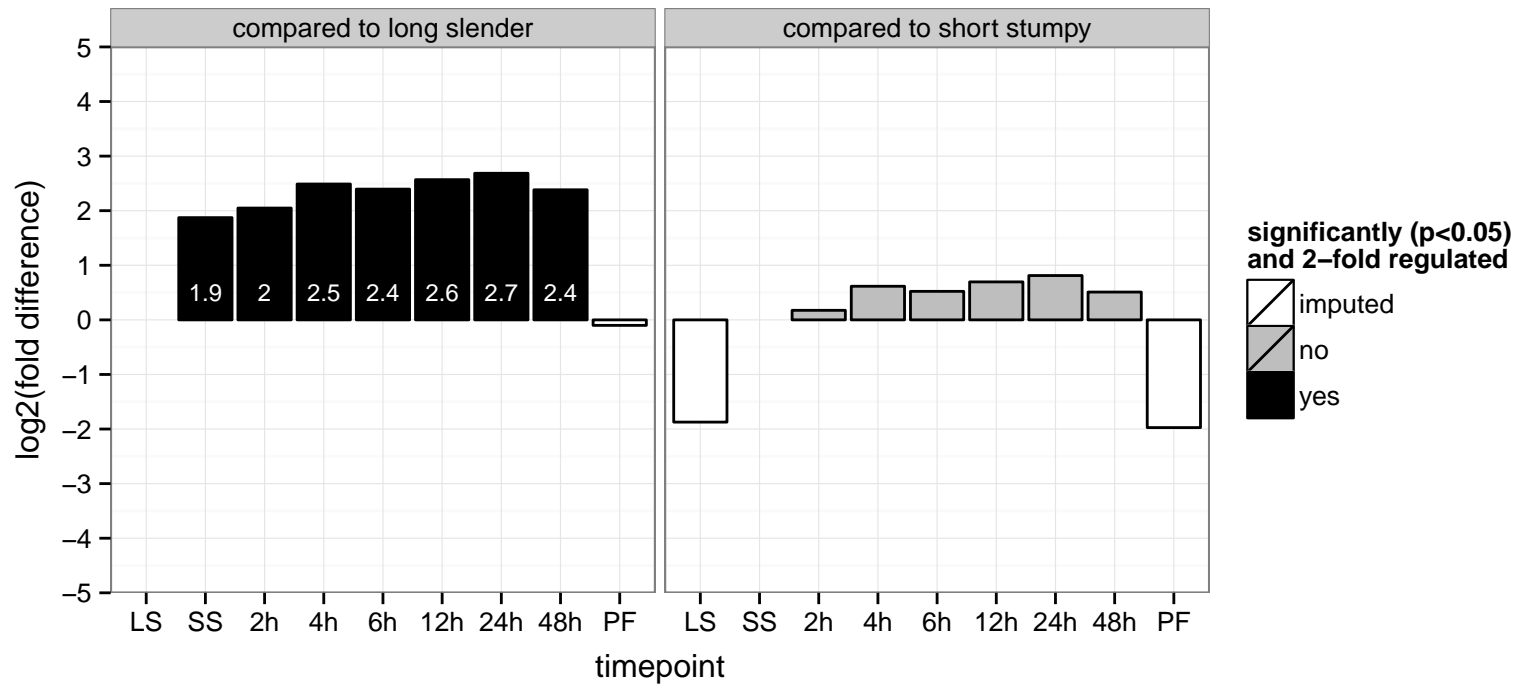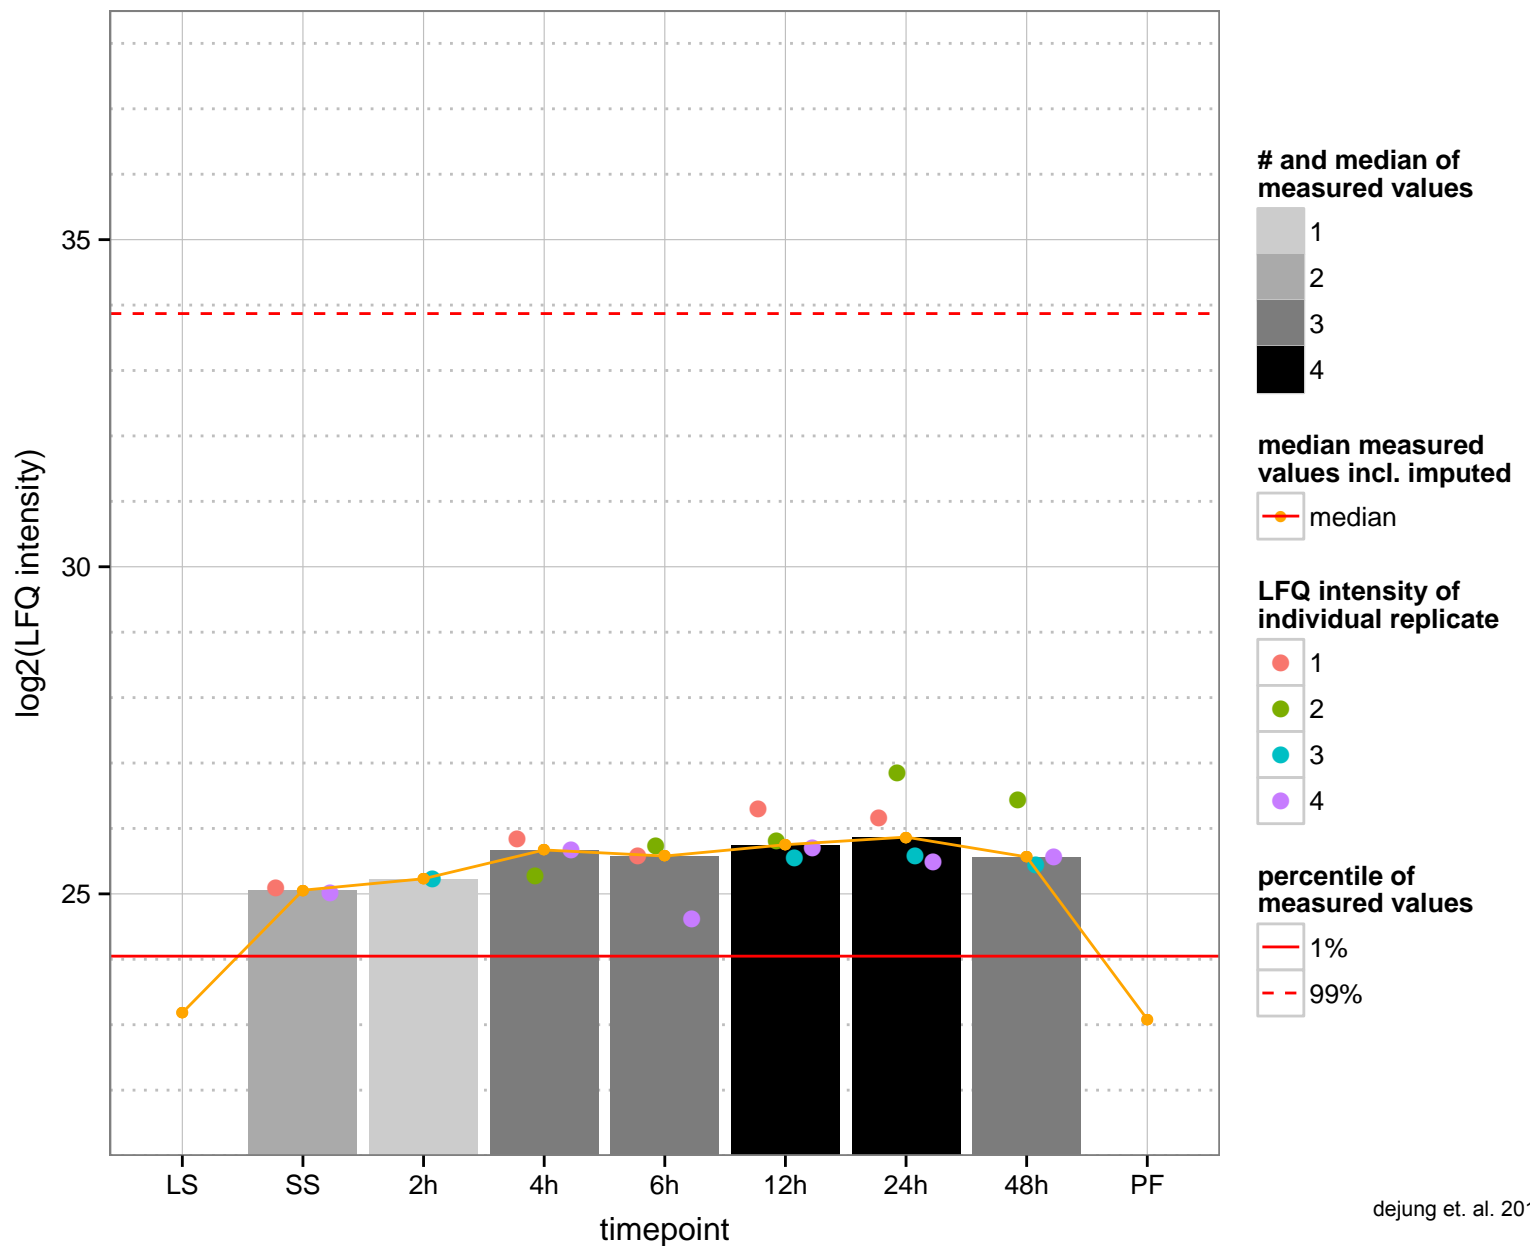

hypothetical protein, conserved  
 Tb927.3.1800  
 AGOF: null  
 AGOC: null  
 AGOP: null  
 PGO: null  
 PGOC: null  
 PGOP: null

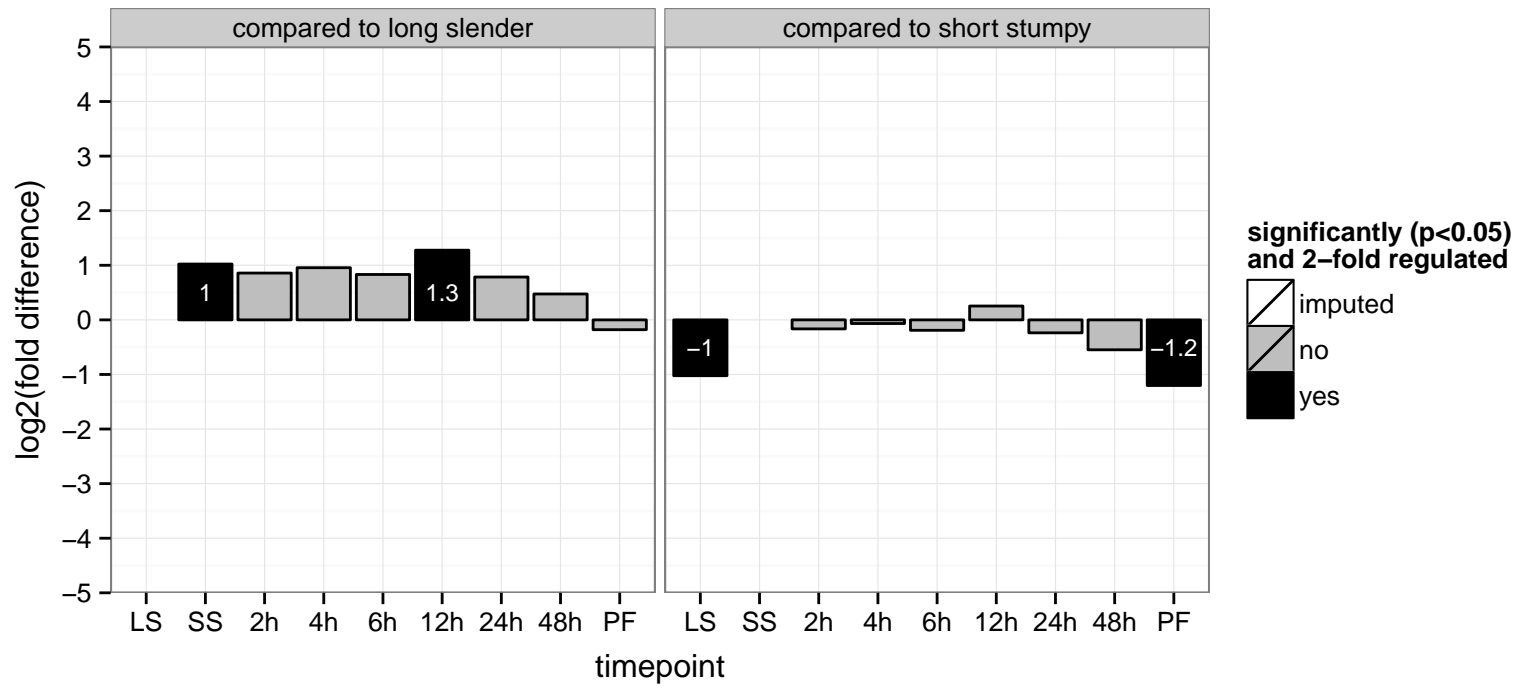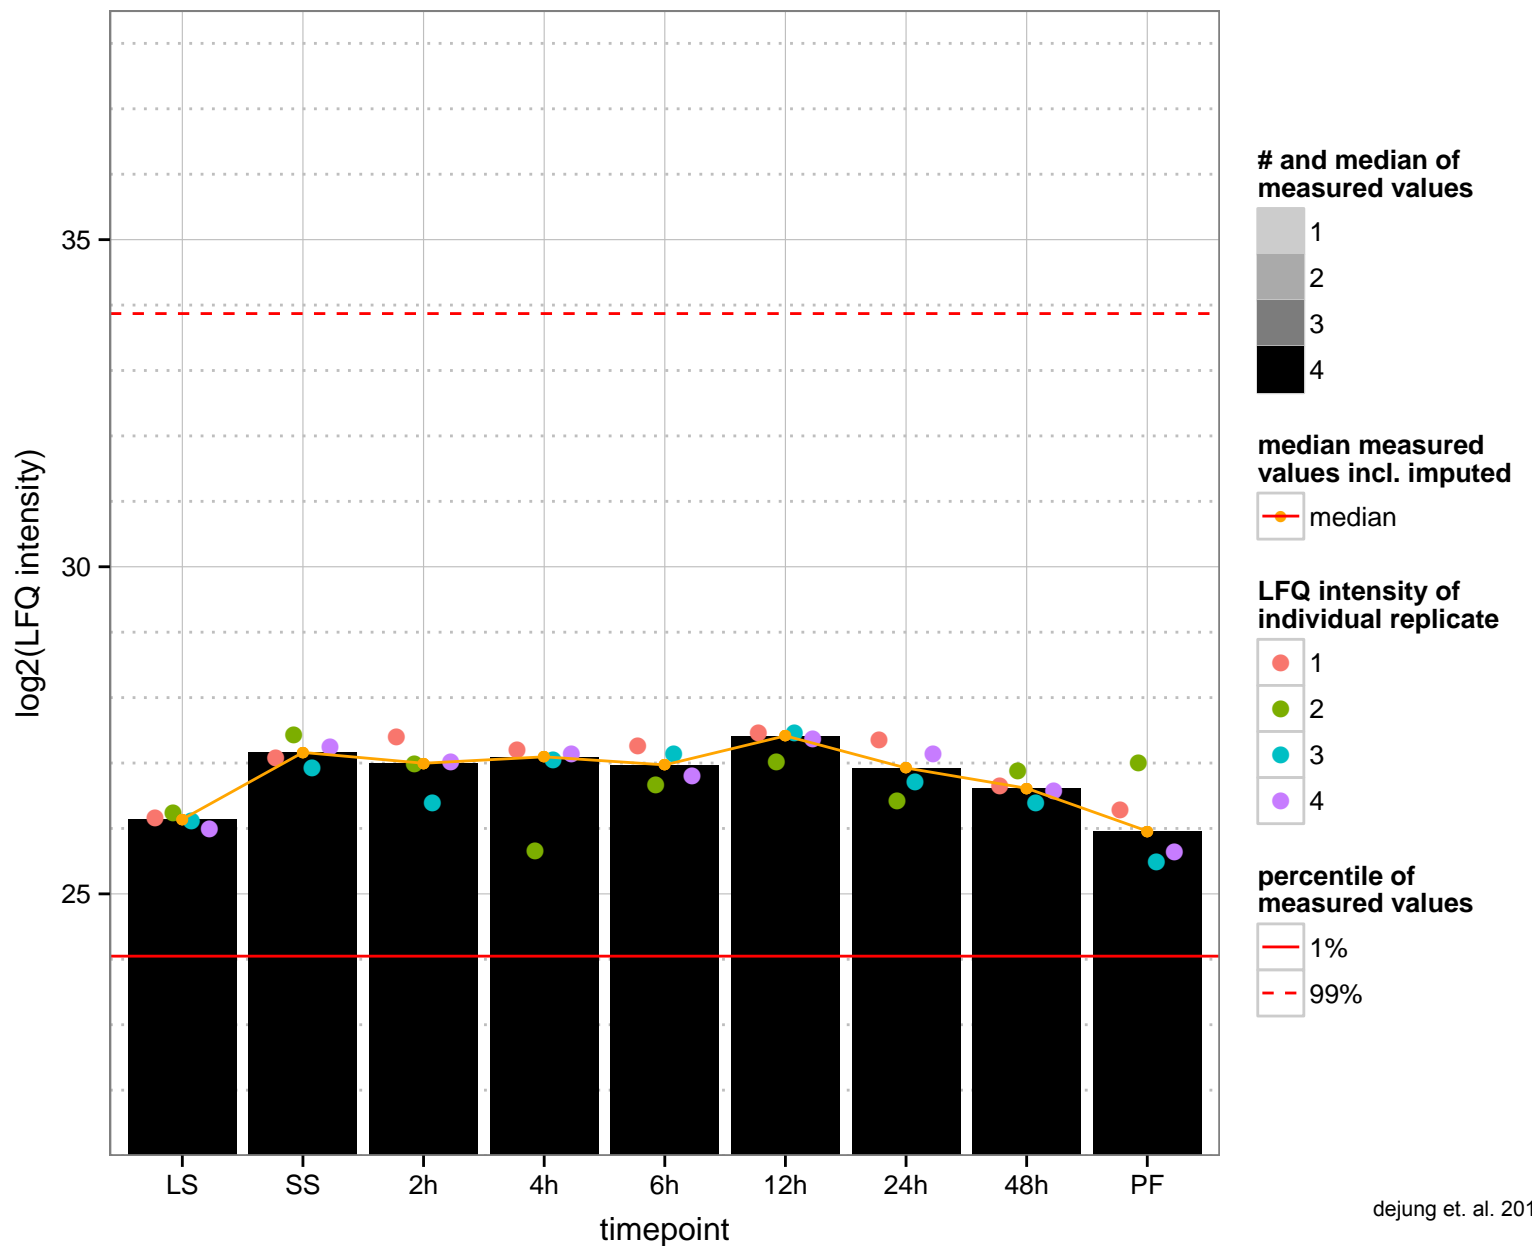

hypothetical protein, conserved  
 Tb927.3.1980  
 AGOF: null  
 AGOC: null  
 AGOP: null  
 PGO: null  
 PGOC: null  
 PGOP: null

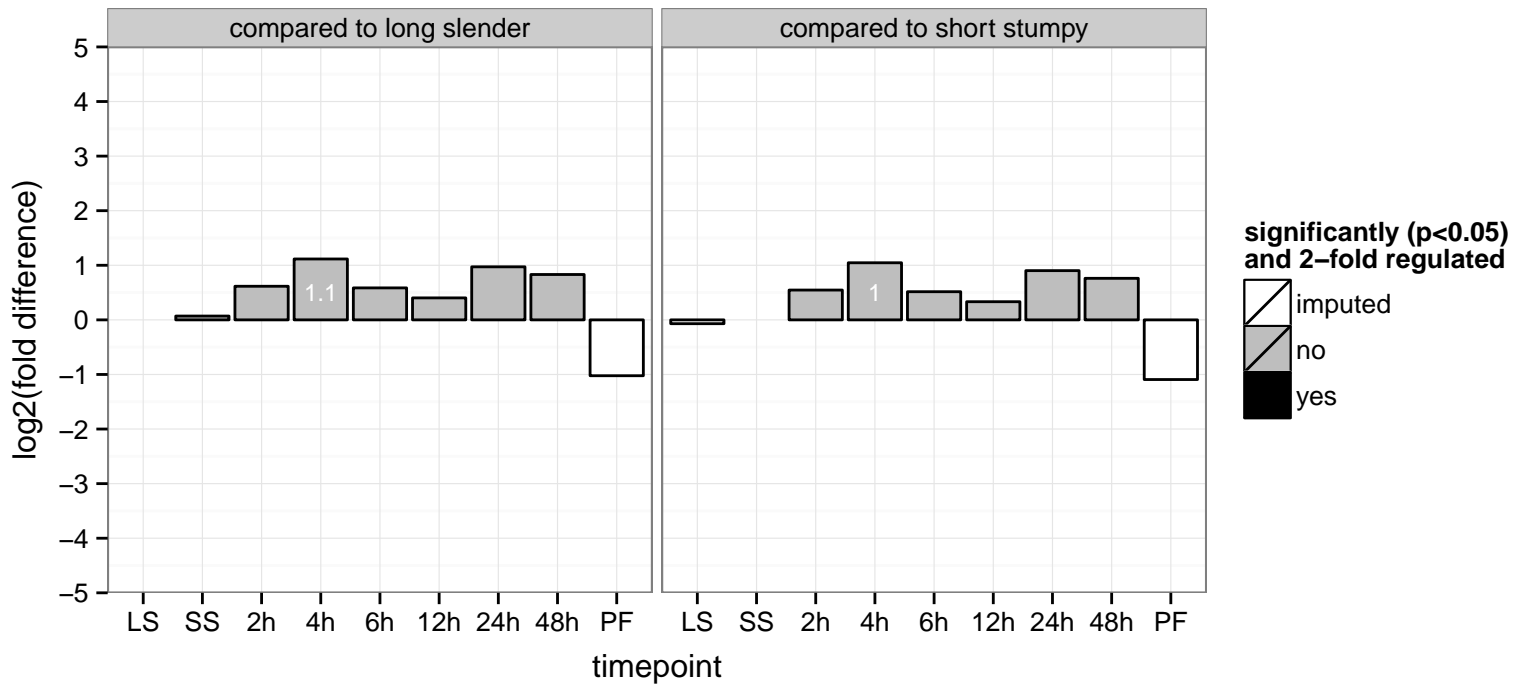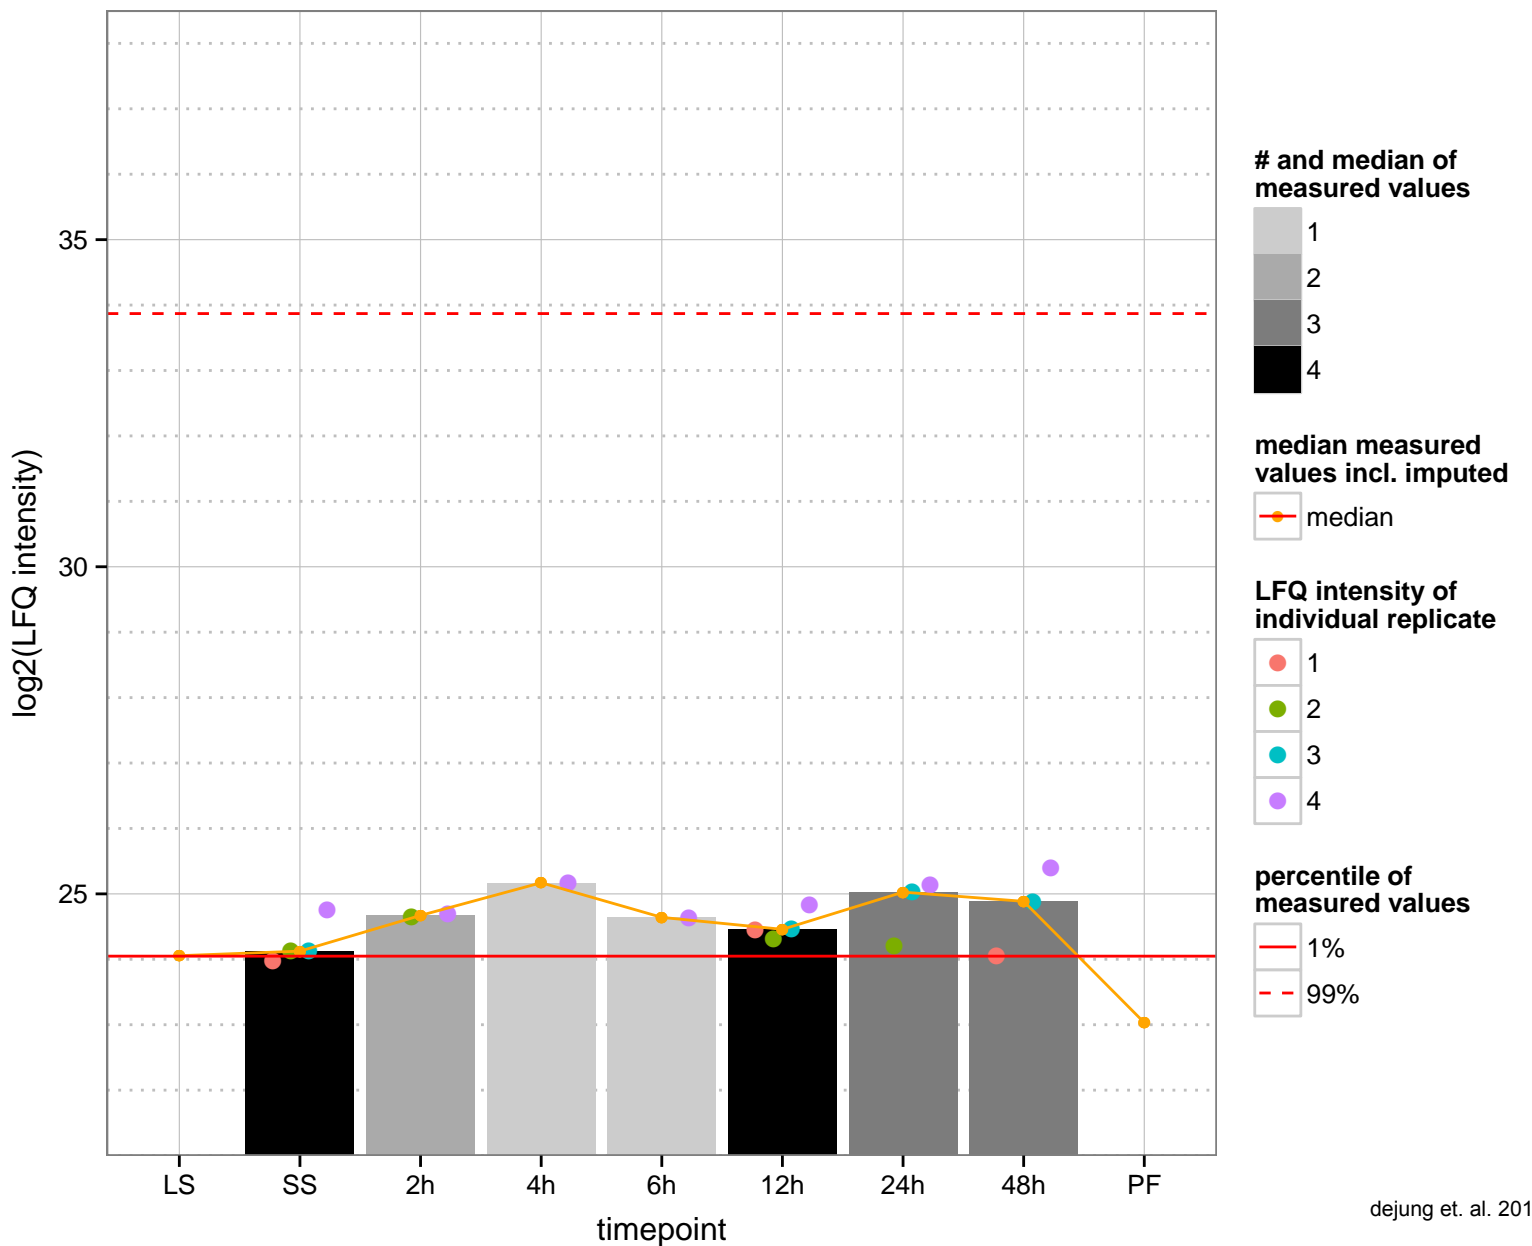

RNA-binding protein, putative (RBP21)  
 Tb927.3.2000  
 AGOF: null  
 AGOC: null  
 AGOP: null  
 PGOF: null  
 PGOC: null  
 PGOP: null

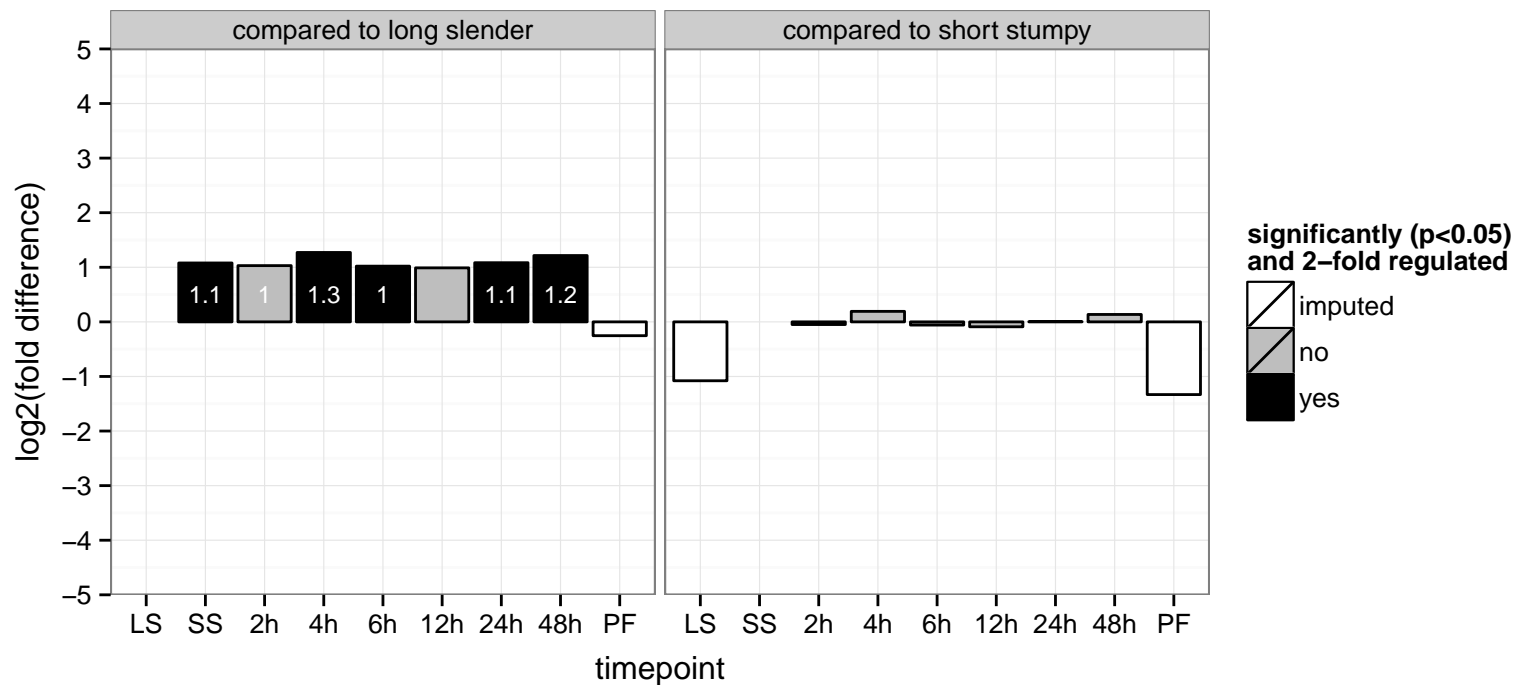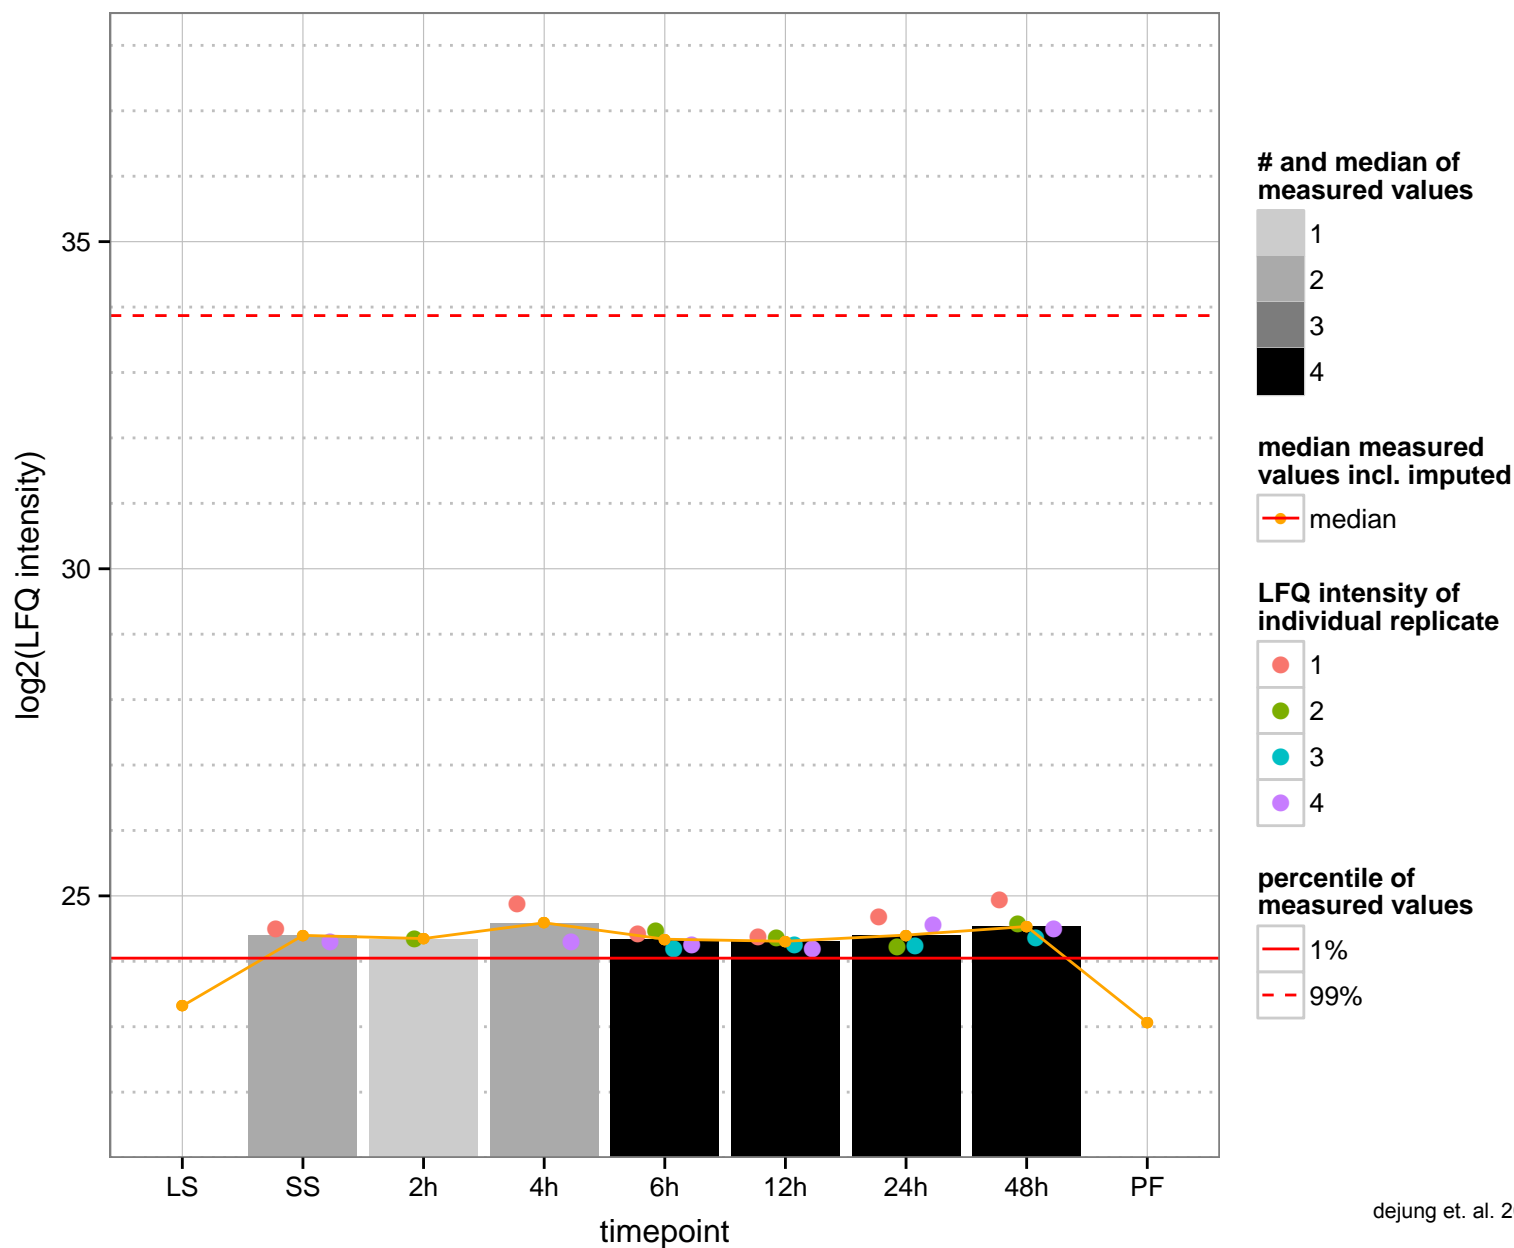

vacuolar sorting protein 33, putative

Tb927.3.2280

AGOF: null

AGOC: null

AGOP: vesicle docking involved in exocytosis, vesicle-mediated transport

PGOF: null

PGOC: null

PGOP: vesicle docking involved in exocytosis, vesicle-mediated transport

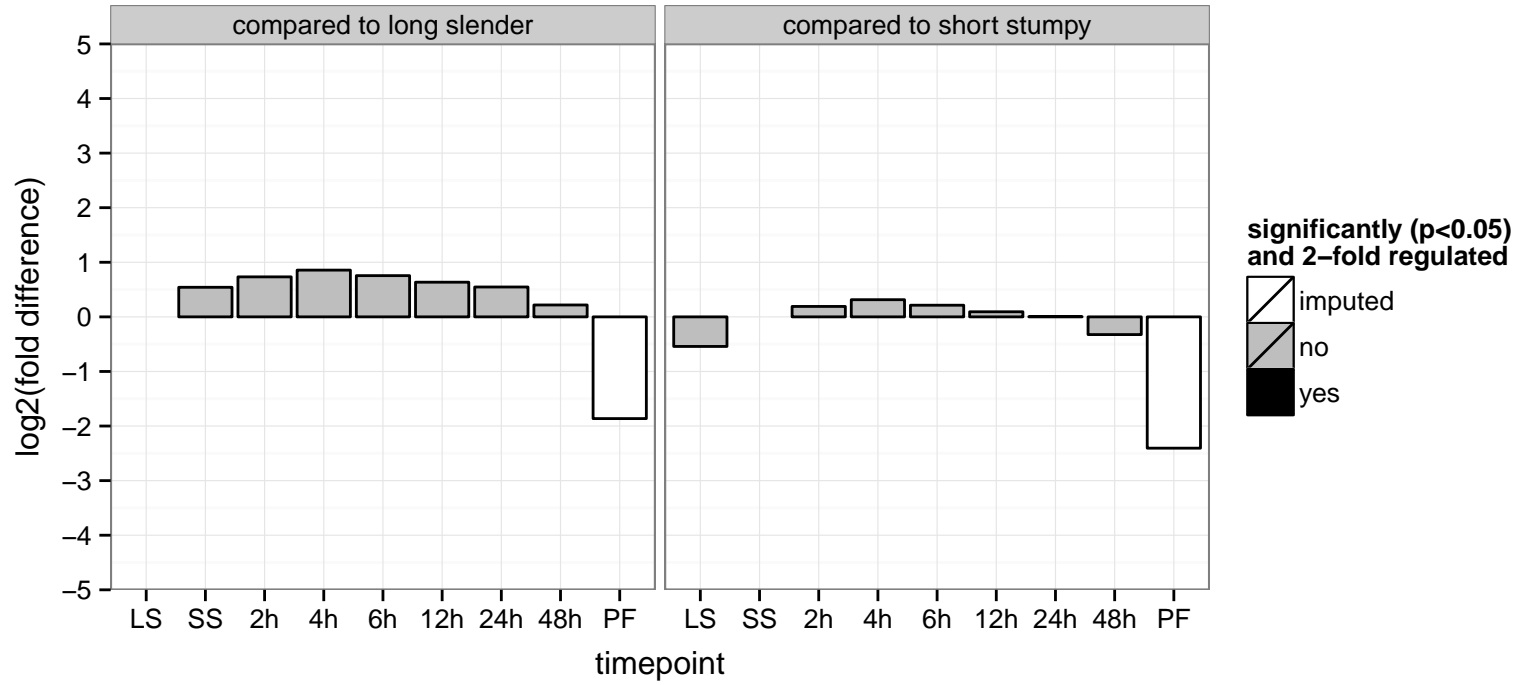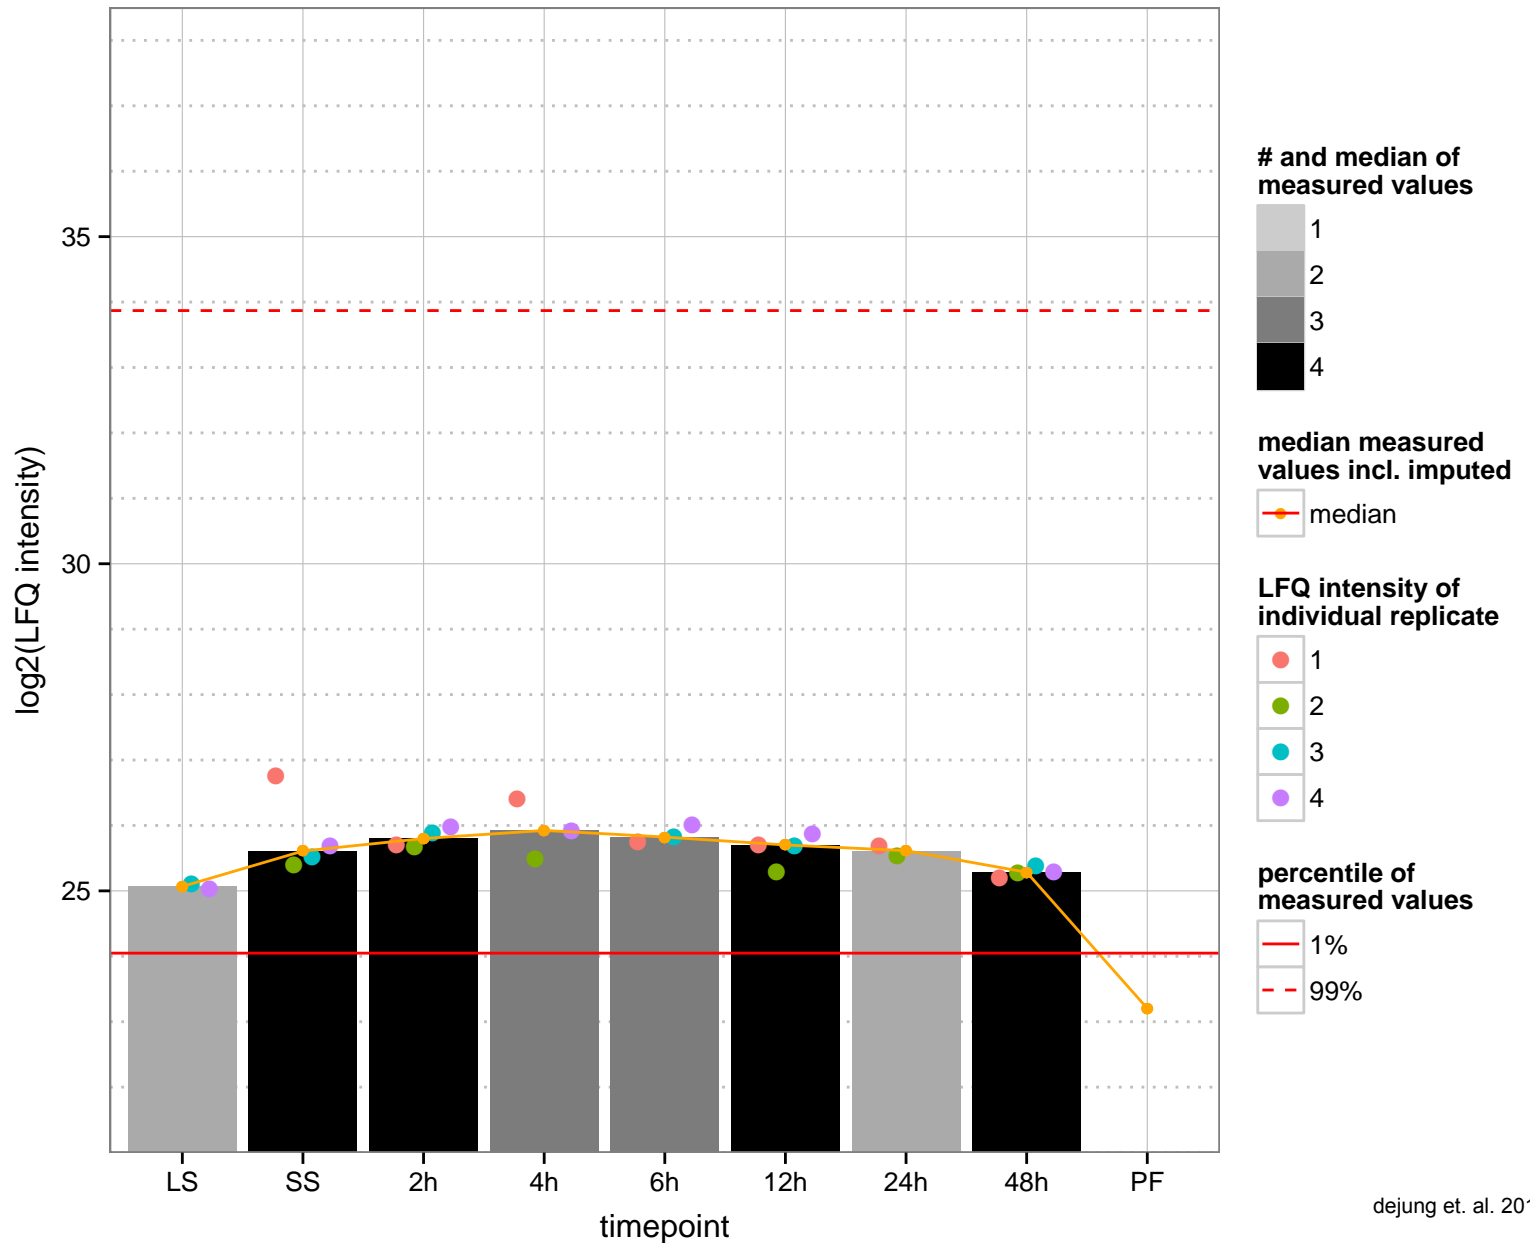

hypothetical protein, conserved  
 Tb927.3.2870  
 AGOF: copper ion binding, oxidoreductase activity  
 AGOC: null  
 AGOP: null  
 PGOF: copper ion binding, oxidoreductase activity  
 PGOC: null  
 PGOP: oxidation–reduction process

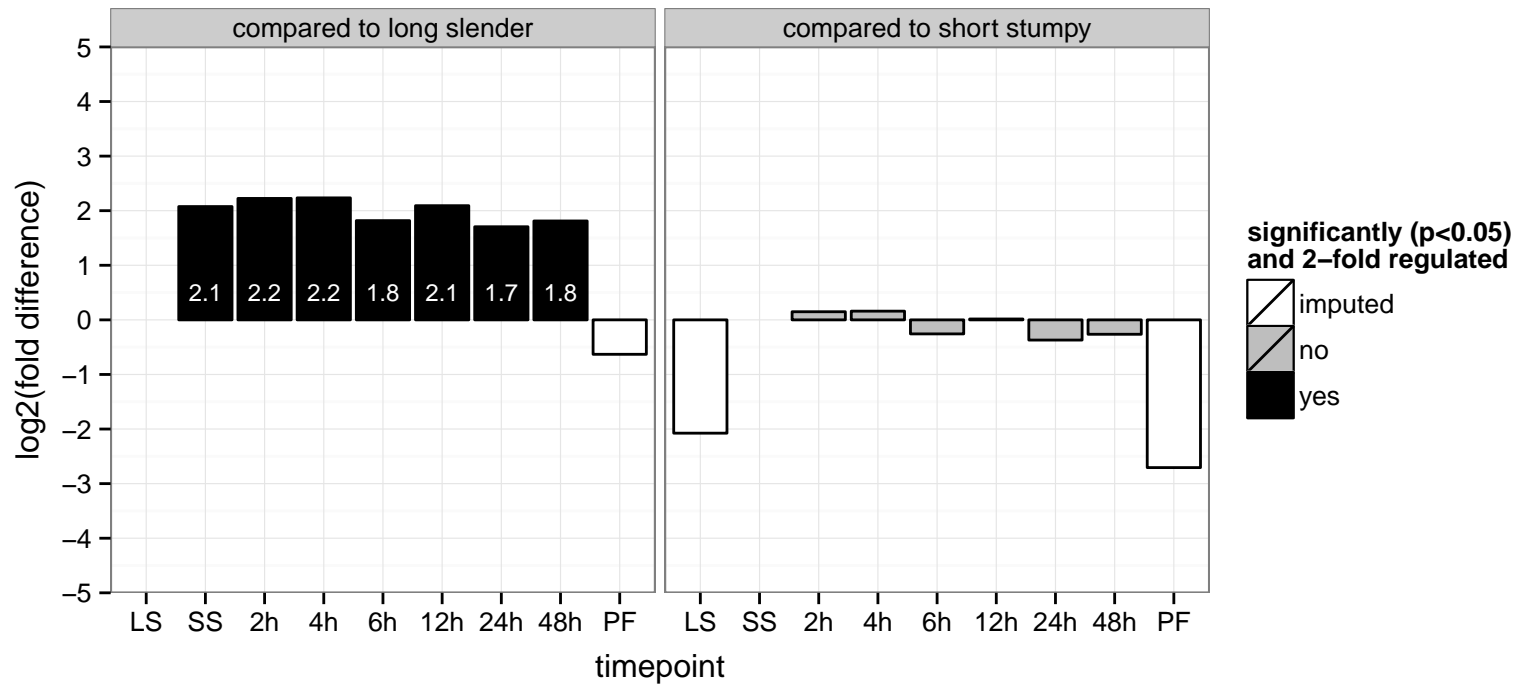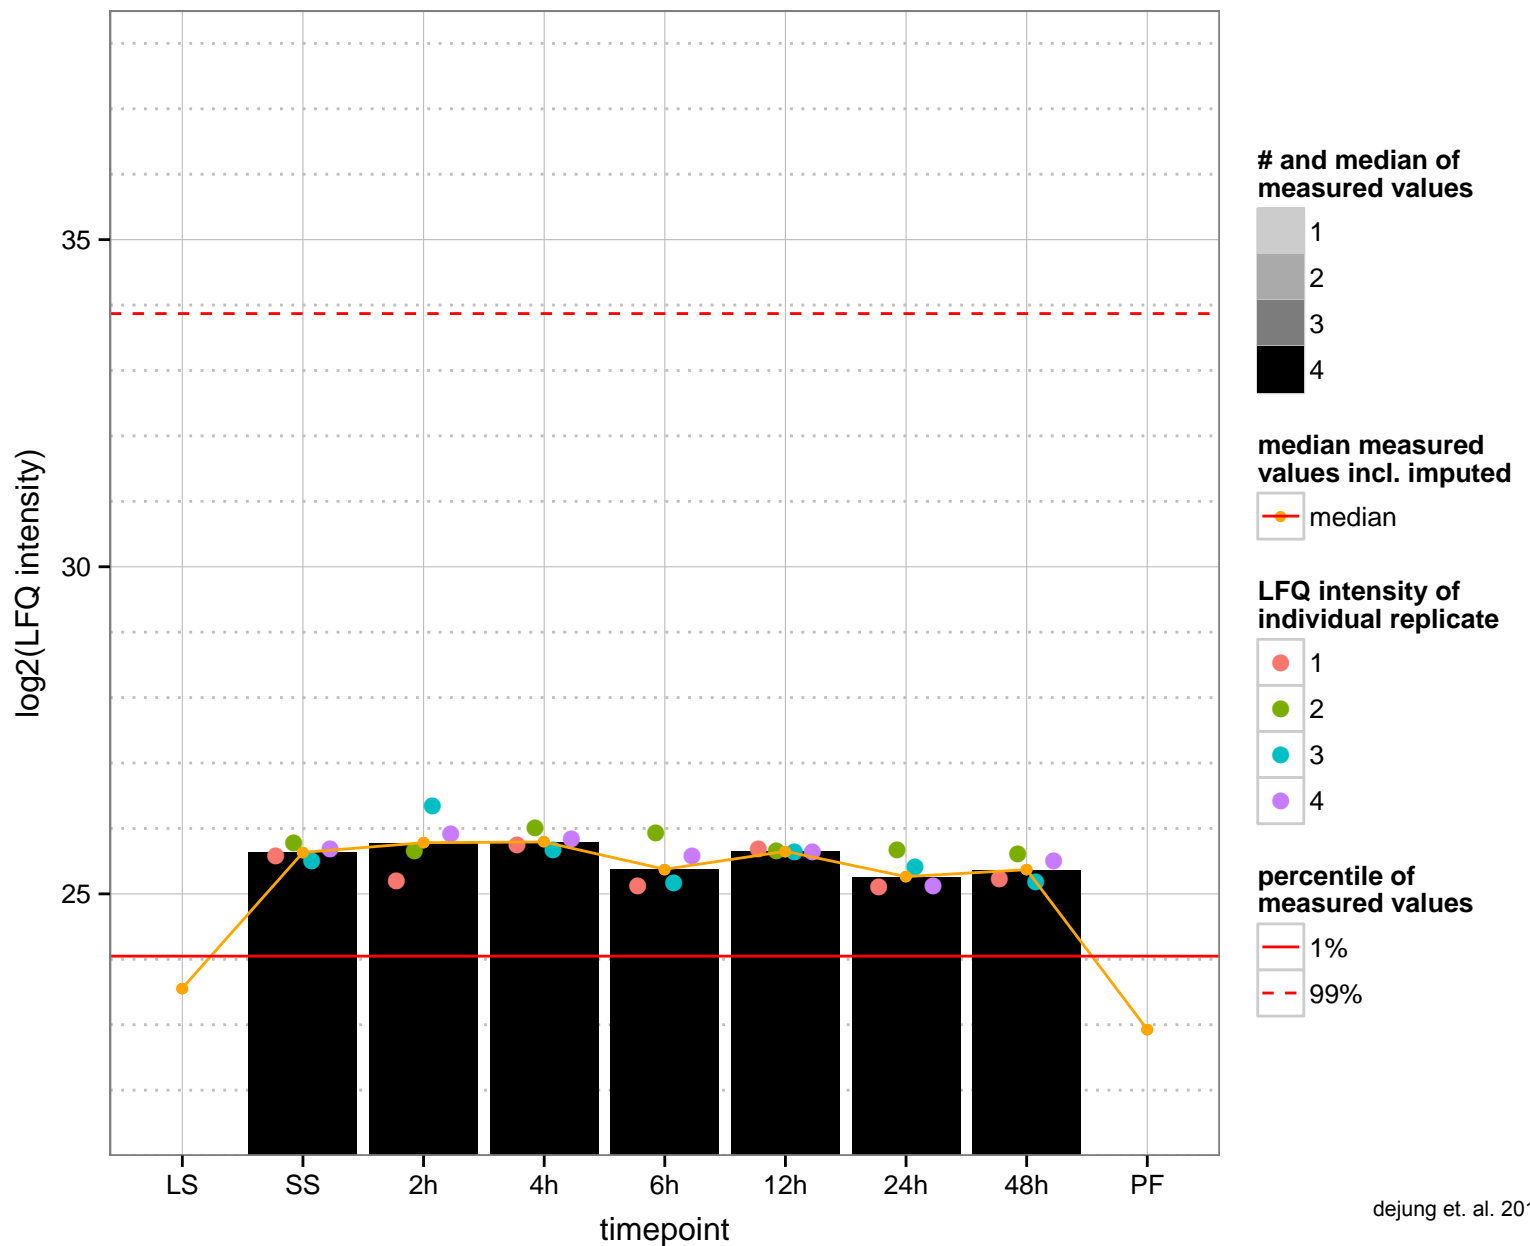

serine/threonine-protein kinase, putative, protein kinase

Tb927.3.3190

AGOF: ATP binding, protein kinase activity, protein serine/threonine kinase activity, protein tyrosine kinase activity

AGOC: null

AGOP: protein phosphorylation

PGOF: ATP binding, protein kinase activity, transferase activity, transferring phosphorus-containing groups

PGOC: null

PGOP: protein phosphorylation

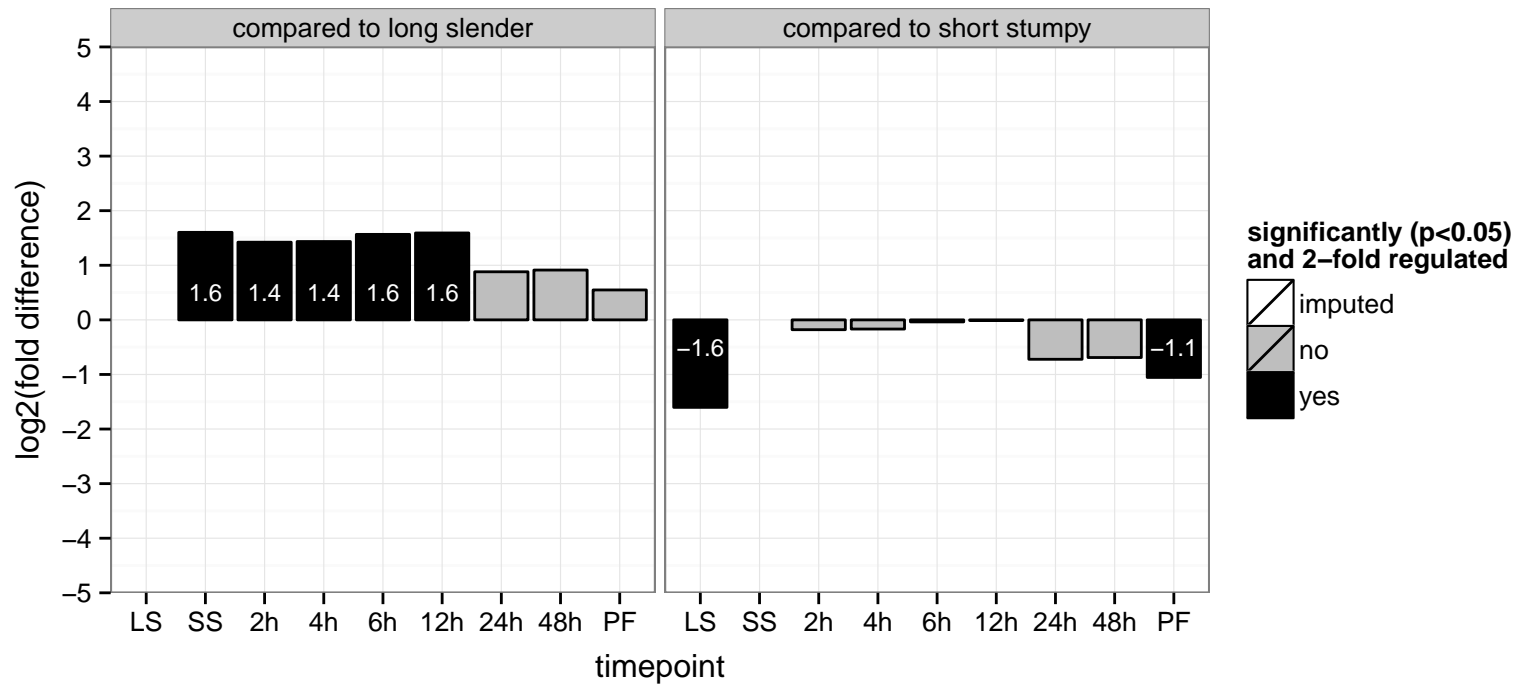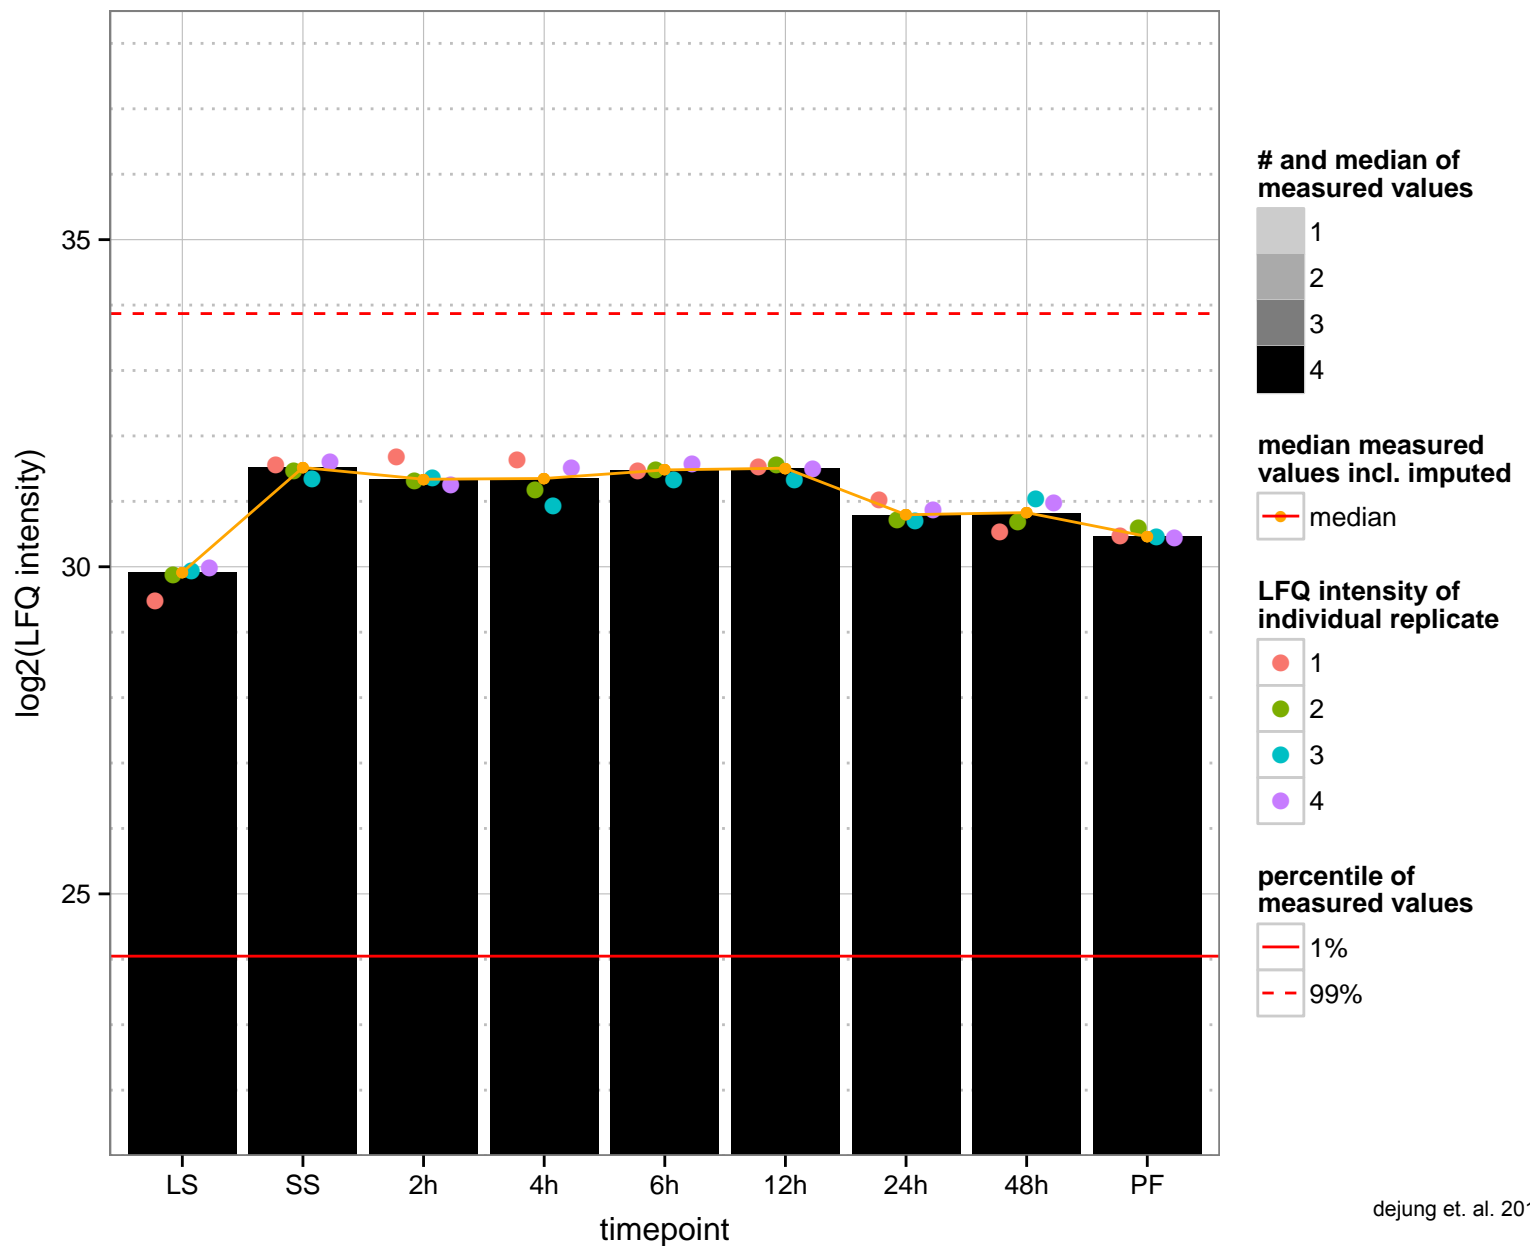



acyltransferase, putative  
 Tb927.3.3360  
 AGOF: transferase activity, transferring acyl groups  
 AGOC: null  
 AGOP: metabolic process  
 PGOF: transferase activity, transferring acyl groups  
 PGO: null  
 PGOP: metabolic process

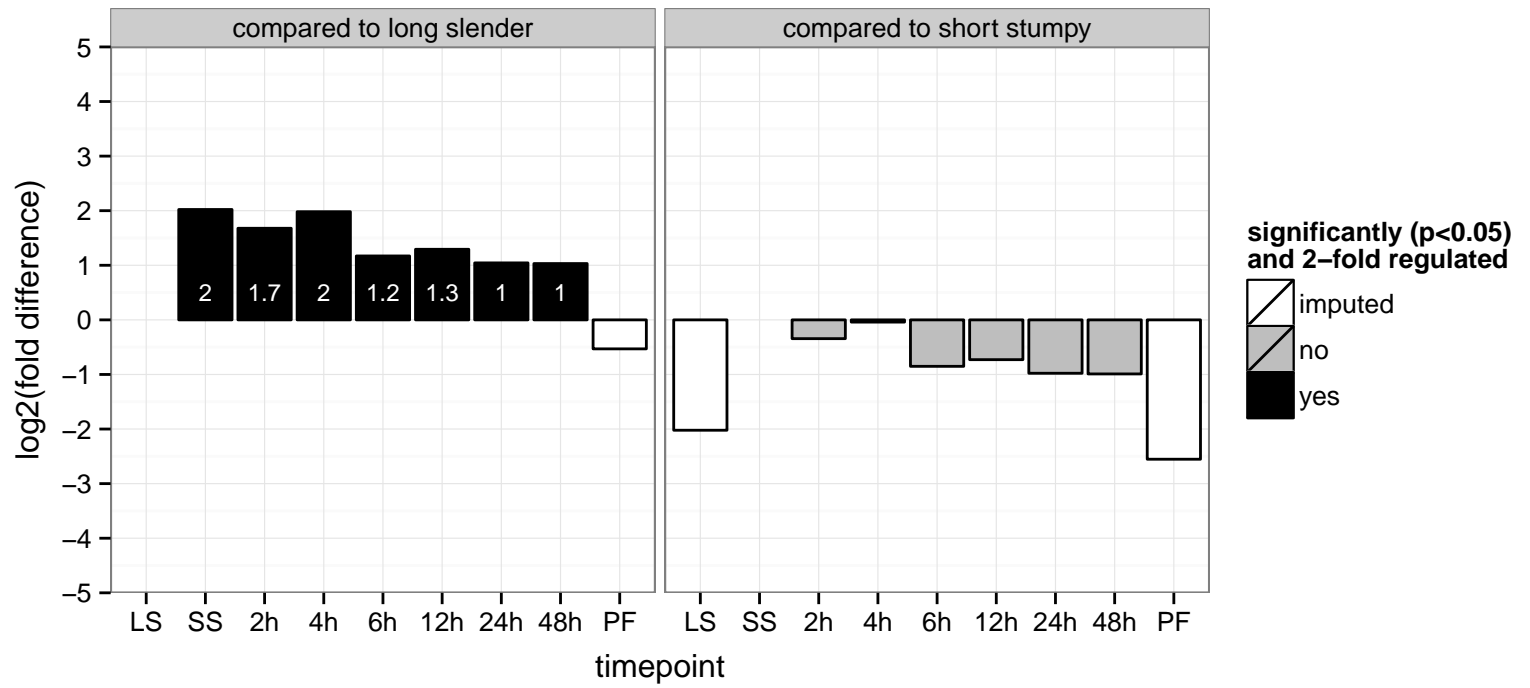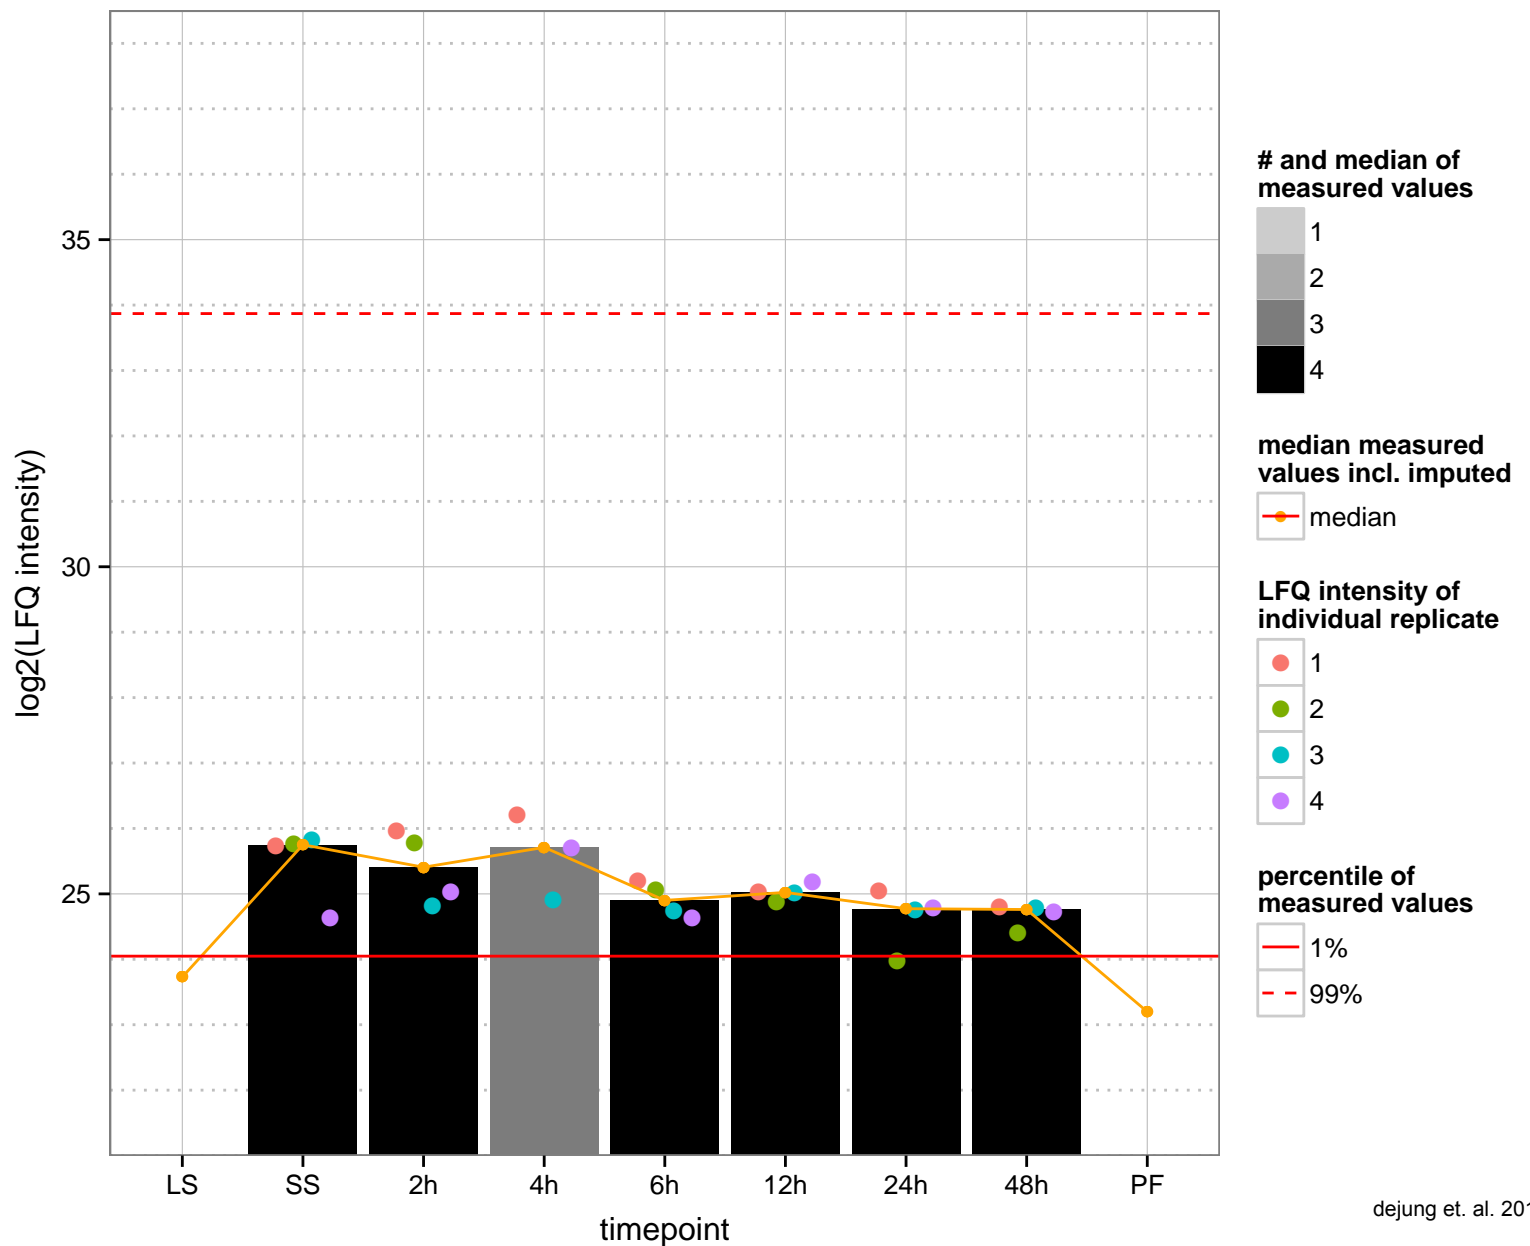

lipase domain protein, putative  
 Tb927.3.3870  
 AGOF: triglyceride lipase activity  
 AGOC: null  
 AGOP: lipid metabolic process  
 PGO: triglyceride lipase activity  
 PGOC: null  
 PGOP: lipid metabolic process

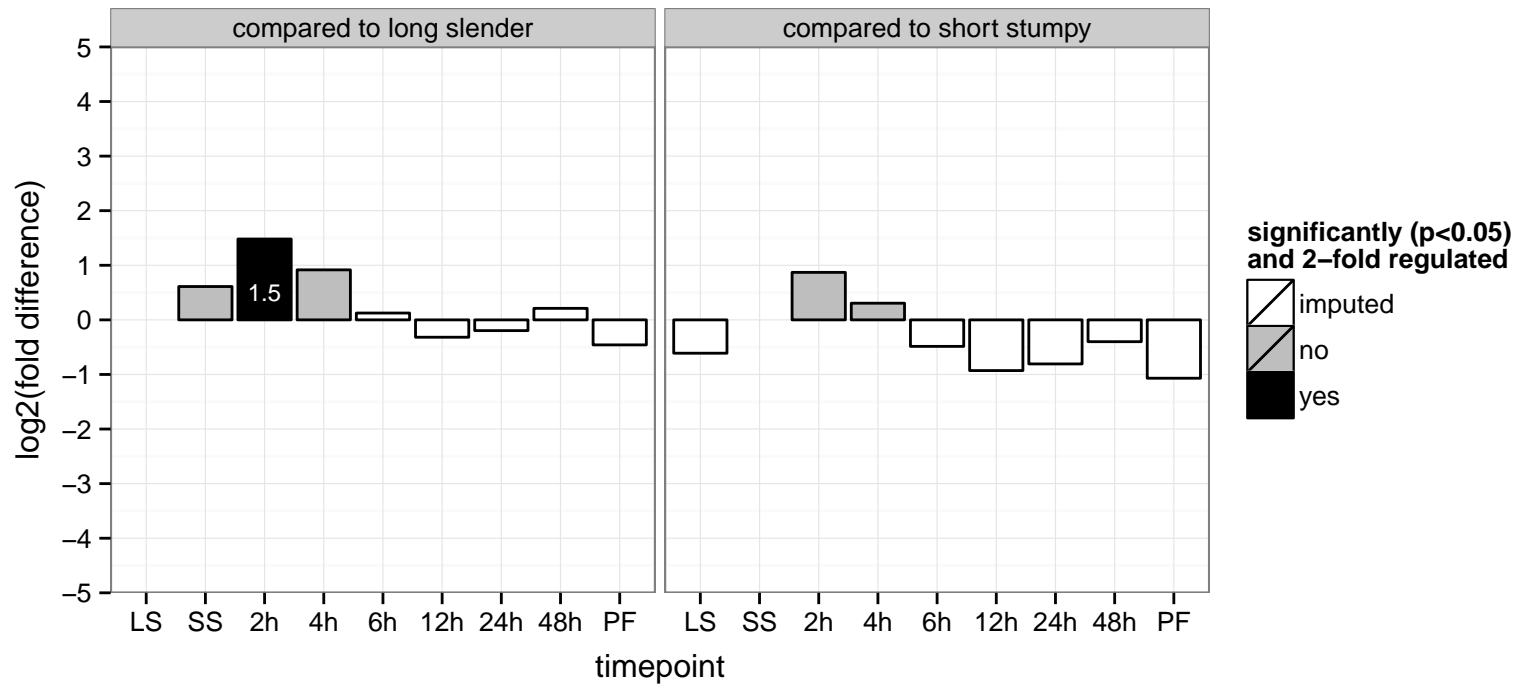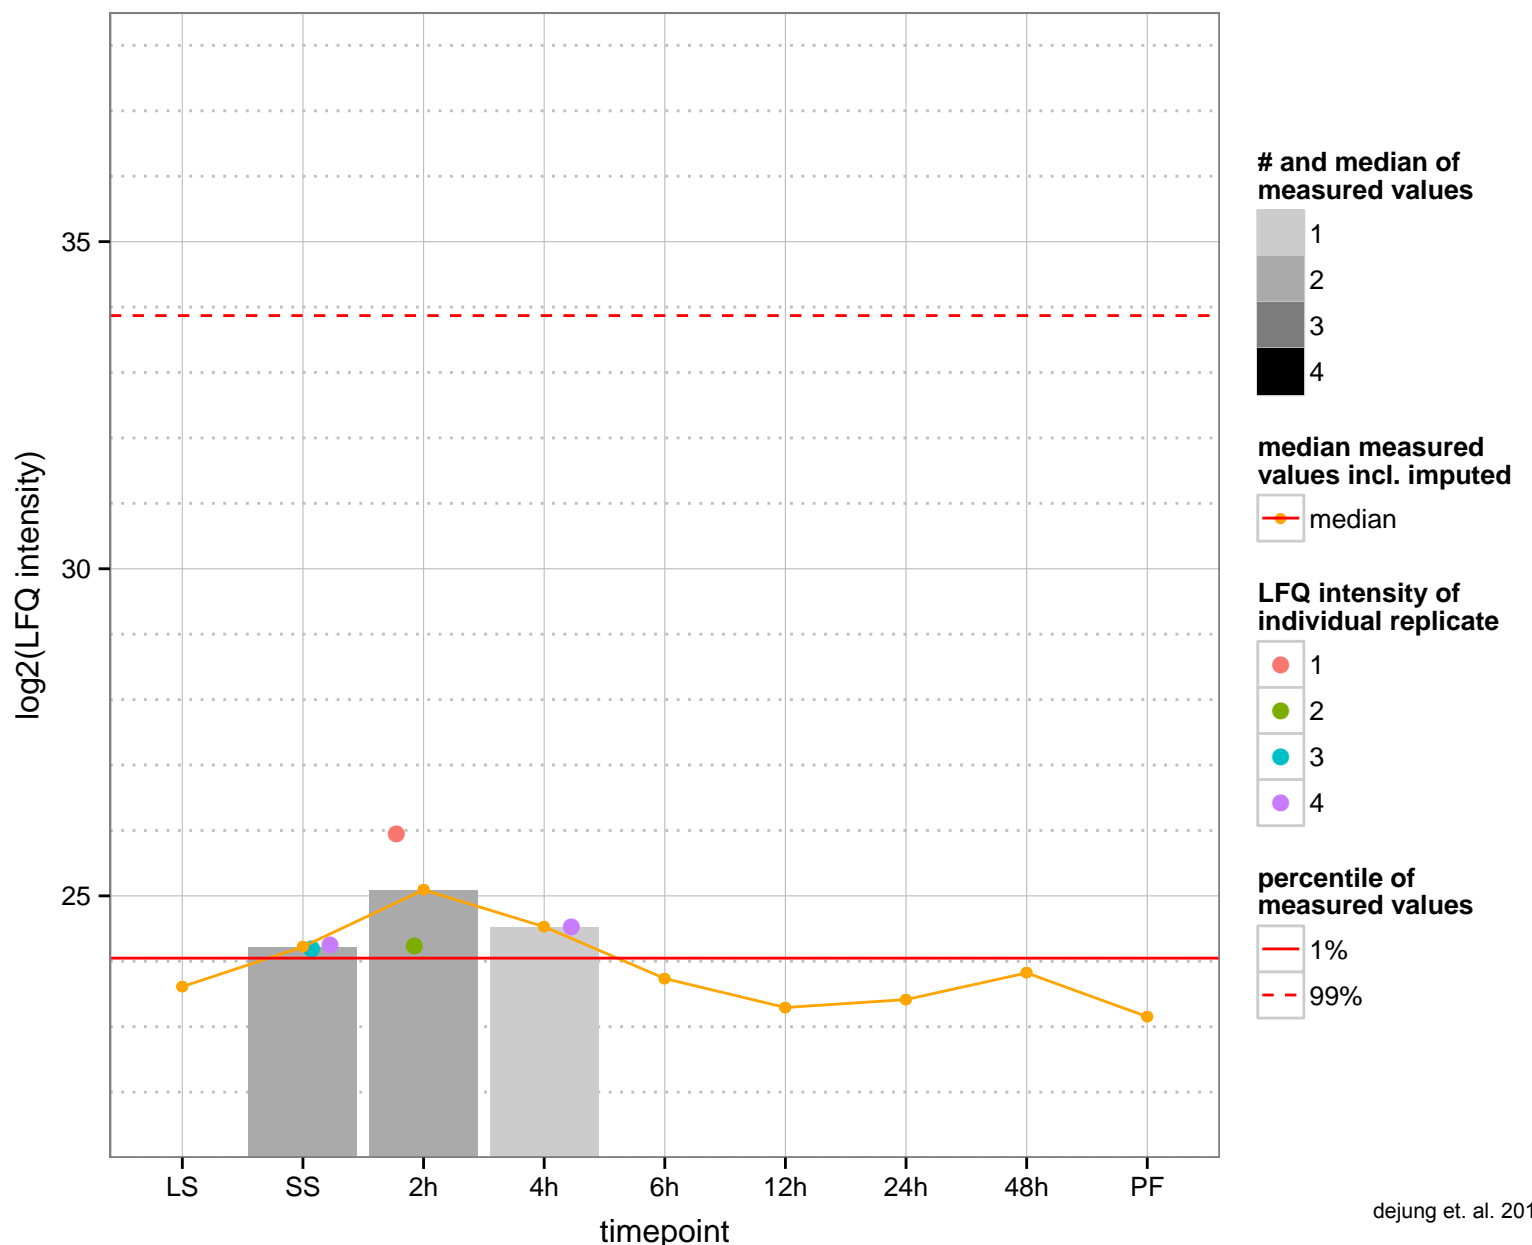

hypothetical protein, conserved  
 Tb927.3.4260  
 AGOF: null  
 AGOC: mitochondrion  
 AGOP: null  
 PGO: null  
 PGO: null  
 PGO: null

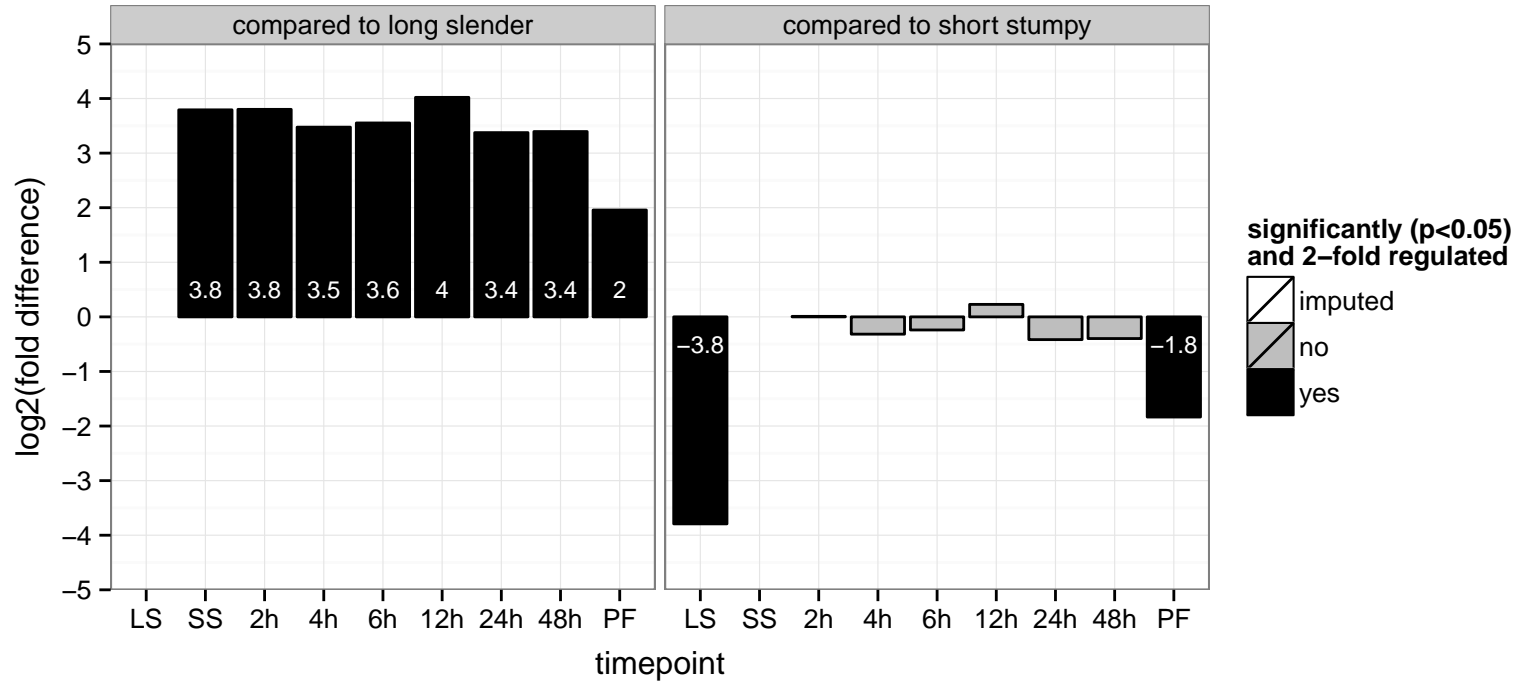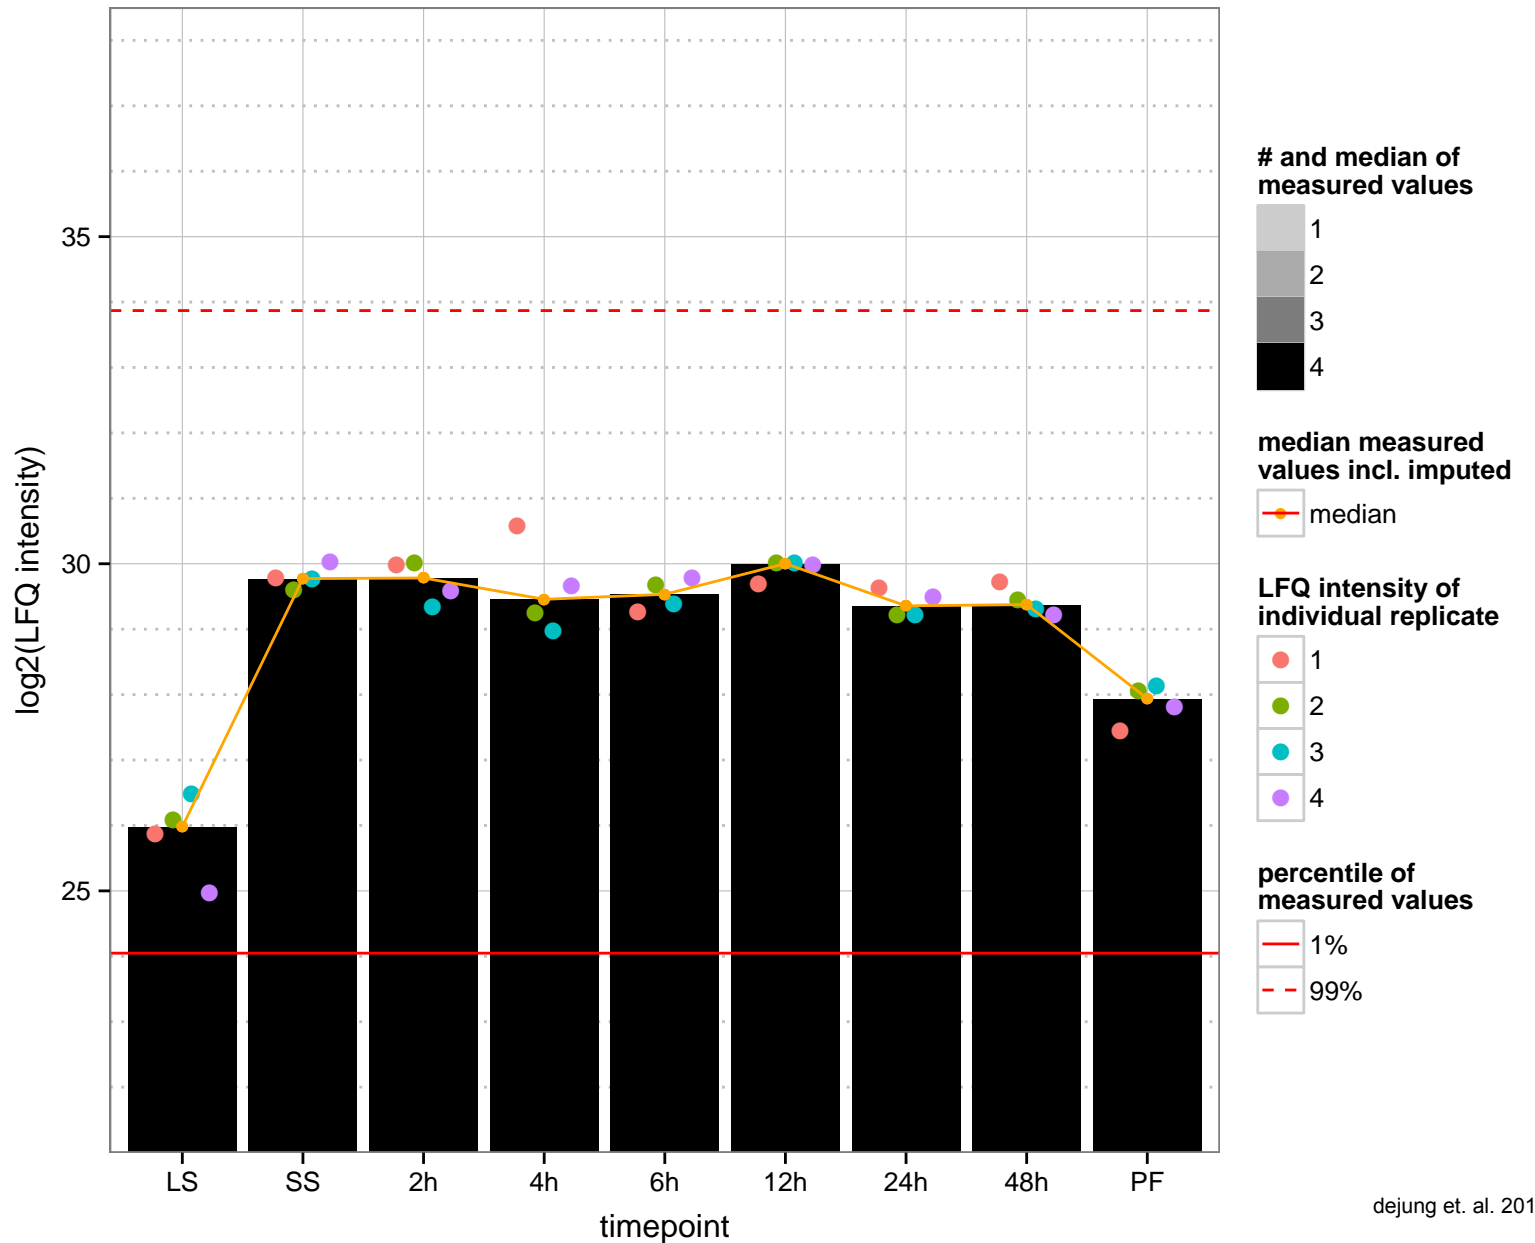

hypothetical protein, conserved  
 Tb927.3.4420  
 AGOF: null  
 AGOC: mitochondrion  
 AGOP: null  
 PGO: null  
 PGOC: null  
 PGOP: null

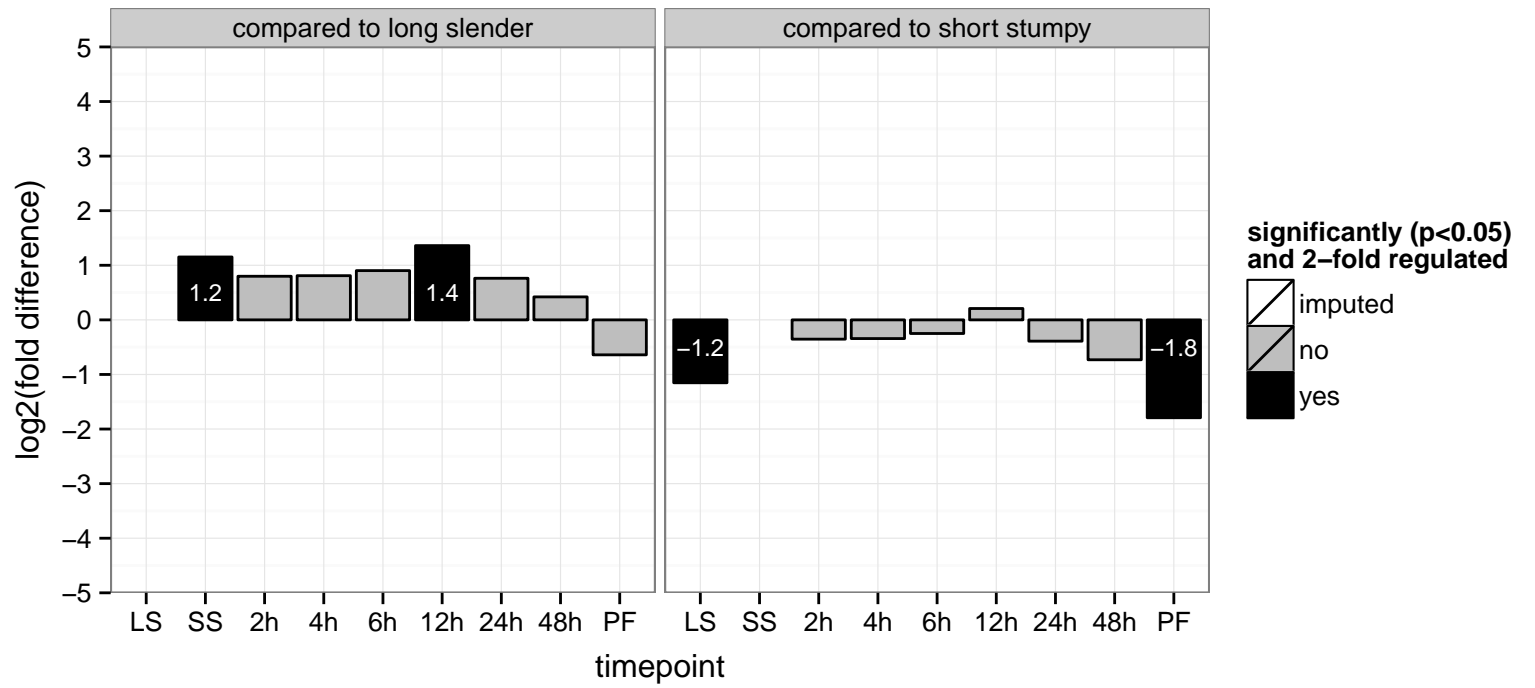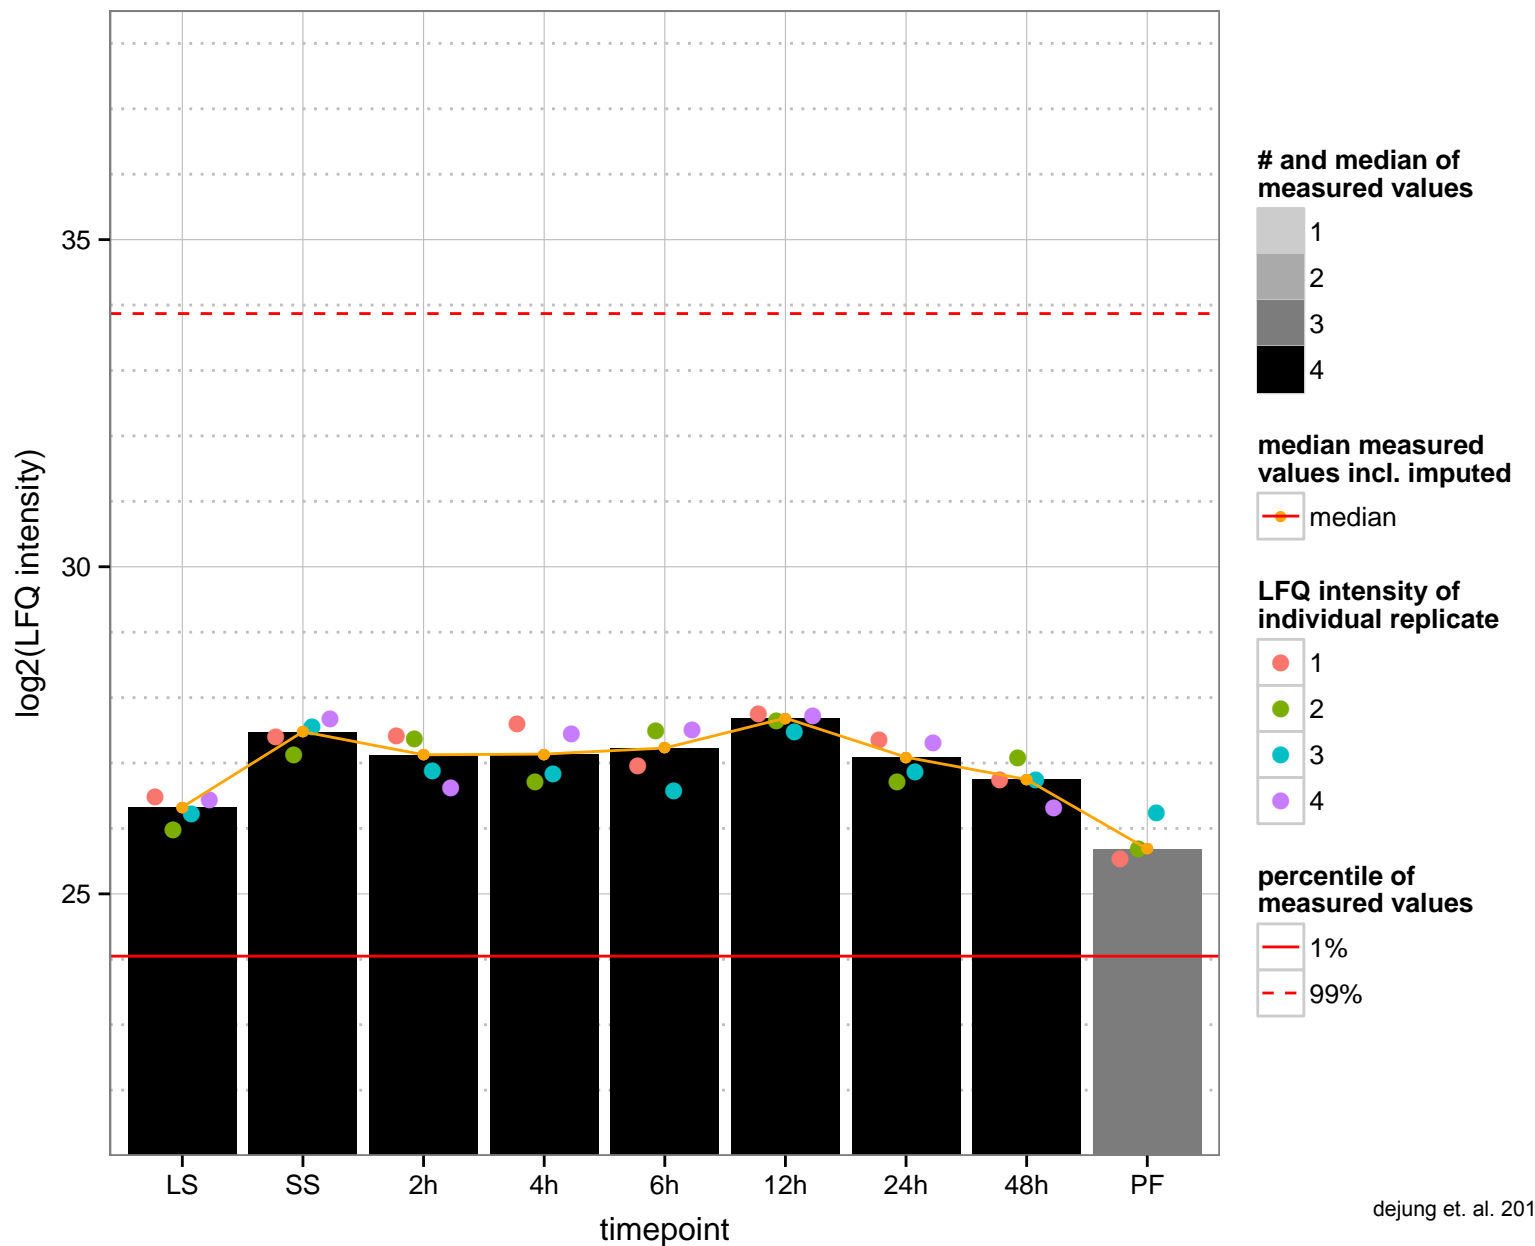

RAB GDP dissociation inhibitor alpha, putative  
 Tb927.3.4680  
 AGOF: Rab GDP-dissociation inhibitor activity  
 AGOC: null  
 AGOP: protein transport, regulation of GTPase activity  
 PGO: null  
 PGO: null  
 PGO: null

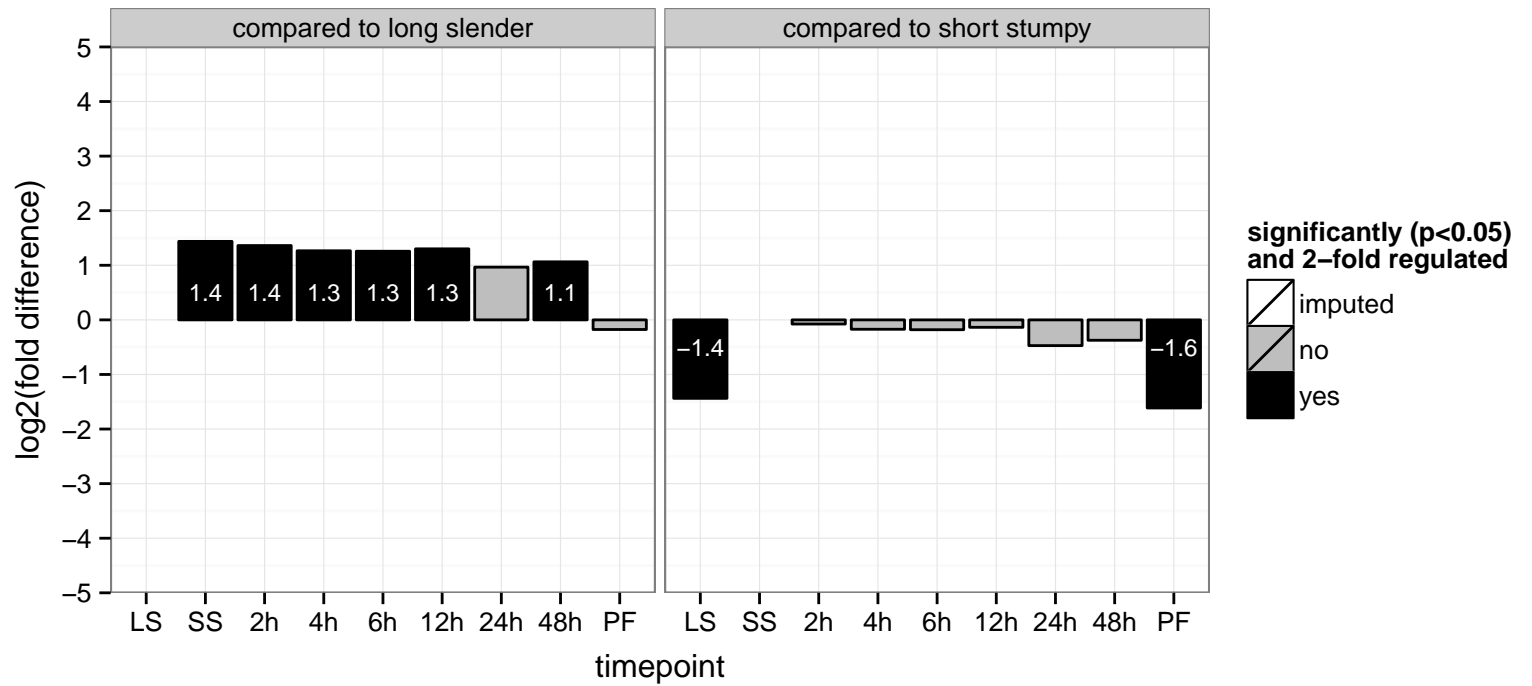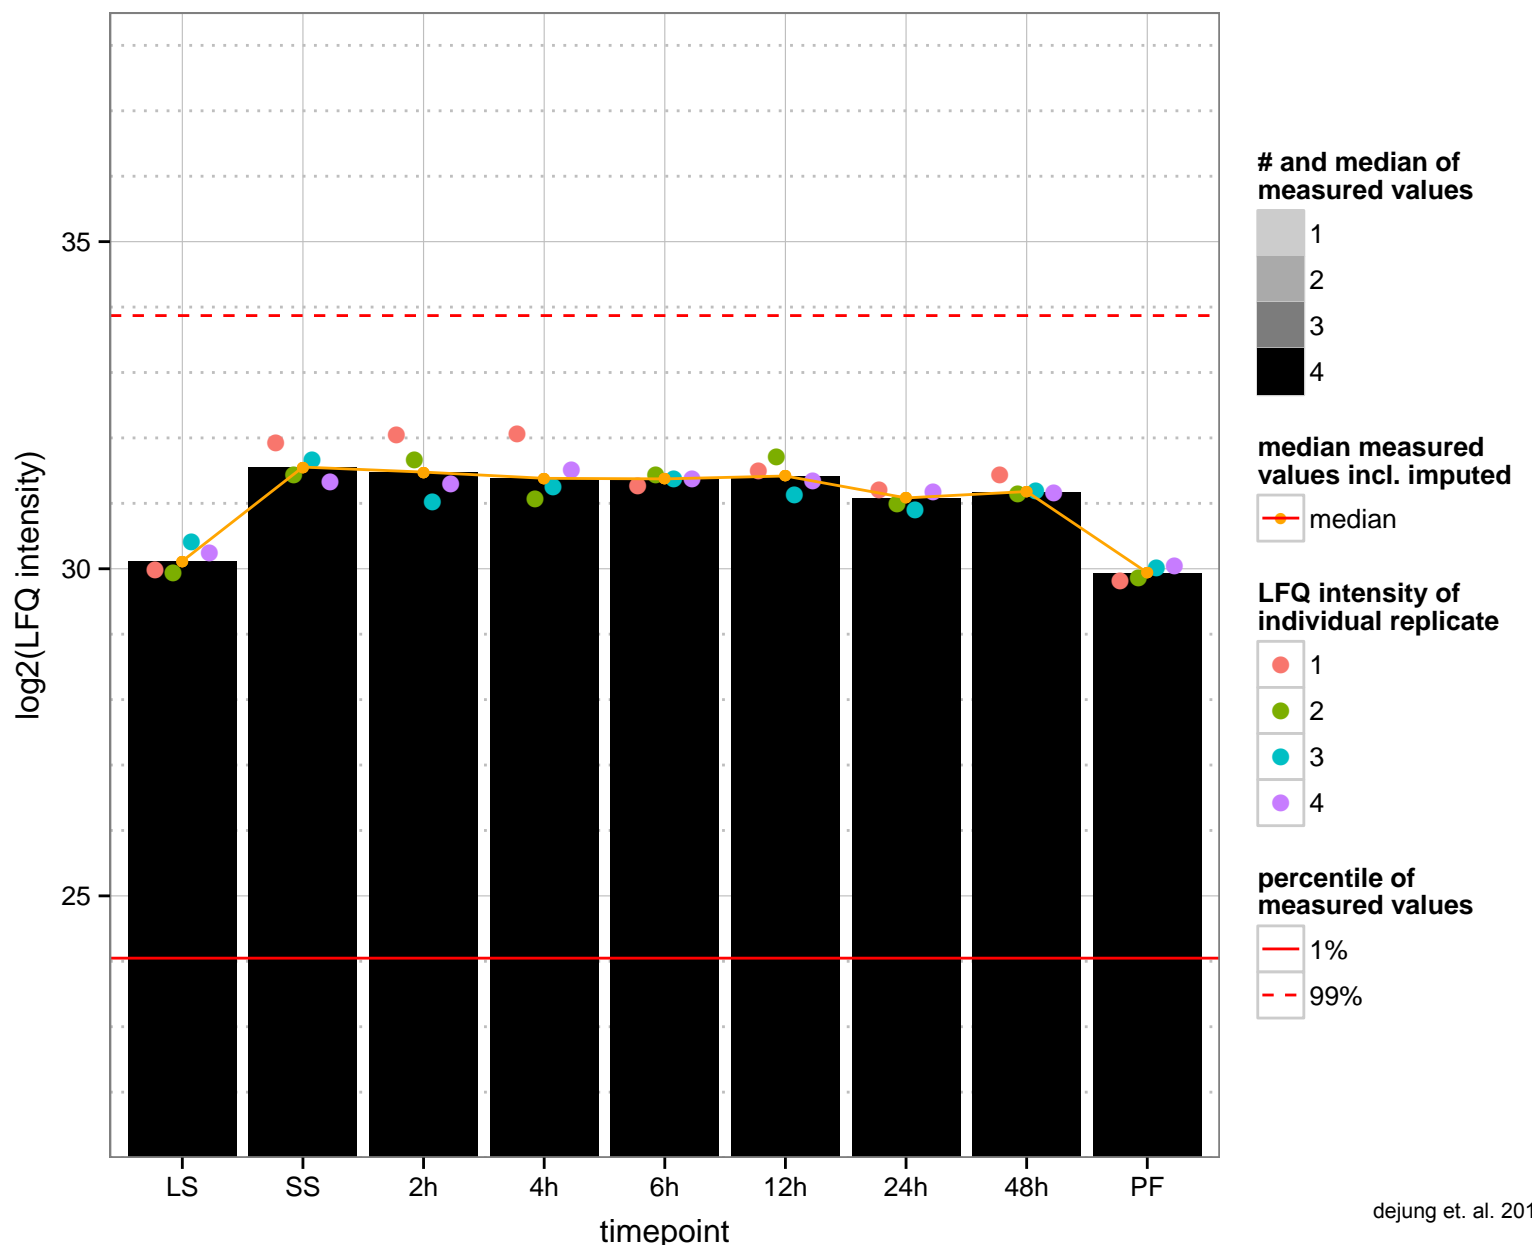

hypothetical protein, conserved  
 Tb927.3.4800  
 AGOF: null  
 AGOC: null  
 AGOP: null  
 PGO: null  
 PGOC: null  
 PGOP: null

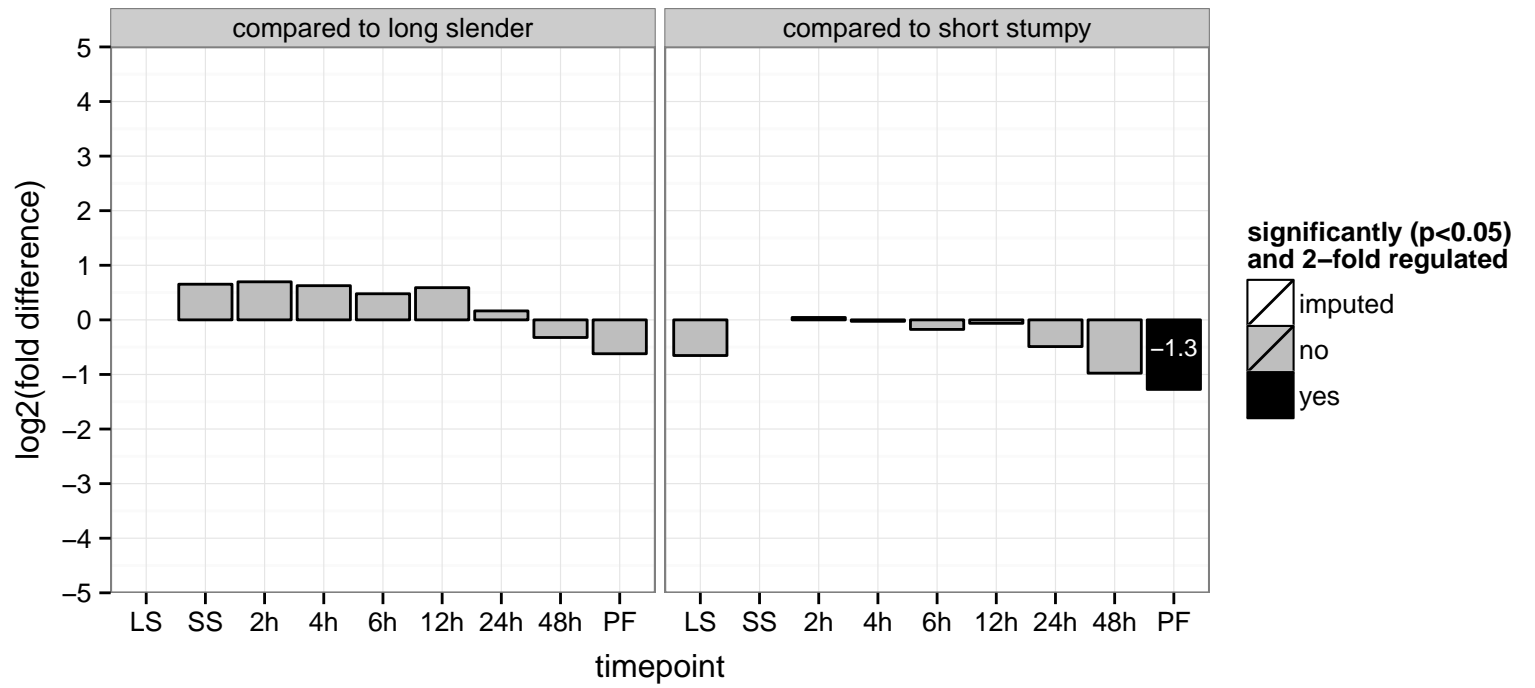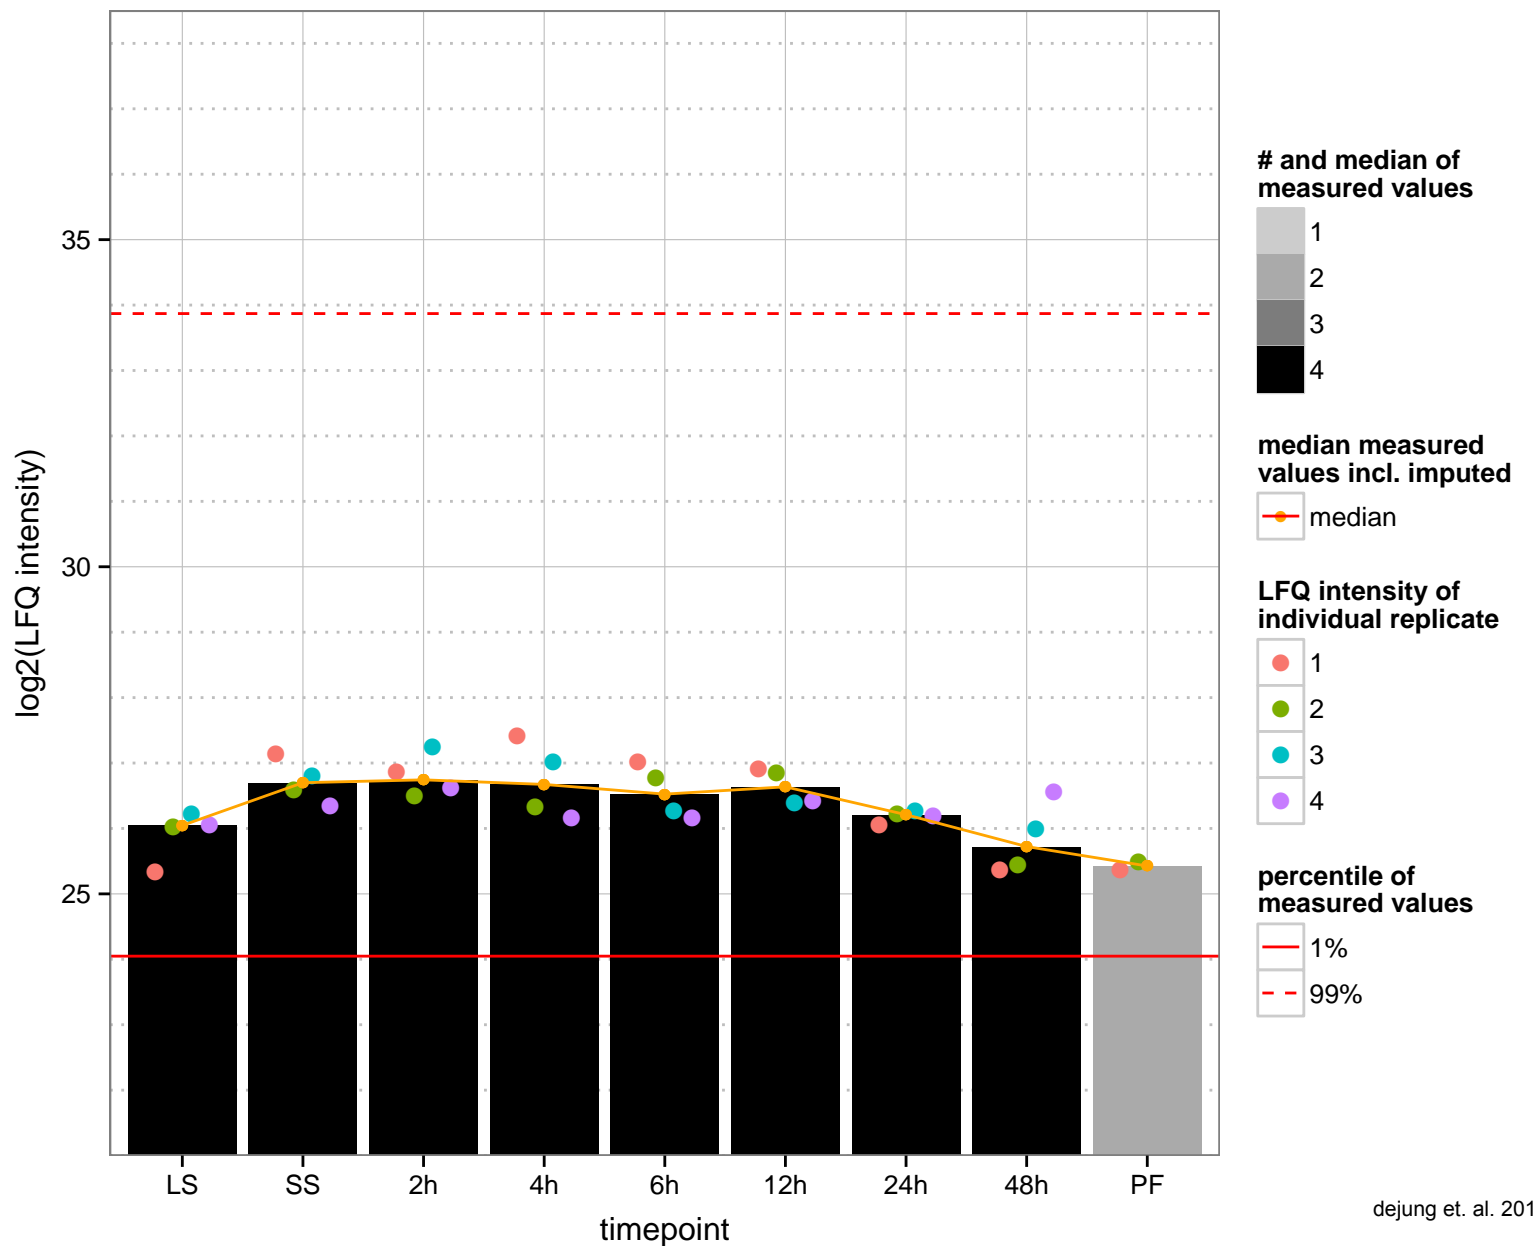

ubiquitin hydrolase, putative, cysteine peptidase, Clan CA, family C19

Tb927.3.4840

AGOF: ubiquitin thiolesterase activity, zinc ion binding

AGOC: null

AGOP: ubiquitin-dependent protein catabolic process

PGOF: omega peptidase activity, protein binding, ubiquitin thiolesterase activity, zinc ion binding

PGOC: null

PGOP: ubiquitin-dependent protein catabolic process

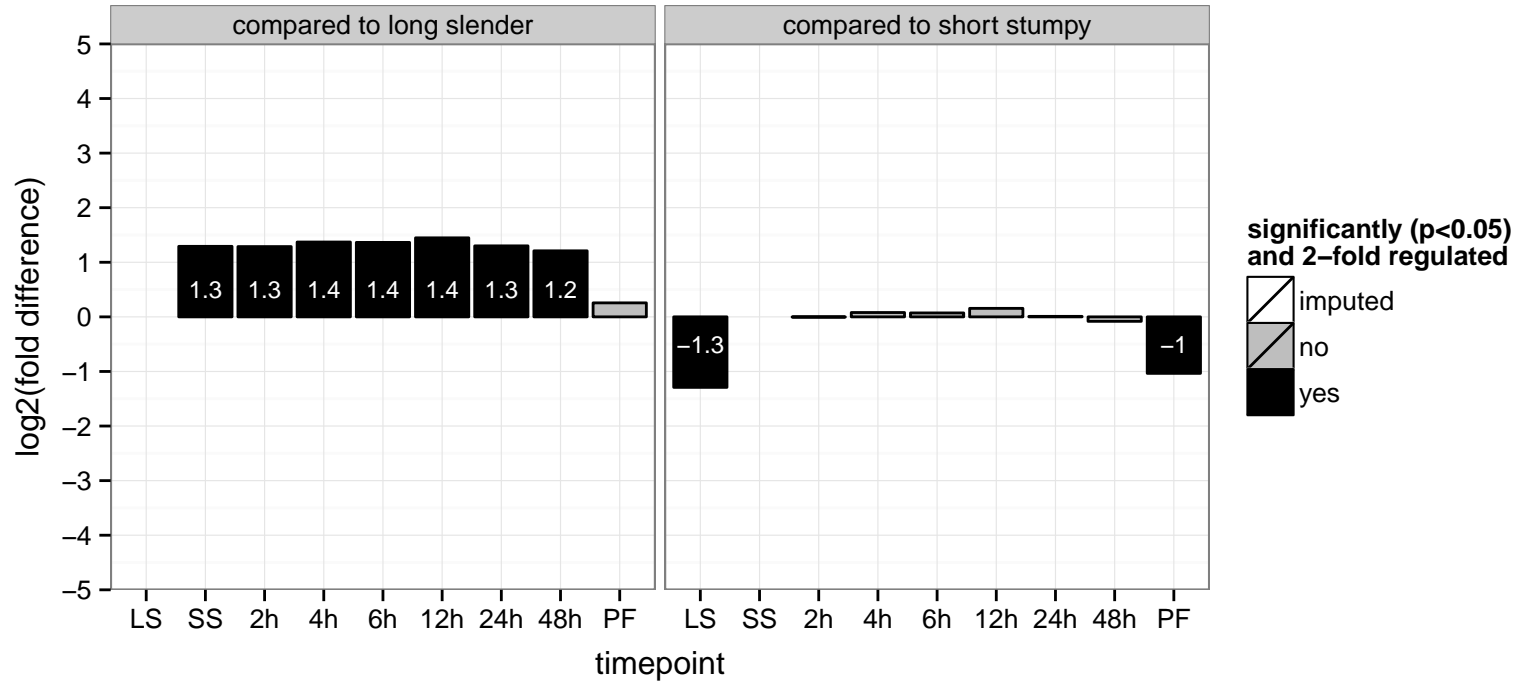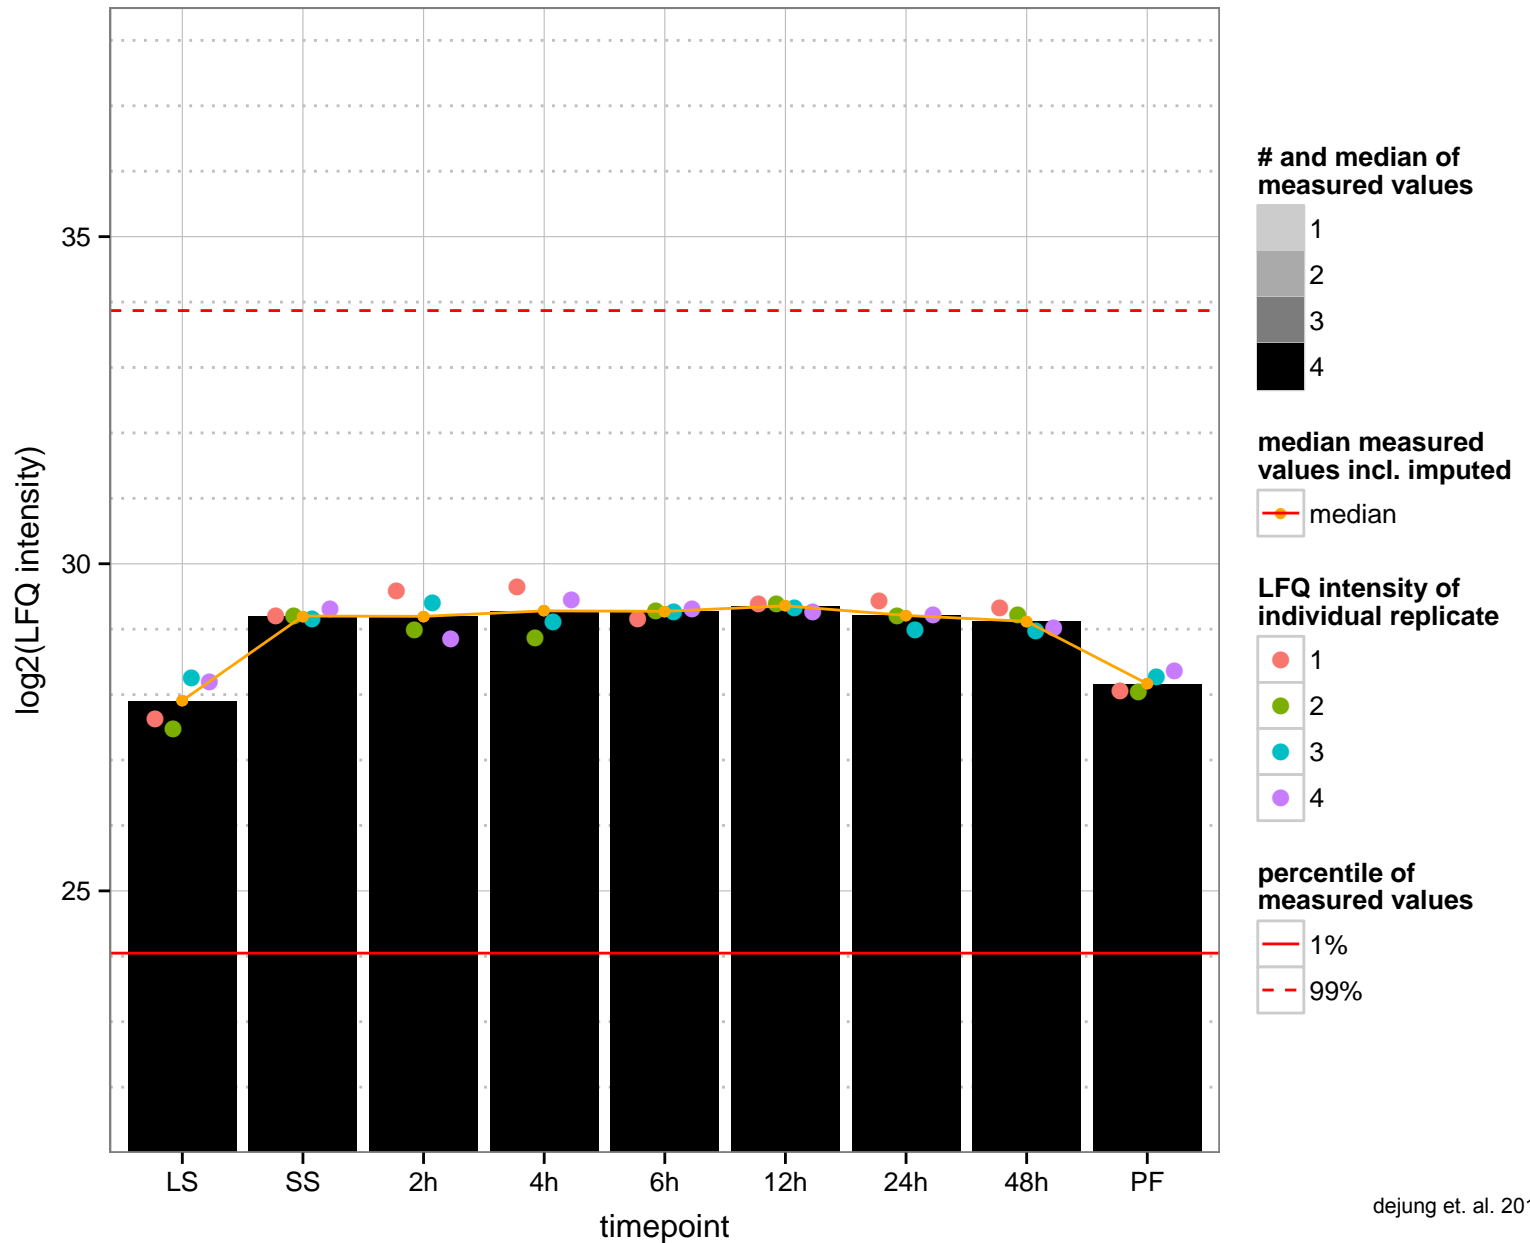

spliceosome-associated protein 49, putative (DRBD1)  
 Tb927.3.5280  
 AGOF: nucleic acid binding, protein binding  
 AGOC: nucleus  
 AGOP: RNA processing  
 PGO: nucleic acid binding  
 PGO: null  
 PGO: null

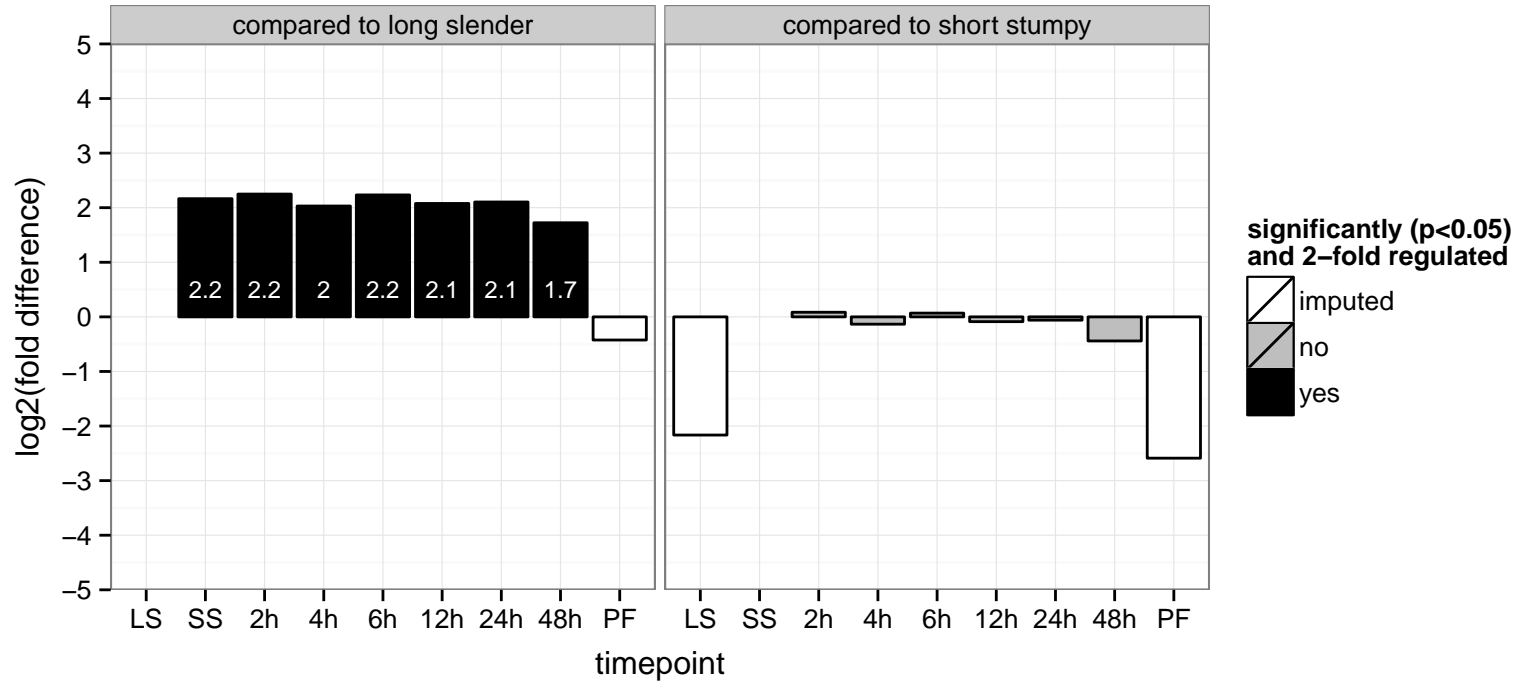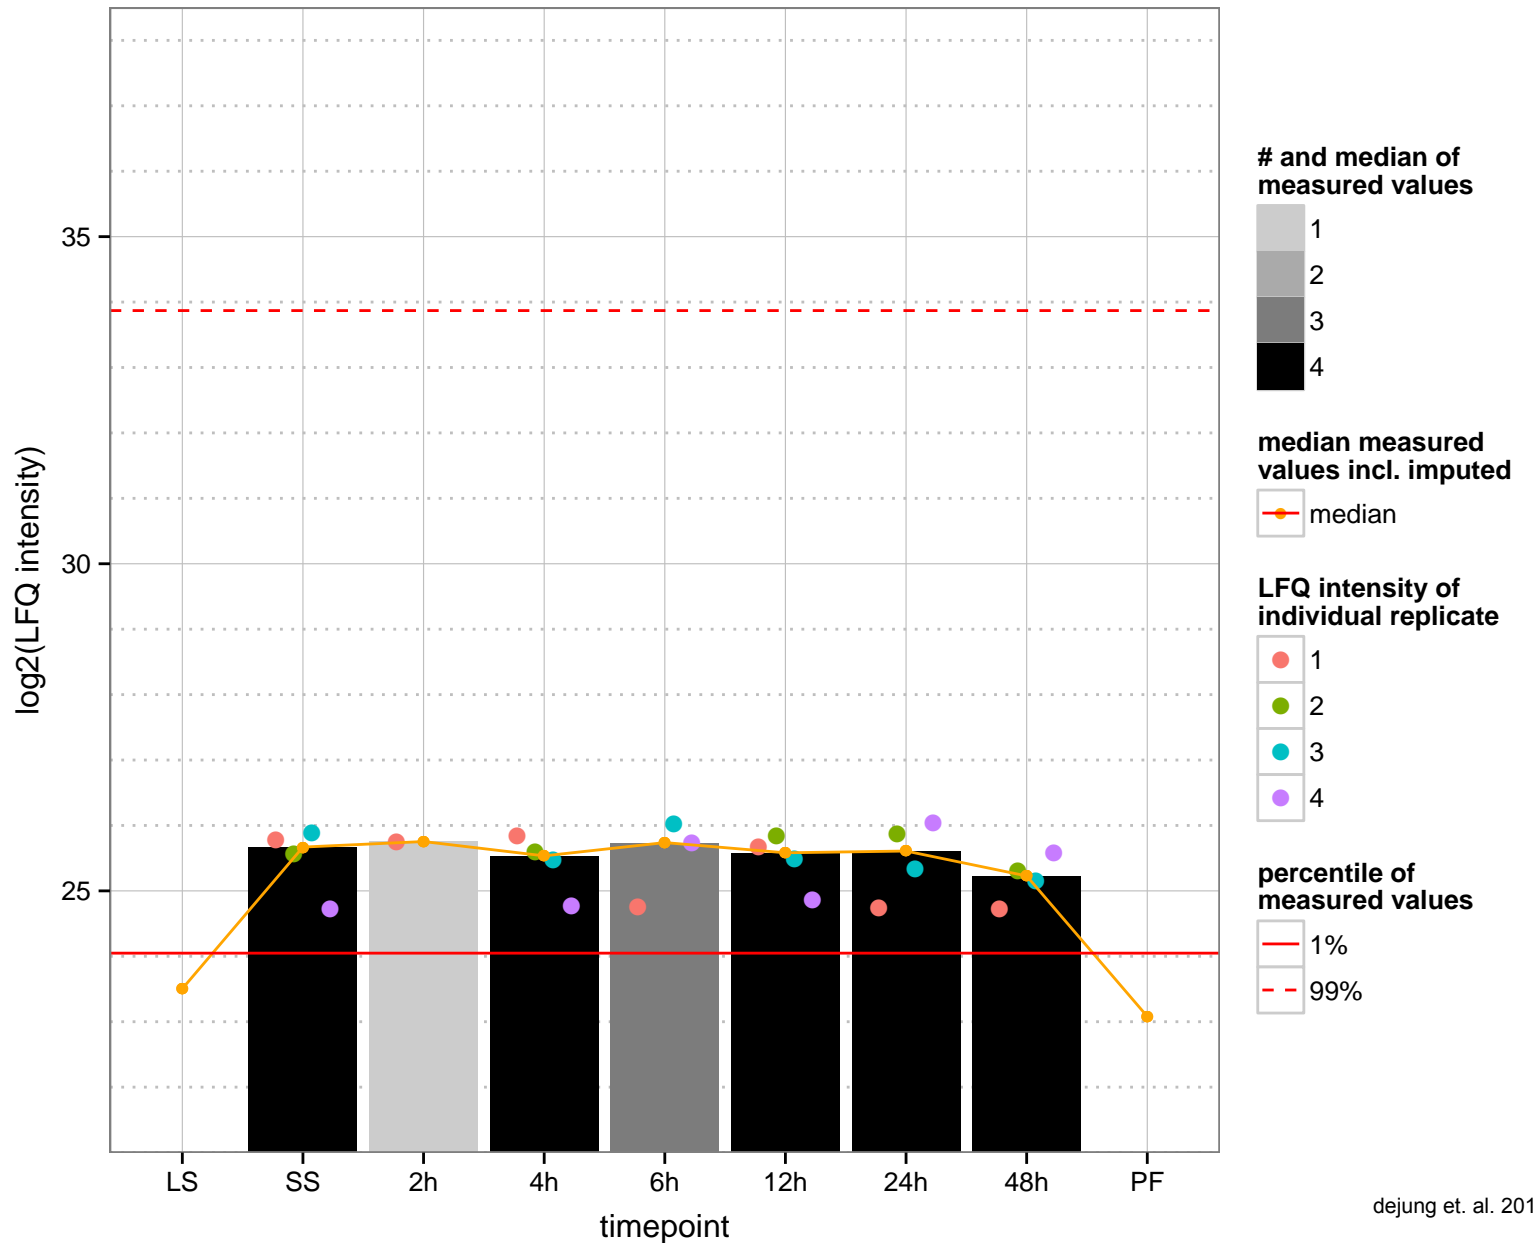



hypothetical protein, conserved  
 Tb927.3.5360  
 AGOF: null  
 AGOC: mitochondrion  
 AGOP: null  
 PGO: protein binding  
 PGOC: null  
 PGOP: null

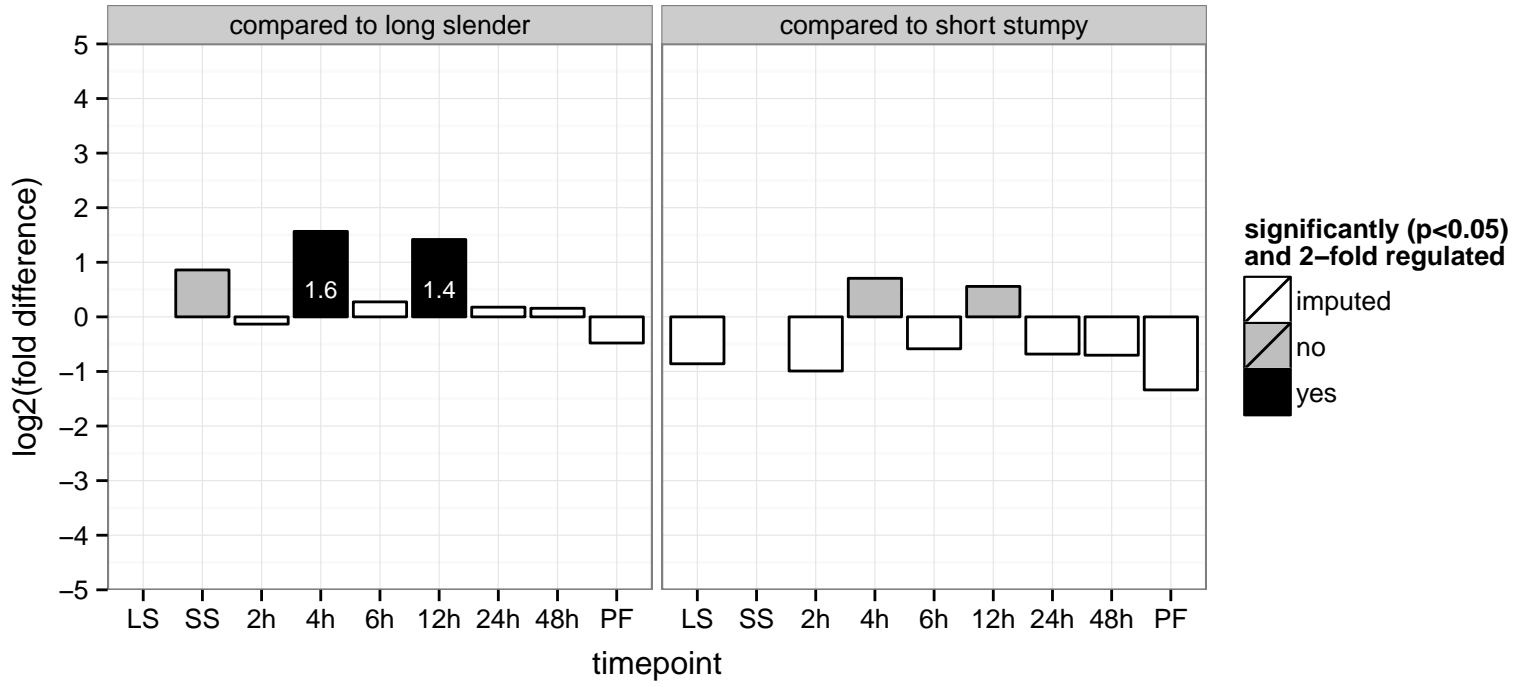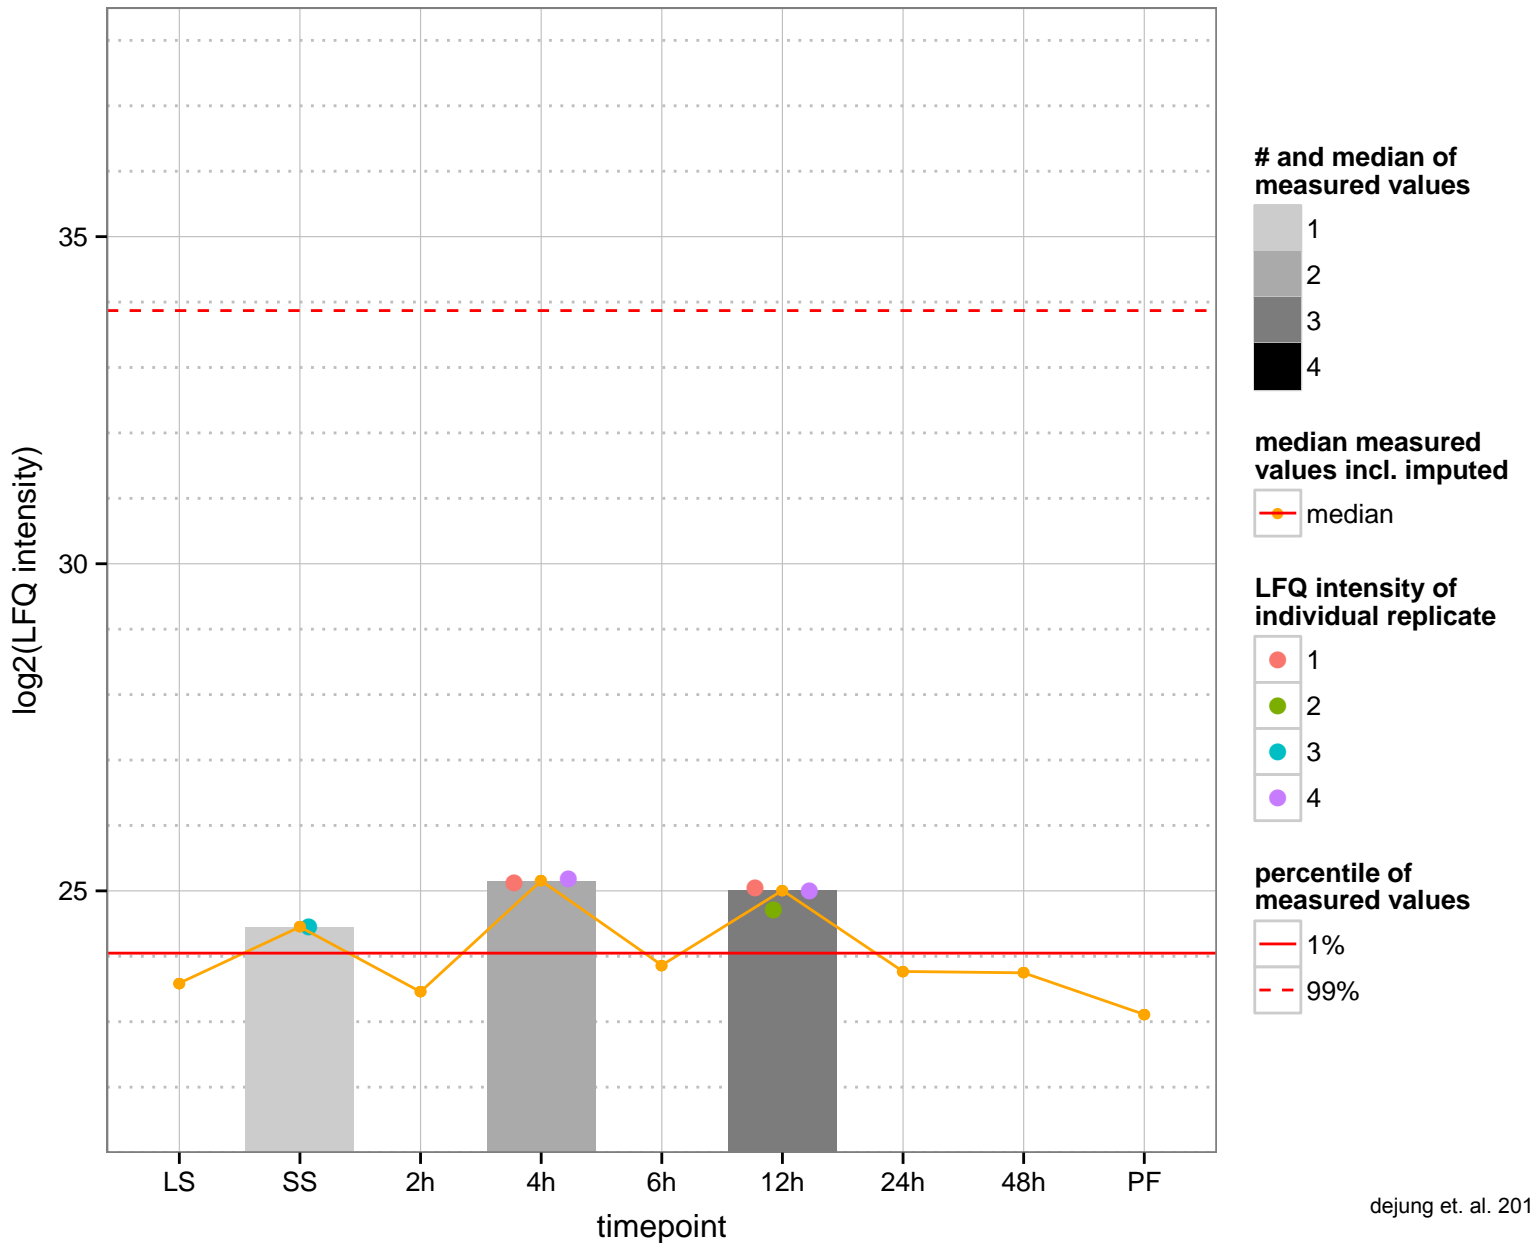

small GTP-binding protein, putative (TbRX1)

Tb927.3.5550

AGOF: GTP binding, GTPase activity

AGOC: intracellular

AGOP: protein transport, small GTPase mediated signal transduction

PGOF: GTP binding, GTPase activity

PGOC: intracellular, membrane

PGOP: GTP catabolic process, protein transport, signal transduction, small GTPase mediated signal transduction

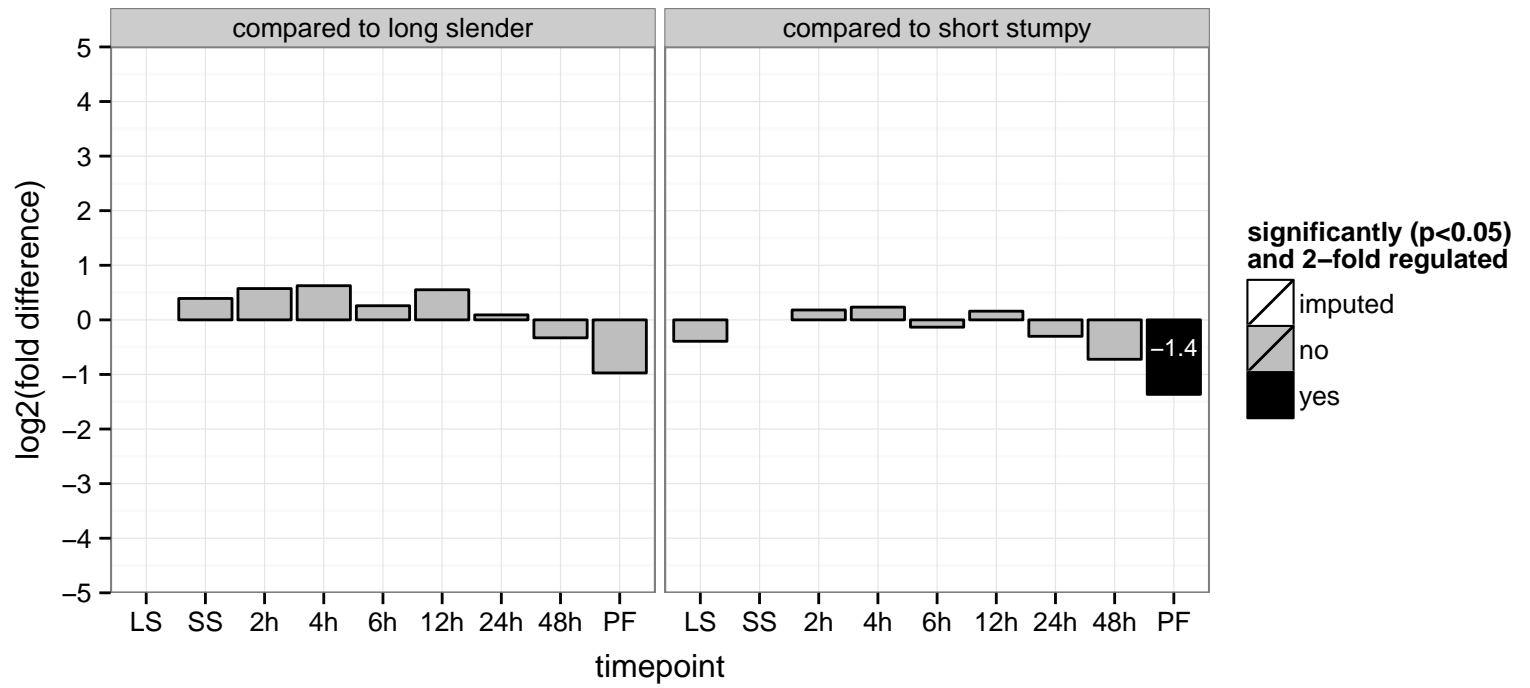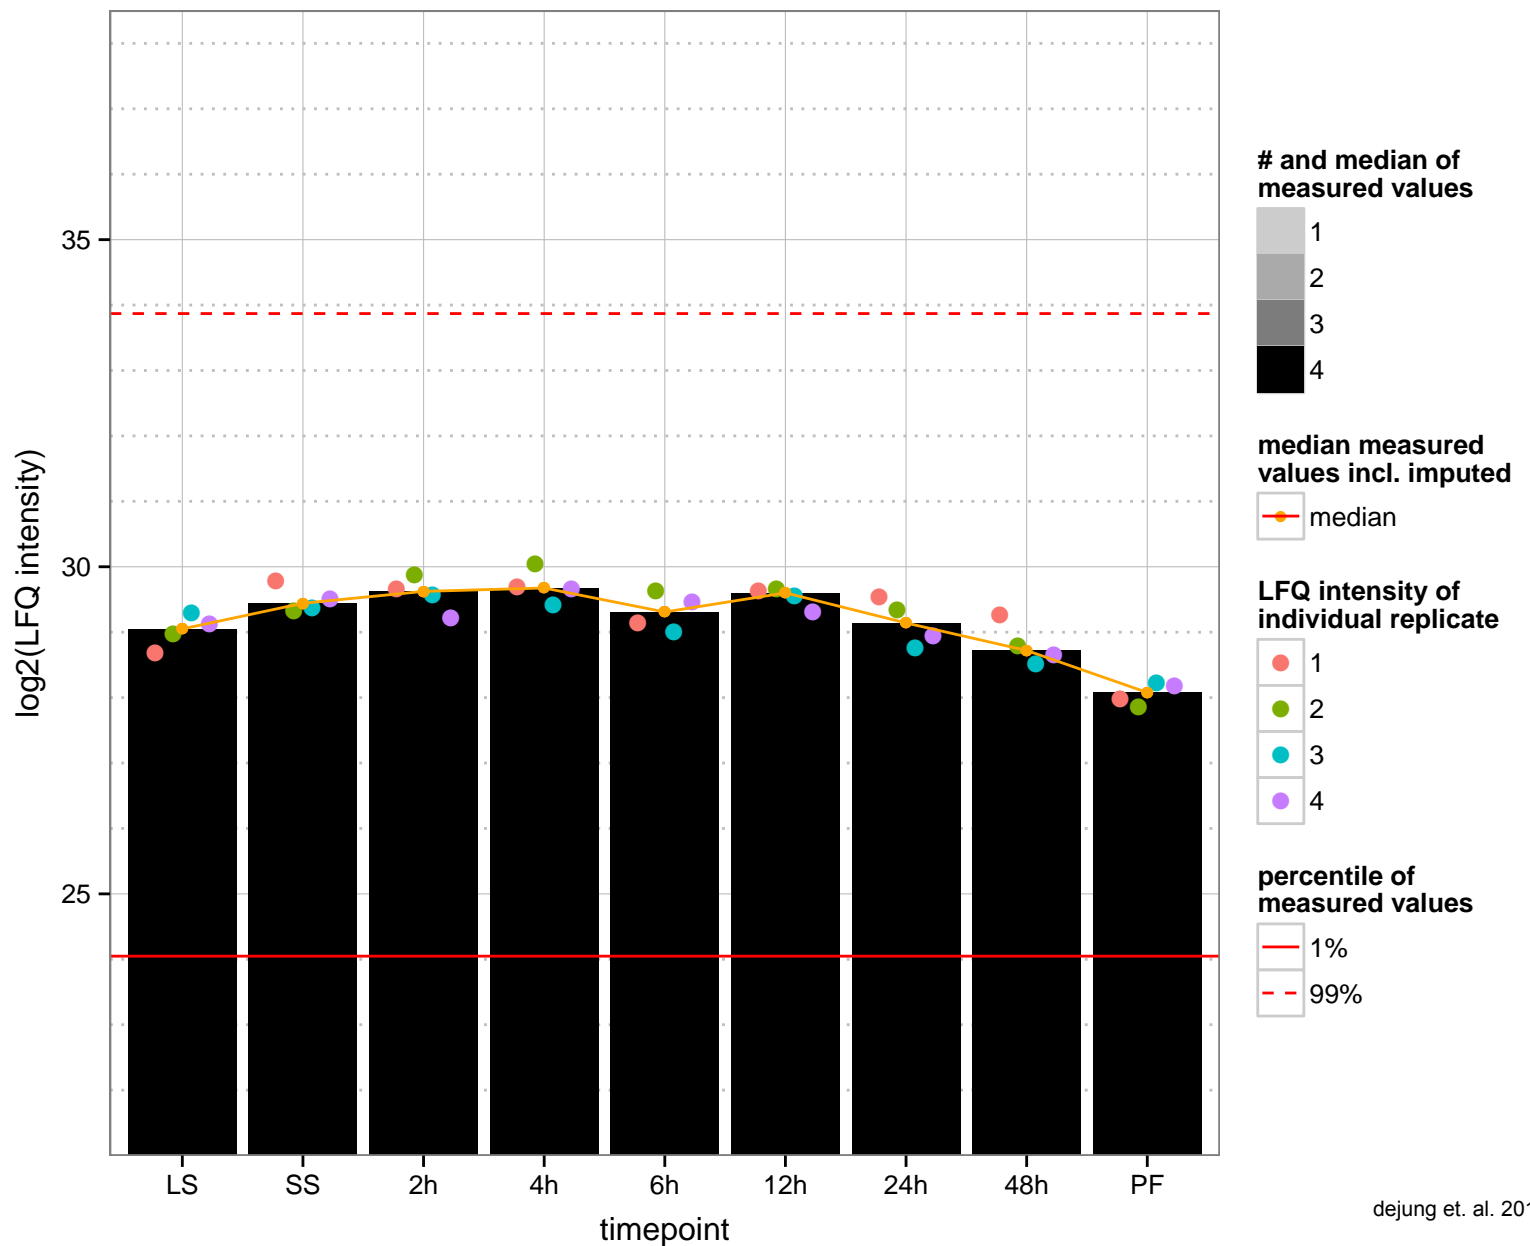

syntaxin, putative  
 Tb927.3.5570  
 AGOF: null  
 AGOC: membrane  
 AGOP: vesicle-mediated transport  
 PGO: protein binding  
 PGO: membrane  
 PGO: vesicle-mediated transport

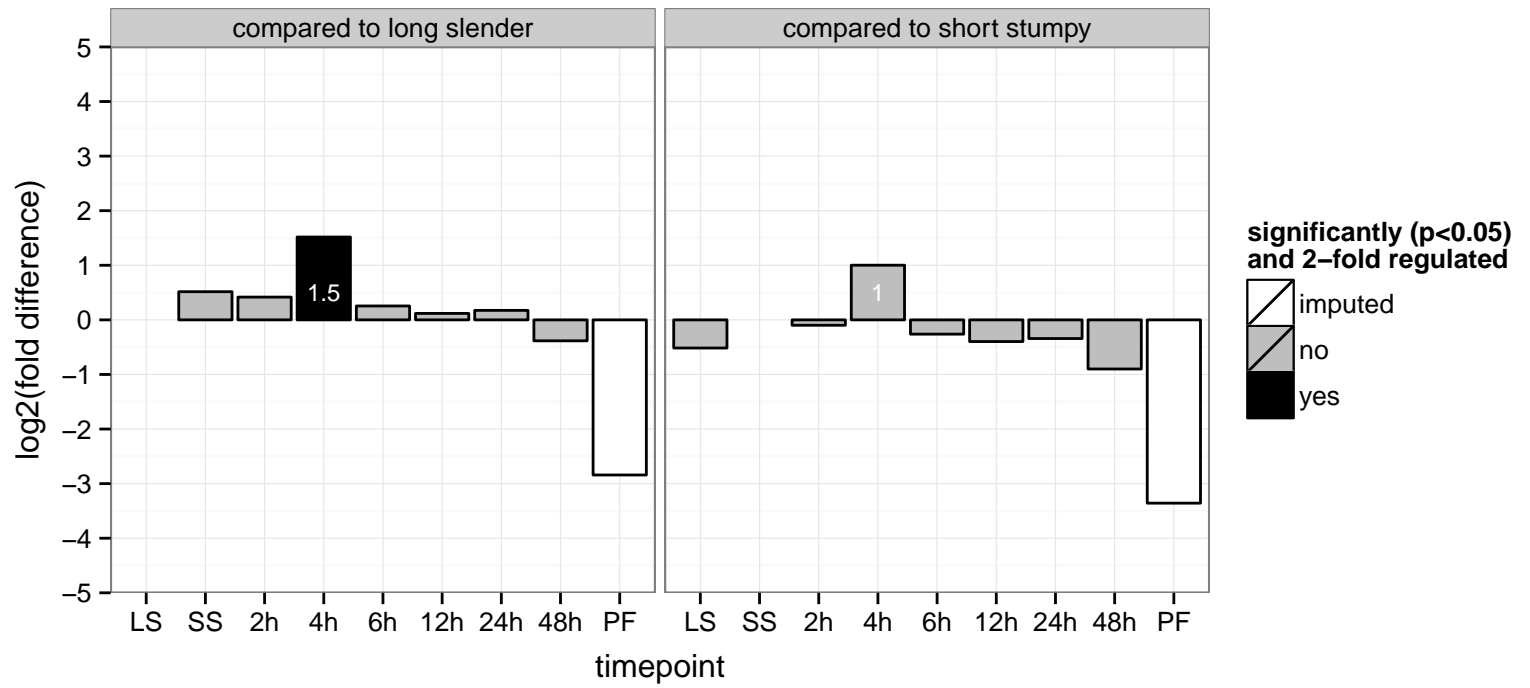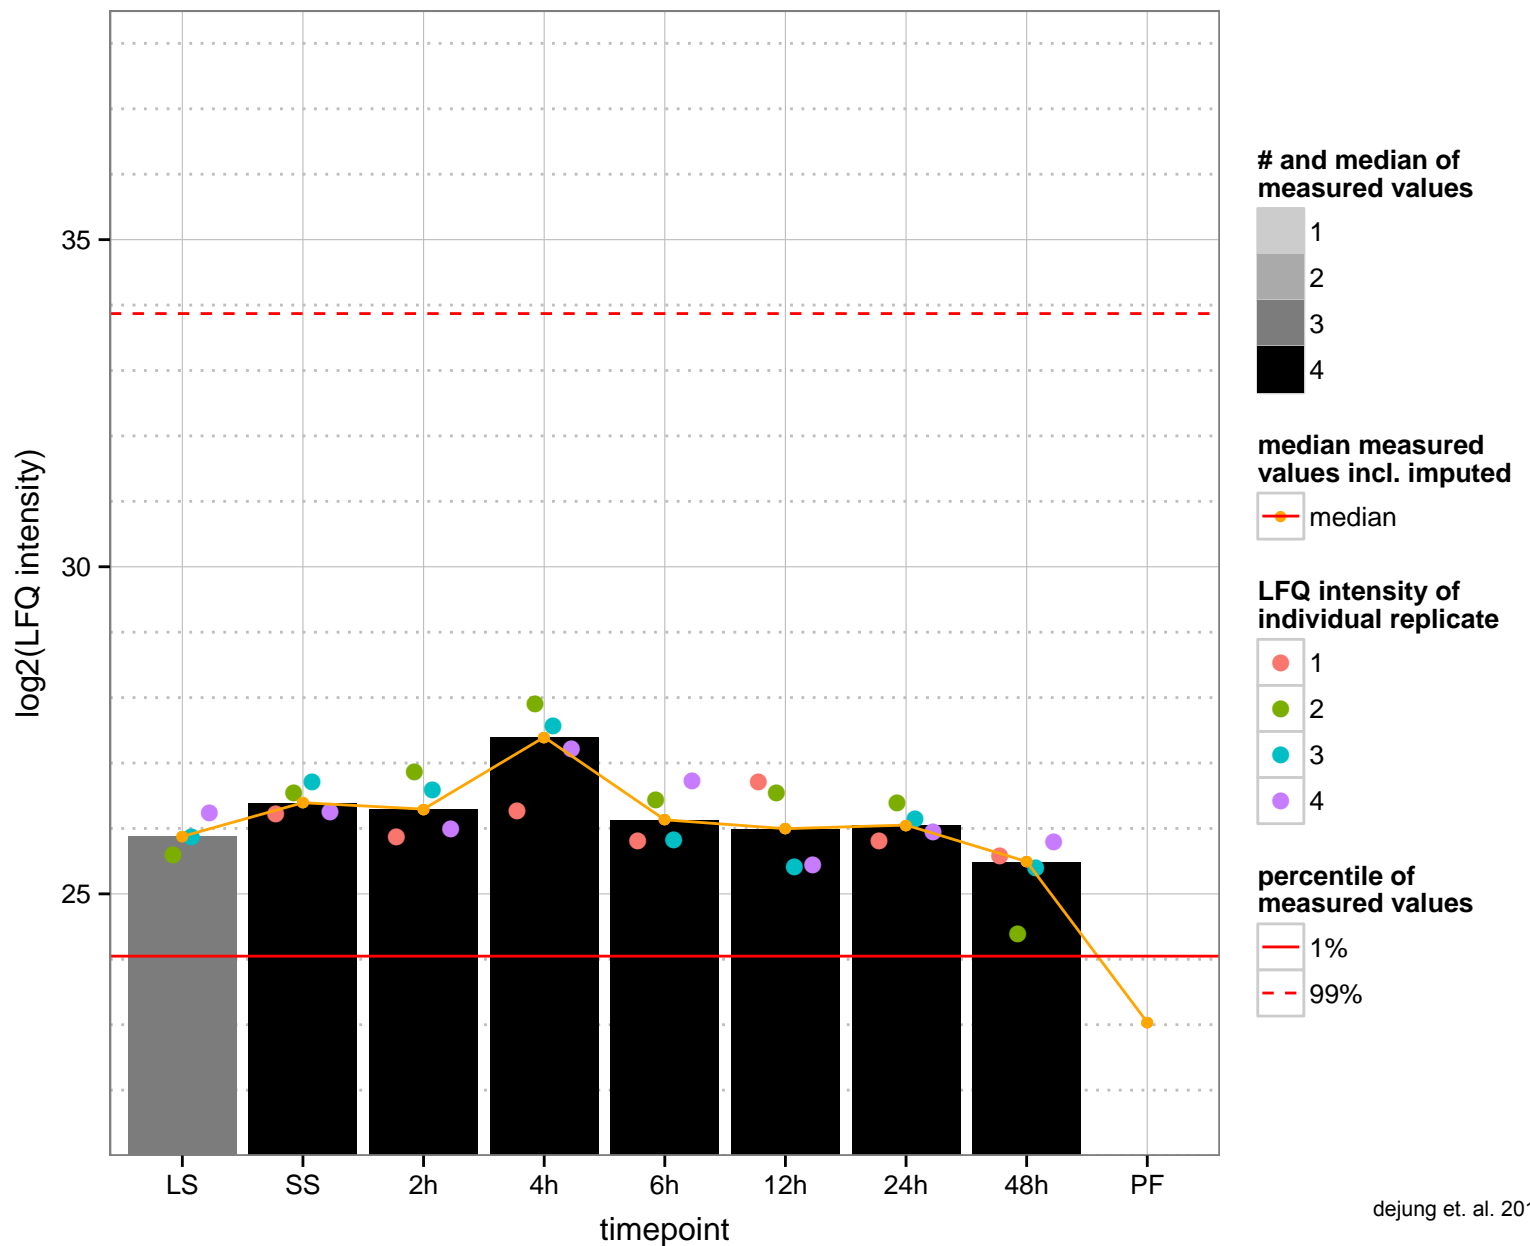

hypothetical protein, conserved  
 Tb927.3.880  
 AGOF: null  
 AGOC: null  
 AGOP: null  
 PGO: protein binding  
 PGOC: null  
 PGOP: null

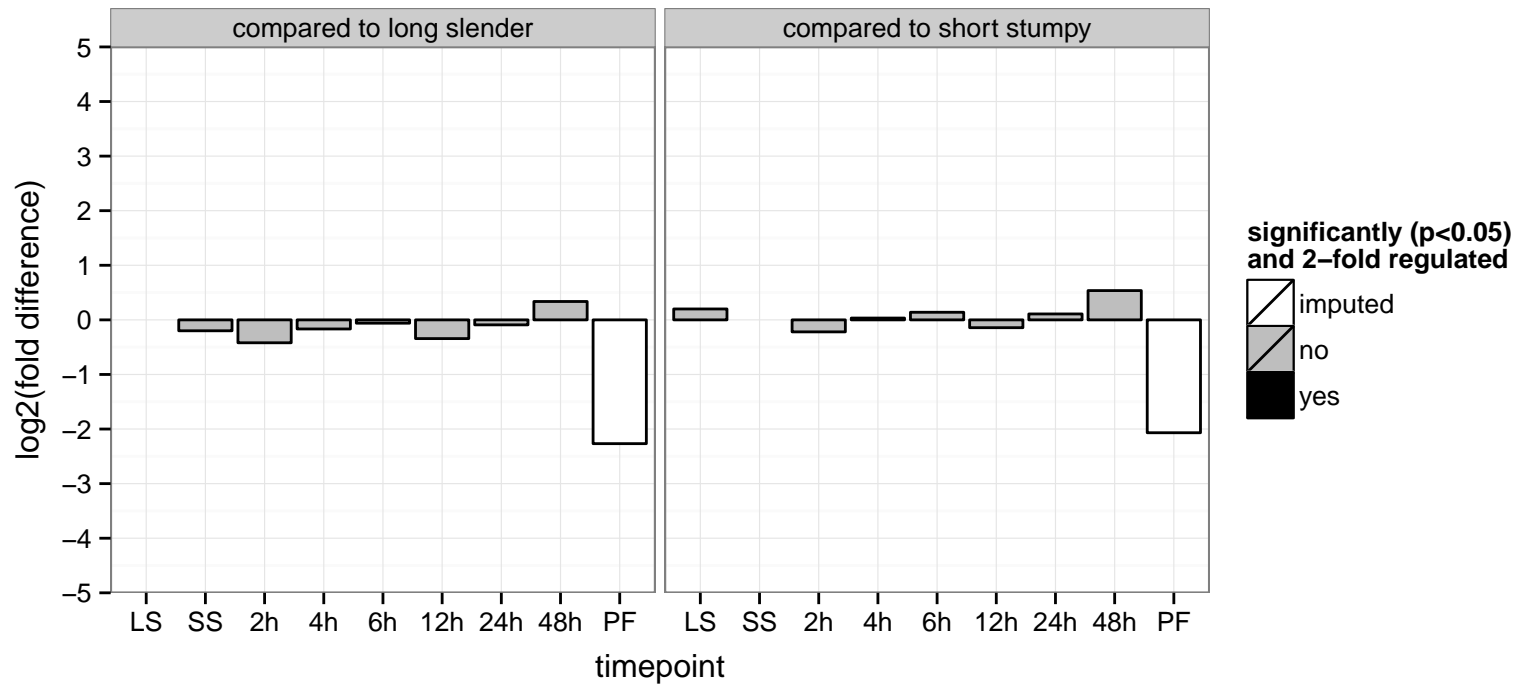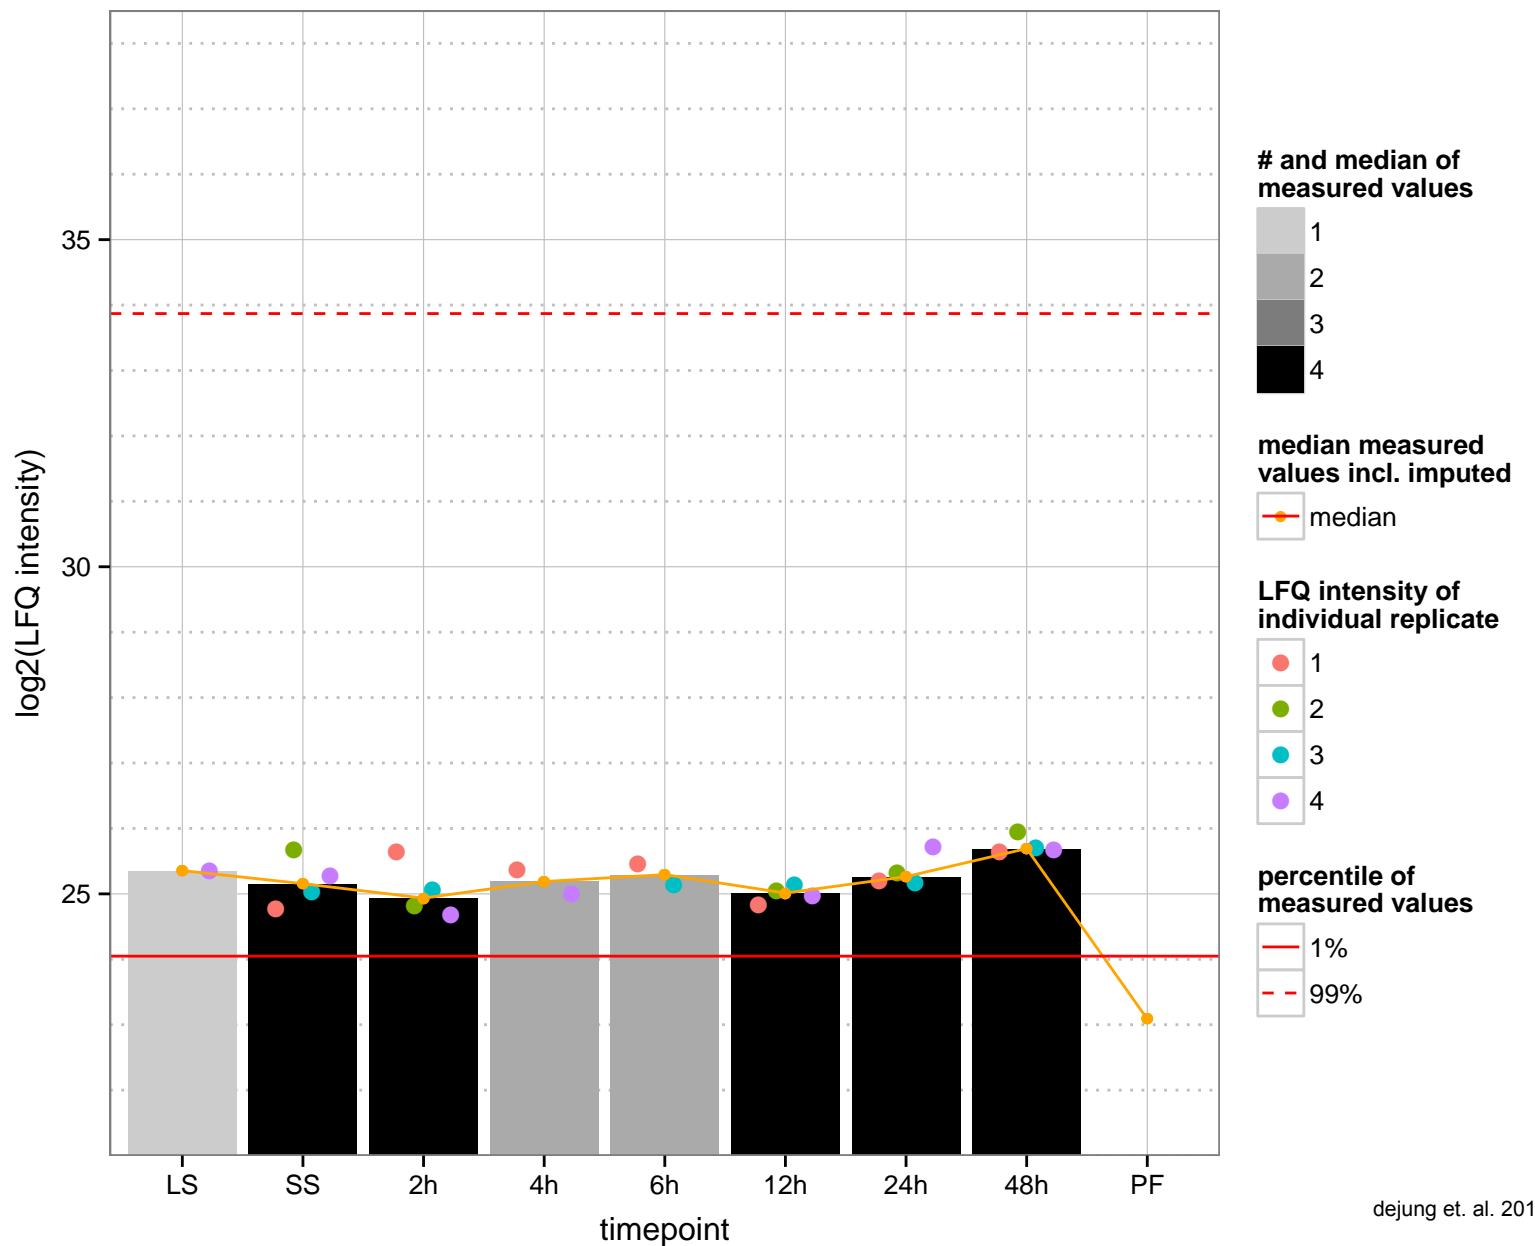

DNA topoisomerase IB, large subunit

Tb927.4.1330

AGOF: DNA topoisomerase (ATP-hydrolyzing) activity, DNA topoisomerase type I activity

AGOC: chromosome, membrane, nucleus

AGOP: DNA topological change, regulation of transcription, DNA-dependent

PGOF: DNA binding, DNA topoisomerase (ATP-hydrolyzing) activity, DNA topoisomerase type I activity

PGOC: chromosome

PGOP: DNA topological change

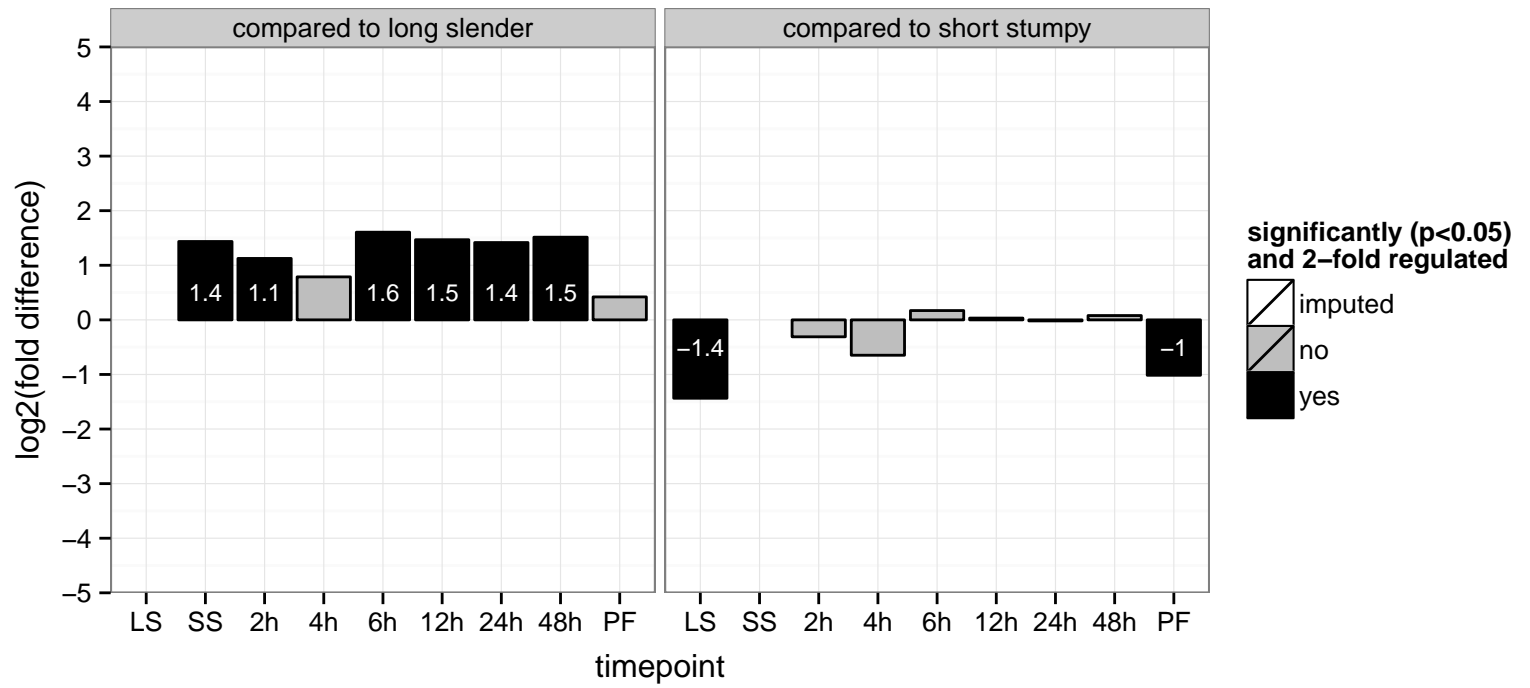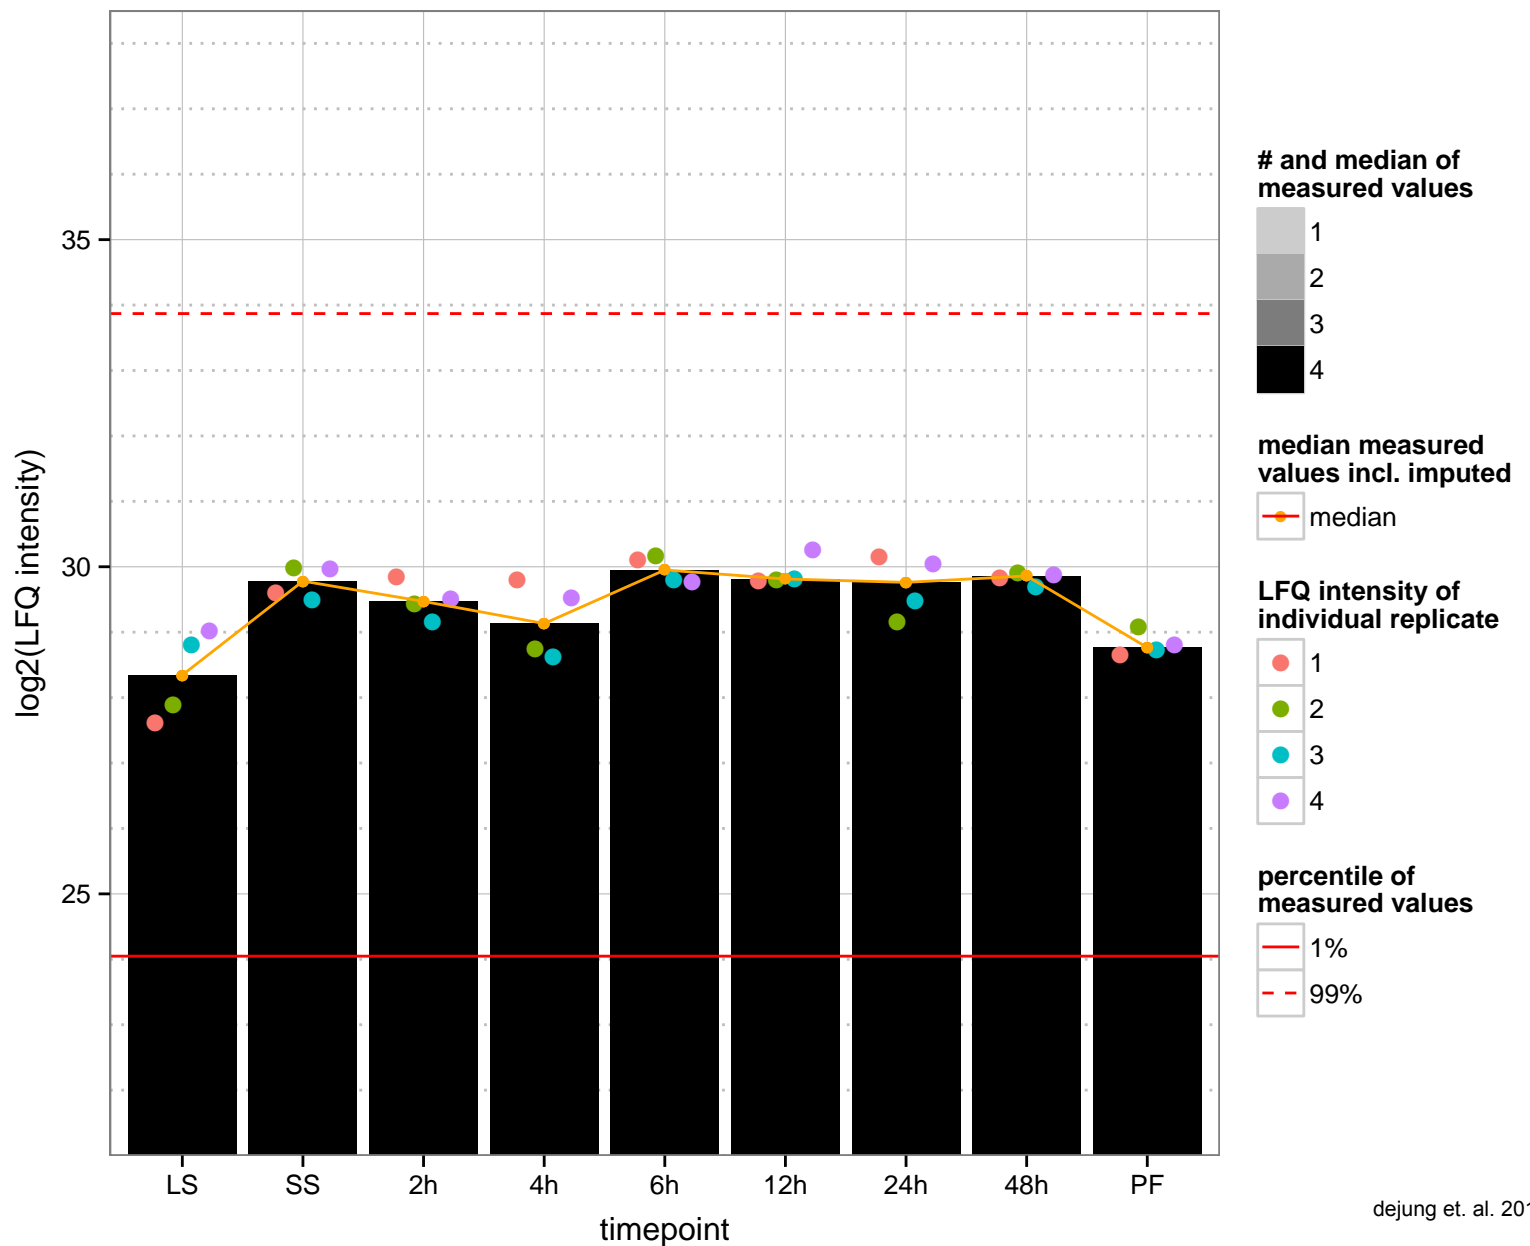

hypothetical protein, conserved  
 Tb927.4.1610  
 AGOF: null  
 AGOC: null  
 AGOP: null  
 PGO: null  
 PGOC: null  
 PGOP: null

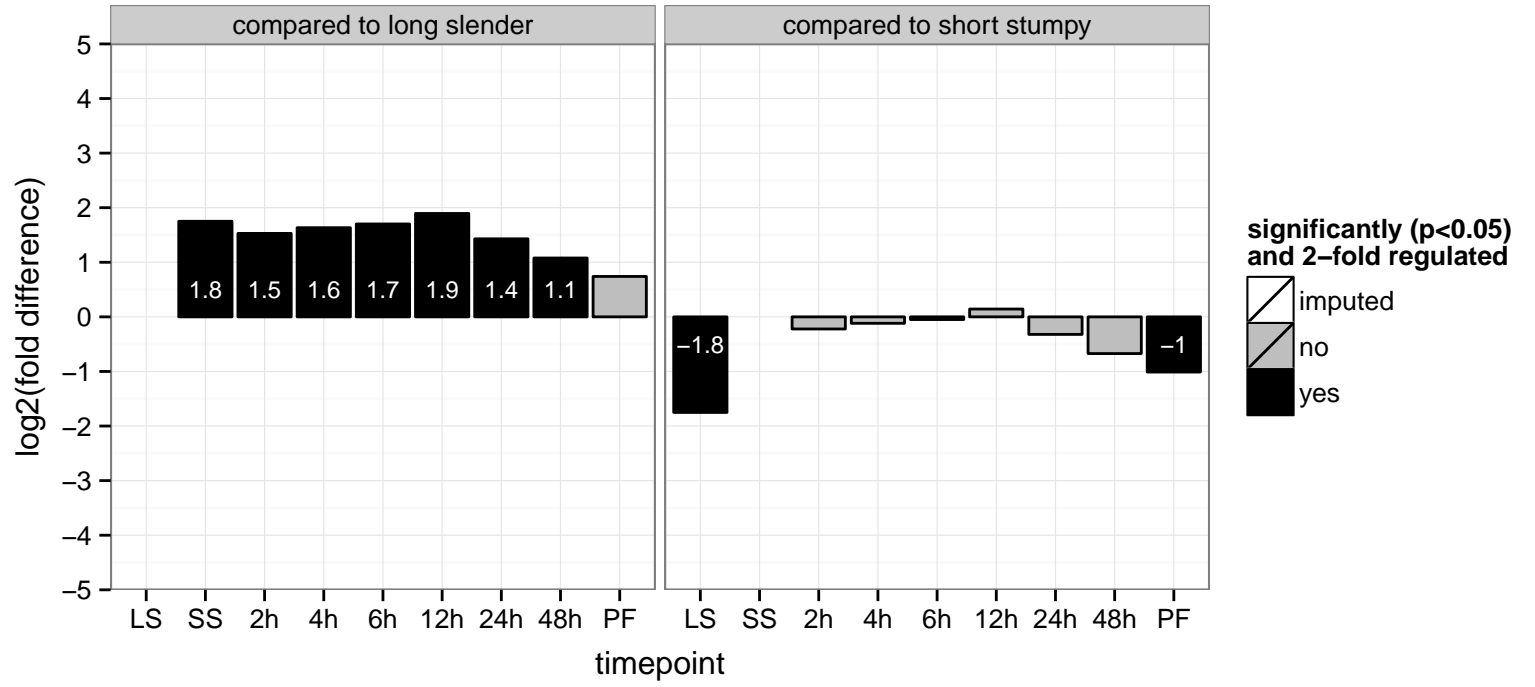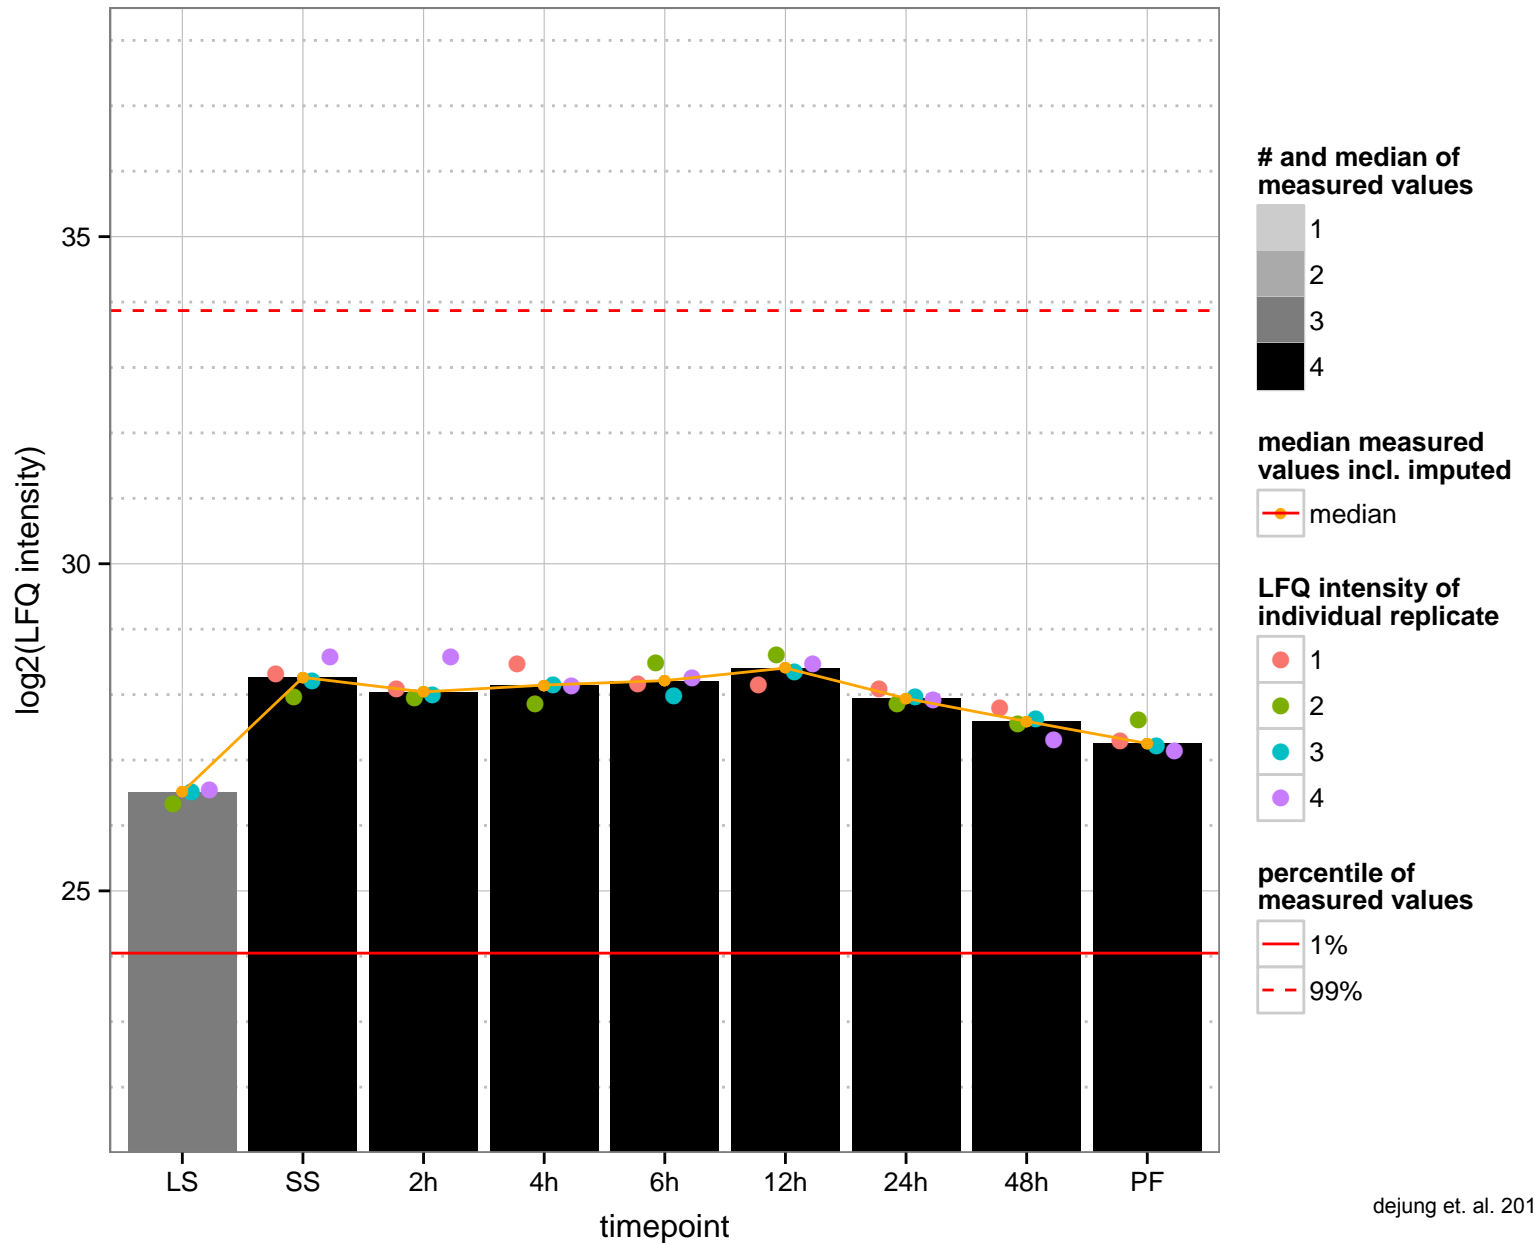

antigenic protein, putative  
 Tb927.4.2070  
 AGOF: ATP binding, aminoacyl-tRNA ligase activity  
 AGOC: cytoplasm  
 AGOP: tRNA aminoacylation for protein translation, translation  
 PGO: null  
 PGOC: null  
 PGOP: null

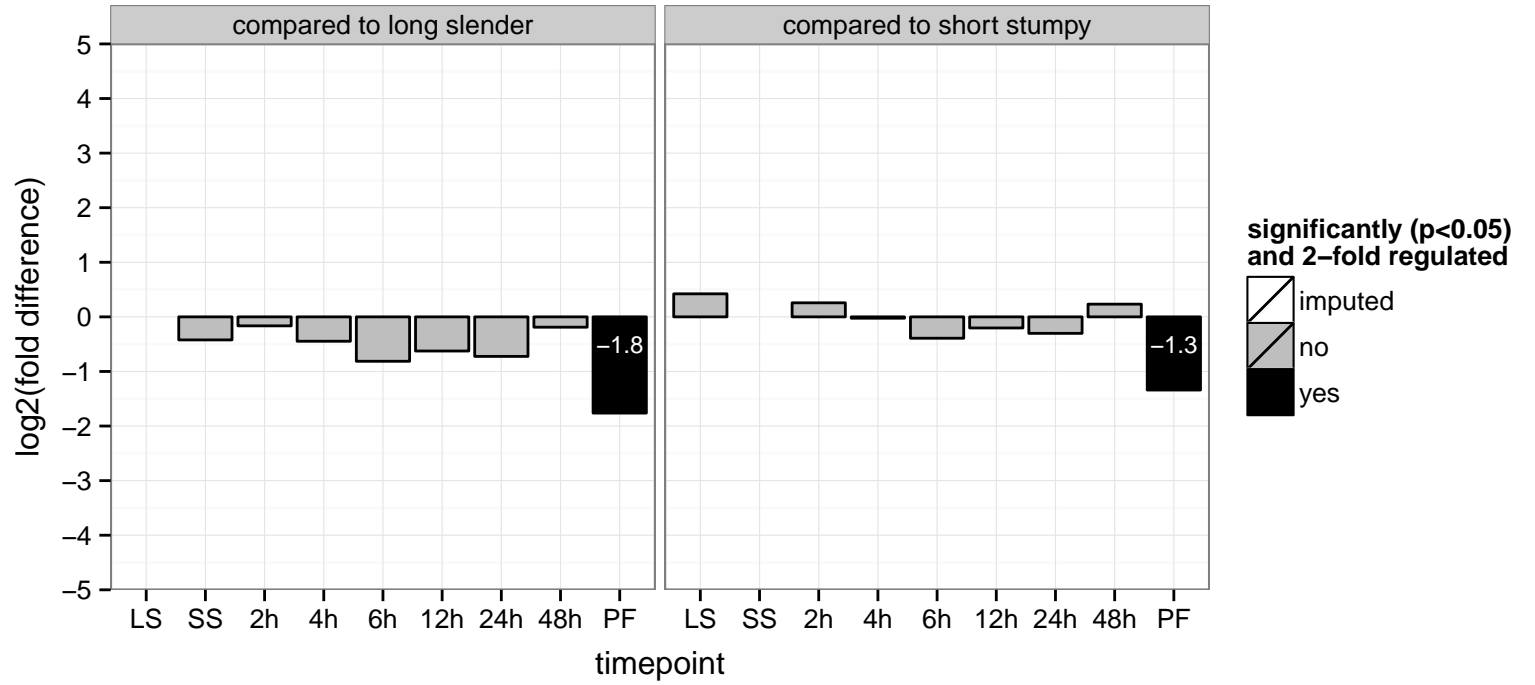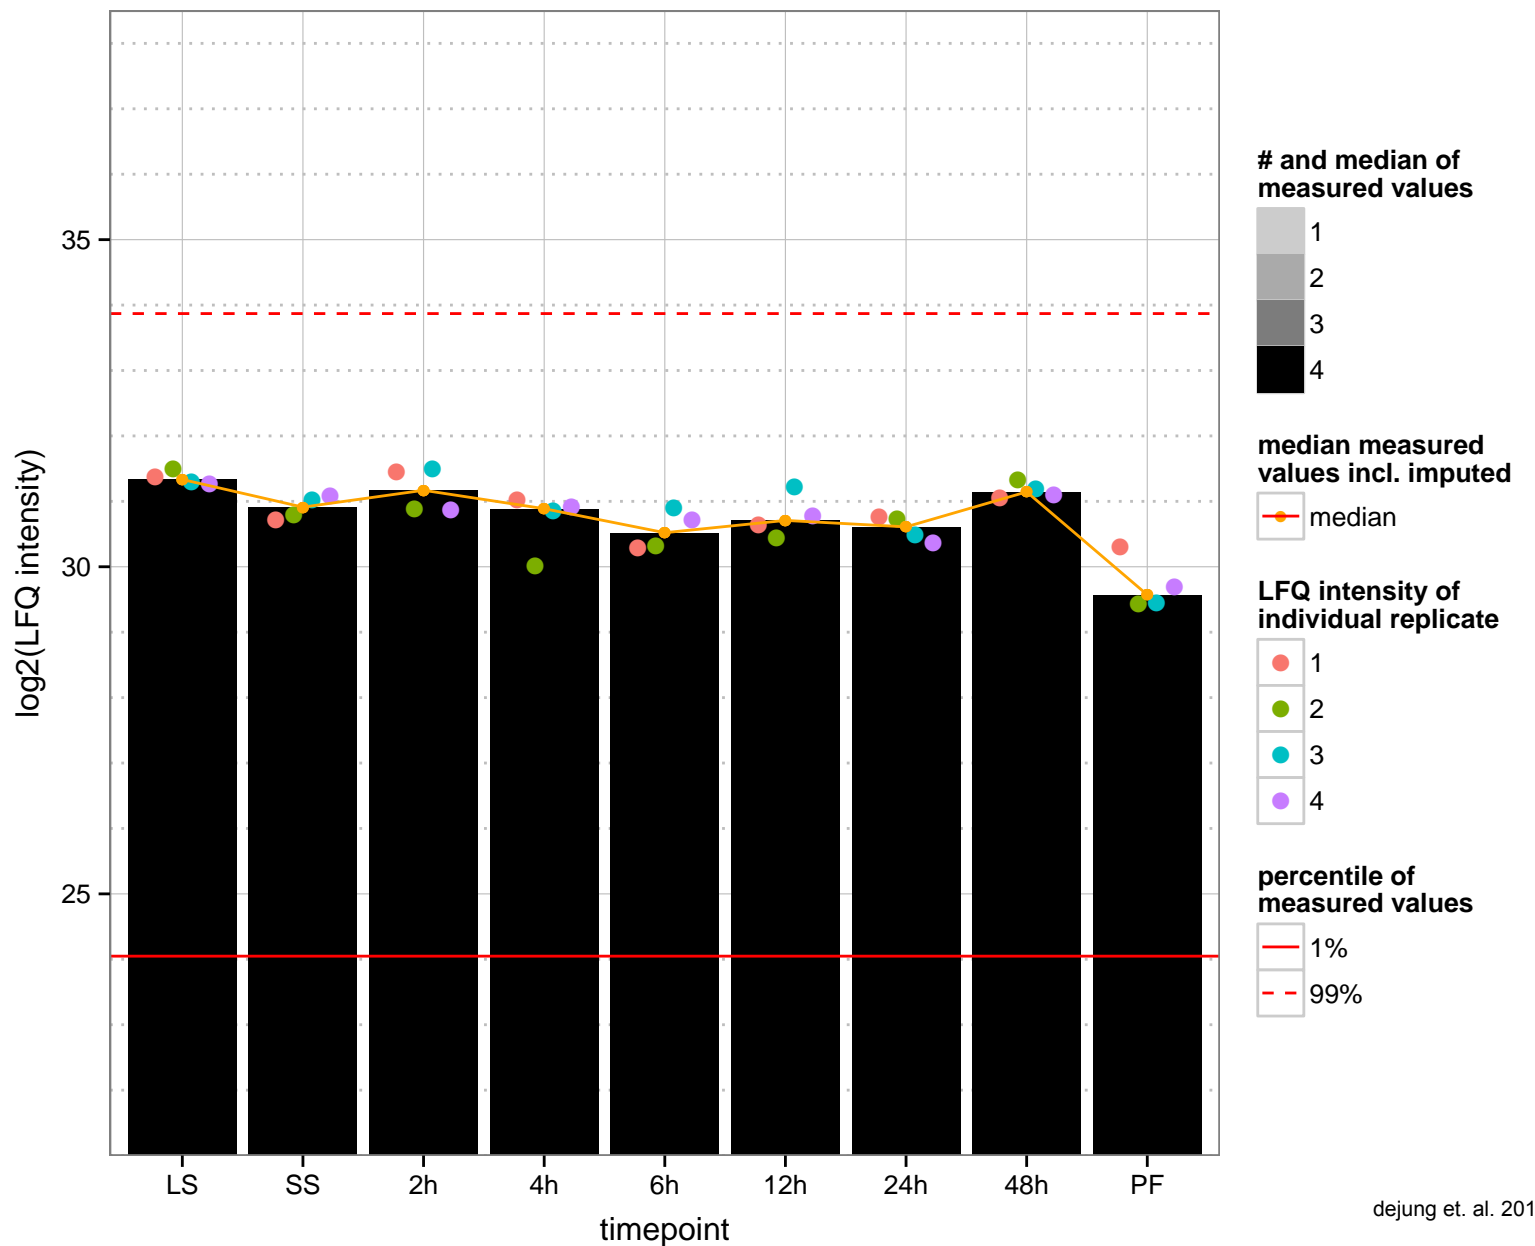

MBO2, flagellar component  
 Tb927.4.2140  
 AGOF: null  
 AGOC: null  
 AGOP: ciliary or flagellar motility  
 PGO: null  
 PGOC: null  
 PGOP: null

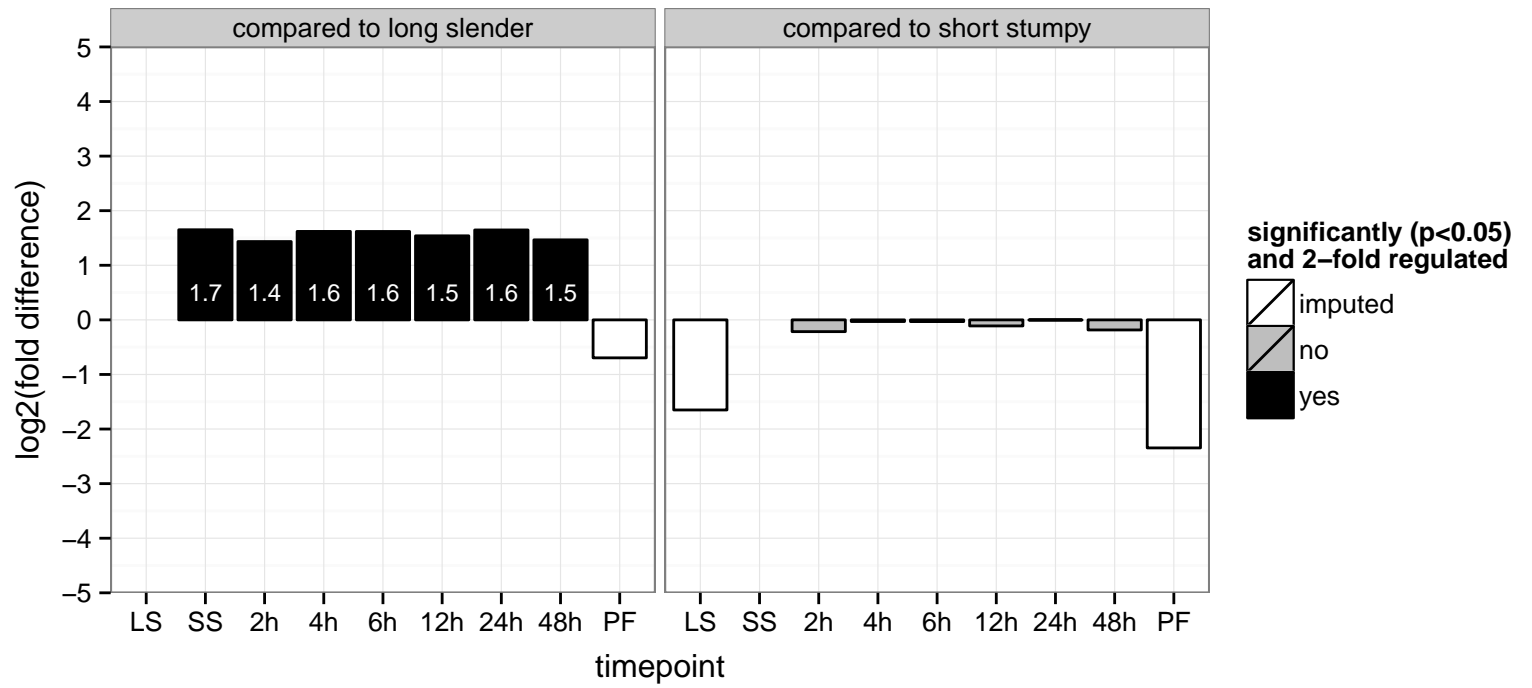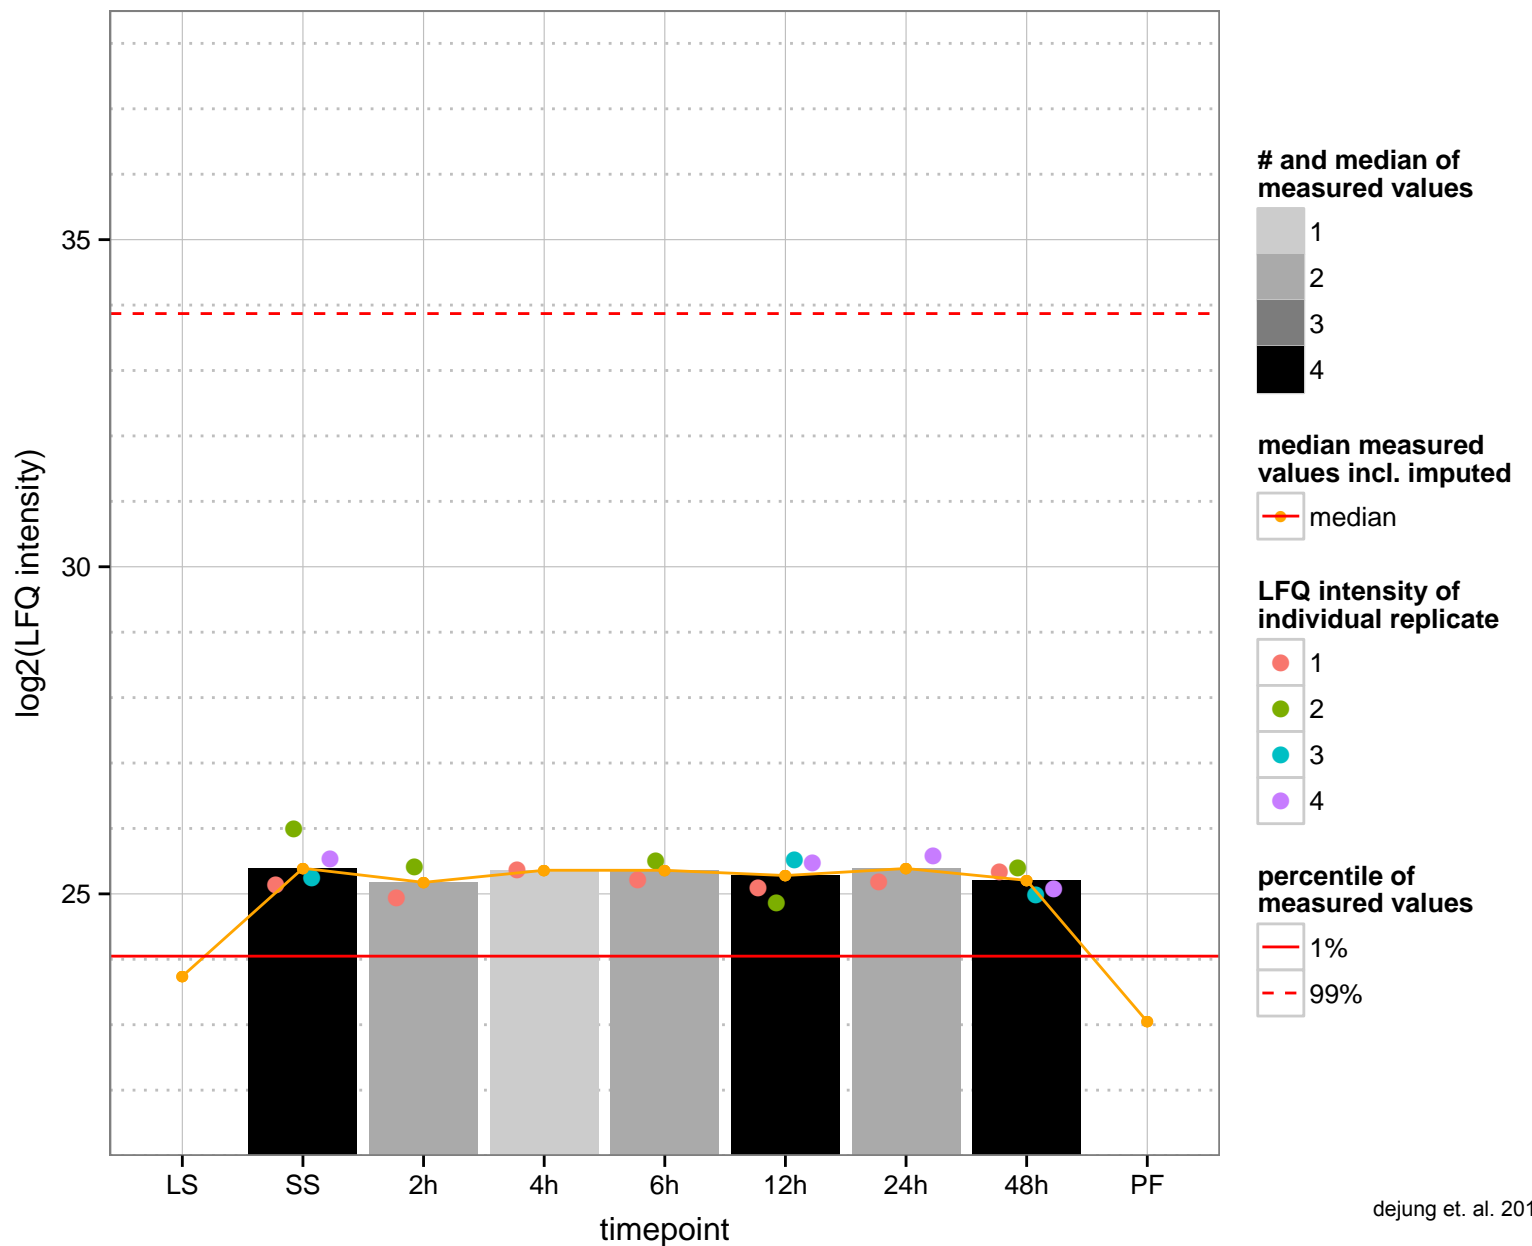



hypothetical protein, conserved  
 Tb927.4.2930  
 AGOF: null  
 AGOC: null  
 AGOP: response to stress  
 PGO: null  
 PGOC: null  
 PGOP: response to stress

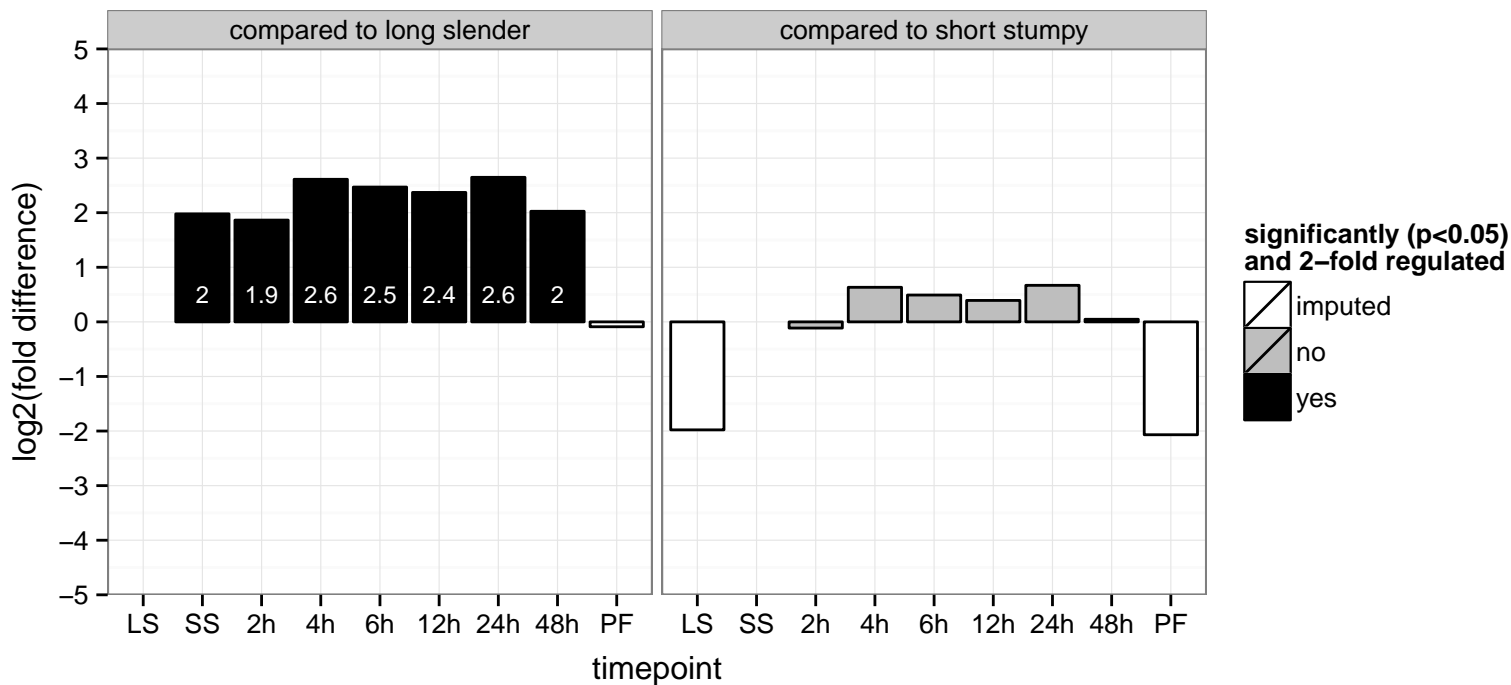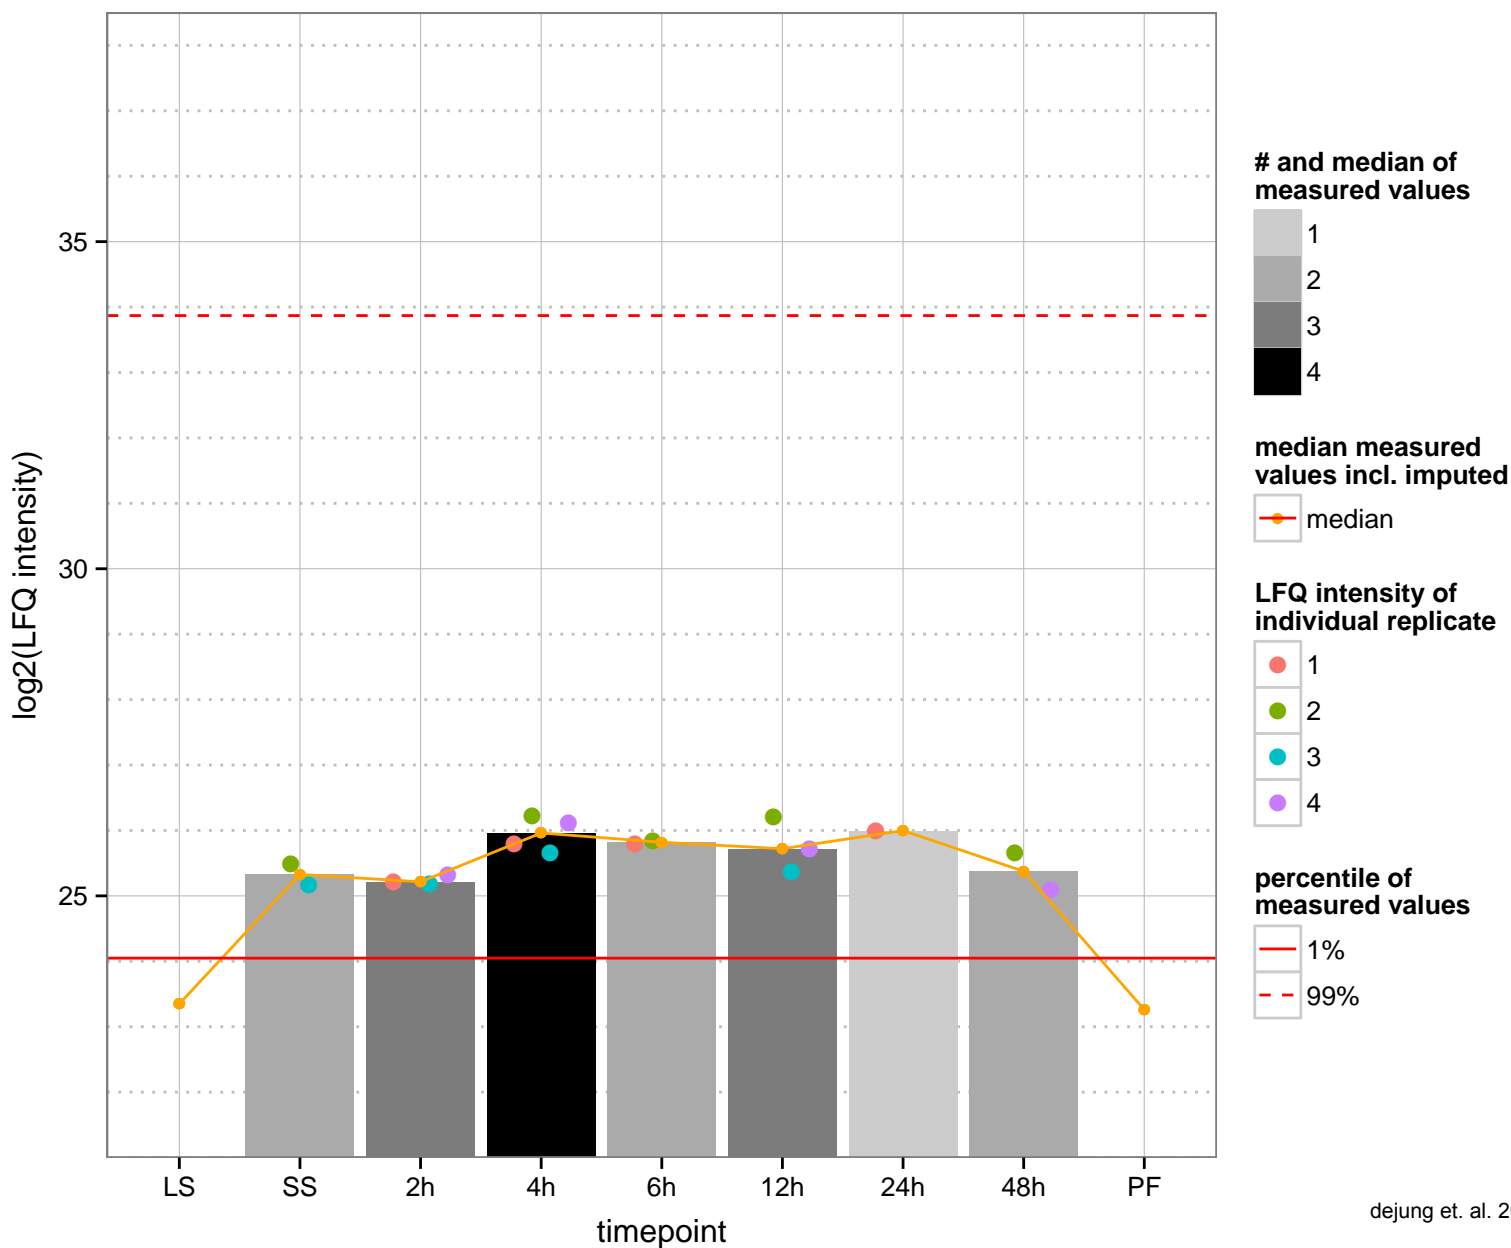

hypothetical protein, conserved

Tb927.4.310

AGOF: acid-amino acid ligase activity

AGOC: intracellular

AGOP: cellular protein modification process

PGOF: acid-amino acid ligase activity, protein binding, transferase activity, transferring phosphorus-containing groups

PGOC: intracellular

PGOP: cellular protein modification process

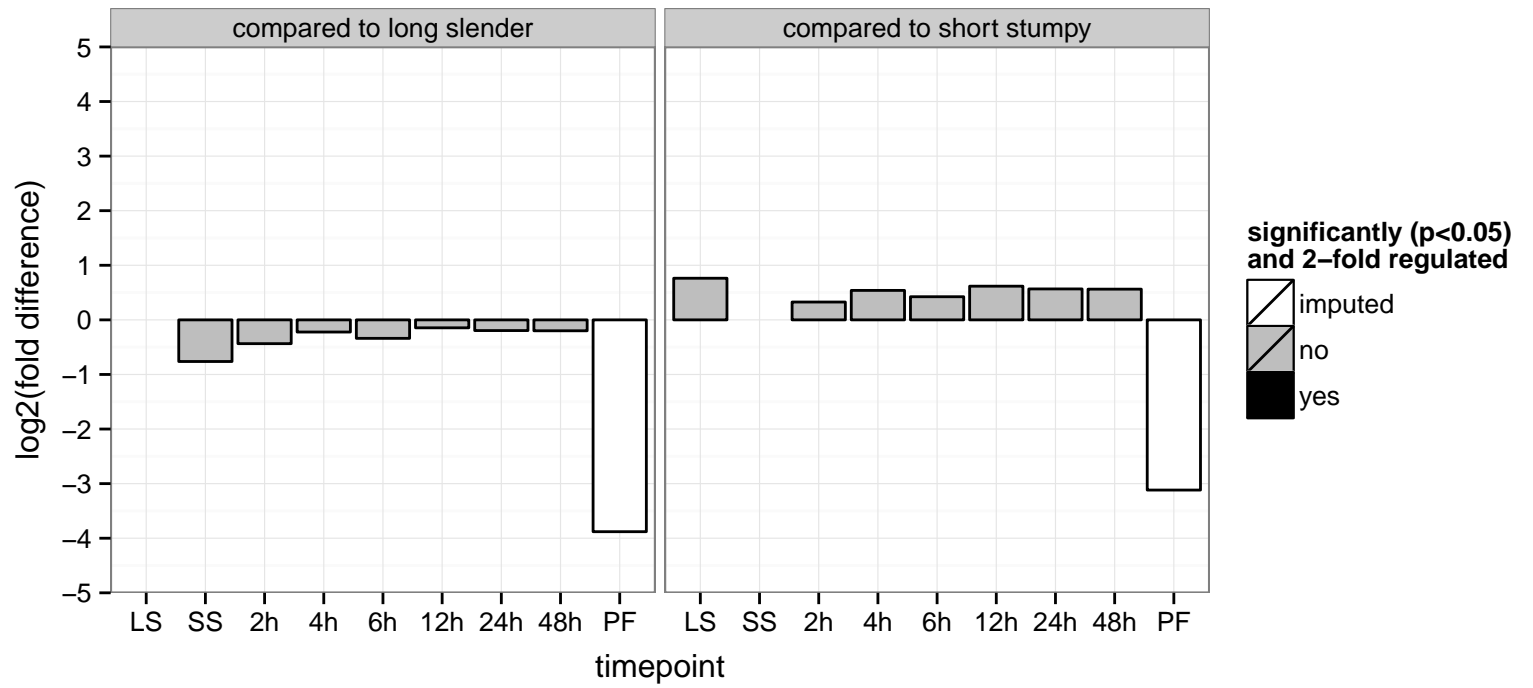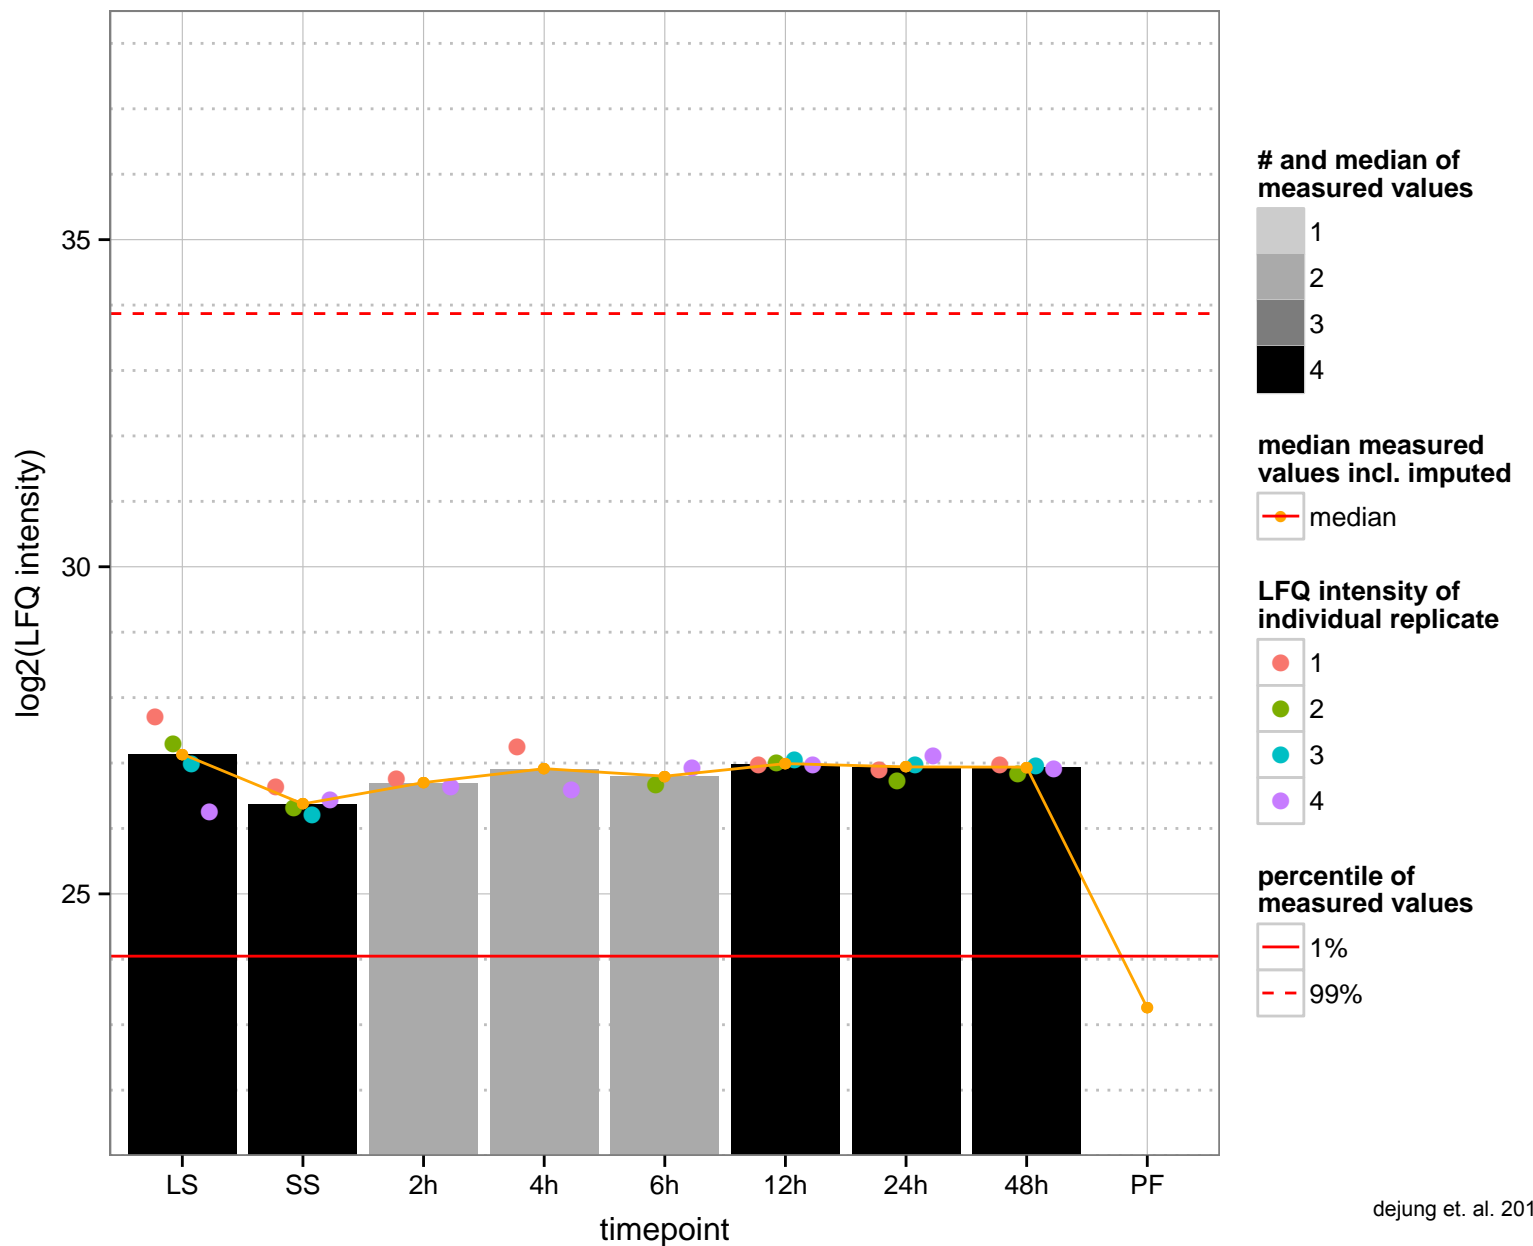

tuzin, putative  
 Tb927.4.3390  
 AGOF: null  
 AGOC: mitochondrion  
 AGOP: null  
 PGO: null  
 PGOC: null  
 PGOP: null

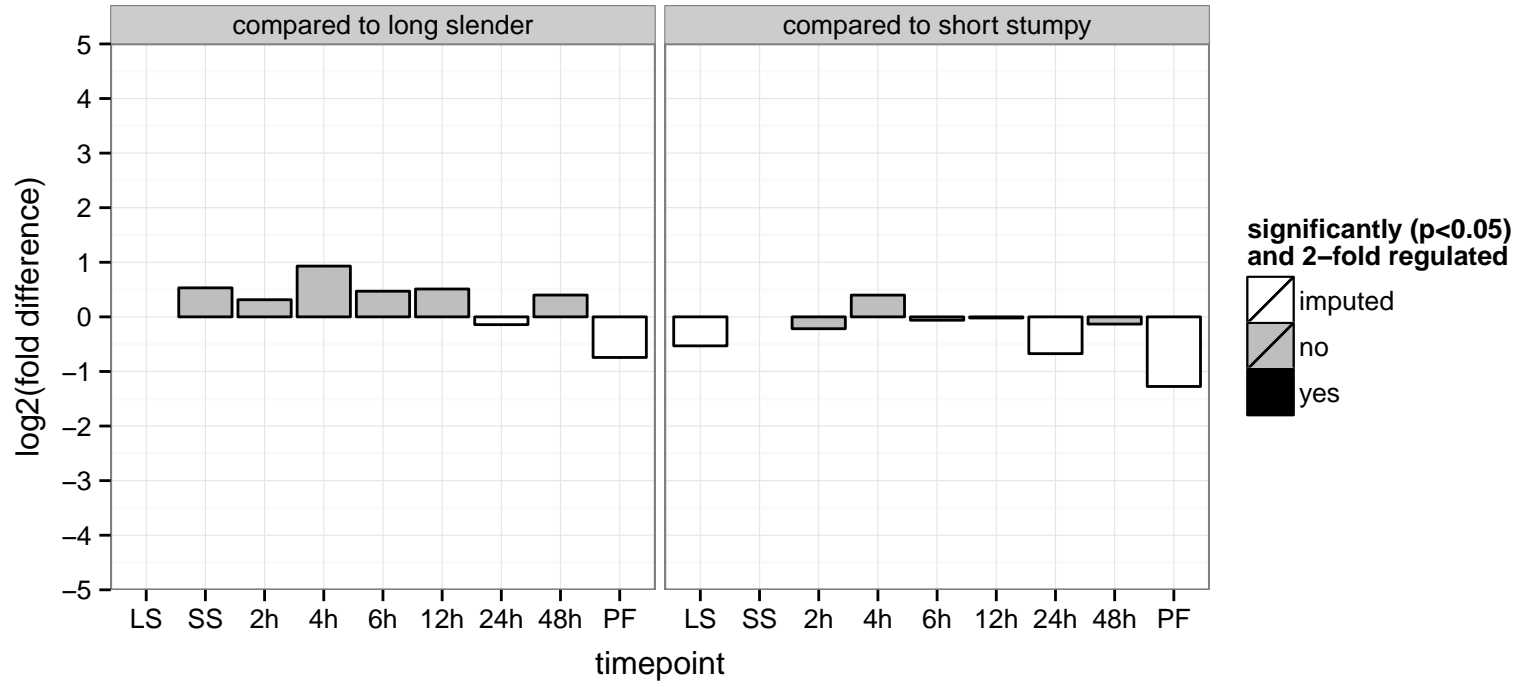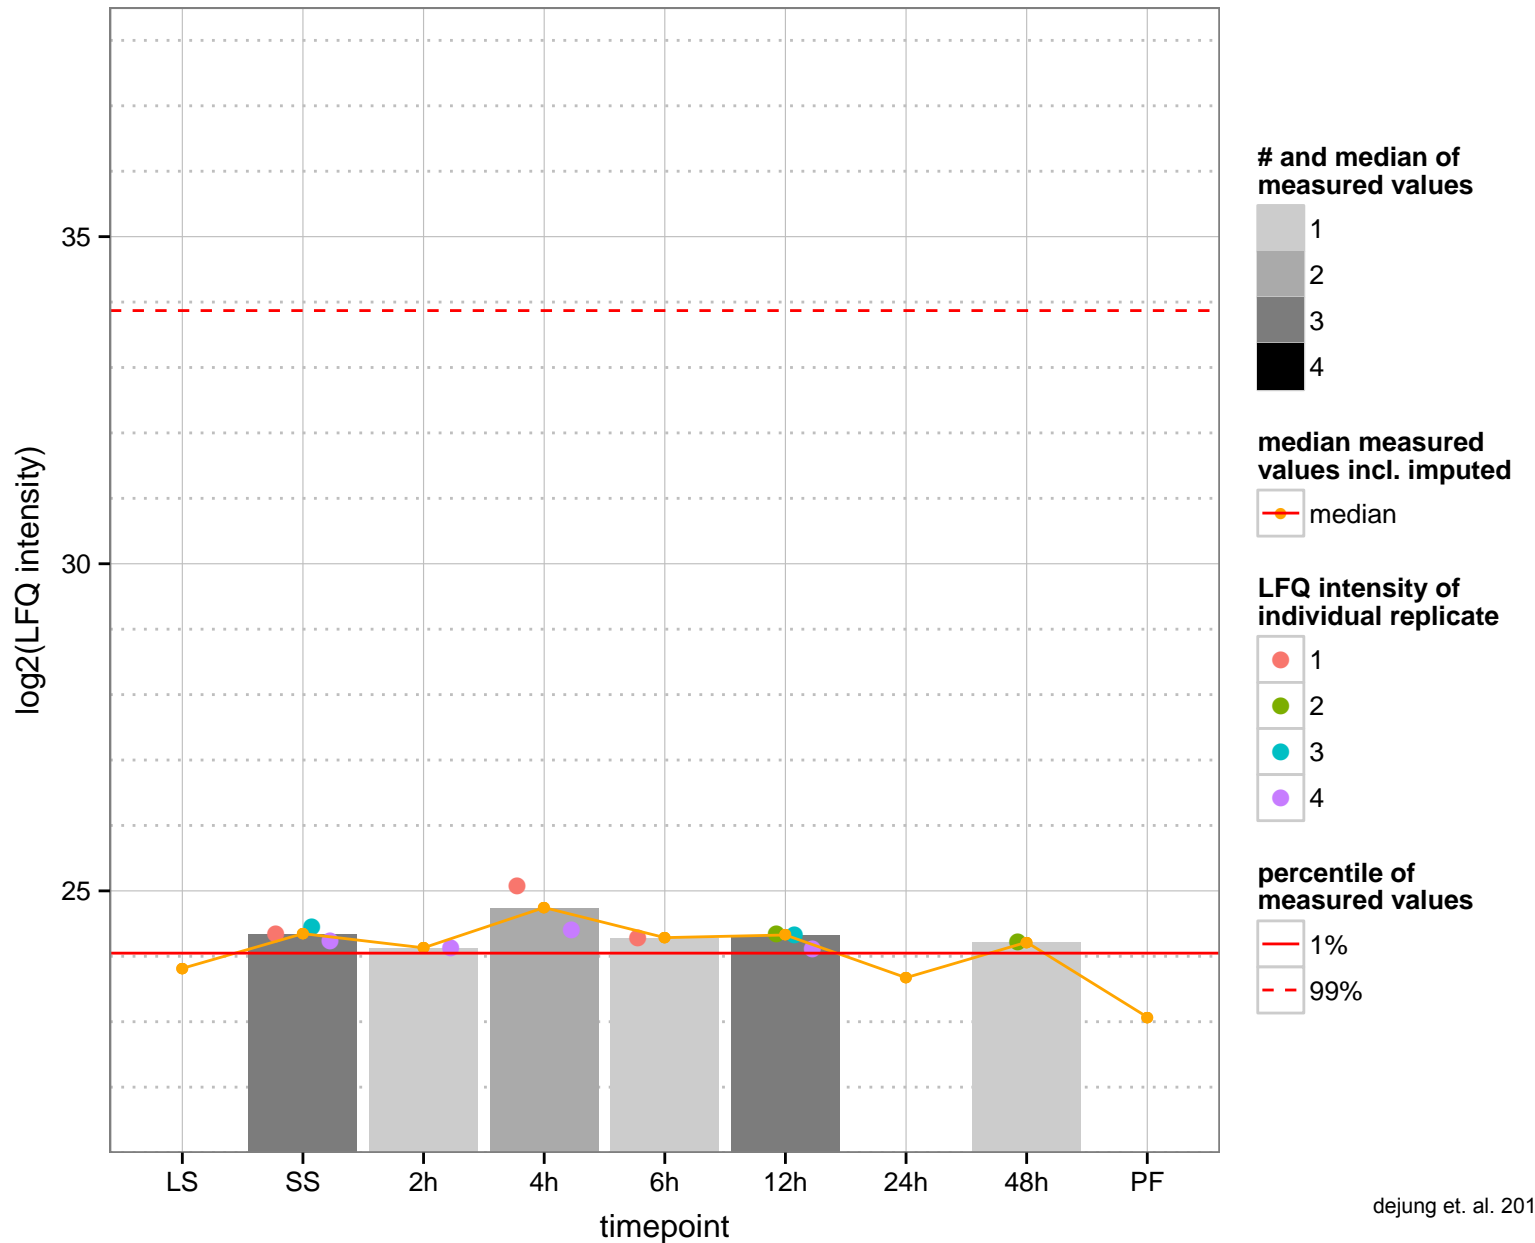

phosphatidylinositol 3-kinase tor, putative, phosphatidylinositol 3-kinase (tor2) (TOR2)

Tb927.4.420

AGOF: null, phosphotransferase activity, alcohol group as acceptor, protein binding

AGOC: null, TORC2 complex, cytosol, endoplasmic reticulum, mitochondrion

AGOP: null, actin cytoskeleton organization

PGOF: phosphotransferase activity, alcohol group as acceptor, transferase activity, transferring phosphorus-containing groups

PGOC: null

PGOP: null

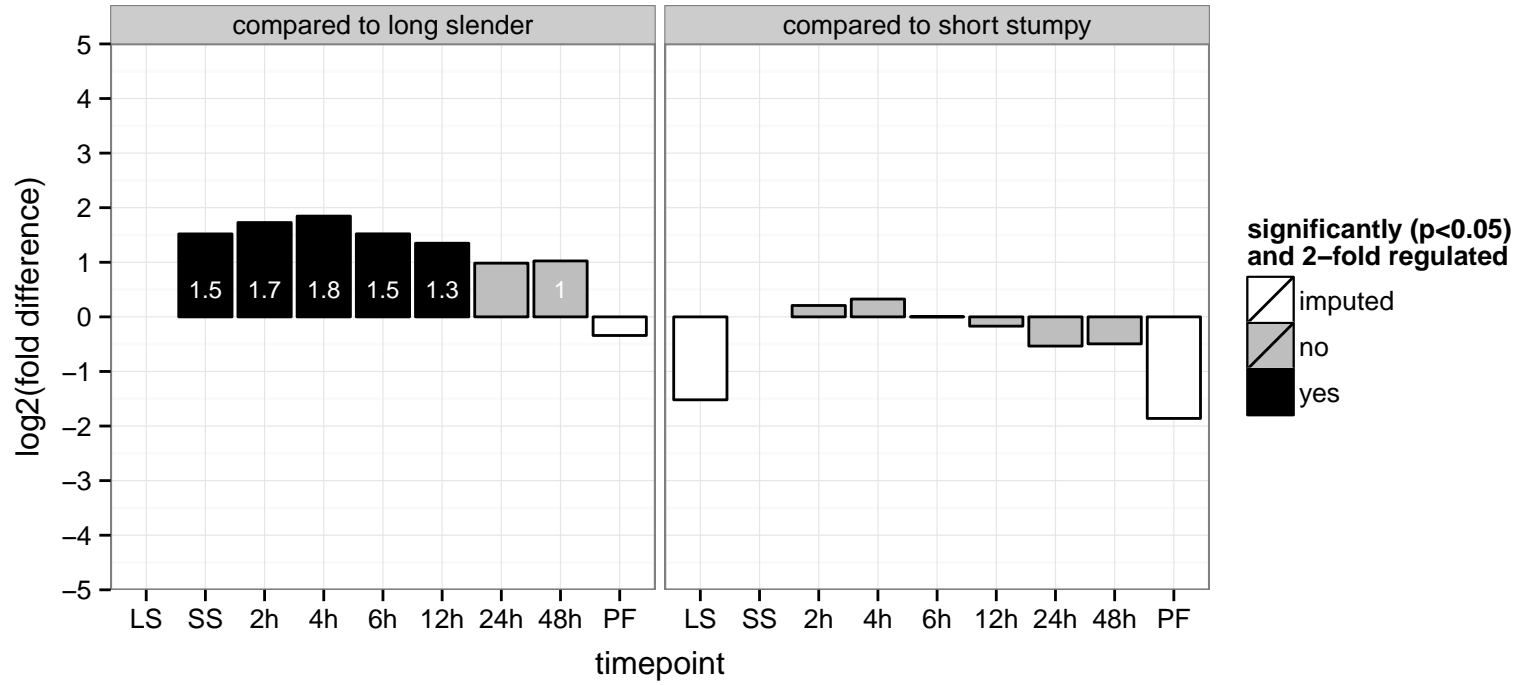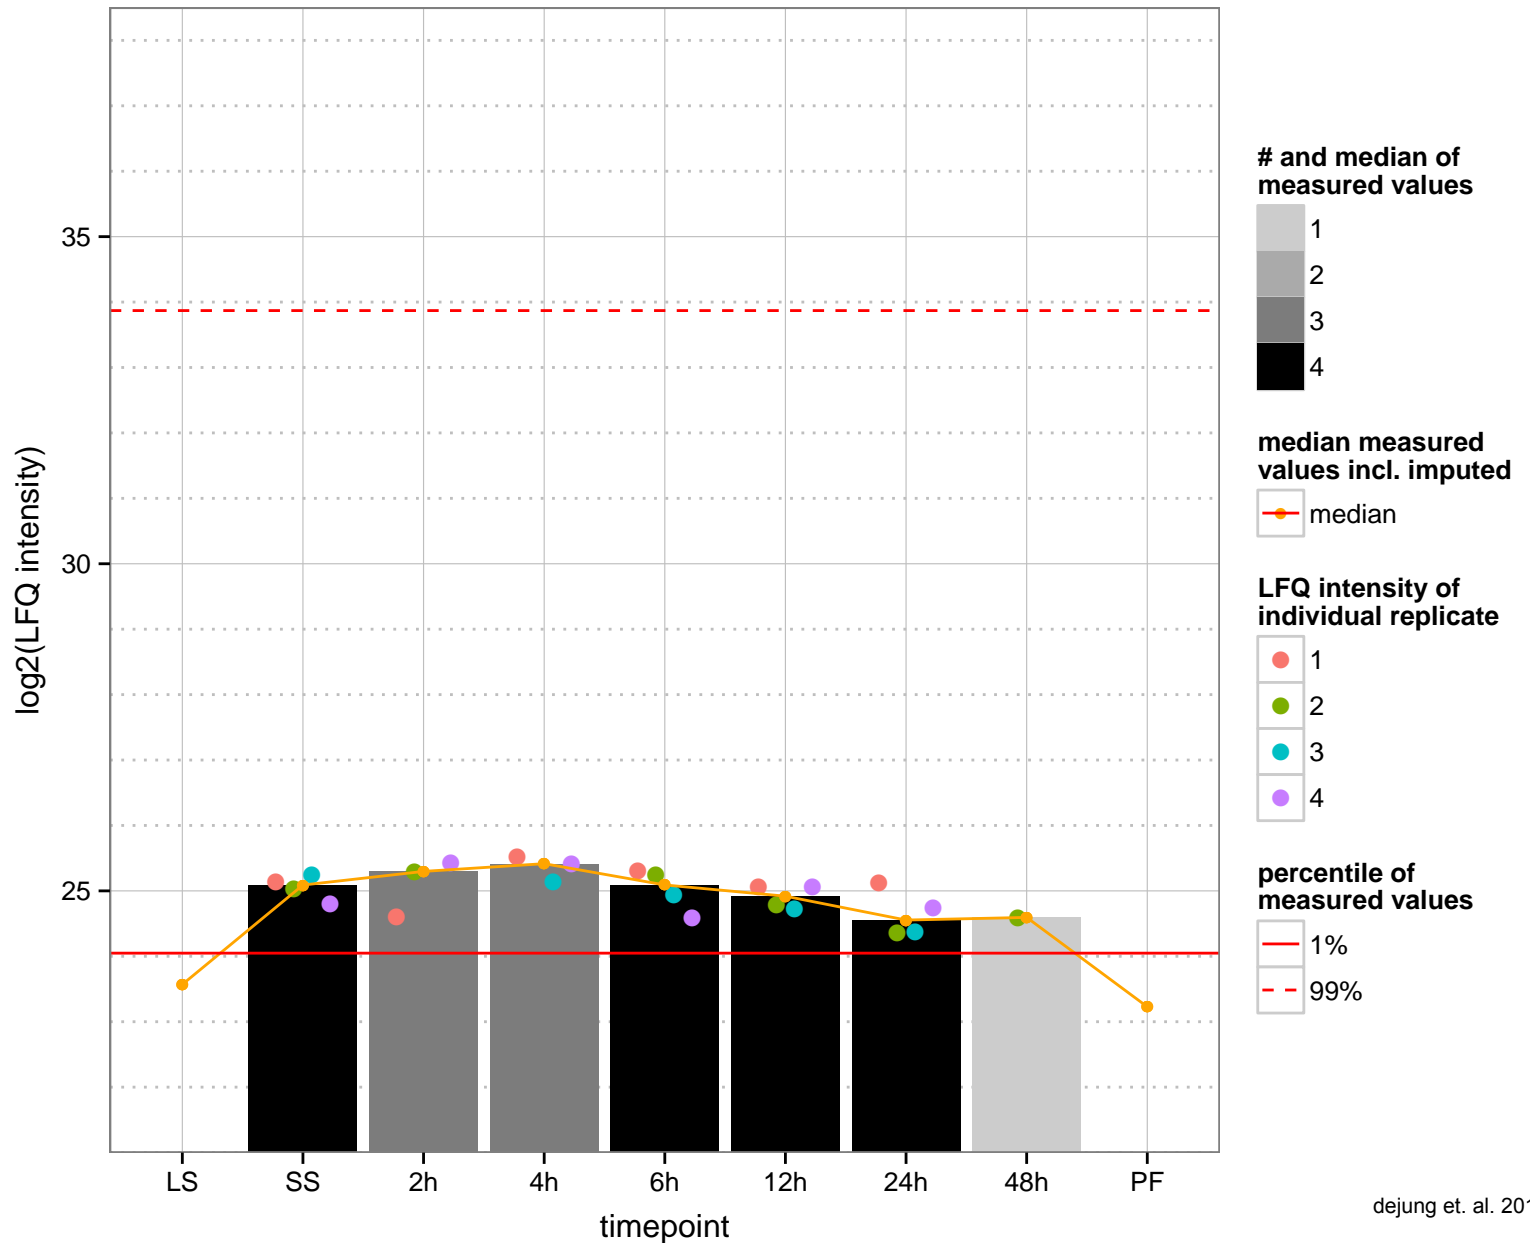

adenylyl cyclase (GRESAG 4.4)  
 Tb927.4.4430;Tb927.4.4450  
 AGOF: ATP binding, adenylate cyclase activity  
 AGOC: integral to membrane  
 AGOP: cyclic nucleotide biosynthetic process, intracellular signal transduction  
 PGO: phosphorus-oxygen lyase activity  
 PGOC: null  
 PGOP: cyclic nucleotide biosynthetic process, intracellular signal transduction

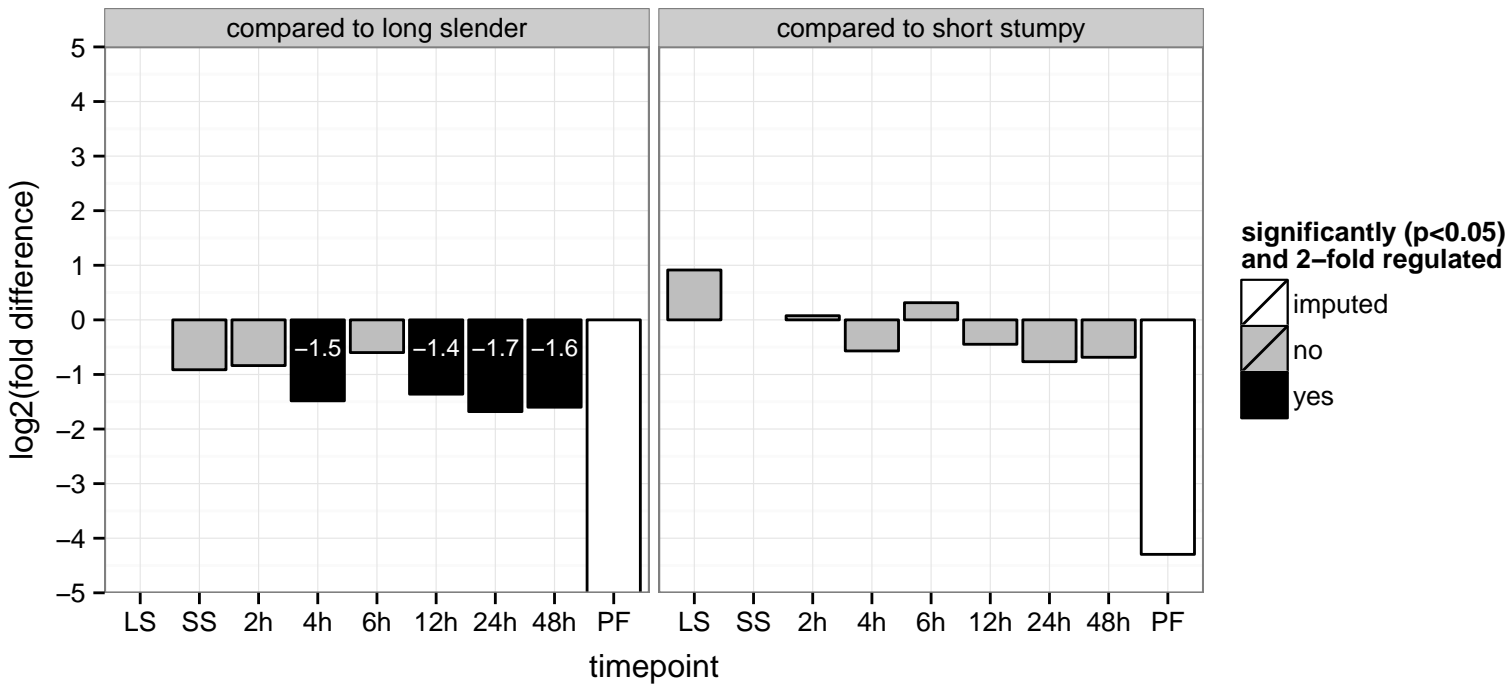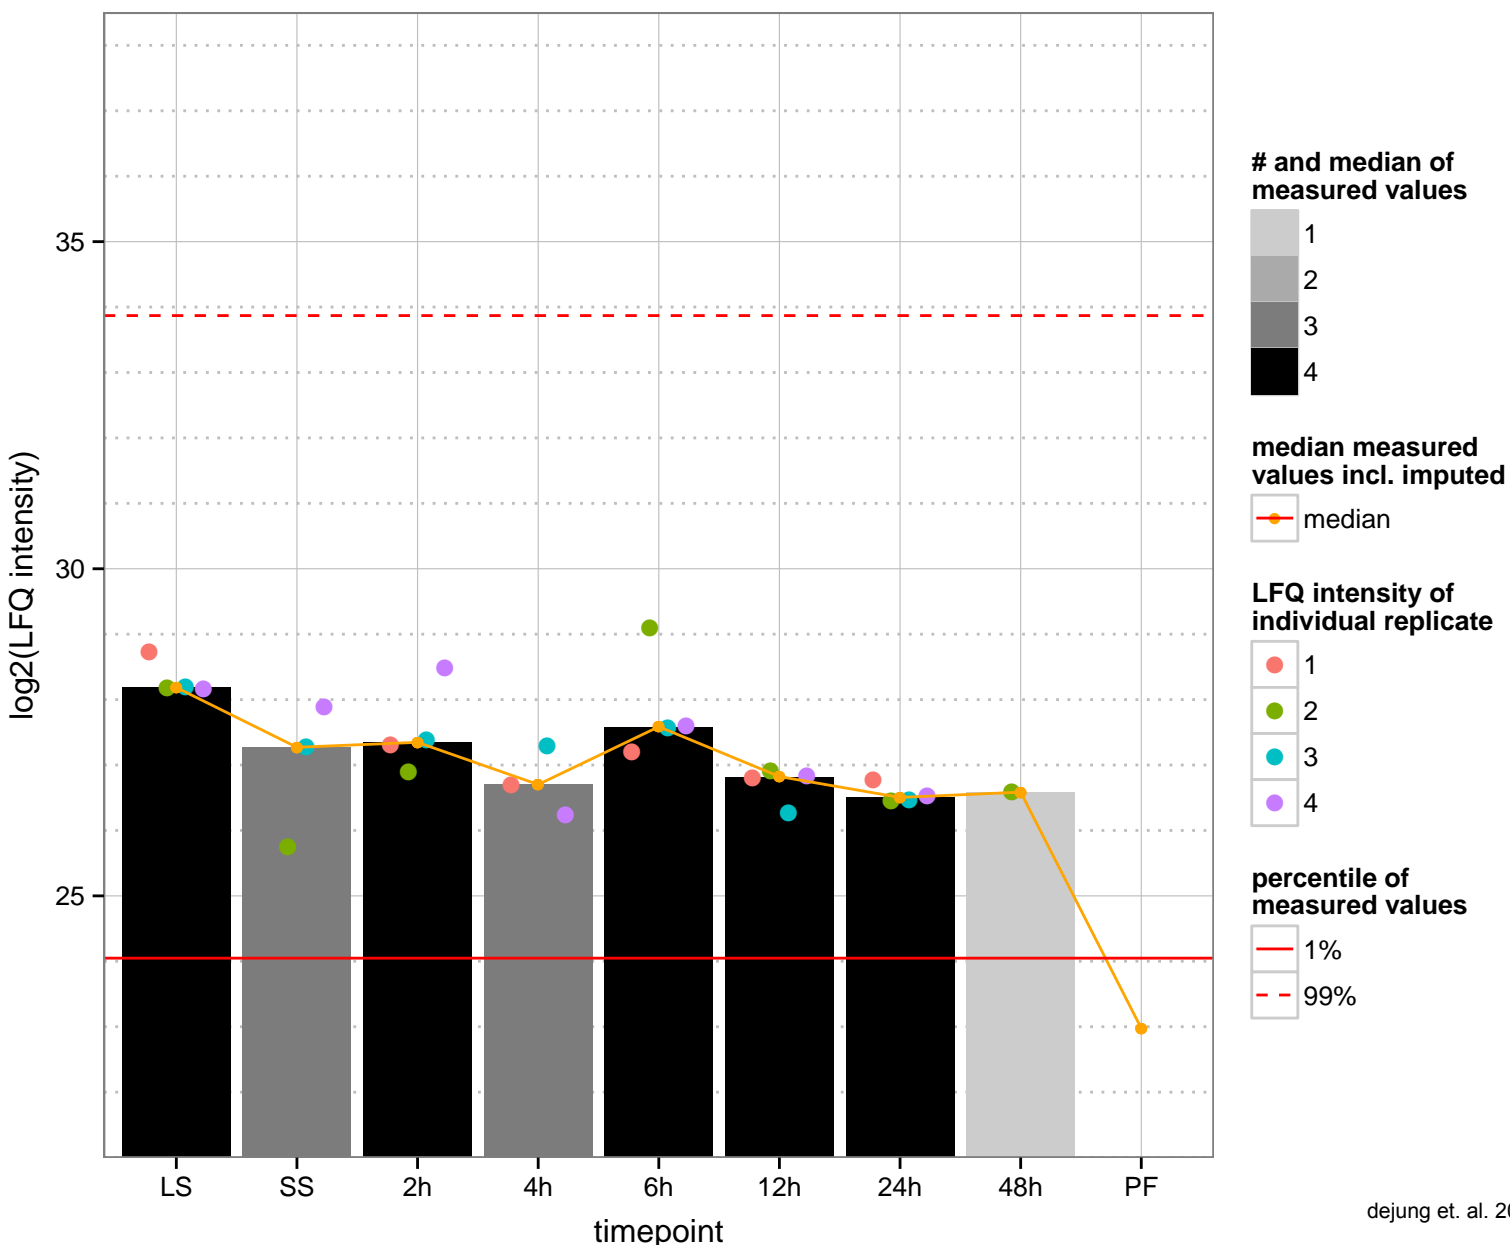

hypothetical protein, conserved  
 Tb927.4.4750  
 AGOF: null  
 AGOC: null  
 AGOP: null  
 PGO: null  
 PGOC: null  
 PGOP: null

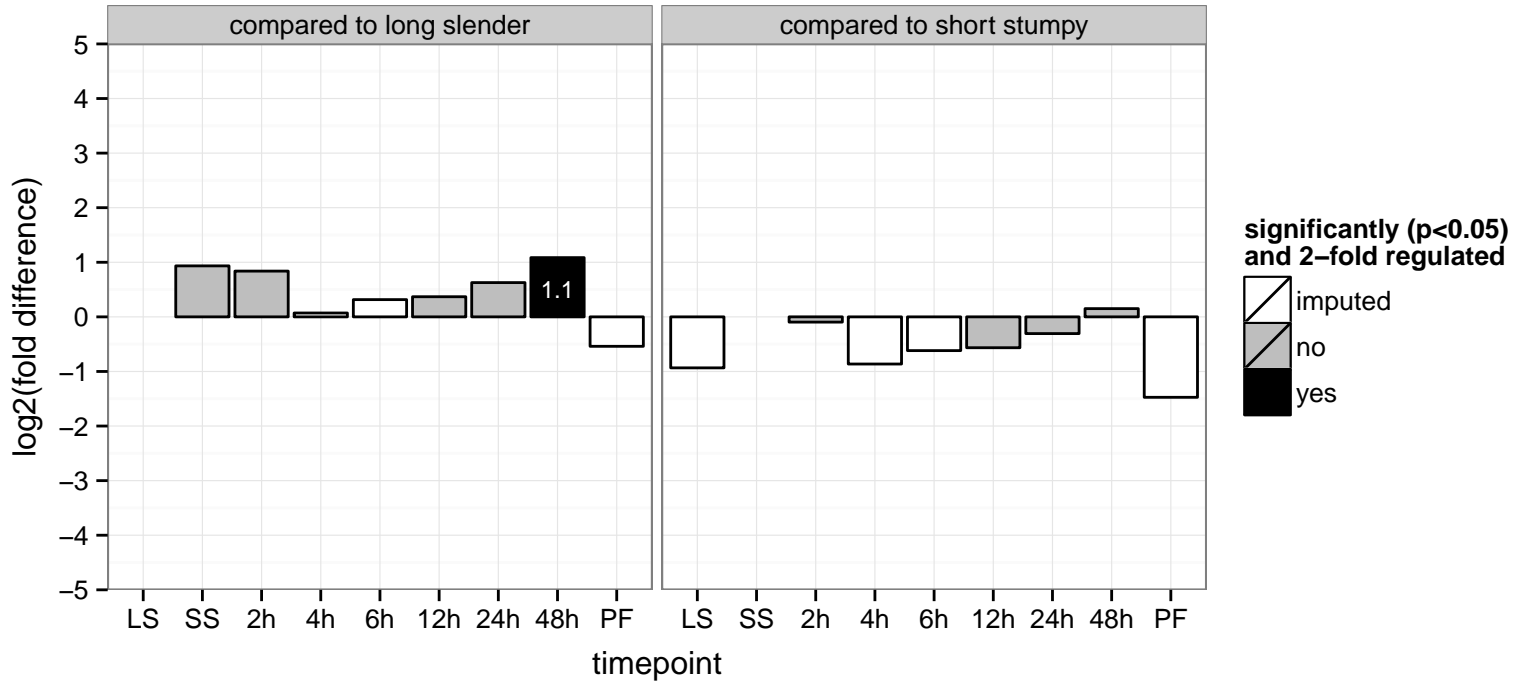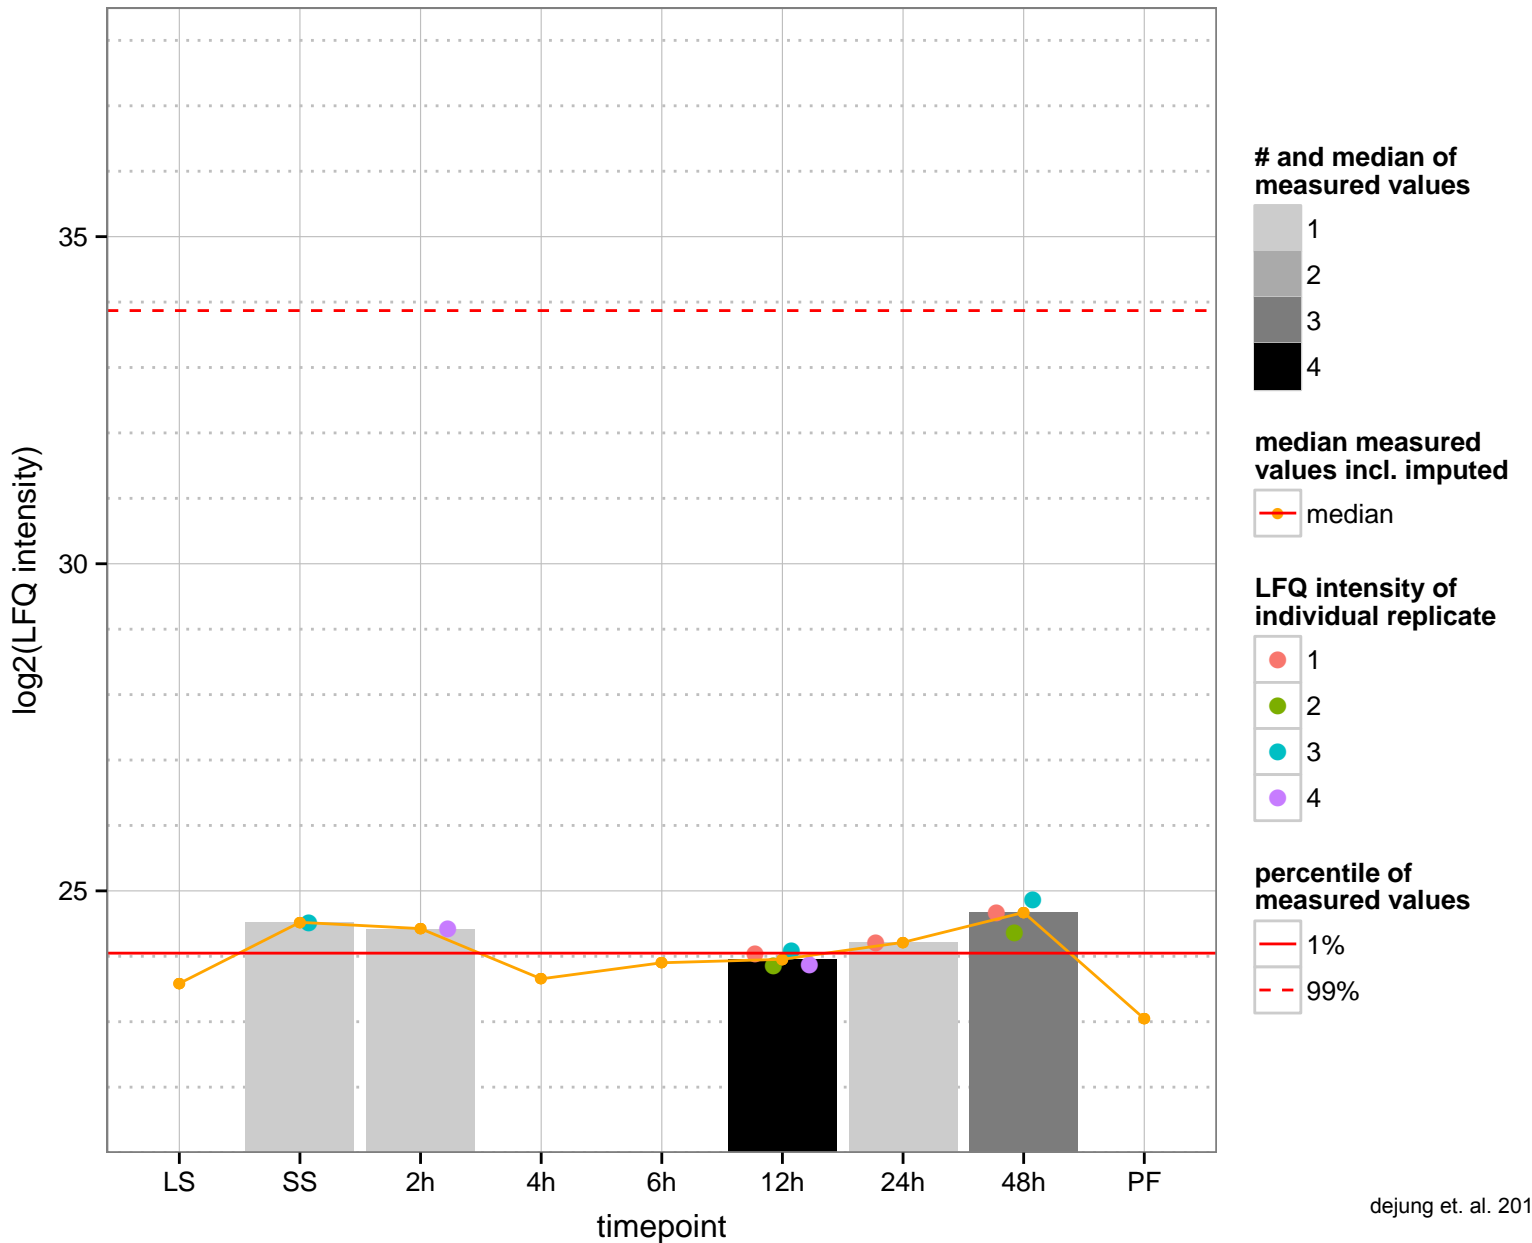

hypothetical protein, conserved  
 Tb927.4.5080  
 AGOF: null  
 AGOC: null  
 AGOP: null  
 PGO: null  
 PGO: endoplasmic reticulum, integral to membrane  
 PGO: intracellular protein transport

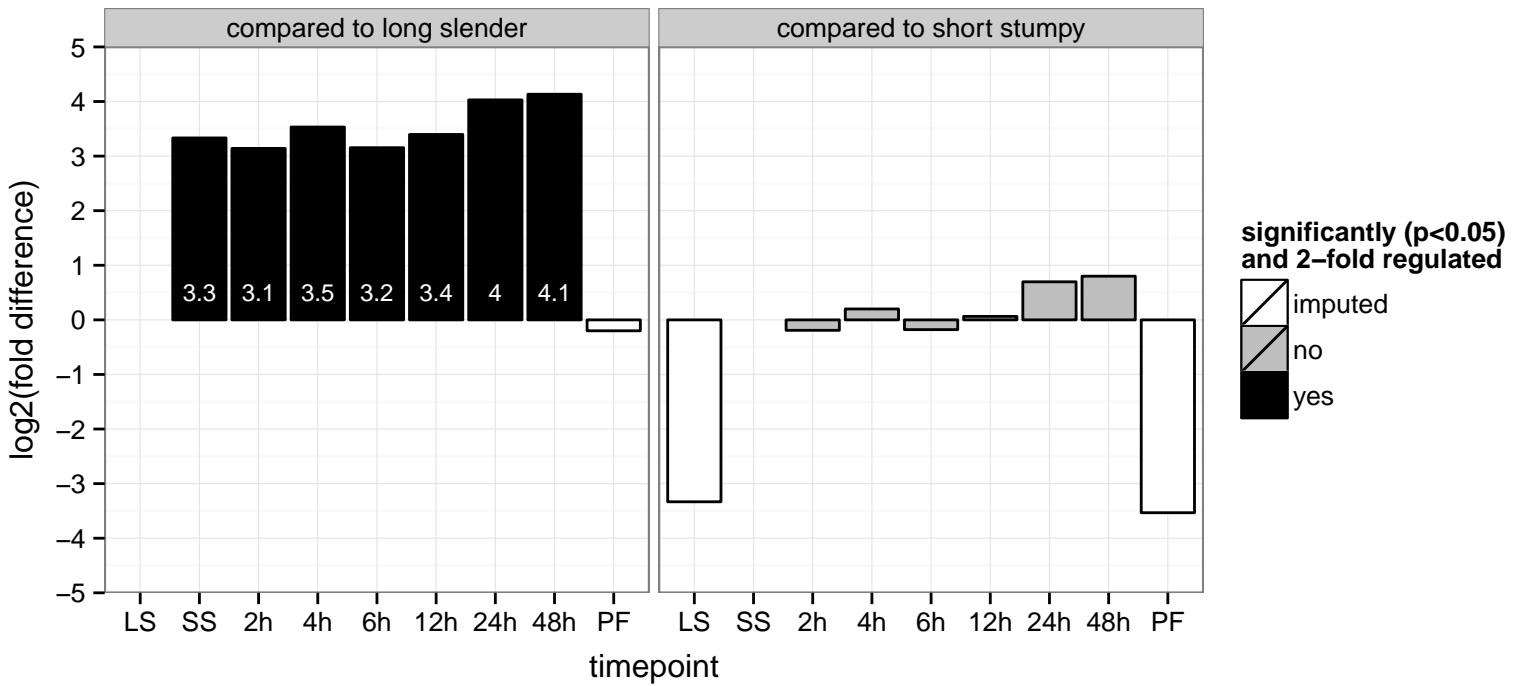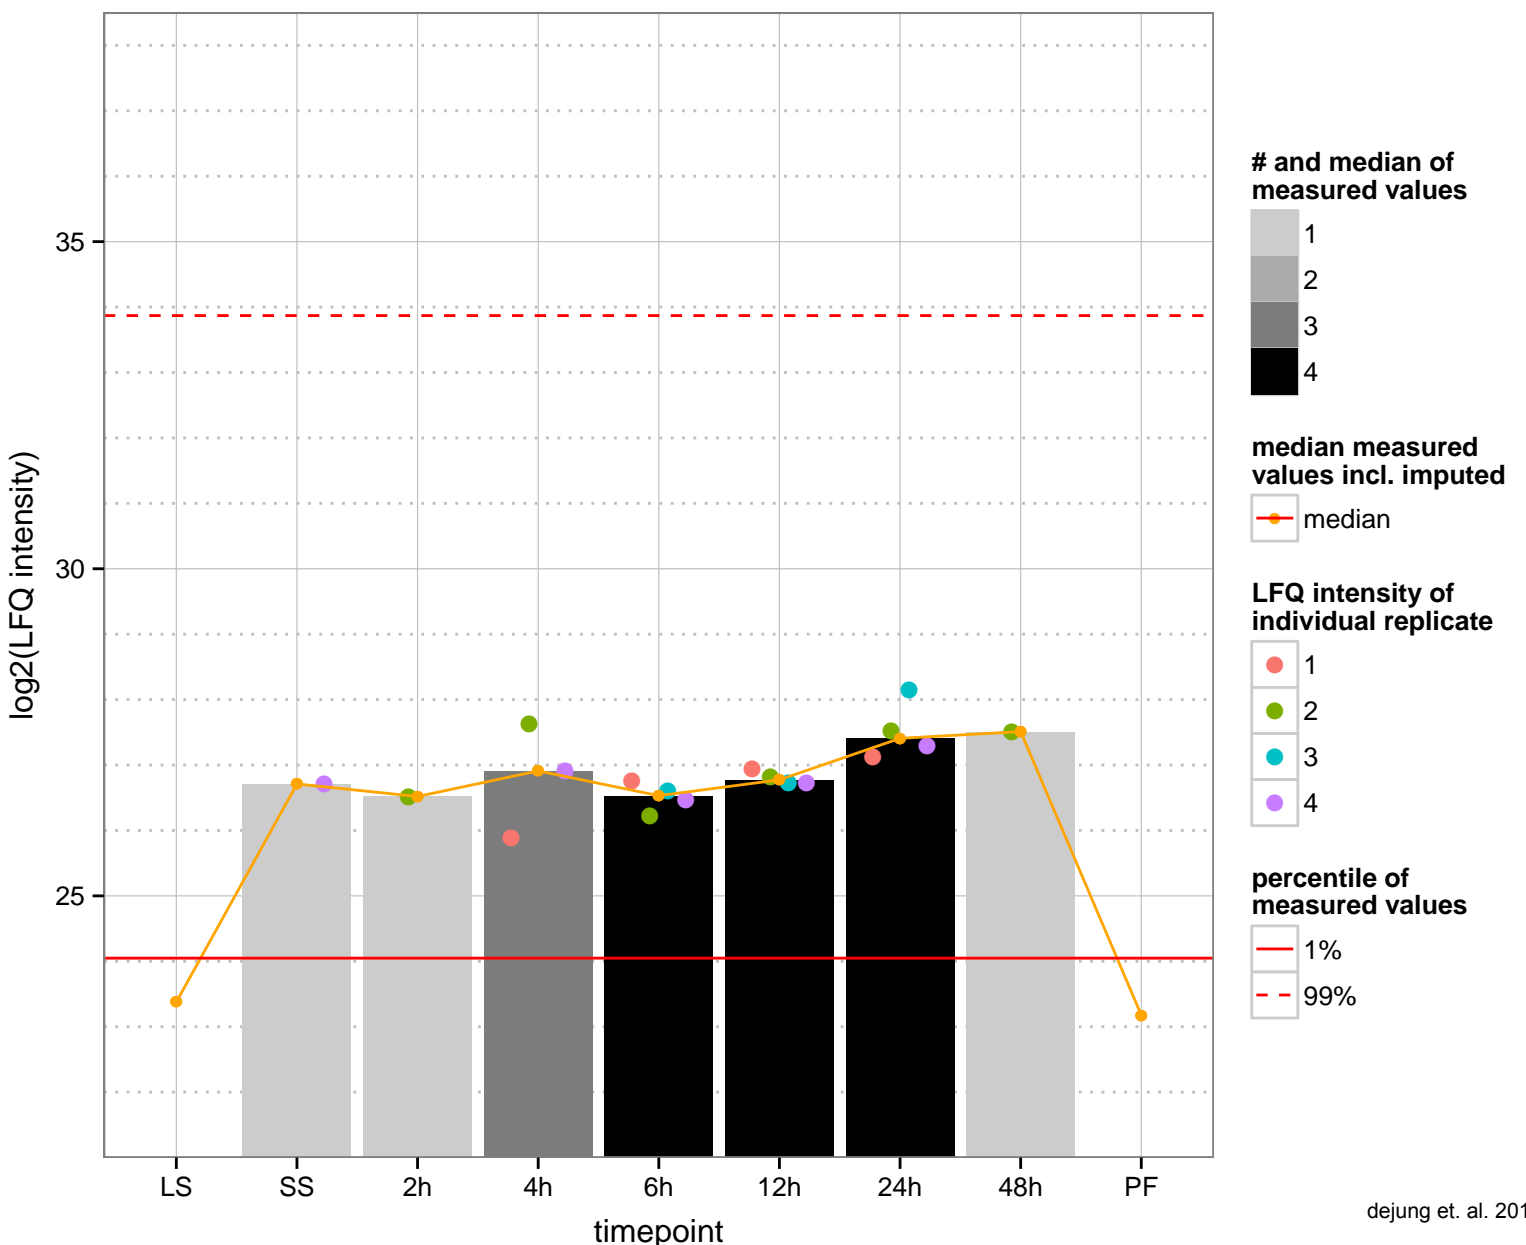

hypothetical protein, conserved  
 Tb927.4.640  
 AGOF: null  
 AGOC: null  
 AGOP: null  
 PGO: protein binding  
 PGOC: null  
 PGO: protein targeting to Golgi

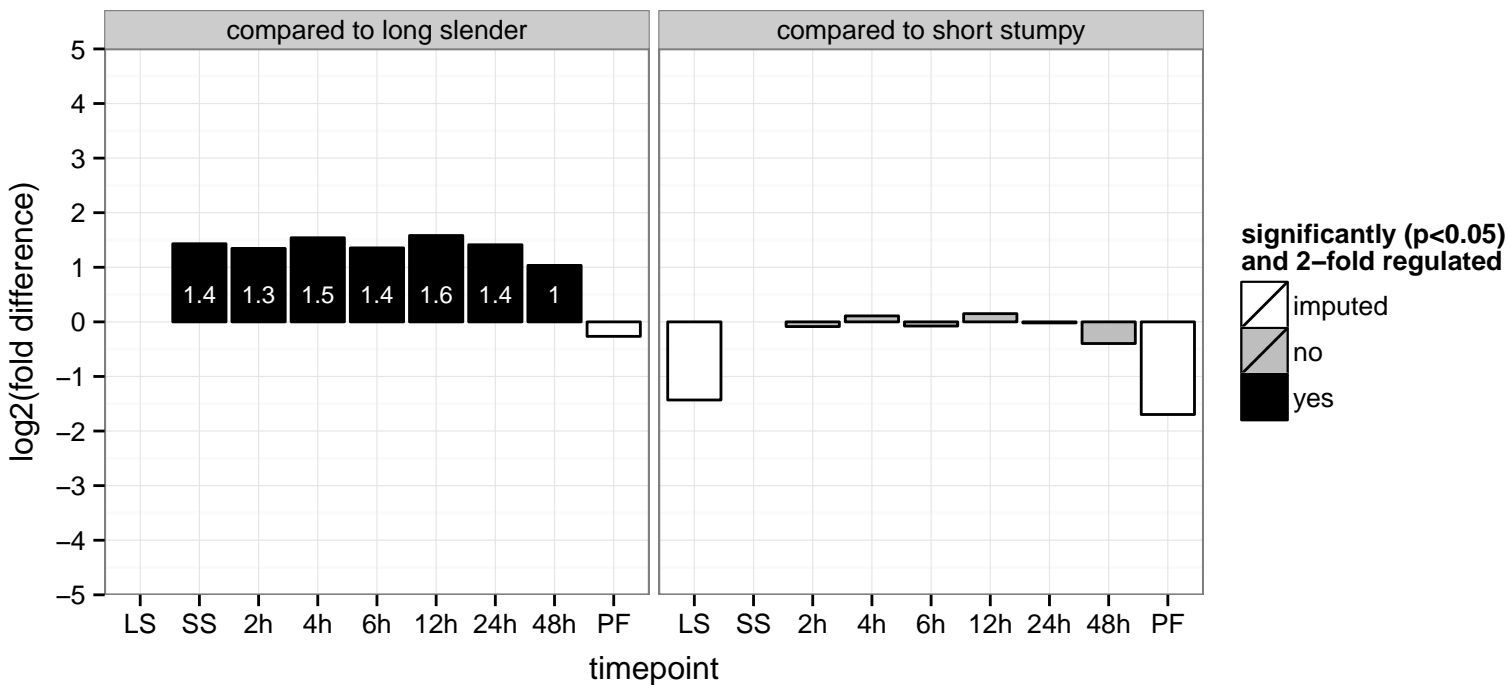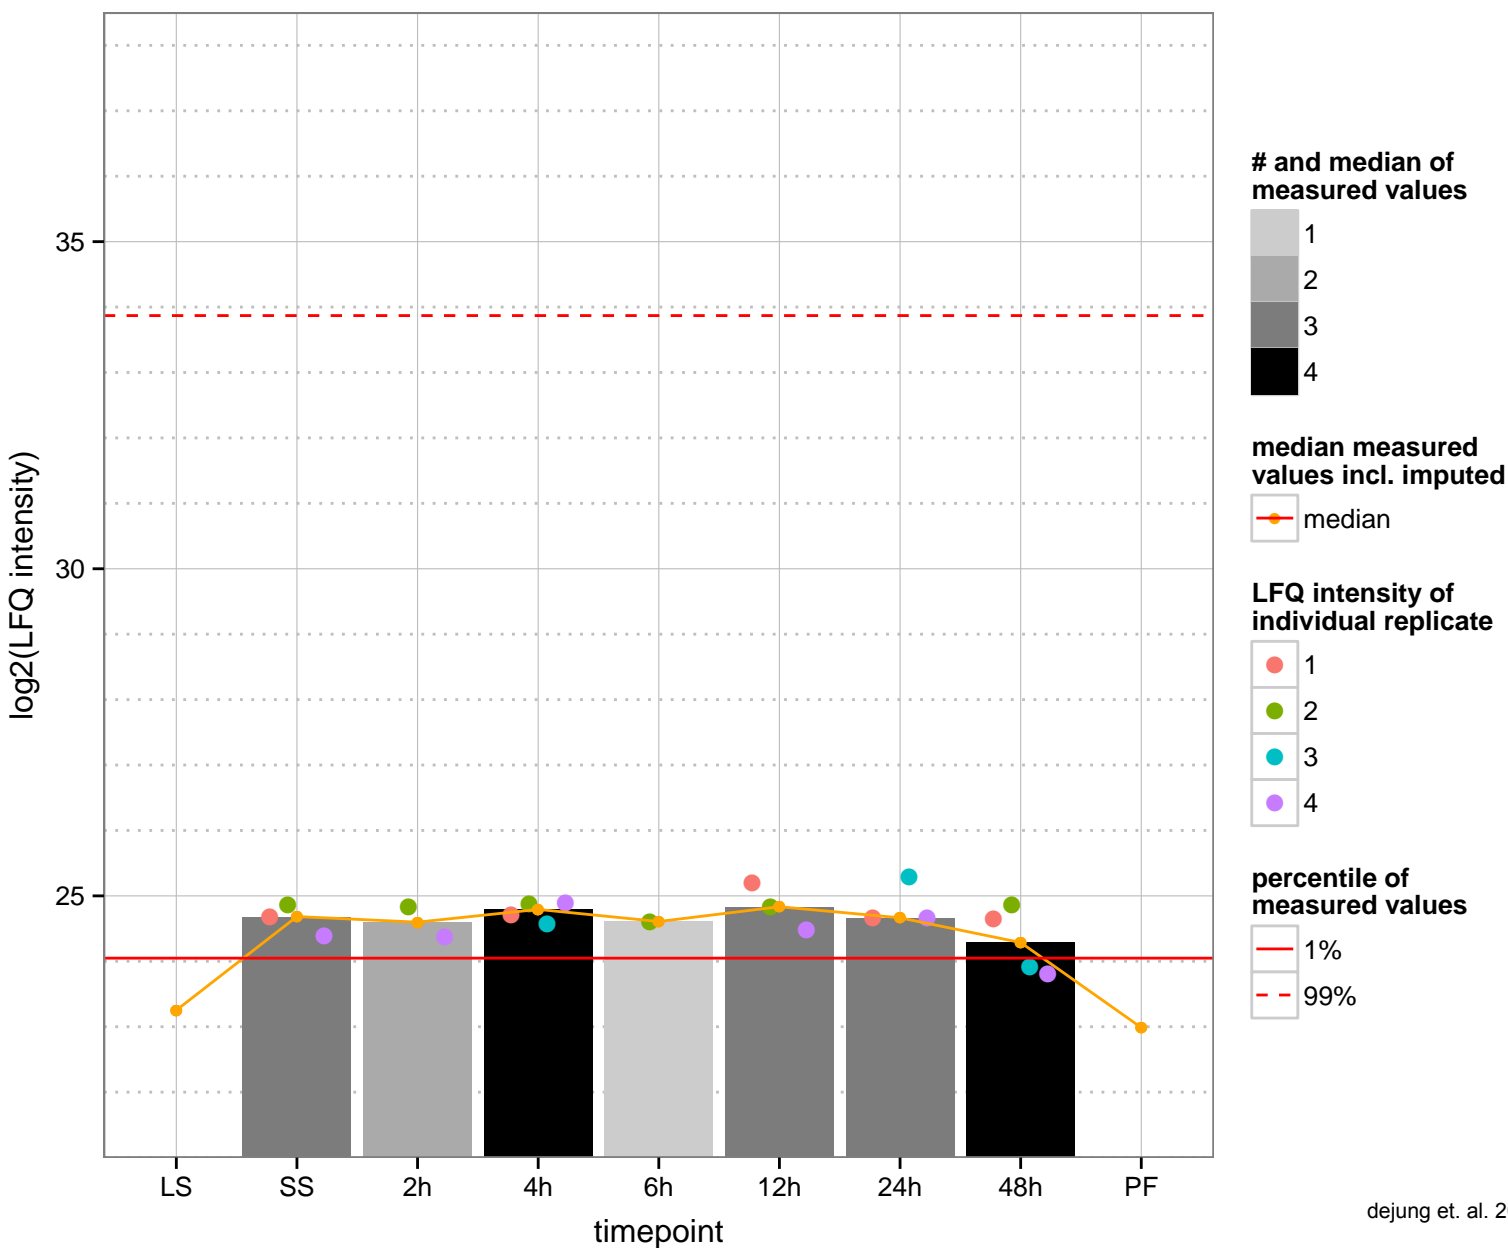



Iron-sulfur assembly protein 2 (Isa2)

Tb927.5.1030

AGOF: null

AGOC: mitochondrion

AGOP: [4Fe-4S] cluster assembly, growth, regulation of reactive oxygen species metabolic process

PGOF: null

PGOC: null

PGOP: null

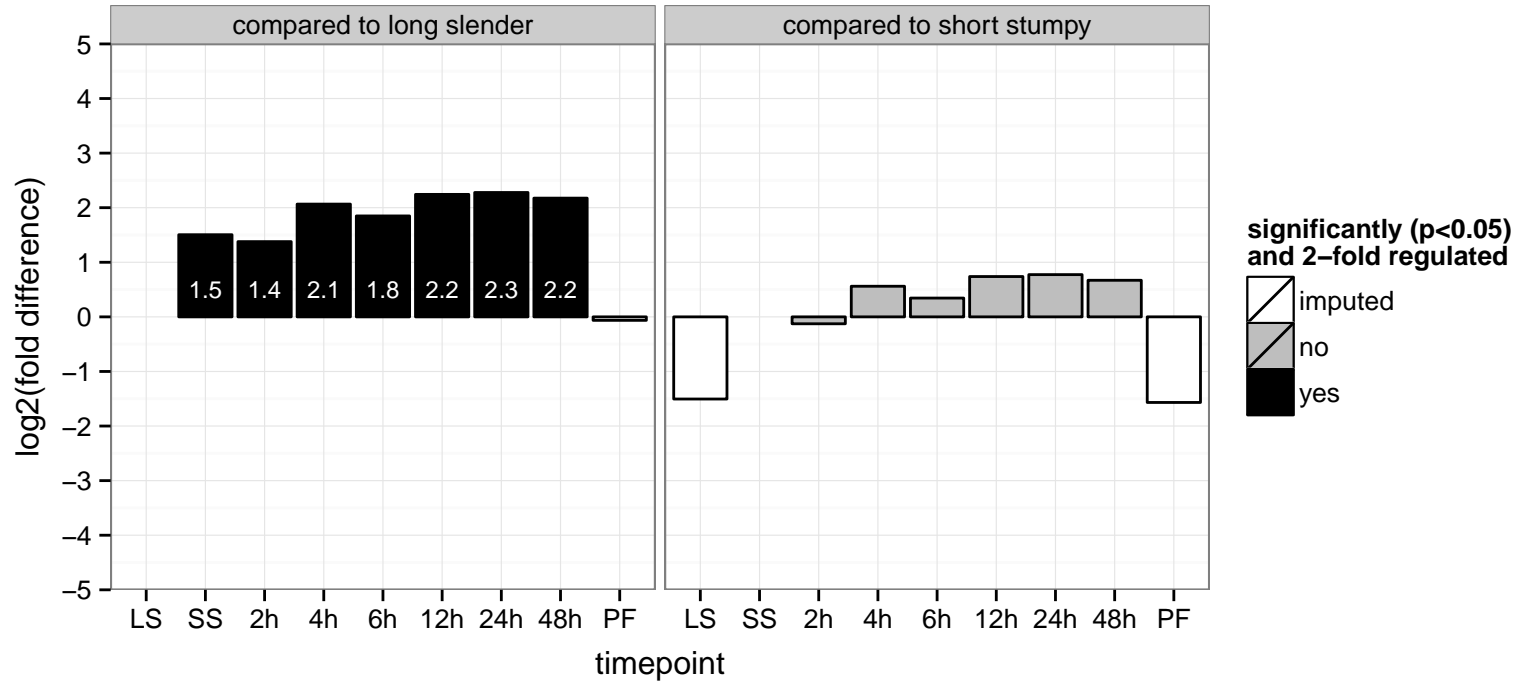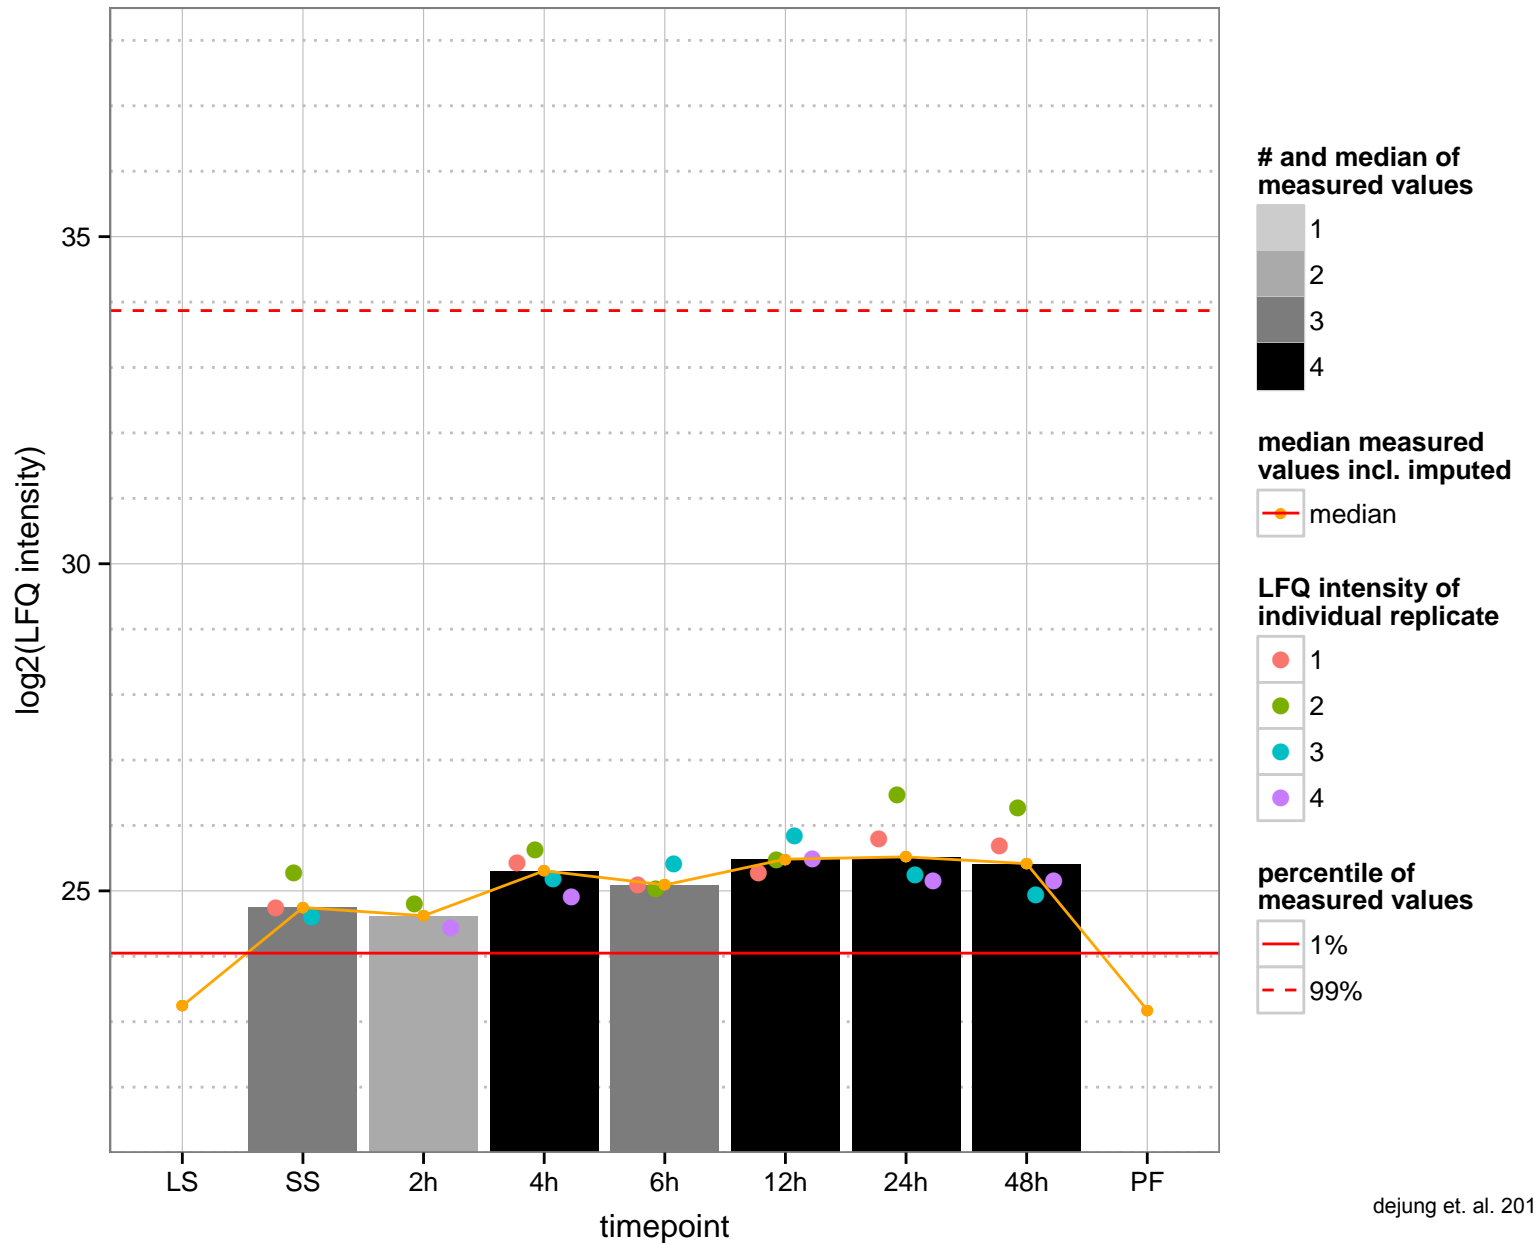

alanine racemase, putative  
 Tb927.5.1280  
 AGOF: alanine racemase activity  
 AGOC: cytosol  
 AGOP: null  
 PGO: null  
 PGOC: null  
 PGOP: null

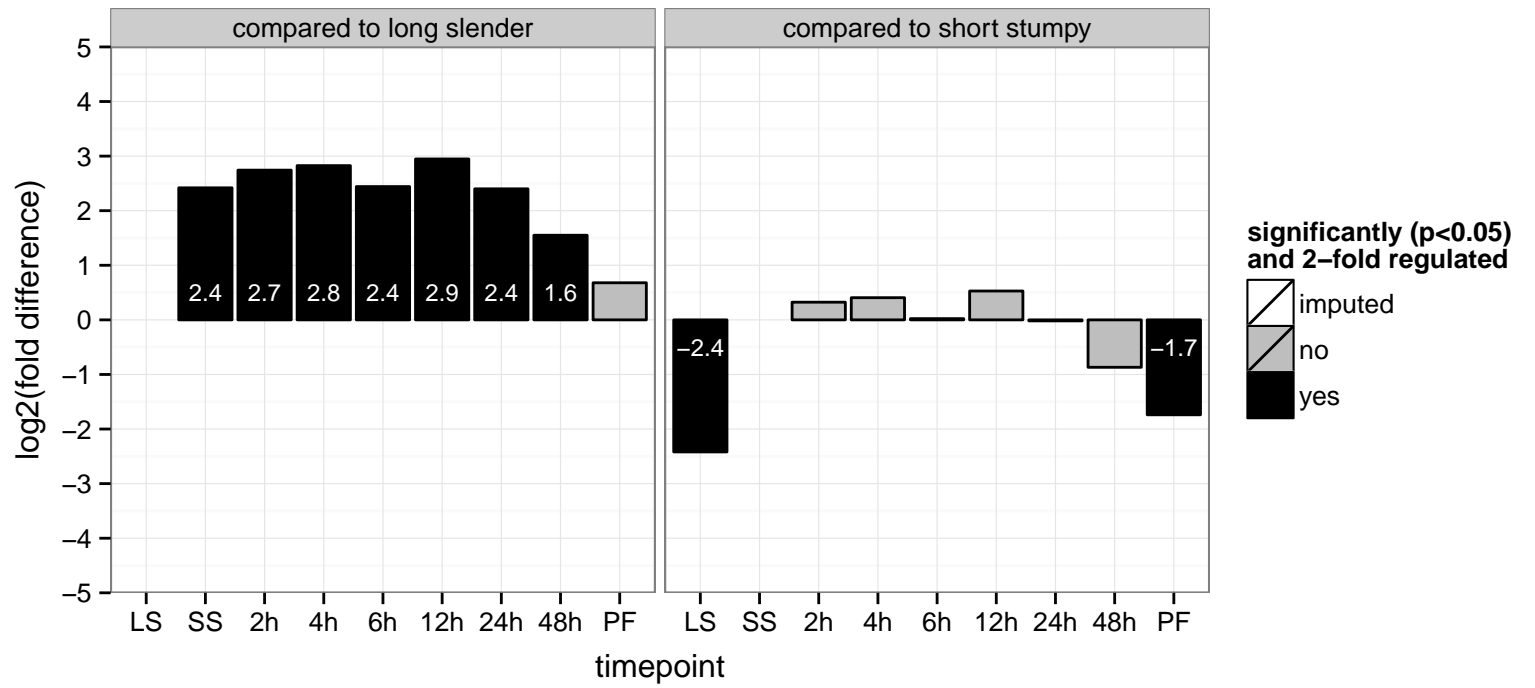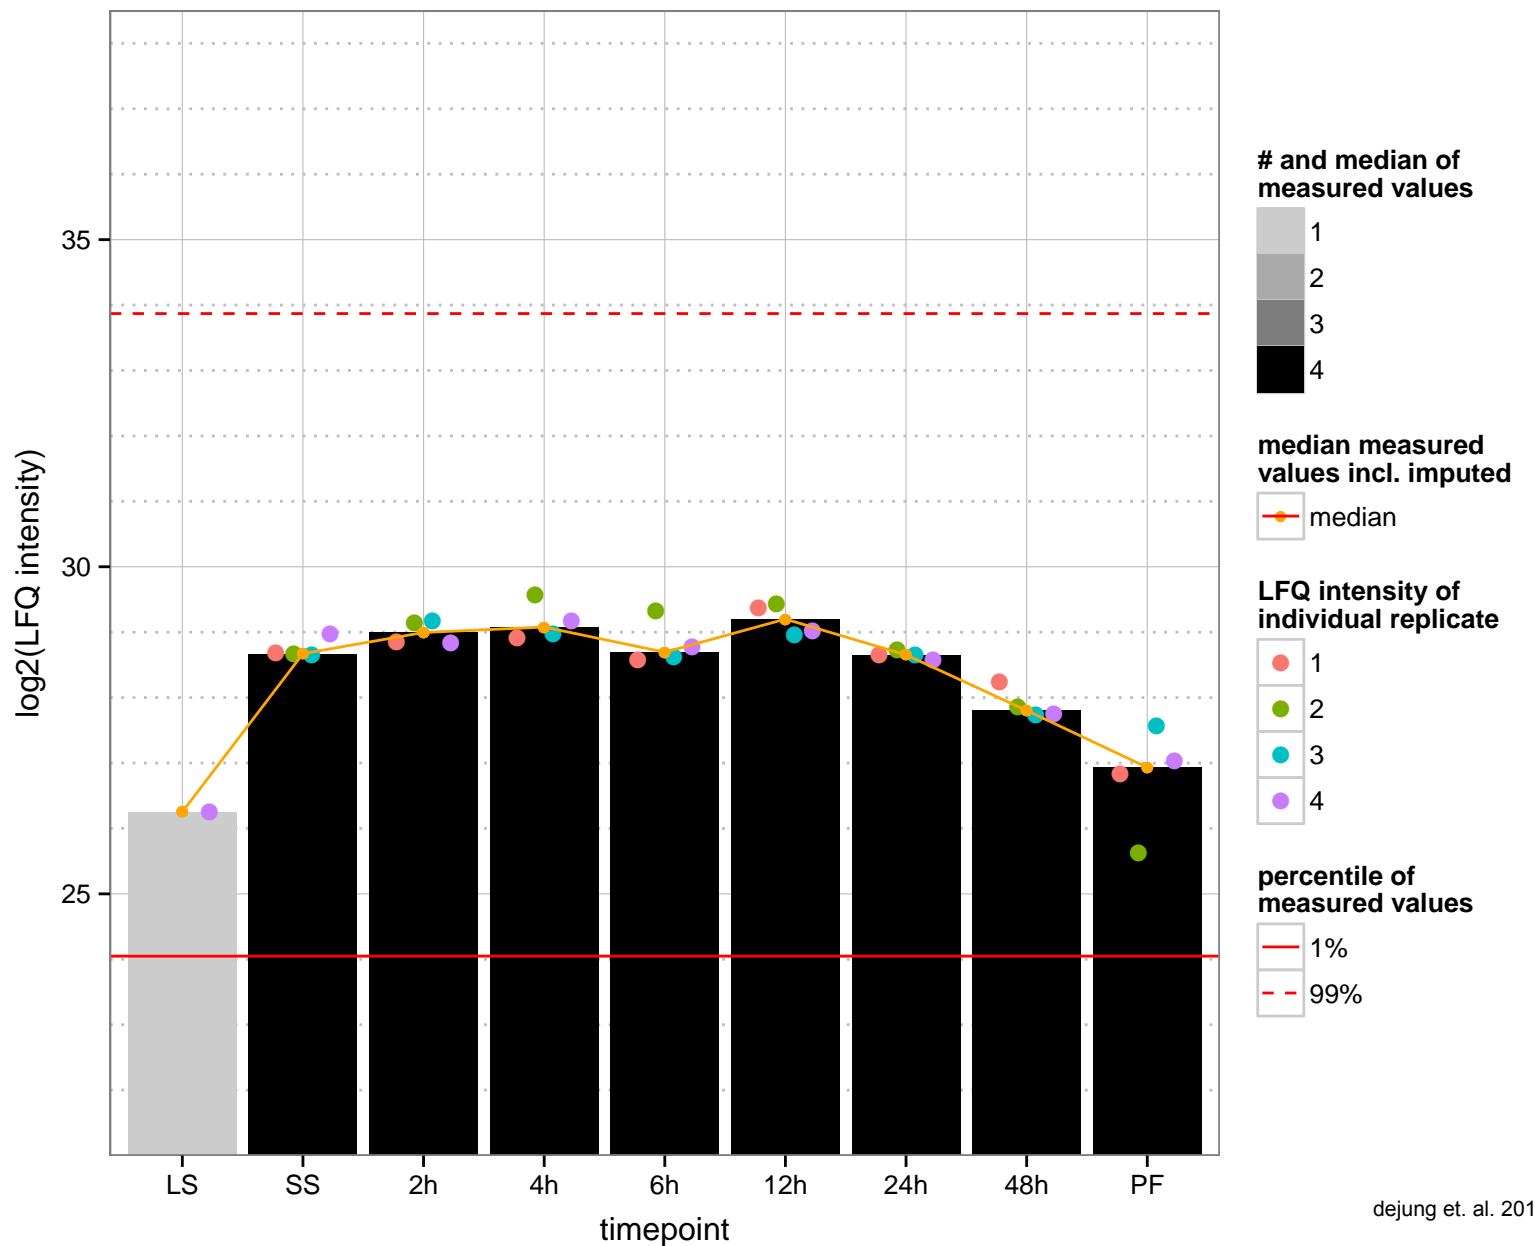

hypothetical protein, conserved  
 Tb927.5.1320  
 AGOF: null  
 AGOC: null  
 AGOP: null  
 PGOF: null  
 PGO: null  
 PGOP: null

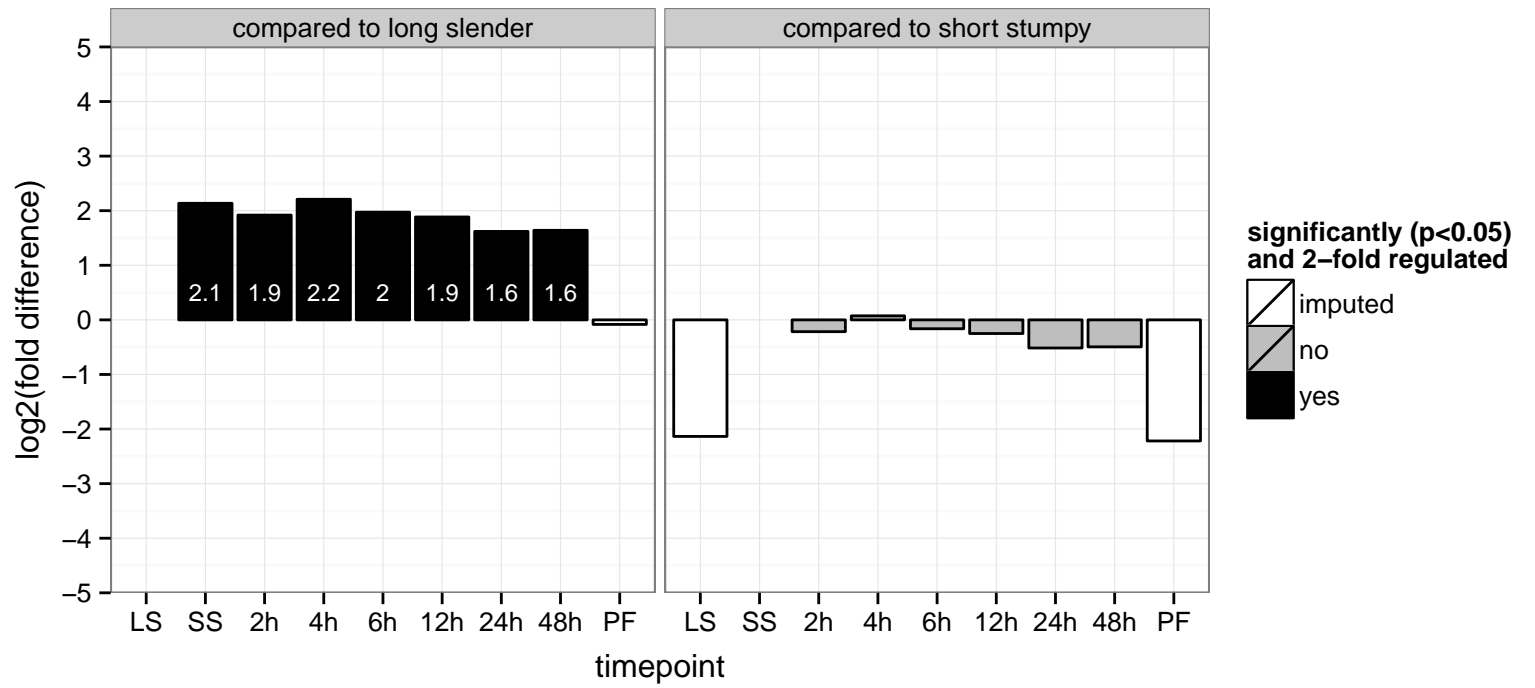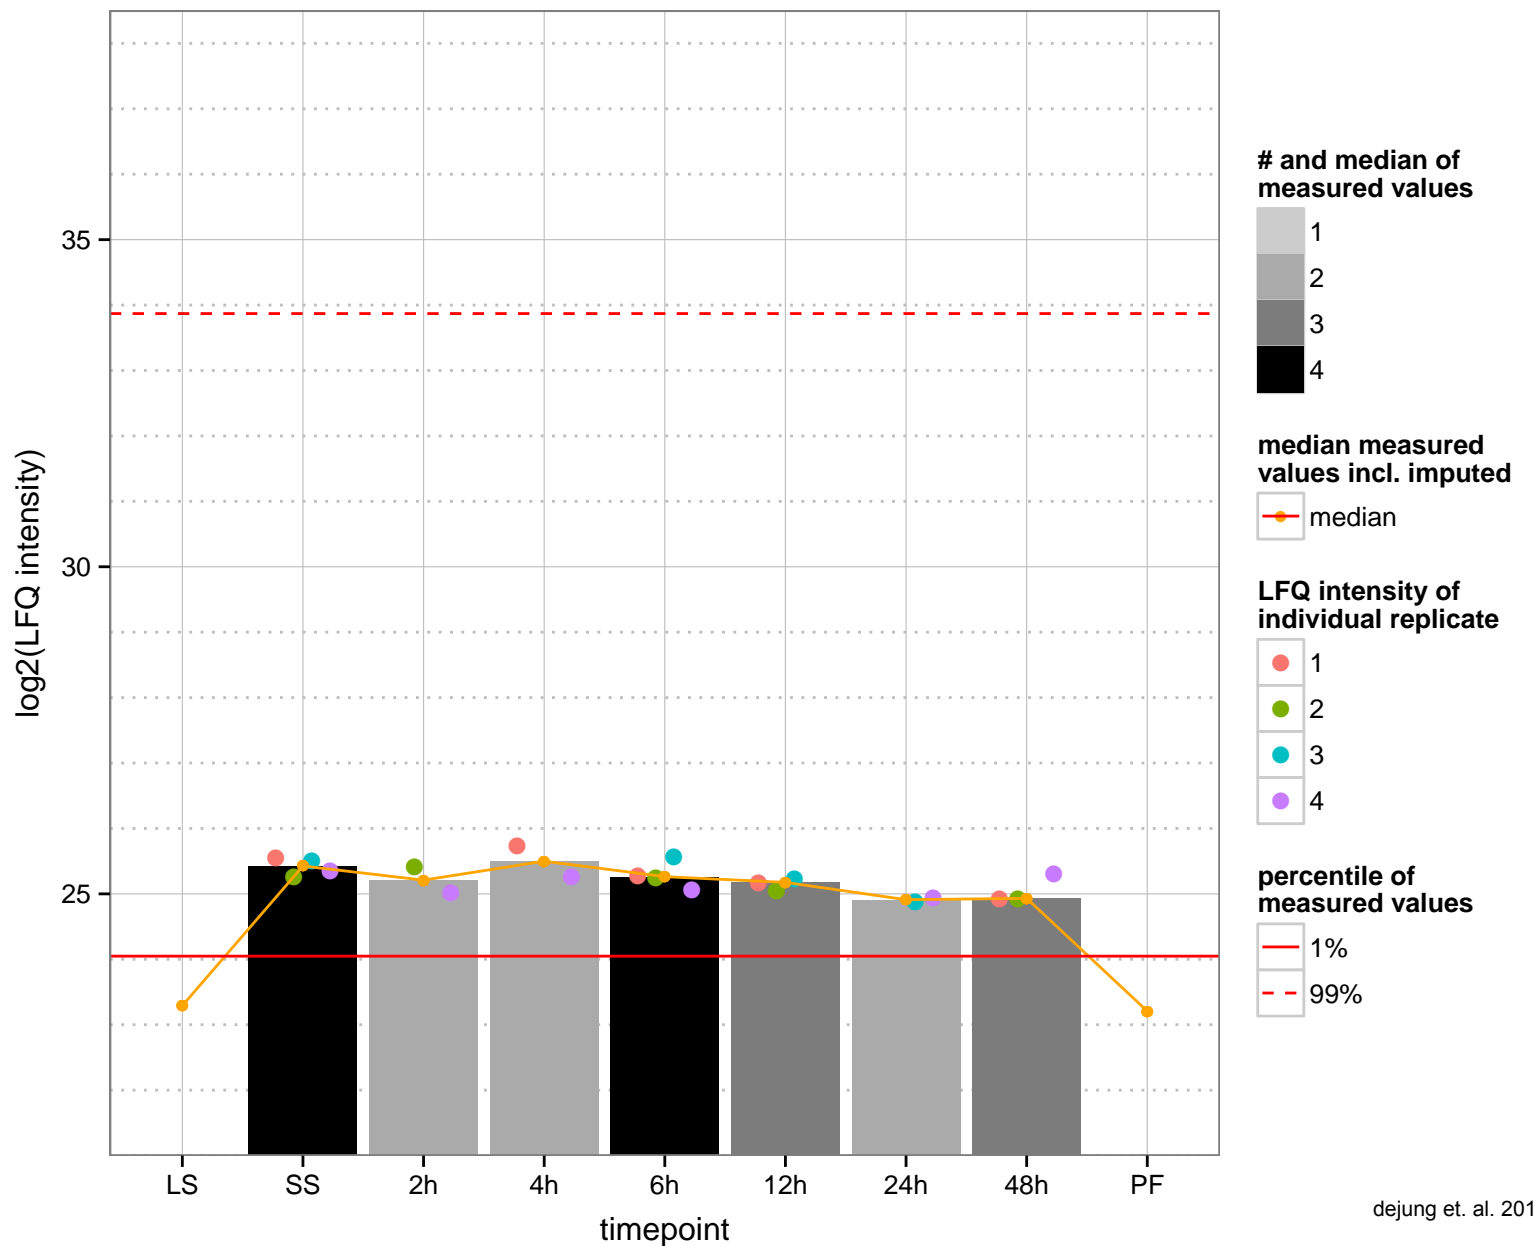

hypothetical protein, conserved  
 Tb927.5.1540  
 AGOF: null  
 AGOC: null  
 AGOP: null  
 PGO: null  
 PGOC: null  
 PGOP: null

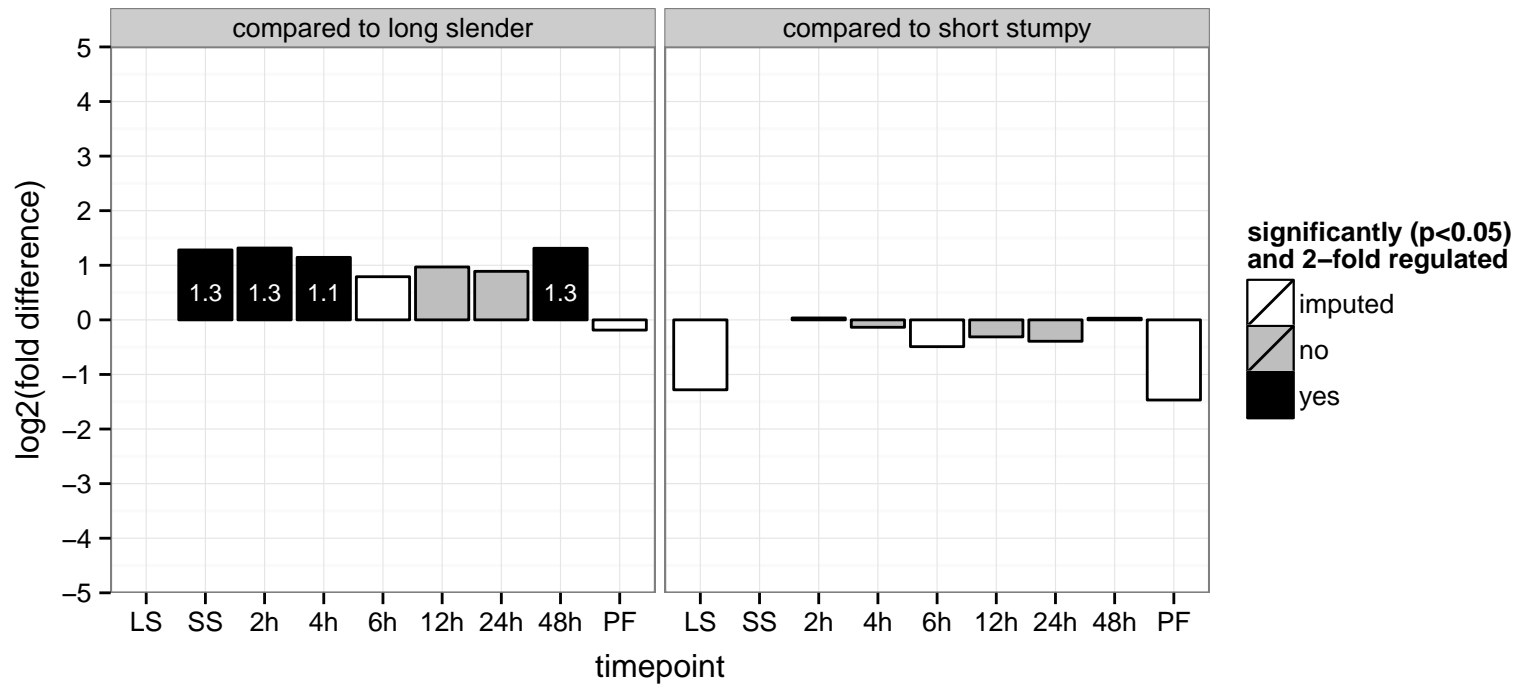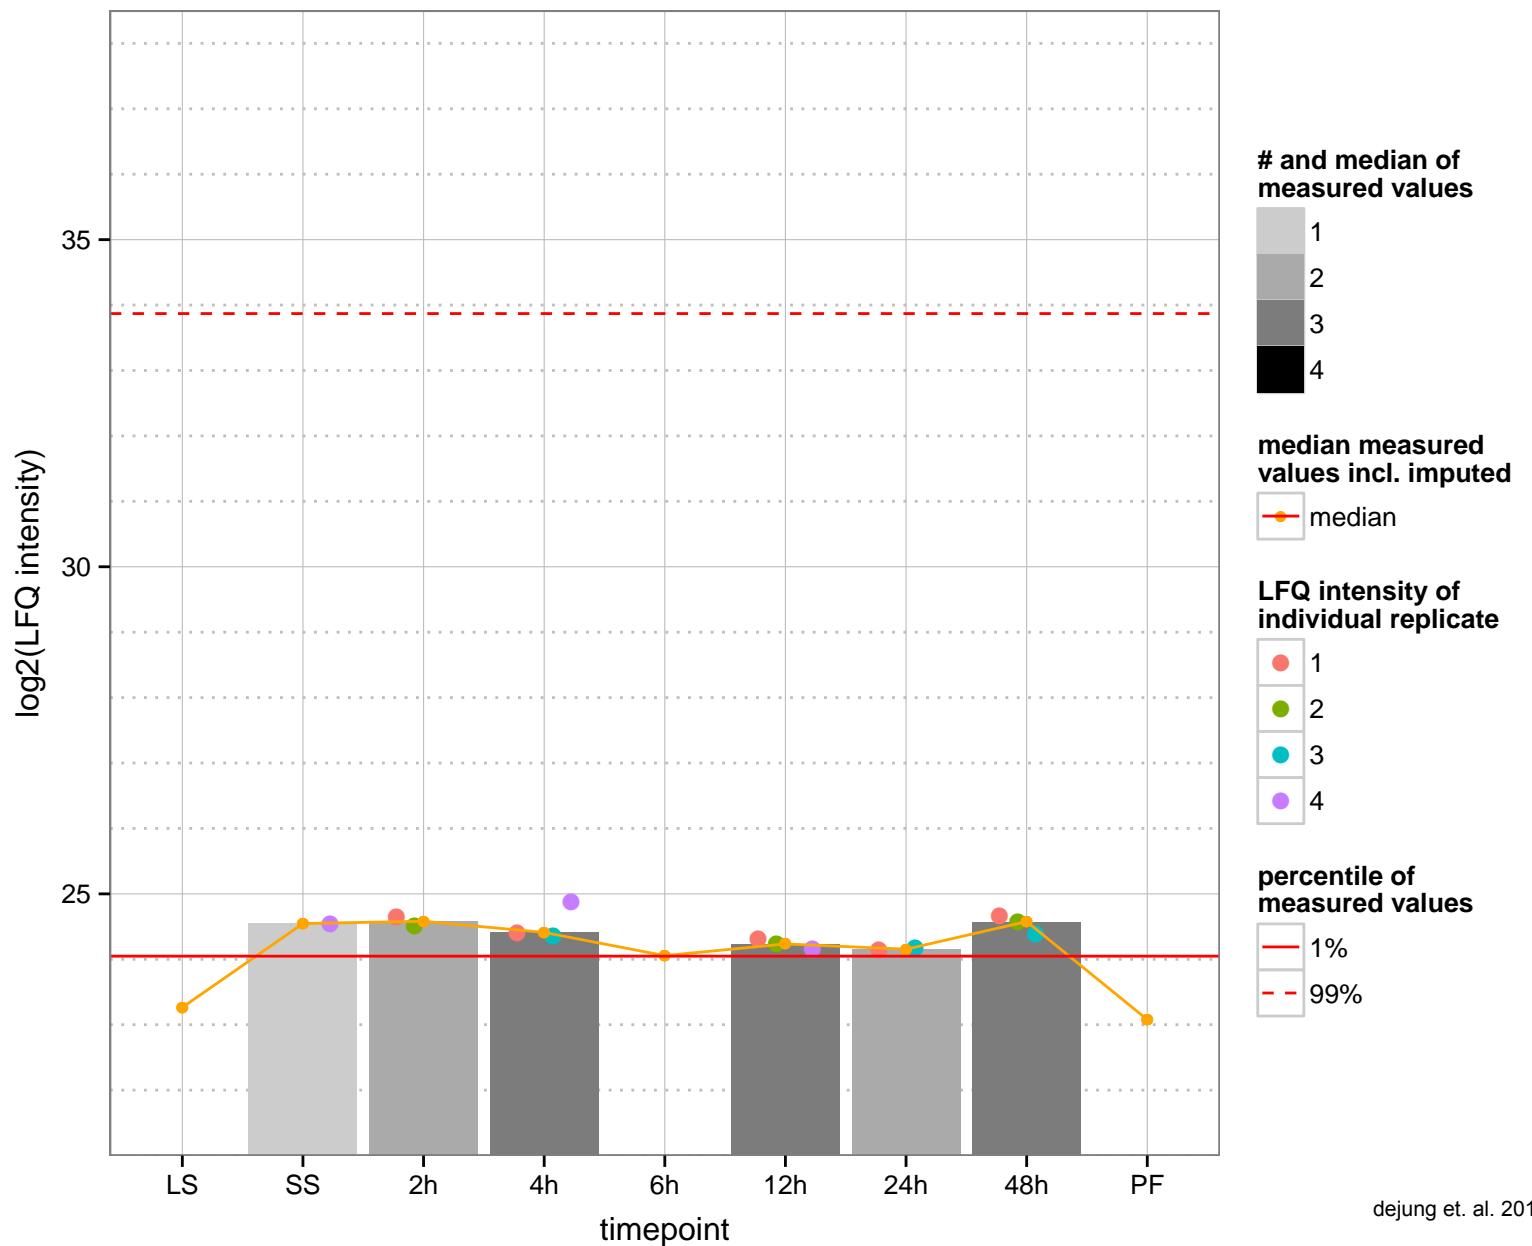

zinc finger CCCH domain containing protein 13 (ZC3H13)

Tb927.5.1580

AGOF: RNA binding, zinc ion binding

AGOC: cytosol

AGOP: null

PGOF: nucleic acid binding, zinc ion binding

PGOC: null

PGOP: null

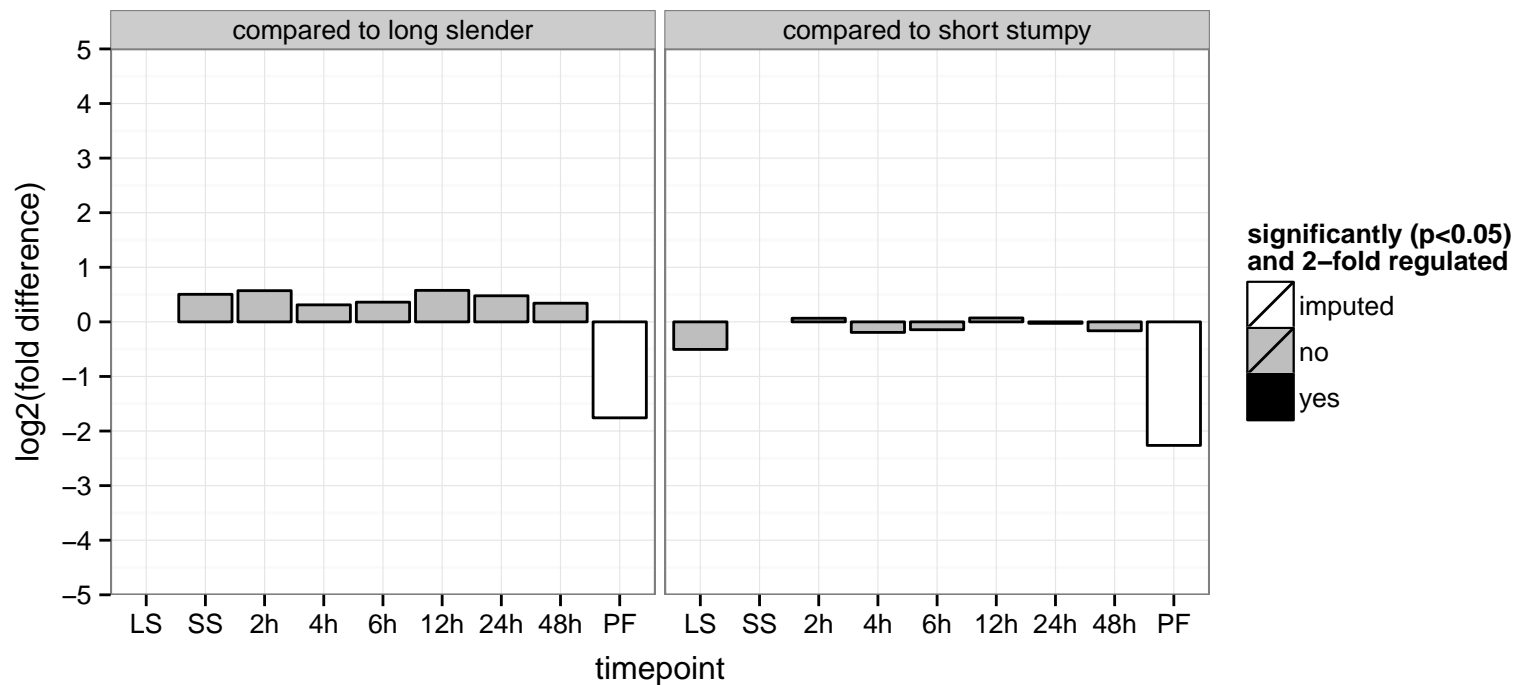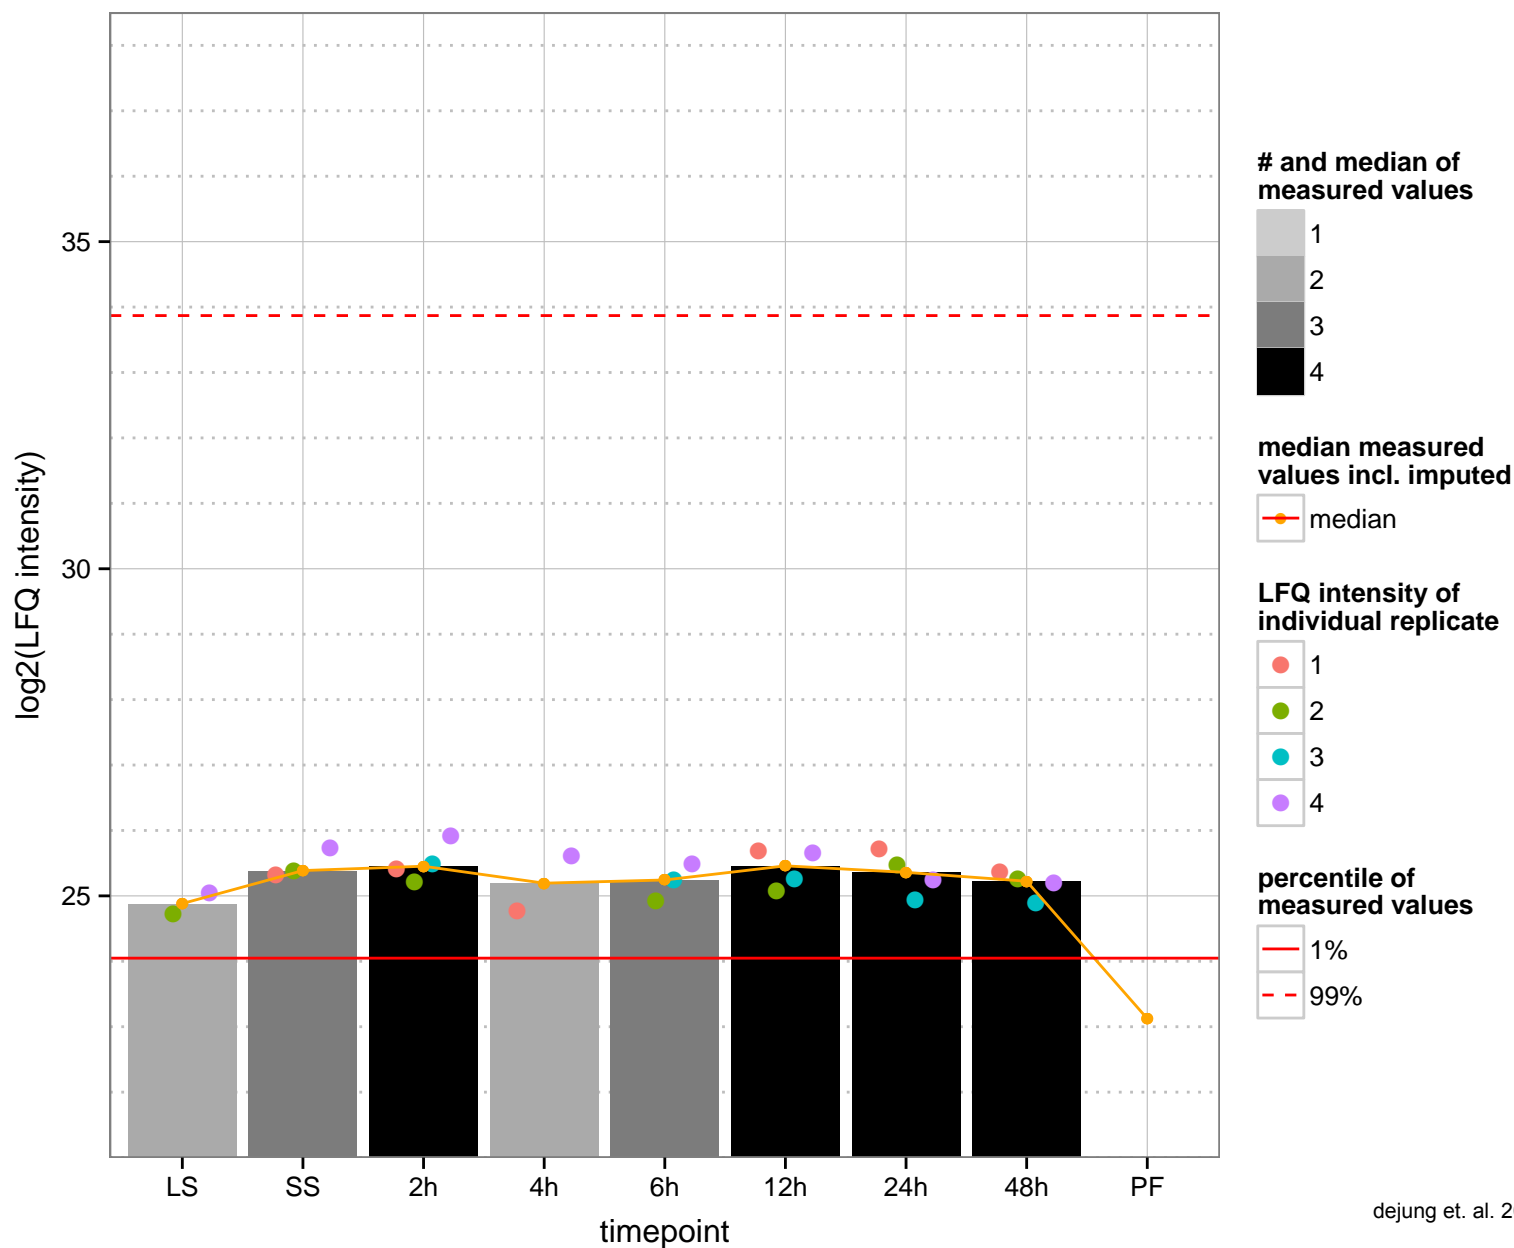

hypothetical protein, conserved  
 Tb927.5.1590  
 AGOF: null  
 AGOC: null  
 AGOP: null  
 PGO: null  
 PGOC: null  
 PGOP: null

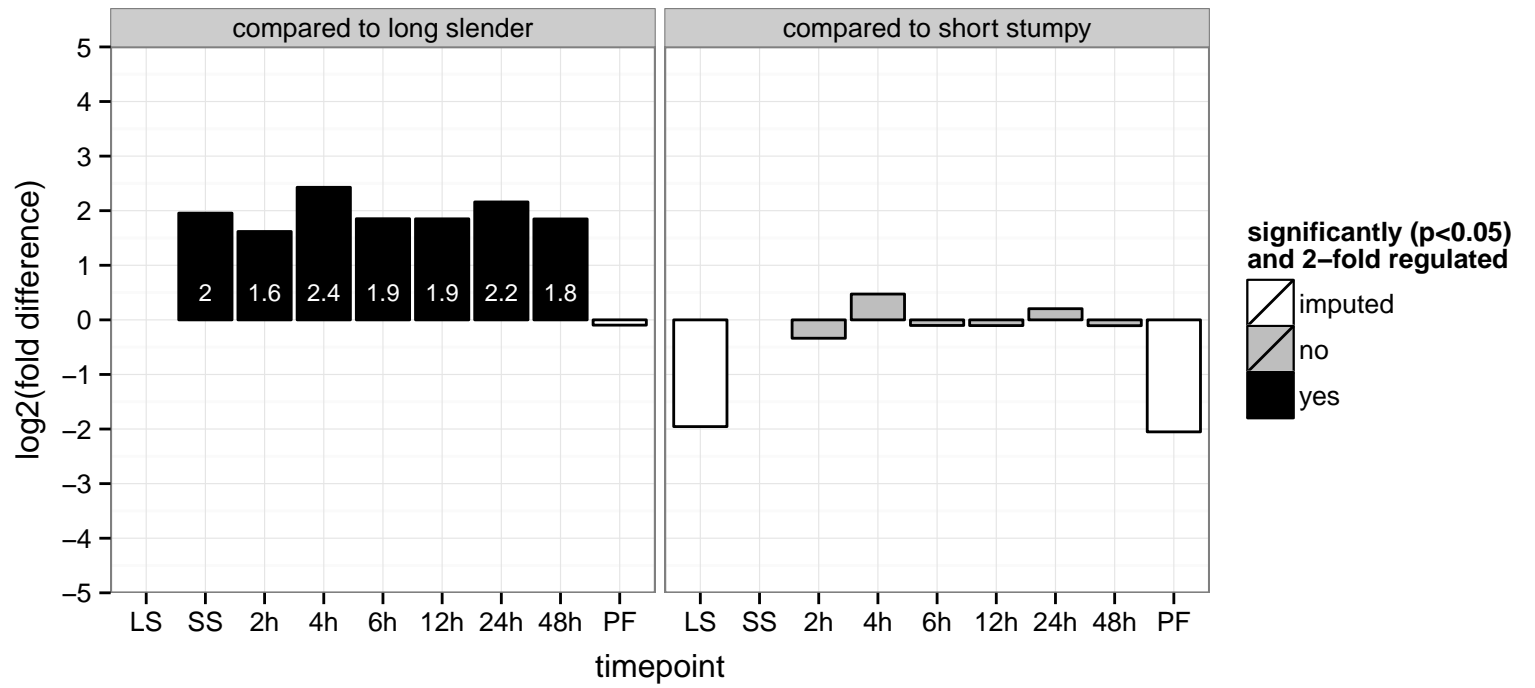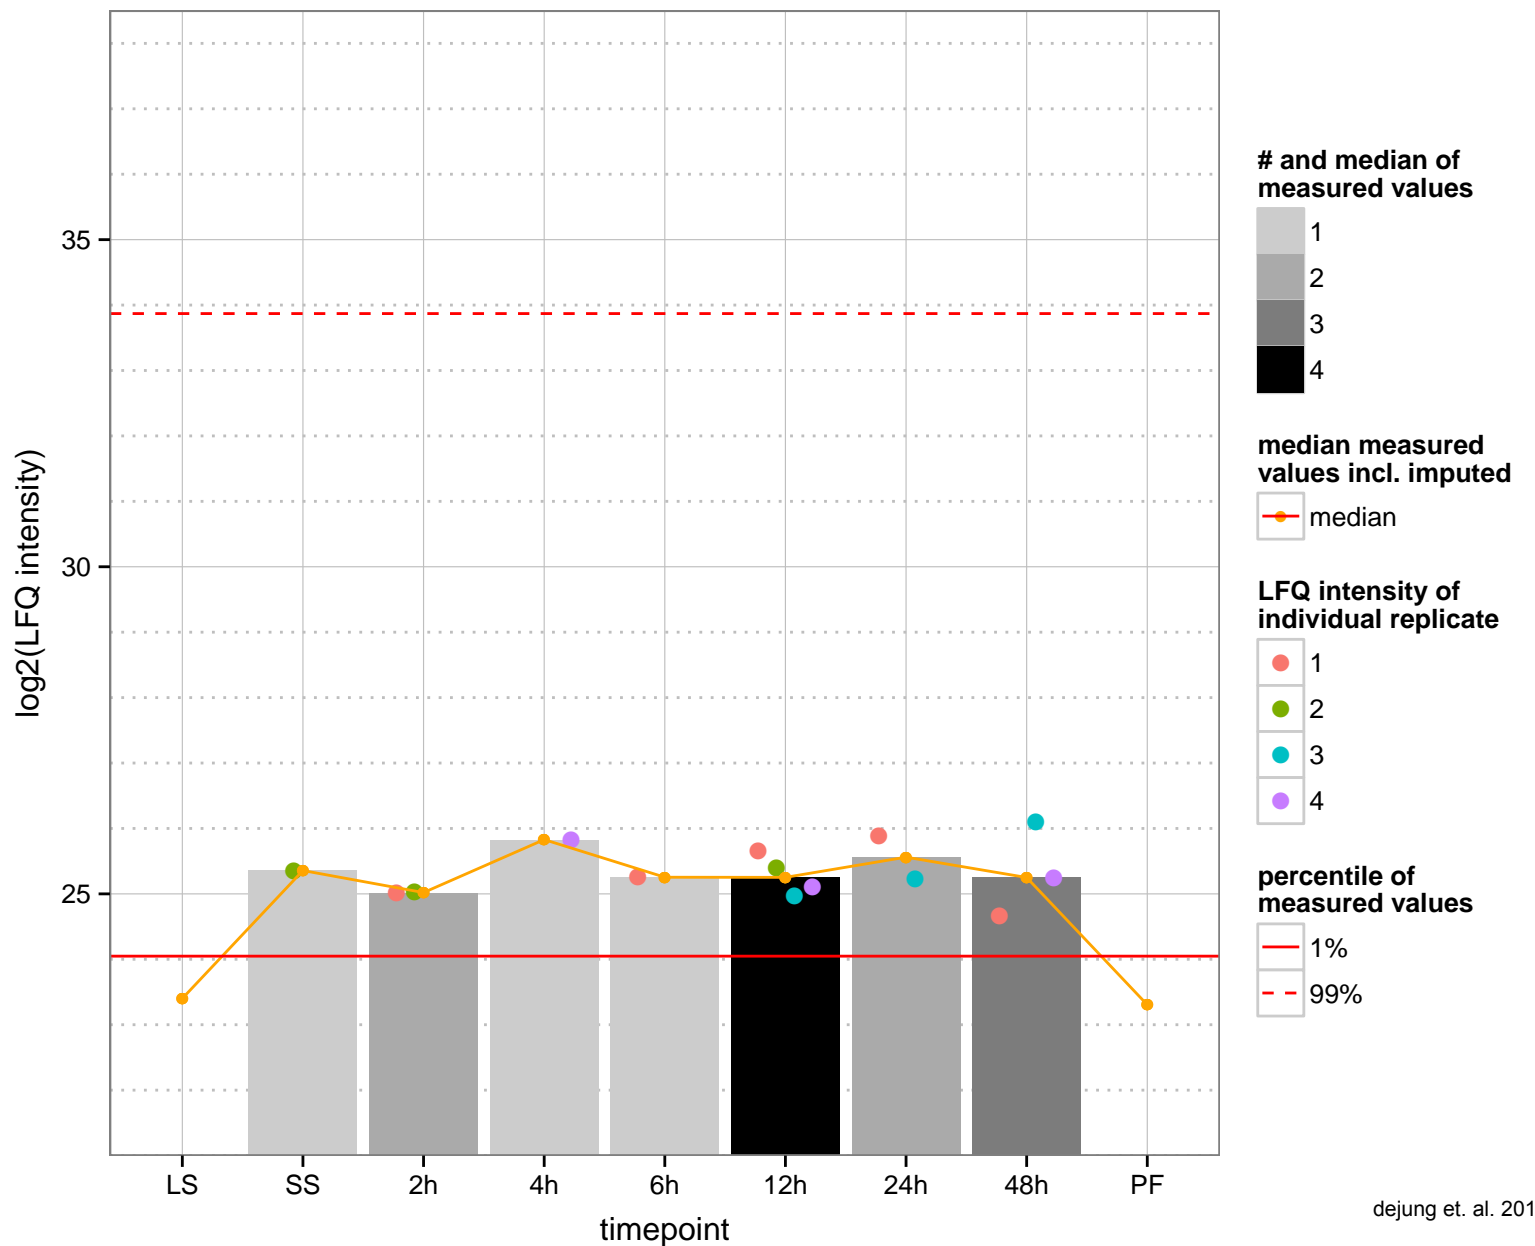

Isoprenylcysteine alpha-carbonyl methylesterase, putative  
Tb927.5.1760  
AGOF: hydrolase activity  
AGOC: null  
AGOP: null  
PGOF: hydrolase activity  
PGOC: null  
PGOP: metabolic process

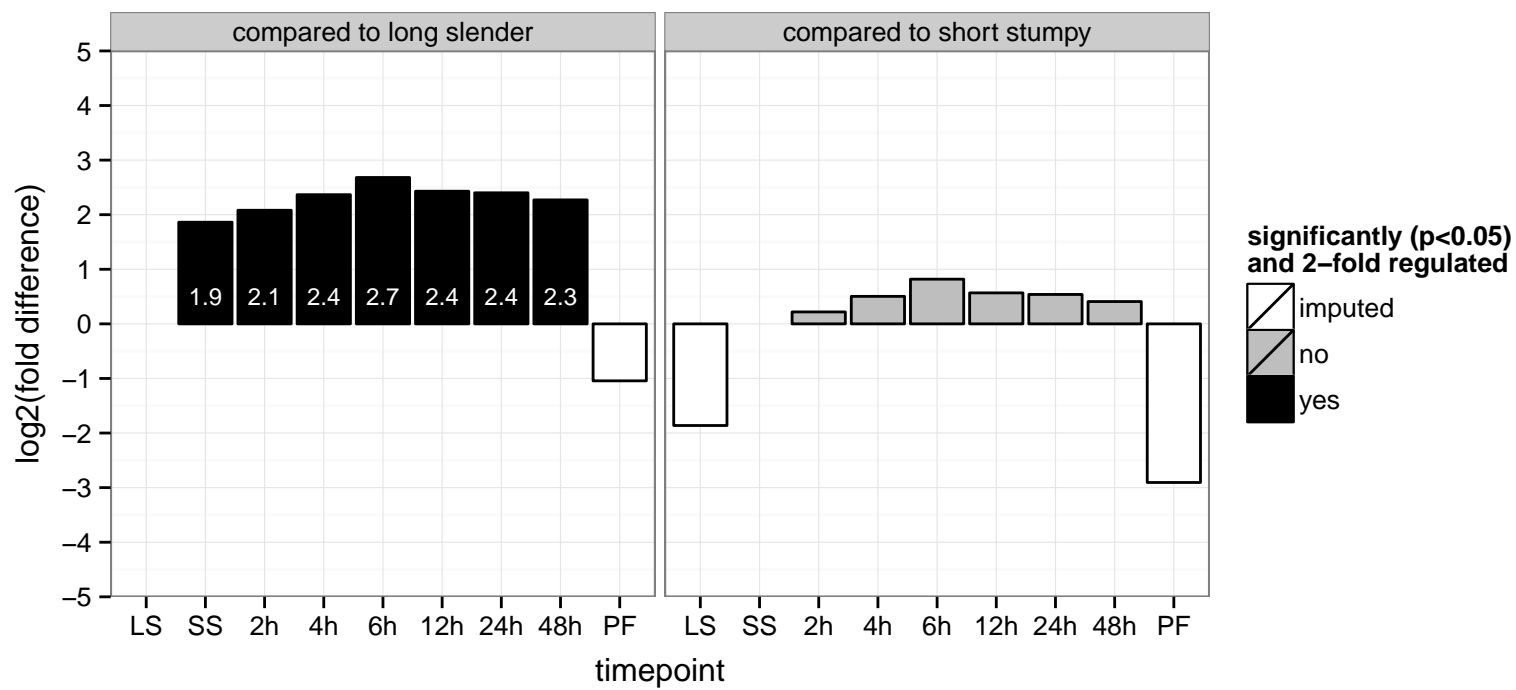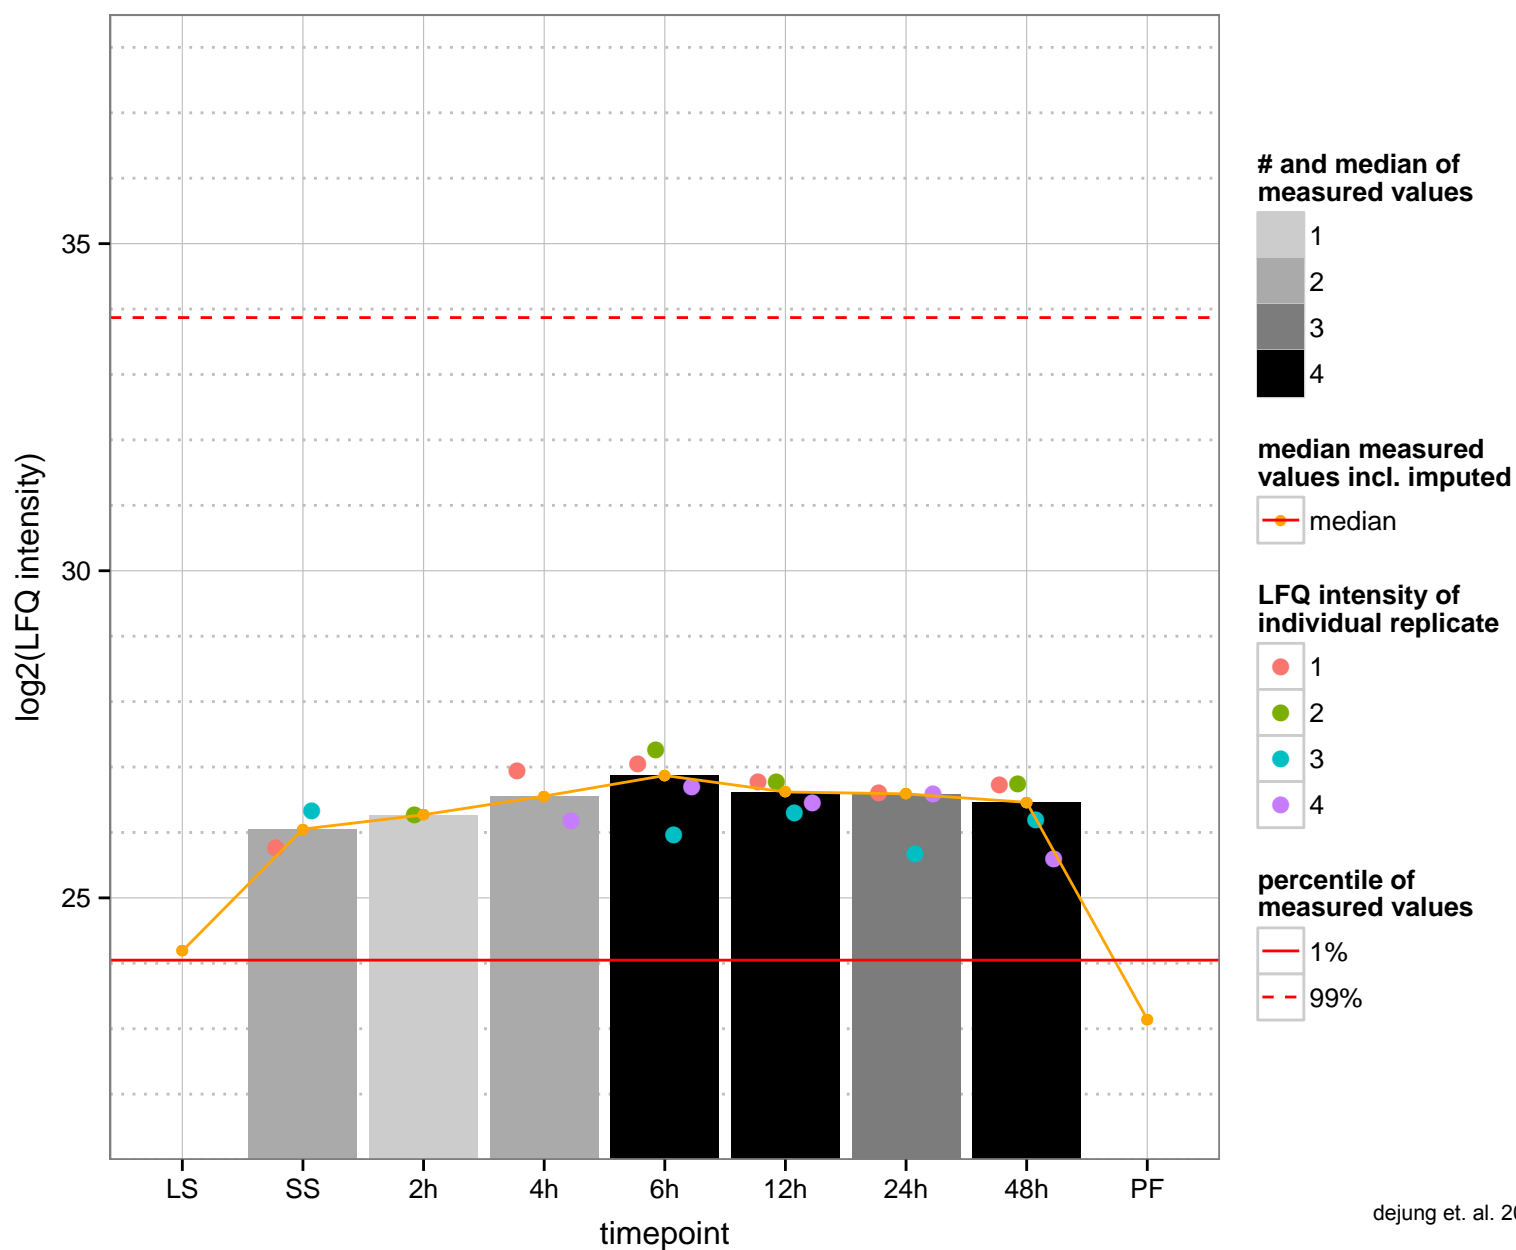

hypothetical protein, conserved  
 Tb927.5.1910  
 AGOF: null  
 AGOC: null  
 AGOP: null  
 PGO: null  
 PGOC: null  
 PGOP: null

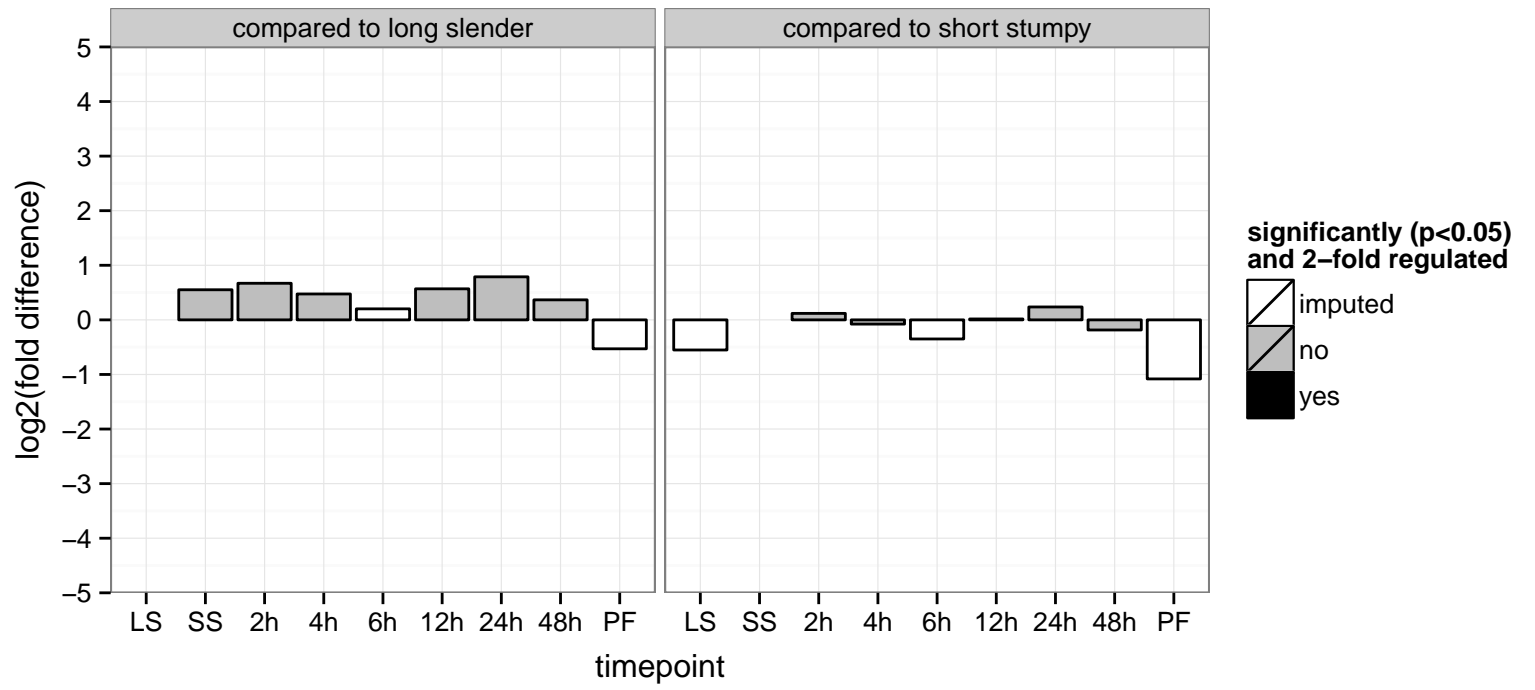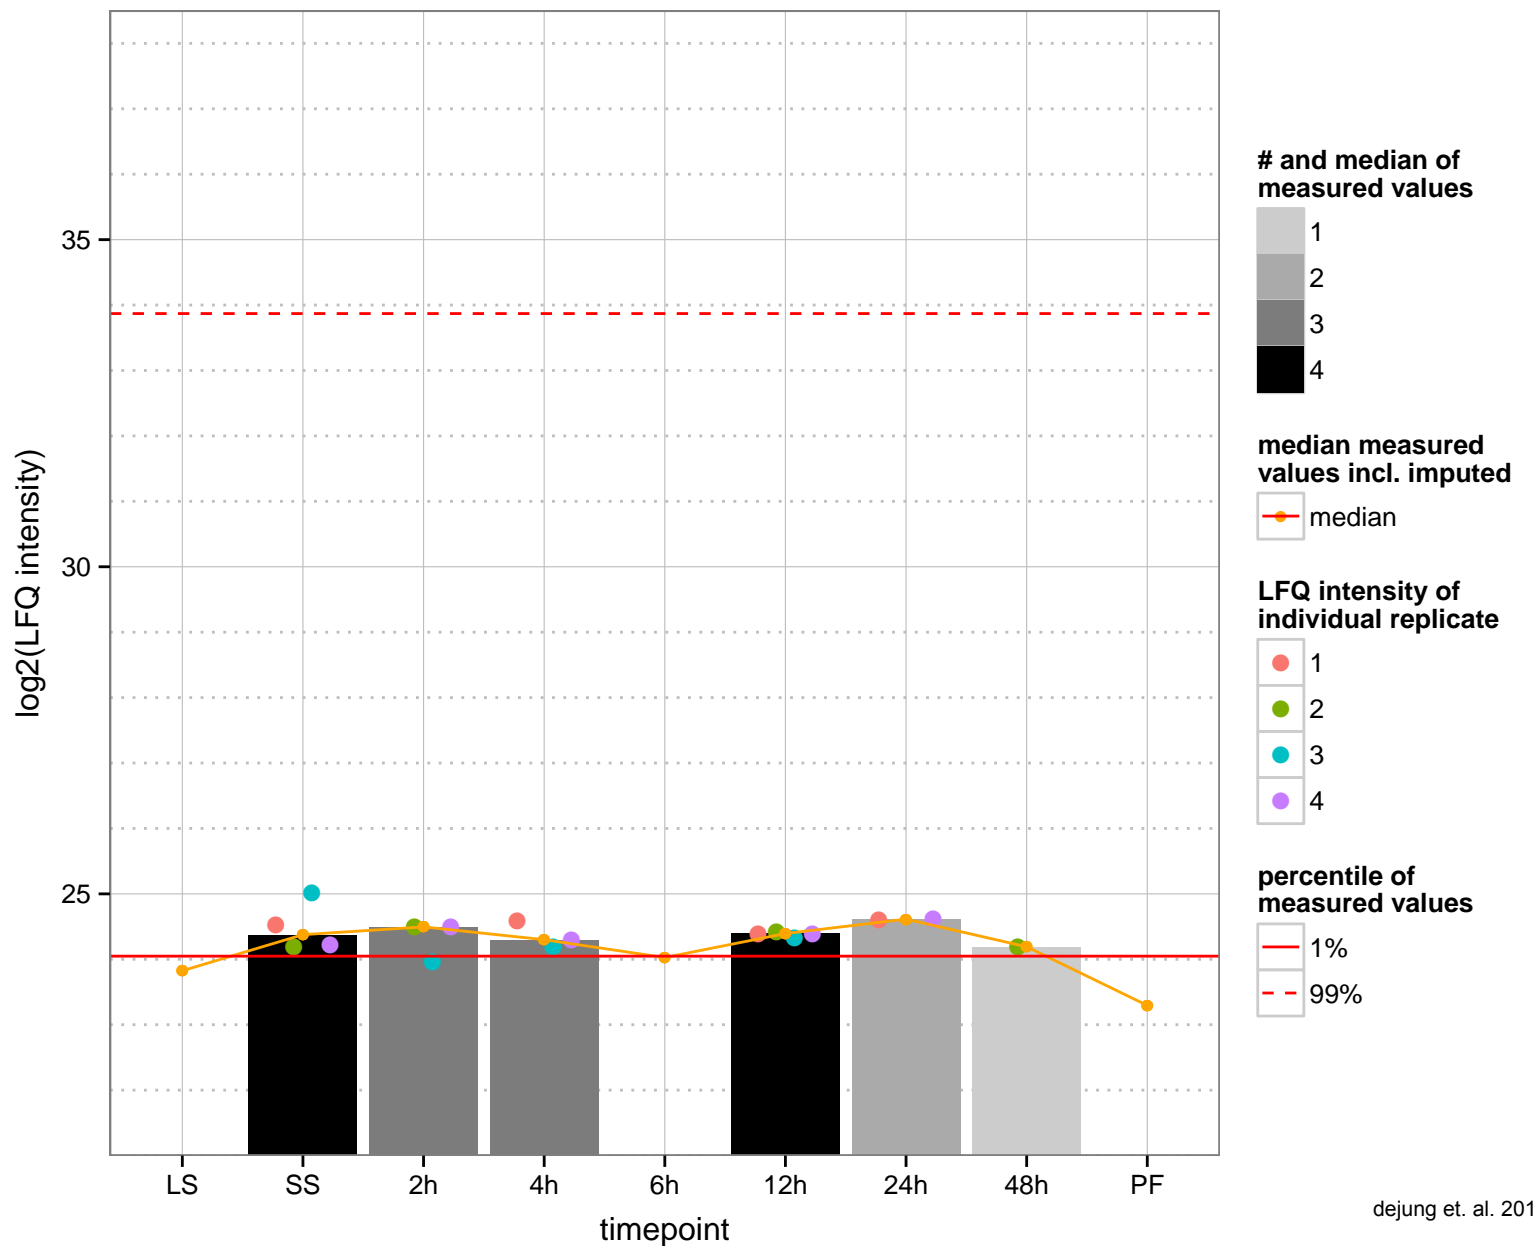



cell division control protein, putative  
 Tb927.5.2060  
 AGOF: DNA binding  
 AGOC: null  
 AGOP: null  
 PGOF: DNA binding  
 PGOC: null  
 PGOP: null

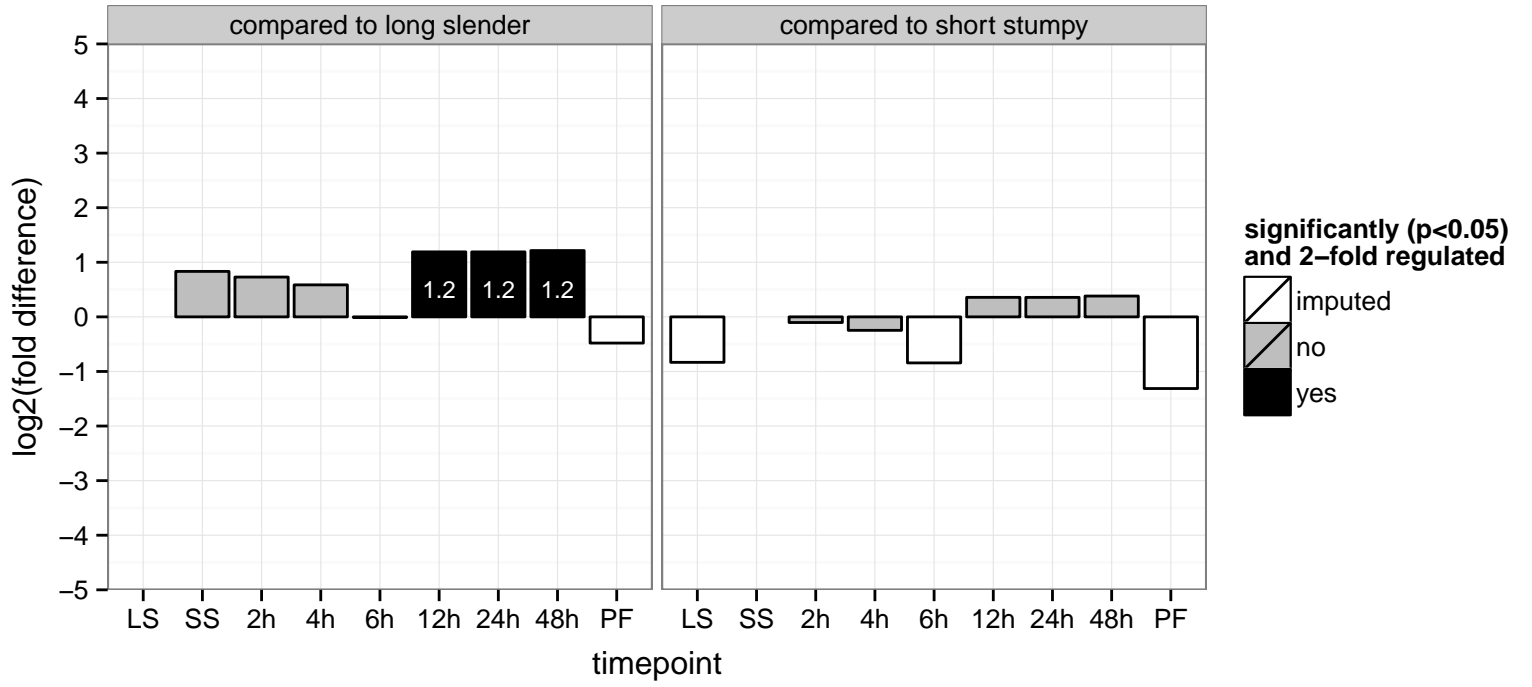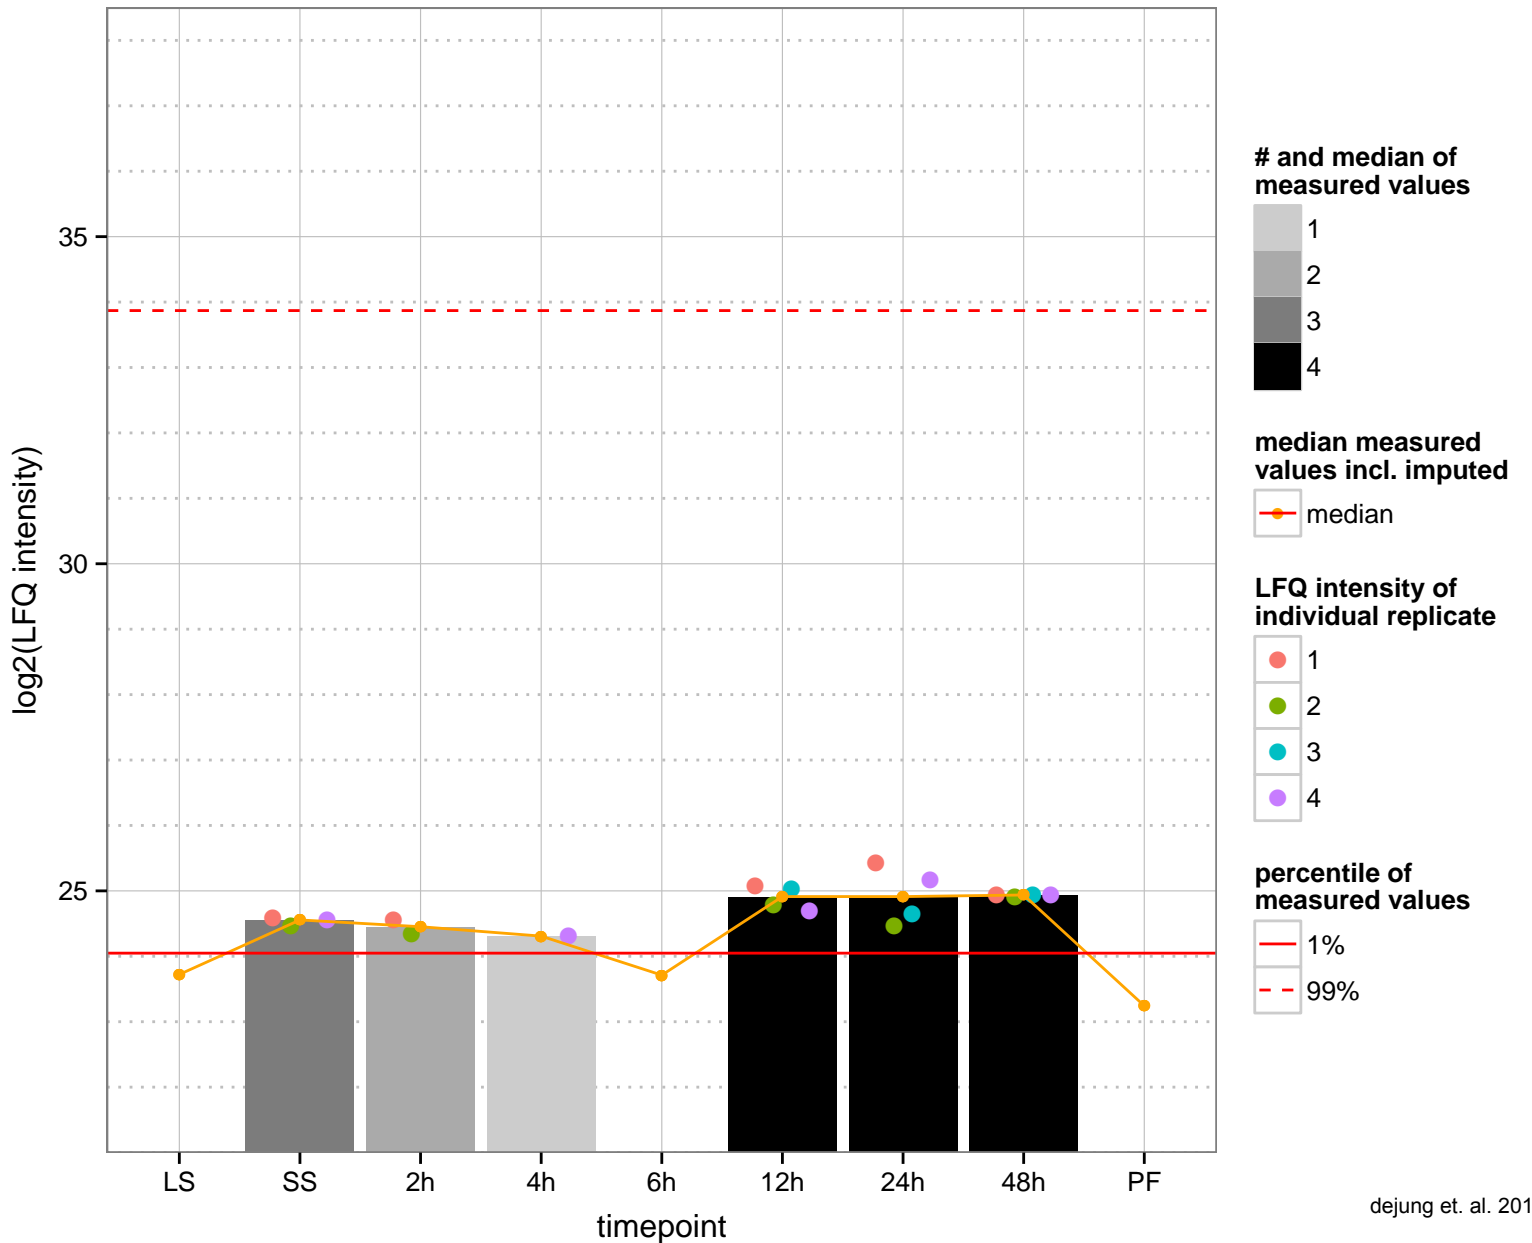

hypothetical protein, conserved  
 Tb927.5.2250;Tb927.5.2220;Tb927.5.2190  
 AGOF: null  
 AGOC: null  
 AGOP: null  
 PGOF: null  
 PGOC: null  
 PGOP: null

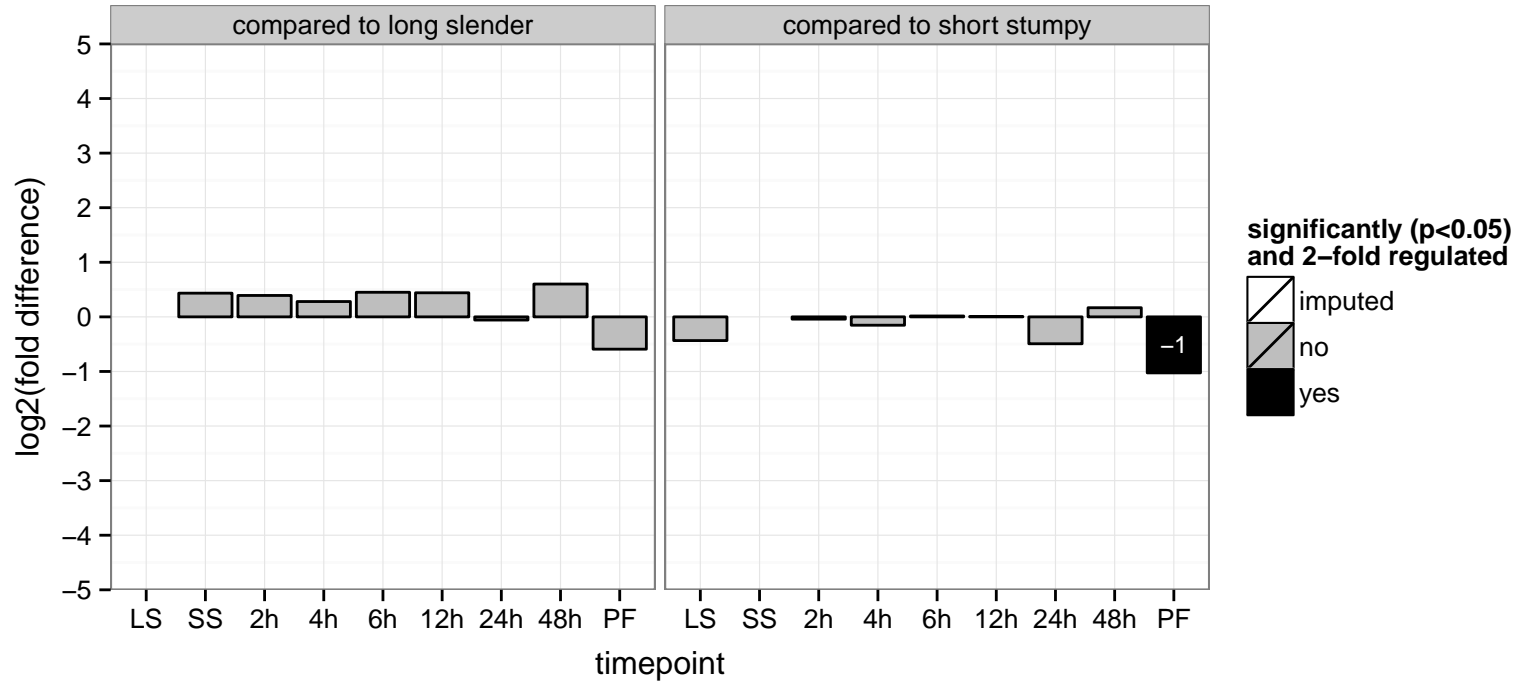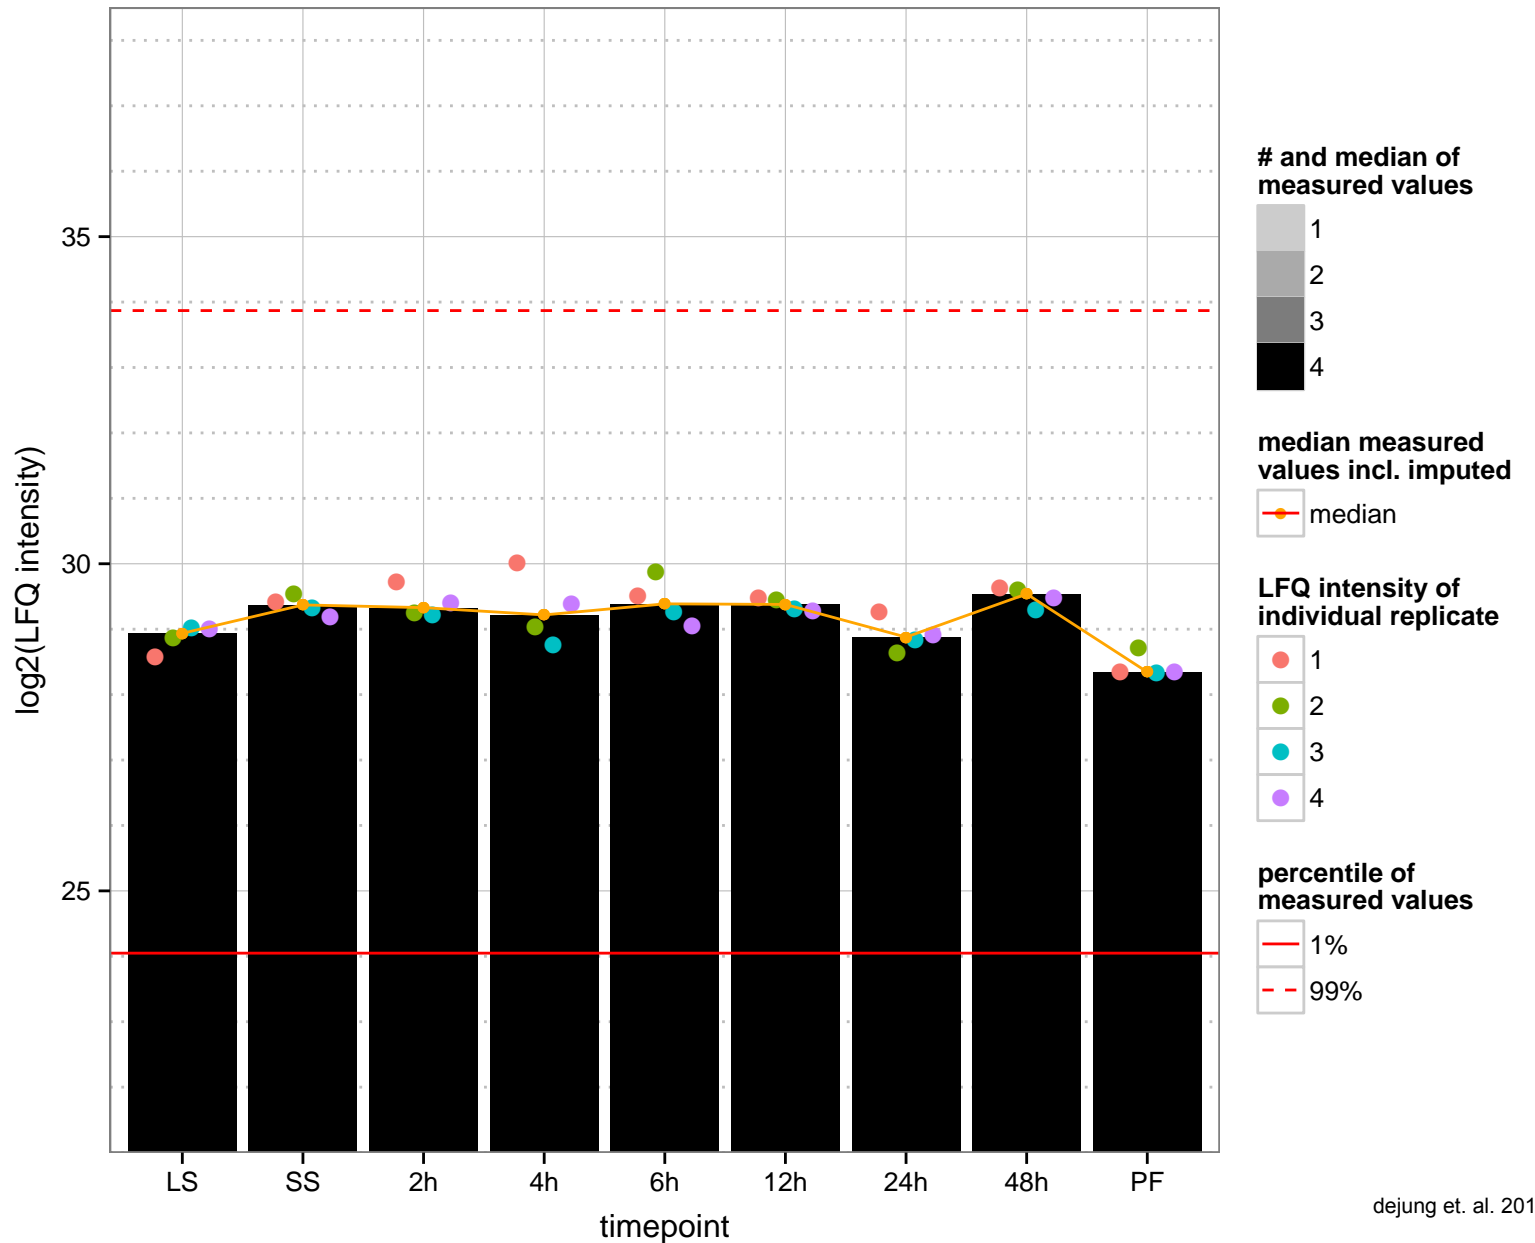

hypothetical protein, conserved  
 Tb927.5.2980  
 AGOF: null  
 AGOC: null  
 AGOP: null  
 PGO: null  
 PGOC: null  
 PGOP: null

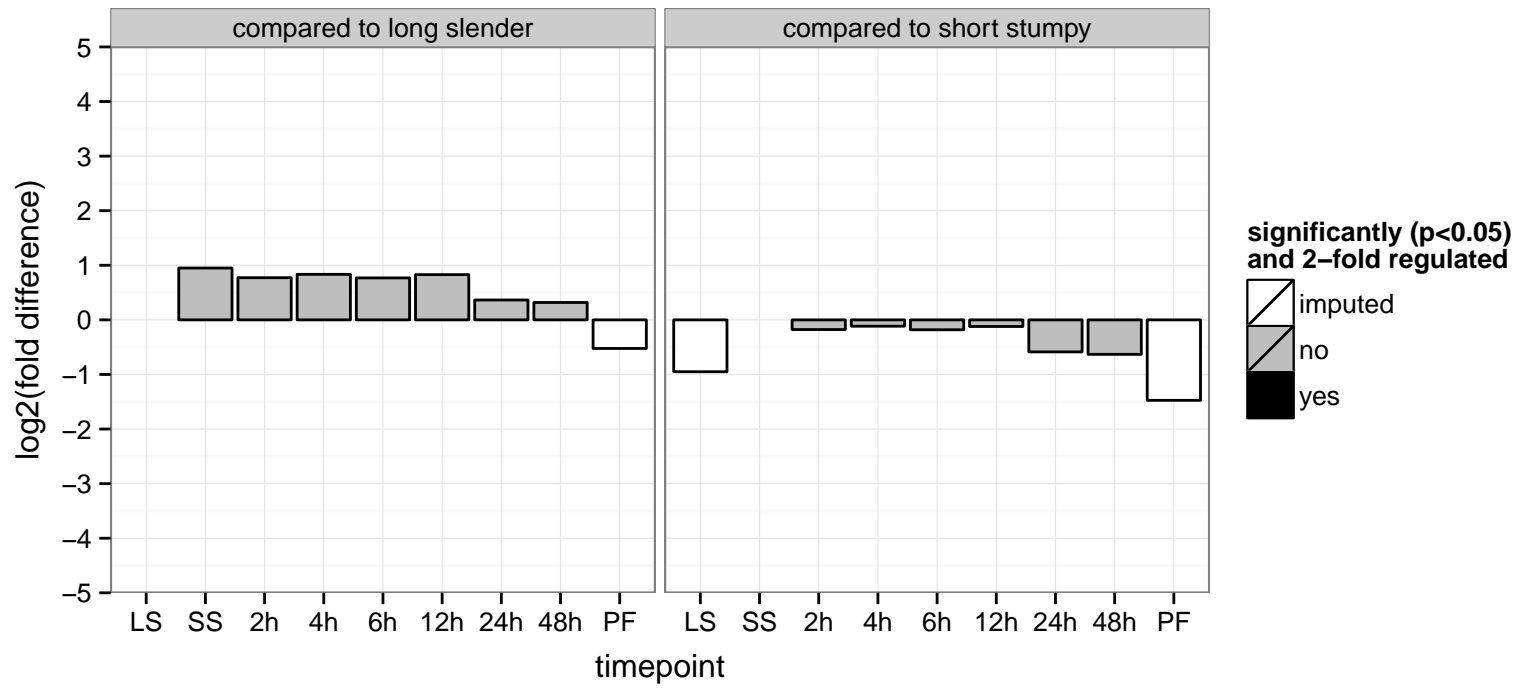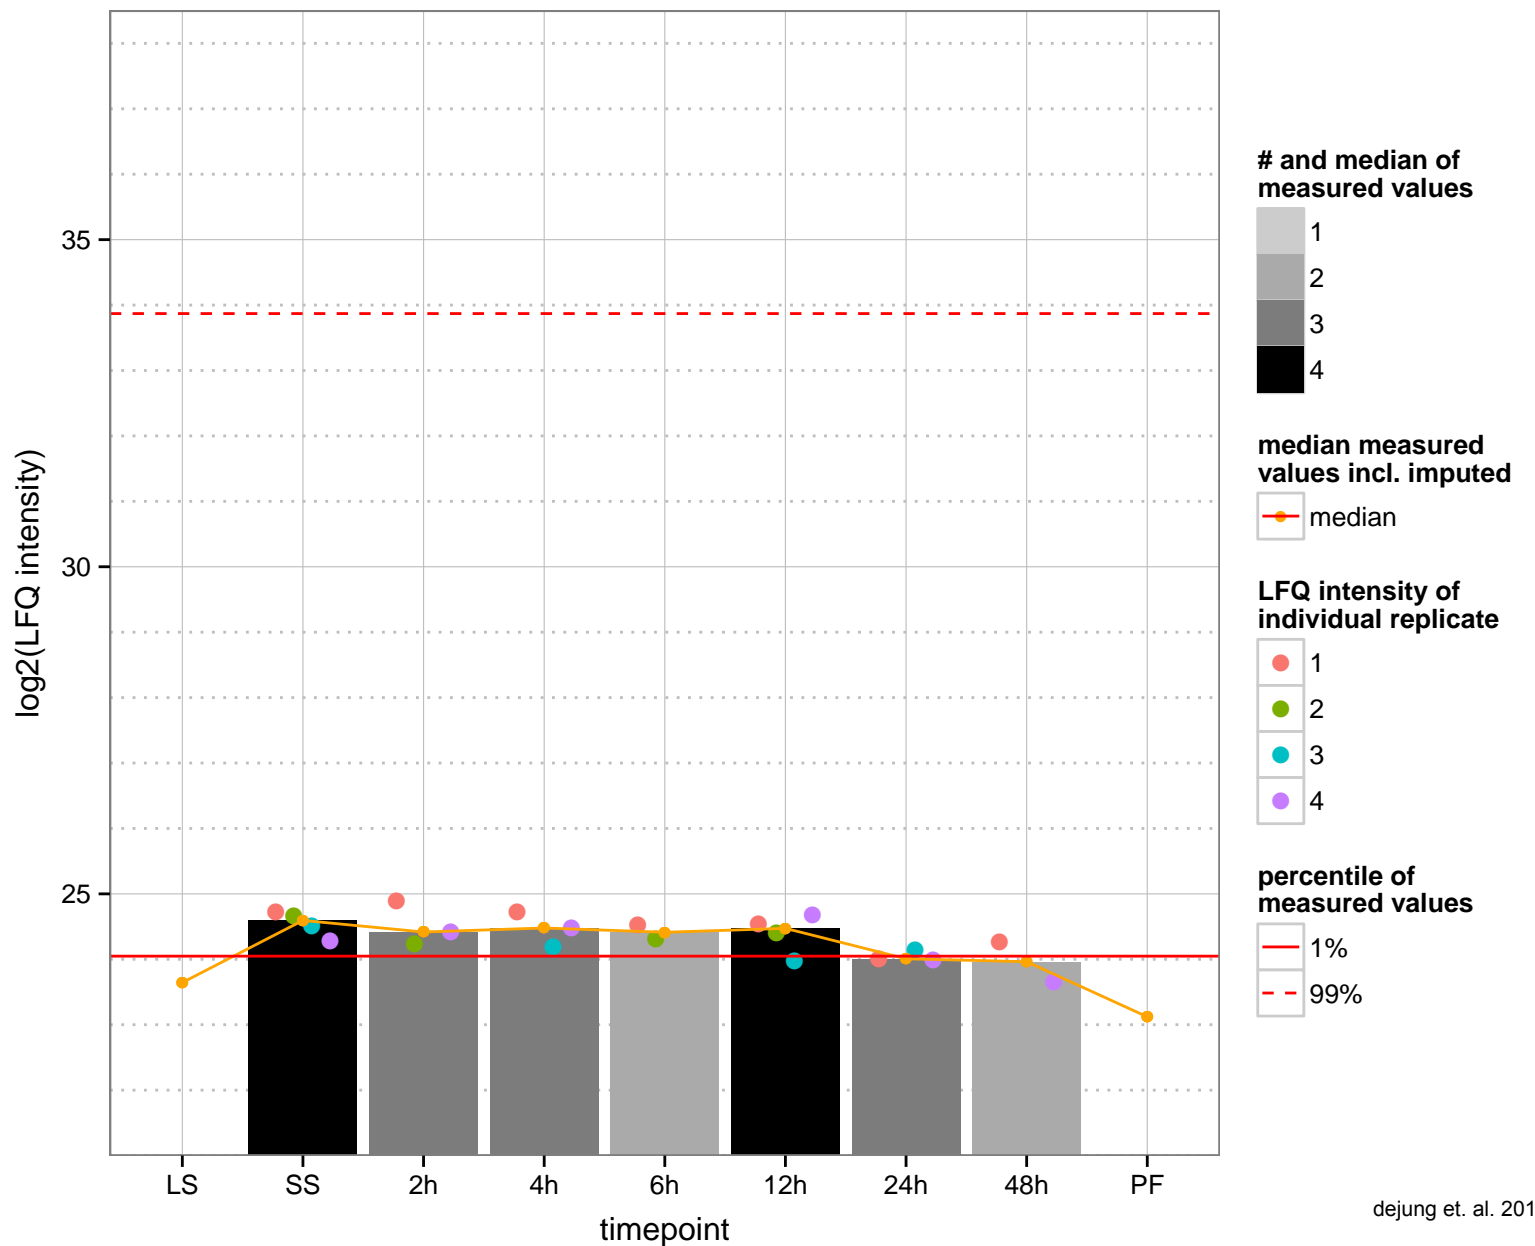

ATP-dependent DEAD/H RNA helicase, putative

Tb927.5.3600

AGOF: ATP binding, ATP-dependent helicase activity, helicase activity, nucleic acid binding

AGOC: null

AGOP: nucleobase-containing compound metabolic process

PGOF: ATP binding, ATP-dependent helicase activity, helicase activity, nucleic acid binding

PGOC: null

PGOP: null

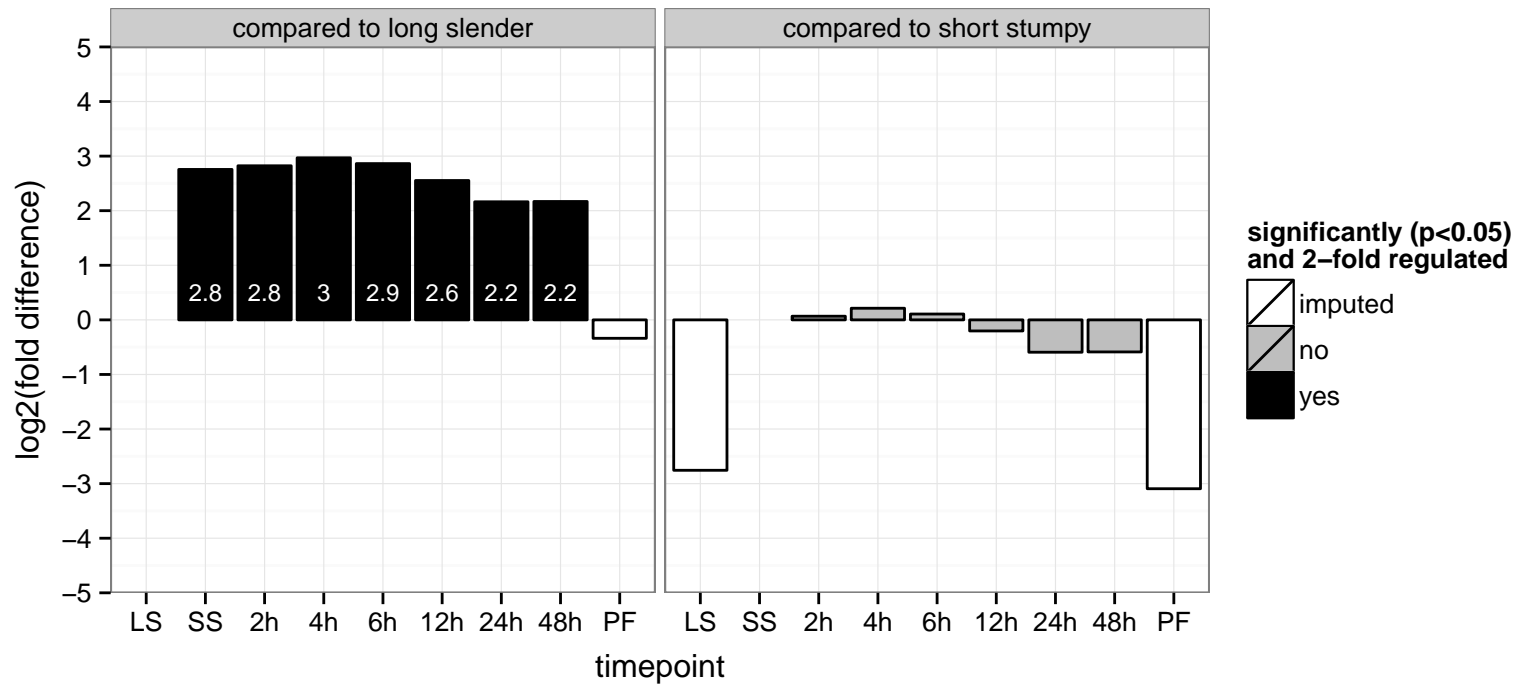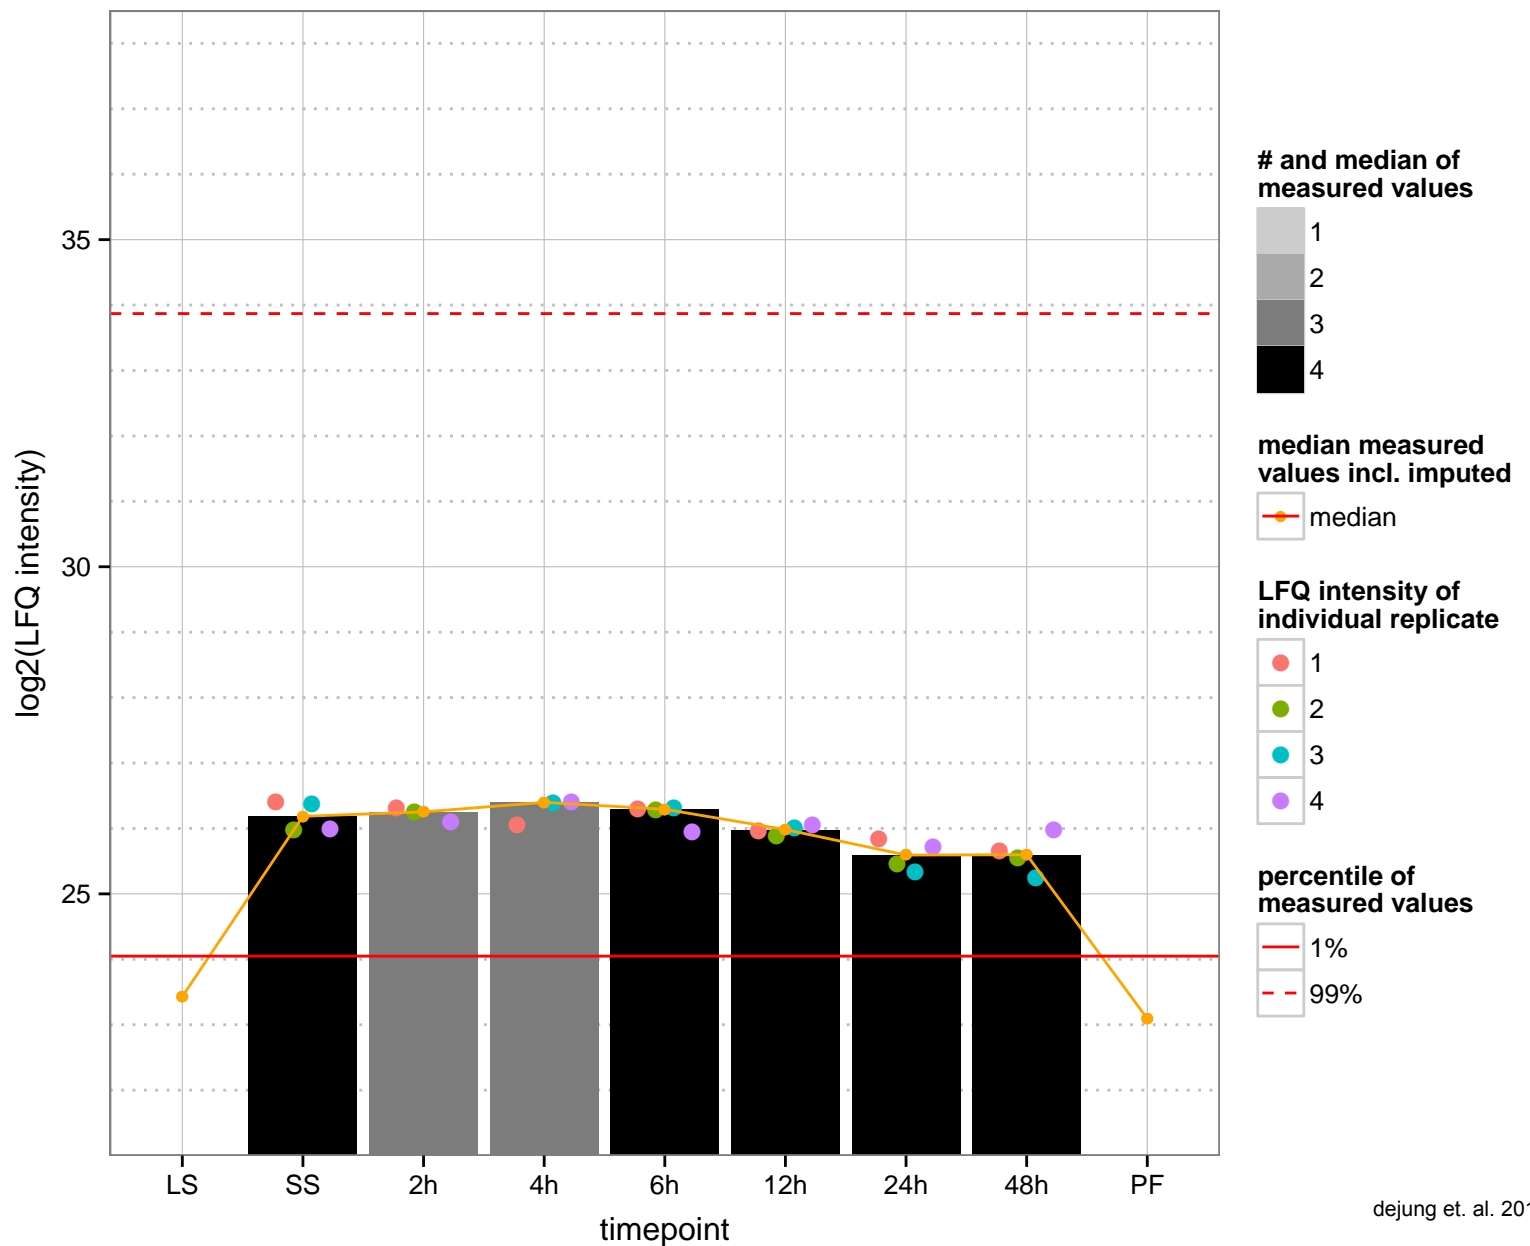

RNA-binding protein, putative (PPCT1)

Tb927.5.3750

AGOF: RNA binding, peptidyl-prolyl cis-trans isomerase activity

AGOC: null

AGOP: RNA processing

PGOF: nucleic acid binding, peptidyl-prolyl cis-trans isomerase activity

PGOC: null

PGOP: protein folding

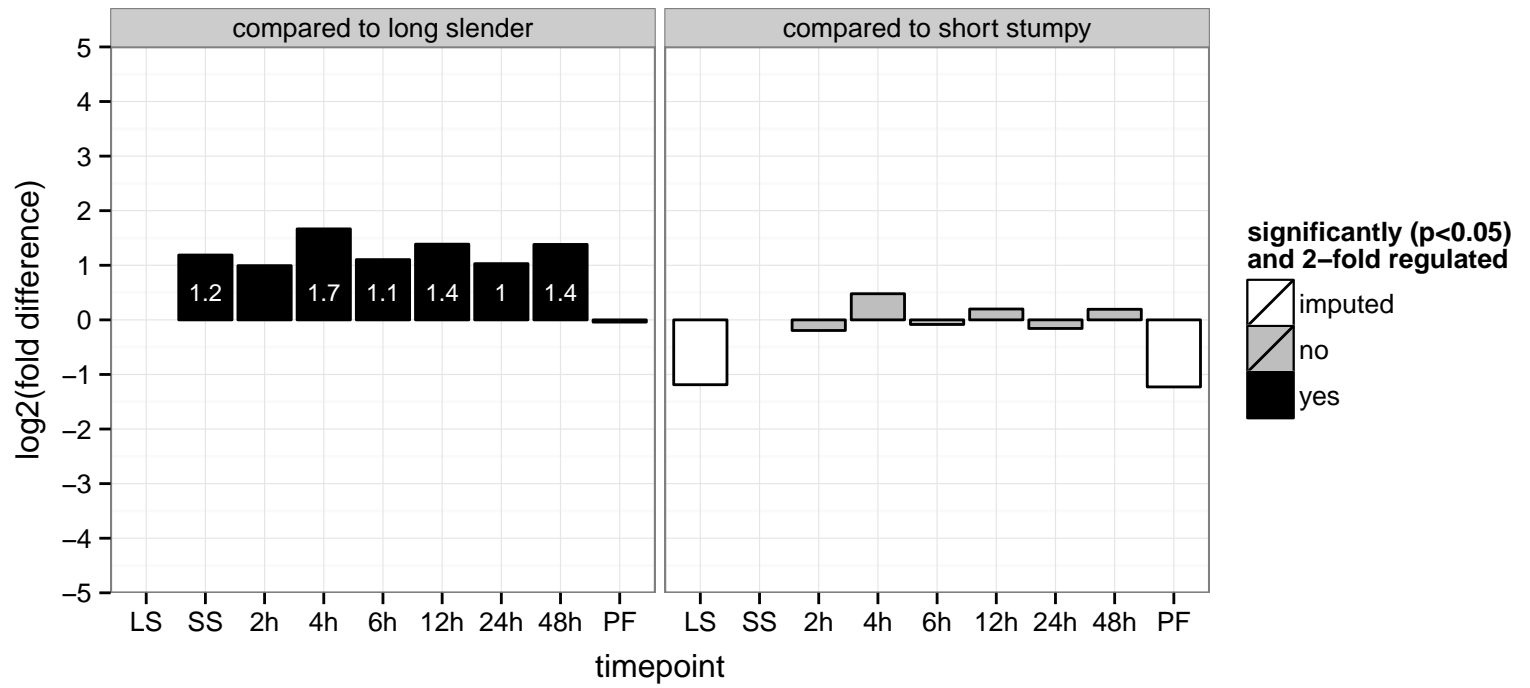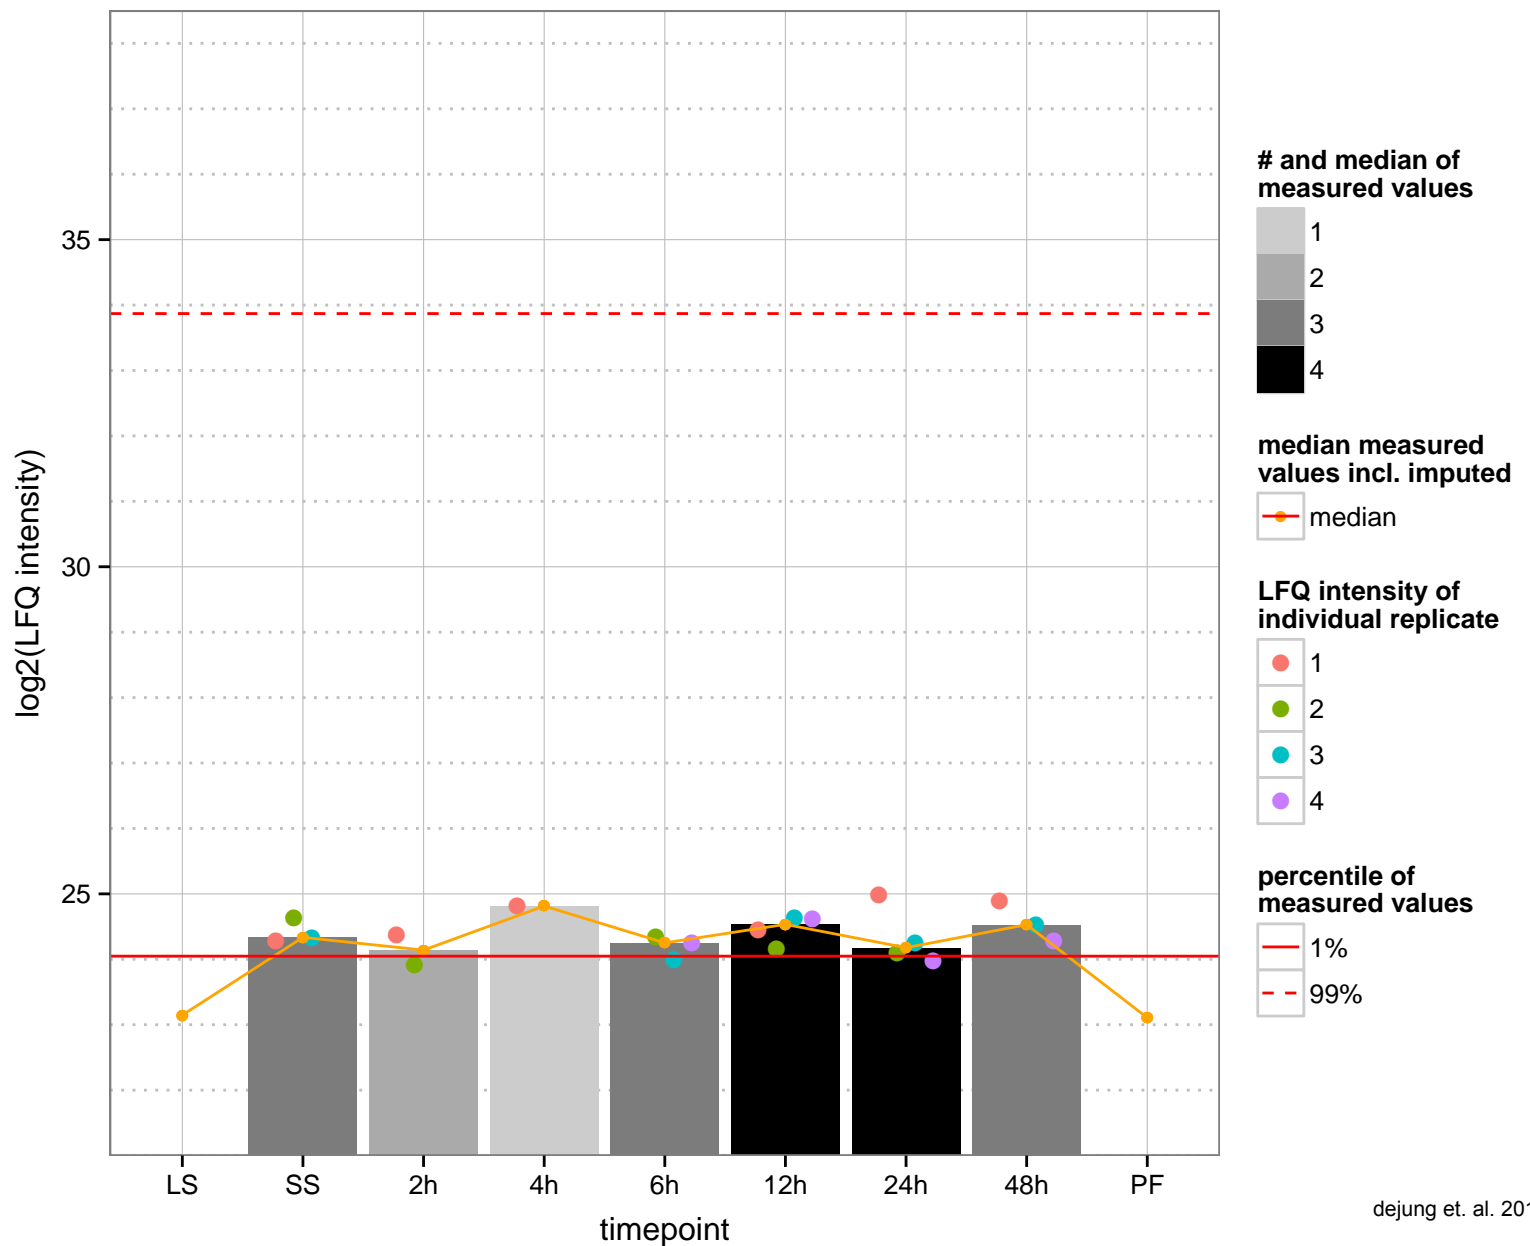

Selenoprotein T, putative (SeIT)  
 Tb927.5.860  
 AGOF: selenium binding  
 AGOC: null  
 AGOP: cell redox homeostasis  
 PGO: selenium binding  
 PGO: null  
 PGO: cell redox homeostasis

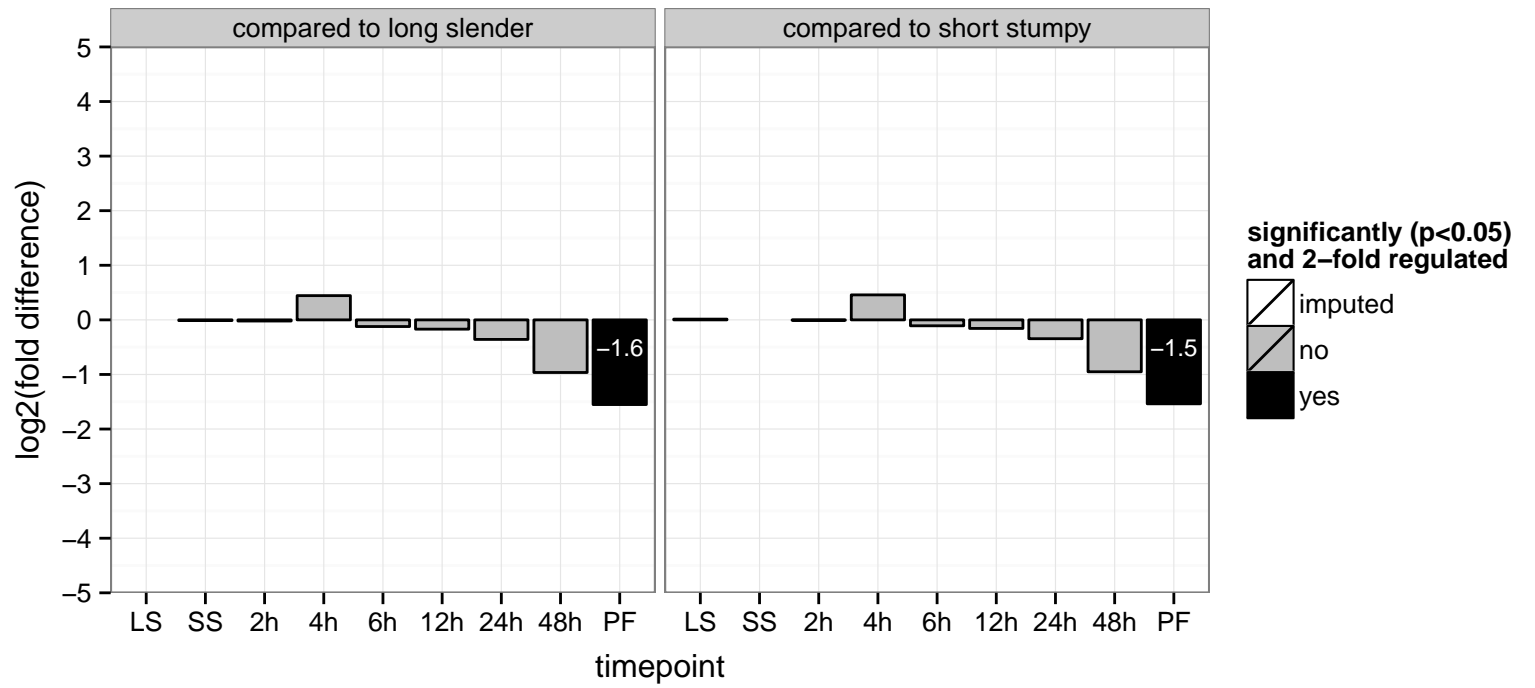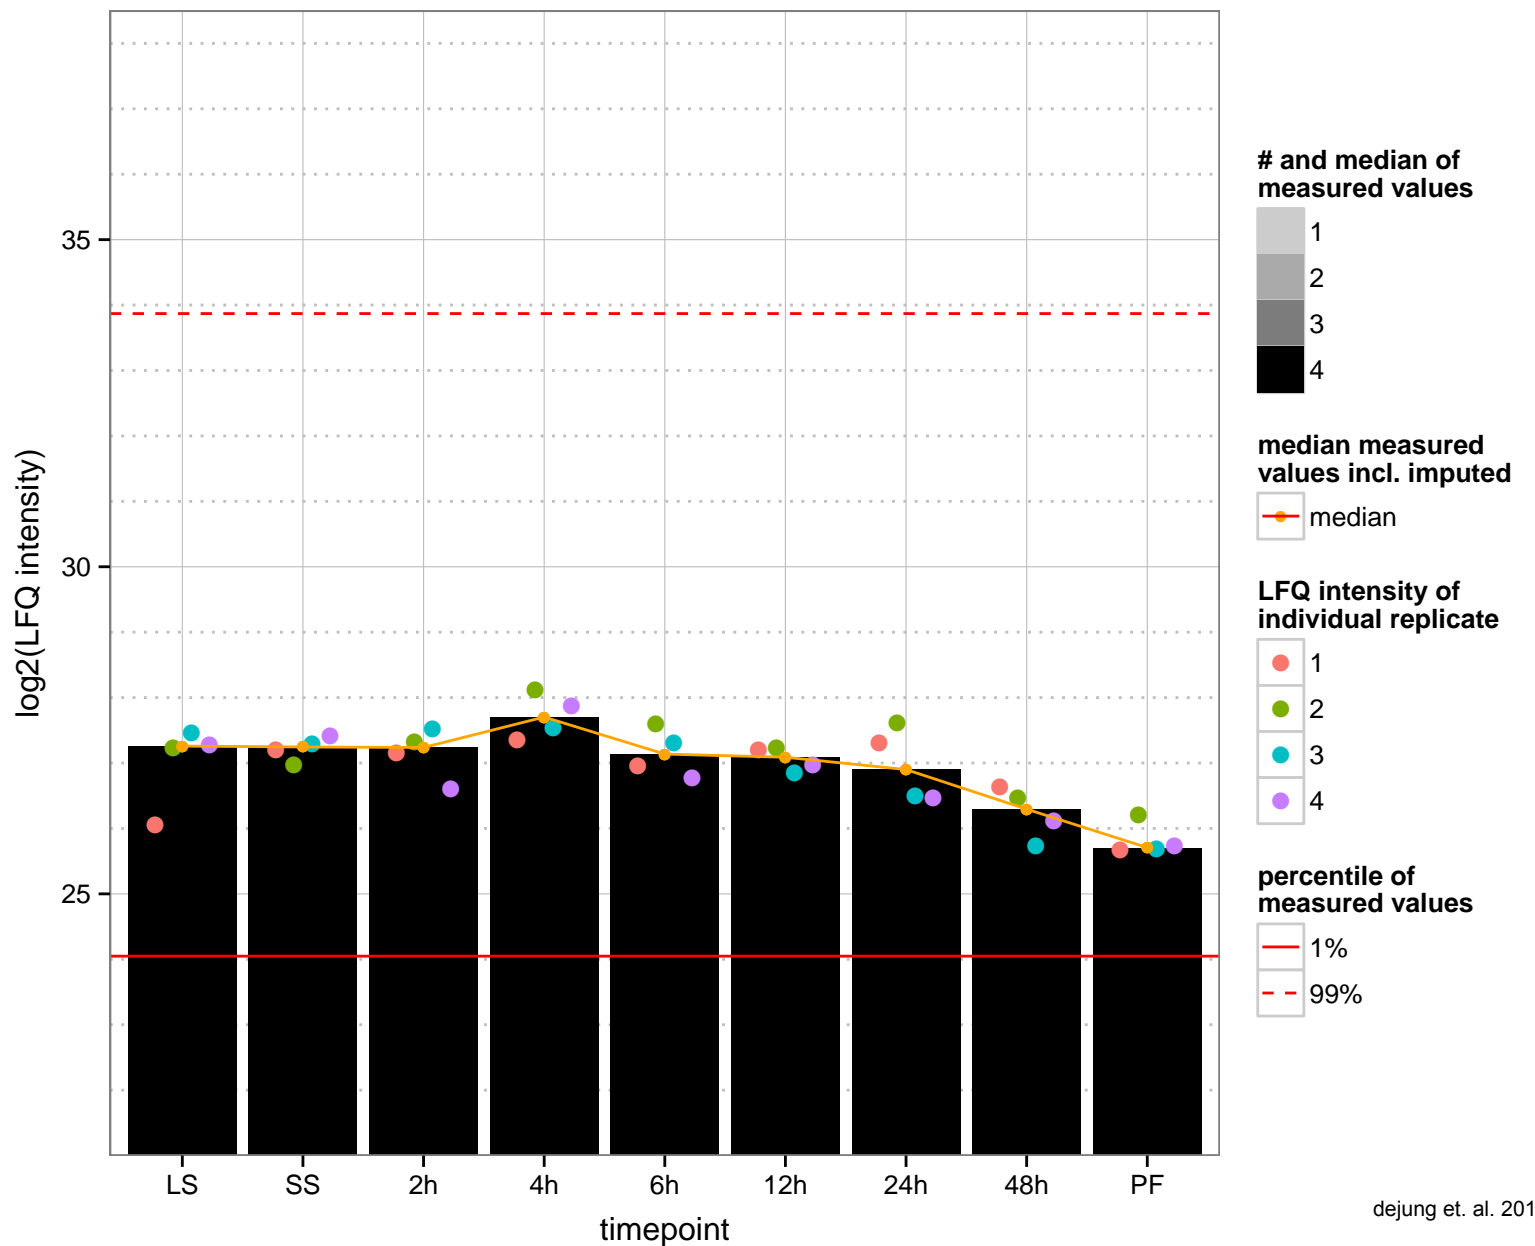

hypothetical protein, conserved  
 Tb927.5.990  
 AGOF: null  
 AGOC: null  
 AGOP: null  
 PGO: null  
 PGO: null  
 PGO: null

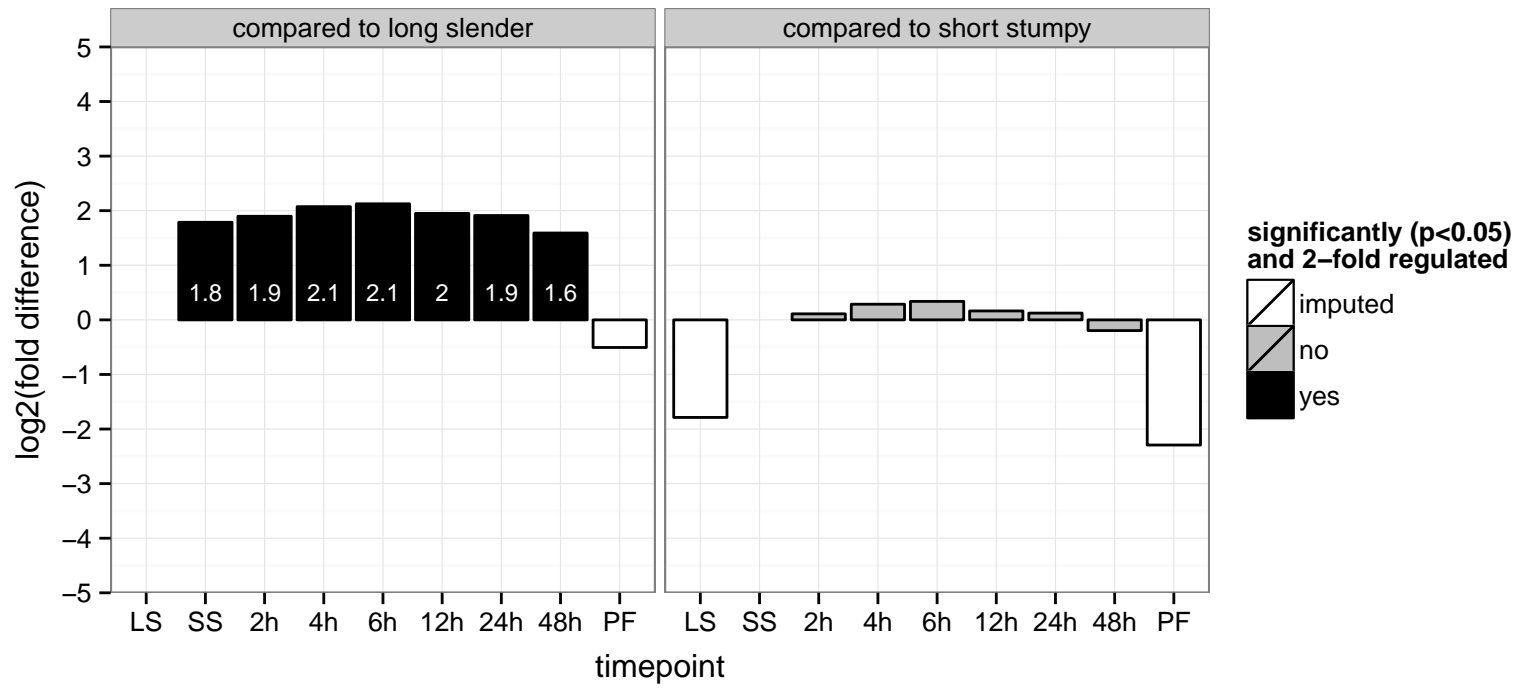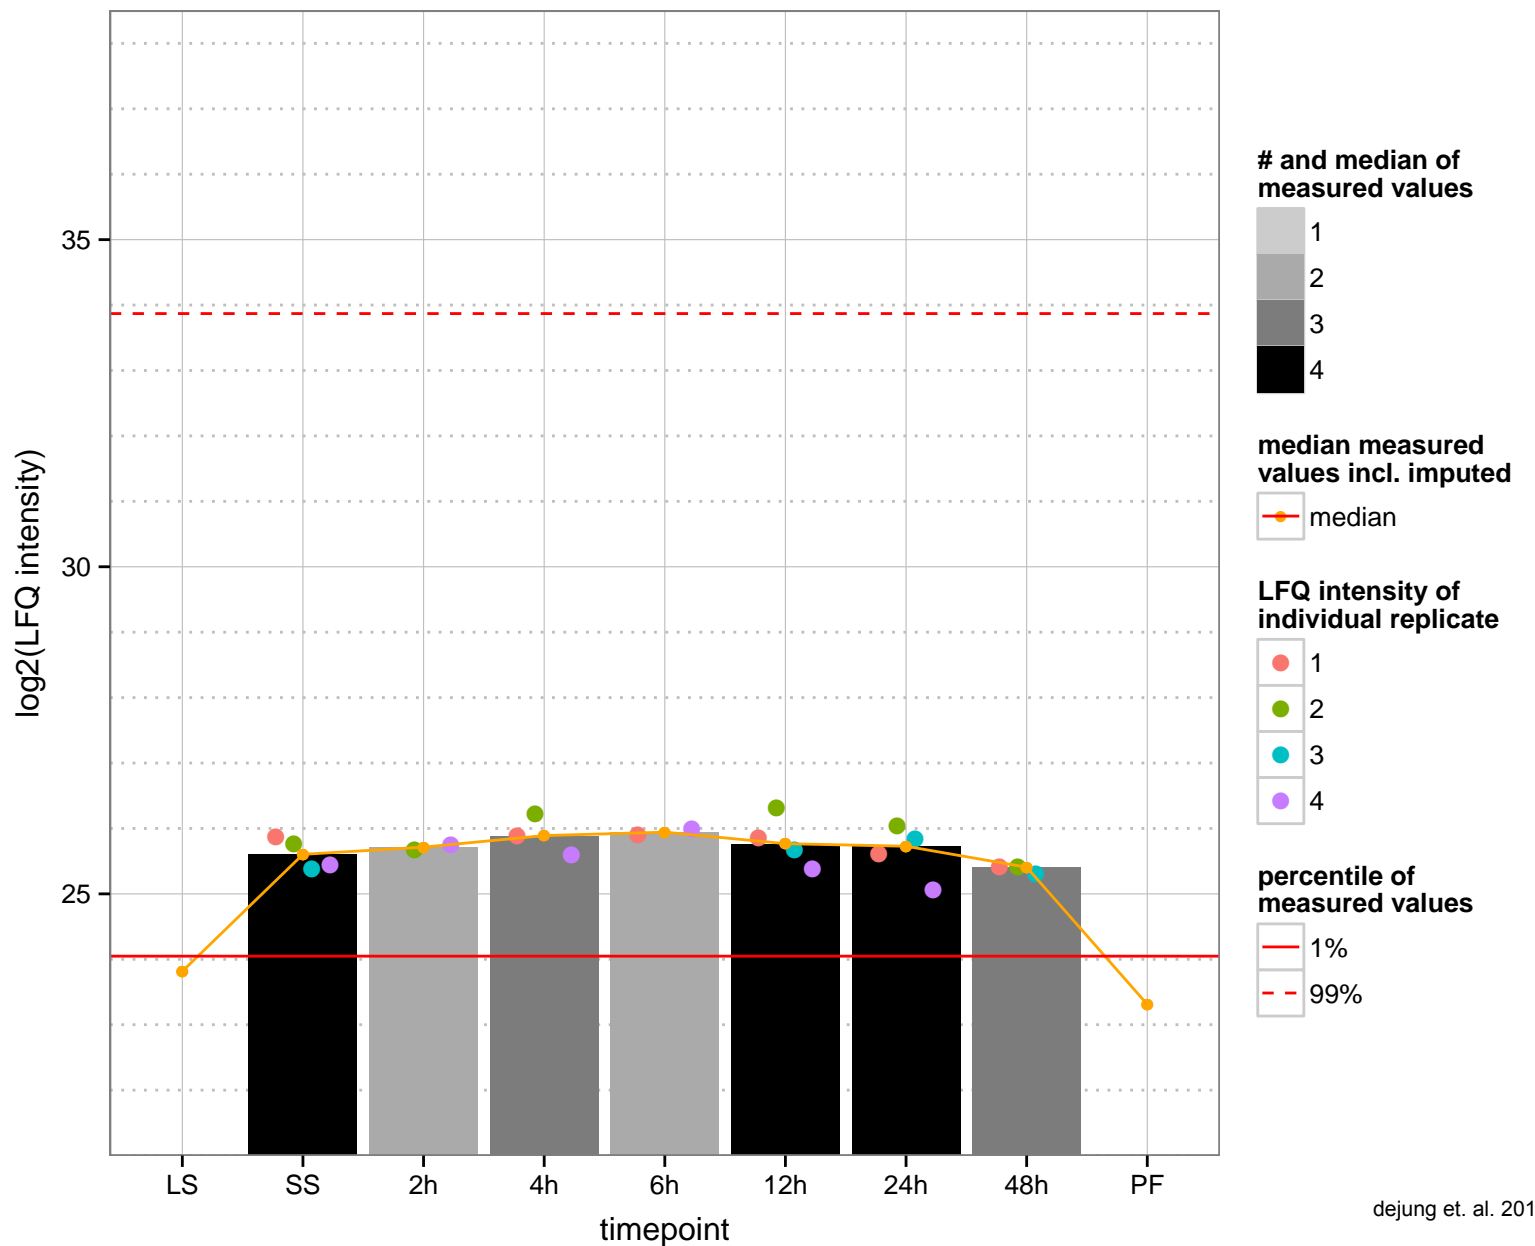

hypothetical protein, conserved  
 Tb927.6.1470  
 AGOF: null  
 AGOC: null  
 AGOP: null  
 PGO: null  
 PGOC: null  
 PGOP: null

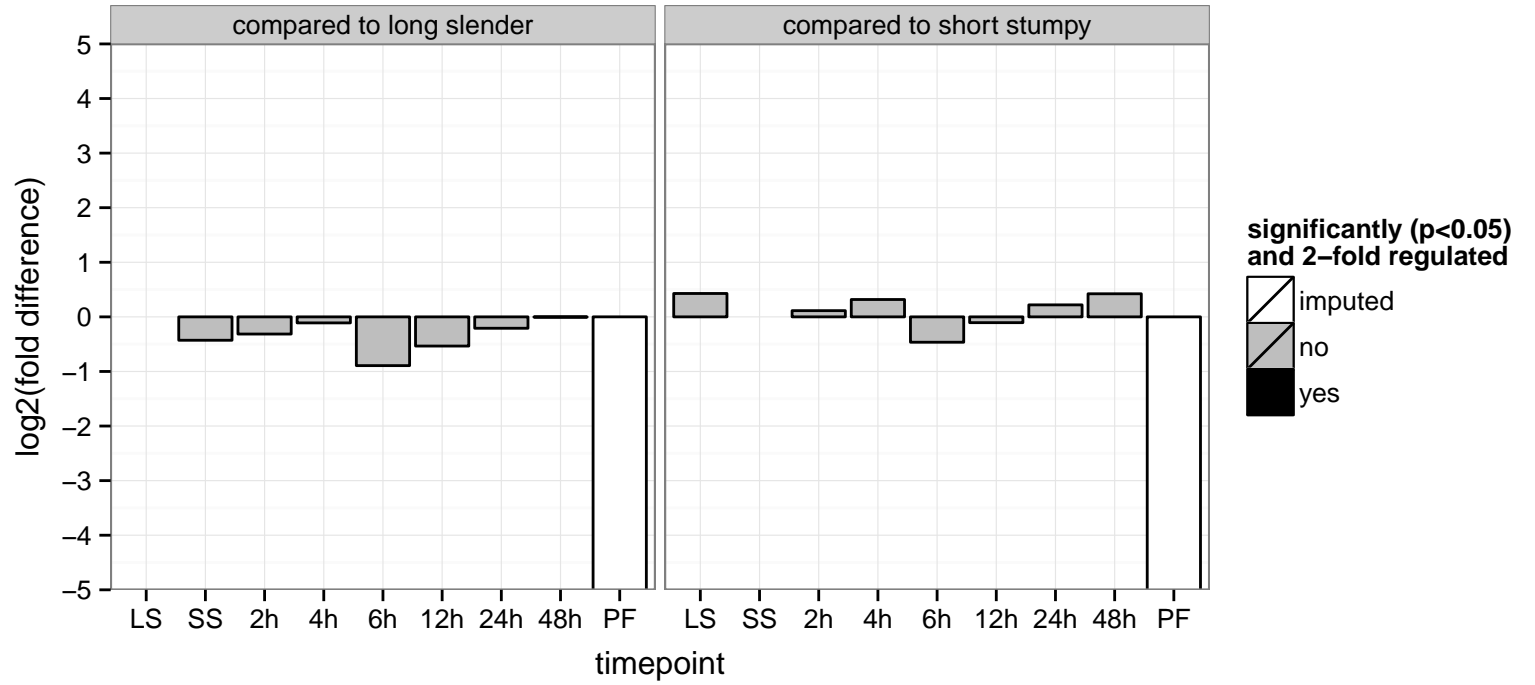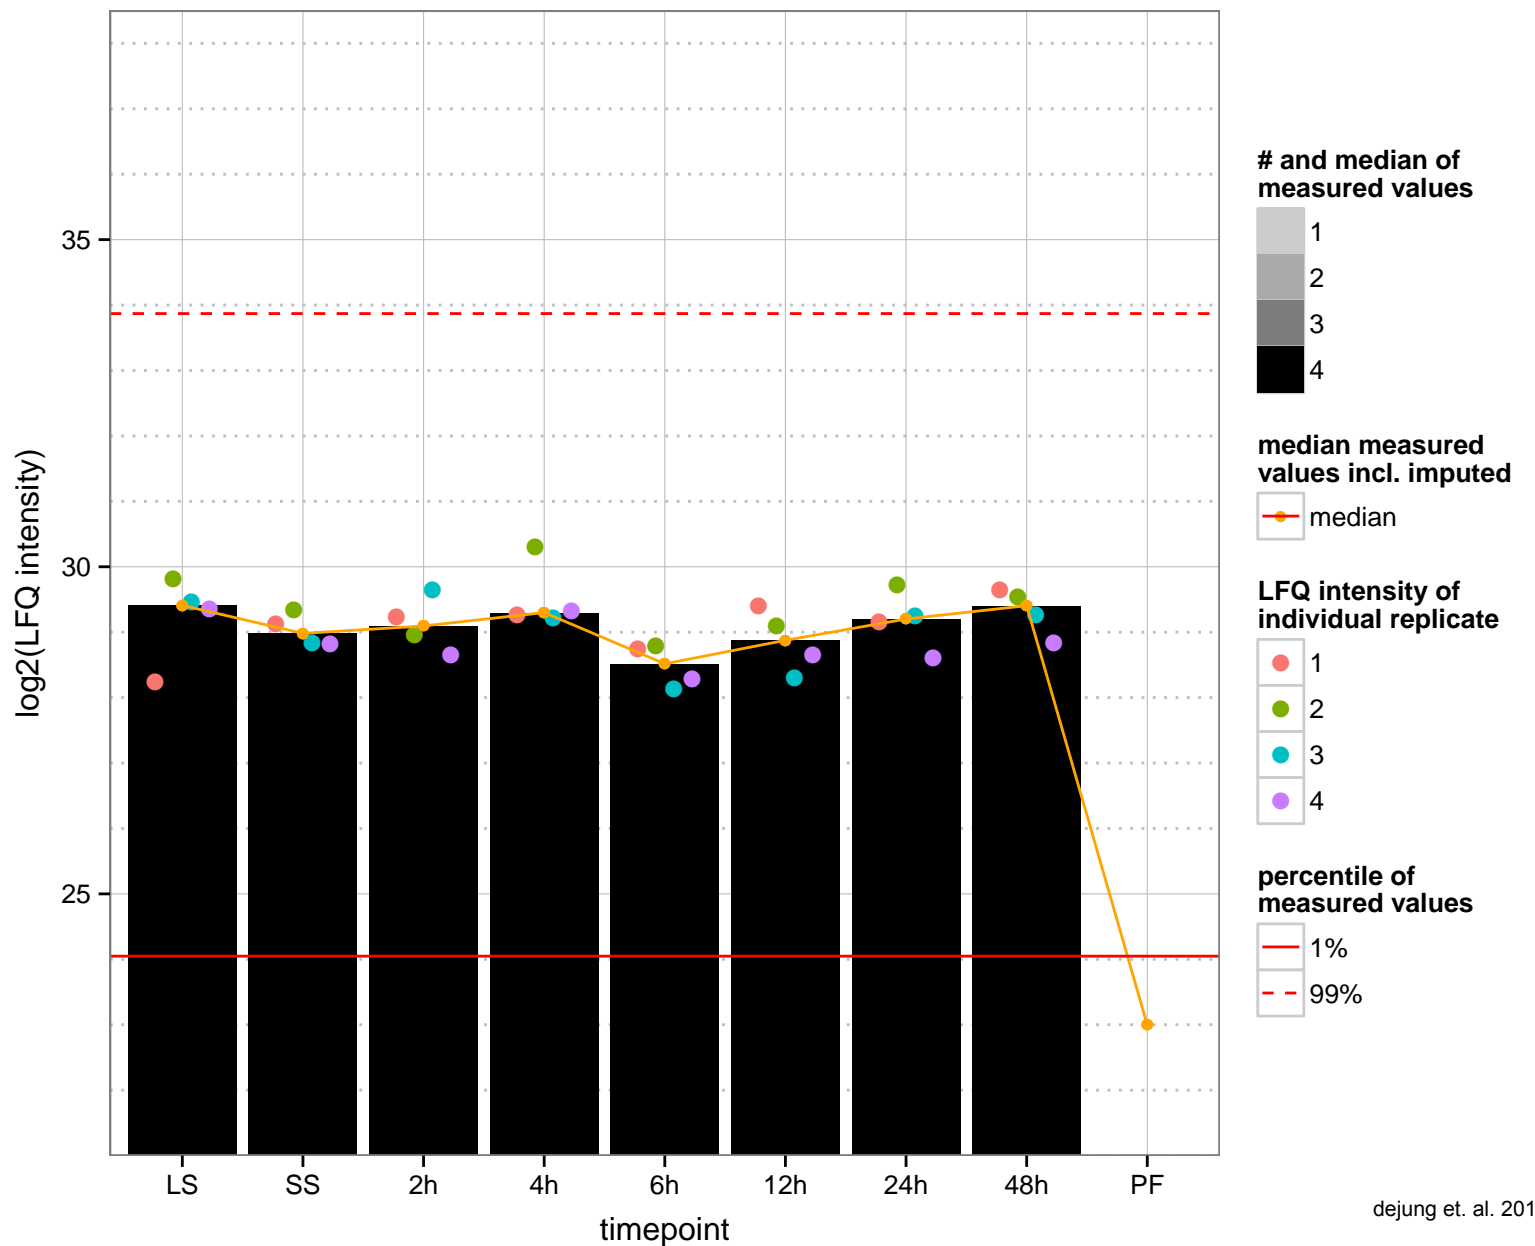



hypothetical protein, conserved  
 Tb927.6.1480  
 AGOF: null  
 AGOC: null  
 AGOP: null  
 PGOF: protein binding  
 PGOC: null  
 PGOP: null

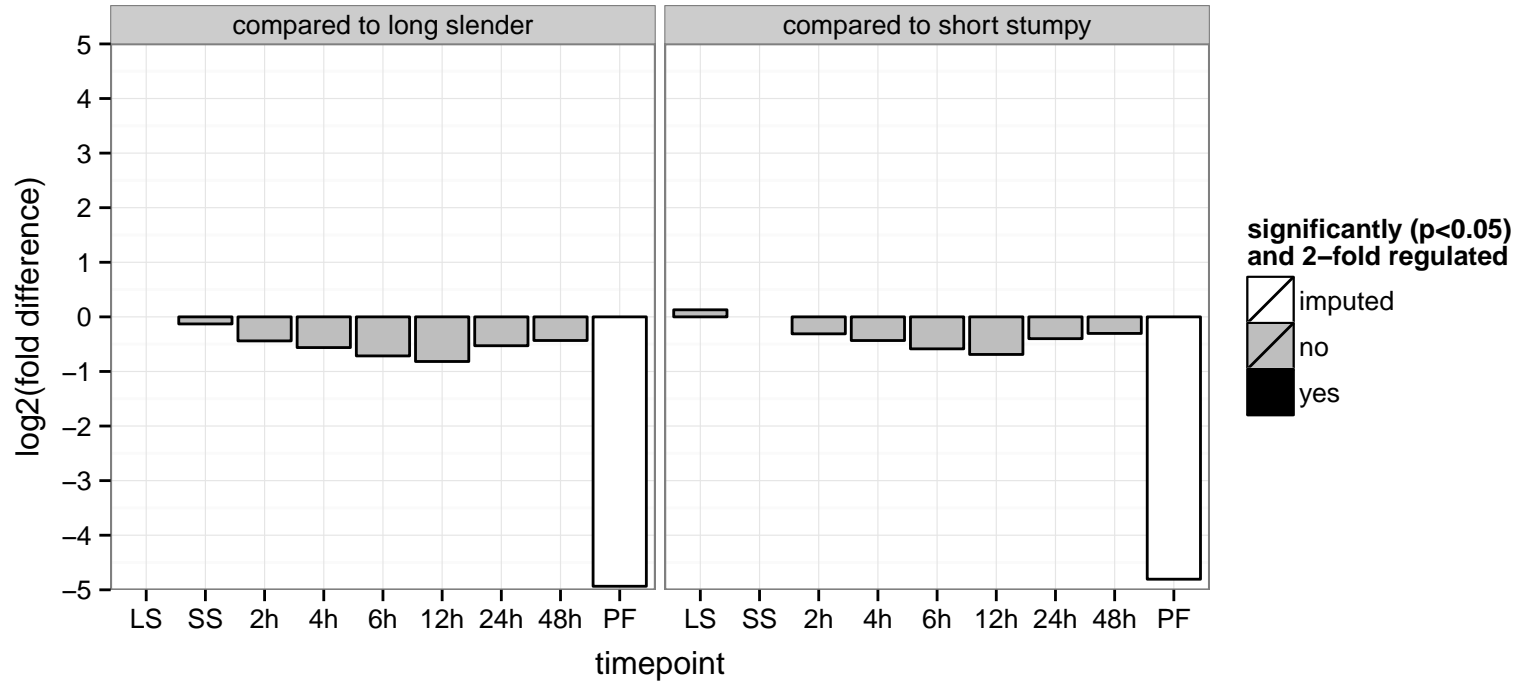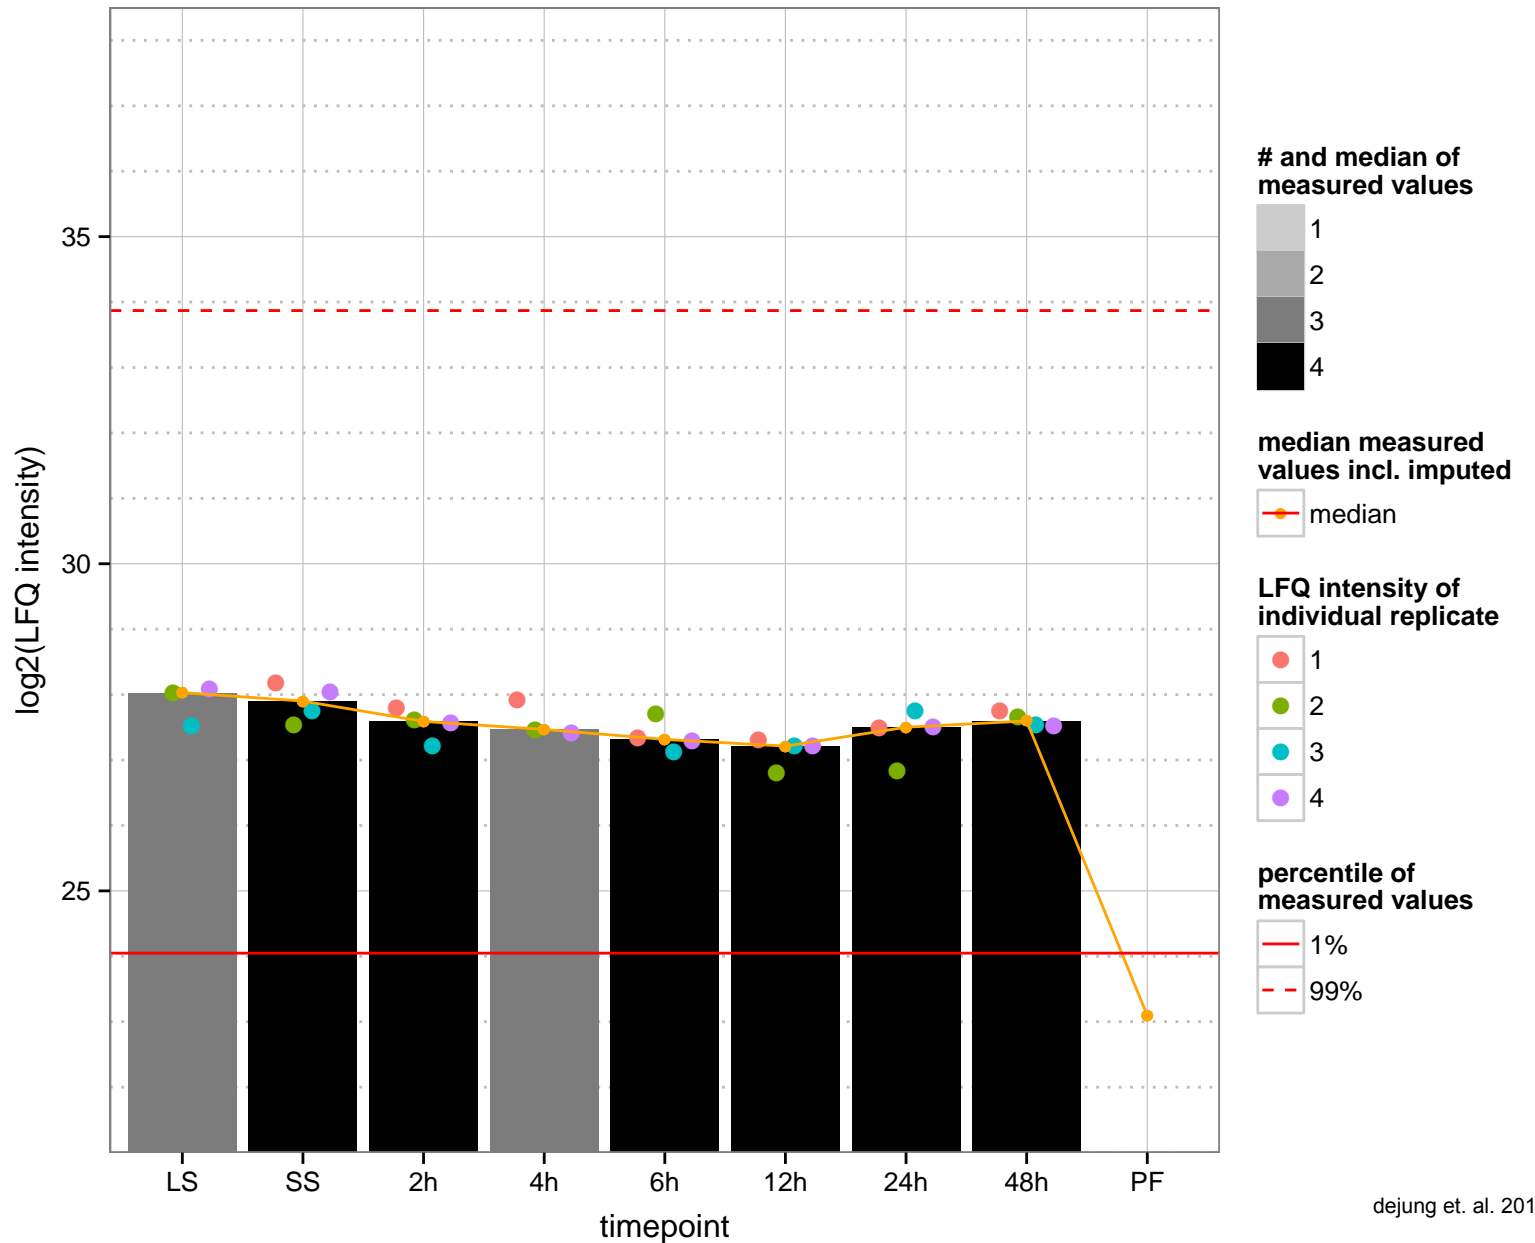

Aquaglyceroporin 1 (AQP1)

Tb927.6.1520

AGOF: drug transmembrane transporter activity, glycerol channel activity, water channel activity

AGOC: membrane

AGOP: detection of osmotic stimulus, drug transmembrane transport, glycerol transport, hypotonic response, response to drug

PGOF: transporter activity

PGOC: integral to membrane, membrane

PGOP: transmembrane transport, transport, water transport

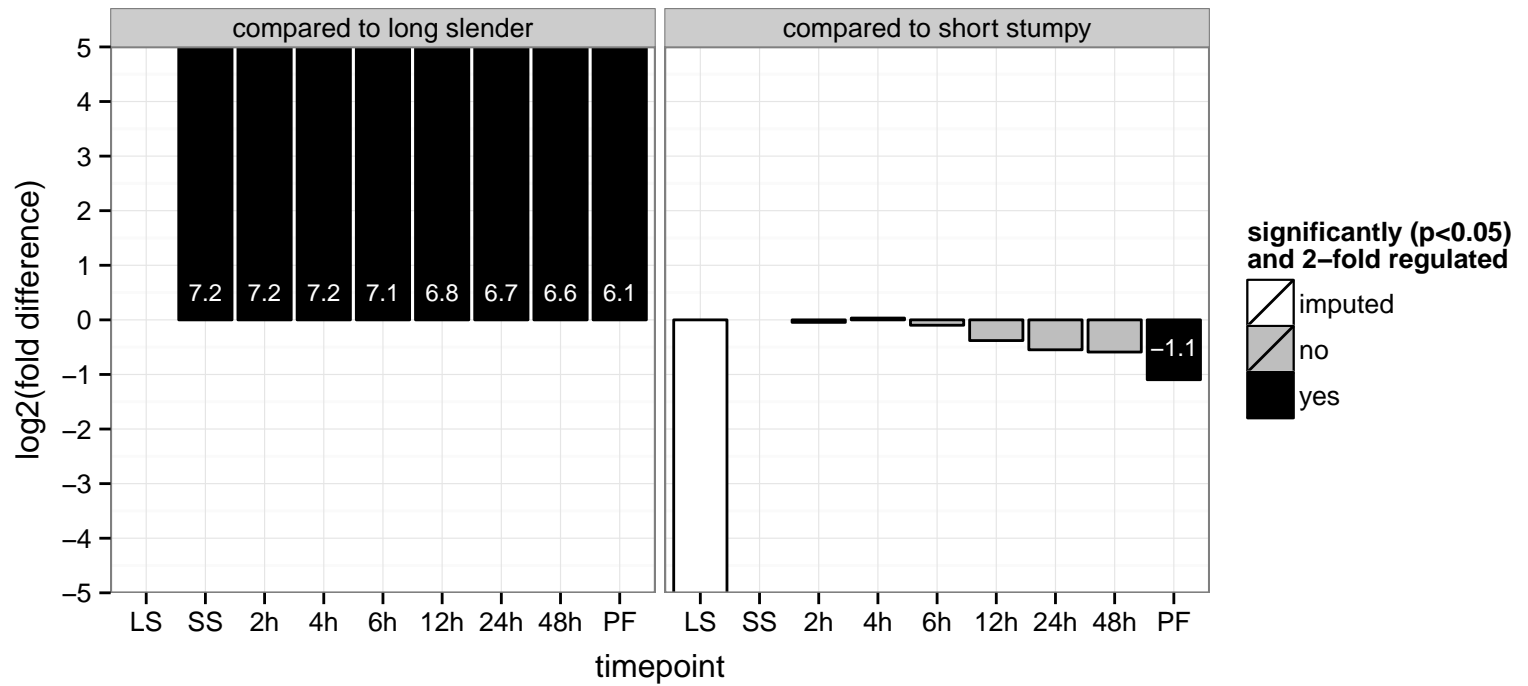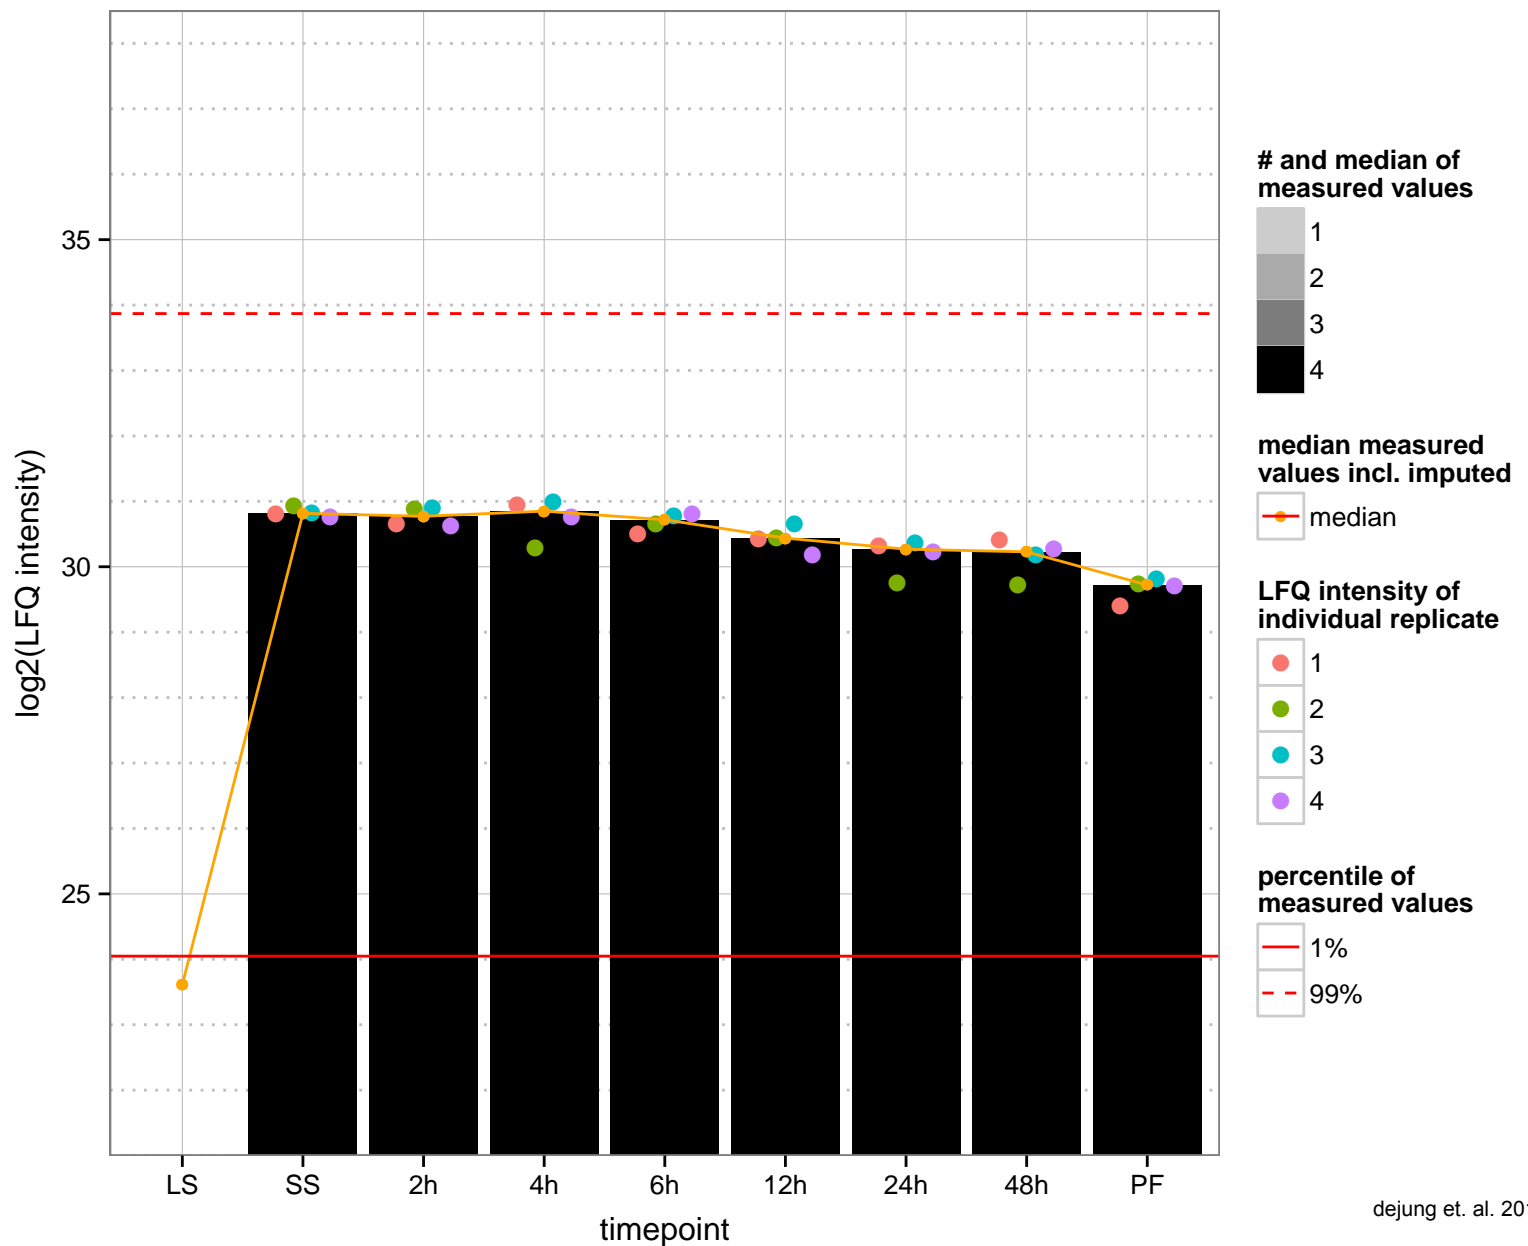

hypothetical protein, conserved  
 Tb927.6.1540  
 AGOF: null  
 AGOC: null  
 AGOP: null  
 PGO: null  
 PGO: membrane  
 PGO: null

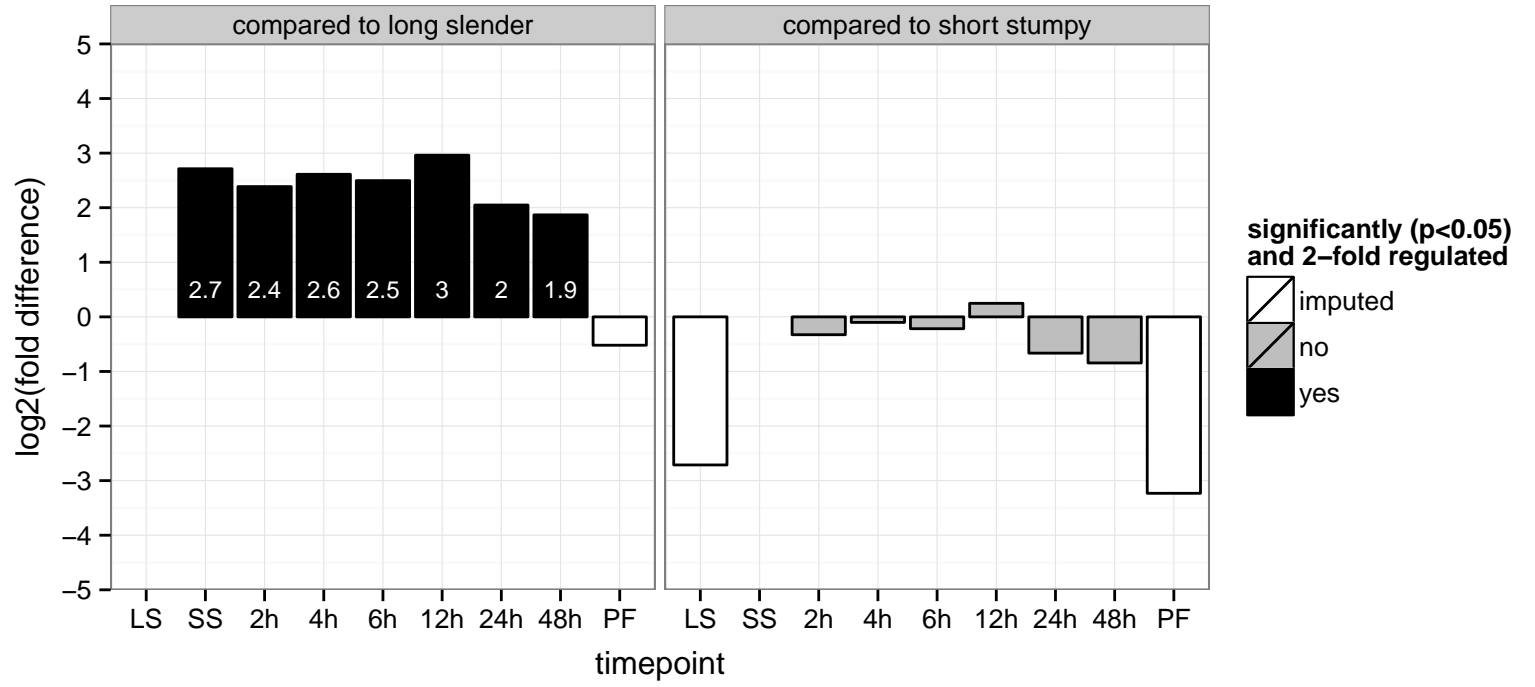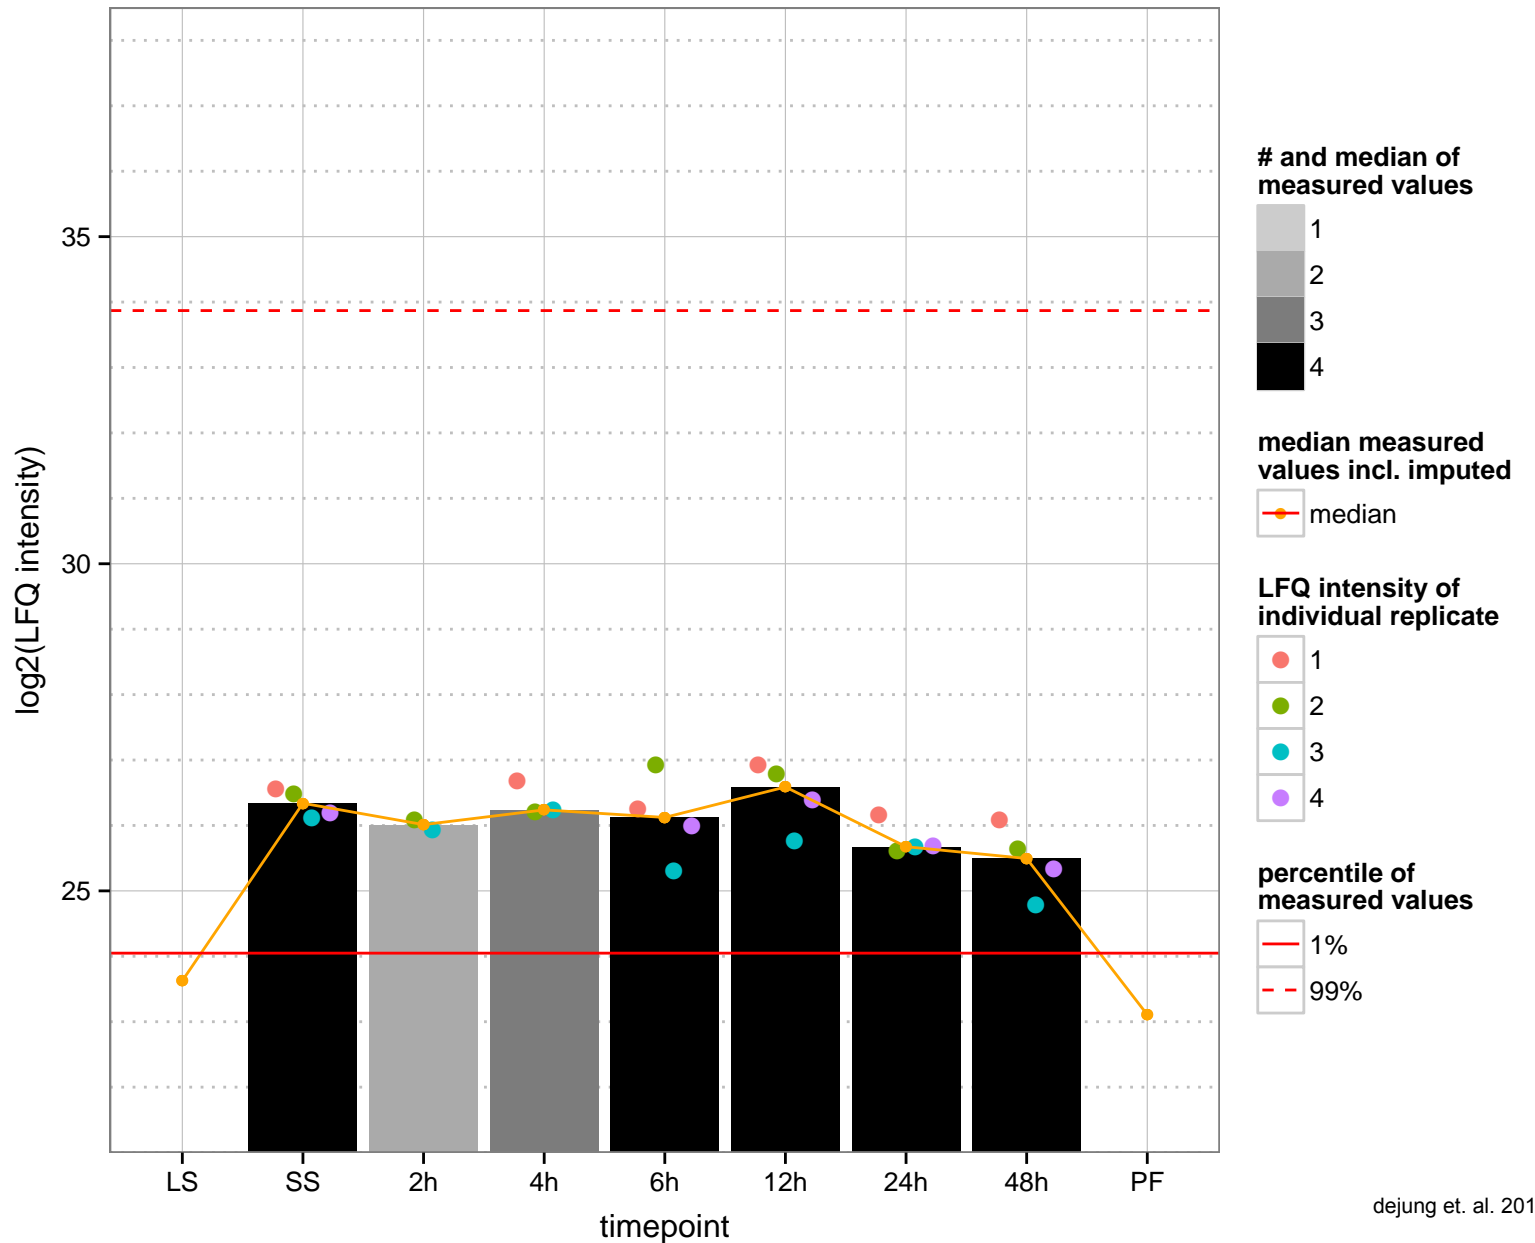

leucine-rich repeat protein (LRRP), putative  
 Tb927.6.1550  
 AGOF: null  
 AGOC: null  
 AGOP: null  
 PGO: null  
 PGOC: null  
 PGOP: null

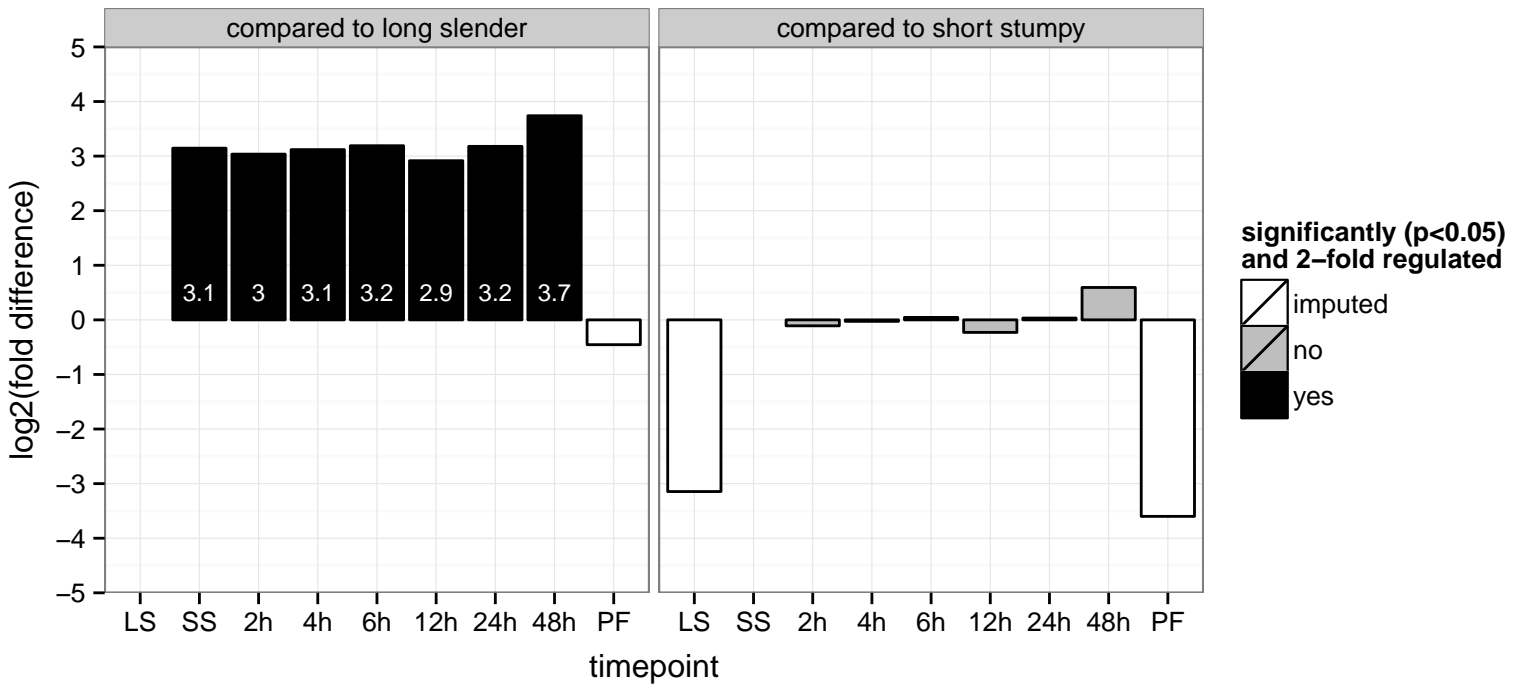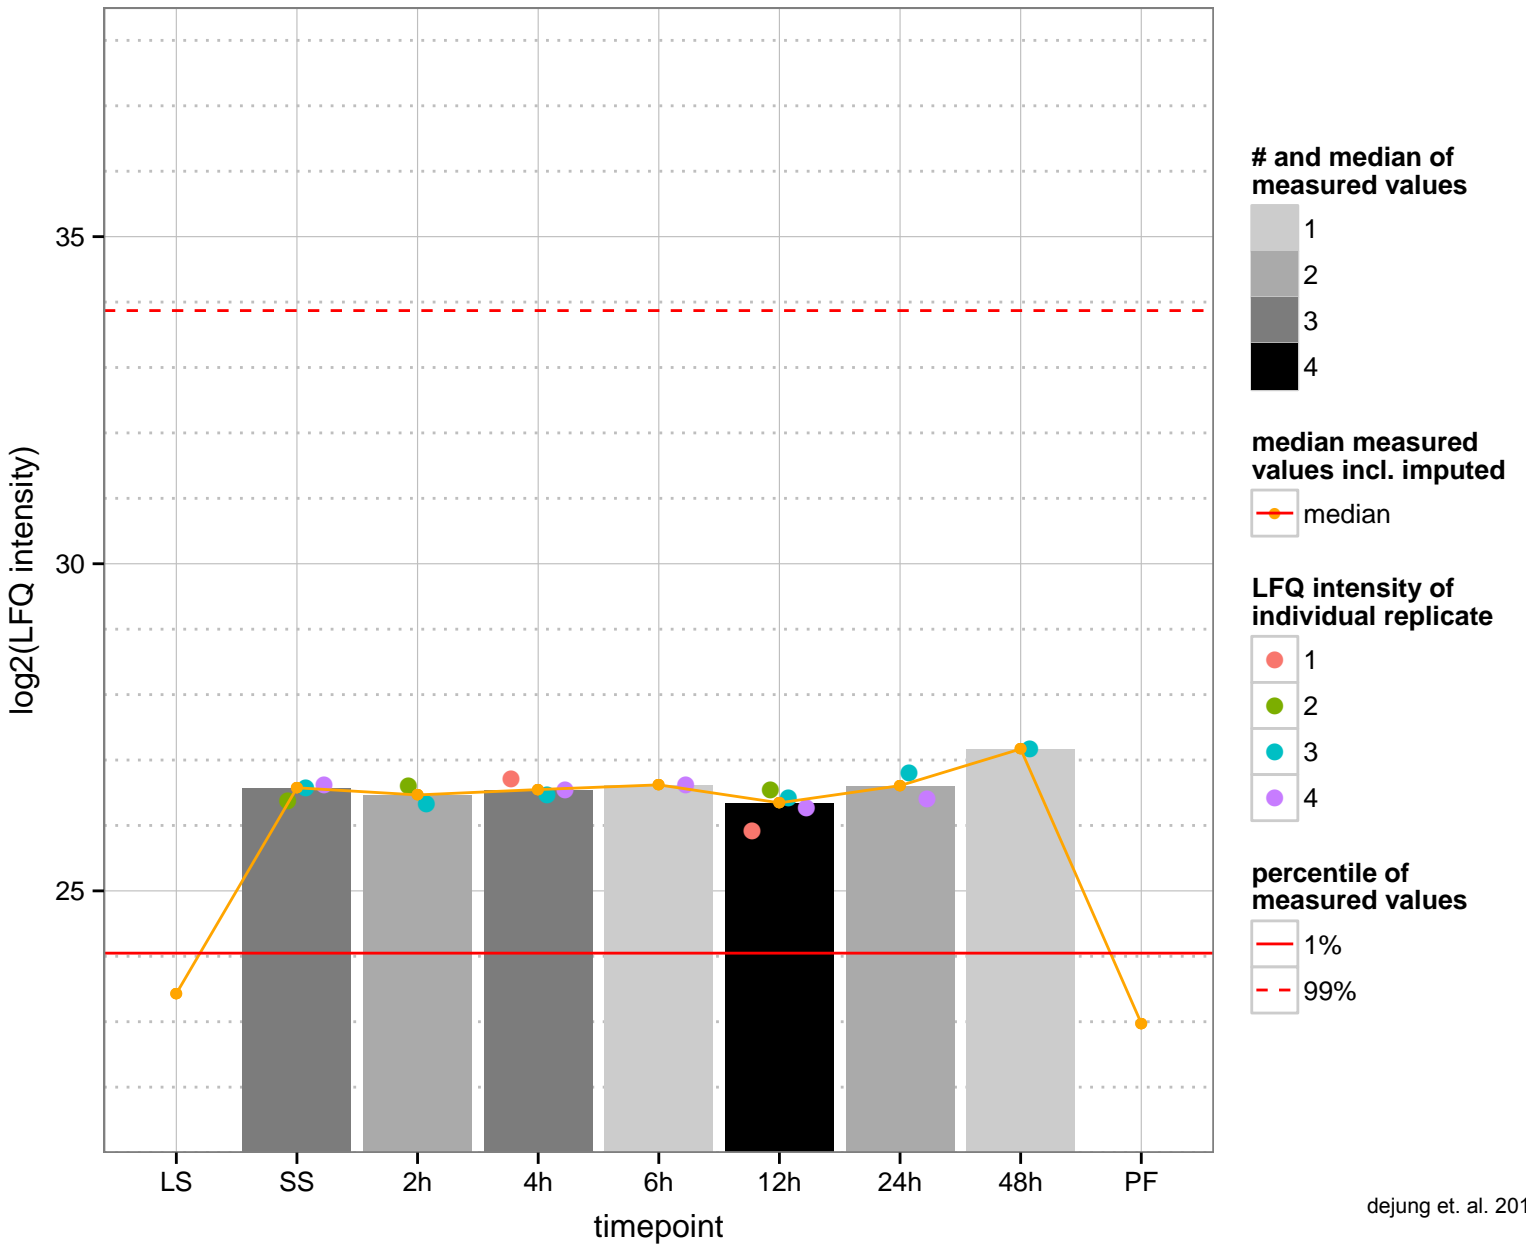

polynucleotide kinase 3'-phosphatase, putative  
 Tb927.6.1580  
 AGOF: null  
 AGOC: null  
 AGOP: null  
 PGOF: null  
 PGO: null  
 PGOP: null

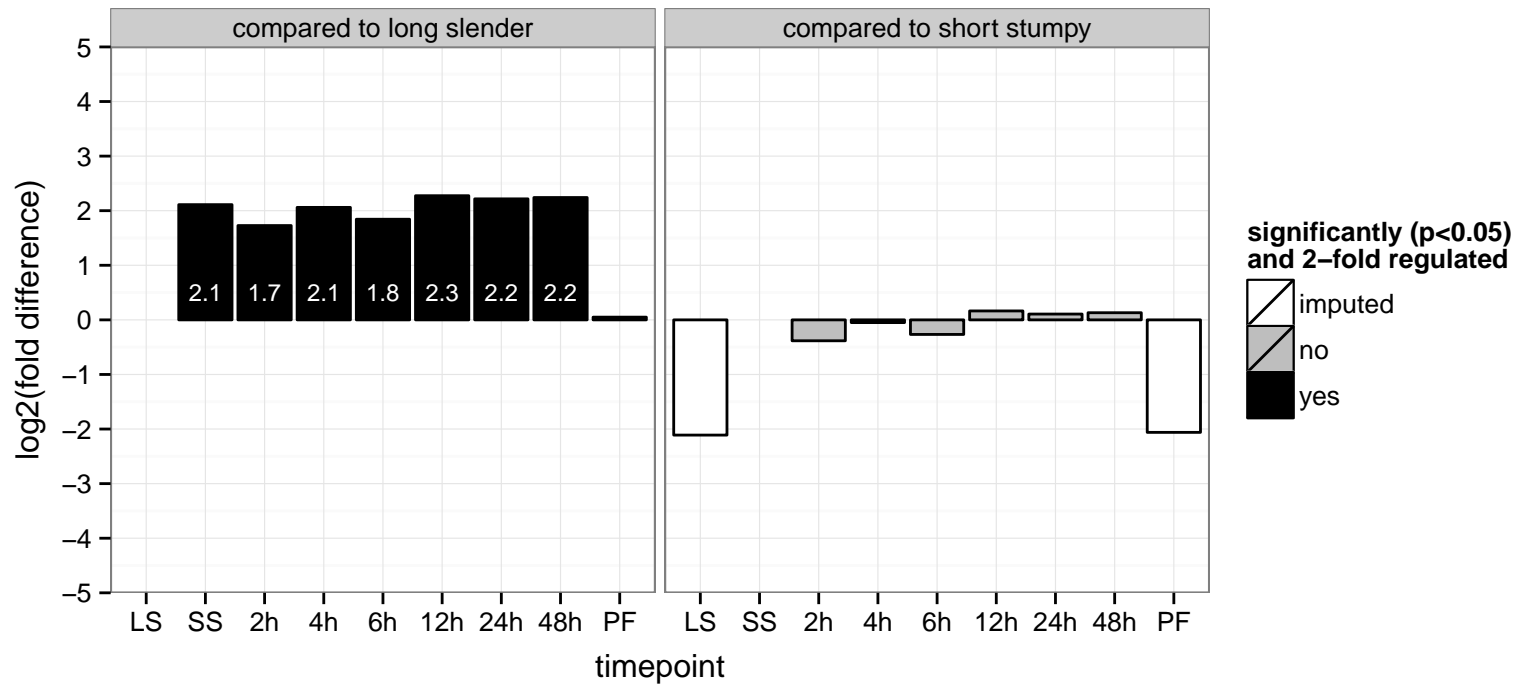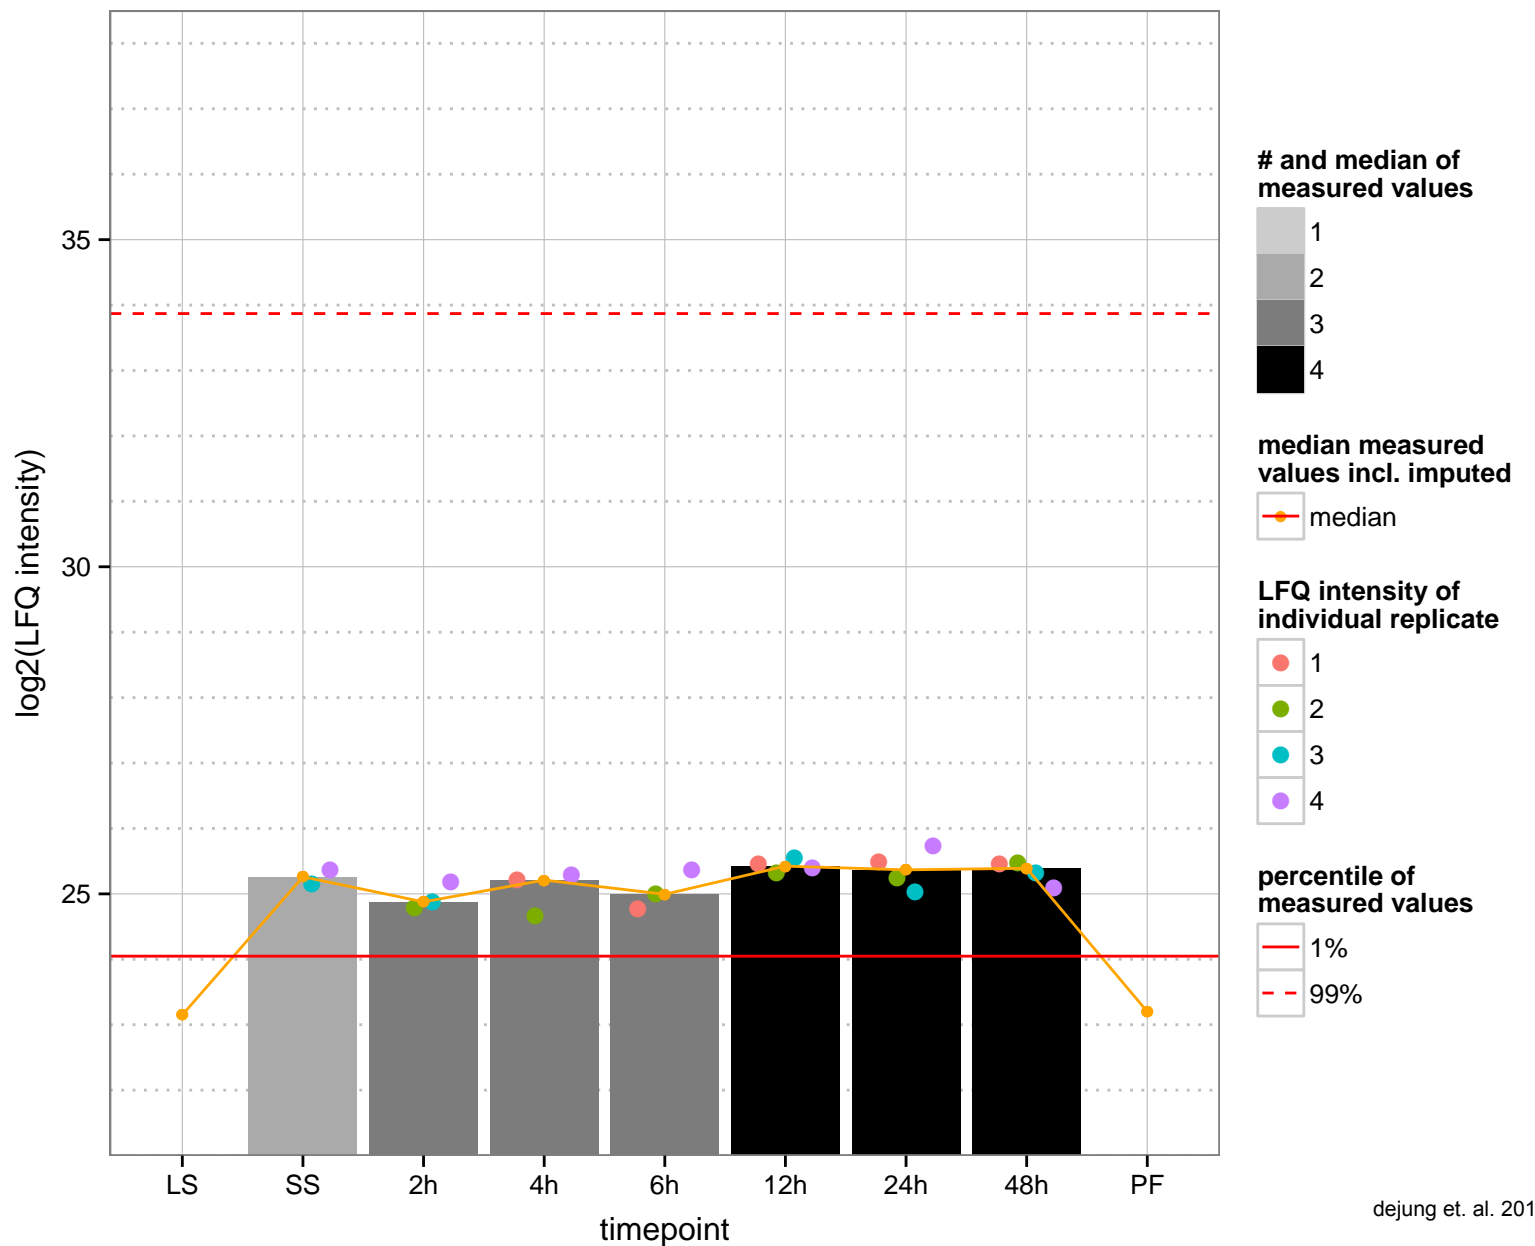

kinesin, putative  
 Tb927.6.1770  
 AGOF: ATP binding, microtubule motor activity, motor activity  
 AGOC: microtubule associated complex  
 AGOP: microtubule-based movement  
 PGOF: ATP binding, microtubule motor activity  
 PGO: null  
 PGOP: microtubule-based movement

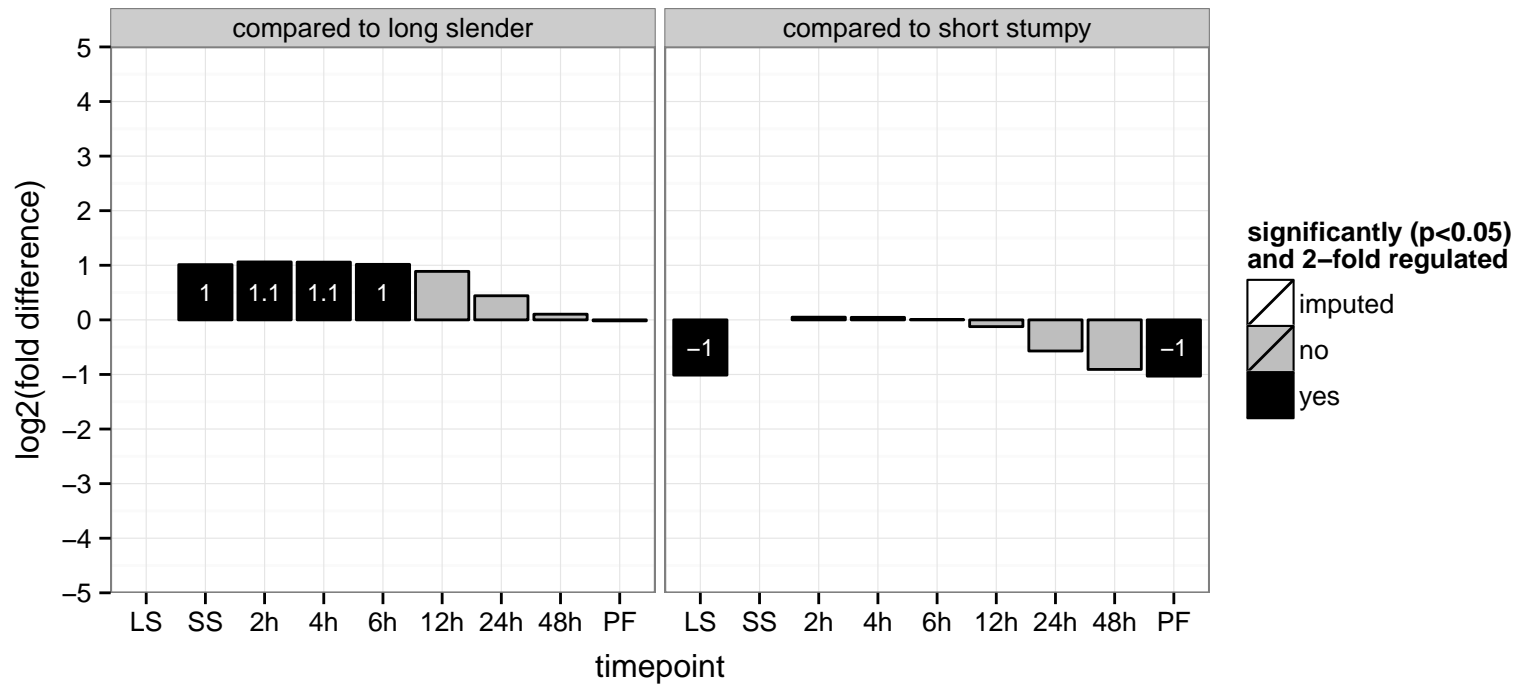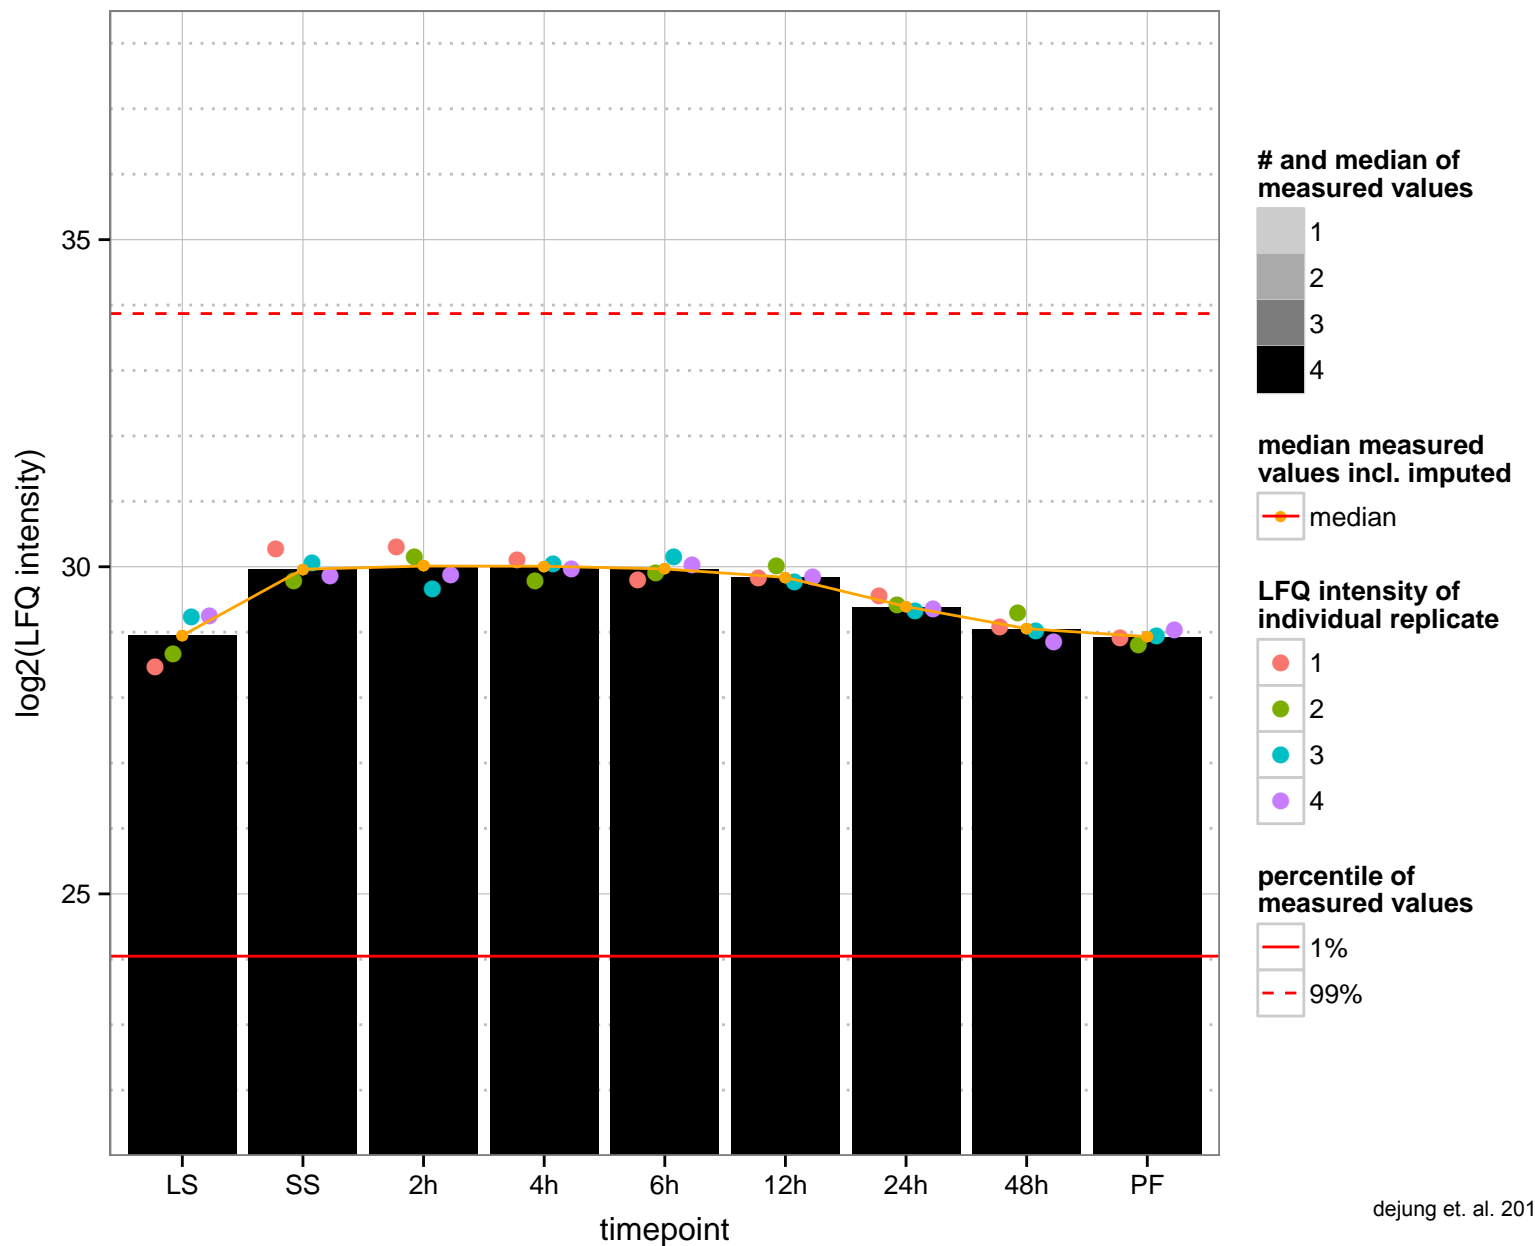

protein phosphatase 2C, putative  
 Tb927.6.1800  
 AGOF: phosphatase activity  
 AGOC: null  
 AGOP: dephosphorylation  
 PGO: catalytic activity  
 PGOC: null  
 PGOP: null

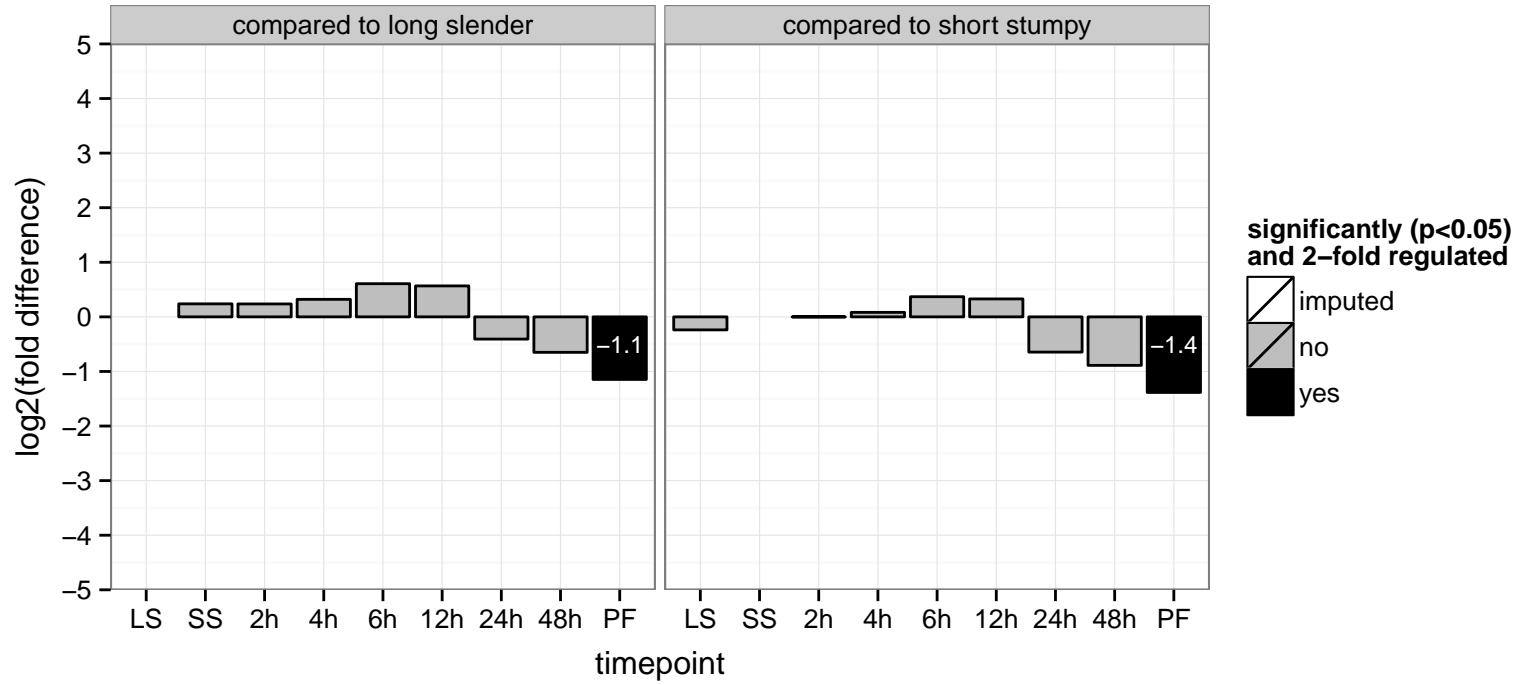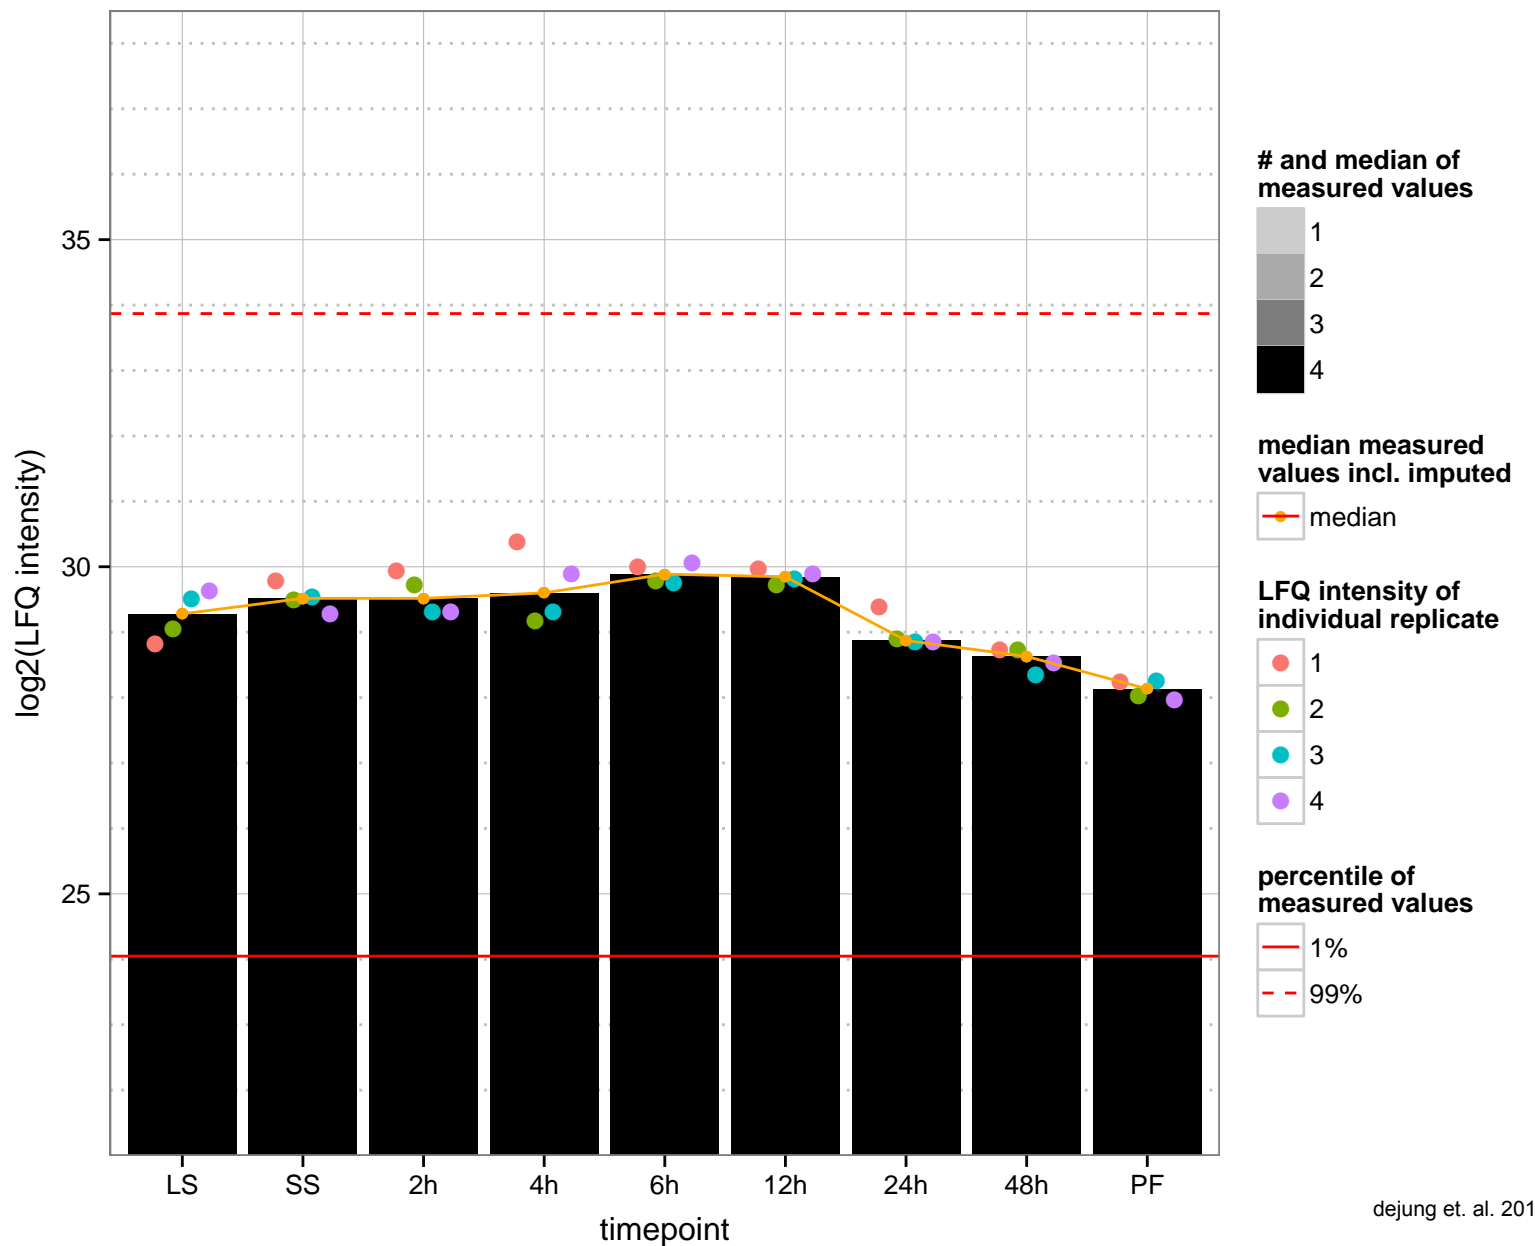

hypothetical protein, conserved  
 Tb927.6.2510  
 AGOF: null  
 AGOC: mitochondrion  
 AGOP: null  
 PGO: null  
 PGO: null  
 PGO: null

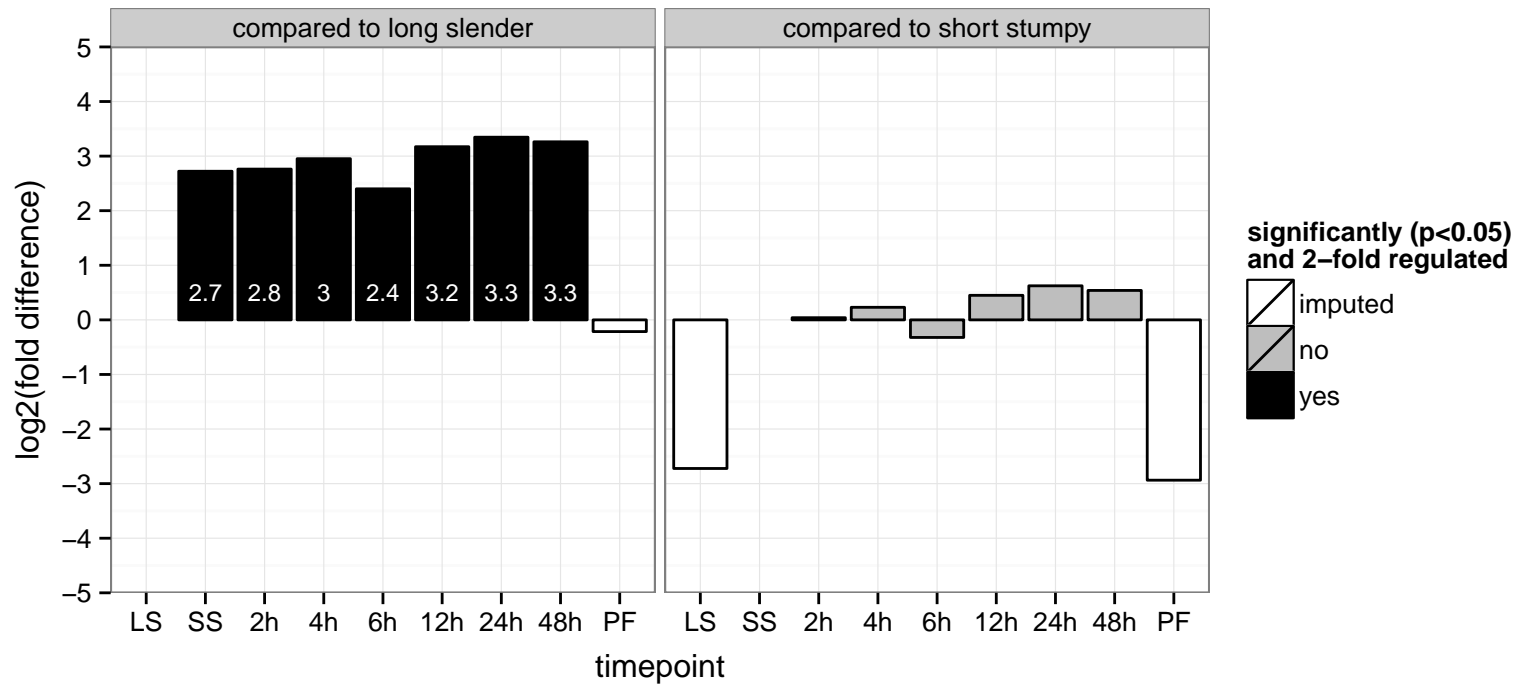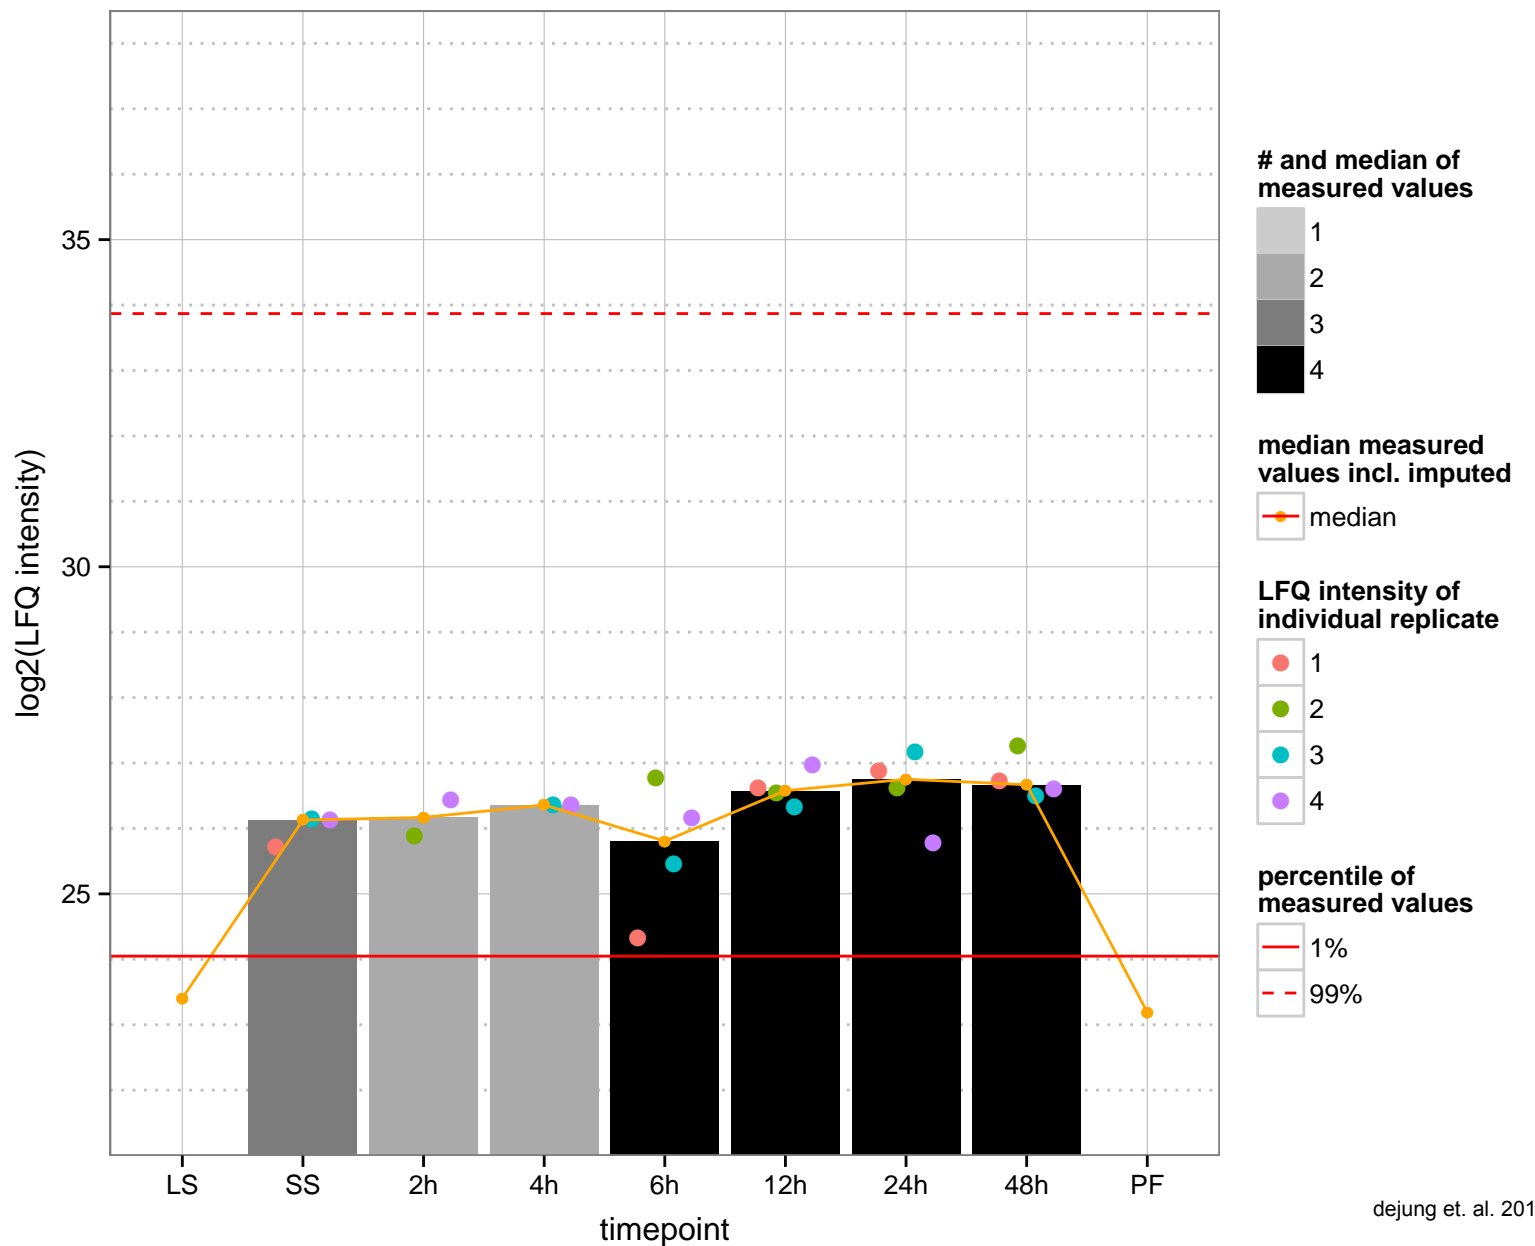



hypothetical protein, conserved  
 Tb927.6.2600  
 AGOF: null  
 AGOC: null  
 AGOP: null  
 PGO: null  
 PGOC: null  
 PGOP: null

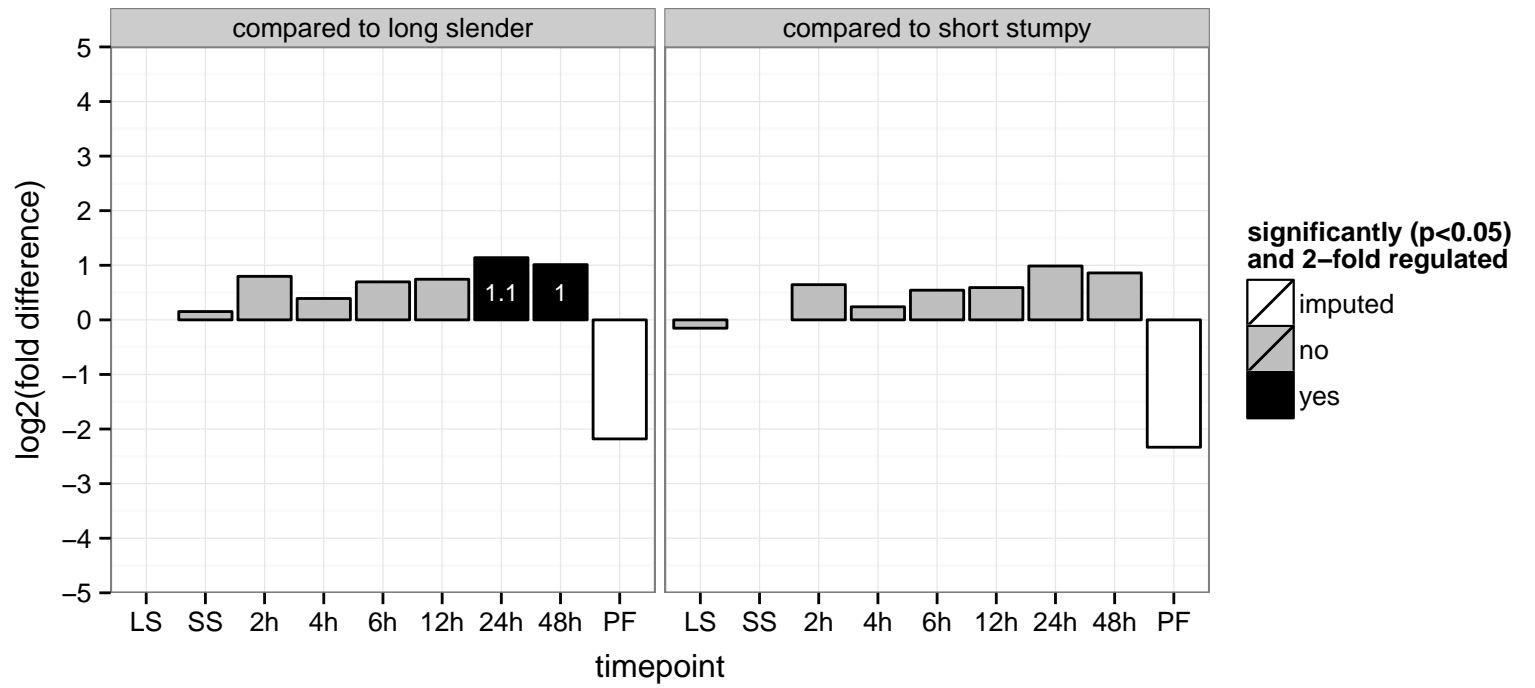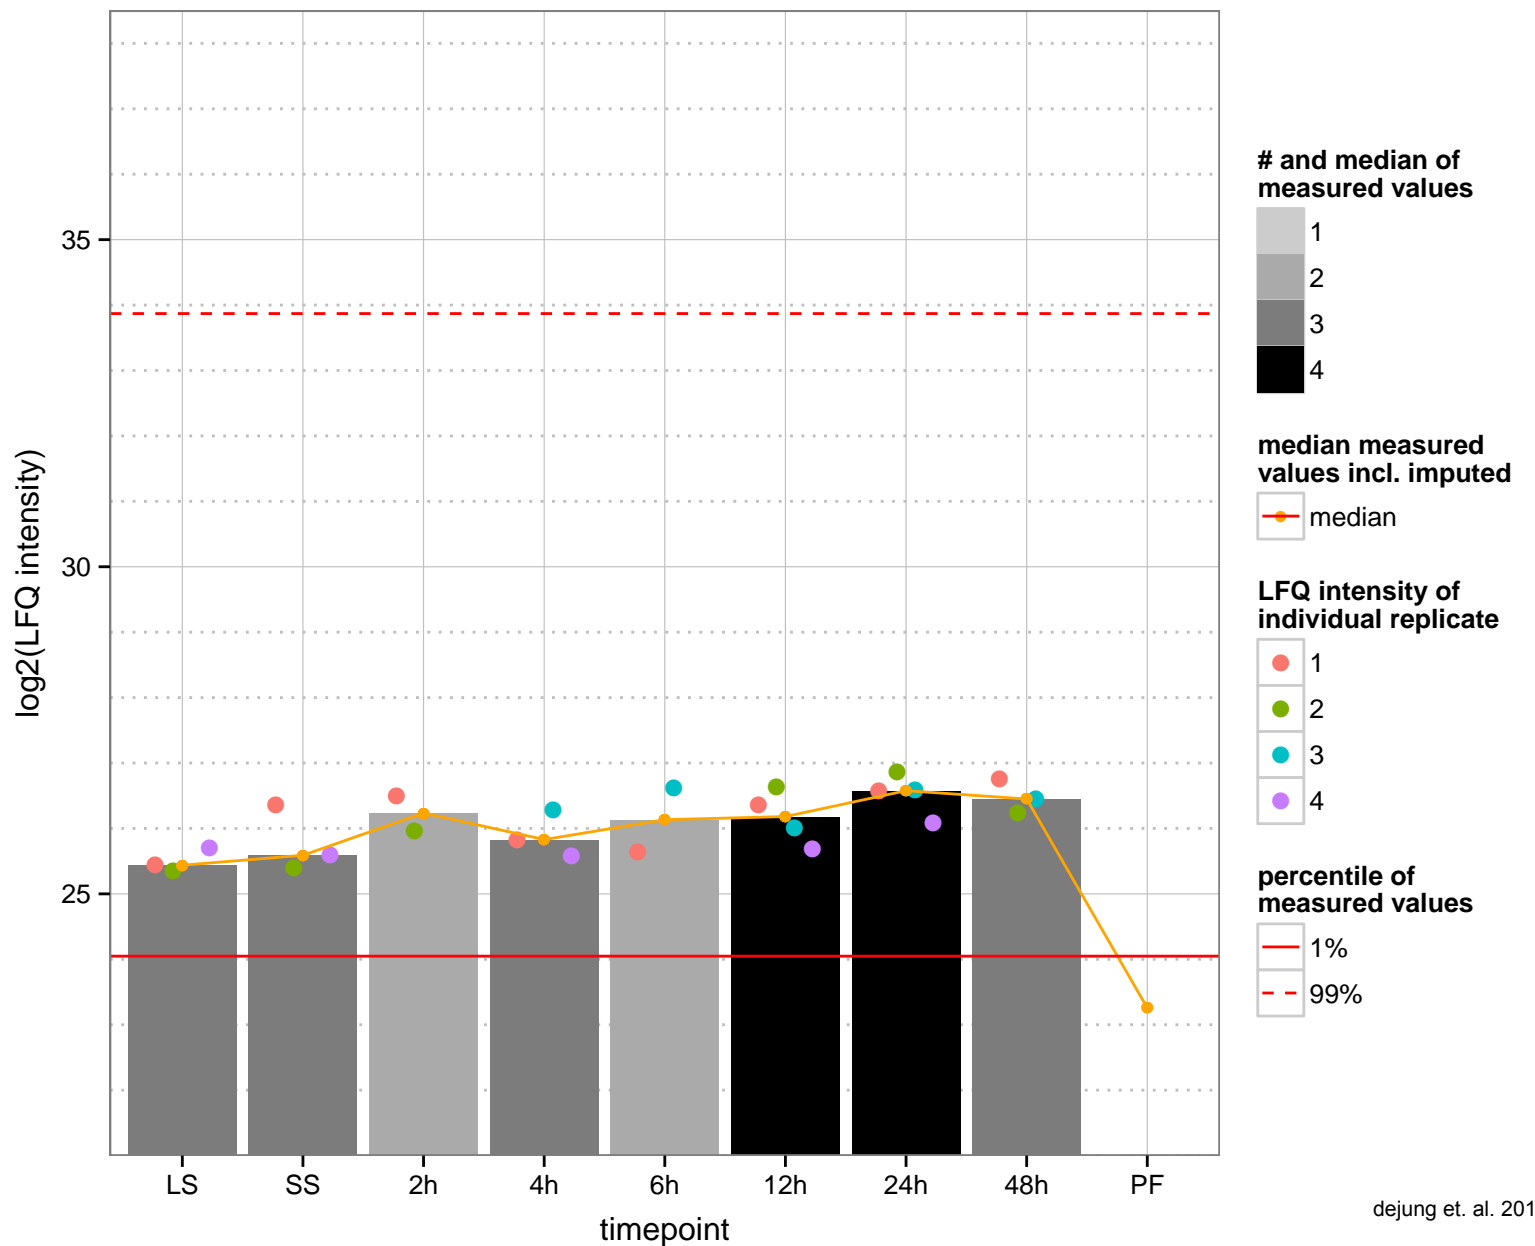

GTPase activating protein, conserved  
 Tb927.6.2830  
 AGOF: Rab GTPase activator activity  
 AGOC: intracellular  
 AGOP: regulation of Rab GTPase activity  
 PGO: Rab GTPase activator activity  
 PGO: intracellular  
 PGO: regulation of Rab GTPase activity

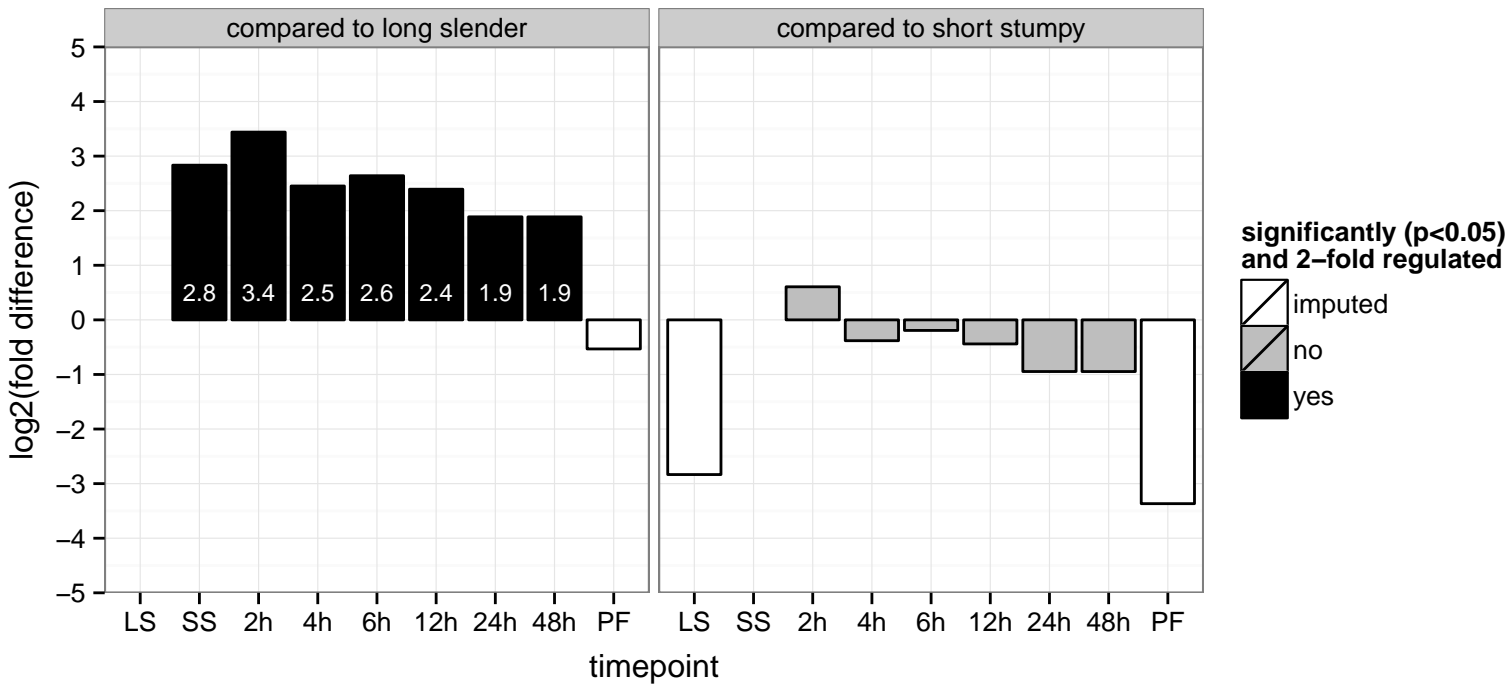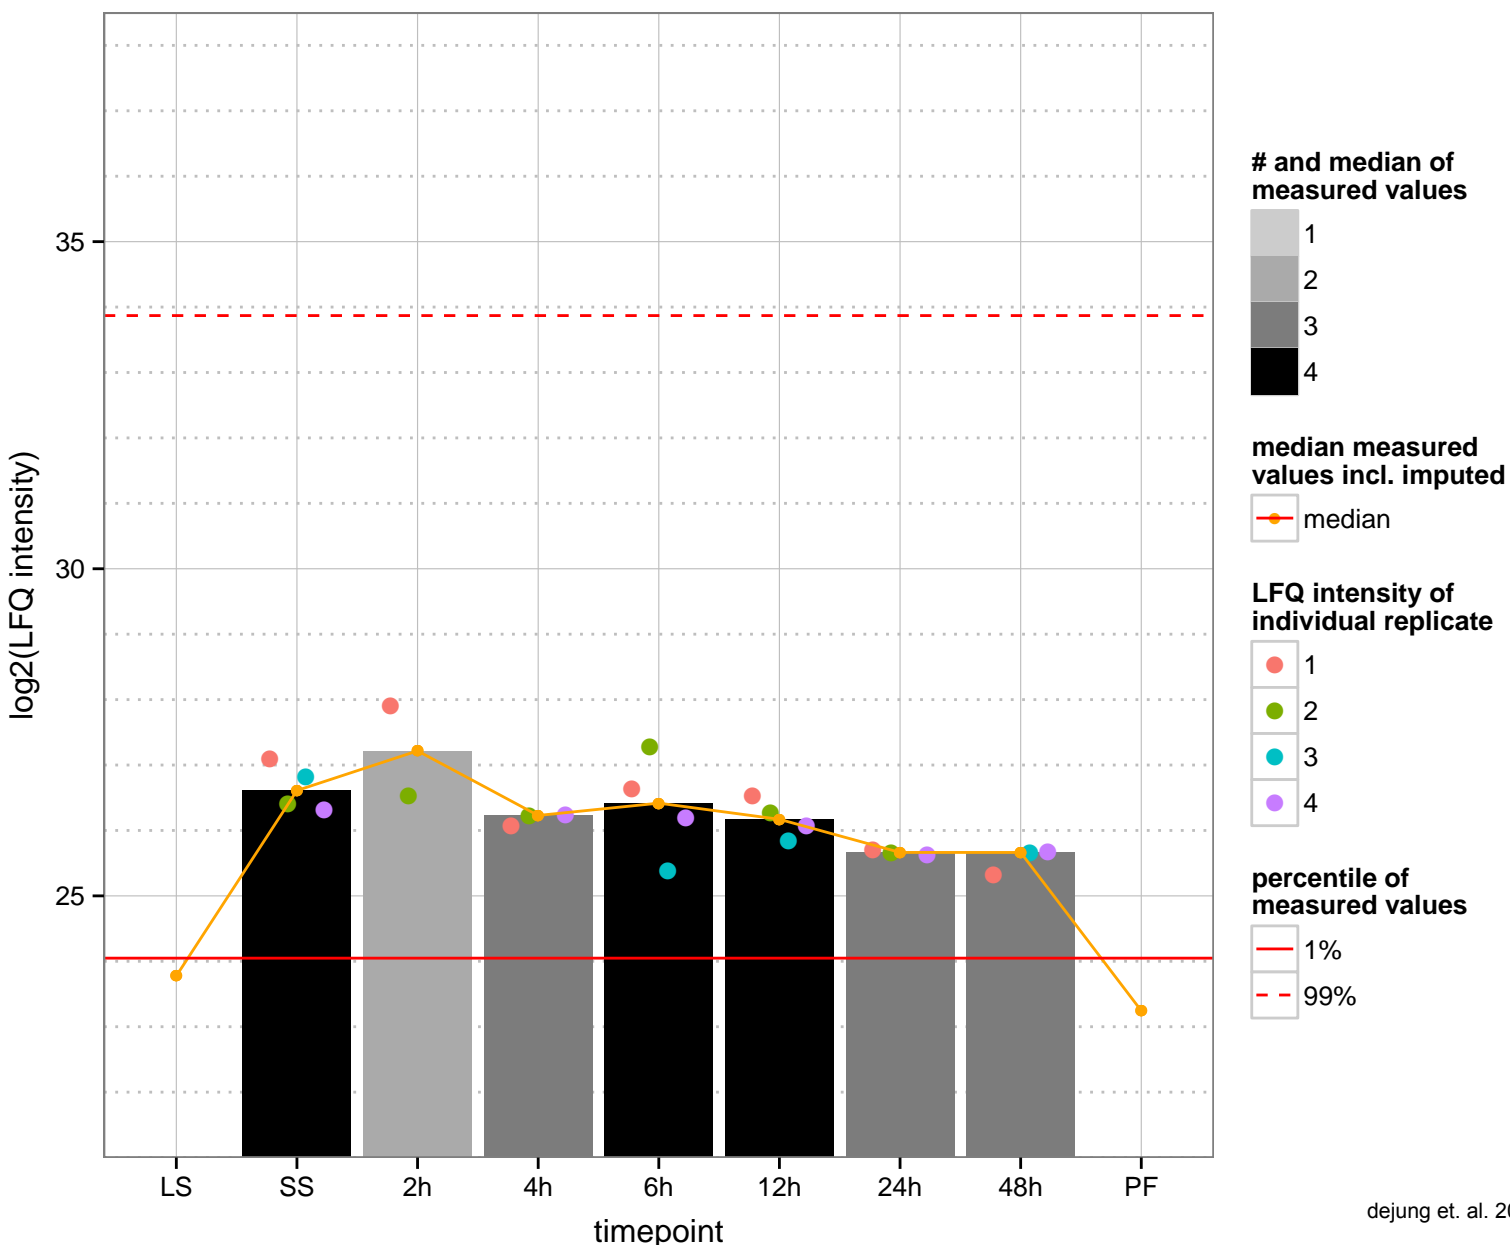

hypothetical protein, conserved  
 Tb927.6.2930  
 AGOF: ATP binding, nucleoside-triphosphatase activity  
 AGOC: null  
 AGOP: null  
 PGO: ATP binding, nucleoside-triphosphatase activity, nucleotide binding  
 PGOC: null  
 PGOP: null

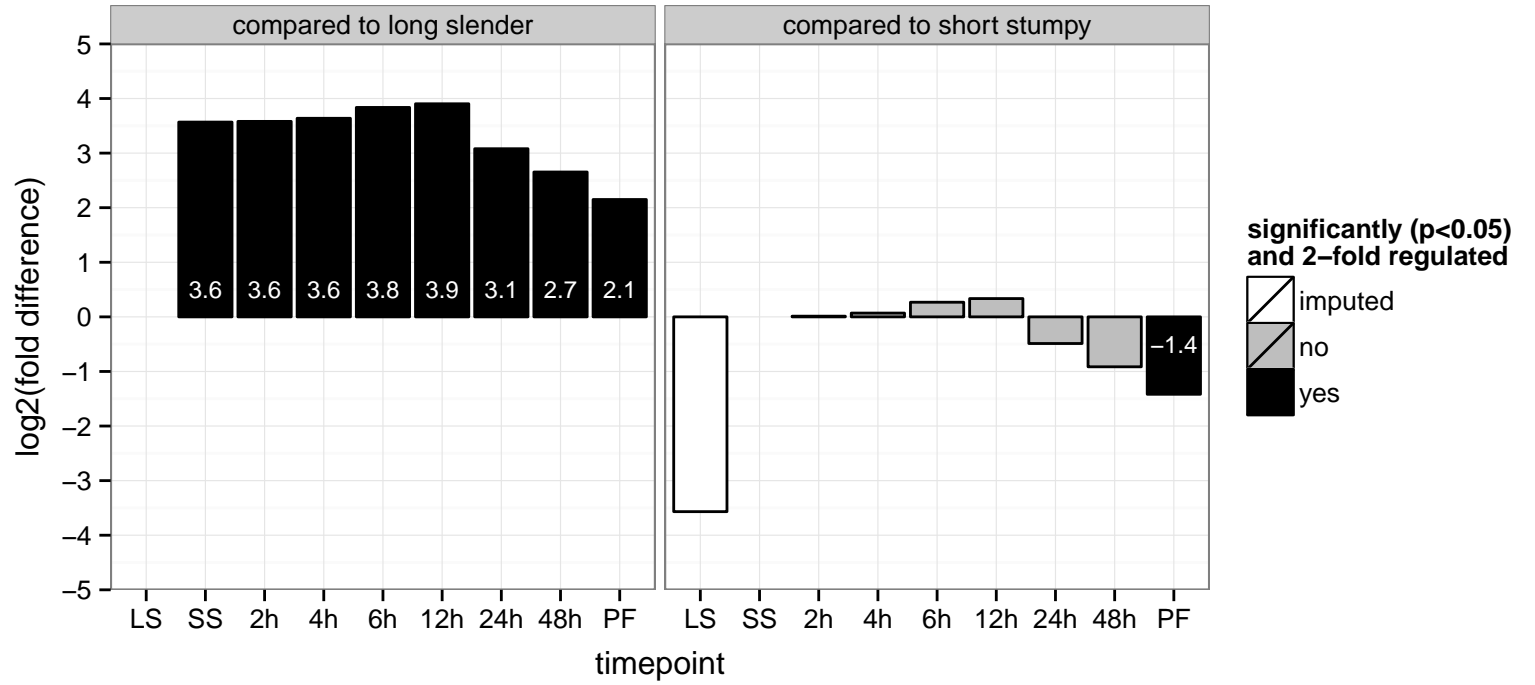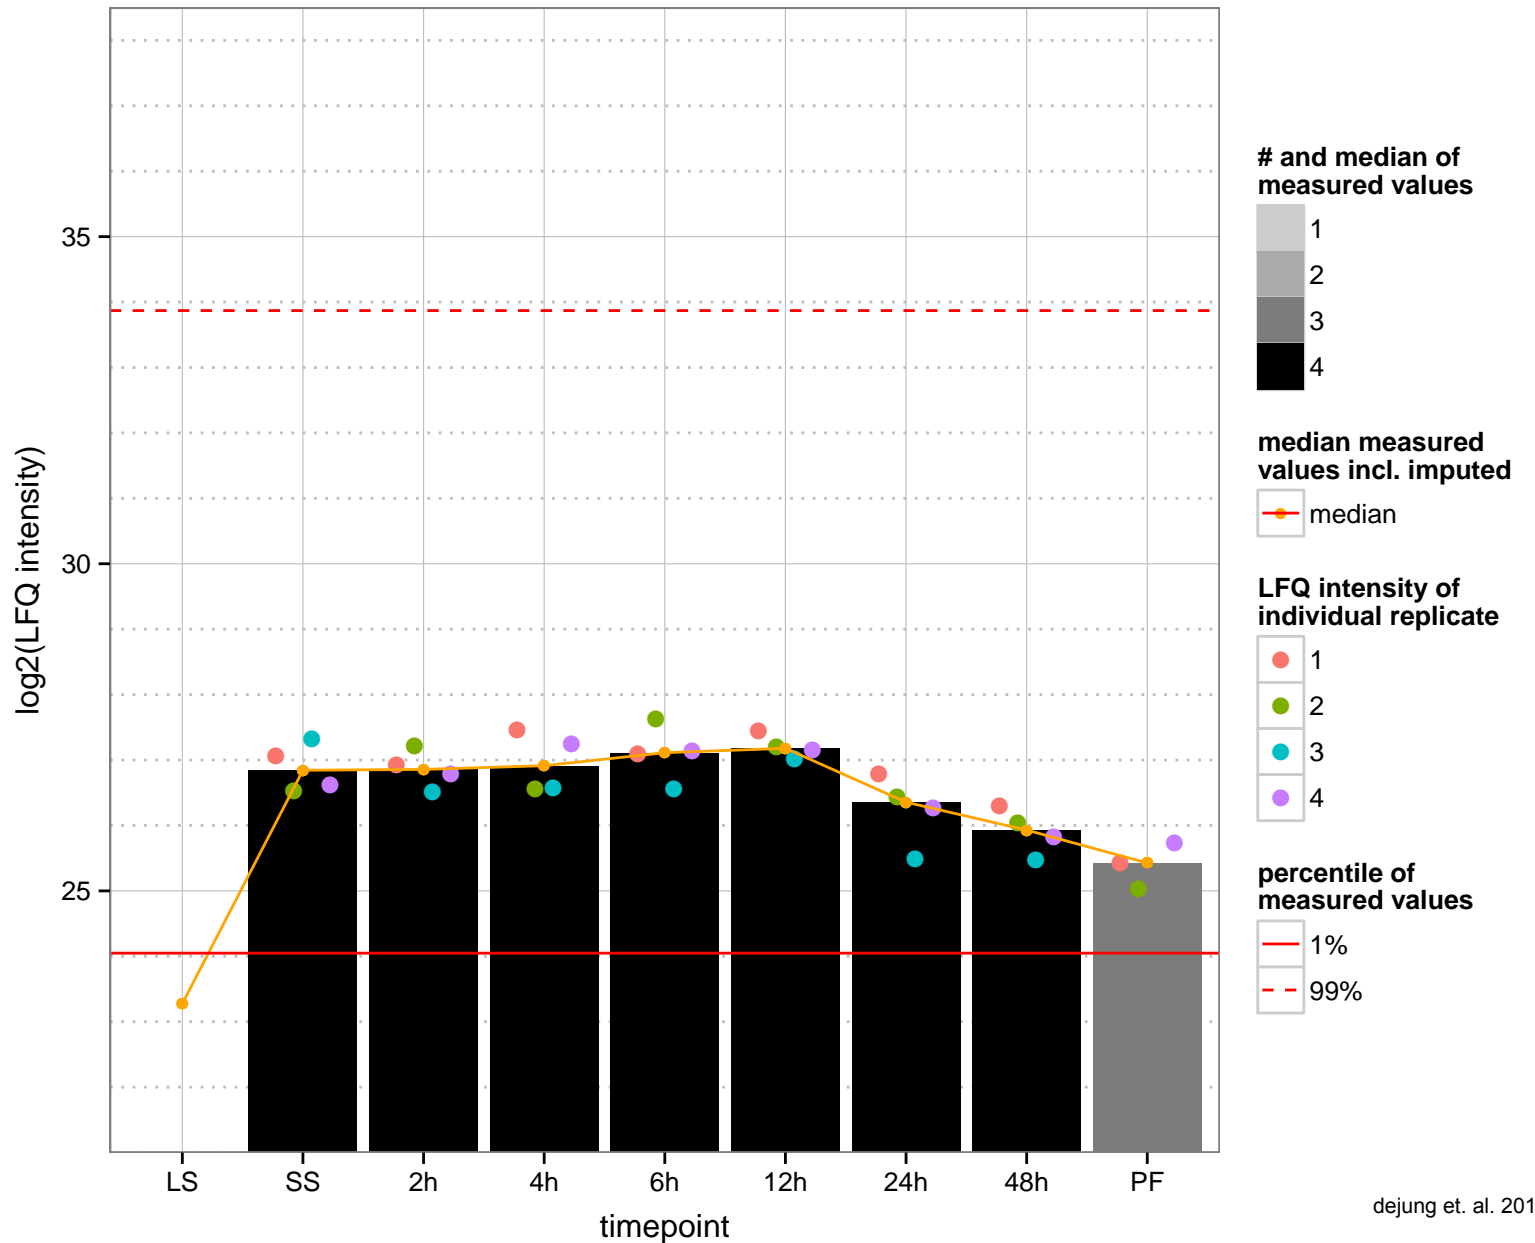

protein kinase, putative, cdc2-related kinase, putative (CRK11)

Tb927.6.3110

AGOF: ATP binding, protein kinase activity, protein serine/threonine kinase activity, protein tyrosine kinase activity

AGOC: null

AGOP: protein phosphorylation

PGOF: ATP binding, protein kinase activity, transferase activity, transferring phosphorus-containing groups

PGOC: null

PGOP: protein phosphorylation

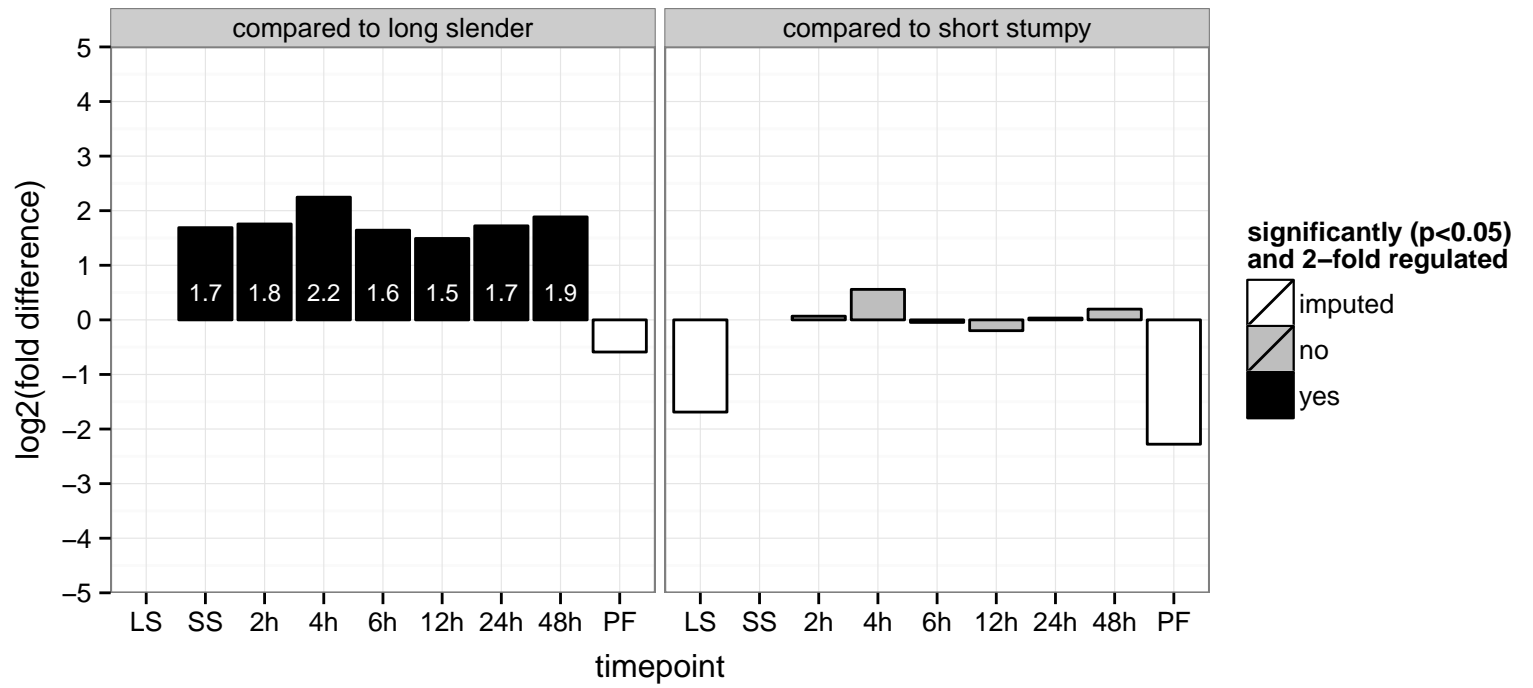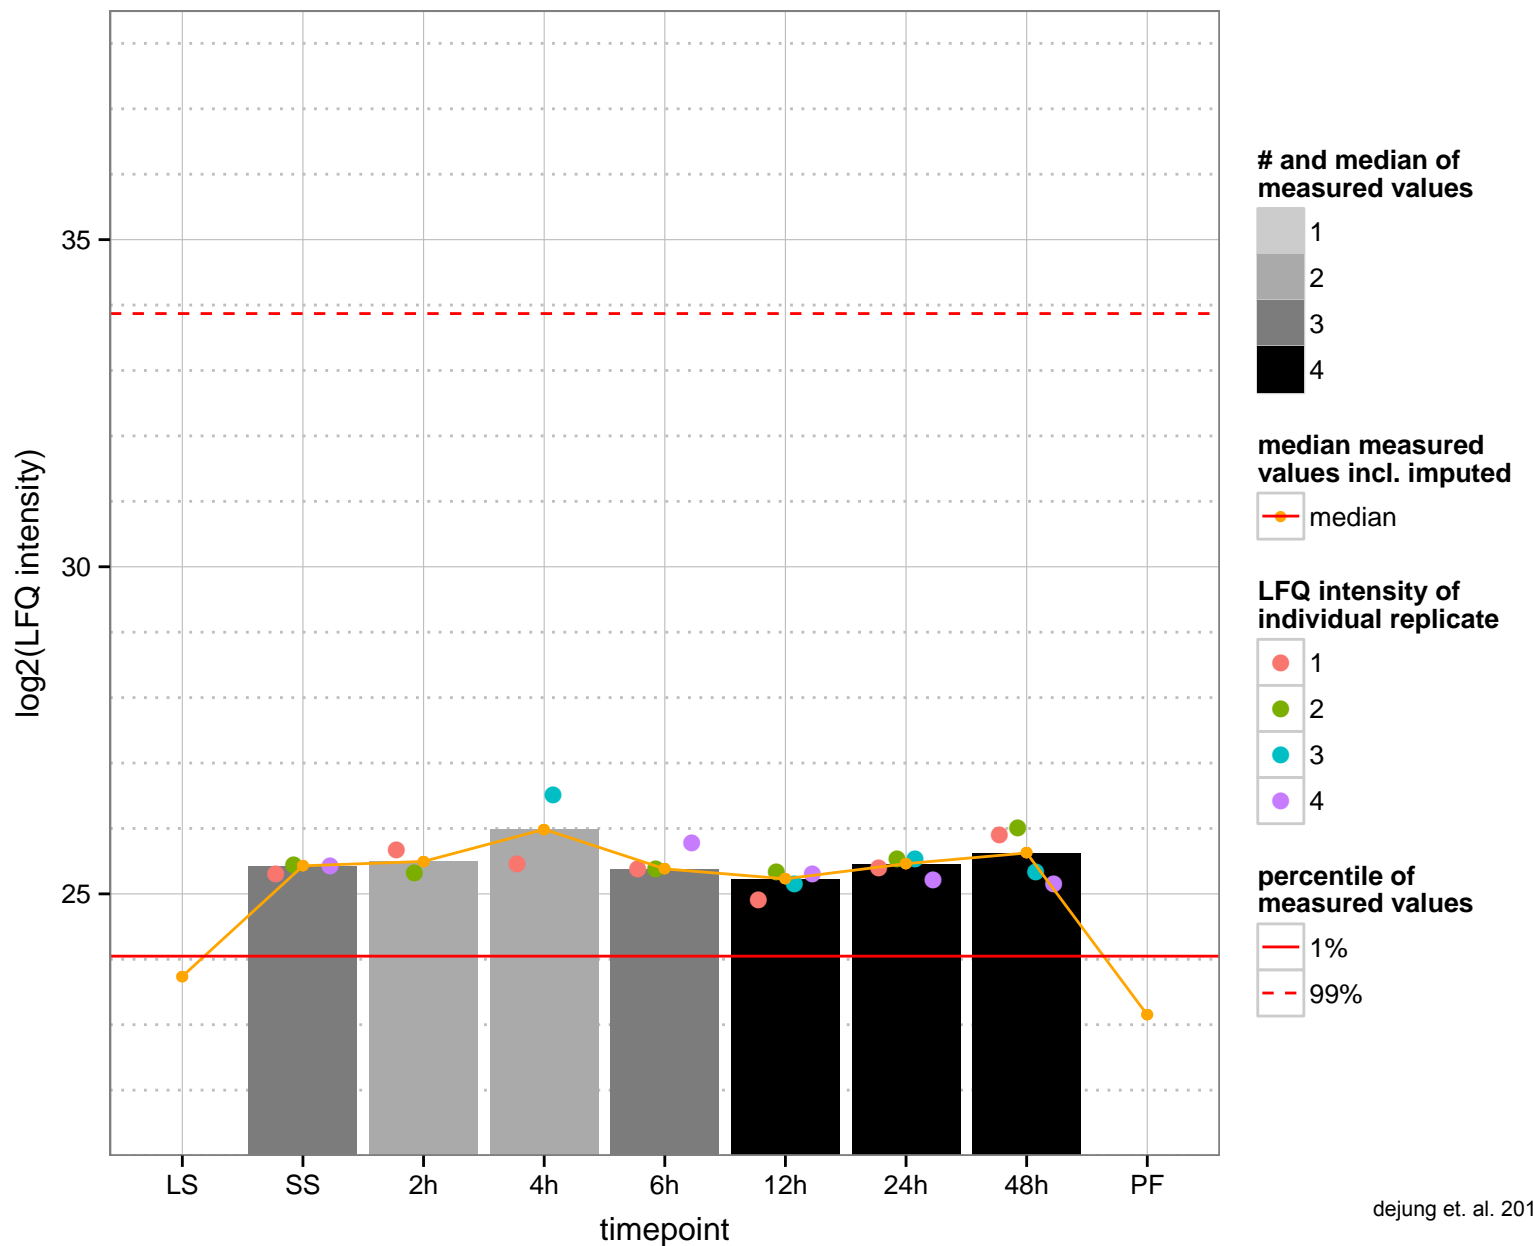

hypothetical protein, conserved  
 Tb927.6.3140  
 AGOF: null  
 AGOC: null  
 AGOP: null  
 PGO: protein binding  
 PGO: null  
 PGO: null

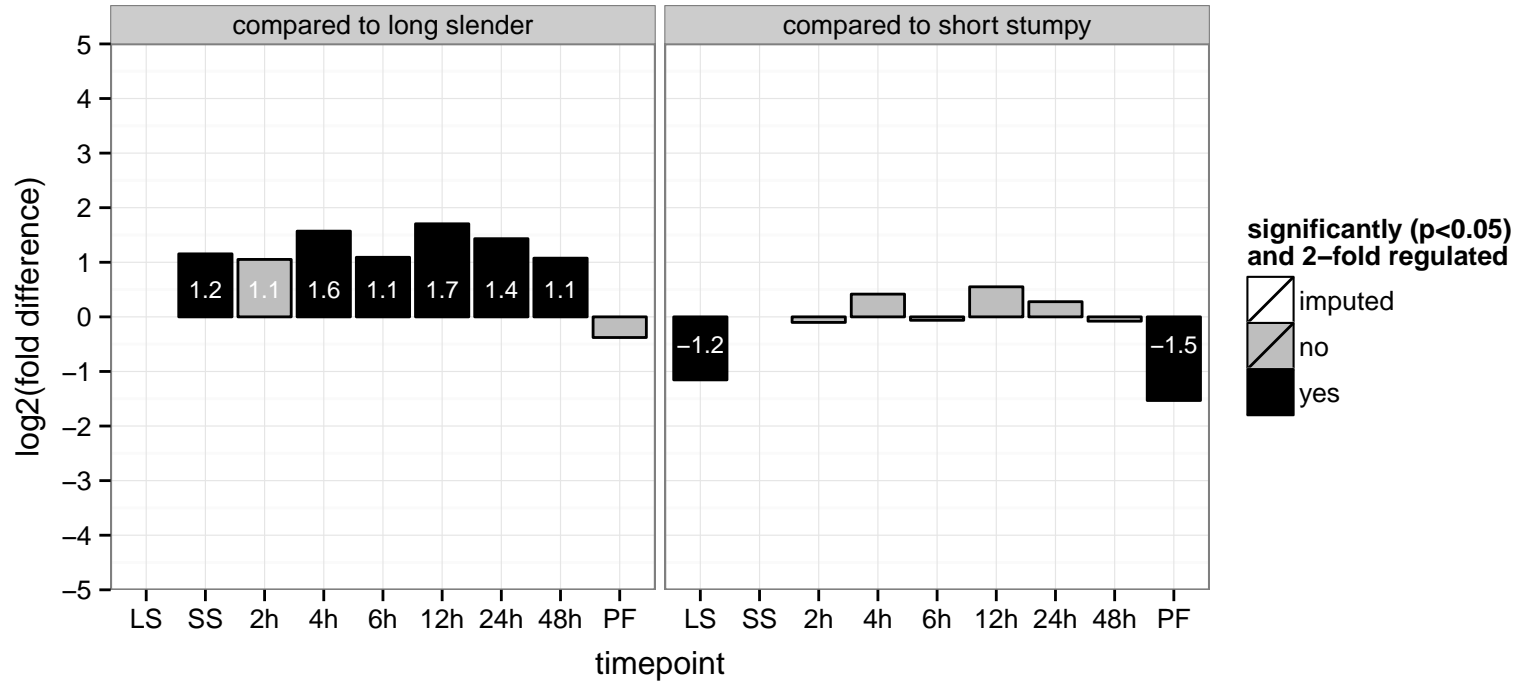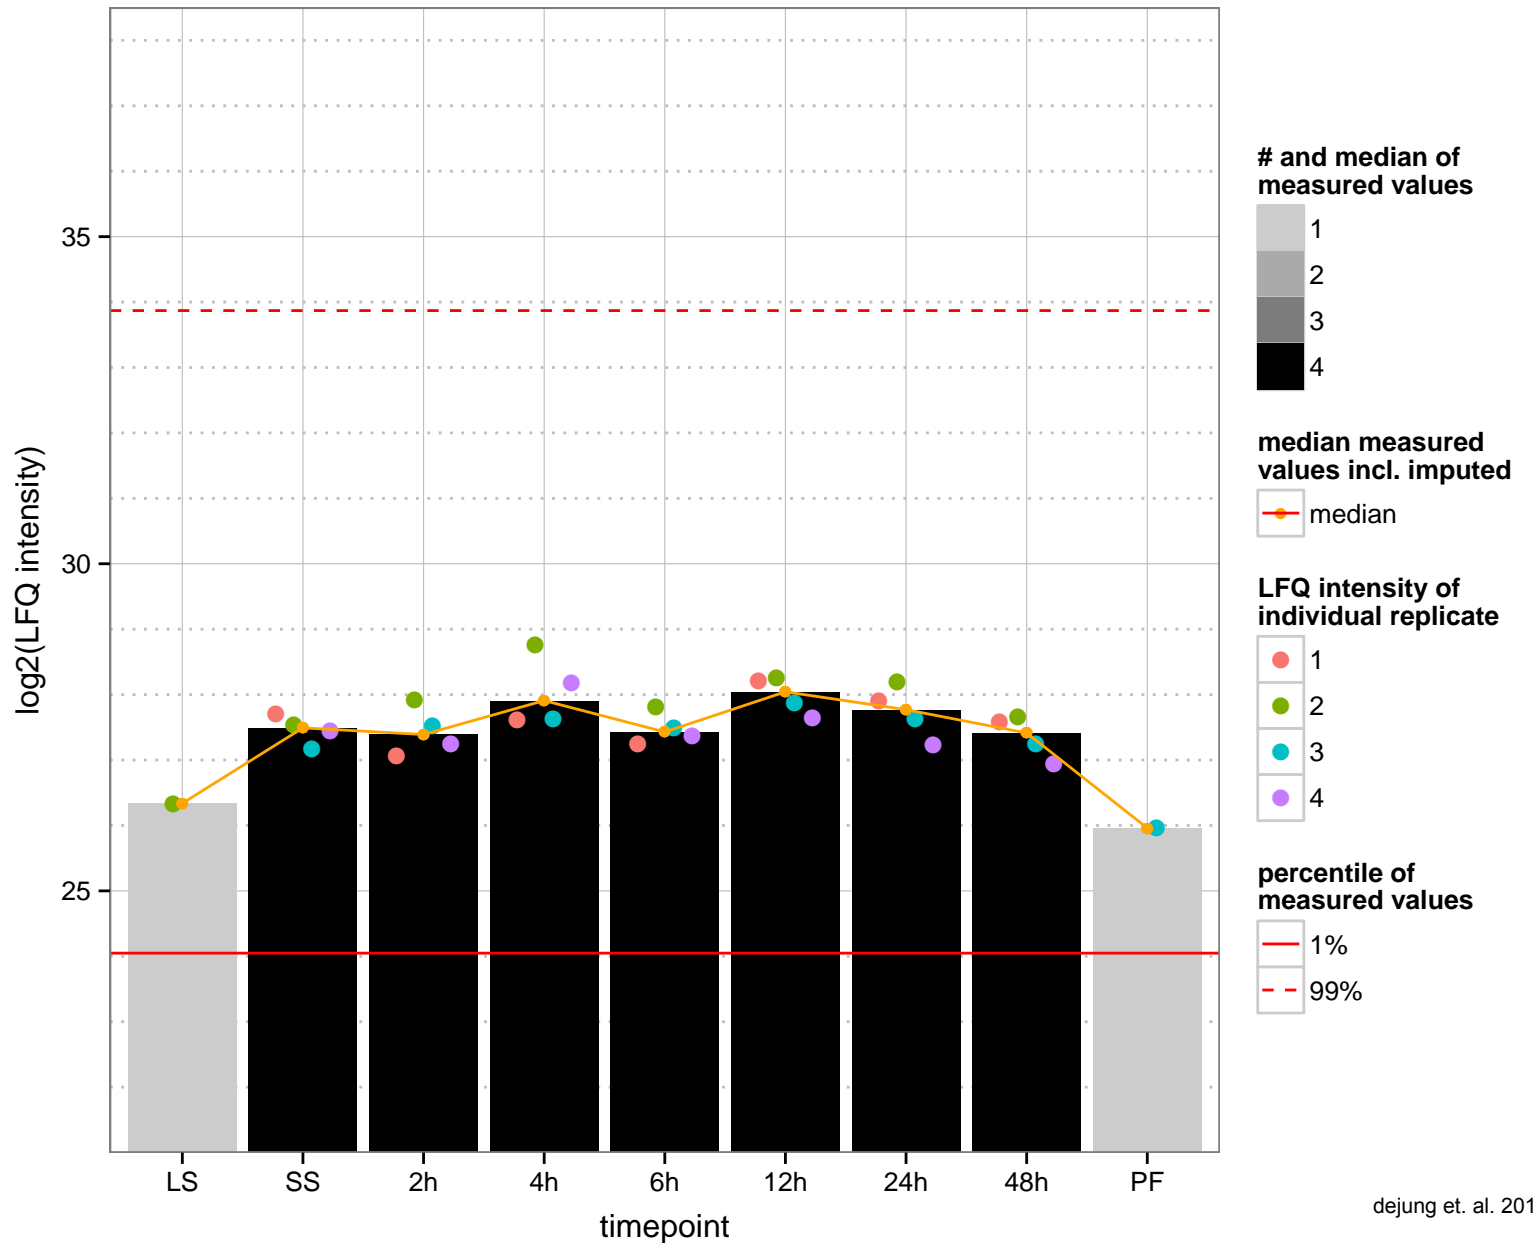

valosin-containing protein homolog, putative, AAA ATPase  
 Tb927.6.3790  
 AGOF: ATP binding, nucleoside-triphosphatase activity  
 AGOC: null  
 AGOP: null  
 PGO: ATP binding, nucleoside-triphosphatase activity, nucleotide binding  
 PGOC: null  
 PGOP: null

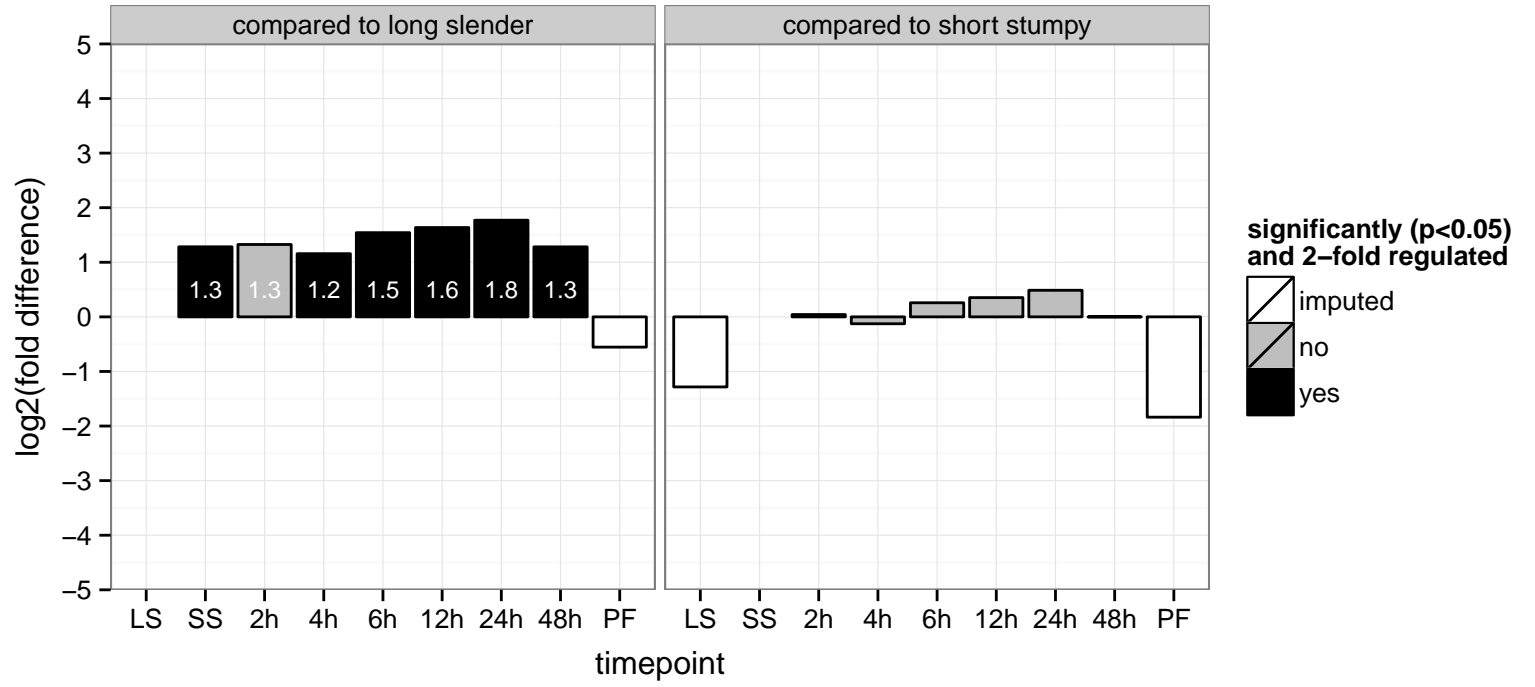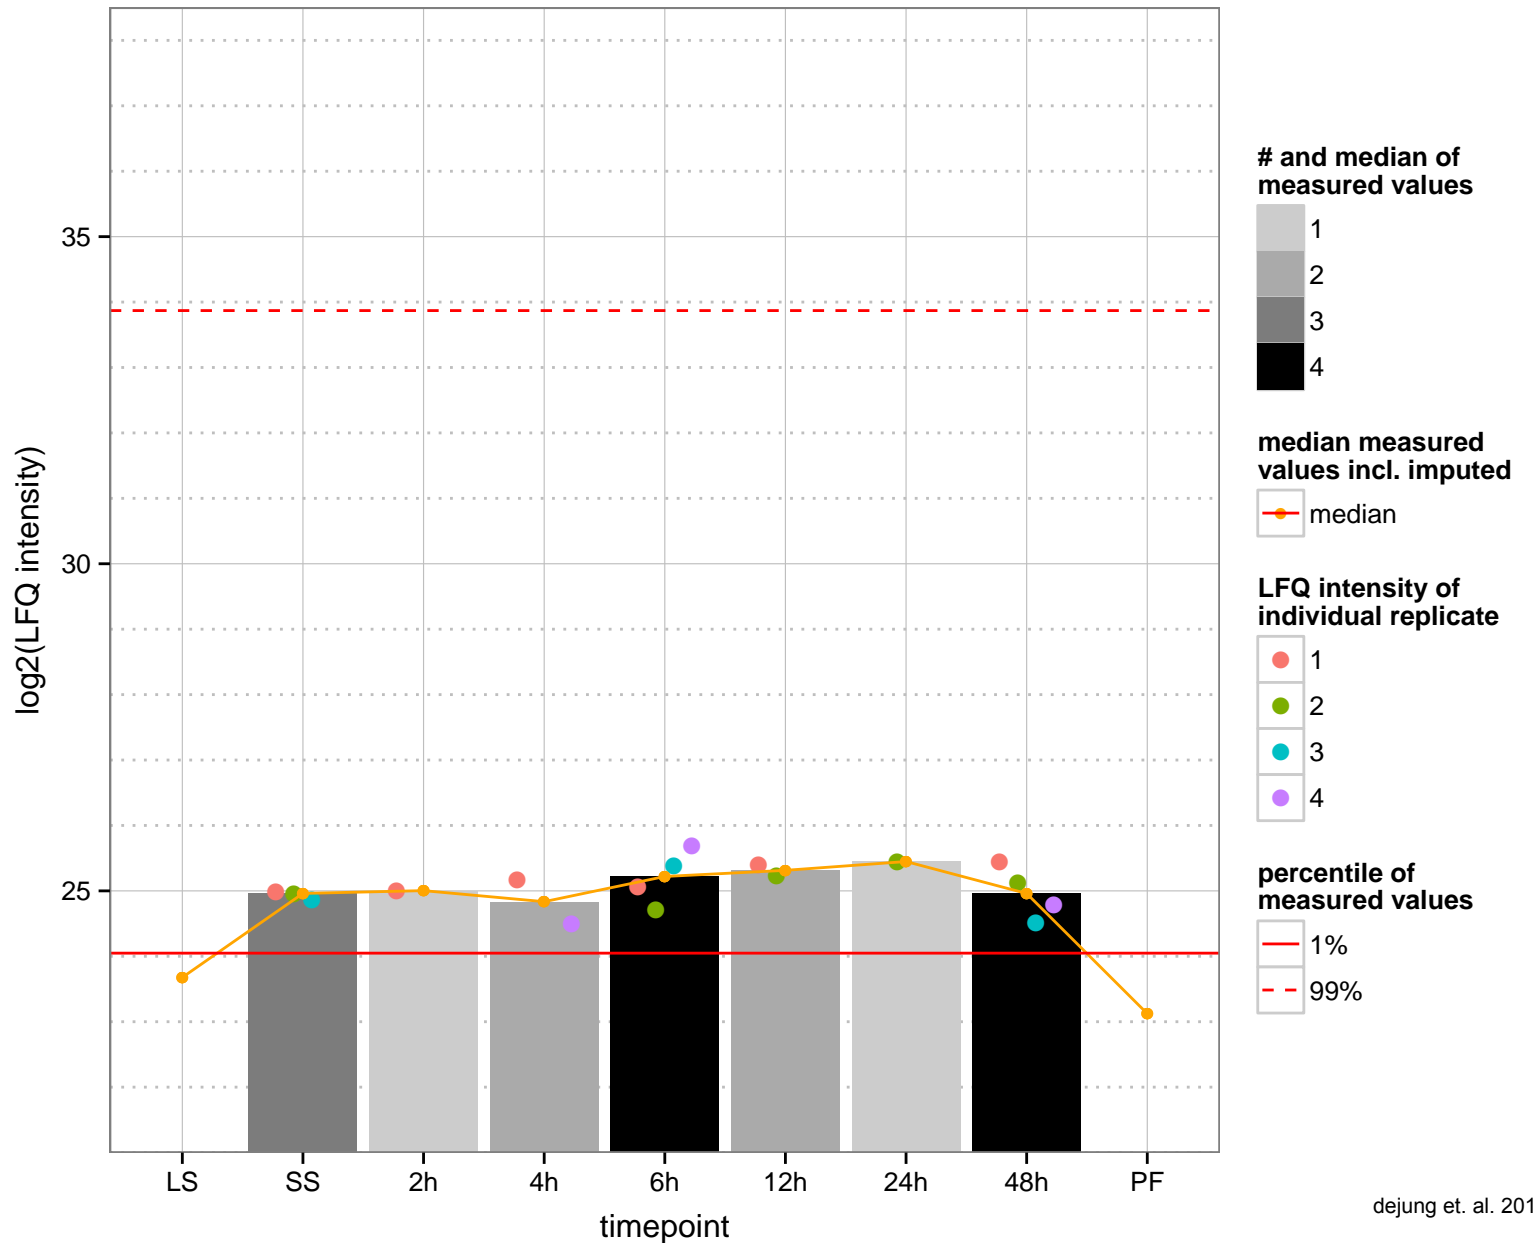

hypothetical protein, conserved  
 Tb927.6.3820  
 AGOF: null  
 AGOC: null  
 AGOP: null  
 PGOF: null  
 PGOC: null  
 PGOP: null

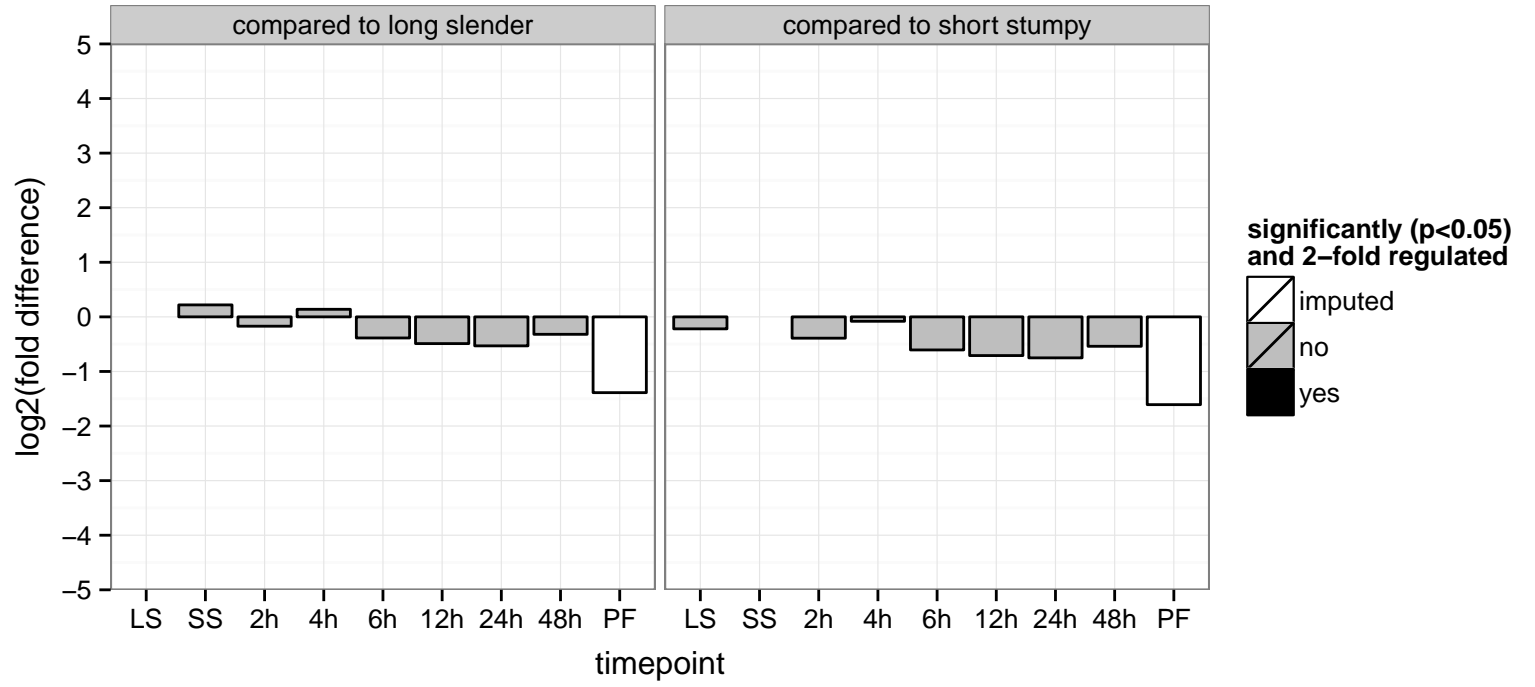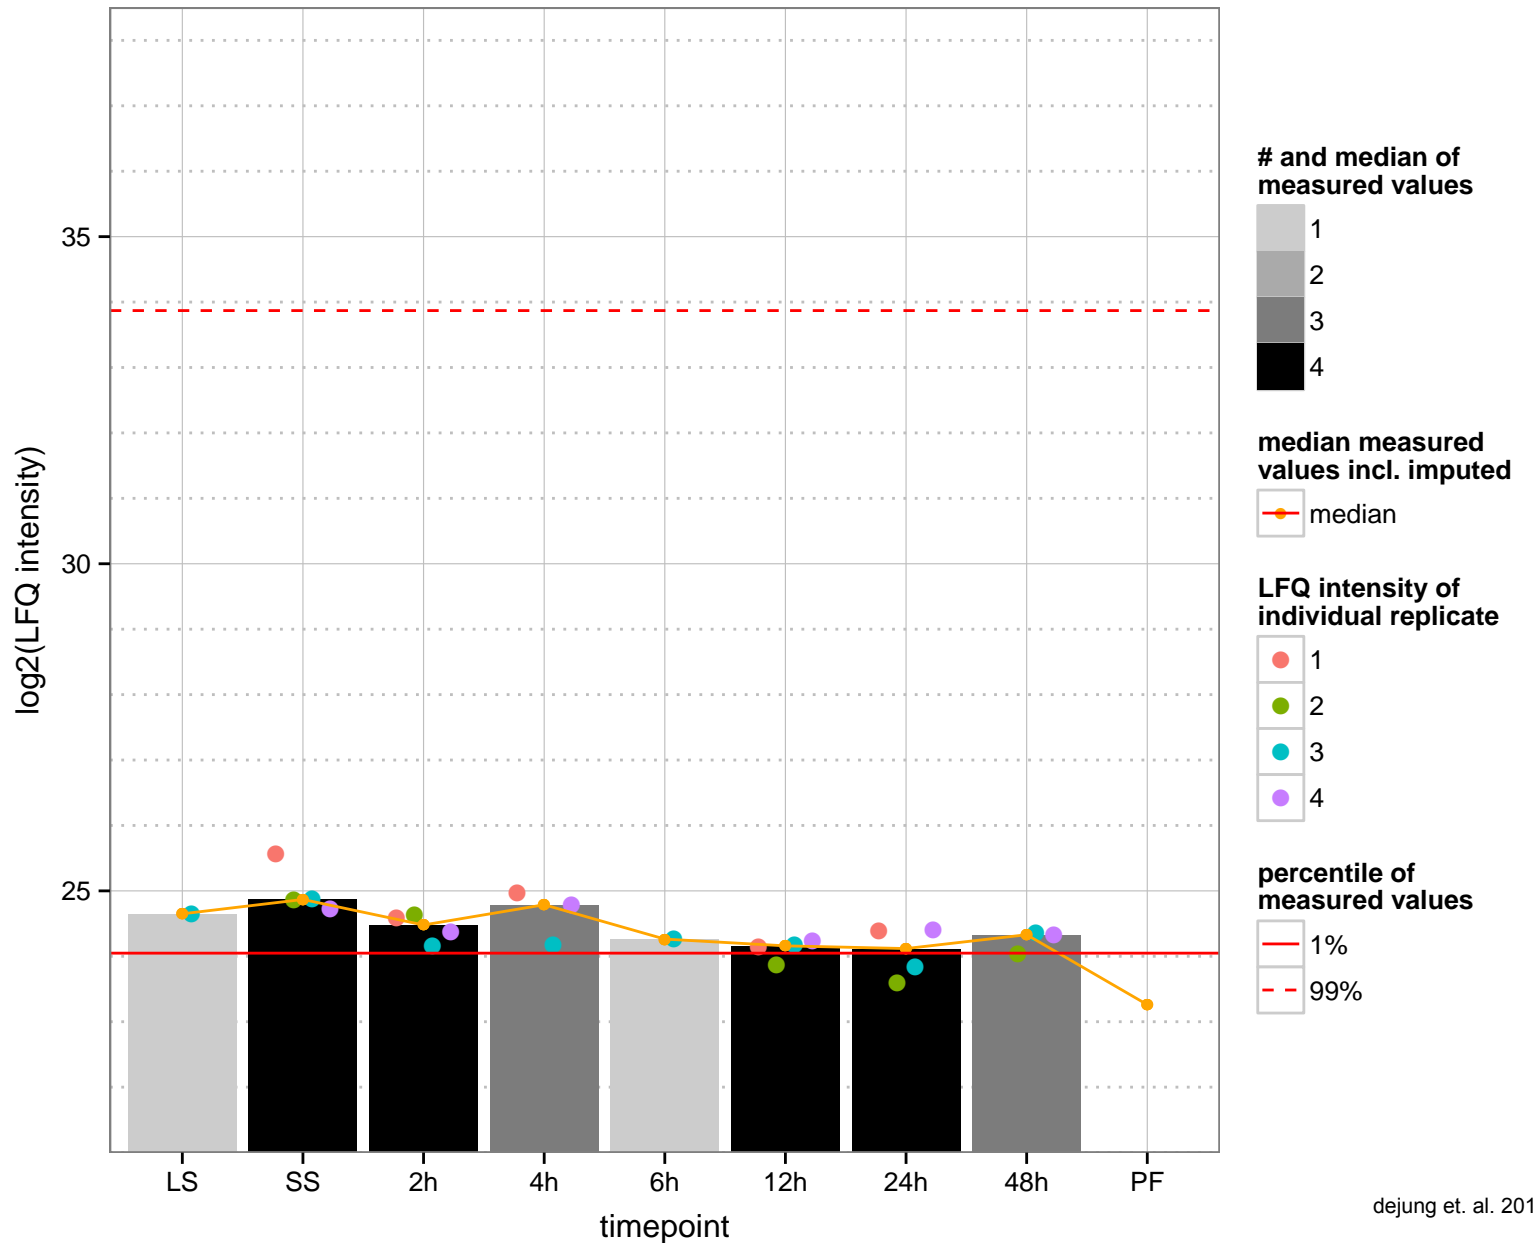

hypothetical protein, conserved  
 Tb927.6.410  
 AGOF: null  
 AGOC: null  
 AGOP: null  
 PGO: null  
 PGOC: null  
 PGOP: null

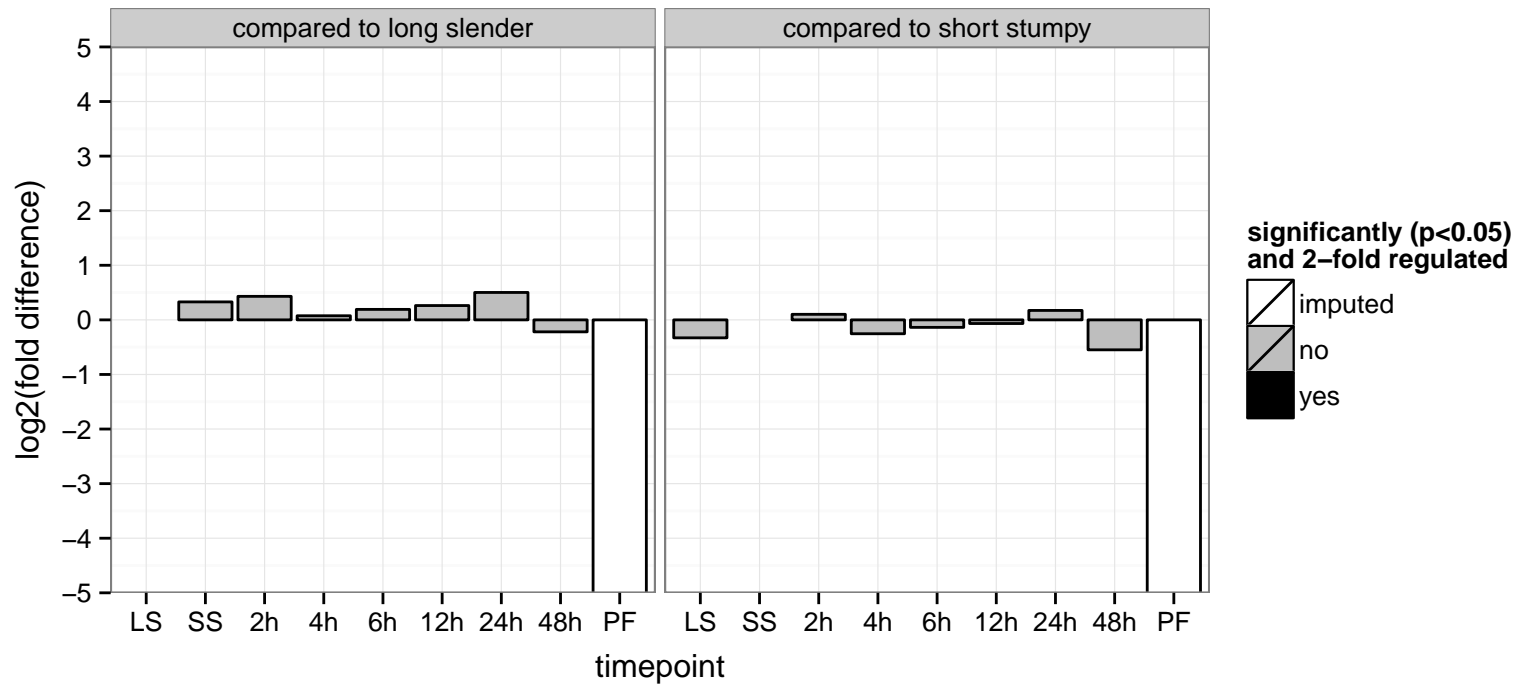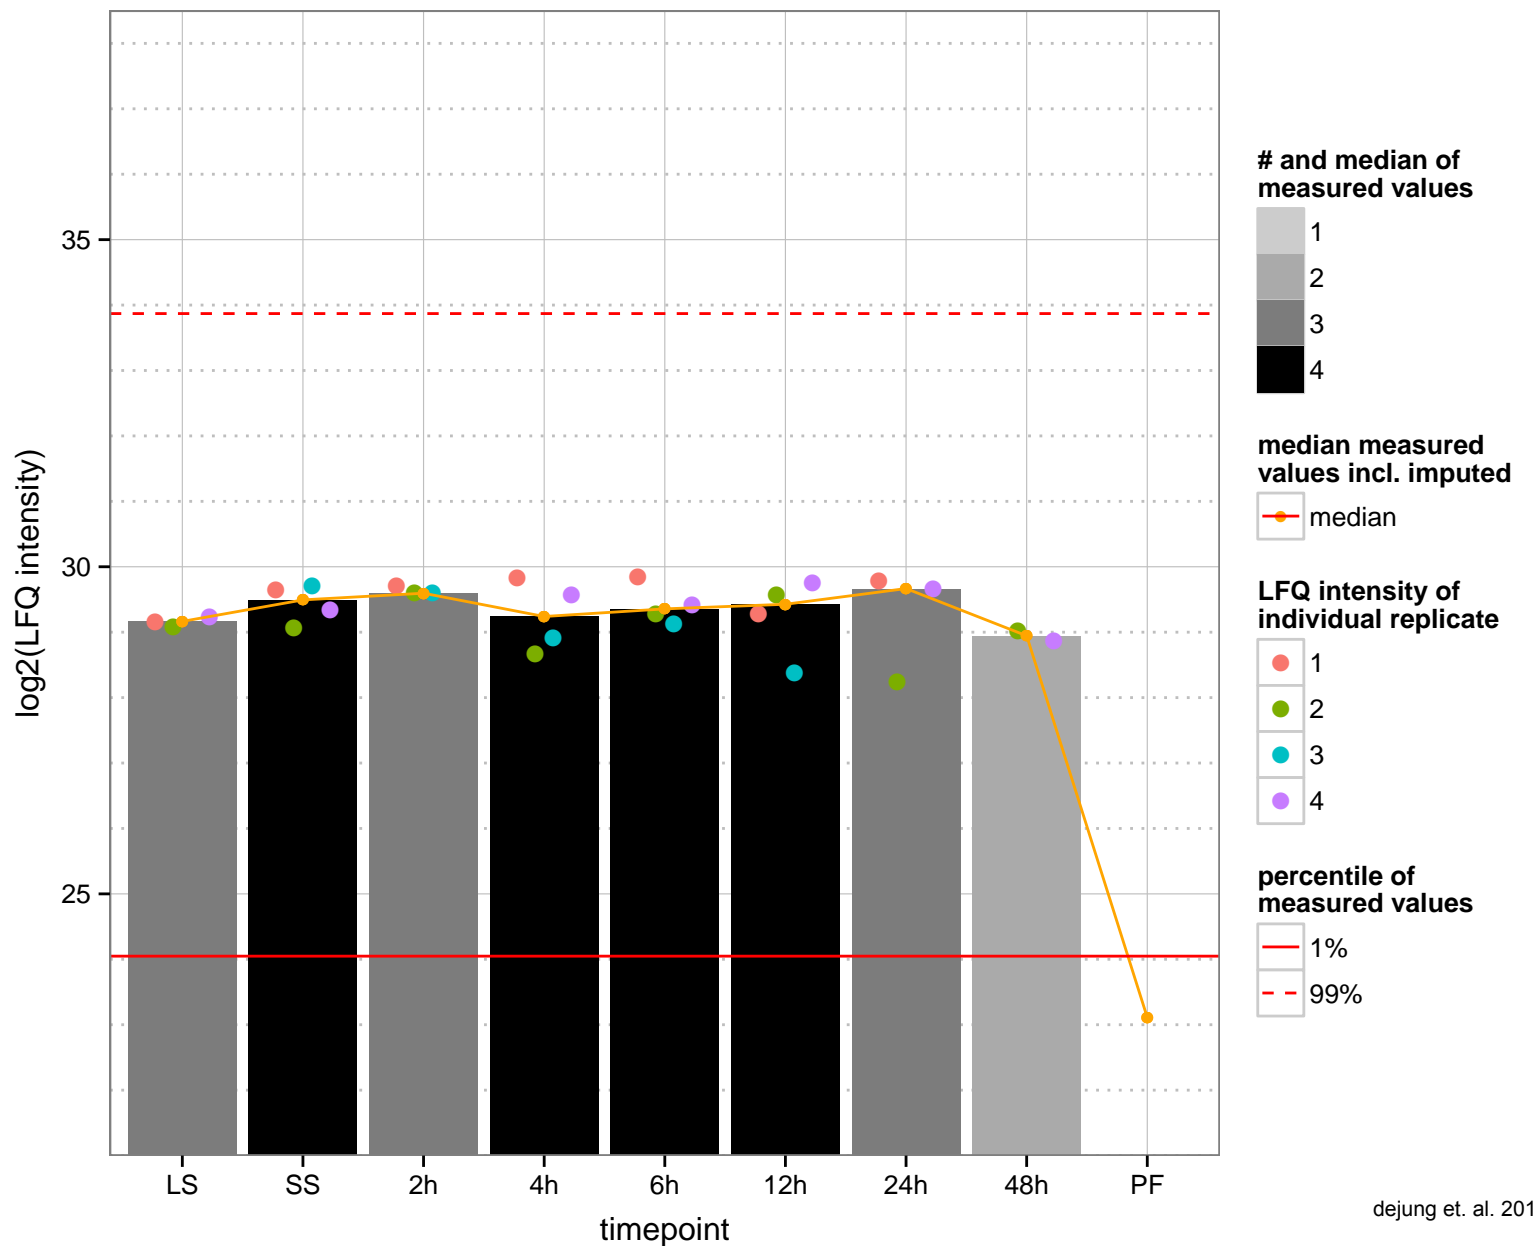



hypothetical protein, conserved  
 Tb927.6.4180  
 AGOF: null  
 AGOC: null  
 AGOP: null  
 PGOF: null  
 PGOE: null  
 PGOP: null

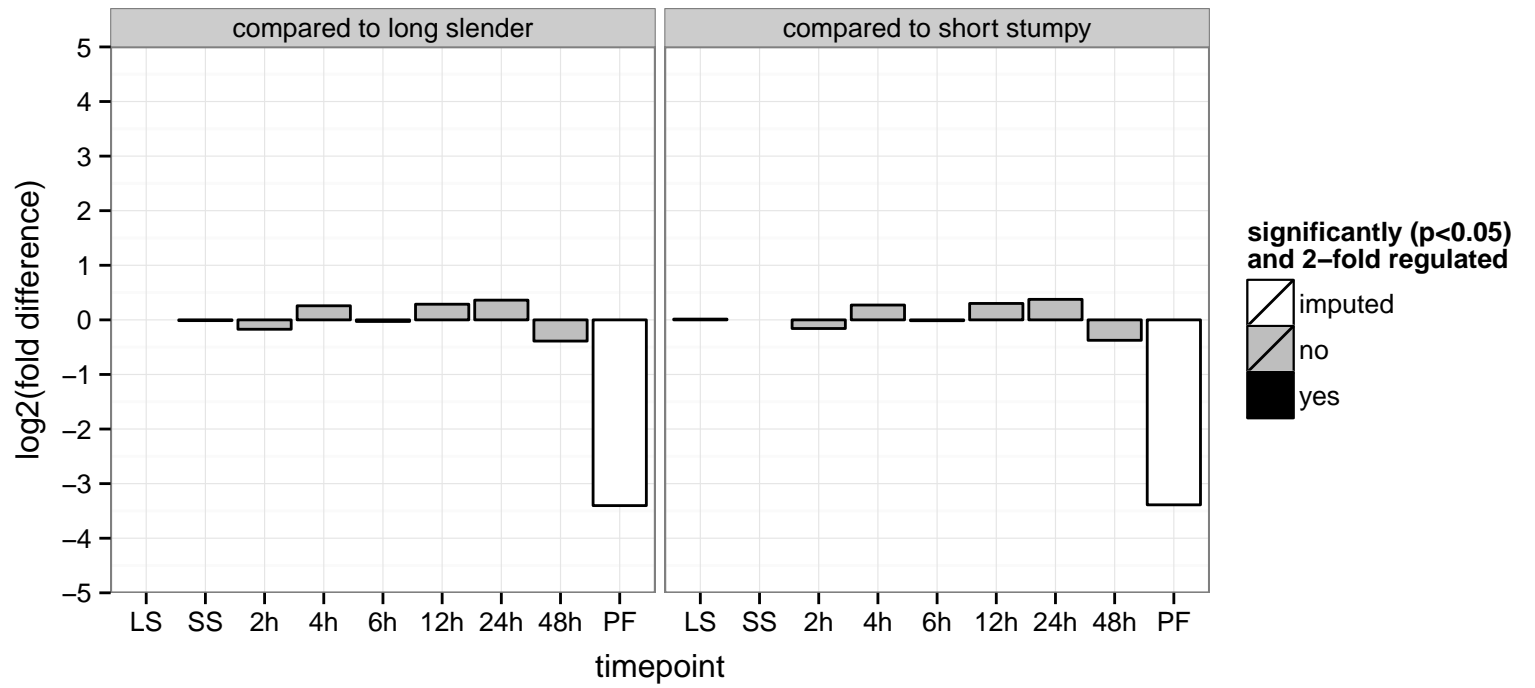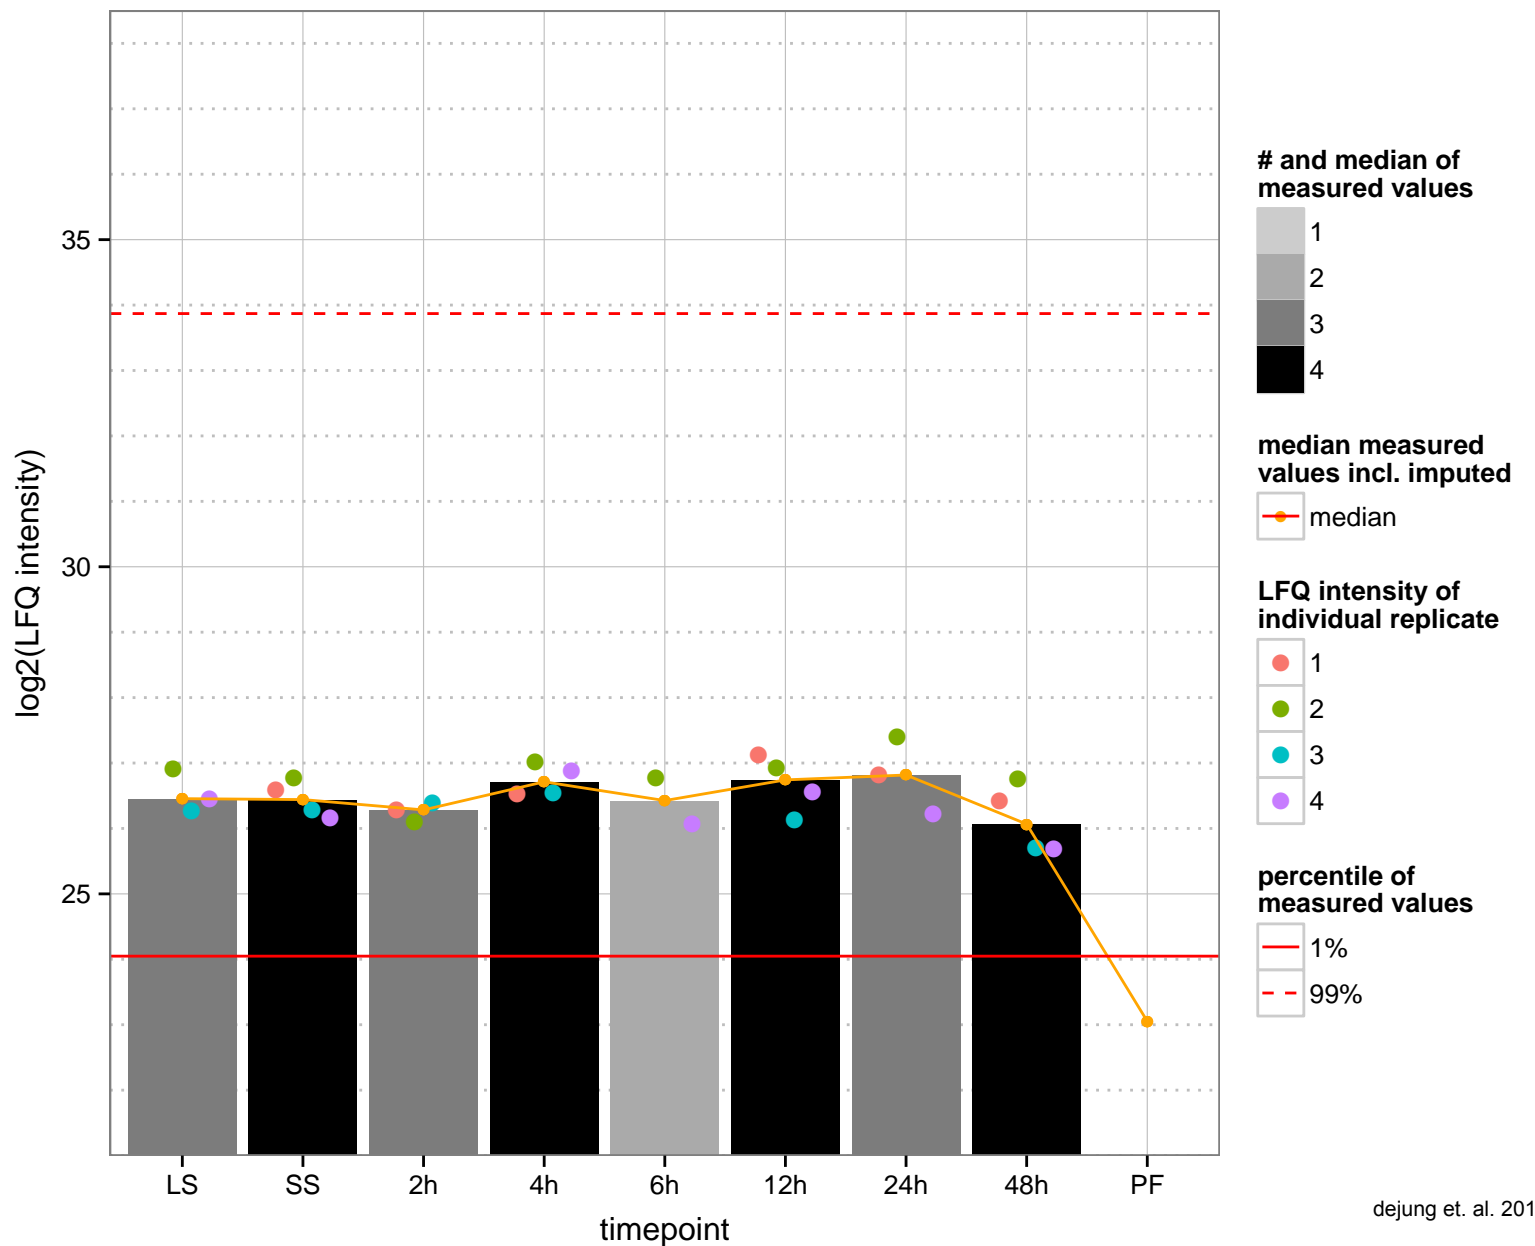

mitogen-activated protein kinase 5 (MAPK5)

Tb927.6.4220

AGOF: ATP binding, protein serine/threonine kinase activity, protein tyrosine kinase activity

AGOC: null

AGOP: protein phosphorylation

PGOF: ATP binding, protein kinase activity, transferase activity, transferring phosphorus-containing groups

PGOC: null

PGOP: protein phosphorylation

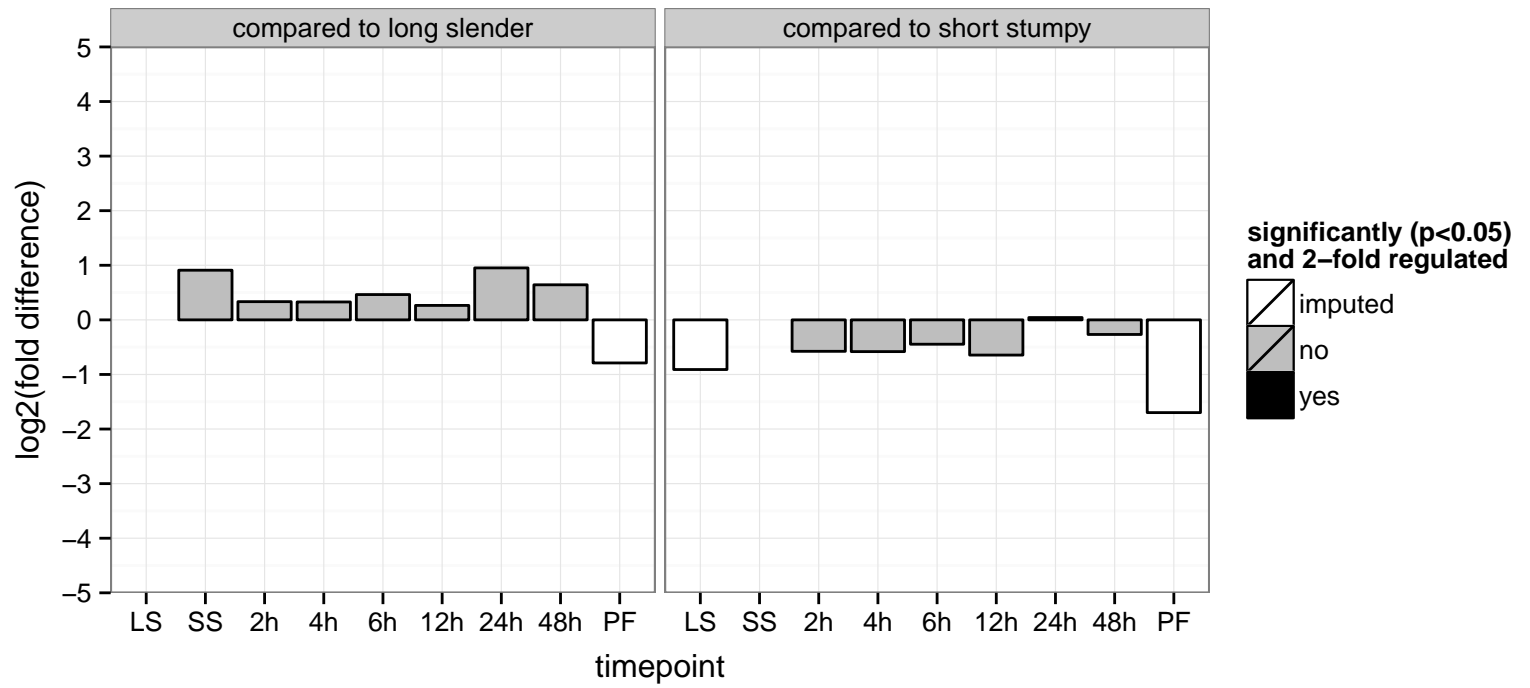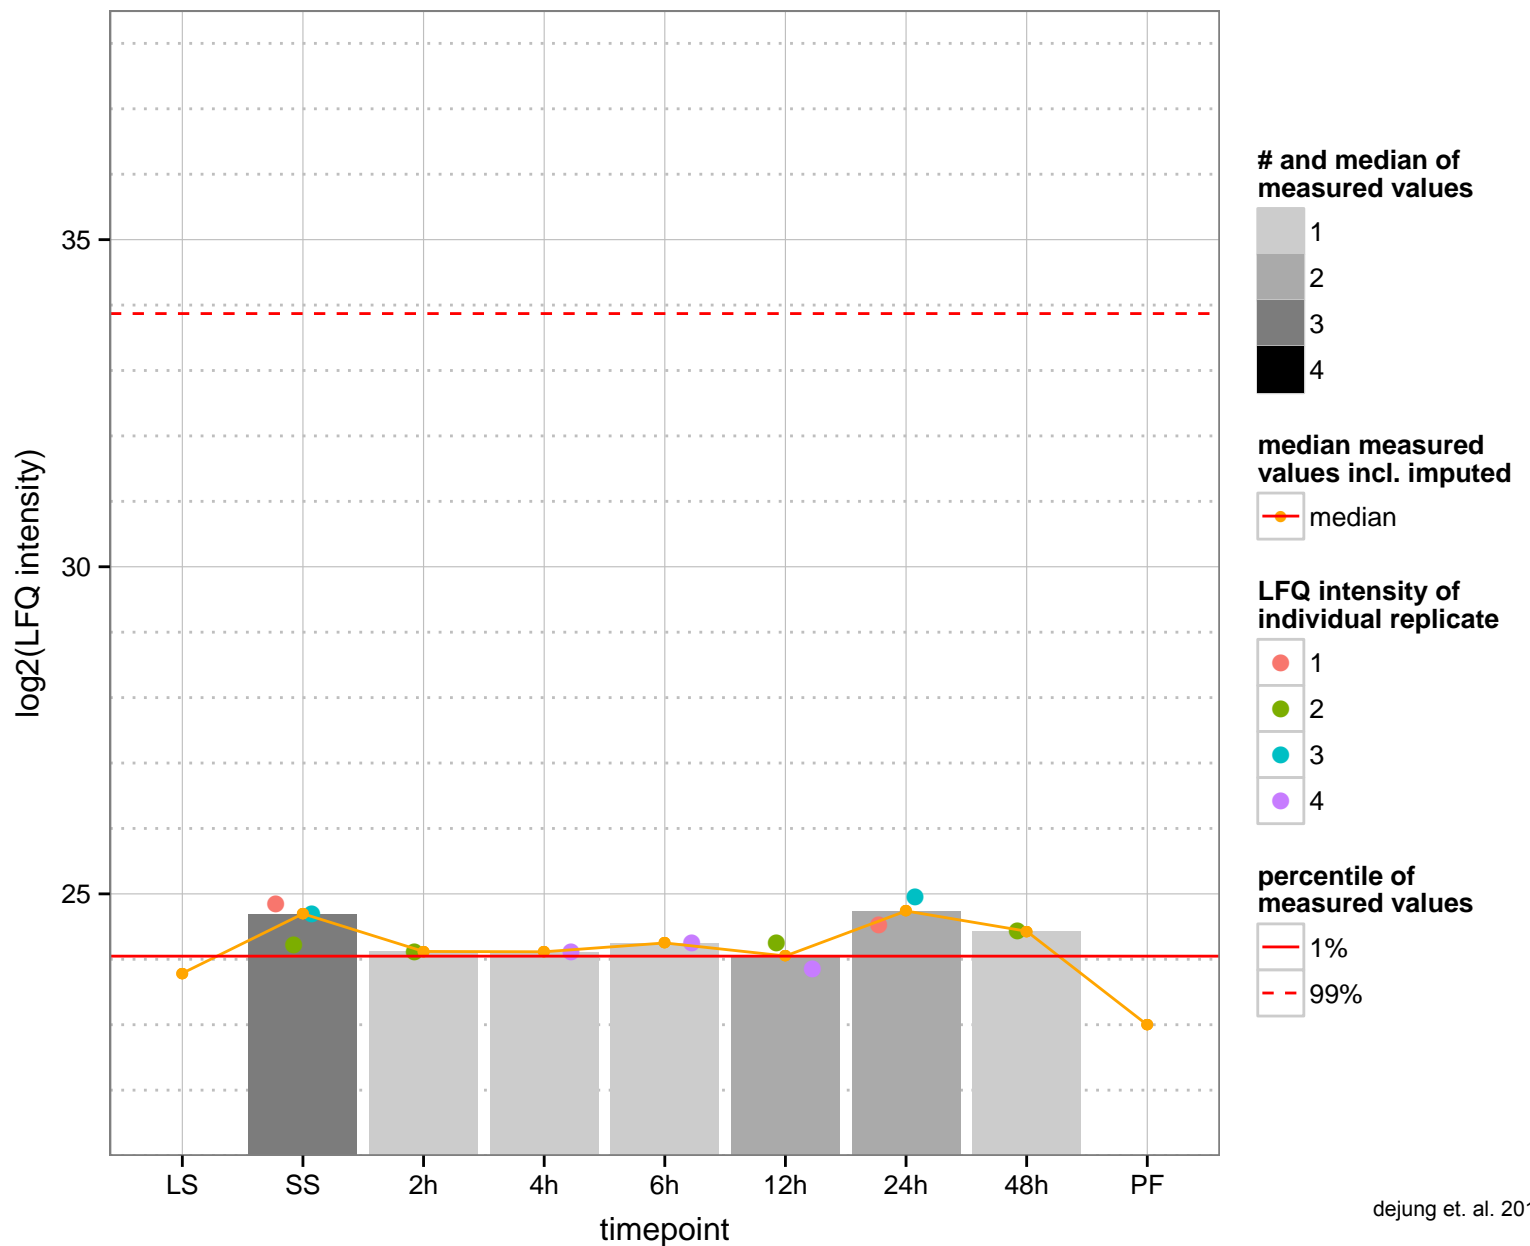

hypothetical protein, conserved  
 Tb927.6.4250  
 AGOF: null  
 AGOC: null  
 AGOP: null  
 PGO: null  
 PGOC: null  
 PGOP: null

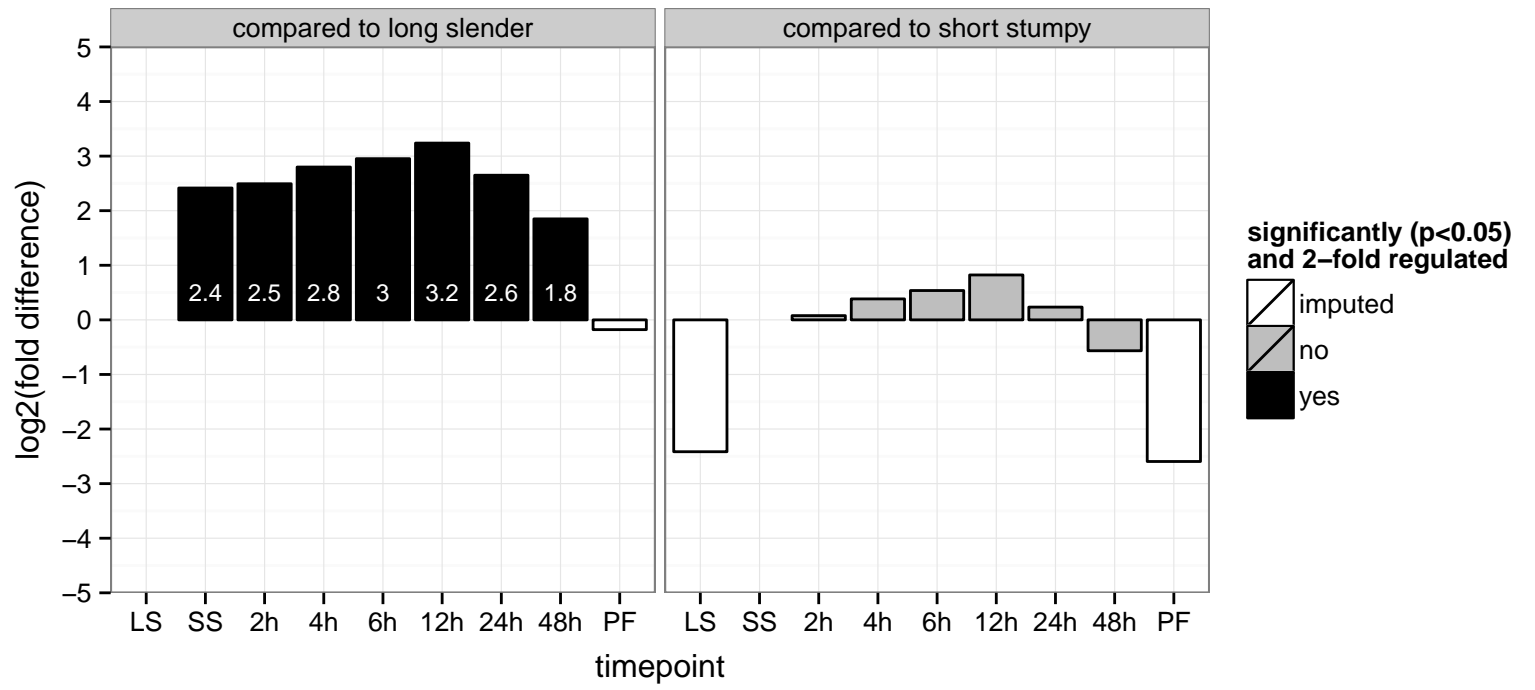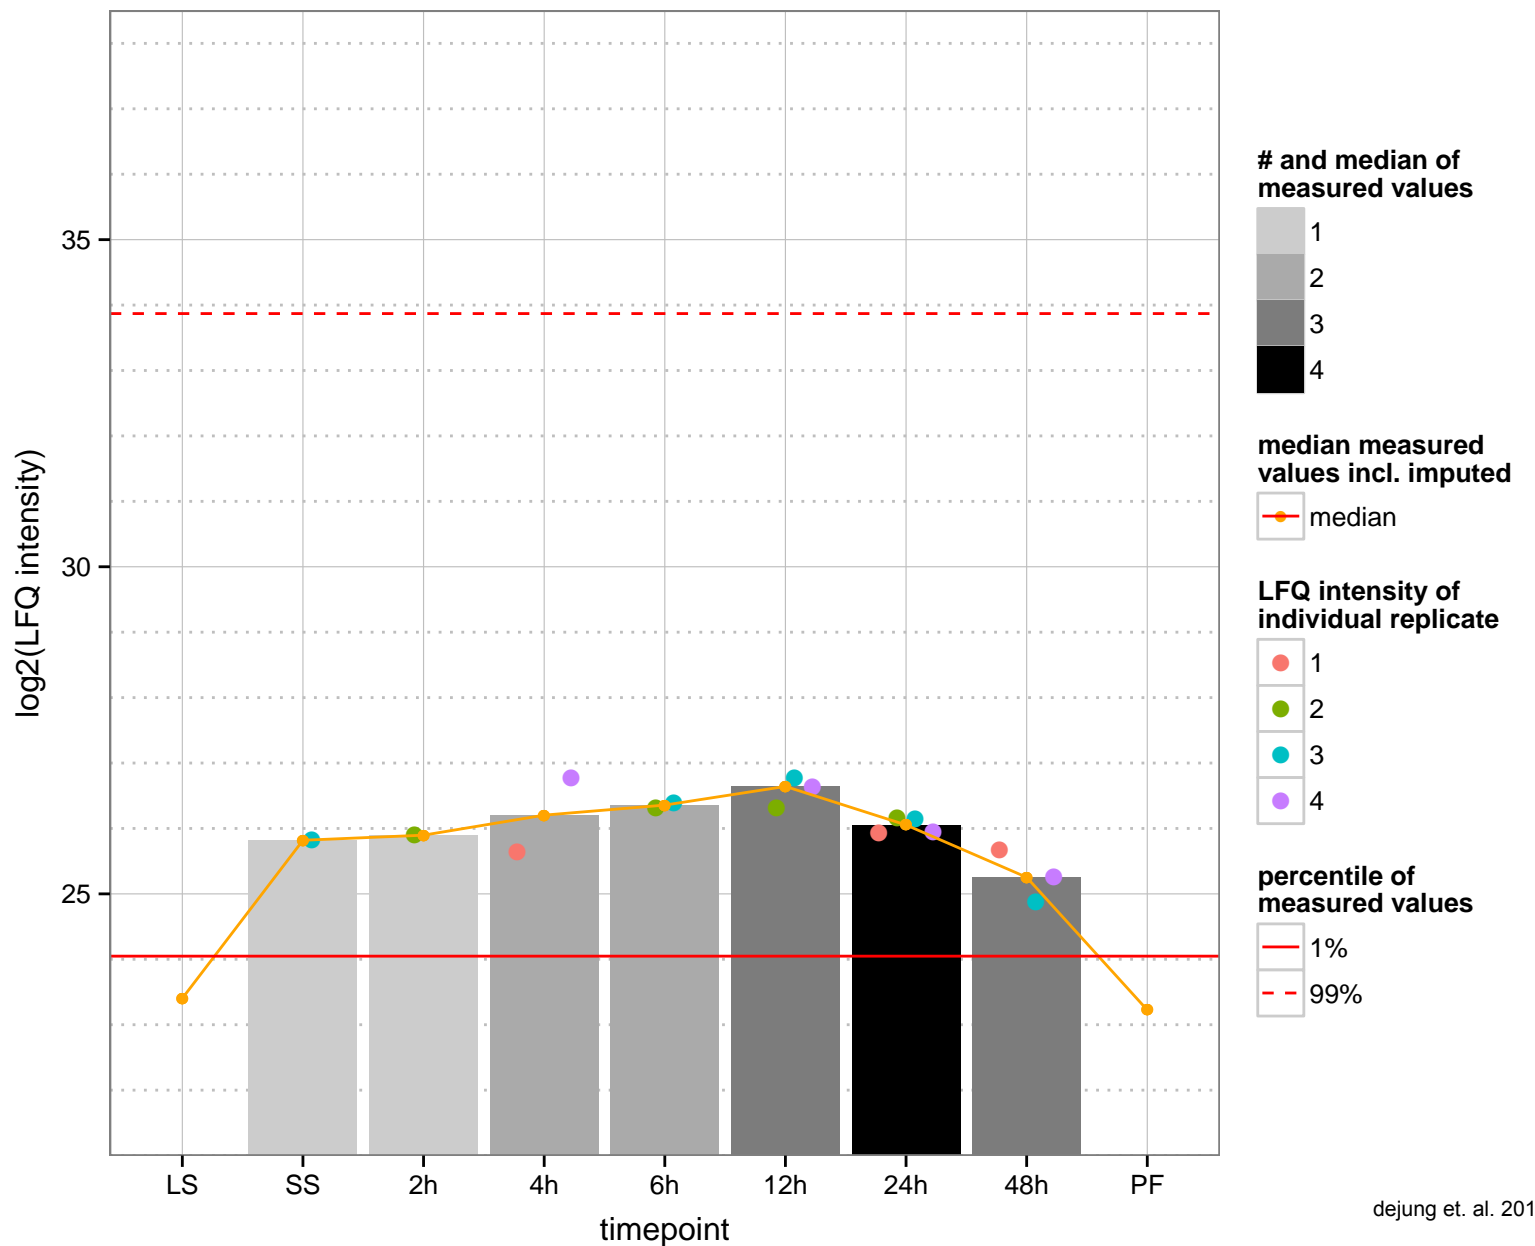

glyceraldehyde 3-phosphate dehydrogenase, glycosomal (GAPDH)

Tb927.6.4300;Tb927.6.4280

AGOF: glyceraldehyde-3-phosphate dehydrogenase (NAD+) (phosphorylating) activity

AGOC: glycosome

AGOP: glycolysis

PGOF: NAD binding, NADP binding, oxidoreductase activity, acting on the aldehyde or oxo group of donors, NAD or NADP as

PGOC: null

PGOP: glucose metabolic process, oxidation-reduction process, null

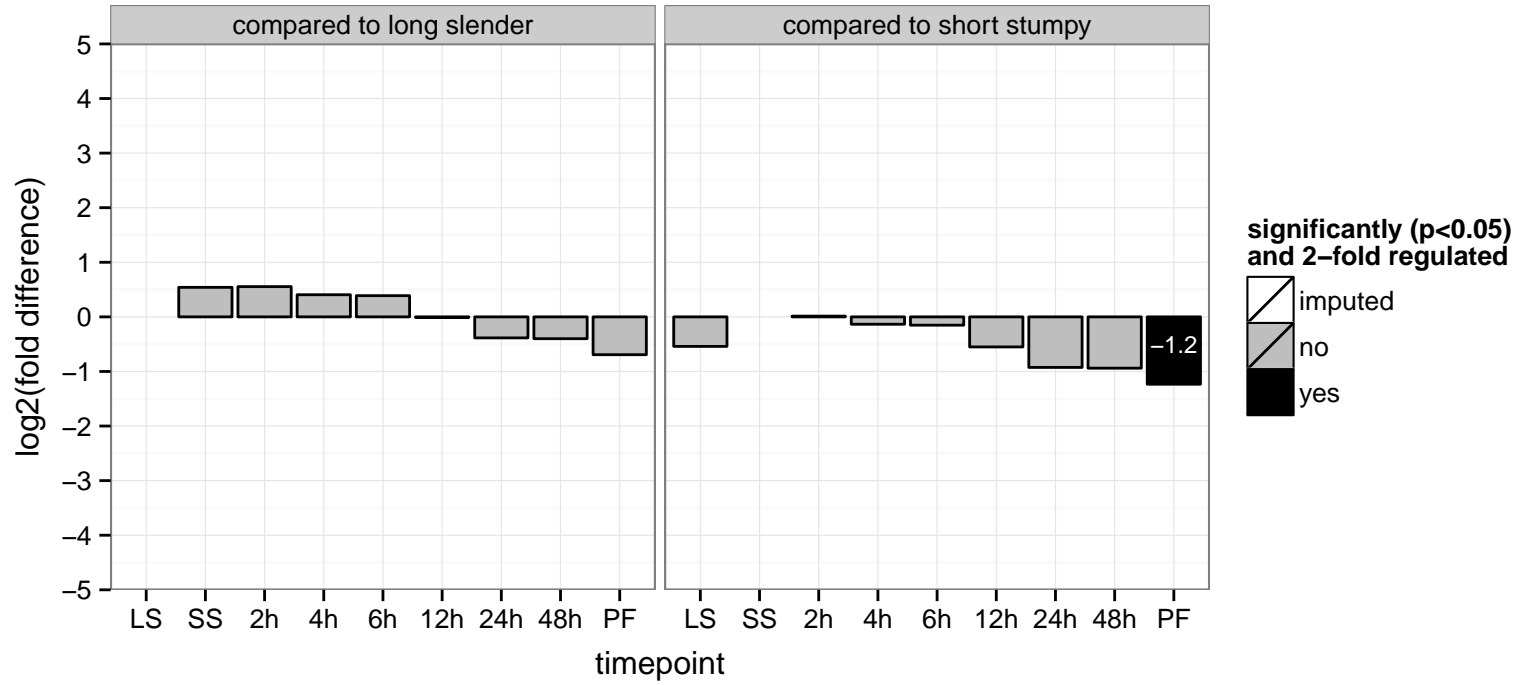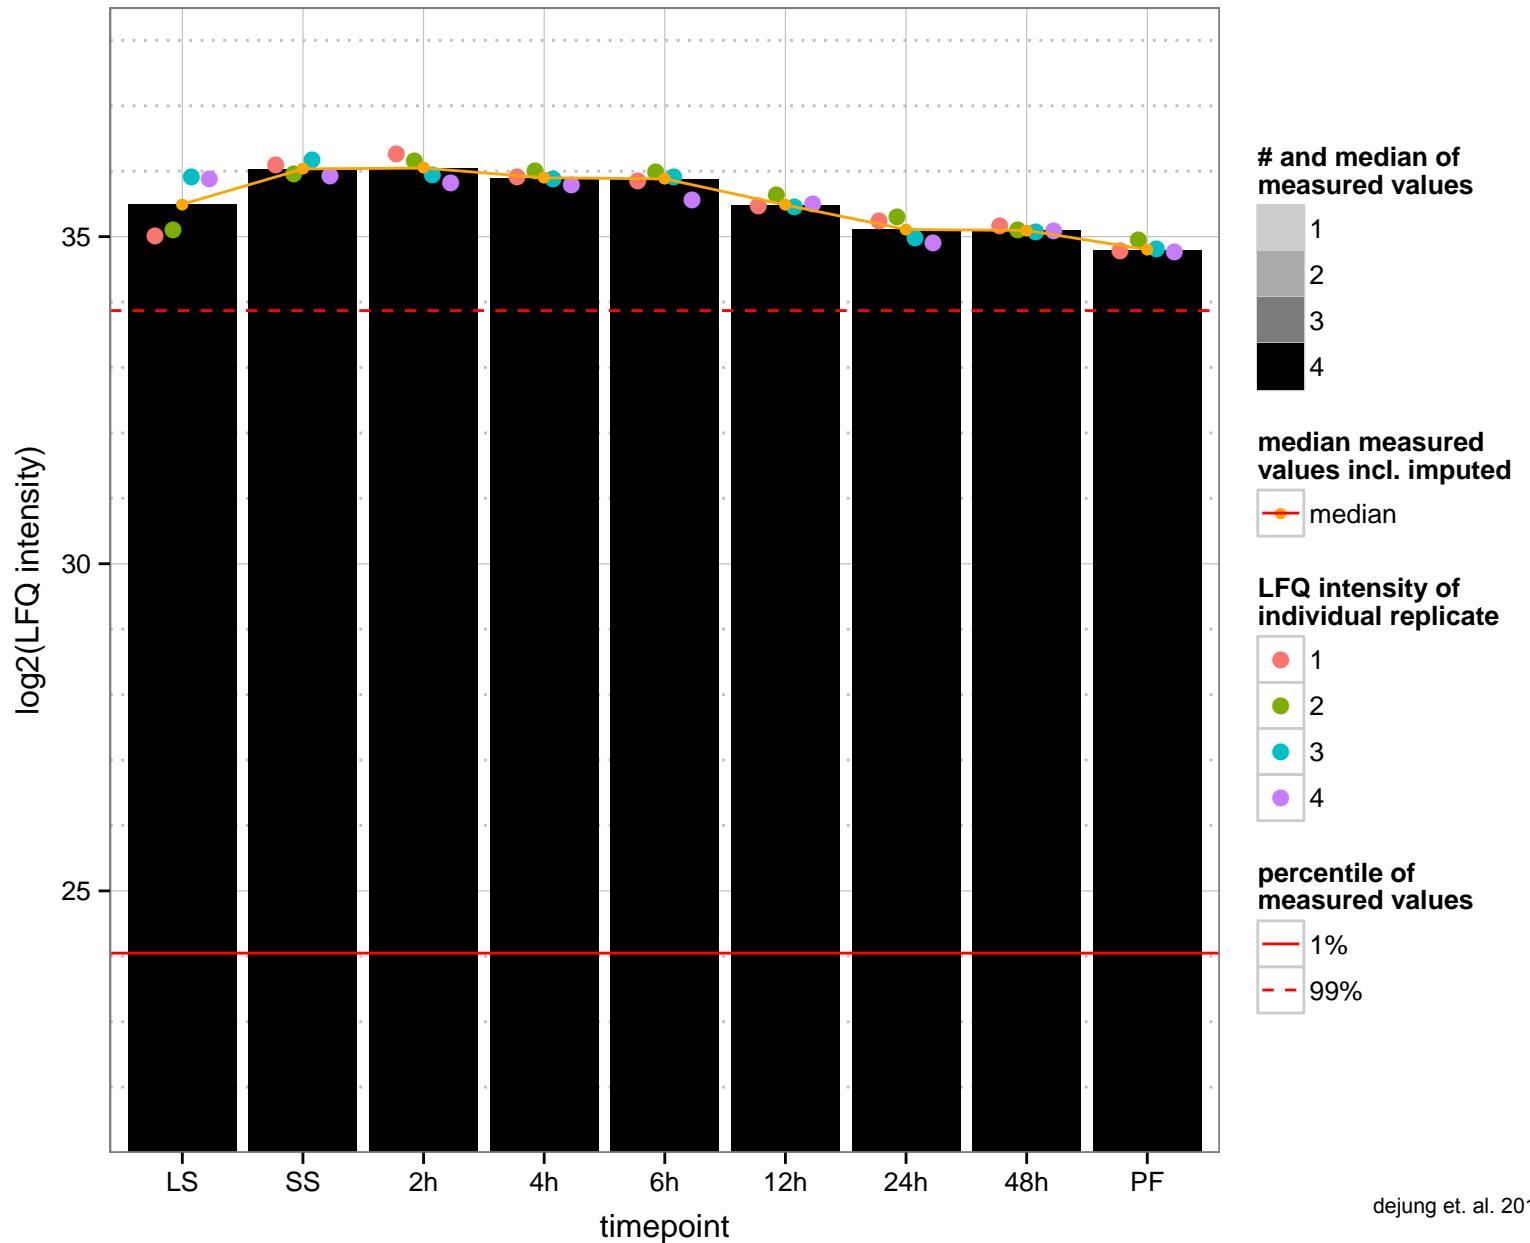

hypothetical protein, conserved  
 Tb927.6.4330  
 AGOF: null  
 AGOC: null  
 AGOP: null  
 PGOF: null  
 PGO: null  
 PGOP: null

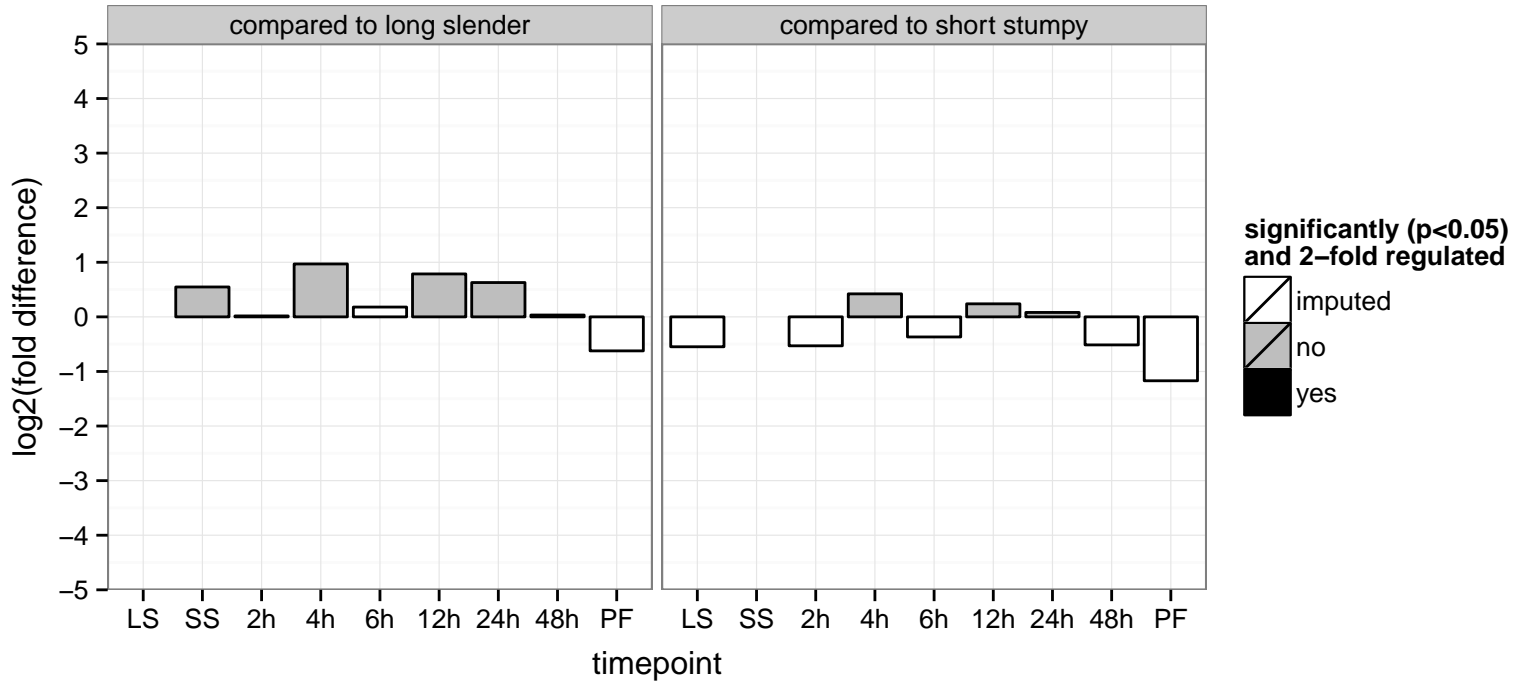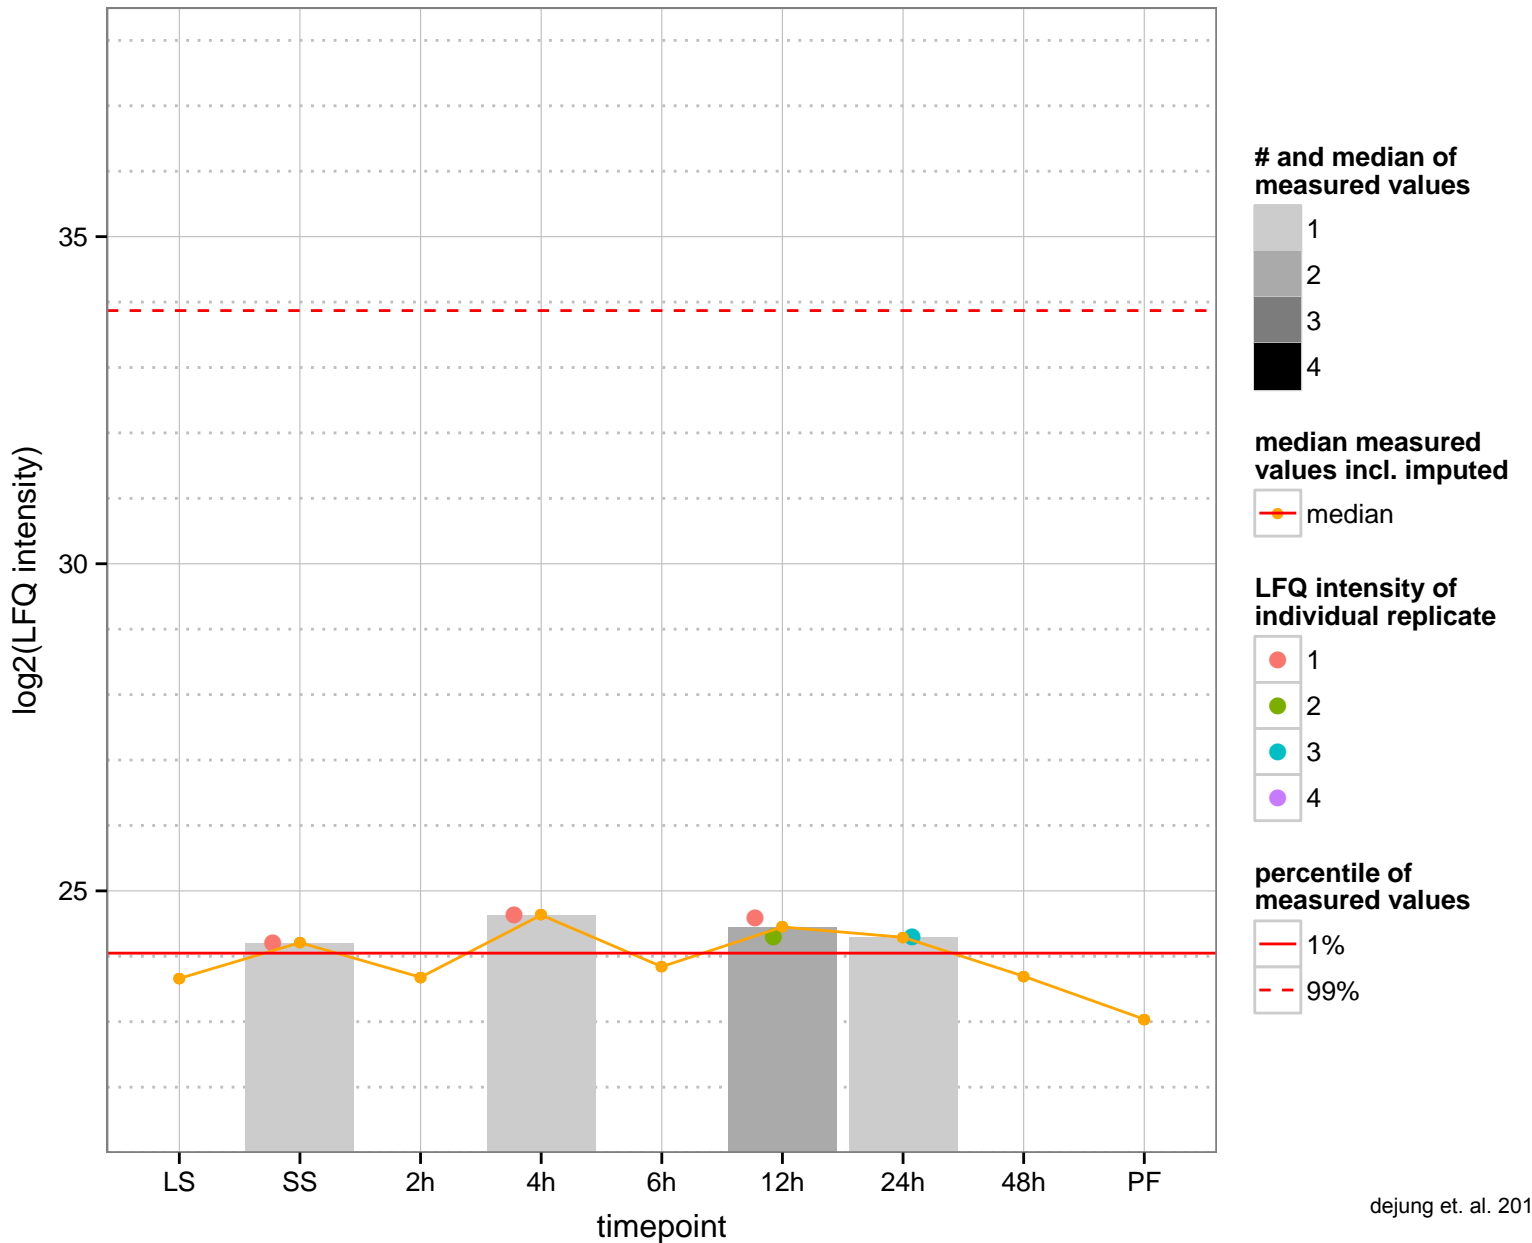

pumillio RNA binding protein 4, putative, pumillio RNA binding protein, putative (PUF4)  
 Tb927.6.820  
 AGOF: null, RNA binding  
 AGOC: null  
 AGOP: null  
 PGO: RNA binding, binding  
 PGOC: null  
 PGOP: null

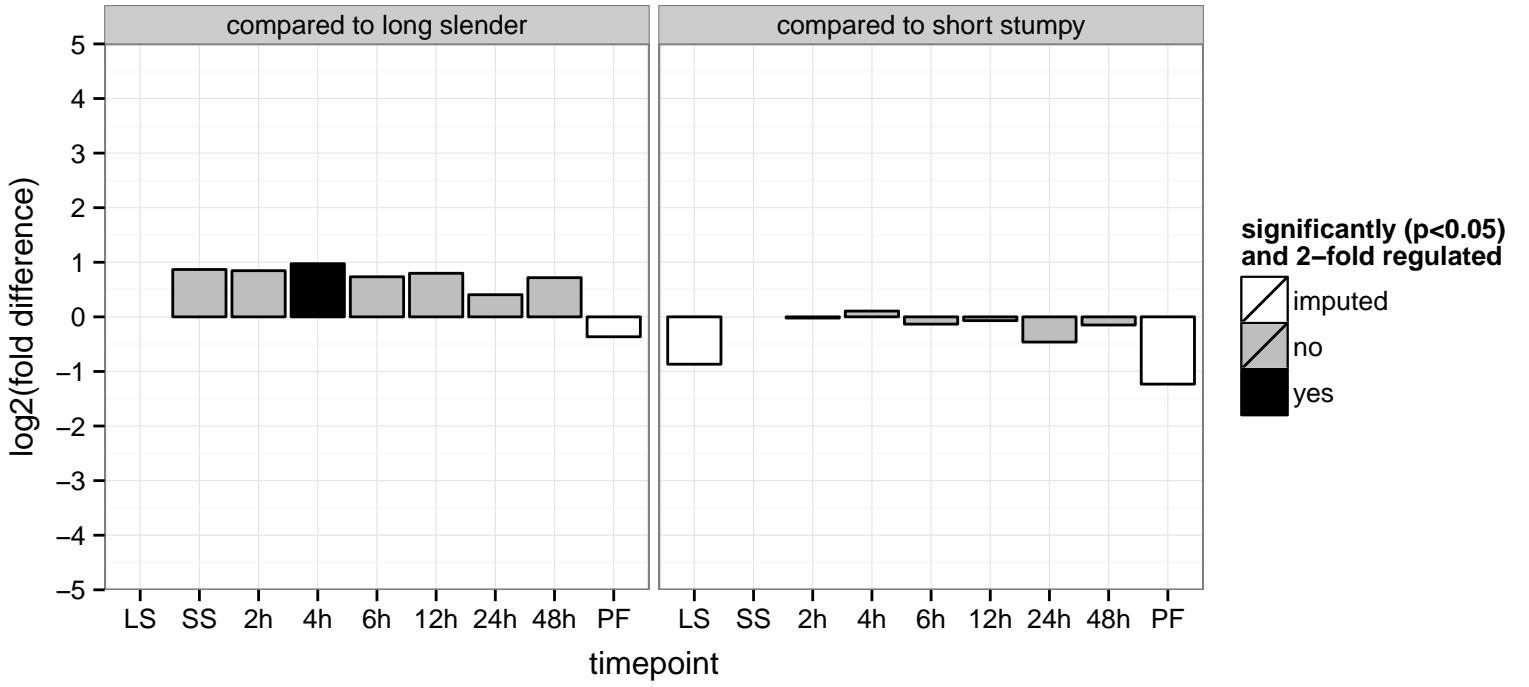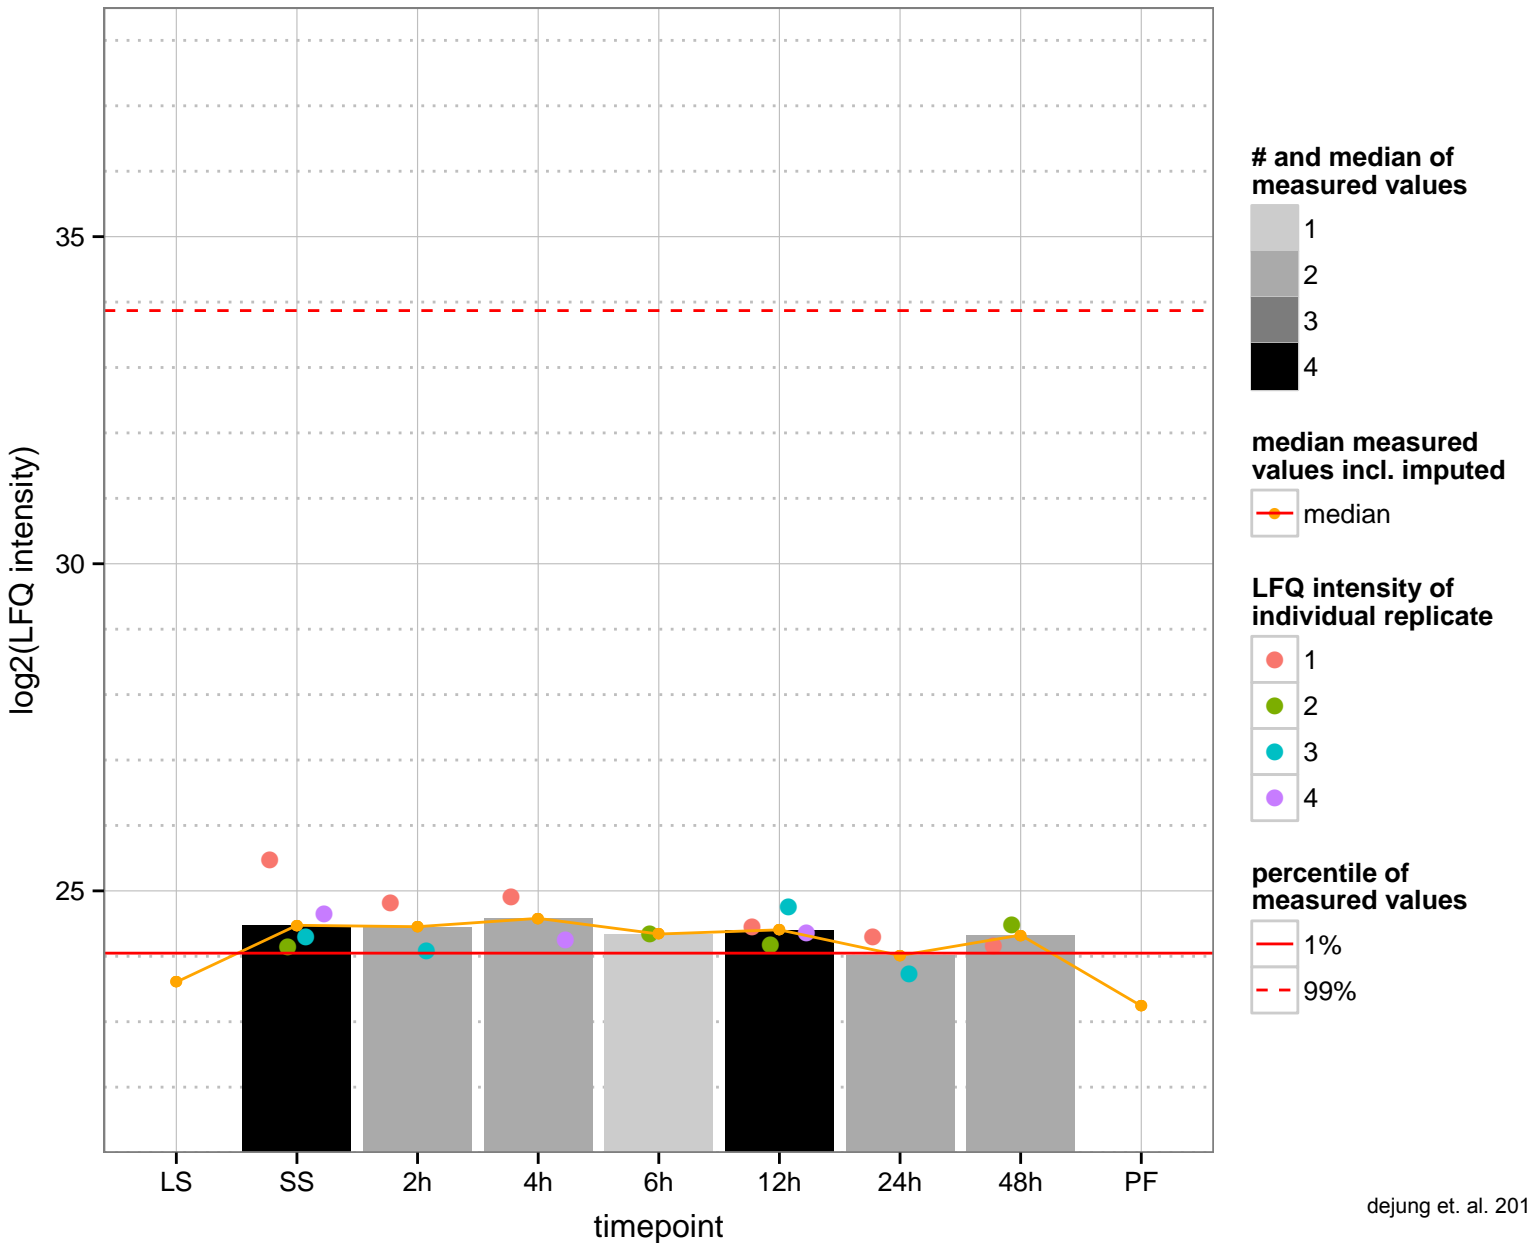

asparagine synthetase a, putative

Tb927.7.1110

AGOF: ATP binding, aminoacyl-tRNA ligase activity, aspartate-ammonia ligase activity

AGOC: cytoplasm

AGOP: asparagine biosynthetic process, tRNA aminoacylation for protein translation, translation

PGOF: ATP binding, aminoacyl-tRNA ligase activity, aspartate-ammonia ligase activity, nucleotide binding

PGOC: cytoplasm

PGOP: asparagine biosynthetic process, tRNA aminoacylation for protein translation

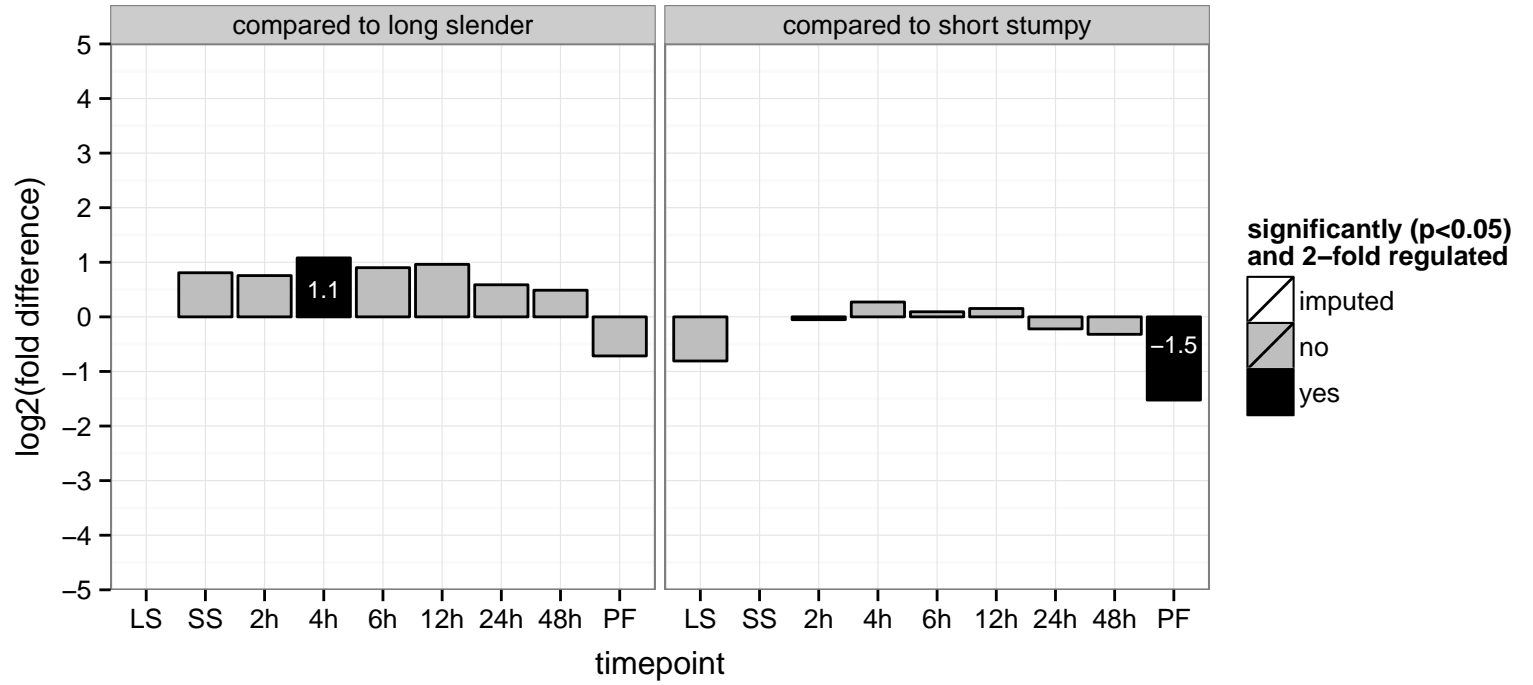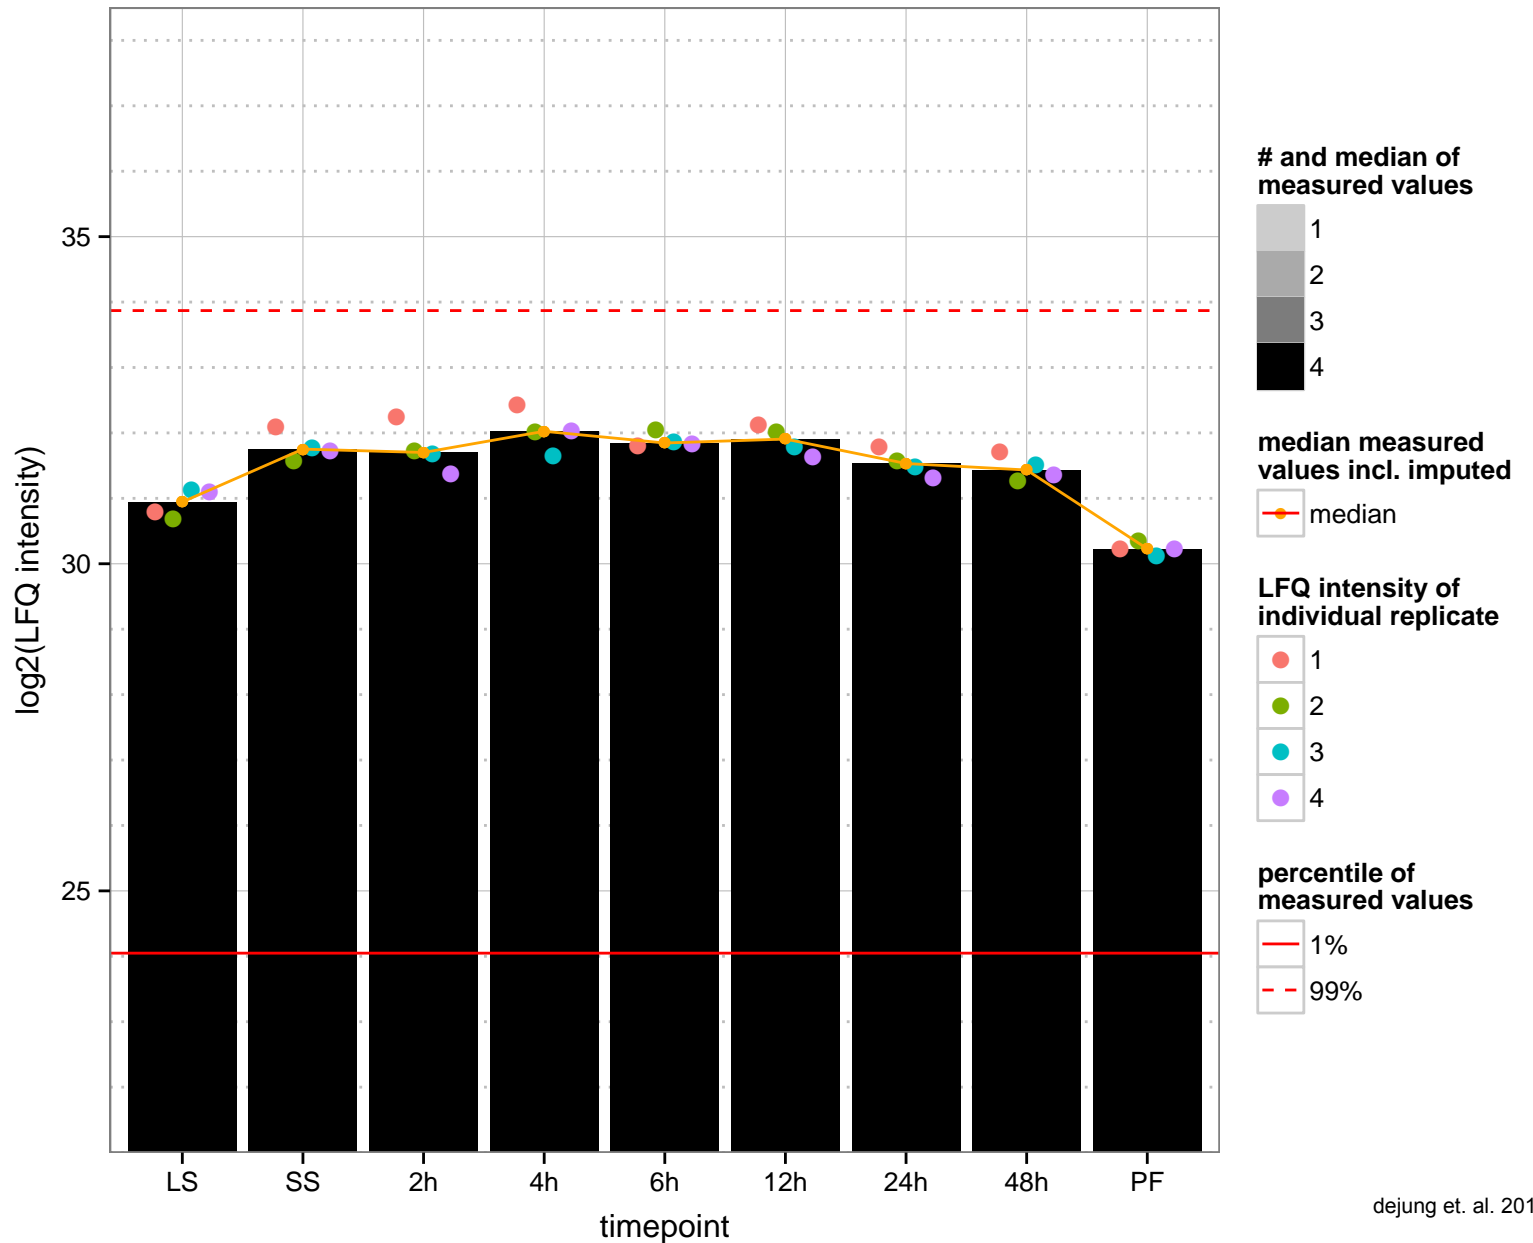

hypothetical protein, conserved  
 Tb927.7.1280;Tb927.7.1260  
 AGOF: null  
 AGOC: null  
 AGOP: null  
 PGO: null  
 PGOC: null  
 PGOP: null

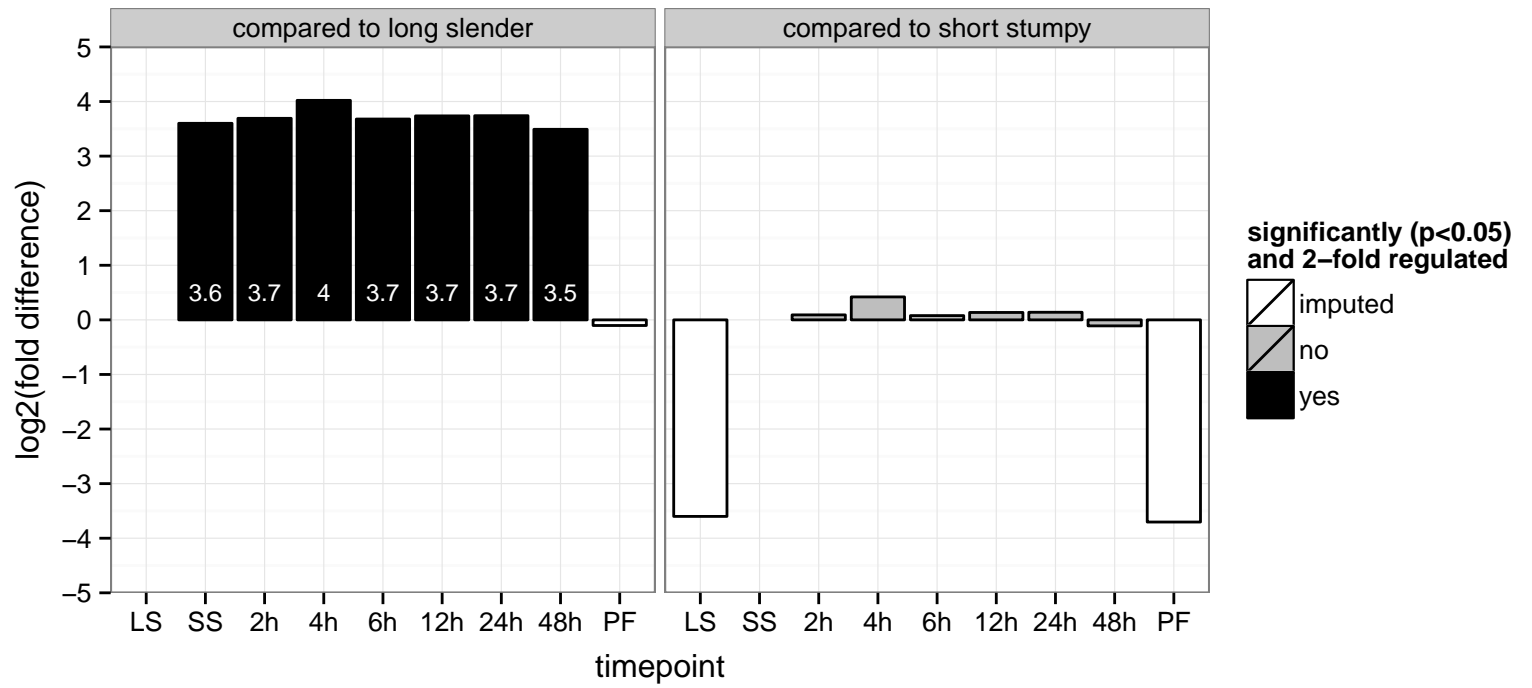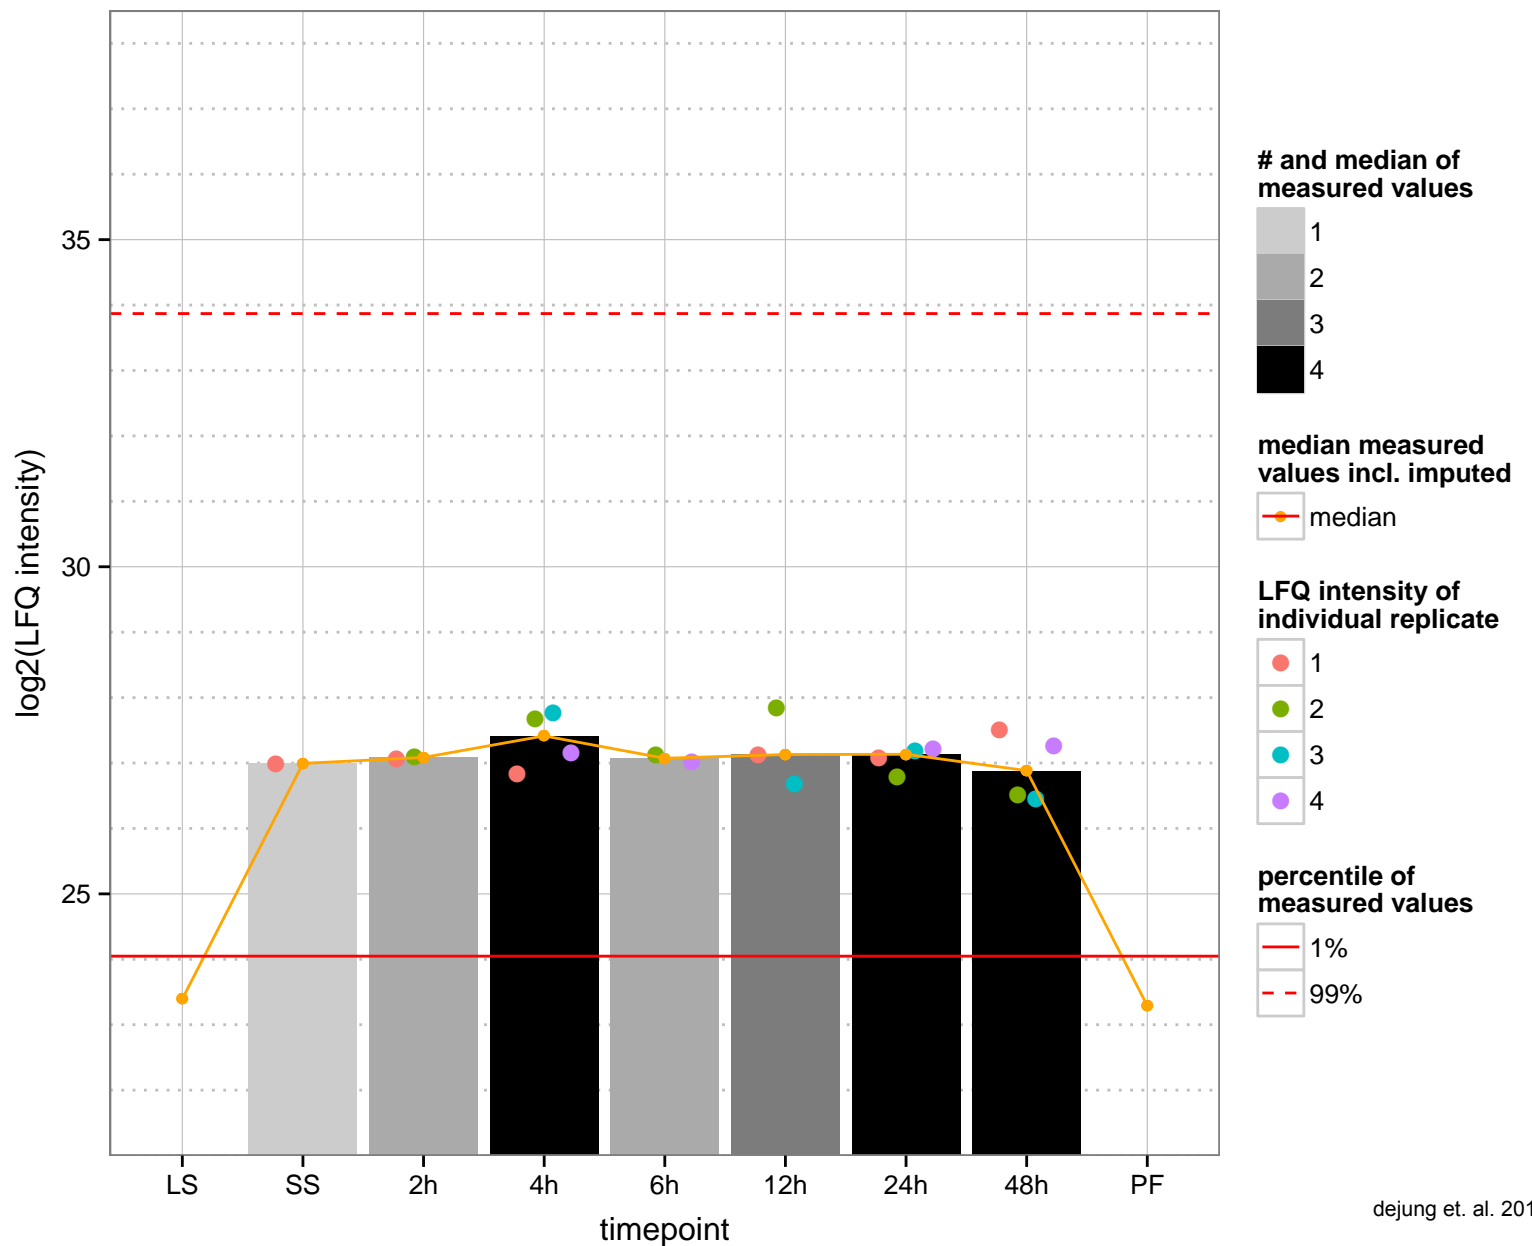



hypothetical protein, conserved  
 Tb927.7.1330  
 AGOF: null  
 AGOC: null  
 AGOP: null  
 PGOF: null  
 PGOE: null  
 PGOP: null

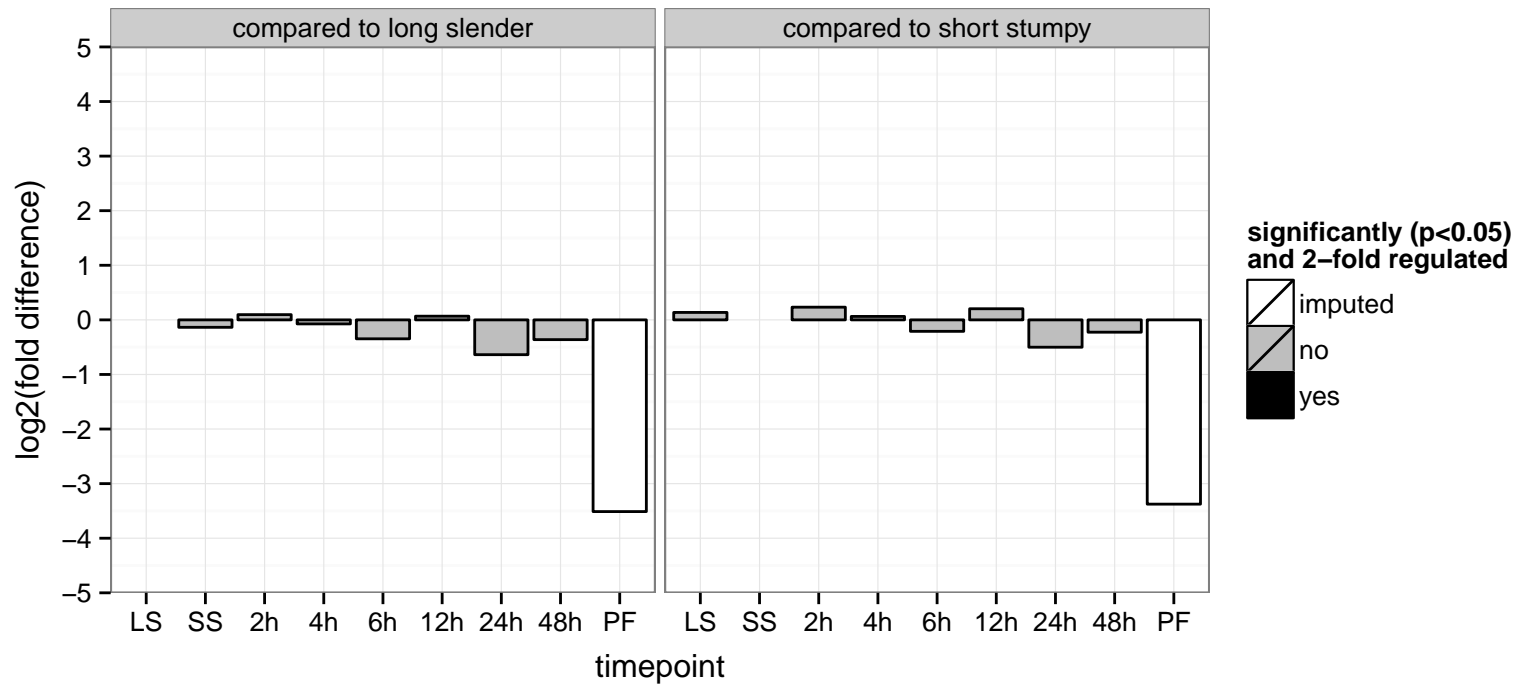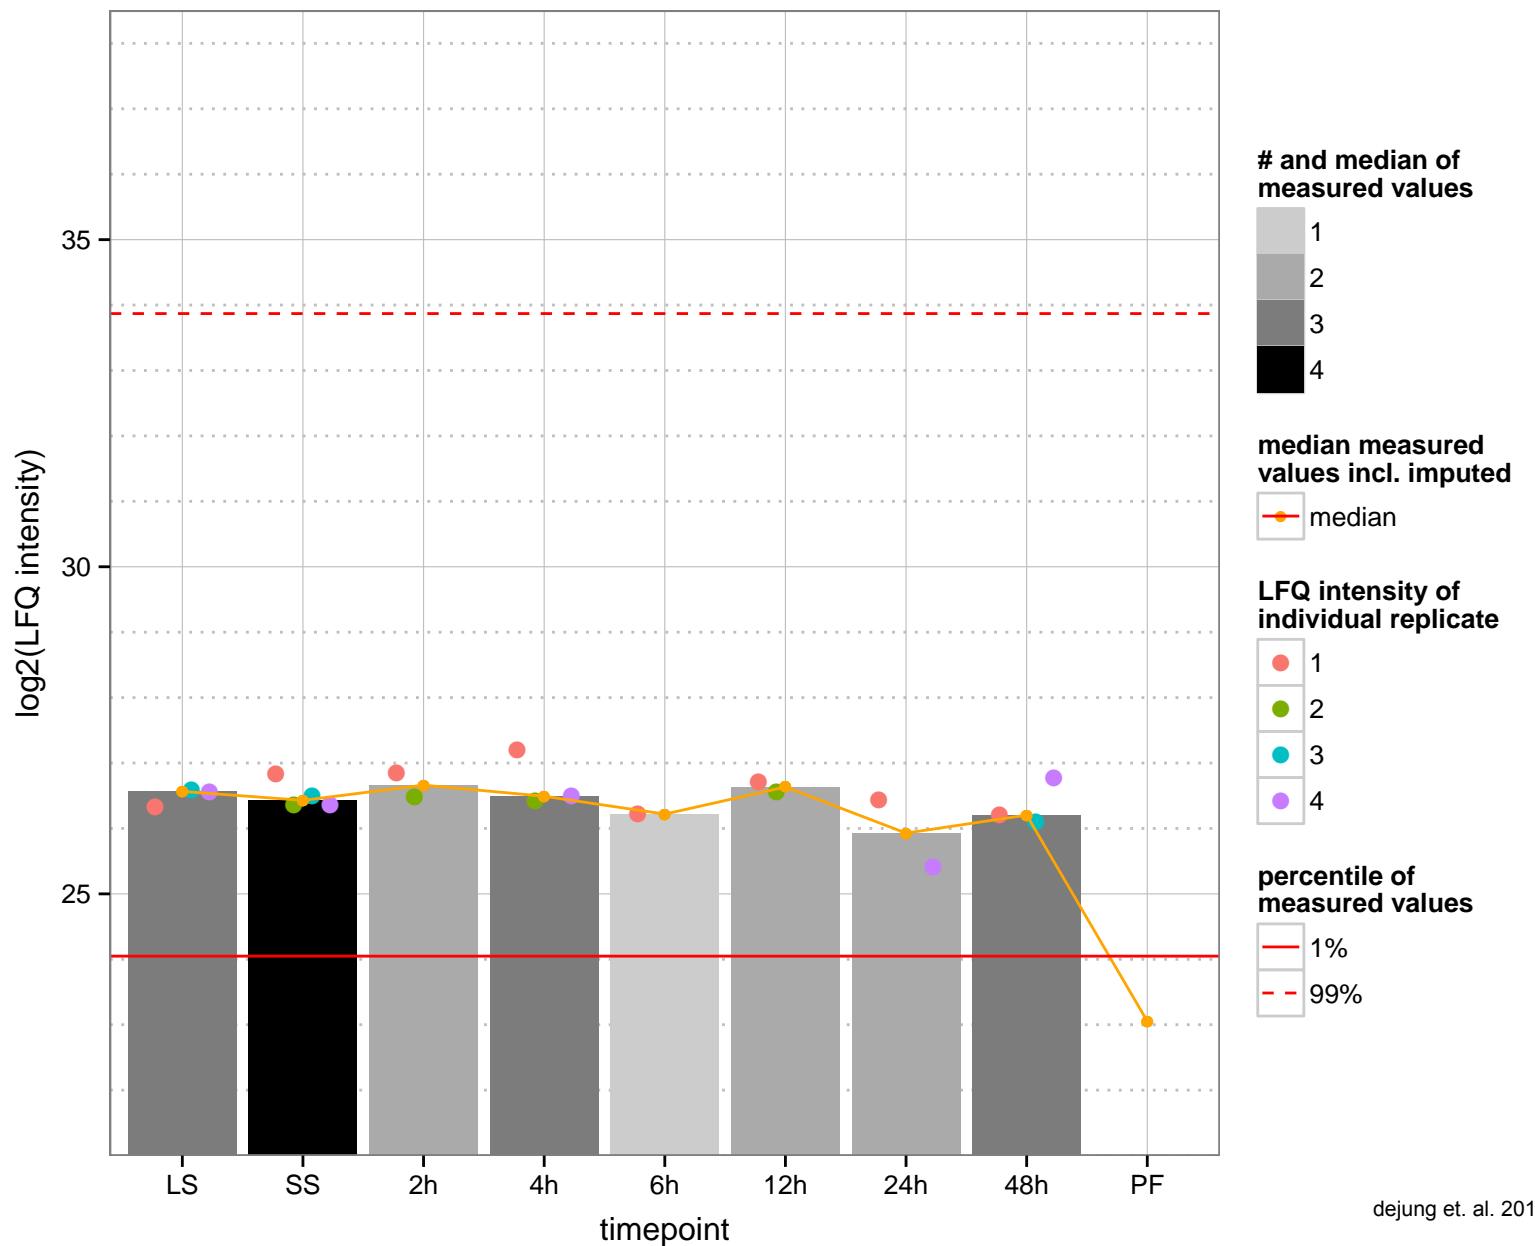

spliced leader RNA PSE-promoter transcription factor, putative (PPB1)

Tb927.7.1370

AGOF: null

AGOC: mitochondrion

AGOP: null

PGOF: null

PGOC: null

PGOP: null

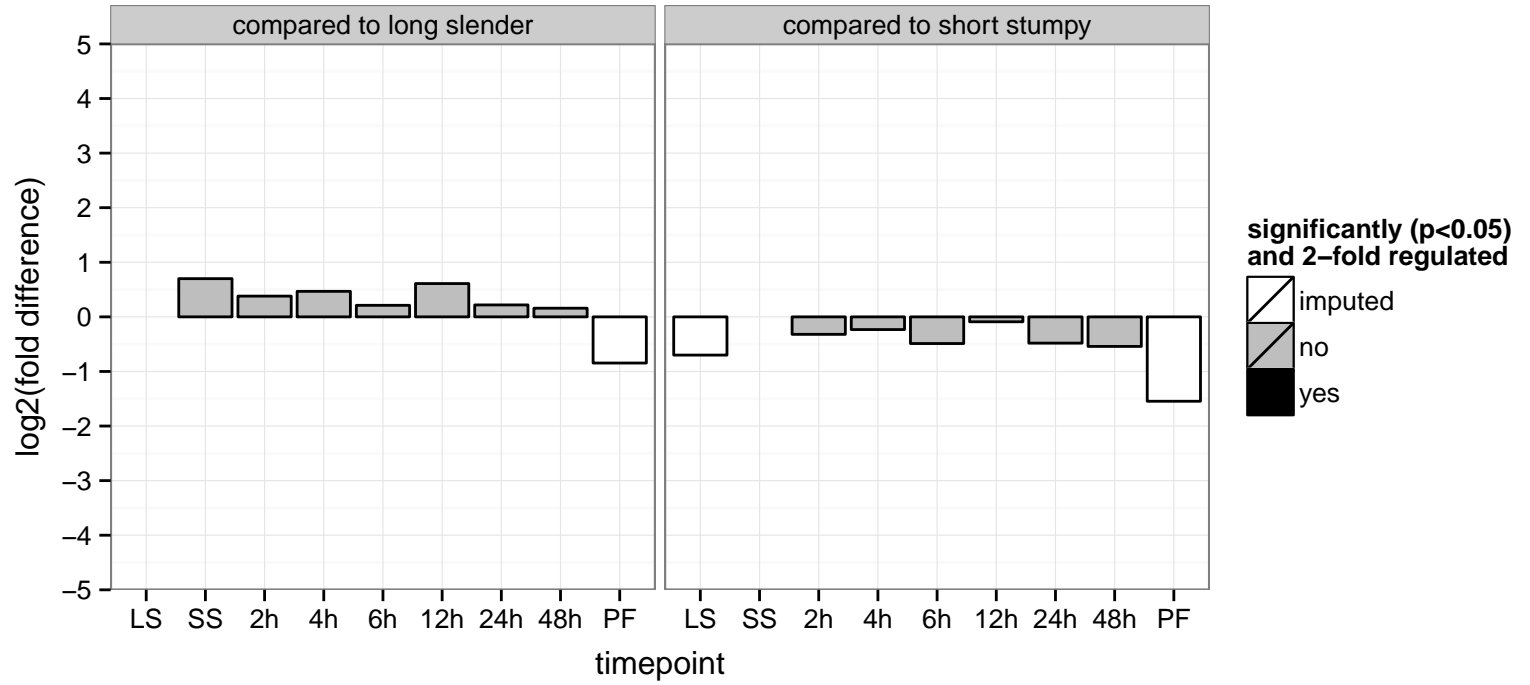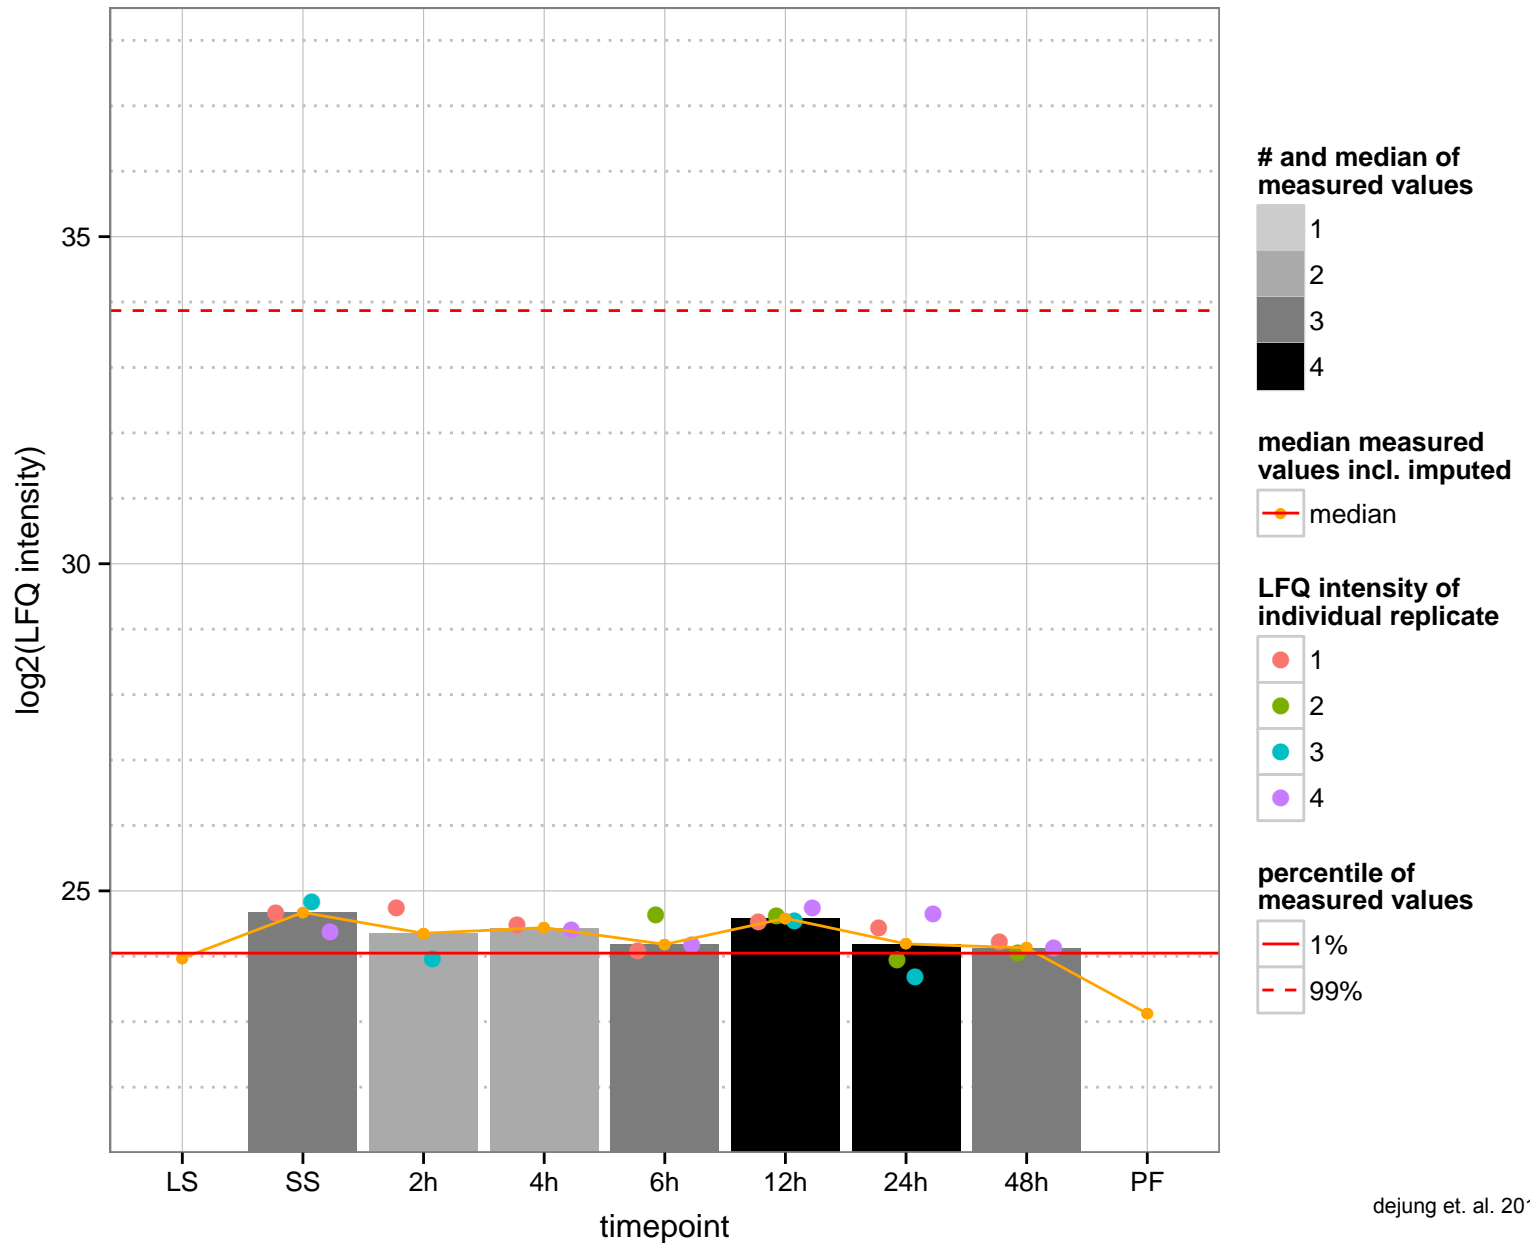

hypothetical protein, conserved  
 Tb927.7.1400  
 AGOF: null  
 AGOC: null  
 AGOP: null  
 PGO: null  
 PGOC: null  
 PGOP: null

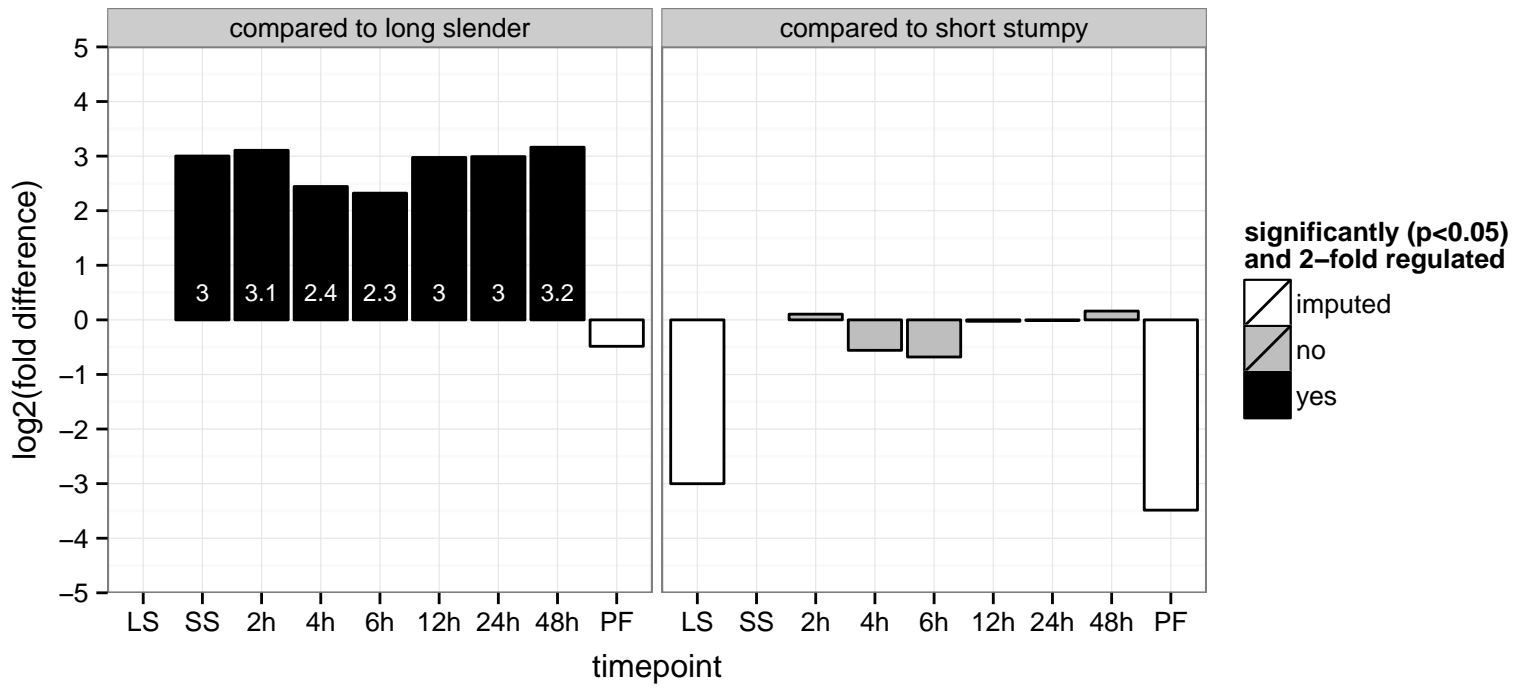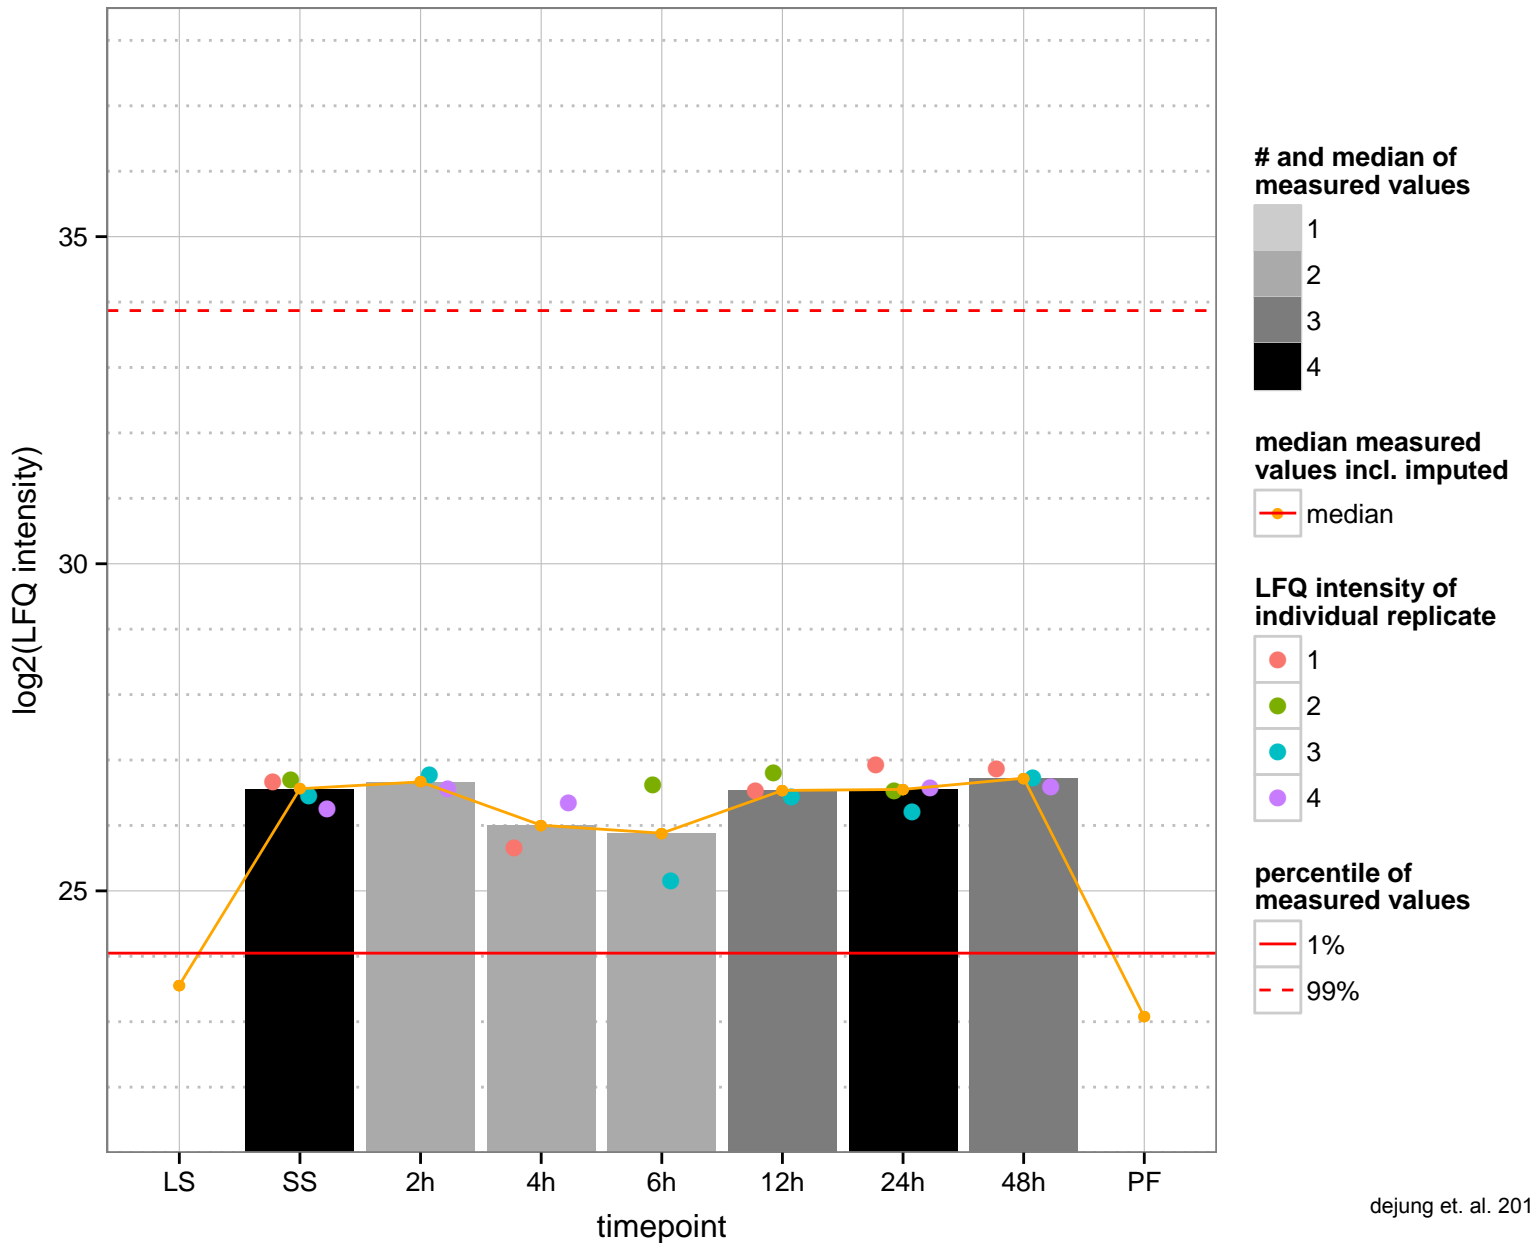

hypothetical protein, conserved  
 Tb927.7.1580  
 AGOF: null  
 AGOC: null  
 AGOP: null  
 PGO: null  
 PGOC: null  
 PGOP: null

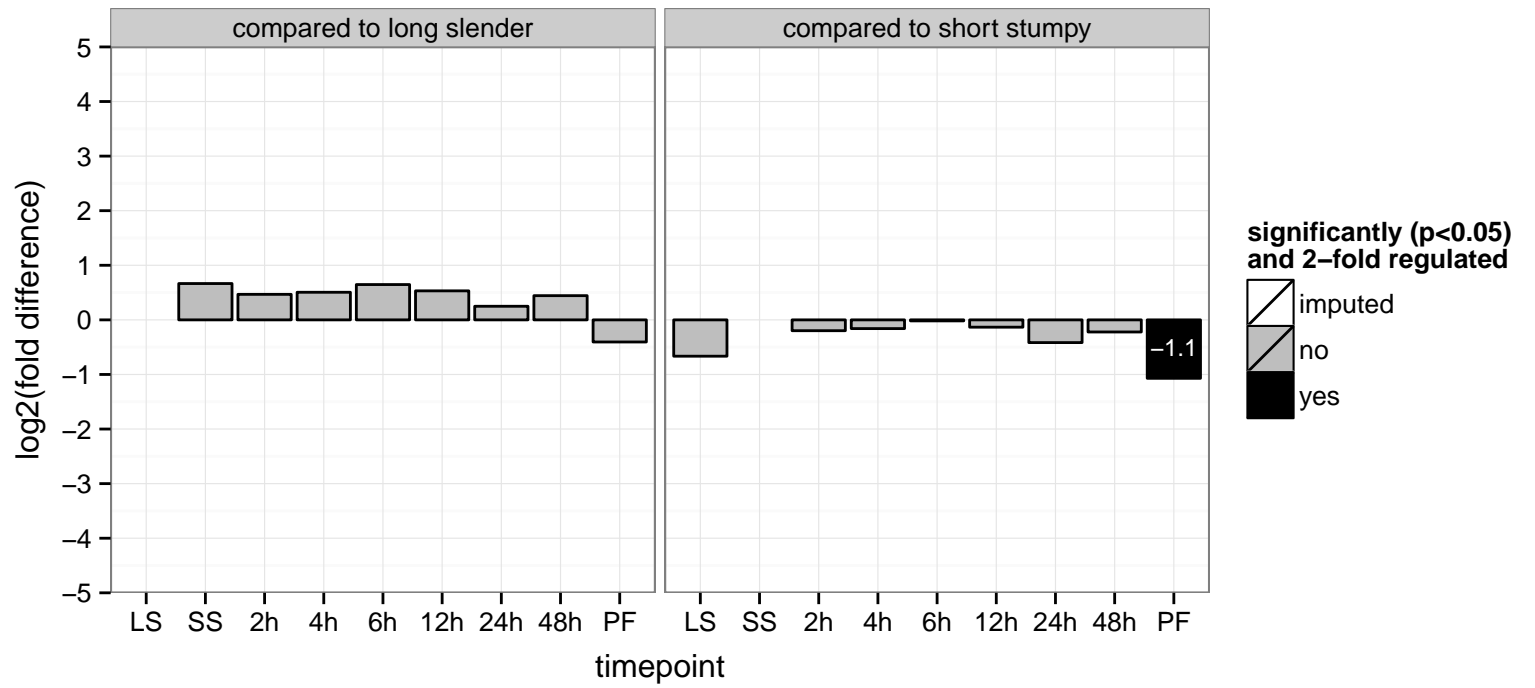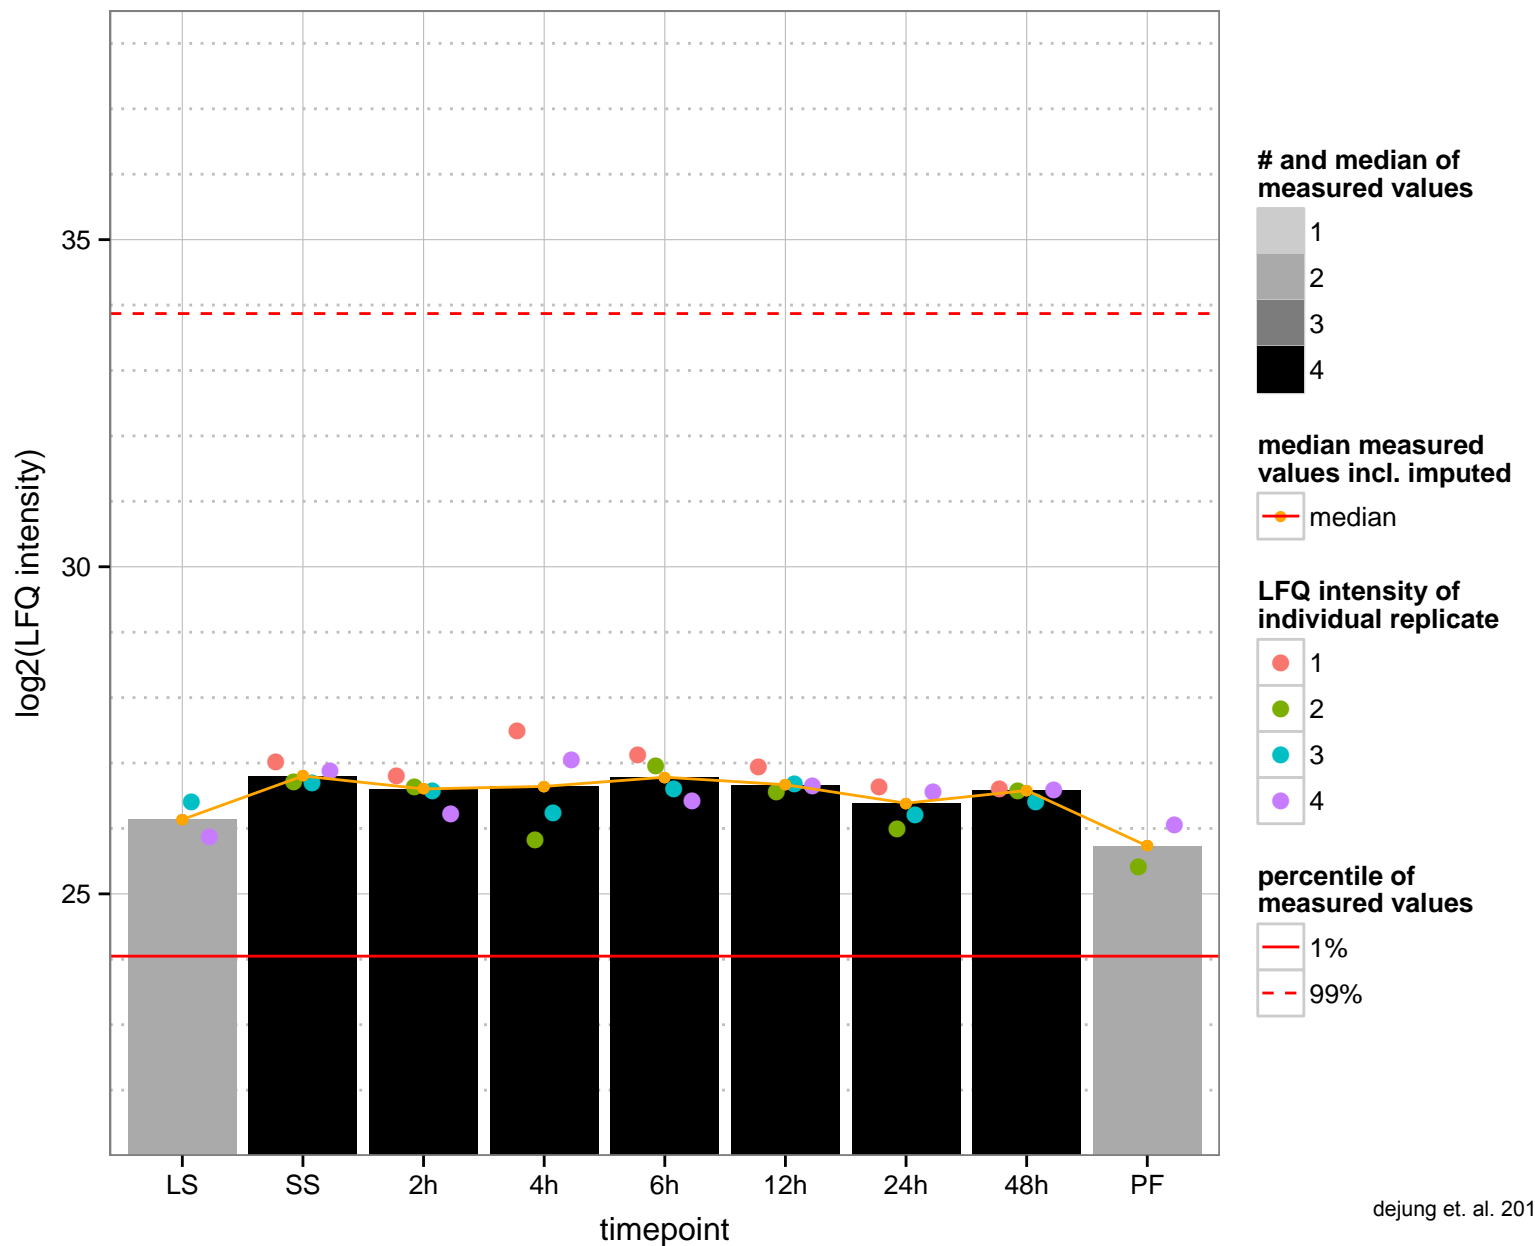

hypothetical protein, conserved  
 Tb927.7.1620  
 AGOF: null  
 AGOC: null  
 AGOP: null  
 PGO: mRNA binding  
 PGOC: mRNA cleavage factor complex  
 PGO: mRNA polyadenylation

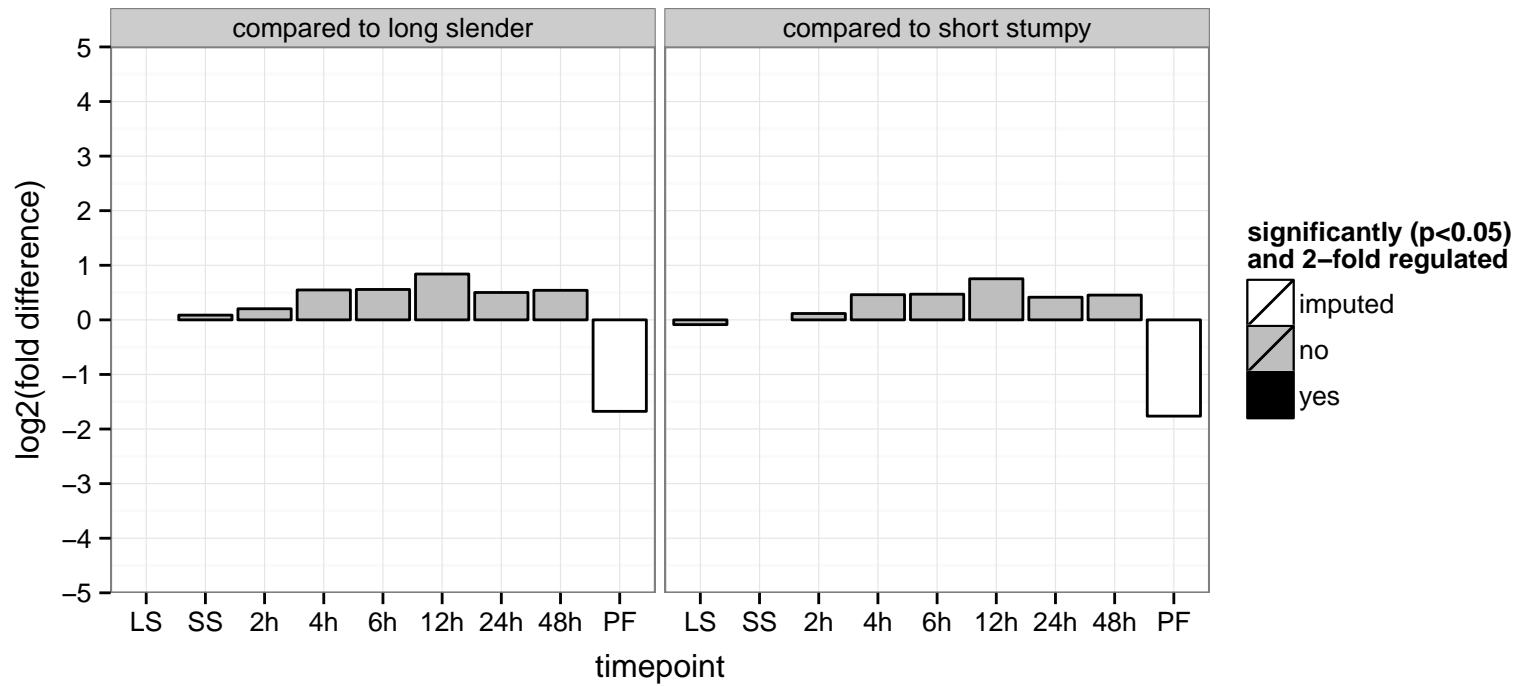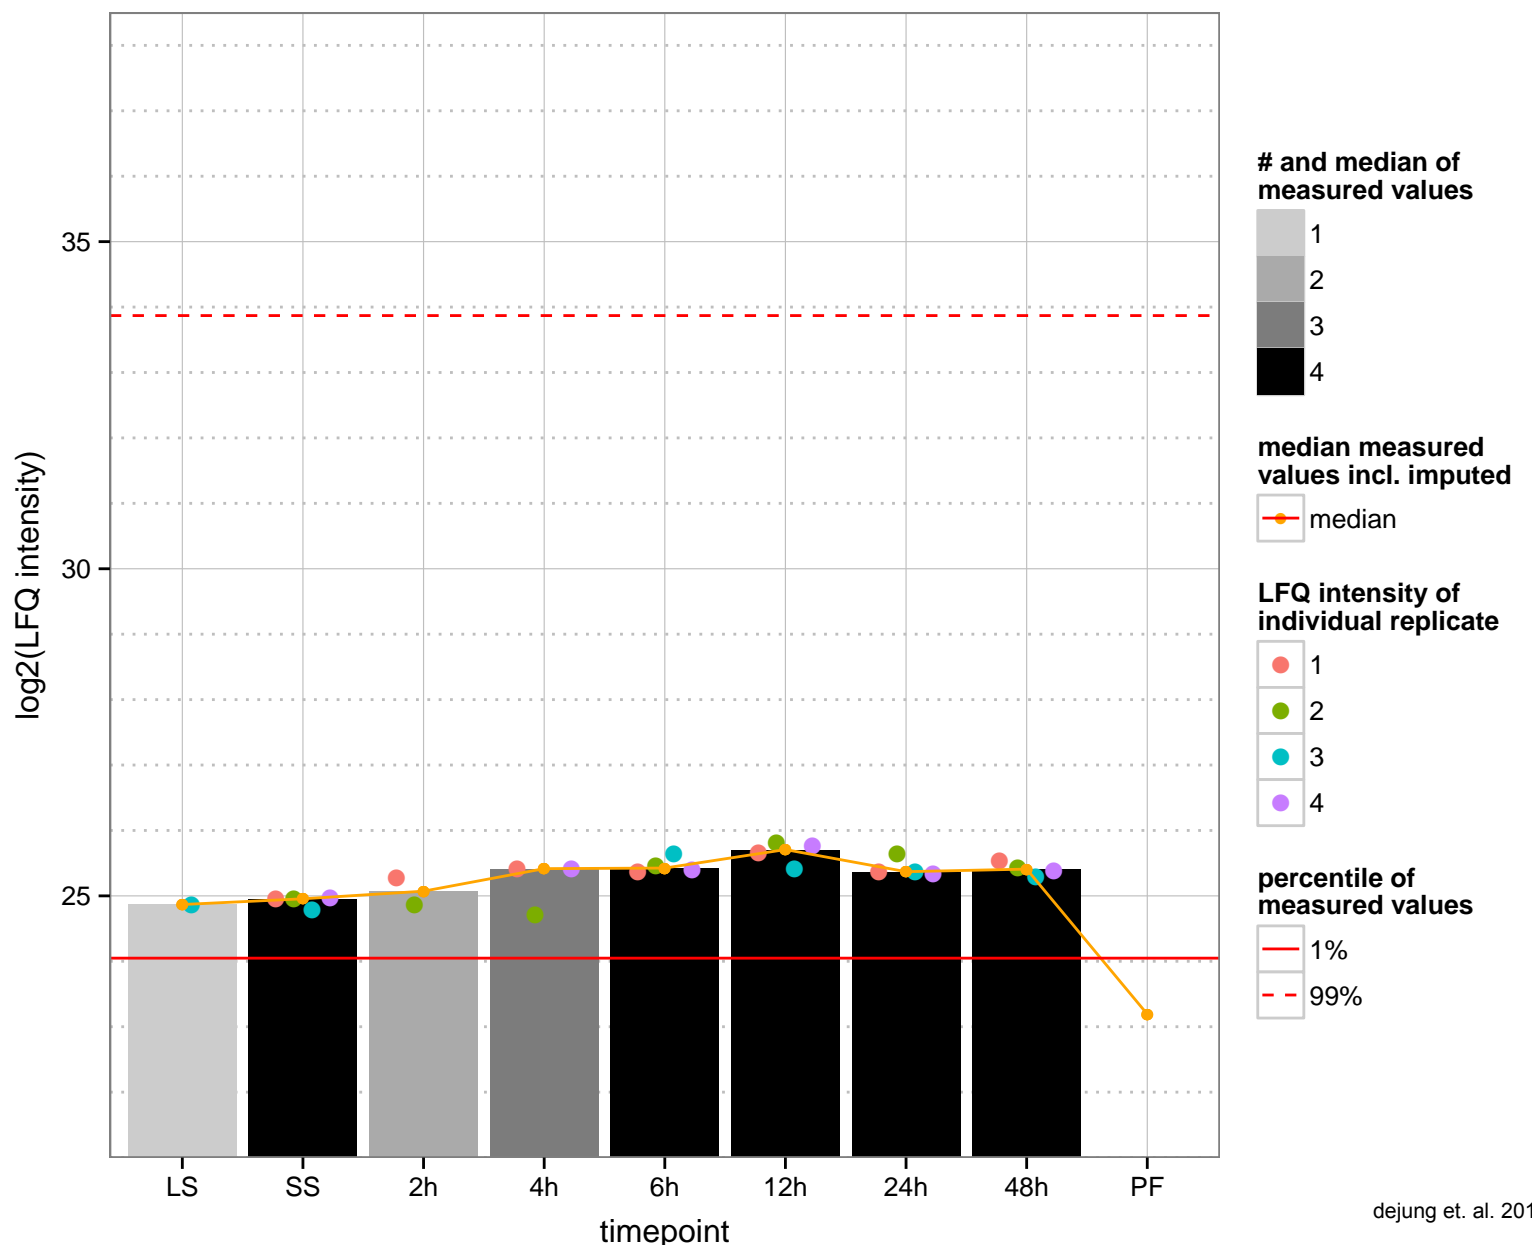

GTPase activating protein, putative  
 Tb927.7.2470  
 AGOF: Rab GTPase activator activity  
 AGOC: intracellular  
 AGOP: regulation of Rab GTPase activity  
 PGO: Rab GTPase activator activity  
 PGO: intracellular  
 PGOP: regulation of Rab GTPase activity

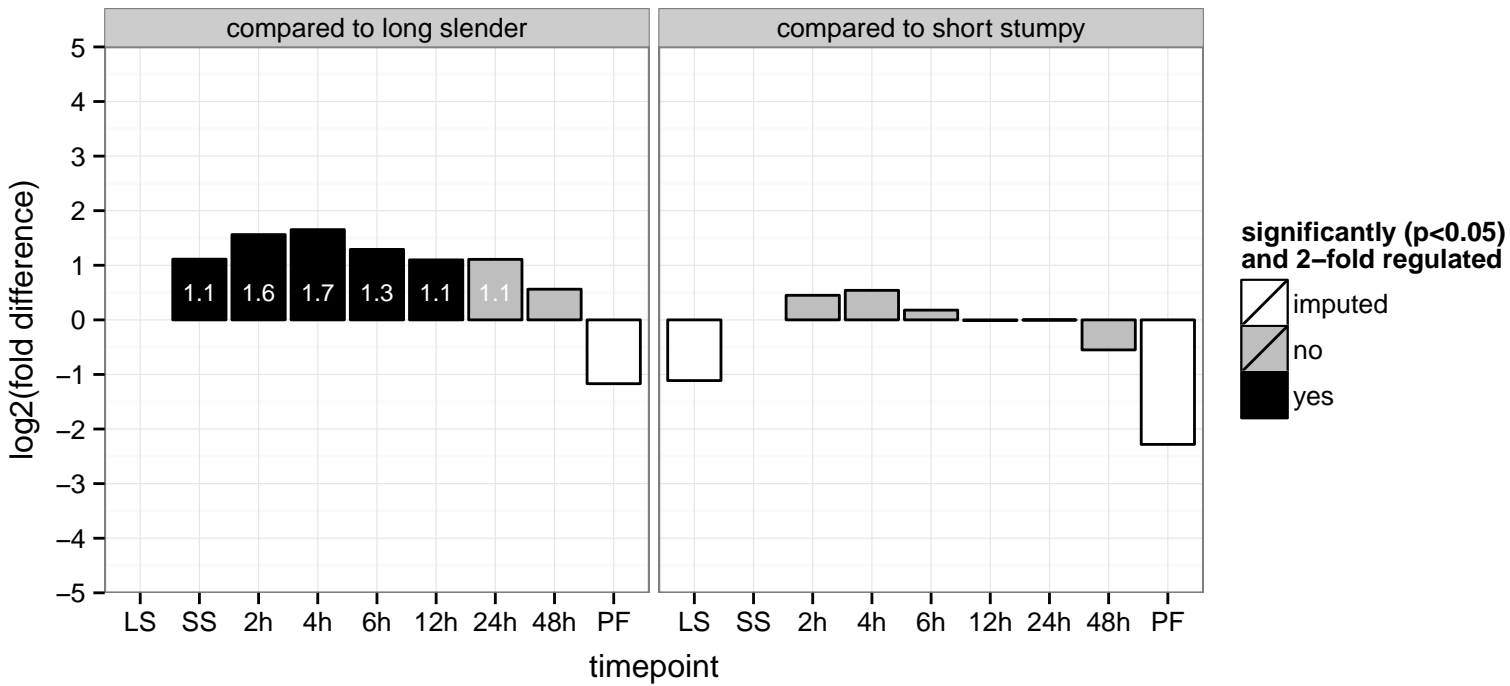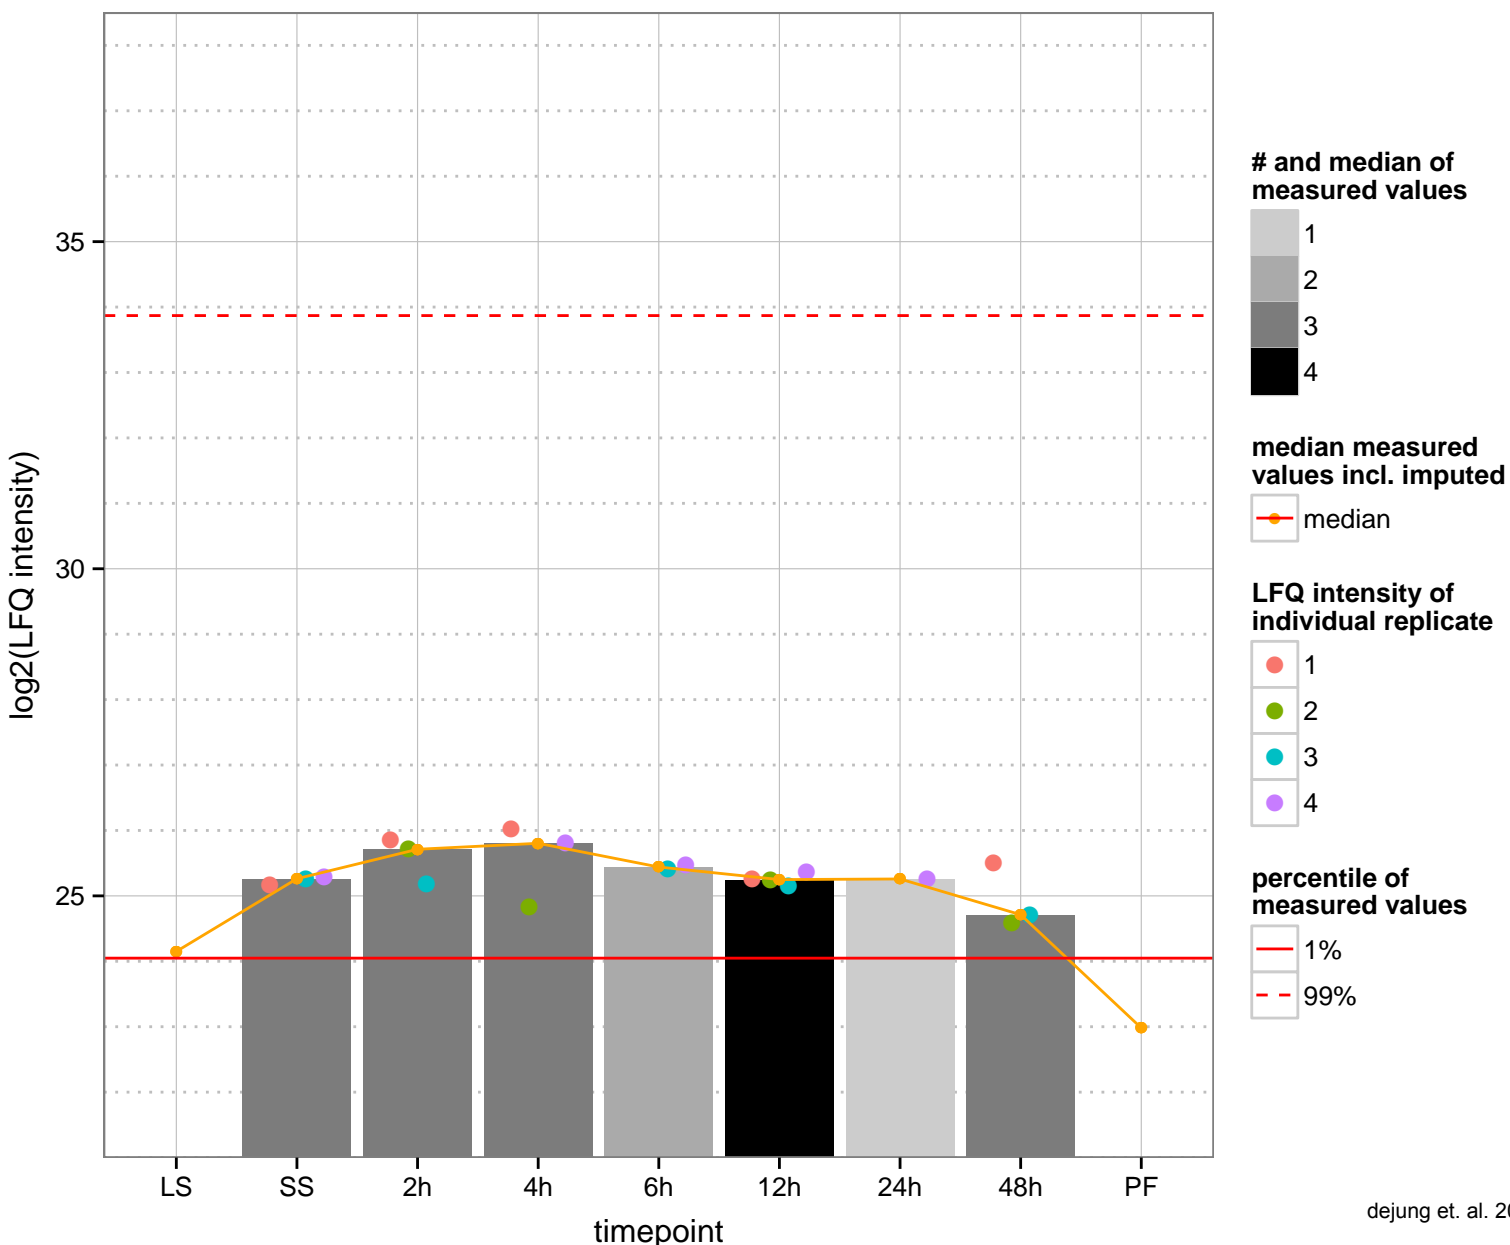

endoplasmic reticulum retrieval protein, putative  
 Tb927.7.2510  
 AGOF: null  
 AGOC: integral to membrane  
 AGOP: null  
 PGO: null  
 PGO: null  
 PGO: integral to membrane  
 PGO: null

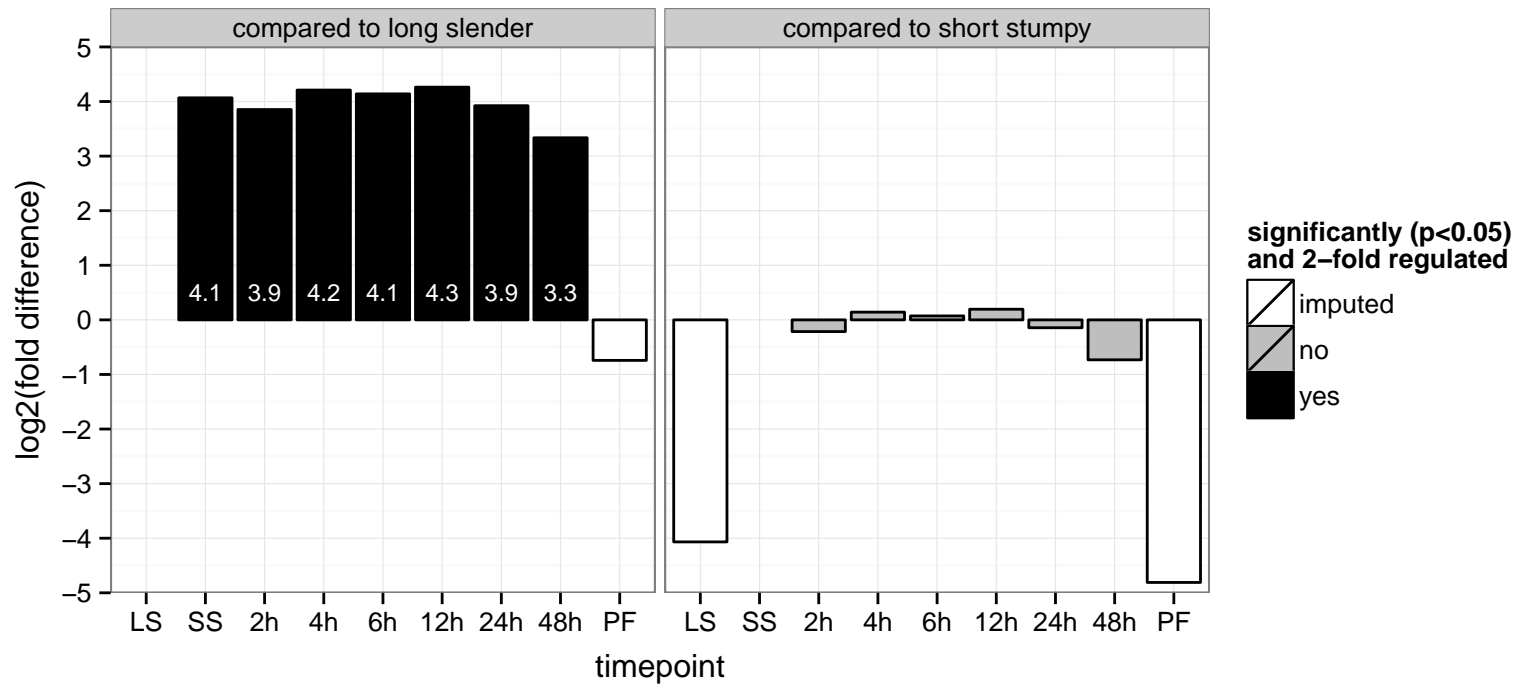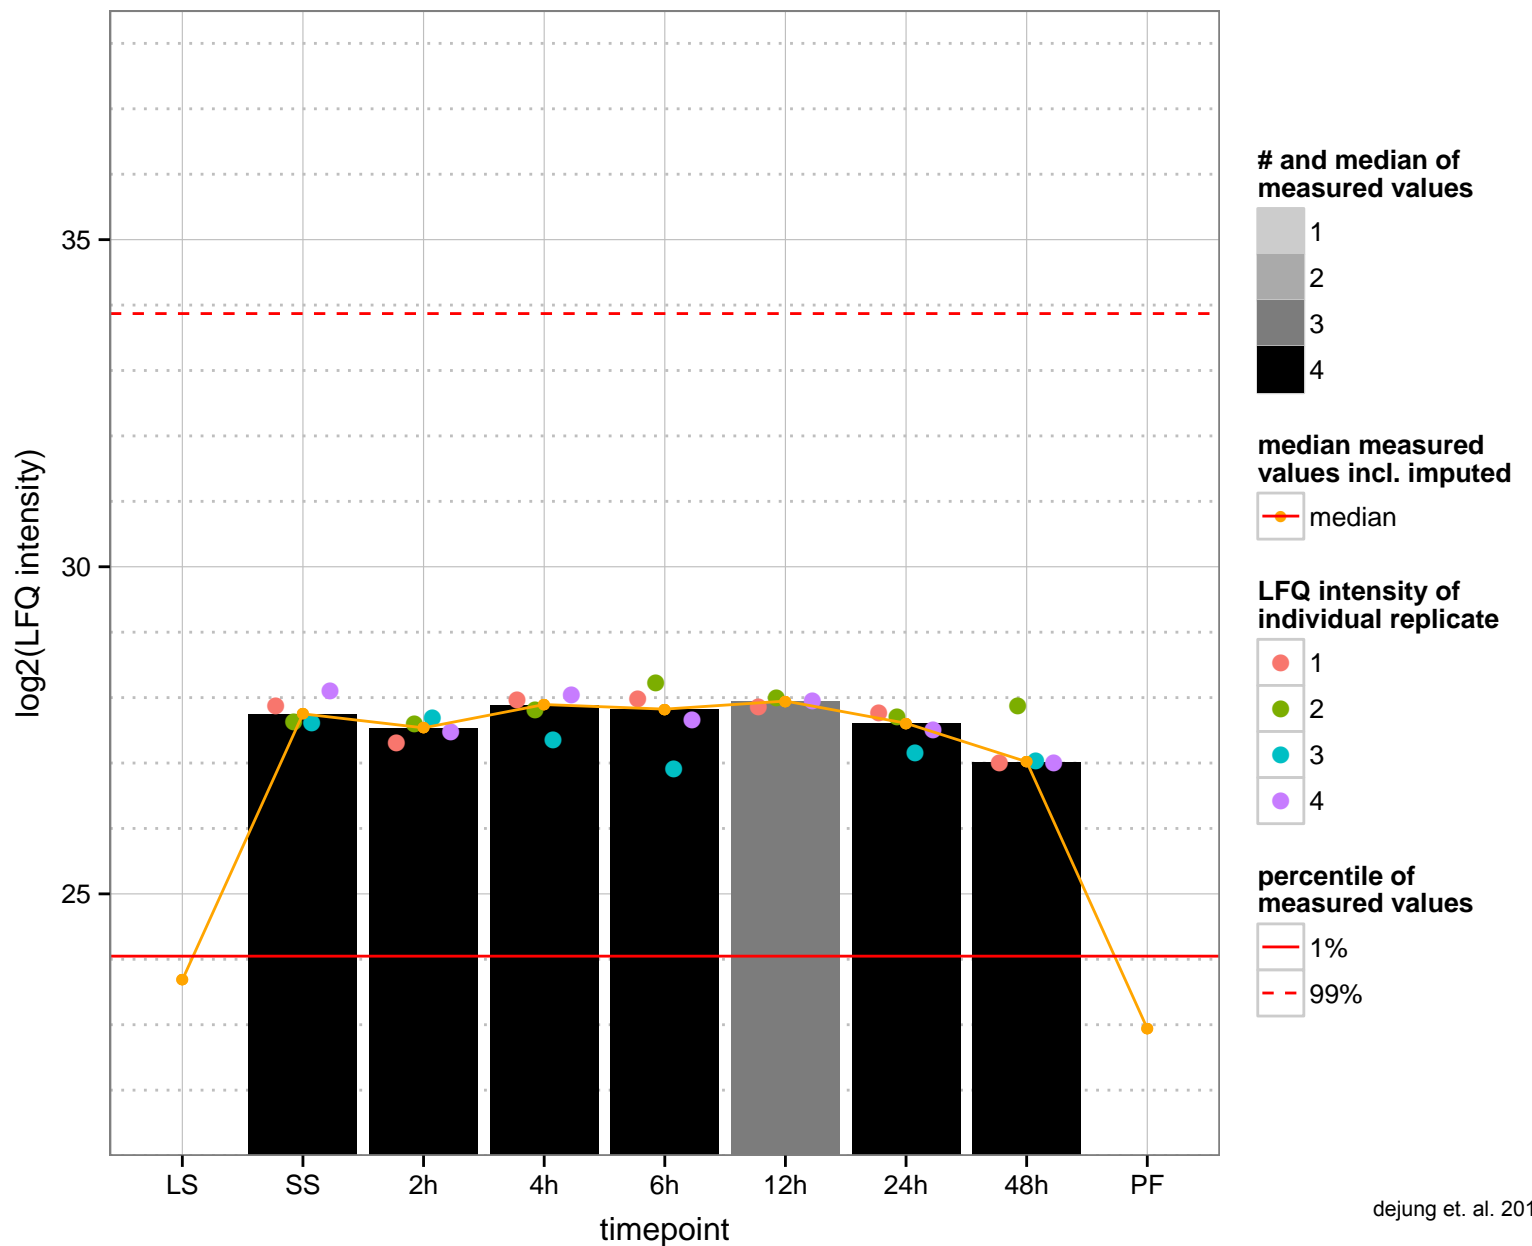

hypothetical protein, conserved  
Tb927.7.3070  
AGOF: null  
AGOC: null  
AGOP: null  
PGOF: null  
PGOC: null  
PGOP: transmembrane transport

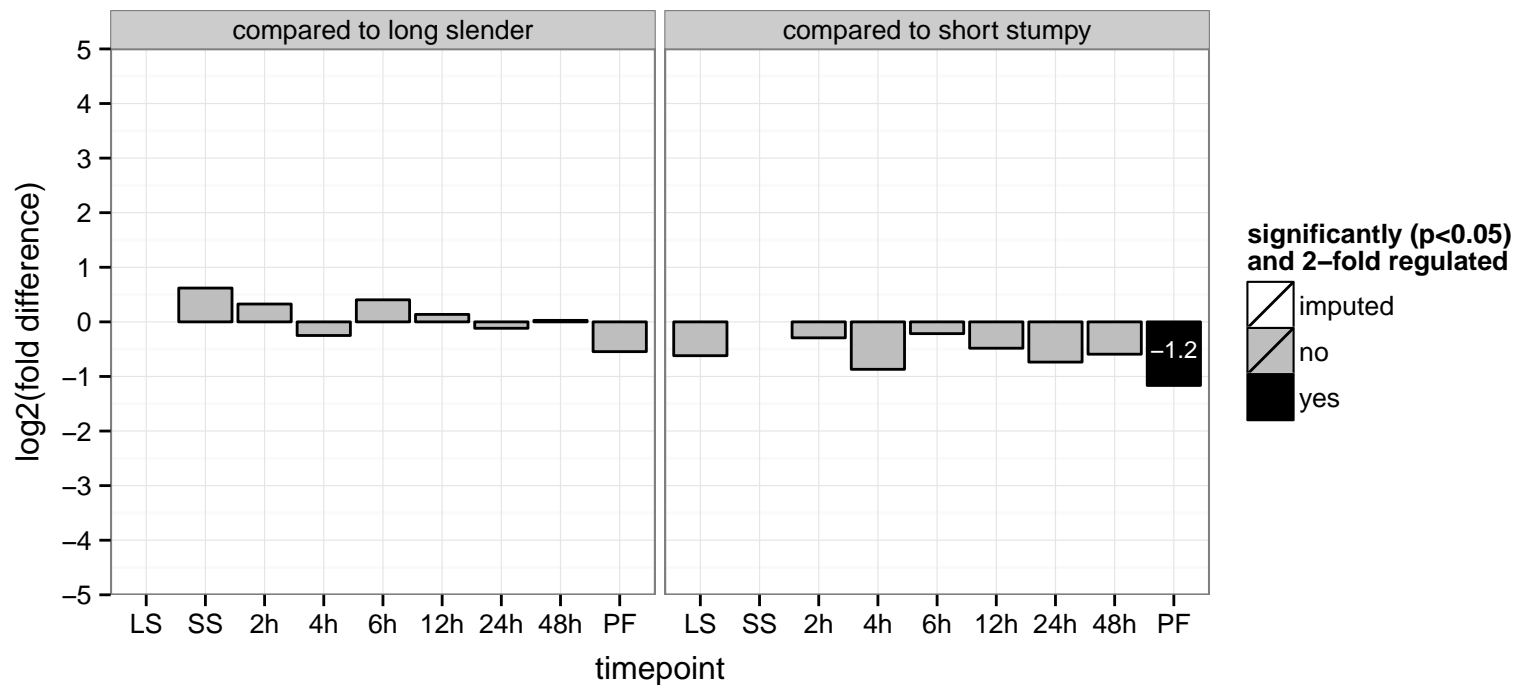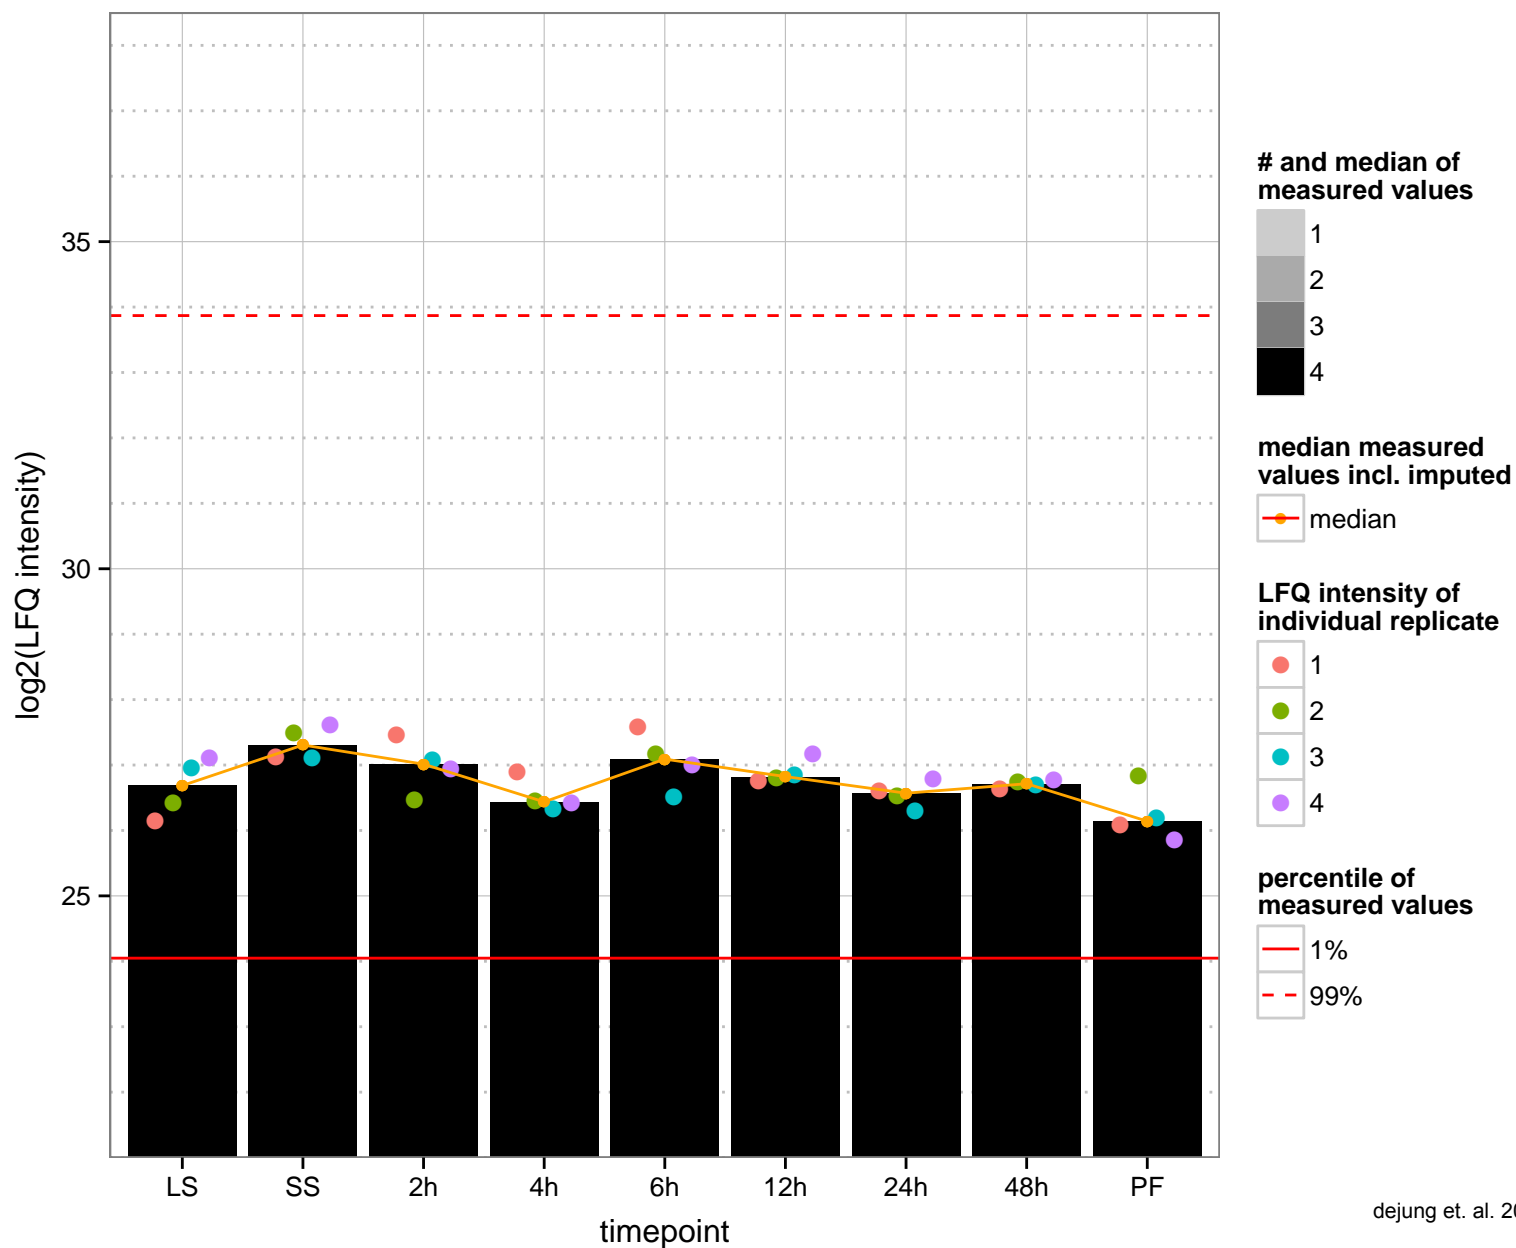



peptidyl-prolyl cis-trans isomerase, putative (PPIase)  
 Tb927.7.3420  
 AGOF: null  
 AGOC: null  
 AGOP: protein folding  
 PGOF: null  
 PGO: null  
 PGOP: protein folding

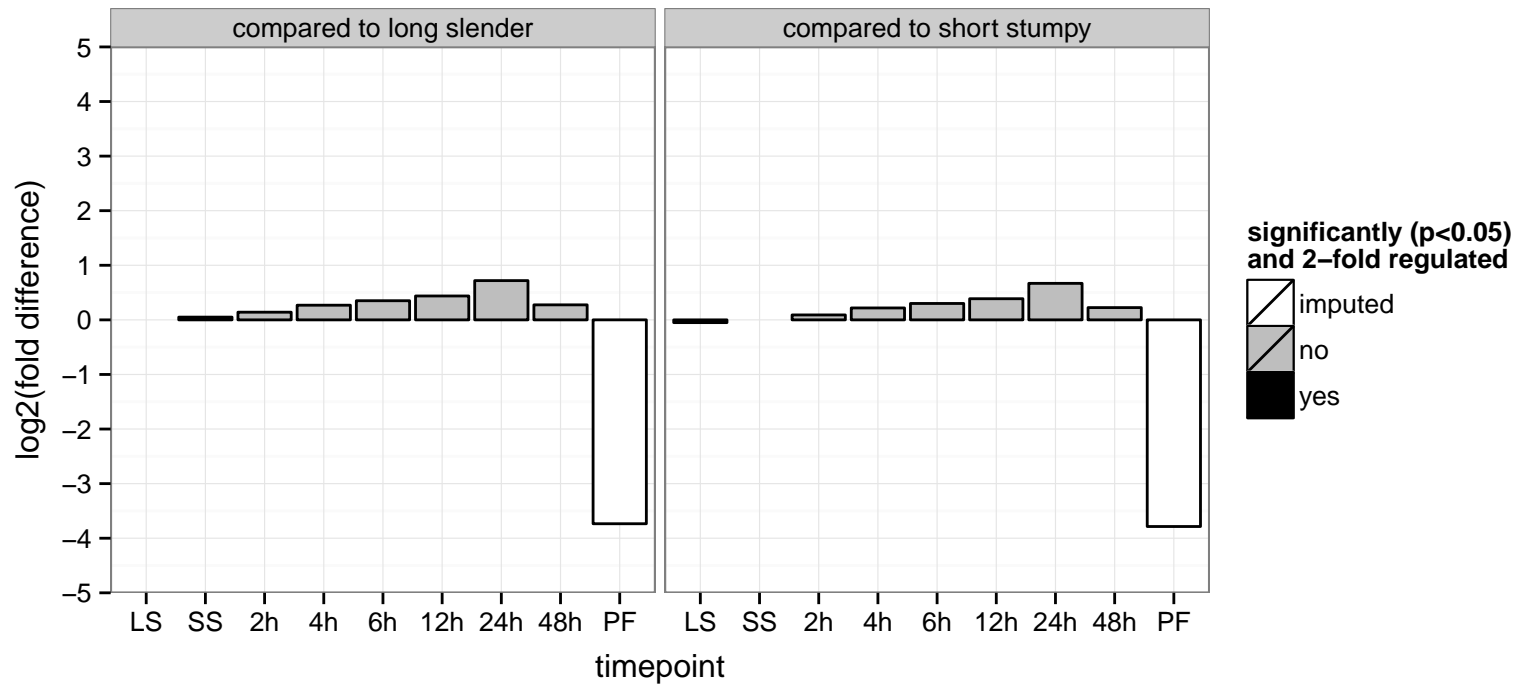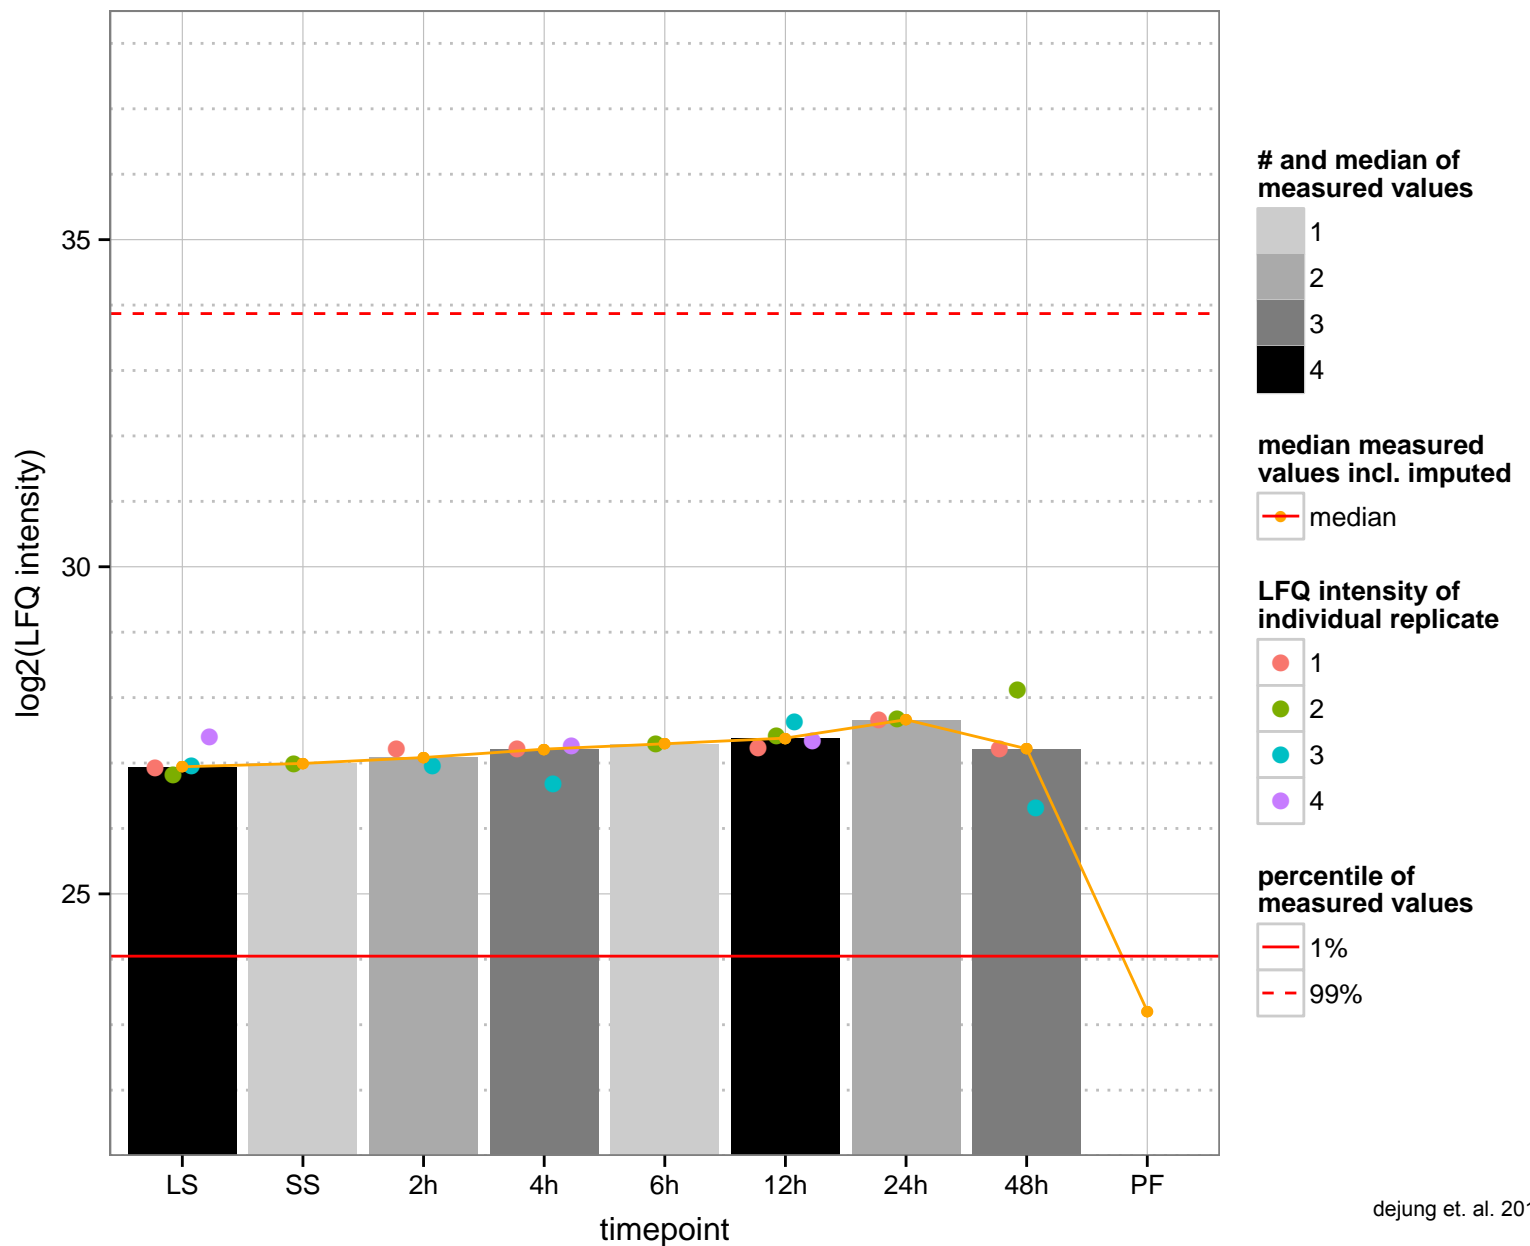

hypothetical protein, conserved  
 Tb927.7.3510  
 AGOF: null  
 AGOC: mitochondrion  
 AGOP: null  
 PGO: null  
 PGOC: null  
 PGOP: null

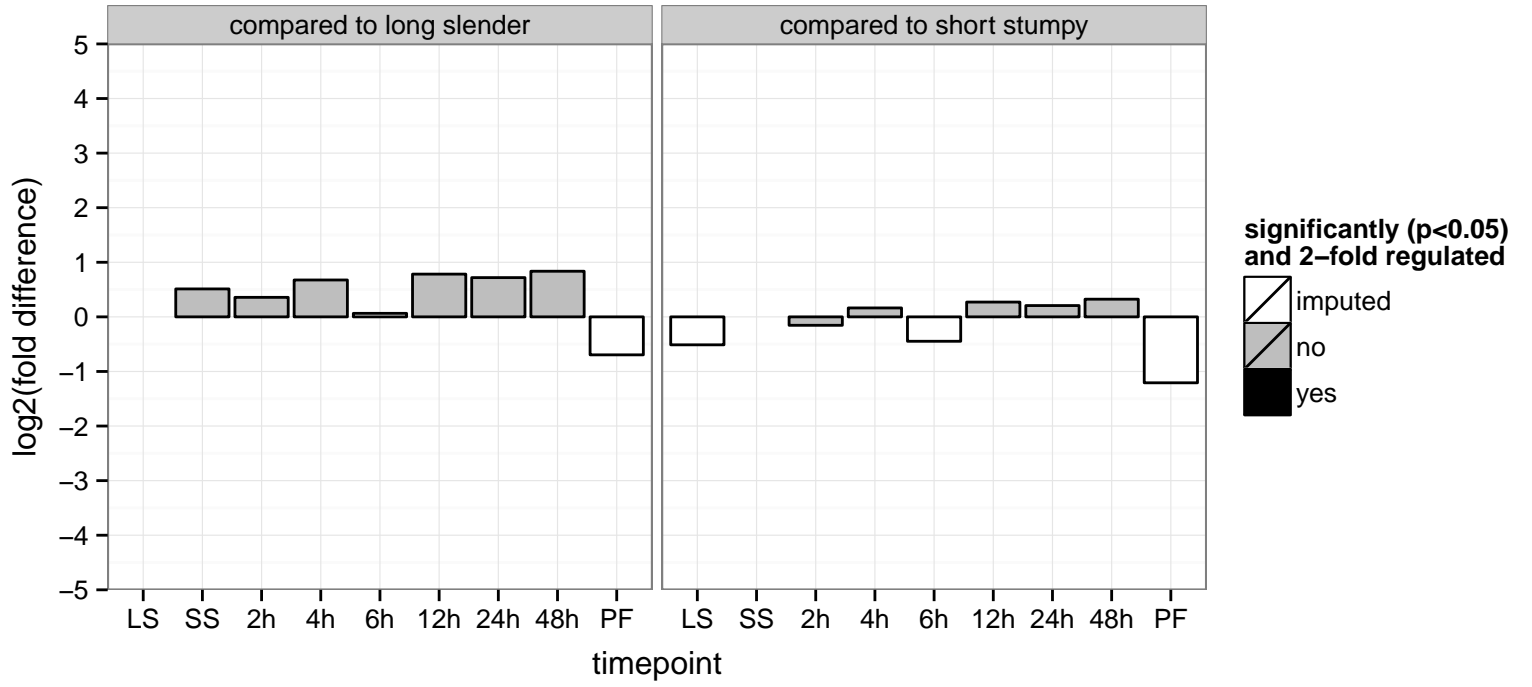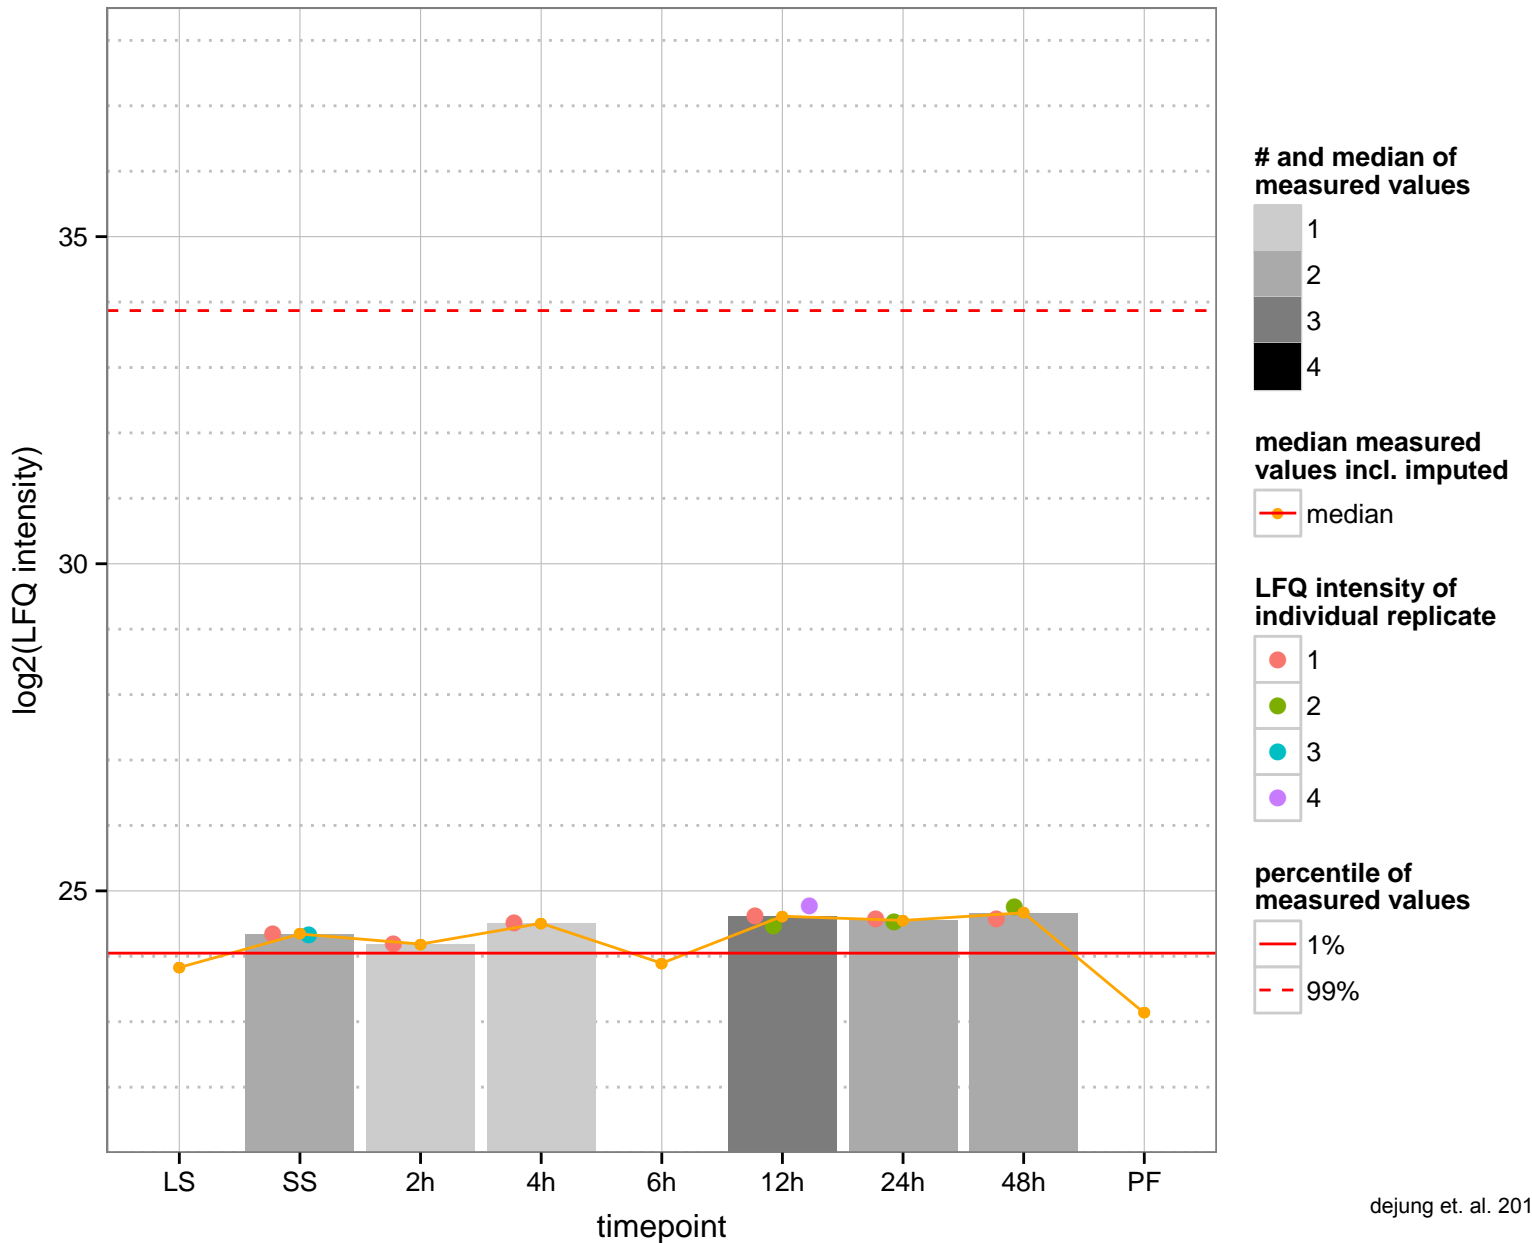

hypothetical protein, conserved  
 Tb927.7.3530  
 AGOF: null  
 AGOC: null  
 AGOP: null  
 PGOF: binding  
 PGO: null  
 PGOP: null

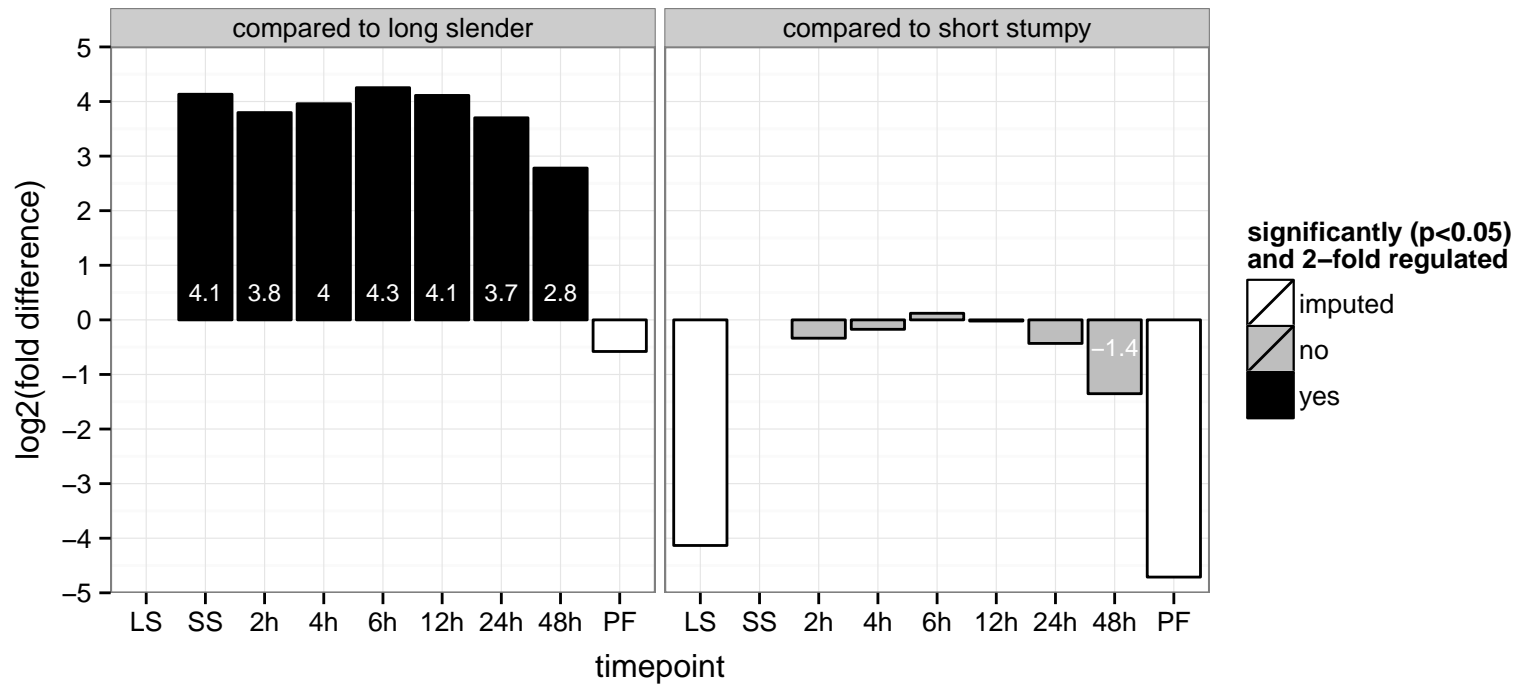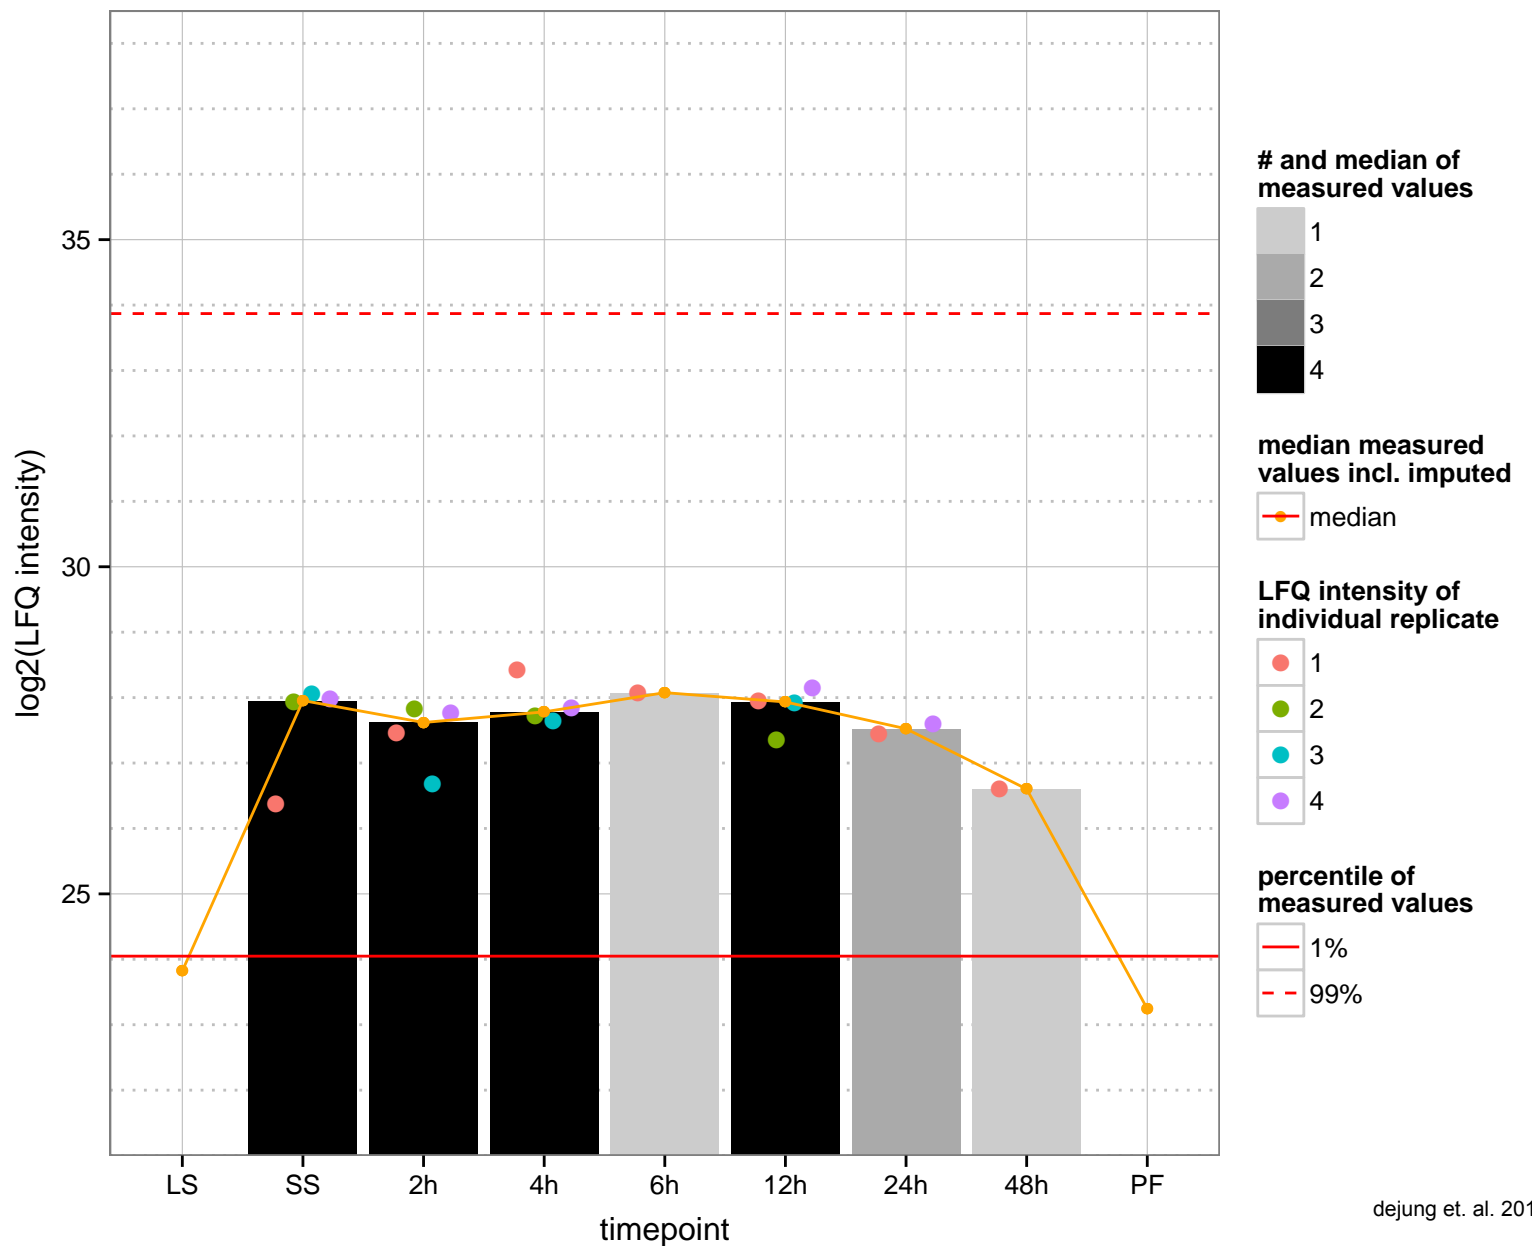

TPR-repeat-containing chaperone protein DNAJ, putative  
 Tb927.7.3630  
 AGOF: heat shock protein binding  
 AGOC: null  
 AGOP: null  
 PGOF: heat shock protein binding, protein binding  
 PGO: null  
 PGOP: null

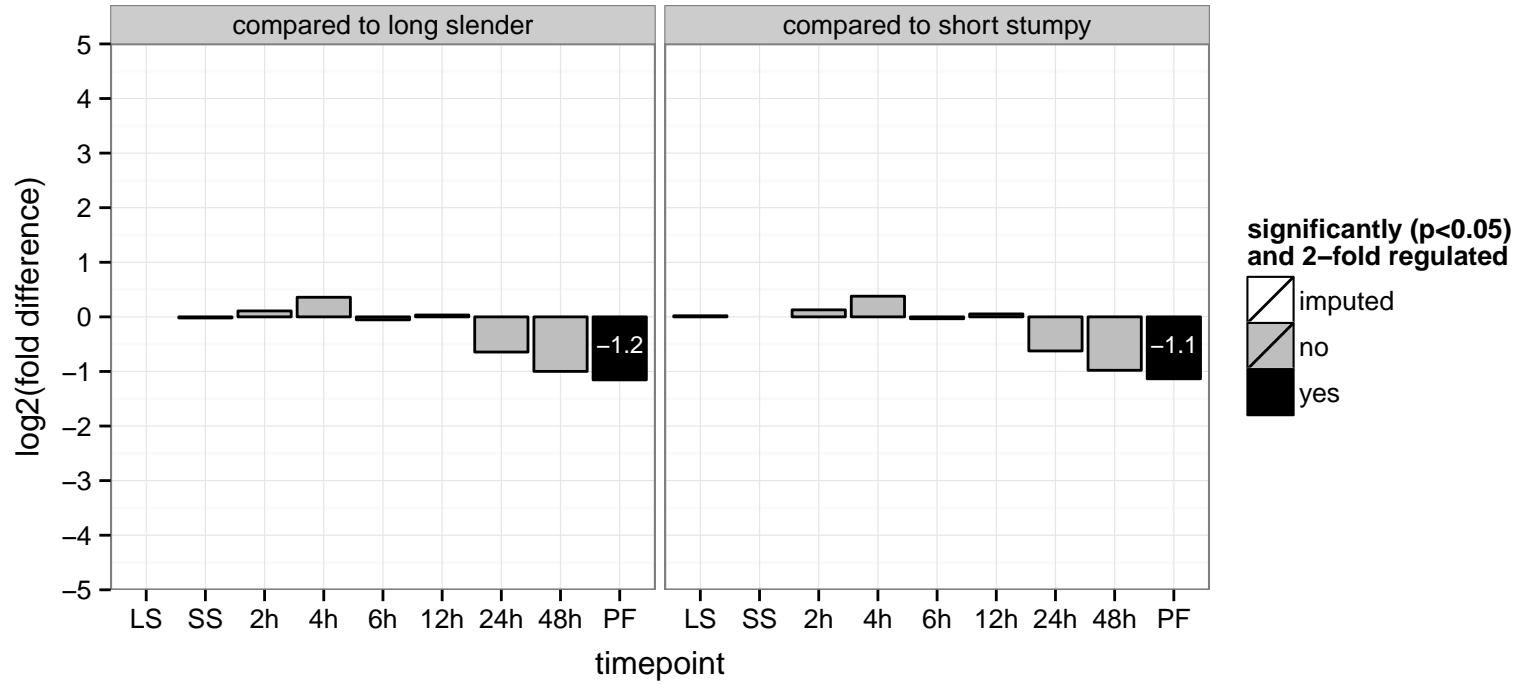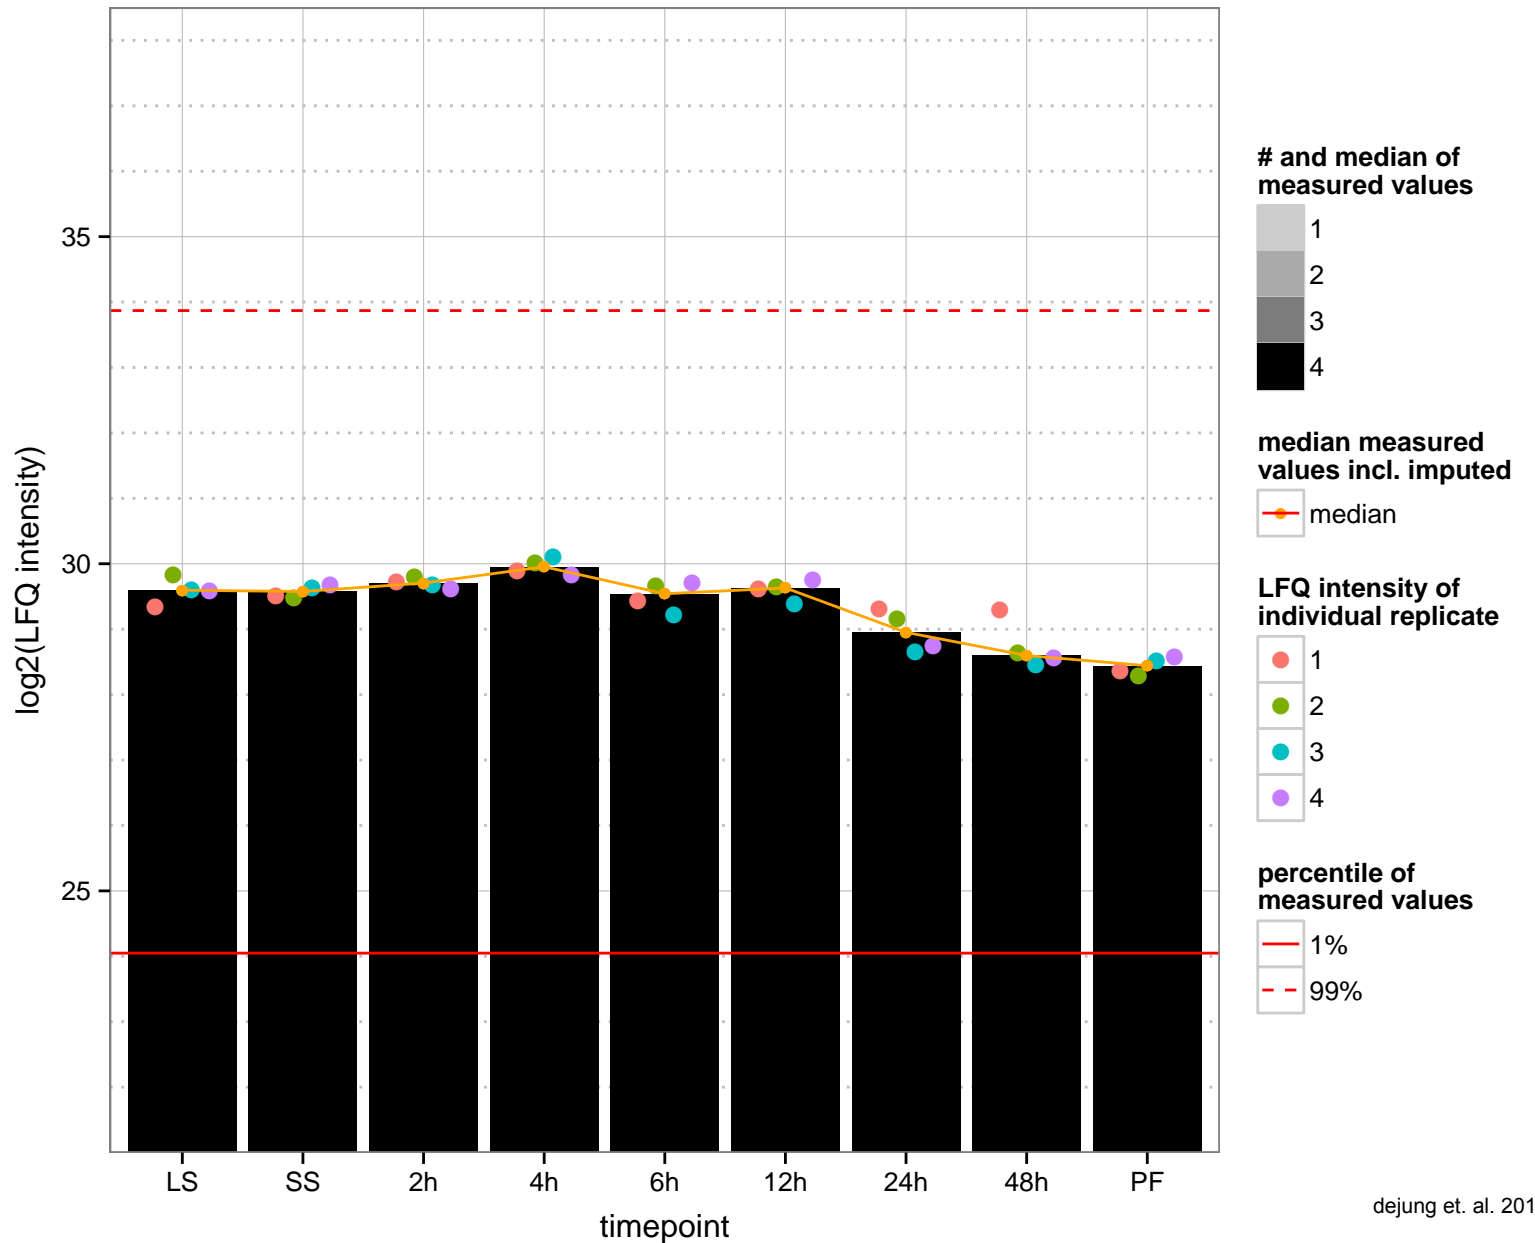

hypothetical protein, conserved  
 Tb927.7.3870  
 AGOF: null  
 AGOC: null  
 AGOP: null  
 PGO: null  
 PGOC: null  
 PGOP: null

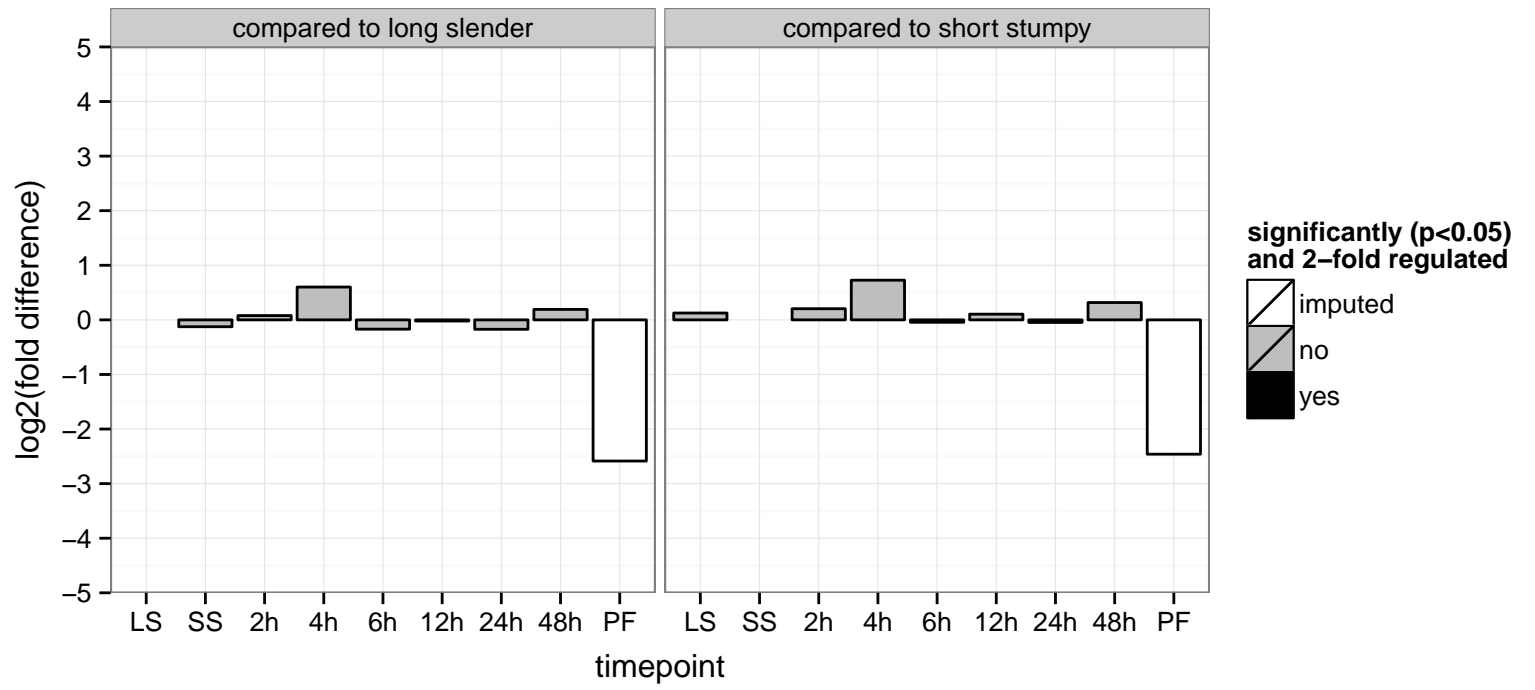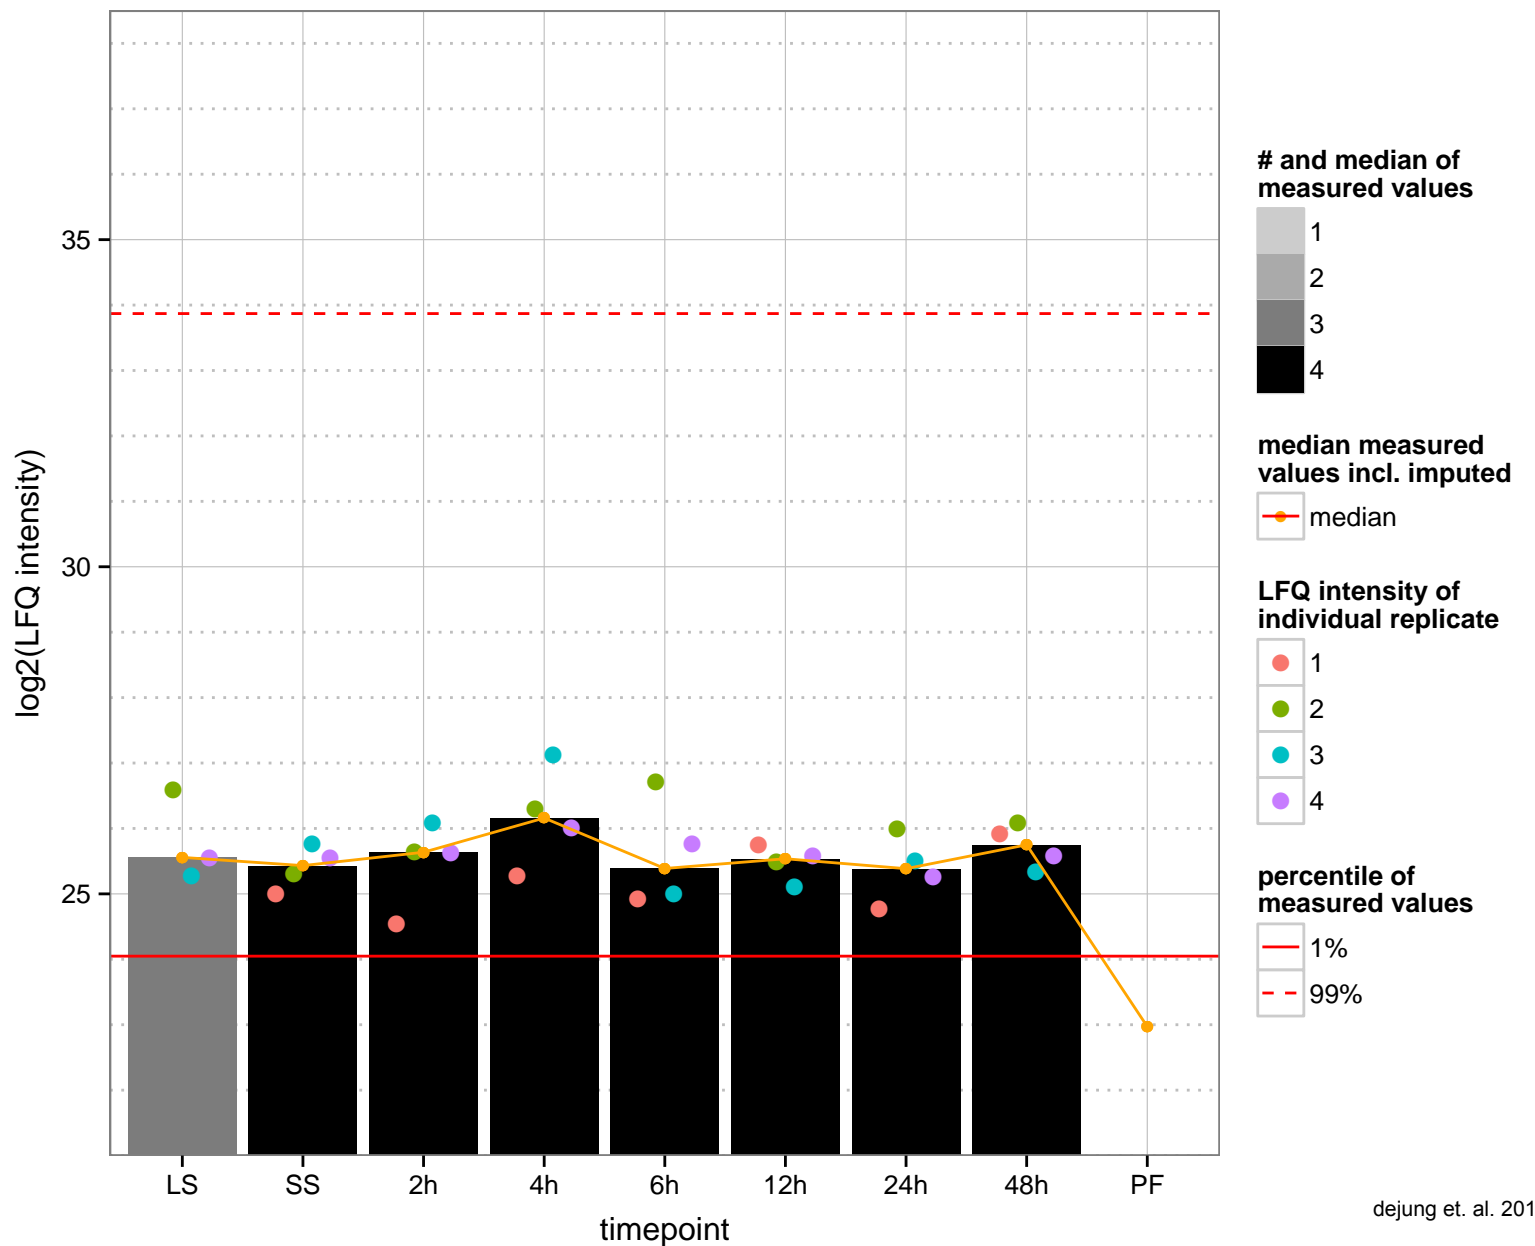

hypothetical protein, conserved  
 Tb927.7.4100  
 AGOF: null  
 AGOC: null  
 AGOP: null  
 PGO: null  
 PGOC: null  
 PGOP: null

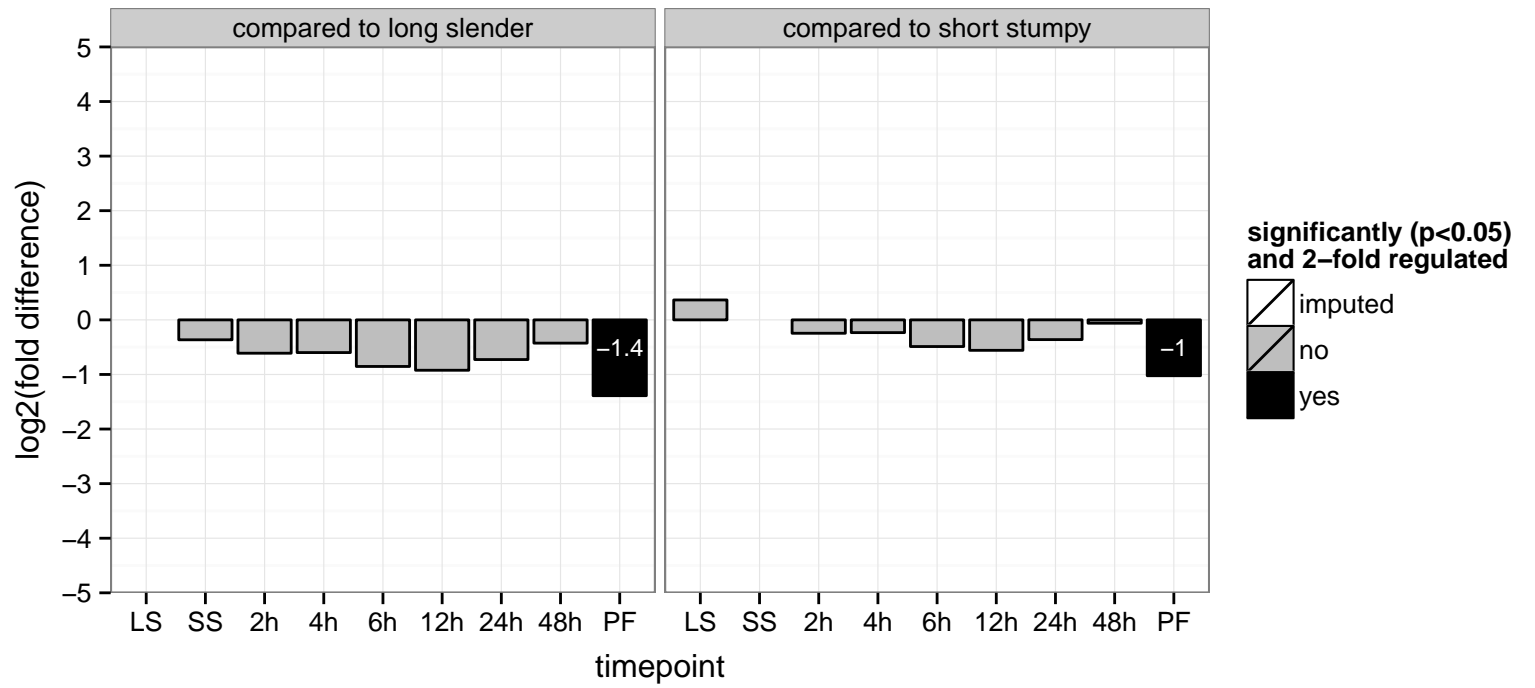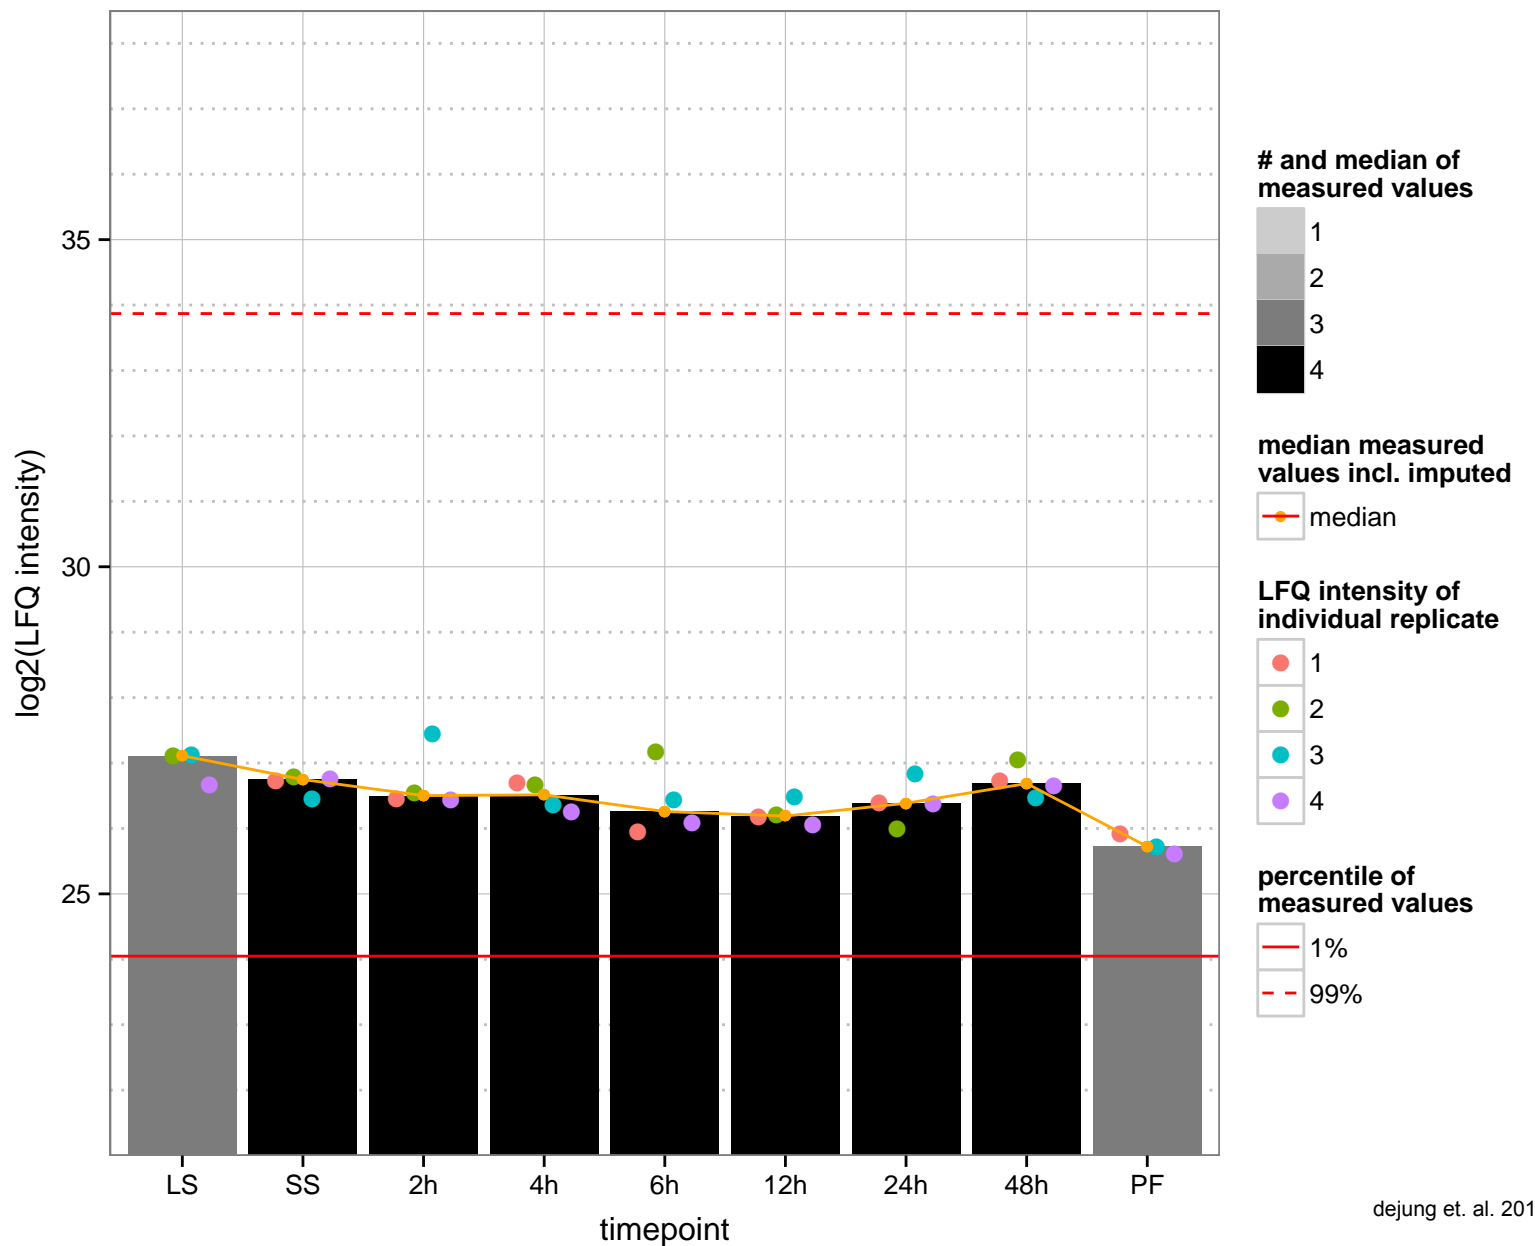

fatty acid elongase, putative  
 Tb927.7.4170  
 AGOF: fatty acid elongase activity  
 AGOC: integral to endoplasmic reticulum membrane  
 AGOP: long-chain fatty acid biosynthetic process  
 PGO: null  
 PGOC: integral to membrane  
 PGOP: null

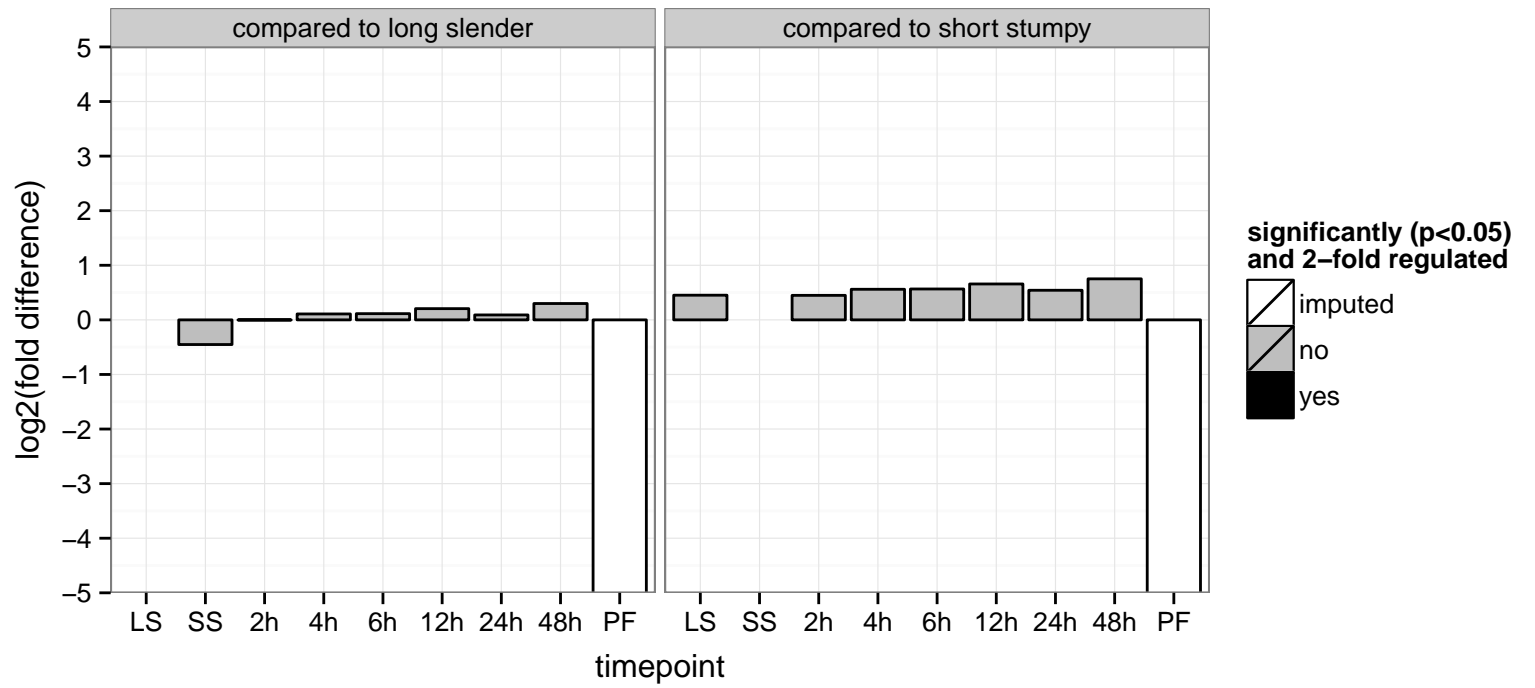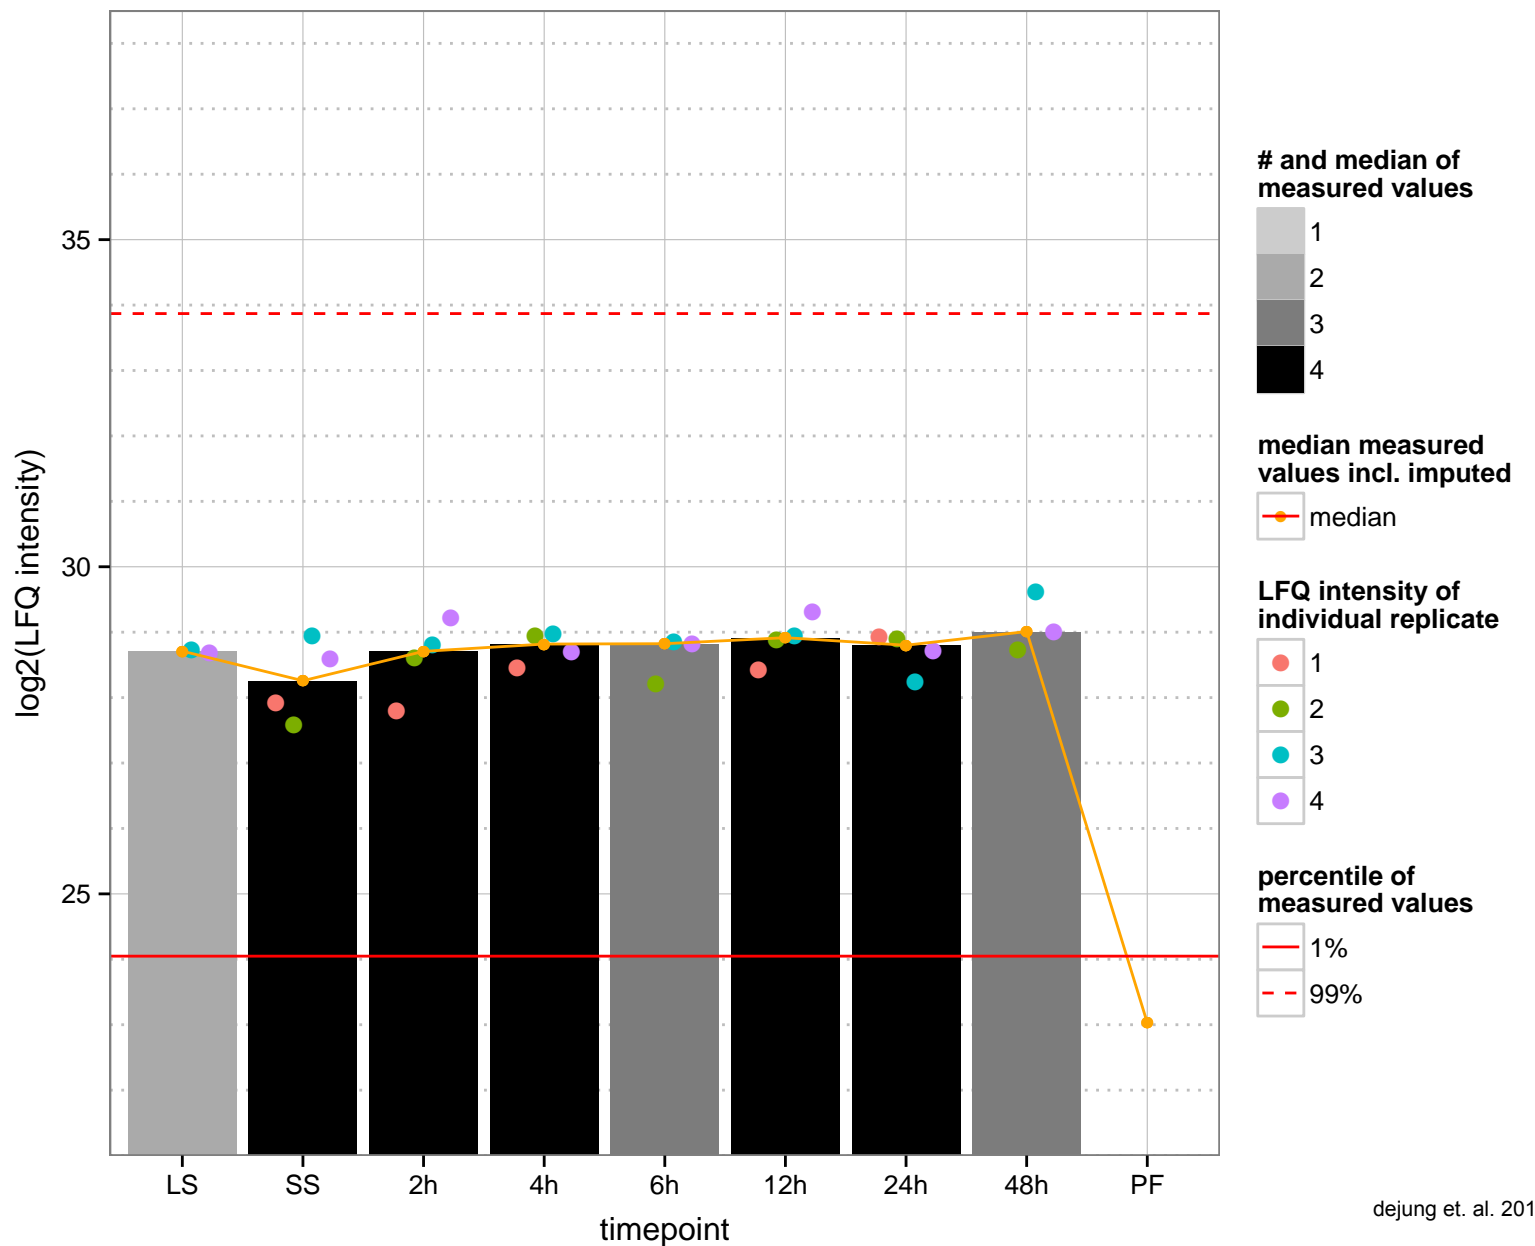

hypothetical protein, conserved  
 Tb927.7.450;Tb927.7.390  
 AGOF: null  
 AGOC: null  
 AGOP: null  
 PGO: null  
 PGOC: null  
 PGOP: null

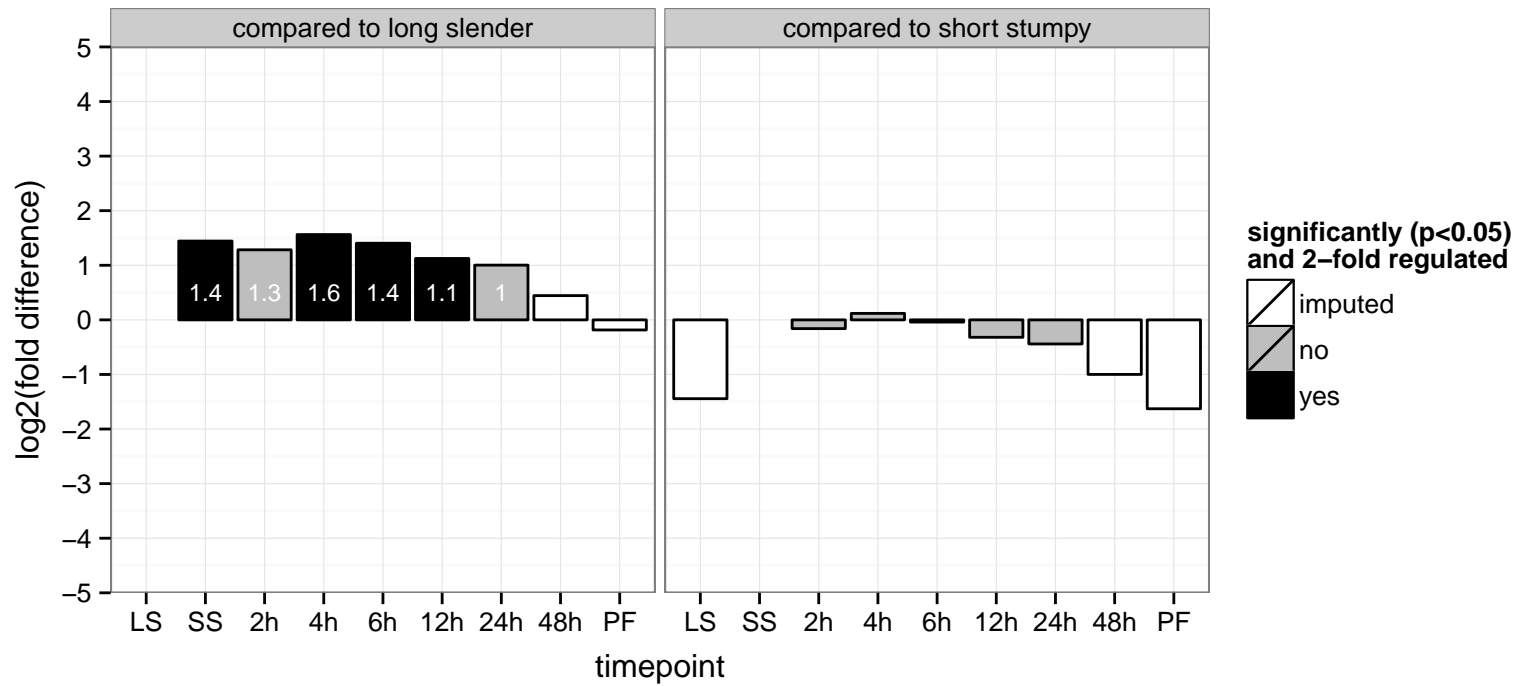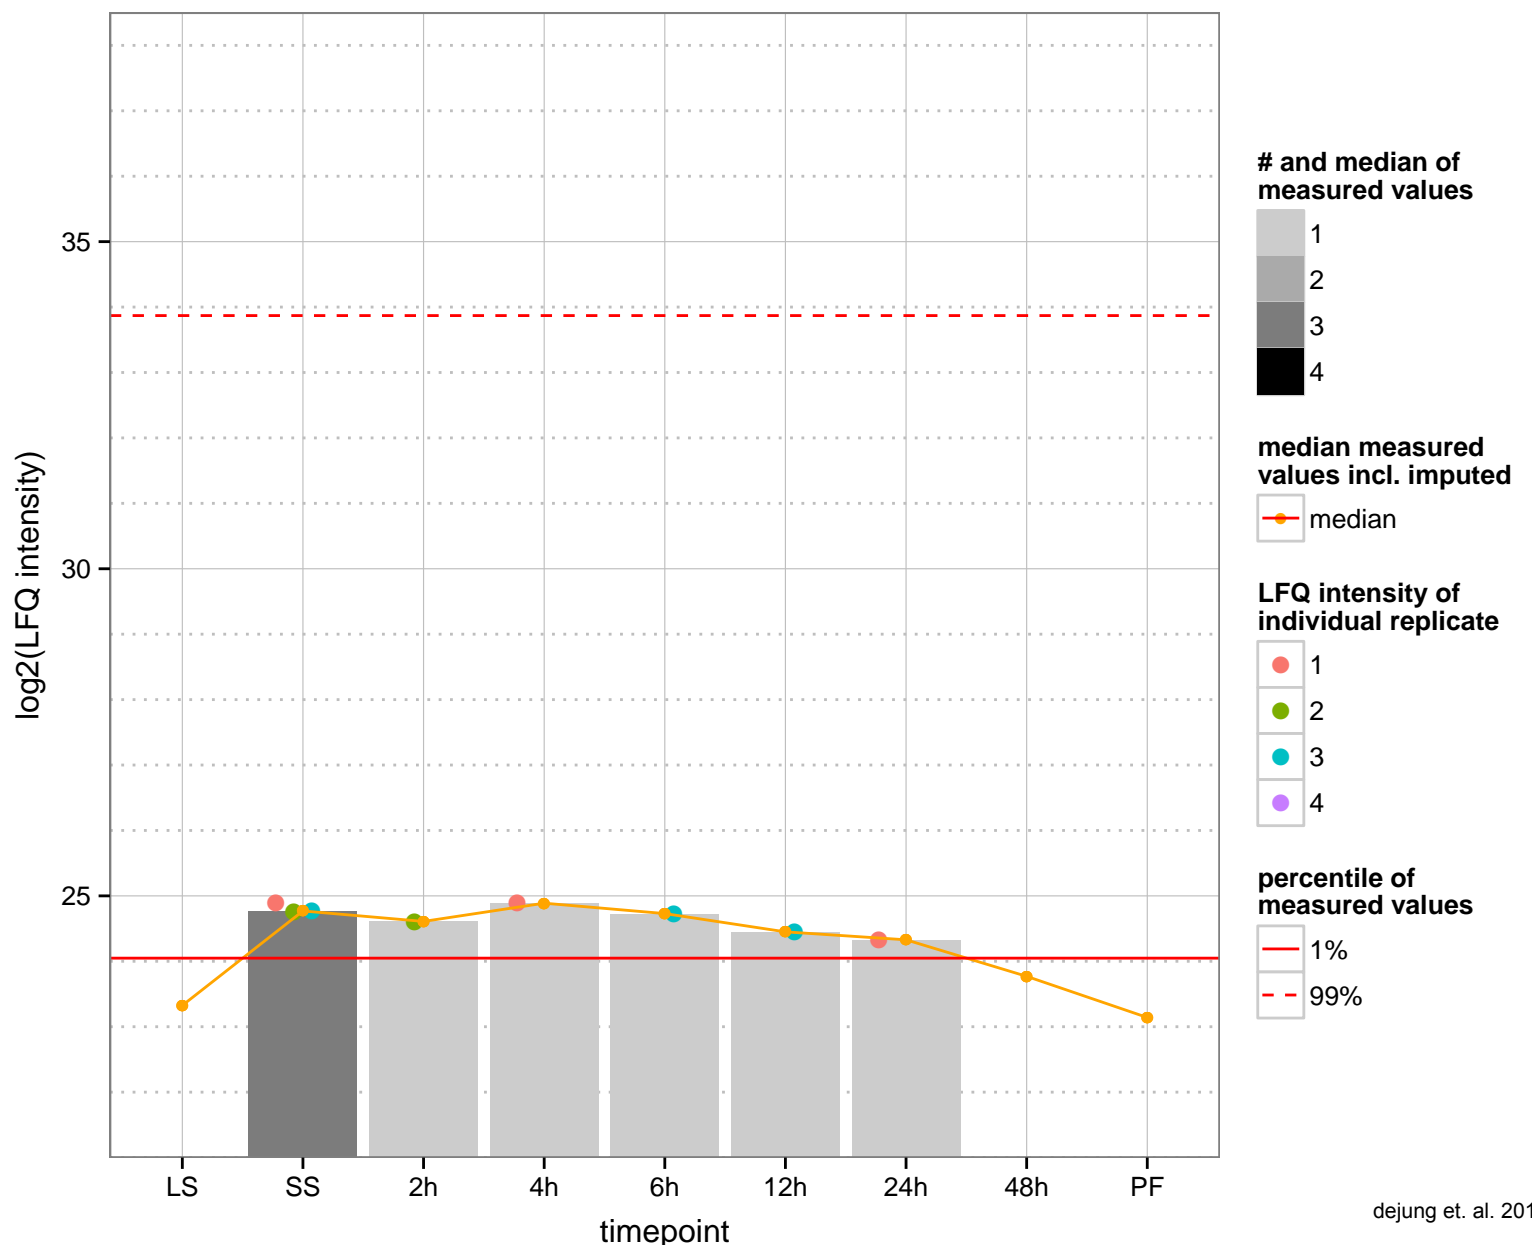



hypothetical protein, conserved  
 Tb927.7.5310  
 AGOF: null  
 AGOC: nucleus  
 AGOP: regulation of transcription, DNA-dependent  
 PGO: null  
 PGO: nucleus  
 PGO: regulation of transcription, DNA-dependent

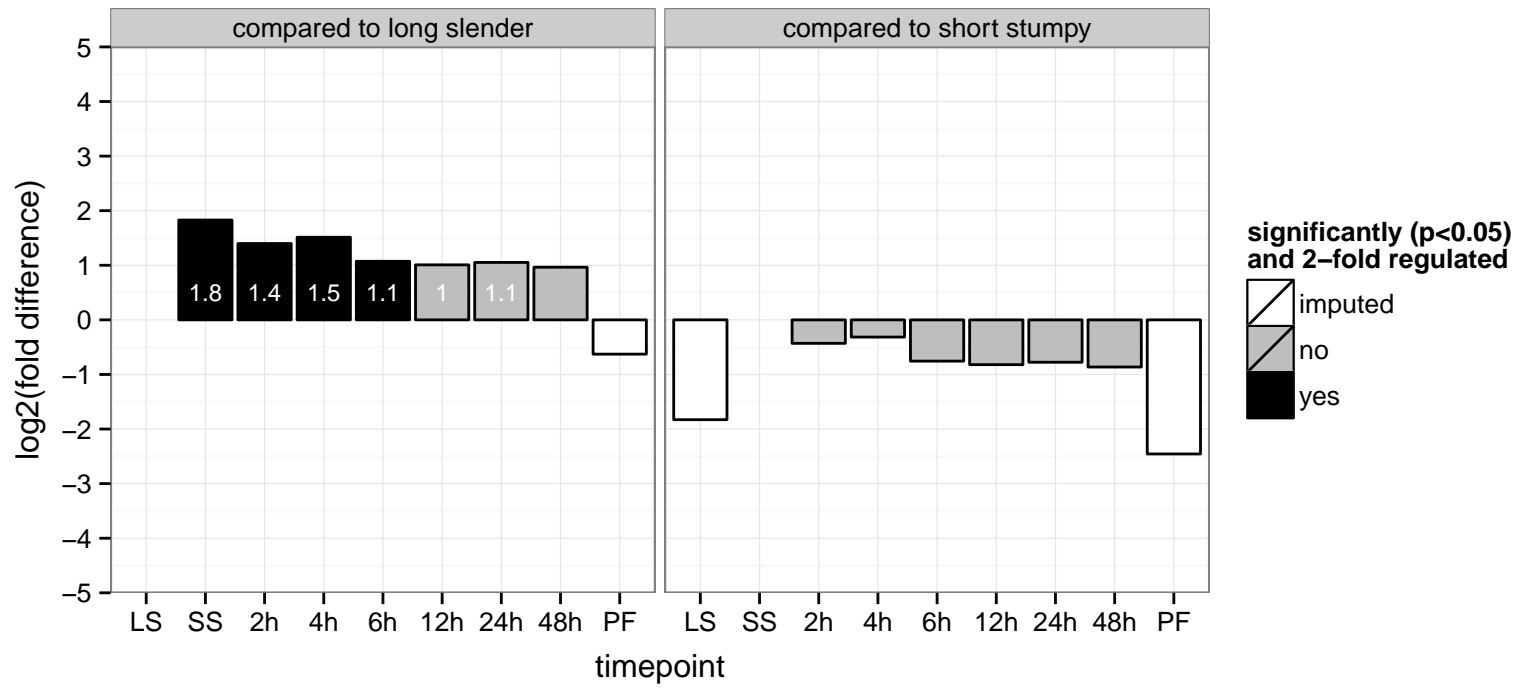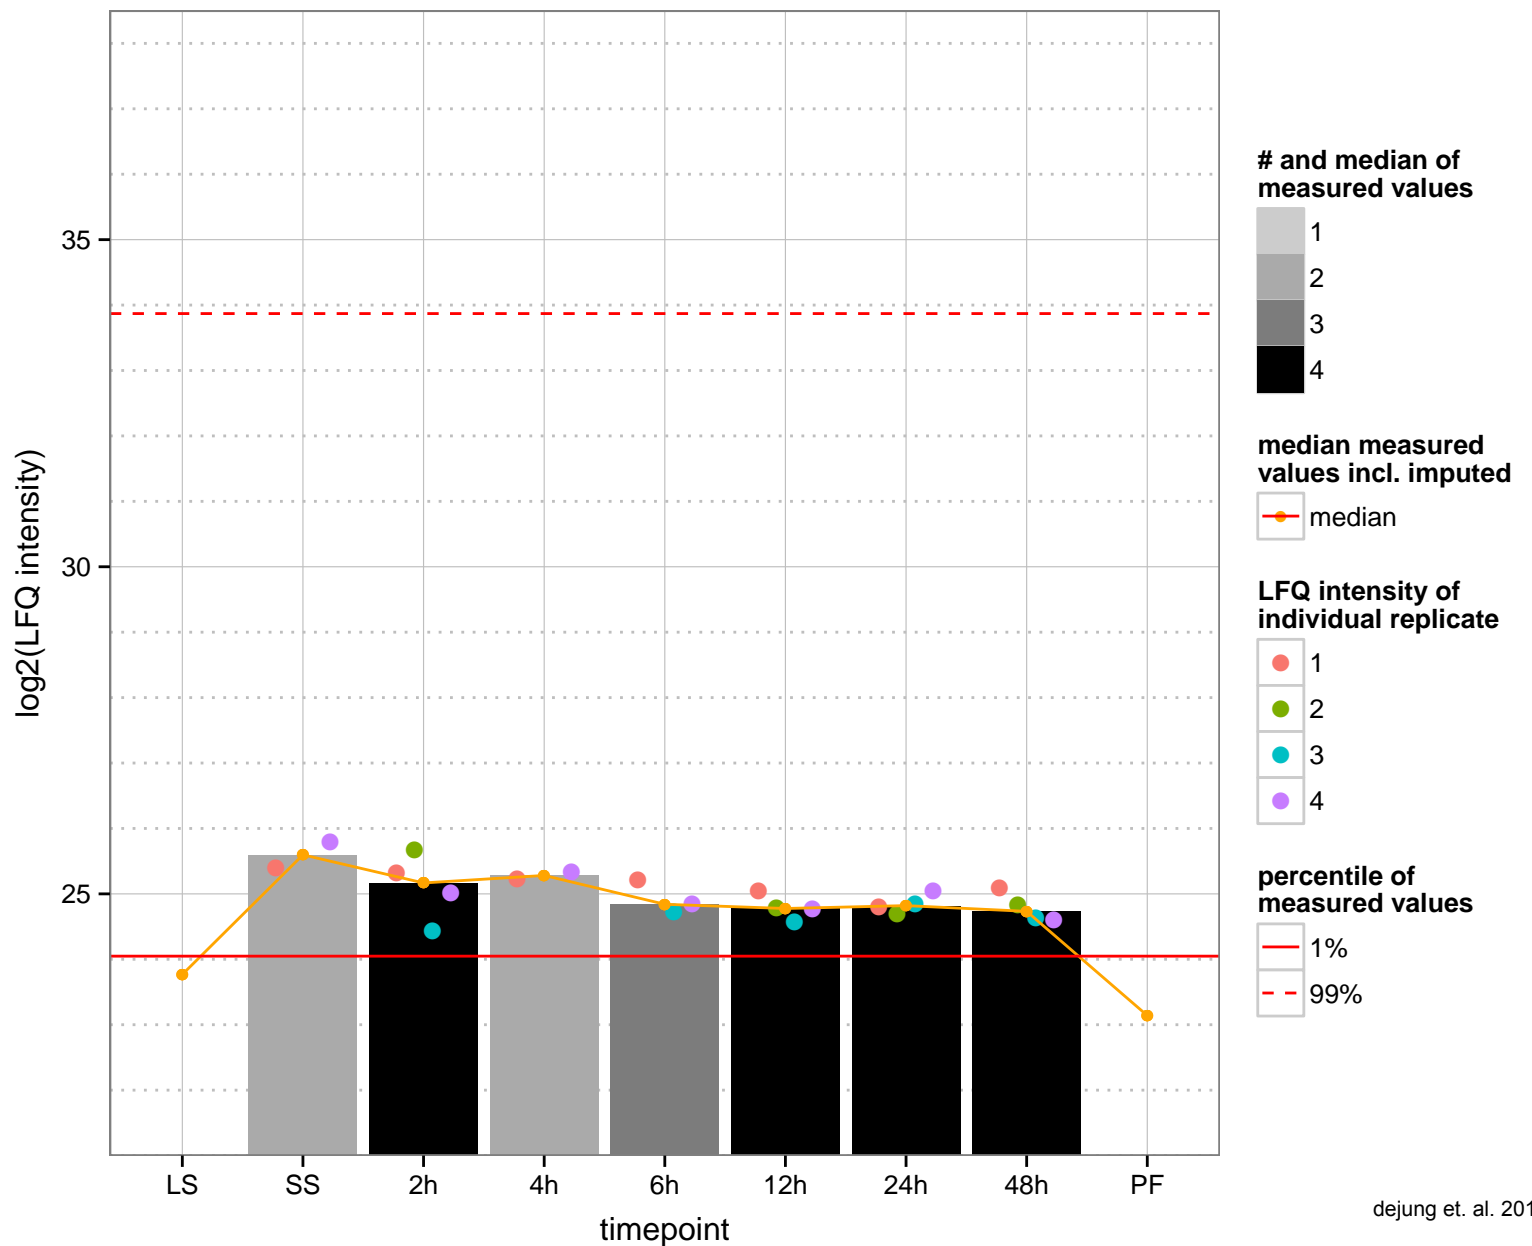

hypothetical protein, conserved  
 Tb927.7.5330  
 AGOF: null  
 AGOC: null  
 AGOP: null  
 PGO: null  
 PGOC: null  
 PGOP: null

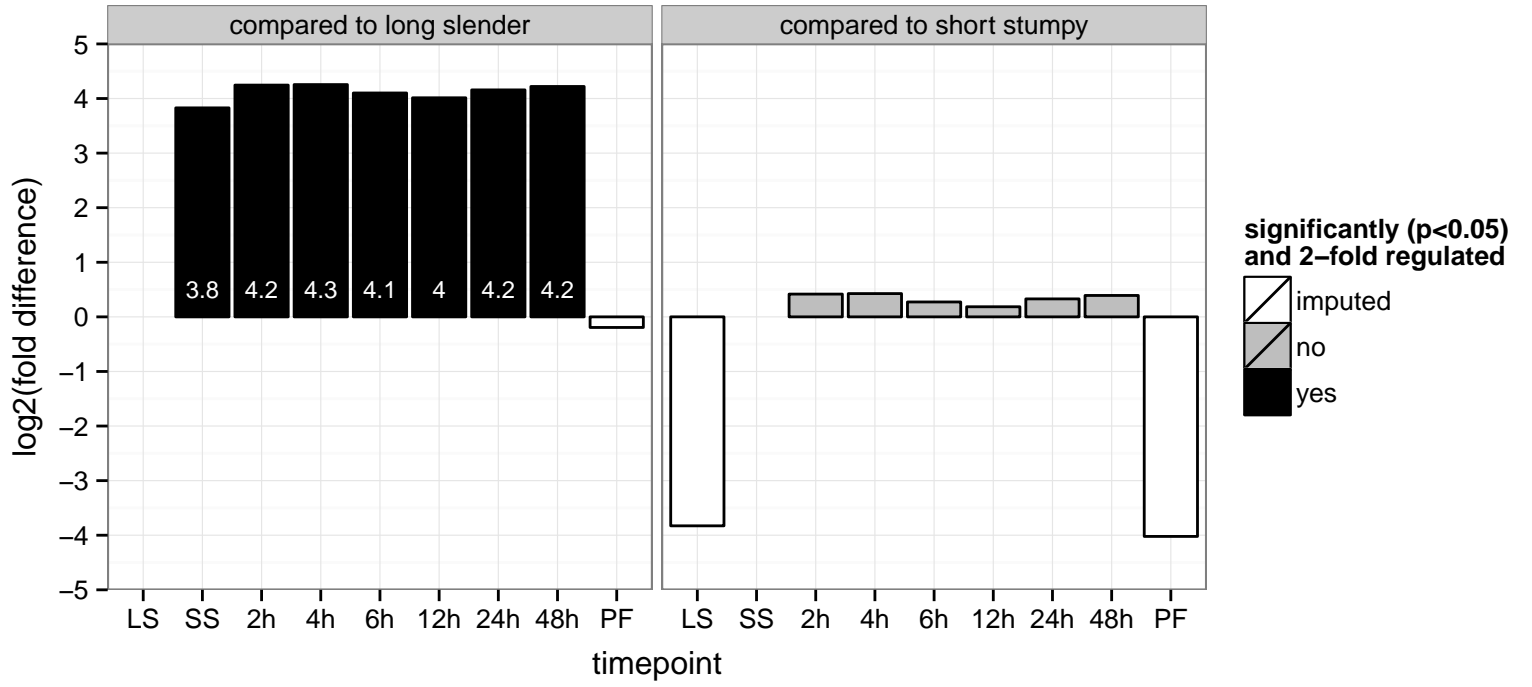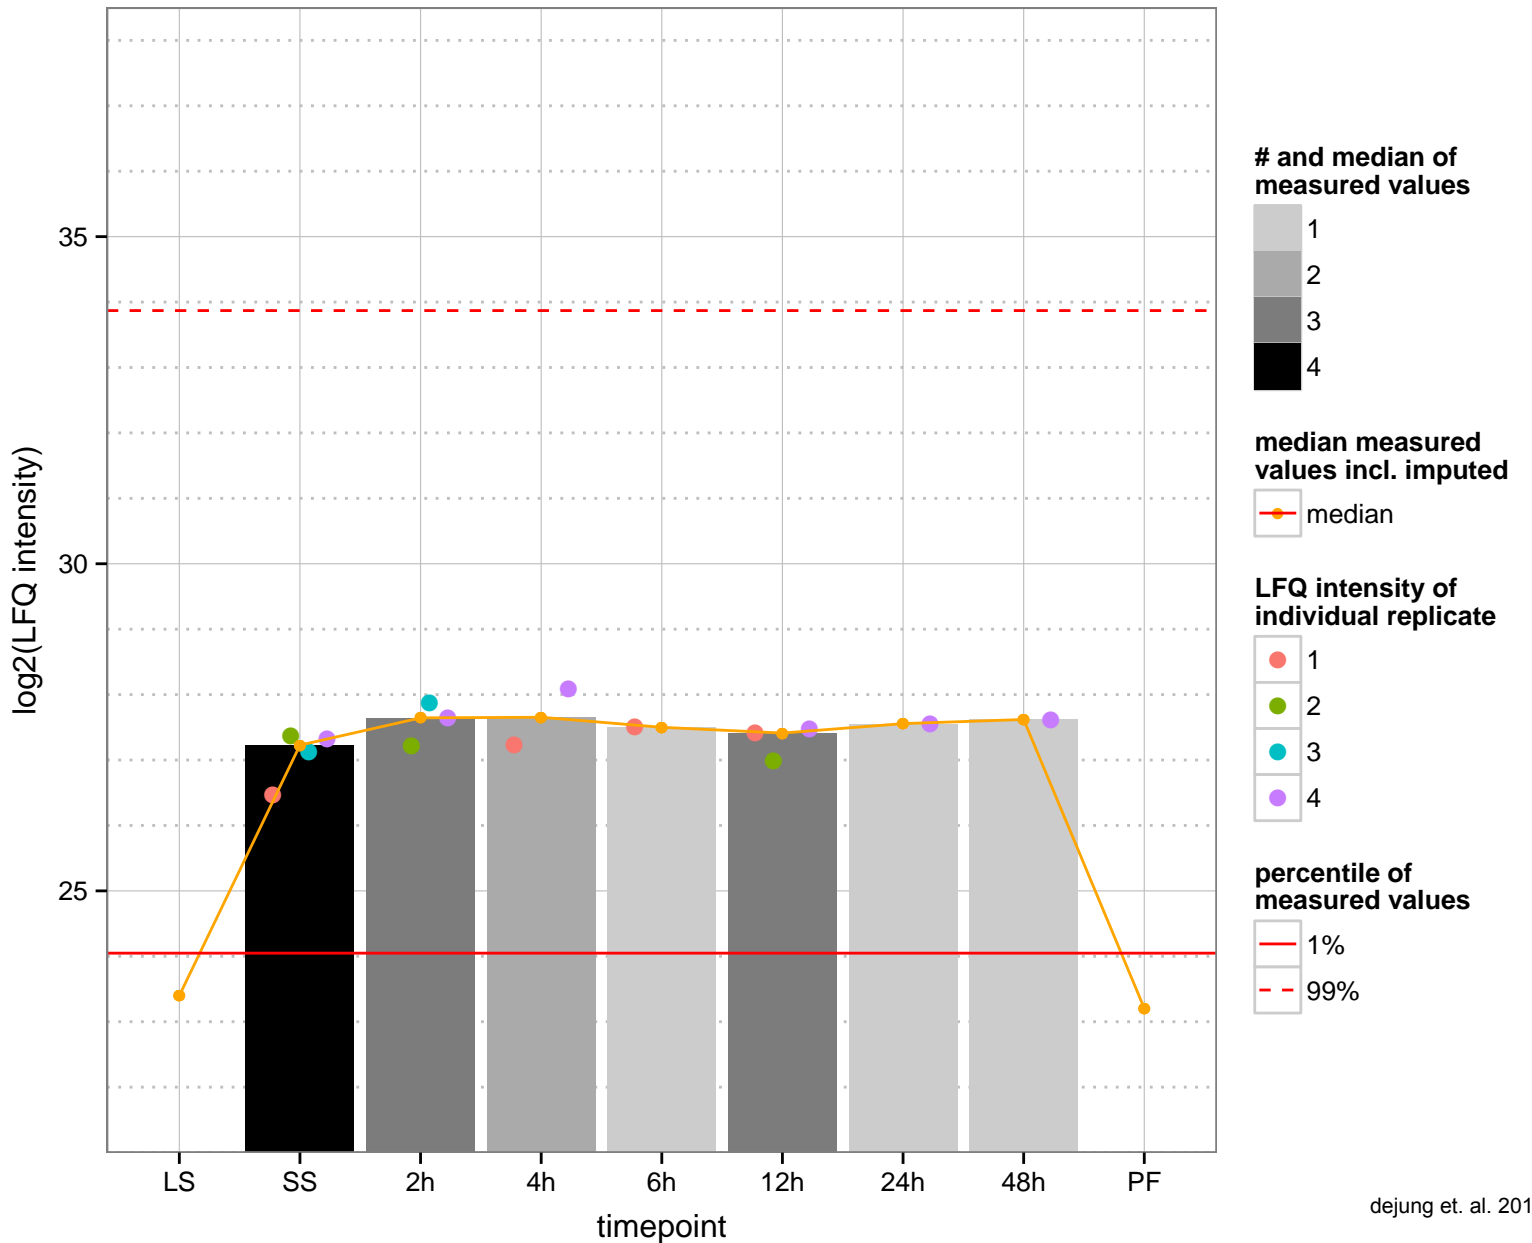

chaperone protein DNAj, putative  
 Tb927.7.540  
 AGOF: heat shock protein binding, unfolded protein binding  
 AGOC: null  
 AGOP: protein folding  
 PGOF: heat shock protein binding  
 PGO: null  
 PGOP: null

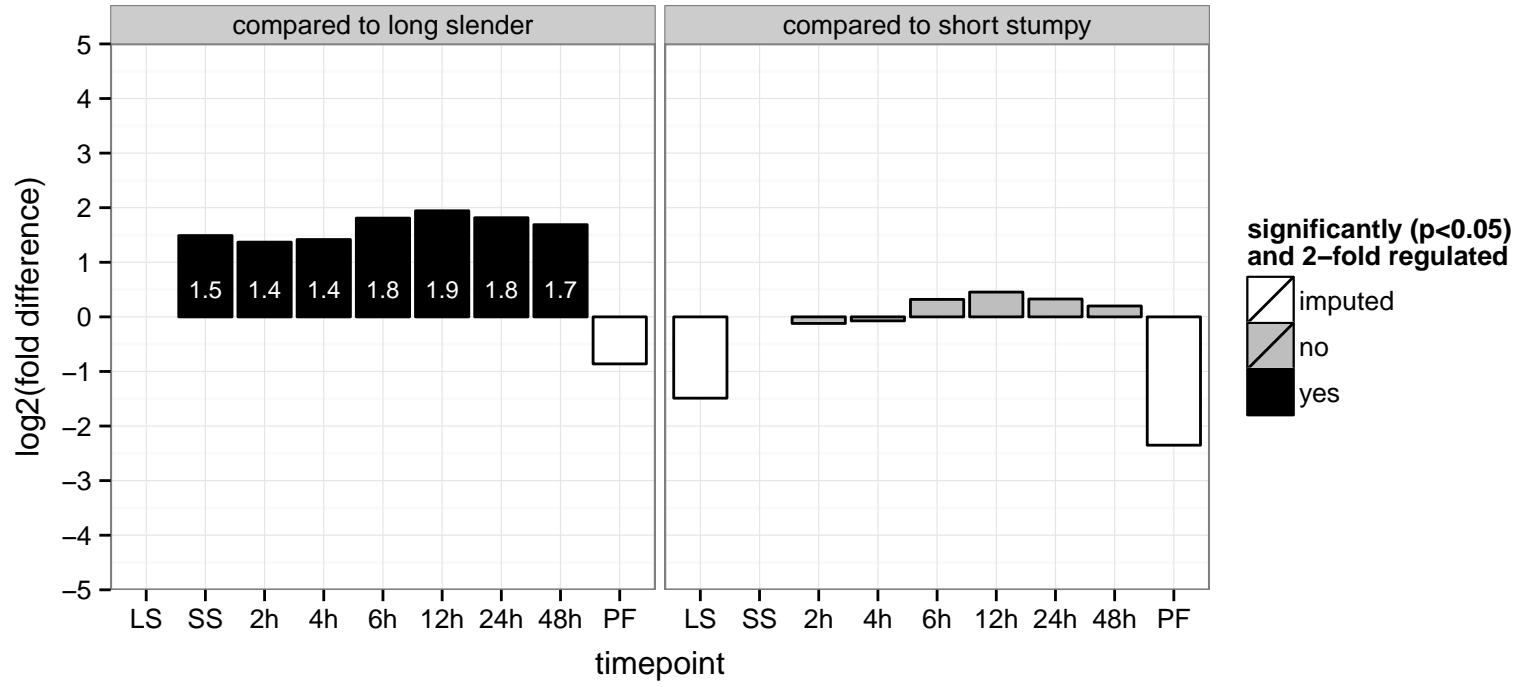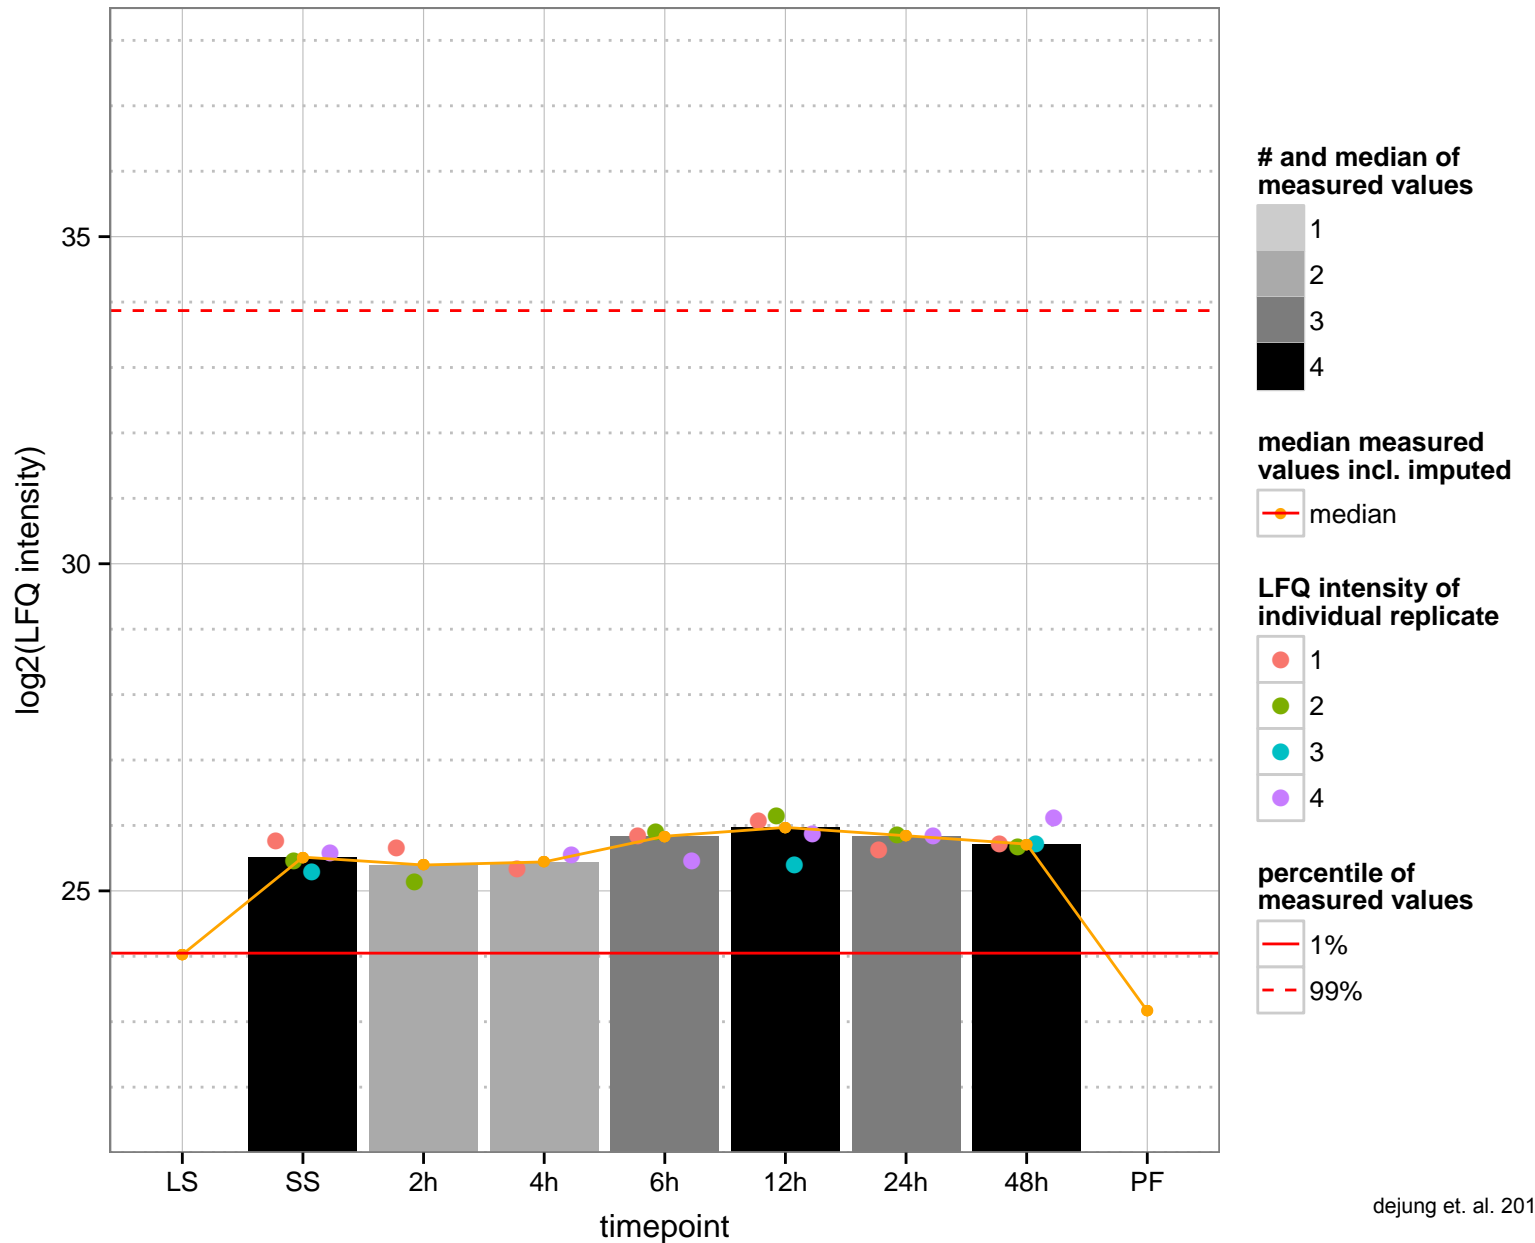

protein disulfide isomerase, putative  
 Tb927.7.5790  
 AGOF: null  
 AGOC: endoplasmic reticulum  
 AGOP: cell redox homeostasis  
 PGO: electron carrier activity, isomerase activity, protein disulfide oxidoreductase activity  
 PGOC: null  
 PGOP: cell redox homeostasis, glycerol ether metabolic process

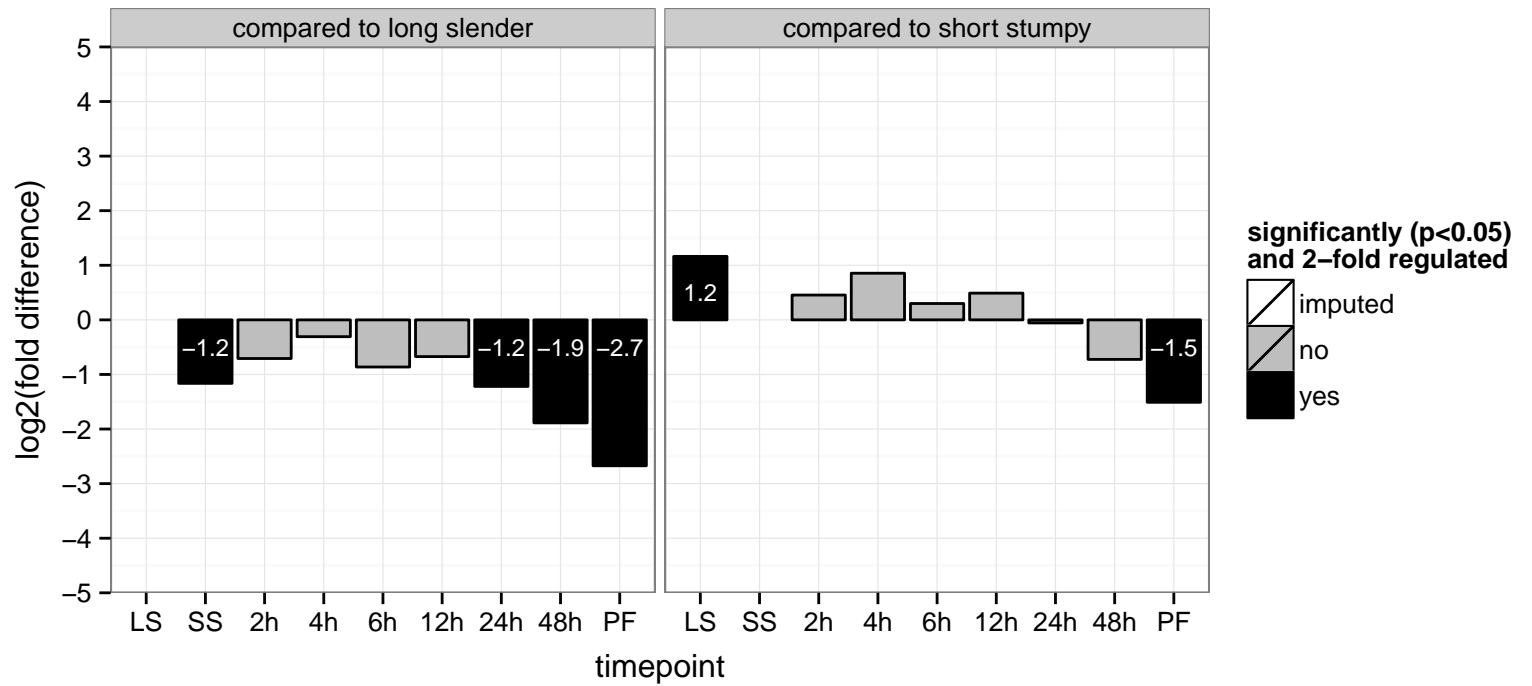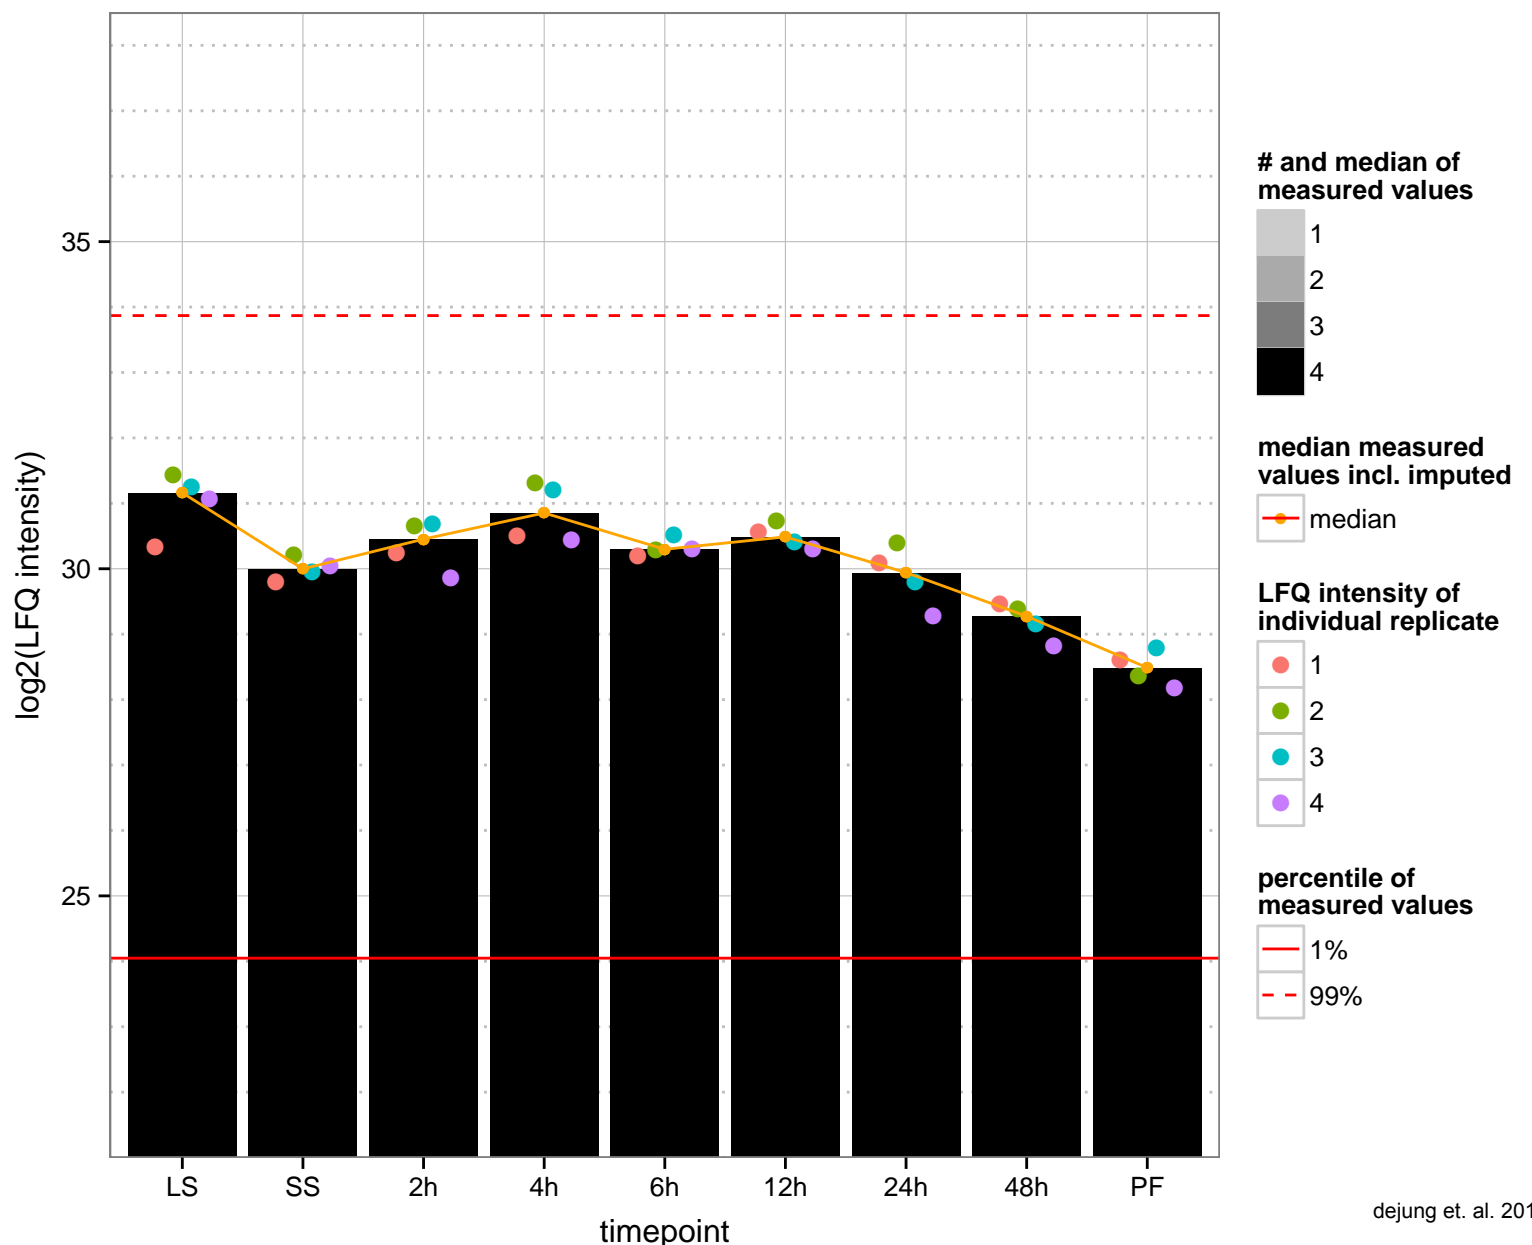

hypothetical protein, conserved  
 Tb927.7.5850  
 AGOF: null  
 AGOC: null  
 AGOP: null  
 PGOF: null  
 PGO C: null  
 PGOP: null

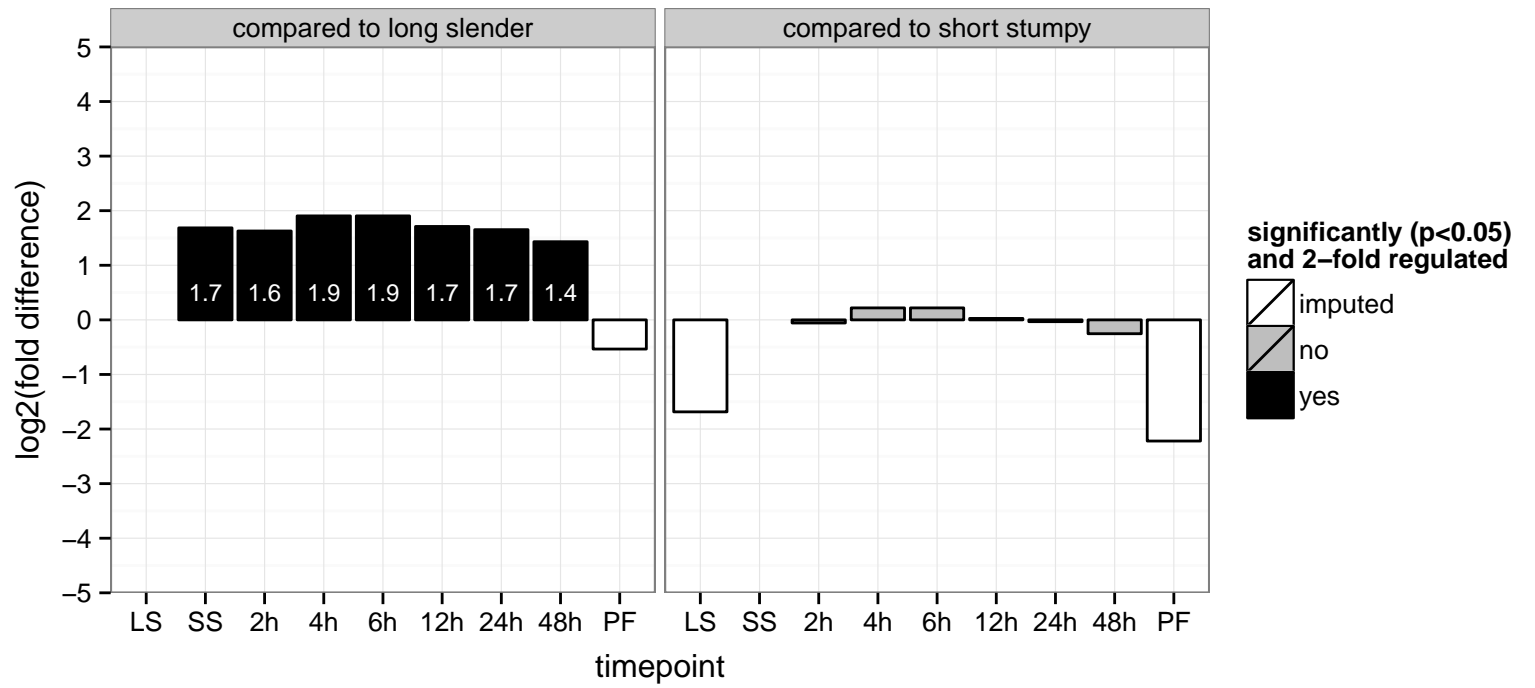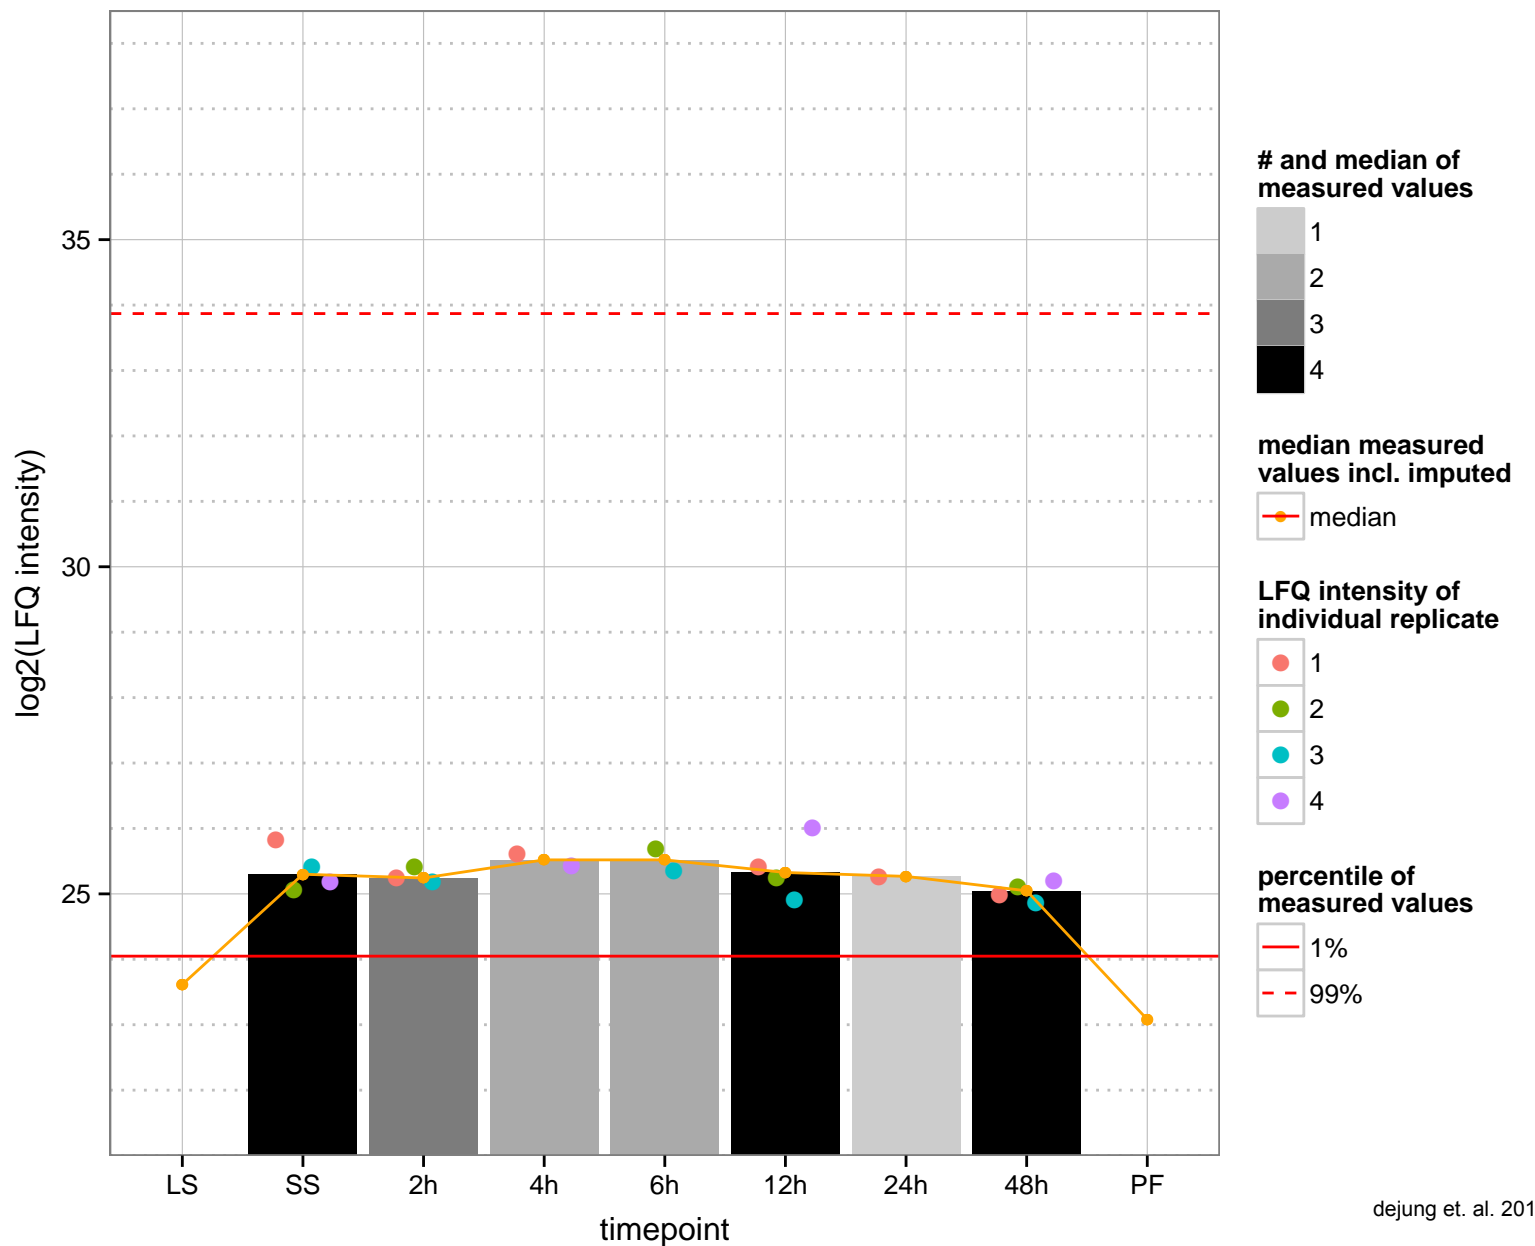

hypothetical protein, conserved  
 Tb927.7.6340  
 AGOF: null  
 AGOC: null  
 AGOP: null  
 PGO: null  
 PGOC: null  
 PGOP: null

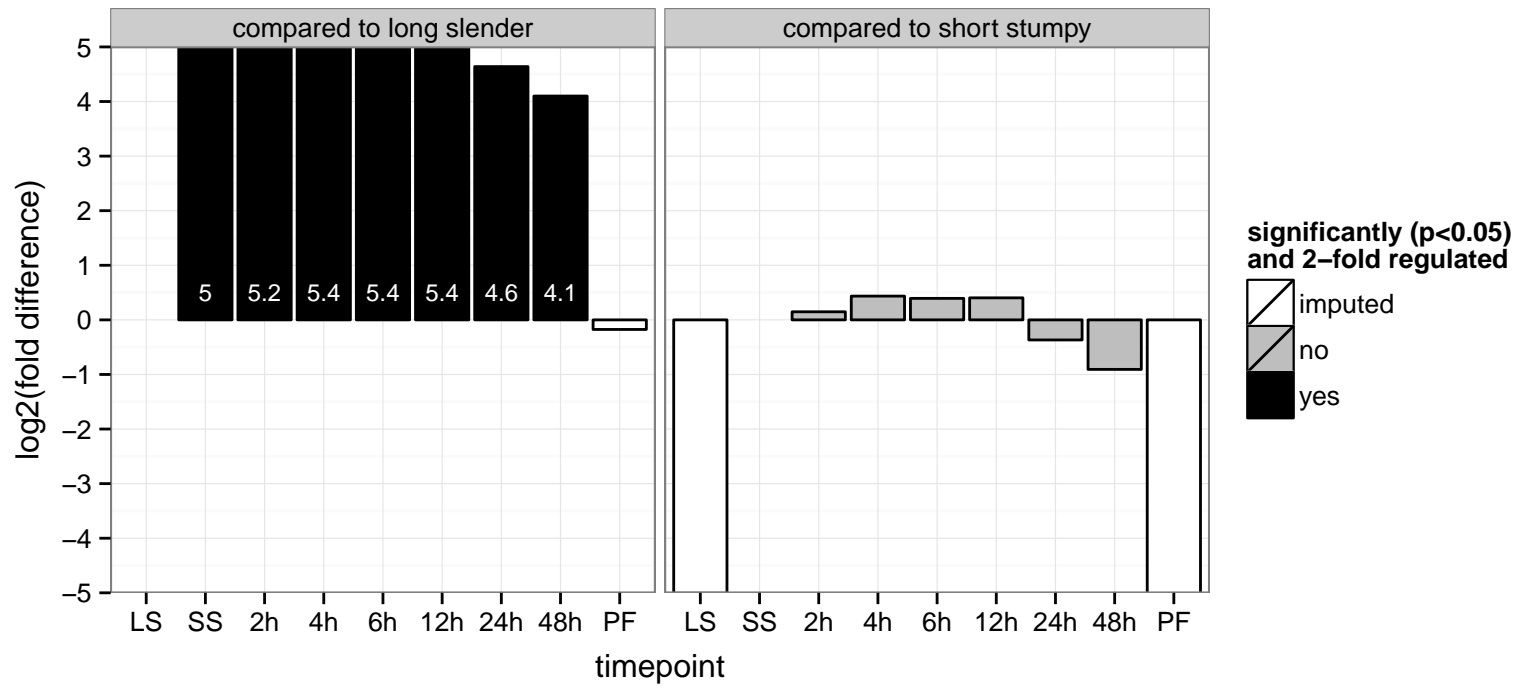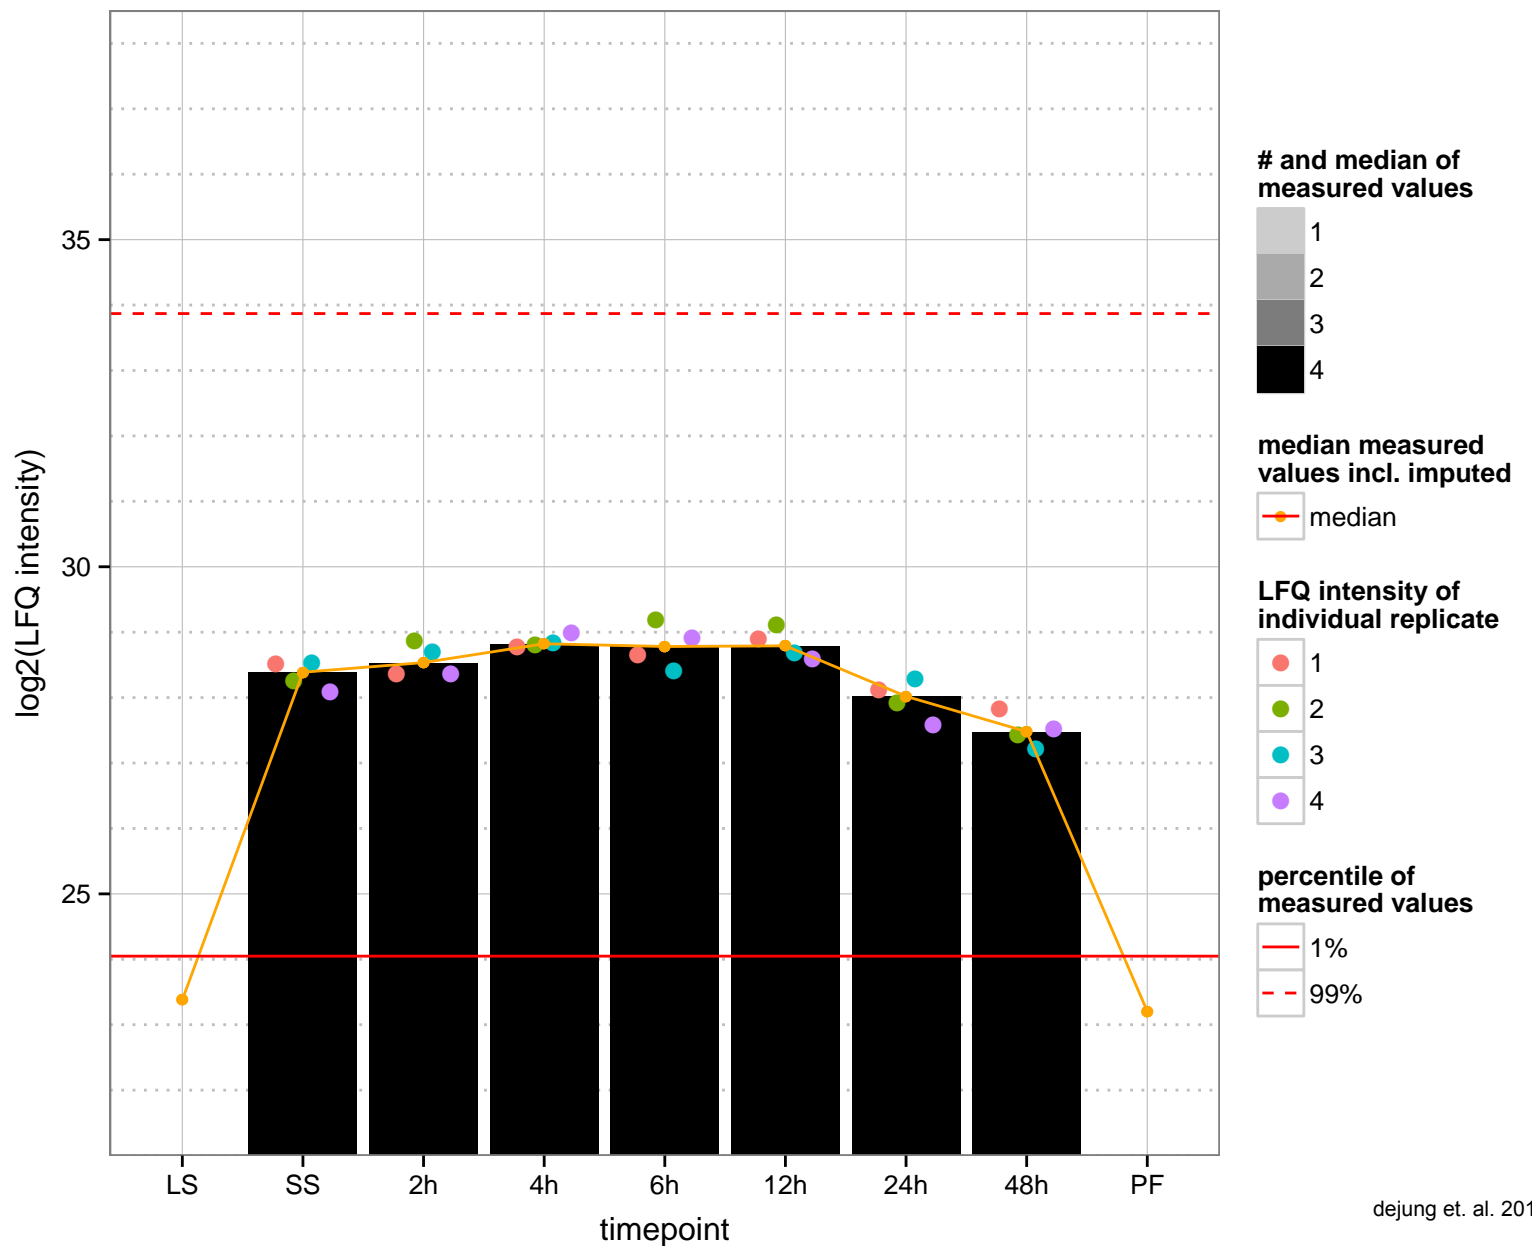

hypothetical protein, conserved  
 Tb927.7.7400  
 AGOF: null  
 AGOC: null  
 AGOP: null  
 PGOF: null  
 PGO: null  
 PGOP: null

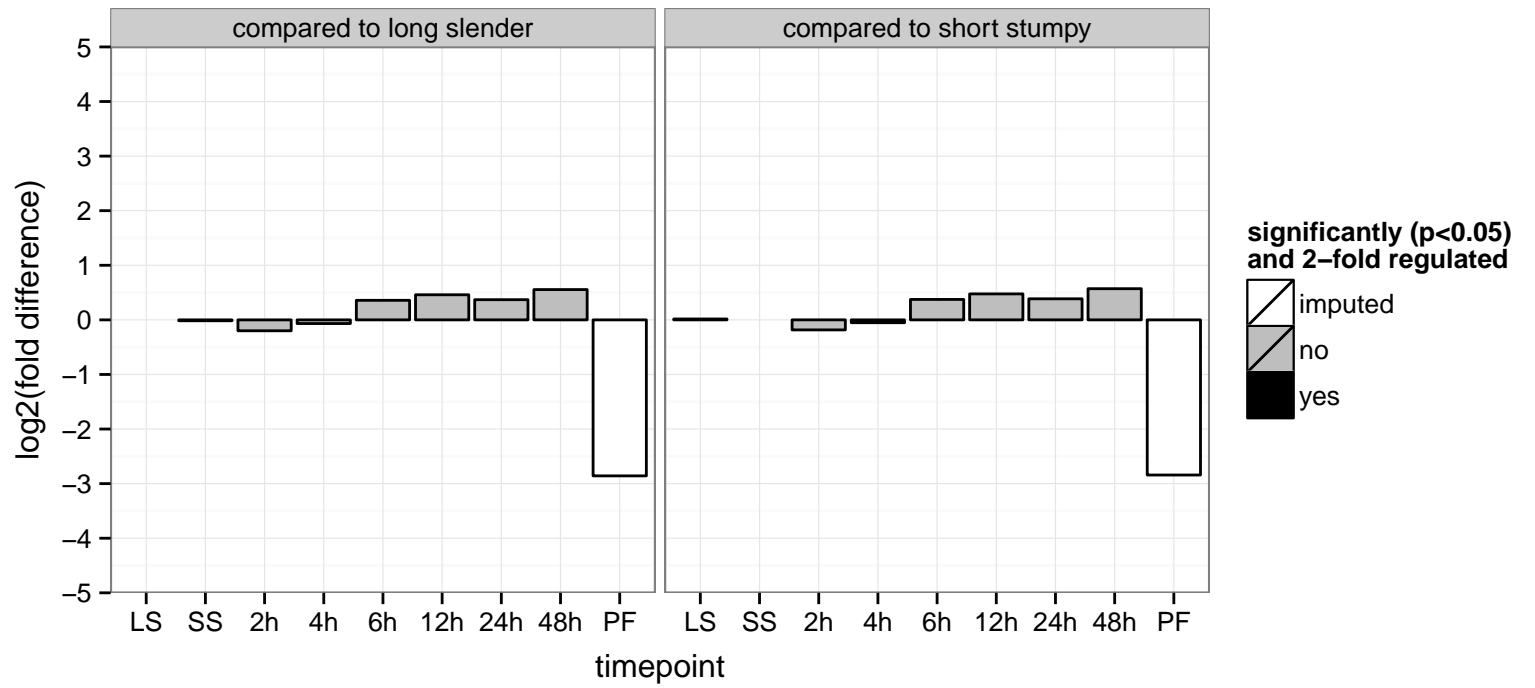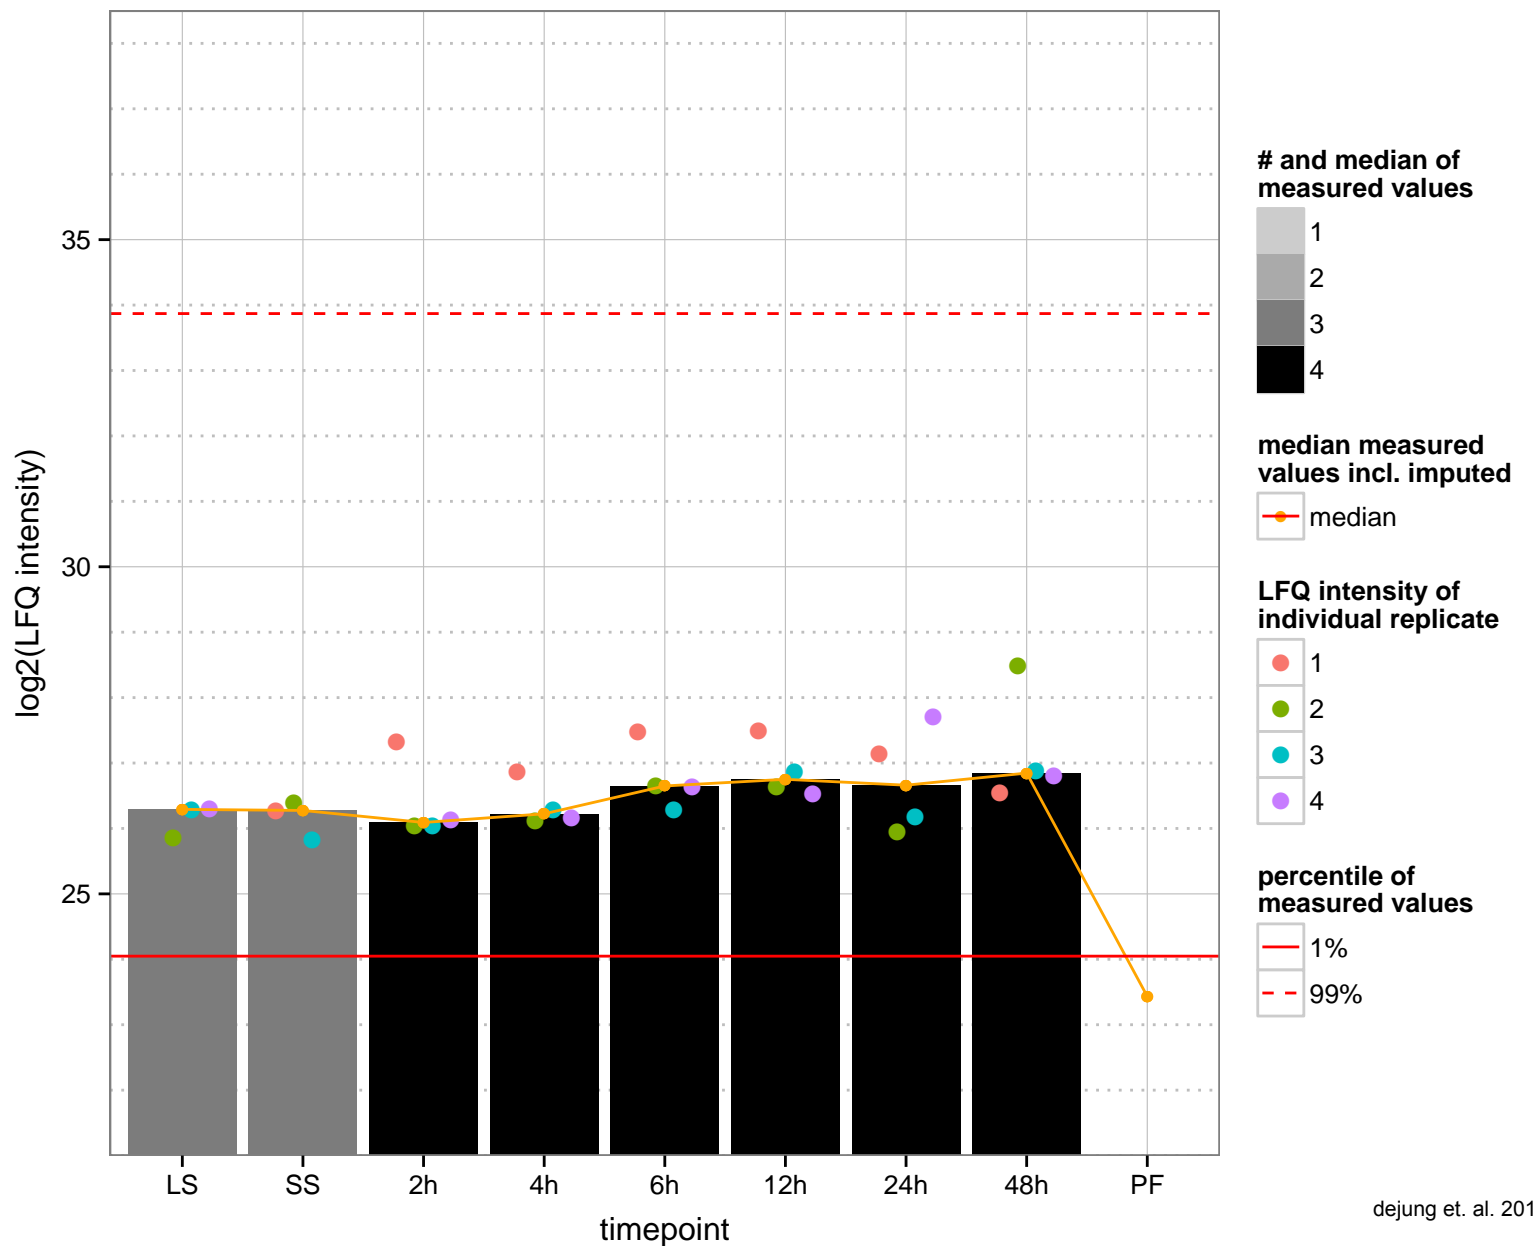

hypothetical protein, conserved  
 Tb927.8.1140  
 AGOF: null  
 AGOC: null  
 AGOP: null  
 PGOF: null  
 PGO C: null  
 PGOP: null

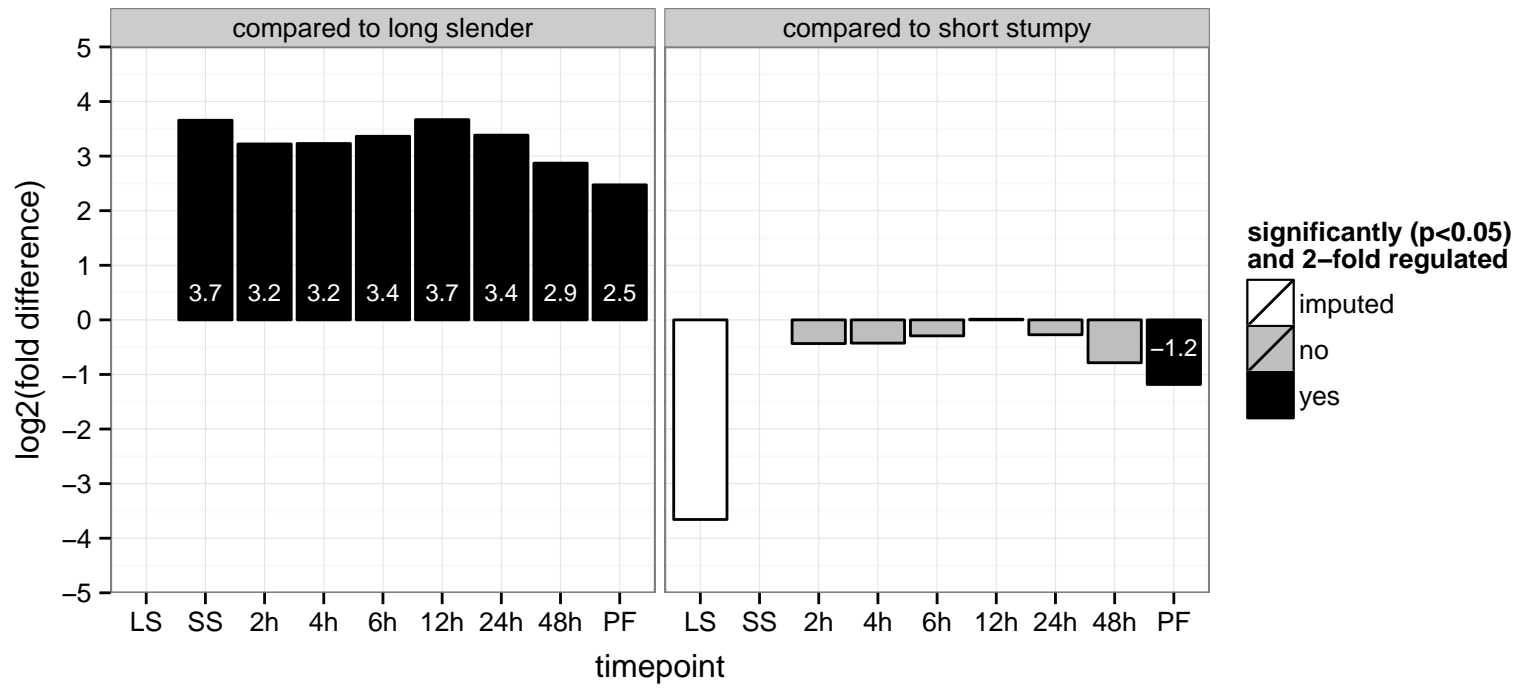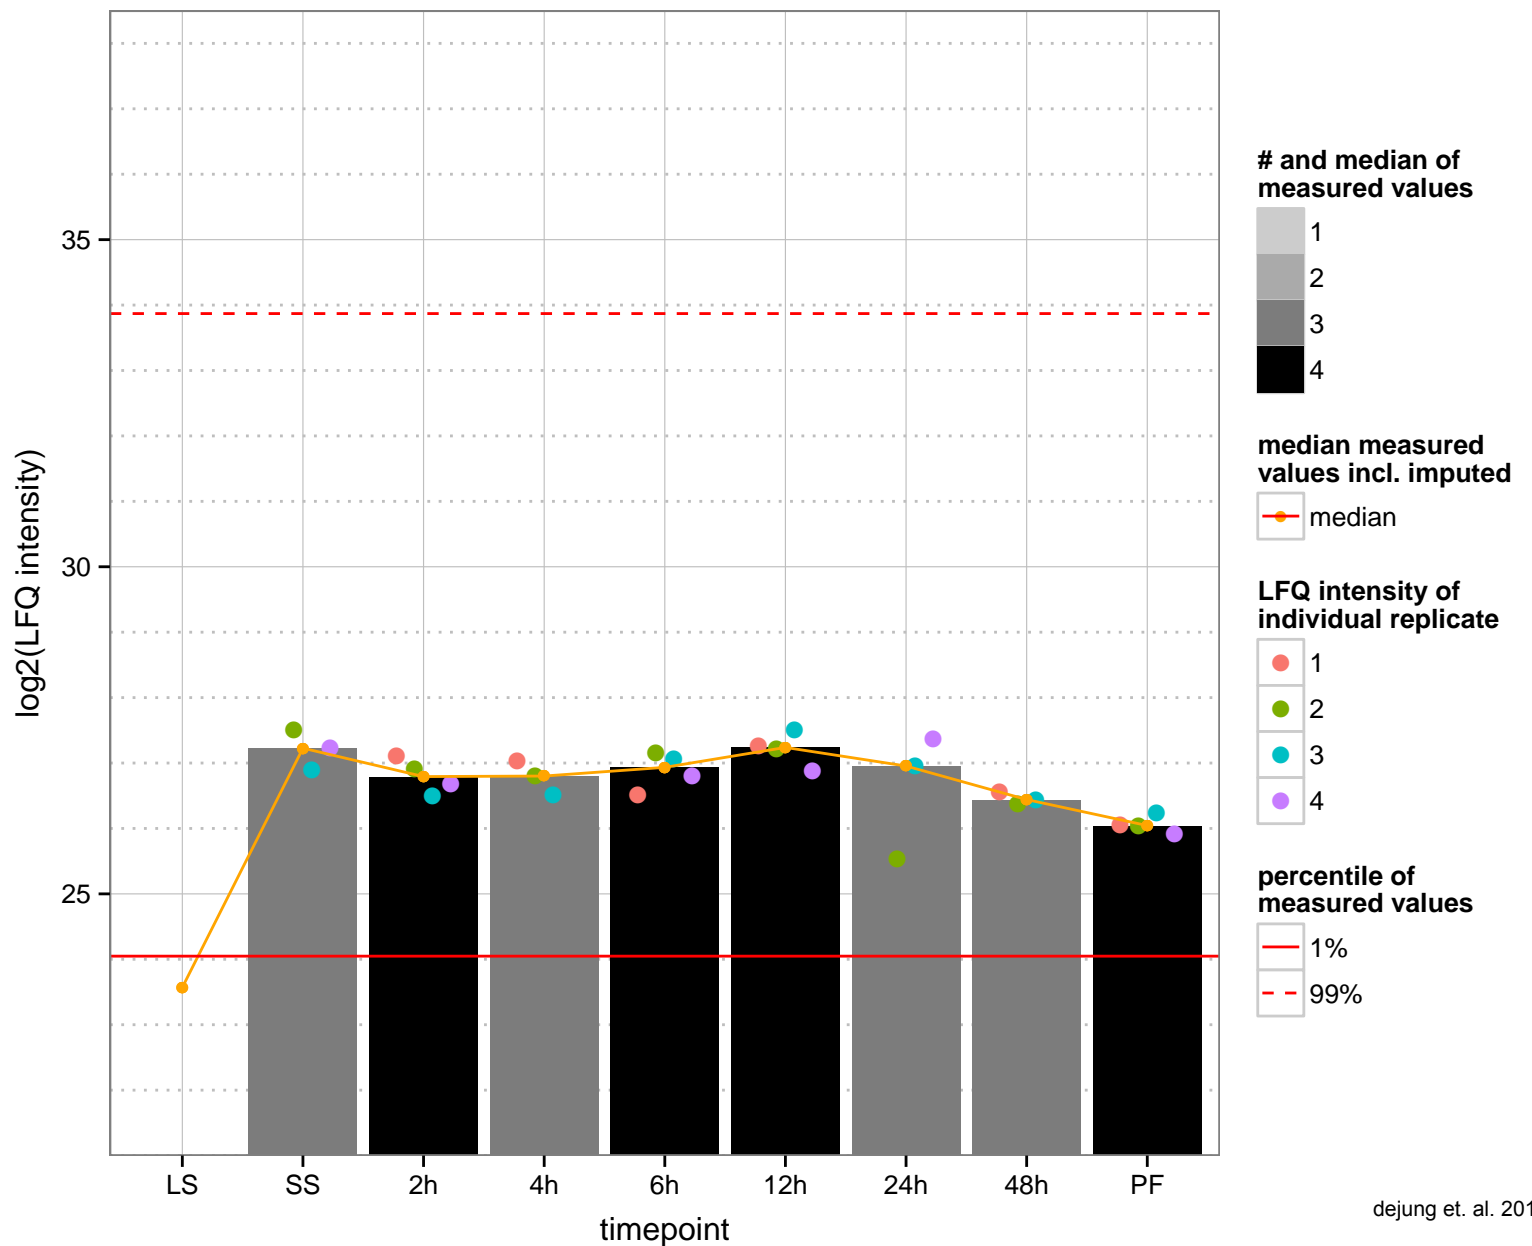



hypothetical protein, conserved  
 Tb927.8.1290  
 AGOF: null  
 AGOC: null  
 AGOP: null  
 PGOF: null  
 PGOC: null  
 PGOP: null

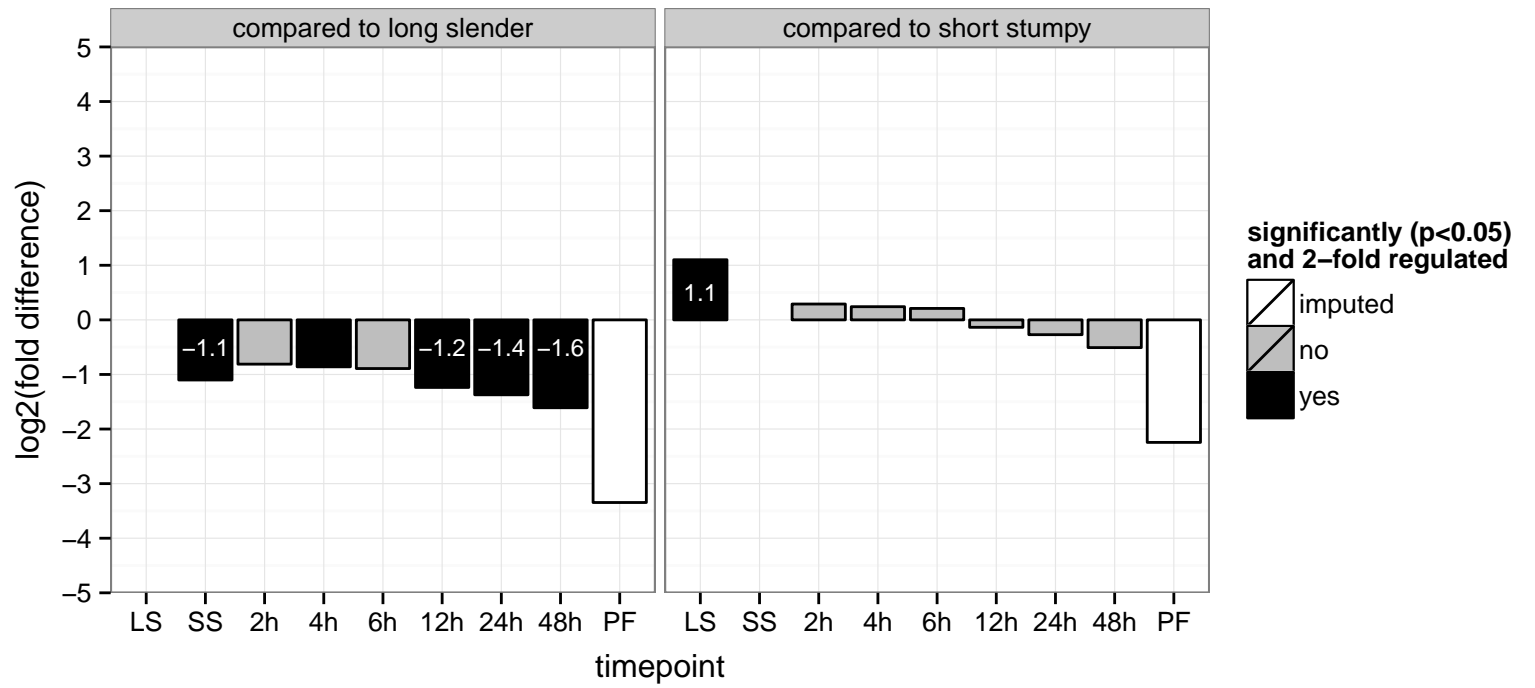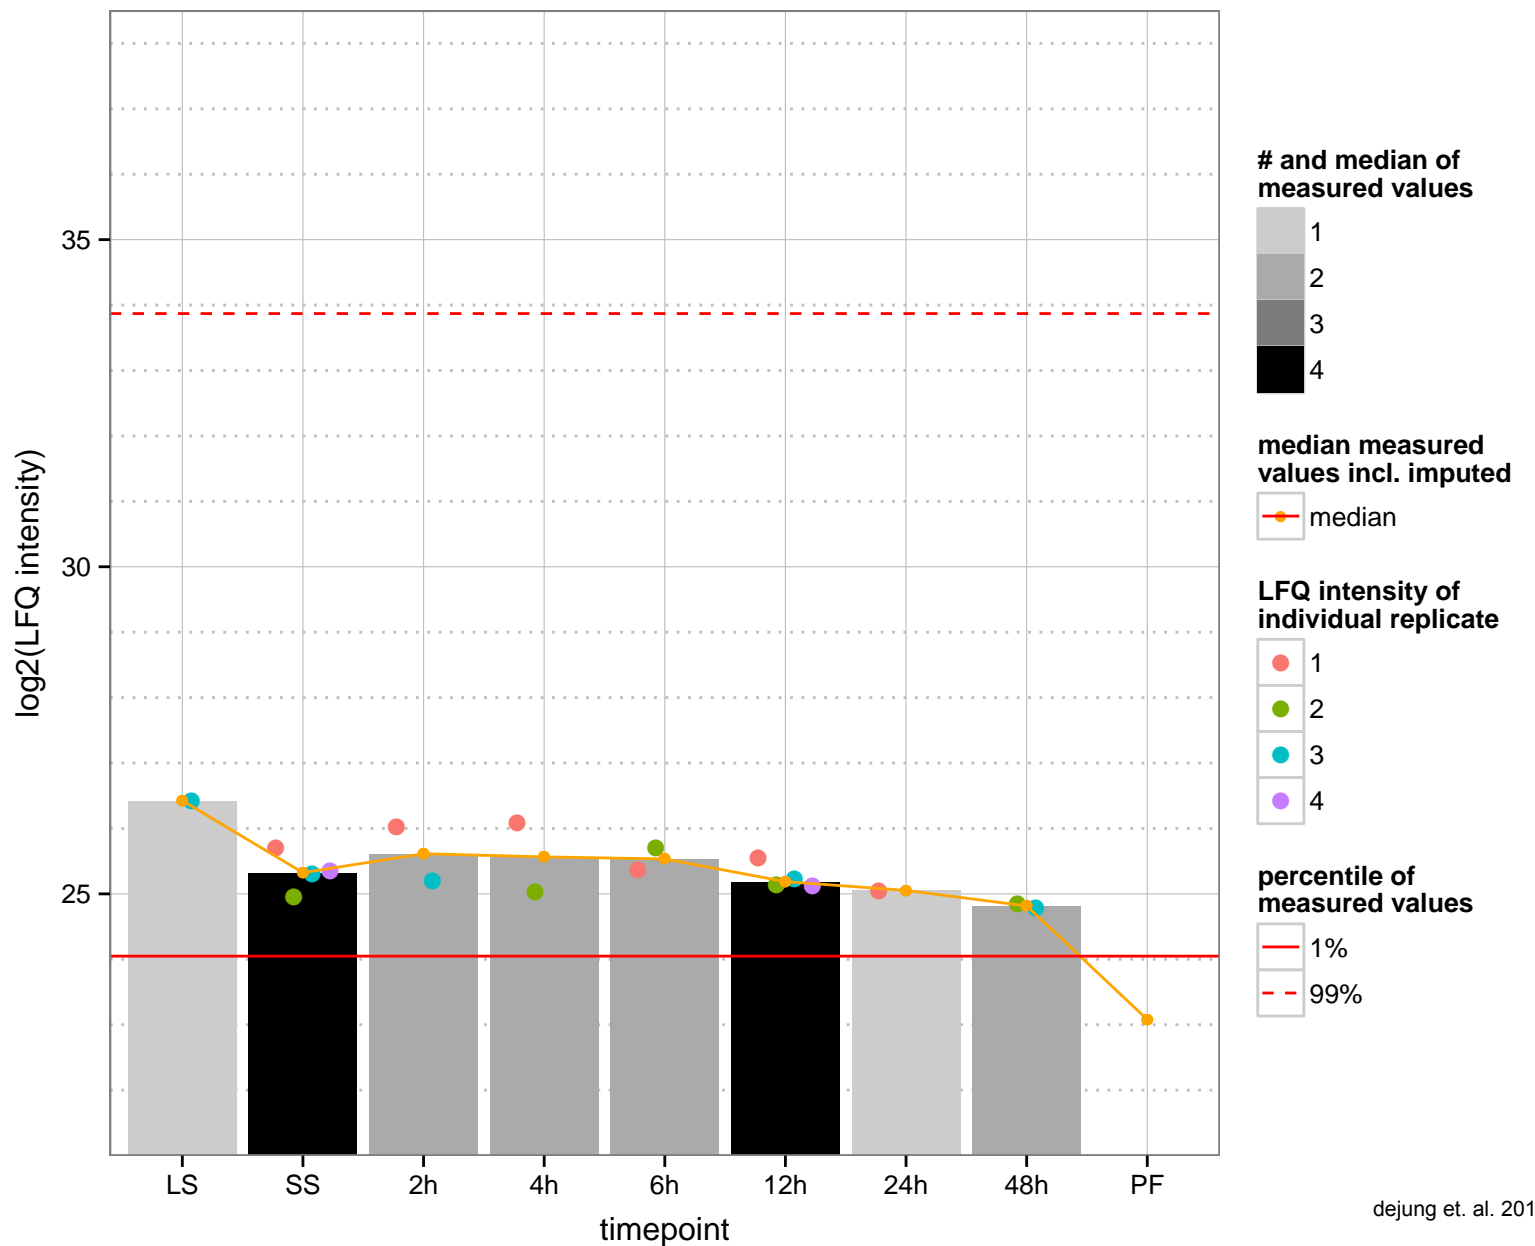

hypothetical protein, conserved  
 Tb927.8.1320  
 AGOF: null  
 AGOC: null  
 AGOP: null  
 PGOF: null  
 PGOC: null  
 PGOP: null

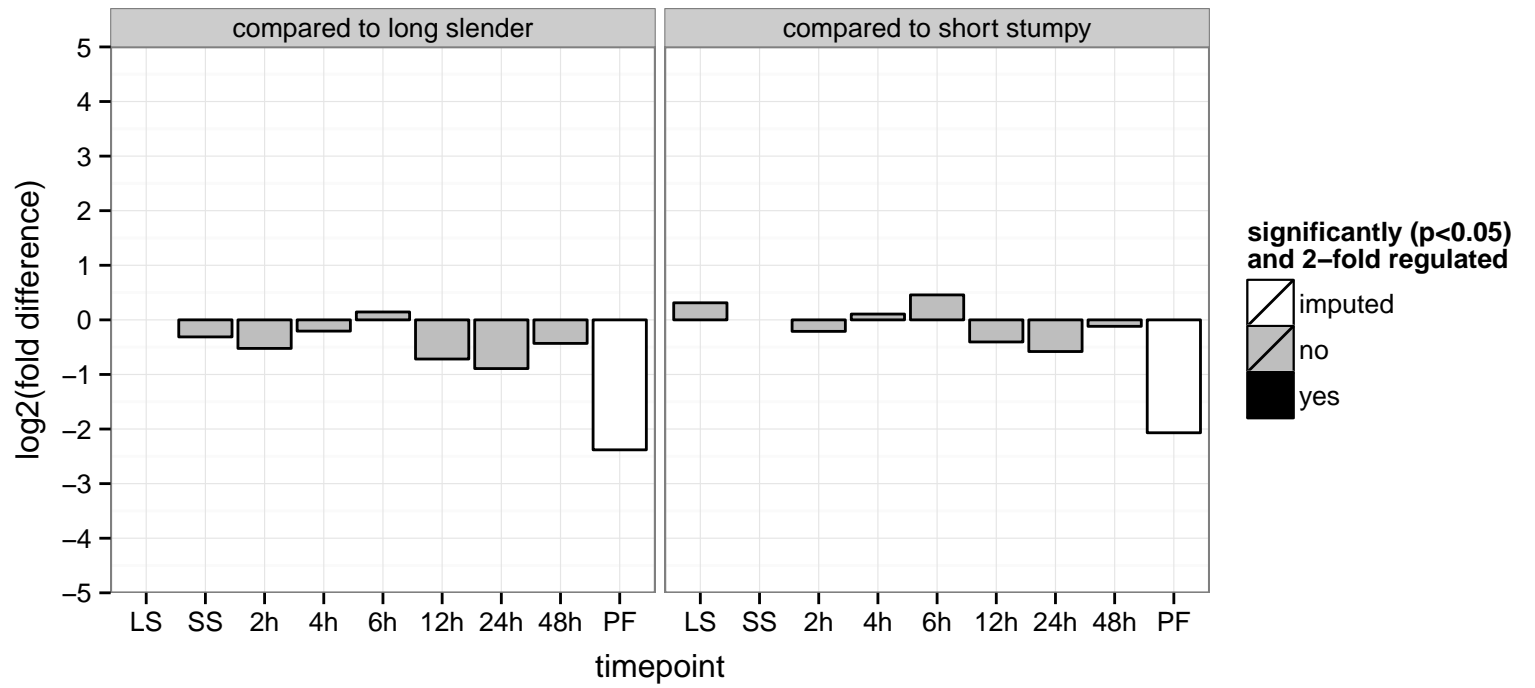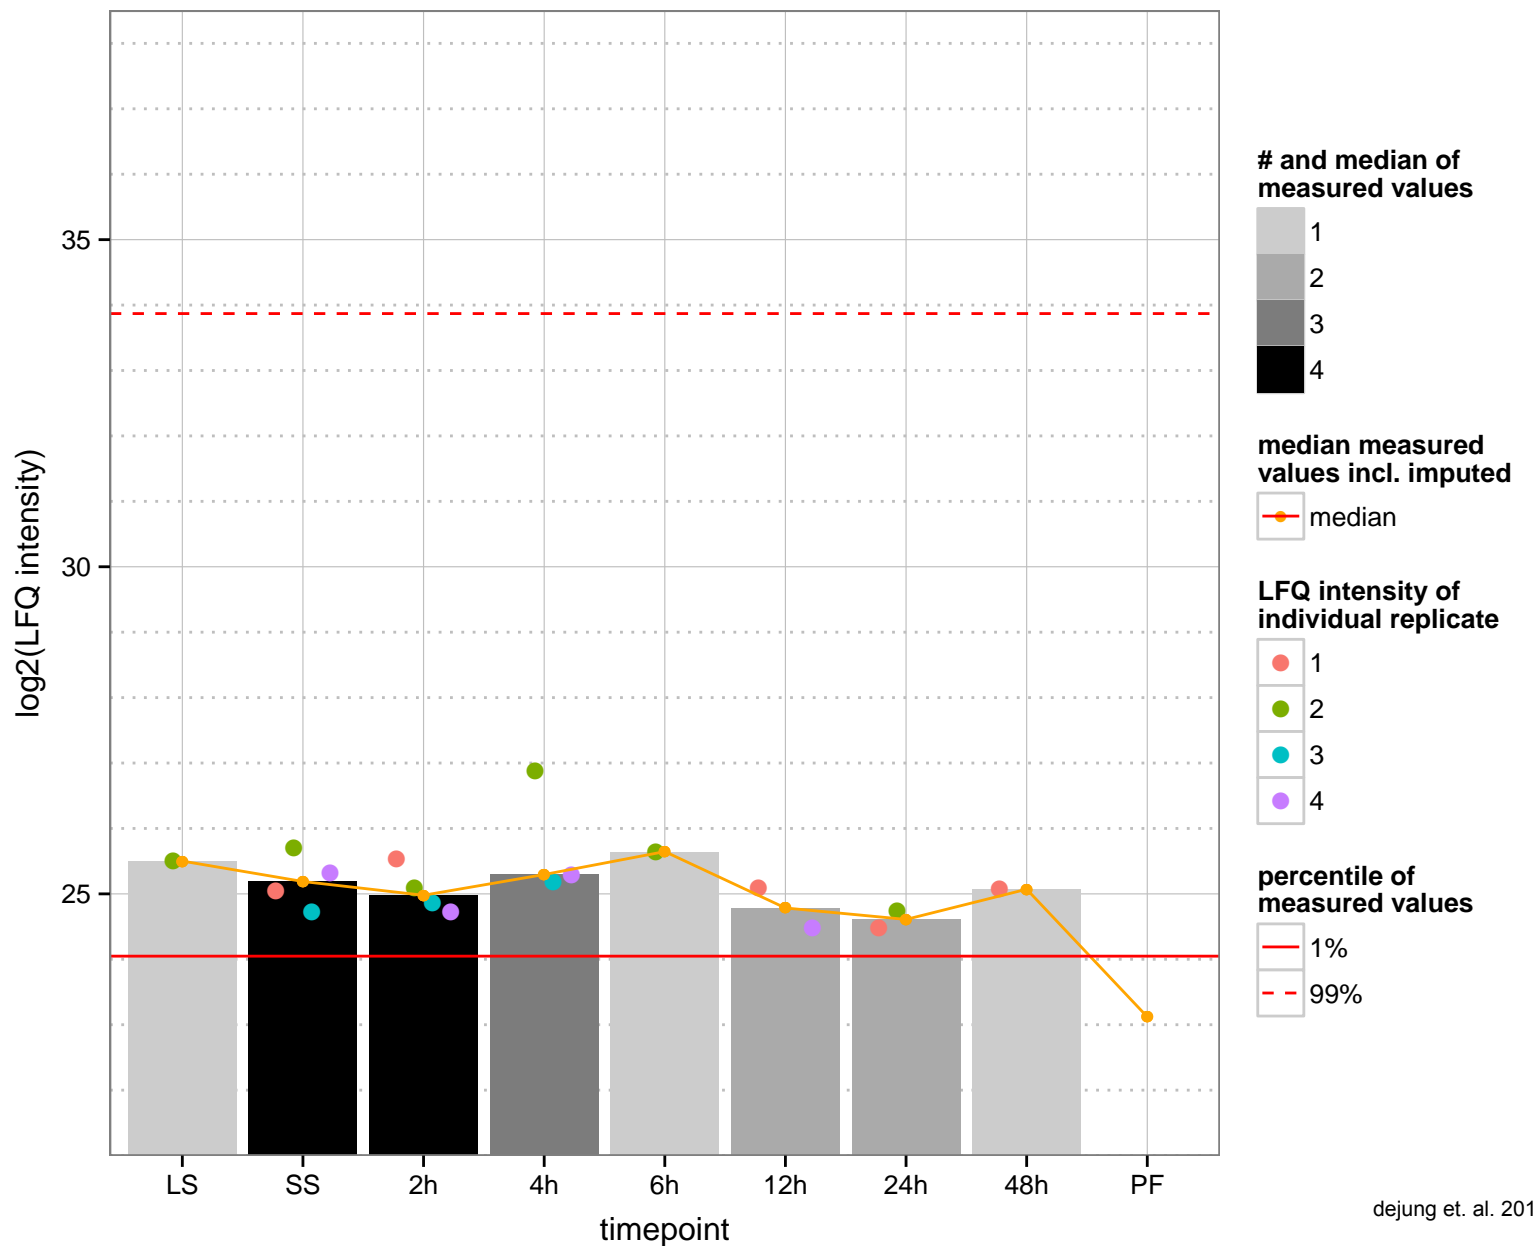

hypothetical protein, conserved  
 Tb927.8.1360  
 AGOF: null  
 AGOC: null  
 AGOP: null  
 PGO: null  
 PGOC: null  
 PGOP: null

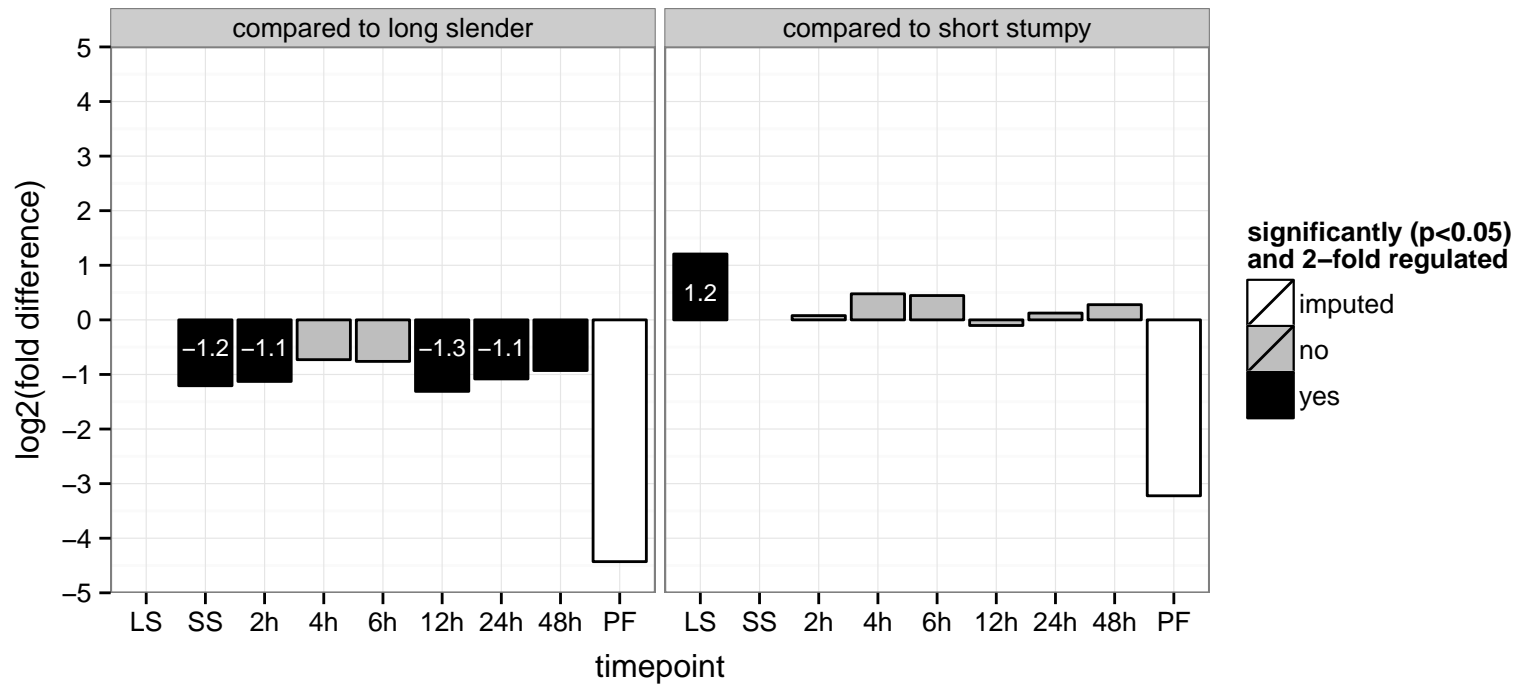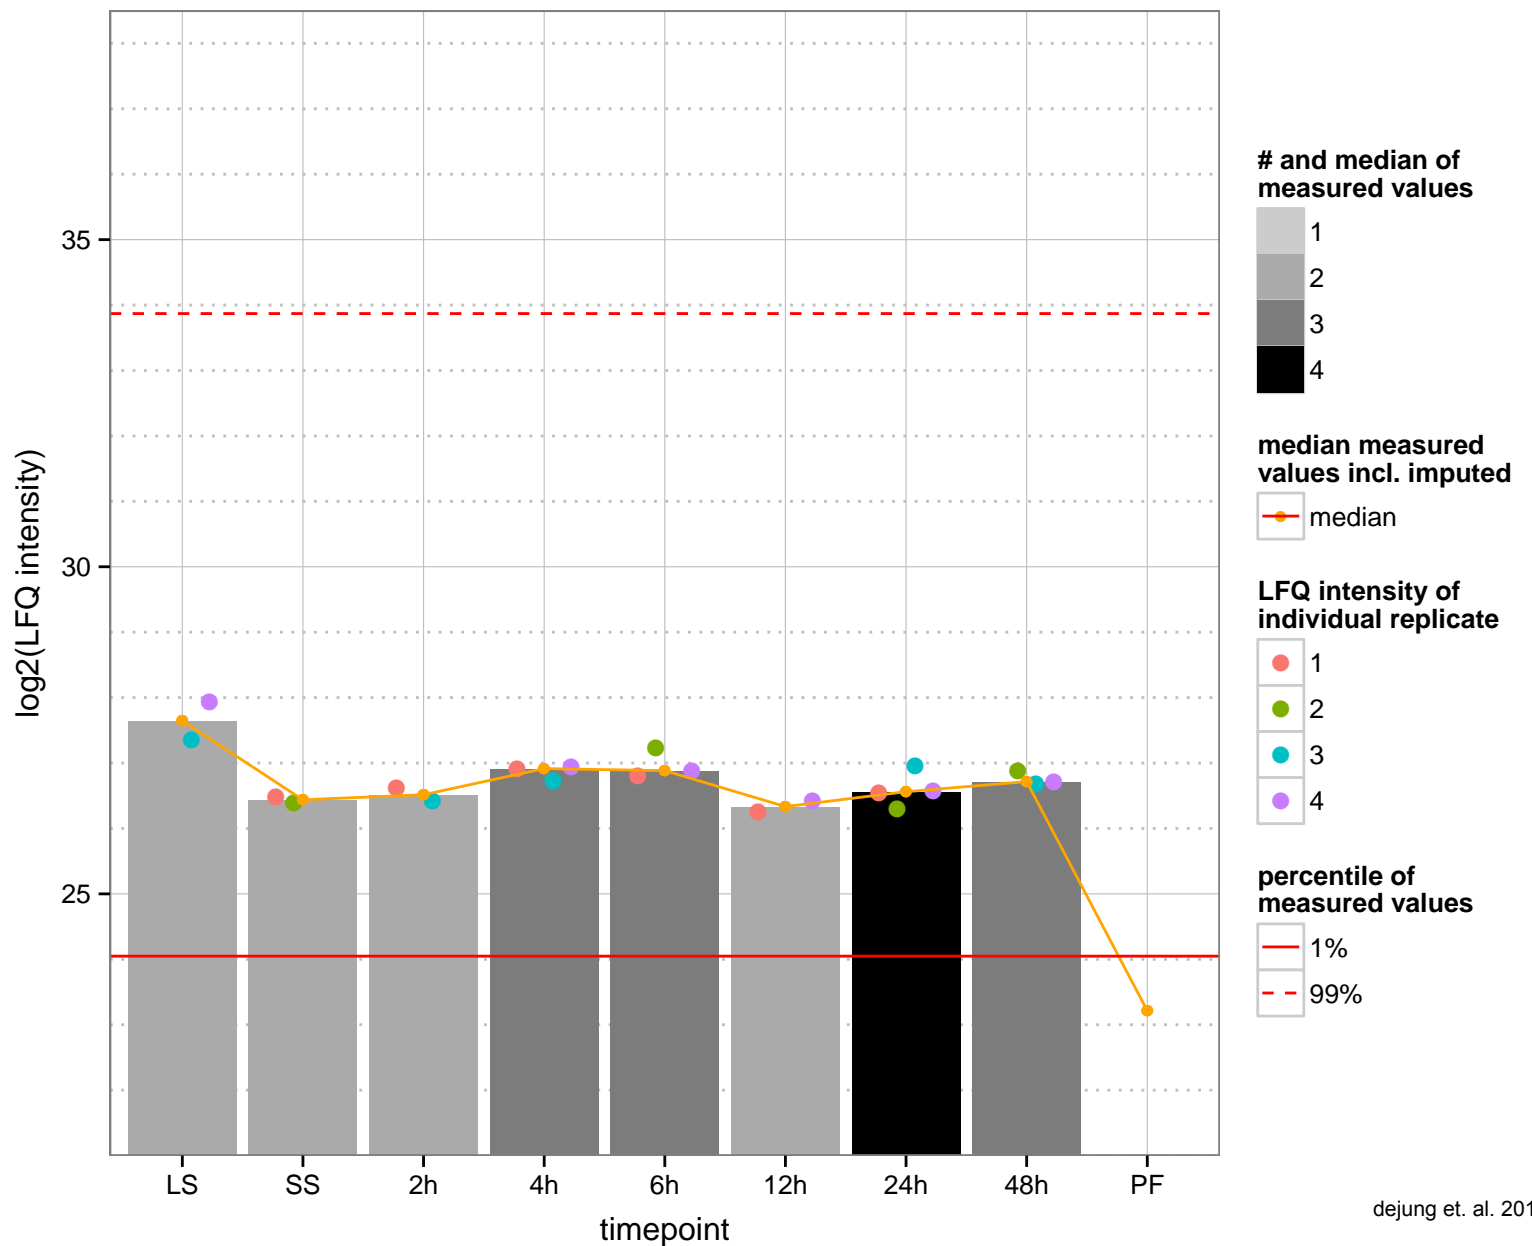

hypothetical protein, conserved  
 Tb927.8.1450  
 AGOF: null  
 AGOC: null  
 AGOP: null  
 PGO: null  
 PGOC: null  
 PGOP: null

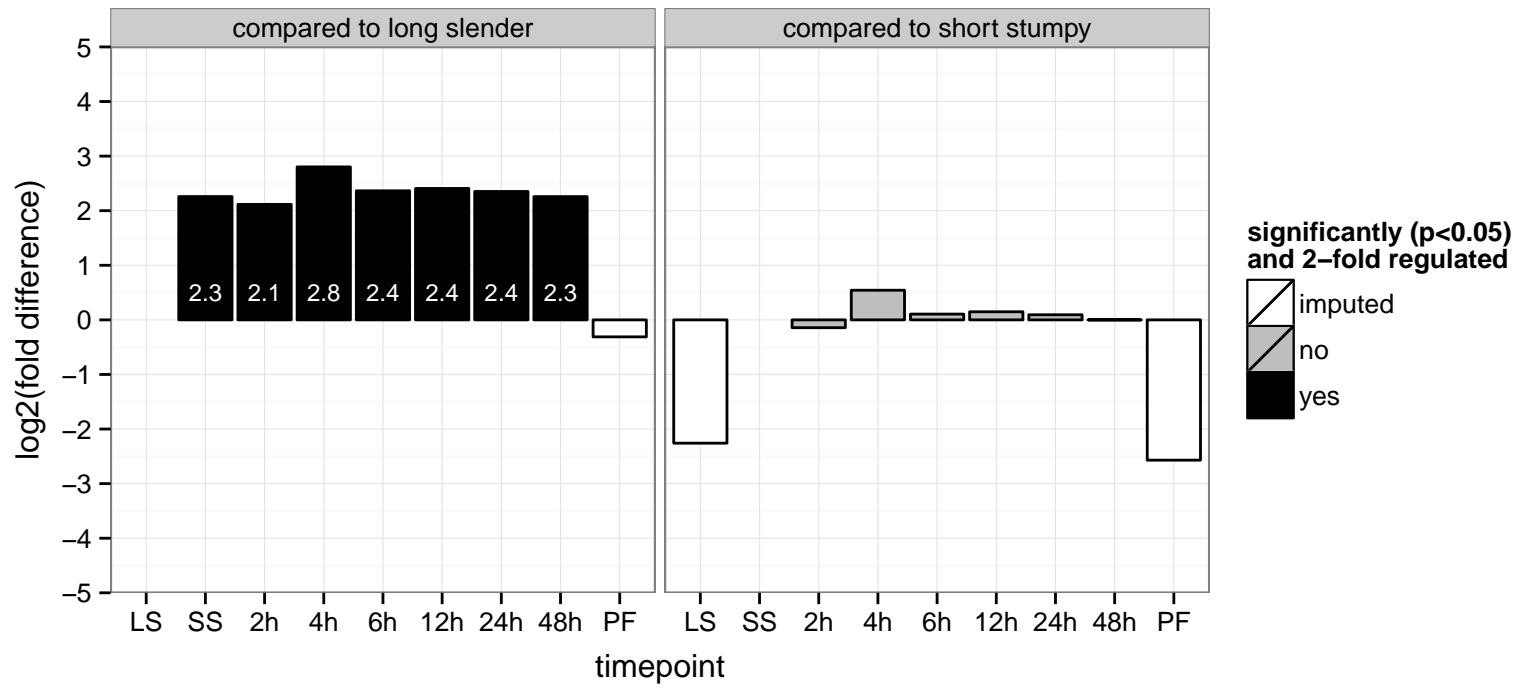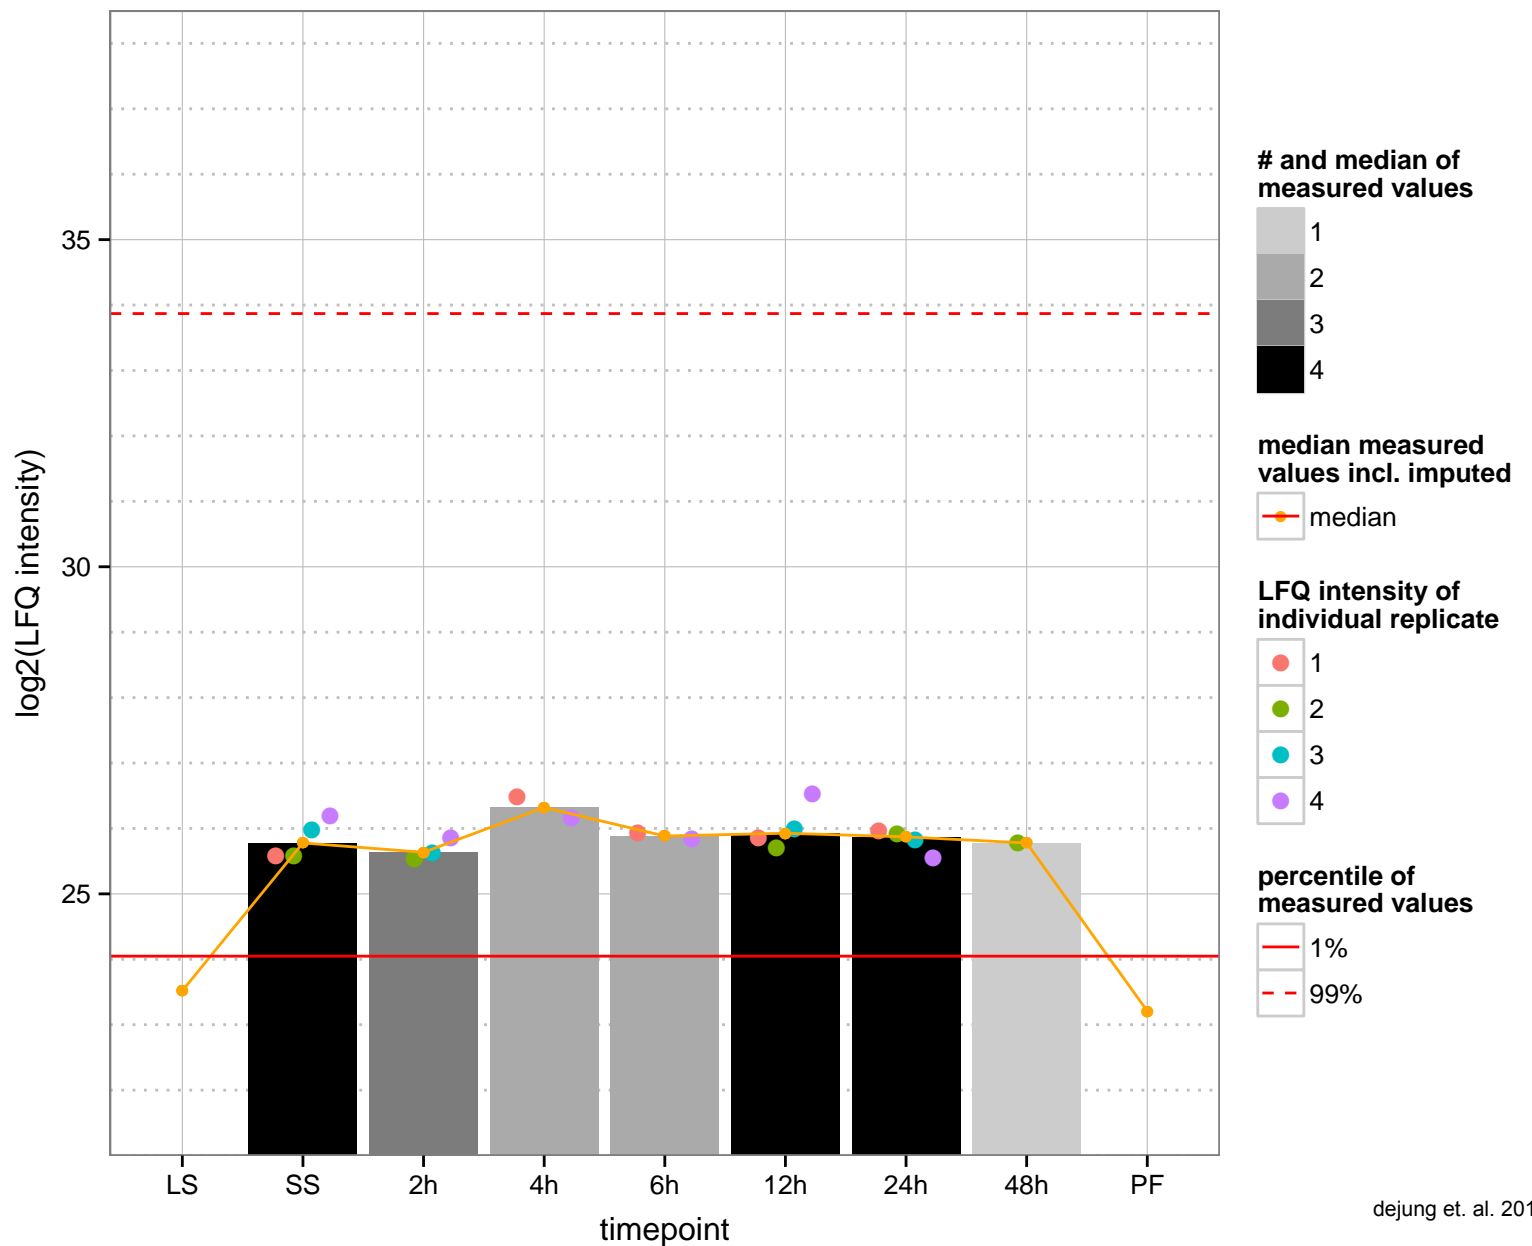

hypothetical protein, conserved  
 Tb927.8.1560  
 AGOF: null  
 AGOC: null  
 AGOP: null  
 PGO: protein binding  
 PGOC: null  
 PGOP: null

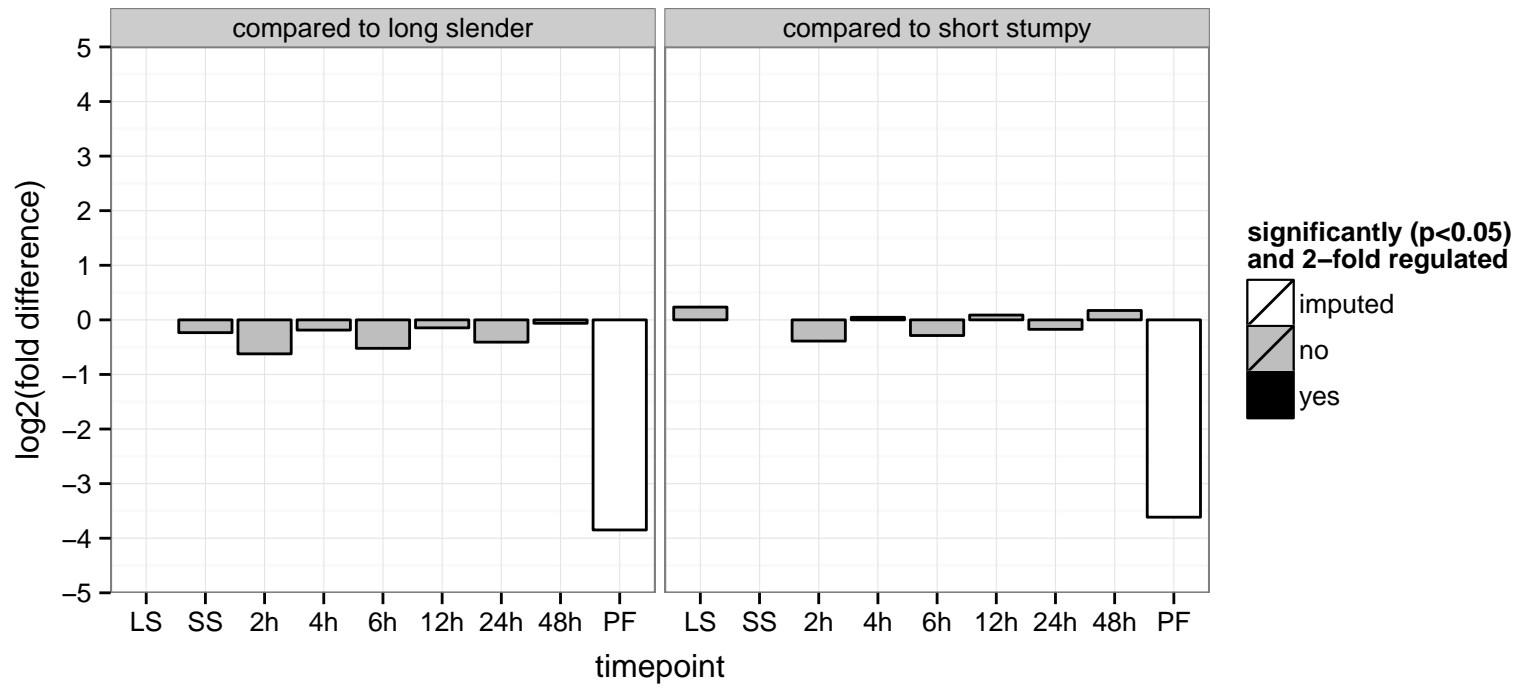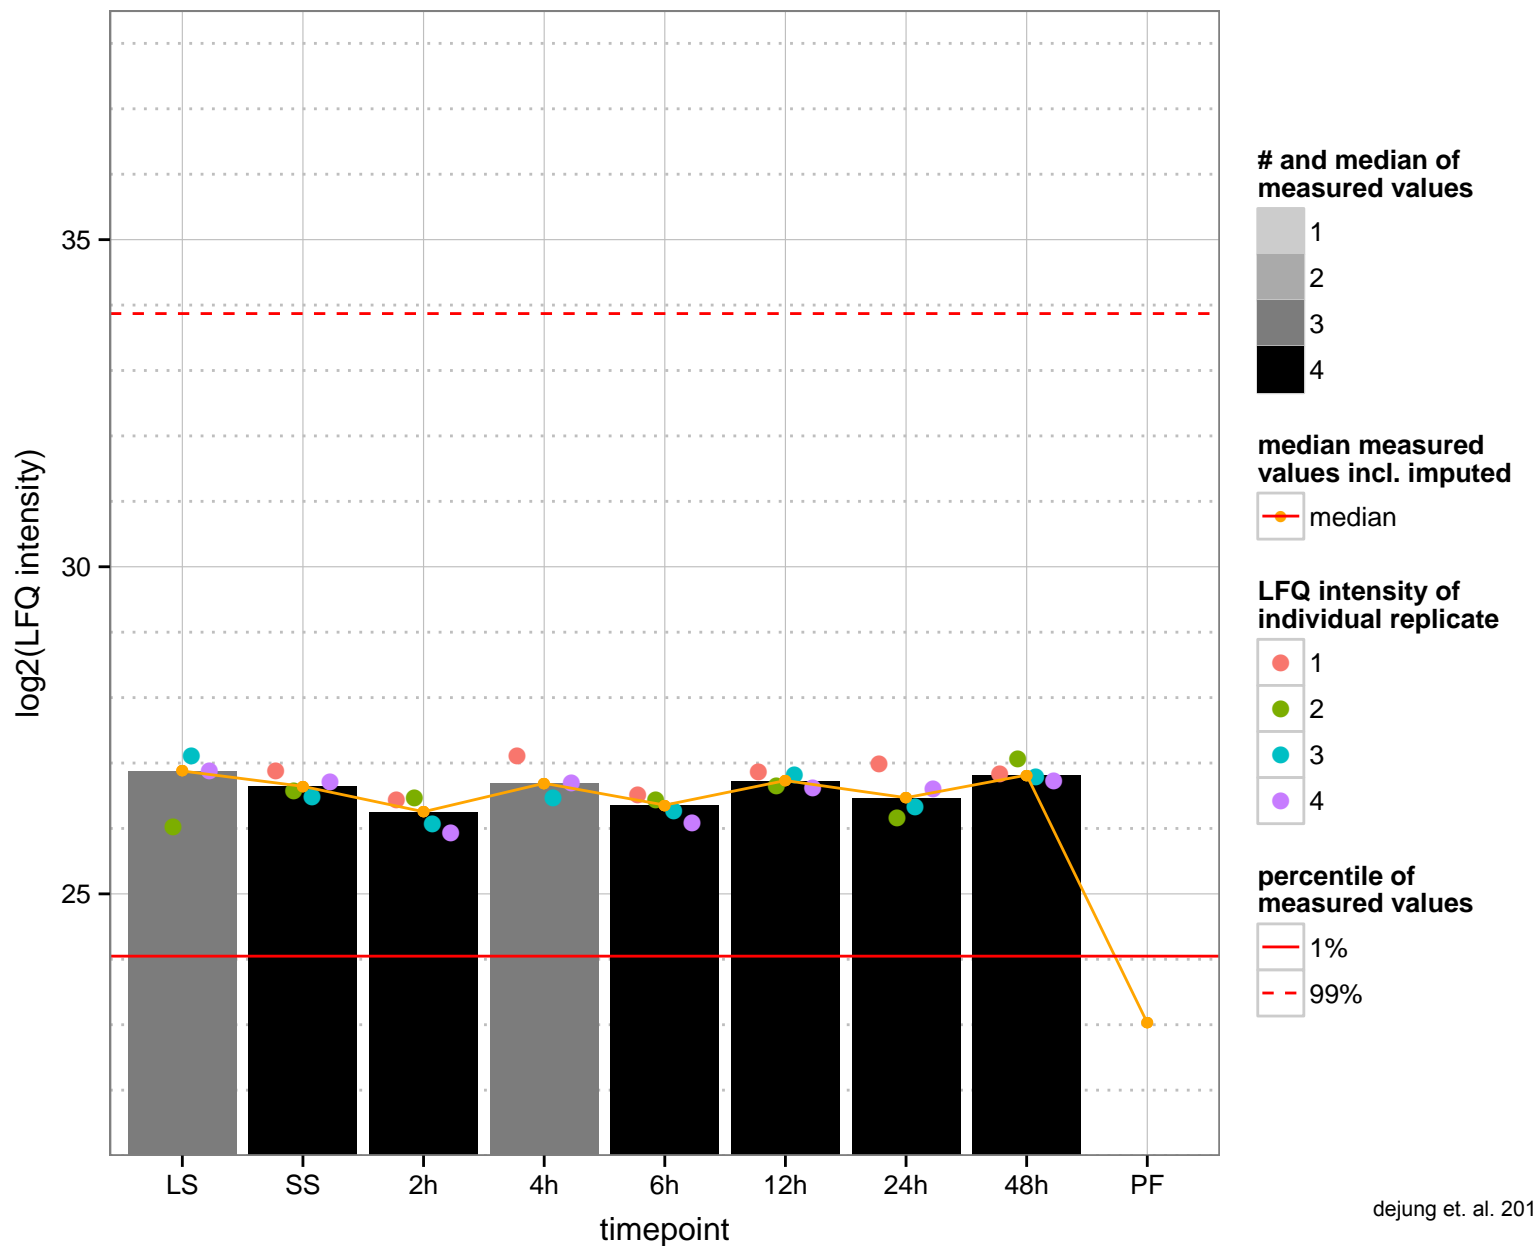

rhomboid-like protein, serine peptidase, Clan S-, family S54, putative  
 Tb927.8.1810  
 AGOF: null  
 AGOC: integral to membrane  
 AGOP: null  
 PGO: null  
 PGO: null  
 PGO: null

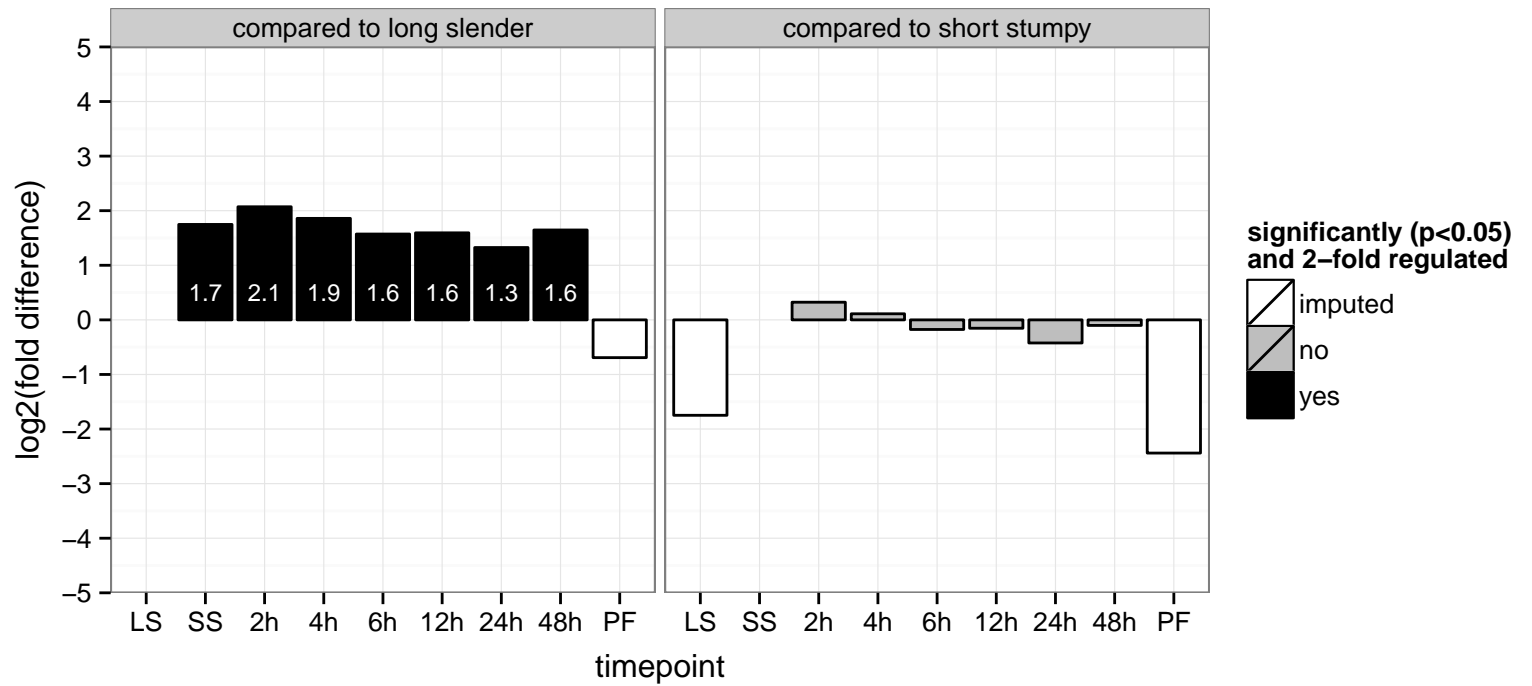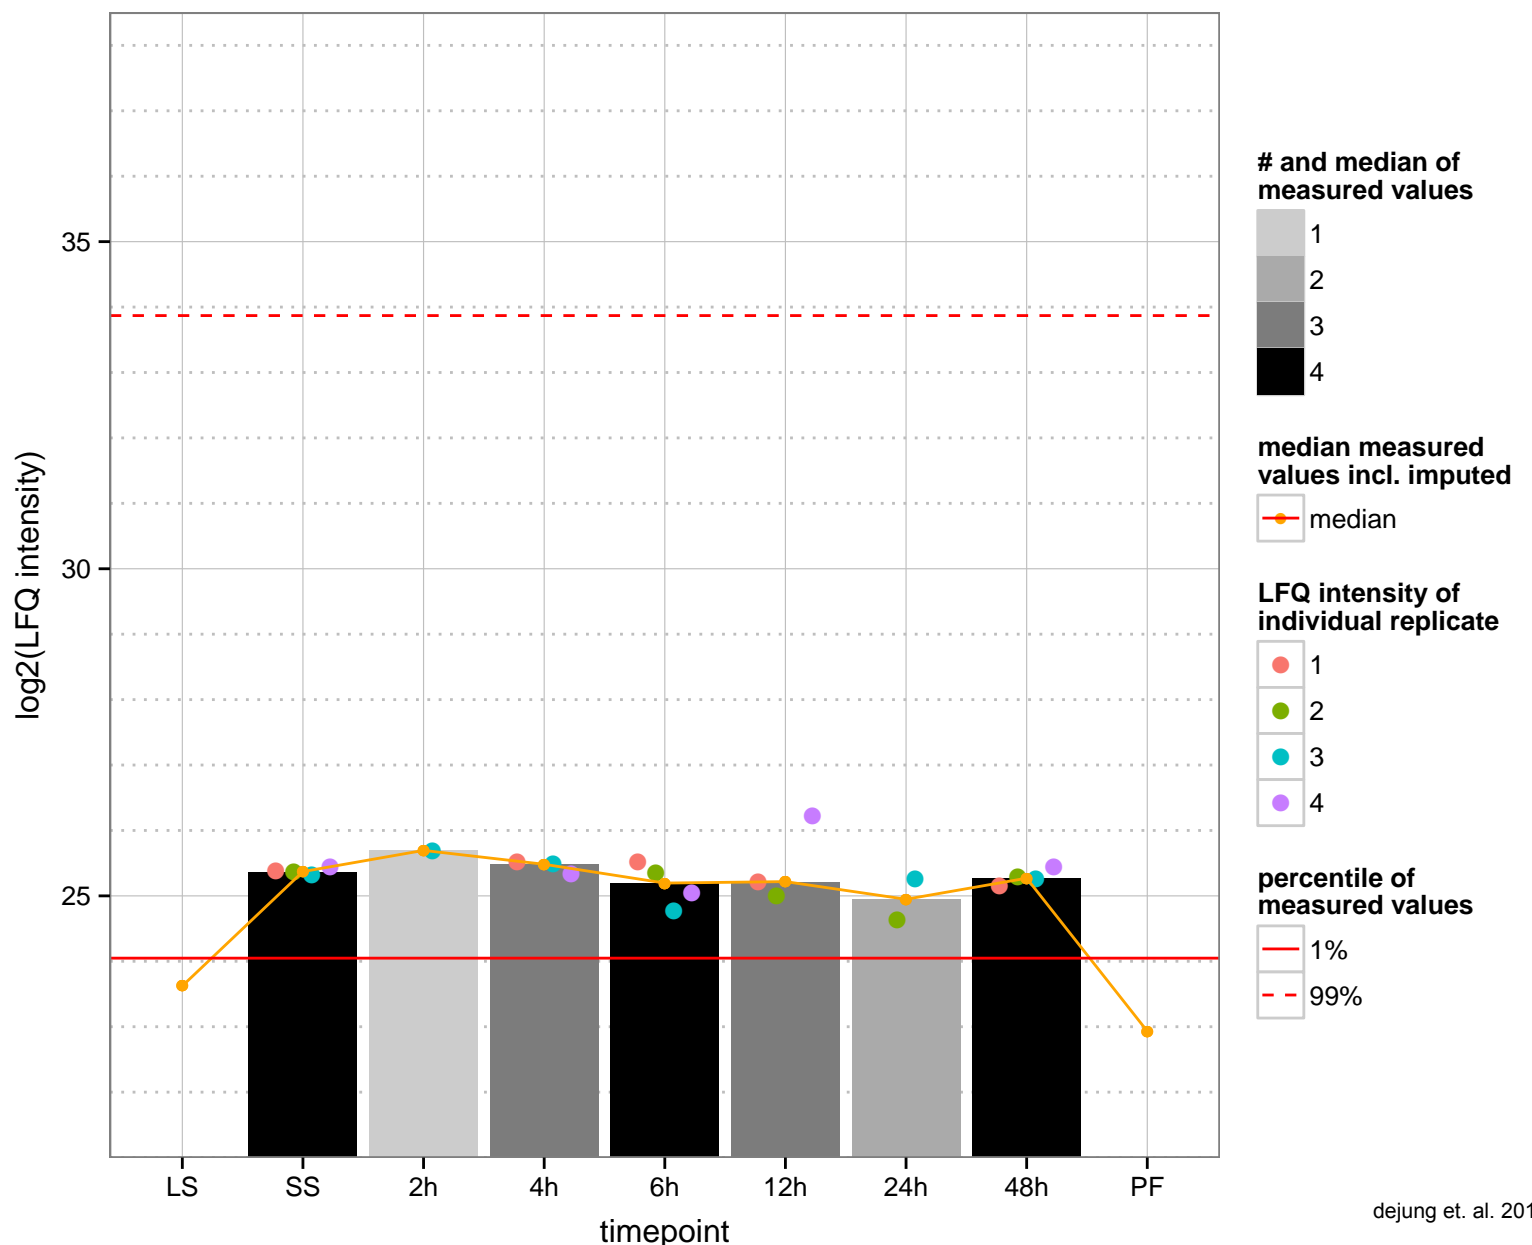

hypothetical protein, conserved  
 Tb927.8.2490  
 AGOF: null  
 AGOC: null  
 AGOP: null  
 PGO: protein binding  
 PGOC: null  
 PGOP: null

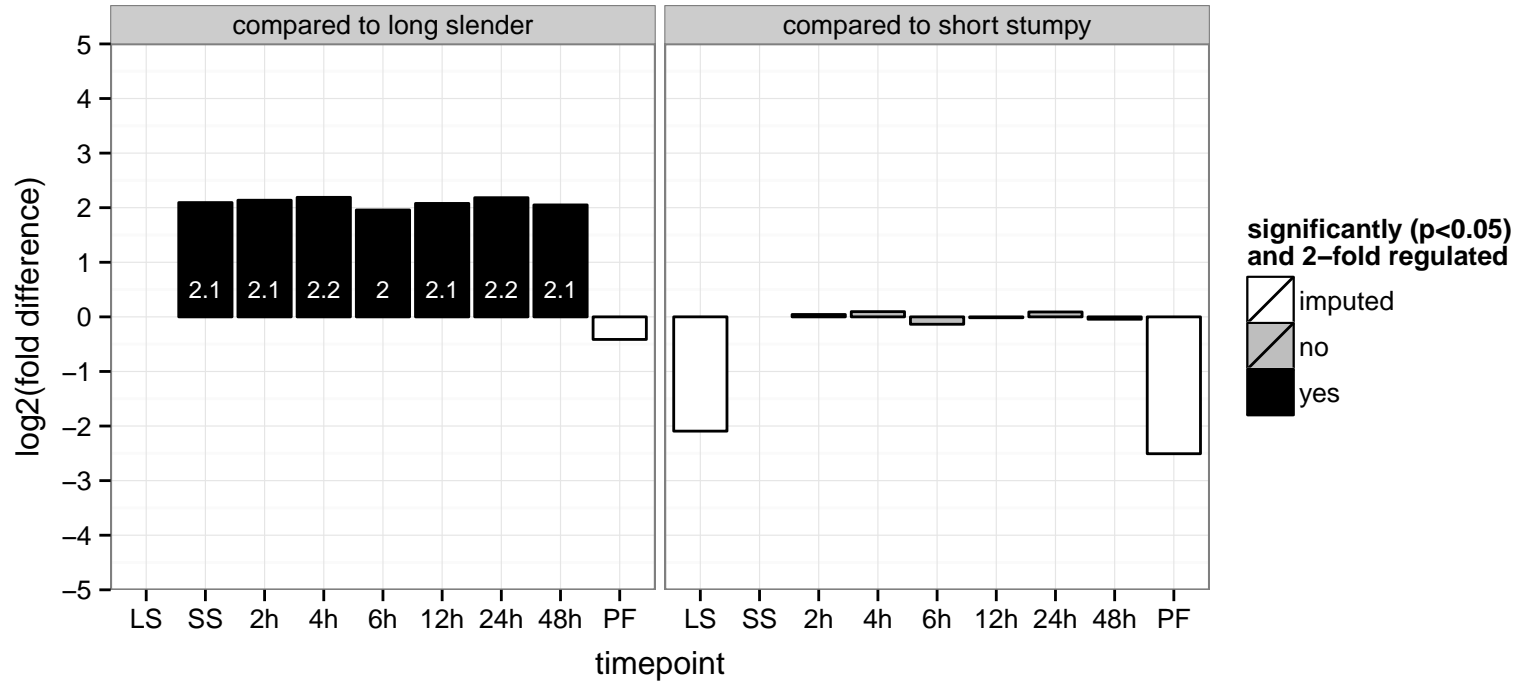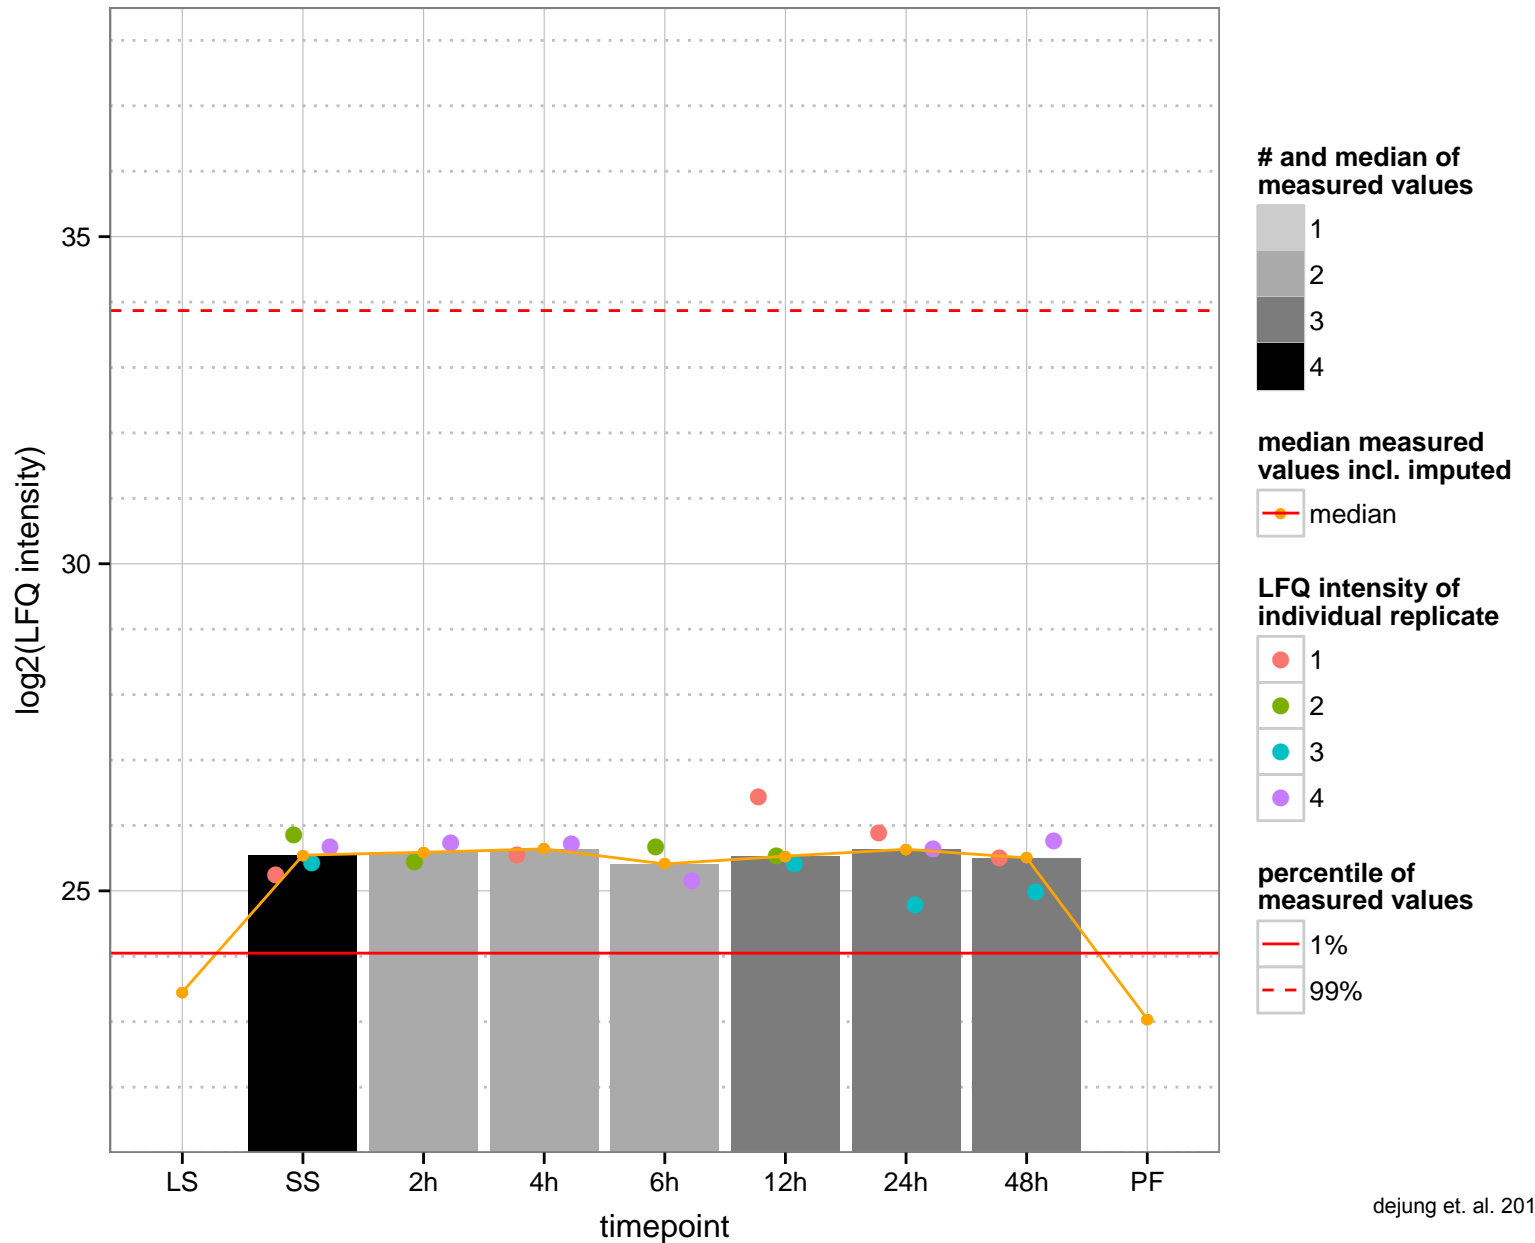

spliceosomal U5 snRNP-specific protein, putative  
 Tb927.8.2560  
 AGOF: null  
 AGOC: nucleus, spliceosomal complex  
 AGOP: RNA splicing, mitosis, nuclear migration along microfilament  
 PGO: null  
 PGO: spliceosomal complex  
 PGO: mitosis

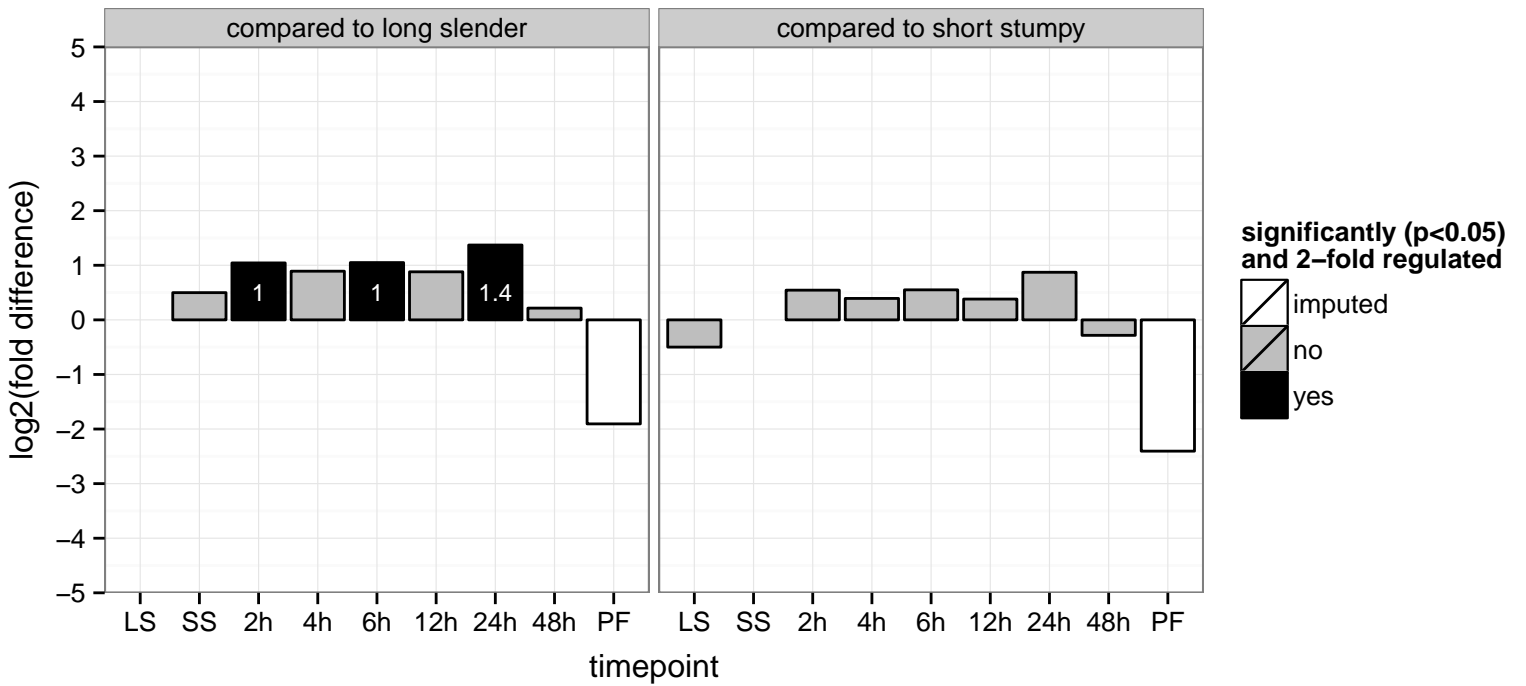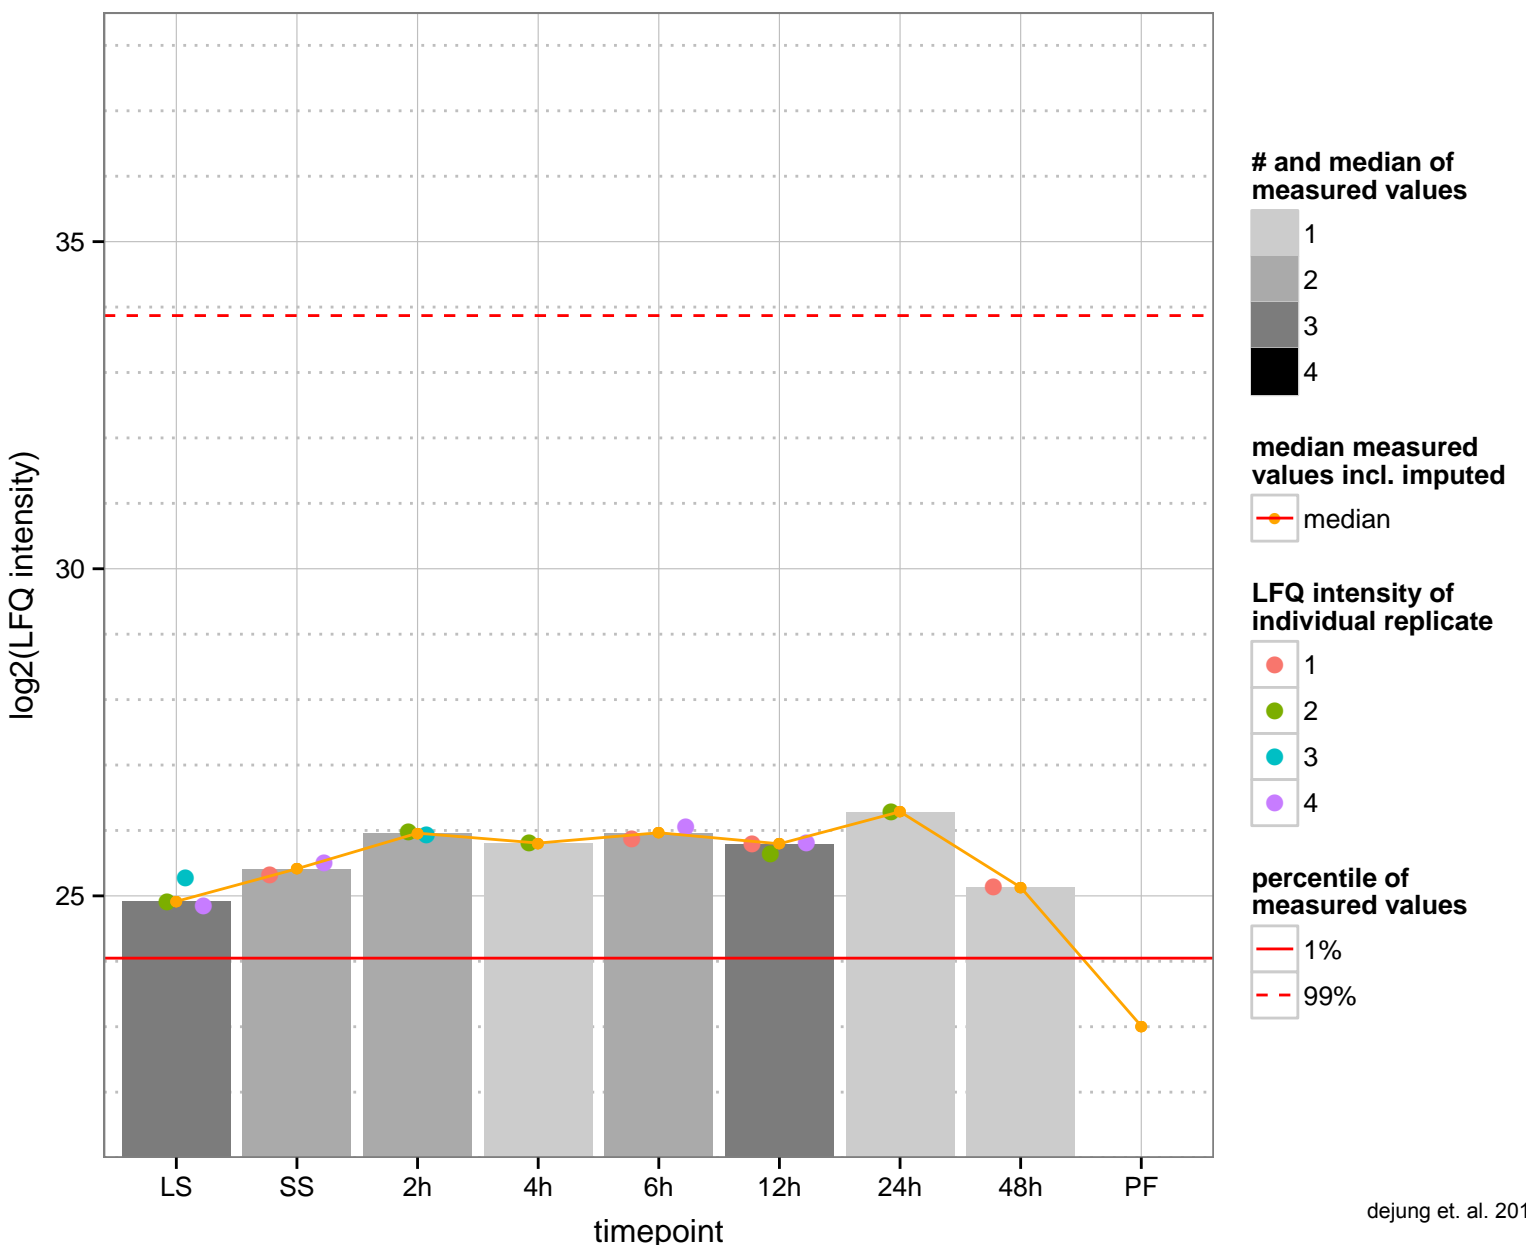



hypothetical protein, conserved  
 Tb927.8.2660  
 AGOF: null  
 AGOC: null  
 AGOP: null  
 PGO: null  
 PGOC: null  
 PGOP: null

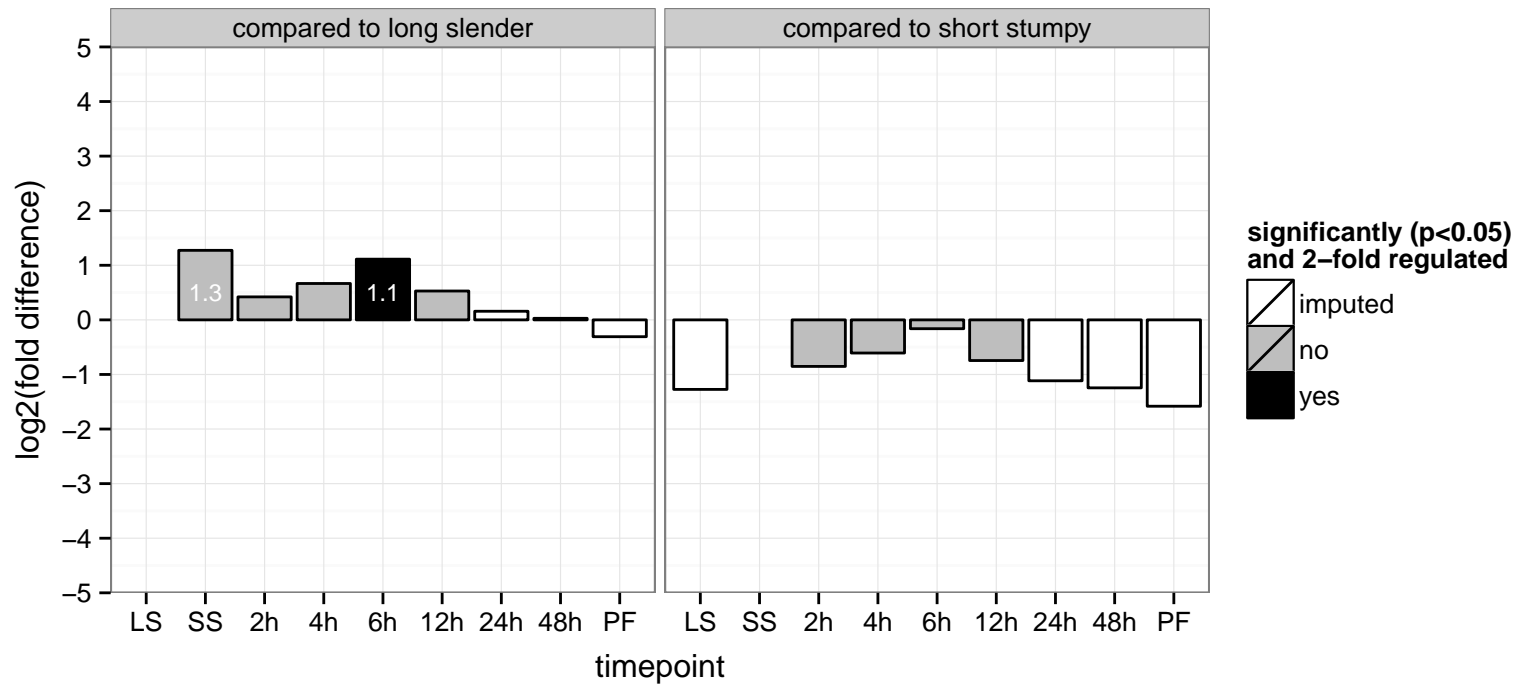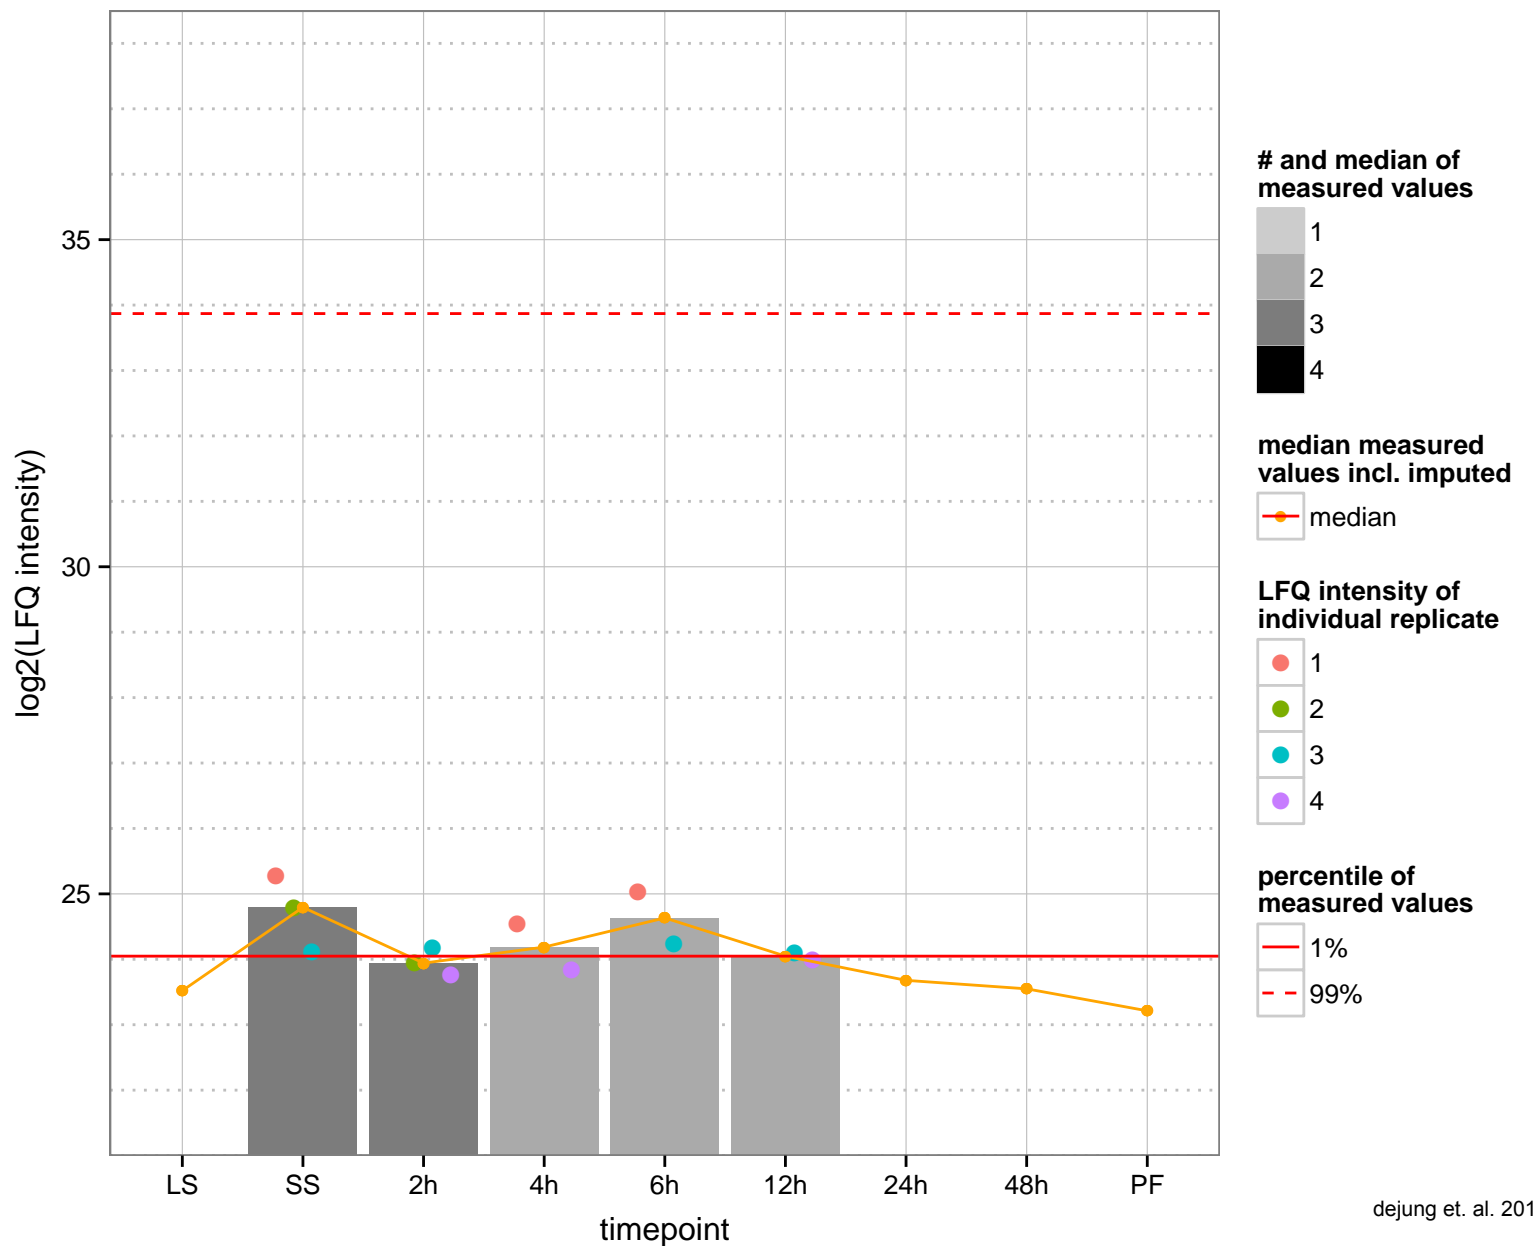

hypothetical protein, conserved  
 Tb927.8.2690  
 AGOF: null  
 AGOC: null  
 AGOP: null  
 PGO: protein binding  
 PGOC: null  
 PGOP: null

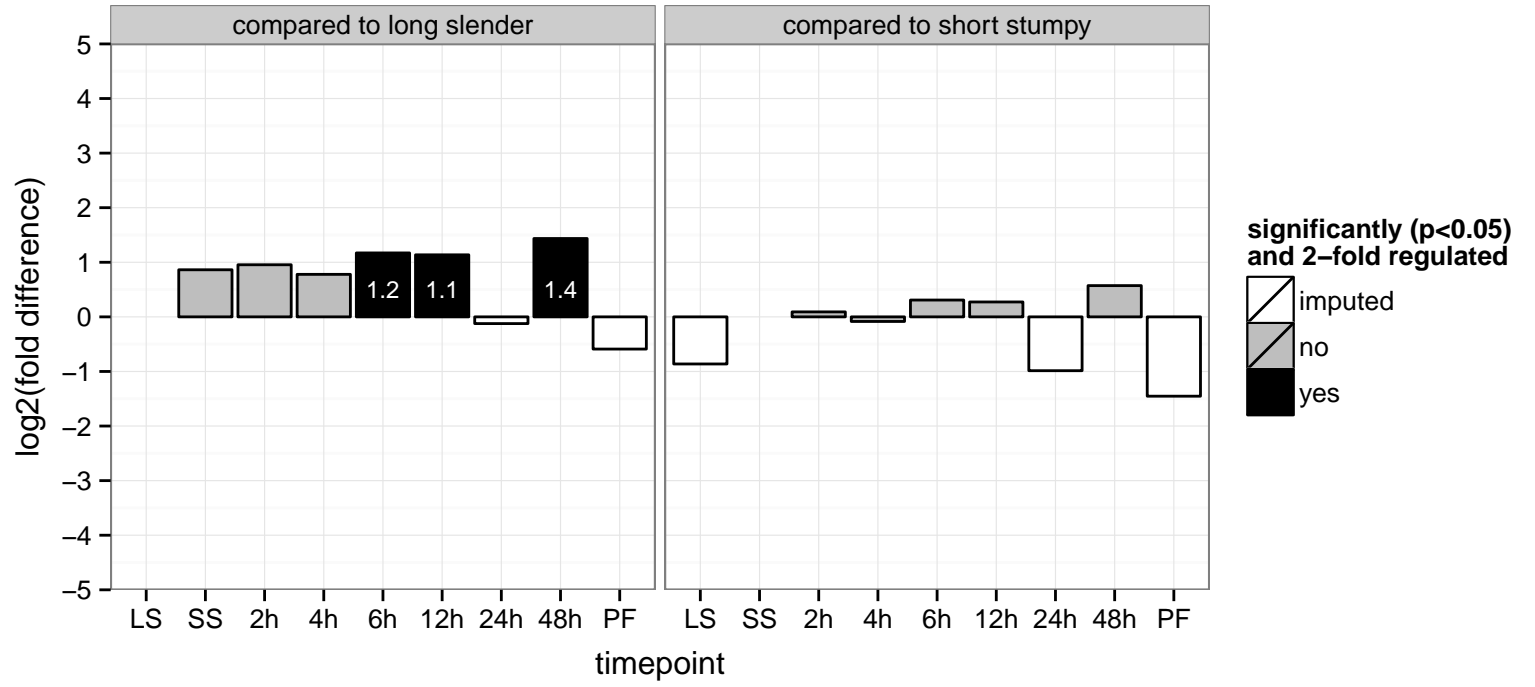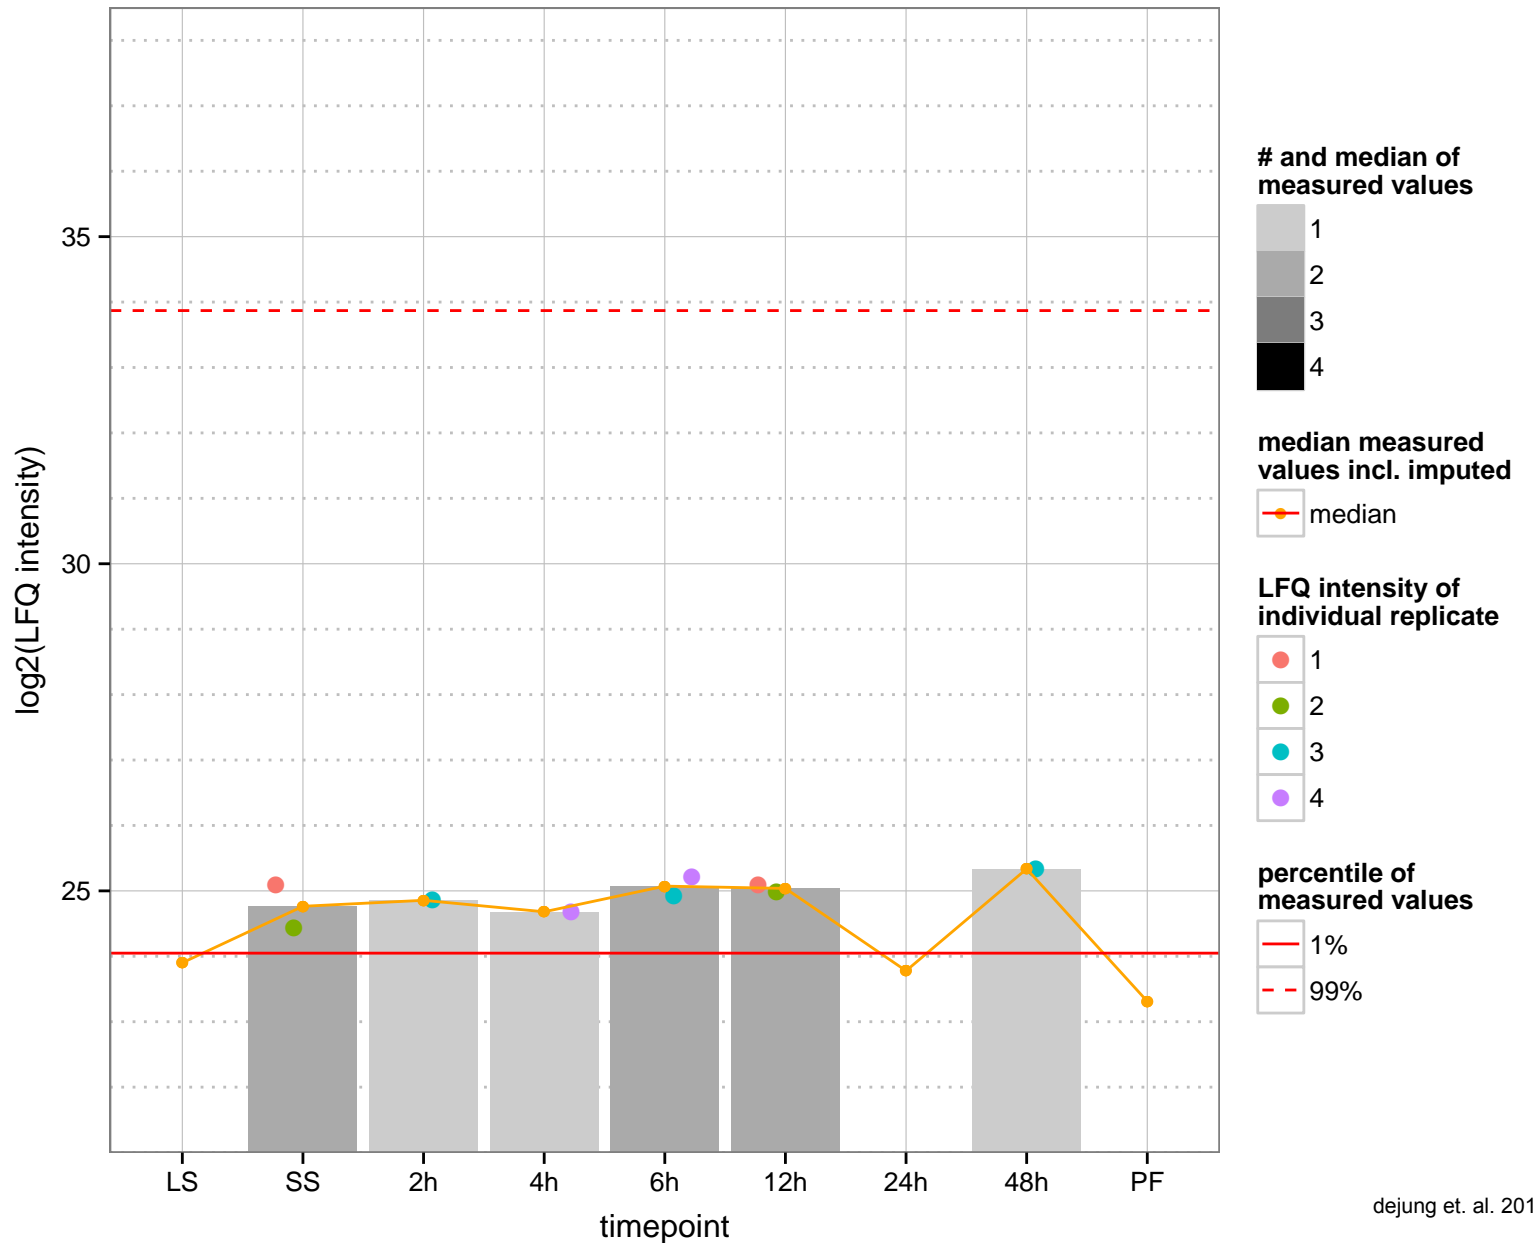

hypothetical protein, conserved  
 Tb927.8.3410  
 AGOF: null  
 AGOC: null  
 AGOP: null  
 PGO: null  
 PGOC: null  
 PGOP: null

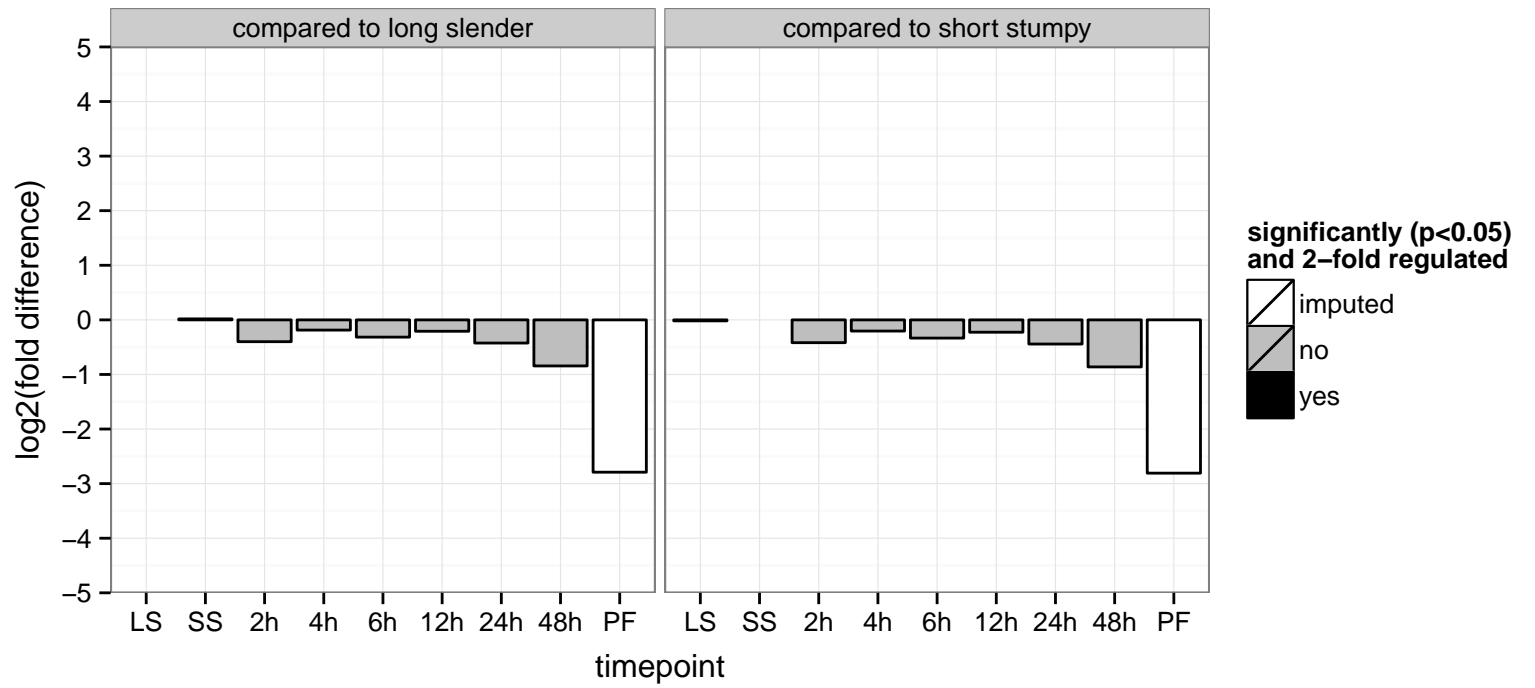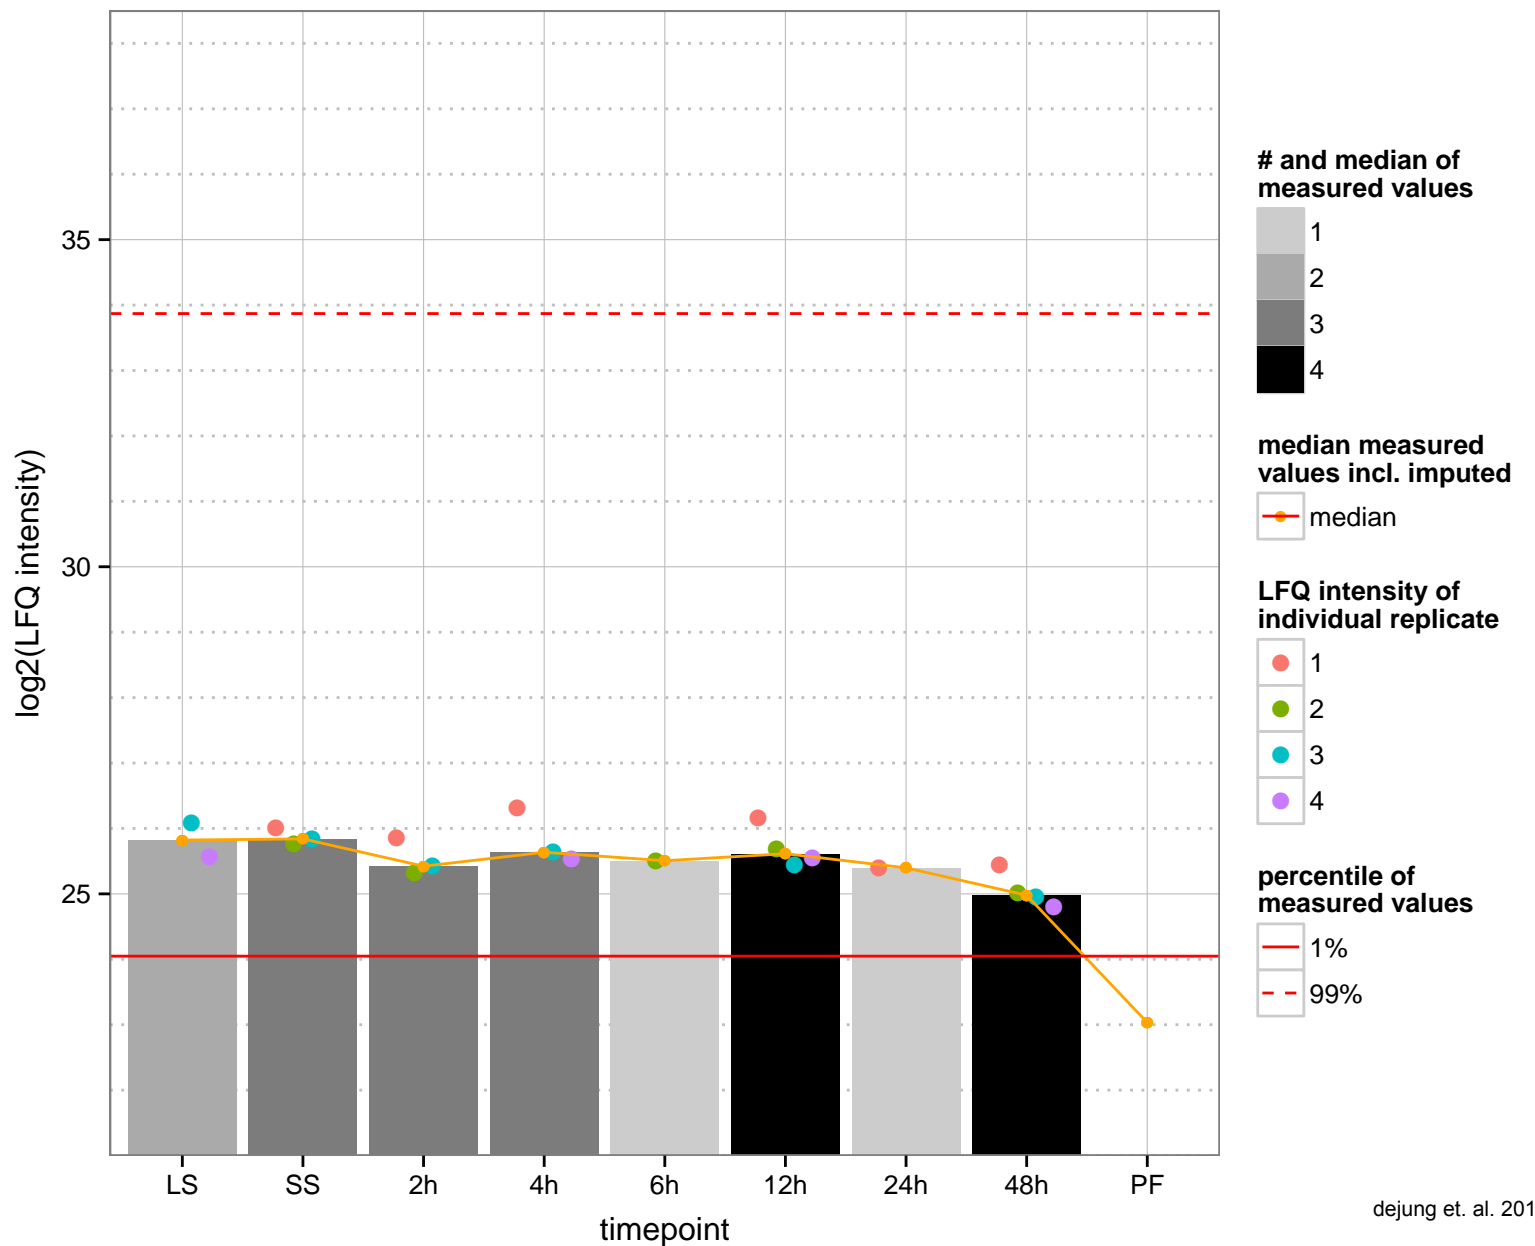

hypothetical protein, conserved  
 Tb927.8.3710  
 AGOF: exonuclease activity, nucleic acid binding  
 AGOC: intracellular  
 AGOP: null  
 PGOF: exonuclease activity, nucleic acid binding  
 PGO: intracellular  
 PGOP: null

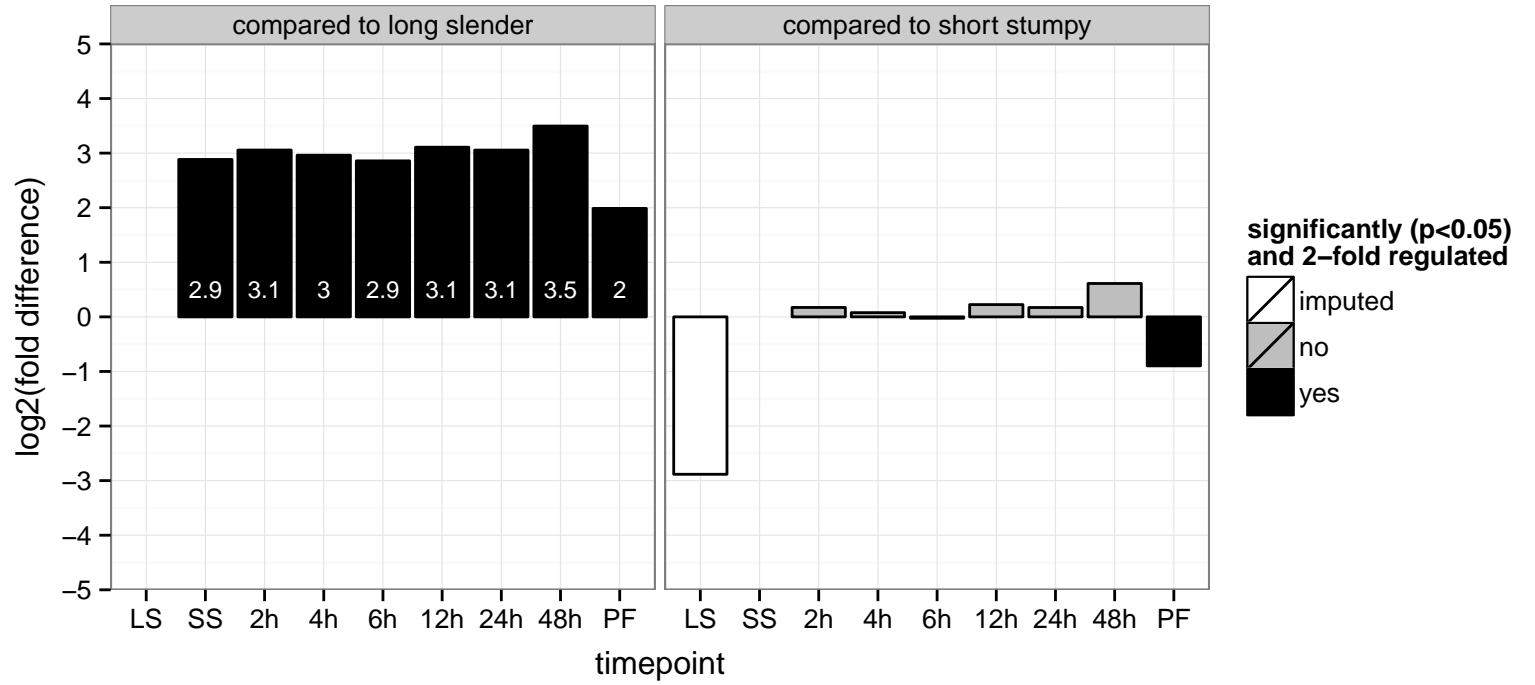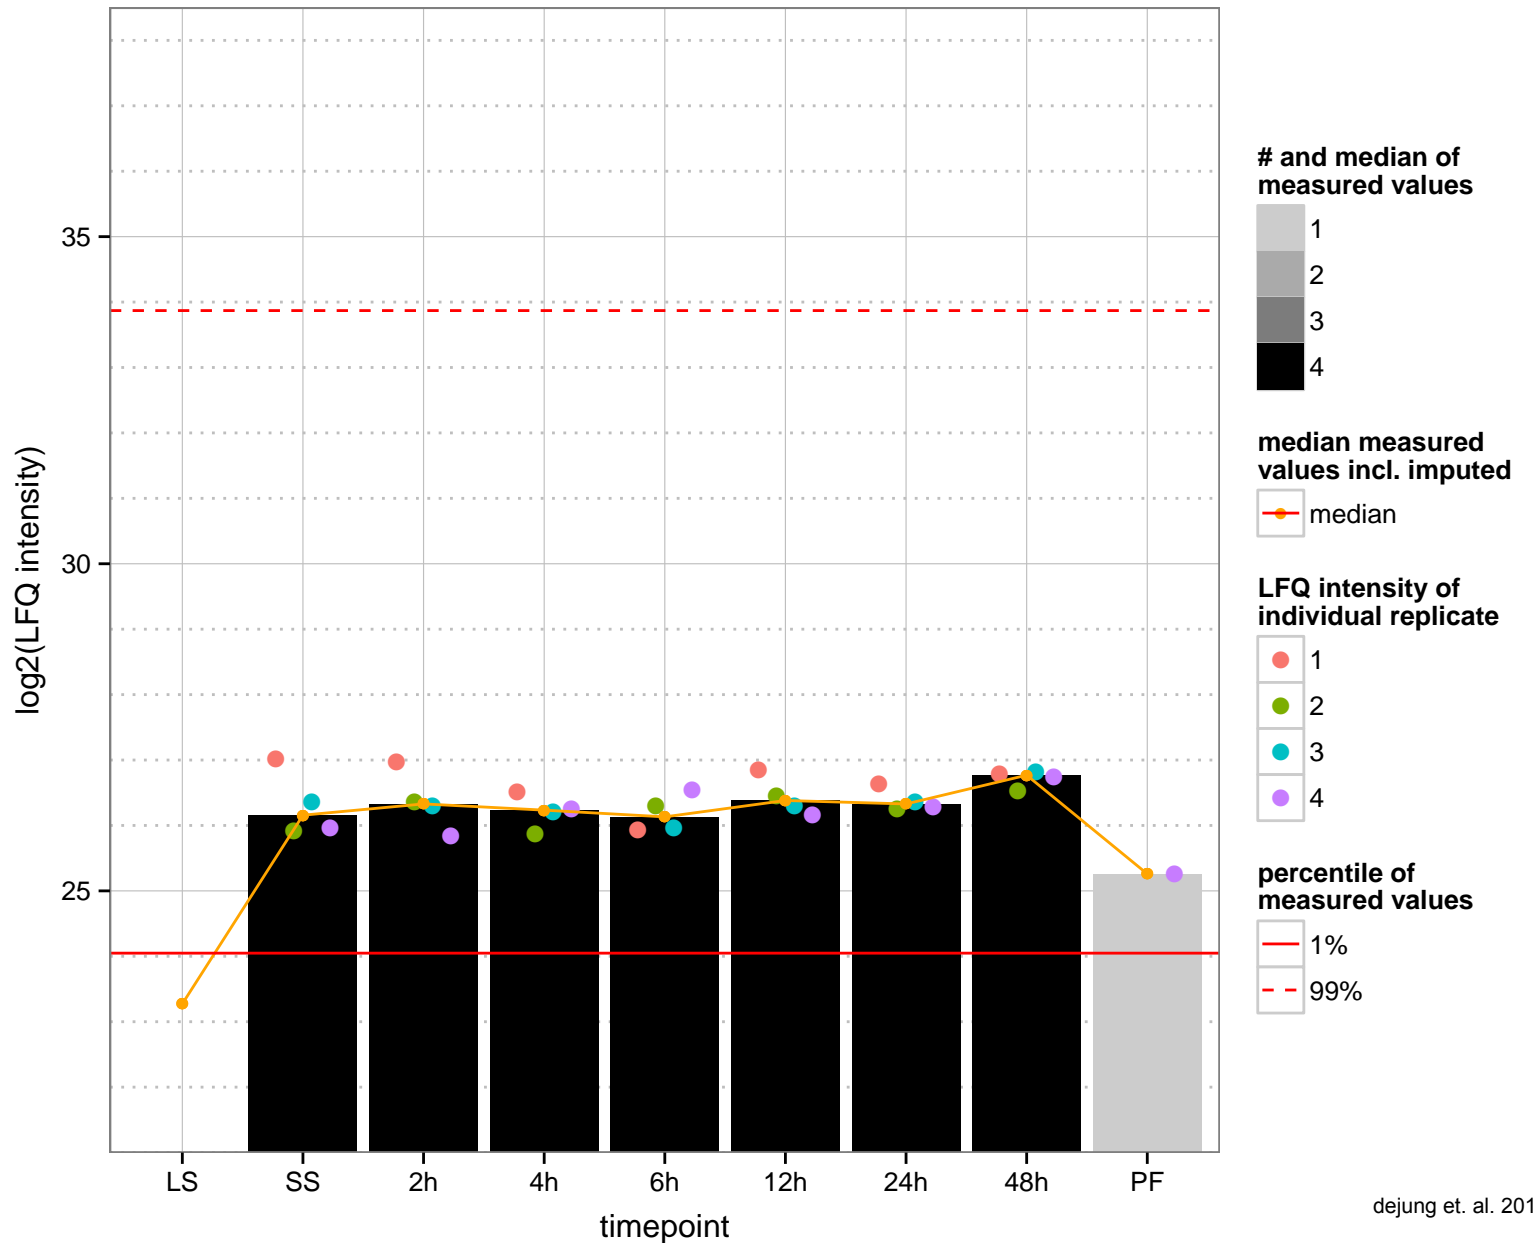

hypothetical protein, conserved  
 Tb927.8.4250  
 AGOF: null  
 AGOC: mitochondrion  
 AGOP: null  
 PGO: protein binding  
 PGOC: null  
 PGOP: null

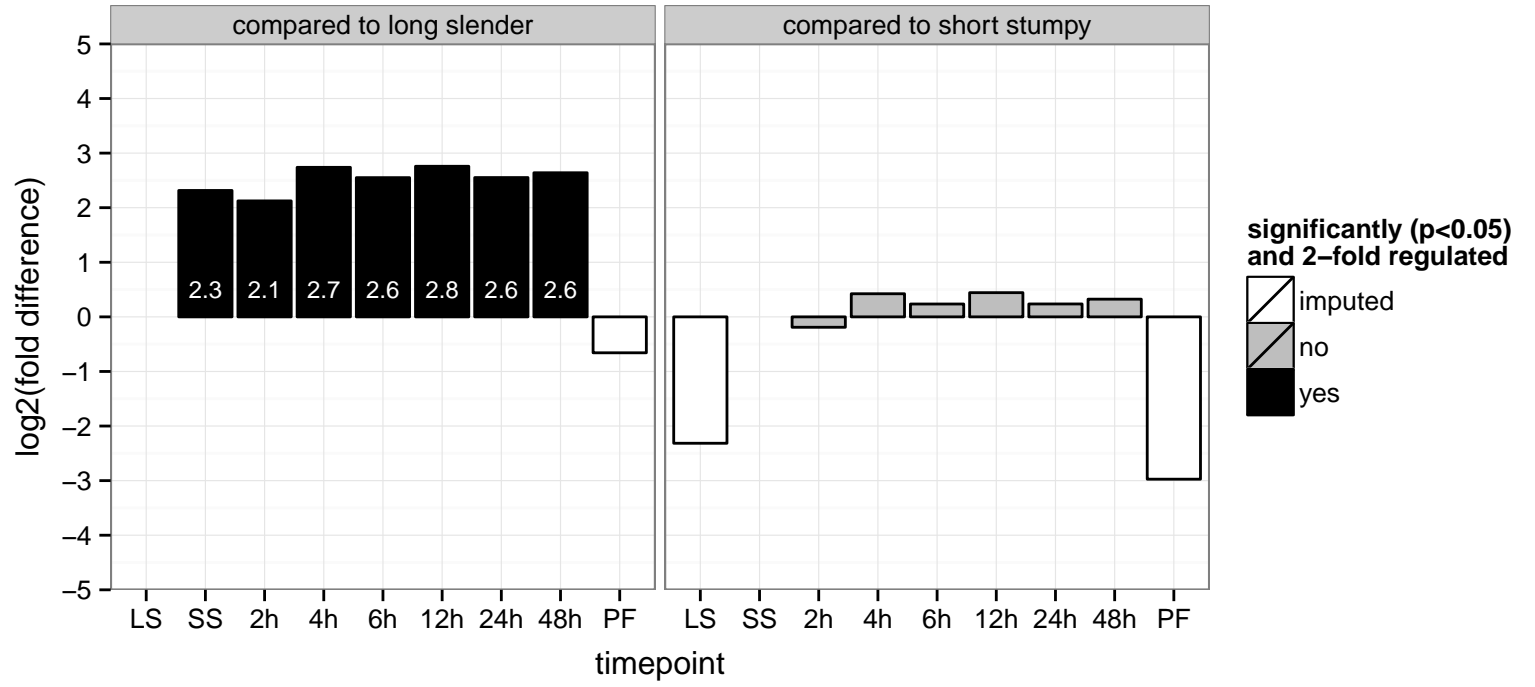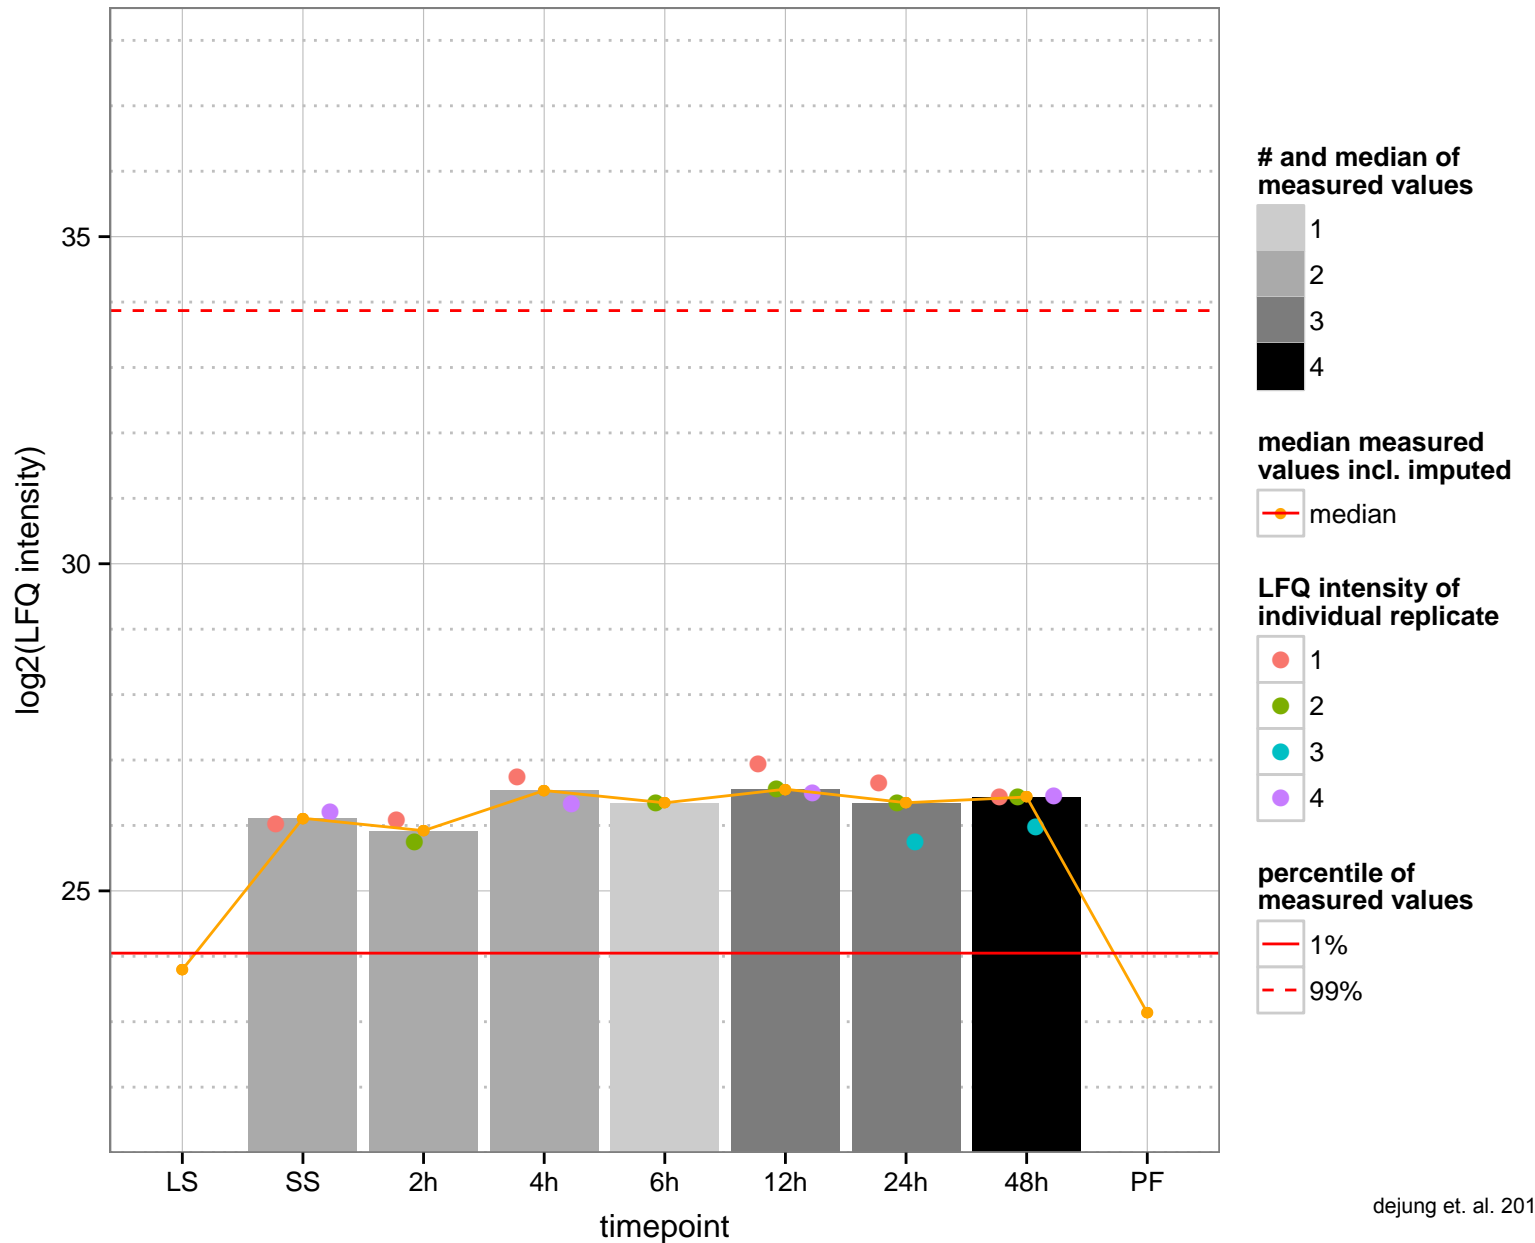

trafficking protein particle complex subunit 3, putative, TRAPP, transport protein particle (TRAPP) component, Bet3  
 Tb927.8.5030  
 AGOF: null  
 AGOC: TRAPP complex, integral to membrane  
 AGOP: ER to Golgi vesicle-mediated transport  
 PGO: null  
 PGOC: null  
 PGOP: null

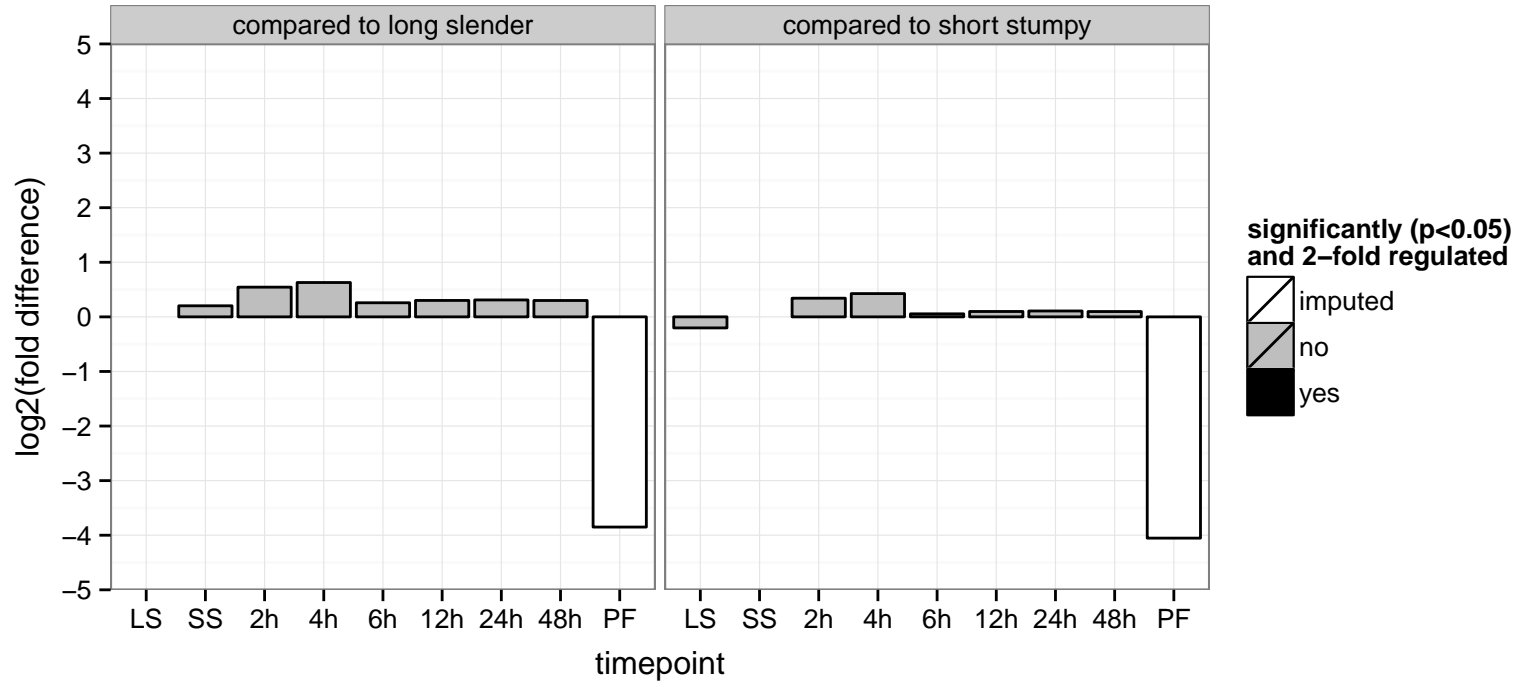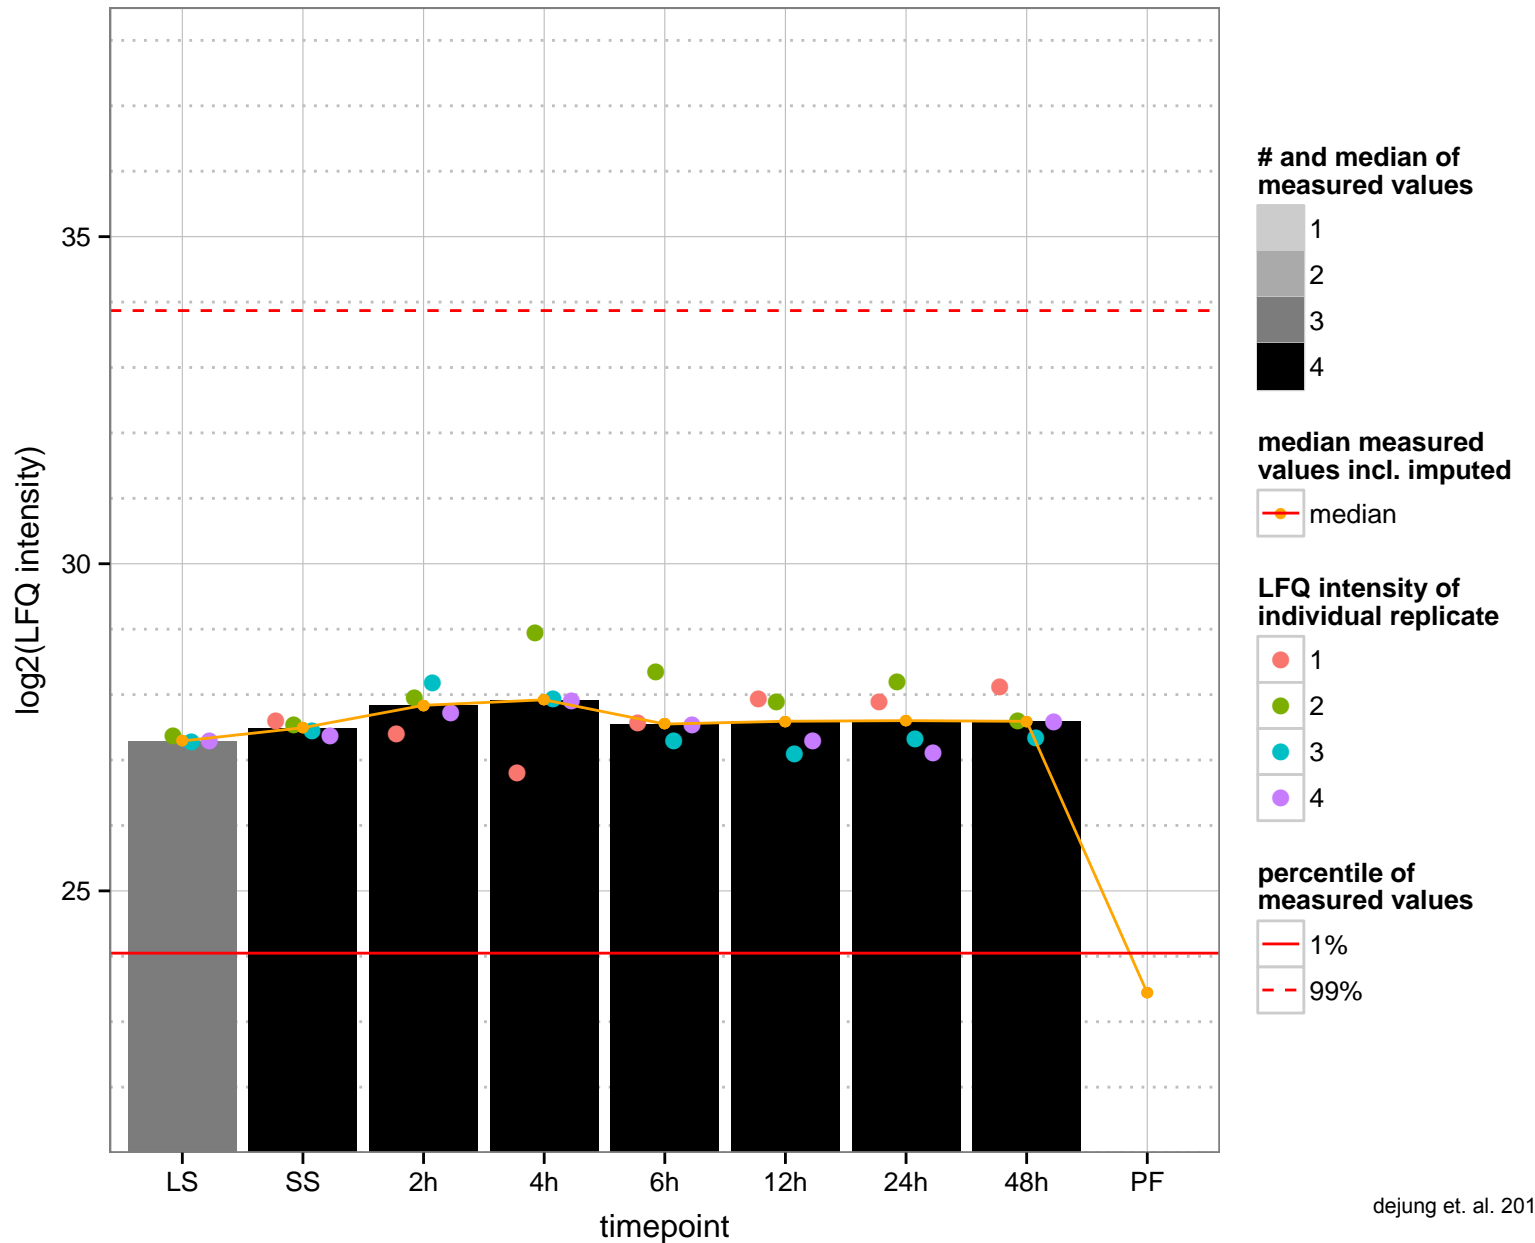

recombination initiation protein NBS1, putative  
 Tb927.8.5710  
 AGOF: null  
 AGOC: null  
 AGOP: null  
 PGO: protein binding  
 PGOC: null  
 PGOP: null

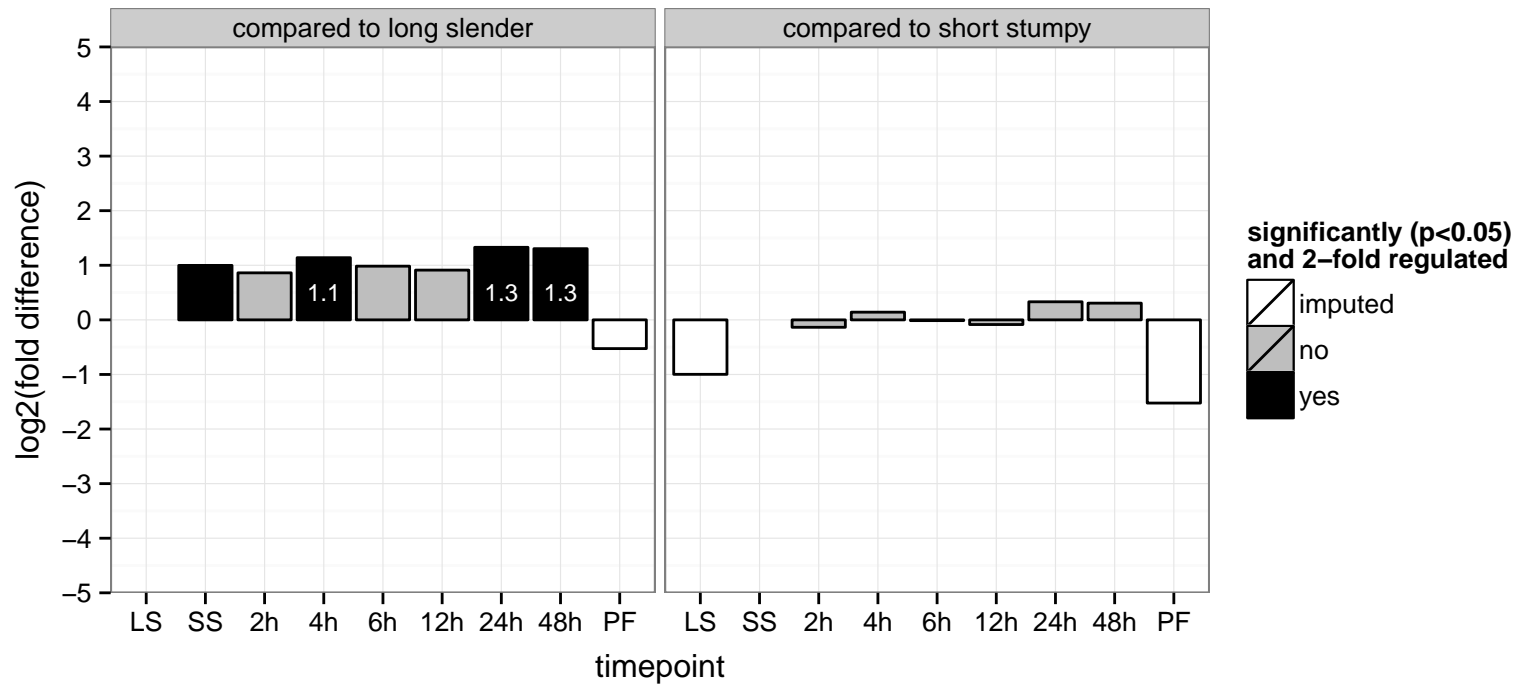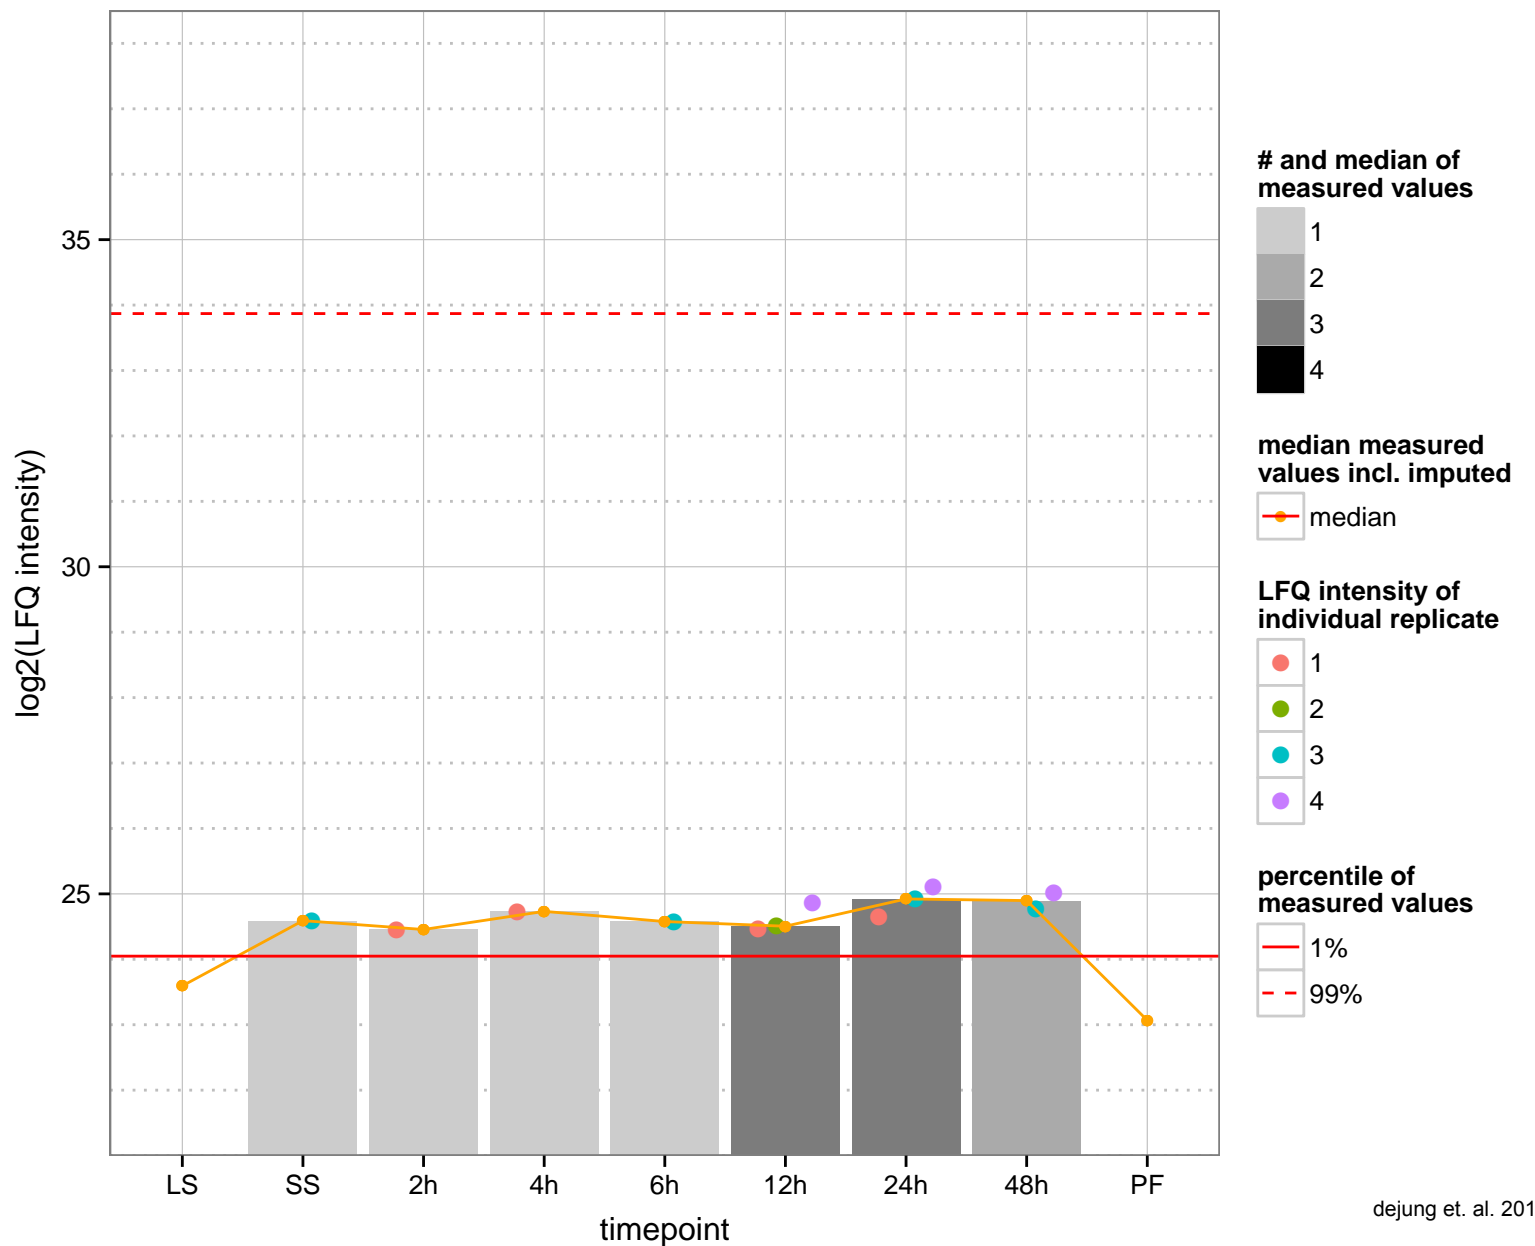

basal body component, ML protein (TBBC)  
 Tb927.8.6070  
 AGOF: null  
 AGOC: cilium, cilium basal body, nucleus  
 AGOP: cilium assembly  
 PGO: null  
 PGOC: null  
 PGOP: null

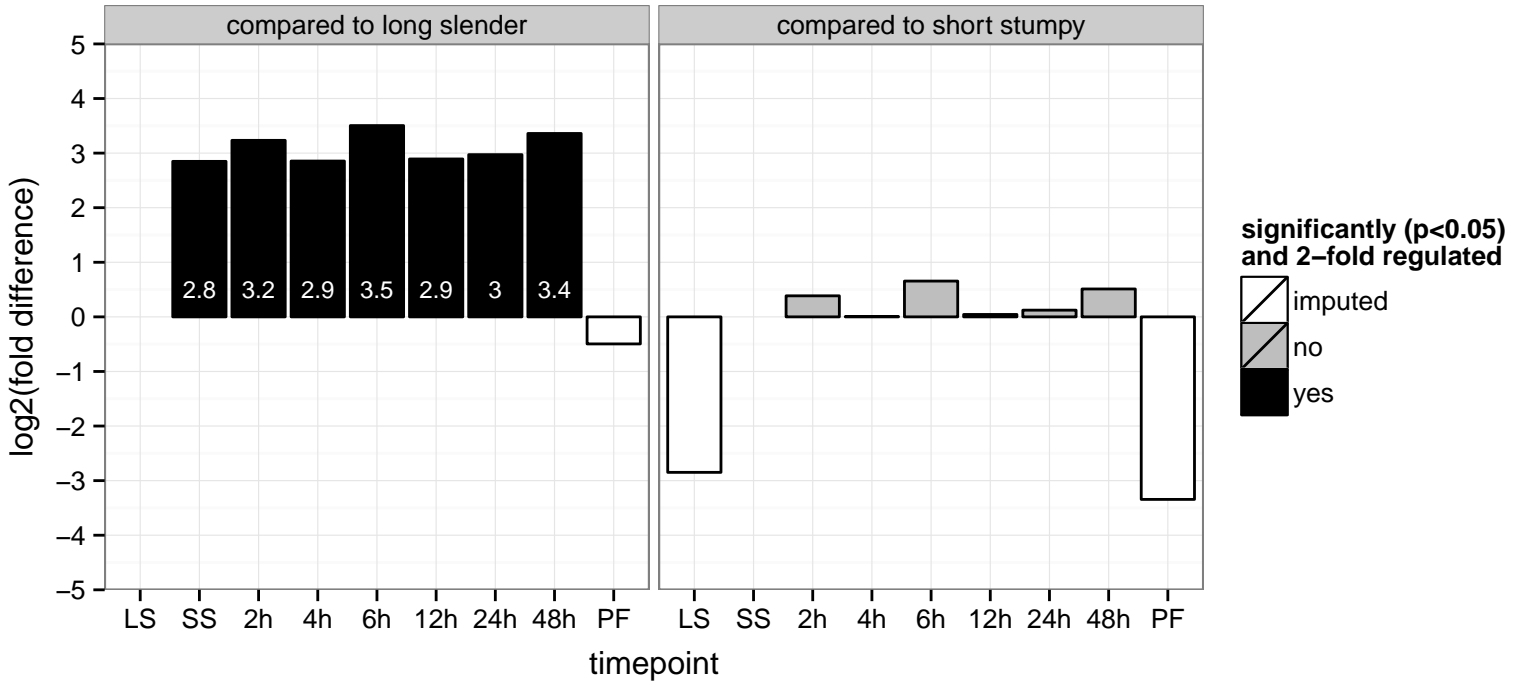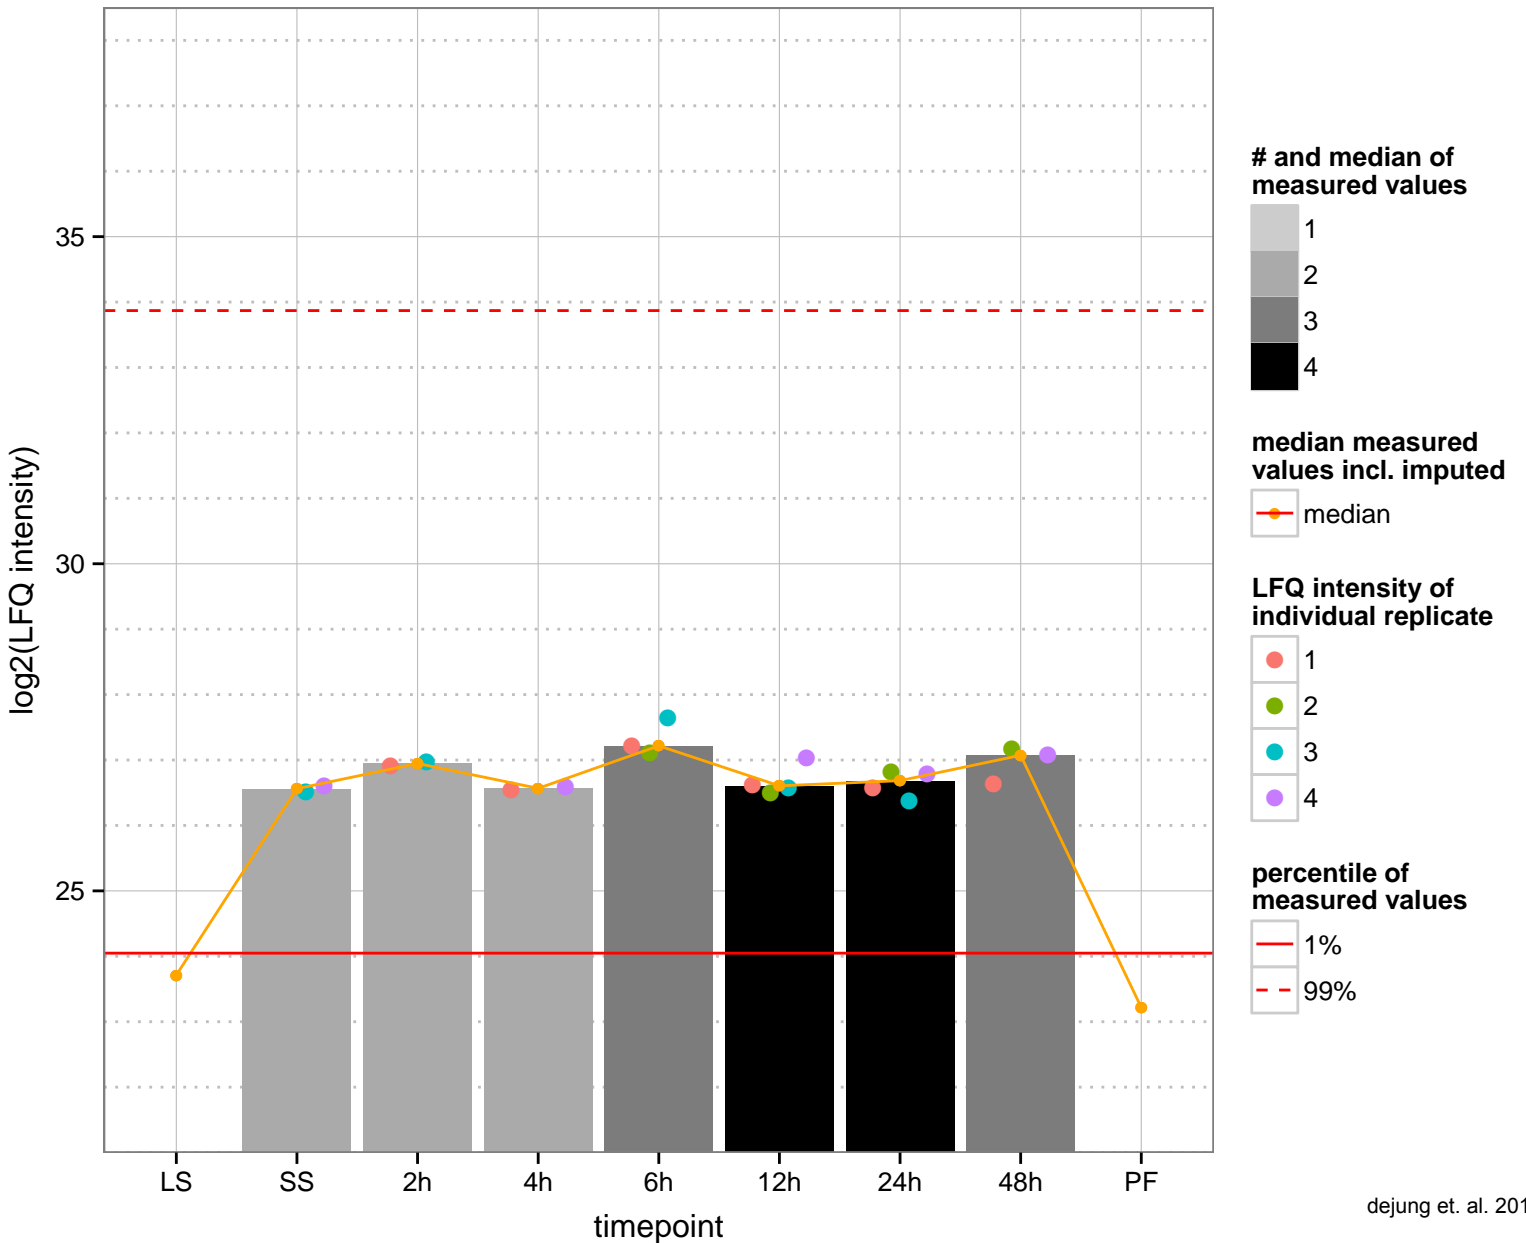



hypothetical protein, conserved  
 Tb927.8.6190  
 AGOF: null  
 AGOC: null  
 AGOP: null  
 PGOF: null  
 PGO: null  
 PGOP: null

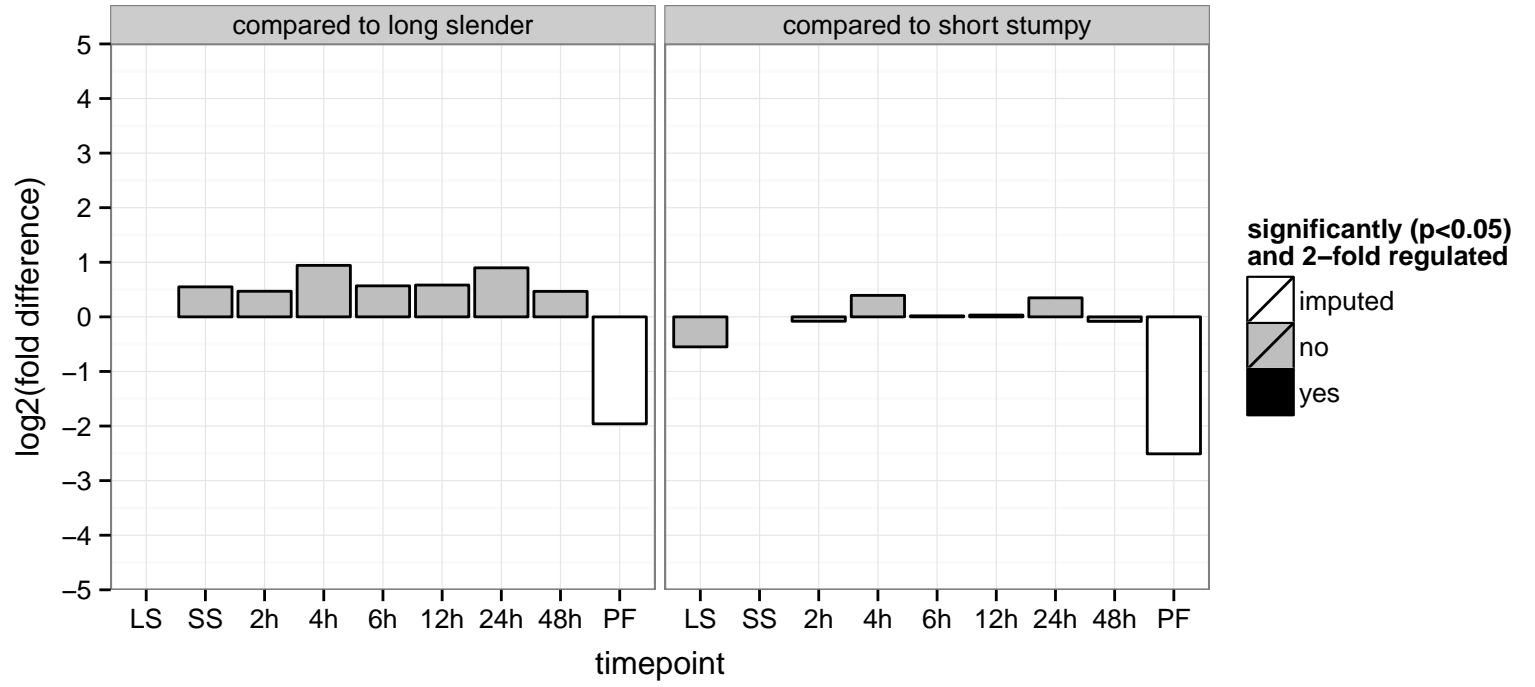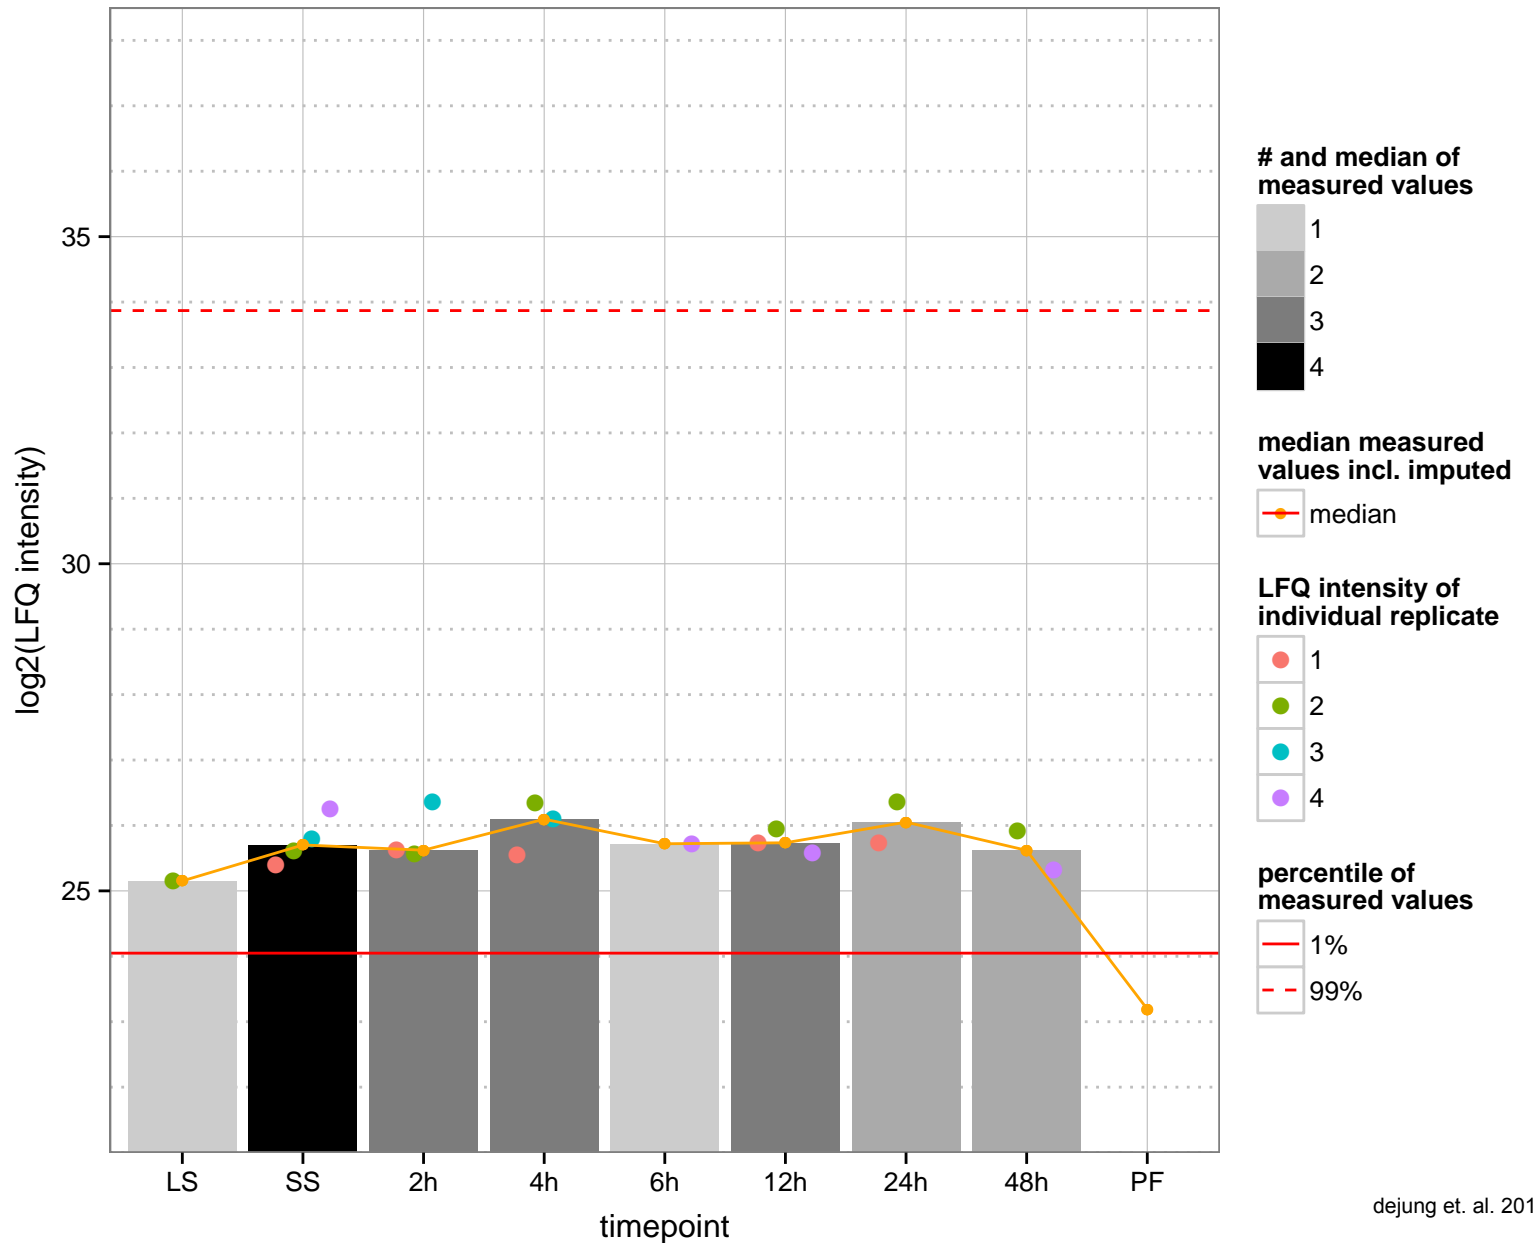

hypothetical protein, conserved  
 Tb927.8.7210  
 AGOF: null  
 AGOC: null  
 AGOP: null  
 PGOF: null  
 PGO: null  
 PGOP: null

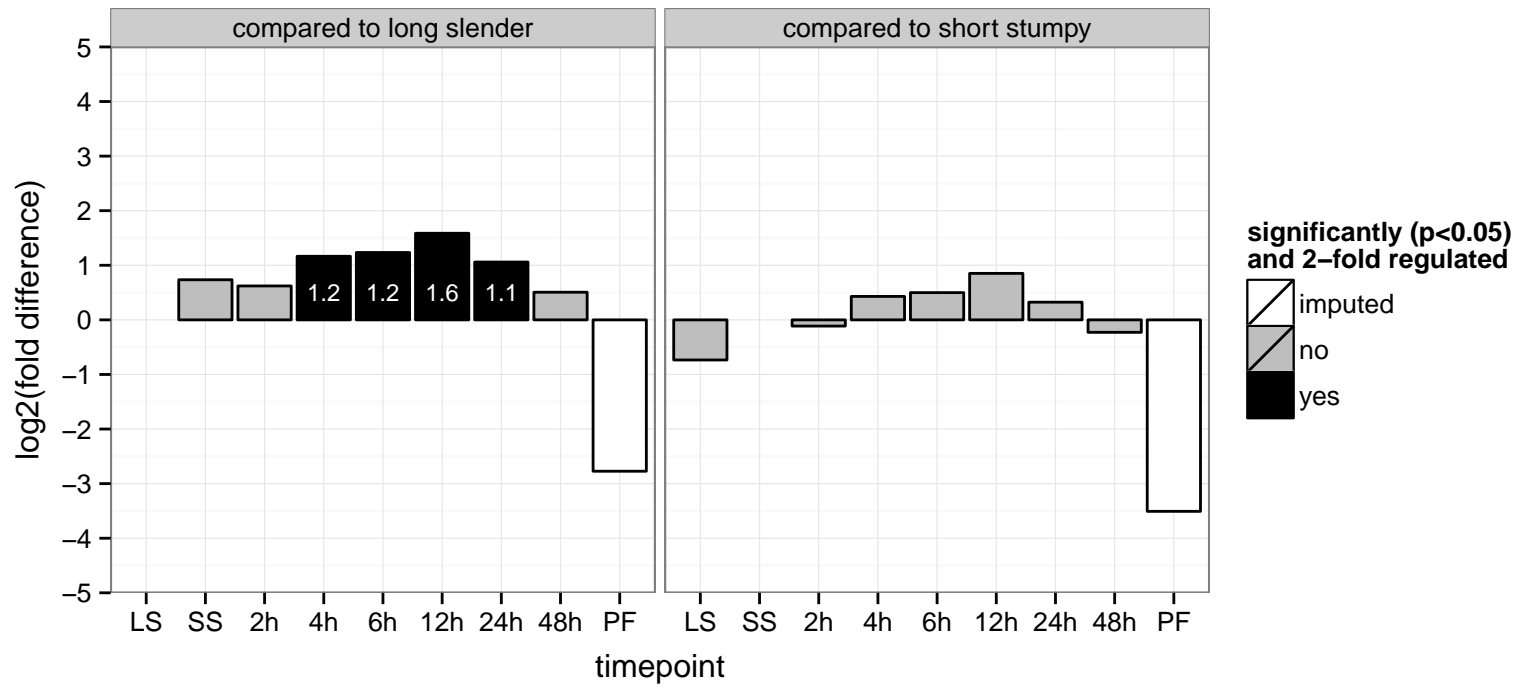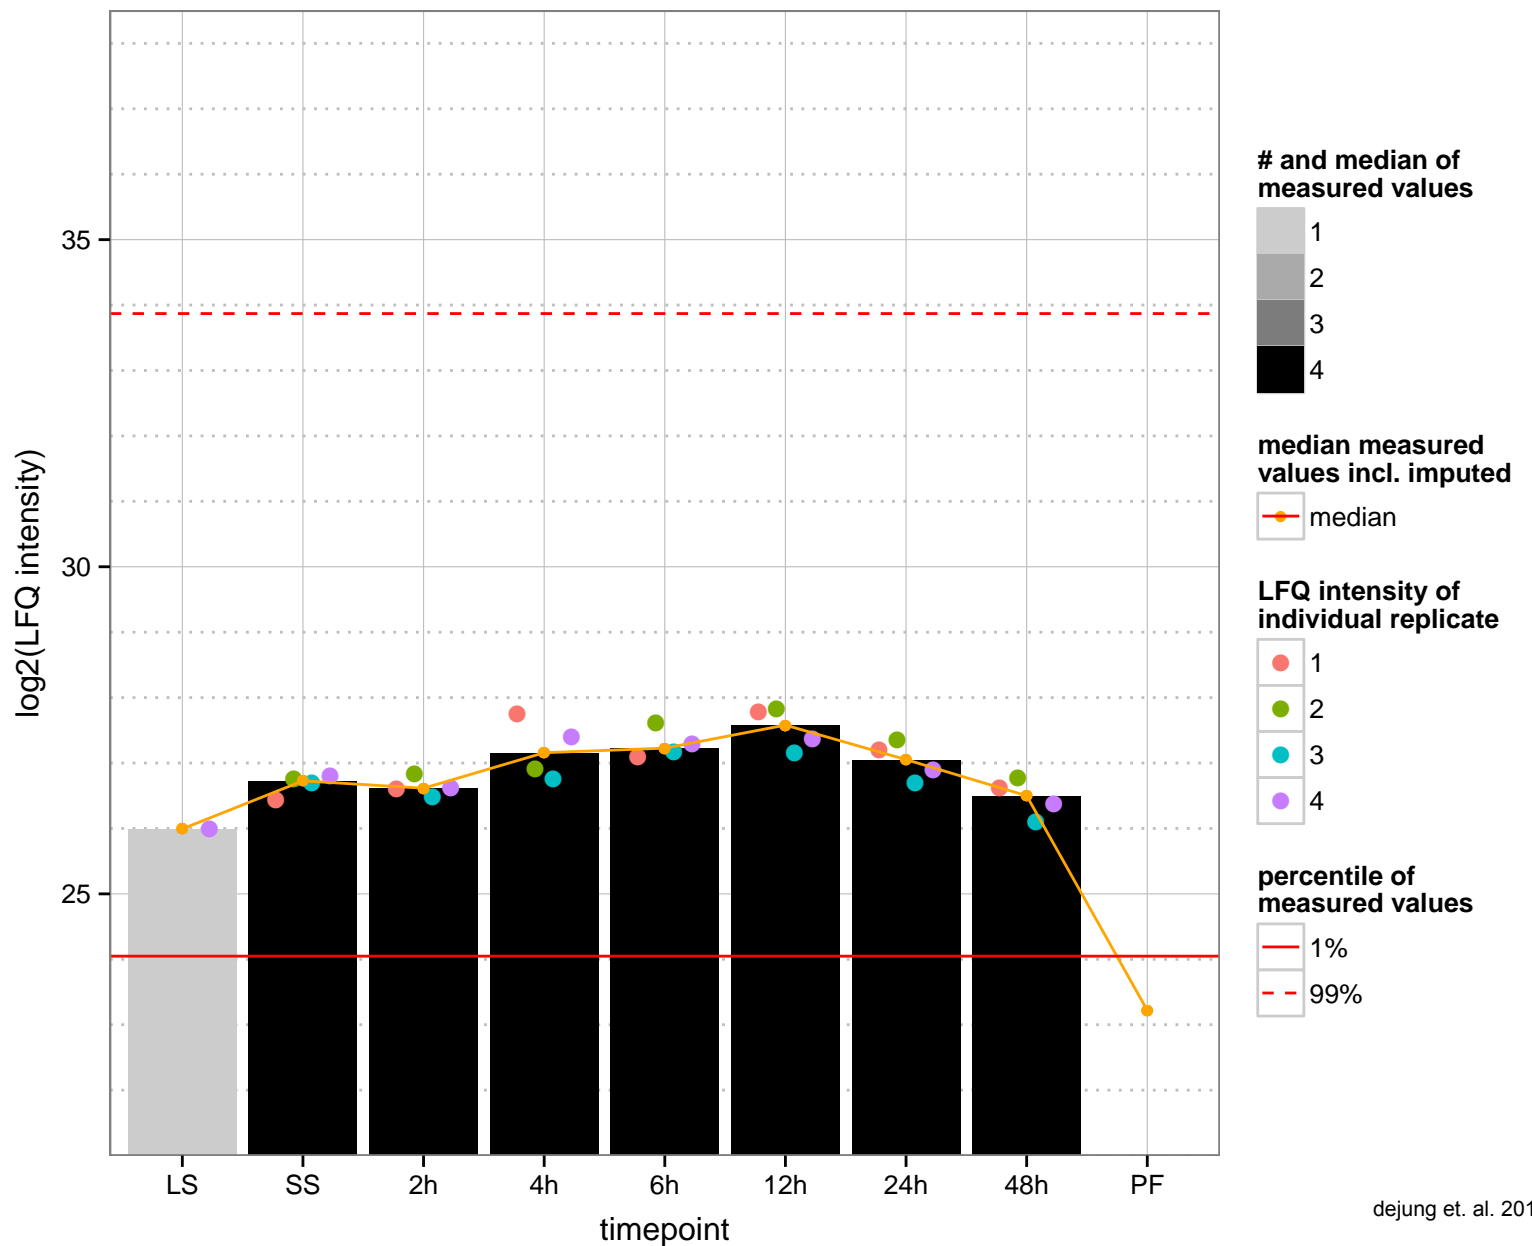

hypothetical protein, conserved  
 Tb927.8.7790  
 AGOF: null  
 AGOC: null  
 AGOP: null  
 PGOF: null  
 PGO: null  
 PGOP: null

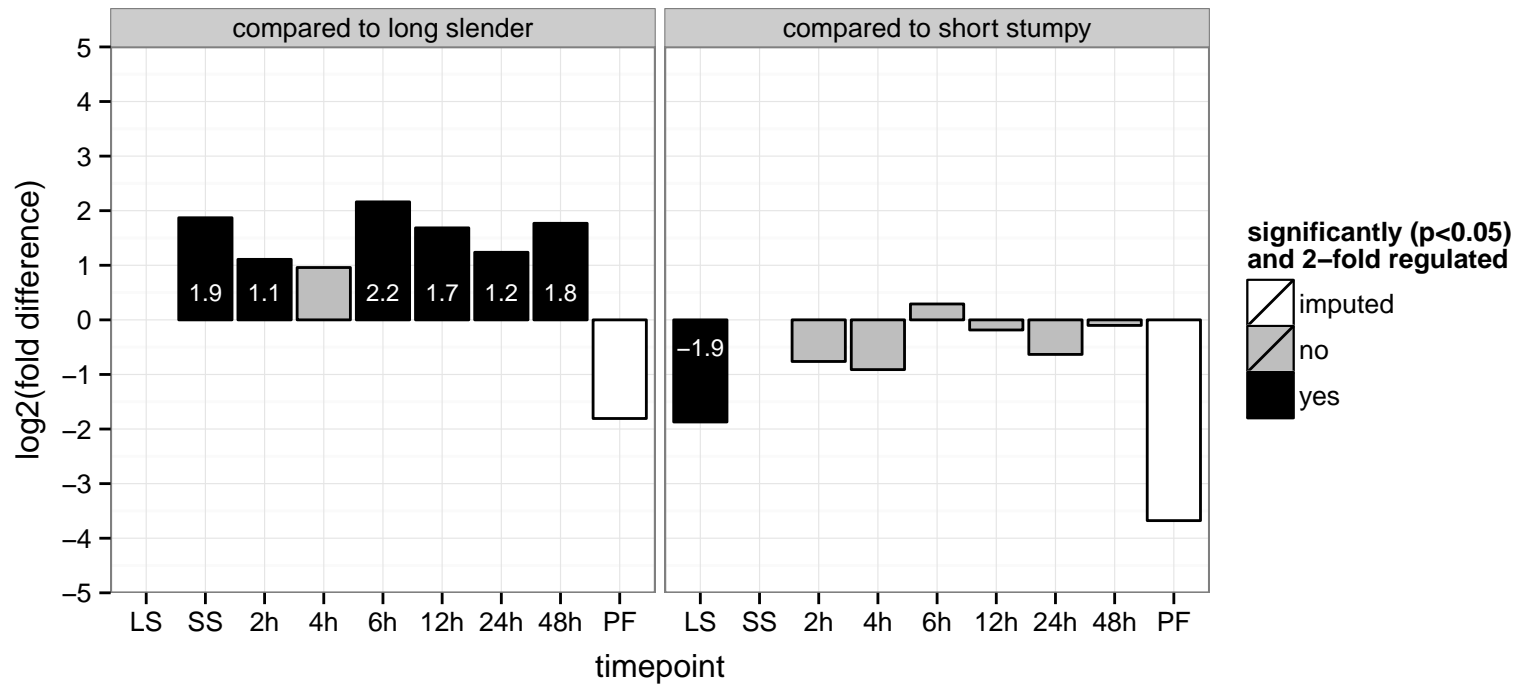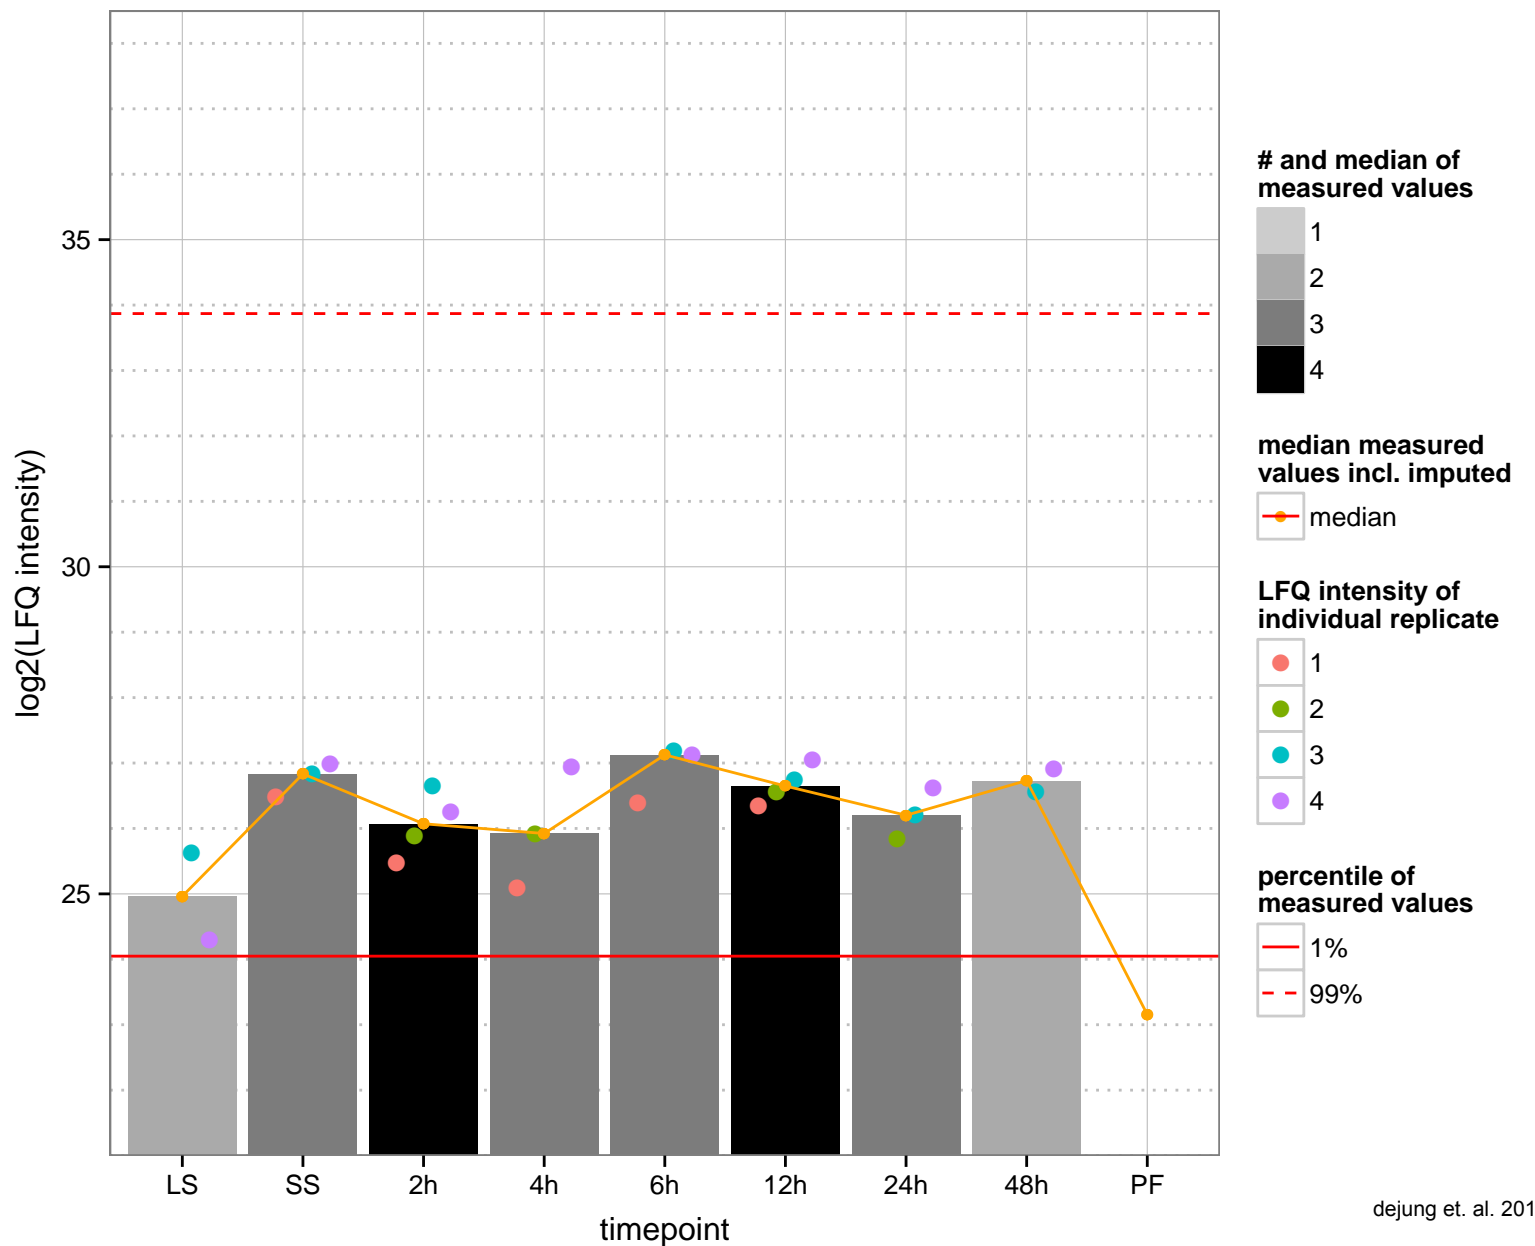

hypothetical protein, conserved  
 Tb927.8.7990  
 AGOF: zinc ion binding  
 AGOC: intracellular  
 AGOP: null  
 PGOF: zinc ion binding  
 PGOC: intracellular  
 PGOP: null

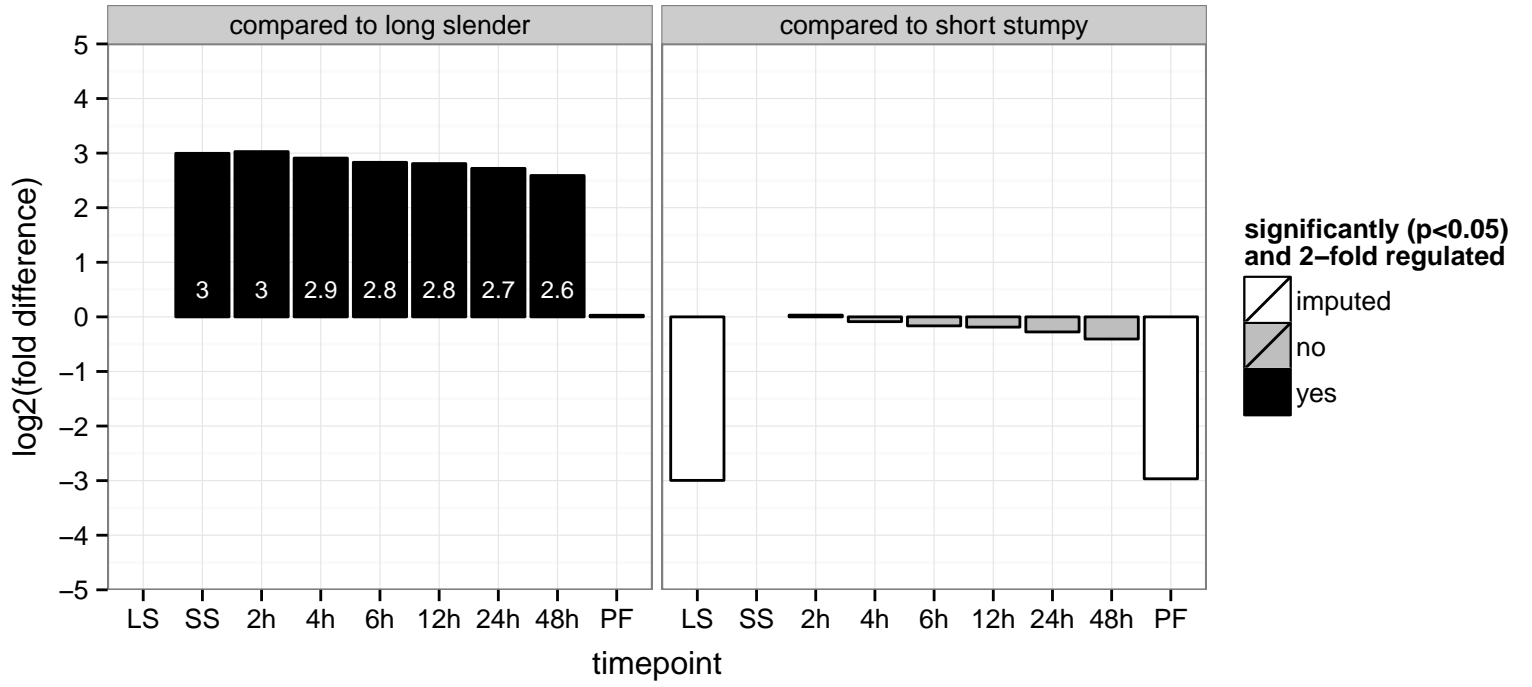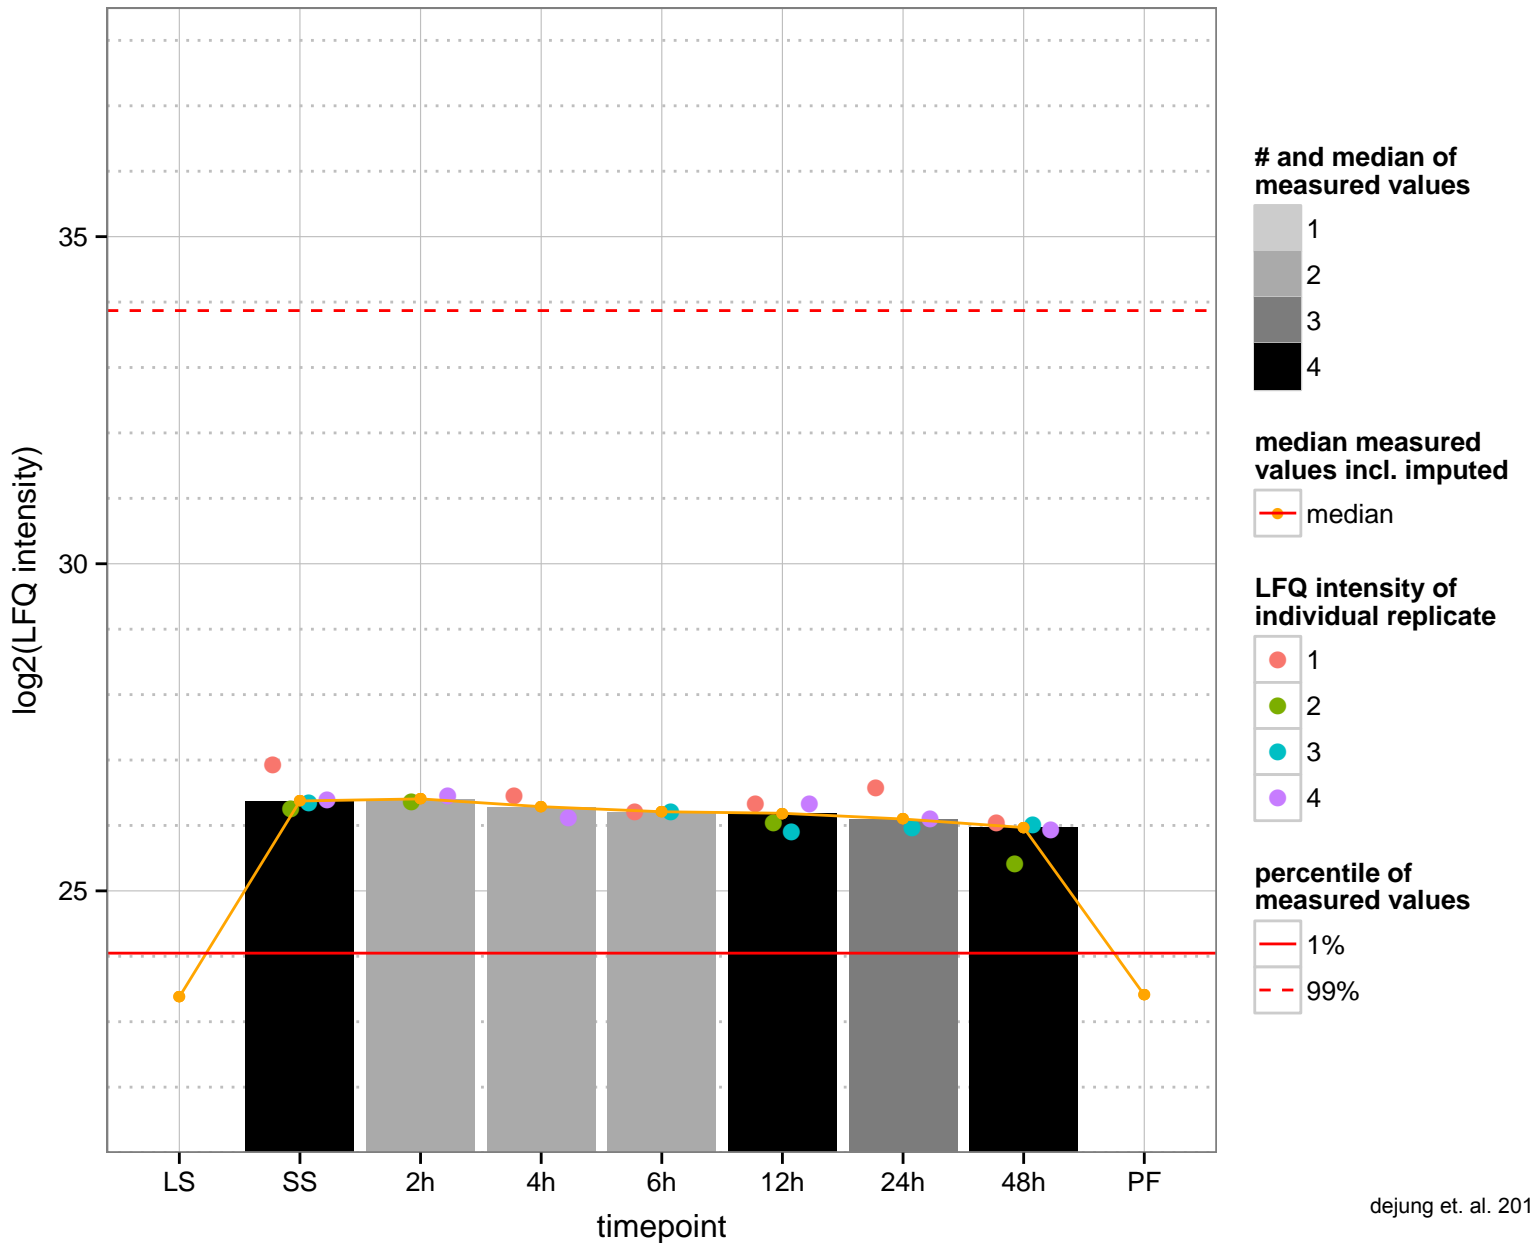

hypothetical protein, conserved  
 Tb927.8.8120  
 AGOF: null  
 AGOC: null  
 AGOP: null  
 PGO: null  
 PGOC: null  
 PGOP: null

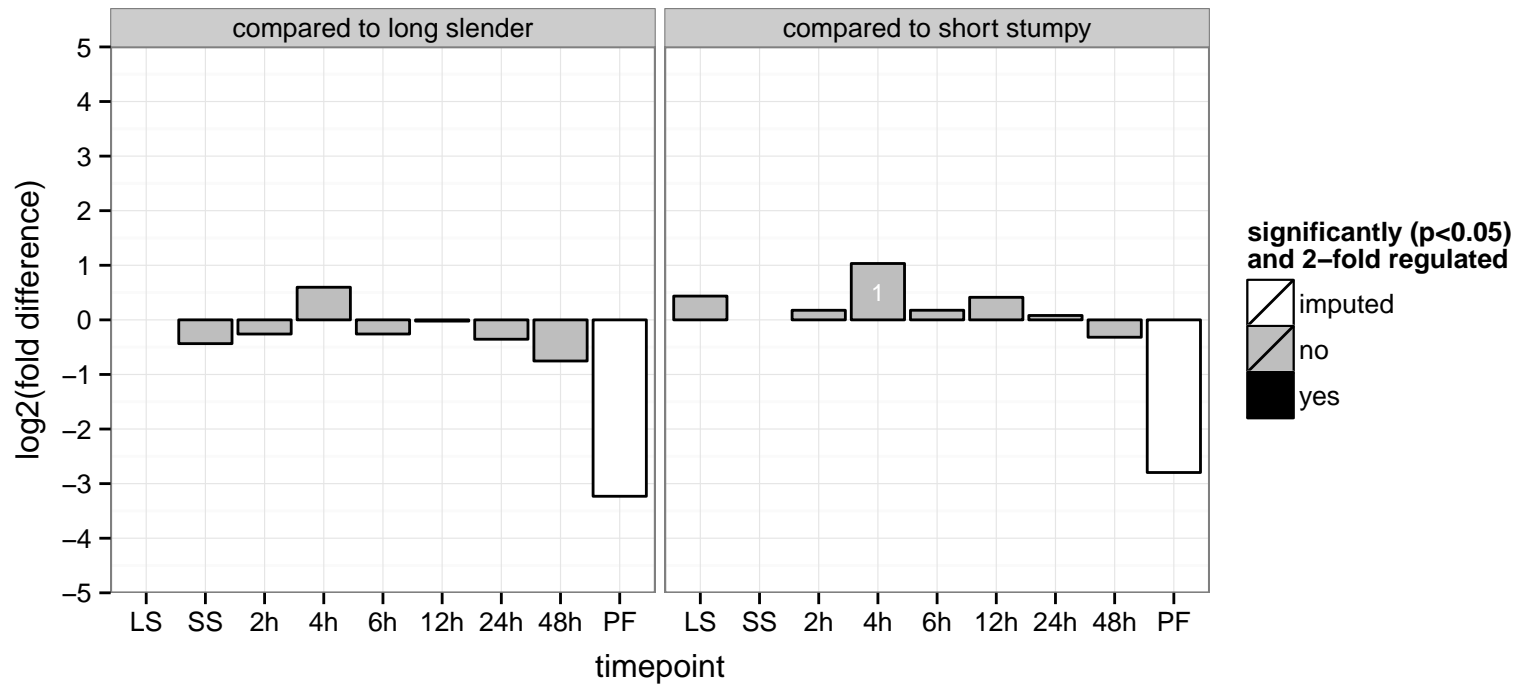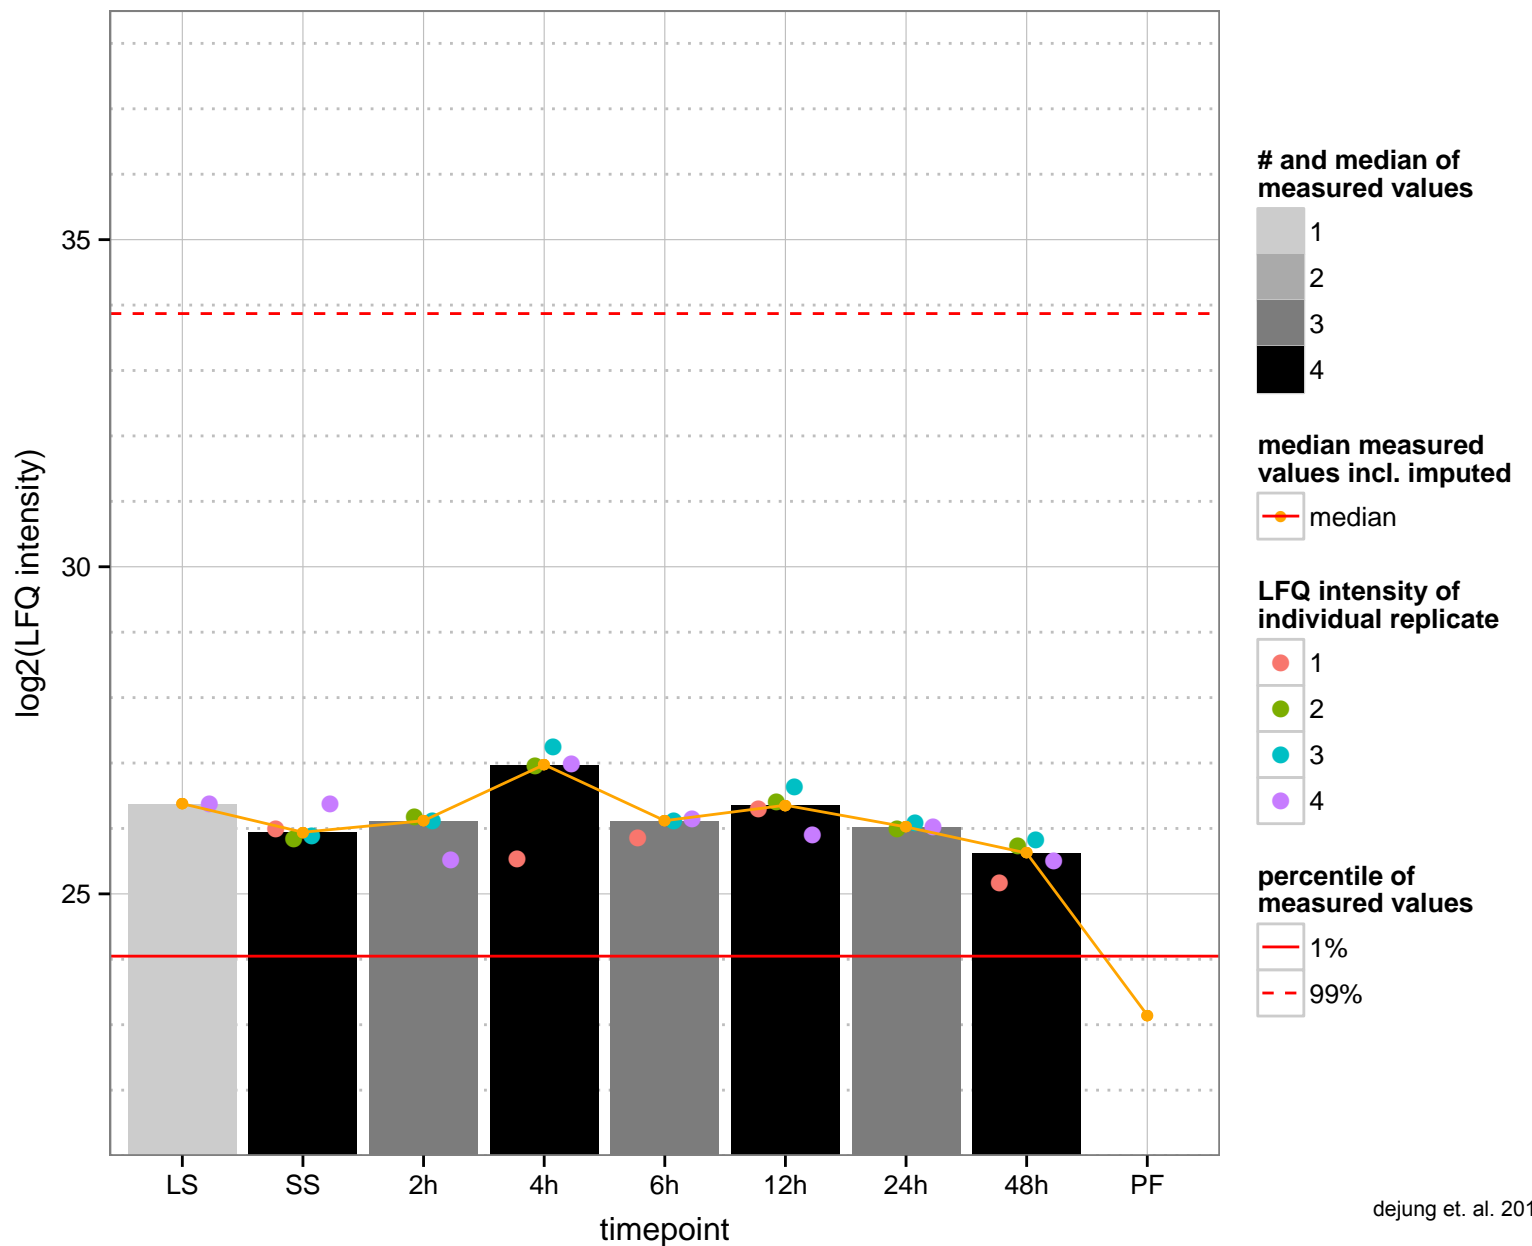

chaperone protein DNAj, putative  
 Tb927.8.8310  
 AGOF: heat shock protein binding, unfolded protein binding  
 AGOC: null  
 AGOP: protein folding  
 PGOF: heat shock protein binding  
 PGO: null  
 PGOP: null

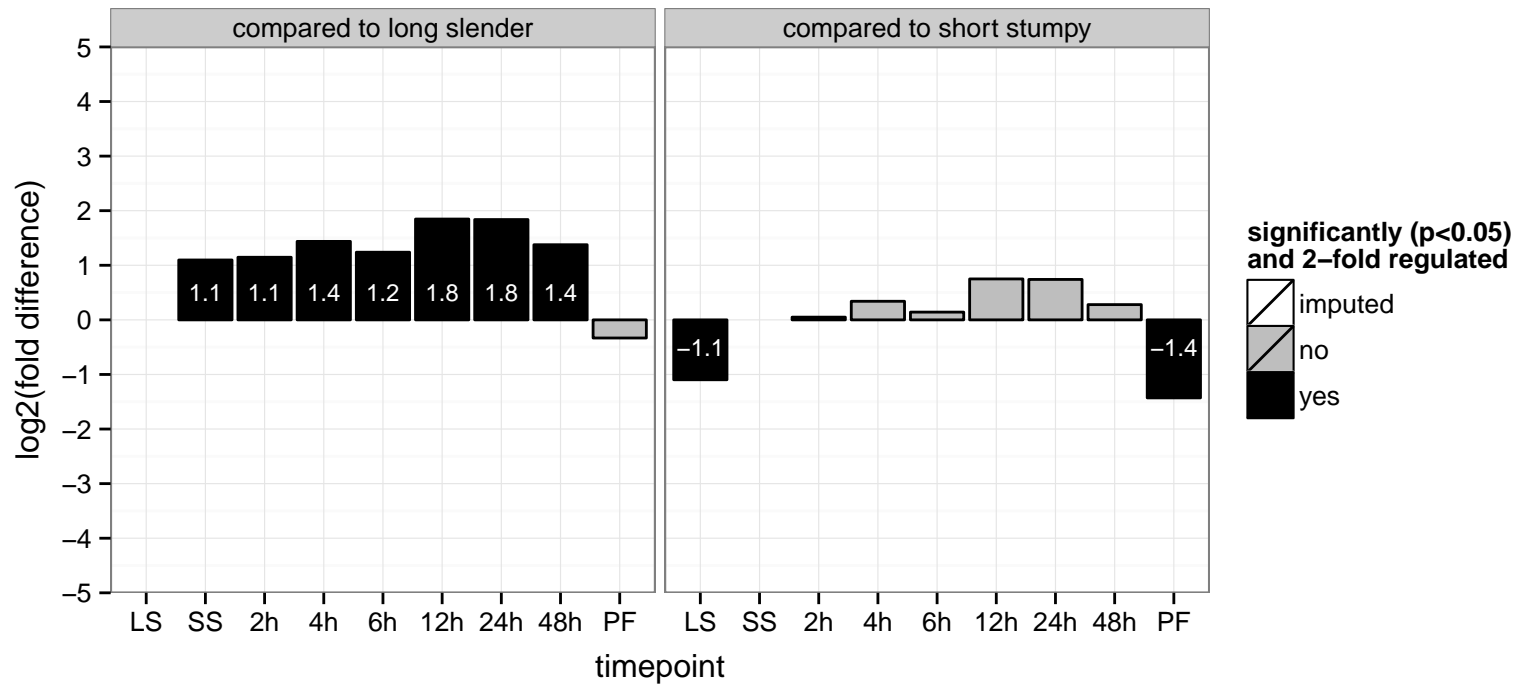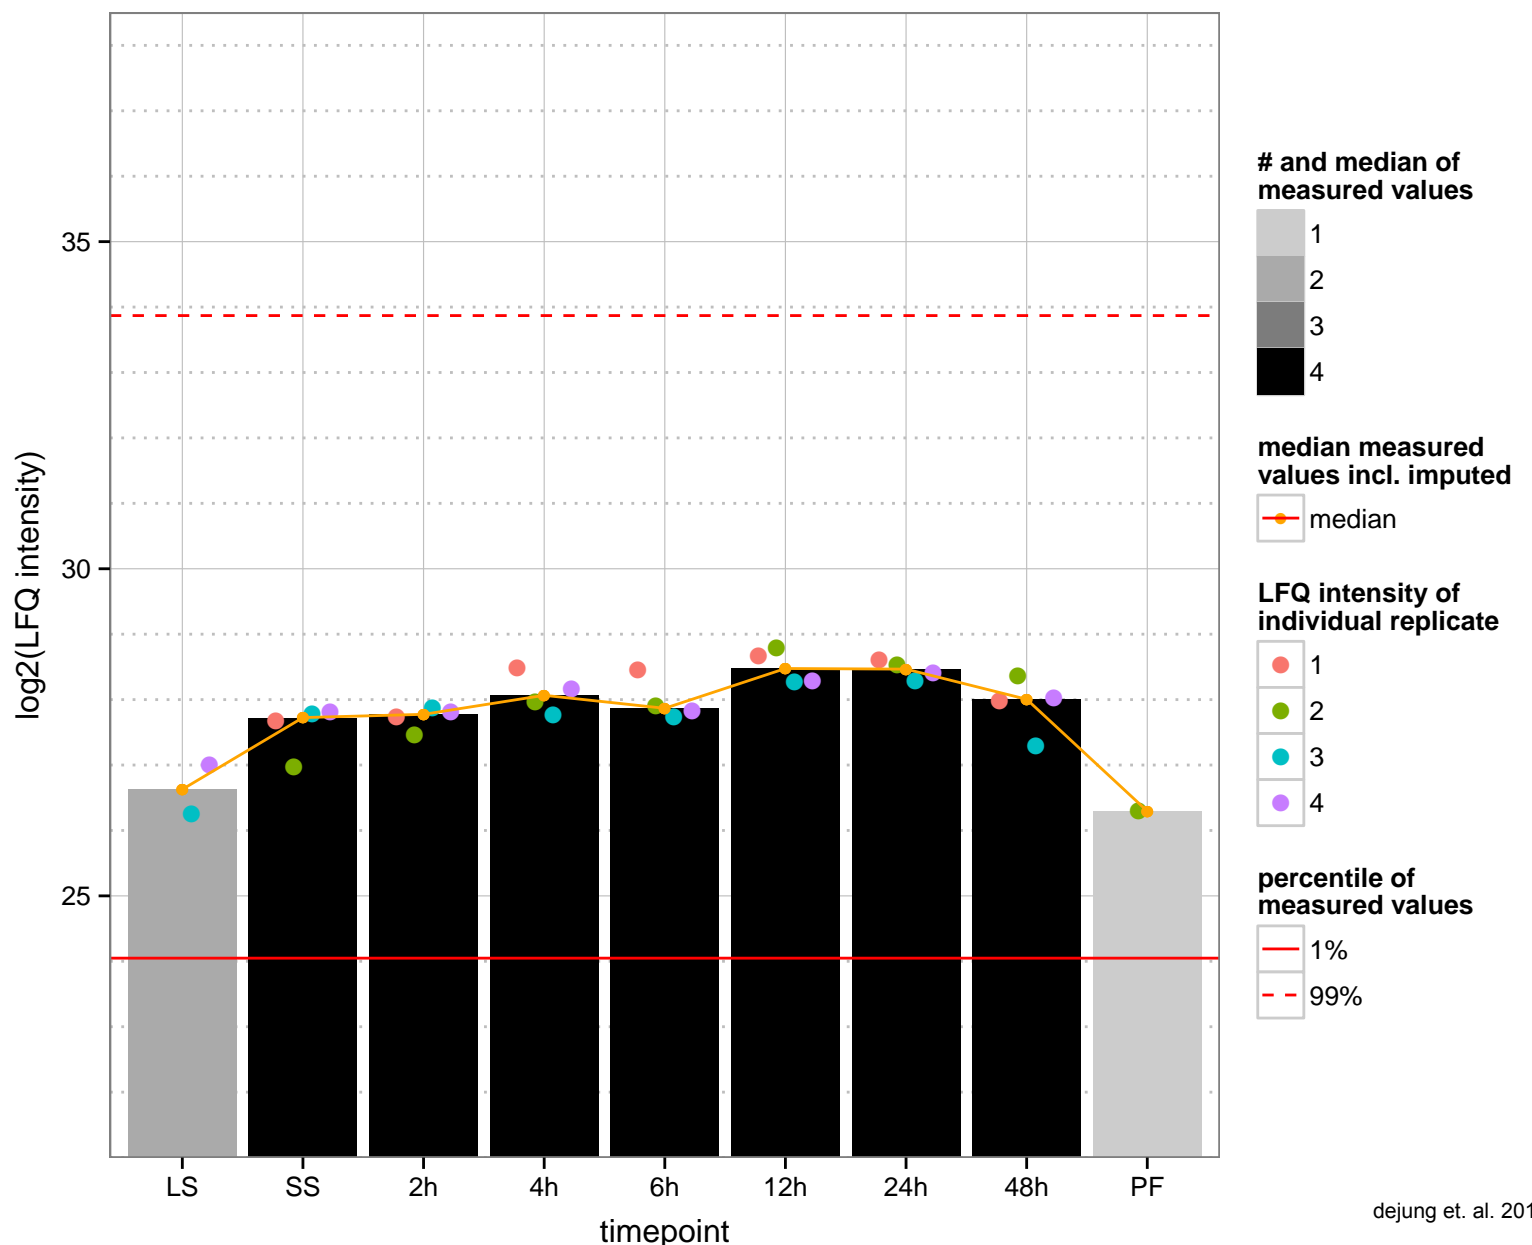

hypothetical protein, conserved  
 Tb927.8.8340  
 AGOF: null  
 AGOC: null  
 AGOP: null  
 PGOF: null  
 PGO: null  
 PGOP: null

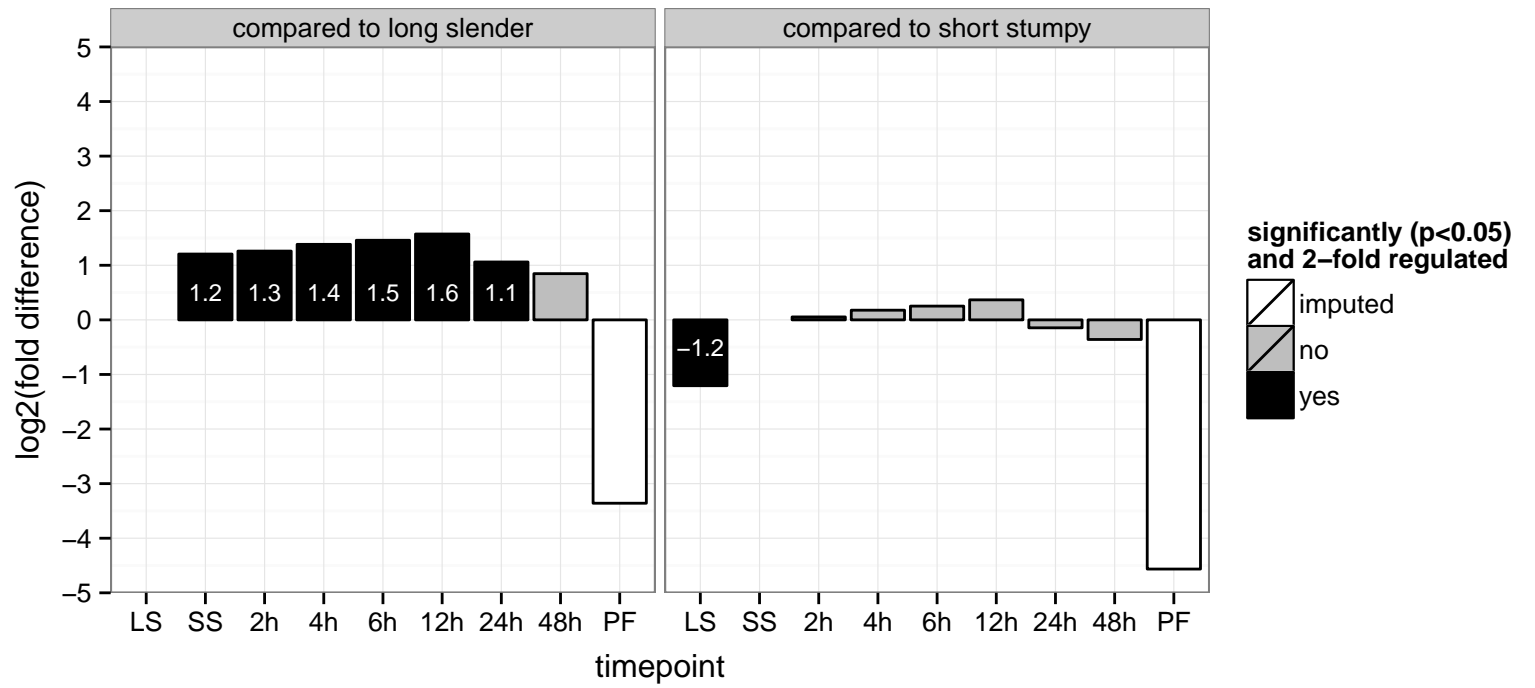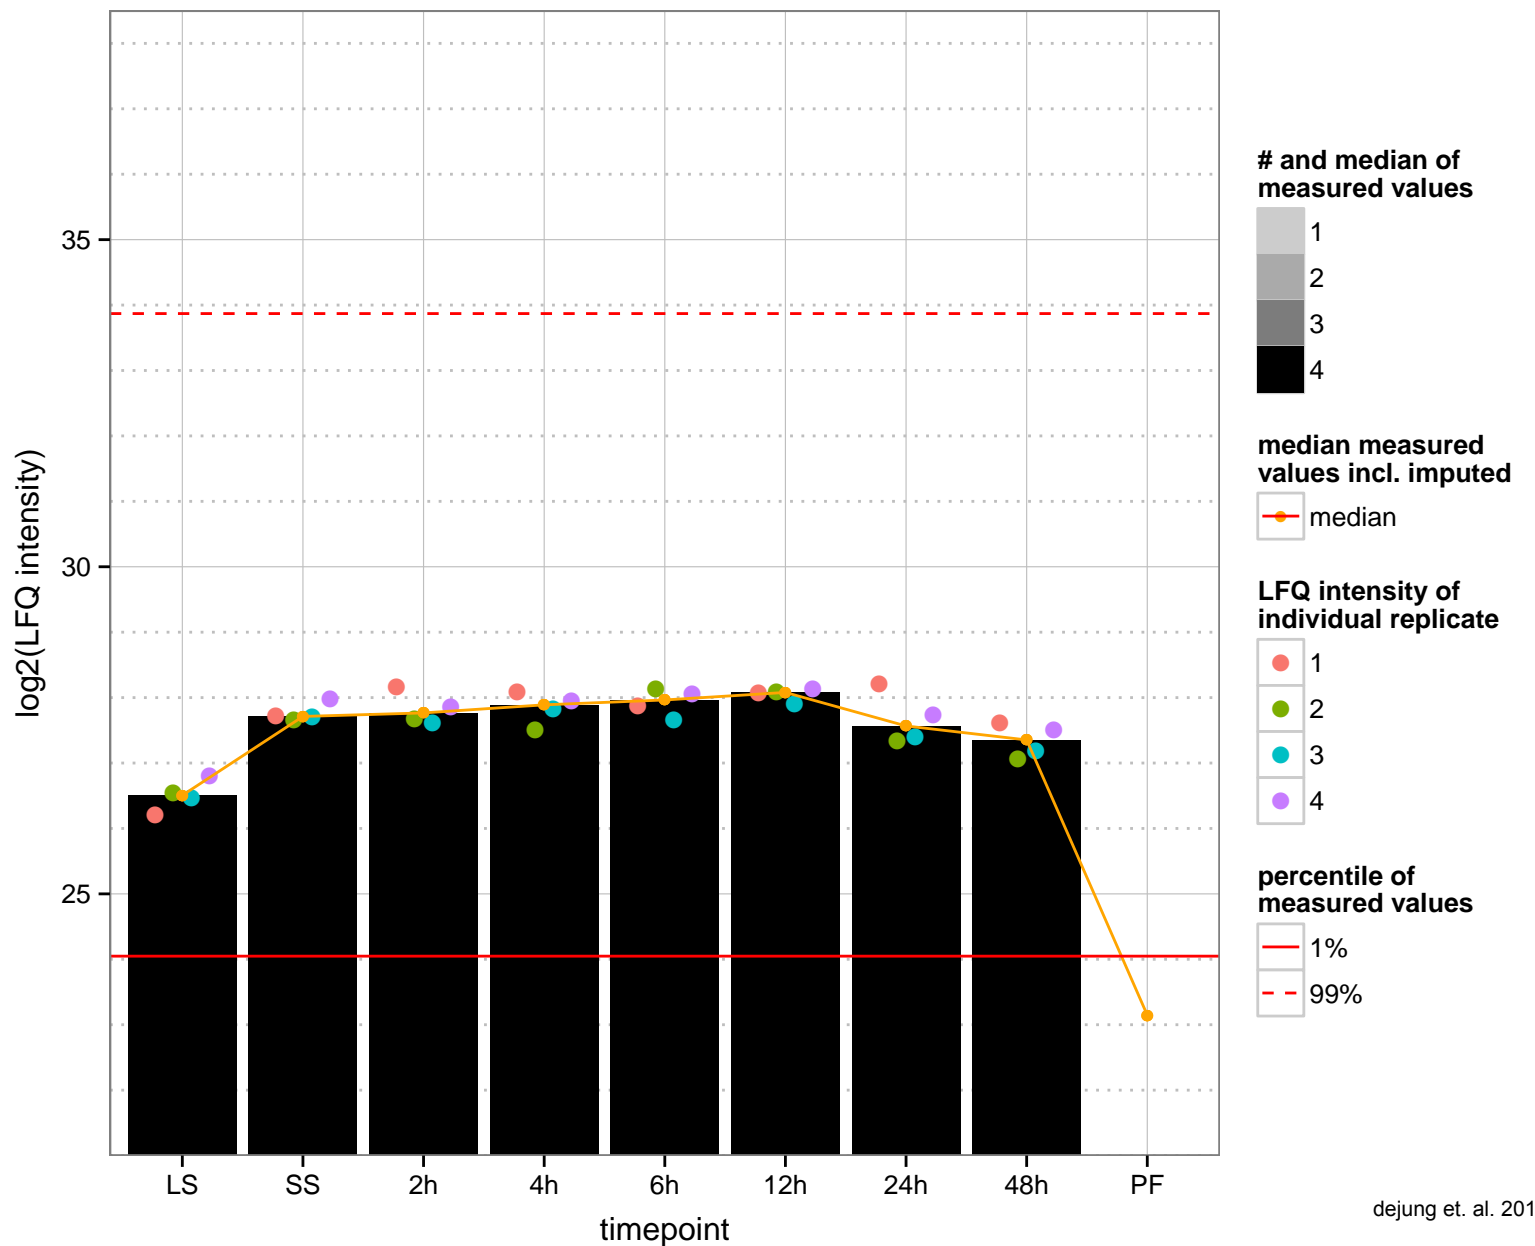

serine/threonine kinase, putative, protein kinase

Tb927.8.870

AGOF: ATP binding, protein serine/threonine kinase activity, protein tyrosine kinase activity

AGOC: null

AGOP: protein phosphorylation

PGOF: ATP binding, protein kinase activity, transferase activity, transferring phosphorus-containing groups

PGOC: null

PGOP: protein phosphorylation

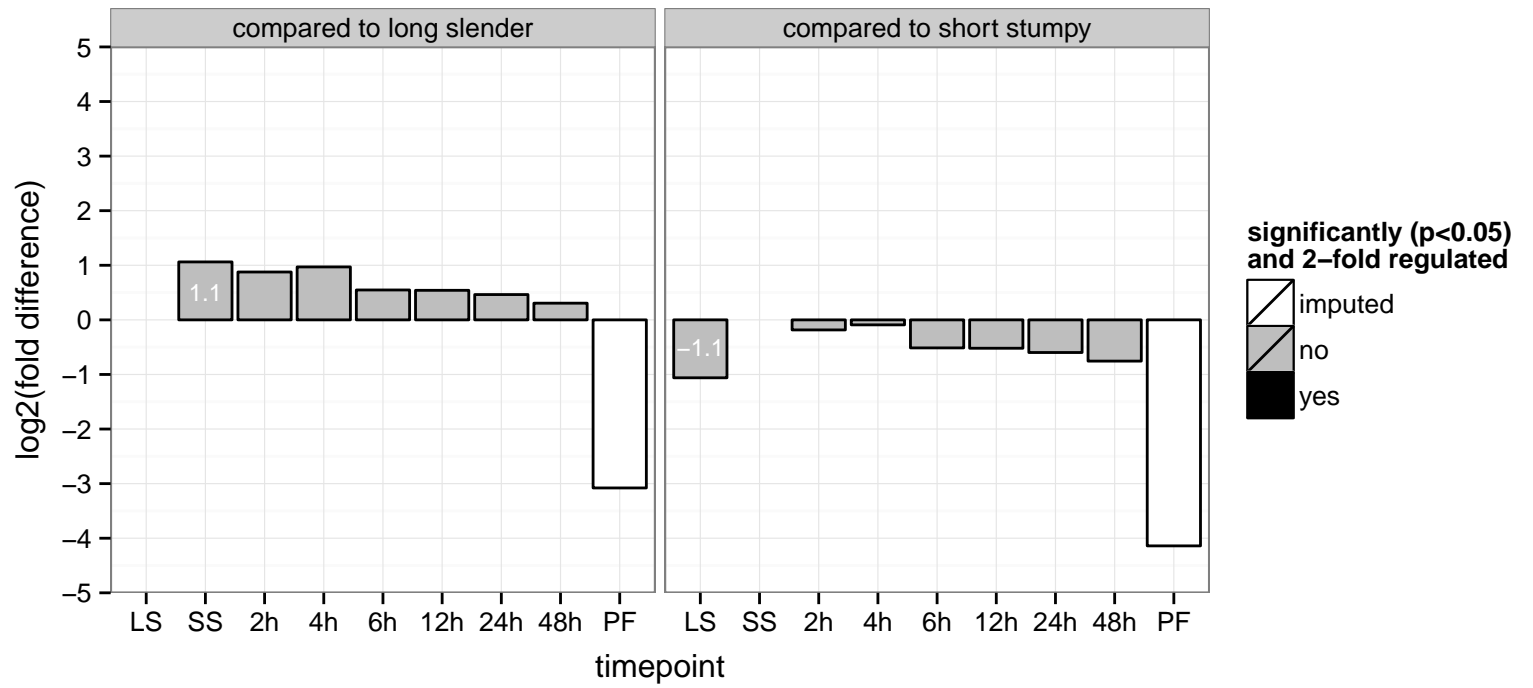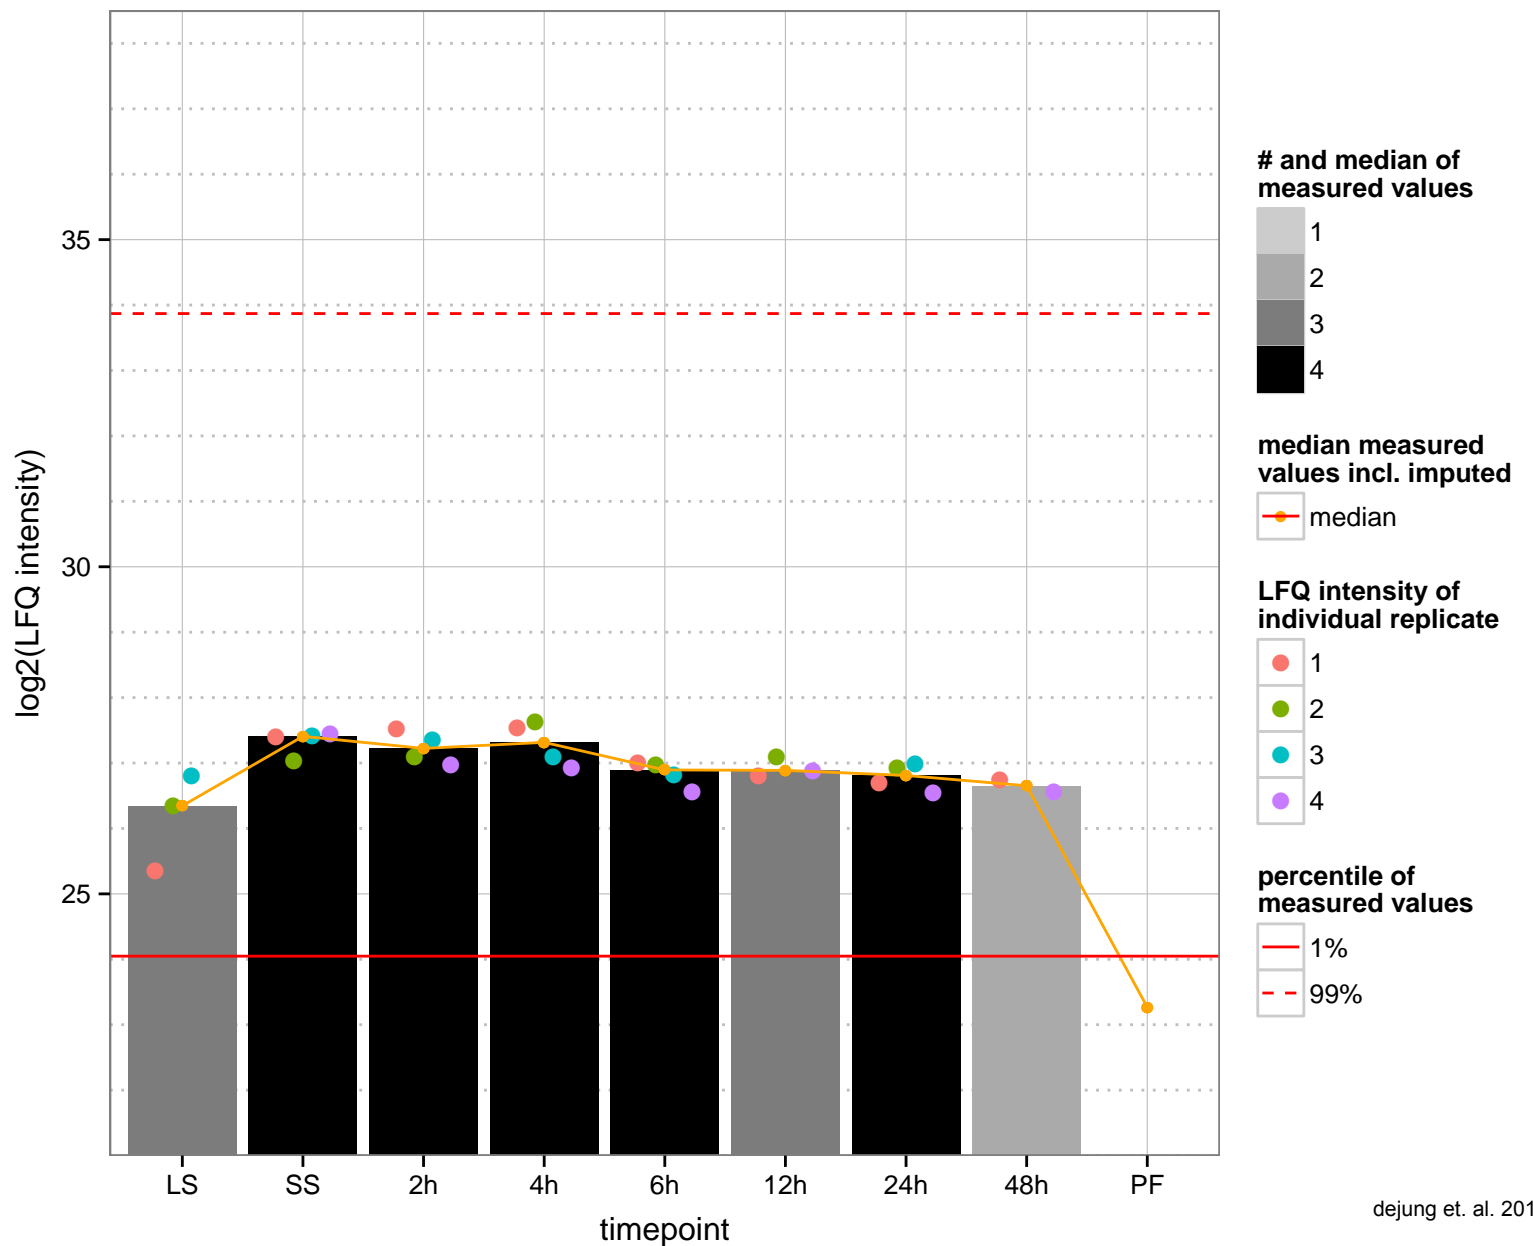



Ras-related protein Rab1A (Rab1A)

Tb927.8.890

AGOF: GTP binding, GTPase activity

AGOC: intracellular

AGOP: intracellular protein transport, nucleocytoplasmic transport, small GTPase mediated signal transduction

PGOF: GTP binding, GTPase activity

PGOC: intracellular, membrane

PGOP: GTP catabolic process, intracellular protein transport, nucleocytoplasmic transport, protein transport, signal transduction

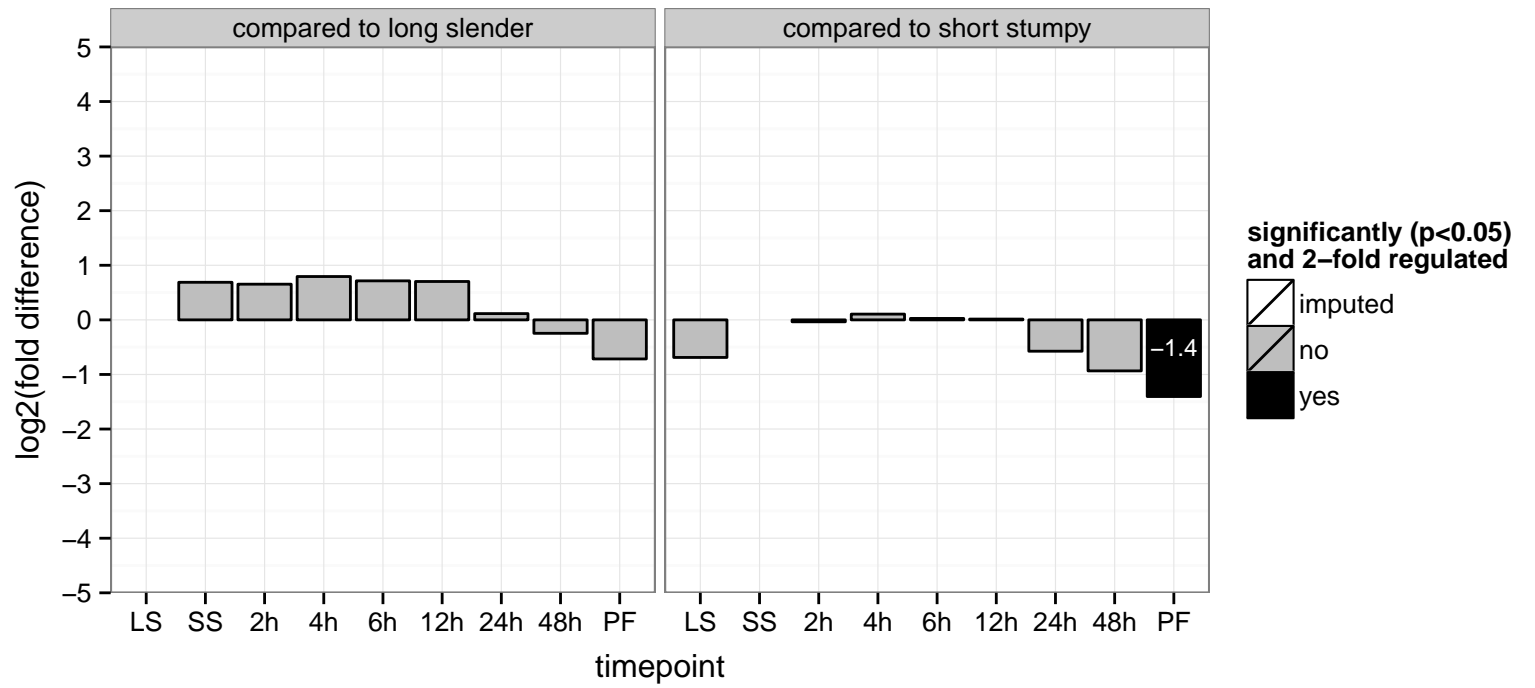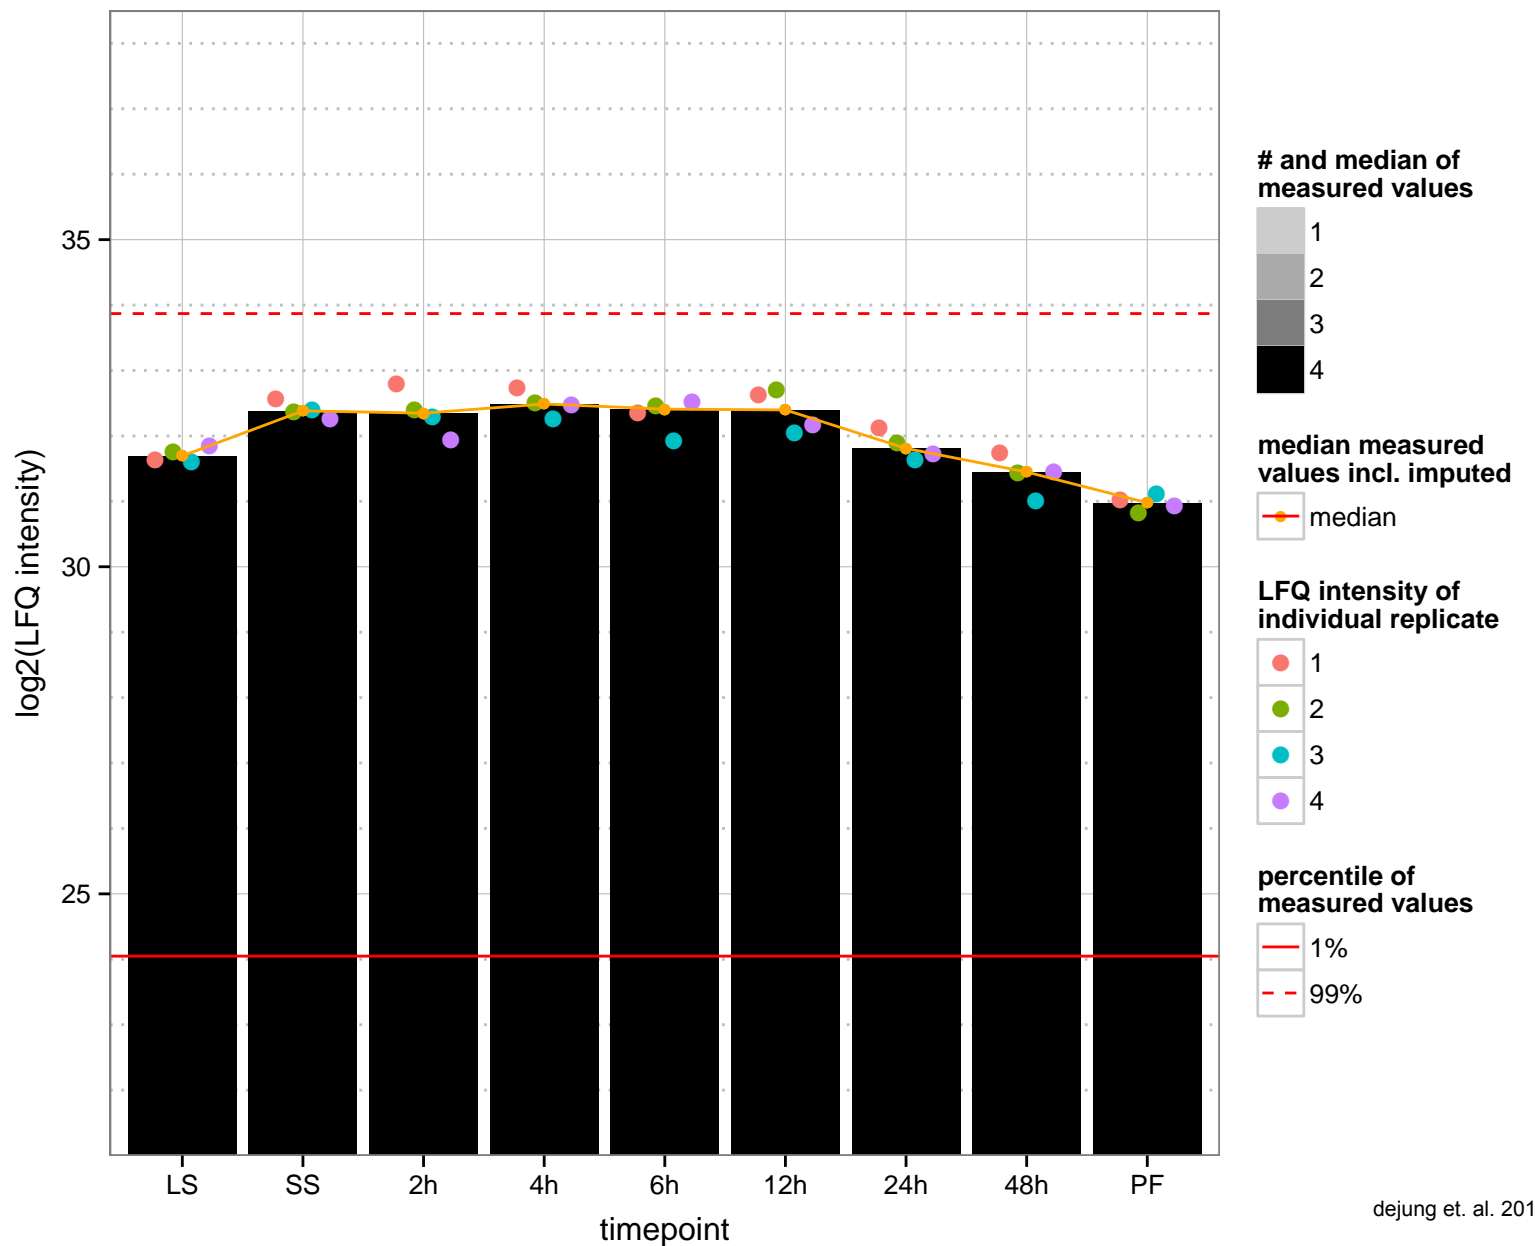

splicing factor TSR1 (TSR1)  
 Tb927.8.900  
 AGOF: RNA binding  
 AGOC: nucleus  
 AGOP: RNA processing  
 PGO: nucleic acid binding  
 PGO: null  
 PGO: null

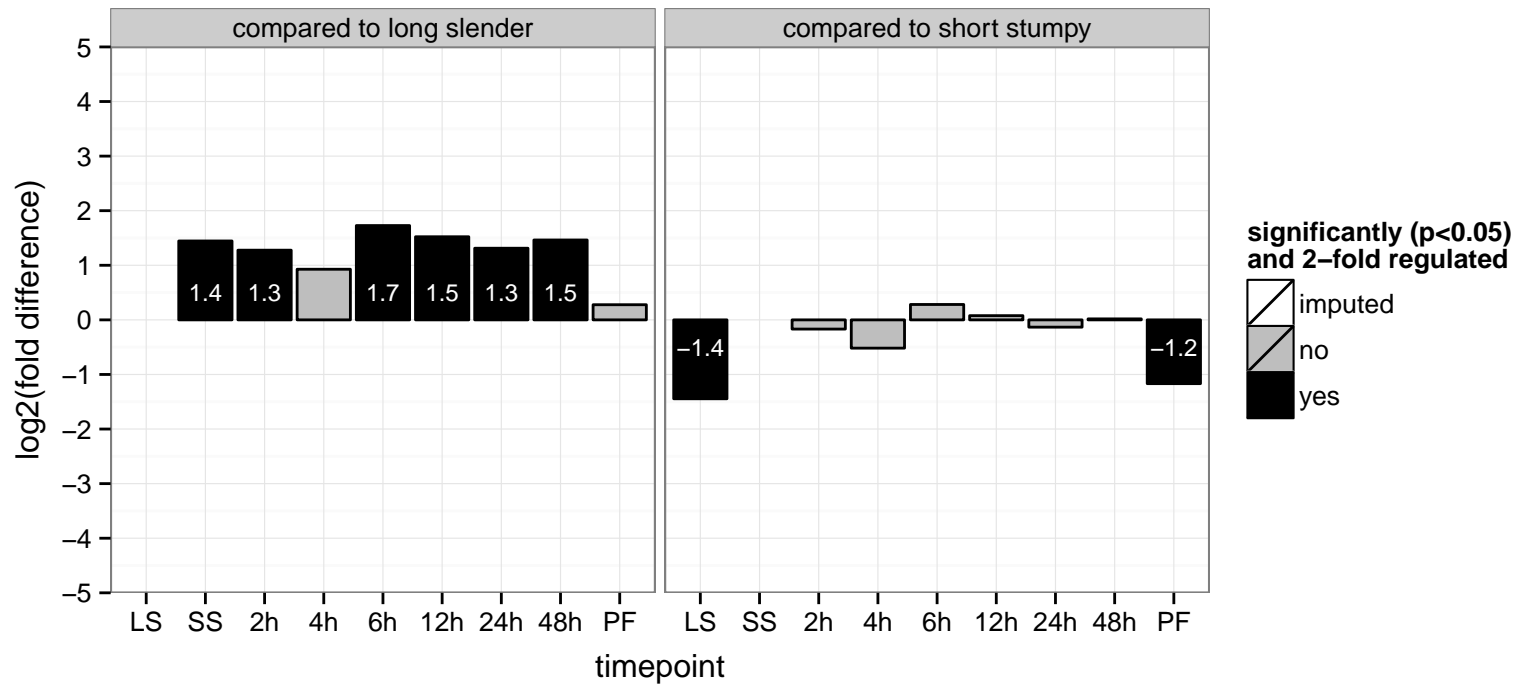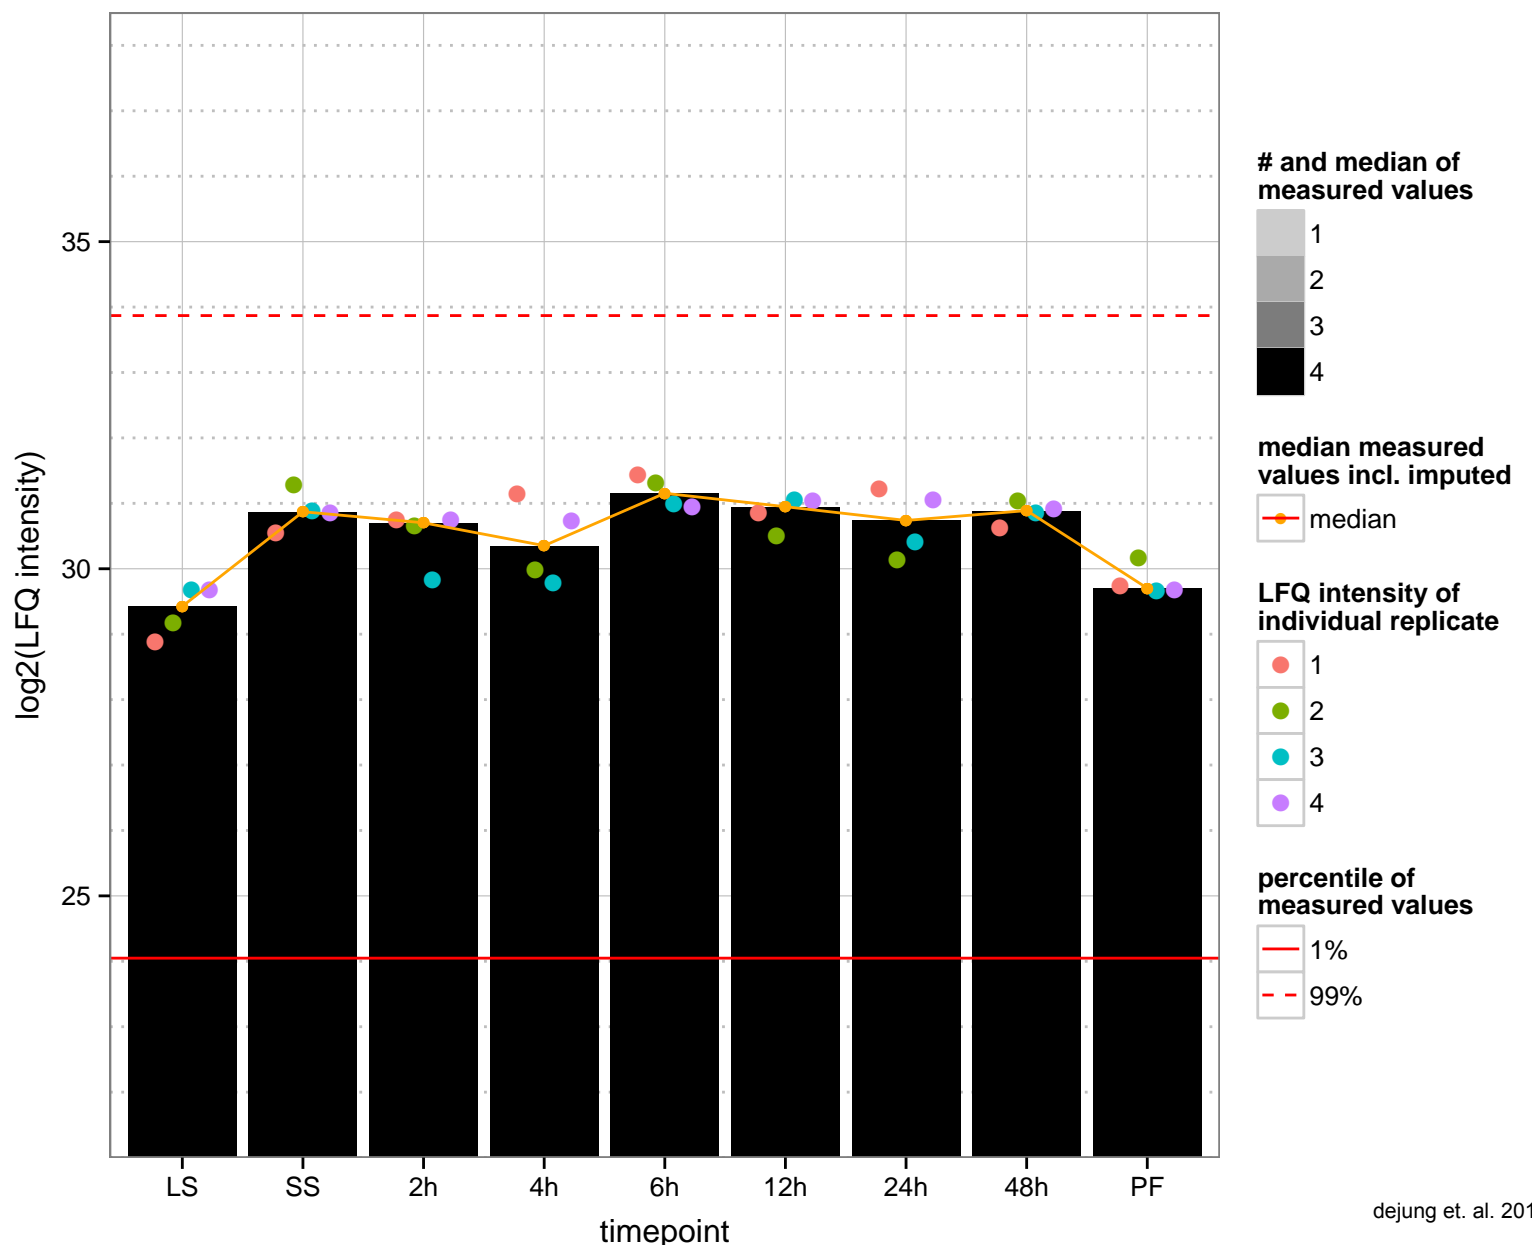

hypothetical protein, conserved  
 Tb927.9.10350  
 AGOF: null  
 AGOC: null  
 AGOP: protein transport, vesicle-mediated transport  
 PGO: null  
 PGO: null  
 PGO: null  
 PGO: protein transport

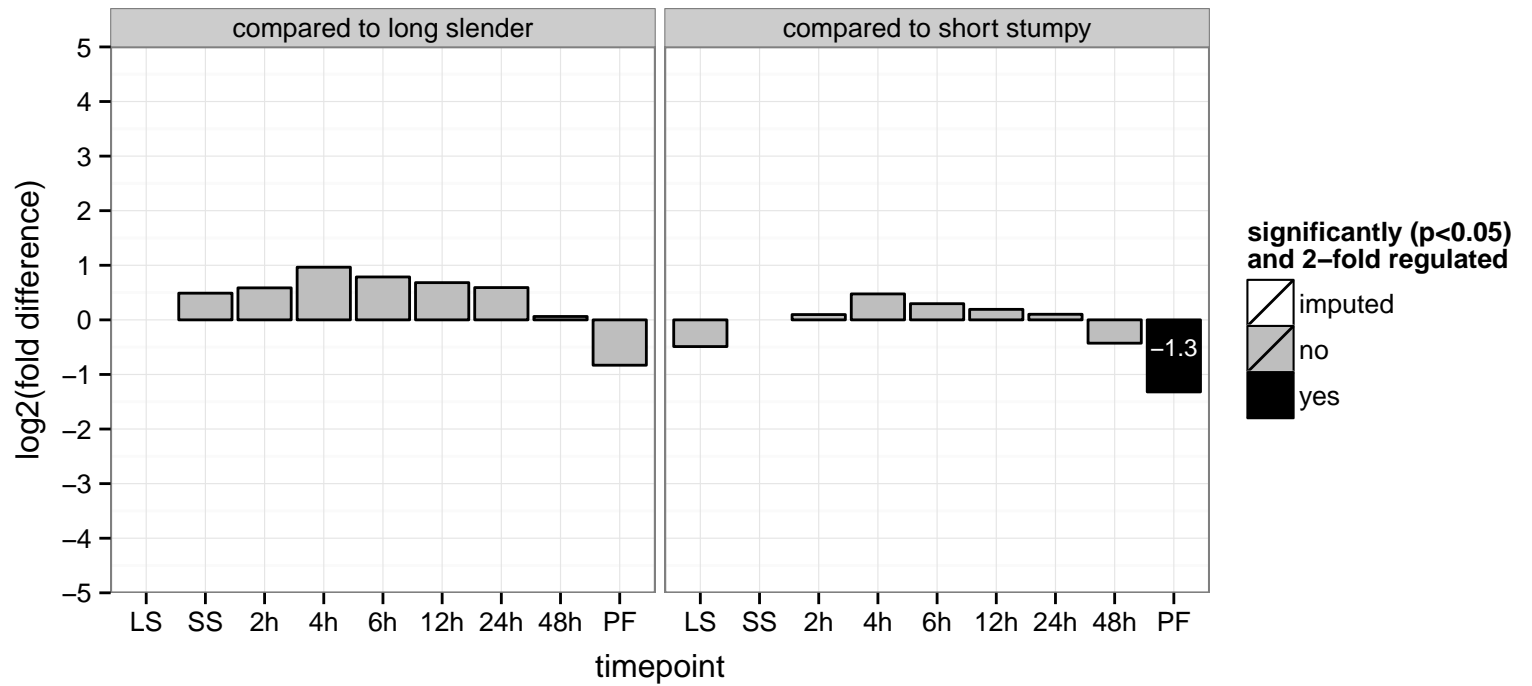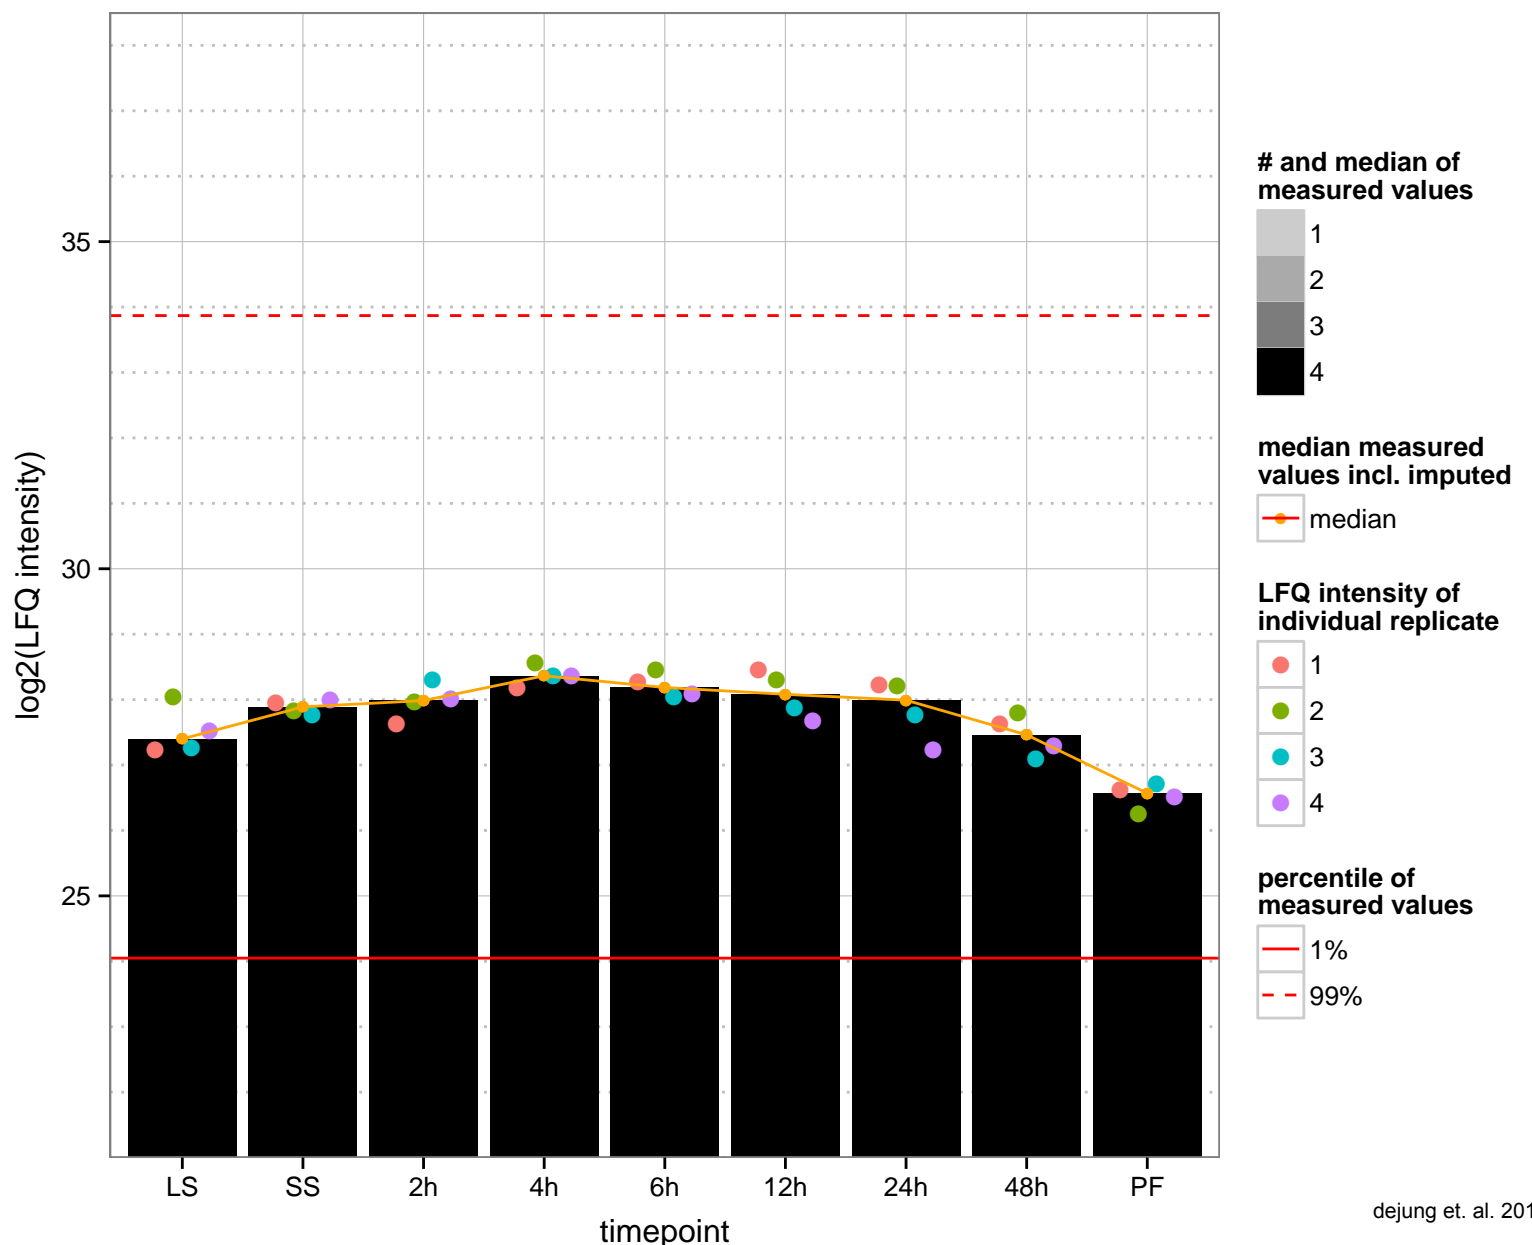

hypothetical protein, conserved  
 Tb927.9.10450  
 AGOF: hydrolase activity, acting on ester bonds  
 AGOC: intrinsic to endoplasmic reticulum membrane  
 AGOP: GPI anchor metabolic process, intracellular protein transport  
 PGO: hydrolase activity, acting on ester bonds  
 PGOC: intrinsic to endoplasmic reticulum membrane  
 PGOP: GPI anchor metabolic process, intracellular protein transport

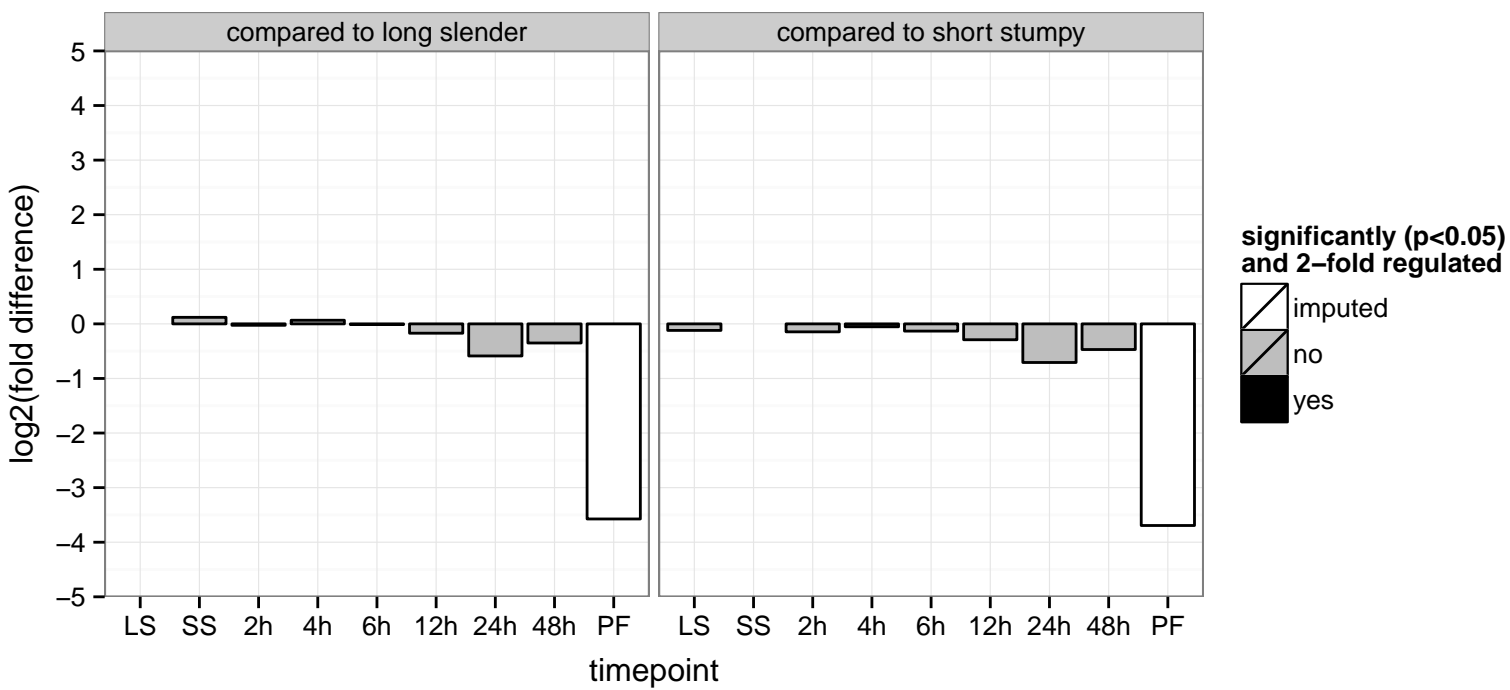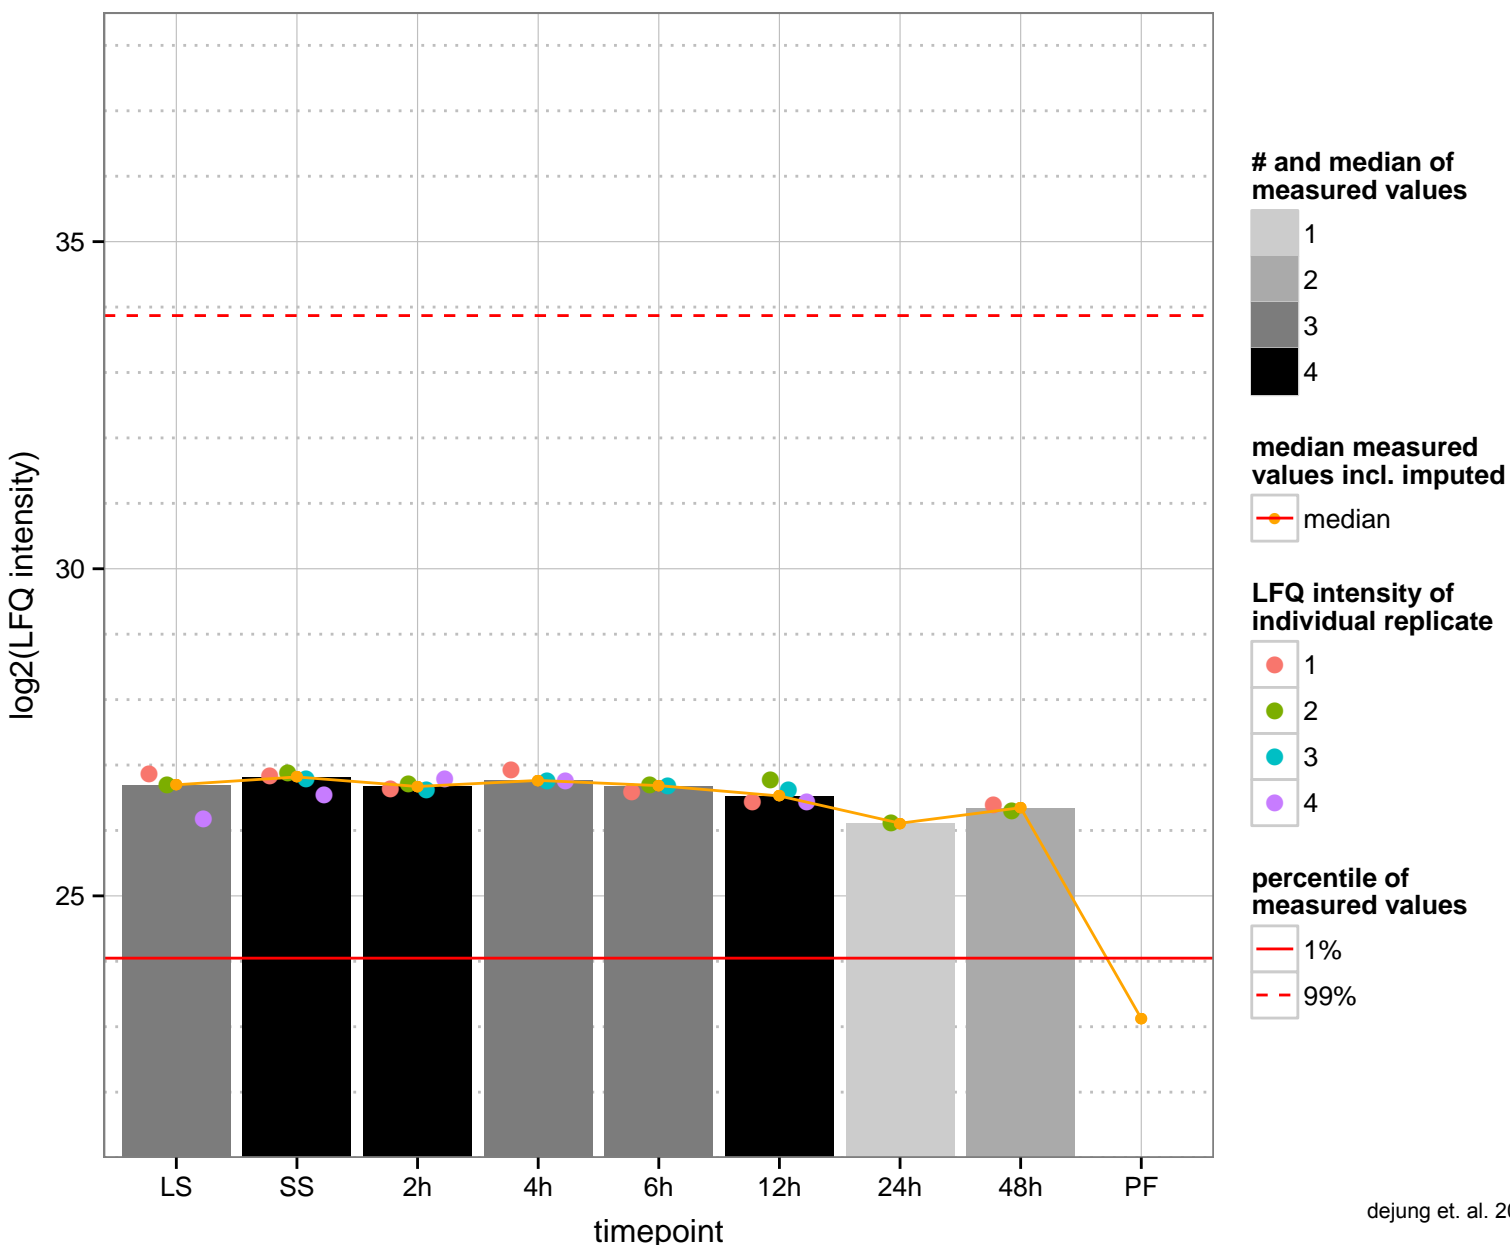

hypothetical protein, conserved  
 Tb927.9.10550  
 AGOF: null  
 AGOC: null  
 AGOP: null  
 PGO: null  
 PGOC: null  
 PGOP: null

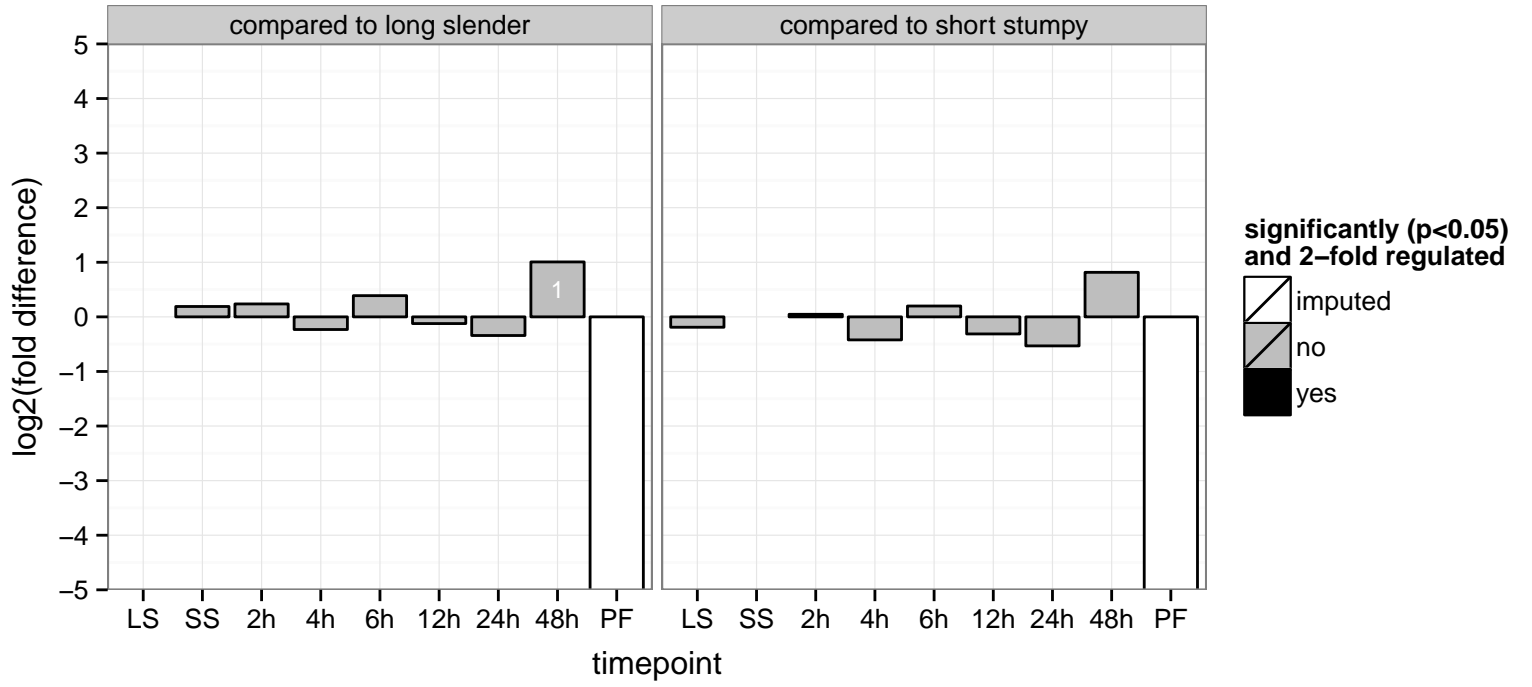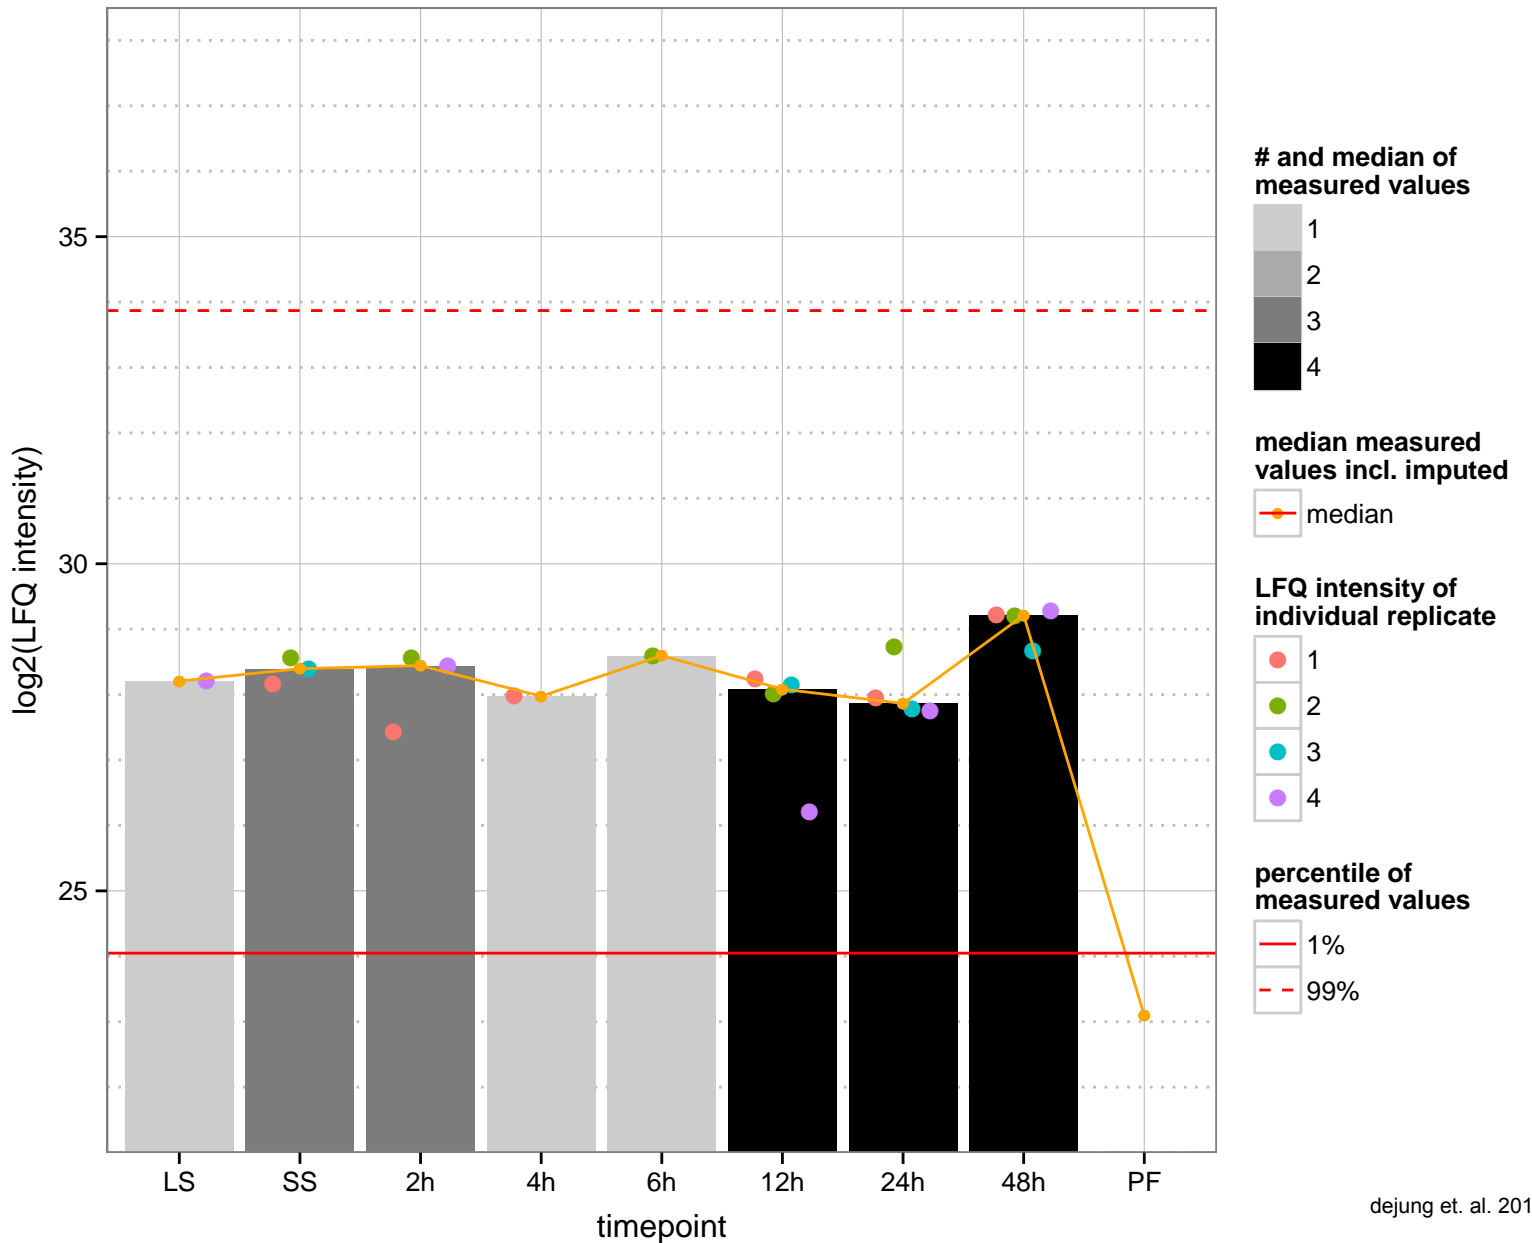

4E-interacting protein, putative  
 Tb927.9.11050  
 AGOF: translation regulator activity  
 AGOC: cytoplasm  
 AGOP: regulation of translation  
 PGO: null  
 PGOC: null  
 PGOP: null

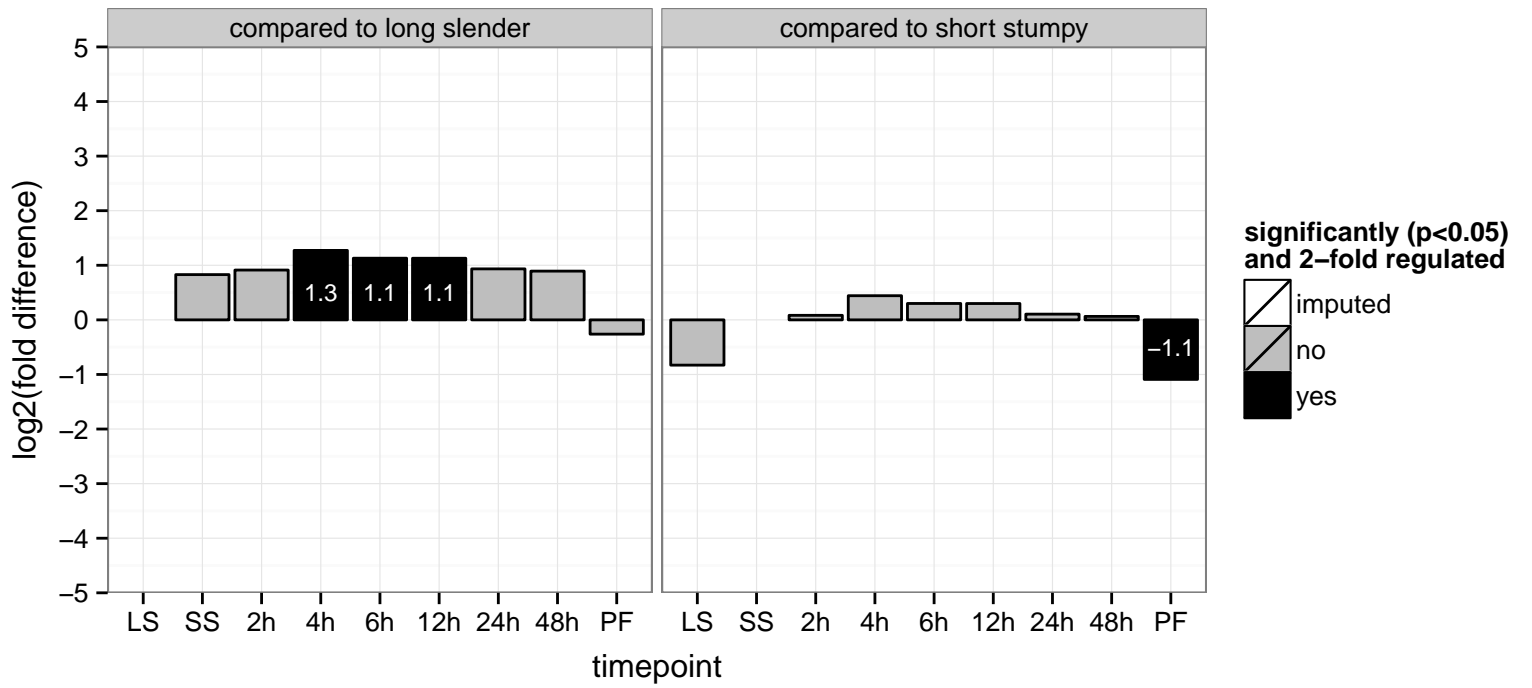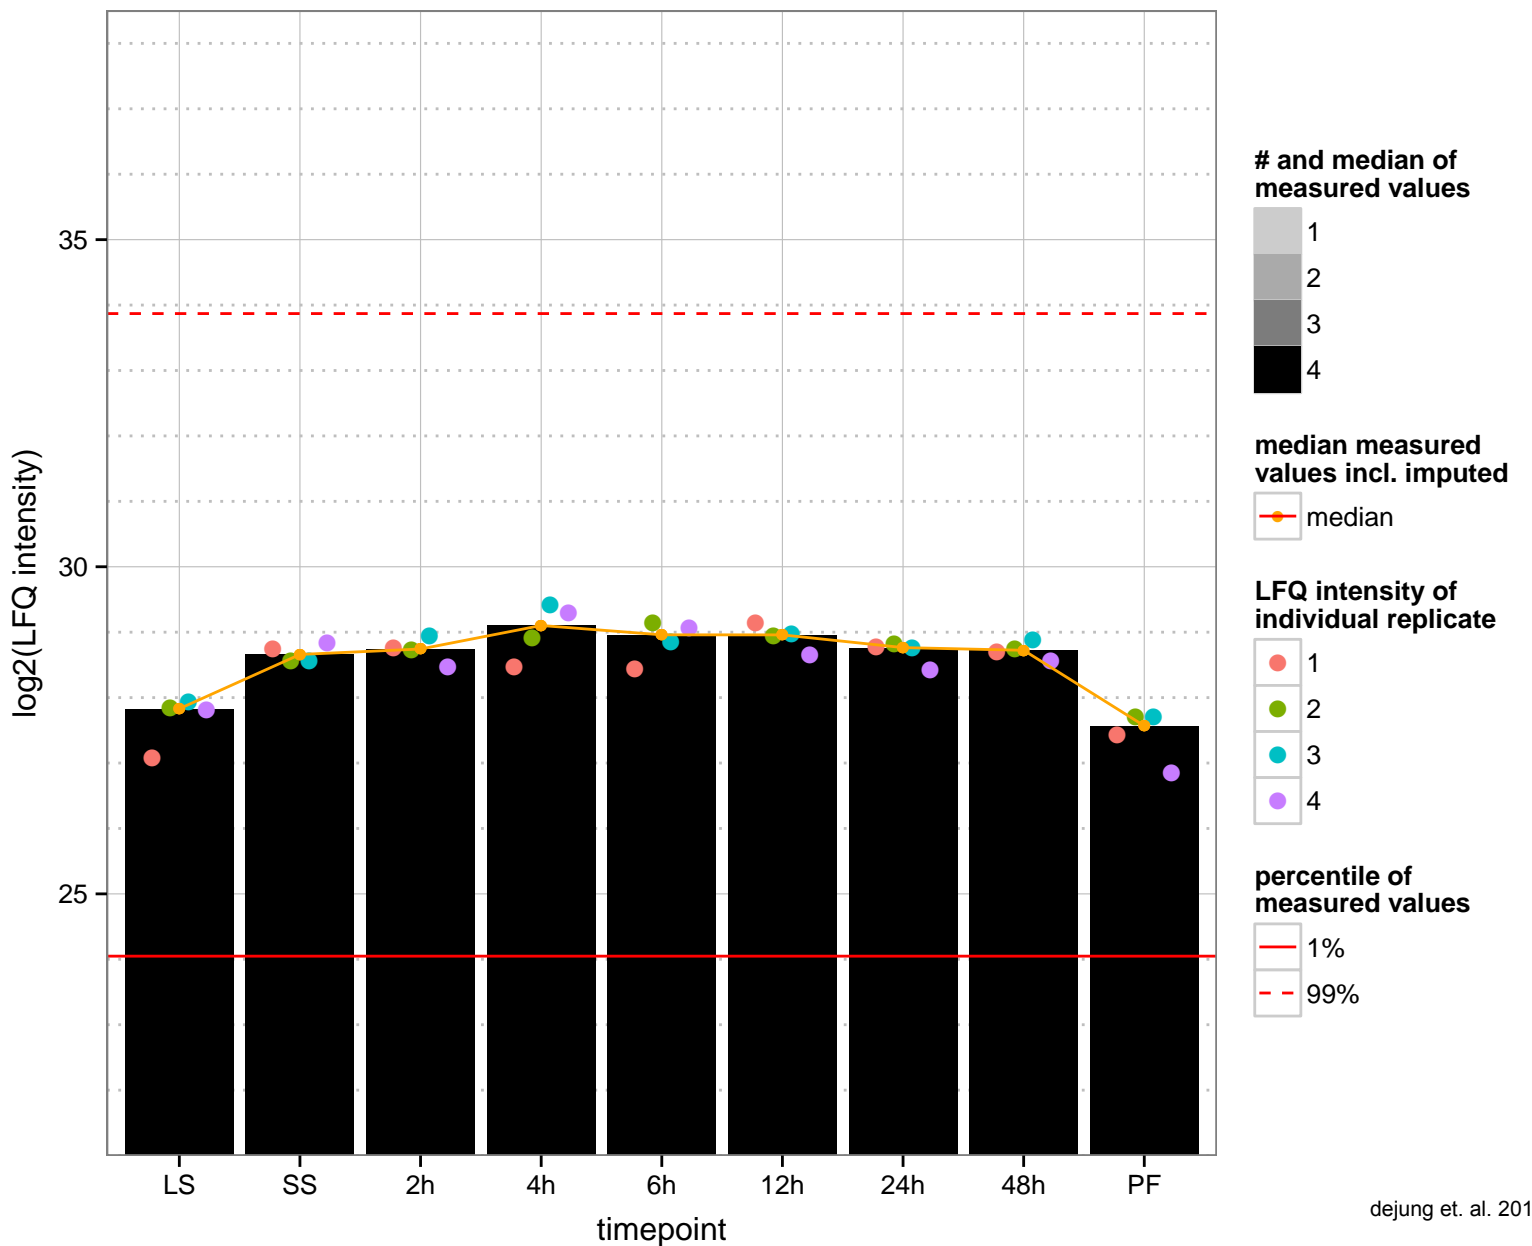

hypothetical protein, conserved  
 Tb927.9.12000  
 AGOF: null  
 AGOC: membrane  
 AGOP: null  
 PGO: null  
 PGO: null  
 PGO: membrane  
 PGO: null

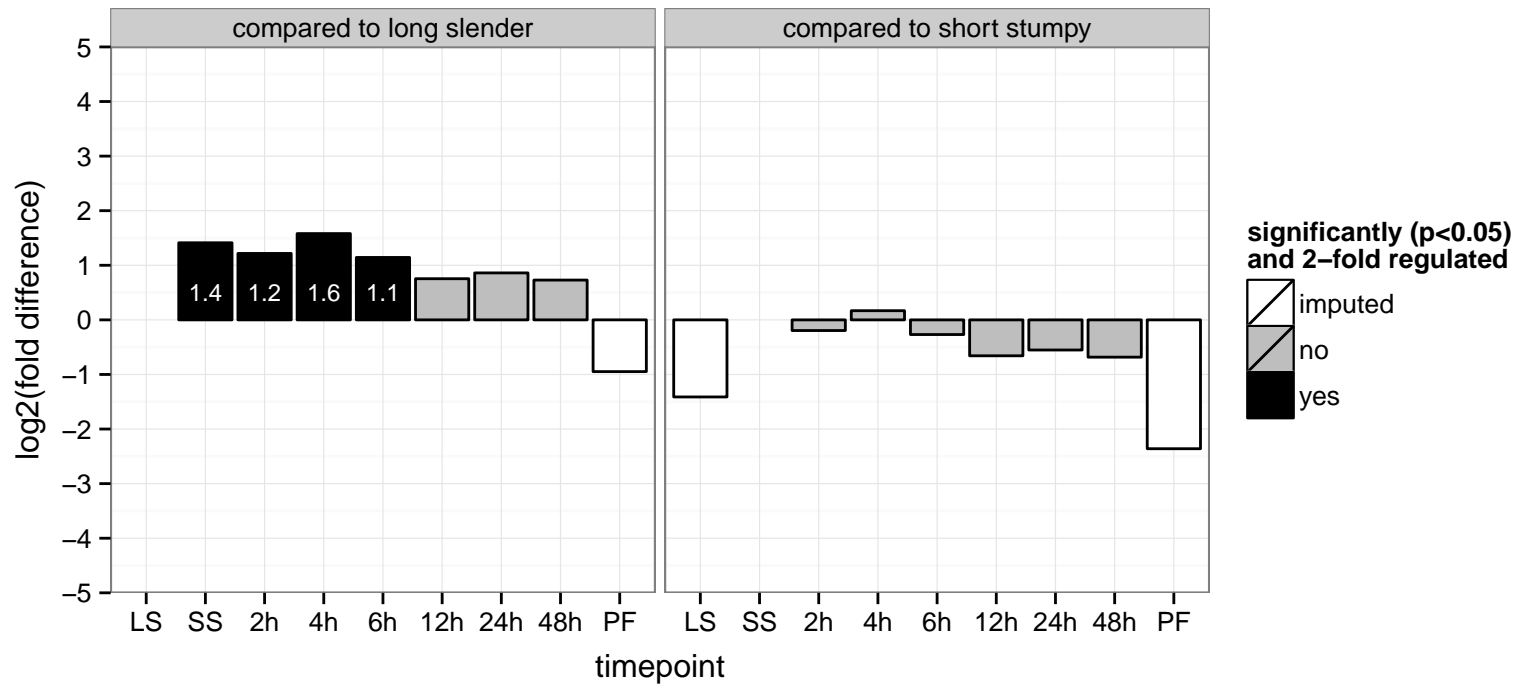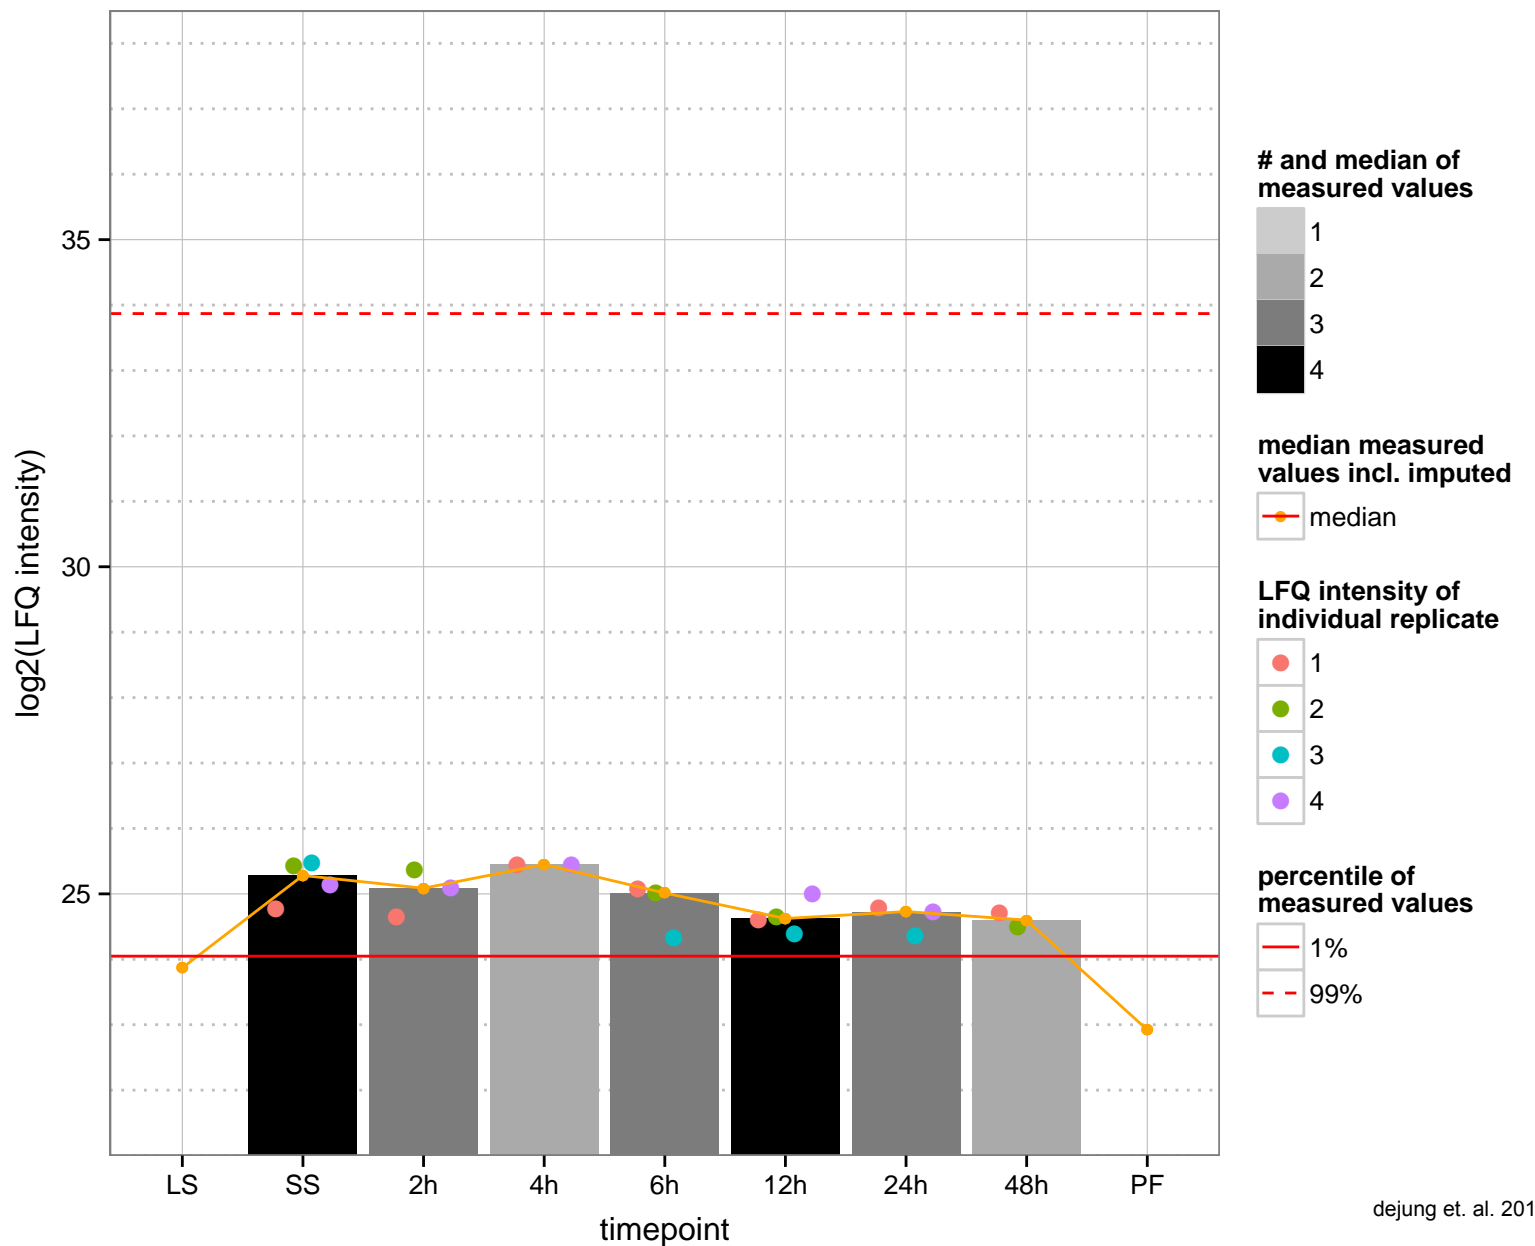

hypothetical protein, conserved  
 Tb927.9.12040  
 AGOF: mRNA (nucleoside-2'-O-)-methyltransferase activity  
 AGOC: null  
 AGOP: 7-methylguanosine mRNA capping  
 PGO: null  
 PGOC: null  
 PGOP: null

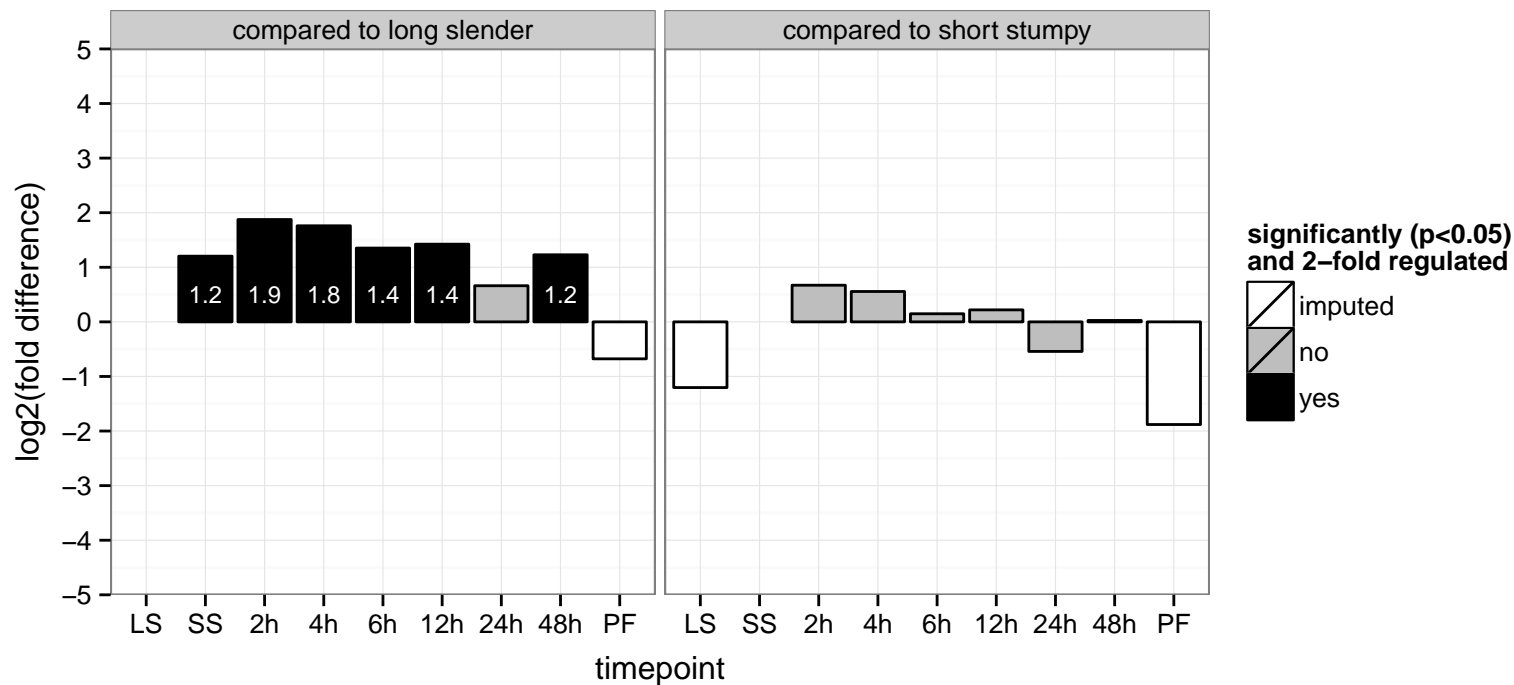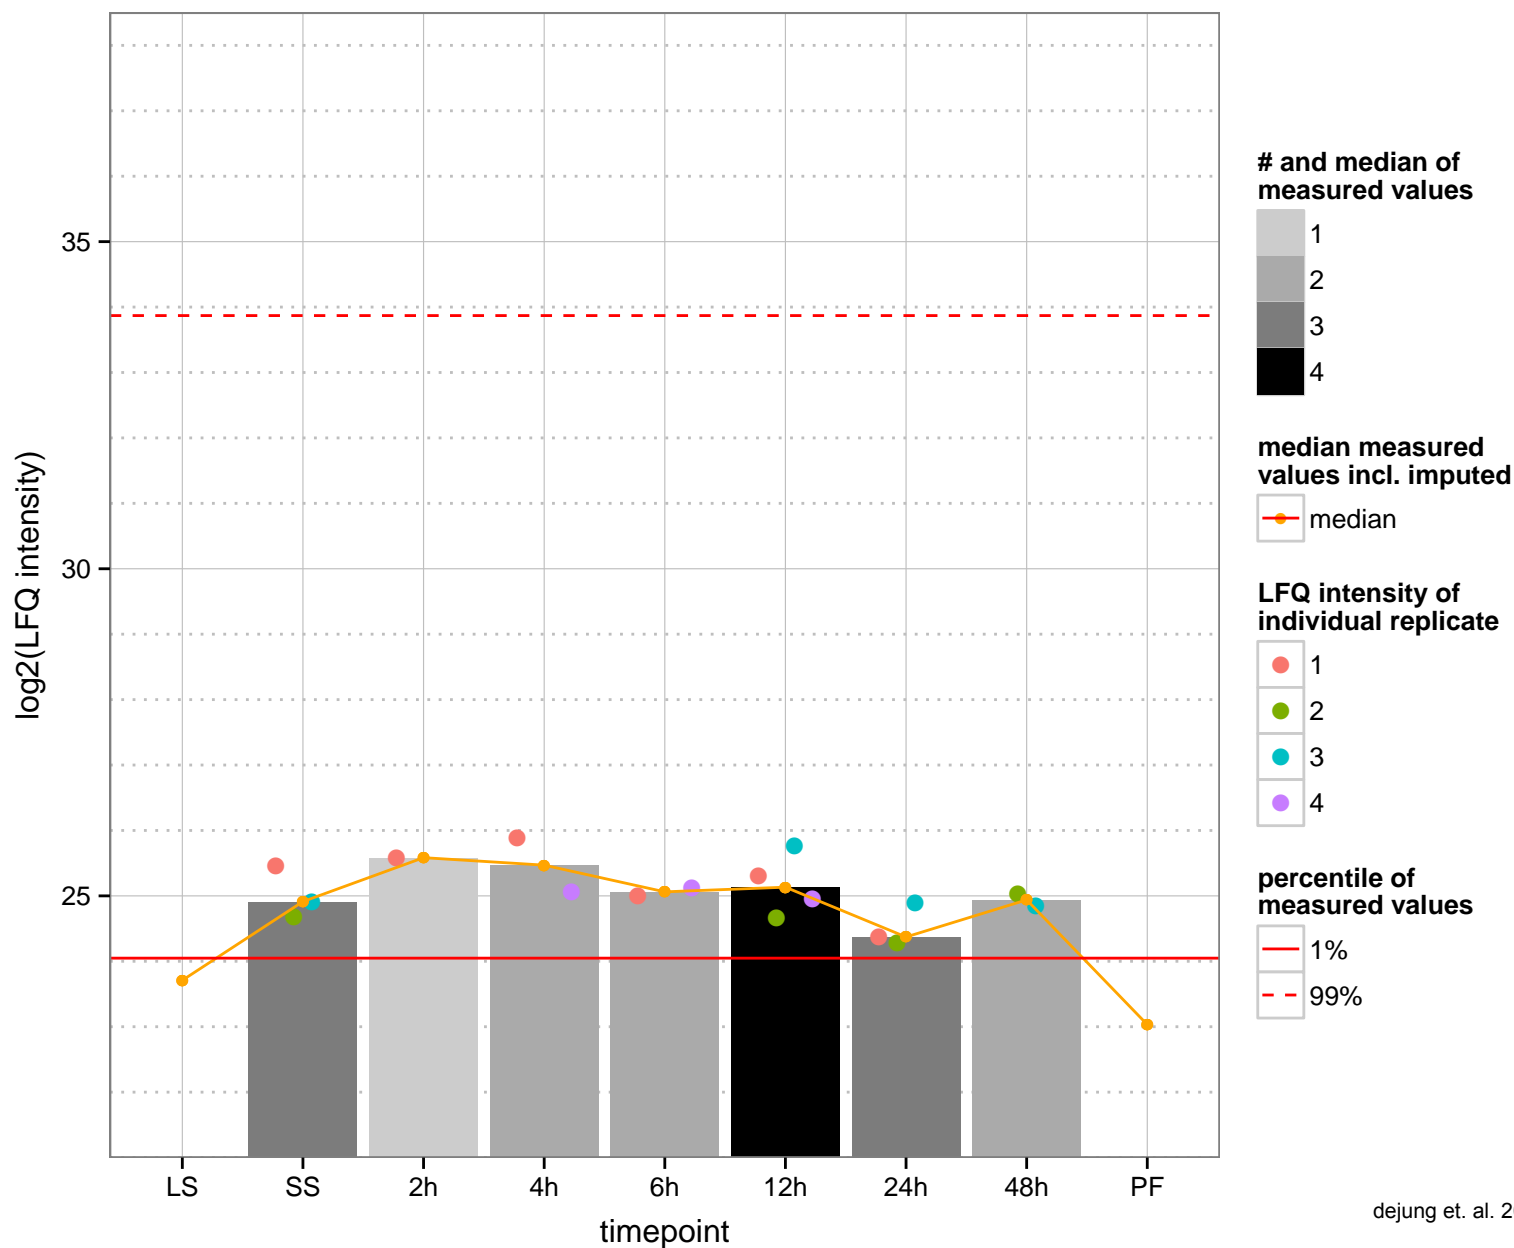



hypothetical protein, conserved  
 Tb927.9.12870  
 AGOF: null  
 AGOC: cis-Golgi network  
 AGOP: ER to Golgi vesicle-mediated transport  
 PGO: null  
 PGOC: cis-Golgi network  
 PGOP: ER to Golgi vesicle-mediated transport, transport

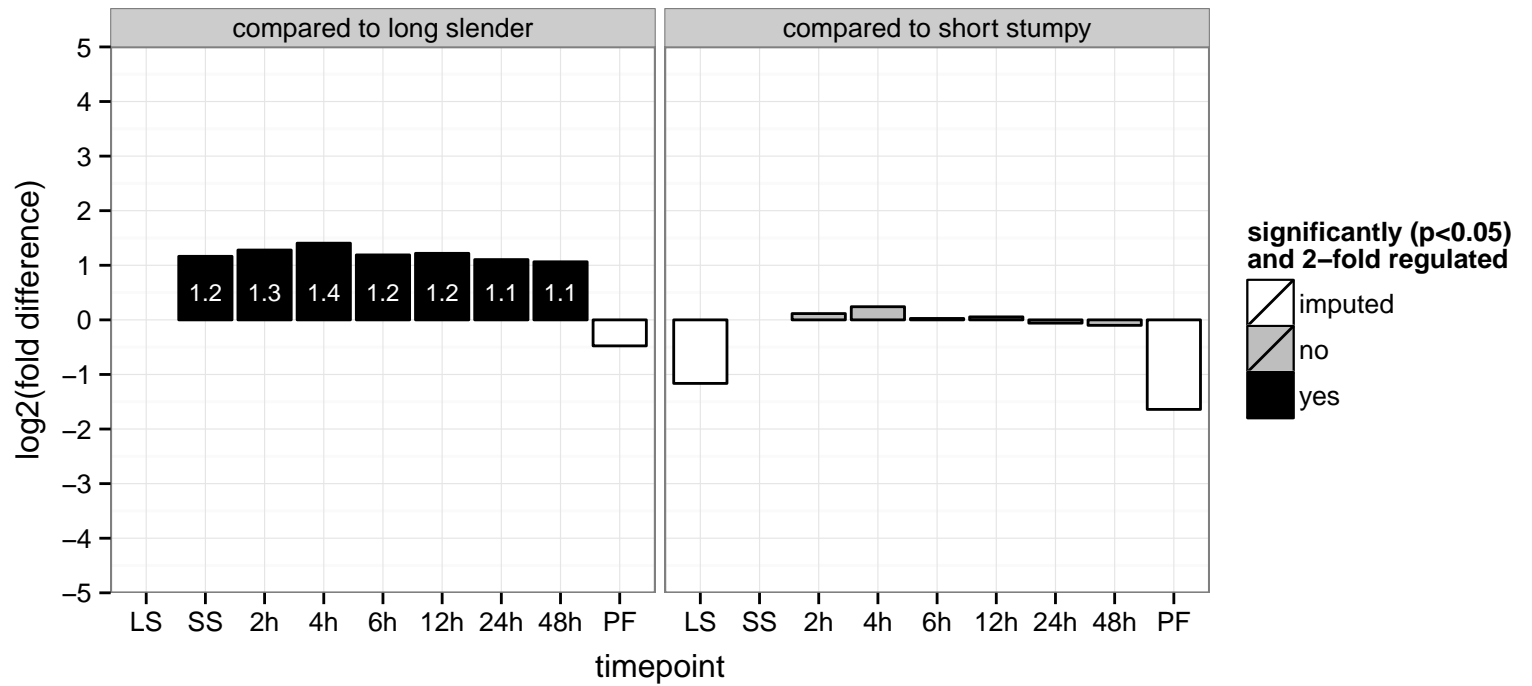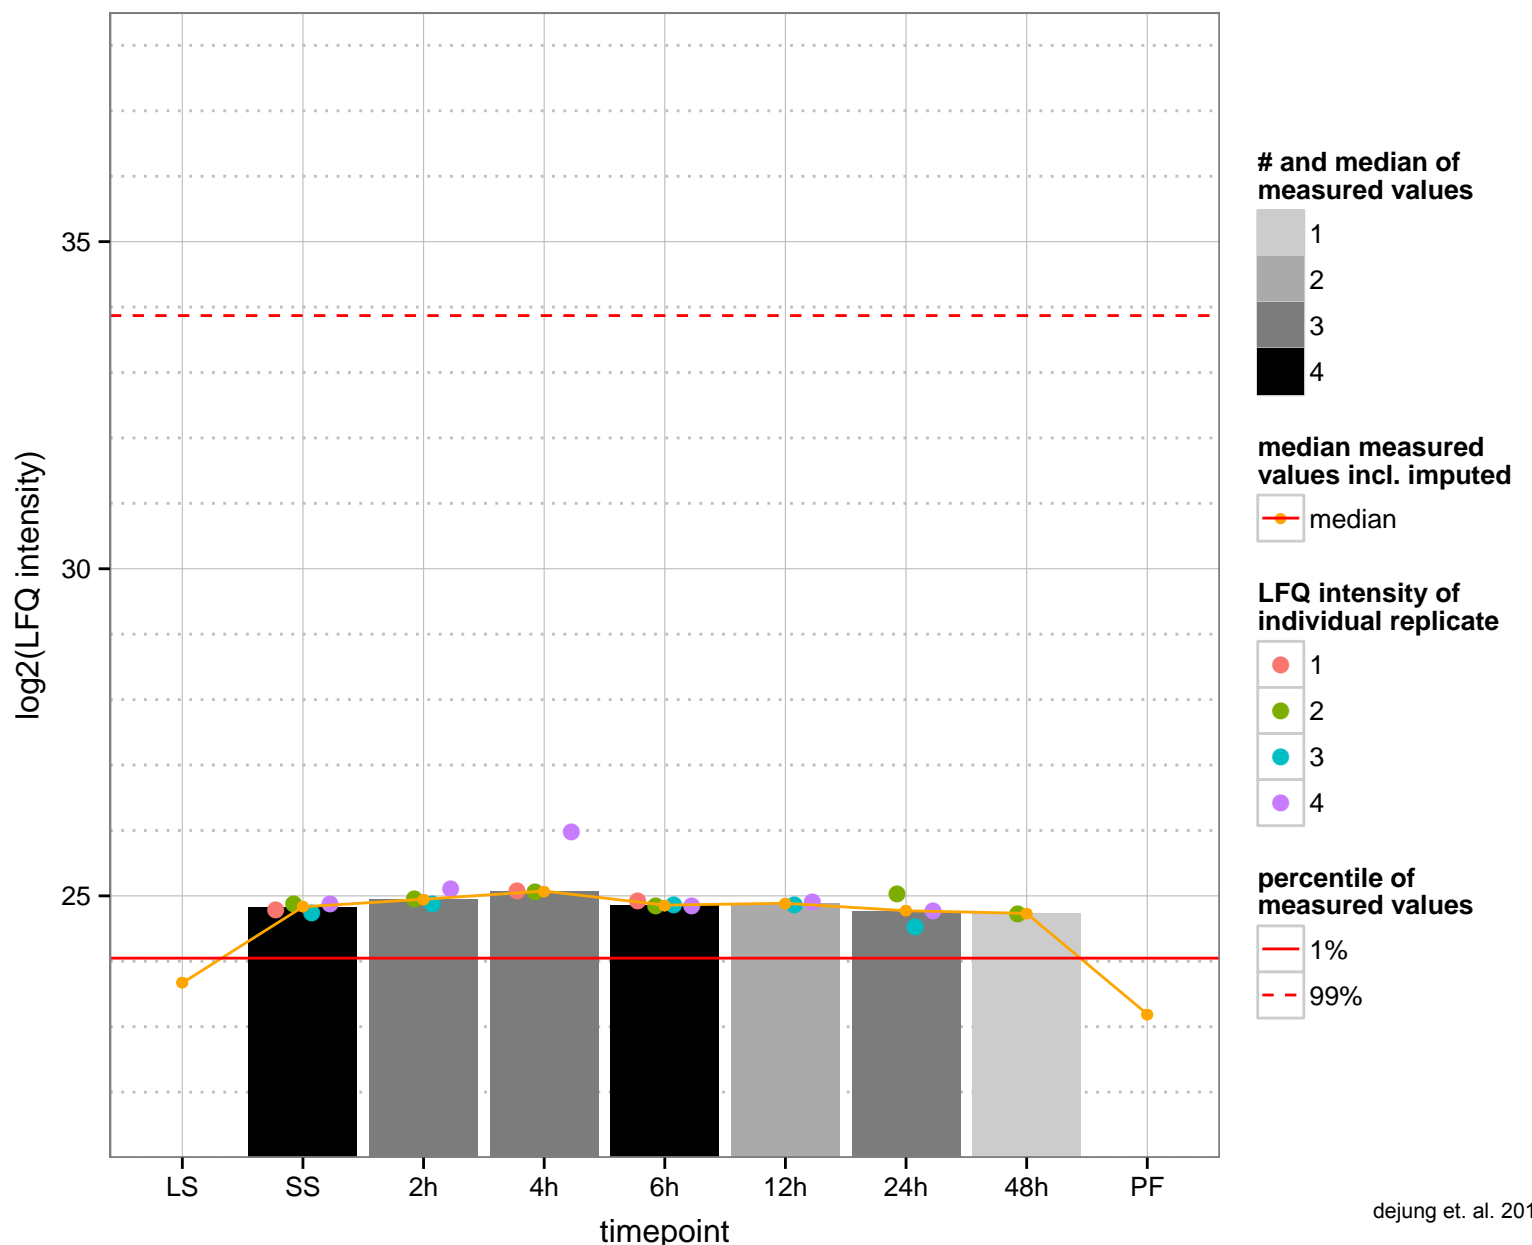

hypothetical protein, conserved  
 Tb927.9.13050  
 AGOF: null  
 AGOC: null  
 AGOP: null  
 PGO: null  
 PGOC: null  
 PGOP: null

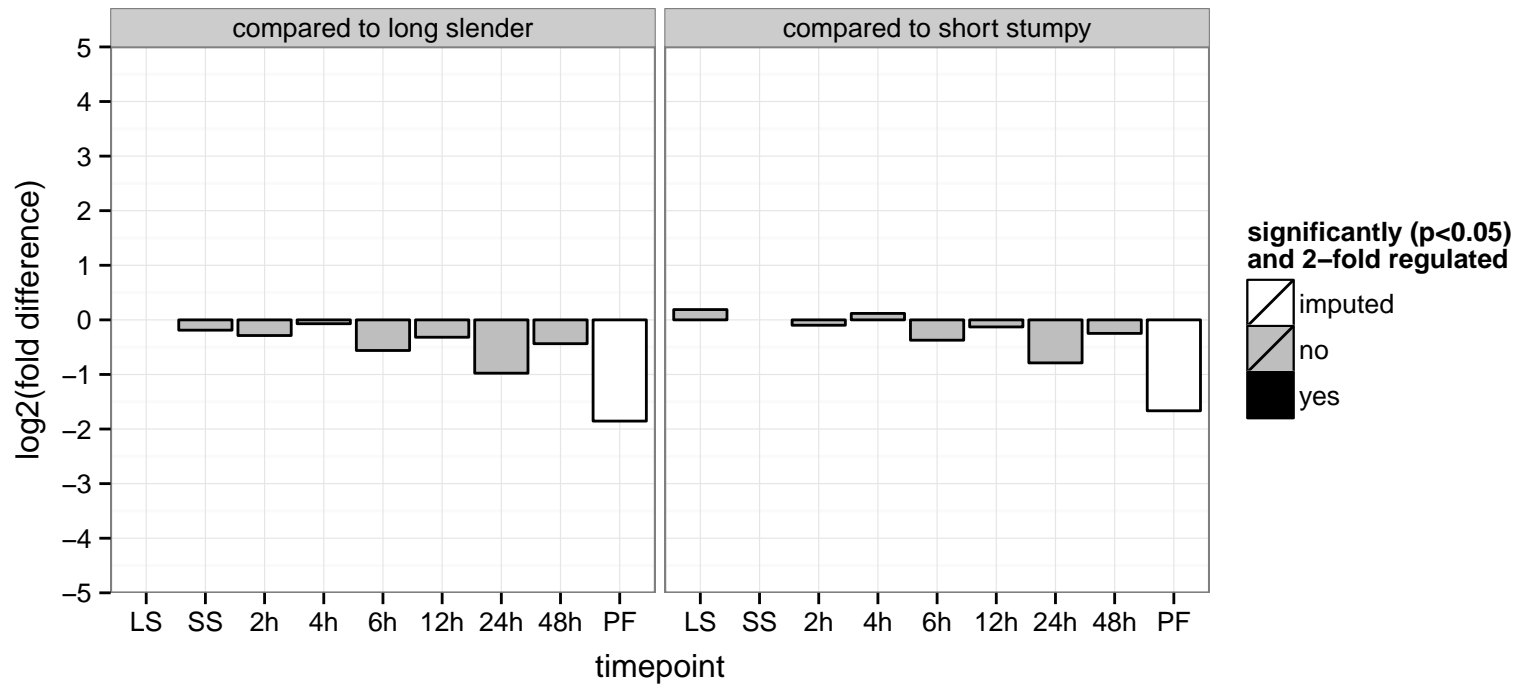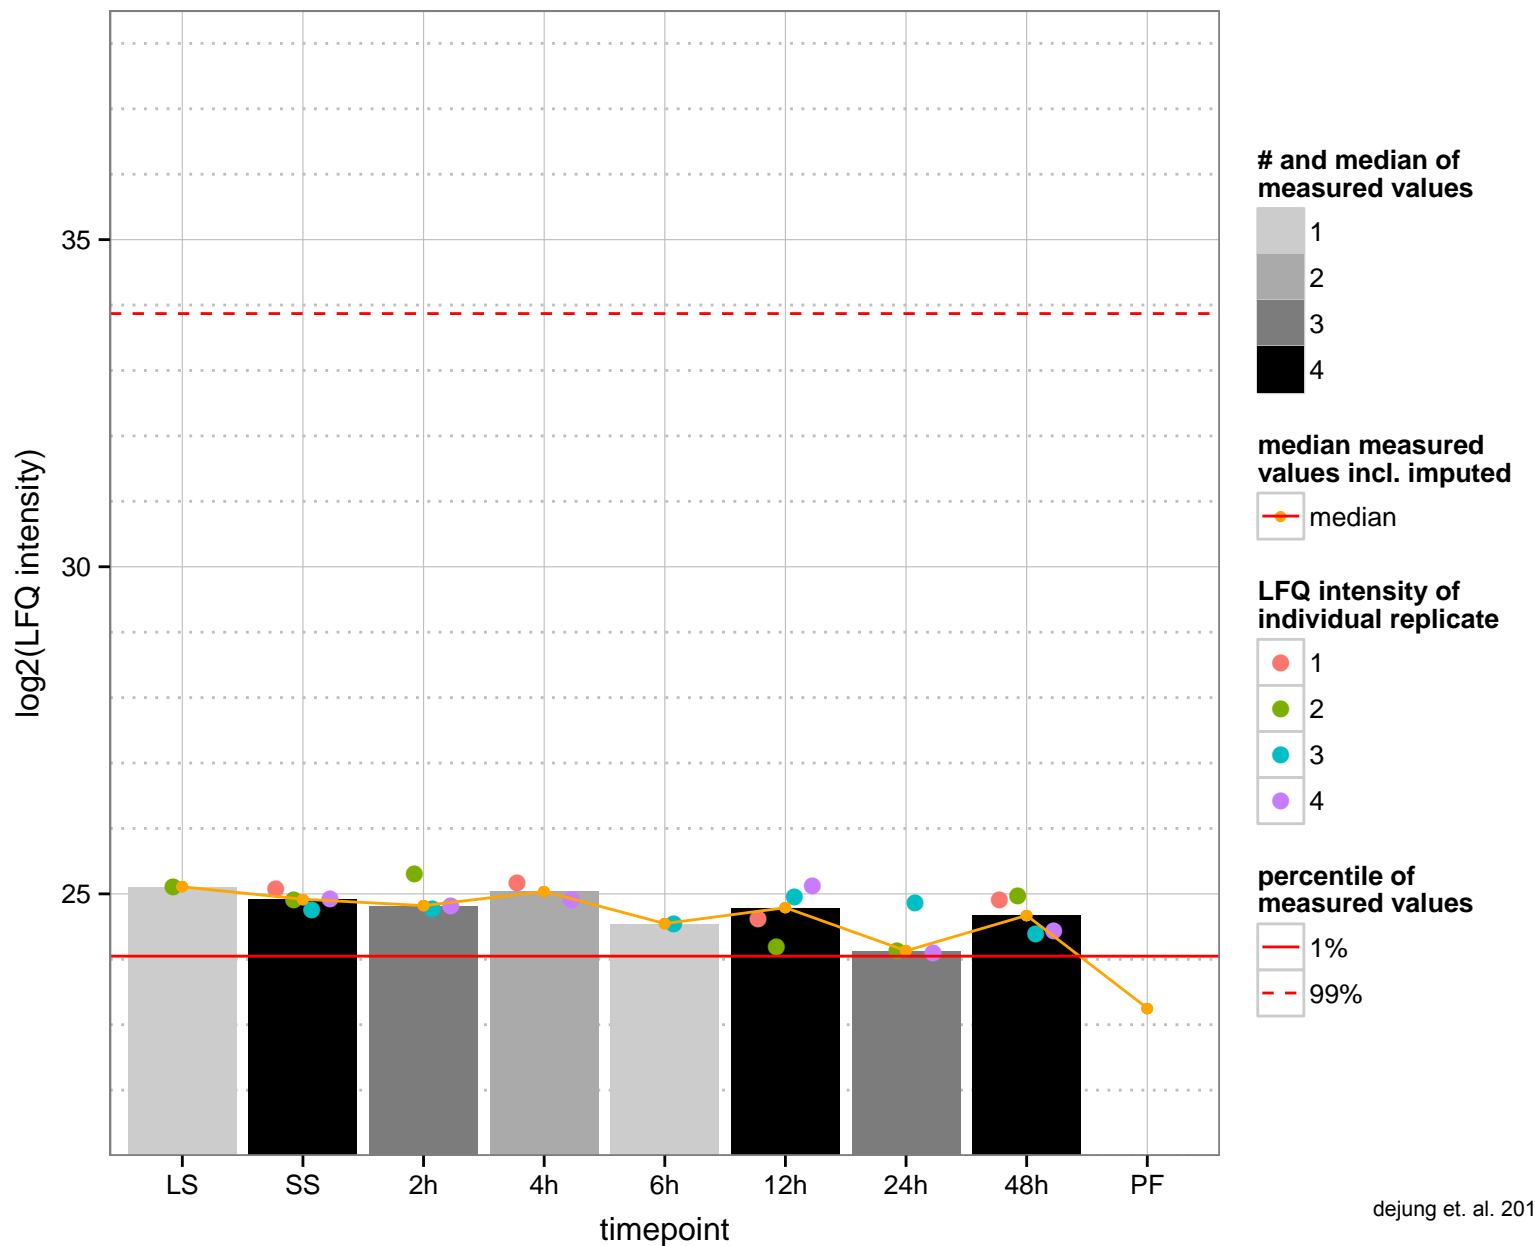

hypothetical protein, conserved  
 Tb927.9.13340  
 AGOF: null  
 AGOC: null  
 AGOP: null  
 PGOF: null  
 PGOC: null  
 PGOP: null

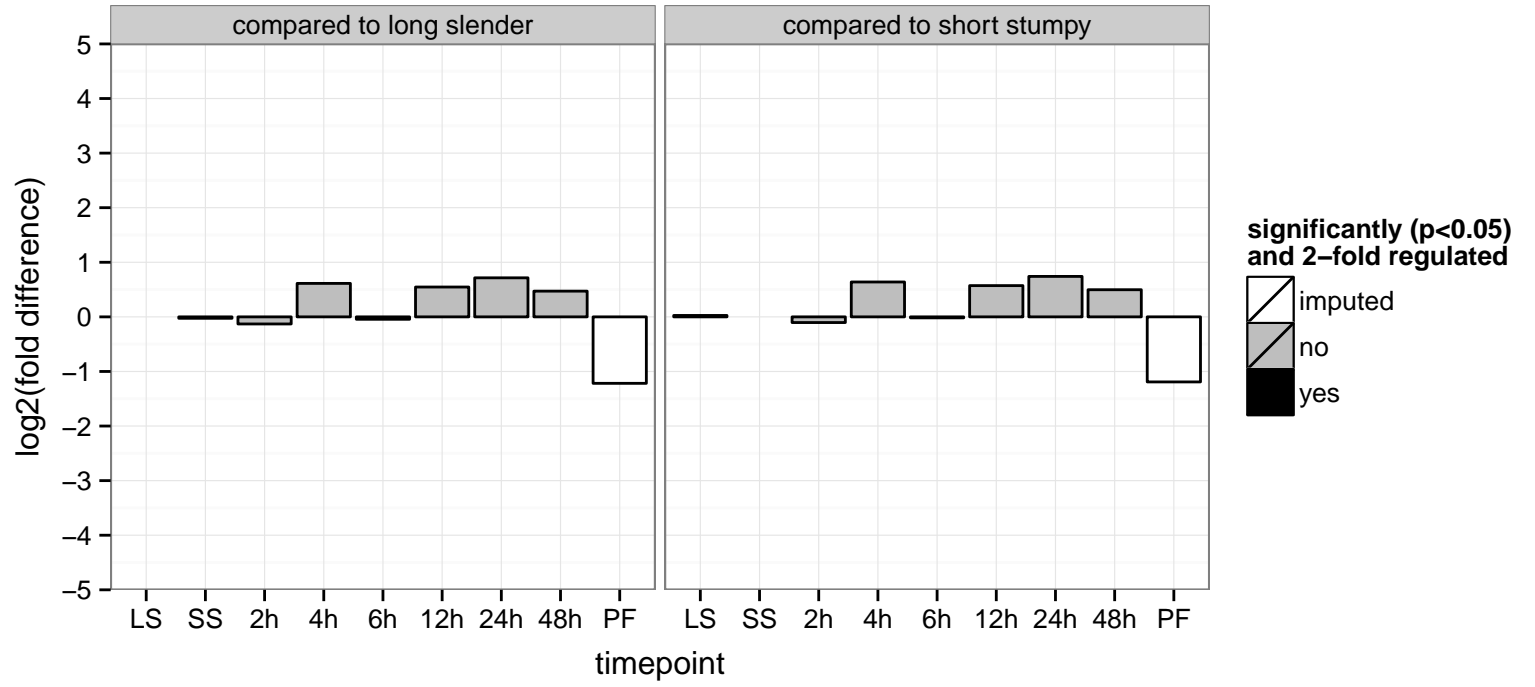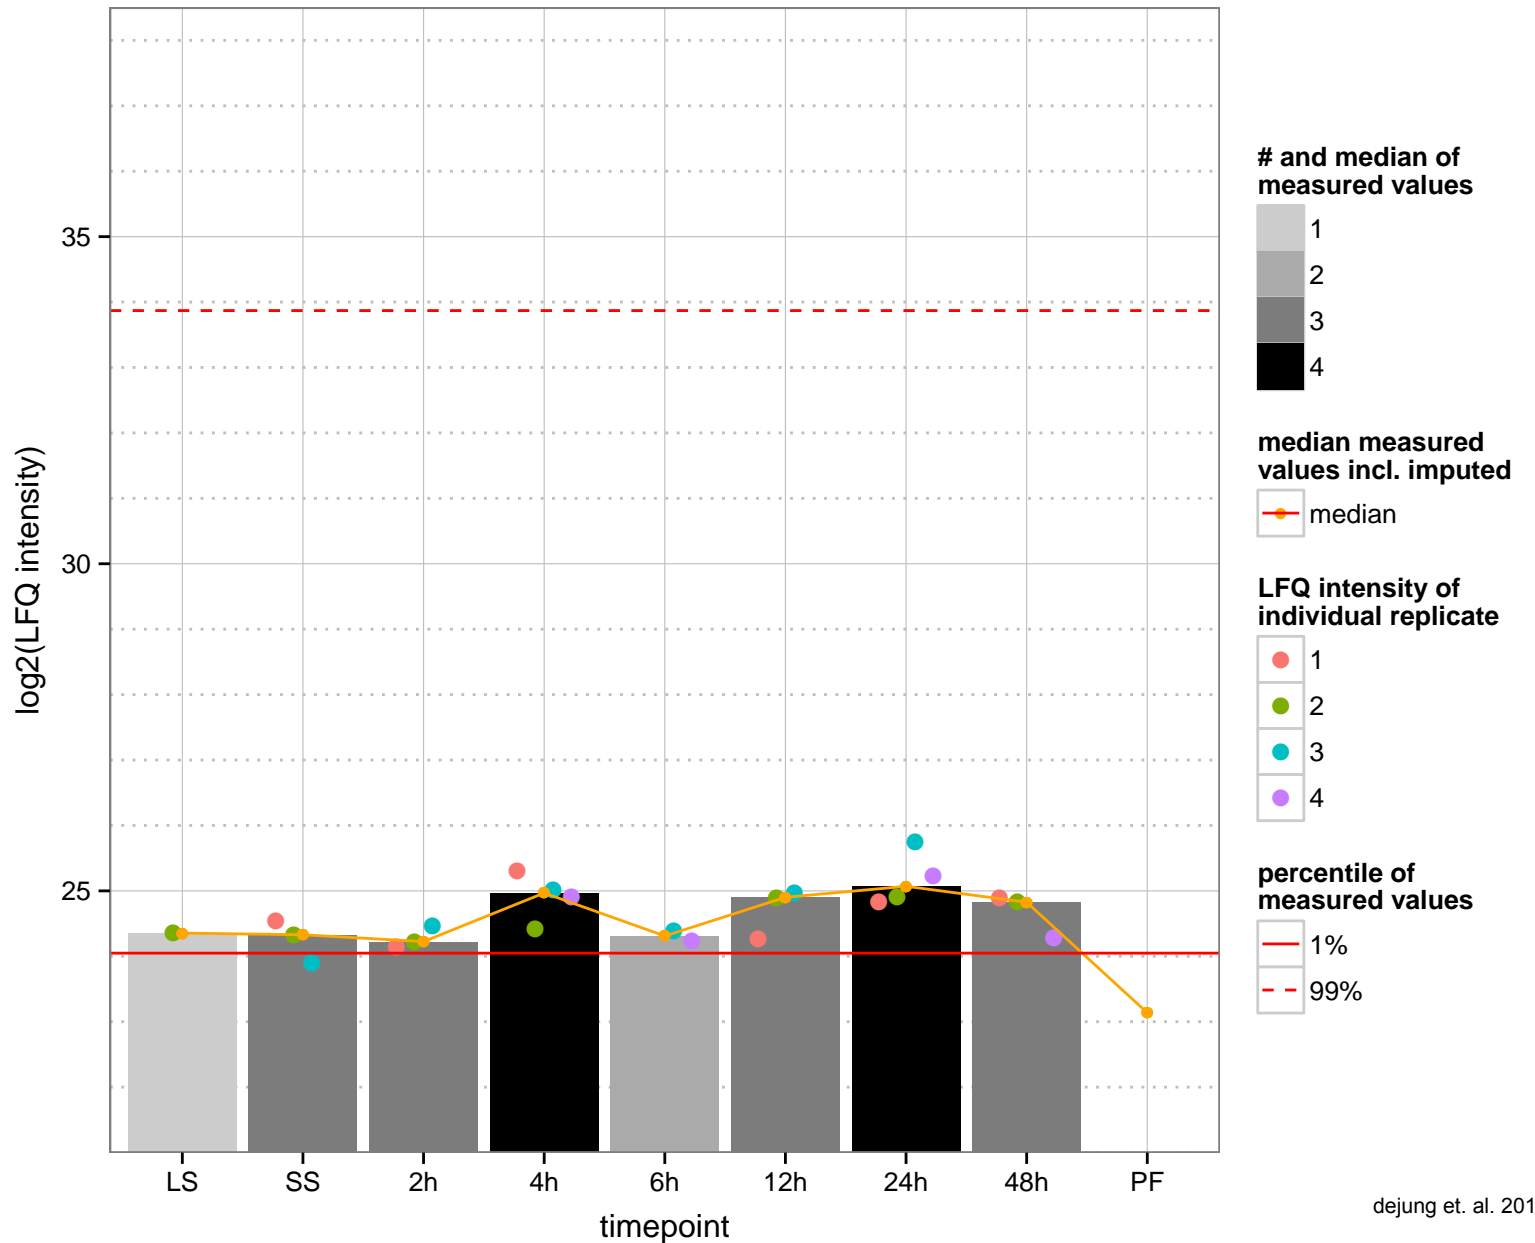

hypothetical protein, conserved  
 Tb927.9.2400  
 AGOF: null  
 AGOC: null  
 AGOP: null  
 PGO: null  
 PGOC: null  
 PGOP: null

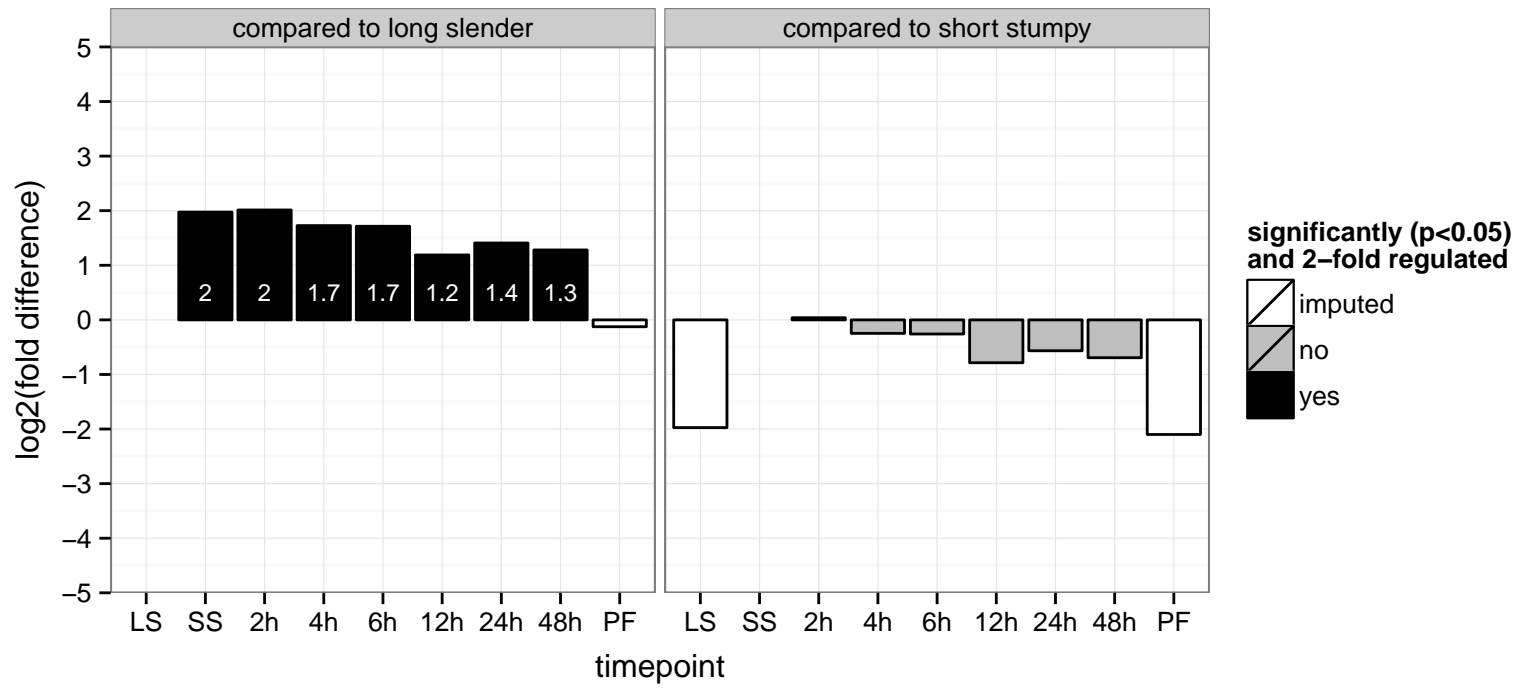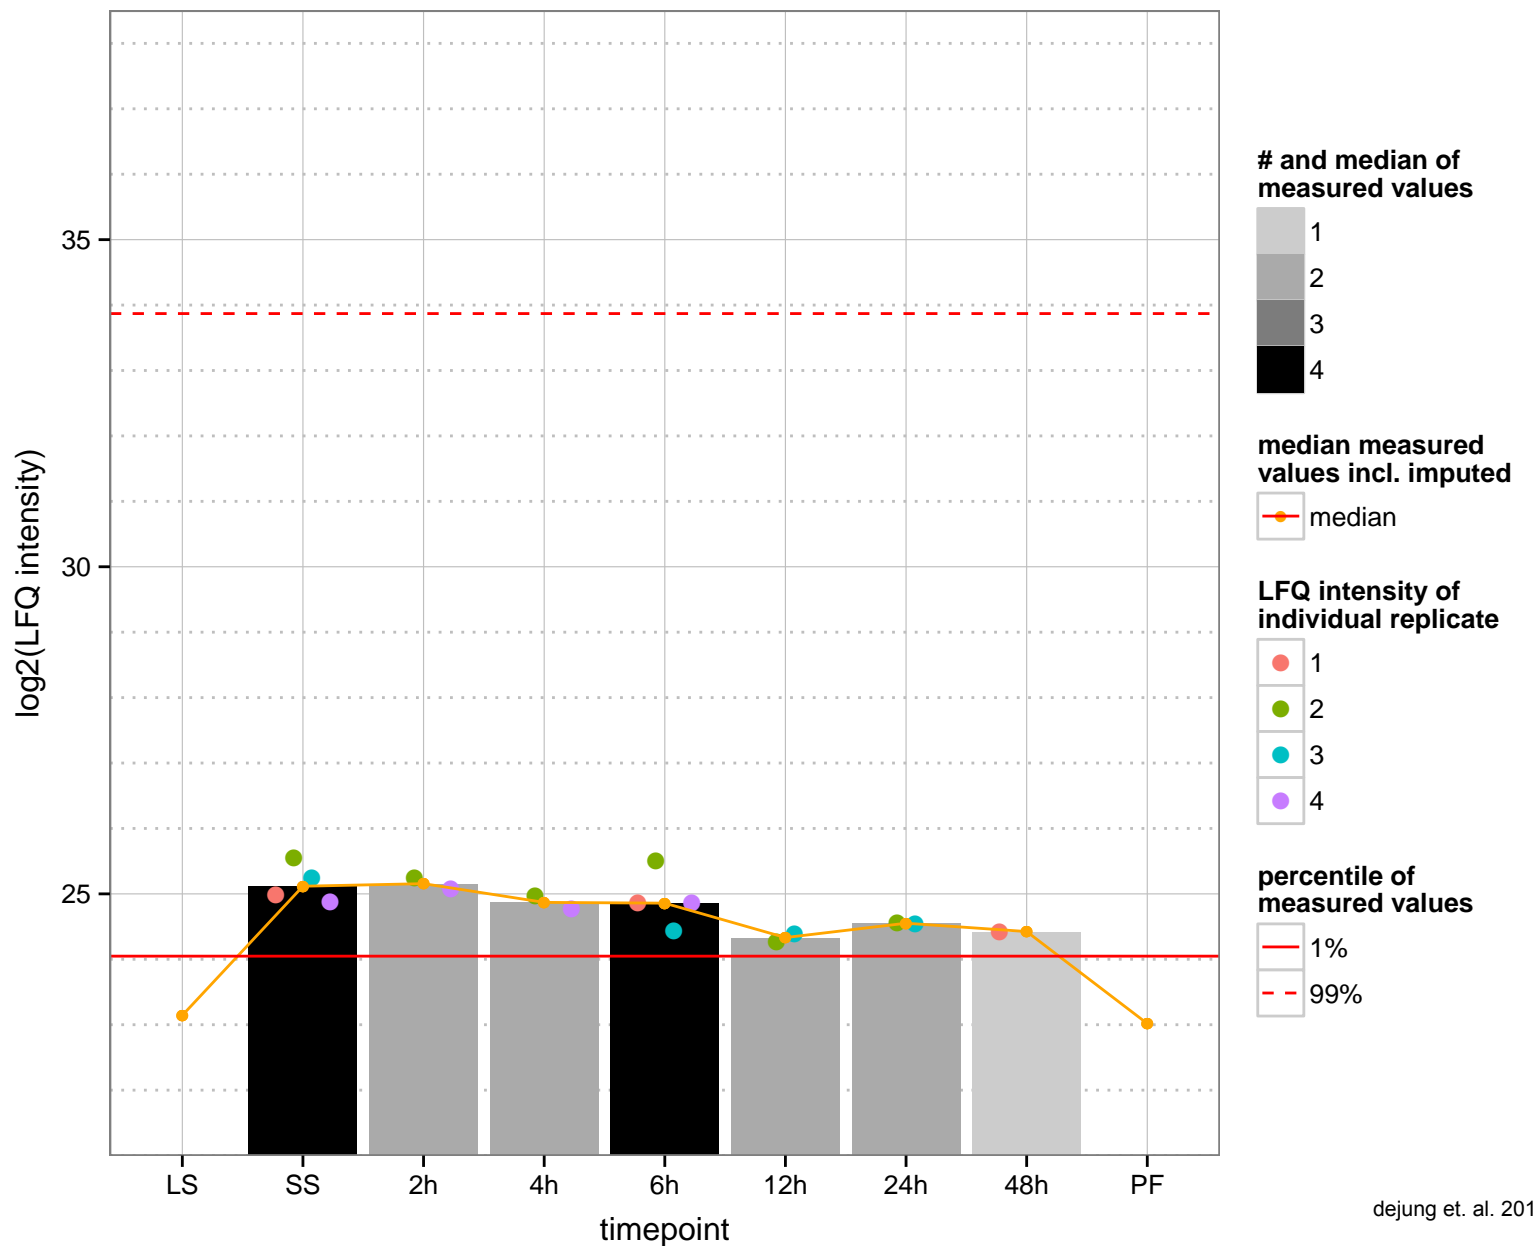

hypothetical protein, conserved  
 Tb927.9.3640  
 AGOF: null  
 AGOC: mitochondrion  
 AGOP: null  
 PGO: null  
 PGO: null  
 PGO: null

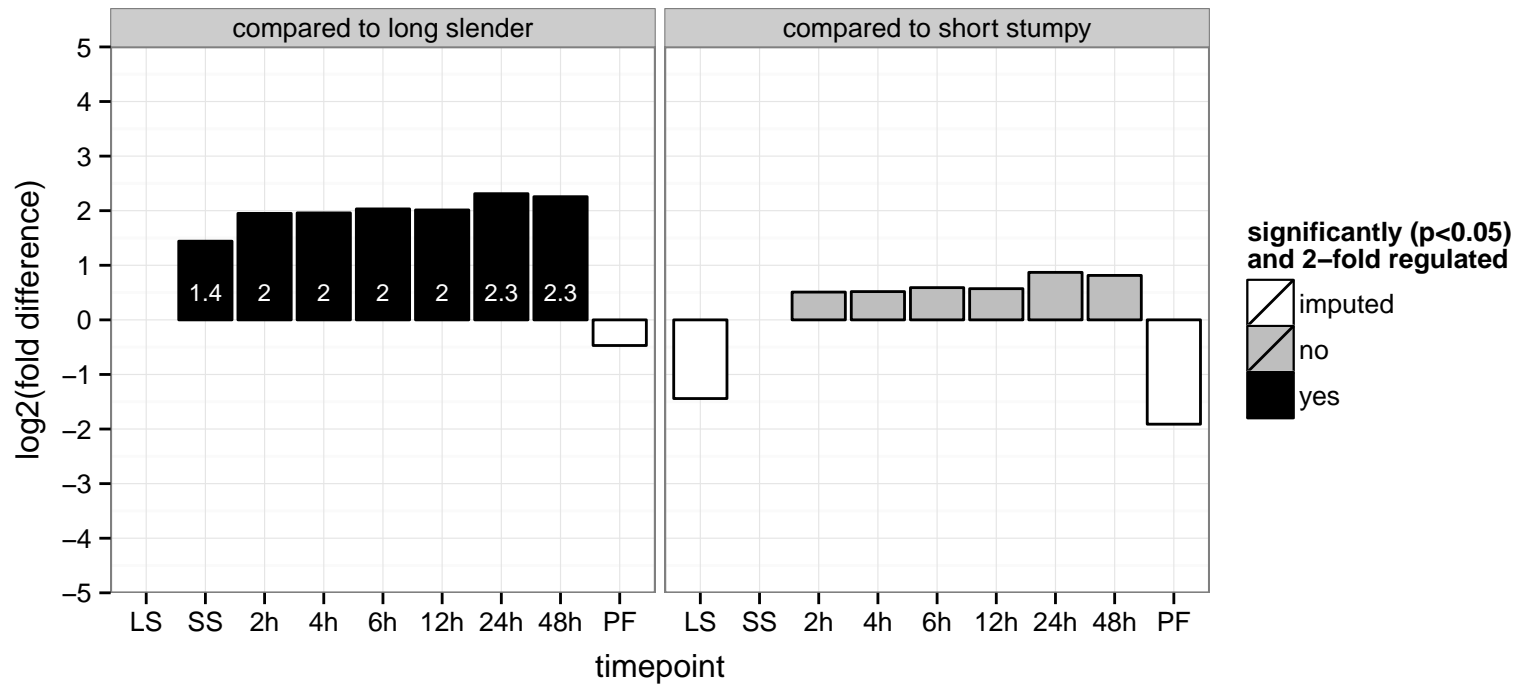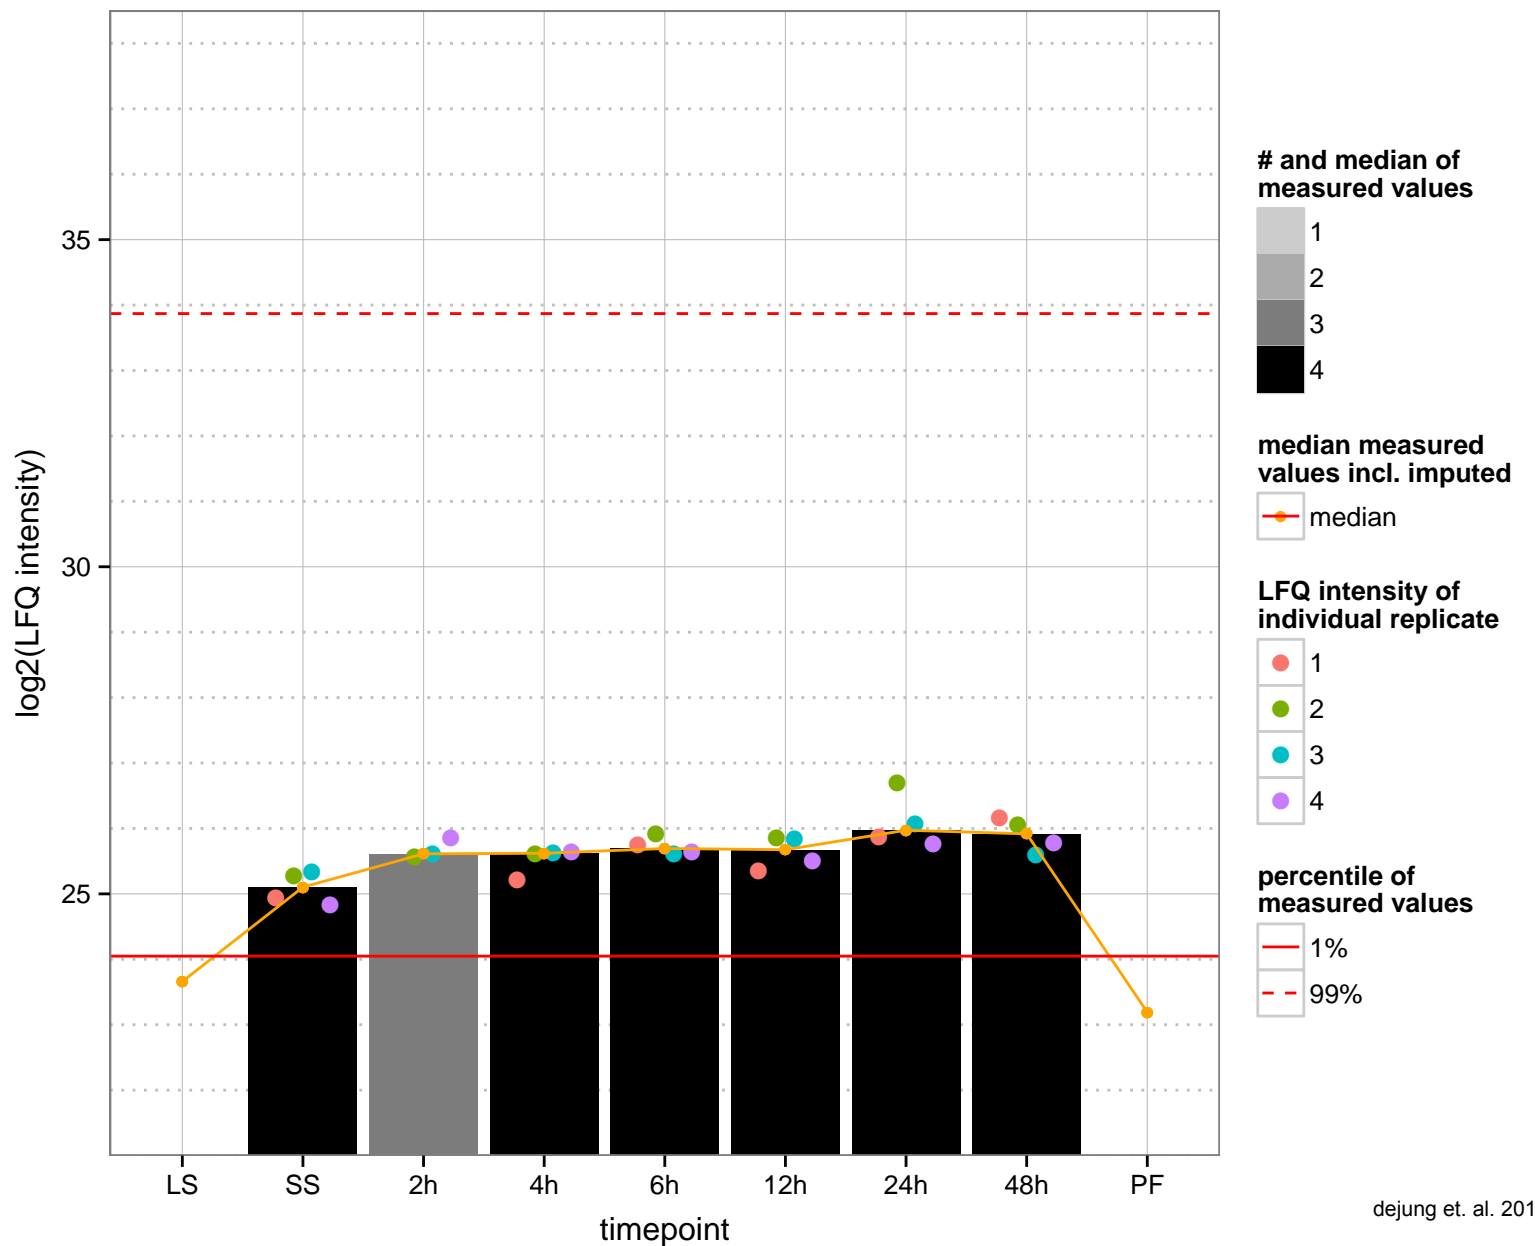

hypothetical protein, conserved  
 Tb927.9.3750  
 AGOF: null  
 AGOC: null  
 AGOP: null  
 PGOF: null  
 PGO: null  
 PGOP: null

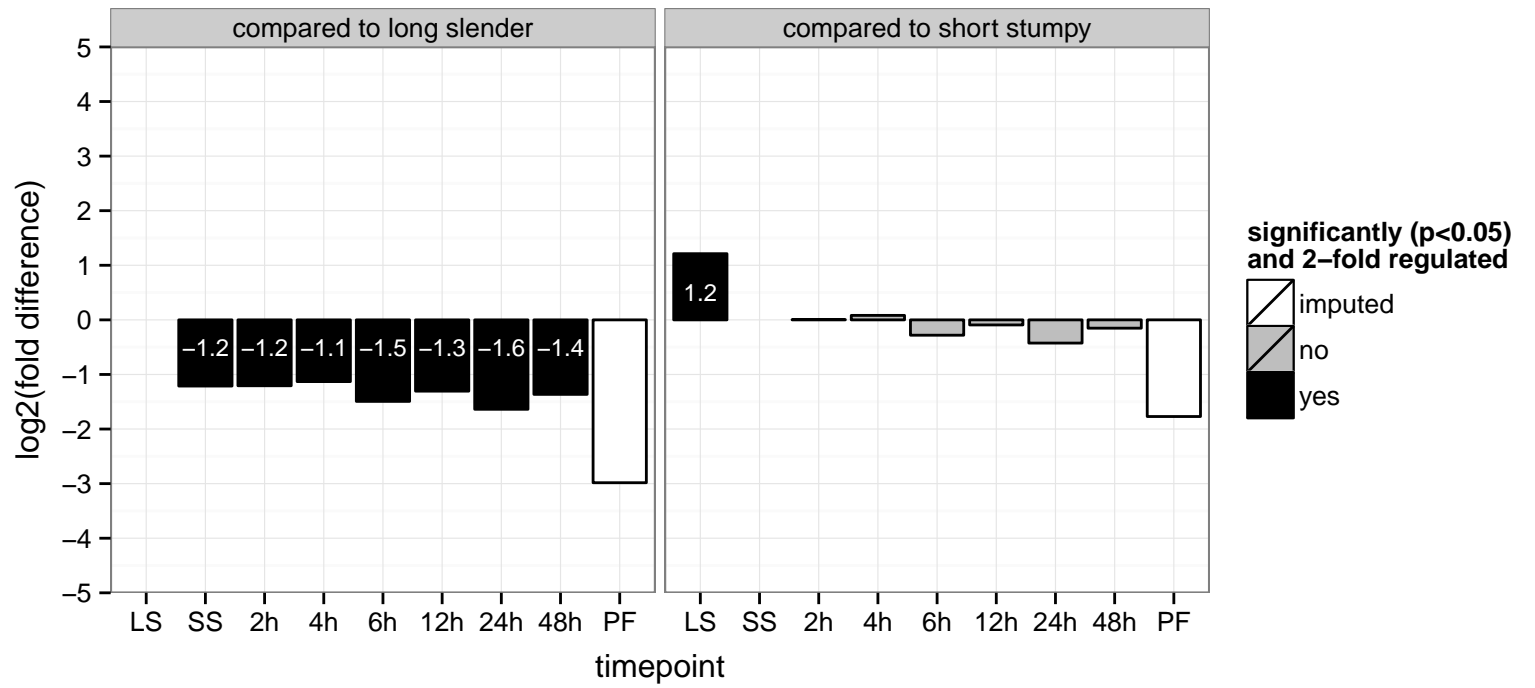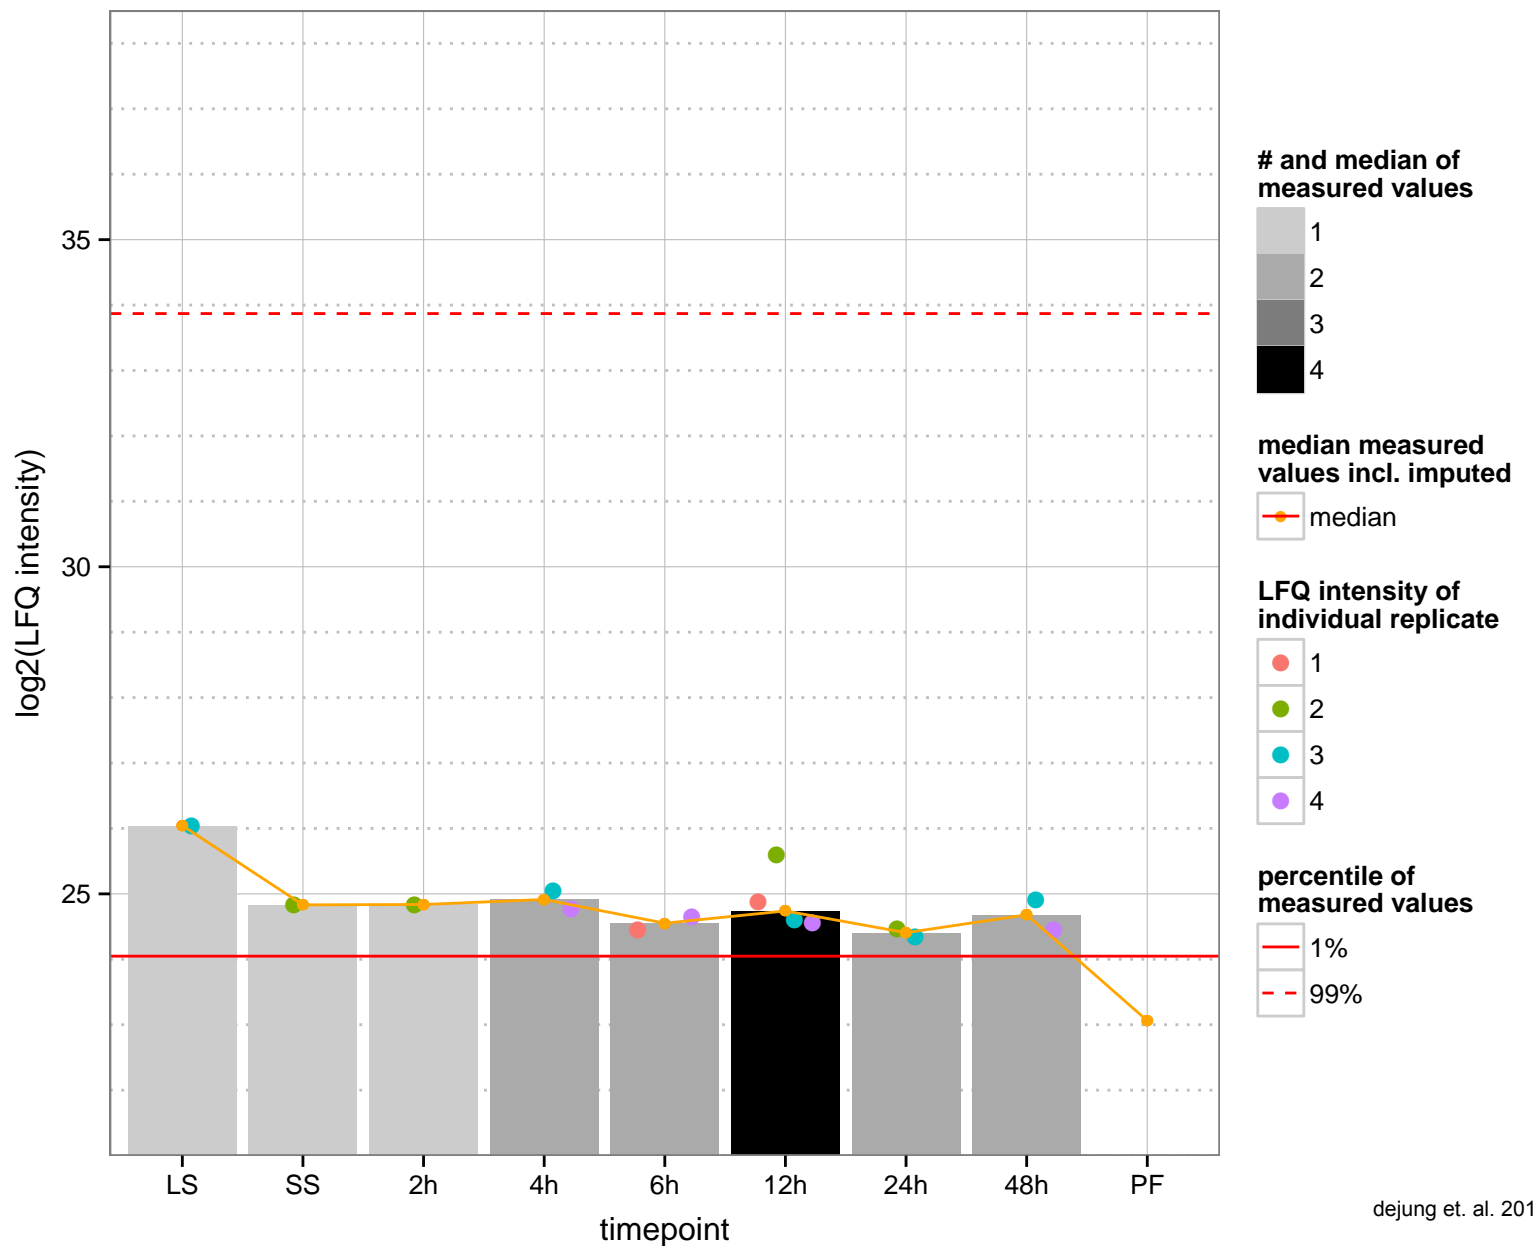

fatty acyl CoA synthetase, putative, fatty acyl CoA synthetase 3 (ACS3)  
 Tb927.9.4210;Tb11.v5.0561  
 AGOF: null, fatty-acyl-CoA synthase activity  
 AGOC: null, membrane  
 AGOP: null, fatty acid metabolic process  
 PGO: catalytic activity  
 PGOC: null  
 PGOP: metabolic process

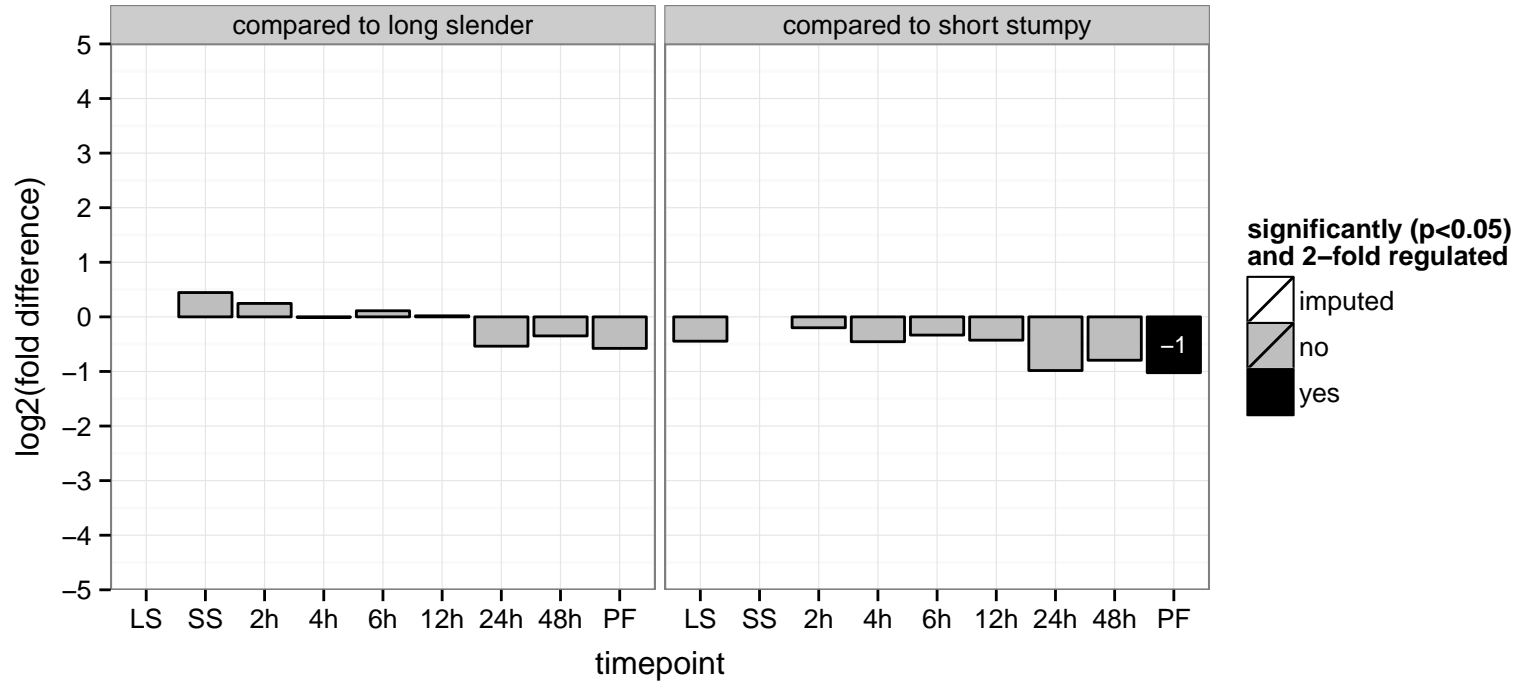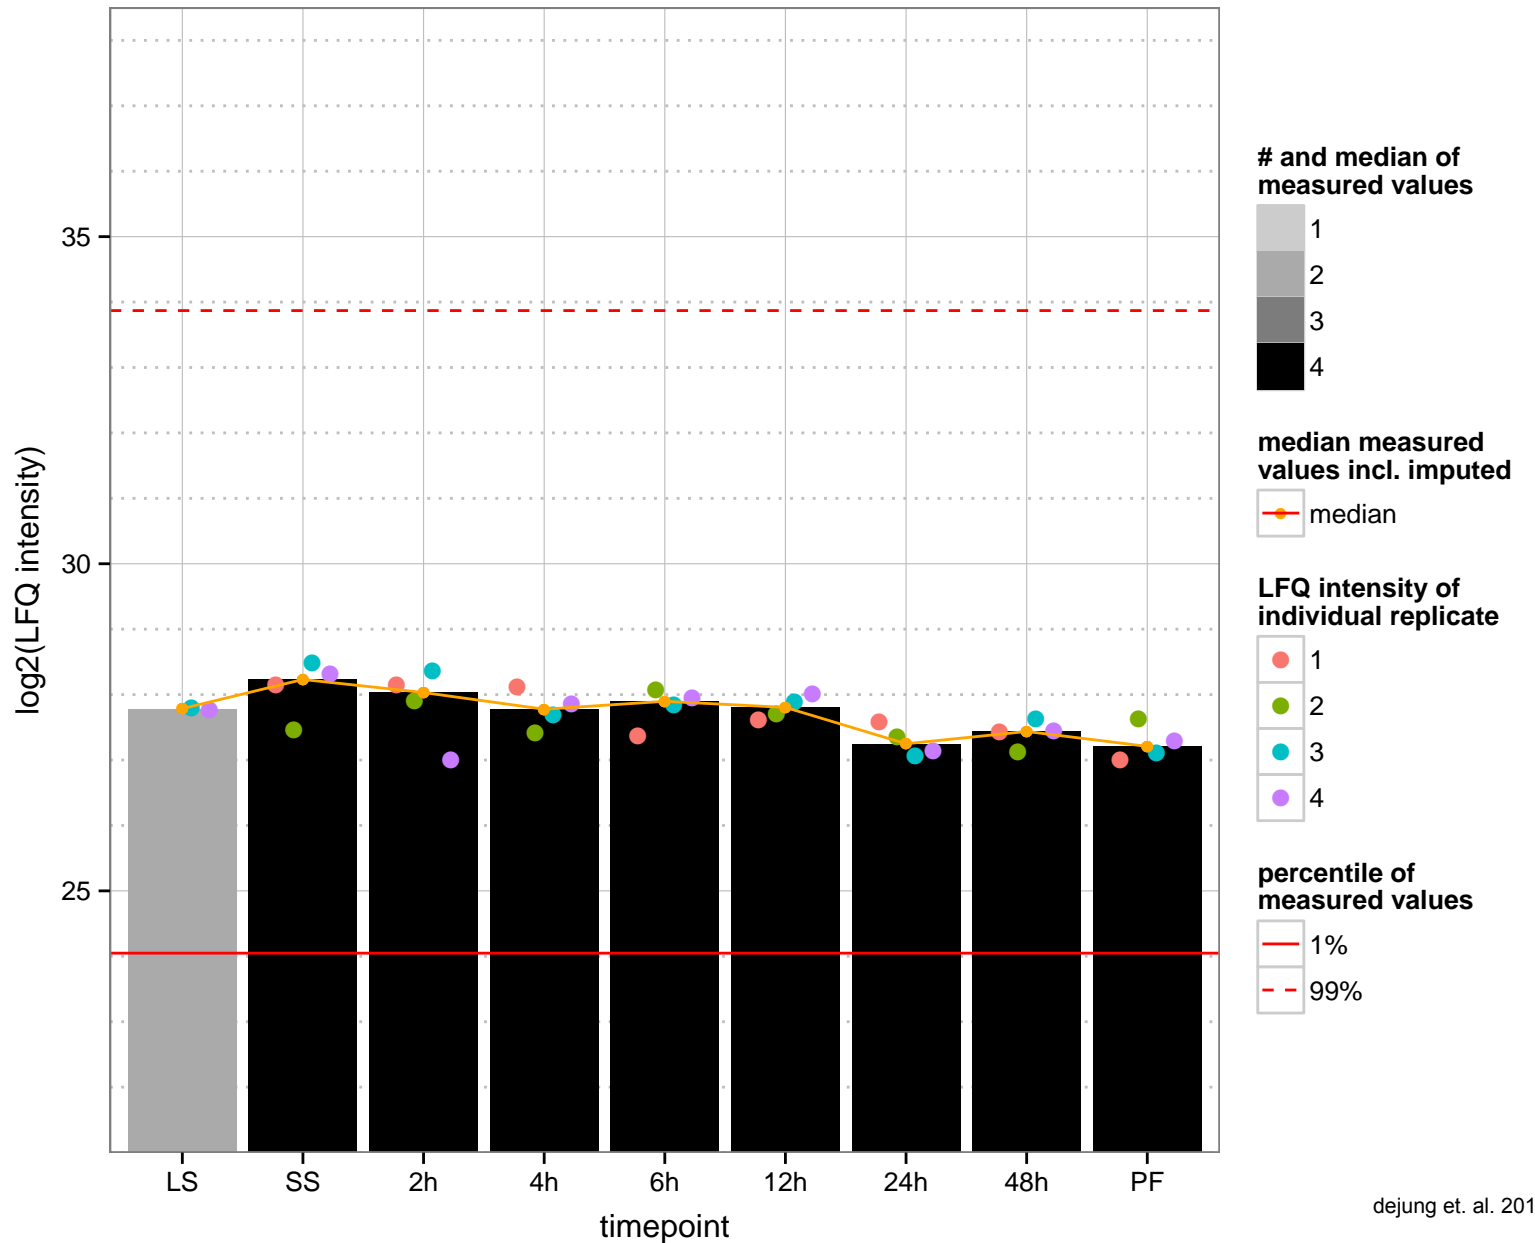

cAMP-specific phosphodiesterase (PDEB2)  
 Tb927.9.5100  
 AGOF: 3', 5'-cyclic-nucleotide phosphodiesterase activity  
 AGOC: cytoplasm  
 AGOP: cell proliferation, signal transduction  
 PGOF: 3', 5'-cyclic-nucleotide phosphodiesterase activity, catalytic activity, protein binding  
 PGOC: null  
 PGOP: signal transduction

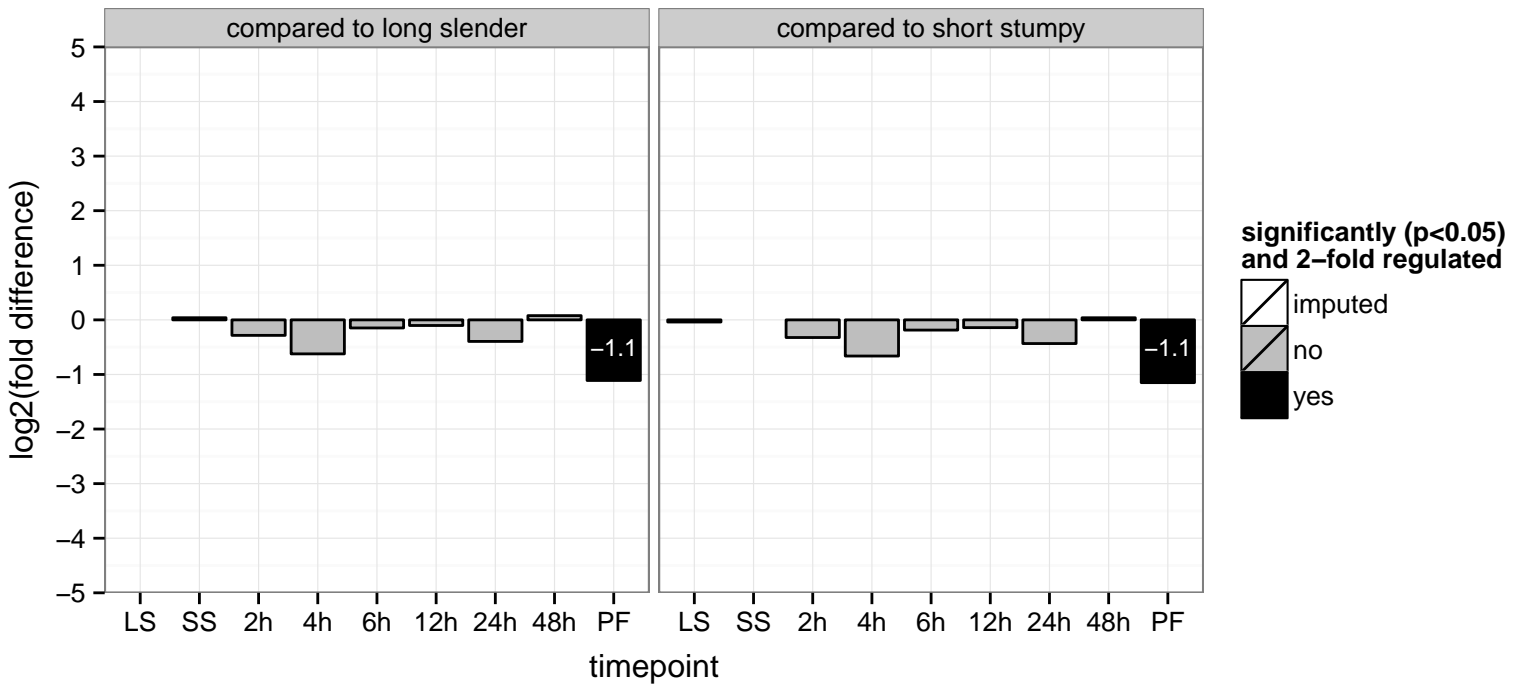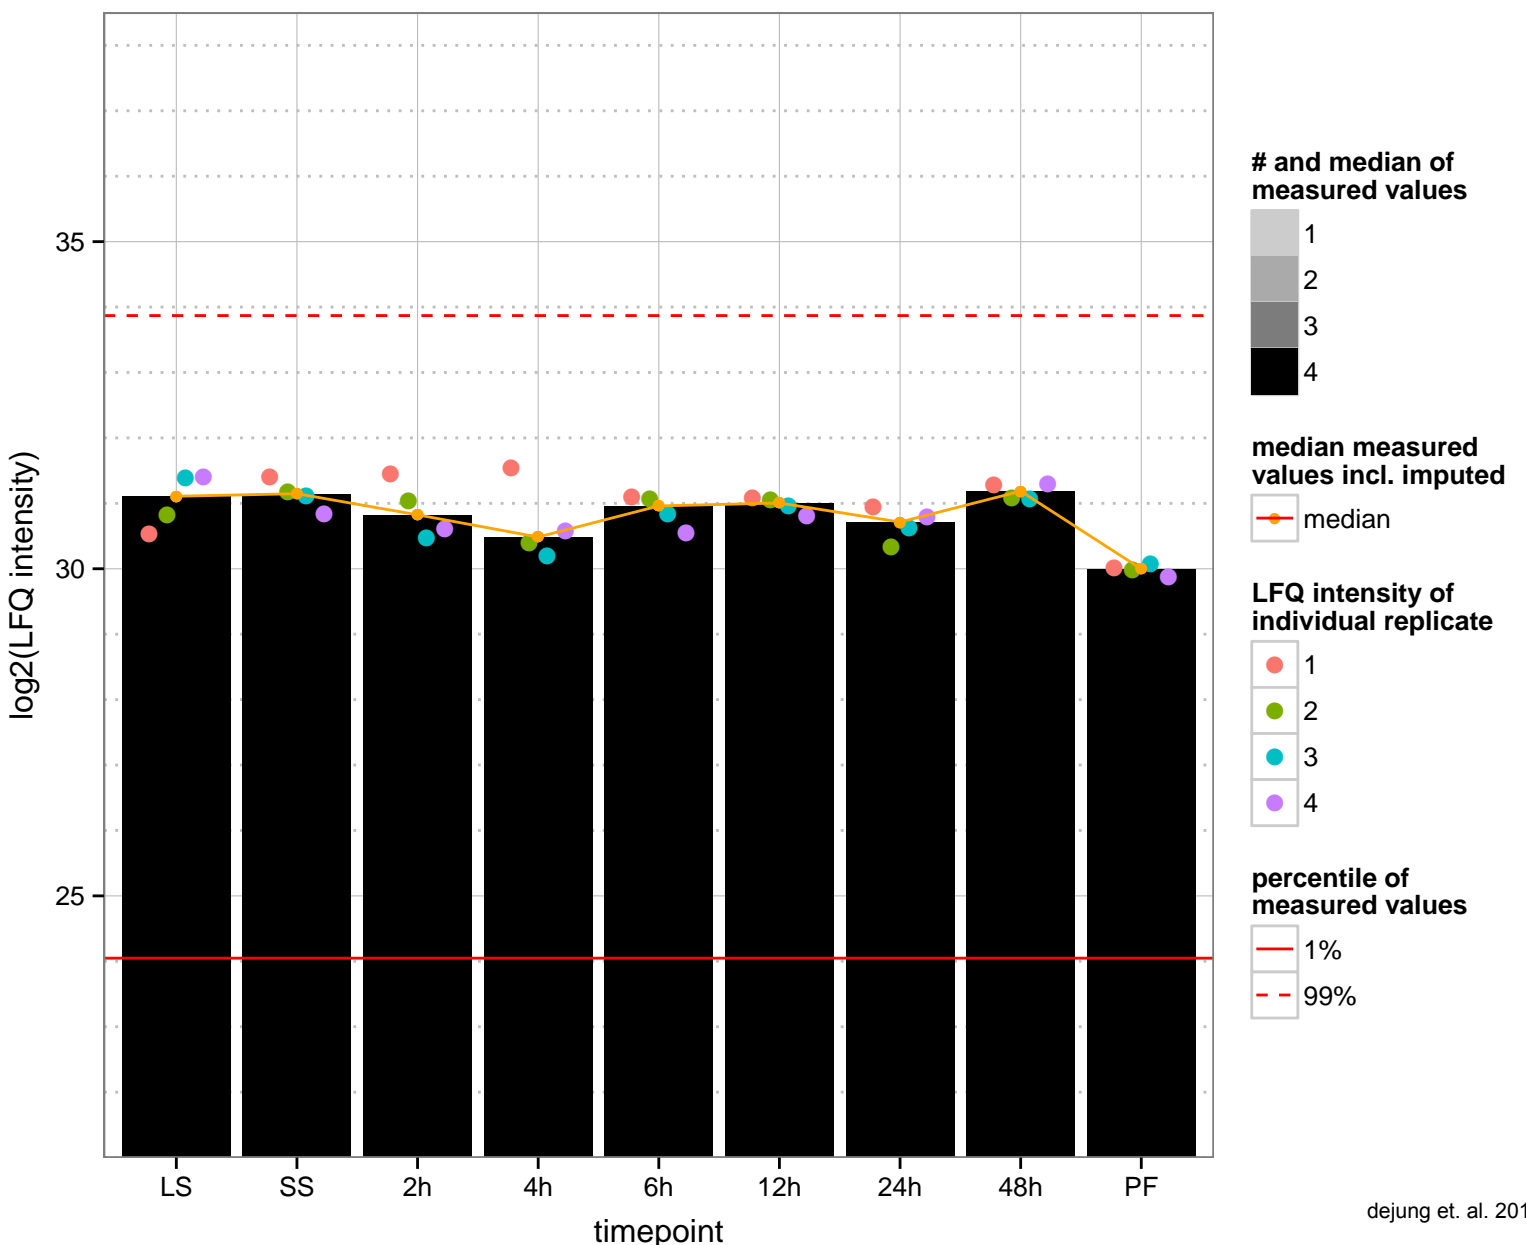



ubiquitin carboxyl-terminal hydrolase, putative, cysteine peptidase, Clan CA, family C19  
 Tb927.9.5520  
 AGOF: cysteine-type endopeptidase activity, ubiquitin thiolesterase activity  
 AGOC: null  
 AGOP: ubiquitin-dependent protein catabolic process  
 PGOF: ubiquitin thiolesterase activity  
 PGO: null  
 PGOP: ubiquitin-dependent protein catabolic process

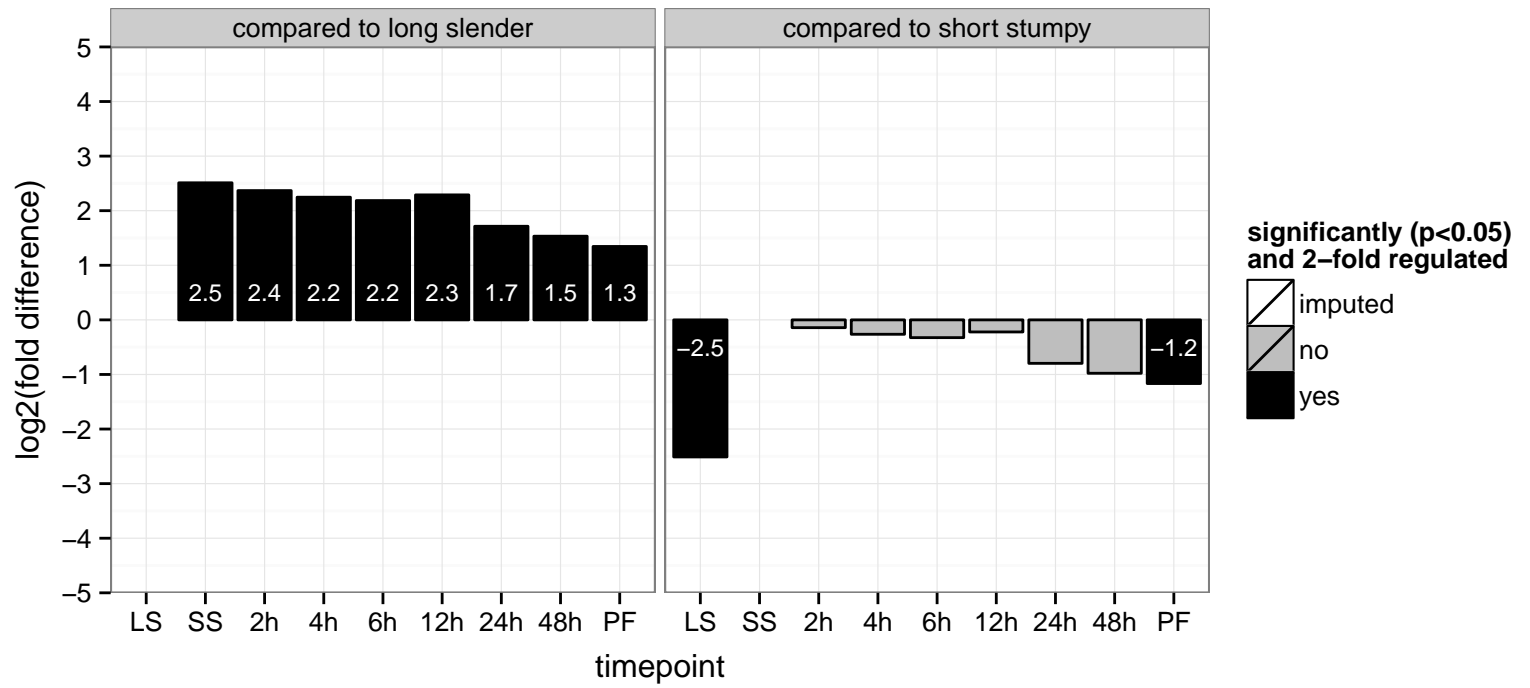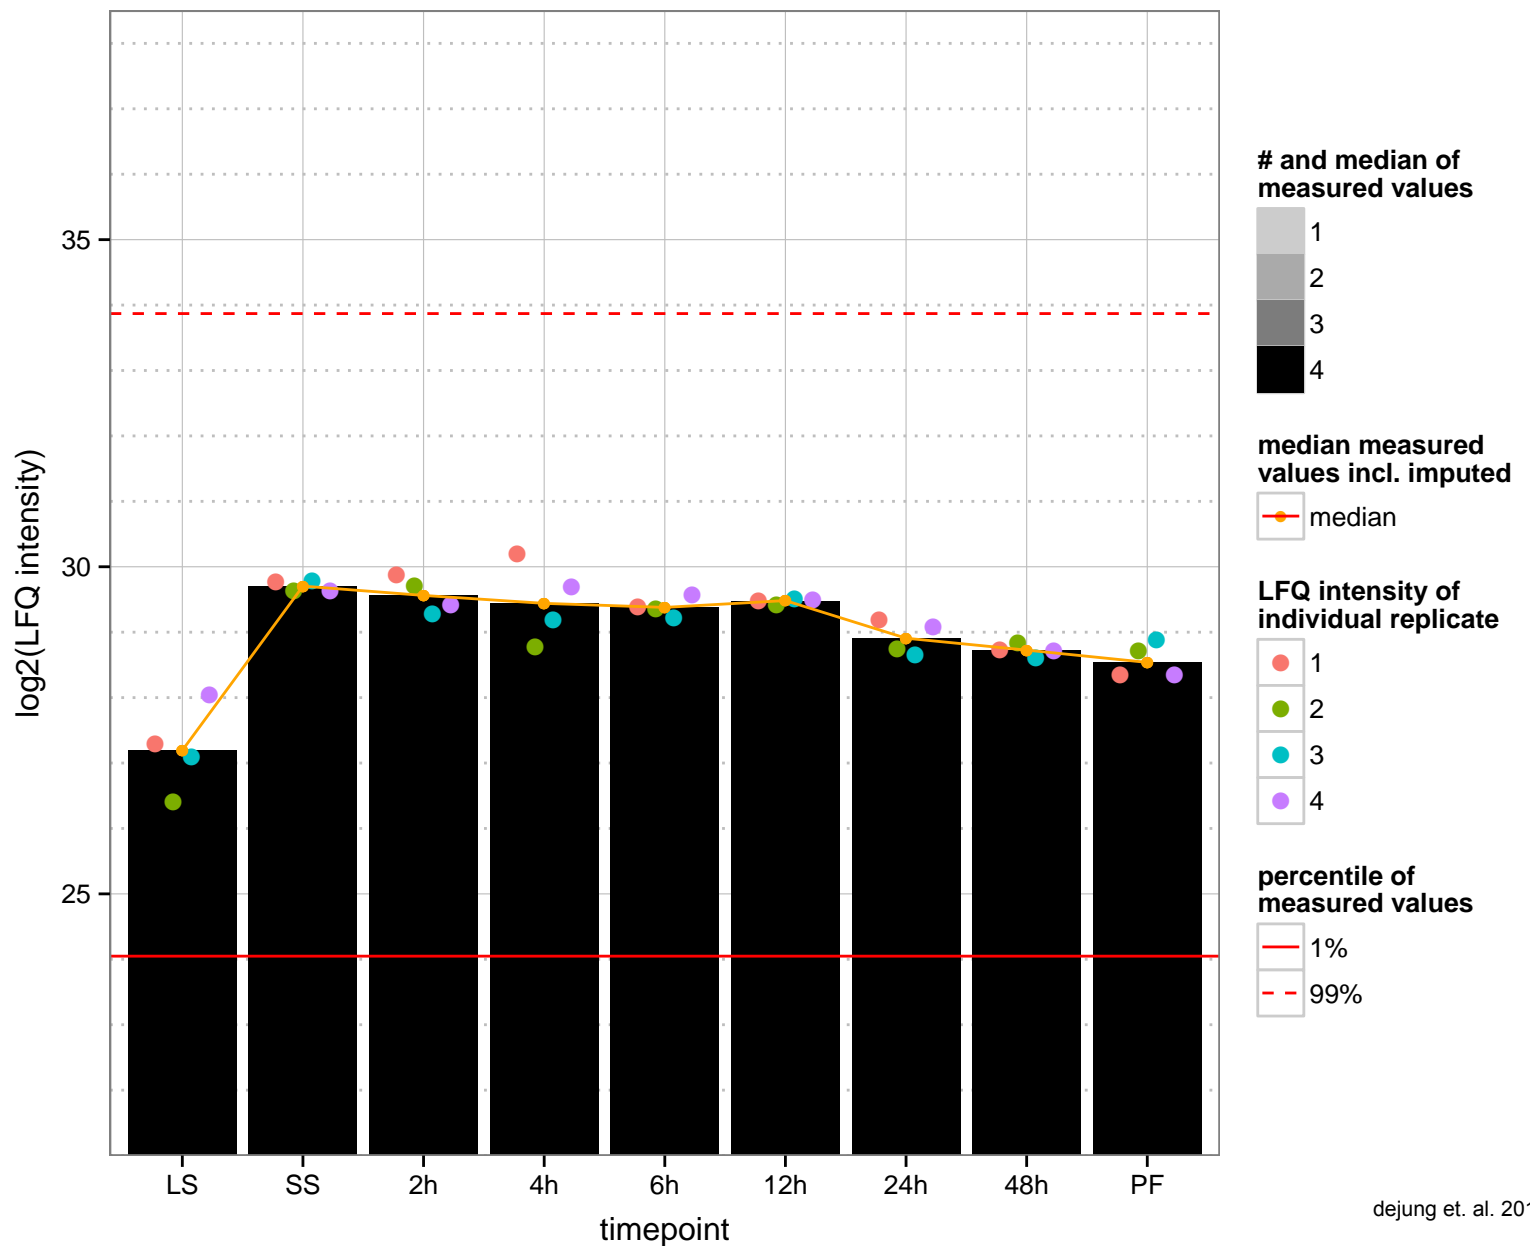

arginine kinase, AK1 (AK)

Tb927.9.6290

AGOF: ATP binding, arginine kinase activity, transferase activity, transferring phosphorus-containing groups

AGOC: cytosol

AGOP: biological\_process

PGOF: kinase activity, transferase activity, transferring phosphorus-containing groups

PGOC: null

PGOP: null

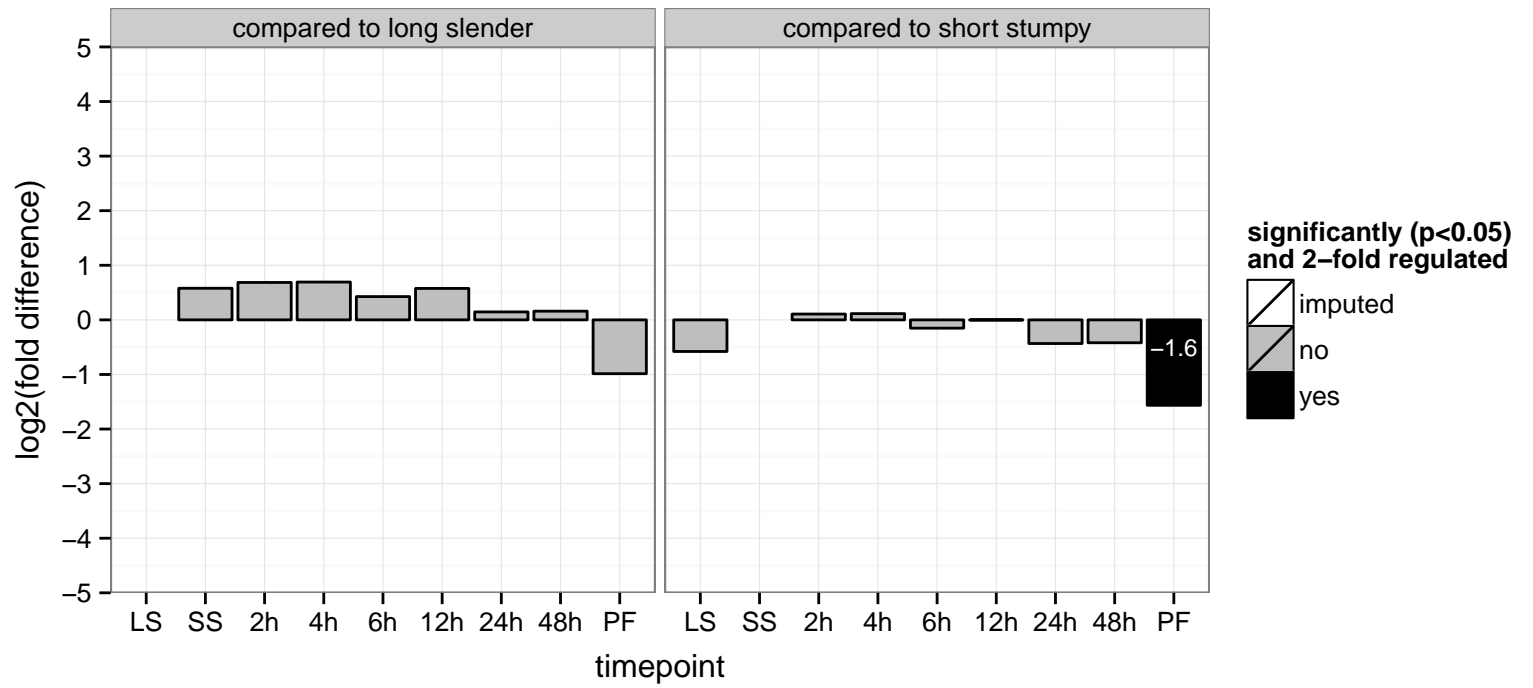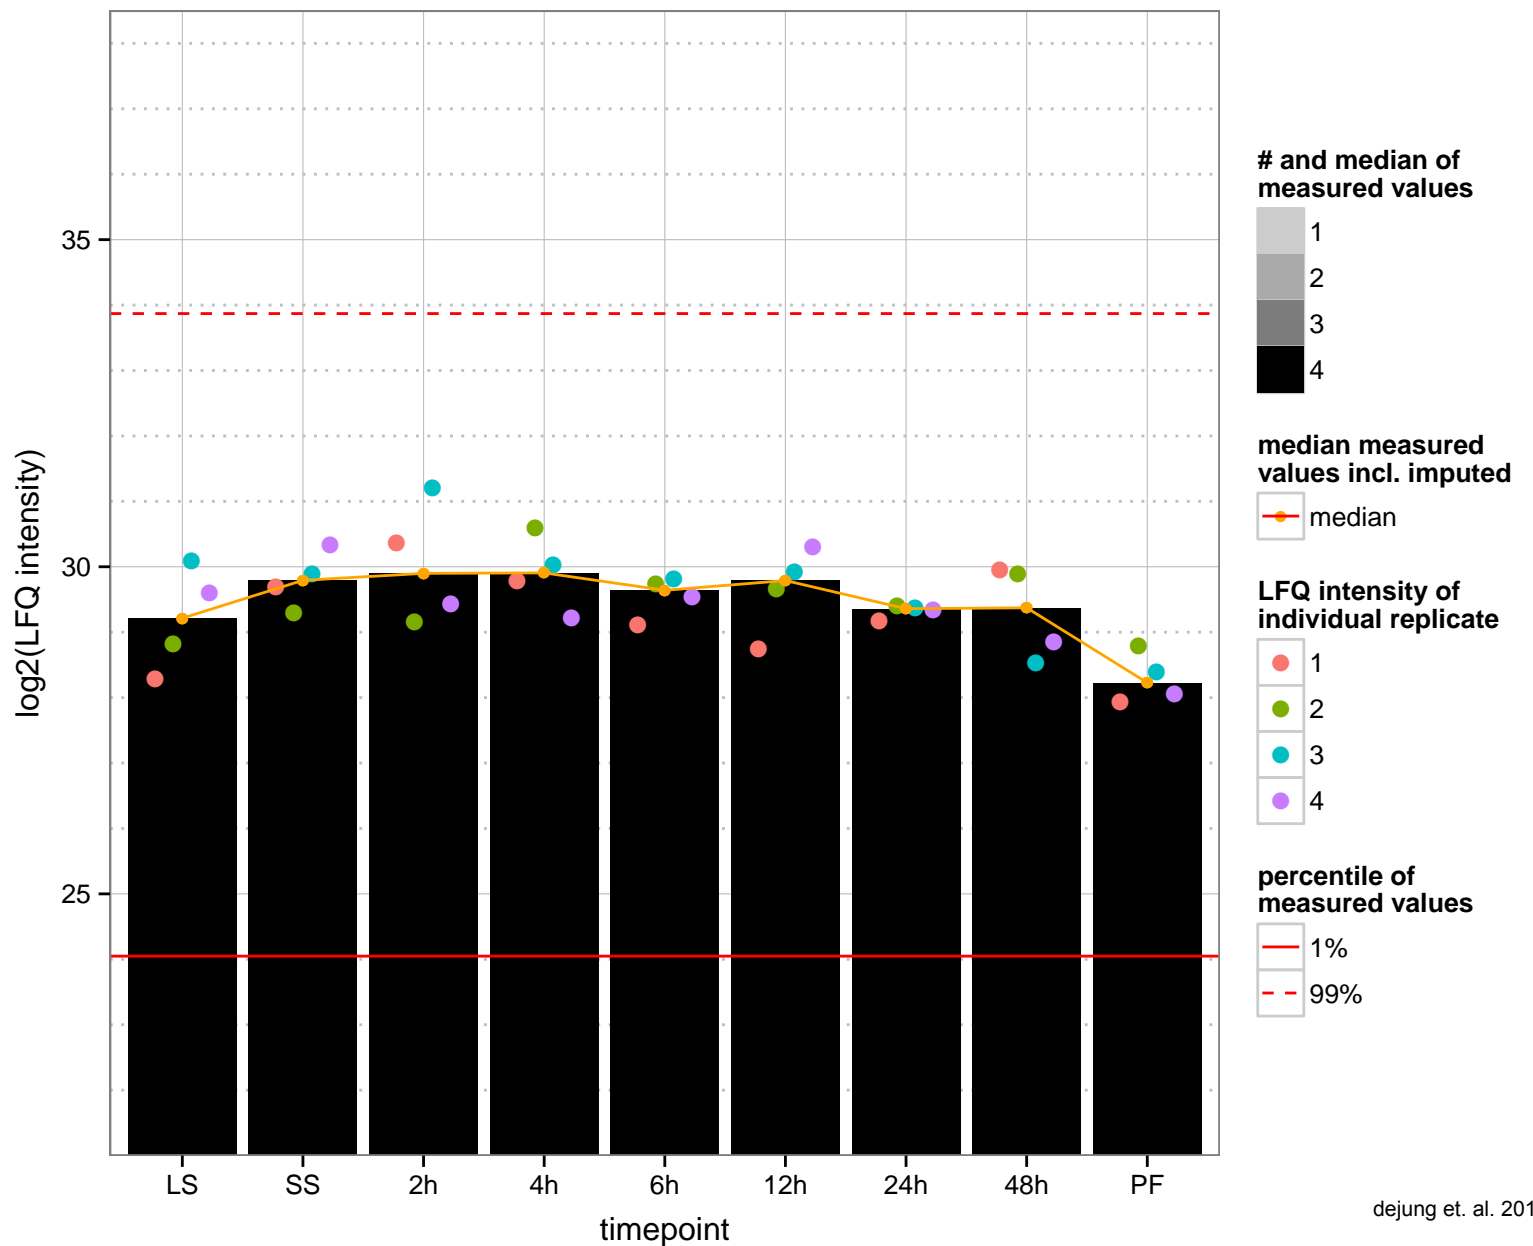

hypothetical protein, conserved  
 Tb927.9.7690  
 AGOF: nucleotidyltransferase activity  
 AGOC: null  
 AGOP: null  
 PGO: null  
 PGOC: null  
 PGOP: null

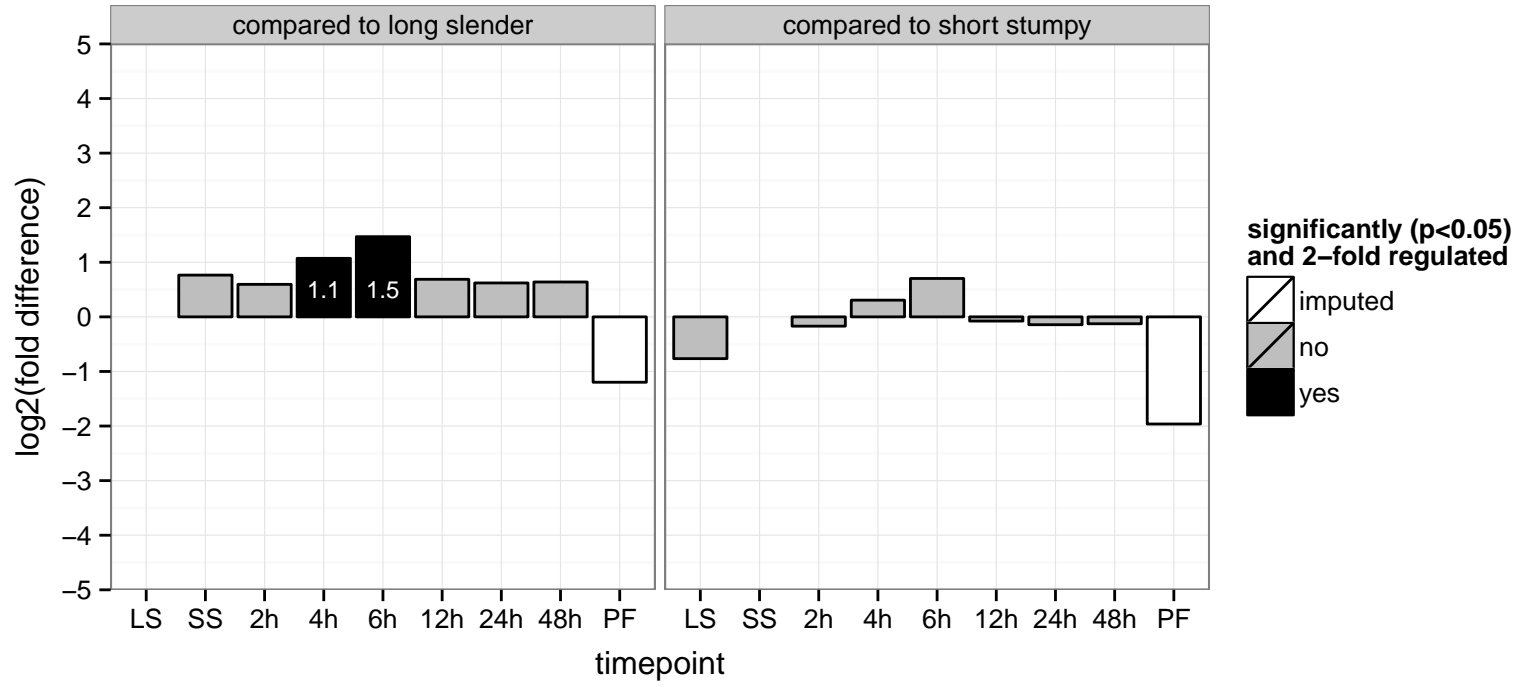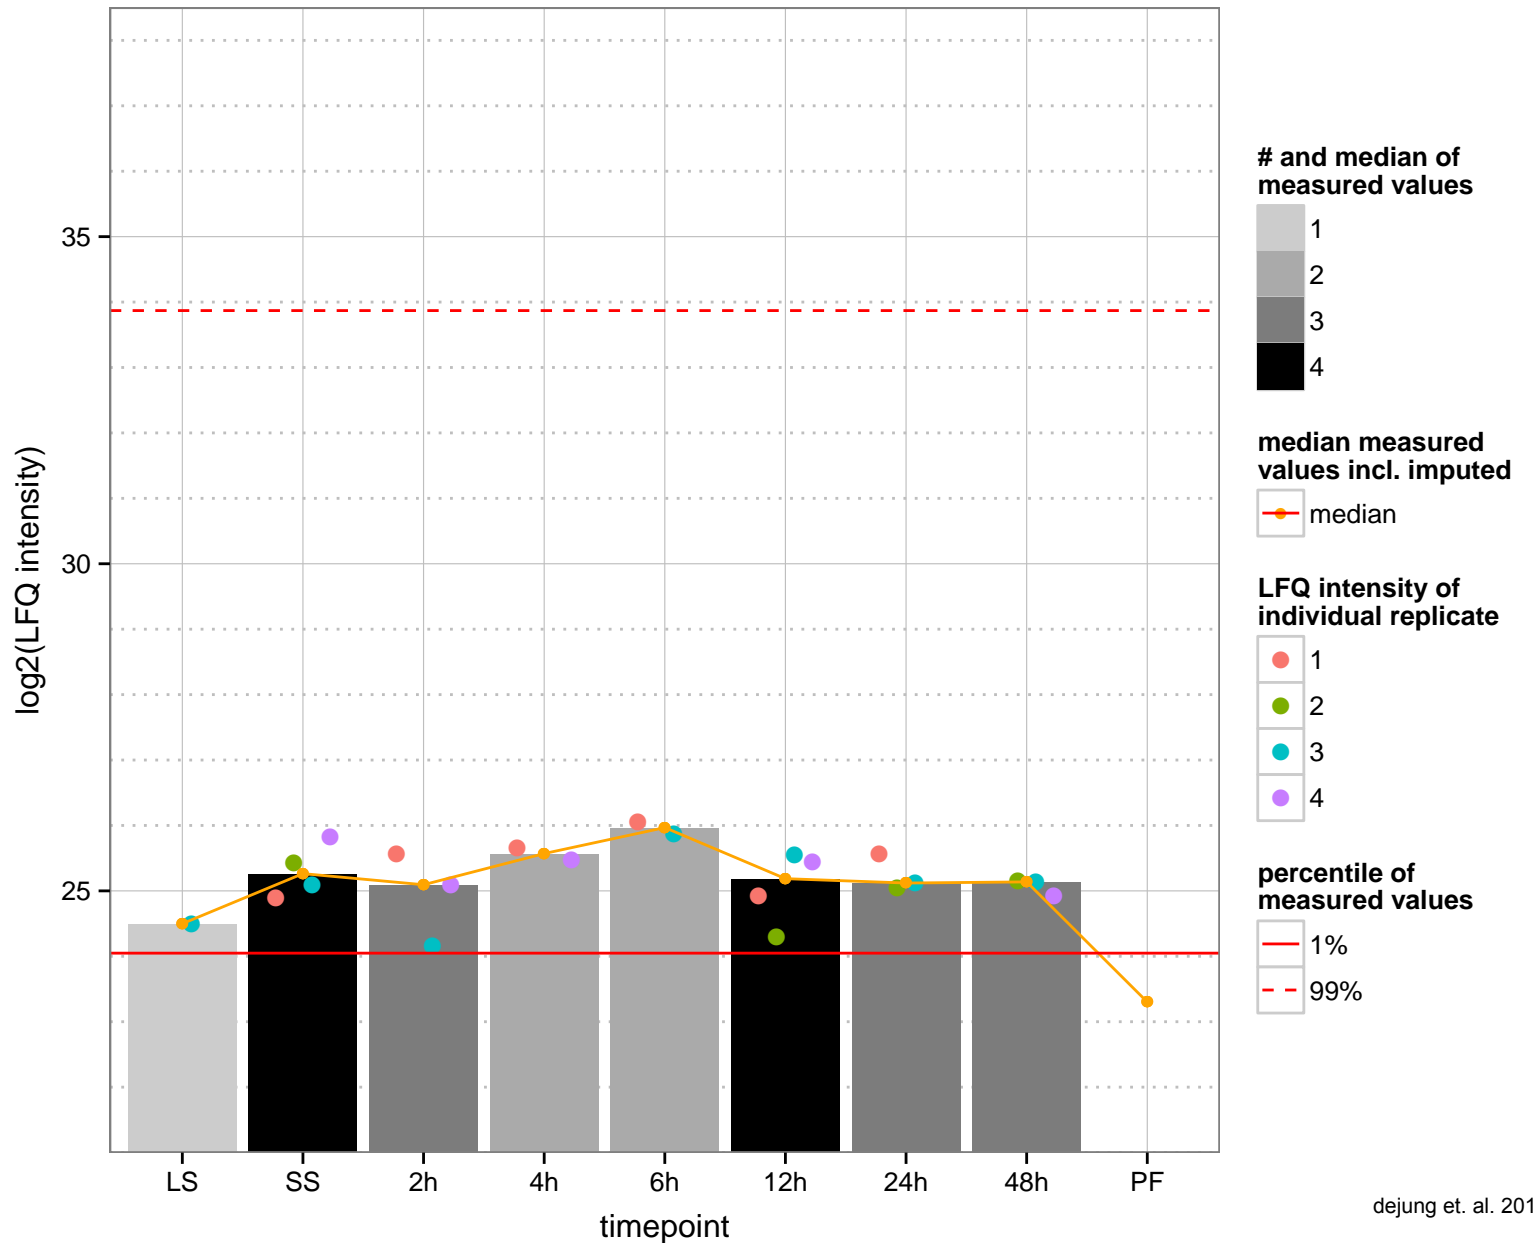

hypothetical protein, conserved  
 Tb927.9.9230  
 AGOF: null  
 AGOC: null  
 AGOP: null  
 PGO: null  
 PGOC: null  
 PGOP: null

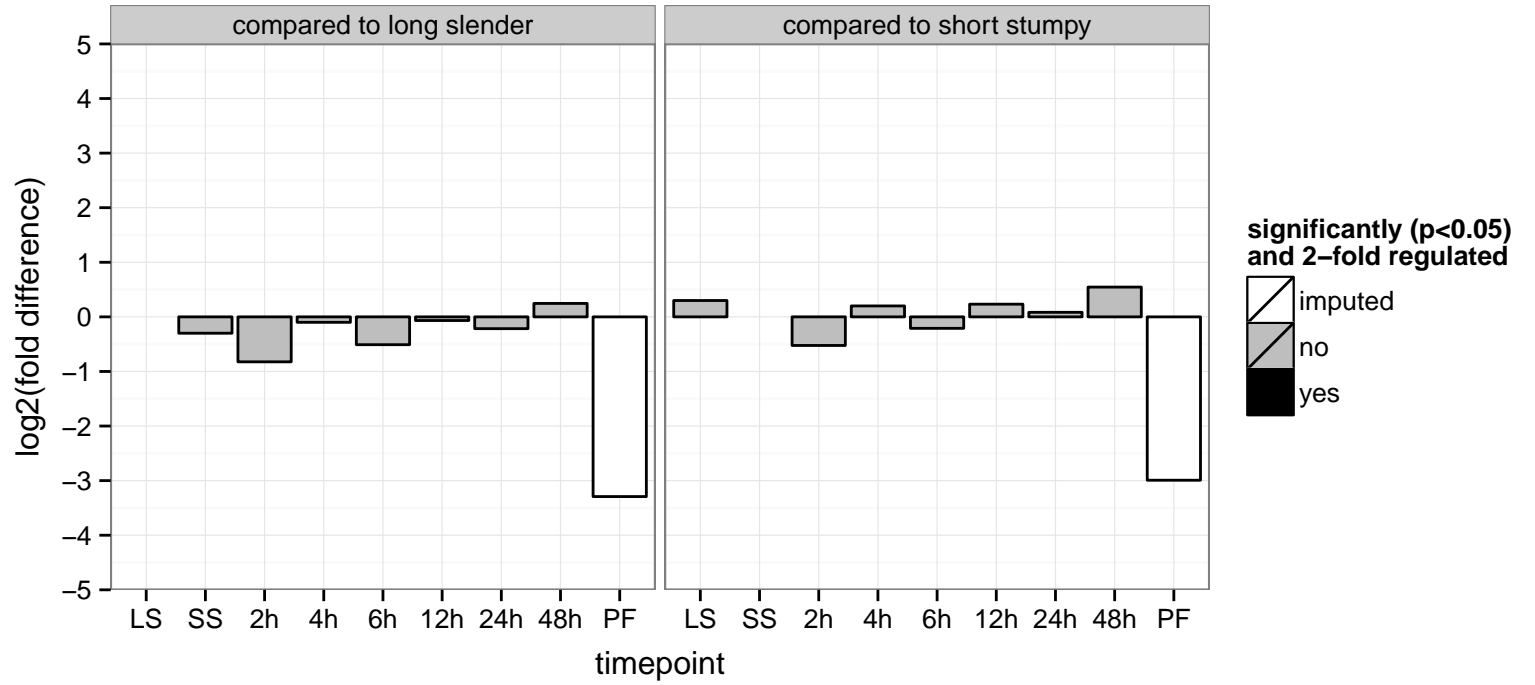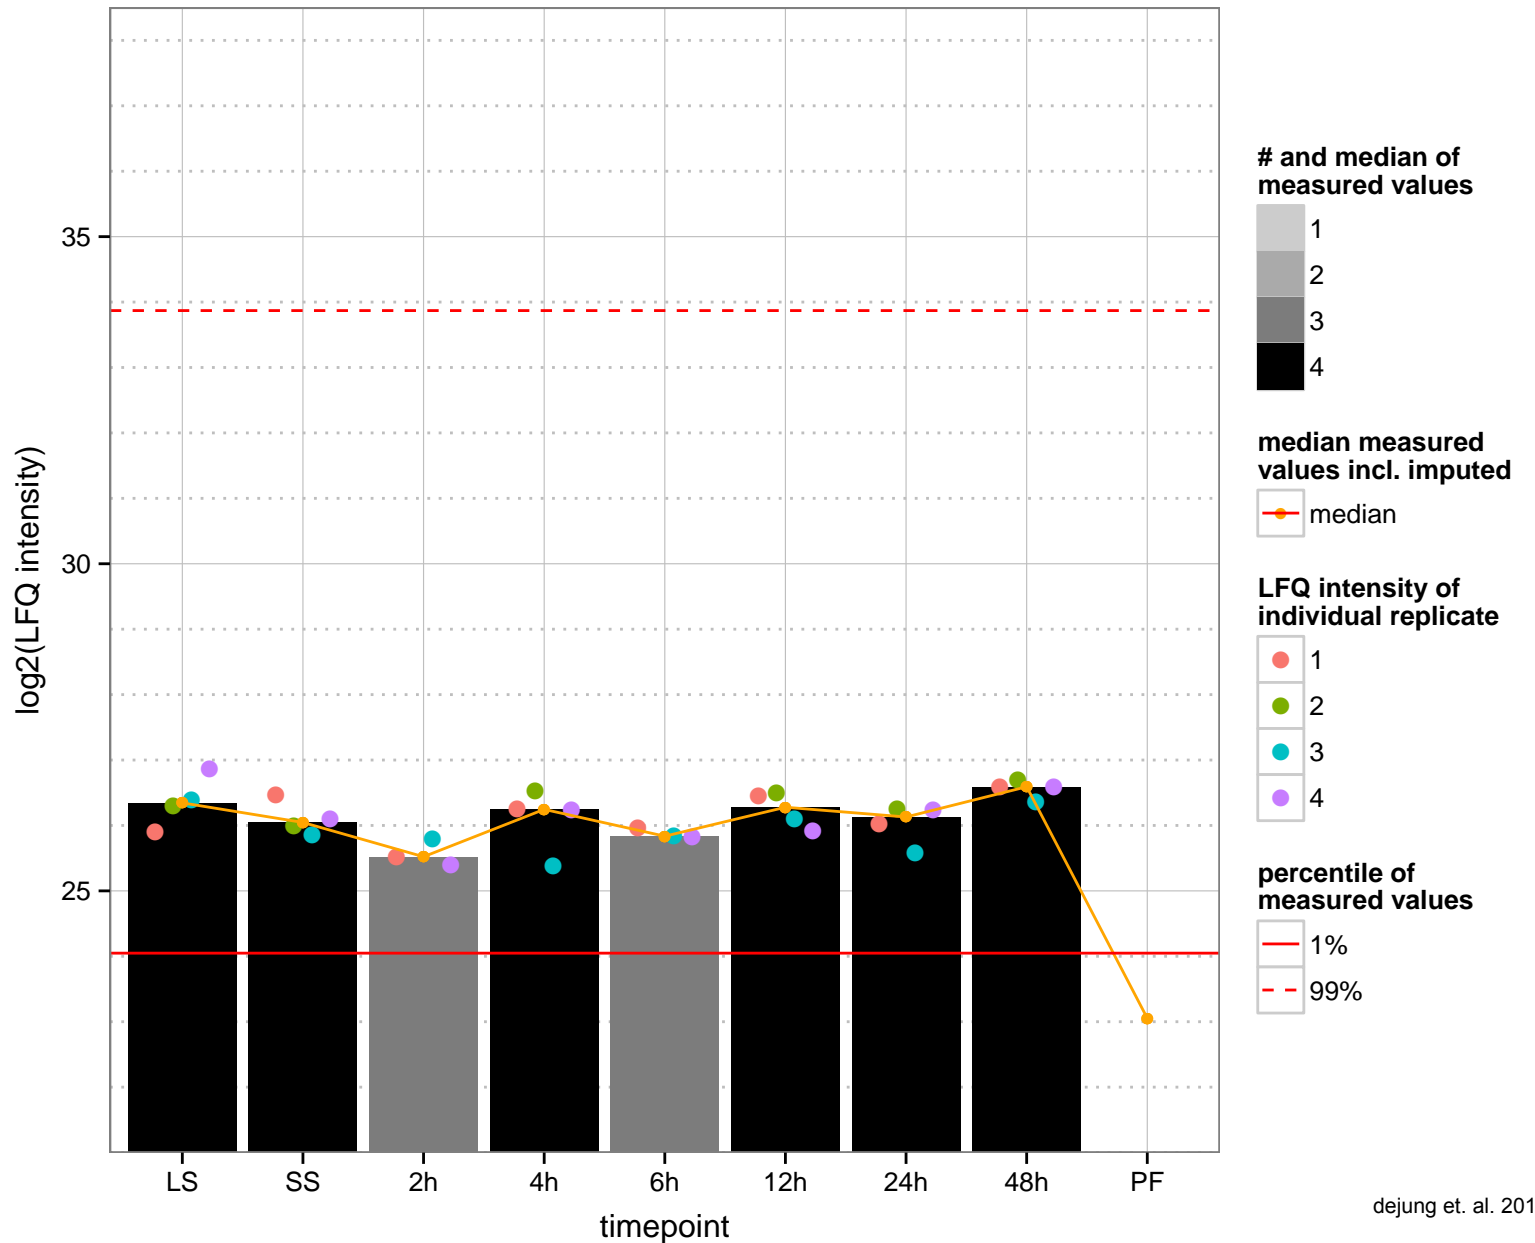

sphingomyelin/ceramide phosphorylethanolamine synthase, bifunctional, sphingomyelin synthase (SLS4), sphingomyelin synthase  
 Tb927.9.9410;Tb927.9.9390;Tb927.9.9380;Tb927.9.9400  
 AGOF: ceramide cholinephosphotransferase activity, ethanolaminephosphotransferase activity, sphingomyelin synthase activity  
 AGOC: Golgi apparatus, membrane, membrane  
 AGOP: ceramide biosynthetic process, sphingomyelin biosynthetic process, ethanolamine biosynthetic process, sphingomyelin biosynthetic process  
 PGO: null  
 PGOC: null  
 PGOP: null

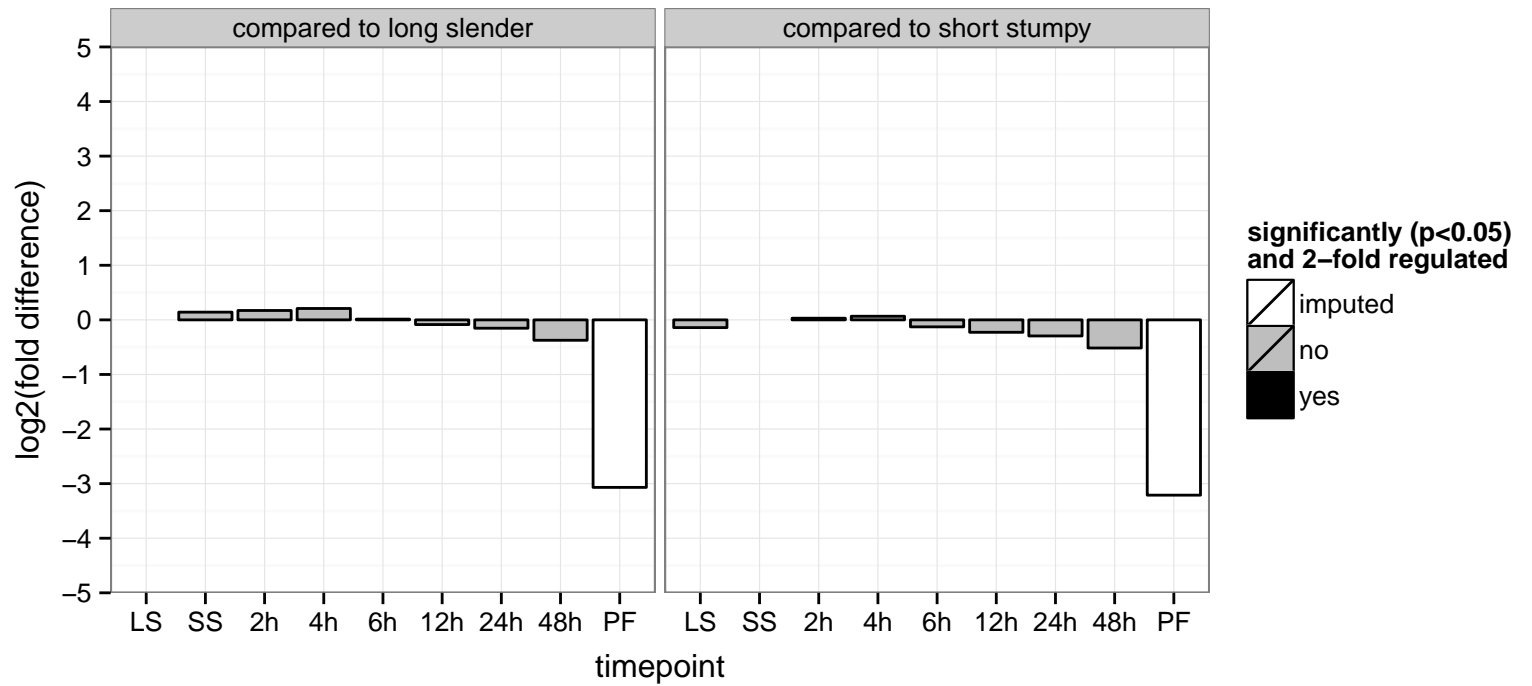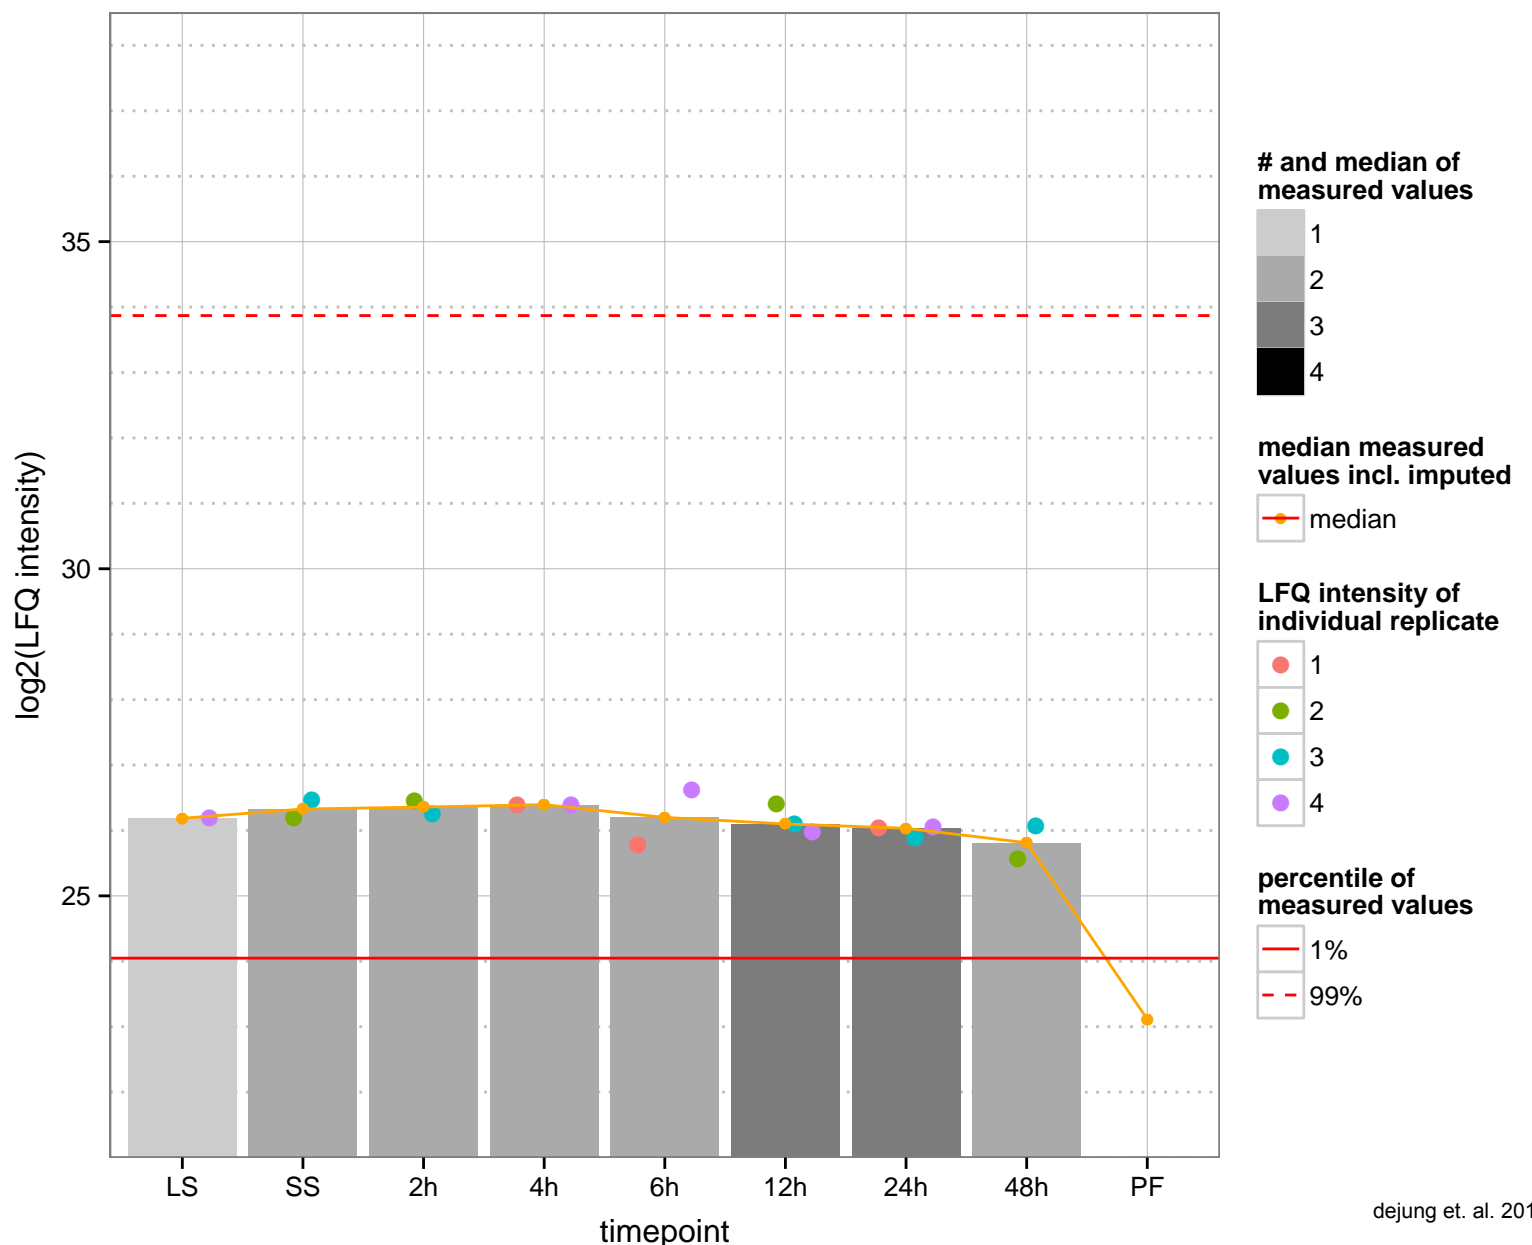

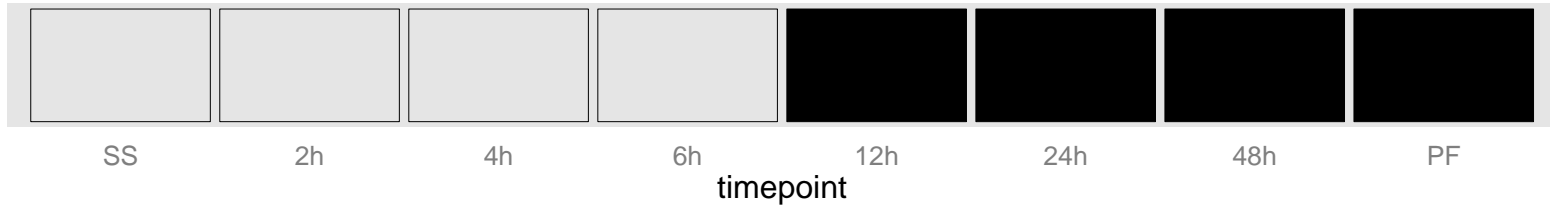

hypothetical protein, conserved  
 Tb11.02.5105b;Tb11.02.5105  
 AGOF: null  
 AGOC: null  
 AGOP: null  
 PGOF: null  
 PGOC: null  
 PGOP: null

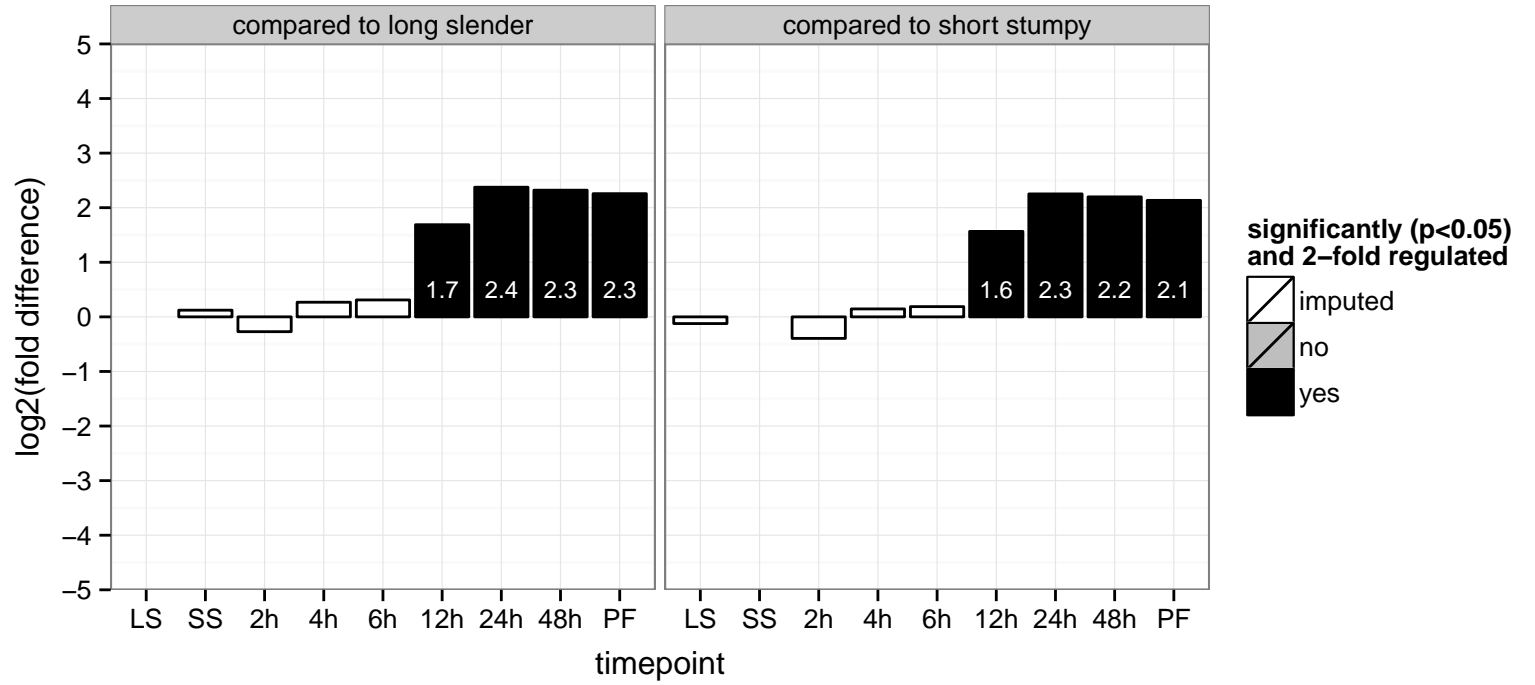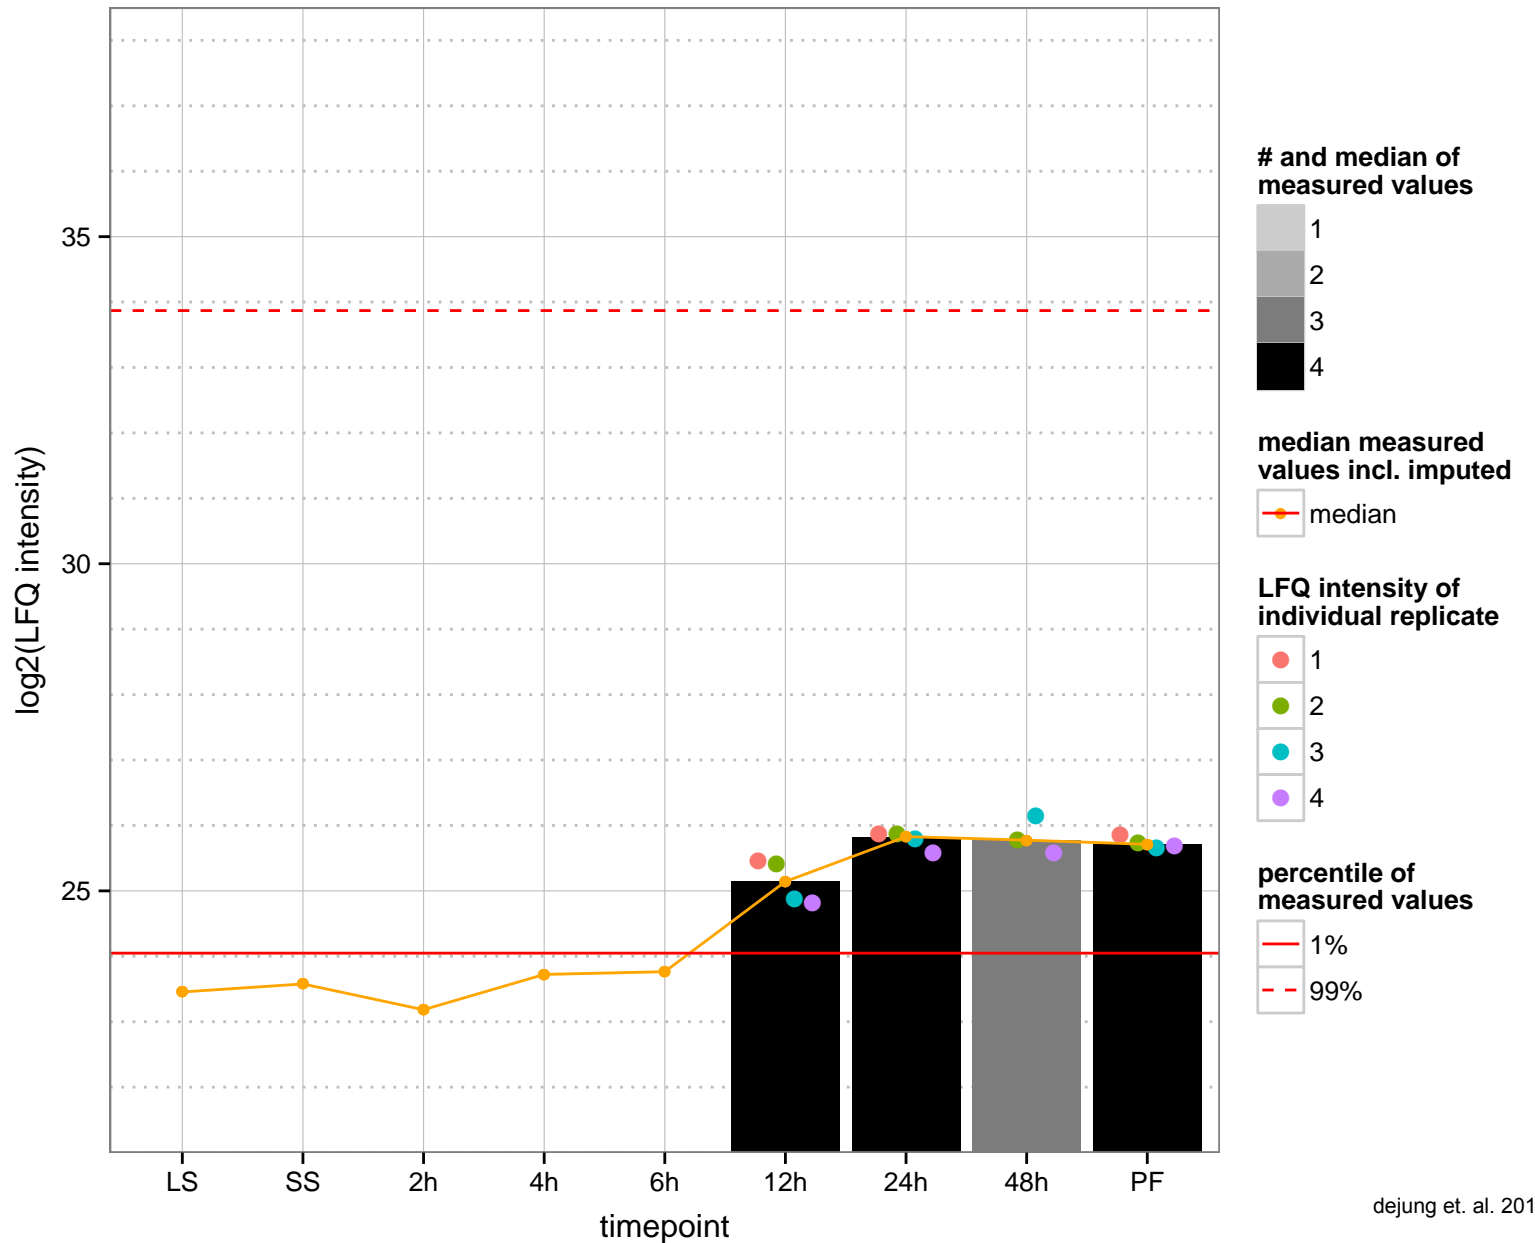

hypothetical protein, chrXI additional, unordered contigs, P27 protein, putative (P27)  
 Tb11.0400;Tb927.11.7700;Tb11.0300  
 AGOF: null  
 AGOC: null, cytochrome complex, mitochondrial inner membrane  
 AGOP: null, regulation of oxidative phosphorylation  
 PGO: null  
 PGOC: null  
 PGOP: null

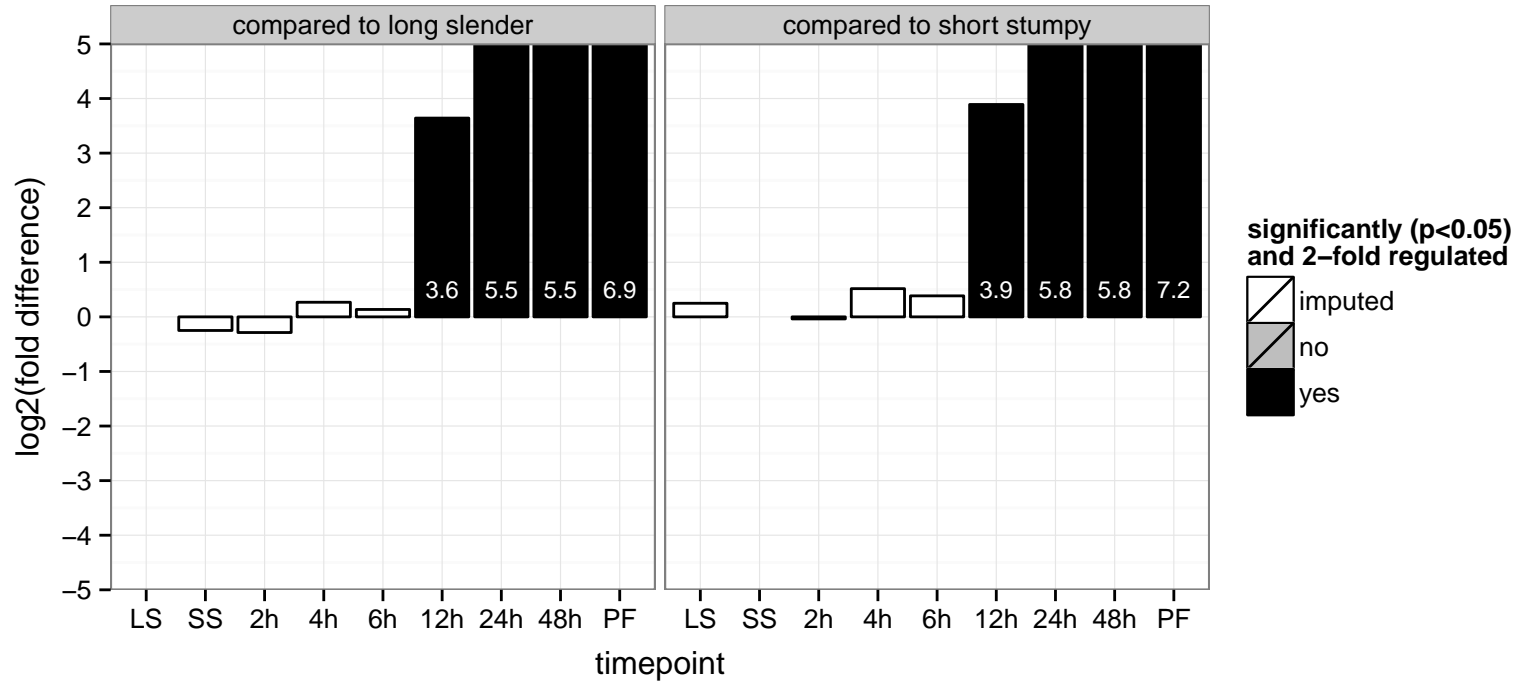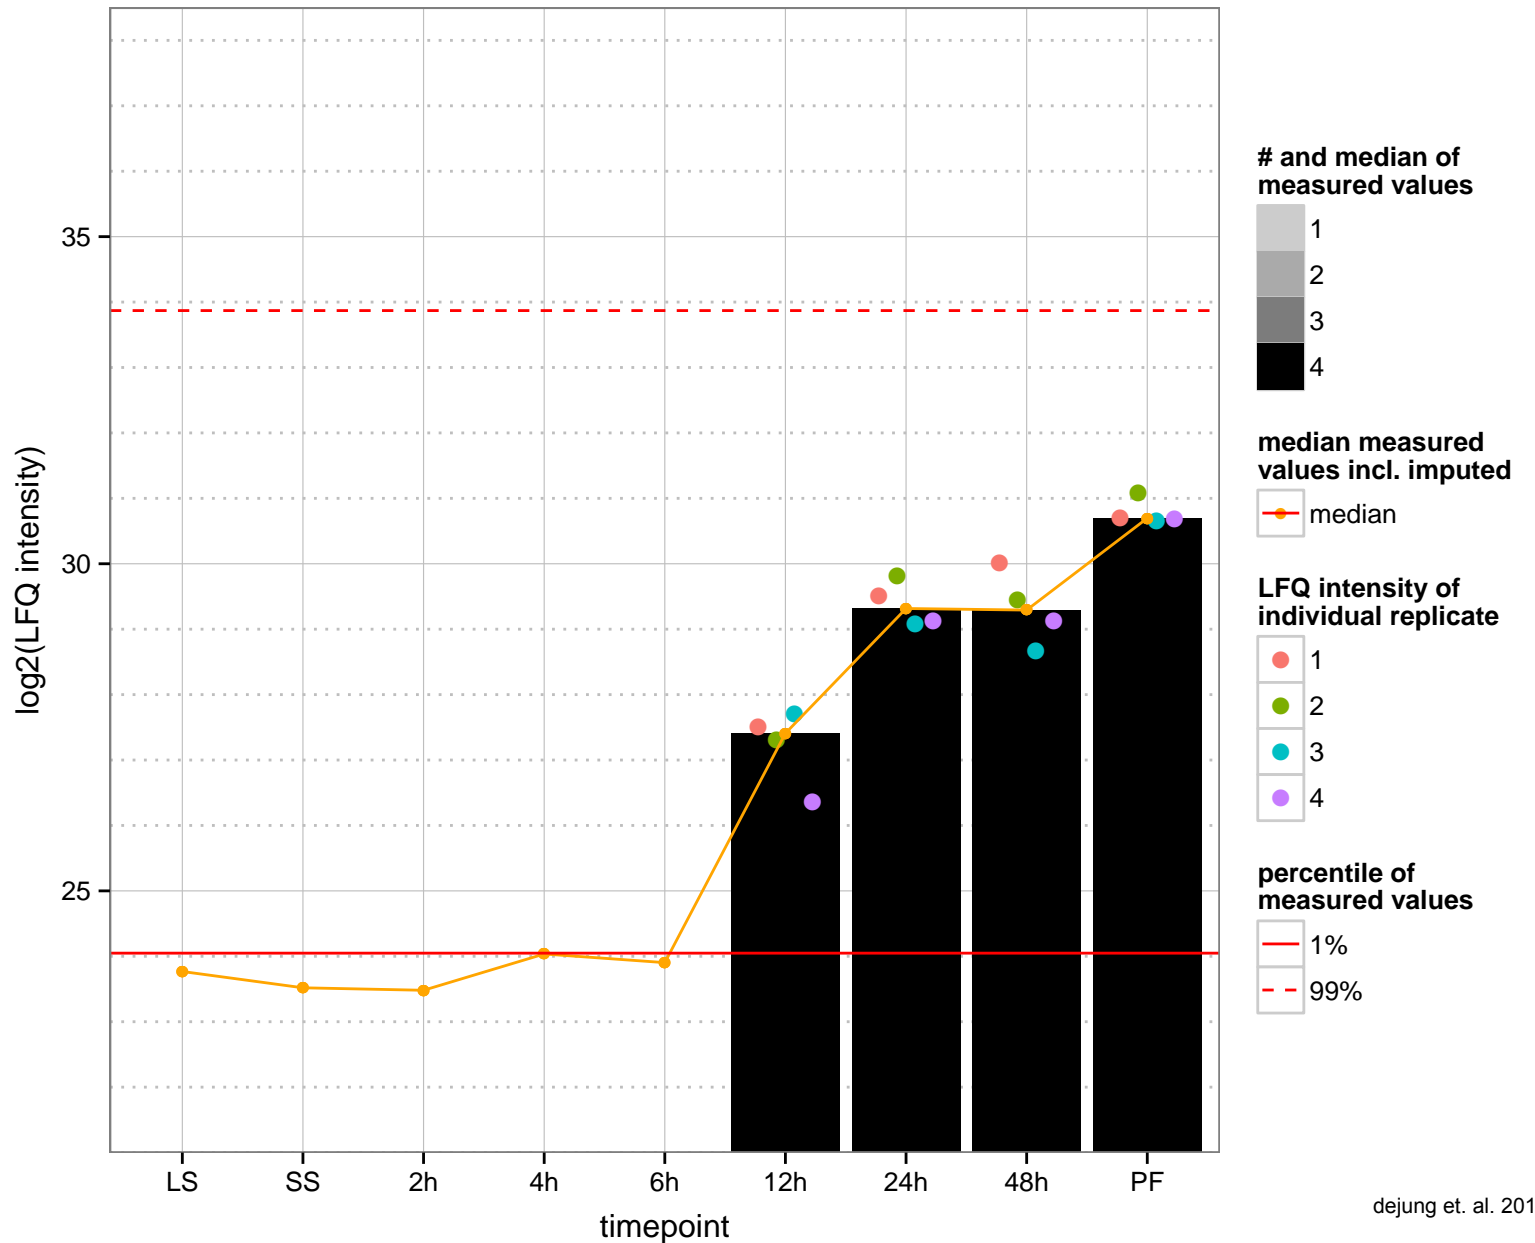



hypothetical protein, conserved  
 Tb927.7.4820;Tb11.v5.0164  
 AGOF: null  
 AGOC: null  
 AGOP: null  
 PGO: null  
 PGOC: null  
 PGOP: null

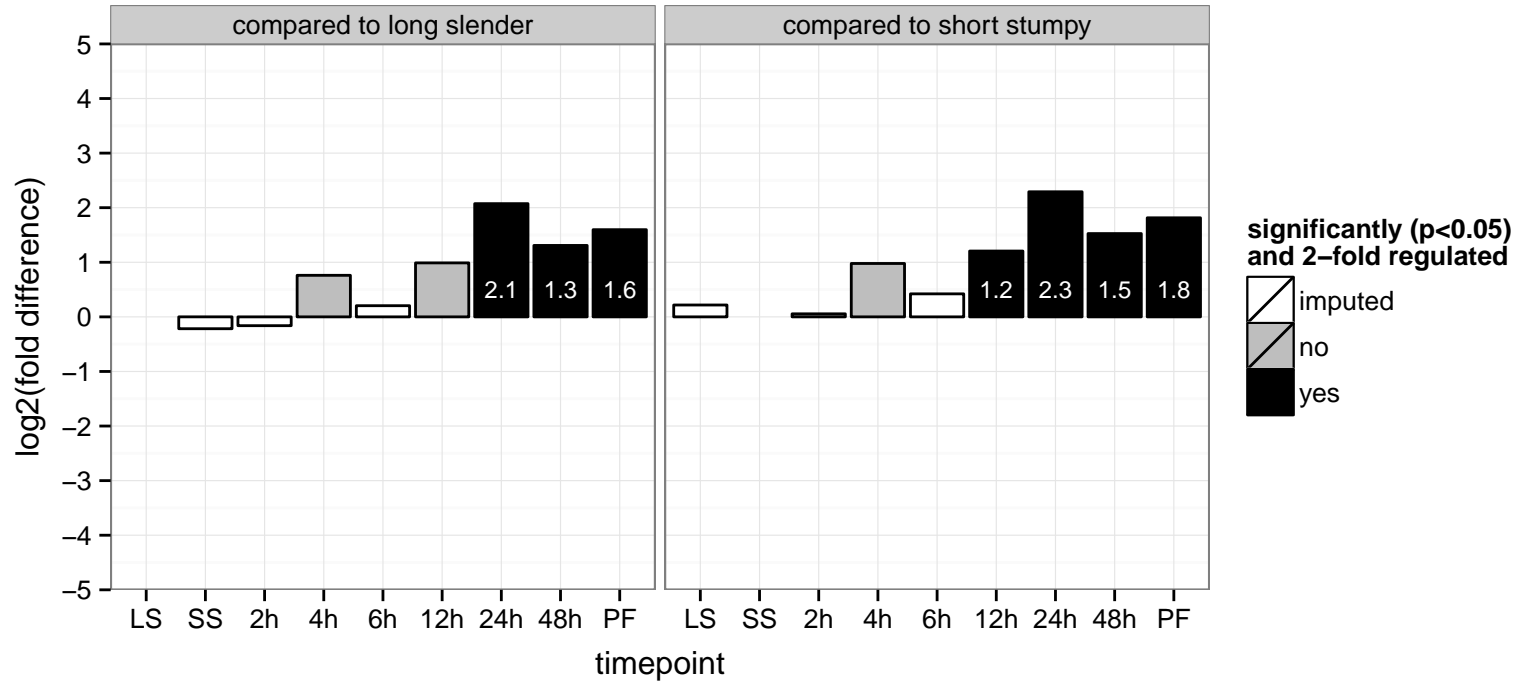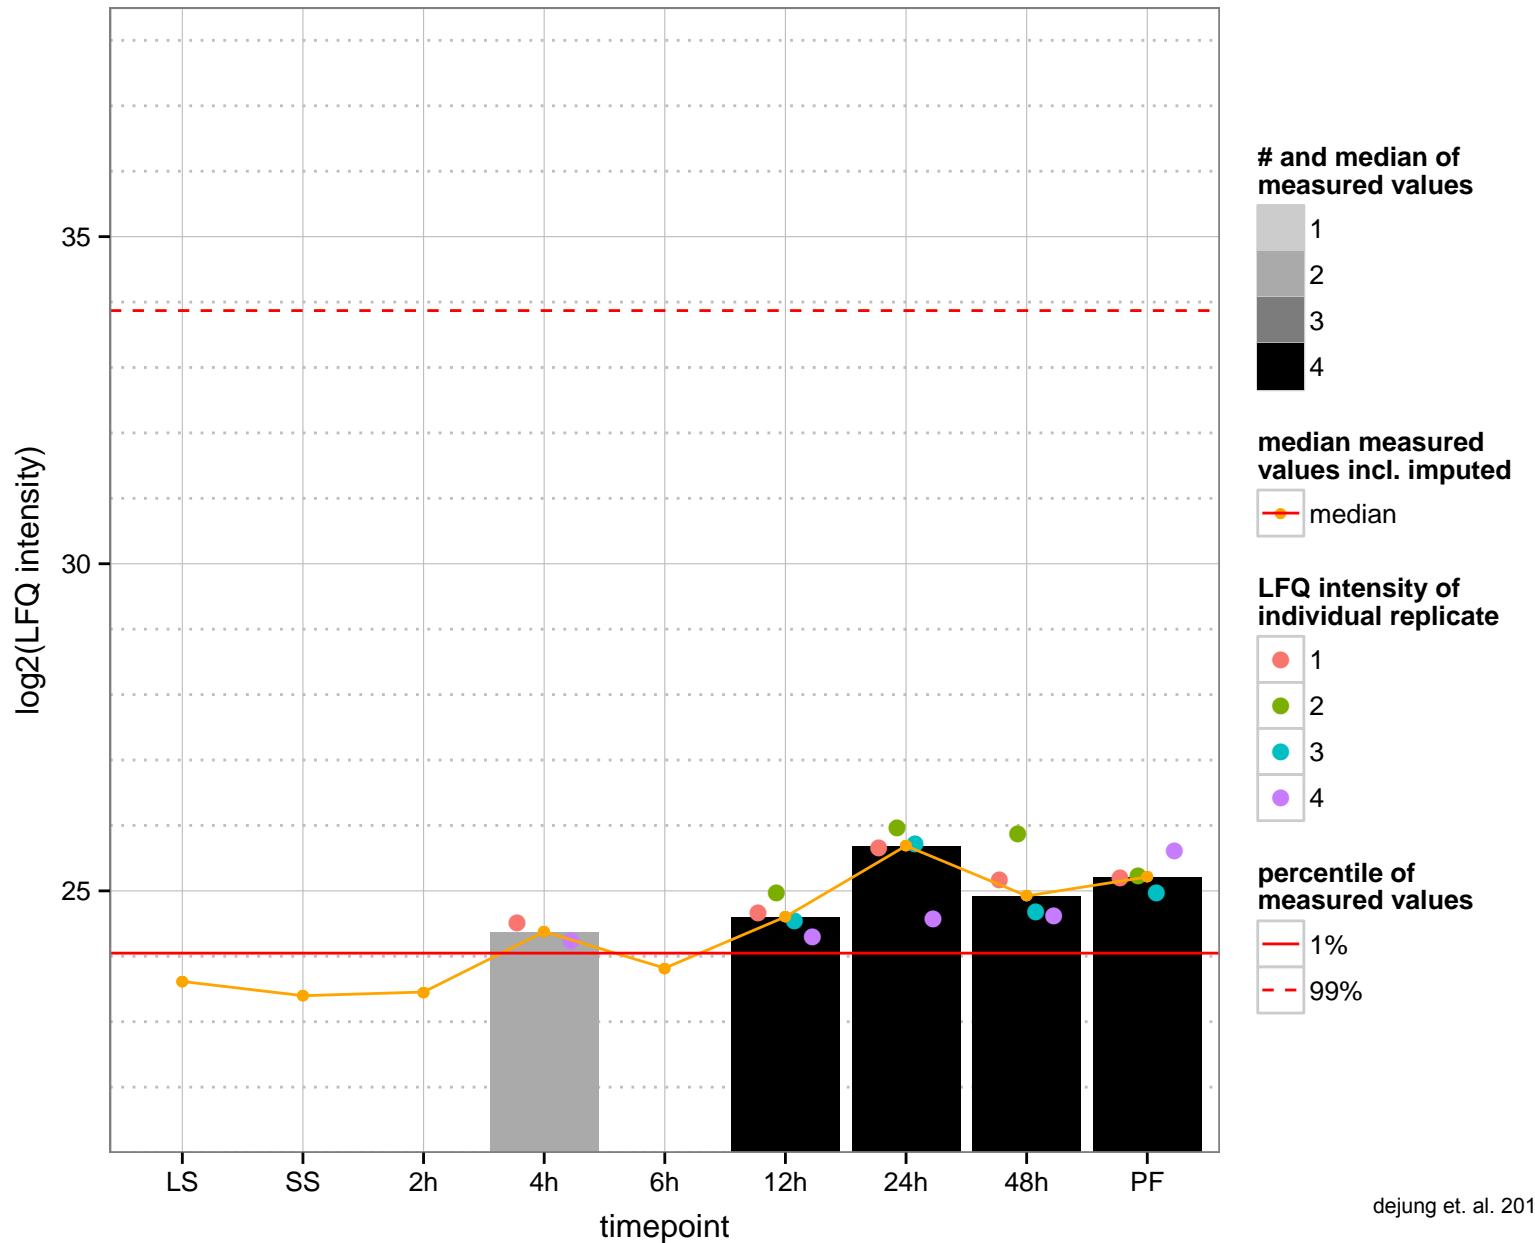

oligopeptidase B protein, putative, serine peptidase, clan SC, family S9A-like protein  
 Tb927.7.4940;Tb11.v5.0175  
 AGOF: null, serine-type endopeptidase activity  
 AGOC: null, mitochondrion  
 AGOP: null, proteolysis  
 PGOF: serine-type endopeptidase activity, serine-type peptidase activity  
 PGO: null  
 PGOP: proteolysis

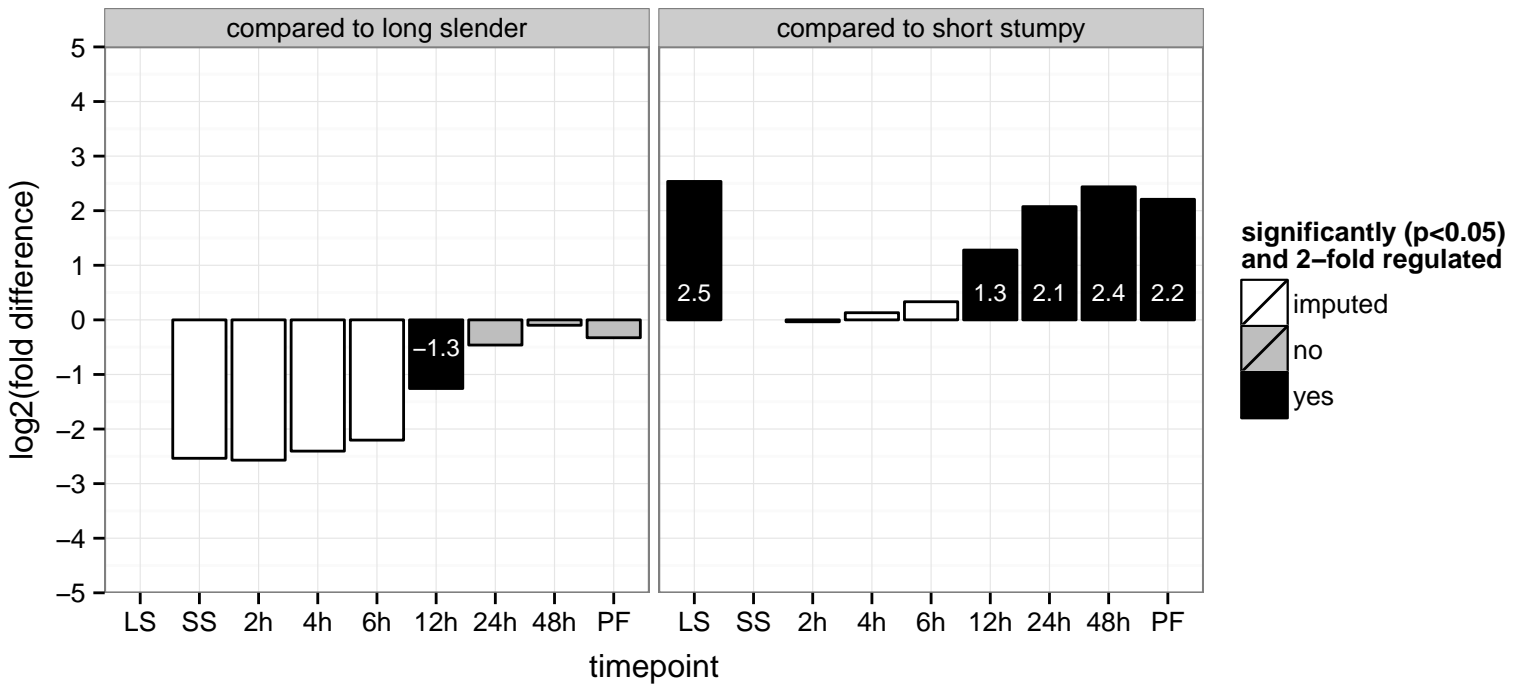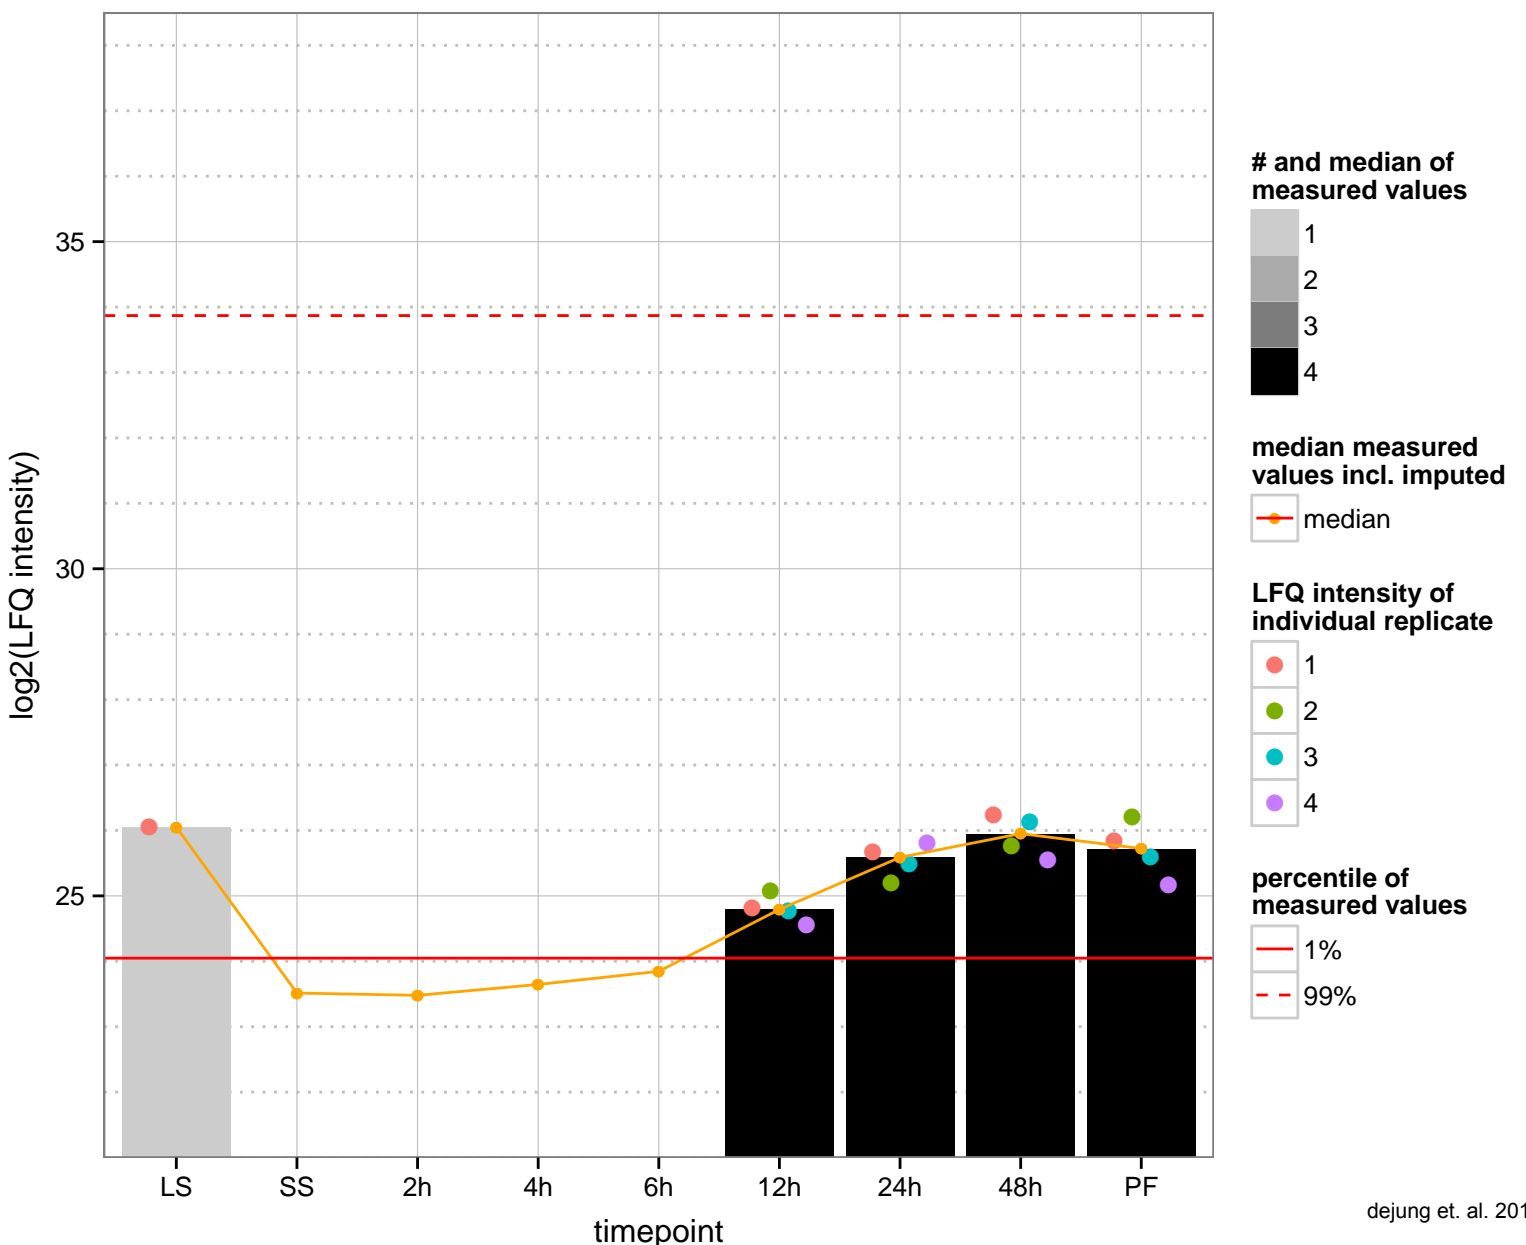

universal minicircle sequence binding protein, putative, universal minicircle sequence binding protein (UMSBP), DNA-binding  
 Tb927.10.6060;Tb11.v5.0199  
 AGOF: null, nucleic acid binding, zinc ion binding  
 AGOC: null  
 AGOP: null  
 PGO: nucleic acid binding, zinc ion binding  
 PGO: null  
 PGO: null

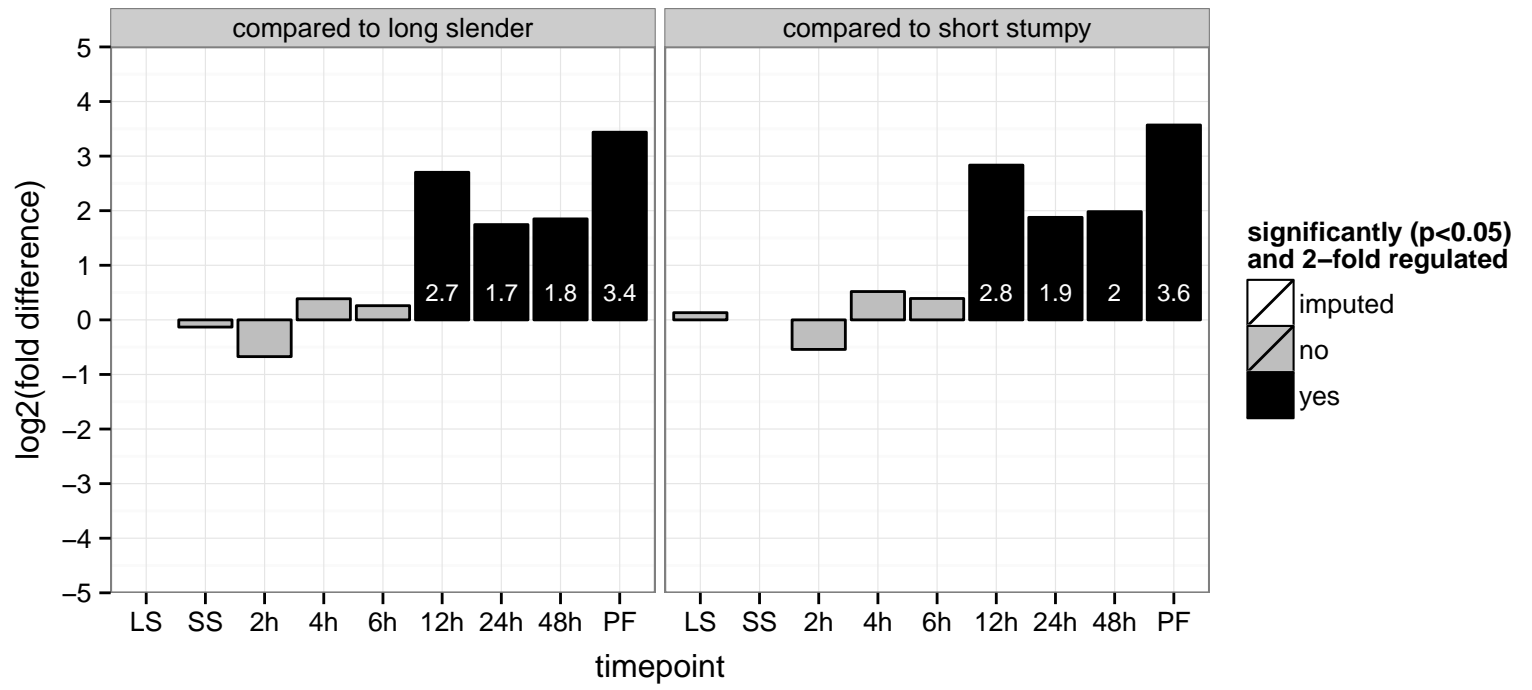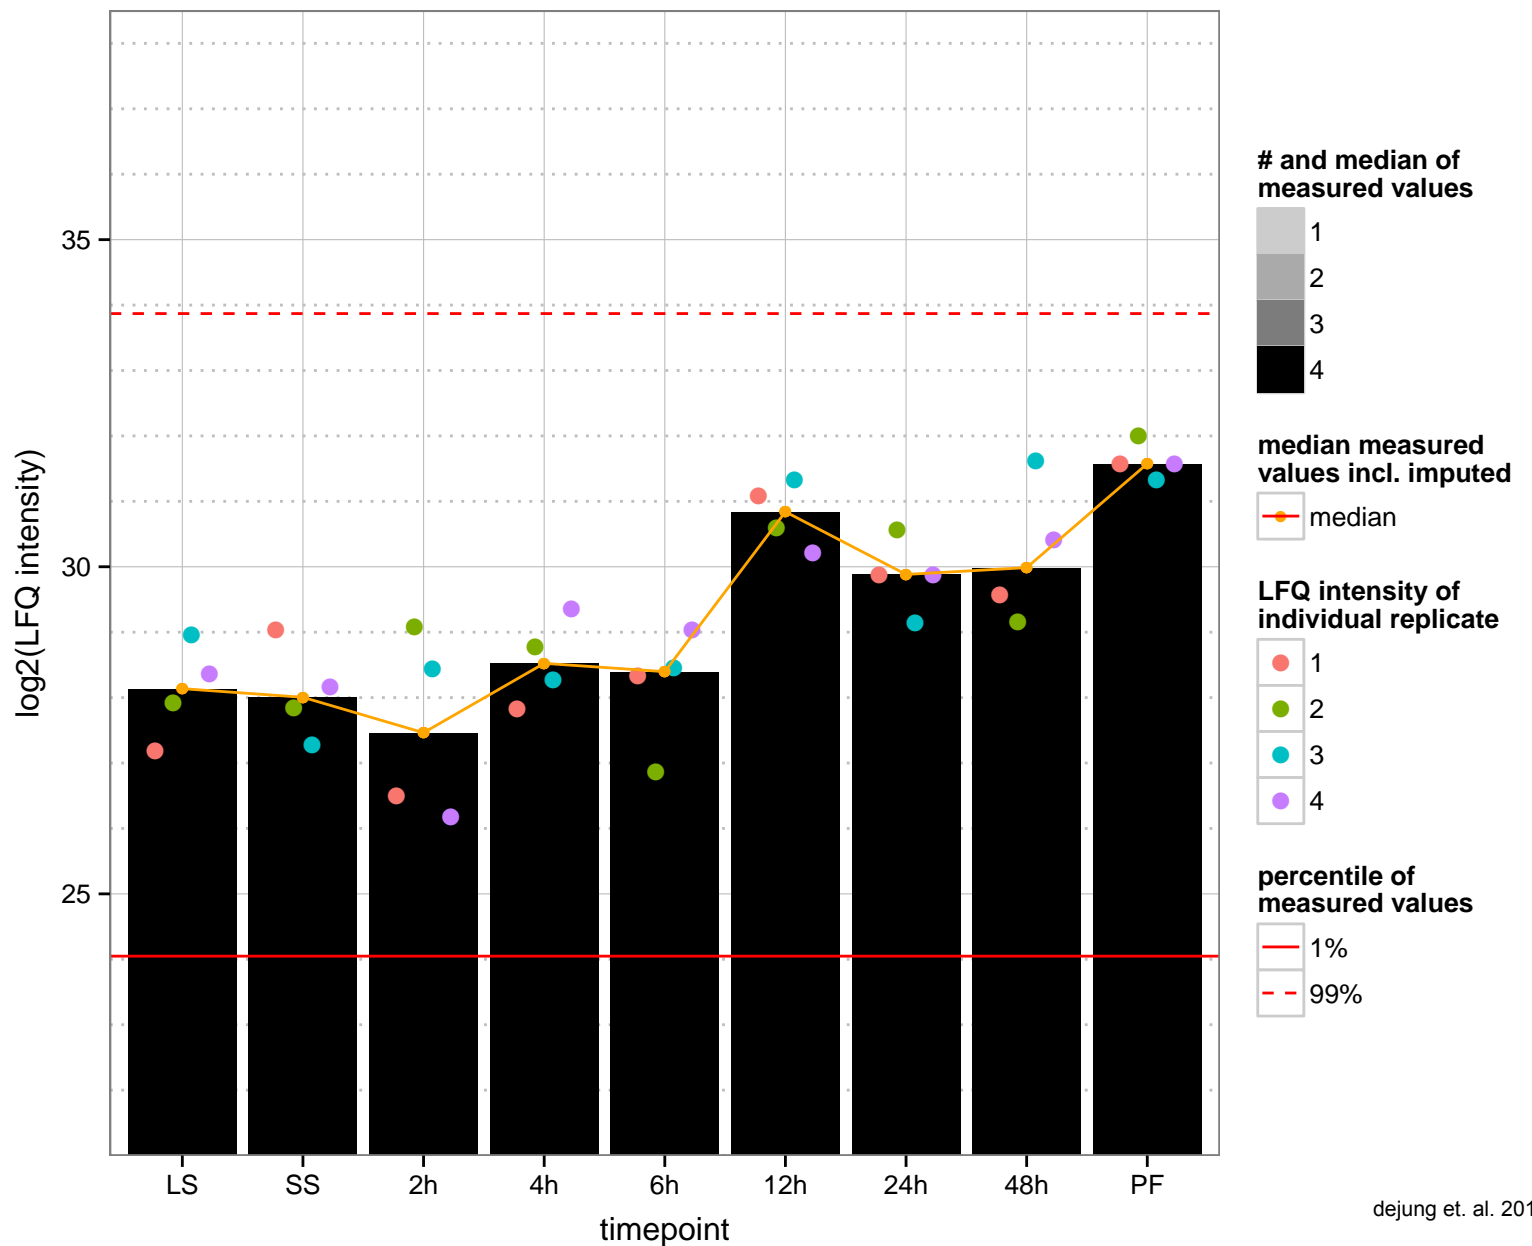

eukaryotic translation initiation factor 5, putative  
 Tb927.10.2770;Tb11.v5.0684  
 AGOF: null, translation initiation factor activity  
 AGOC: null  
 AGOP: null, translational initiation  
 PGO: protein binding, translation initiation factor activity  
 PGO: null  
 PGO: translational initiation

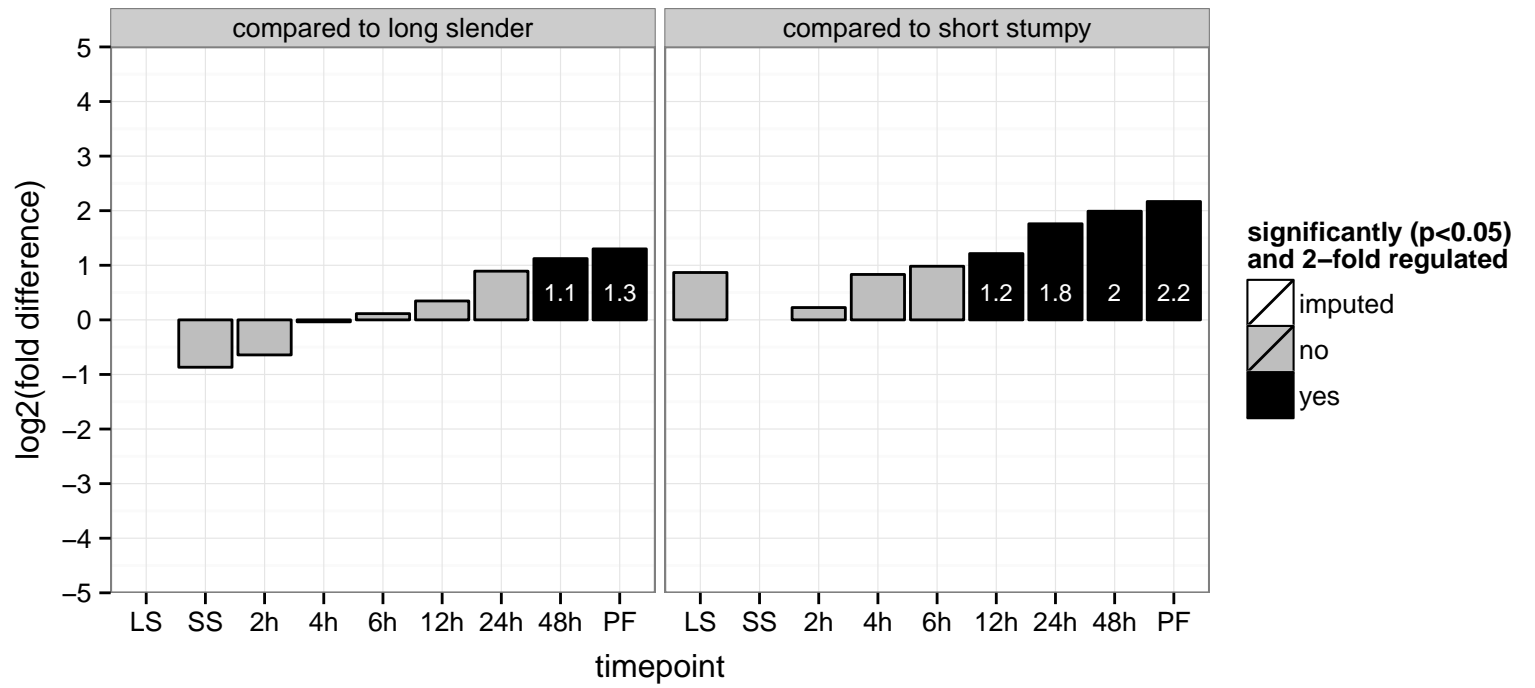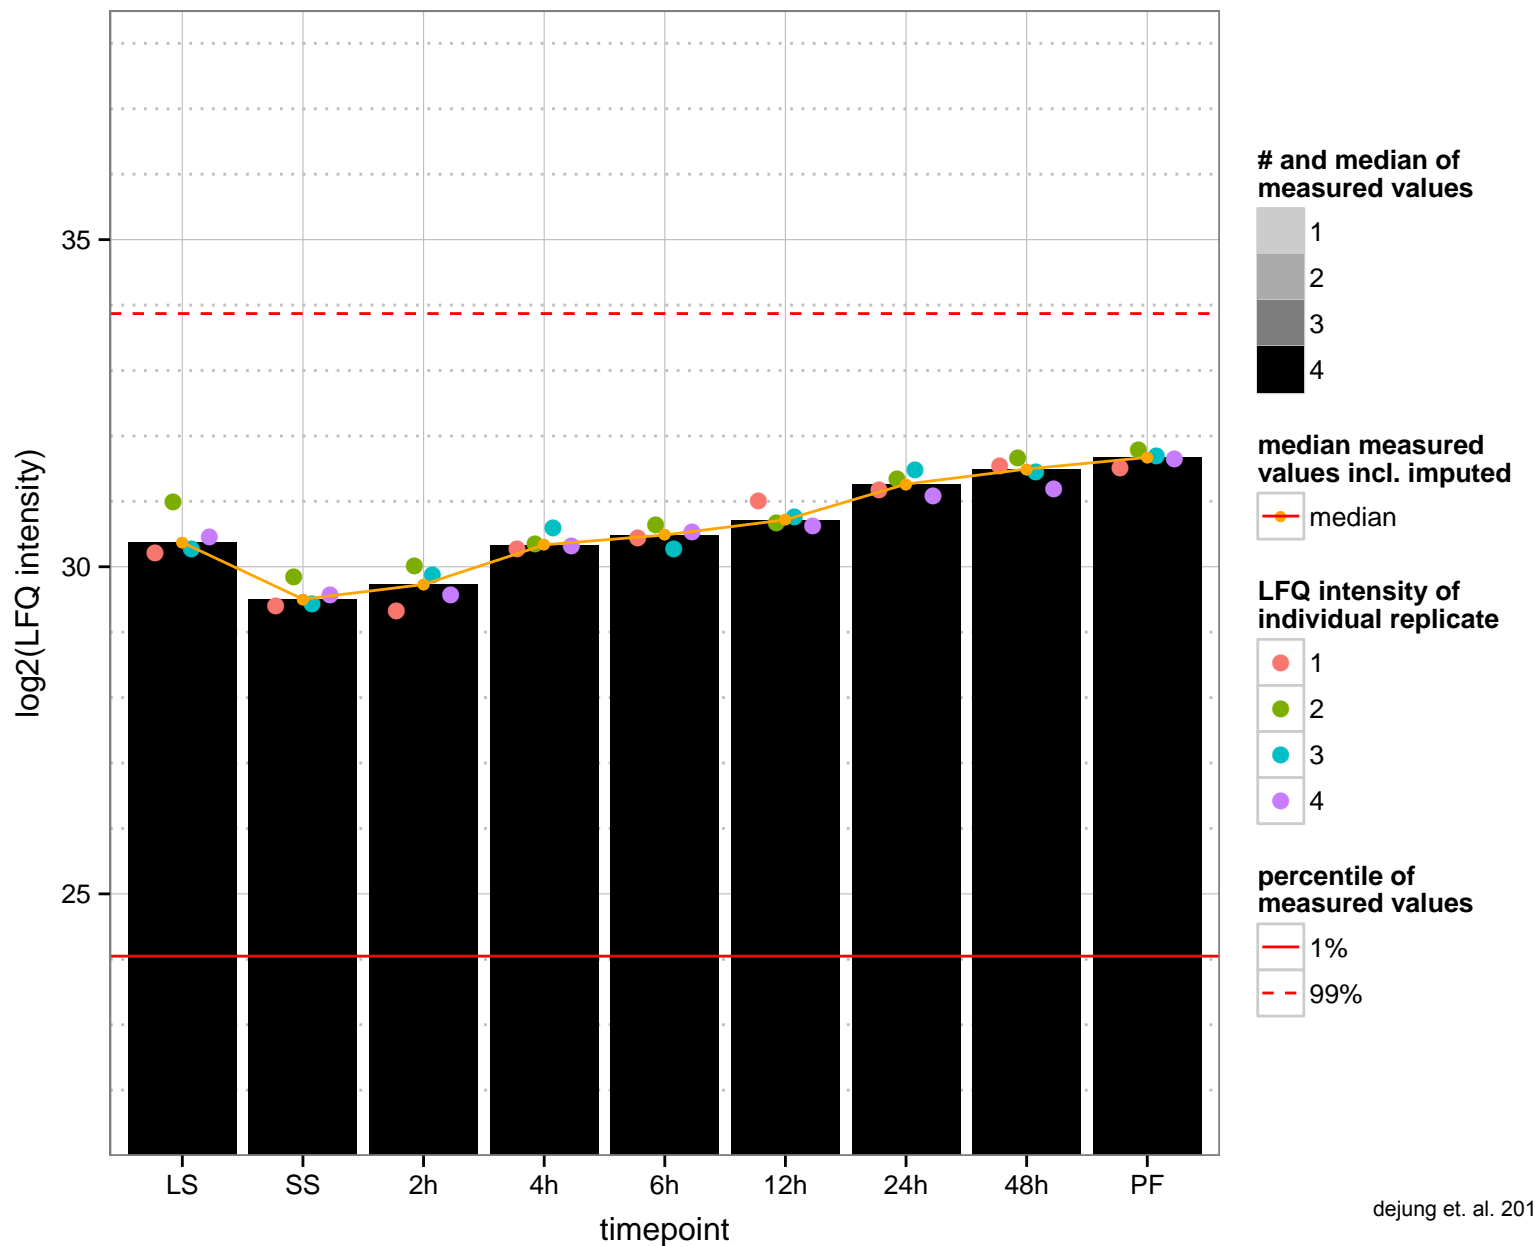

conserved protein, unknown function  
 Tb927.1.1210  
 AGOF: null  
 AGOC: mitochondrion  
 AGOP: null  
 PGO: null  
 PGOC: null  
 PGOP: null

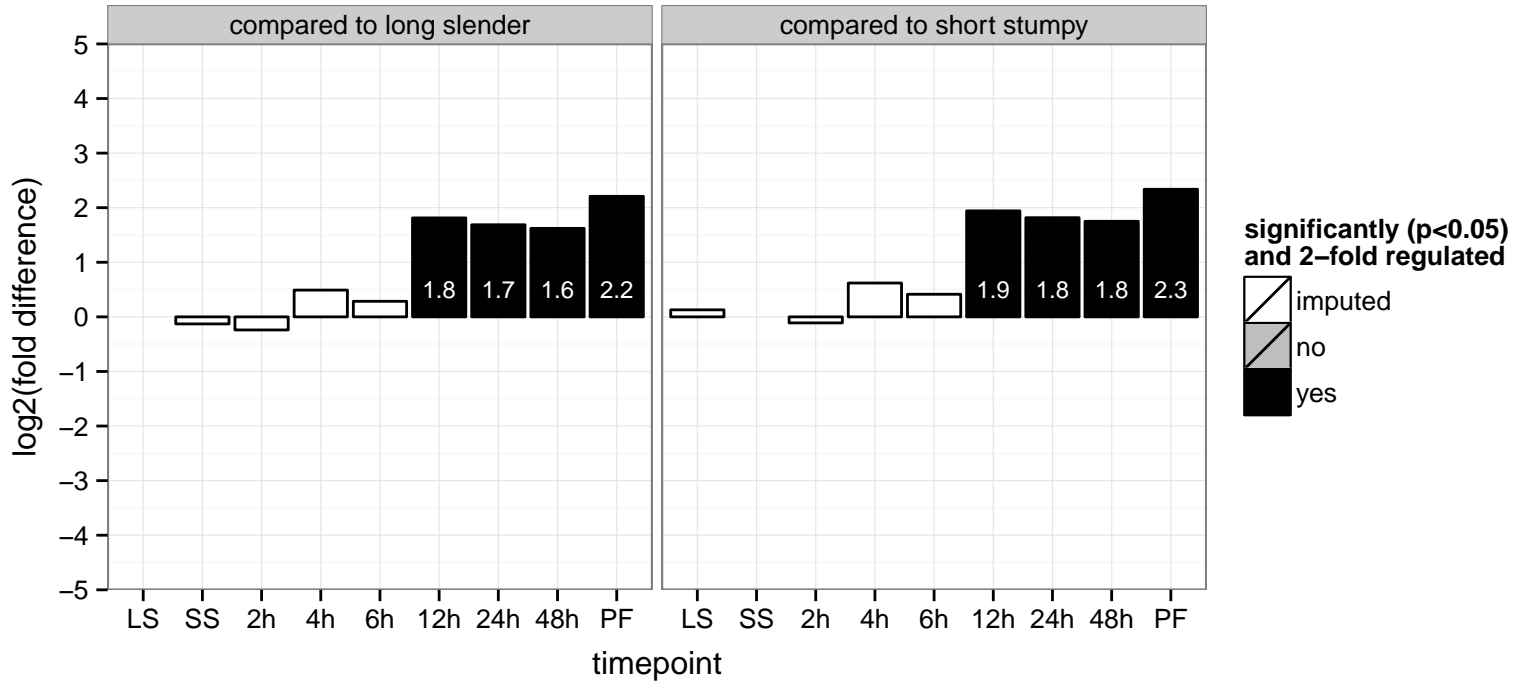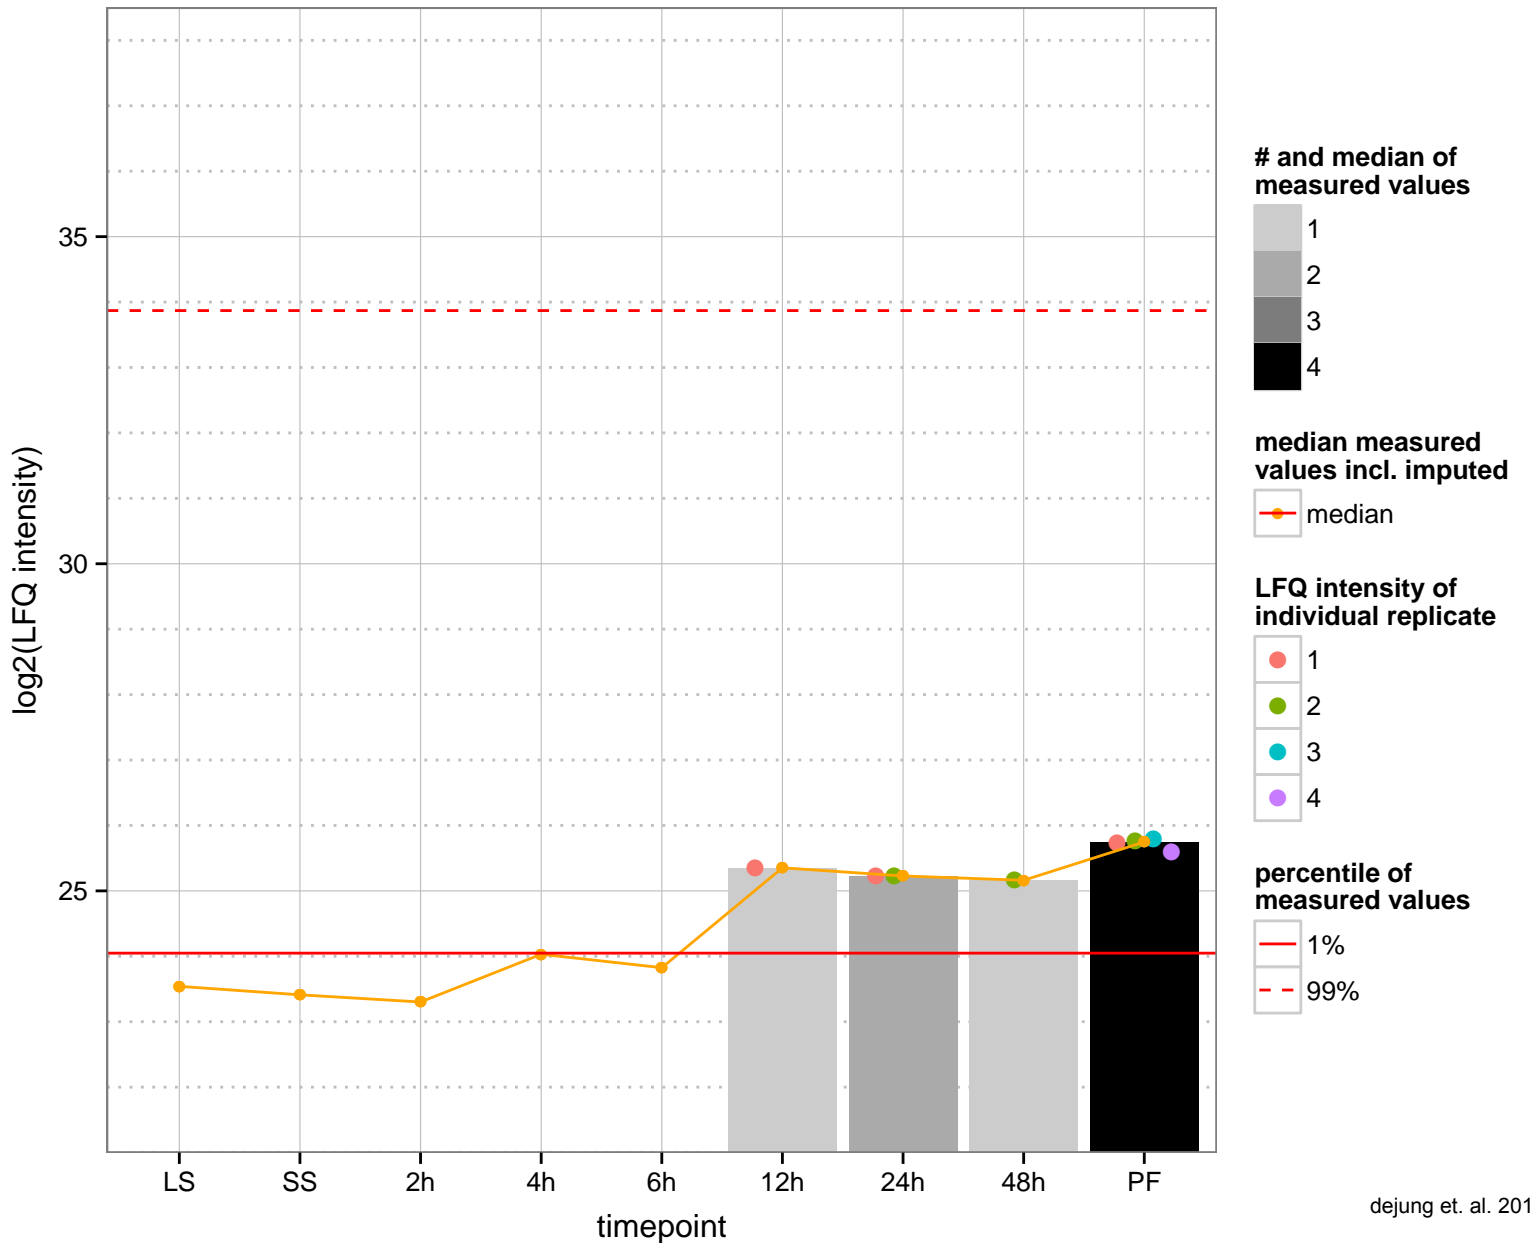

RWD domain-containing protein  
 Tb927.1.1220  
 AGOF: null  
 AGOC: null  
 AGOP: null  
 PGO: protein binding  
 PGOC: null  
 PGOP: null

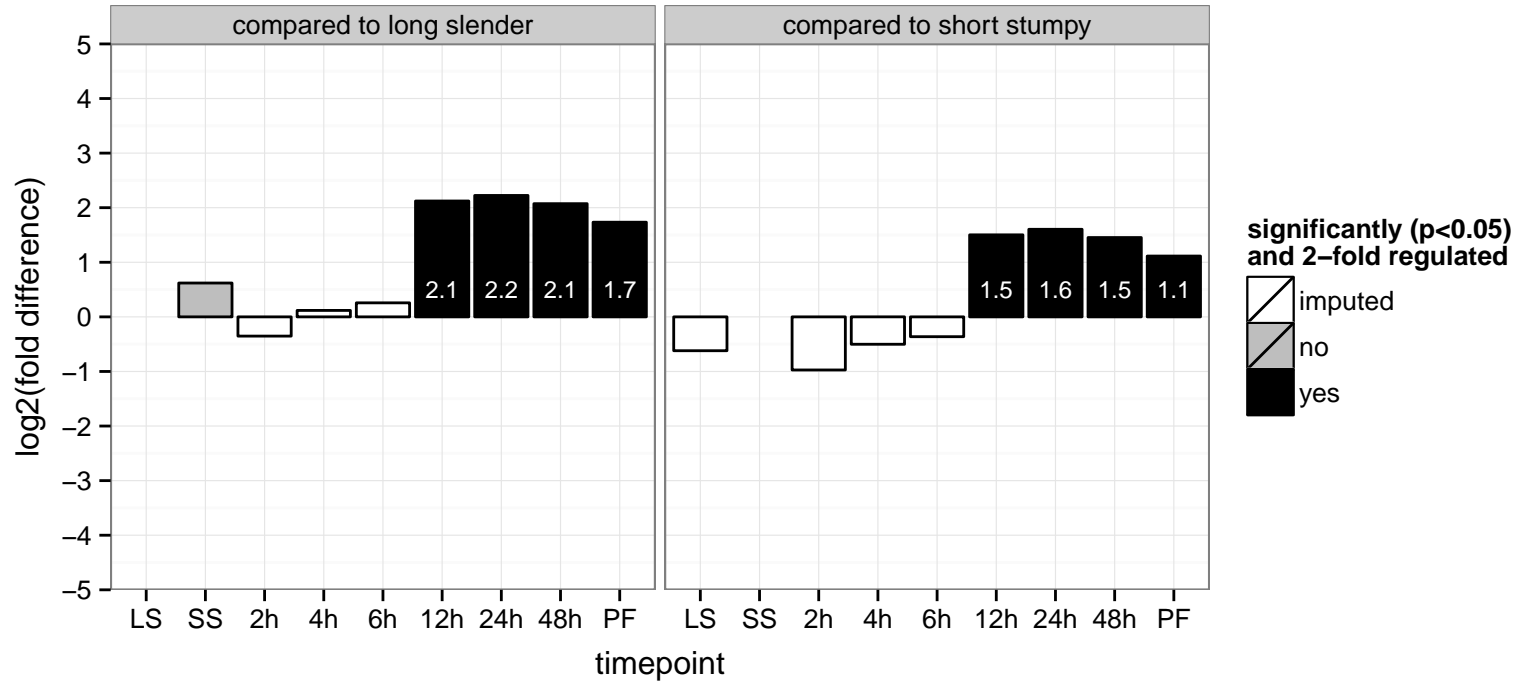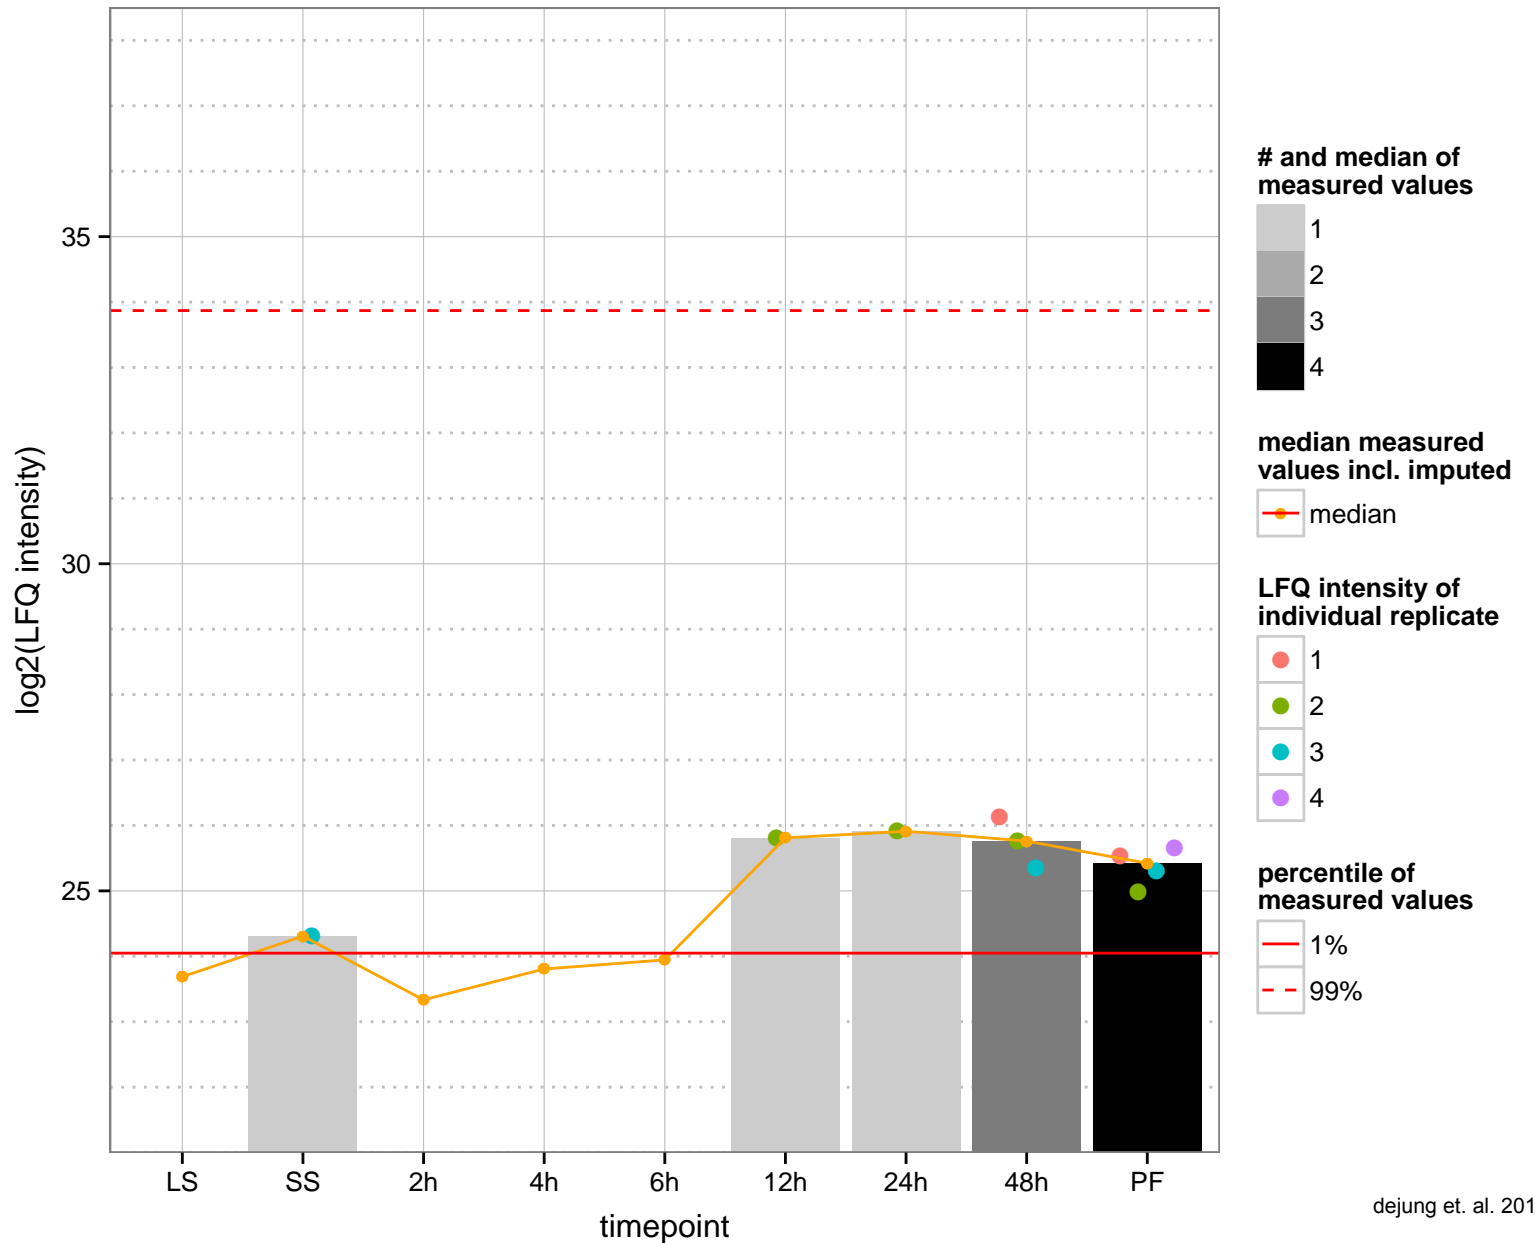

hypothetical protein, conserved  
 Tb927.1.3310  
 AGOF: null  
 AGOC: null  
 AGOP: null  
 PGO: null  
 PGOC: null  
 PGOP: null

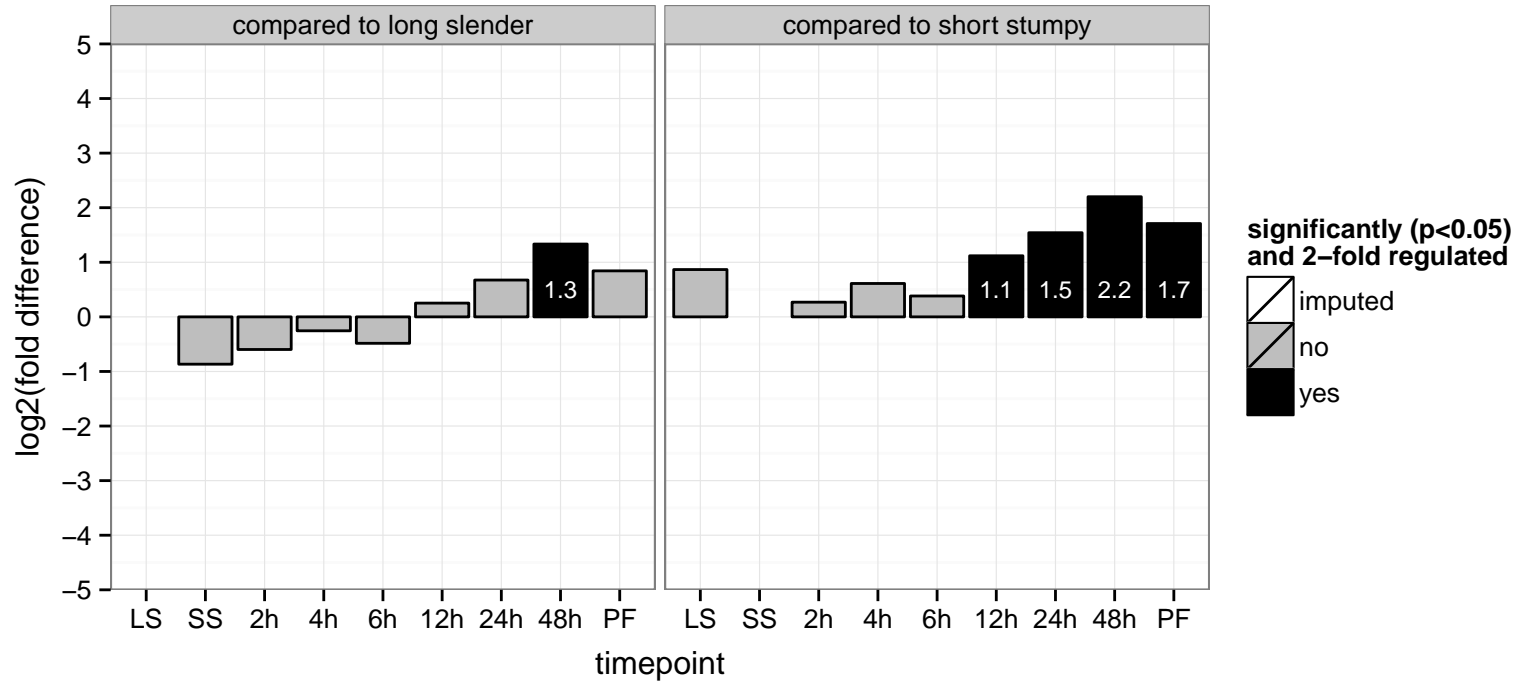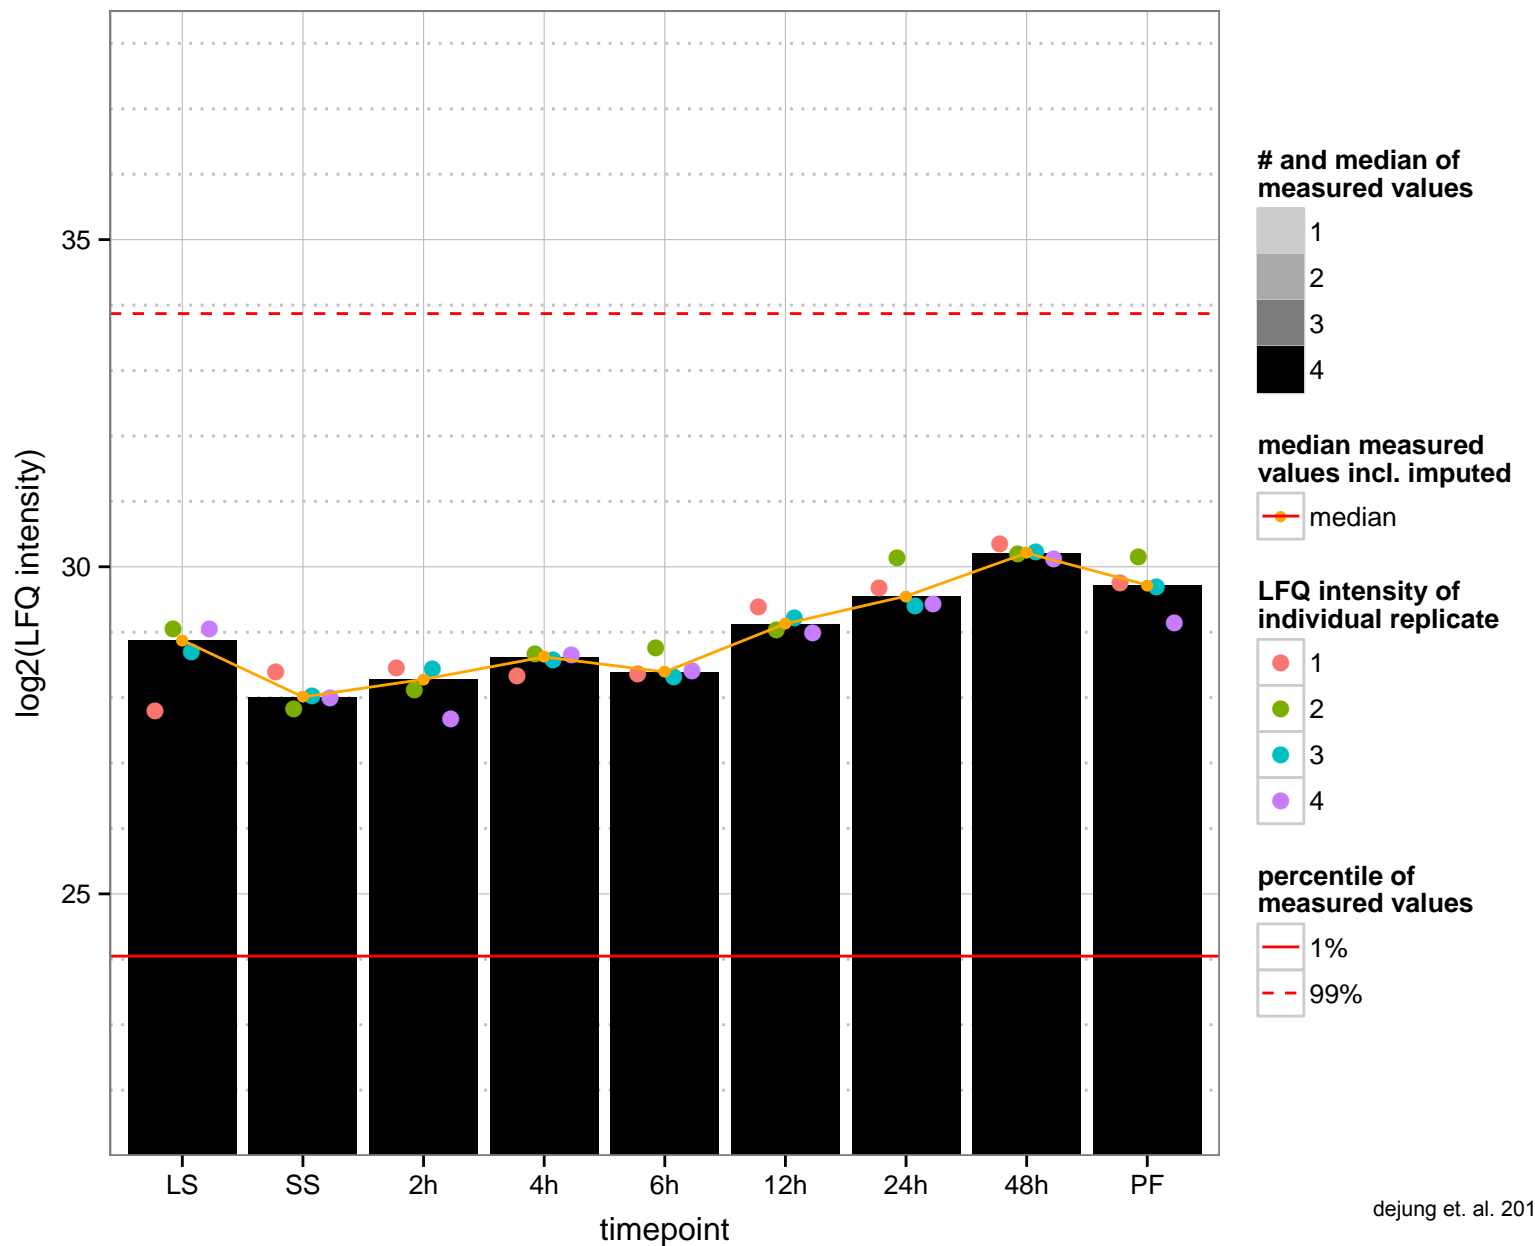

hypothetical protein, conserved  
 Tb927.1.4230  
 AGOF: null  
 AGOC: mitochondrion  
 AGOP: null  
 PGO: null  
 PGOC: null  
 PGOP: null

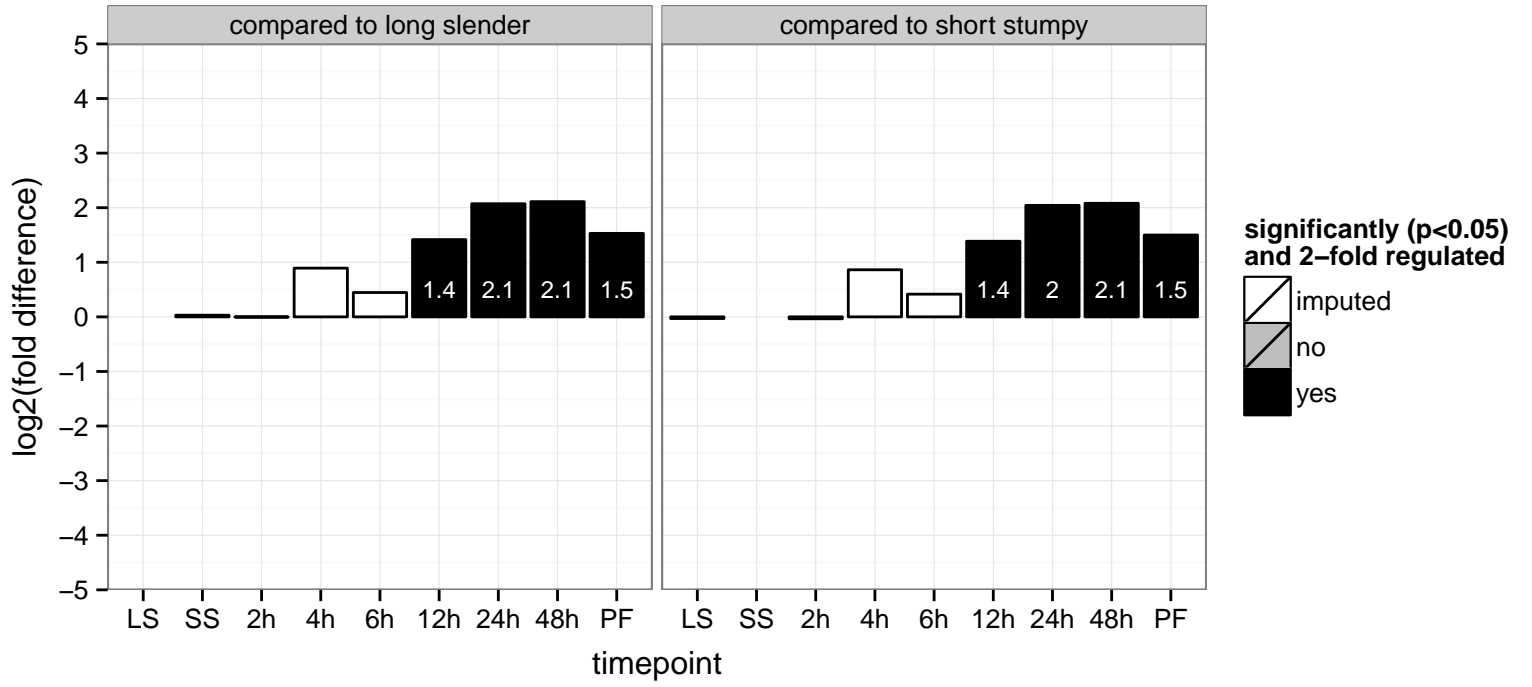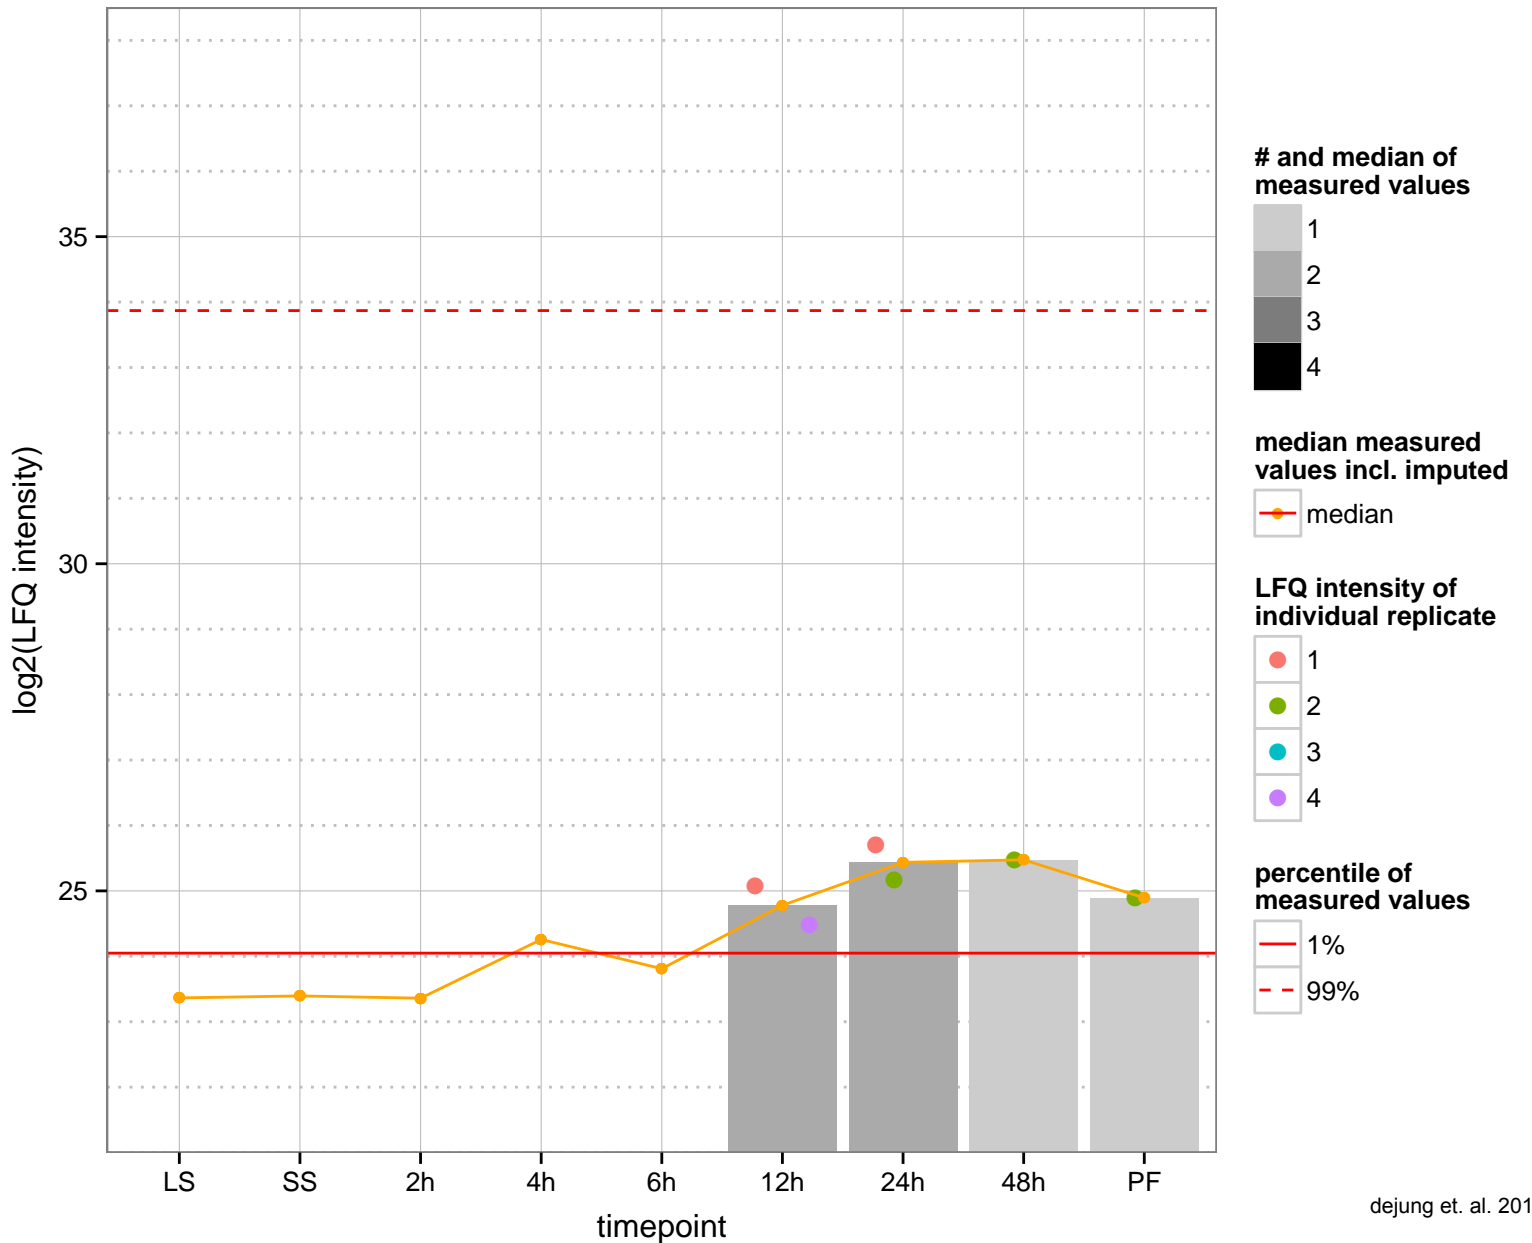



structural maintenance of chromosome 2, putative, putative (SMC2)

Tb927.10.10340;Tb11.v5.0811

AGOF: null, ATP binding

AGOC: null, chromosome, cohesin complex, nucleus

AGOP: null, chromosome organization, mitosis, mitotic sister chromatid segregation

PGOF: ATP binding, protein binding

PGOC: chromosome

PGOP: chromosome organization

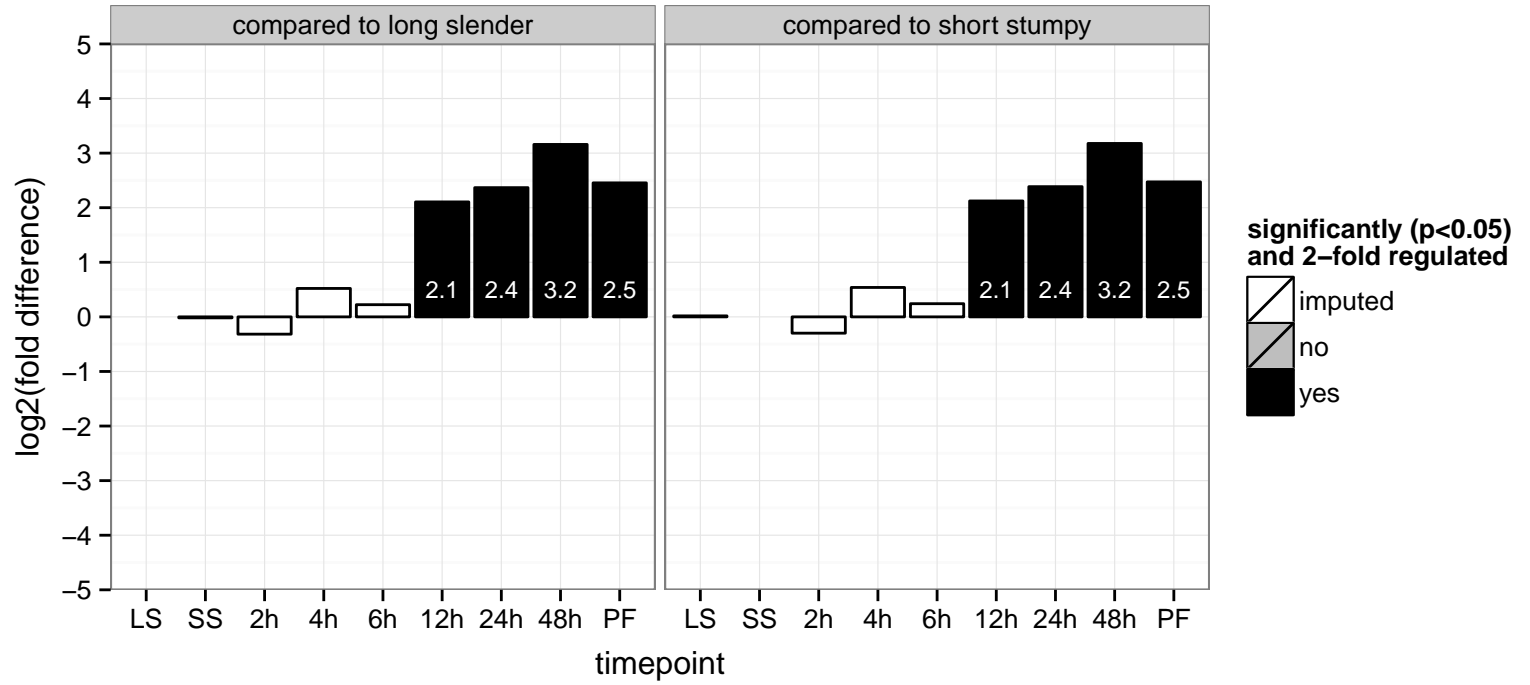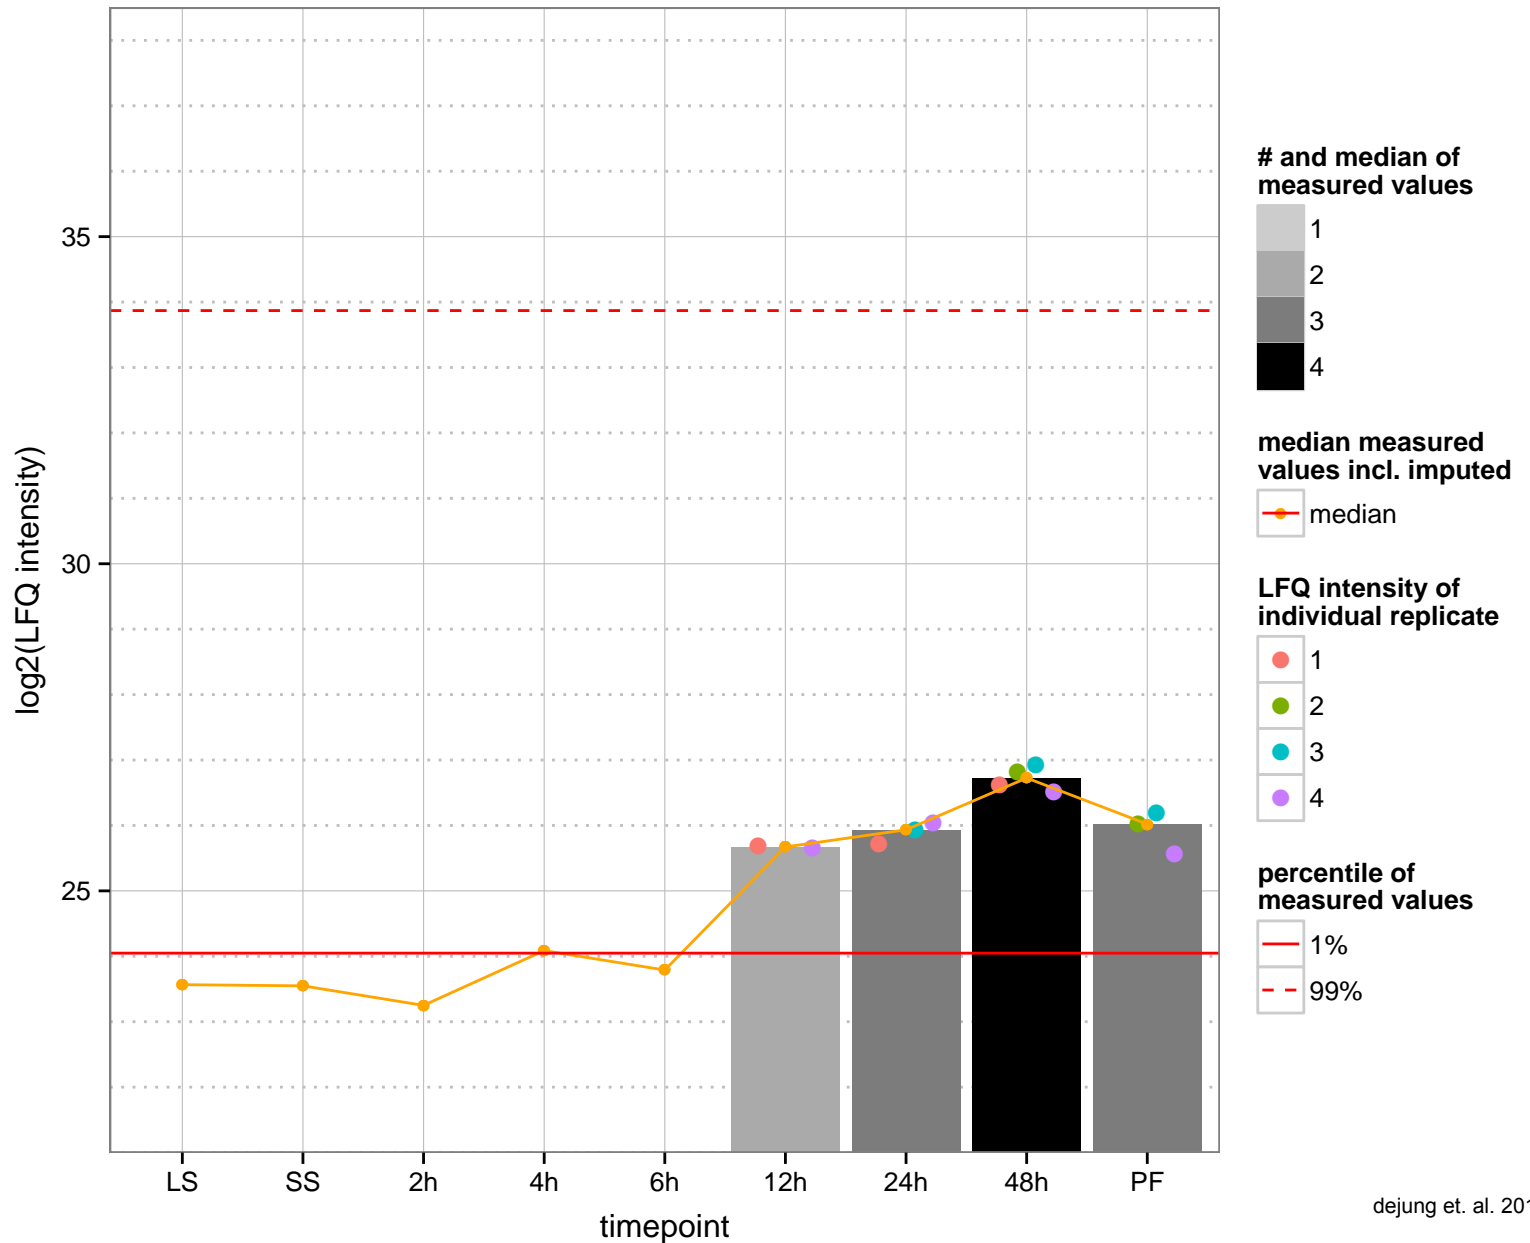

RNA-binding protein, putative (RBP23)  
 Tb927.10.11270  
 AGOF: RNA binding  
 AGOC: null  
 AGOP: RNA processing  
 PGOF: nucleic acid binding  
 PGO: null  
 PGOP: null

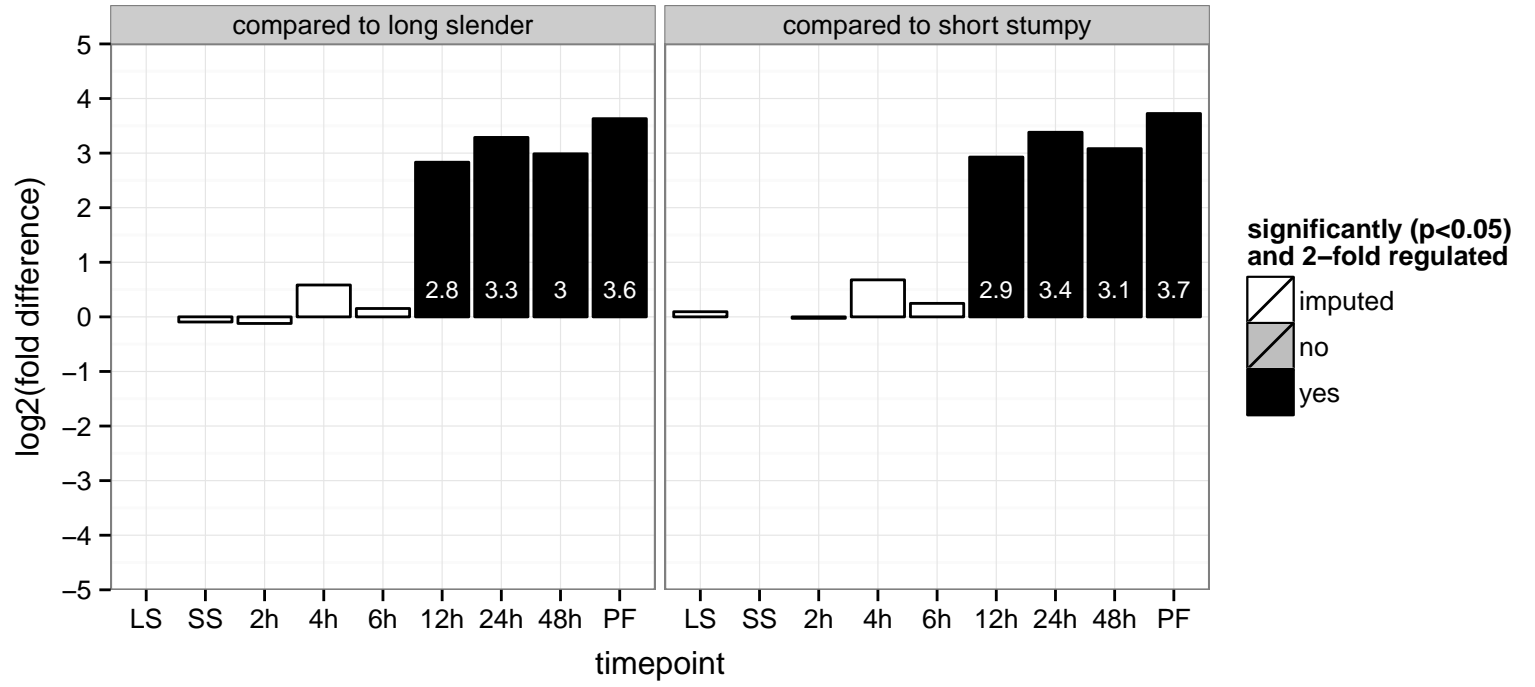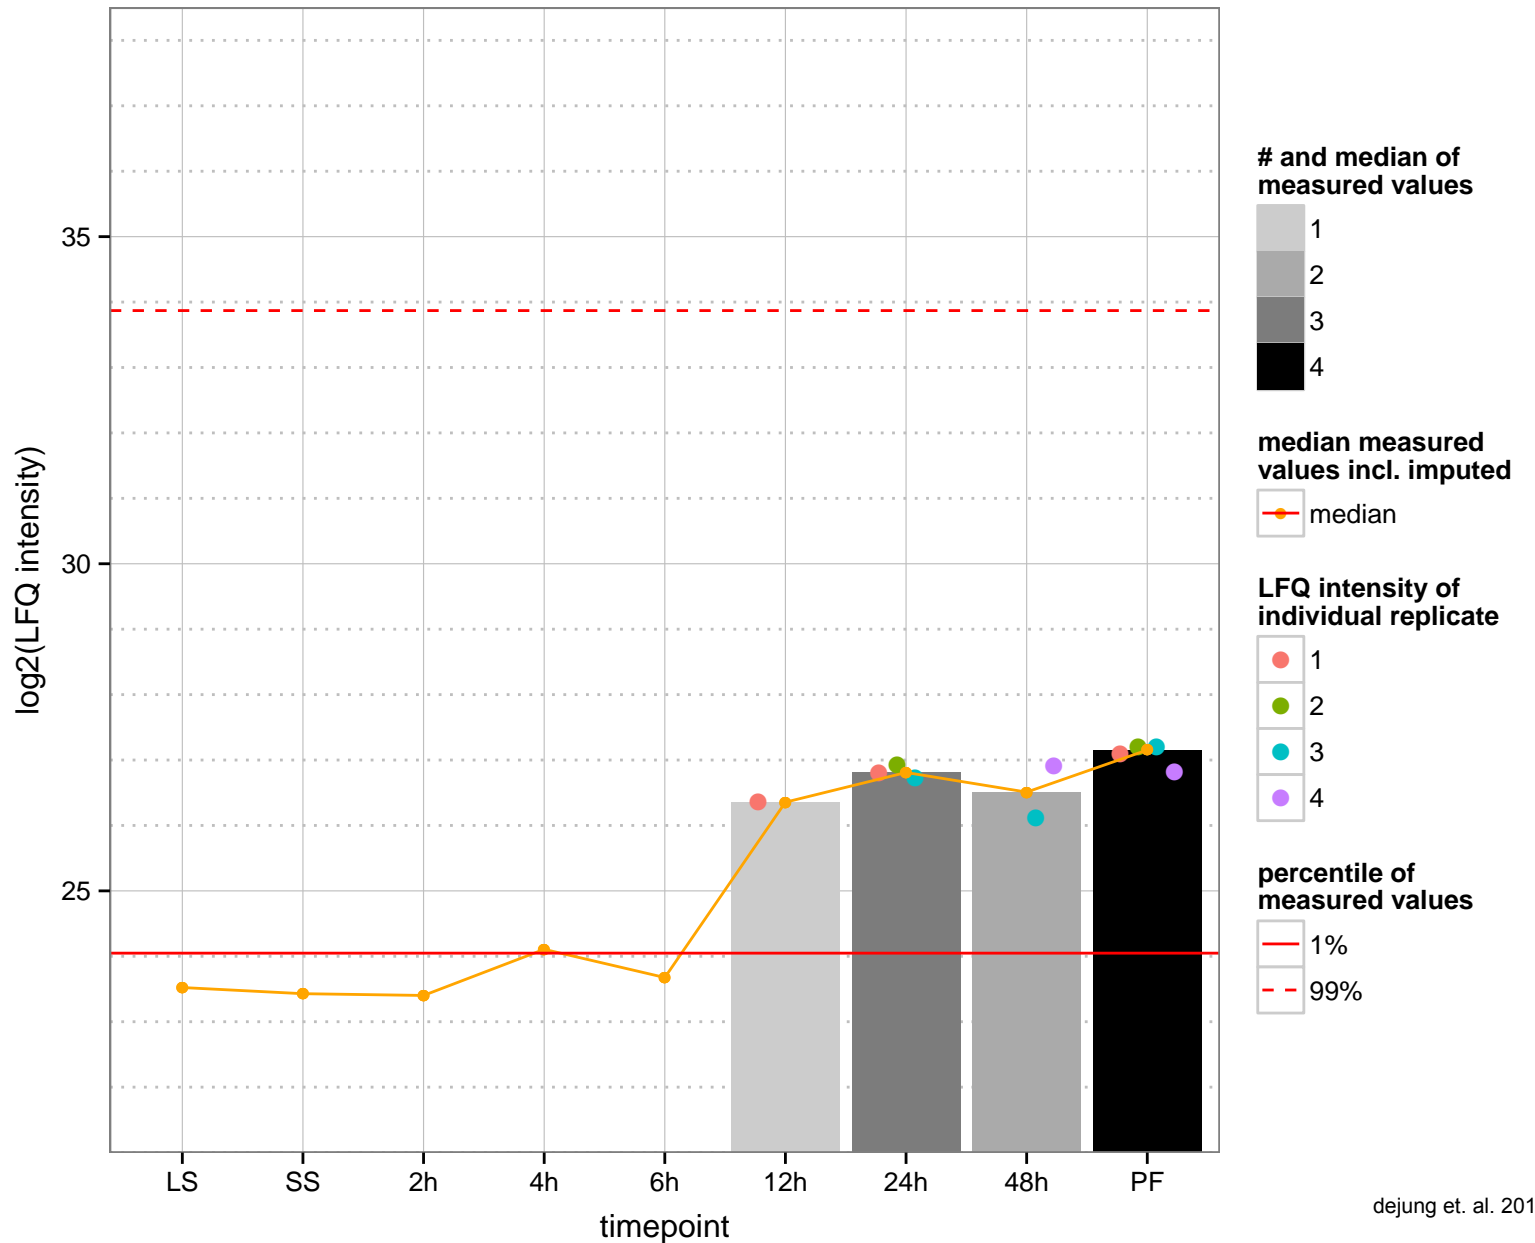

UDP-Gal or UDP-GlcNAc-dependent glycosyltransferase, putative  
 Tb927.10.12290  
 AGOF: UDP-glycosyltransferase activity, galactosyltransferase activity  
 AGOC: membrane  
 AGOP: GPI anchor biosynthetic process, protein glycosylation  
 PGO: null  
 PGOC: null  
 PGOP: null

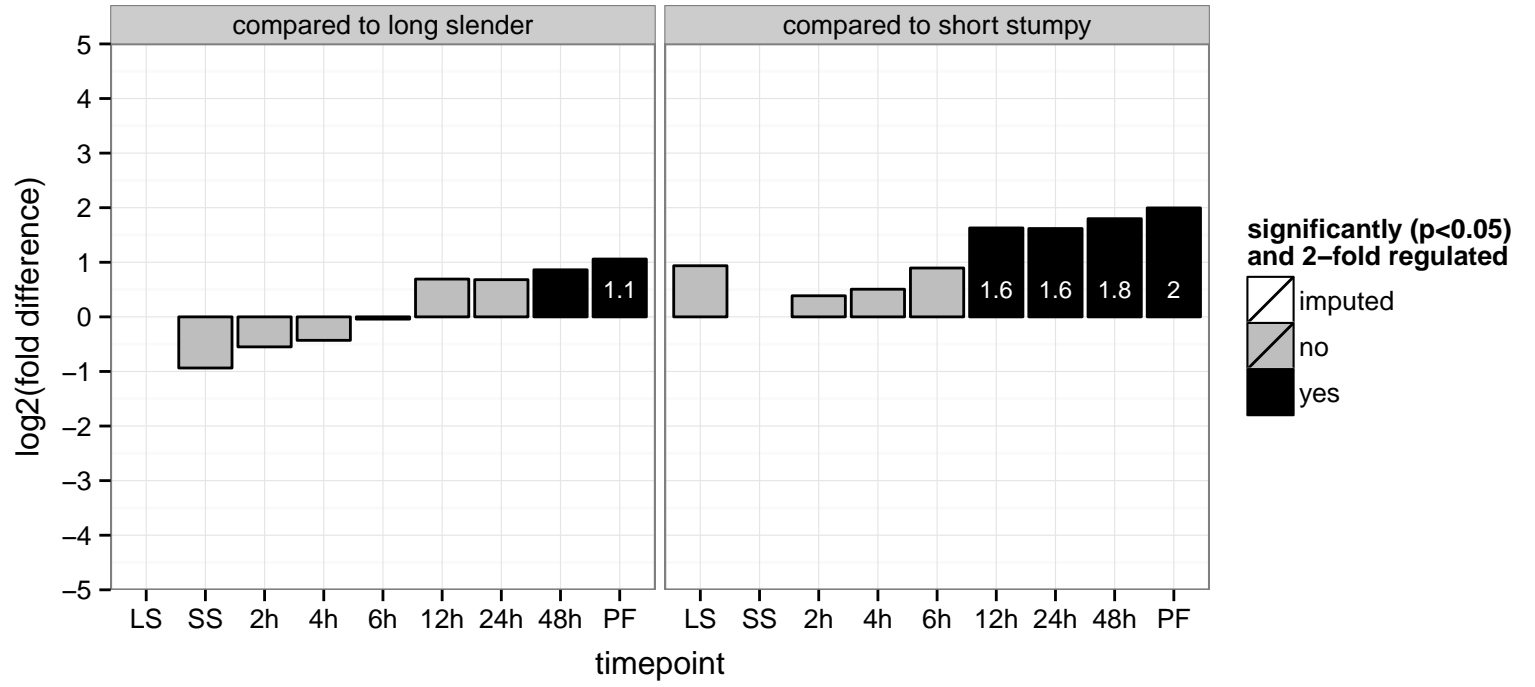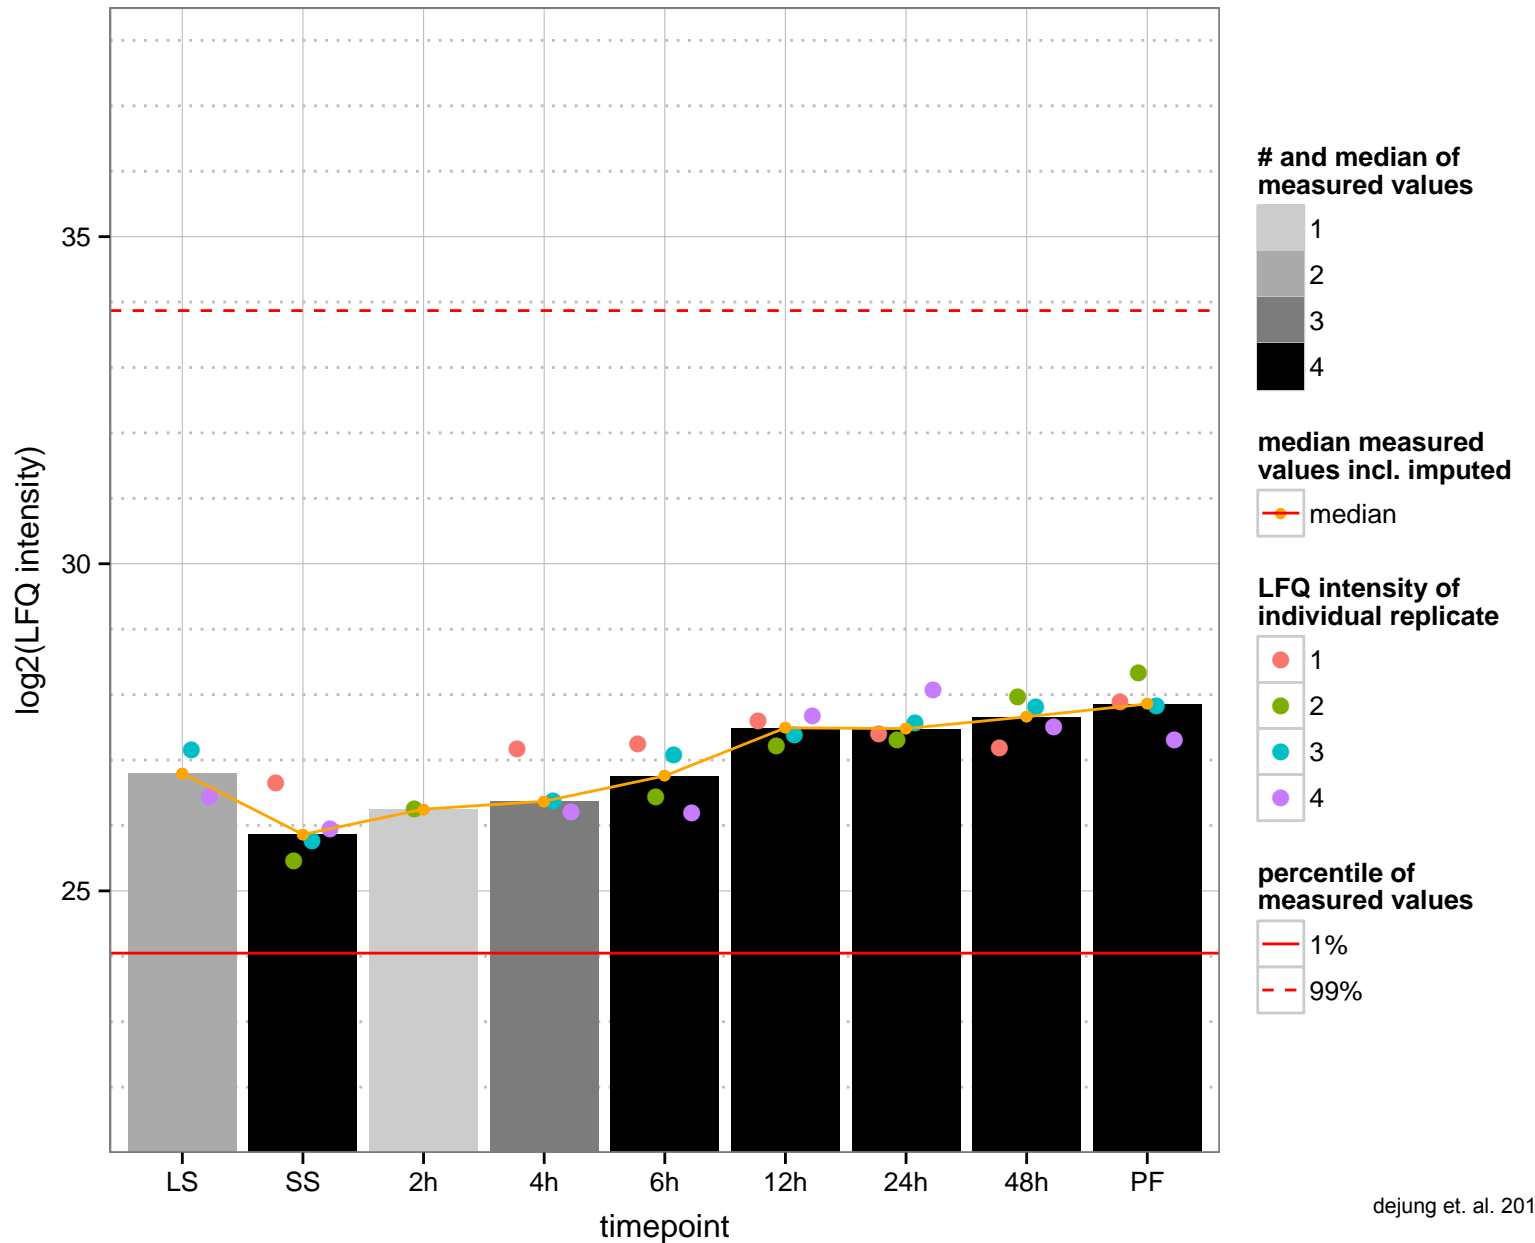

zinc finger protein family member, putative (ZC3H34)  
 Tb927.10.12330  
 AGOF: RNA binding, zinc ion binding  
 AGOC: null  
 AGOP: null  
 PGO: nucleic acid binding, zinc ion binding  
 PGO: null  
 PGOP: null

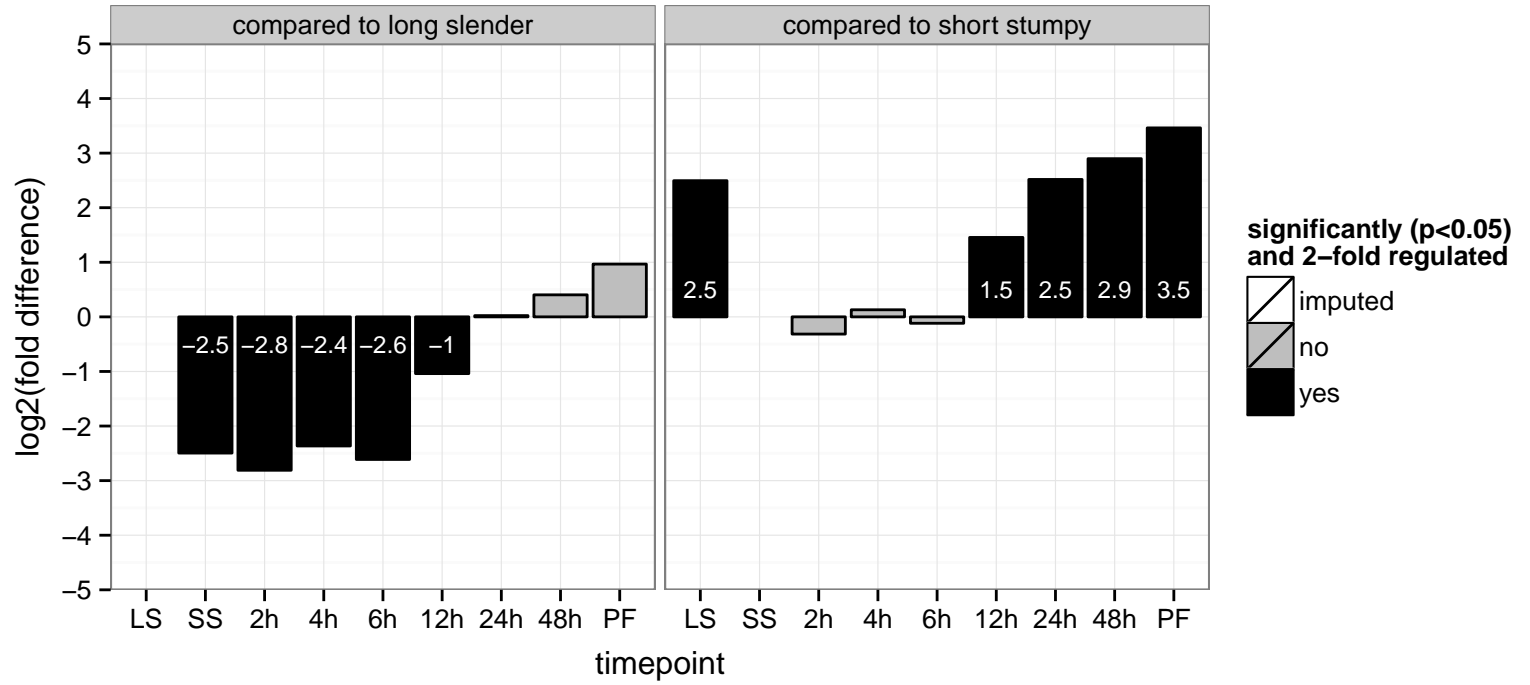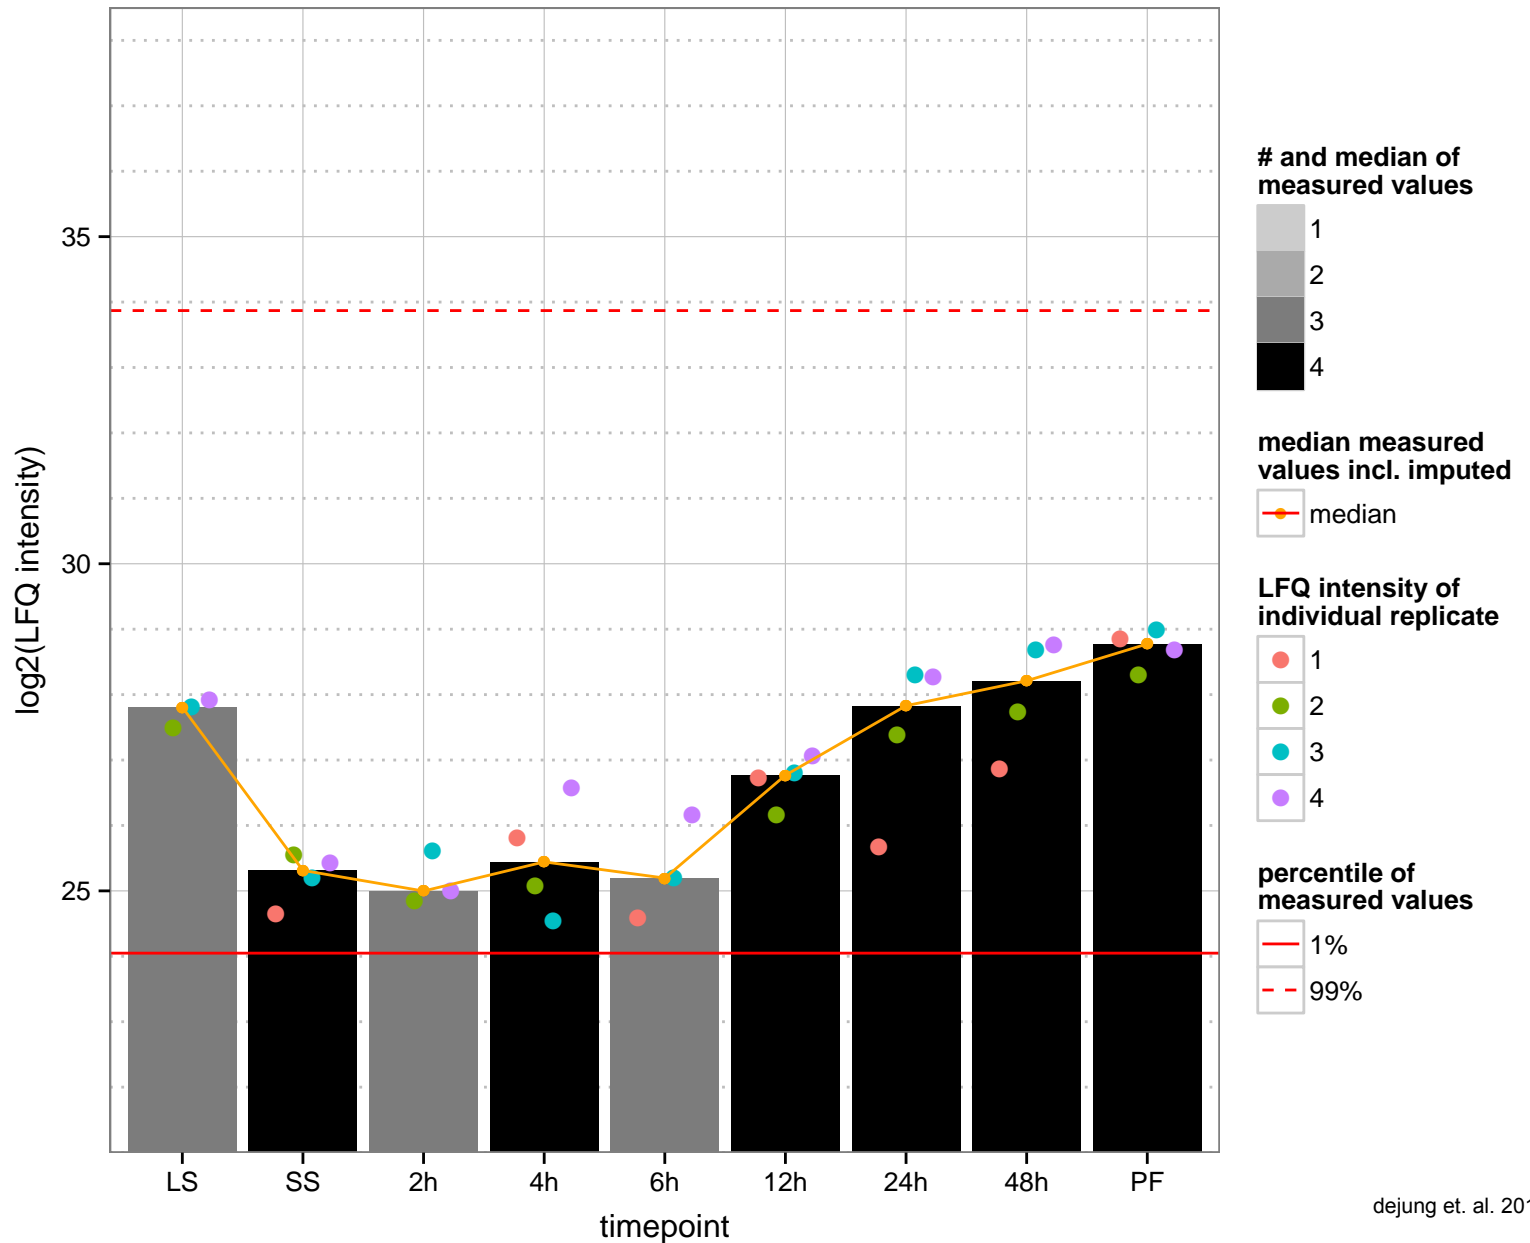

hypothetical protein, conserved  
 Tb927.10.1250  
 AGOF: null  
 AGOC: null  
 AGOP: null  
 PGO: null  
 PGOC: null  
 PGOP: null

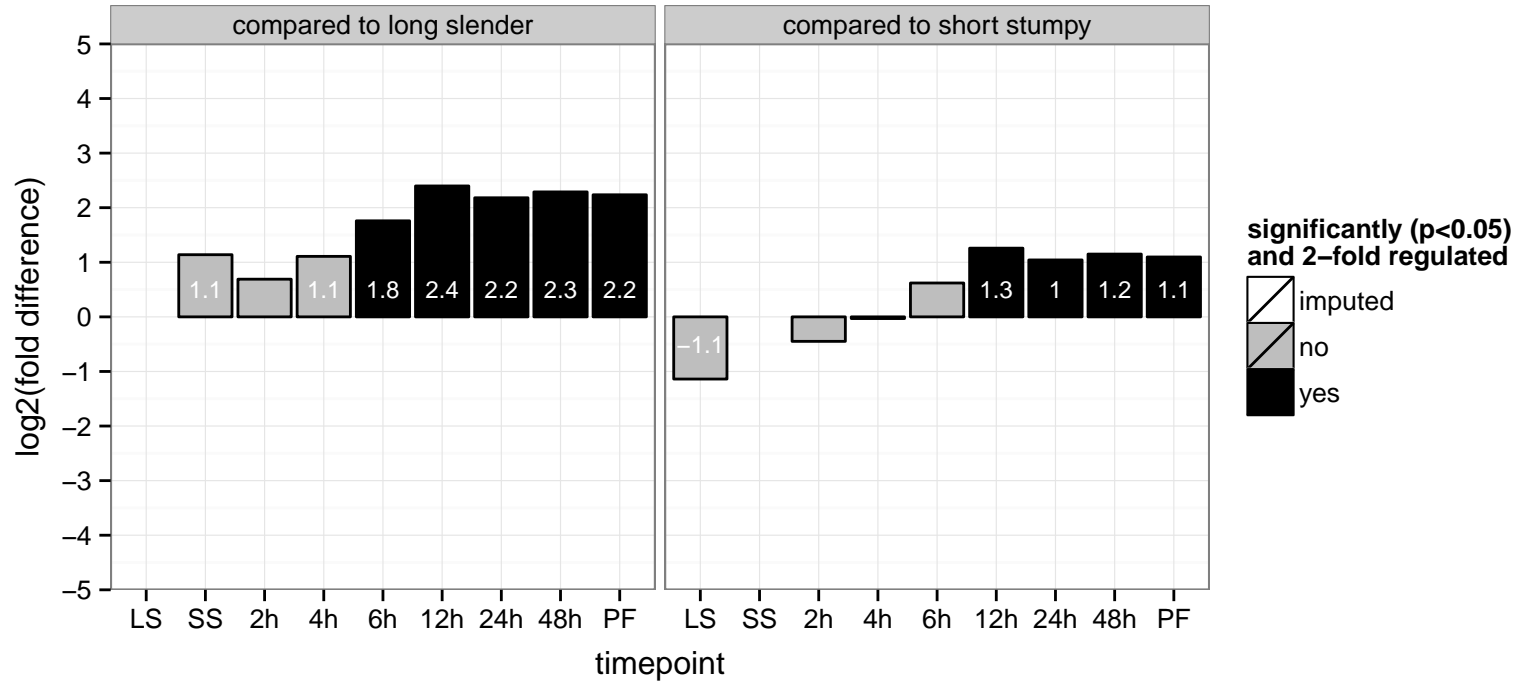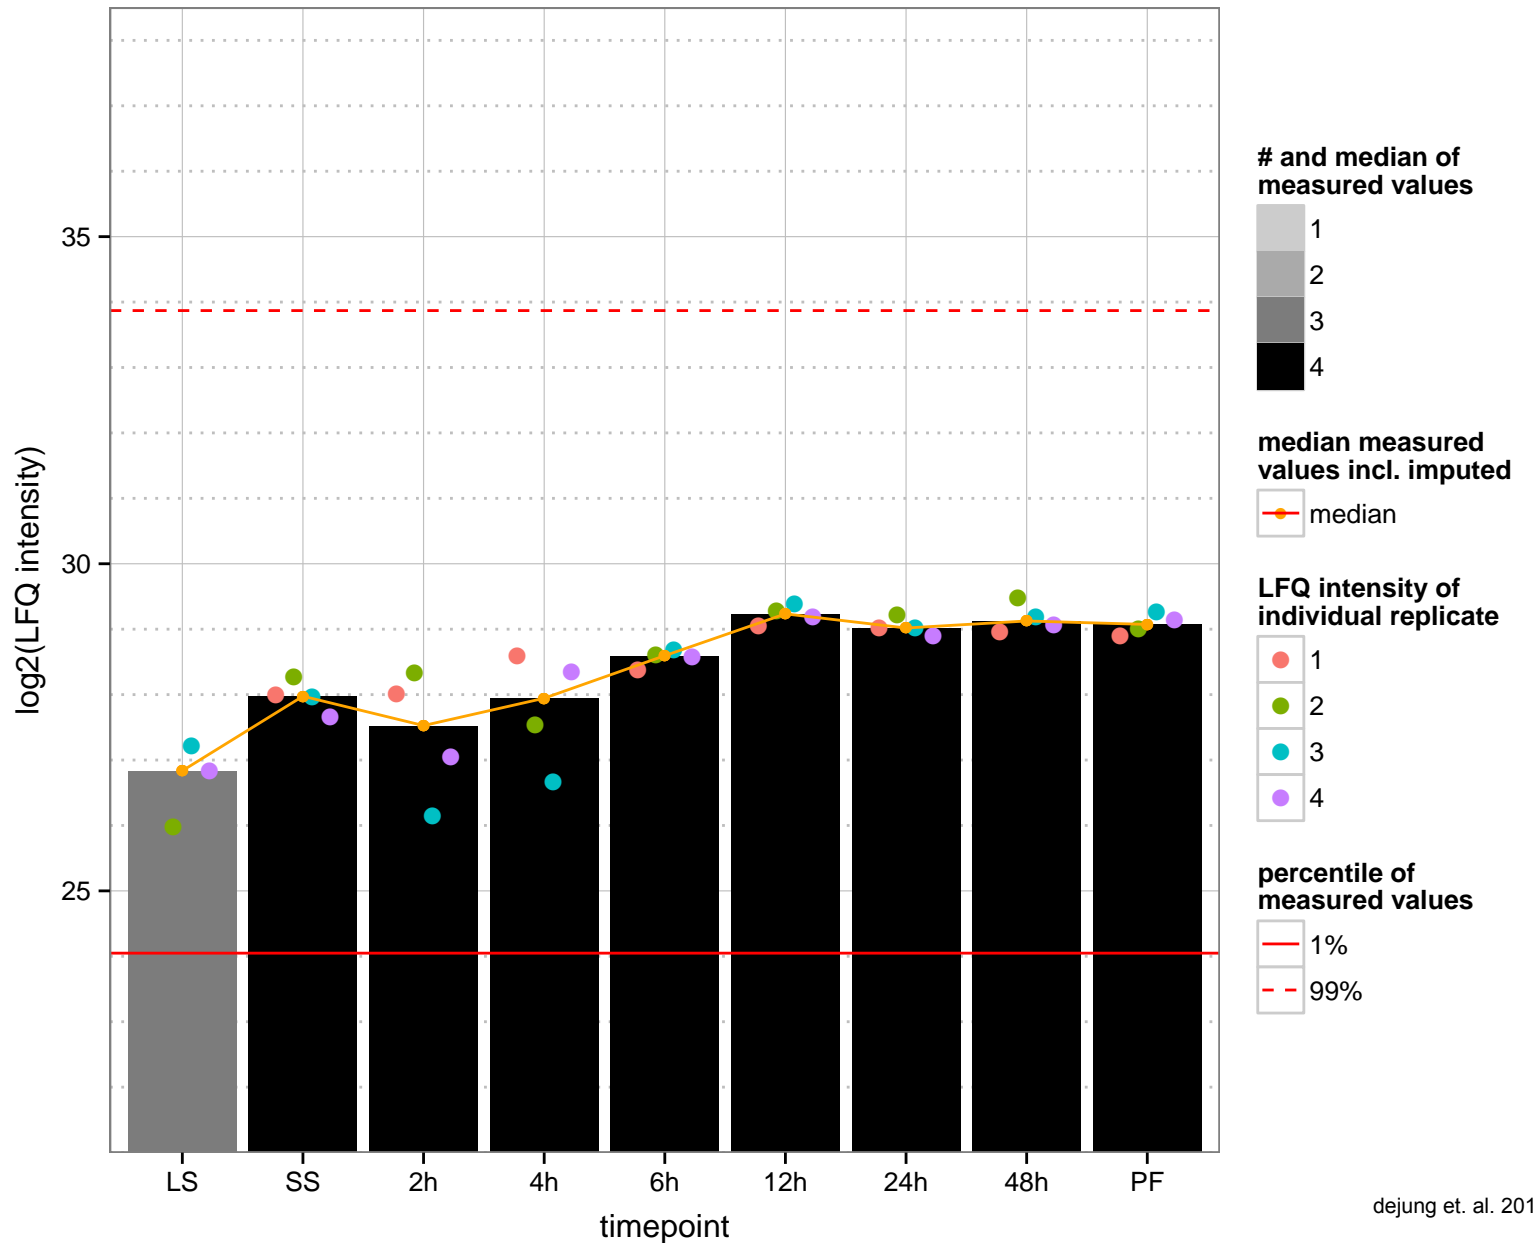

hypothetical protein, conserved  
 Tb927.10.1280  
 AGOF: null  
 AGOC: null  
 AGOP: null  
 PGOF: null  
 PGOC: null  
 PGOP: null

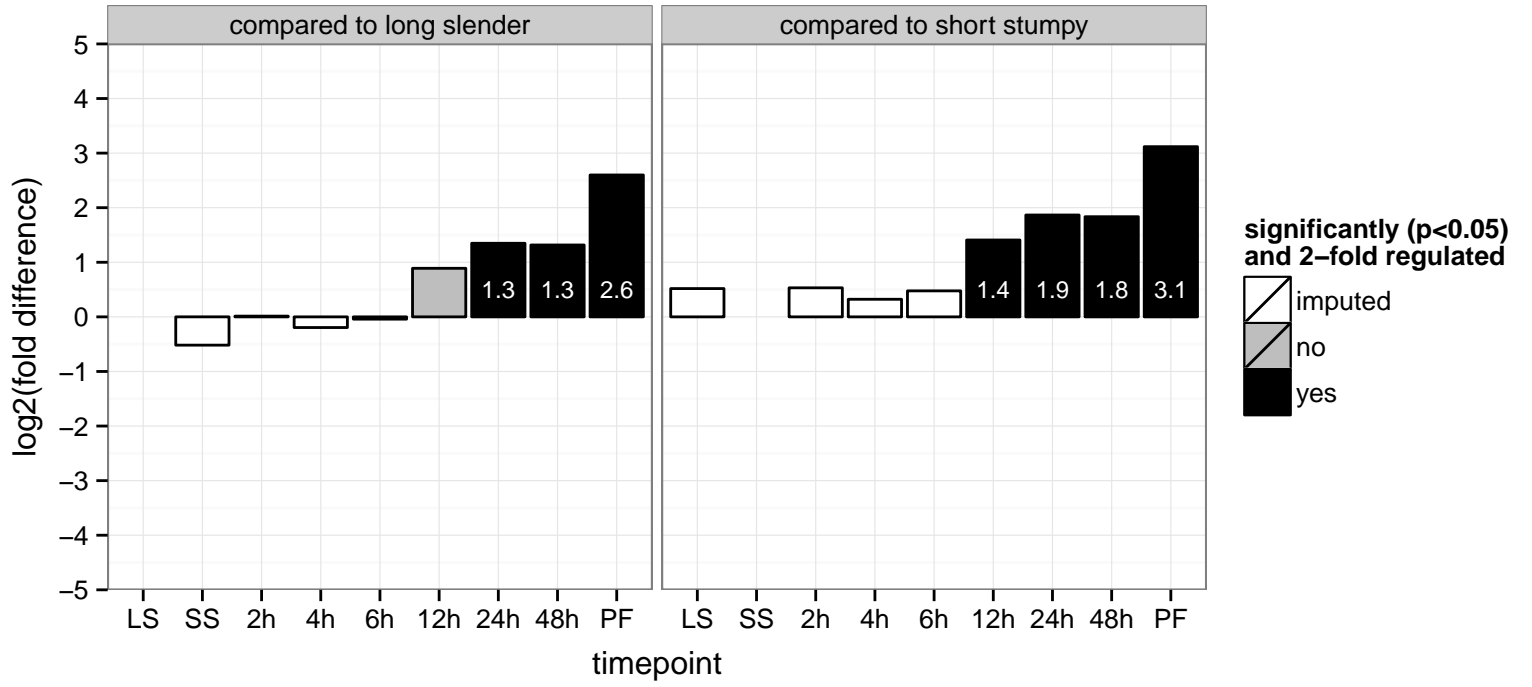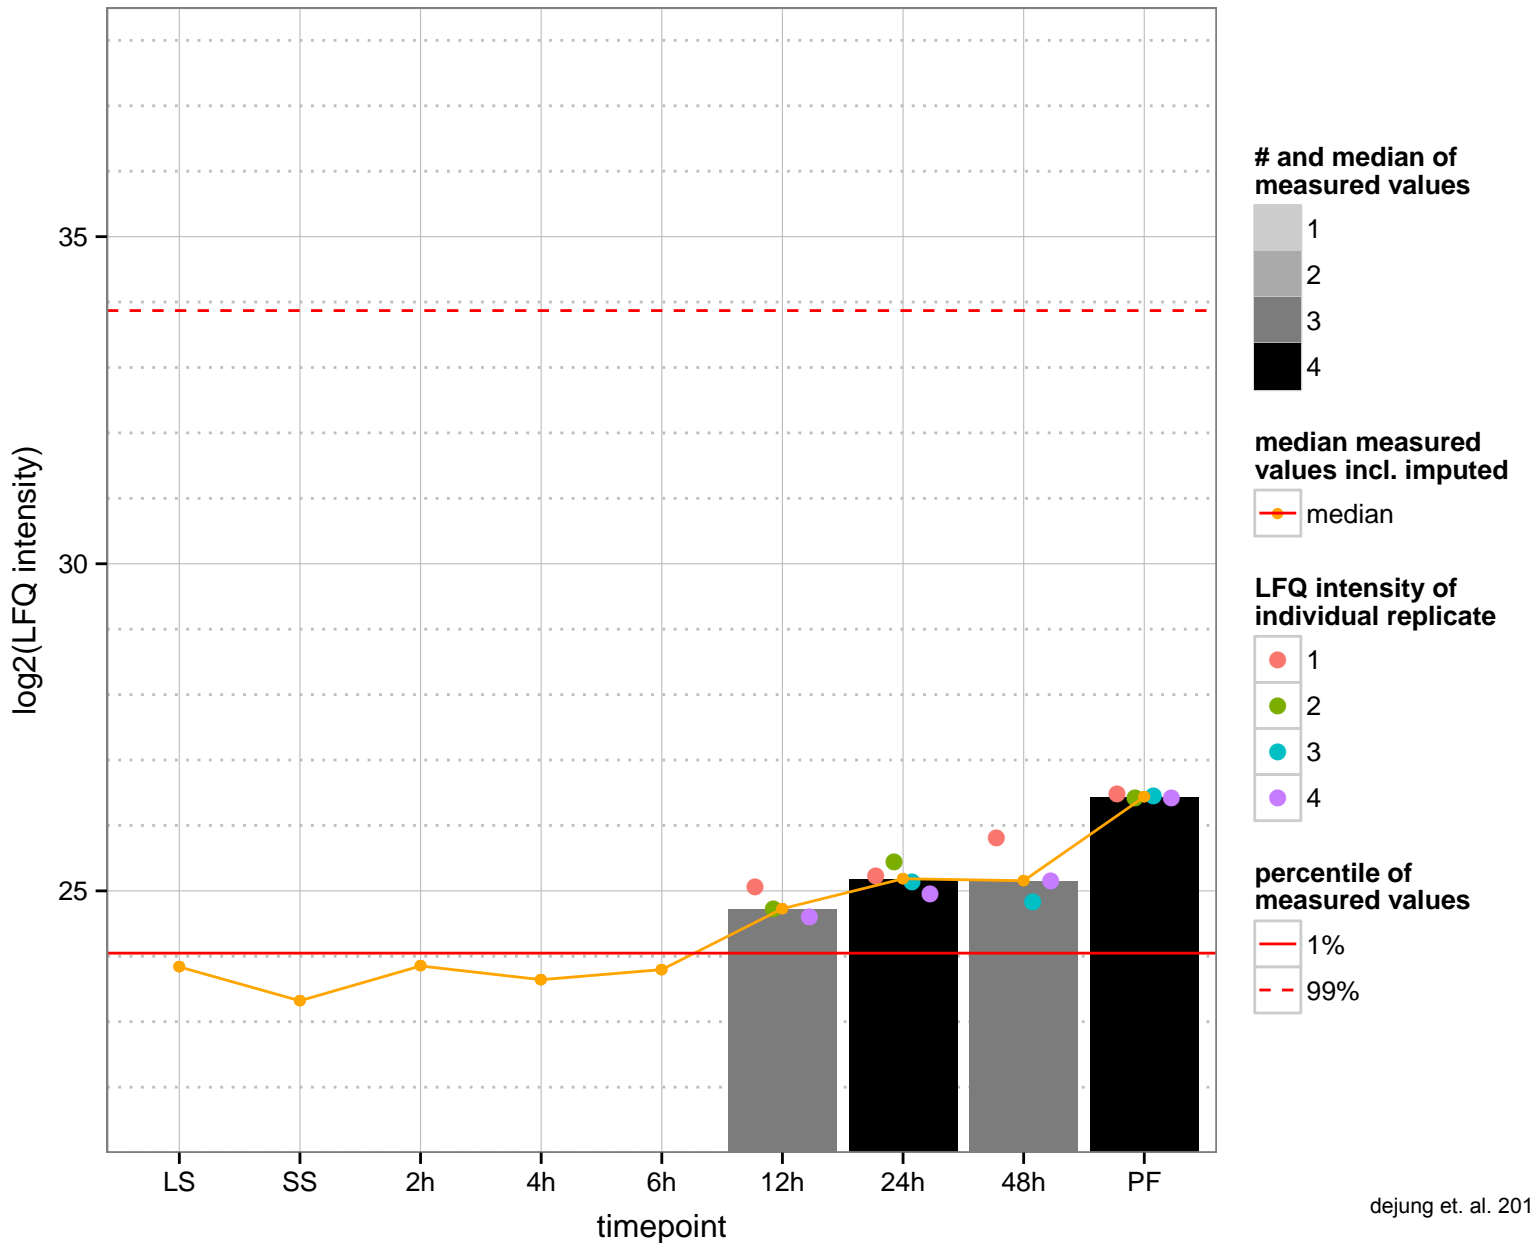

hypothetical protein, conserved  
 Tb927.10.12860  
 AGOF: null  
 AGOC: null  
 AGOP: null  
 PGOF: null  
 PGOC: null  
 PGOP: null

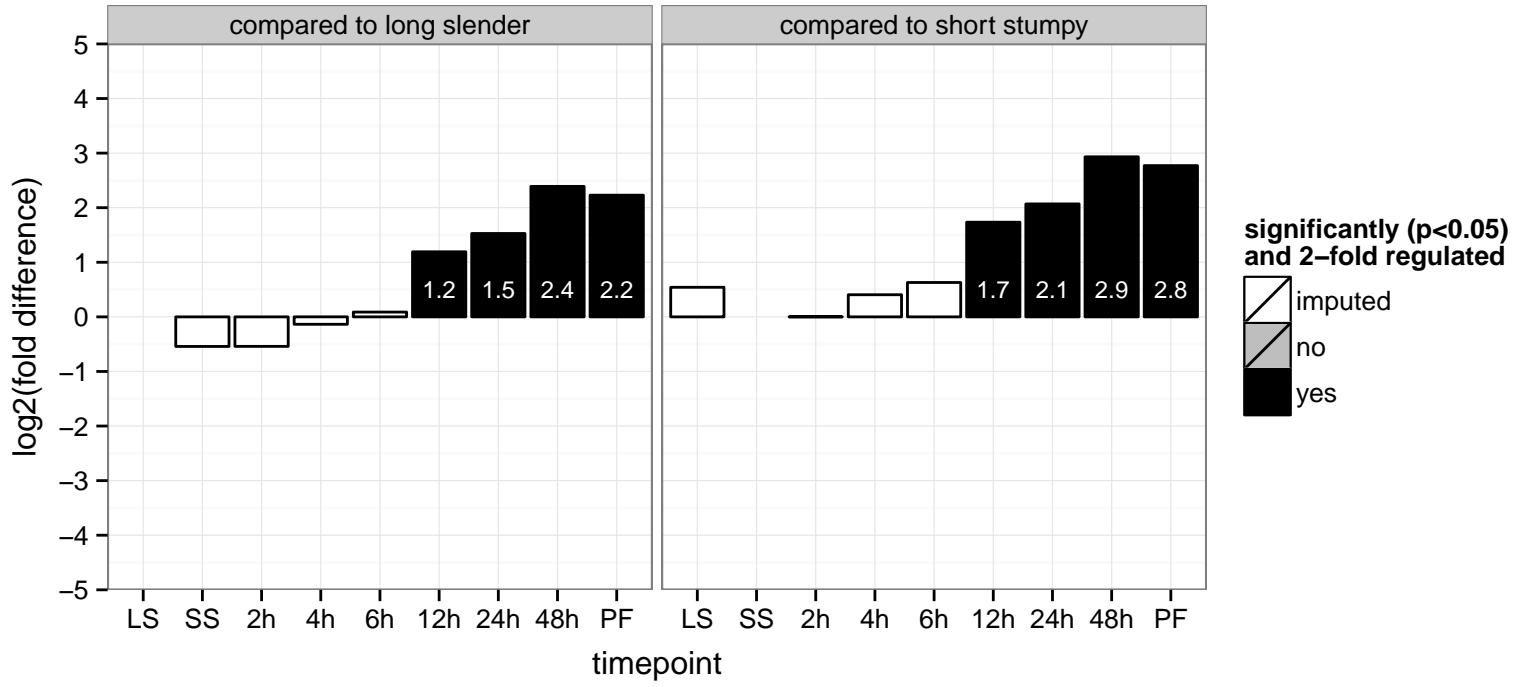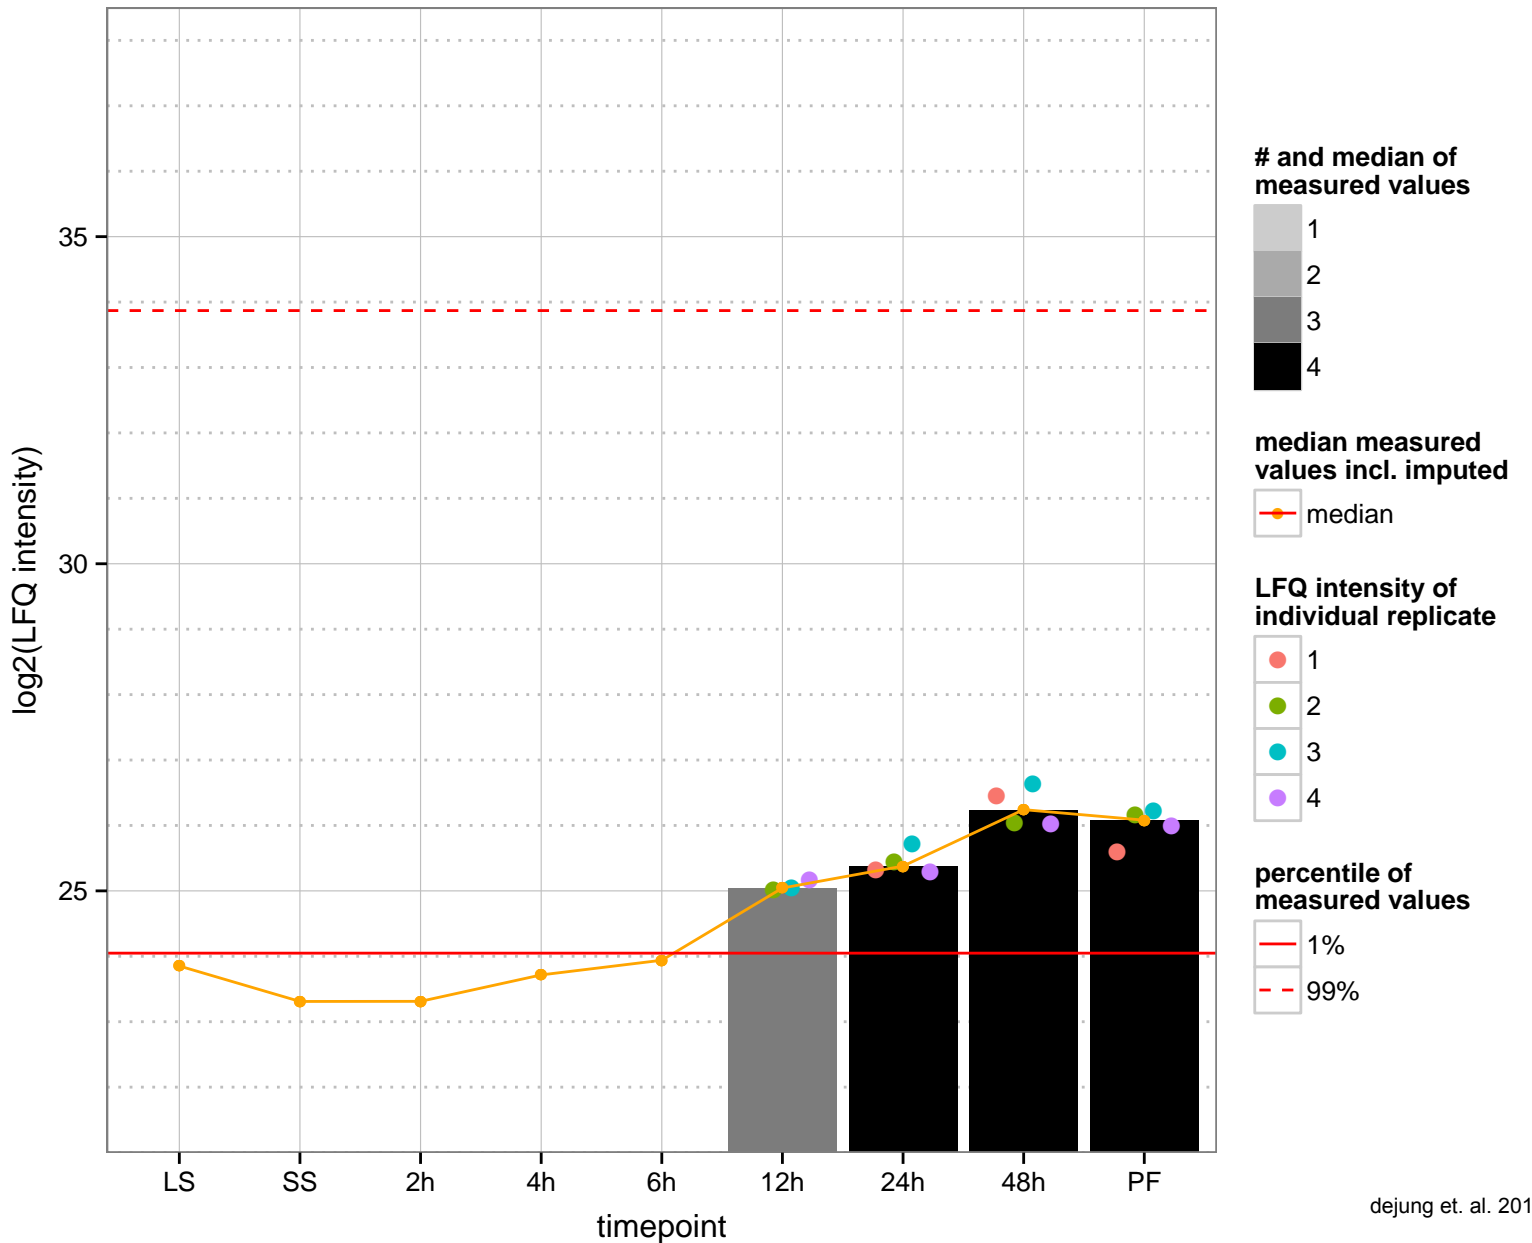

hypothetical protein, conserved  
 Tb927.10.13140  
 AGOF: null  
 AGOC: null  
 AGOP: null  
 PGOF: null  
 PGOC: null  
 PGOP: null

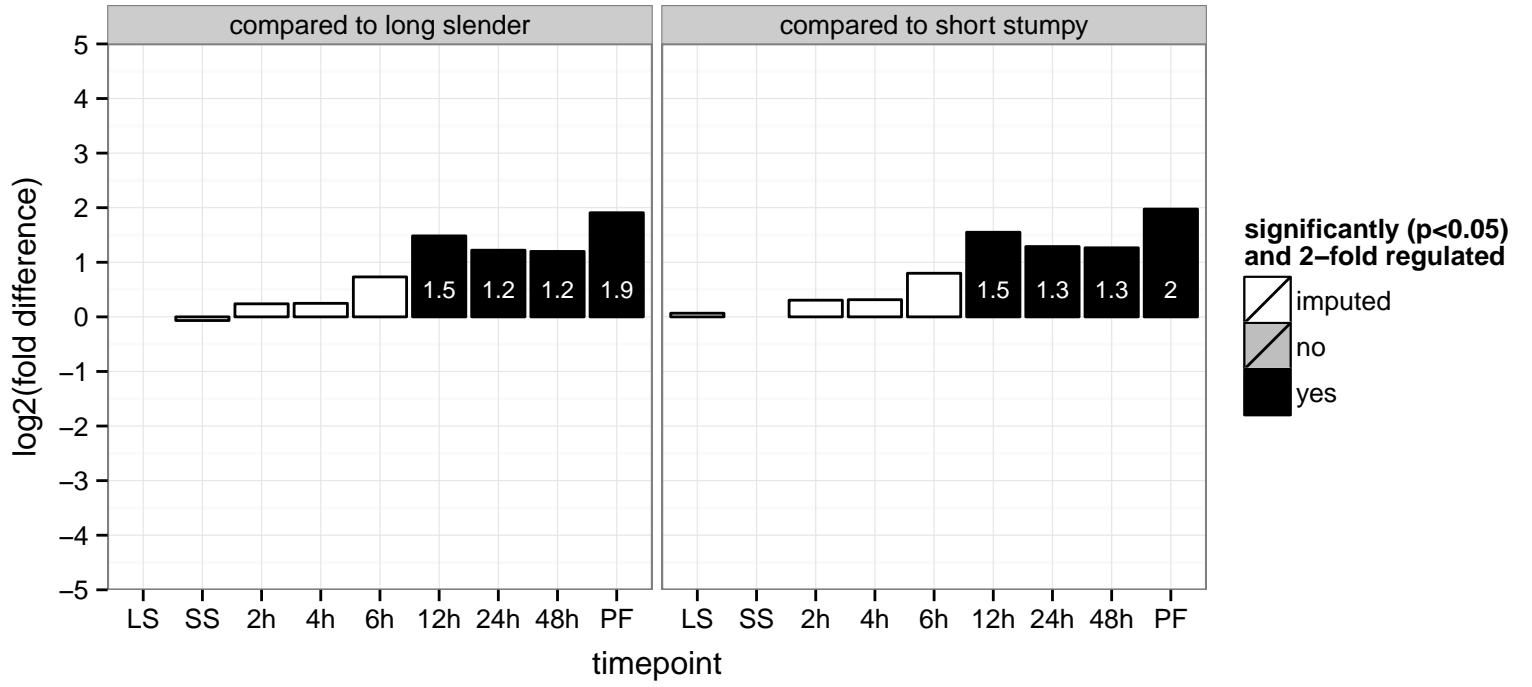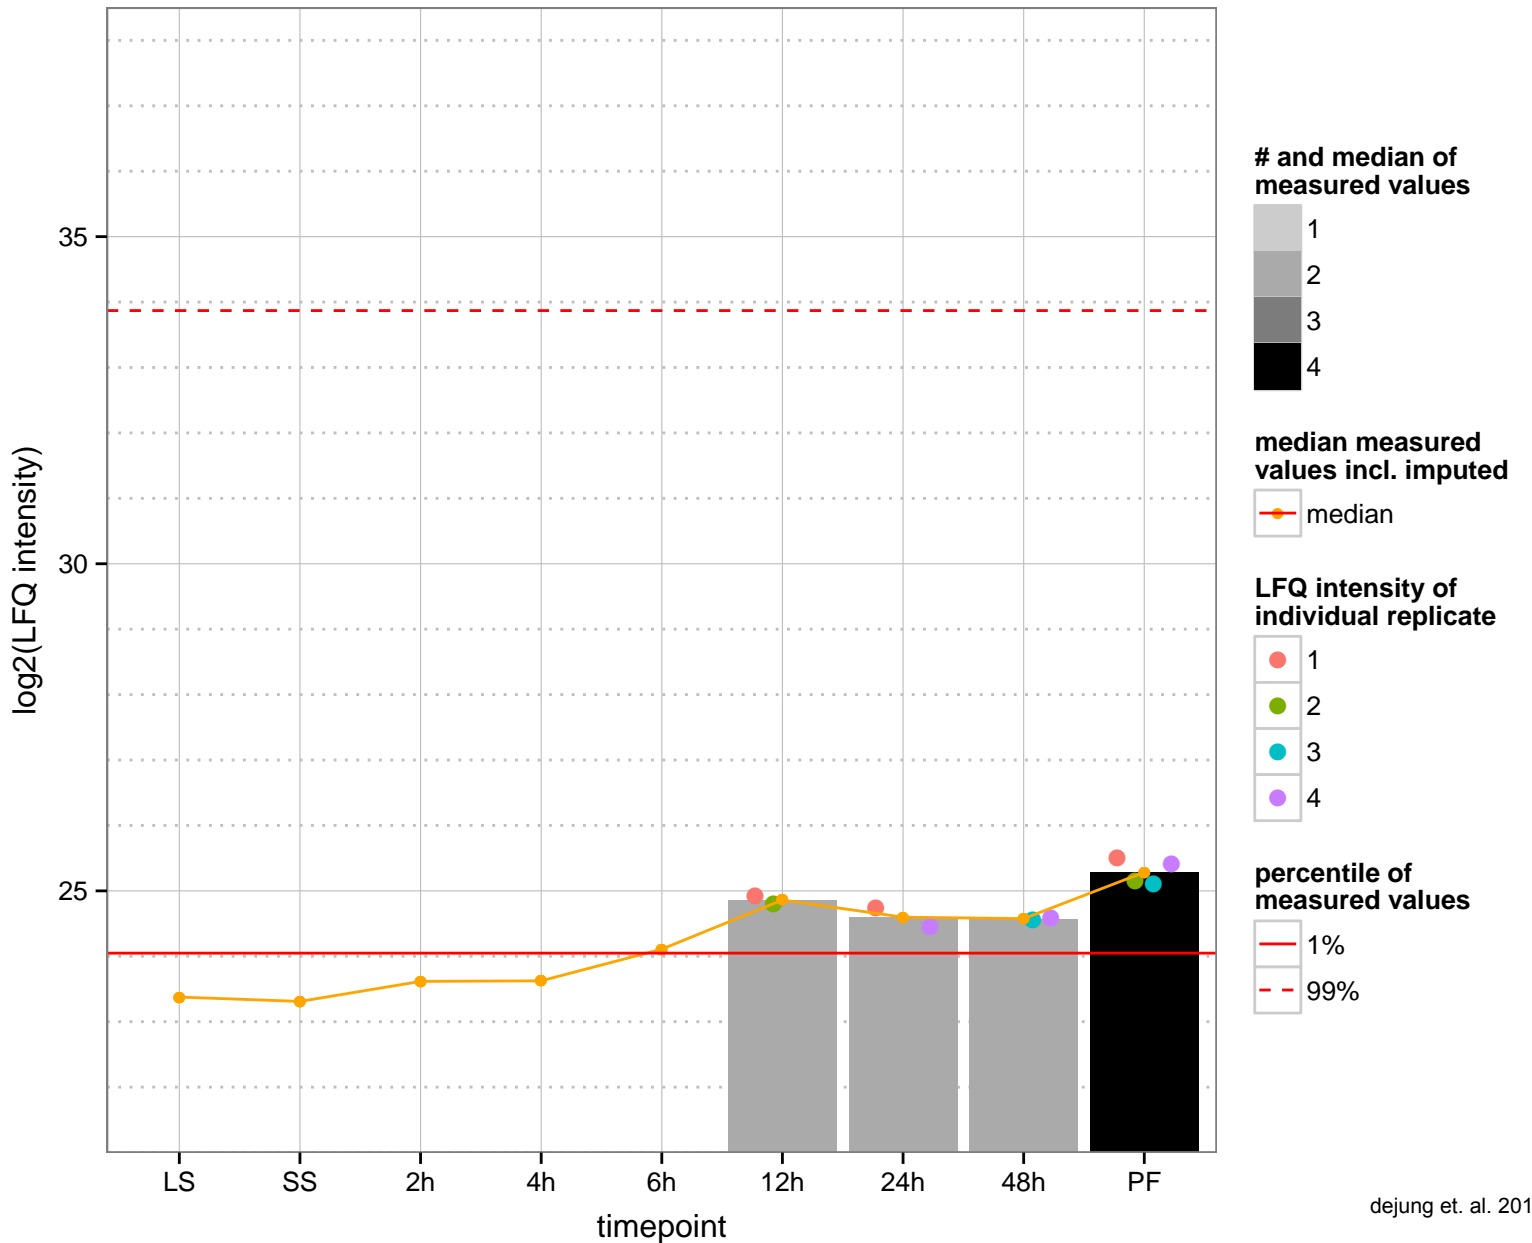



DNA-directed RNA polymerase I subunit RPB5z, putative (RPB5z)  
 Tb927.10.13310  
 AGOF: DNA binding, DNA-directed RNA polymerase activity  
 AGOC: nucleus  
 AGOP: transcription, DNA-dependent  
 PGOF: DNA binding, DNA-directed RNA polymerase activity  
 PGO: nucleus  
 PGOP: transcription, DNA-dependent

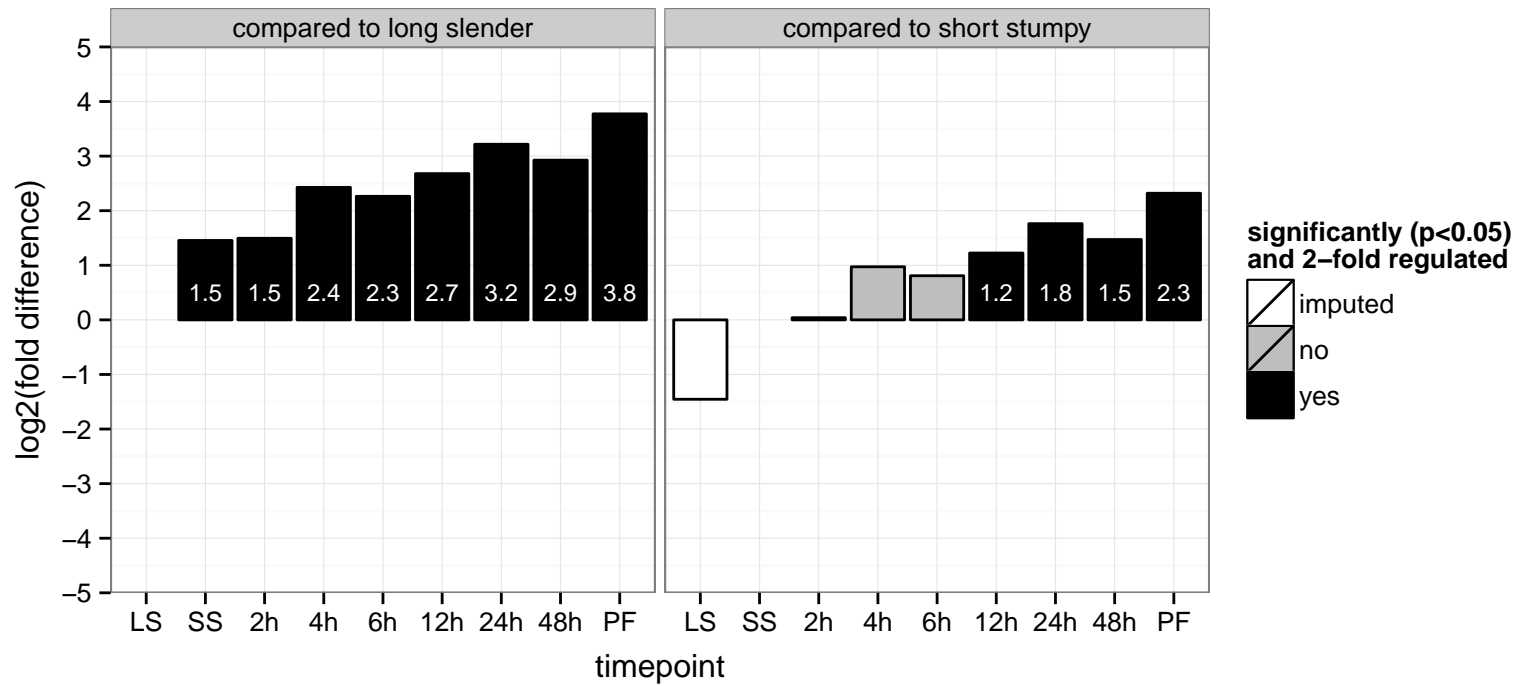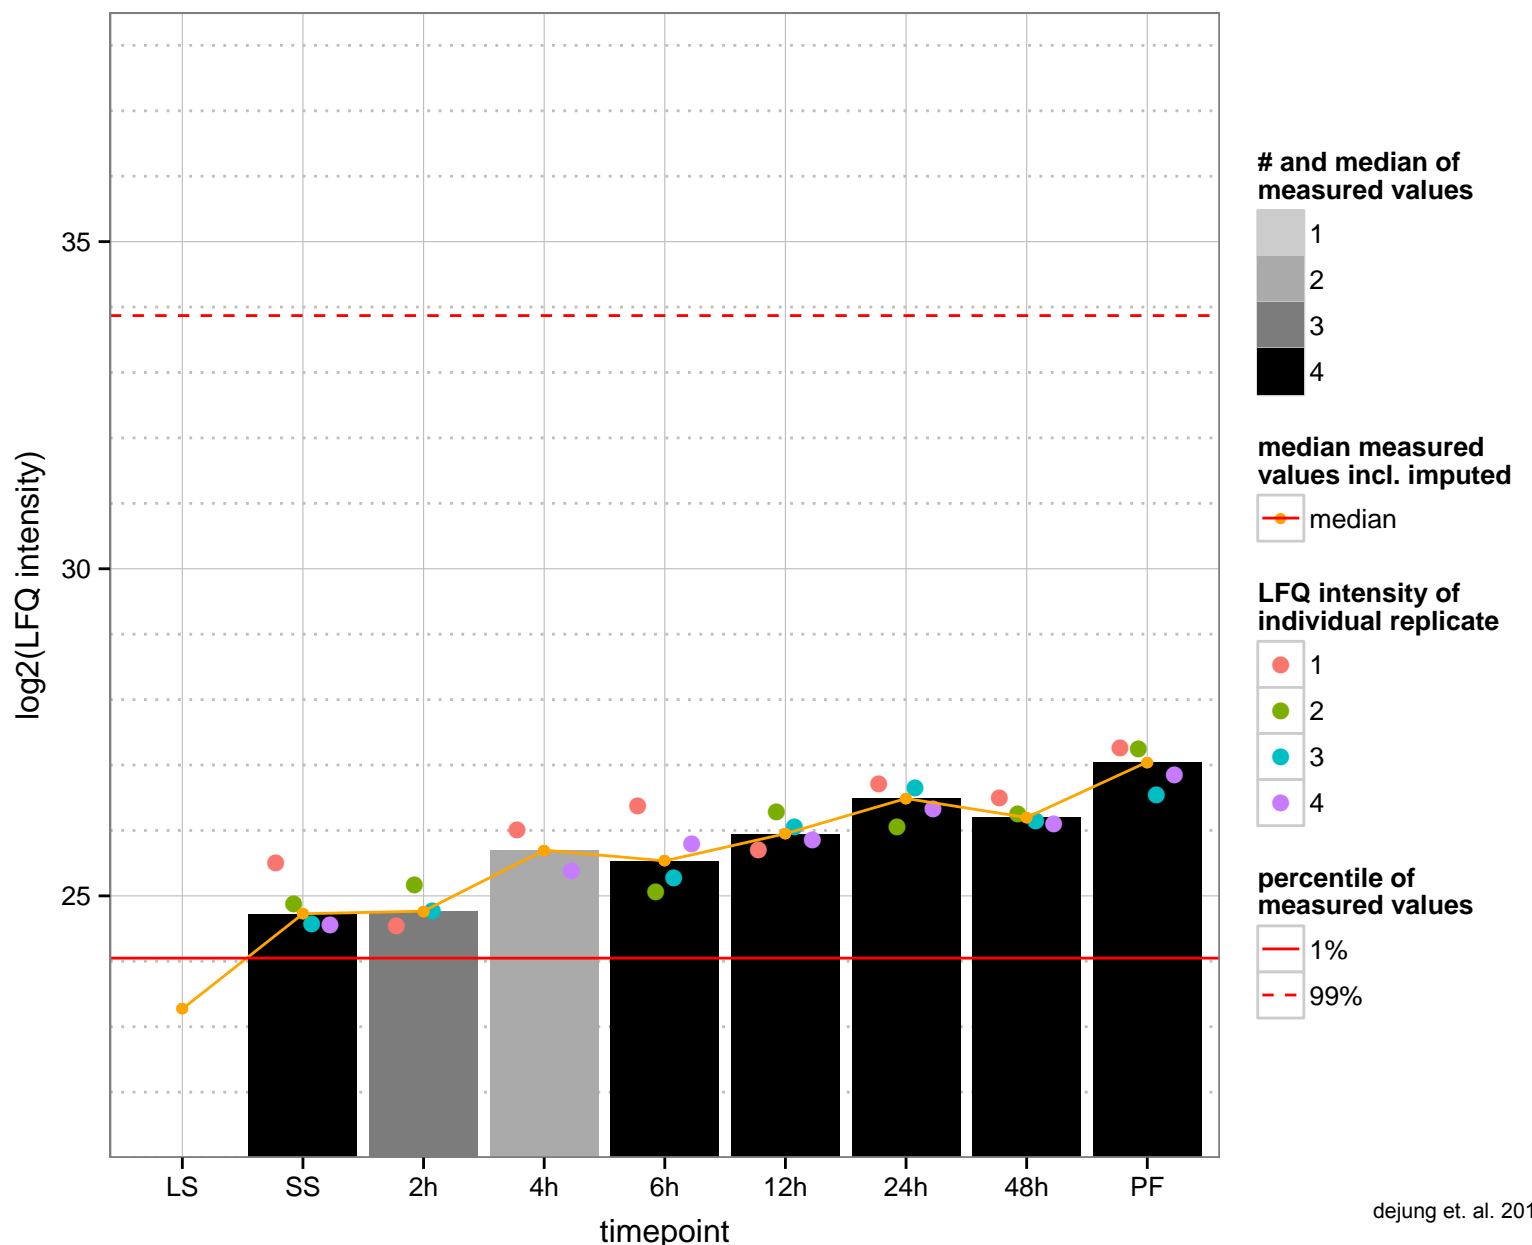

hypothetical protein, conserved  
 Tb927.10.13800  
 AGOF: null  
 AGOC: null  
 AGOP: null  
 PGOF: null  
 PGO: null  
 PGOP: null

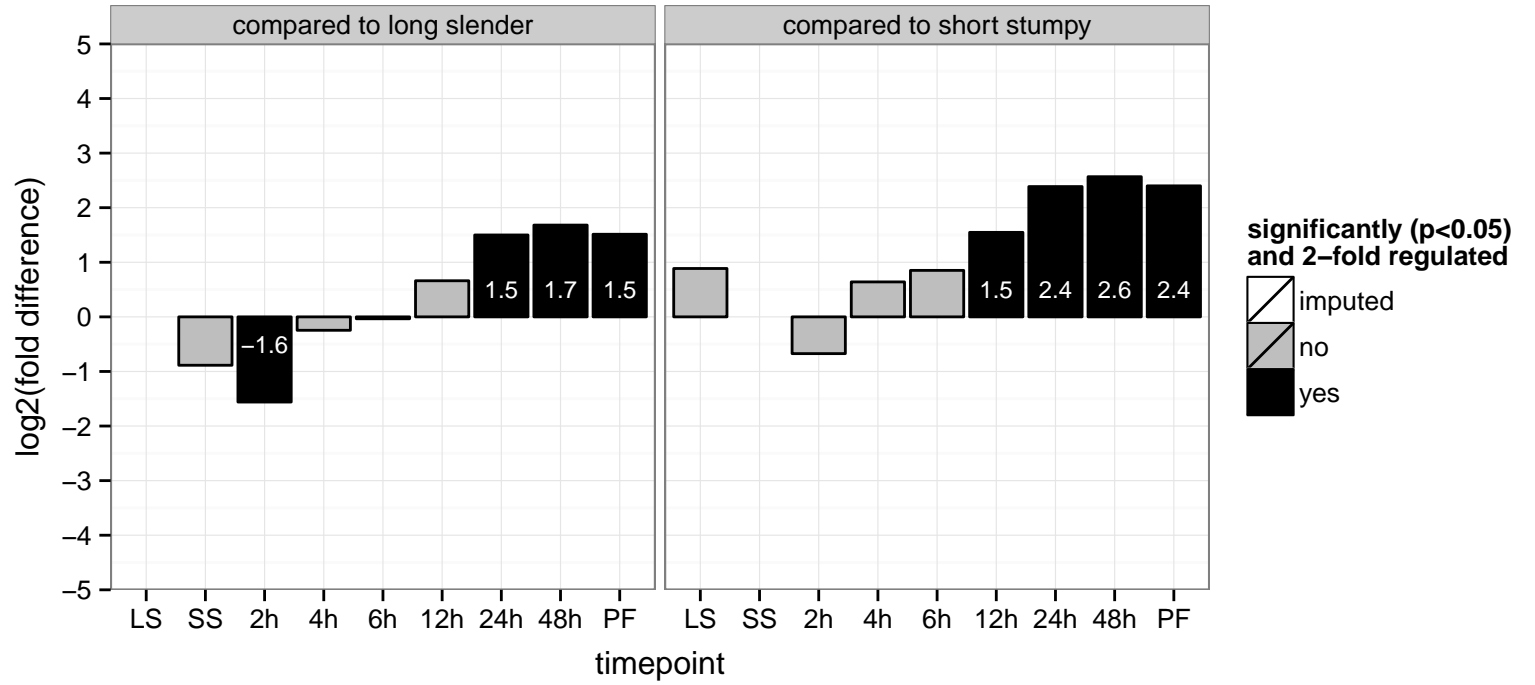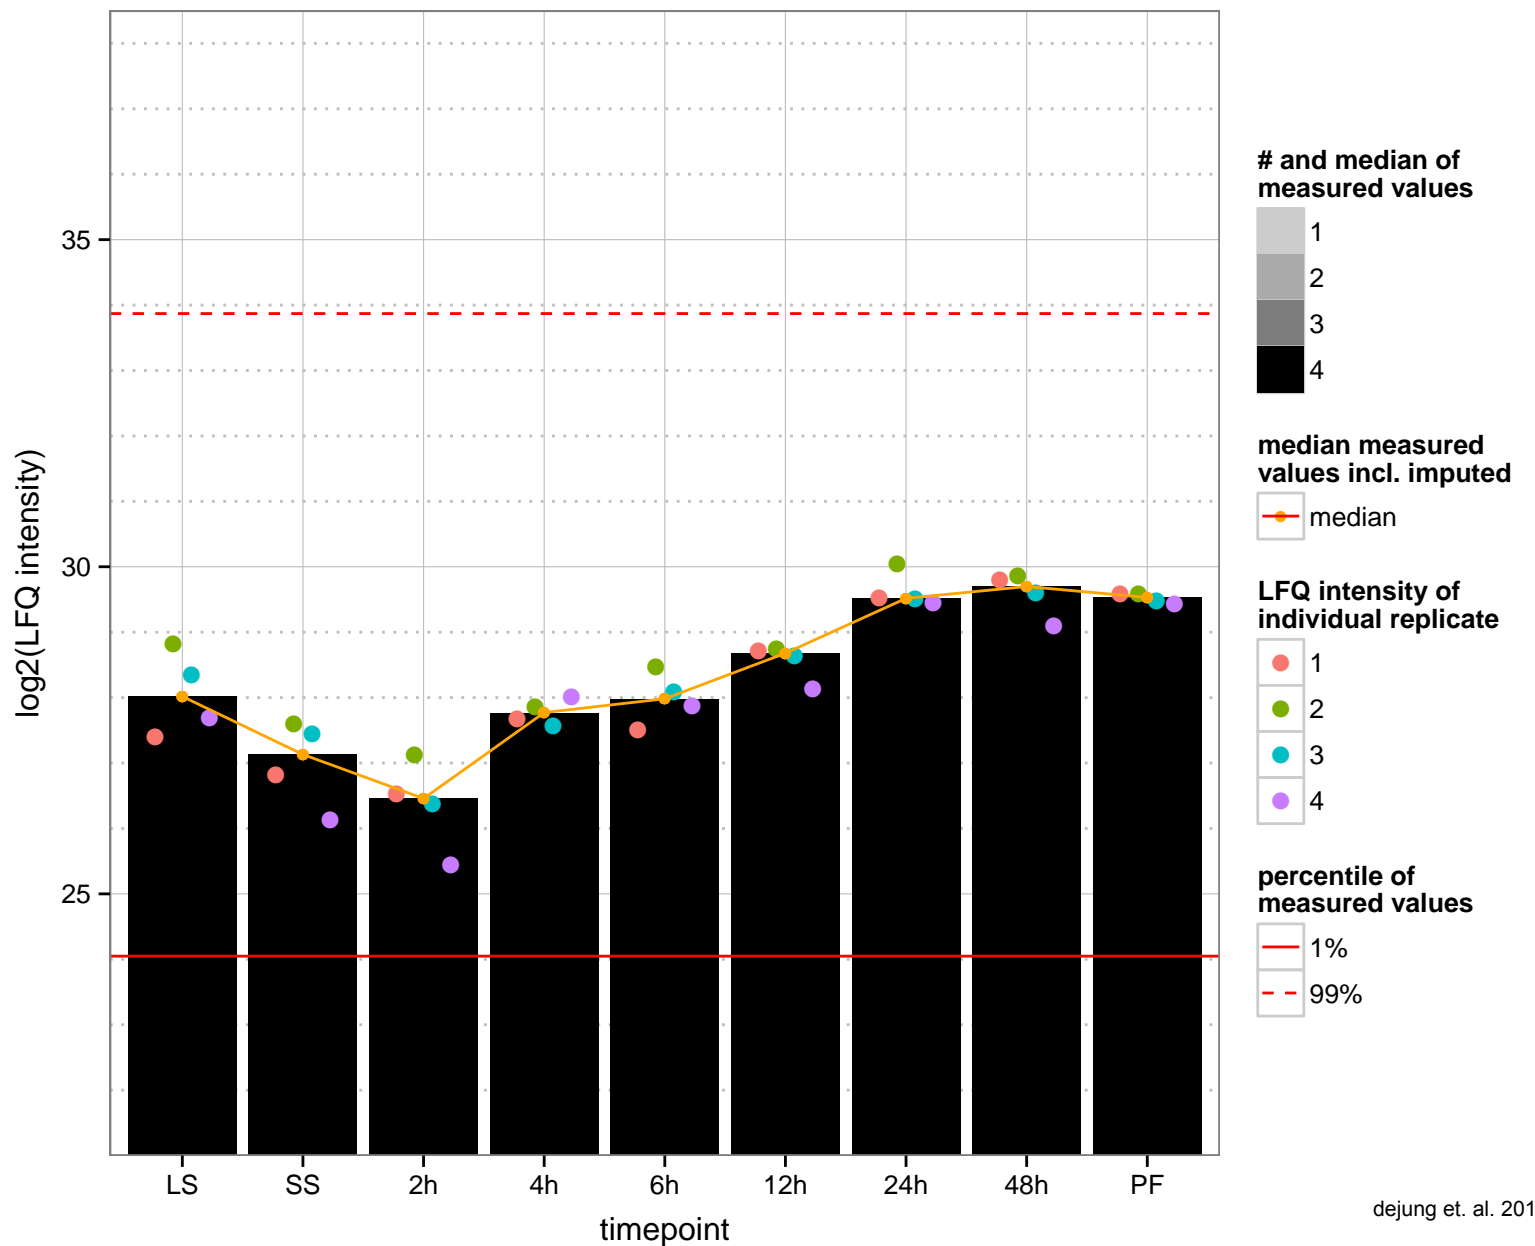

aquaglyceroporin 2 (AQP2)

Tb927.10.14170

AGOF: glycerol channel activity, water channel activity, water transmembrane transporter activity

AGOC: flagellar pocket, plasma membrane

AGOP: glycerol transport

PGOF: transporter activity

PGOC: membrane

PGOP: transport

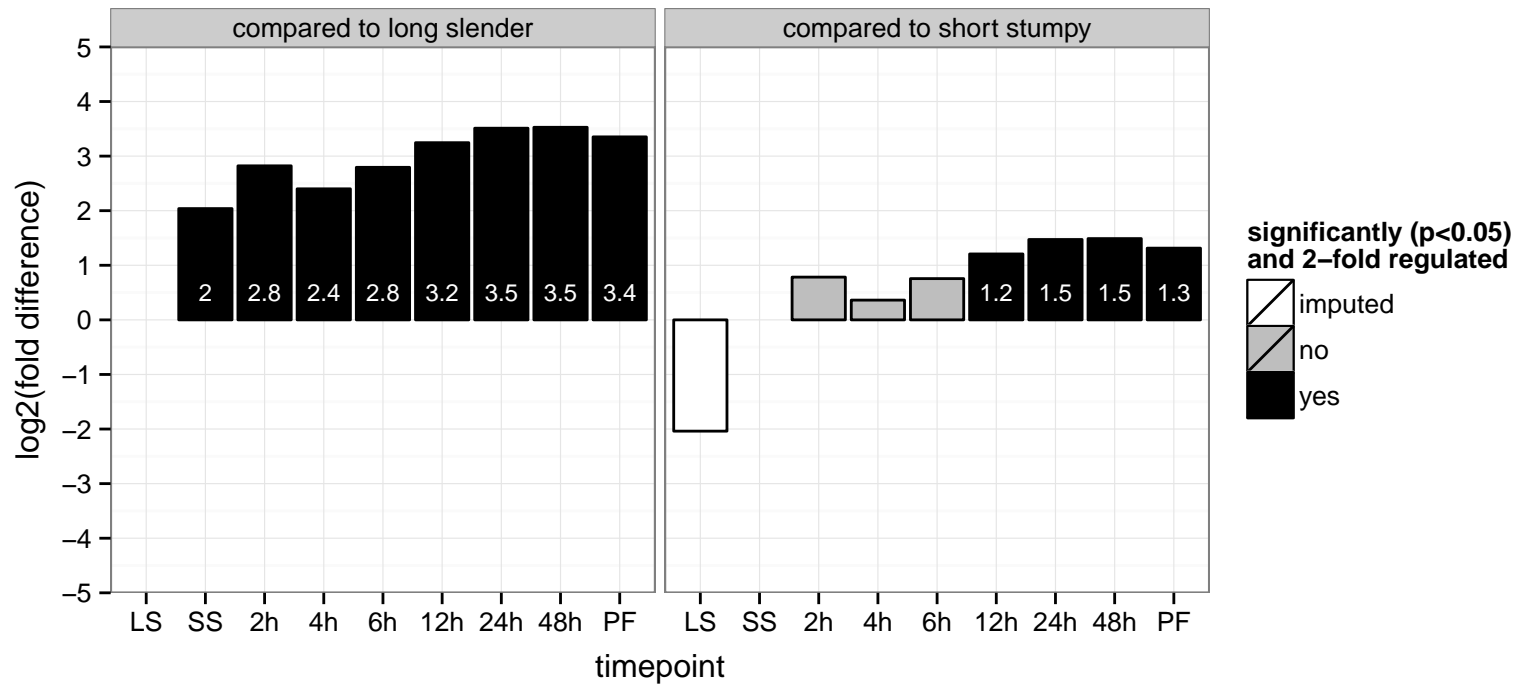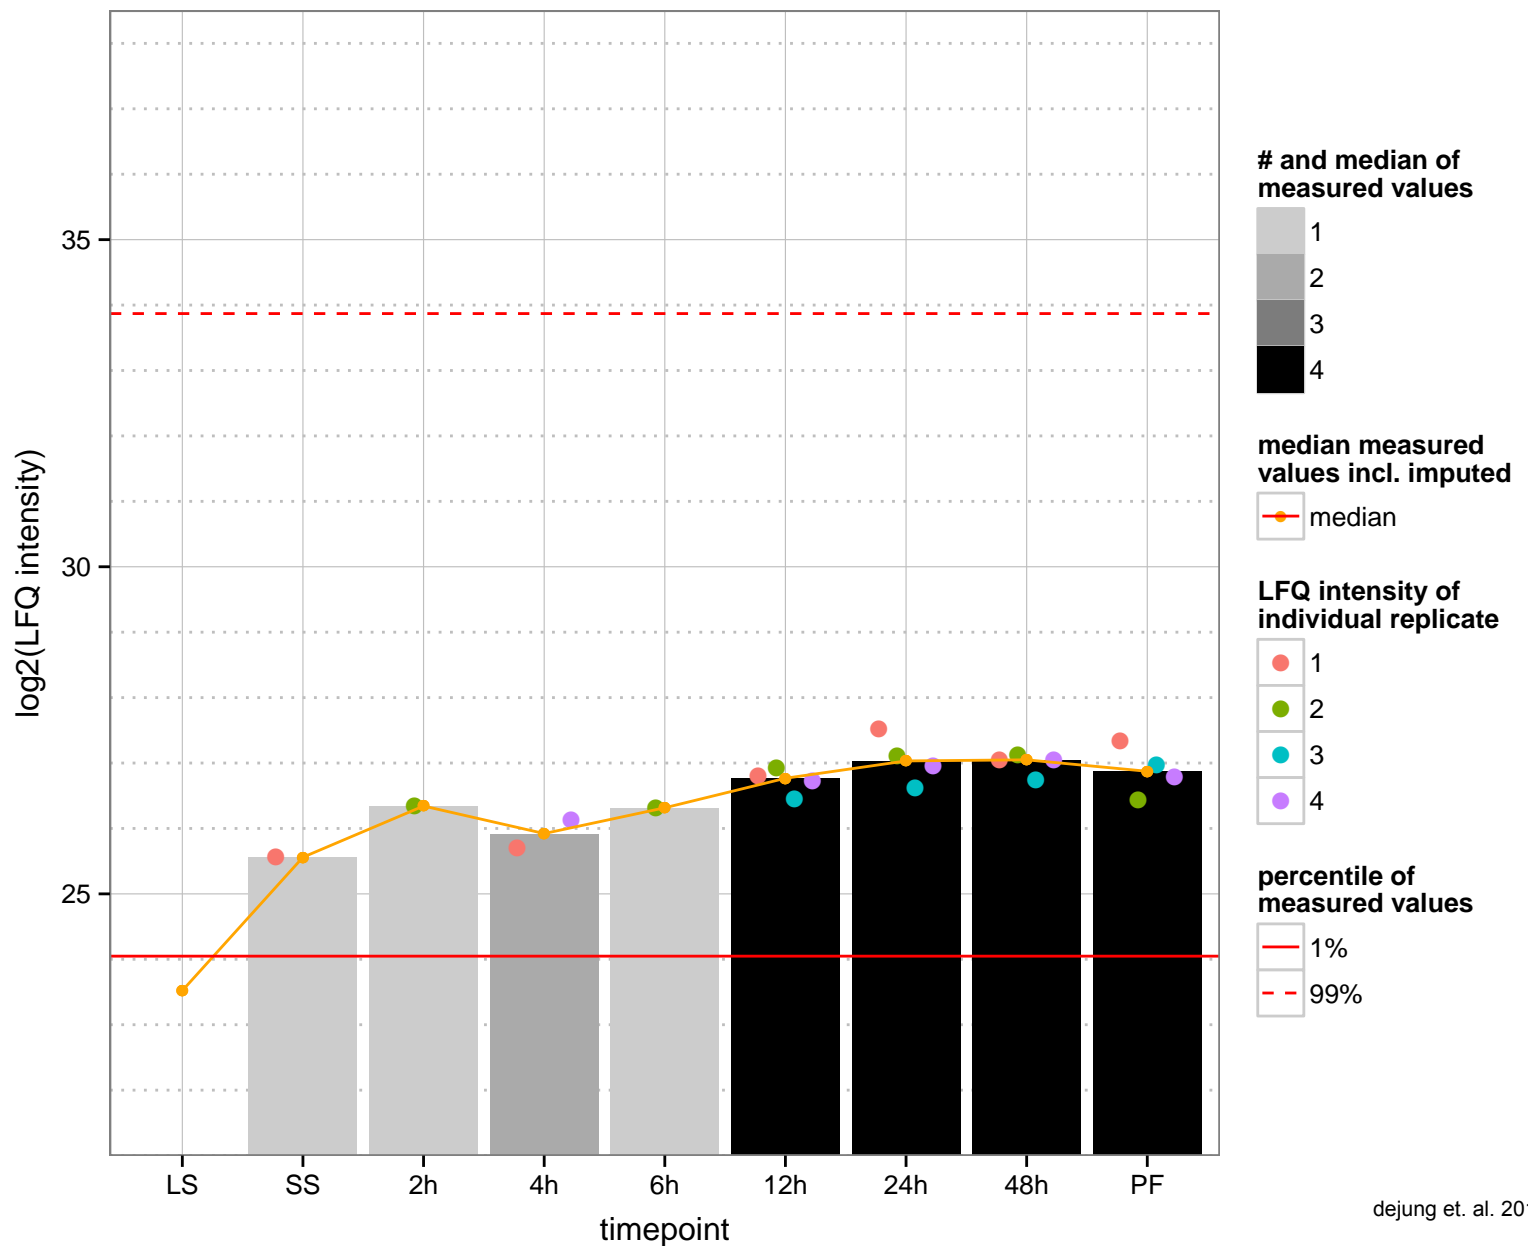

peroxin 13, SH3 domain protein, conserved (PEX13)  
 Tb927.10.14720  
 AGOF: null  
 AGOC: glycosome membrane  
 AGOP: peroxisomal membrane transport, peroxisome organization  
 PGO: protein binding  
 PGOC: null  
 PGOP: null

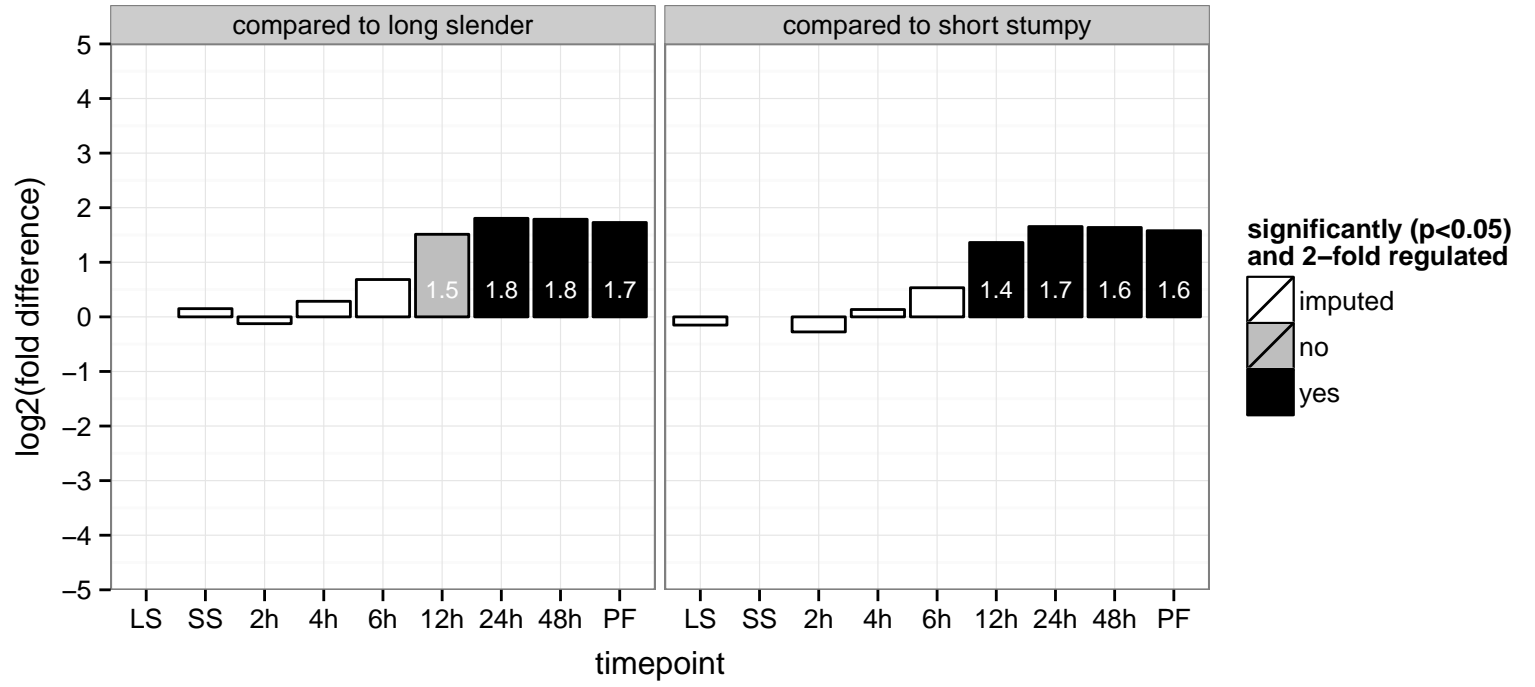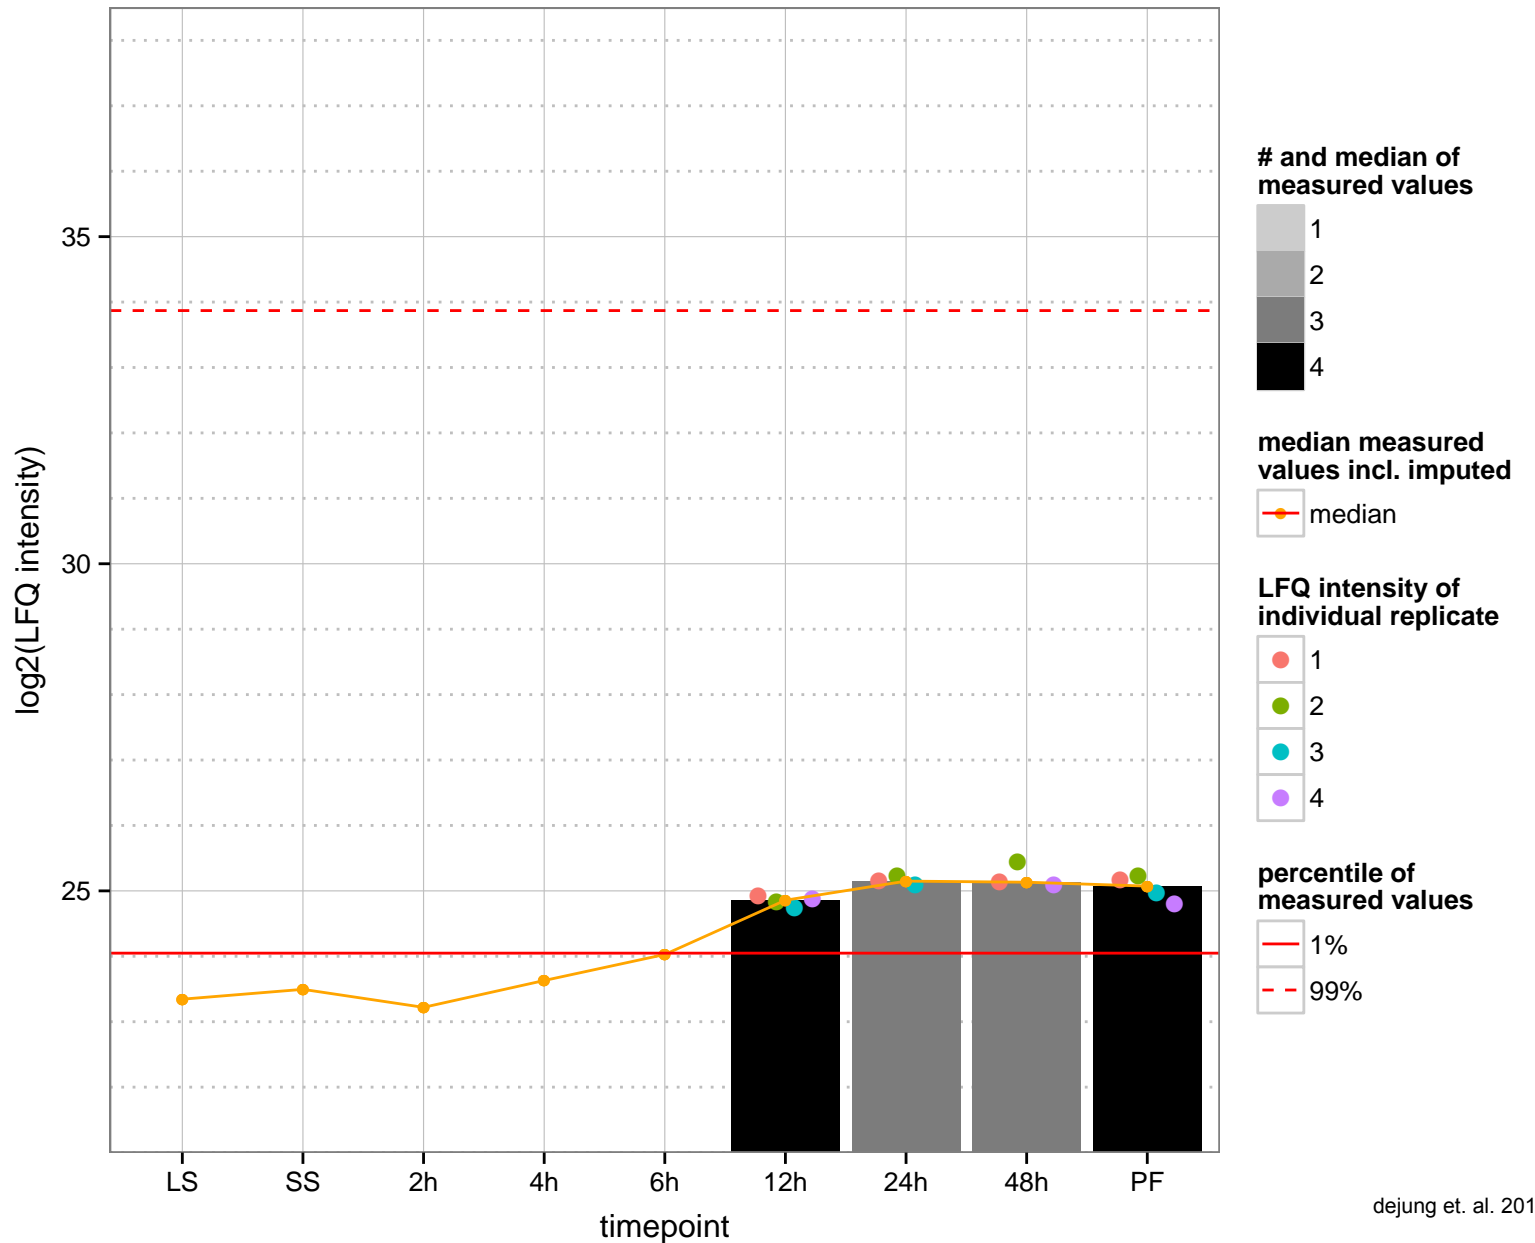

Multiprotein-bridging factor 1, putative (mbf1)

Tb927.10.14810

AGOF: DNA binding, sequence-specific DNA binding, transcription coactivator activity

AGOC: null

AGOP: positive regulation of transcription from RNA polymerase II promoter

PGOF: DNA binding, sequence-specific DNA binding

PGOC: null

PGOP: null

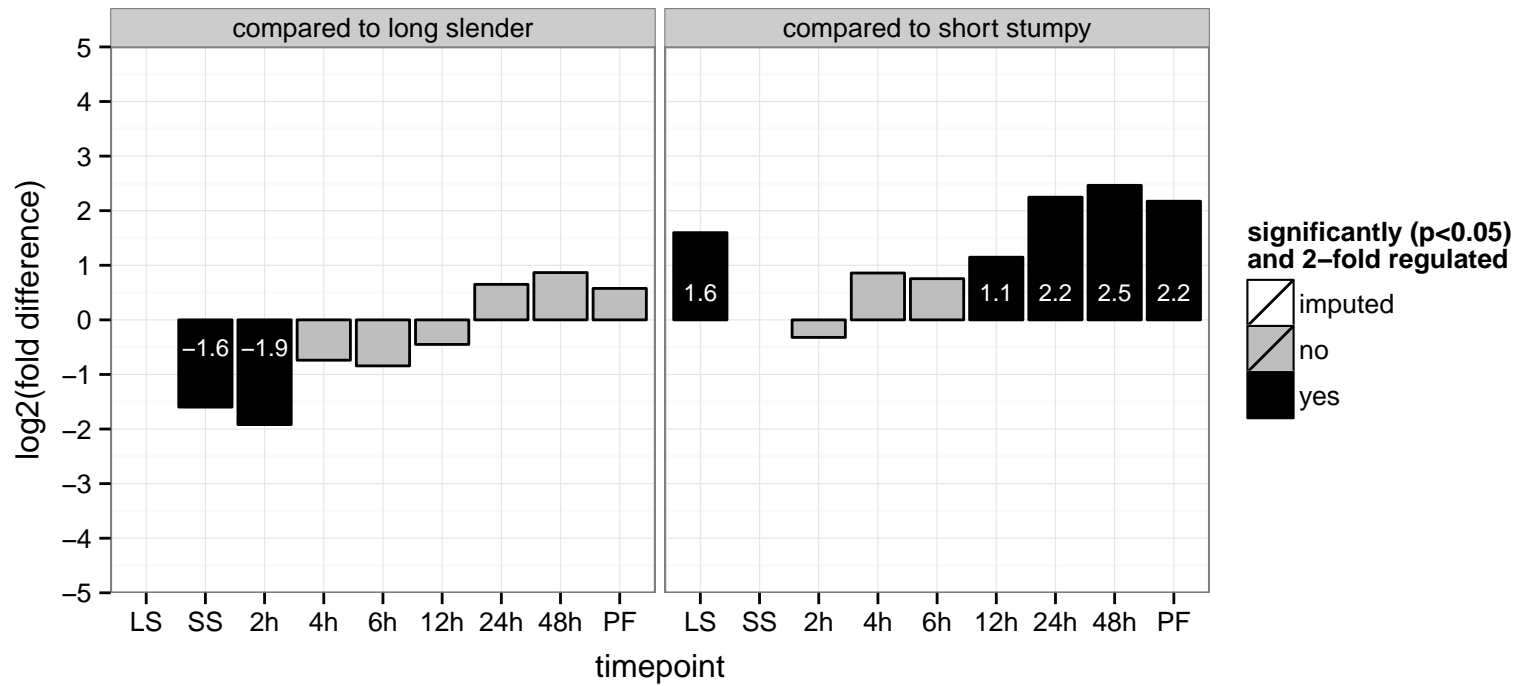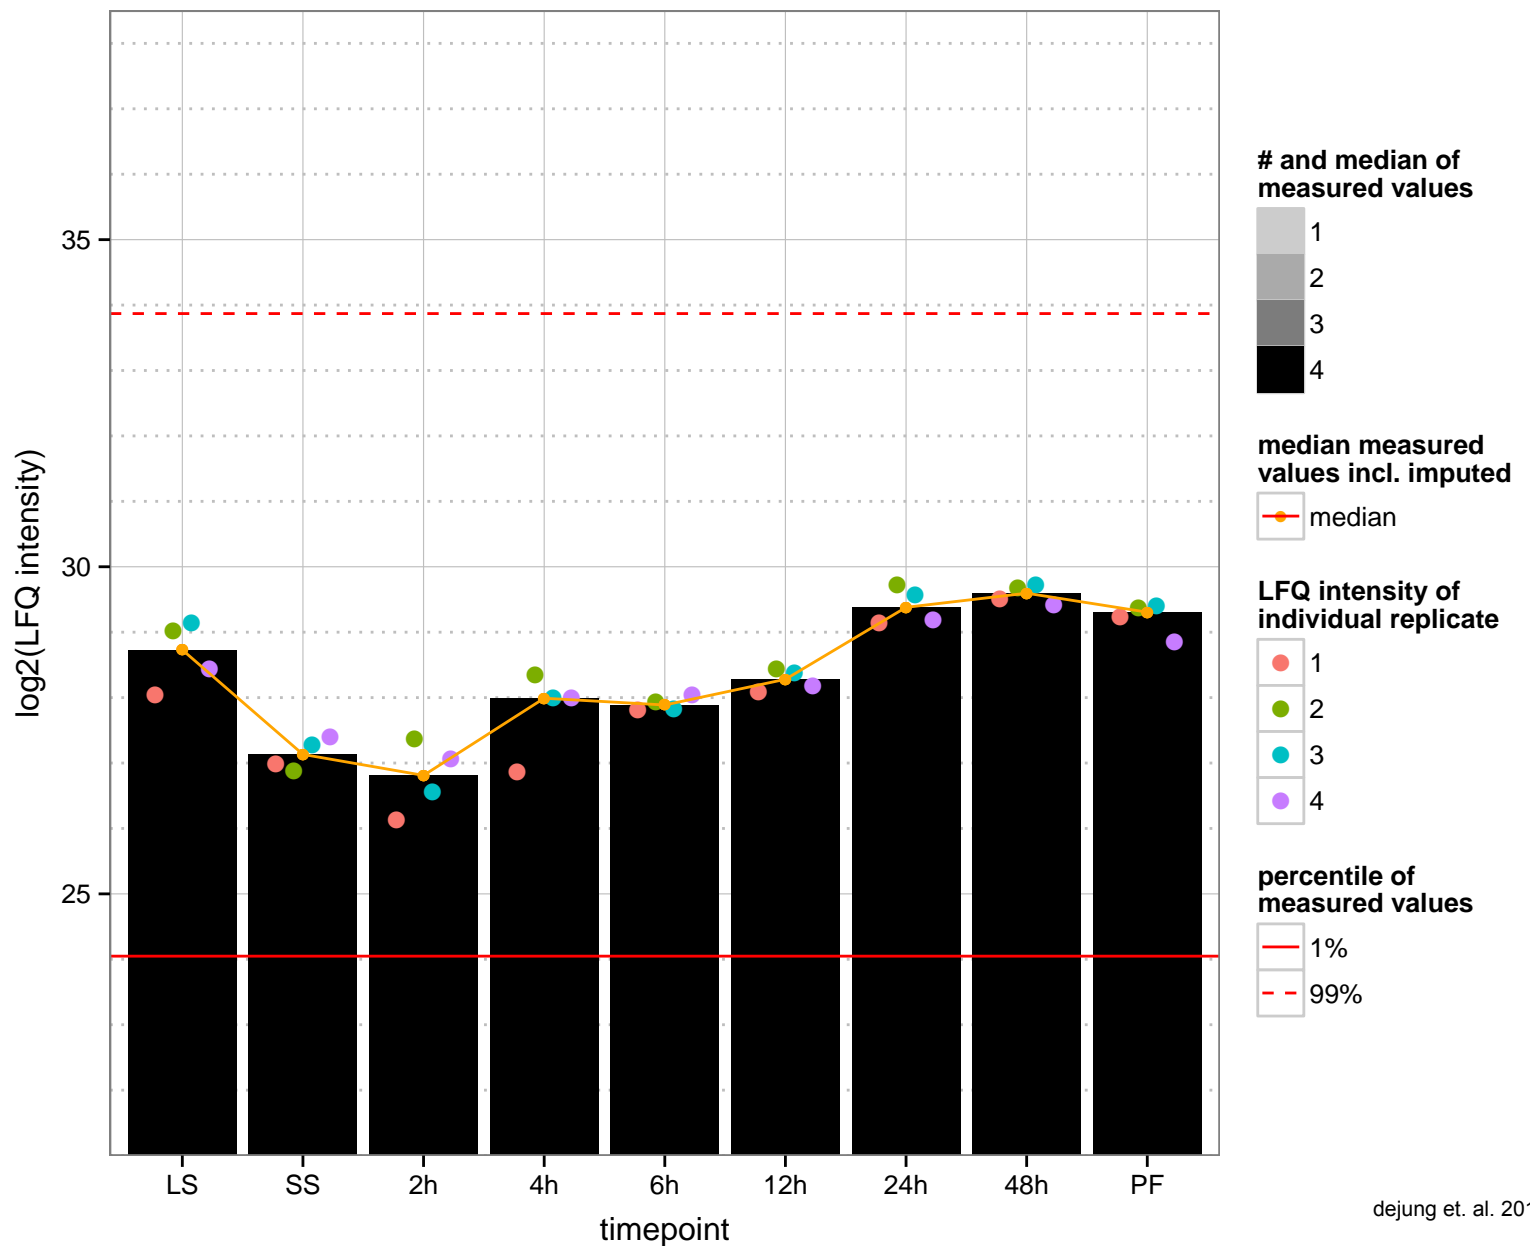

Zinc finger CCCH domain-containing protein 39 (ZC3H39)

Tb927.10.14930

AGOF: RNA binding, ubiquitin-protein ligase activity

AGOC: ubiquitin ligase complex

AGOP: protein ubiquitination

PGOF: nucleic acid binding, zinc ion binding

PGOC: null

PGOP: null

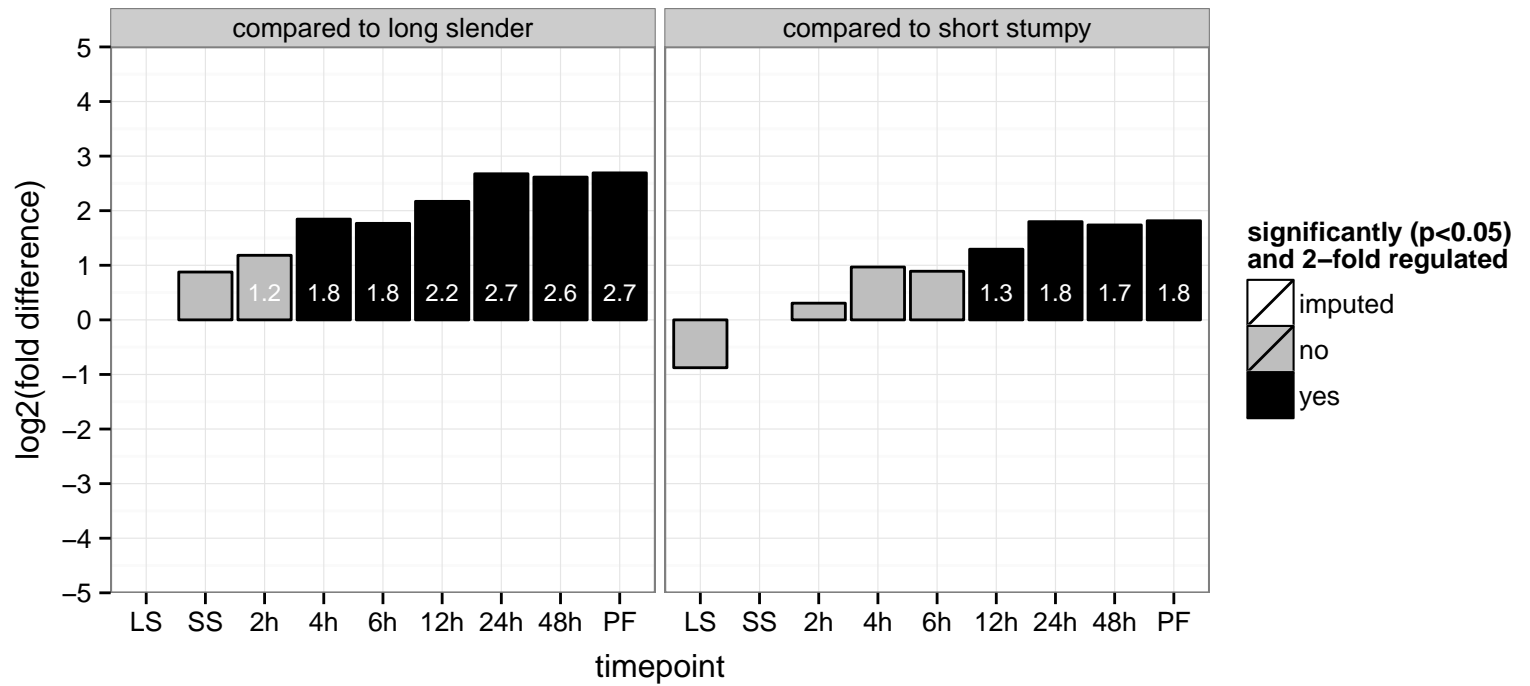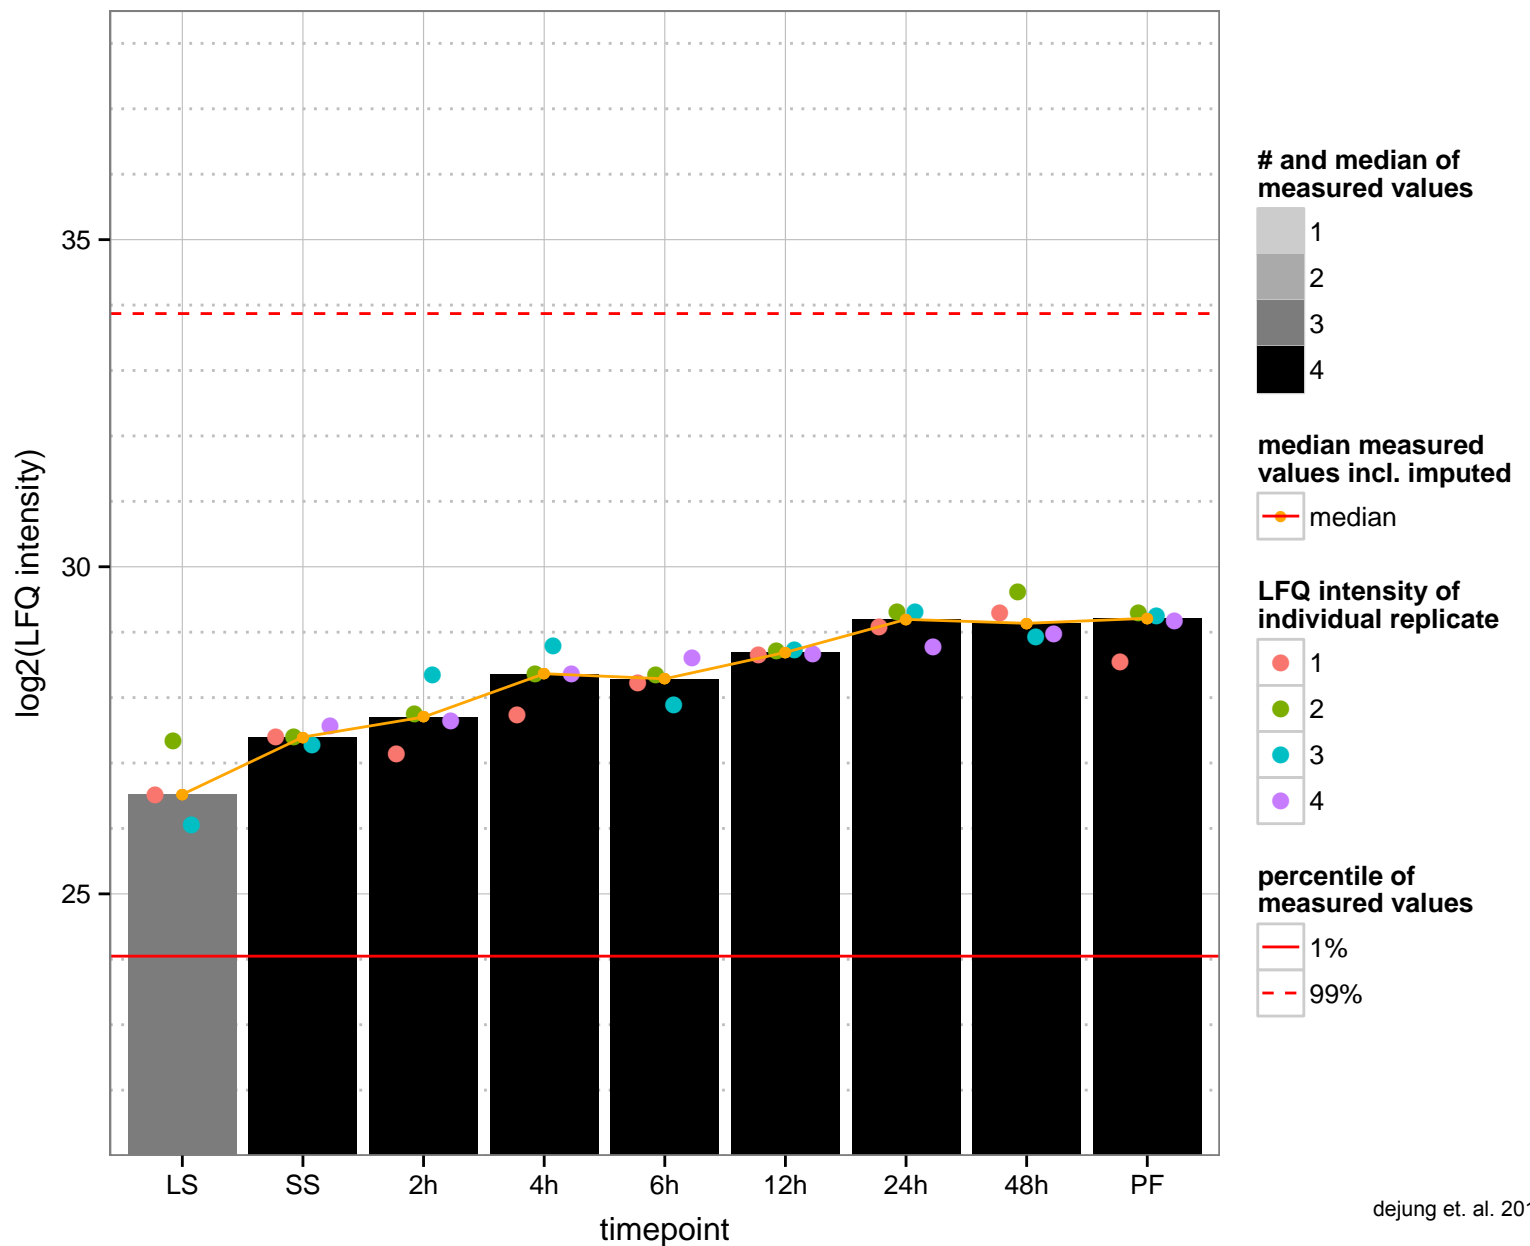

zinc finger protein family member, putative (ZC3H30)  
 Tb927.10.1540  
 AGOF: RNA binding  
 AGOC: null  
 AGOP: null  
 PGO: null  
 PGOC: null  
 PGOP: null

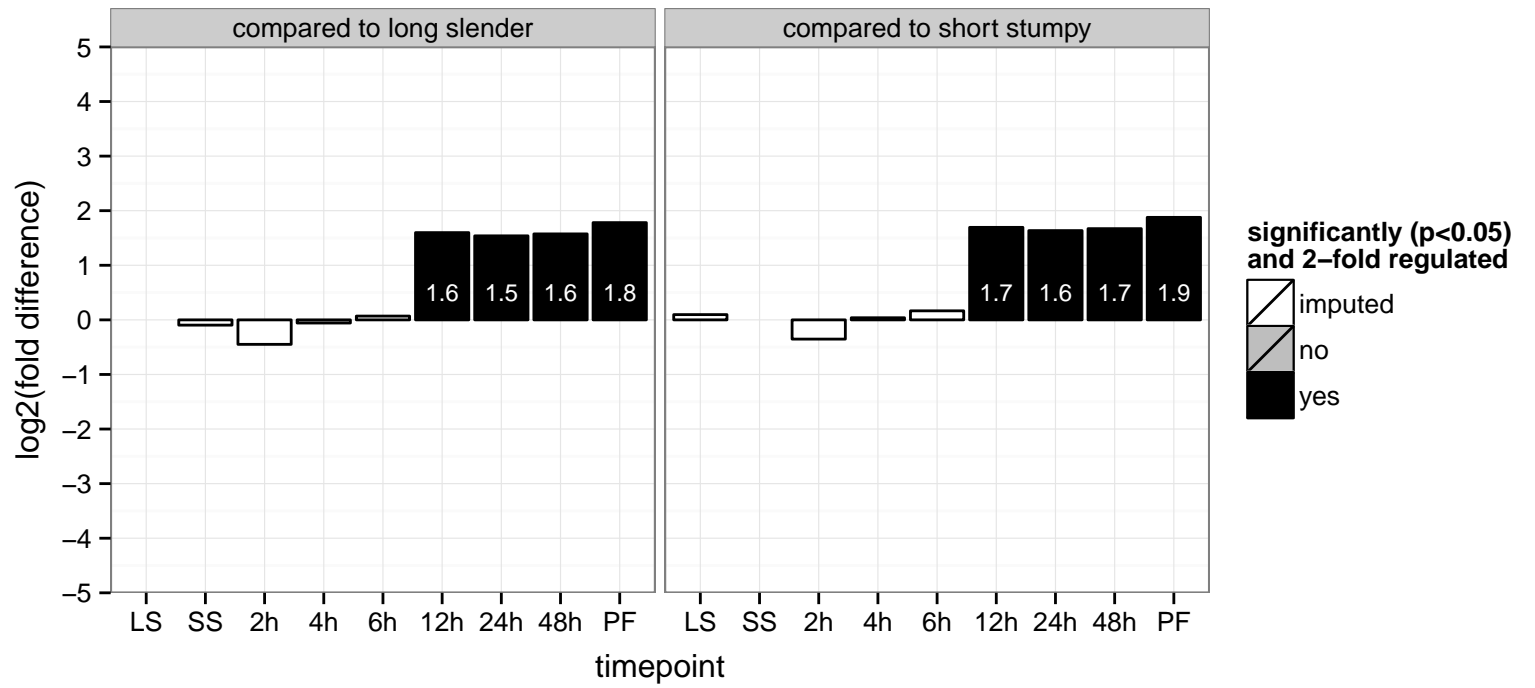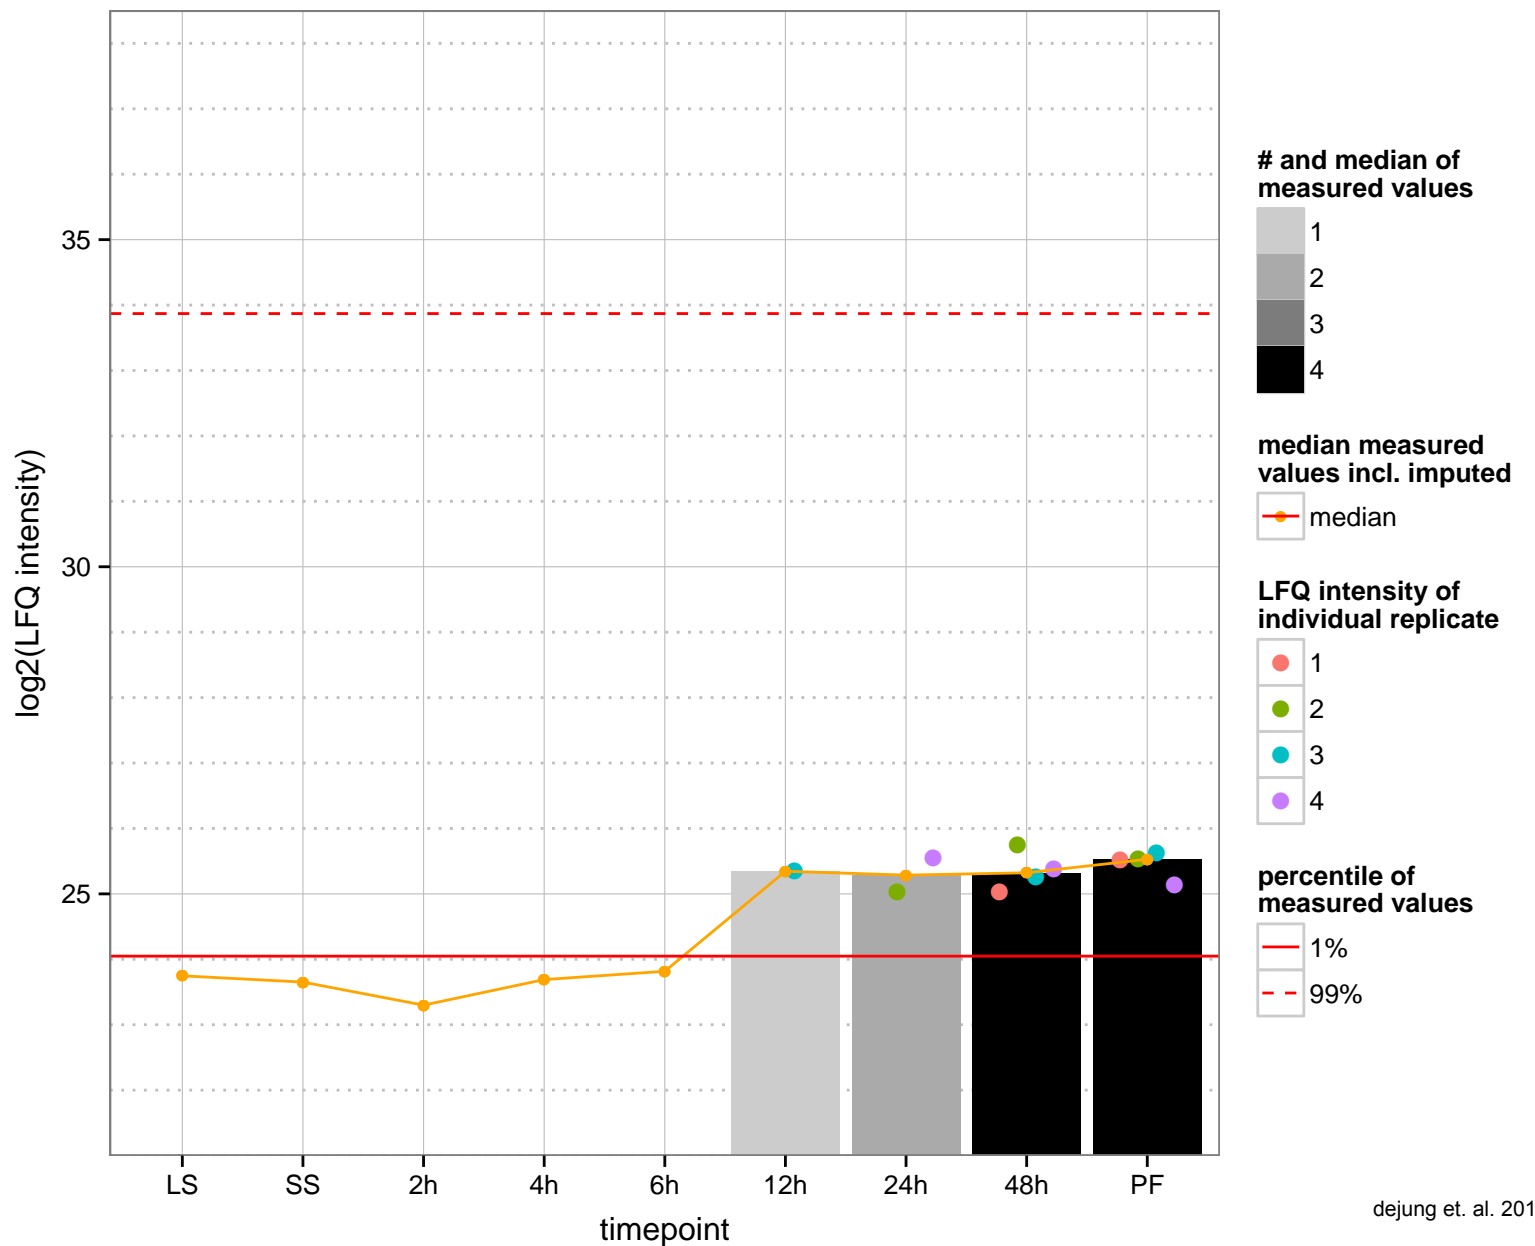

hypothetical protein, conserved  
 Tb927.10.2060  
 AGOF: null  
 AGOC: mitochondrion  
 AGOP: null  
 PGO: null  
 PGOC: null  
 PGOP: null

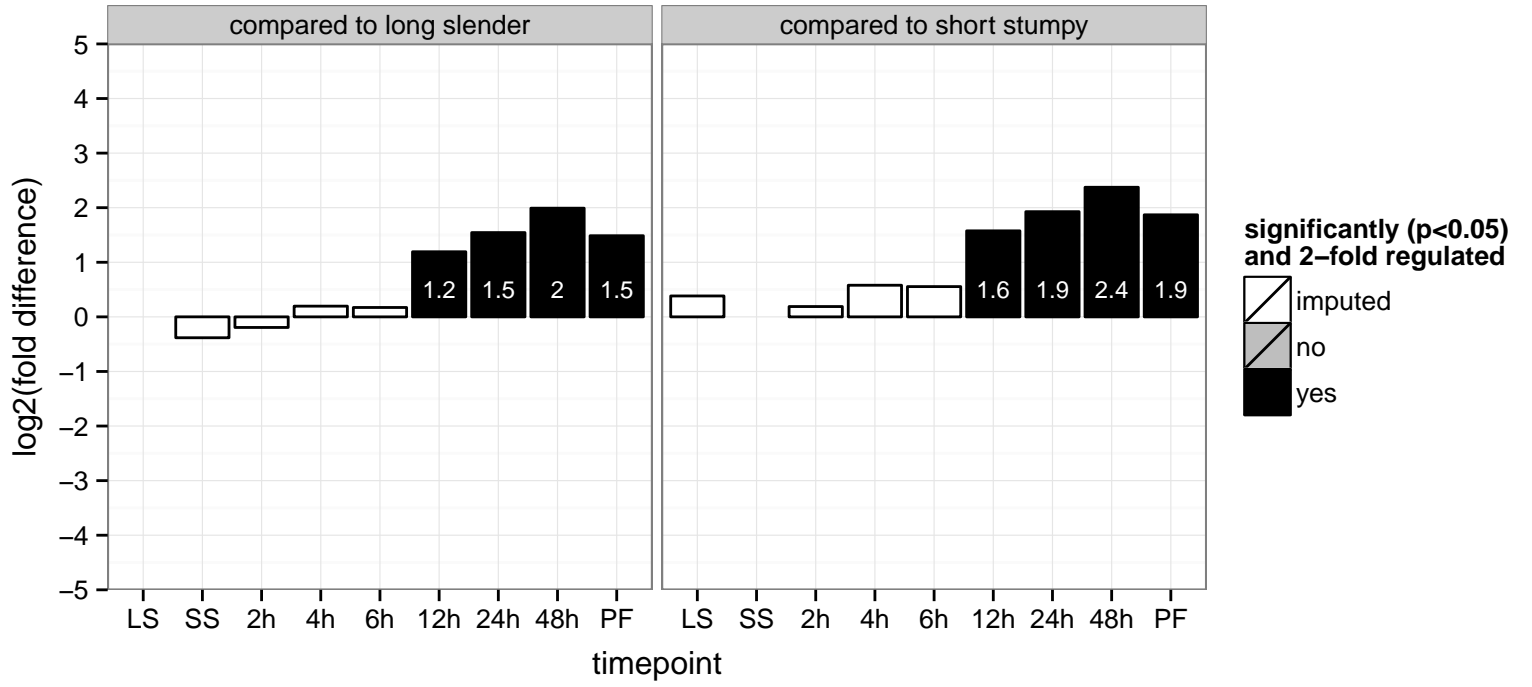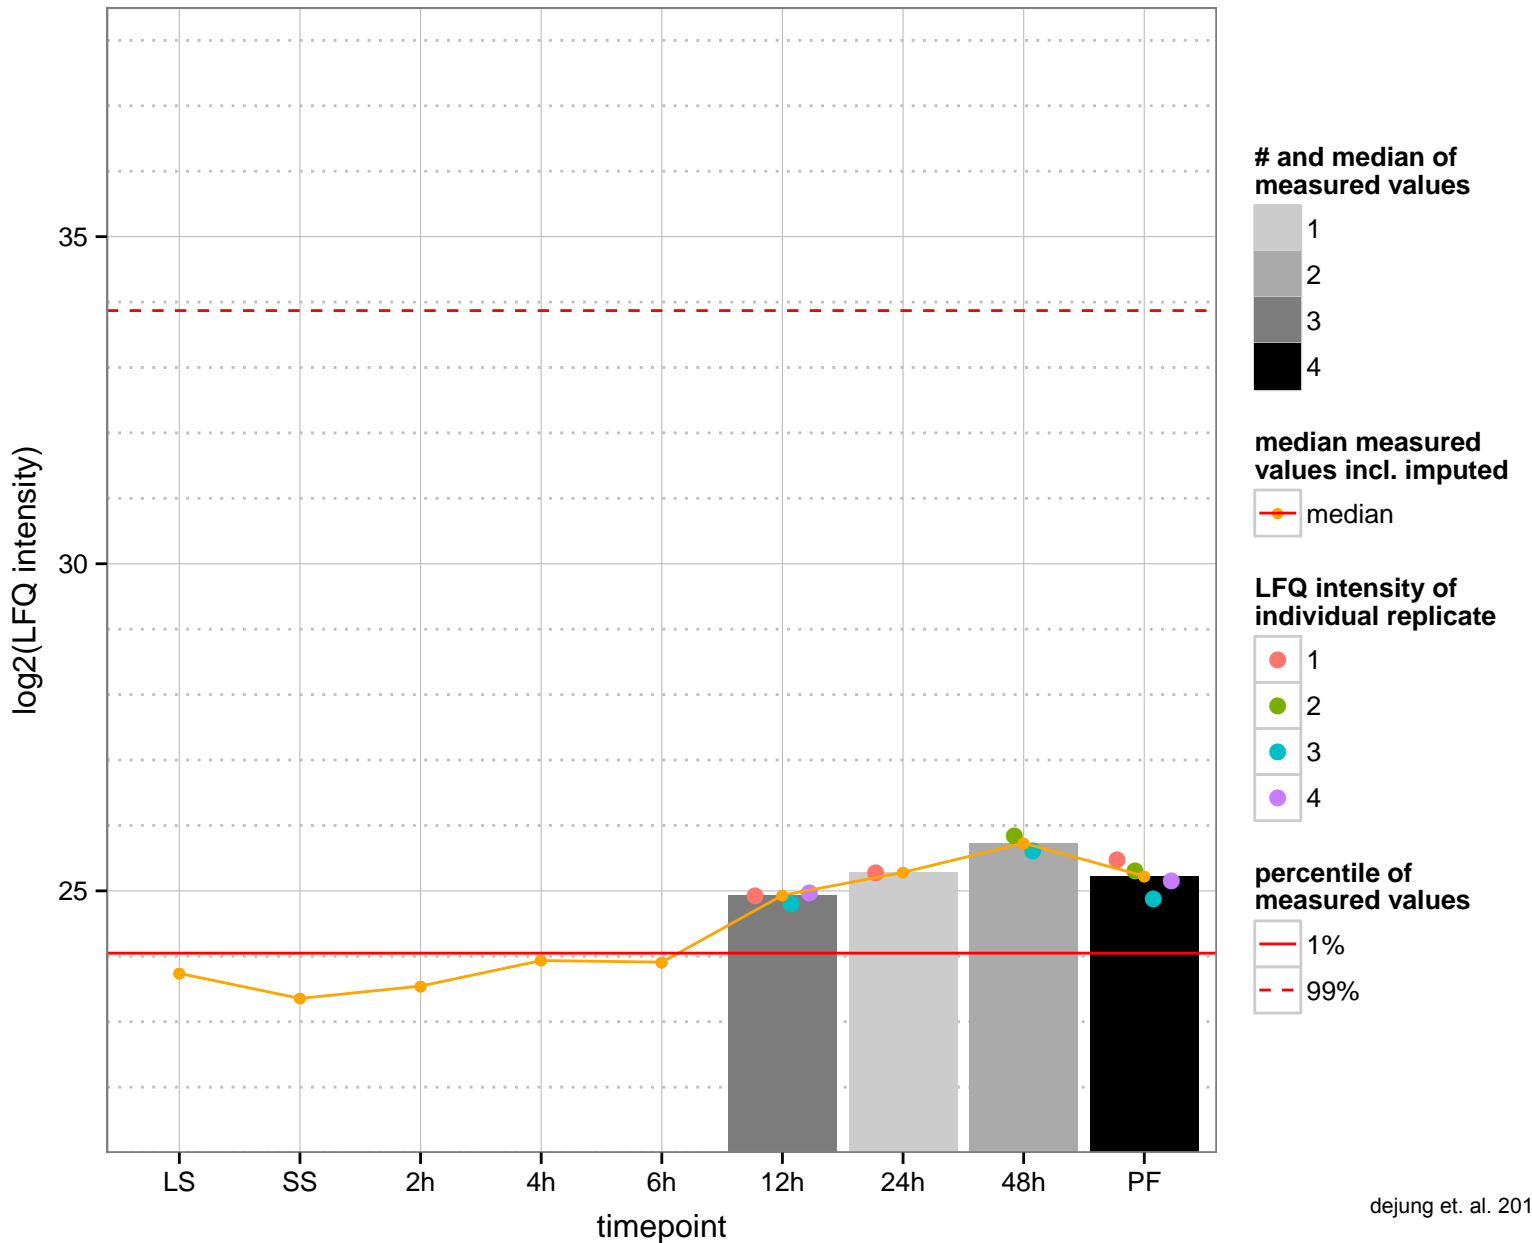



pumillio/PUF RNA binding protein 3 (PUF3)  
 Tb927.10.310  
 AGOF: RNA binding  
 AGOC: null  
 AGOP: mRNA metabolic process  
 PGO: RNA binding, binding  
 PGO: null  
 PGO: null

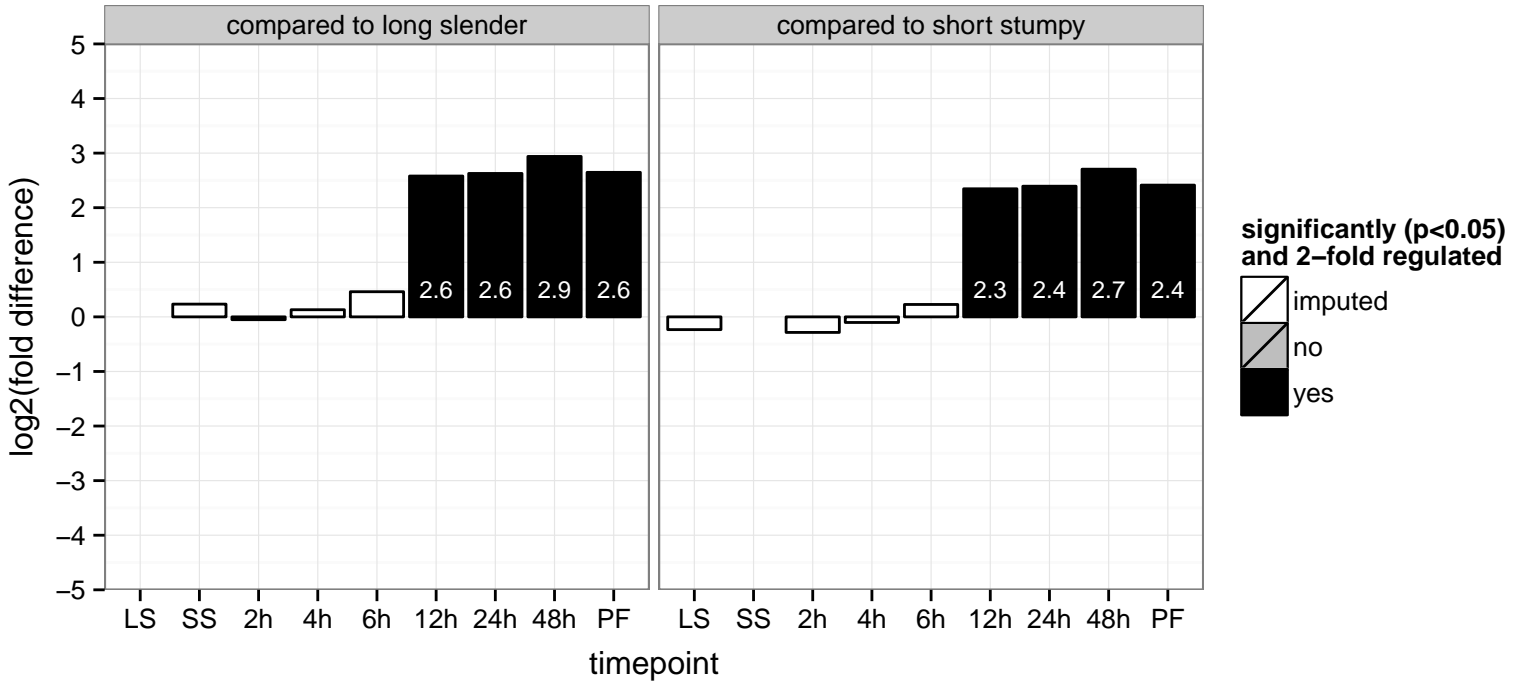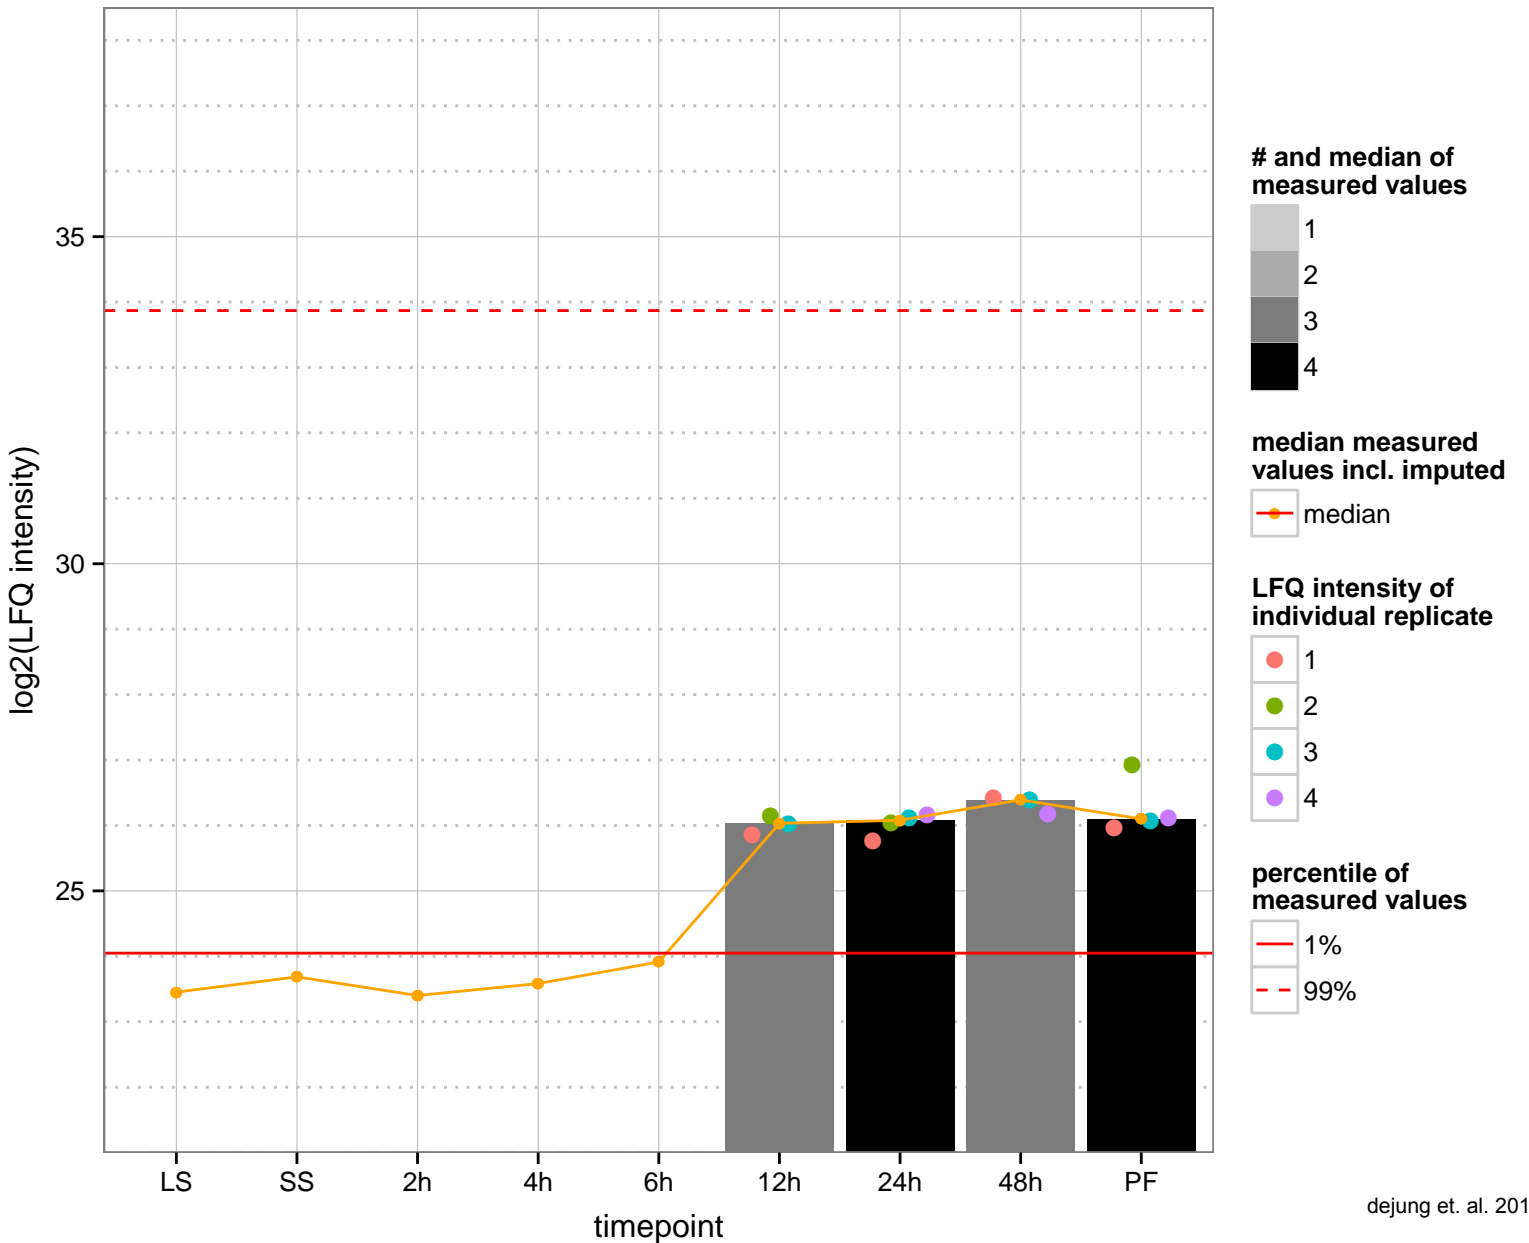

hypothetical protein, conserved  
 Tb927.10.3250  
 AGOF: null  
 AGOC: null, mitochondrion  
 AGOP: null  
 PGO: null  
 PGOC: null  
 PGOP: null

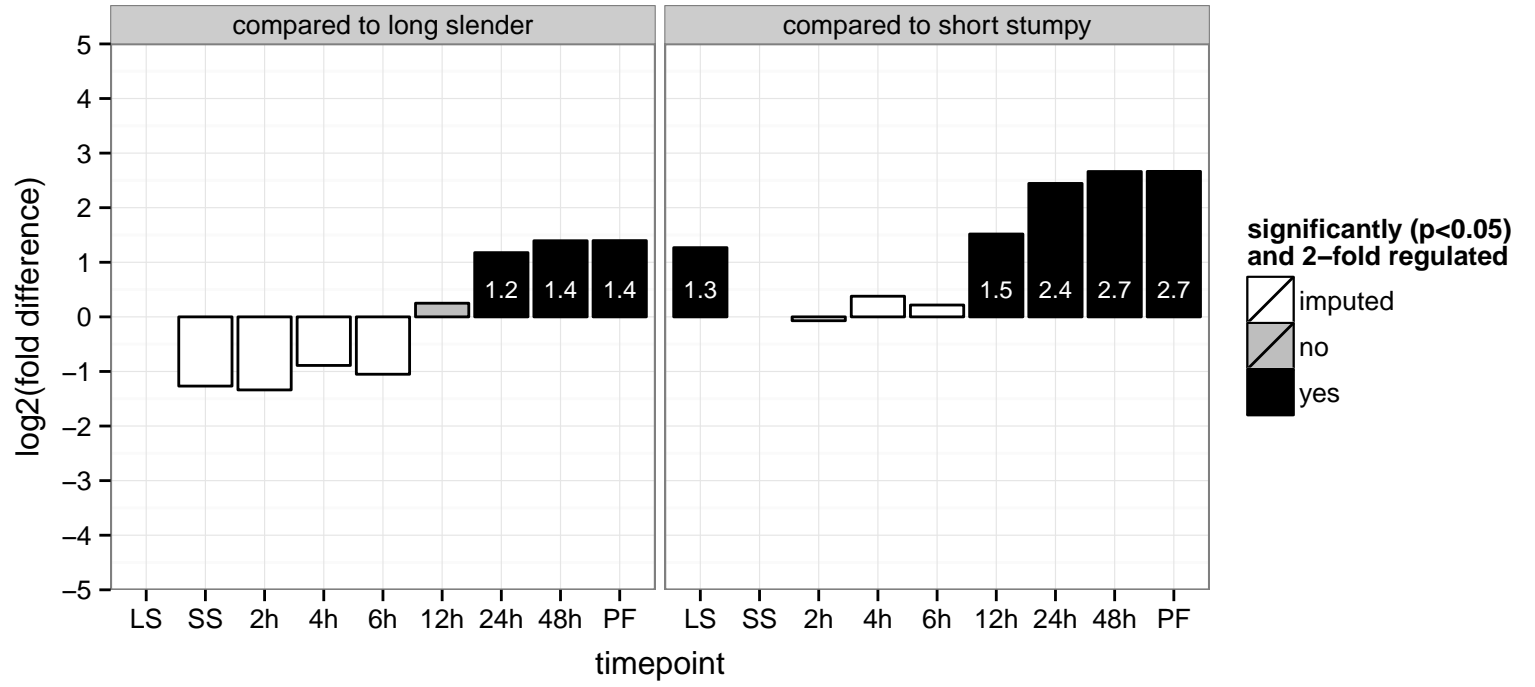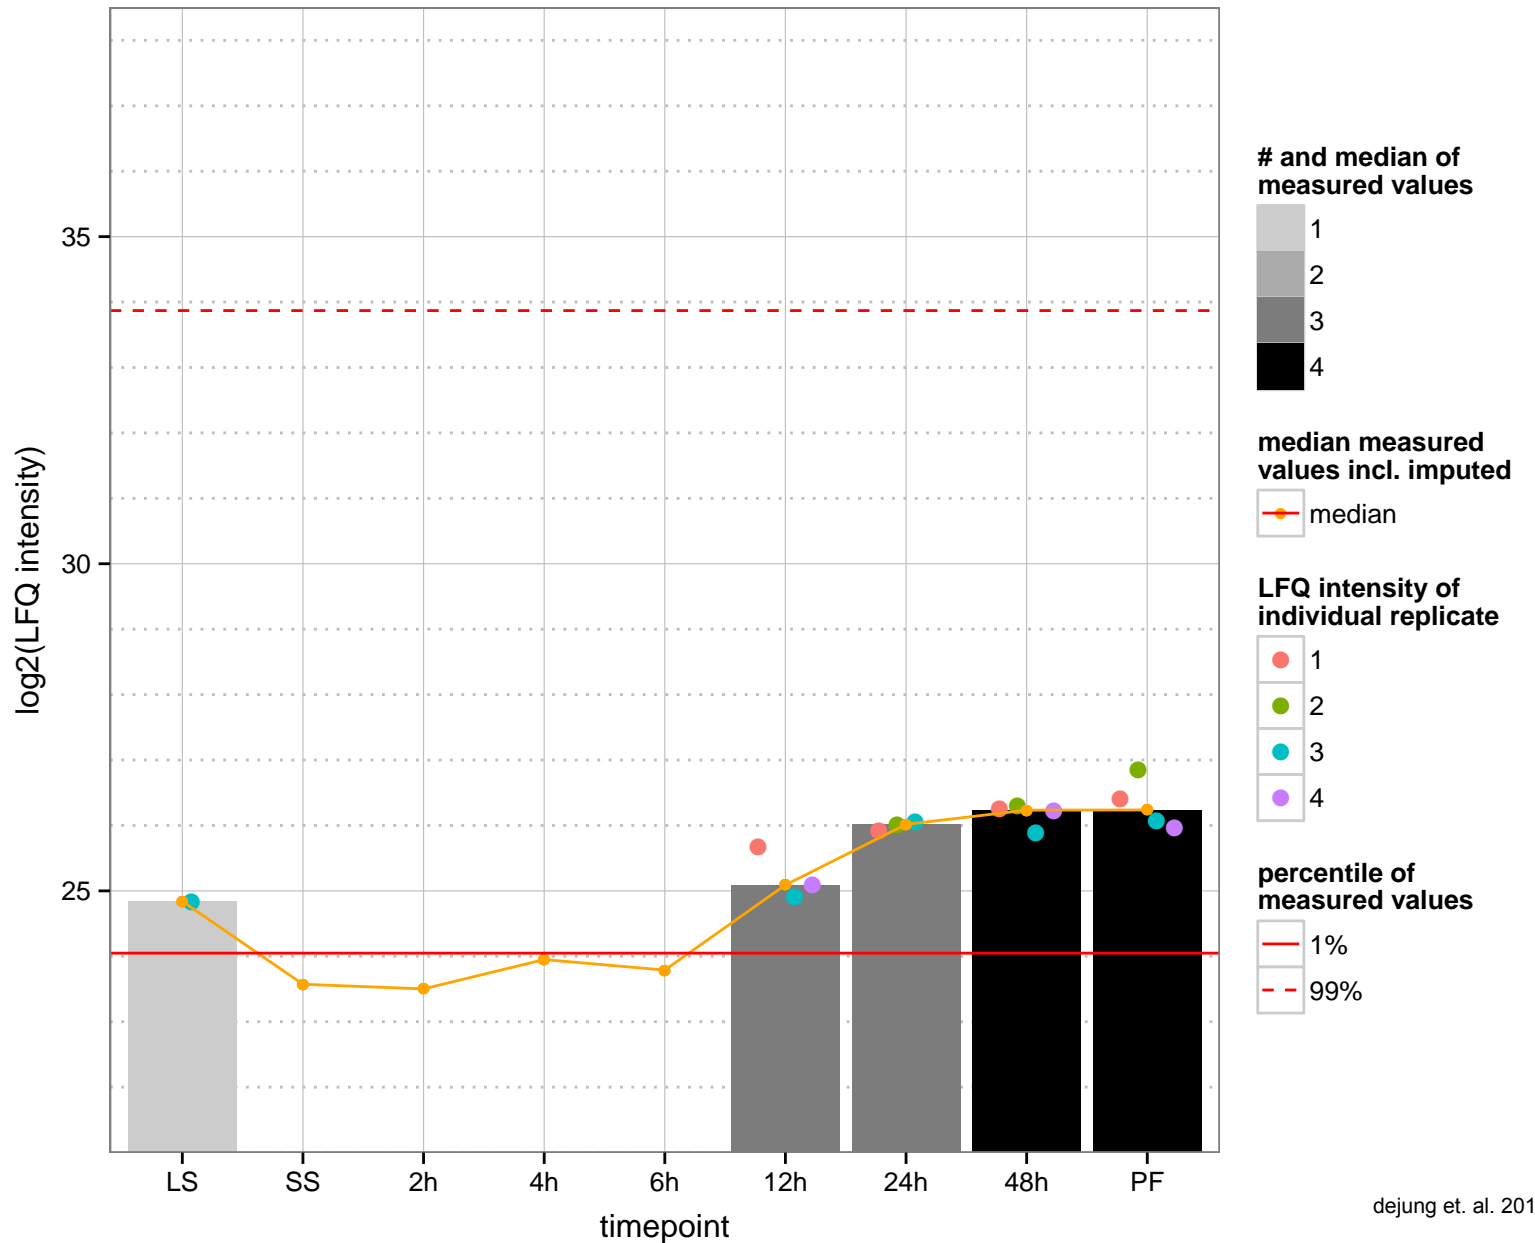

hypothetical protein, conserved  
 Tb927.10.4240  
 AGOF: null  
 AGOC: mitochondrial inner membrane, mitochondrion  
 AGOP: null  
 PGO: null  
 PGO: null  
 PGO: null

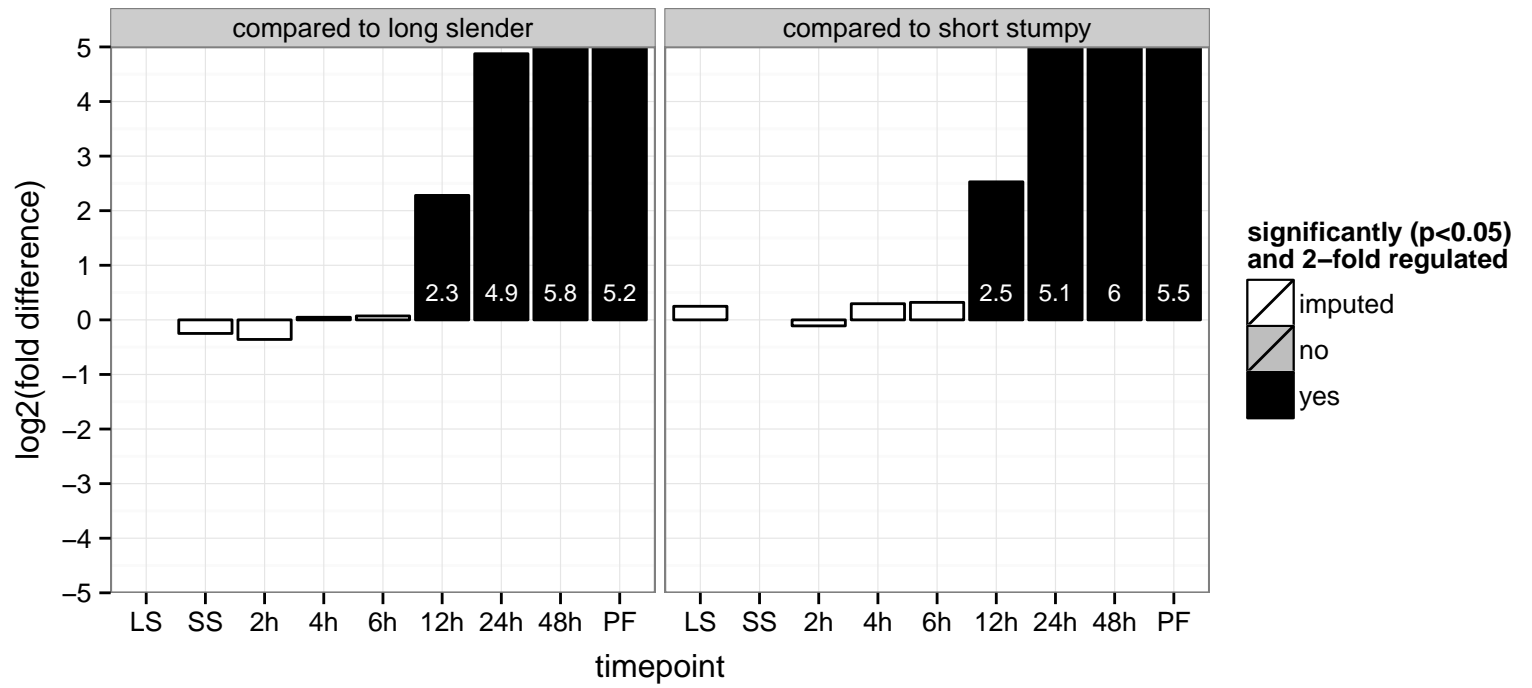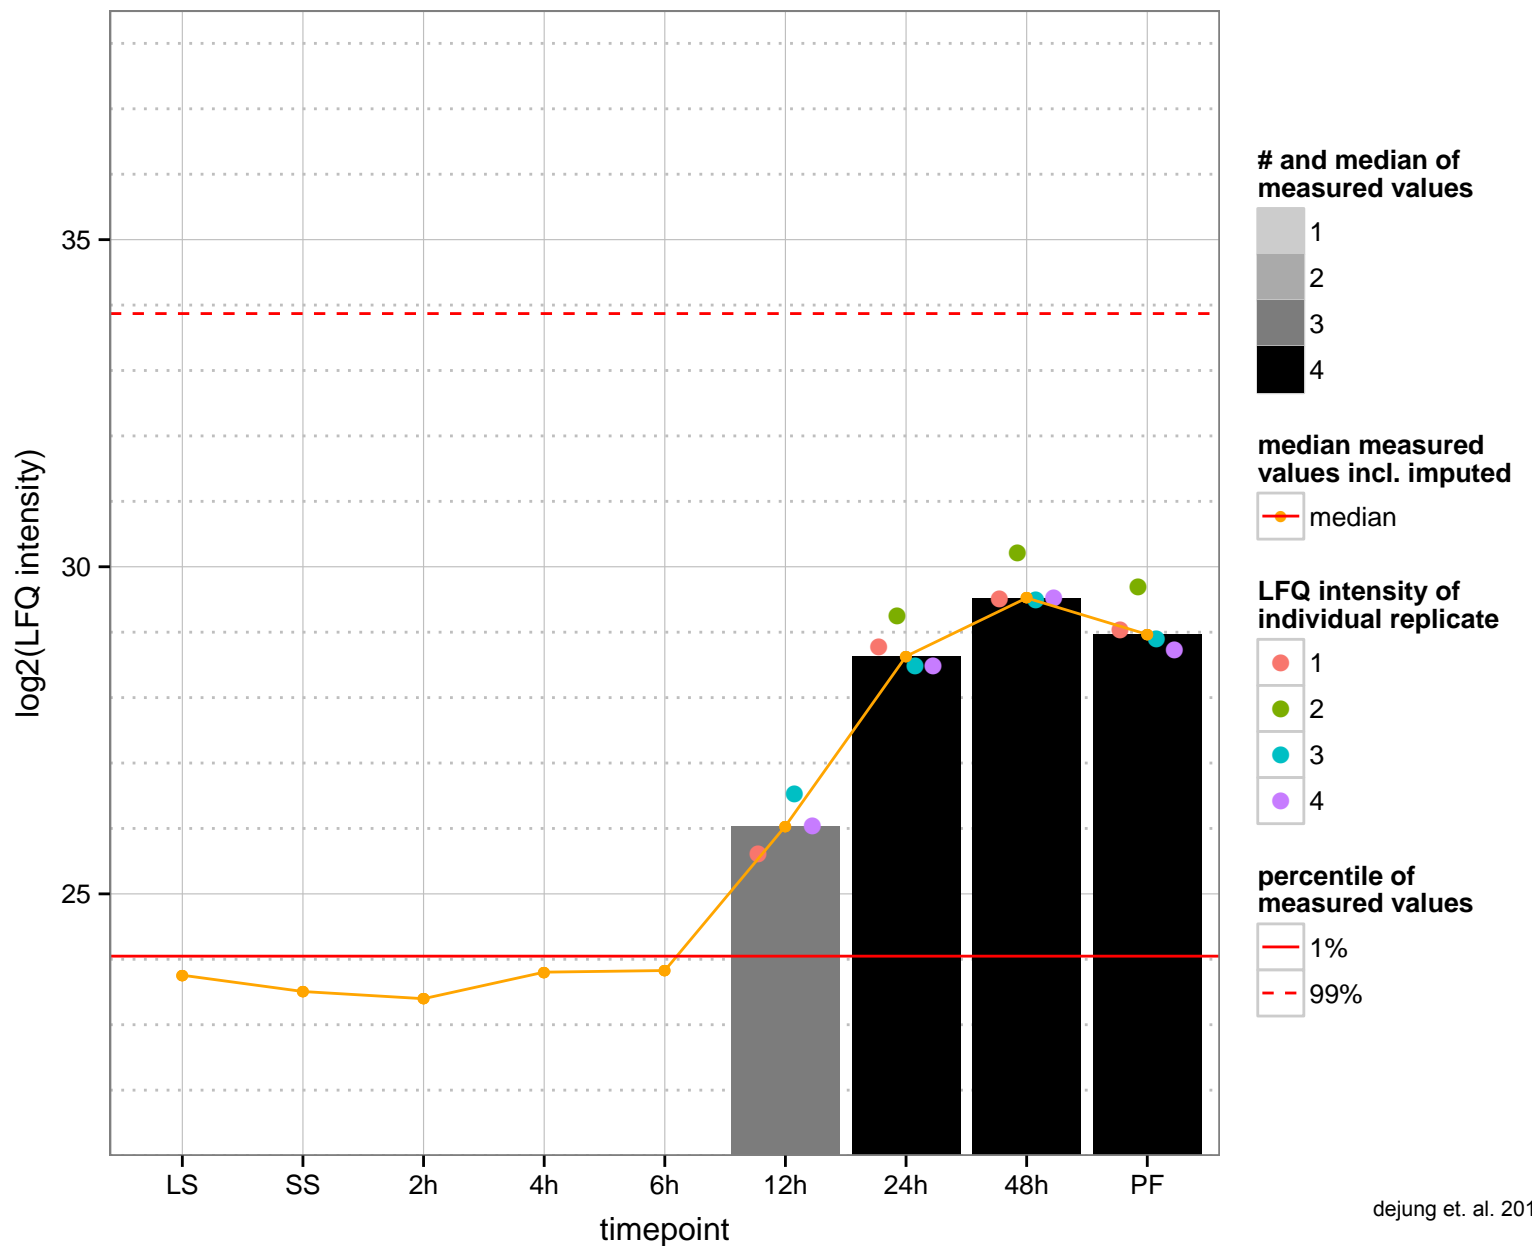

hypothetical protein, conserved  
 Tb927.10.4280  
 AGOF: ubiquinol-cytochrome-c reductase activity  
 AGOC: mitochondrion  
 AGOP: mitochondrial electron transport, ubiquinol to cytochrome c  
 PGO: ubiquinol-cytochrome-c reductase activity  
 PGOC: null  
 PGOP: mitochondrial electron transport, ubiquinol to cytochrome c

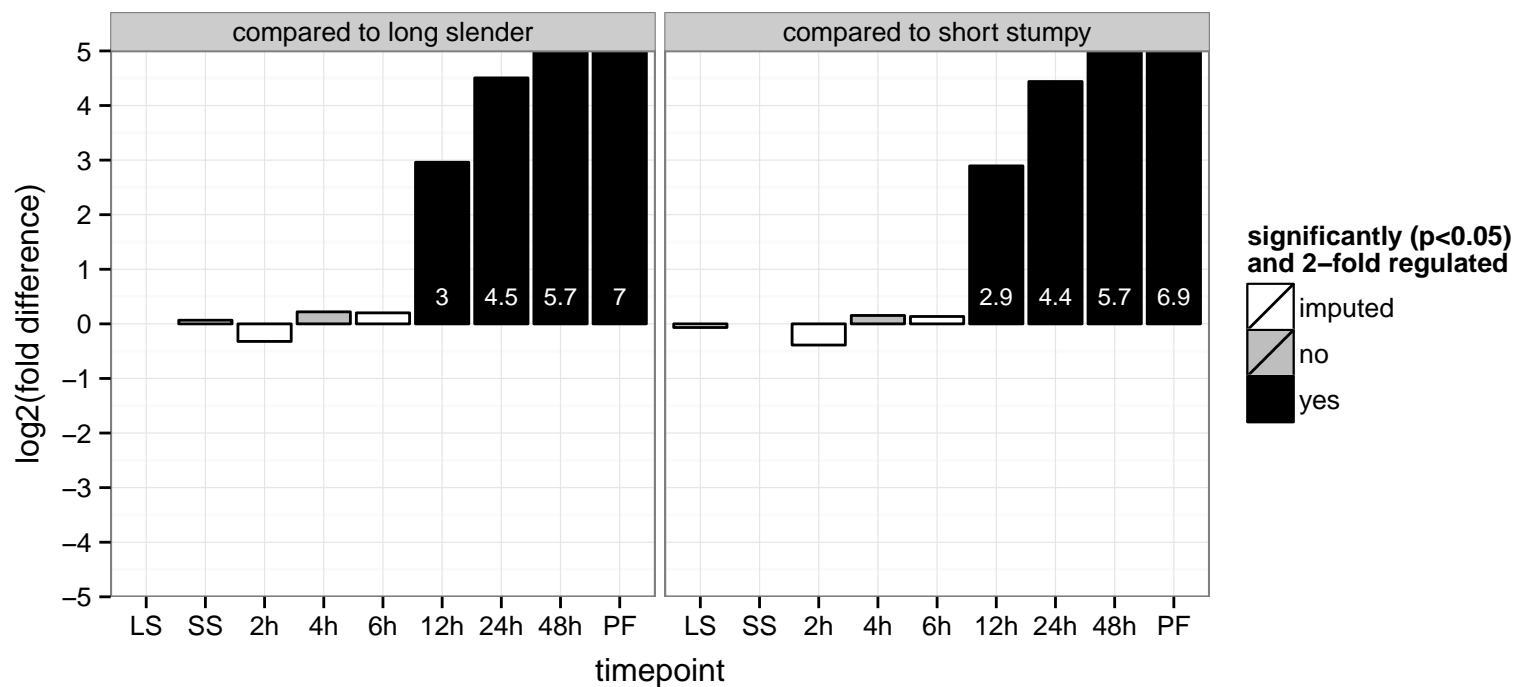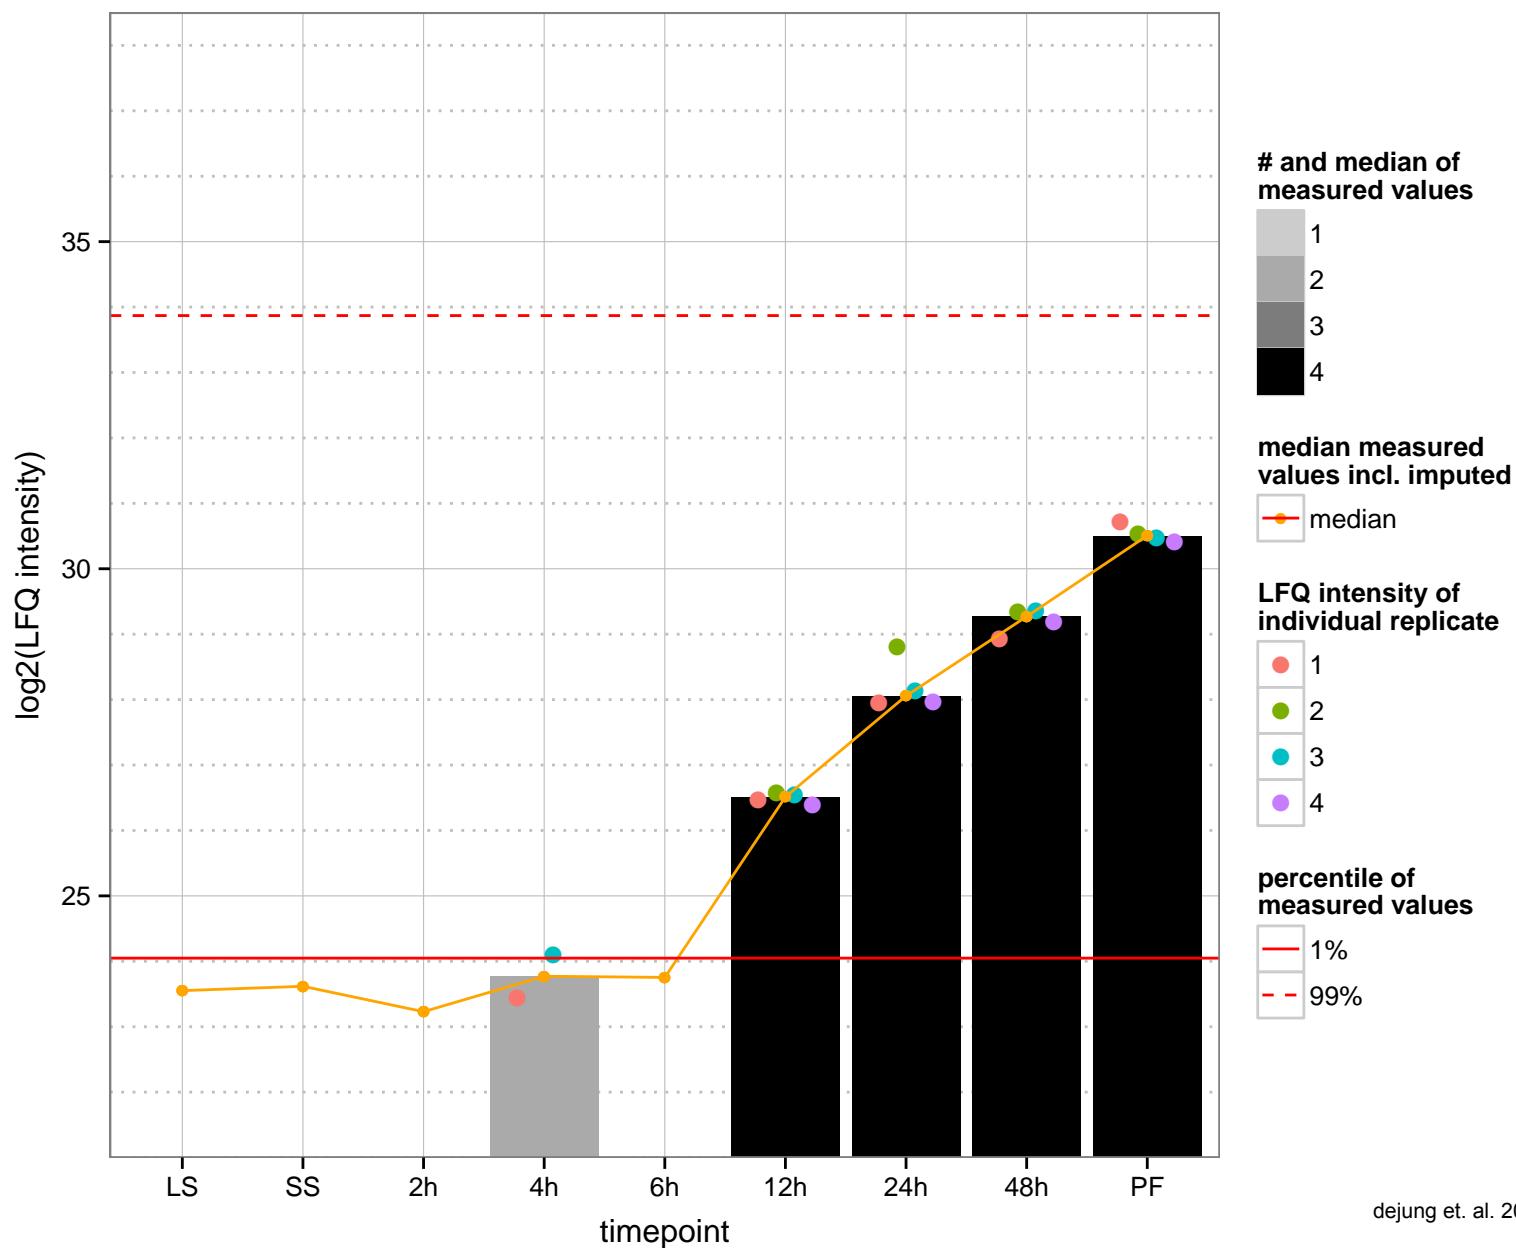

hypothetical protein, conserved  
 Tb927.10.430  
 AGOF: heme binding, peroxidase activity  
 AGOC: mitochondrion  
 AGOP: response to oxidative stress  
 PGO: heme binding, peroxidase activity  
 PGOC: null  
 PGO: oxidation–reduction process, response to oxidative stress

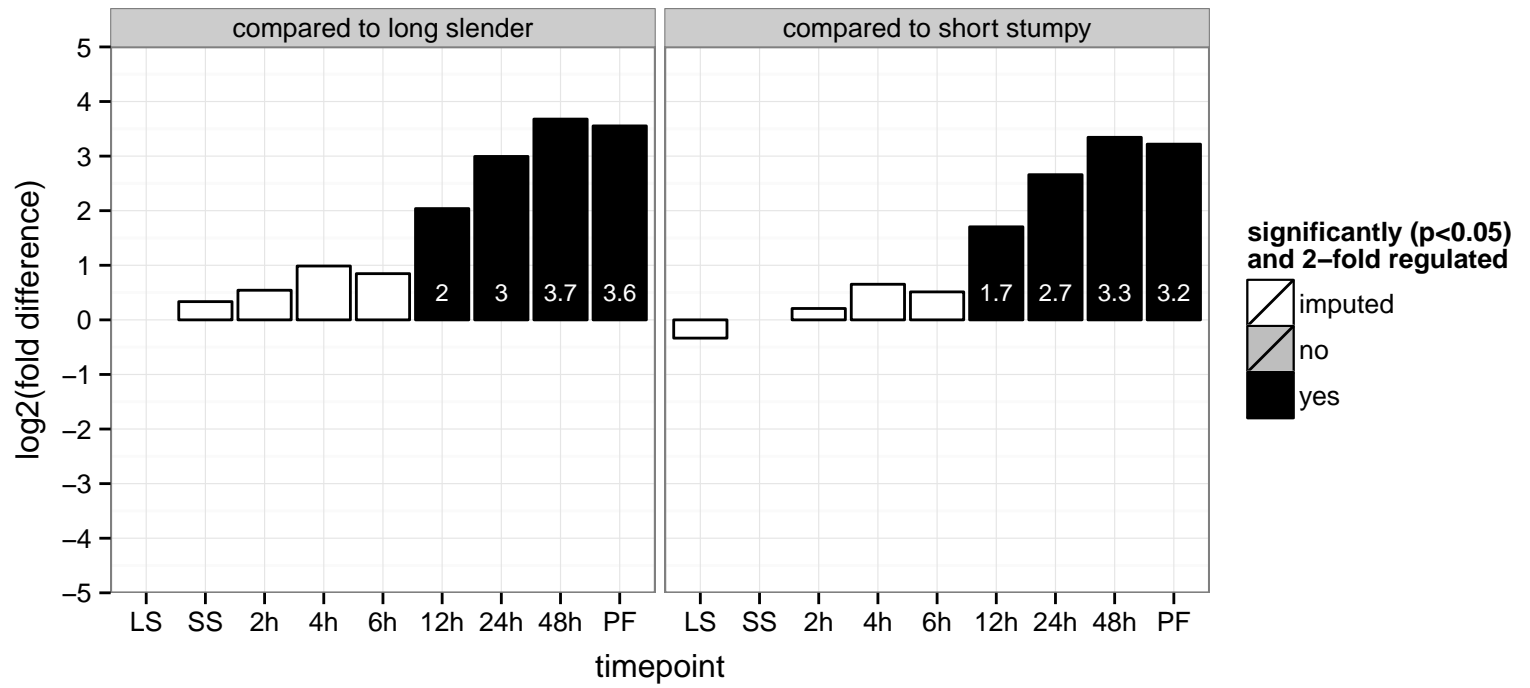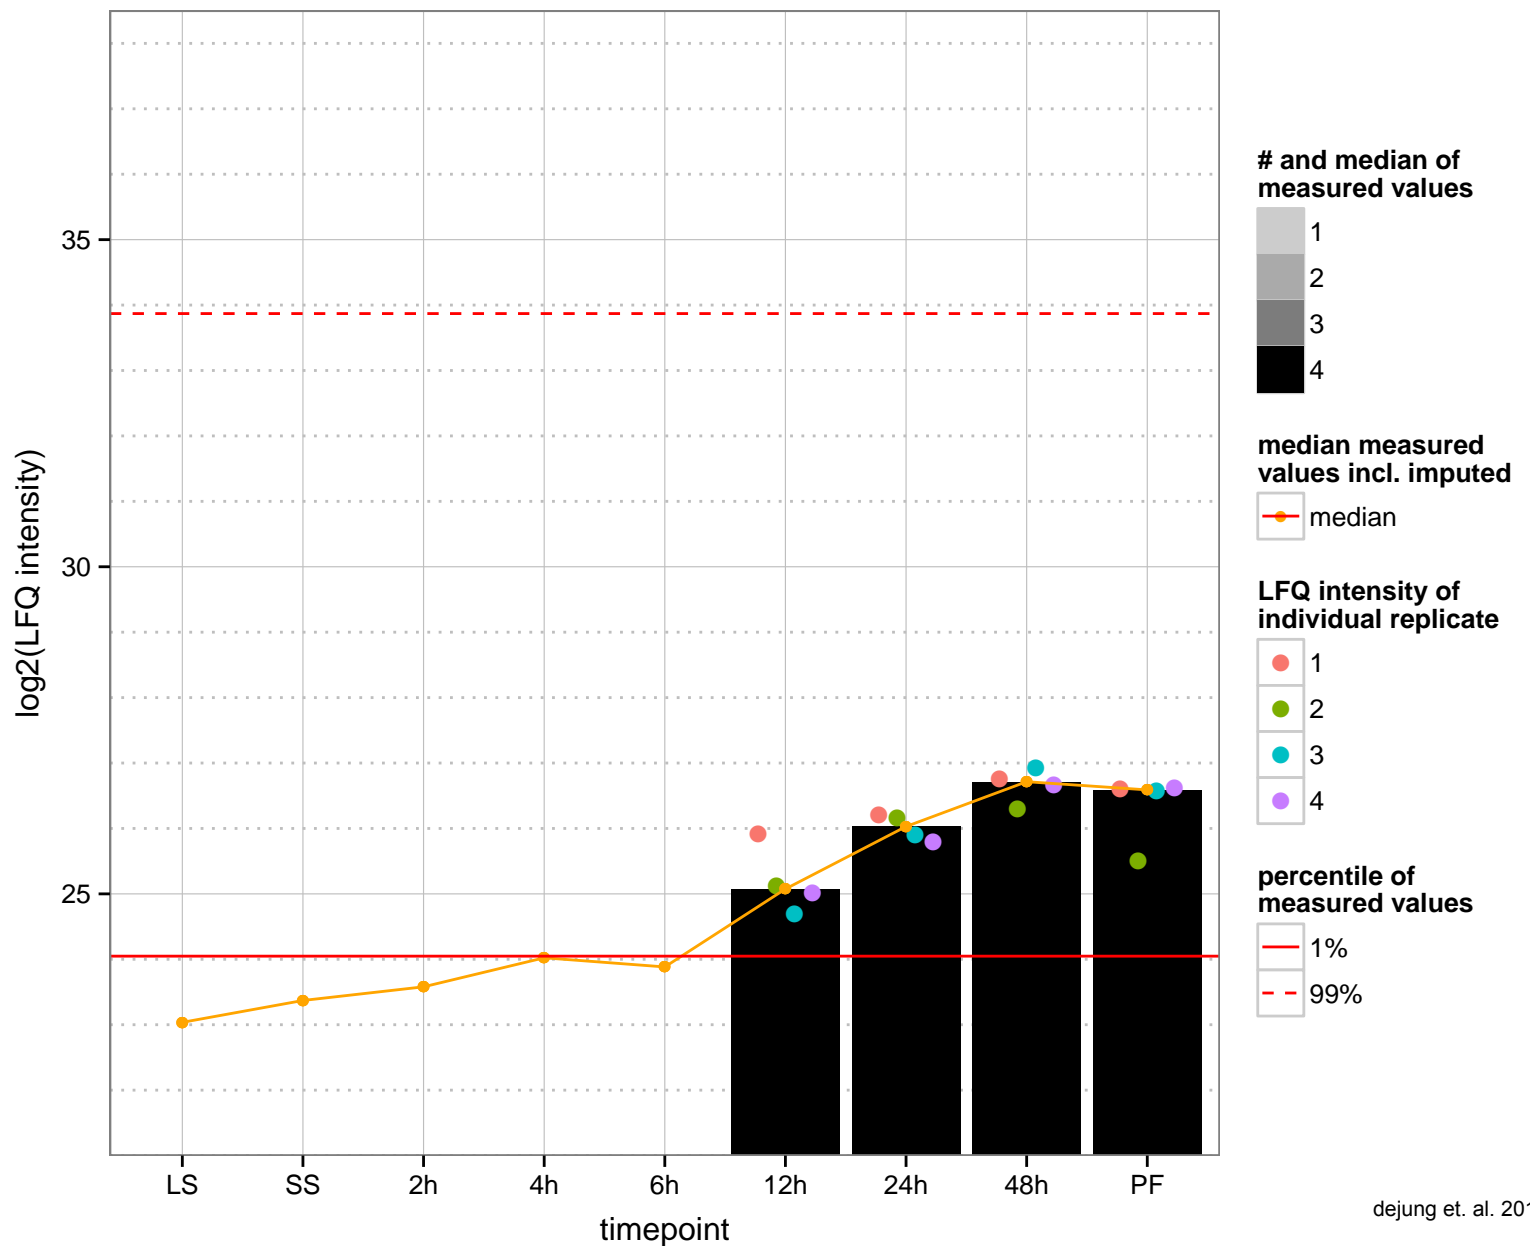

hypothetical protein, conserved  
 Tb927.10.4880  
 AGOF: null  
 AGOC: mitochondrion  
 AGOP: null  
 PGO: null  
 PGO: null  
 PGO: null

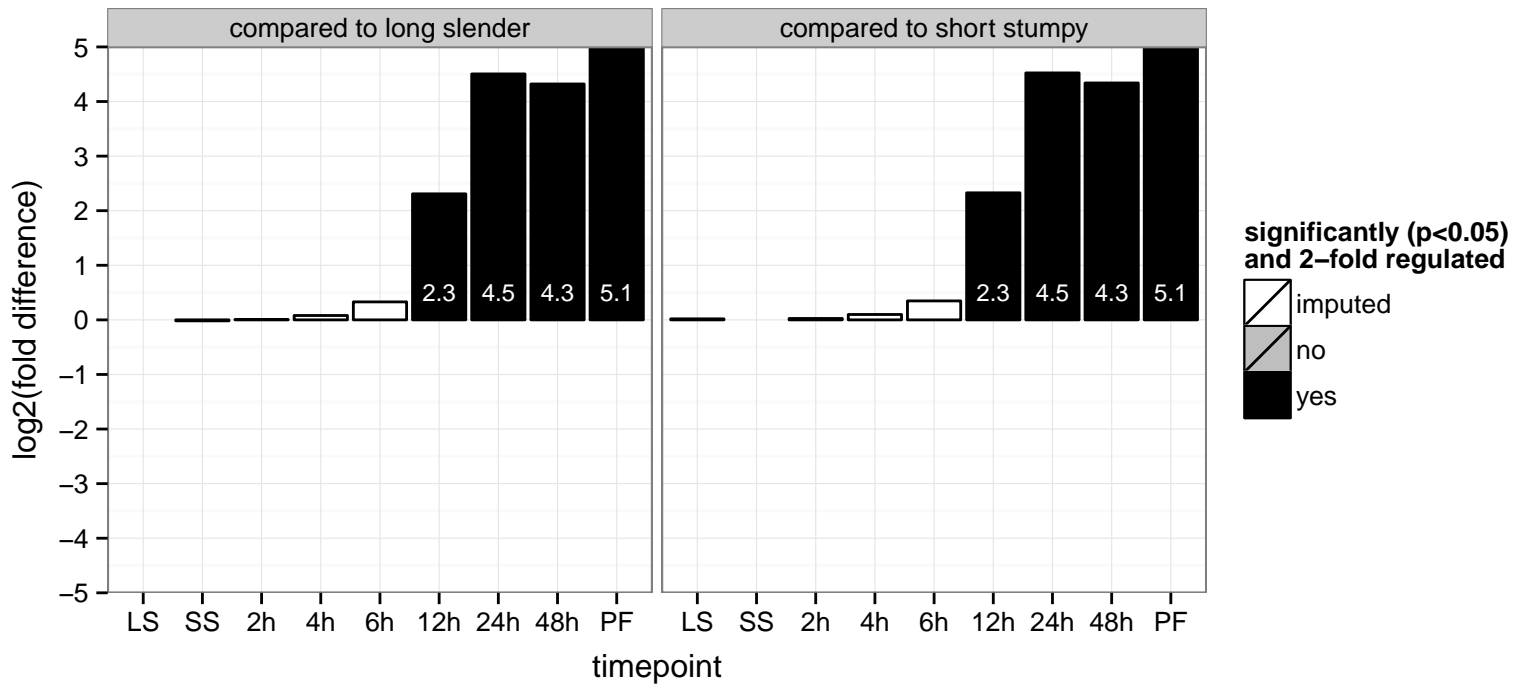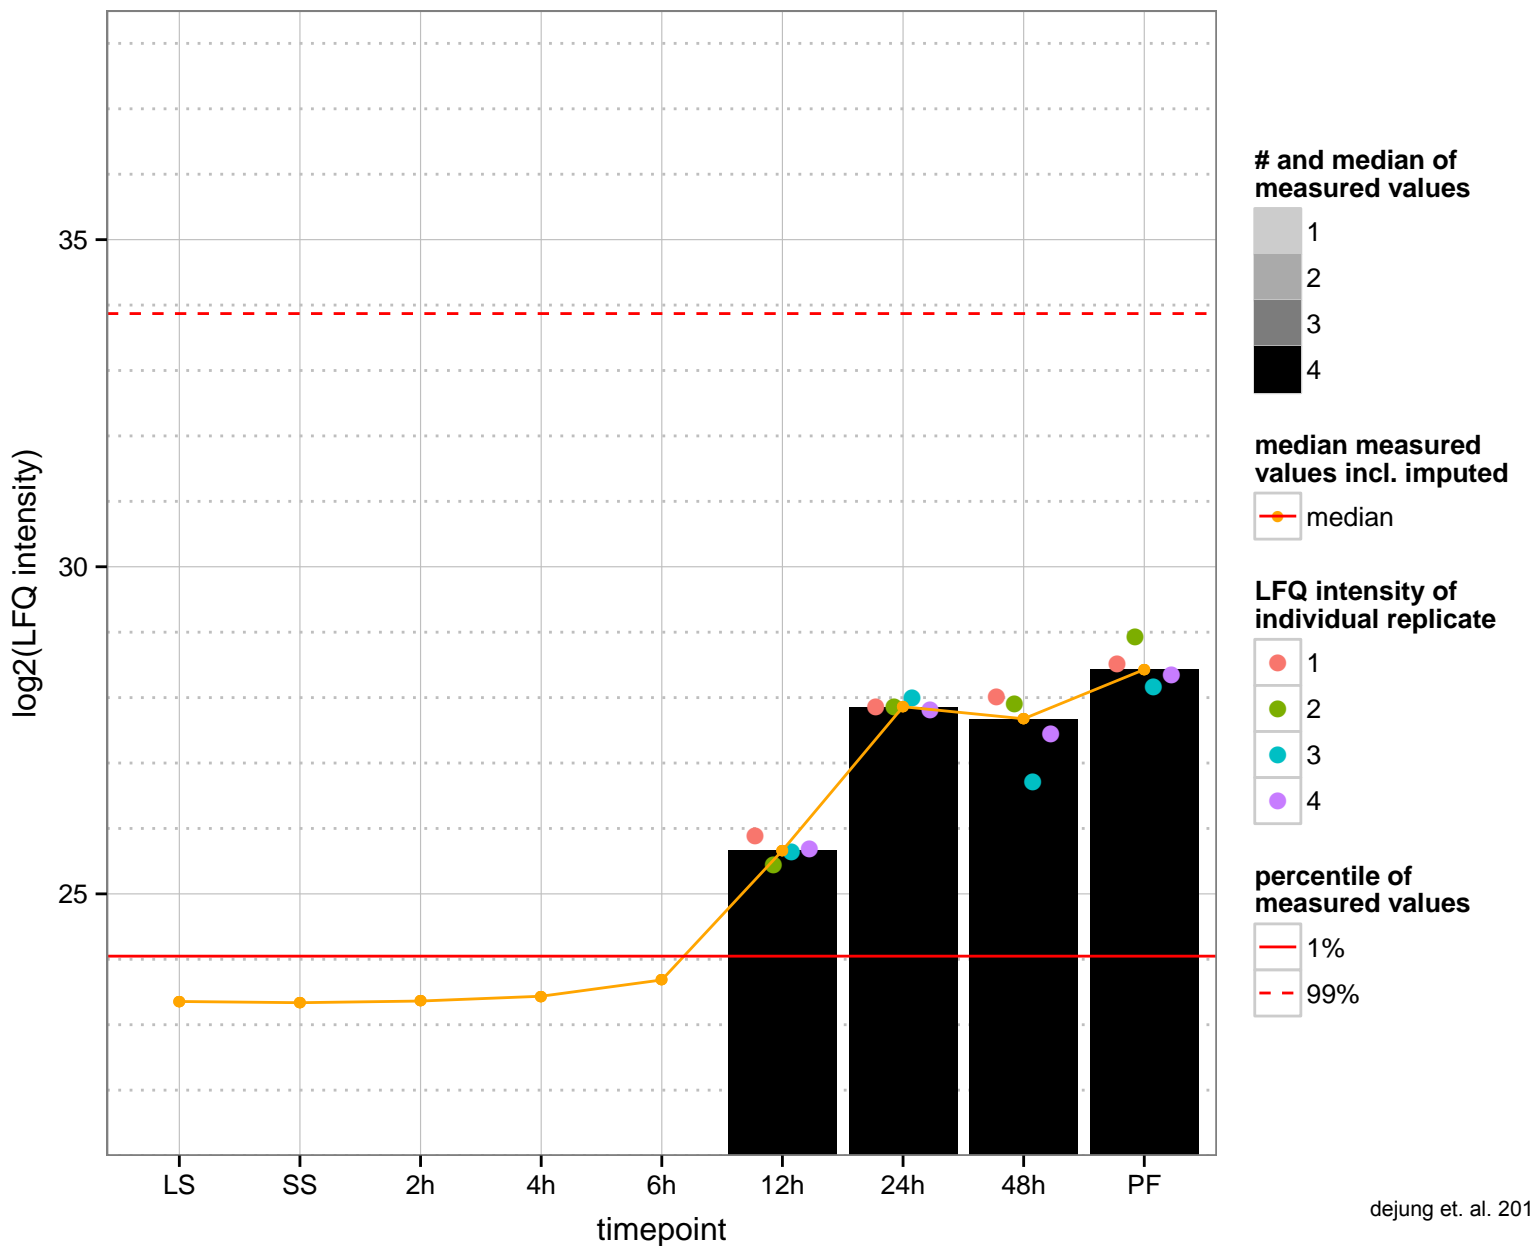

Elongation factor G1, mitochondrial, putative (EF-G1)

Tb927.10.5010

AGOF: GTP binding, GTPase activity, translation elongation factor activity

AGOC: intracellular, mitochondrion

AGOP: growth, oxidative phosphorylation, translational elongation

PGOF: GTP binding, GTPase activity, translation elongation factor activity

PGOC: intracellular

PGOP: translational elongation

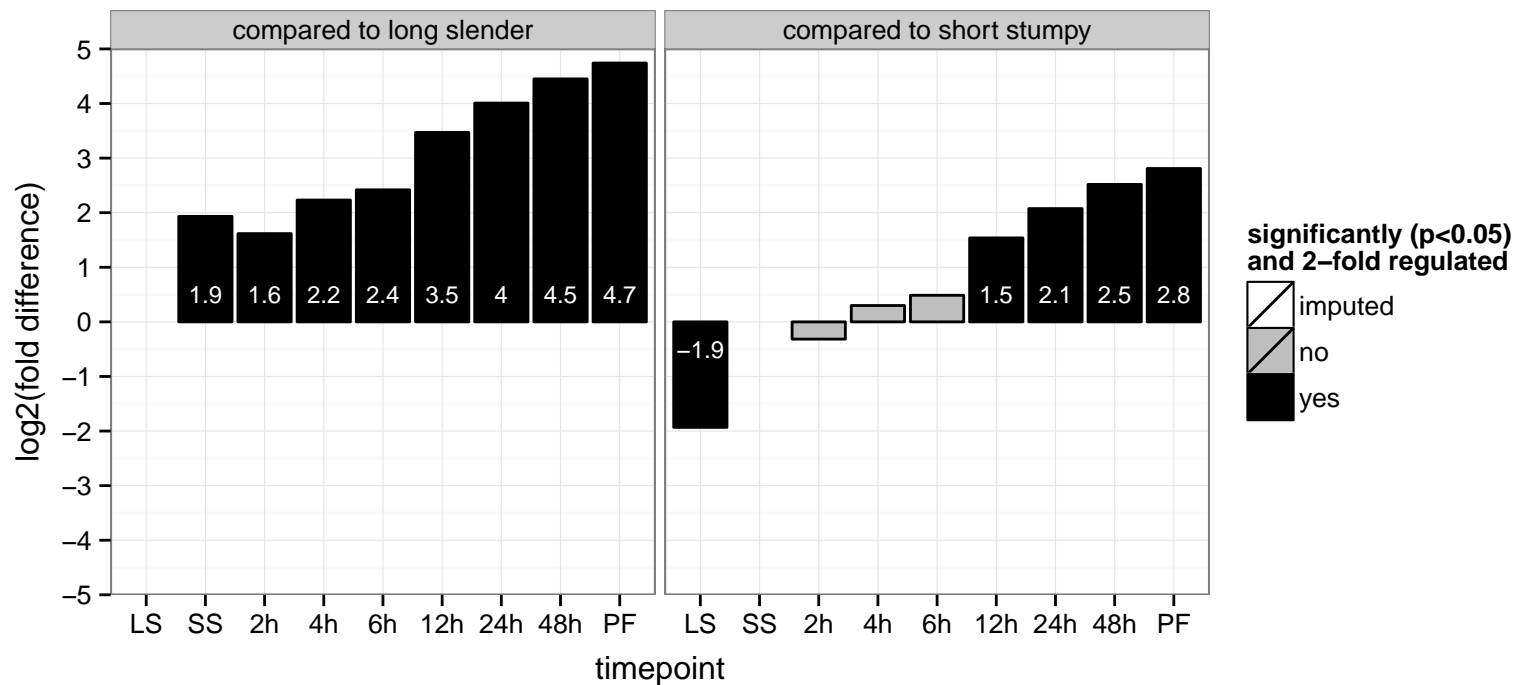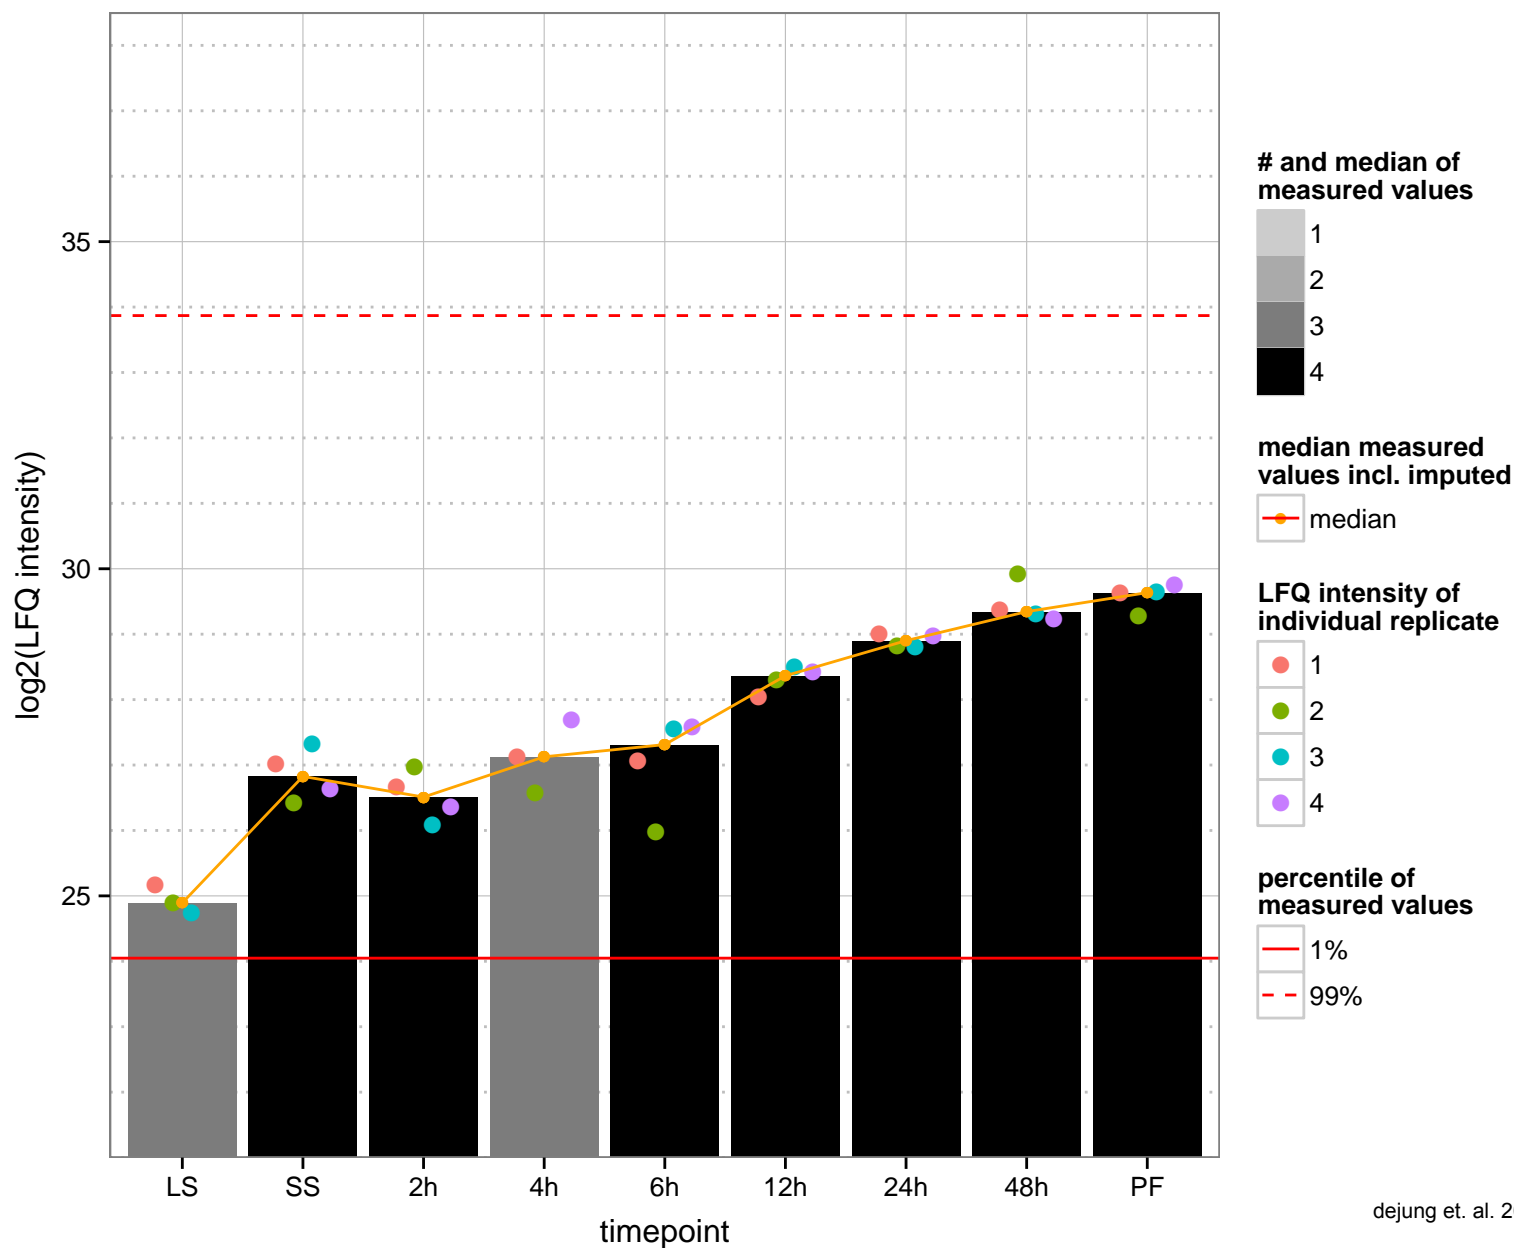

translation elongation factor 1-beta, putative  
 Tb927.10.5840  
 AGOF: translation elongation factor activity  
 AGOC: eukaryotic translation elongation factor 1 complex  
 AGOP: translational elongation  
 PGO: translation elongation factor activity  
 PGOC: eukaryotic translation elongation factor 1 complex  
 PGOP: translational elongation

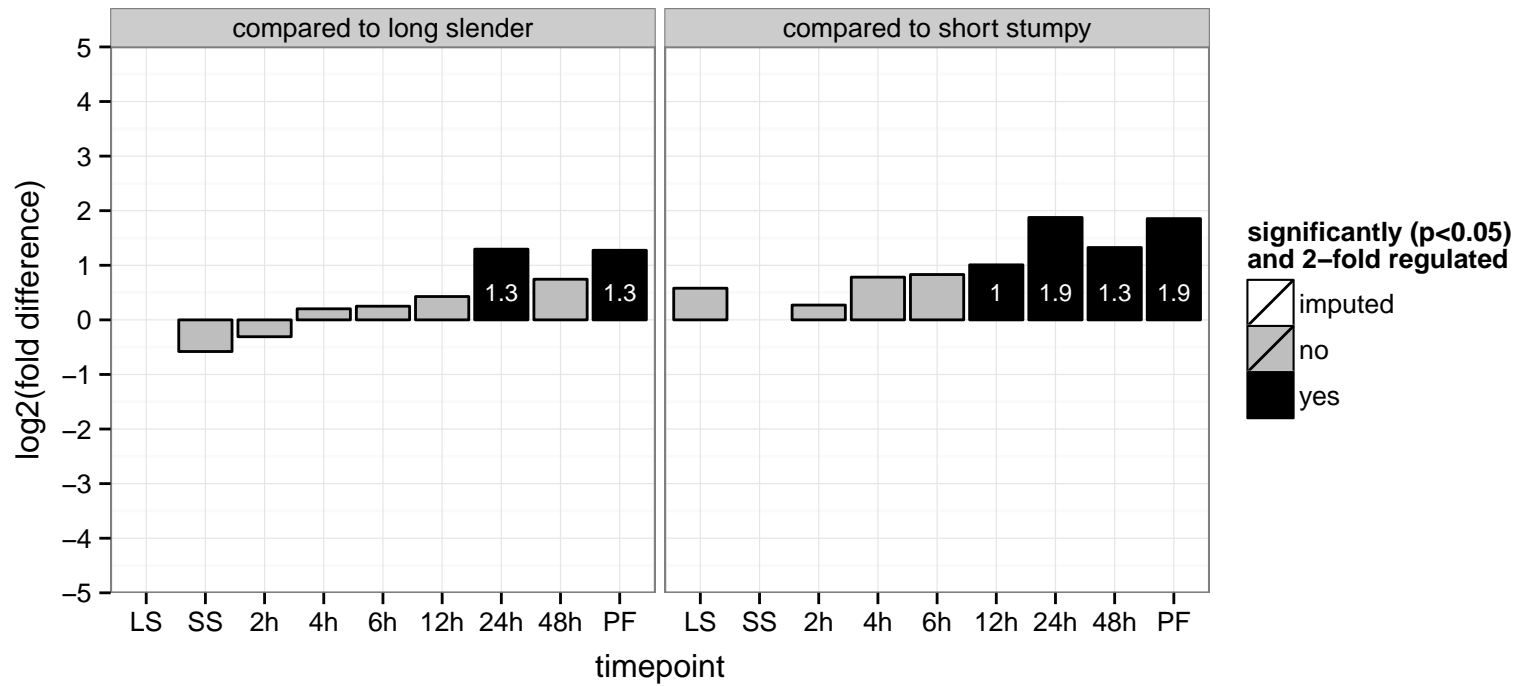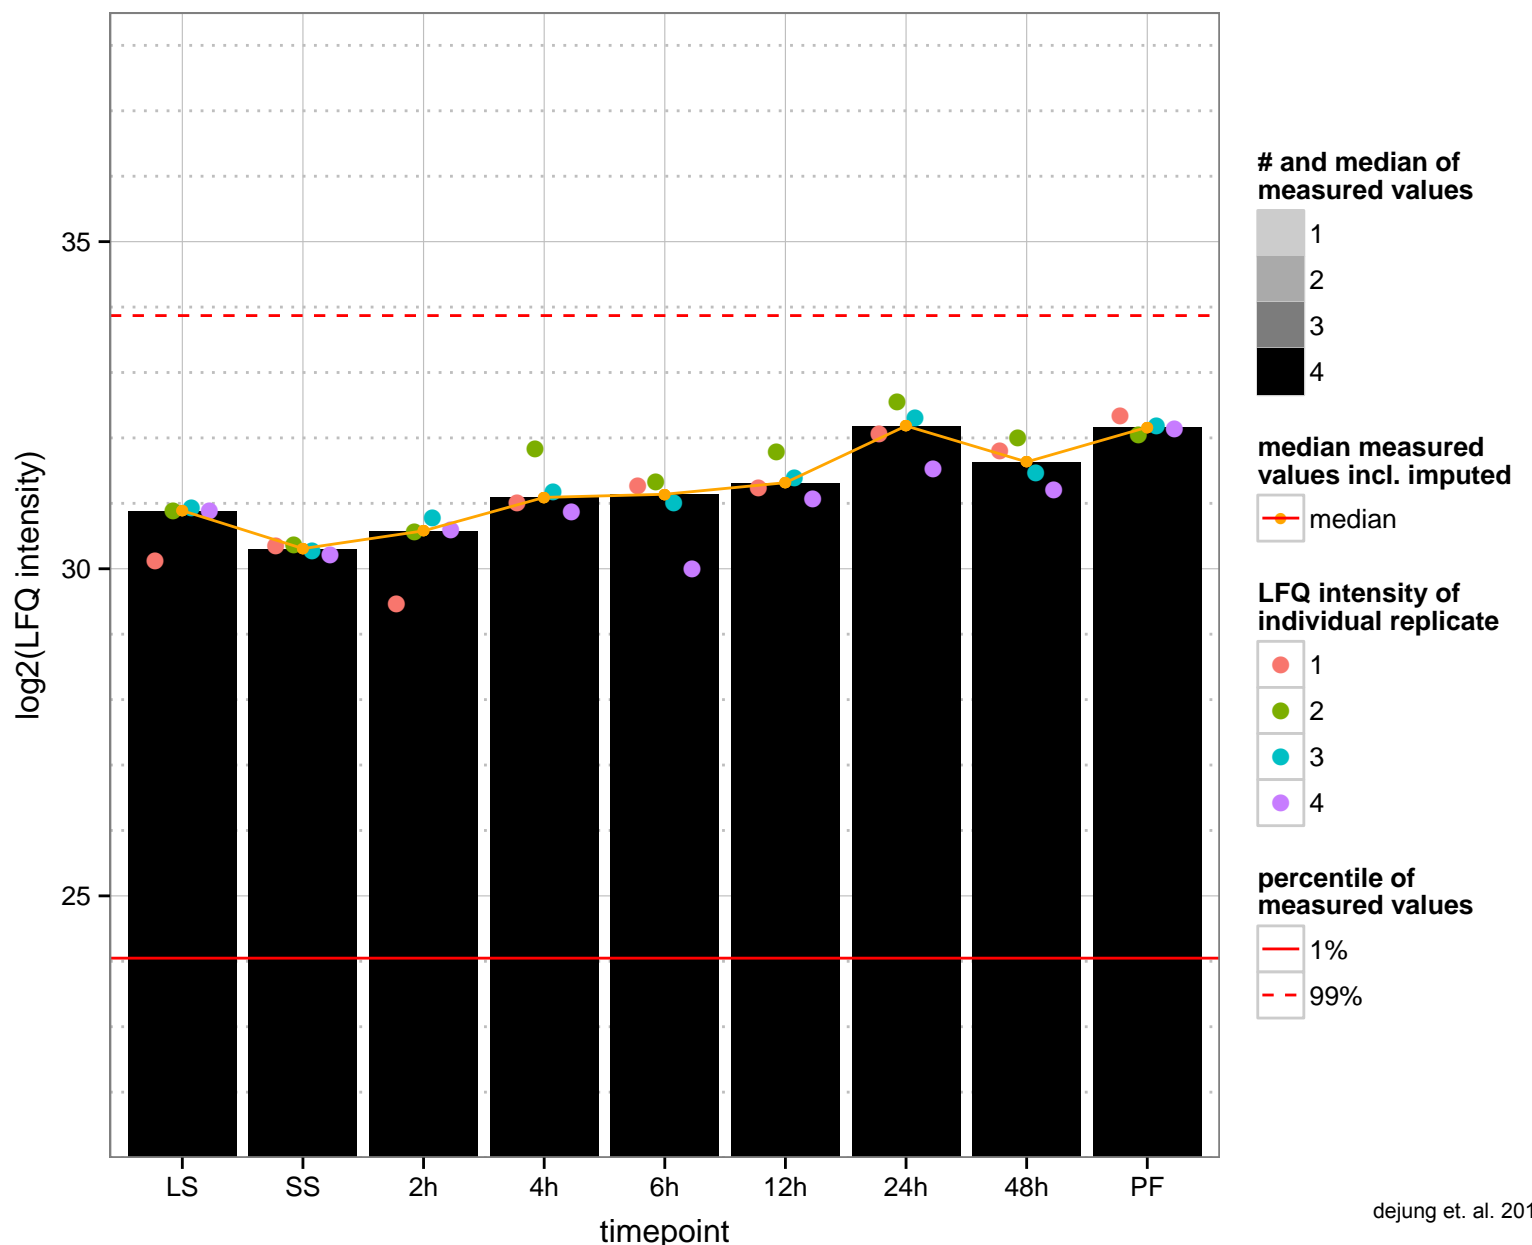



hypothetical protein, conserved  
 Tb927.10.6020  
 AGOF: null  
 AGOC: null  
 AGOP: null  
 PGO: null  
 PGOC: null  
 PGOP: null

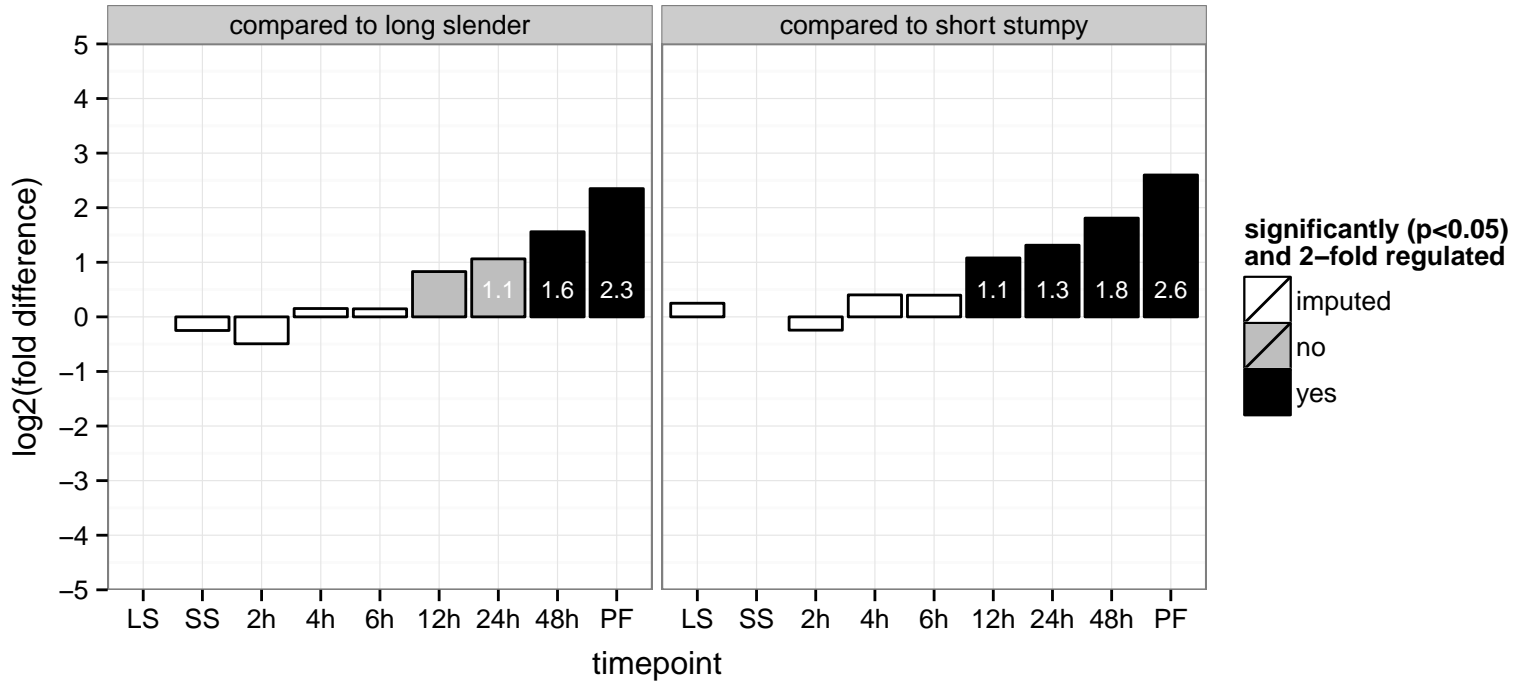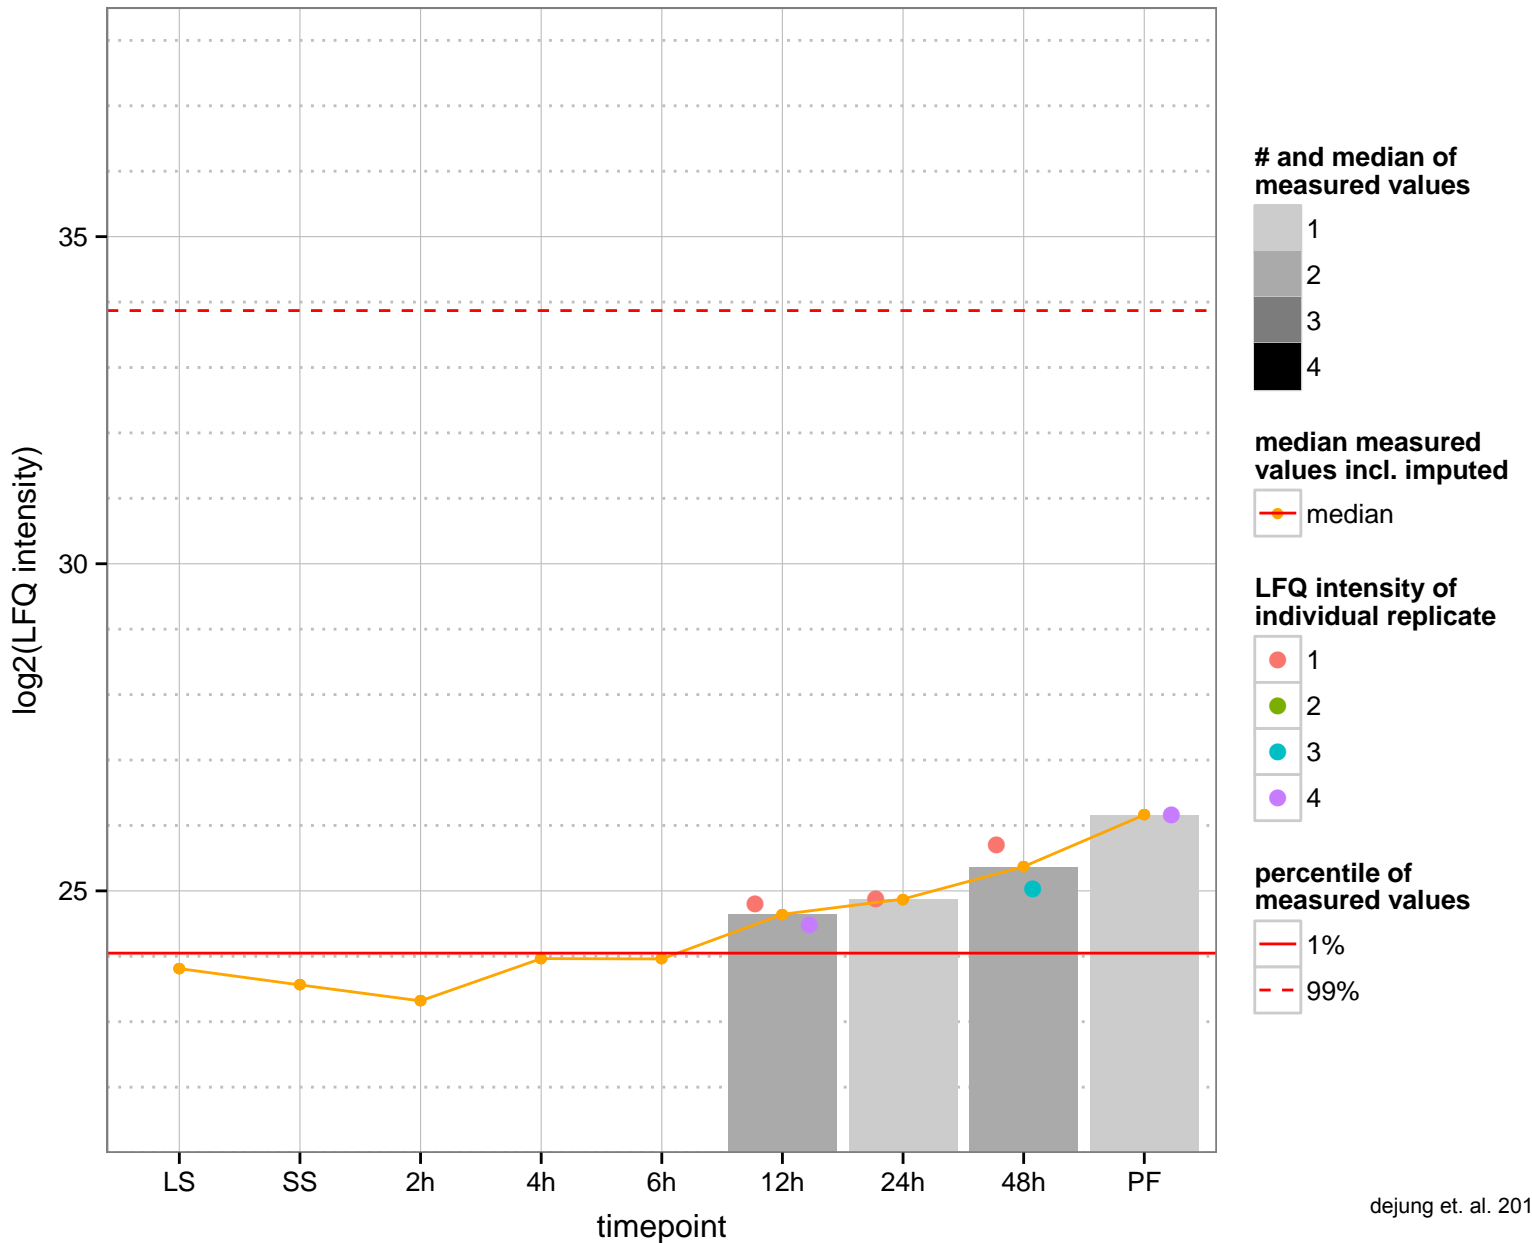

universal minicircle sequence binding protein (UMSBP), putative, predicted zinc finger protein  
 Tb927.10.6070  
 AGOF: nucleic acid binding, zinc ion binding  
 AGOC: null  
 AGOP: null  
 PGOF: nucleic acid binding, zinc ion binding  
 PGO: null  
 PGOP: null

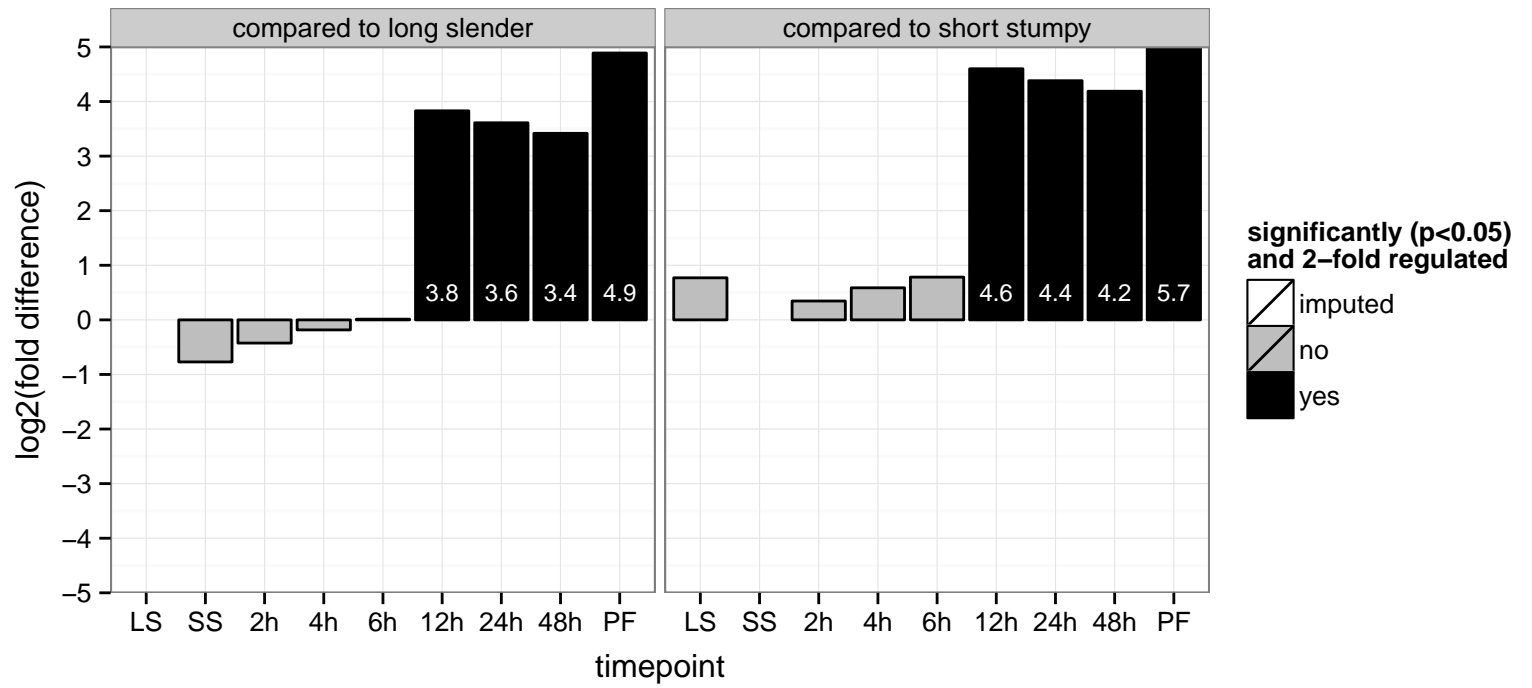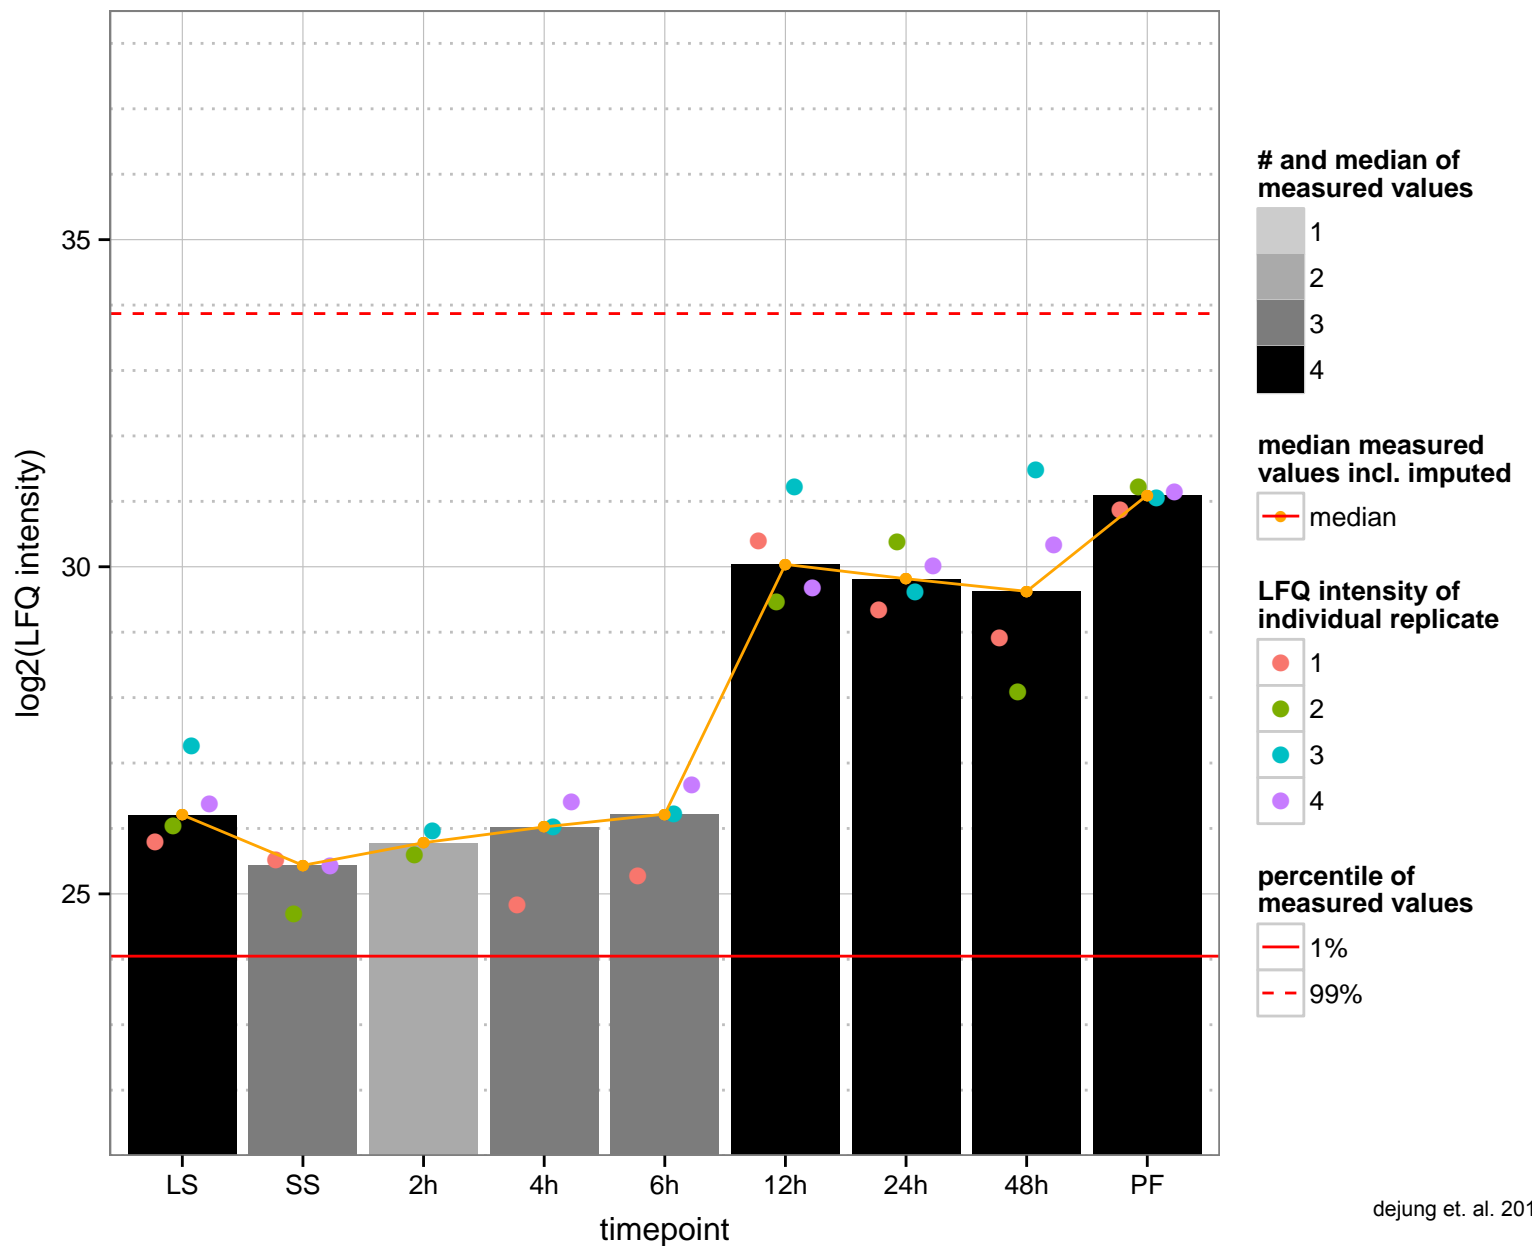

aldehyde dehydrogenase, putative (ALDH)  
 Tb927.10.6190  
 AGOF: glutathione-disulfide reductase activity  
 AGOC: null  
 AGOP: gamma-aminobutyric acid catabolic process  
 PGOF: oxidoreductase activity  
 PGOC: null  
 PGOP: metabolic process, oxidation-reduction process

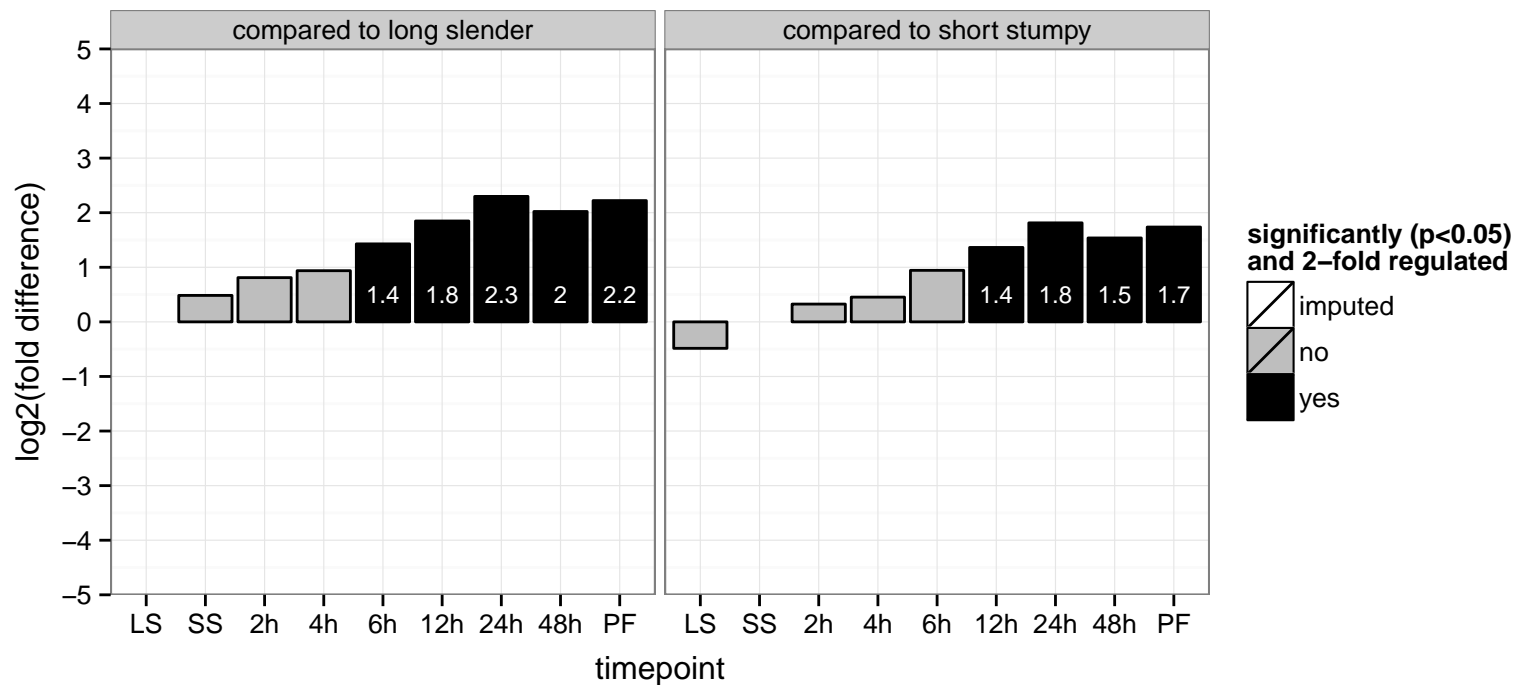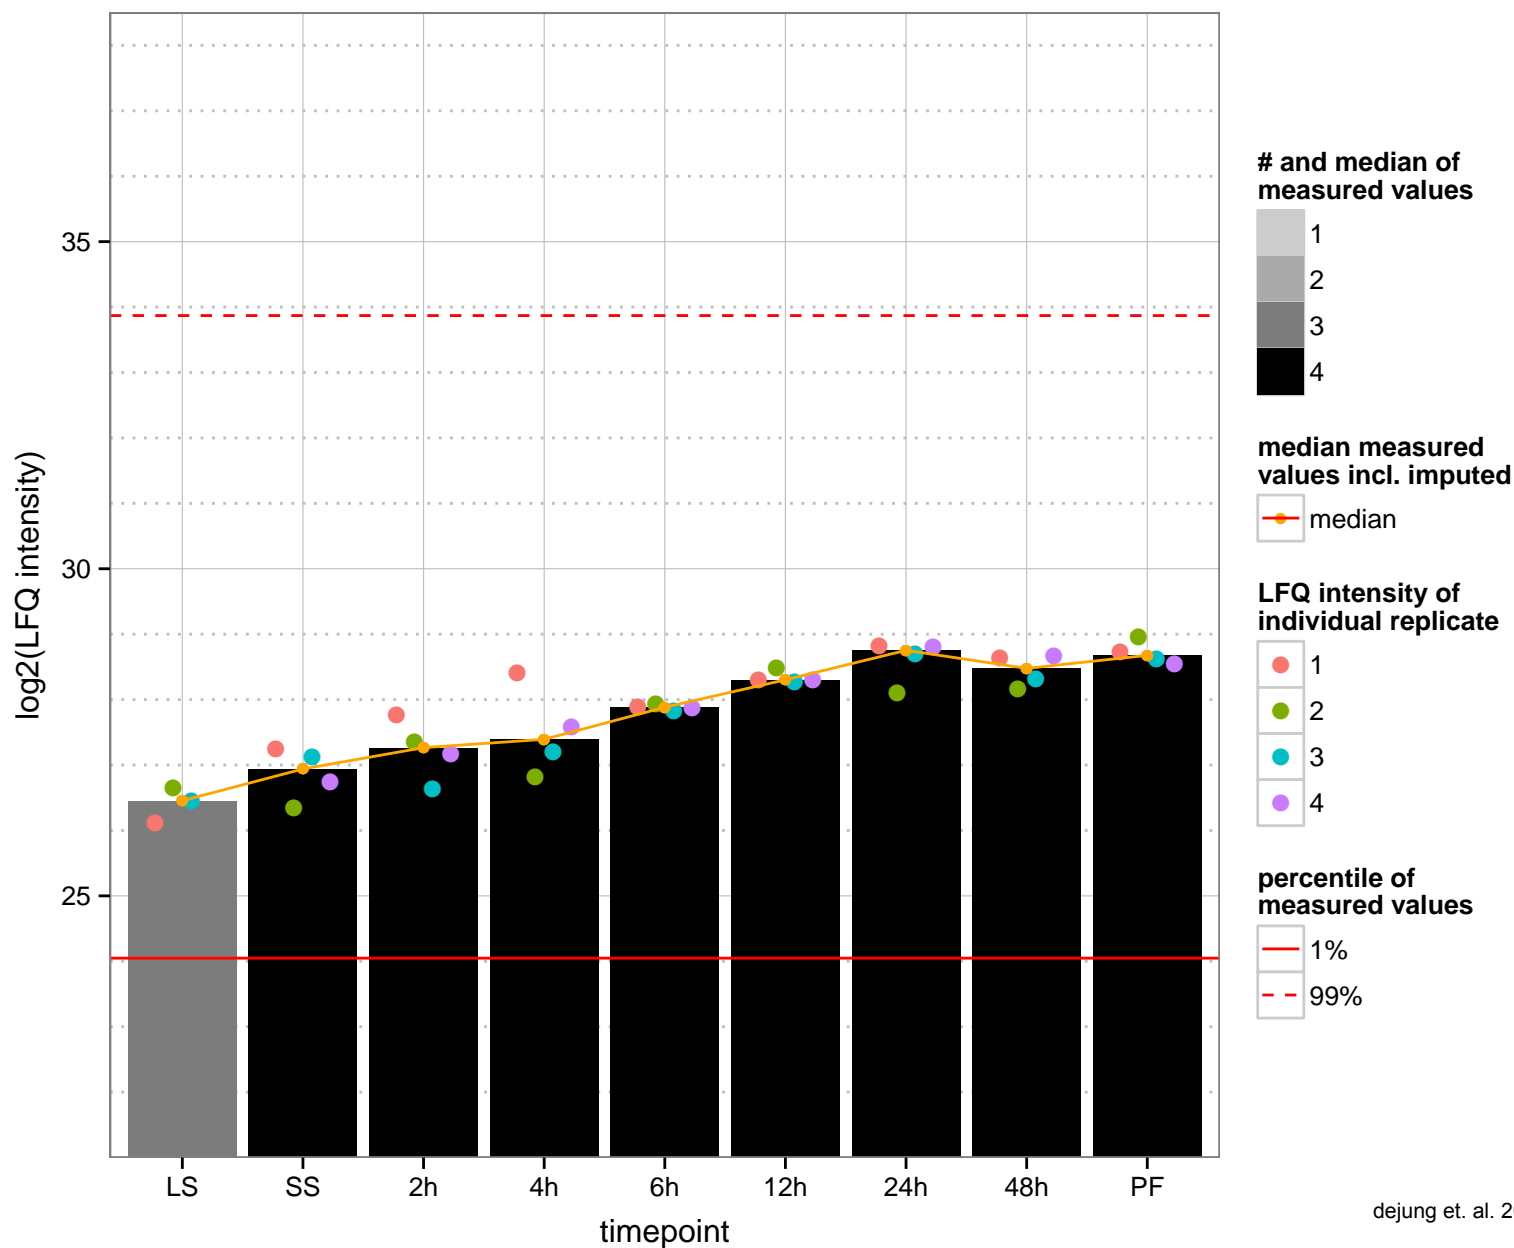

hypothetical protein, conserved  
 Tb927.10.760  
 AGOF: null  
 AGOC: mitochondrion  
 AGOP: null  
 PGO: null  
 PGOC: null  
 PGOP: null

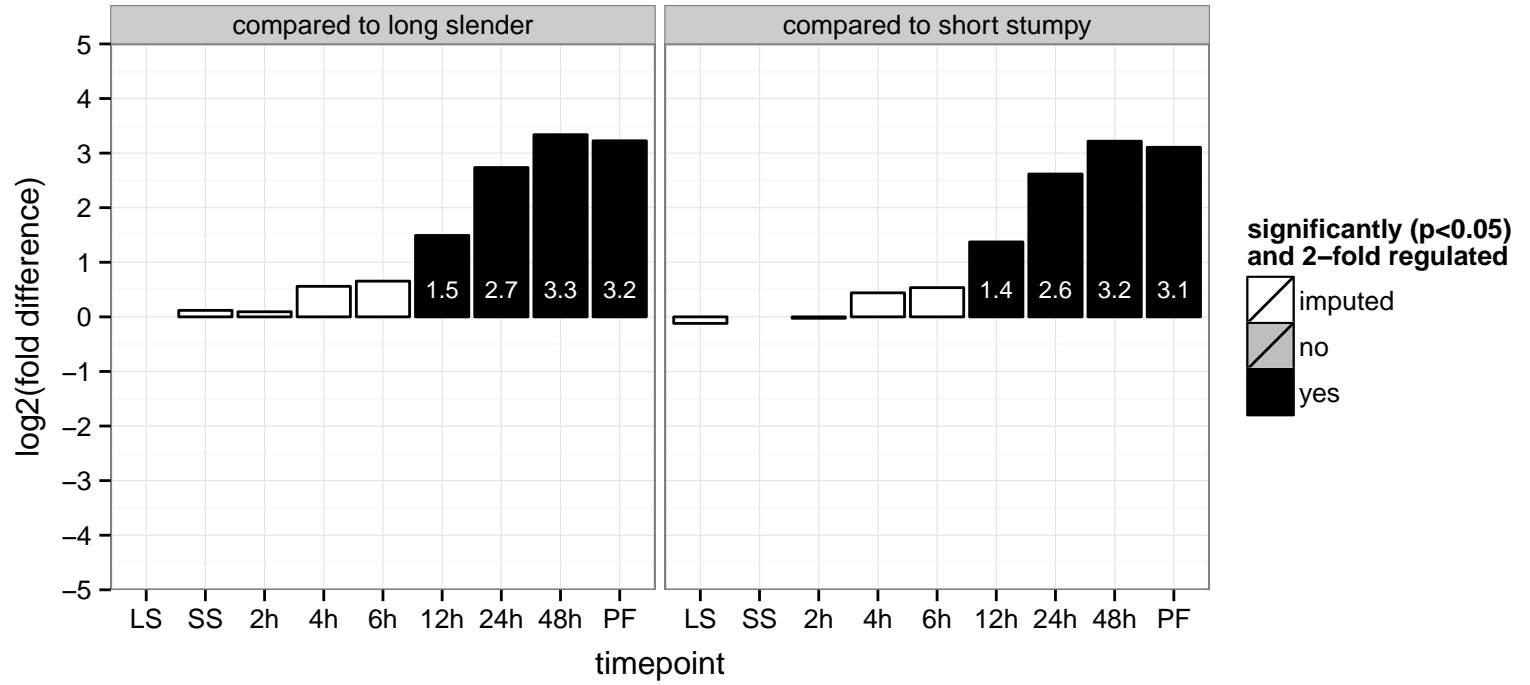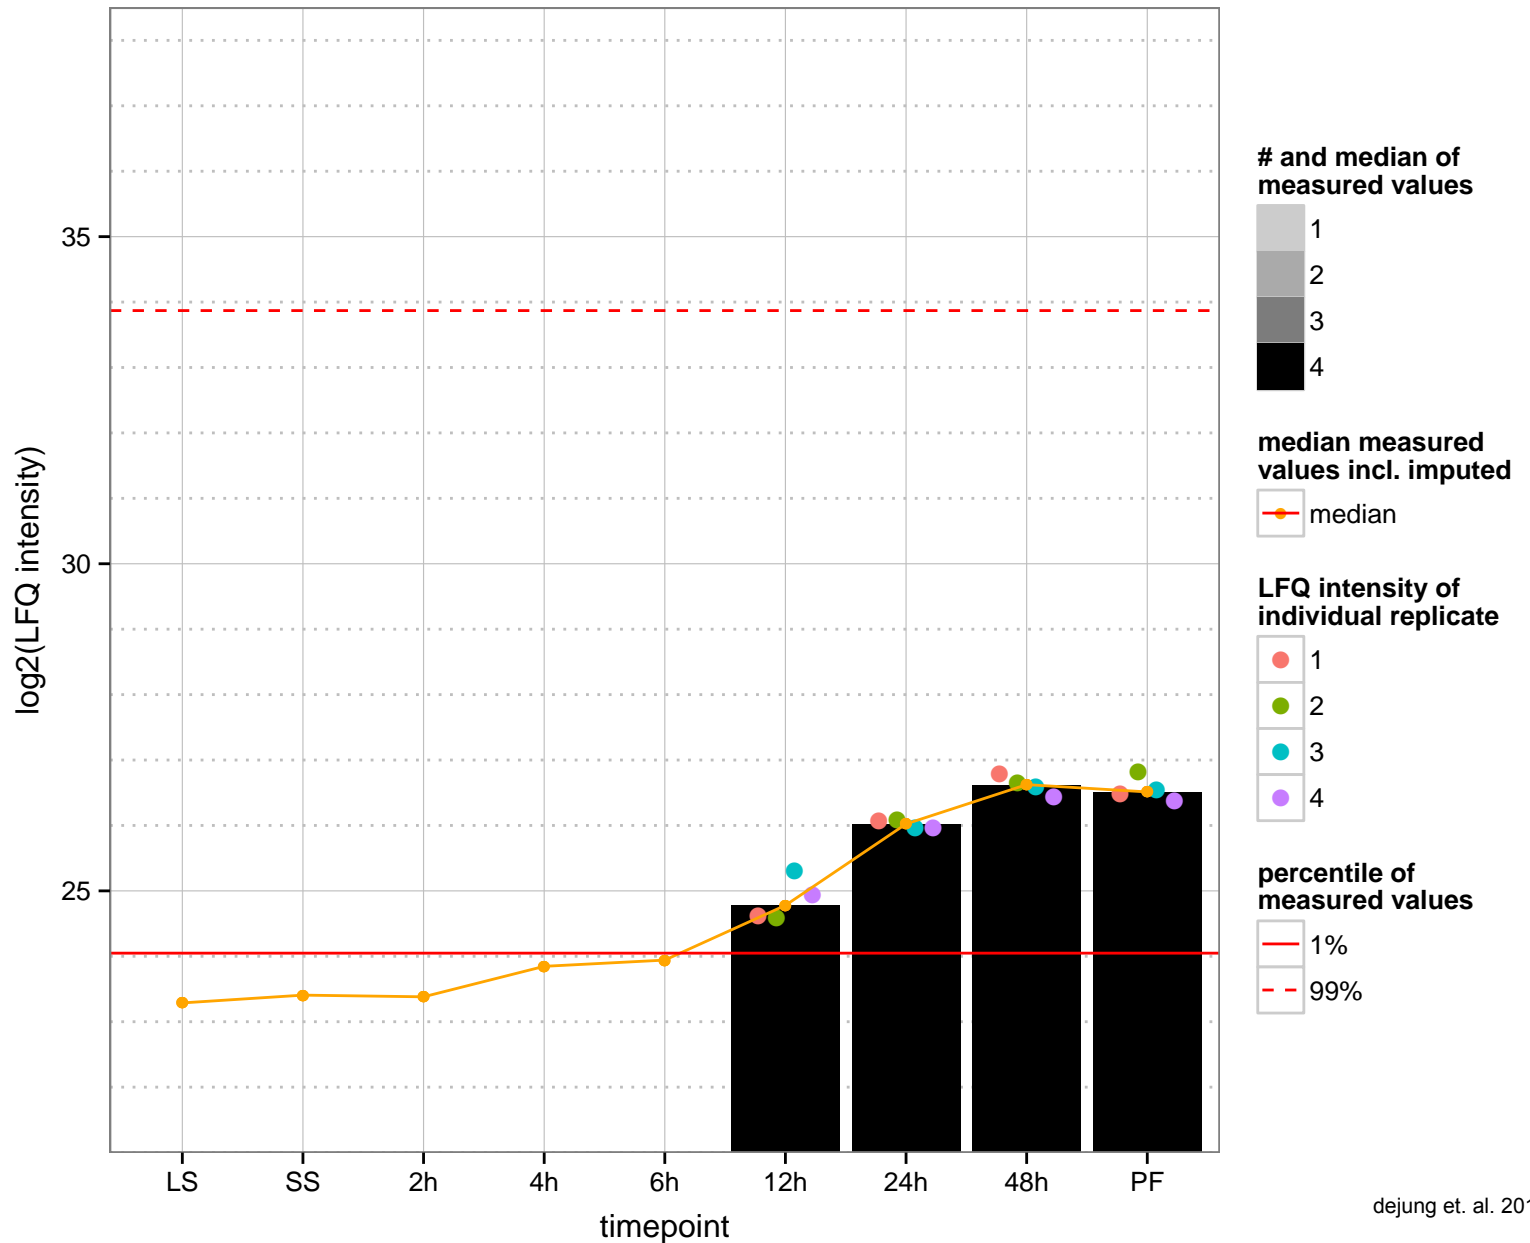

cytochrome oxidase subunit IX (COXIX)  
 Tb927.10.8320  
 AGOF: null  
 AGOC: mitochondrion  
 AGOP: null  
 PGO: null  
 PGOC: null  
 PGOP: null

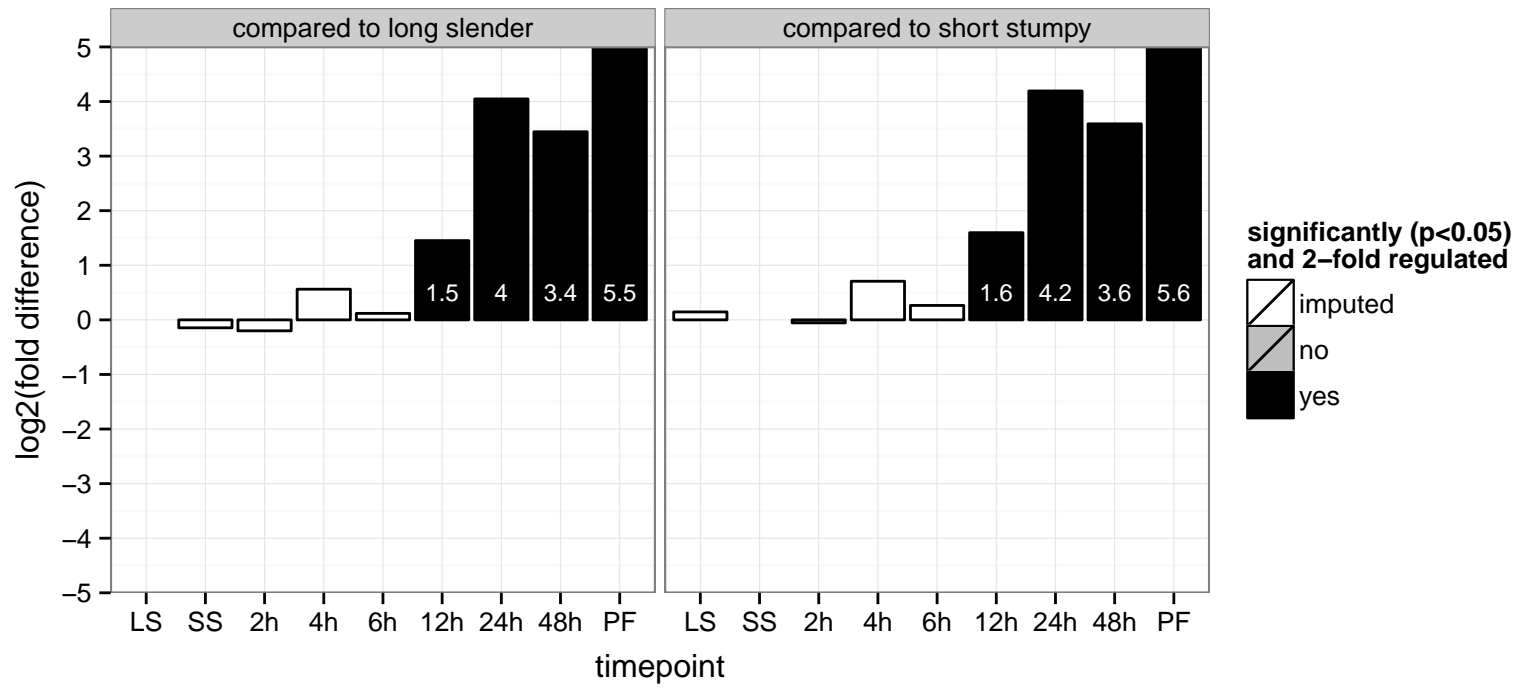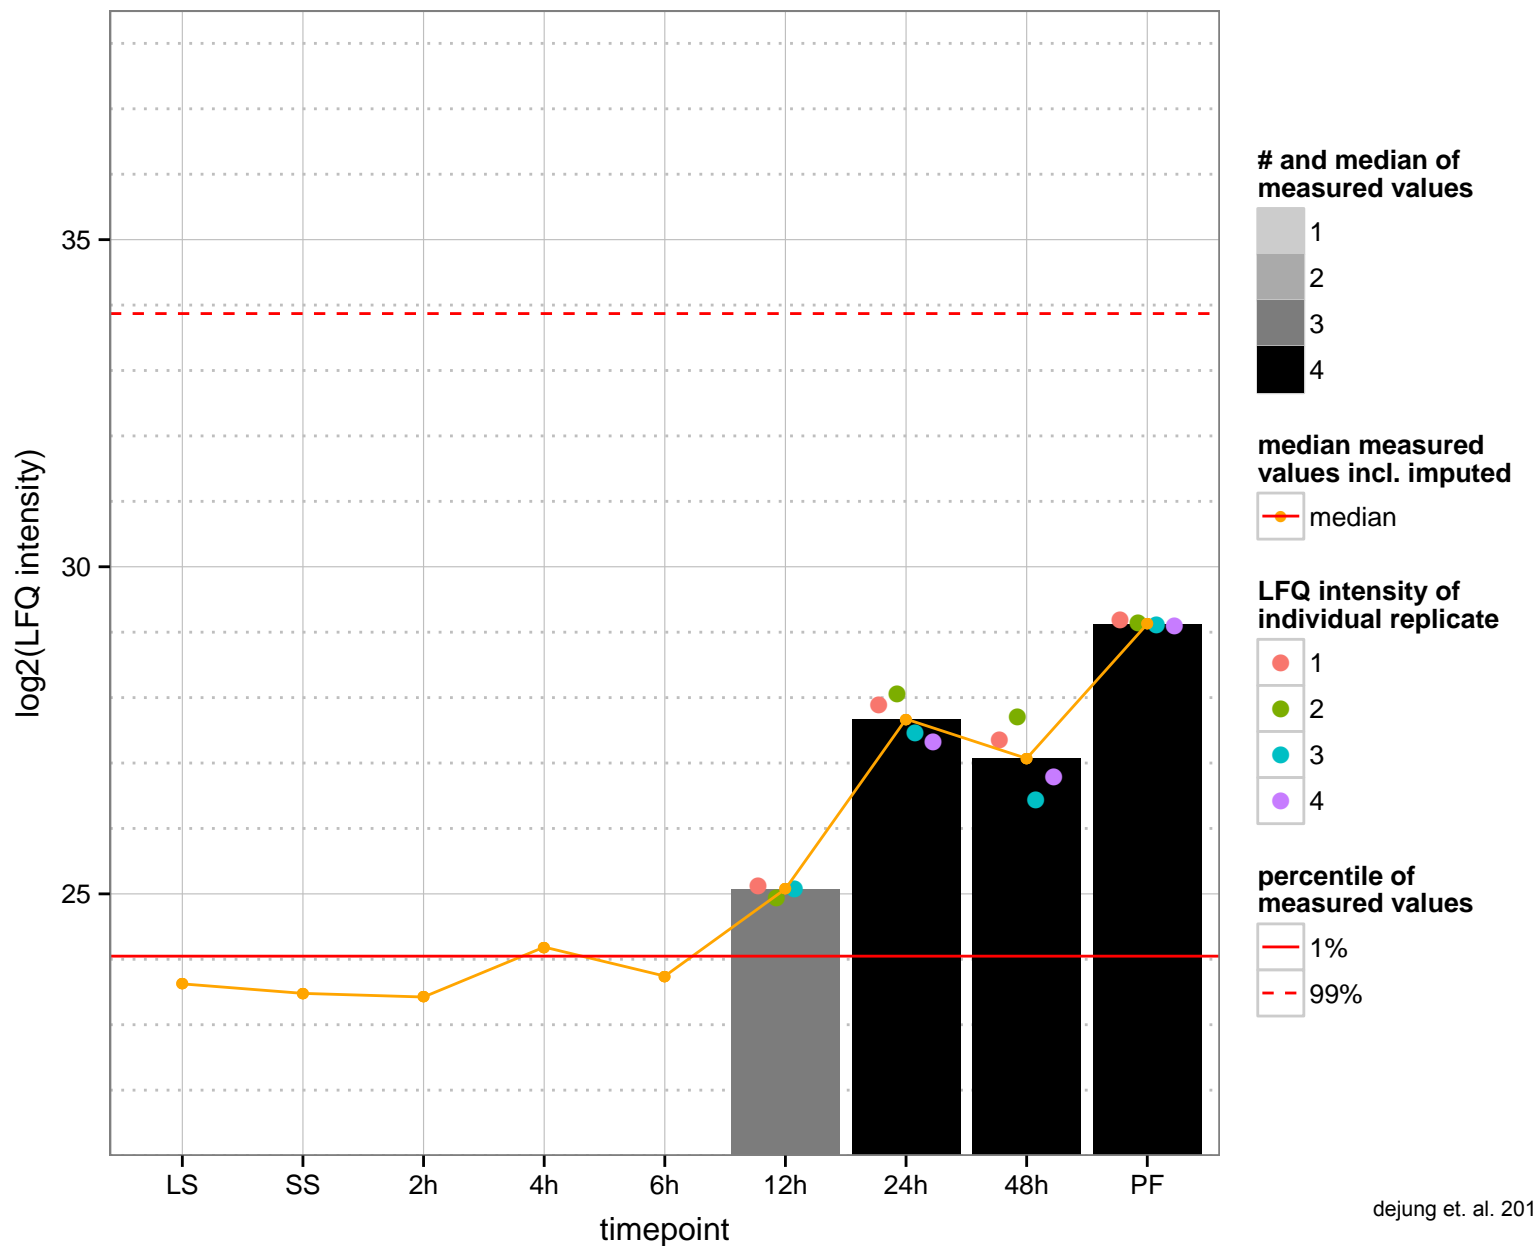

hypothetical protein, conserved  
 Tb927.10.8620  
 AGOF: null  
 AGOC: mitochondrion  
 AGOP: null  
 PGO: null  
 PGOC: null  
 PGOP: null

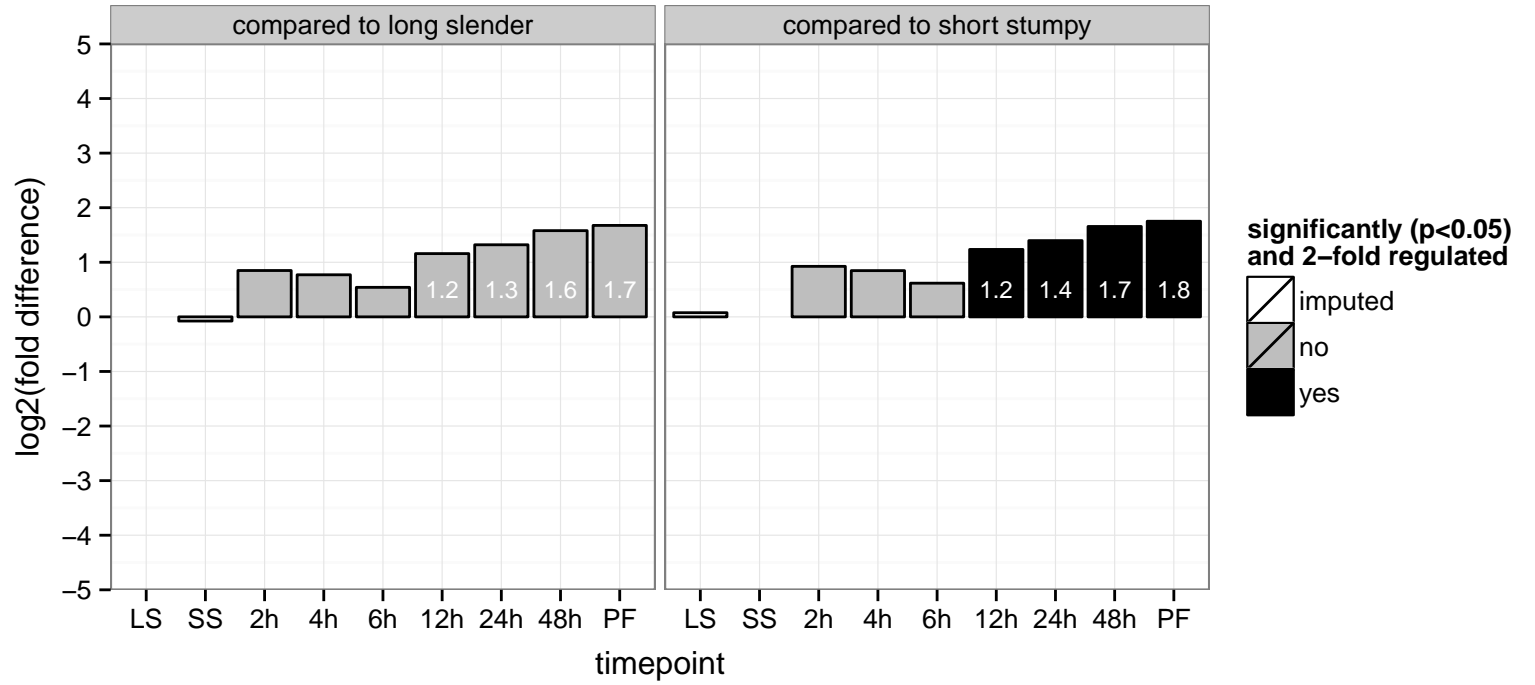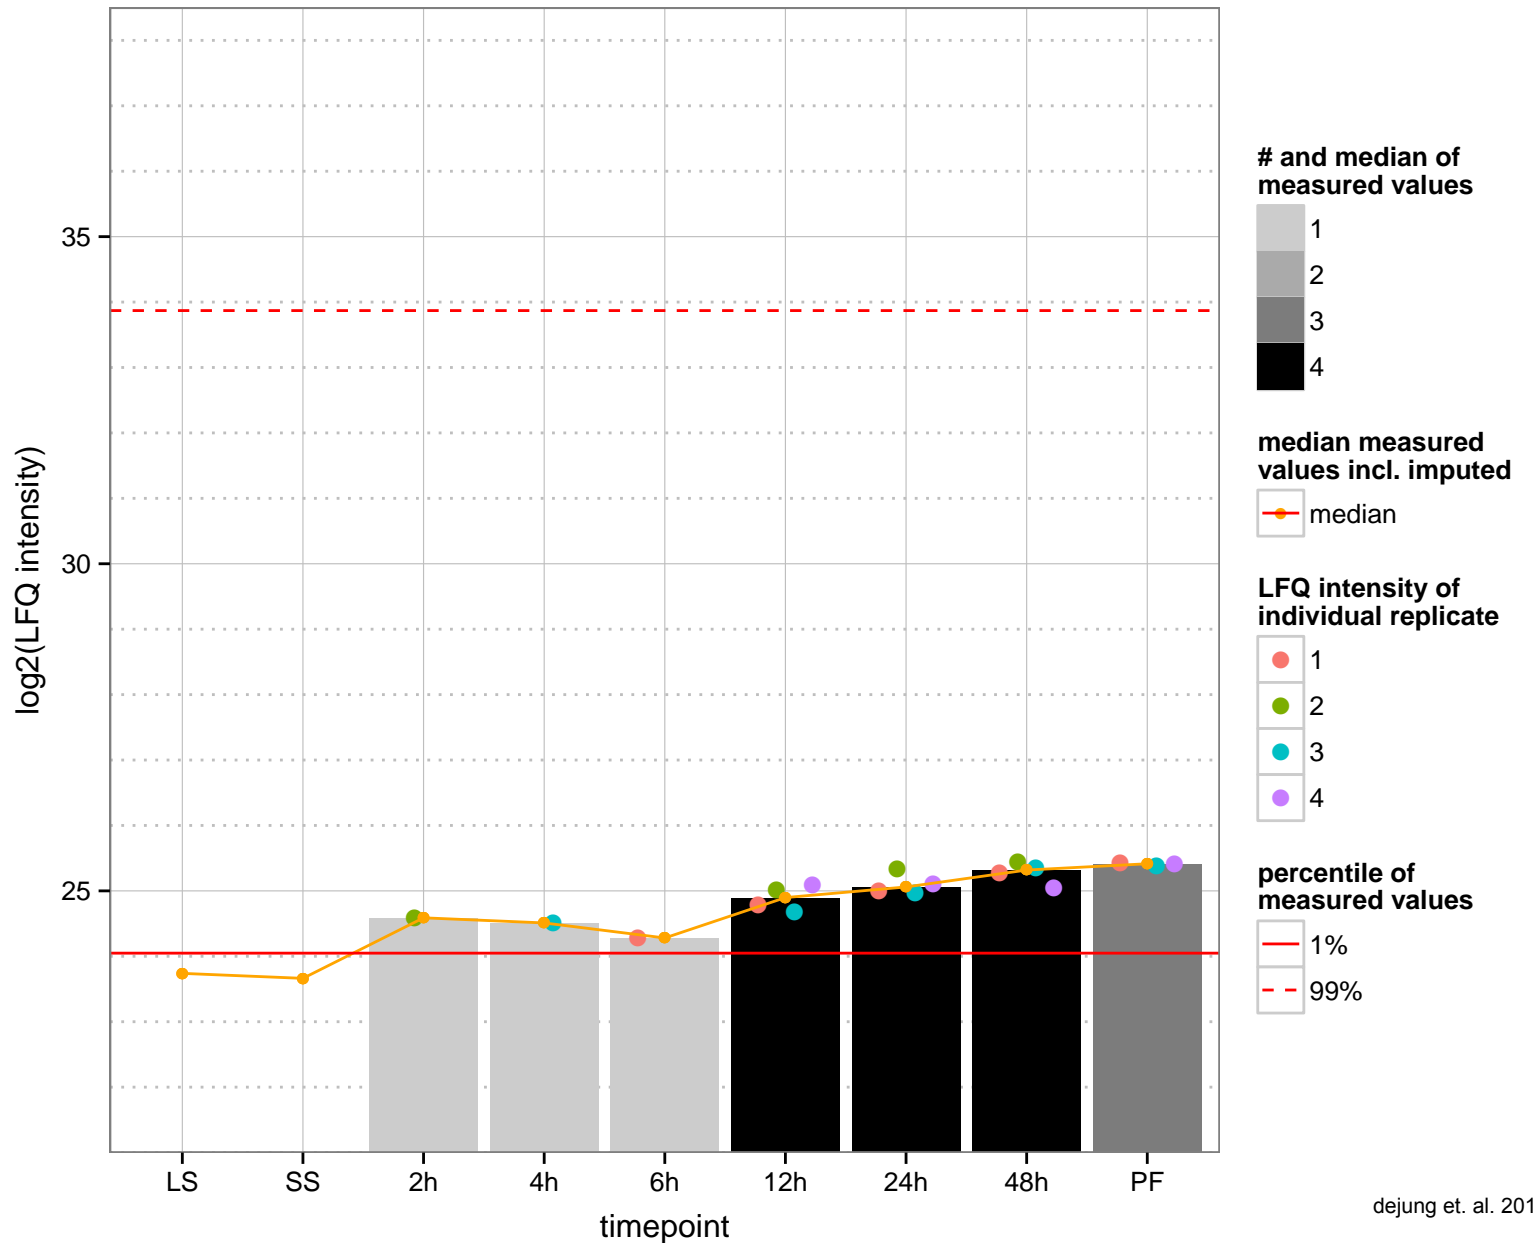

hypothetical protein, conserved  
 Tb927.10.8870  
 AGOF: null  
 AGOC: null  
 AGOP: null  
 PGO: null  
 PGOC: null  
 PGOP: null

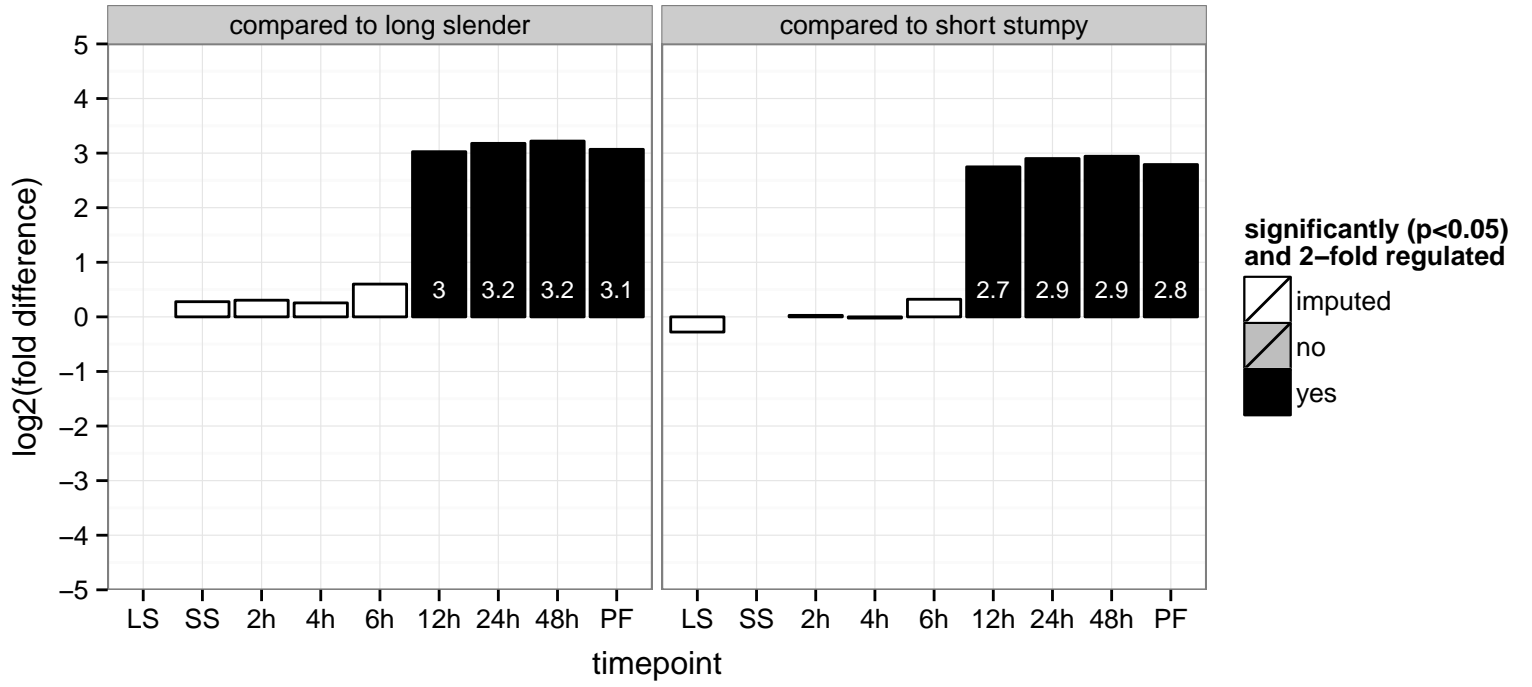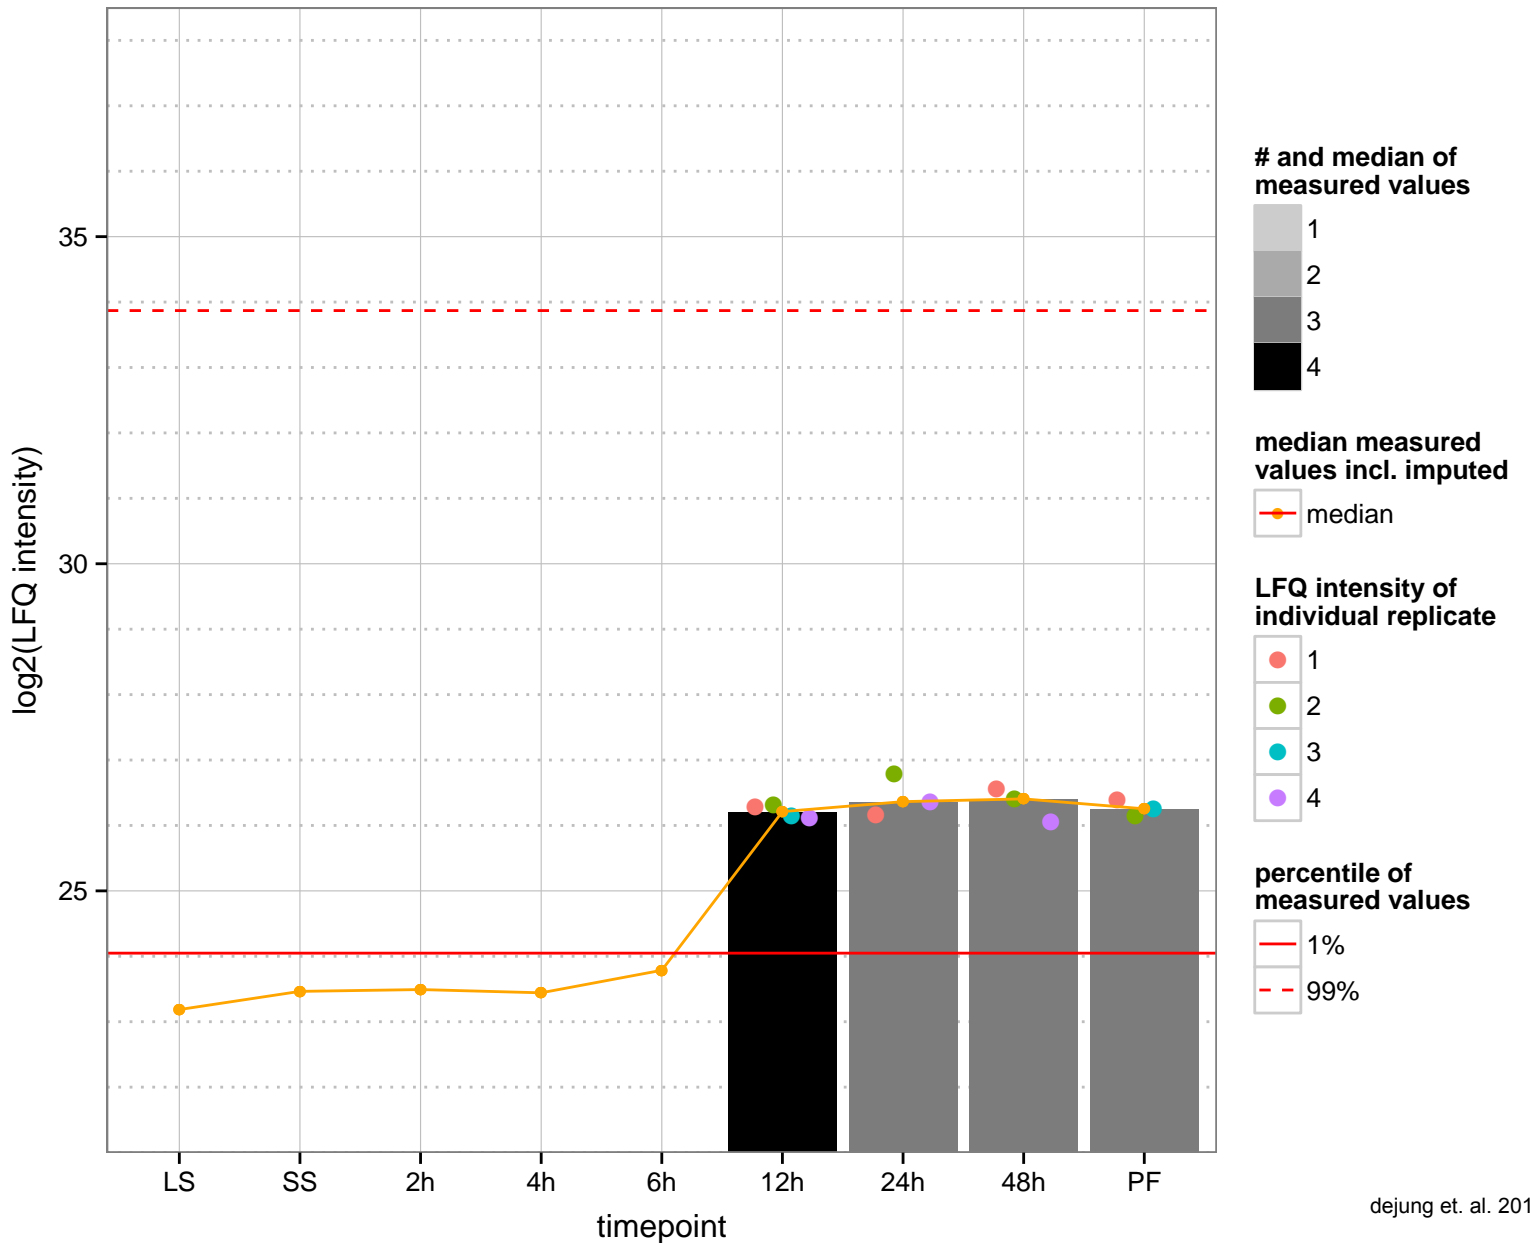

hypothetical protein, conserved  
 Tb927.11.10140  
 AGOF: null  
 AGOC: mitochondrial inner membrane, mitochondrion  
 AGOP: null  
 PGO: null  
 PGO: null  
 PGO: null

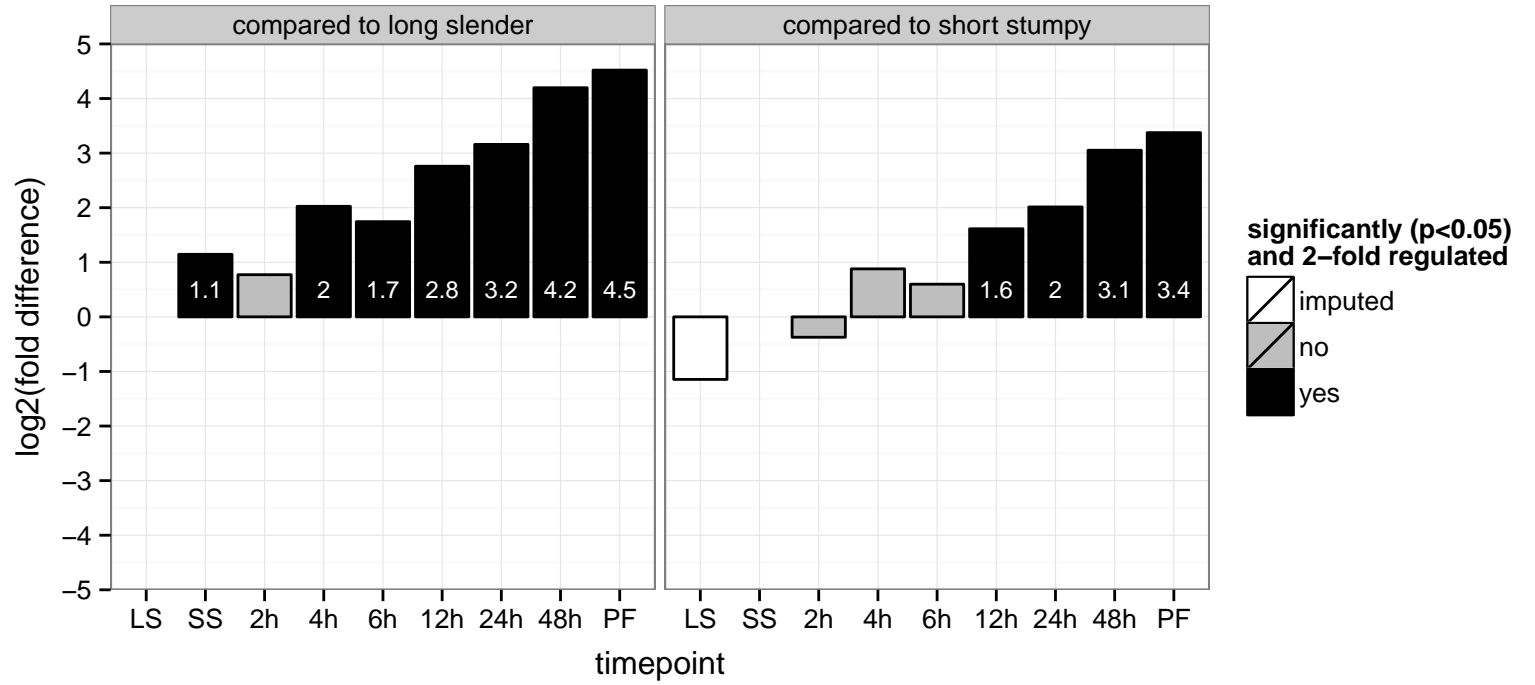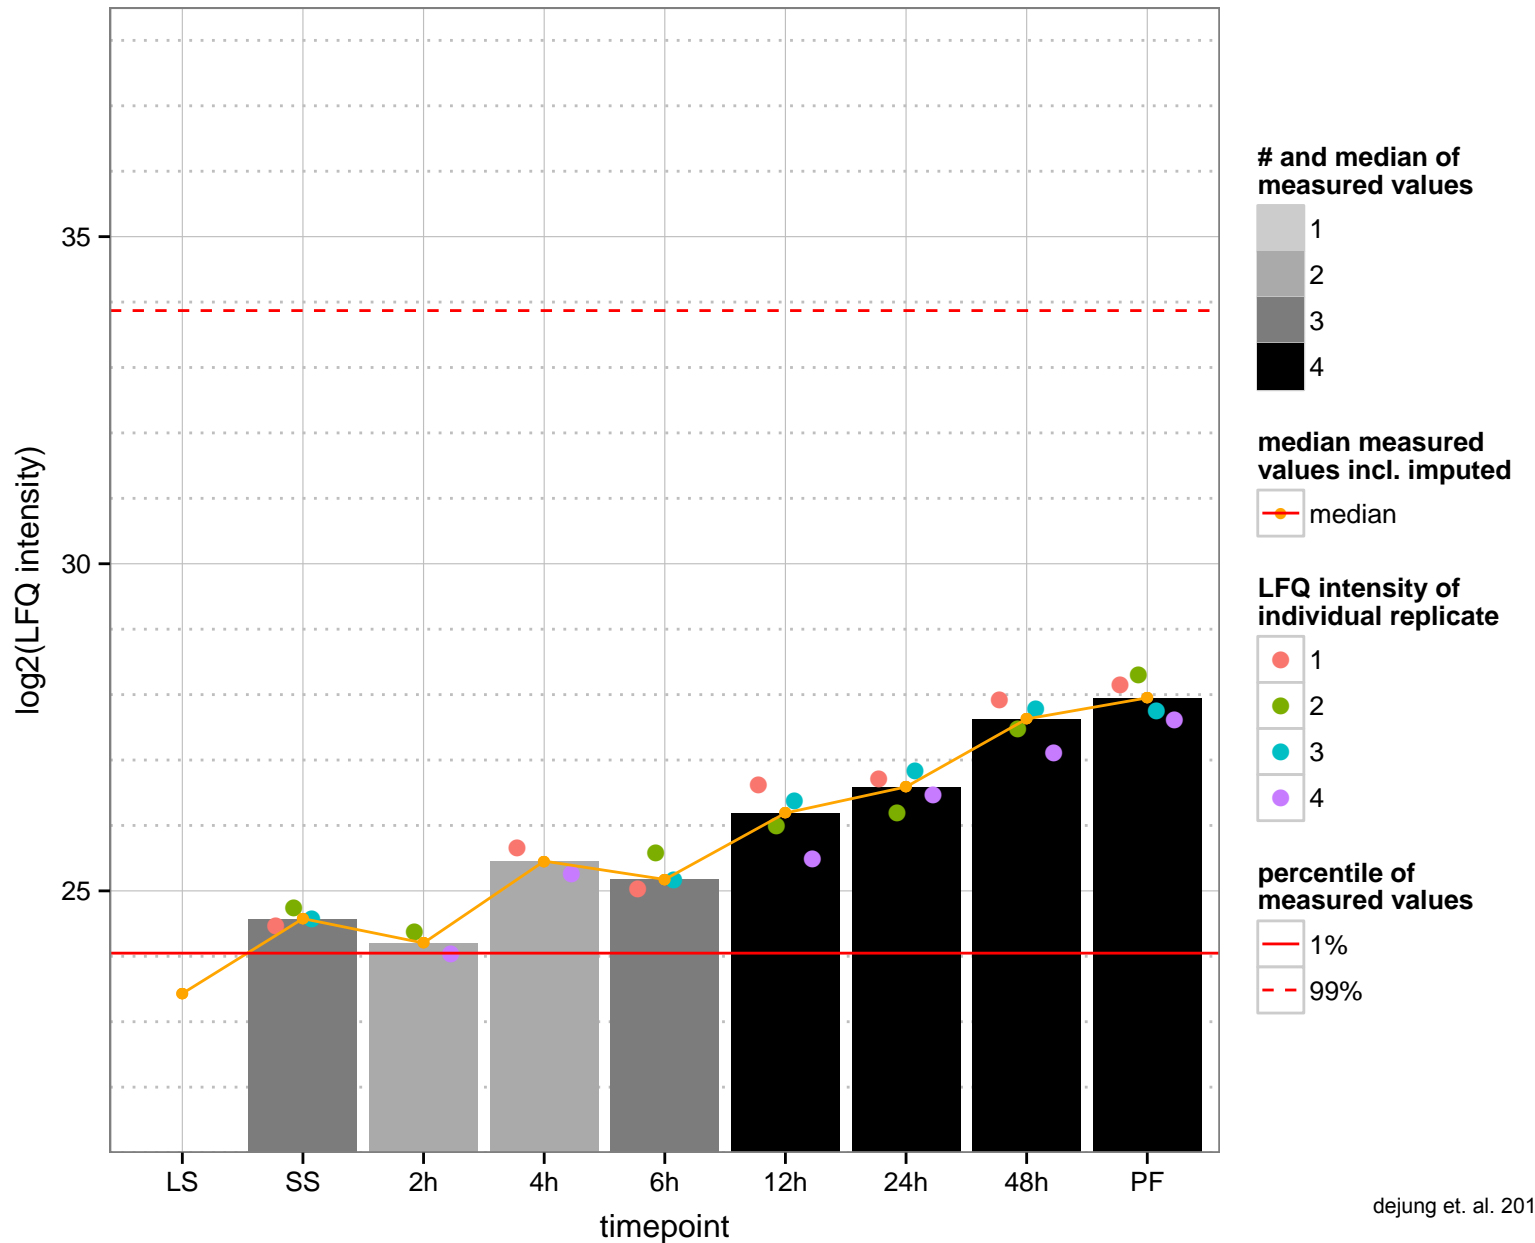



eukaryotic translation initiation factor 4 gamma, putative

Tb927.11.10560

AGOF: RNA binding

AGOC: cytoplasm

AGOP: RNA metabolic process, nucleobase-containing compound metabolic process, translation

PGOF: DNA binding, RNA binding, binding, protein binding

PGOC: null

PGOP: null

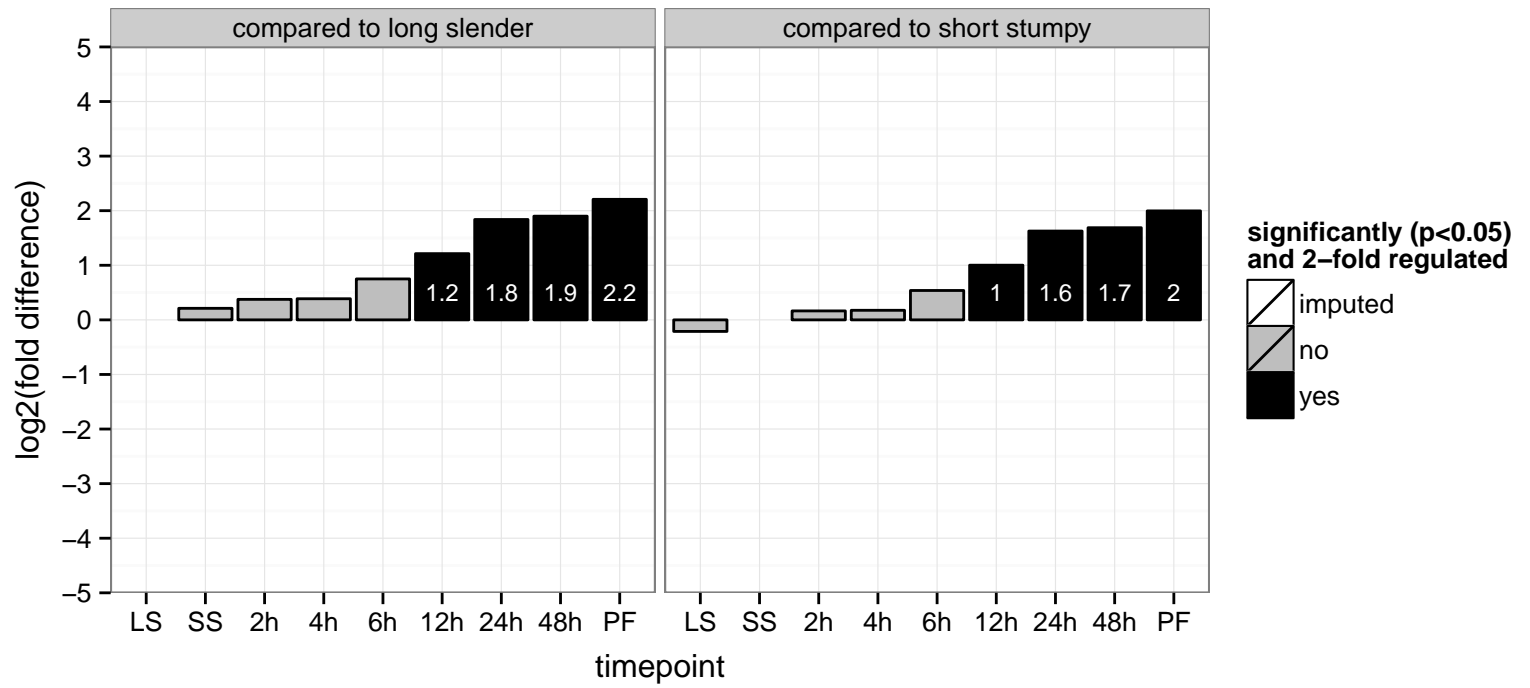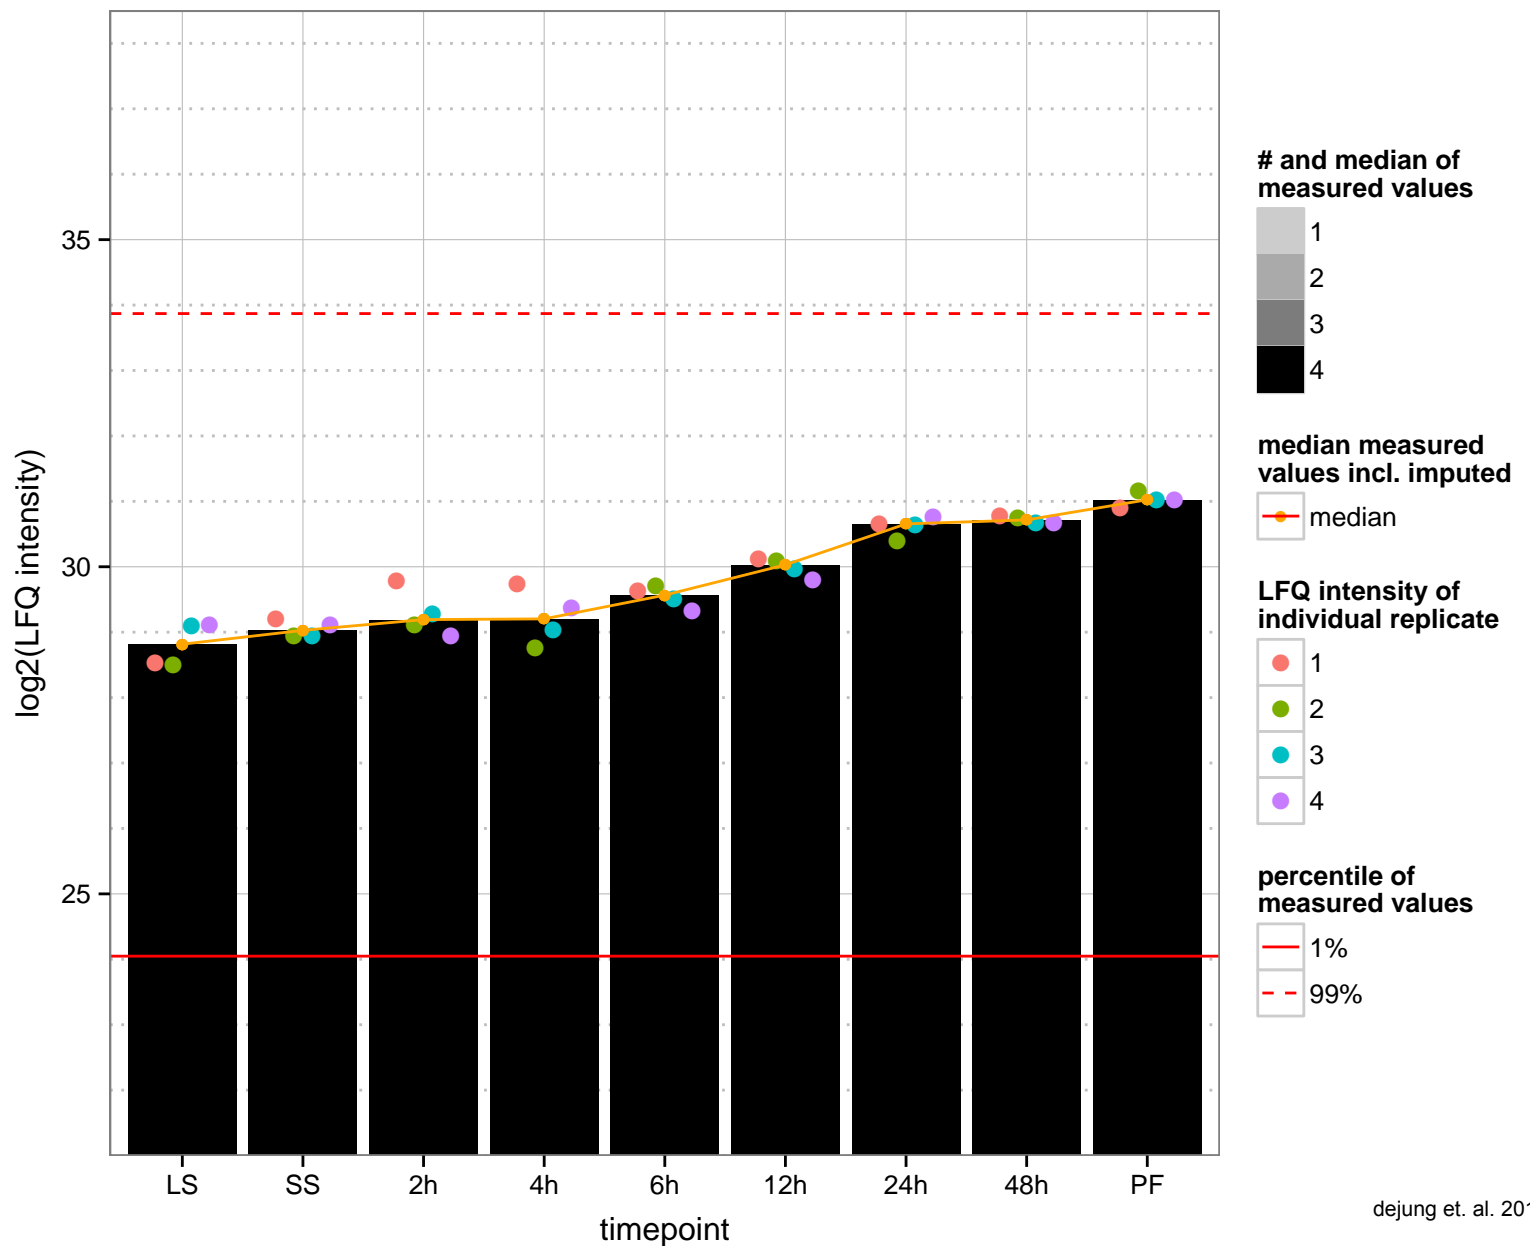

hypothetical protein, conserved  
 Tb927.11.11630  
 AGOF: null  
 AGOC: mitochondrion  
 AGOP: null  
 PGO: null  
 PGOC: null  
 PGOP: null

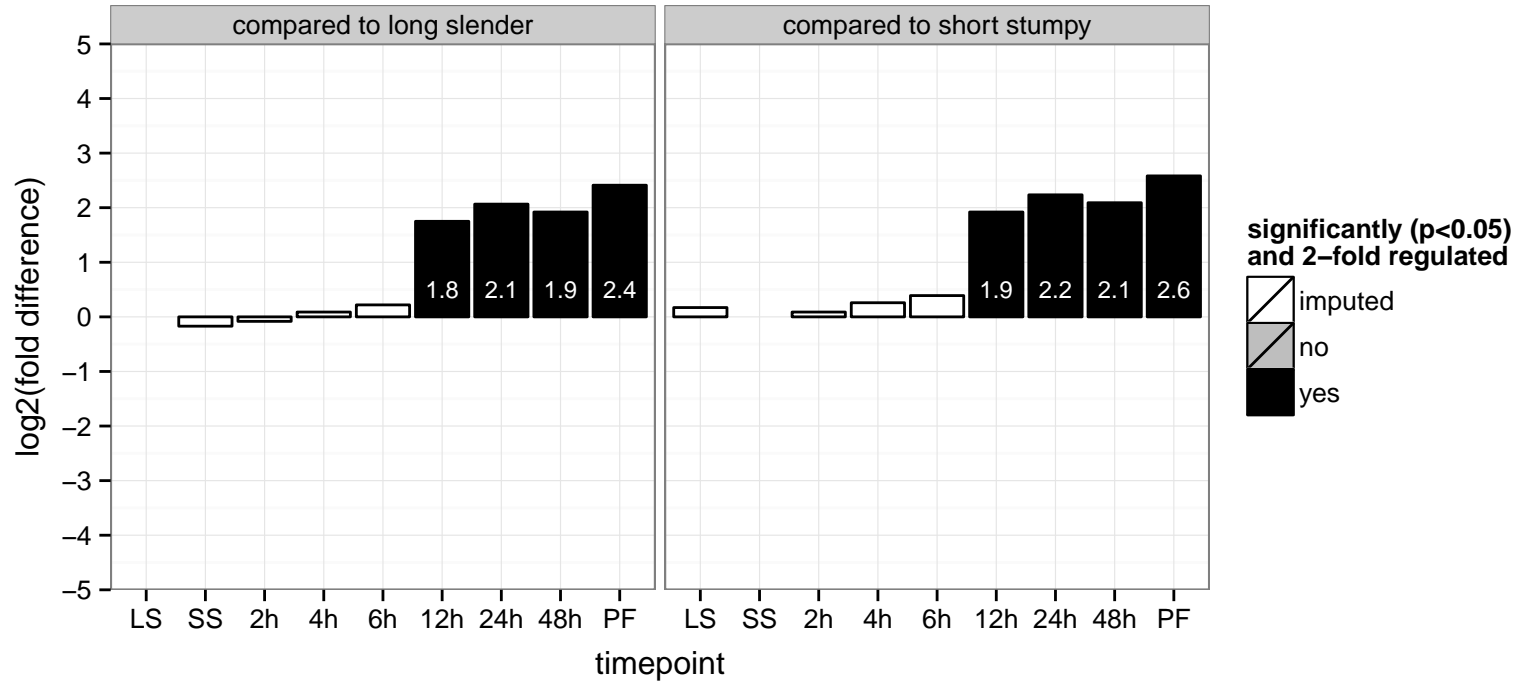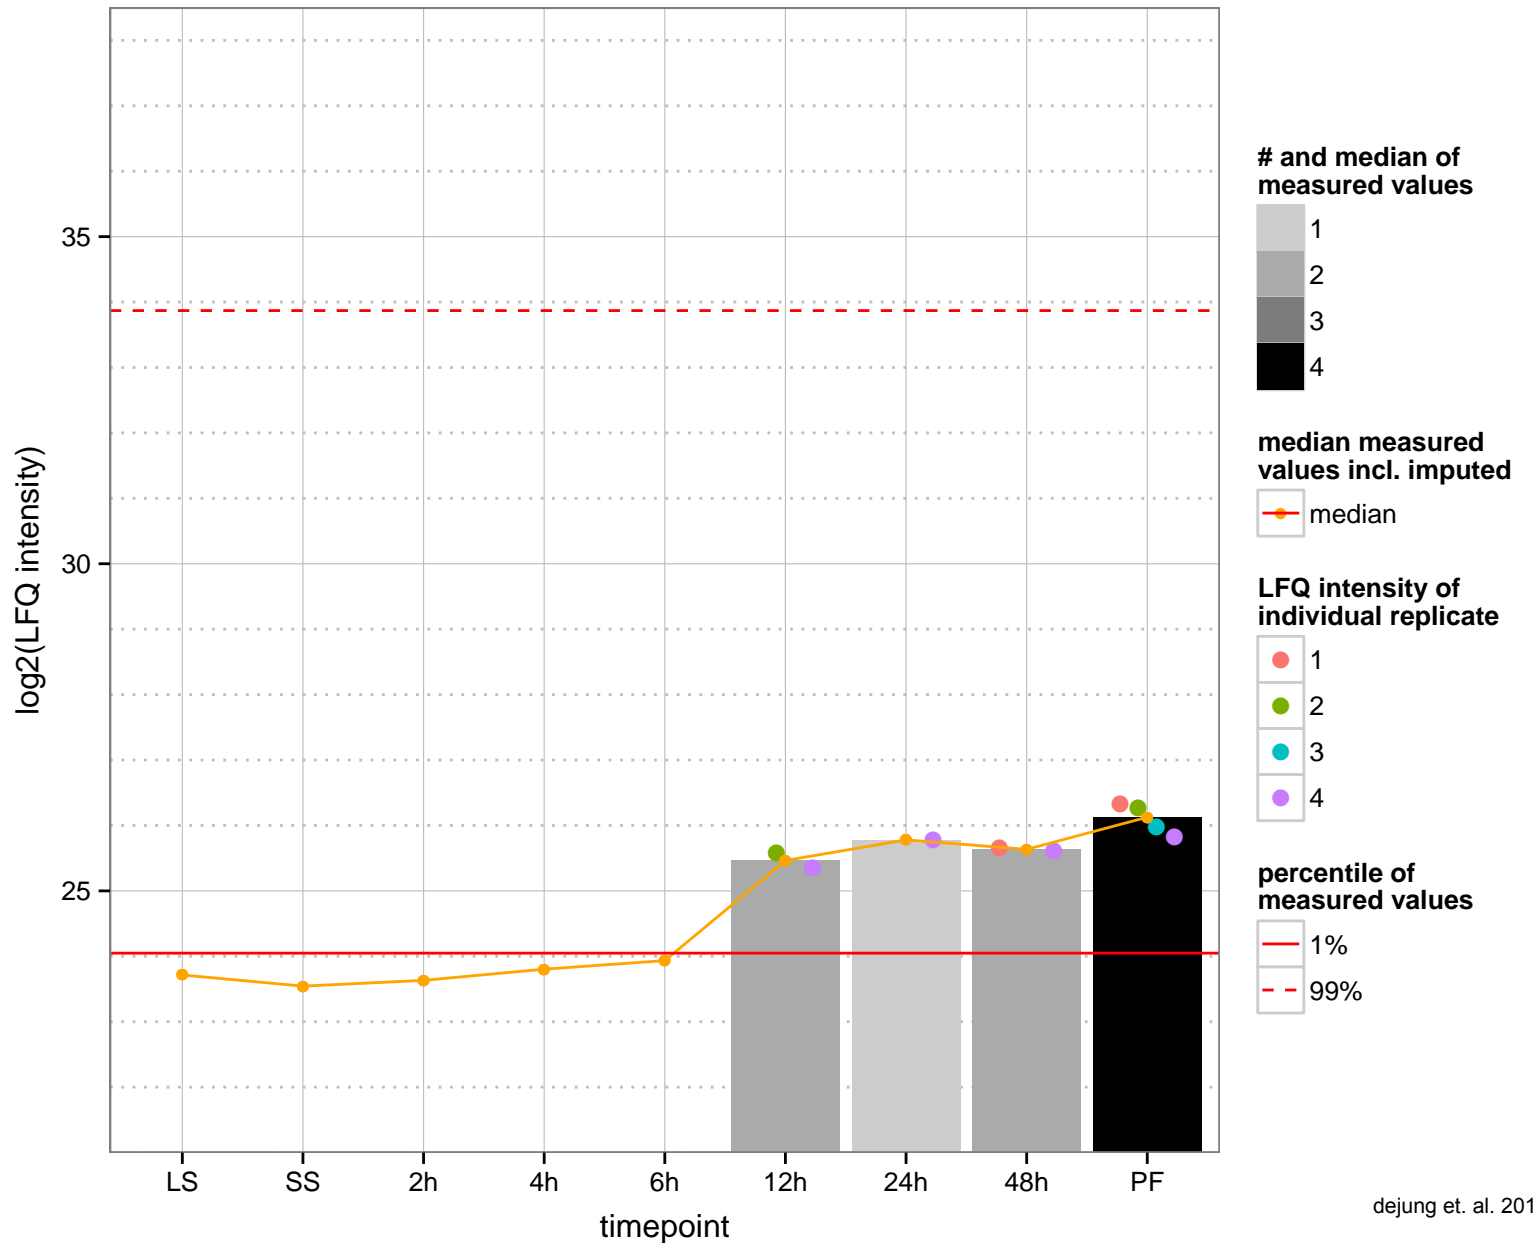

eukaryotic translation initiation factor 4e, putative  
 Tb927.11.11770  
 AGOF: RNA binding, RNA cap binding, translation initiation factor activity  
 AGOC: cytoplasm  
 AGOP: translational initiation  
 PGO: RNA binding, translation initiation factor activity  
 PGO: cytoplasm  
 PGO: translational initiation

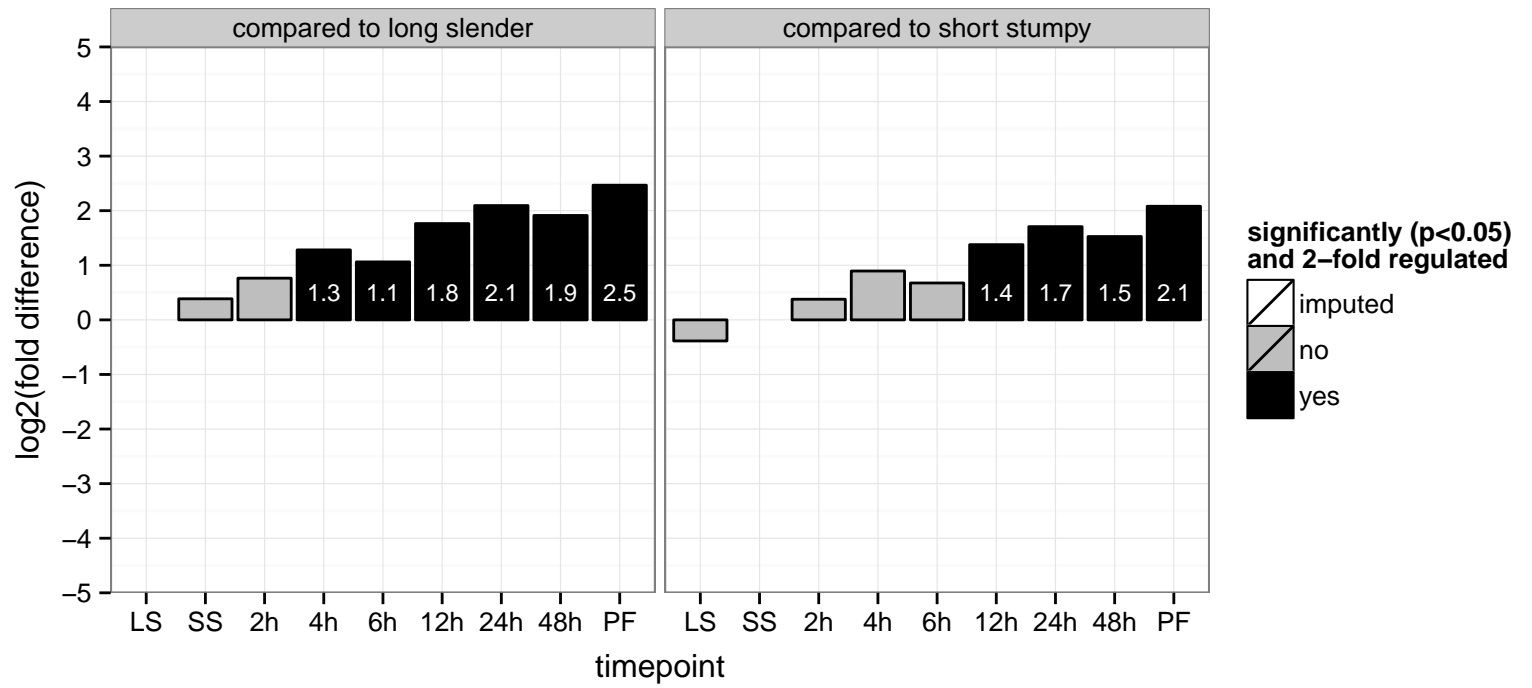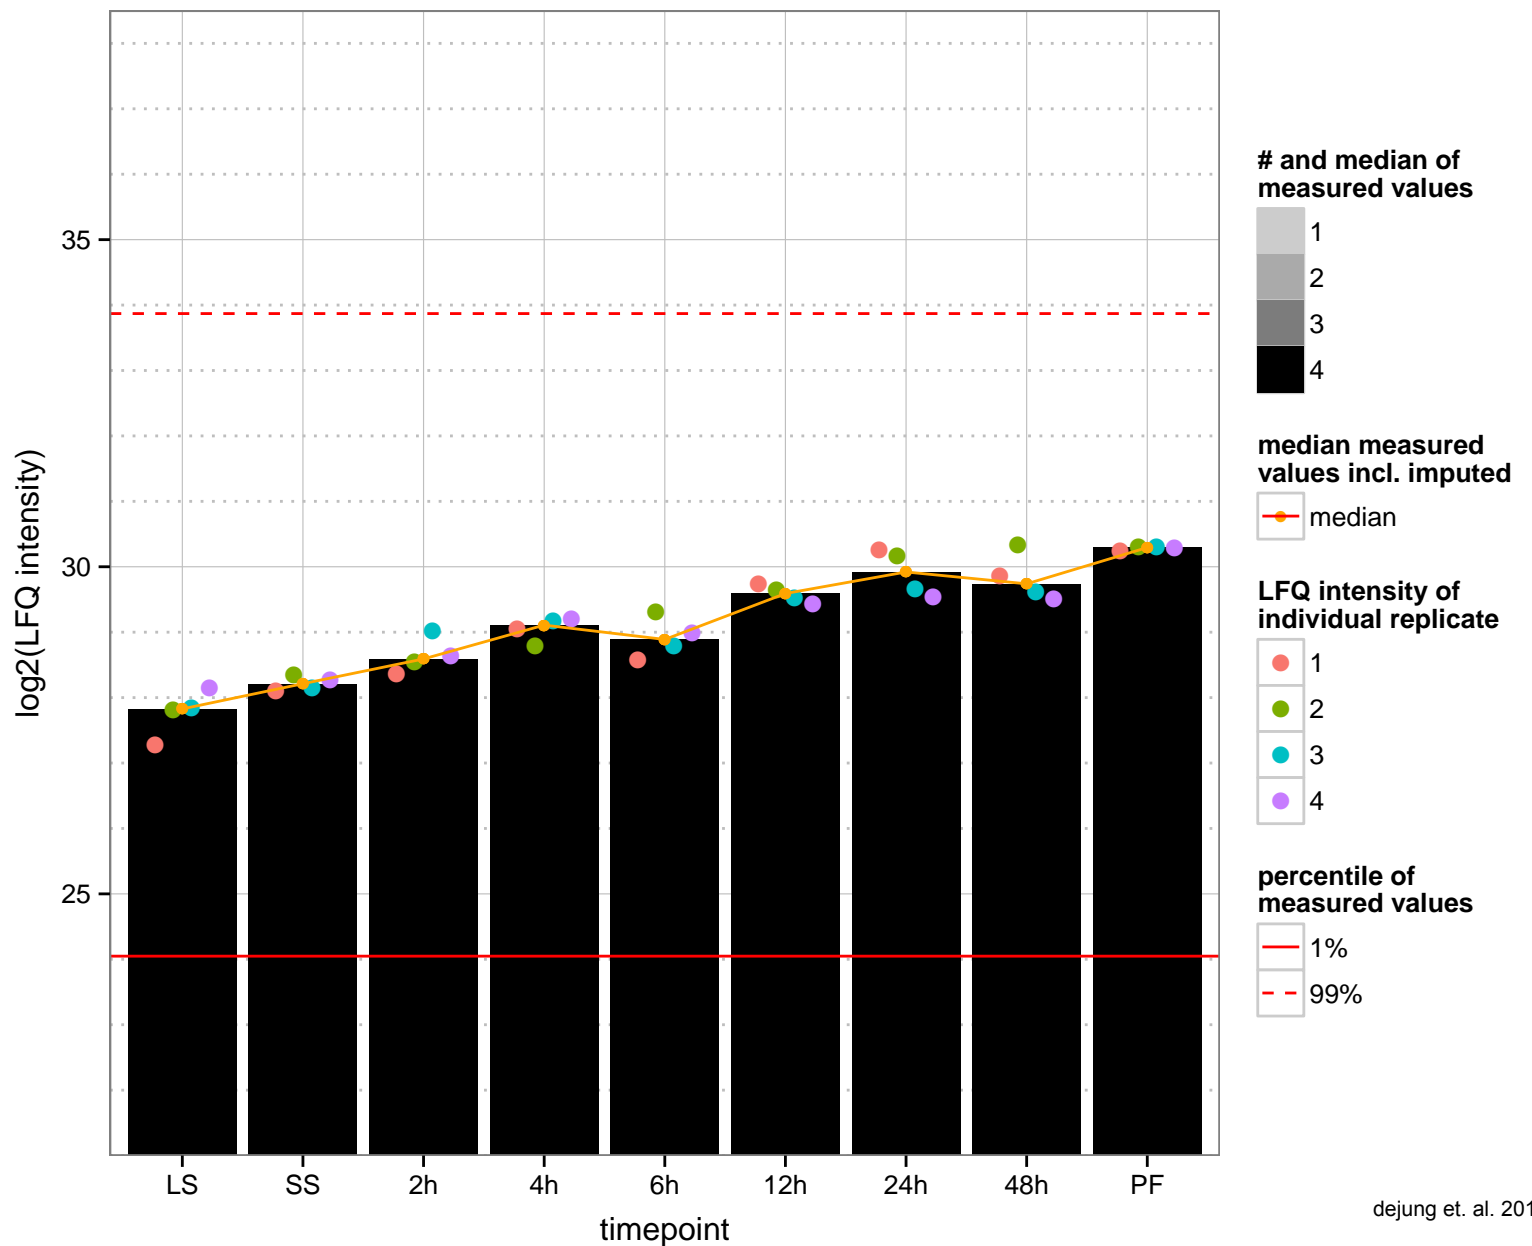

ubiquitin carboxyl-terminal hydrolase, putative, cysteine peptidase, Clan CA, family C19  
 Tb927.11.12240  
 AGOF: ubiquitin thiolesterase activity  
 AGOC: null  
 AGOP: ubiquitin-dependent protein catabolic process  
 PGO: ubiquitin thiolesterase activity  
 PGO: null  
 PGO: ubiquitin-dependent protein catabolic process

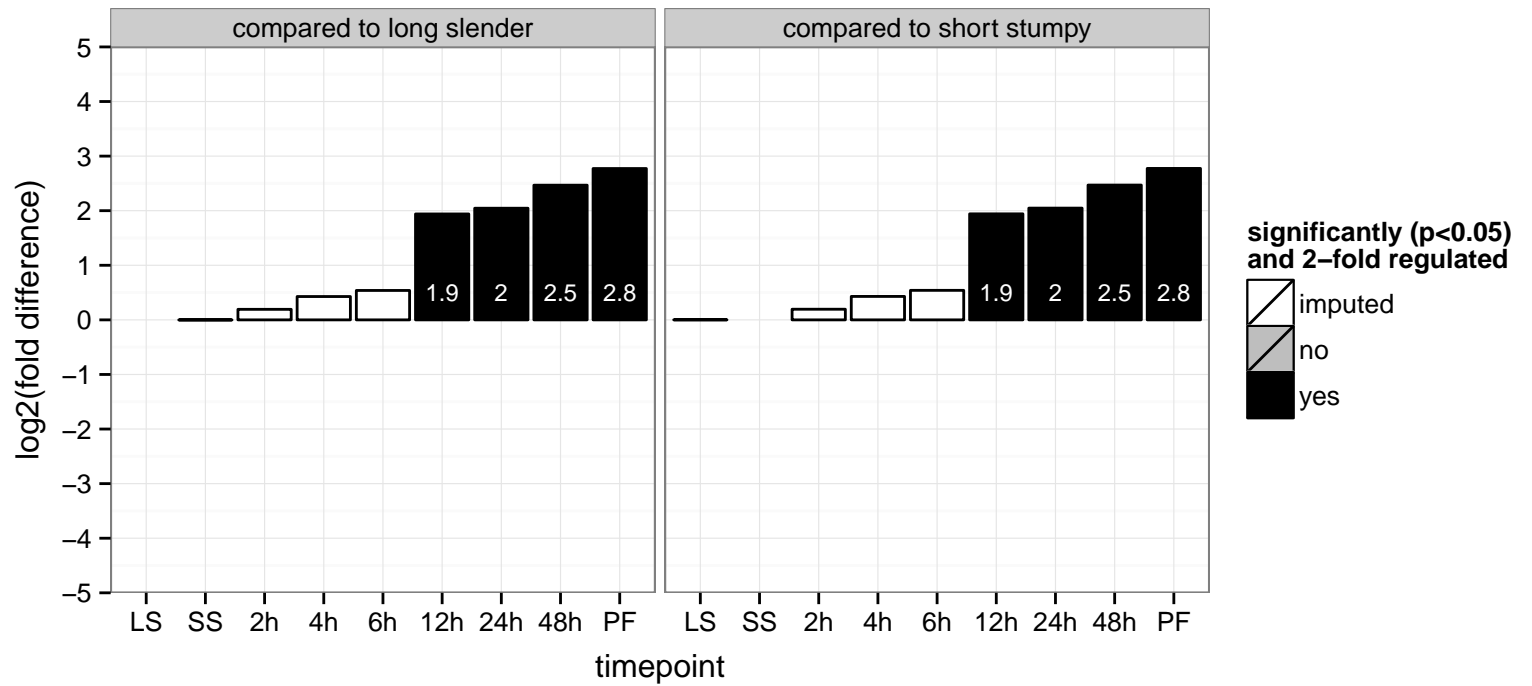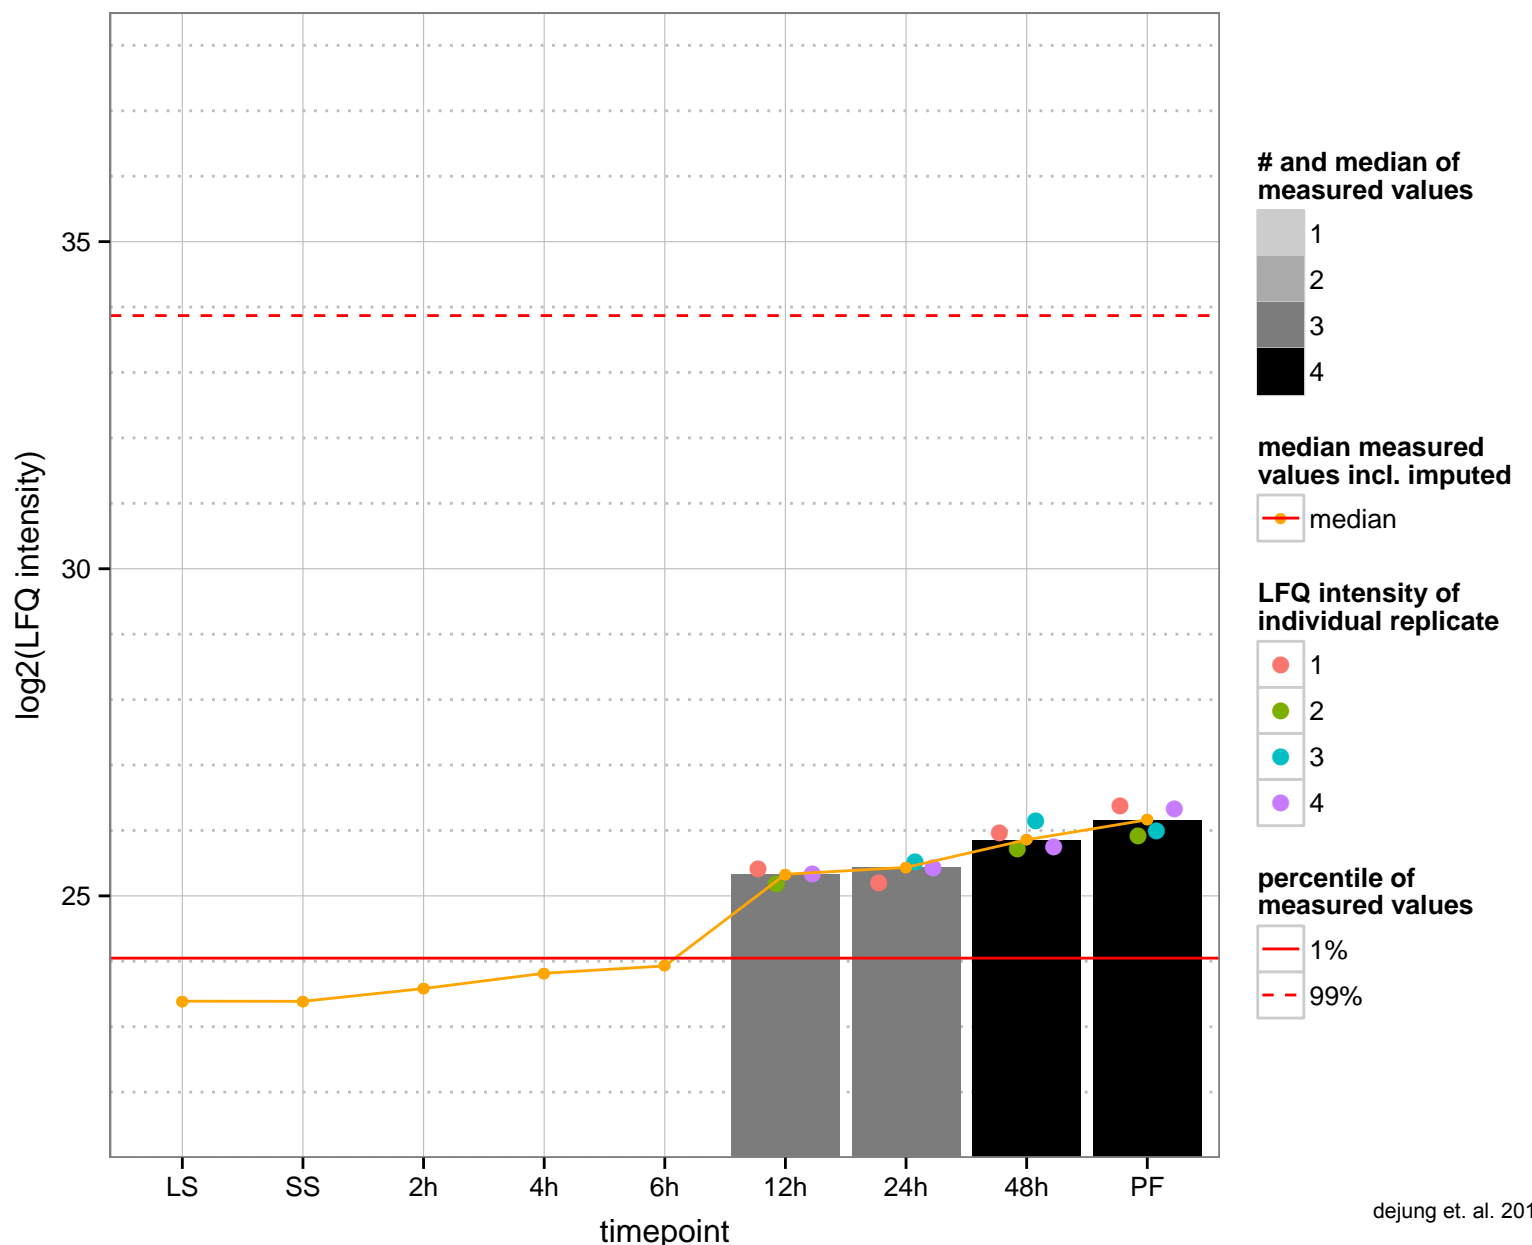

Mitochondrial SSU ribosomal protein, putative, mitochondrial edited mRNA stability factor 1 subunit, kinteoplast poly(A) polym  
 Tb927.11.1250  
 AGOF: RNA binding  
 AGOC: mitochondrion  
 AGOP: RNA polyadenylation, mRNA stabilization  
 PGO: null  
 PGOC: null  
 PGOP: null

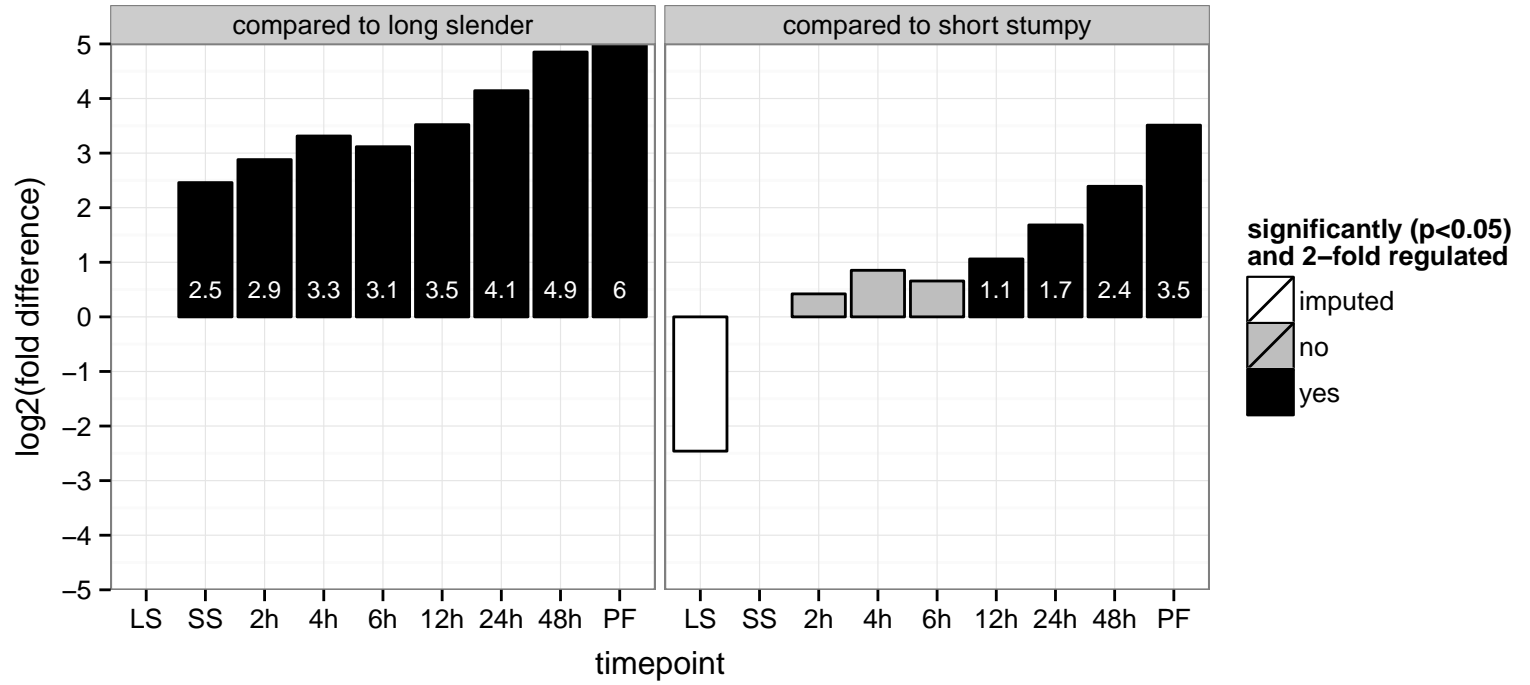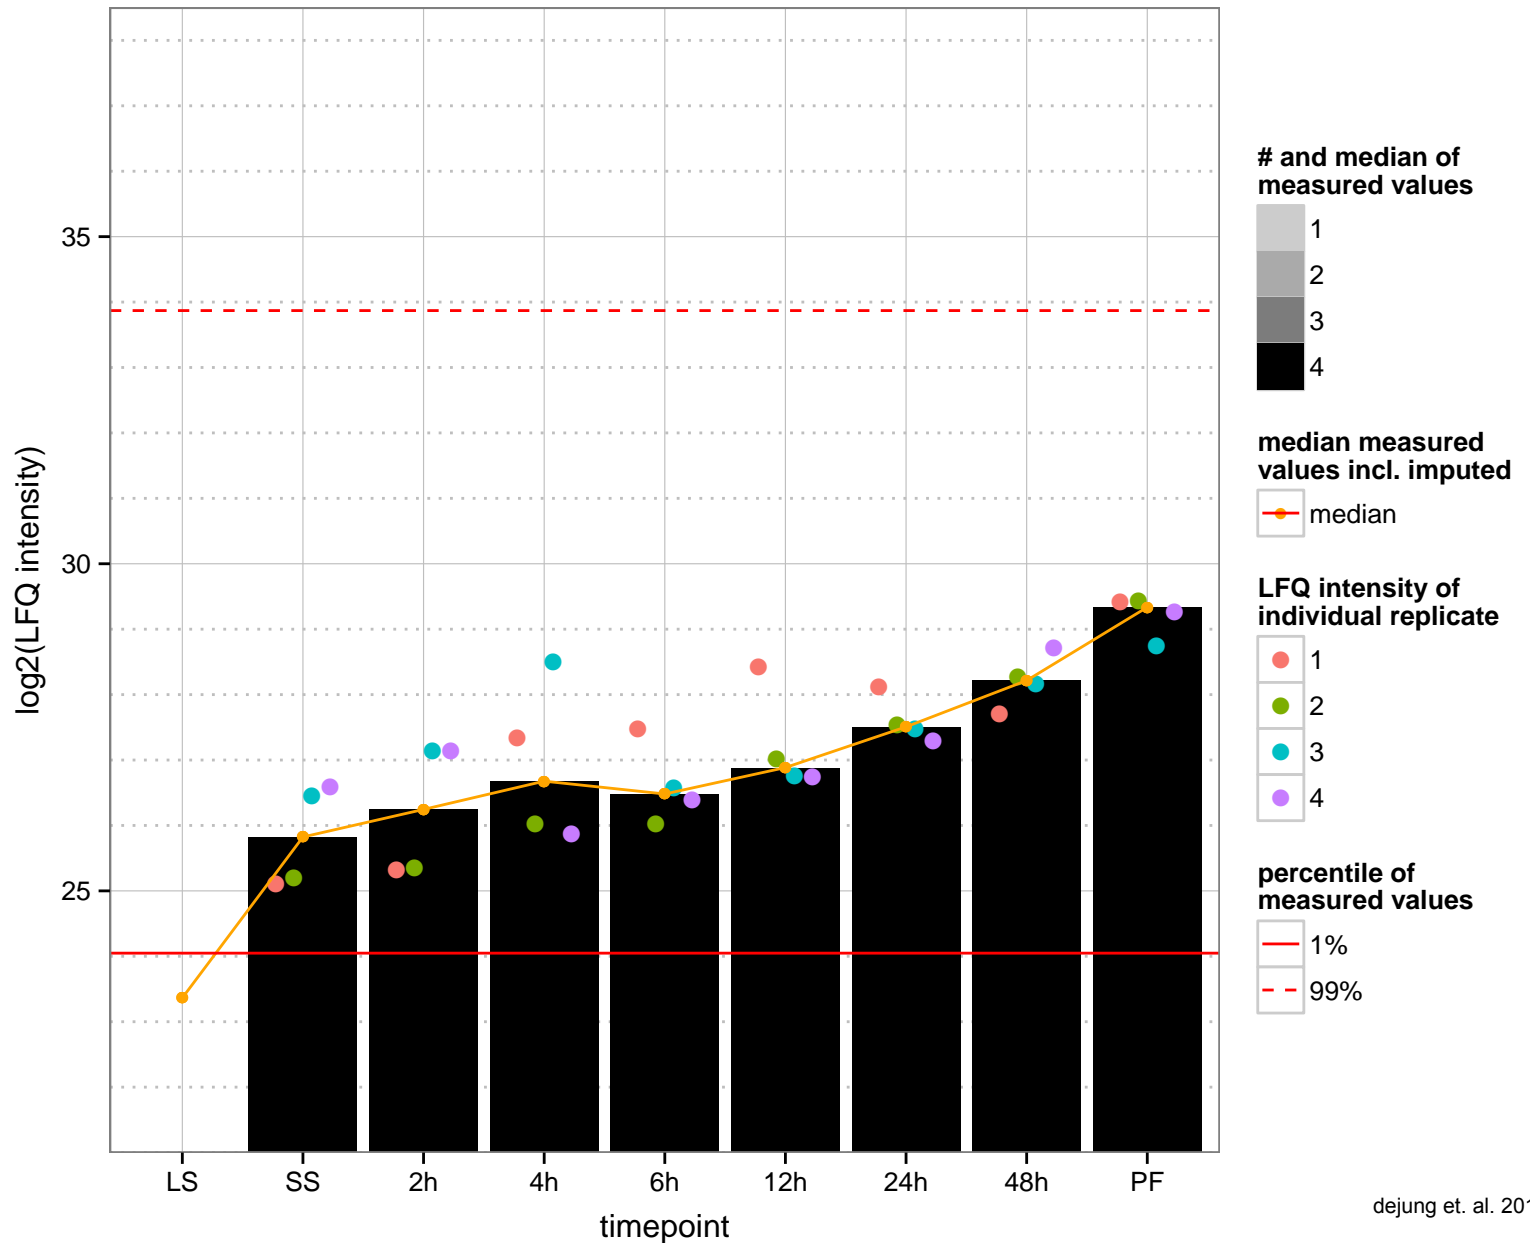

prefoldin subunit 2, putative  
 Tb927.11.12680  
 AGOF: unfolded protein binding  
 AGOC: prefoldin complex  
 AGOP: protein folding  
 PGO: unfolded protein binding  
 PGOC: prefoldin complex  
 PGOP: protein folding

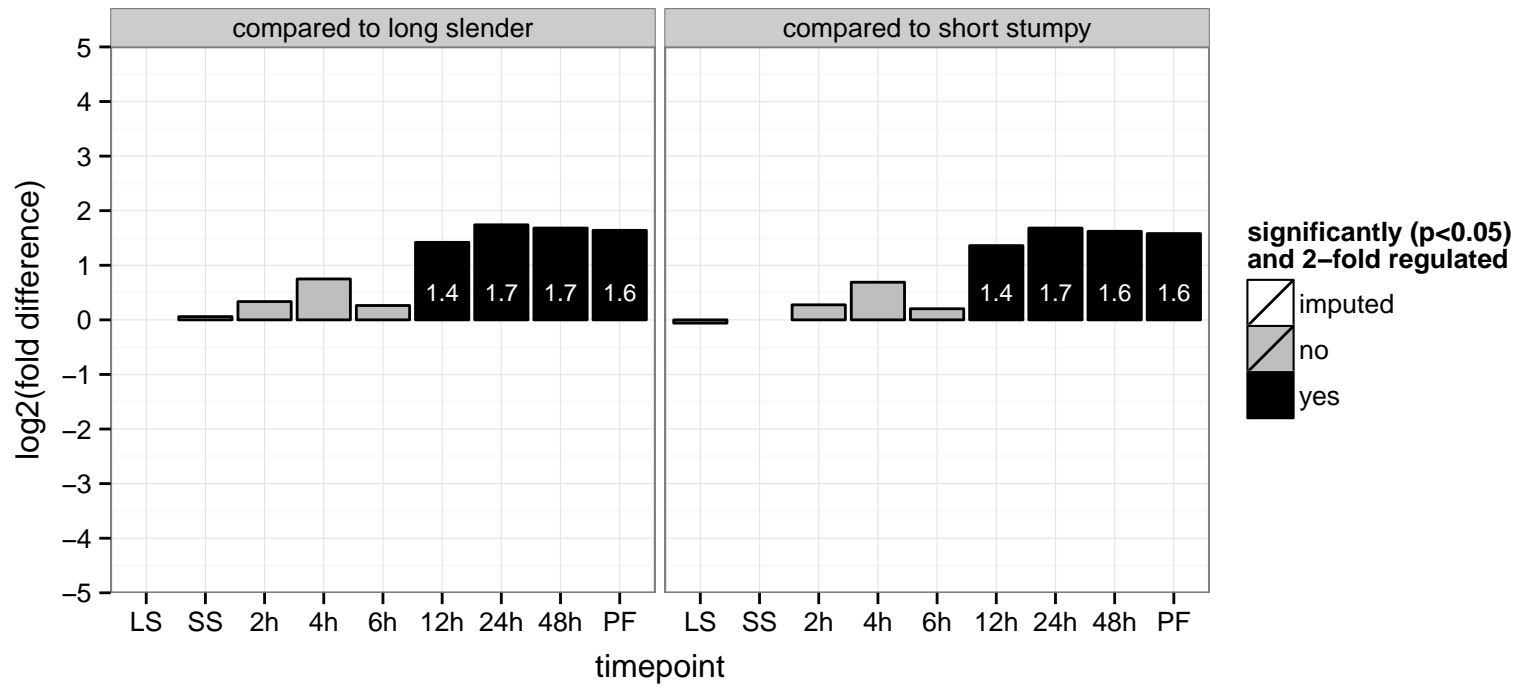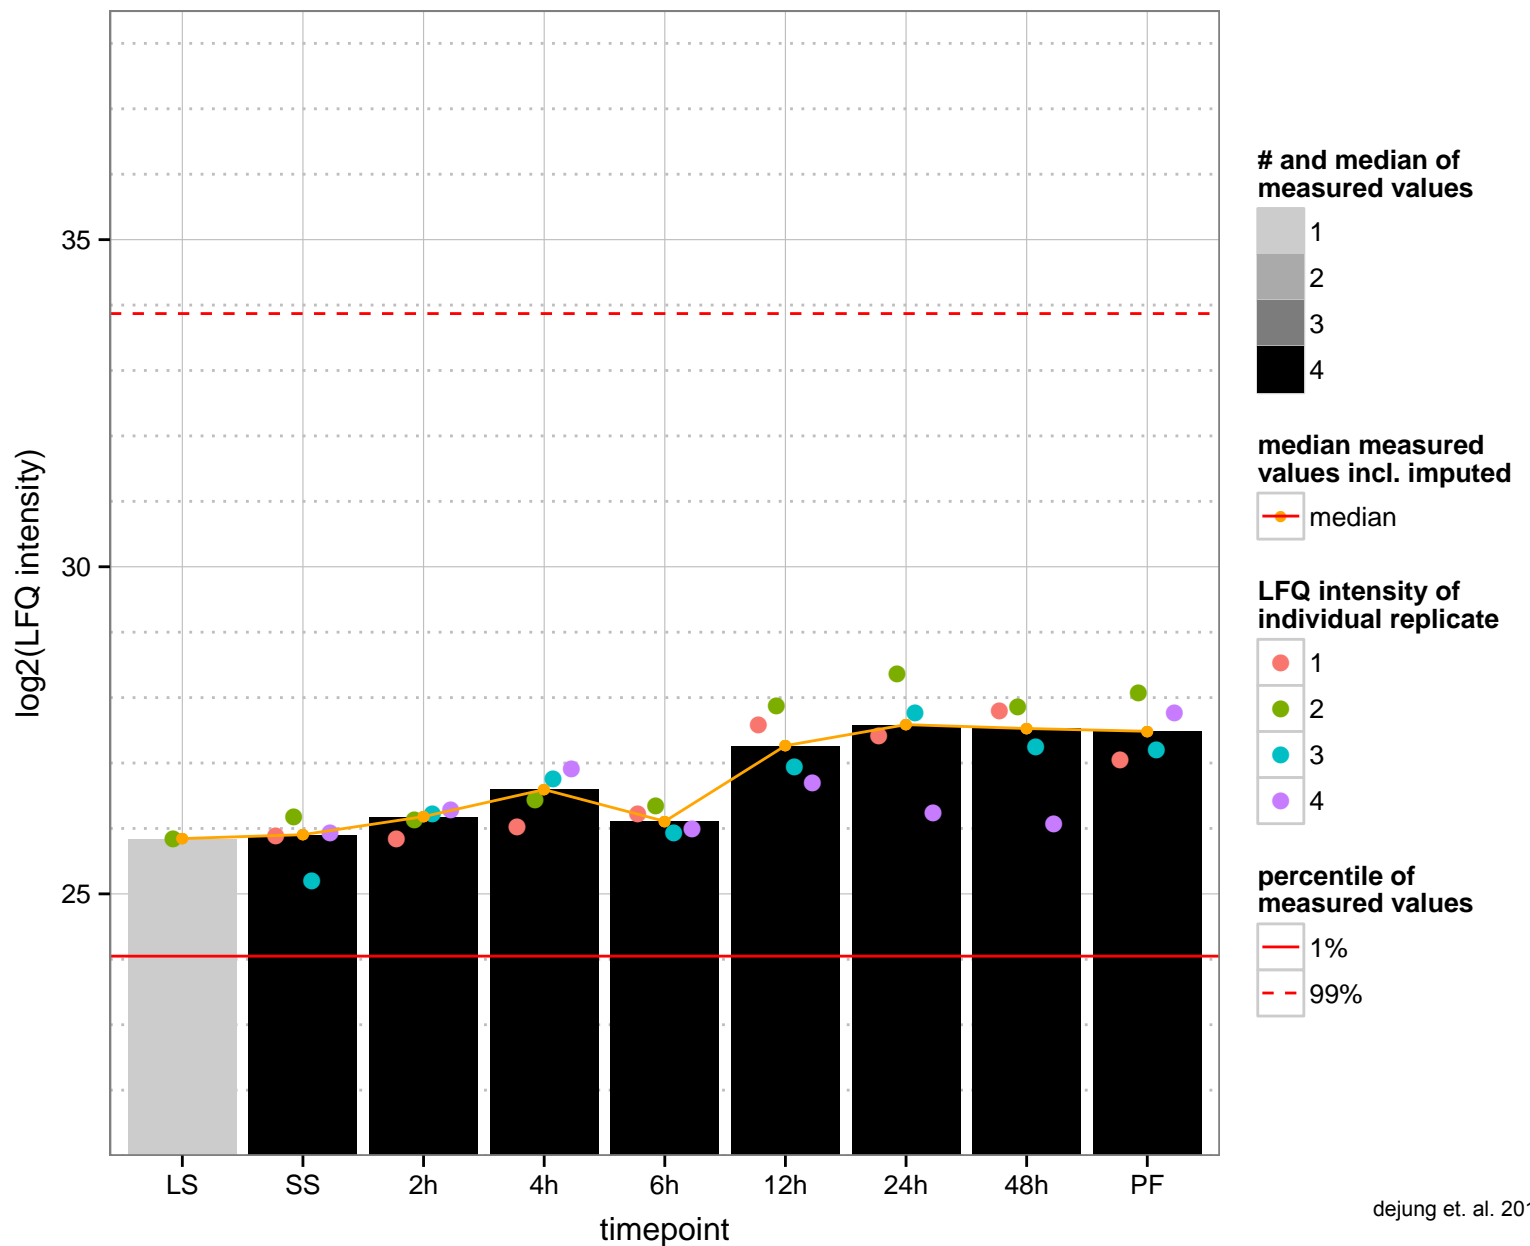

ribonucleoside–diphosphate reductase small chain, putative, ribonucleoside–diphosphate reductase small chain (RNR2)  
 Tb927.11.12800;Tb927.11.12790;Tb927.11.12780;Tb927.11.12820;Tb11.v5.0288;Tb927.11.12810  
 AGOF: null, ribonucleoside–diphosphate reductase activity, thioredoxin disulfide as acceptor, transition metal ion binding  
 AGOC: null  
 AGOP: null, deoxyribonucleoside diphosphate metabolic process  
 PGOF: oxidoreductase activity, ribonucleoside–diphosphate reductase activity, thioredoxin disulfide as acceptor, transition me  
 PGO: null  
 PGOP: deoxyribonucleoside diphosphate metabolic process, oxidation–reduction process

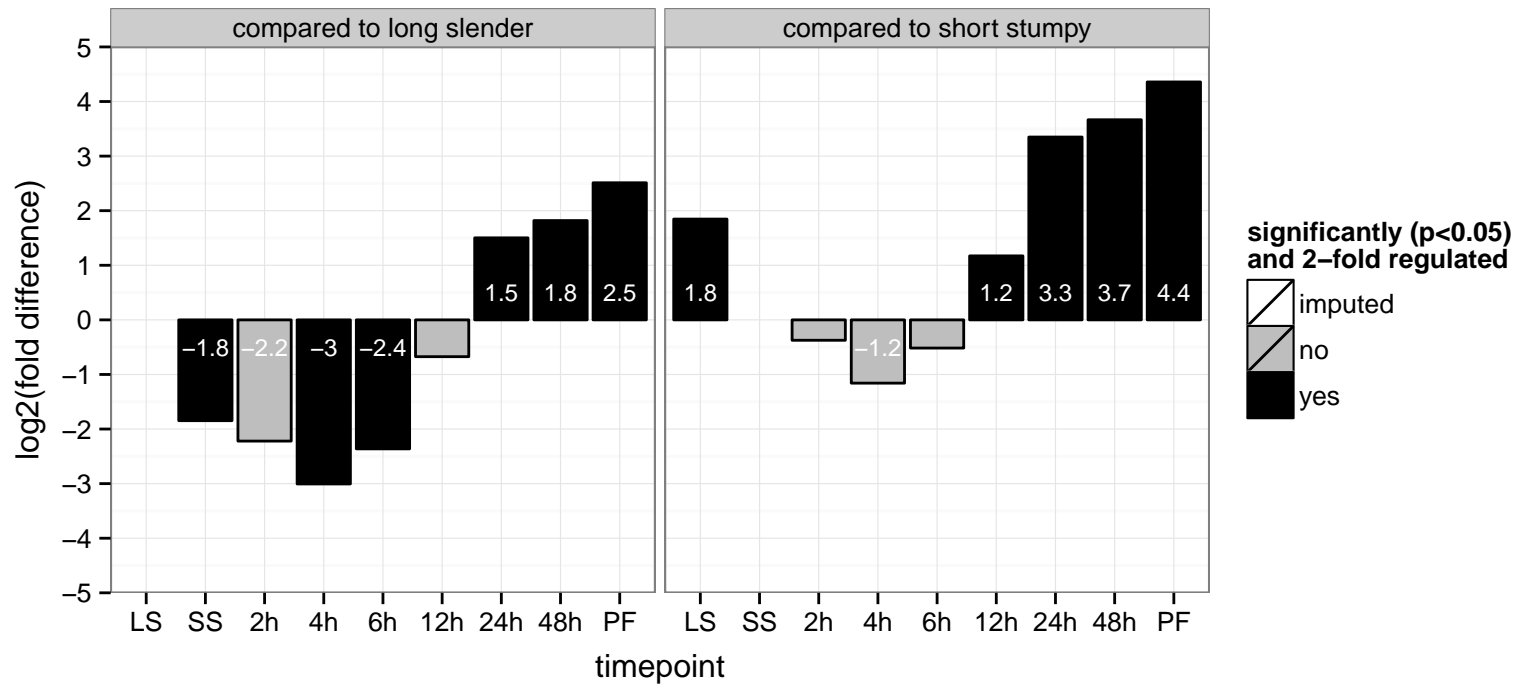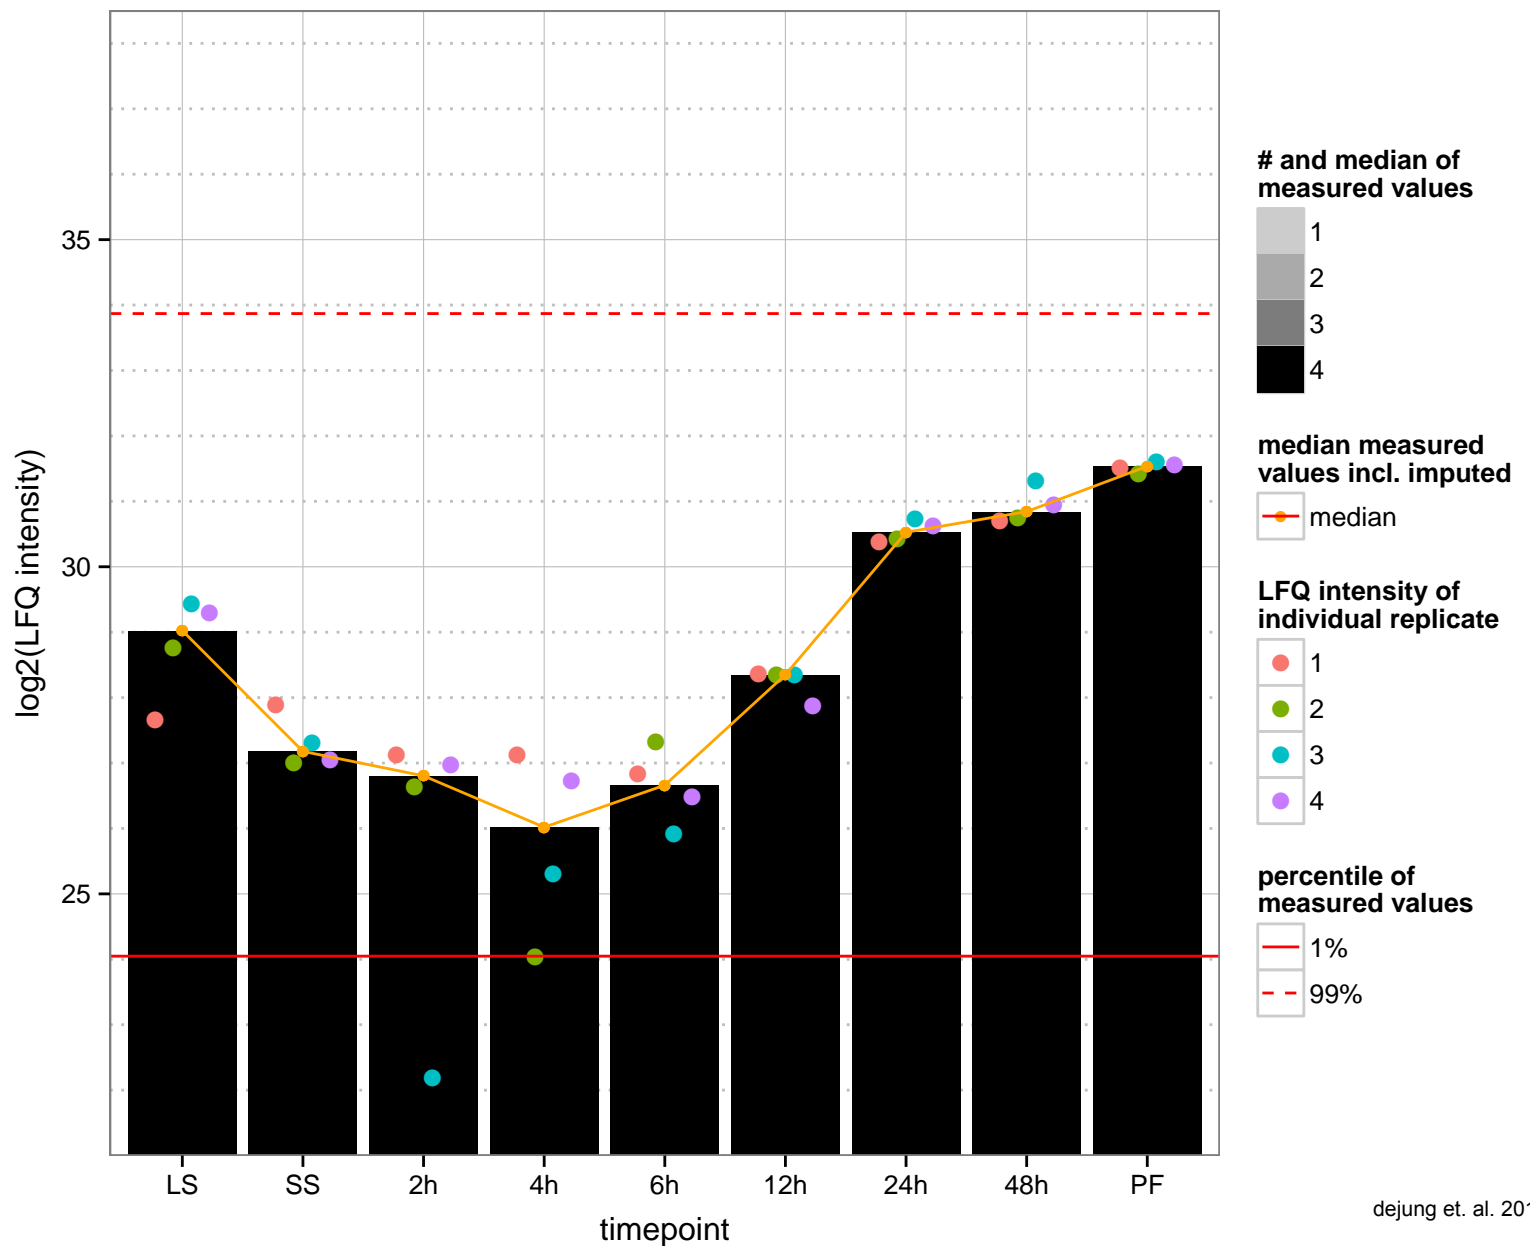

cytochrome oxidase subunit X (COXX)  
 Tb927.11.13140  
 AGOF: null  
 AGOC: mitochondrion  
 AGOP: null  
 PGO: null  
 PGO: null  
 PGO: null

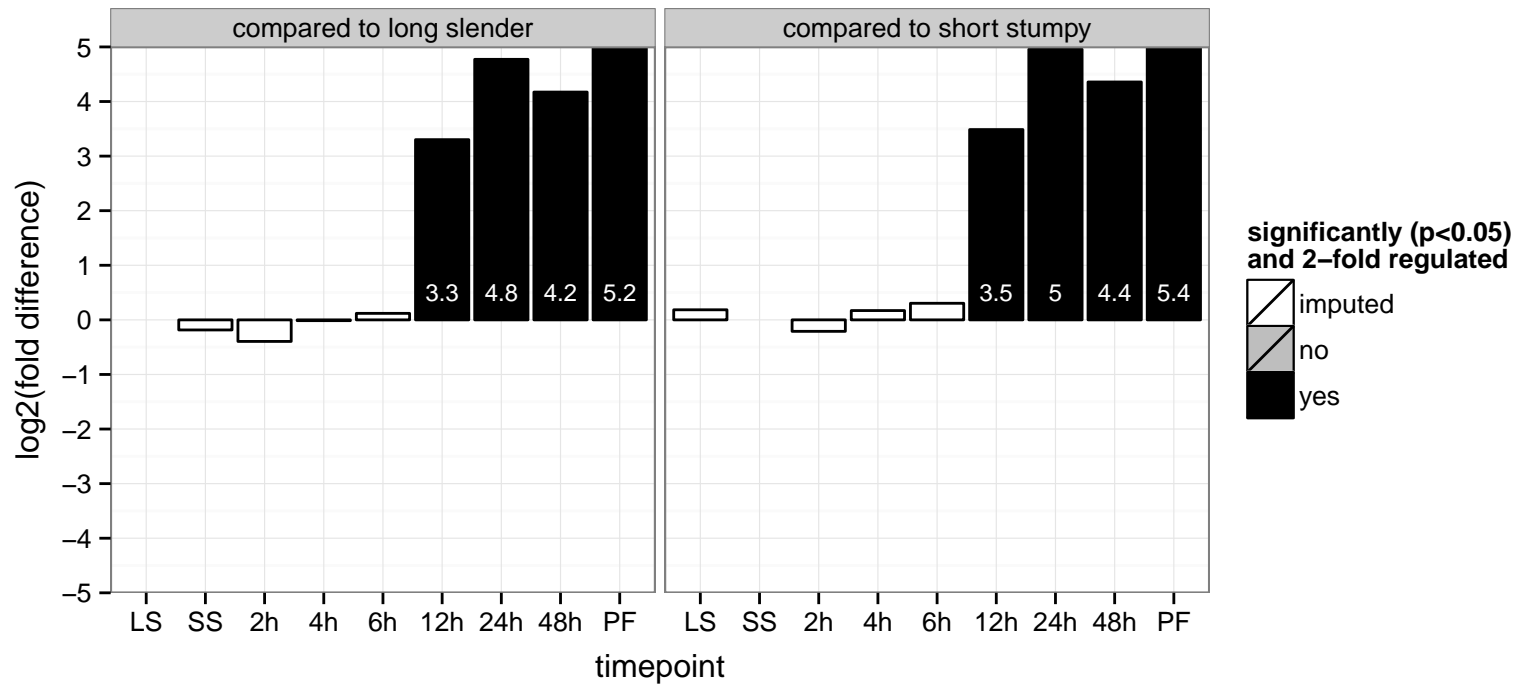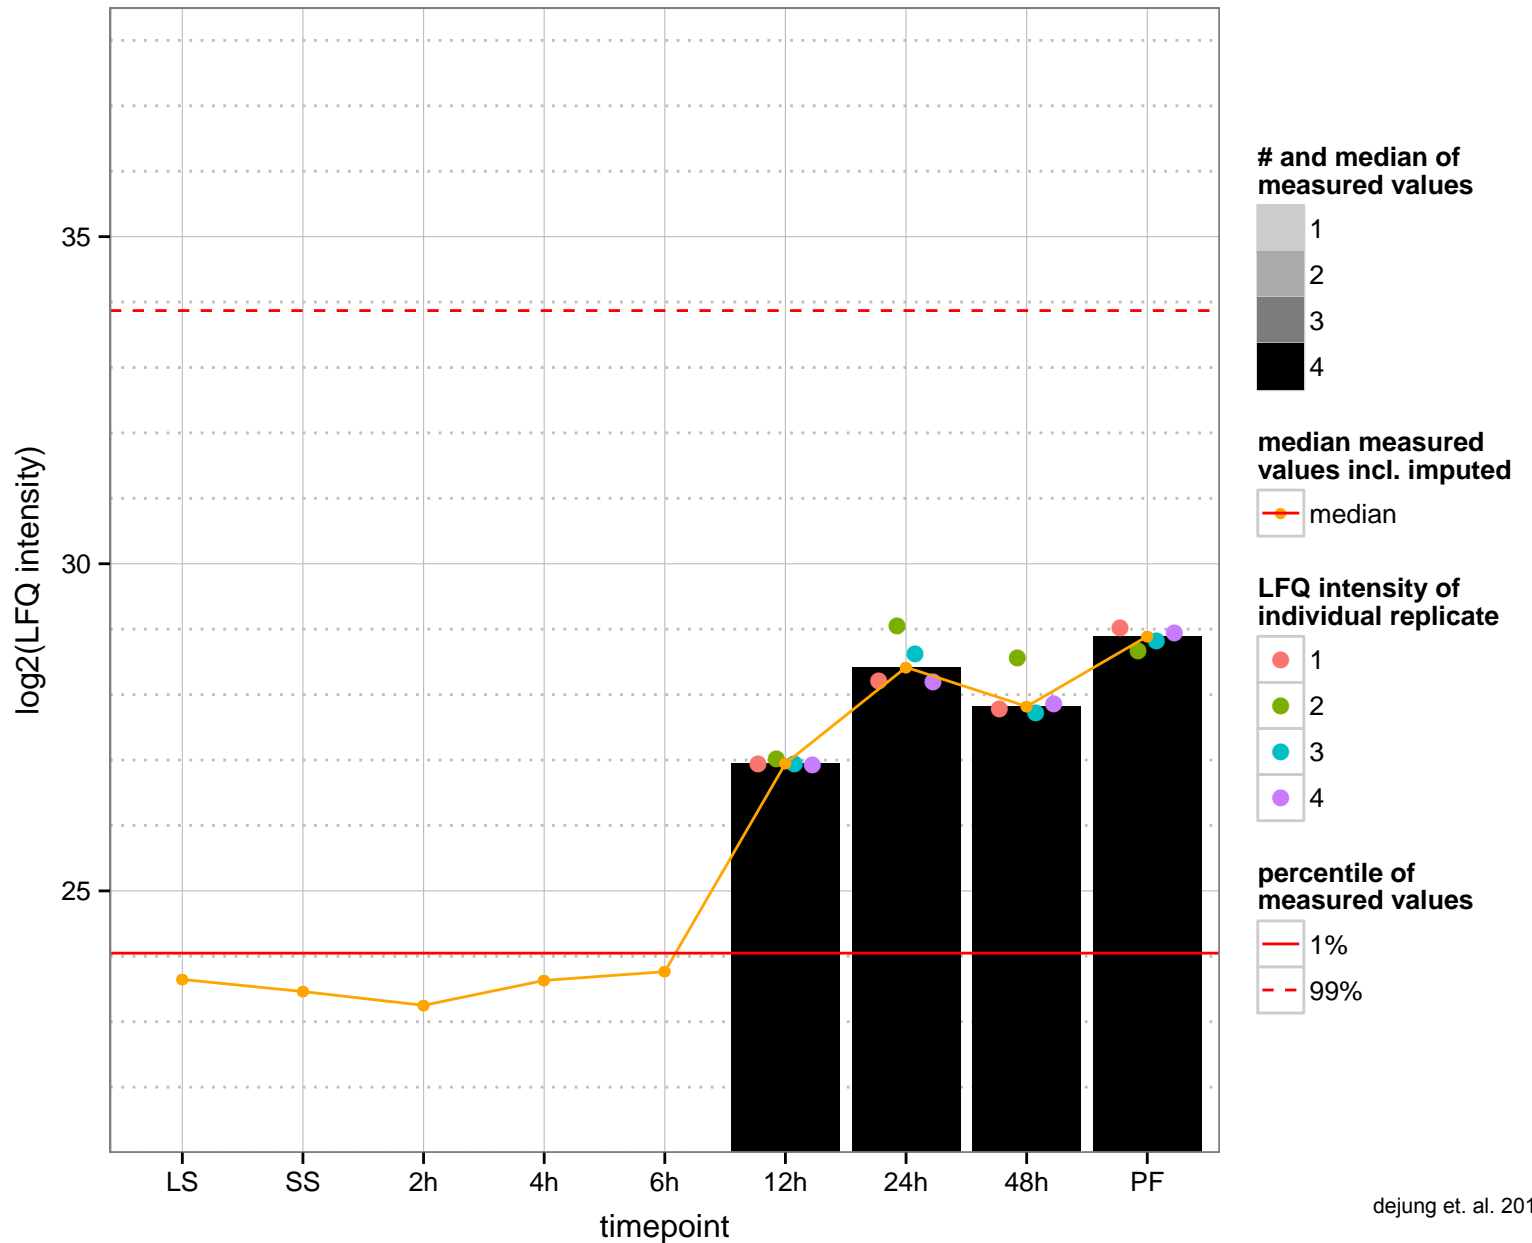



hypothetical protein, conserved  
 Tb927.11.13510  
 AGOF: null  
 AGOC: mitochondrion  
 AGOP: null  
 PGO: null  
 PGOC: null  
 PGOP: null

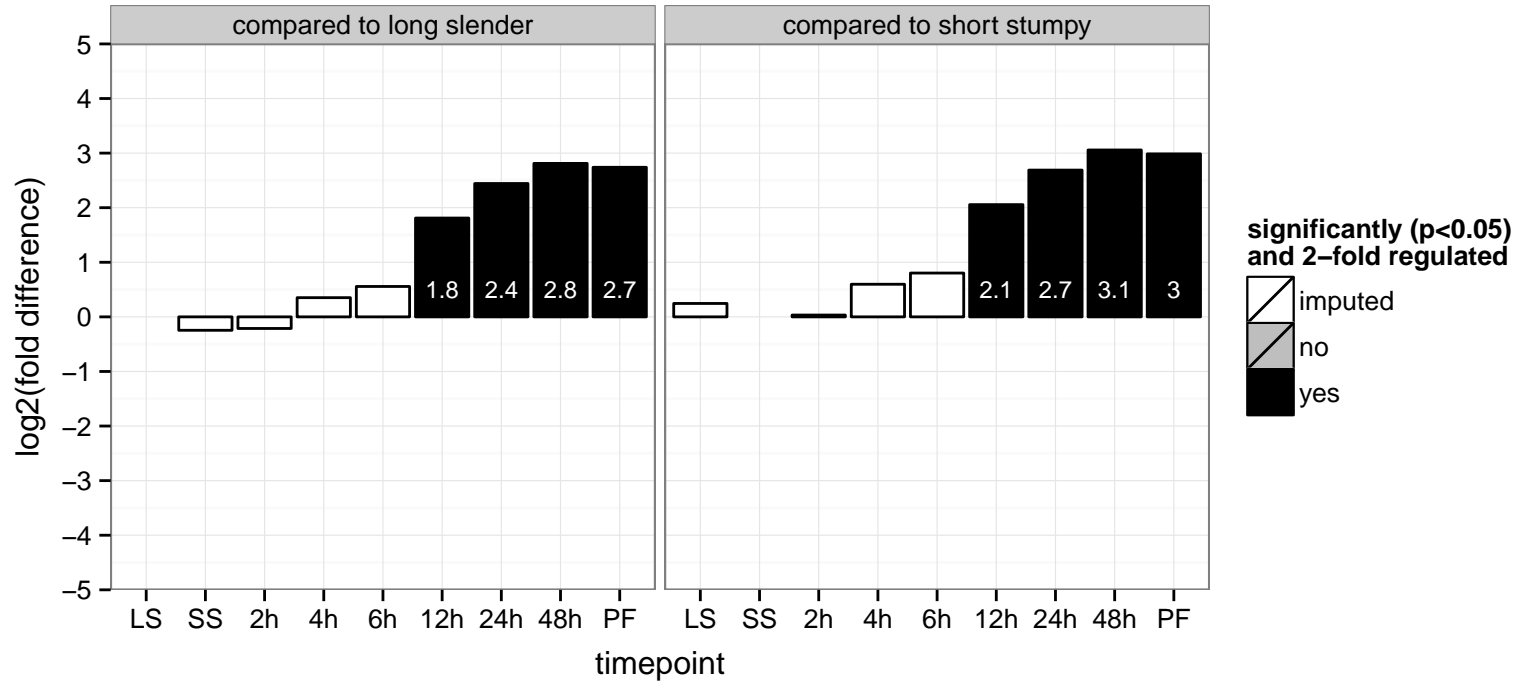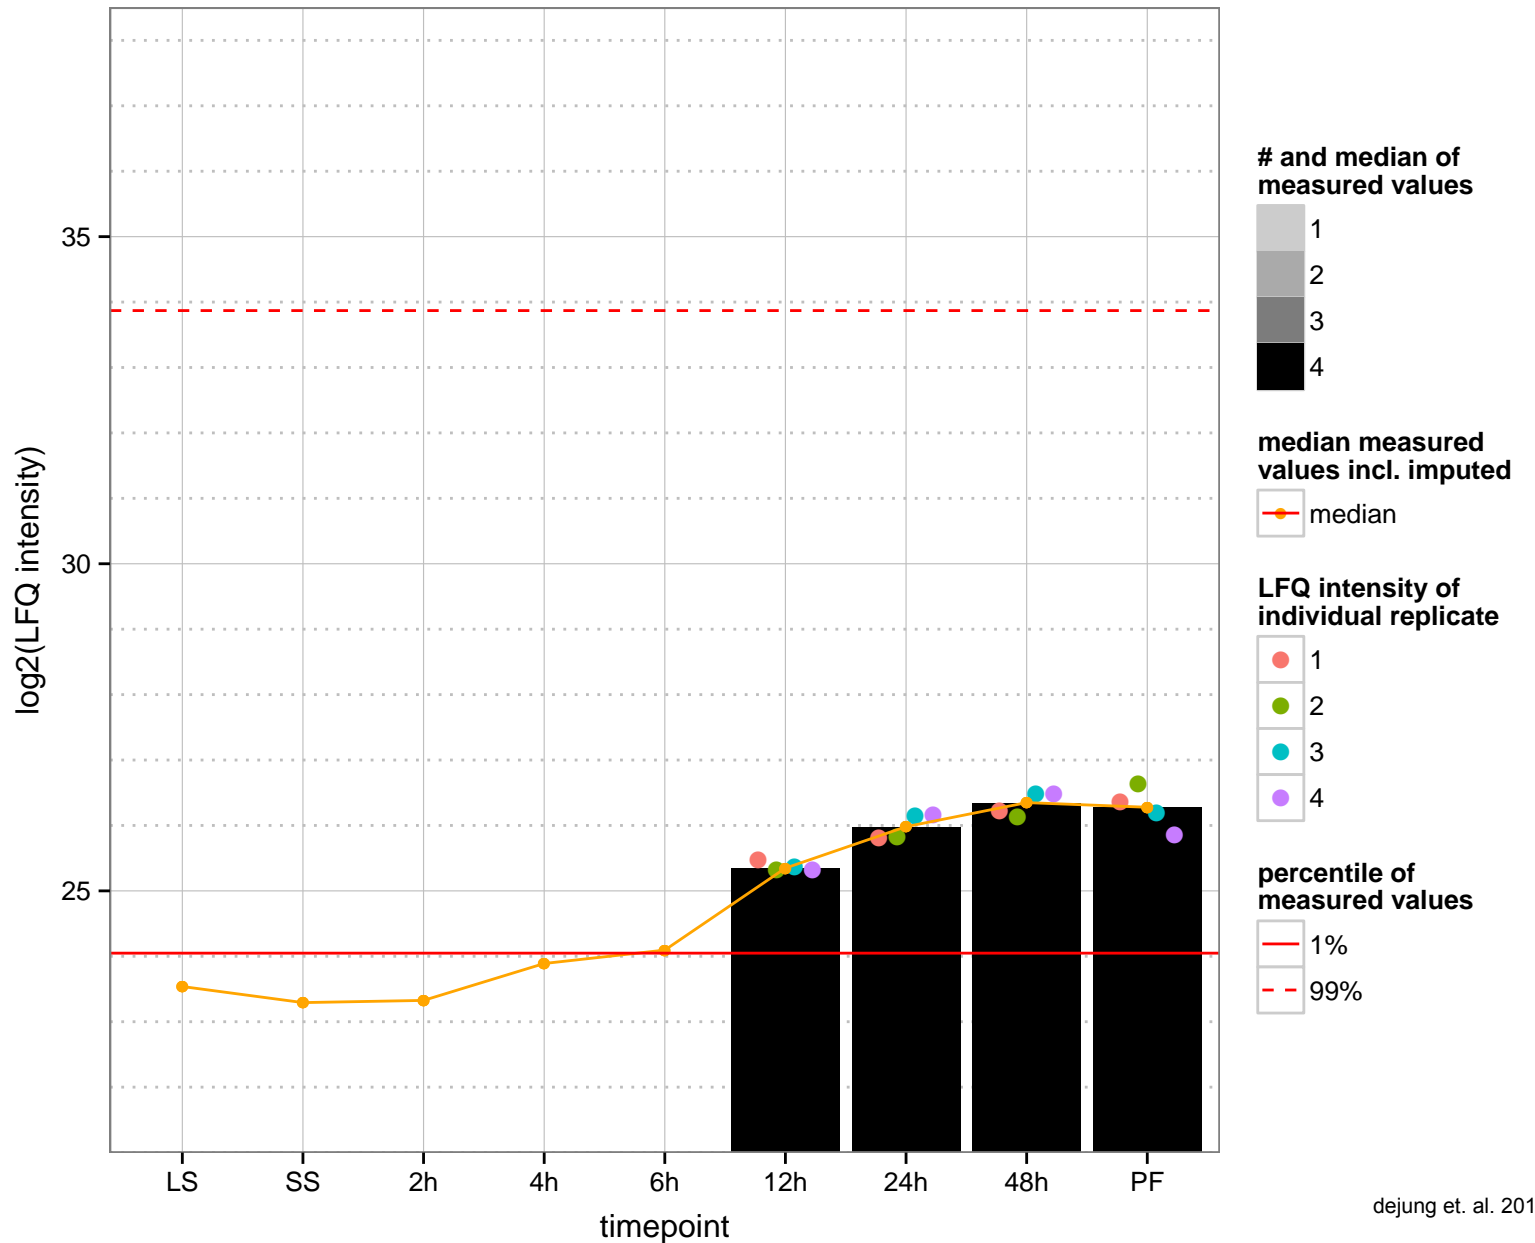

hypothetical protein, conserved  
 Tb927.11.13610  
 AGOF: null  
 AGOC: null  
 AGOP: null  
 PGO: null  
 PGOC: null  
 PGOP: null

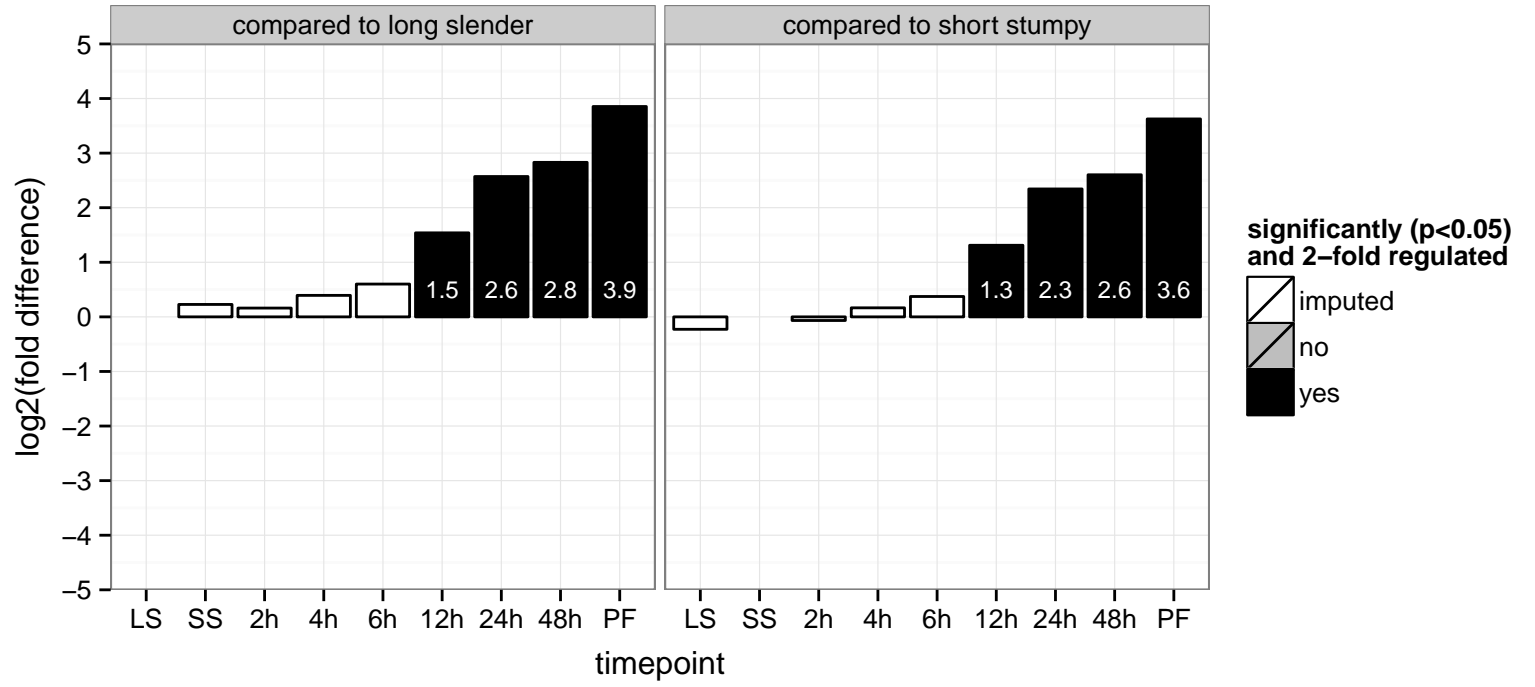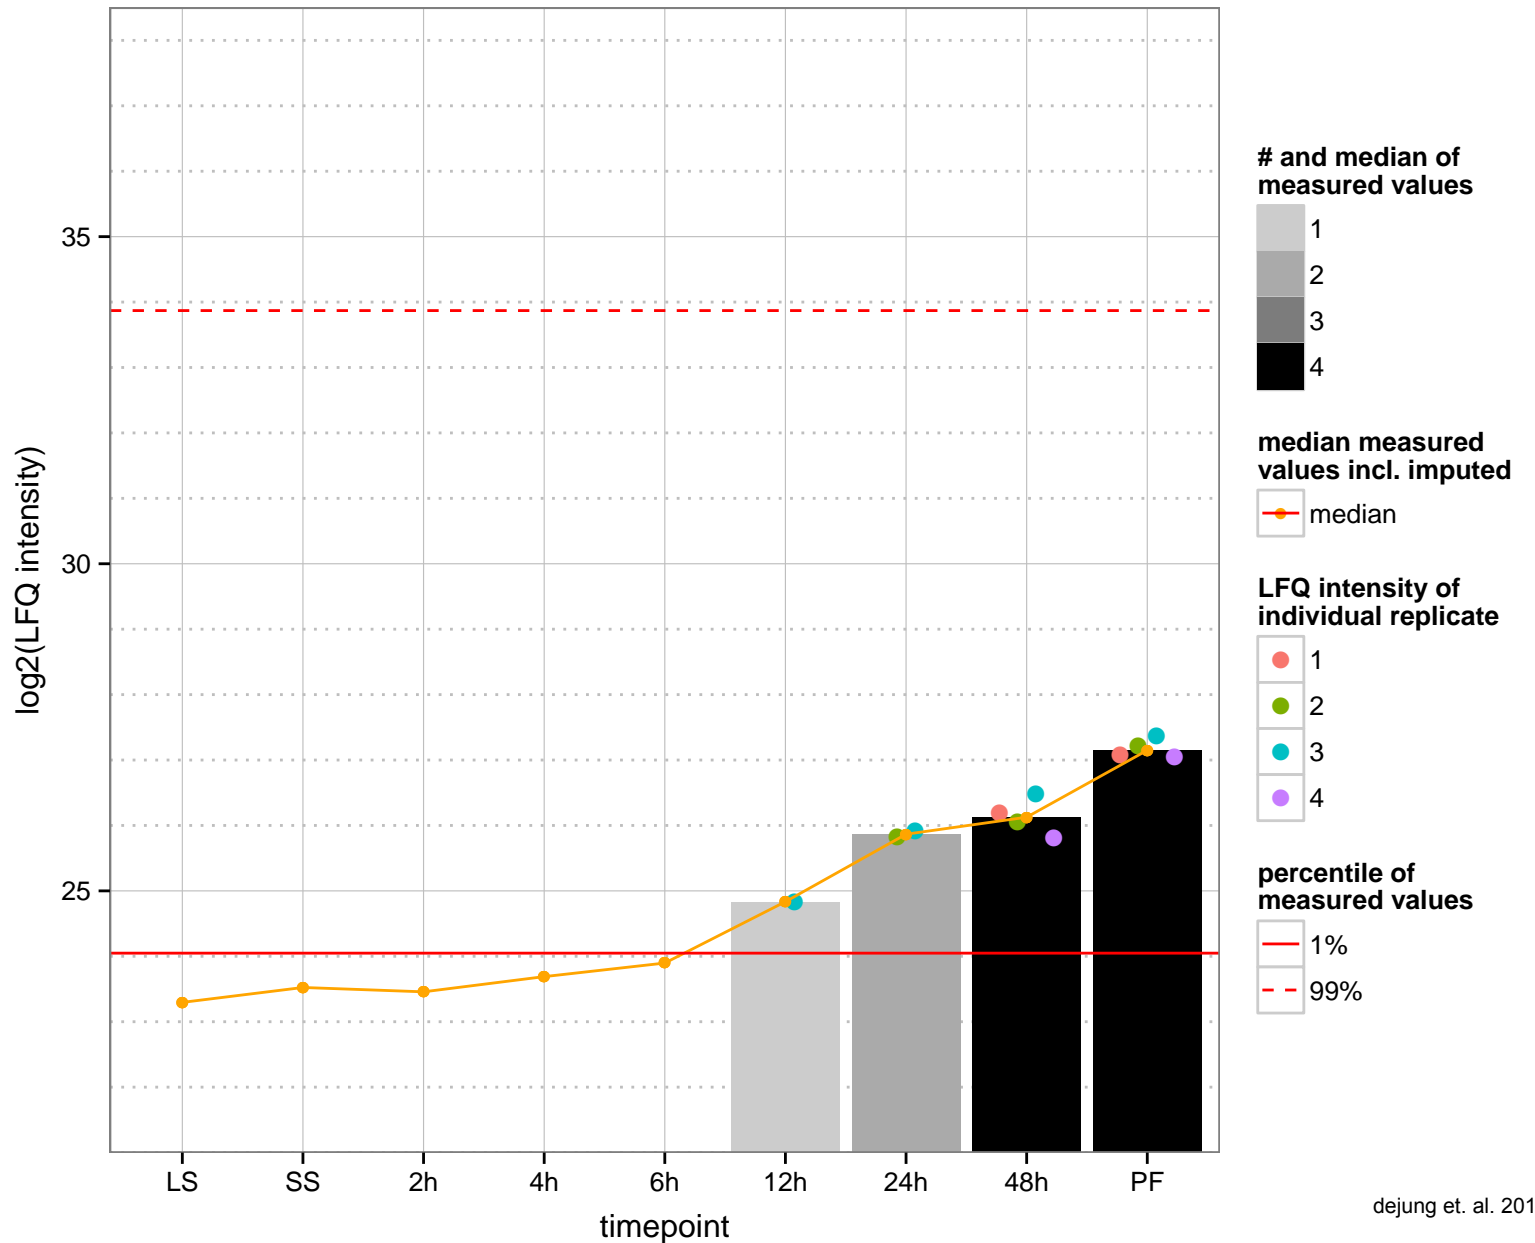

hypothetical protein, conserved  
 Tb927.11.13620  
 AGOF: null  
 AGOC: mitochondrion  
 AGOP: null  
 PGO: null  
 PGOC: null  
 PGOP: null

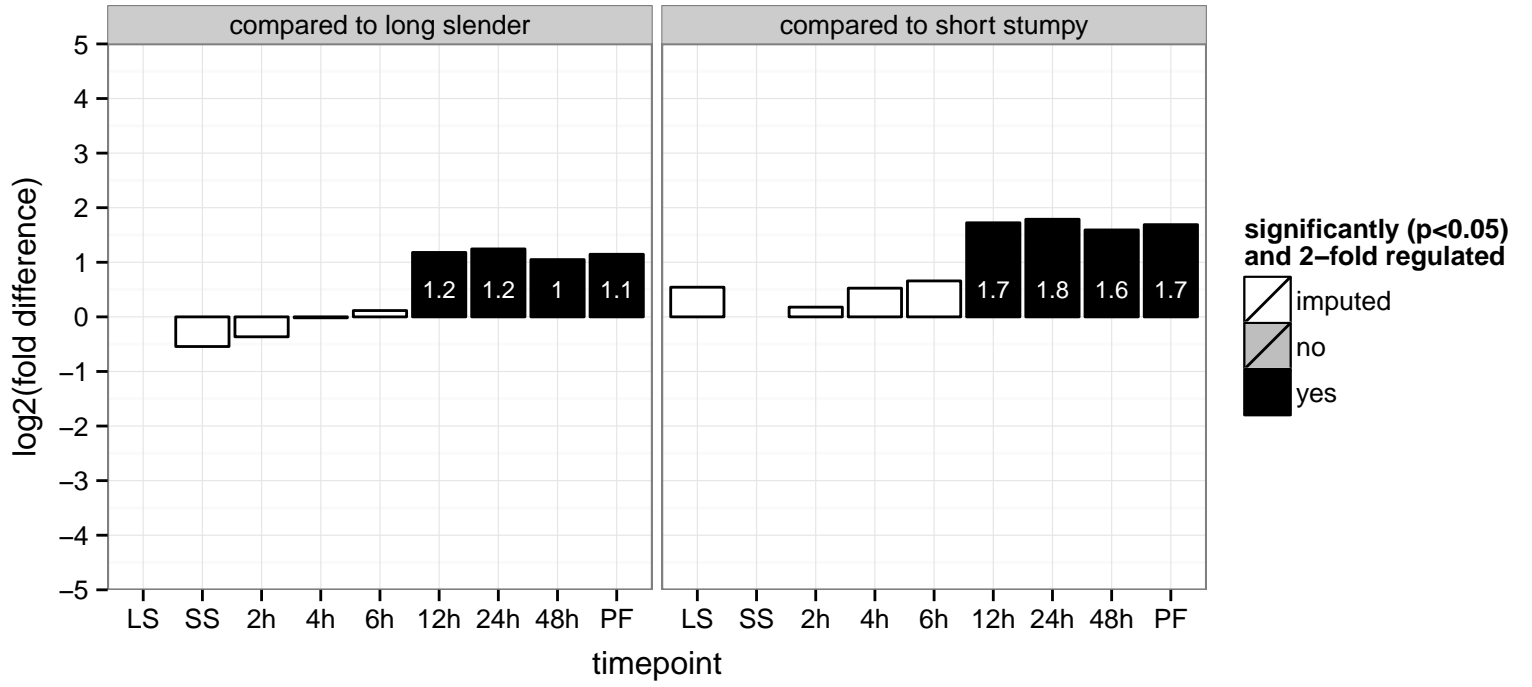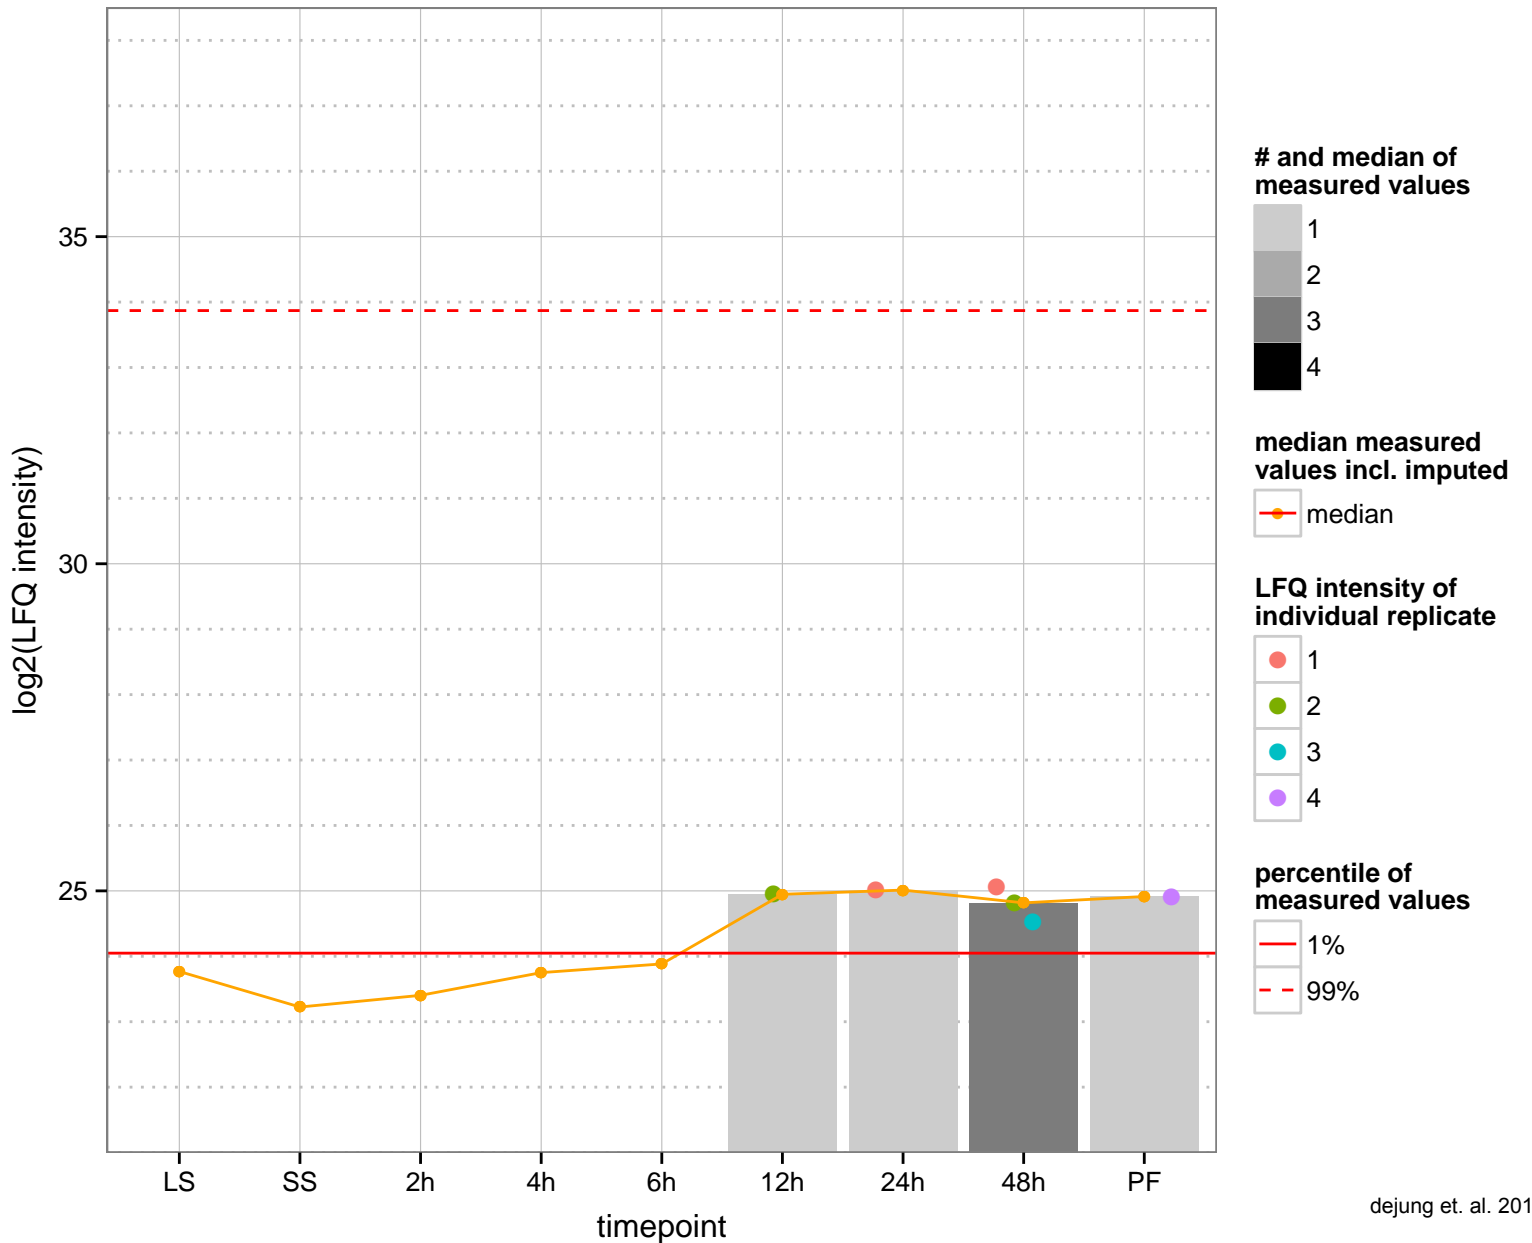

receptor-type adenylyate cyclase GRESAG 4, putative

Tb927.11.13740

AGOF: adenylyate cyclase activity

AGOC: integral to membrane

AGOP: cyclic nucleotide biosynthetic process, intracellular signal transduction

PGOF: phosphorus-oxygen lyase activity

PGOC: null

PGOP: cyclic nucleotide biosynthetic process, intracellular signal transduction

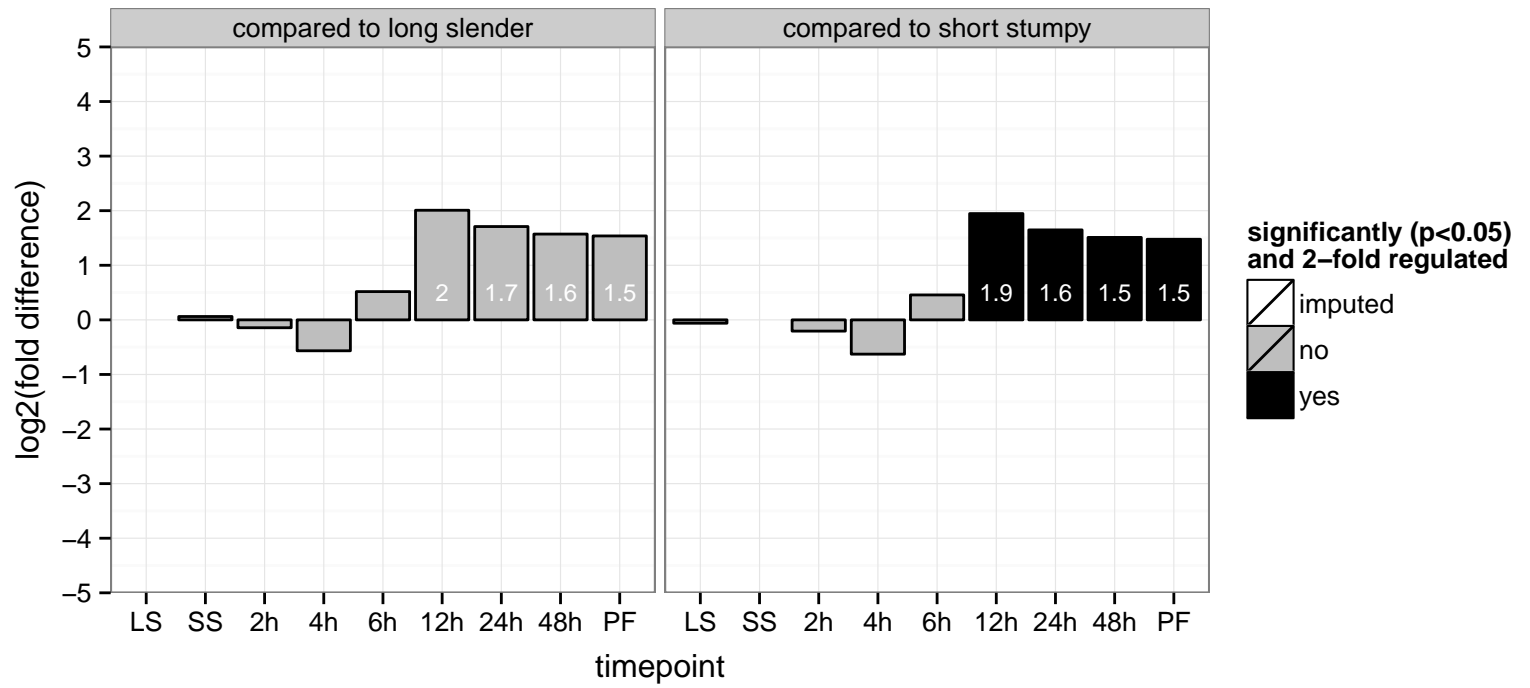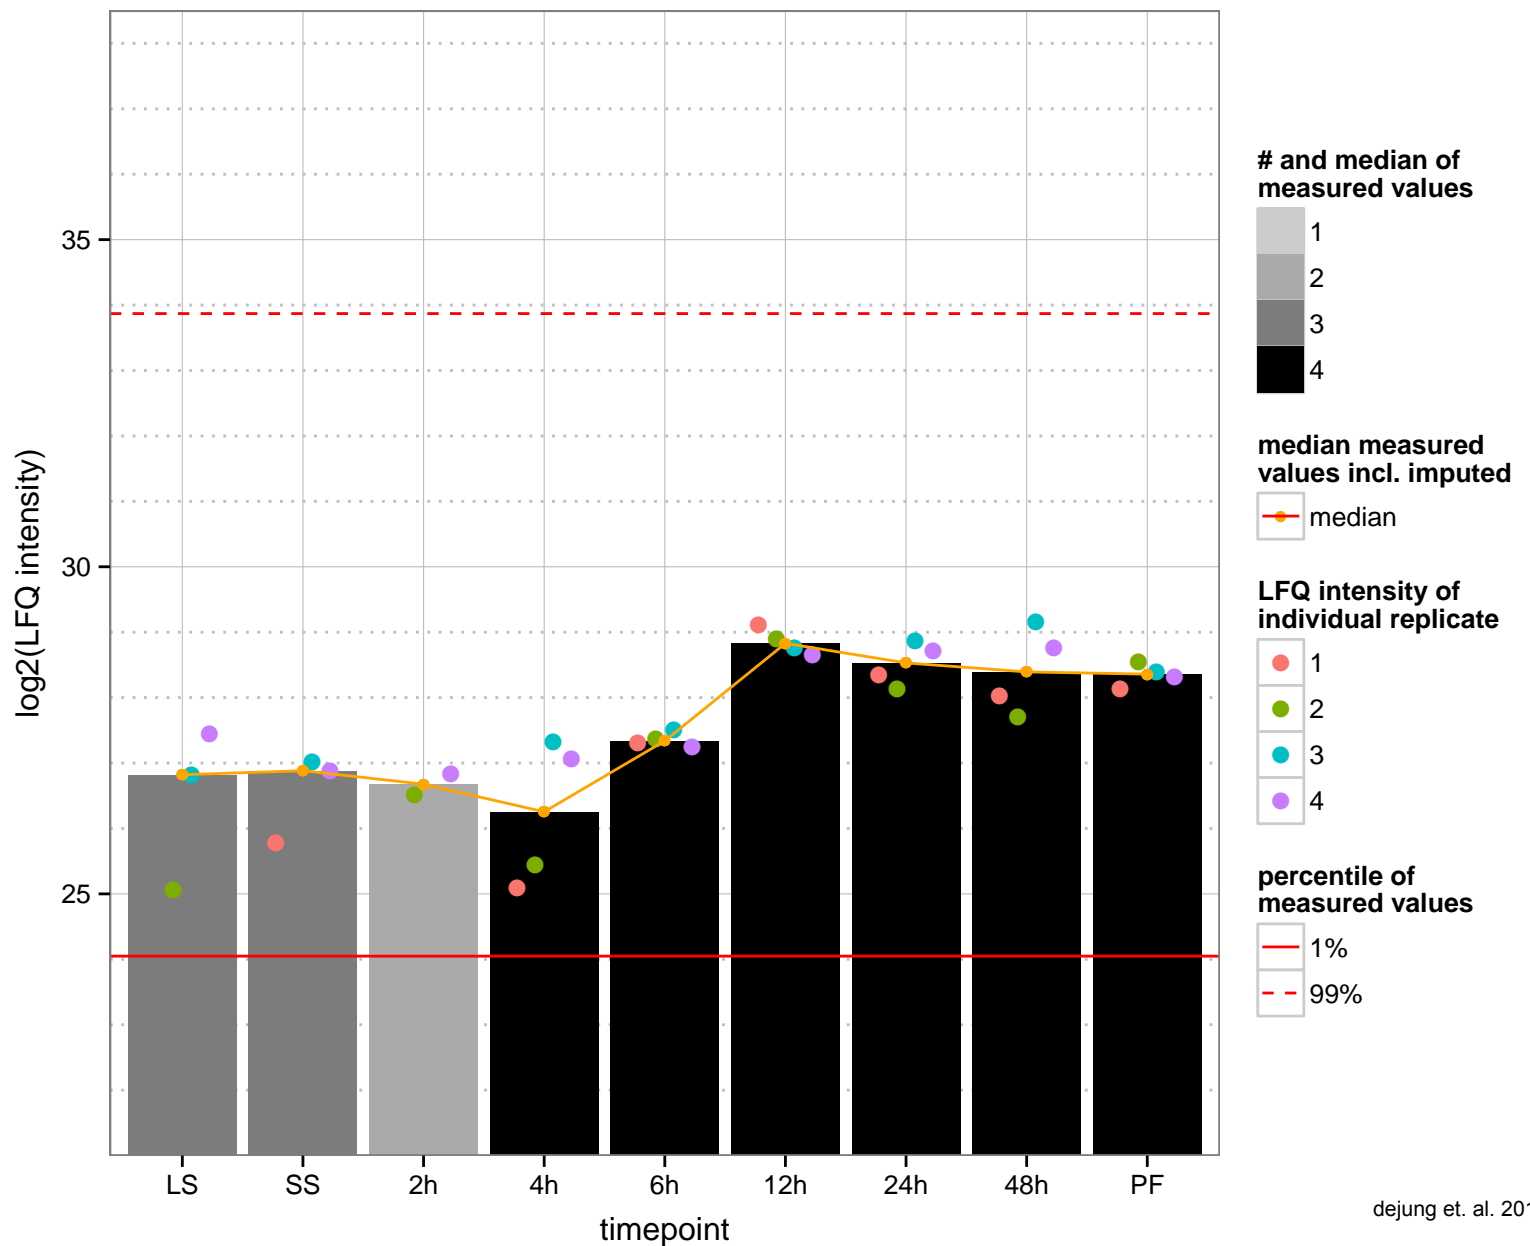

hypothetical protein, conserved  
 Tb927.11.13830  
 AGOF: heat shock protein binding  
 AGOC: integral to membrane, mitochondrial membrane, mitochondrion  
 AGOP: null  
 PGOF: heat shock protein binding  
 PGOC: null  
 PGO: null

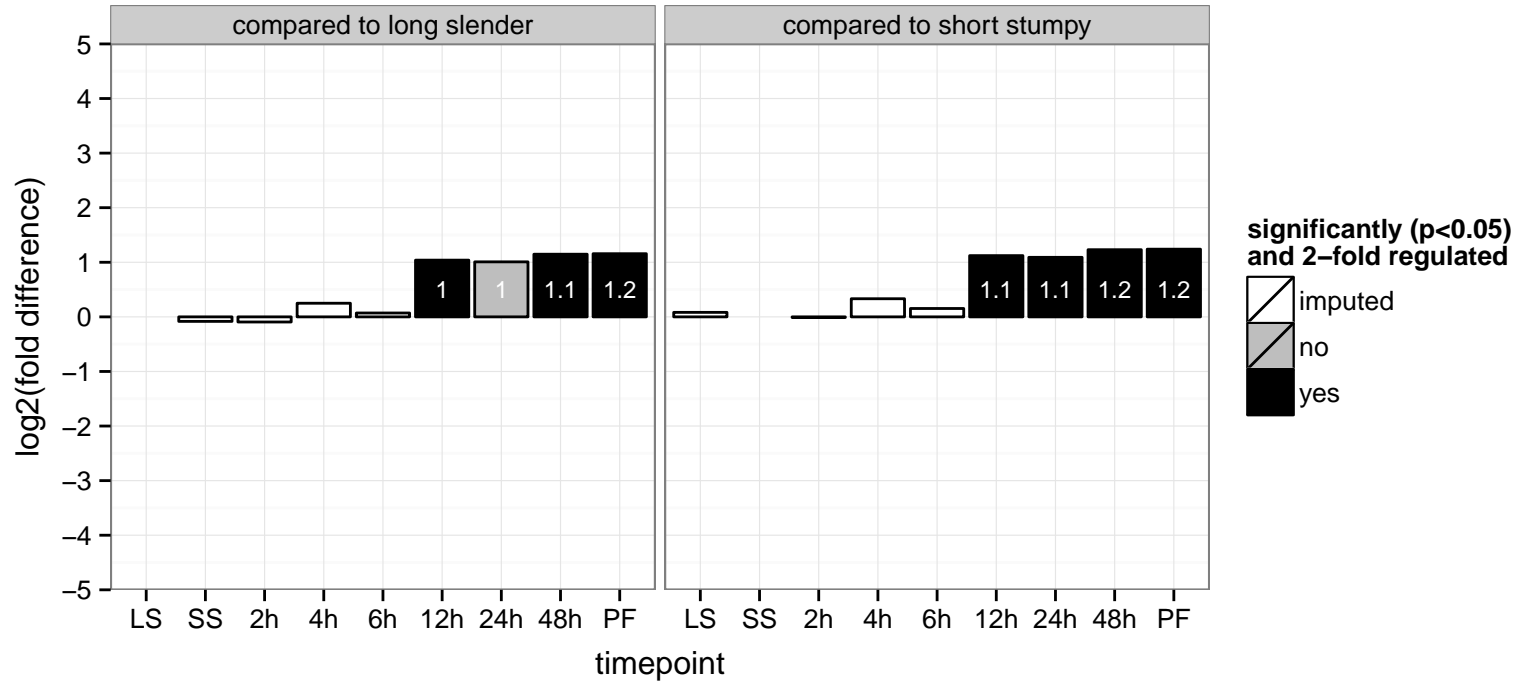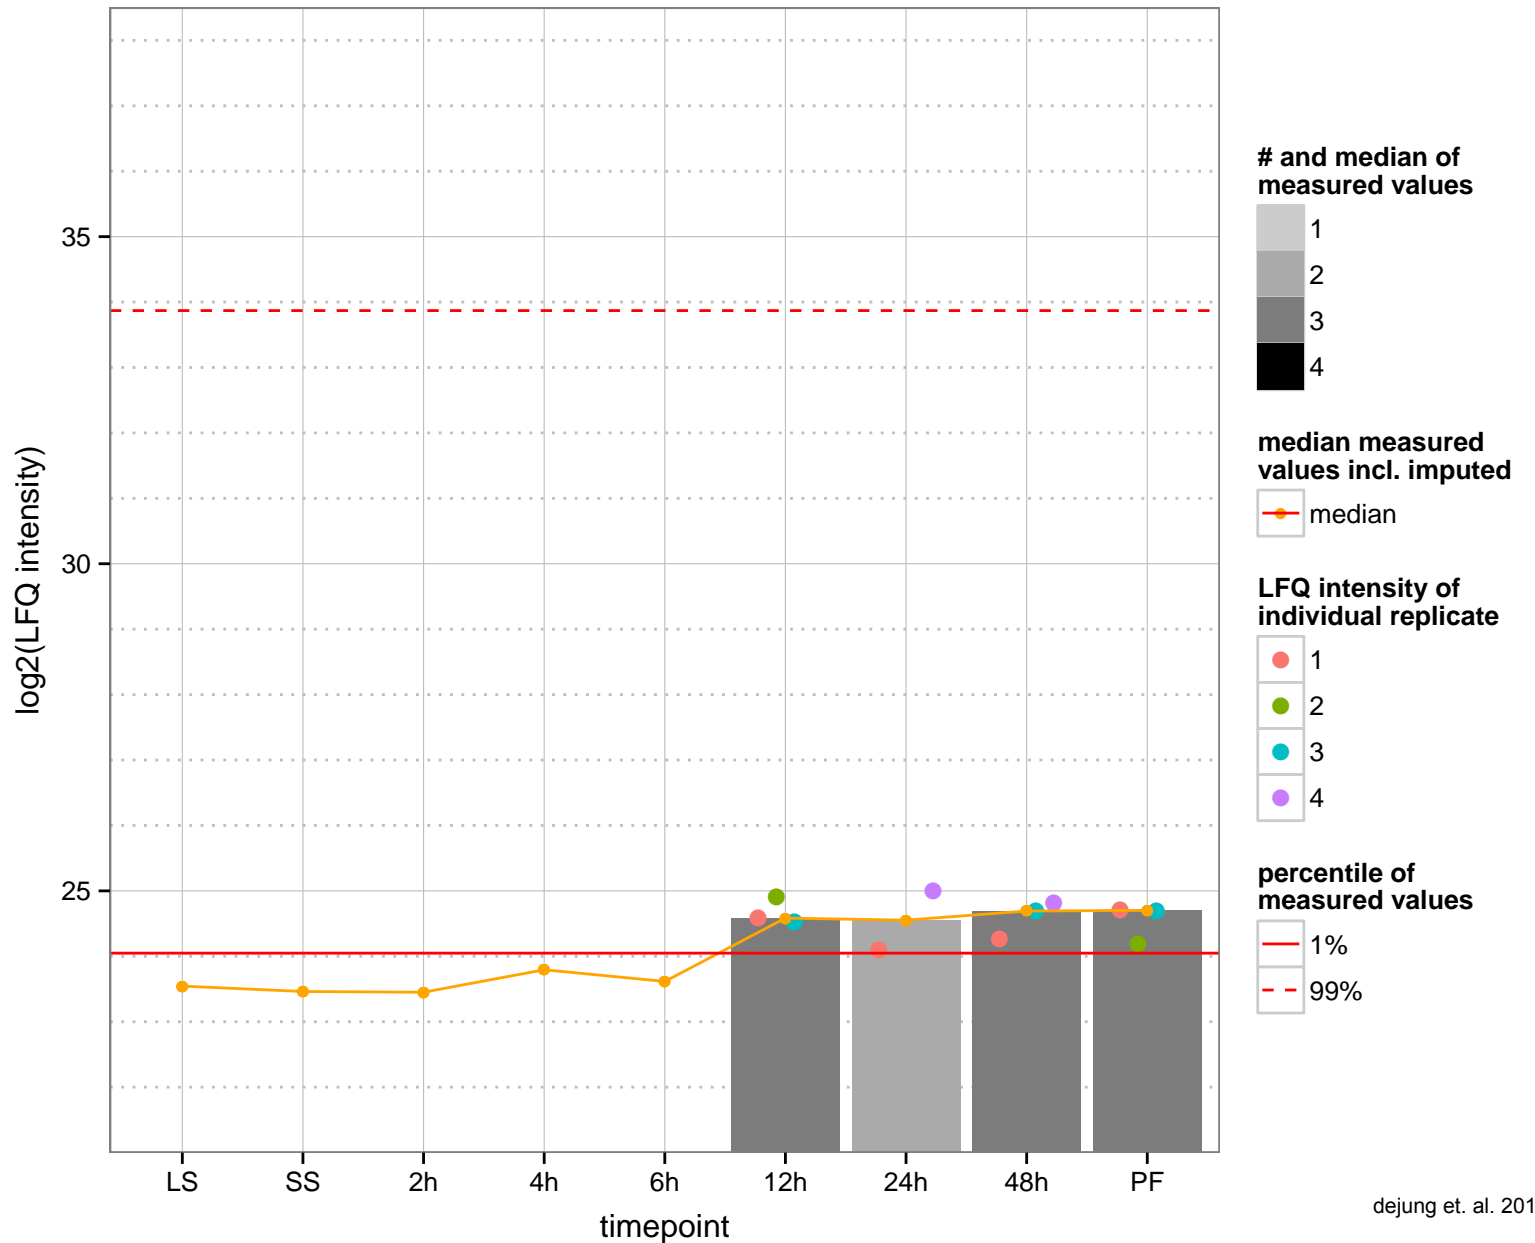

hypothetical protein, conserved  
 Tb927.11.13890  
 AGOF: catalytic activity  
 AGOC: intracellular, mitochondrion  
 AGOP: RNA metabolic process  
 PGO: catalytic activity  
 PGOC: intracellular  
 PGOP: RNA metabolic process

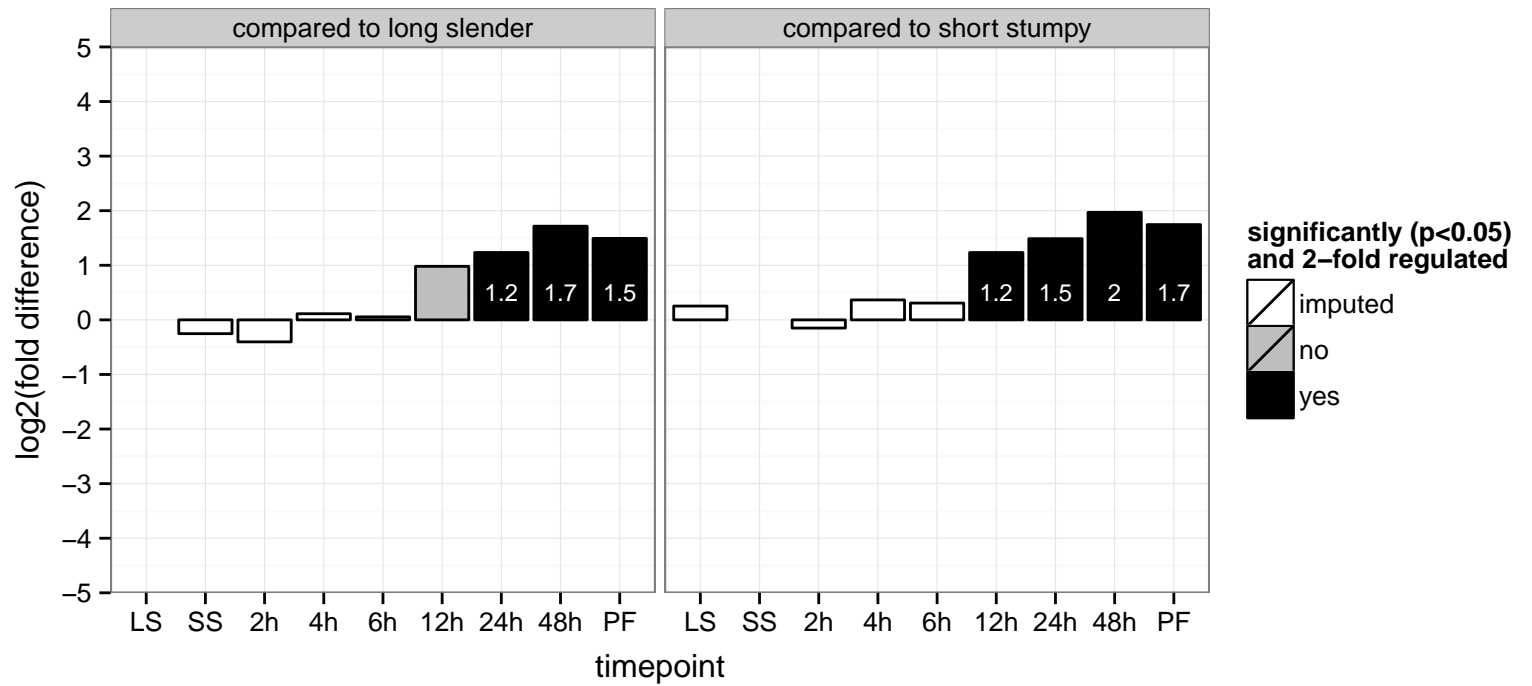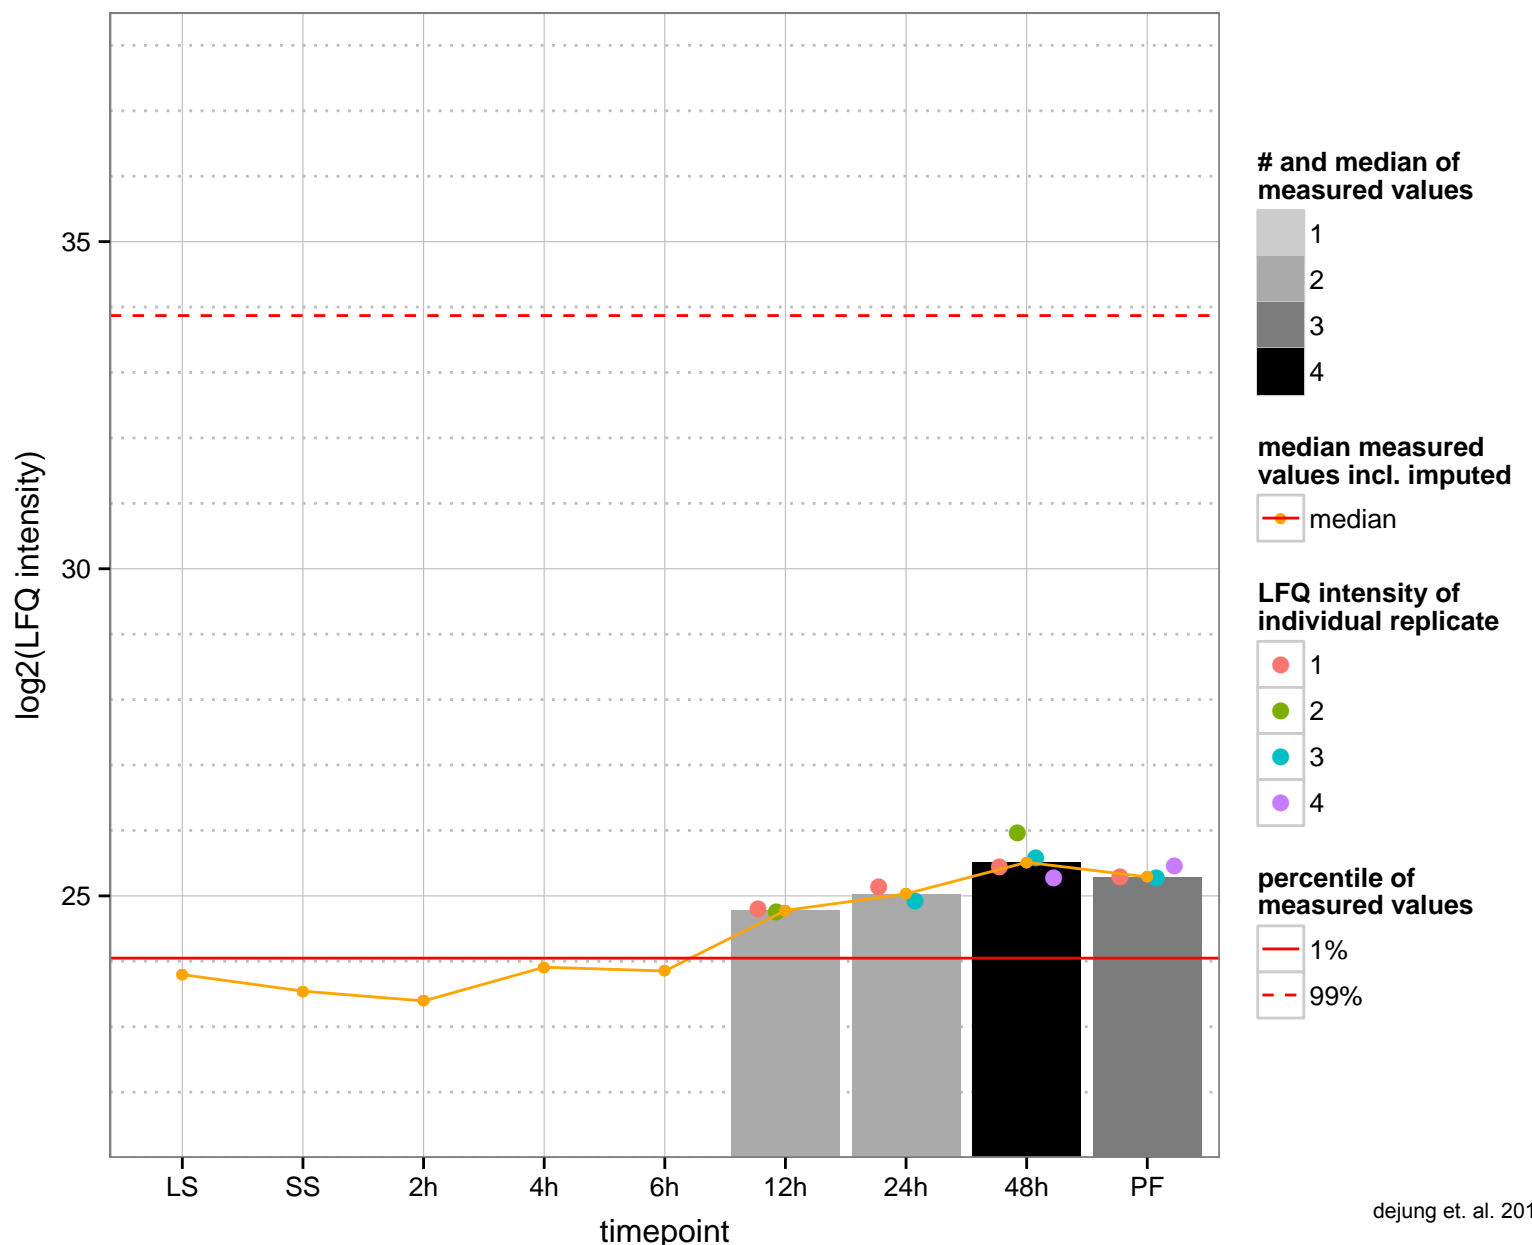

hypothetical protein, conserved  
 Tb927.11.14220  
 AGOF: null  
 AGOC: null  
 AGOP: null  
 PGO: null  
 PGOC: null  
 PGOP: null

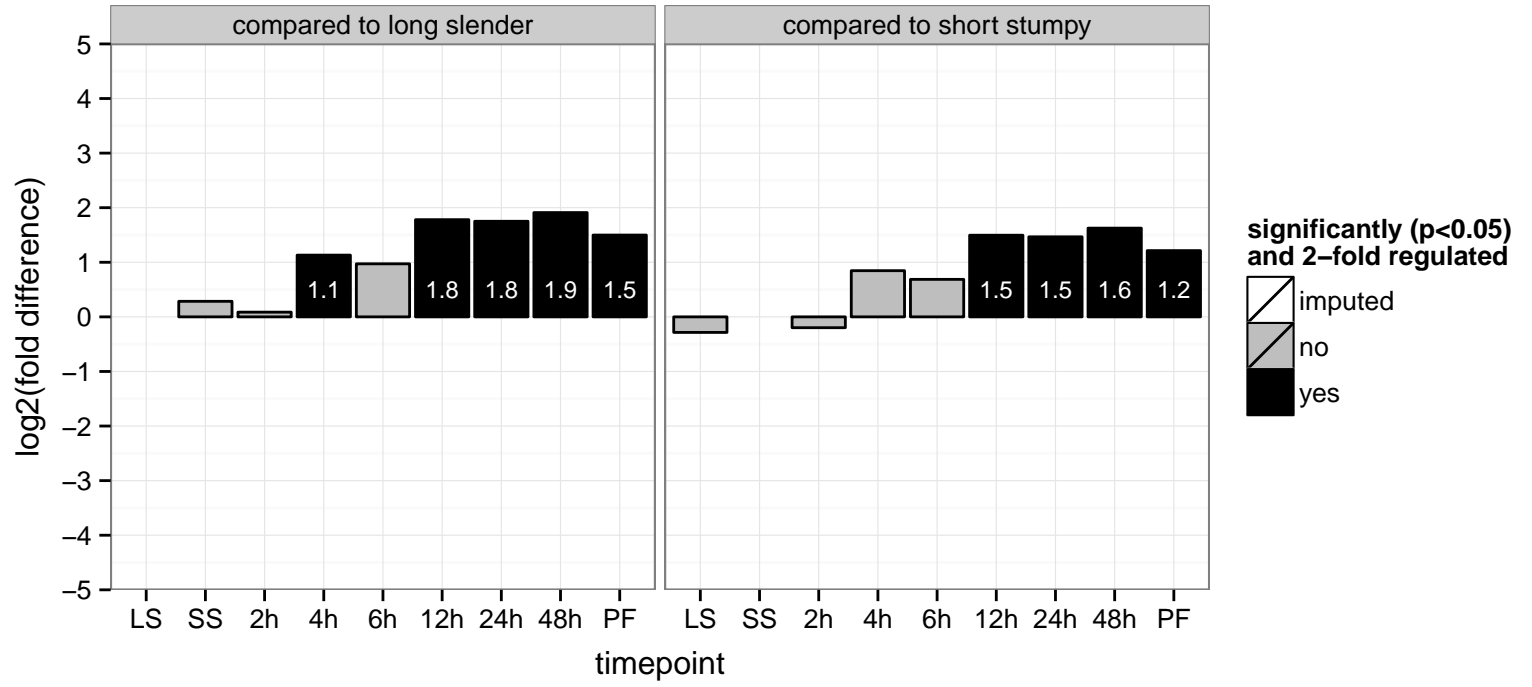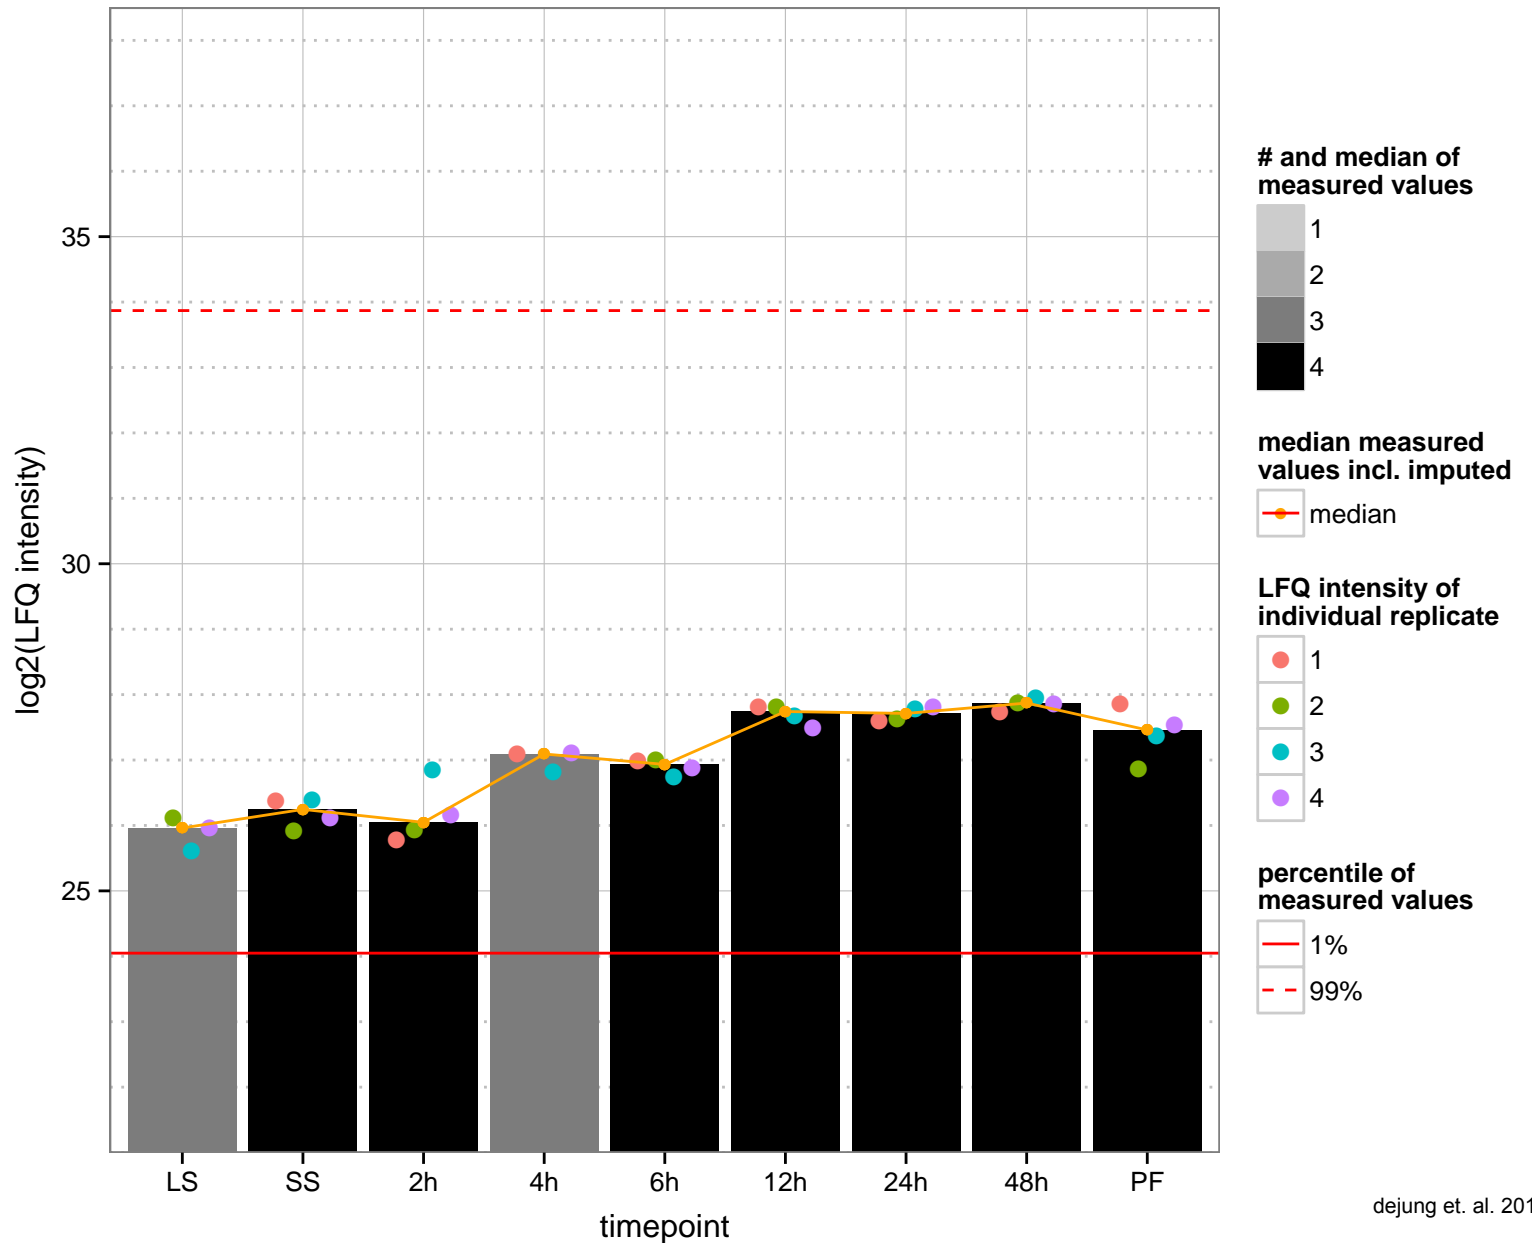

hypothetical protein, conserved  
 Tb927.11.14760  
 AGOF: null  
 AGOC: null  
 AGOP: null  
 PGO: null  
 PGOC: null  
 PGOP: null

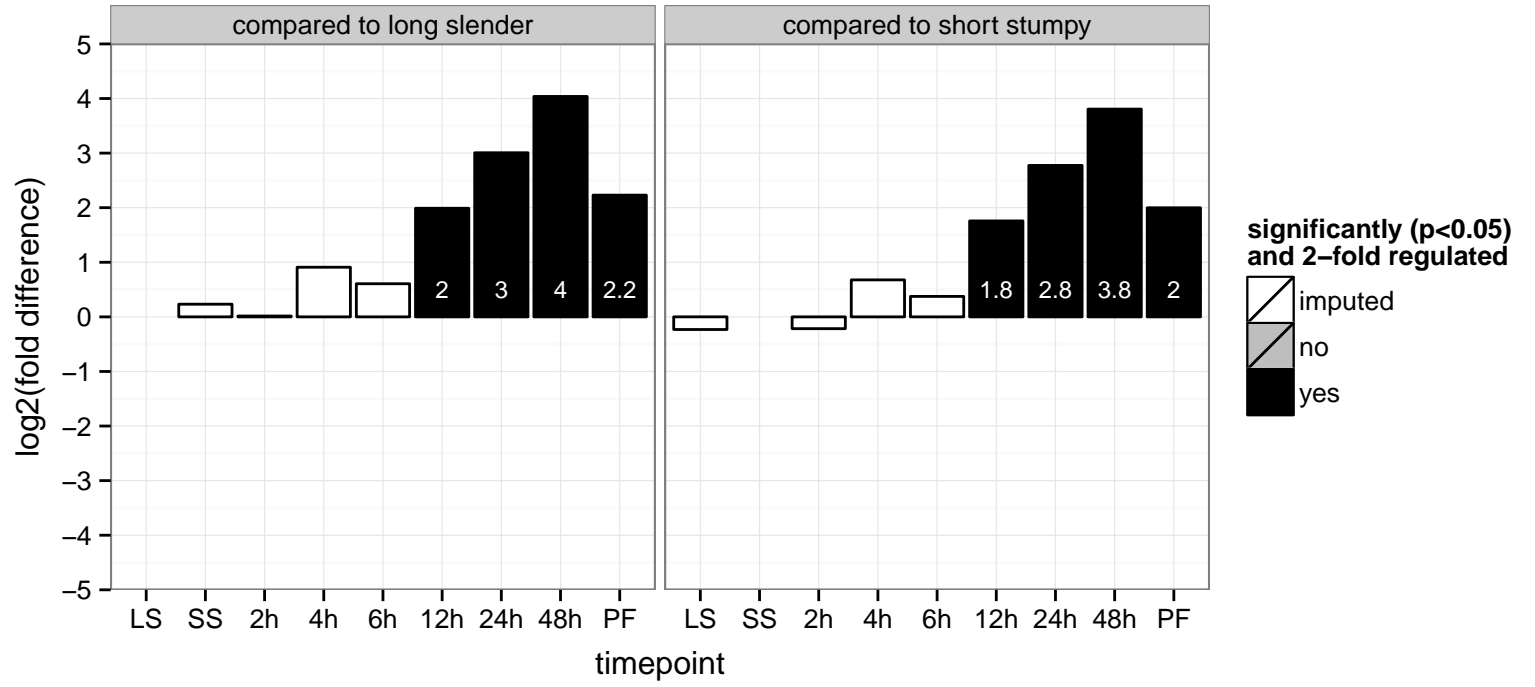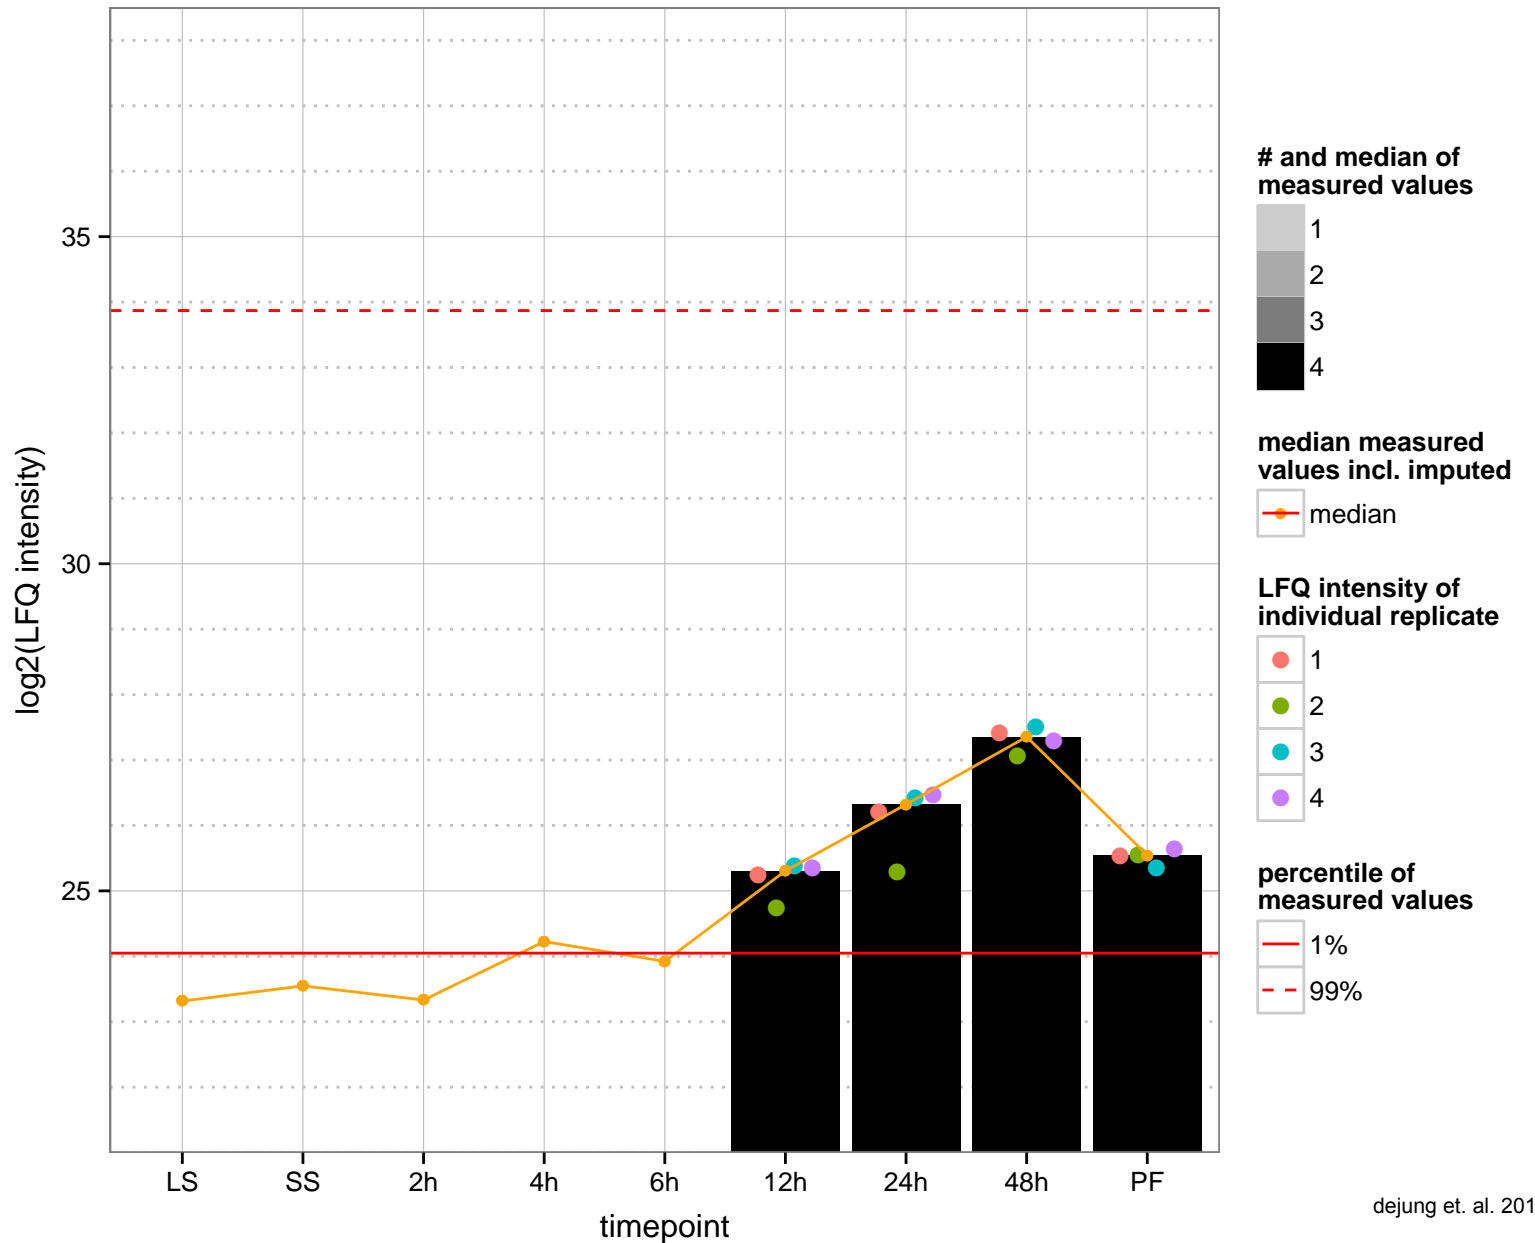



phosphomannose isomerase, putative  
 Tb927.11.14780  
 AGOF: mannose-6-phosphate isomerase activity, zinc ion binding  
 AGOC: cytoplasm  
 AGOP: carbohydrate metabolic process  
 PGOF: mannose-6-phosphate isomerase activity, zinc ion binding  
 PGOC: null  
 PGOP: carbohydrate metabolic process

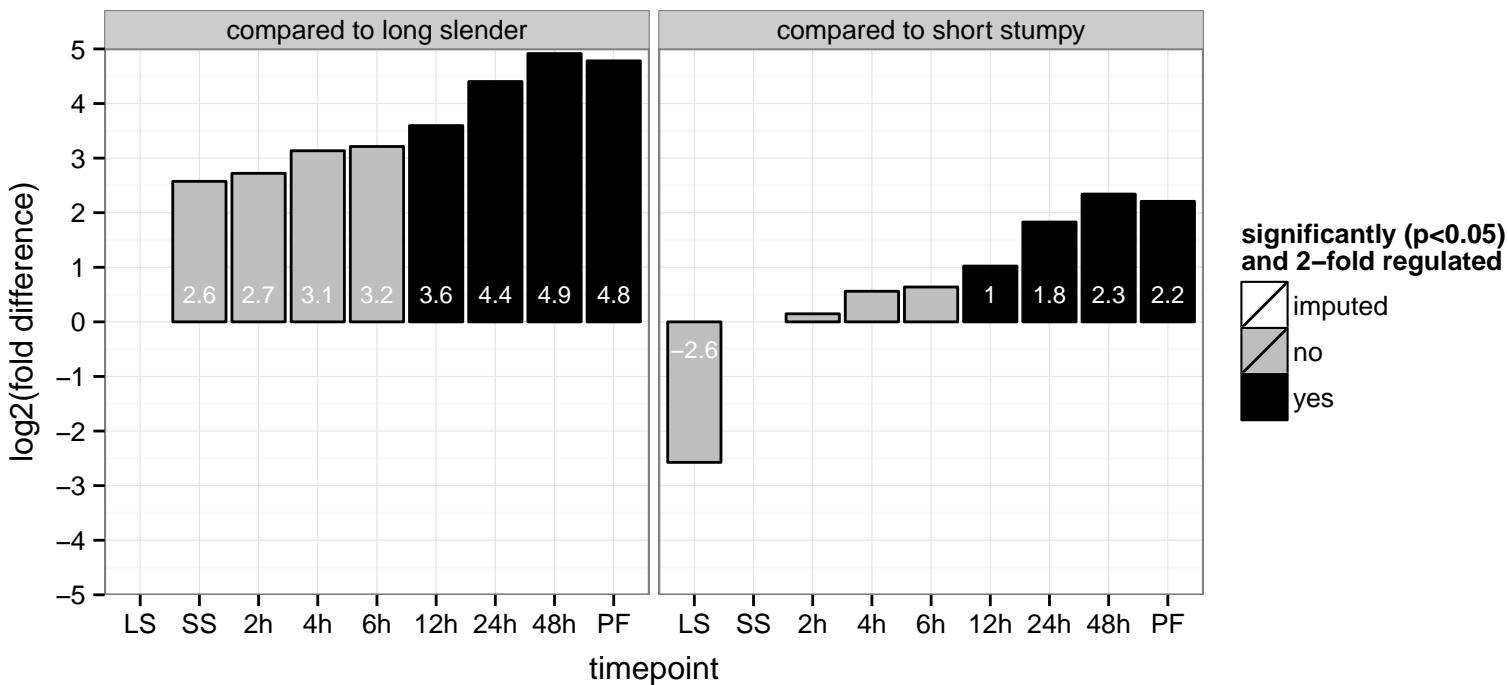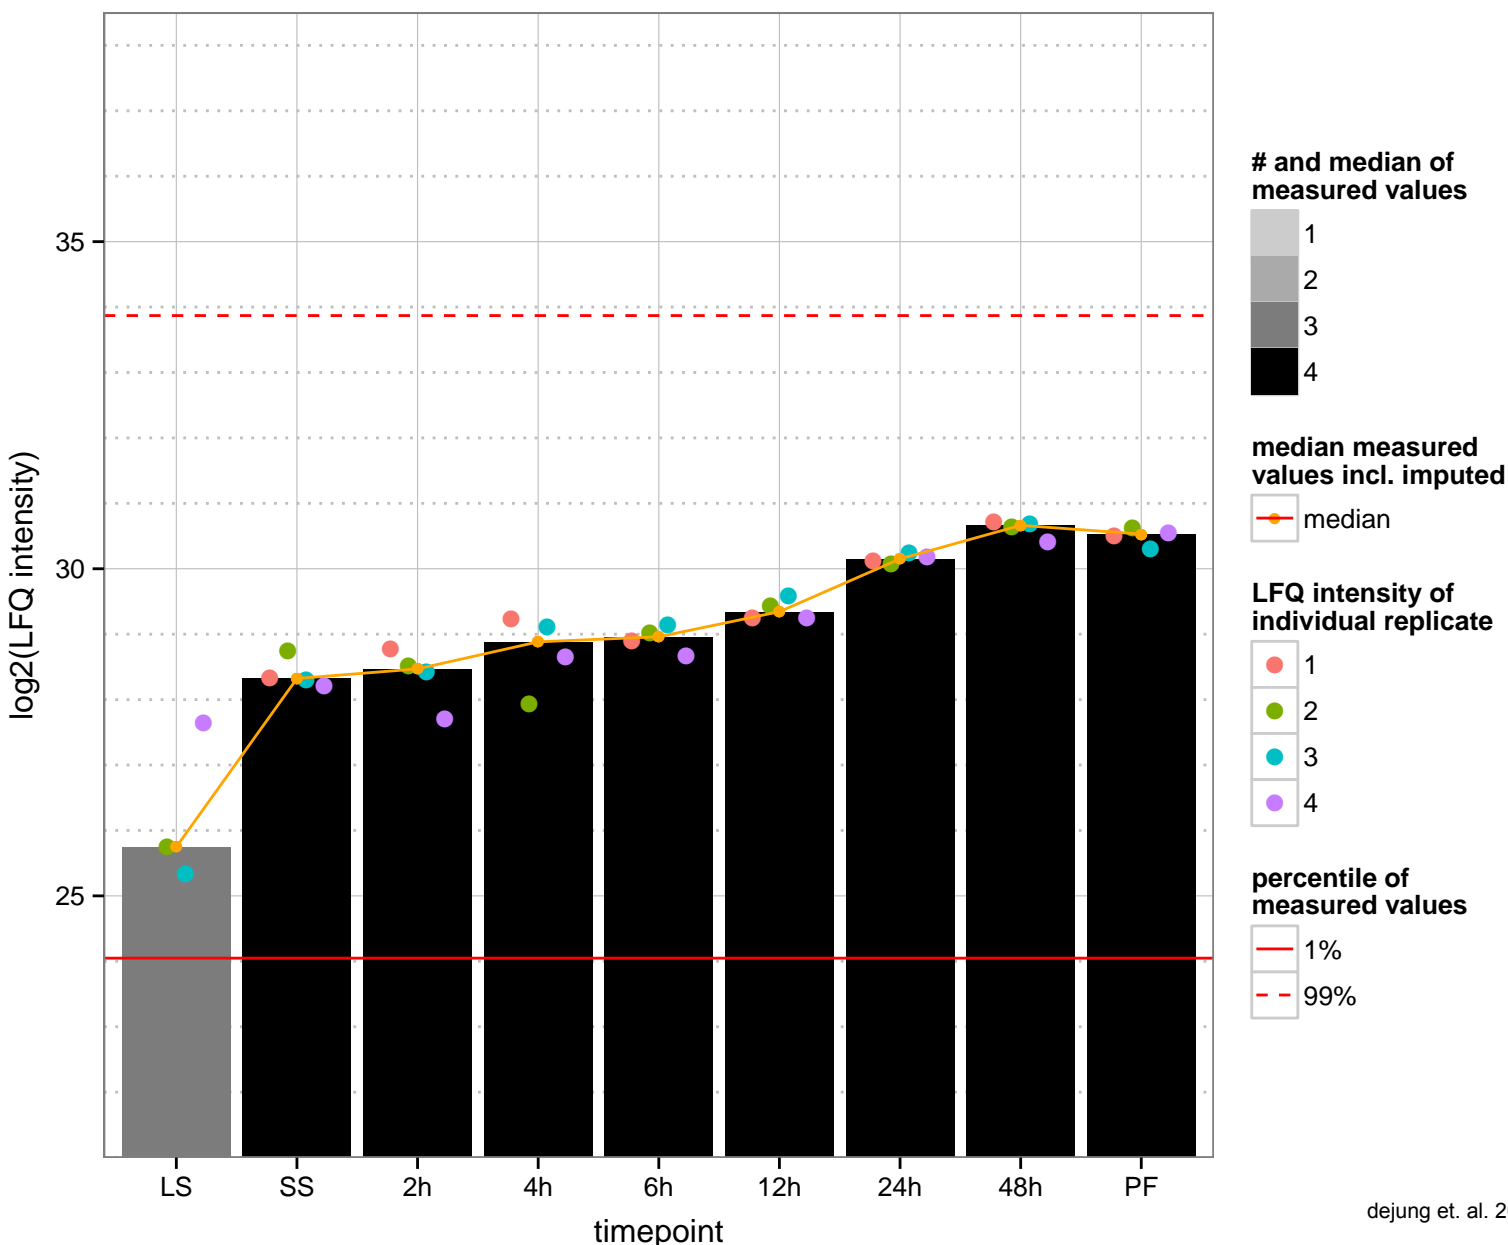

iron superoxide dismutase (TbSODB)  
 Tb927.11.15020  
 AGOF: metal ion binding, superoxide dismutase activity  
 AGOC: glycosome  
 AGOP: oxidation–reduction process, superoxide metabolic process  
 PGOF: metal ion binding, superoxide dismutase activity  
 PGO: null  
 PGOP: oxidation–reduction process, superoxide metabolic process

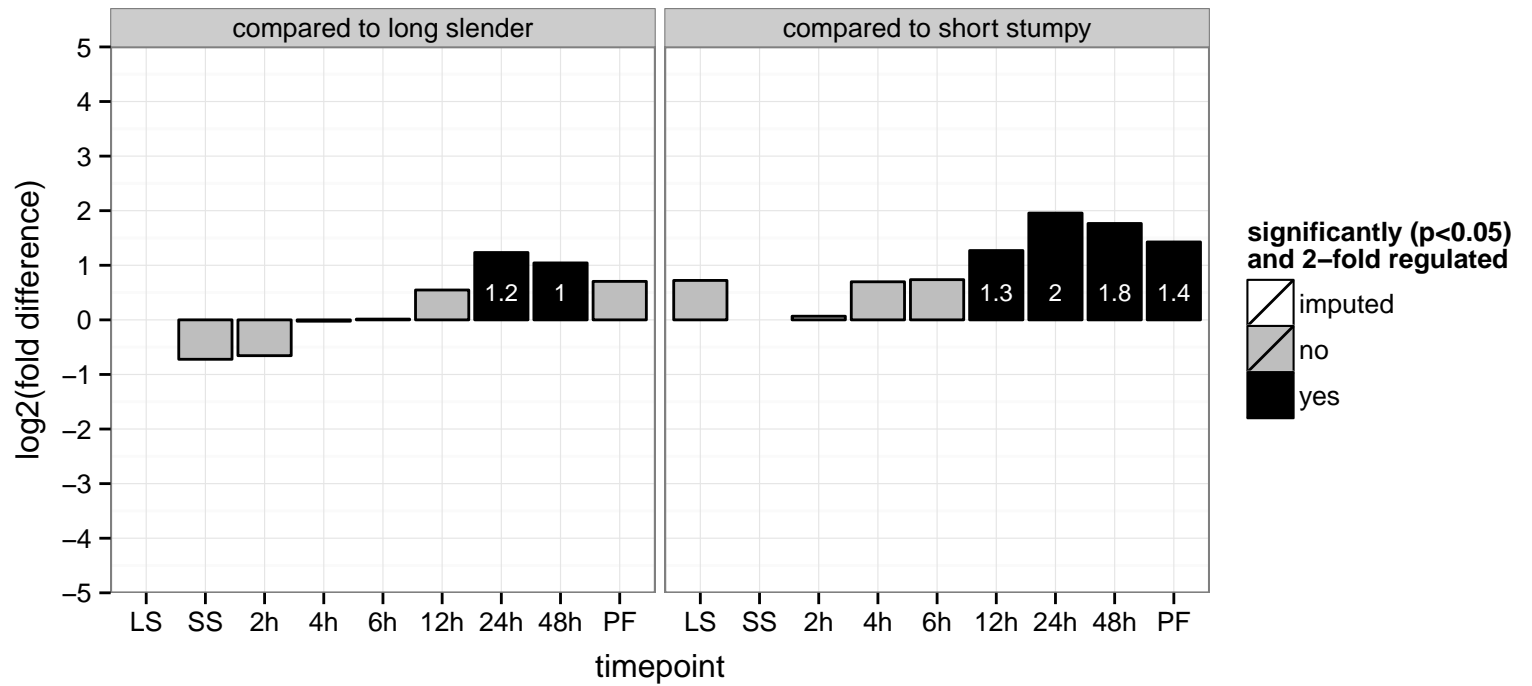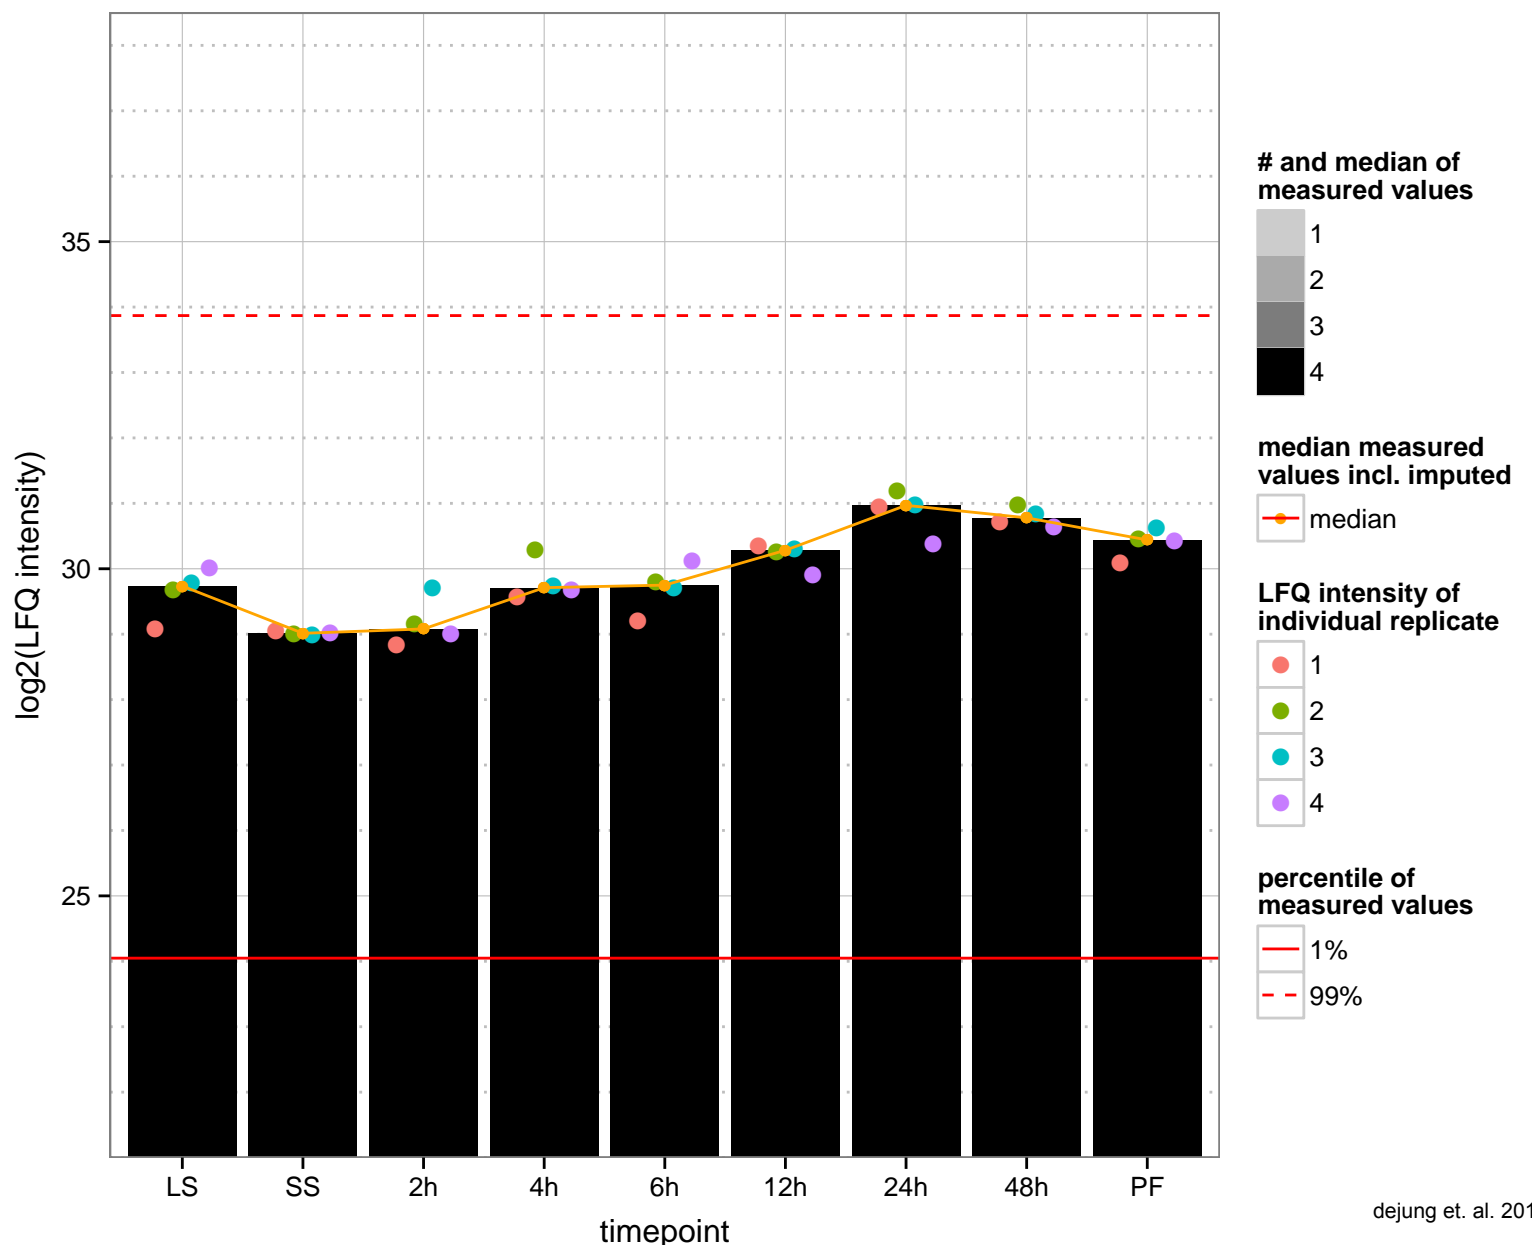

hypothetical protein  
 Tb927.11.15450  
 AGOF: null  
 AGOC: null  
 AGOP: null  
 PGO: null  
 PGOC: null  
 PGOP: null

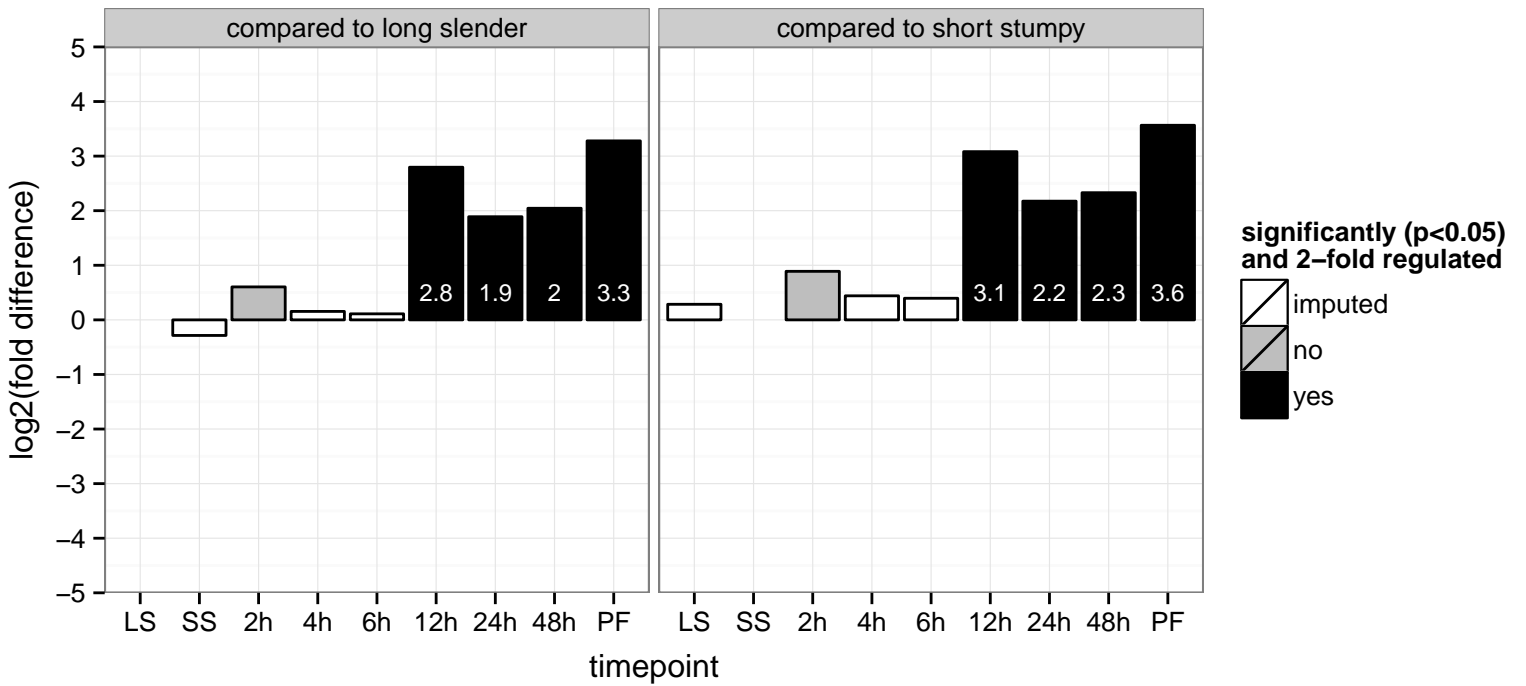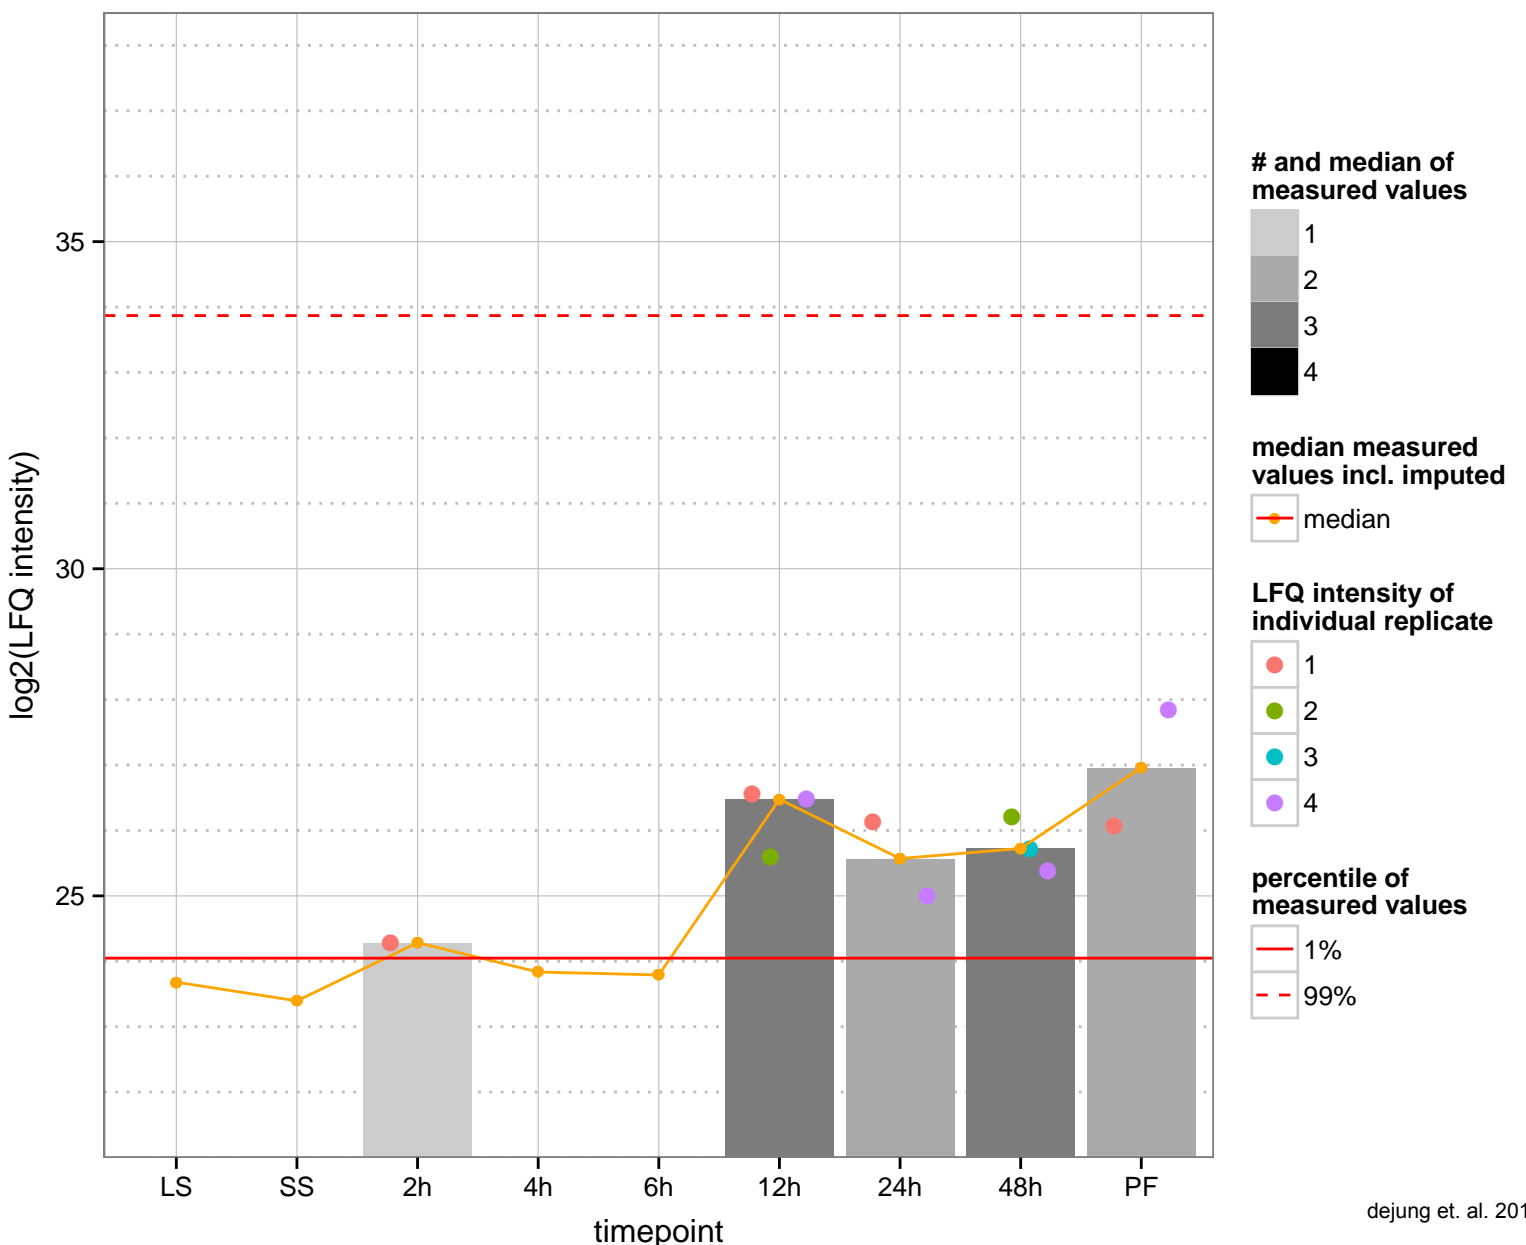

NADH-cytochrome b5 reductase, putative (B5R)  
 Tb927.11.15550  
 AGOF: cytochrome-b5 reductase activity, electron carrier activity  
 AGOC: null  
 AGOP: oxidation-reduction process  
 PGOF: oxidoreductase activity  
 PGO: null  
 PGOP: oxidation-reduction process

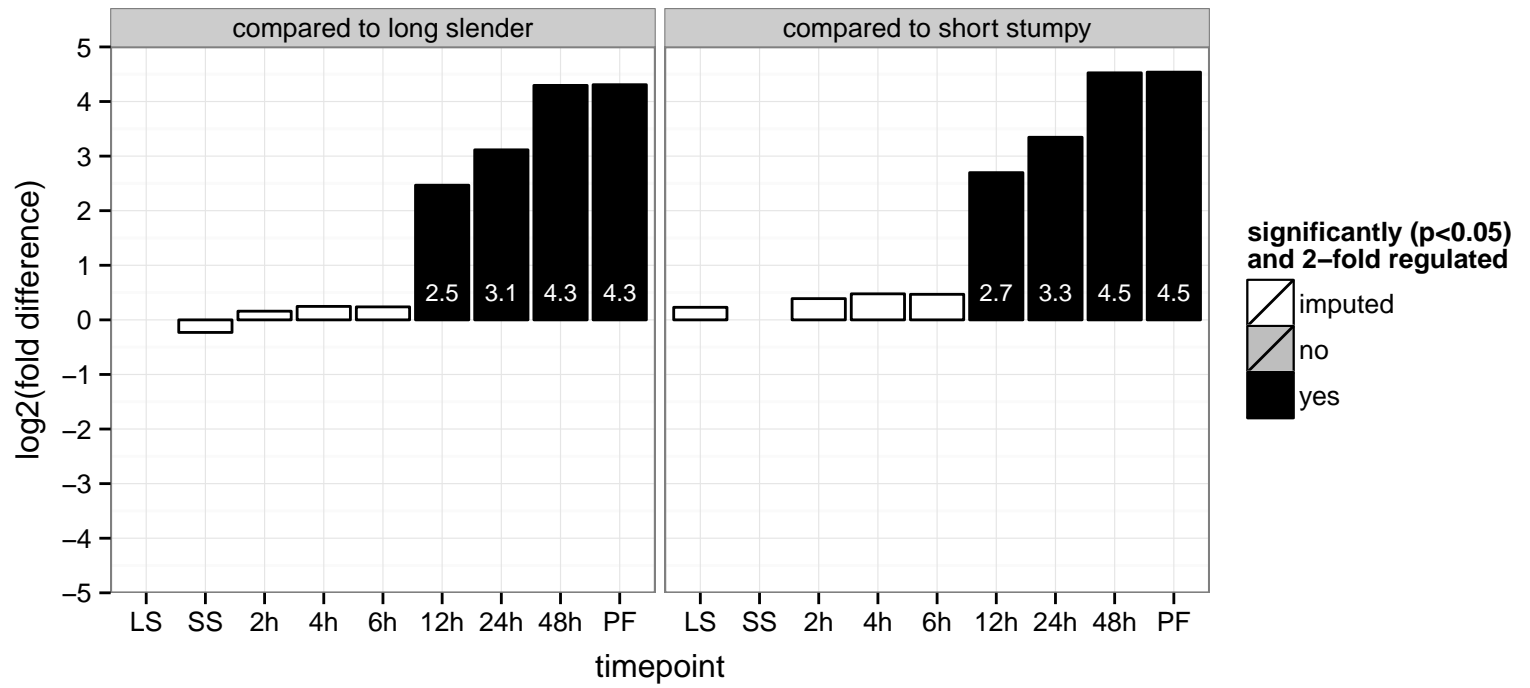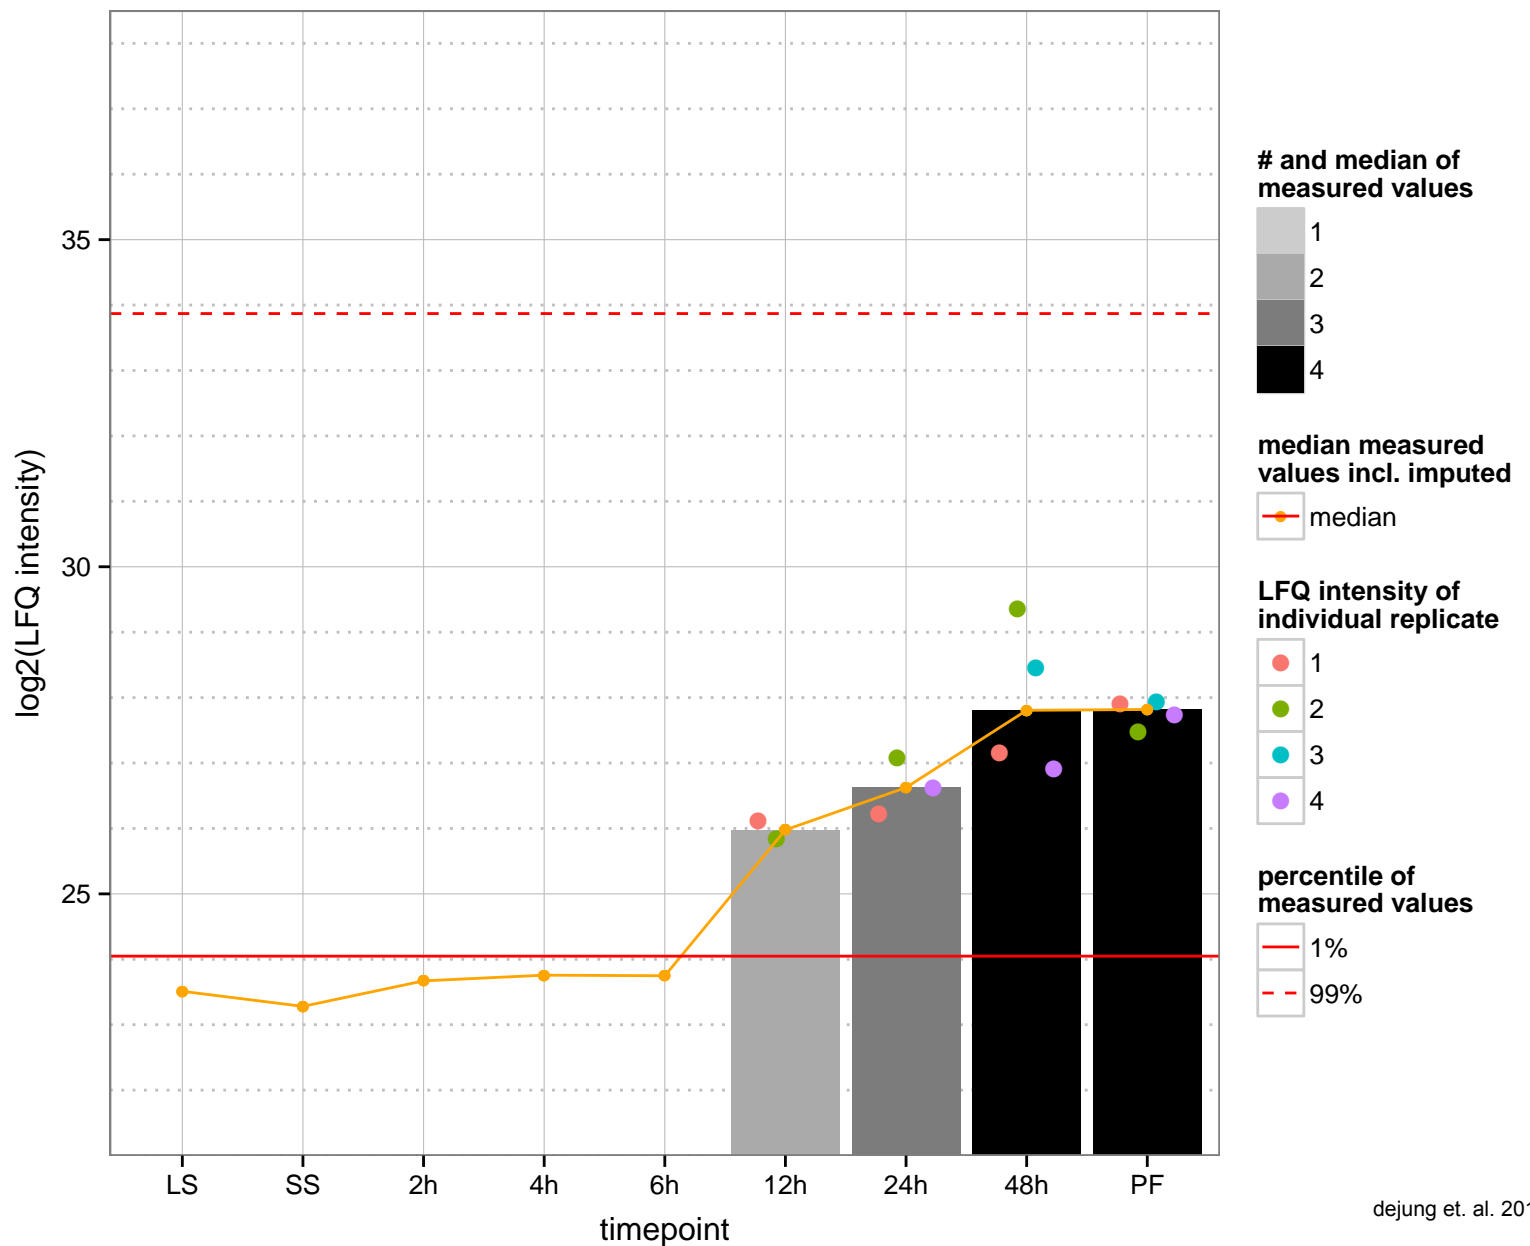

superoxide dismutase, putative  
 Tb927.11.15820  
 AGOF: metal ion binding, superoxide dismutase activity  
 AGOC: mitochondrion  
 AGOP: oxidation–reduction process, superoxide metabolic process  
 PGOF: metal ion binding, superoxide dismutase activity  
 PGOC: null  
 PGOP: oxidation–reduction process, superoxide metabolic process

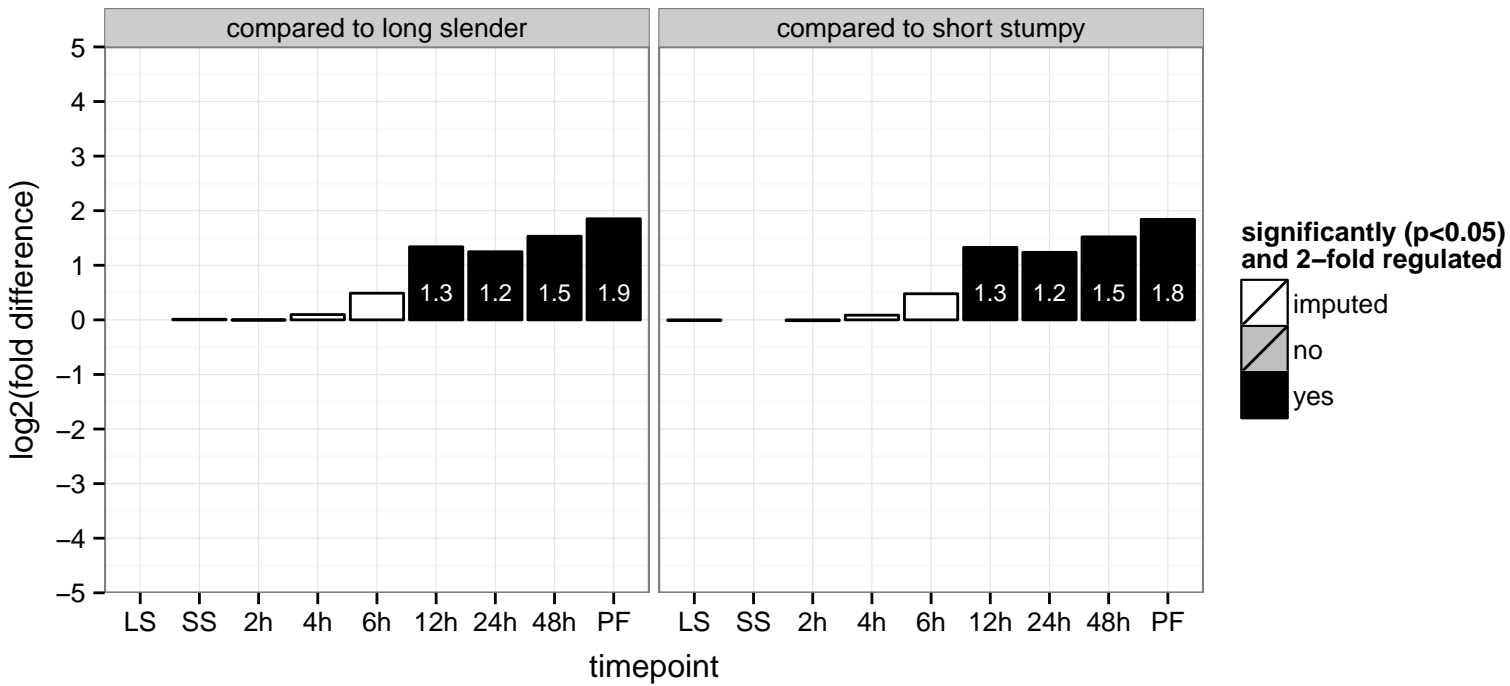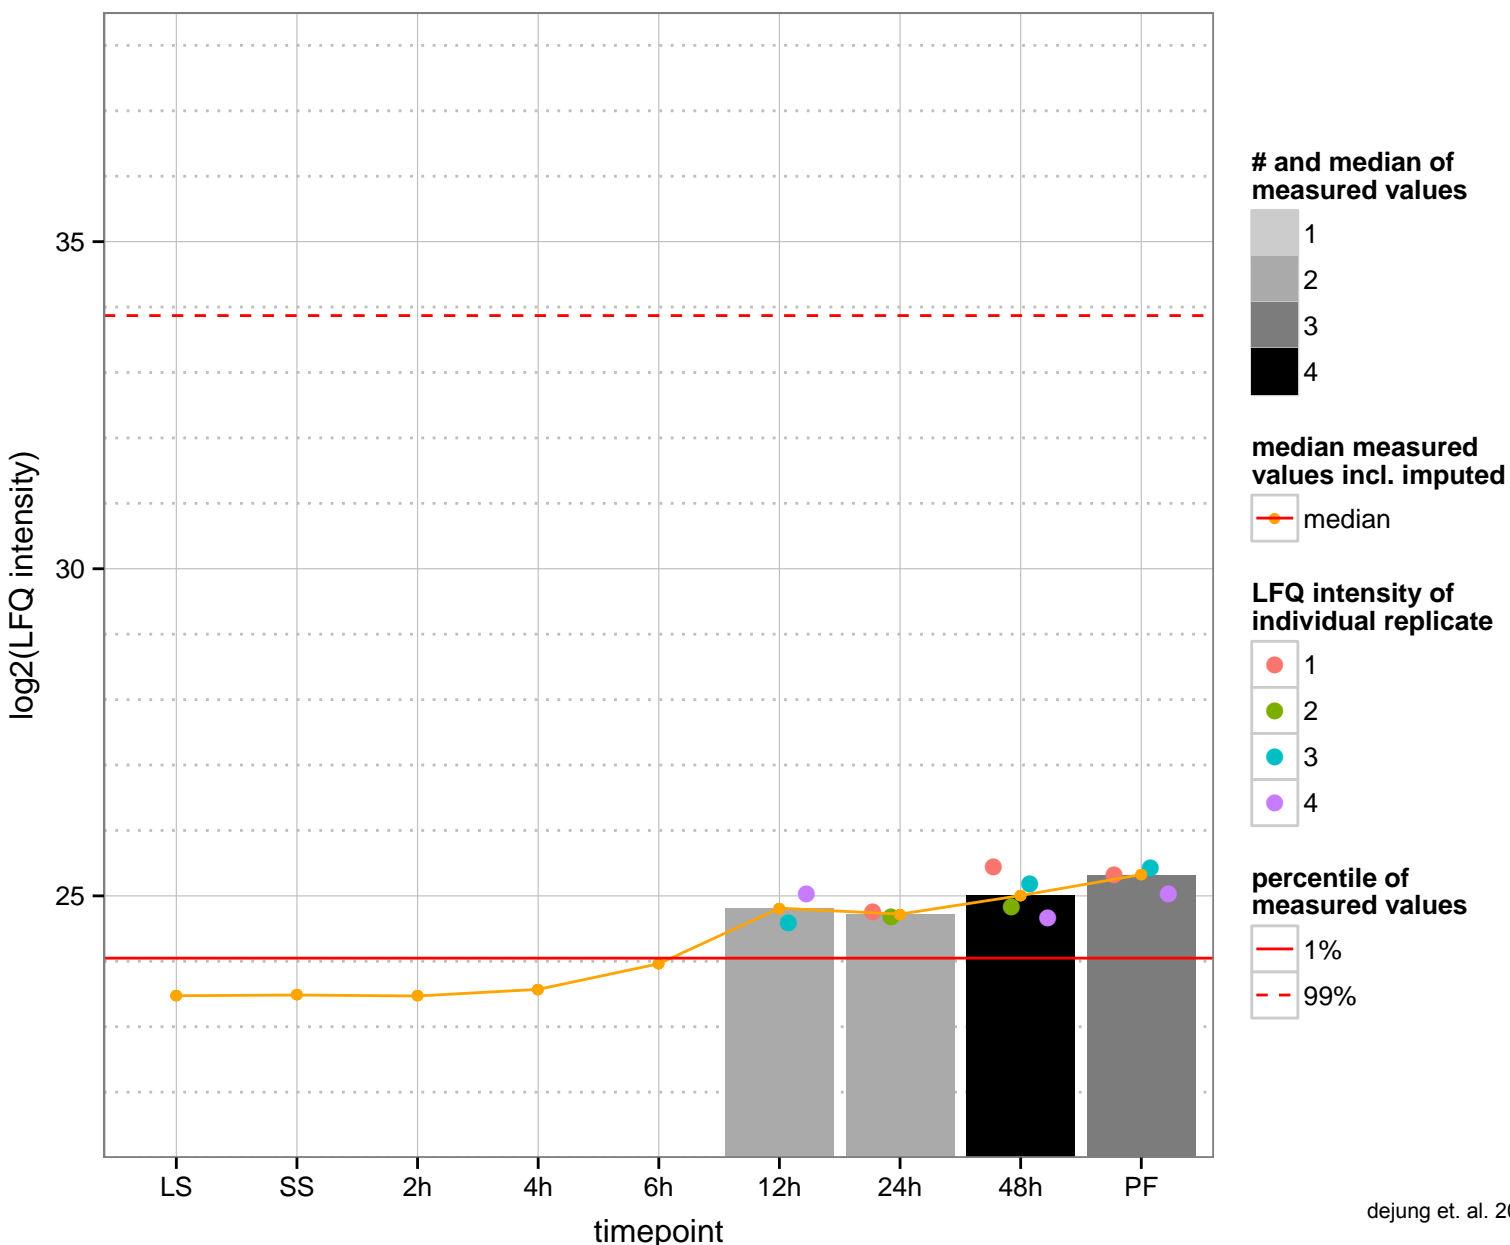

RNA-binding protein, putative (DRBD10)  
 Tb927.11.16020  
 AGOF: RNA binding  
 AGOC: null  
 AGOP: RNA processing  
 PGO: nucleic acid binding  
 PGO: null  
 PGO: null

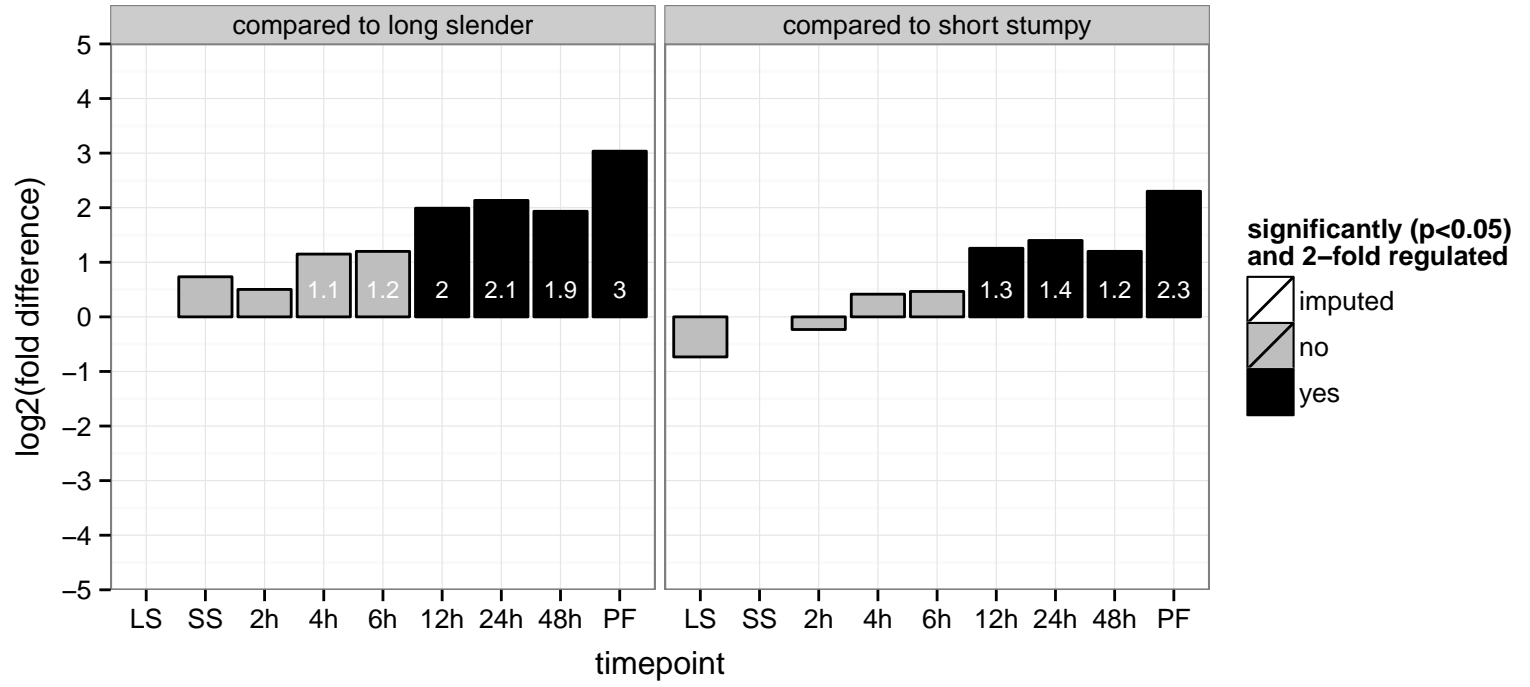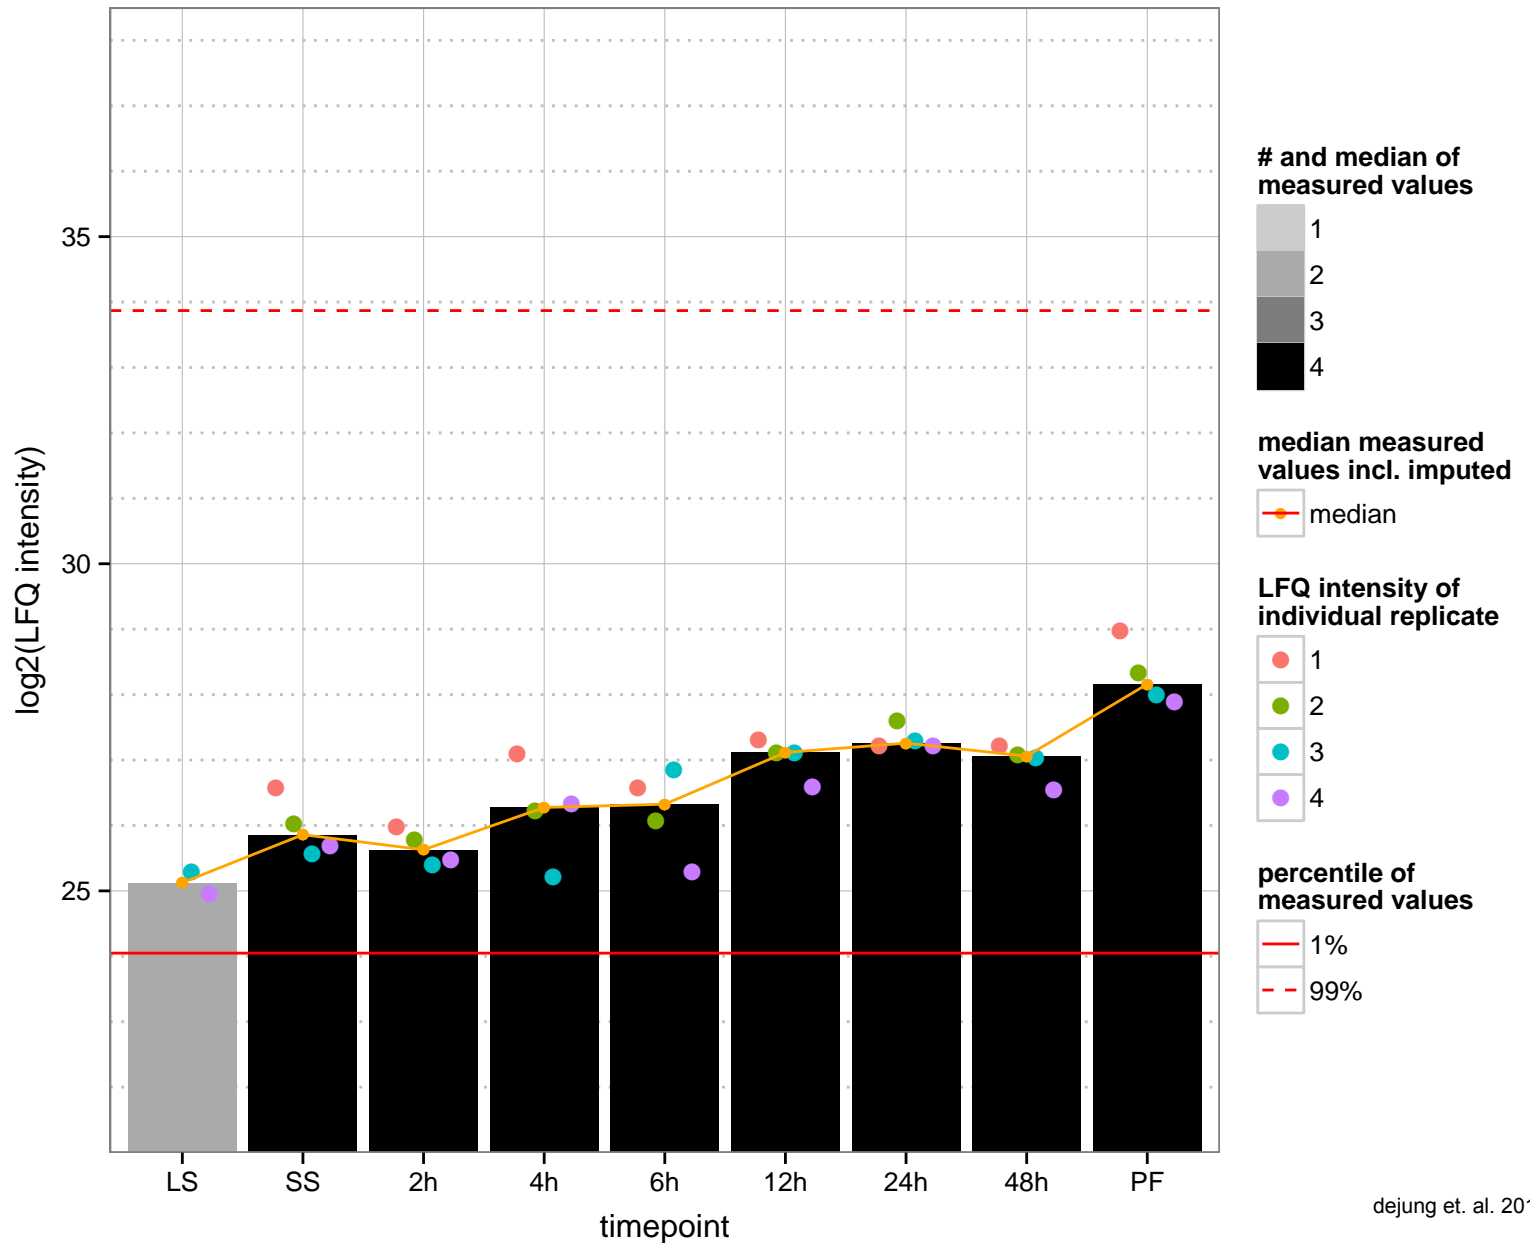

hypothetical protein, conserved  
 Tb927.11.16220  
 AGOF: null  
 AGOC: mitochondrion  
 AGOP: null  
 PGO: null  
 PGOC: null  
 PGOP: null

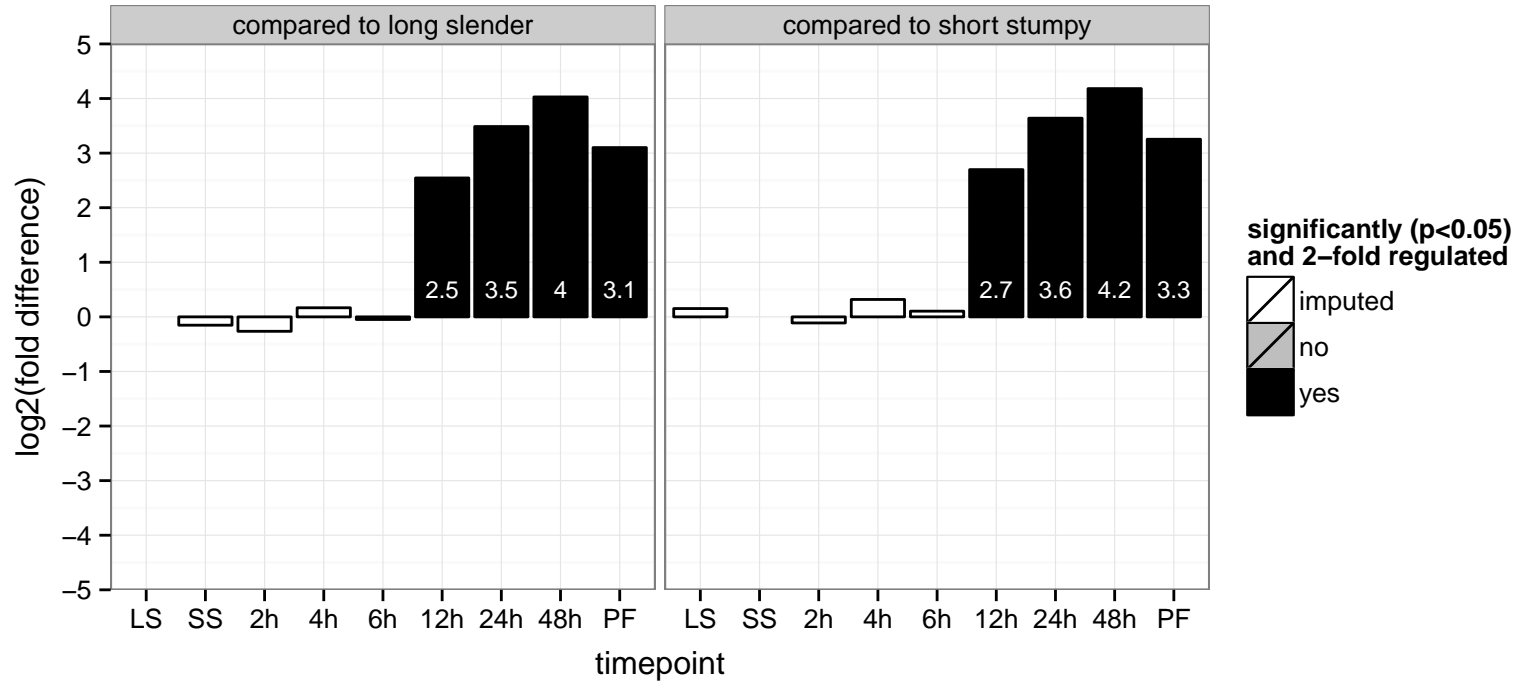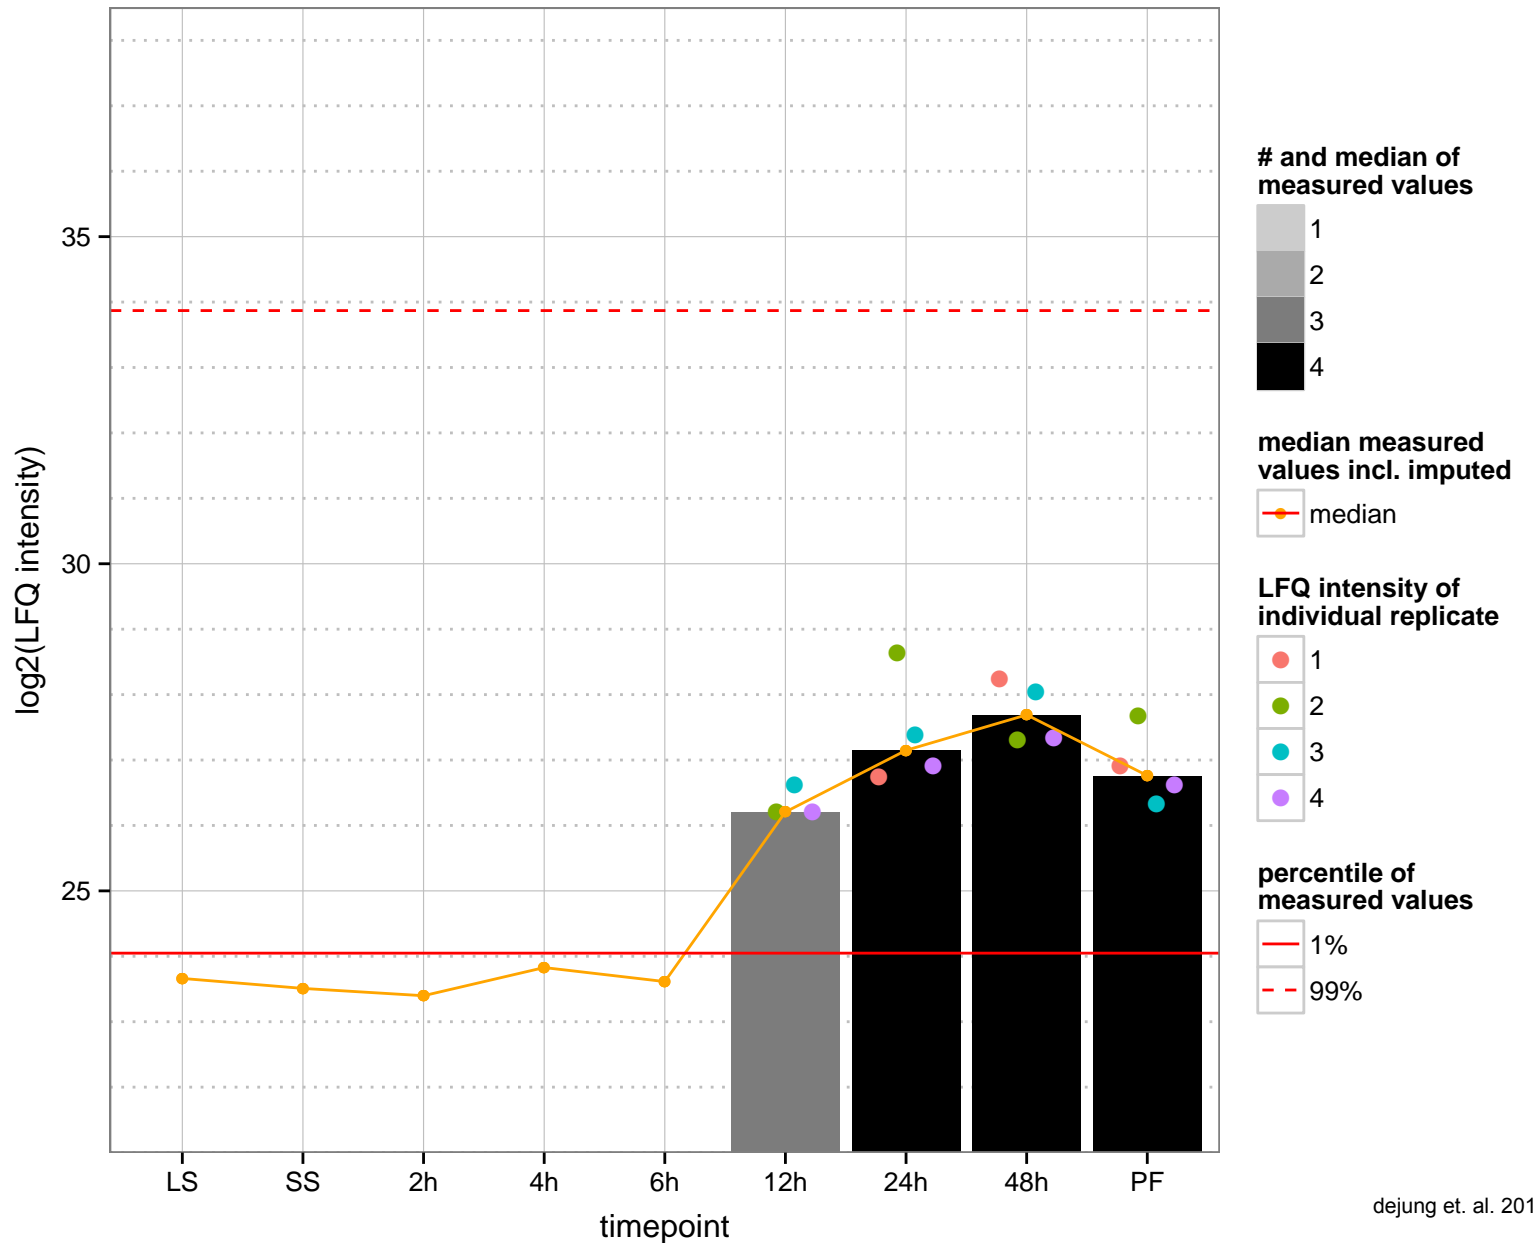

hypothetical protein, conserved  
 Tb927.11.16340  
 AGOF: protein transporter activity  
 AGOC: cytoplasm, nuclear pore, nucleus  
 AGOP: intracellular protein transport, protein import into nucleus, docking  
 PGO: binding, protein transporter activity  
 PGOC: null  
 PGOP: intracellular protein transport

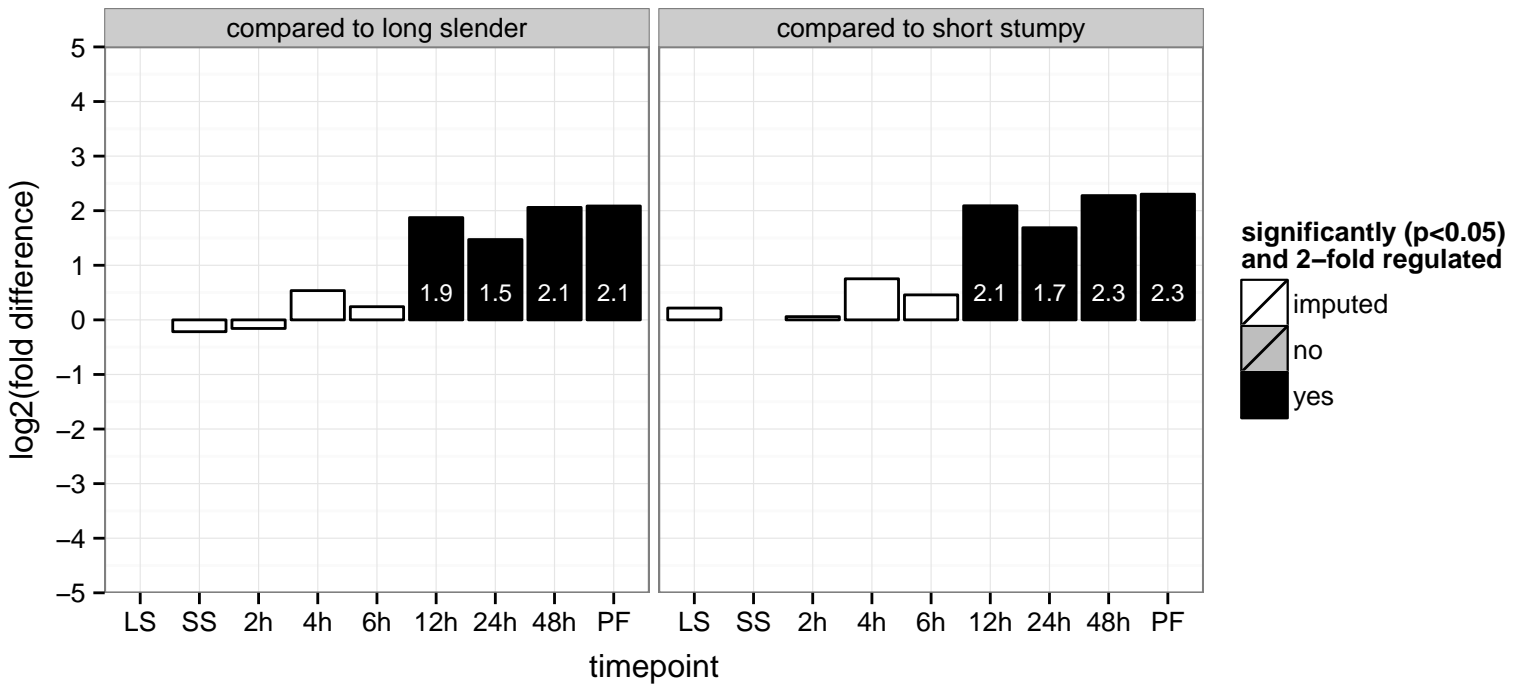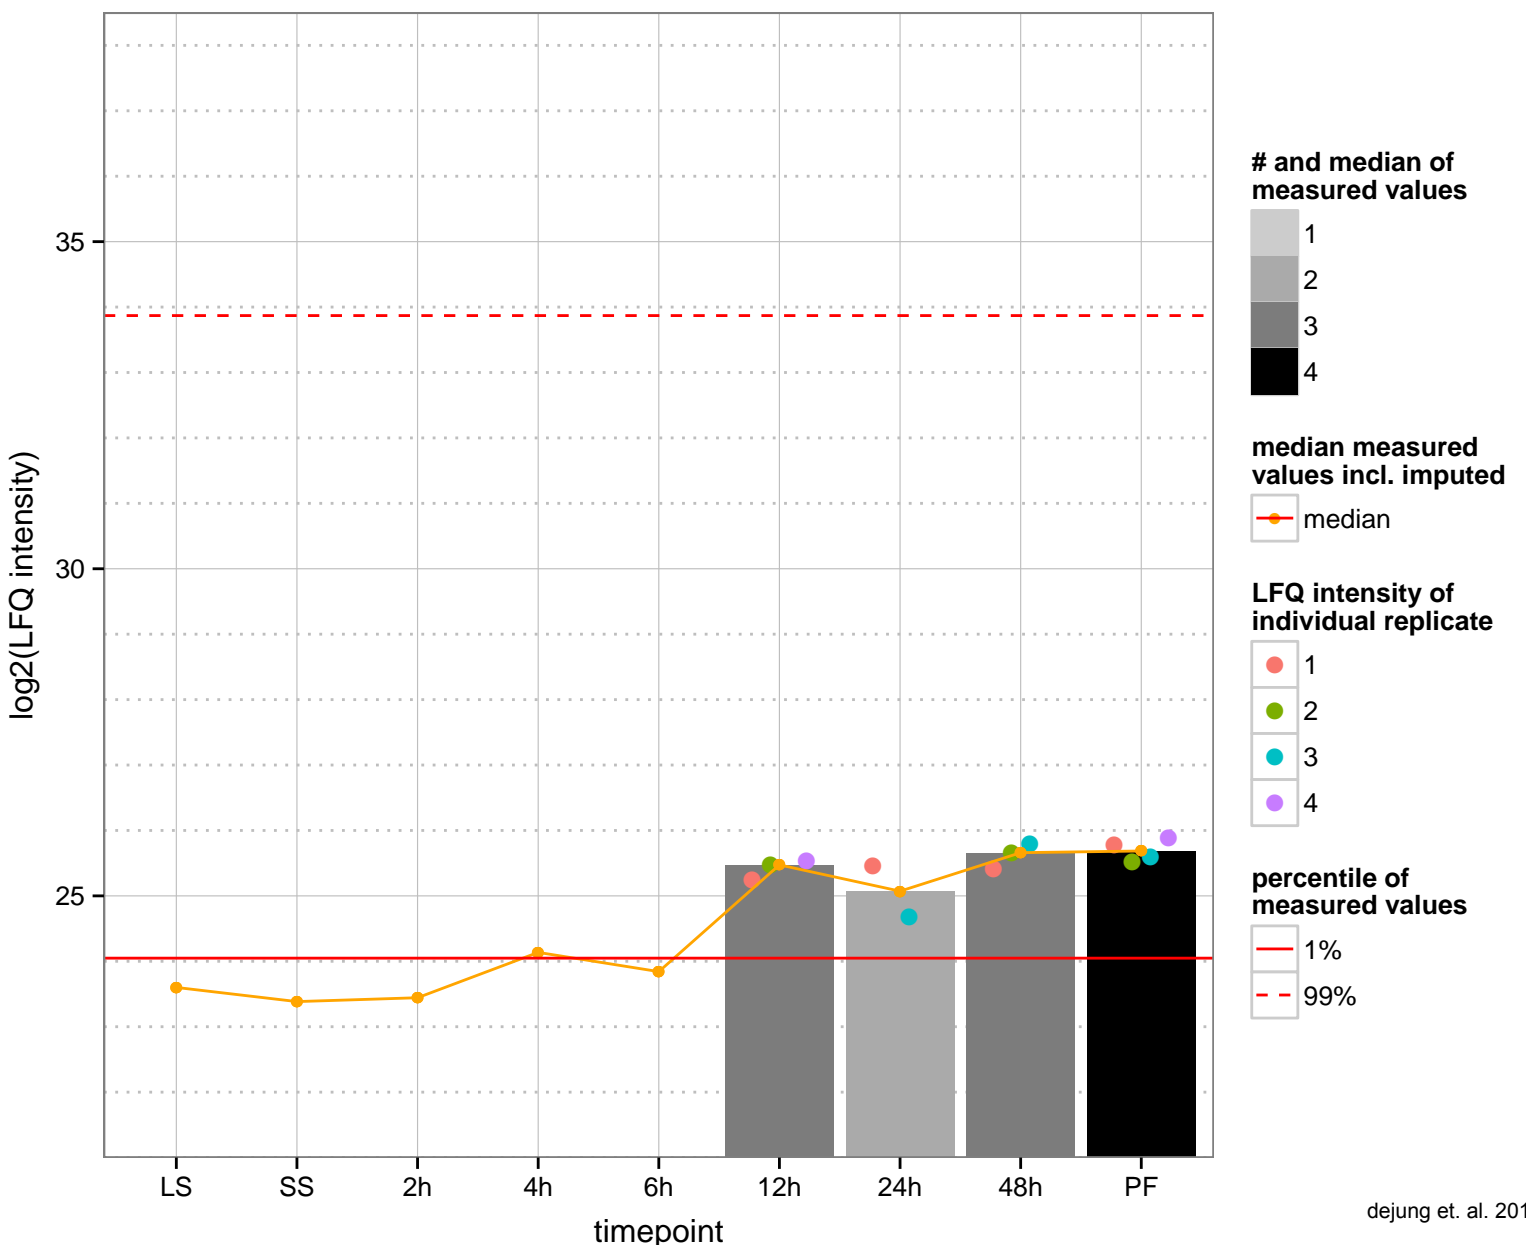



hypothetical protein, conserved  
 Tb927.11.16450  
 AGOF: null  
 AGOC: null  
 AGOP: null  
 PGO: null  
 PGO: null  
 PGO: null

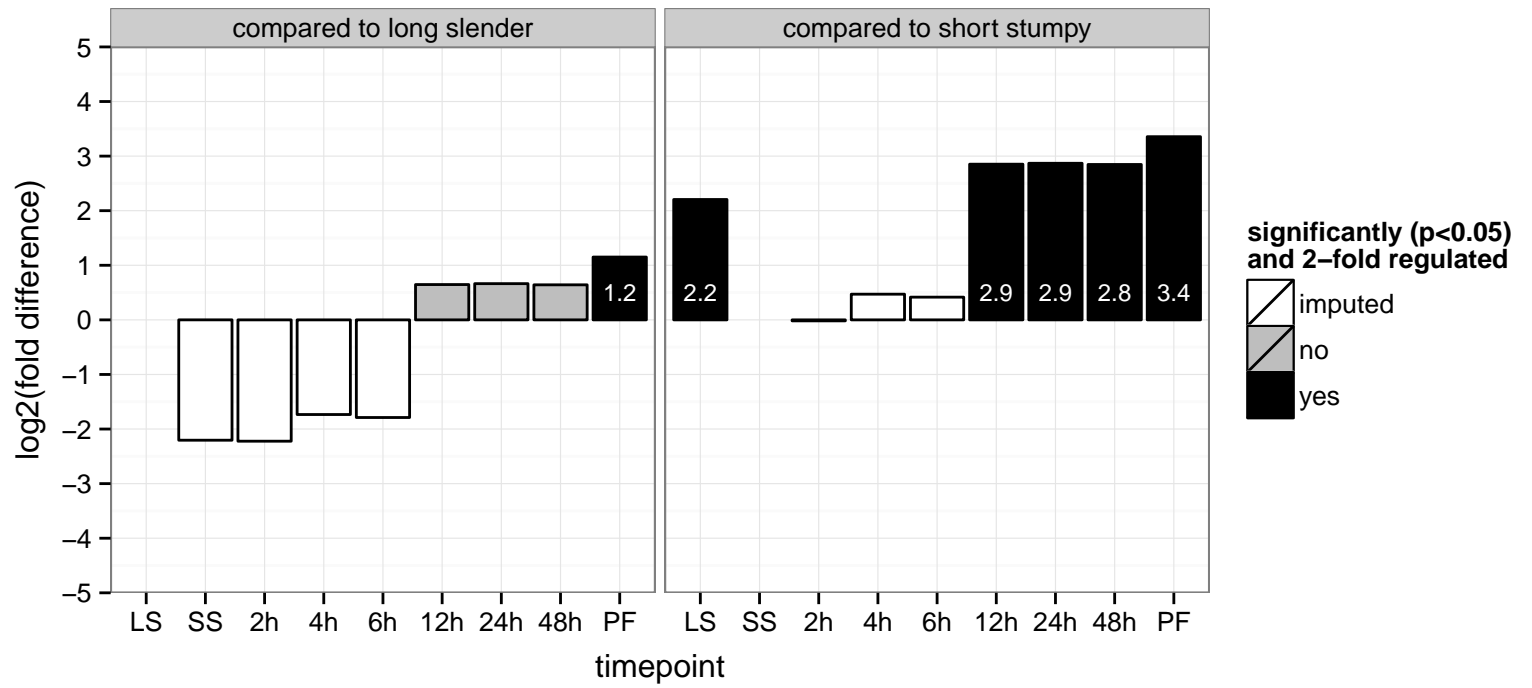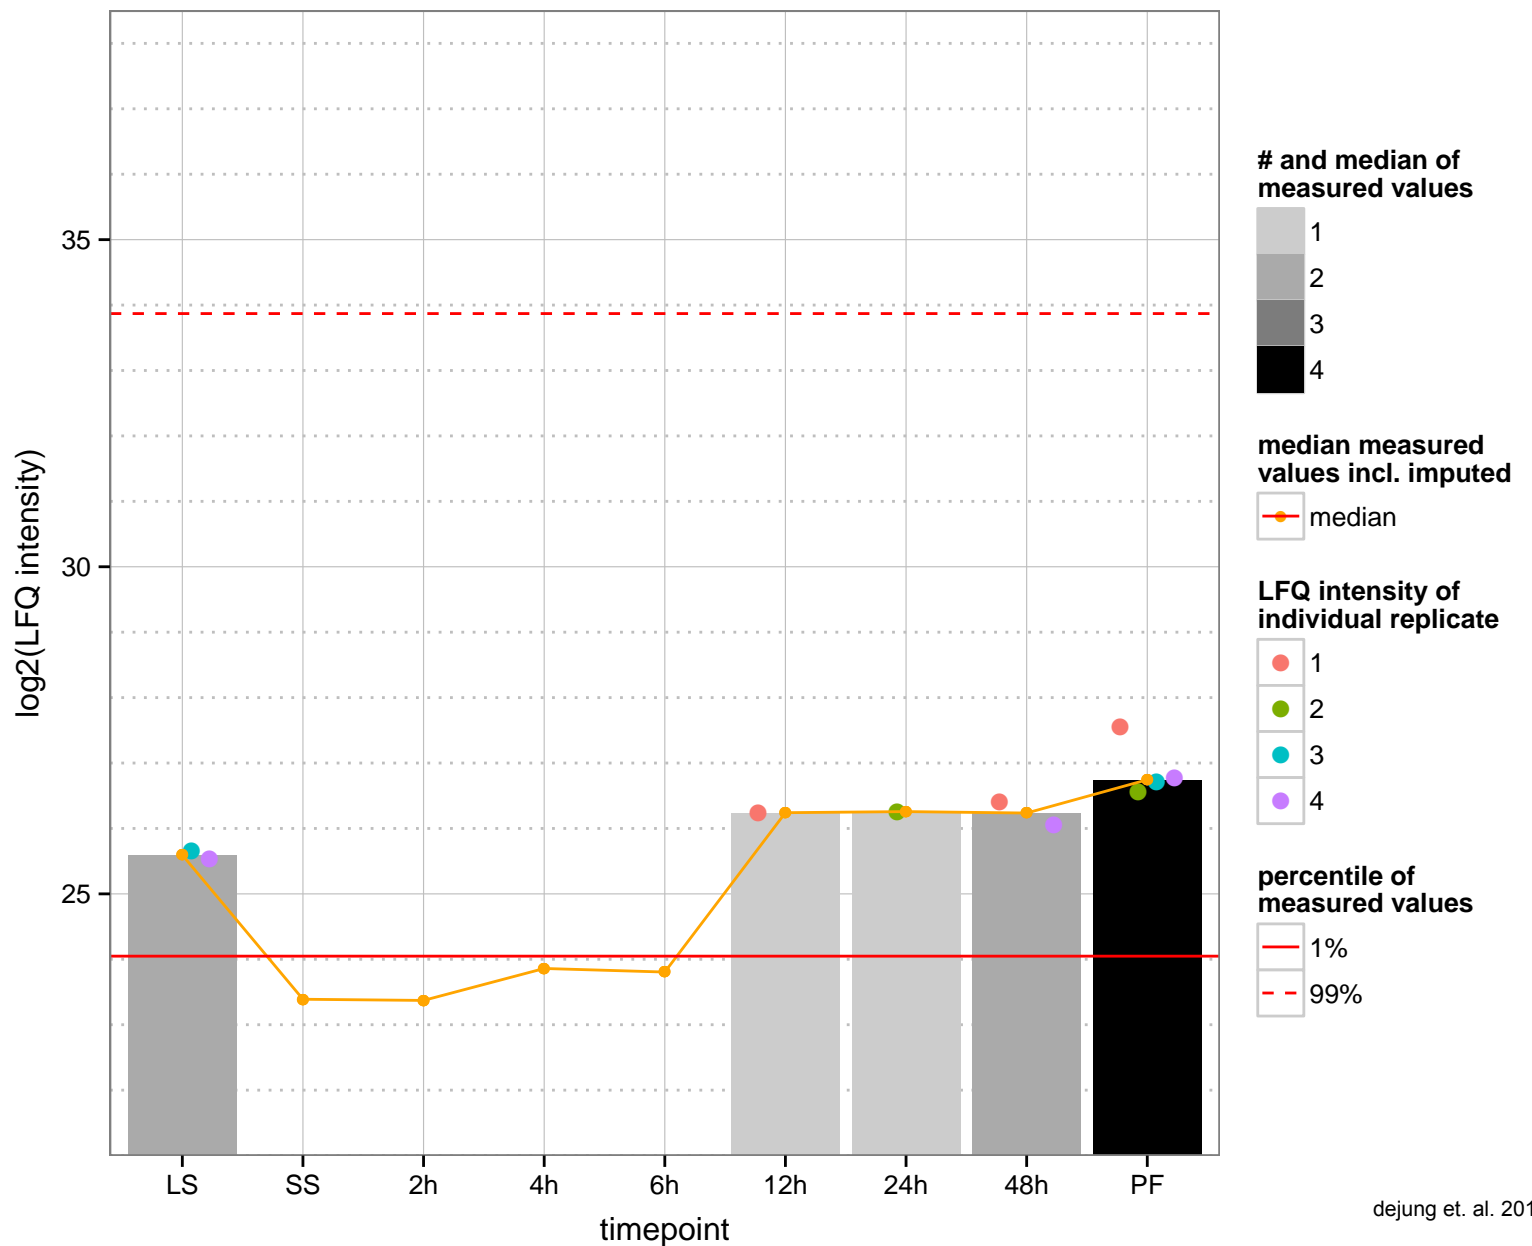

hypothetical protein, conserved  
 Tb927.11.16510  
 AGOF: null  
 AGOC: mitochondrion  
 AGOP: null  
 PGO: null  
 PGOC: null  
 PGOP: null

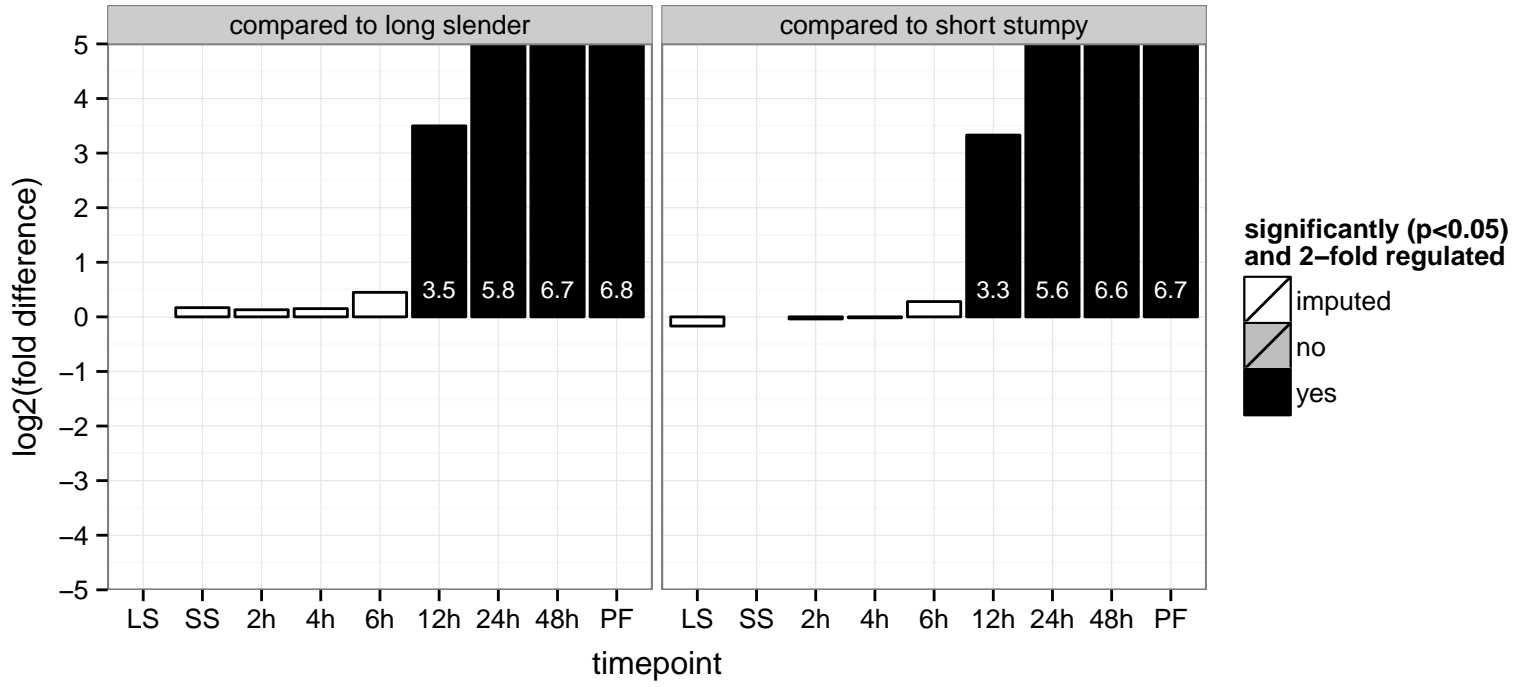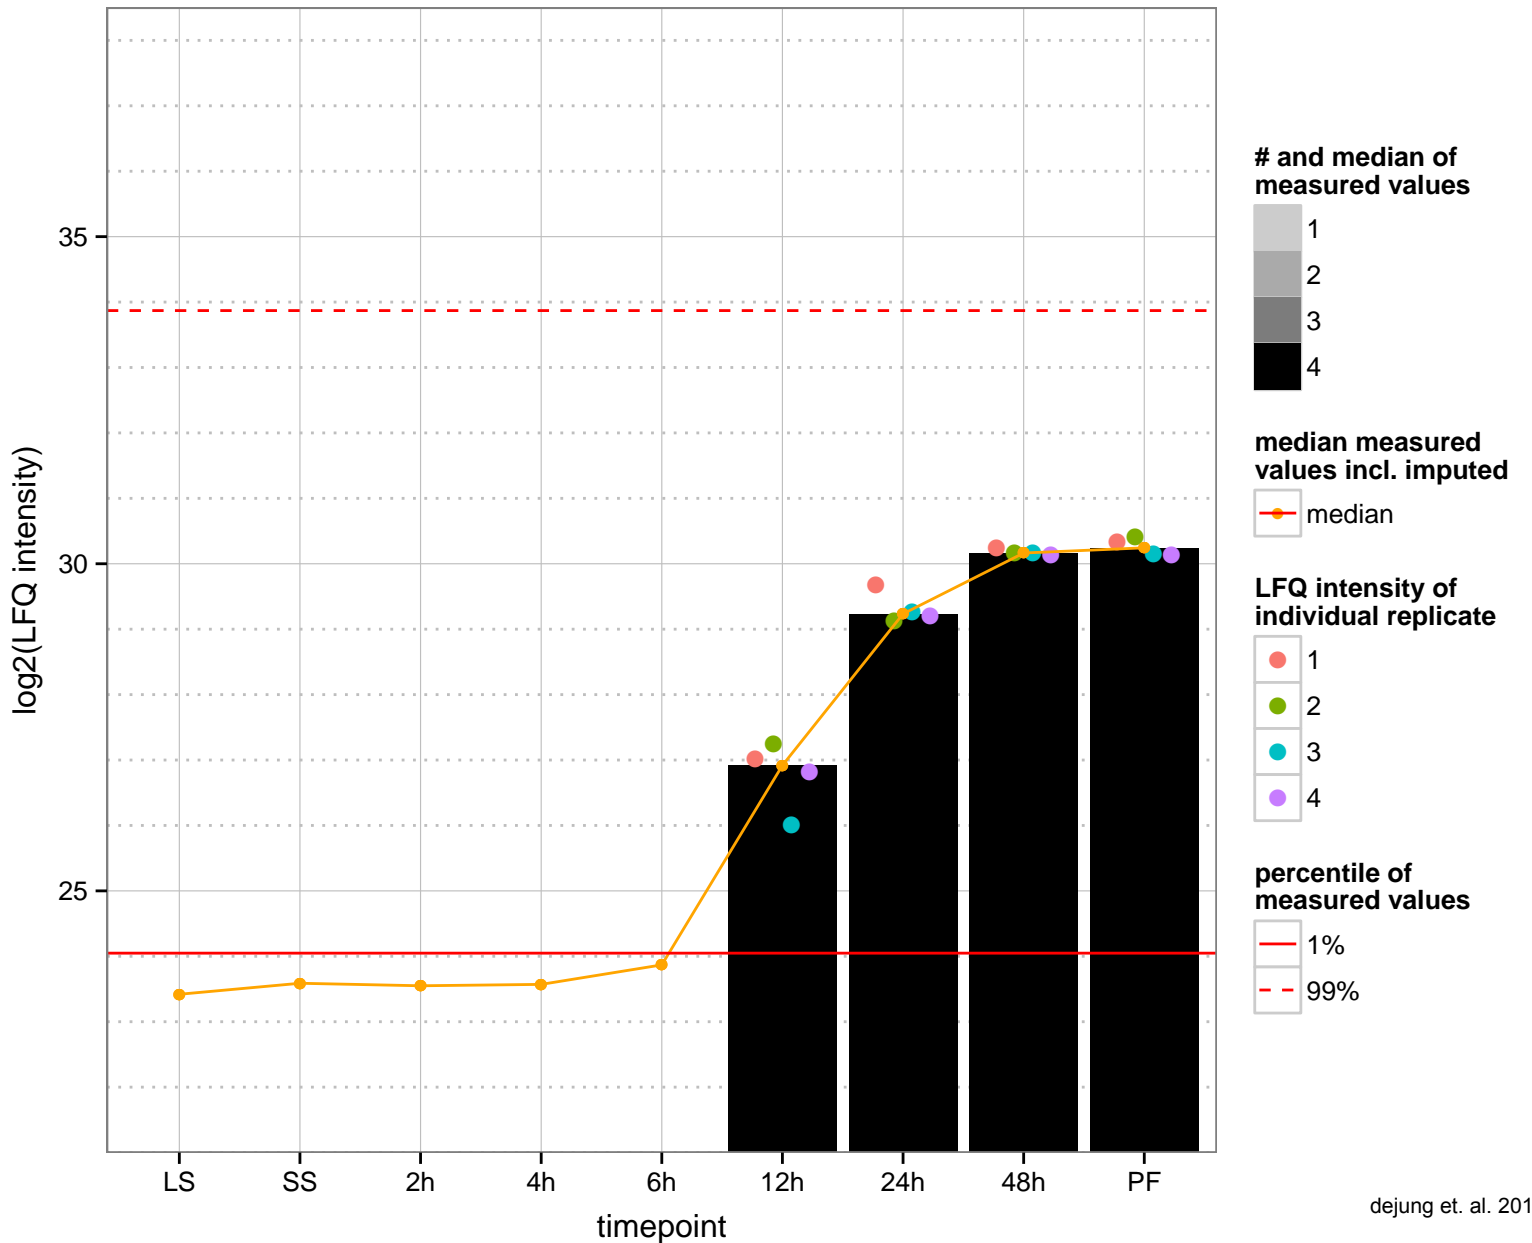

electron transfer flavoprotein, putative  
 Tb927.11.180  
 AGOF: electron carrier activity  
 AGOC: mitochondrion  
 AGOP: oxidation-reduction process  
 PGO: electron carrier activity  
 PGOC: null  
 PGOP: null

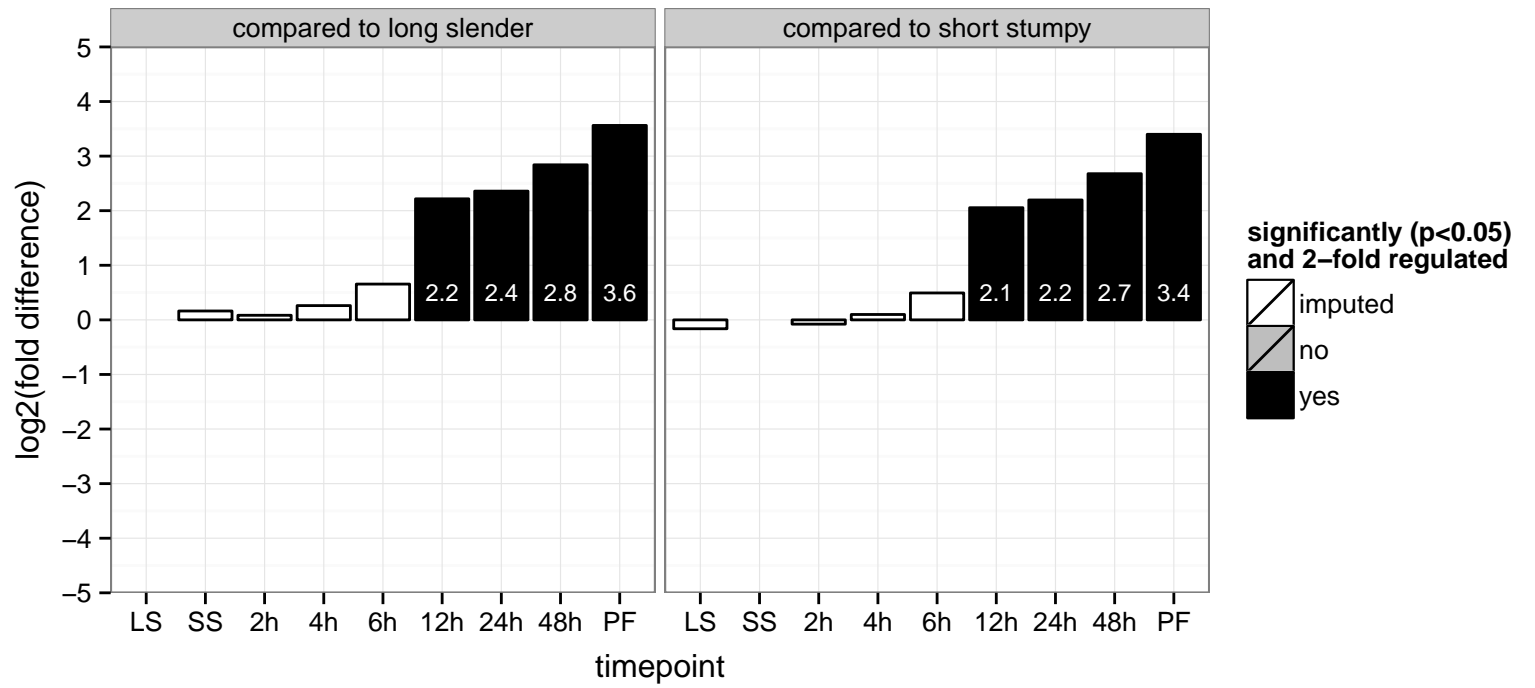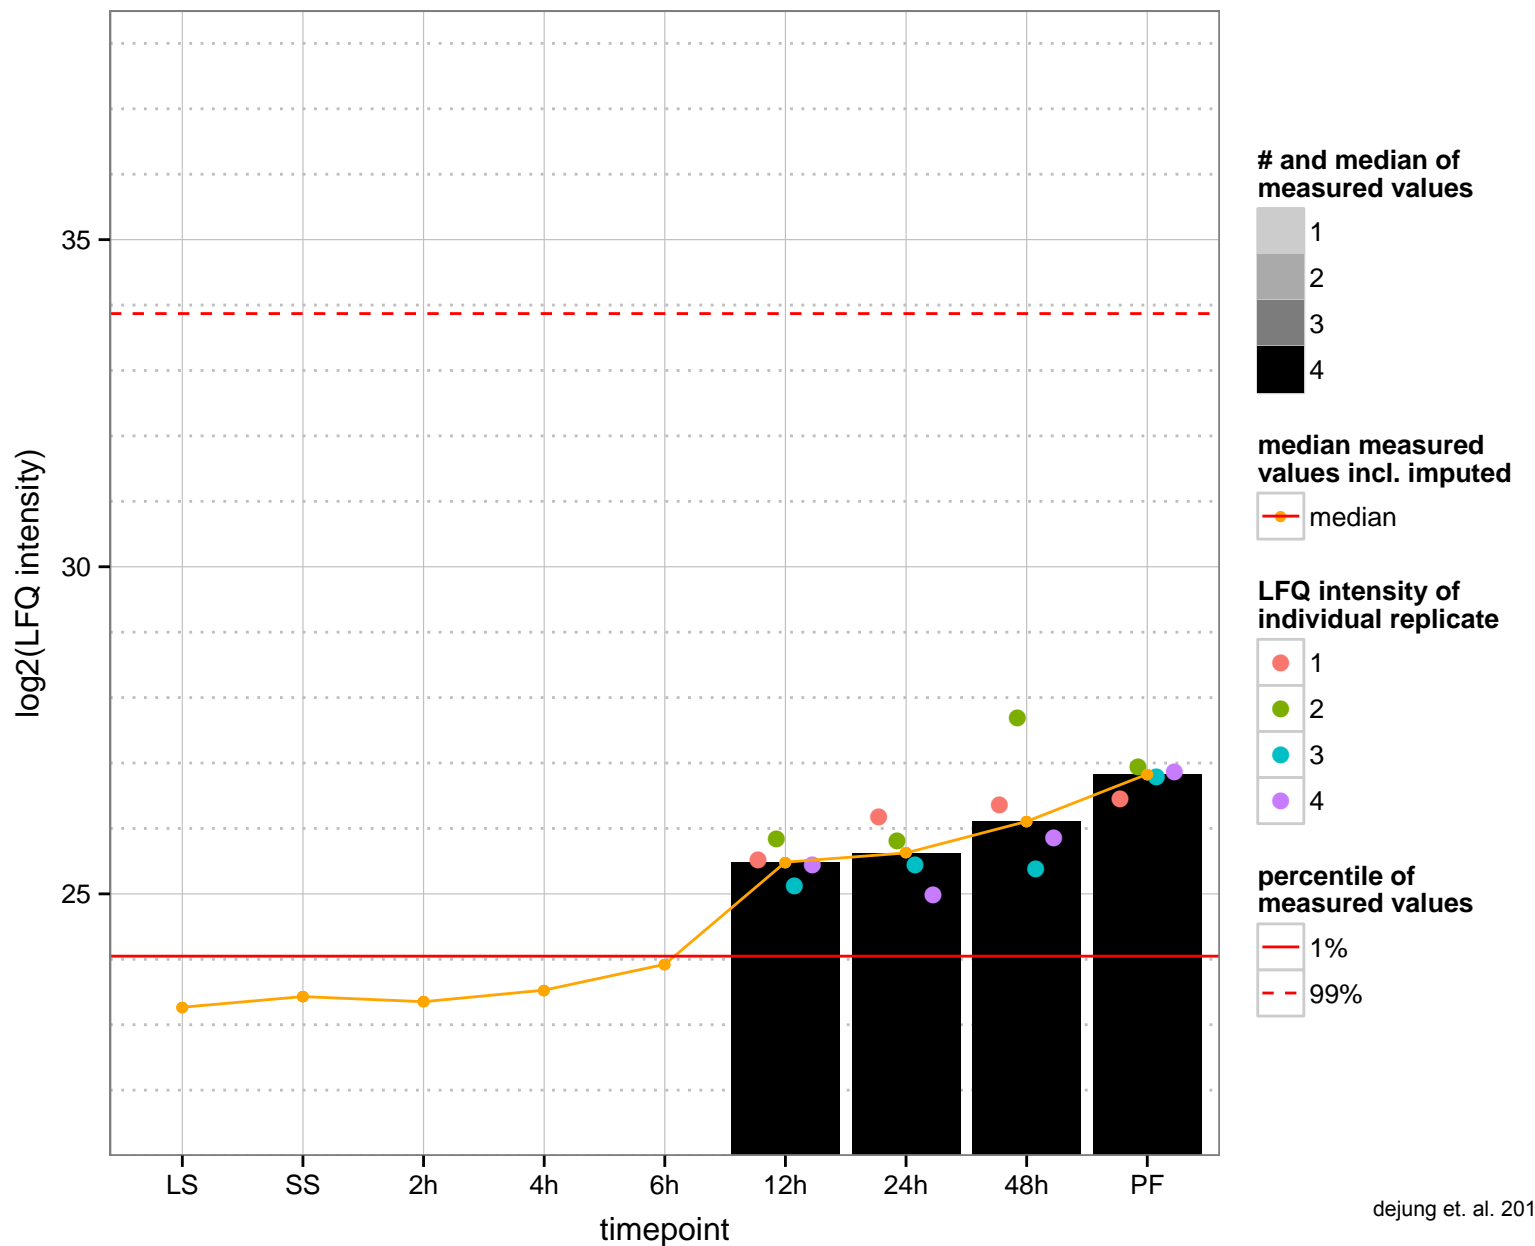

elongation factor, putative  
 Tb927.11.190  
 AGOF: GTP binding, GTPase activity  
 AGOC: null  
 AGOP: null  
 PGOF: GTP binding, GTPase activity  
 PGO: null  
 PGOP: null

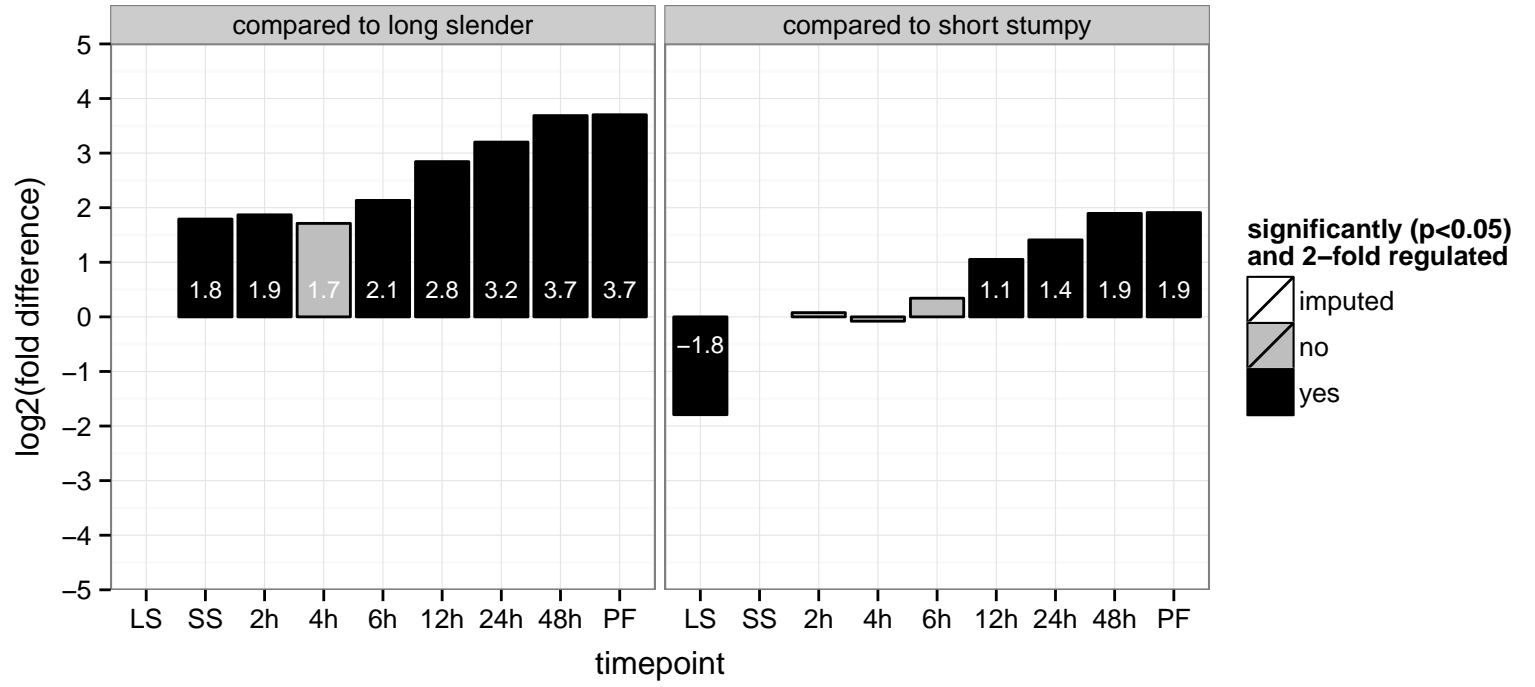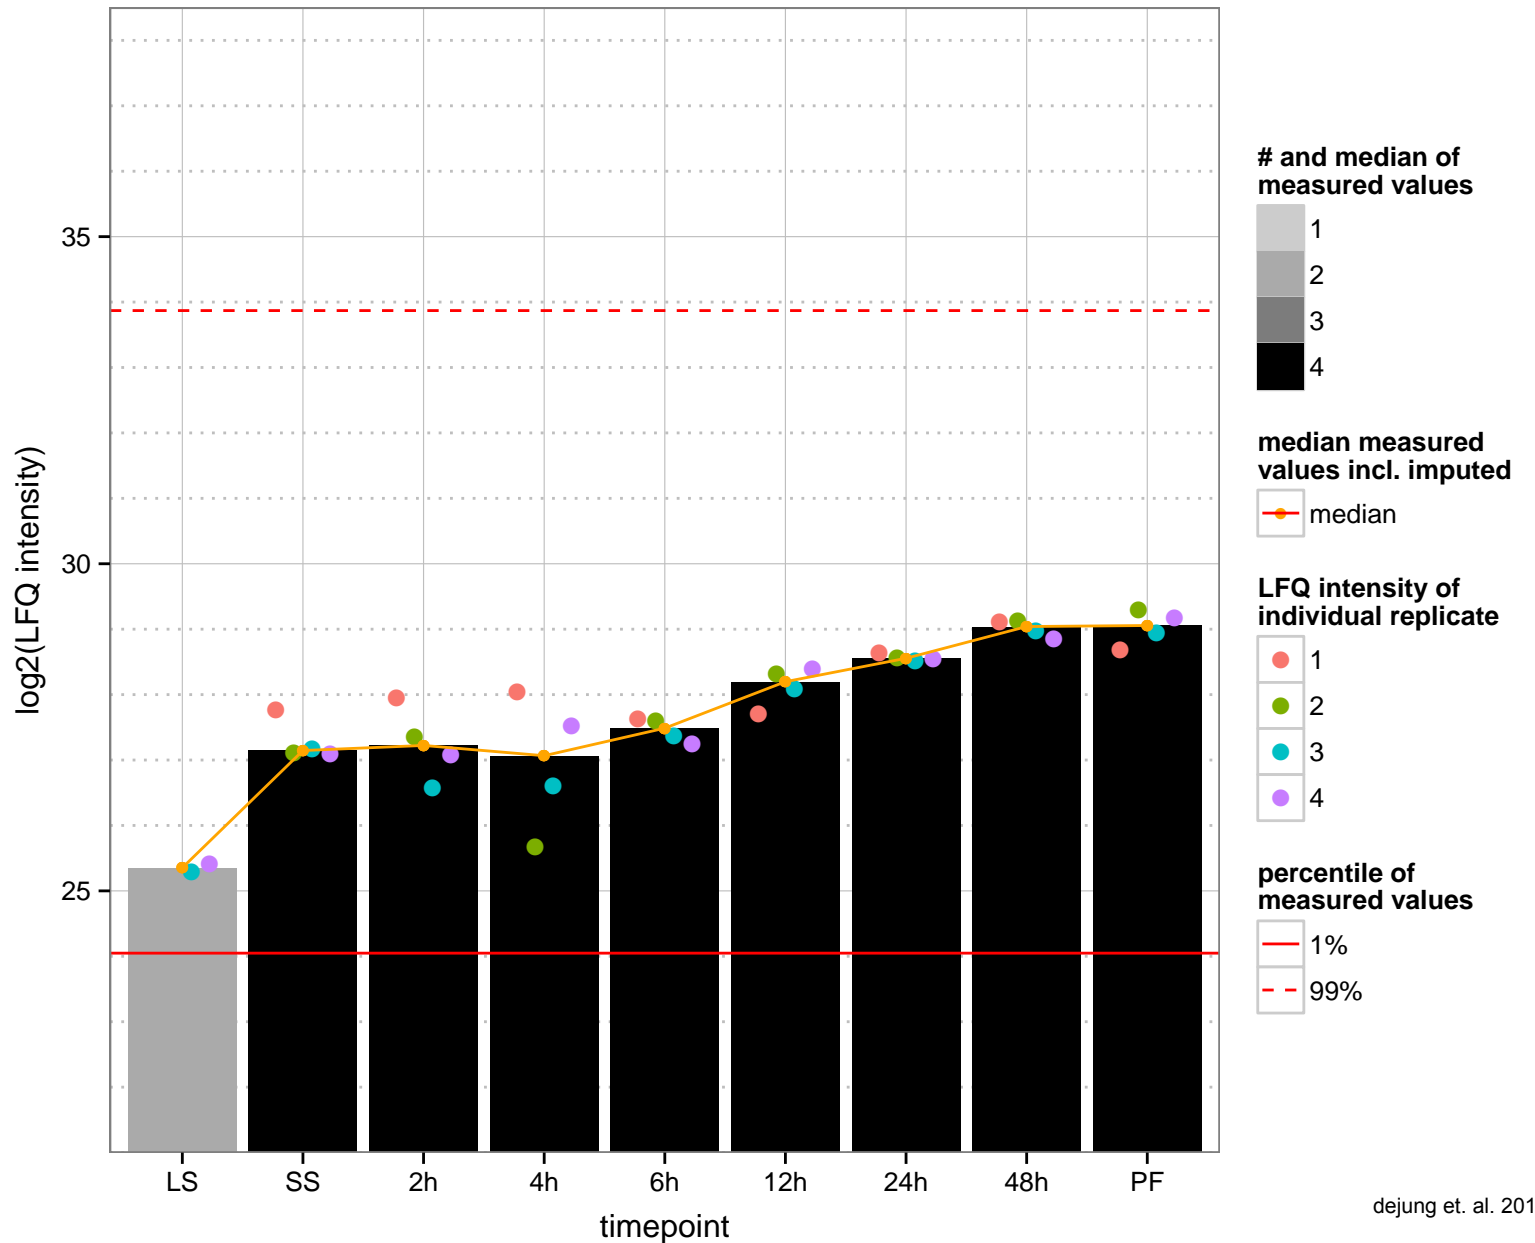

60S ribosomal protein L37, putative  
 Tb927.9.9210;Tb927.11.3000  
 AGOF: structural constituent of ribosome  
 AGOC: intracellular, ribosome  
 AGOP: translation  
 PGOF: structural constituent of ribosome  
 PGO: intracellular, ribosome  
 PGOP: translation

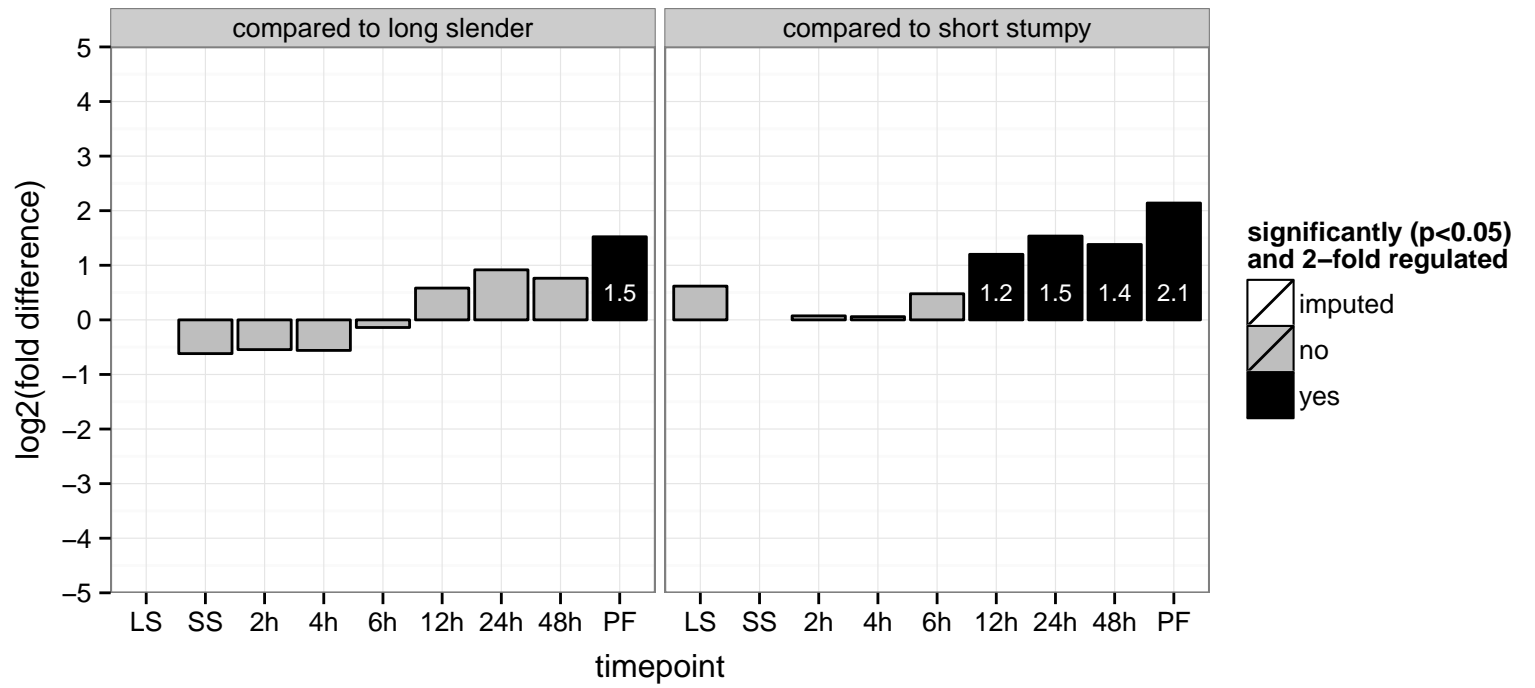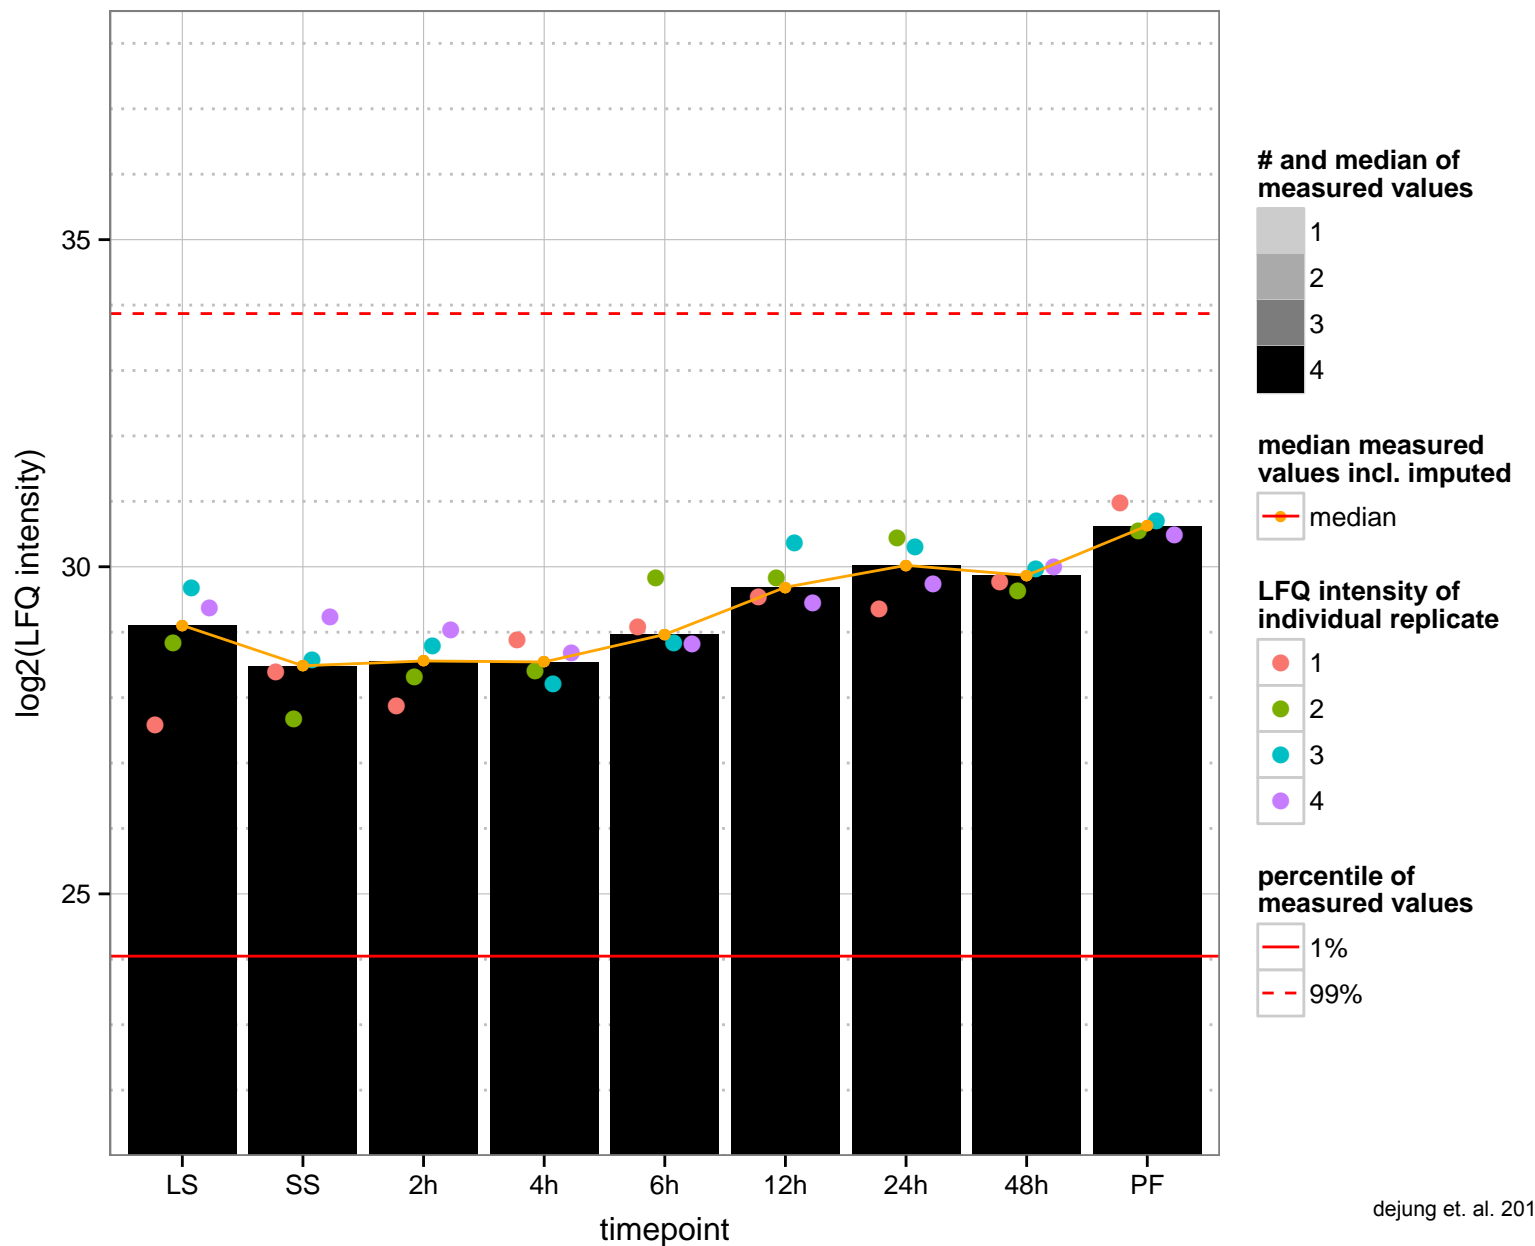

mitochondrial DNA polymerase I protein D, putative (POLID)

Tb927.11.3260

AGOF: DNA binding, DNA-directed DNA polymerase activity

AGOC: mitochondrion

AGOP: DNA replication

PGOF: 3'-5' exonuclease activity, DNA binding, DNA-directed DNA polymerase activity, nucleic acid binding

PGOC: intracellular

PGOP: DNA replication, nucleobase-containing compound metabolic process

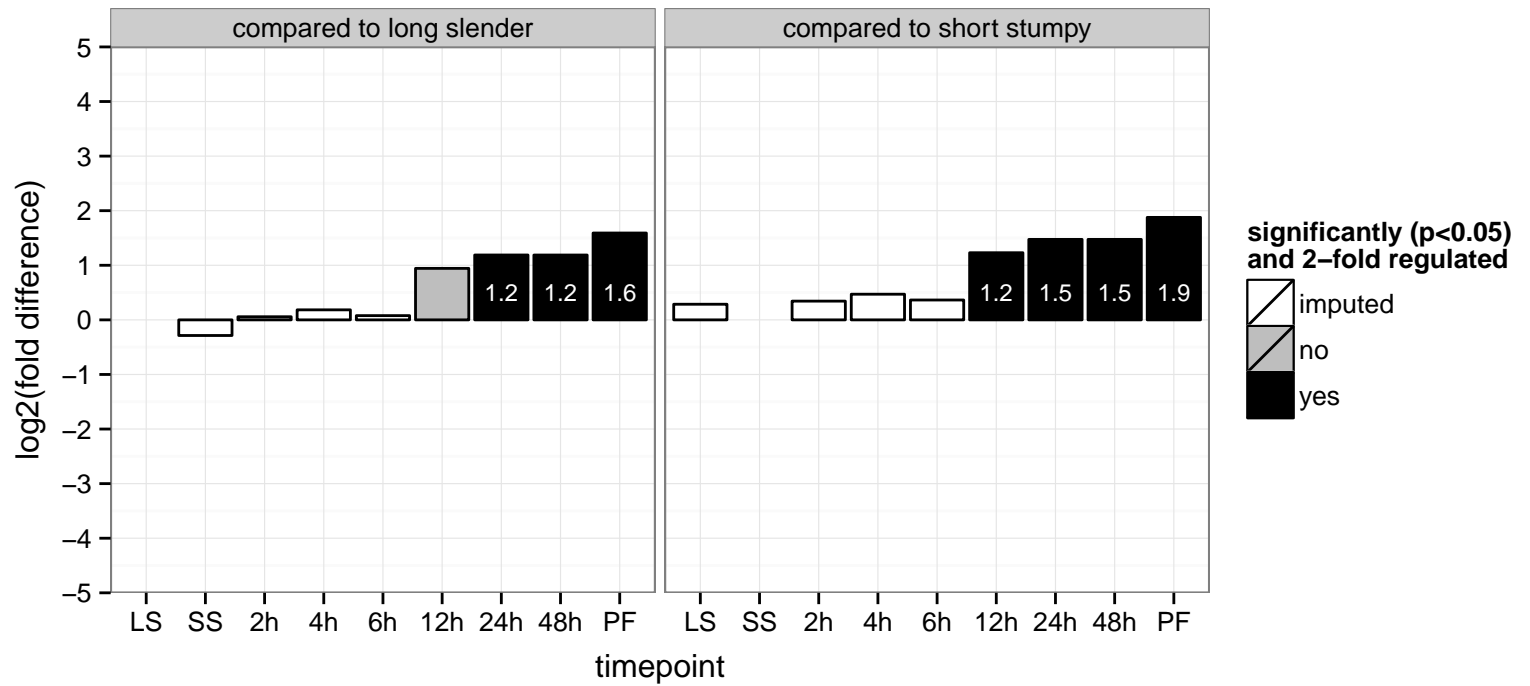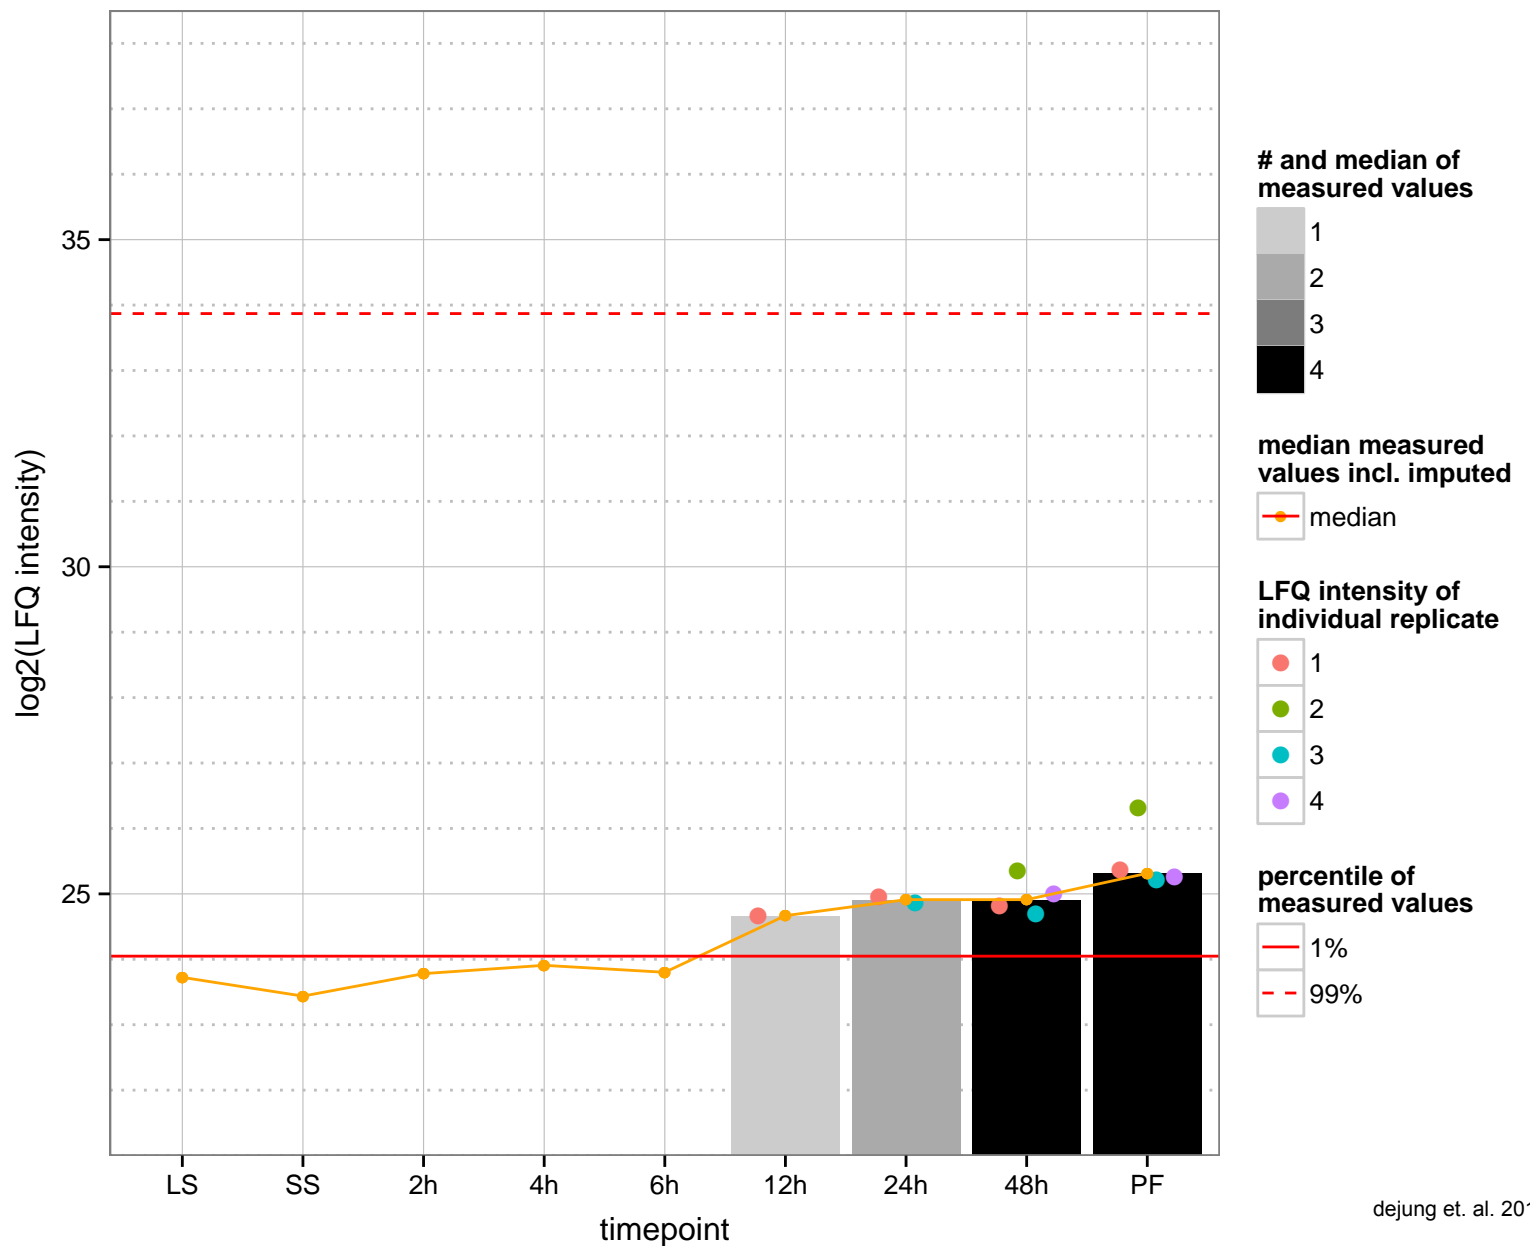

squalene monooxygenase, putative

Tb927.11.3270

AGOF: flavin adenine dinucleotide binding, monooxygenase activity, squalene monooxygenase activity

AGOC: integral to membrane

AGOP: cellular aromatic compound metabolic process, oxidation–reduction process

PGOF: flavin adenine dinucleotide binding, squalene monooxygenase activity

PGOC: integral to membrane

PGOP: oxidation–reduction process

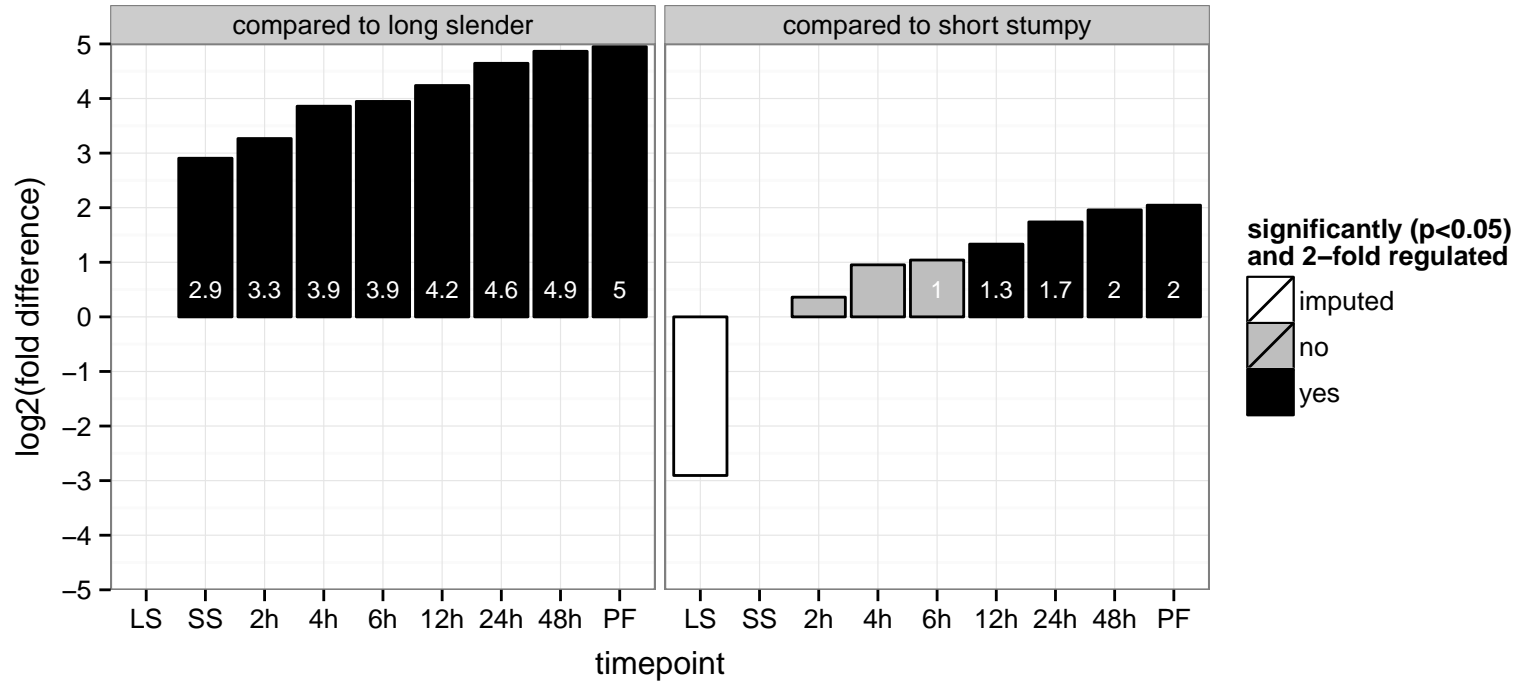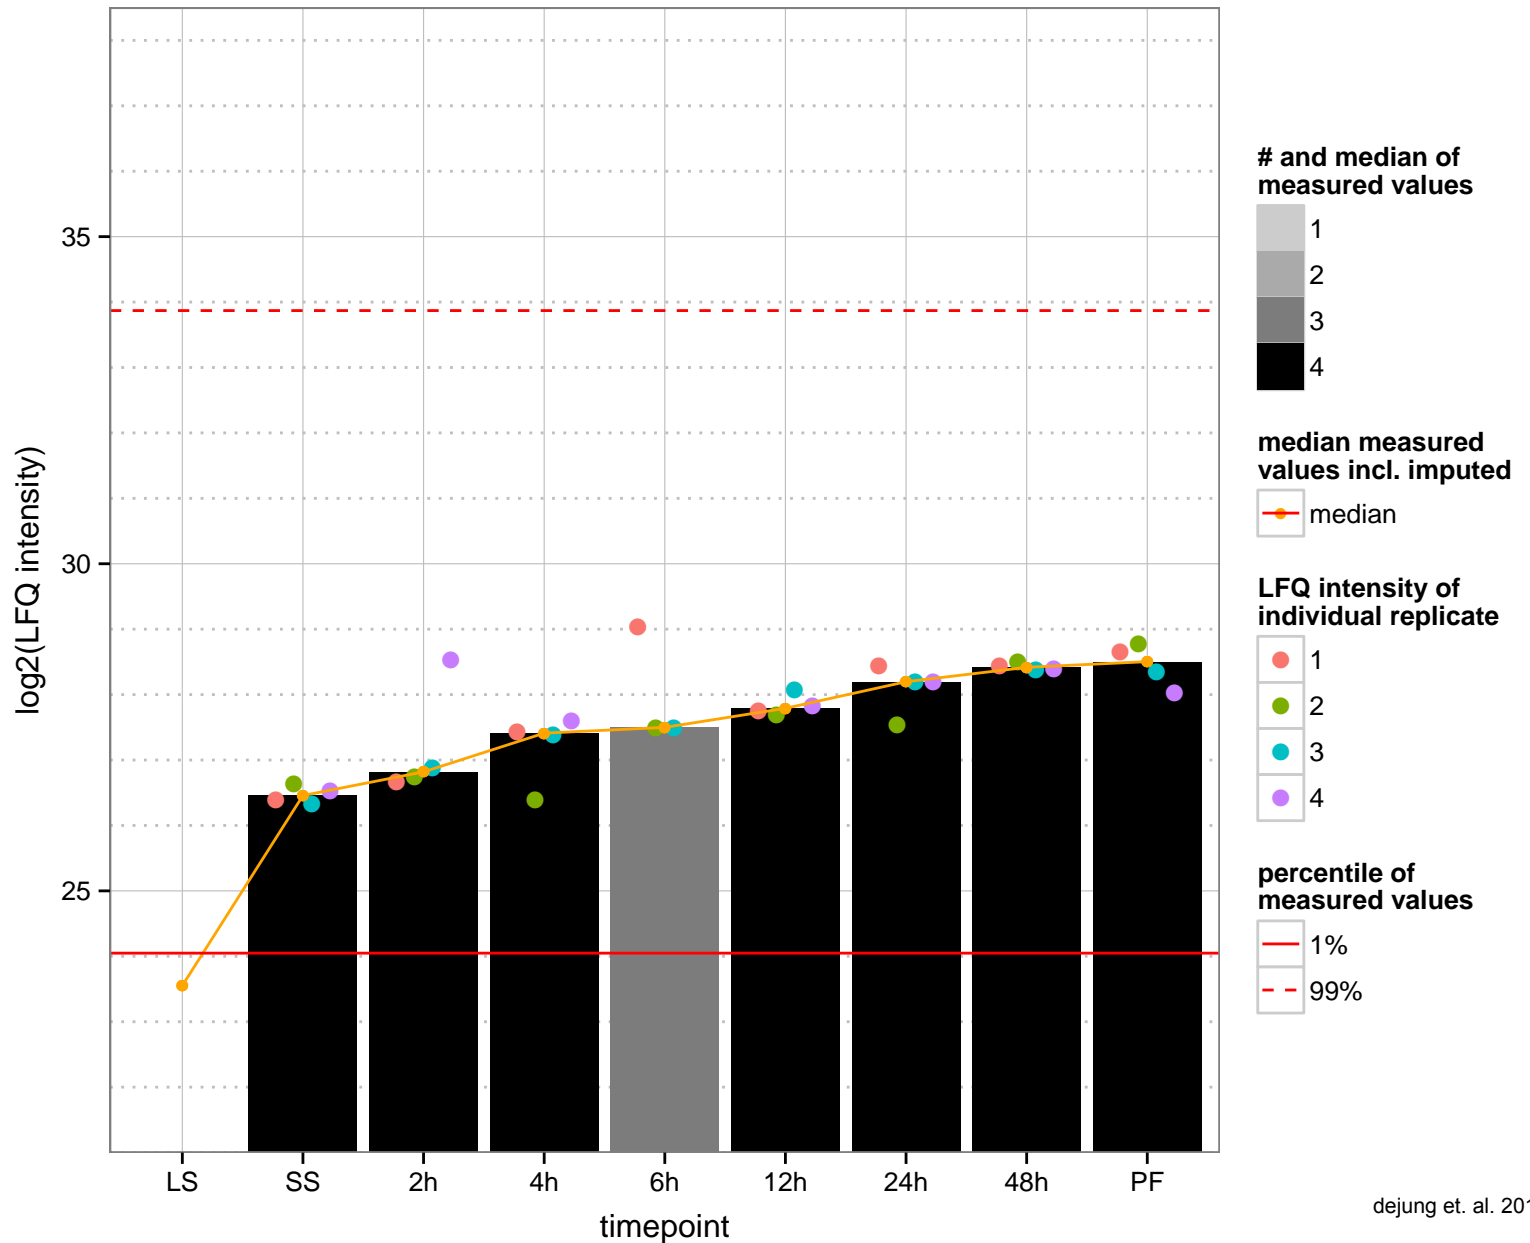

hypothetical protein, conserved  
 Tb927.11.3400  
 AGOF: null  
 AGOC: null  
 AGOP: null  
 PGO: null  
 PGOC: null  
 PGOP: null

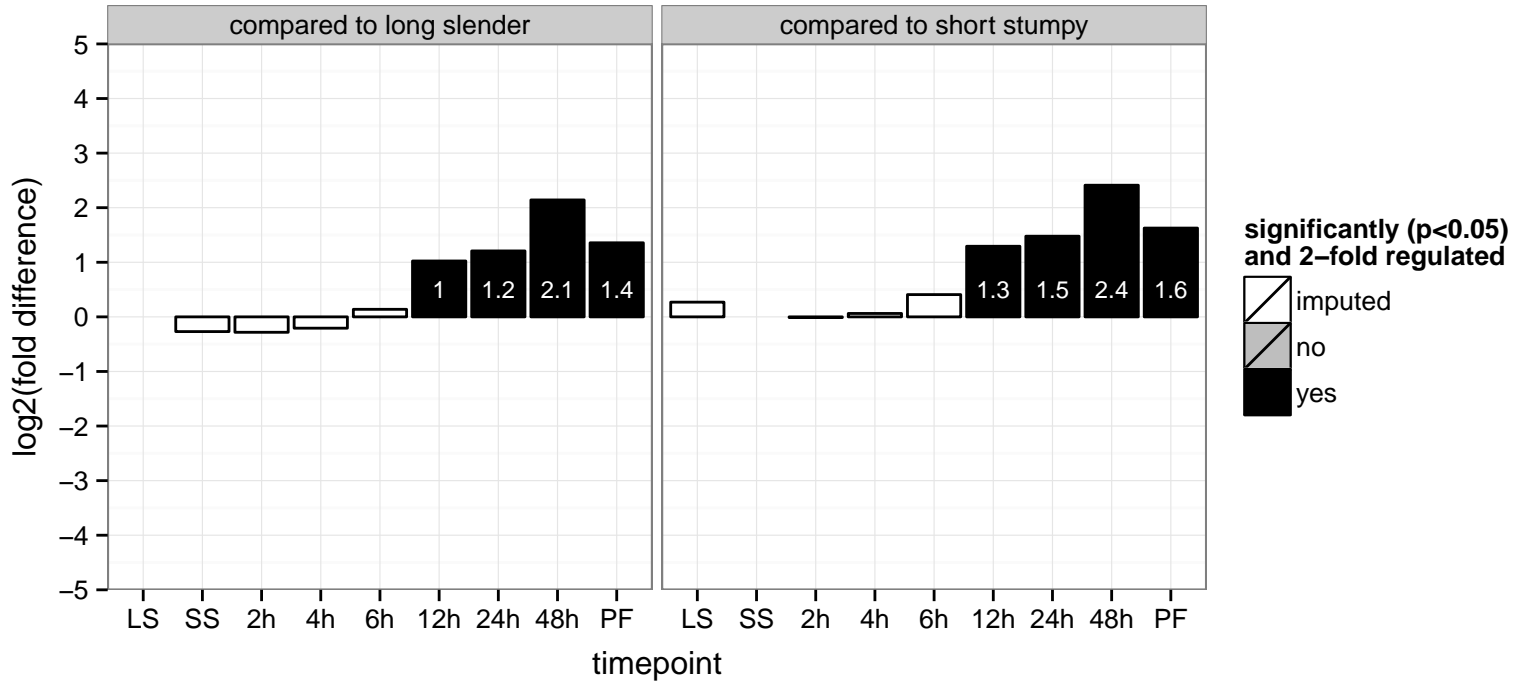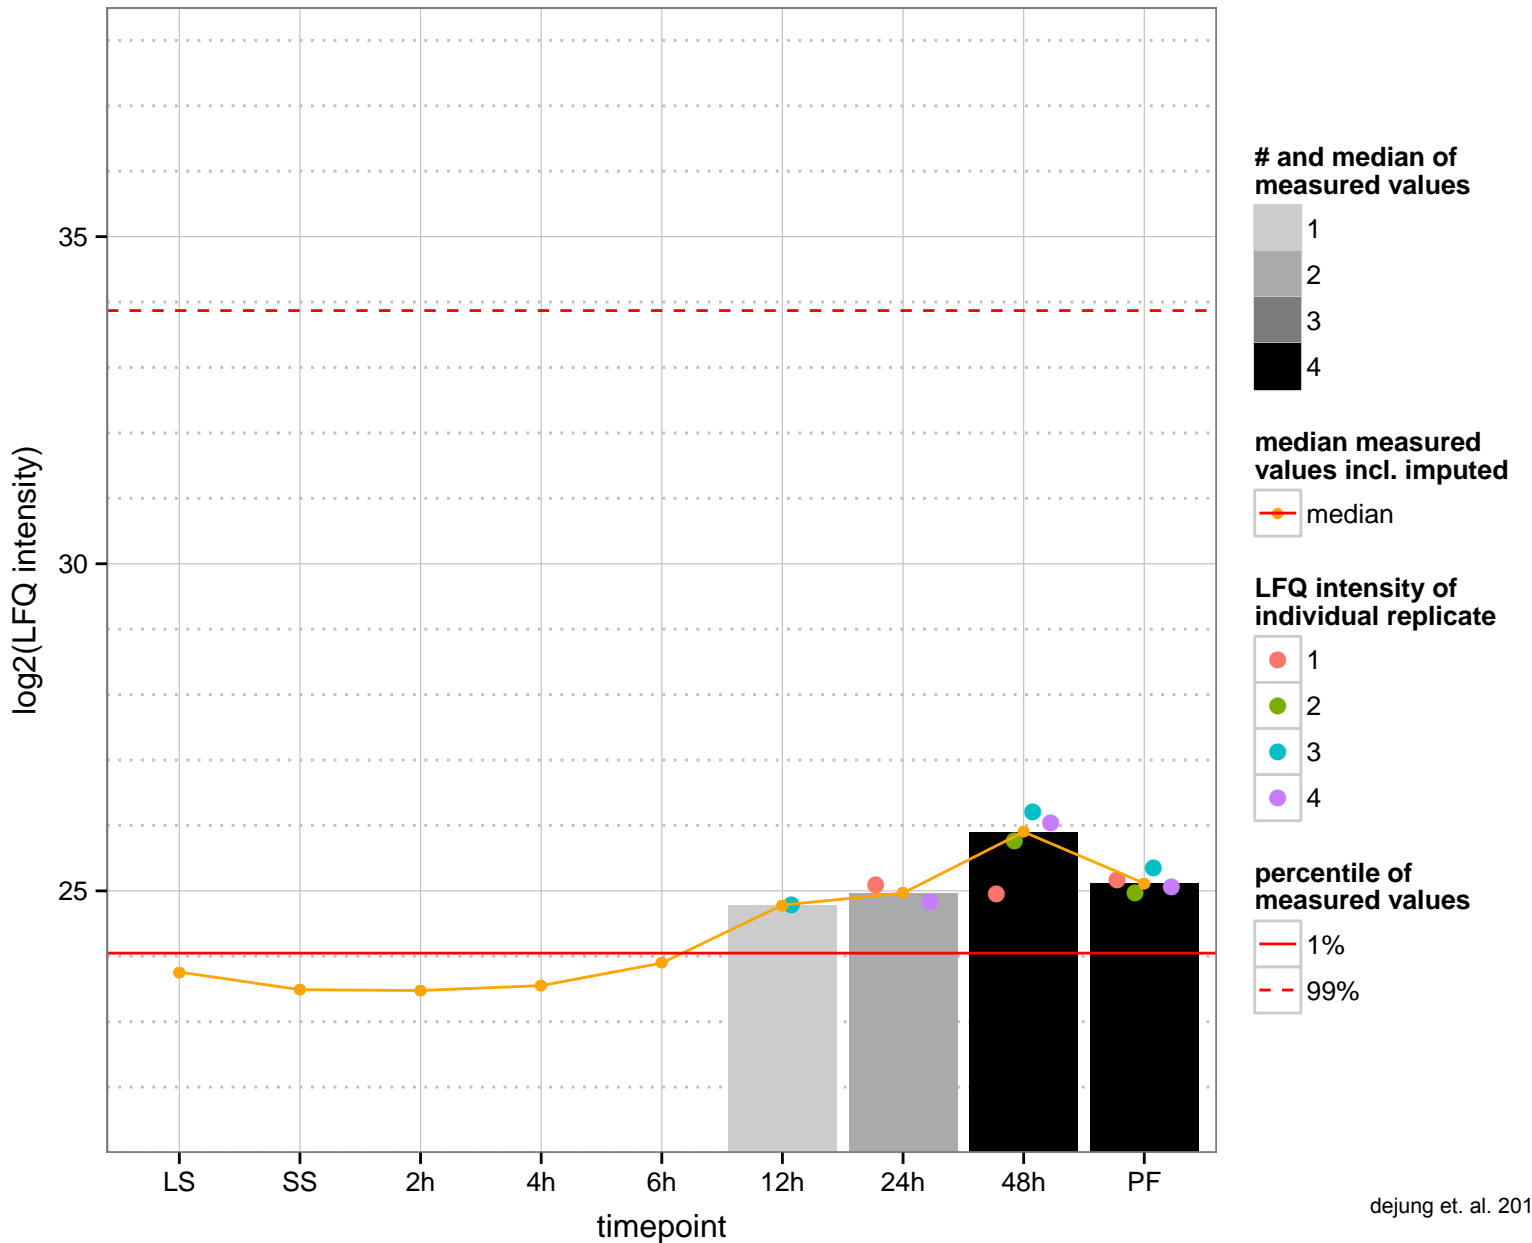



hypothetical protein, conserved  
 Tb927.11.5060  
 AGOF: methyltransferase activity  
 AGOC: mitochondrion  
 AGOP: translation  
 PGOF: methyltransferase activity  
 PGOC: null  
 PGOP: translation

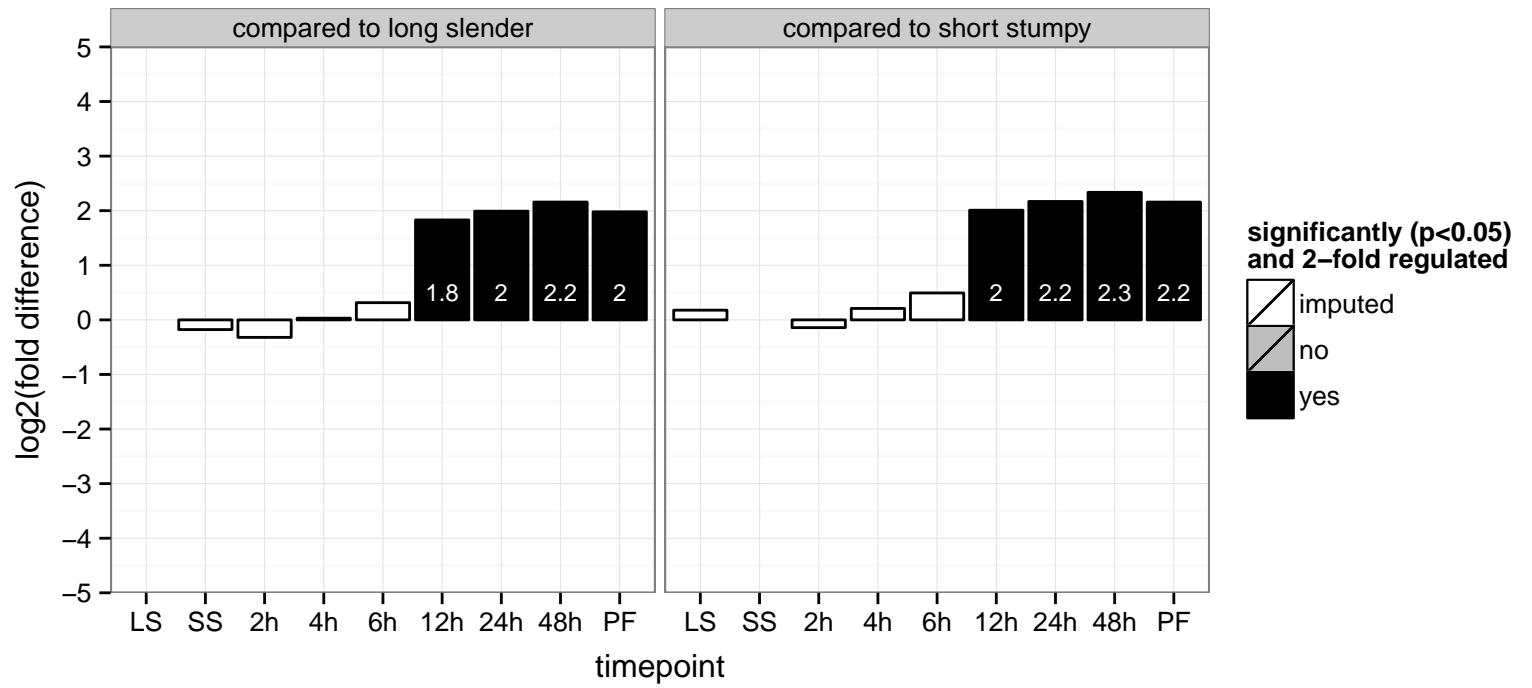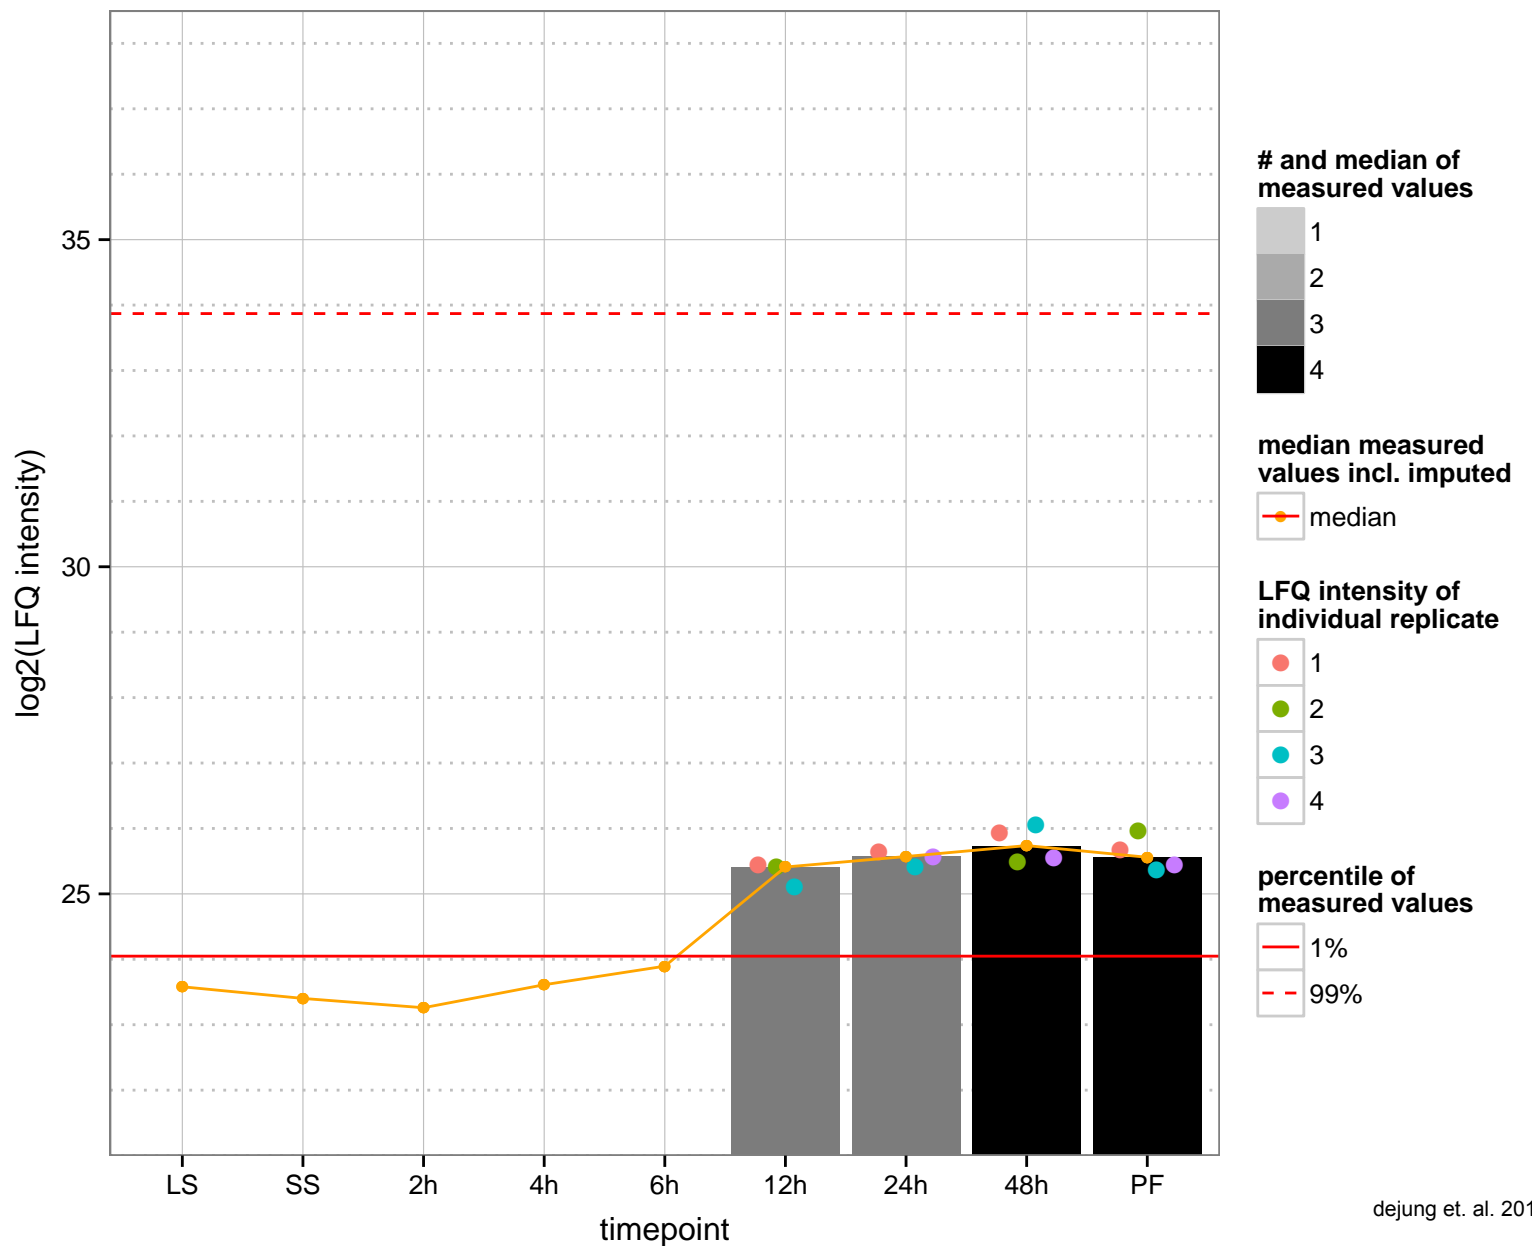

pyruvate phosphate dikinase (PPDK)

Tb927.11.6280

AGOF: ATP binding, kinase activity, pyruvate, phosphate dikinase activity

AGOC: glycosome

AGOP: phosphorylation

PGOF: ATP binding, catalytic activity, kinase activity, pyruvate, phosphate dikinase activity, transferase activity, transferring ph

PGOC: null

PGOP: phosphorylation

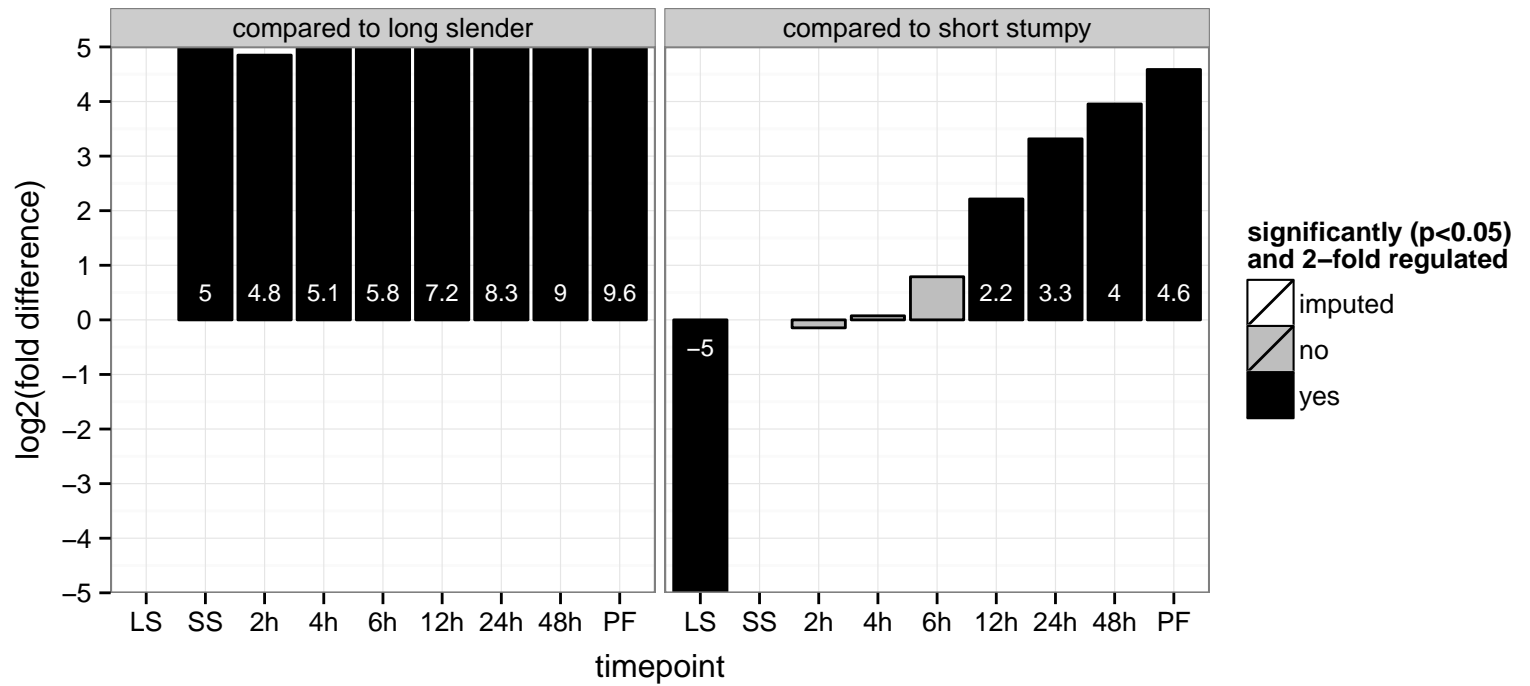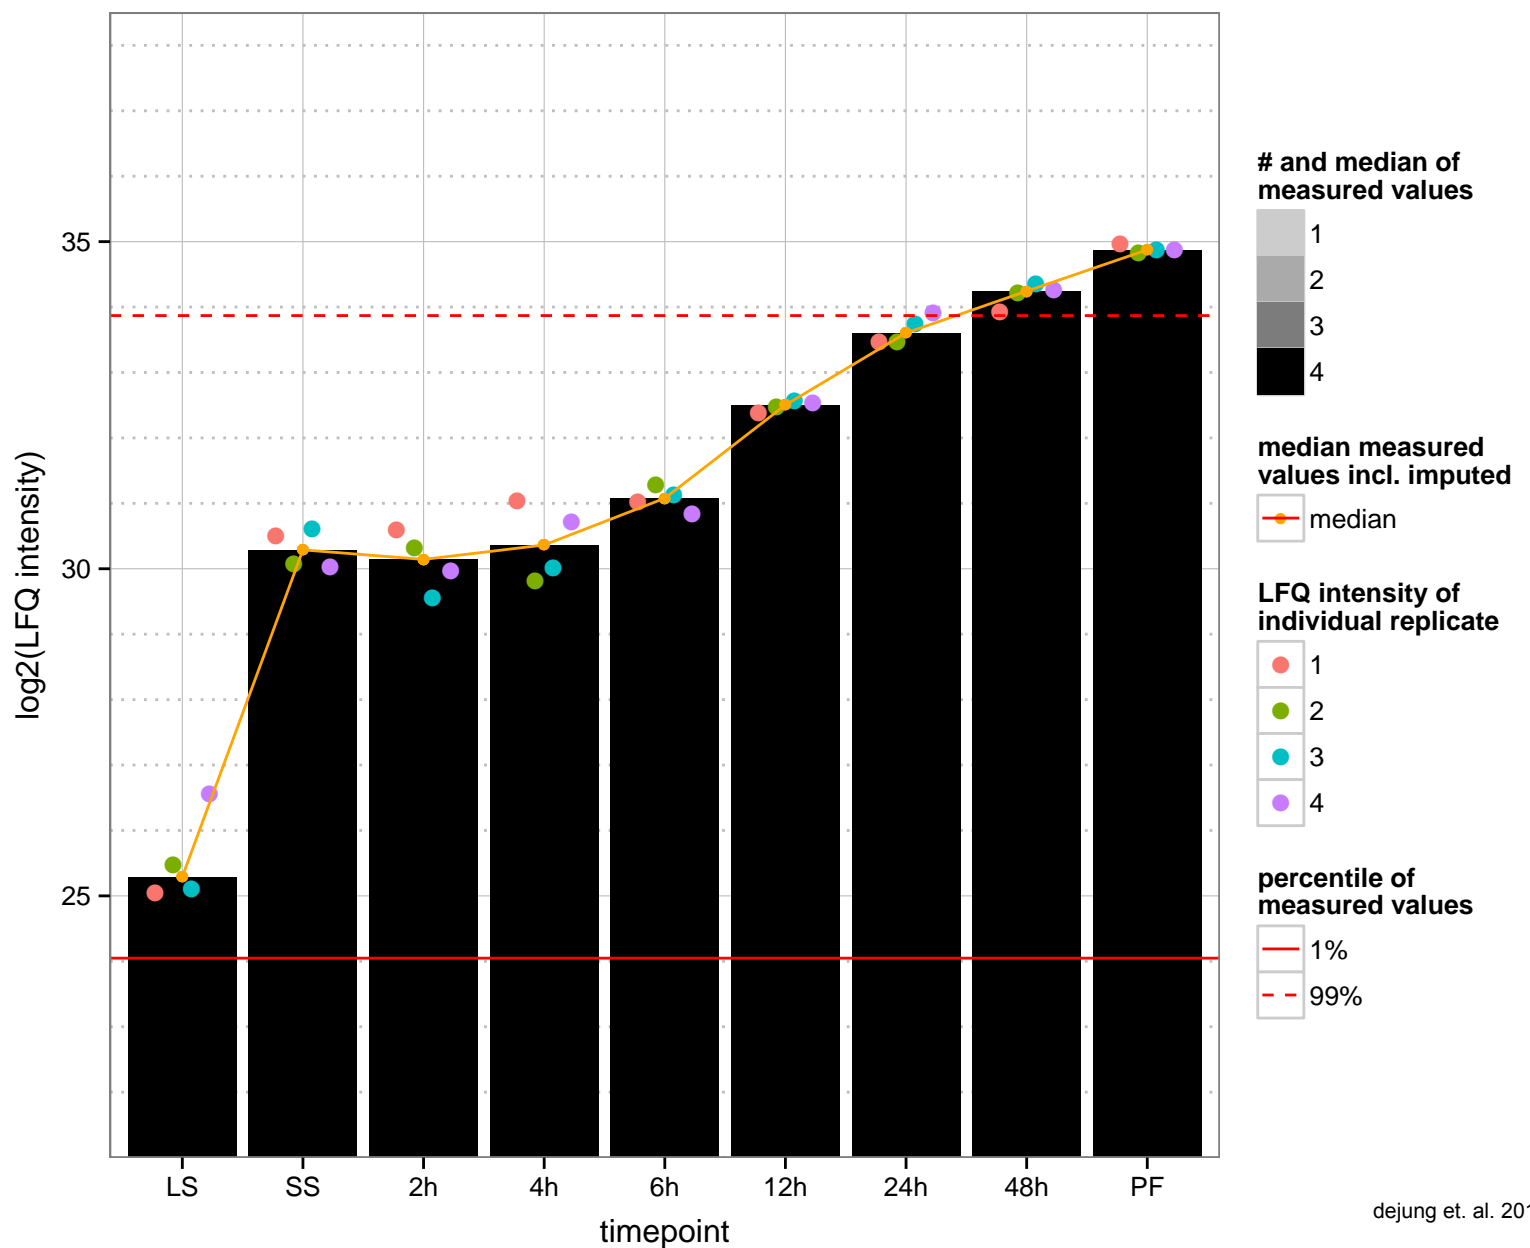

hypothetical protein, conserved  
 Tb927.11.6440  
 AGOF: null  
 AGOC: null  
 AGOP: null  
 PGO: null  
 PGOC: null  
 PGOP: null

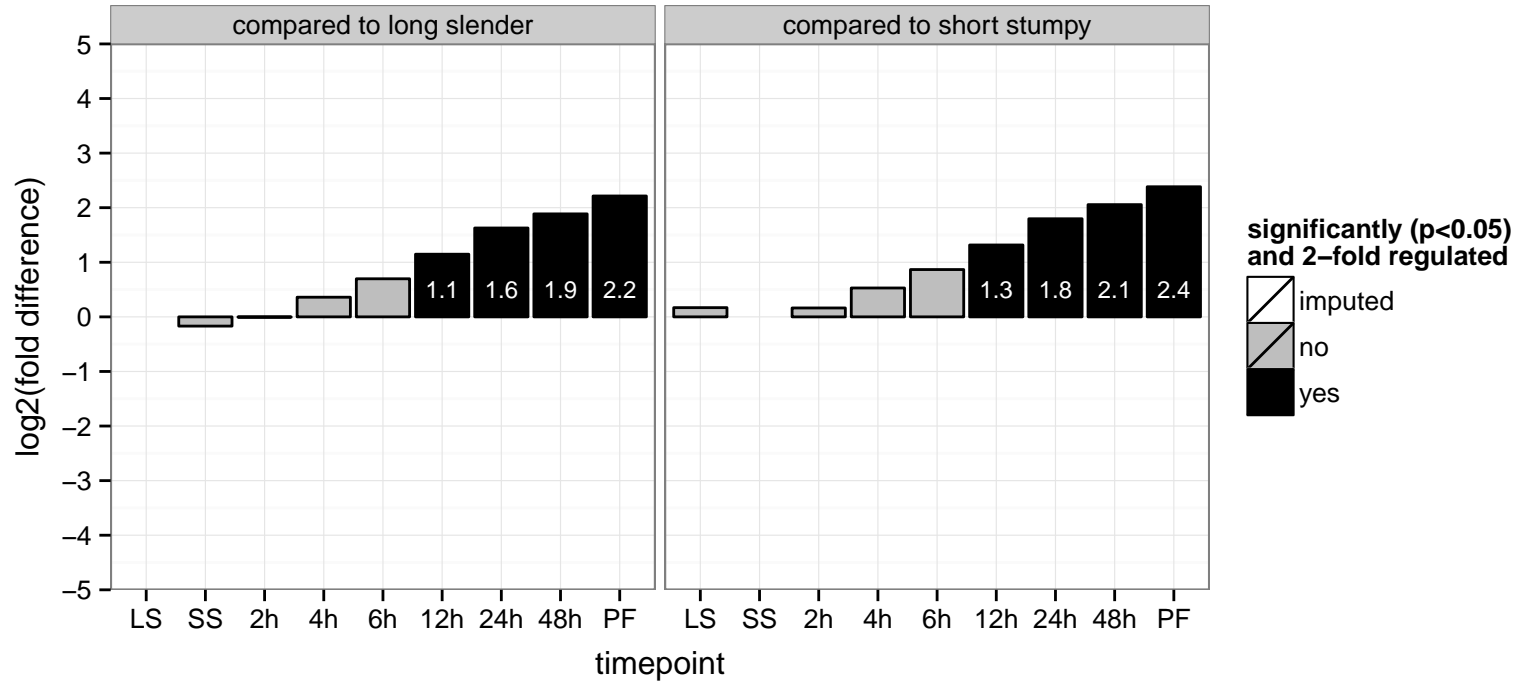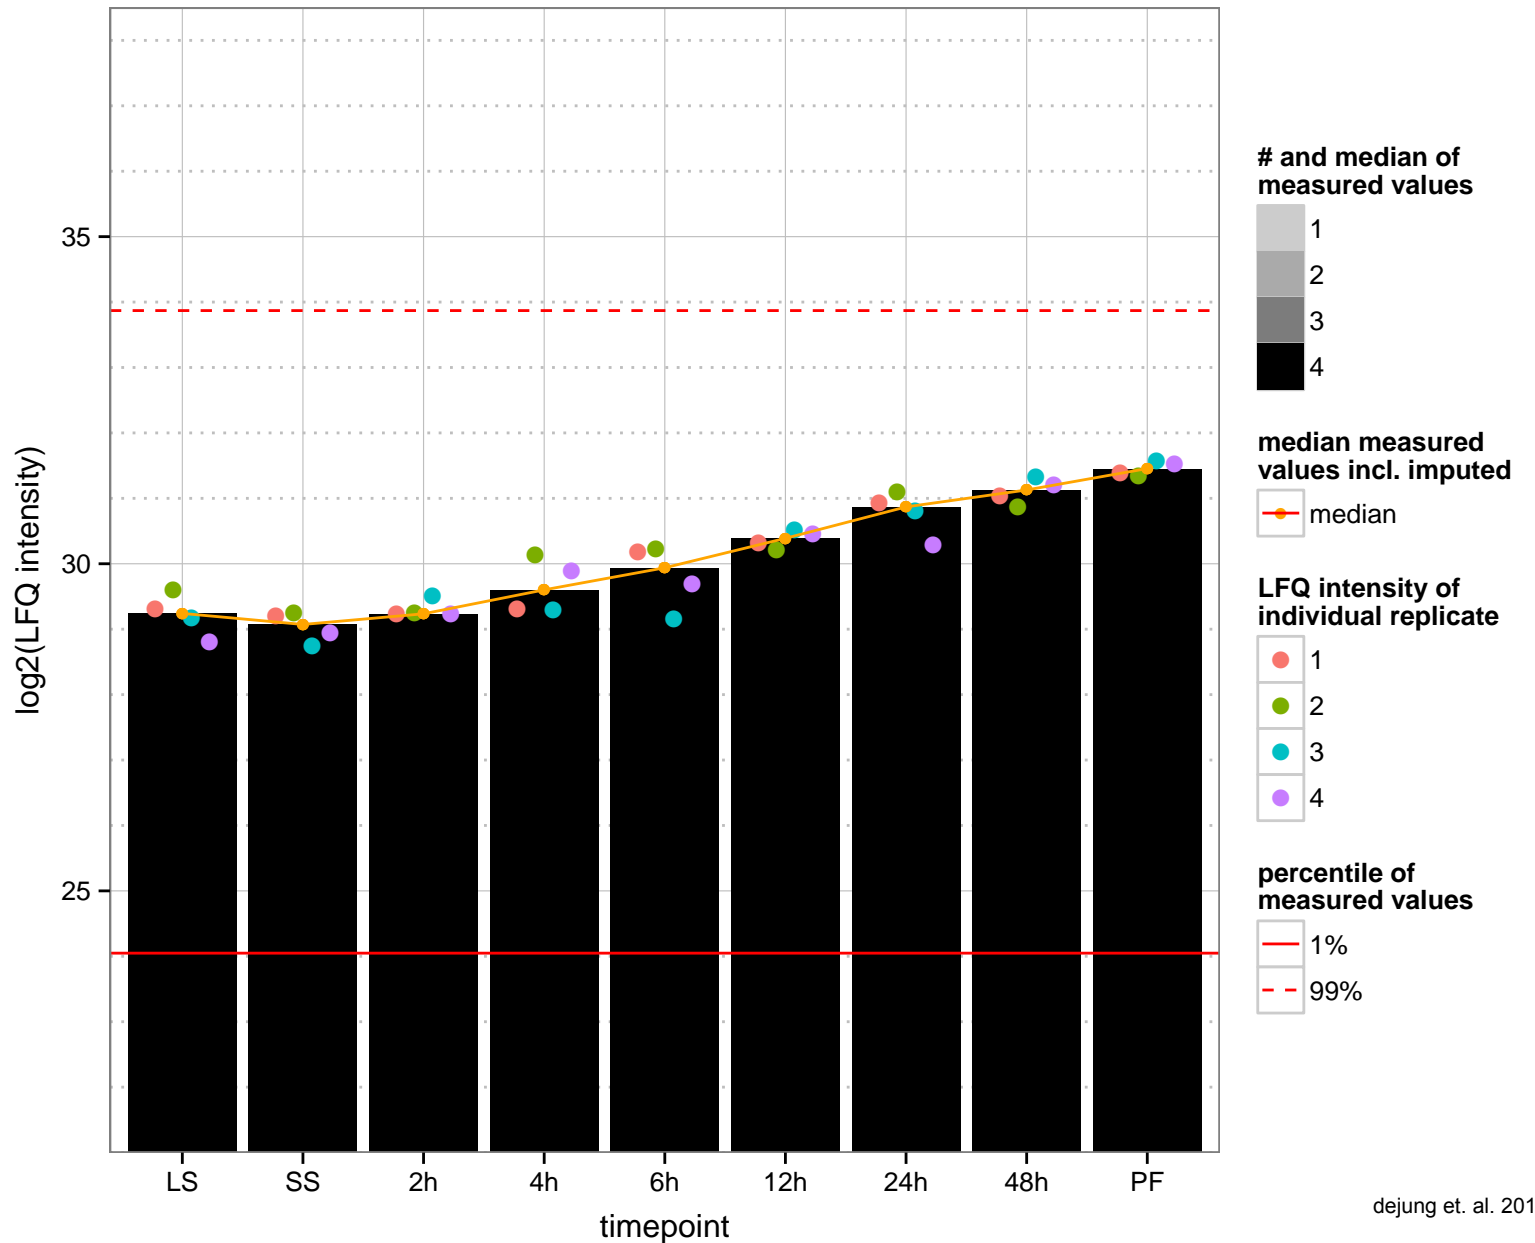

mRNA cap guanine–N7 methyltransferase, putative  
 Tb927.11.6720  
 AGOF: mRNA (guanine–N7–)–methyltransferase activity, protein binding  
 AGOC: eukaryotic translation initiation factor 4F complex  
 AGOP: null  
 PGO: null  
 PGO: null  
 PGO: null  
 PGO: 7–methylguanosine mRNA capping

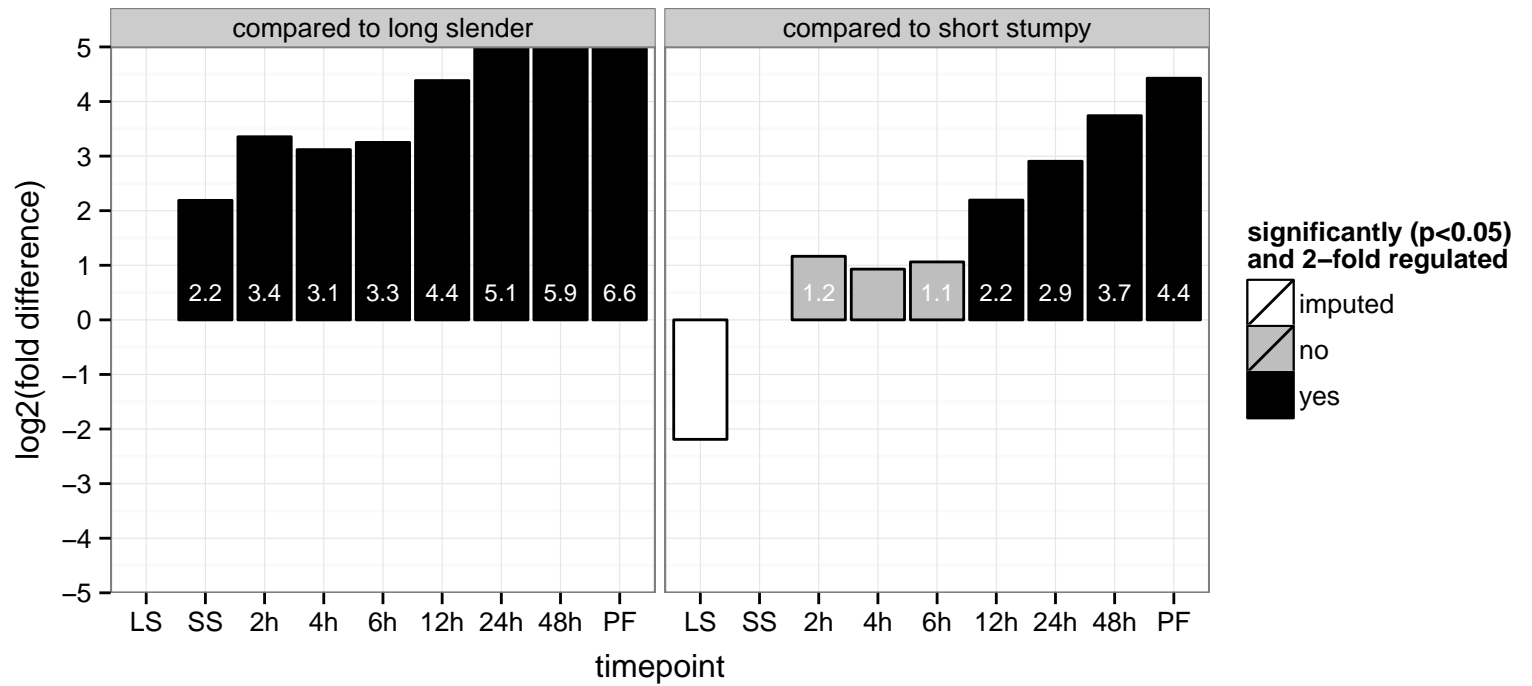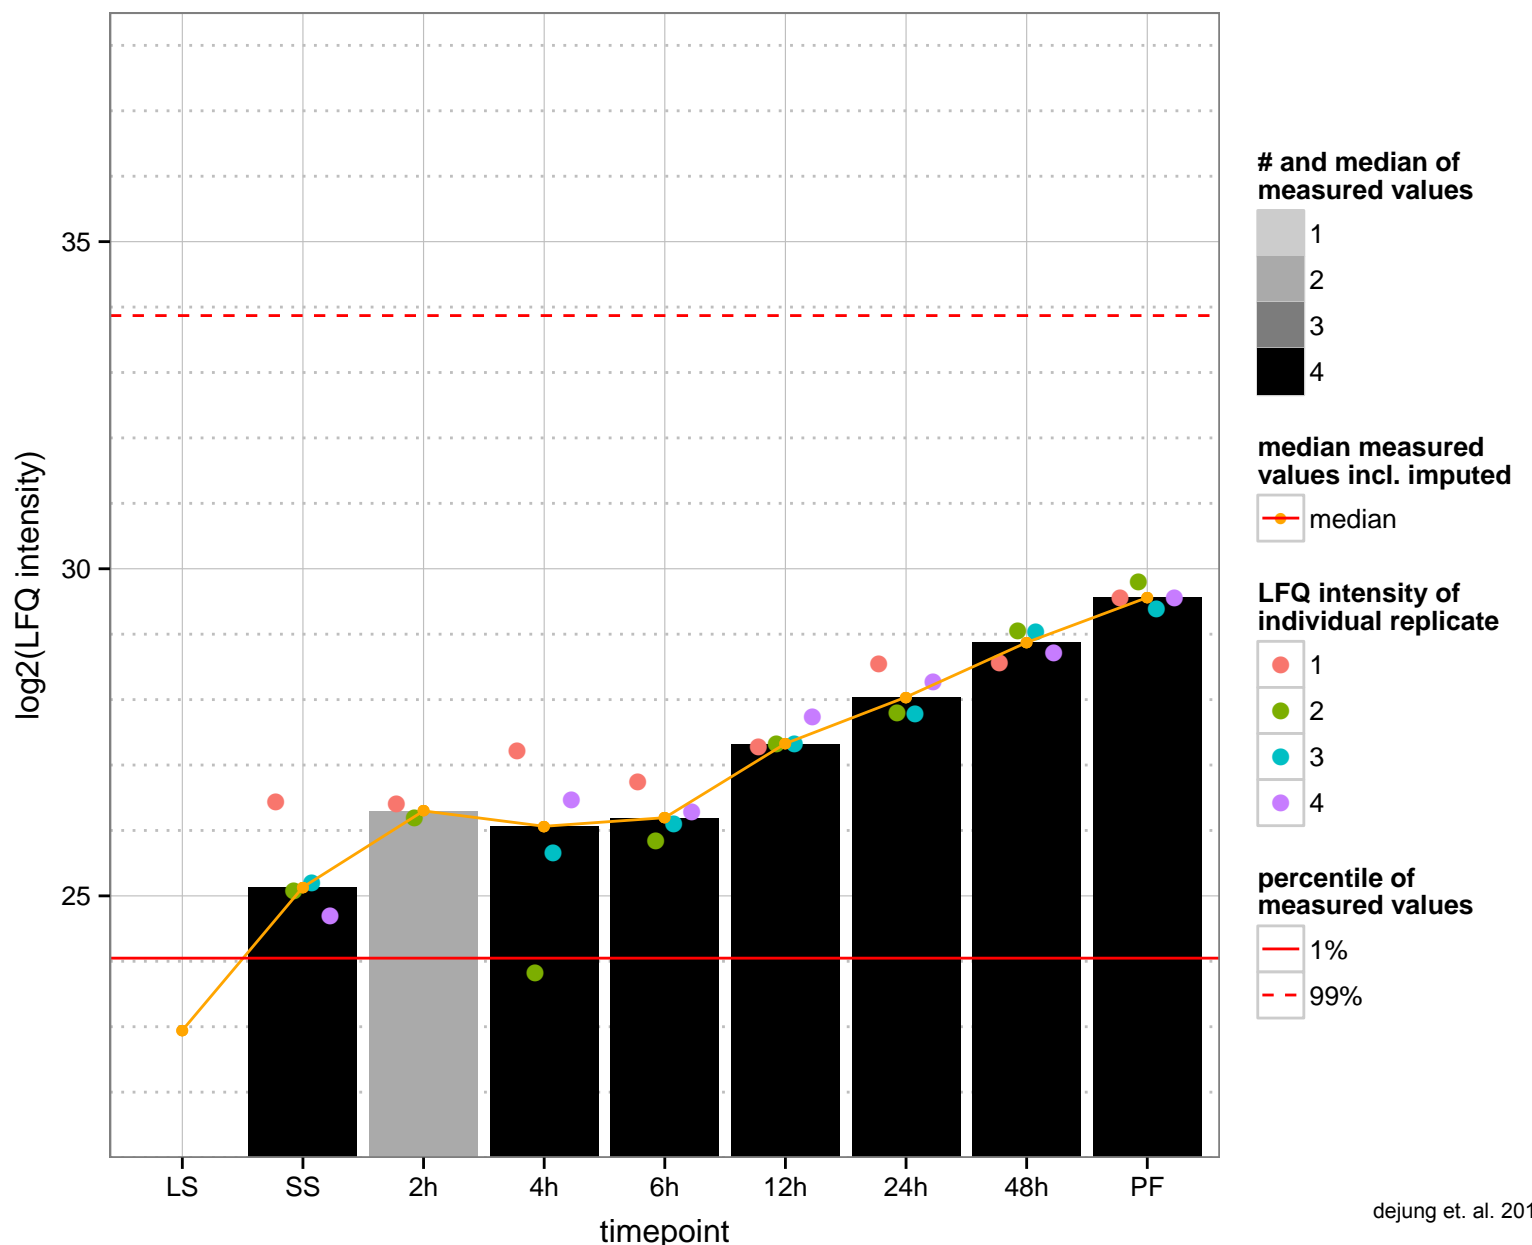

hypothetical protein, conserved  
 Tb927.11.6850  
 AGOF: null  
 AGOC: null  
 AGOP: null  
 PGOF: null  
 PGO: null  
 PGOP: null

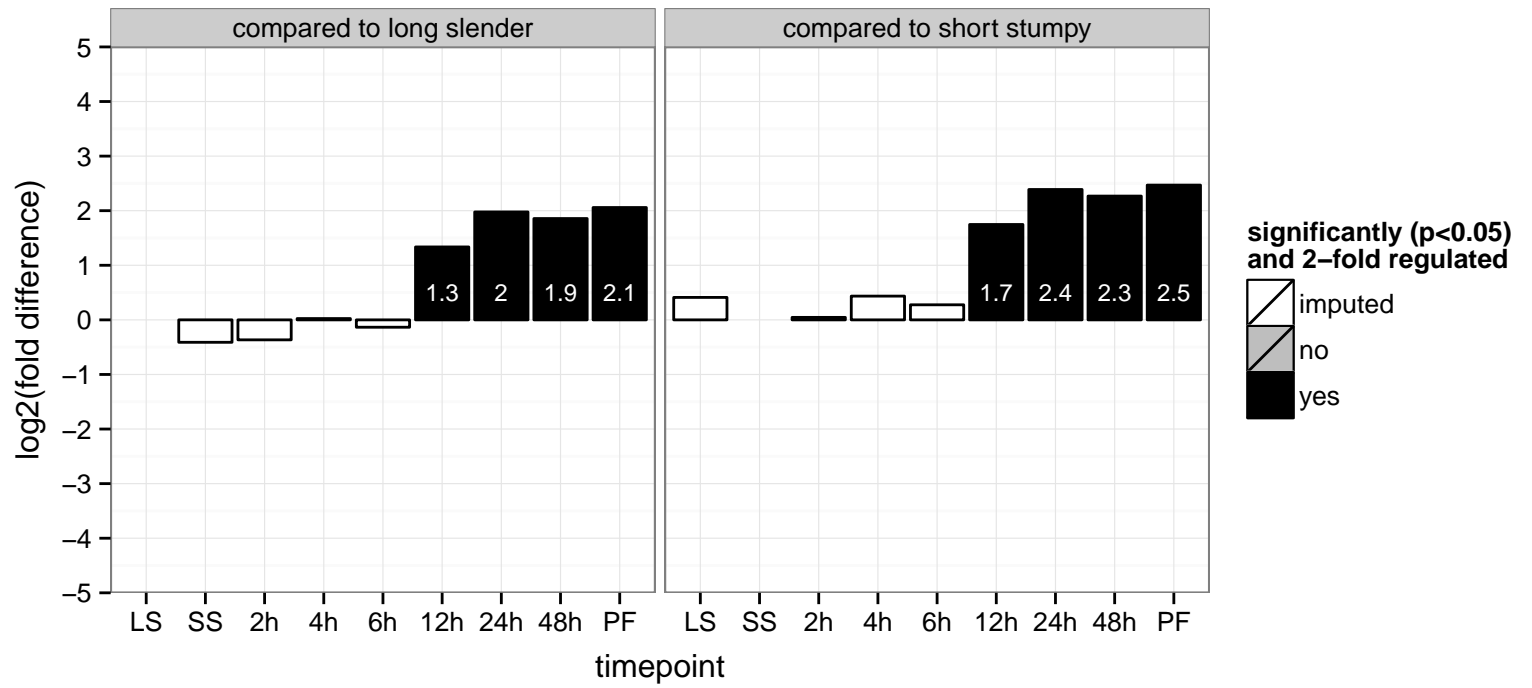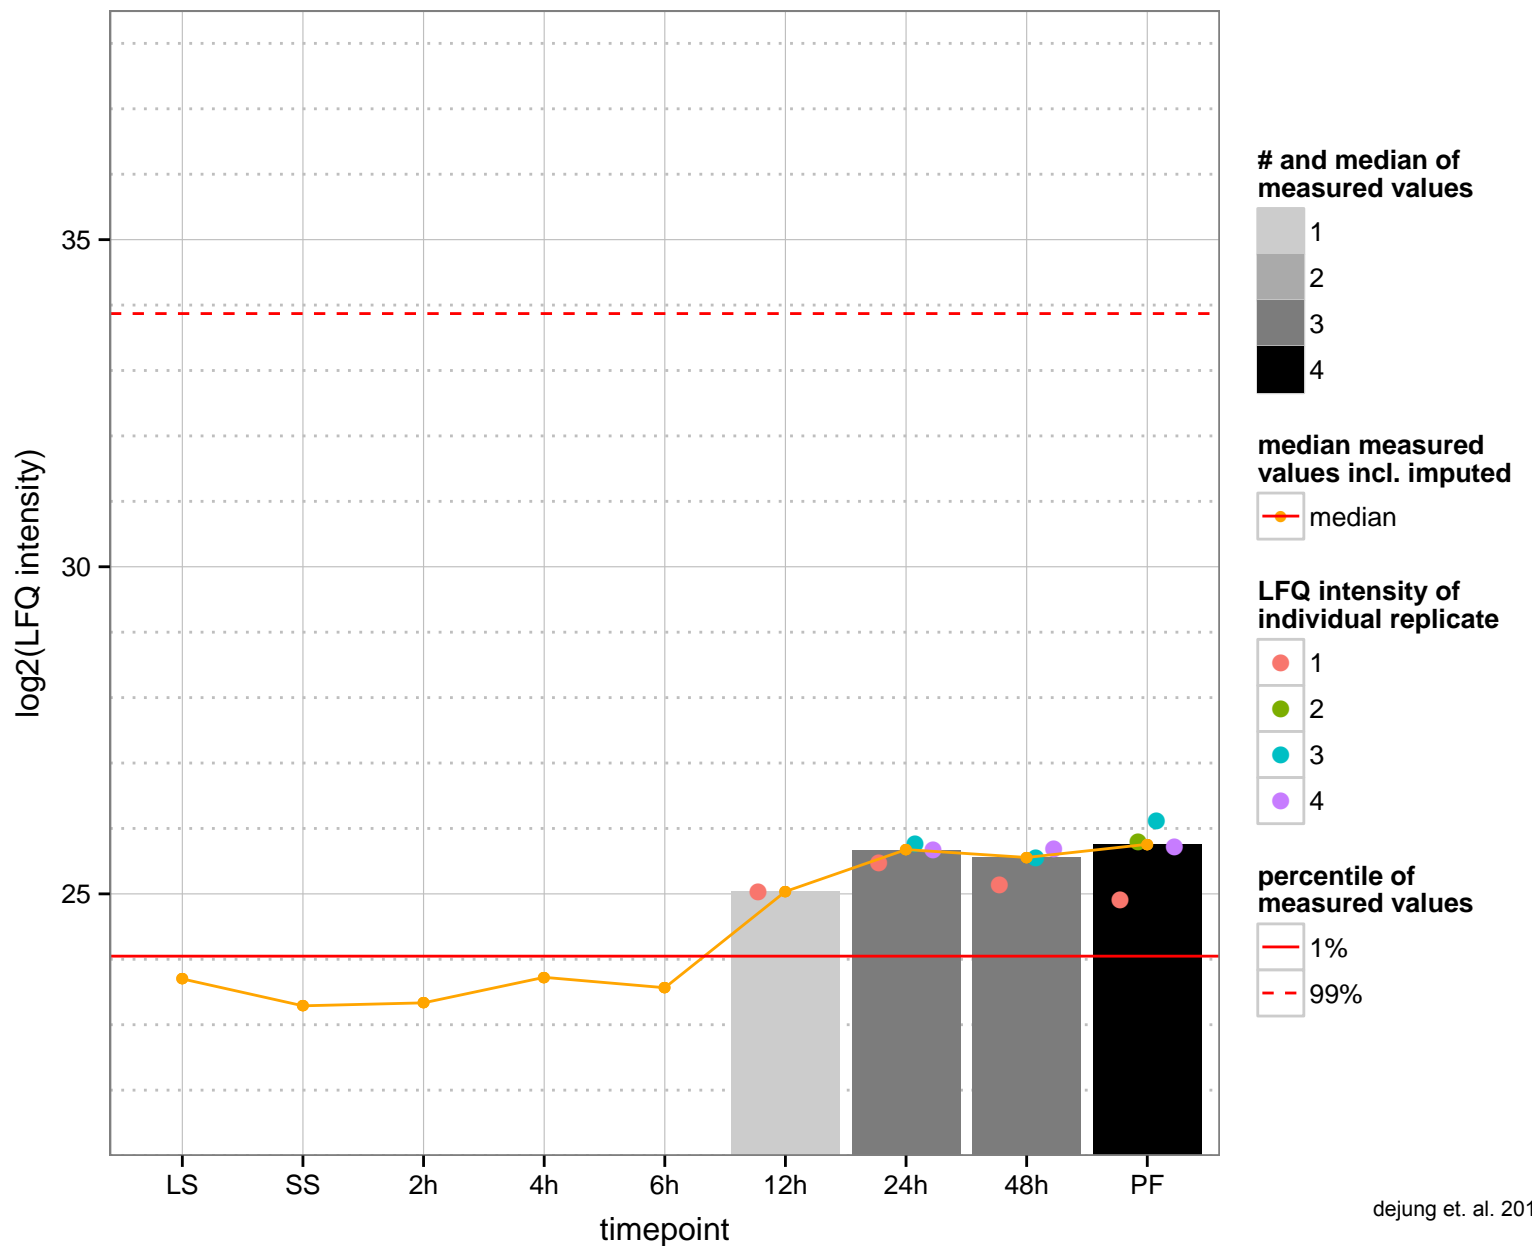

hypothetical protein, conserved  
 Tb927.11.7520  
 AGOF: null  
 AGOC: null  
 AGOP: null  
 PGO: null  
 PGOC: null  
 PGOP: null

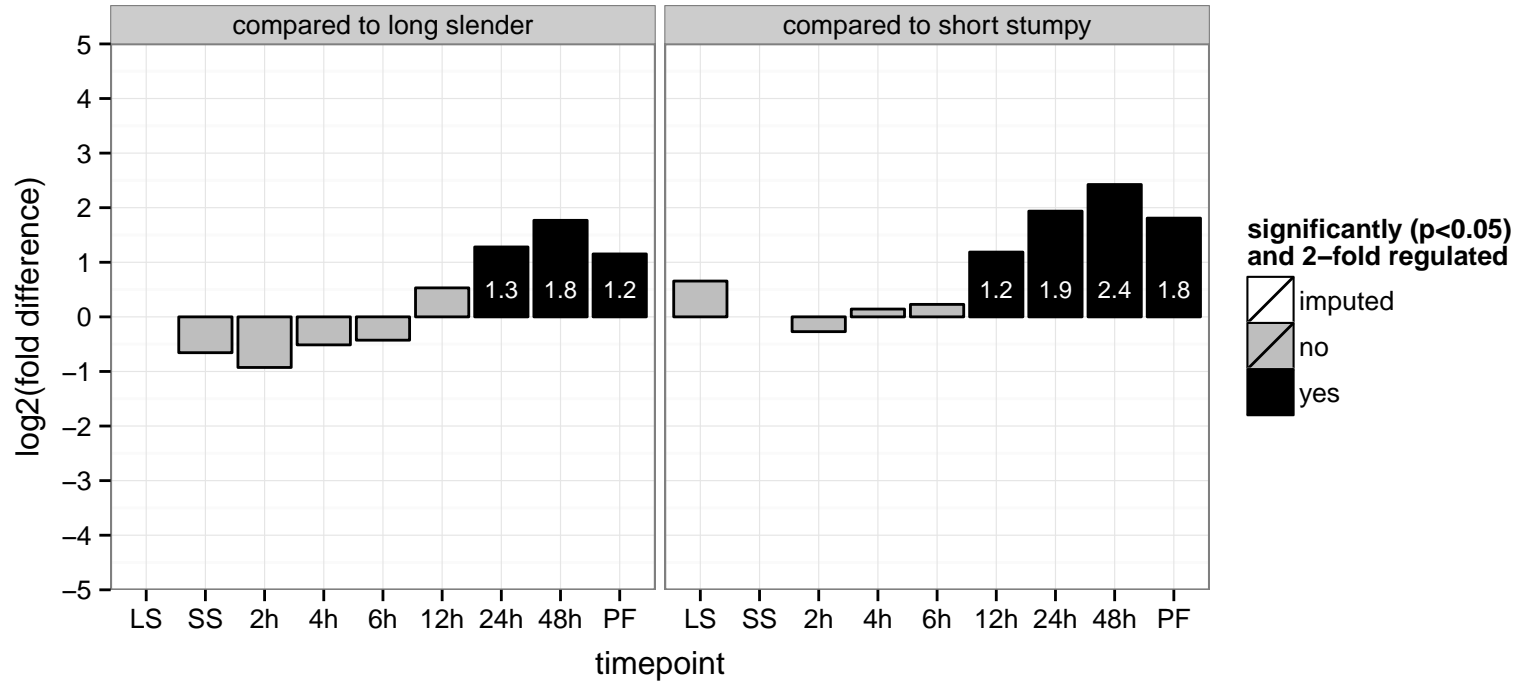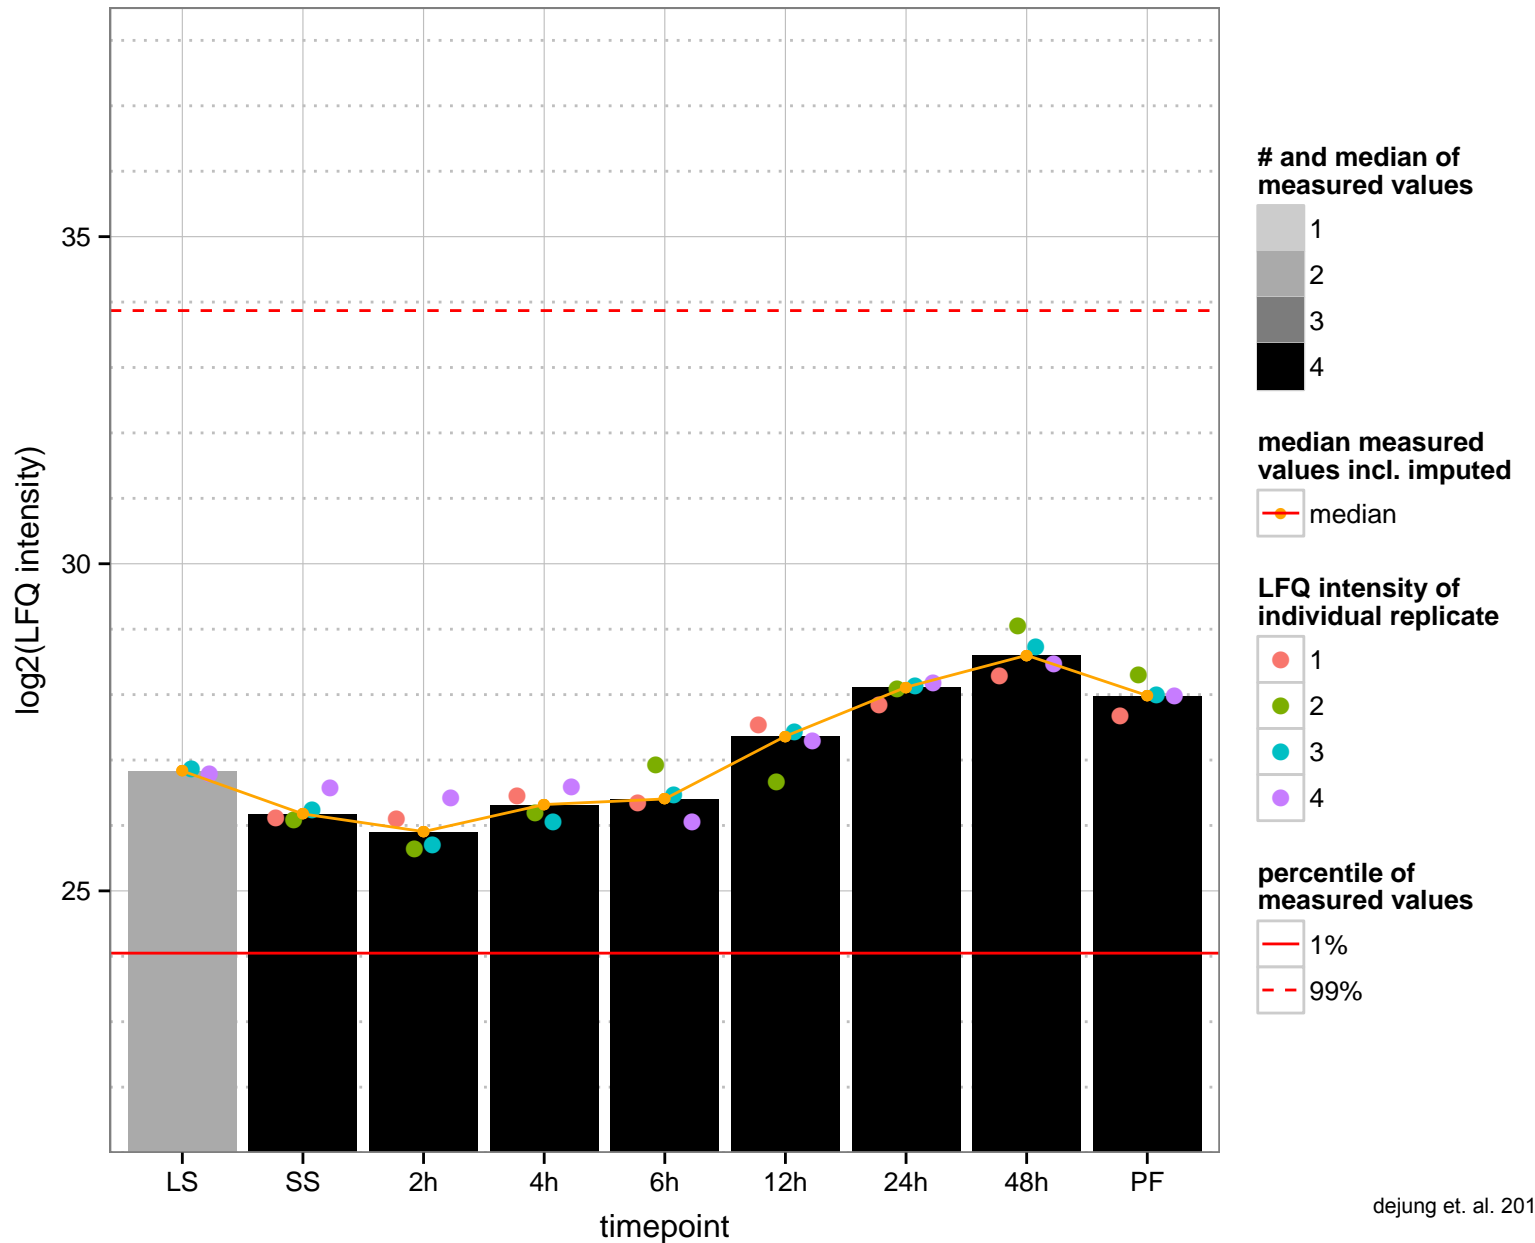

electron-transfer-flavoprotein, alpha polypeptide, putative  
 Tb927.11.7540  
 AGOF: electron carrier activity, flavin adenine dinucleotide binding  
 AGOC: mitochondrion  
 AGOP: oxidation-reduction process  
 PGOF: electron carrier activity, flavin adenine dinucleotide binding  
 PGO: null  
 PGOP: null

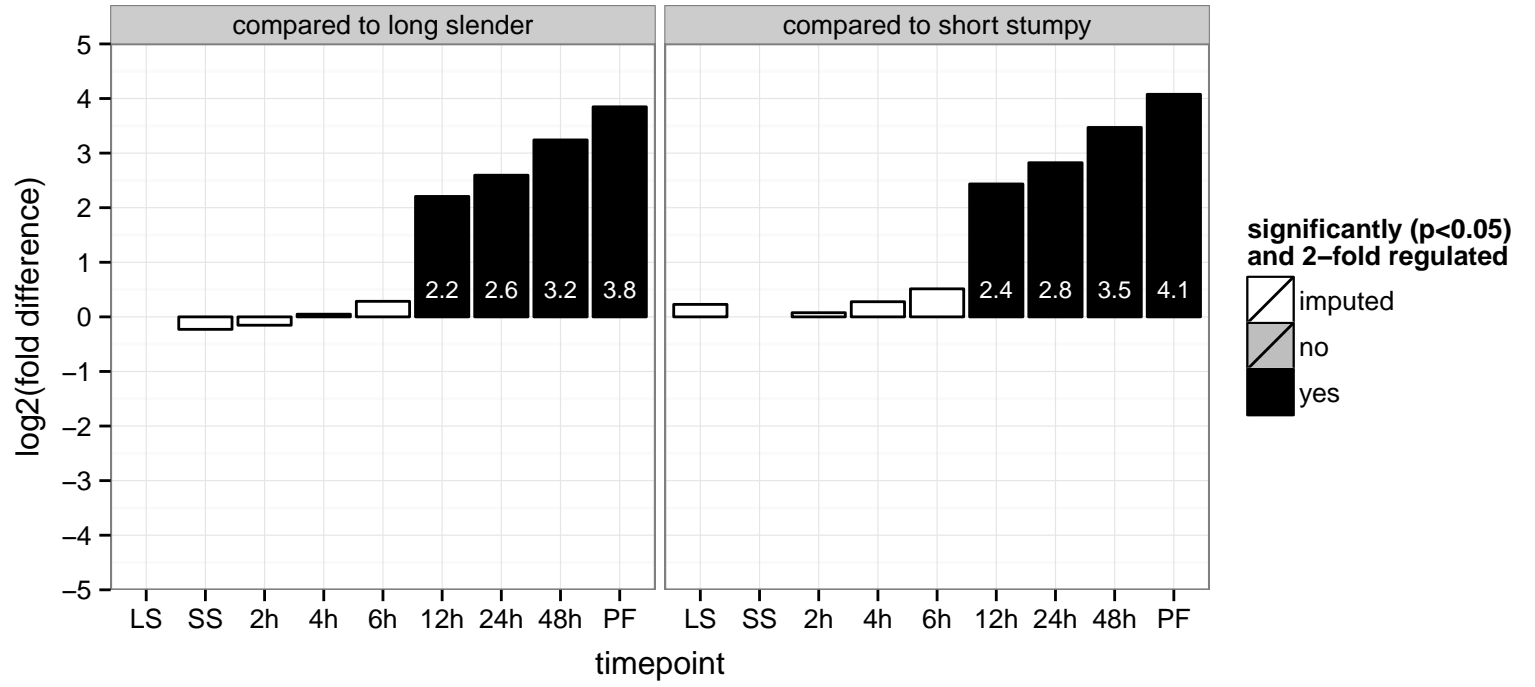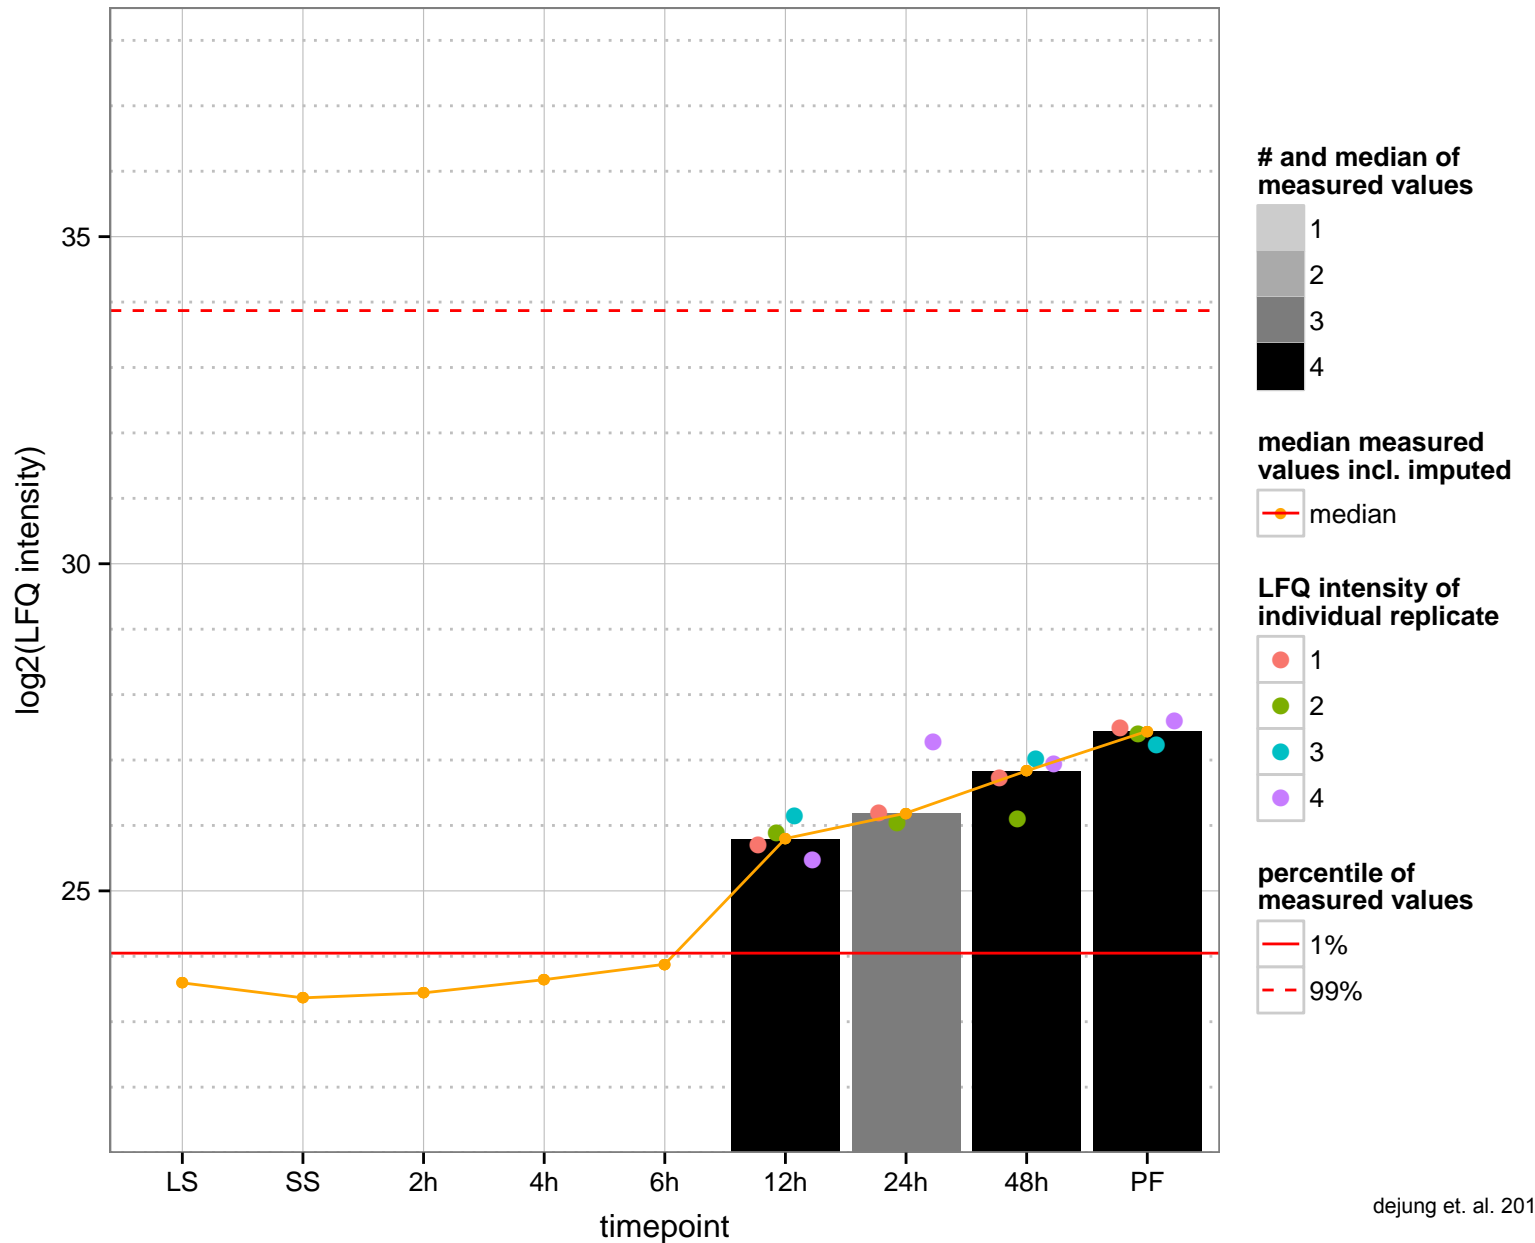

hypothetical protein, conserved  
 Tb927.11.7600  
 AGOF: null  
 AGOC: null  
 AGOP: null  
 PGOF: null  
 PGOE: null  
 PGOP: null

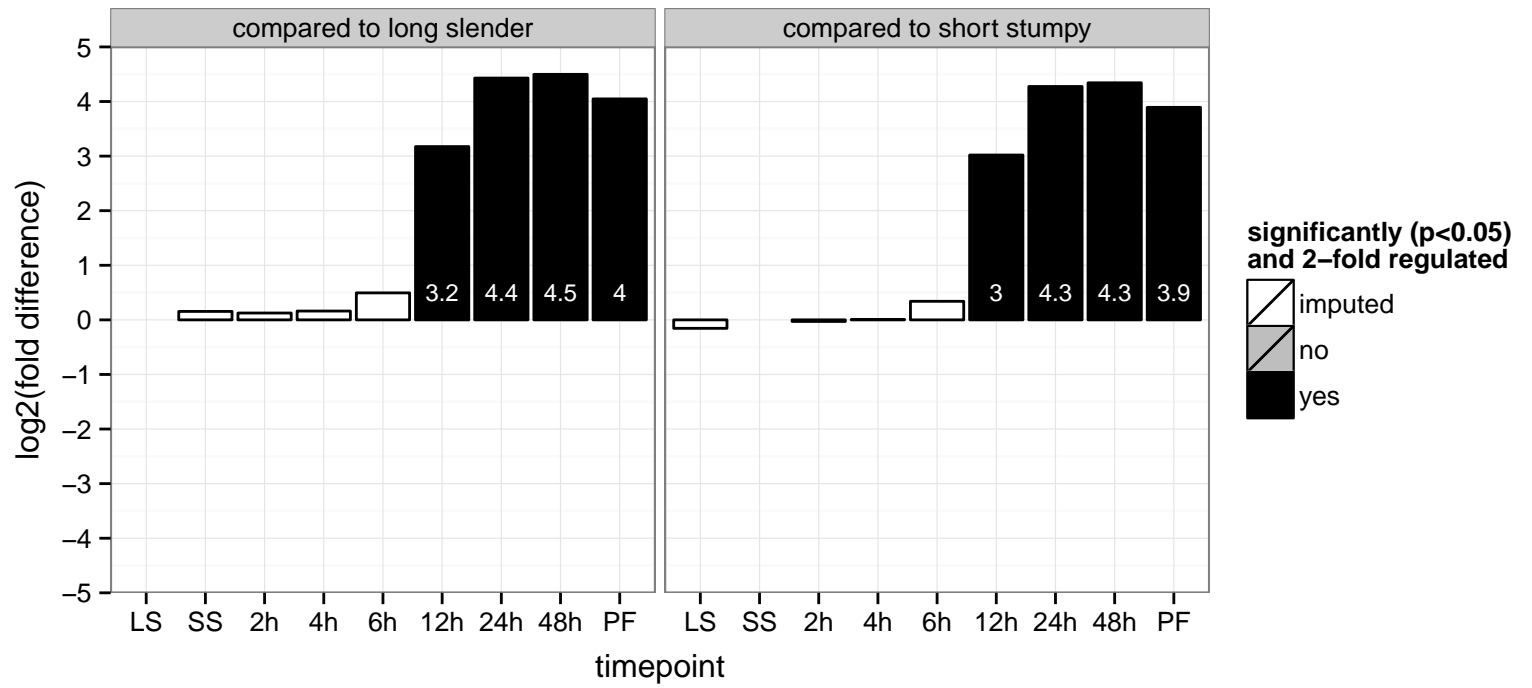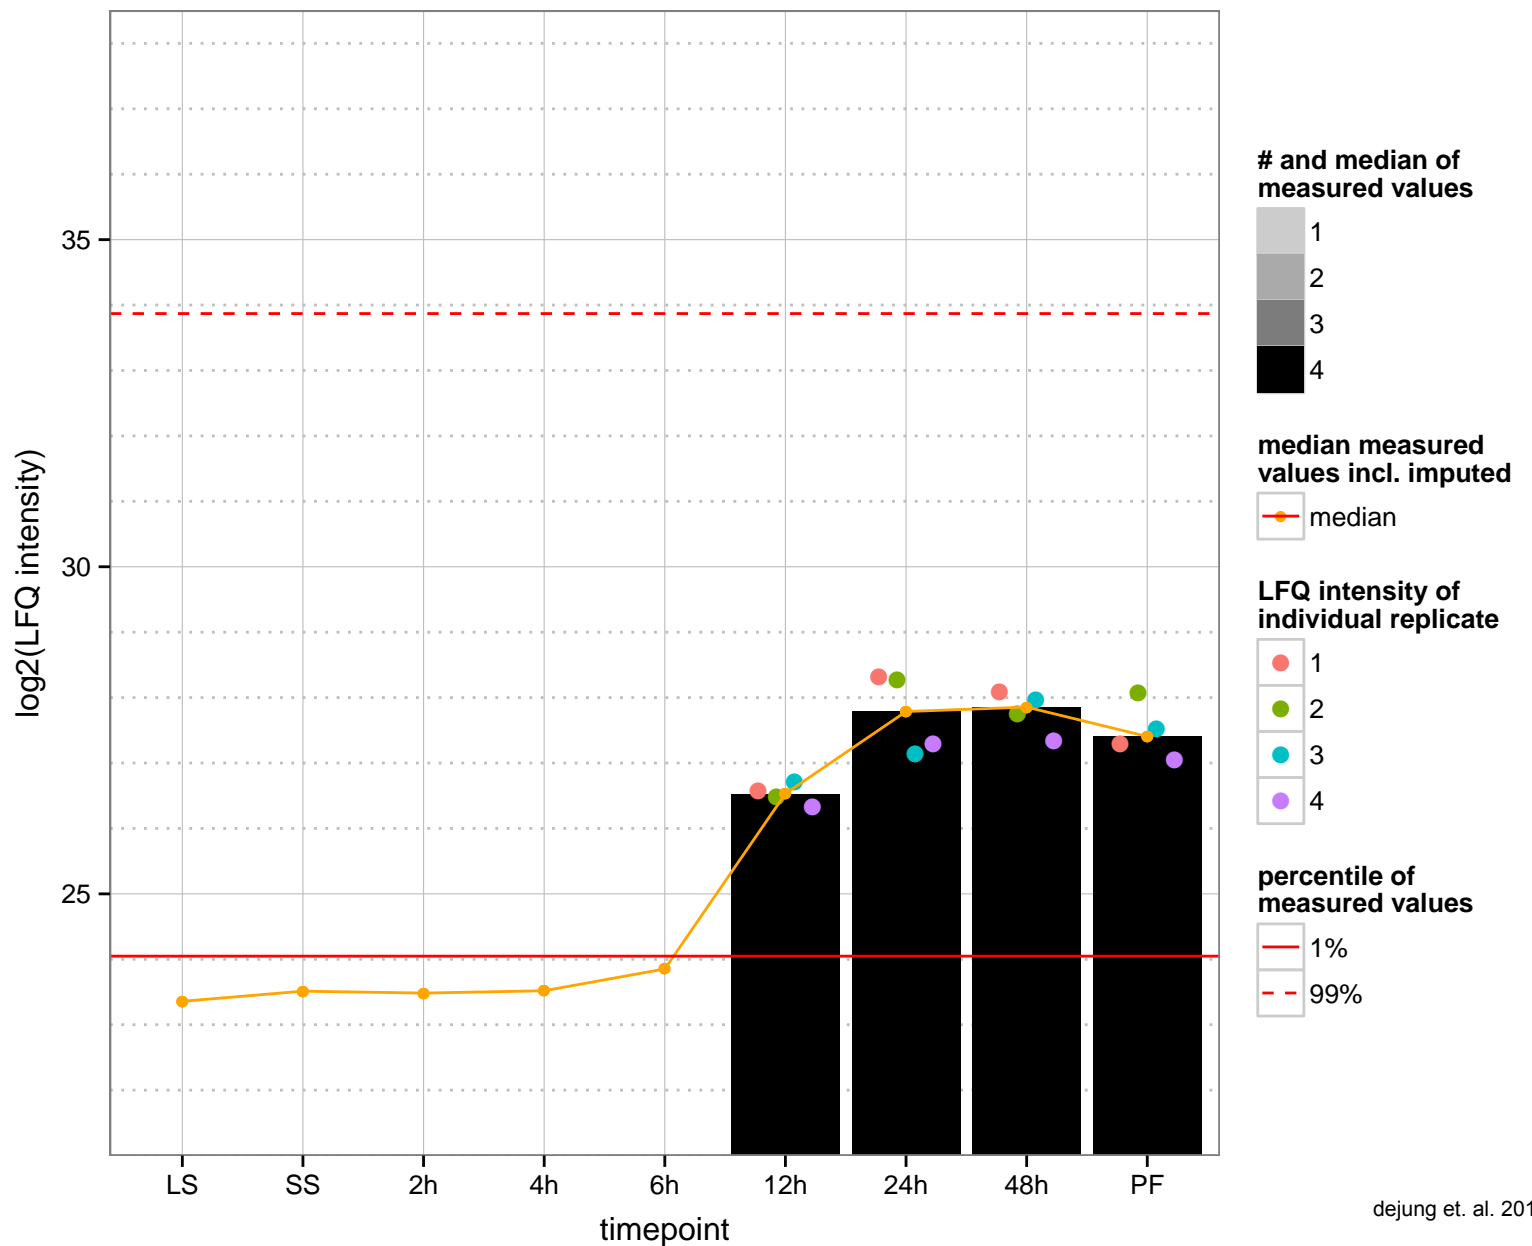



DIS3-like exonuclease, putative  
 Tb927.11.8290  
 AGOF: null, RNA binding, ribonuclease activity  
 AGOC: null  
 AGOP: null  
 PGO: RNA binding, ribonuclease activity  
 PGOC: null  
 PGOP: null

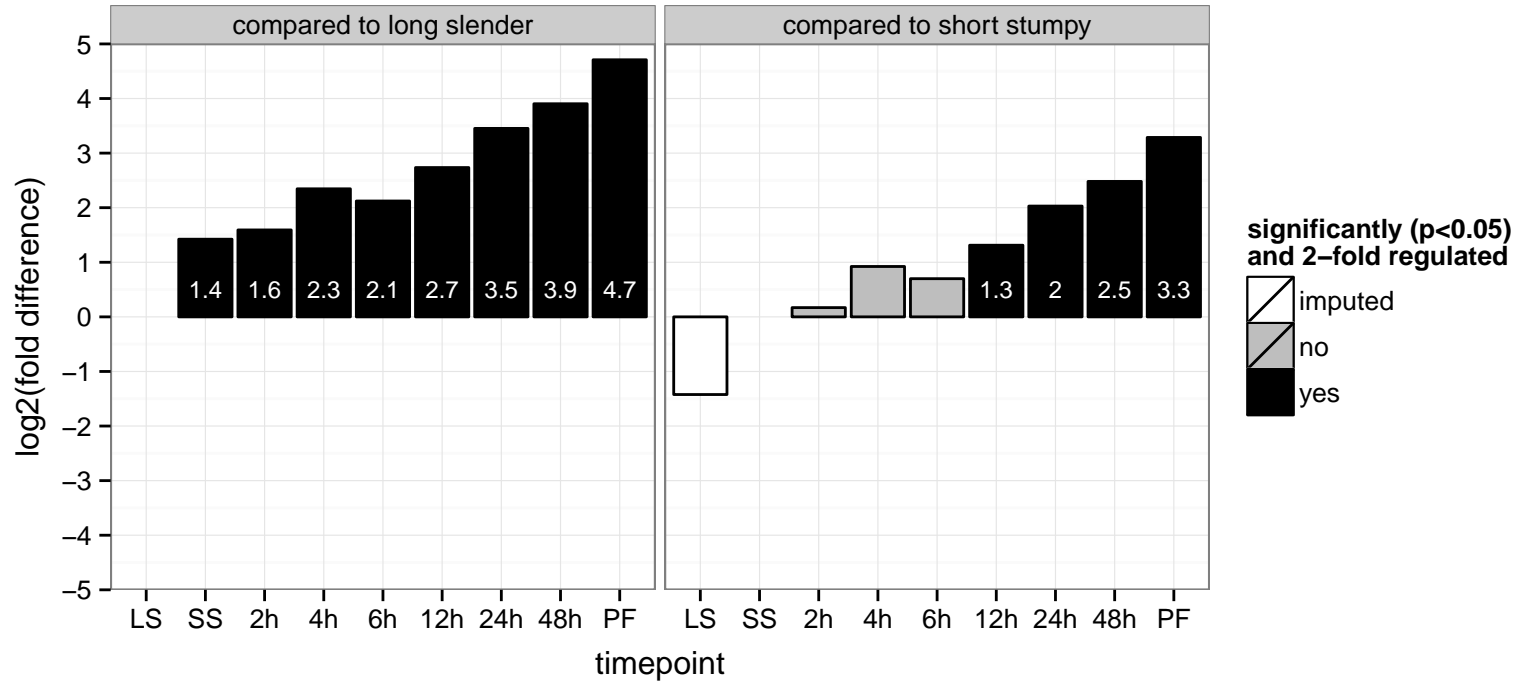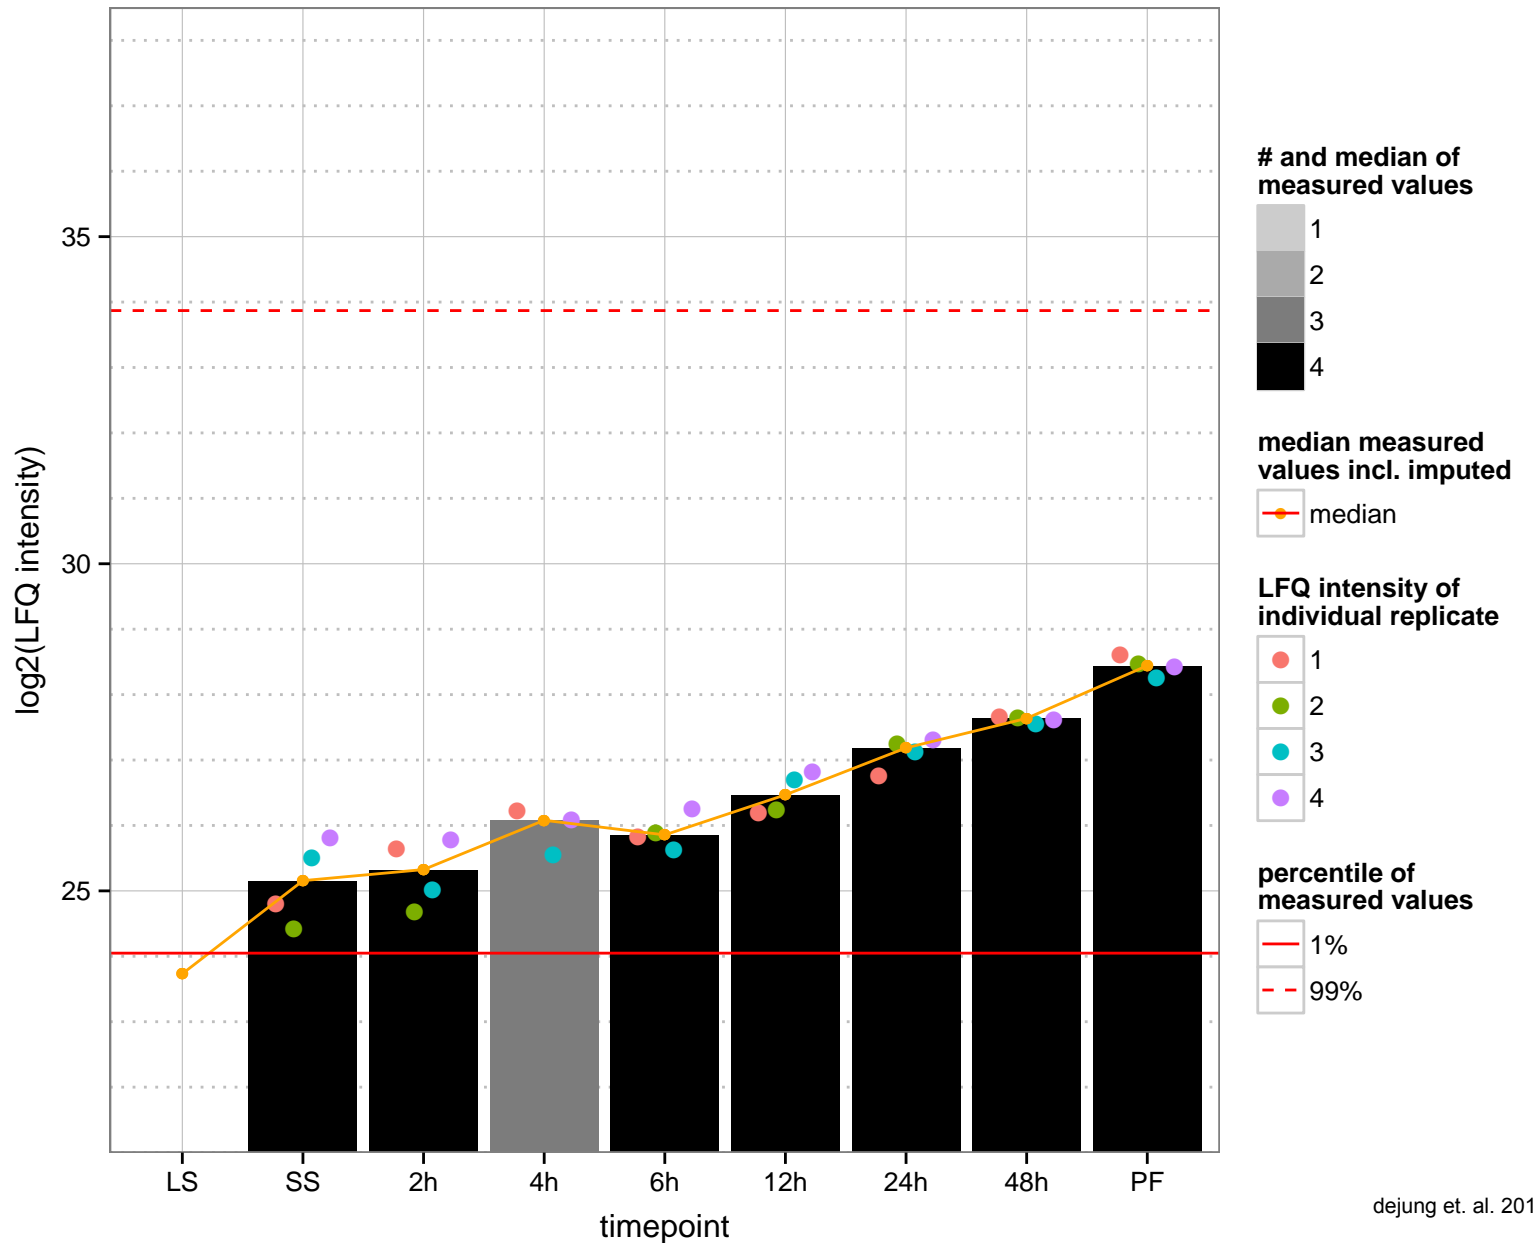

mitochondrial DEAD box protein, KREH1 (KREH1)

Tb927.11.8870

AGOF: ATP binding, ATP-dependent helicase activity, helicase activity, nucleic acid binding

AGOC: mitochondrion

AGOP: nucleobase-containing compound metabolic process

PGOF: ATP binding, ATP-dependent helicase activity, helicase activity, nucleic acid binding

PGOC: null

PGOP: null

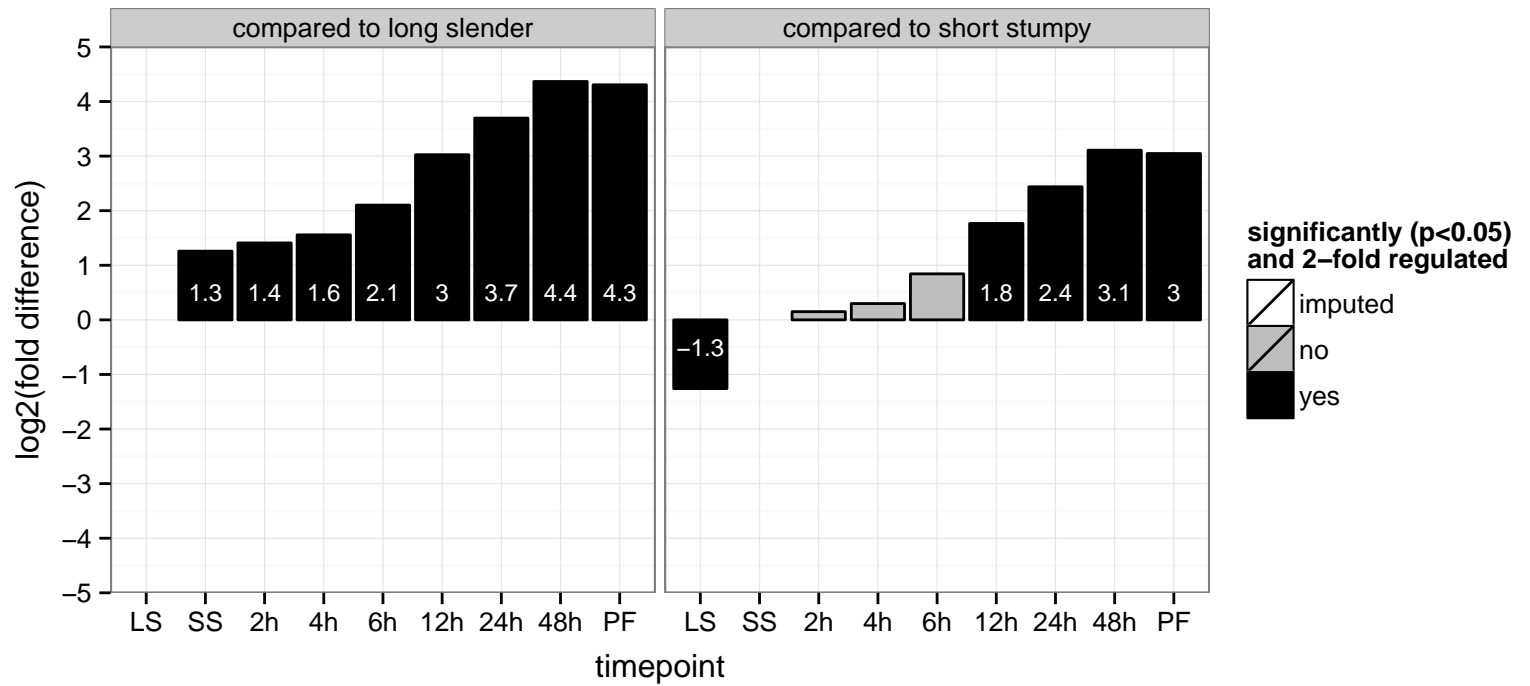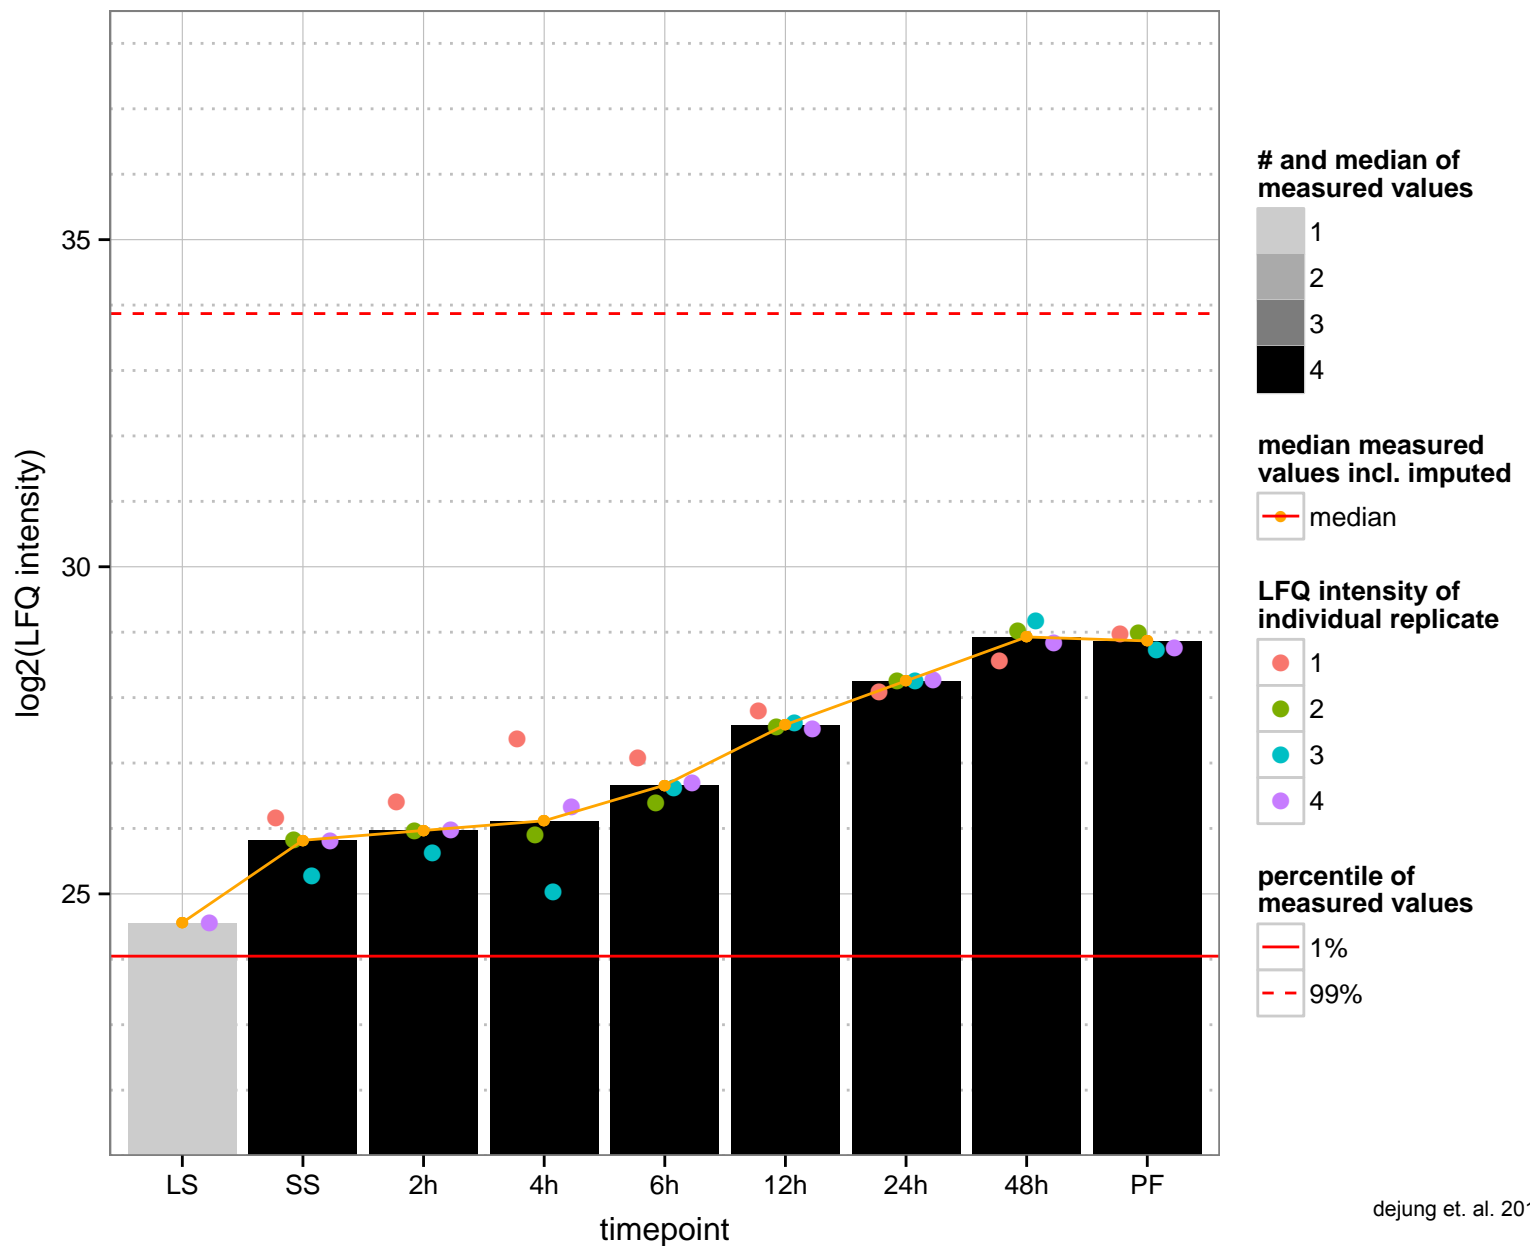

conserved protein  
 Tb927.11.9040  
 AGOF: DNA binding  
 AGOC: null  
 AGOP: null  
 PGOF: DNA binding  
 PGO: null  
 PGOP: null

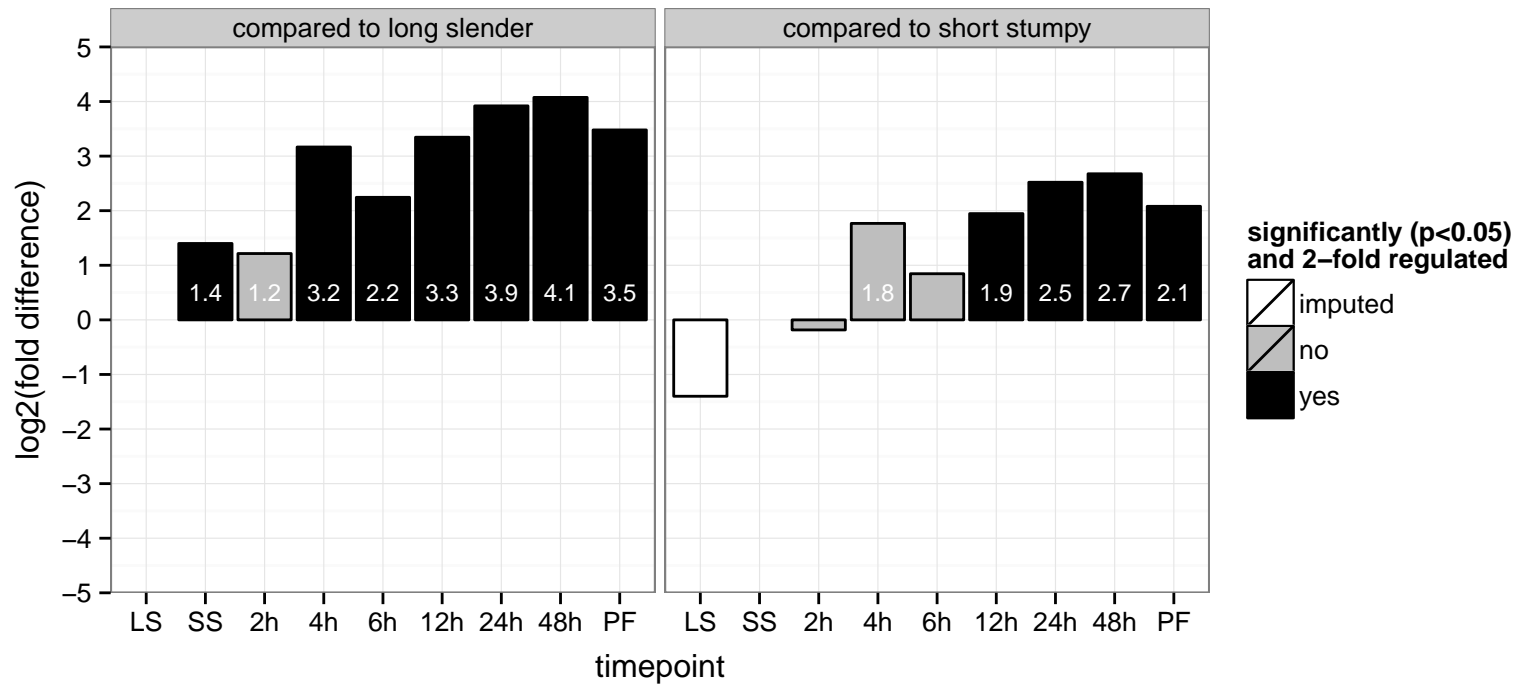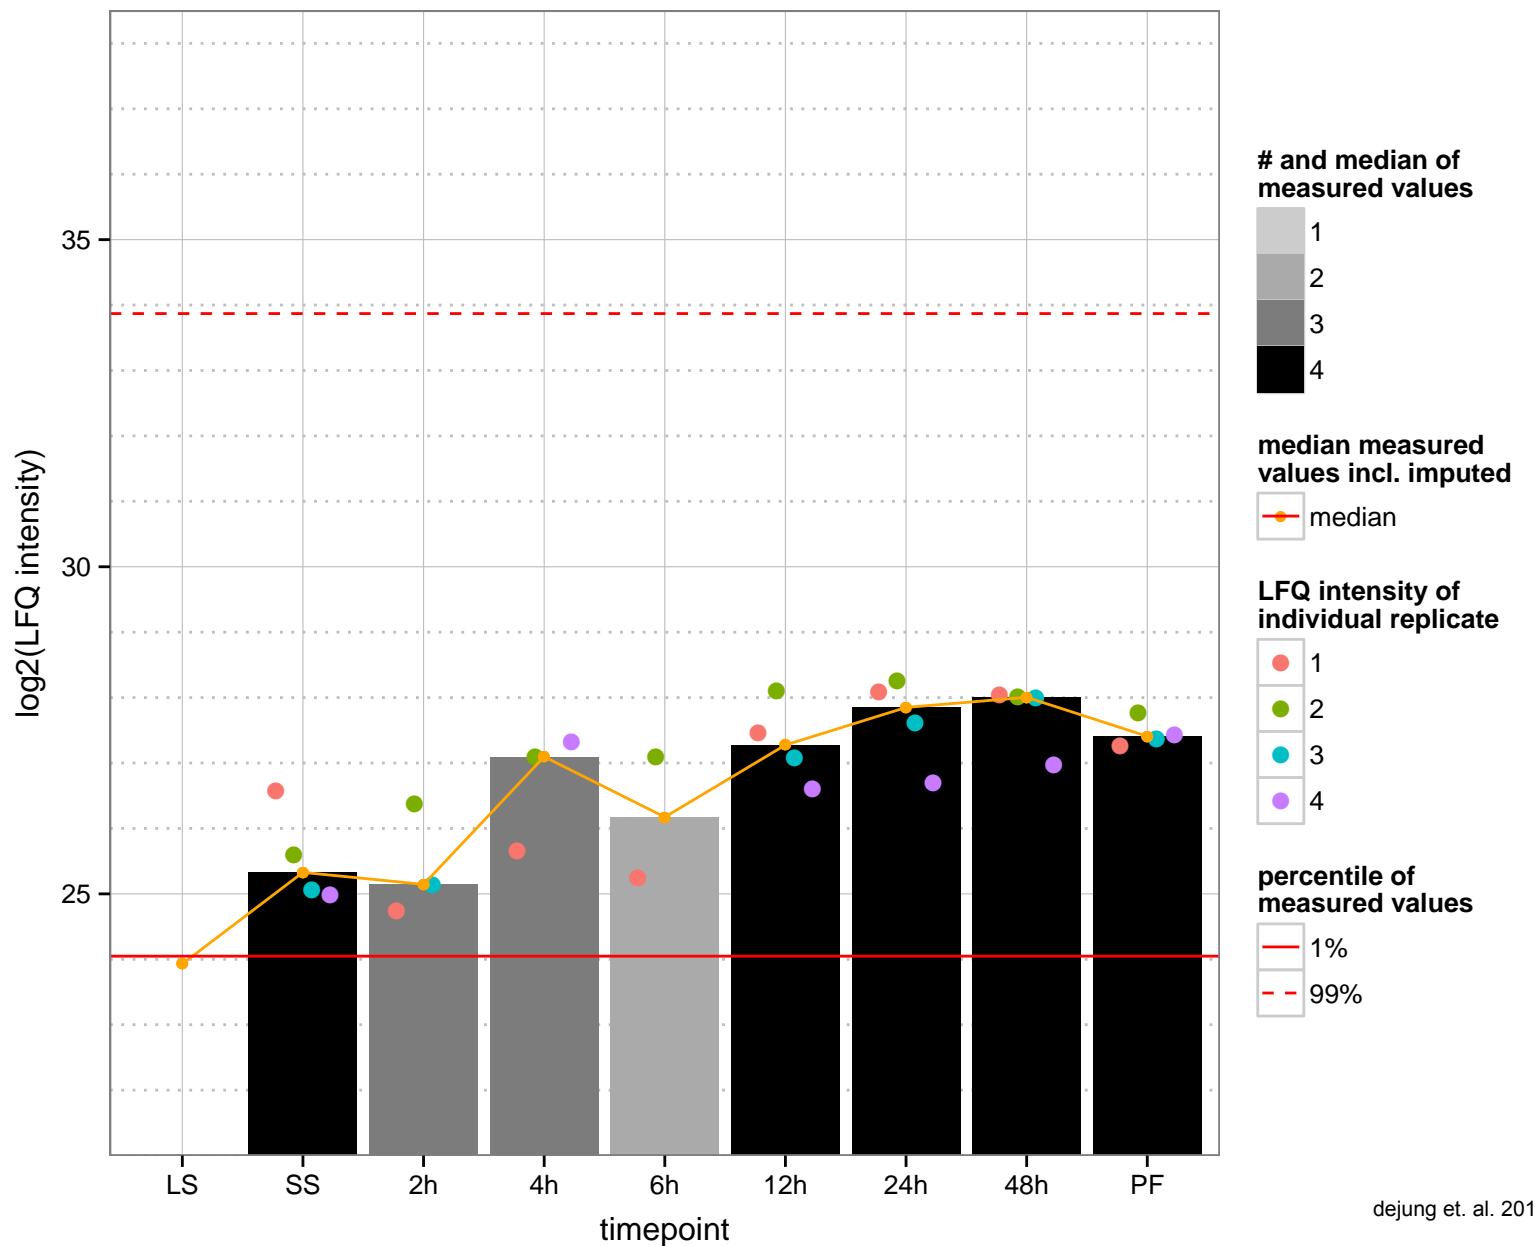

hypothetical protein, conserved  
 Tb927.11.9280  
 AGOF: null  
 AGOC: mitochondrion  
 AGOP: null  
 PGO: null  
 PGOC: null  
 PGOP: null

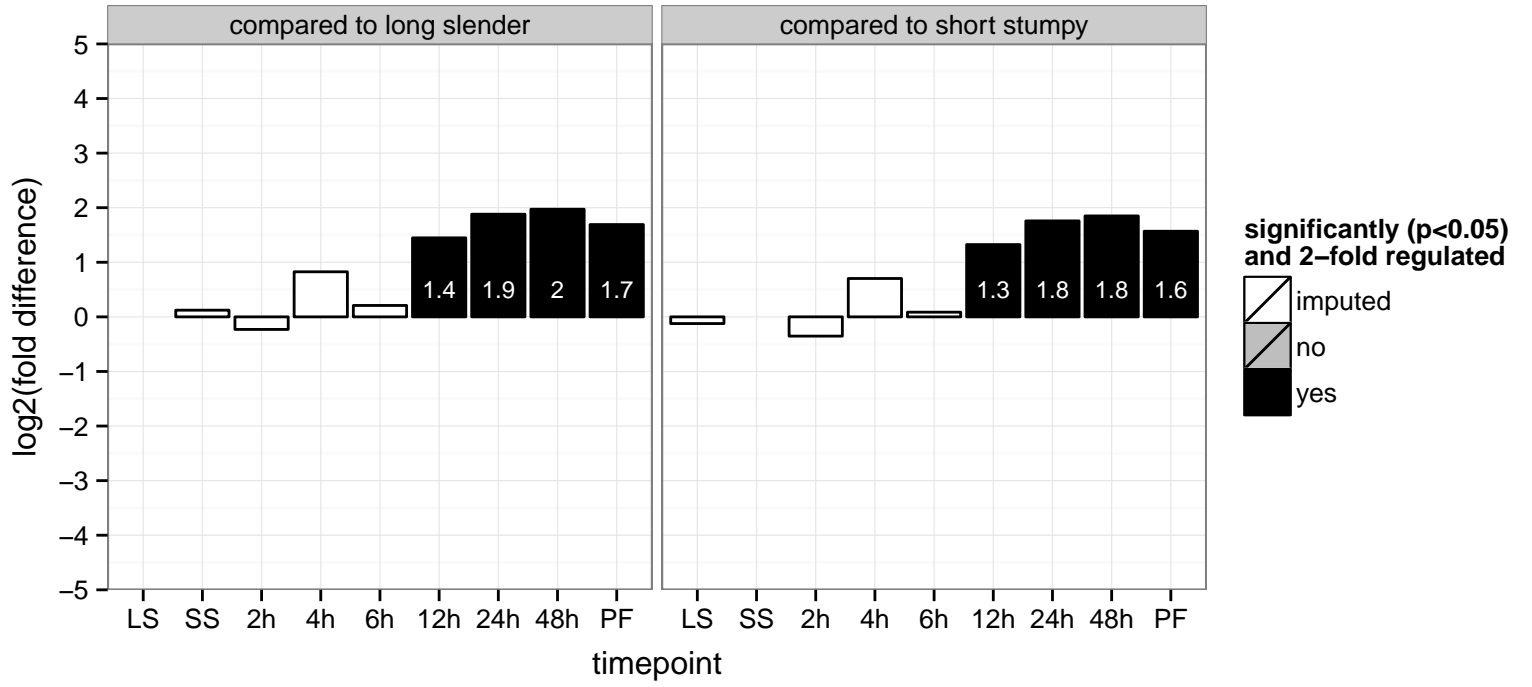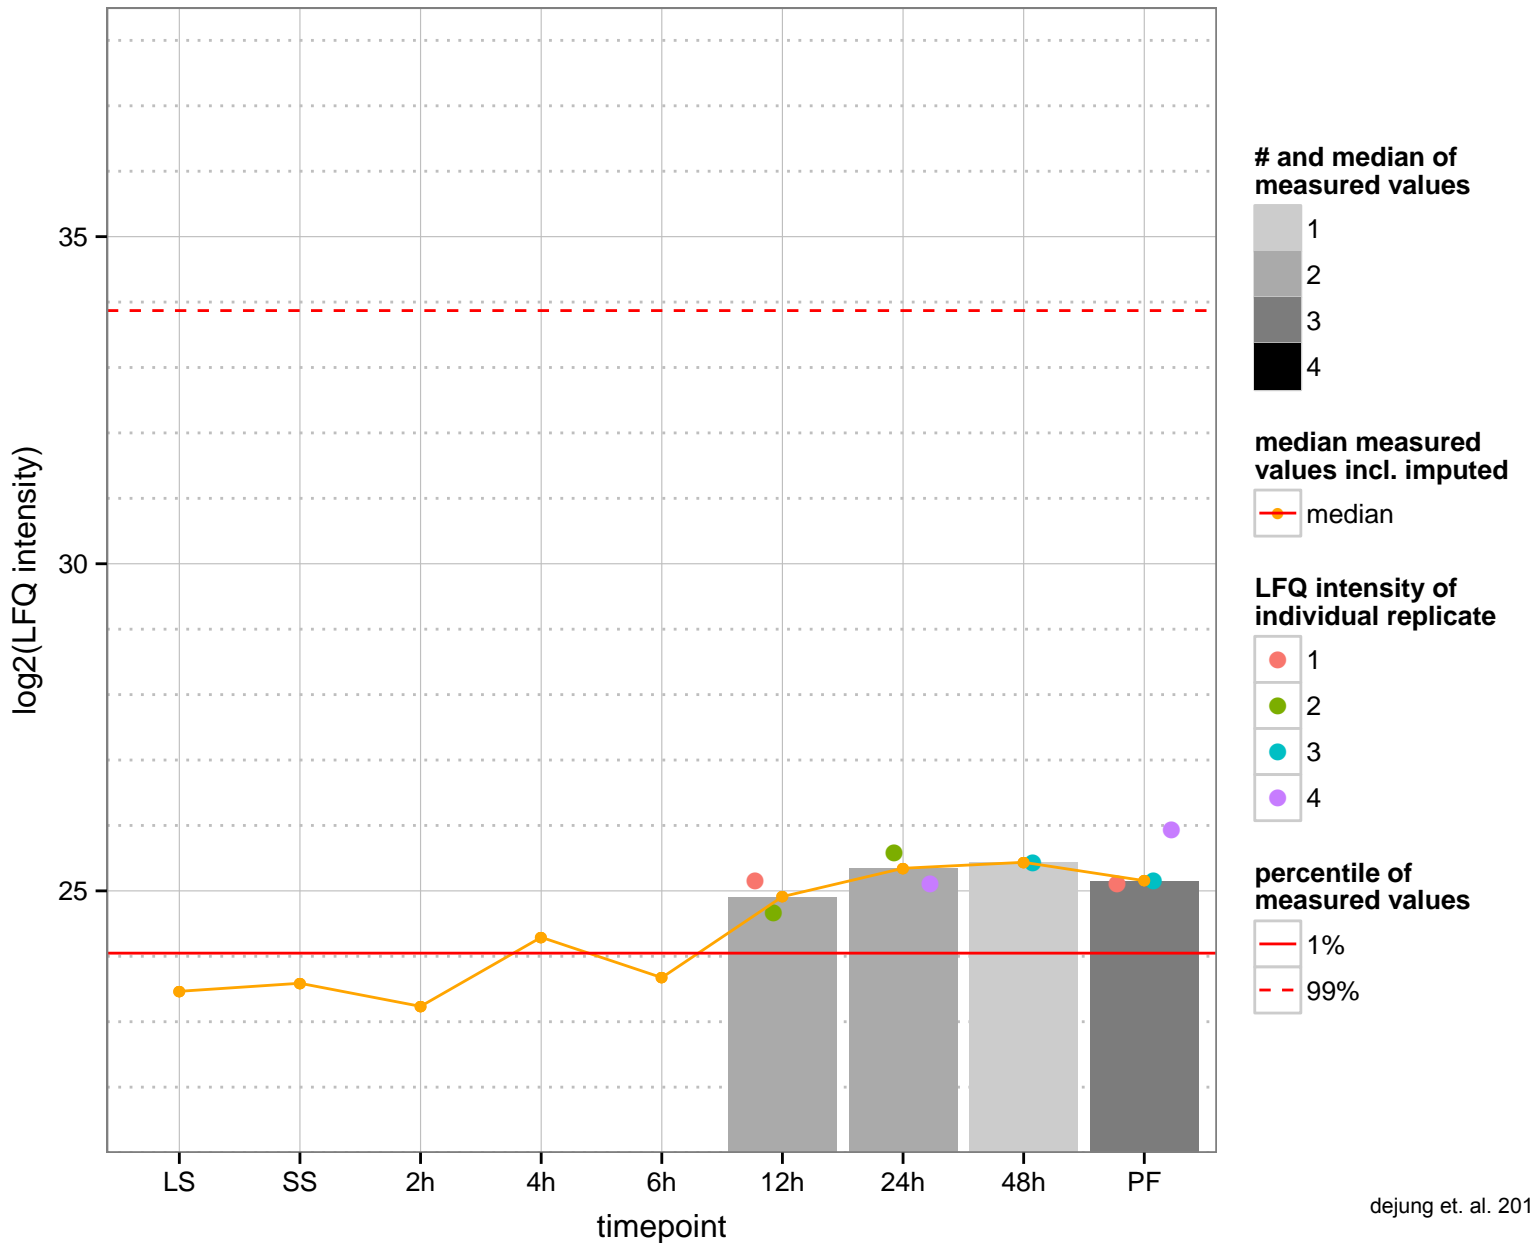

casein kinase II, alpha chain (CK2A2)

Tb927.2.2430

AGOF: ATP binding, protein kinase activity, protein serine/threonine kinase activity, protein tyrosine kinase activity

AGOC: null

AGOP: protein phosphorylation

PGOF: ATP binding, protein kinase activity, transferase activity, transferring phosphorus-containing groups

PGOC: null

PGOP: protein phosphorylation

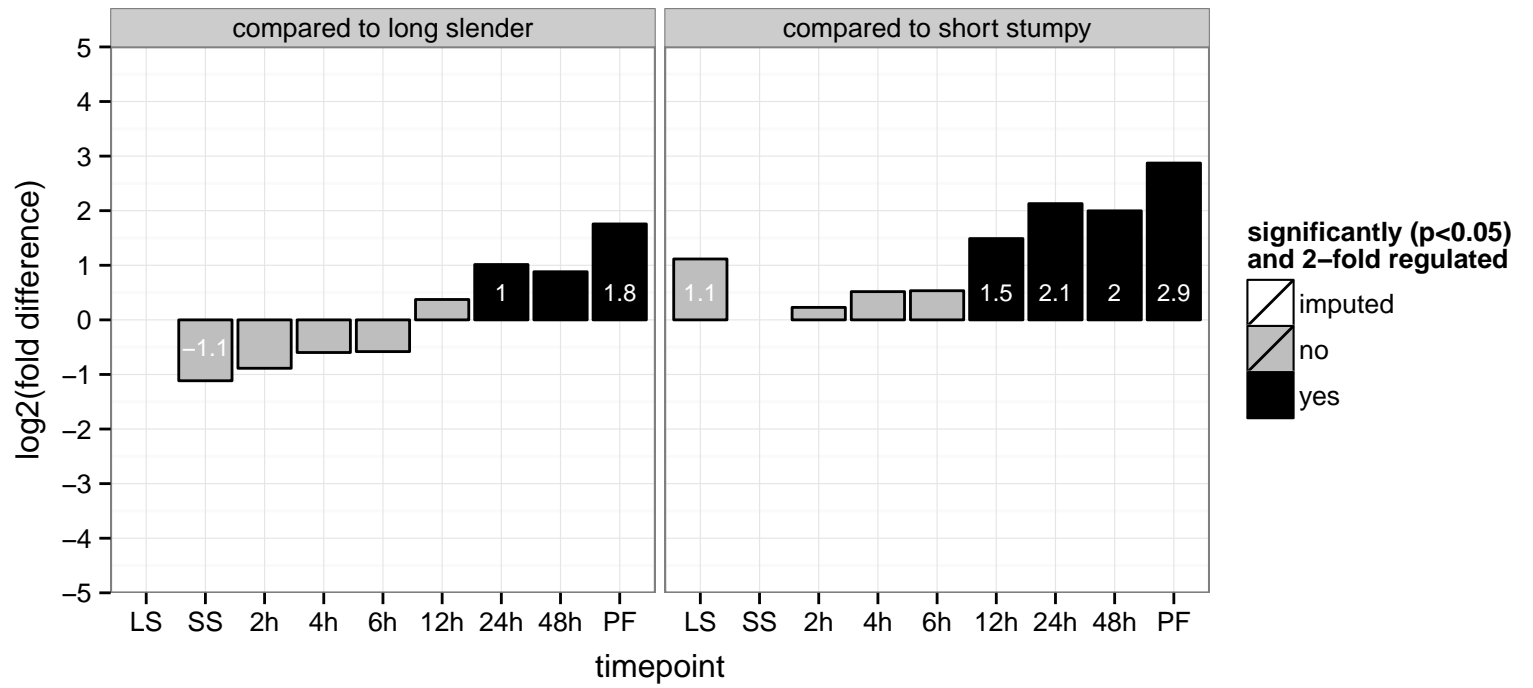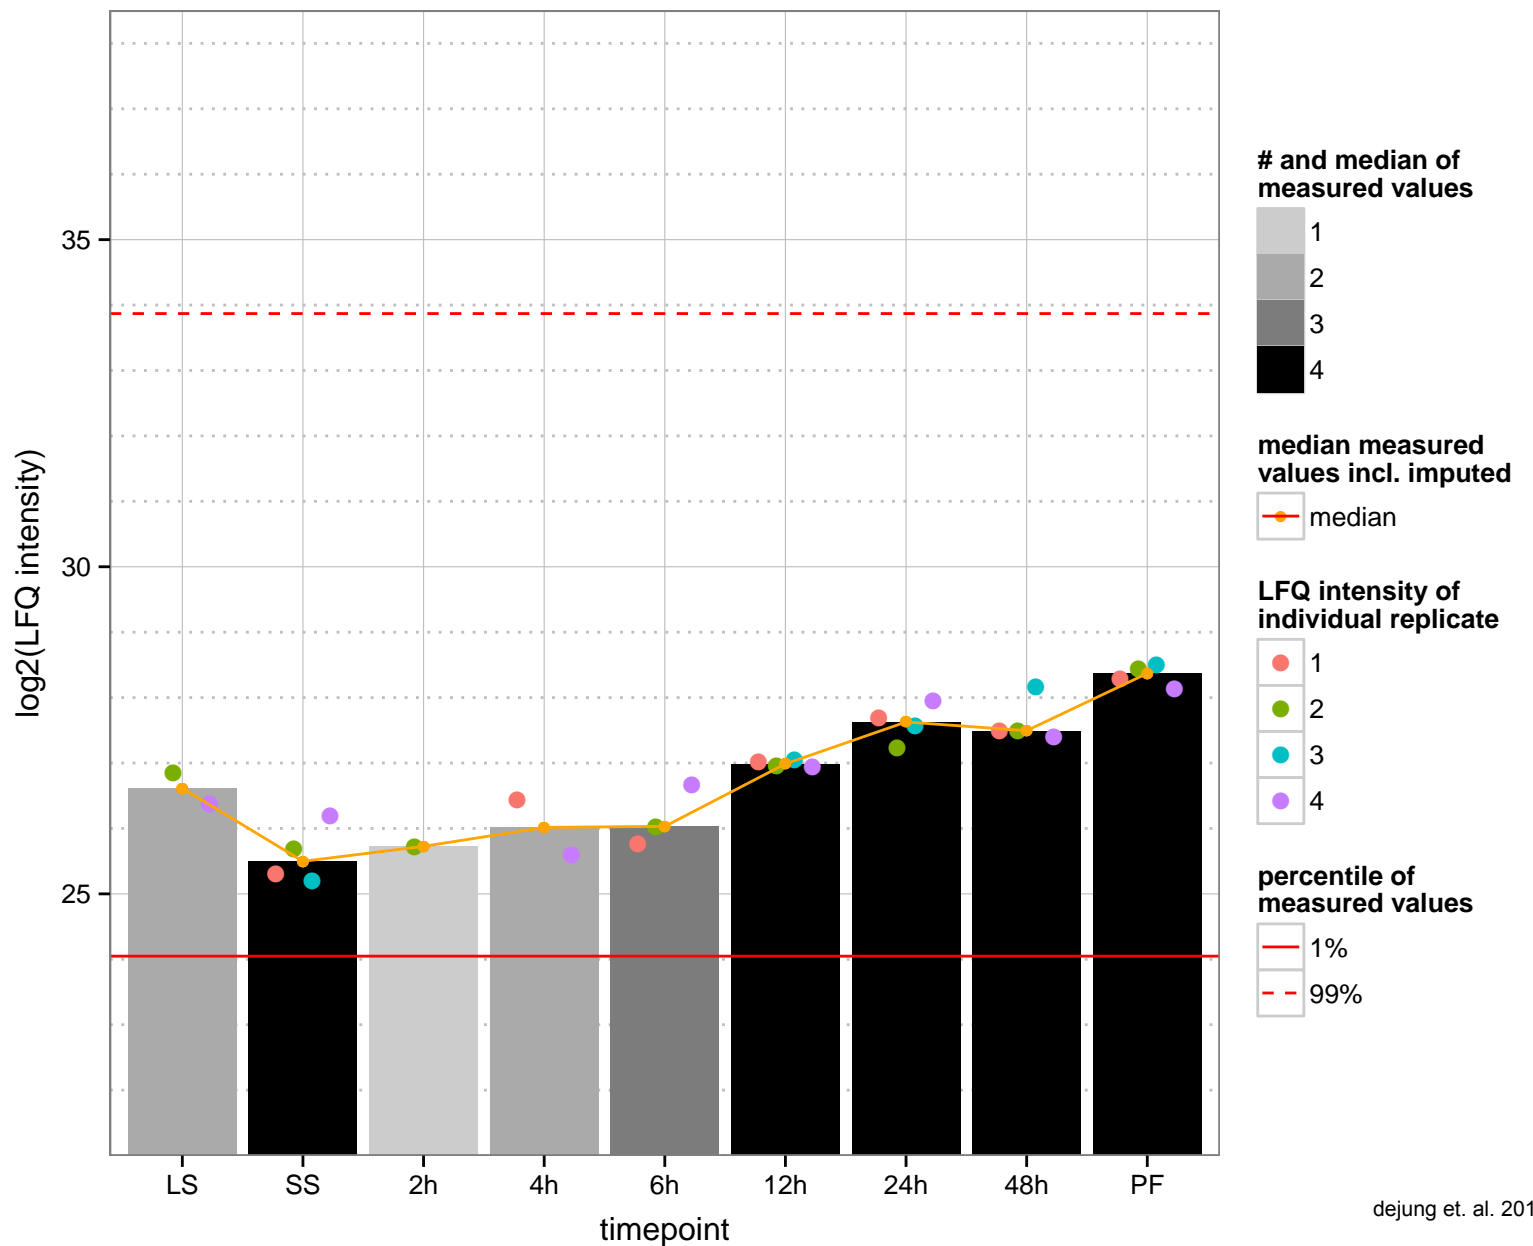

UDP-Gal or UDP-GlcNAc-dependent glycosyltransferase, putative  
 Tb927.2.3370  
 AGOF: UDP-glycosyltransferase activity, galactosyltransferase activity  
 AGOC: integral to membrane, membrane  
 AGOP: GPI anchor biosynthetic process, protein glycosylation  
 PGO: null  
 PGOC: null  
 PGOP: null

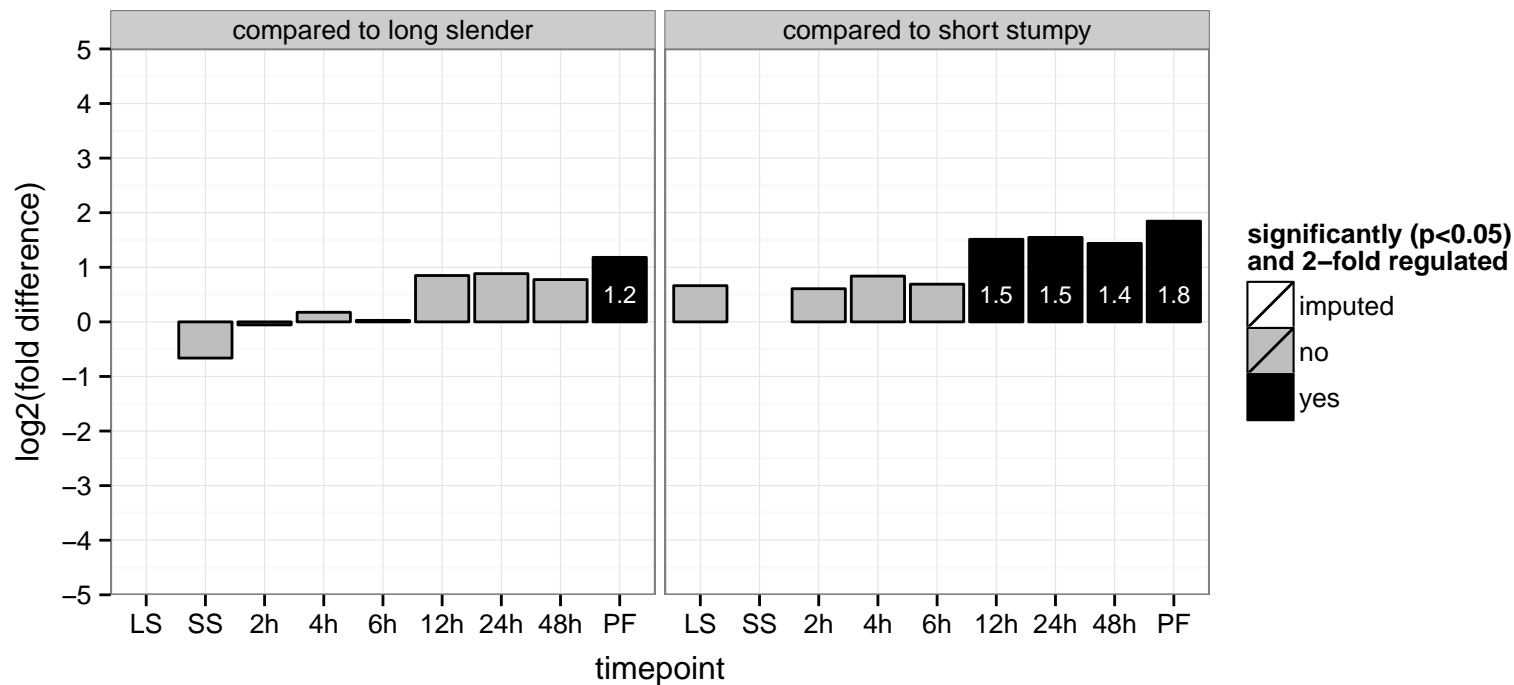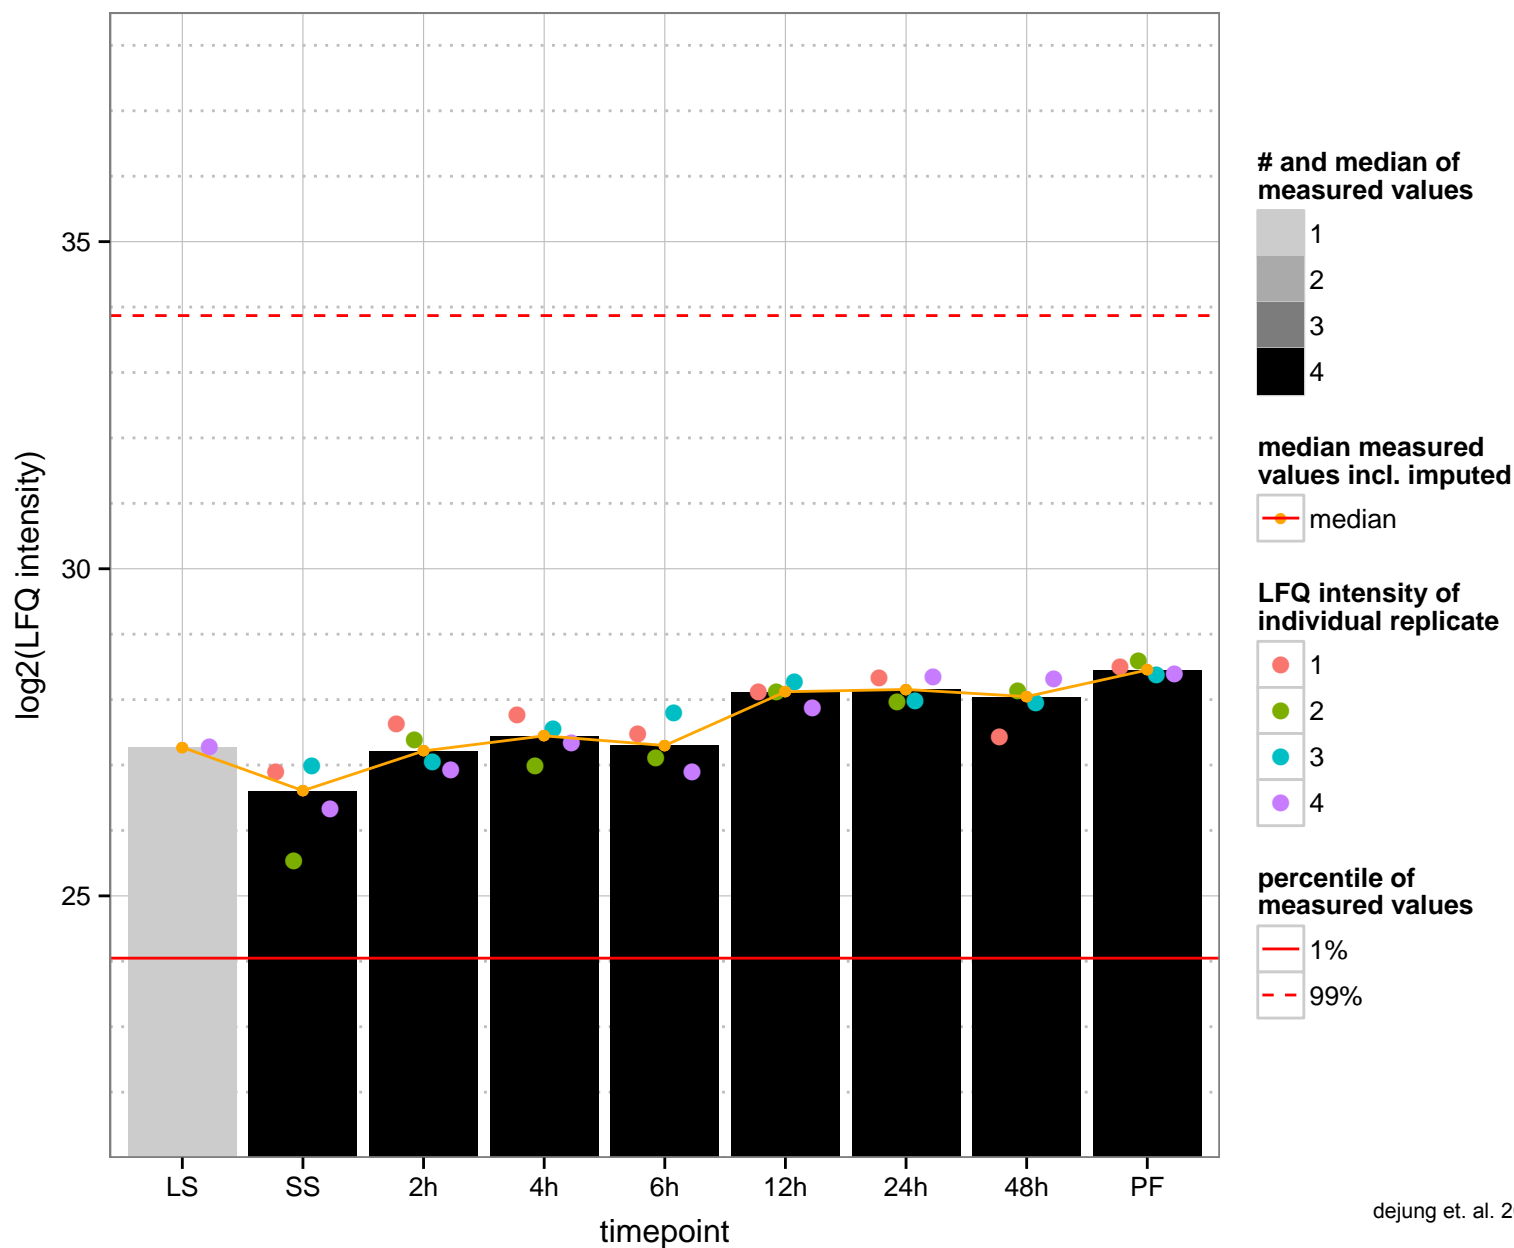

GTP binding protein, putative  
 Tb927.2.4240  
 AGOF: GTP binding  
 AGOC: intracellular  
 AGOP: null  
 PGOF: GTP binding  
 PGOC: null  
 PGOP: null

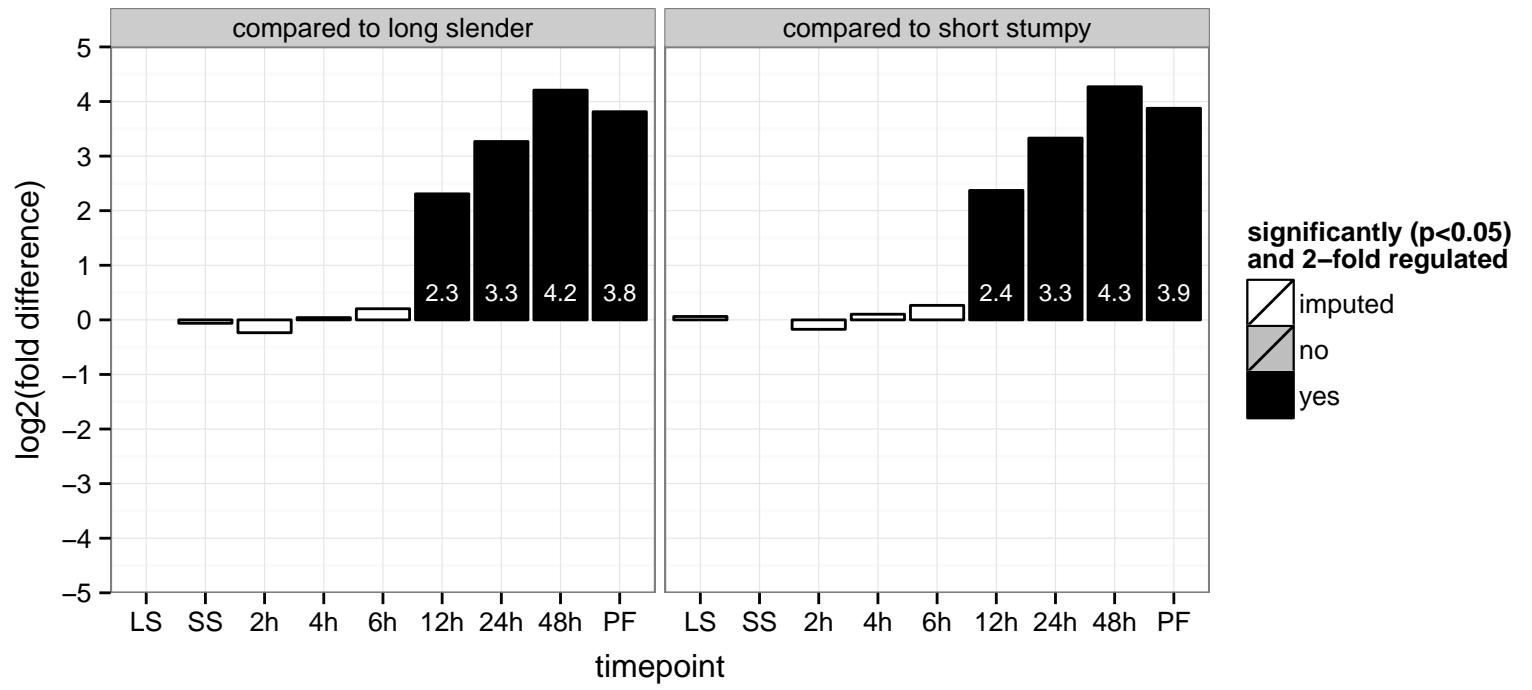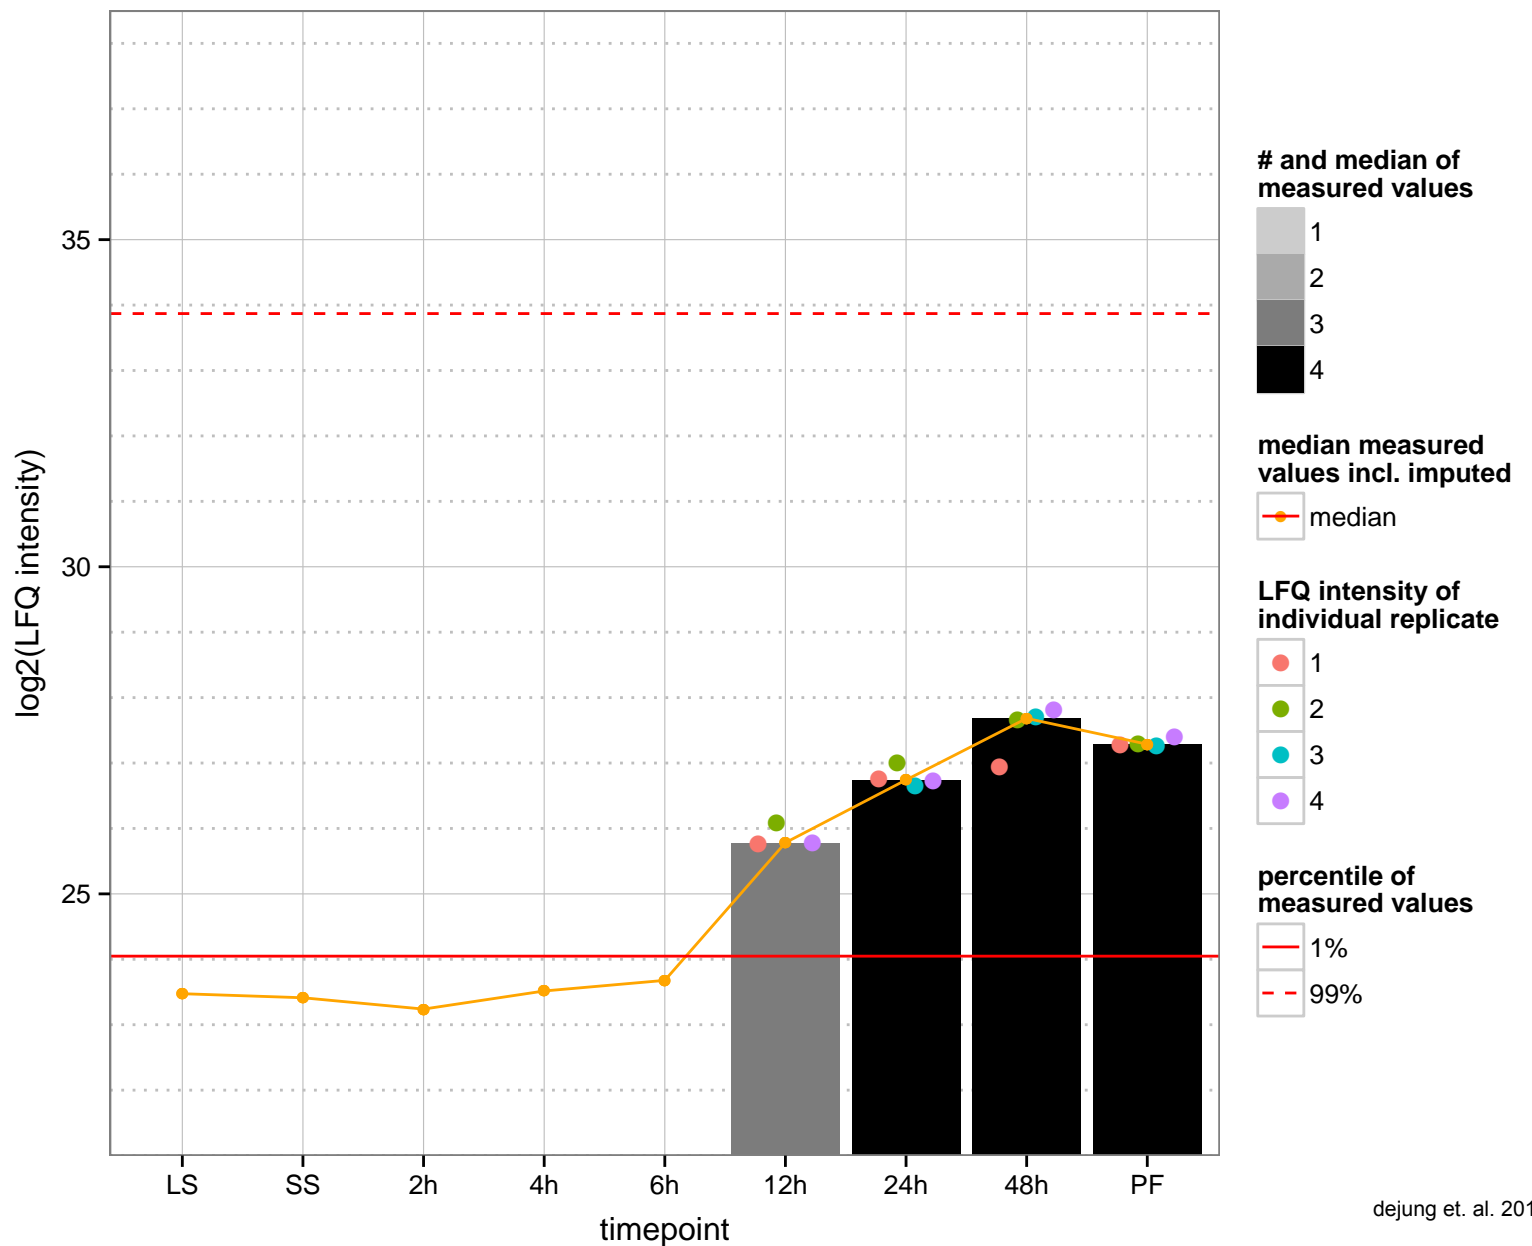

hypothetical protein, conserved  
 Tb927.2.4400  
 AGOF: null  
 AGOC: mitochondrion  
 AGOP: null  
 PGO: null  
 PGO: null  
 PGO: null

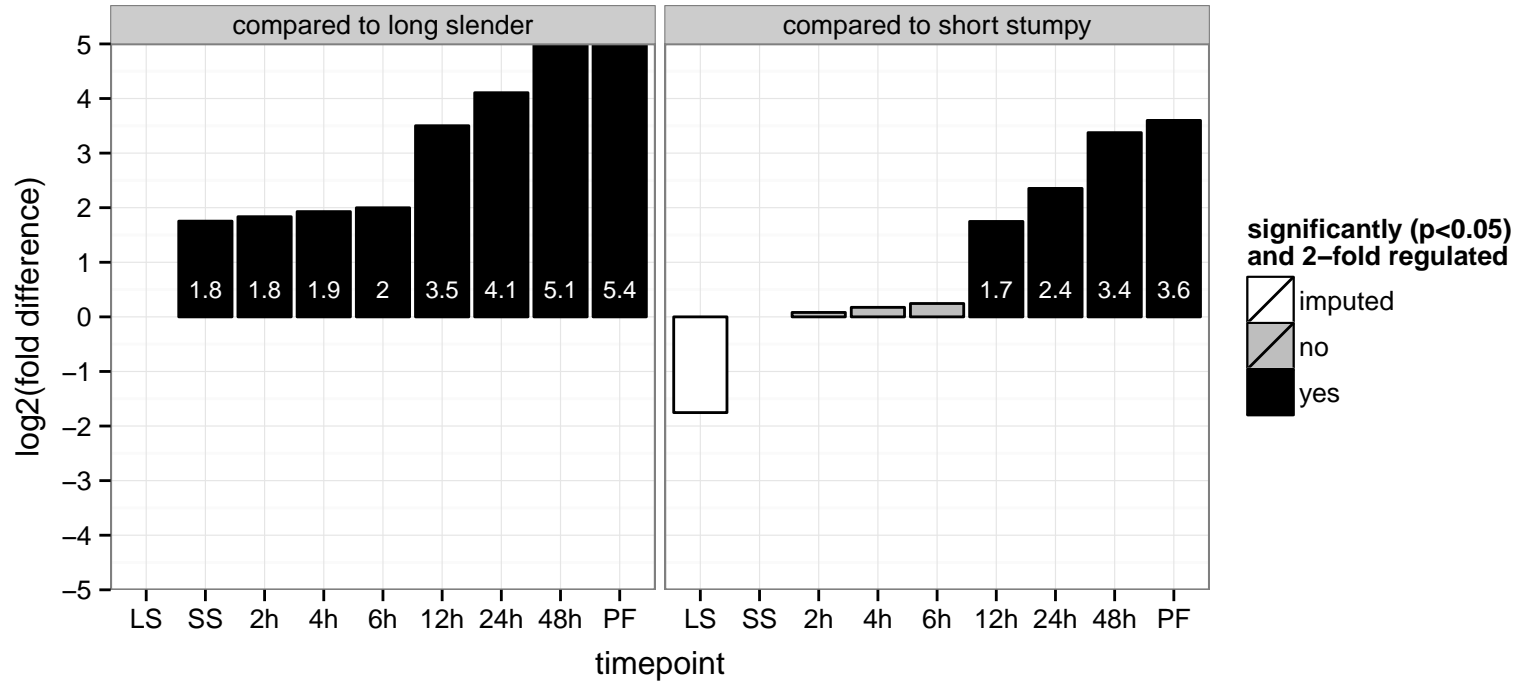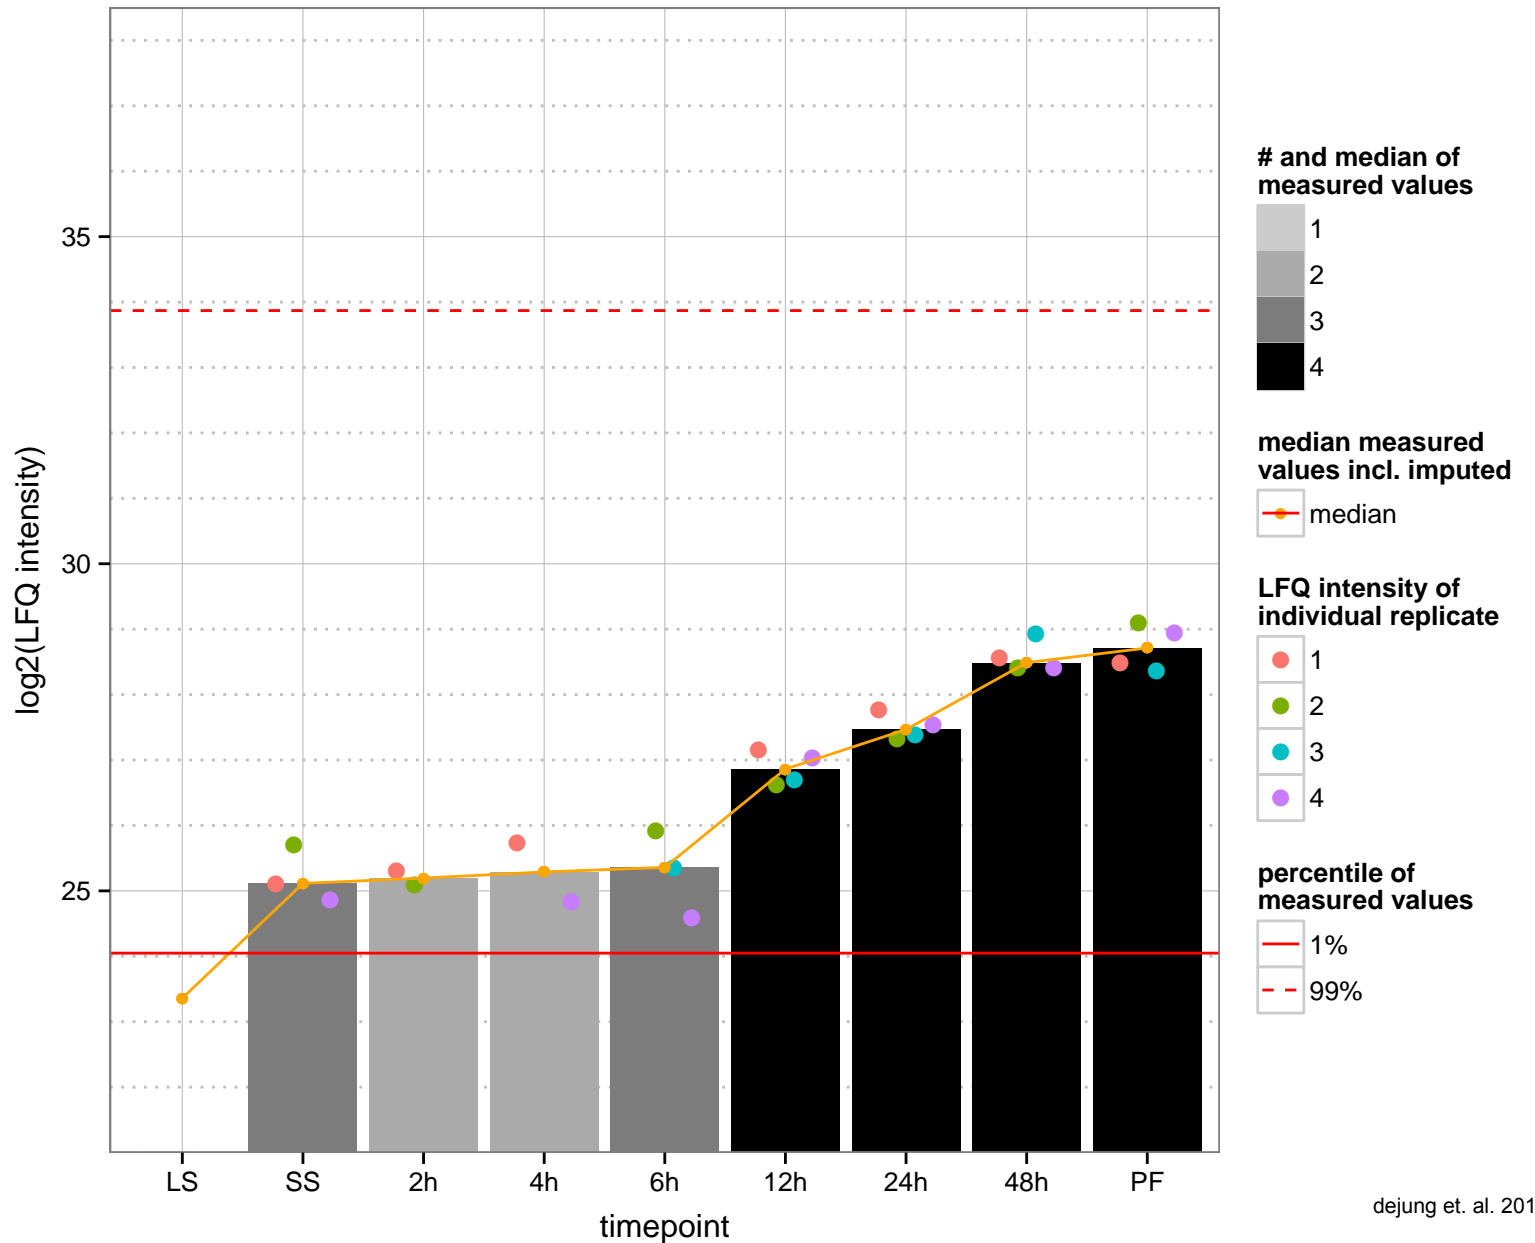



hypothetical protein, conserved  
 Tb927.2.4460  
 AGOF: null  
 AGOC: null  
 AGOP: null  
 PGOF: null  
 PGO: null  
 PGOP: null

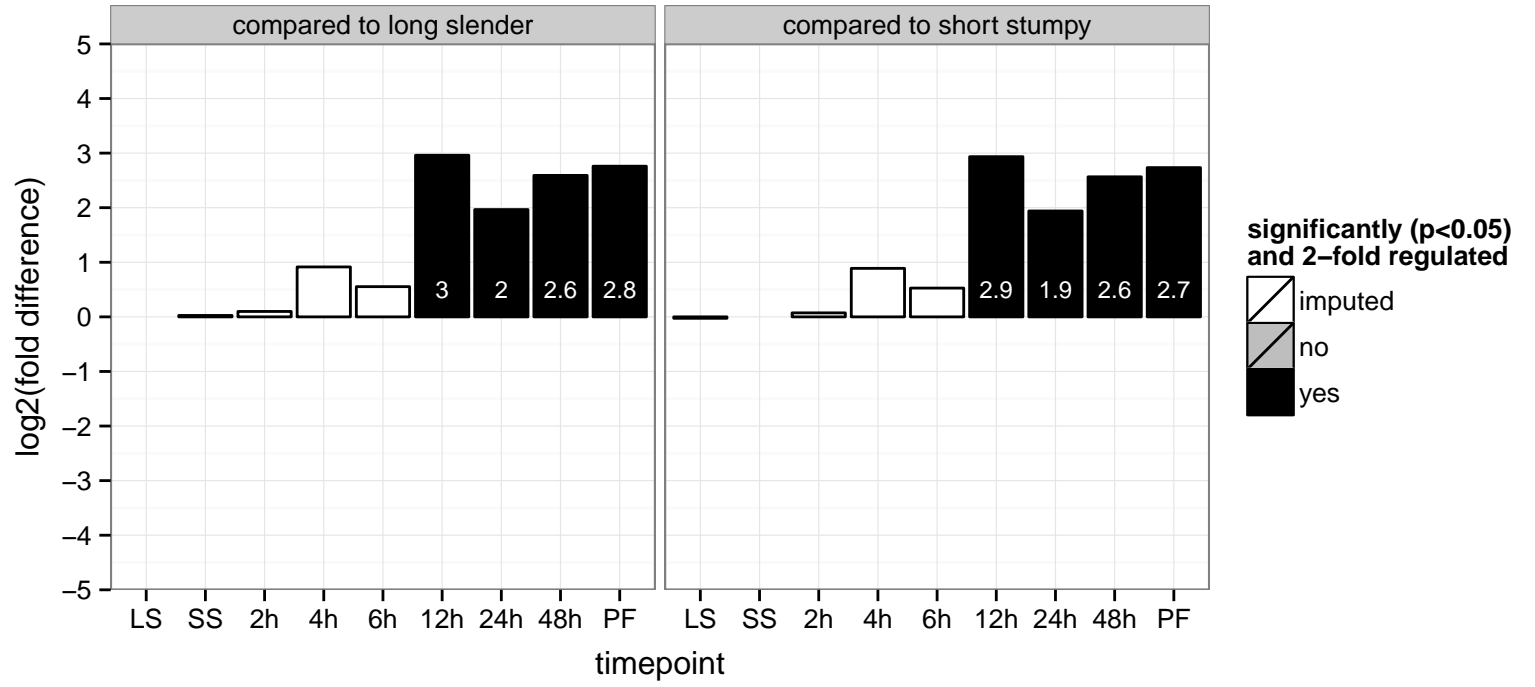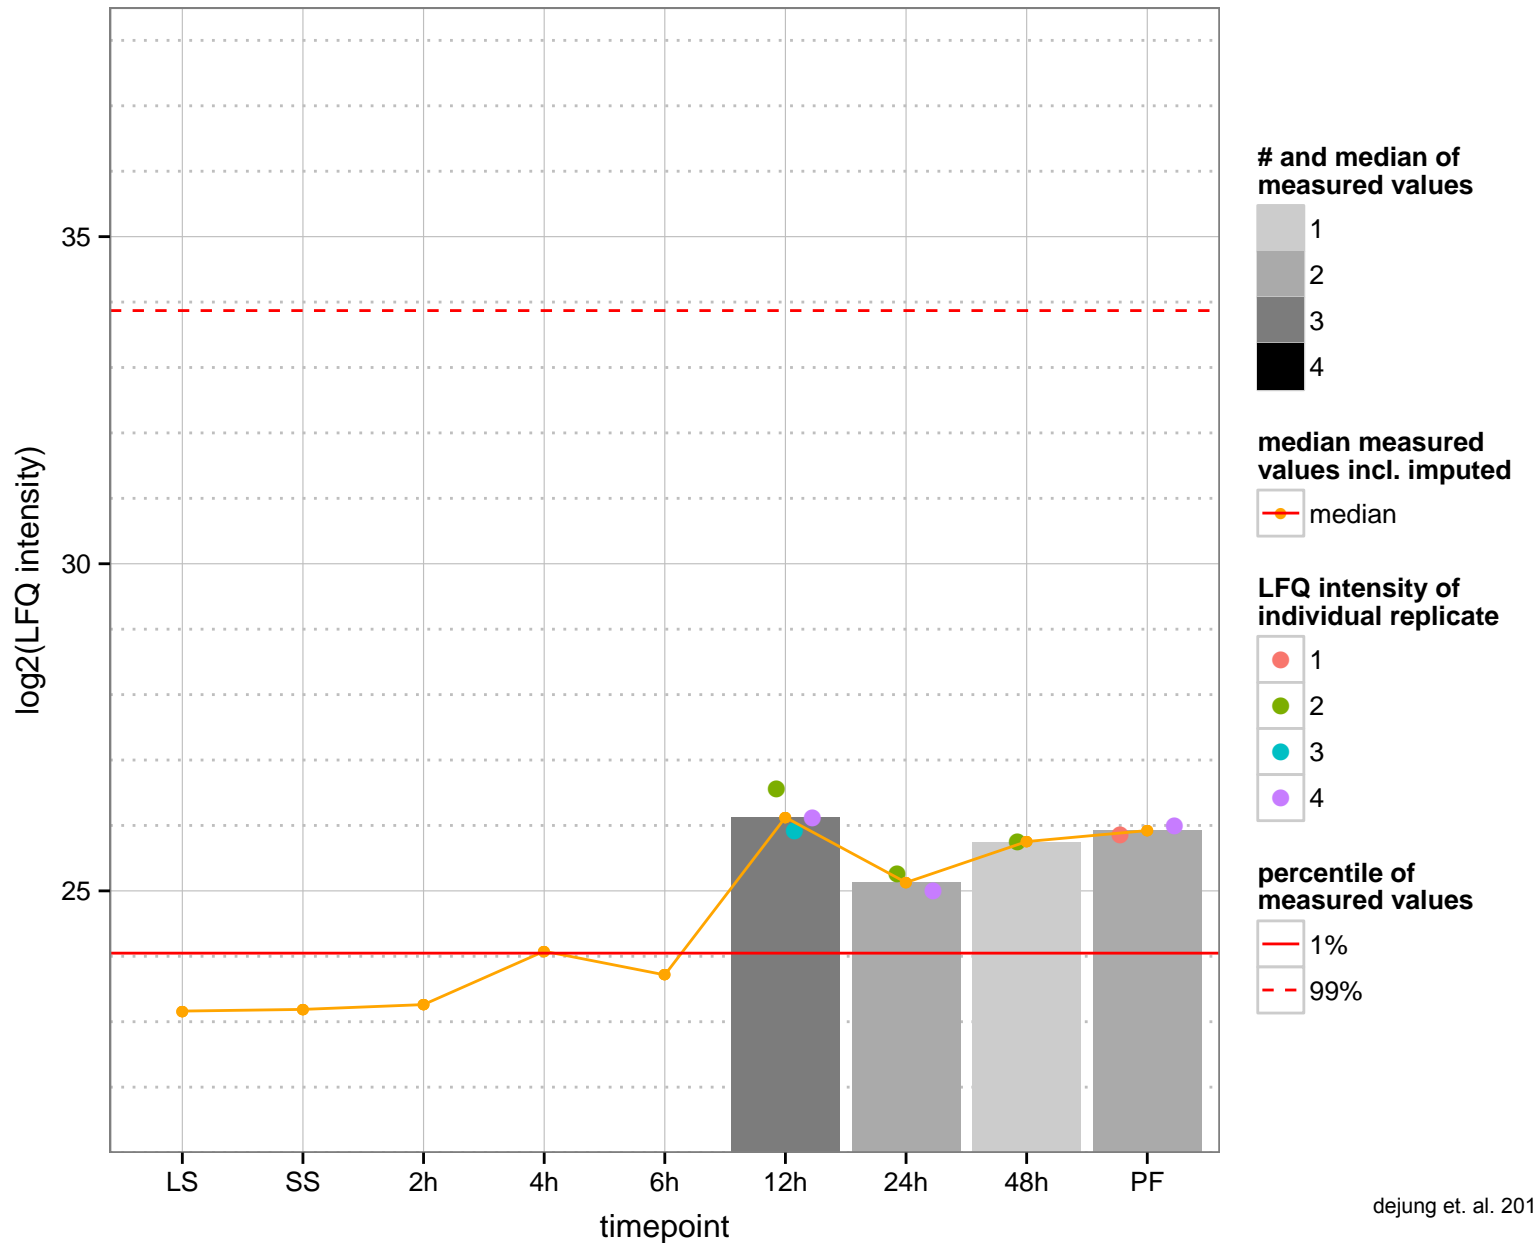

hypothetical protein, conserved  
 Tb927.2.4650  
 AGOF: null  
 AGOC: null  
 AGOP: null  
 PGO: null  
 PGOC: null  
 PGOP: null

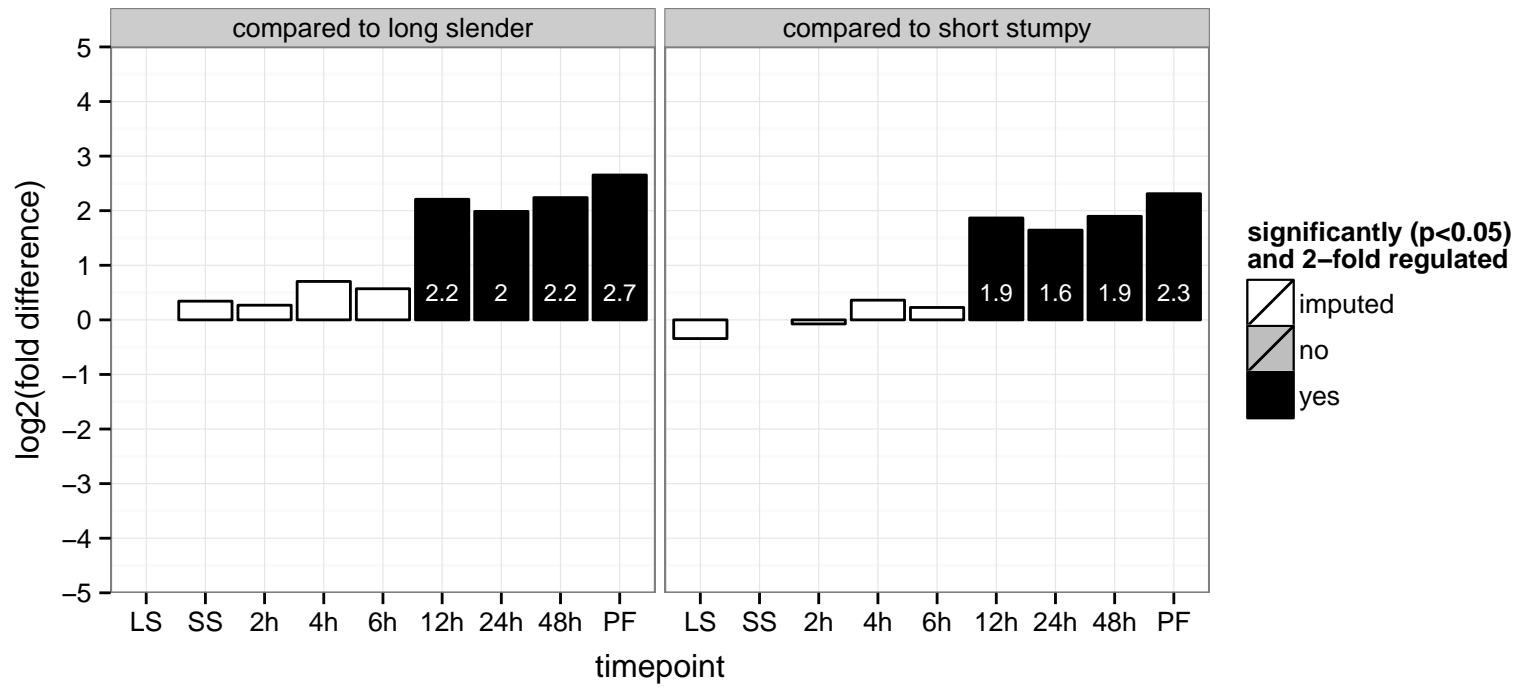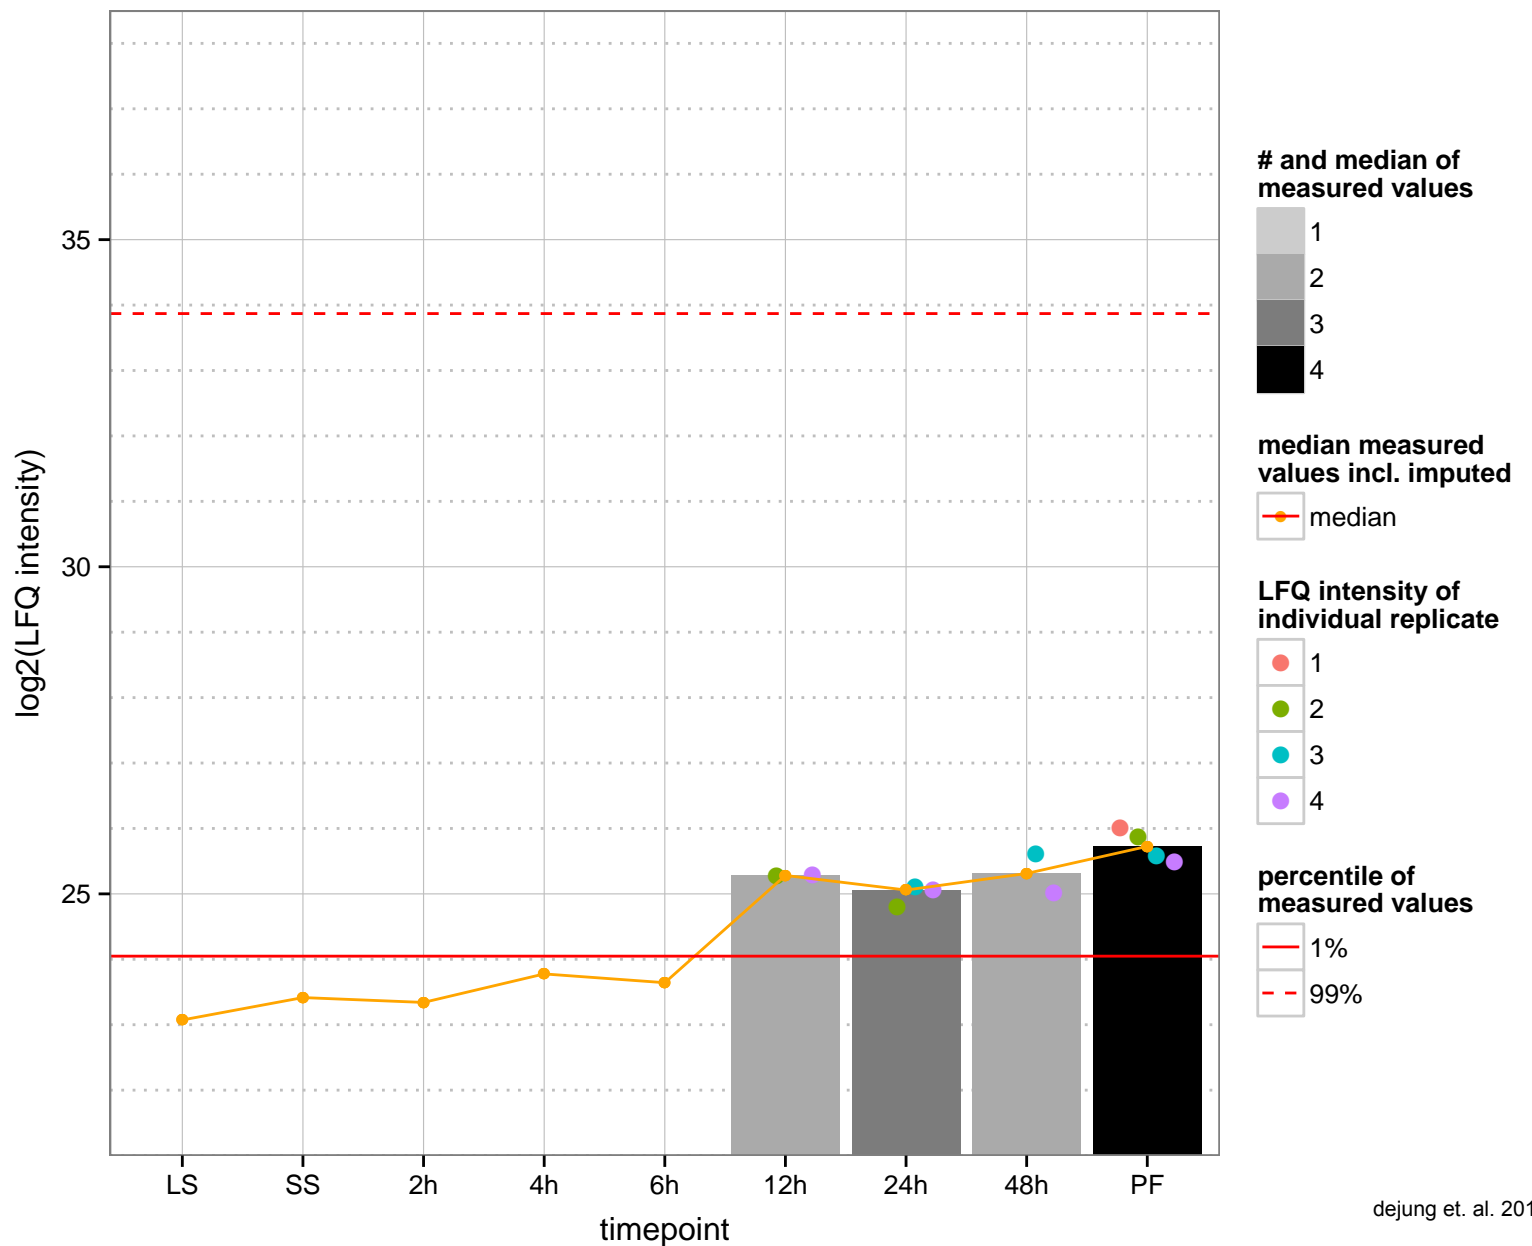

acyl-CoA oxidase, putative

Tb927.2.5020

AGOF: acyl-CoA oxidase activity

AGOC: mitochondrion, peroxisome

AGOP: fatty acid beta-oxidation

PGOF: acyl-CoA oxidase activity, oxidoreductase activity, acting on the CH-CH group of donors

PGOC: peroxisome

PGOP: fatty acid beta-oxidation, metabolic process, oxidation-reduction process

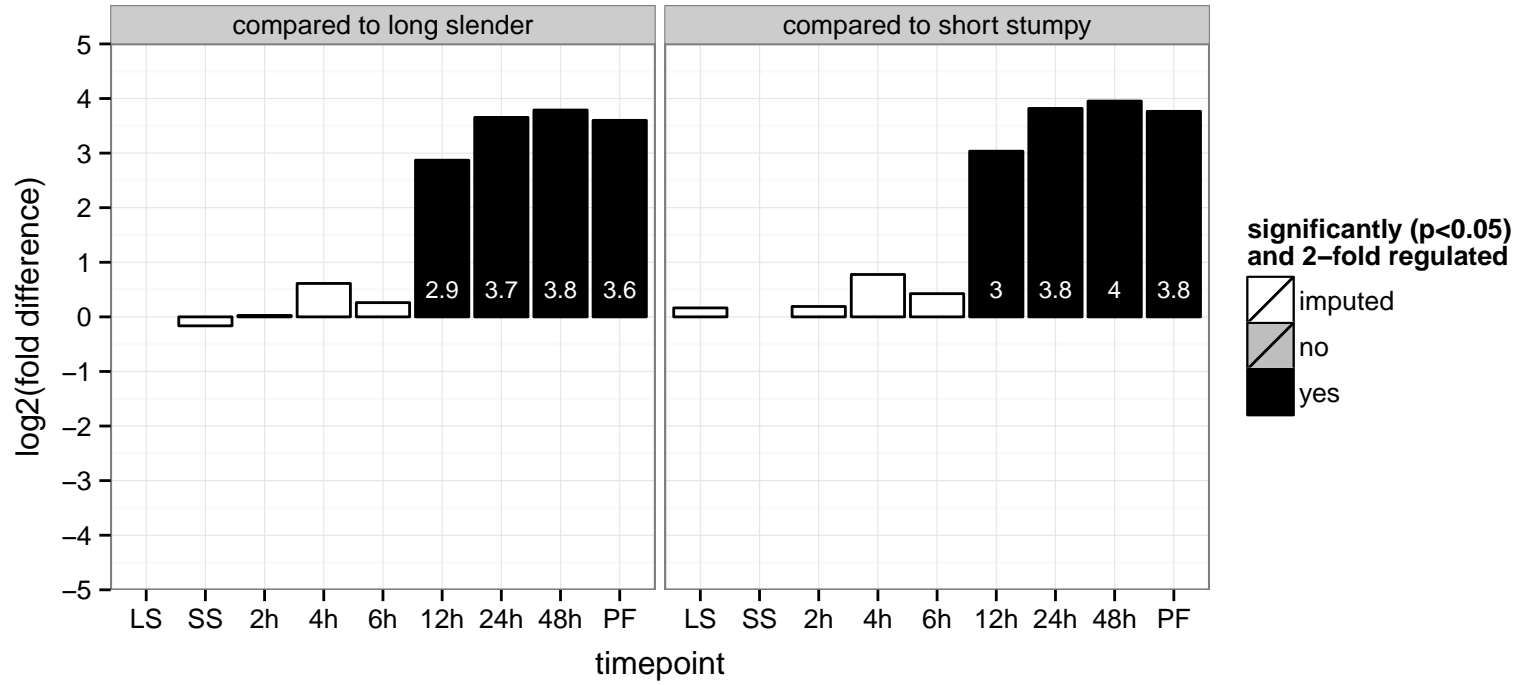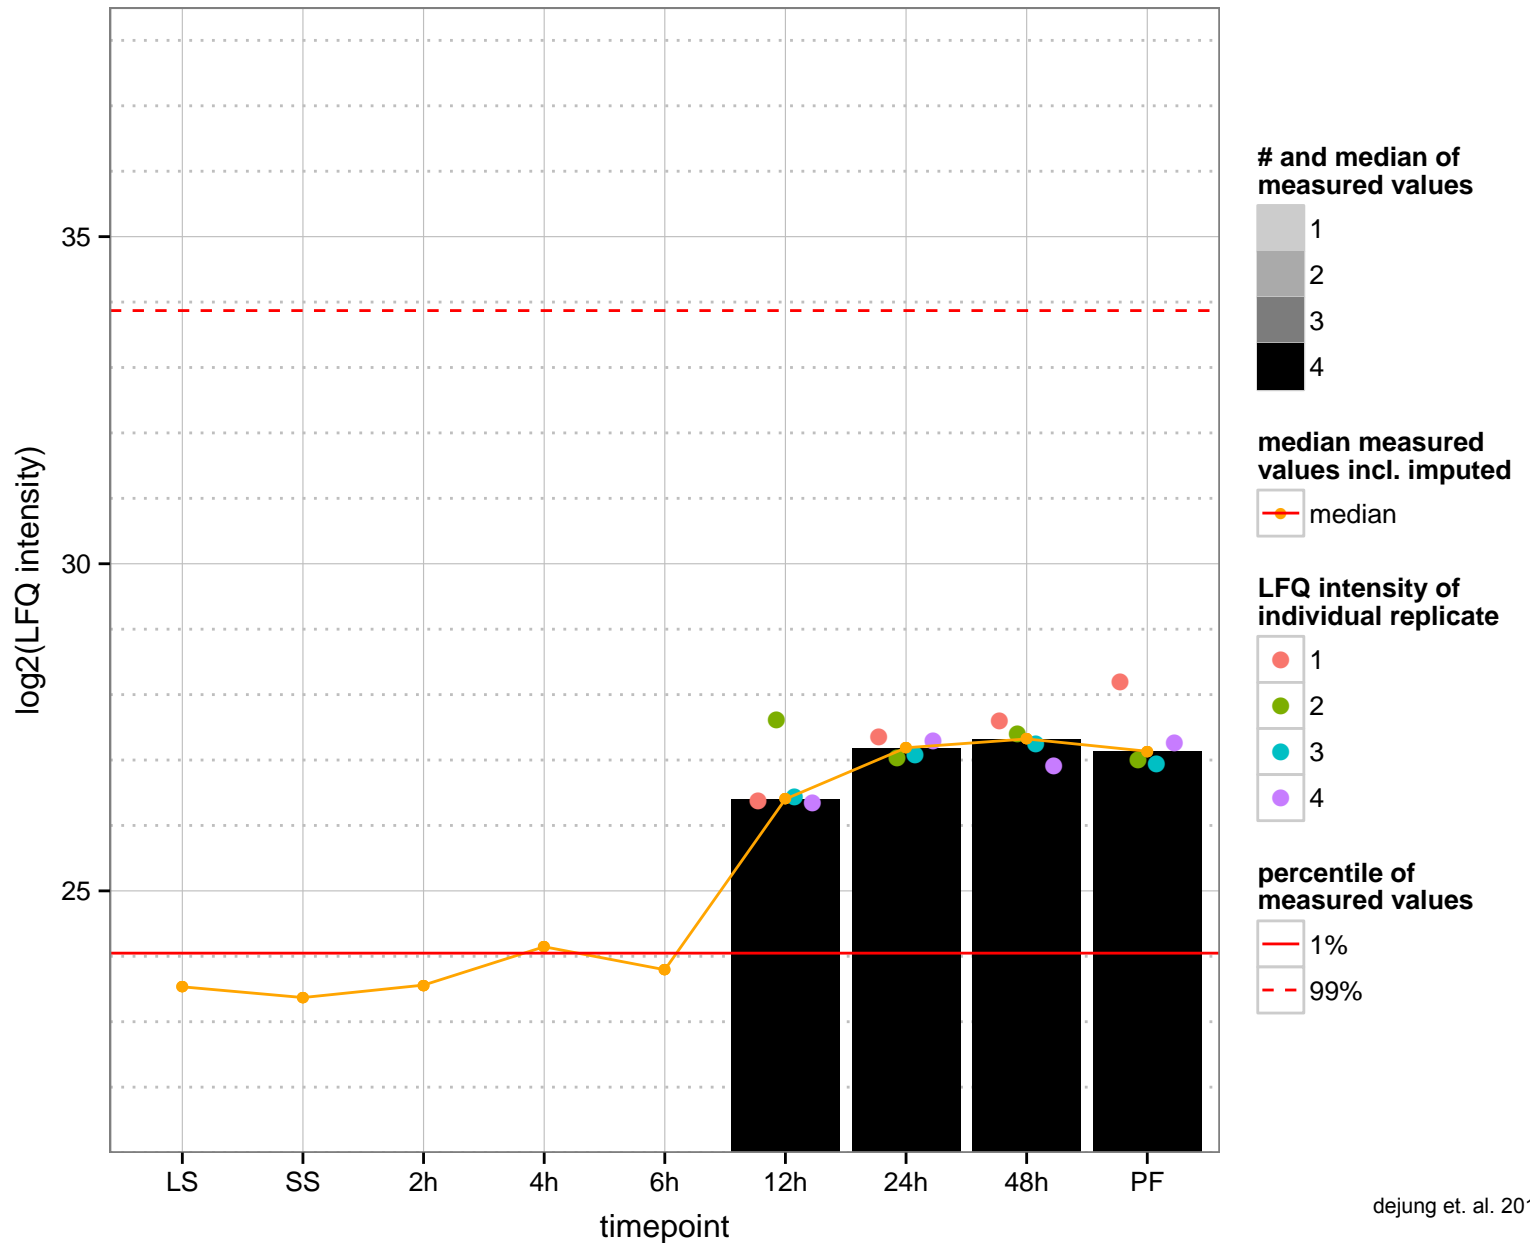

hypothetical protein, conserved  
 Tb927.2.5610;Tb927.2.5530  
 AGOF: null  
 AGOC: null  
 AGOP: null  
 PGO: null  
 PGOC: null  
 PGOP: null

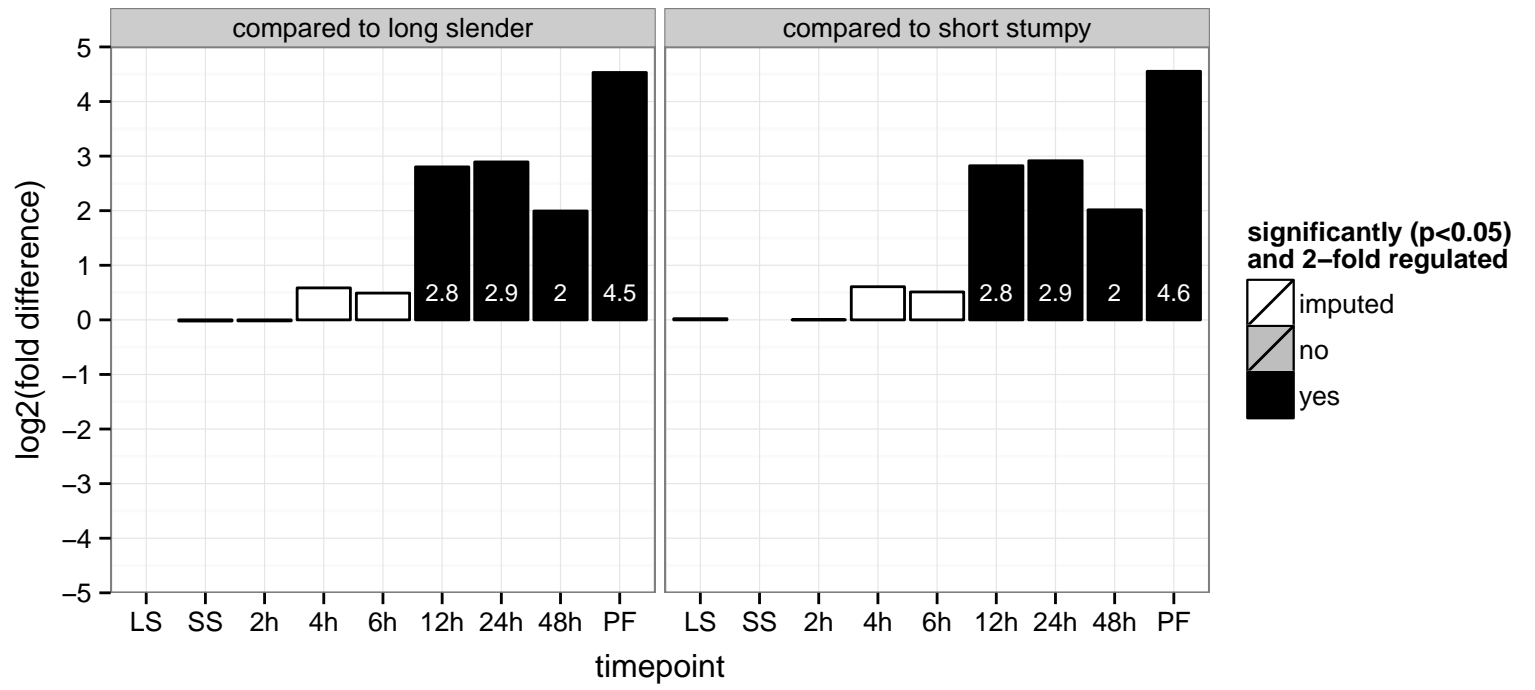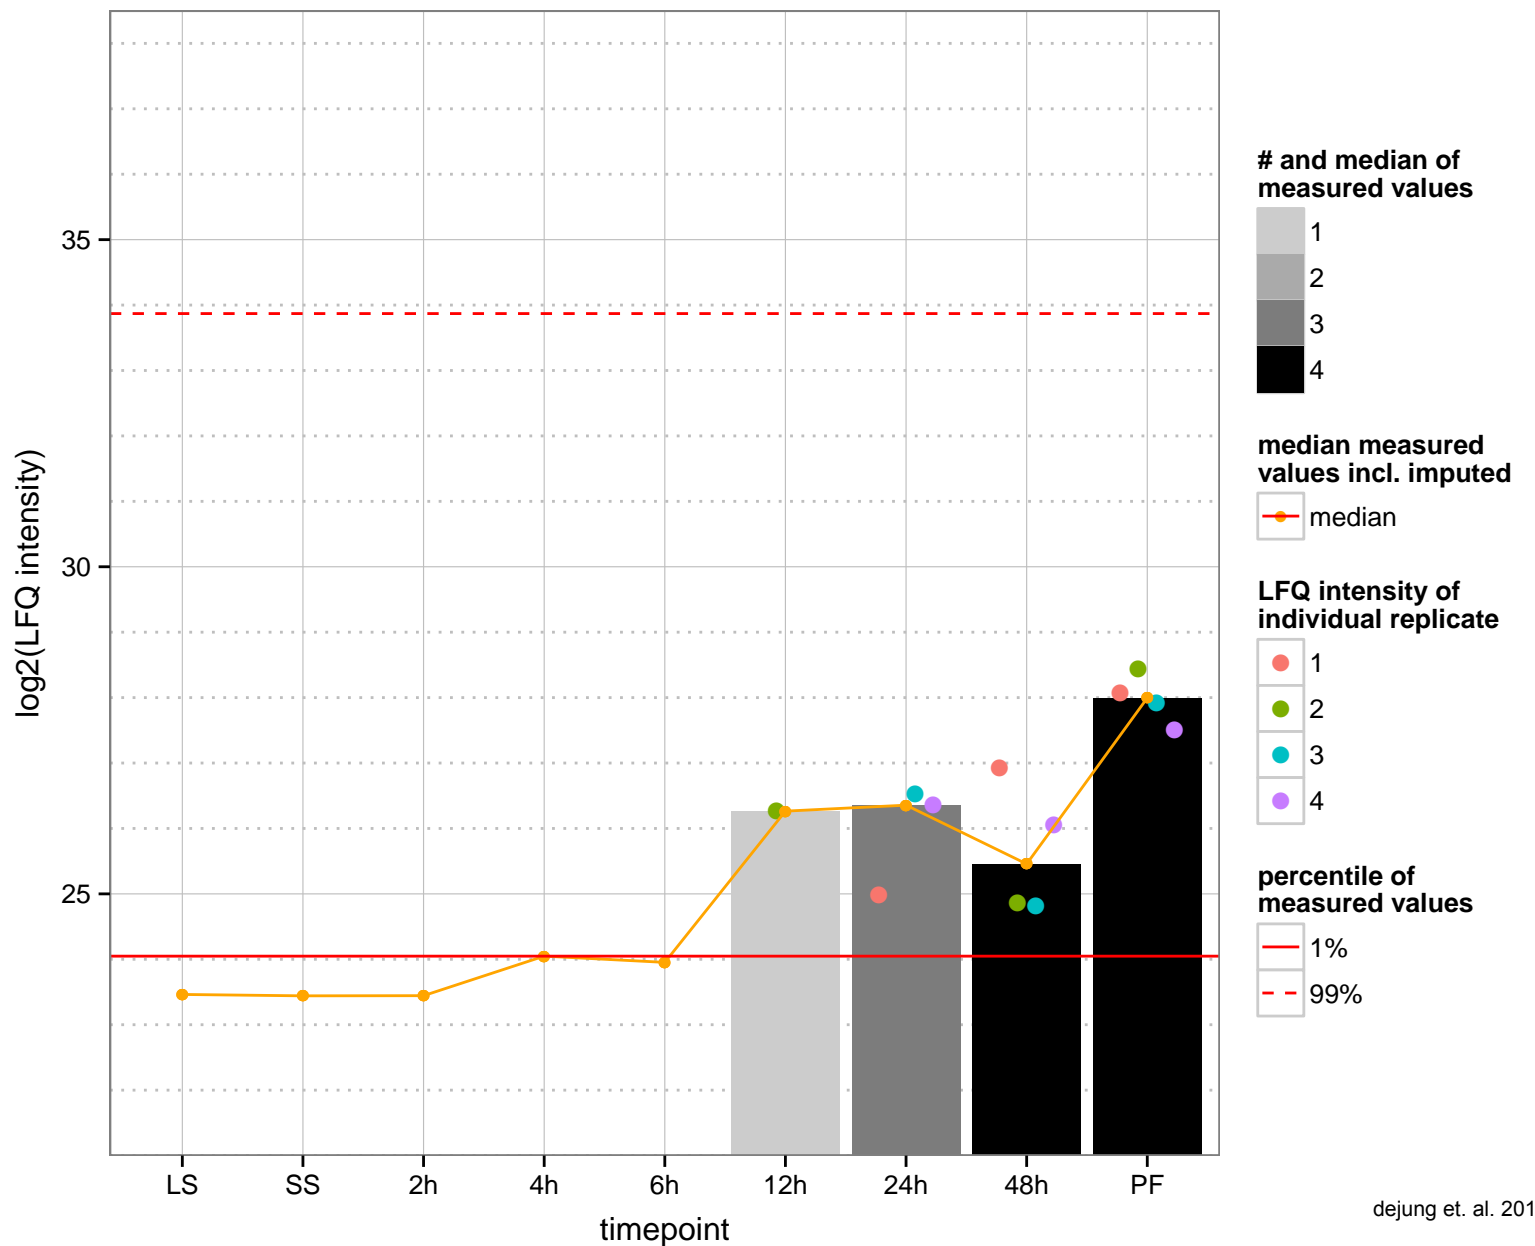

cytochrome oxidase subunit VII (COXVII)  
 Tb927.3.1410  
 AGOF: null  
 AGOC: mitochondrion  
 AGOP: null  
 PGO: null  
 PGO: null  
 PGO: null

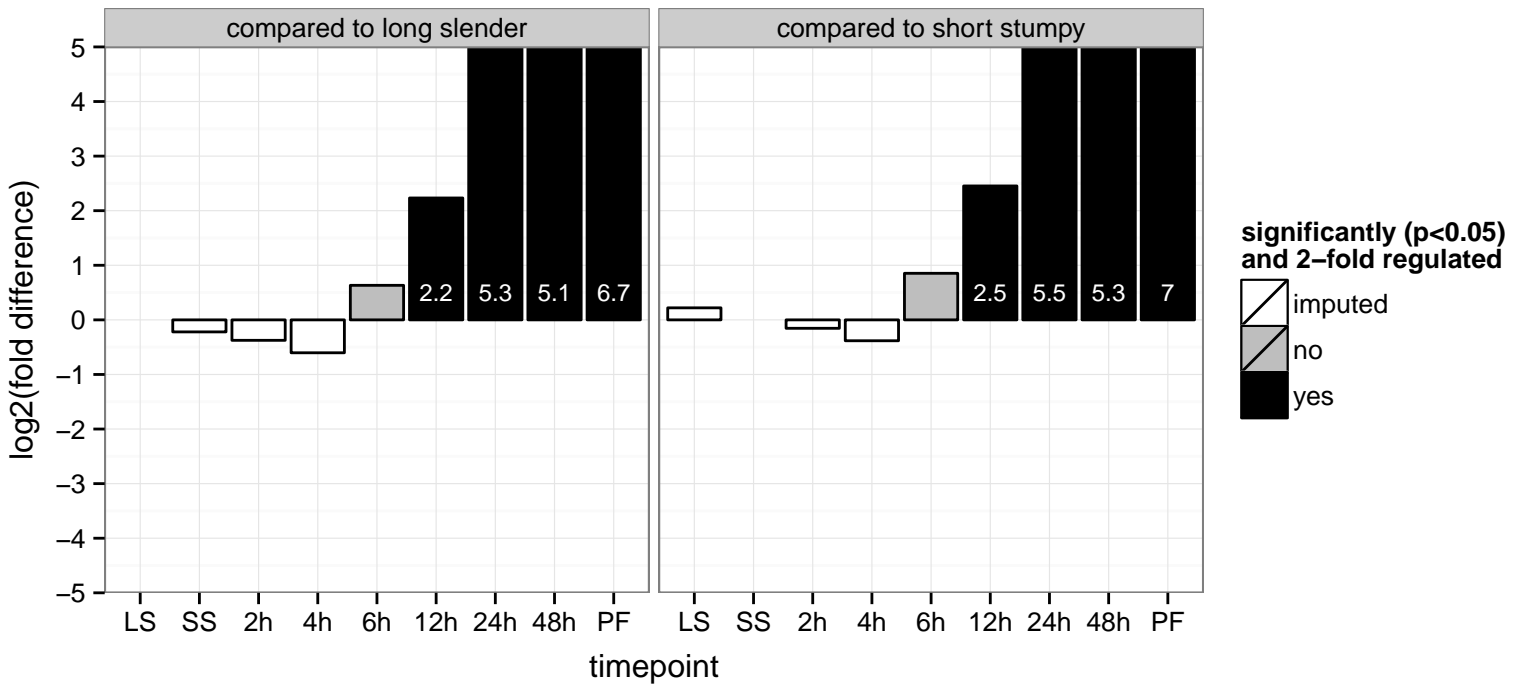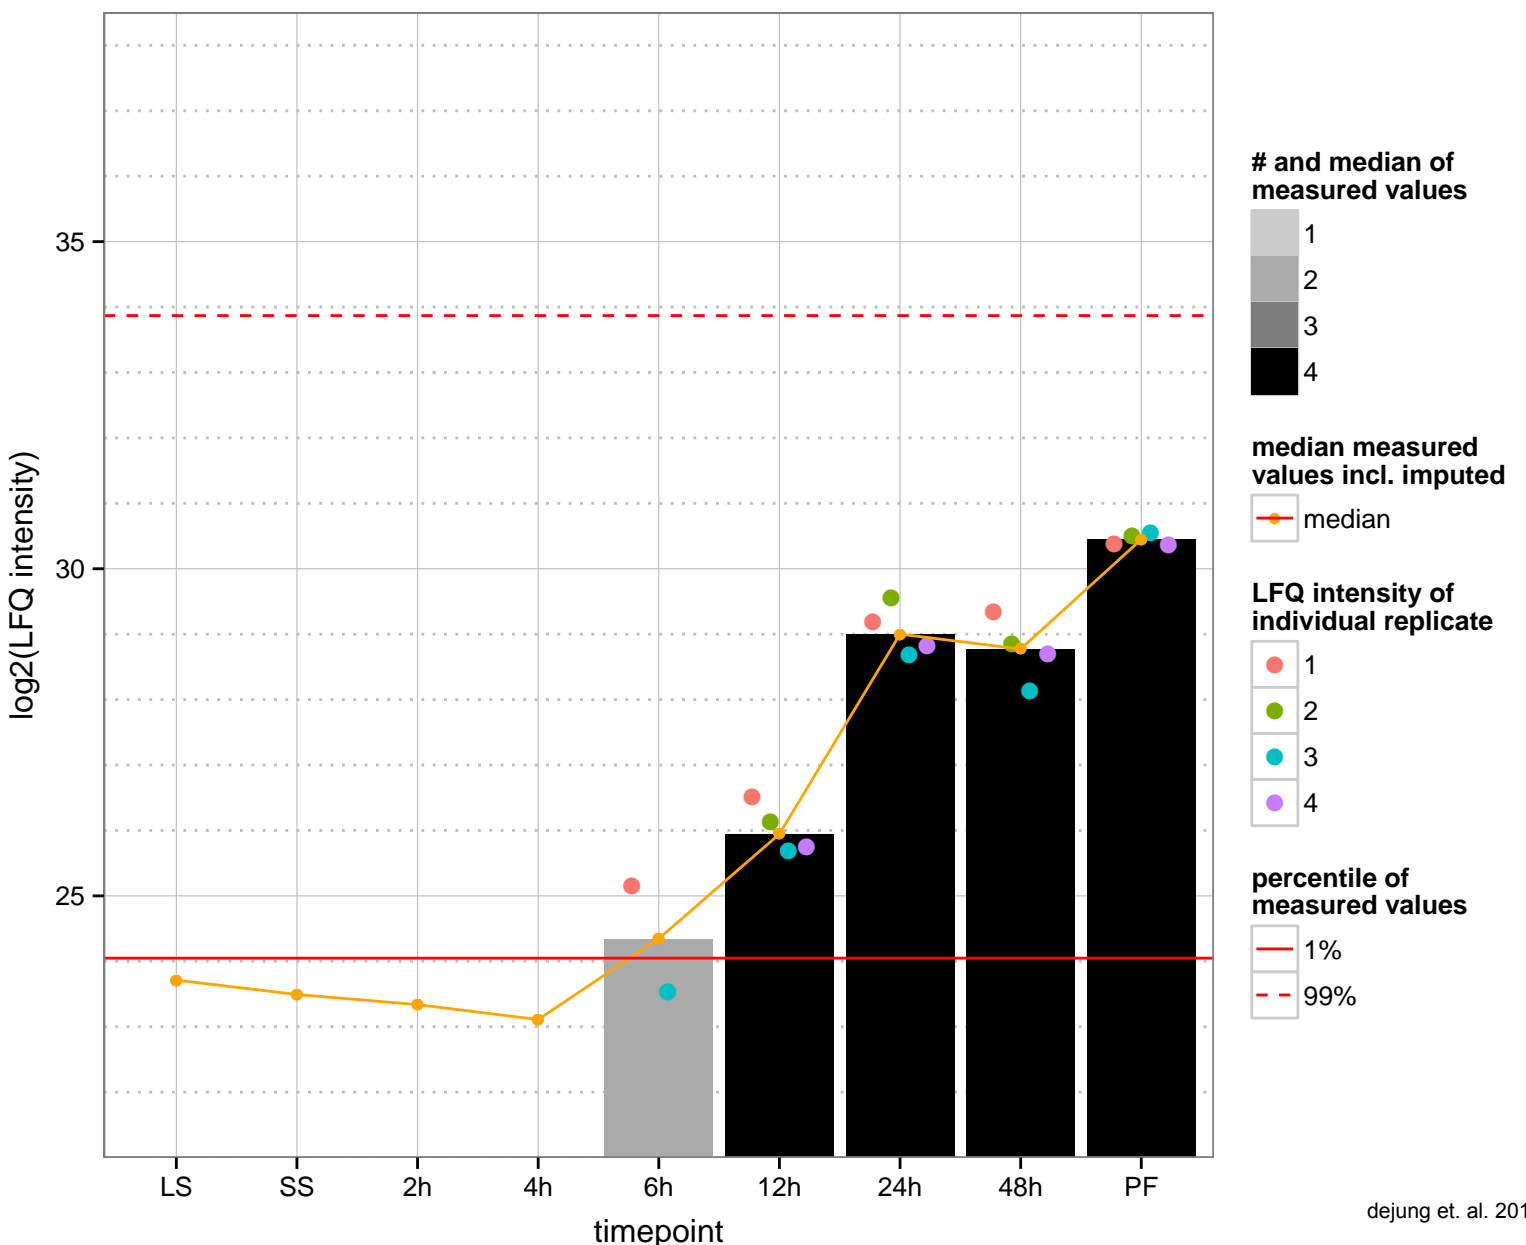

hypothetical protein, conserved  
 Tb927.3.1680  
 AGOF: null  
 AGOC: null  
 AGOP: null  
 PGO: null  
 PGOC: null  
 PGOP: null

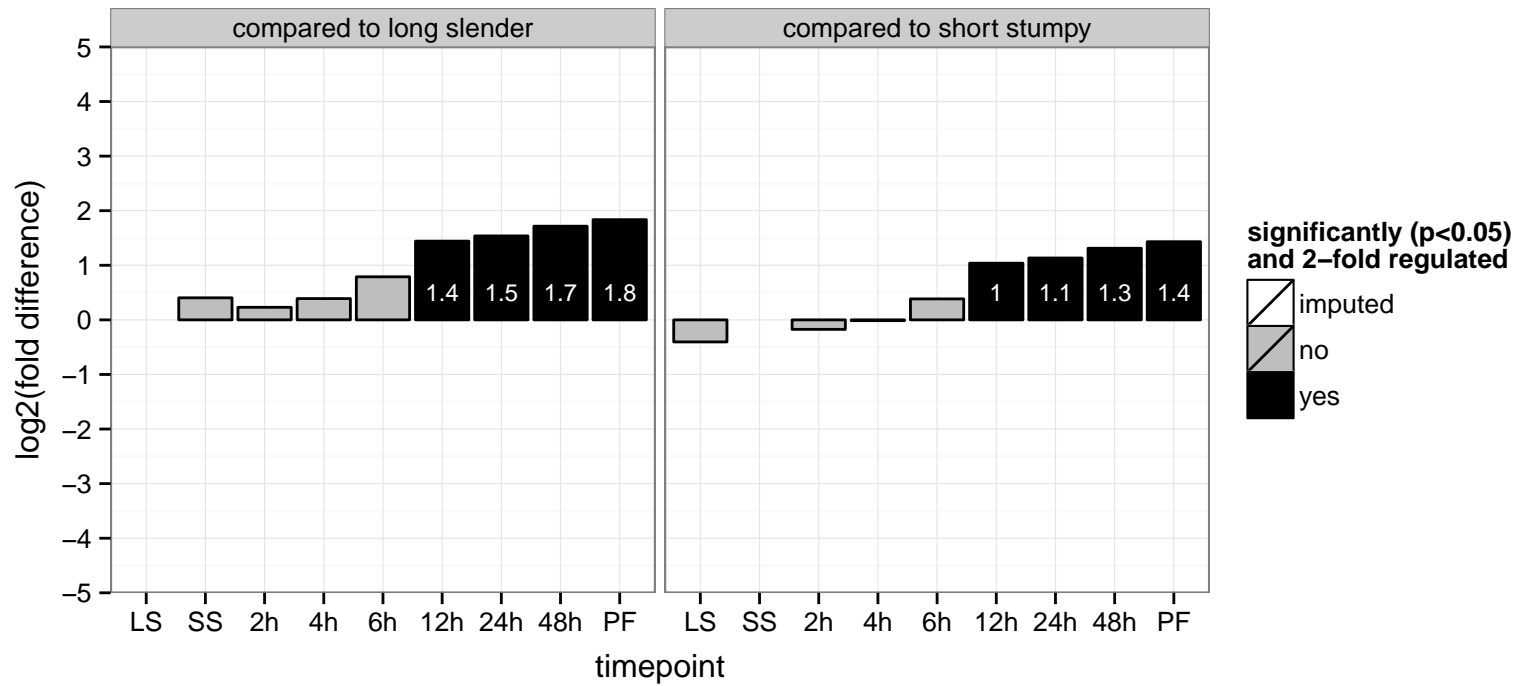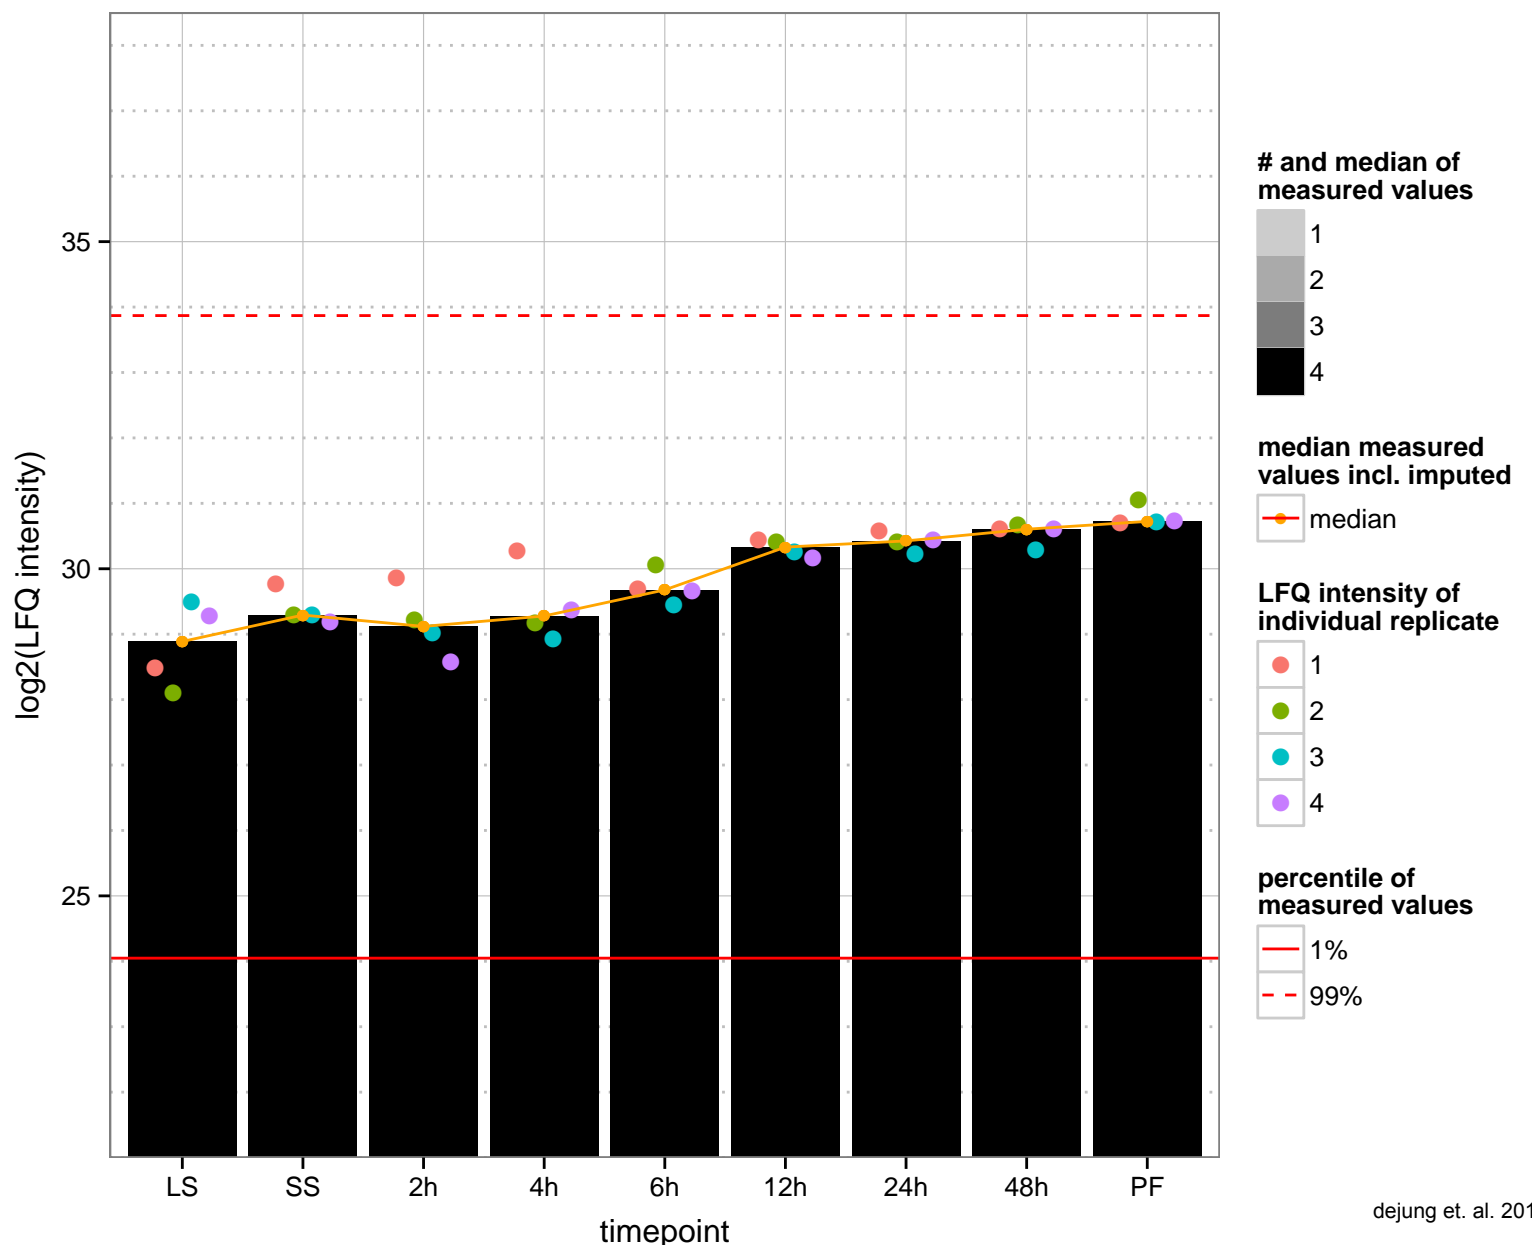

hypothetical protein, conserved  
 Tb927.3.1730  
 AGOF: null  
 AGOC: mitochondrion  
 AGOP: null  
 PGO: null  
 PGOC: null  
 PGOP: null

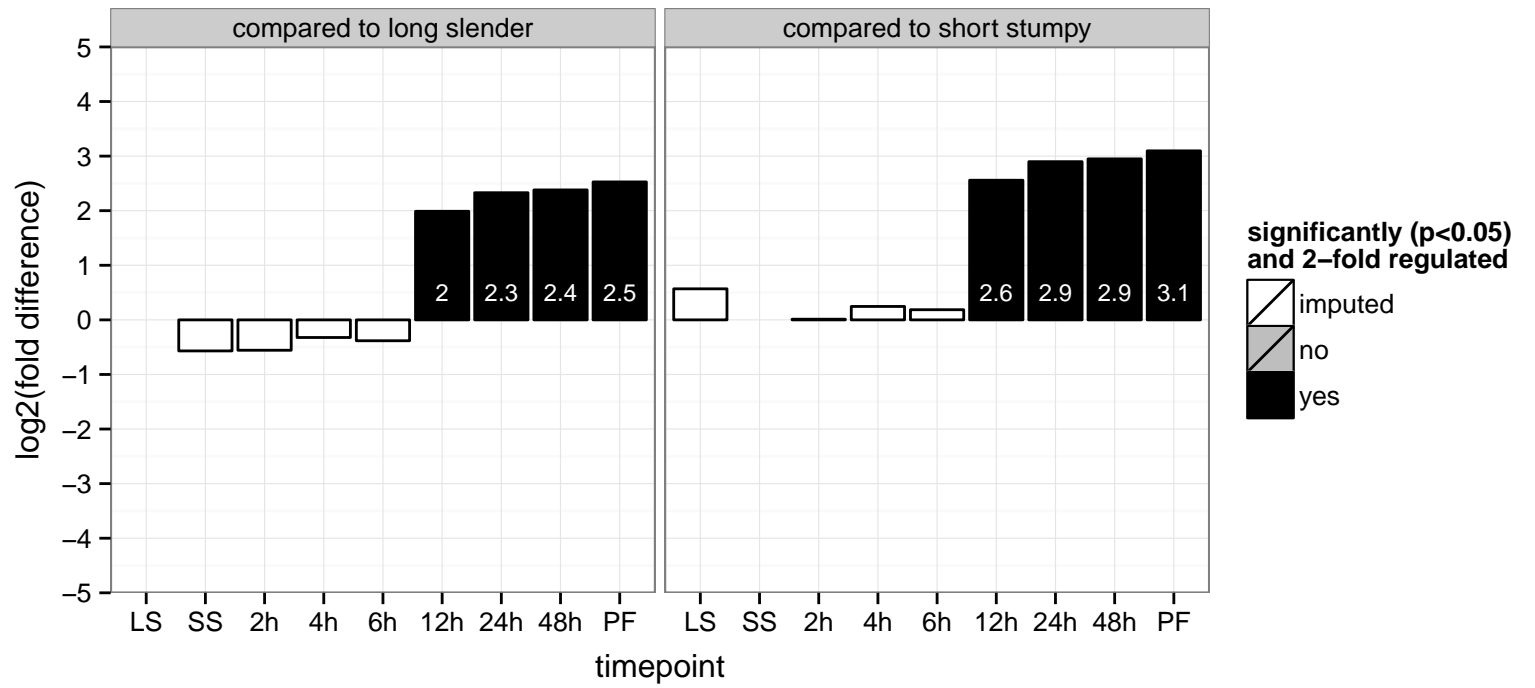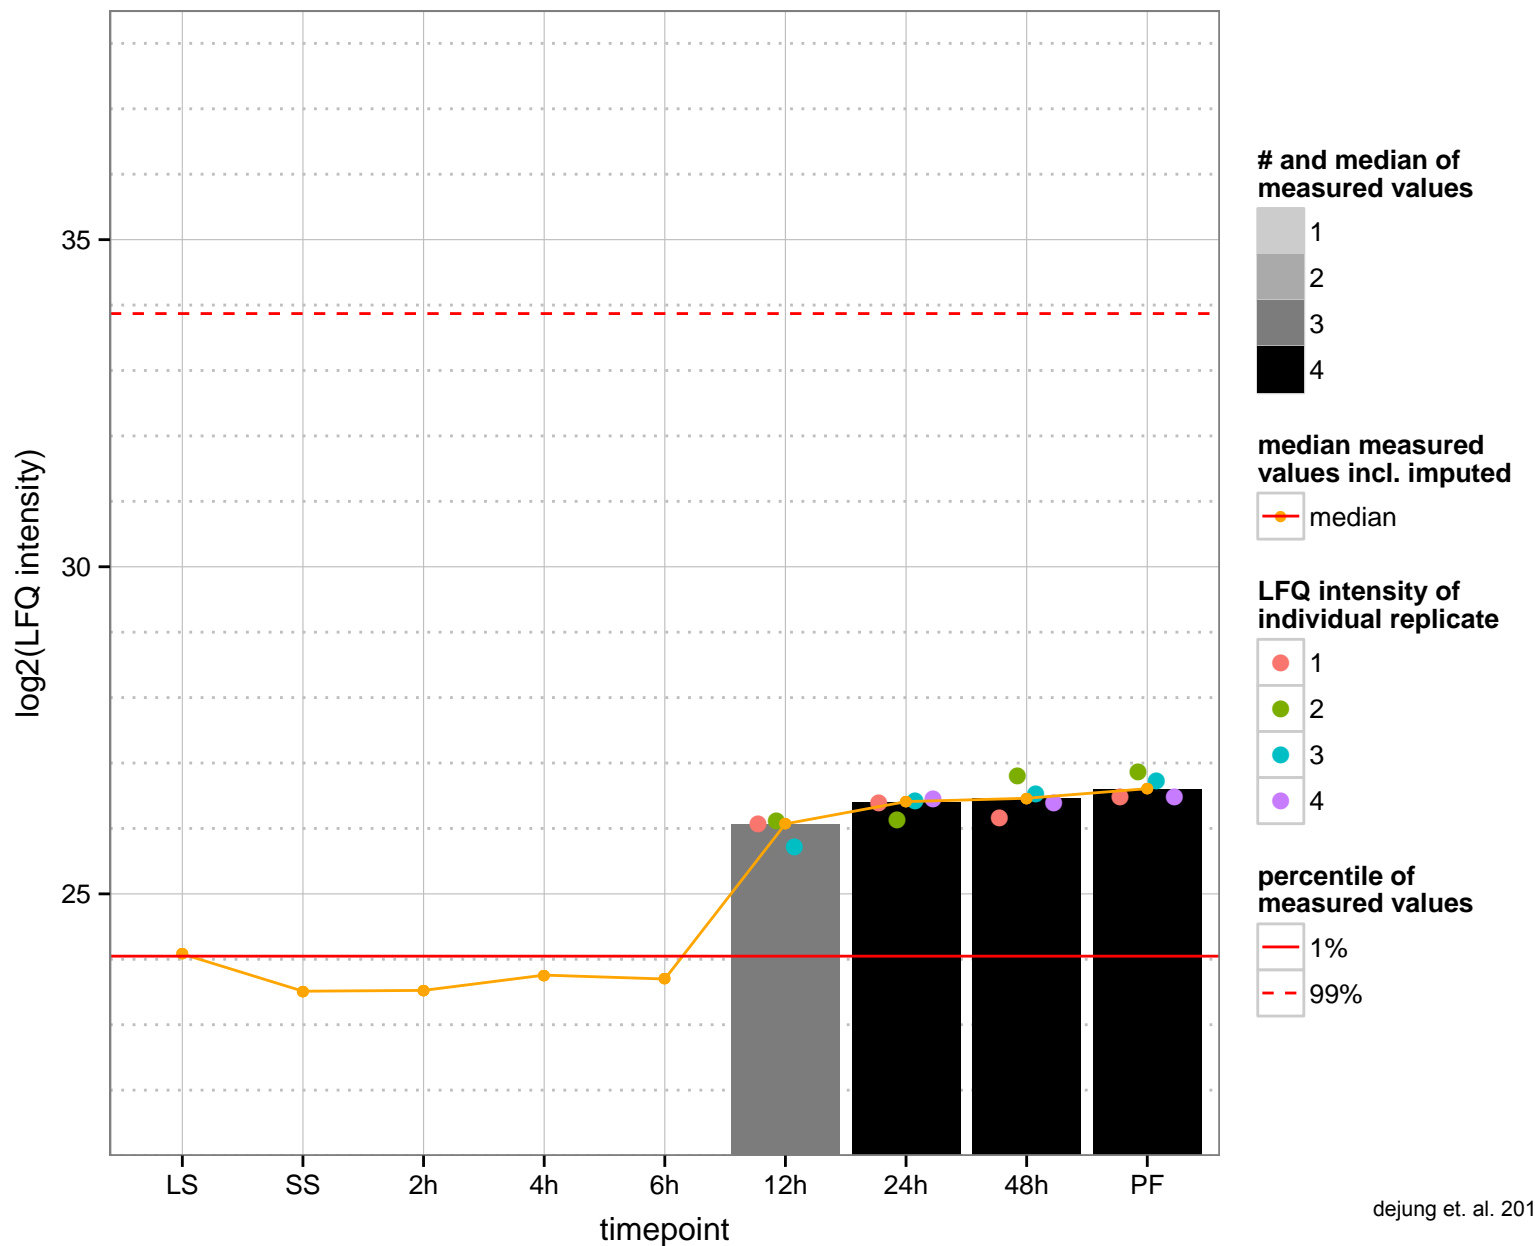

hypothetical protein, conserved  
 Tb927.3.1940  
 AGOF: null  
 AGOC: mitochondrion  
 AGOP: null  
 PGO: null  
 PGO: null  
 PGO: null

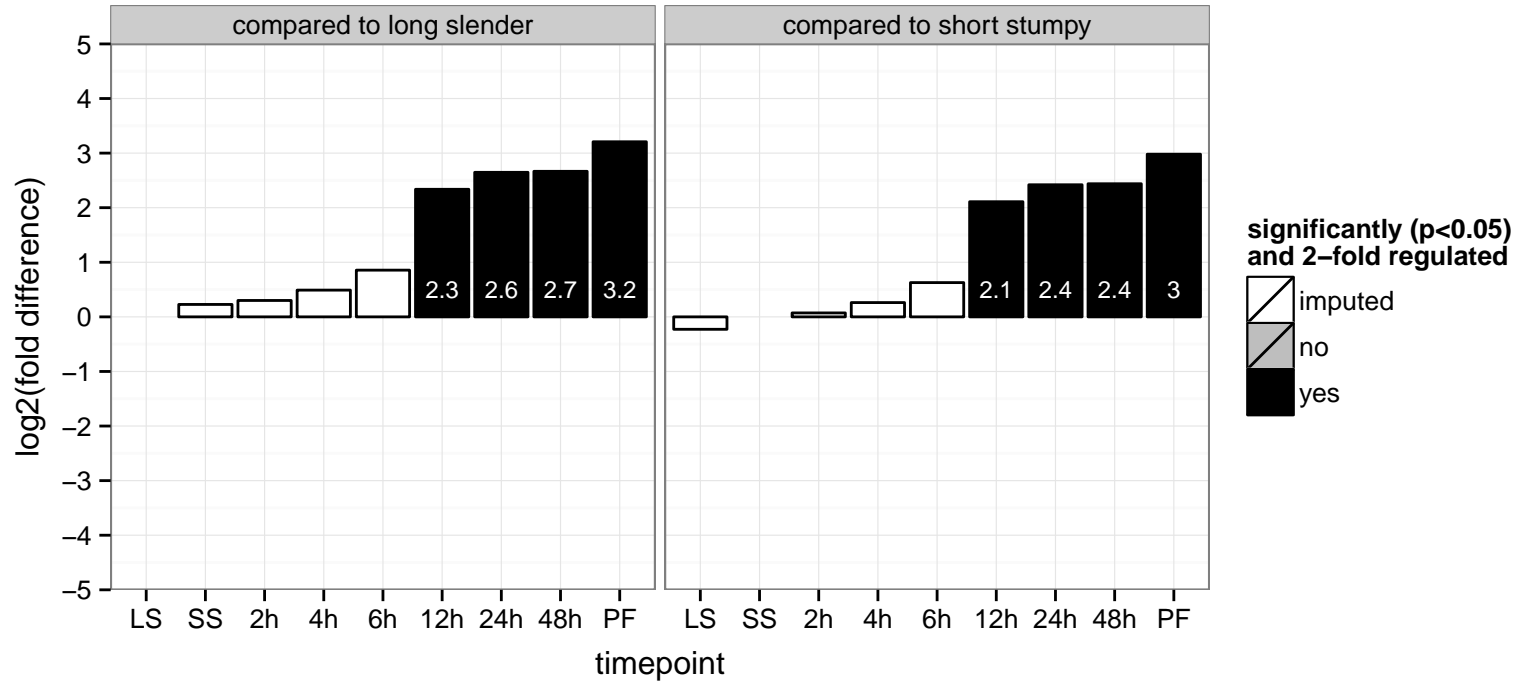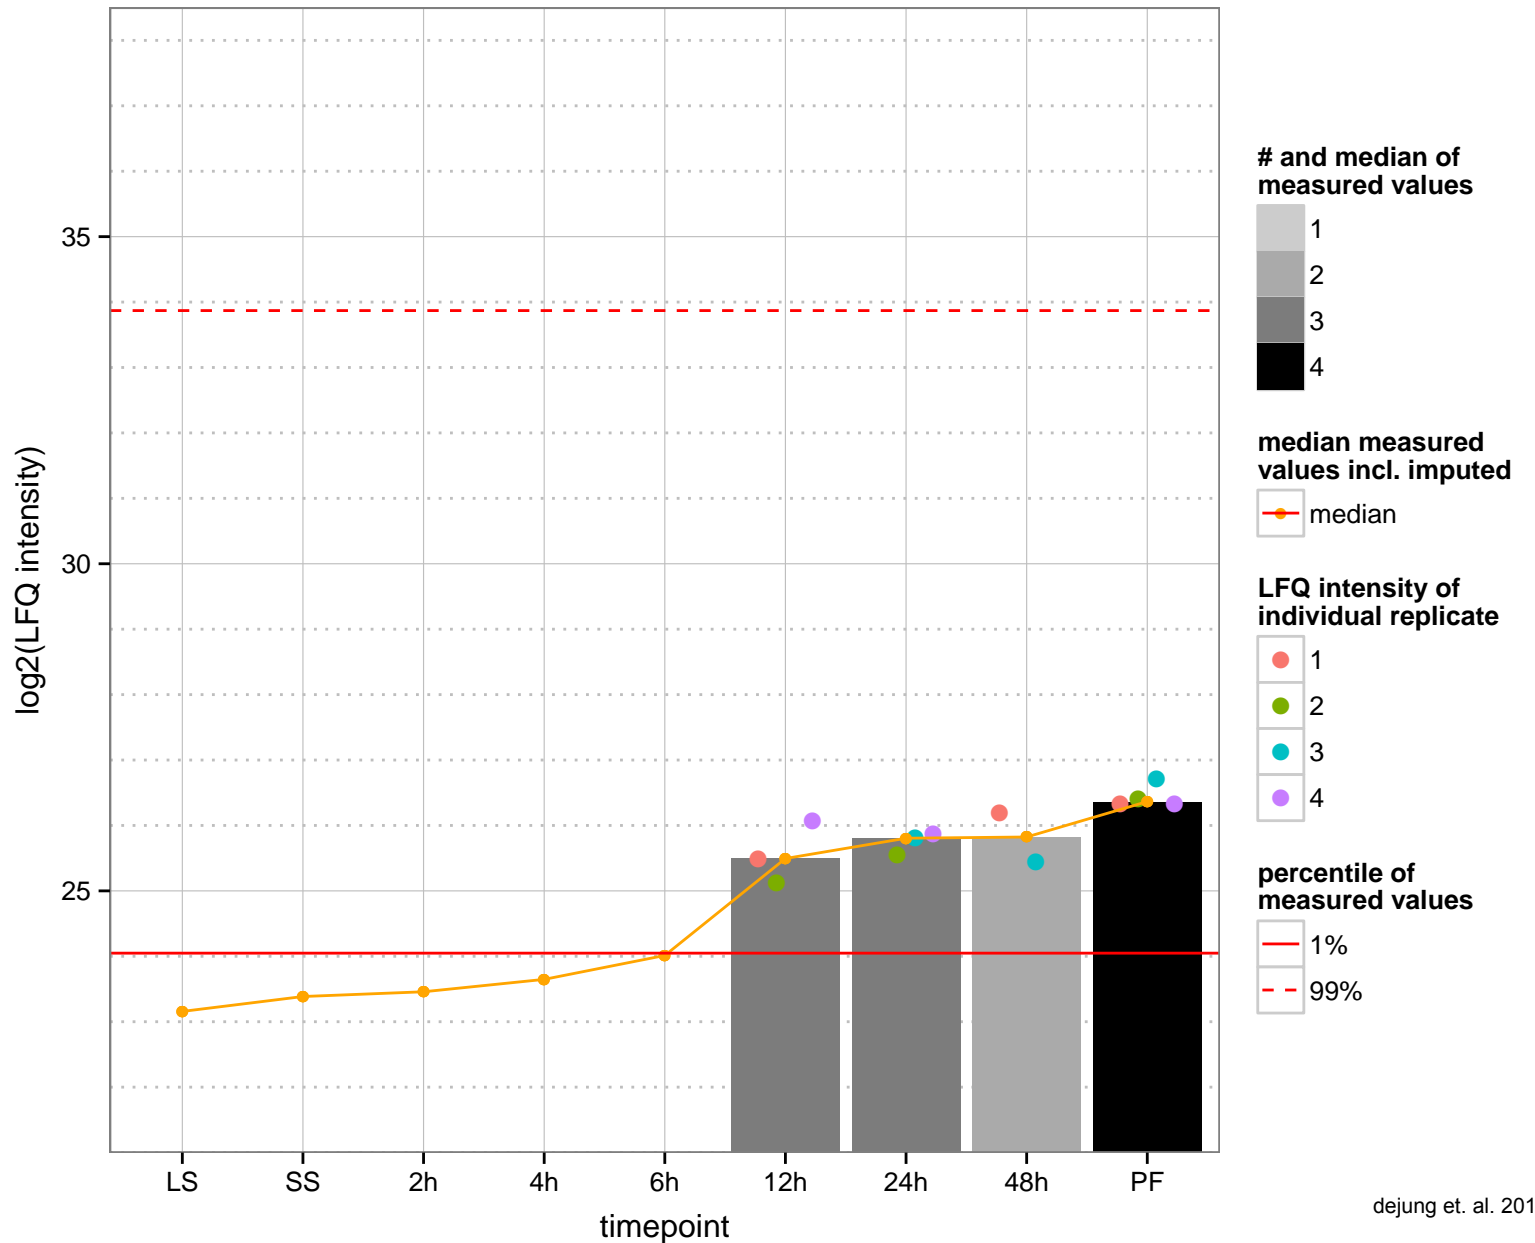



hypothetical protein, conserved  
 Tb927.3.2180  
 AGOF: null  
 AGOC: mitochondrion  
 AGOP: null  
 PGO: null  
 PGO: null  
 PGO: null

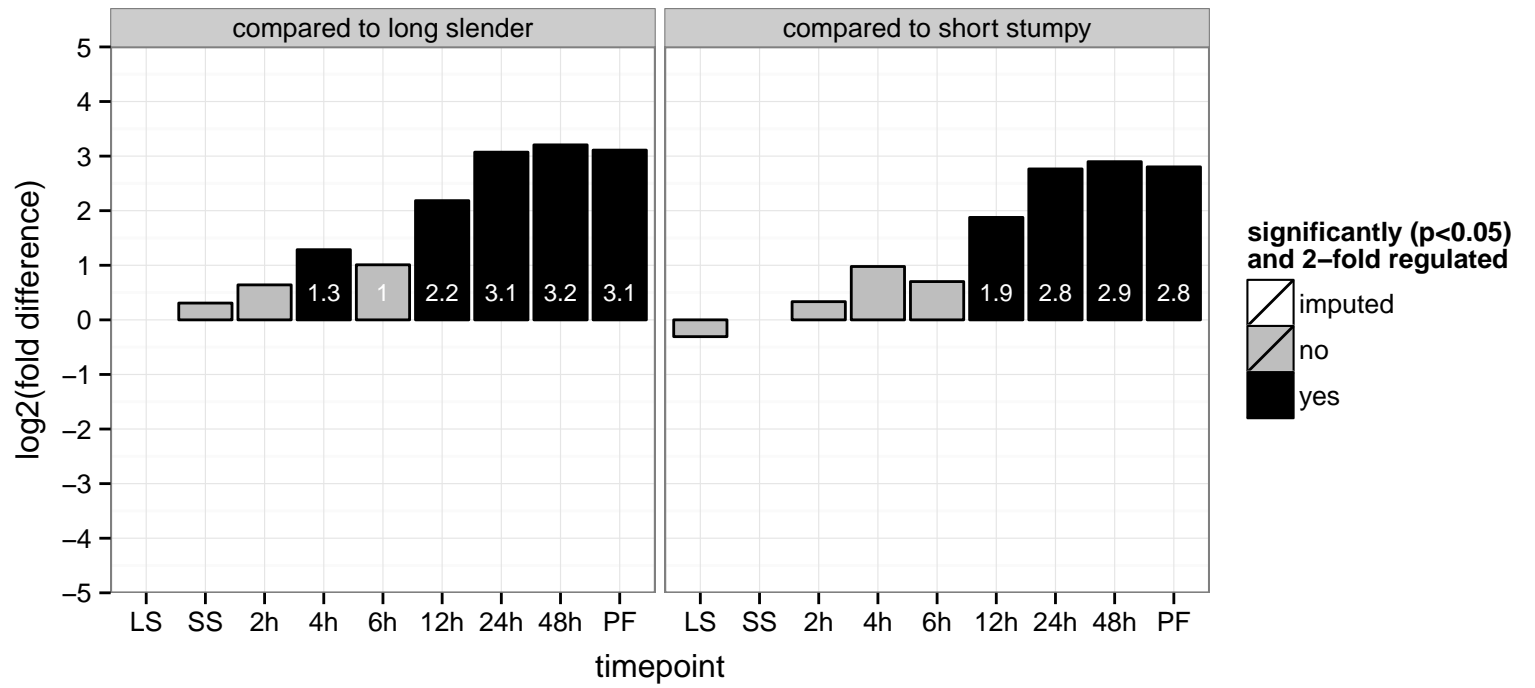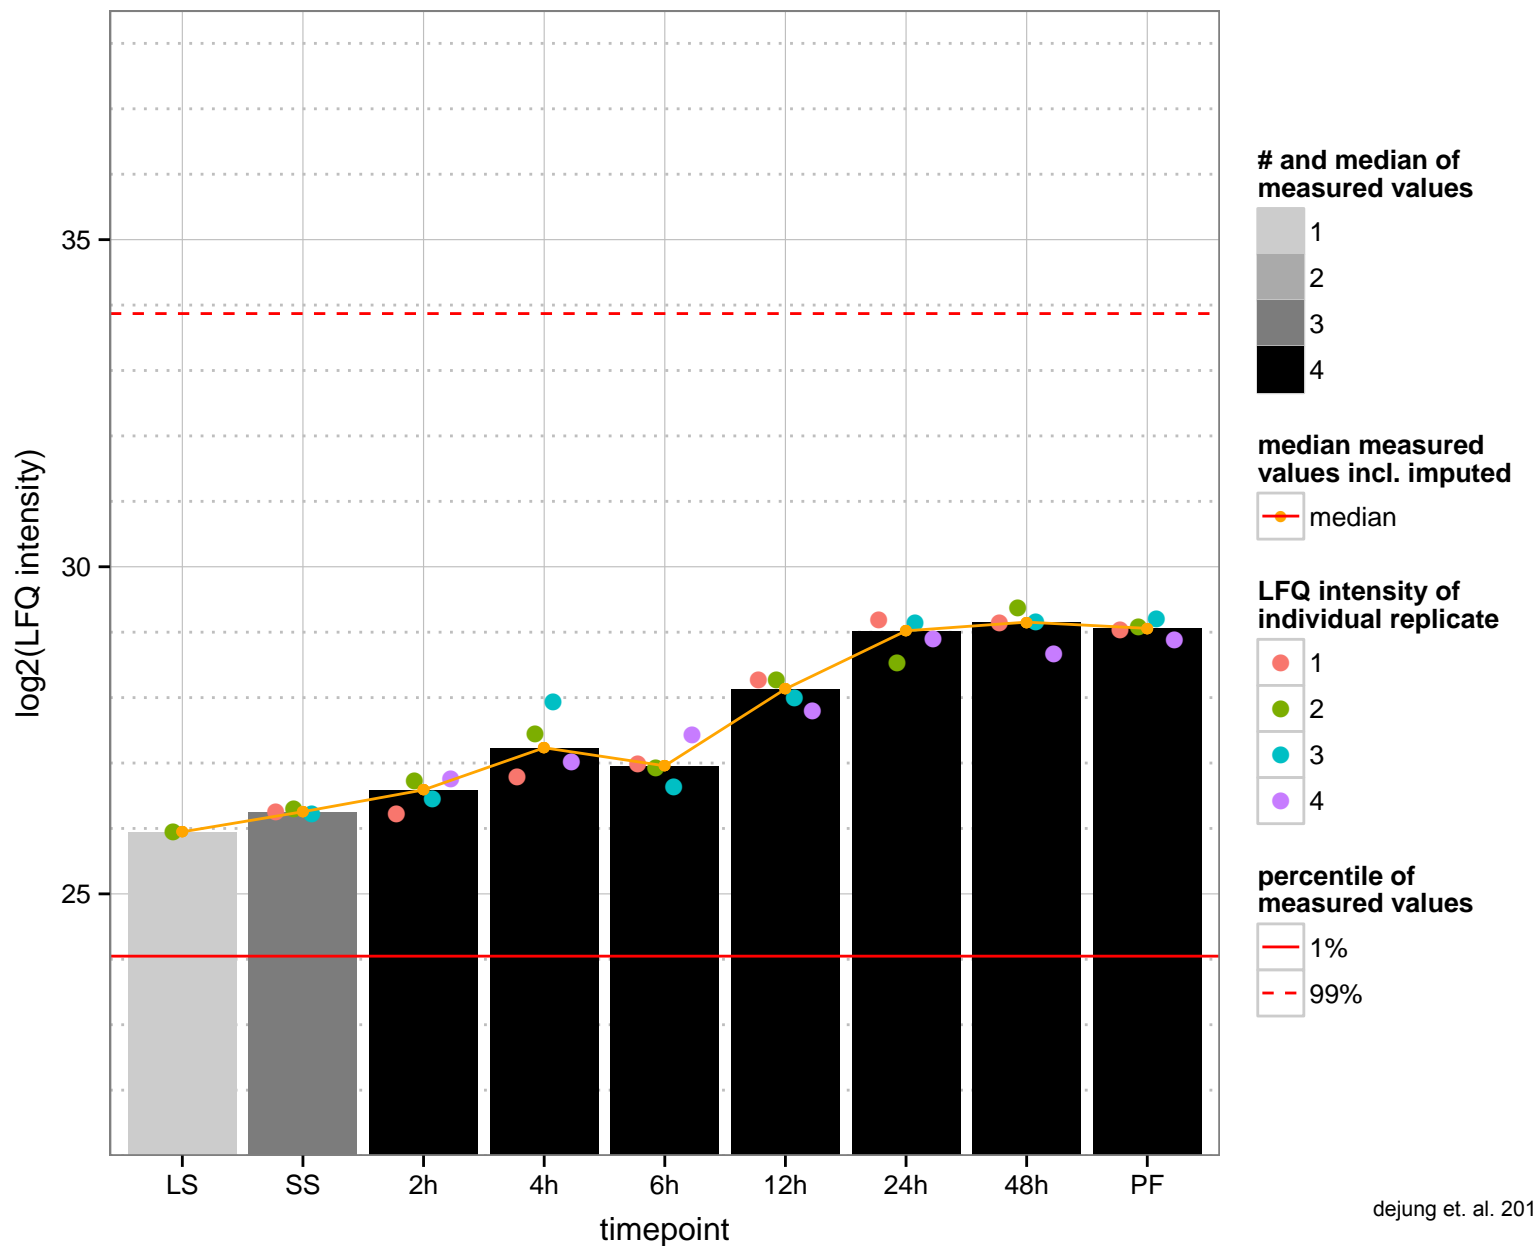

hypothetical protein, conserved  
 Tb927.3.2880  
 AGOF: null  
 AGOC: mitochondrion  
 AGOP: null  
 PGO: null  
 PGO: null  
 PGO: null

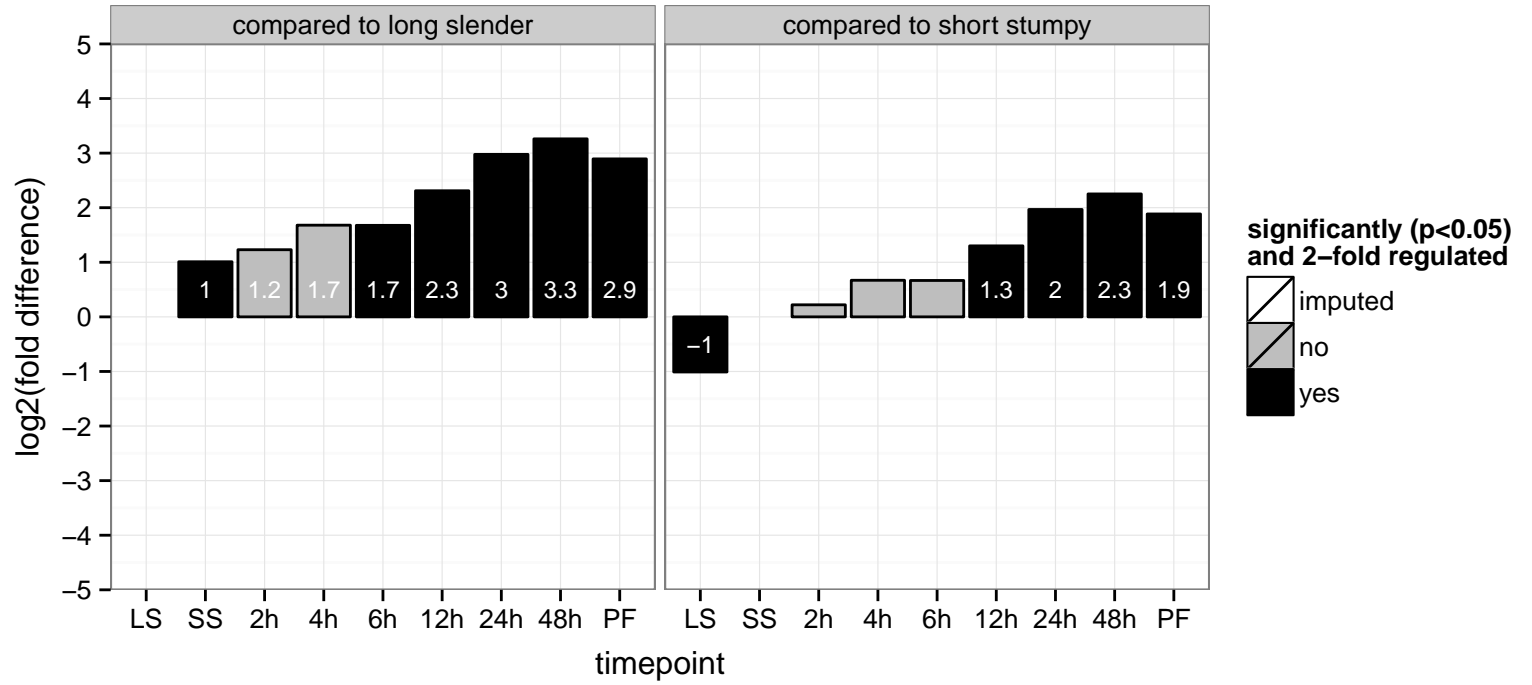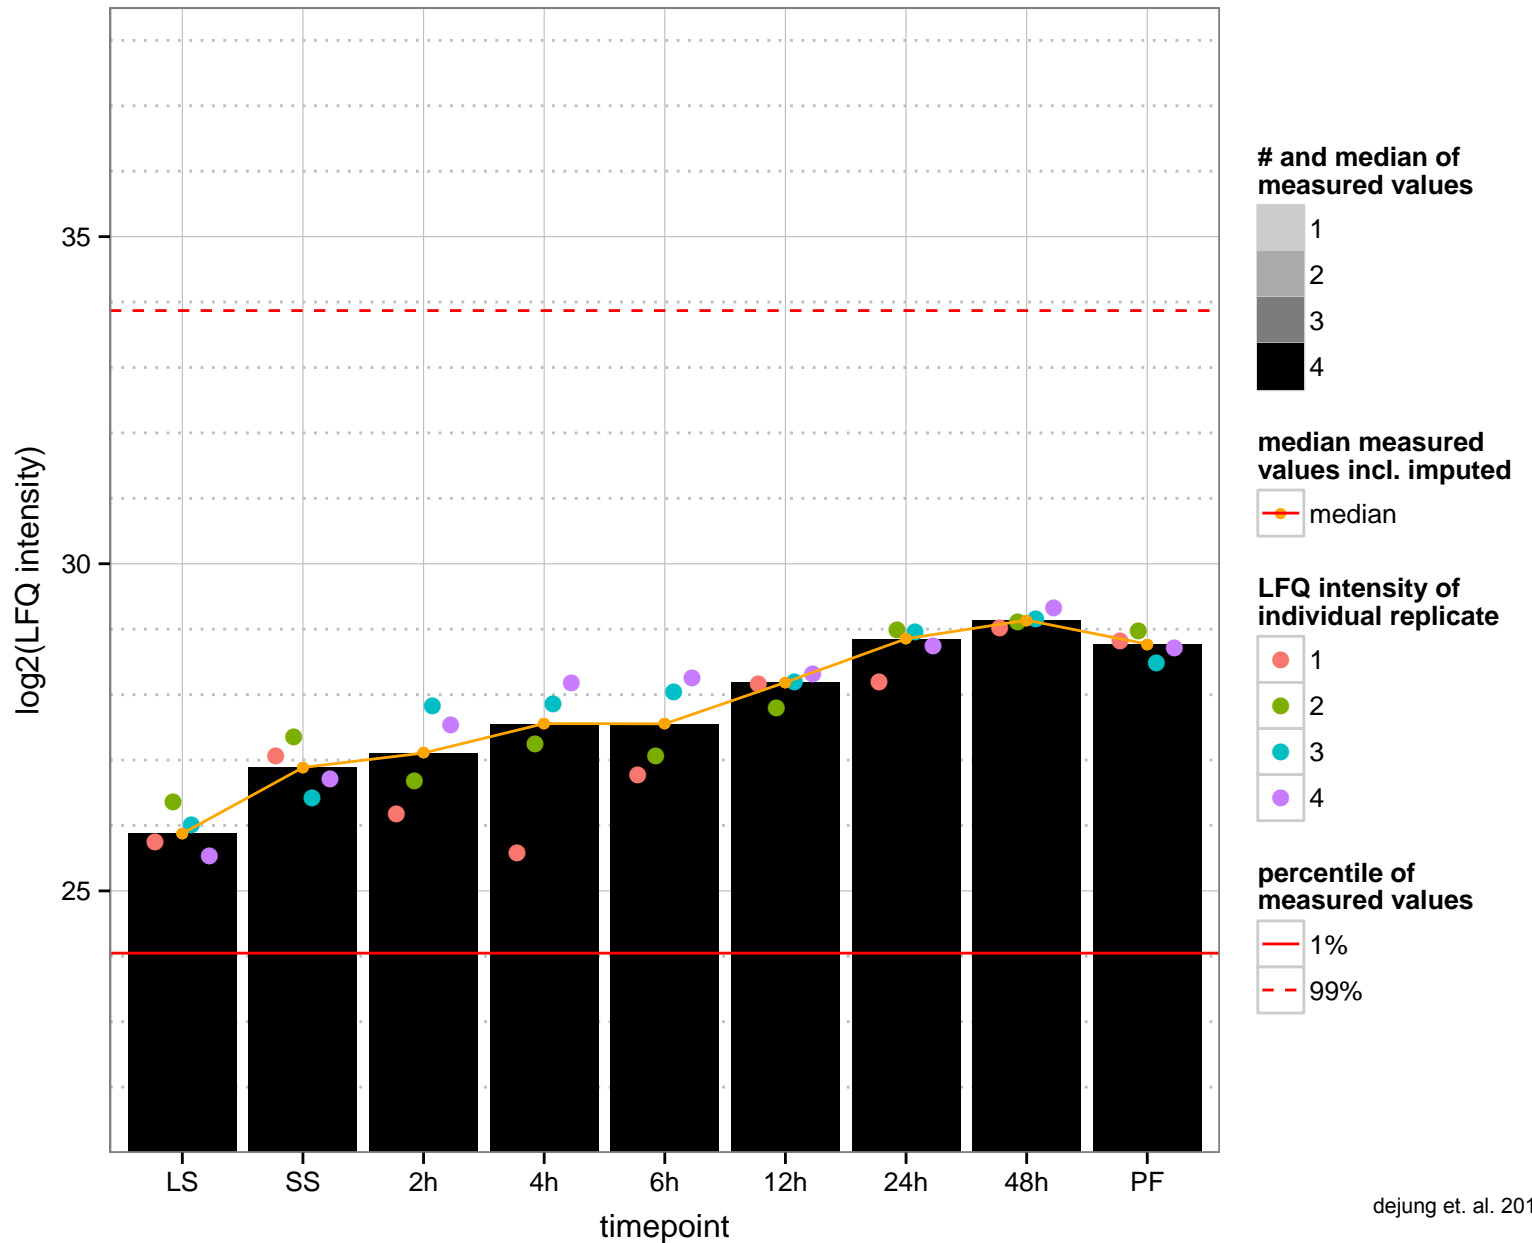

peptidyl-prolyl cis-trans isomerase NIMA-interacting 4, putative  
 Tb927.3.3100  
 AGOF: isomerase activity  
 AGOC: null  
 AGOP: null  
 PGOF: isomerase activity  
 PGOC: null  
 PGOP: null

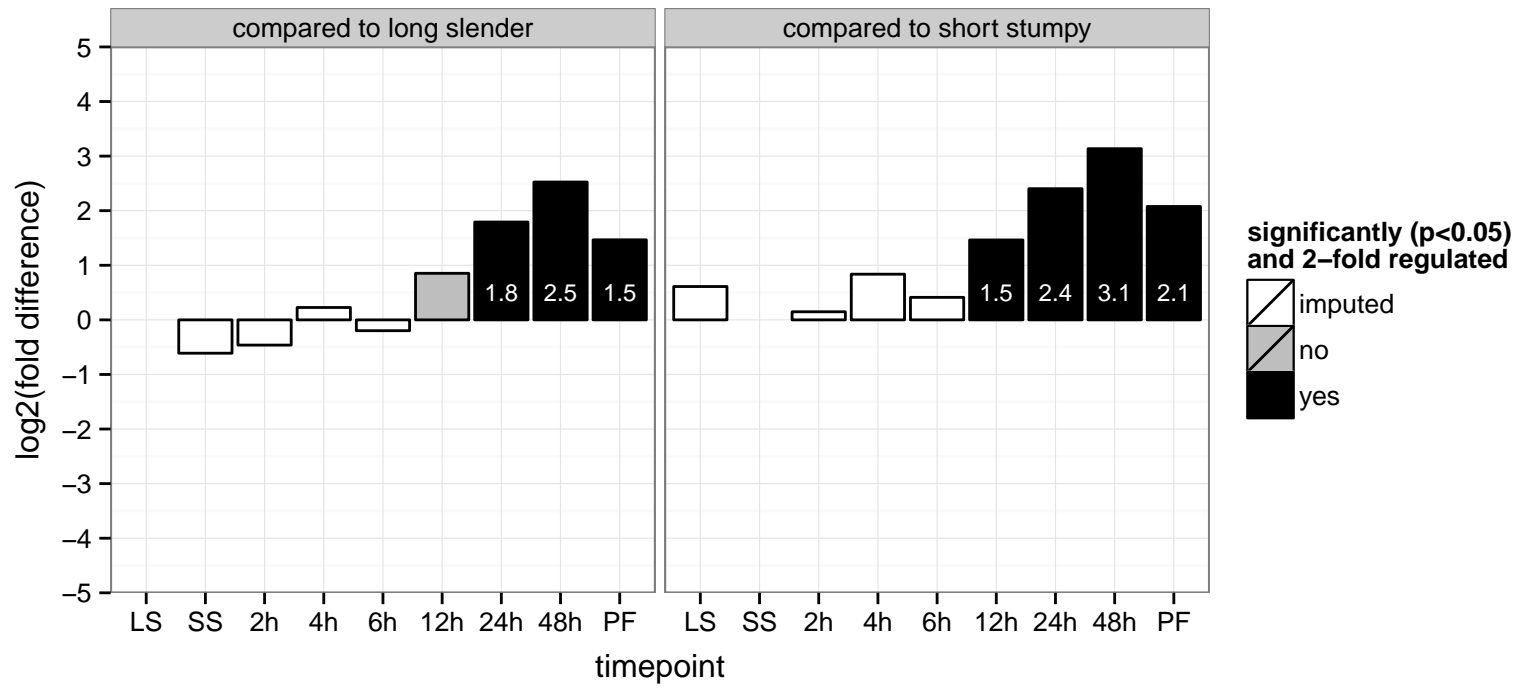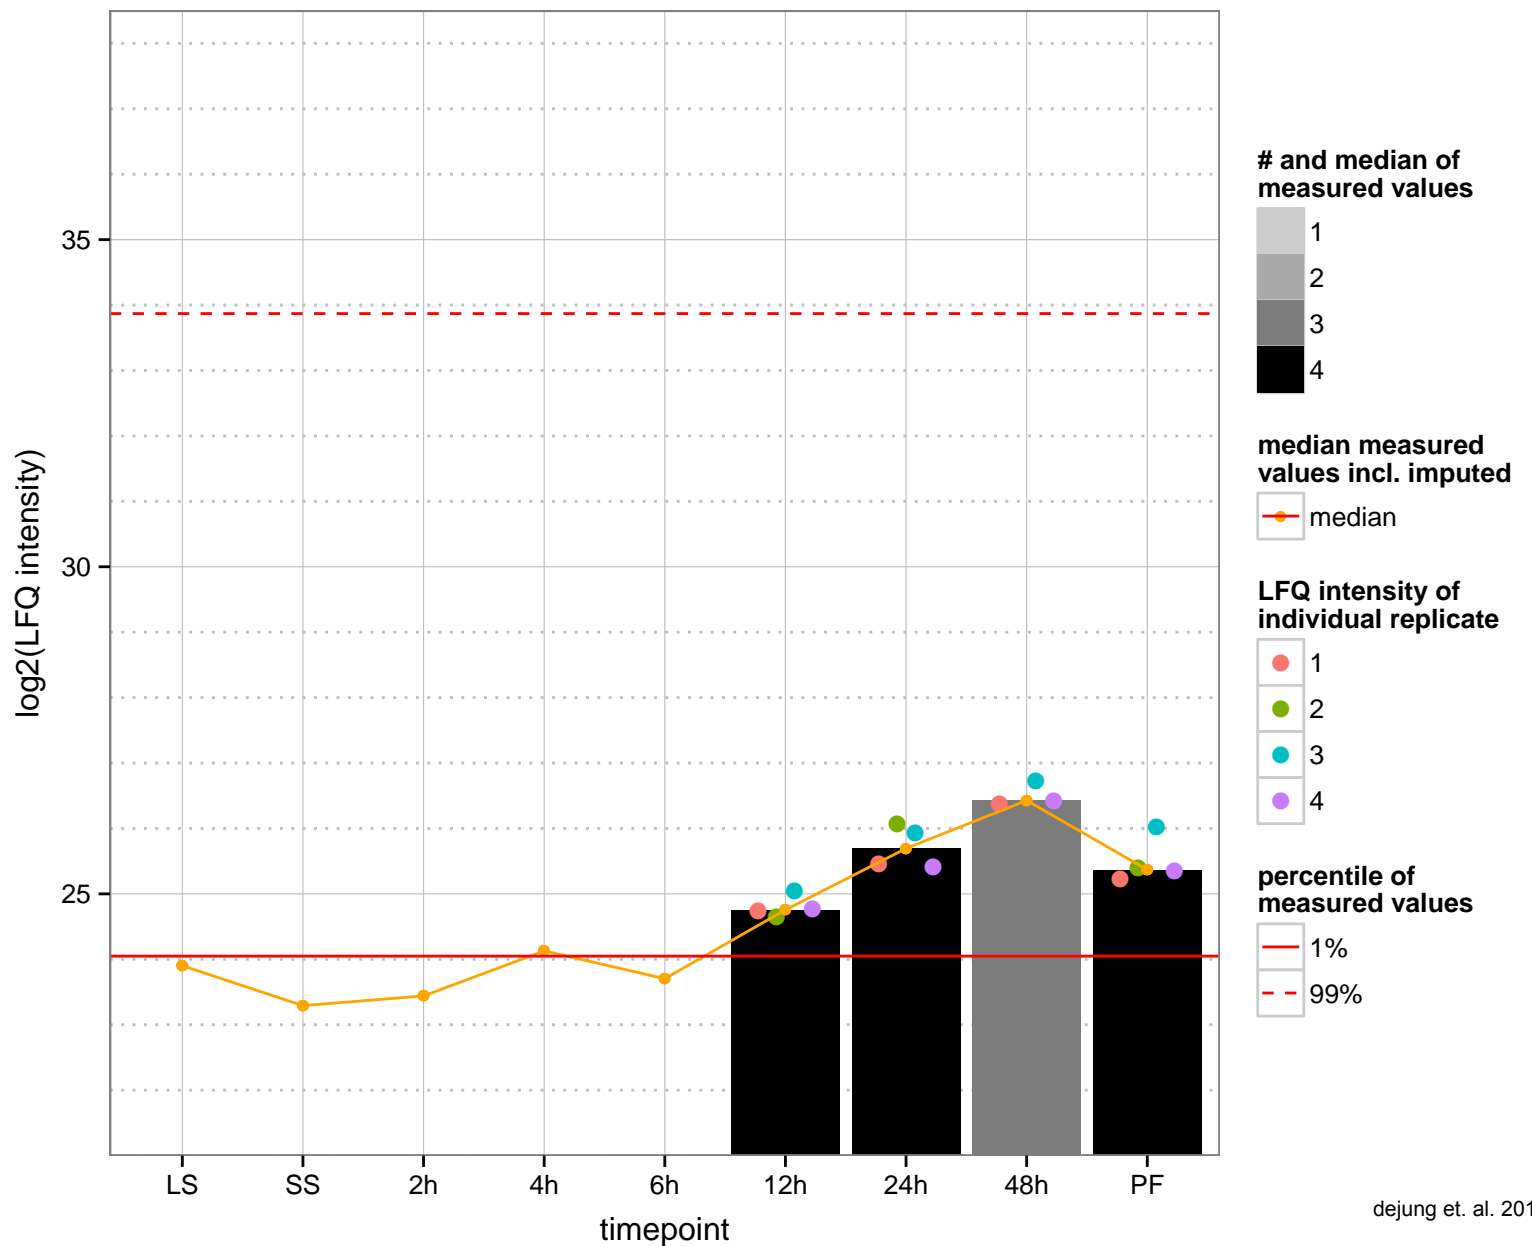

hypothetical protein, conserved  
 Tb927.3.3660  
 AGOF: null  
 AGOC: mitochondrion  
 AGOP: null  
 PGO: null  
 PGO: null  
 PGO: null

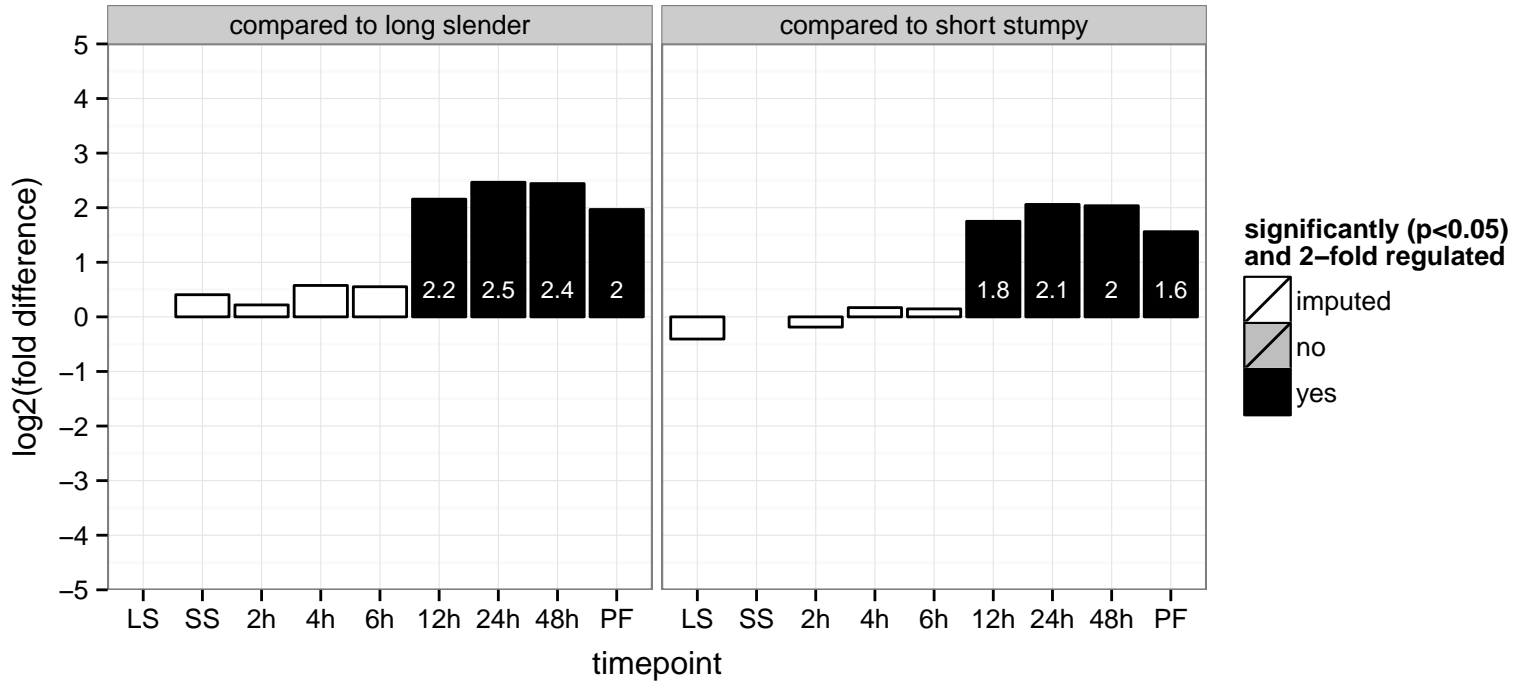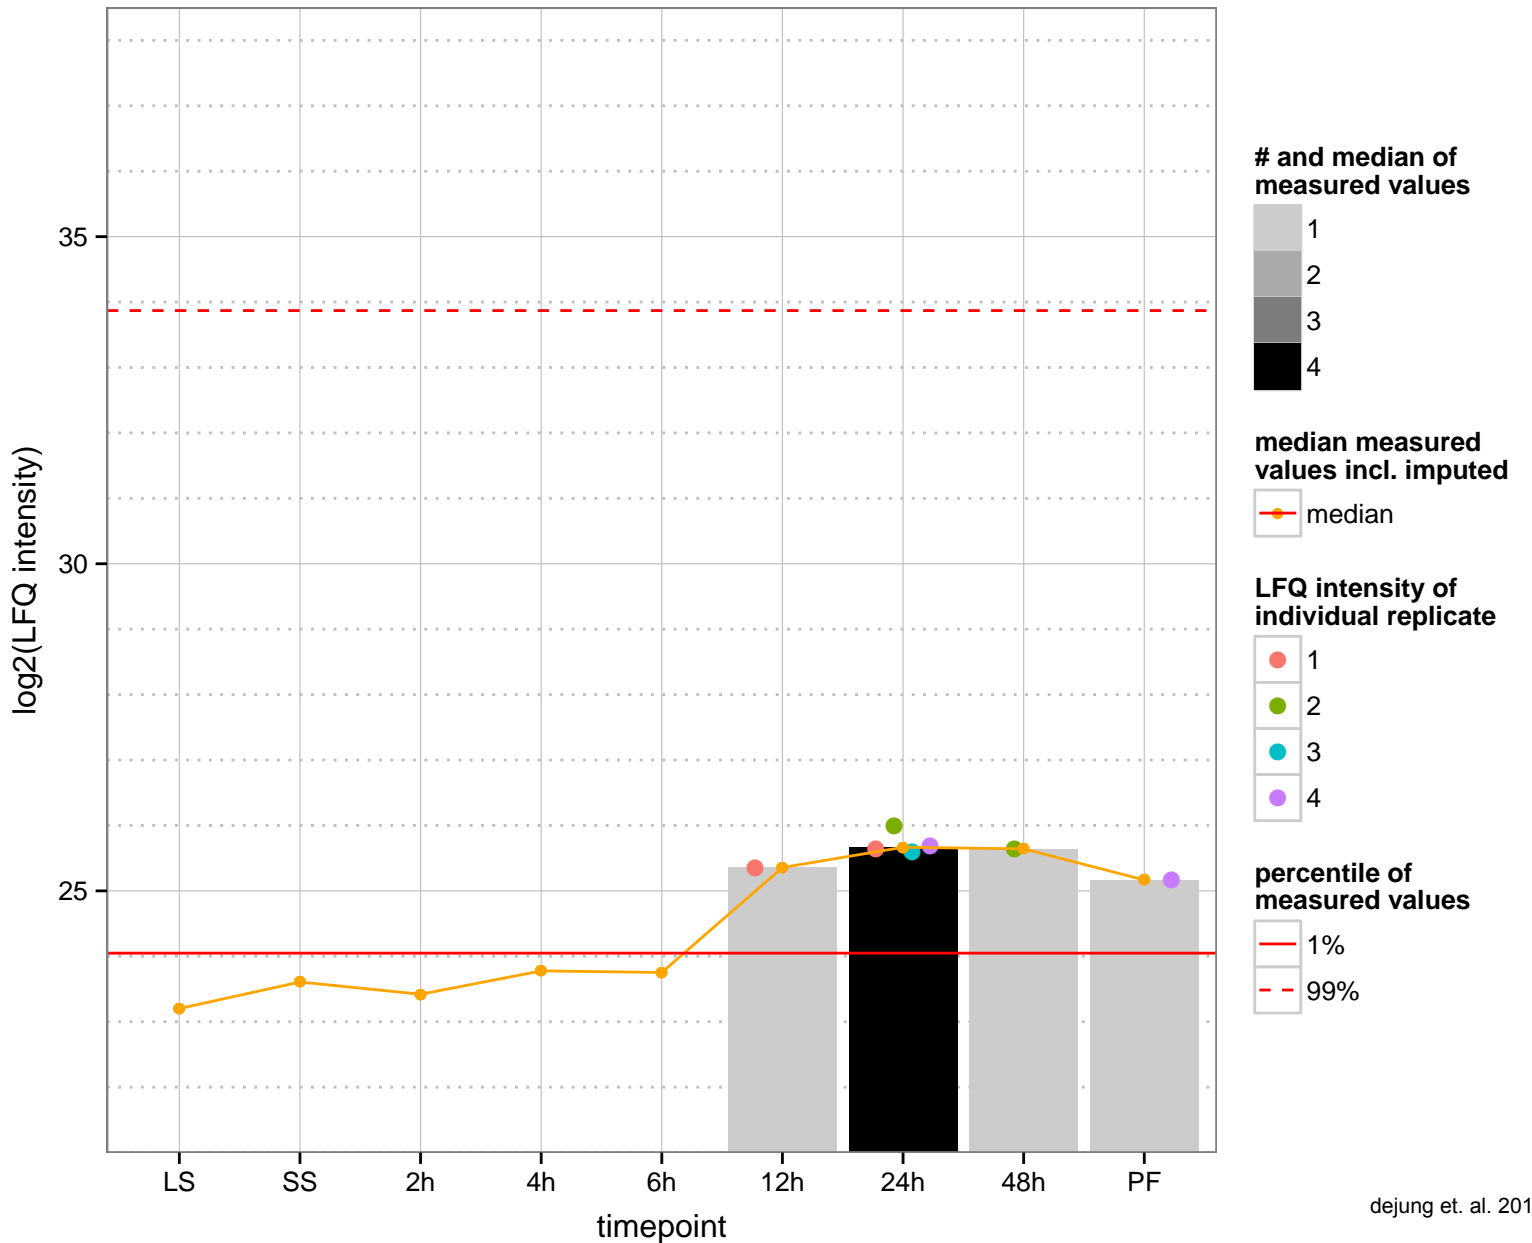

hypothetical protein, conserved  
 Tb927.3.3890  
 AGOF: null  
 AGOC: mitochondrion  
 AGOP: null  
 PGO: null  
 PGO: null  
 PGO: null

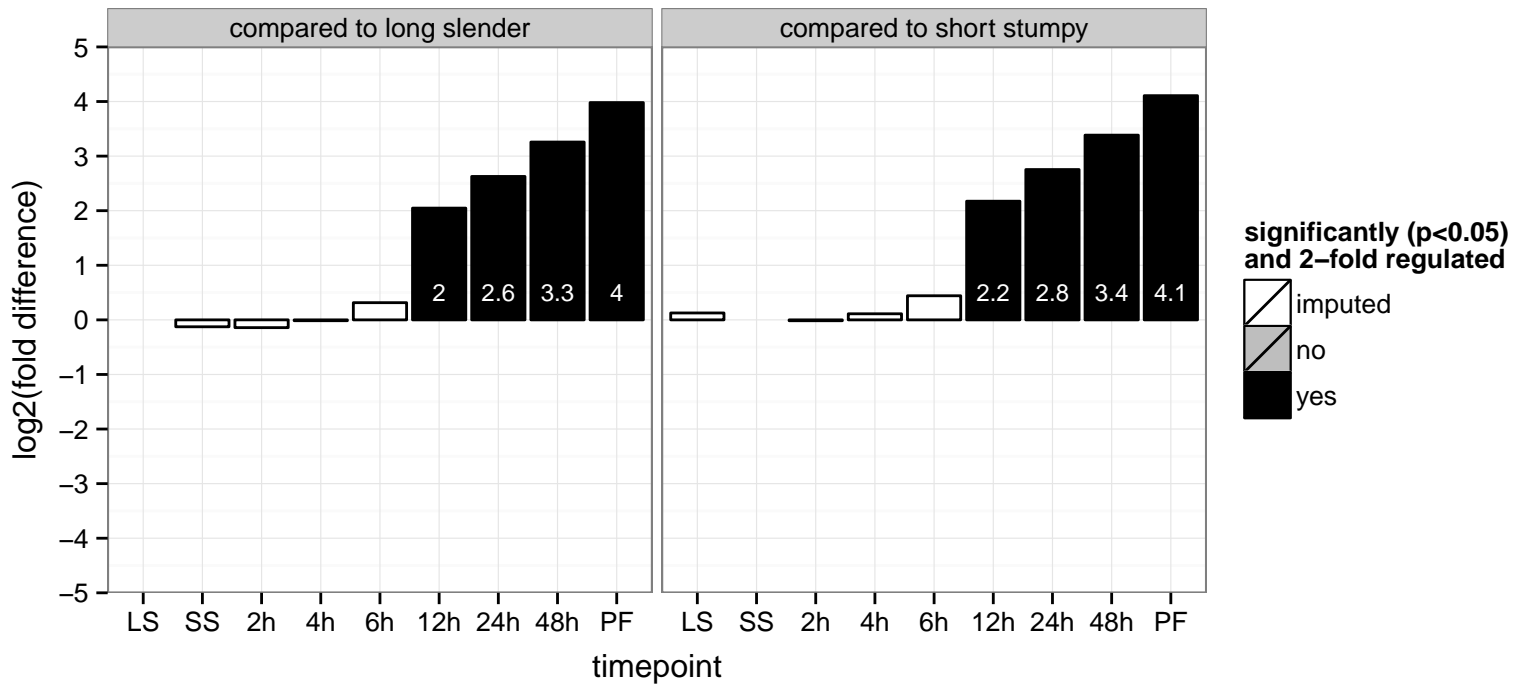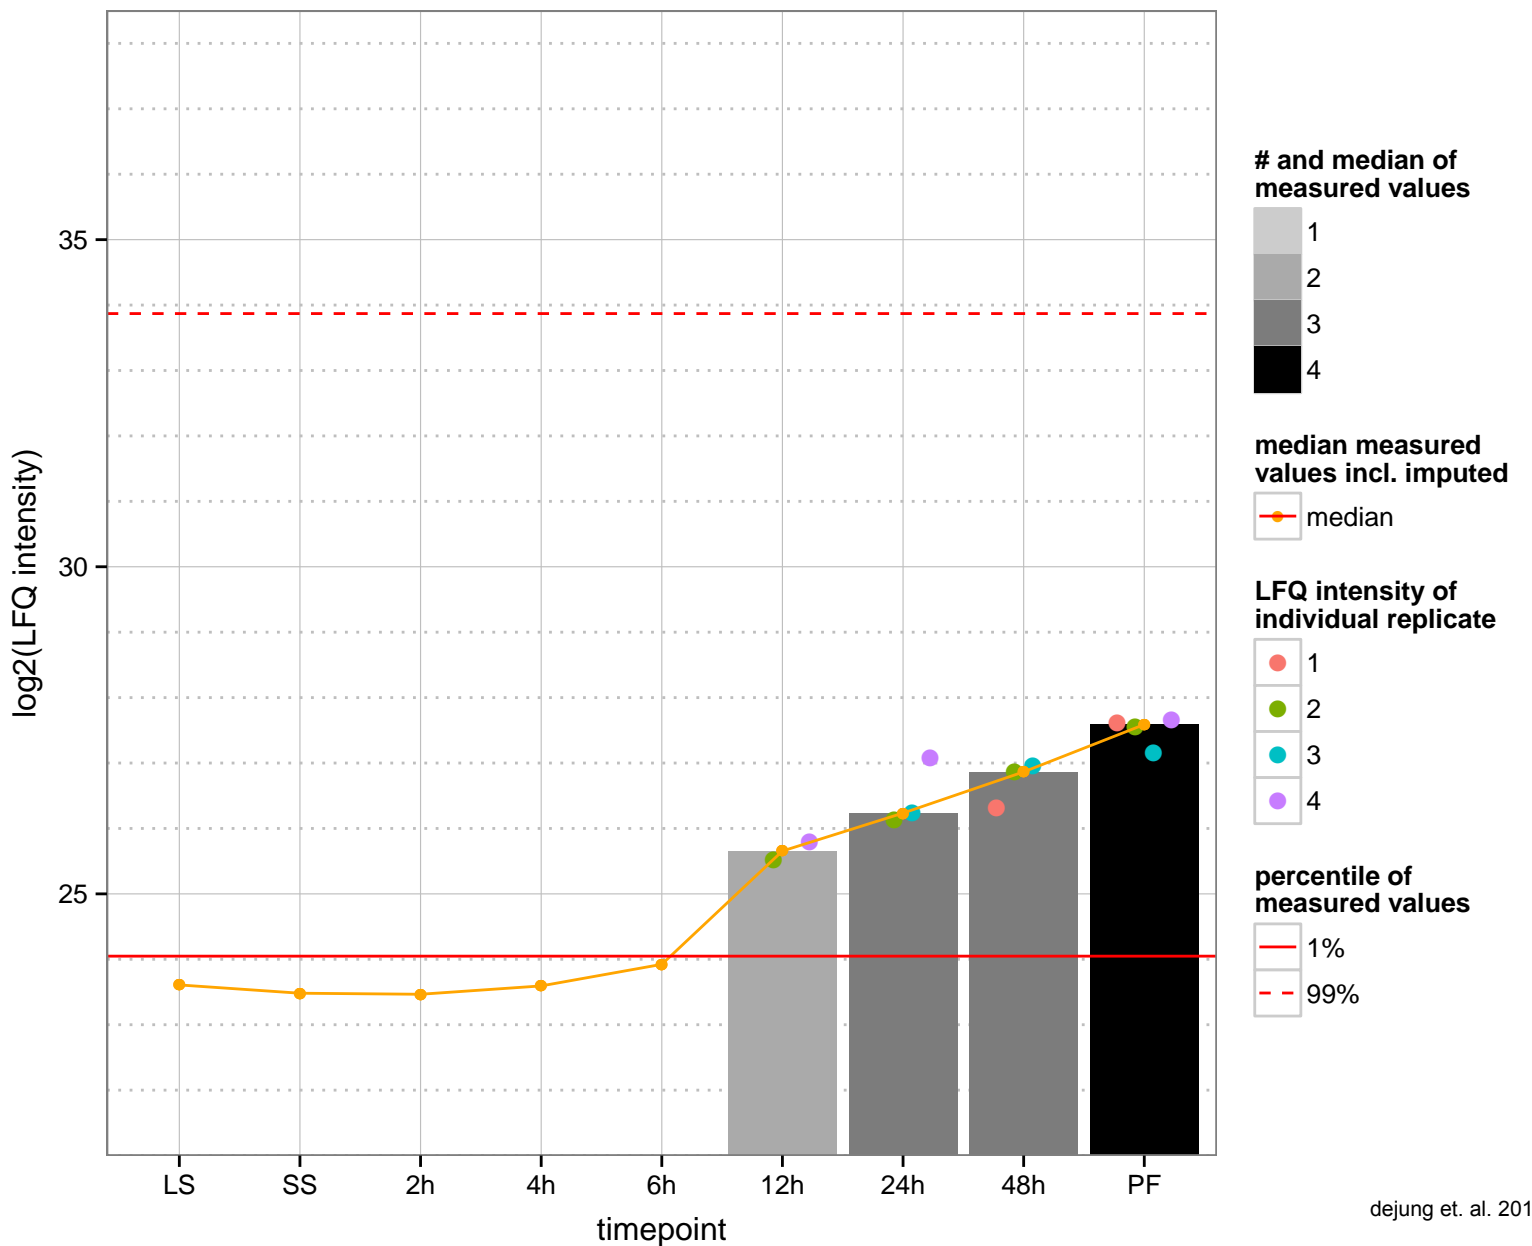

RNA-binding protein (DRBD6B), RNA-binding protein, putative (DRBD11), RNA-binding protein (DRBD6A)  
 Tb927.3.3940  
 AGOF: nucleic acid binding, RNA binding  
 AGOC: null  
 AGOP: RNA processing  
 PGO: nucleic acid binding  
 PGO: null  
 PGO: null

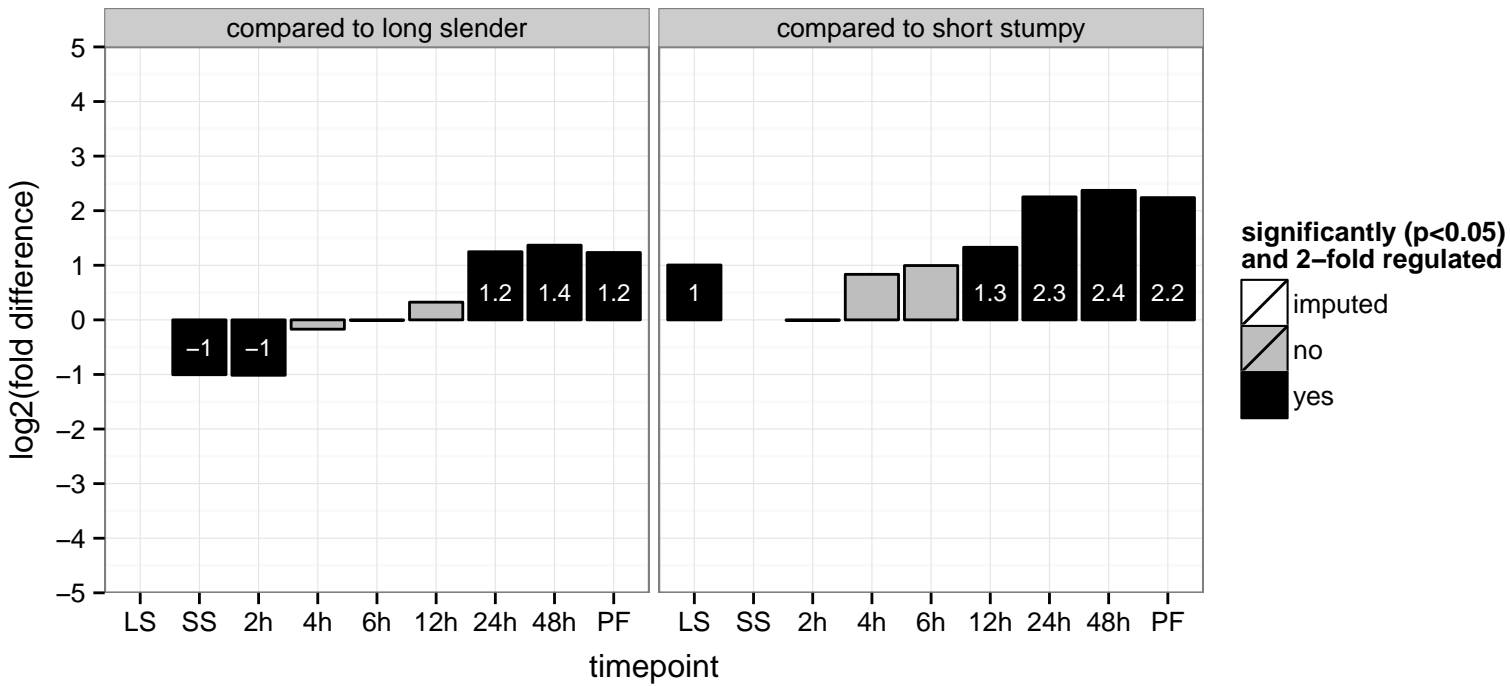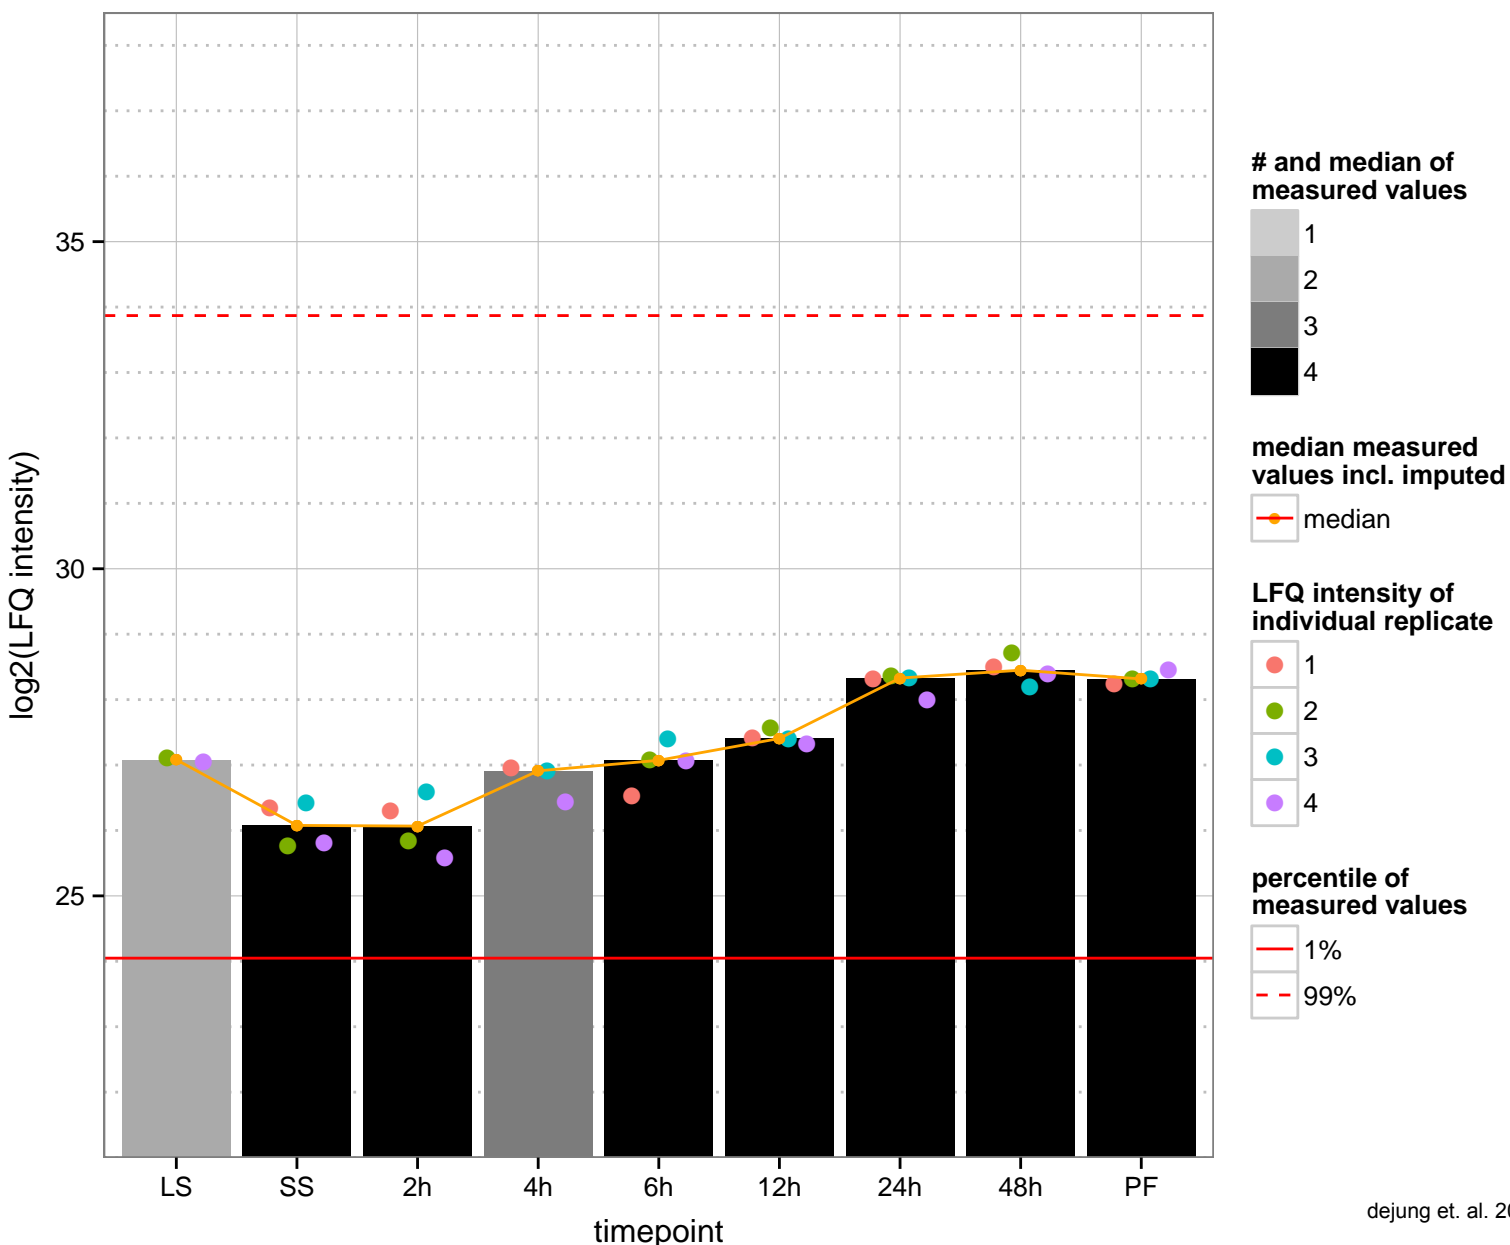

Zinc finger CCCH domain-containing protein 8 (ZC3H8)

Tb927.3.5250

AGOF: RNA binding

AGOC: null

AGOP: null

PGOF: nucleic acid binding, zinc ion binding

PGOC: null

PGOP: null

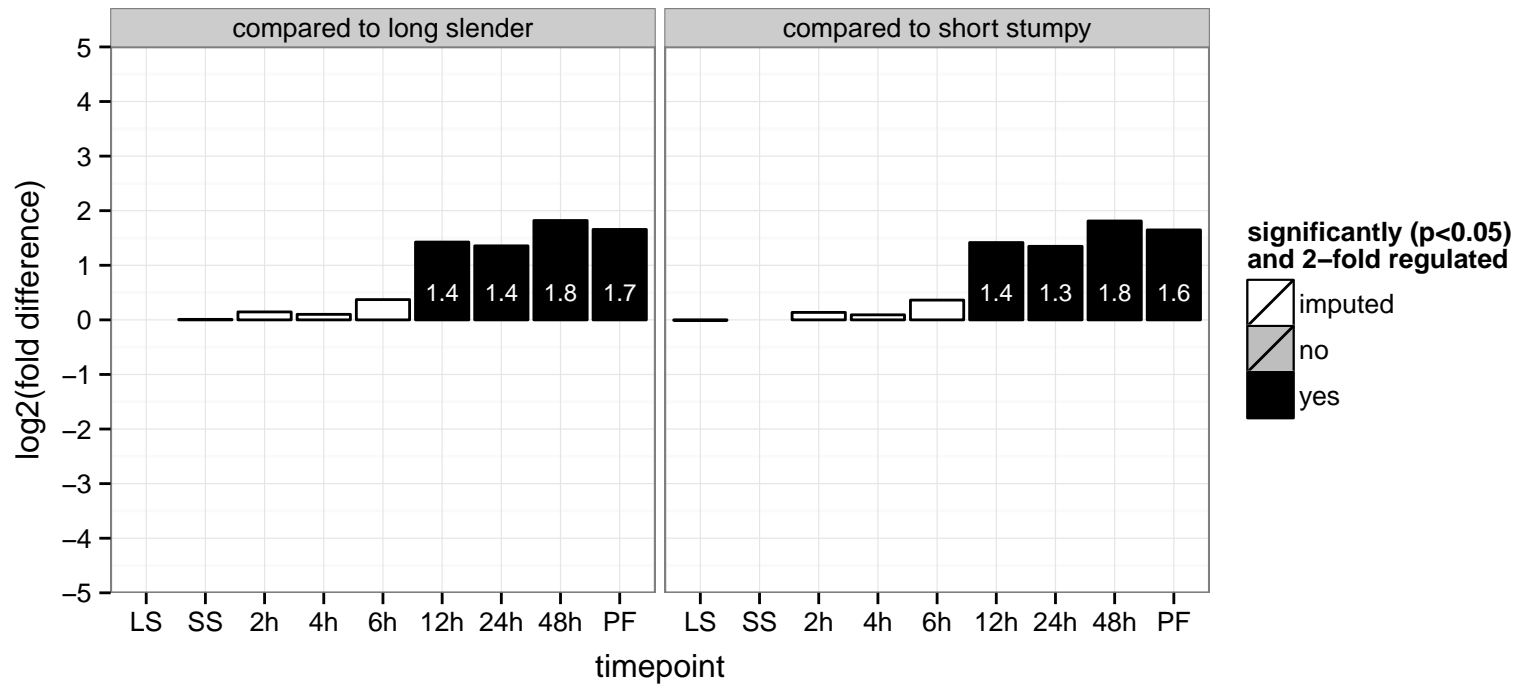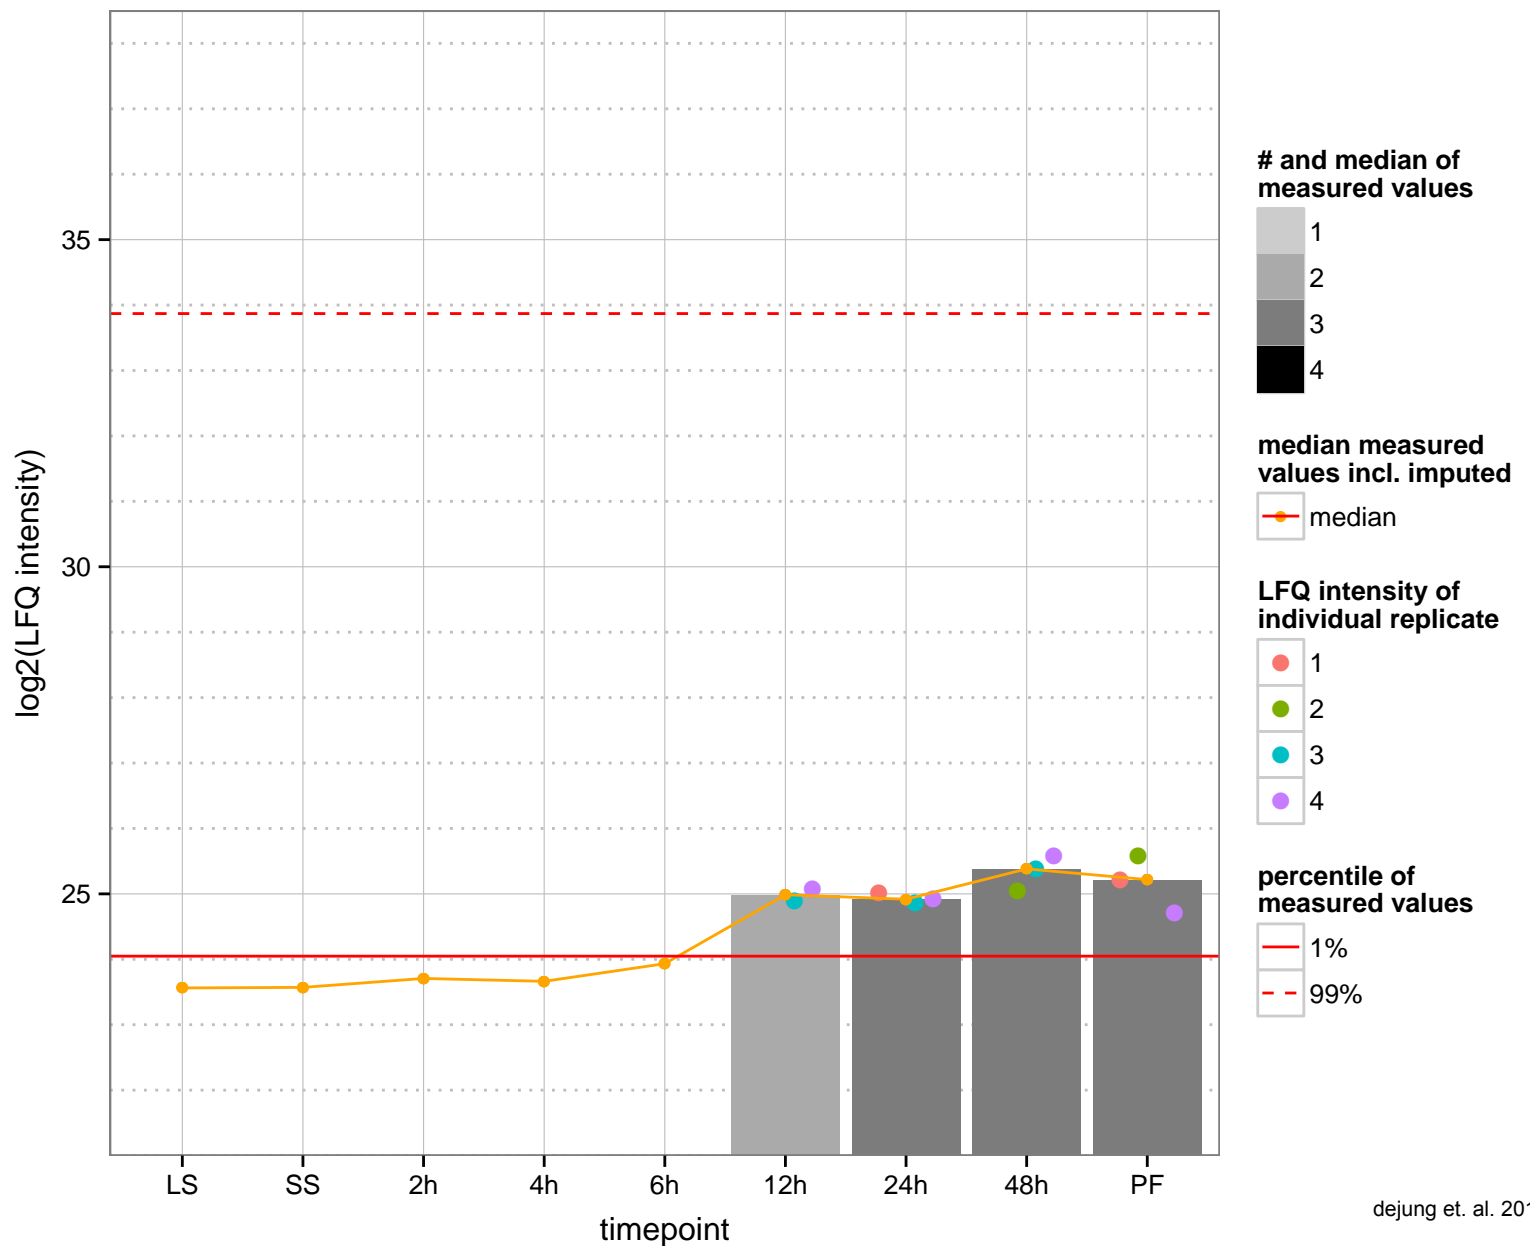

N-acetyltransferase complex ARD1 subunit, putative  
 Tb927.3.610  
 AGOF: N-acetyltransferase activity  
 AGOC: null  
 AGOP: metabolic process  
 PGOF: N-acetyltransferase activity  
 PGOC: null  
 PGOP: null

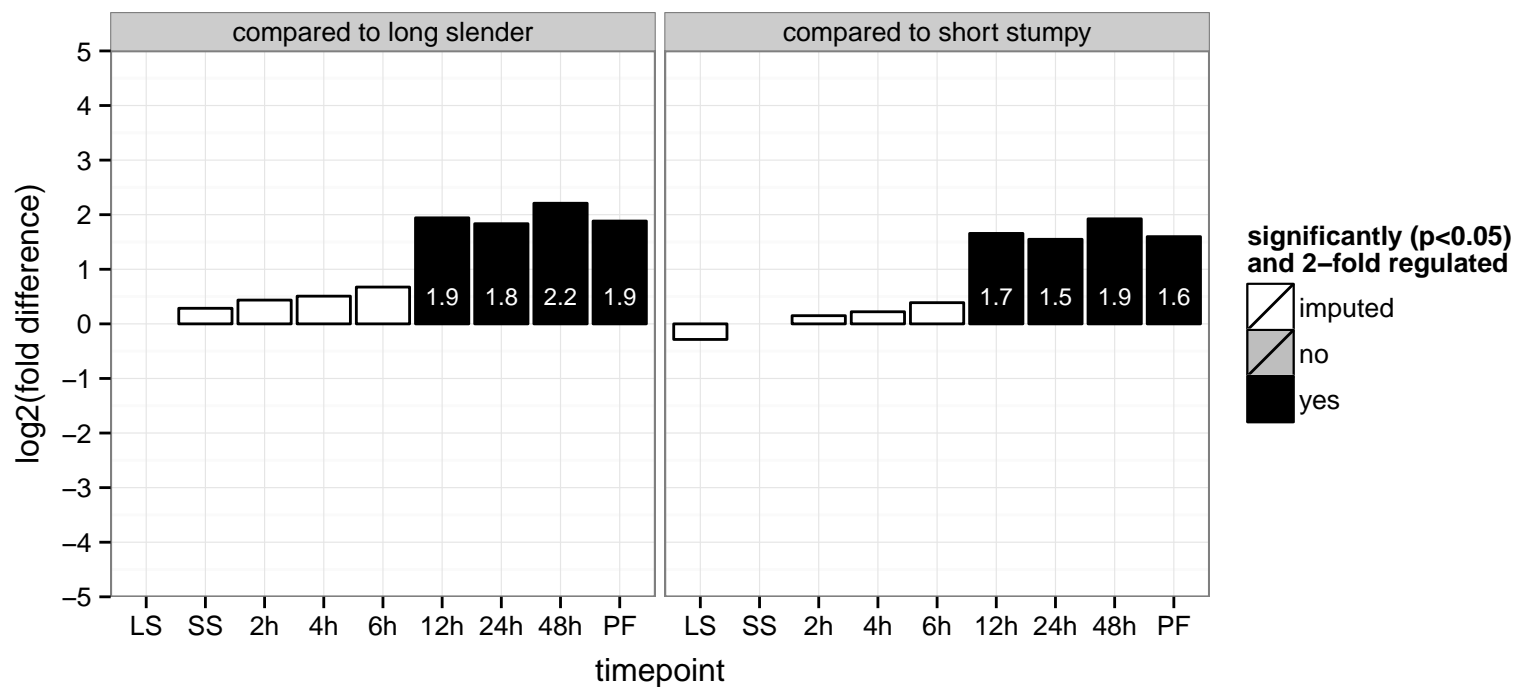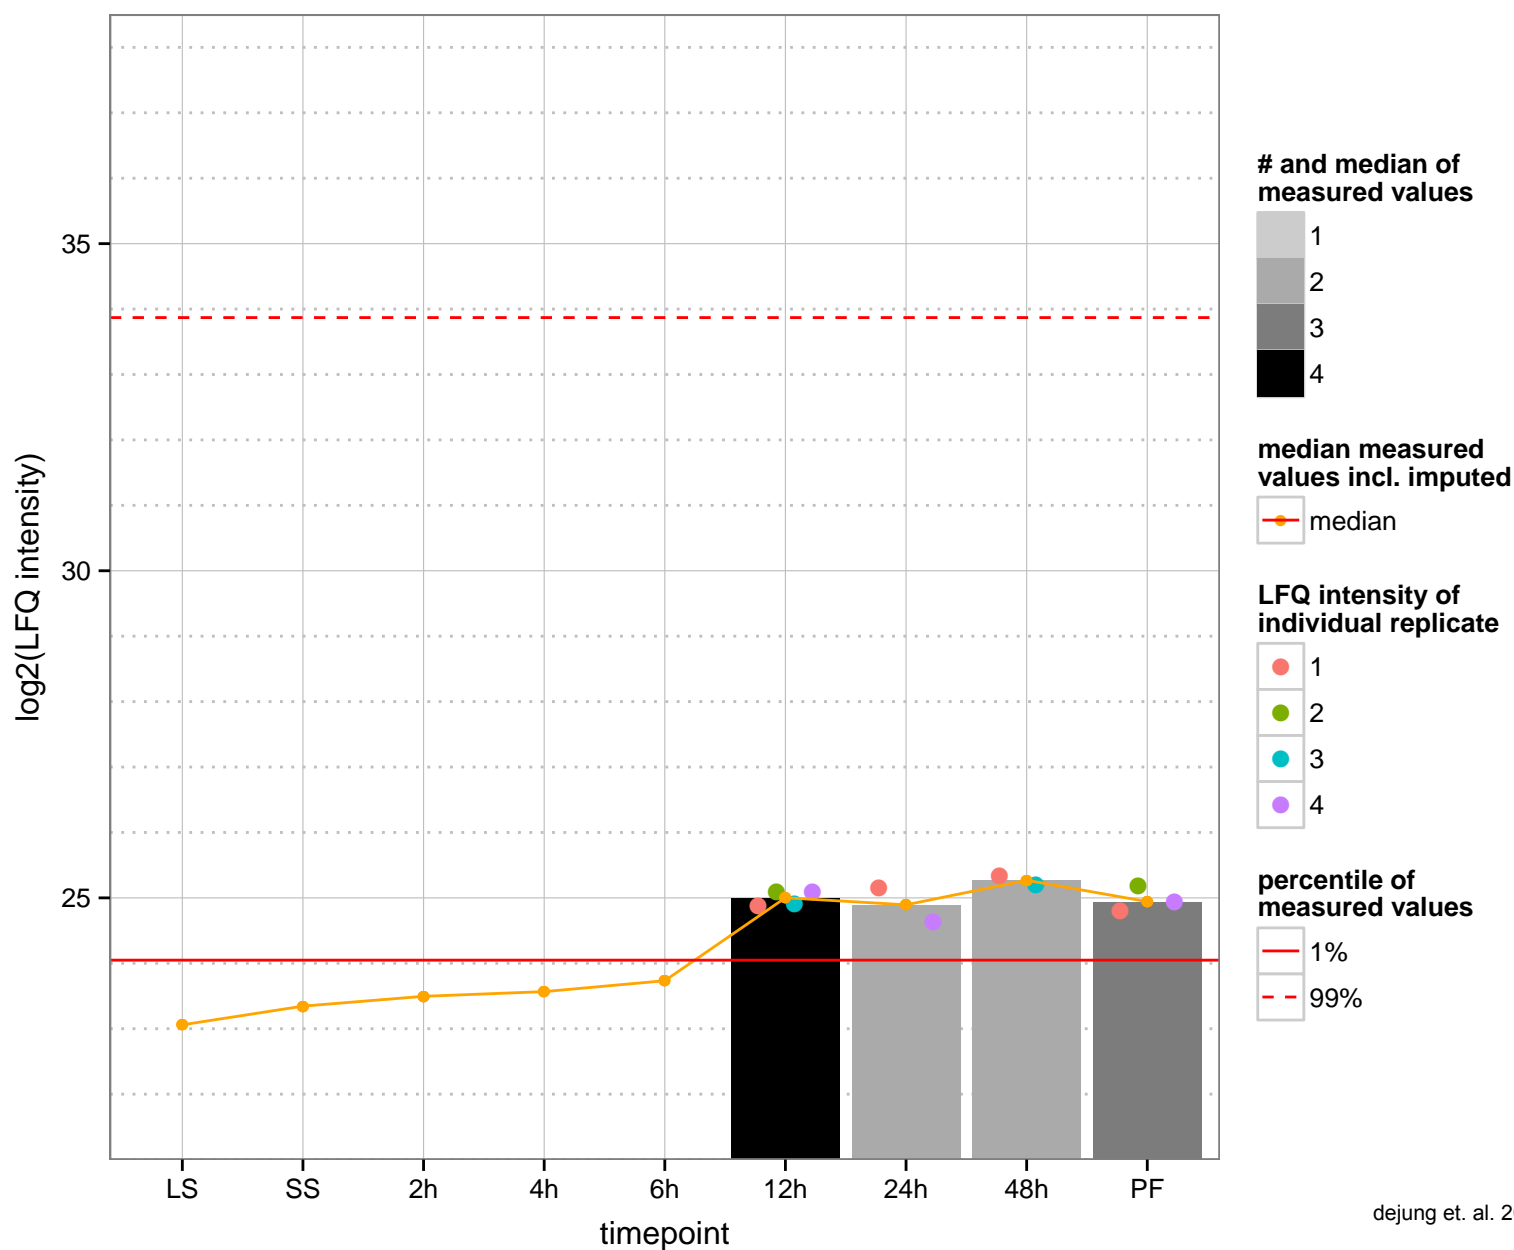



zinc finger protein 3, ZFP family member, putative (ZFP3)  
 Tb927.3.720  
 AGOF: RNA binding, zinc ion binding  
 AGOC: ribonucleoprotein complex  
 AGOP: null  
 PGO: nucleic acid binding, protein binding, zinc ion binding  
 PGO: null  
 PGOP: null

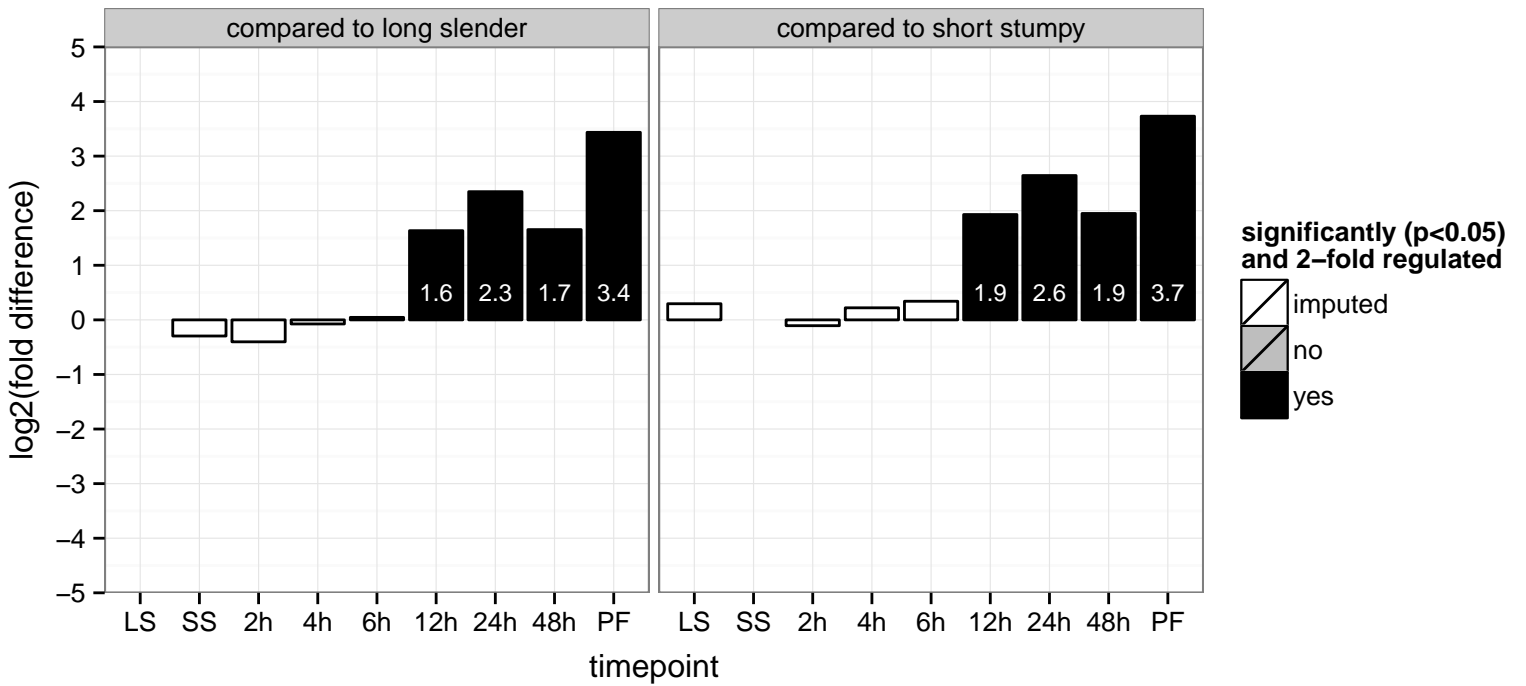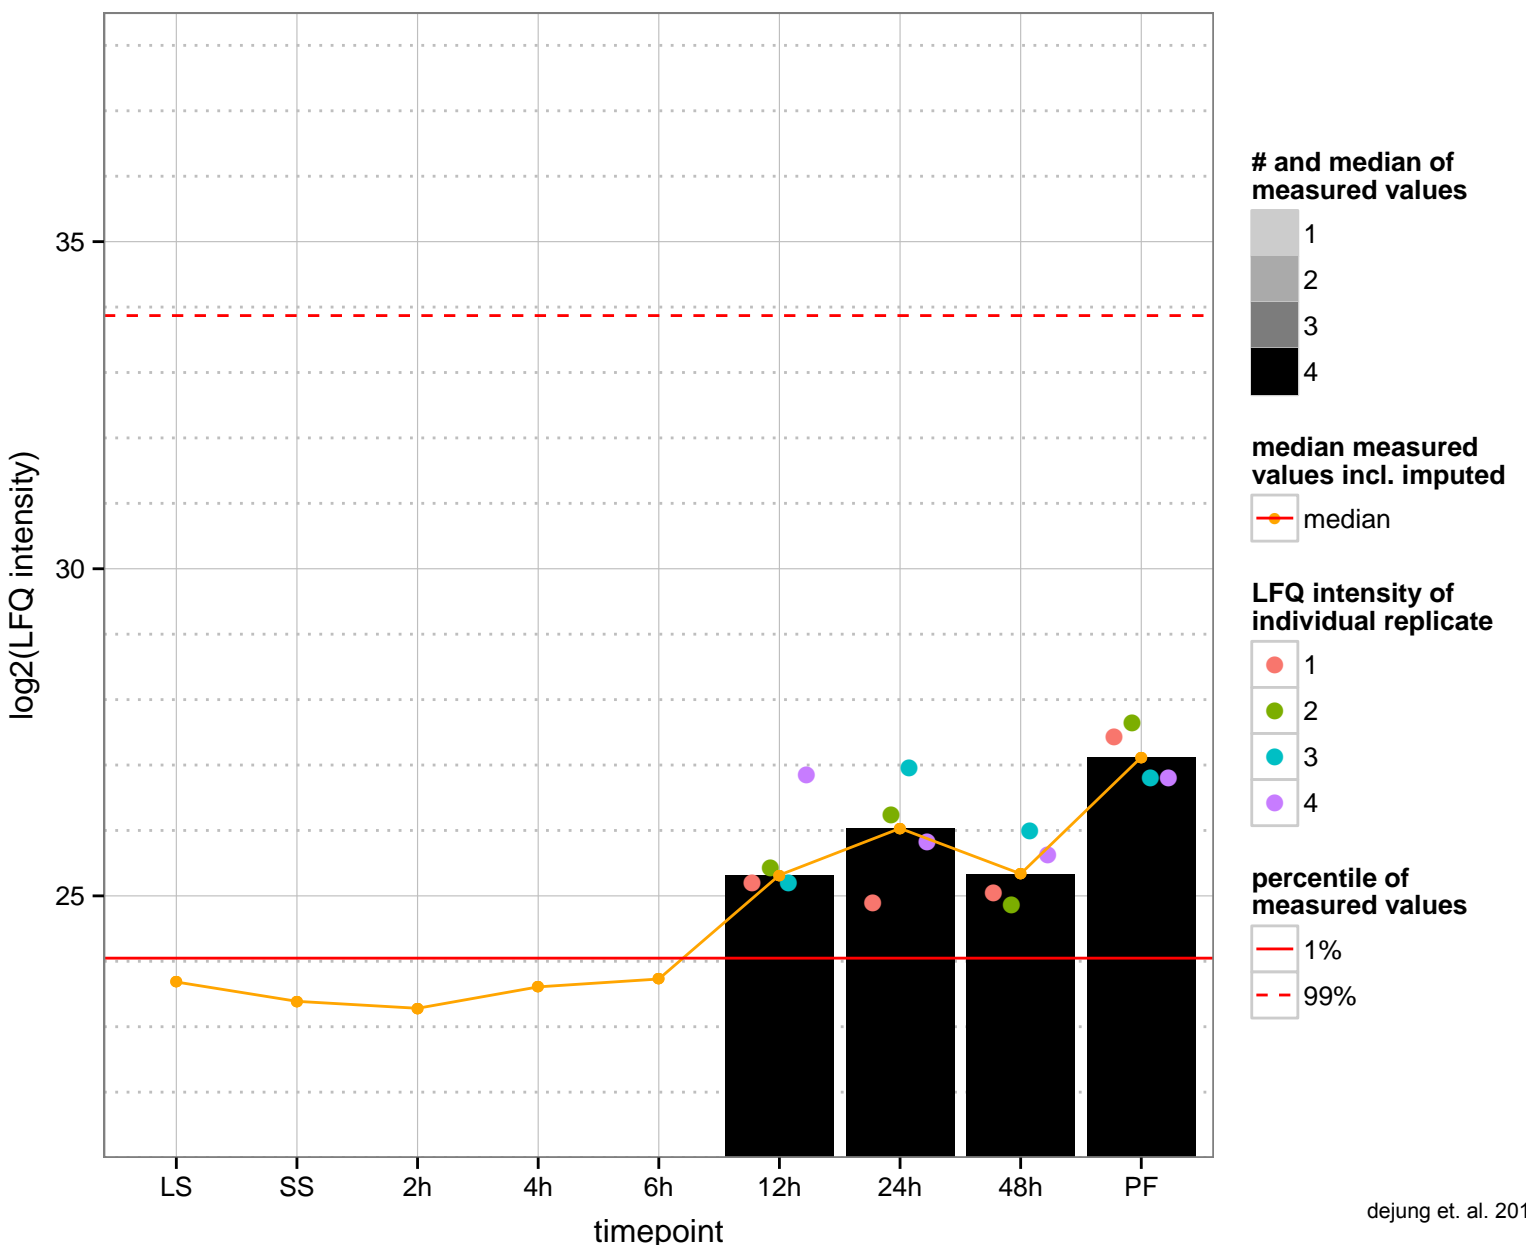

hypothetical protein, conserved

Tb927.3.950

AGOF: oxidoreductase activity

AGOC: mitochondrion

AGOP: null

PGOF: oxidoreductase activity, oxidoreductase activity, acting on paired donors, with incorporation or reduction of molecular oxygen

PGOC: null

PGOP: oxidation-reduction process

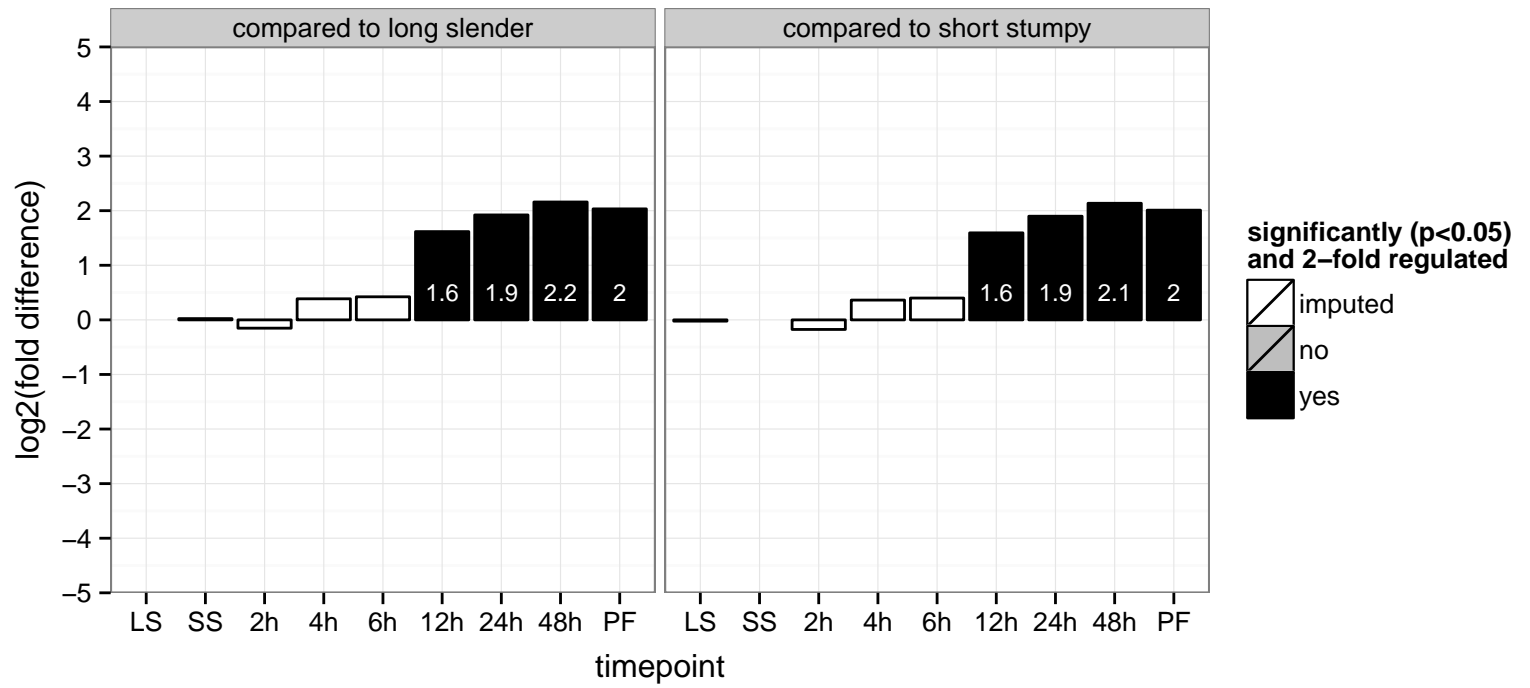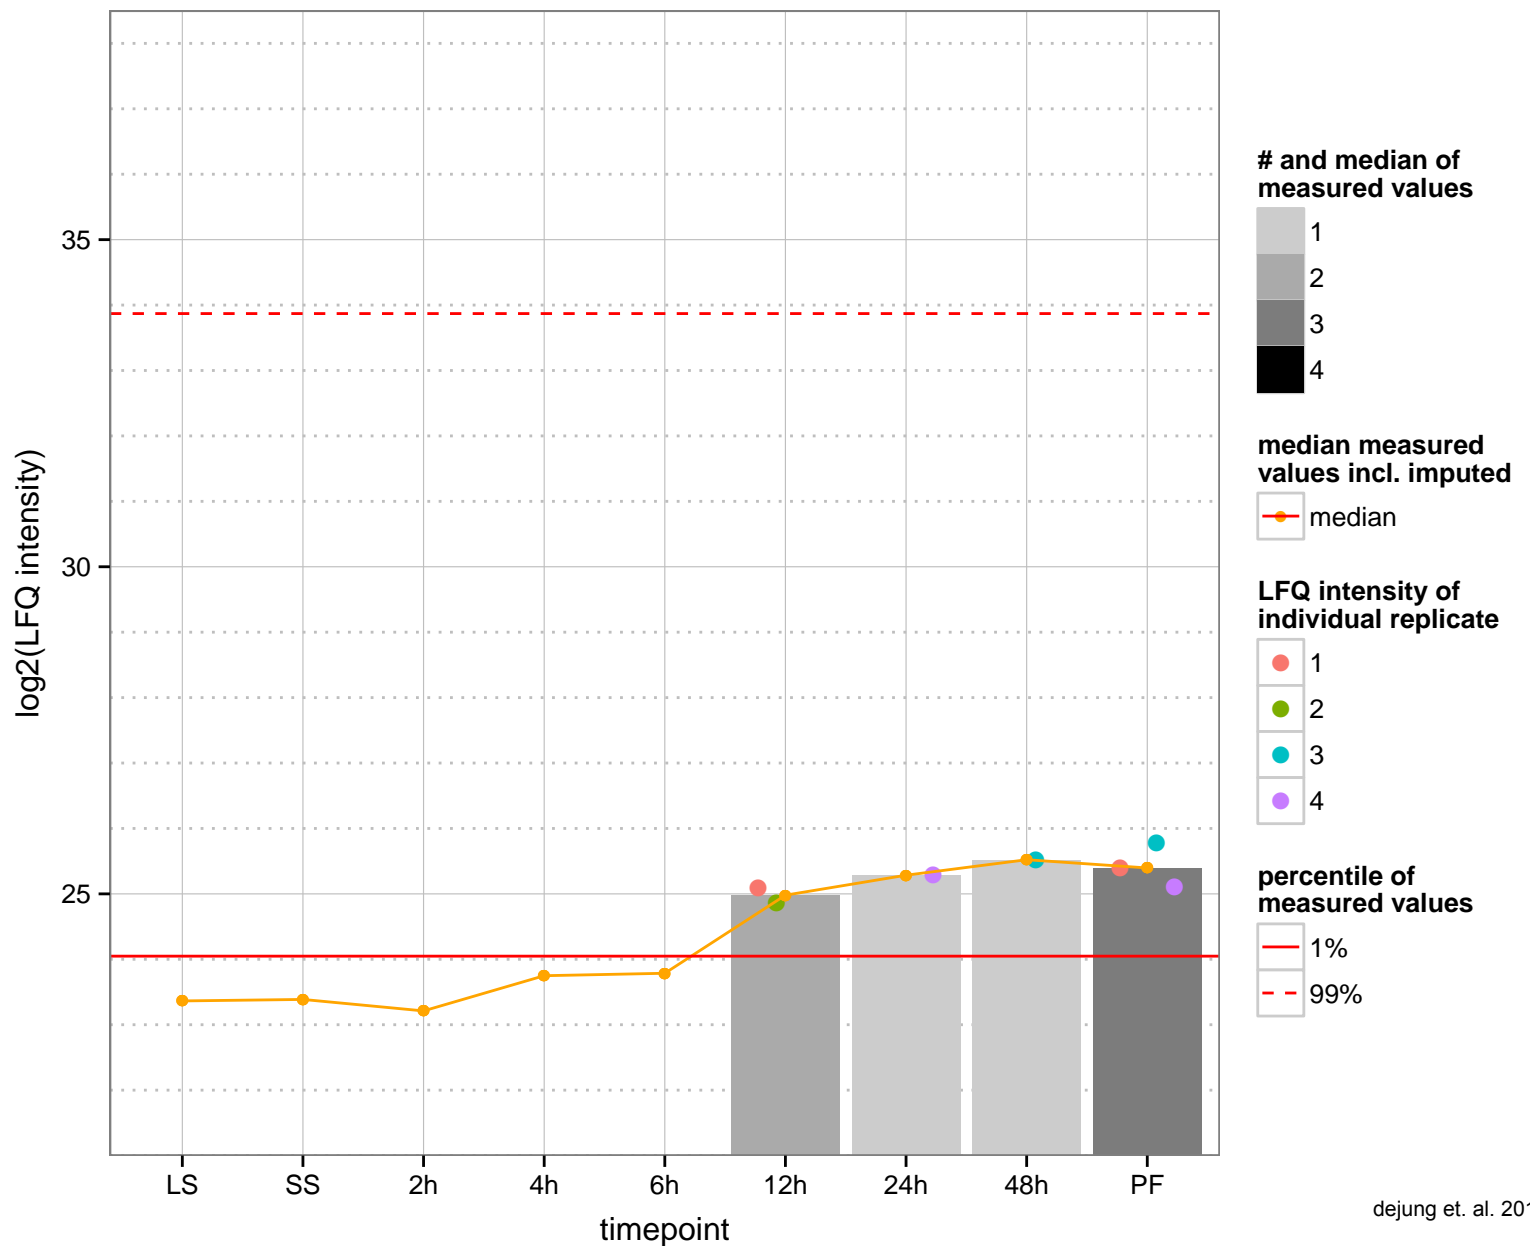

ankyrin, putative  
 Tb927.4.1170;Tb11.v5.0430  
 AGOF: null  
 AGOC: null  
 AGOP: null  
 PGO: null, protein binding  
 PGOC: null  
 PGOP: null

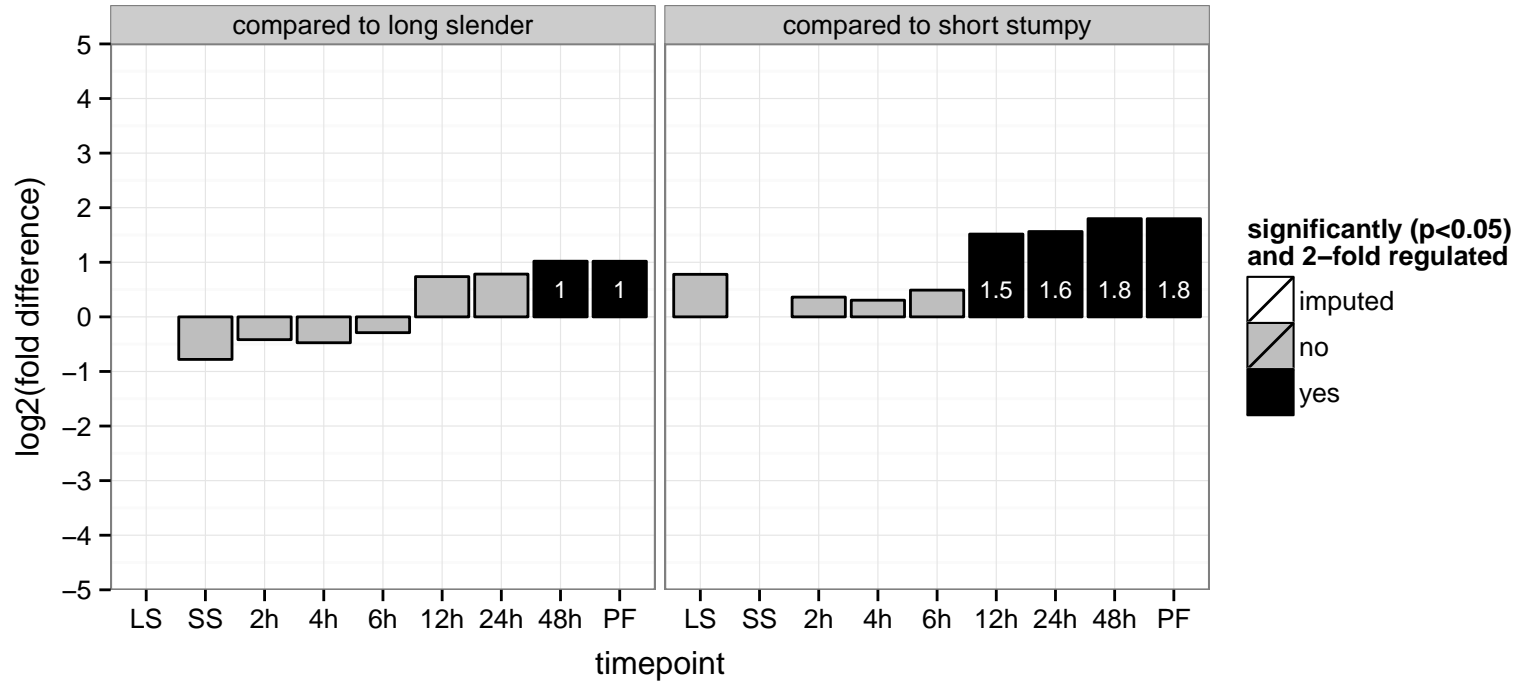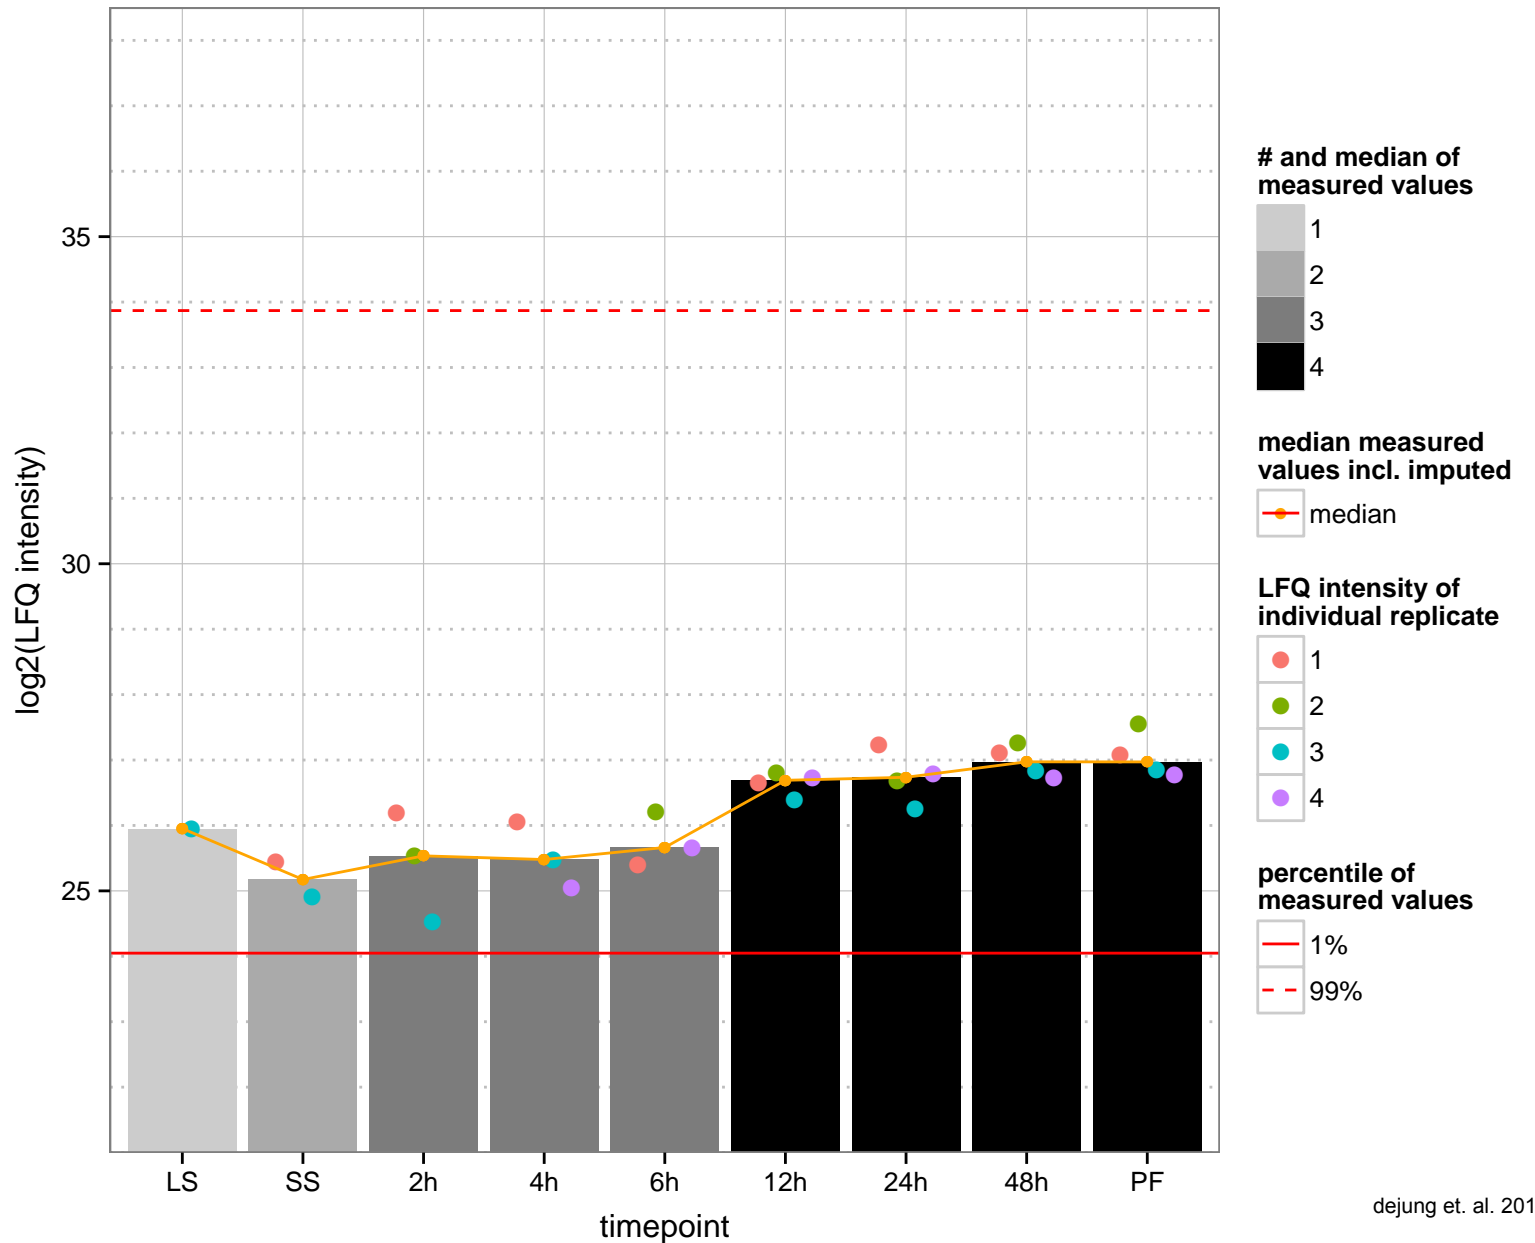

expression site-associated gene (ESAG, pseudogene), putative, expression site-associated gene 4 (ESAG4), pseudogene, r  
 Tb927.4.130  
 AGOF: phosphorus-oxygen lyase activity, null  
 AGOC: null  
 AGOP: cyclic nucleotide biosynthetic process, intracellular signal transduction, null  
 PGOF: phosphorus-oxygen lyase activity, null  
 PGO: null  
 PGOP: cyclic nucleotide biosynthetic process, intracellular signal transduction, null

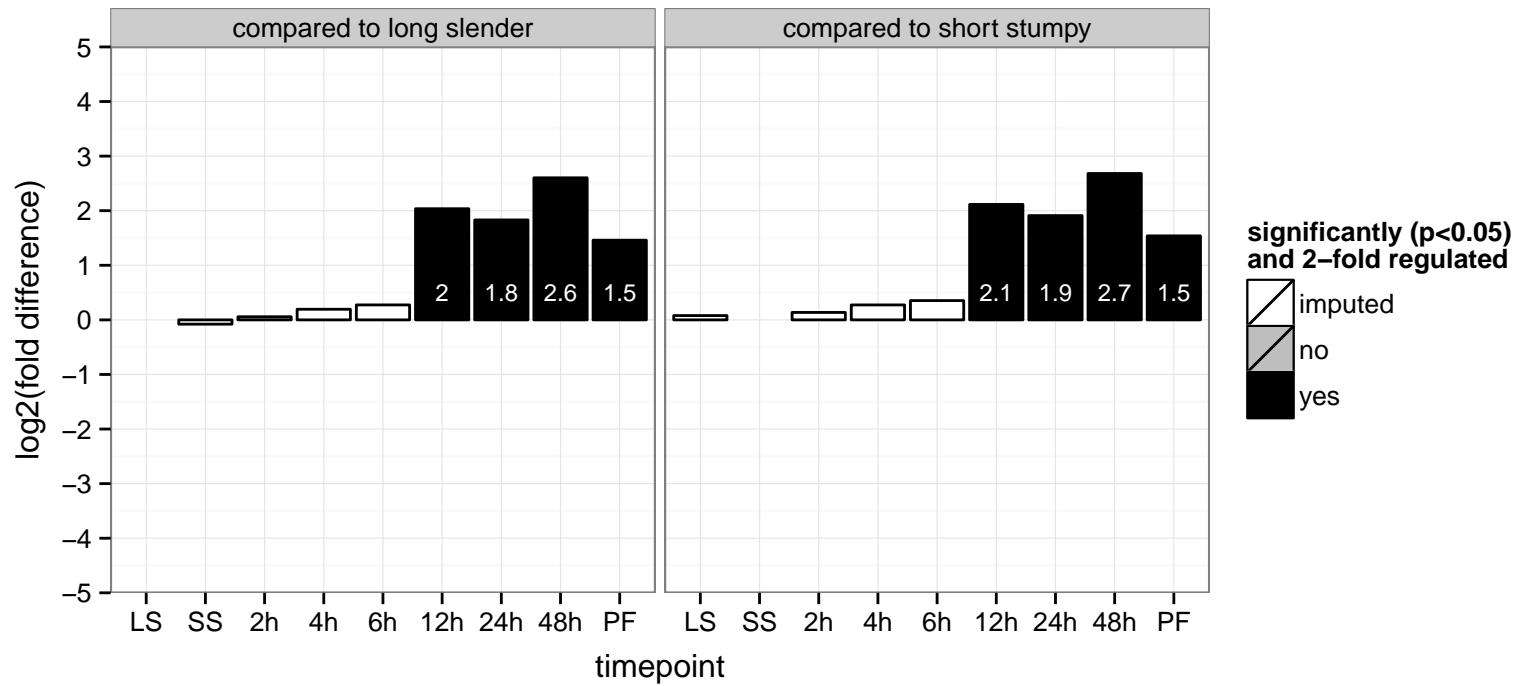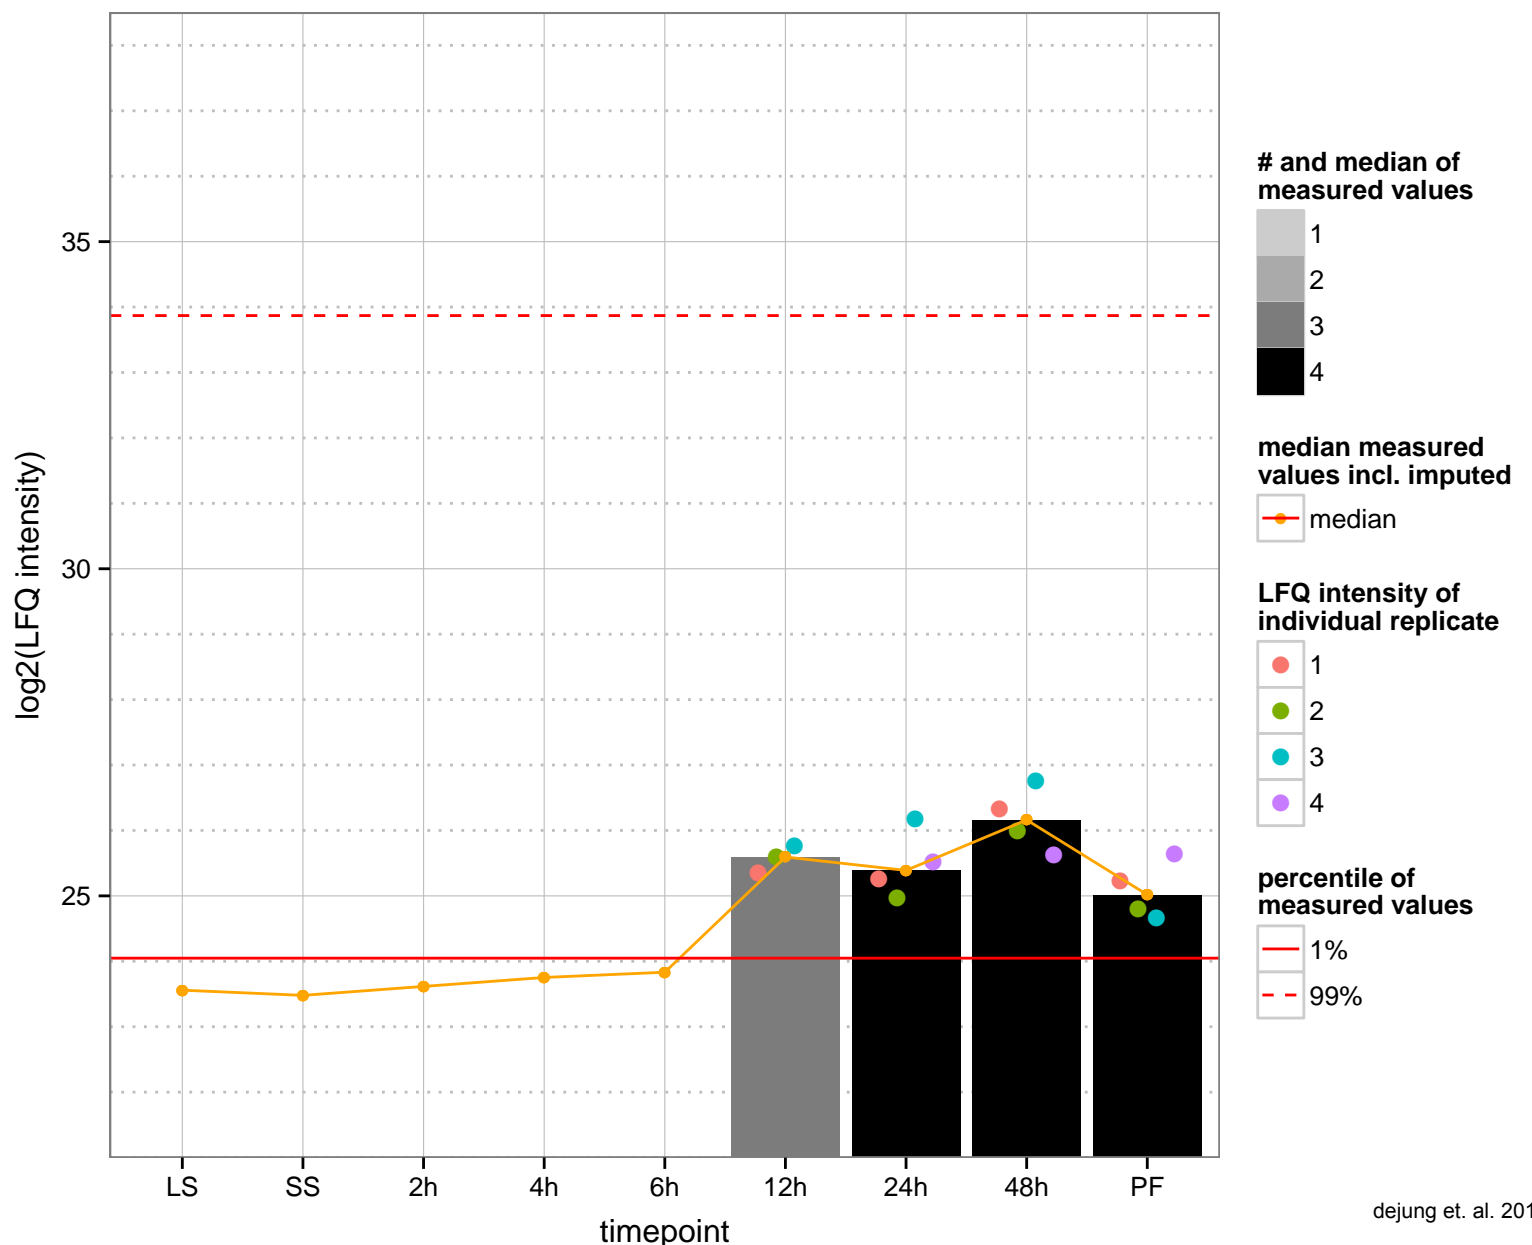

ATP-dependent DEAD/H RNA helicase, putative

Tb927.4.2630

AGOF: ATP binding, ATP-dependent helicase activity, RNA binding, helicase activity

AGOC: nucleus

AGOP: nucleobase-containing compound metabolic process

PGOF: ATP binding, ATP-dependent helicase activity, RNA binding, helicase activity, hydrolase activity, acting on acid anhydrides

PGOC: nucleus

PGOP: null

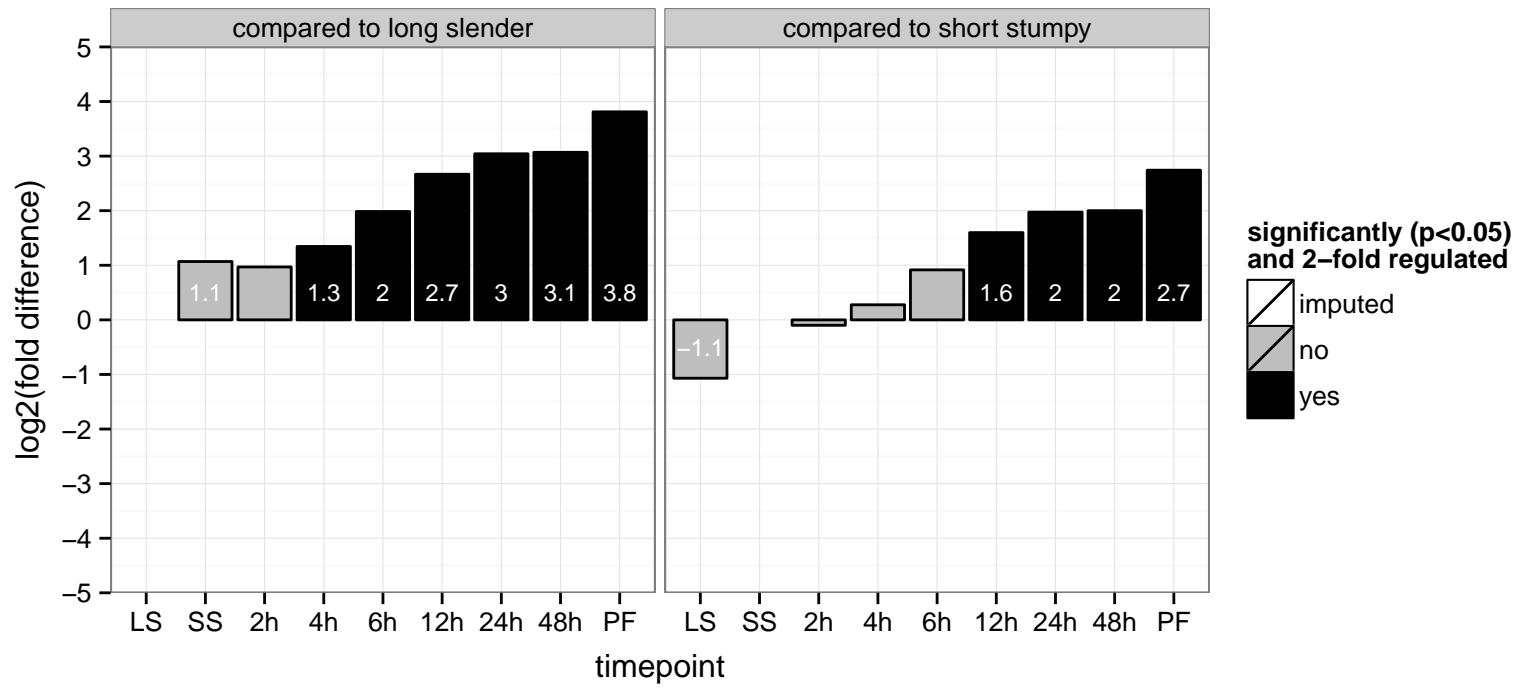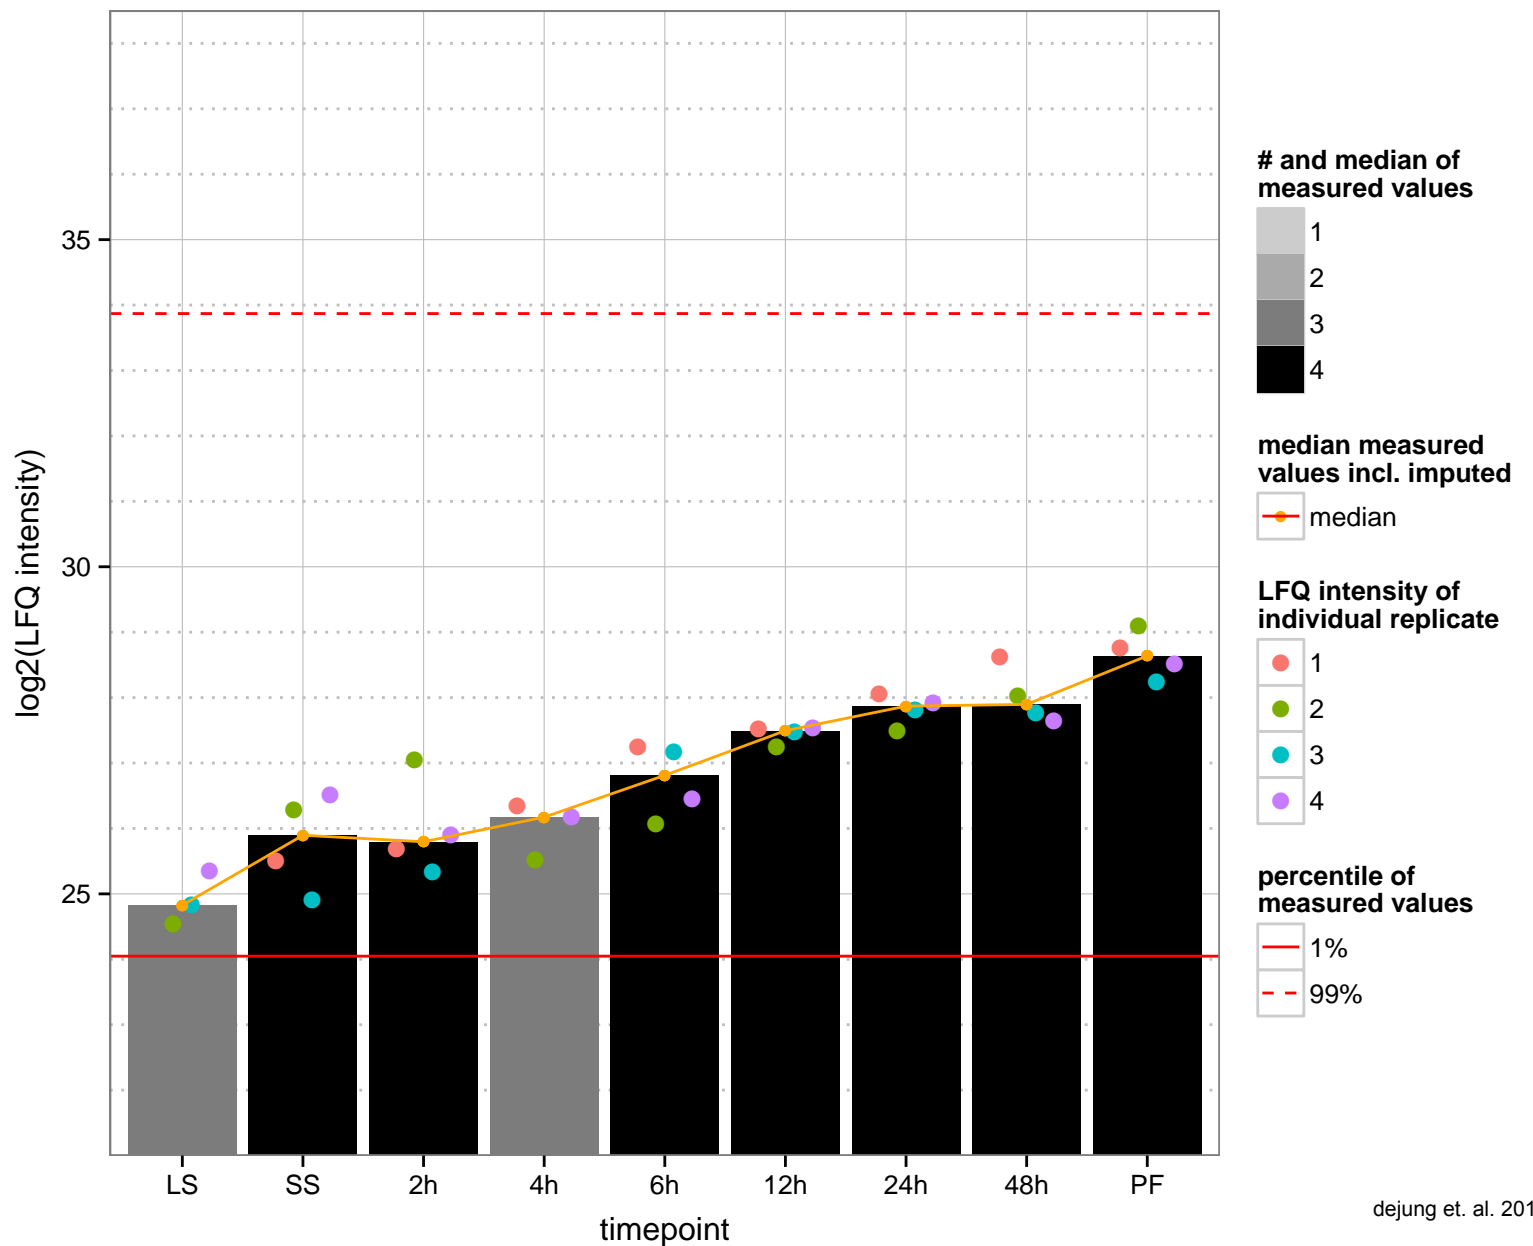

3, 2-trans-enoyl-CoA isomerase, mitochondrial precursor, putative  
 Tb927.4.4910  
 AGOF: catalytic activity  
 AGOC: mitochondrion  
 AGOP: metabolic process  
 PGO: catalytic activity  
 PGO: null  
 PGO: metabolic process

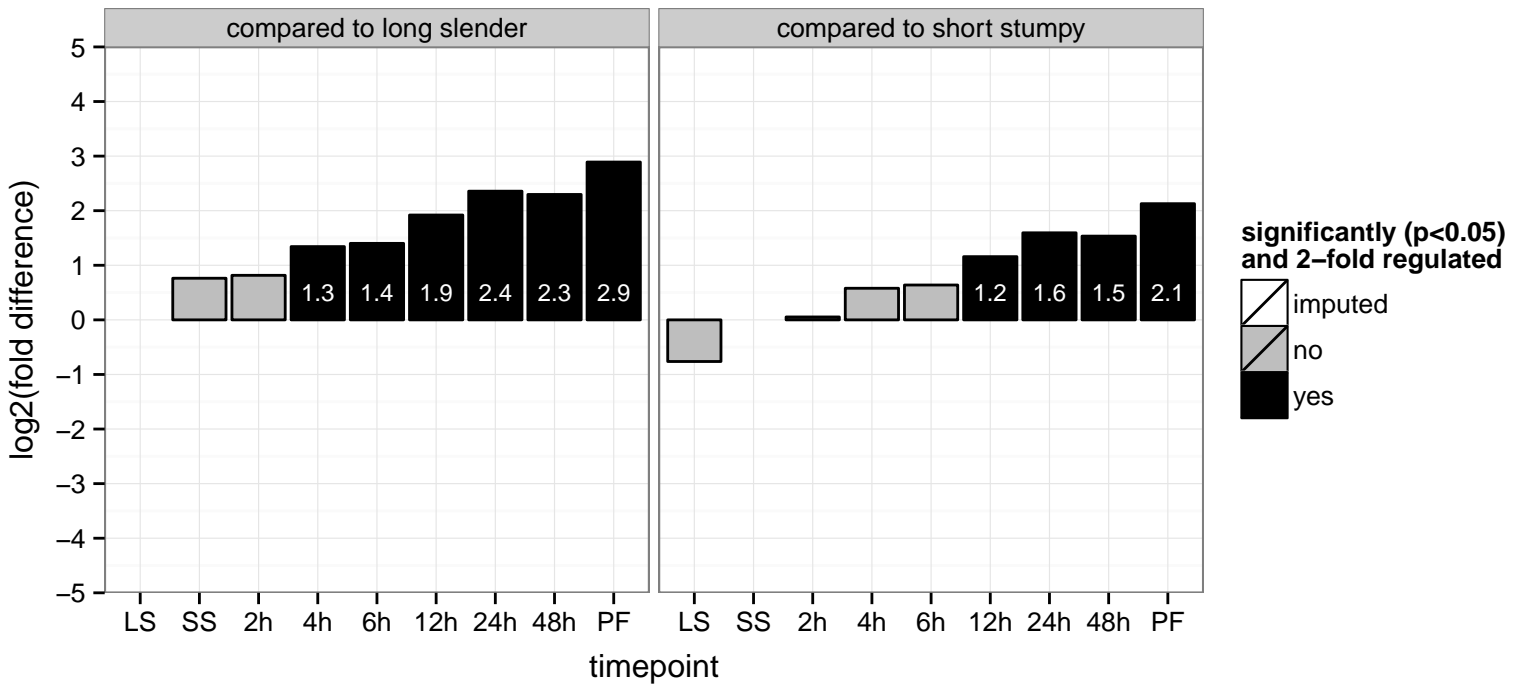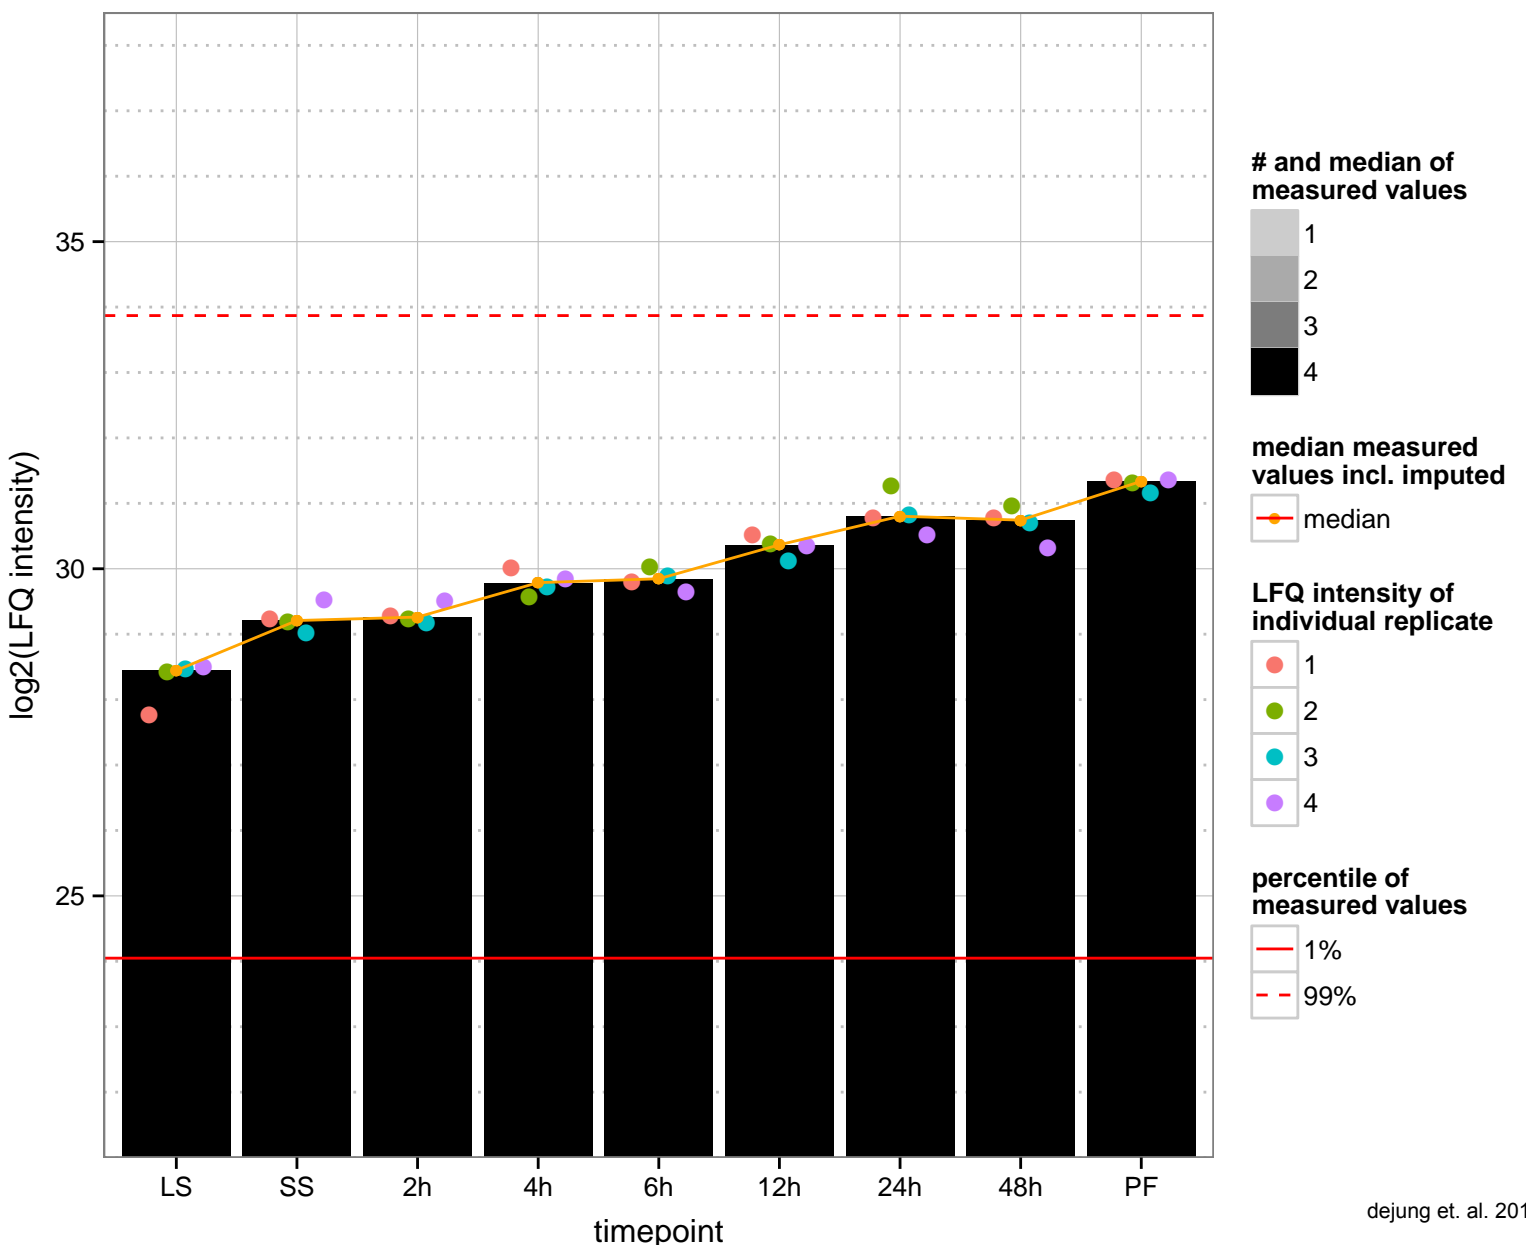

hypothetical protein, conserved  
 Tb927.4.5120  
 AGOF: null  
 AGOC: null  
 AGOP: null  
 PGOF: null  
 PGOC: null  
 PGOP: null

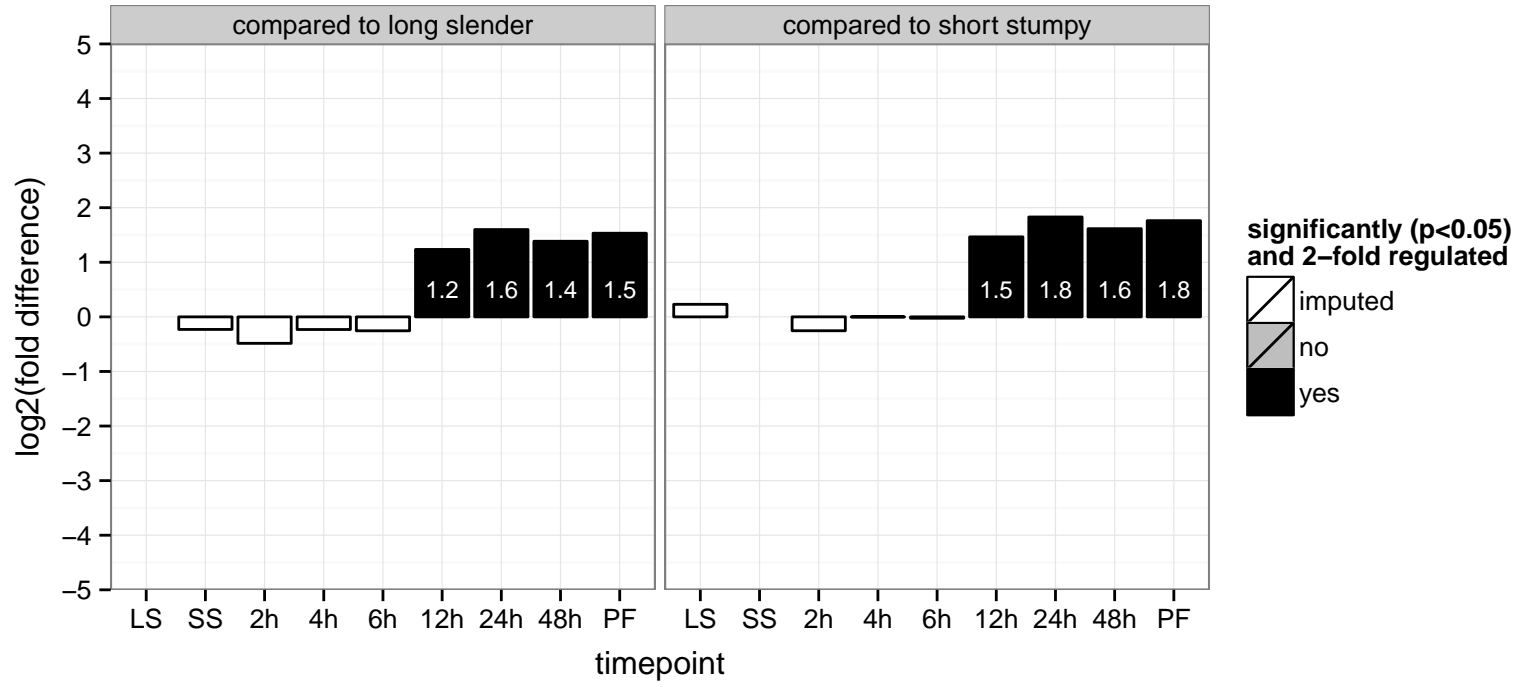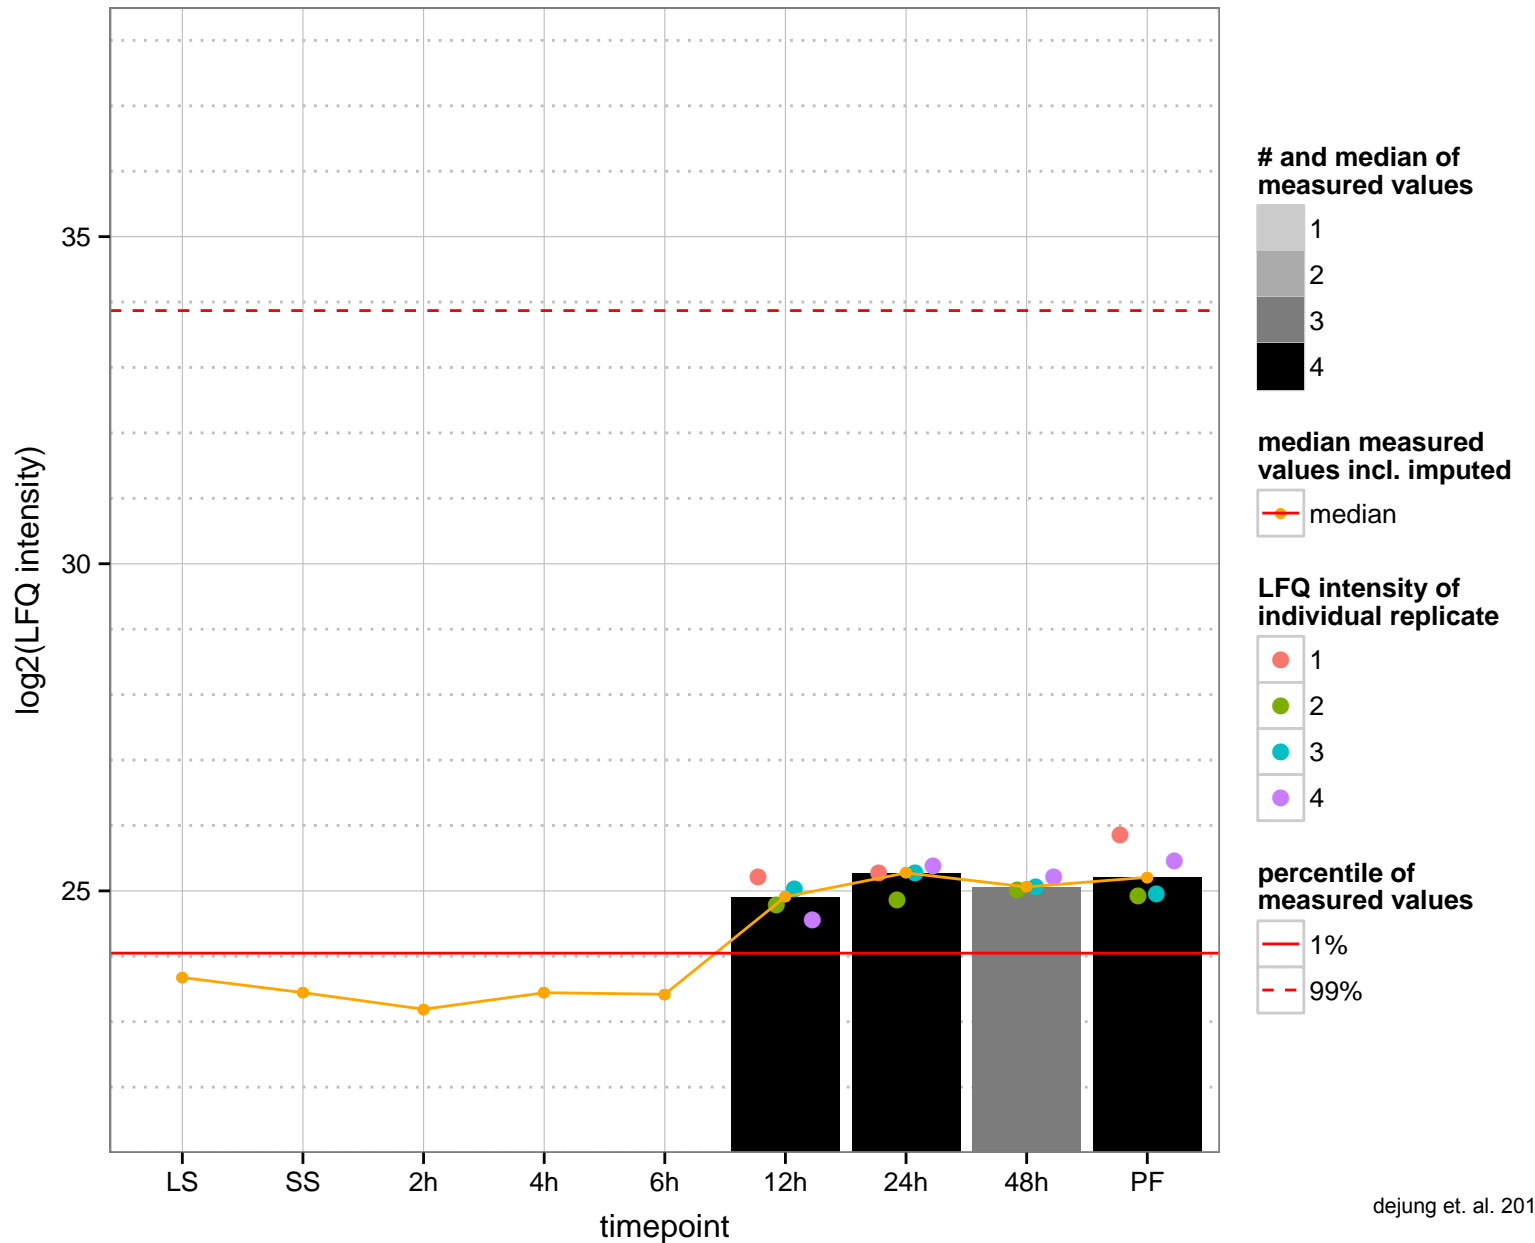

ATP-dependent DEAD/H RNA helicase, putative

Tb927.5.1560

AGOF: ATP binding, ATP-dependent helicase activity, helicase activity, nucleic acid binding

AGOC: null

AGOP: nucleobase-containing compound metabolic process

PGOF: ATP binding, ATP-dependent helicase activity, helicase activity, nucleic acid binding

PGOC: null

PGOP: null

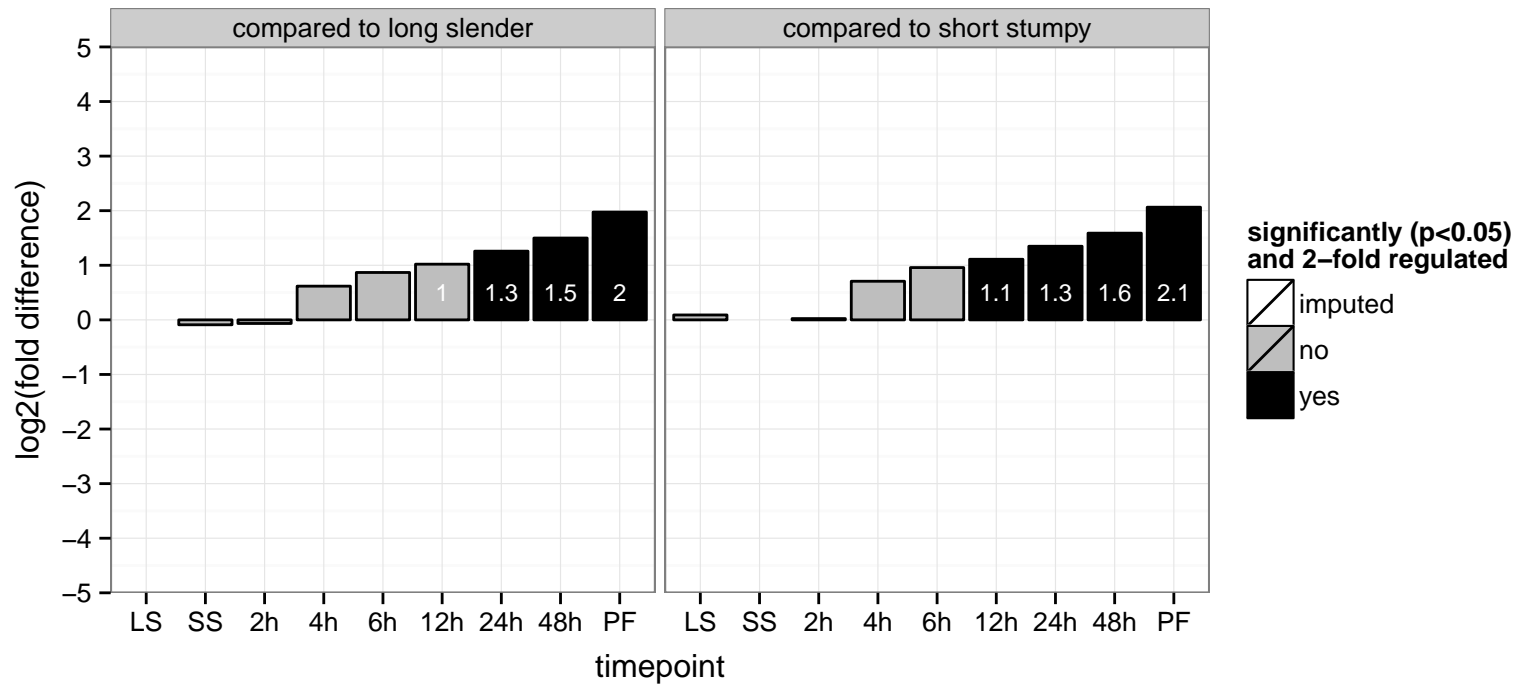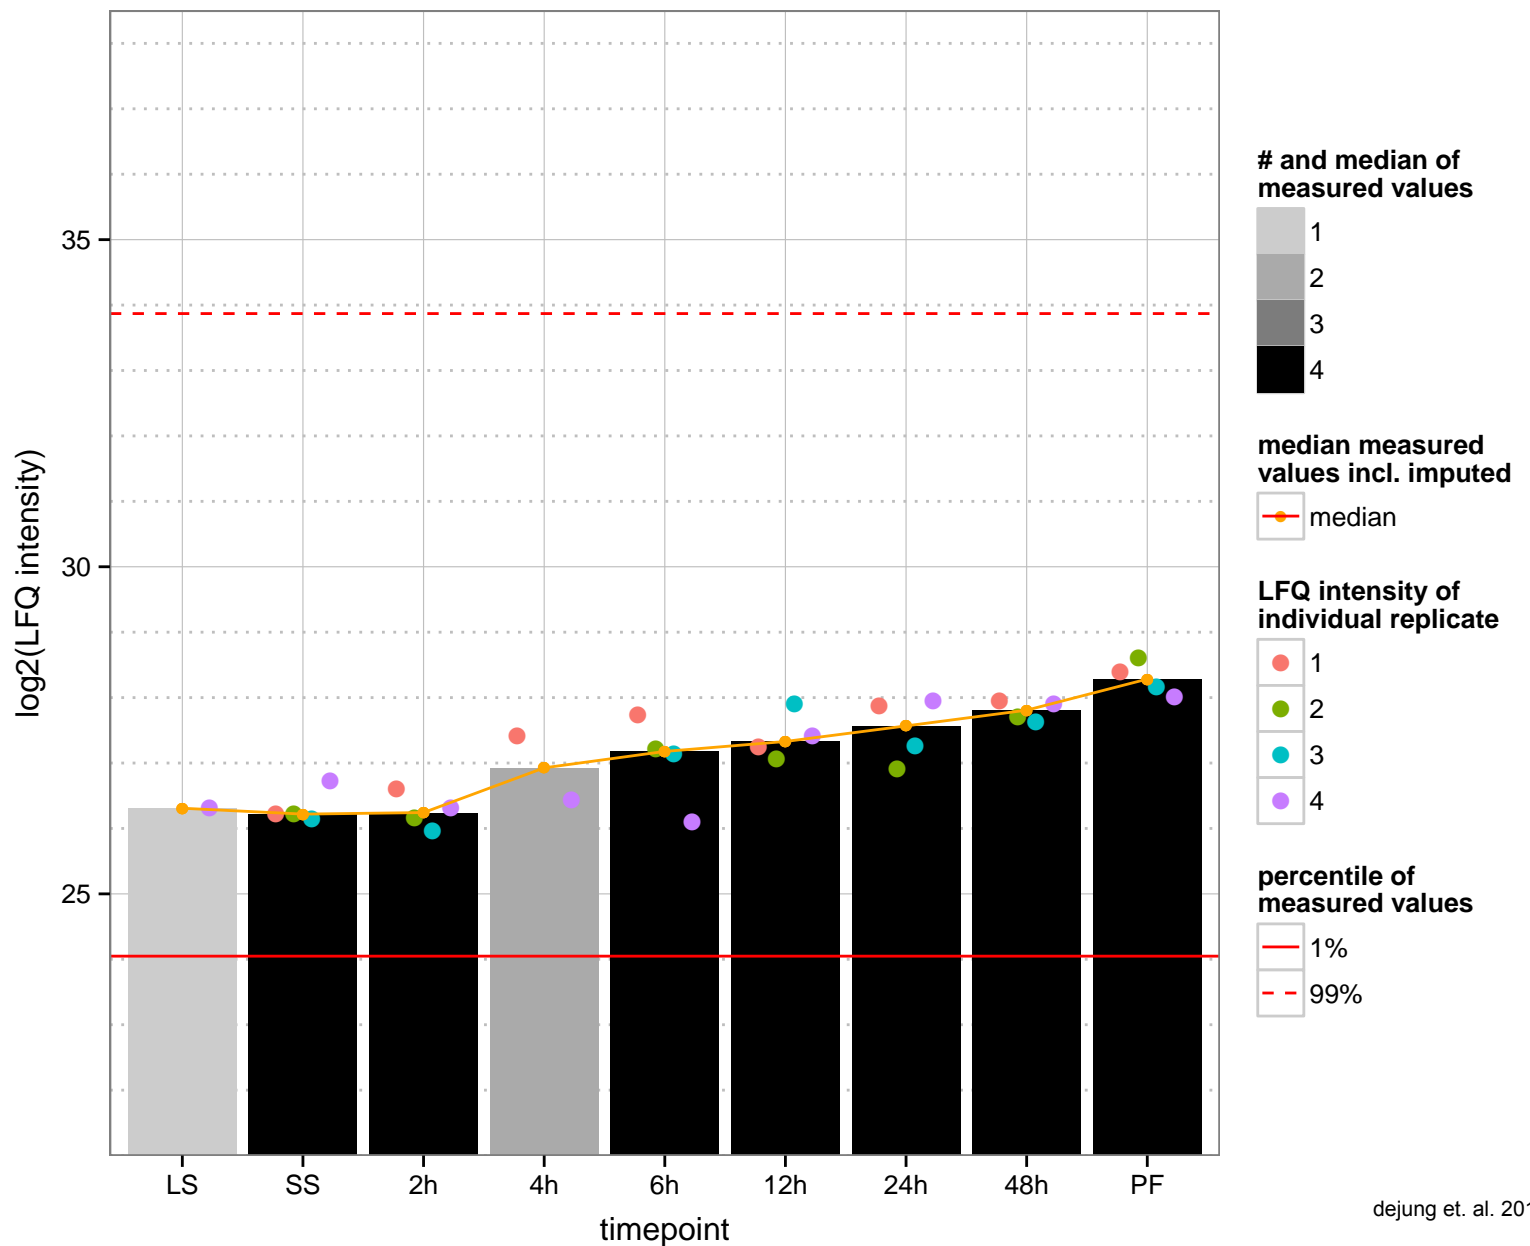



ribonucleoprotein p18, mitochondrial precursor, putative  
 Tb927.5.1710  
 AGOF: null  
 AGOC: mitochondrion  
 AGOP: null  
 PGO: null  
 PGOC: null  
 PGOP: null

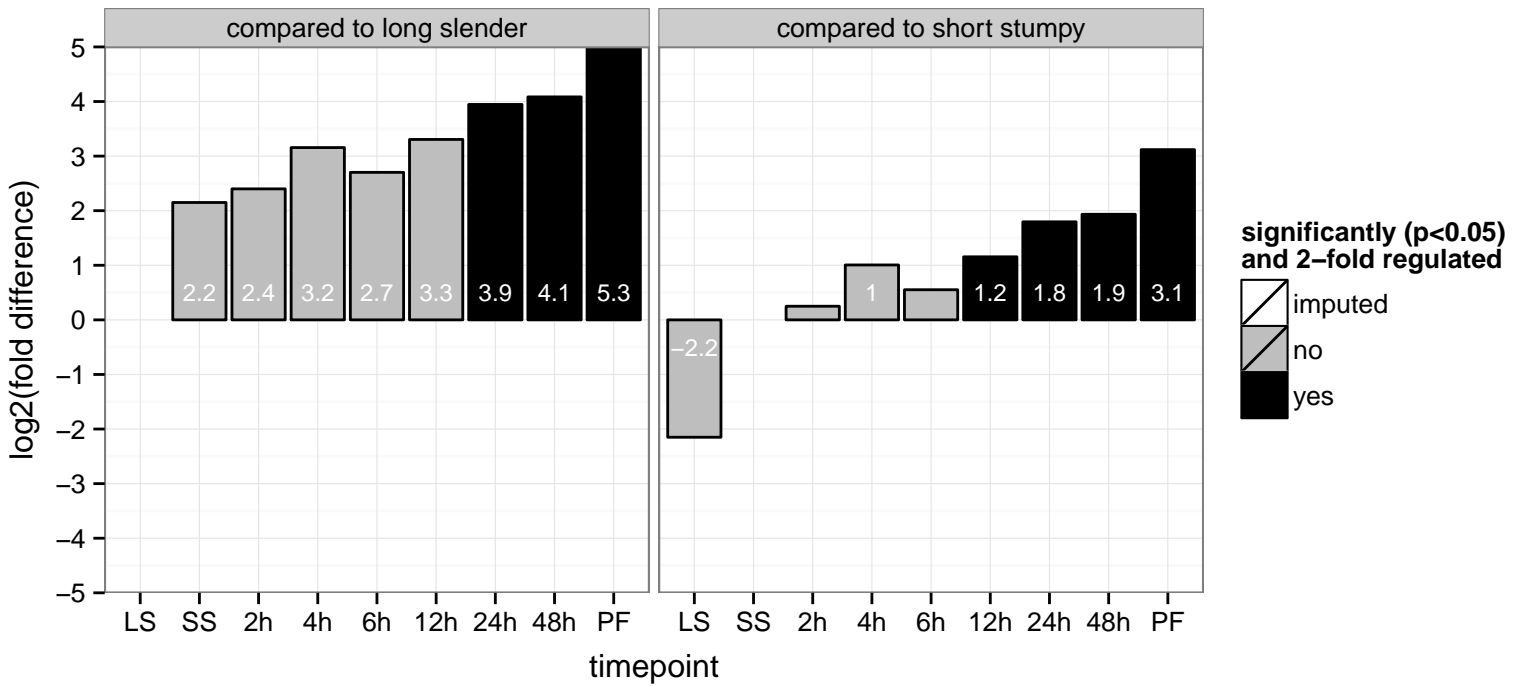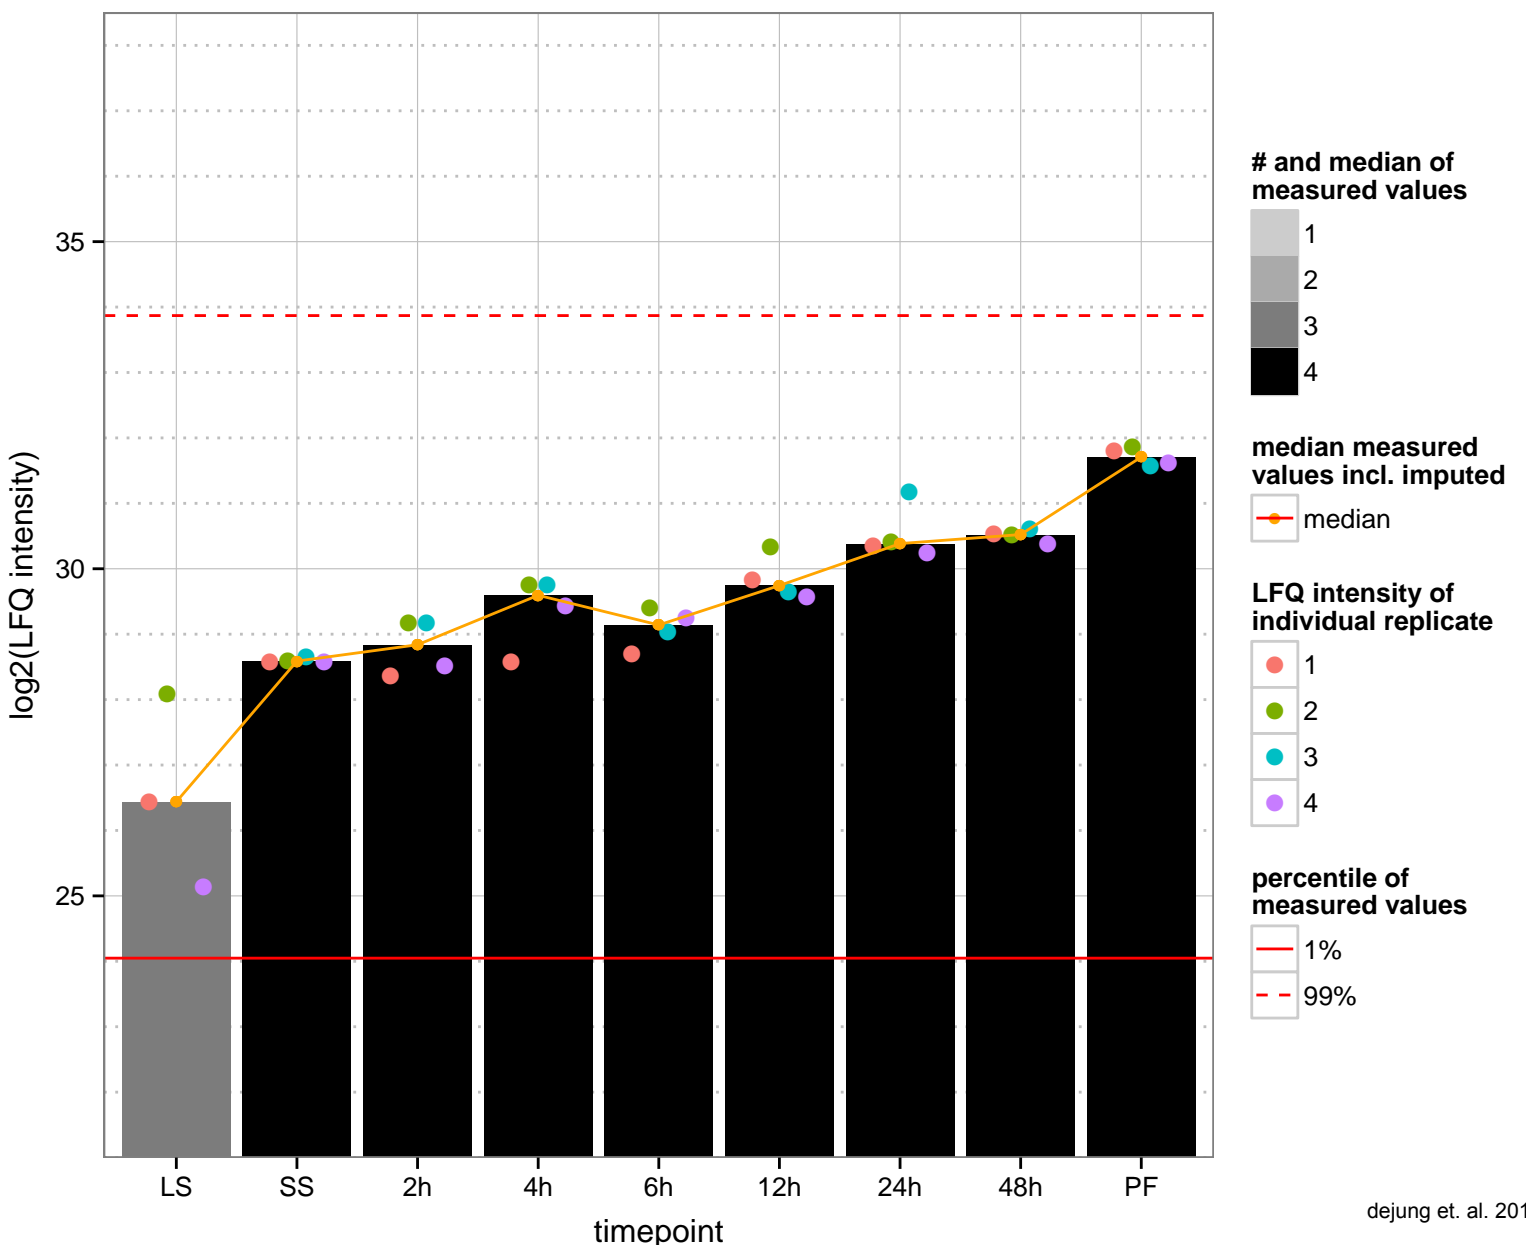

60S acidic ribosomal protein, putative  
 Tb927.5.1820  
 AGOF: structural constituent of ribosome  
 AGOC: intracellular, ribosome  
 AGOP: translation, translational elongation  
 PGO: structural constituent of ribosome  
 PGO: intracellular, ribosome  
 PGO: translational elongation

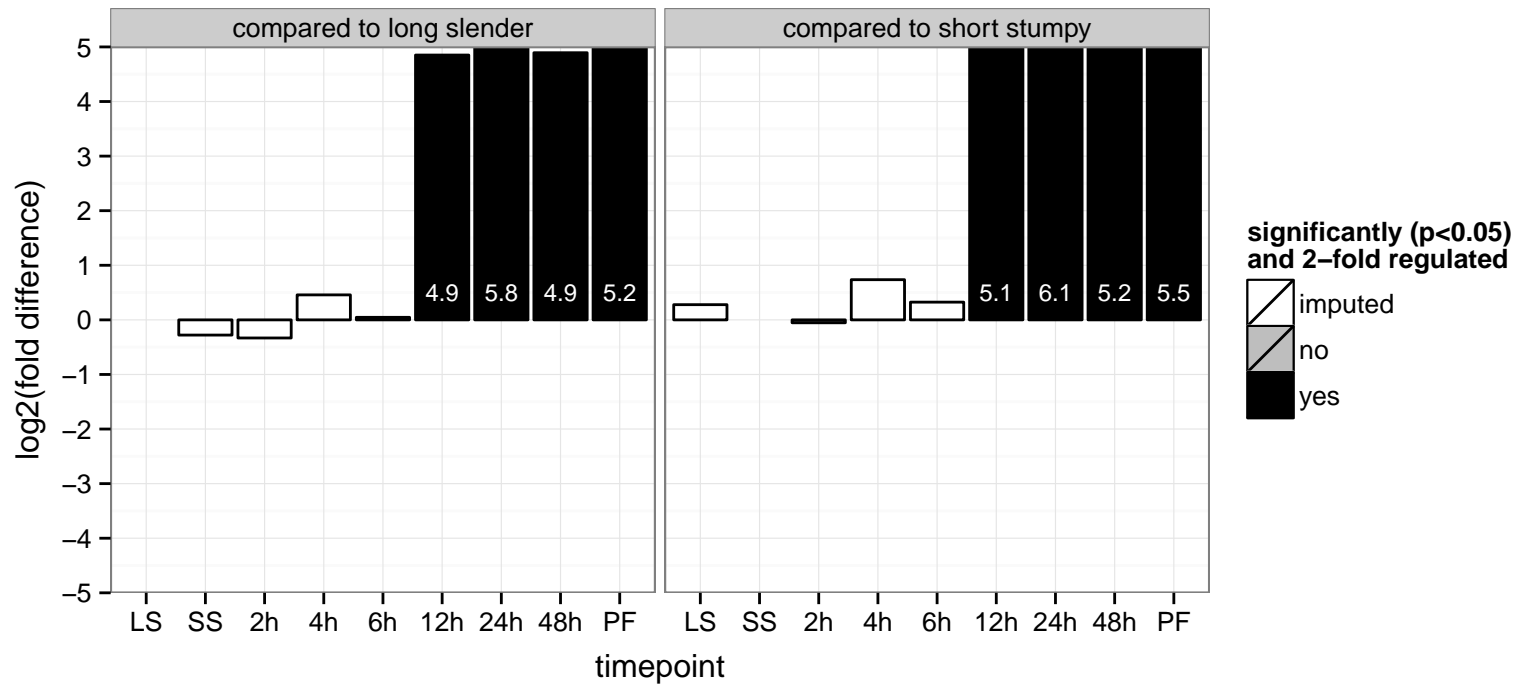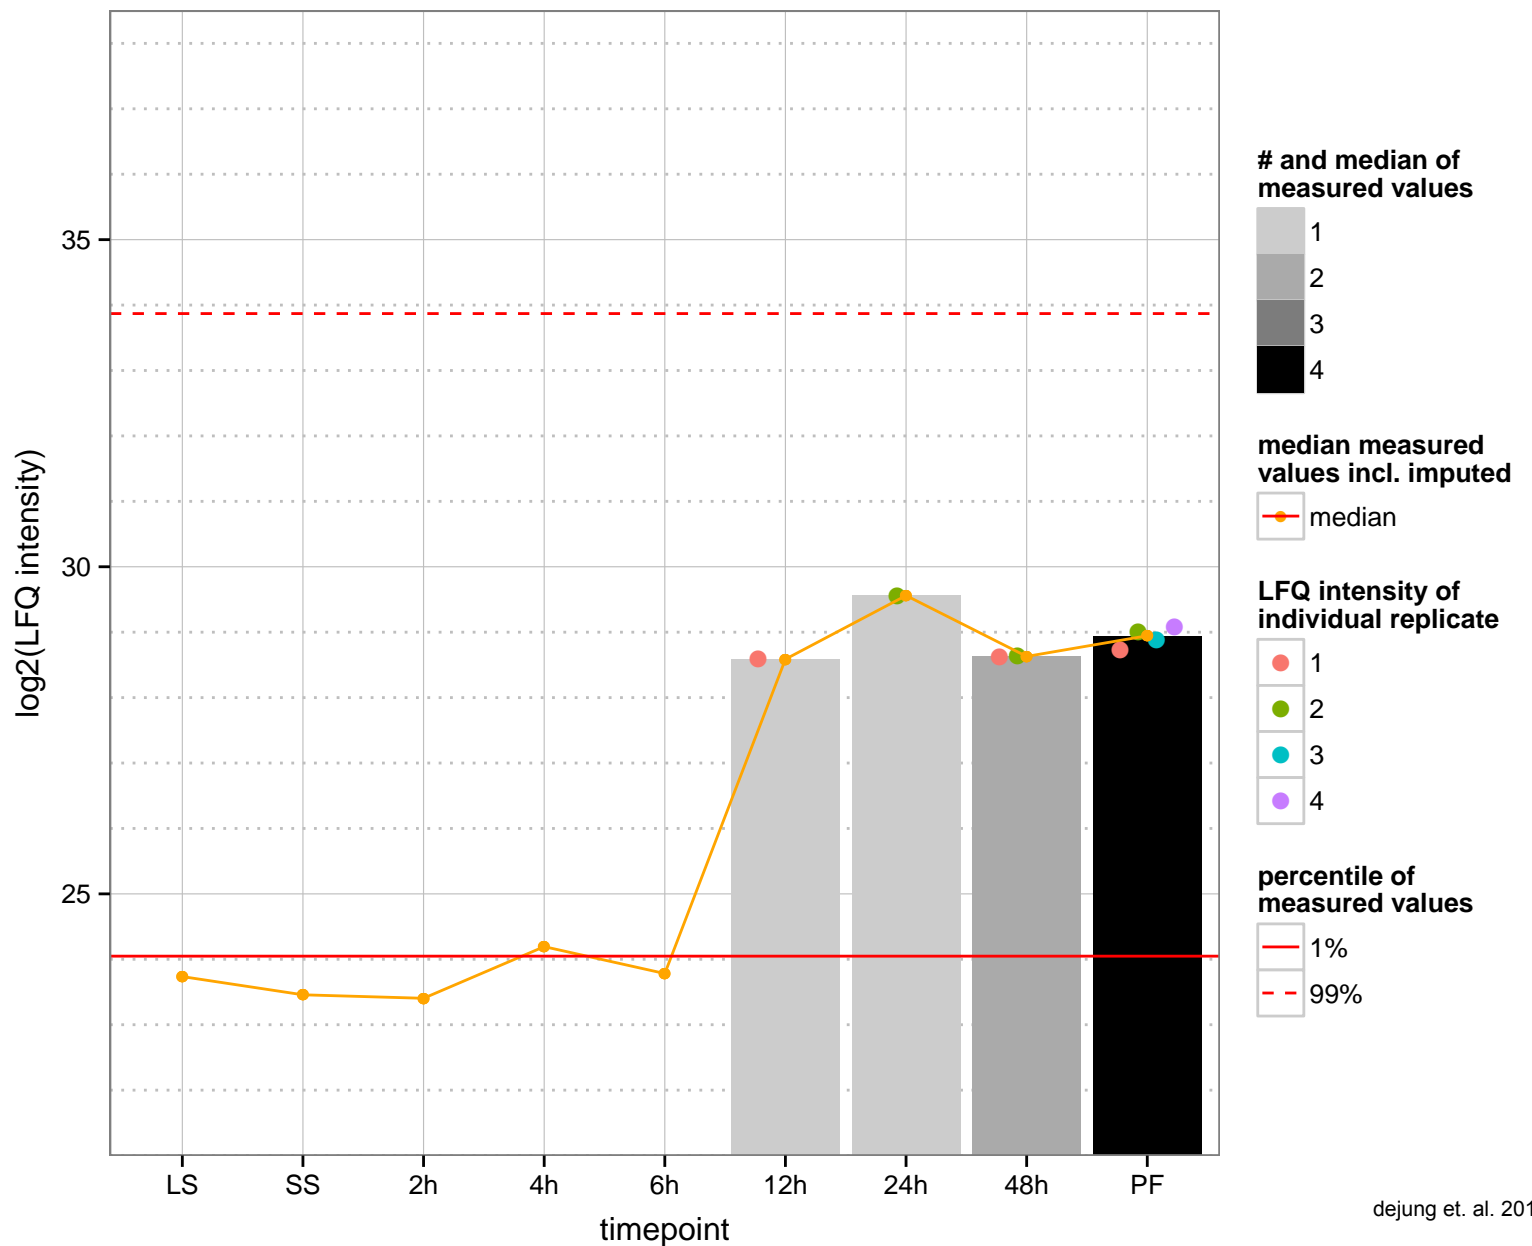

conserved protein  
 Tb927.5.2160  
 AGOF: null  
 AGOC: null  
 AGOP: null  
 PGOF: null  
 PGO: null  
 PGOP: null

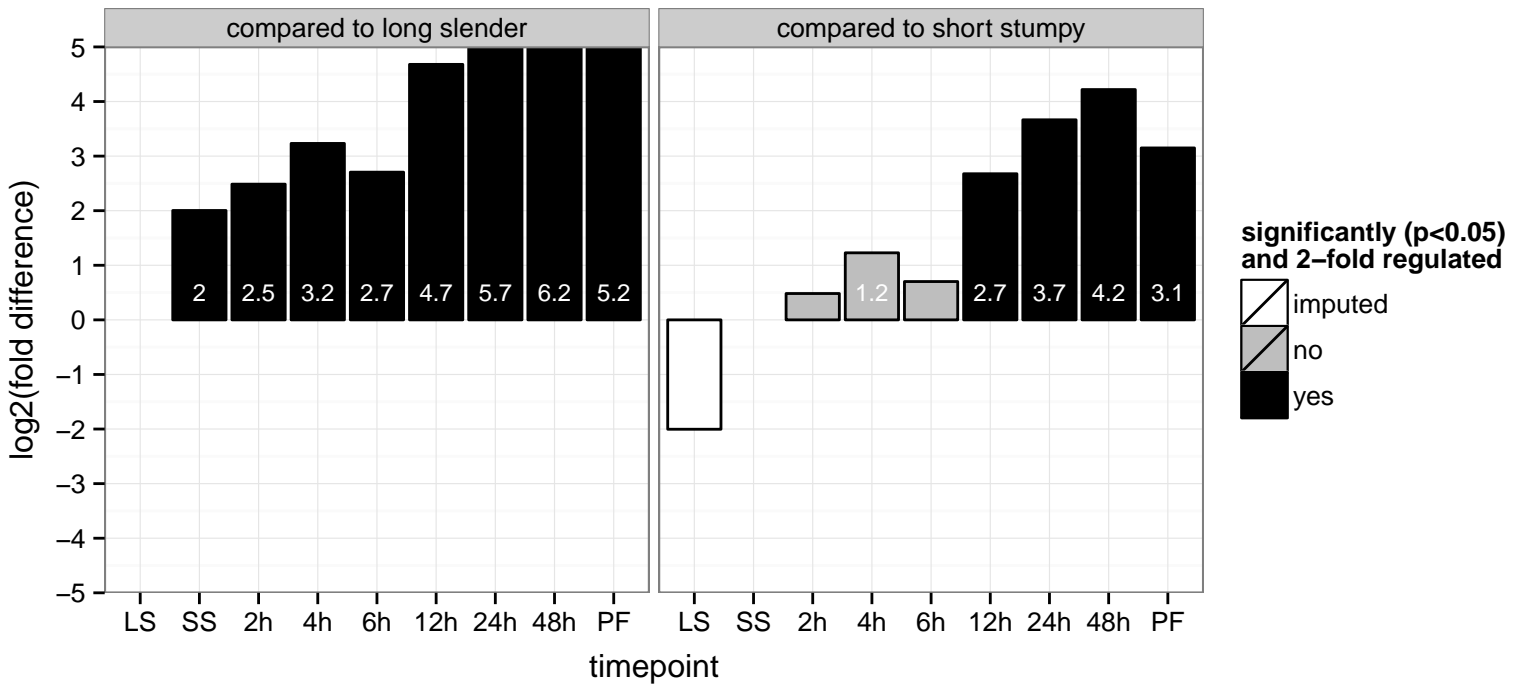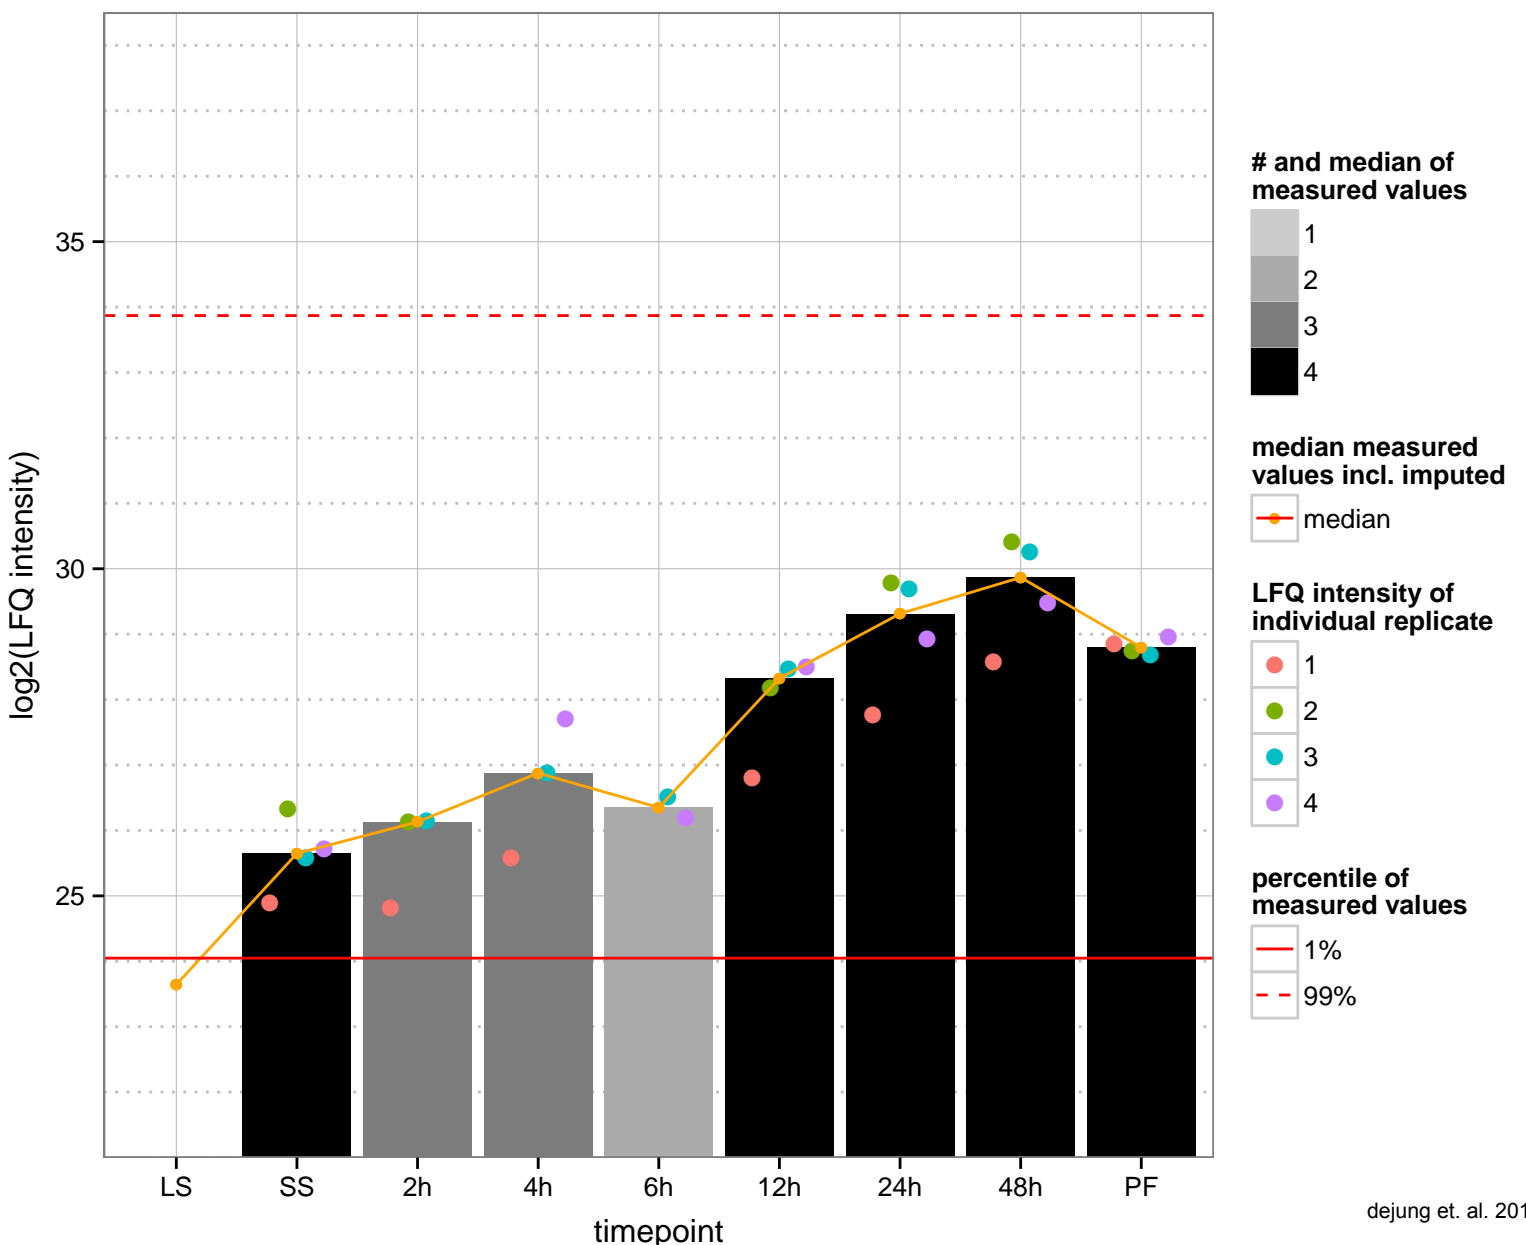

hypothetical protein, conserved  
 Tb927.5.2560  
 AGOF: null  
 AGOC: null  
 AGOP: null  
 PGO: null  
 PGOC: null  
 PGOP: null

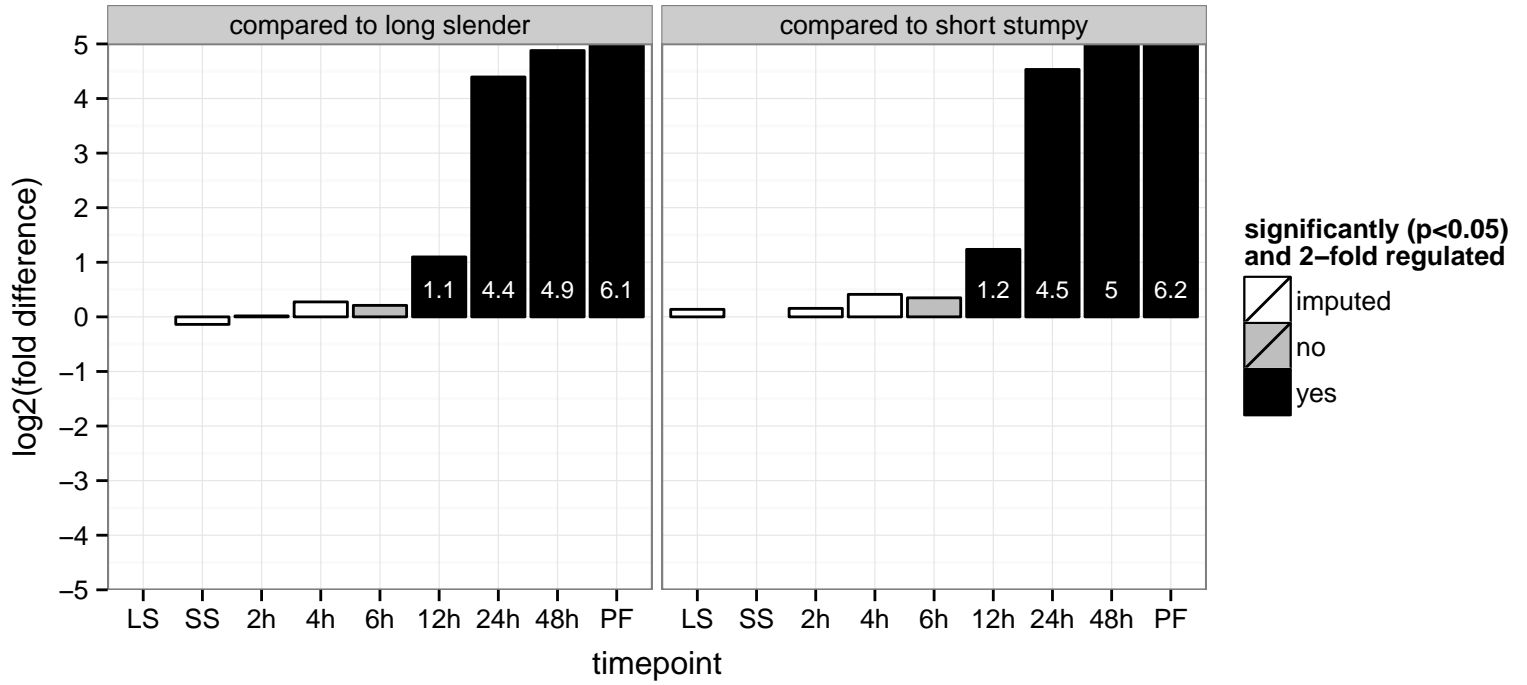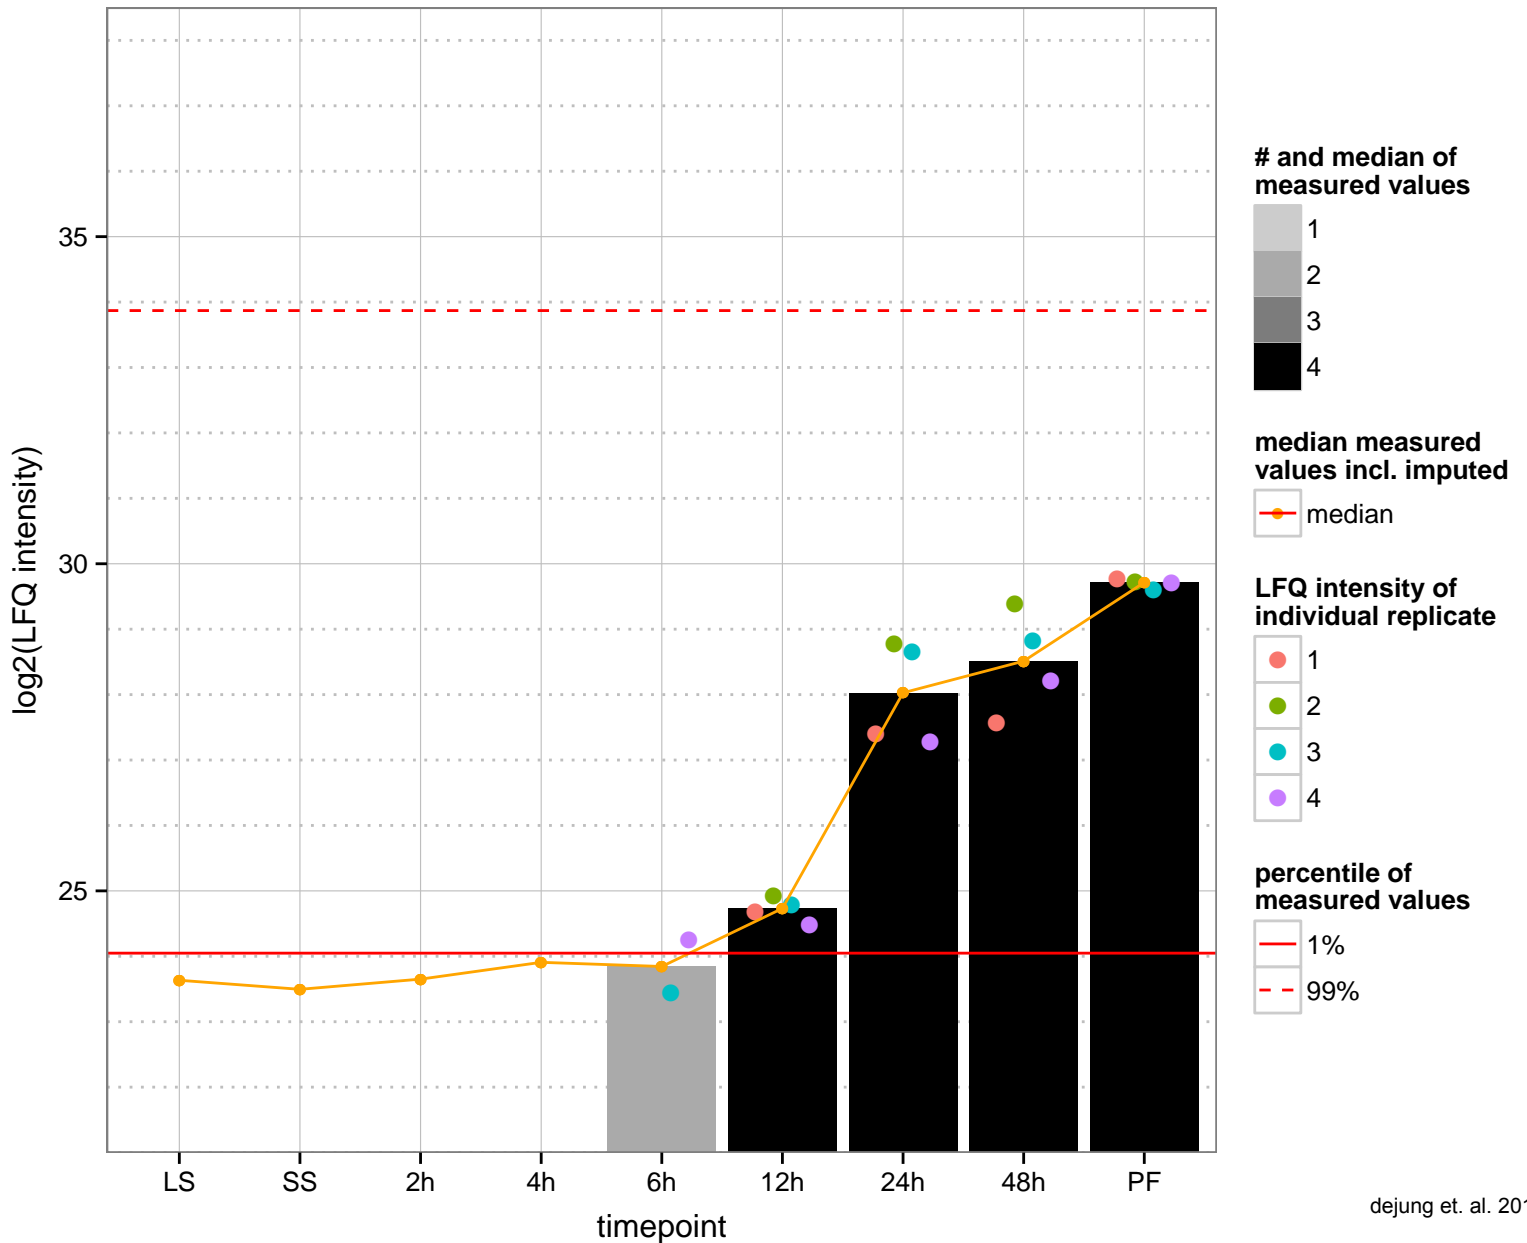

hypothetical protein, conserved  
 Tb927.5.3090  
 AGOF: null  
 AGOC: mitochondrion  
 AGOP: null  
 PGO: null  
 PGO: null  
 PGO: null

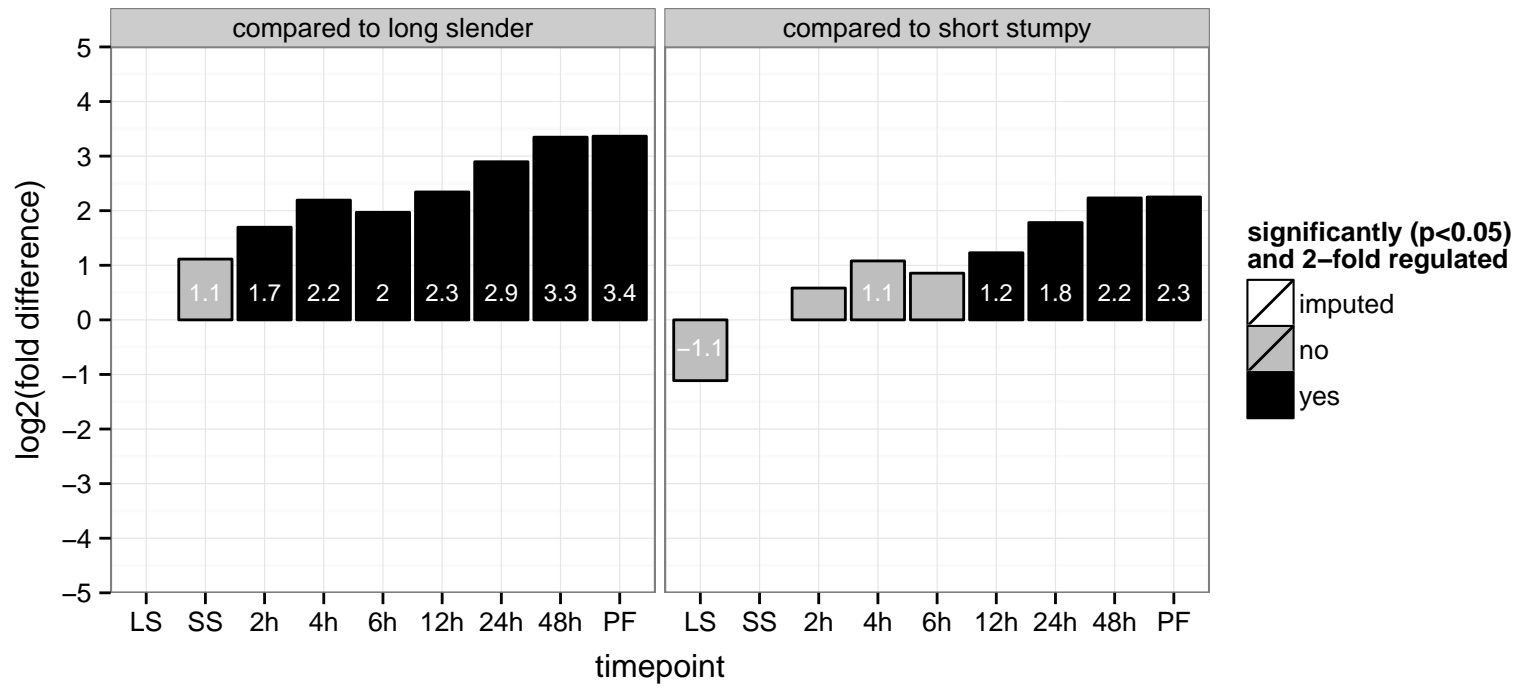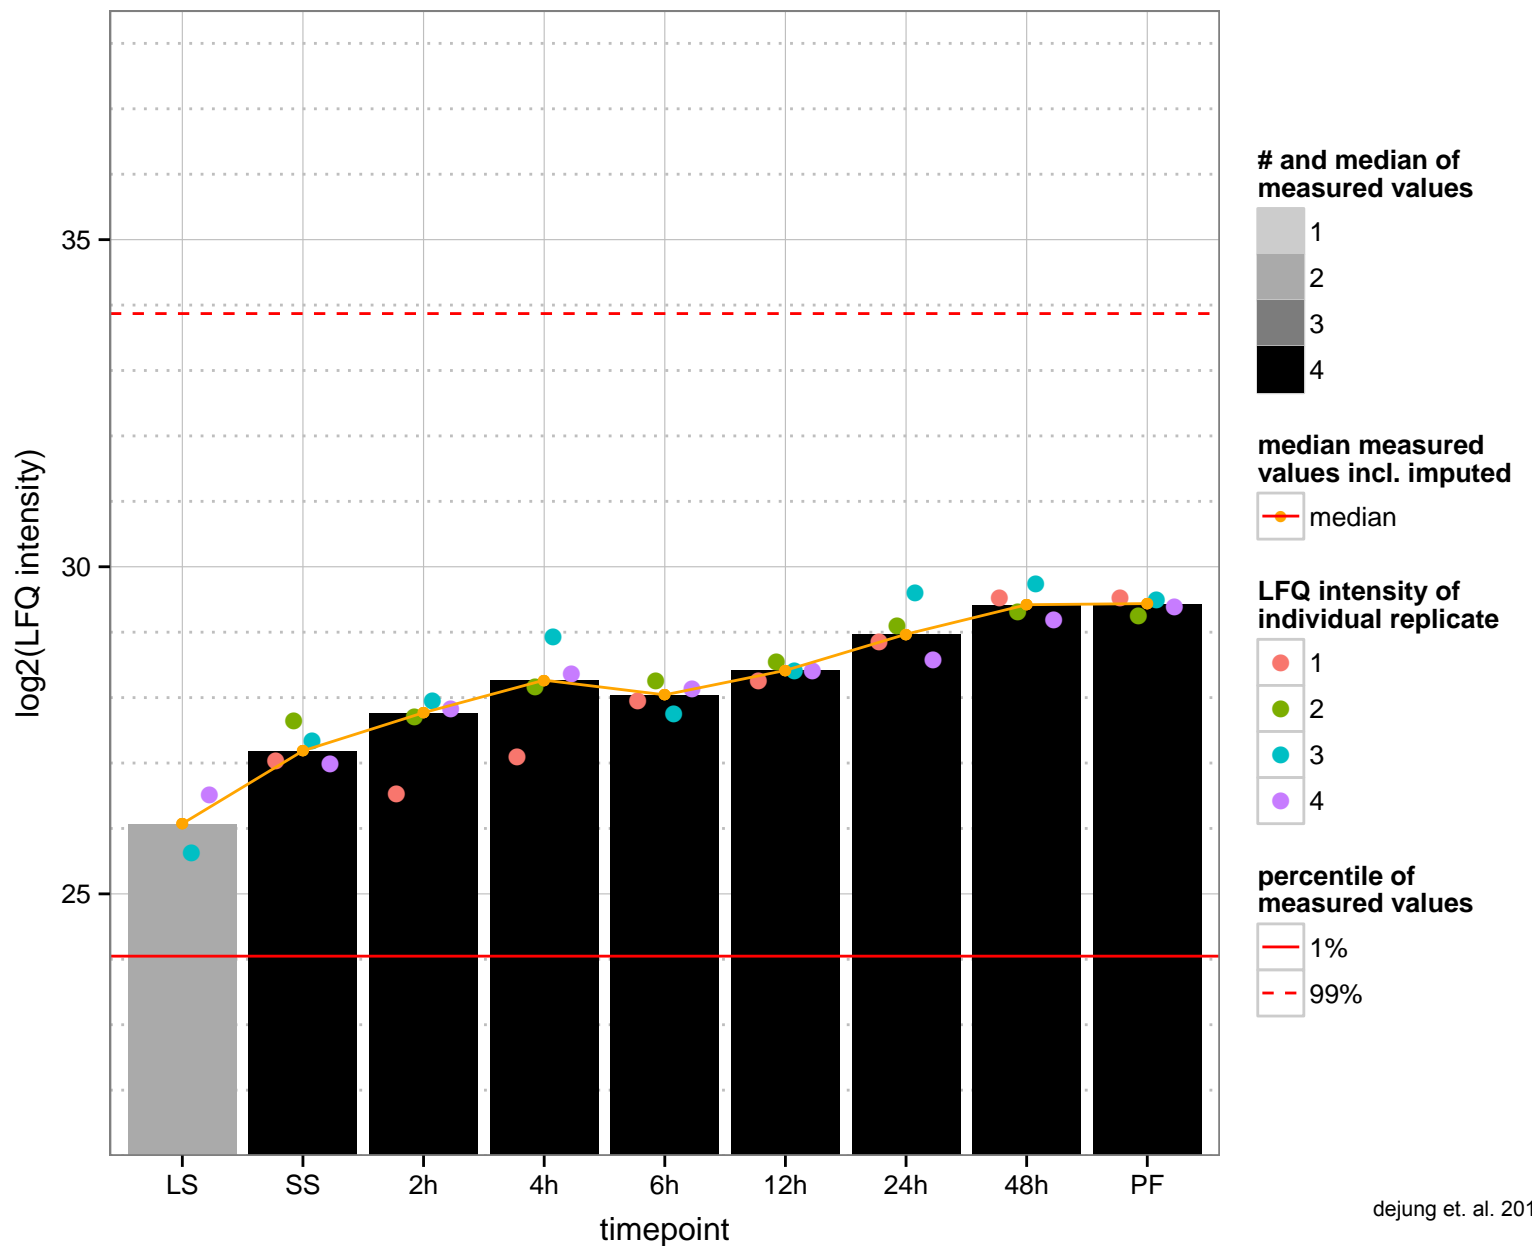

hypothetical protein, conserved  
 Tb927.5.3110  
 AGOF: null  
 AGOC: mitochondrion  
 AGOP: null  
 PGO: null  
 PGO: null  
 PGO: null

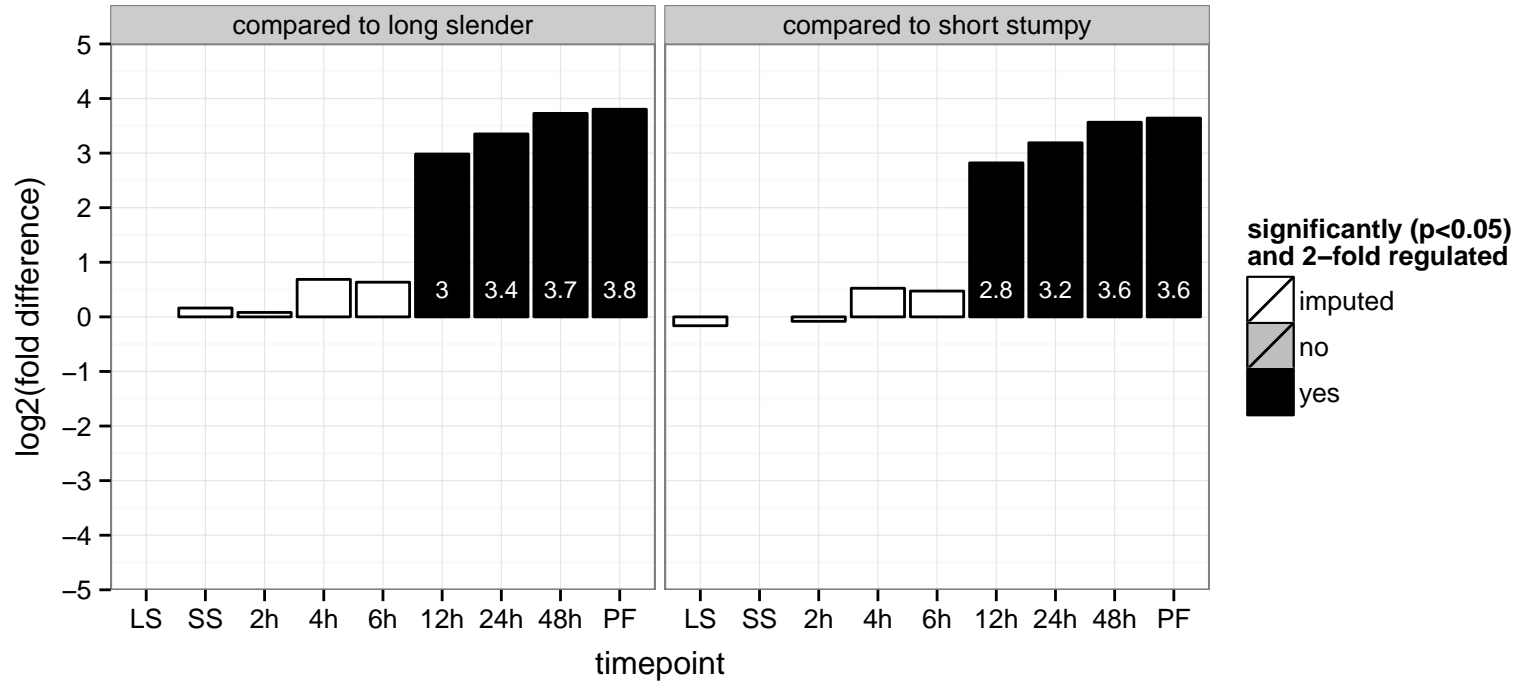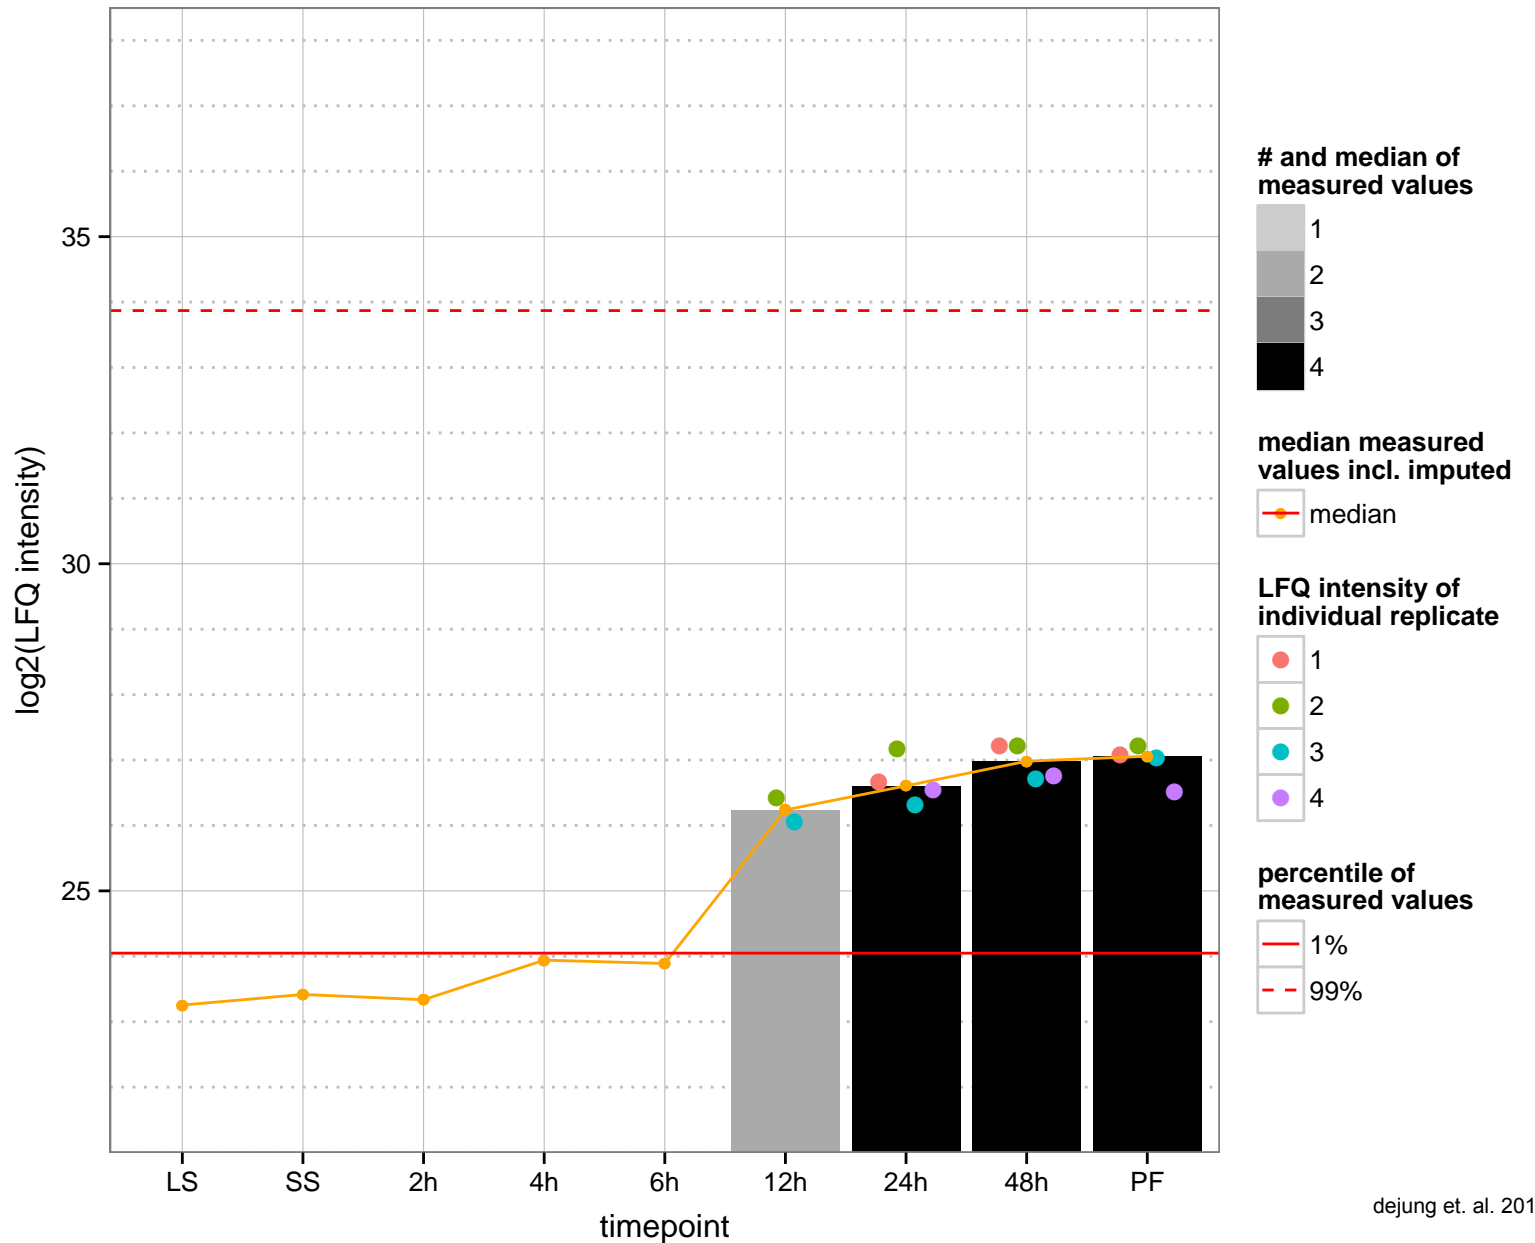

eukaryotic translation initiation factor 2 beta subunit, putative (EIF2B)

Tb927.5.3120

AGOF: translation initiation factor activity, translation initiation factor binding

AGOC: eukaryotic translation initiation factor 2 complex

AGOP: formation of translation preinitiation complex, translational initiation

PGOF: translation initiation factor activity

PGOC: null

PGOP: translational initiation

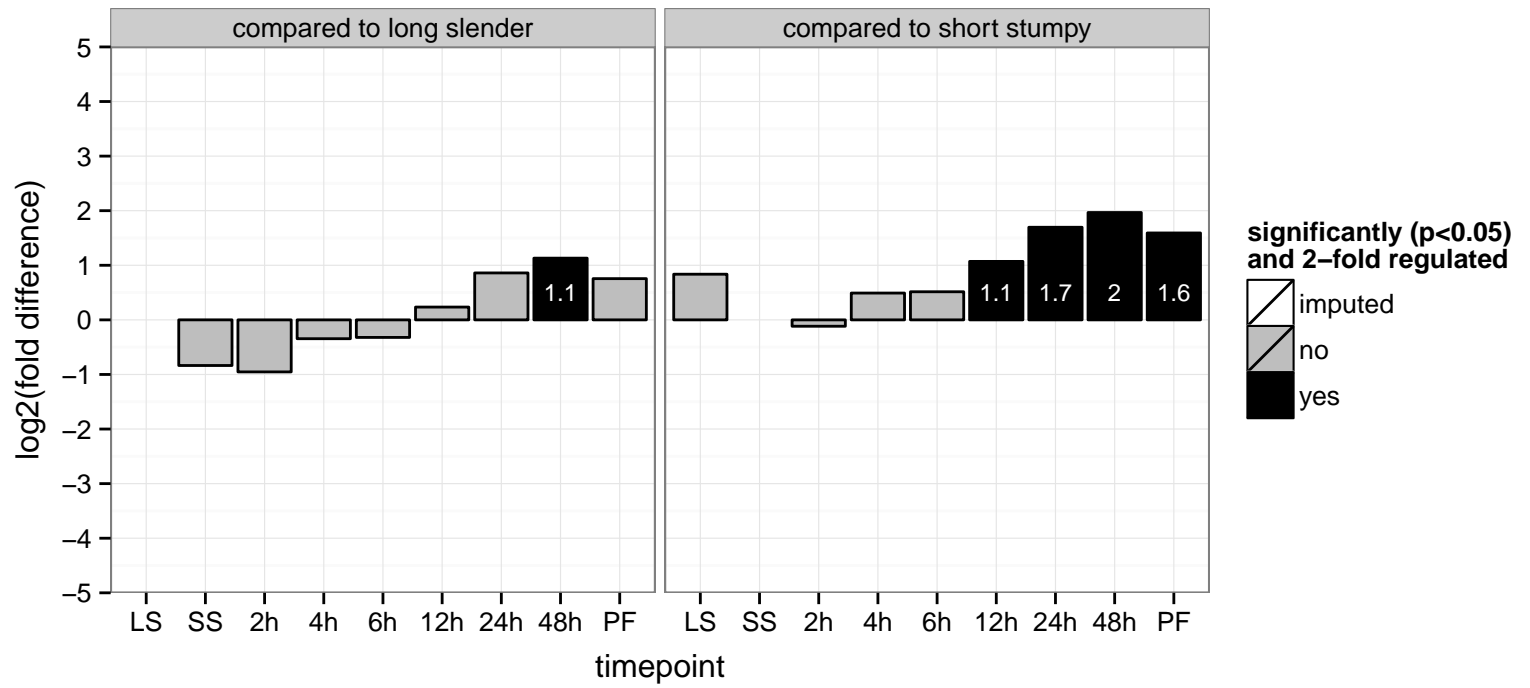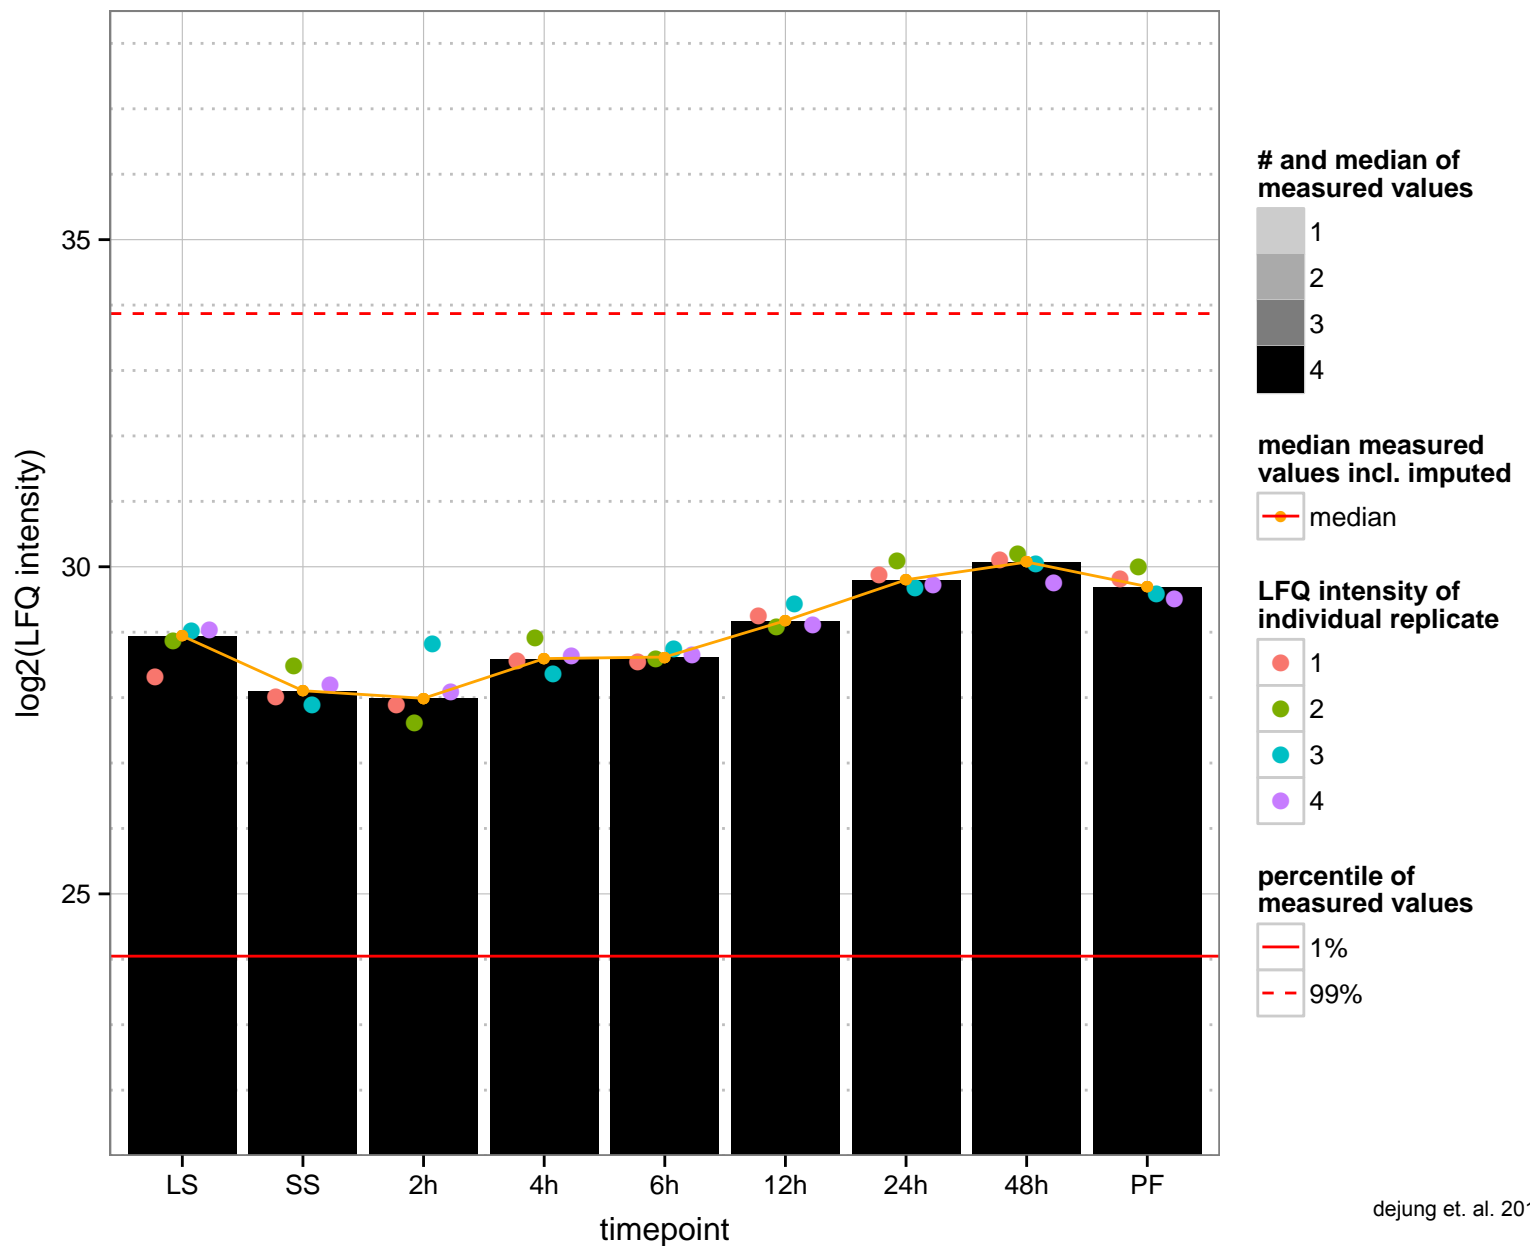

hypothetical protein, conserved  
 Tb927.5.3980  
 AGOF: structural constituent of ribosome  
 AGOC: large ribosomal subunit, mitochondrion  
 AGOP: translation  
 PGO: null  
 PGO: null  
 PGO: null

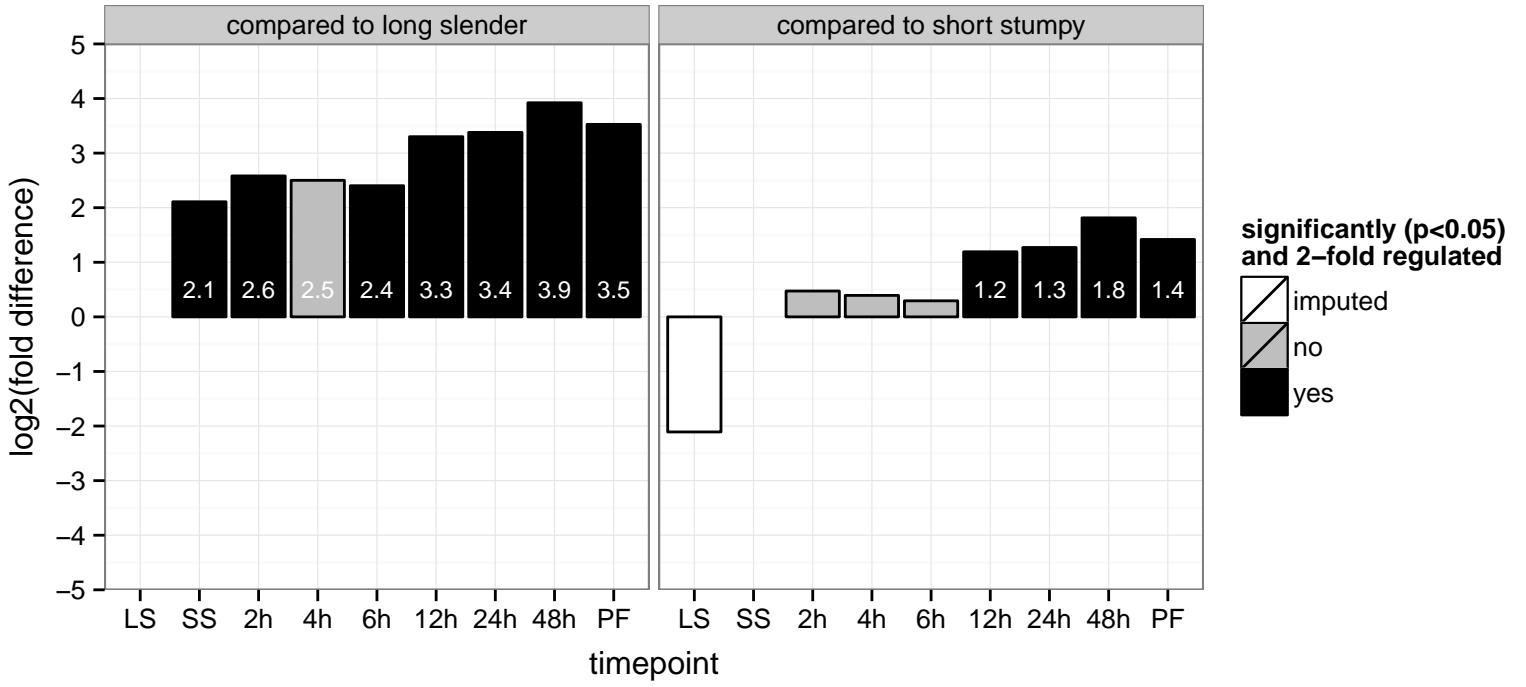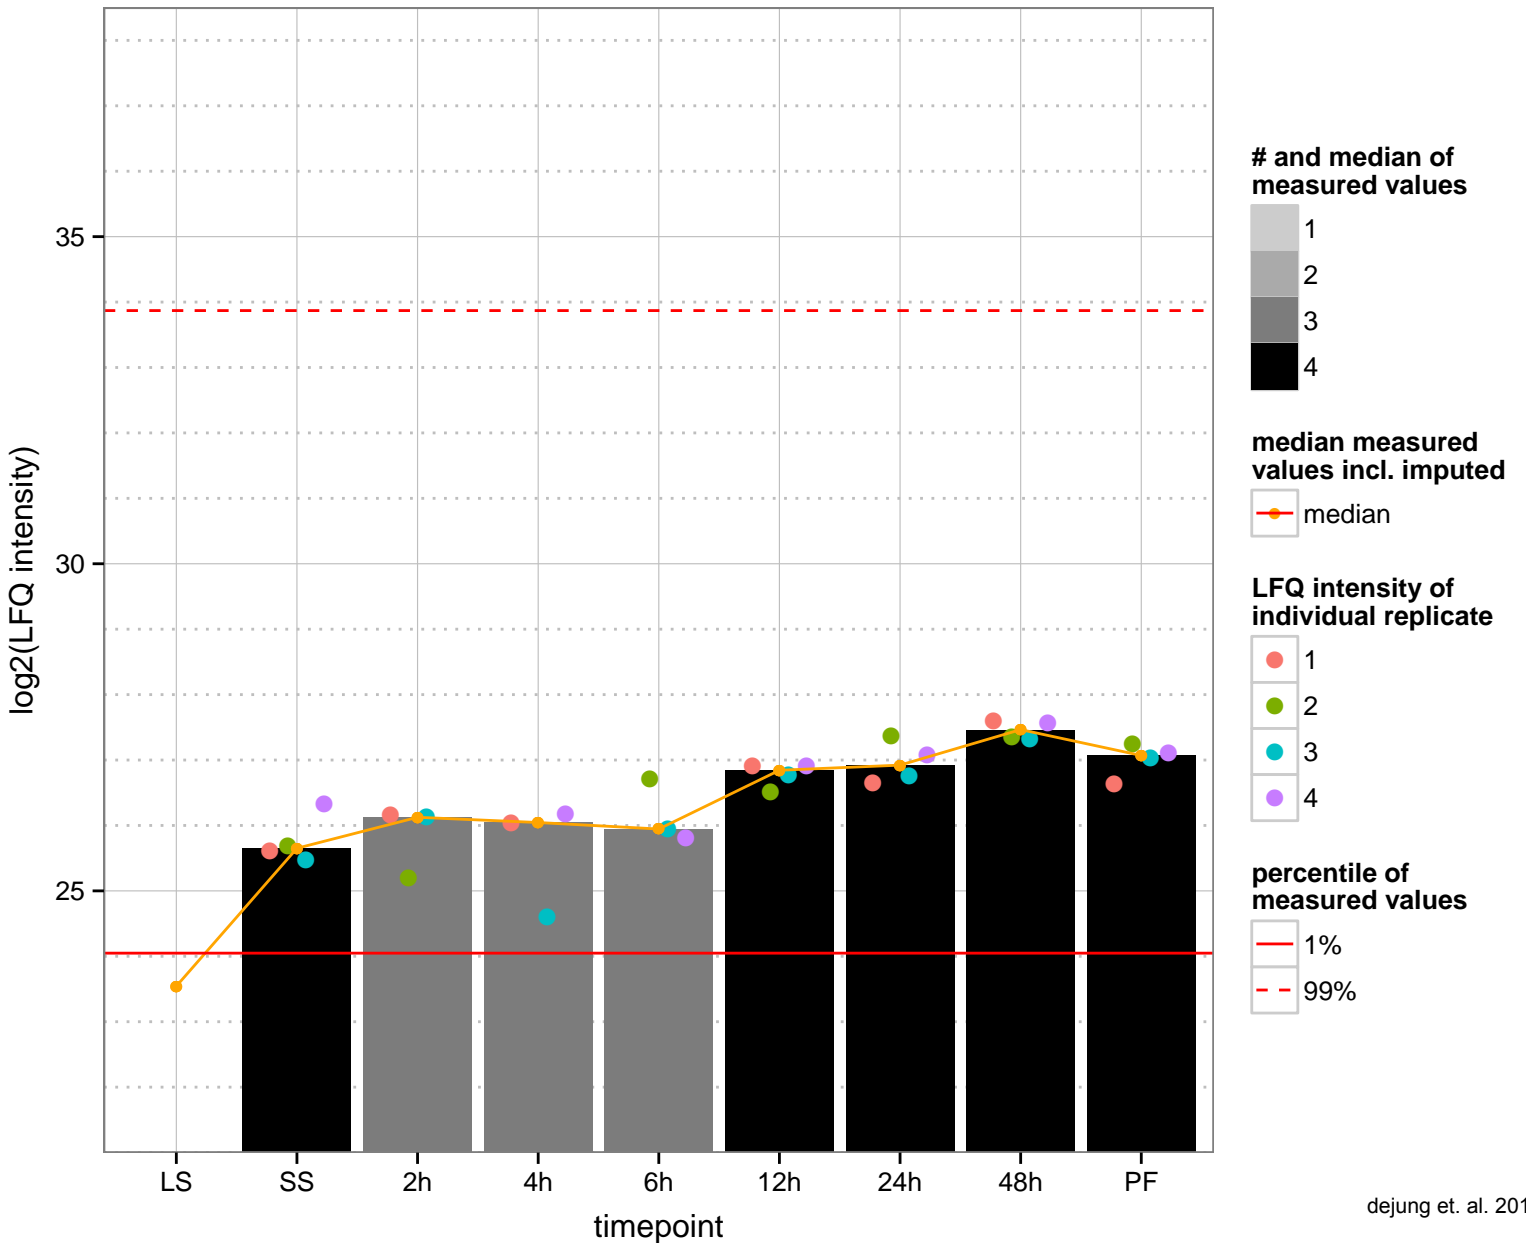



hypothetical protein, conserved  
 Tb927.5.4090  
 AGOF: null  
 AGOC: null  
 AGOP: null  
 PGO: protein binding  
 PGOC: null  
 PGOP: null

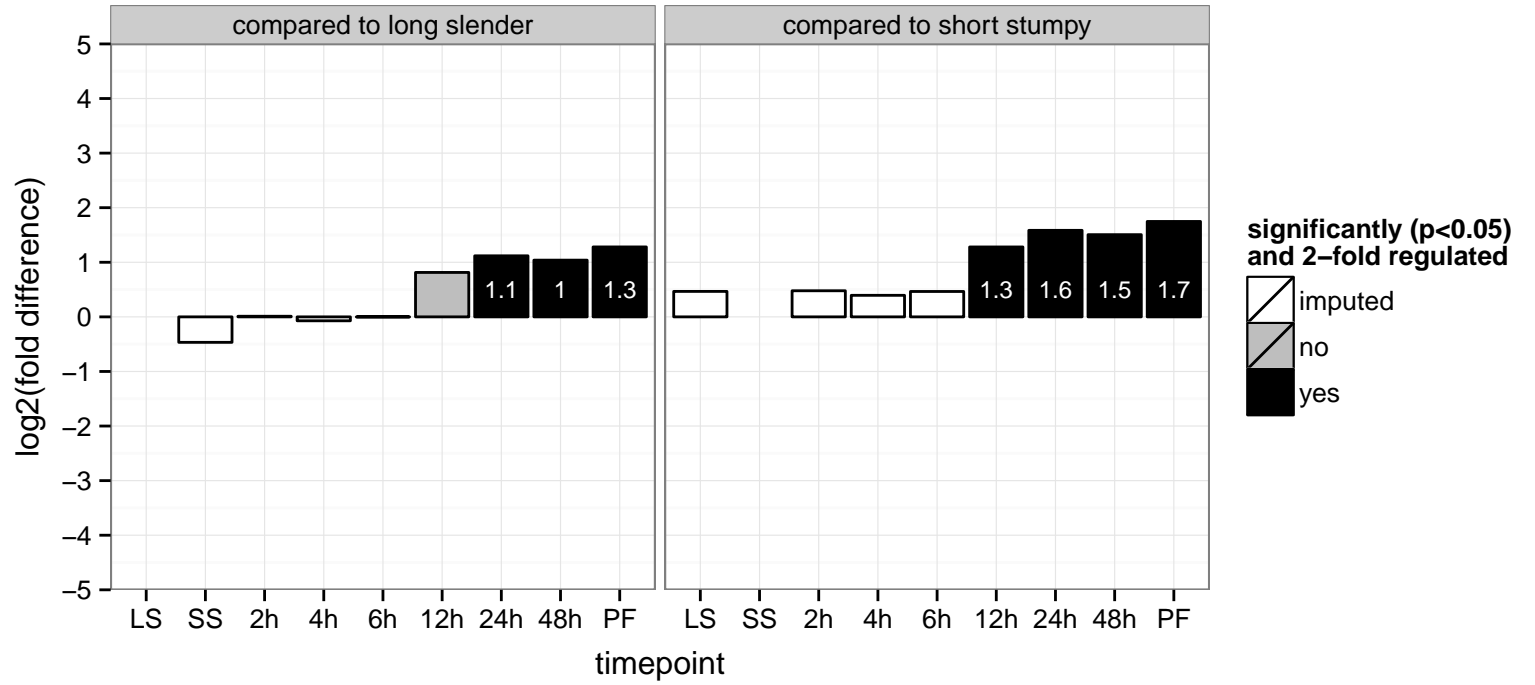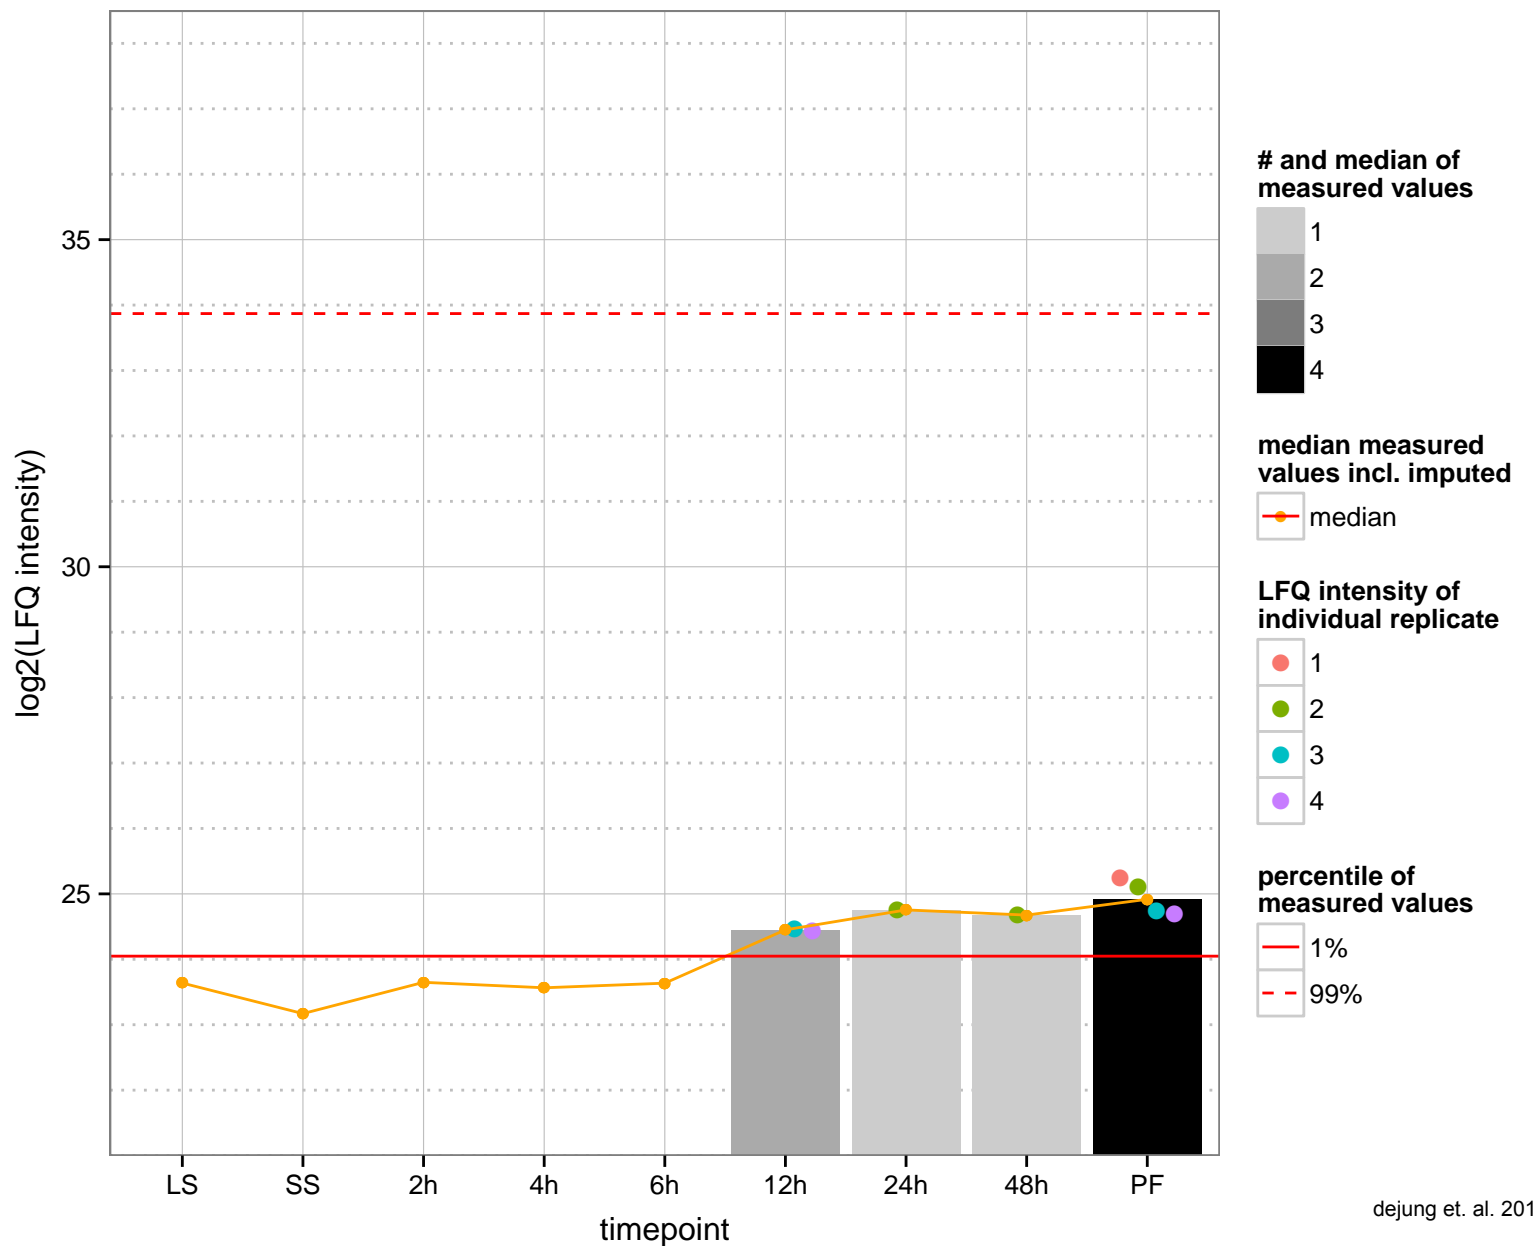

hypothetical protein, conserved  
 Tb927.6.1890  
 AGOF: null  
 AGOC: mitochondrion  
 AGOP: null  
 PGO: null  
 PGOC: null  
 PGOP: null

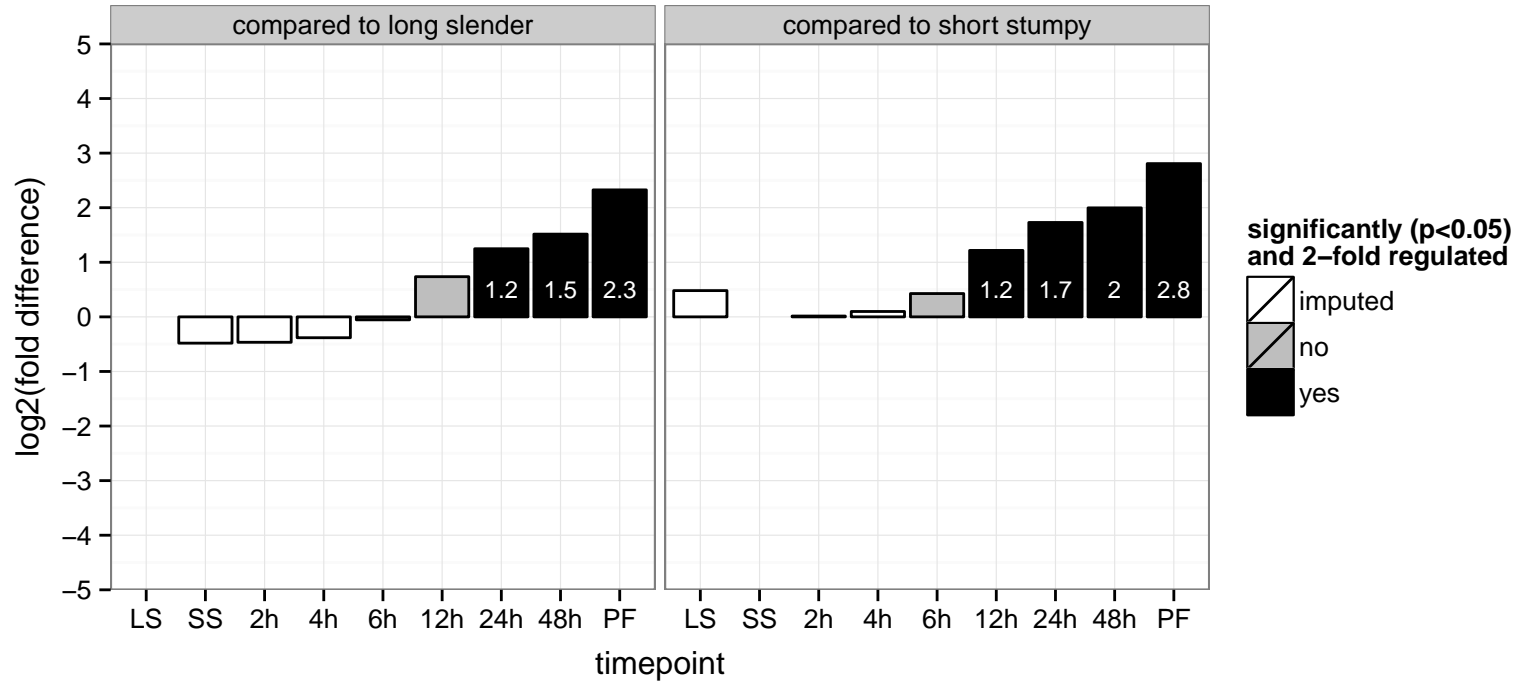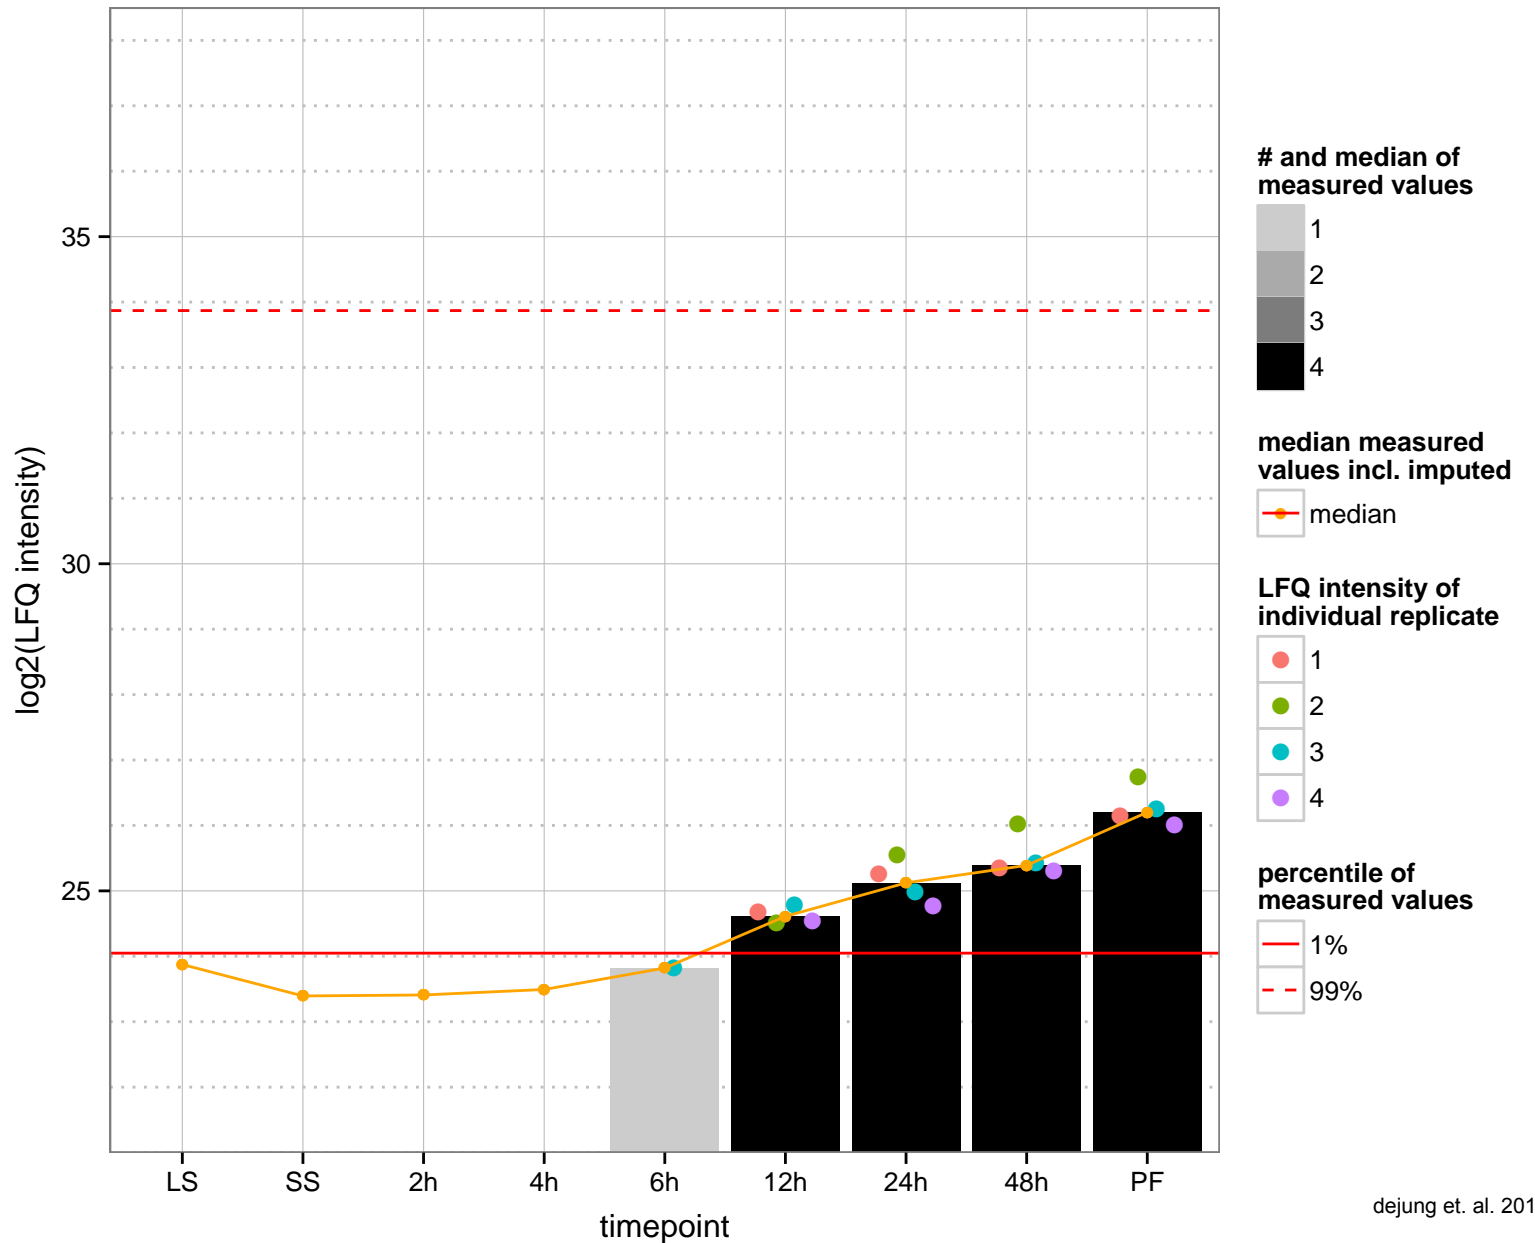

hypothetical protein, conserved  
 Tb927.6.2080  
 AGOF: null  
 AGOC: mitochondrion  
 AGOP: null  
 PGO: null  
 PGO: null  
 PGO: null

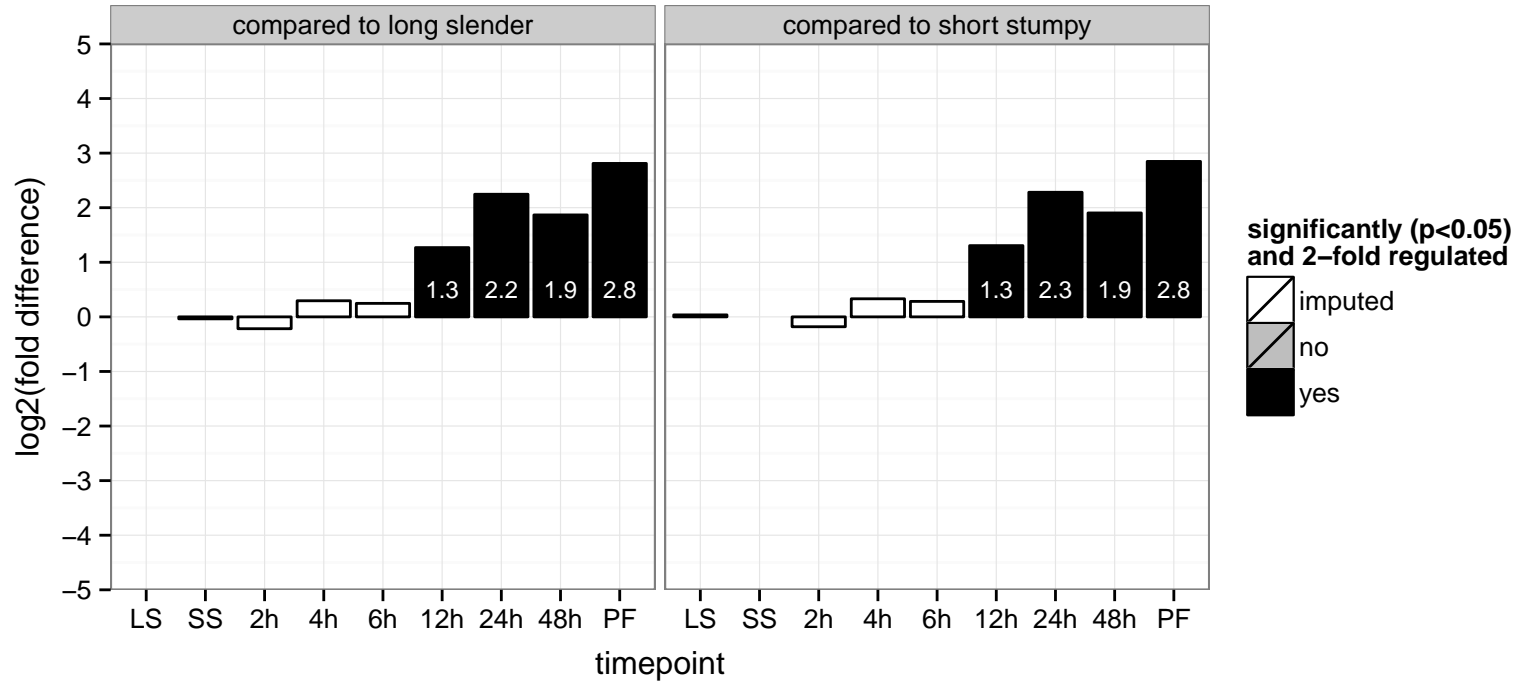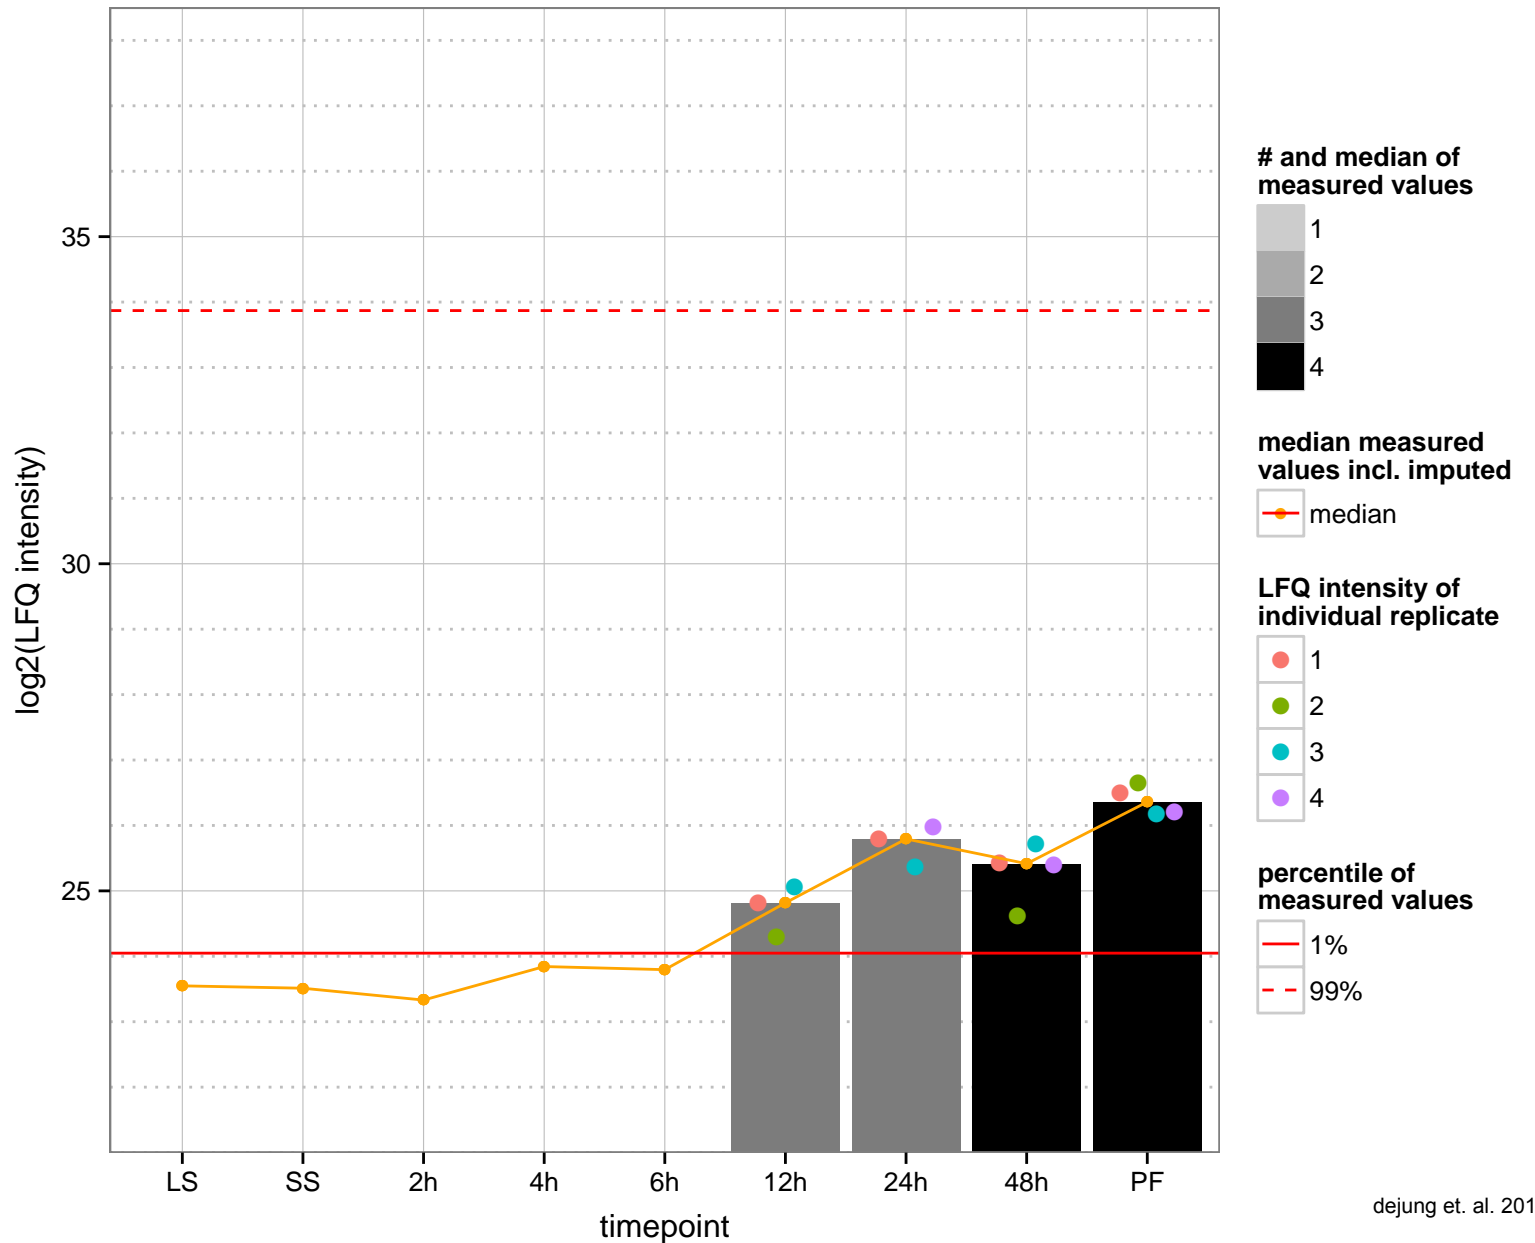

protein kinase, putative, protein kinase B kinase

Tb927.6.2450

AGOF: ATP binding, protein kinase activity, protein serine/threonine kinase activity, protein tyrosine kinase activity

AGOC: null

AGOP: protein phosphorylation

PGOF: ATP binding, protein kinase activity, transferase activity, transferring phosphorus-containing groups

PGOC: null

PGOP: protein phosphorylation

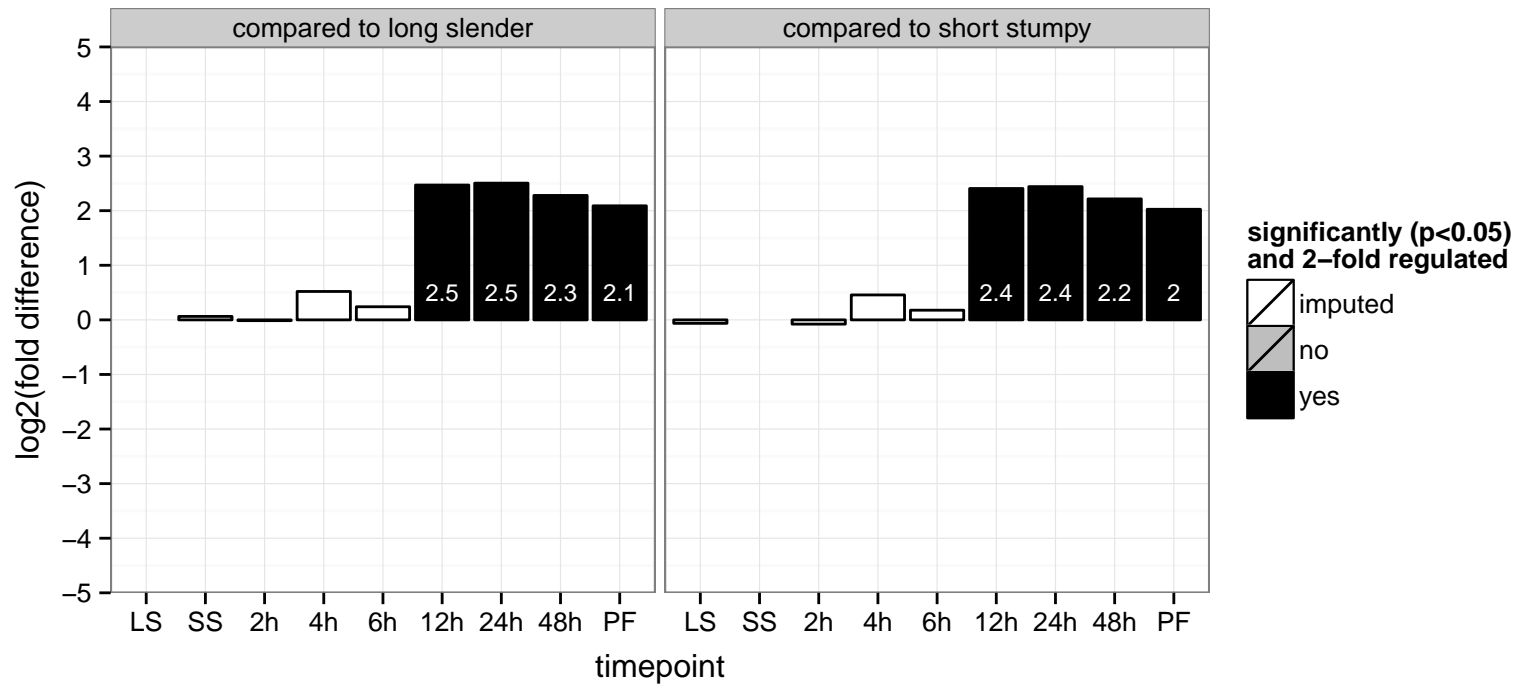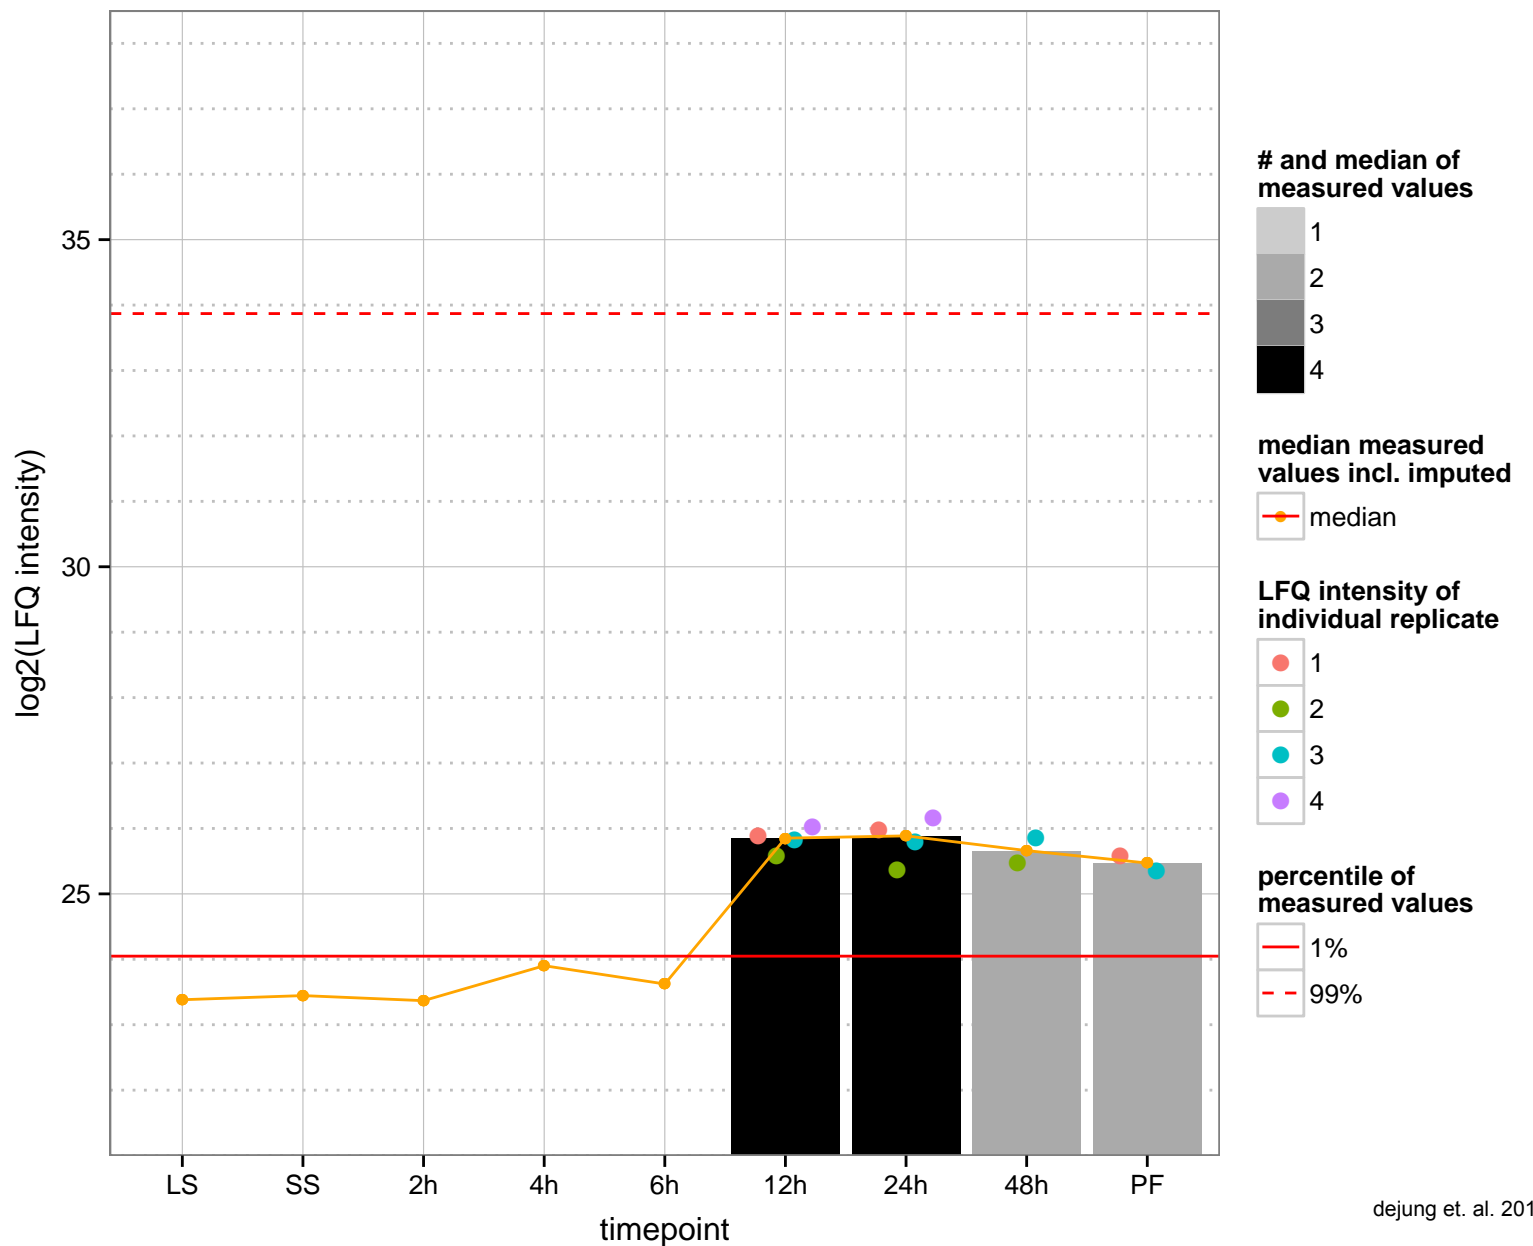

receptor-type adenylyate cyclase GRESAG 4, pseudogene, putative, degenerate  
 Tb927.6.320  
 AGOF: phosphorus-oxygen lyase activity  
 AGOC: null  
 AGOP: cyclic nucleotide biosynthetic process, intracellular signal transduction  
 PGO: phosphorus-oxygen lyase activity  
 PGOC: null  
 PGOP: cyclic nucleotide biosynthetic process, intracellular signal transduction

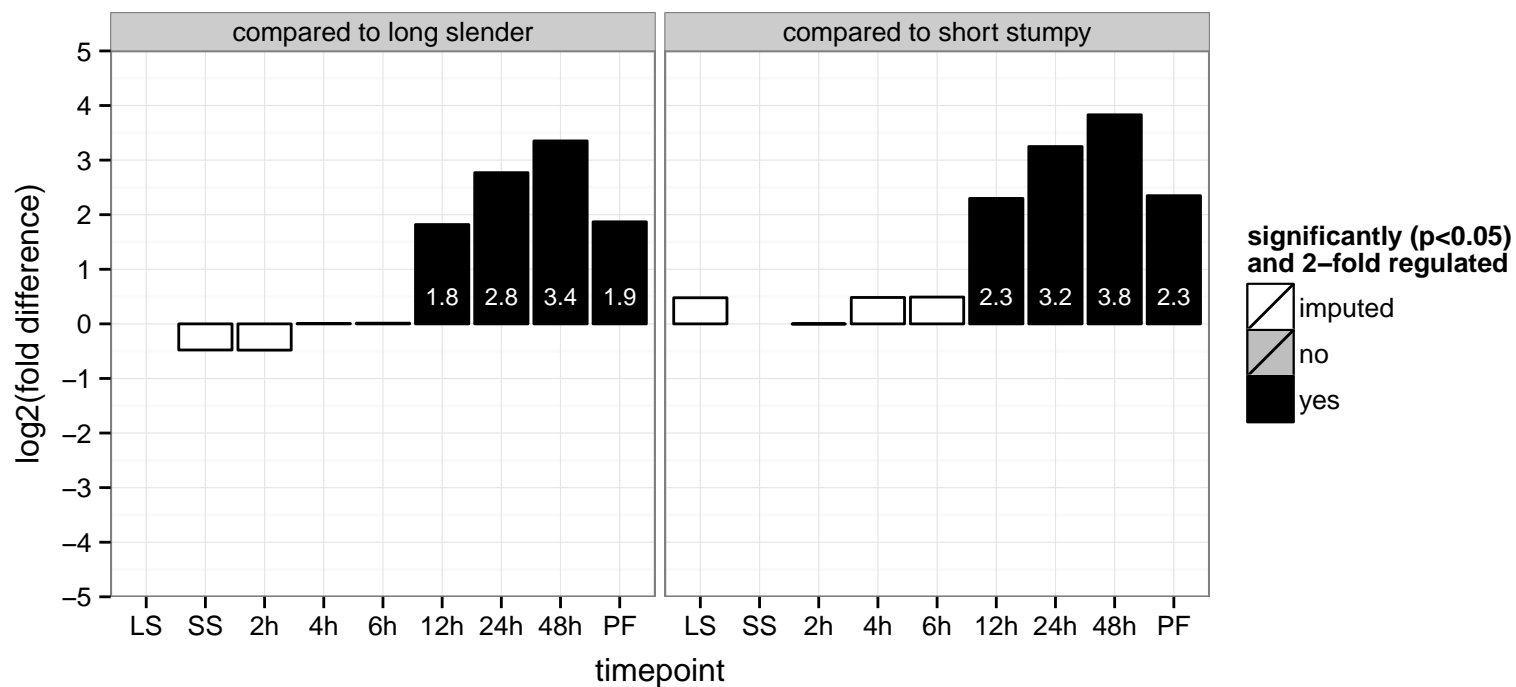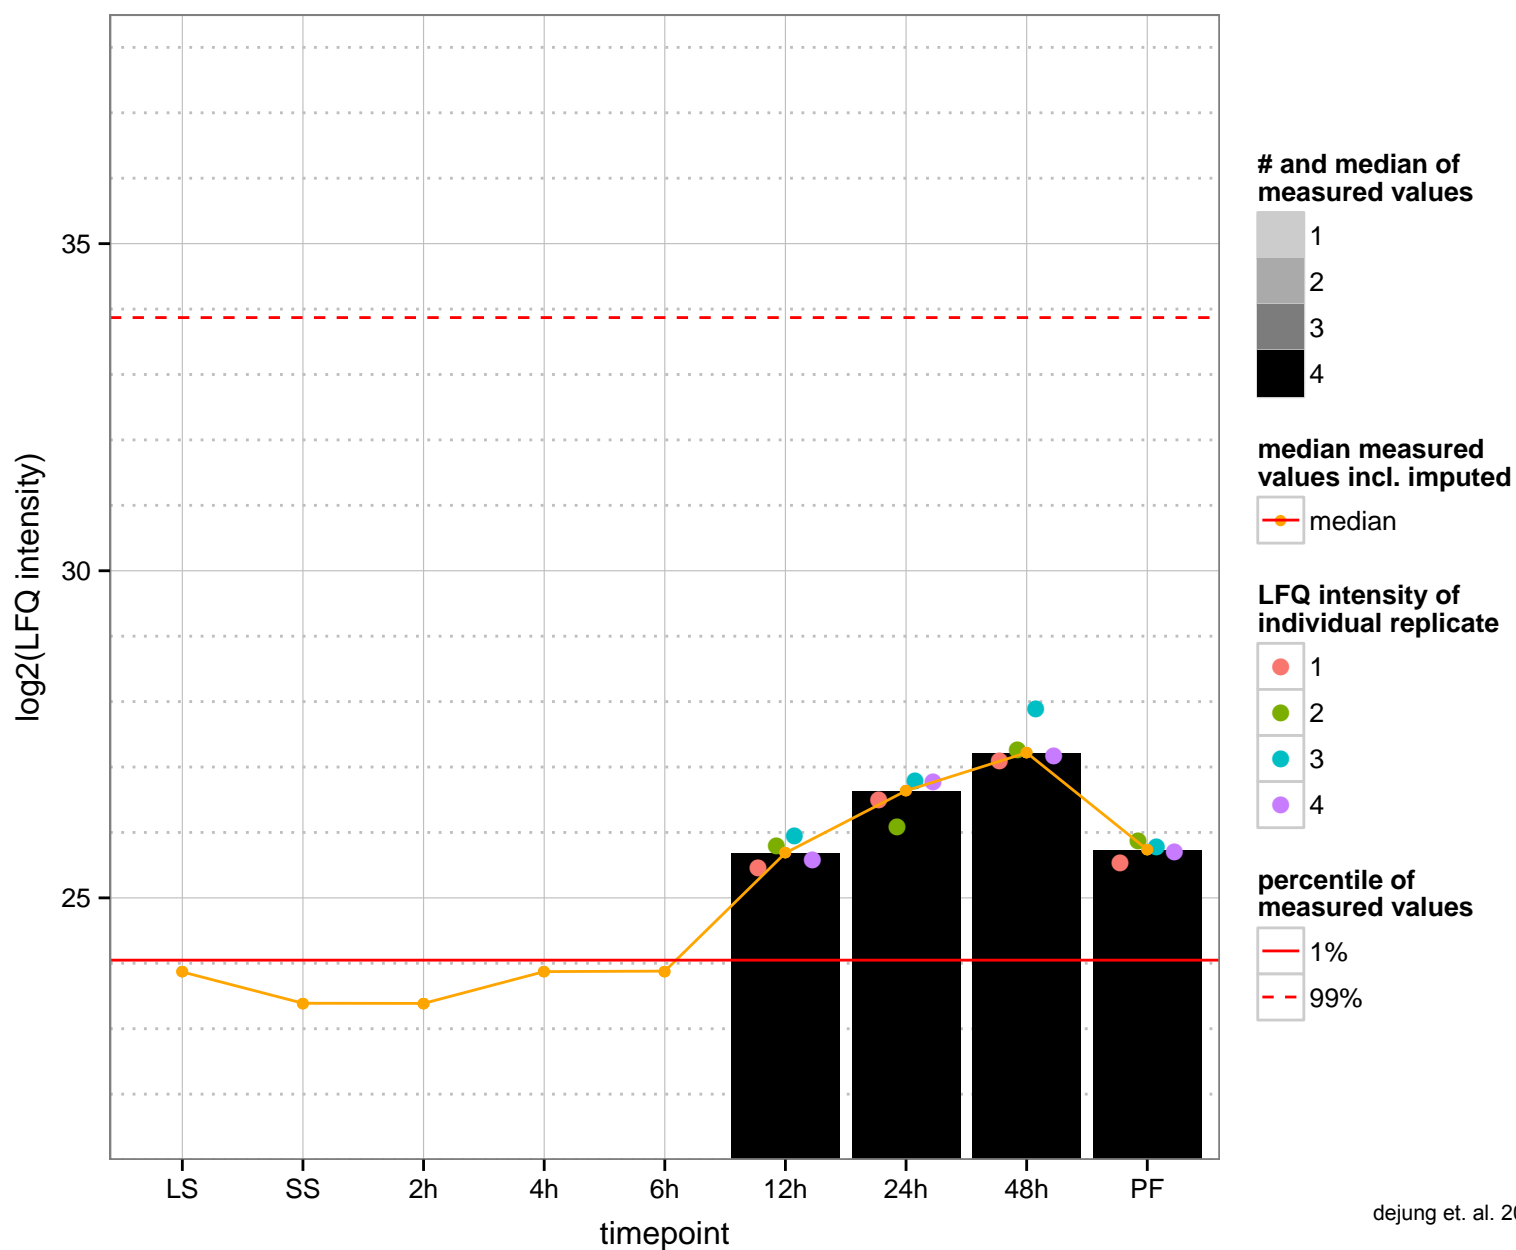

hypothetical protein, conserved  
 Tb927.6.3250  
 AGOF: zinc ion binding  
 AGOC: intracellular  
 AGOP: null  
 PGOF: zinc ion binding  
 PGOC: intracellular  
 PGOP: null

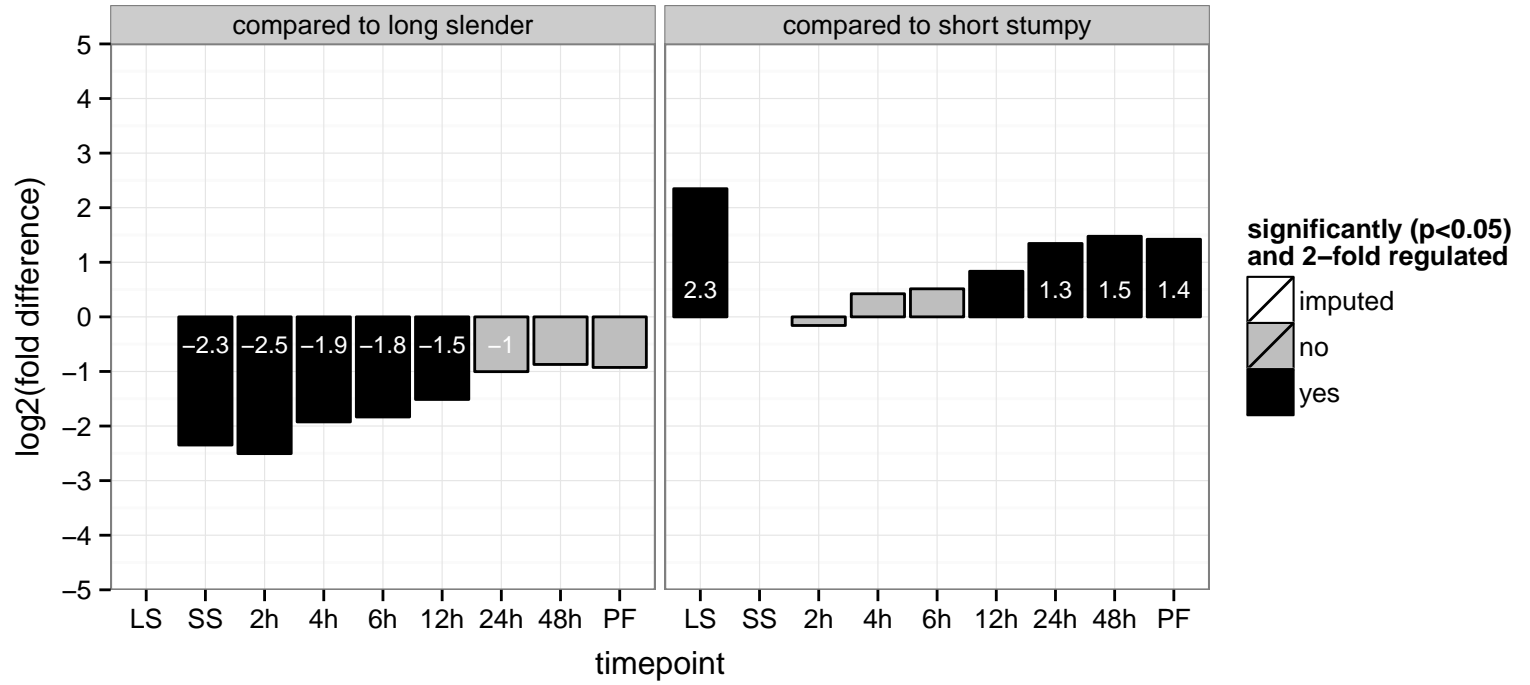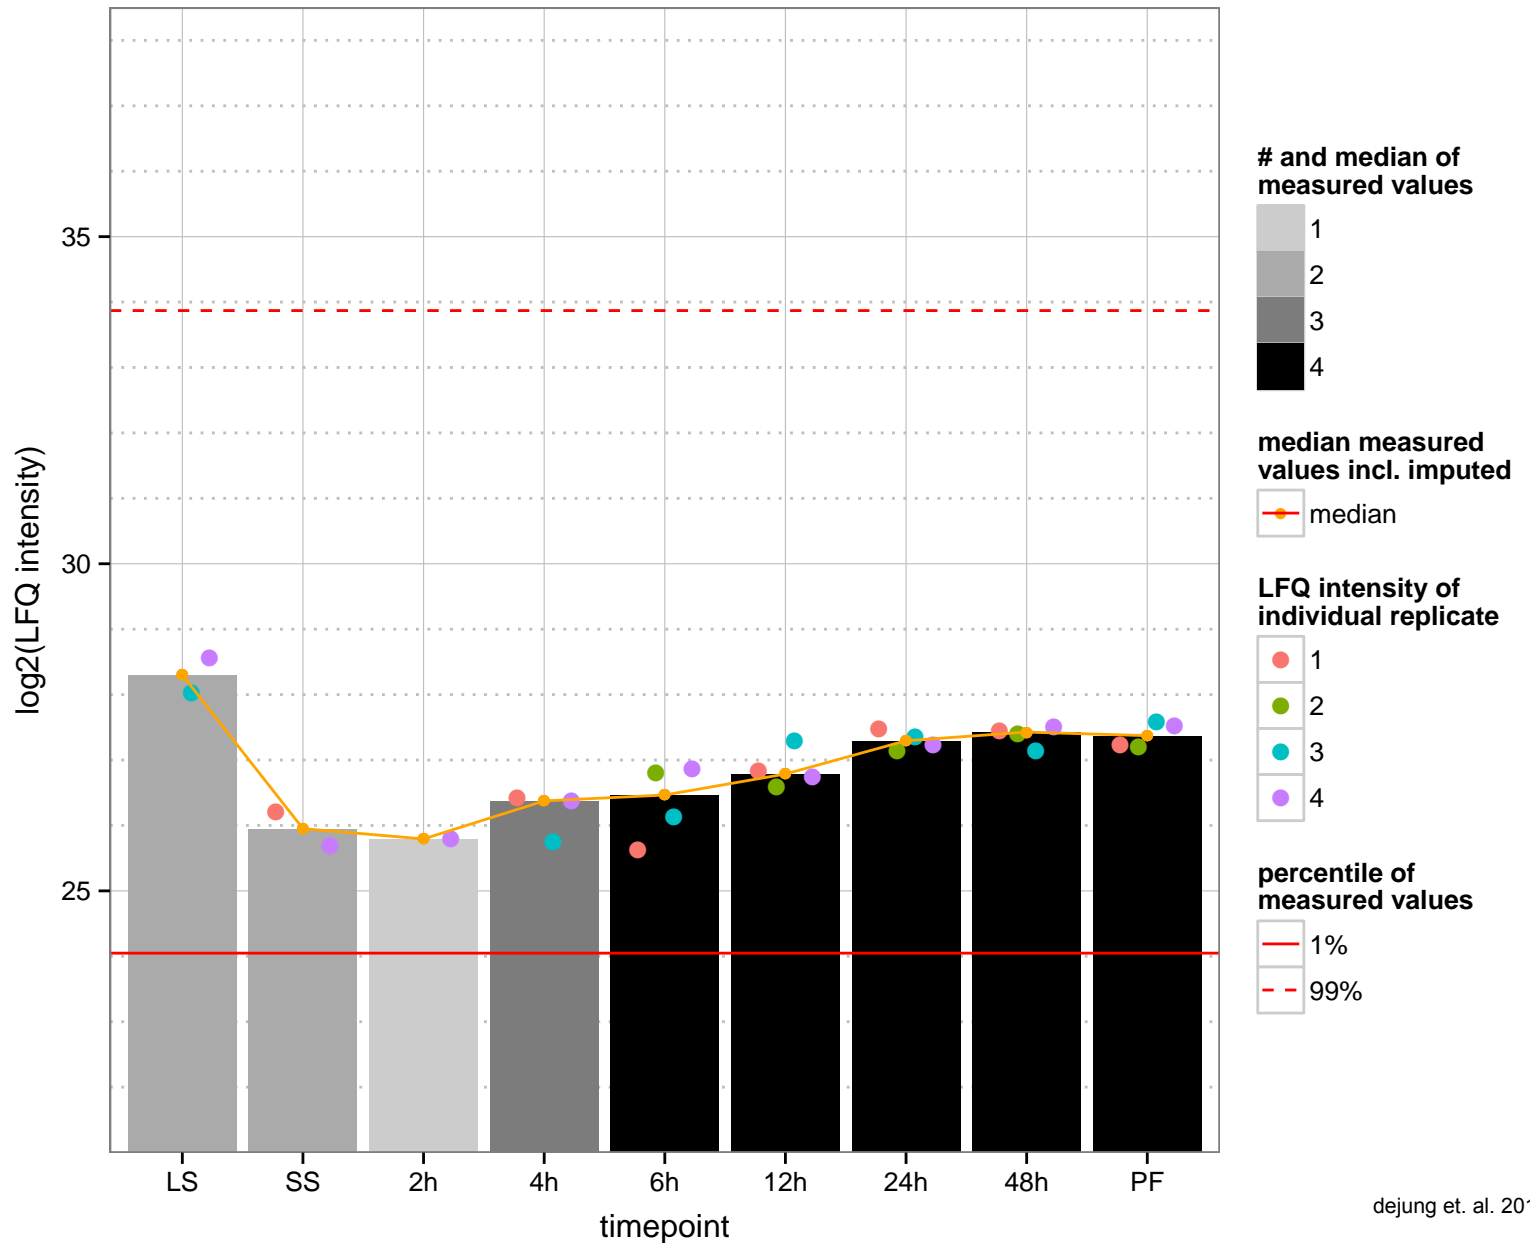

RNA-binding protein 42 (RNA-binding motif protein 42) (RBP42)  
 Tb927.6.4440  
 AGOF: RNA polymerase binding, mRNA binding  
 AGOC: polysome  
 AGOP: null  
 PGO: null  
 PGO: null  
 PGO: null

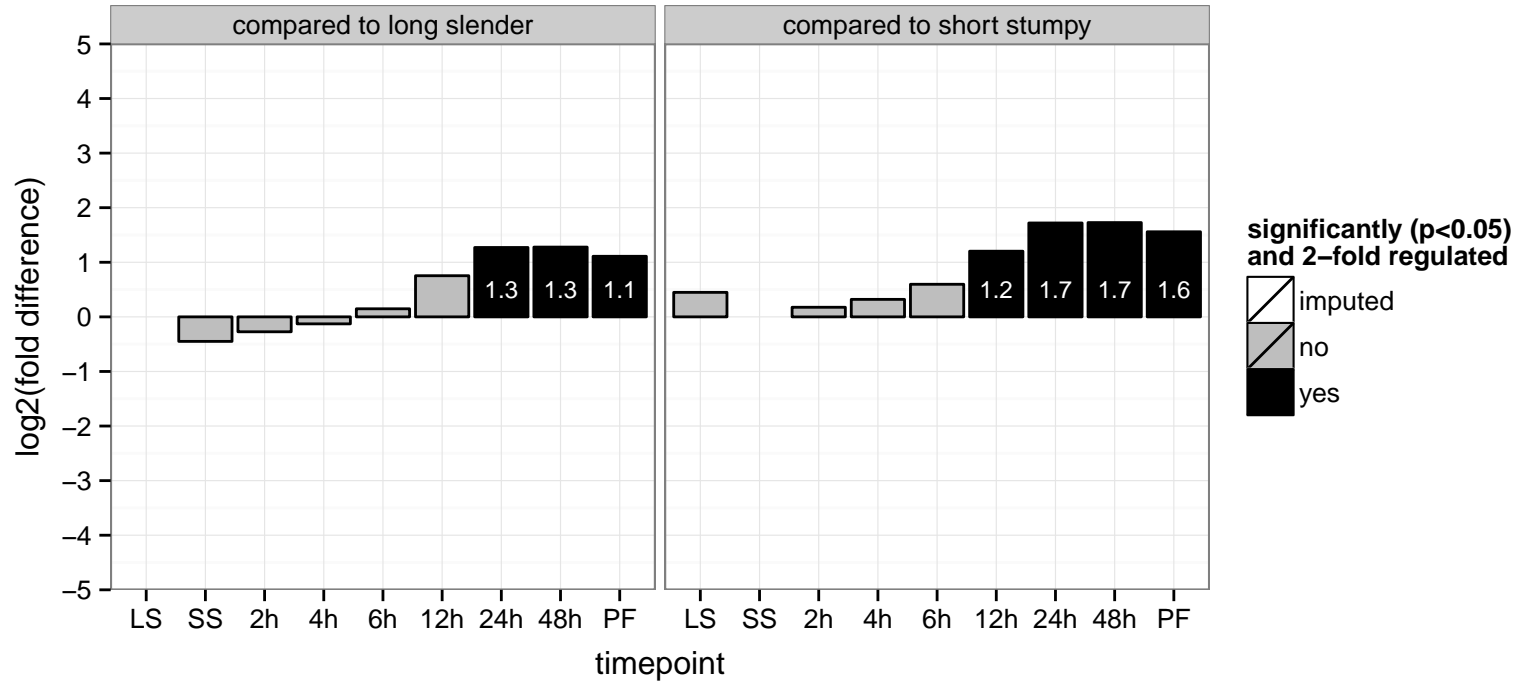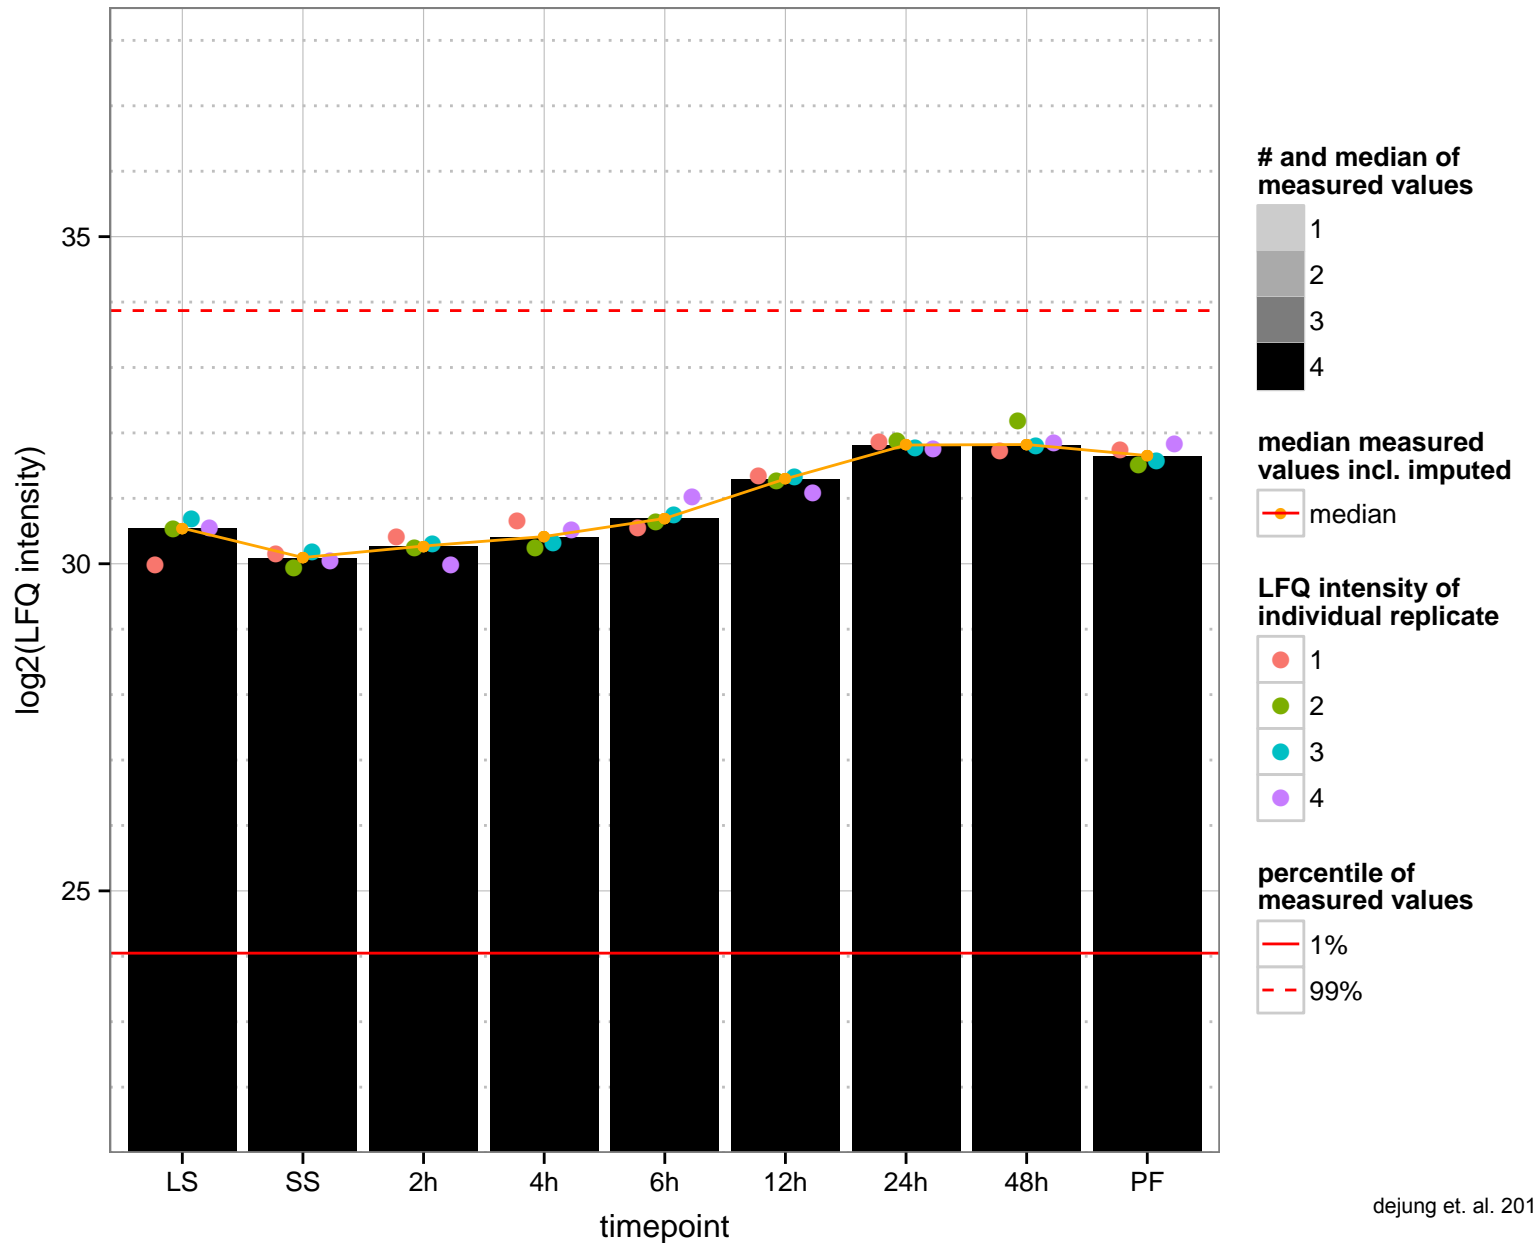

3-hydroxy-3-methylglutaryl-CoA reductase, putative

Tb927.6.4540

AGOF: NADP binding

AGOC: integral to membrane, mitochondrial inner membrane, mitochondrion

AGOP: coenzyme A metabolic process, oxidation-reduction process

PGOF: NADP binding, coenzyme binding, hydroxymethylglutaryl-CoA reductase (NADPH) activity, oxidoreductase activity, acyl-CoA oxidase activity

PGOC: integral to membrane

PGOP: coenzyme A metabolic process, isoprenoid biosynthetic process, oxidation-reduction process

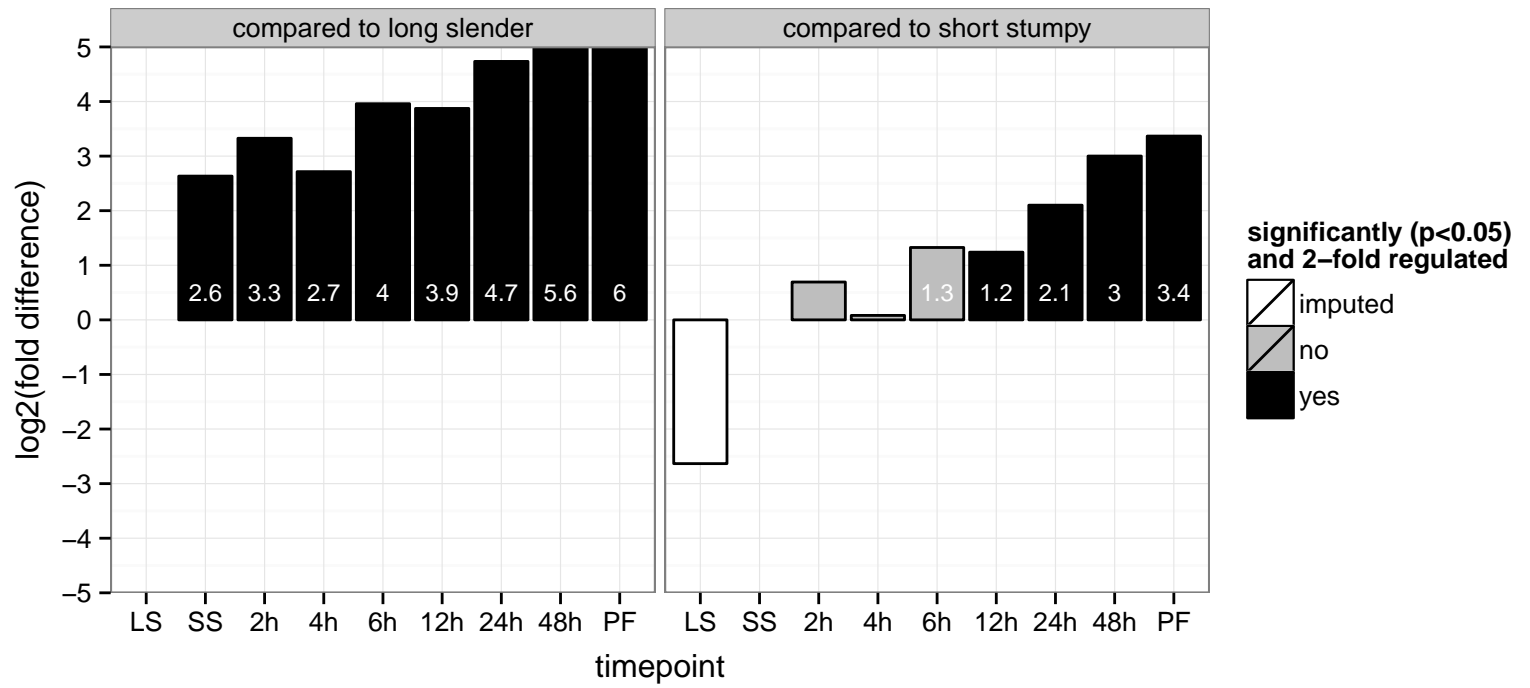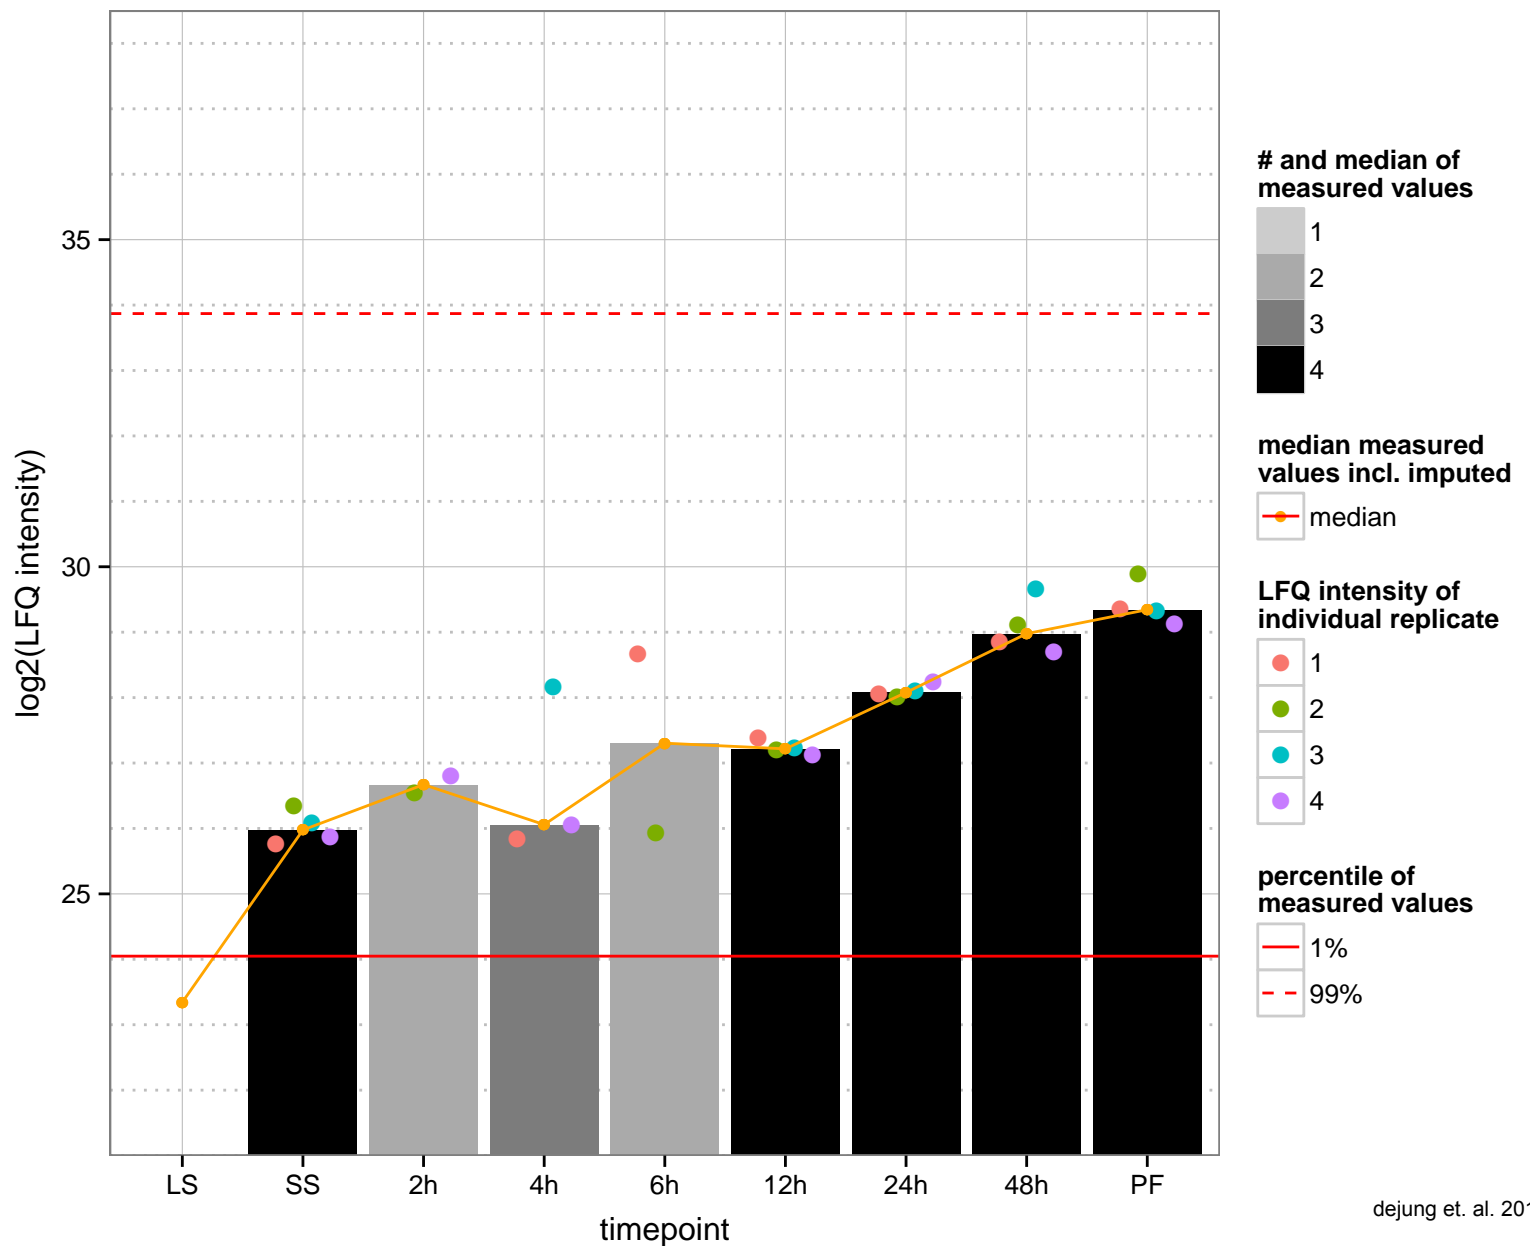



hypothetical protein, conserved  
 Tb927.6.4560  
 AGOF: null  
 AGOC: mitochondrion  
 AGOP: null  
 PGO: null  
 PGO: null  
 PGO: null

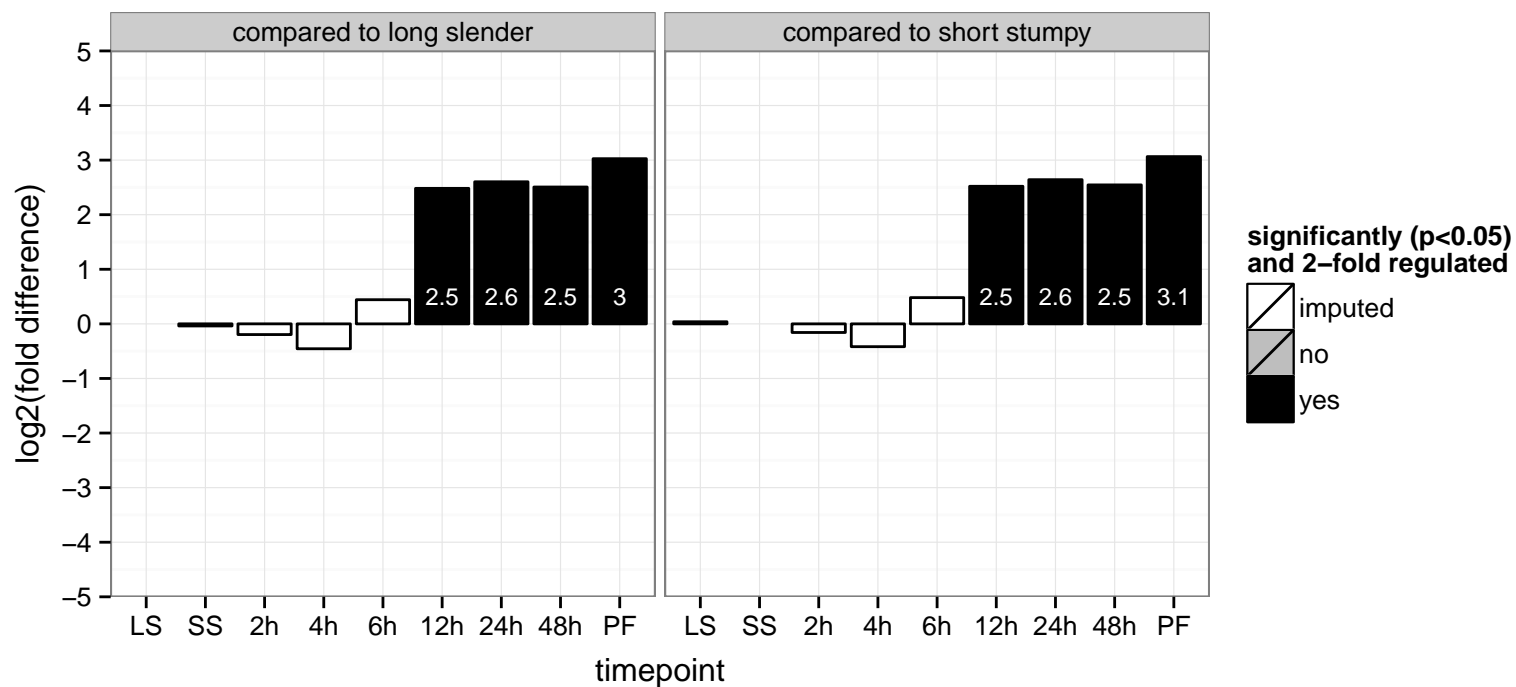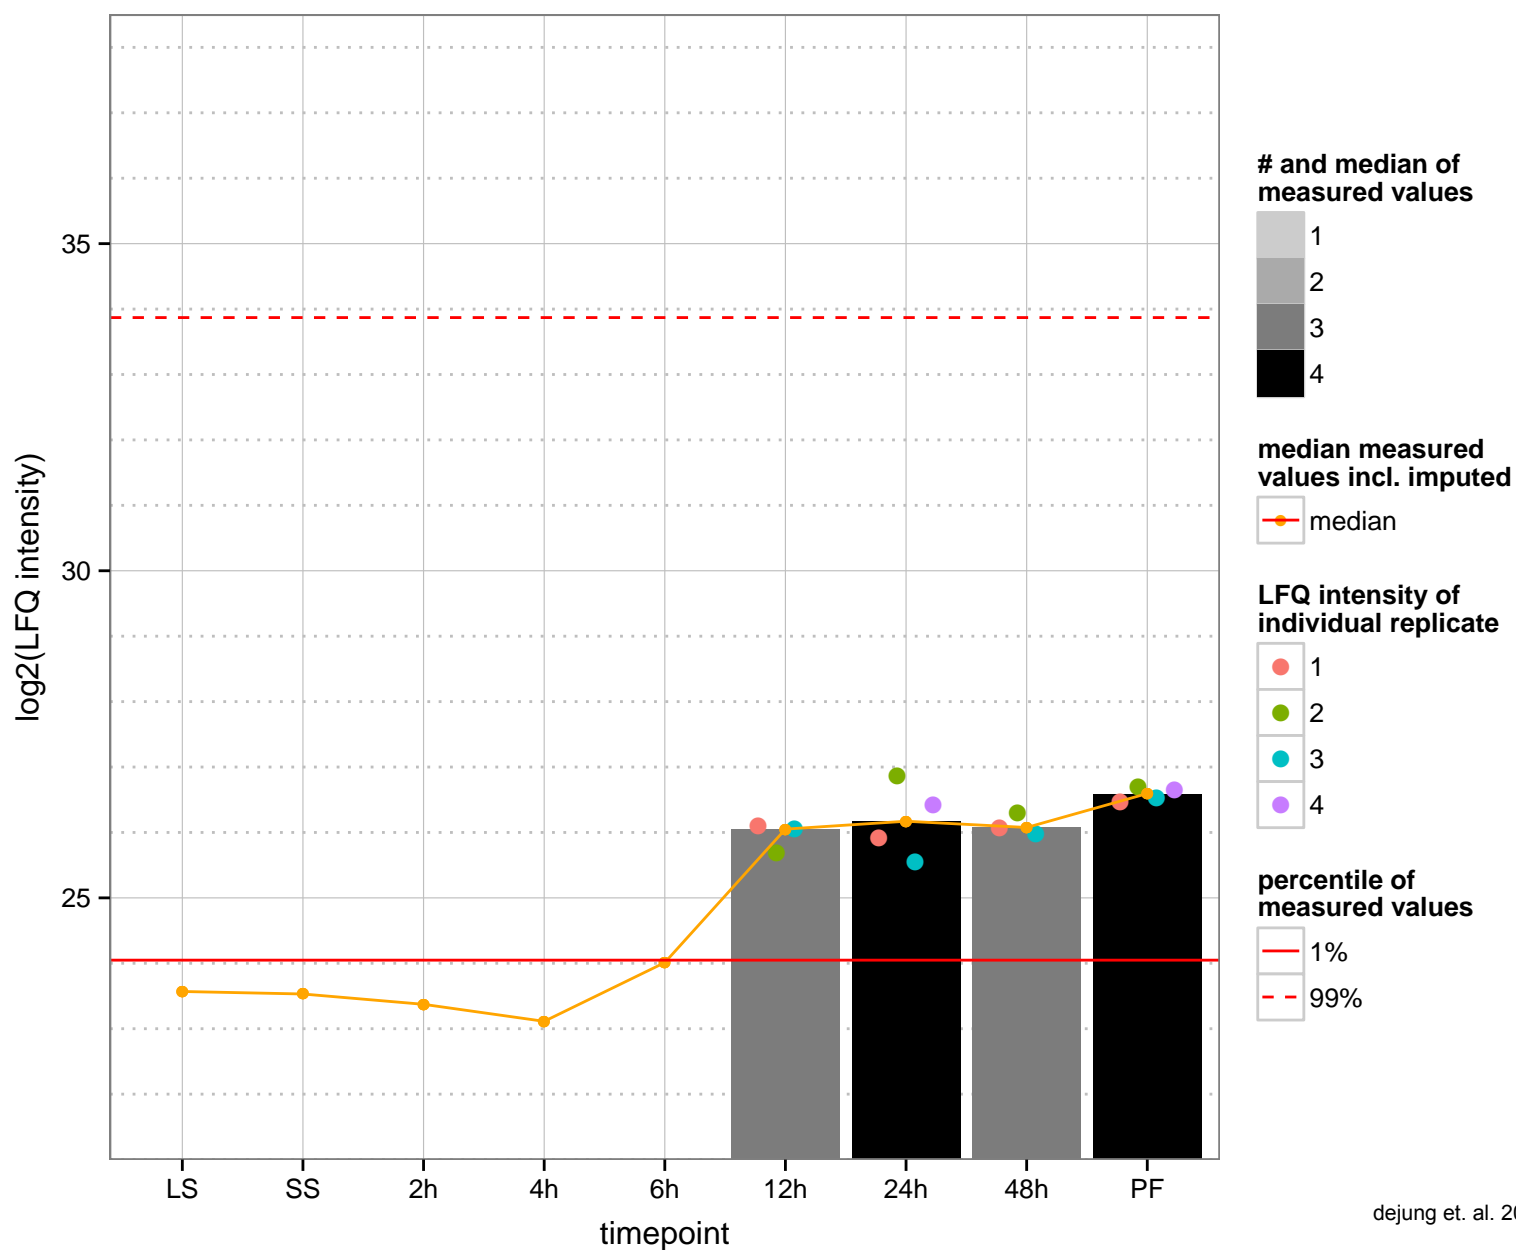

hypothetical protein, conserved  
 Tb927.6.4800  
 AGOF: null  
 AGOC: null  
 AGOP: null  
 PGOF: protein binding  
 PGO: null  
 PGOP: null

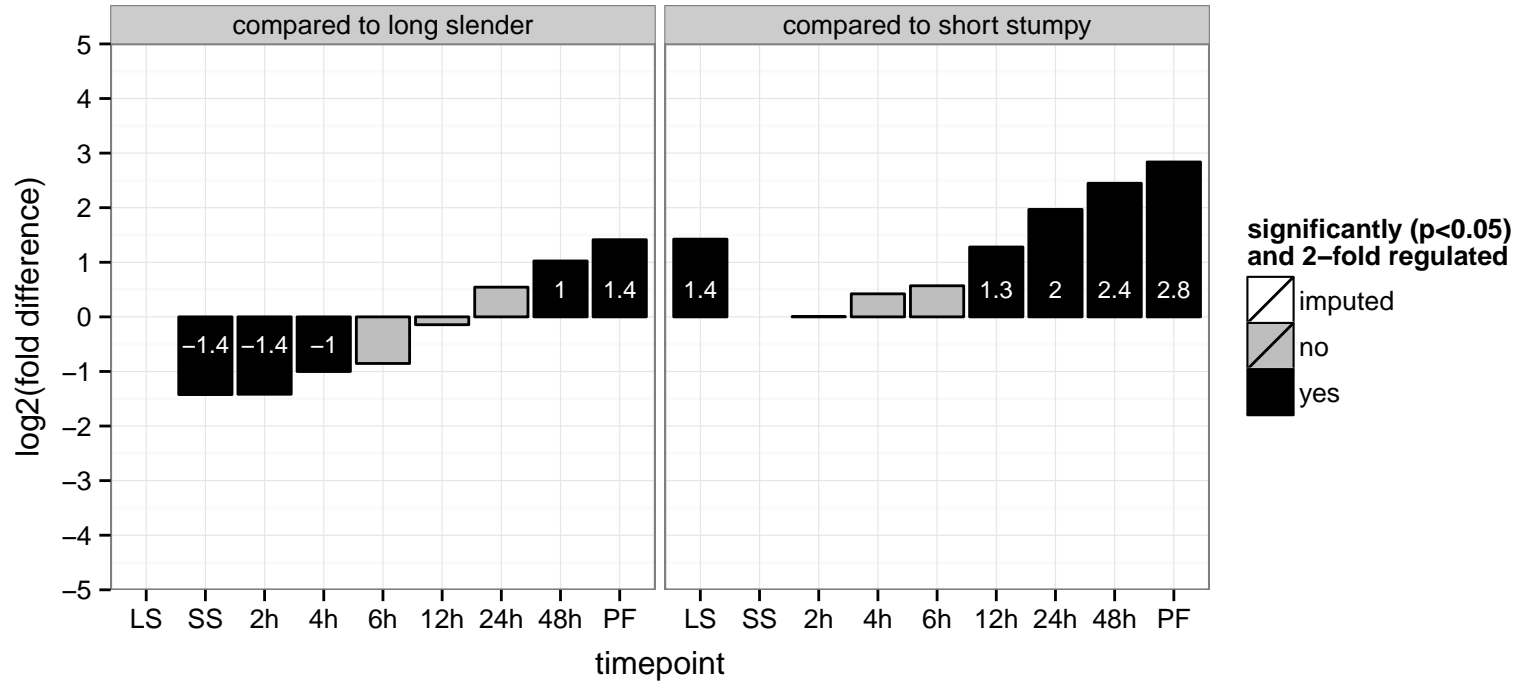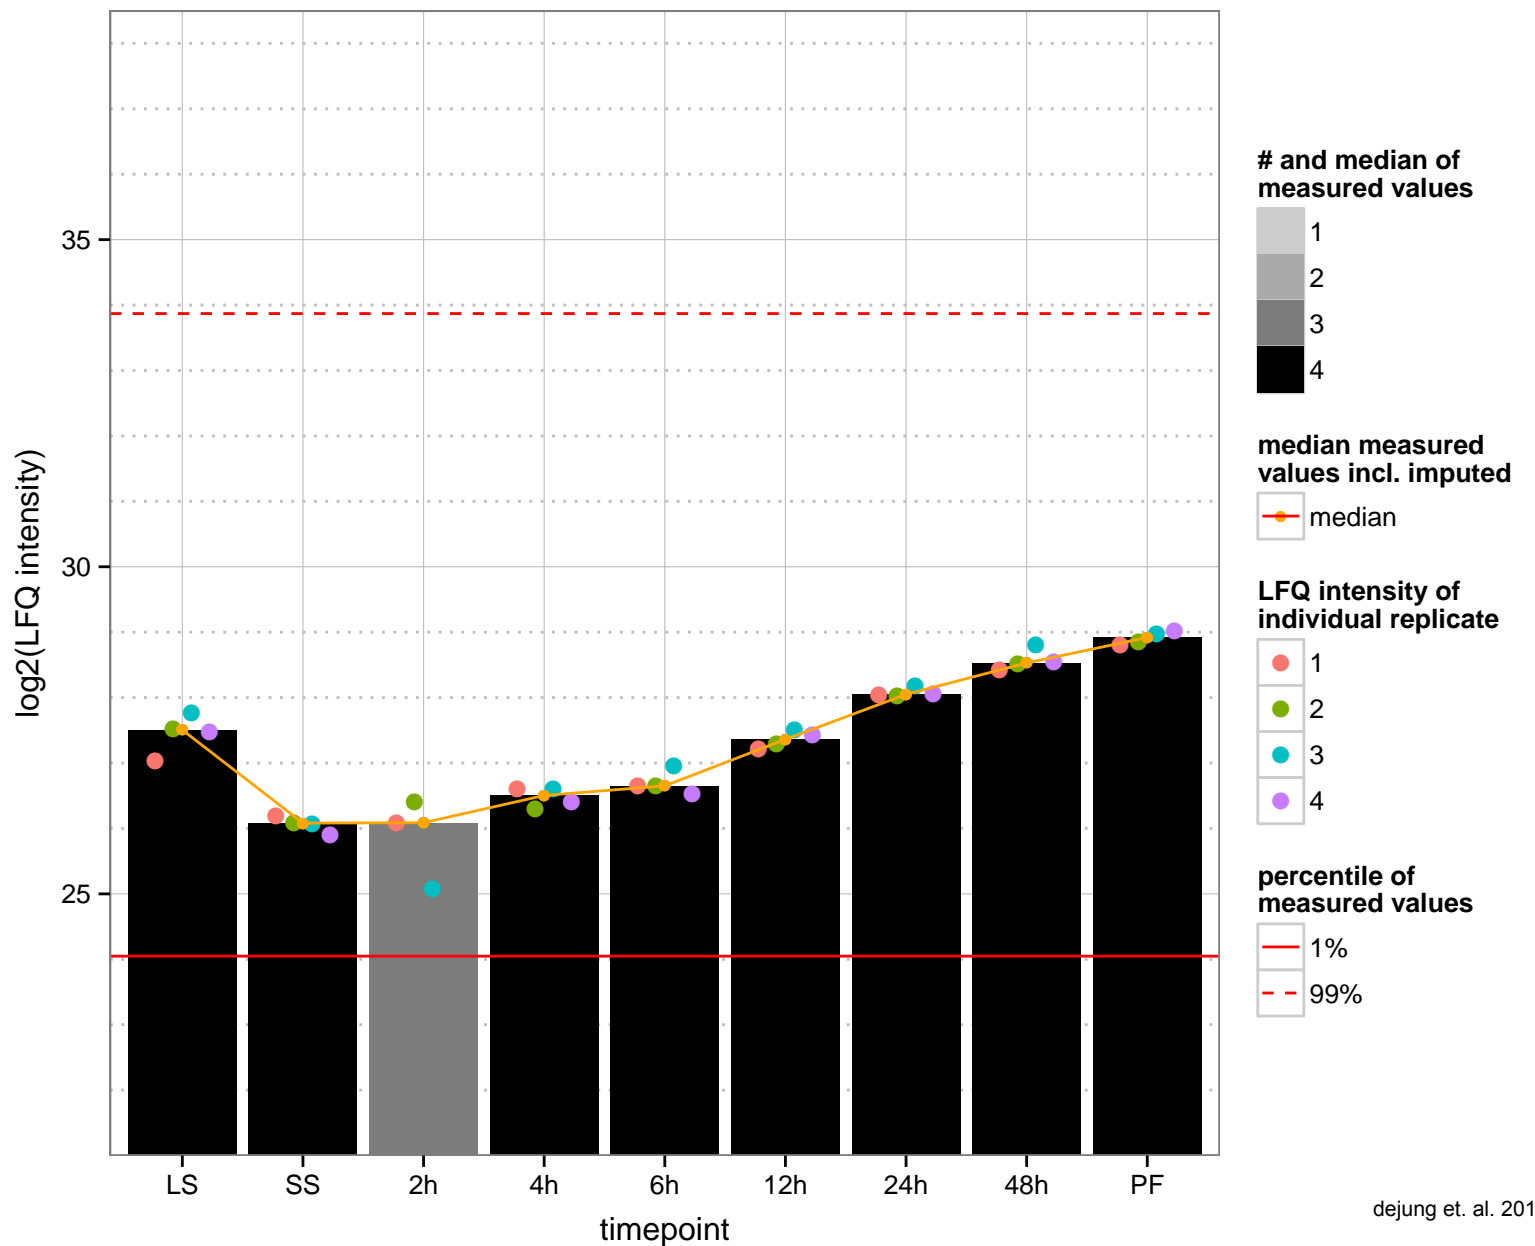

hypothetical protein, conserved  
 Tb927.6.5090  
 AGOF: null  
 AGOC: null  
 AGOP: null  
 PGOF: null  
 PGO: null  
 PGOP: null

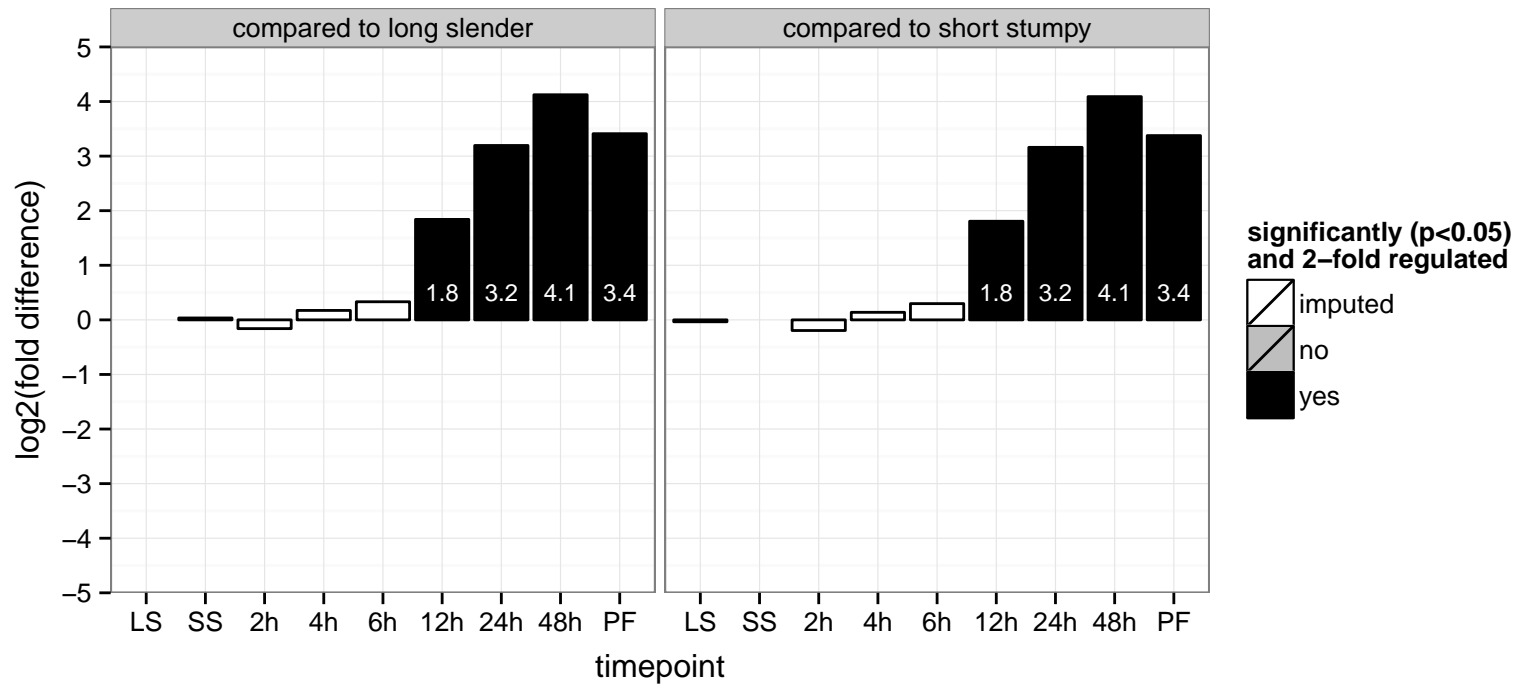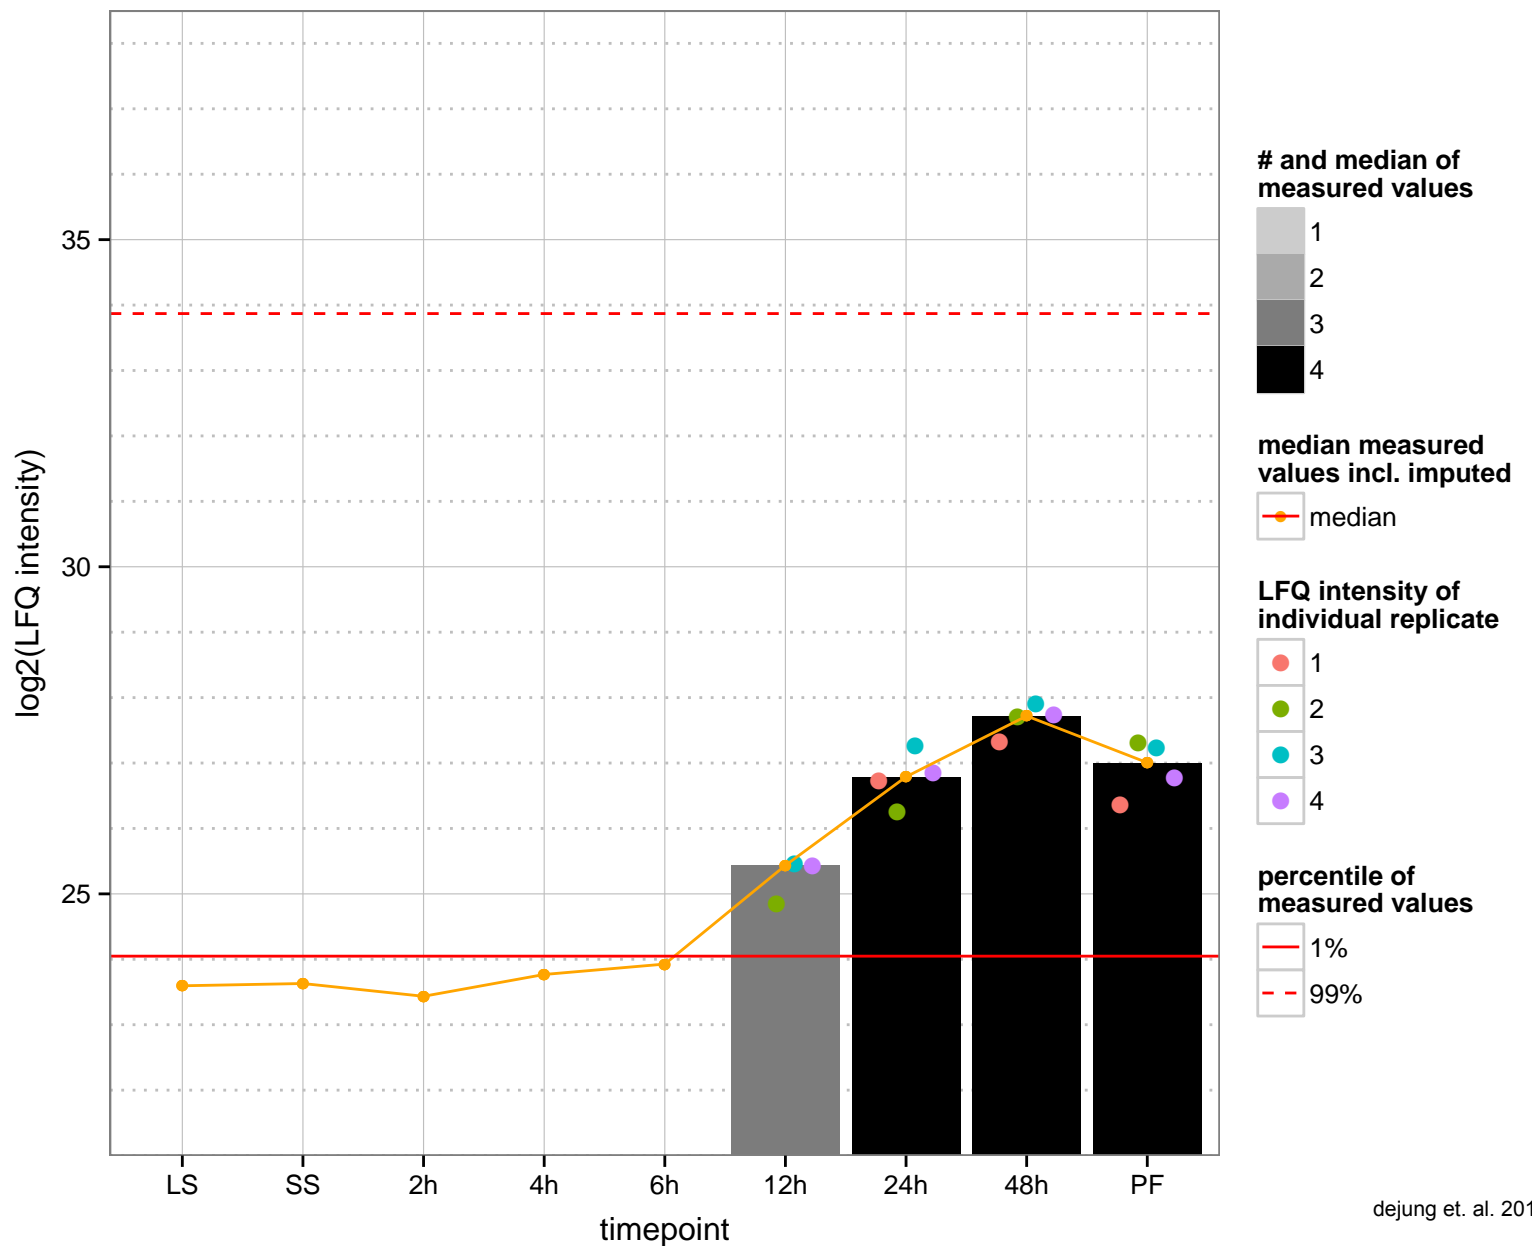

thimet oligopeptidase, putative (THOP1)  
 Tb927.7.190  
 AGOF: metalloendopeptidase activity  
 AGOC: null  
 AGOP: intracellular signal transduction, proteolysis  
 PGOF: metalloendopeptidase activity  
 PGO: null  
 PGOP: proteolysis

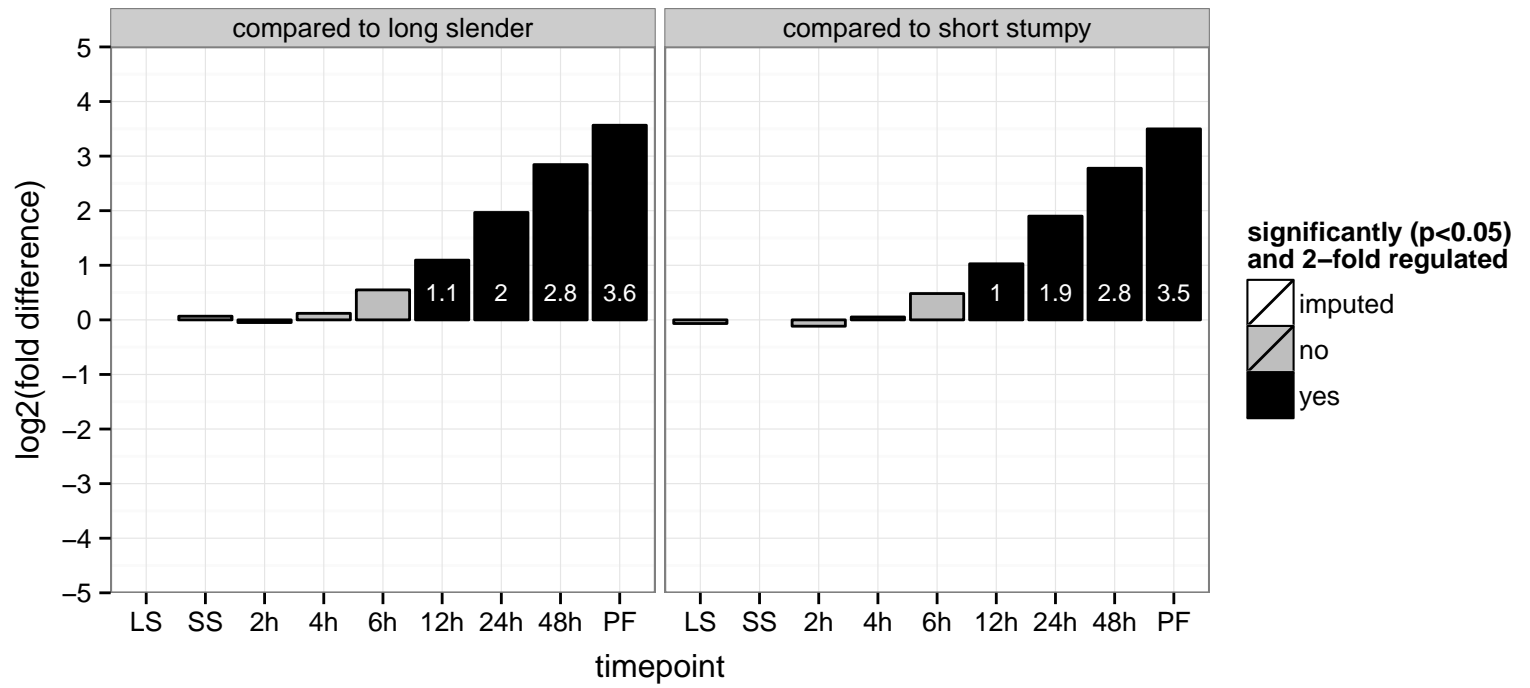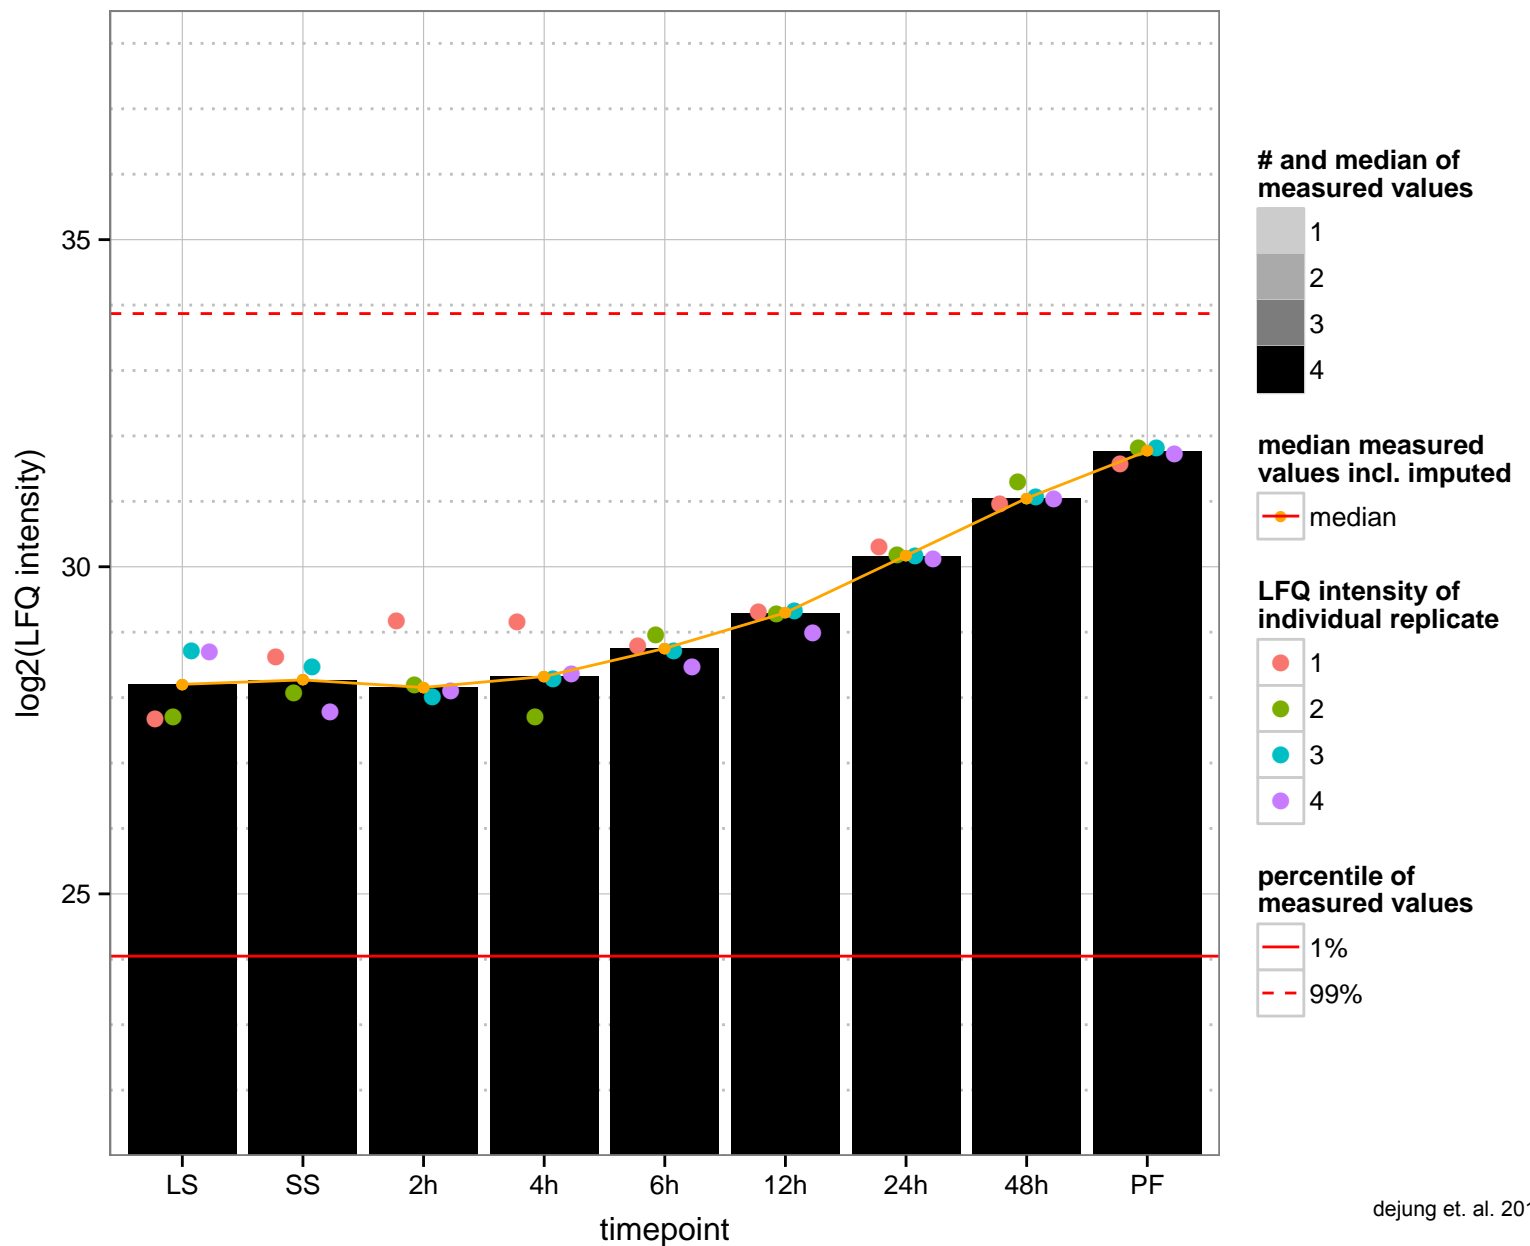

glutathione-S-transferase/glutaredoxin, putative

Tb927.7.3500

AGOF: electron carrier activity, protein disulfide oxidoreductase activity

AGOC: null

AGOP: cell redox homeostasis

PGOF: electron carrier activity, protein disulfide oxidoreductase activity

PGOC: null

PGOP: cell redox homeostasis

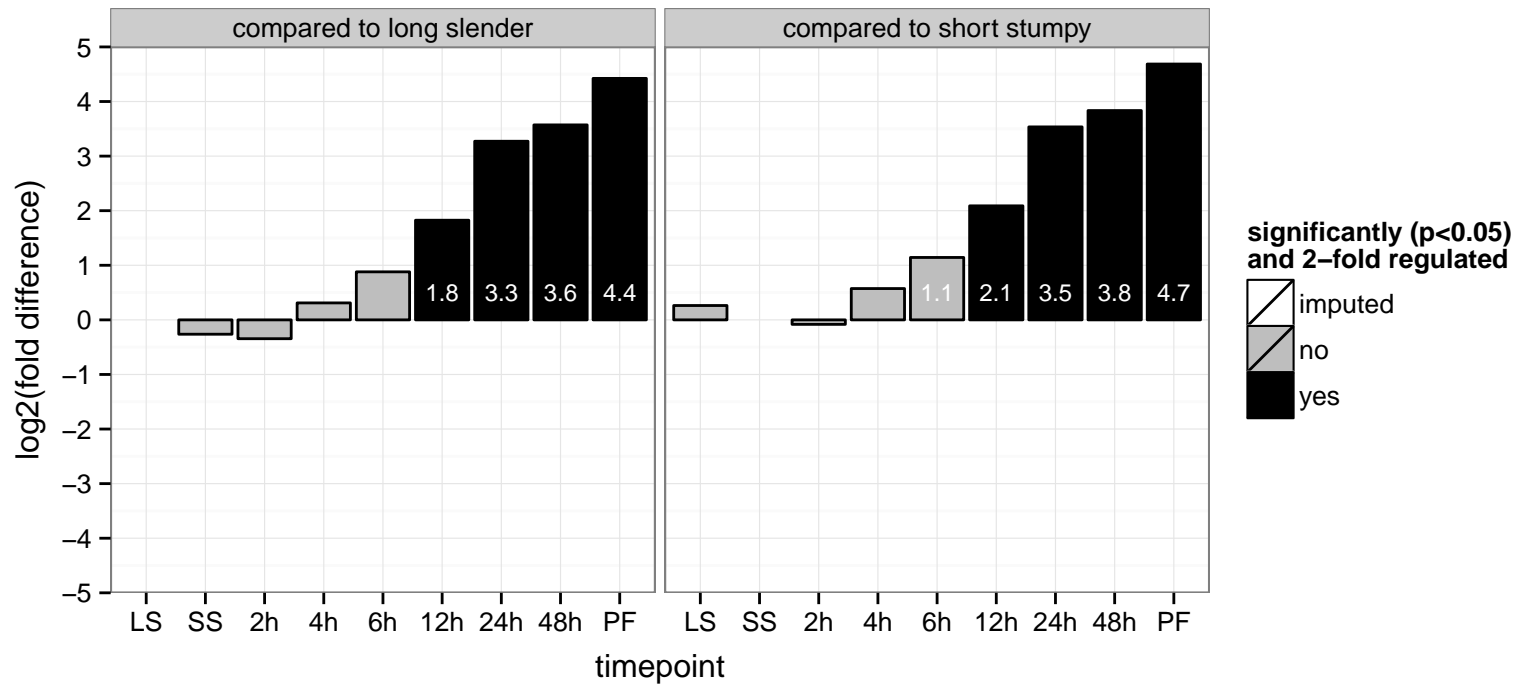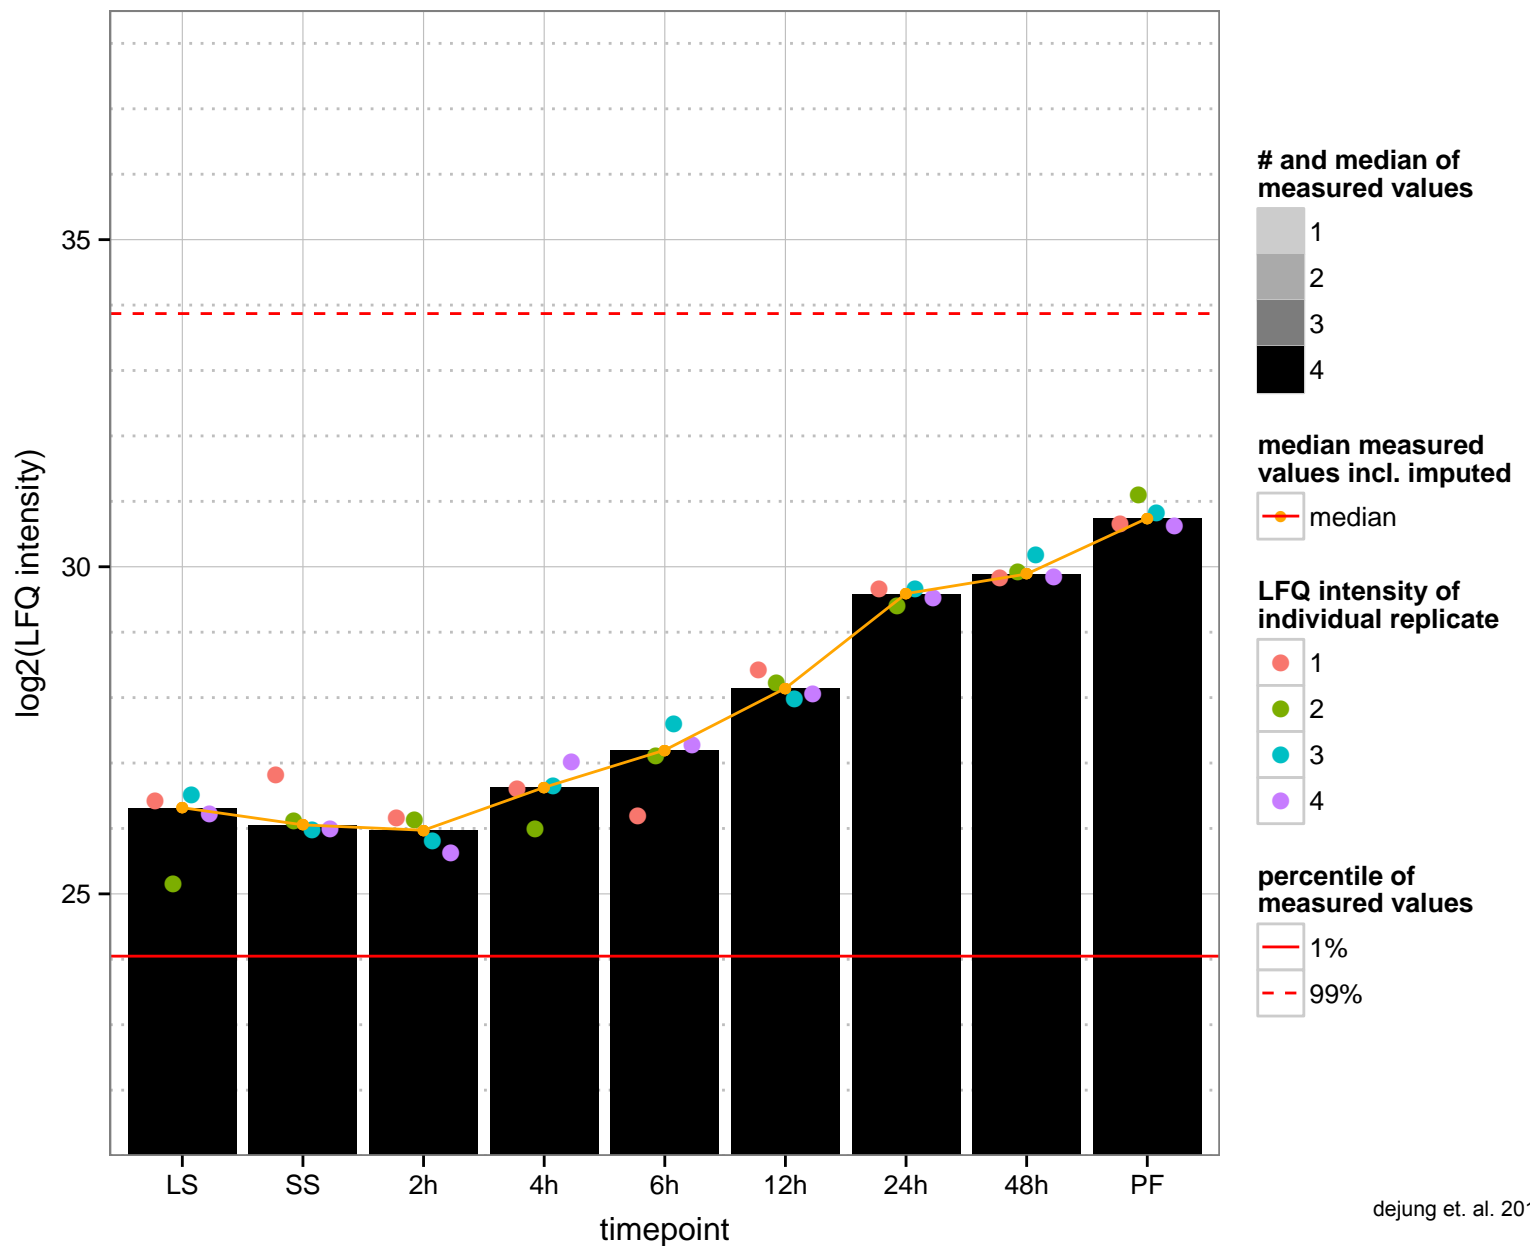

fatty acid elongase, putative  
 Tb927.7.4160  
 AGOF: fatty acid elongase activity  
 AGOC: integral to endoplasmic reticulum membrane  
 AGOP: long-chain fatty acid biosynthetic process  
 PGO: null  
 PGOC: integral to membrane  
 PGOP: null

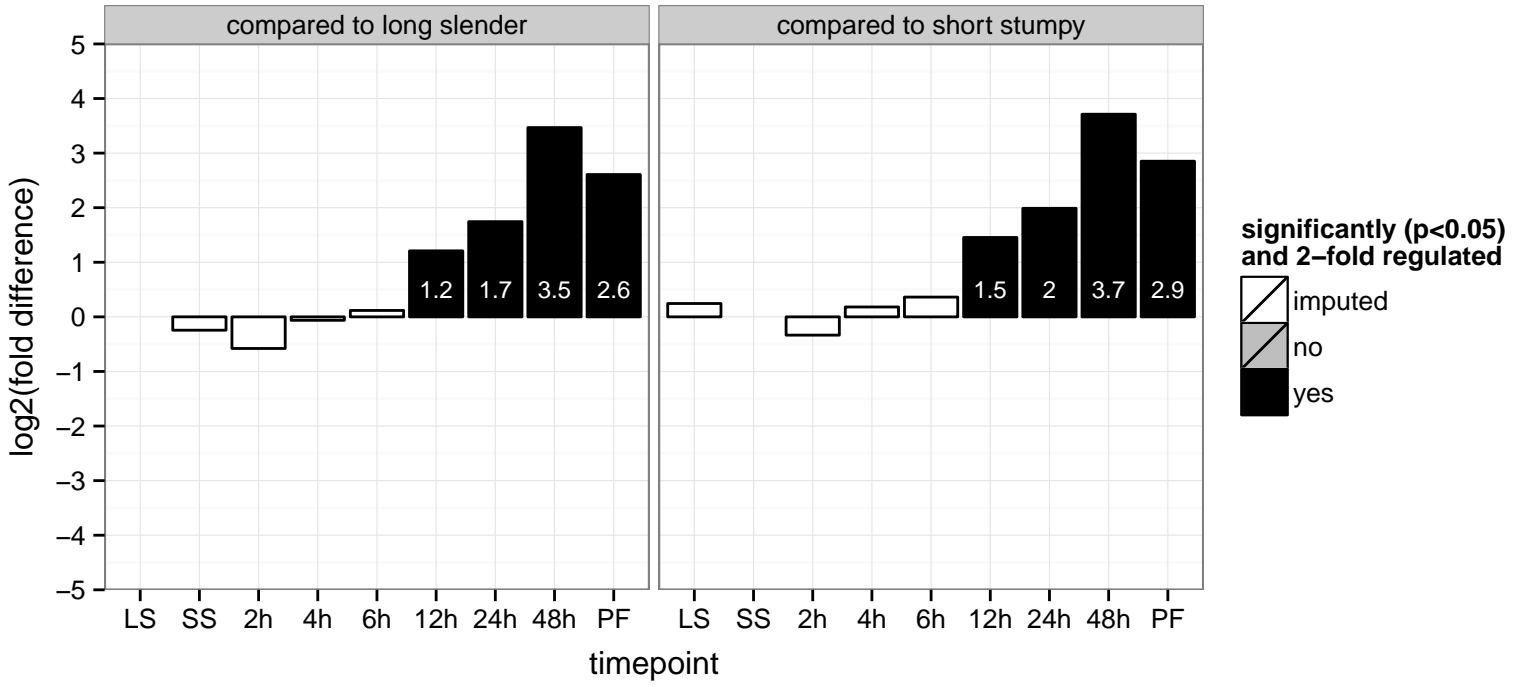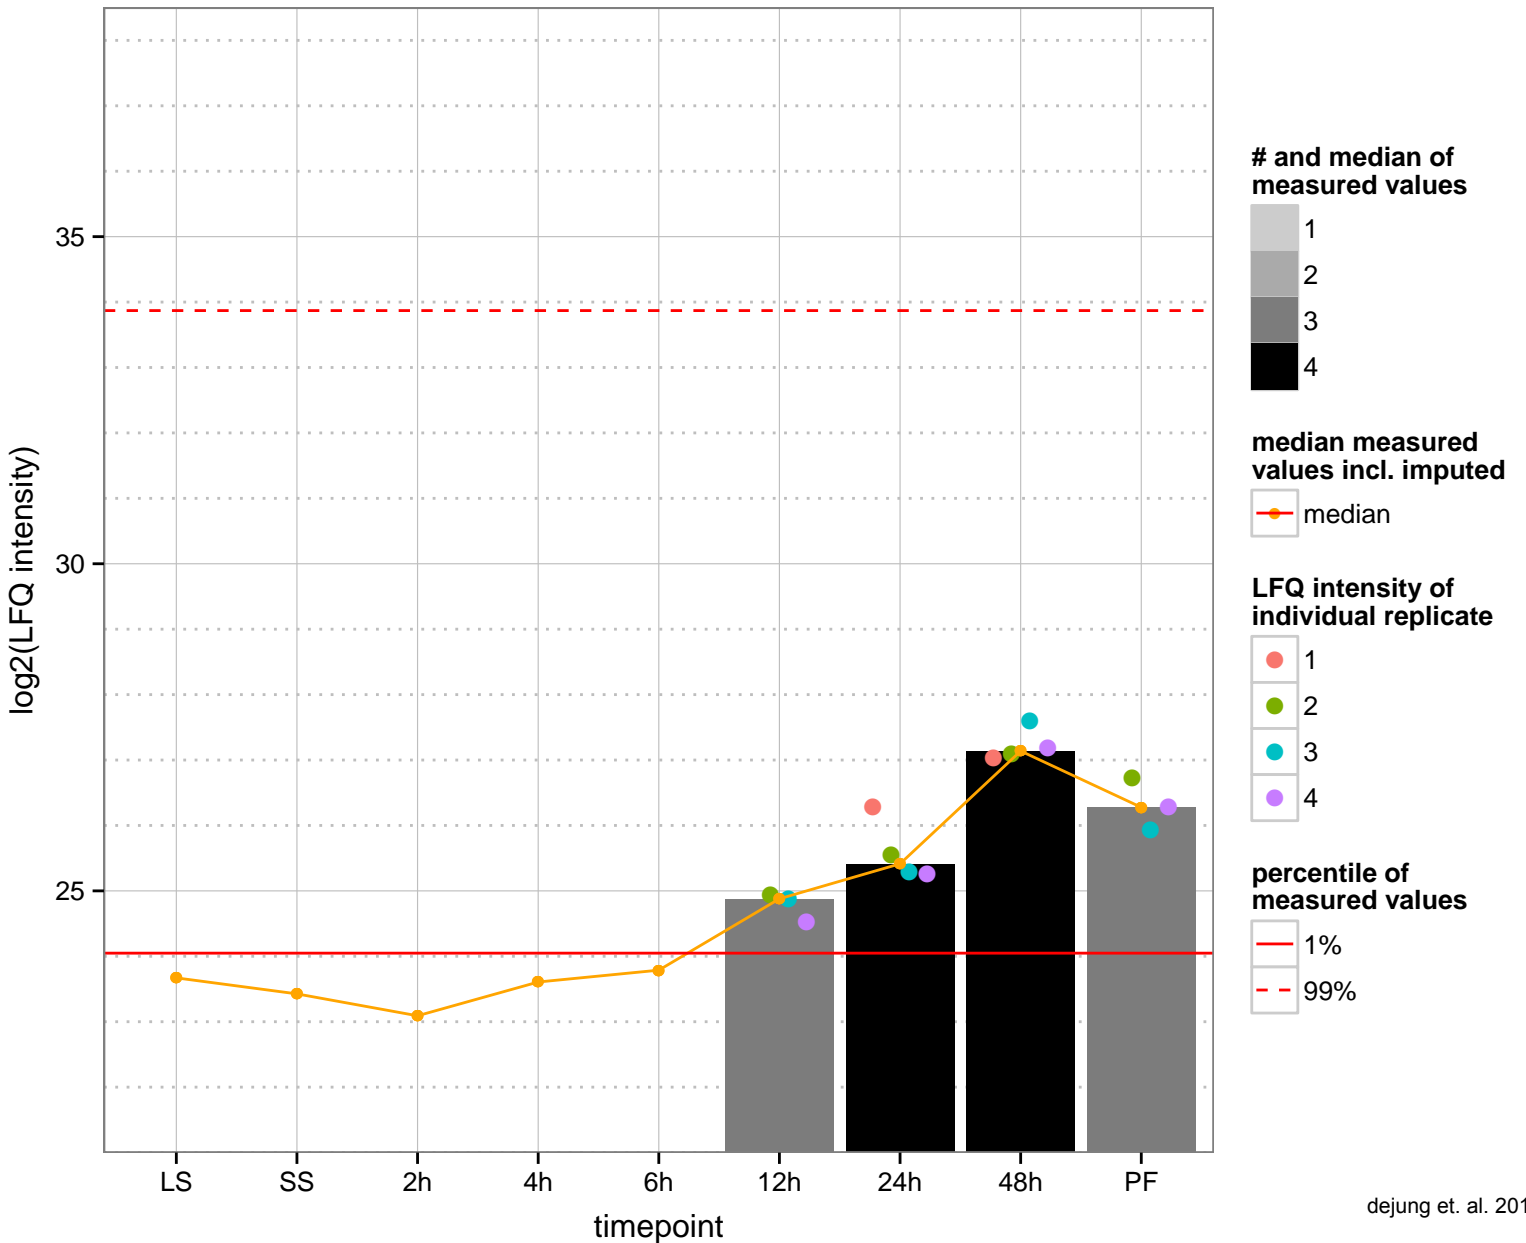

hypothetical protein, conserved  
 Tb927.7.5140  
 AGOF: null  
 AGOC: null  
 AGOP: null  
 PGOF: null  
 PGOC: null  
 PGOP: null

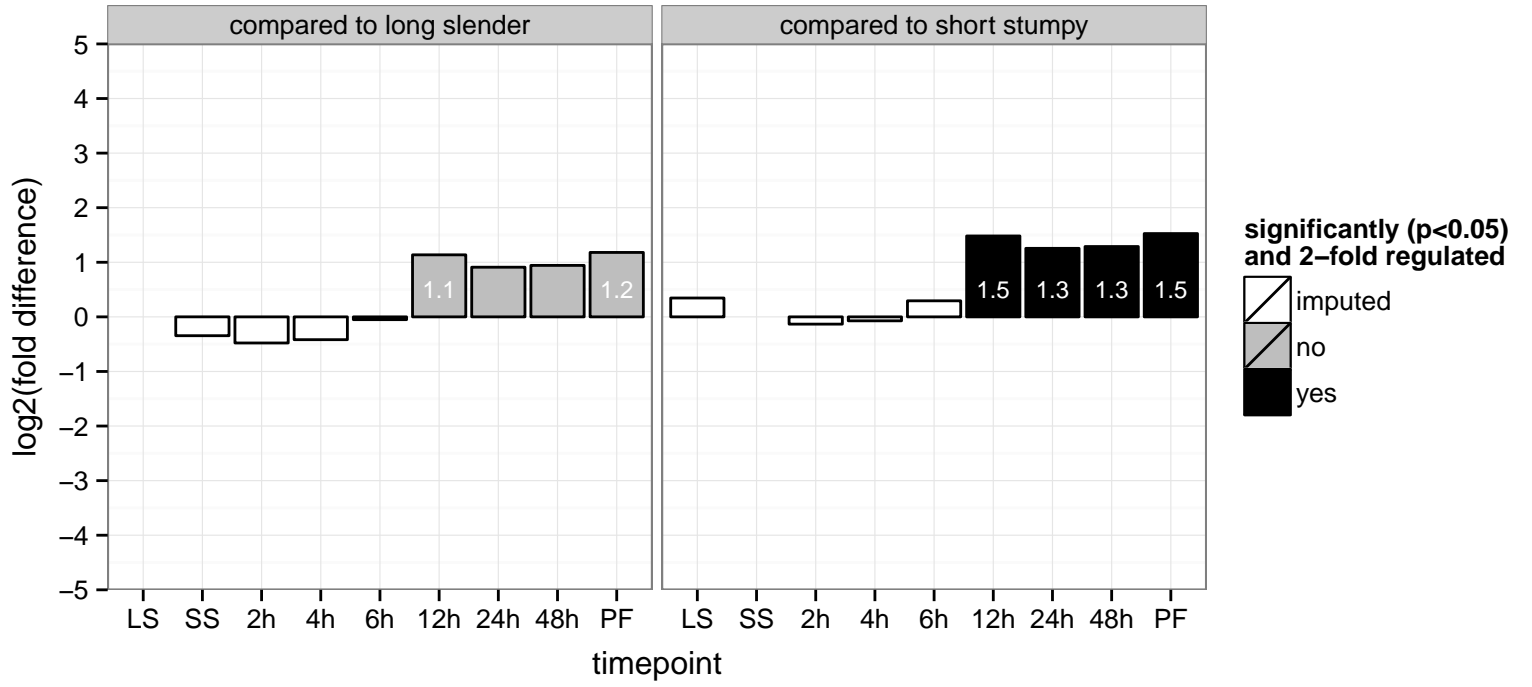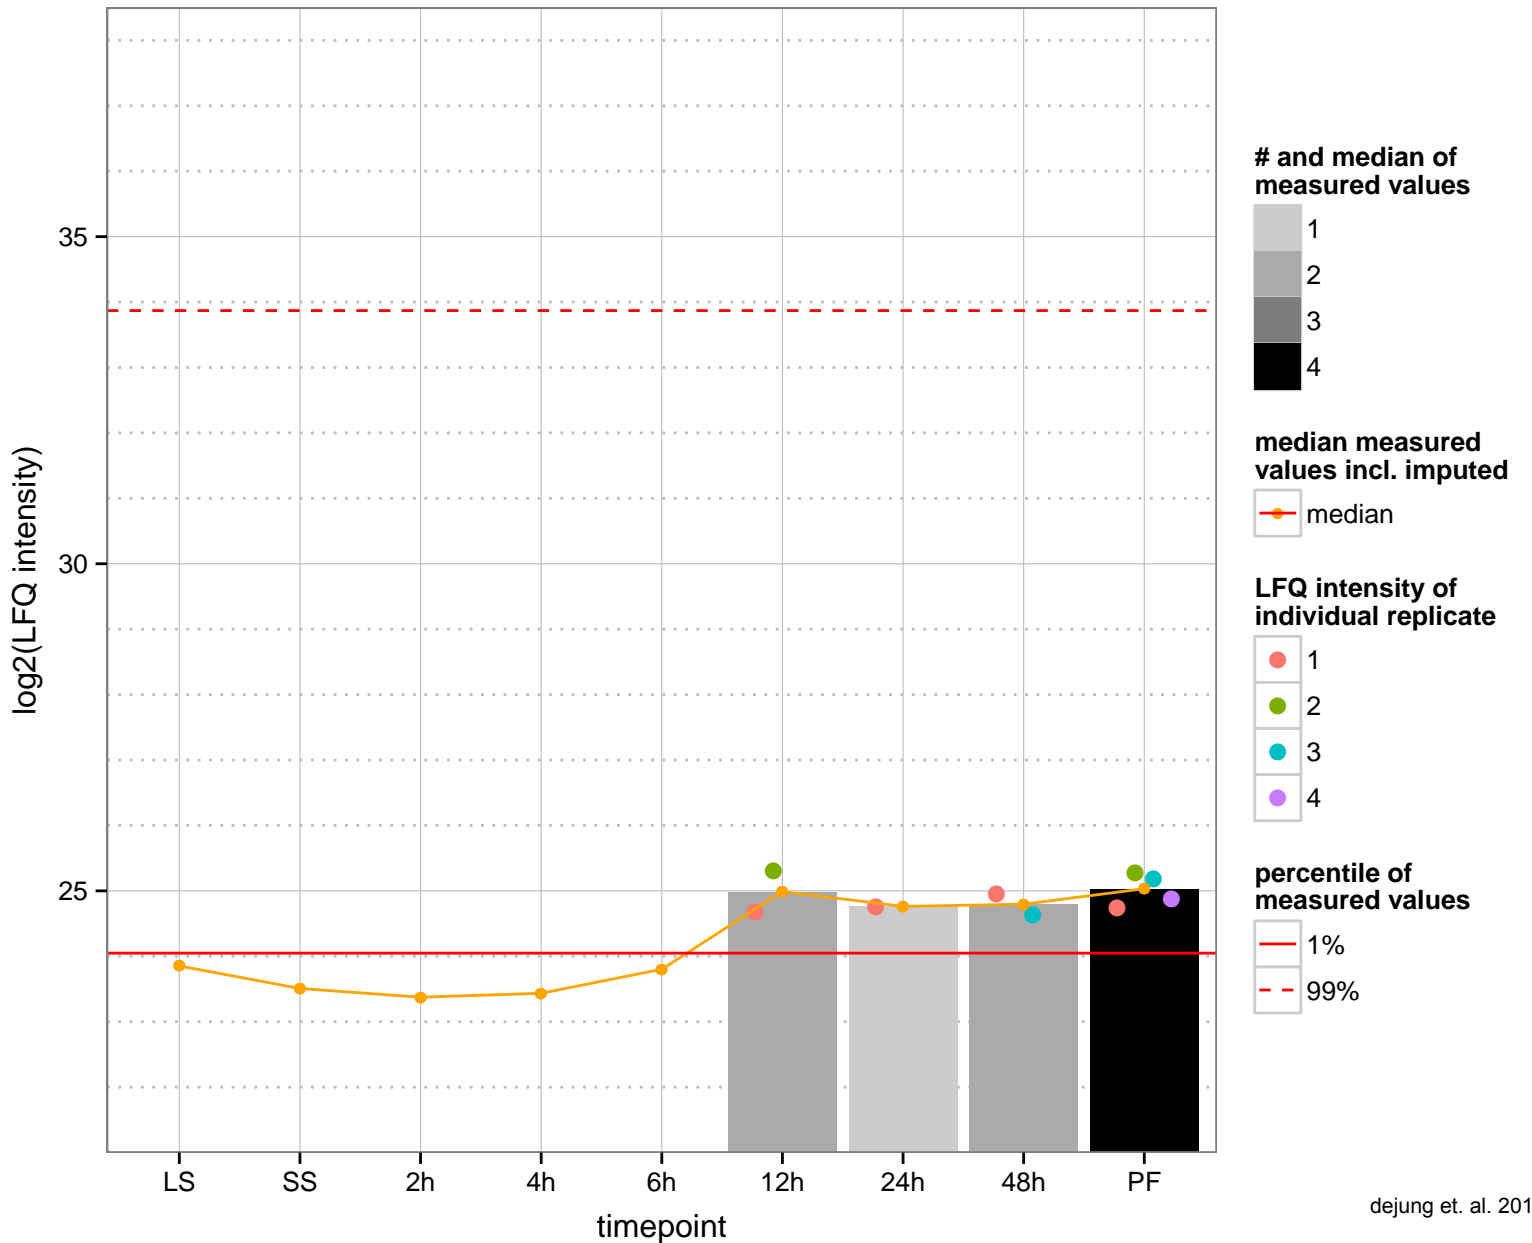

chaperone protein DNAj, putative  
 Tb927.7.6200  
 AGOF: heat shock protein binding, unfolded protein binding  
 AGOC: integral to membrane, mitochondrial inner membrane, mitochondrion  
 AGOP: protein folding  
 PGOF: heat shock protein binding  
 PGOC: null  
 PGOP: null

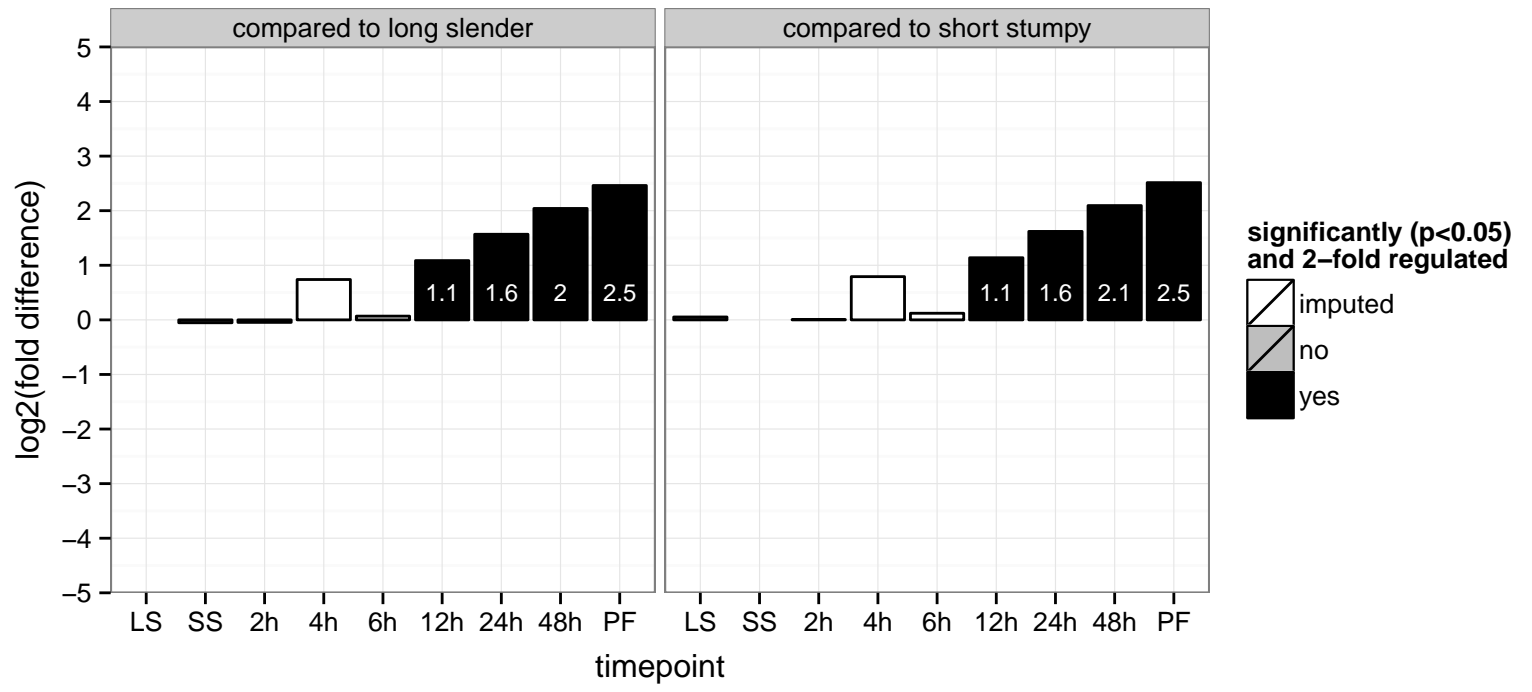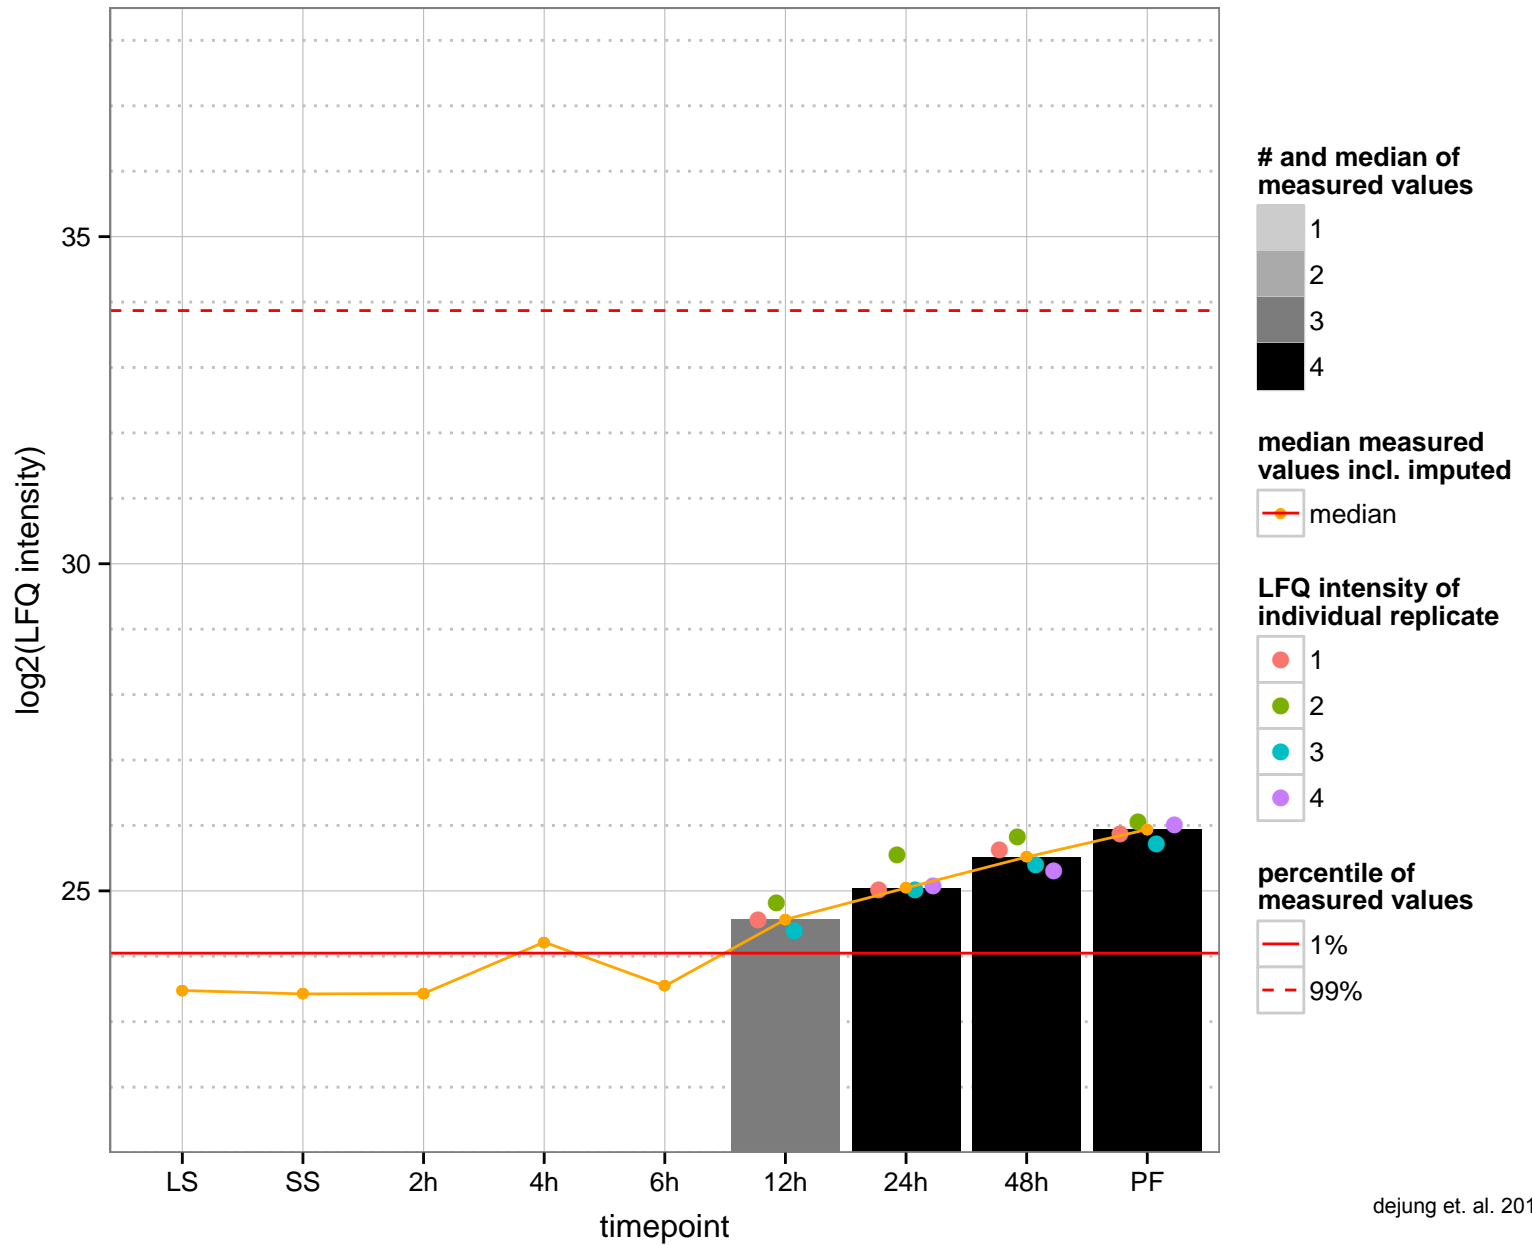



peptidase t, putative, aminotripeptidase

Tb927.7.6270

AGOF: hydrolase activity, metallopeptidase activity, protein dimerization activity, tripeptide aminopeptidase activity, zinc ion binding

AGOC: cytoplasm

AGOP: peptide metabolic process, proteolysis

PGOF: hydrolase activity, tripeptide aminopeptidase activity, zinc ion binding

PGOC: cytoplasm

PGOP: metabolic process, peptide metabolic process

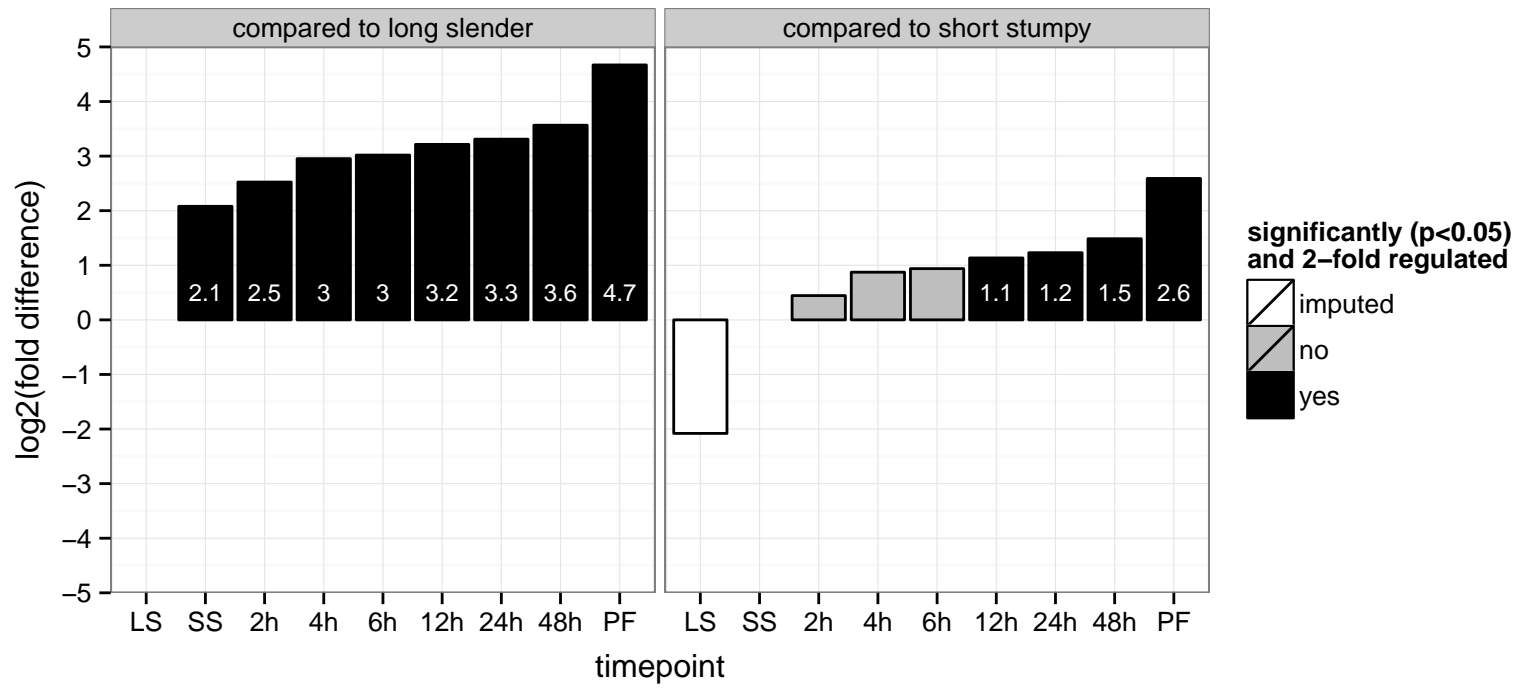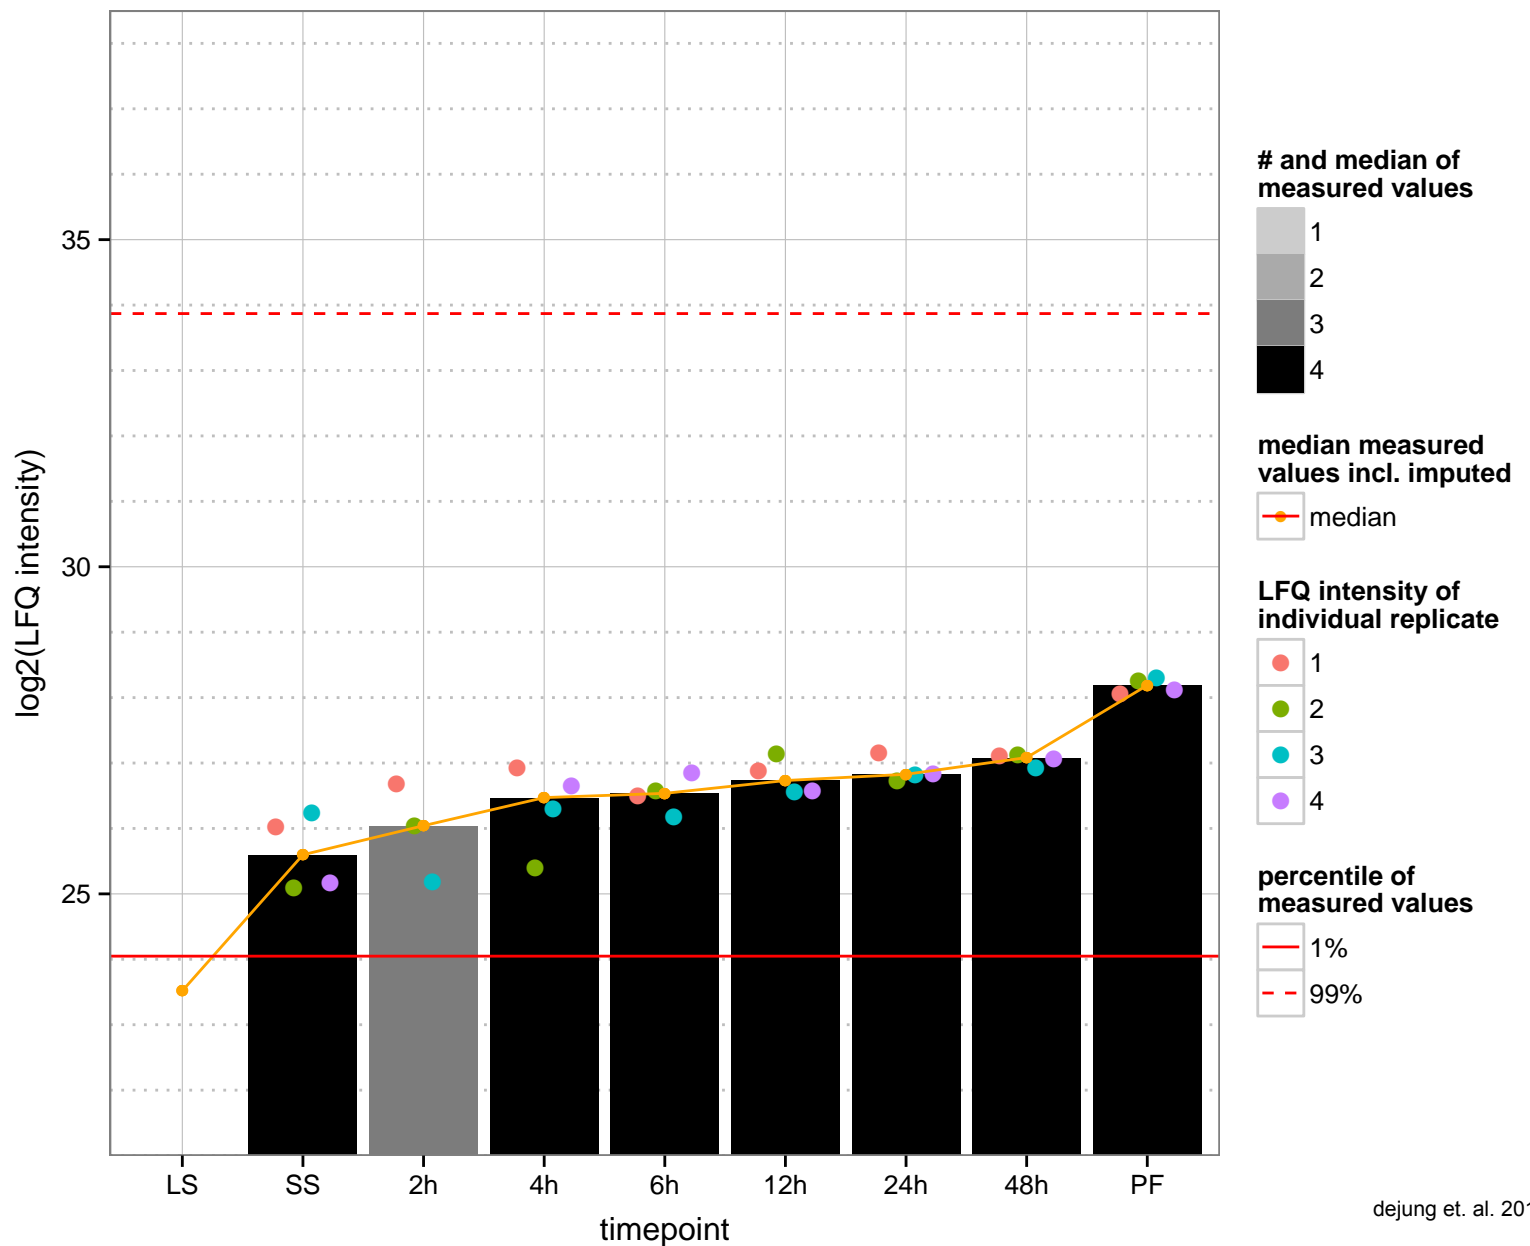

O-sialoglycoprotein endopeptidase, putative, metallo-peptidase, Clan MK, Family M67  
 Tb927.7.6470  
 AGOF: metalloendopeptidase activity, zinc ion binding  
 AGOC: null  
 AGOP: proteolysis  
 PGOF: metalloendopeptidase activity  
 PGO: null  
 PGOP: proteolysis

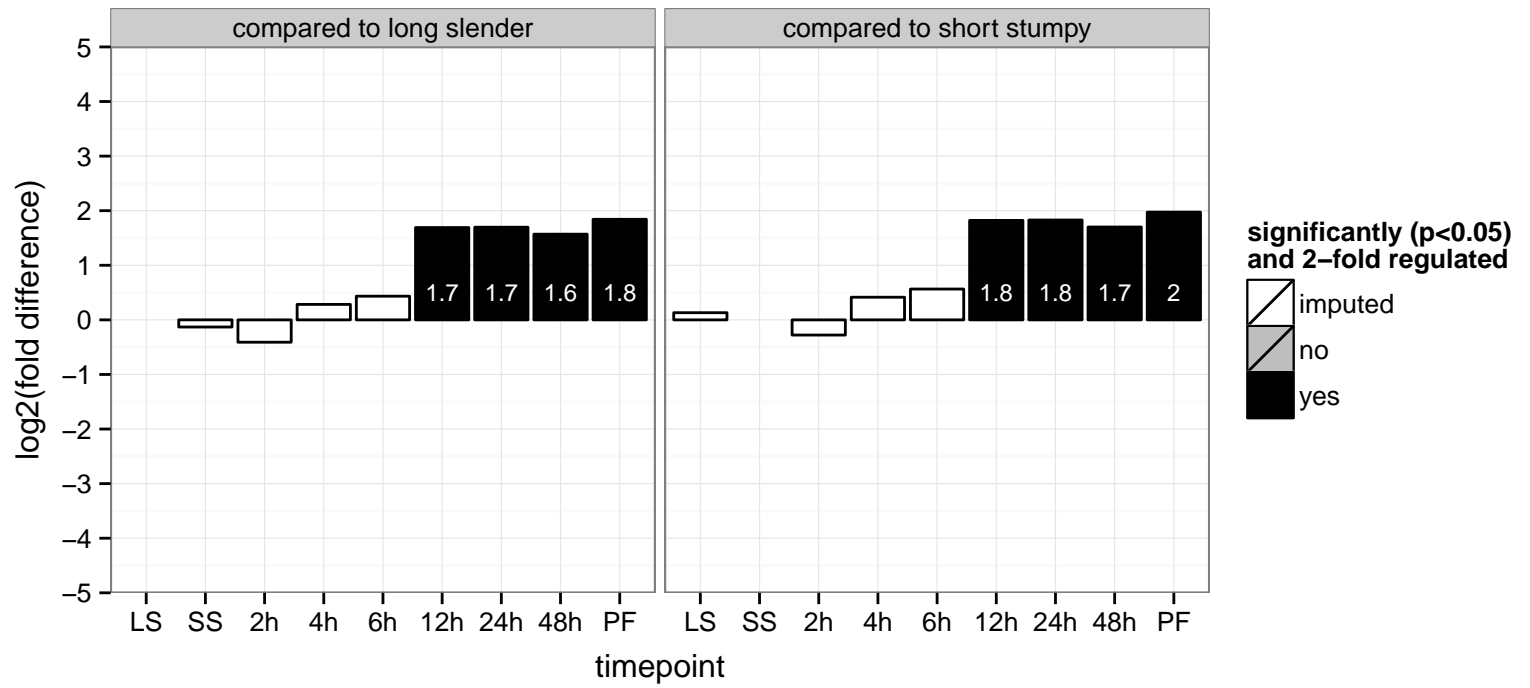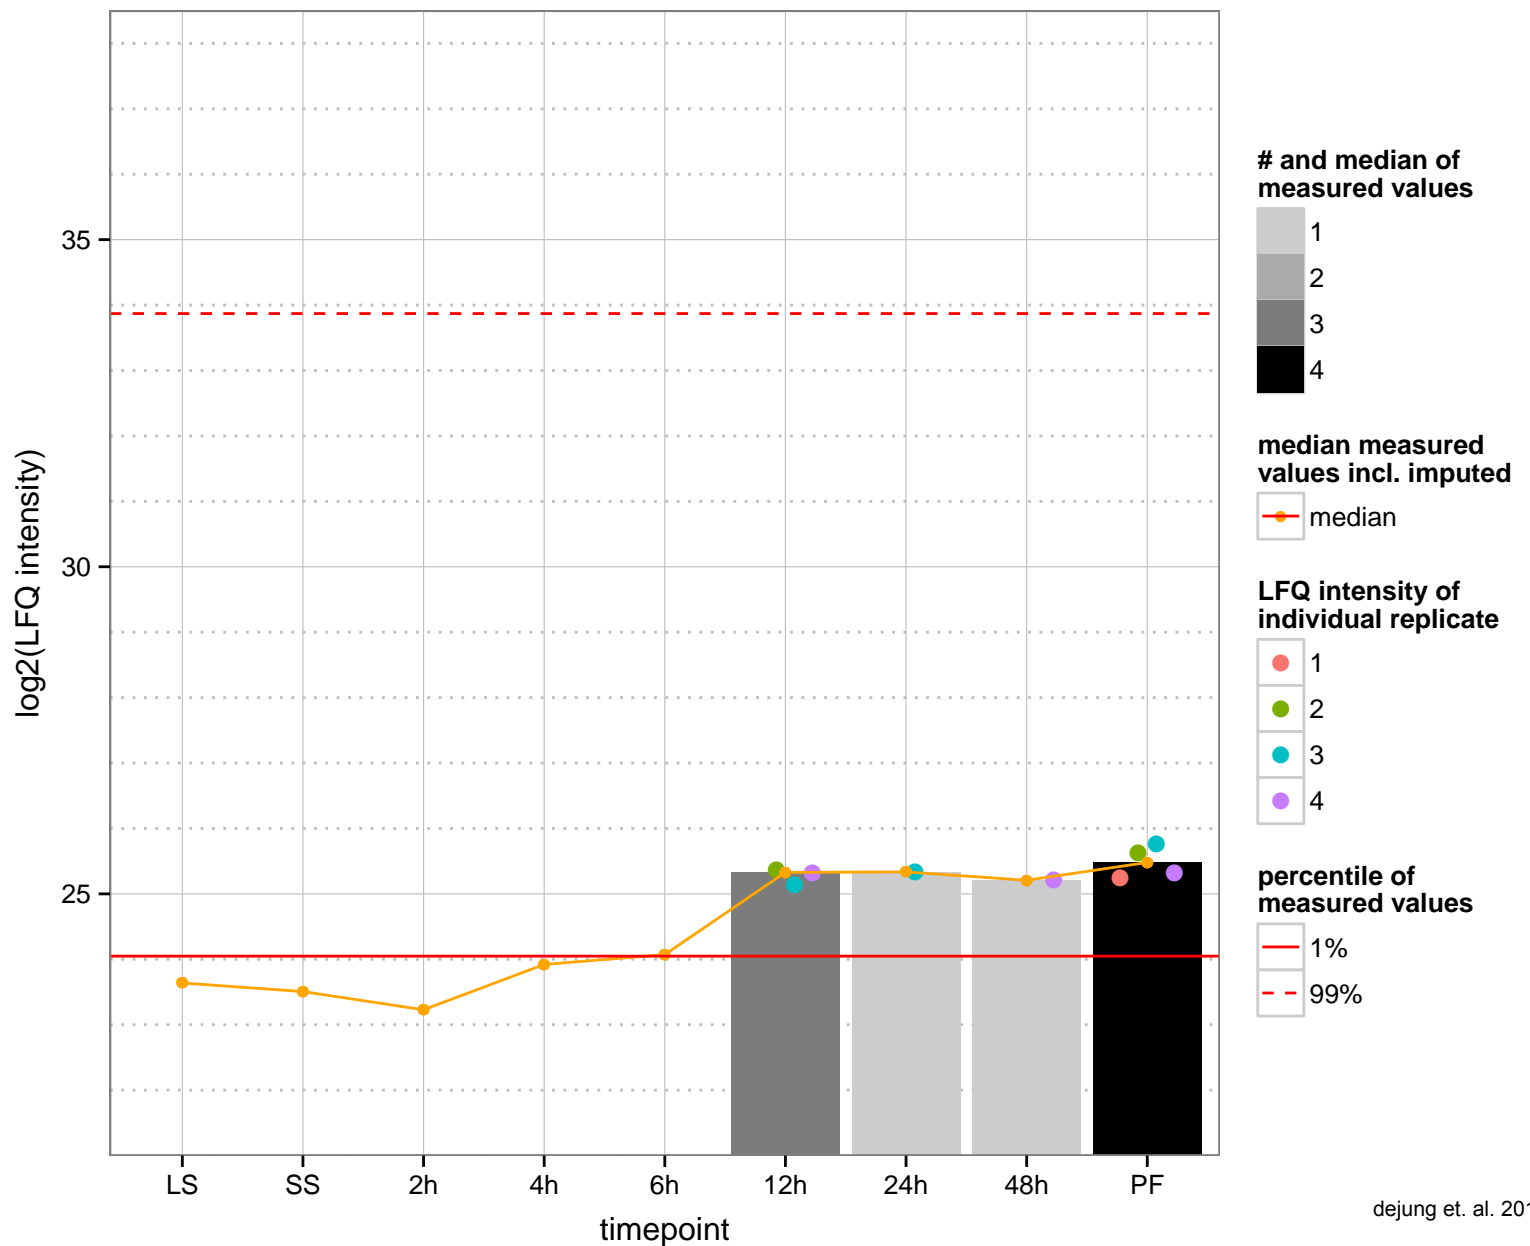

hypothetical protein, conserved  
 Tb927.7.6790  
 AGOF: null  
 AGOC: null  
 AGOP: null  
 PGO: null  
 PGOC: null  
 PGOP: null

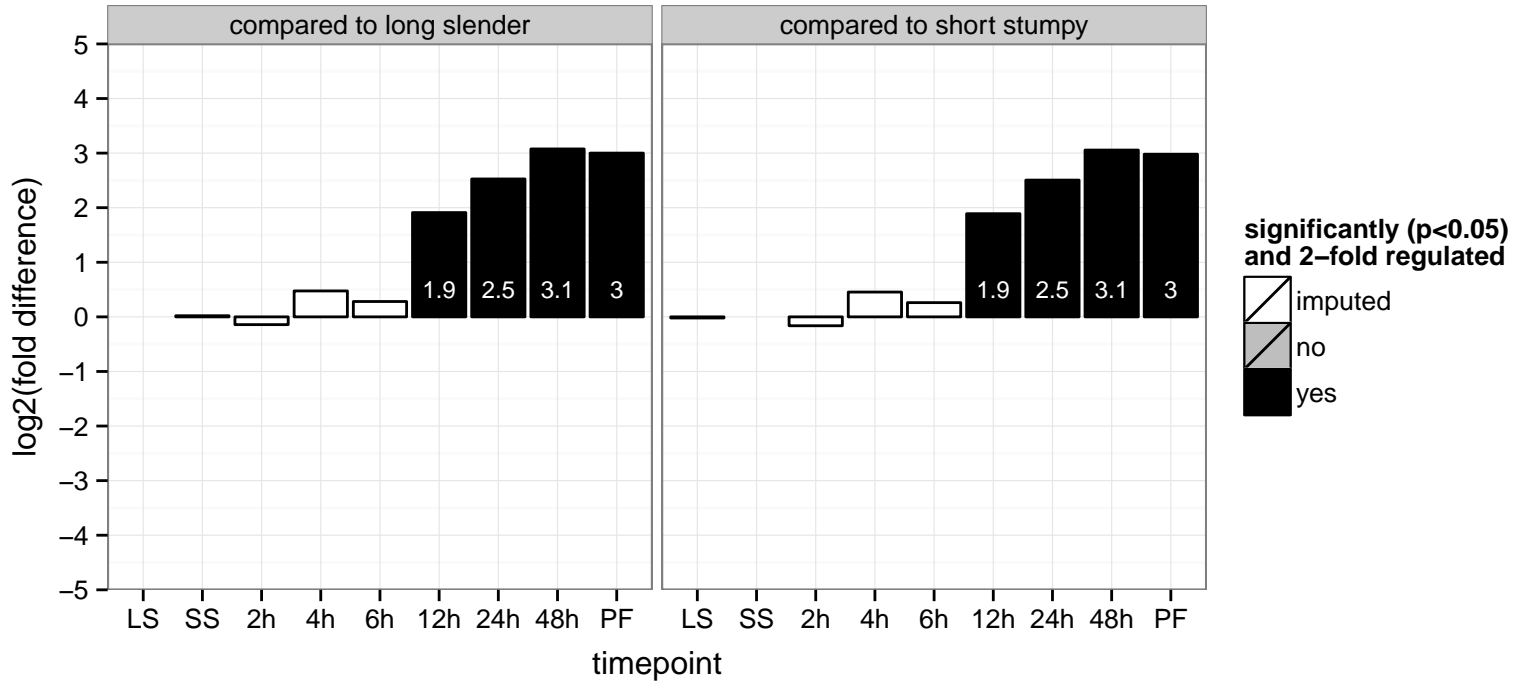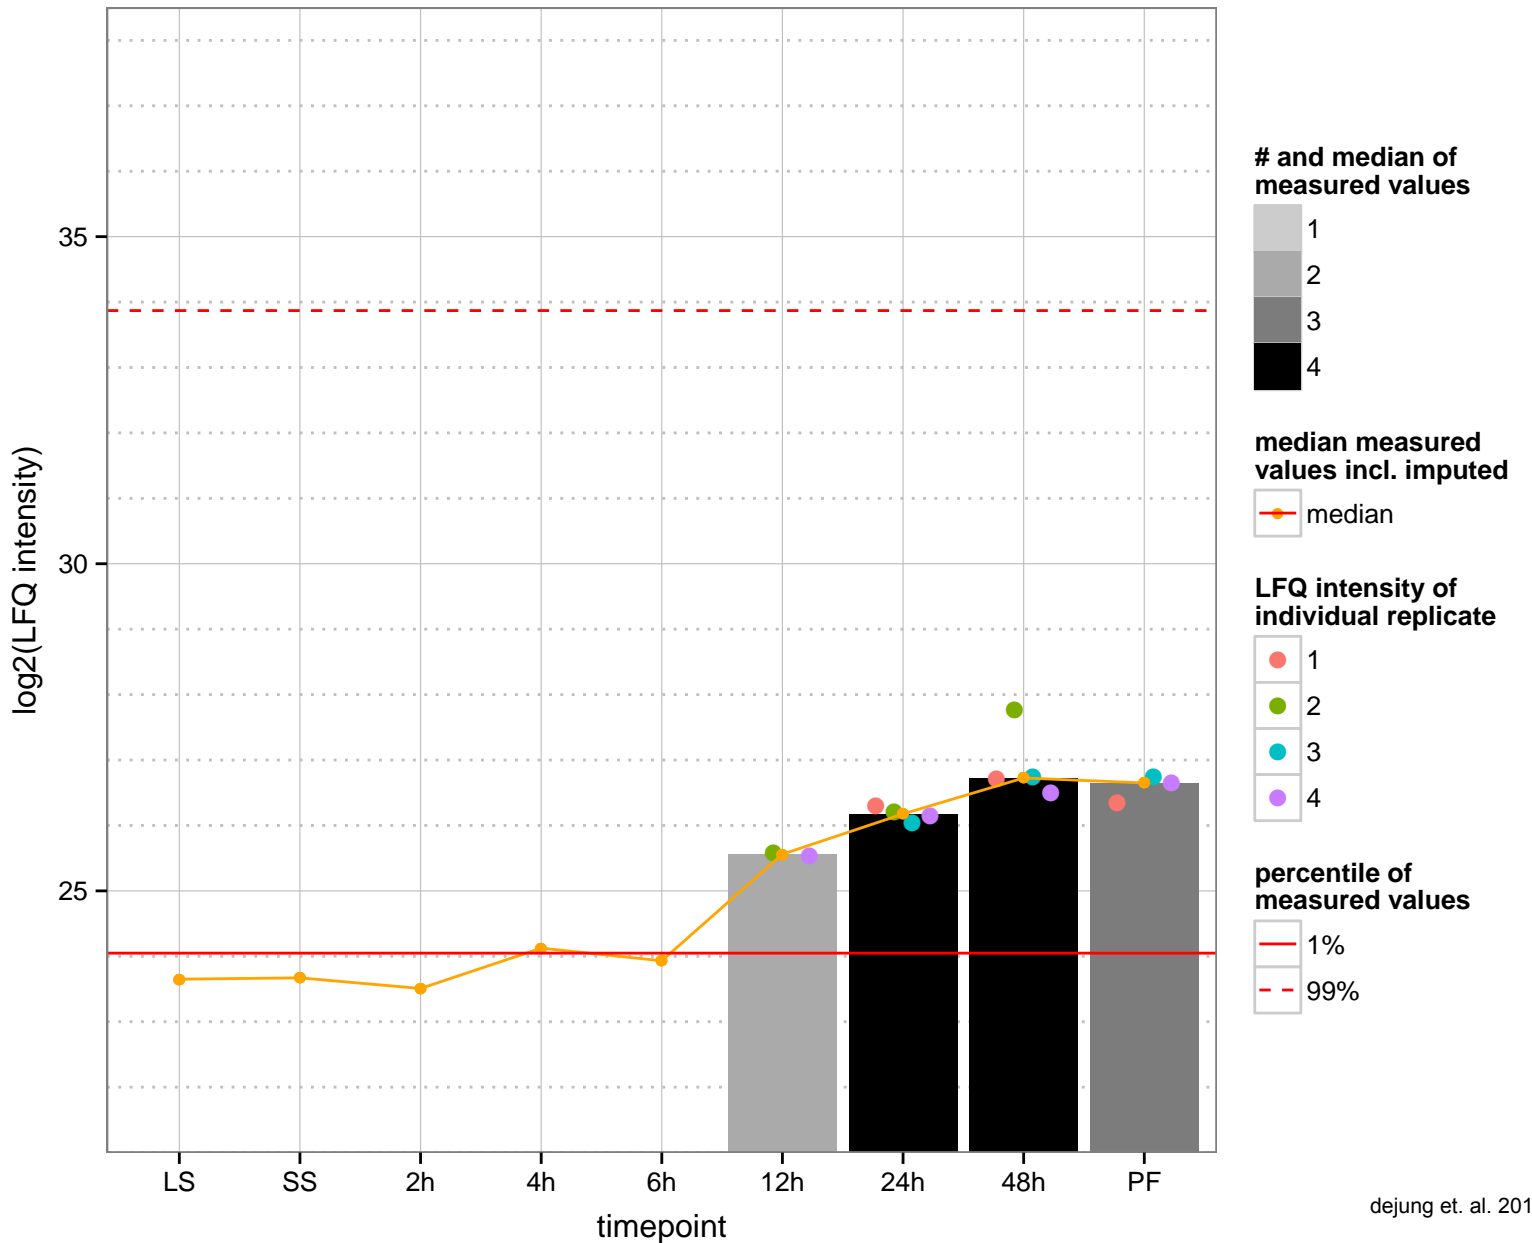

leucine-rich repeat protein (LRRP), putative, leucine-rich repeat protein 1 (LRRP1)

Tb927.7.7180;Tb927.7.7110

AGOF: null

AGOC: null

AGOP: null

PGOF: null

PGOC: null

PGOP: null

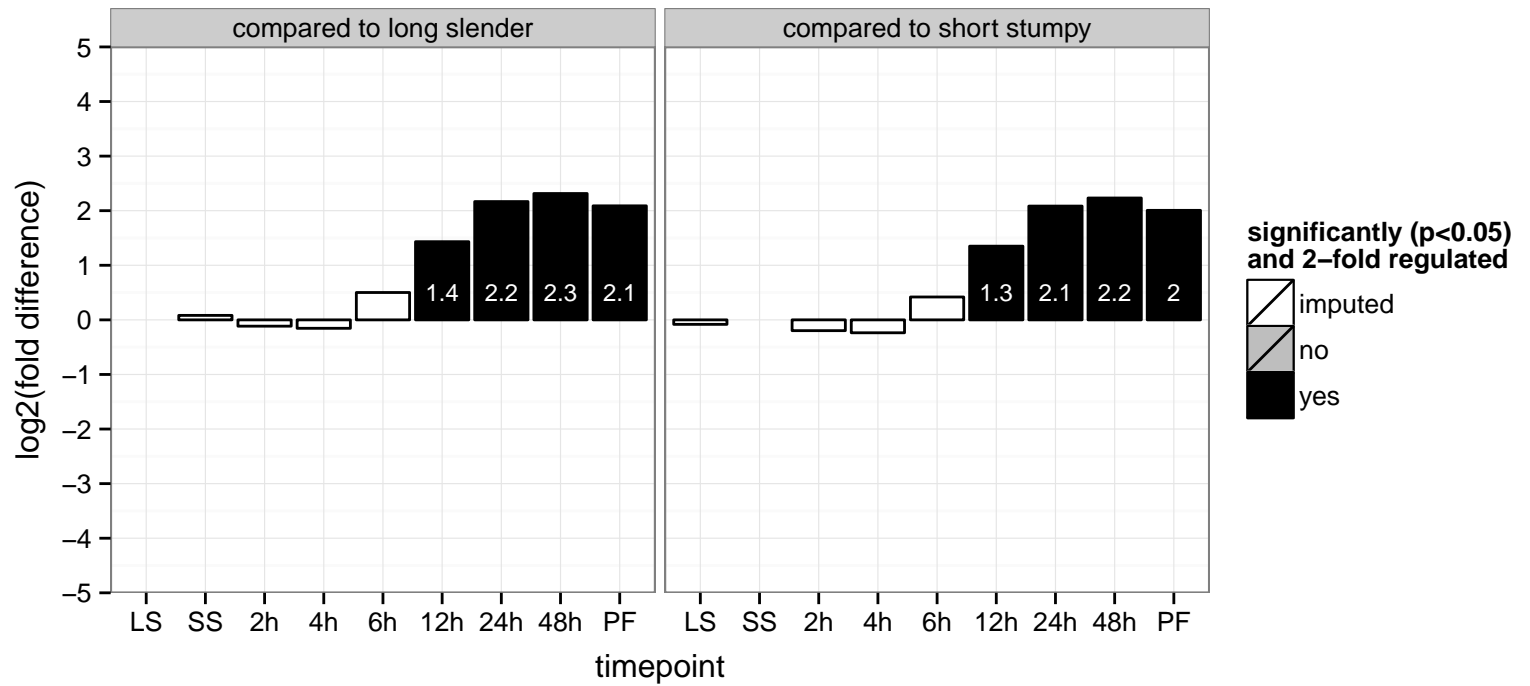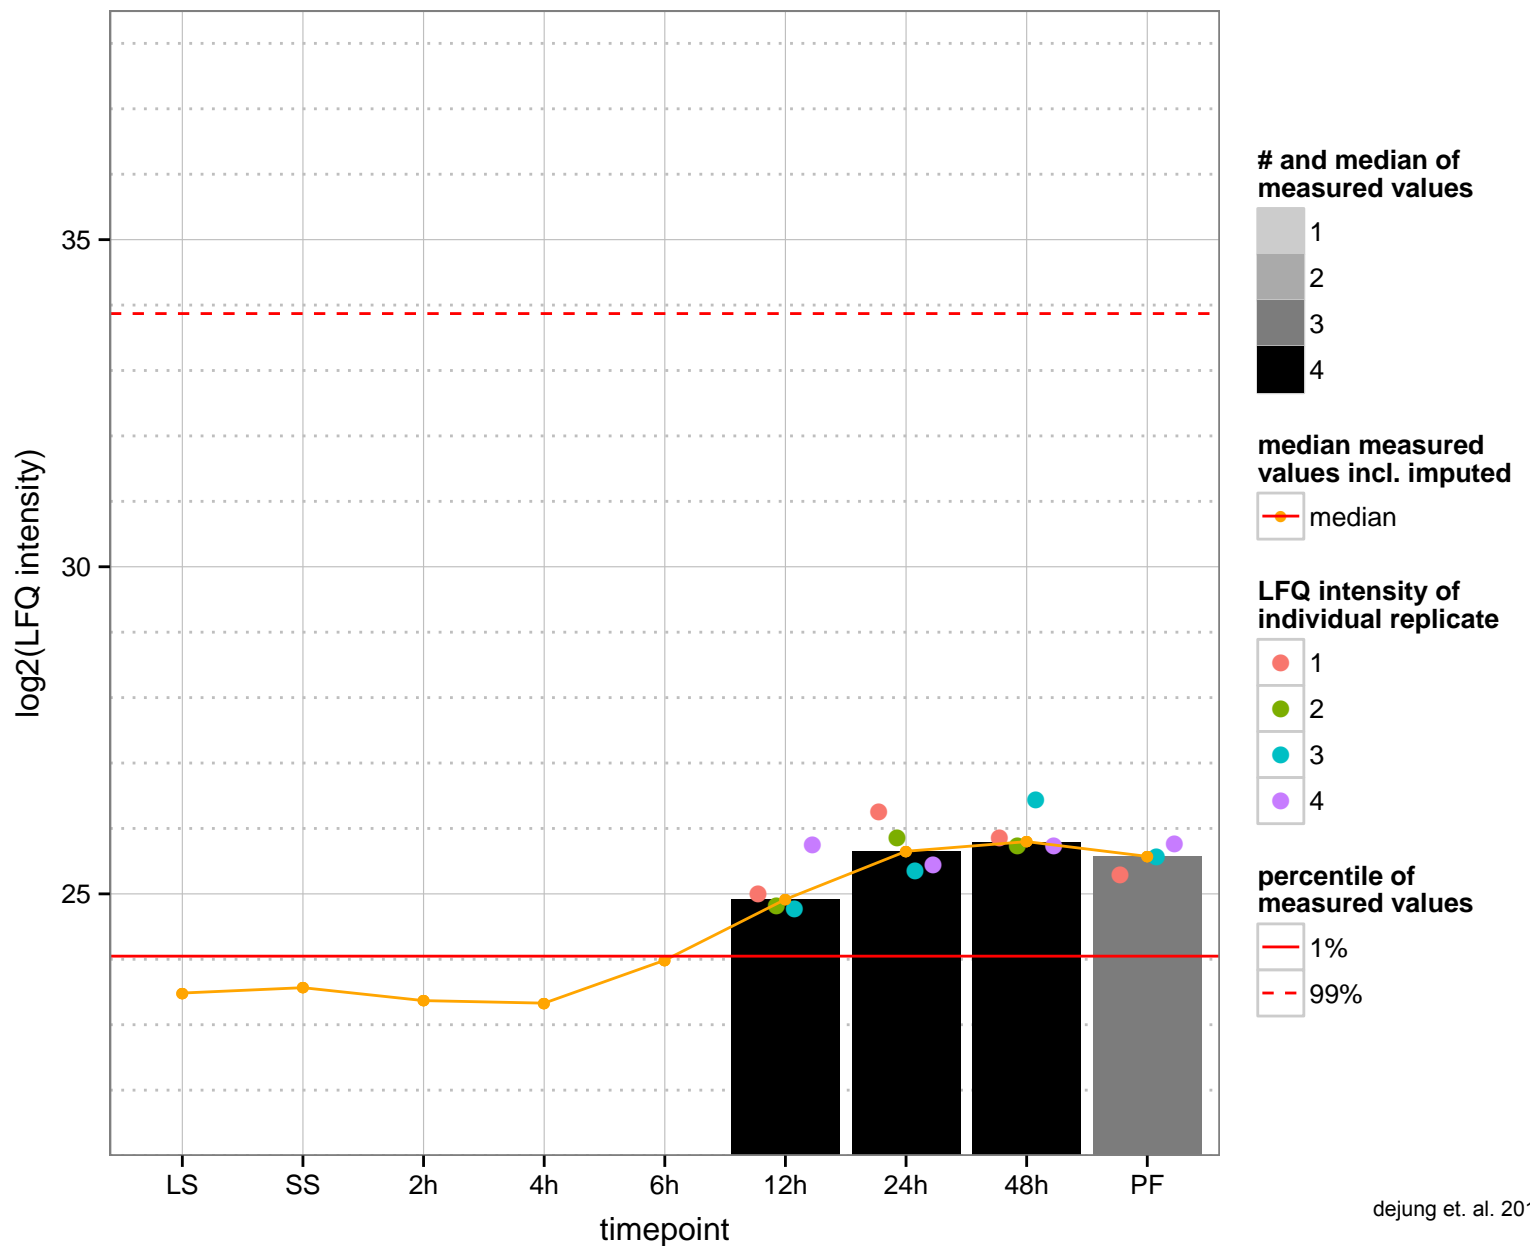

hypothetical protein, conserved  
 Tb927.7.7440  
 AGOF: null  
 AGOC: mitochondrion  
 AGOP: null  
 PGO: null  
 PGO: null  
 PGO: null

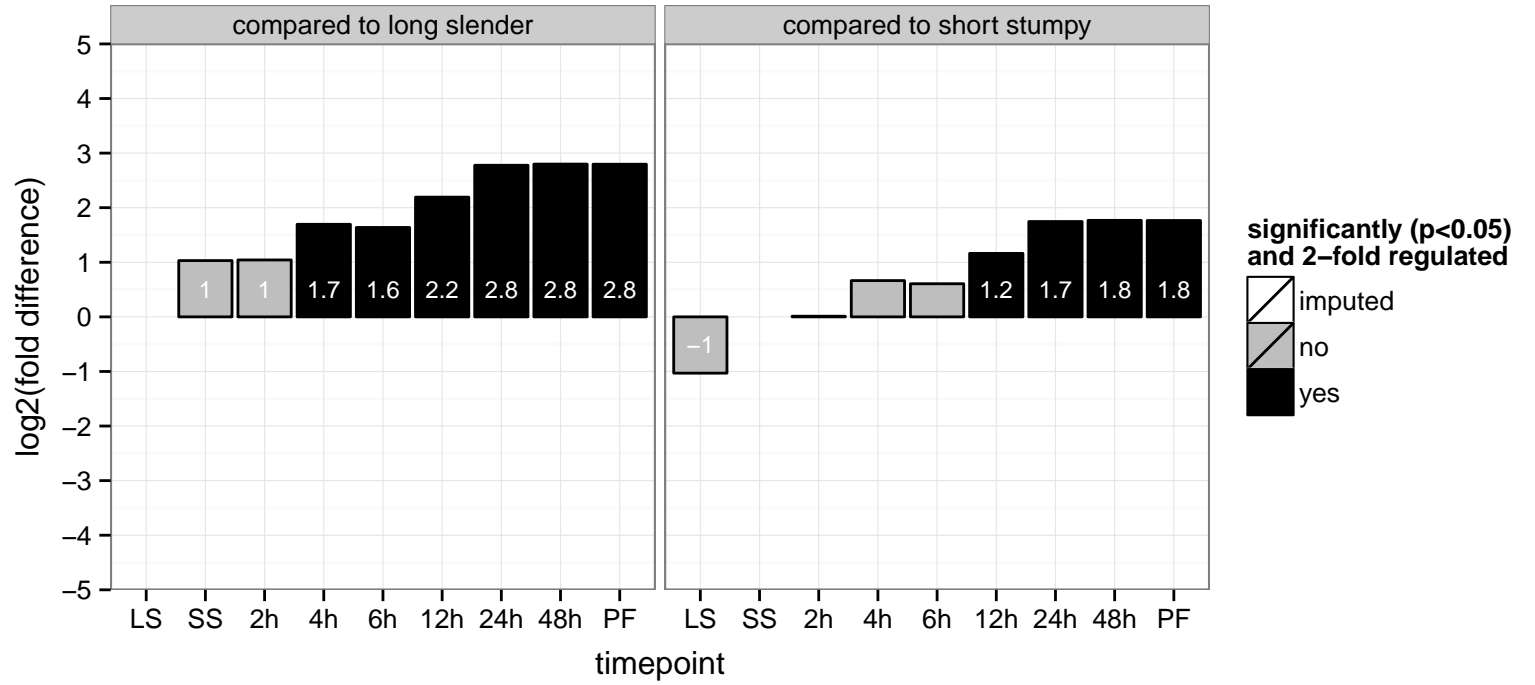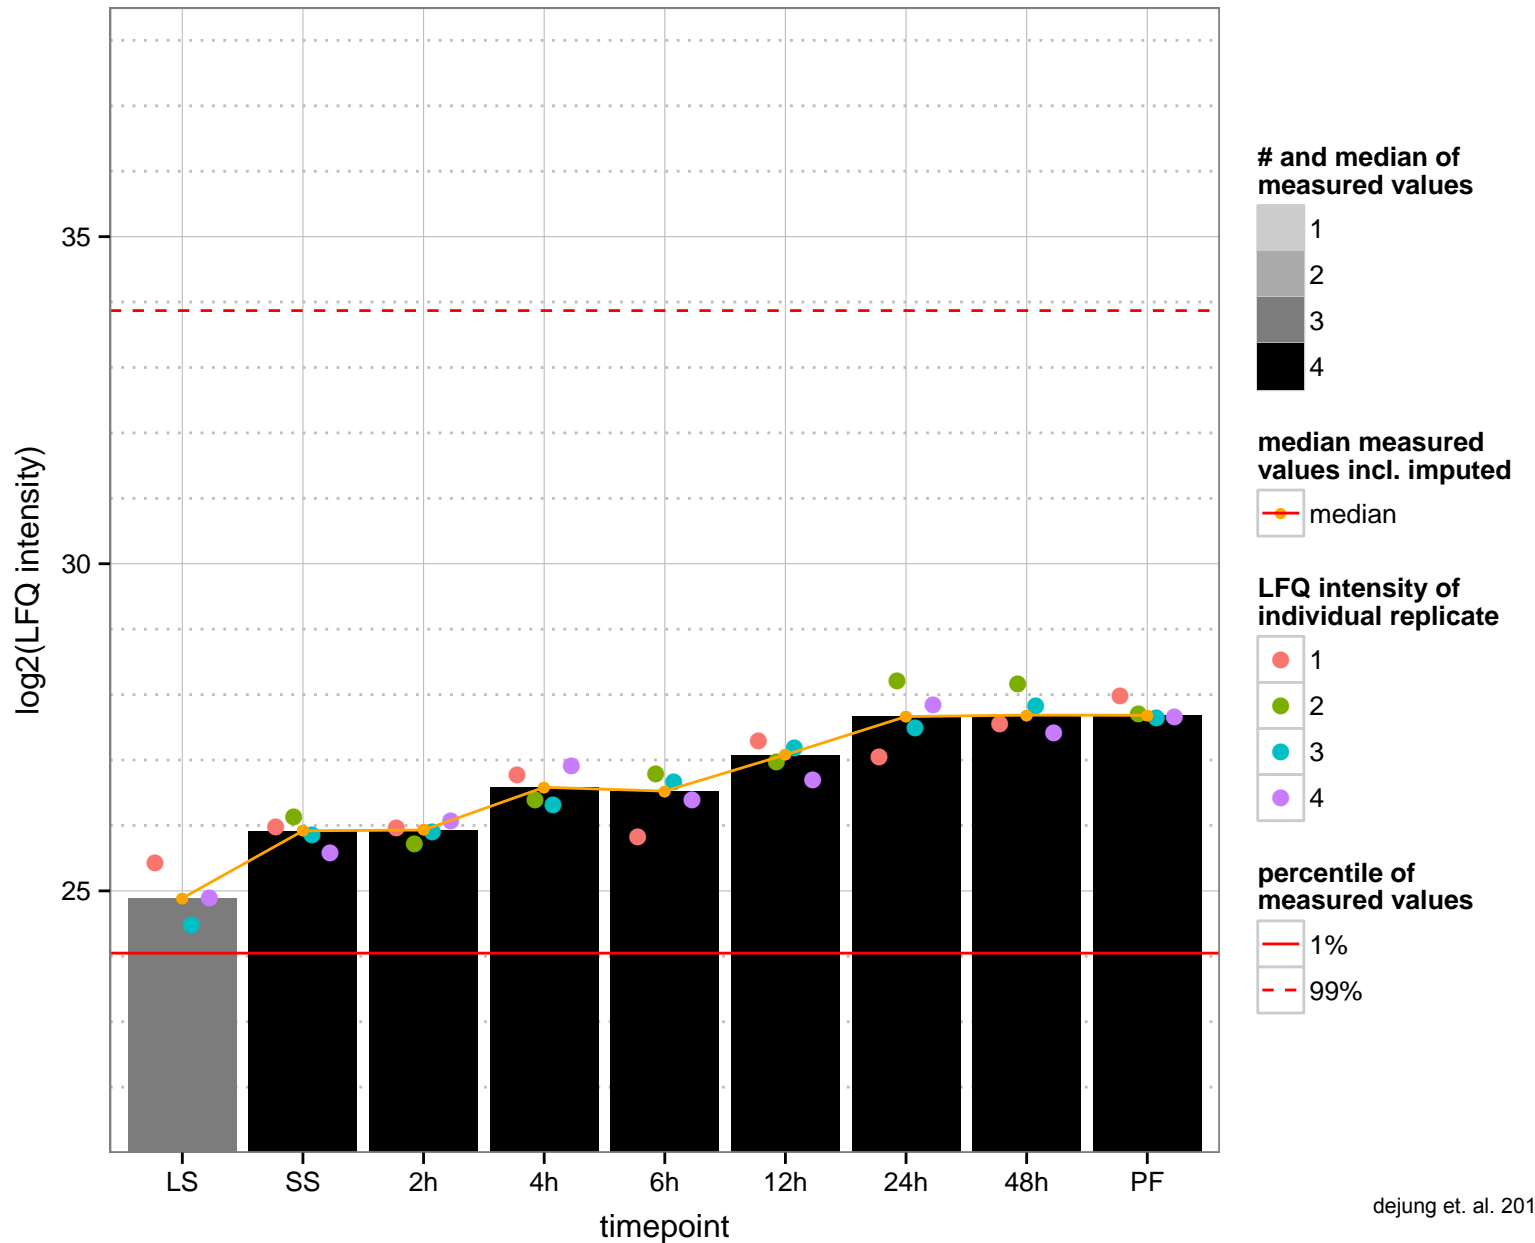

hypothetical protein, conserved  
 Tb927.8.1880  
 AGOF: null  
 AGOC: mitochondrion  
 AGOP: null  
 PGO: null  
 PGOC: null  
 PGOP: null

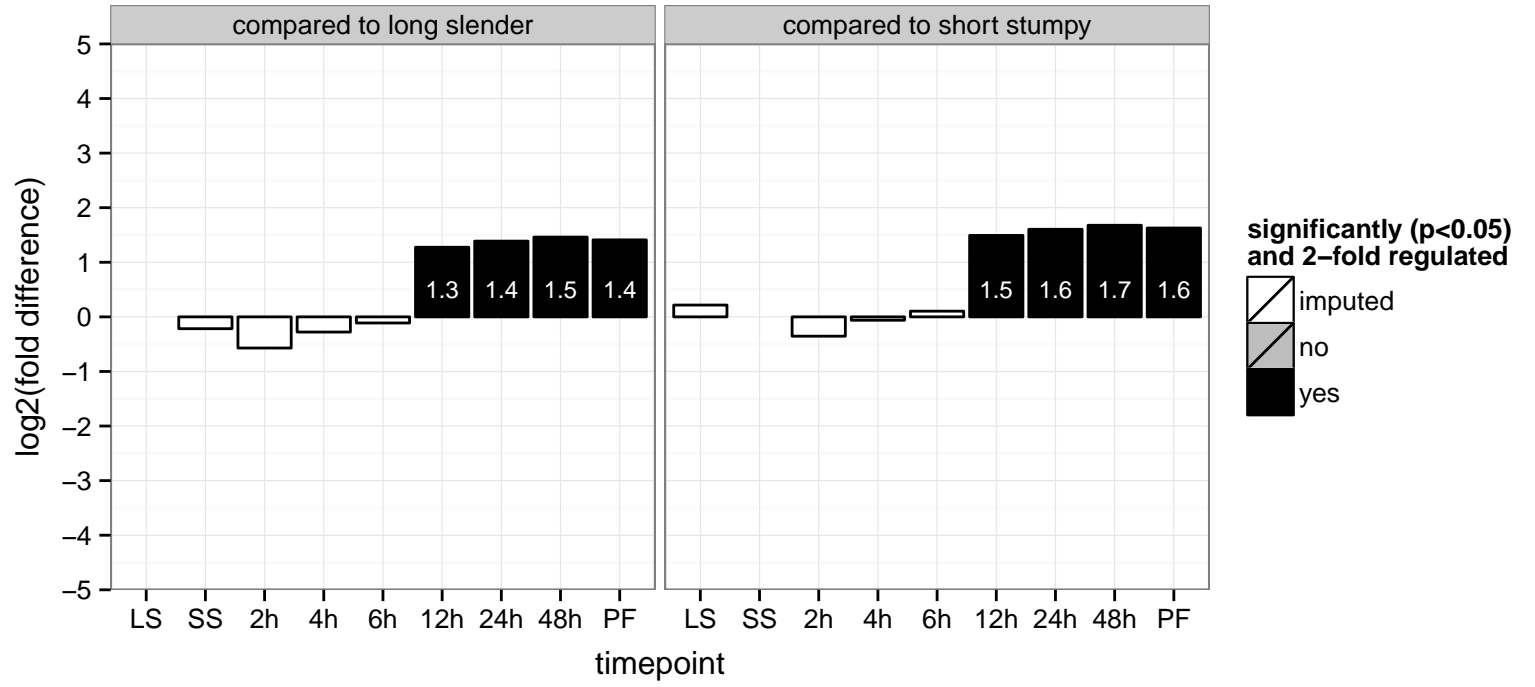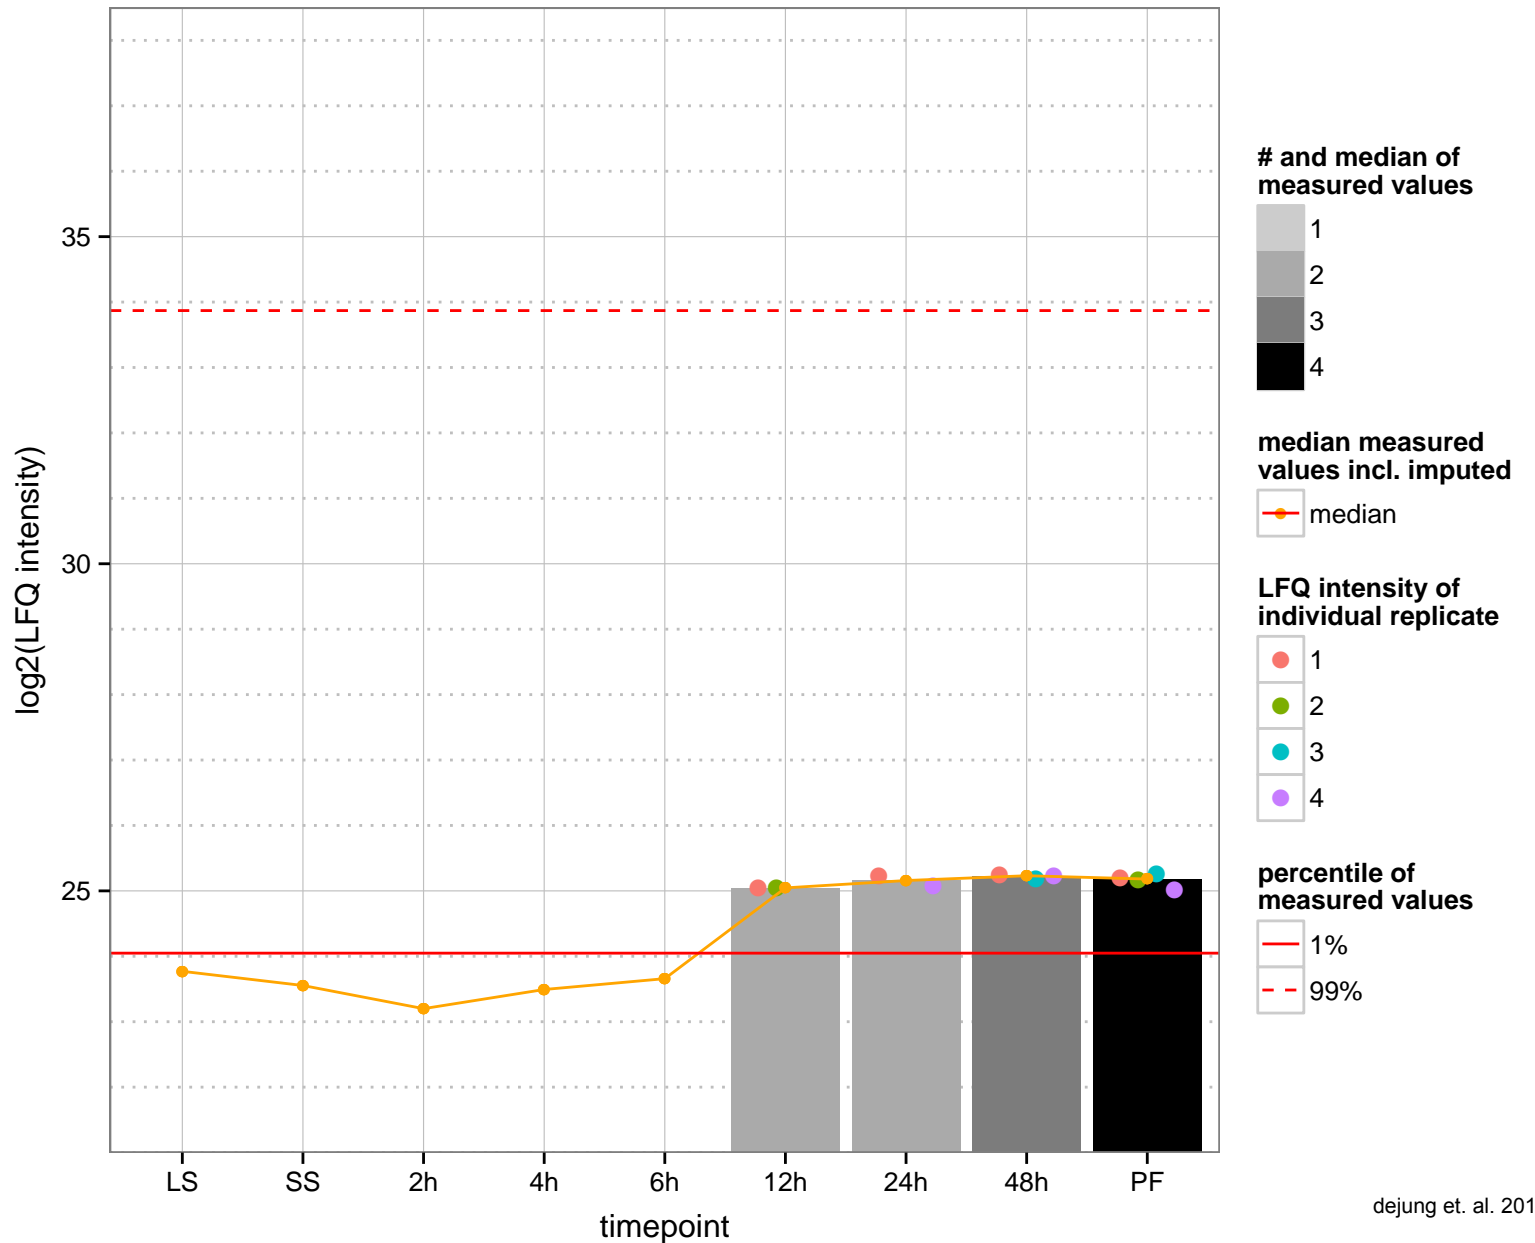

cytochrome c1, heme protein, mitochondrial precursor  
 Tb927.8.1890  
 AGOF: electron carrier activity, heme binding, iron ion binding  
 AGOC: mitochondrial respiratory chain, mitochondrion  
 AGOP: oxidation–reduction process  
 PGOF: electron carrier activity, heme binding, iron ion binding  
 PGO: null  
 PGOP: null

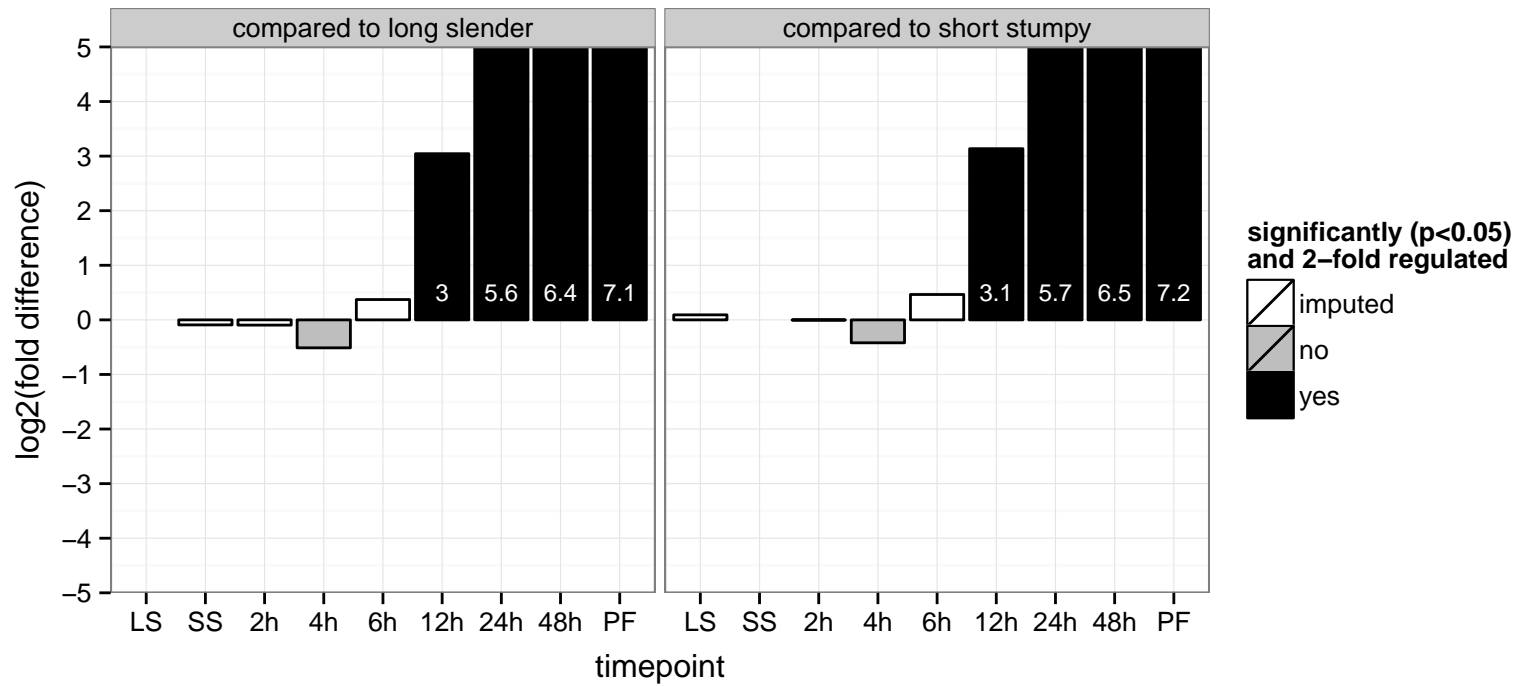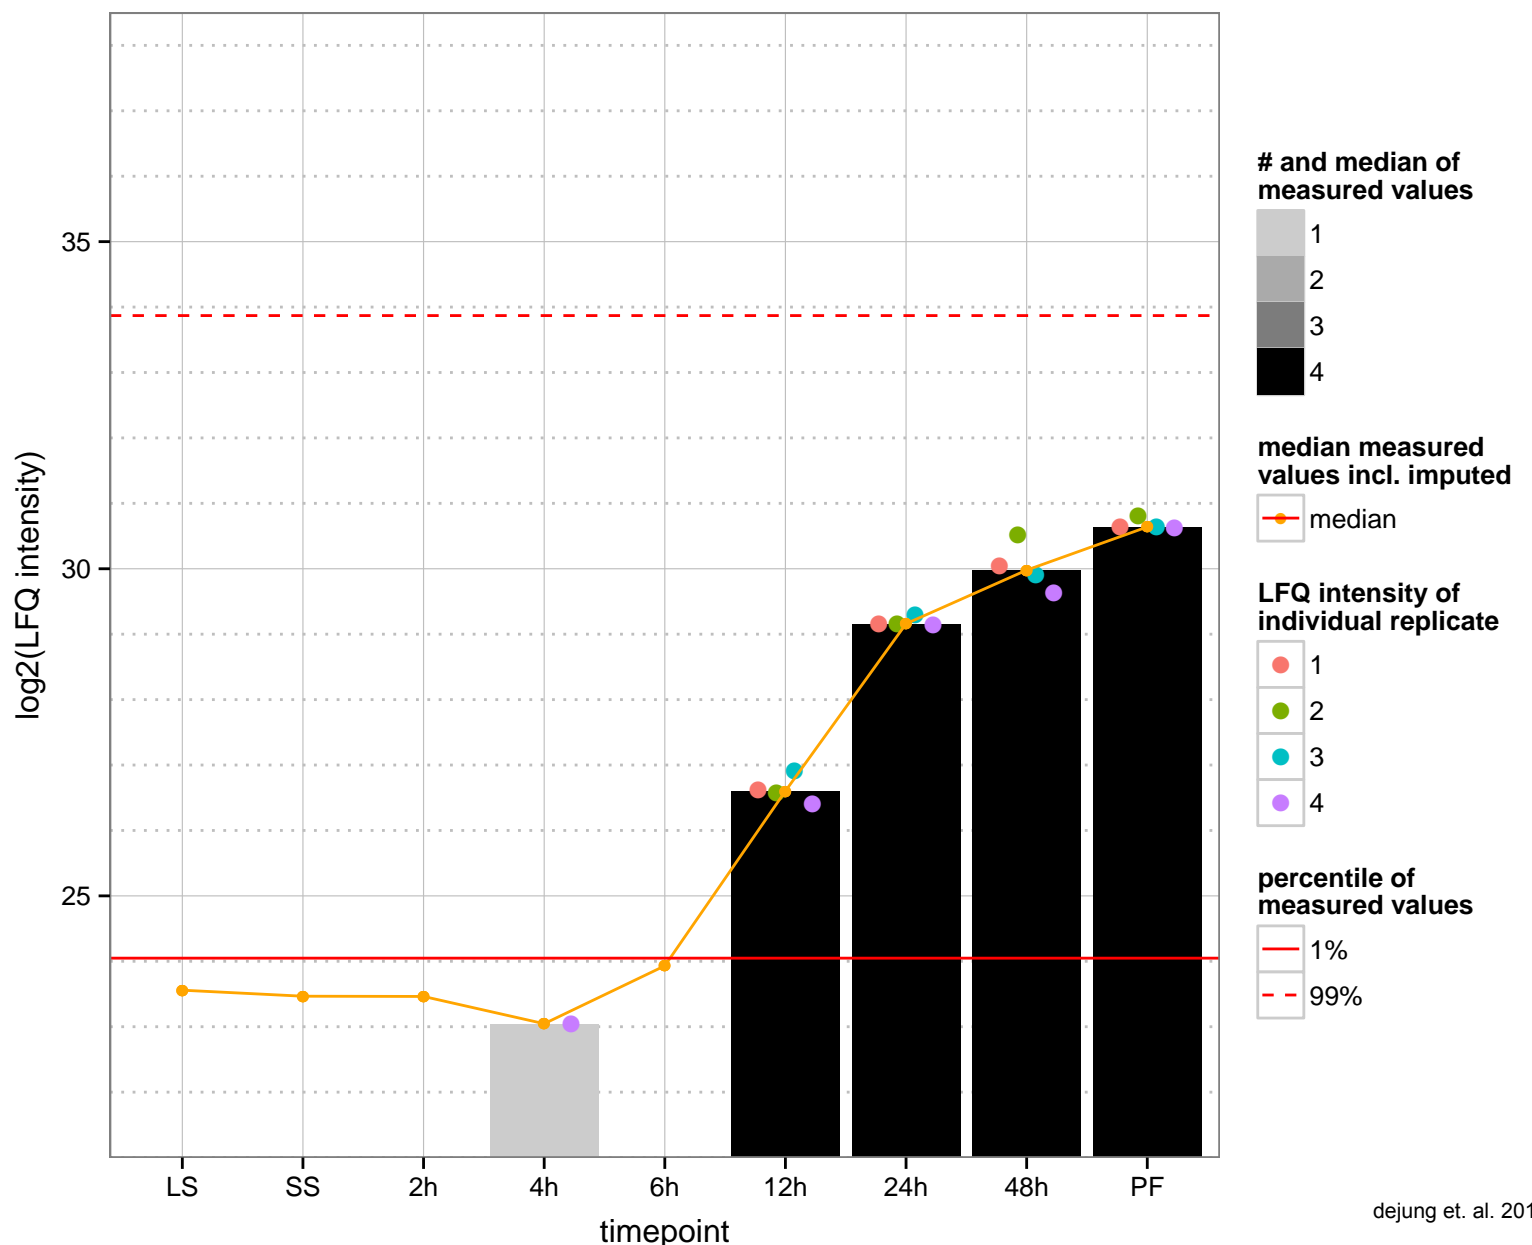

cyclophilin, putative, cyclophilin type peptidyl-prolyl cis-trans isomerase, peptidyl-prolyl cis-trans isomerase, putative (NCP1, Tb927.8.2000

AGOF: peptidyl-prolyl cis-trans isomerase activity, protein binding, rRNA binding

AGOC: nucleus

AGOP: protein folding, rRNA processing

PGOF: peptidyl-prolyl cis-trans isomerase activity

PGOC: null

PGOP: protein folding

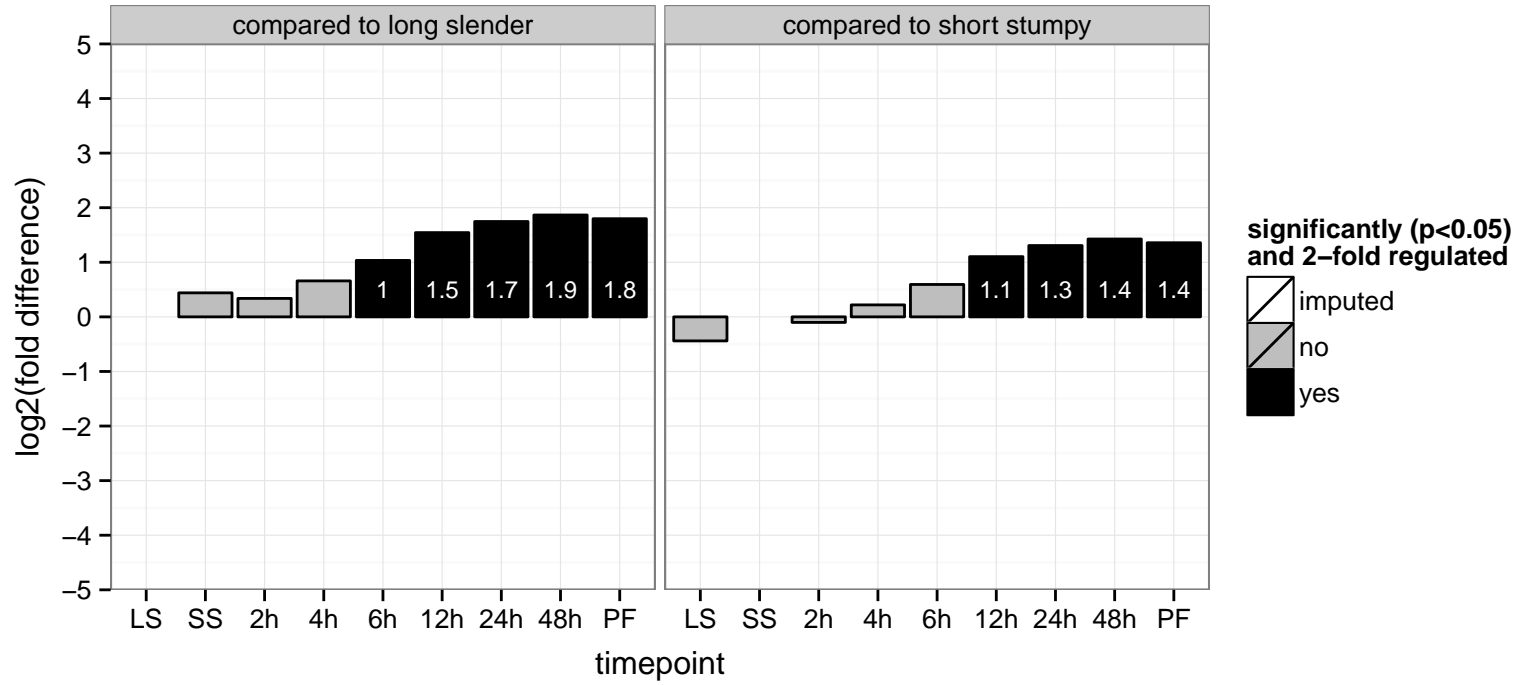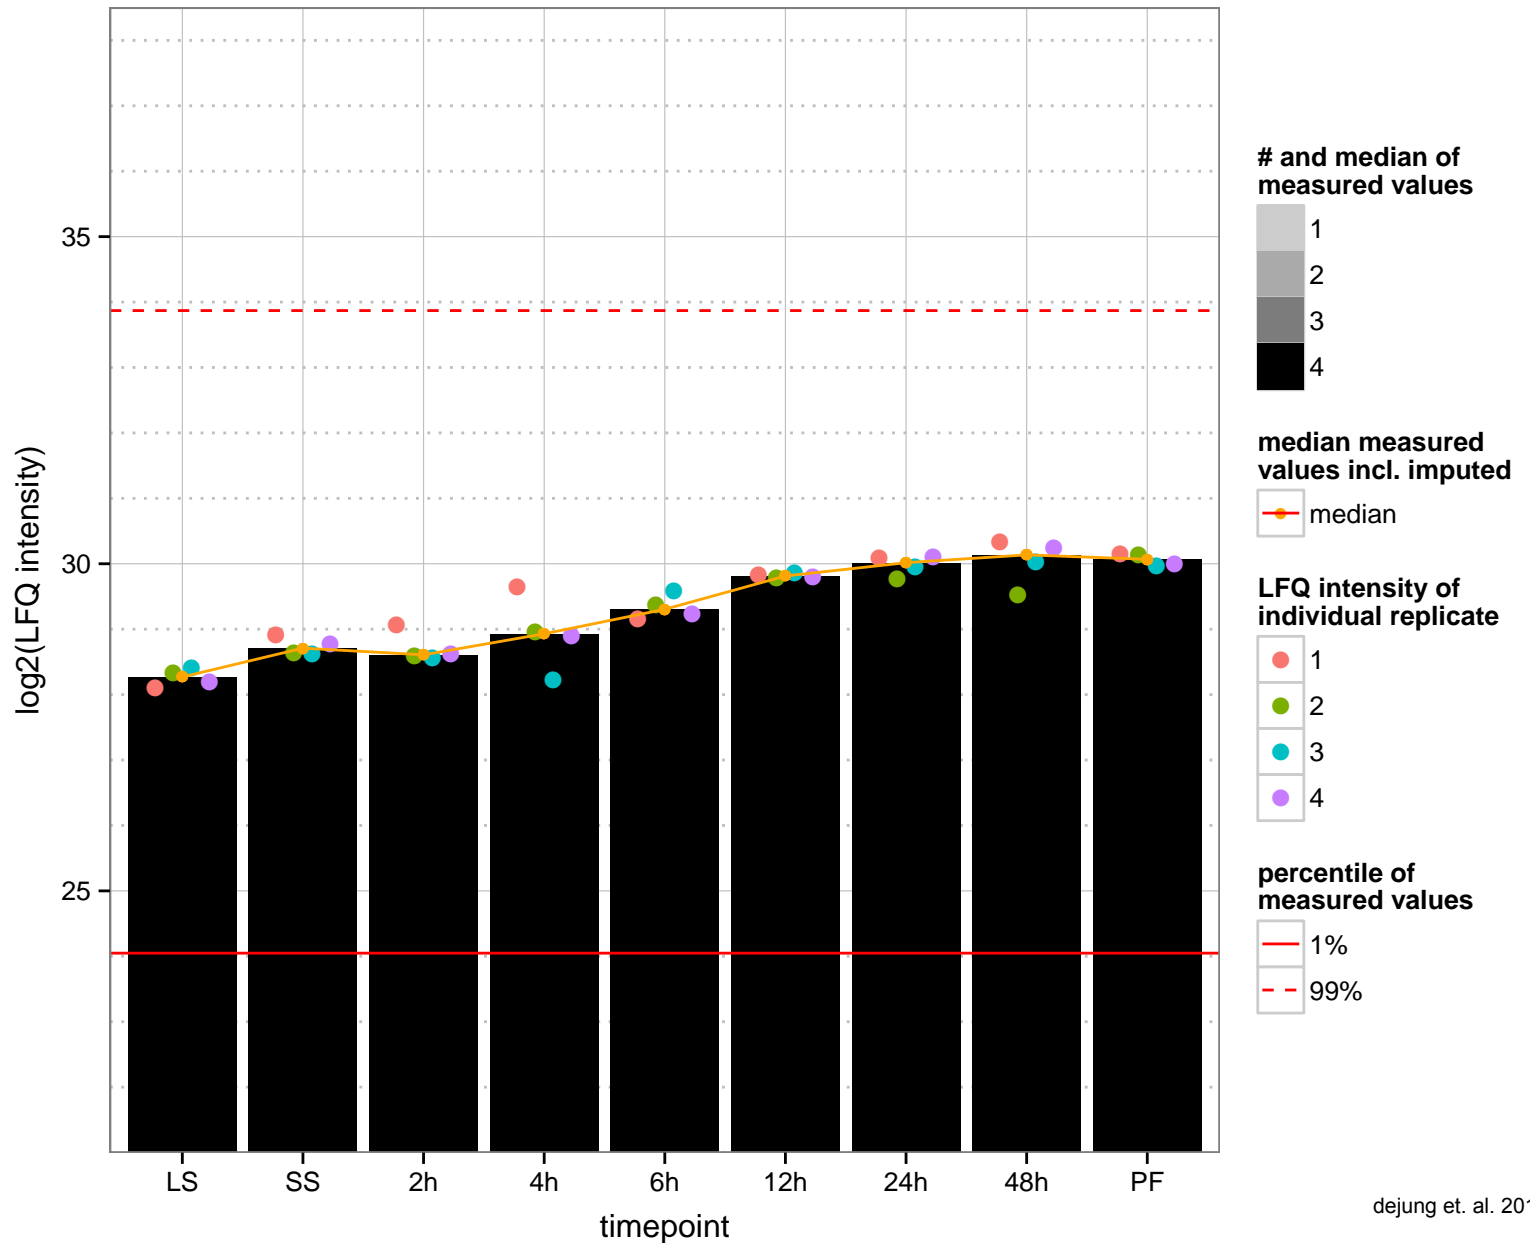



multidrug resistance protein A, p-glycoprotein (PGPA)

Tb927.8.2160

AGOF: ATP binding, ATPase activity, coupled to transmembrane movement of substances

AGOC: ATP-binding cassette (ABC) transporter complex, integral to membrane

AGOP: response to drug, transport

PGOF: ATP binding, ATPase activity, coupled to transmembrane movement of substances, nucleoside-triphosphatase activity

PGOC: integral to membrane

PGOP: transmembrane transport, transport

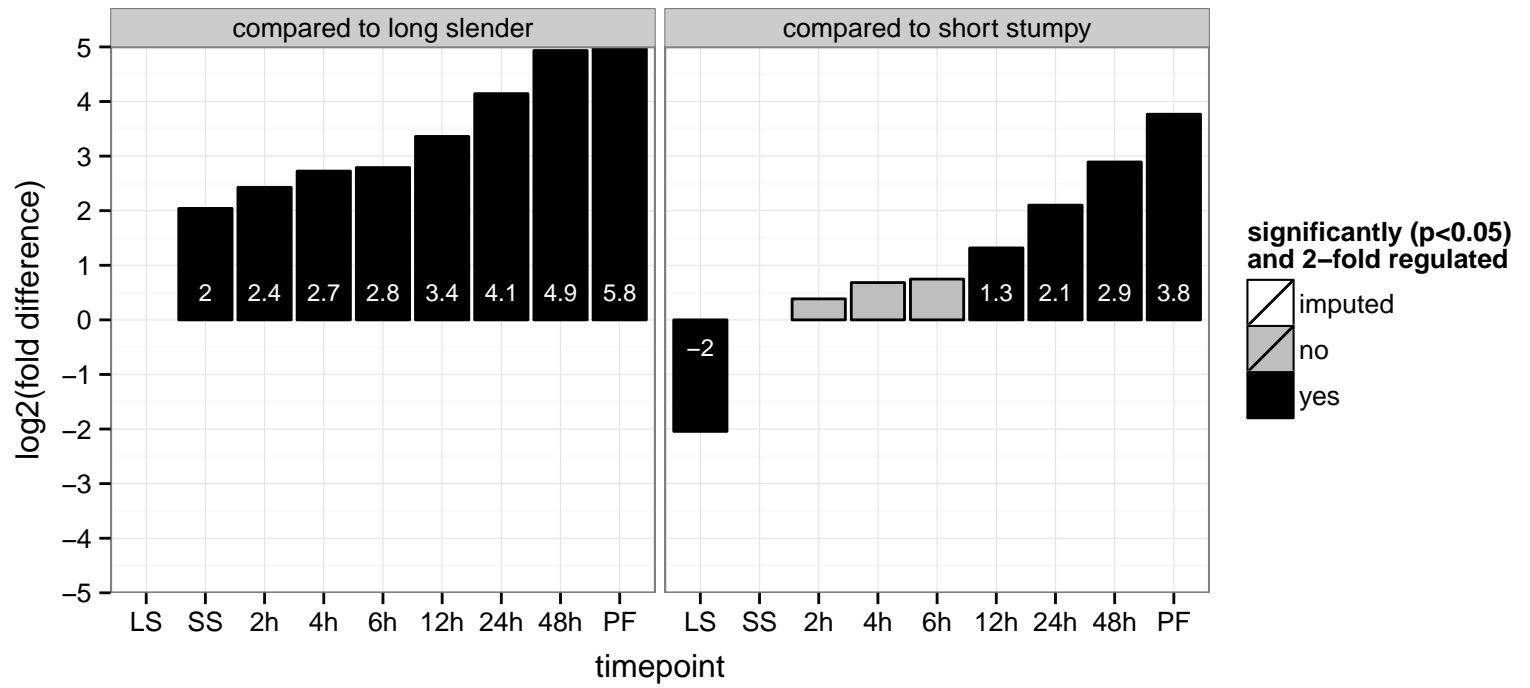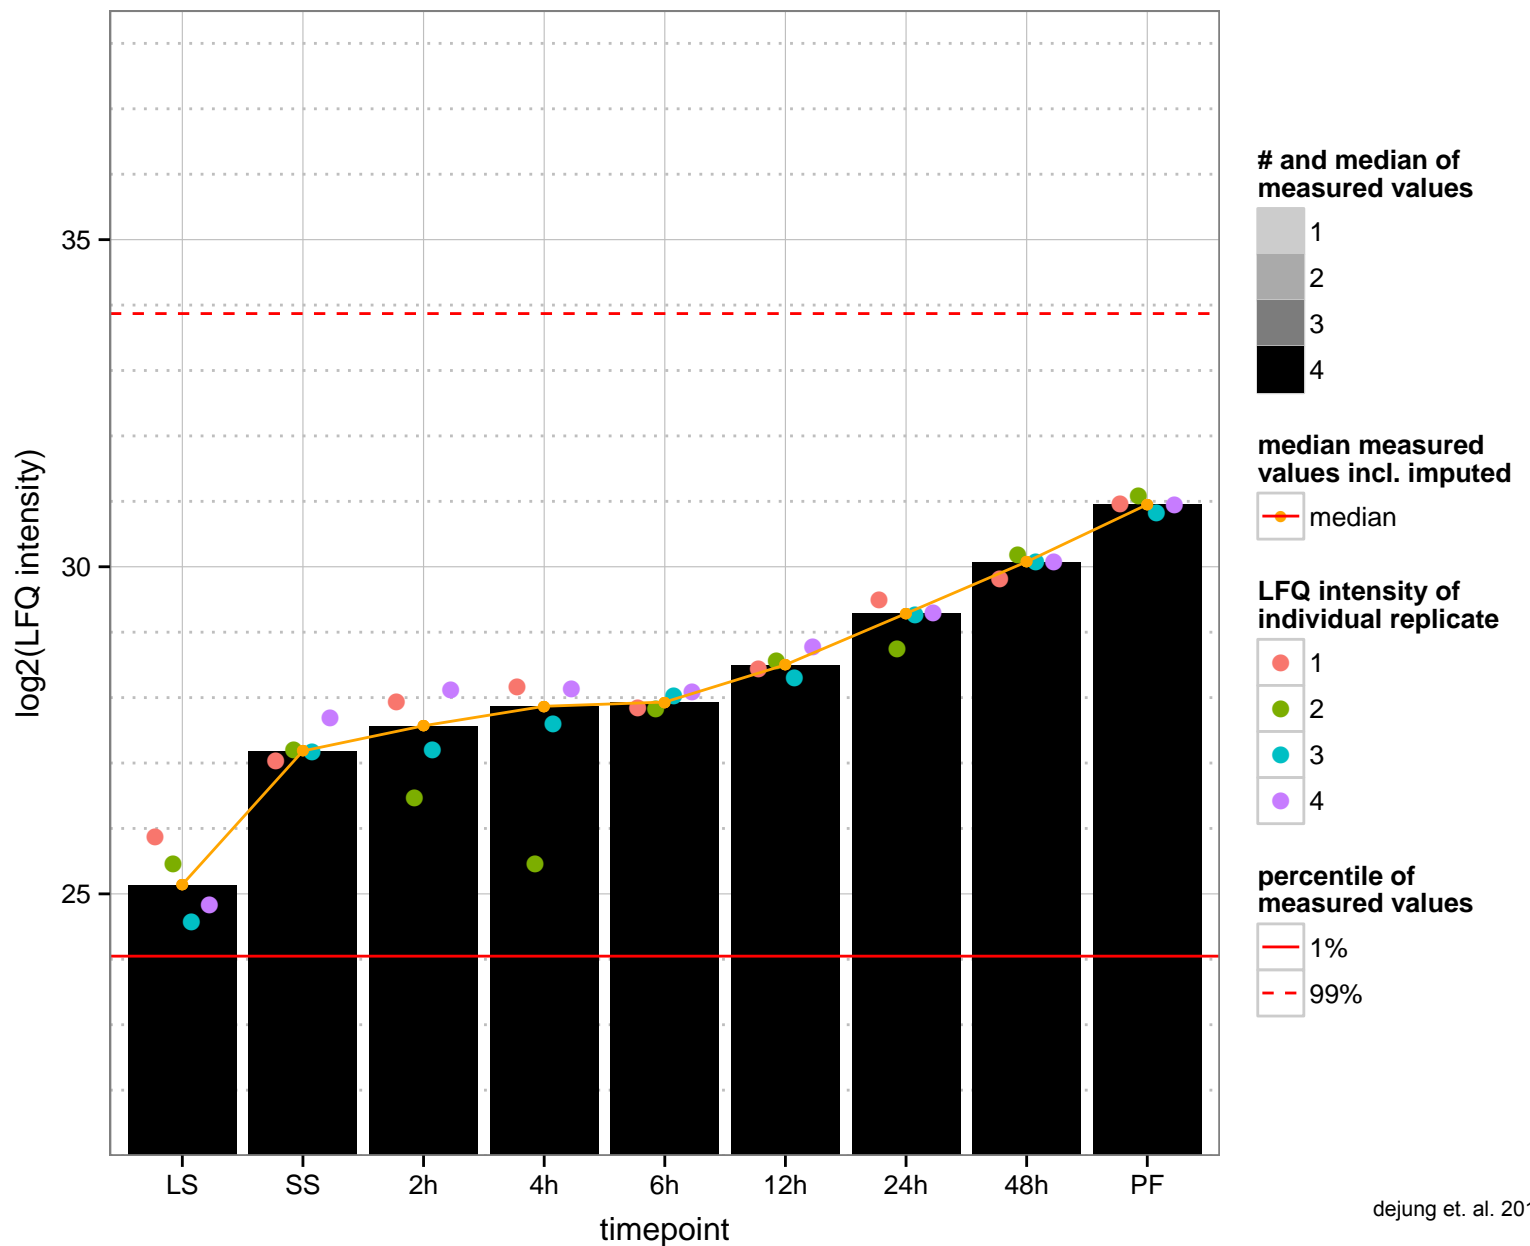

3-ketoacyl-CoA thiolase, putative, ERG10

Tb927.8.2540

AGOF: acetyl-CoA C-acyltransferase activity

AGOC: mitochondrion

AGOP: metabolic process

PGOF: catalytic activity, transferase activity, transferring acyl groups other than amino-acyl groups

PGOC: null

PGOP: metabolic process

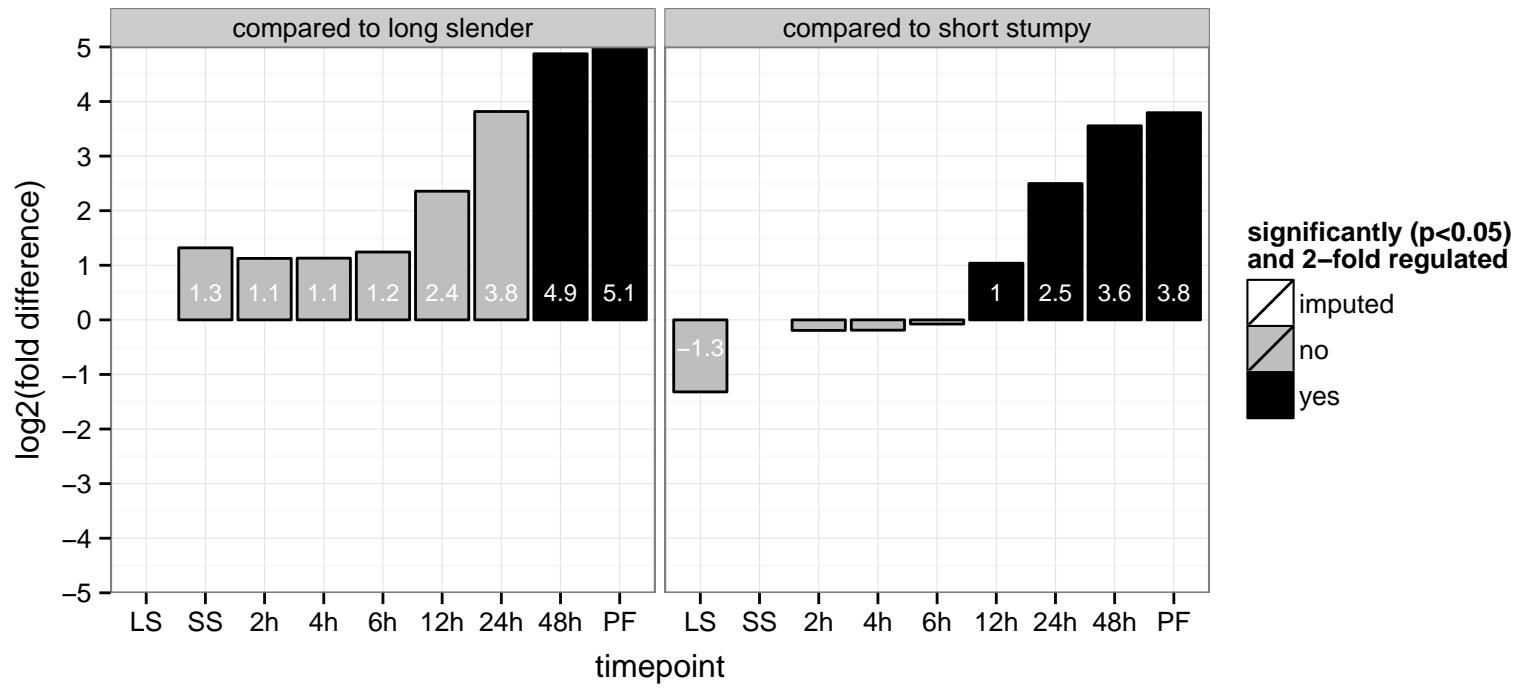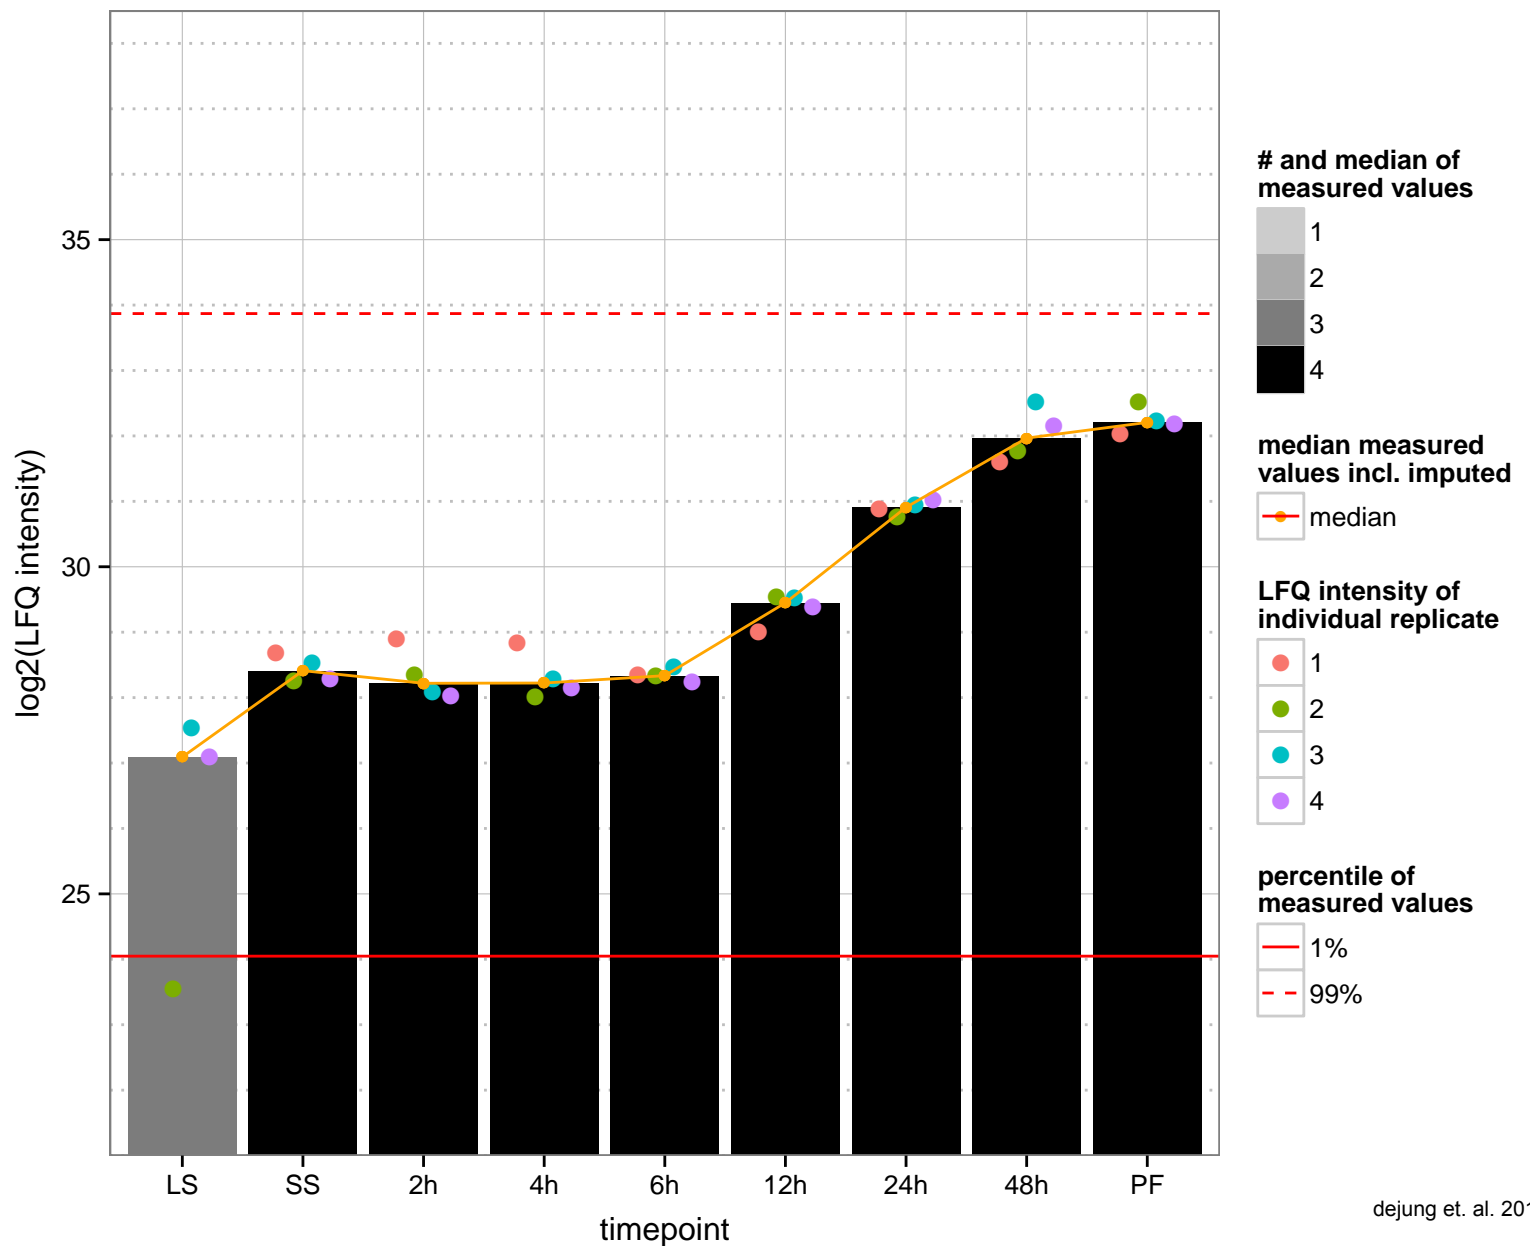

mitochondrial DNA primase (PR11)  
 Tb927.8.2550  
 AGOF: DNA primase activity  
 AGOC: kinetoplast, mitochondrial matrix  
 AGOP: mitochondrial DNA replication  
 PGOF: hydrolase activity, acting on acid anhydrides  
 PGOC: null  
 PGOP: null

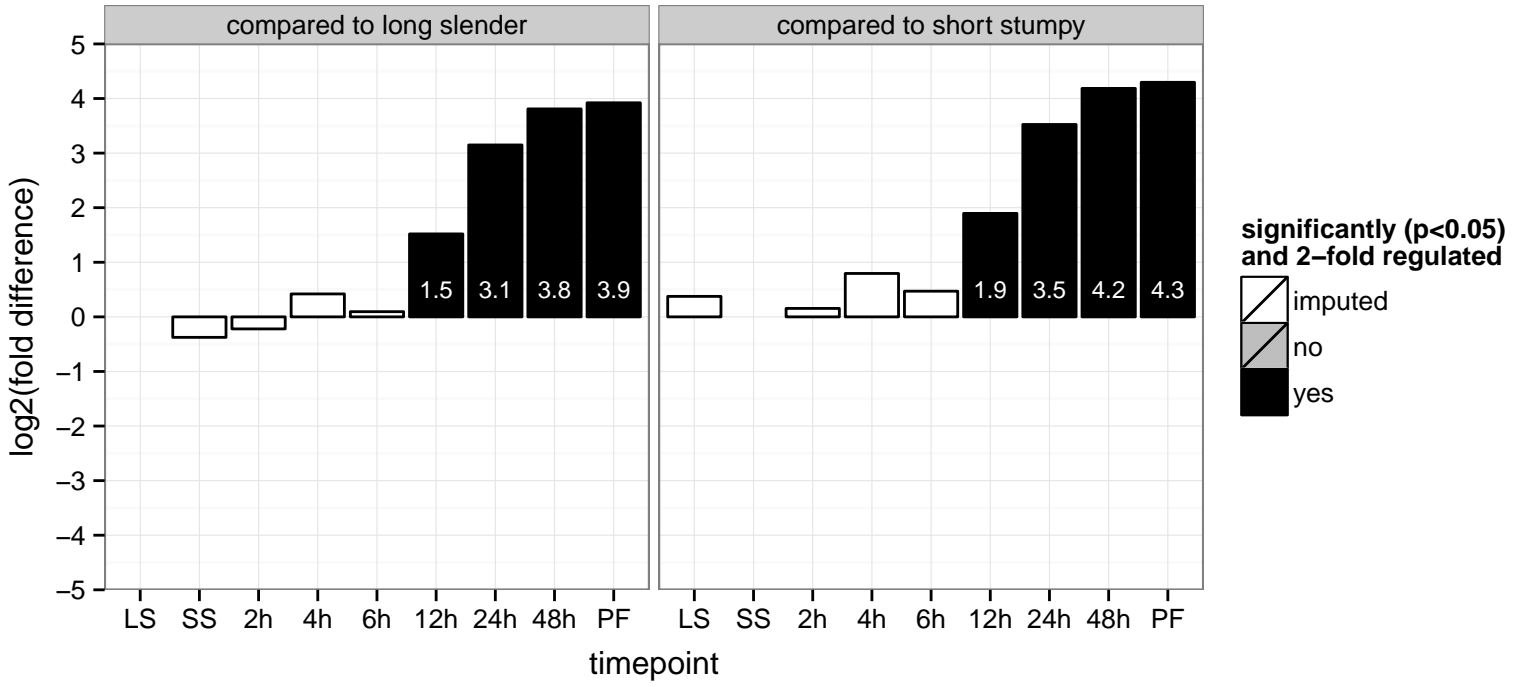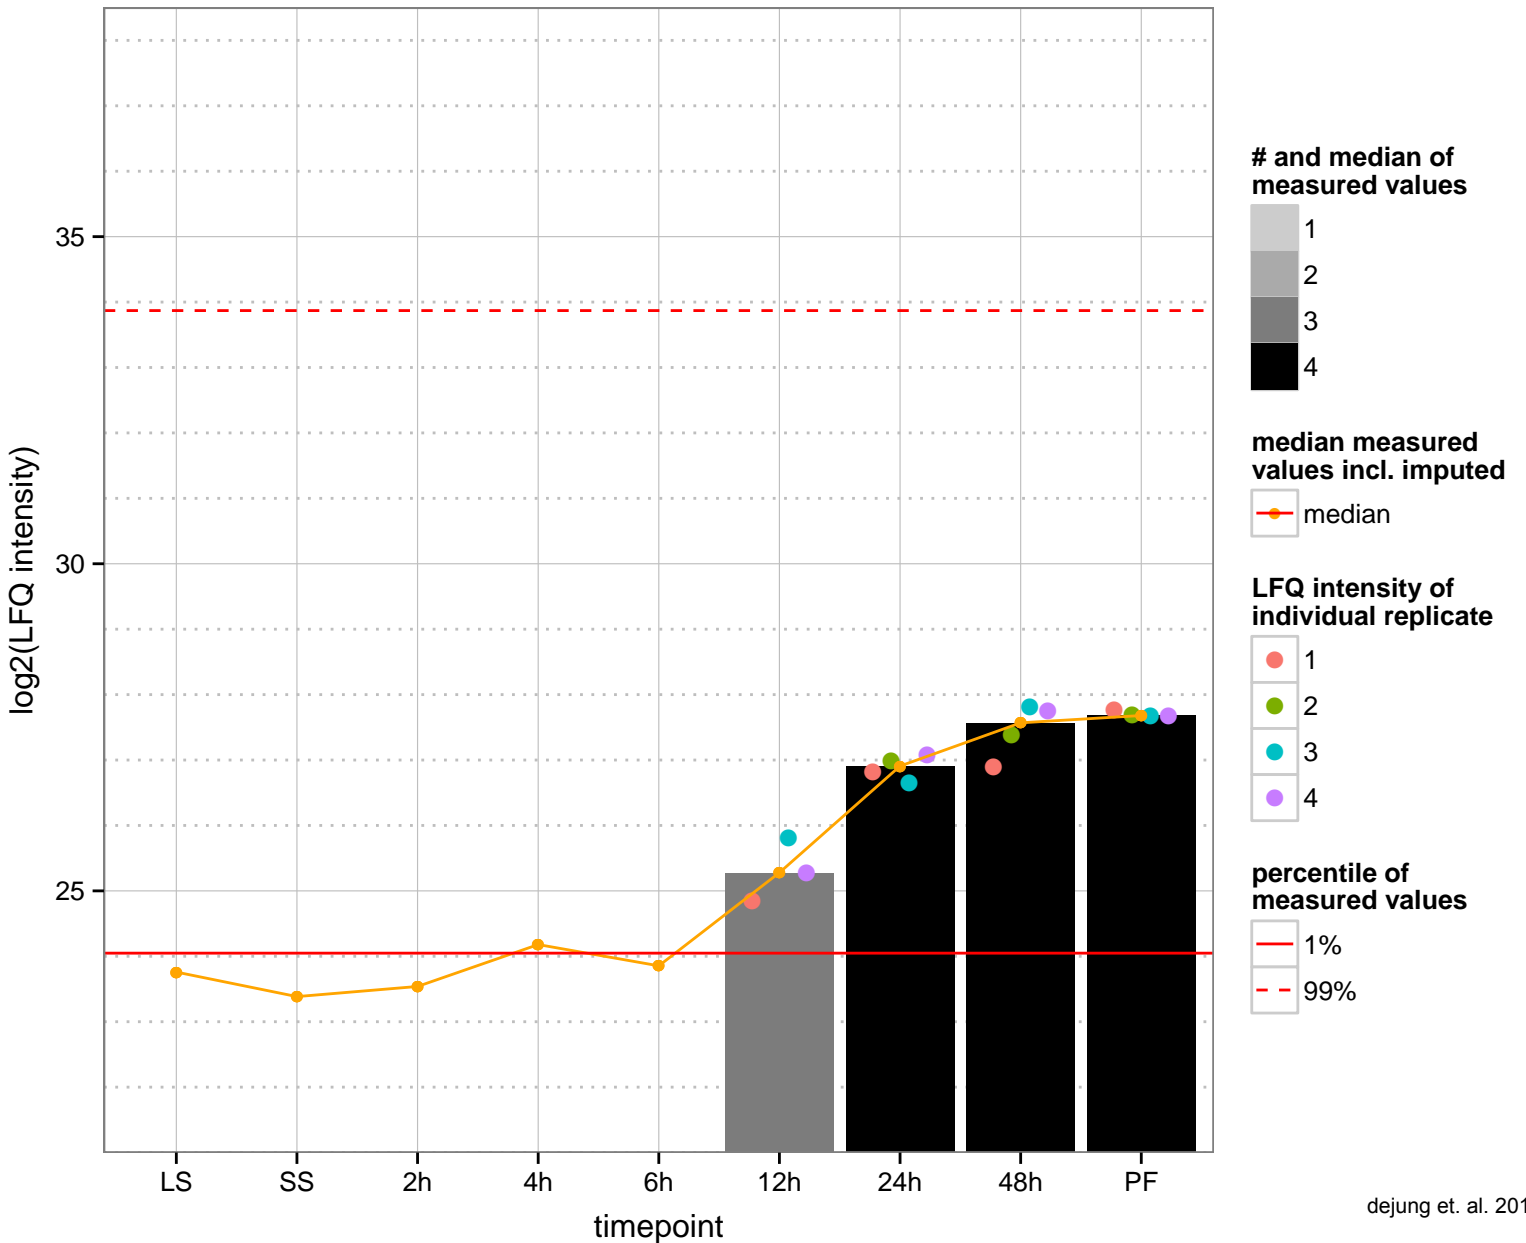

hypothetical protein, conserved  
 Tb927.8.2880  
 AGOF: null  
 AGOC: mitochondrion  
 AGOP: null  
 PGO: null  
 PGOC: null  
 PGOP: null

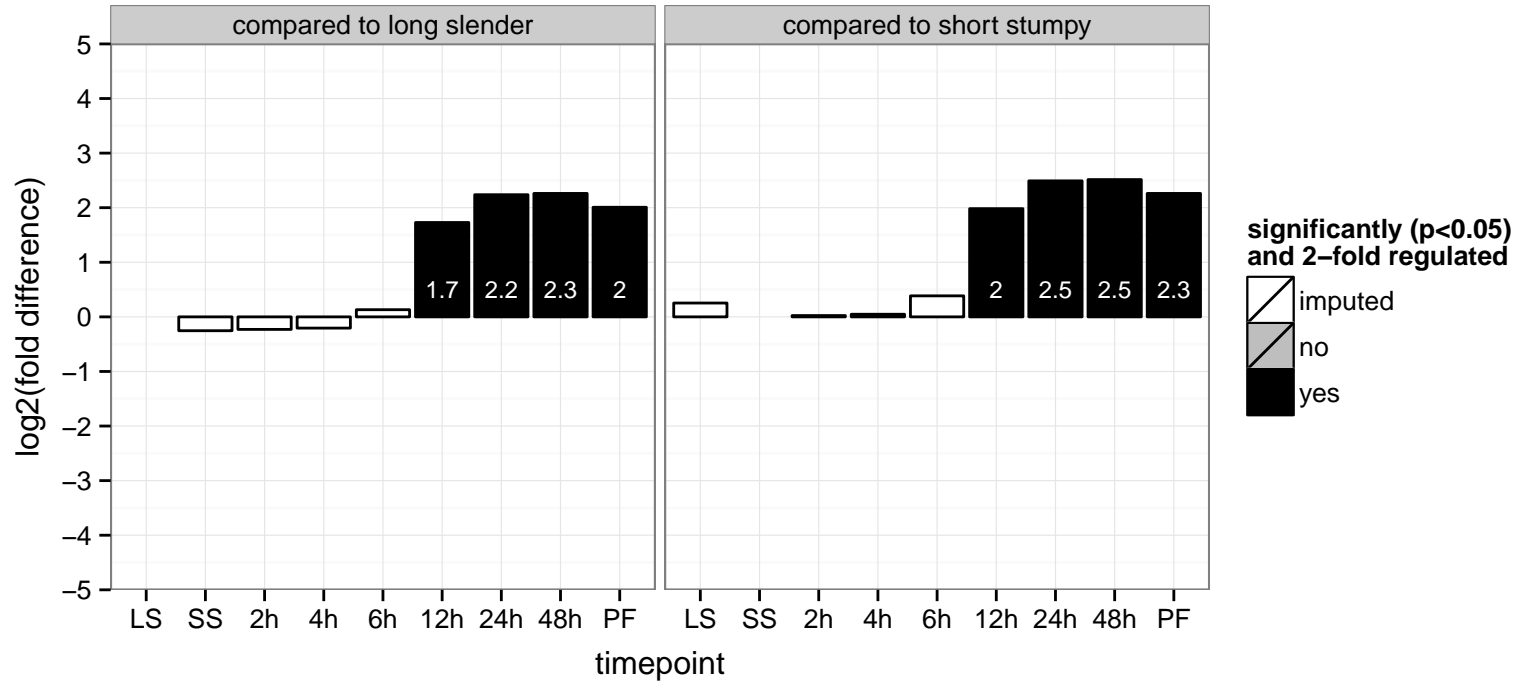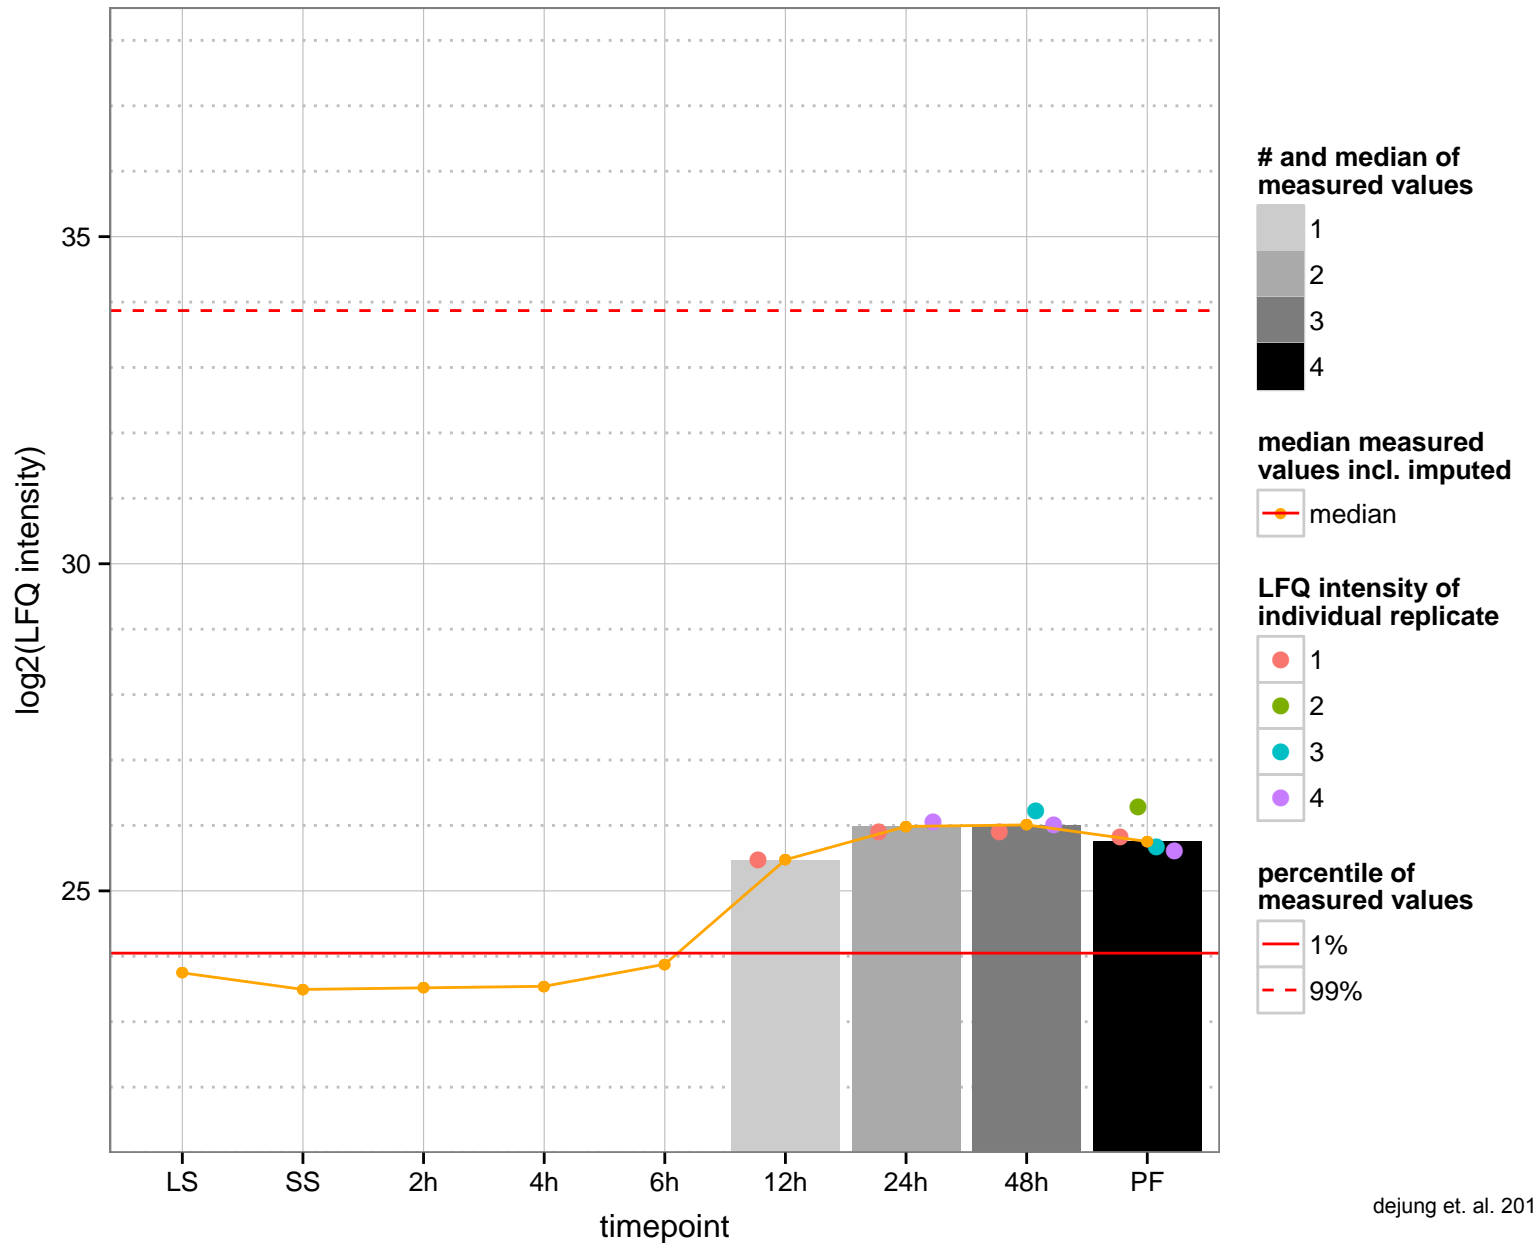

hypothetical protein, conserved  
 Tb927.8.3010  
 AGOF: null  
 AGOC: null  
 AGOP: null  
 PGOF: null  
 PGOC: null  
 PGOP: null

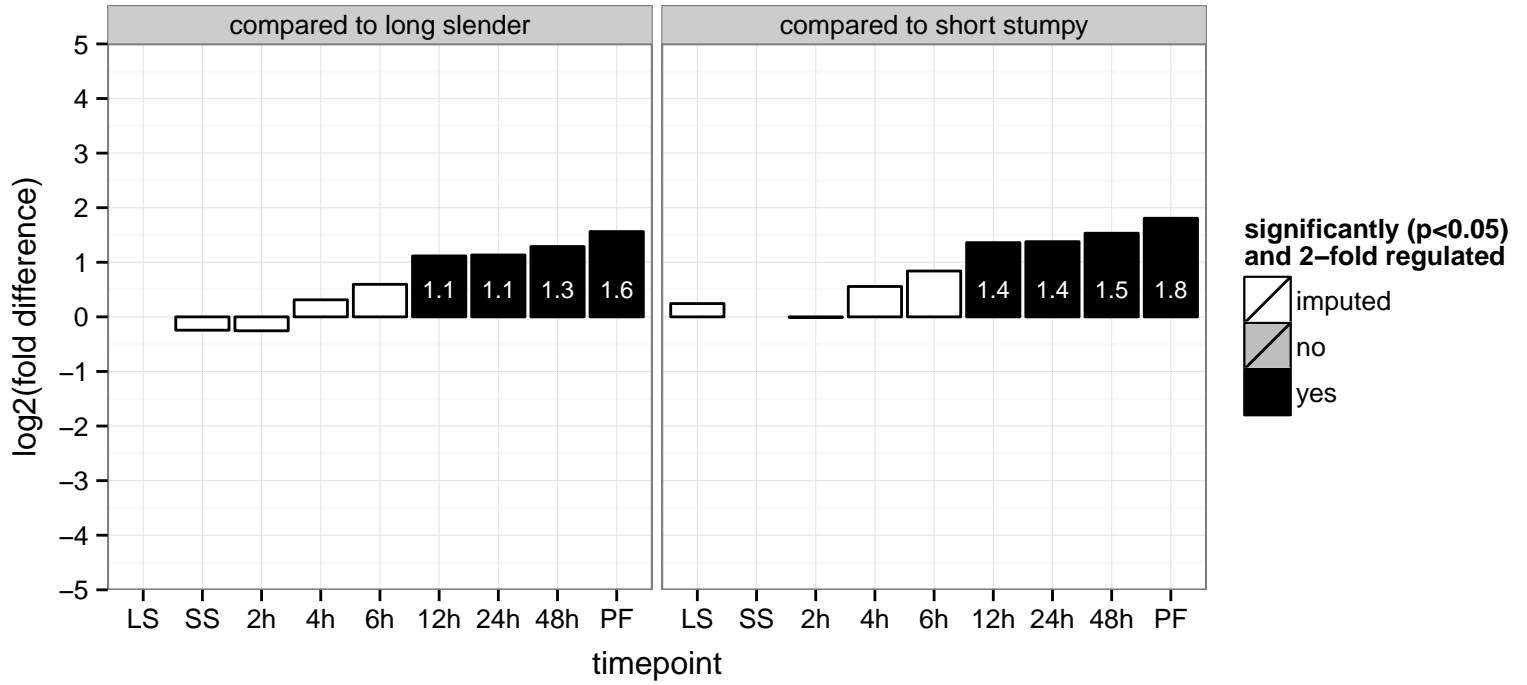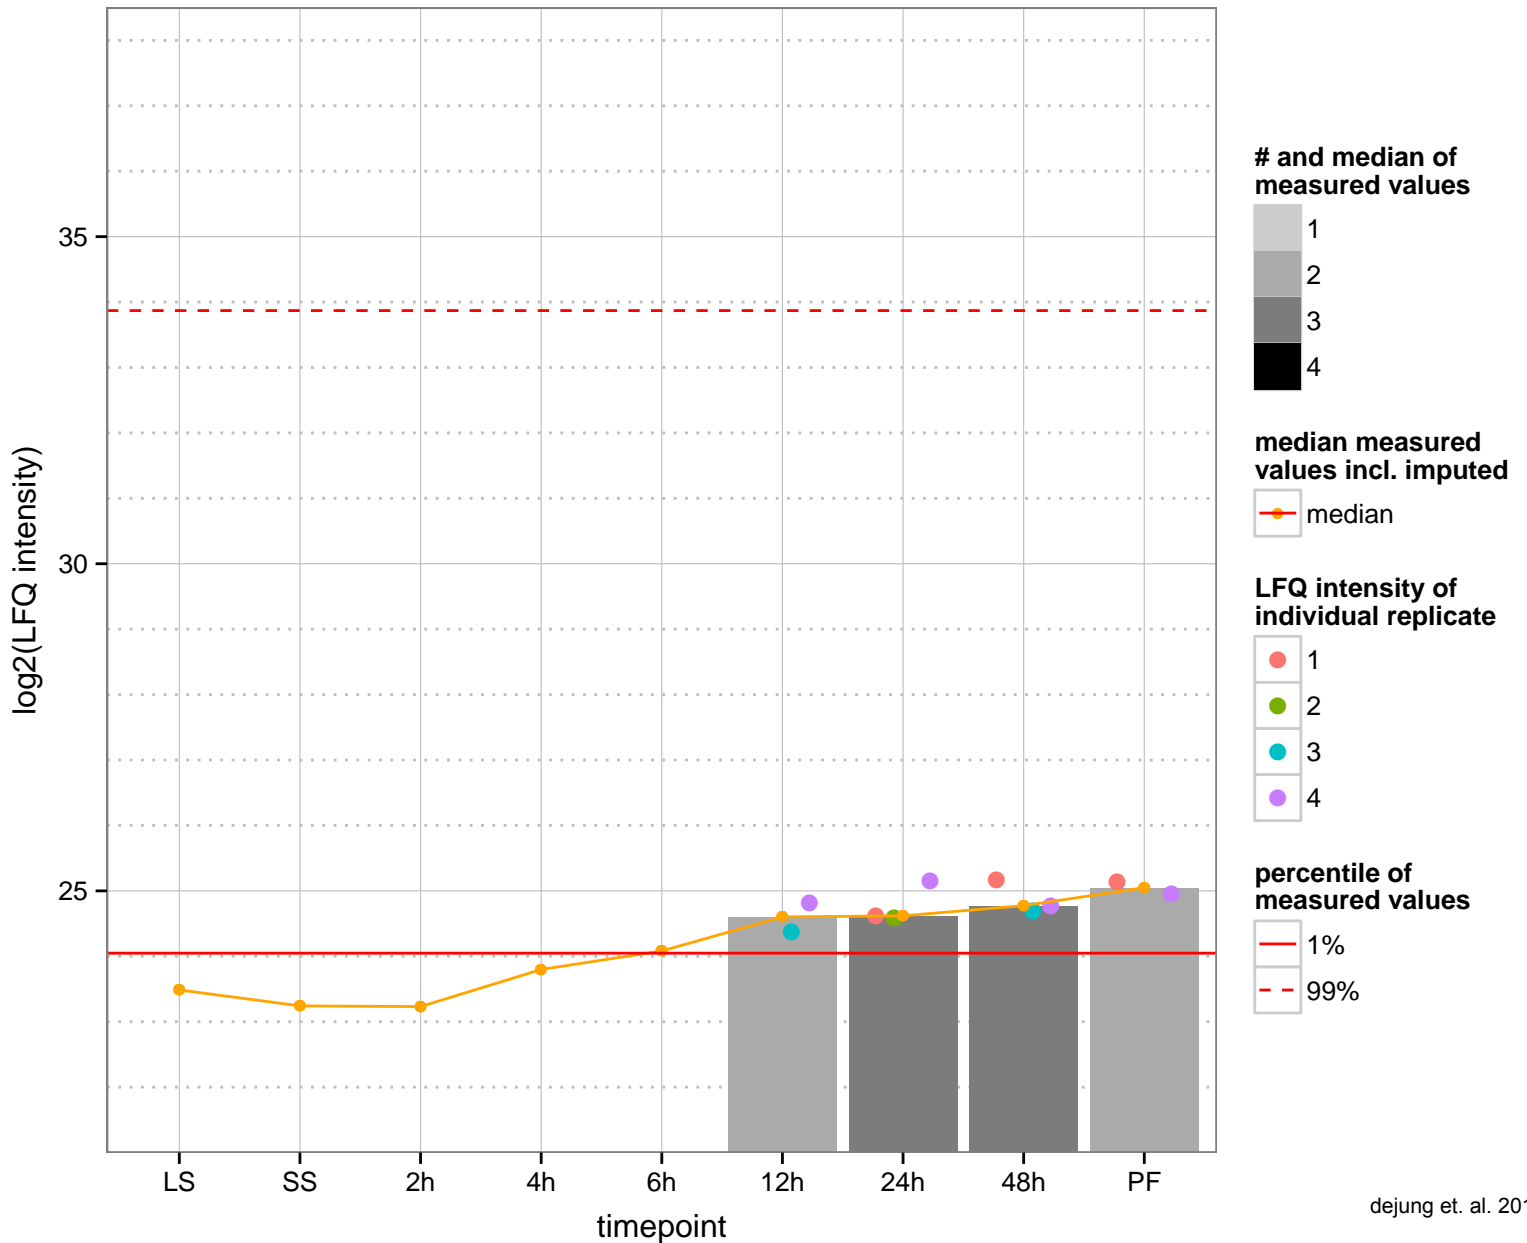

hypothetical protein, conserved  
 Tb927.8.3340  
 AGOF: null  
 AGOC: null  
 AGOP: null  
 PGO: null  
 PGO: null  
 PGO: null

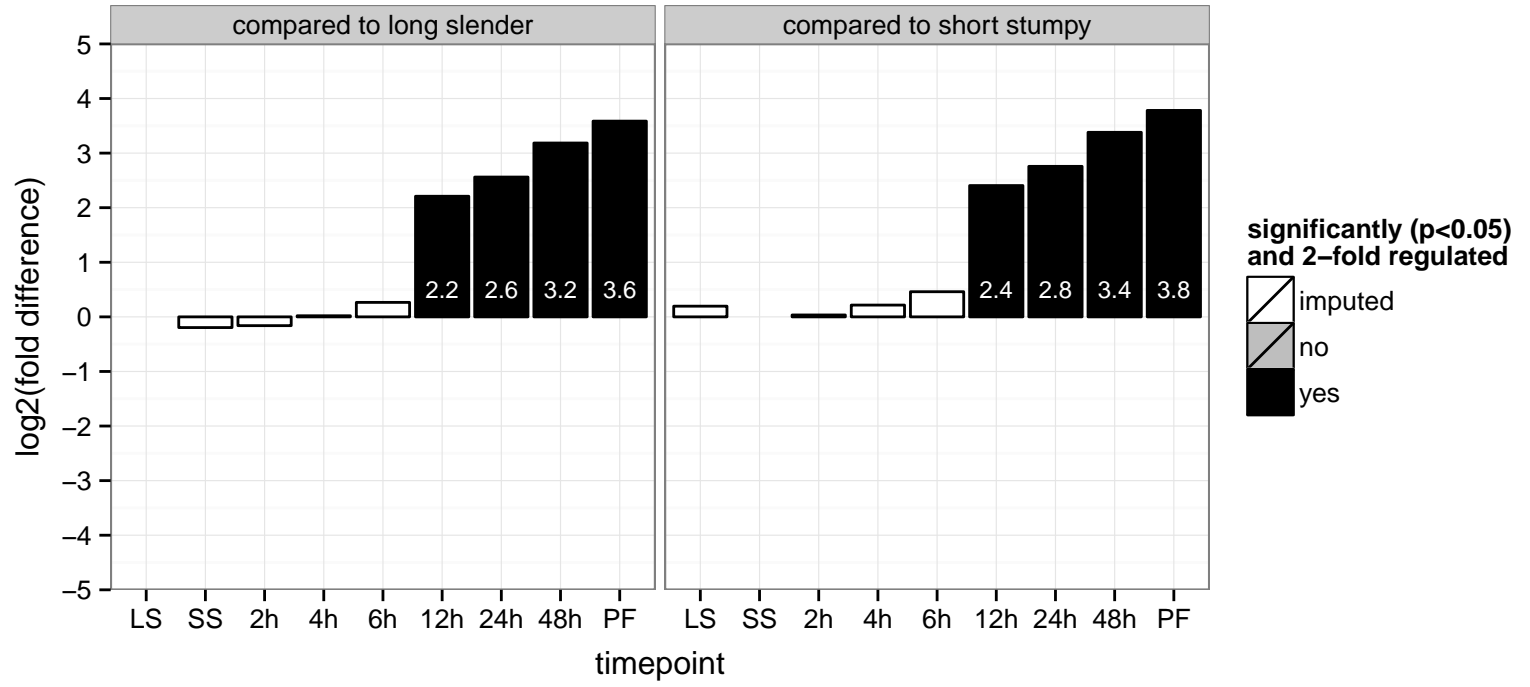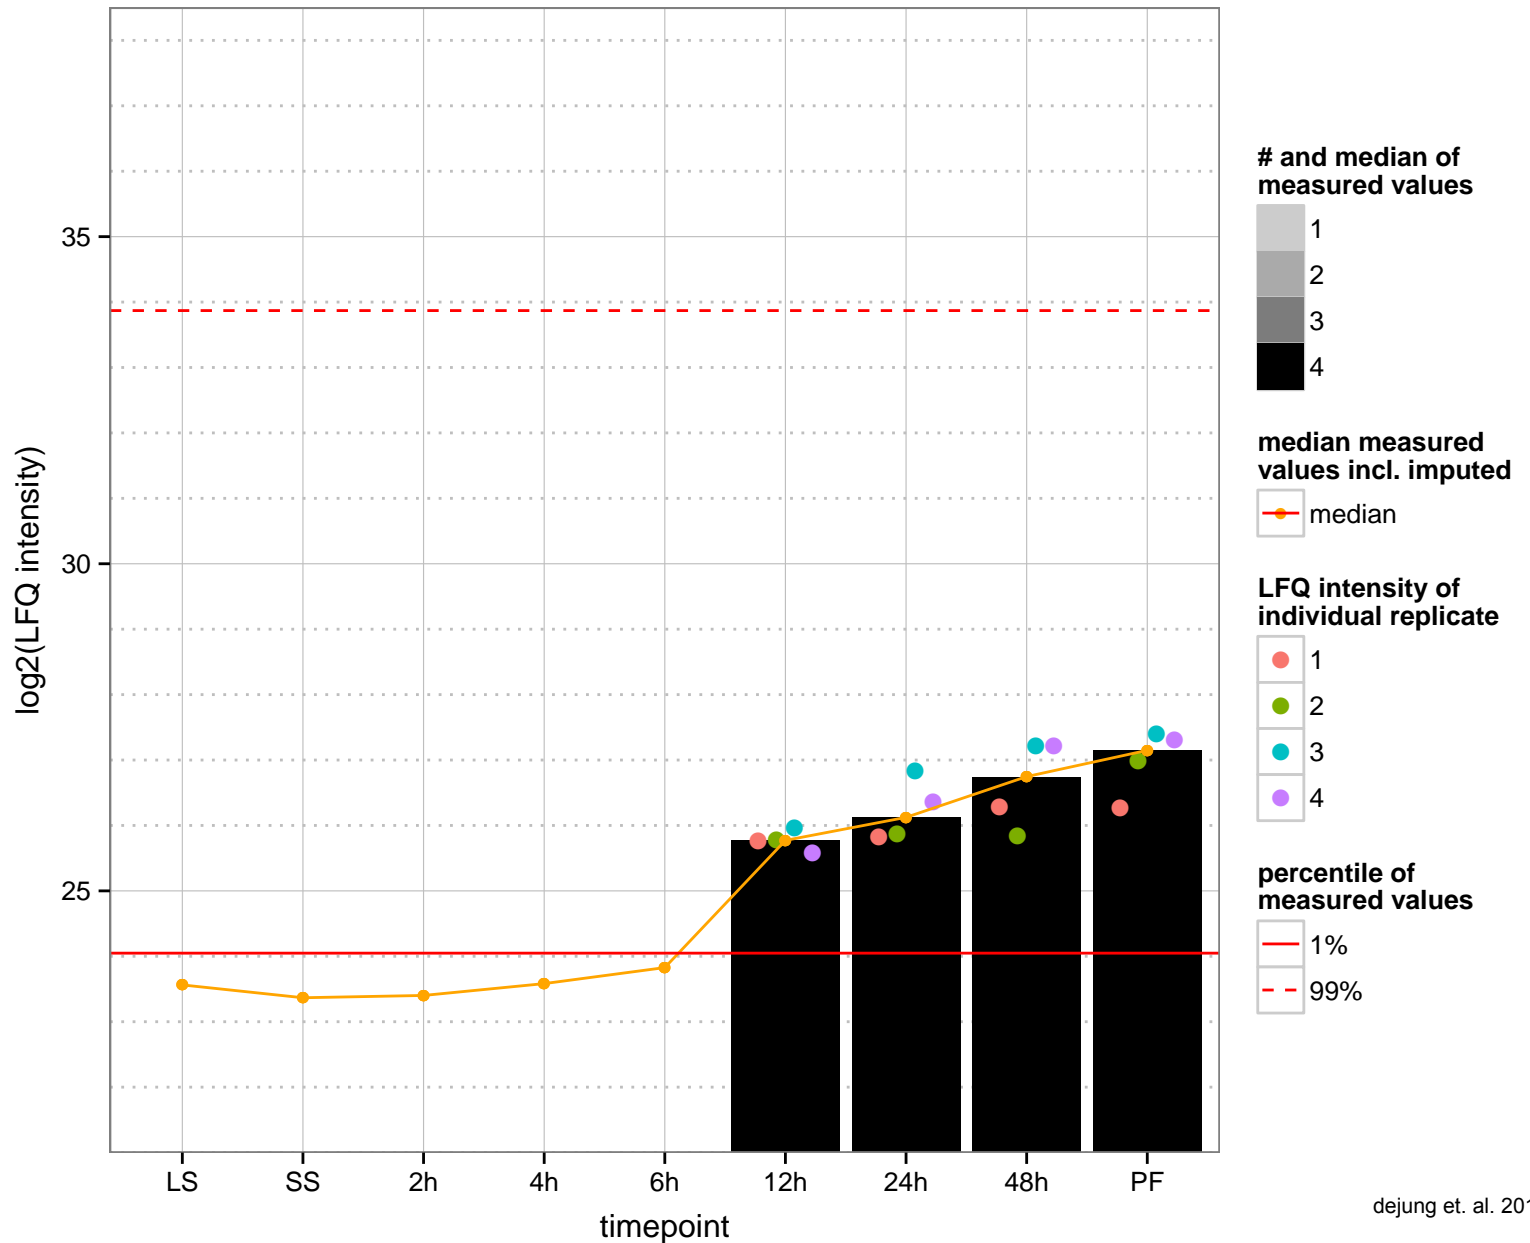

hypothetical protein, conserved  
 Tb927.8.5070  
 AGOF: null  
 AGOC: null  
 AGOP: null  
 PGO: null  
 PGOC: null  
 PGOP: null

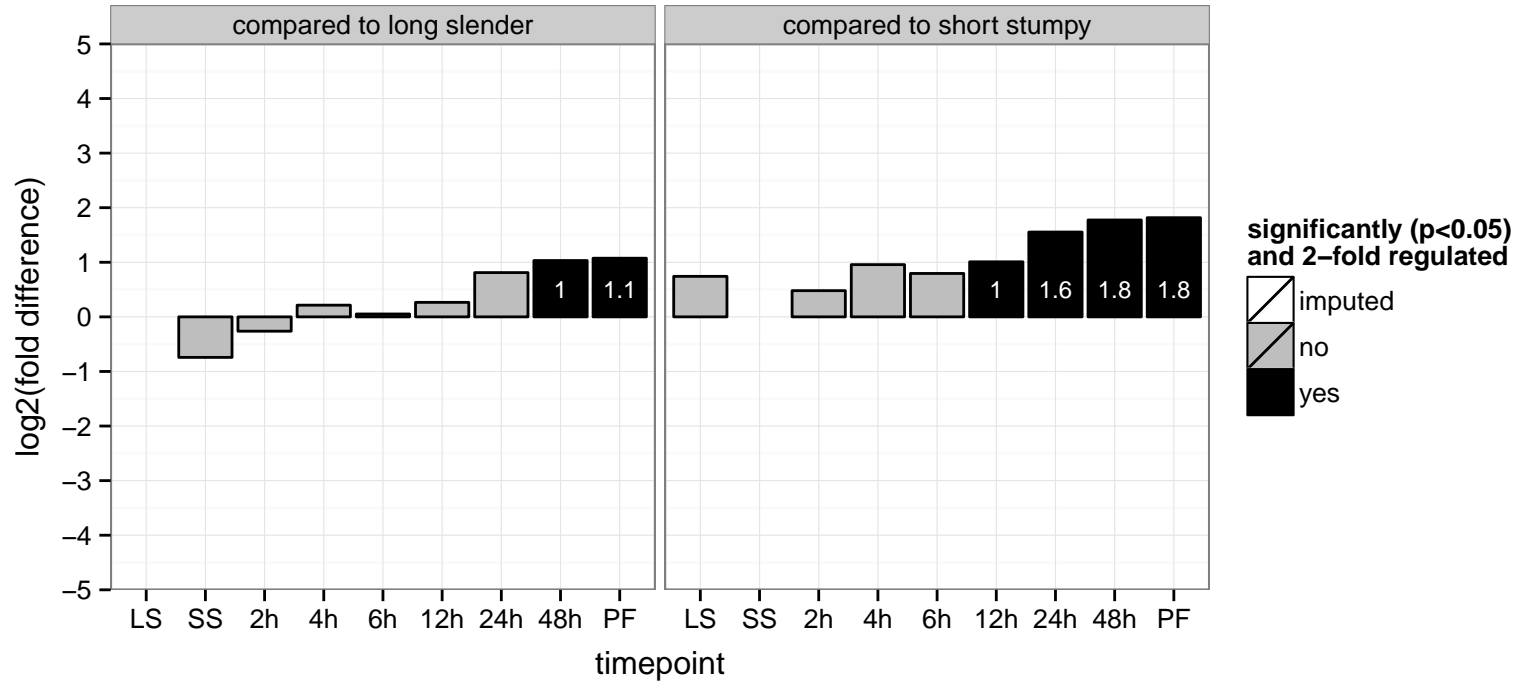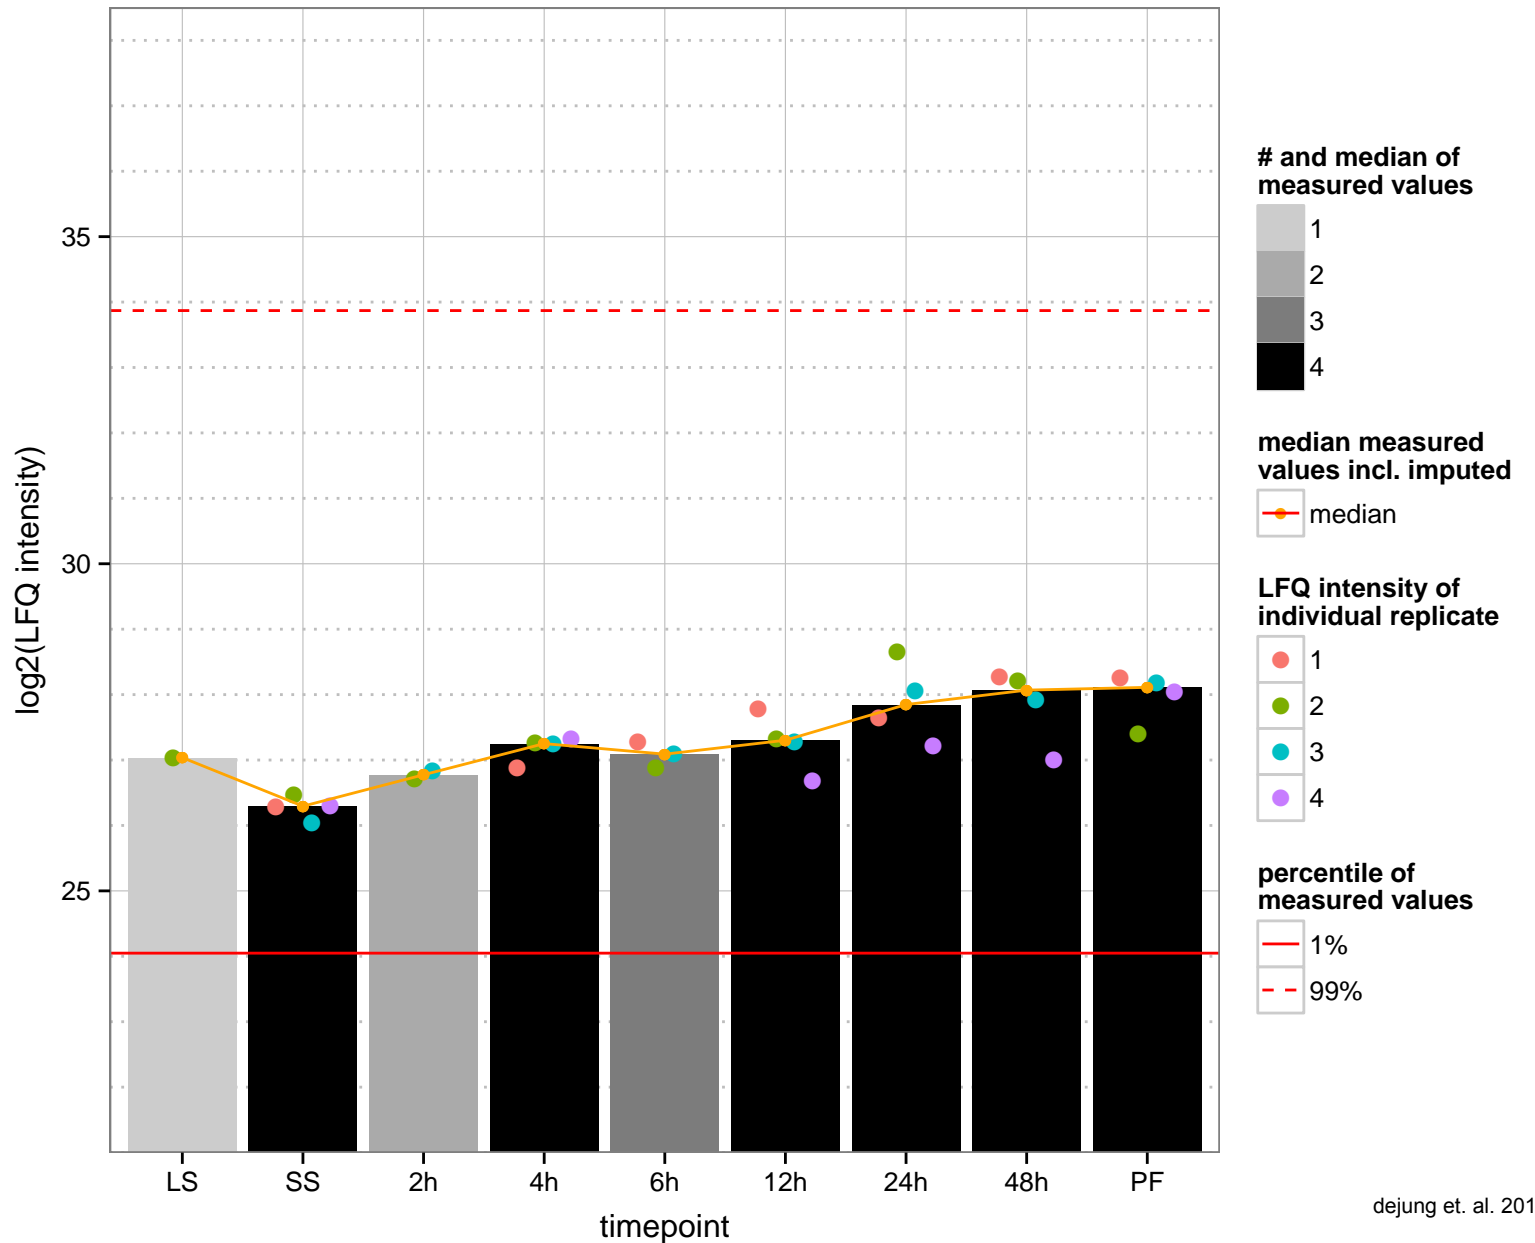

hypothetical protein, conserved  
 Tb927.8.5490  
 AGOF: null  
 AGOC: preribosome, small subunit precursor  
 AGOP: rRNA processing  
 PGO: null  
 PGOC: preribosome, small subunit precursor  
 PGOP: rRNA processing

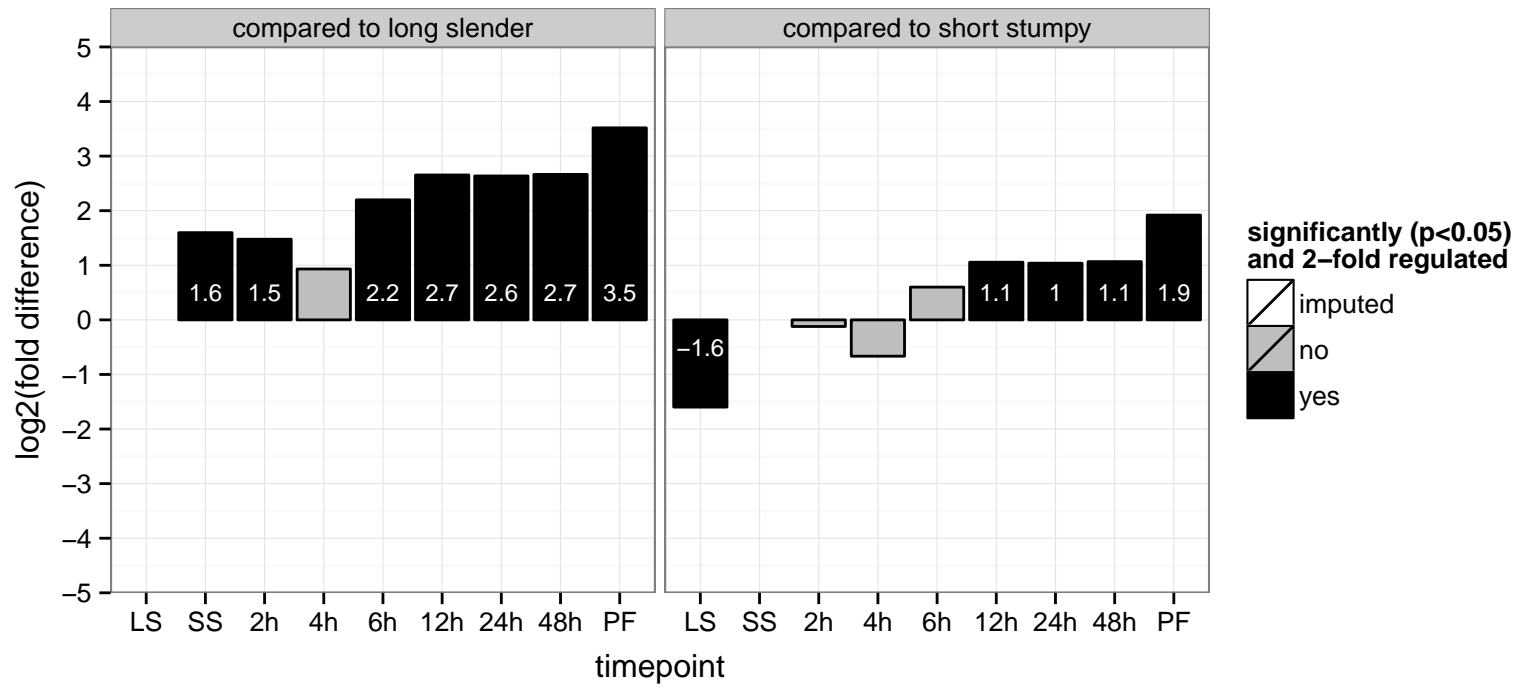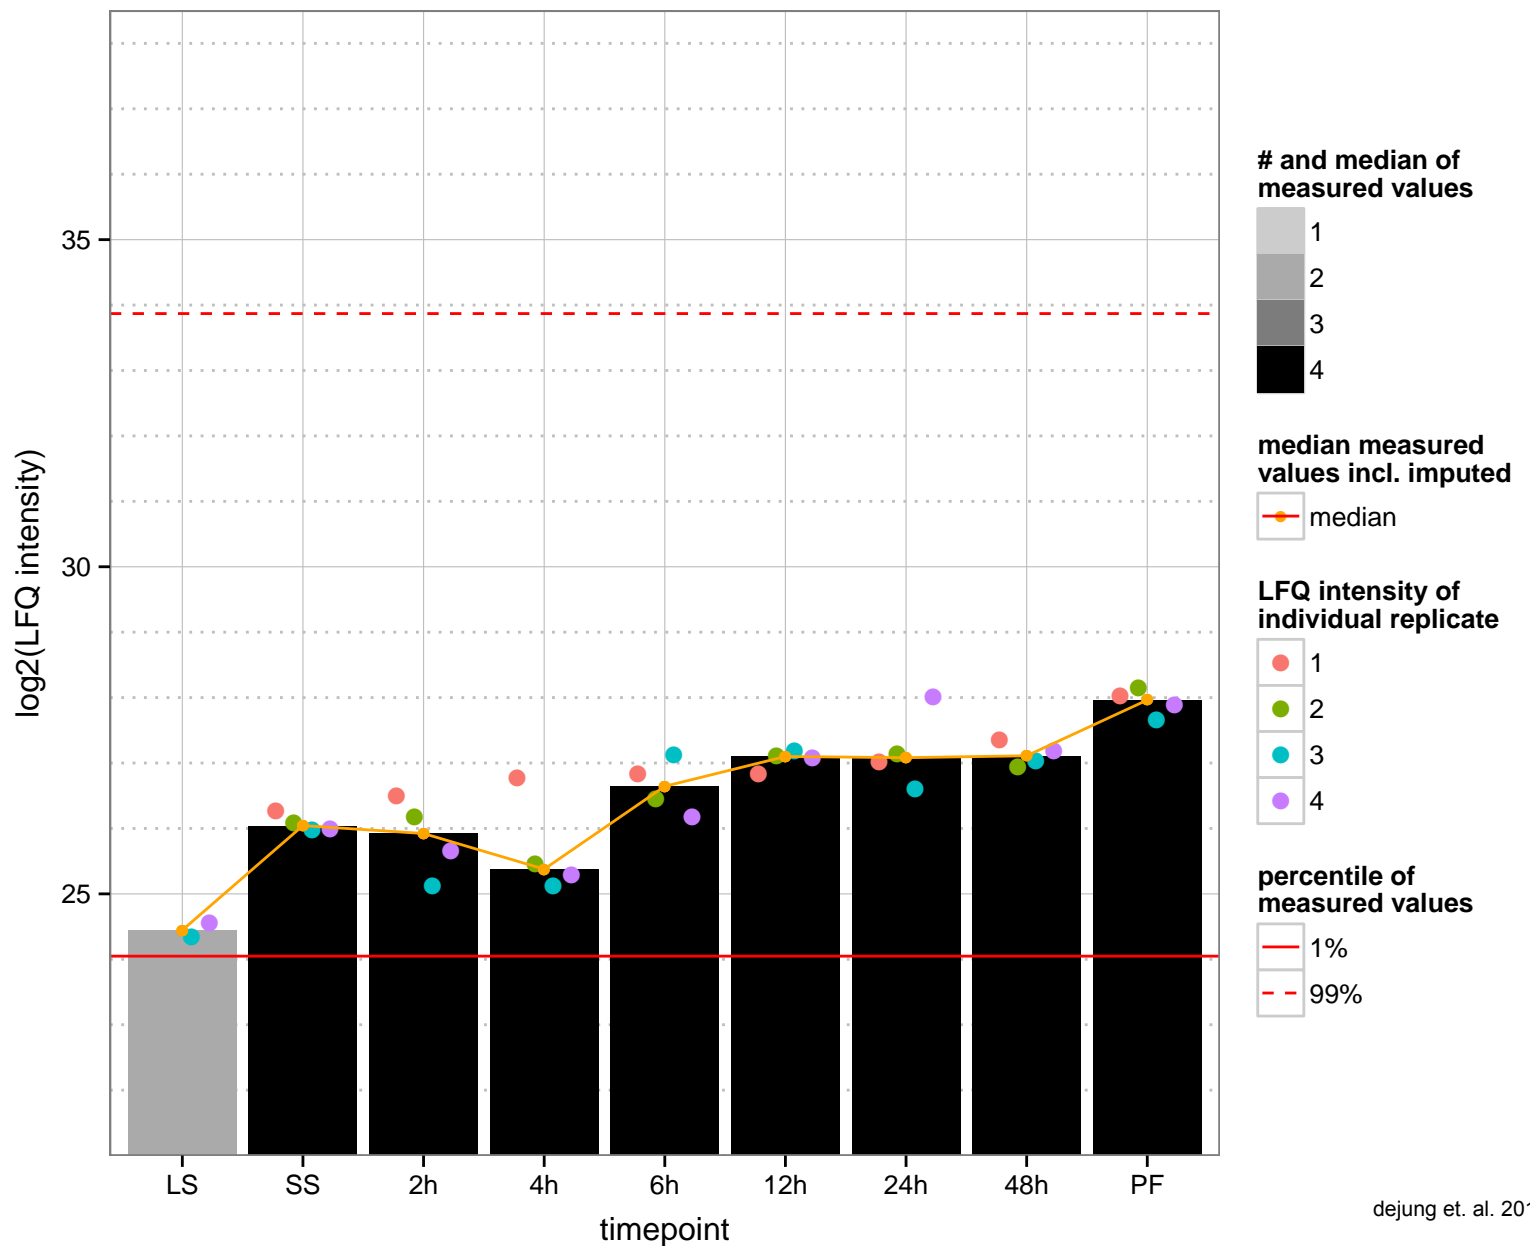



eukaryotic translation initiation factor 1A, putative  
 Tb927.8.5880  
 AGOF: RNA binding, translation initiation factor activity  
 AGOC: cytoplasm  
 AGOP: translational initiation  
 PGOF: RNA binding, translation initiation factor activity  
 PGO: null  
 PGOP: translational initiation

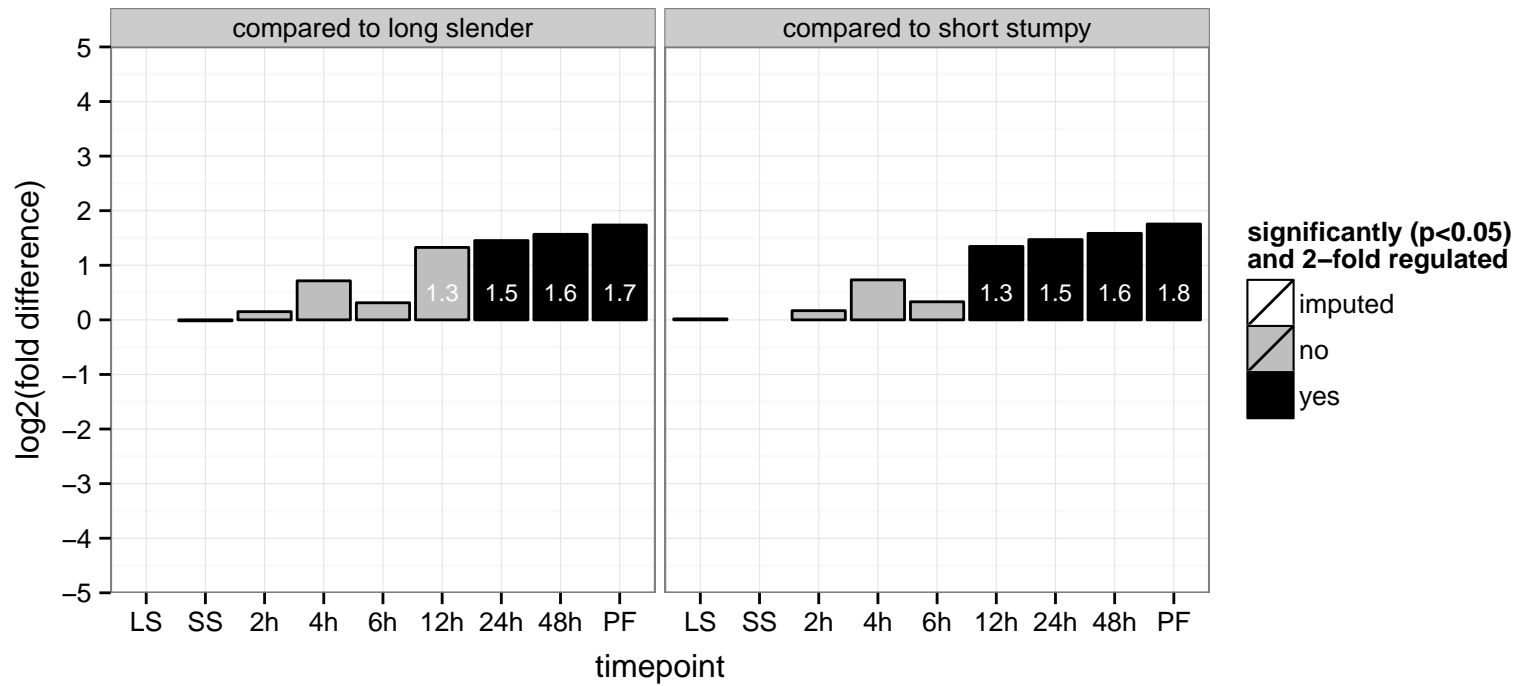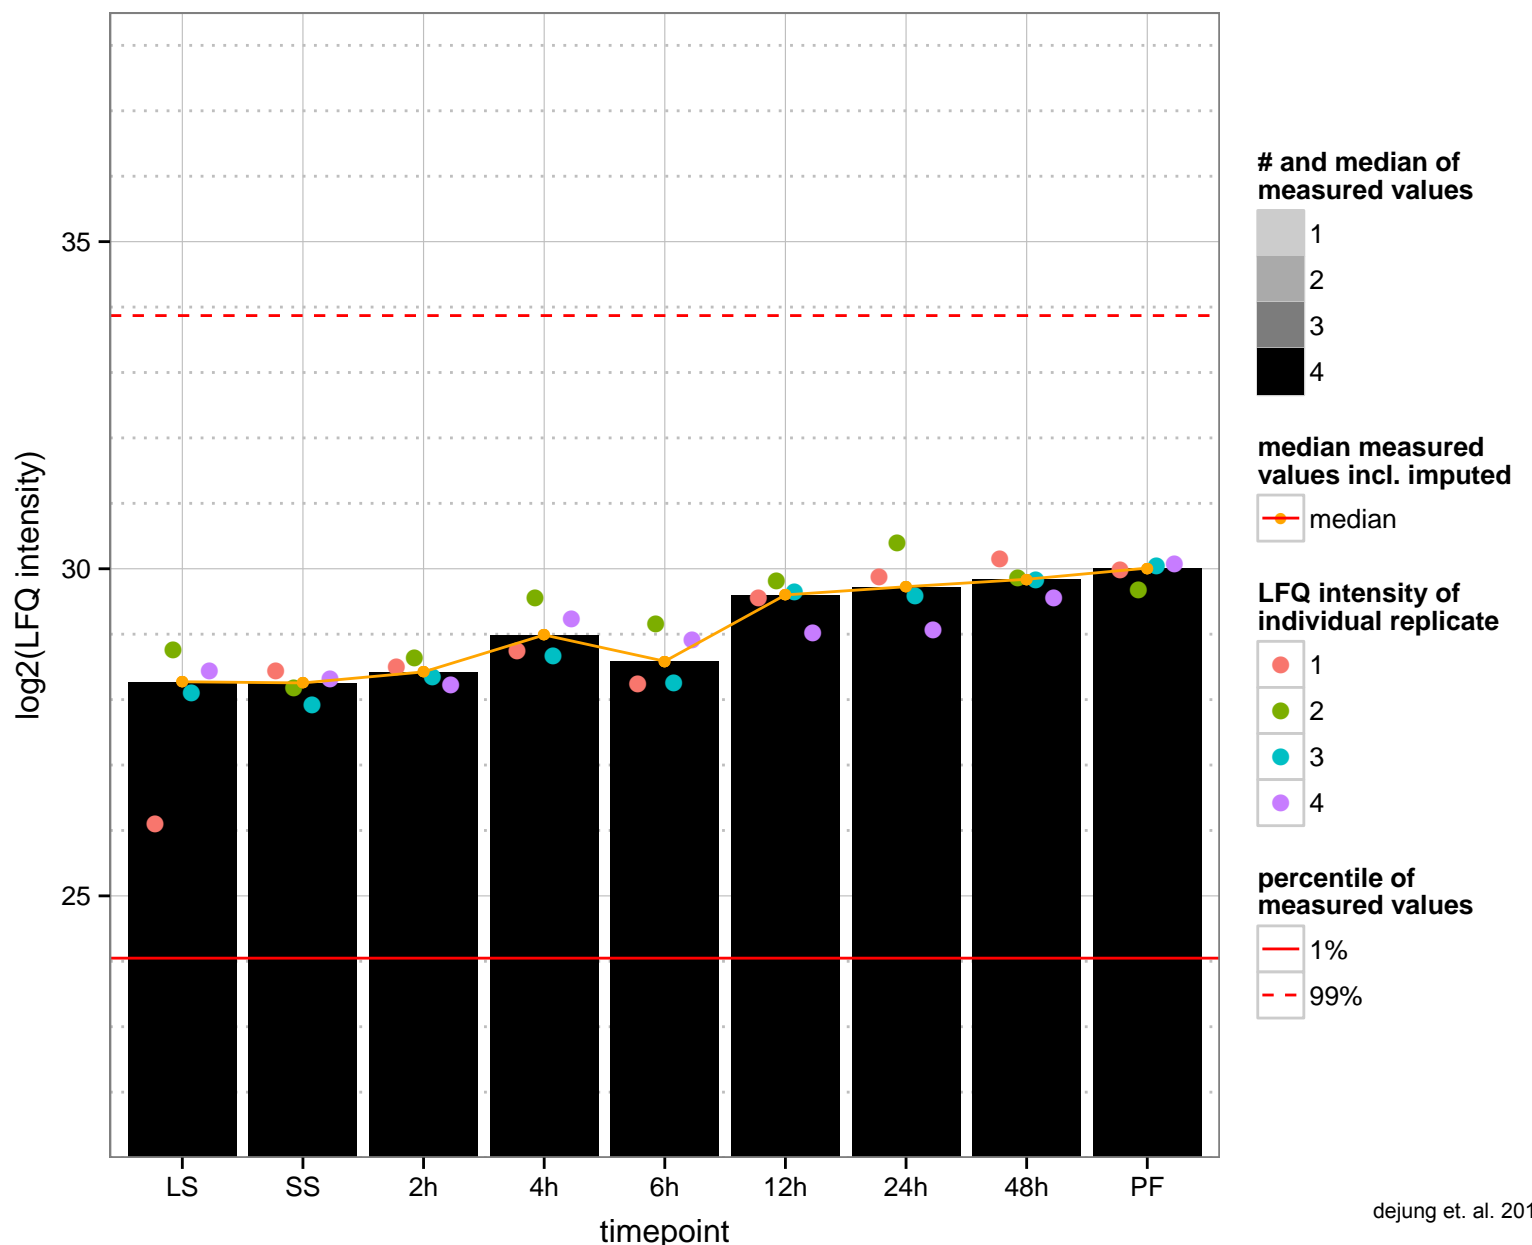

hypothetical protein, conserved

Tb927.8.6080

AGOF: glycerophosphodiester phosphodiesterase activity

AGOC: mitochondrion

AGOP: glycerol metabolic process, lipid metabolic process, phospholipid catabolic process

PGOF: glycerophosphodiester phosphodiesterase activity, phosphoric diester hydrolase activity

PGOC: null

PGOP: glycerol metabolic process, lipid metabolic process

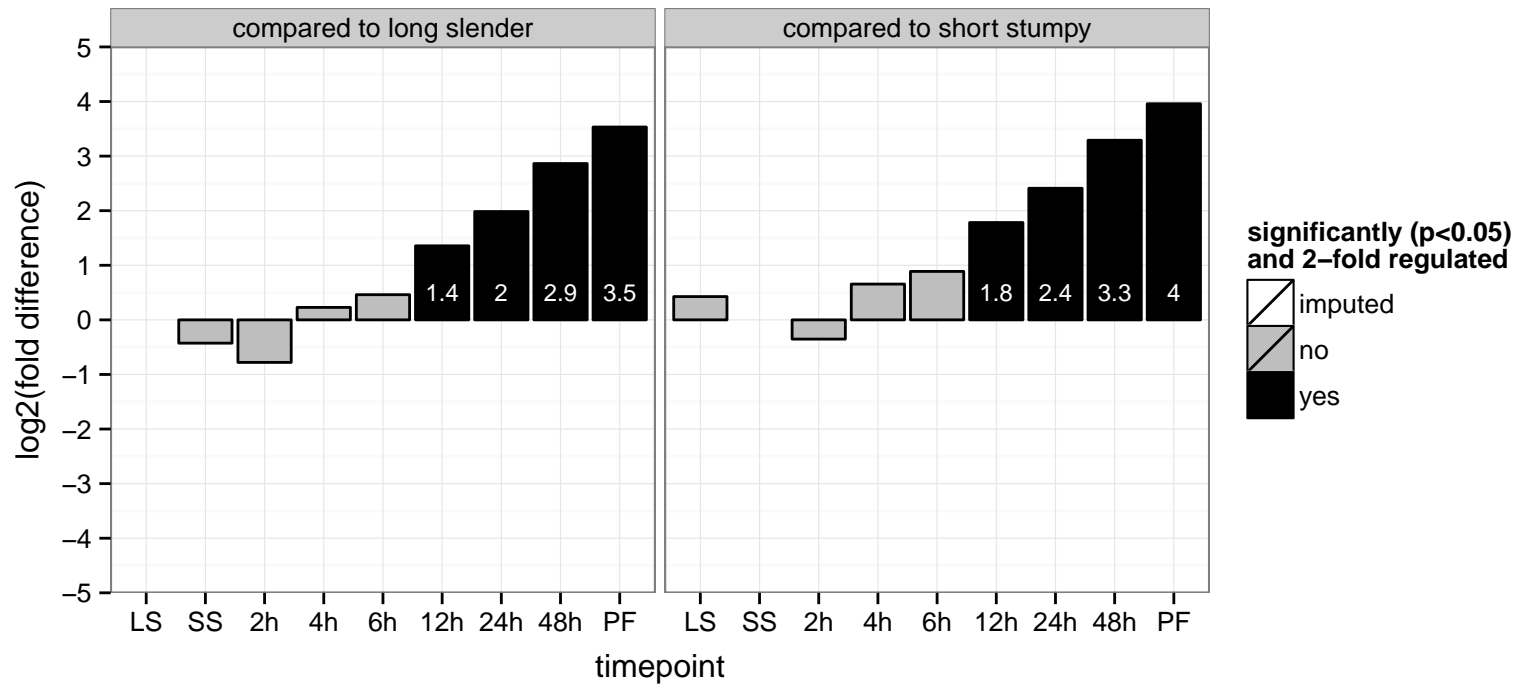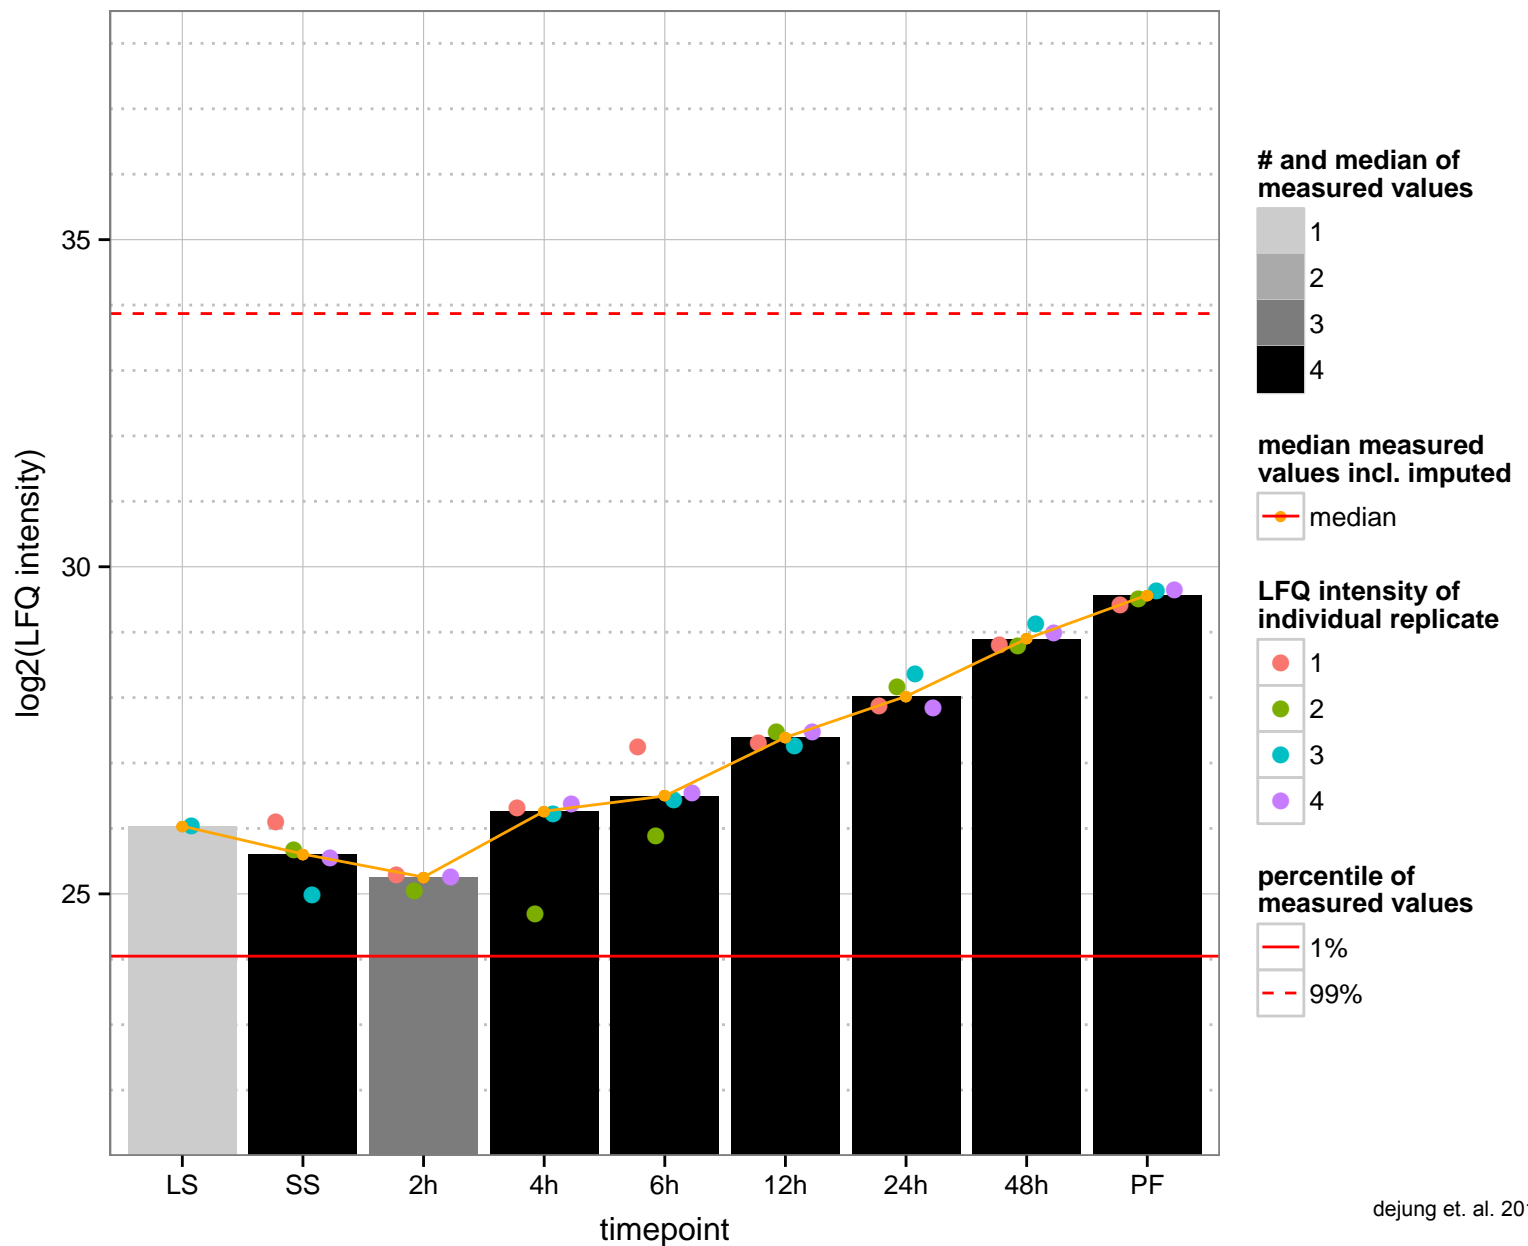

ubiquitin-conjugating enzyme E2, putative, ubiquitin-protein ligase, ubiquitin carrier protein  
 Tb927.8.6090  
 AGOF: ATP binding, ubiquitin-protein ligase activity  
 AGOC: null  
 AGOP: cellular protein modification process, post-translational protein modification, protein ubiquitination, regulation of protein  
 PGO: acid-amino acid ligase activity  
 PGO: null  
 PGOP: null

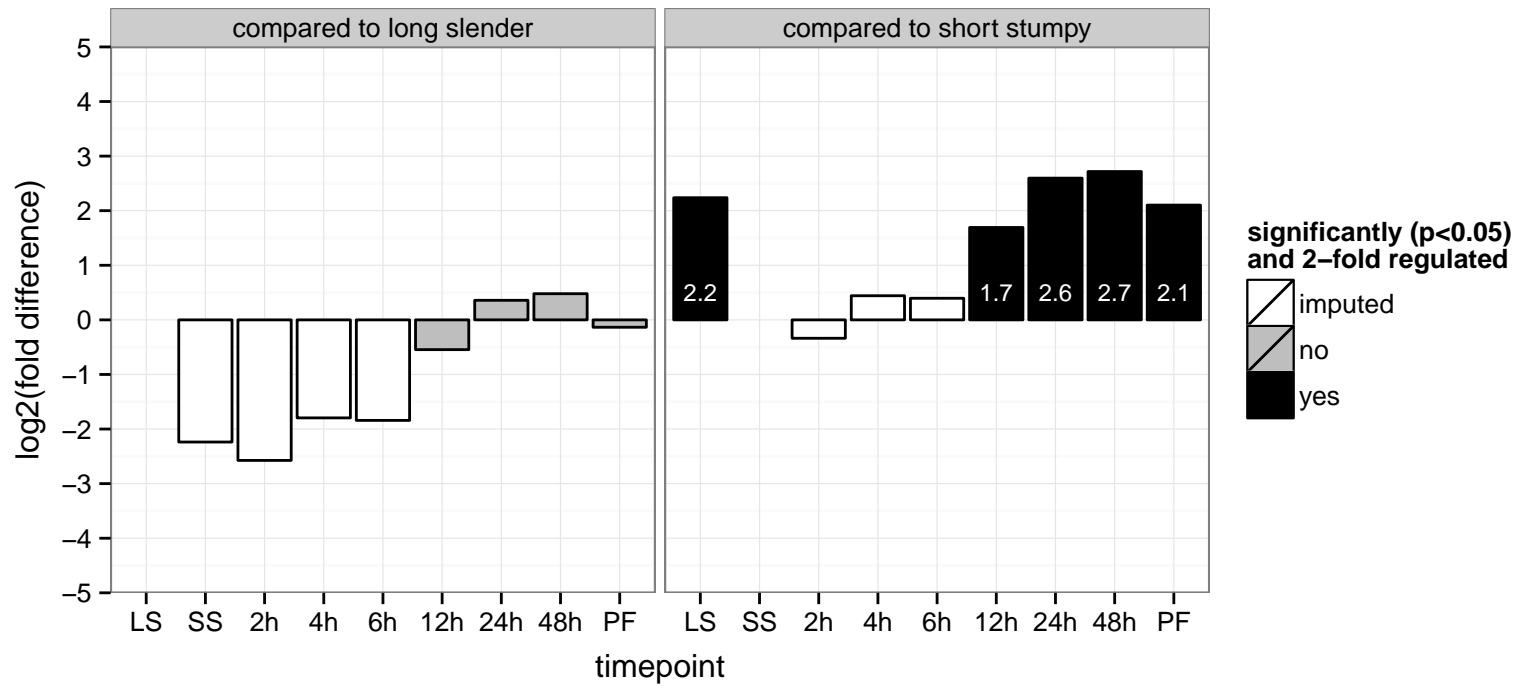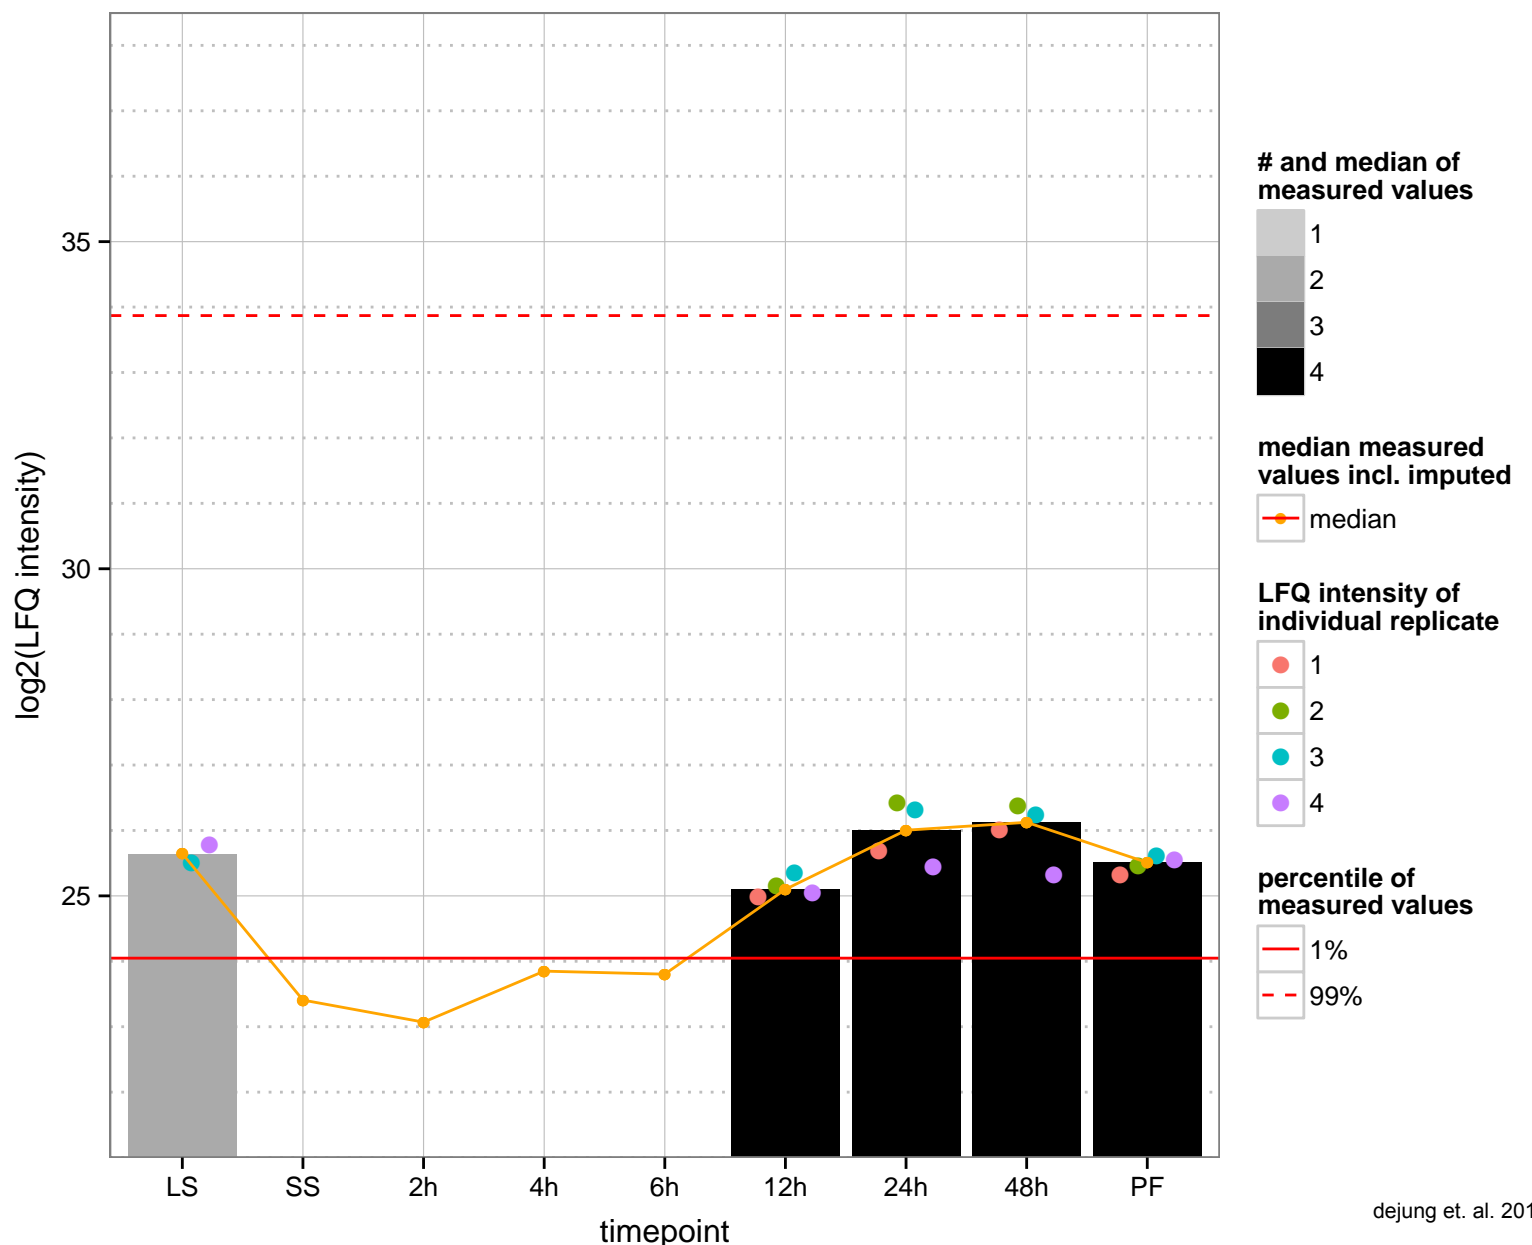

transketolase, putative (TK)  
 Tb927.8.6170  
 AGOF: transketolase activity  
 AGOC: cytoplasm, glycosome  
 AGOP: pentose-phosphate shunt  
 PGO: catalytic activity, transketolase activity  
 PGOC: null  
 PGOP: metabolic process

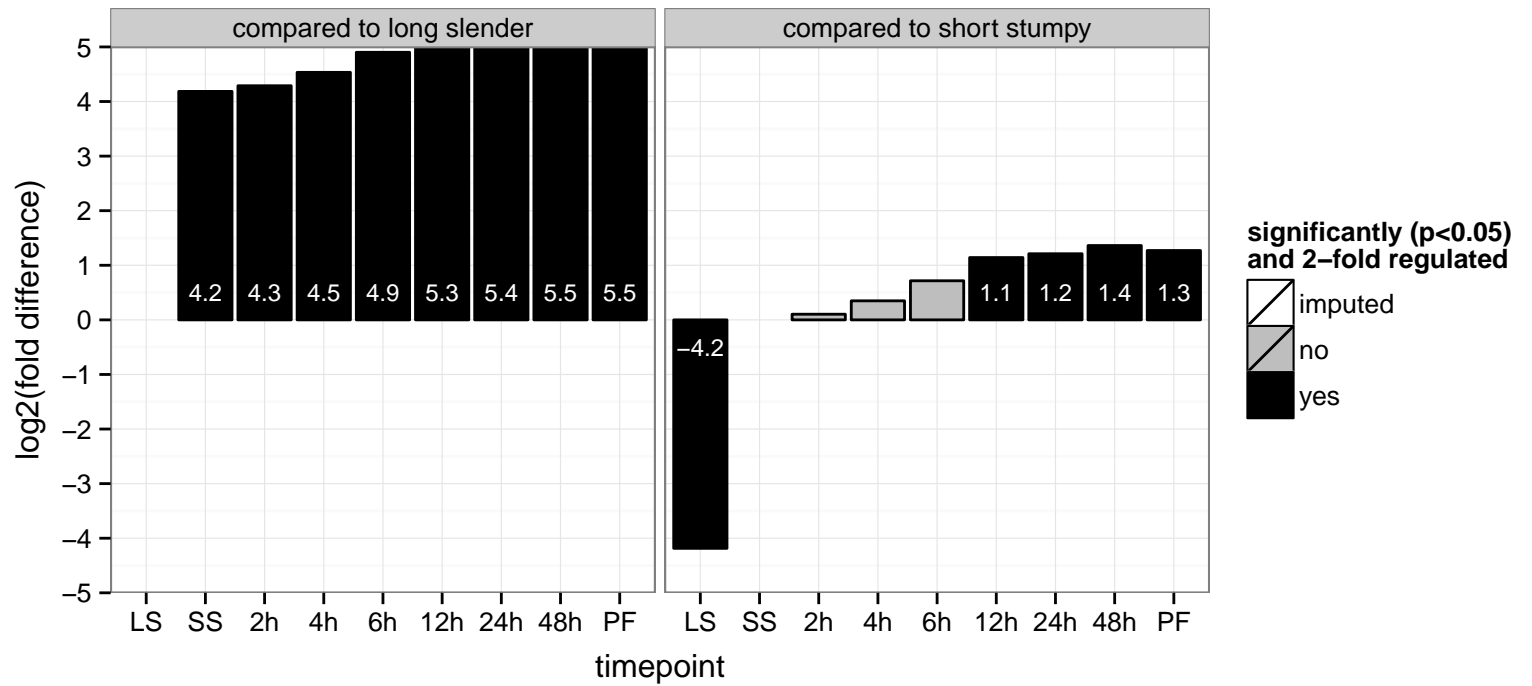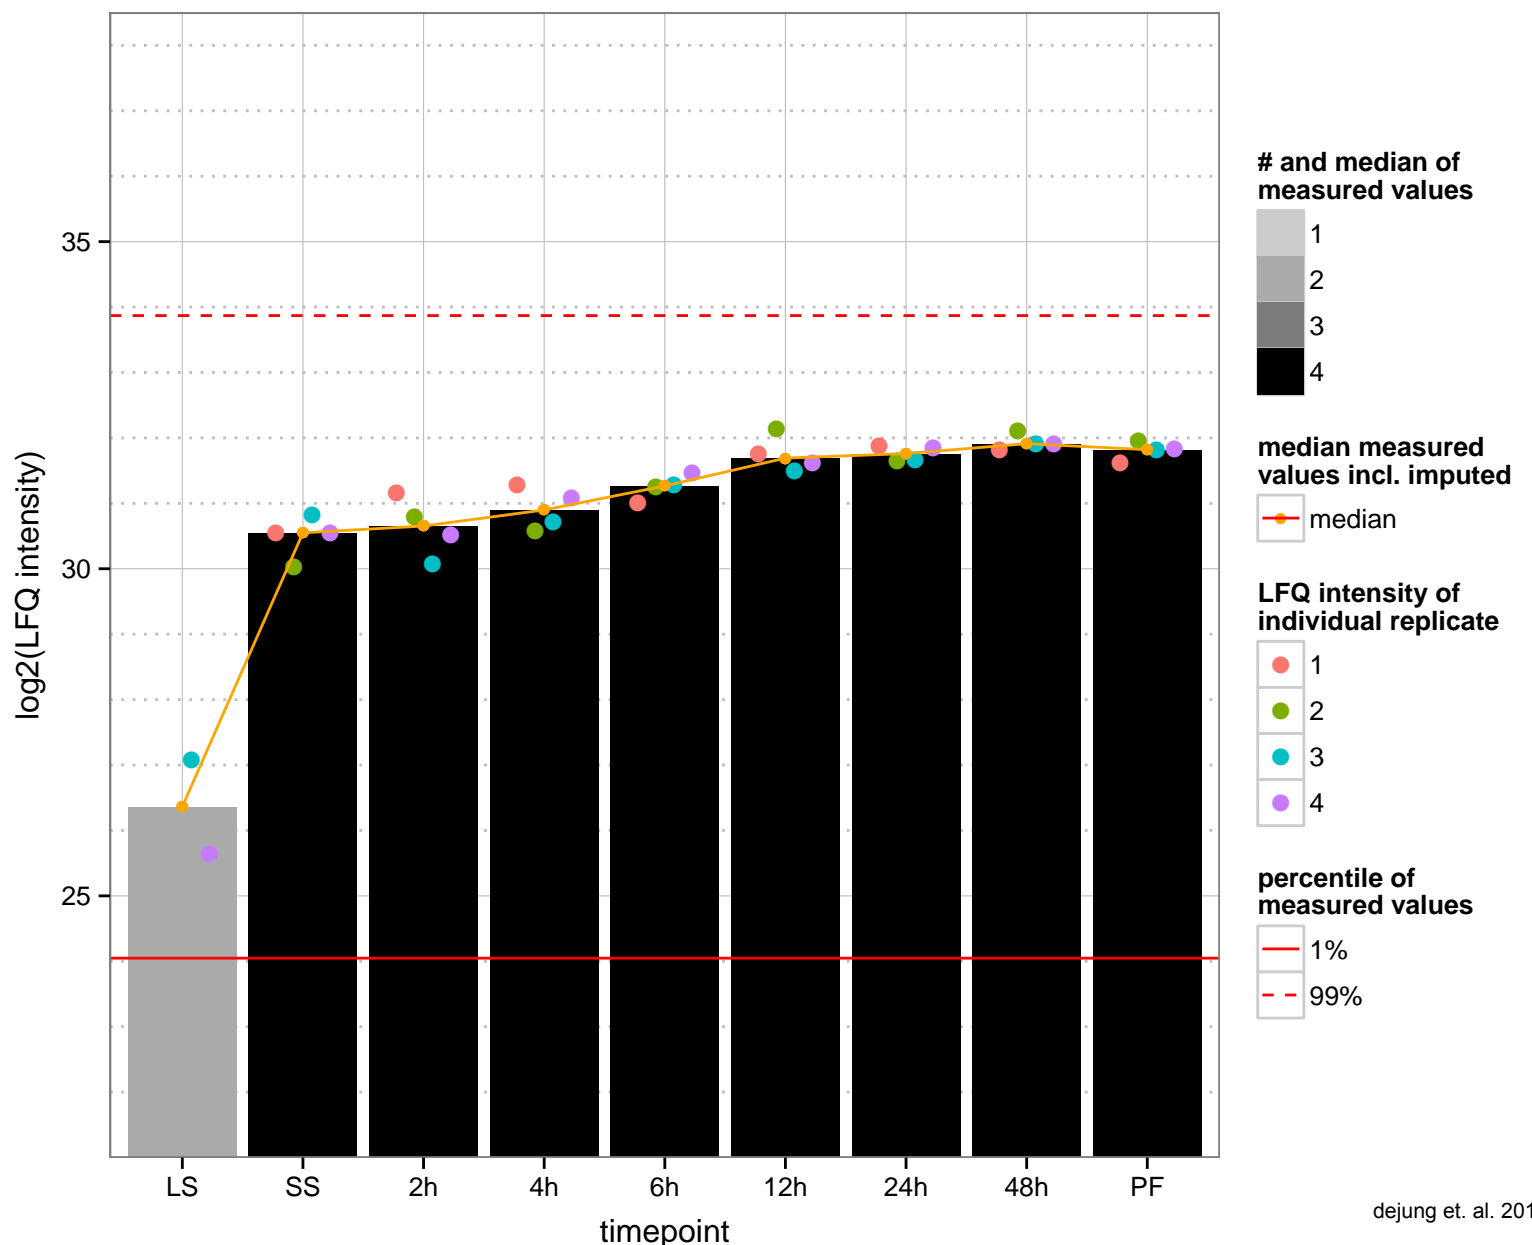

short-chain dehydrogenase, putative

Tb927.8.6410

AGOF: oxidoreductase activity

AGOC: integral to membrane, mitochondrial inner membrane, mitochondrion

AGOP: metabolic process

PGOF: oxidoreductase activity

PGOC: null

PGOP: metabolic process

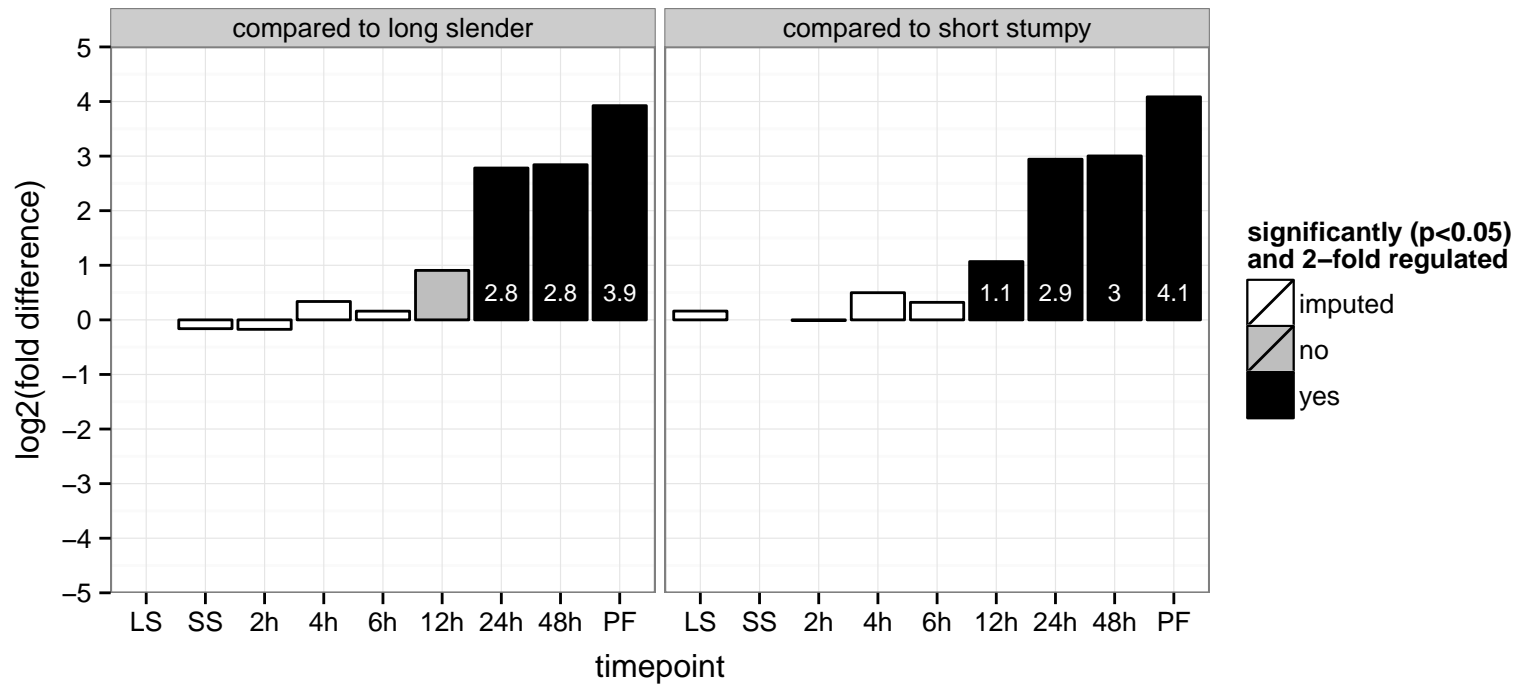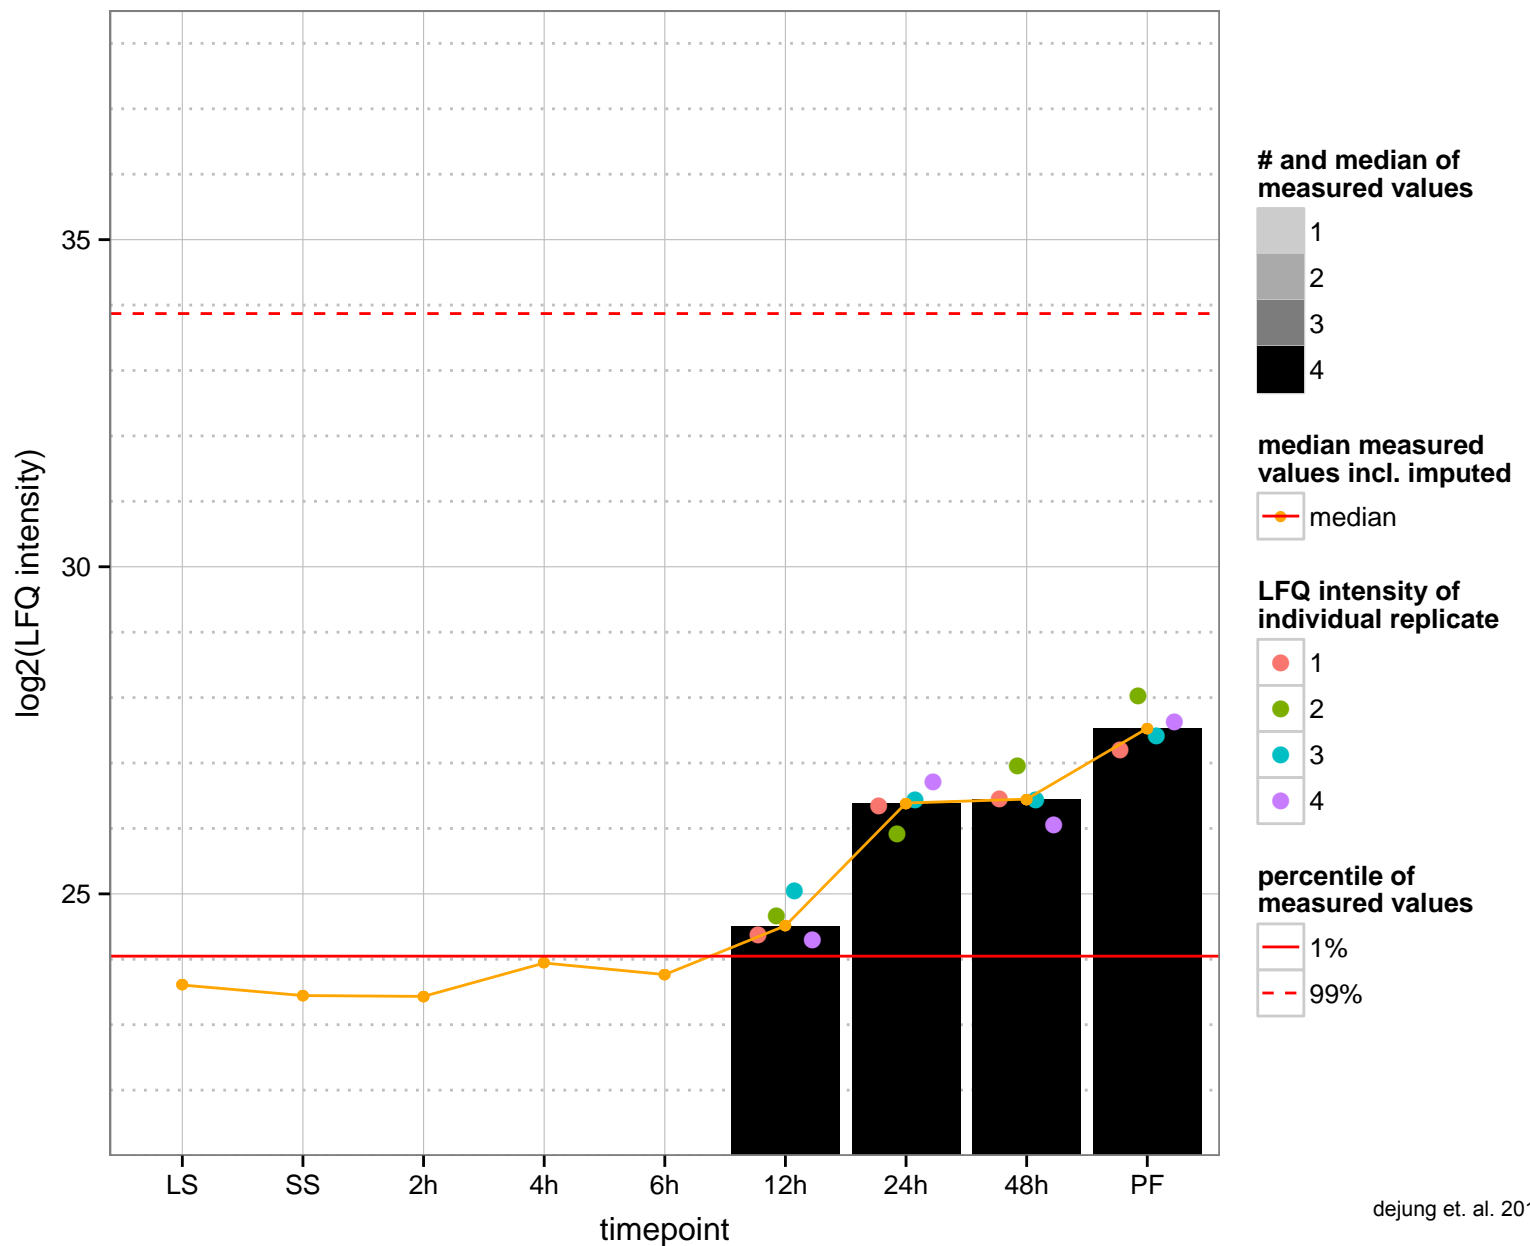

translationally controlled tumor protein (TCTP), putative  
 Tb927.8.6750  
 AGOF: null  
 AGOC: cytoplasm, mitochondrion  
 AGOP: translation  
 PGO: null  
 PGOC: null  
 PGOP: null

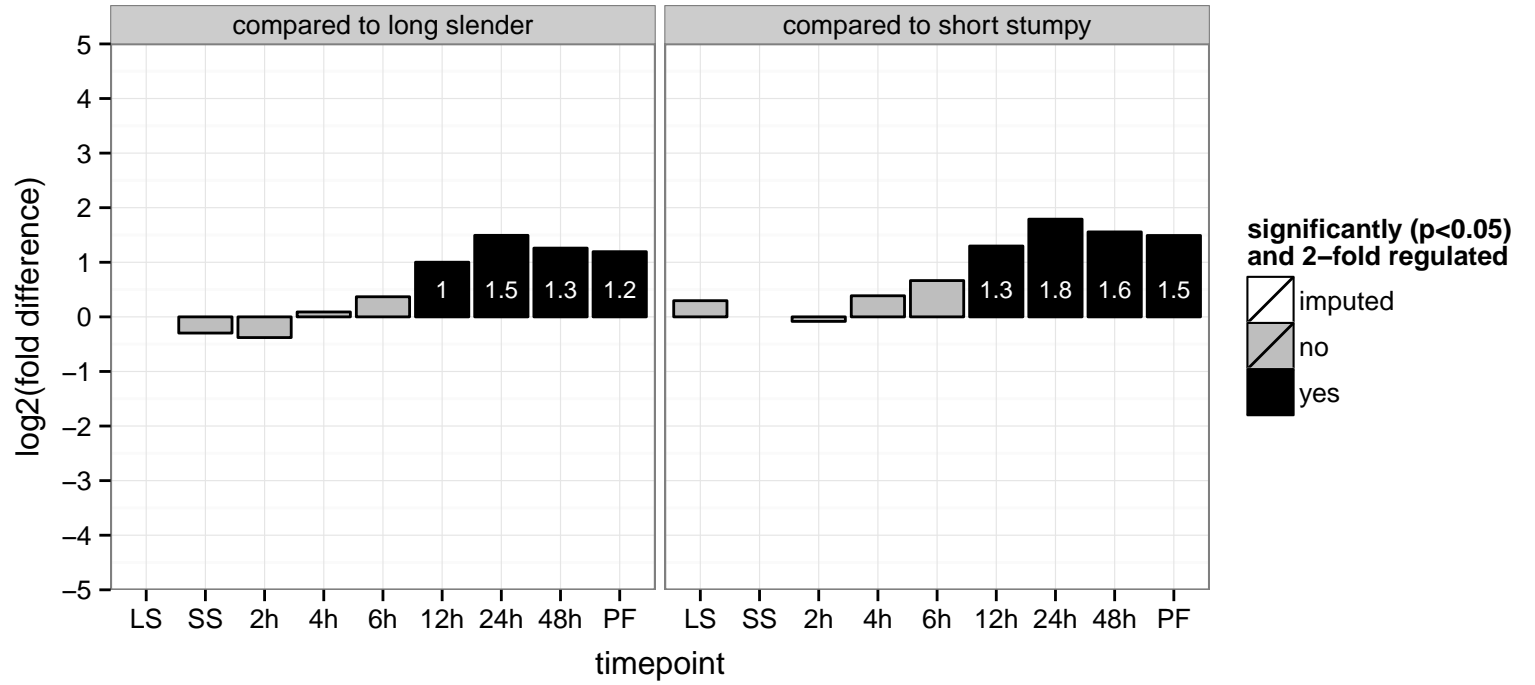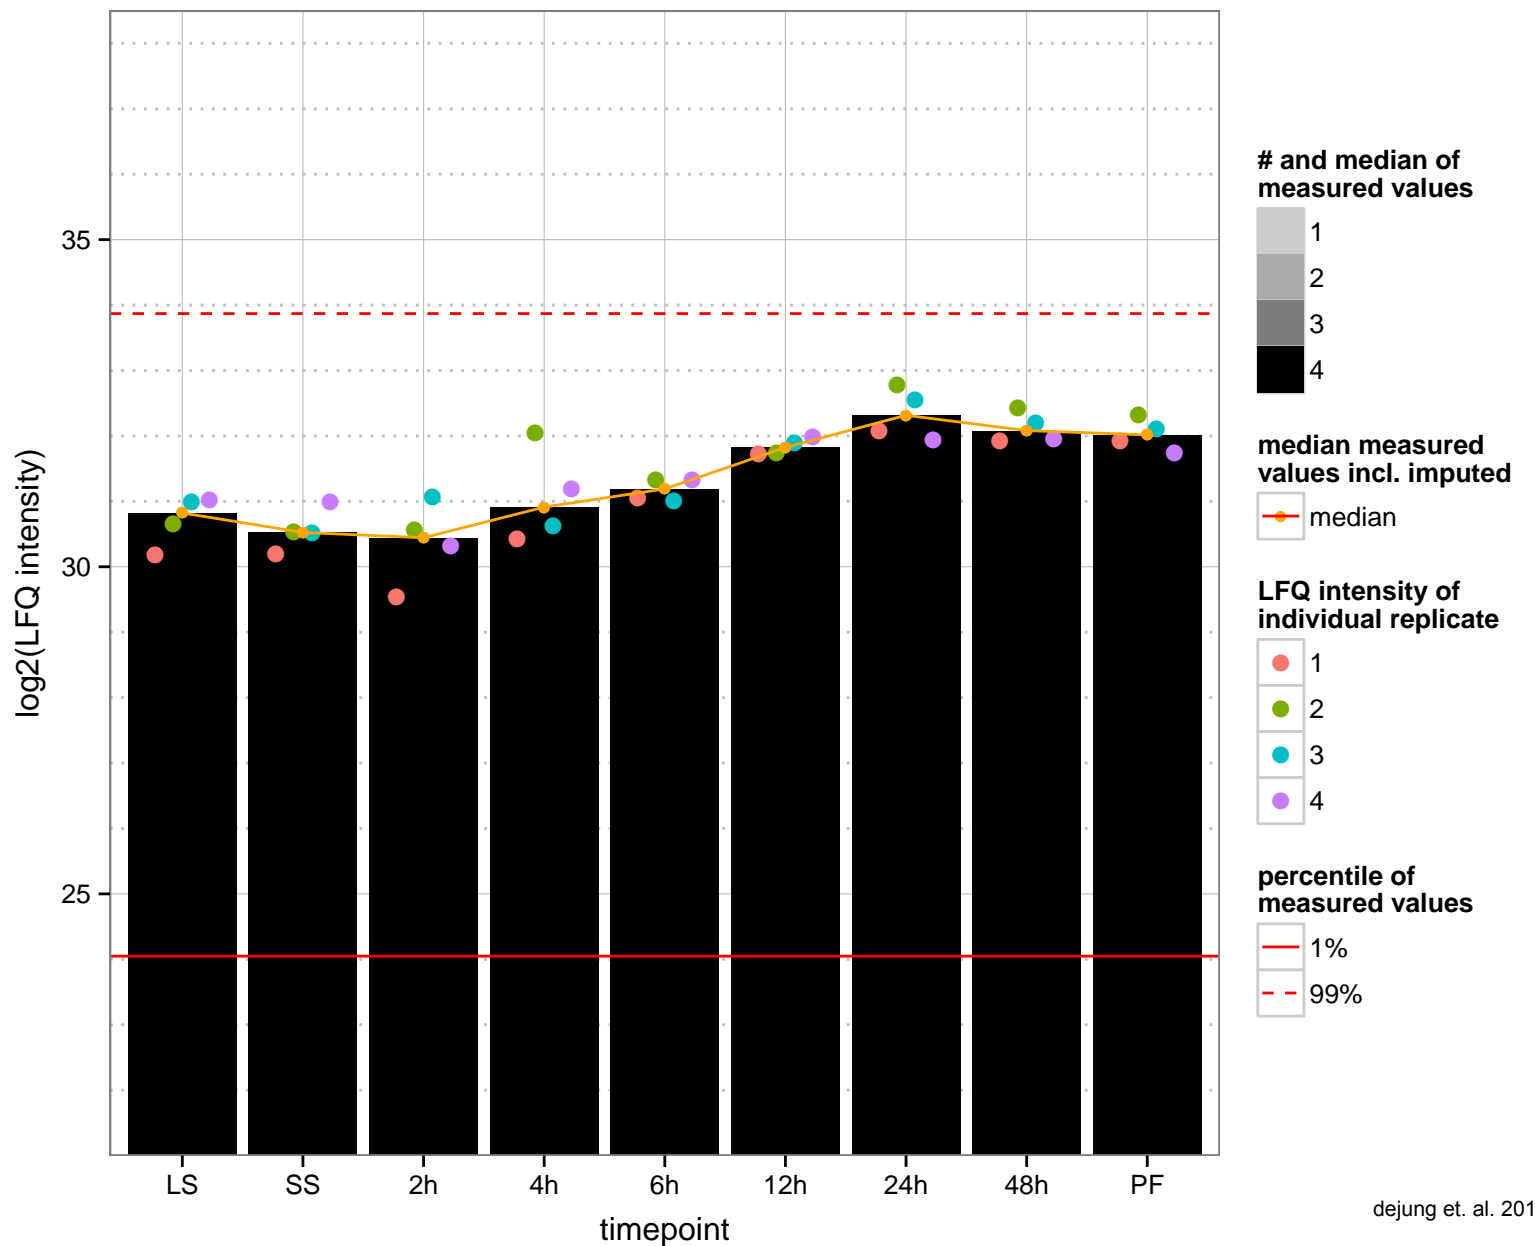

hypothetical protein, conserved  
 Tb927.8.6890  
 AGOF: null  
 AGOC: mitochondrion  
 AGOP: null  
 PGO: null  
 PGOC: null  
 PGOP: null

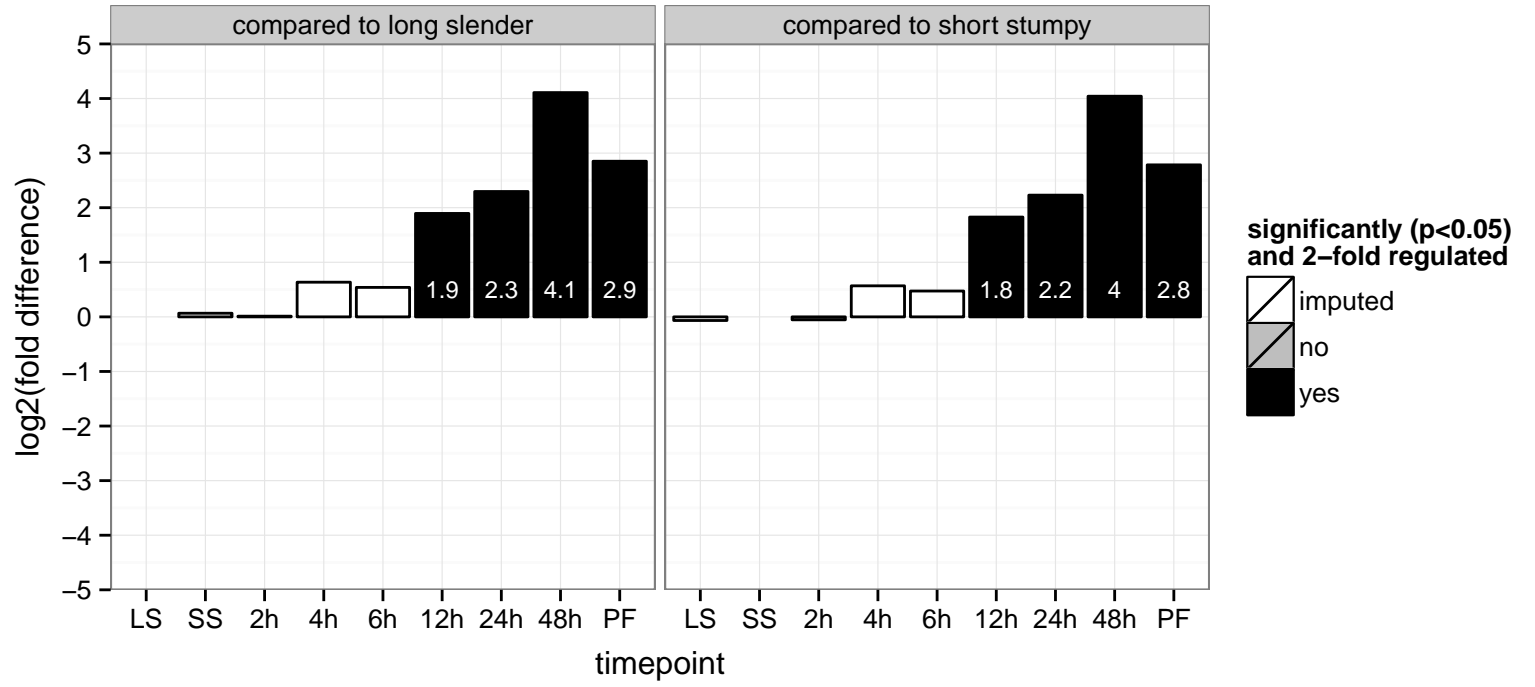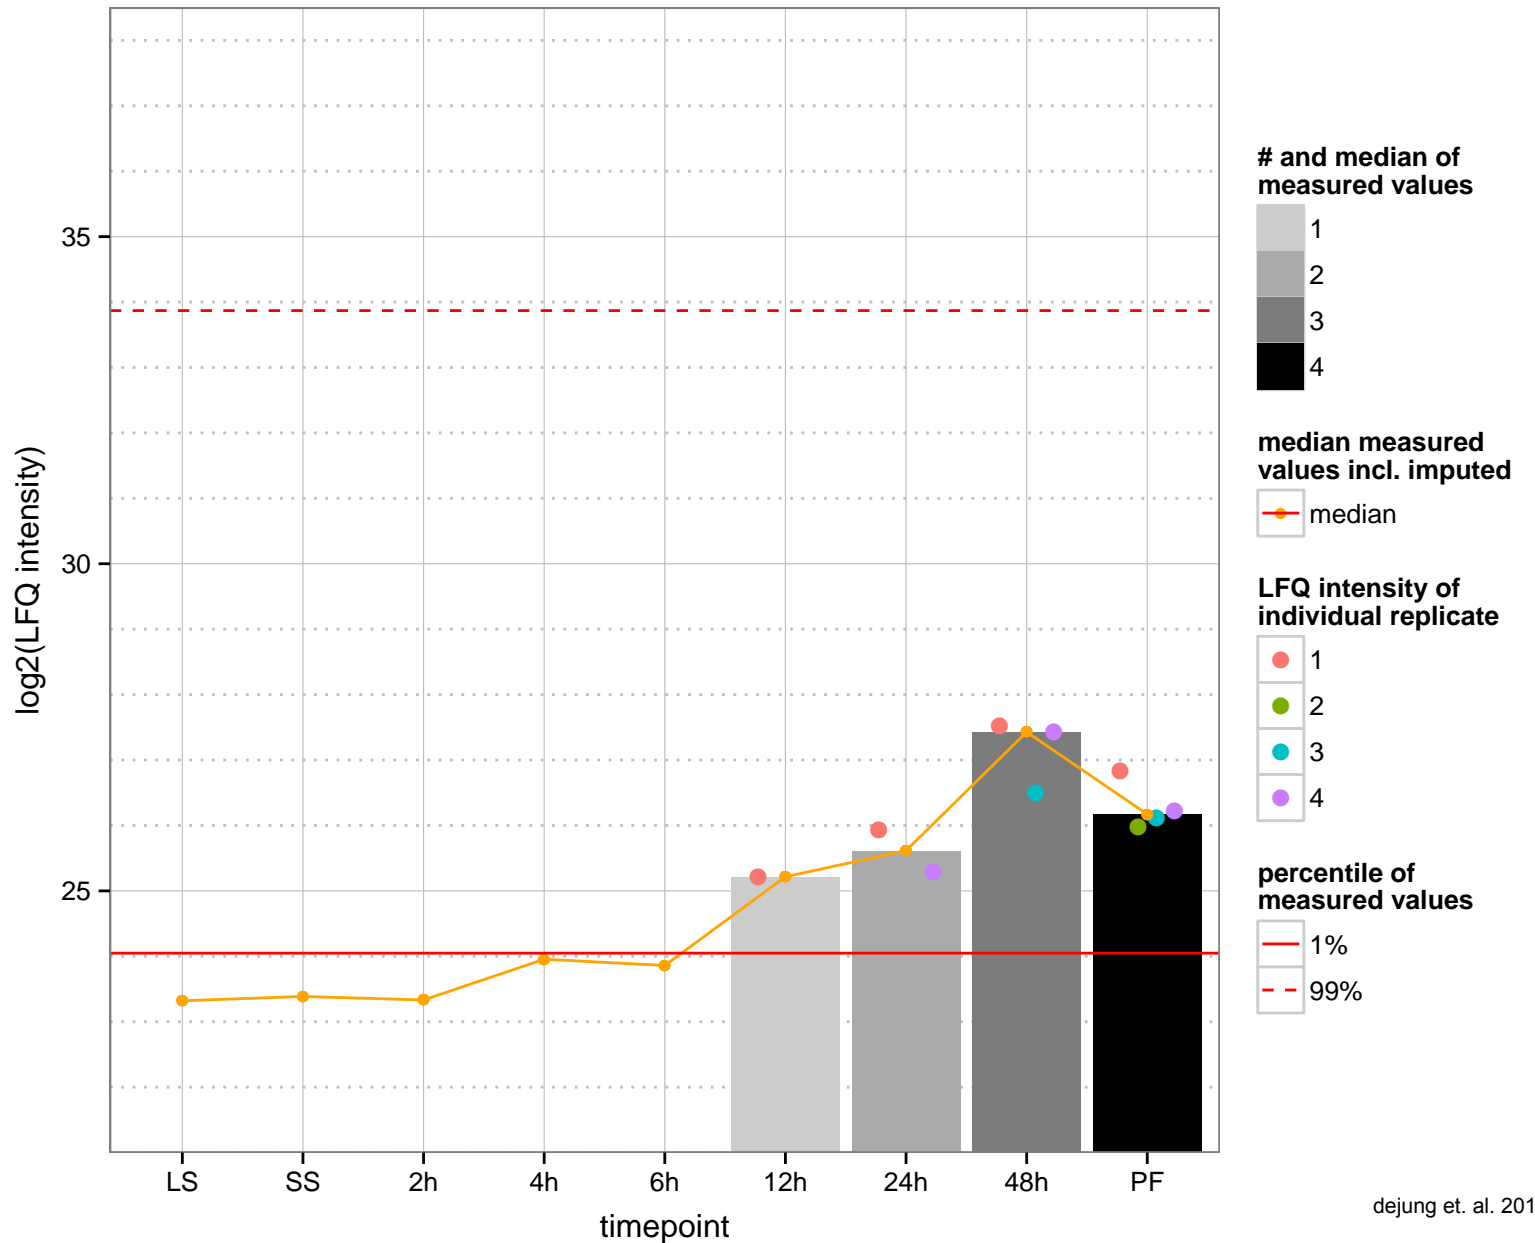

hypothetical protein, conserved  
 Tb927.8.6960  
 AGOF: null  
 AGOC: mitochondrion  
 AGOP: null  
 PGO: null  
 PGO: null  
 PGO: null

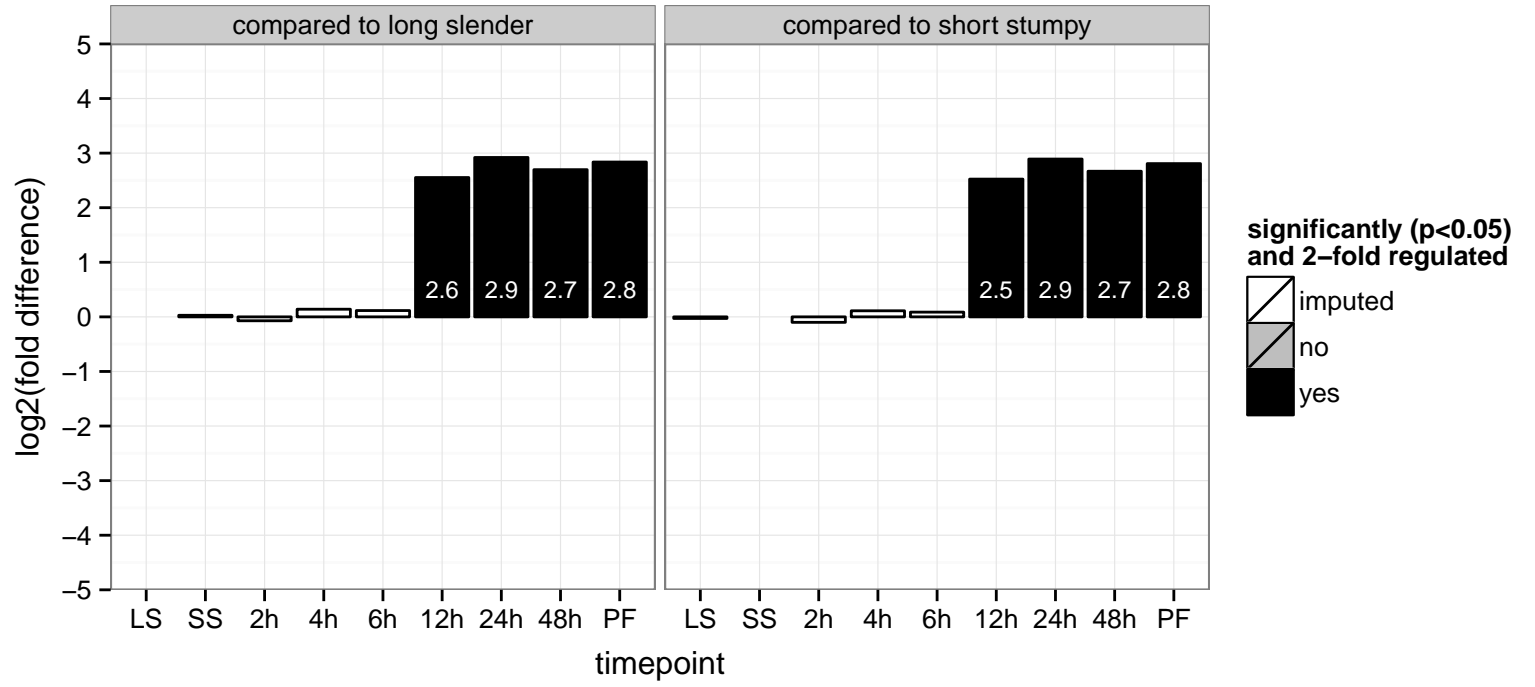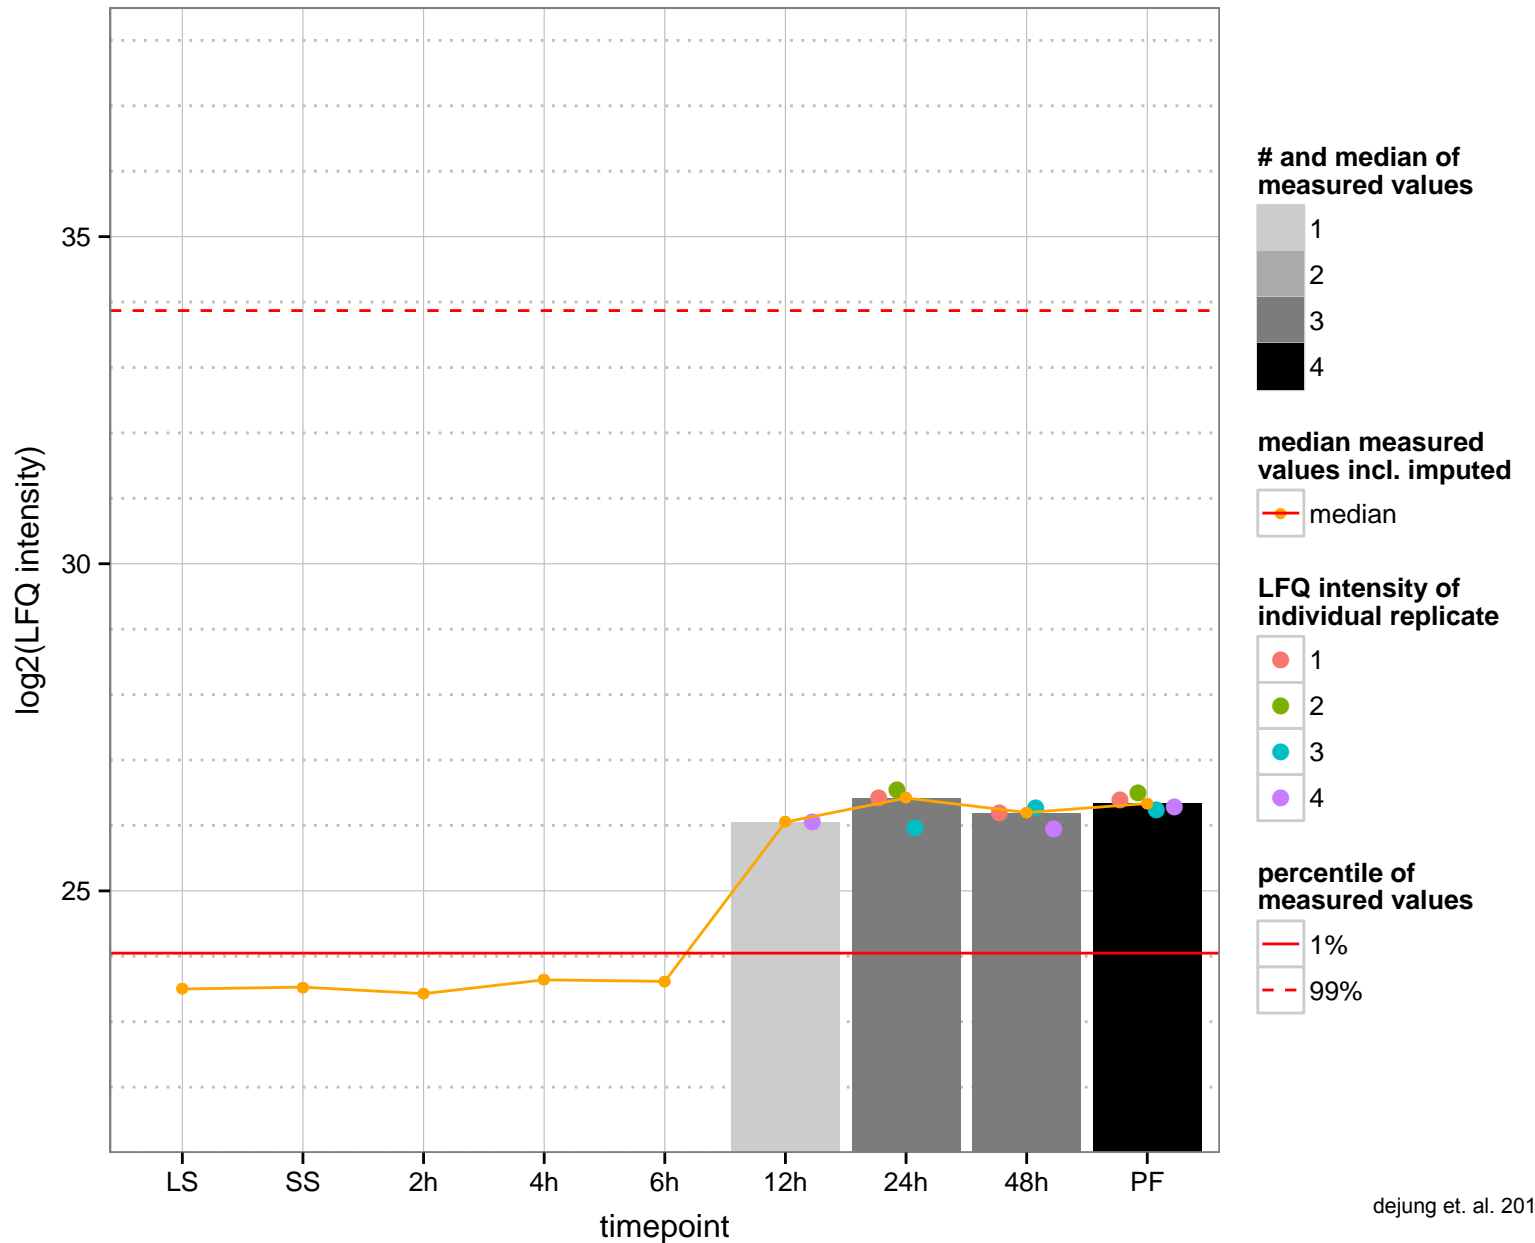



3, 2-trans-enoyl-CoA isomerase, mitochondrial precursor, putative  
 Tb927.8.7530  
 AGOF: catalytic activity  
 AGOC: mitochondrion  
 AGOP: metabolic process  
 PGO: catalytic activity  
 PGO: null  
 PGO: metabolic process

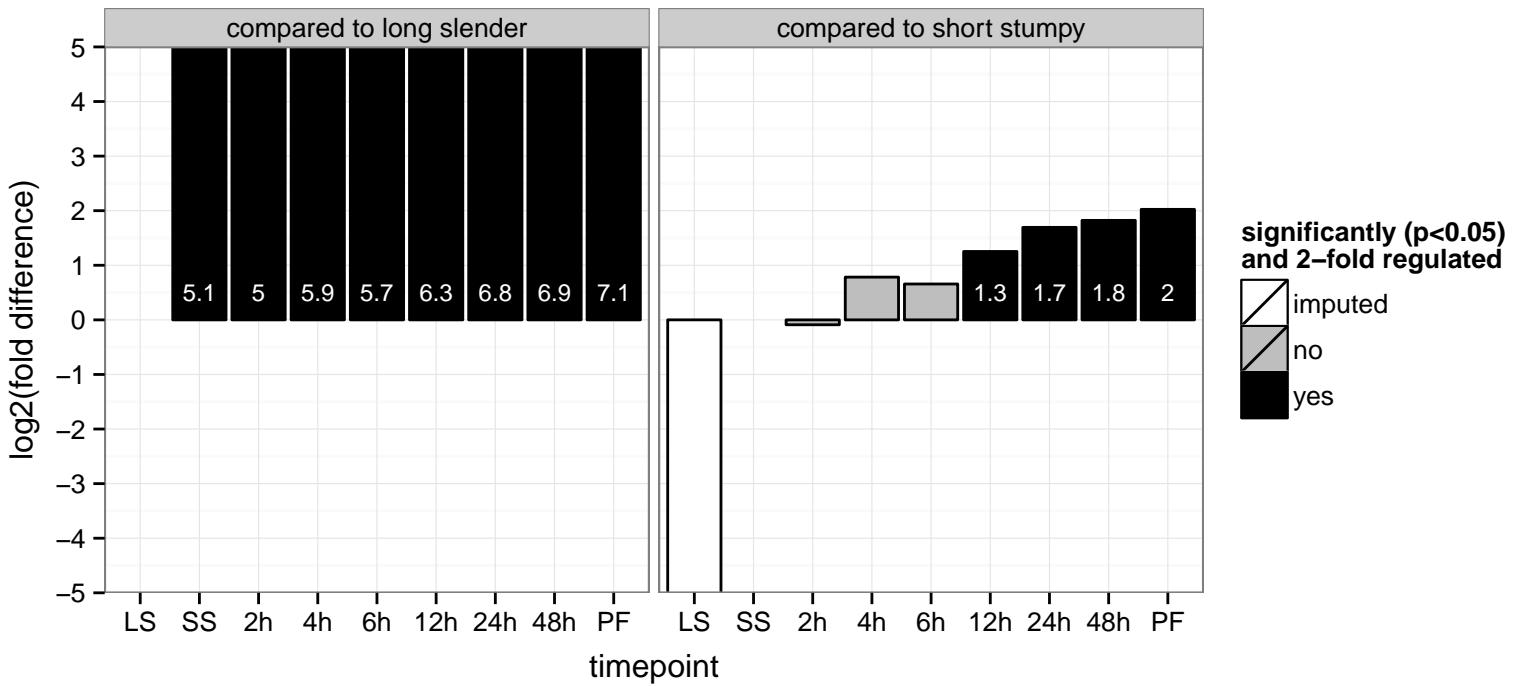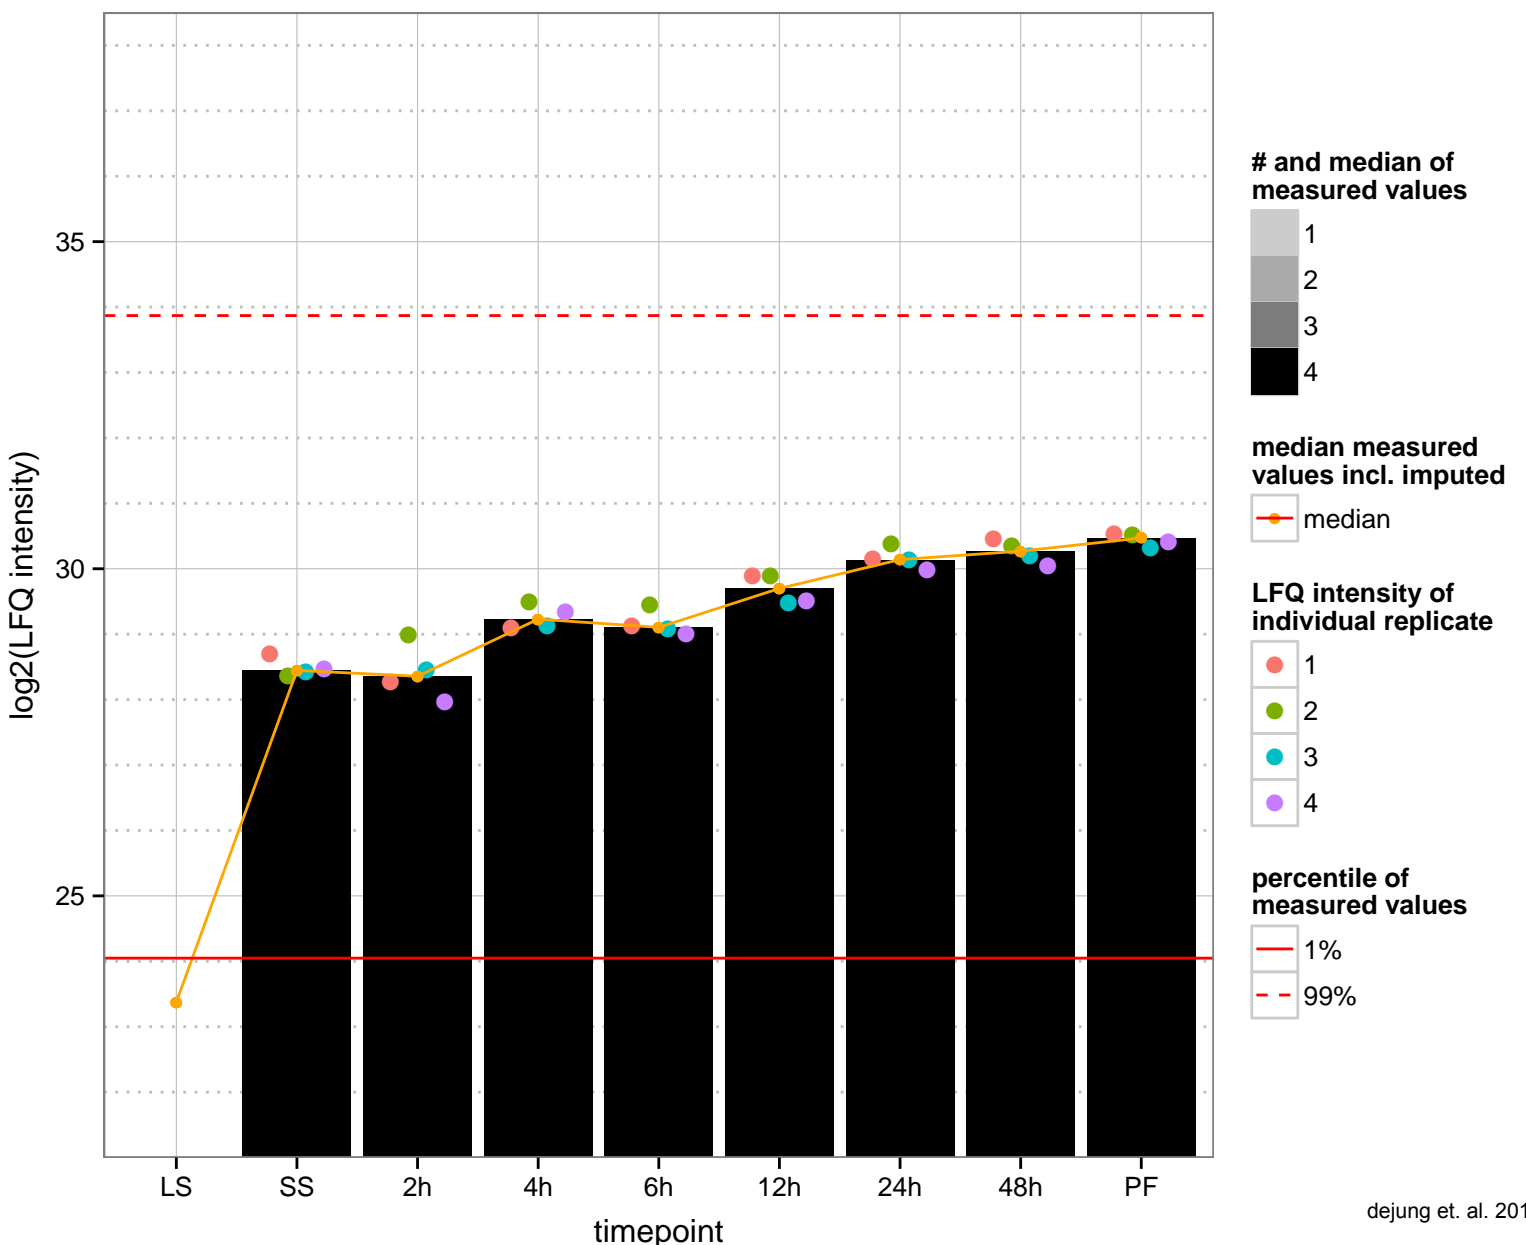

hypothetical protein, conserved  
 Tb927.8.960;Tb927.8.940  
 AGOF: null  
 AGOC: null  
 AGOP: null  
 PGO: null  
 PGOC: null  
 PGOP: null

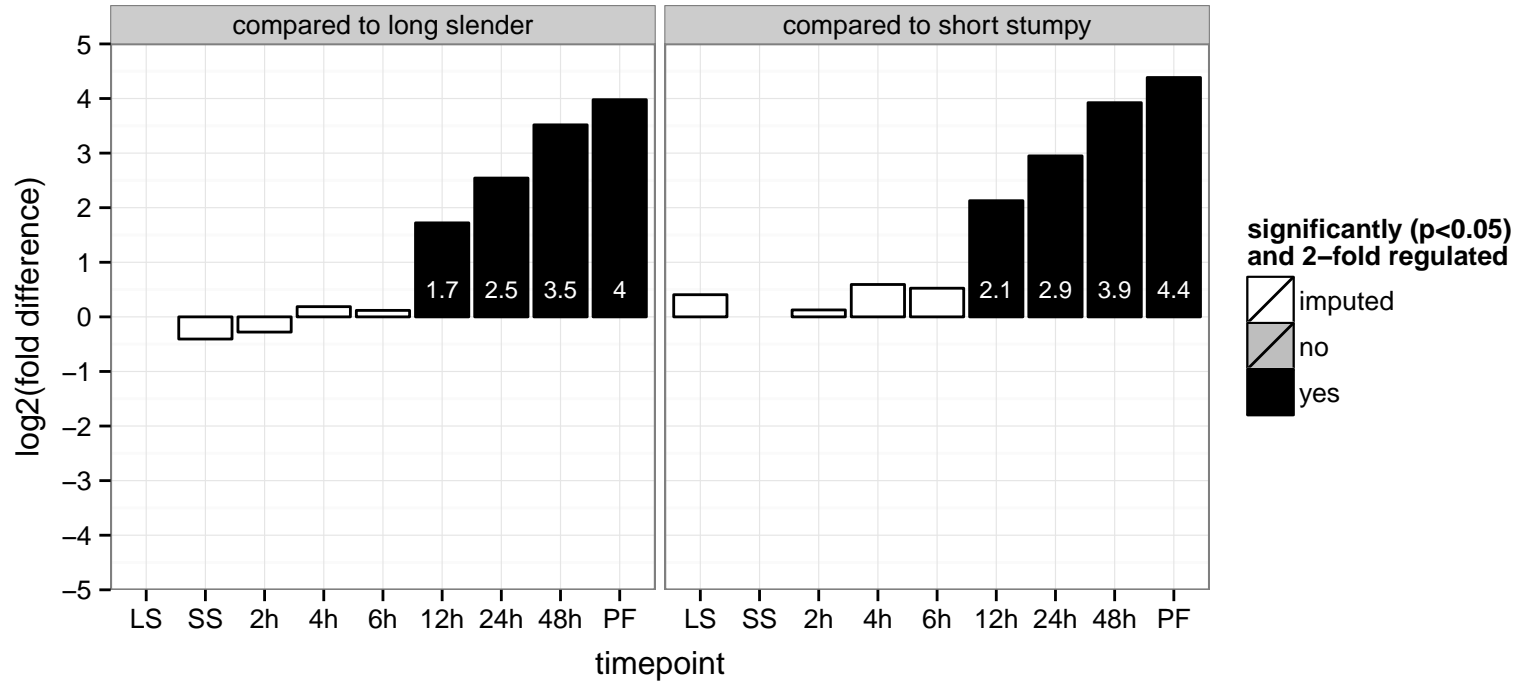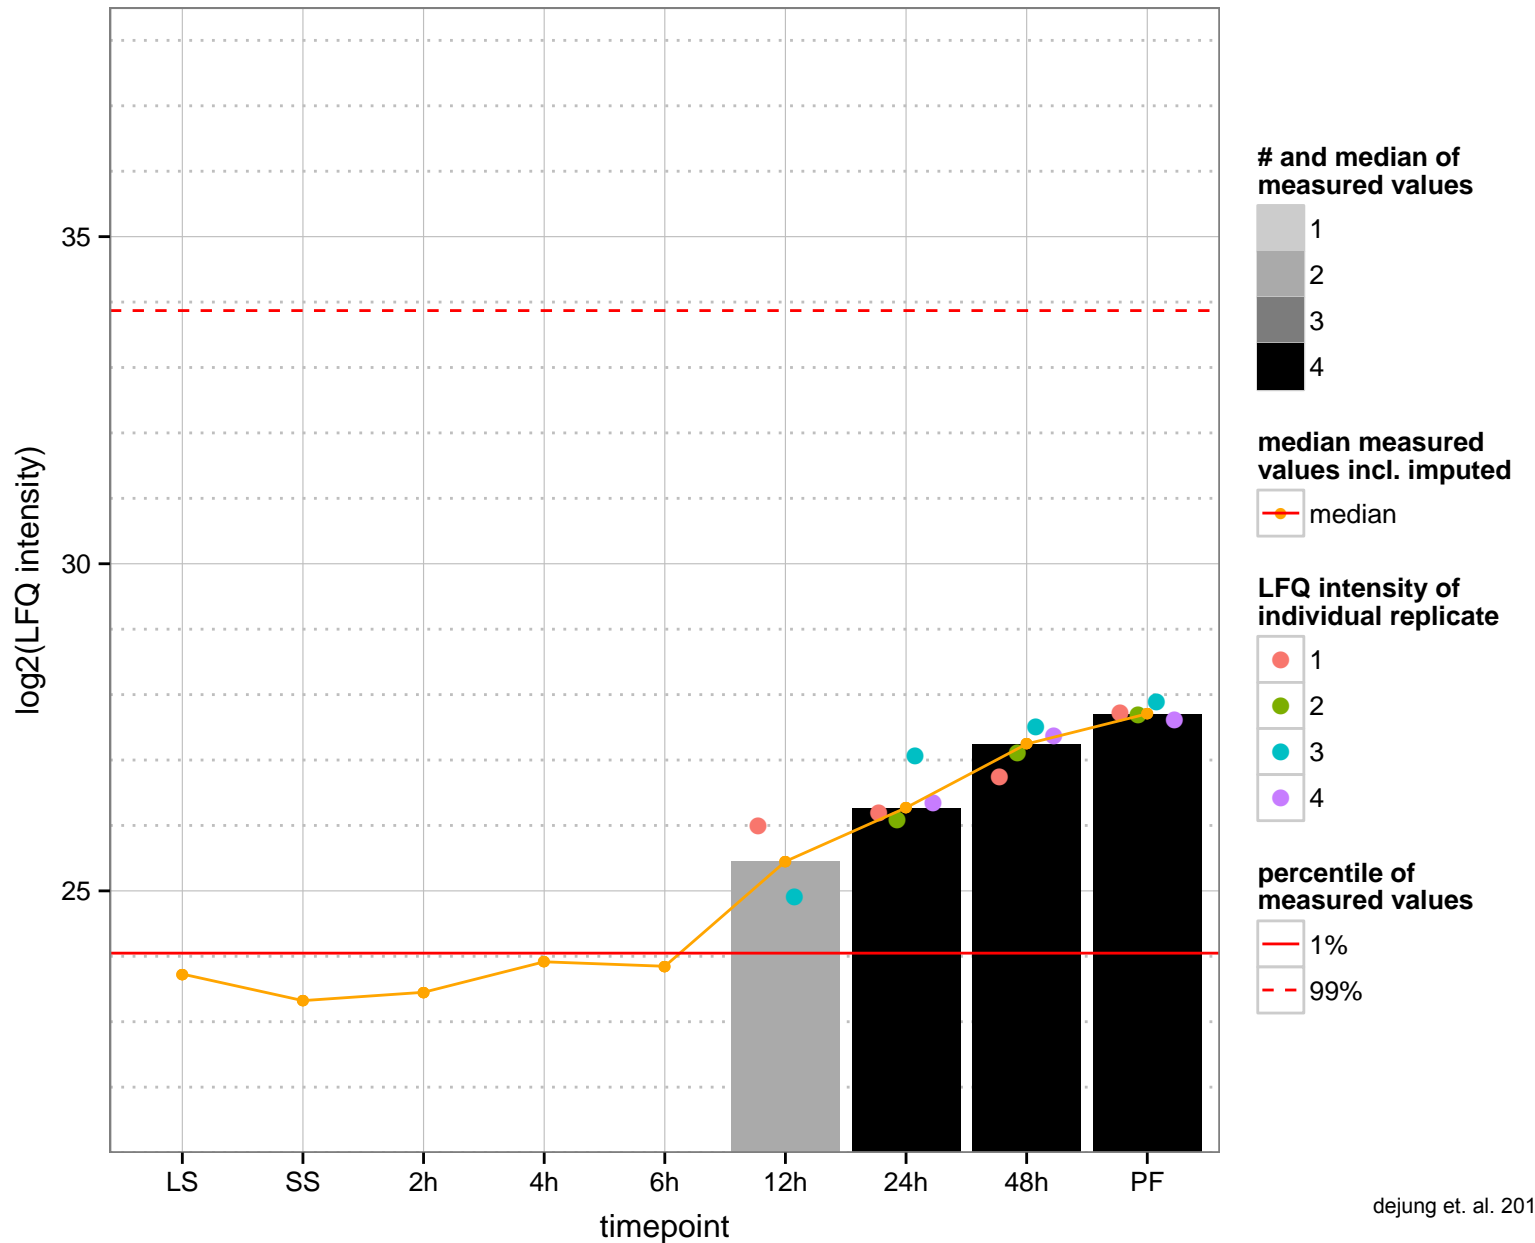

hypothetical protein, conserved  
 Tb927.9.10490  
 AGOF: null  
 AGOC: null  
 AGOP: ciliary or flagellar motility  
 PGO: null  
 PGO: null  
 PGO: null

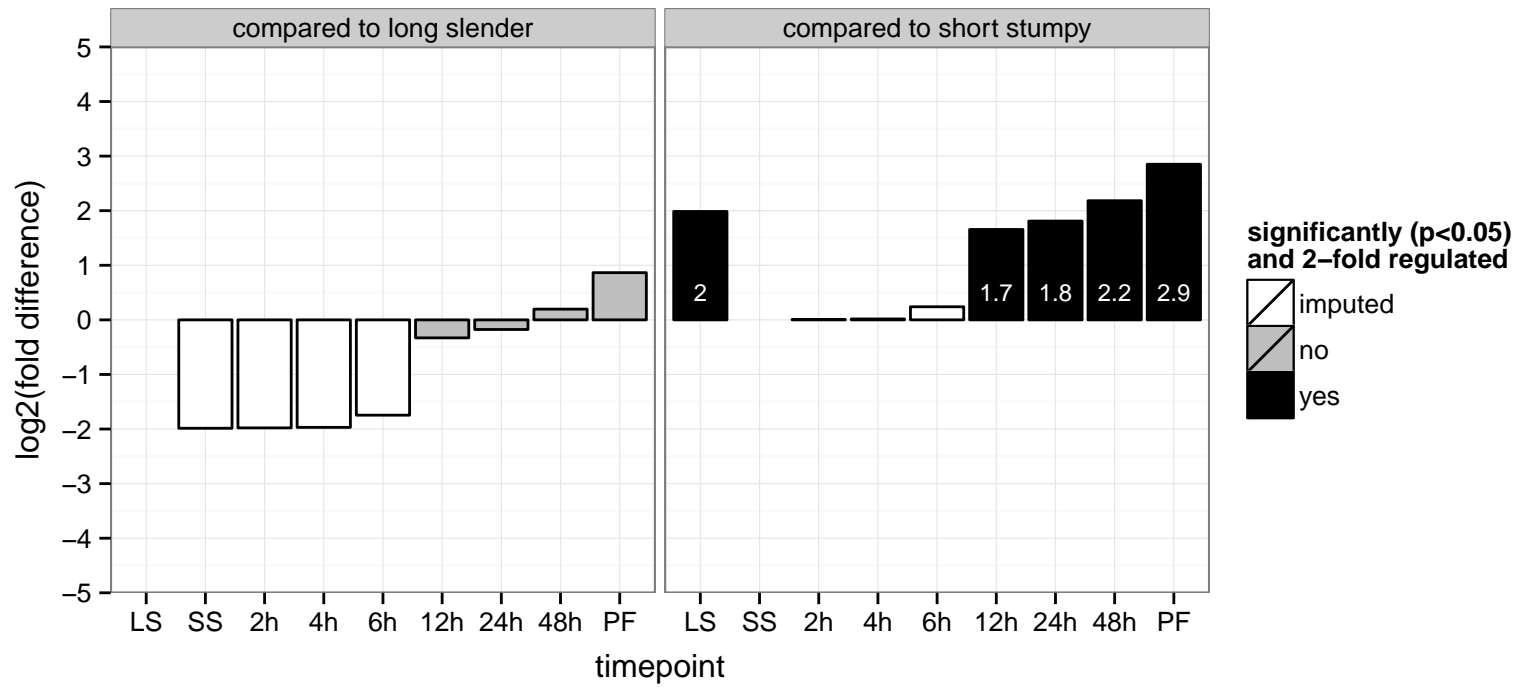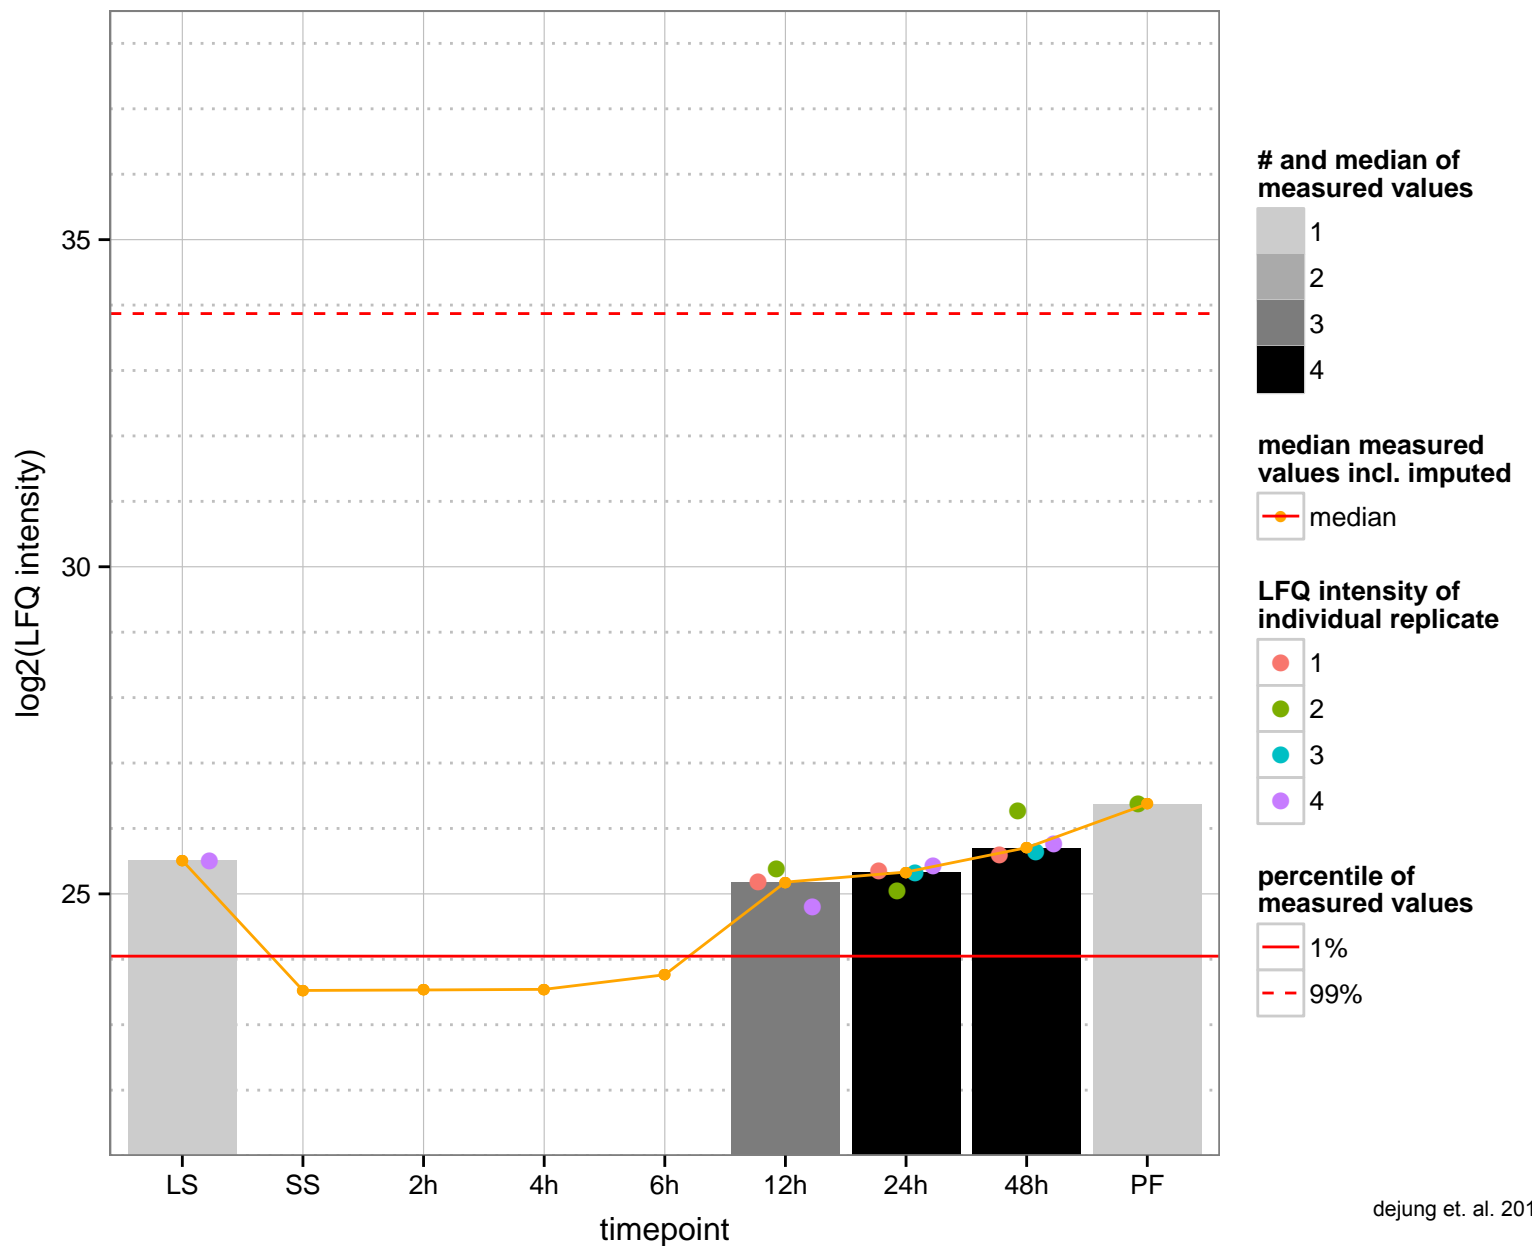

hypothetical protein, conserved  
 Tb927.9.10880  
 AGOF: null  
 AGOC: null  
 AGOP: null  
 PGOF: null  
 PGO: null  
 PGOP: null

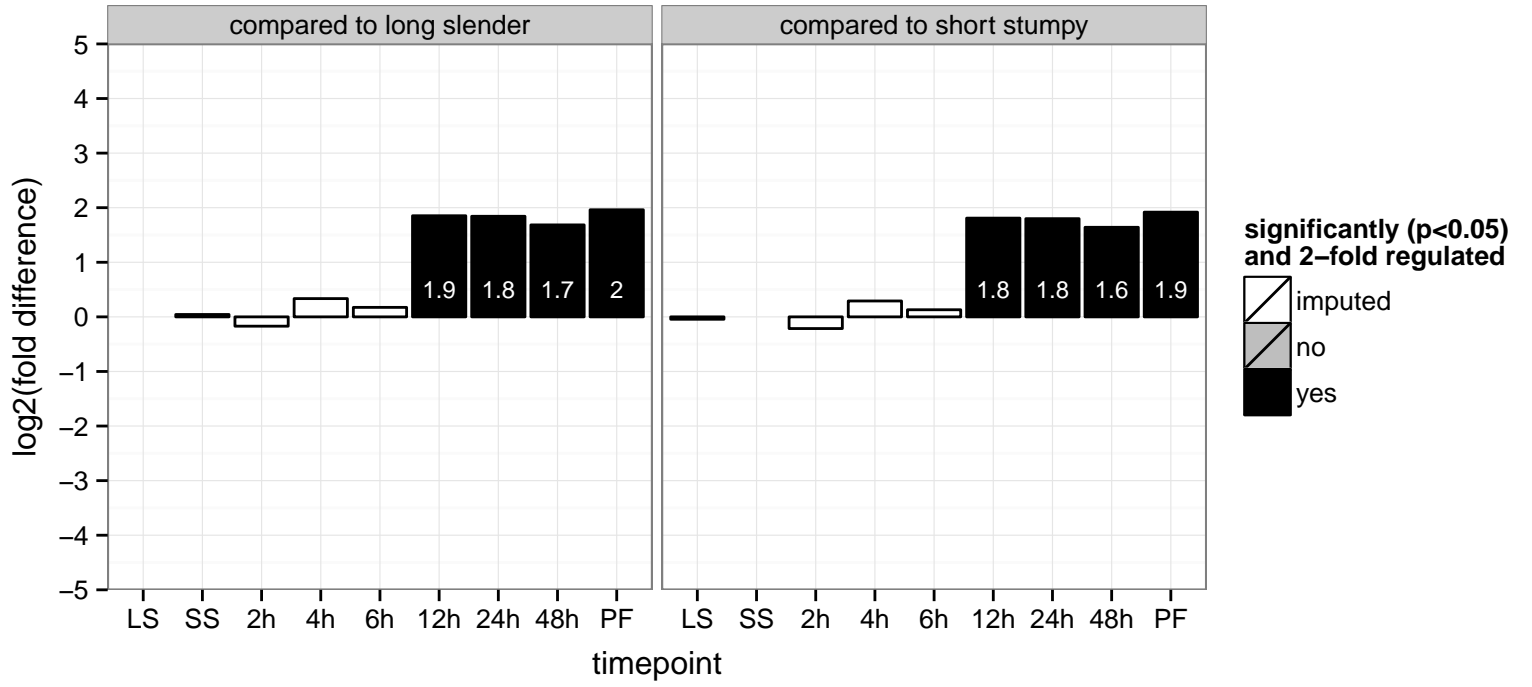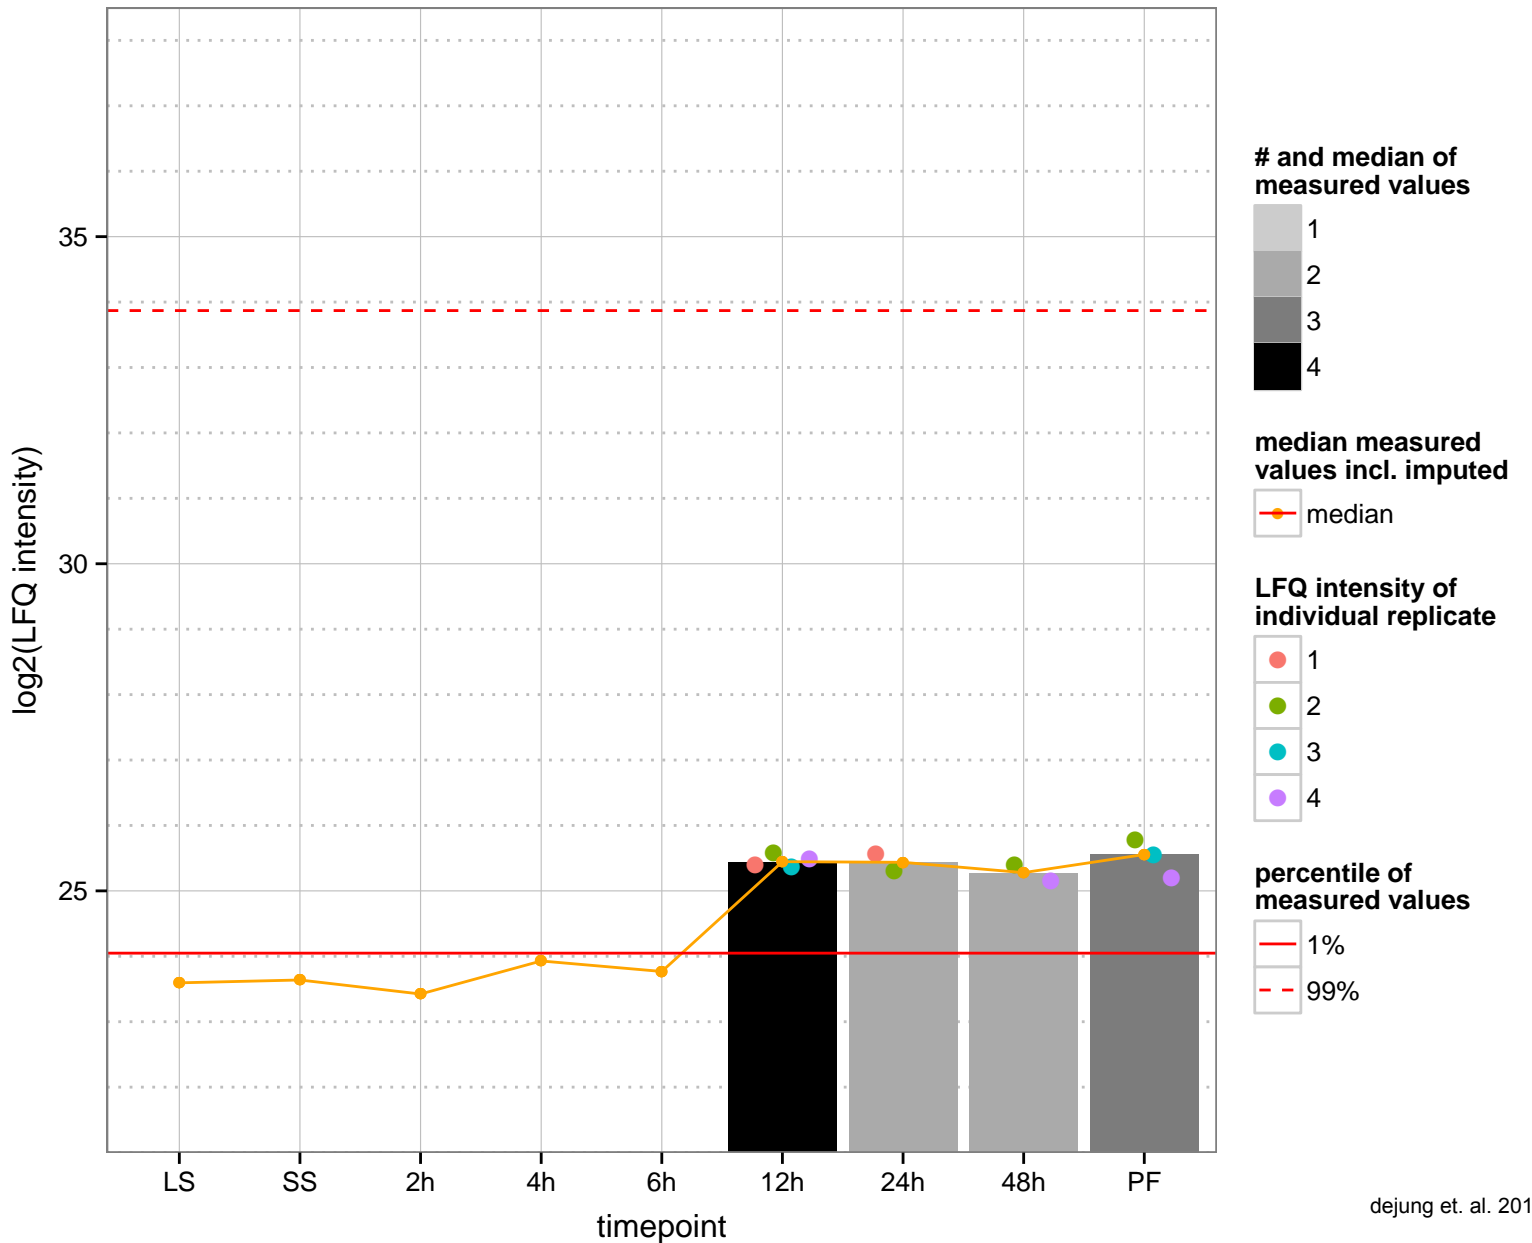

RNA-binding protein, putative (RBP35)  
 Tb927.9.12360  
 AGOF: null  
 AGOC: null  
 AGOP: null  
 PGOF: null  
 PGO: null  
 PGOP: null

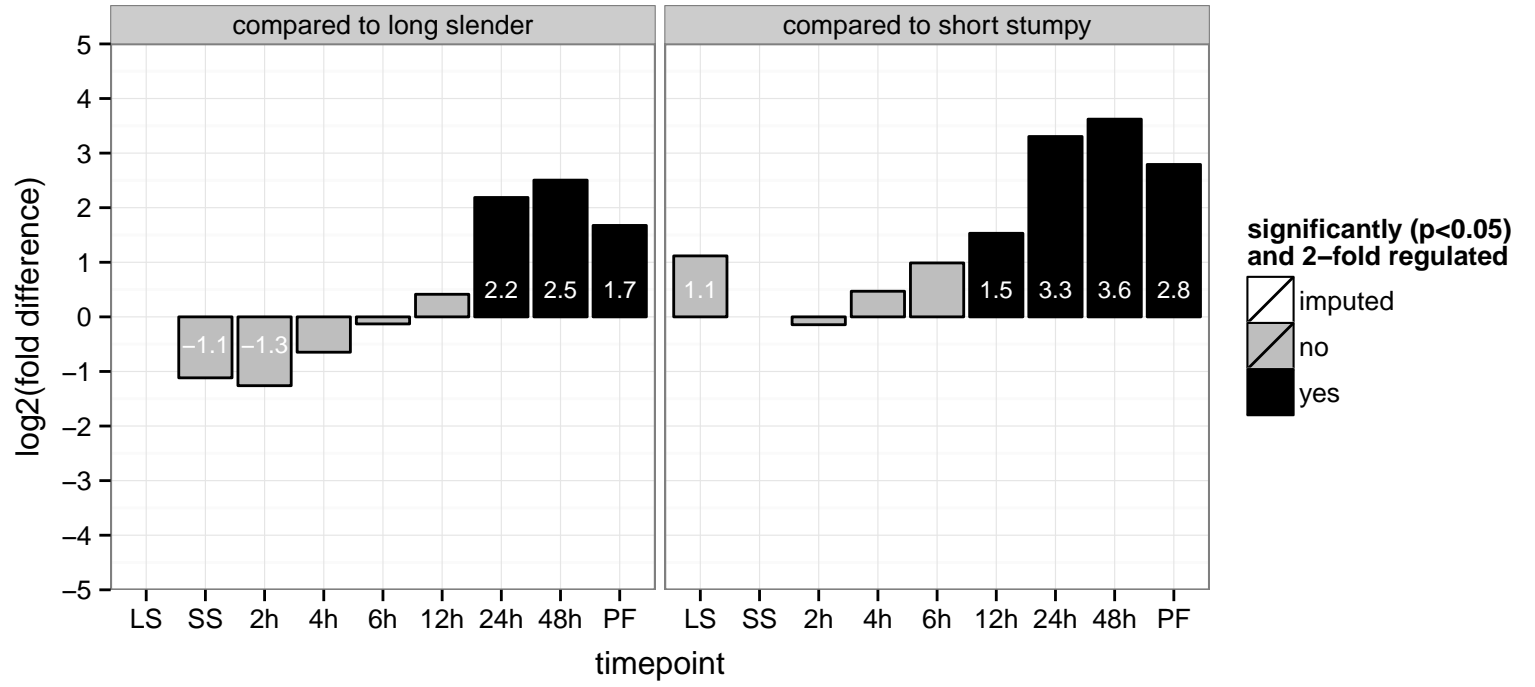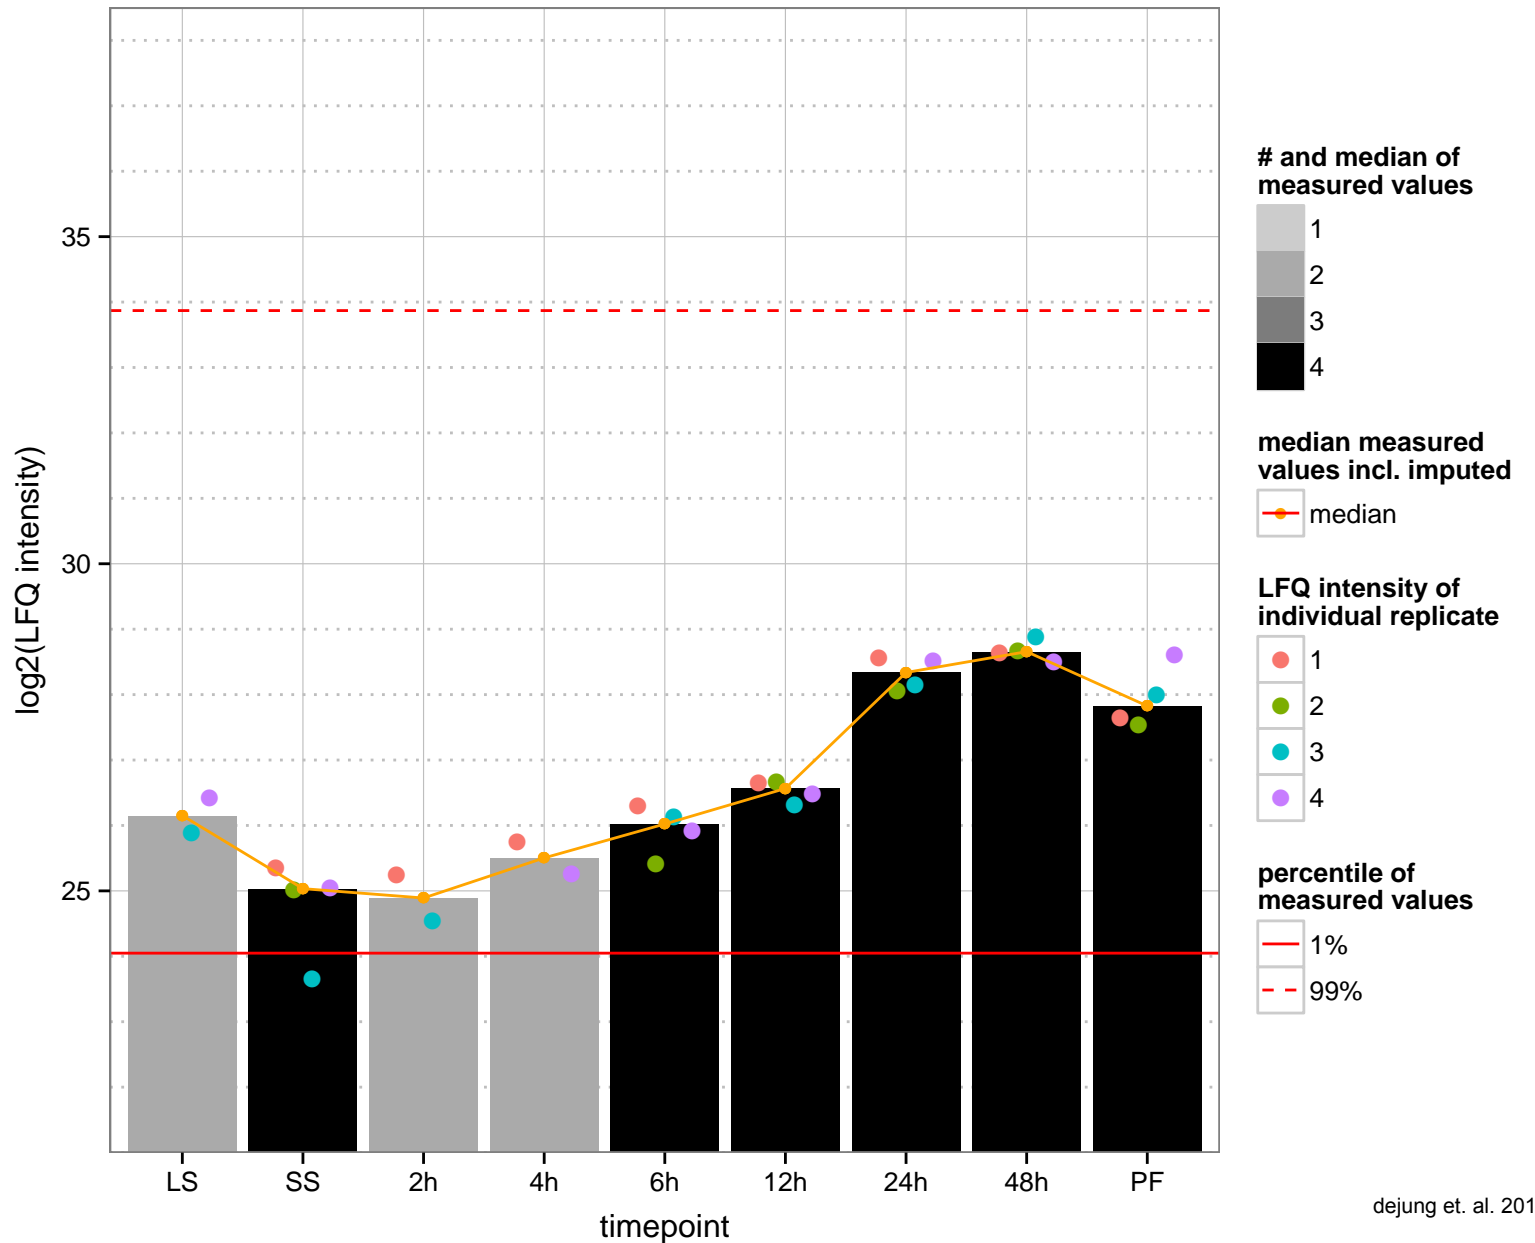

Double RNA binding domain protein 9 (DRBD9)  
 Tb927.9.13280  
 AGOF: RNA binding  
 AGOC: nucleus  
 AGOP: RNA processing  
 PGO: nucleic acid binding  
 PGO: null  
 PGO: null

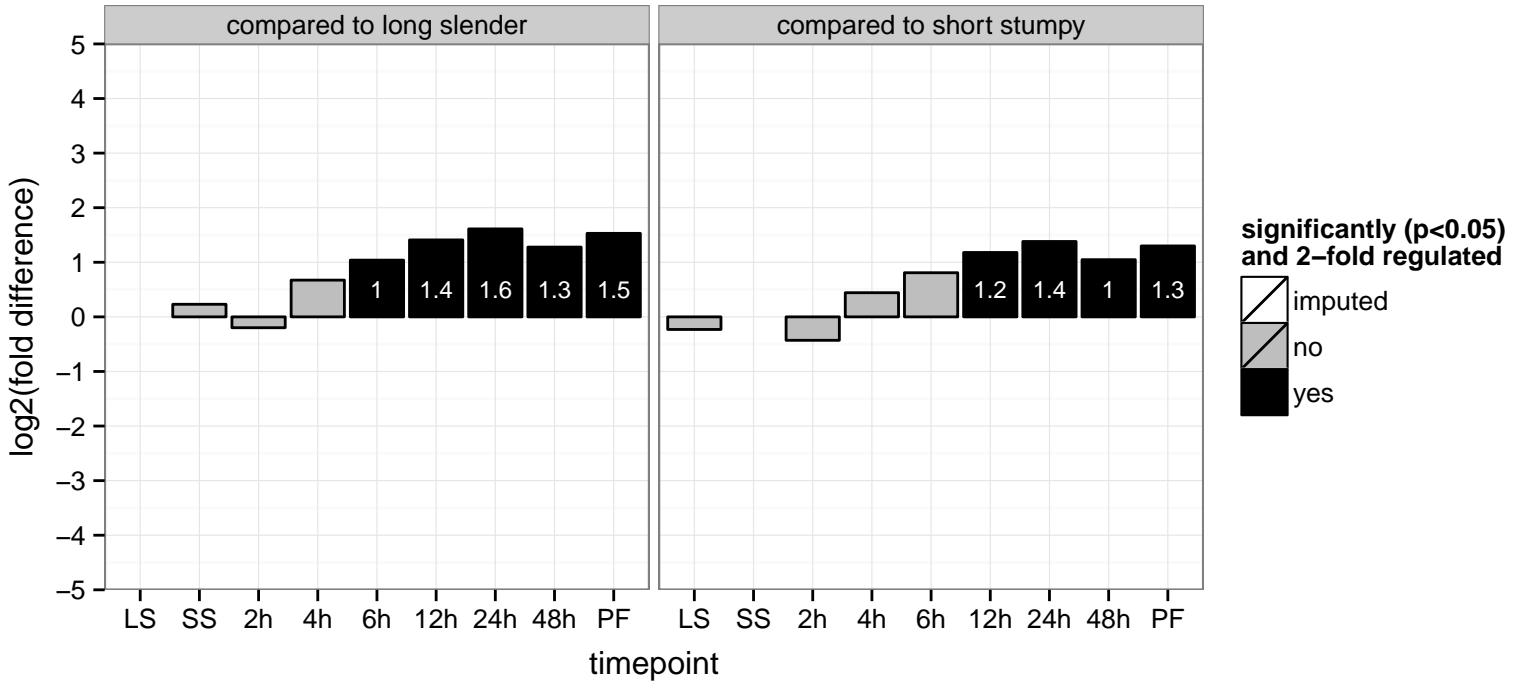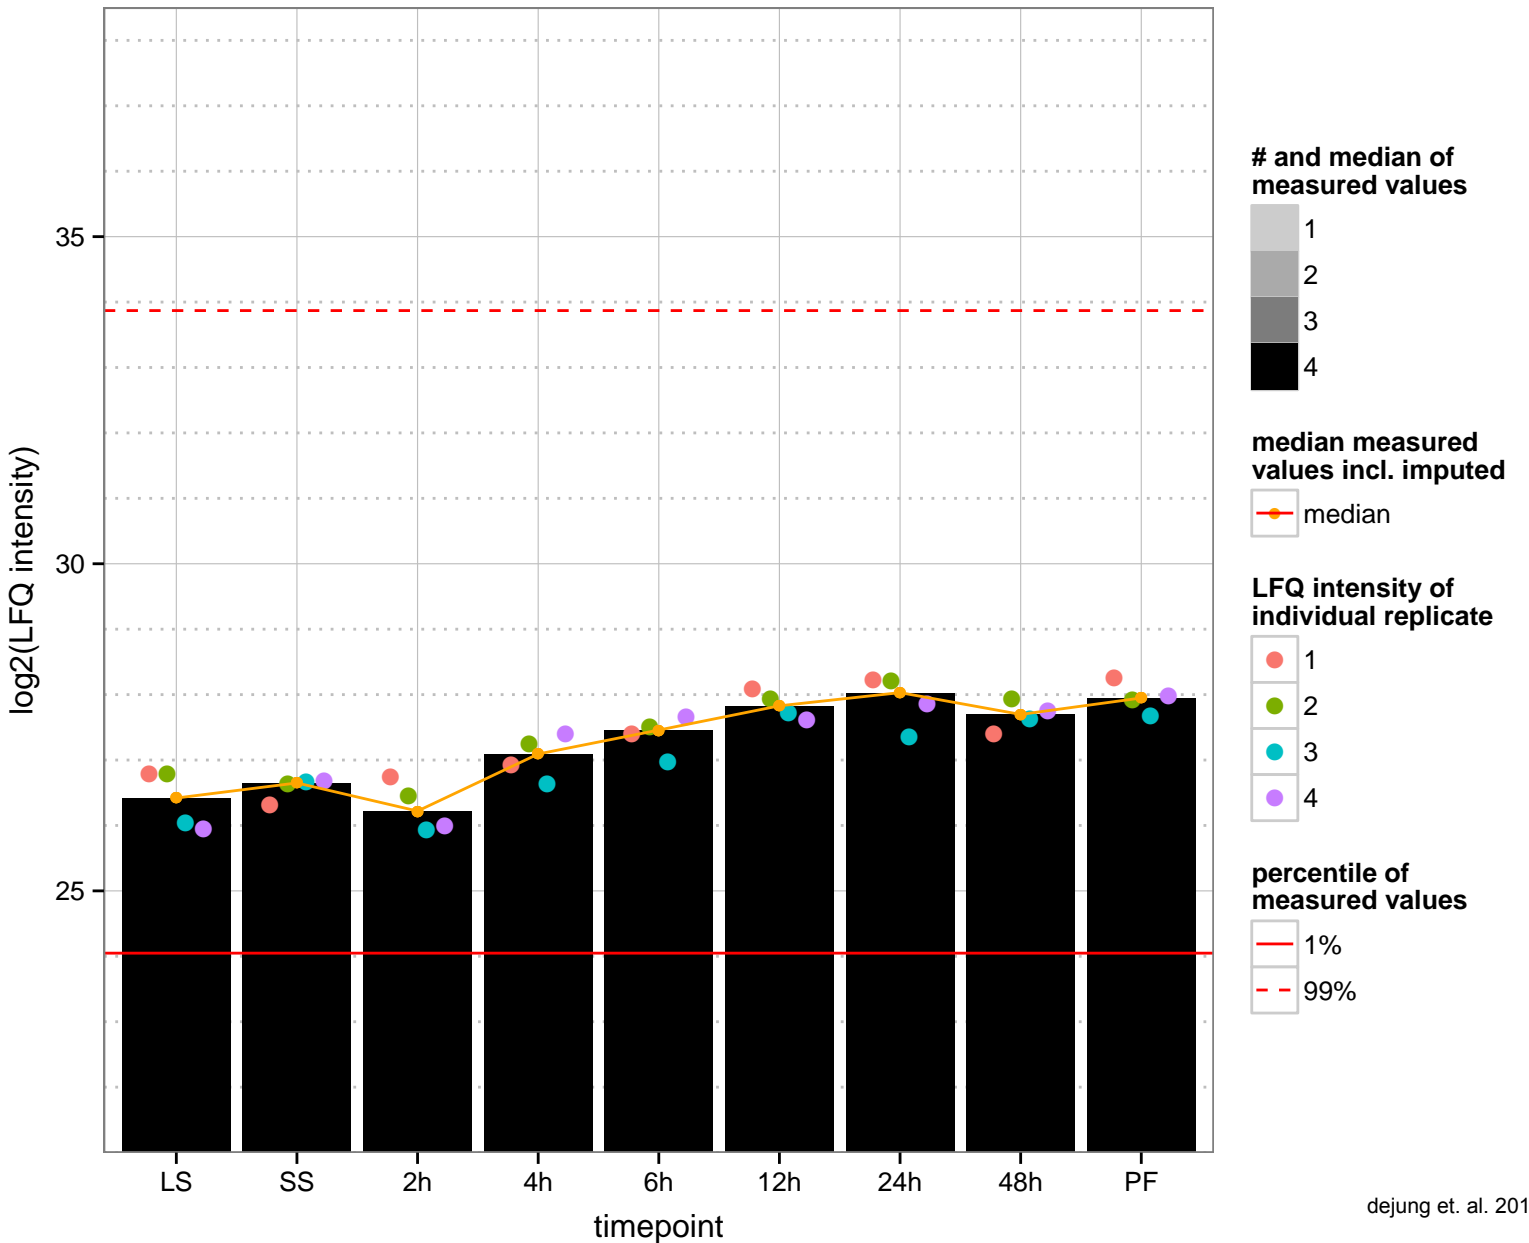

hypothetical protein, conserved  
 Tb927.9.14200  
 AGOF: methyltransferase activity  
 AGOC: mitochondrial inner membrane, mitochondrion  
 AGOP: metabolic process  
 PGO: null  
 PGOC: null  
 PGOP: null

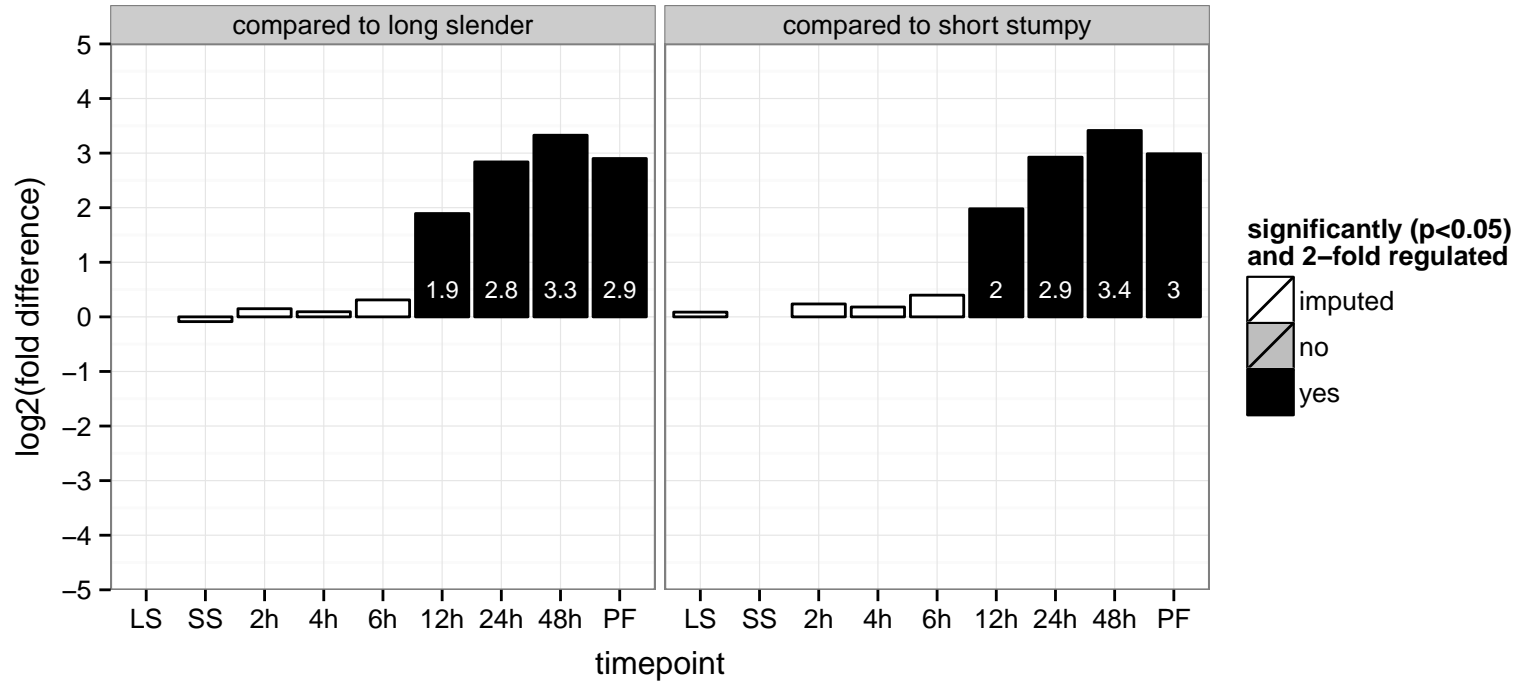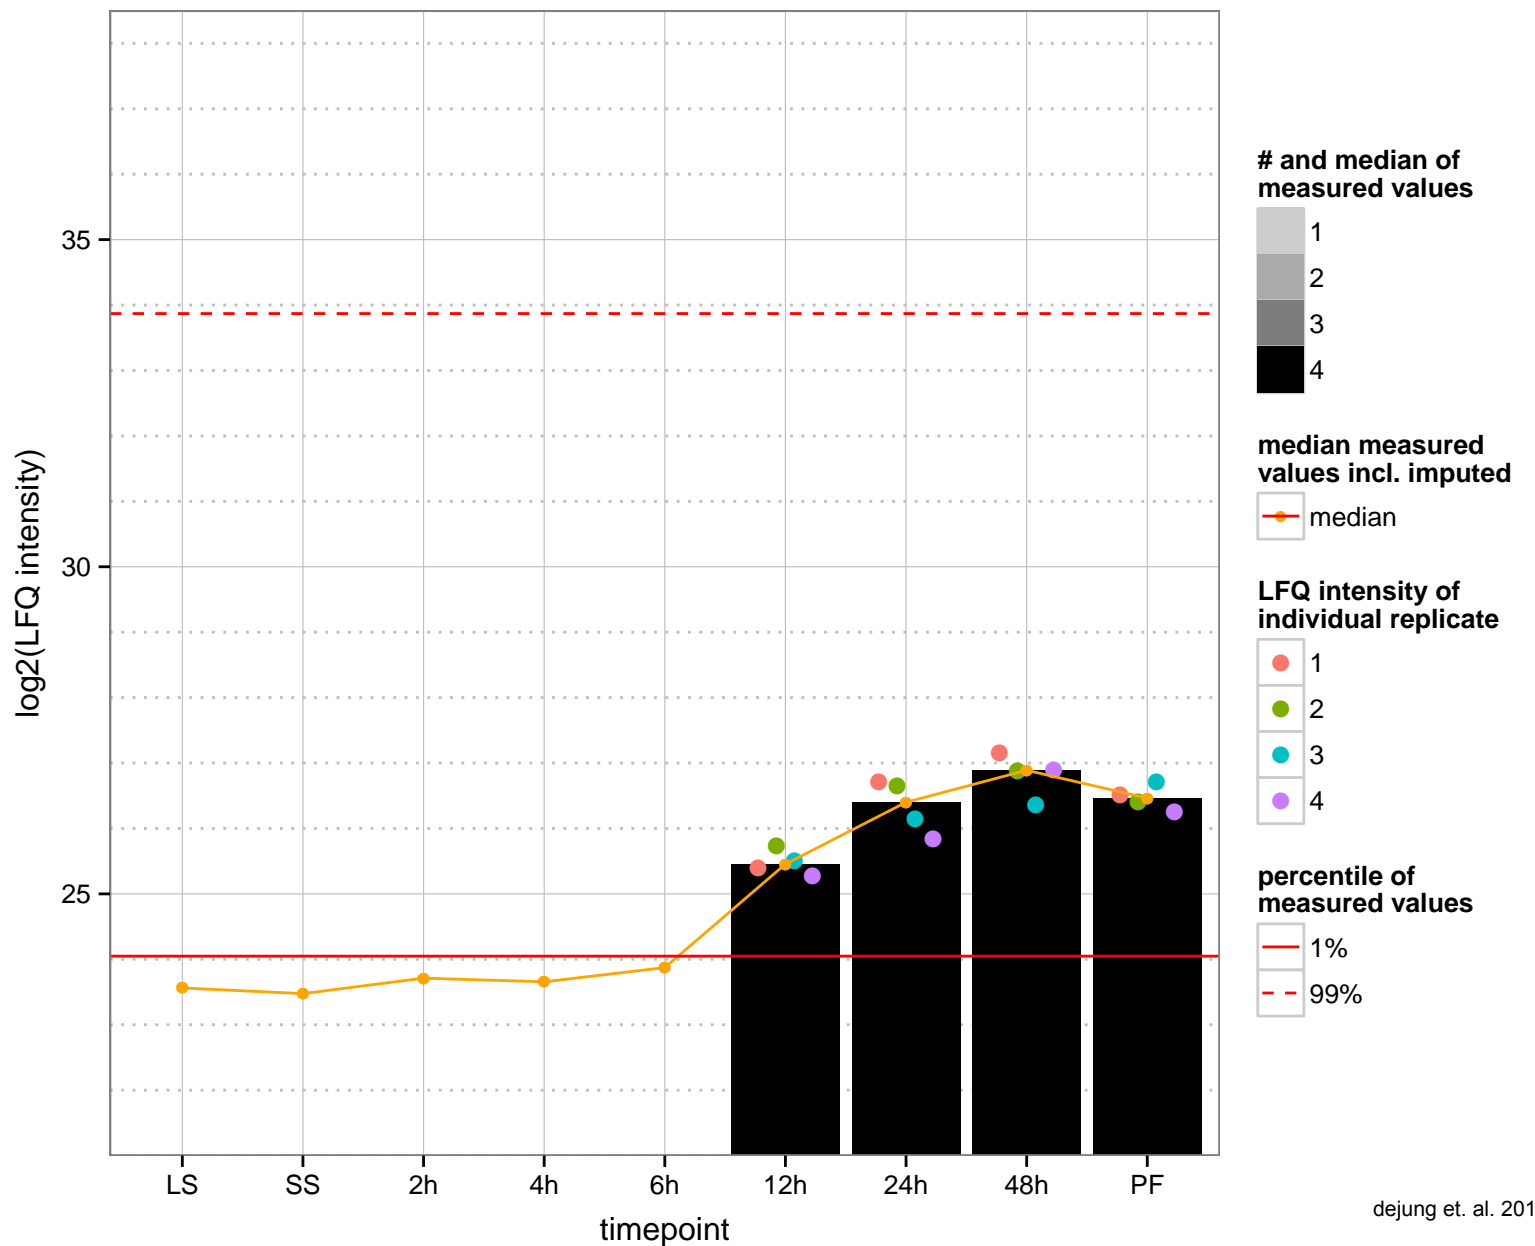

unspecified product  
 Tb927.9.14550  
 AGOF: null  
 AGOC: null  
 AGOP: null  
 PGO: null  
 PGOC: null  
 PGOP: null

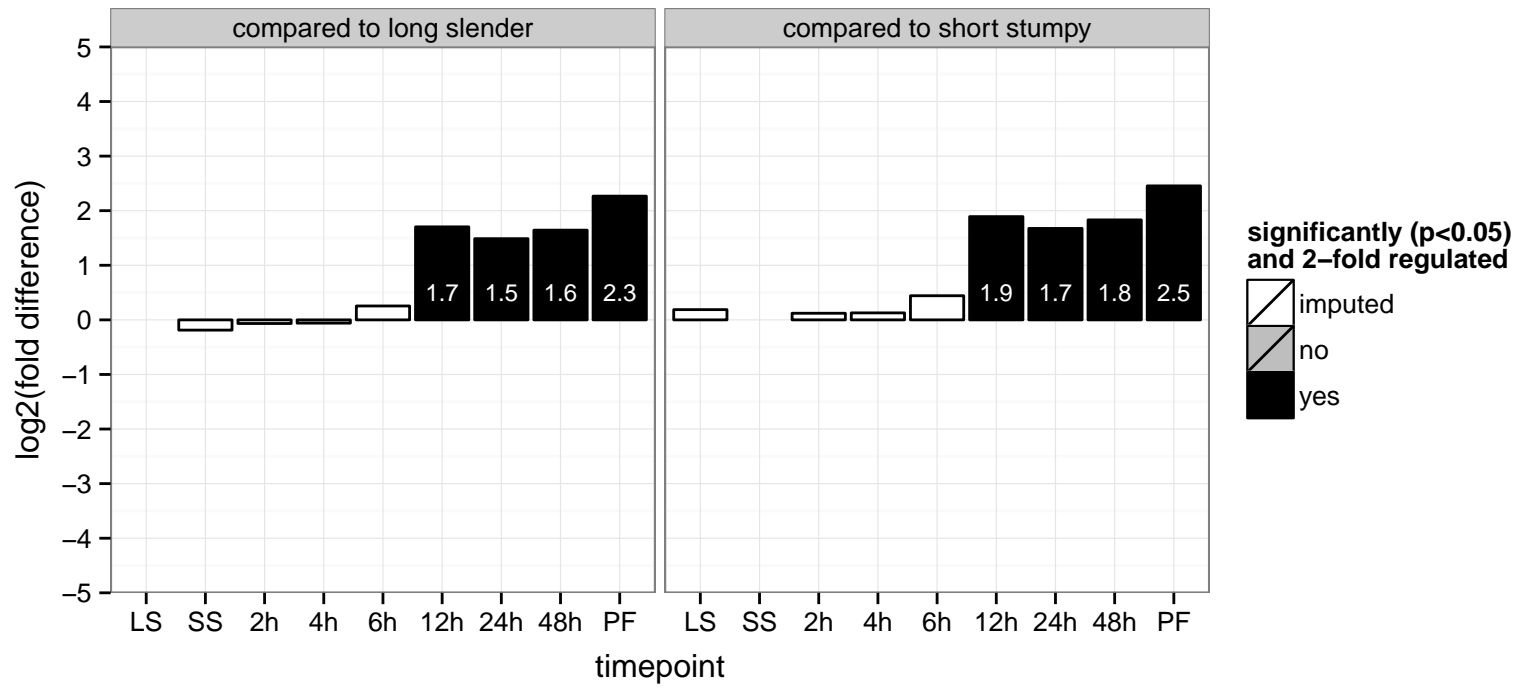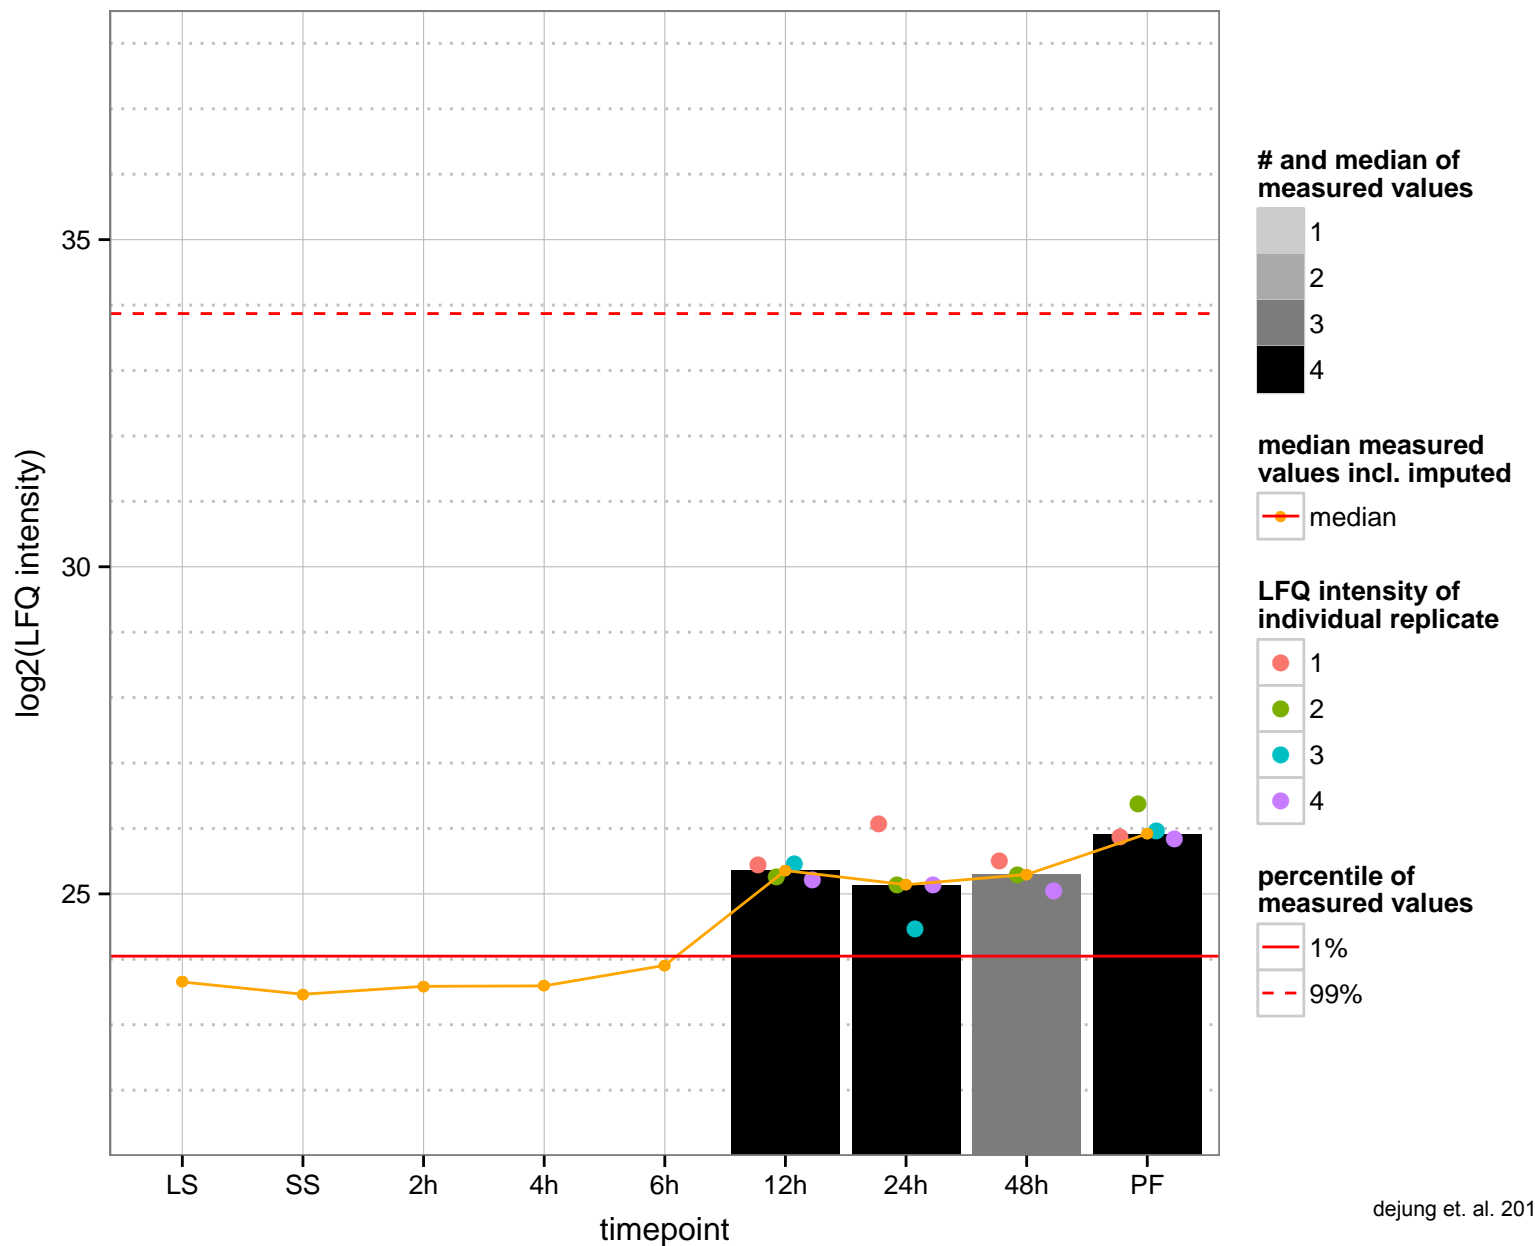



hypothetical protein, conserved  
 Tb927.9.15330  
 AGOF: null  
 AGOC: null  
 AGOP: null  
 PGO: null  
 PGOC: null  
 PGOP: null

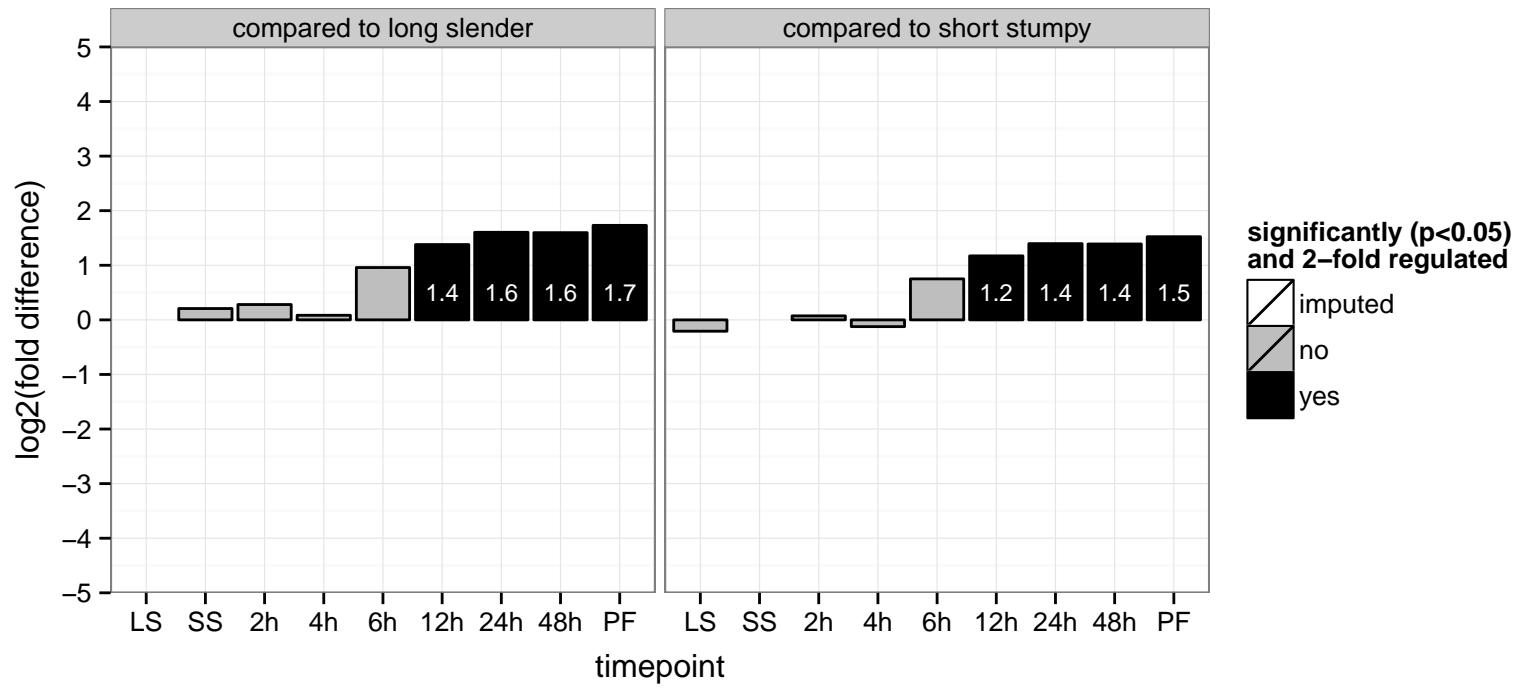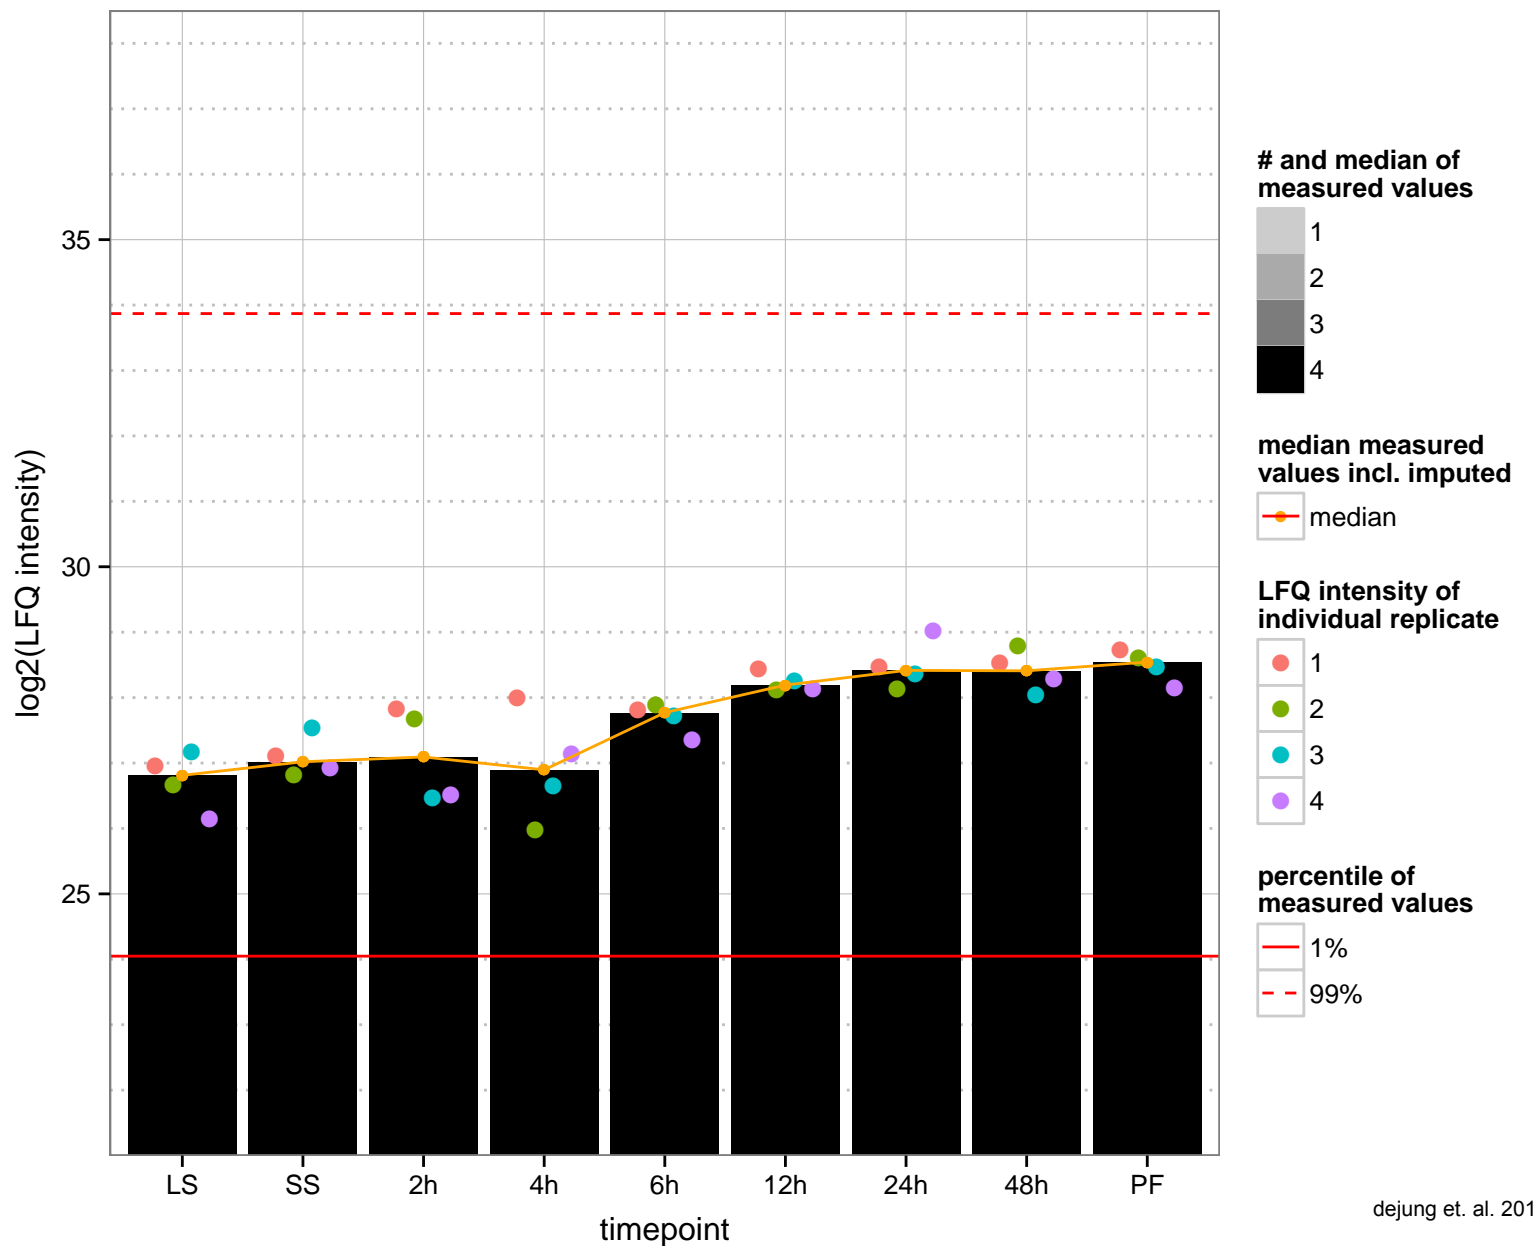

hypothetical protein, conserved  
 Tb927.9.2320  
 AGOF: methyltransferase activity  
 AGOC: null  
 AGOP: metabolic process  
 PGO: null  
 PGOC: null  
 PGOP: null

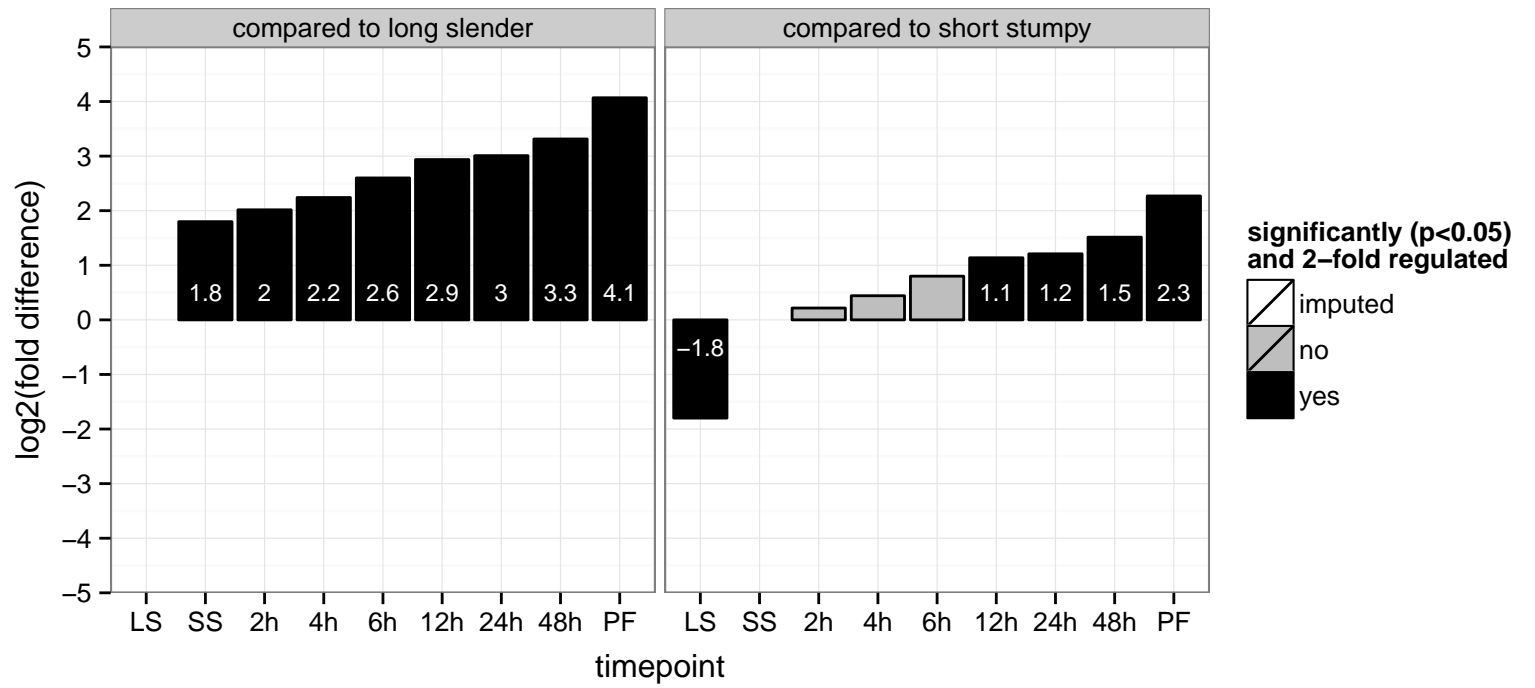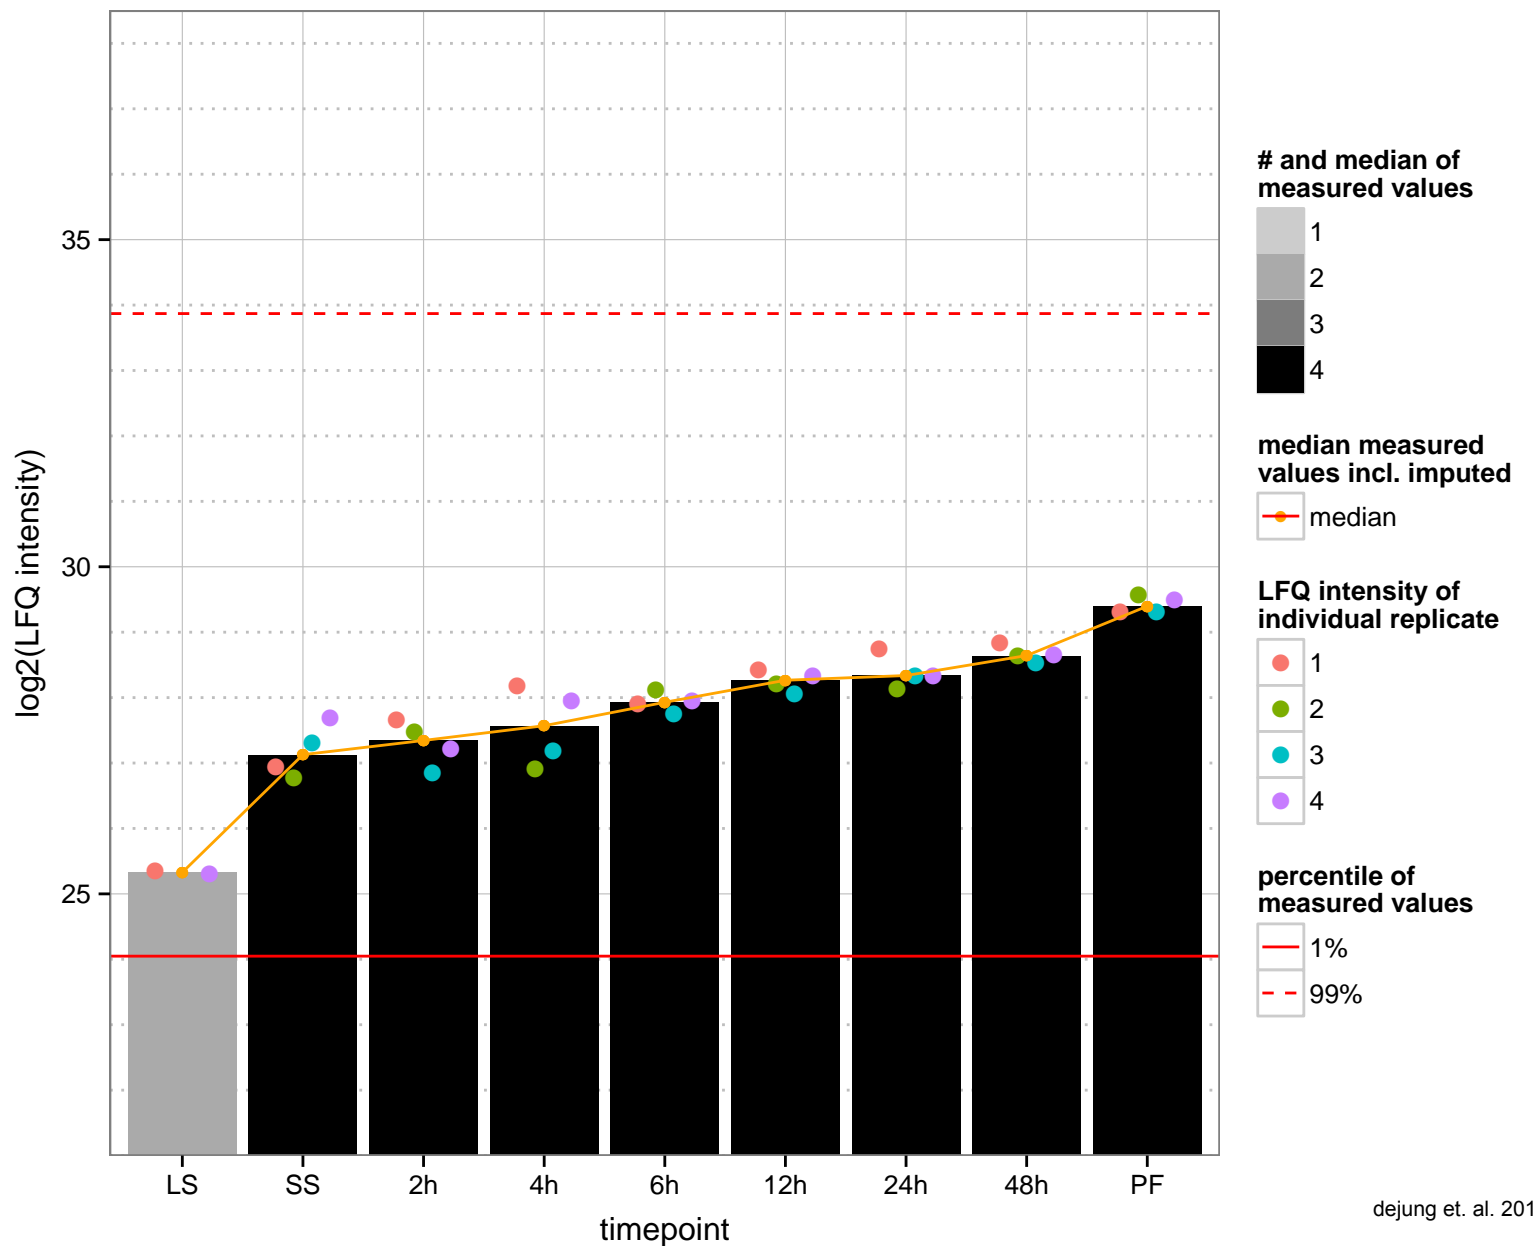

hypothetical protein, conserved  
 Tb927.9.3080  
 AGOF: null  
 AGOC: null  
 AGOP: null  
 PGO: null  
 PGOC: null  
 PGOP: null

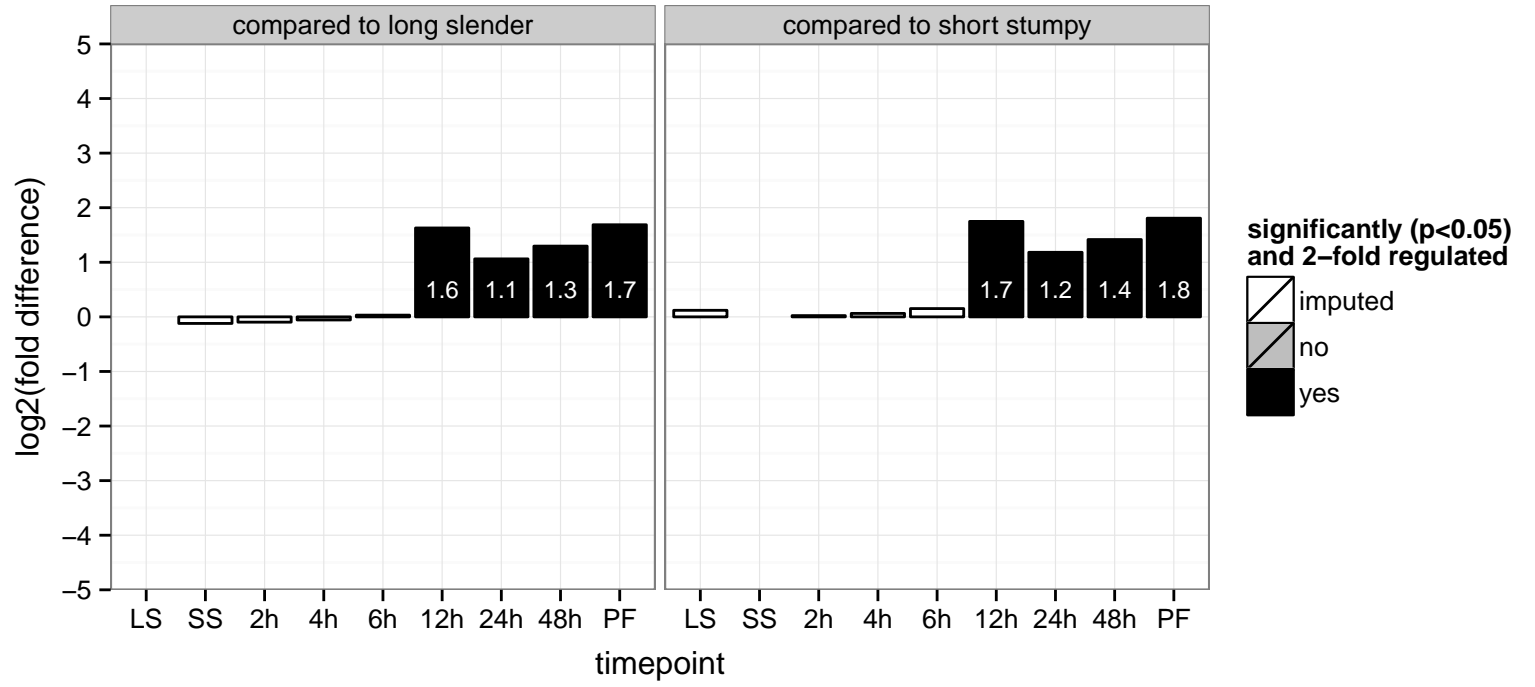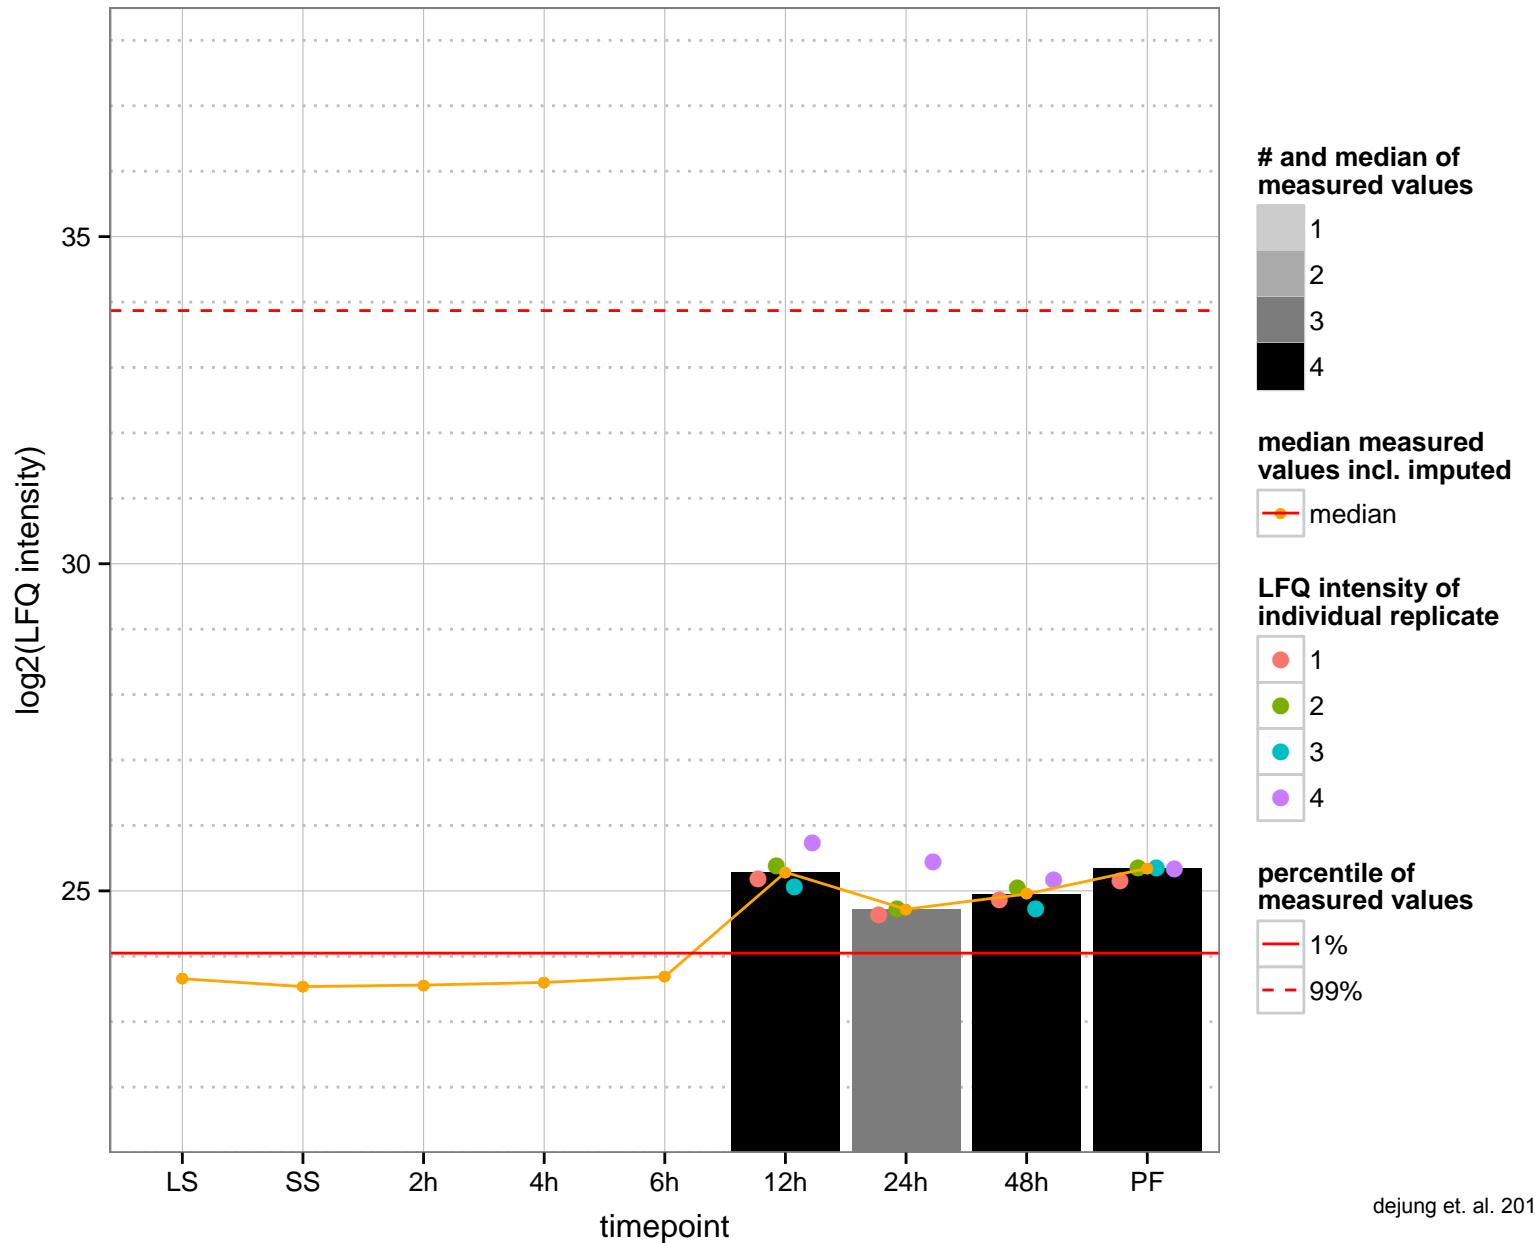

solaneyl-diphosphate synthase, putative, trans-octaprenyltranstransferase

Tb927.9.5890

AGOF: trans-hexaprenyltranstransferase activity, trans-octaprenyltranstransferase activity

AGOC: mitochondrion

AGOP: isoprenoid biosynthetic process, ubiquinone metabolic process

PGOF: null

PGOC: null

PGOP: isoprenoid biosynthetic process

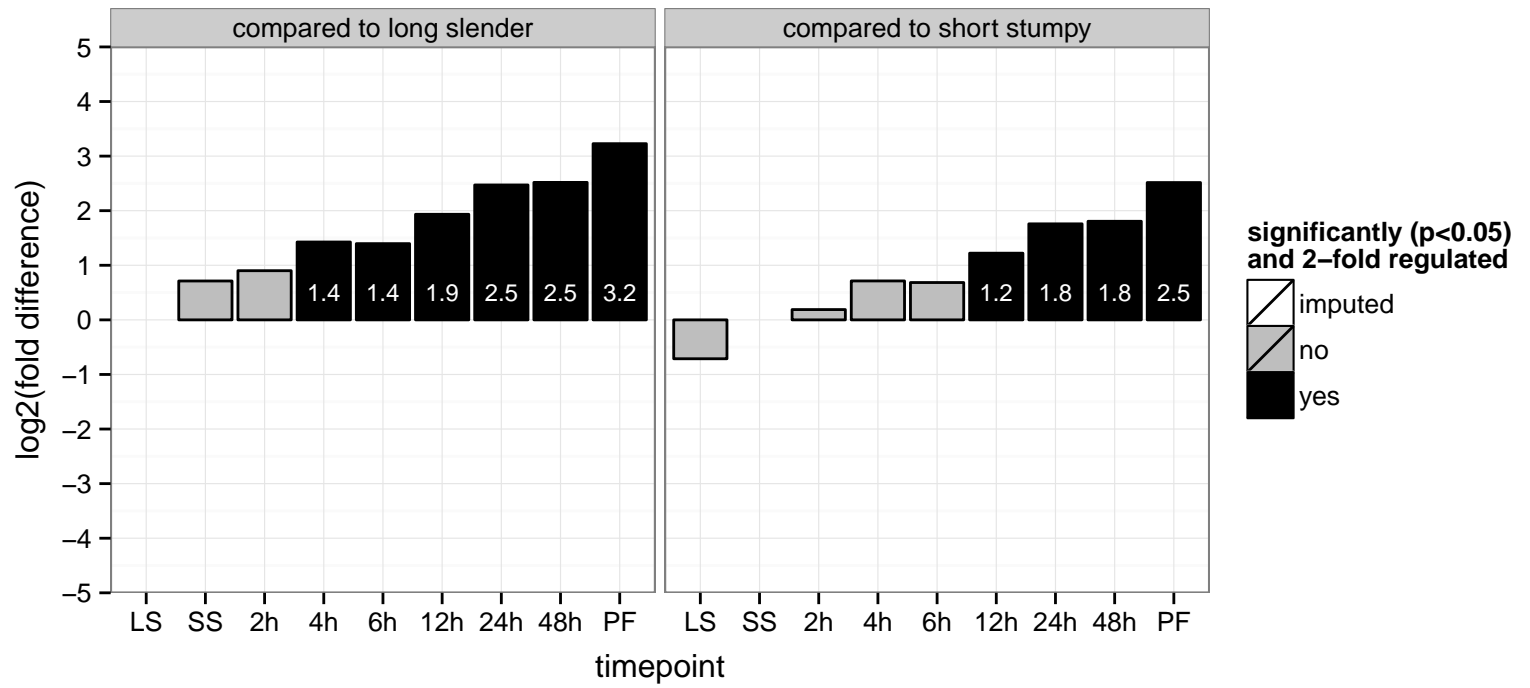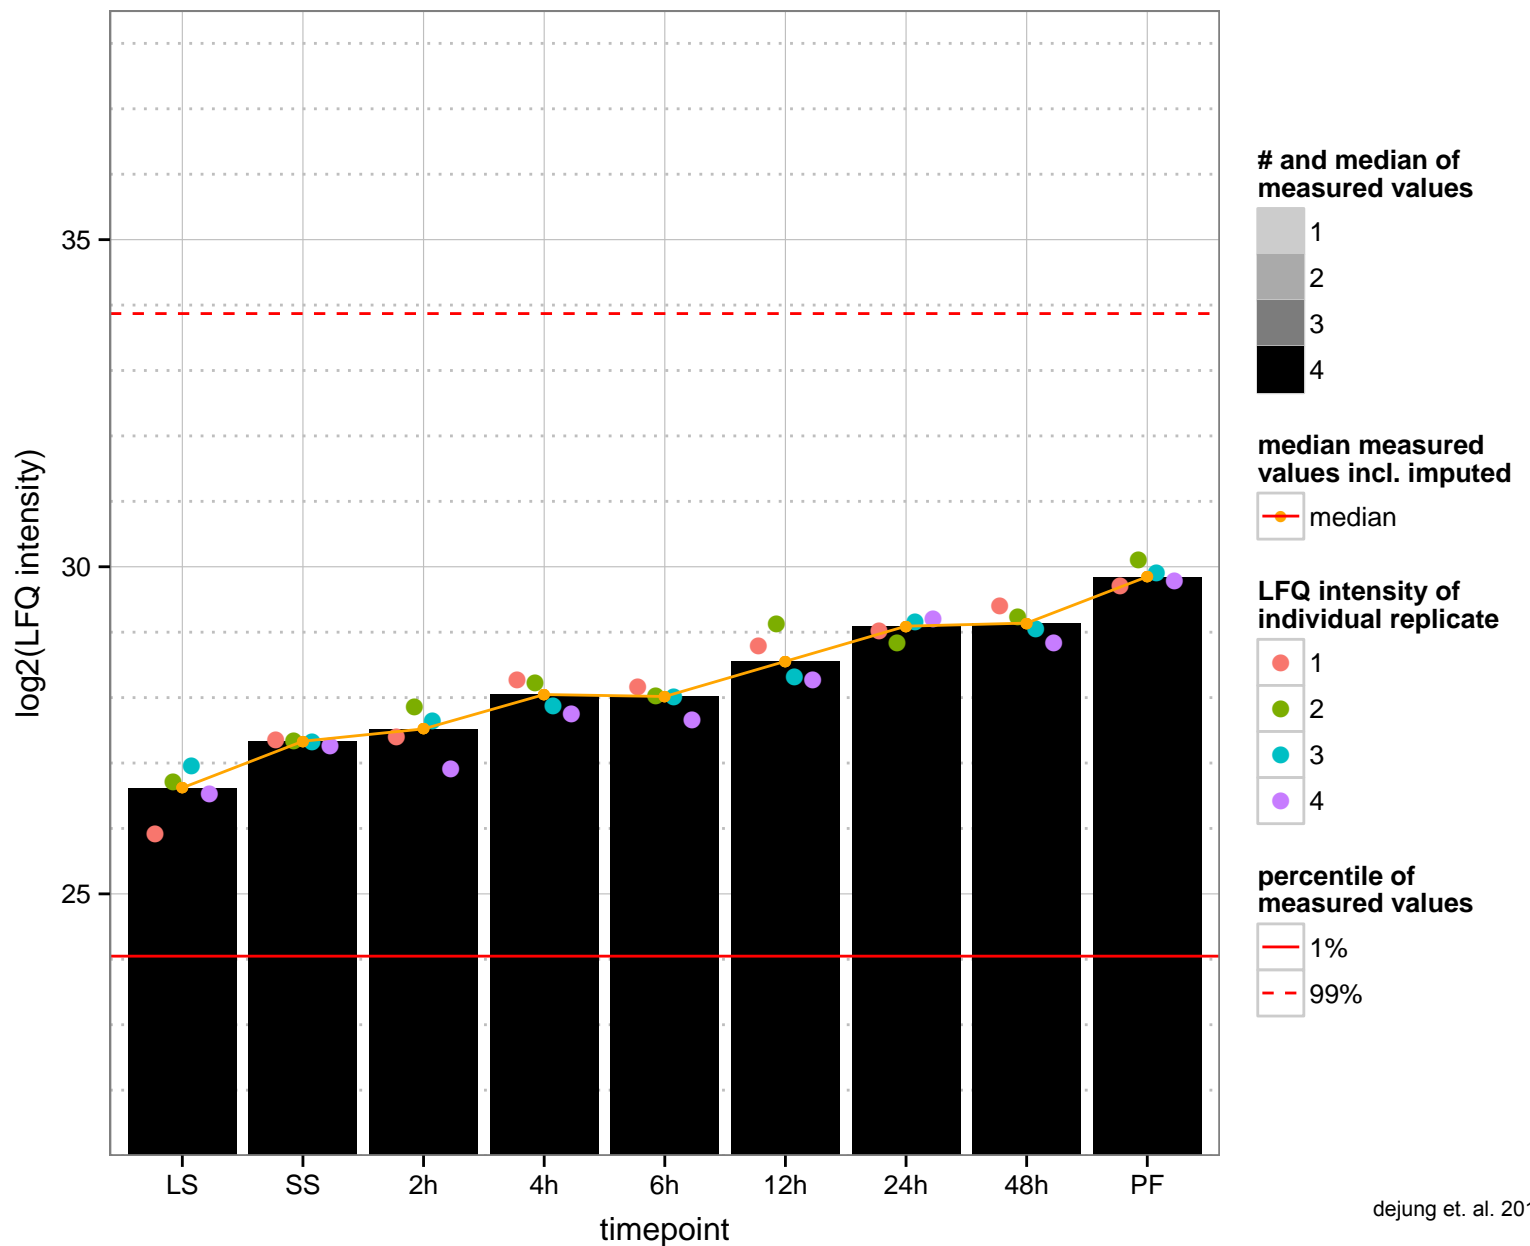

hypothetical protein, conserved  
 Tb927.9.6920  
 AGOF: null  
 AGOC: null  
 AGOP: null  
 PGOF: null  
 PGOC: null  
 PGOP: null

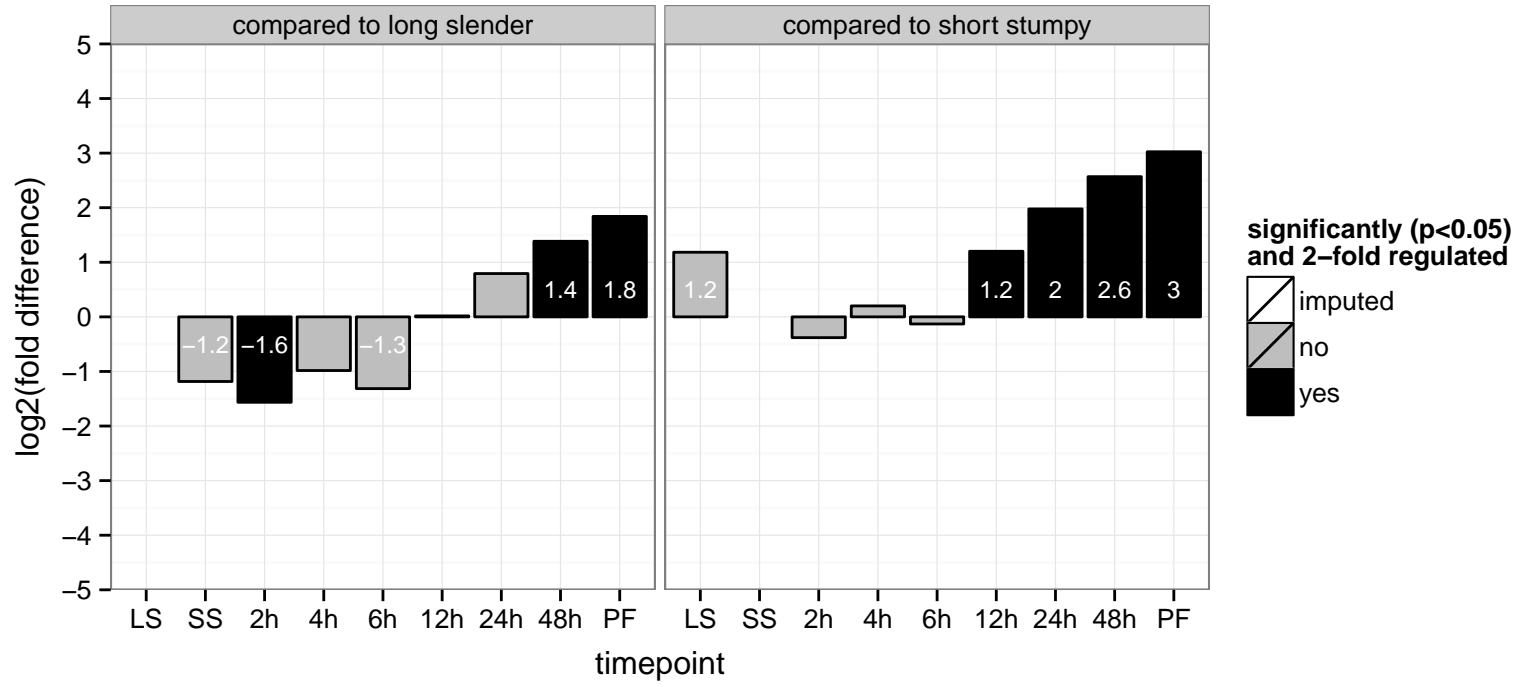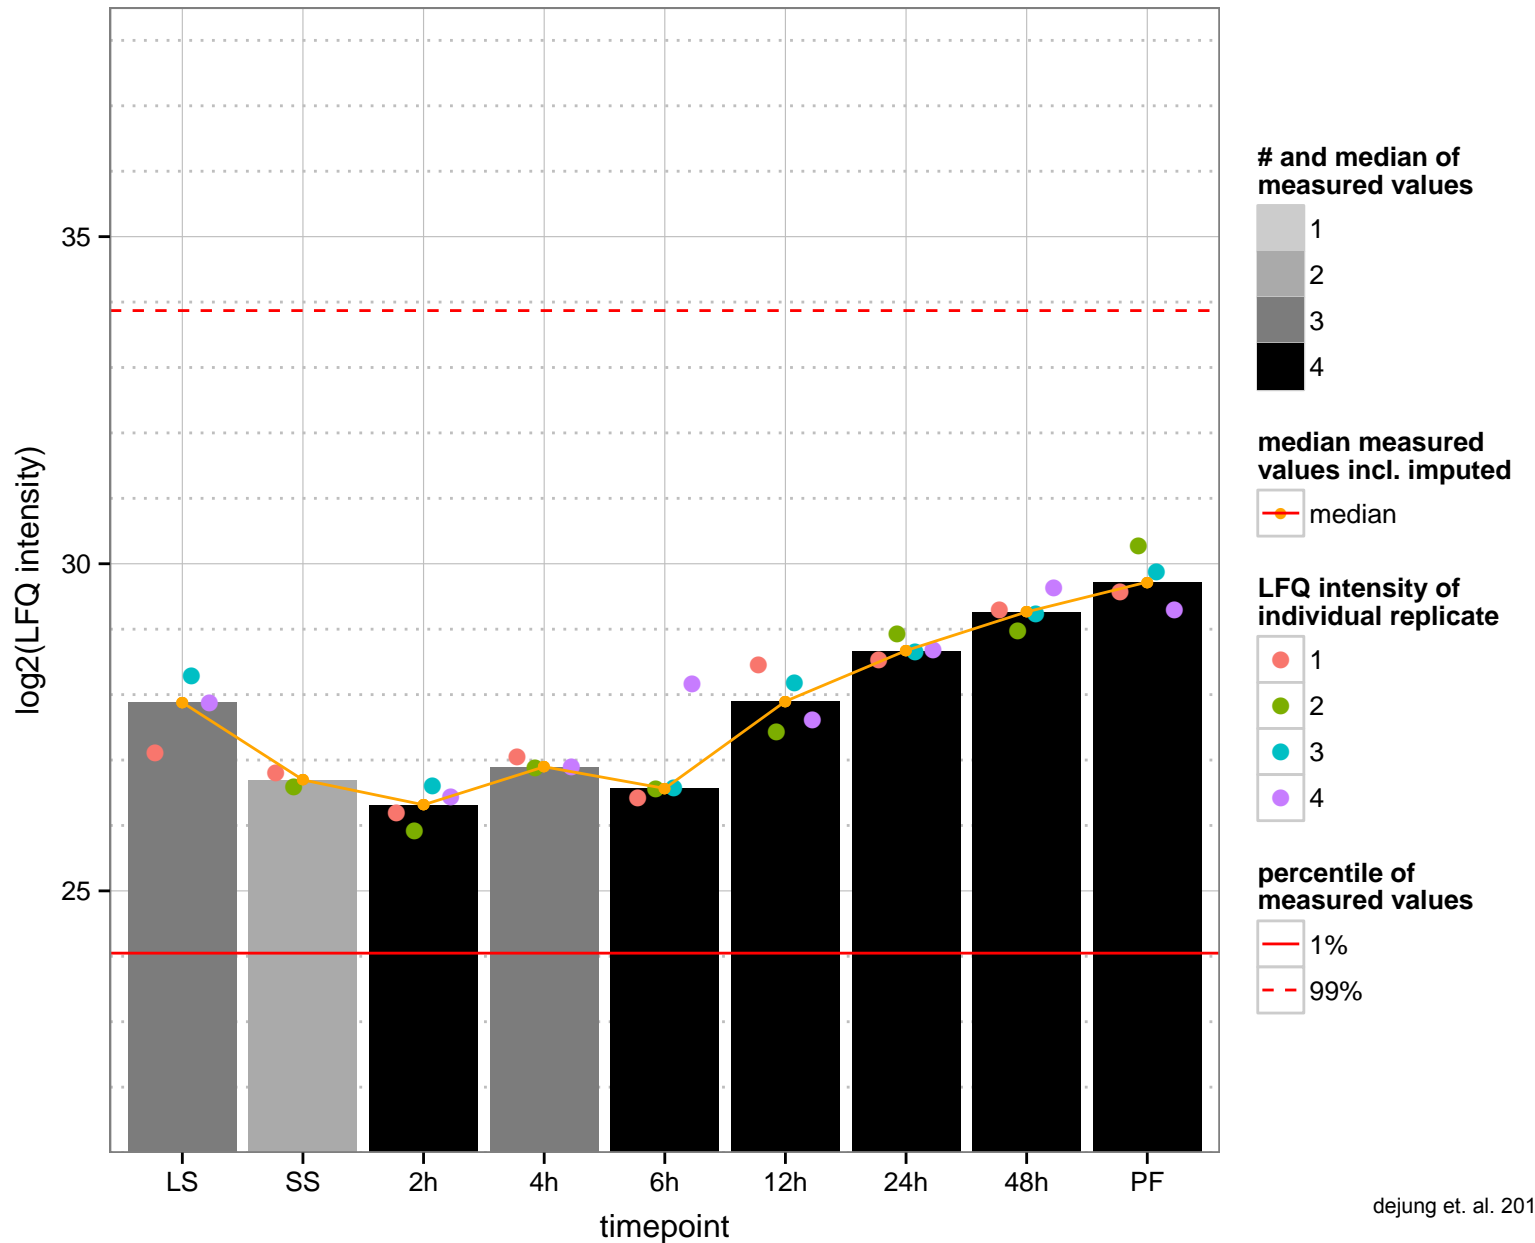

adenosine transporter 2 (TbNT2/927), adenosine transporter 2, putative (TbNT3), adenosine transporter 2 (TbNT5), putative (Tb927.9.7470)  
 AGOF: purine nucleoside transmembrane transporter activity, nucleoside transmembrane transporter activity, nucleoside:hydrolysis activity  
 AGOC: integral to membrane, membrane  
 AGOP: purine ribonucleoside salvage, transport, nucleoside transport, adenosine transport, inosine transport, nucleoside transport  
 PGOF: nucleoside transmembrane transporter activity  
 PGOC: integral to membrane  
 PGOP: transport

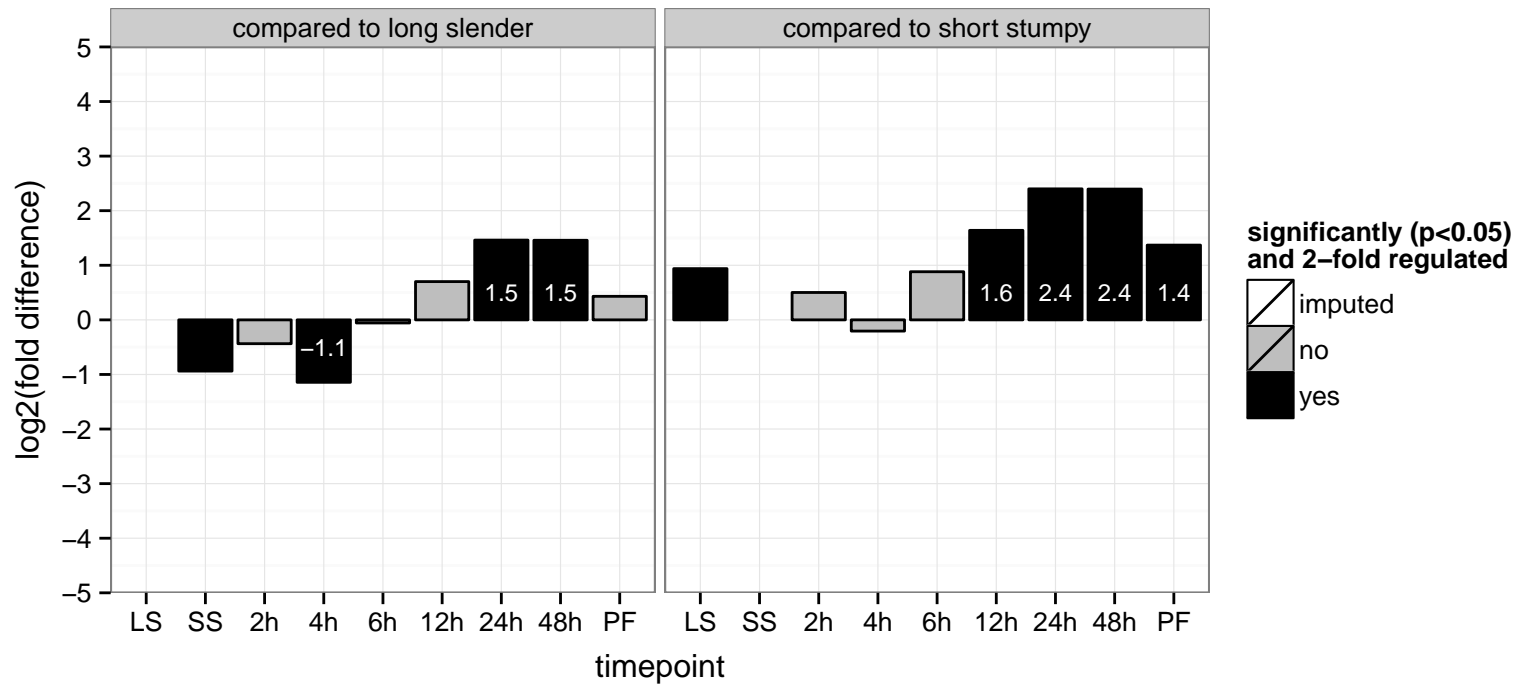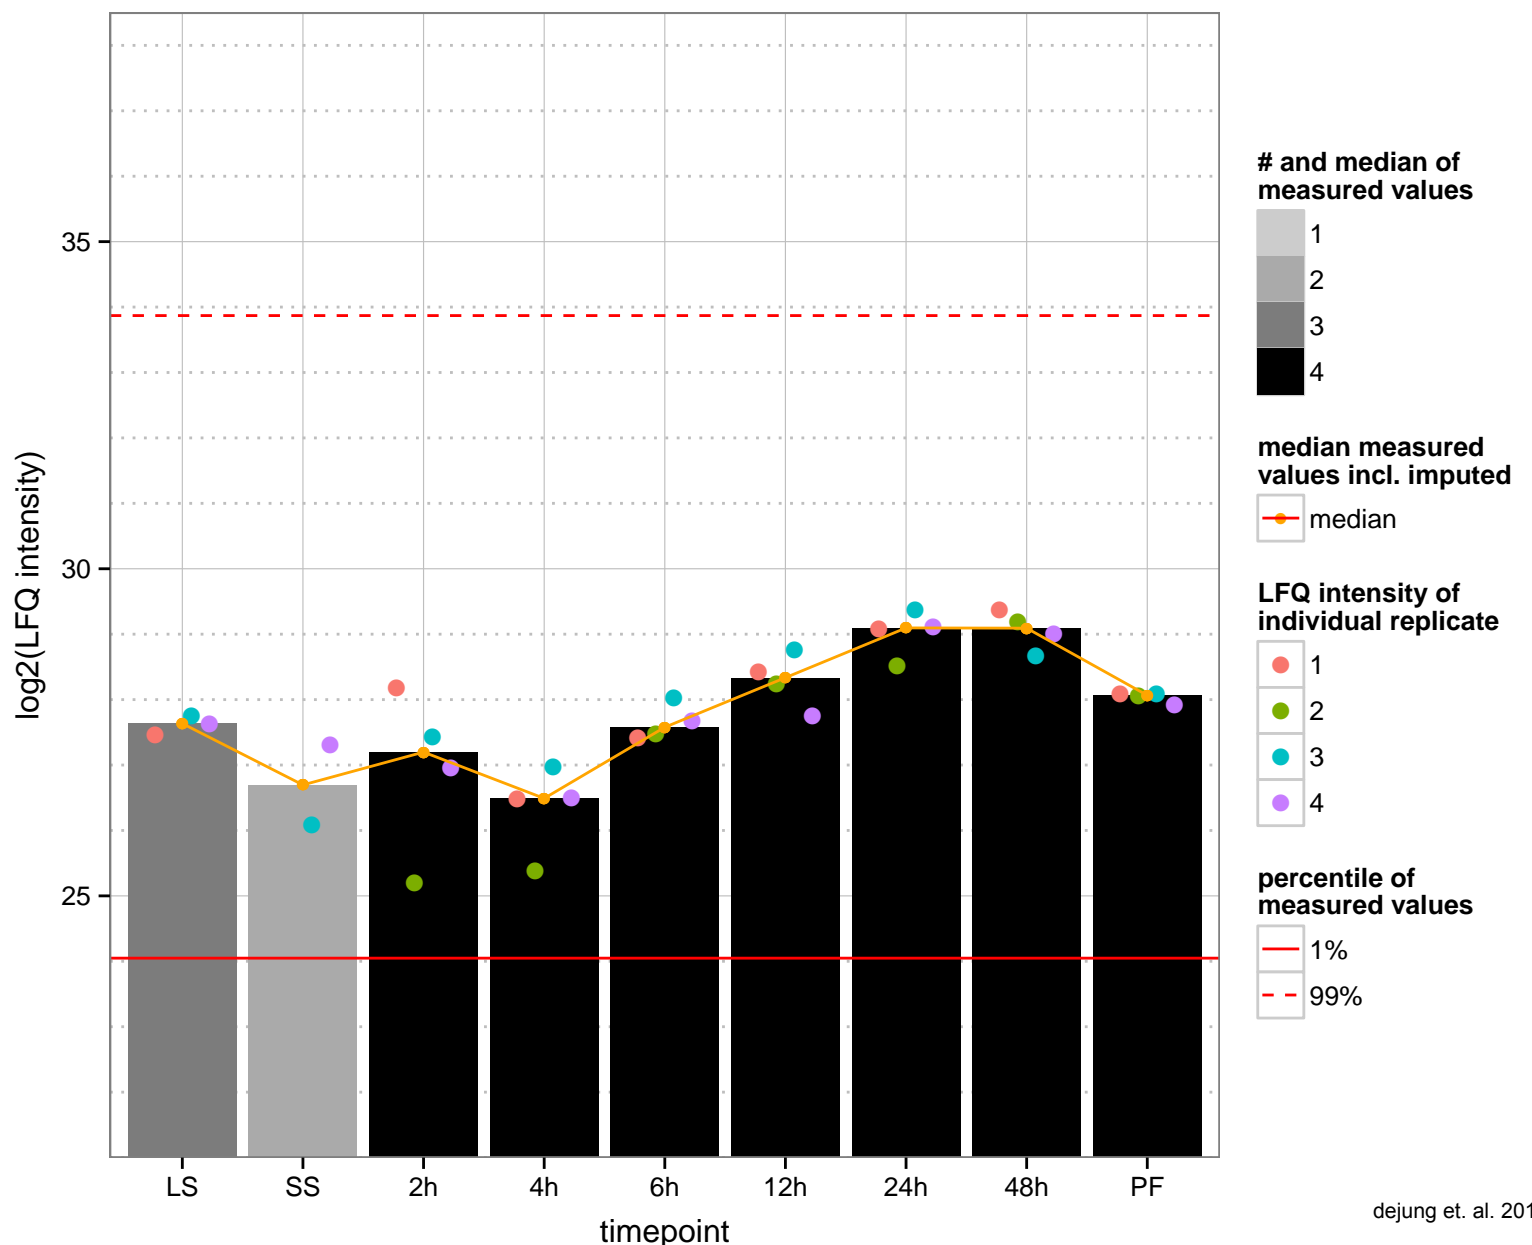

Peptide deformylase 2  
 Tb927.9.8210  
 AGOF: iron ion binding, peptide deformylase activity  
 AGOC: mitochondrion  
 AGOP: translation  
 PGO: null  
 PGOC: null  
 PGOP: null

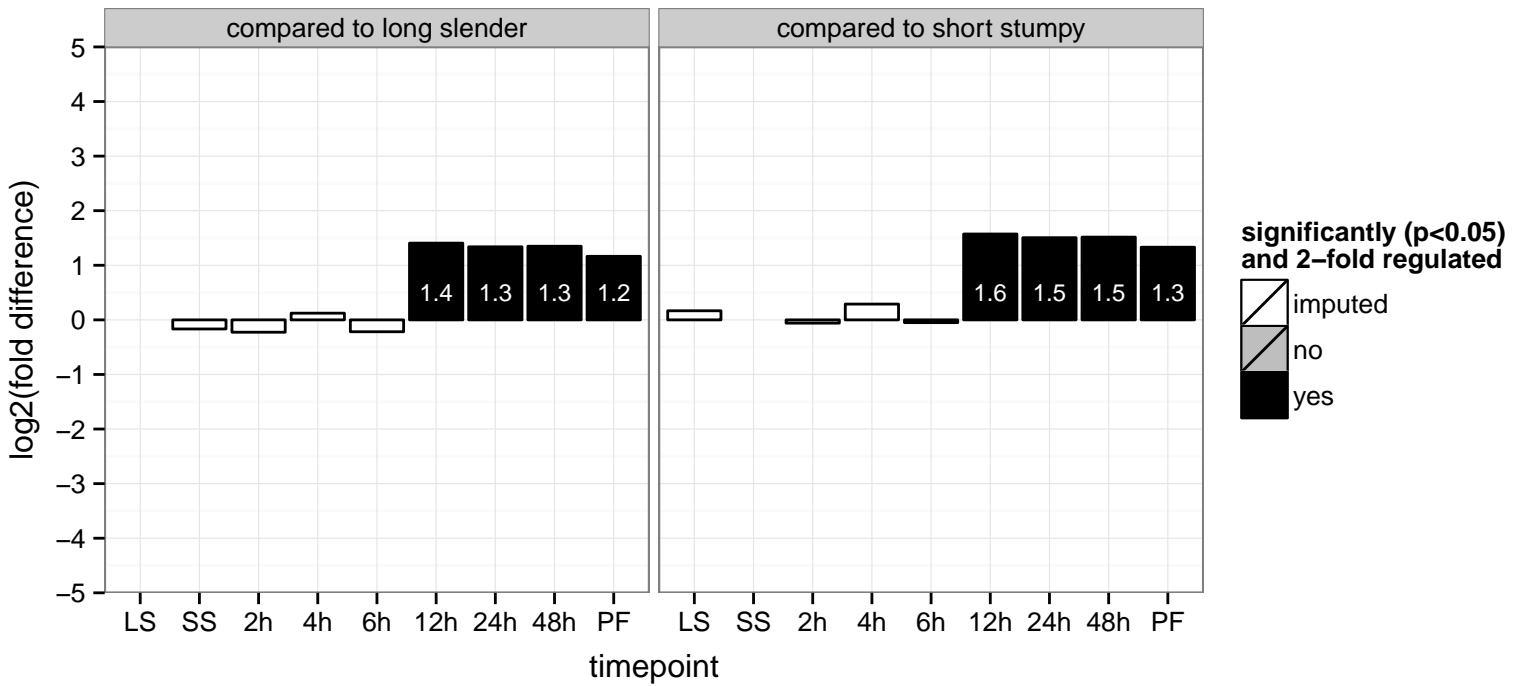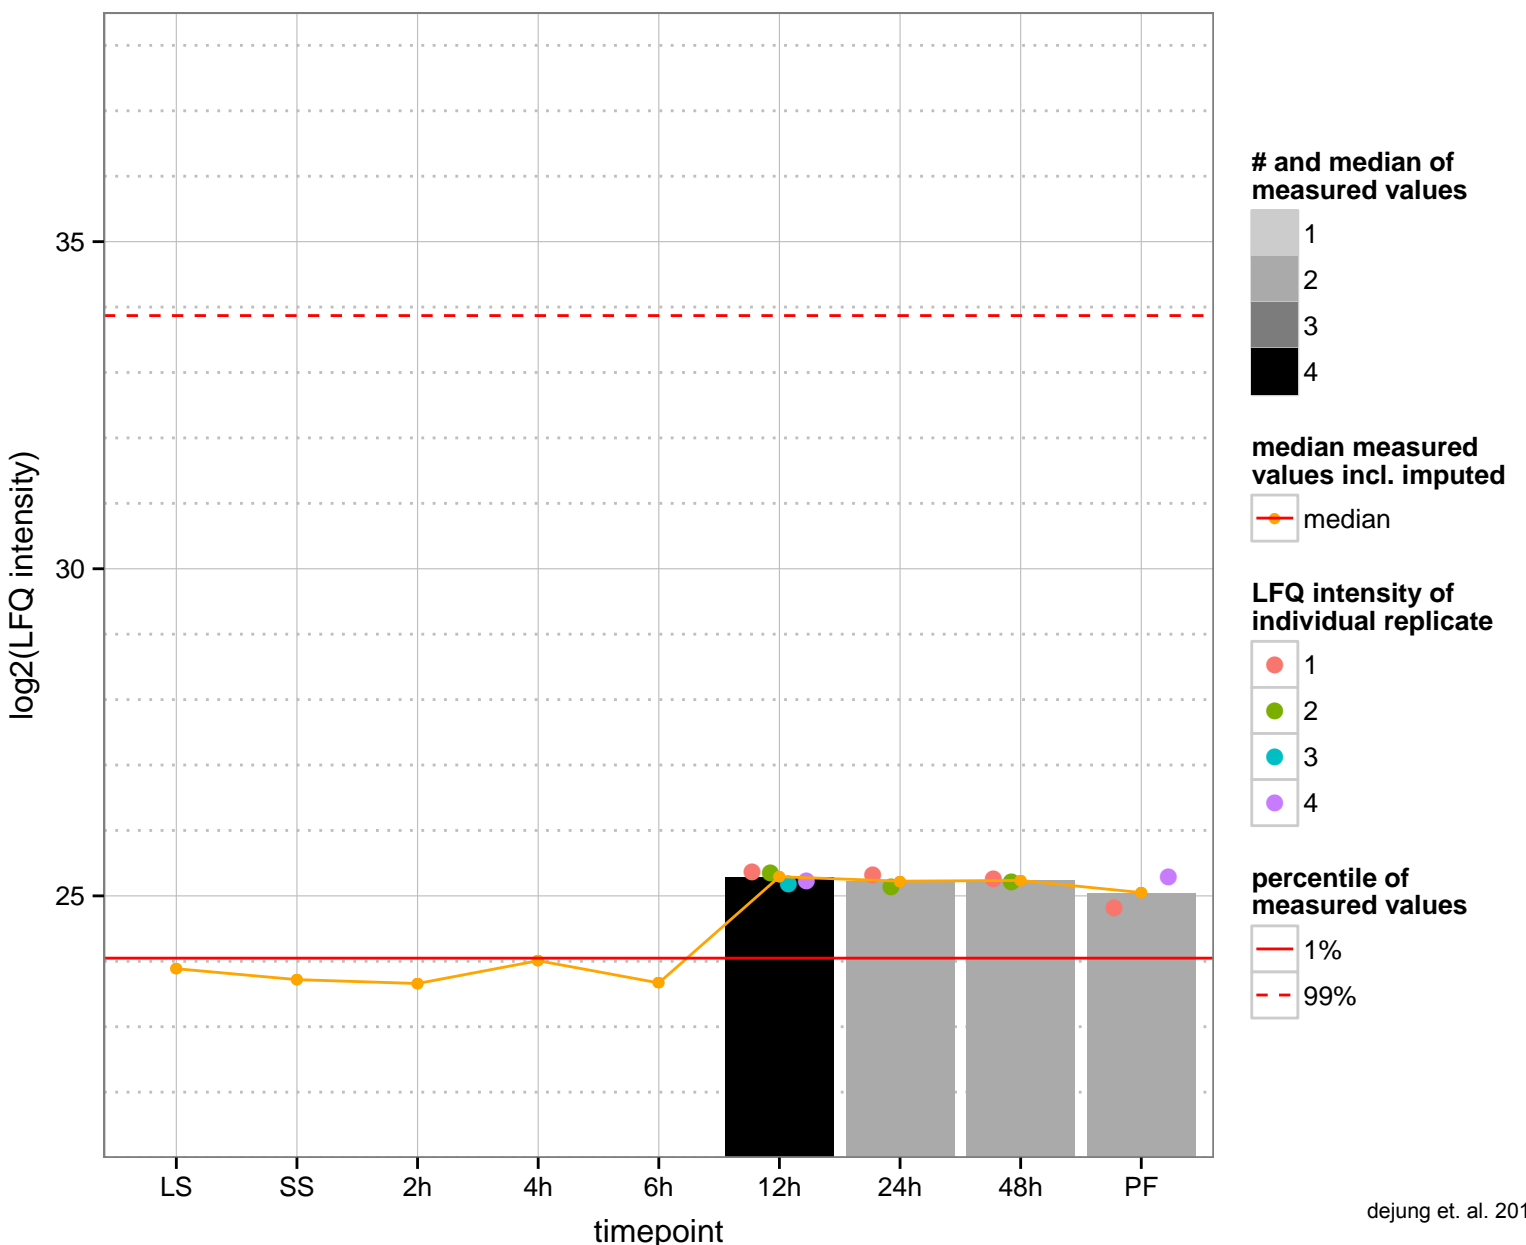

hypothetical protein, conserved  
 Tb927.9.8380  
 AGOF: null  
 AGOC: null  
 AGOP: null  
 PGO: null  
 PGOC: null  
 PGOP: null

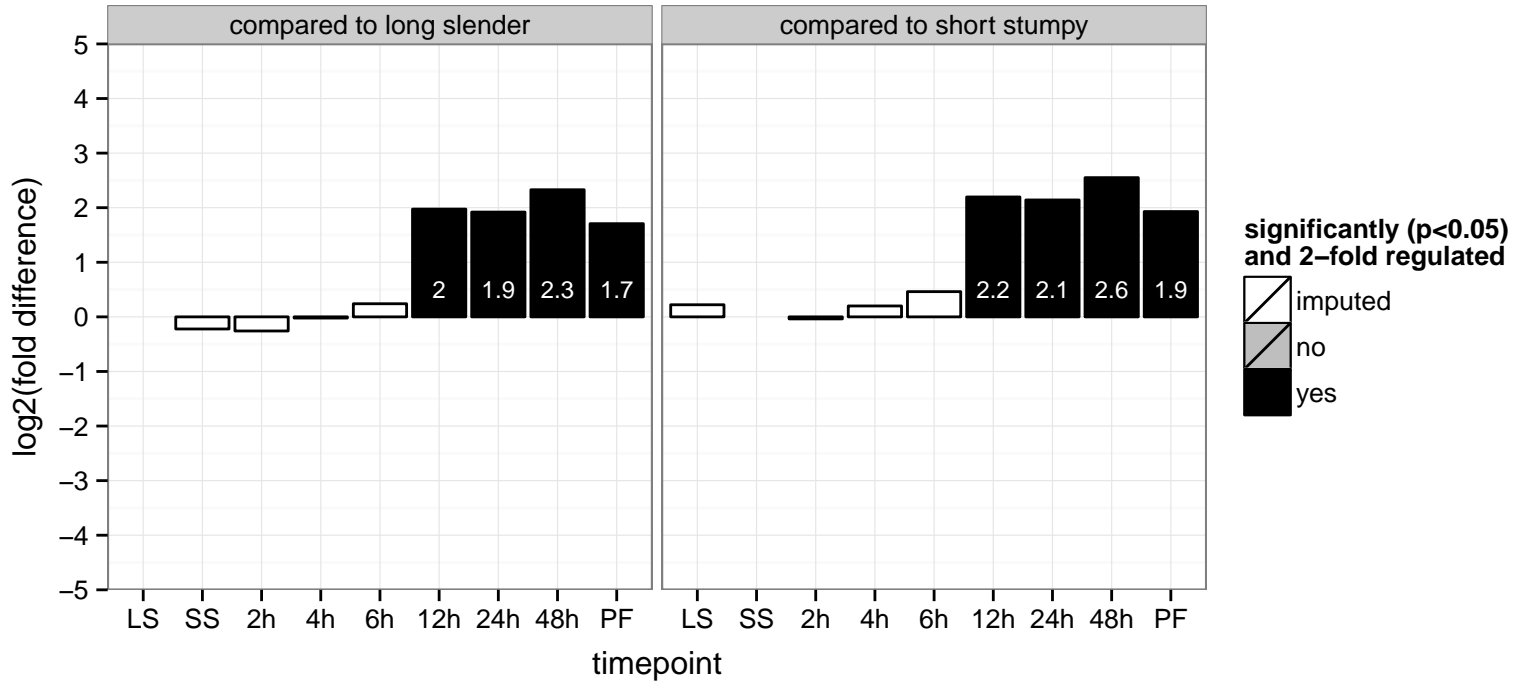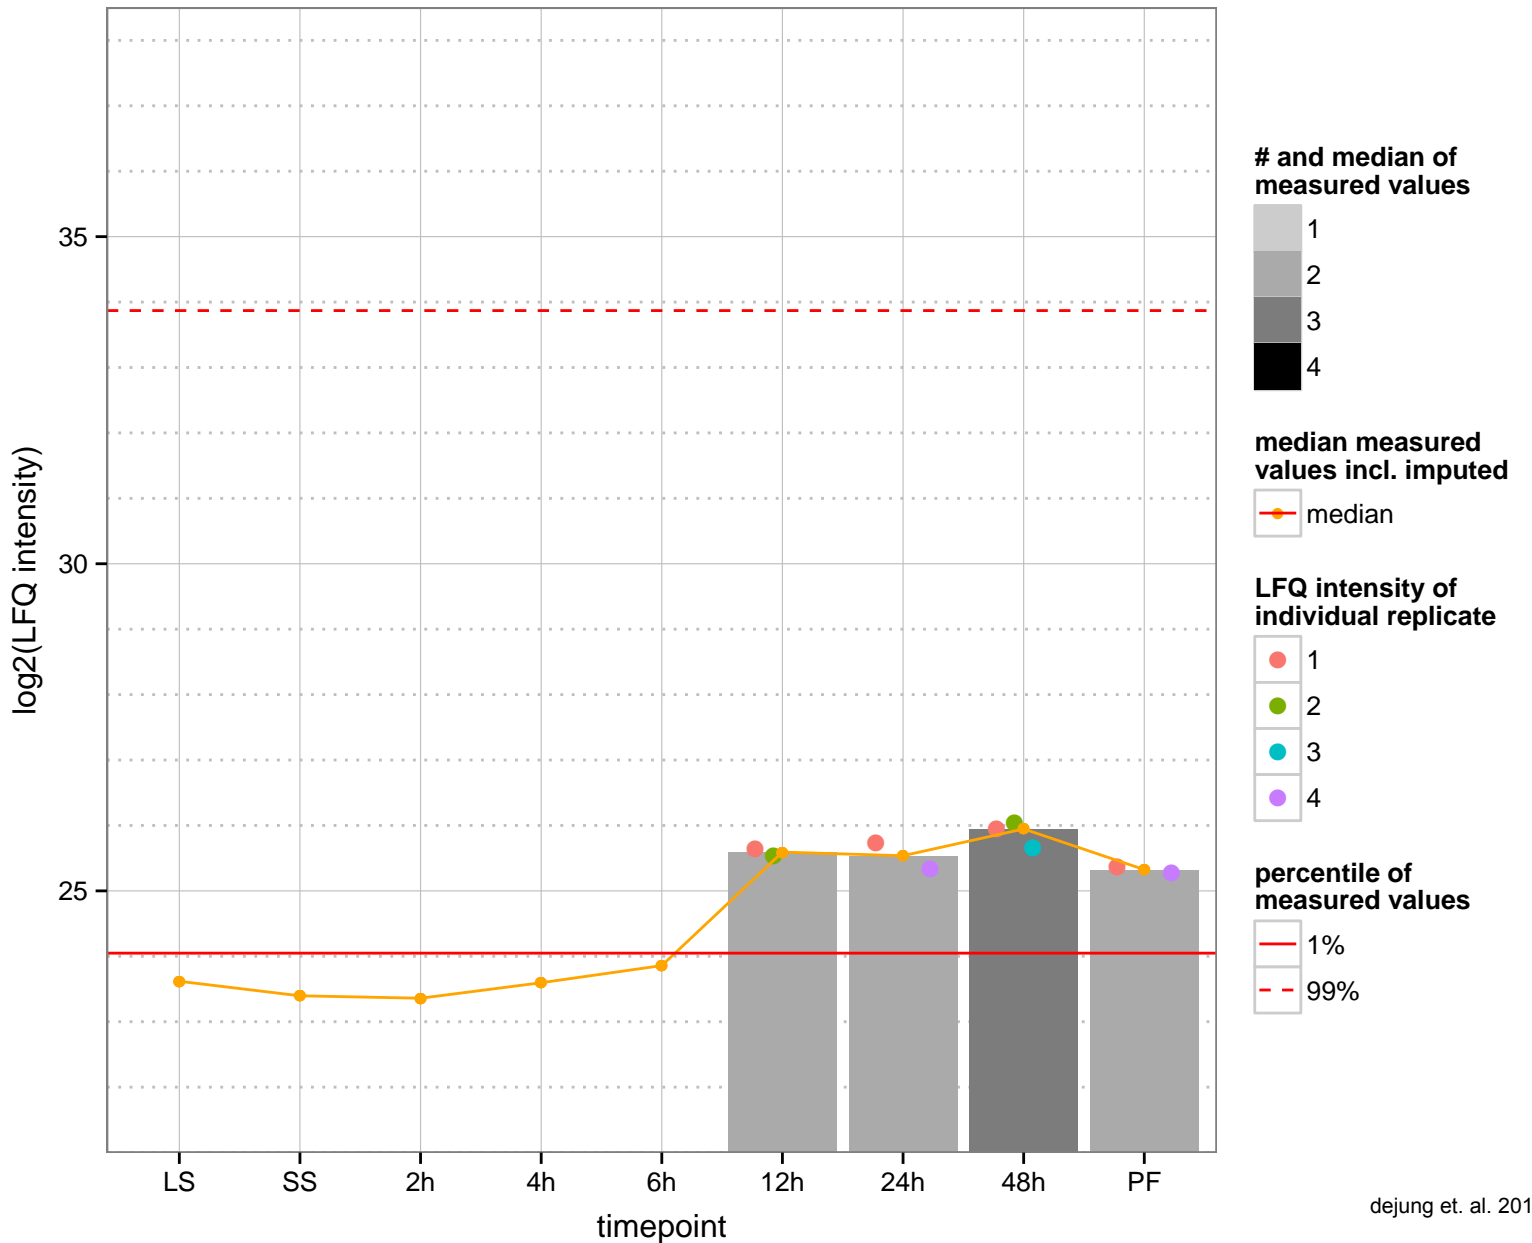



hypothetical protein, conserved  
 Tb927.9.9310  
 AGOF: null  
 AGOC: mitochondrion  
 AGOP: null  
 PGO: null  
 PGO: null  
 PGO: null

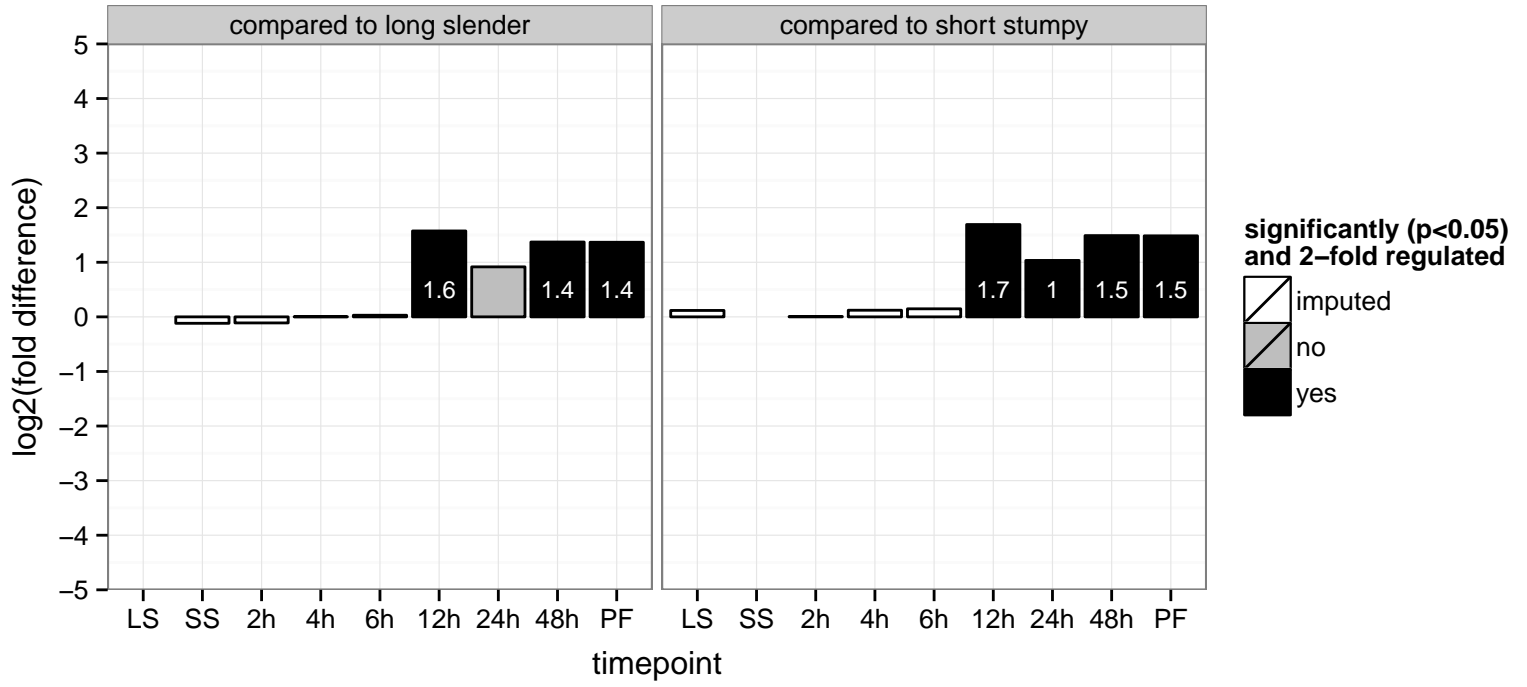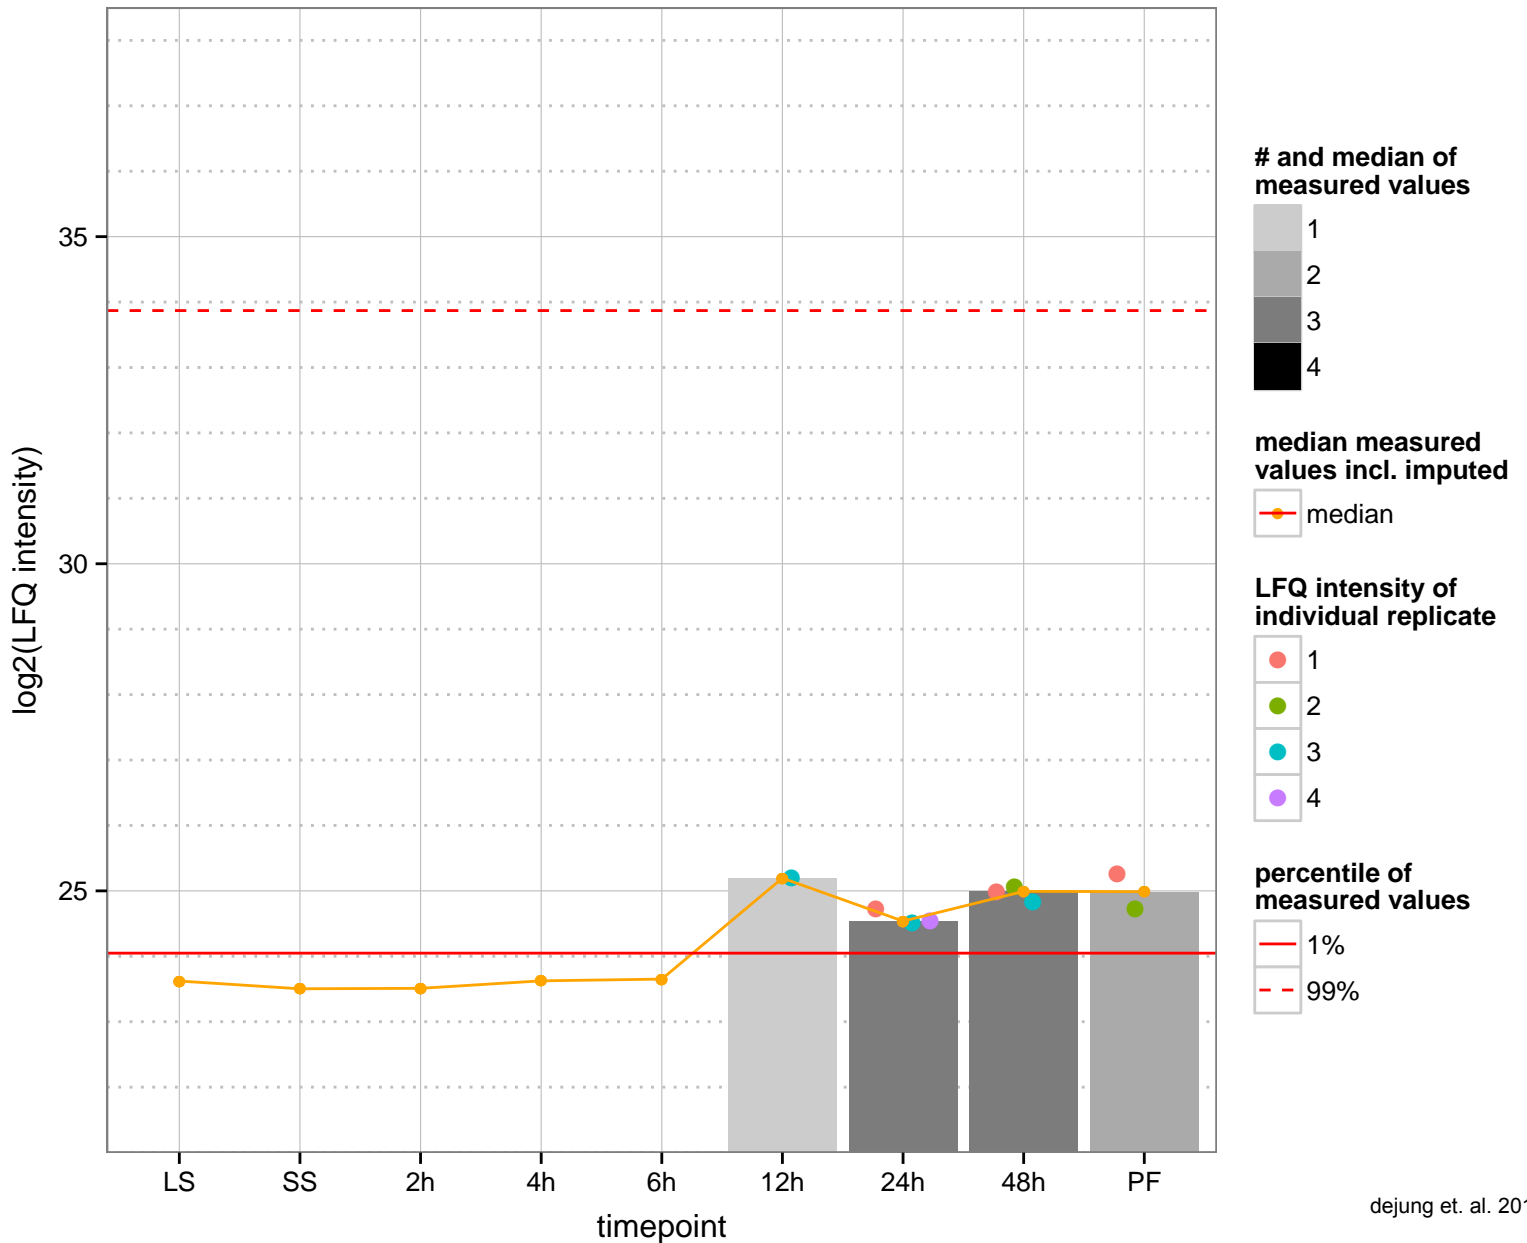

zinc finger protein family member, putative (ZC3H29)  
 Tb927.9.9520  
 AGOF: RNA binding, zinc ion binding  
 AGOC: null  
 AGOP: null  
 PGOF: nucleic acid binding, zinc ion binding  
 PGO: null  
 PGOP: null

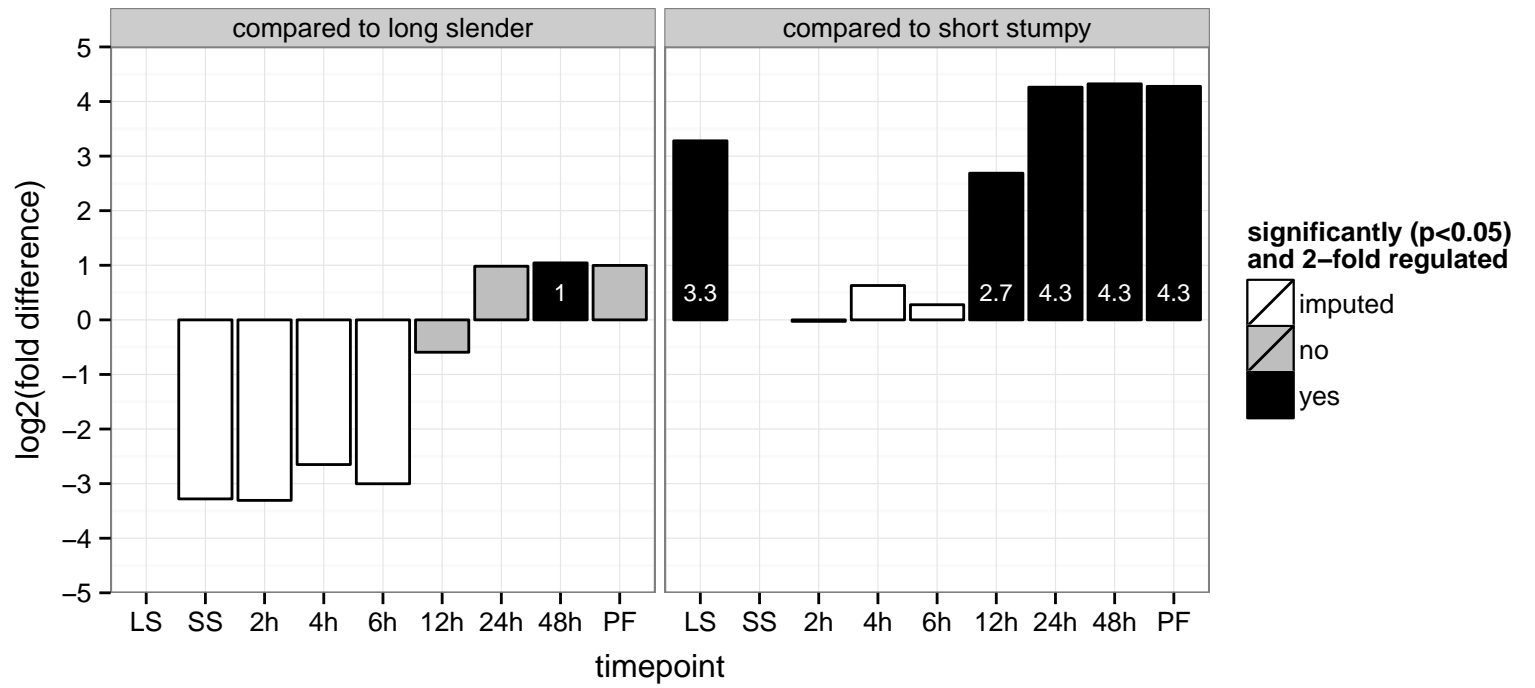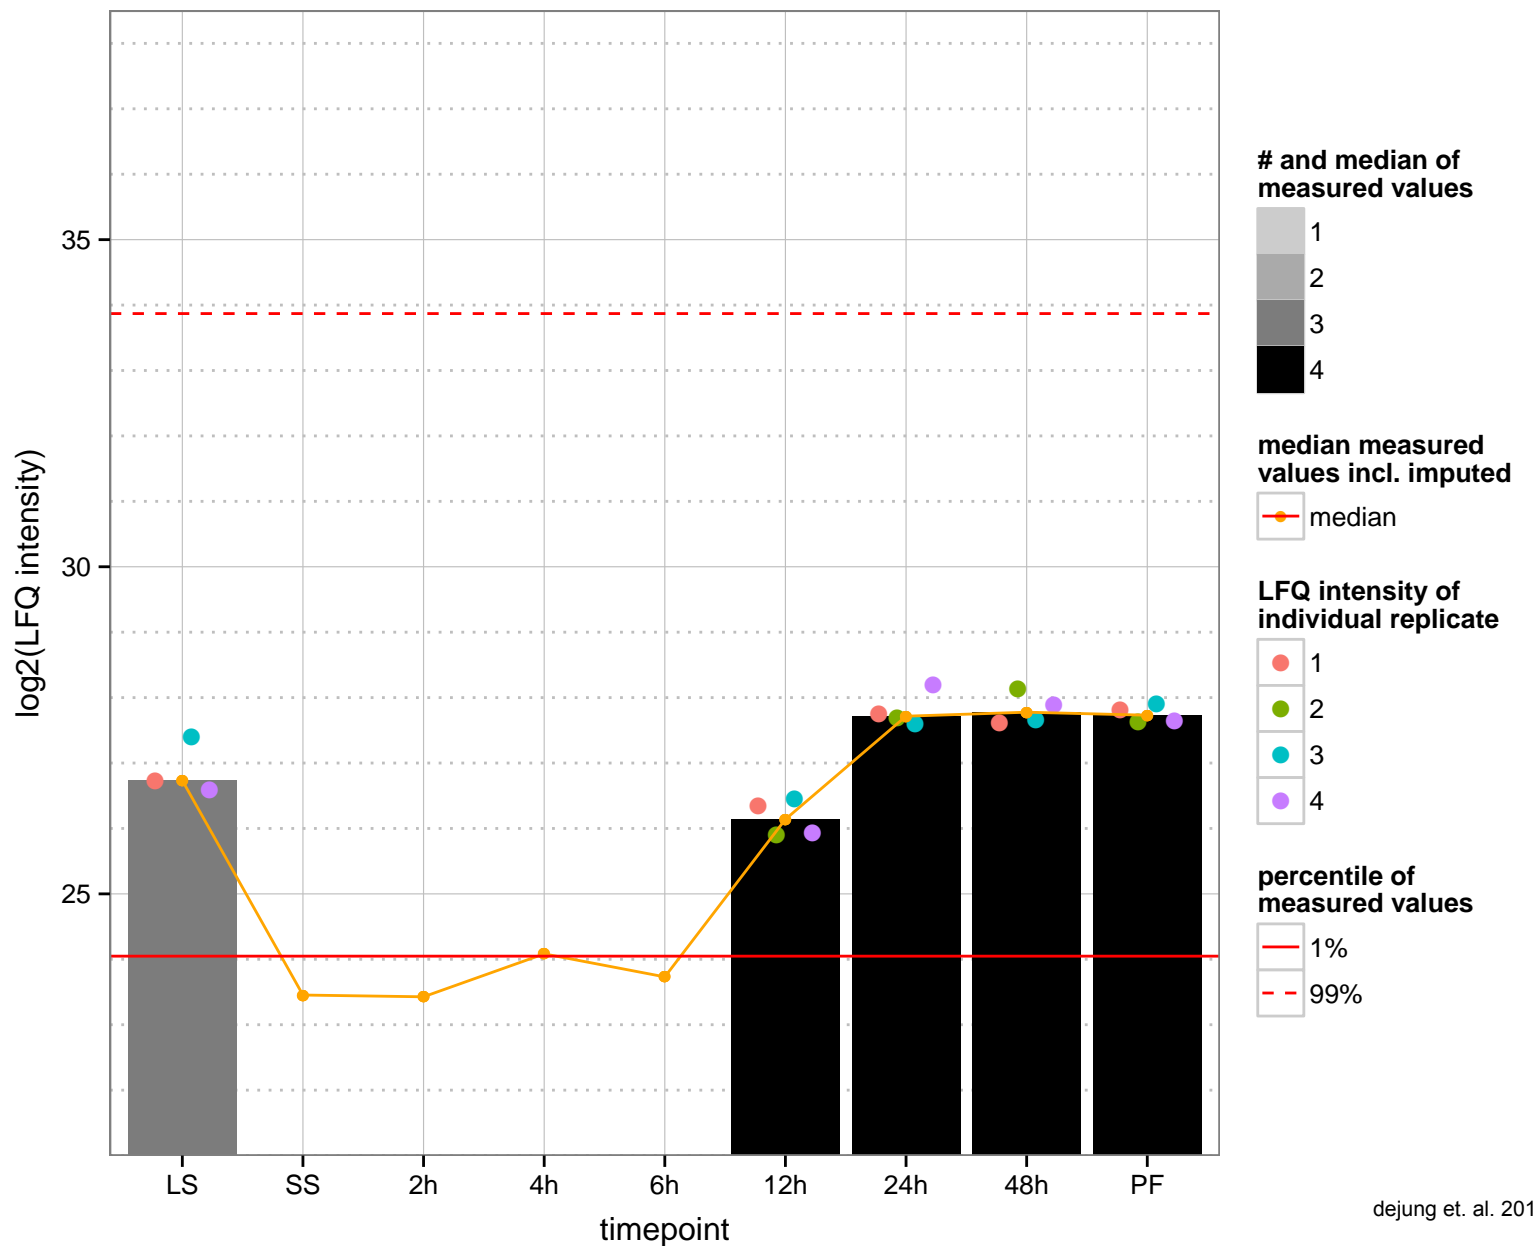

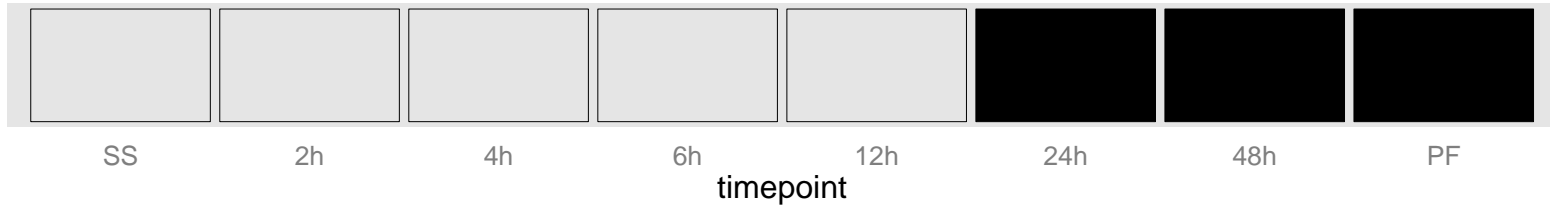

**regulated**  **not regulated**  **significant down**  **significant up**

nucleolar RNA helicase II, putative, nucleolar RNA helicase Gu, BAC from homologous region on chr5  
 Tb927.5.4420;Tb05.5K5.70  
 AGOF: ATP binding, ATP-dependent helicase activity, RNA binding, helicase activity  
 AGOC: nucleus, nucleolus, nucleus  
 AGOP: null, nucleobase-containing compound metabolic process  
 PGO: ATP binding, ATP-dependent helicase activity, RNA binding, helicase activity, nucleic acid binding  
 PGOC: nucleus  
 PGOP: null

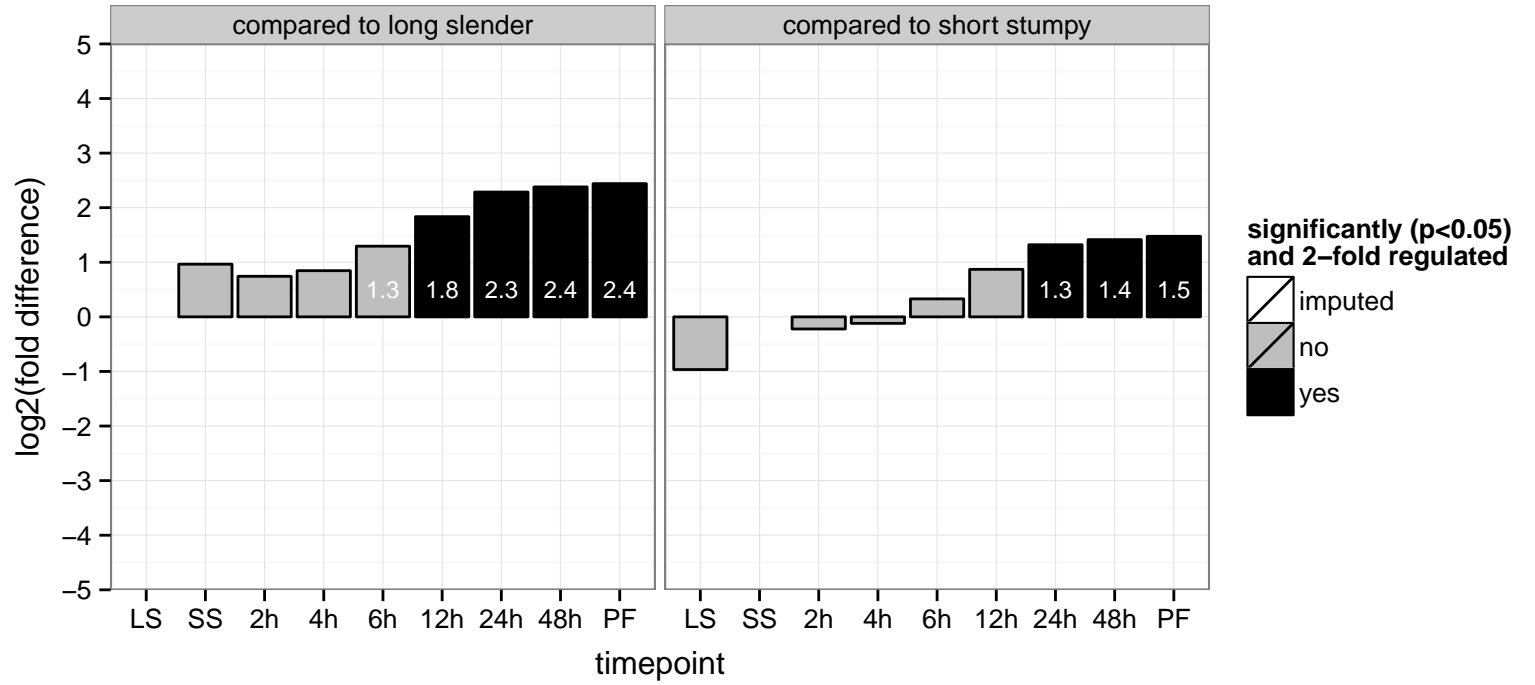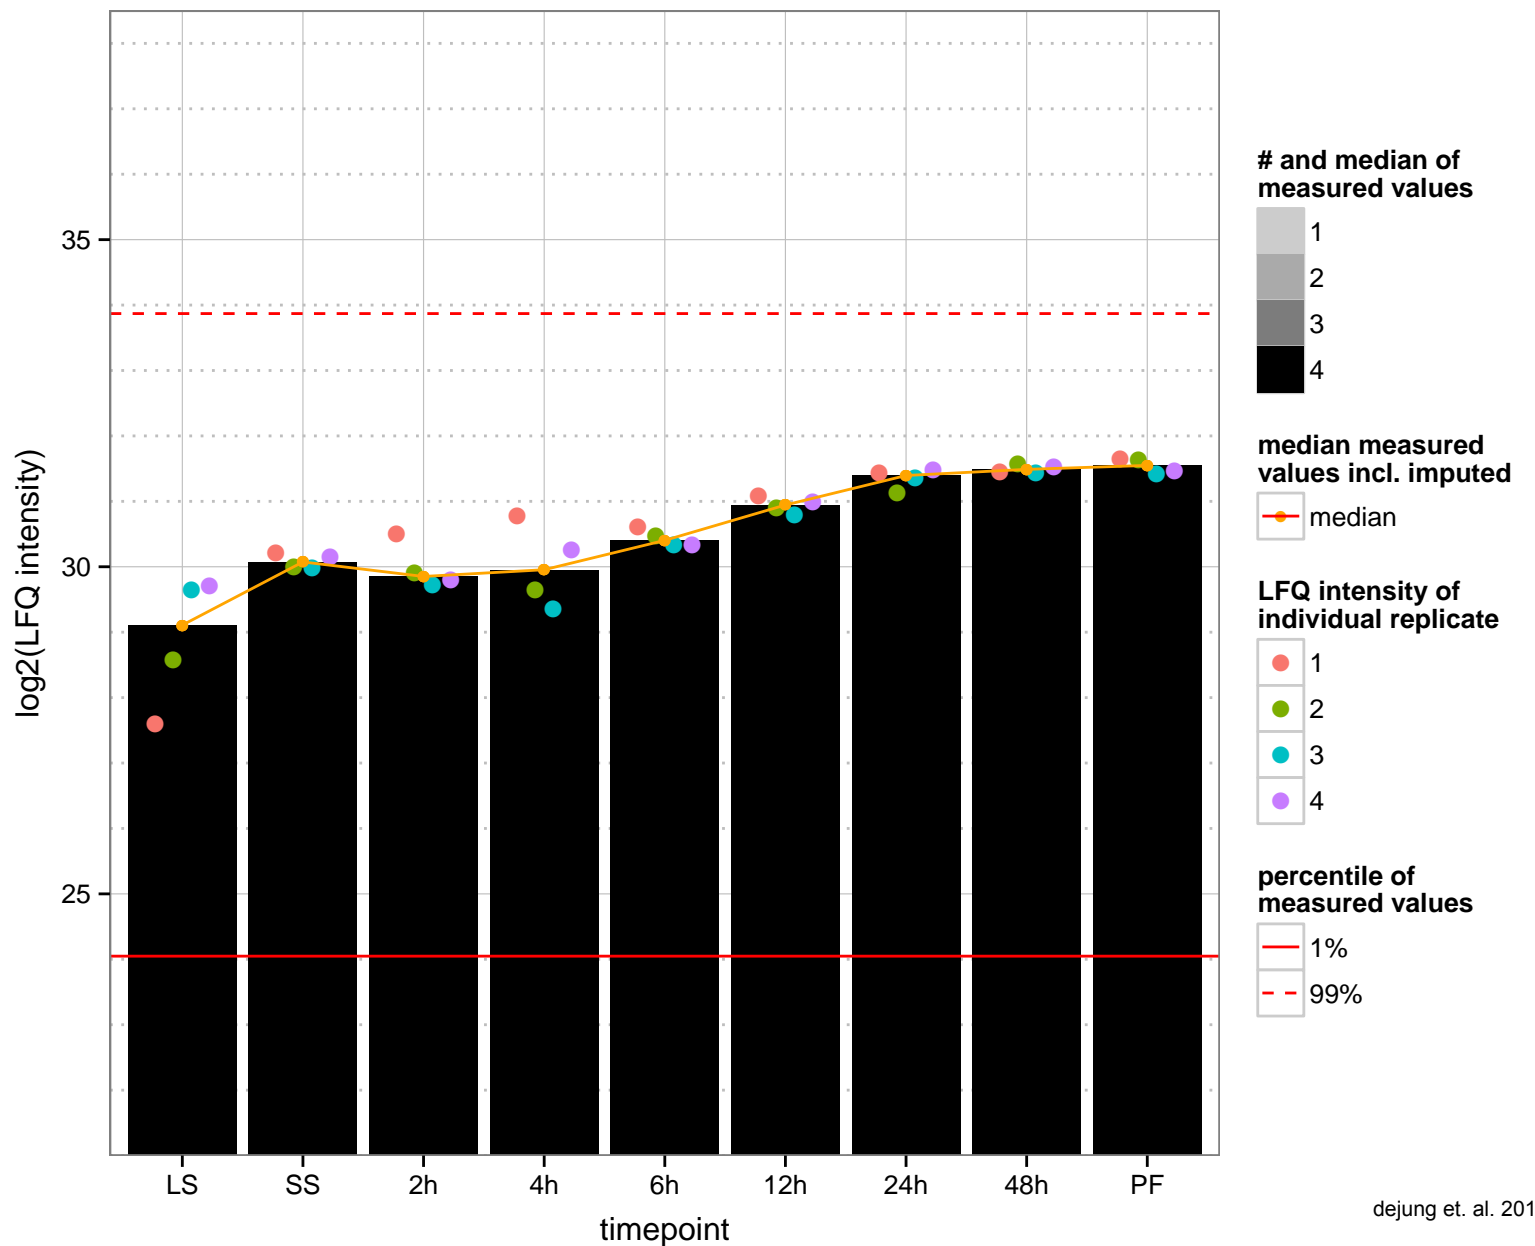

hypothetical protein, conserved, chrXI additional, unordered contigs  
 Tb11.1420;Tb11.1370;Tb927.11.1850  
 AGOF: null  
 AGOC: null  
 AGOP: null  
 PGO: null  
 PGOC: null  
 PGOP: null

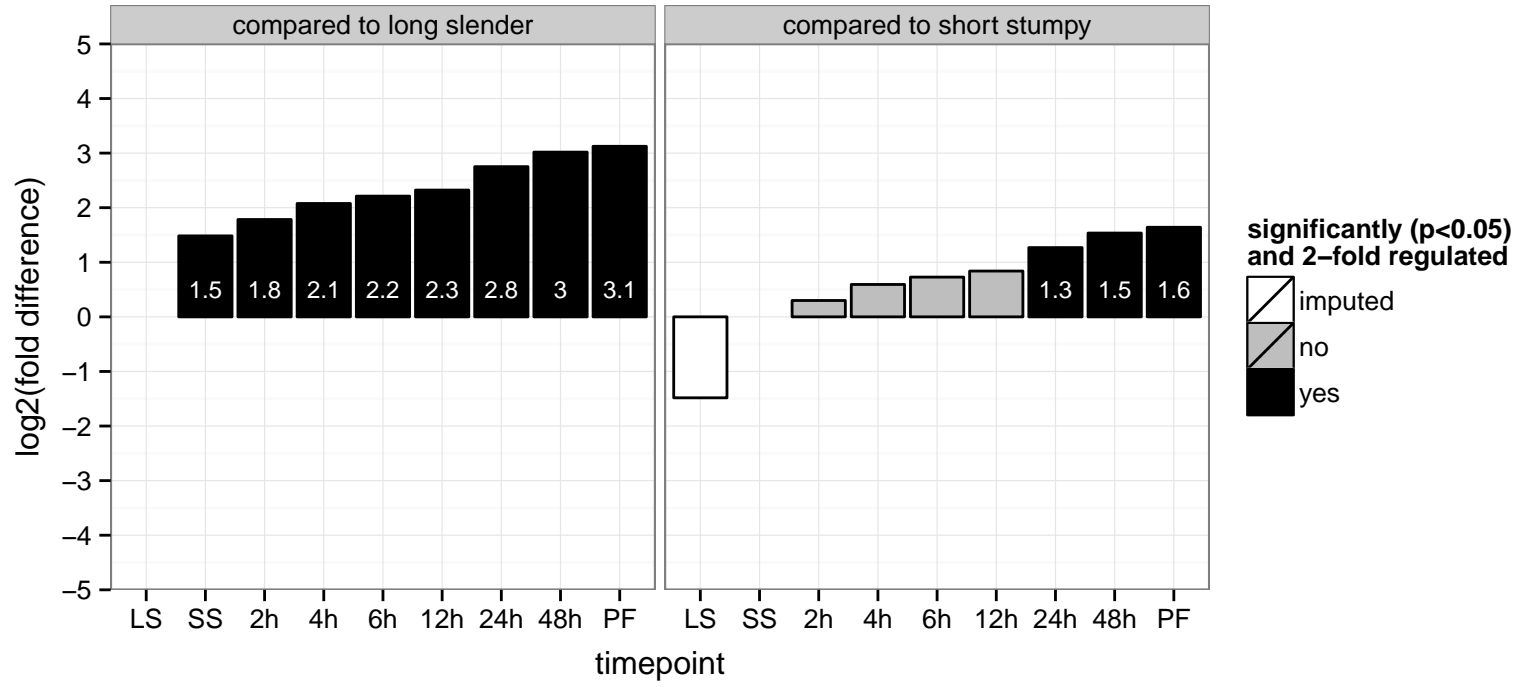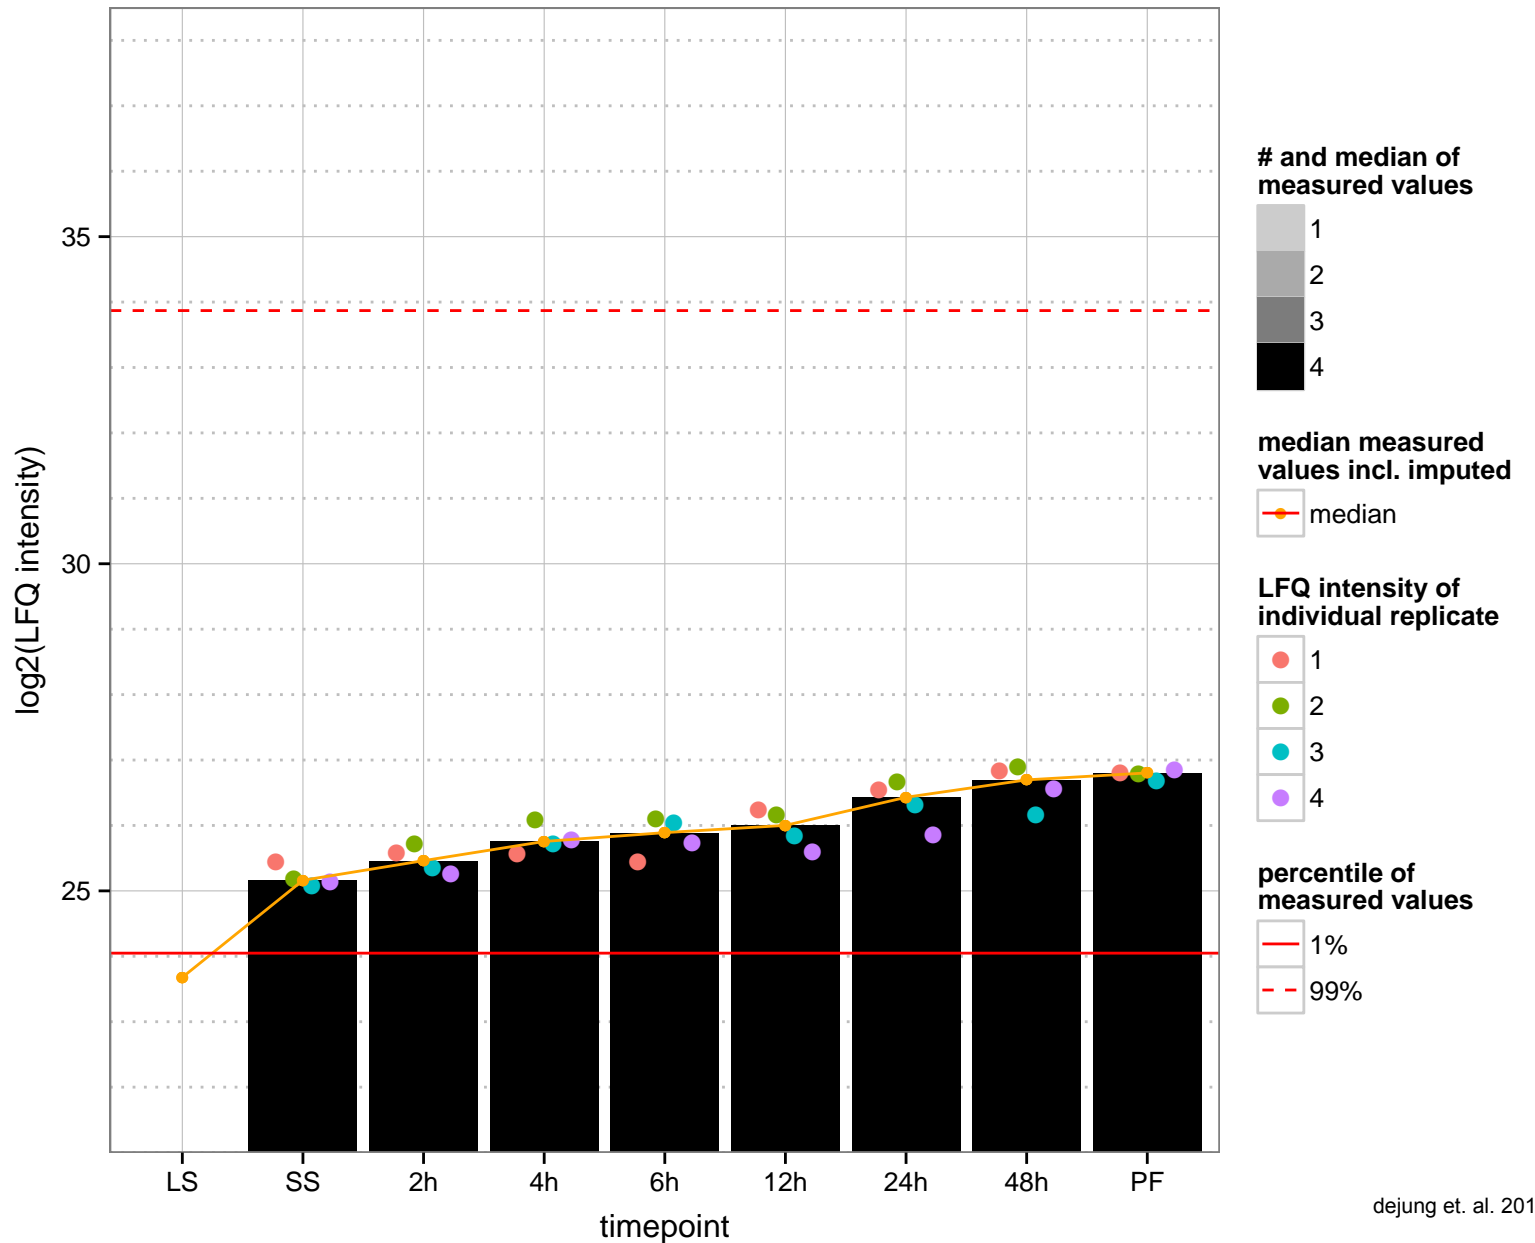

2-oxoisovalerate dehydrogenase alpha subunit, putative

Tb927.10.660;Tb11.v5.0500

AGOF: null, 2-oxoisovalerate dehydrogenase (acylating) activity, oxidoreductase activity, acting on the aldehyde or oxo group

AGOC: null, mitochondrion

AGOP: null, metabolic process

PGOF: oxidoreductase activity, acting on the aldehyde or oxo group of donors, disulfide as acceptor

PGOC: null

PGOP: metabolic process

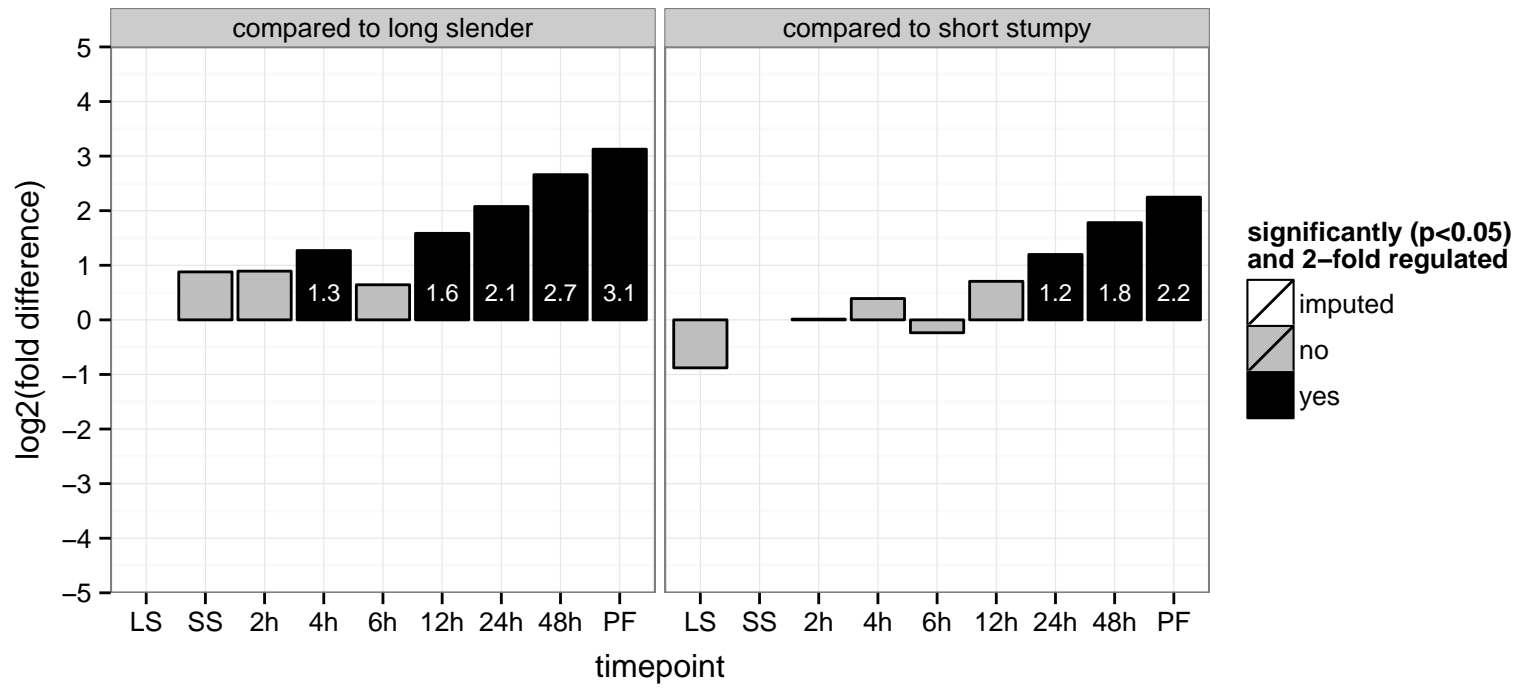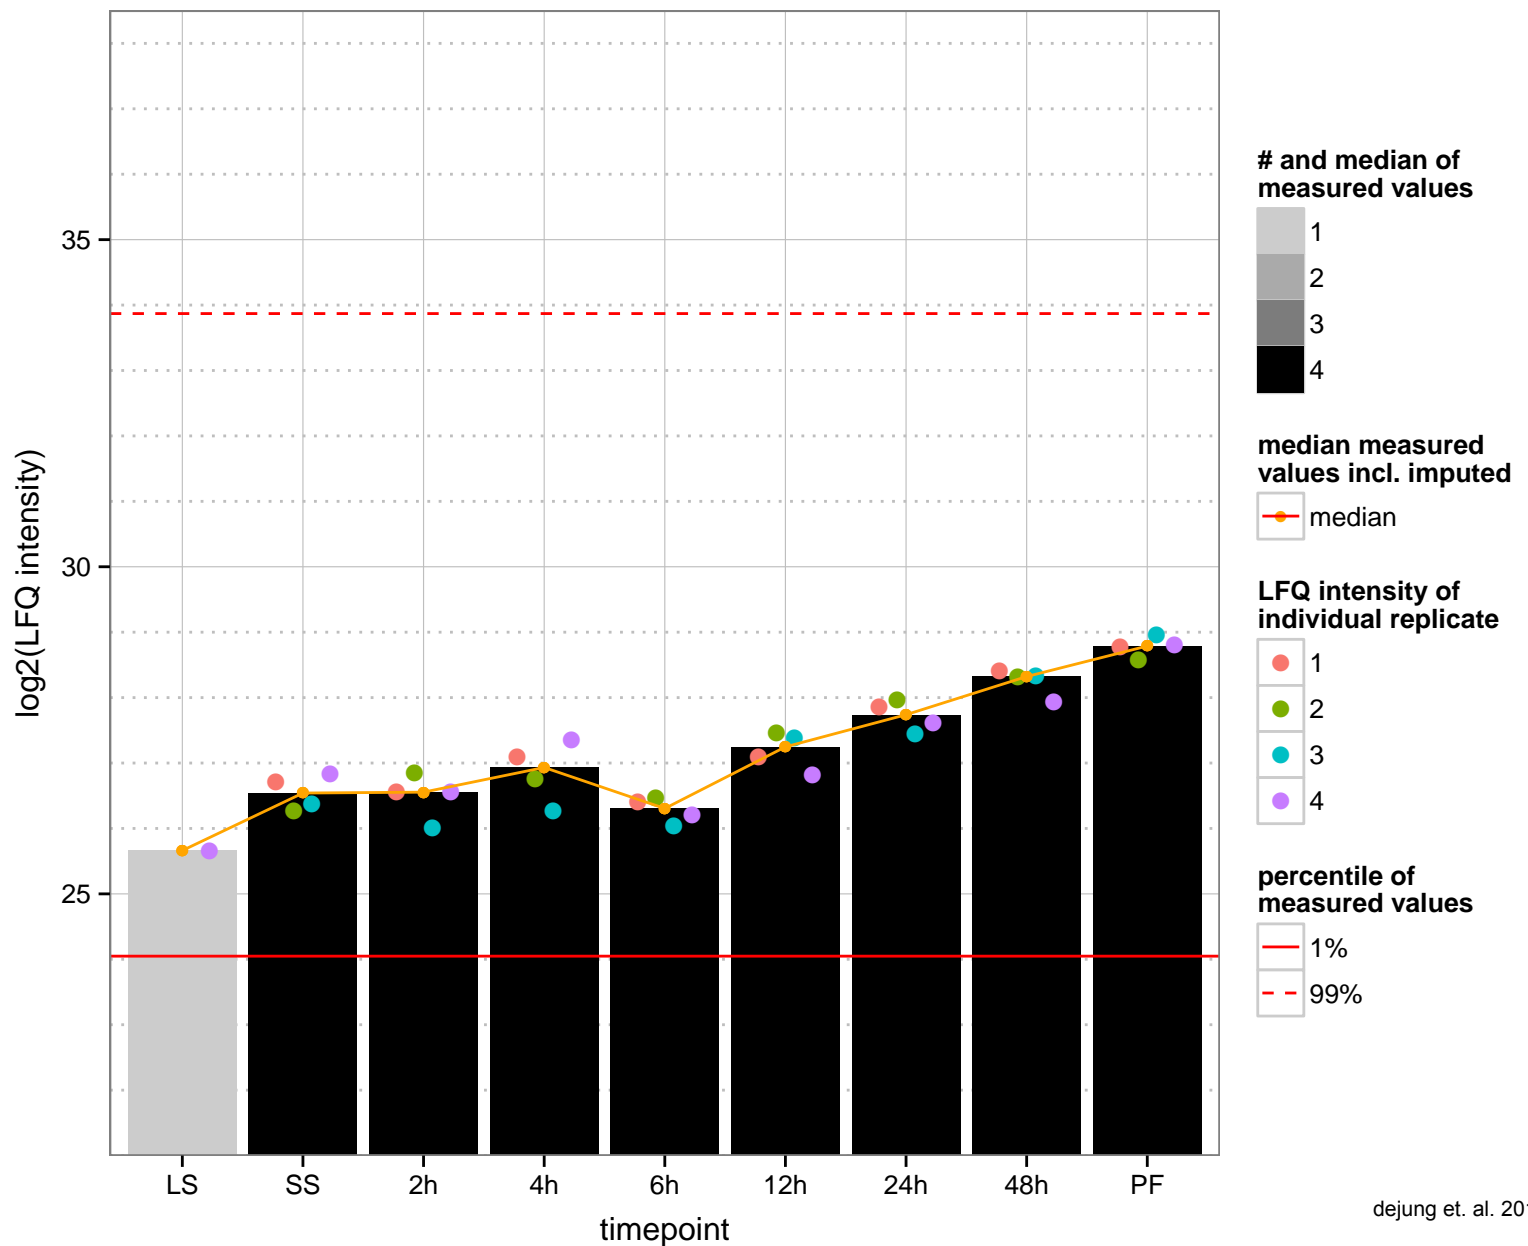

calpain-like protein fragment, putative  
 Tb927.1.2260  
 AGOF: null  
 AGOC: null  
 AGOP: null  
 PGO: null  
 PGOC: null  
 PGOP: null

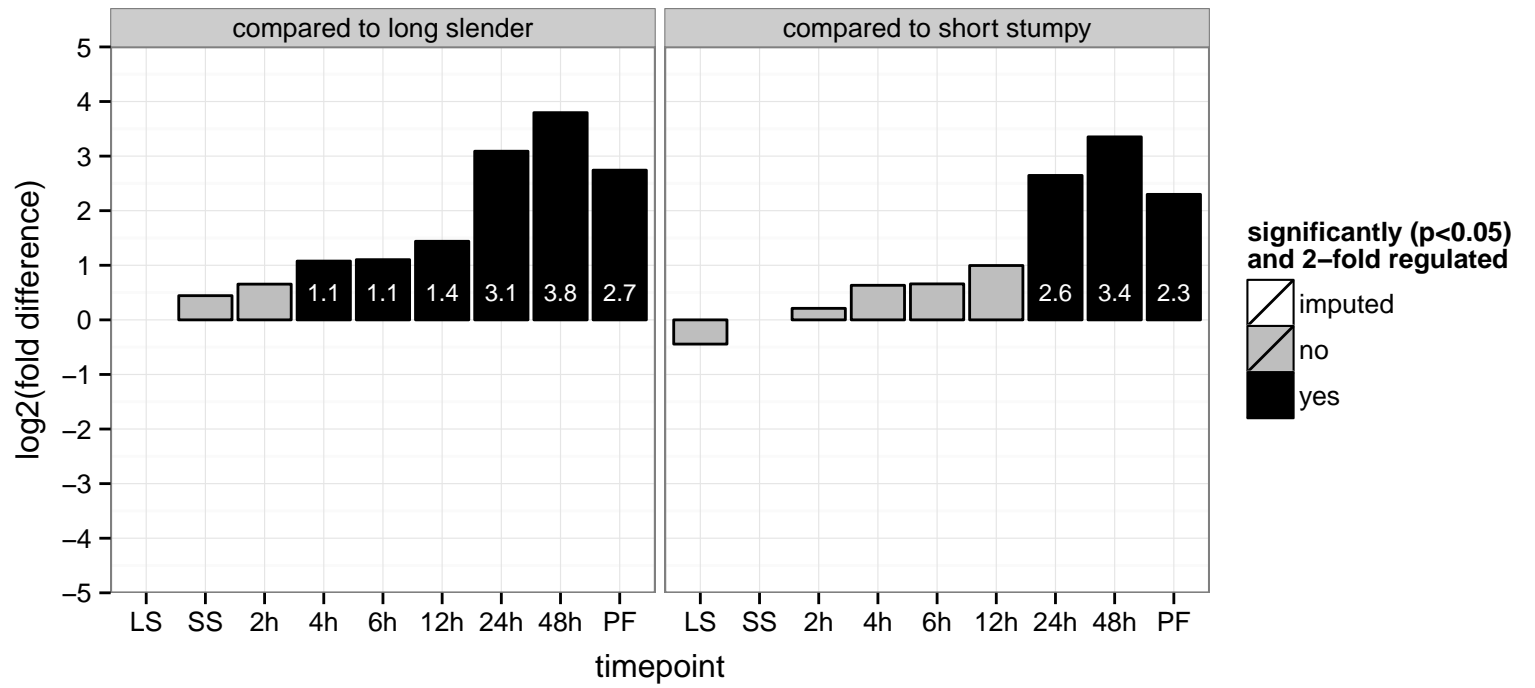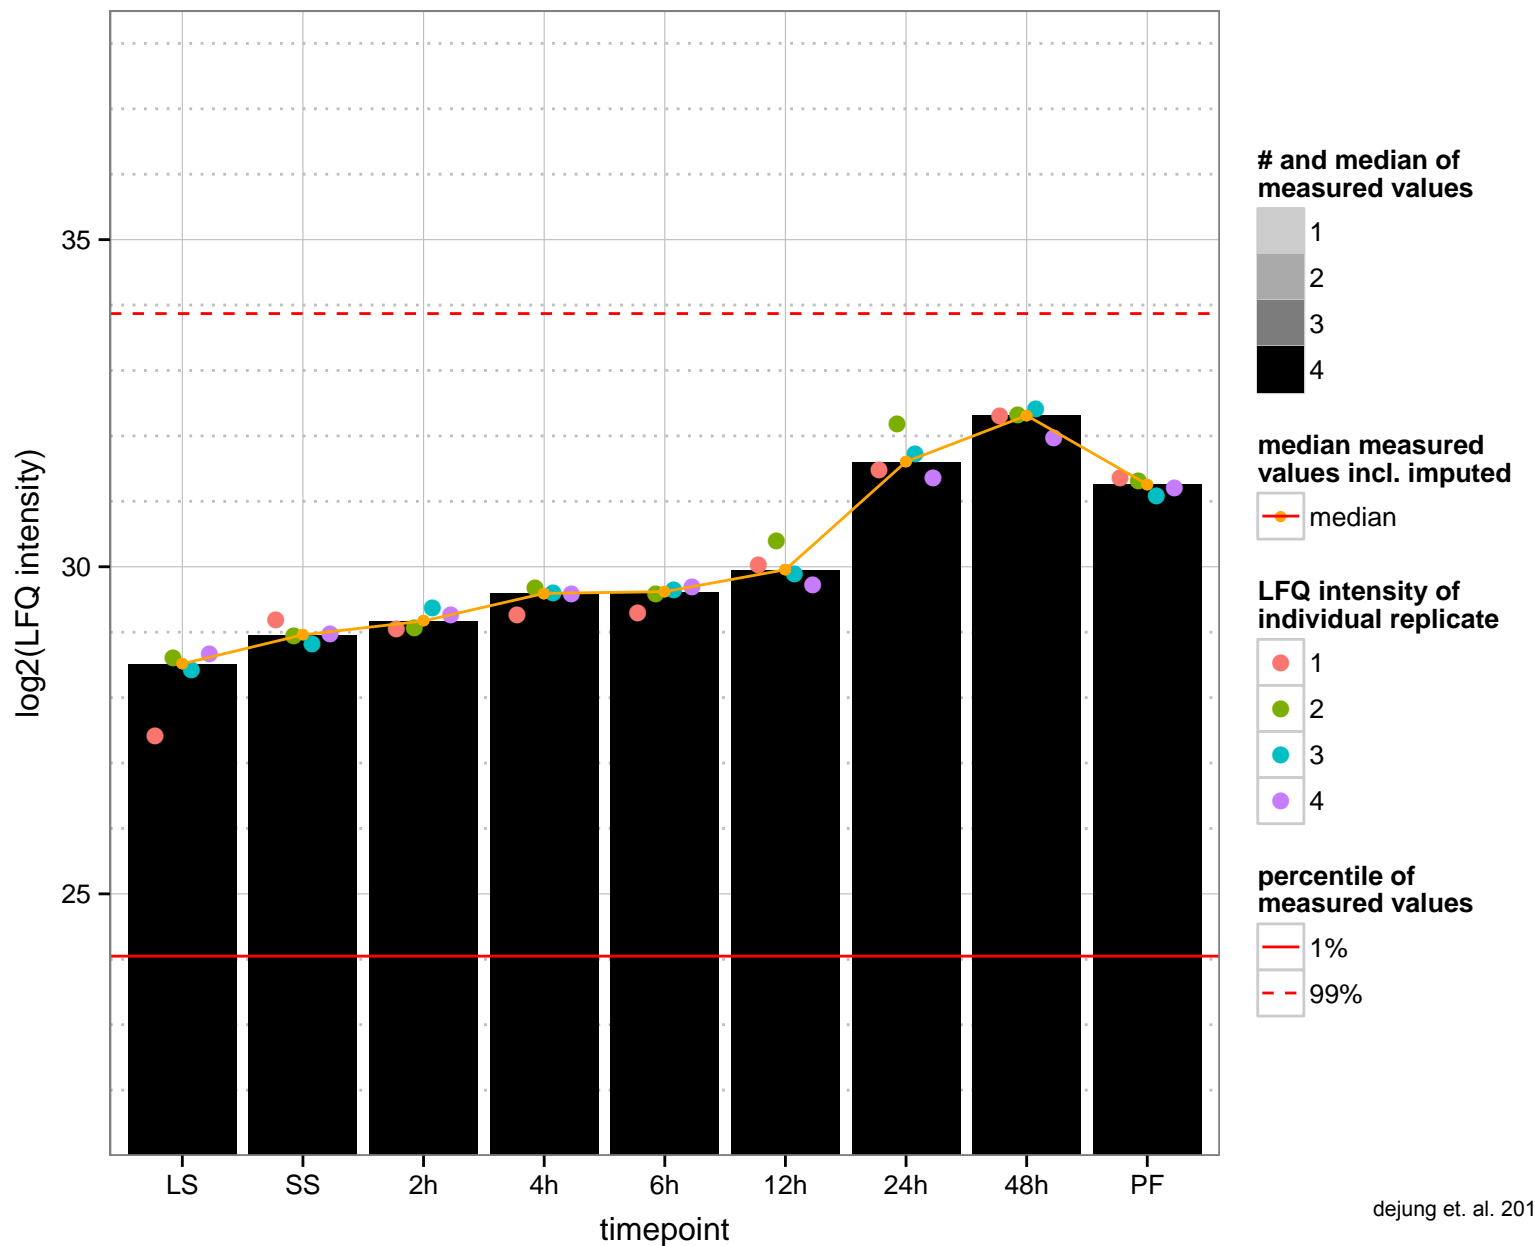

pumilio/PUF RNA binding protein 9 (PUF9)  
 Tb927.1.2600  
 AGOF: mRNA binding  
 AGOC: null  
 AGOP: regulation of mRNA stability  
 PGO: RNA binding, binding  
 PGO: null  
 PGO: null

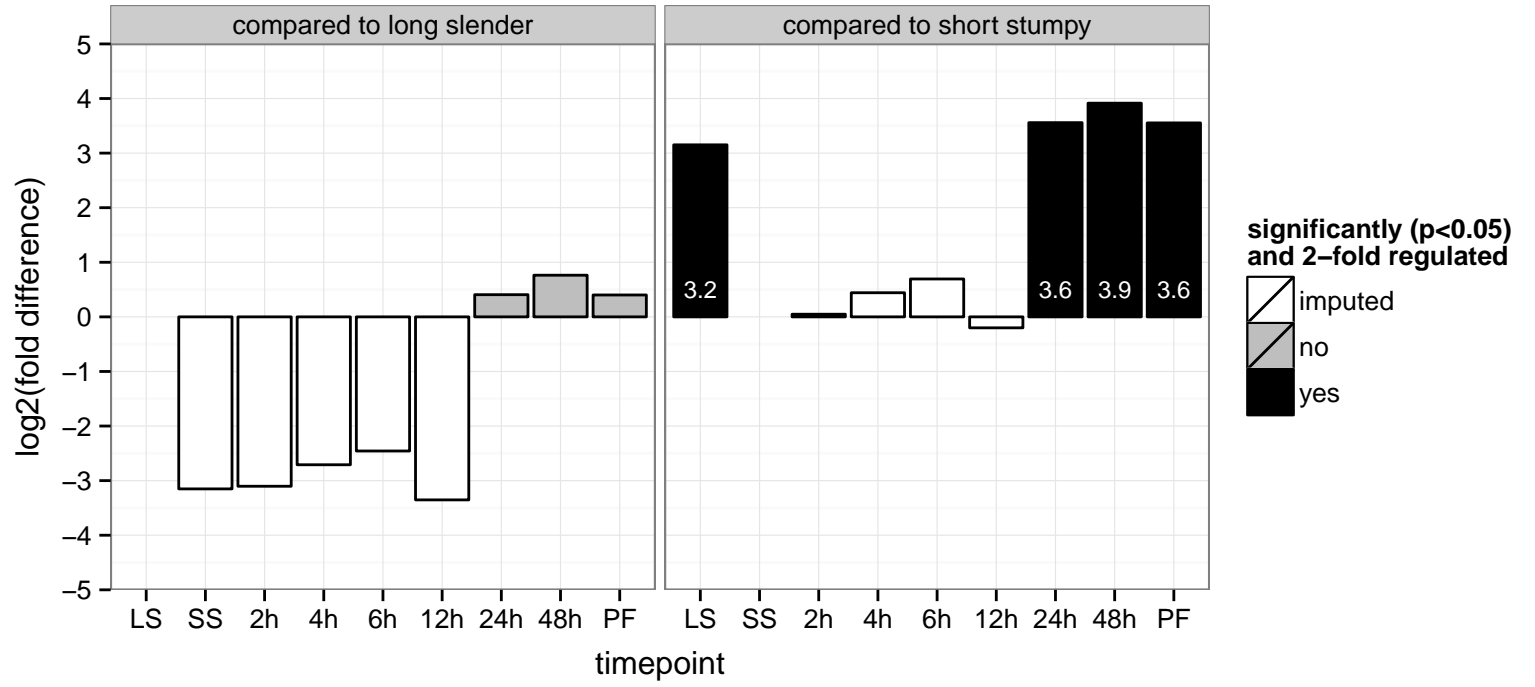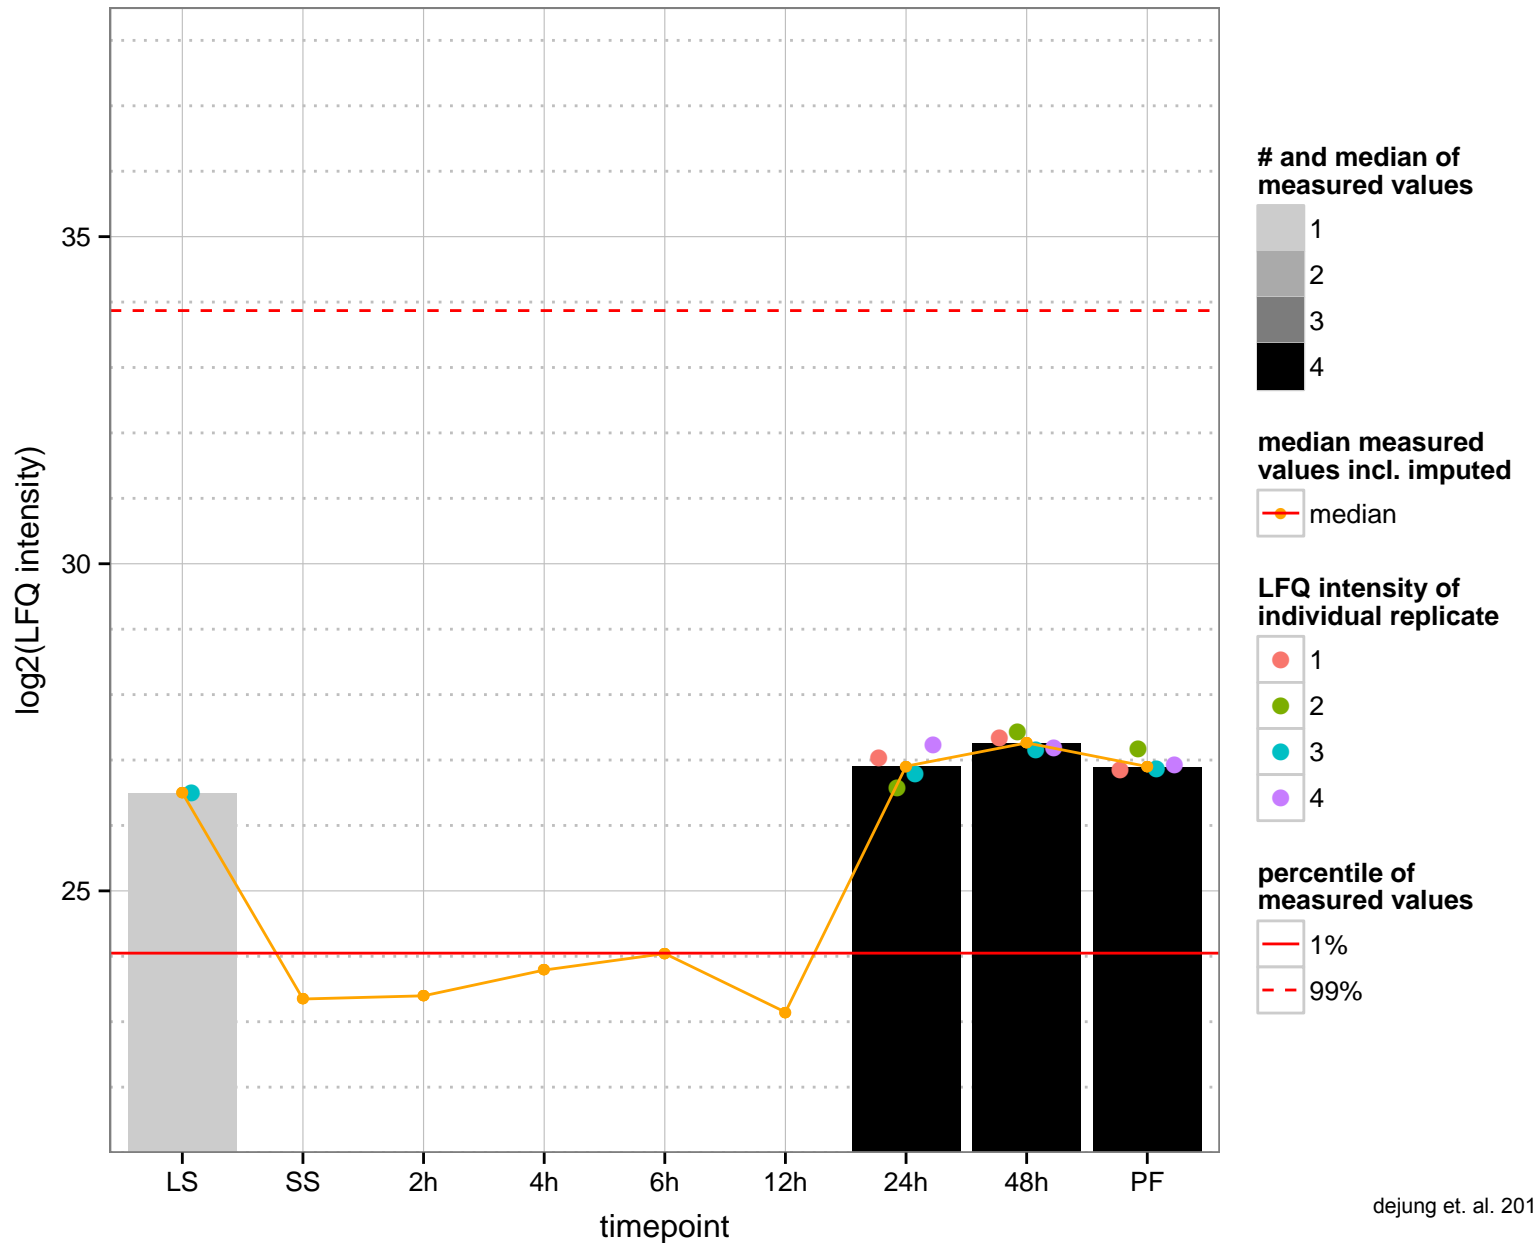



monothiol glutaredoxin, putative

Tb927.10.10420

AGOF: electron carrier activity, protein disulfide isomerase activity, protein disulfide oxidoreductase activity

AGOC: mitochondrion

AGOP: cell redox homeostasis, oxidation–reduction process

PGOF: electron carrier activity, protein disulfide oxidoreductase activity

PGOC: null

PGOP: cell redox homeostasis

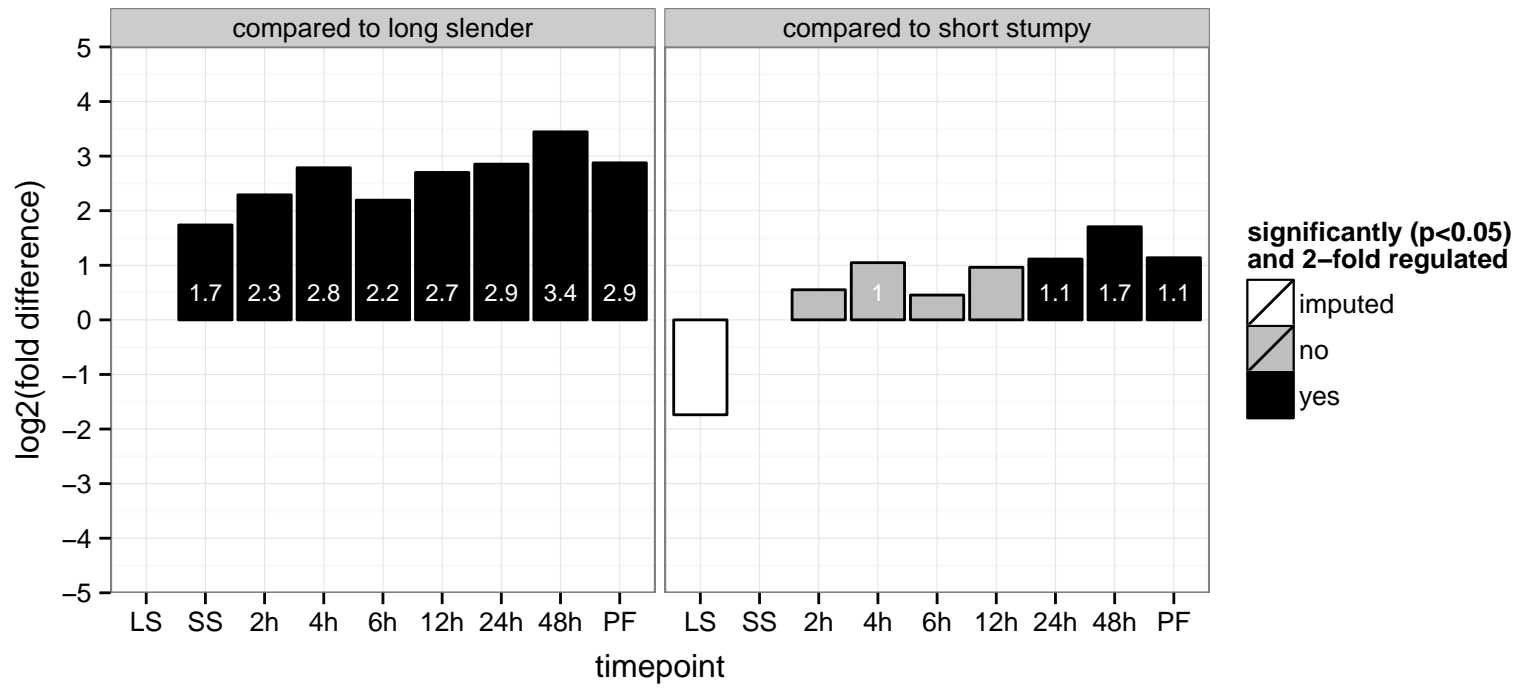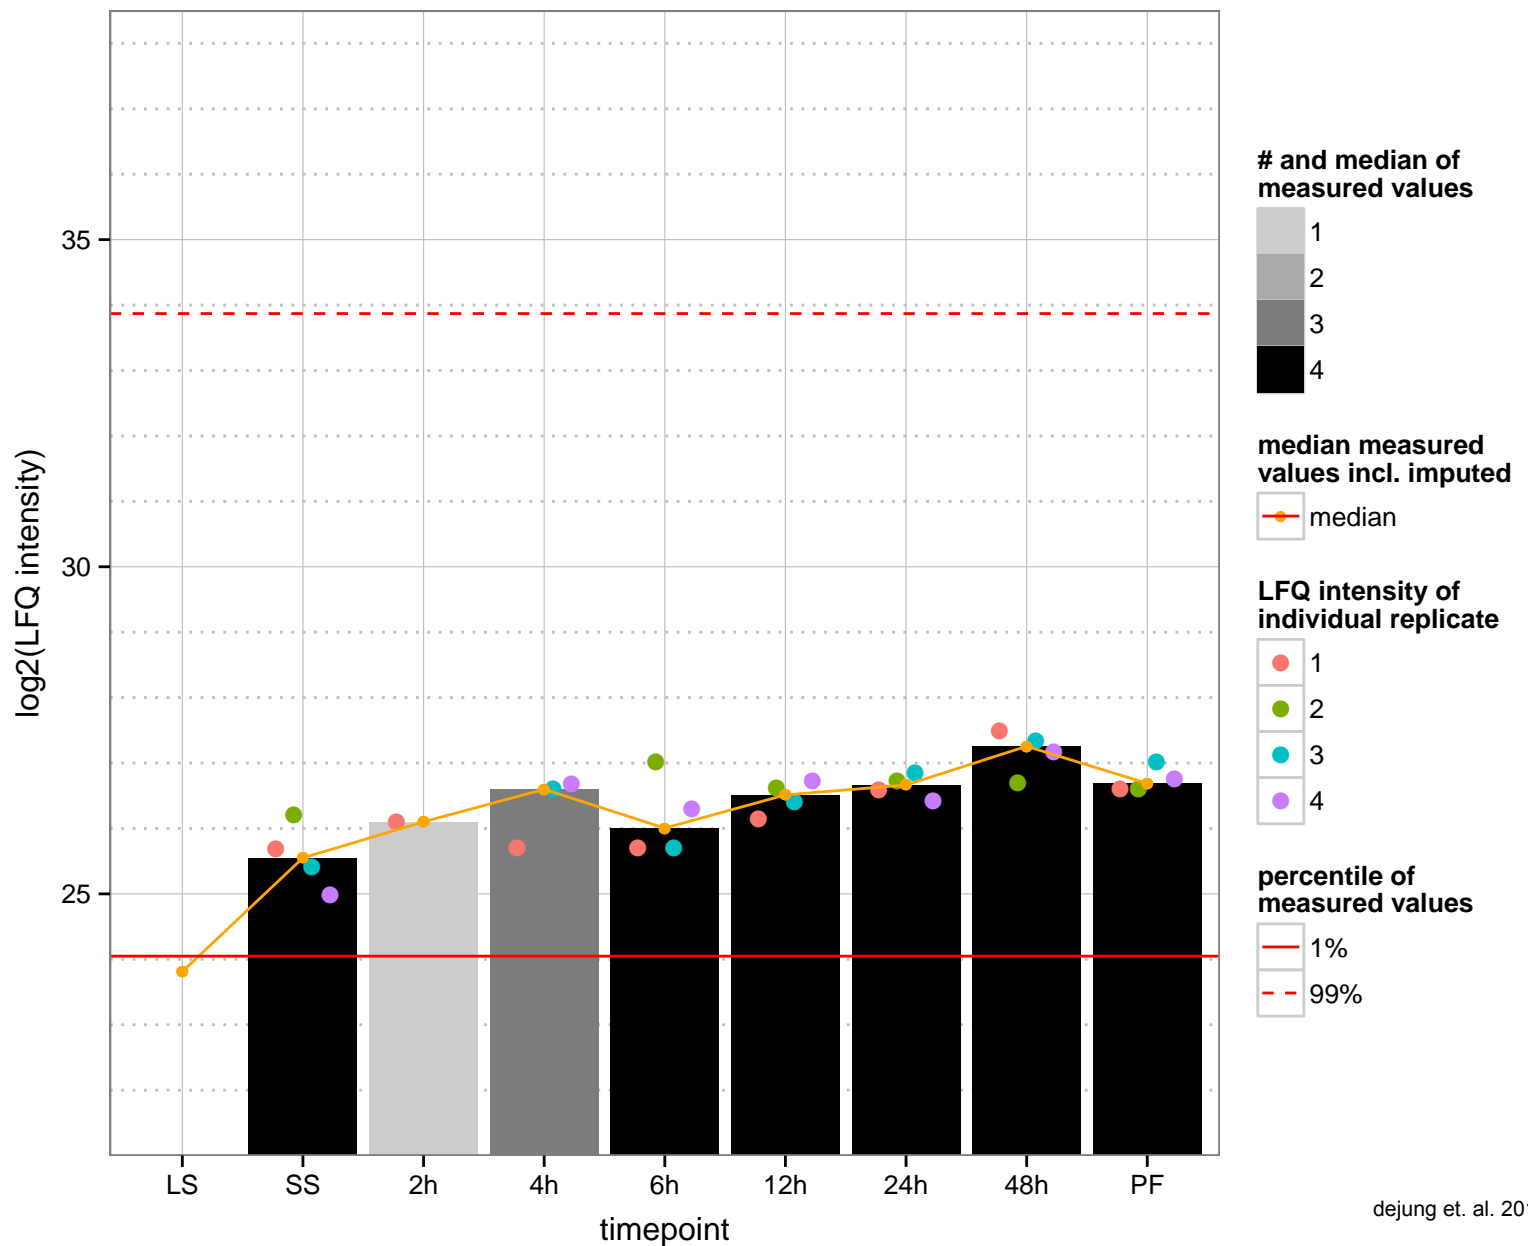

RGG-containing protein 2, MRB1-associated protein, RGGm (RGG2)  
 Tb927.10.10830  
 AGOF: mRNA binding  
 AGOC: external side of mitochondrial outer membrane, mitochondrion  
 AGOP: RNA processing  
 PGO: nucleic acid binding  
 PGO: null  
 PGO: null

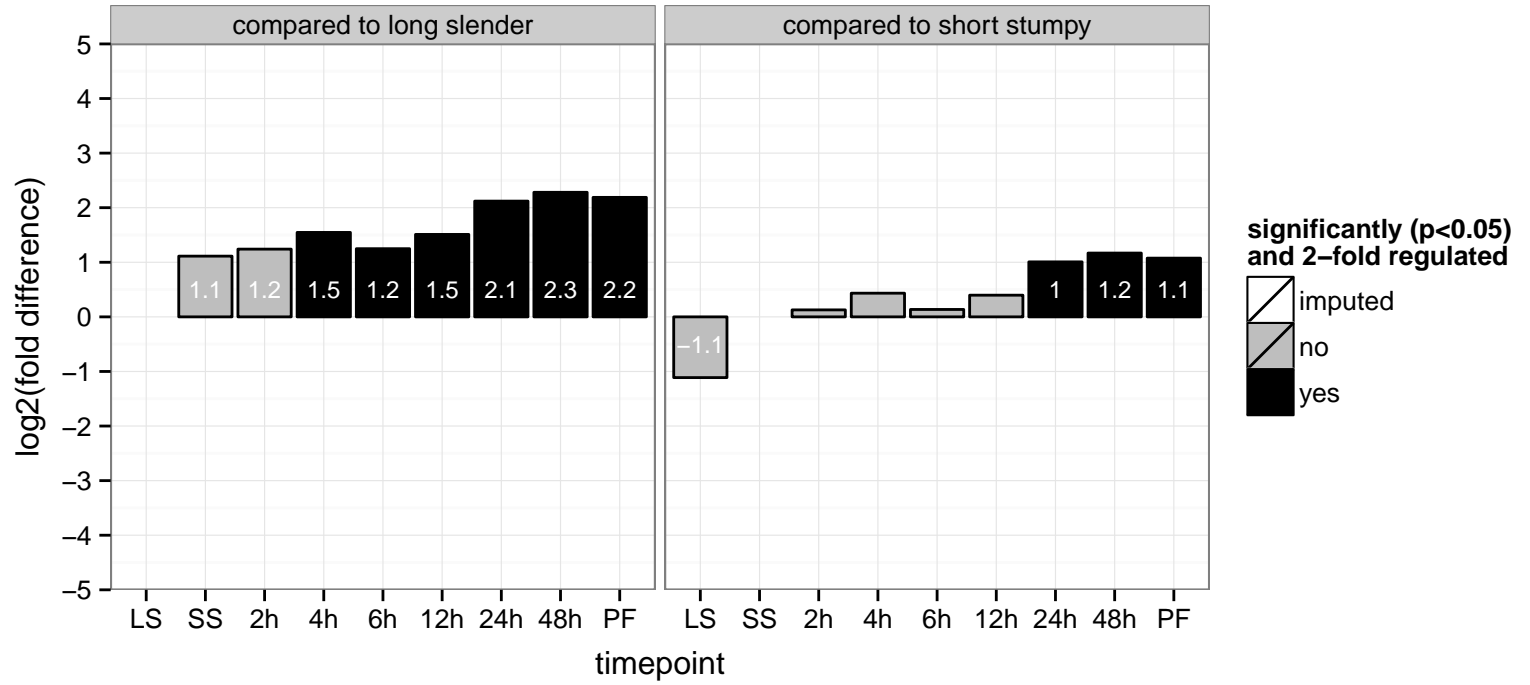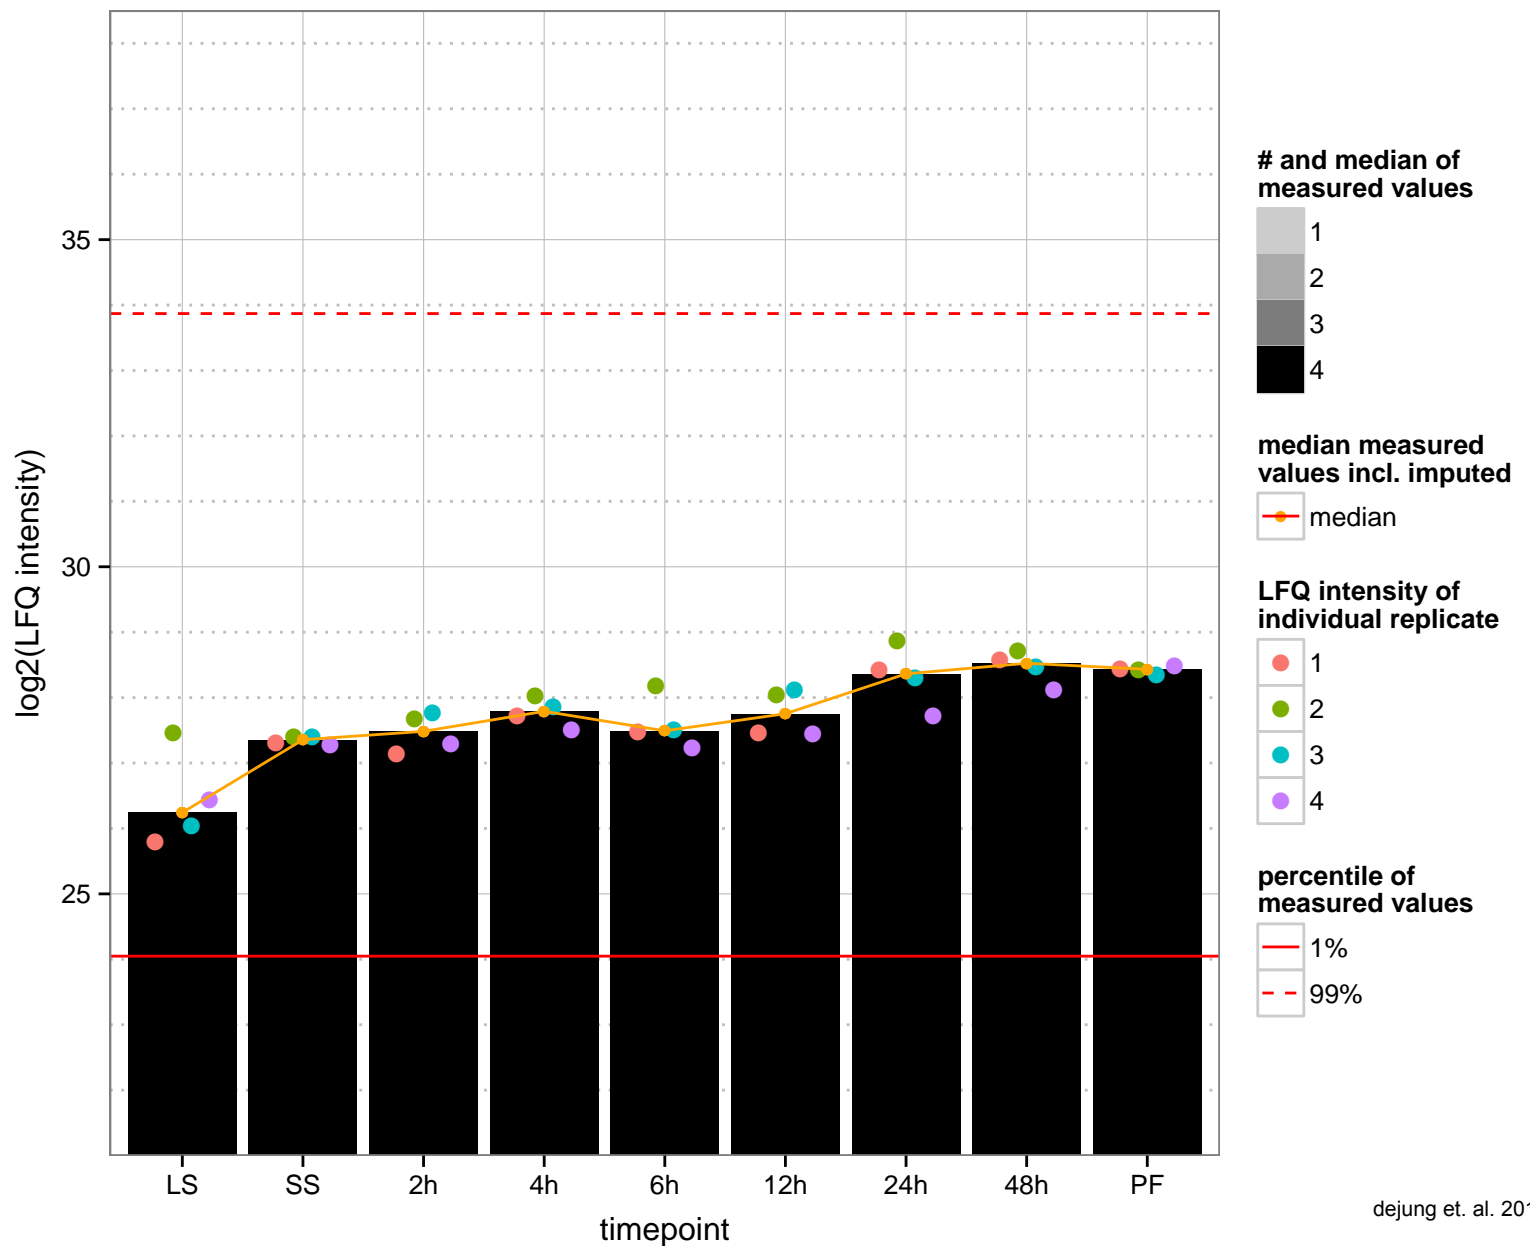

hypothetical protein, conserved  
 Tb927.10.11030  
 AGOF: null  
 AGOC: mitochondrion  
 AGOP: null  
 PGO: null  
 PGOC: null  
 PGOP: null

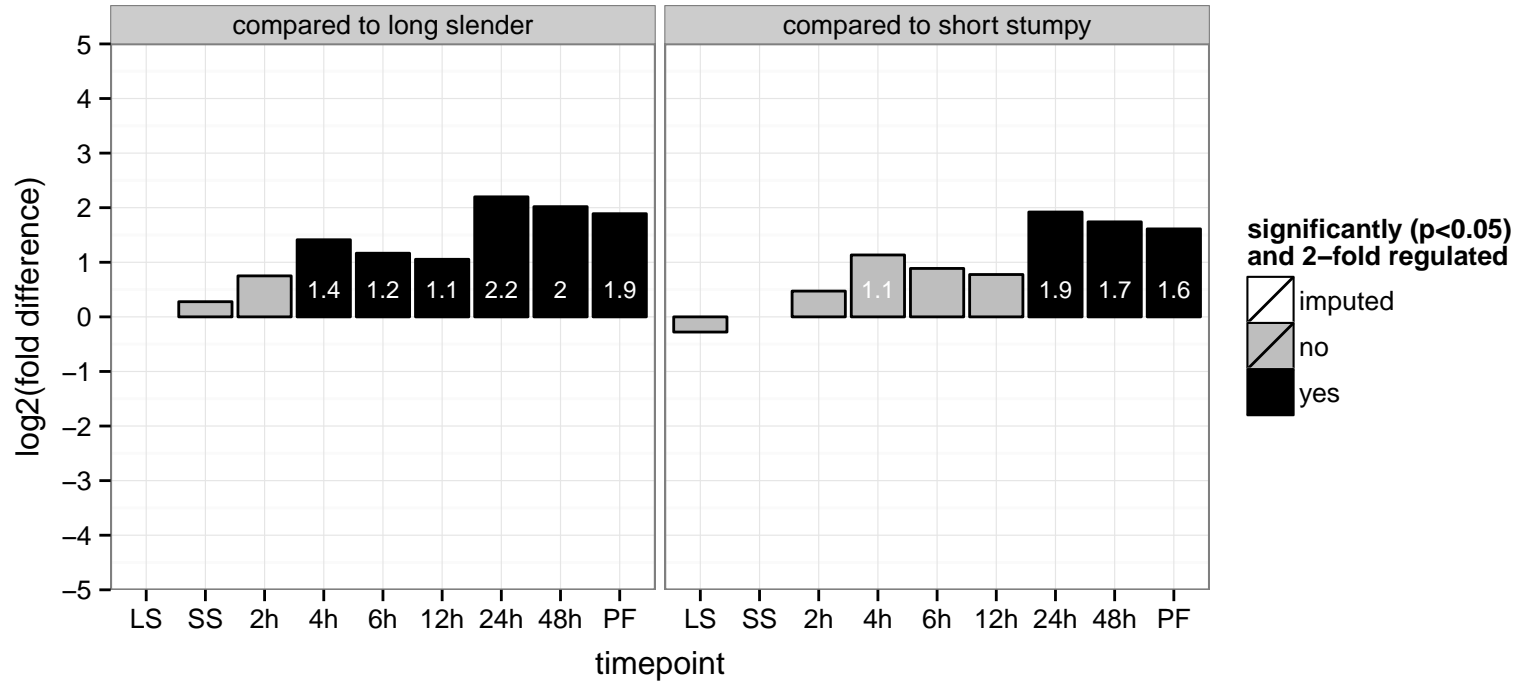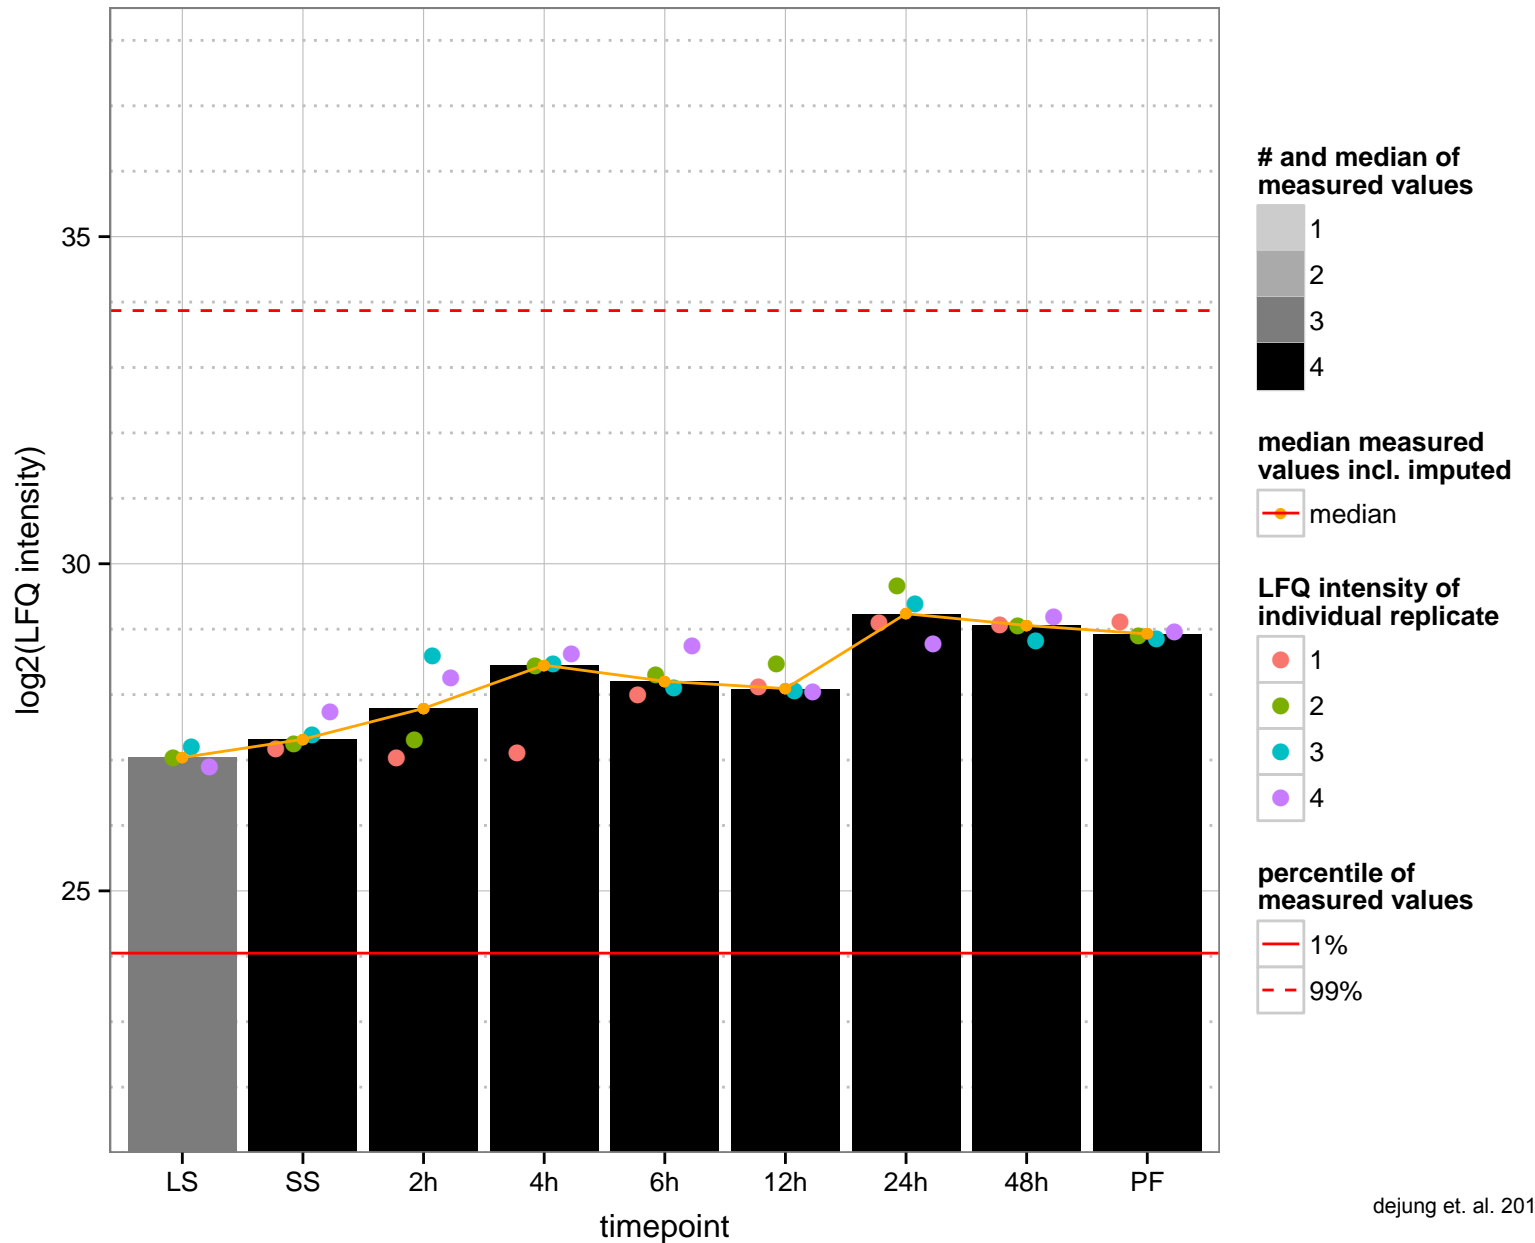

pumilio/PUF RNA binding protein 6 (PUF6)  
 Tb927.10.11760  
 AGOF: RNA binding  
 AGOC: null  
 AGOP: mRNA metabolic process  
 PGO: RNA binding, binding  
 PGO: null  
 PGO: null

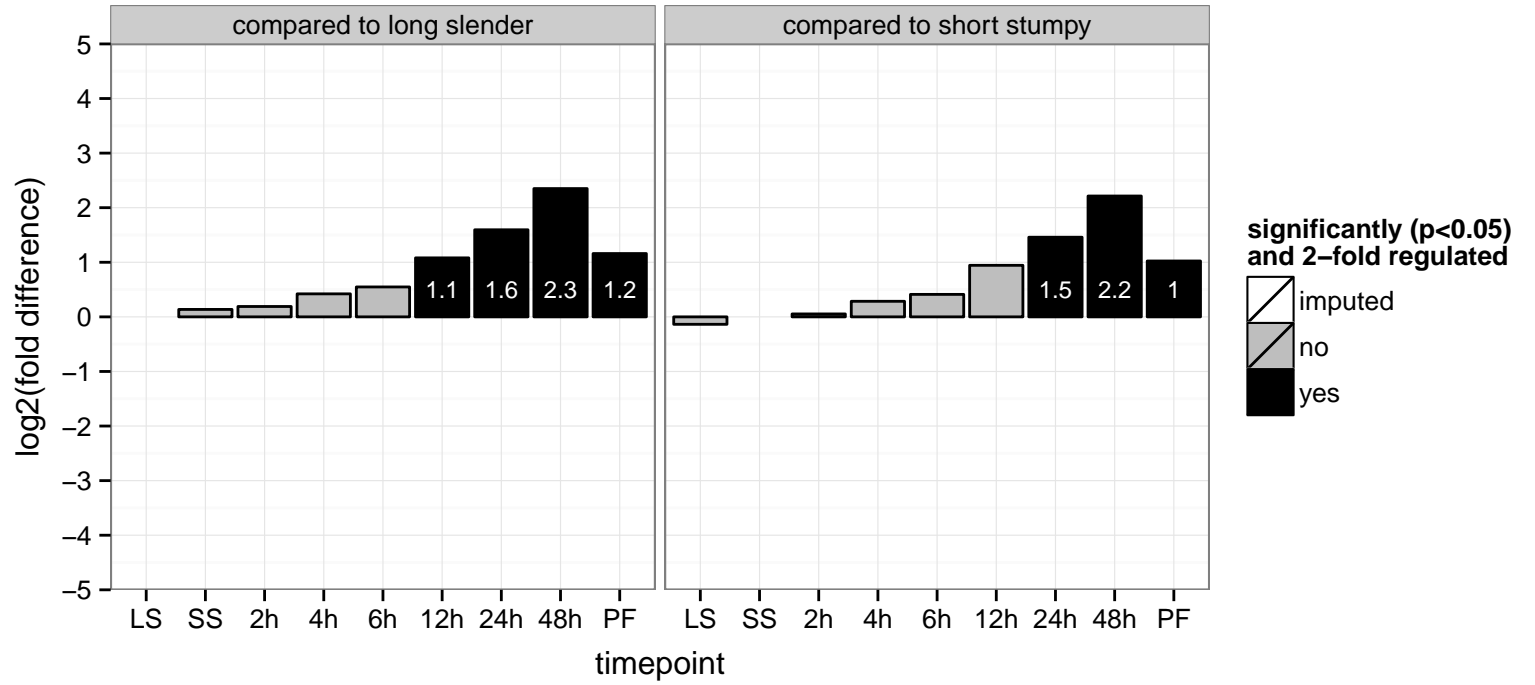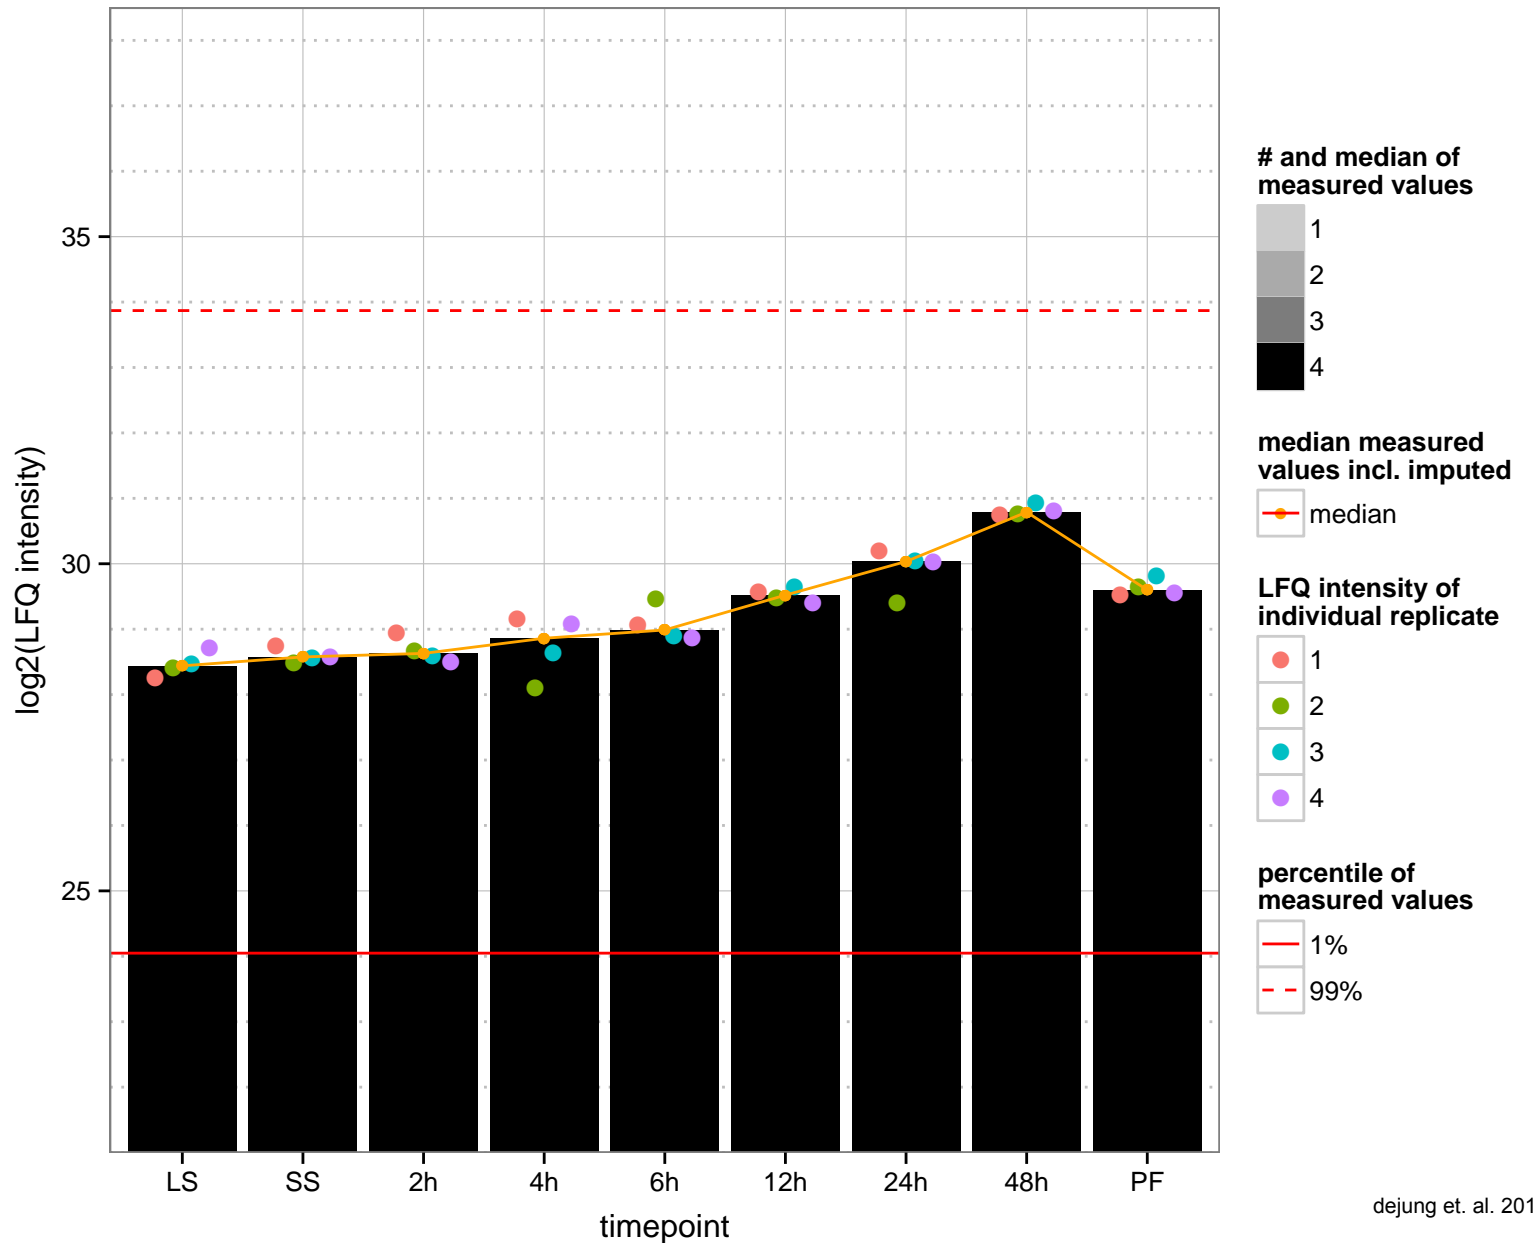

Elongation factor Tu, mitochondrial (EF-Tu)

Tb927.10.13360

AGOF: GTP binding, GTPase activity, translation elongation factor activity

AGOC: intracellular, mitochondrion

AGOP: growth, mitochondrial translation, oxidative phosphorylation, translational elongation

PGOF: GTP binding, GTPase activity

PGOC: null

PGOP: null

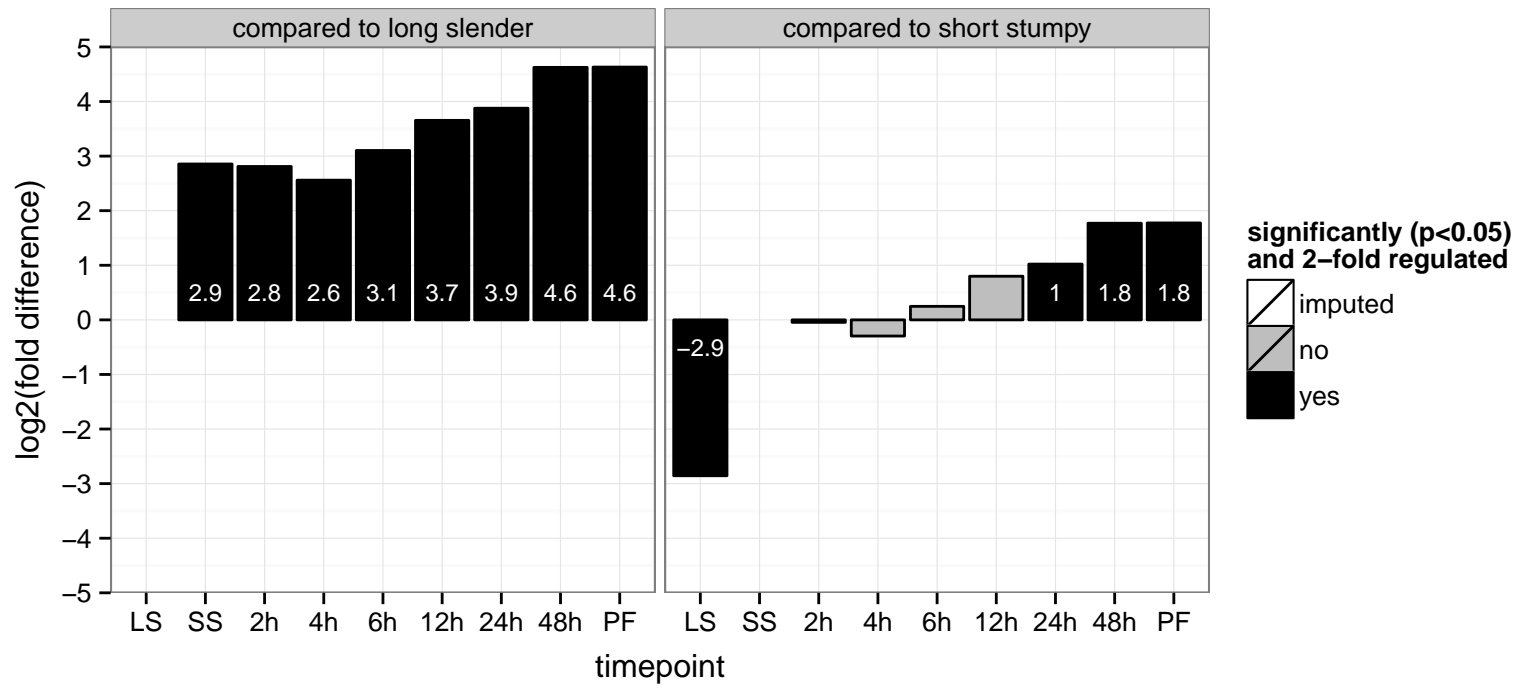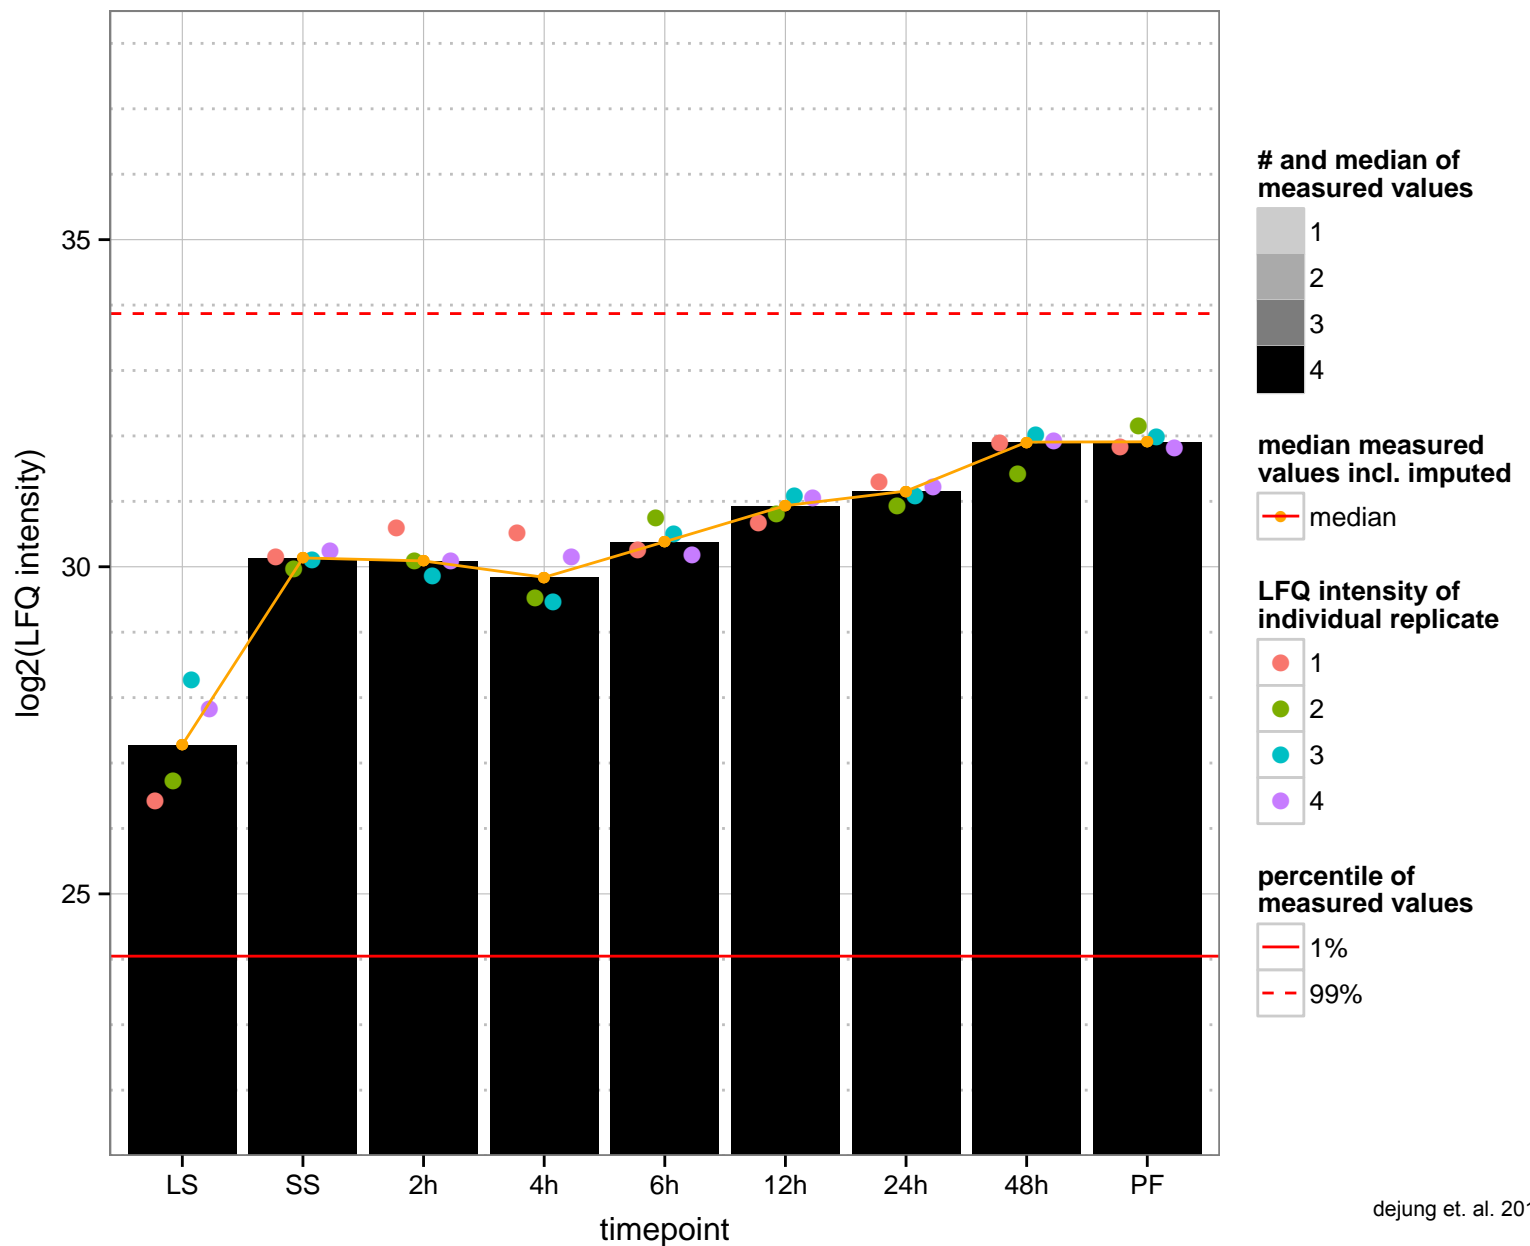

hypoxanthine-guanine phosphoribosyltransferase, putative  
 Tb927.10.1390  
 AGOF: hypoxanthine phosphoribosyltransferase activity  
 AGOC: cytoplasm  
 AGOP: purine ribonucleoside salvage  
 PGO: null  
 PGO: null  
 PGO: nucleoside metabolic process

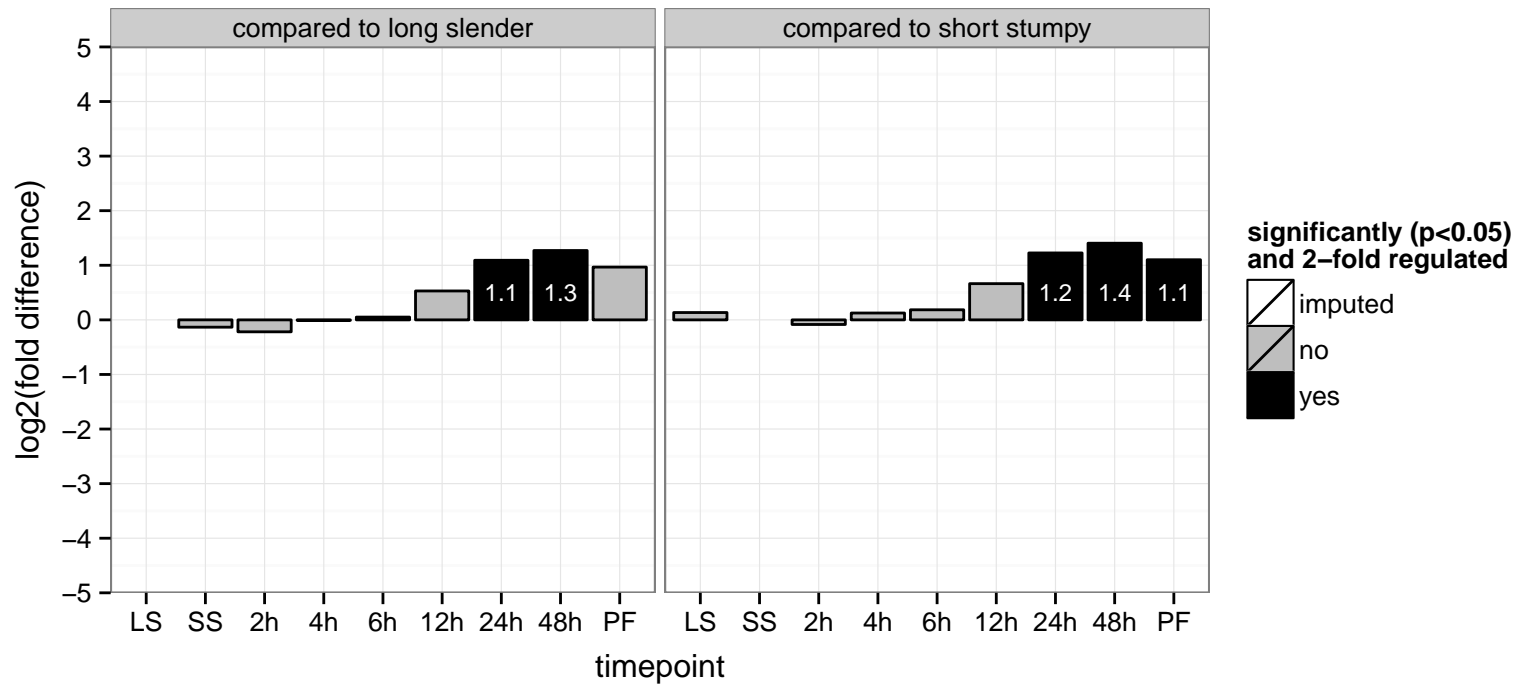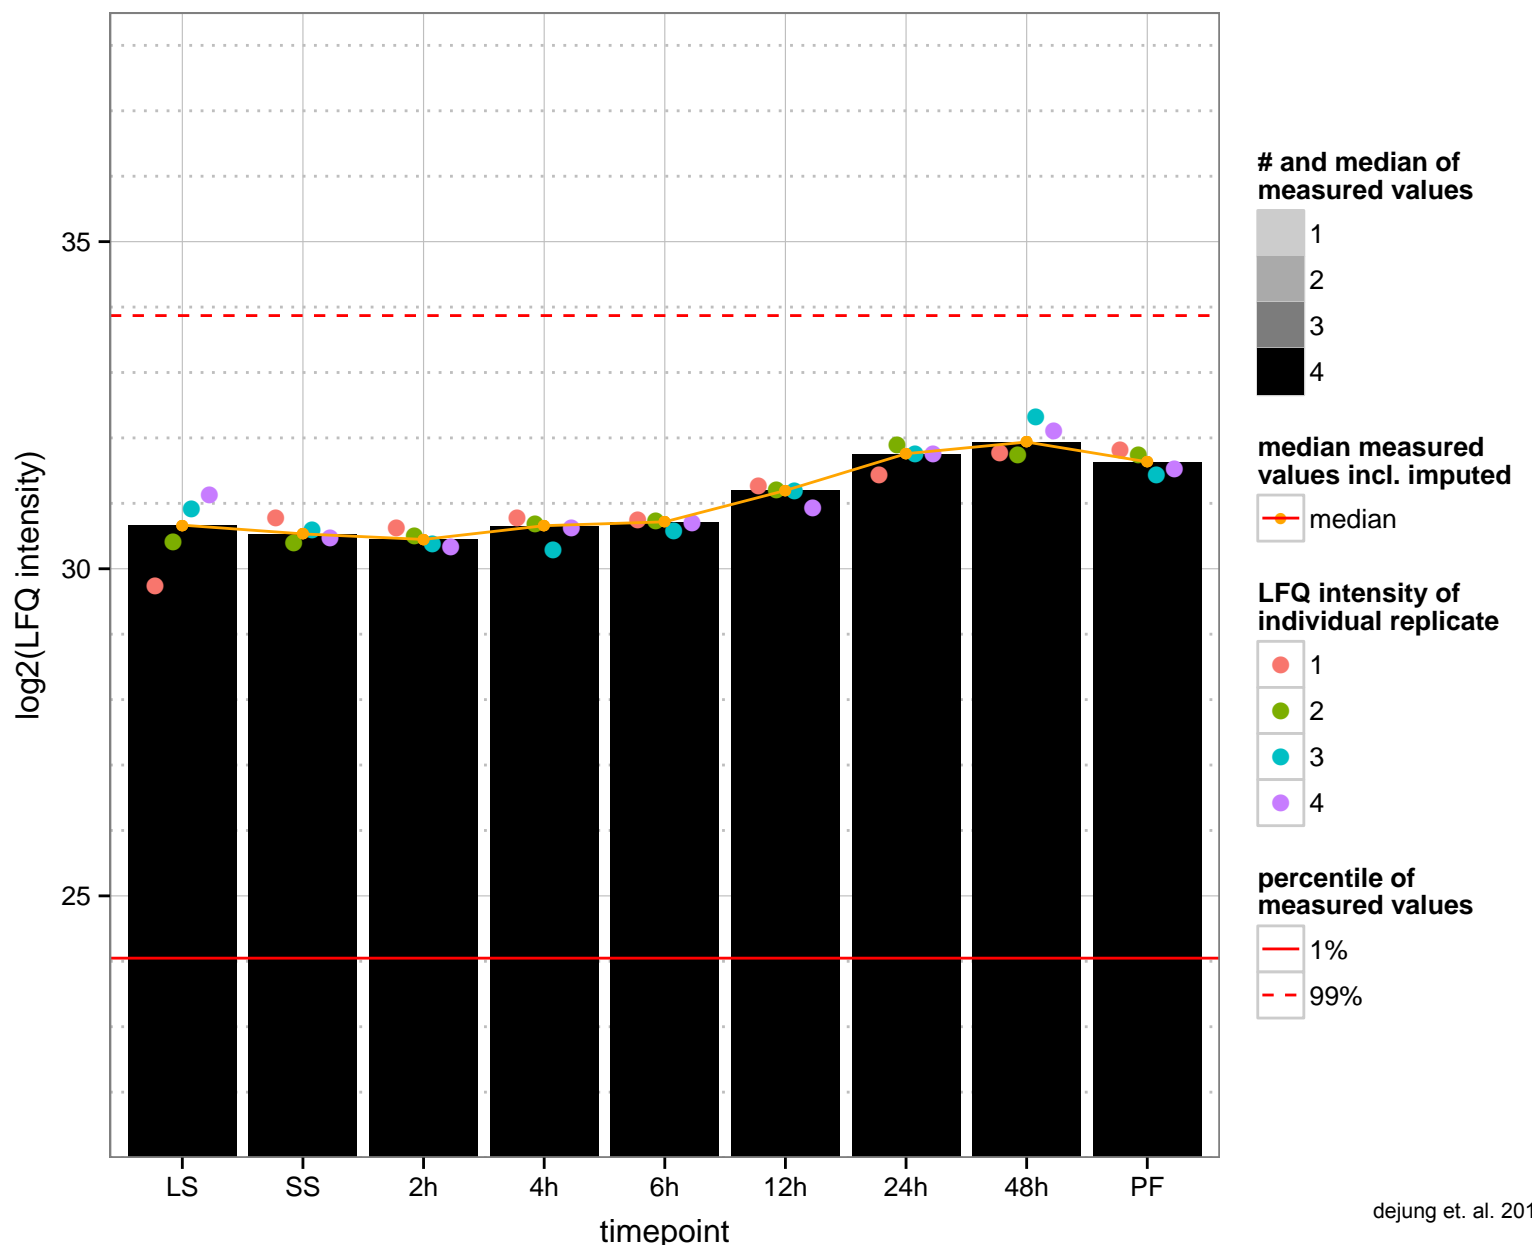

hypothetical protein, conserved  
 Tb927.10.14860  
 AGOF: null  
 AGOC: mitochondrion  
 AGOP: null  
 PGO: null  
 PGO: null  
 PGO: null

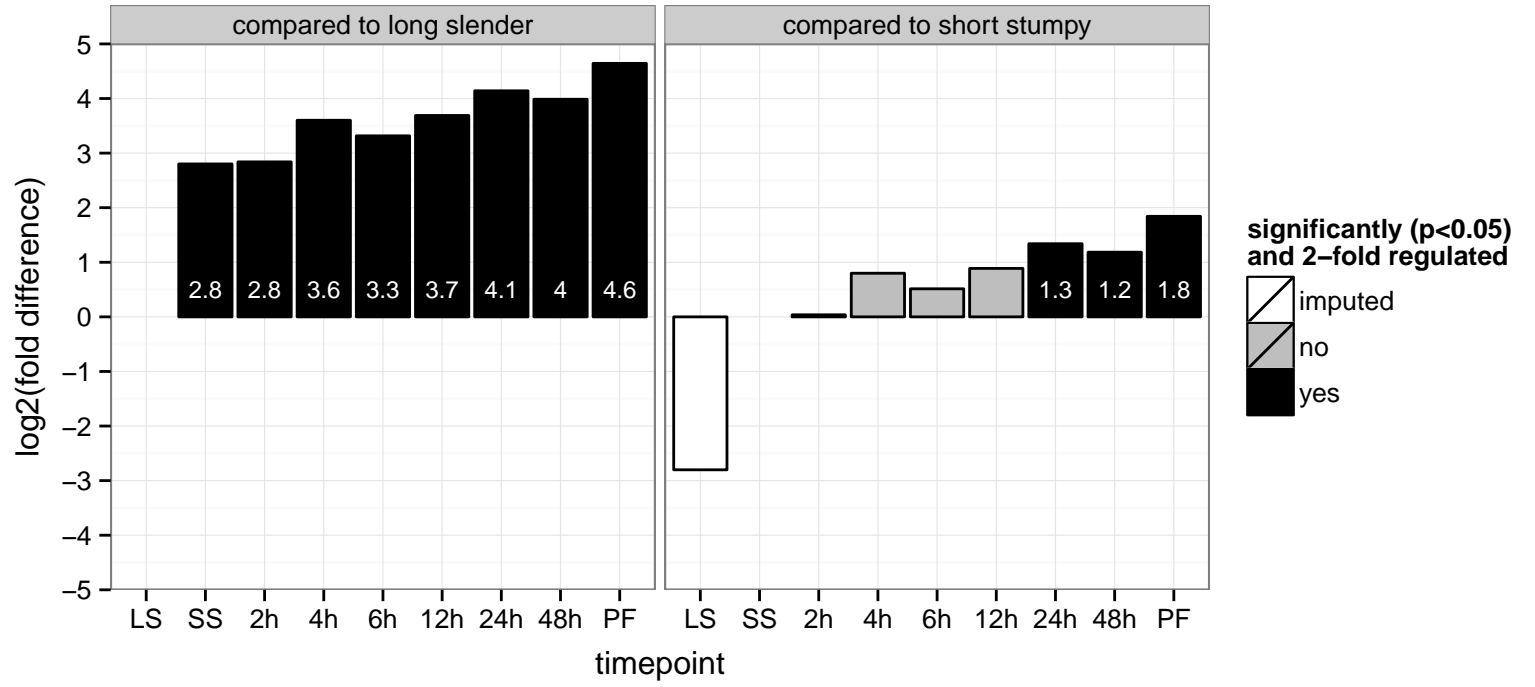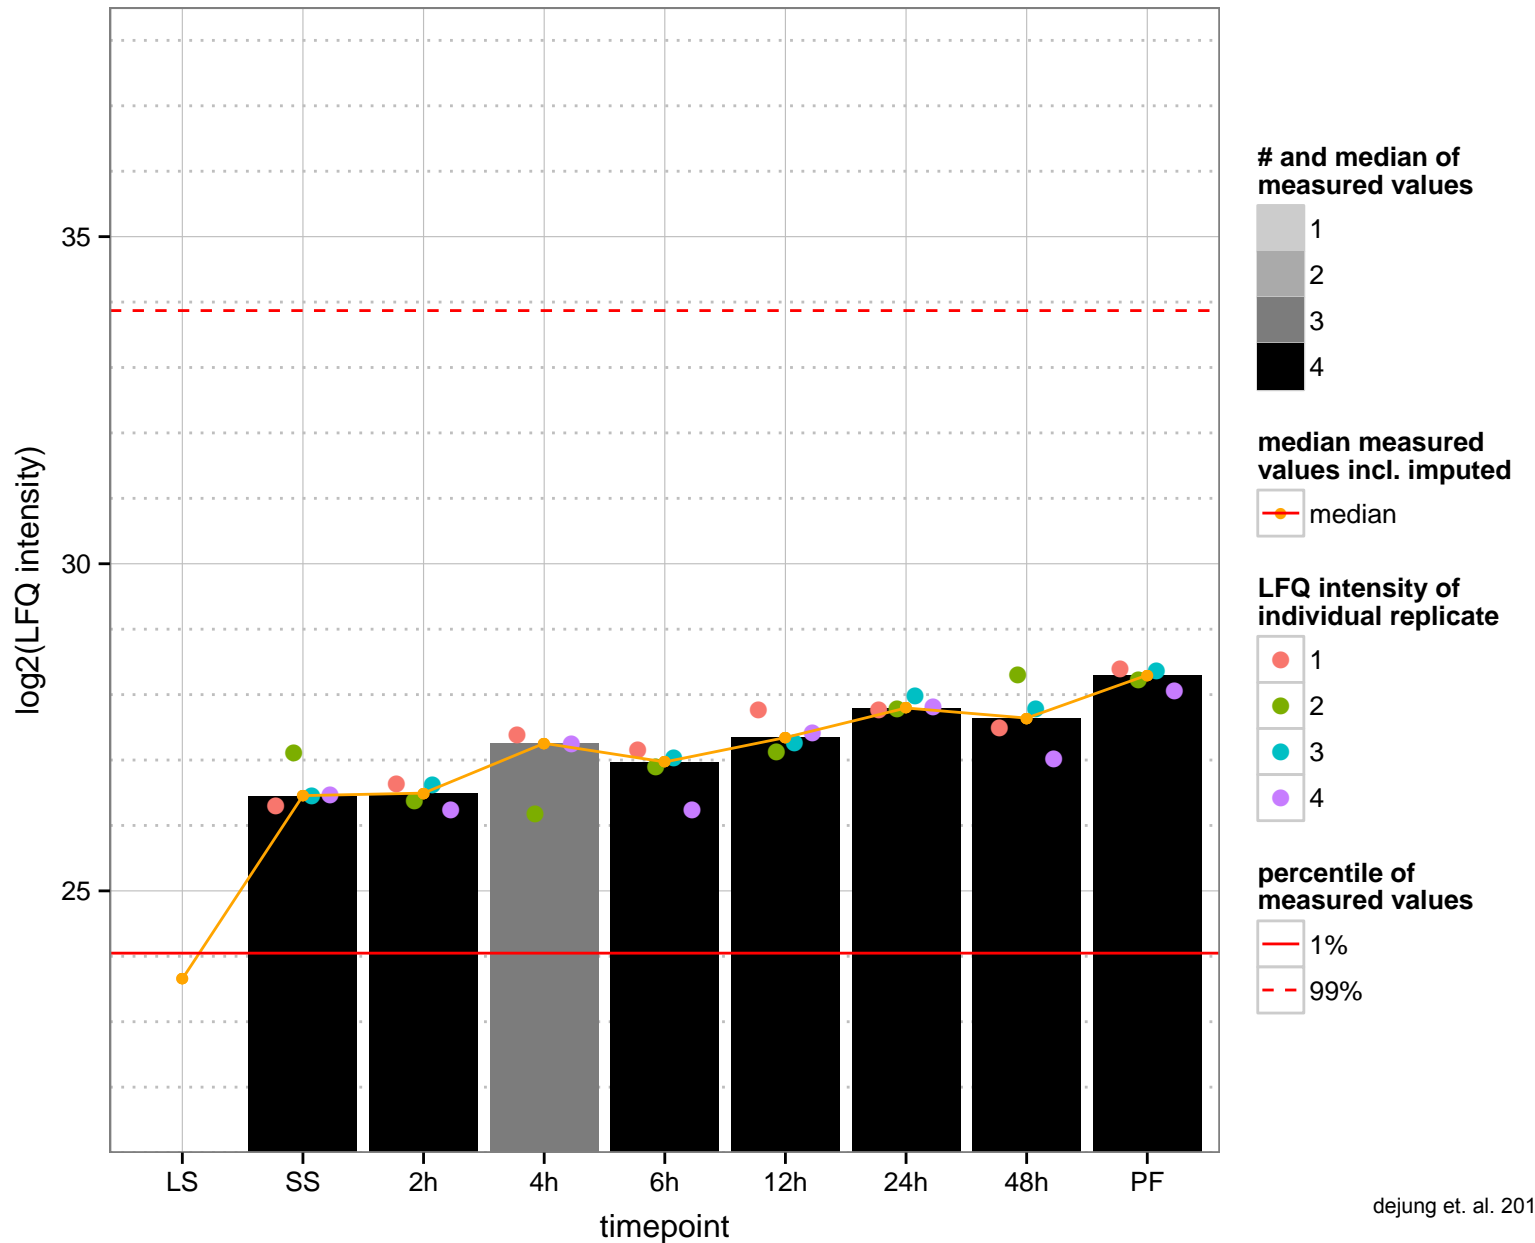

methionyl-tRNA synthetase, putative (MetRS)

Tb927.10.1500

AGOF: ATP binding, methionine-tRNA ligase activity

AGOC: cytoplasm

AGOP: methionyl-tRNA aminoacylation, translation

PGOF: ATP binding, aminoacyl-tRNA ligase activity, methionine-tRNA ligase activity, nucleotide binding

PGOC: cytoplasm

PGOP: methionyl-tRNA aminoacylation, tRNA aminoacylation for protein translation

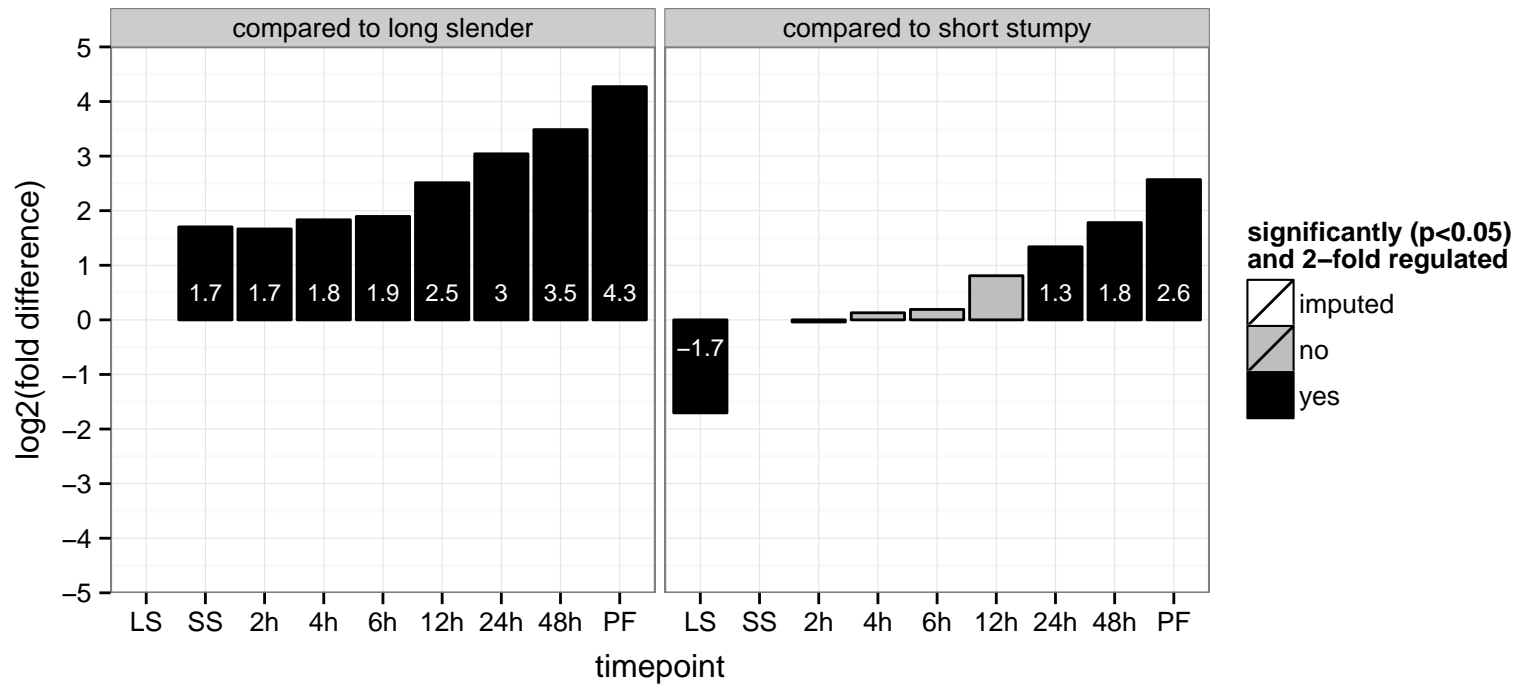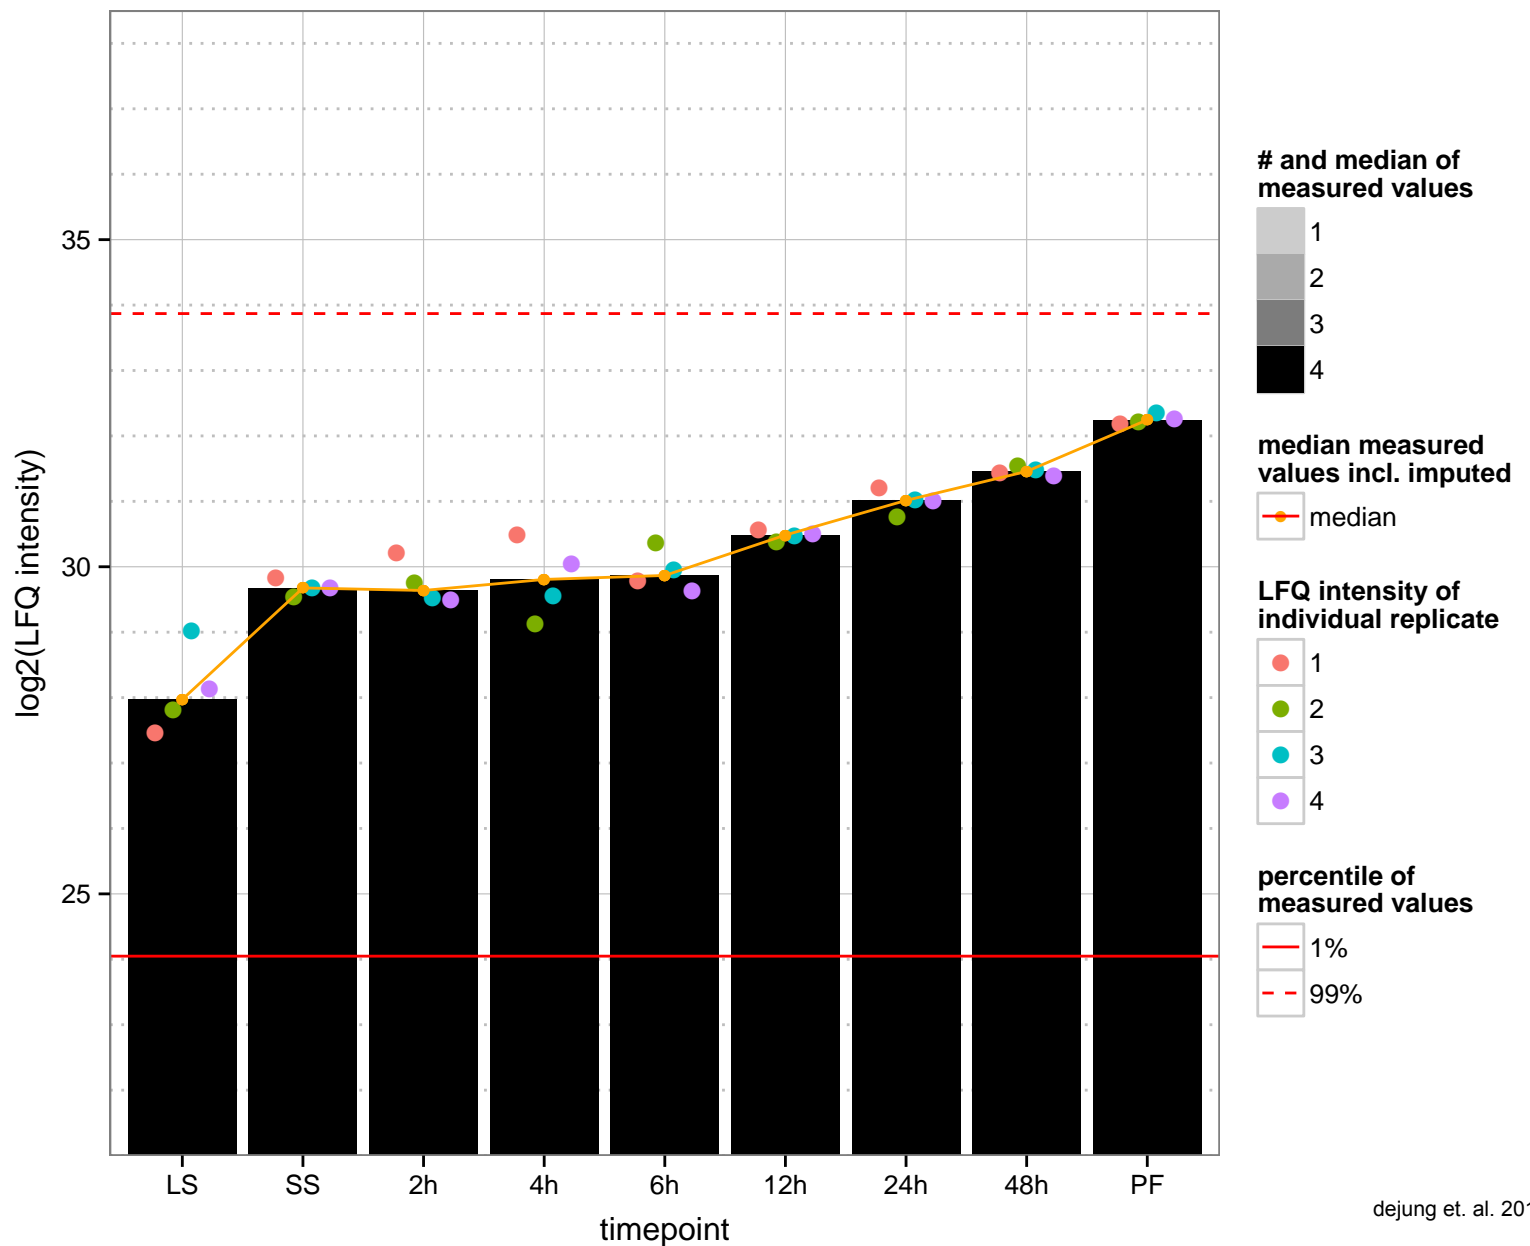



hypothetical protein, conserved  
 Tb927.10.15170  
 AGOF: null  
 AGOC: null  
 AGOP: null  
 PGO: null  
 PGOC: null  
 PGOP: null

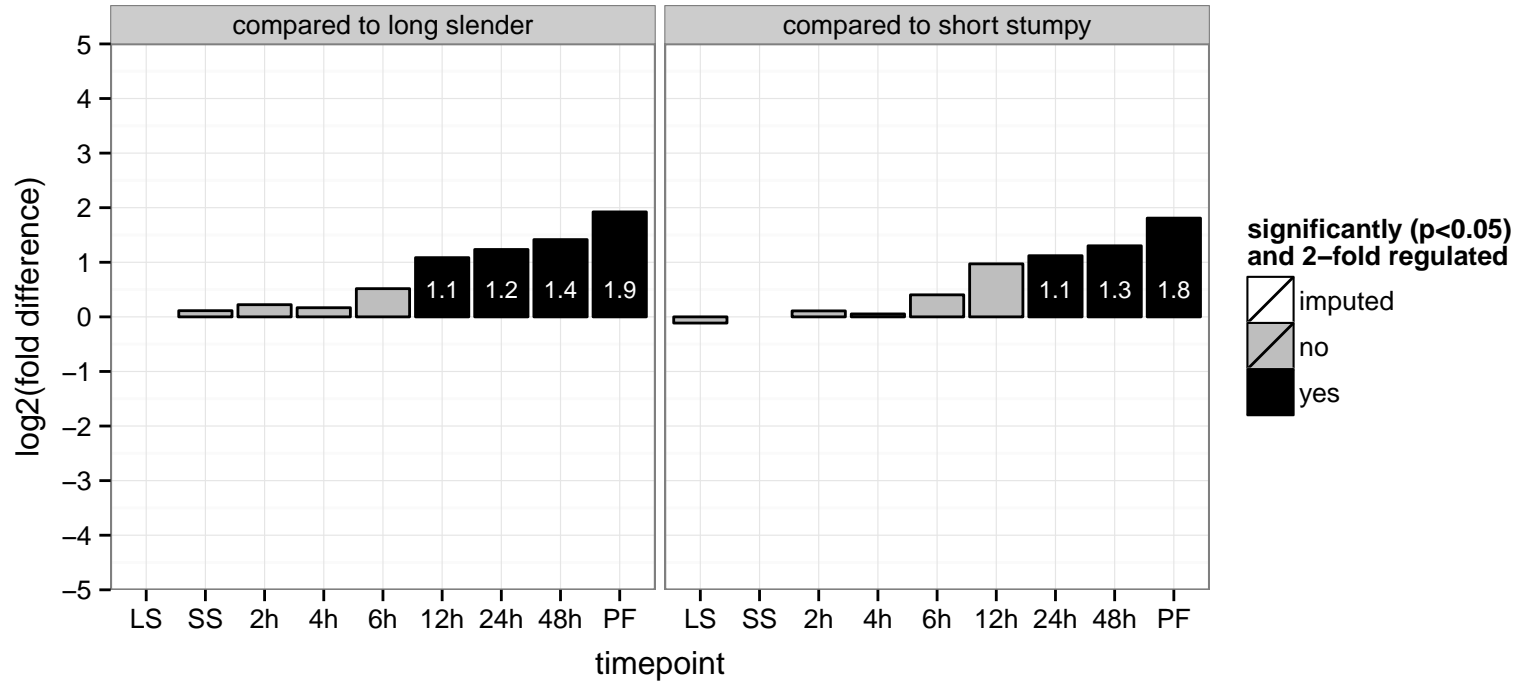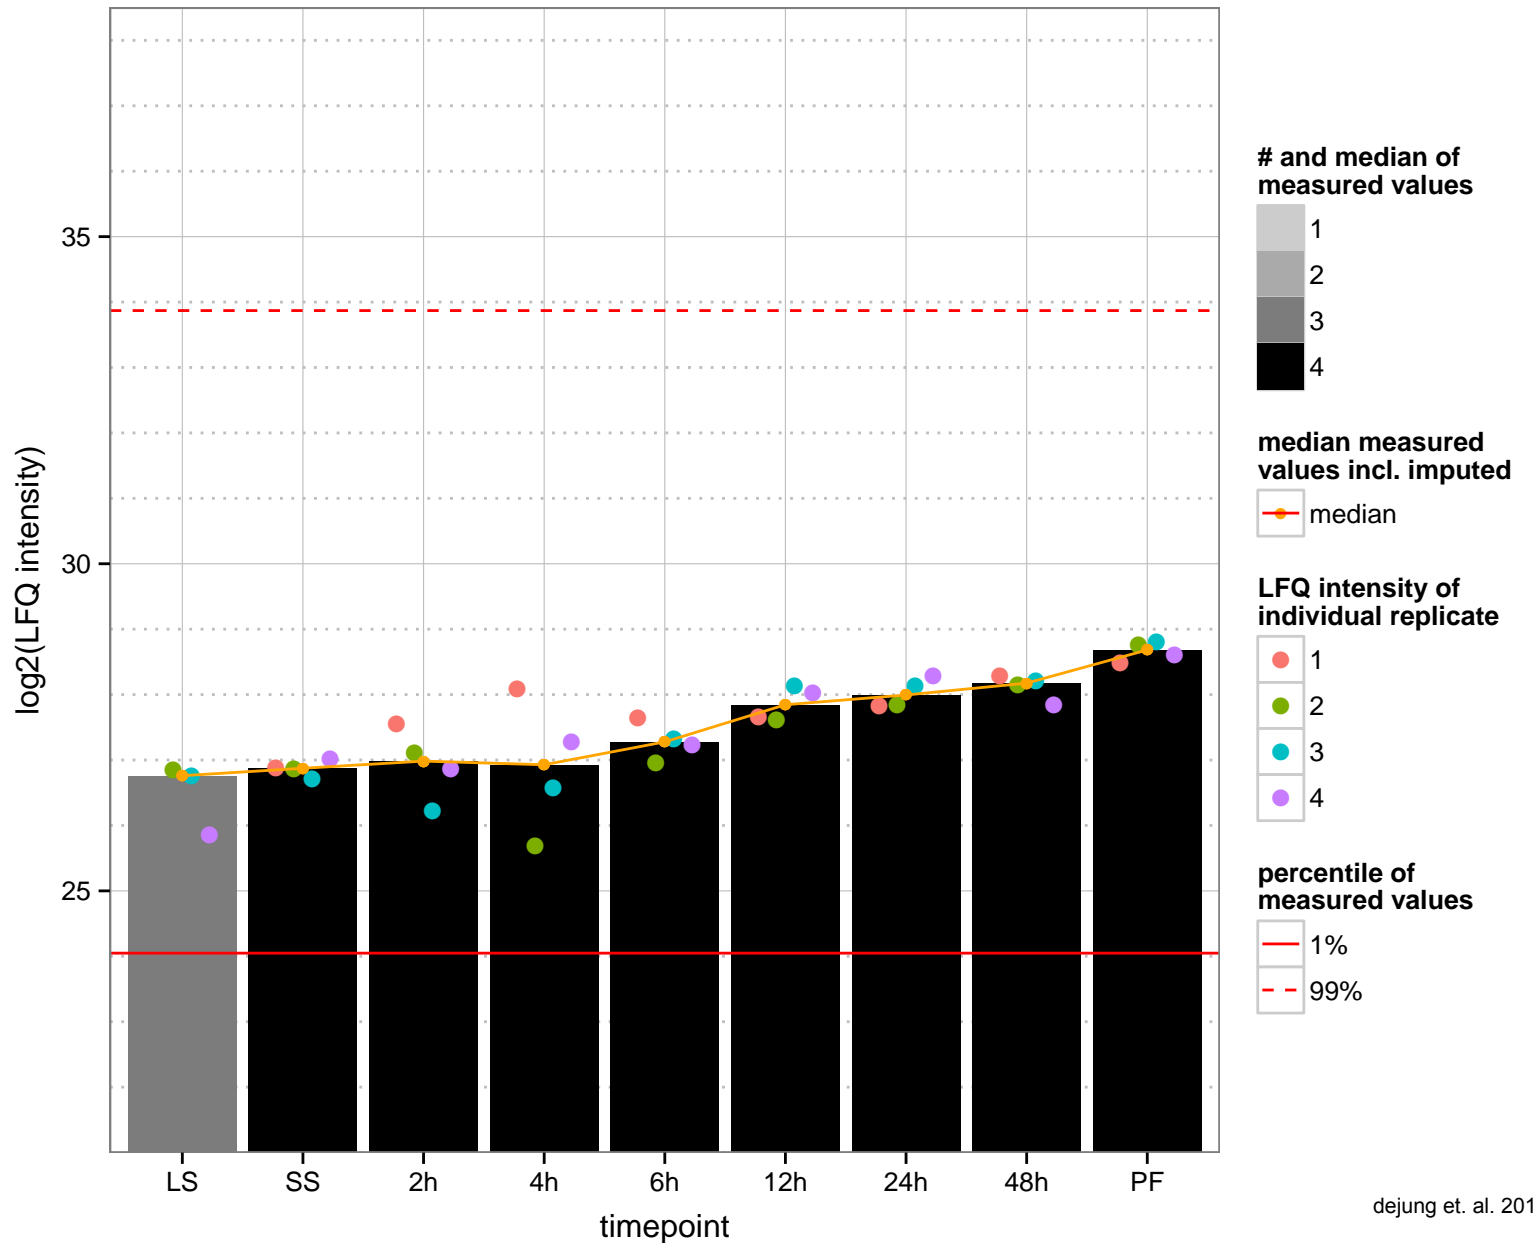

hypothetical protein, conserved  
 Tb927.10.15790  
 AGOF: null  
 AGOC: mitochondrion  
 AGOP: null  
 PGO: null  
 PGO: null  
 PGO: null

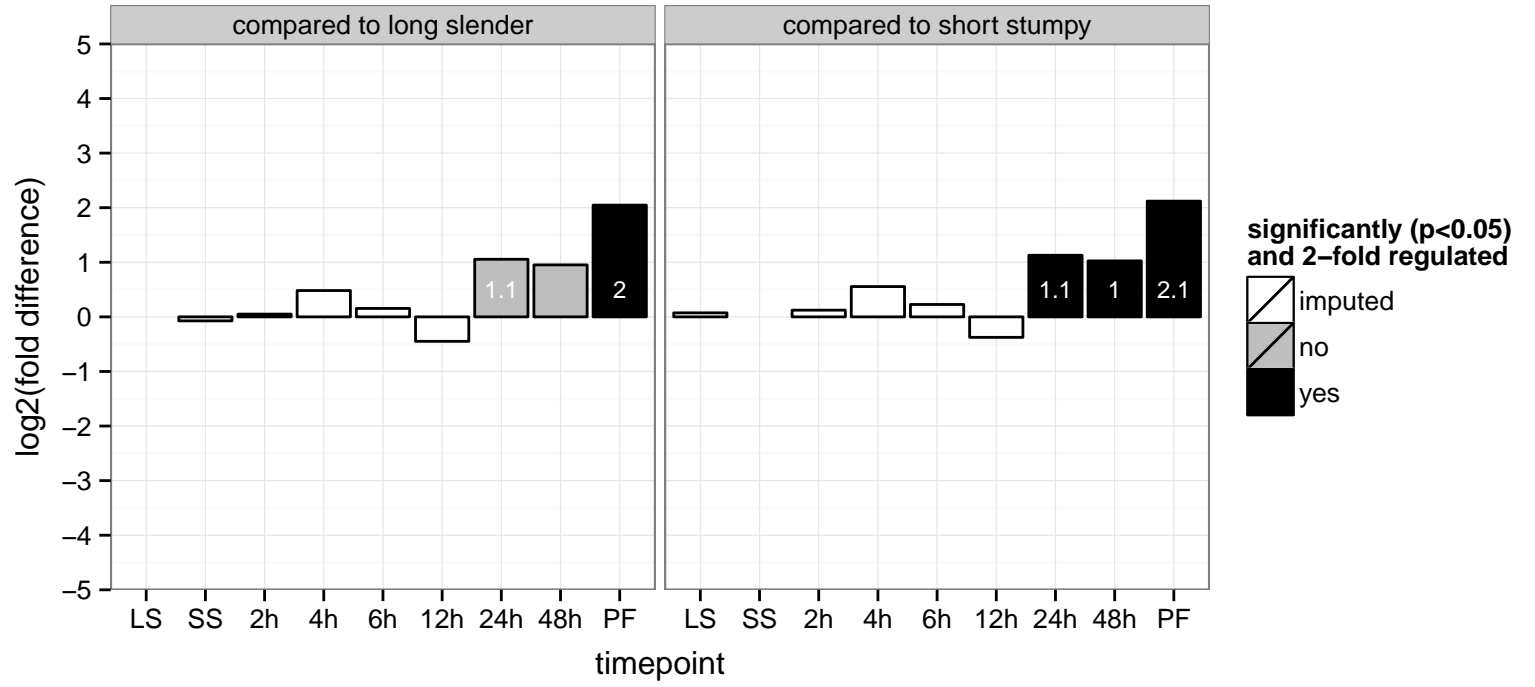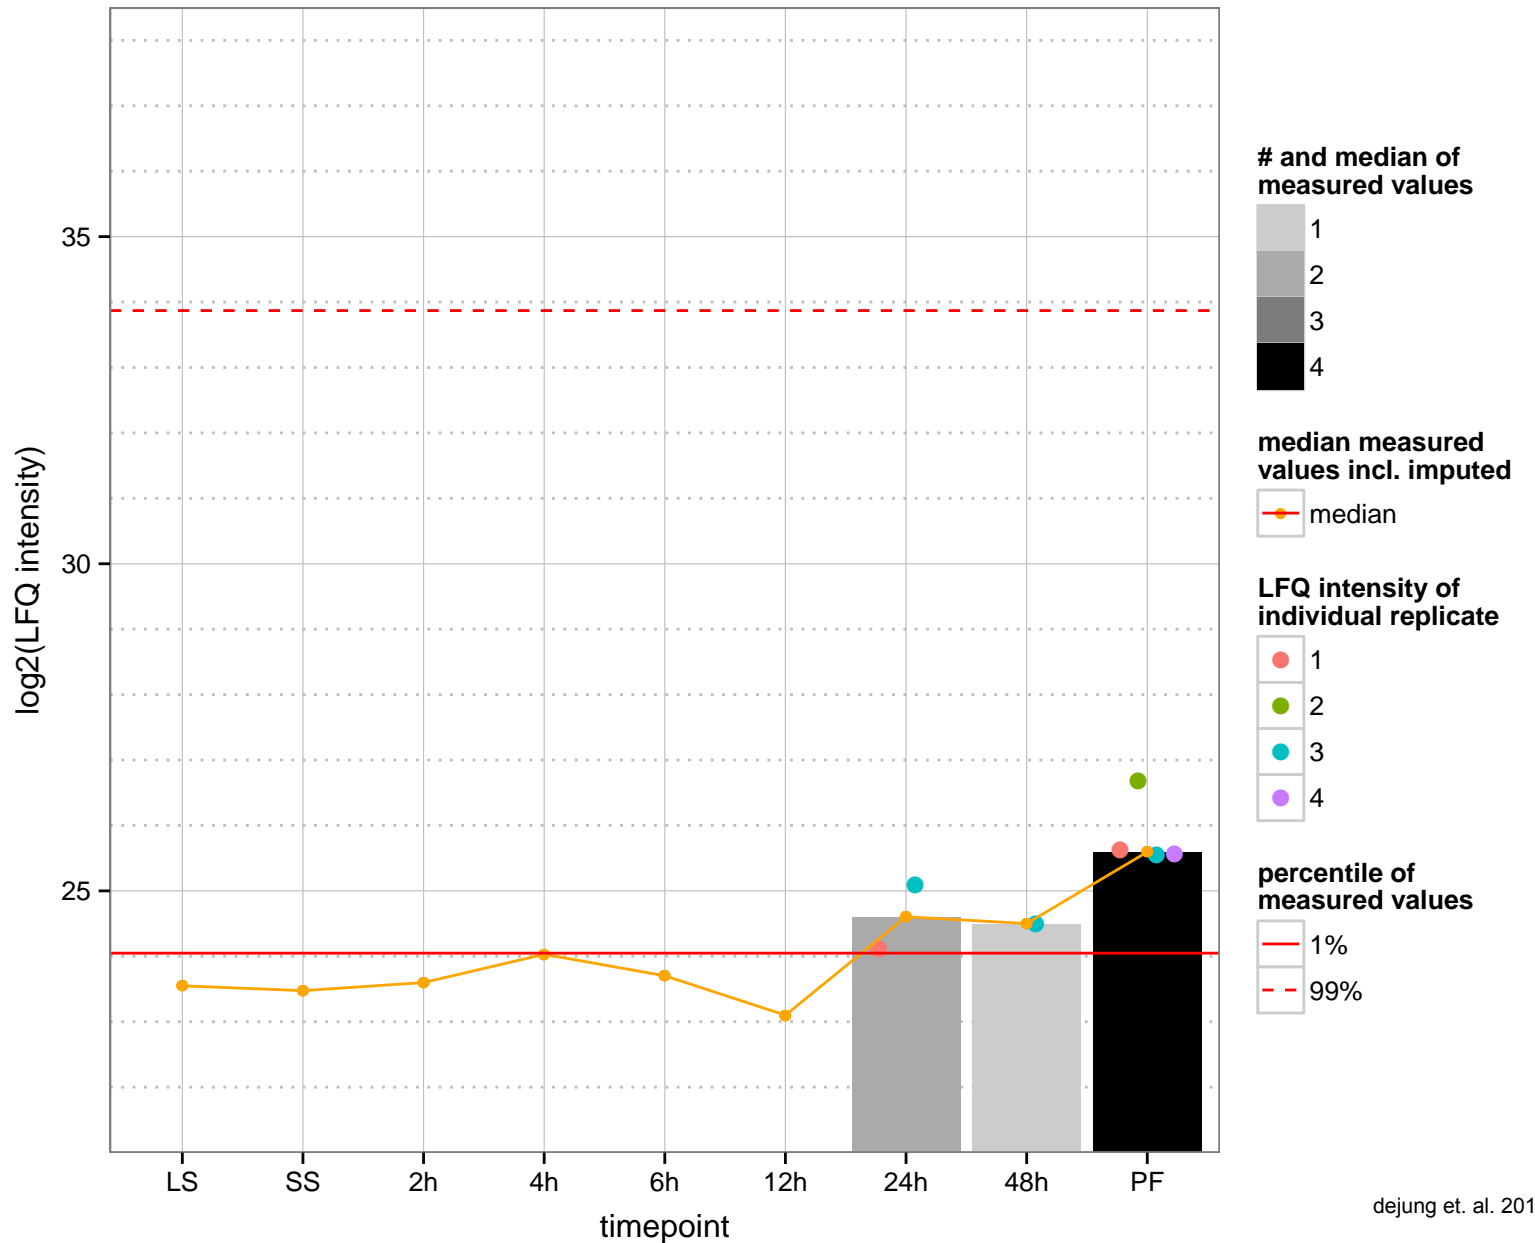

ATP synthase F1 subunit gamma protein, putative

Tb927.10.180

AGOF: hydrogen ion transporting ATP synthase activity, rotational mechanism, proton-transporting ATPase activity

AGOC: mitochondrion, proton-transporting ATP synthase complex, catalytic core F(1), proton-transporting two-sector ATPase

AGOP: ATP synthesis coupled proton transport

PGOF: hydrogen ion transporting ATP synthase activity, rotational mechanism, proton-transporting ATPase activity

PGOC: proton-transporting ATP synthase complex, catalytic core F(1)

PGOP: ATP synthesis coupled proton transport

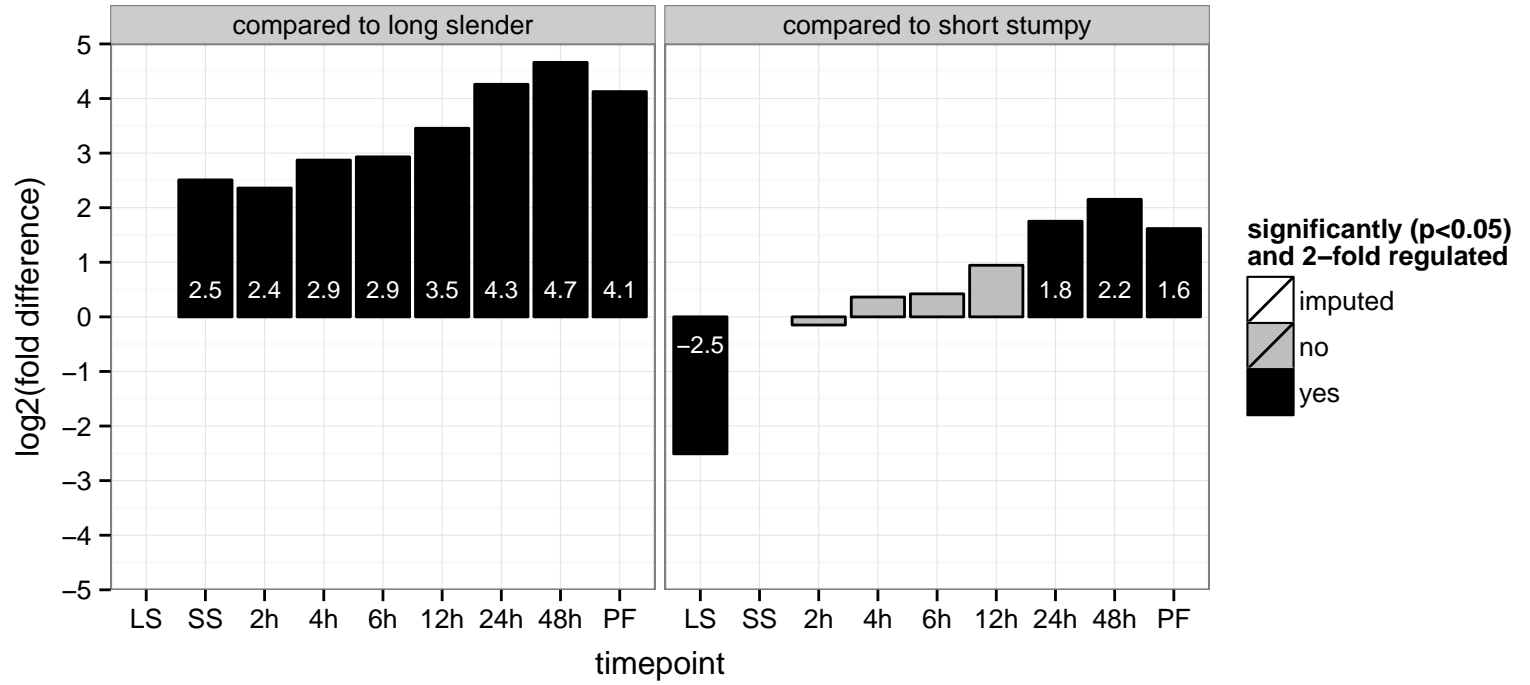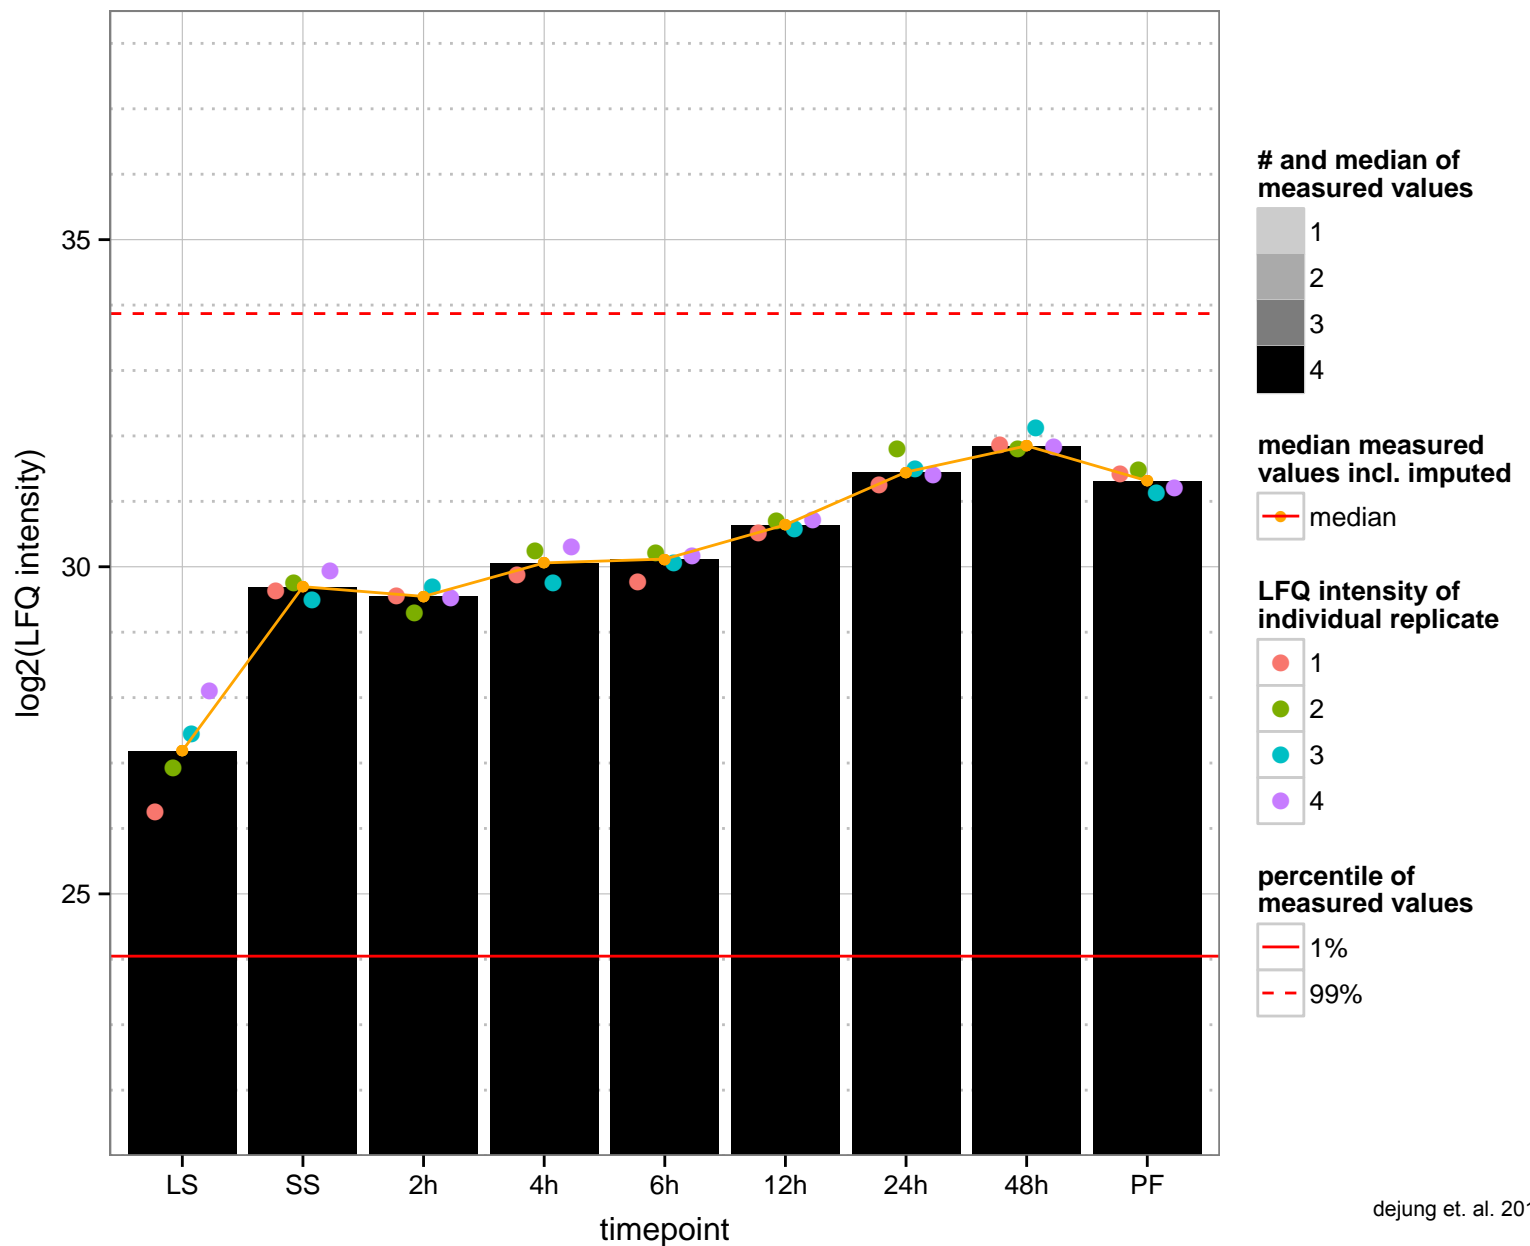

NA, 40S ribosomal protein S6, putative  
 Tb927.10.190  
 AGOF: NA, structural constituent of ribosome  
 AGOC: NA, intracellular, ribosome  
 AGOP: NA, regulation of cell growth, regulation of cell proliferation, translation  
 PGOF: NA, structural constituent of ribosome  
 PGO: NA, intracellular, ribosome  
 PGOP: NA, translation

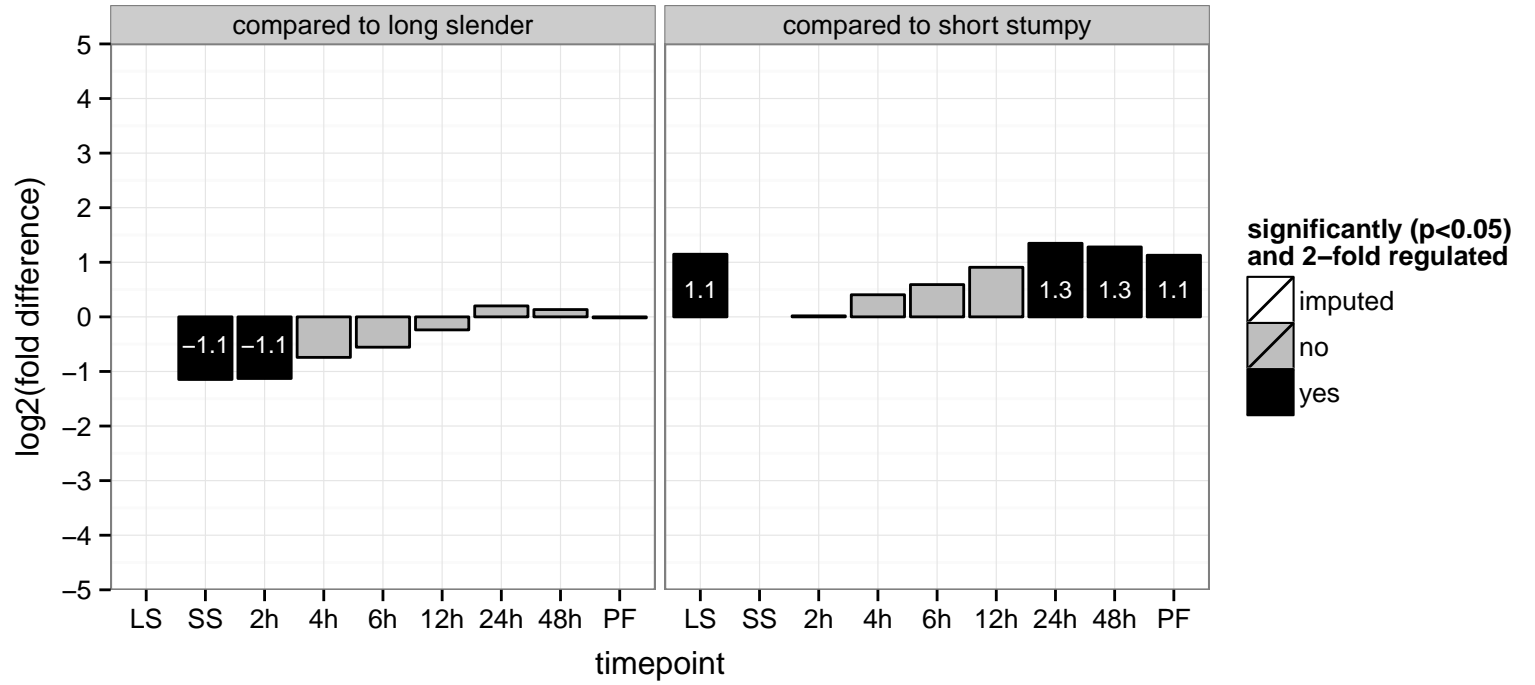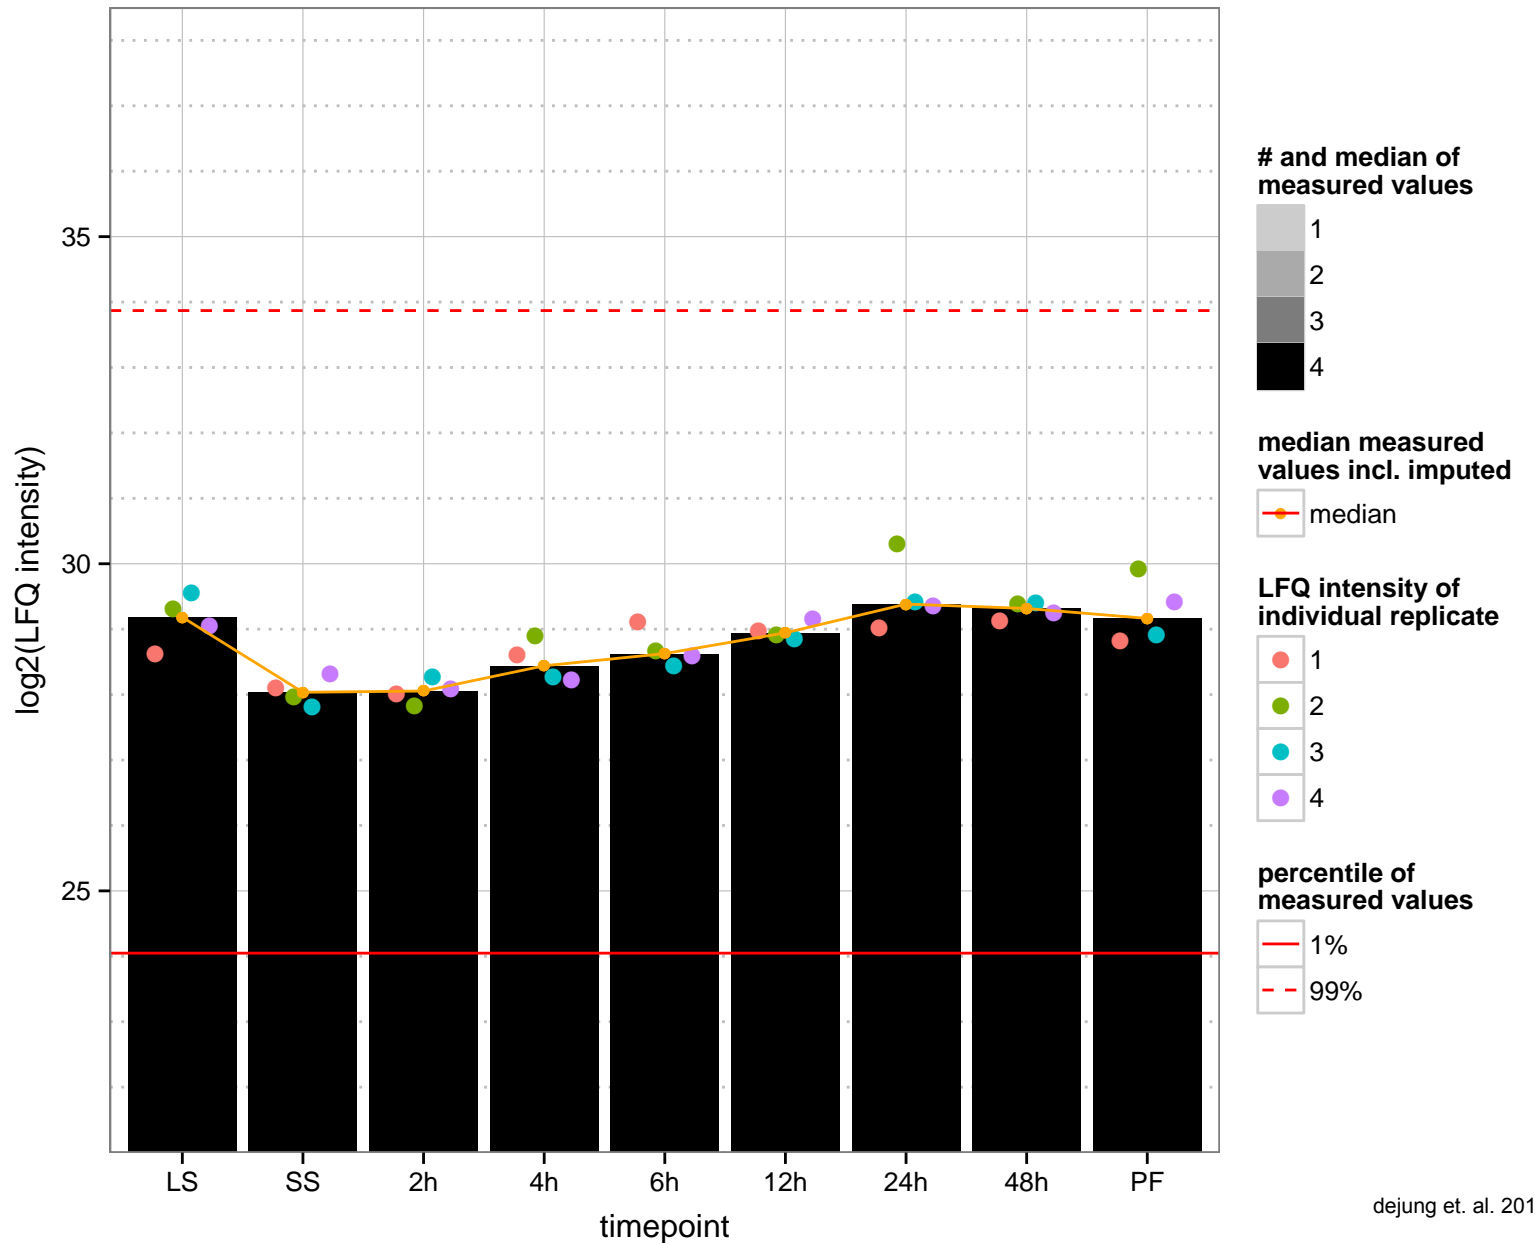

DNA topoisomerase IA, putative  
 Tb927.10.1900  
 AGOF: DNA binding, DNA topoisomerase type I activity  
 AGOC: chromosome  
 AGOP: DNA modification, DNA topological change  
 PGOF: DNA binding, DNA topoisomerase activity  
 PGO: chromosome  
 PGO: DNA topological change

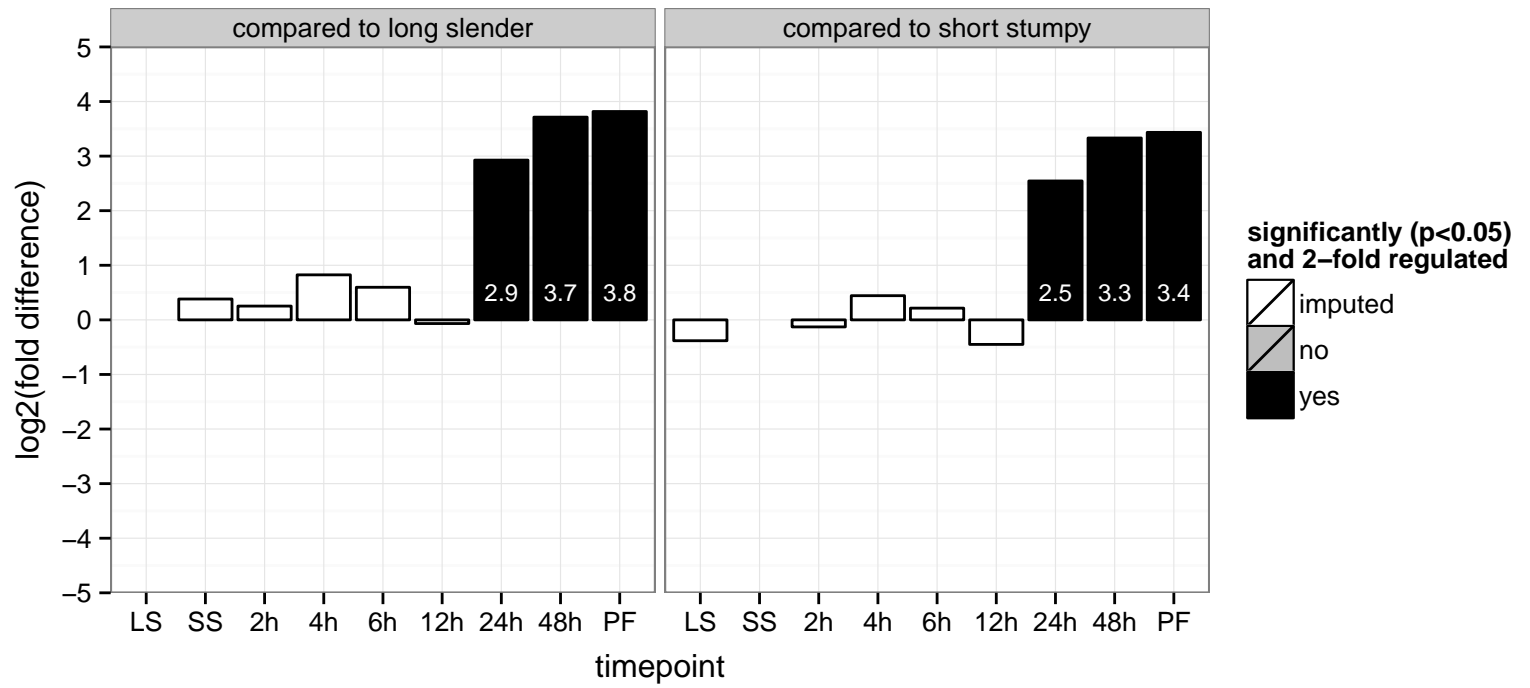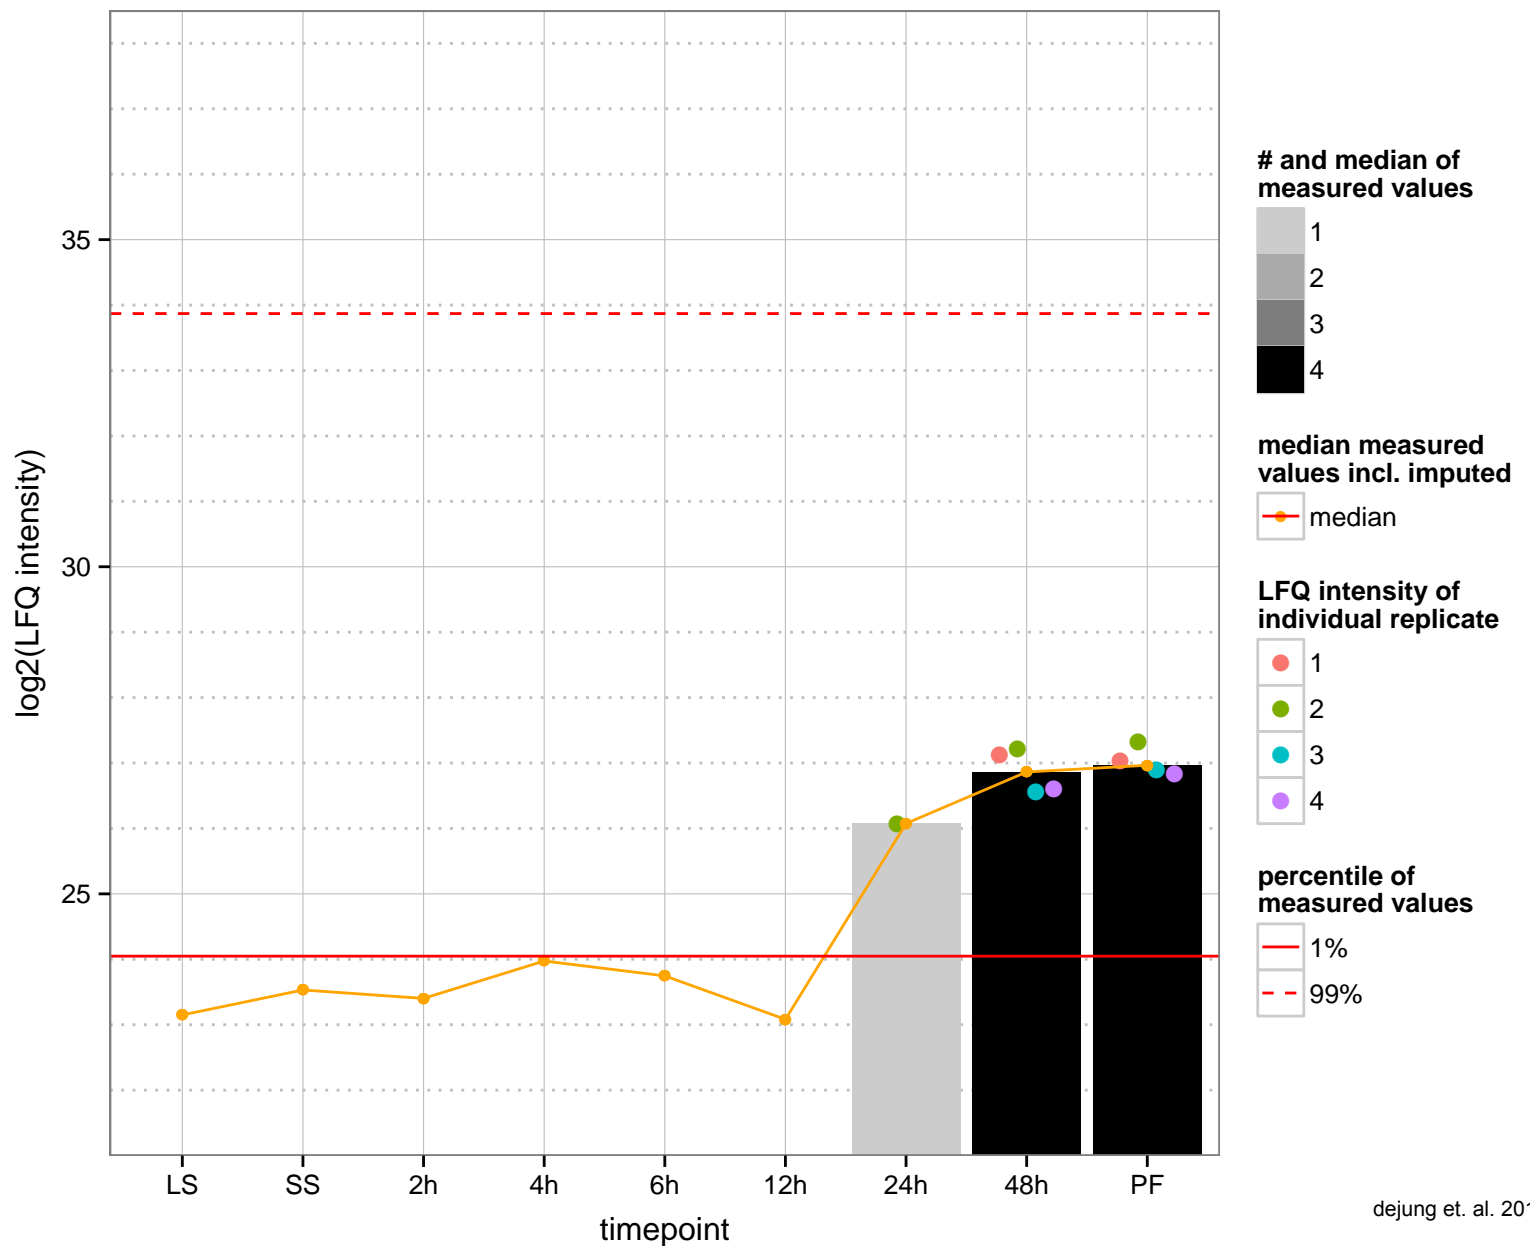

hypothetical protein, conserved  
 Tb927.10.2070  
 AGOF: null  
 AGOC: null  
 AGOP: null  
 PGO: null  
 PGOC: null  
 PGOP: null

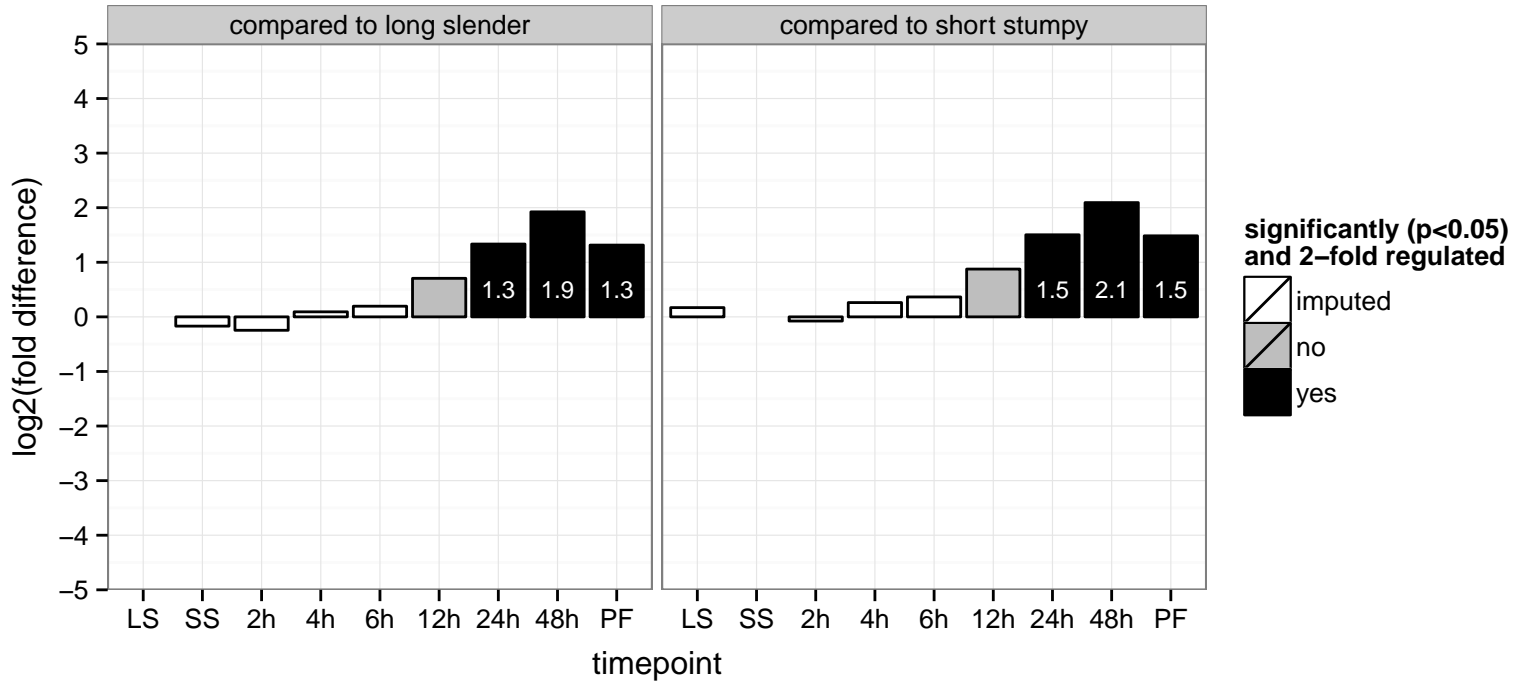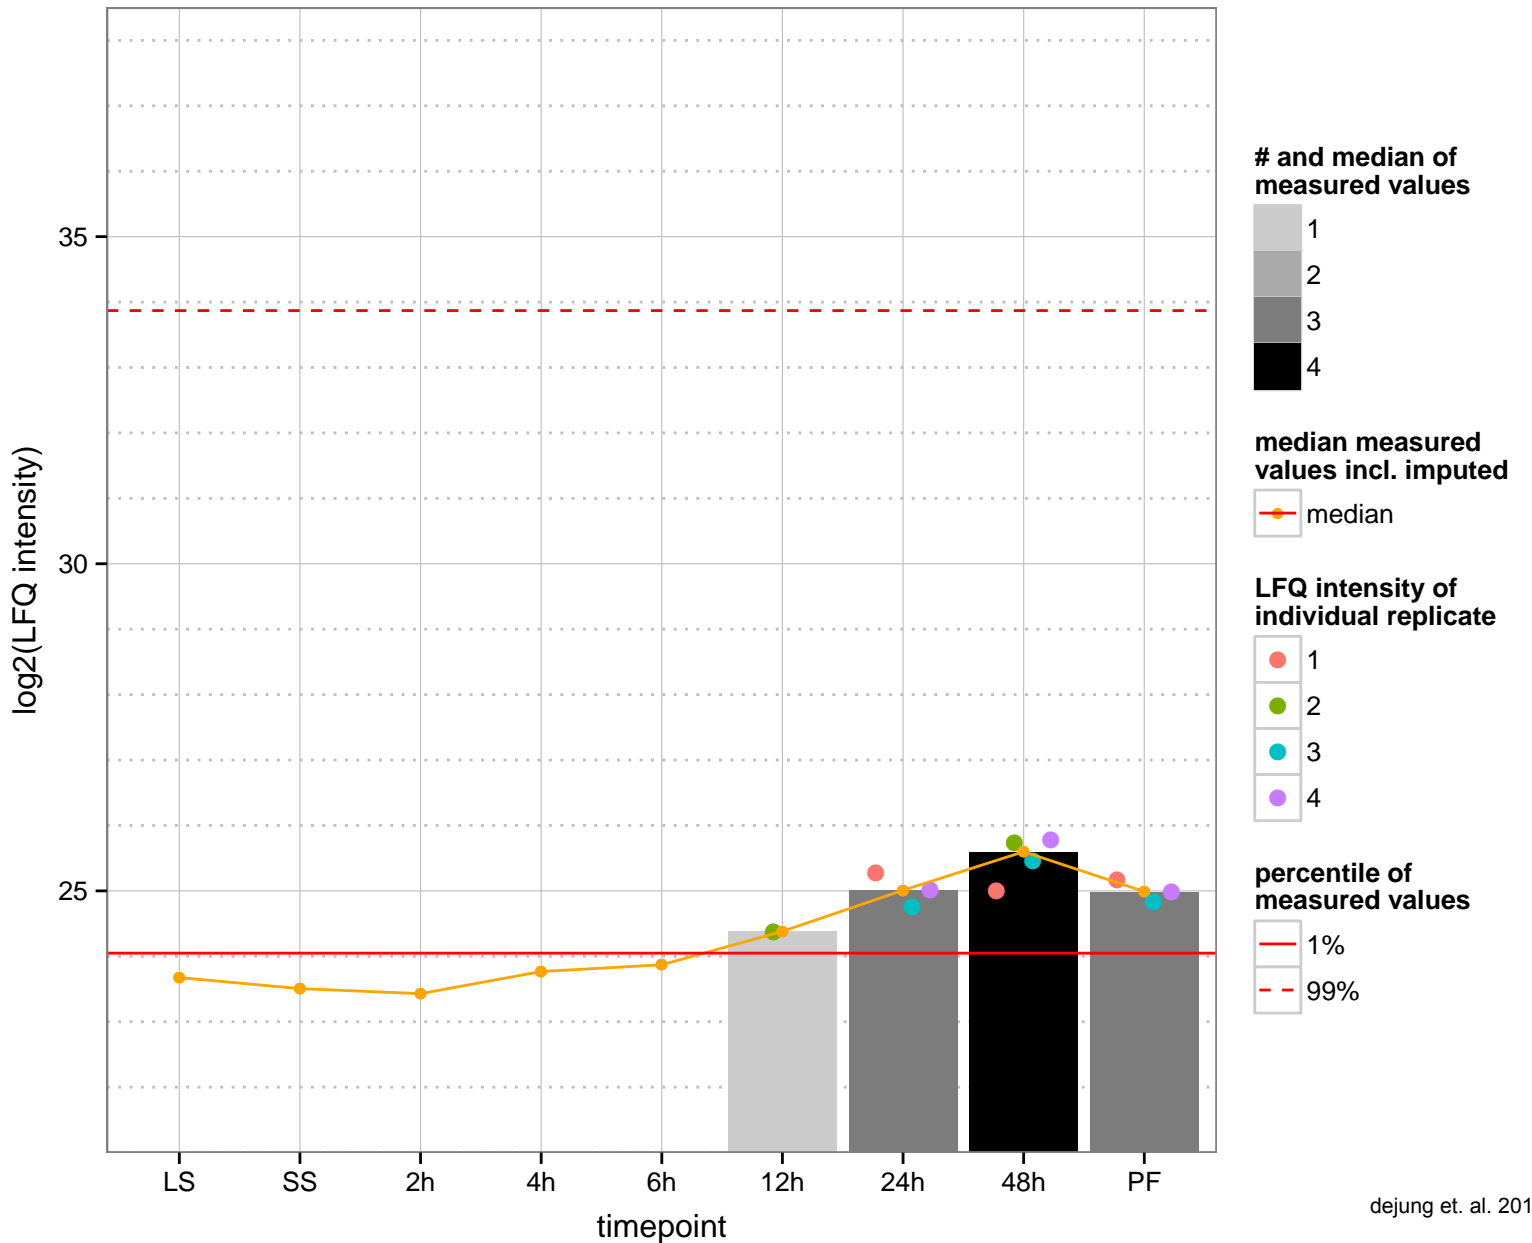

hypothetical protein, conserved  
 Tb927.10.2240  
 AGOF: null  
 AGOC: intracellular  
 AGOP: transport  
 PGO: null  
 PGO: null  
 PGO: null

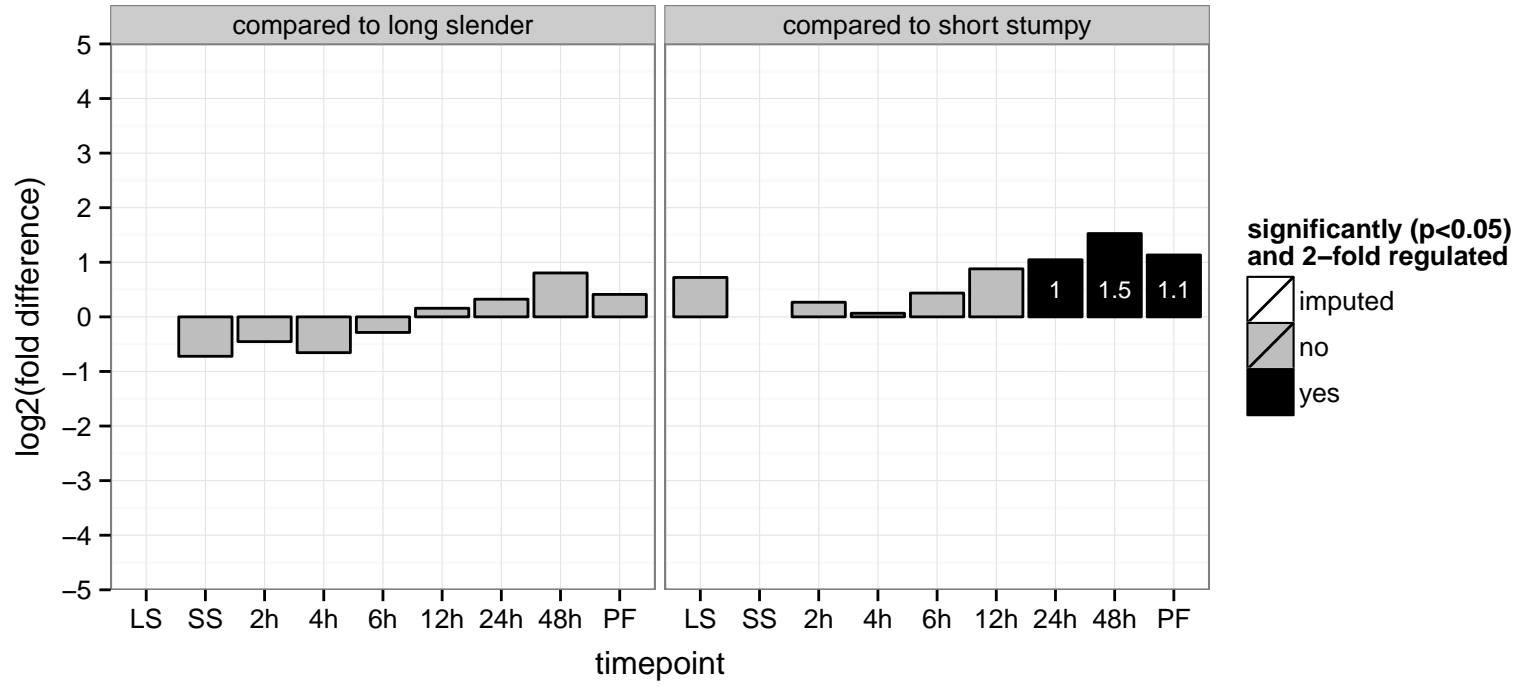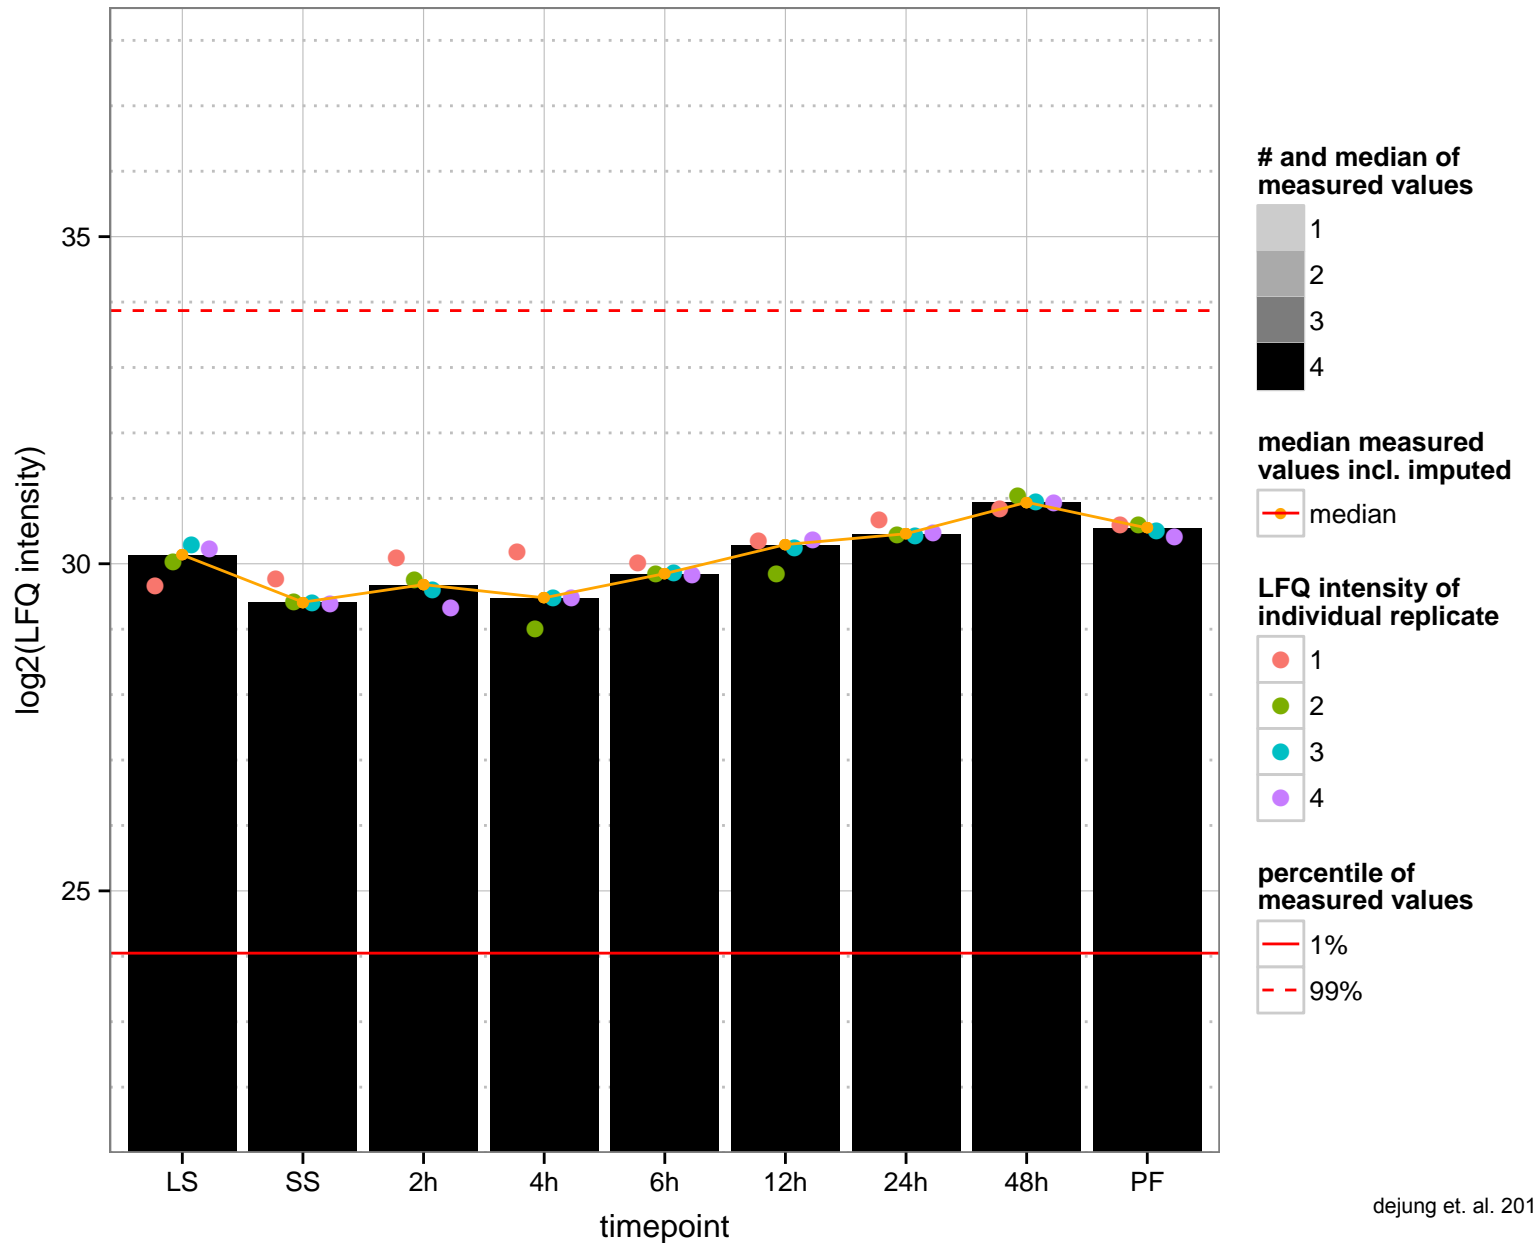

60S ribosomal protein L32, putative, unspecified product  
 Tb927.9.15420;Tb927.10.270  
 AGOF: structural constituent of ribosome  
 AGOC: intracellular, ribosome  
 AGOP: null, translation  
 PGO: structural constituent of ribosome  
 PGO: intracellular, ribosome  
 PGO: translation

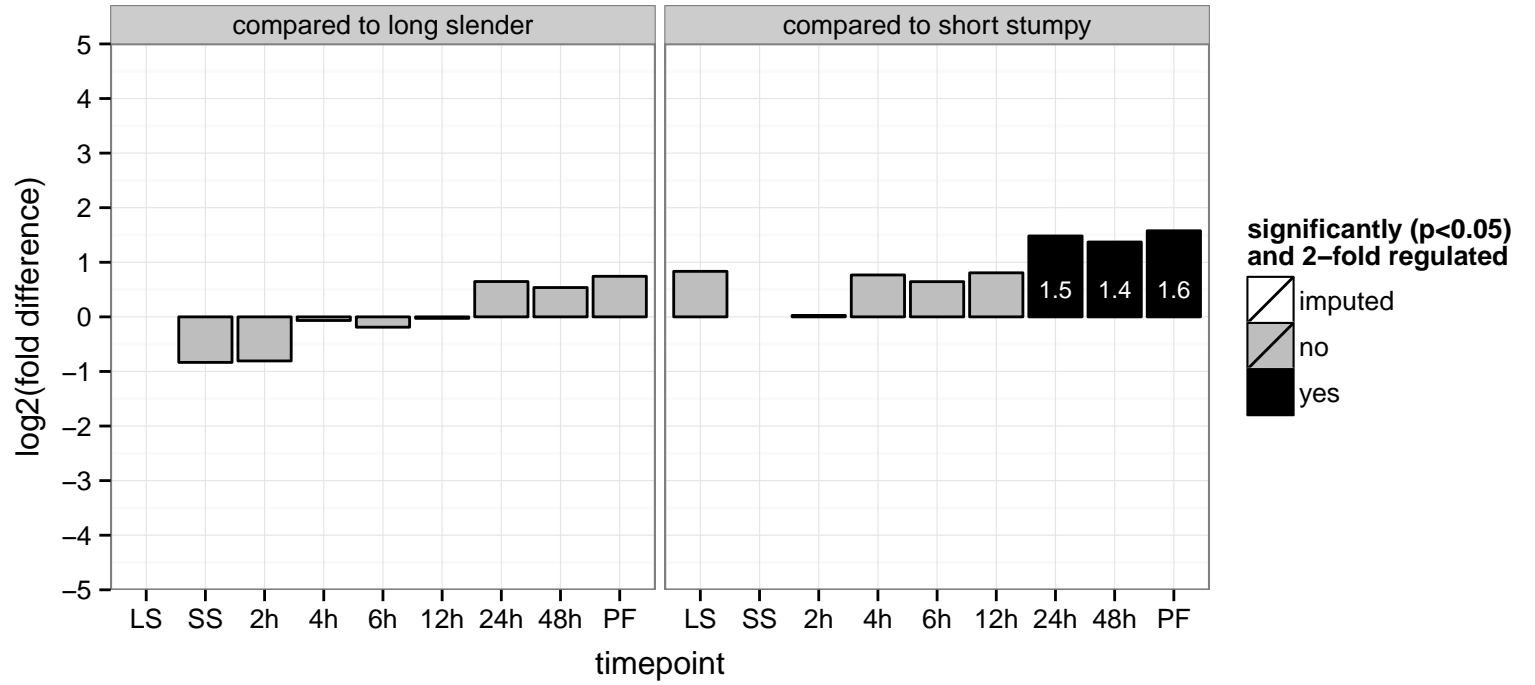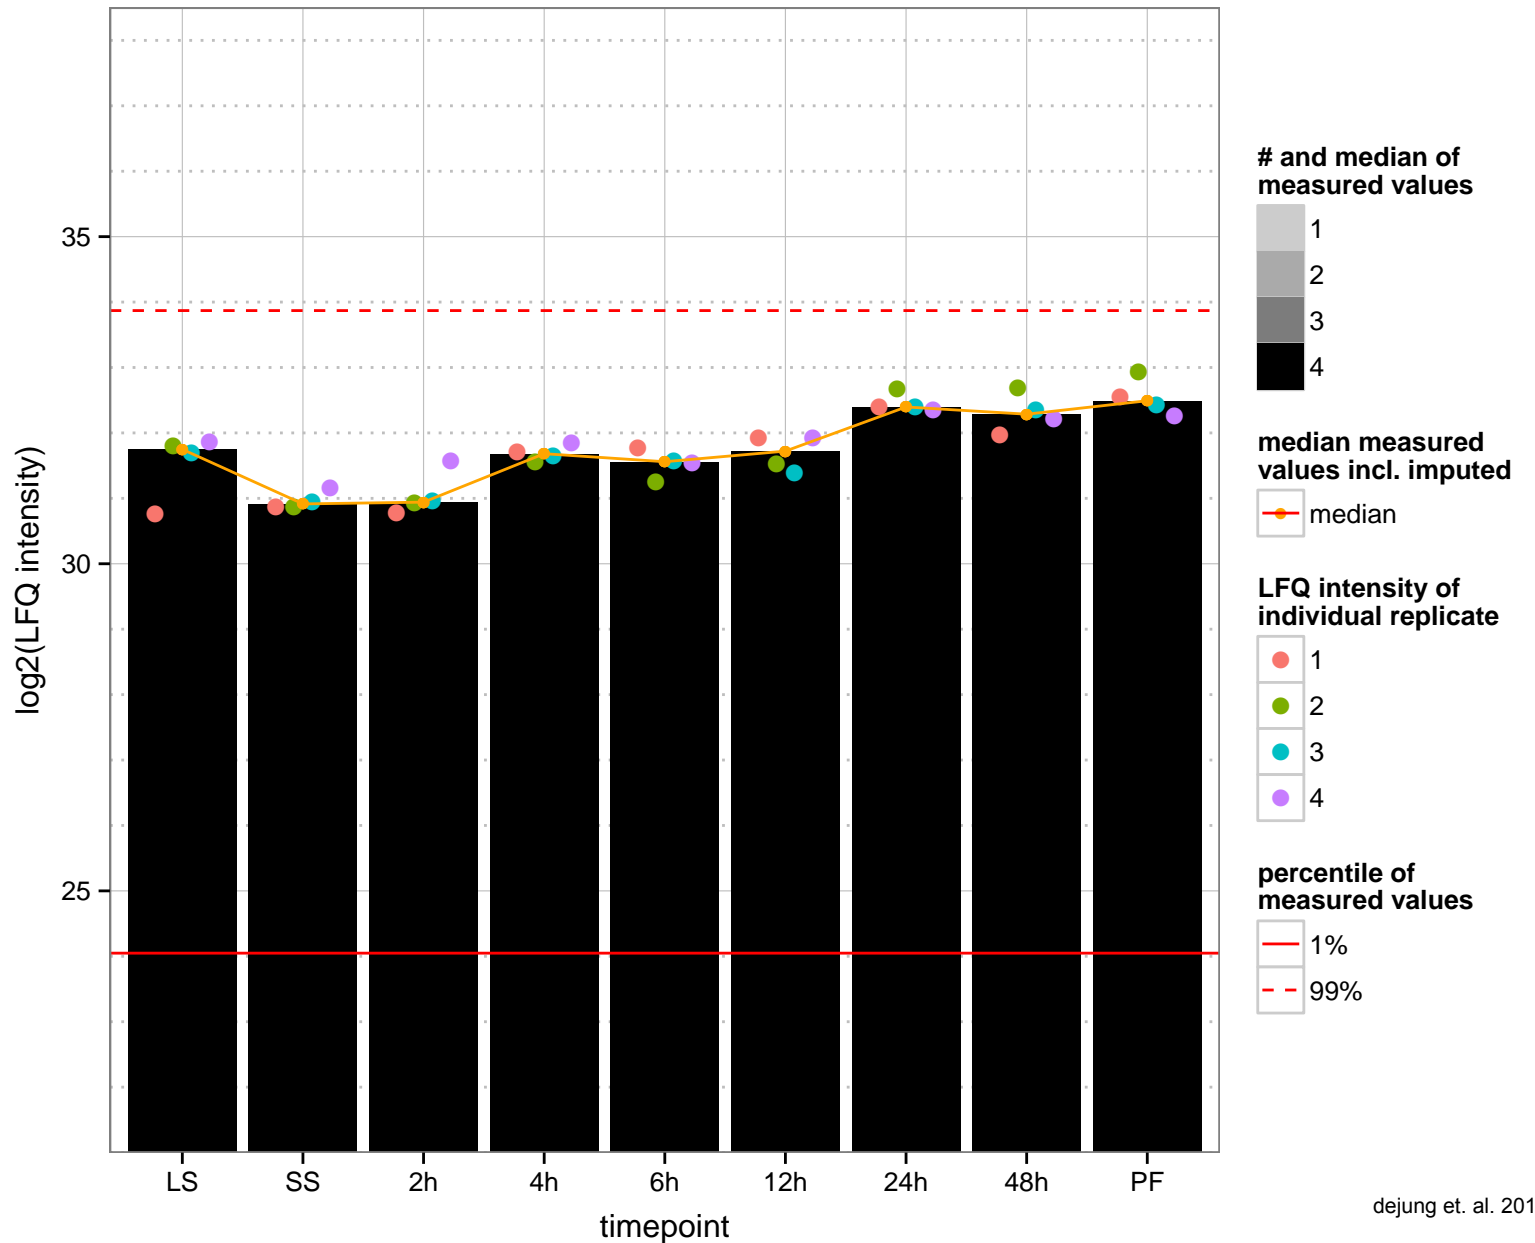



60S ribosomal proteins L38, putative  
 Tb927.10.3280  
 AGOF: structural constituent of ribosome  
 AGOC: intracellular, ribosome  
 AGOP: translation  
 PGOF: structural constituent of ribosome  
 PGO: intracellular, ribosome  
 PGOP: translation

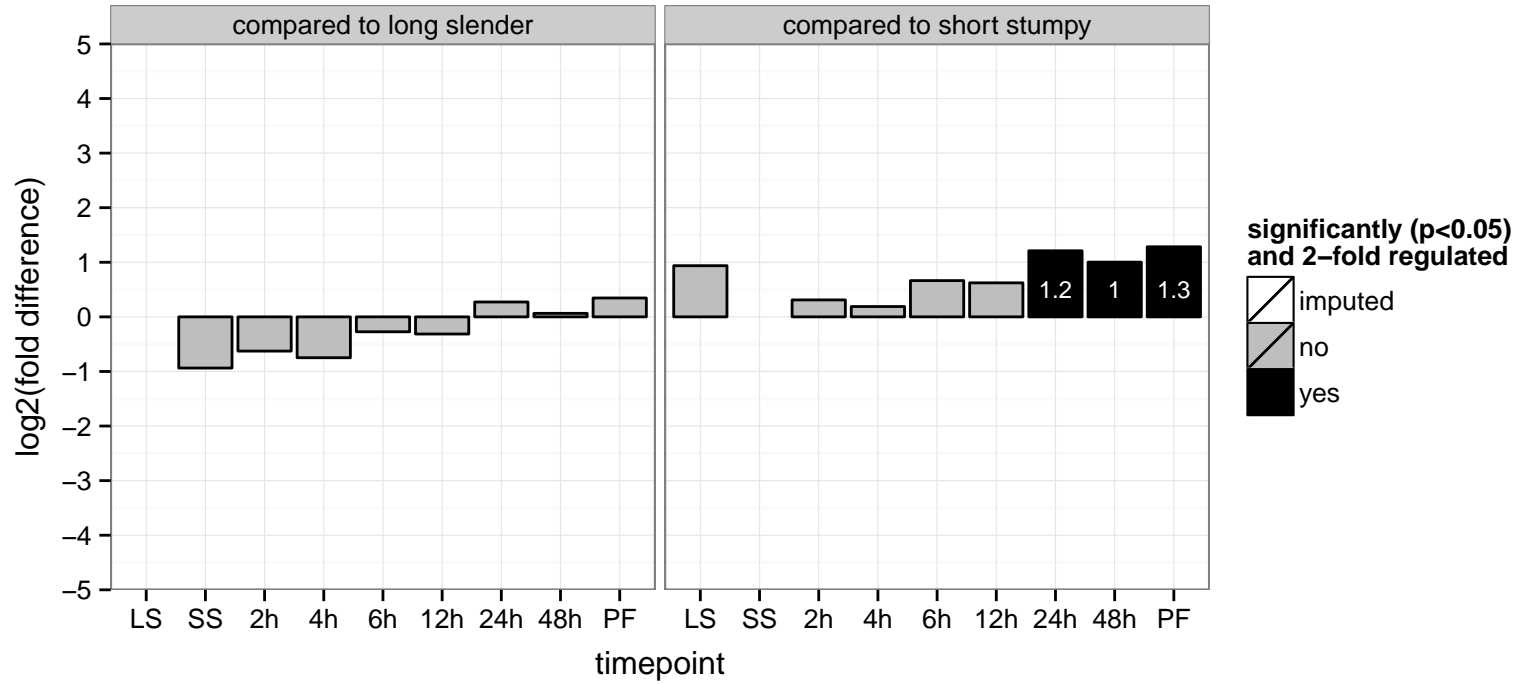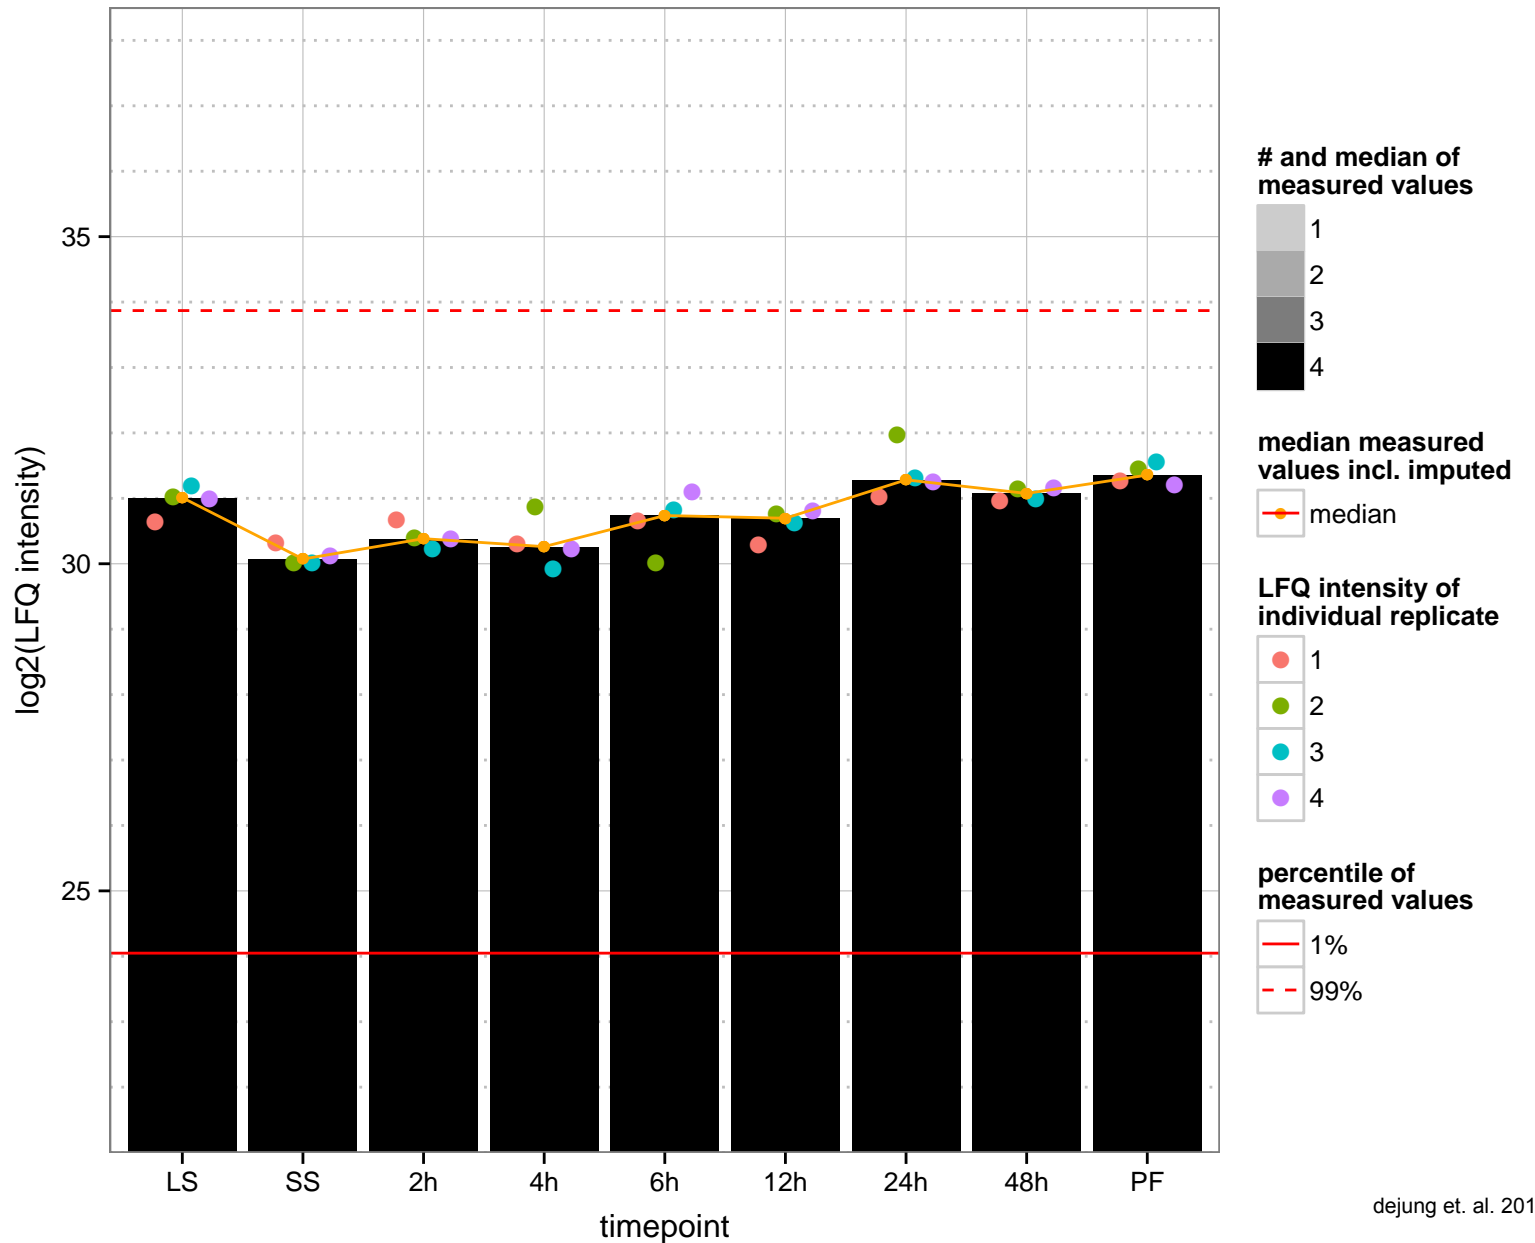

mitochondrial structure specific endonuclease I (SSE-1), putative  
 Tb927.10.340  
 AGOF: 5'-3' exonuclease activity, DNA binding  
 AGOC: mitochondrion  
 AGOP: DNA catabolic process  
 PGOF: 5'-3' exonuclease activity, DNA binding, catalytic activity  
 PGOC: null  
 PGOP: null

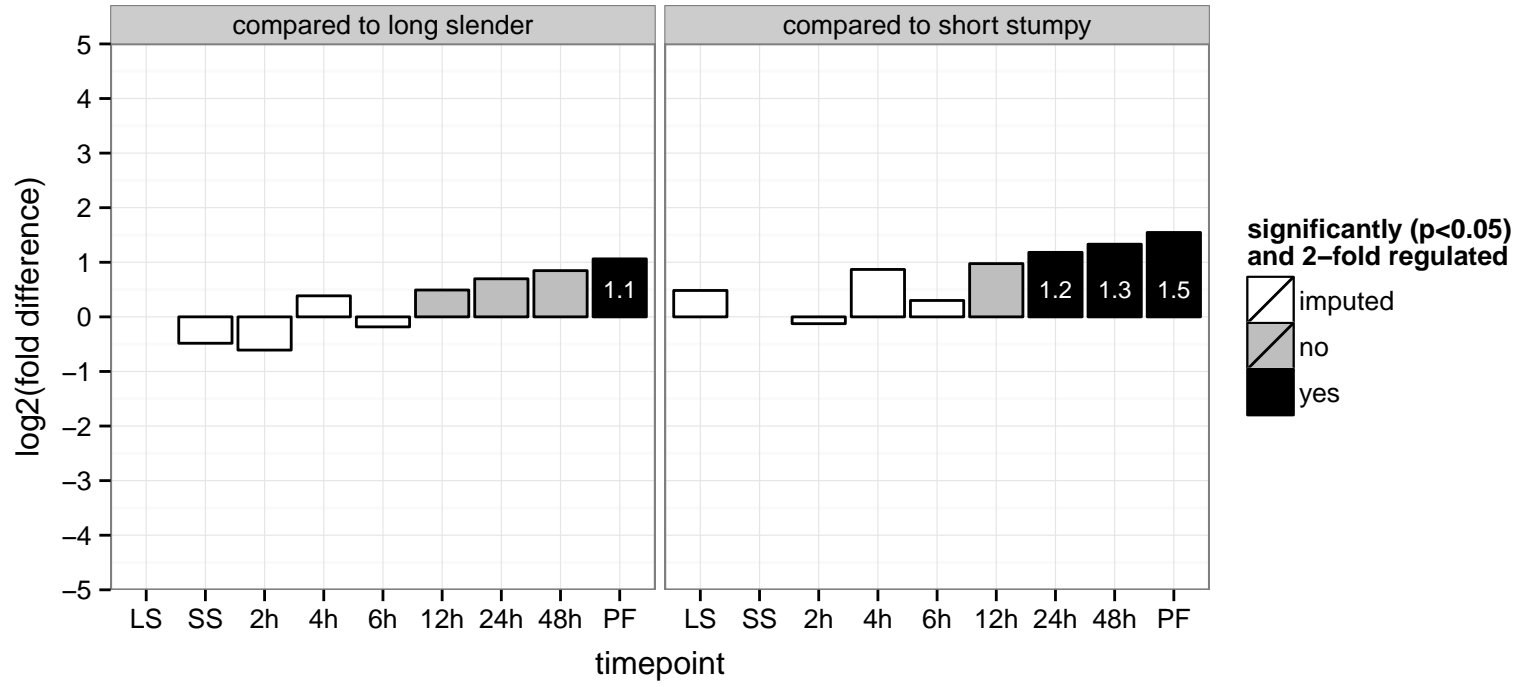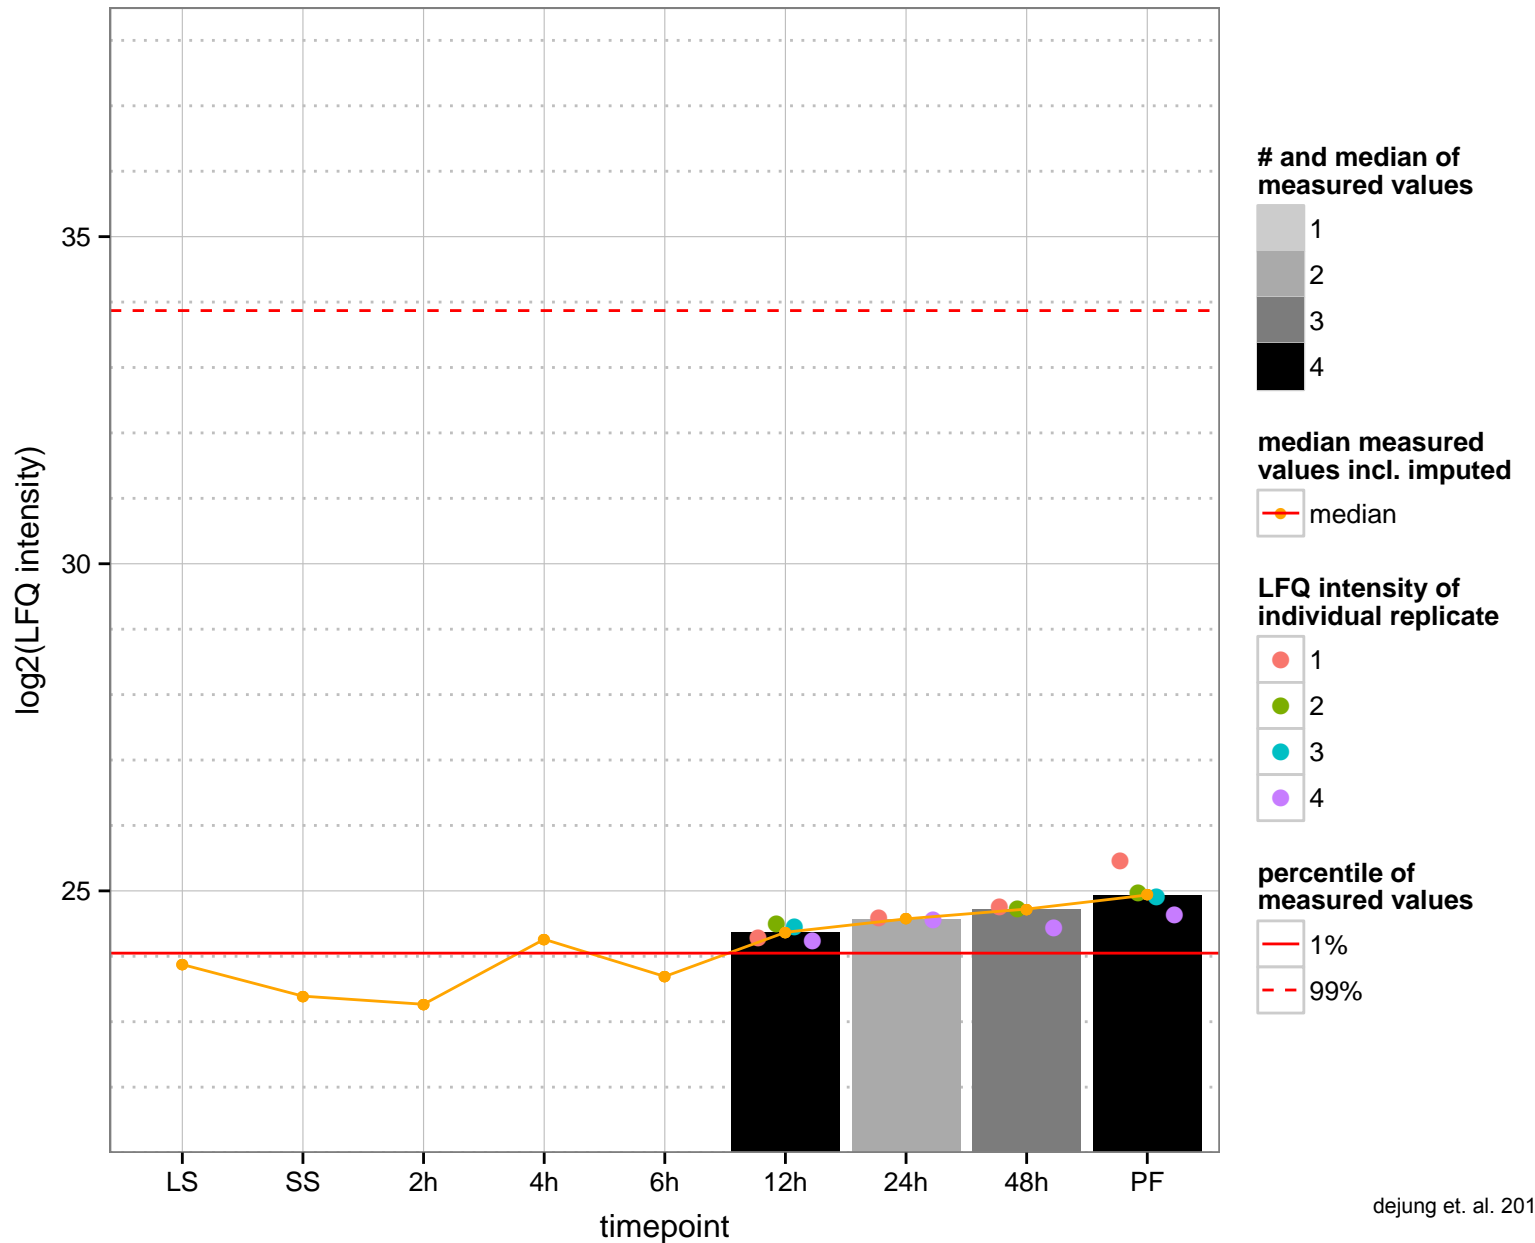

NADH-dependent fumarate reductase, putative  
 Tb927.10.3650  
 AGOF: electron carrier activity, succinate dehydrogenase activity  
 AGOC: null  
 AGOP: thiamine biosynthetic process  
 PGOF: oxidoreductase activity, succinate dehydrogenase activity  
 PGOC: null  
 PGOP: oxidation-reduction process

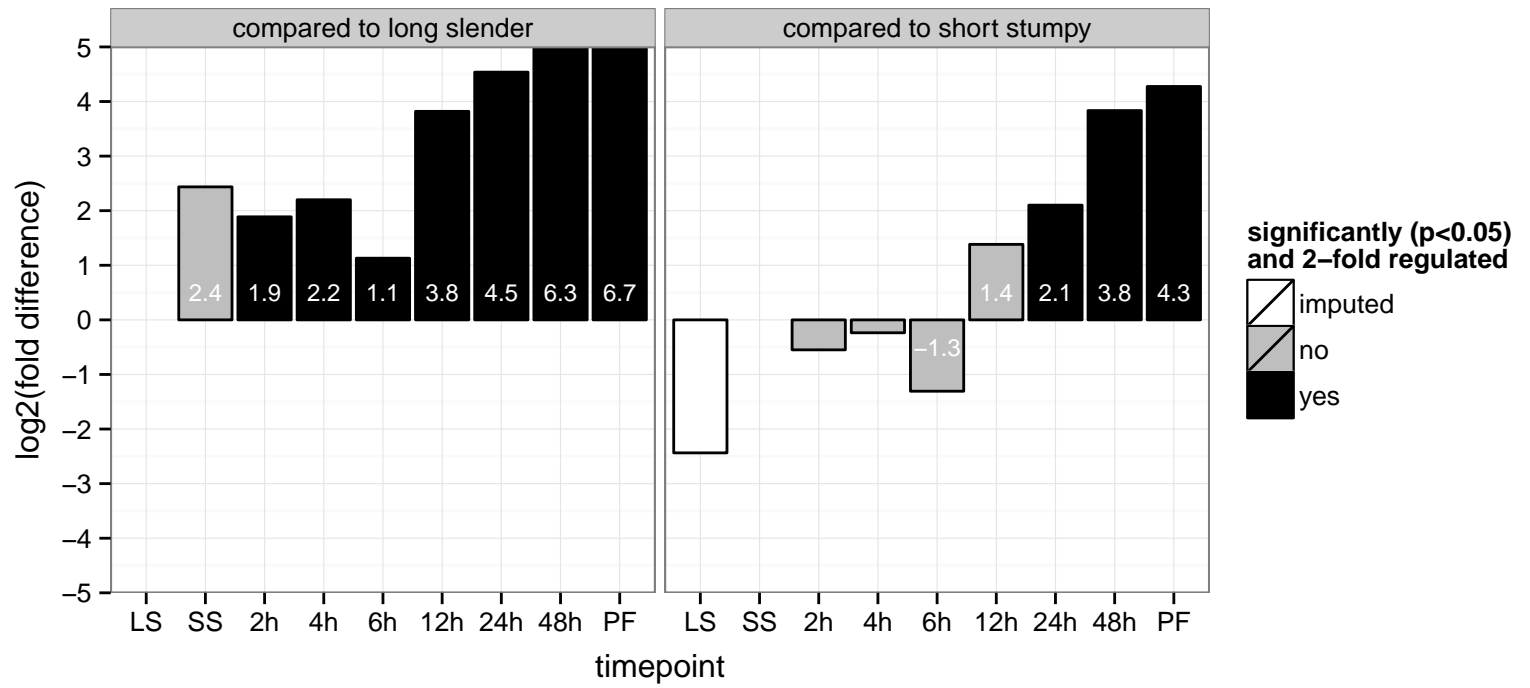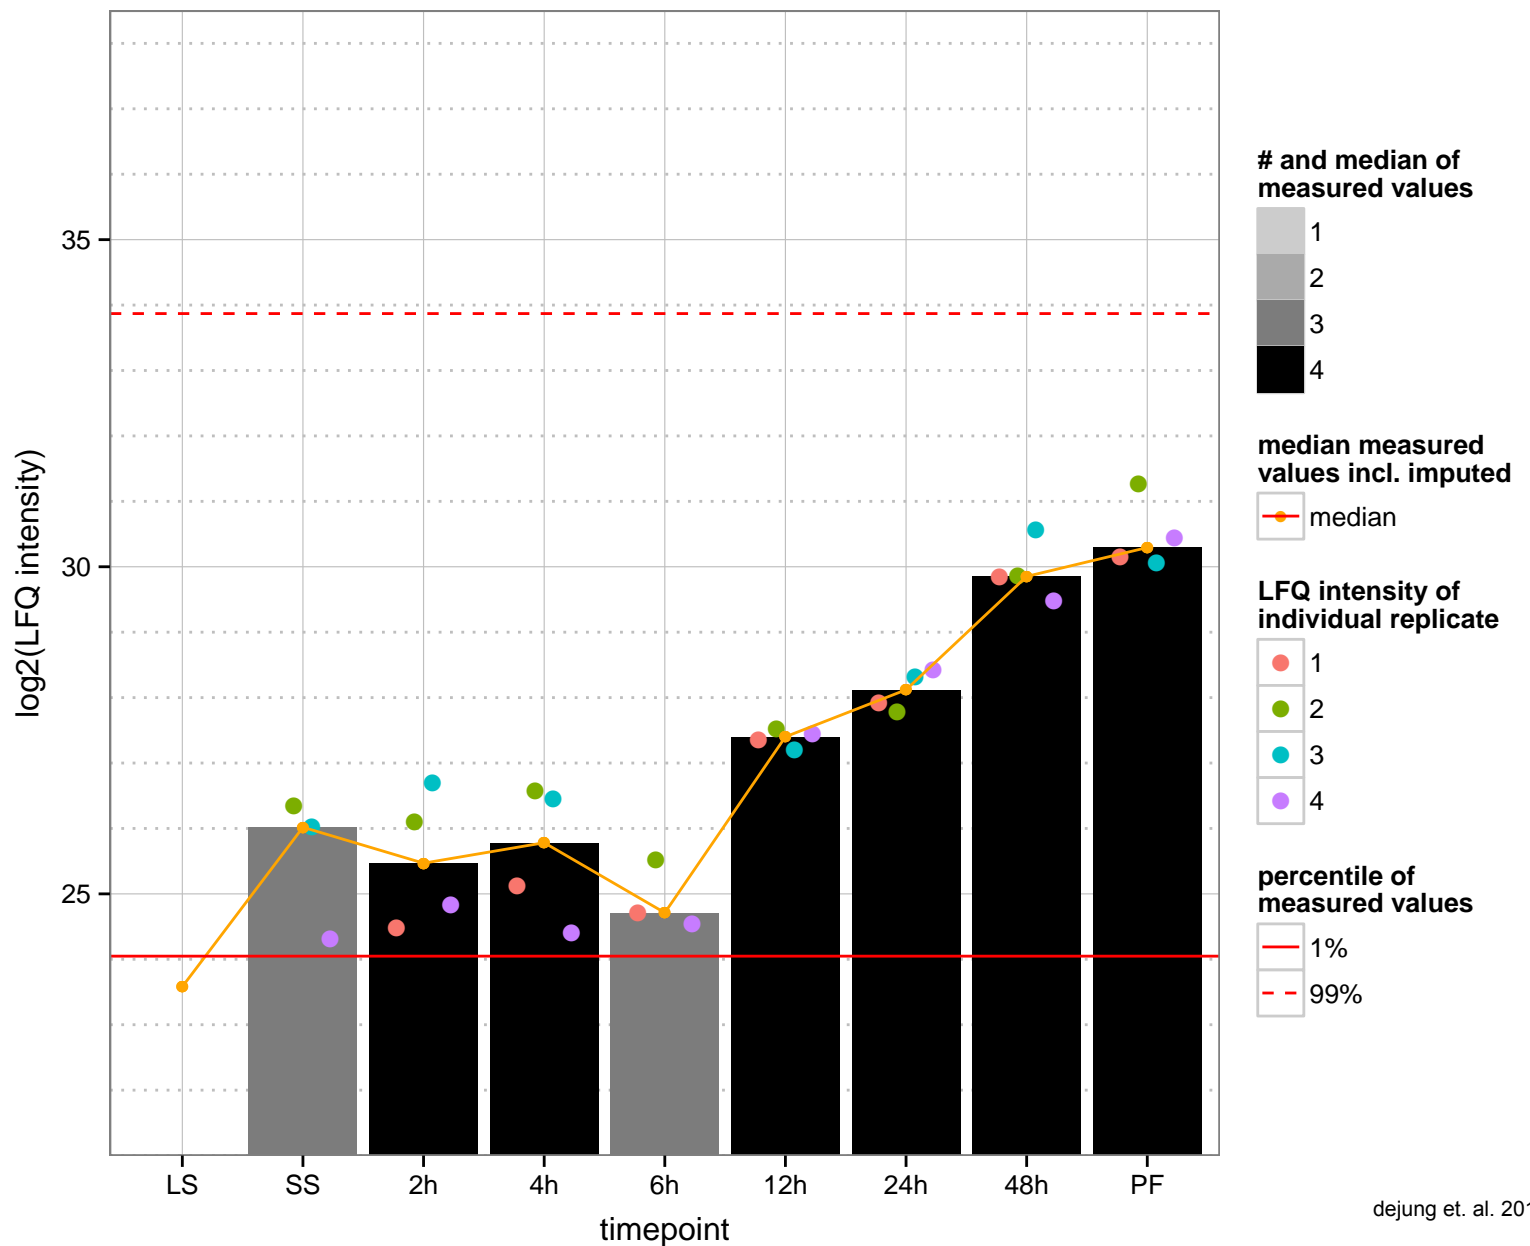

hypothetical protein, conserved  
 Tb927.10.3790  
 AGOF: null  
 AGOC: null  
 AGOP: null  
 PGOF: binding, null  
 PGO: null  
 PGOP: null

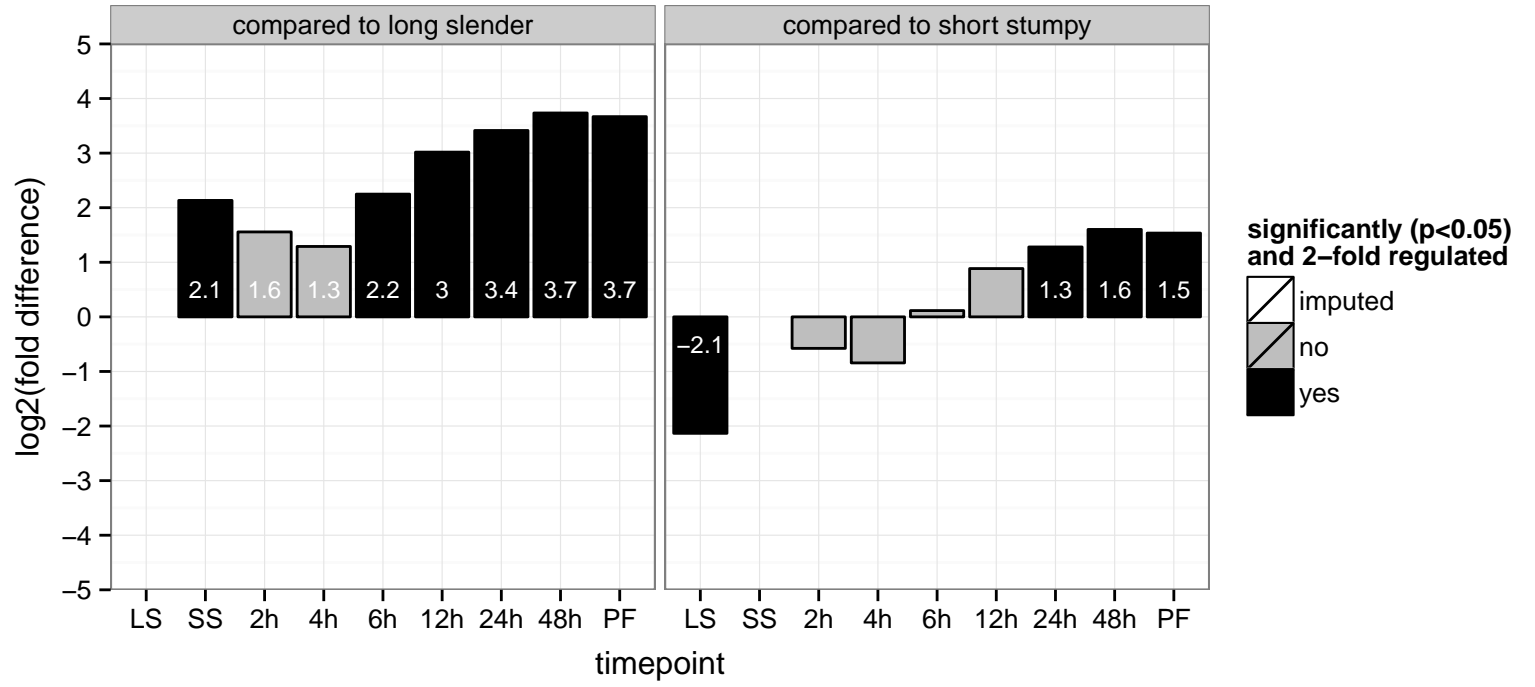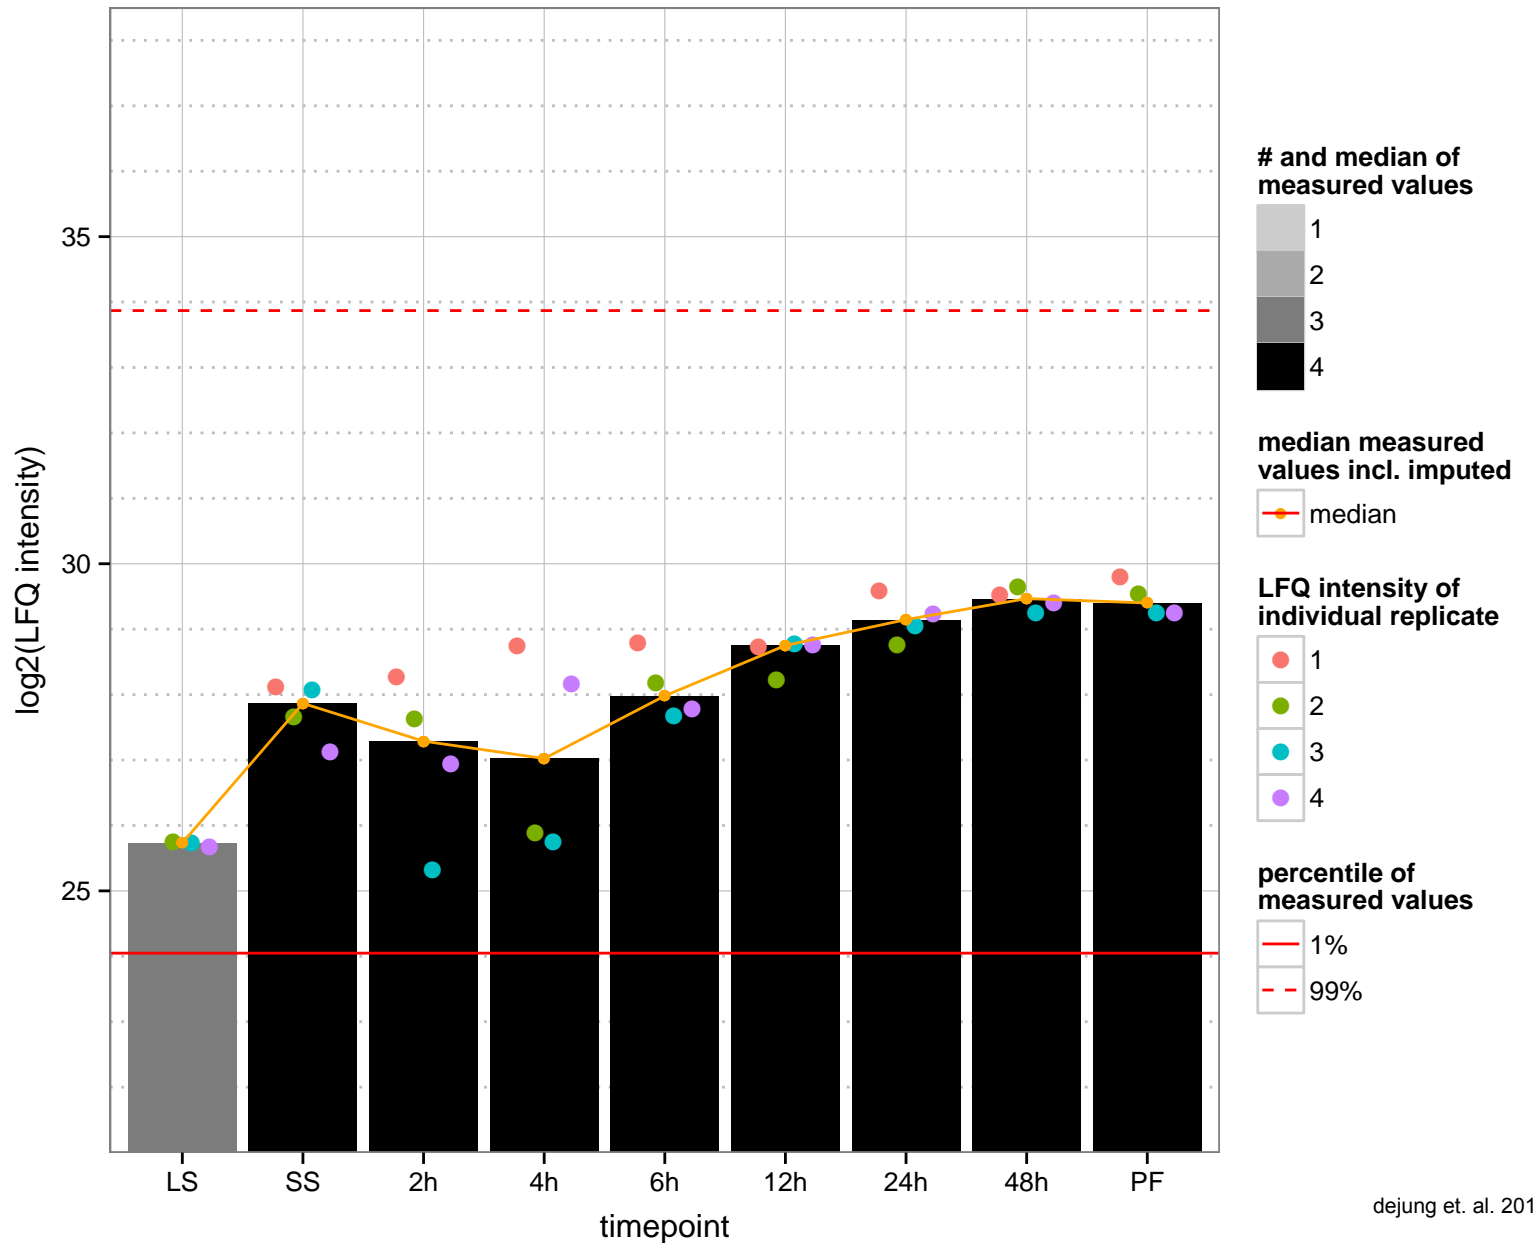

hypothetical protein, conserved  
 Tb927.10.4080  
 AGOF: oxidoreductase activity  
 AGOC: mitochondrion  
 AGOP: fatty acid metabolic process  
 PGO: null  
 PGOC: null  
 PGOP: oxidation-reduction process

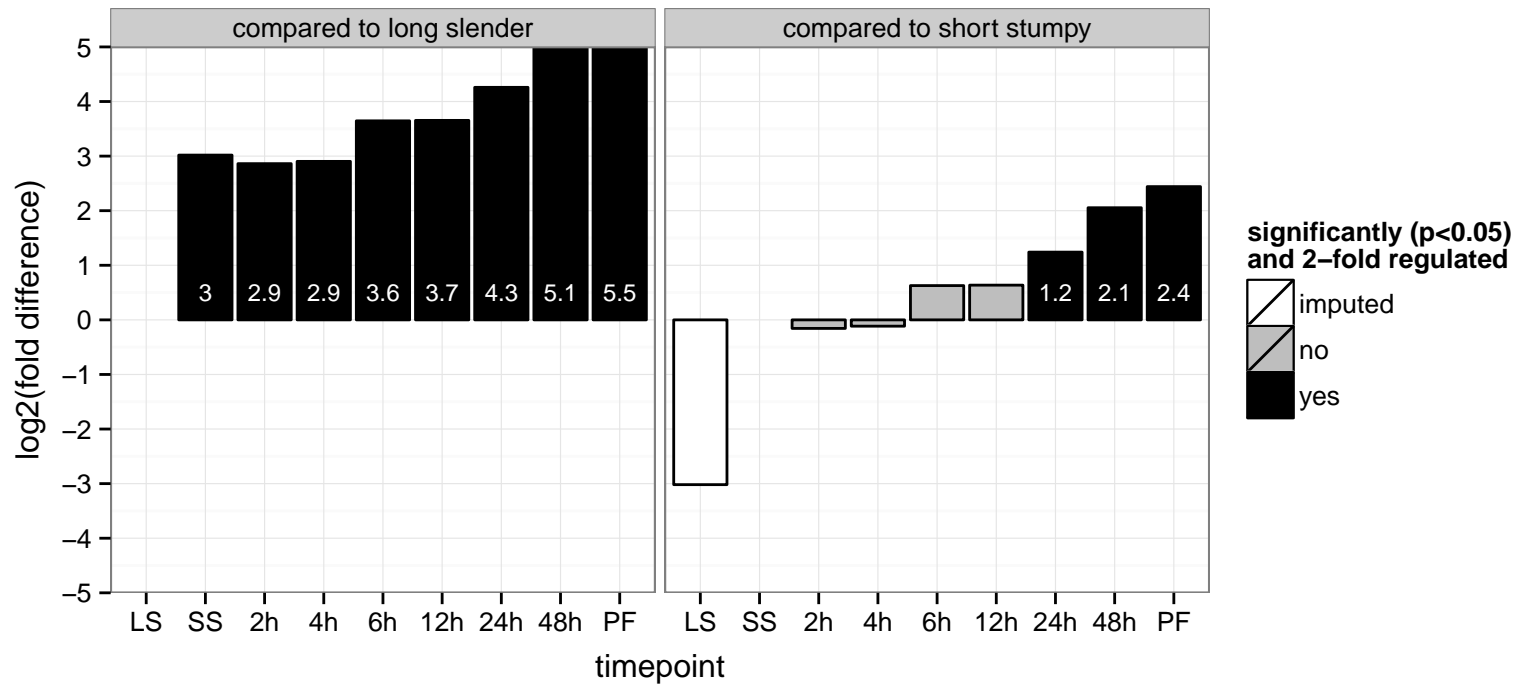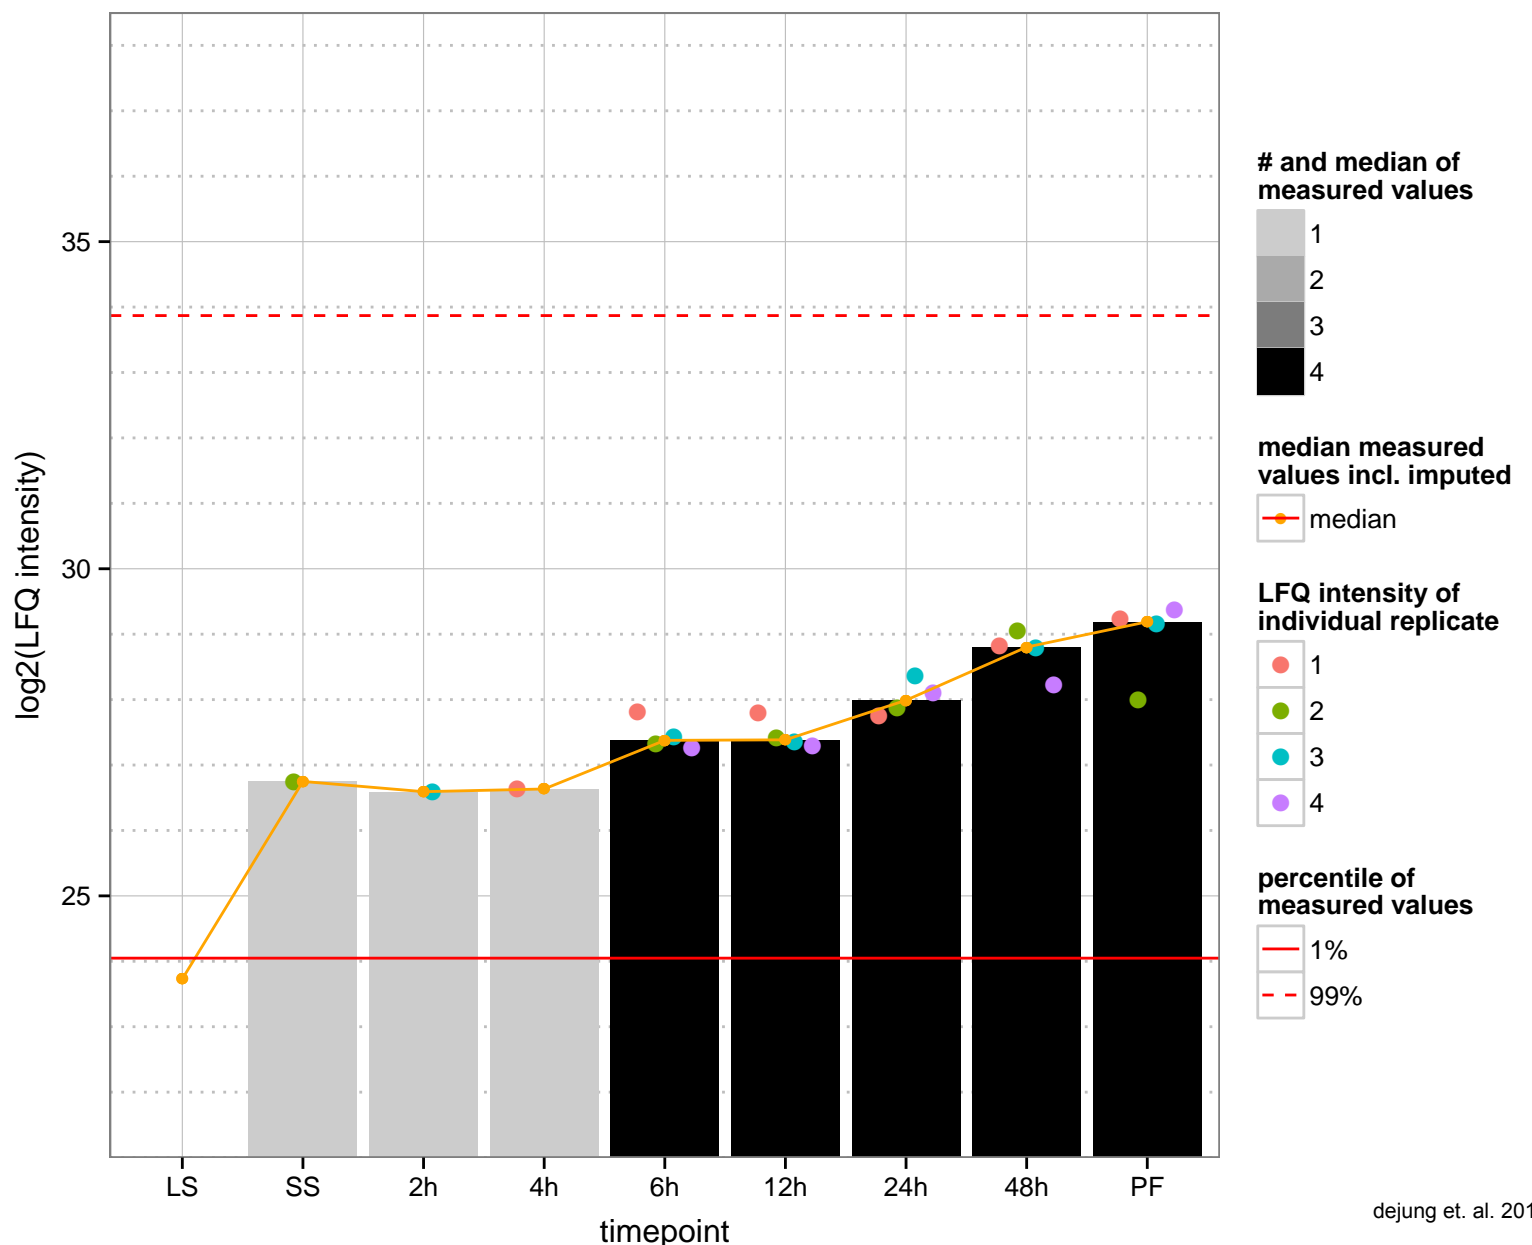

hypothetical protein, conserved  
 Tb927.10.520  
 AGOF: null  
 AGOC: mitochondrial inner membrane, mitochondrion  
 AGOP: null  
 PGO: null  
 PGO: null  
 PGO: null

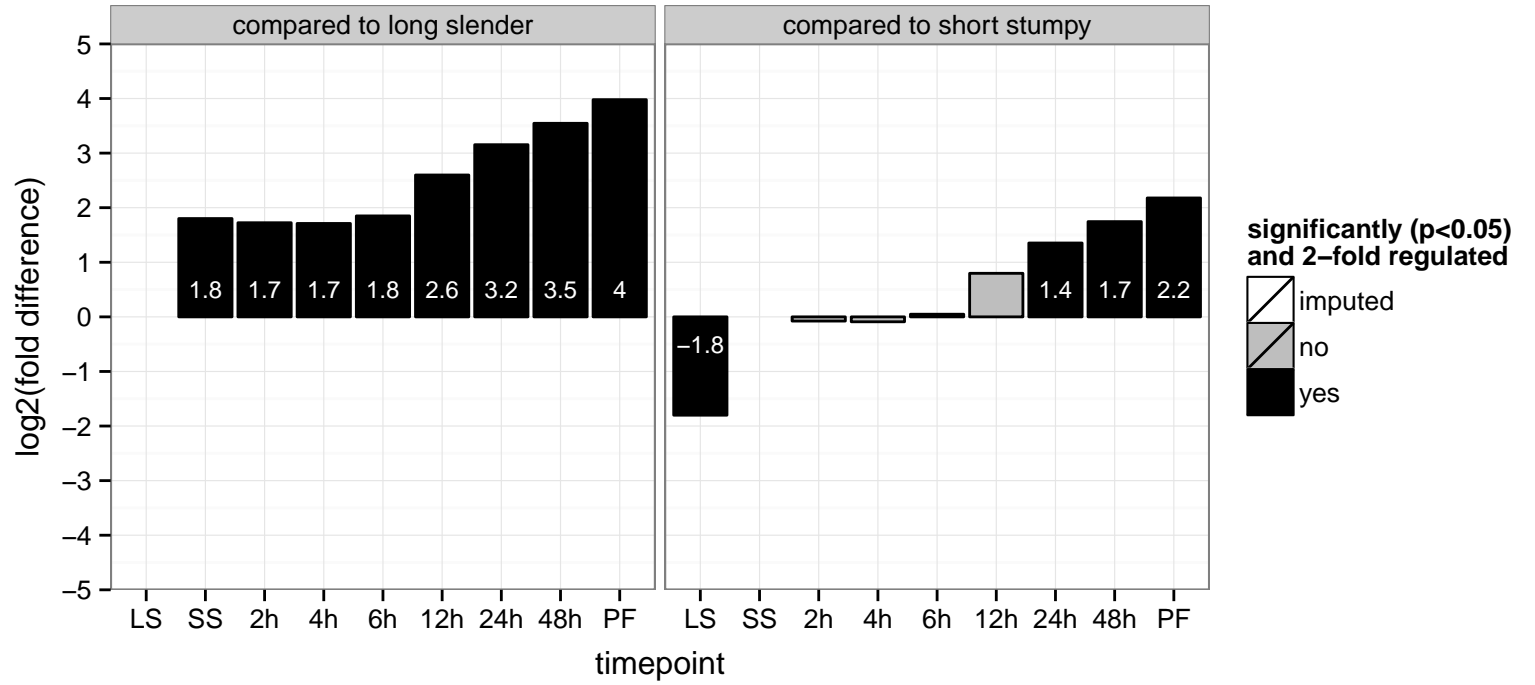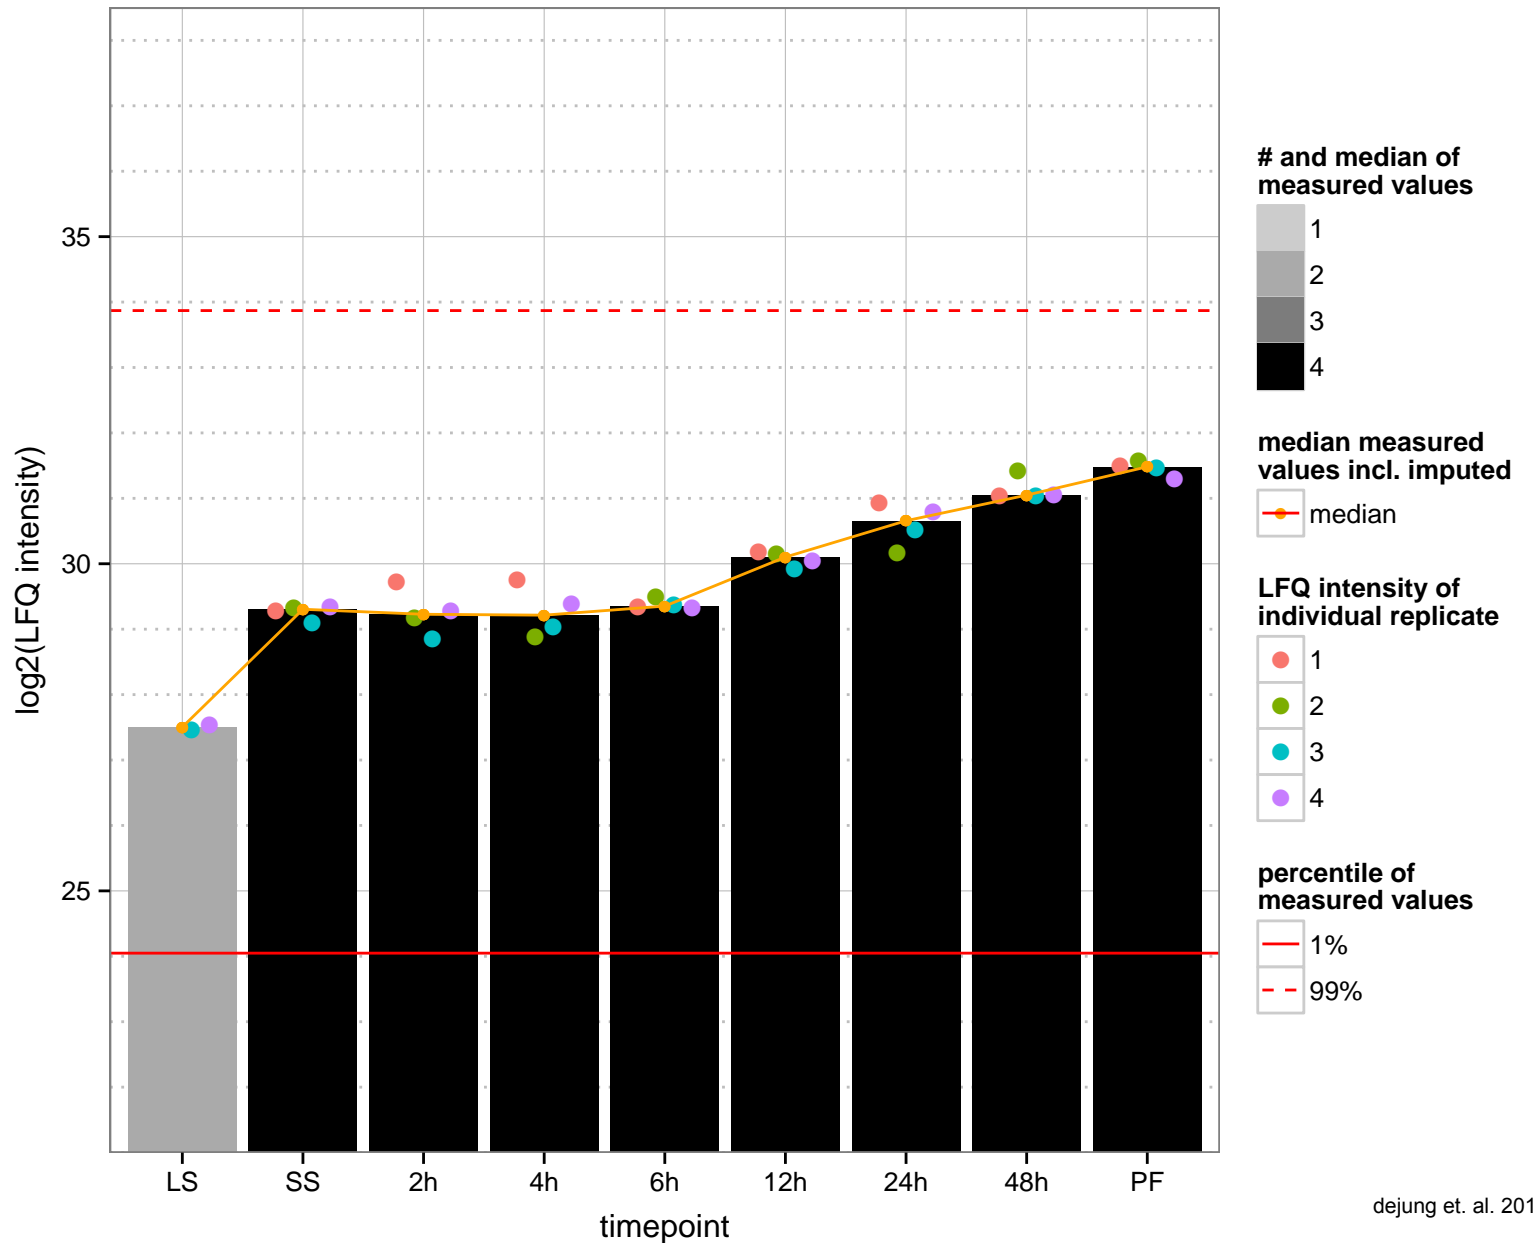

40S ribosomal proteins S11, putative  
 Tb927.10.560  
 AGOF: structural constituent of ribosome  
 AGOC: intracellular, organellar small ribosomal subunit, ribosome  
 AGOP: translation  
 PGOF: structural constituent of ribosome  
 PGO: intracellular, ribosome  
 PGOP: translation

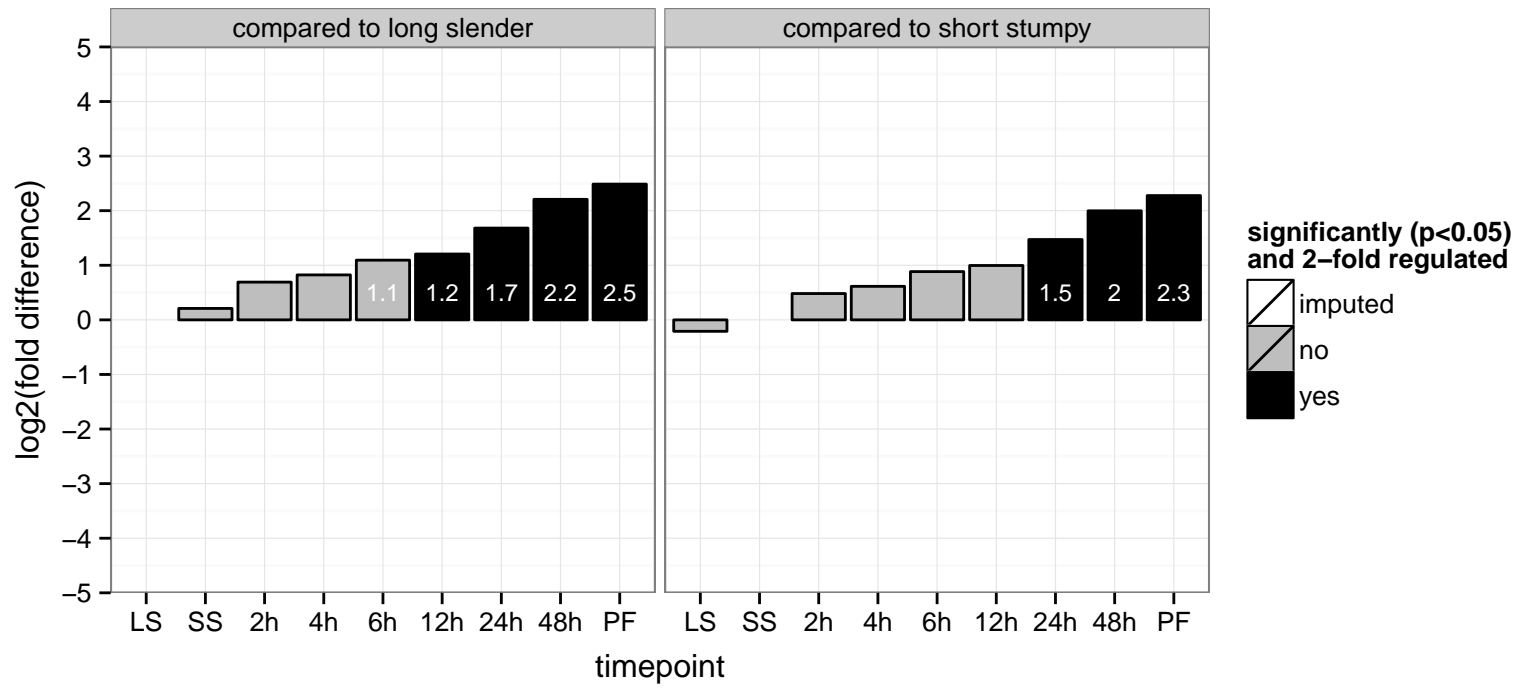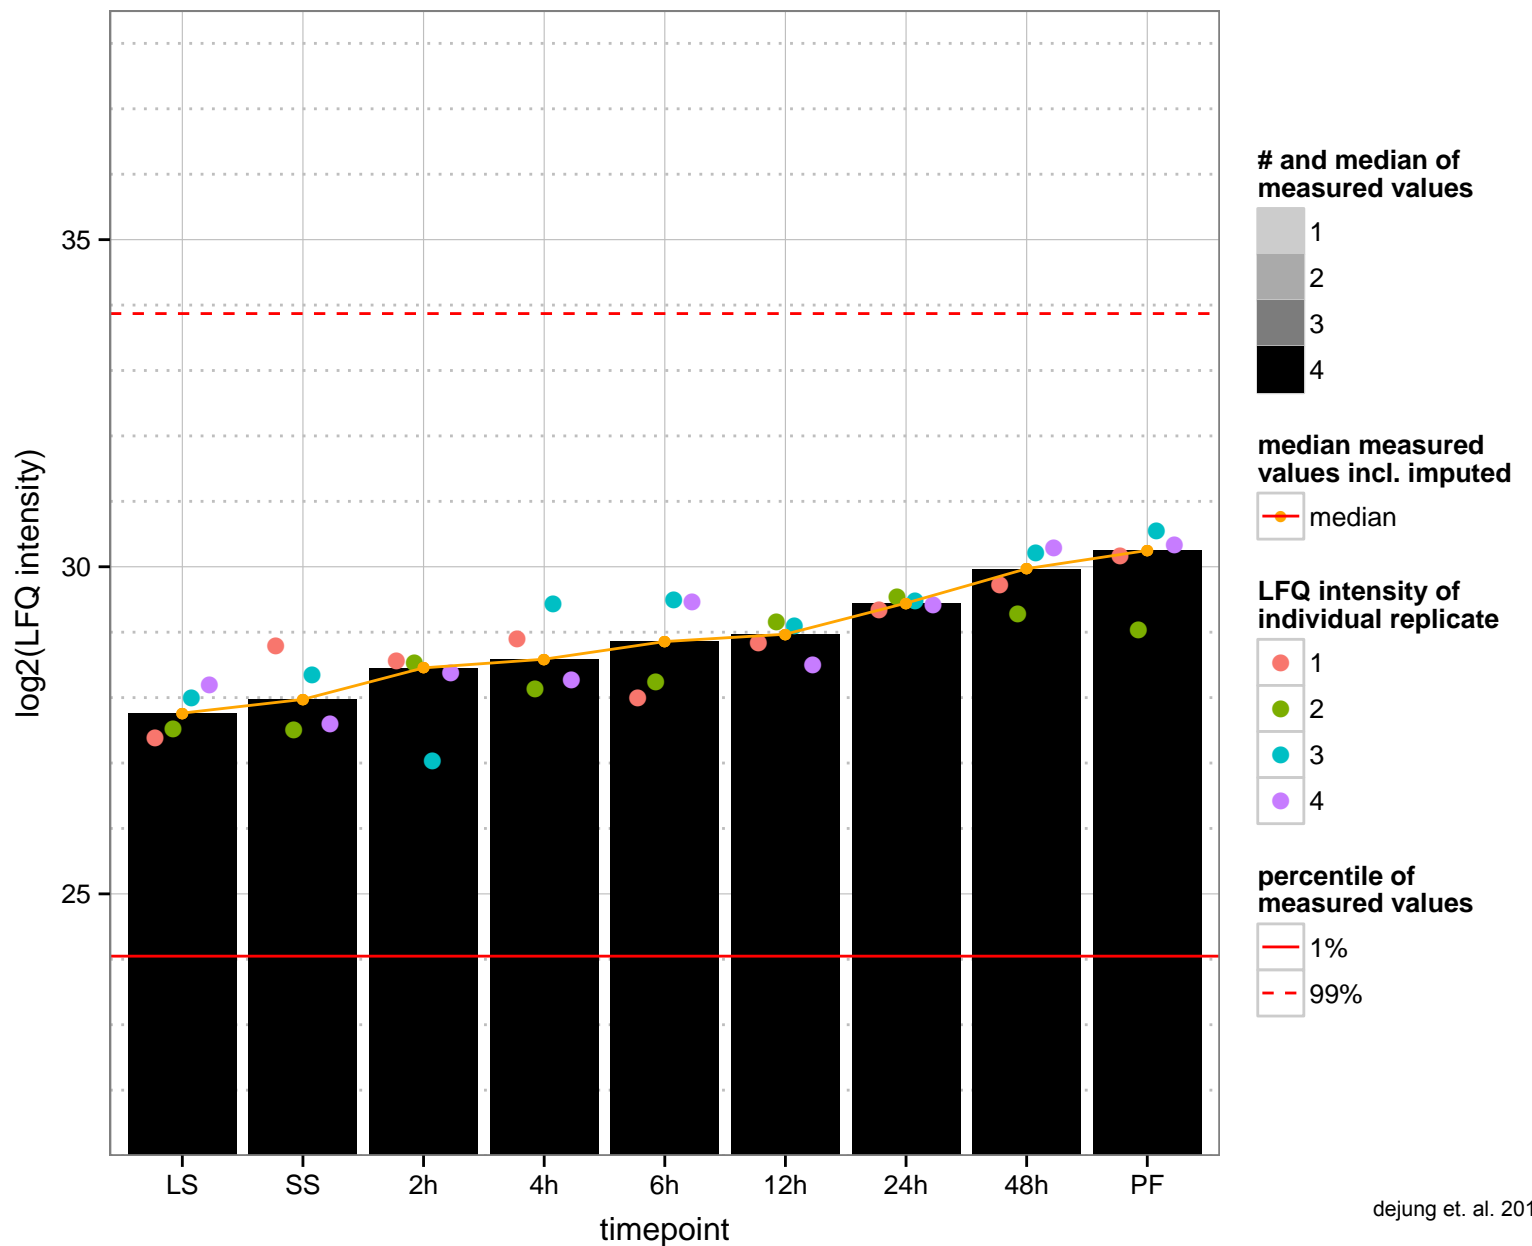

adenylate kinase, putative

Tb927.10.5760

AGOF: ATP binding, adenylate kinase activity

AGOC: null

AGOP: nucleobase-containing compound metabolic process, nucleobase-containing small molecule interconversion

PGOF: ATP binding, nucleobase-containing compound kinase activity, nucleotide kinase activity, phosphotransferase activity,

PGOC: null

PGOP: nucleobase-containing compound metabolic process, nucleotide phosphorylation

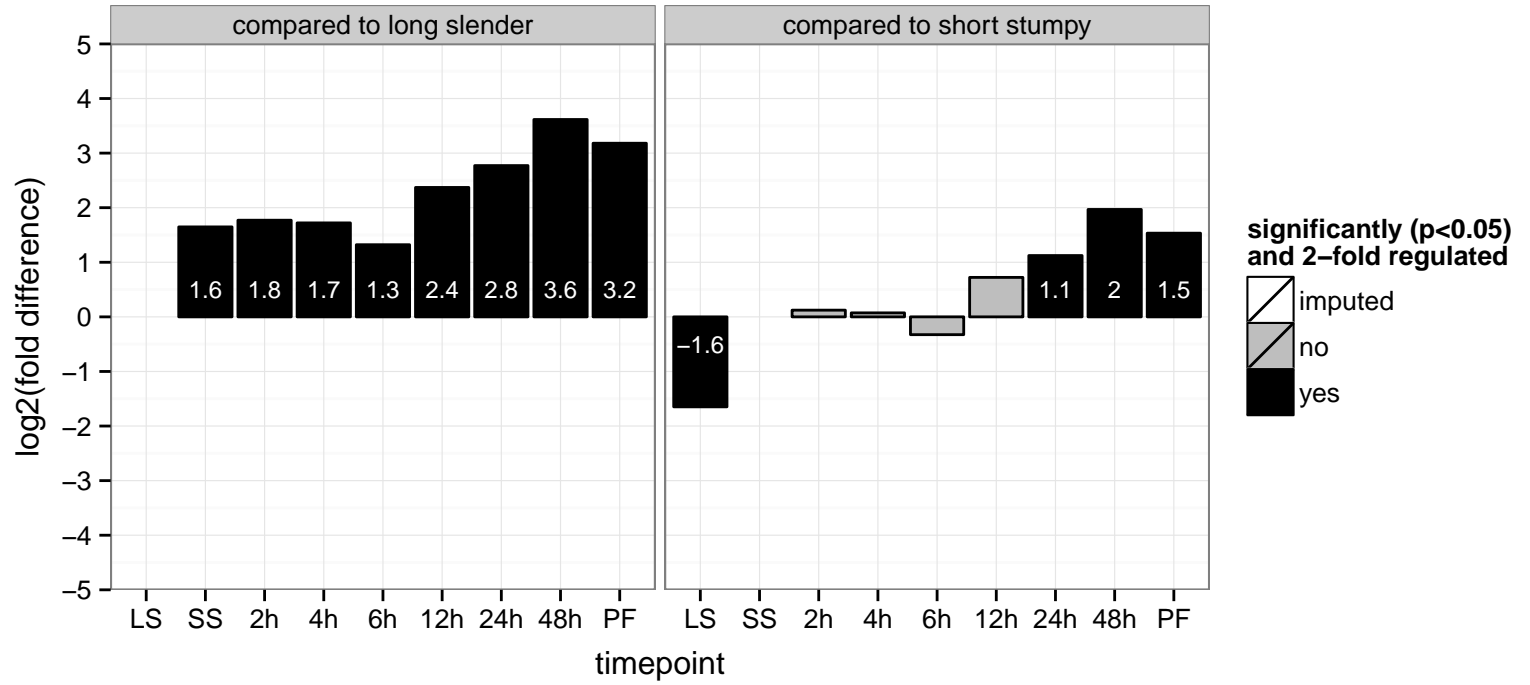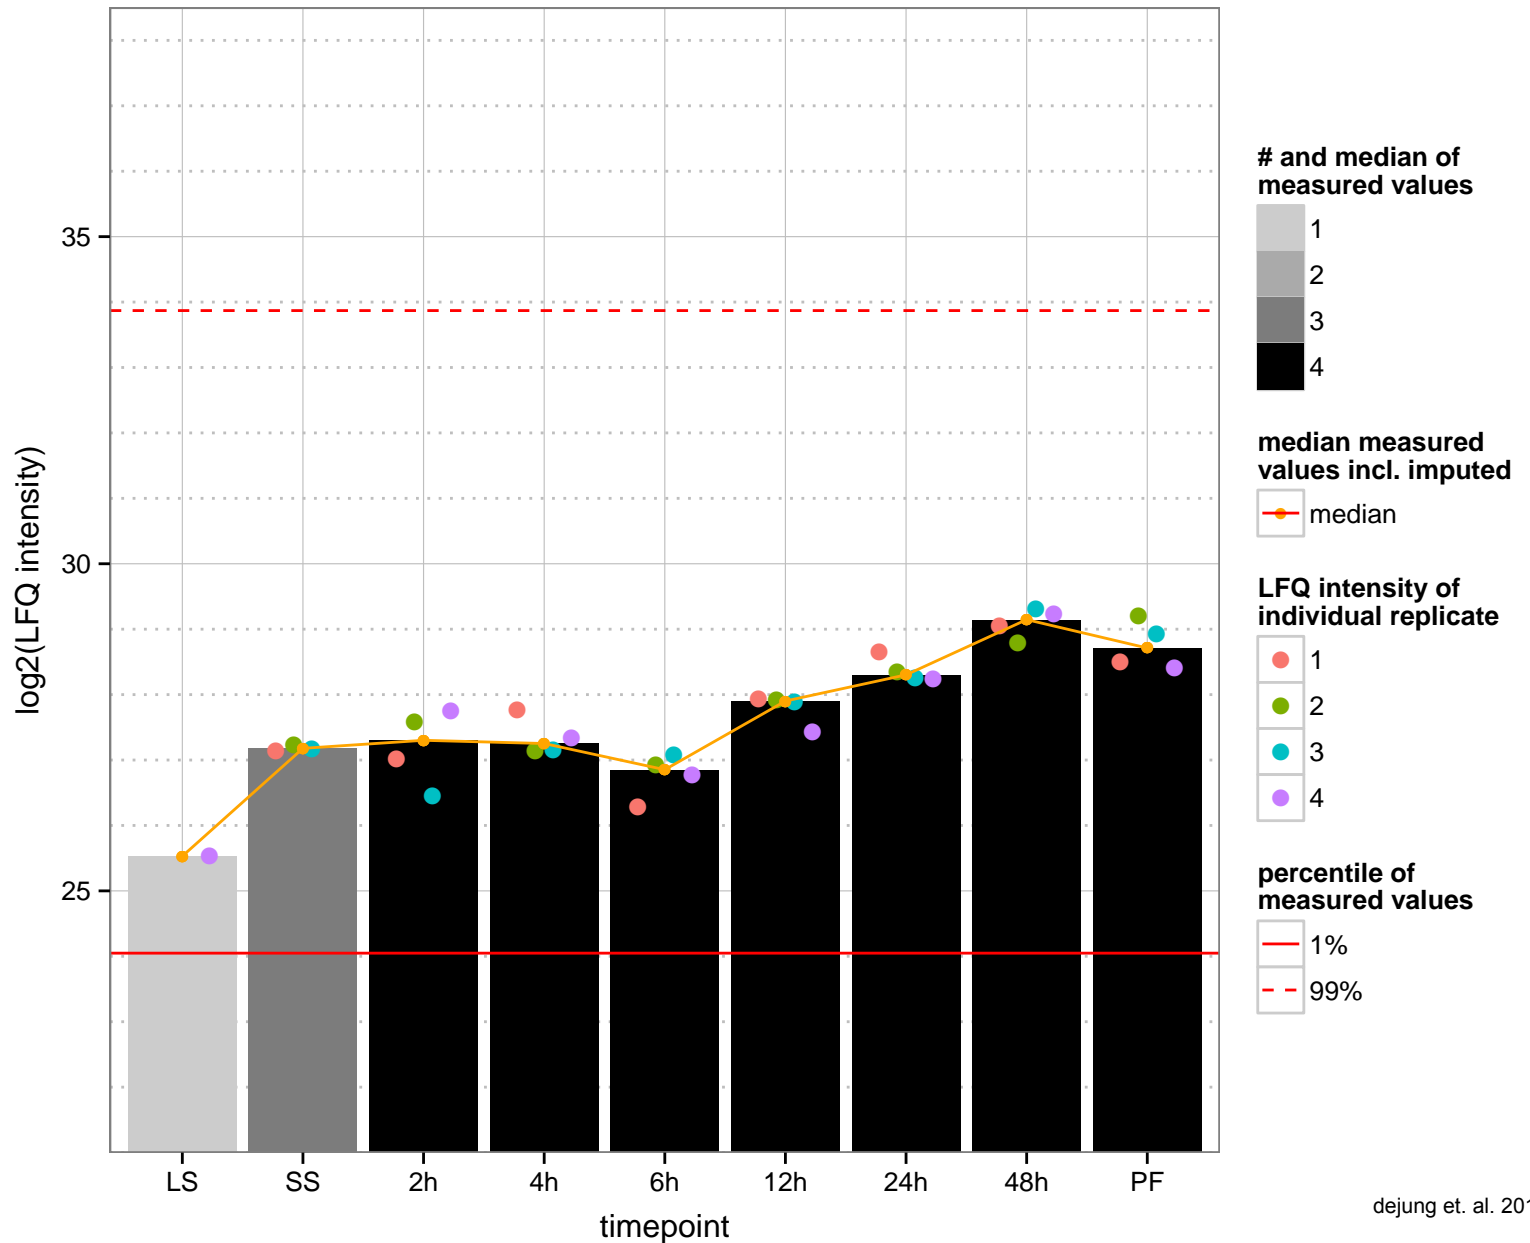



hypothetical protein, conserved  
 Tb927.10.600  
 AGOF: null  
 AGOC: mitochondrion  
 AGOP: null  
 PGO: null  
 PGO: null  
 PGO: null

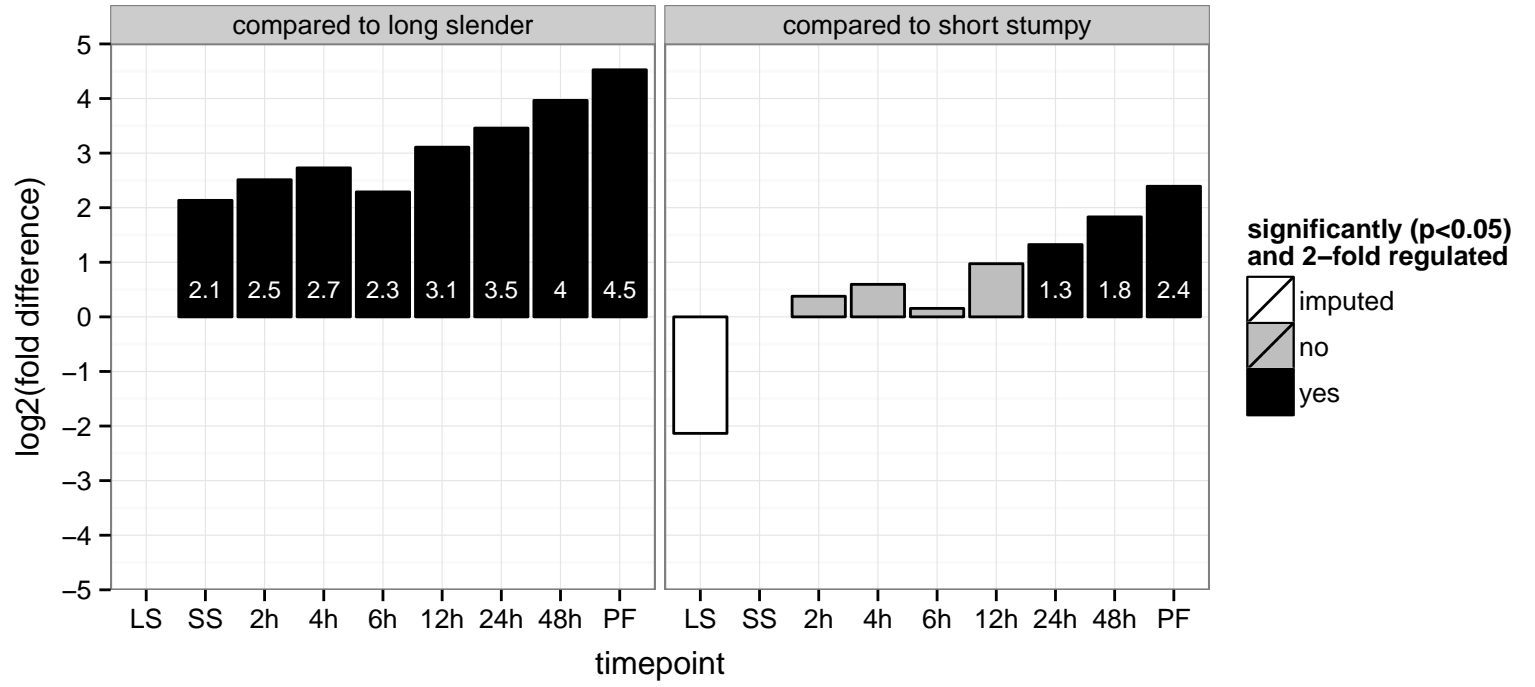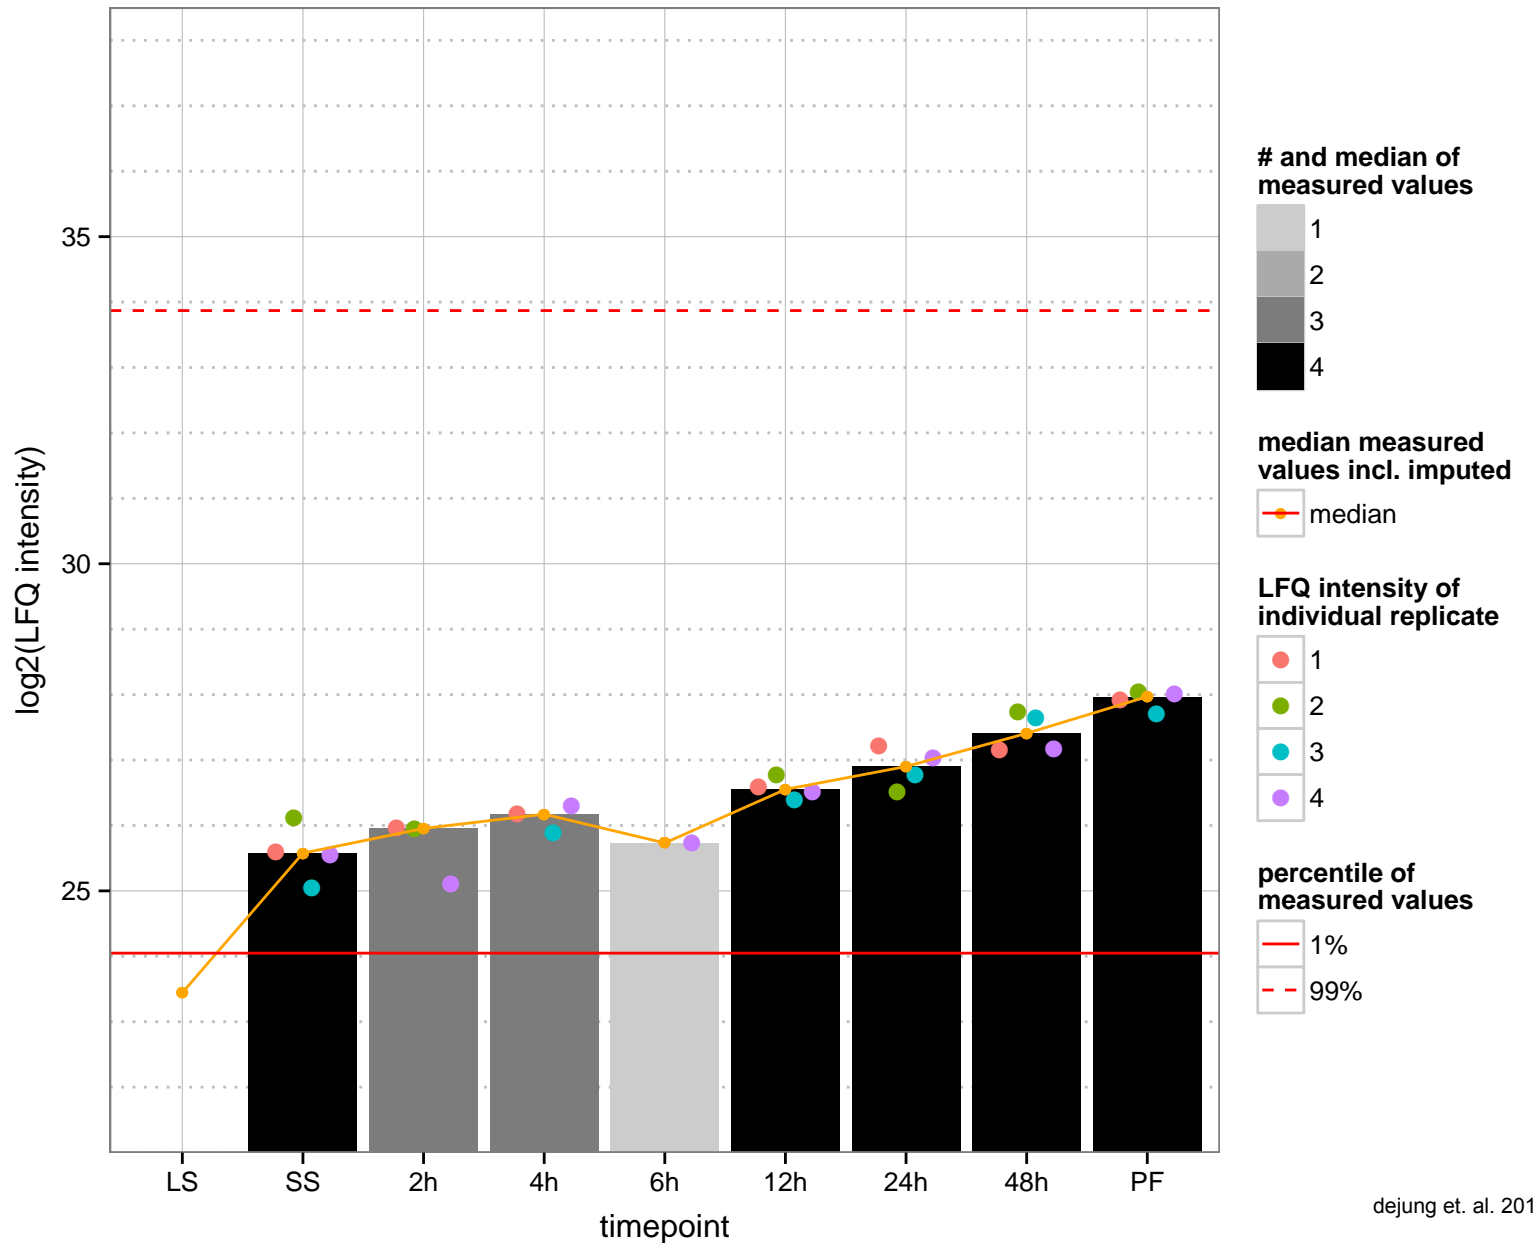

hypothetical protein, conserved  
 Tb927.10.6200  
 AGOF: null  
 AGOC: mitochondrion  
 AGOP: null  
 PGO: null  
 PGO: null  
 PGO: null

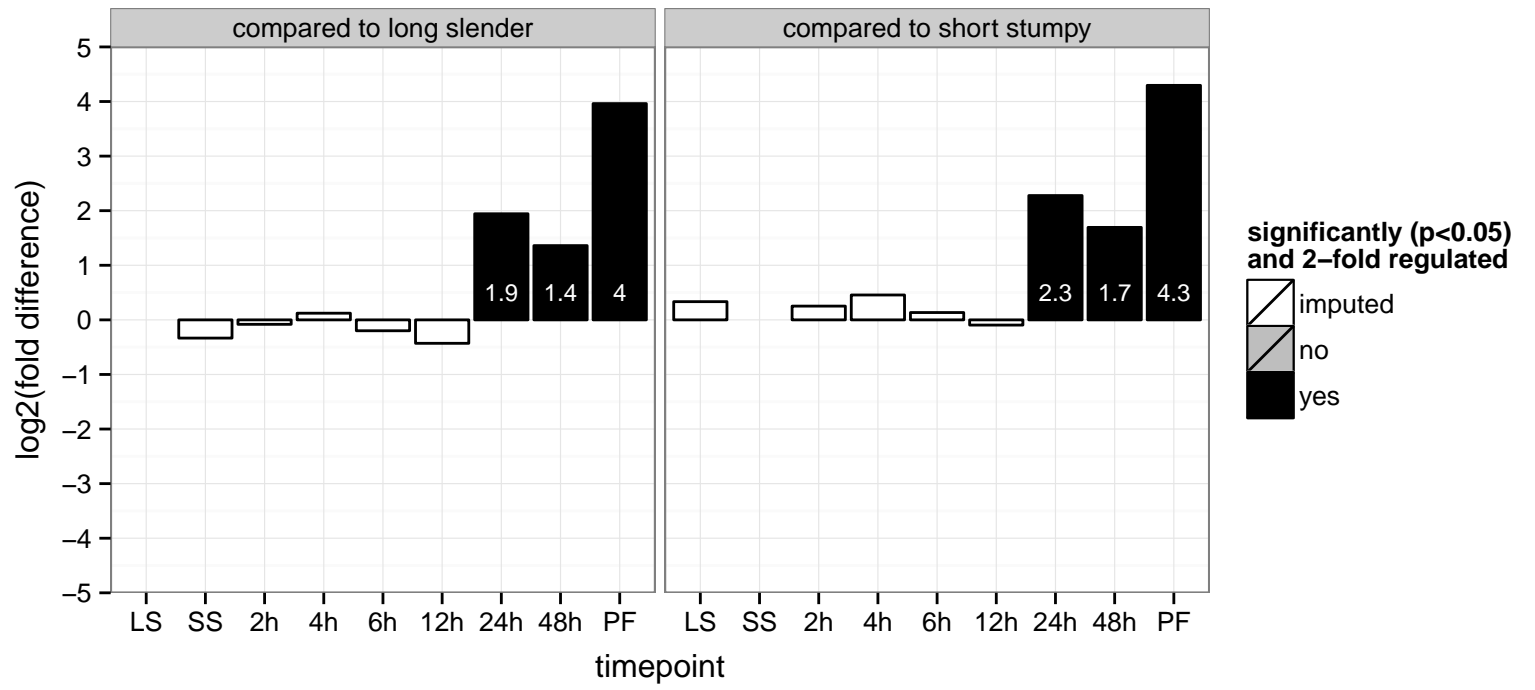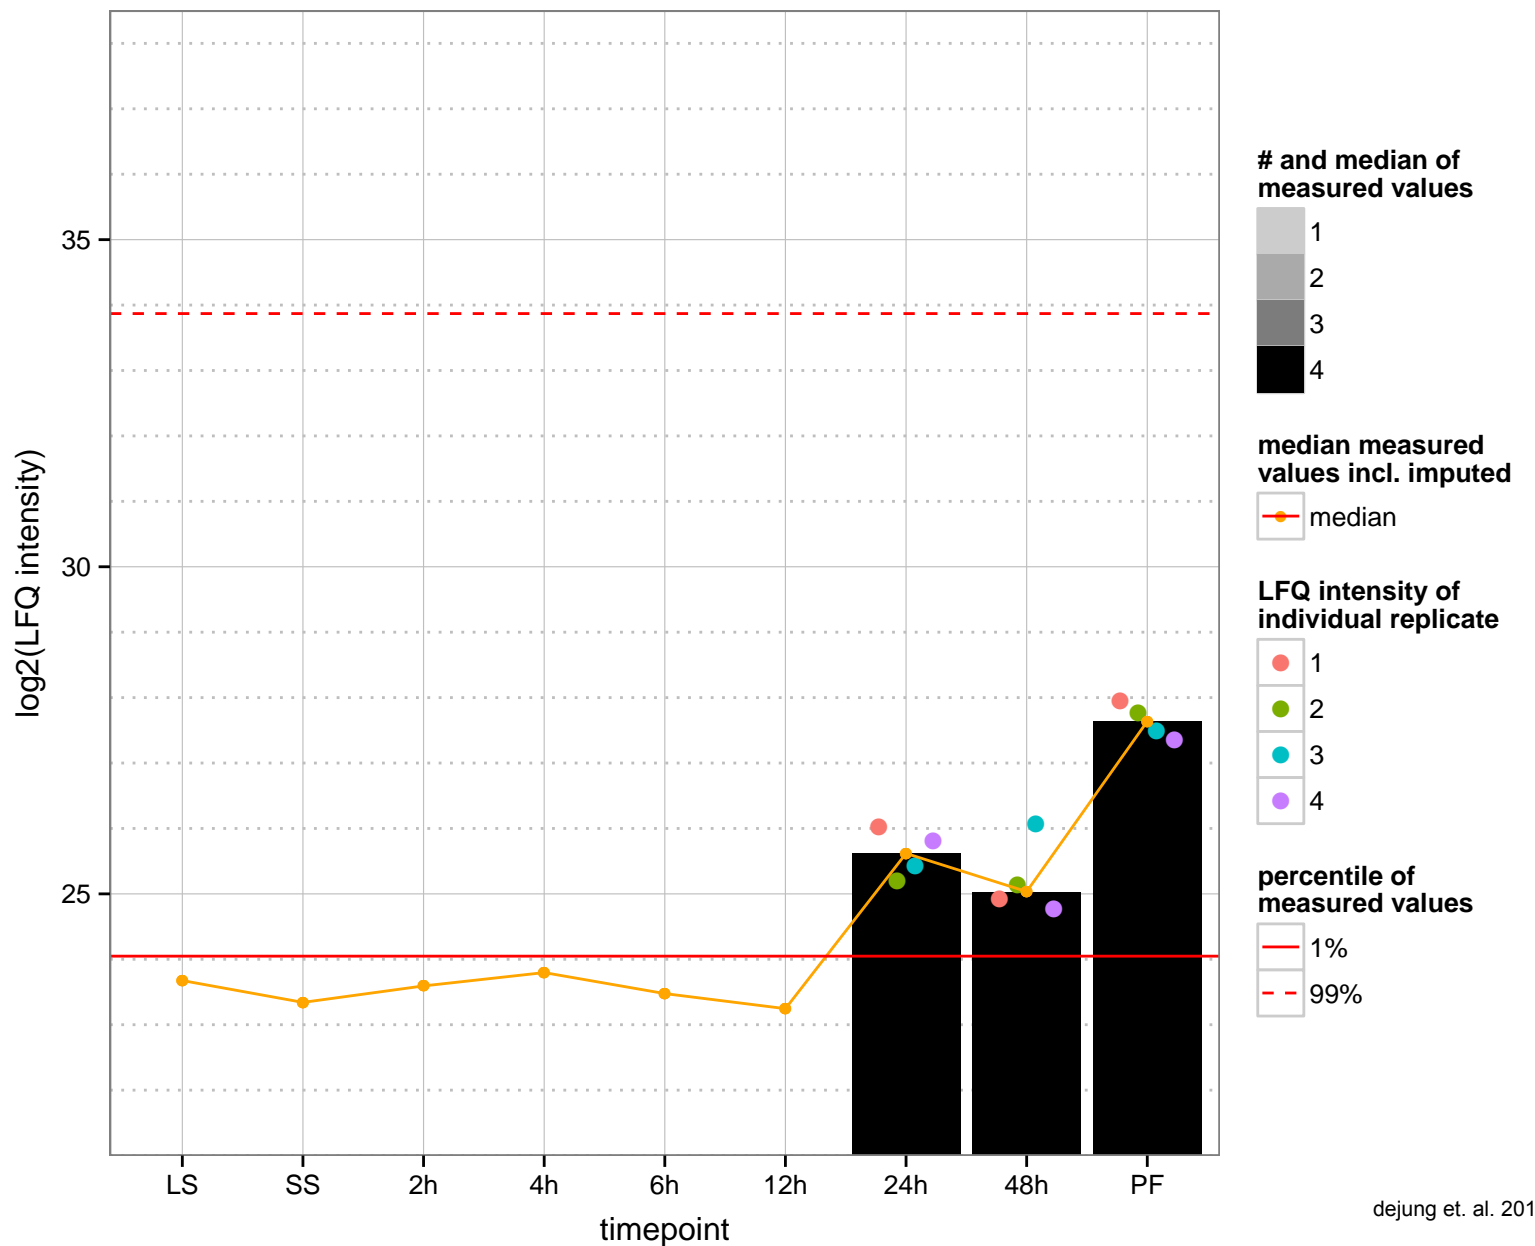

thymidine kinase, putative  
 Tb927.10.880  
 AGOF: ATP binding, thymidine kinase activity  
 AGOC: mitochondrion  
 AGOP: nucleobase-containing small molecule interconversion  
 PGO: ATP binding, thymidine kinase activity  
 PGO: null  
 PGO: null

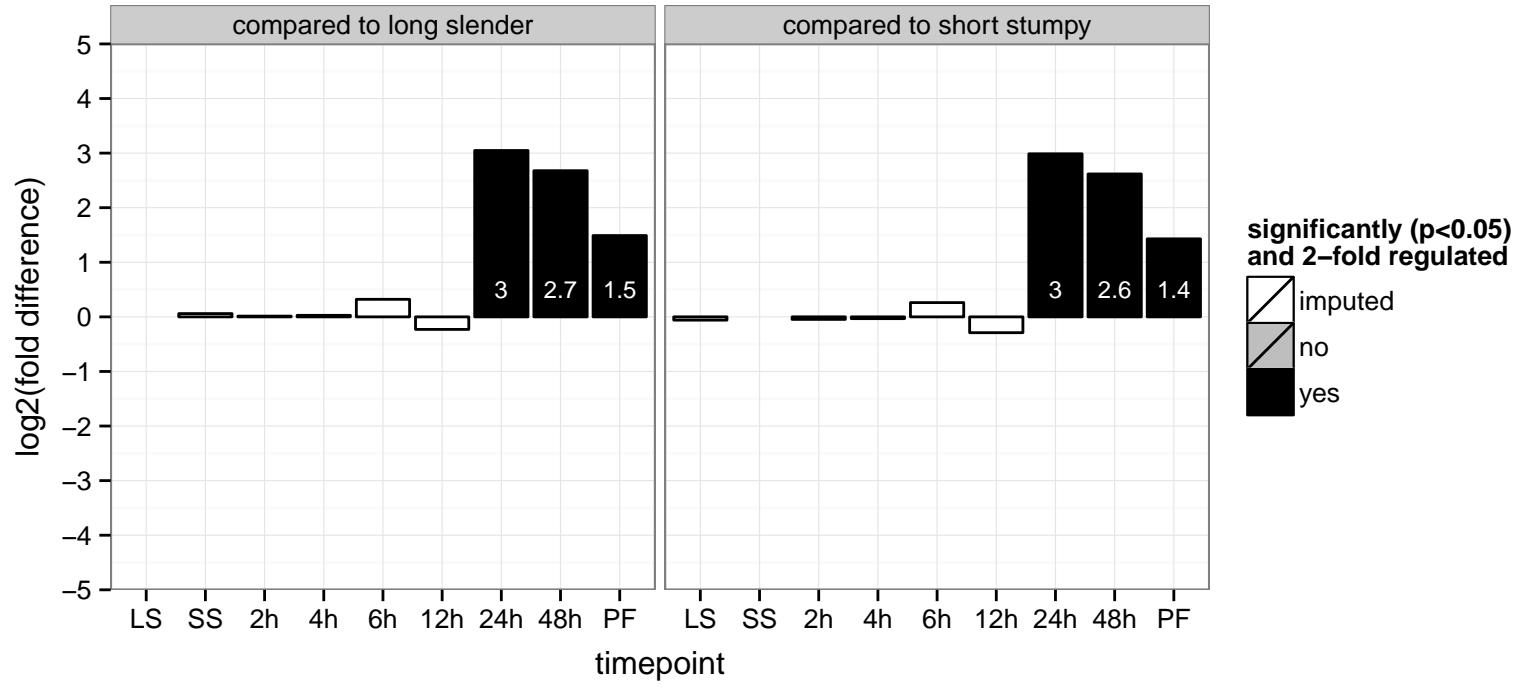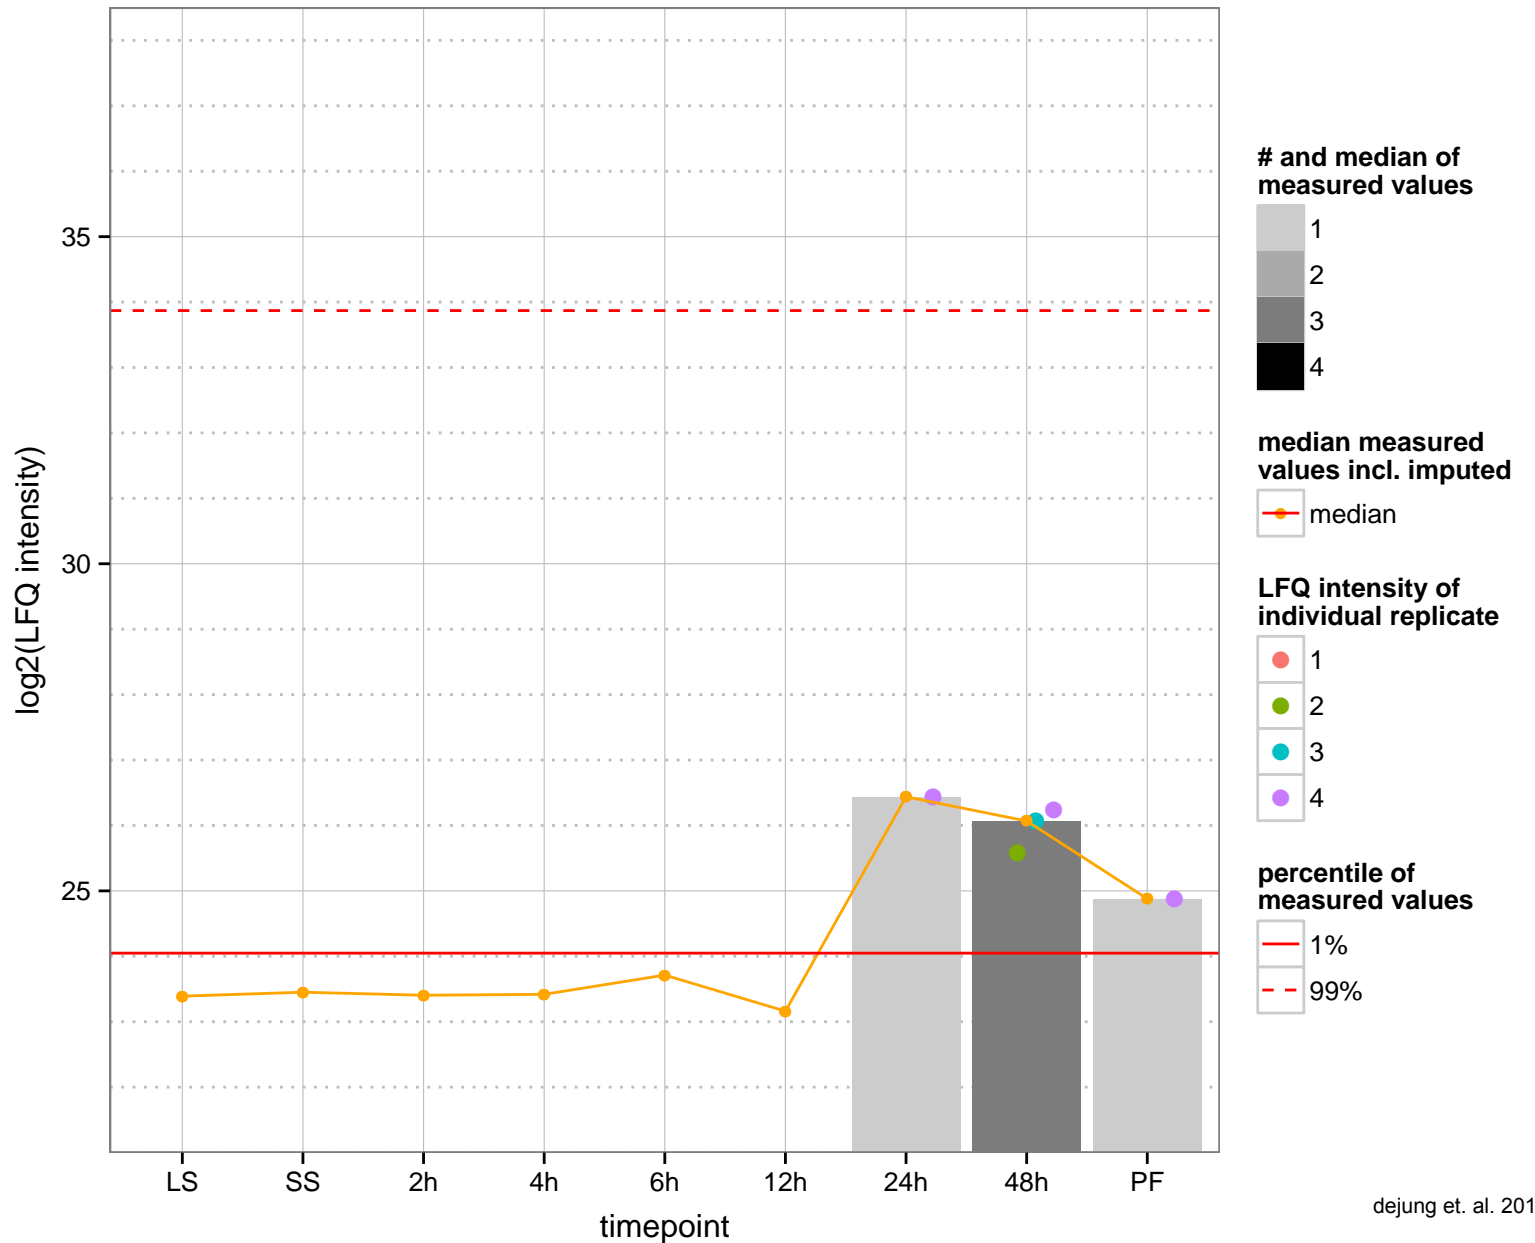

ras-like small GTPase, putative (TbGRP)  
 Tb927.10.8920  
 AGOF: GTP binding  
 AGOC: cytoplasm, nucleus  
 AGOP: null  
 PGO: GTP binding  
 PGOC: cytoplasm, nucleus  
 PGOP: null

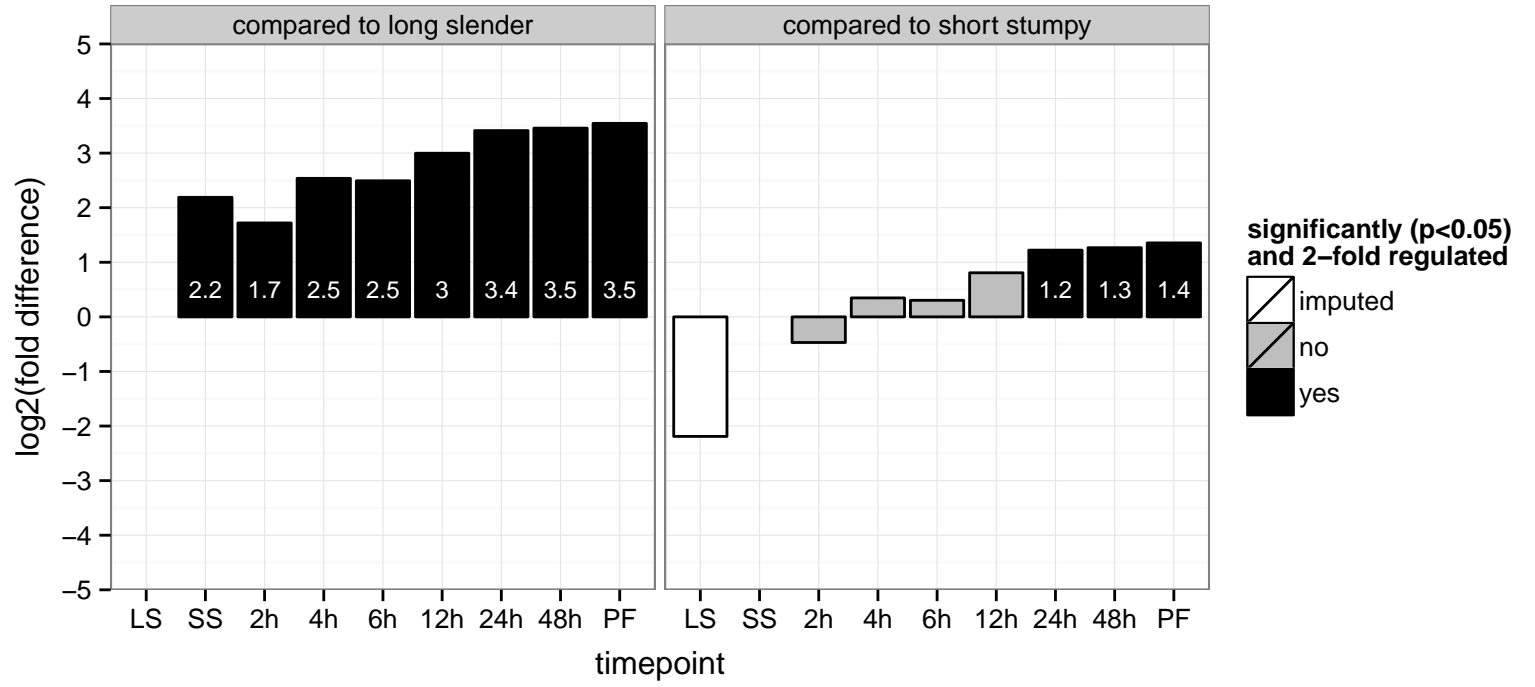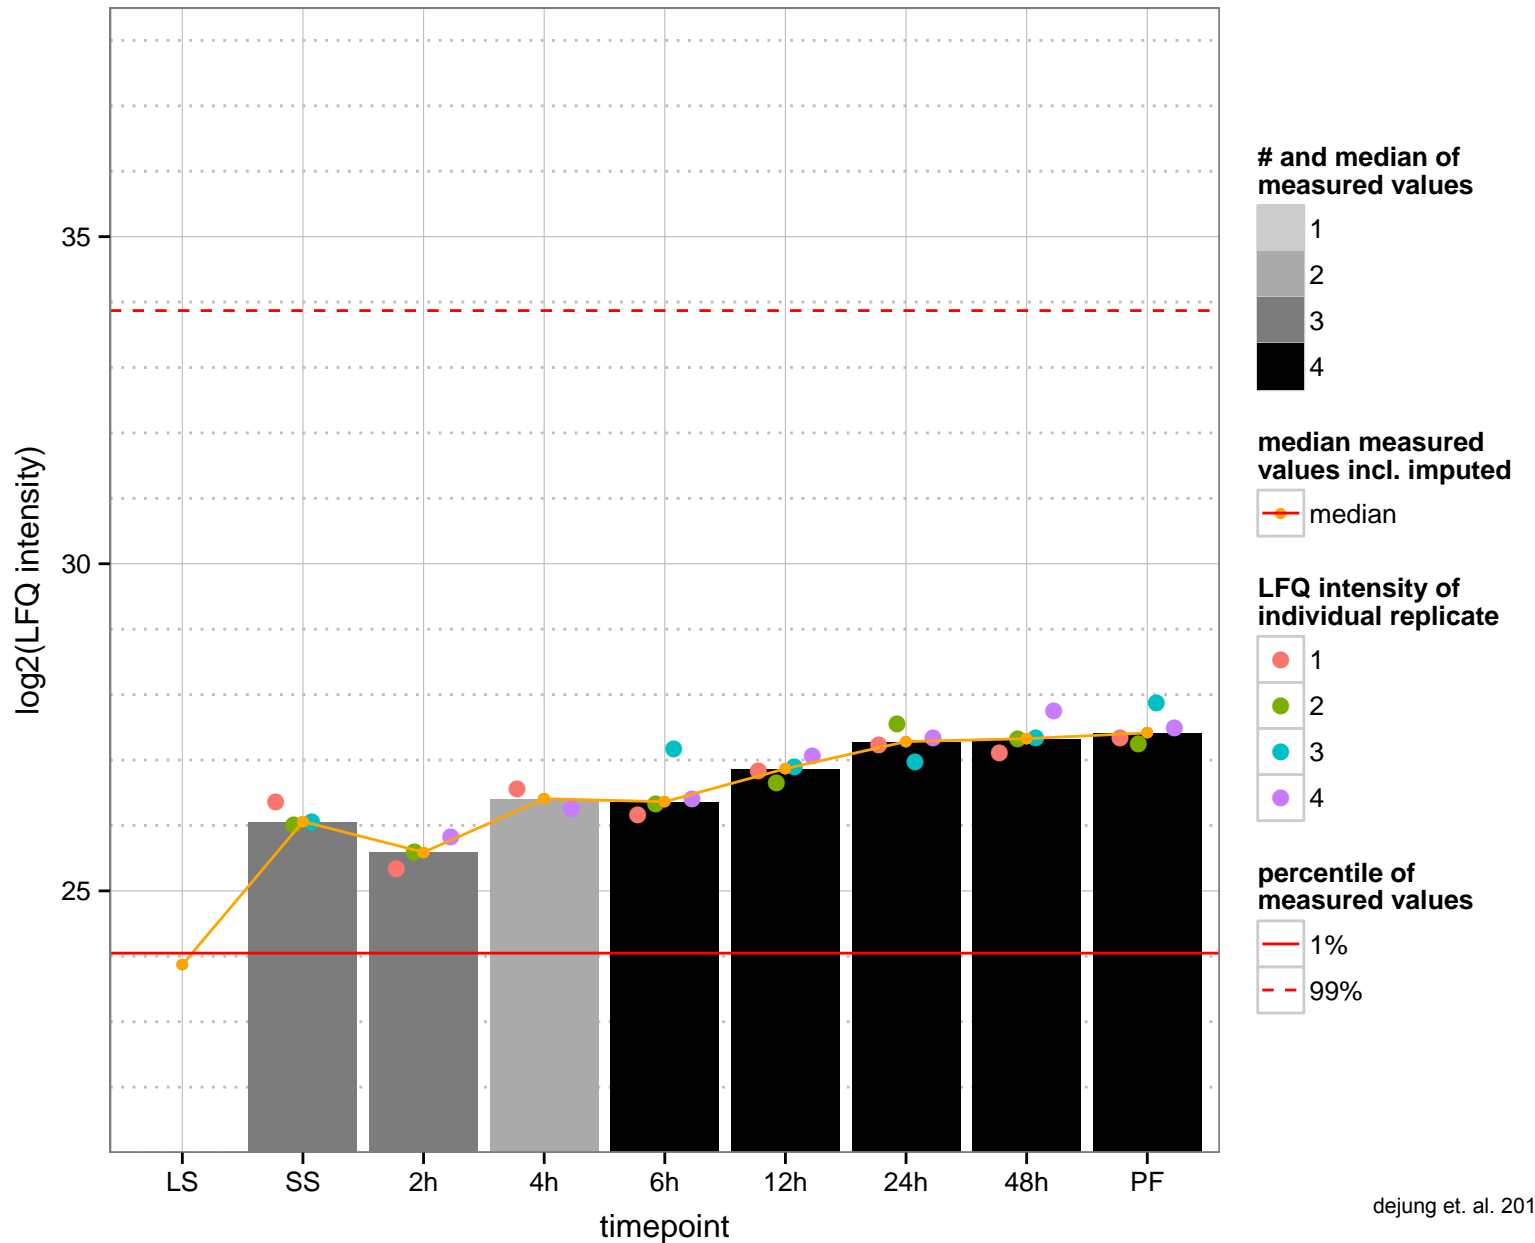

hypothetical protein, conserved  
 Tb927.10.8980  
 AGOF: null  
 AGOC: mitochondrion  
 AGOP: null  
 PGO: null  
 PGO: null  
 PGO: null

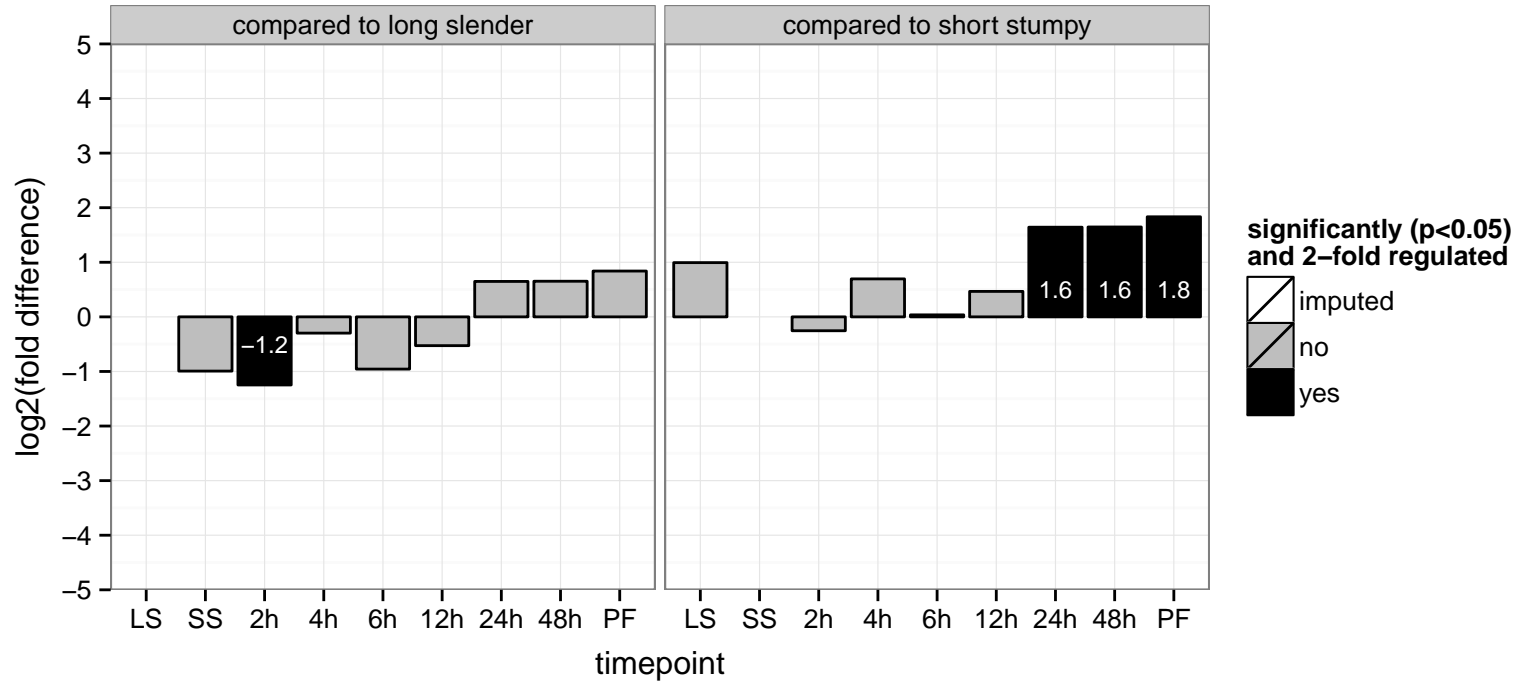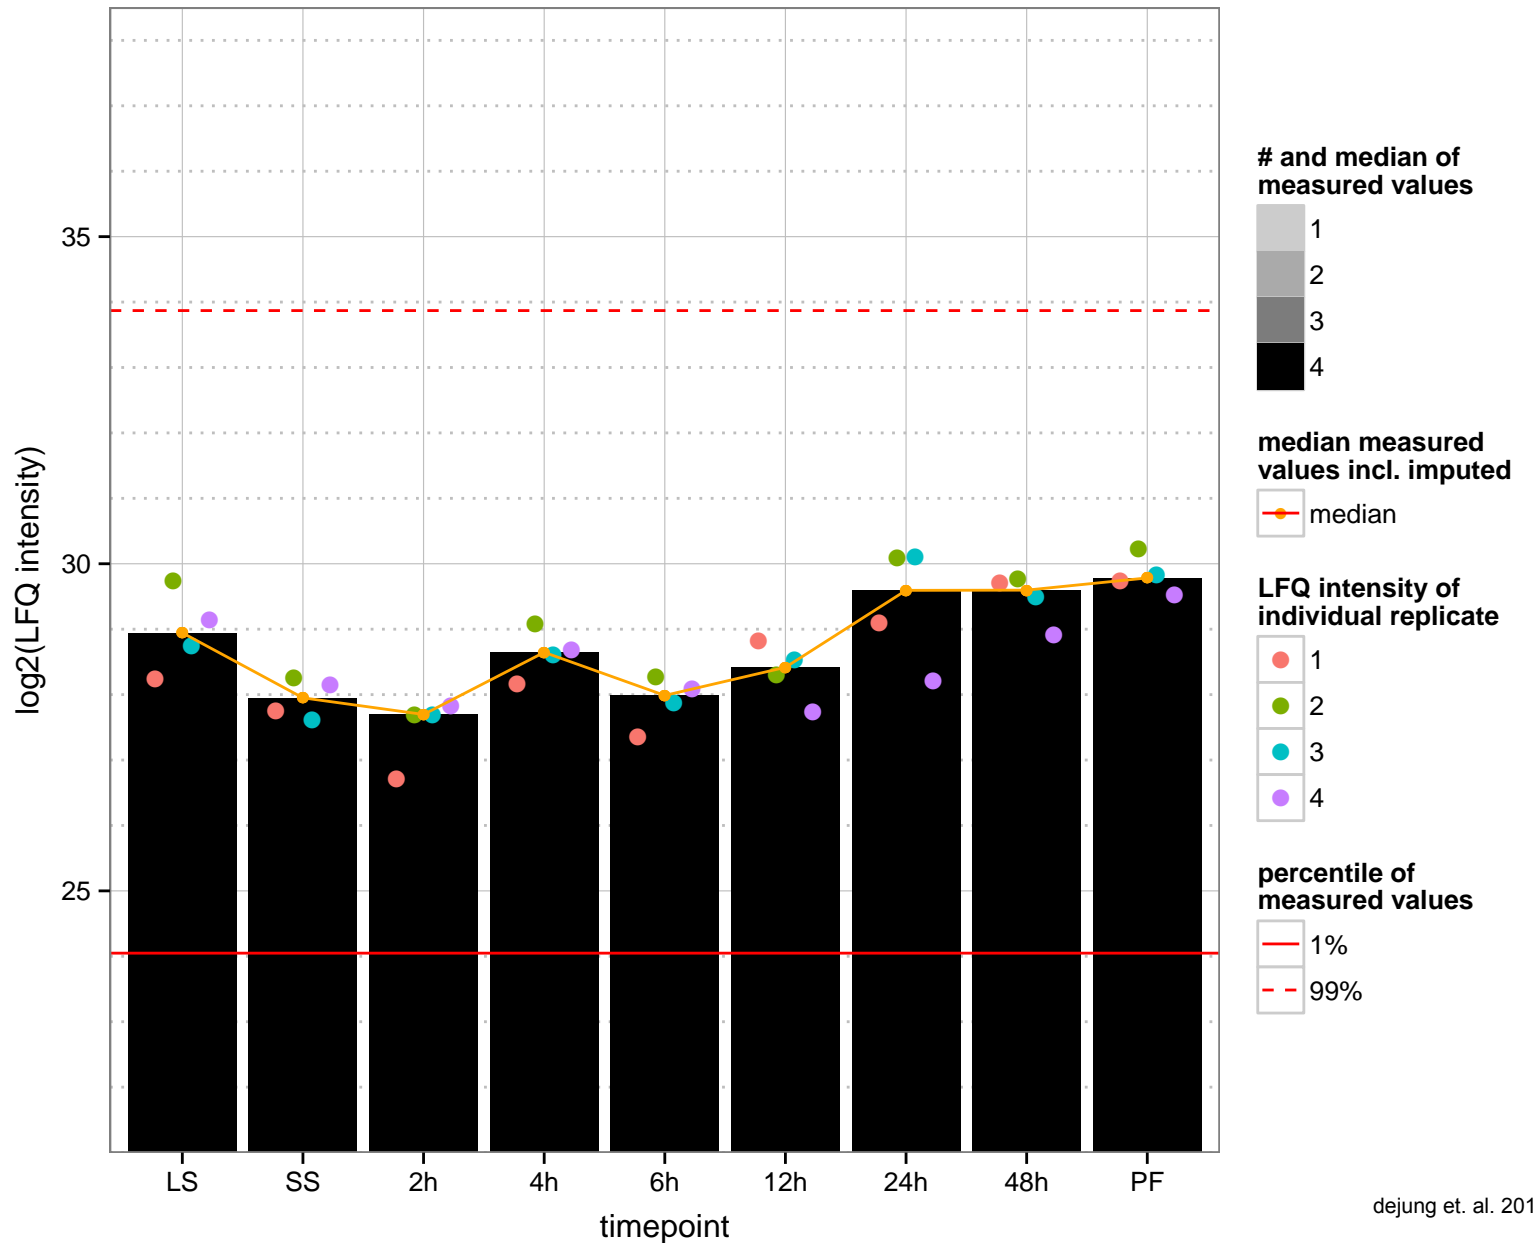

hypothetical protein, conserved  
 Tb927.10.920  
 AGOF: RNA binding  
 AGOC: null  
 AGOP: RNA processing  
 PGOF: RNA binding, structural constituent of ribosome  
 PGO: large ribosomal subunit  
 PGO: translation

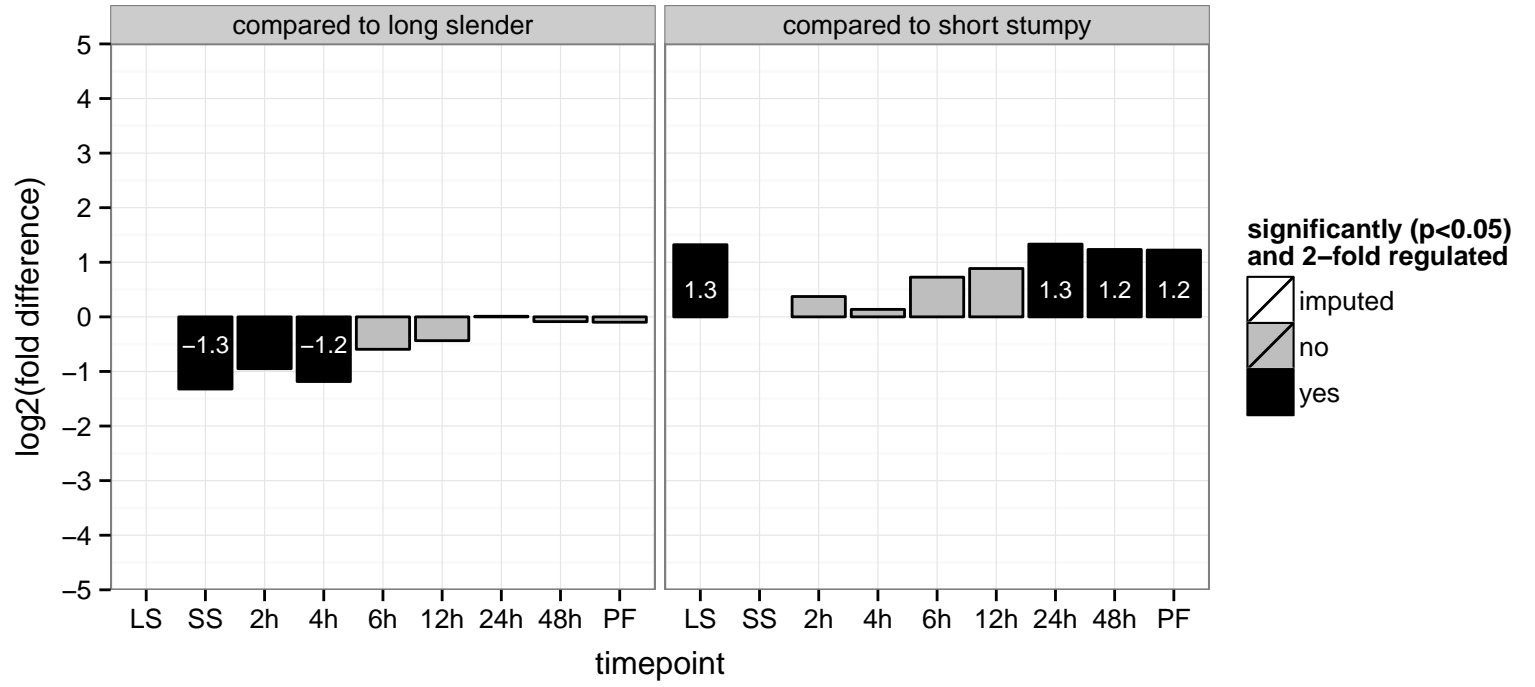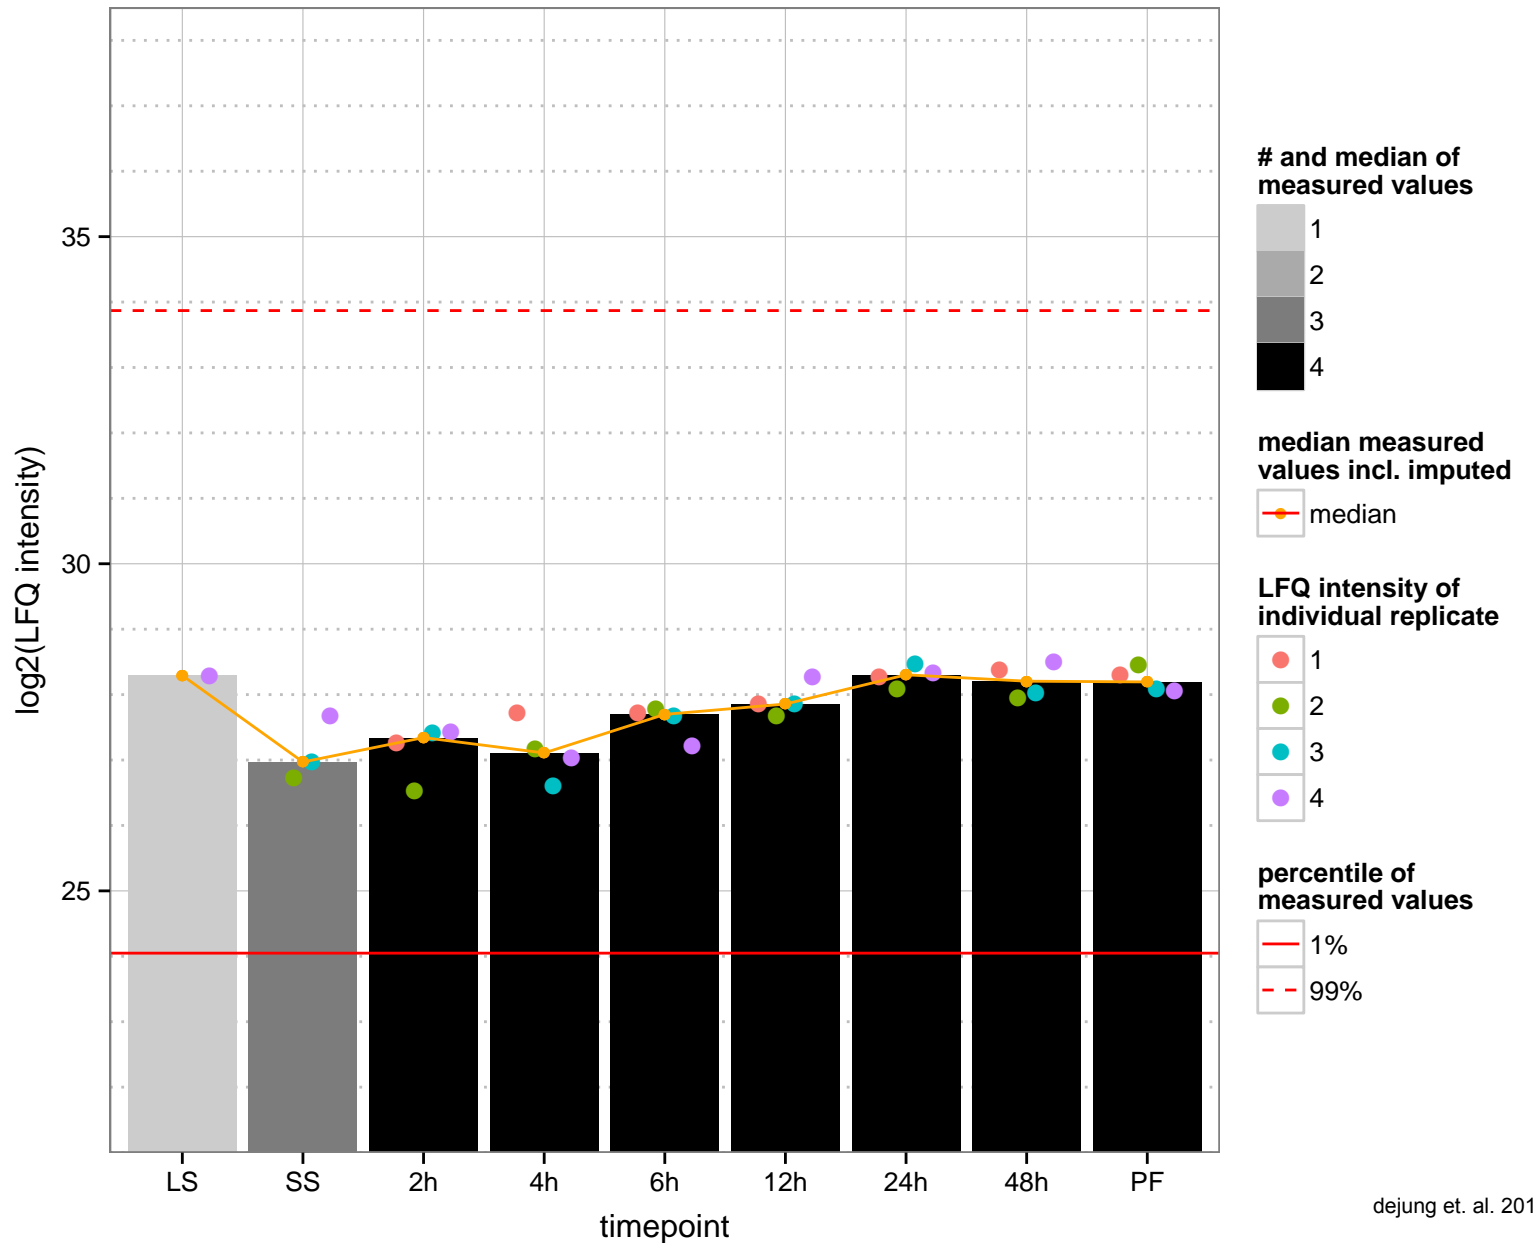

ATP-dependent DEAD/H RNA helicase, putative, ATP-dependent RNA helicase  
 Tb927.10.9780  
 AGOF: ATP binding, ATP-dependent helicase activity, helicase activity, nucleic acid binding  
 AGOC: null  
 AGOP: nucleobase-containing compound metabolic process  
 PGO: ATP binding, ATP-dependent helicase activity, helicase activity, nucleic acid binding  
 PGOC: null  
 PGOP: null

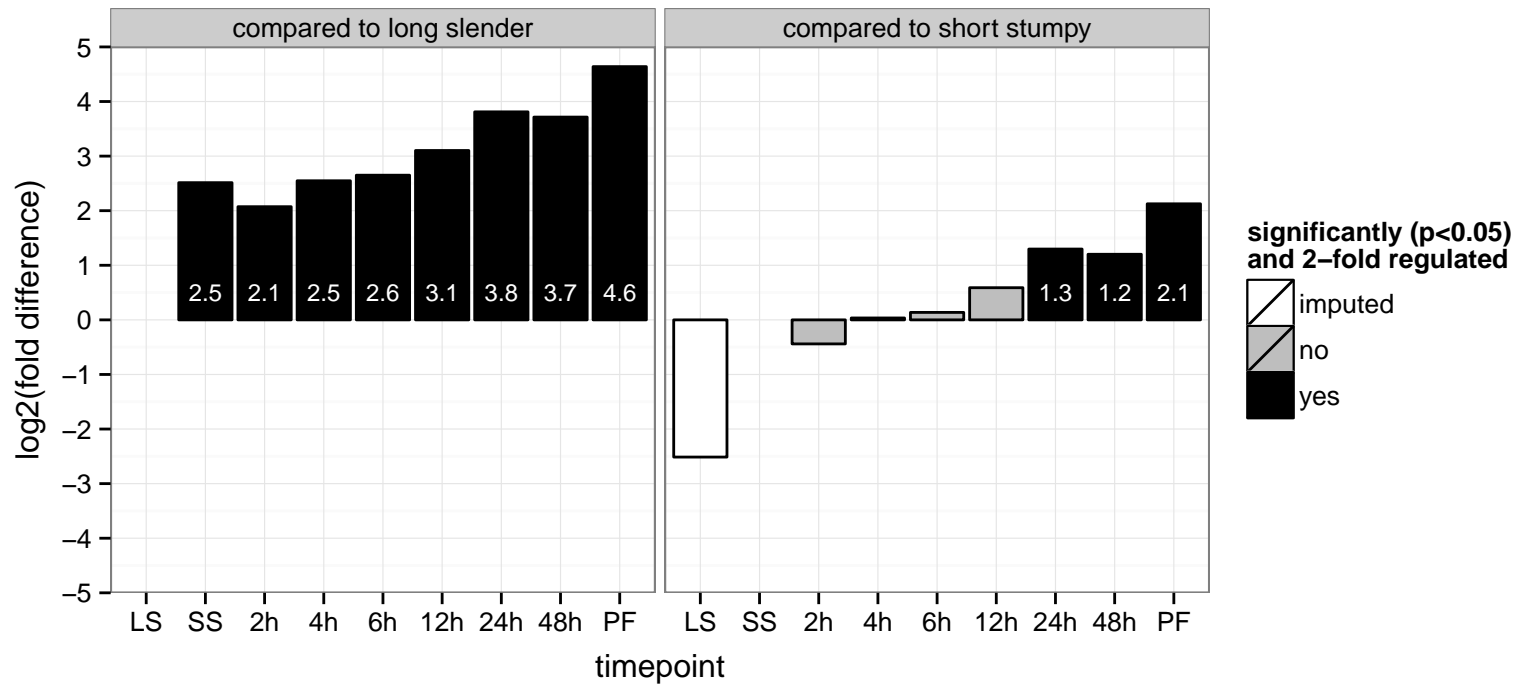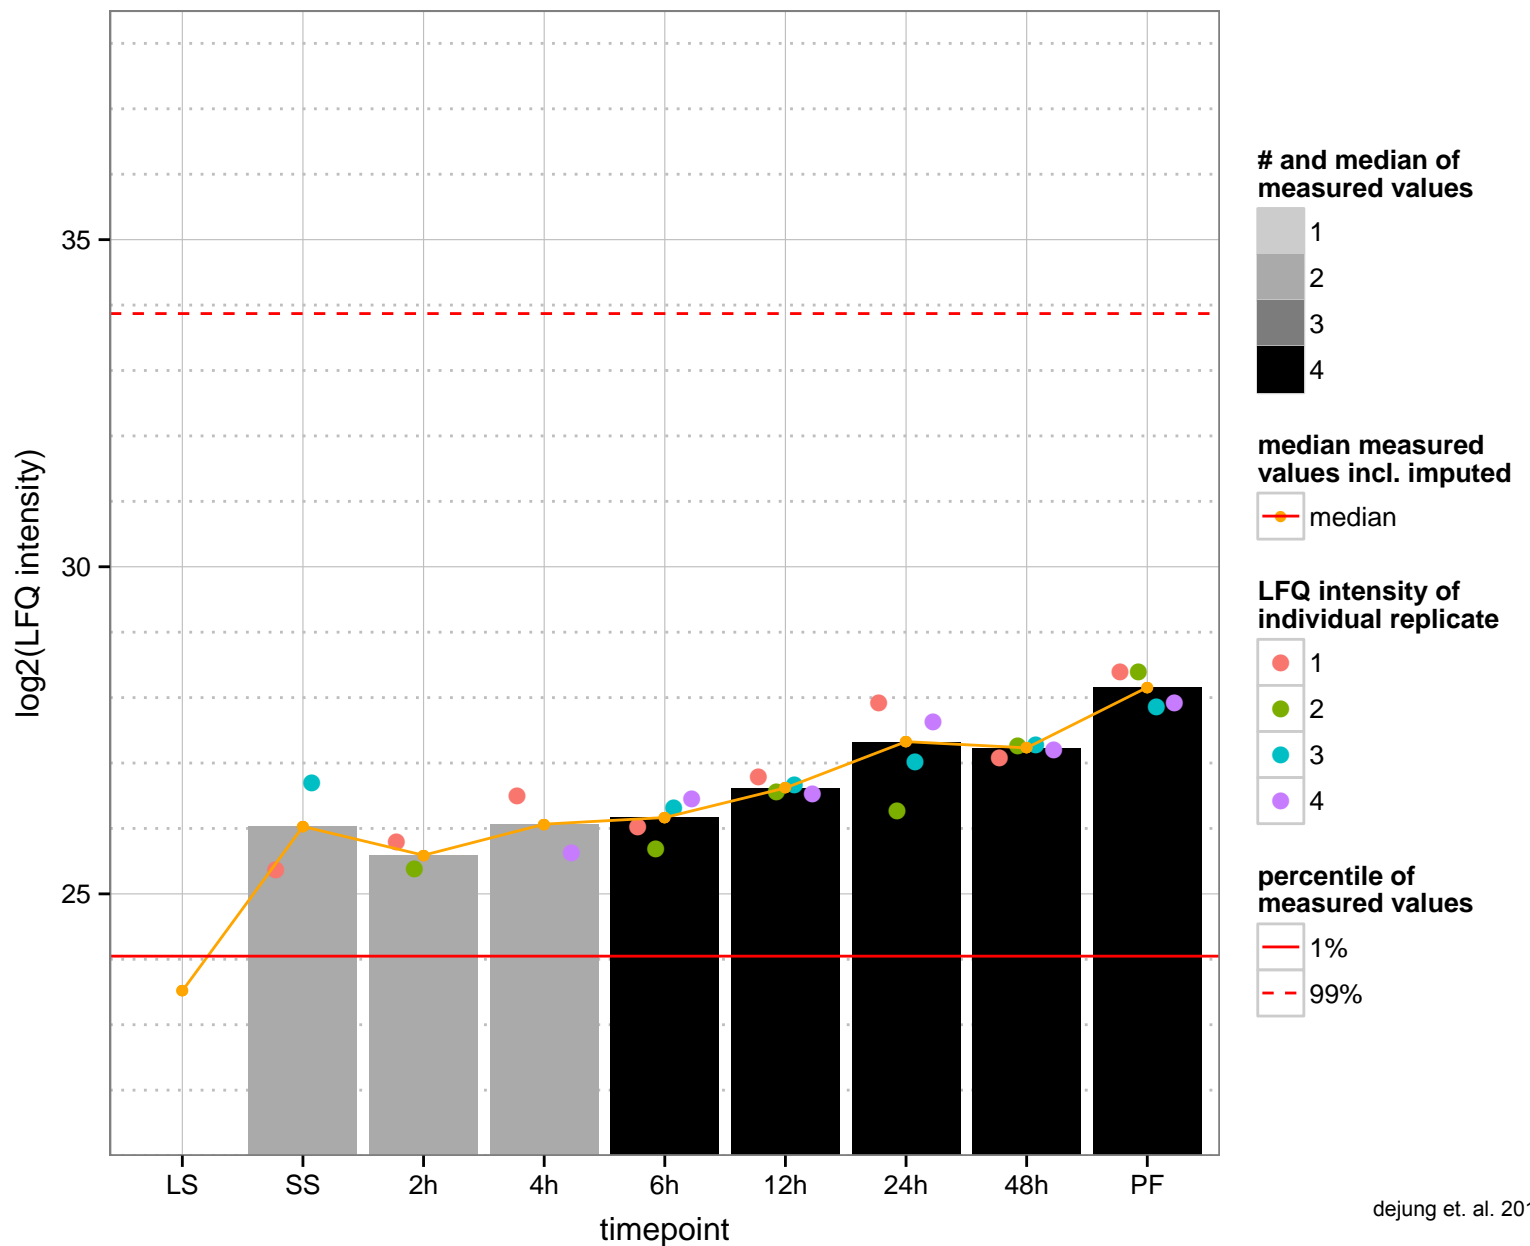

hypothetical protein, conserved  
 Tb927.10.9810  
 AGOF: null  
 AGOC: mitochondrion  
 AGOP: null  
 PGO: null  
 PGO: null  
 PGO: null

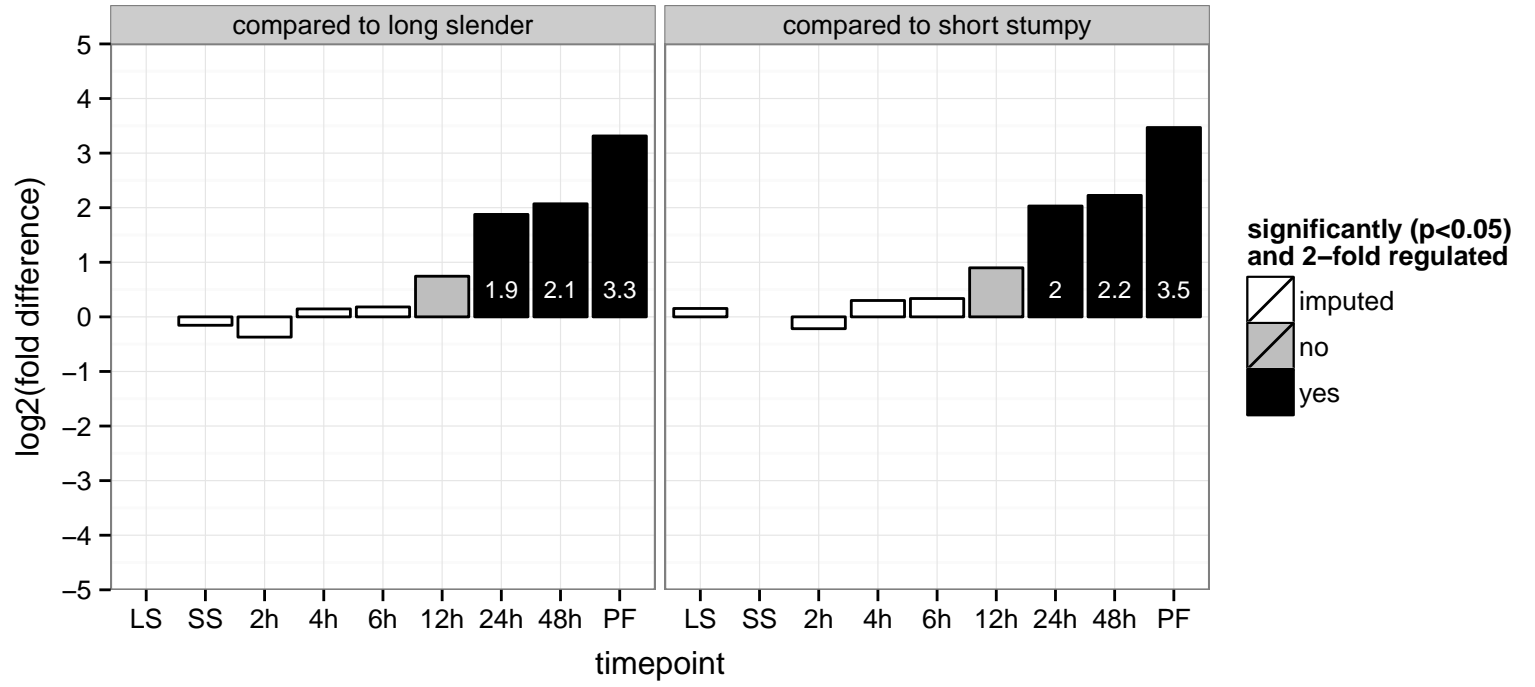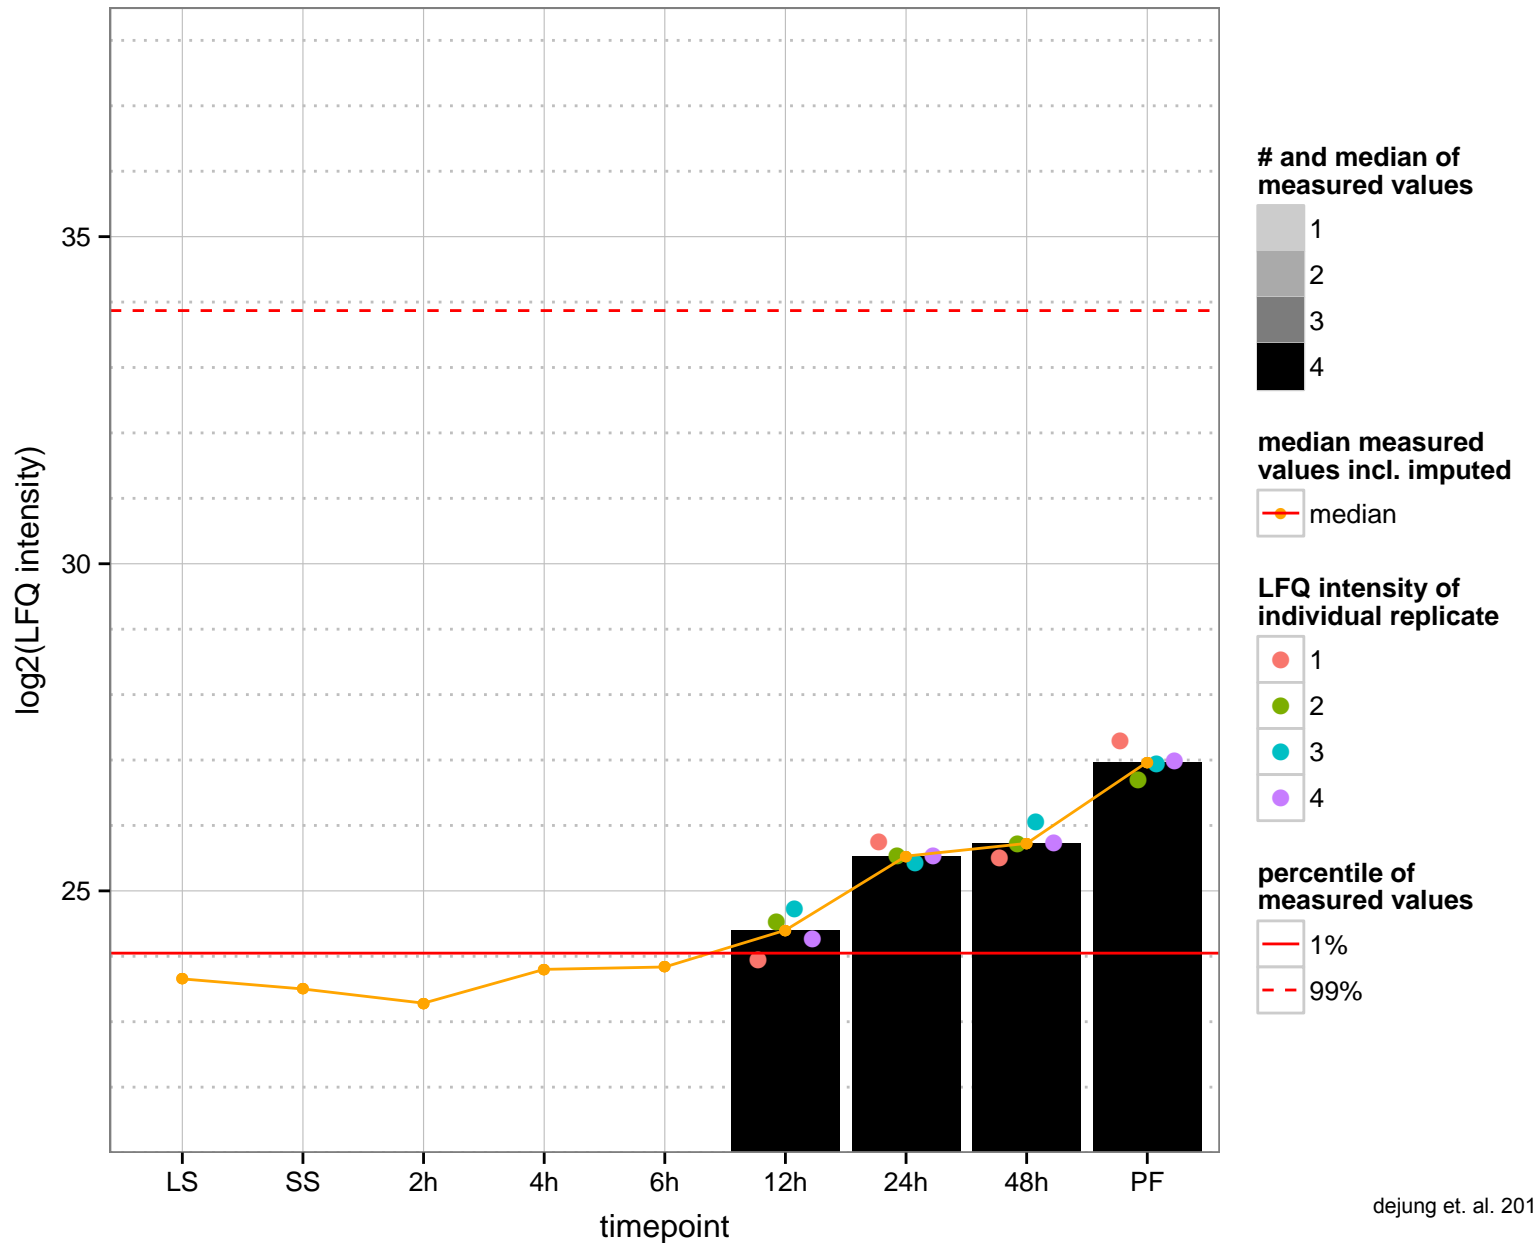



mitochondrial intermediate peptidase, putative, metallo-peptidase, Clan MA(E) Family M3  
 Tb927.10.9820;Tb11.v5.0565  
 AGOF: null, metalloendopeptidase activity  
 AGOC: null, mitochondrion  
 AGOP: null, proteolysis  
 PGO: metalloendopeptidase activity  
 PGOC: null  
 PGOP: proteolysis

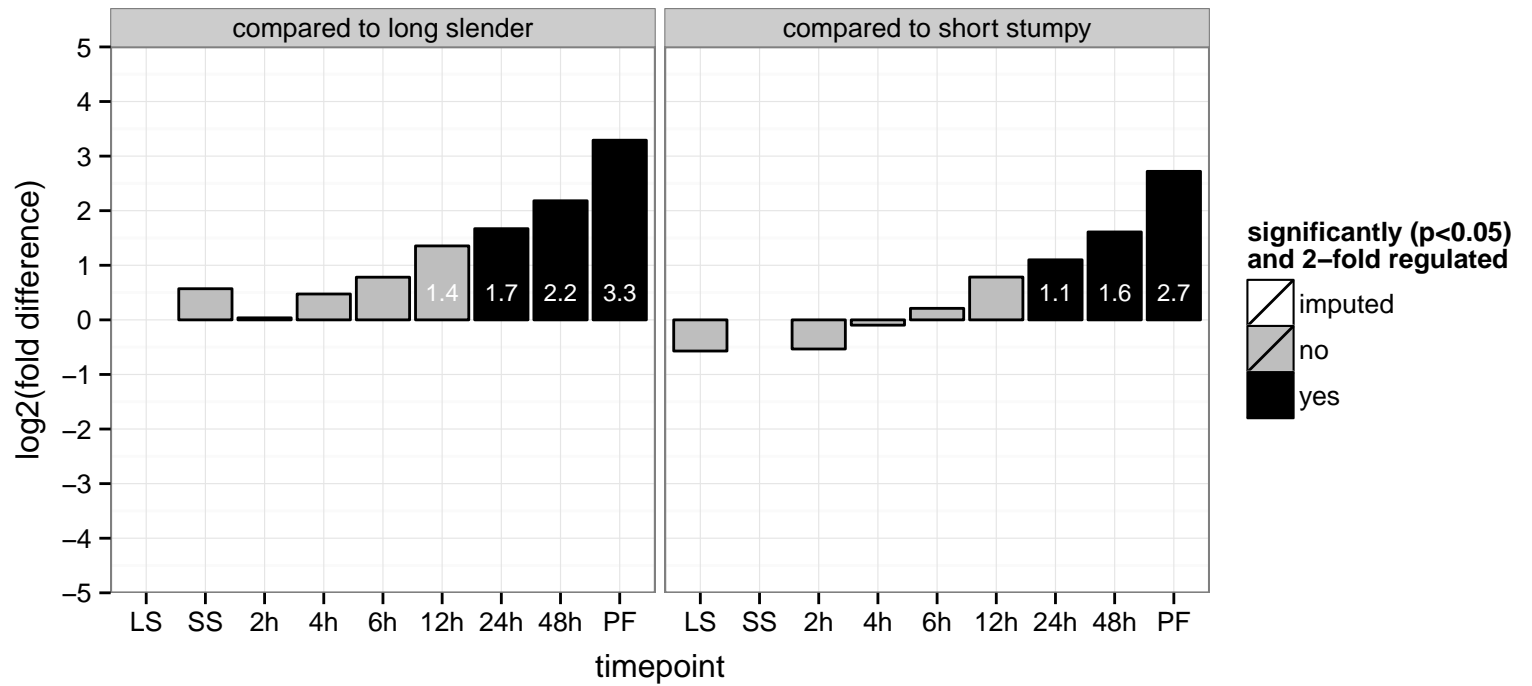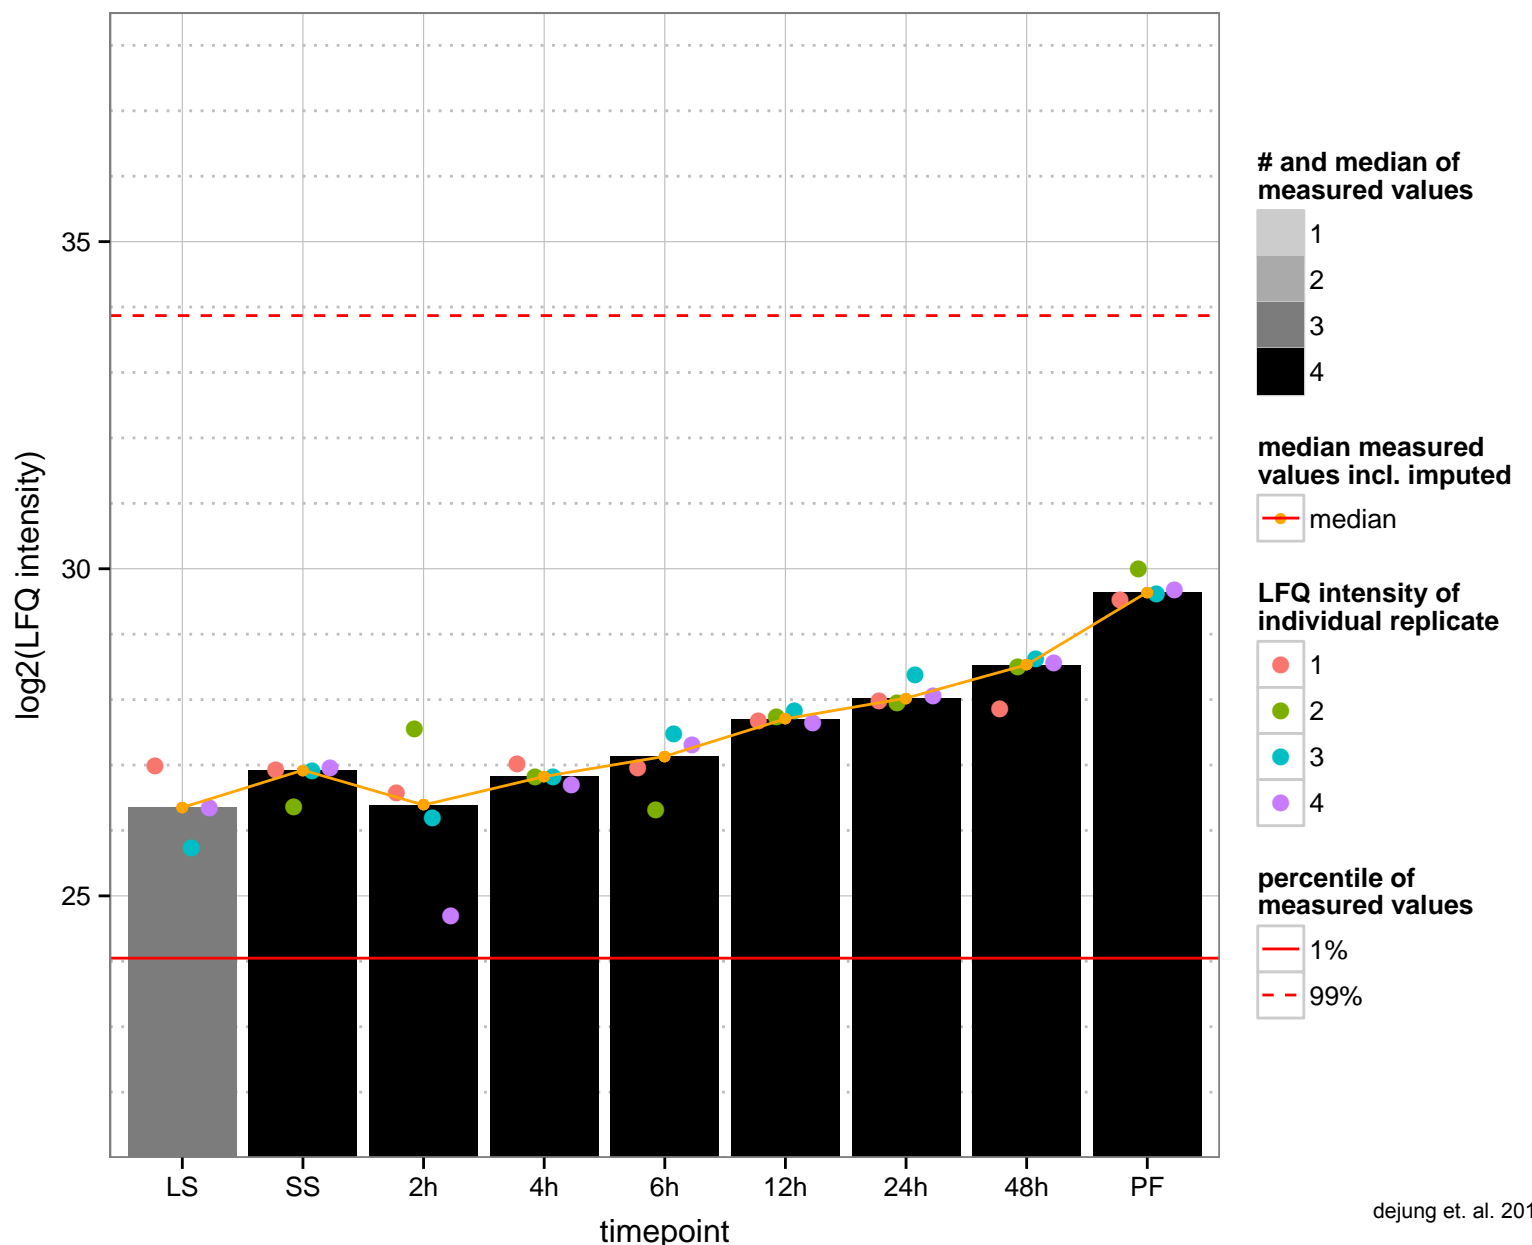

hypothetical protein, conserved  
 Tb927.10.9830  
 AGOF: null  
 AGOC: mitochondrion  
 AGOP: null  
 PGO: null  
 PGO: null  
 PGO: null

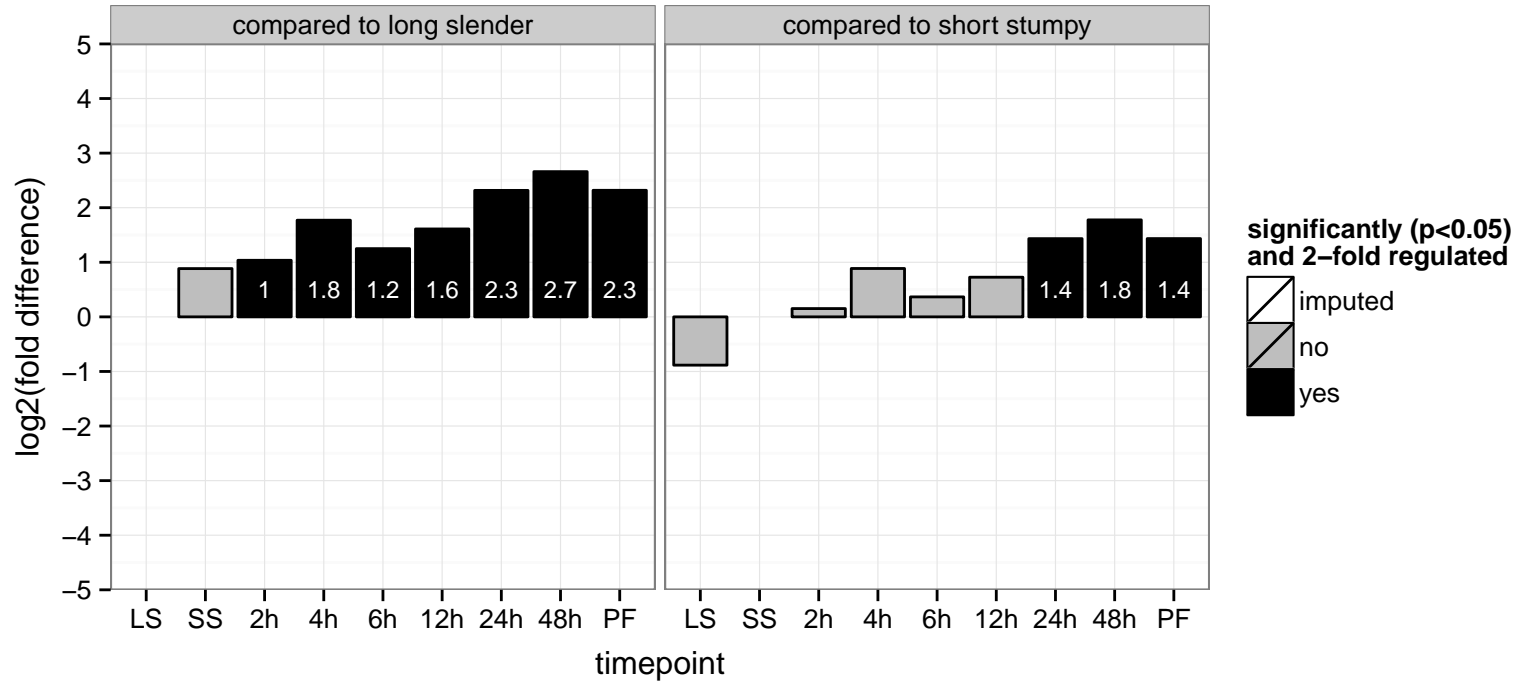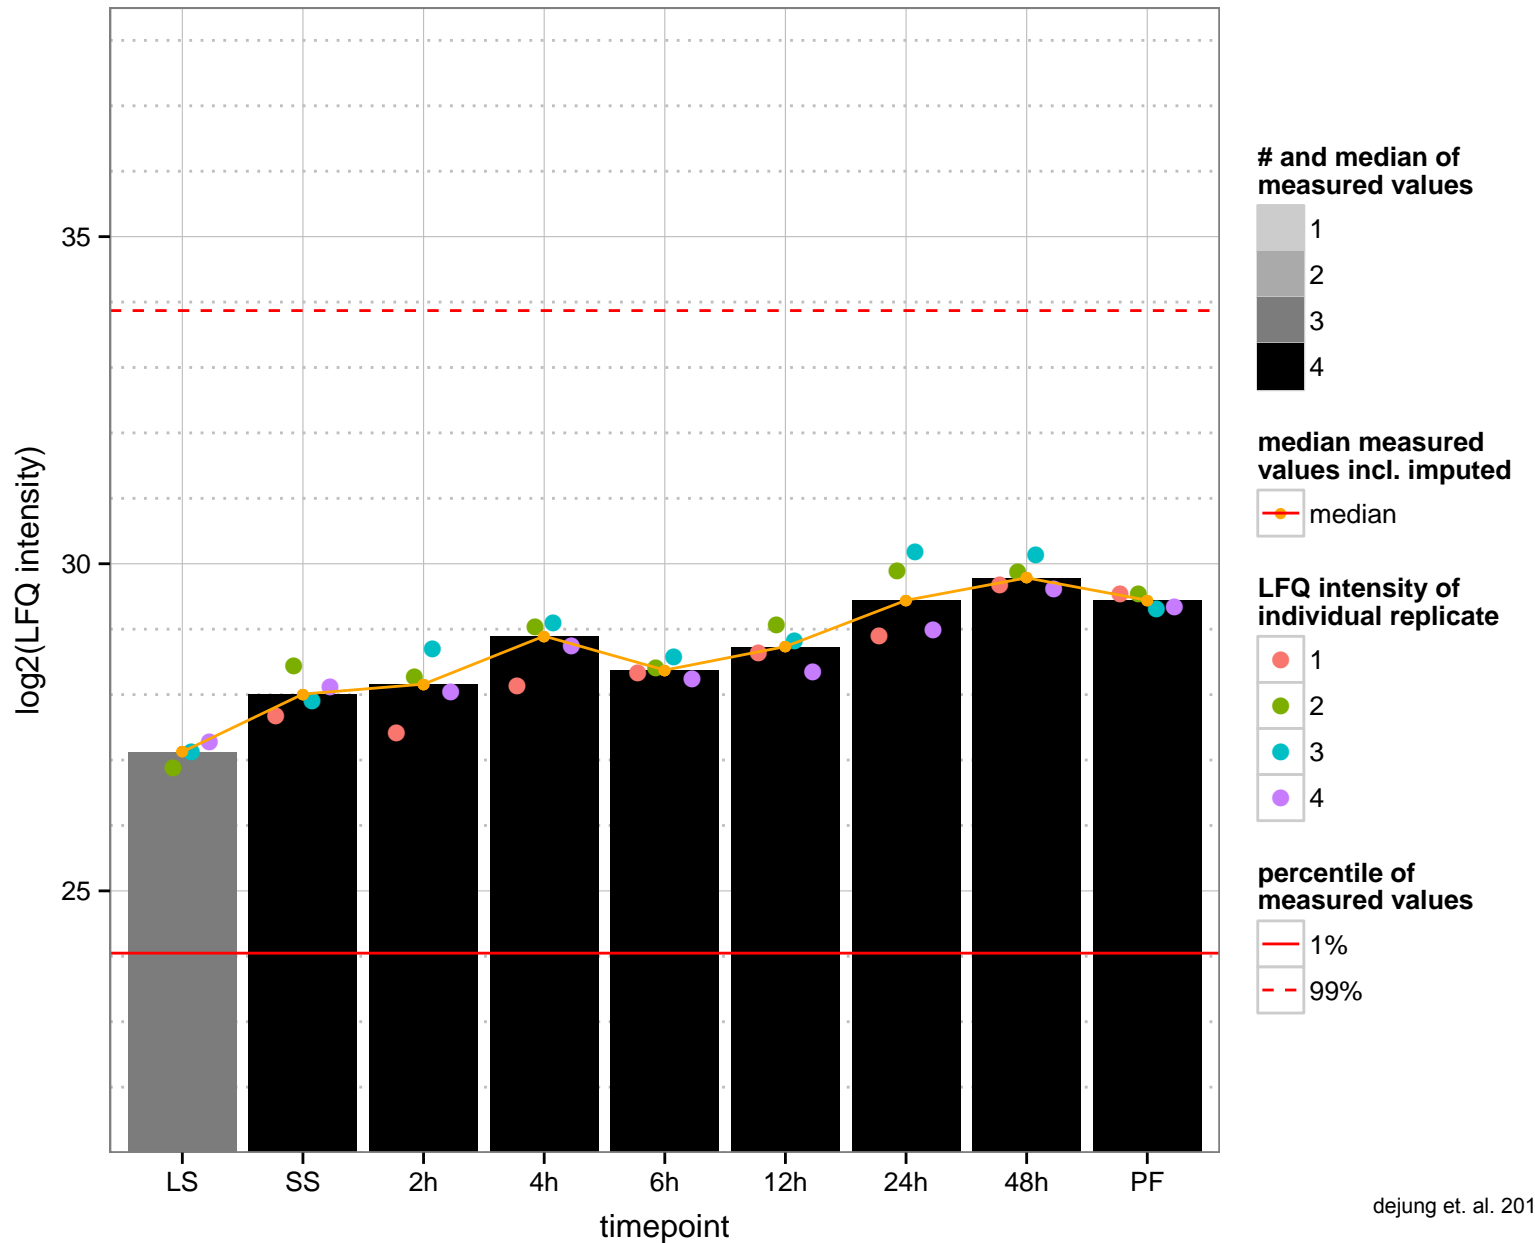

hypothetical protein, conserved  
 Tb927.10.9990  
 AGOF: hydrolase activity  
 AGOC: null  
 AGOP: null  
 PGO: hydrolase activity  
 PGOC: null  
 PGOP: null

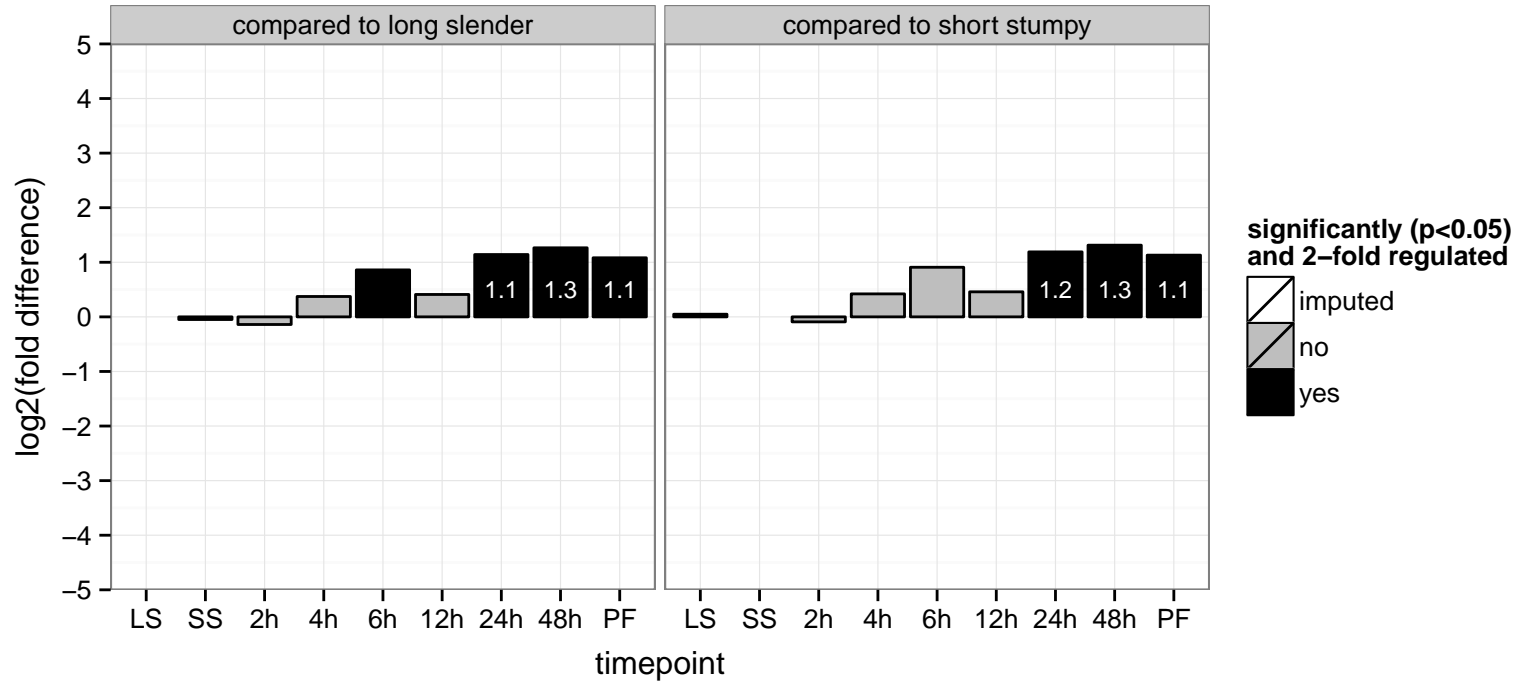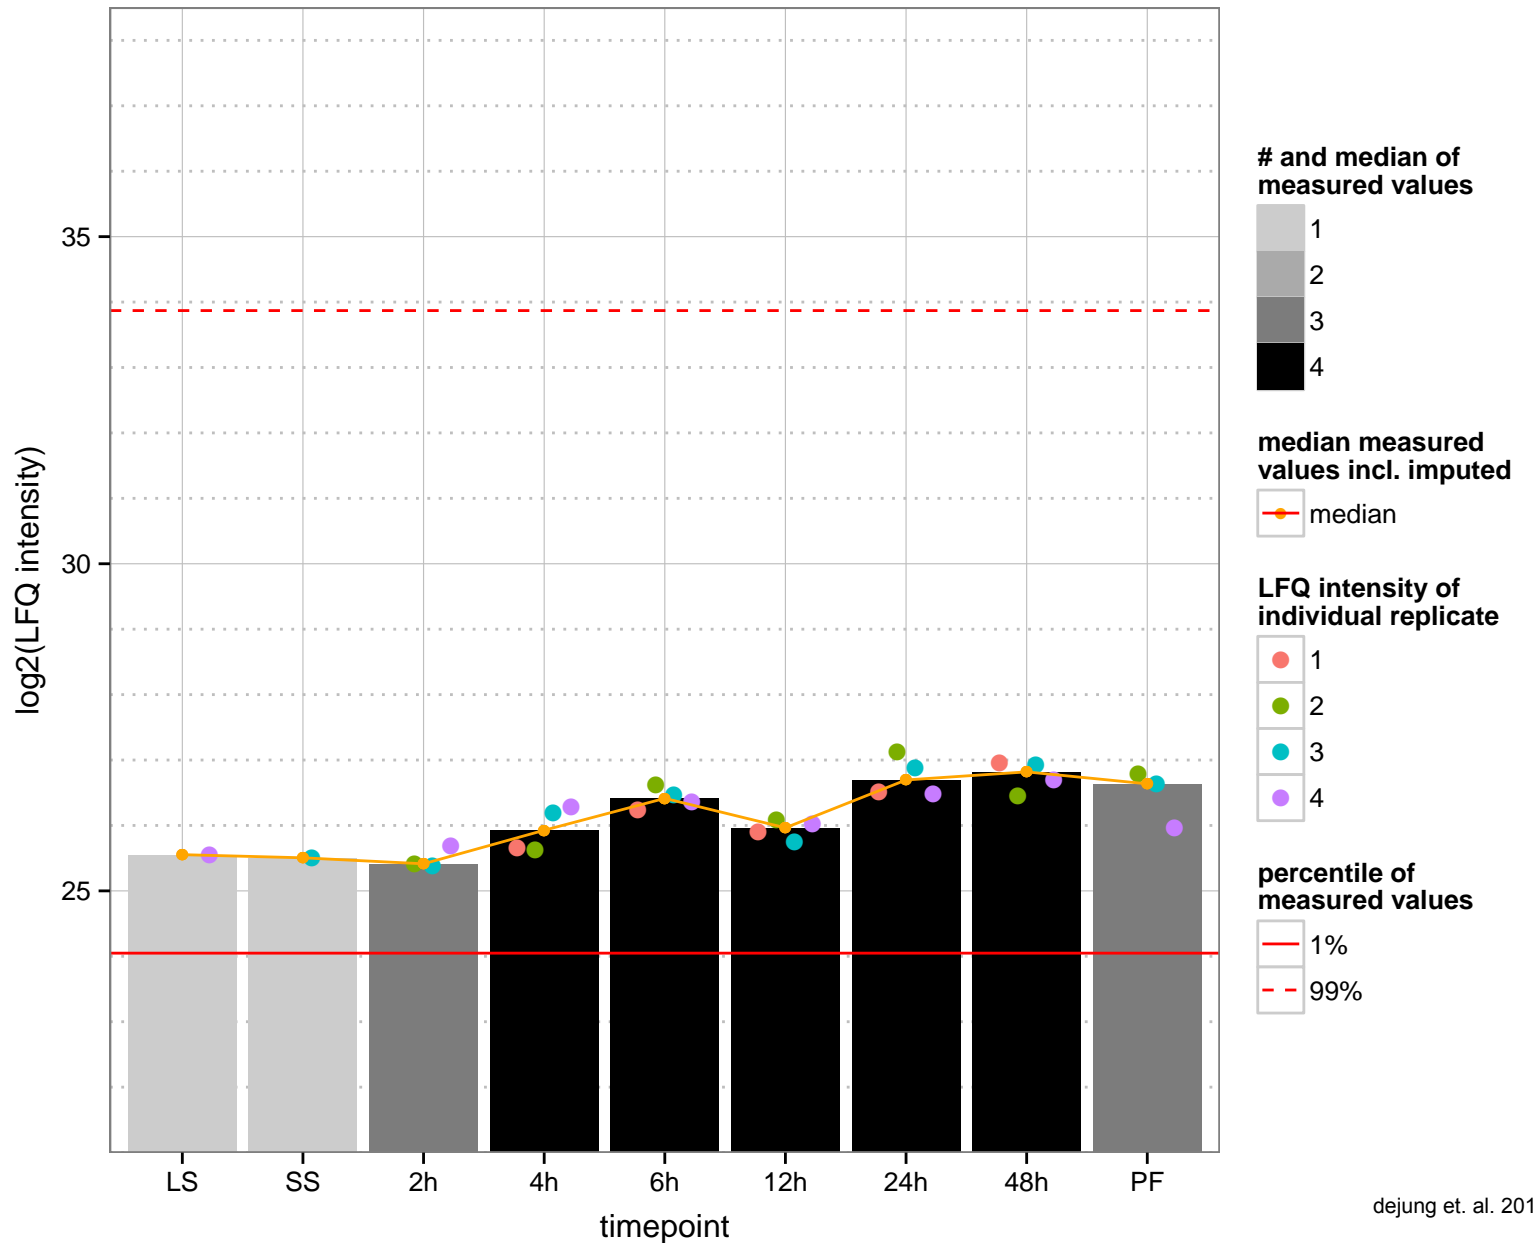

hypothetical protein, conserved  
 Tb927.11.10400  
 AGOF: null  
 AGOC: mitochondrion  
 AGOP: null  
 PGO: null  
 PGOC: null  
 PGOP: null

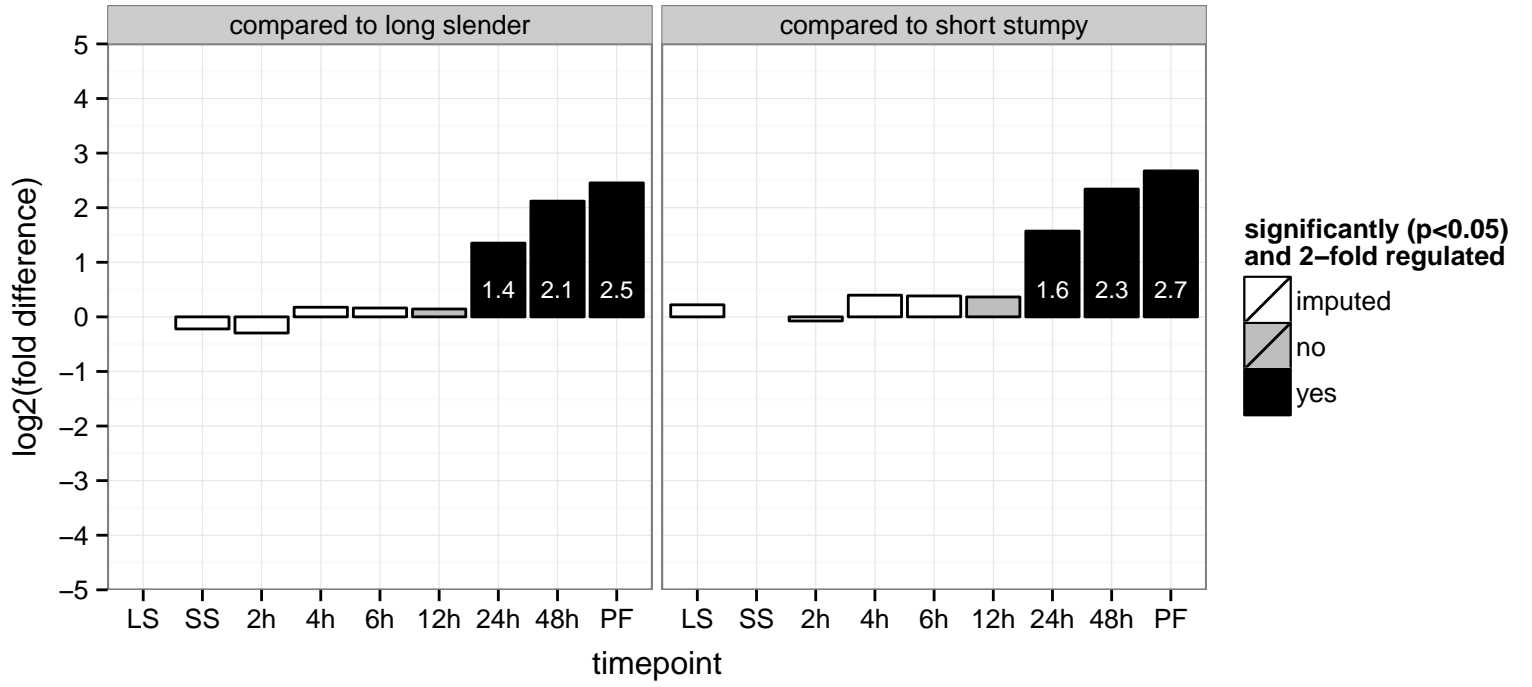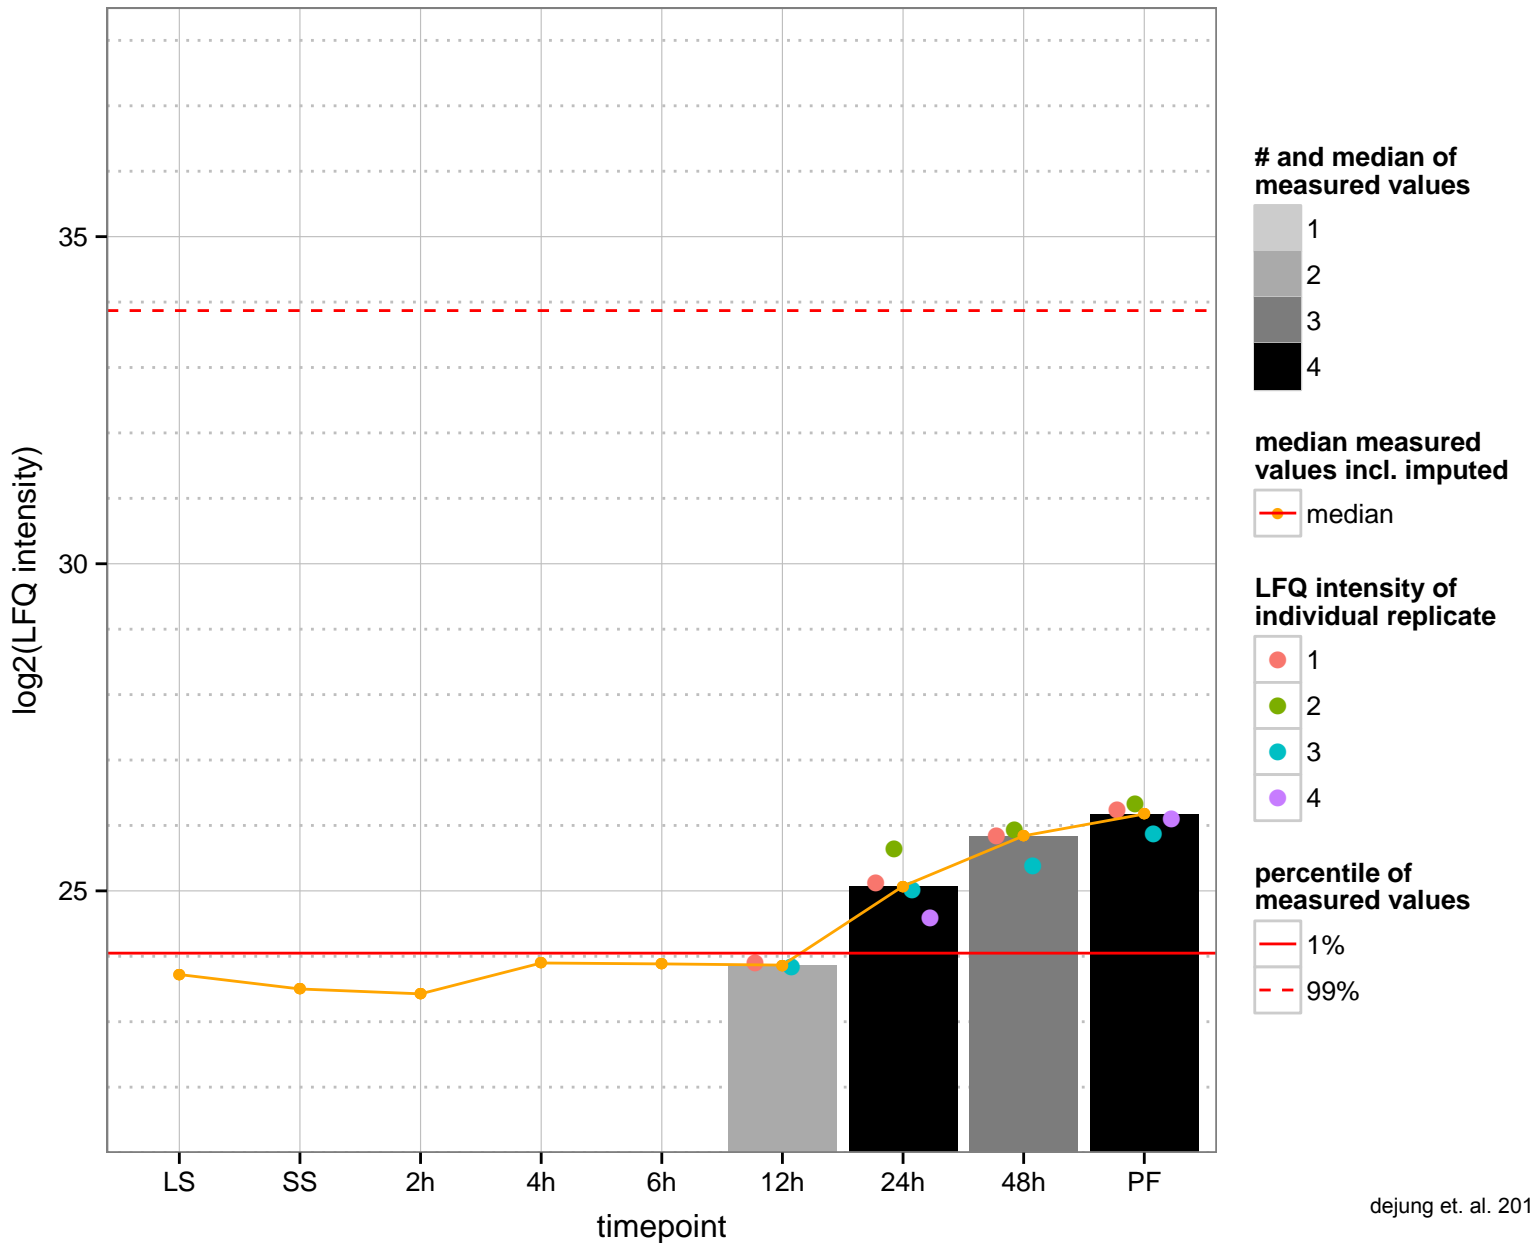

glycosomal transporter (GAT3), putative (gat3)

Tb927.11.1070

AGOF: ATP binding, ATPase activity

AGOC: ATP-binding cassette (ABC) transporter complex, integral to membrane, membrane

AGOP: transport

PGOF: ATP binding, ATPase activity, coupled to transmembrane movement of substances, nucleoside-triphosphatase activity

PGOC: integral to membrane, membrane

PGOP: transmembrane transport, transport

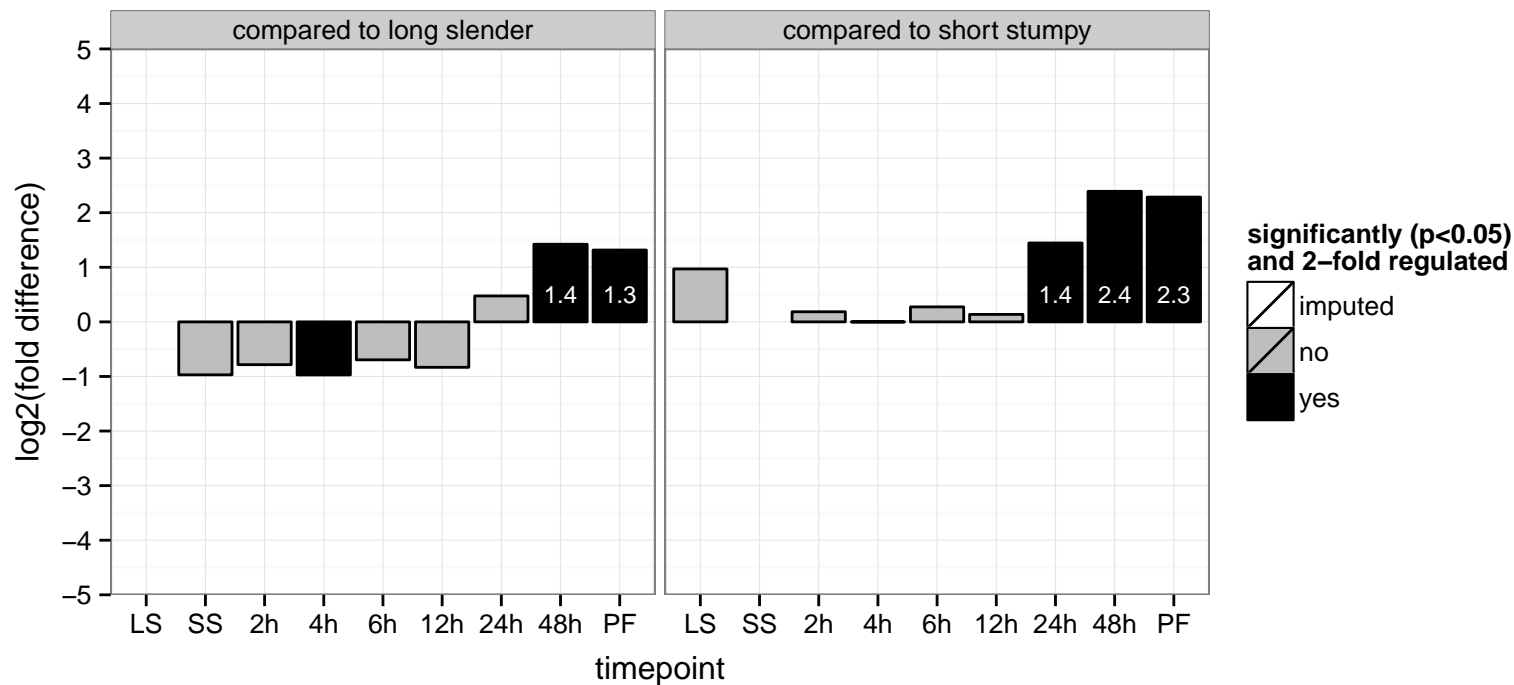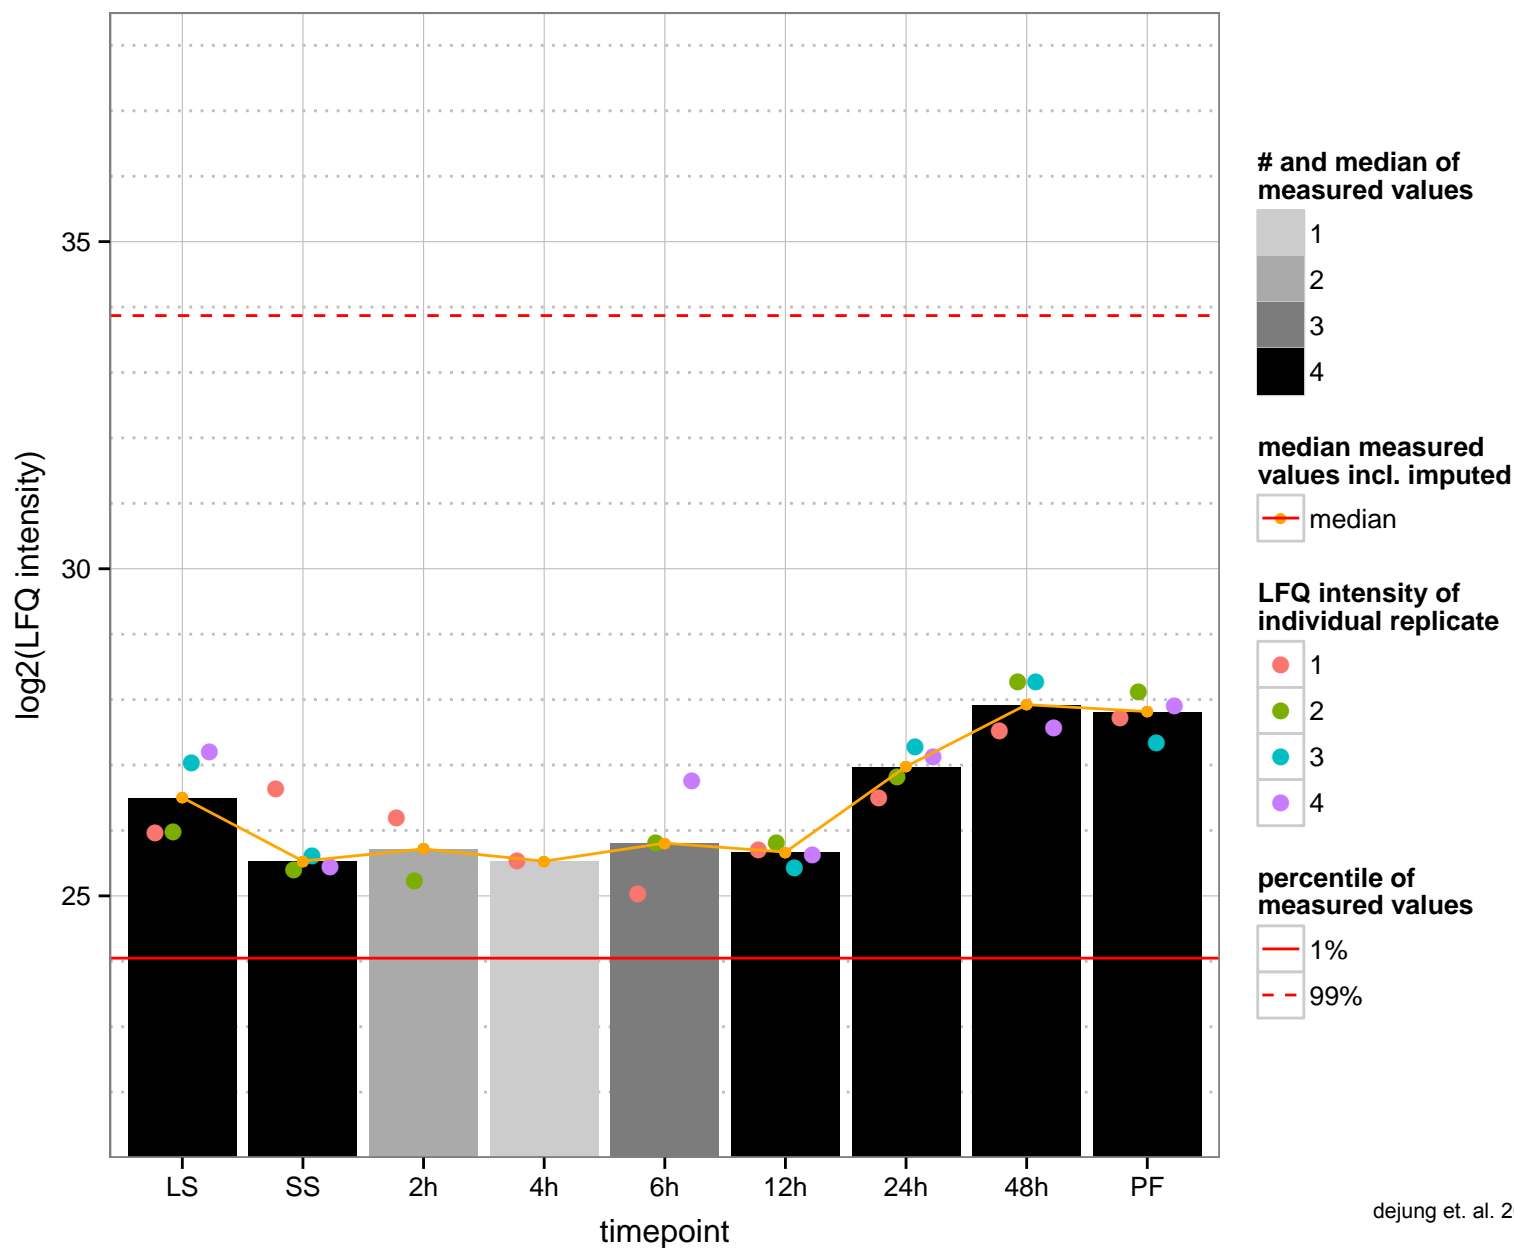

kinesin-like protein, putative  
 Tb927.11.10760  
 AGOF: ATP binding, microtubule motor activity, motor activity  
 AGOC: microtubule associated complex  
 AGOP: microtubule-based movement  
 PGOF: ATP binding, microtubule motor activity  
 PGO: null  
 PGOP: microtubule-based movement

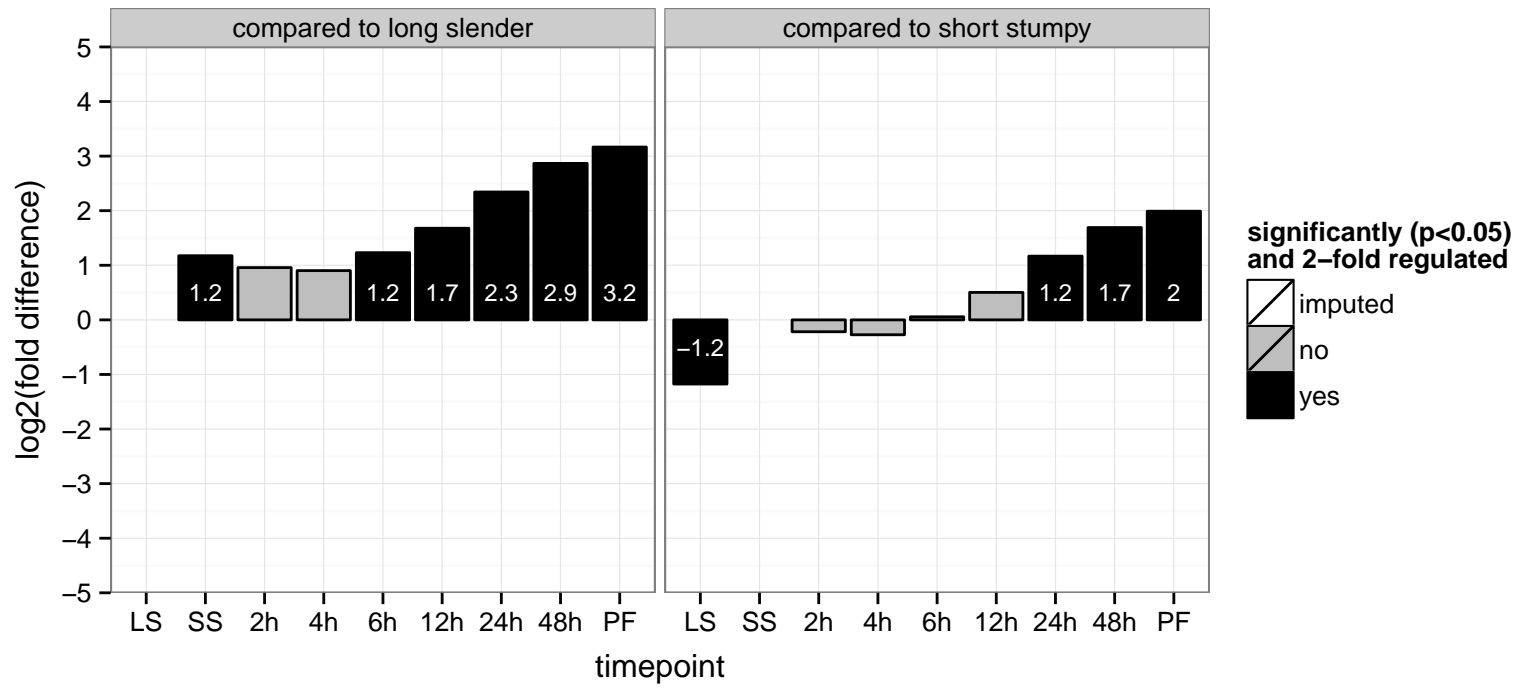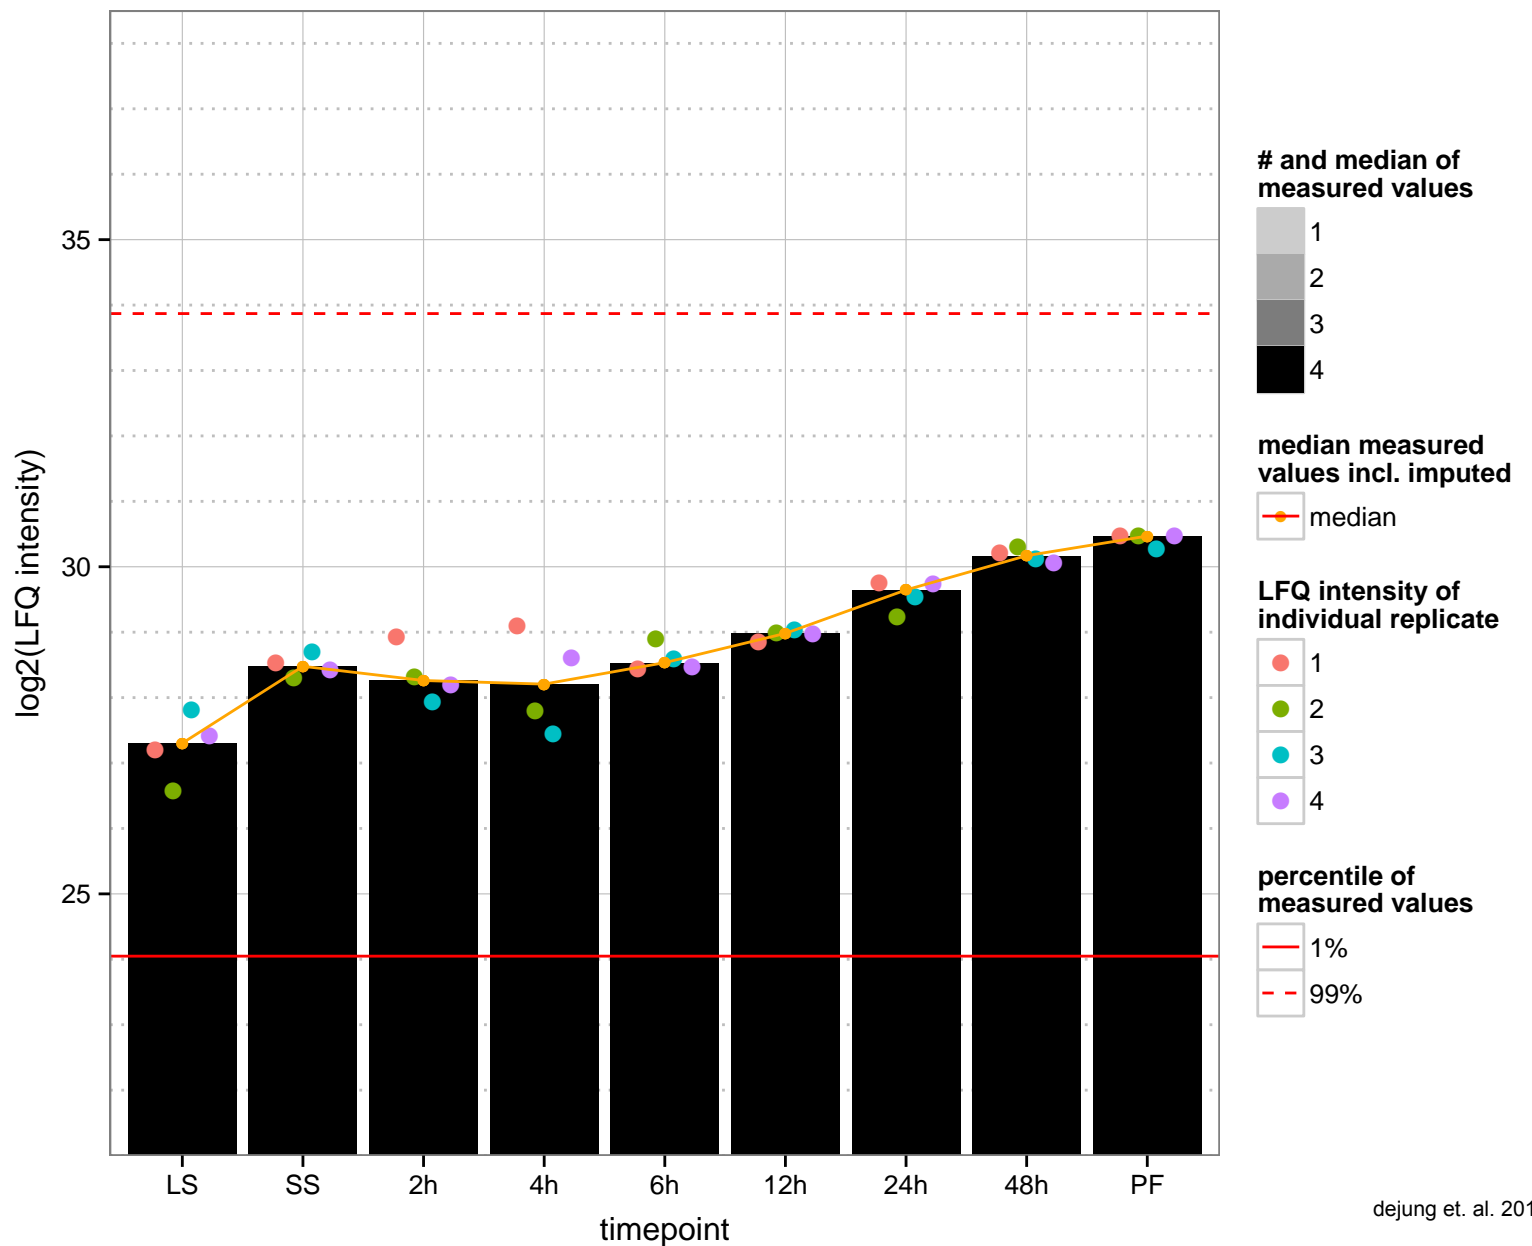

hypothetical protein, conserved  
 Tb927.11.12040  
 AGOF: null  
 AGOC: mitochondrion  
 AGOP: null  
 PGO: null  
 PGOC: null  
 PGOP: null

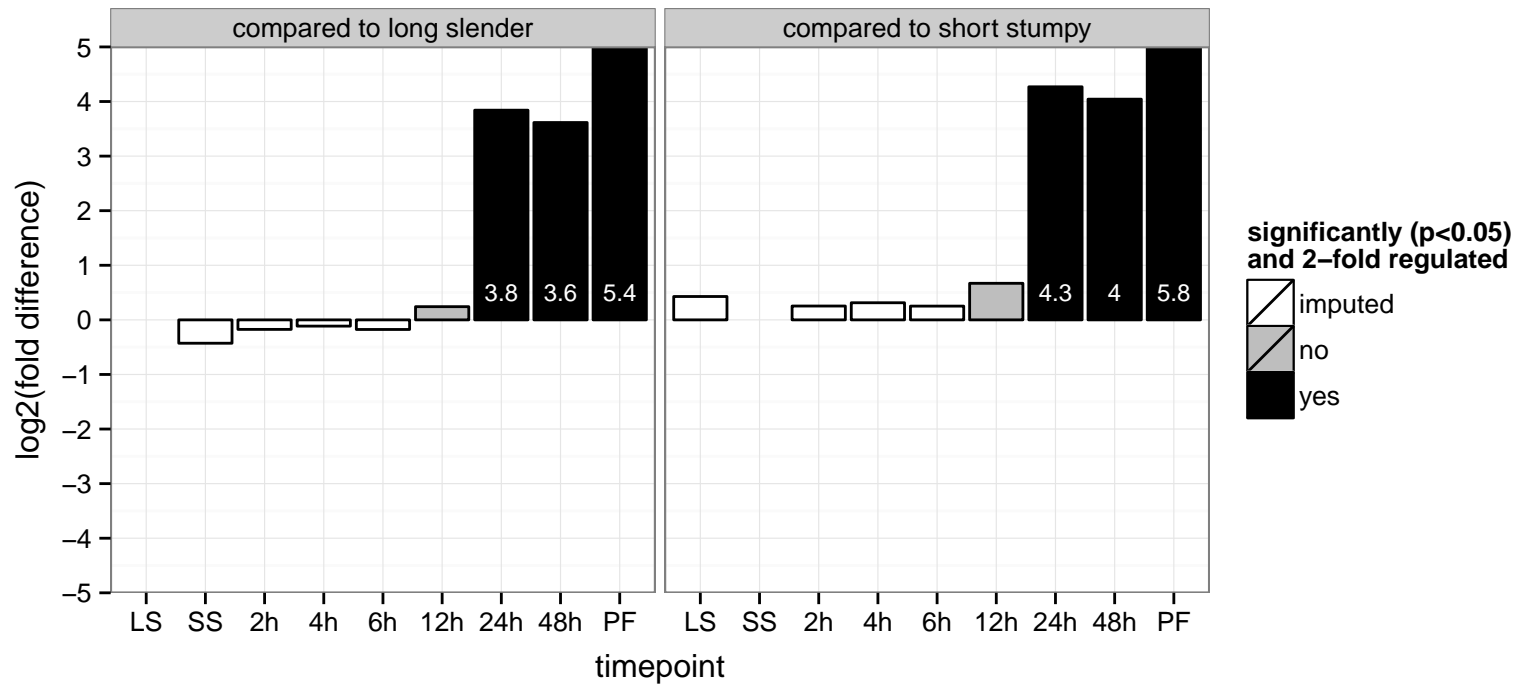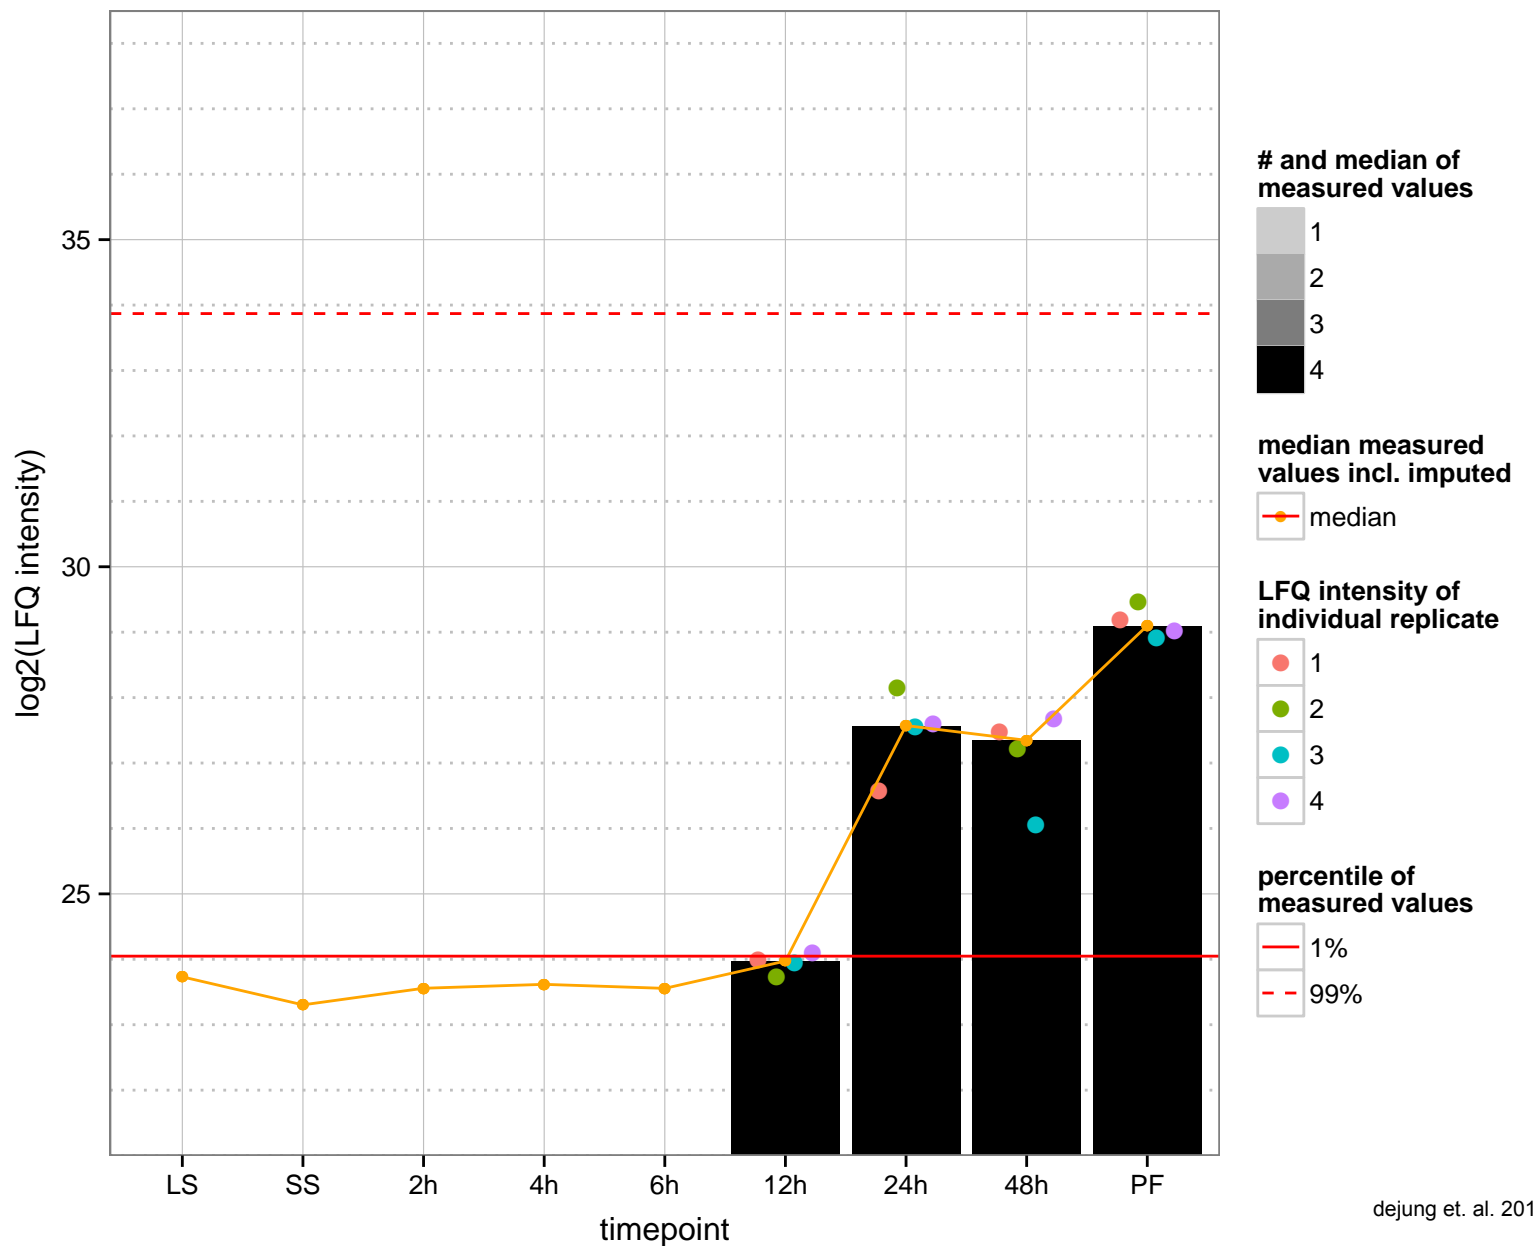

hypothetical protein, conserved  
 Tb927.11.1270  
 AGOF: null  
 AGOC: mitochondrial inner membrane, mitochondrion  
 AGOP: null  
 PGO: null  
 PGO: null  
 PGO: null

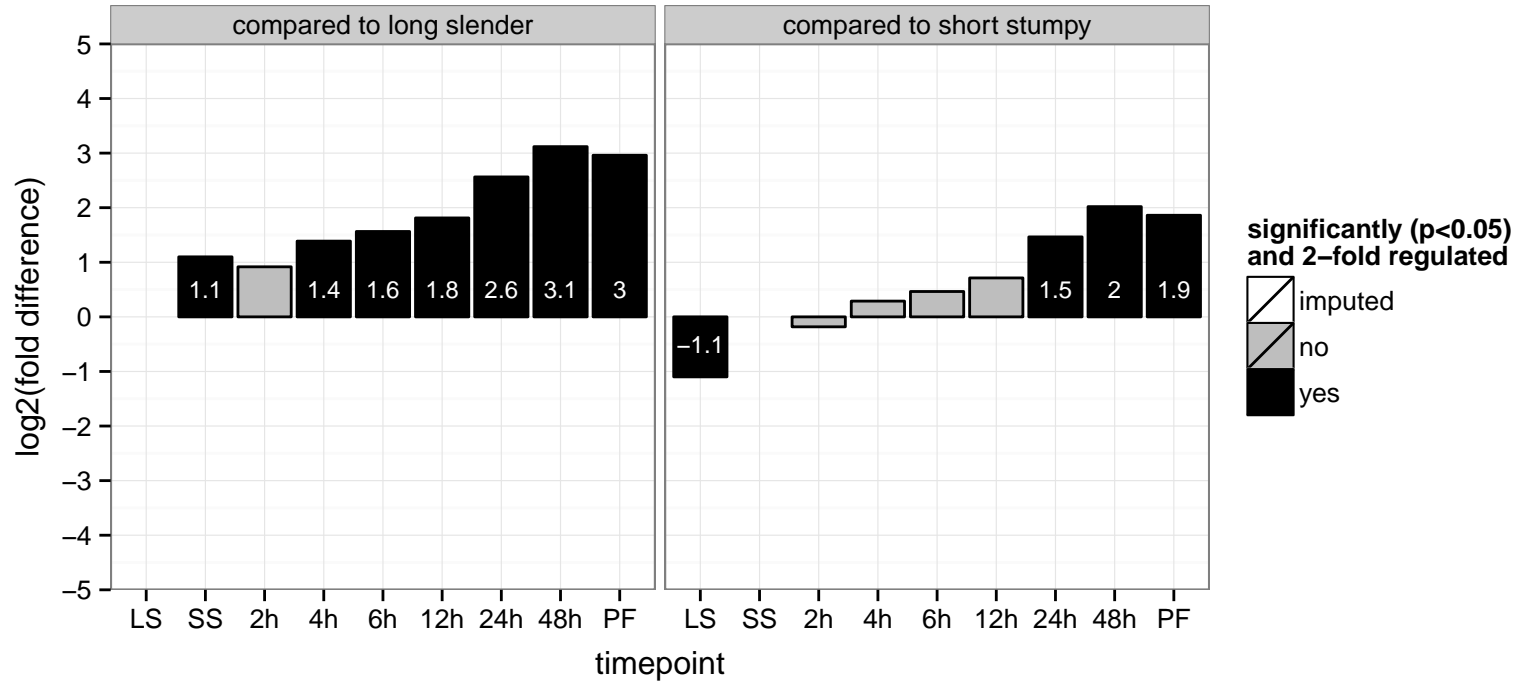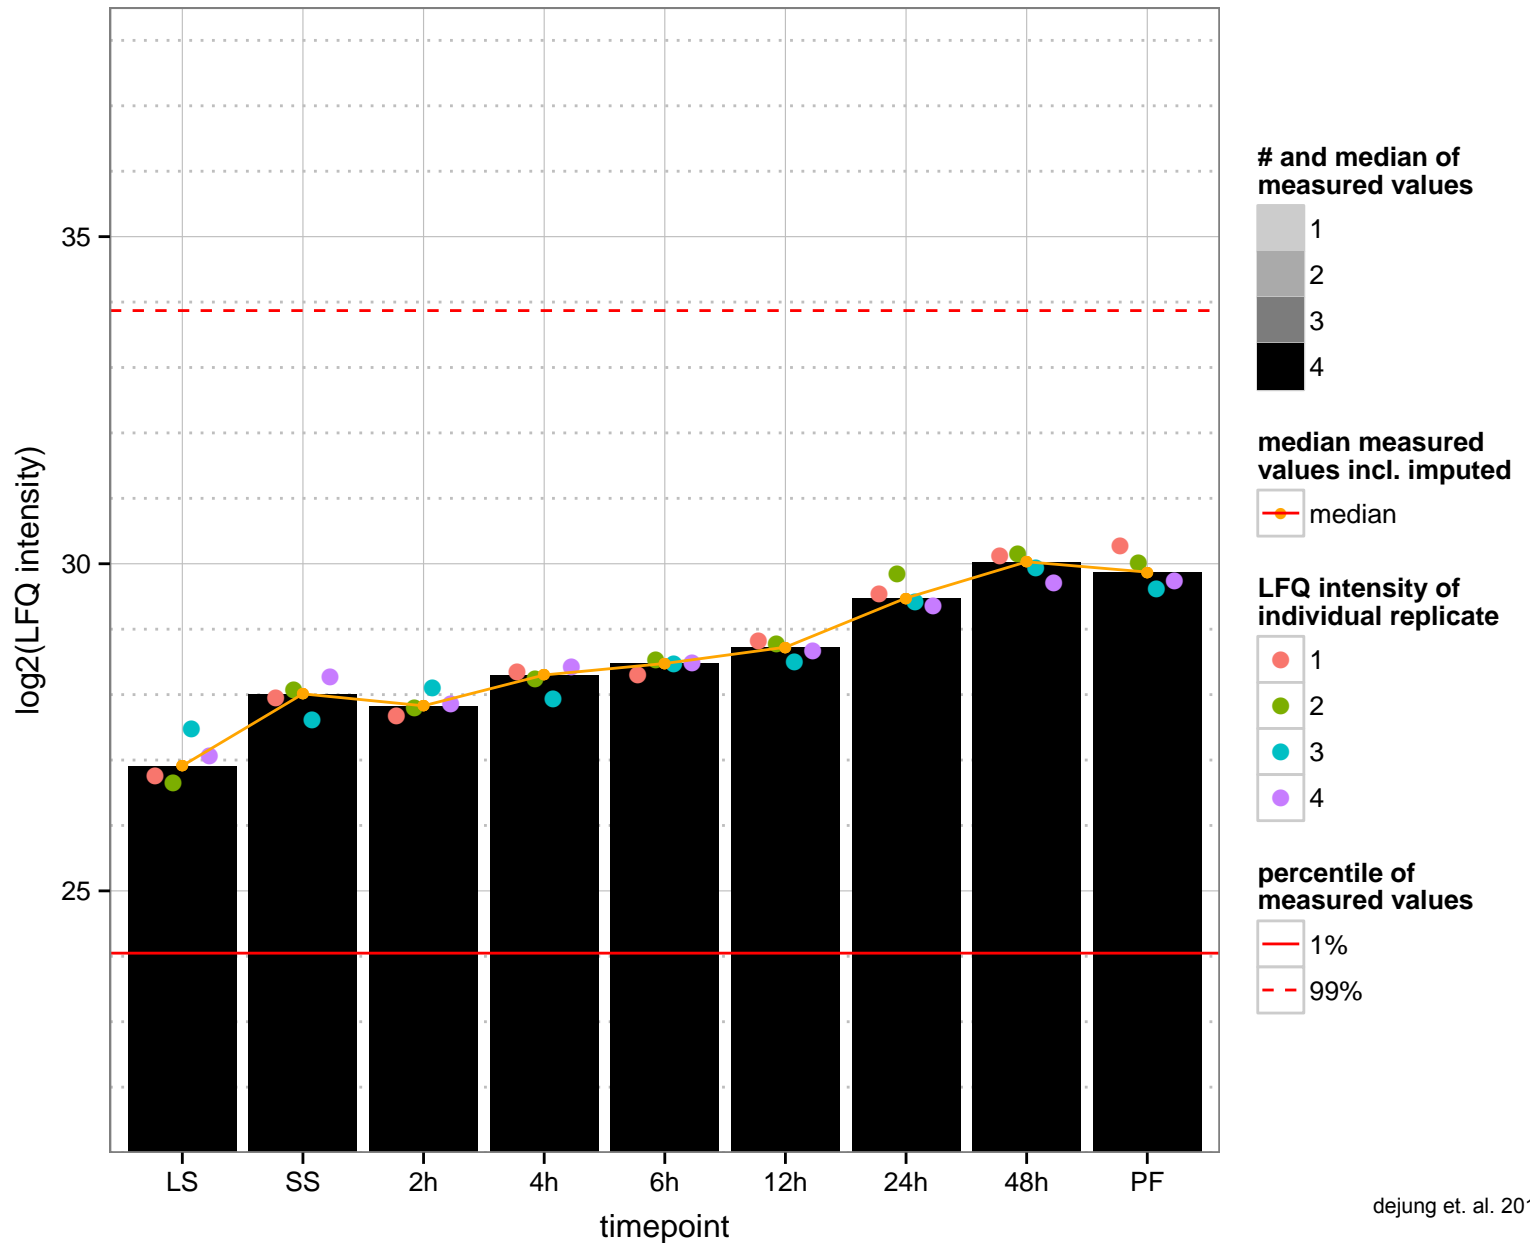



hypothetical protein conserved  
 Tb927.11.13180  
 AGOF: null  
 AGOC: mitochondrial inner membrane, mitochondrion  
 AGOP: null  
 PGO: null  
 PGO: null  
 PGO: null

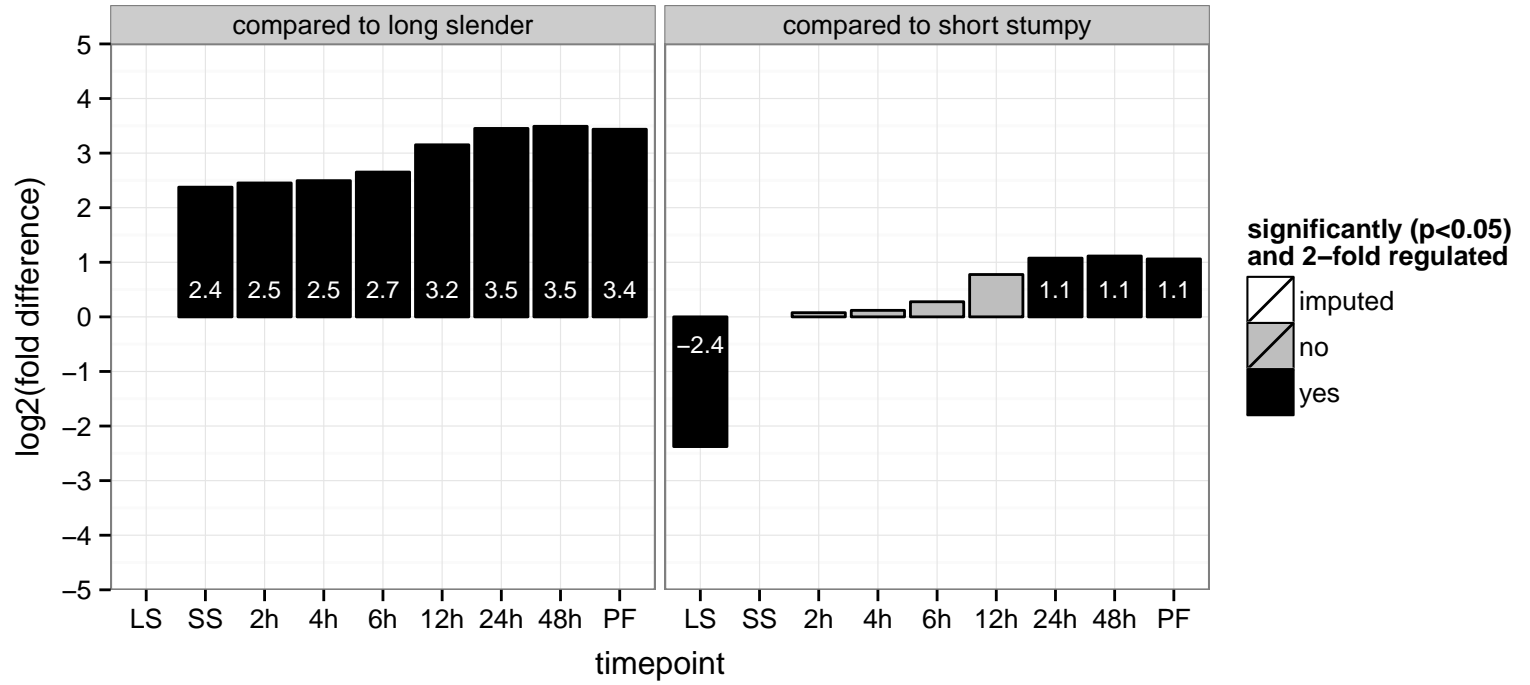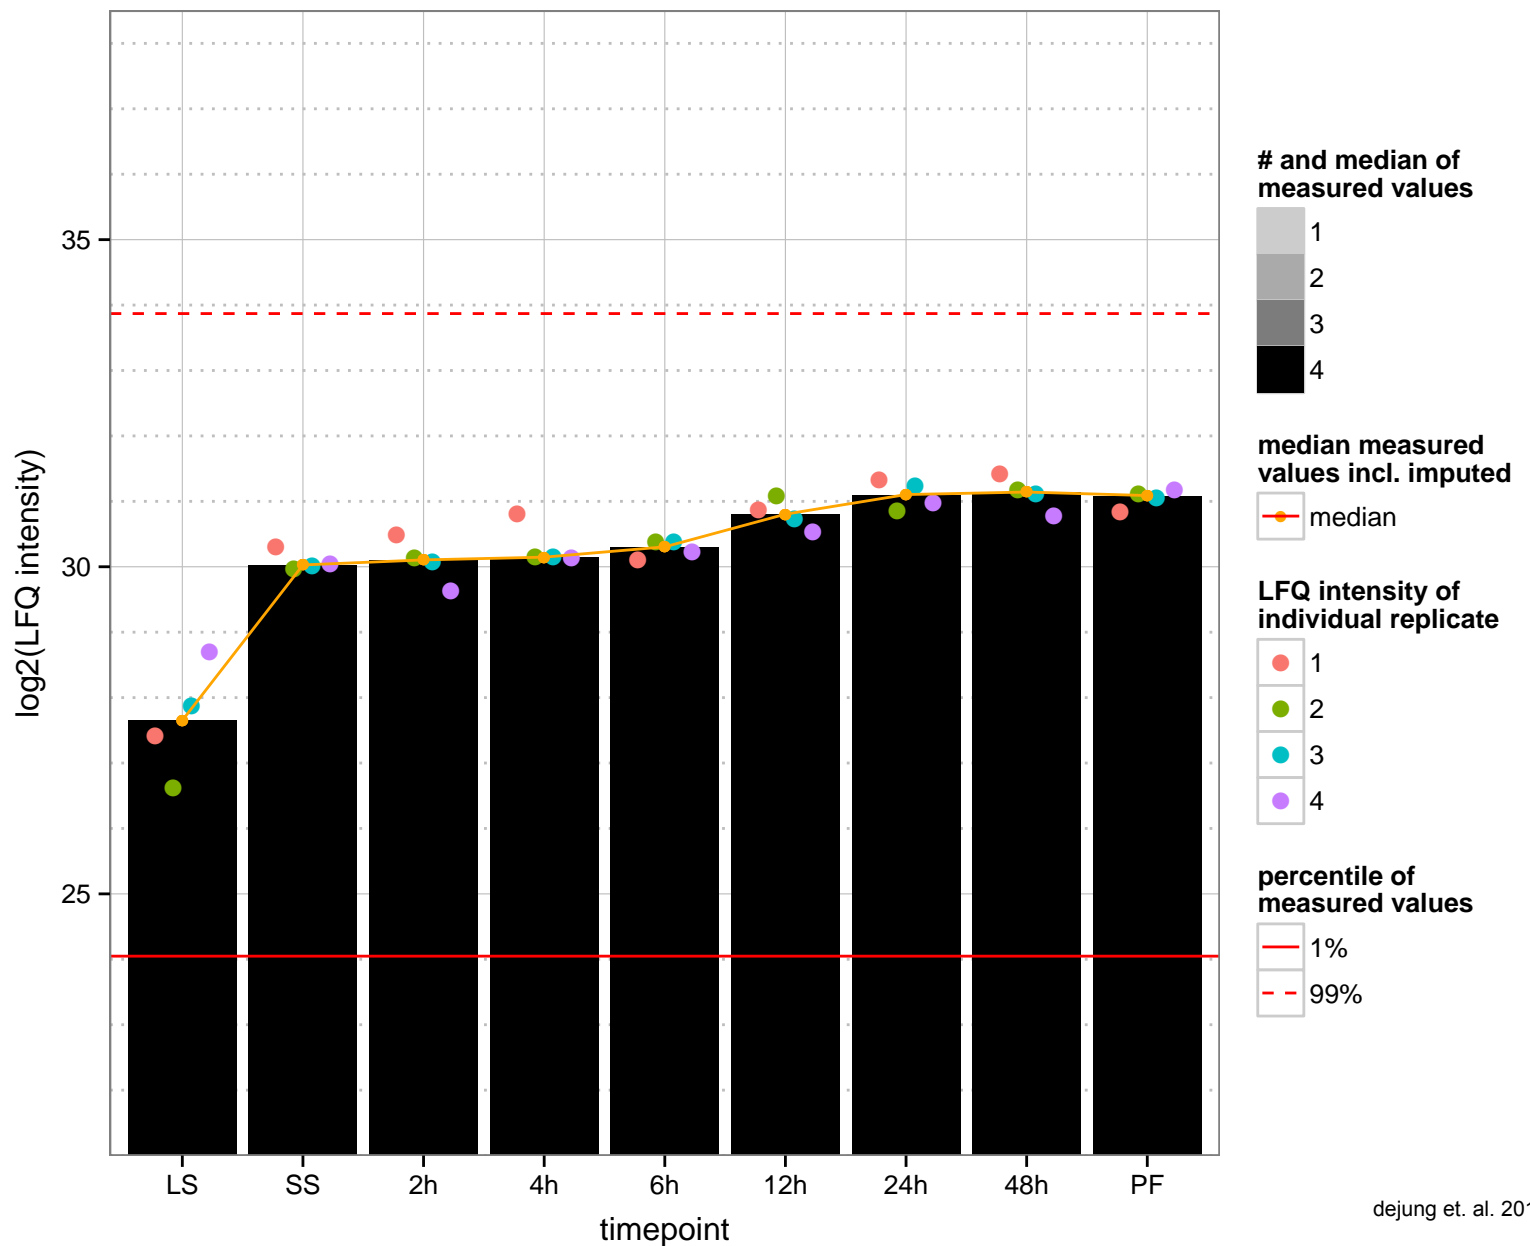

eukaryotic translation initiation factor 2 gamma, putative (eIF-2-gamma)

Tb927.11.13250

AGOF: GTP binding, GTPase activity, histone methyltransferase activity, translation initiation factor activity

AGOC: eukaryotic 43S preinitiation complex

AGOP: translation, translational initiation

PGOF: GTP binding, GTPase activity

PGOC: null

PGOP: null

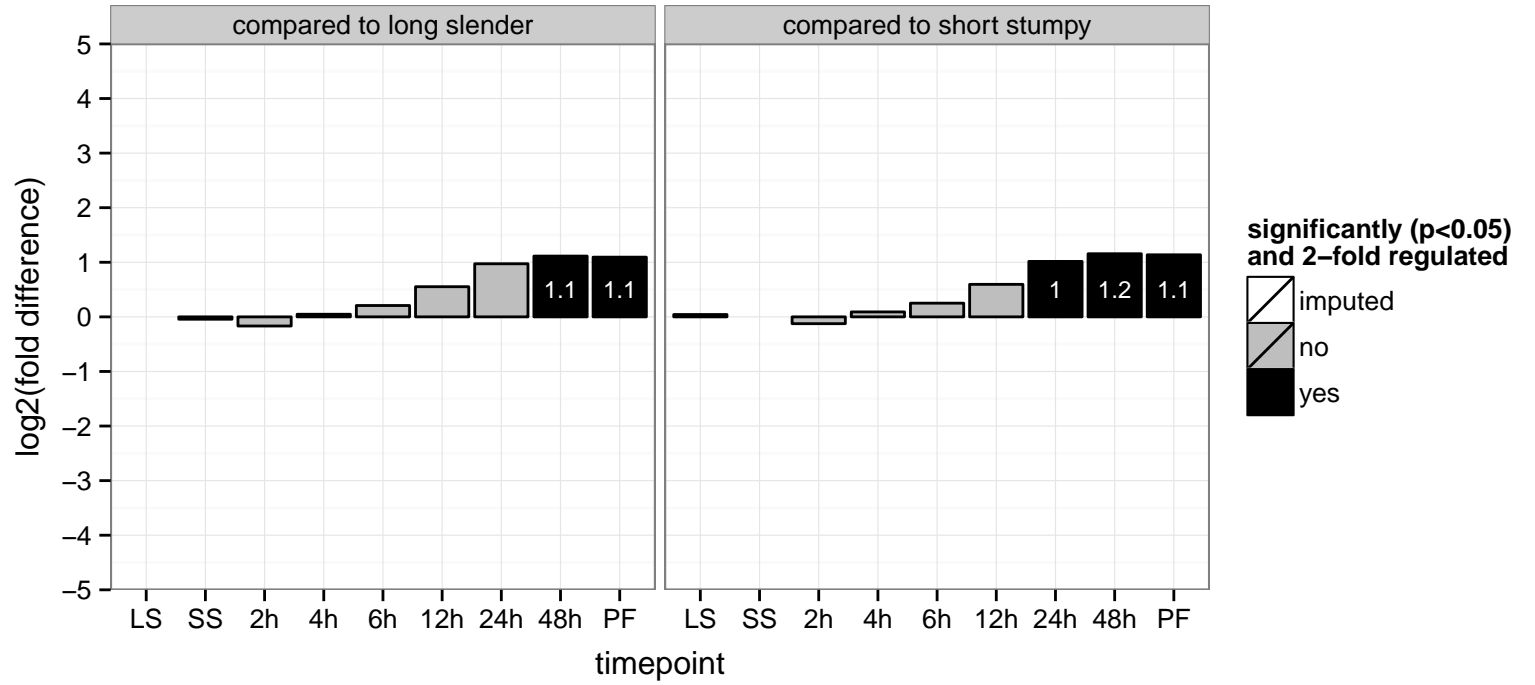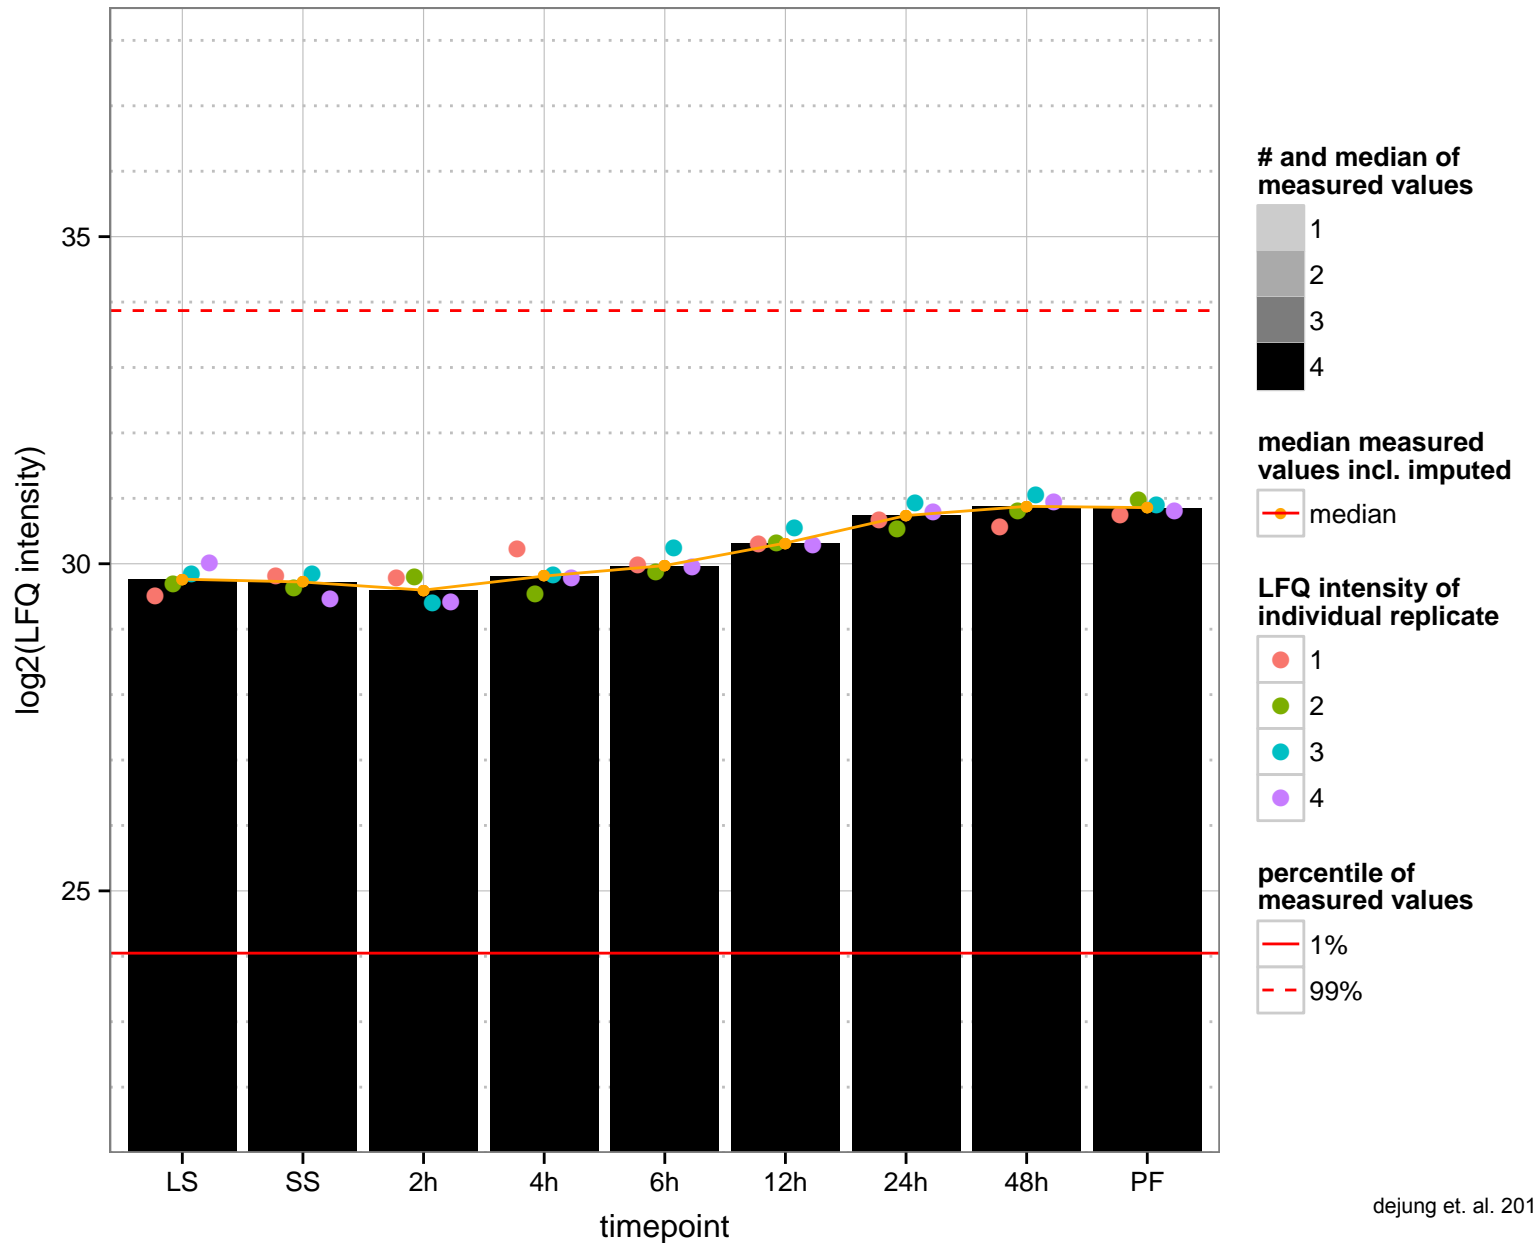

hypothetical protein, conserved  
 Tb927.11.1340  
 AGOF: null  
 AGOC: null  
 AGOP: null  
 PGO: transferase activity, transferring phosphorus-containing groups  
 PGOC: null  
 PGOP: null

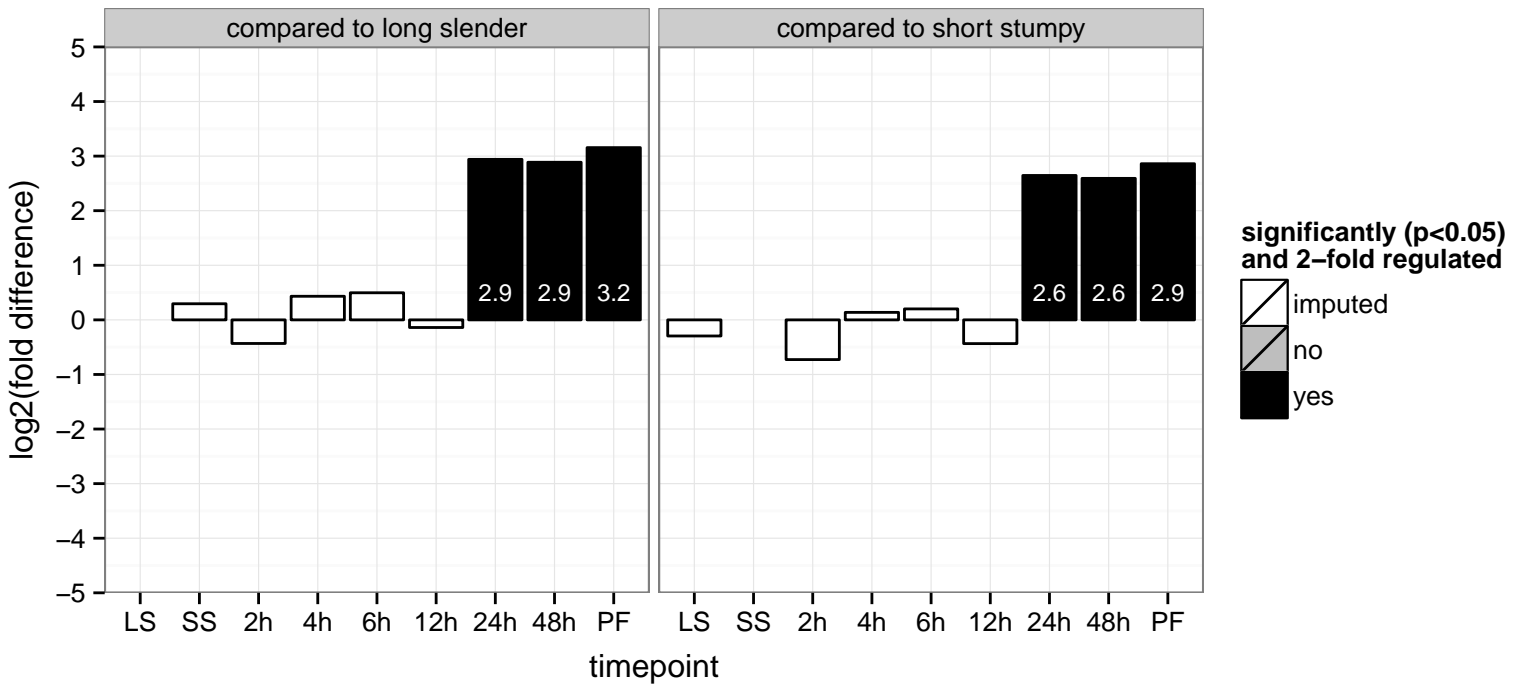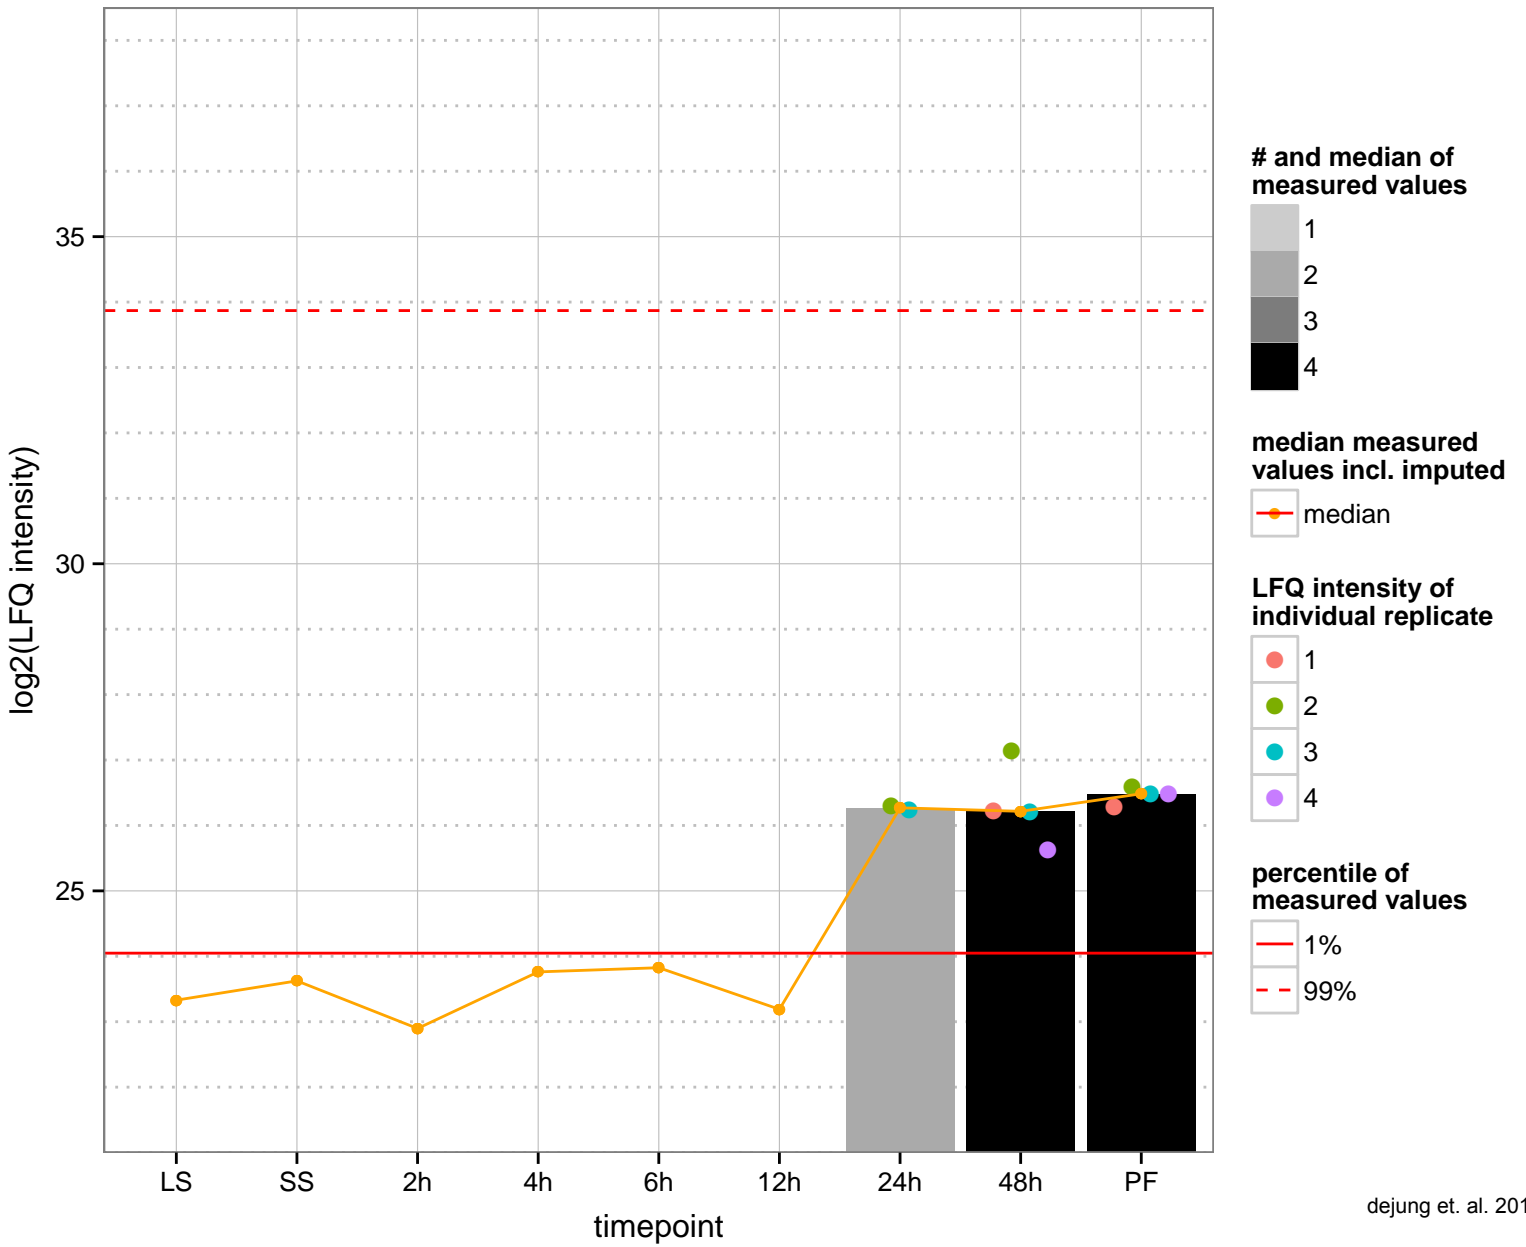

G5-interacting protein (G5-IP)  
 Tb927.11.14590  
 AGOF: protein binding  
 AGOC: cytoplasm, eukaryotic translation initiation factor 4F complex  
 AGOP: RNA capping  
 PGO: null  
 PGOC: null  
 PGOP: null

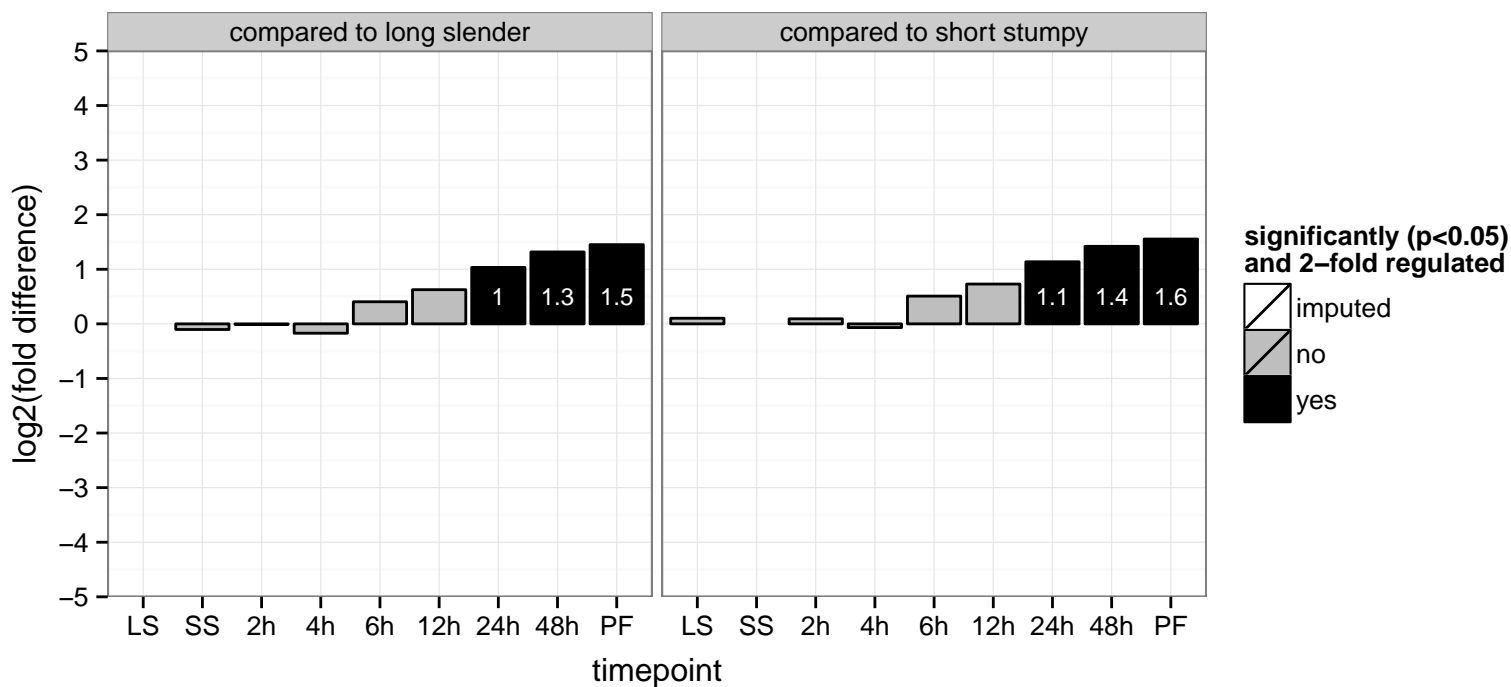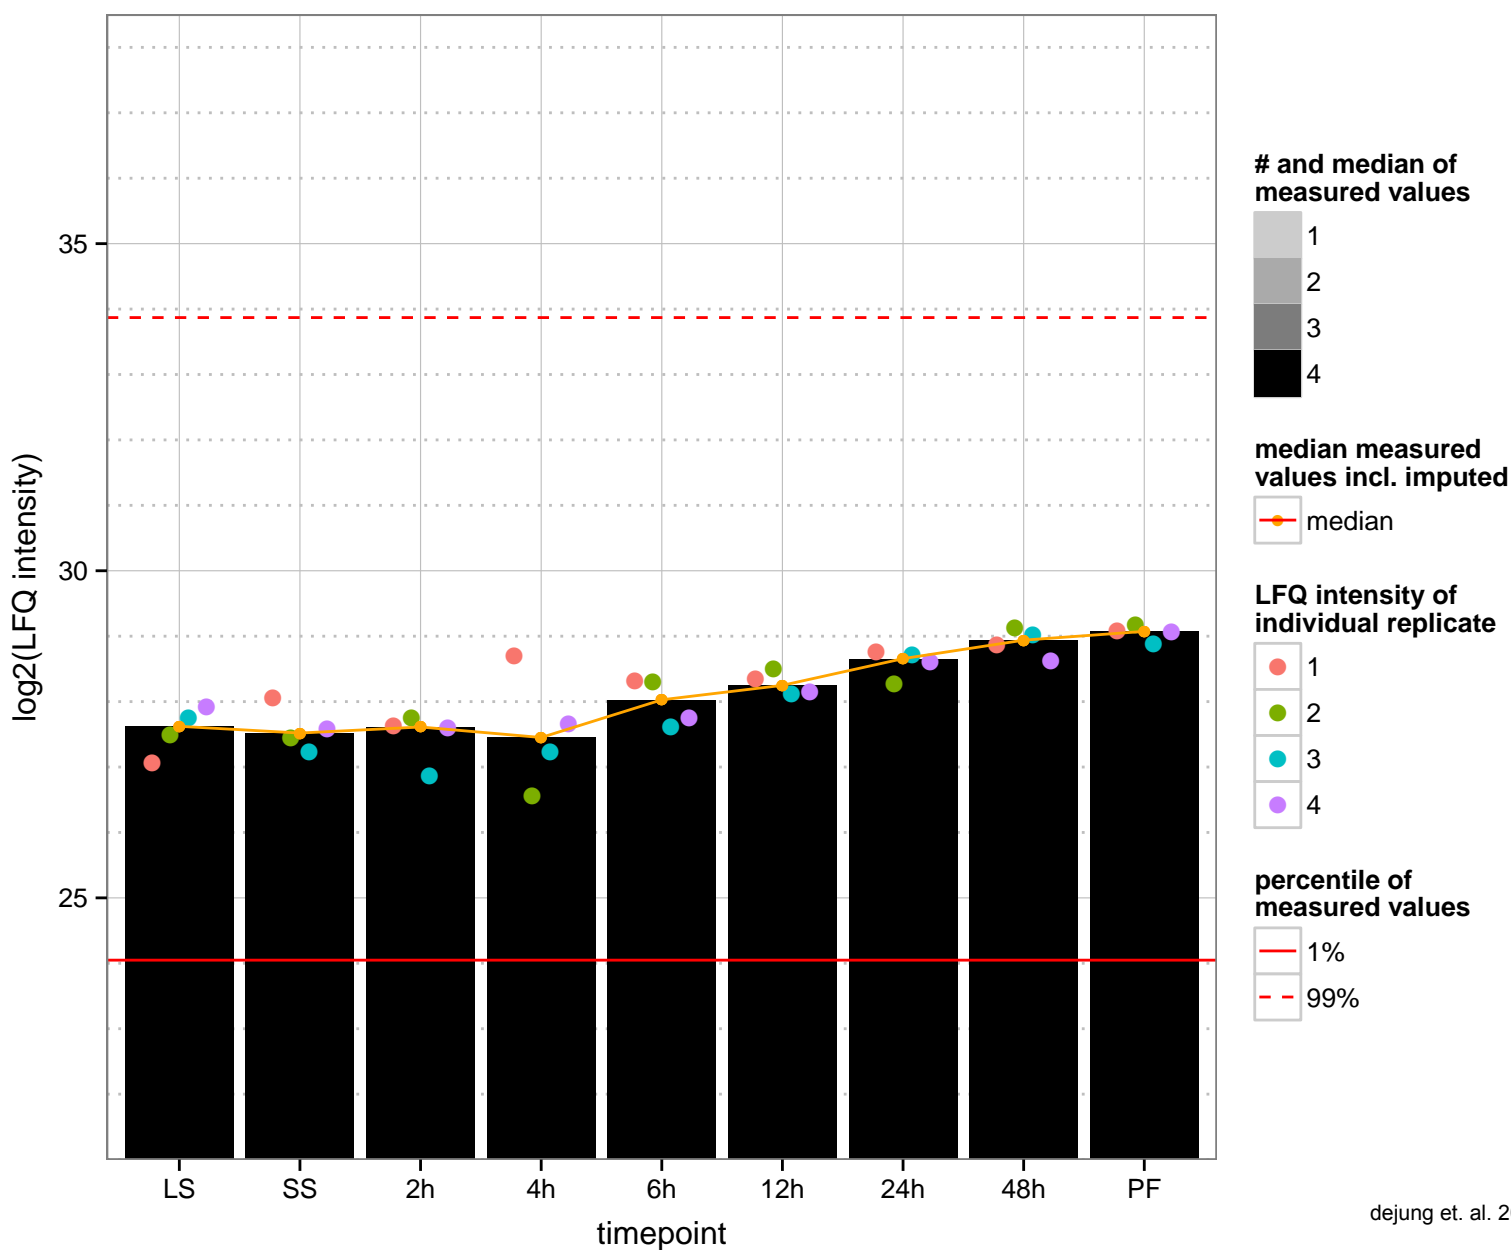

zinc finger protein 2 (ZFP2)  
 Tb927.11.14950  
 AGOF: RNA binding, nucleic acid binding, zinc ion binding  
 AGOC: cytoplasm  
 AGOP: cell differentiation, microtubule polymerization  
 PGO: nucleic acid binding, protein binding, zinc ion binding  
 PGO: null  
 PGO: null

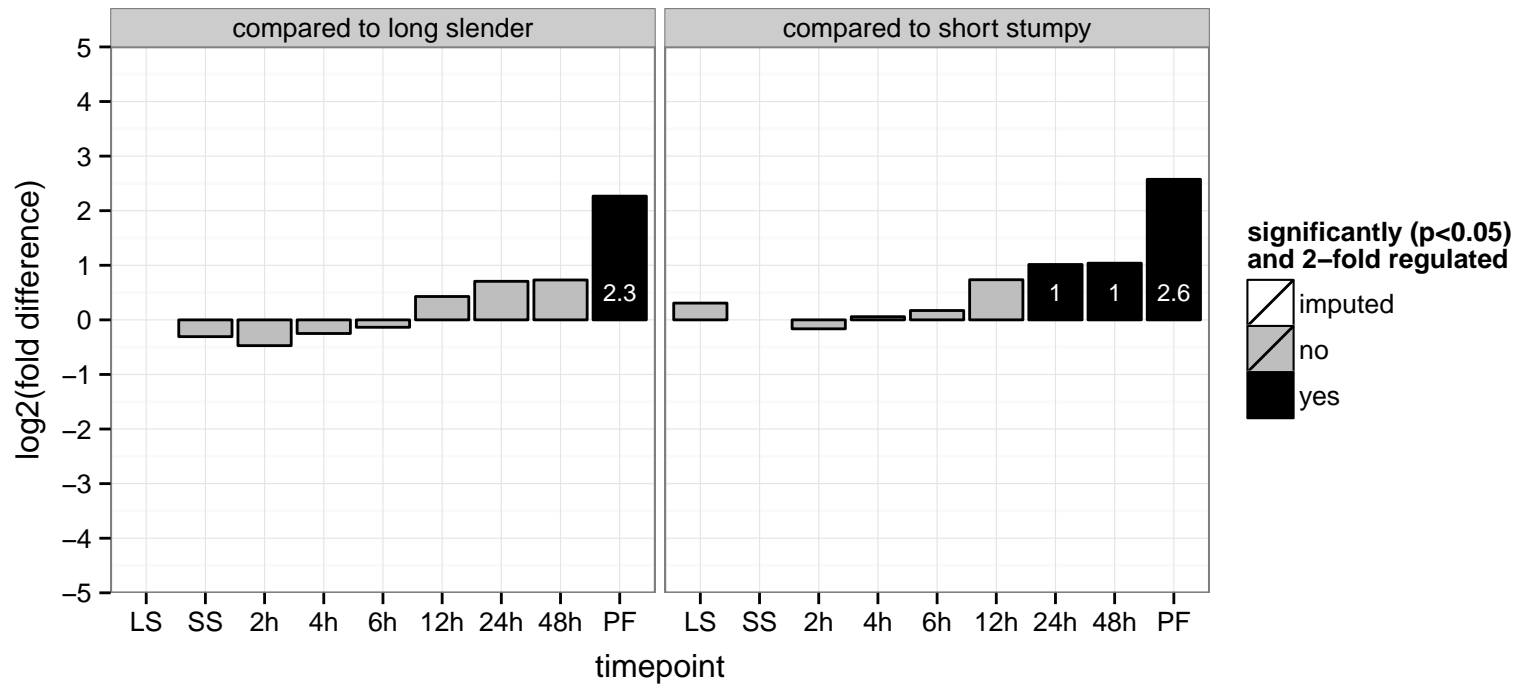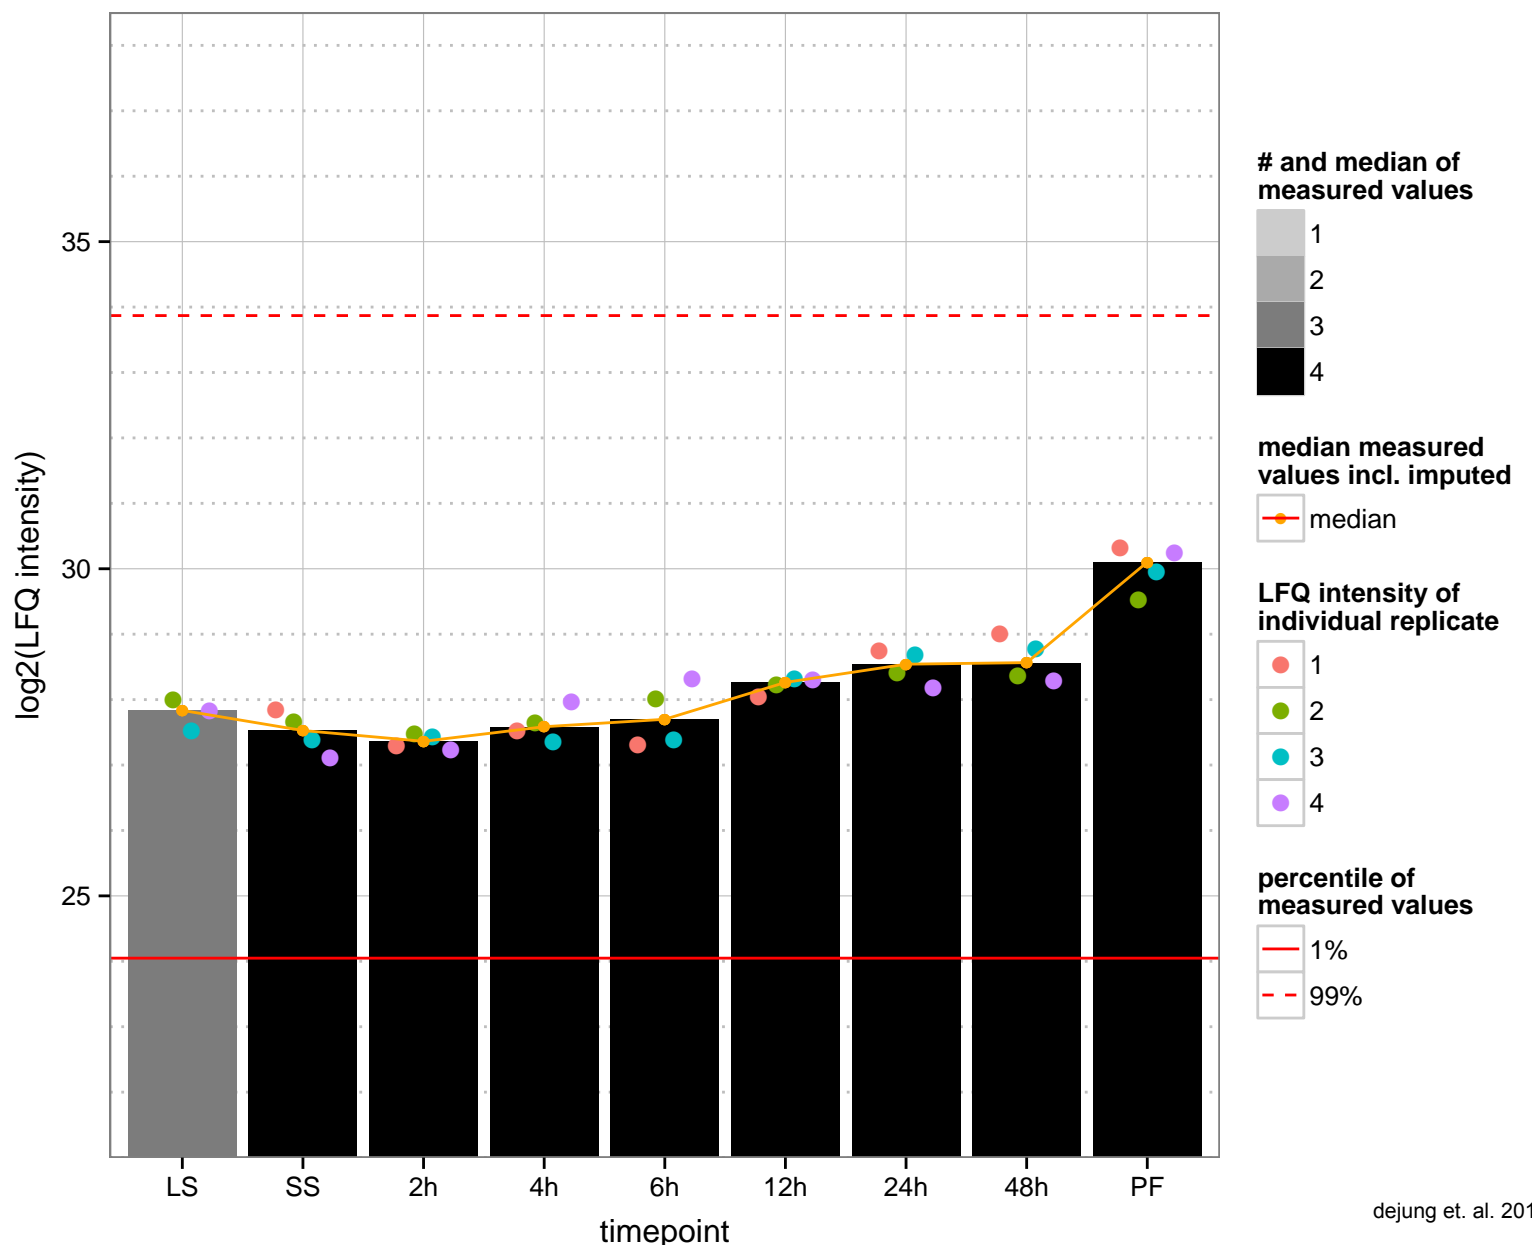

hypothetical protein, conserved  
 Tb927.11.15500  
 AGOF: null  
 AGOC: mitochondrion  
 AGOP: null  
 PGO: null  
 PGOC: null  
 PGOP: null

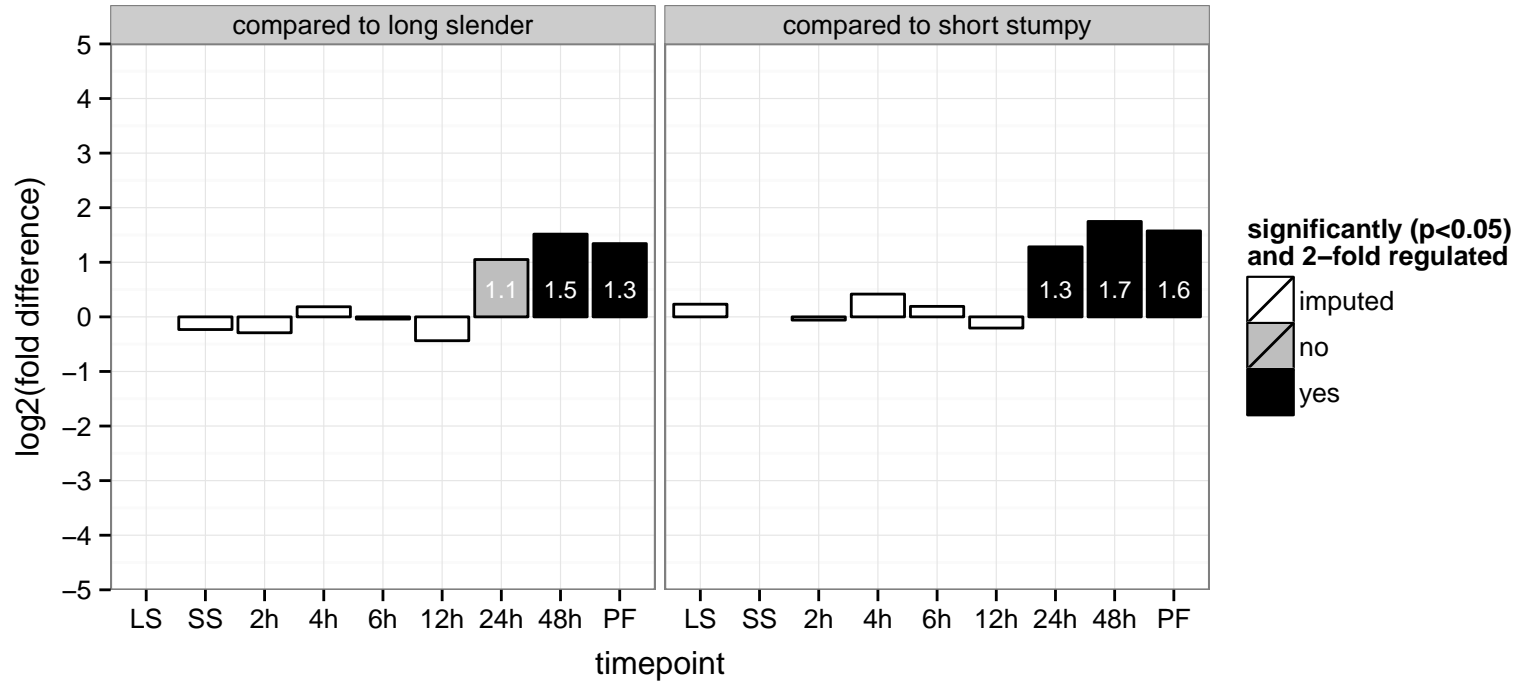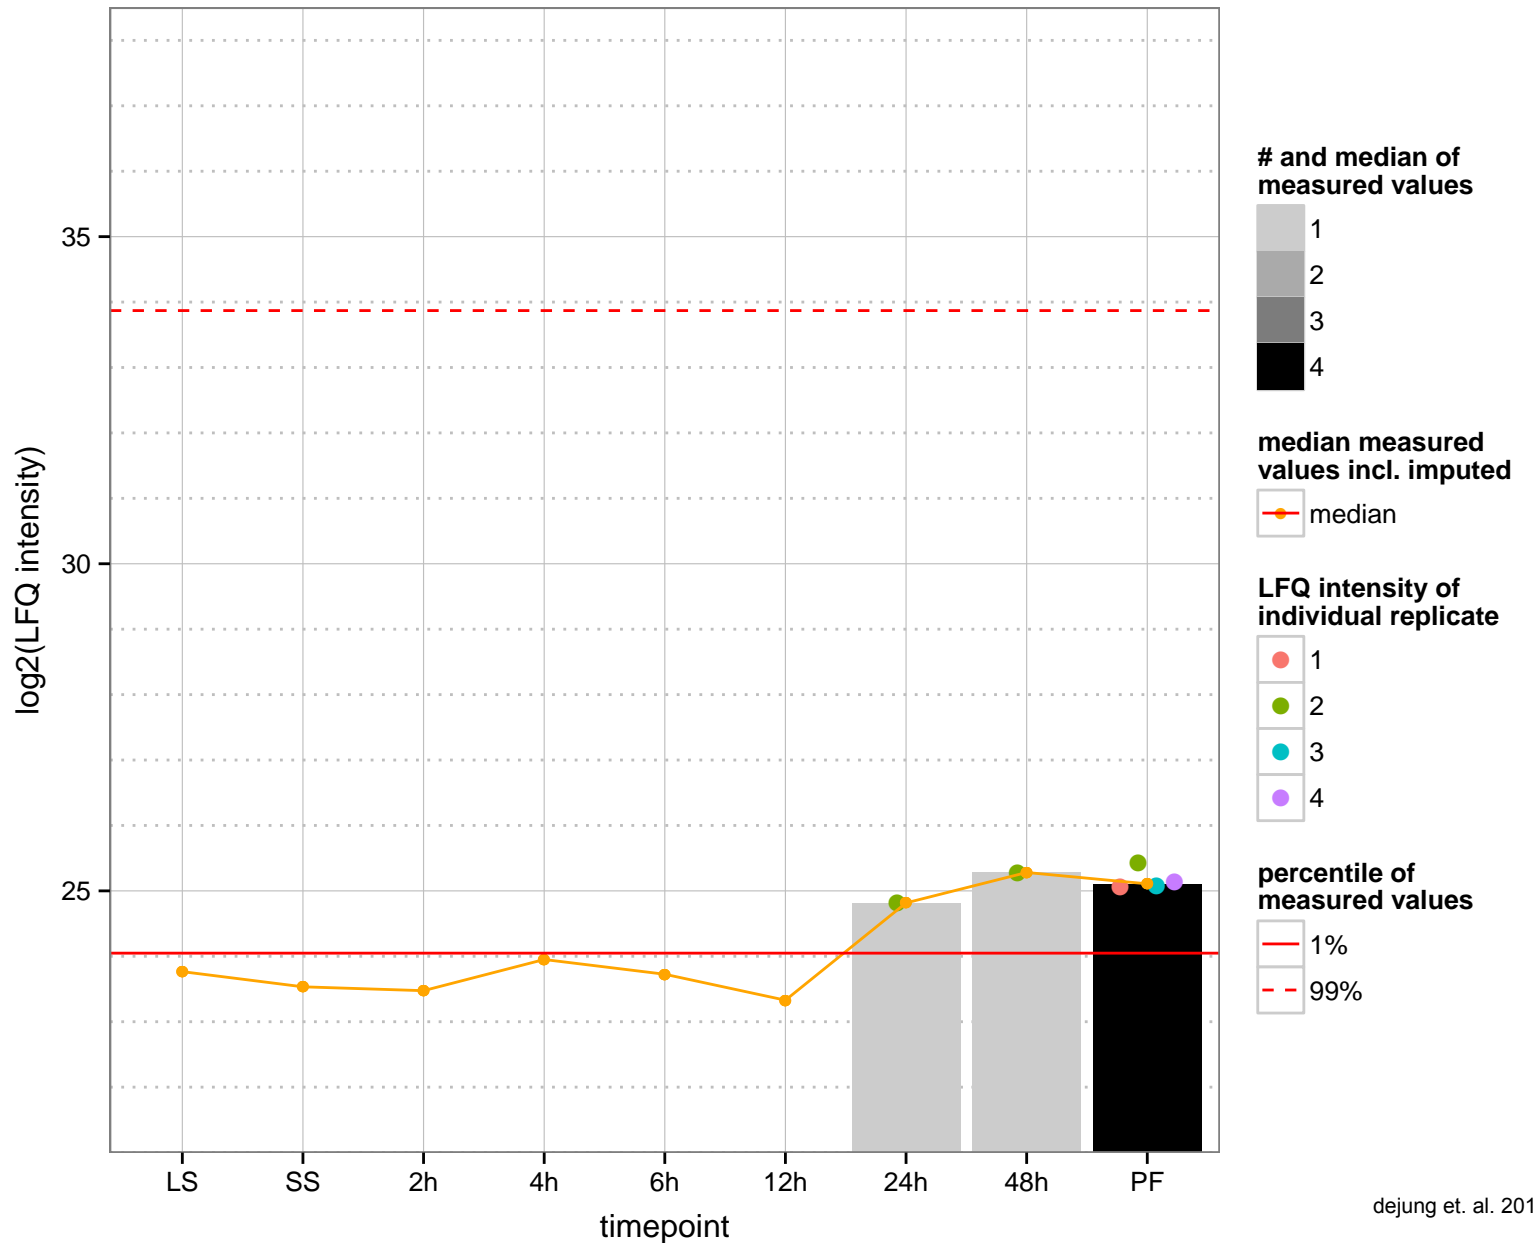

hypothetical protein, conserved  
 Tb927.11.15800  
 AGOF: null  
 AGOC: null  
 AGOP: null  
 PGO: protein binding  
 PGO: null  
 PGO: null

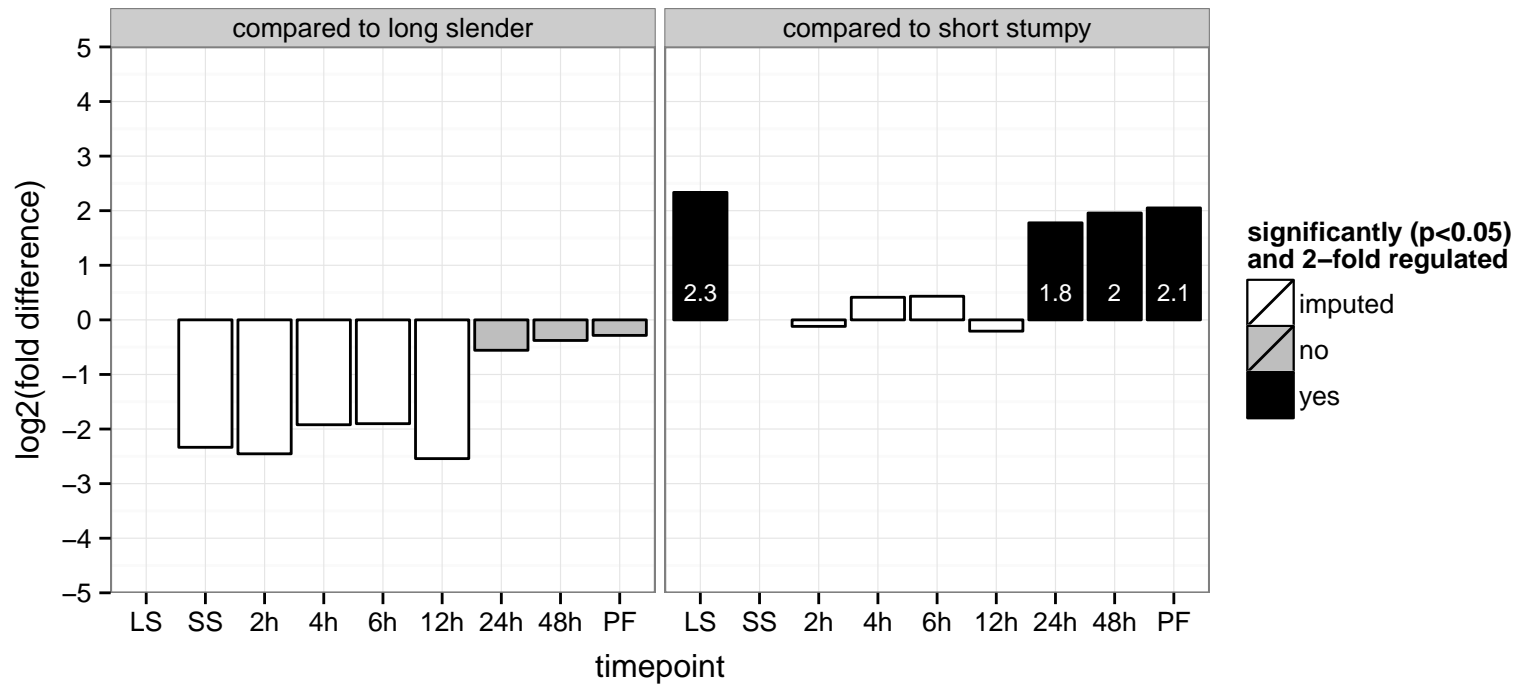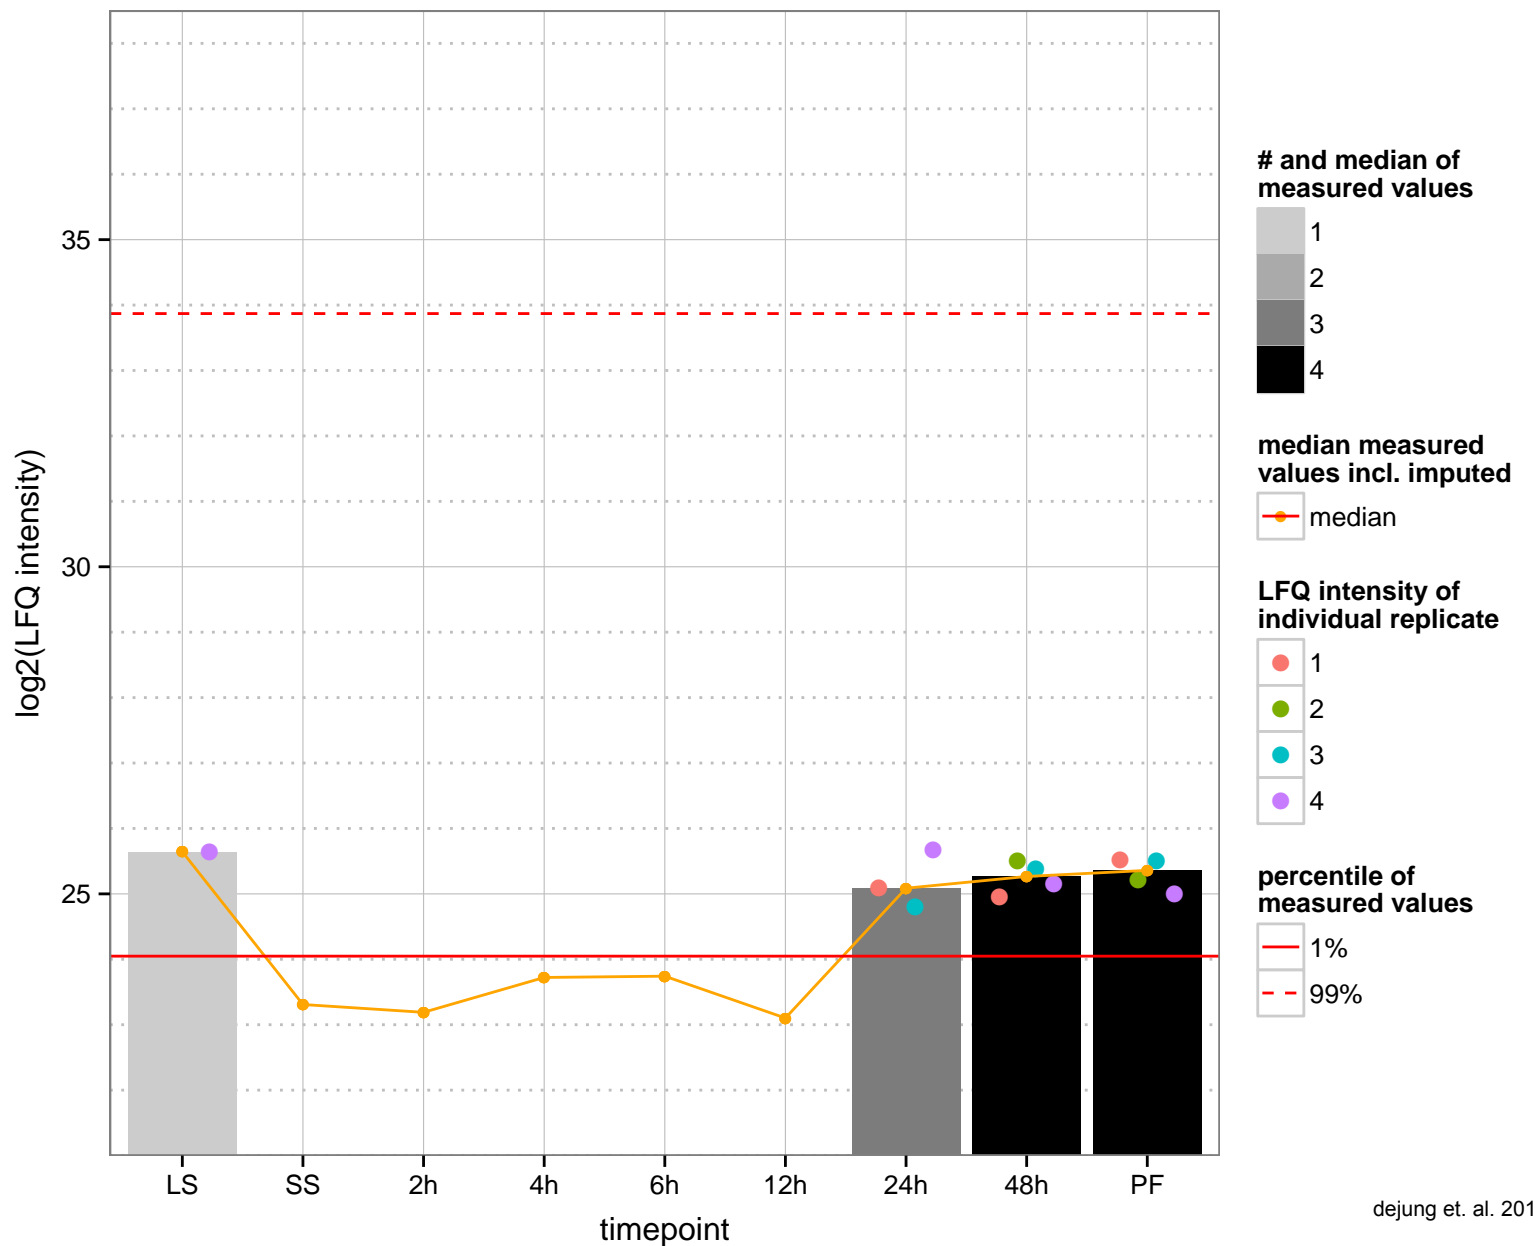

ATP binding protein-like protein  
 Tb927.11.16160  
 AGOF: glutathione-disulfide reductase activity  
 AGOC: null  
 AGOP: oxidation-reduction process  
 PGO: null  
 PGO: null  
 PGO: null

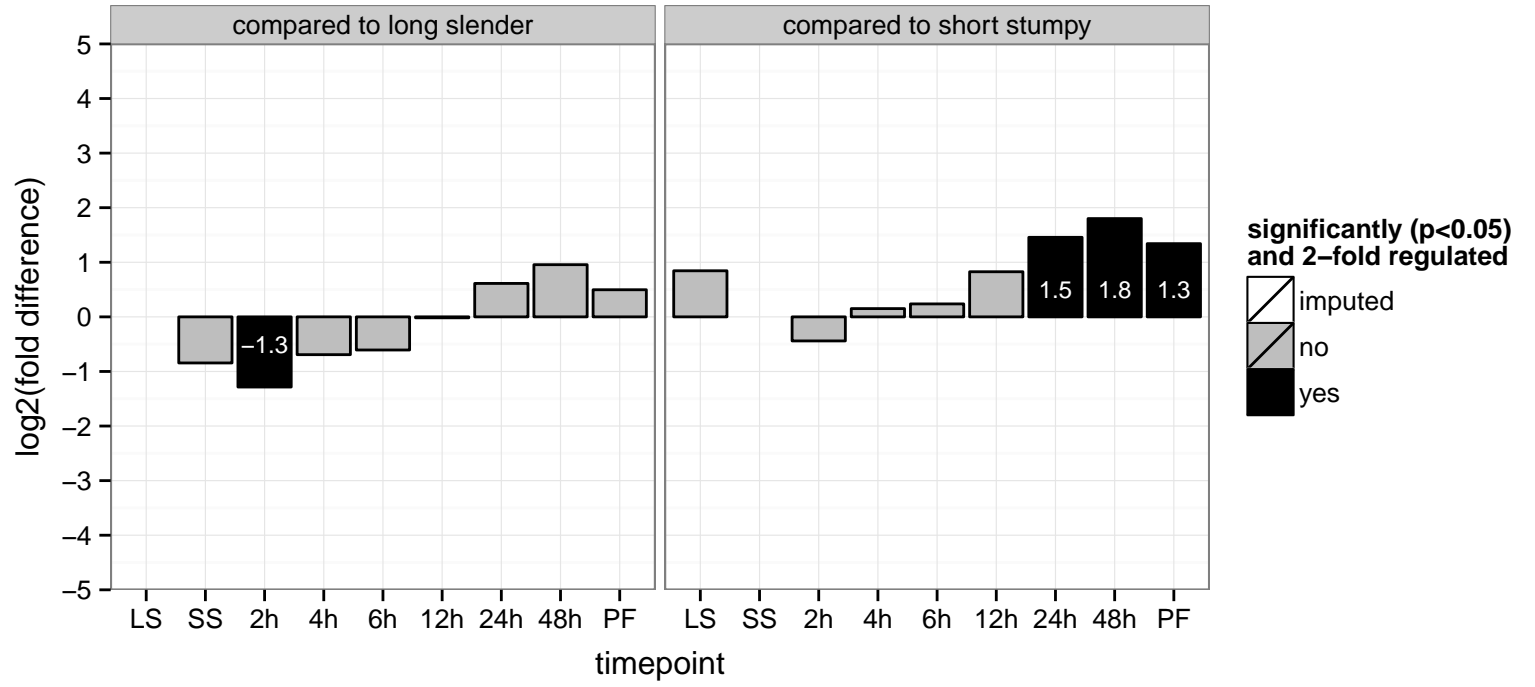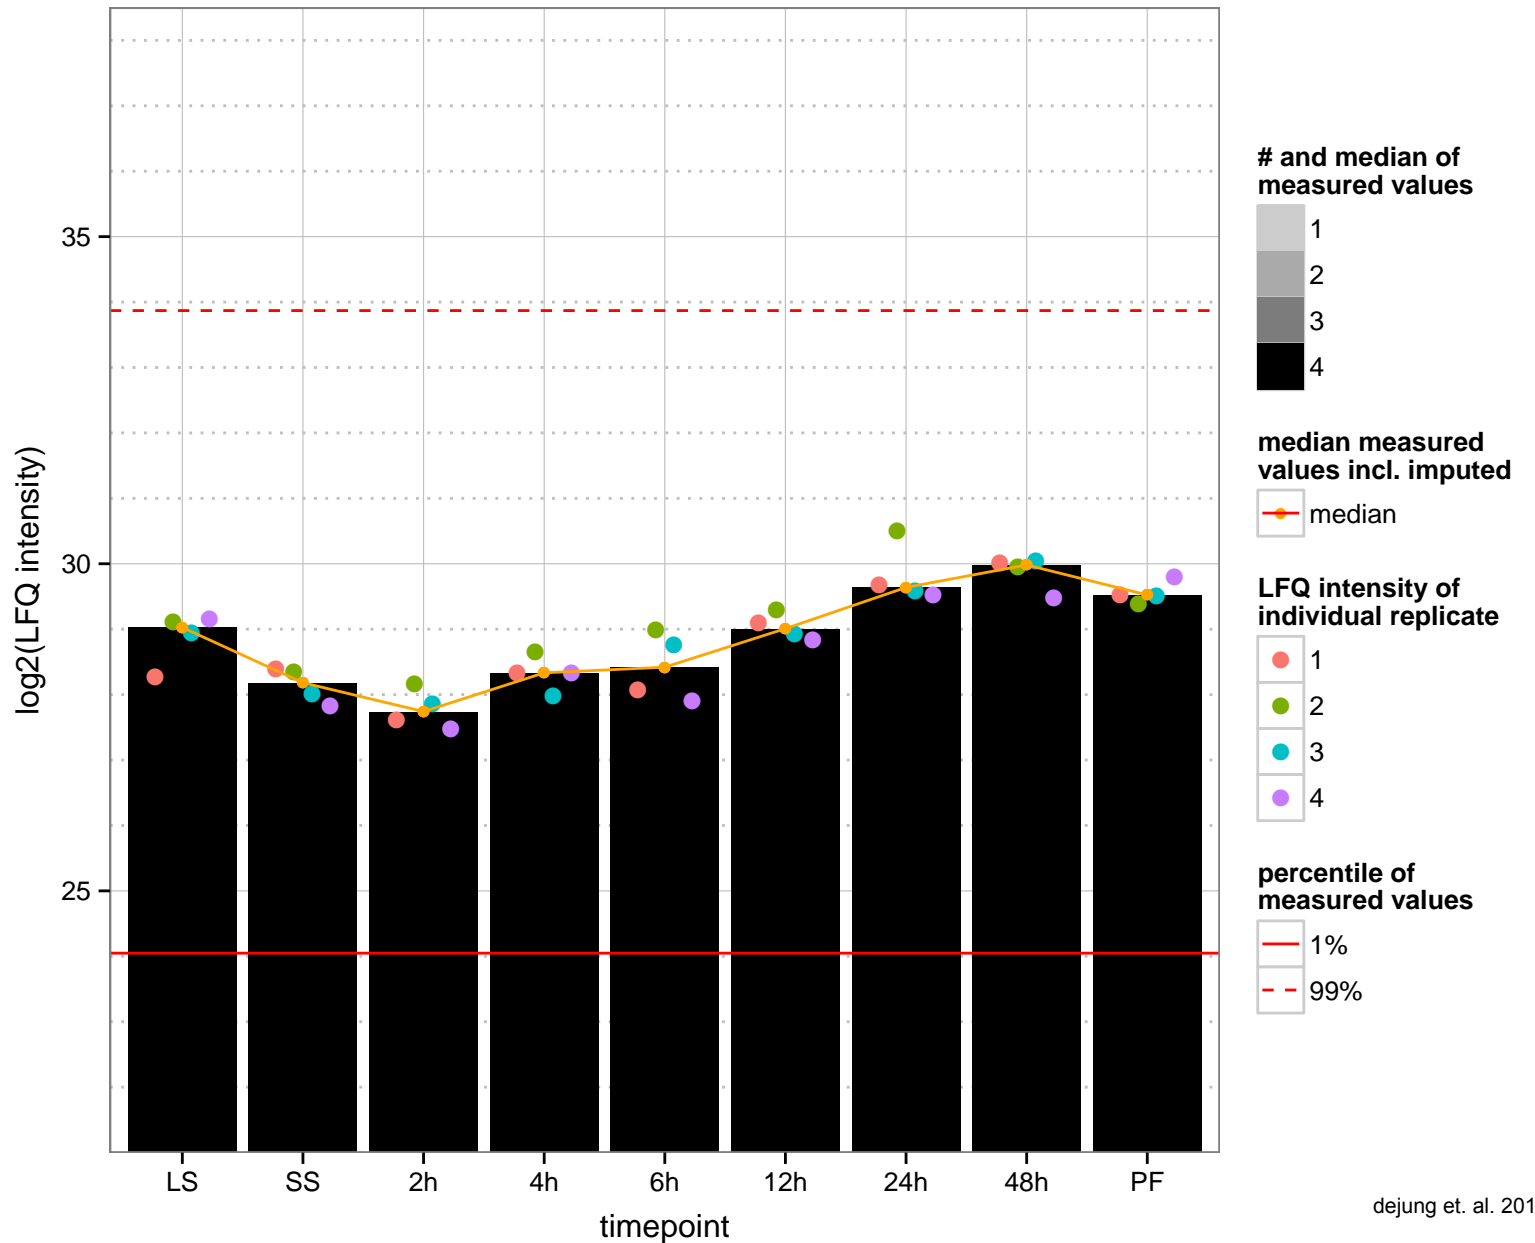



enoyl-CoA hydratase/isomerase family protein, putative  
 Tb927.11.16480  
 AGOF: catalytic activity  
 AGOC: mitochondrion  
 AGOP: metabolic process  
 PGOF: catalytic activity  
 PGO: null  
 PGOP: metabolic process

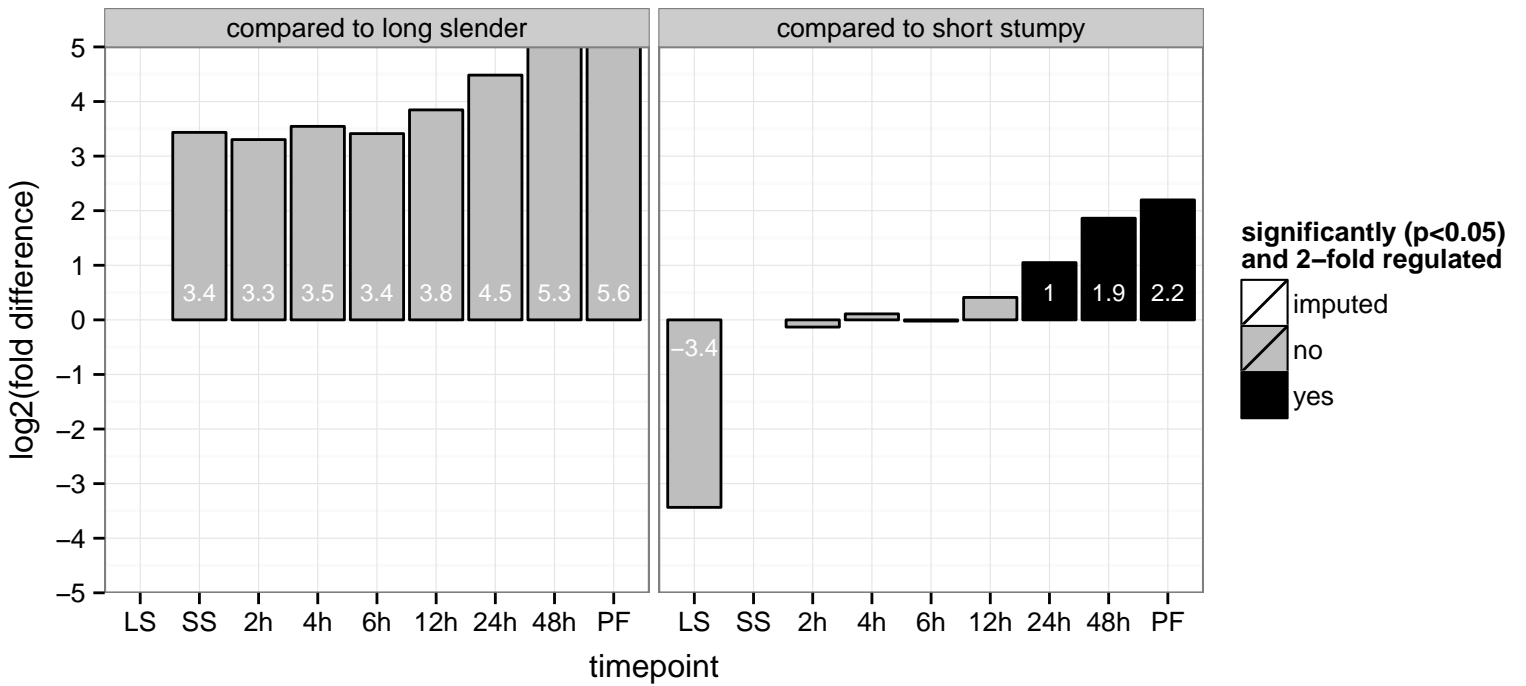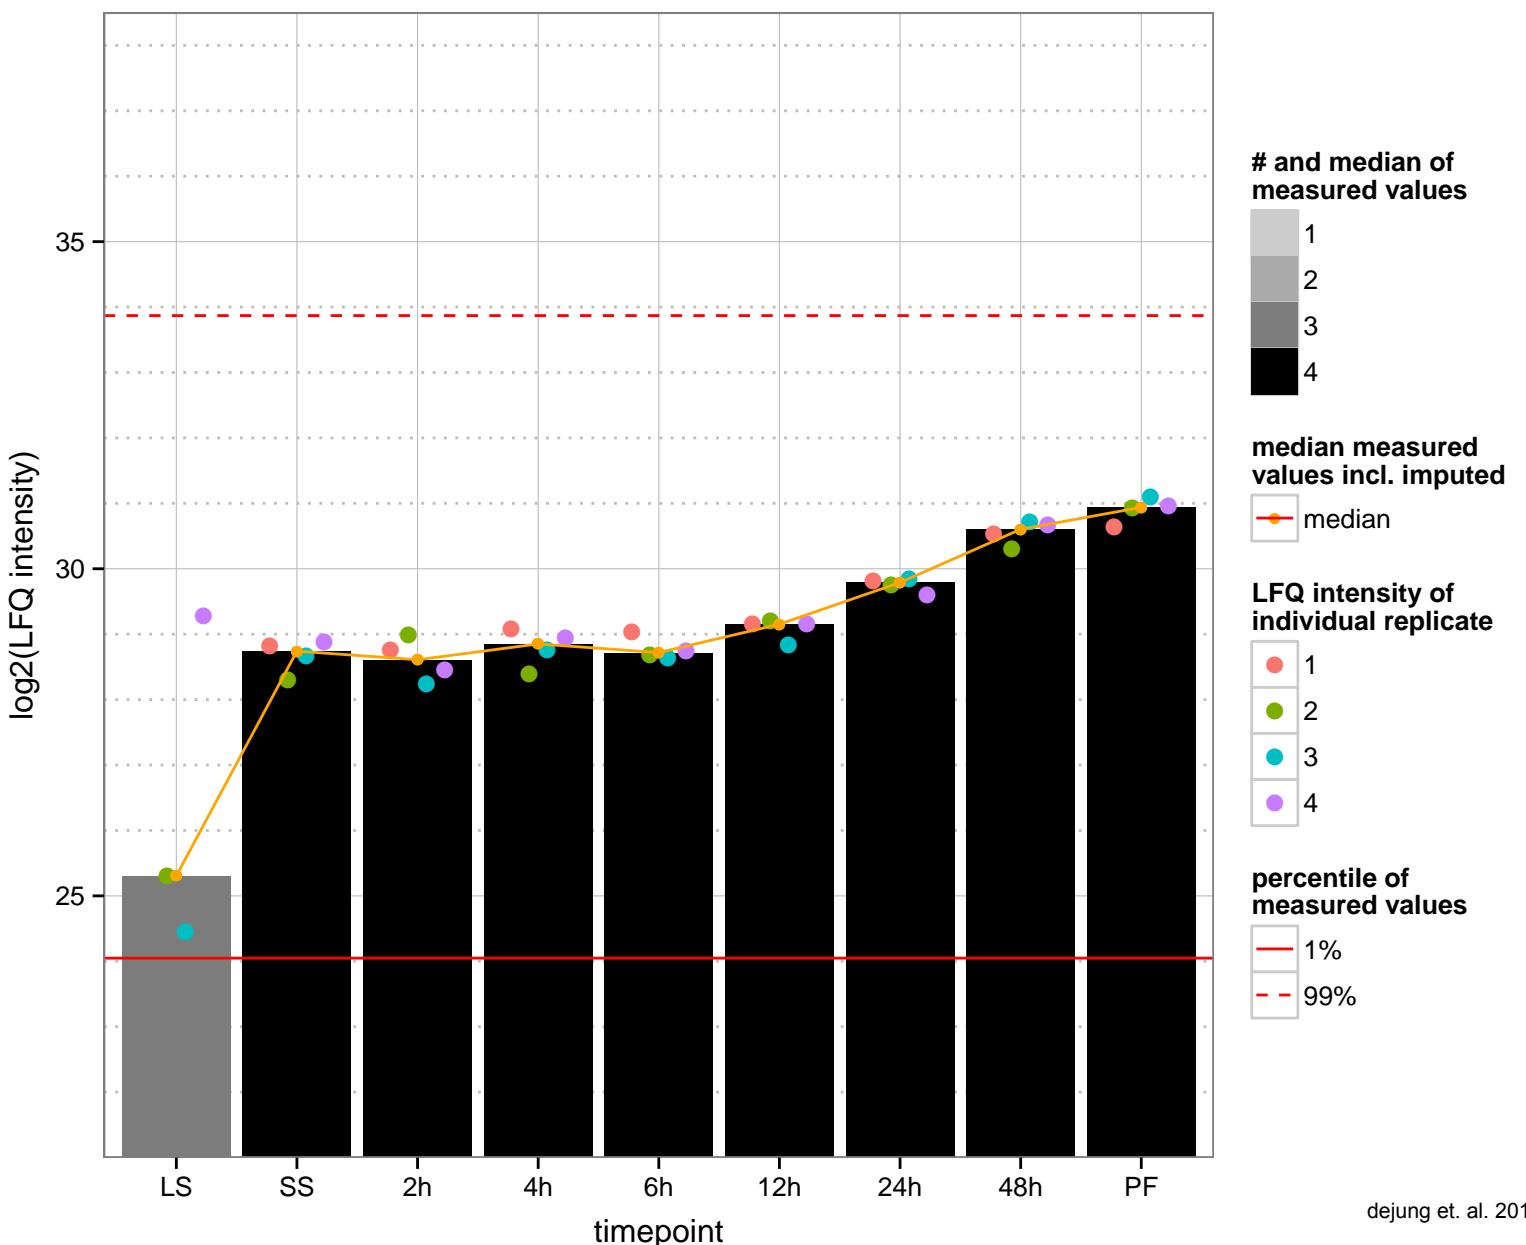

NADH dehydrogenase subunit NI8M, putative, NADH-ubiquinone oxidoreductase chain NI8M  
 Tb927.11.16870  
 AGOF: null  
 AGOC: mitochondrion  
 AGOP: mitochondrial electron transport, NADH to ubiquinone  
 PGO: null  
 PGO: null  
 PGO: null

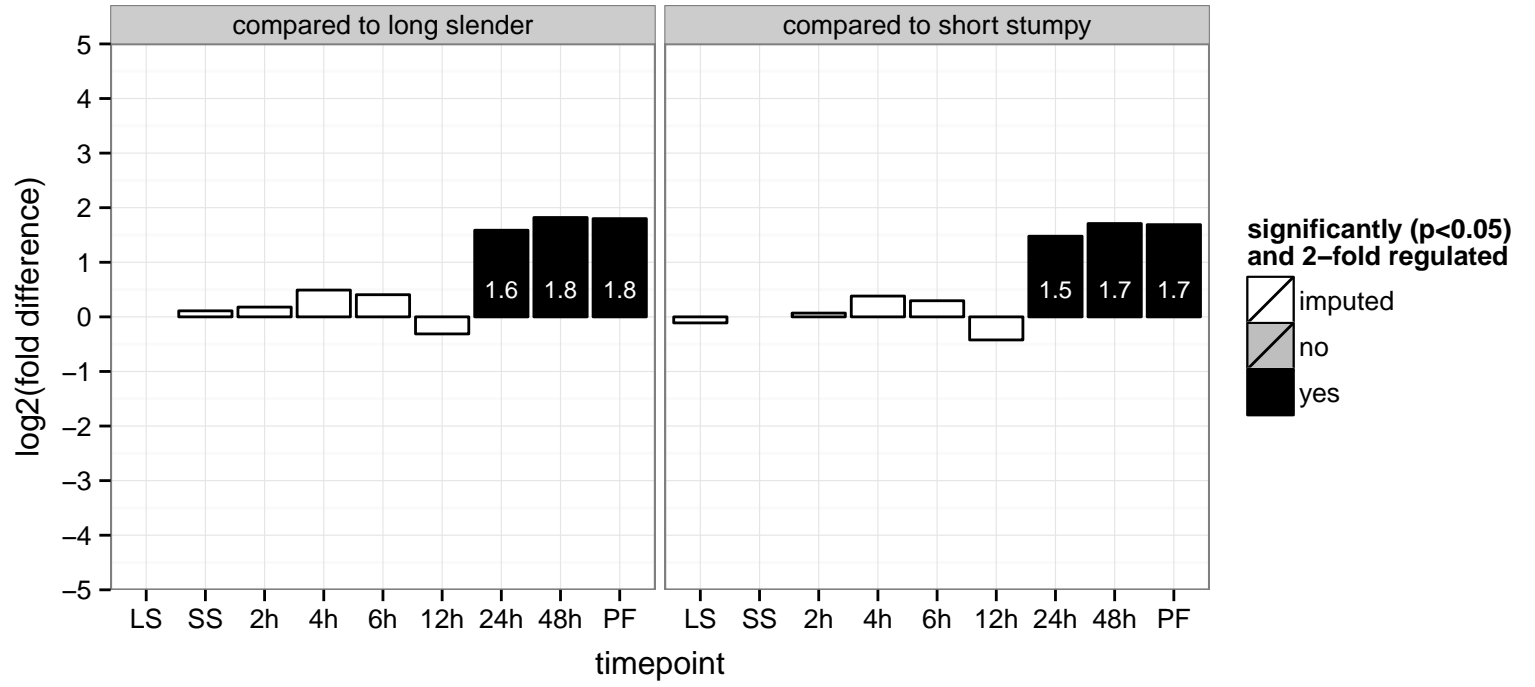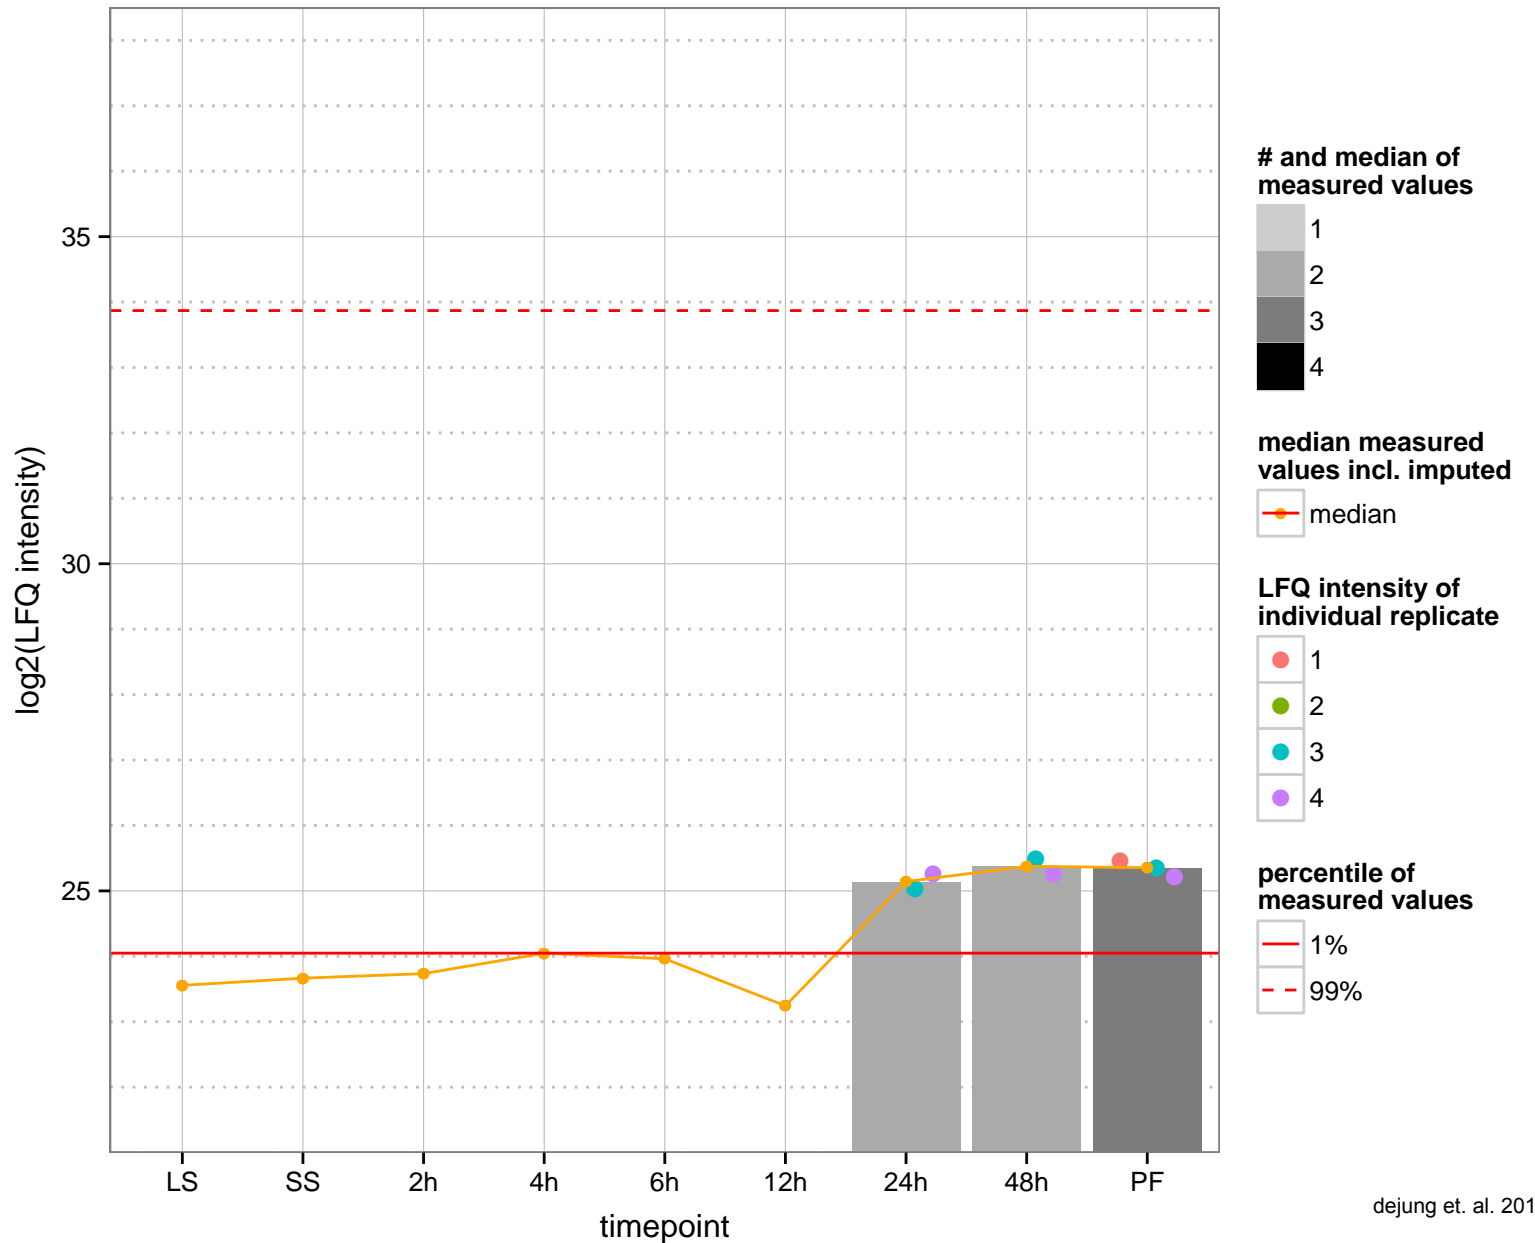

hypothetical protein, conserved  
 Tb927.11.16910  
 AGOF: null, GTP binding  
 AGOC: null, intracellular  
 AGOP: null  
 PGOF: GTP binding, protein binding  
 PGOC: null  
 PGOP: null

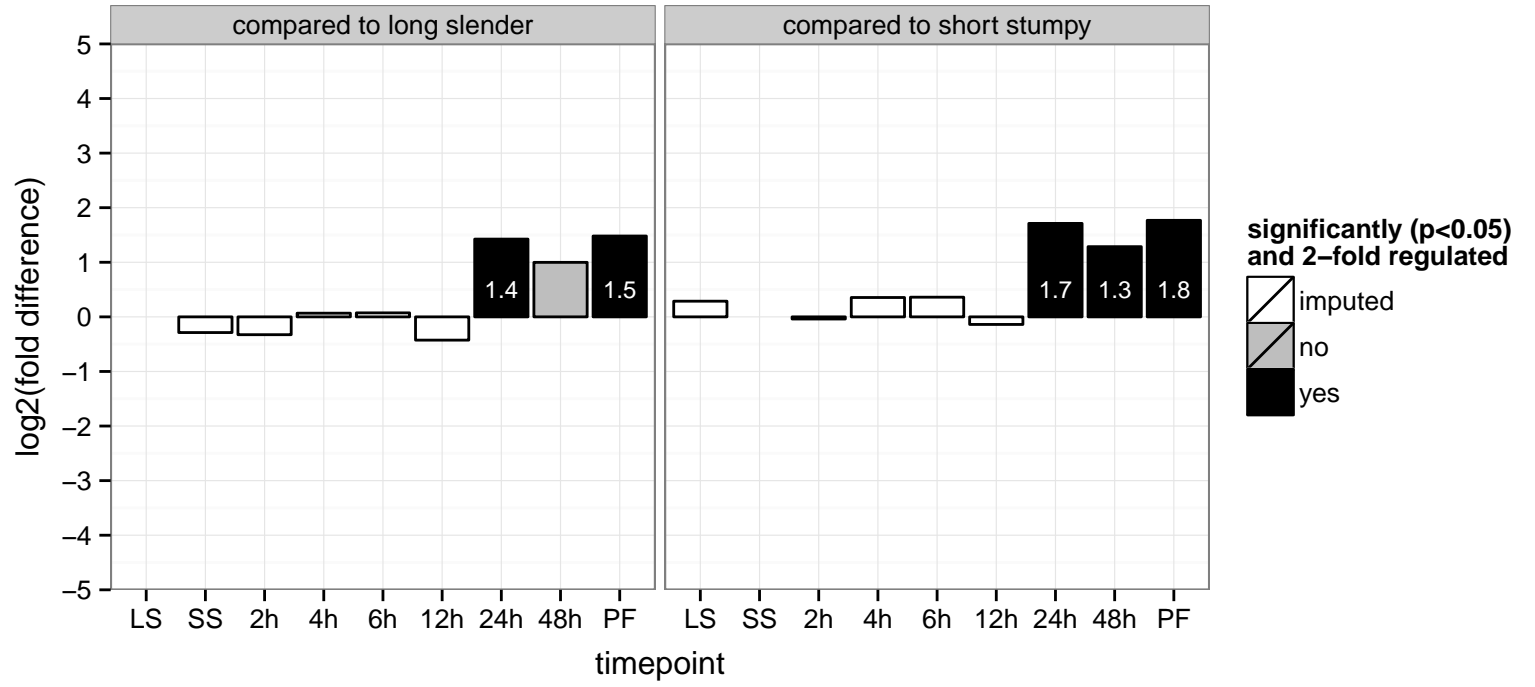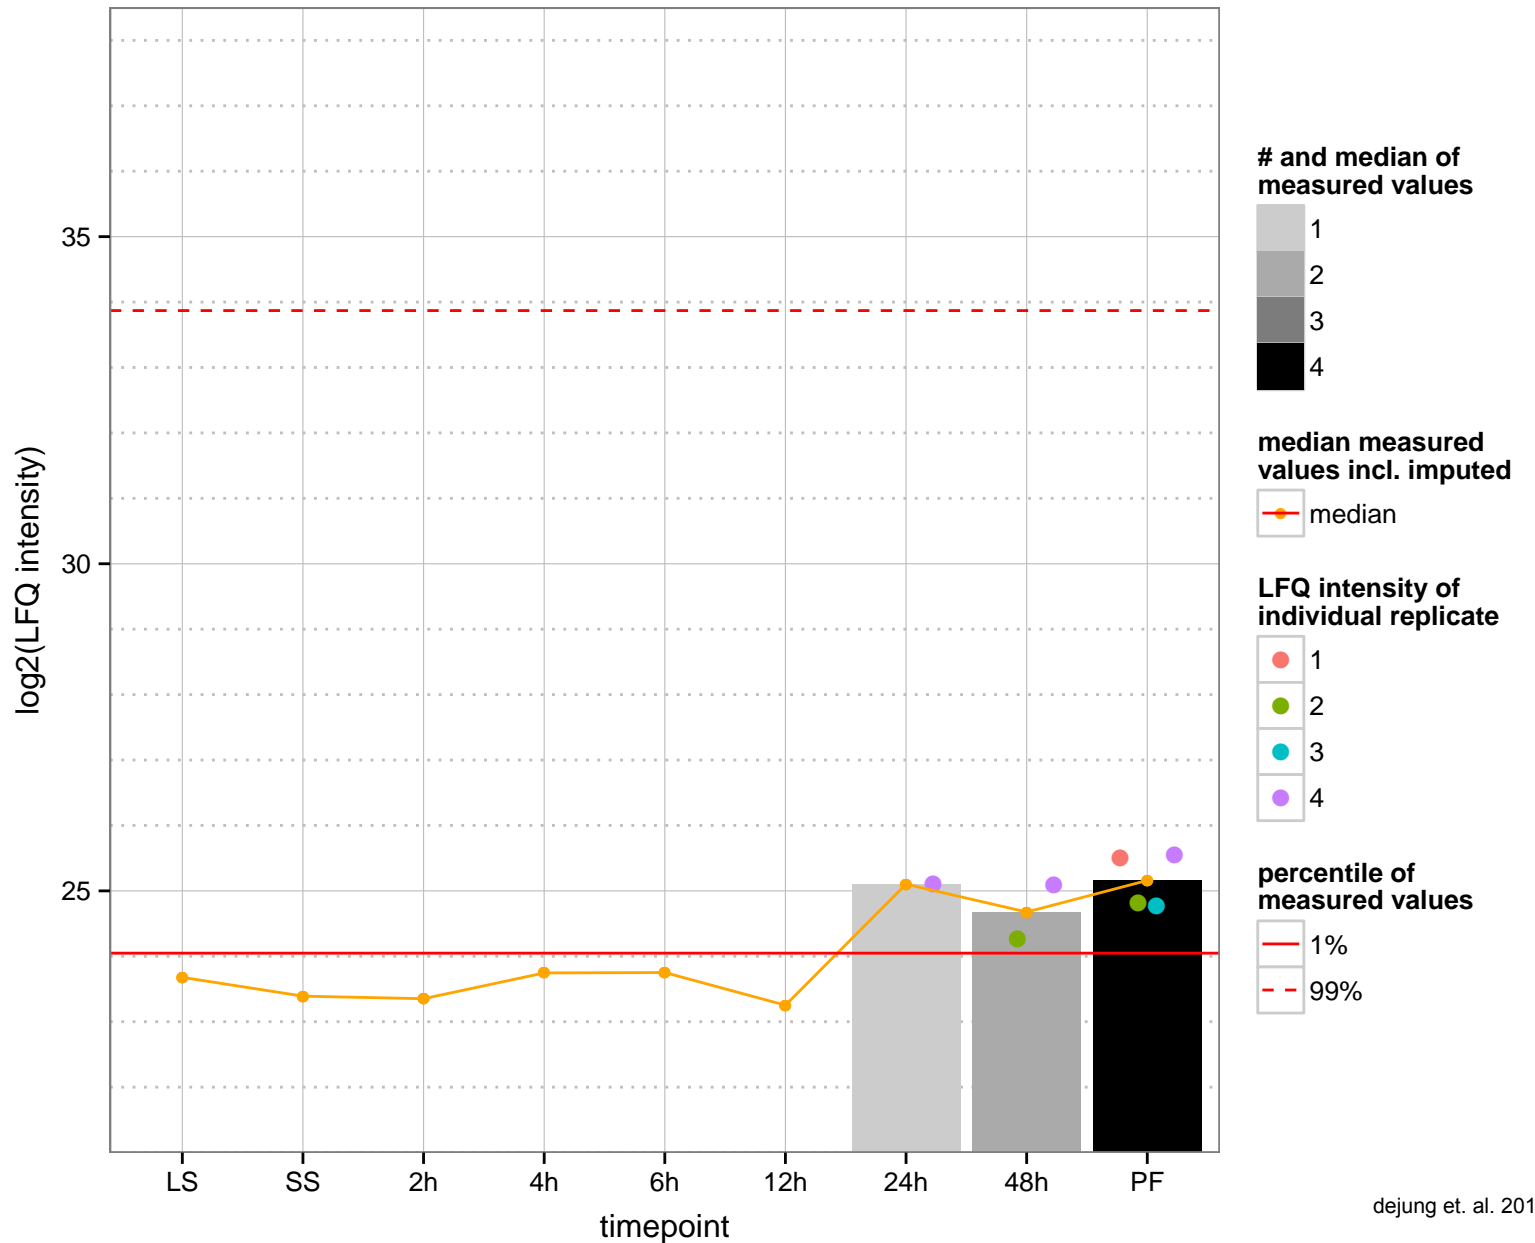

zinc finger protein family member, putative (ZC3H41)

Tb927.11.1980

AGOF: ATP binding, RNA binding, helicase activity, zinc ion binding

AGOC: null

AGOP: null

PGOF: ATP binding, helicase activity, nucleic acid binding, zinc ion binding

PGOC: null

PGOP: null

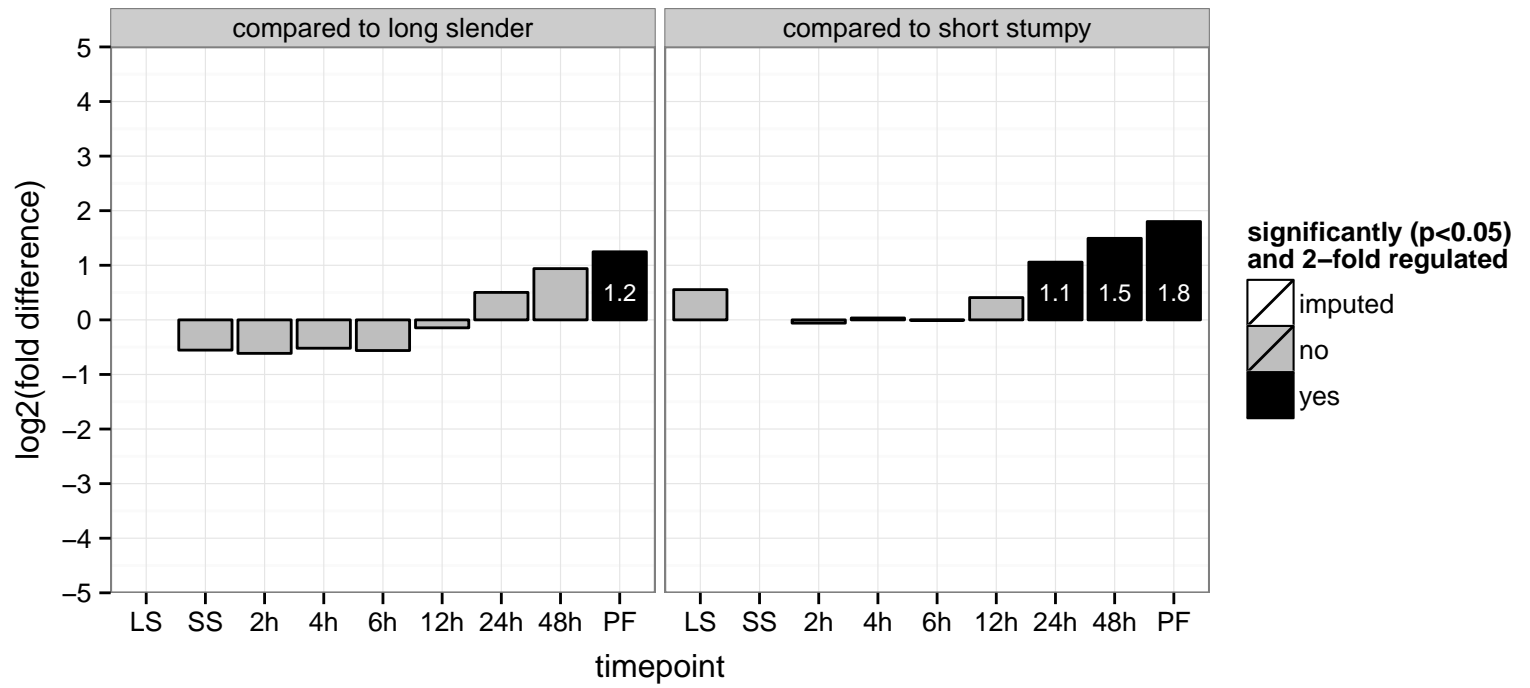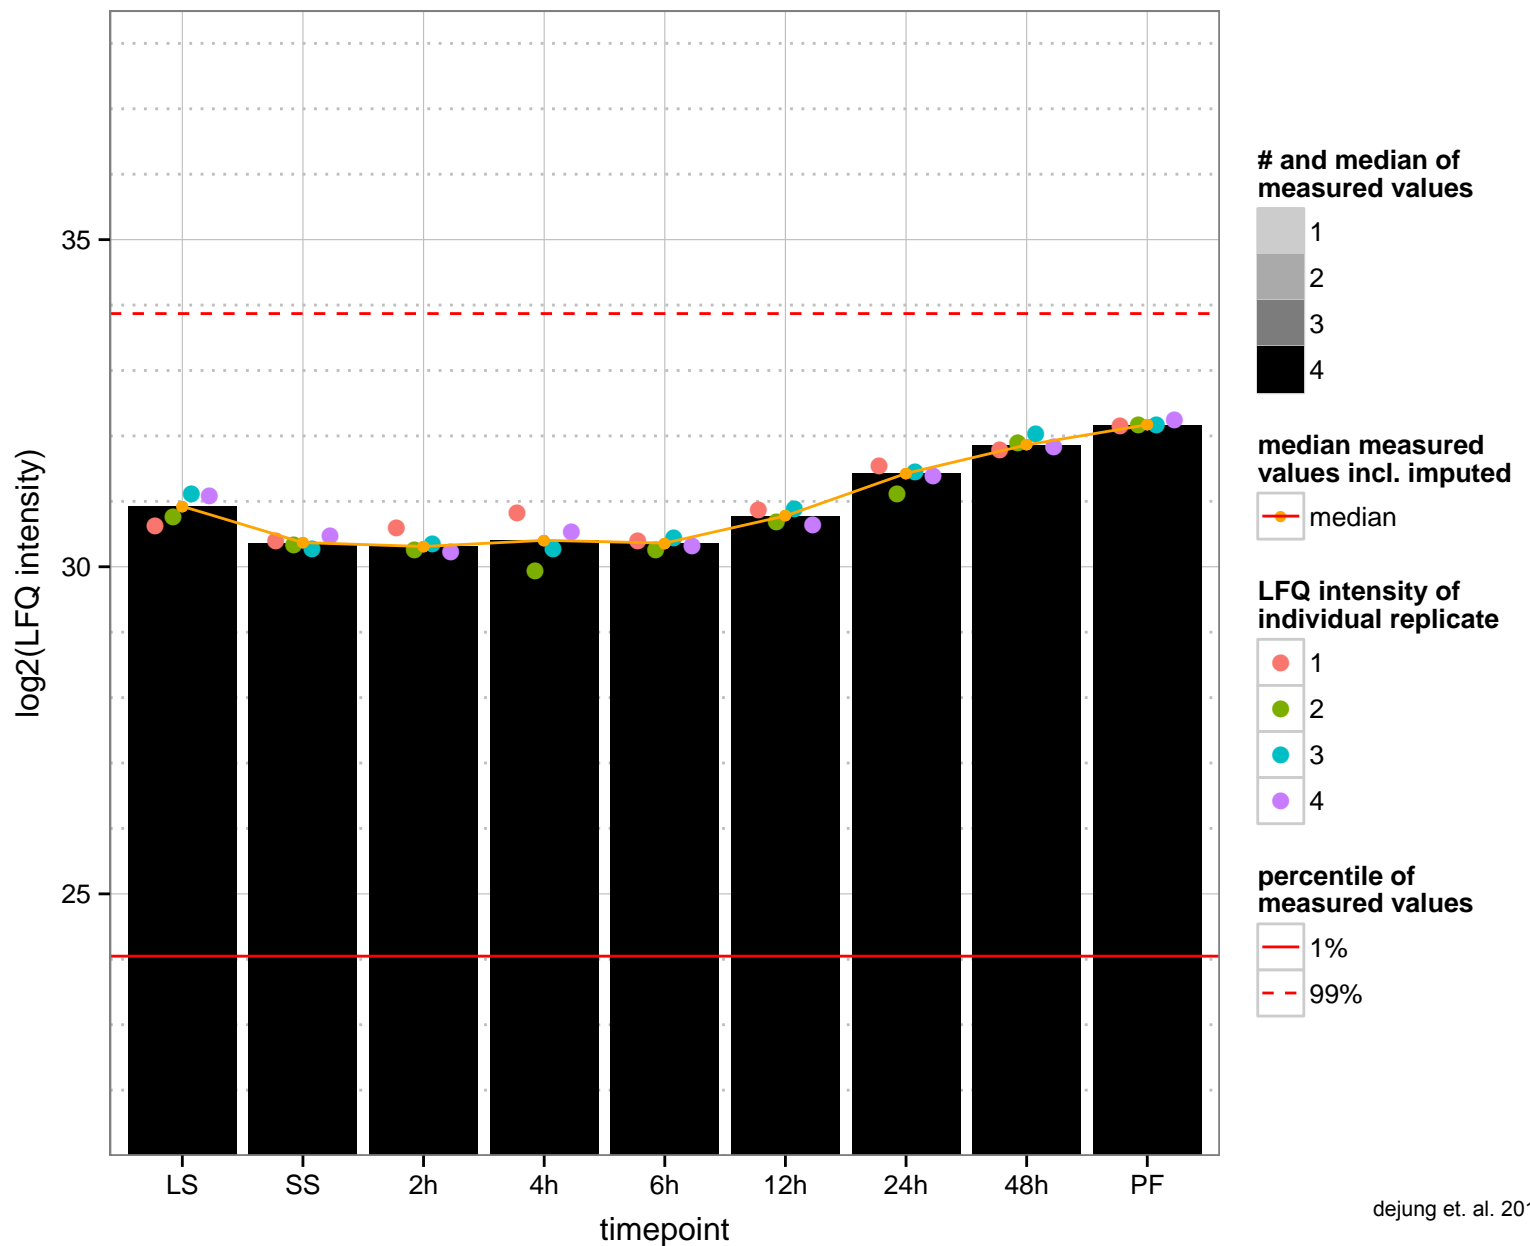

mitochondrial RNA binding complex 1 subunit, kinteoplast poly(A) polymerase complex 1 subunit, mitochondrial edited mRNA  
 Tb927.11.2530  
 AGOF: RNA binding  
 AGOC: mitochondrion  
 AGOP: RNA polyadenylation, mRNA stabilization  
 PGO: null  
 PGO: null  
 PGO: null

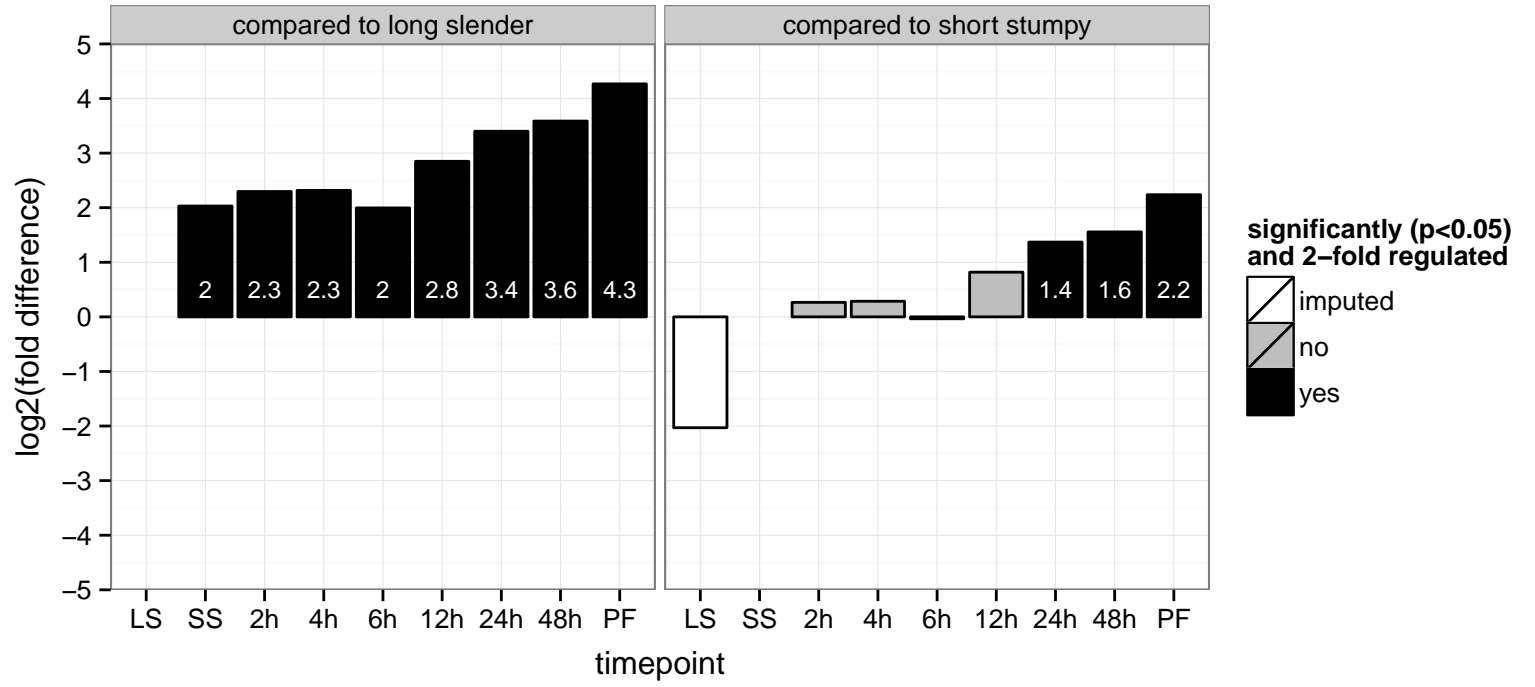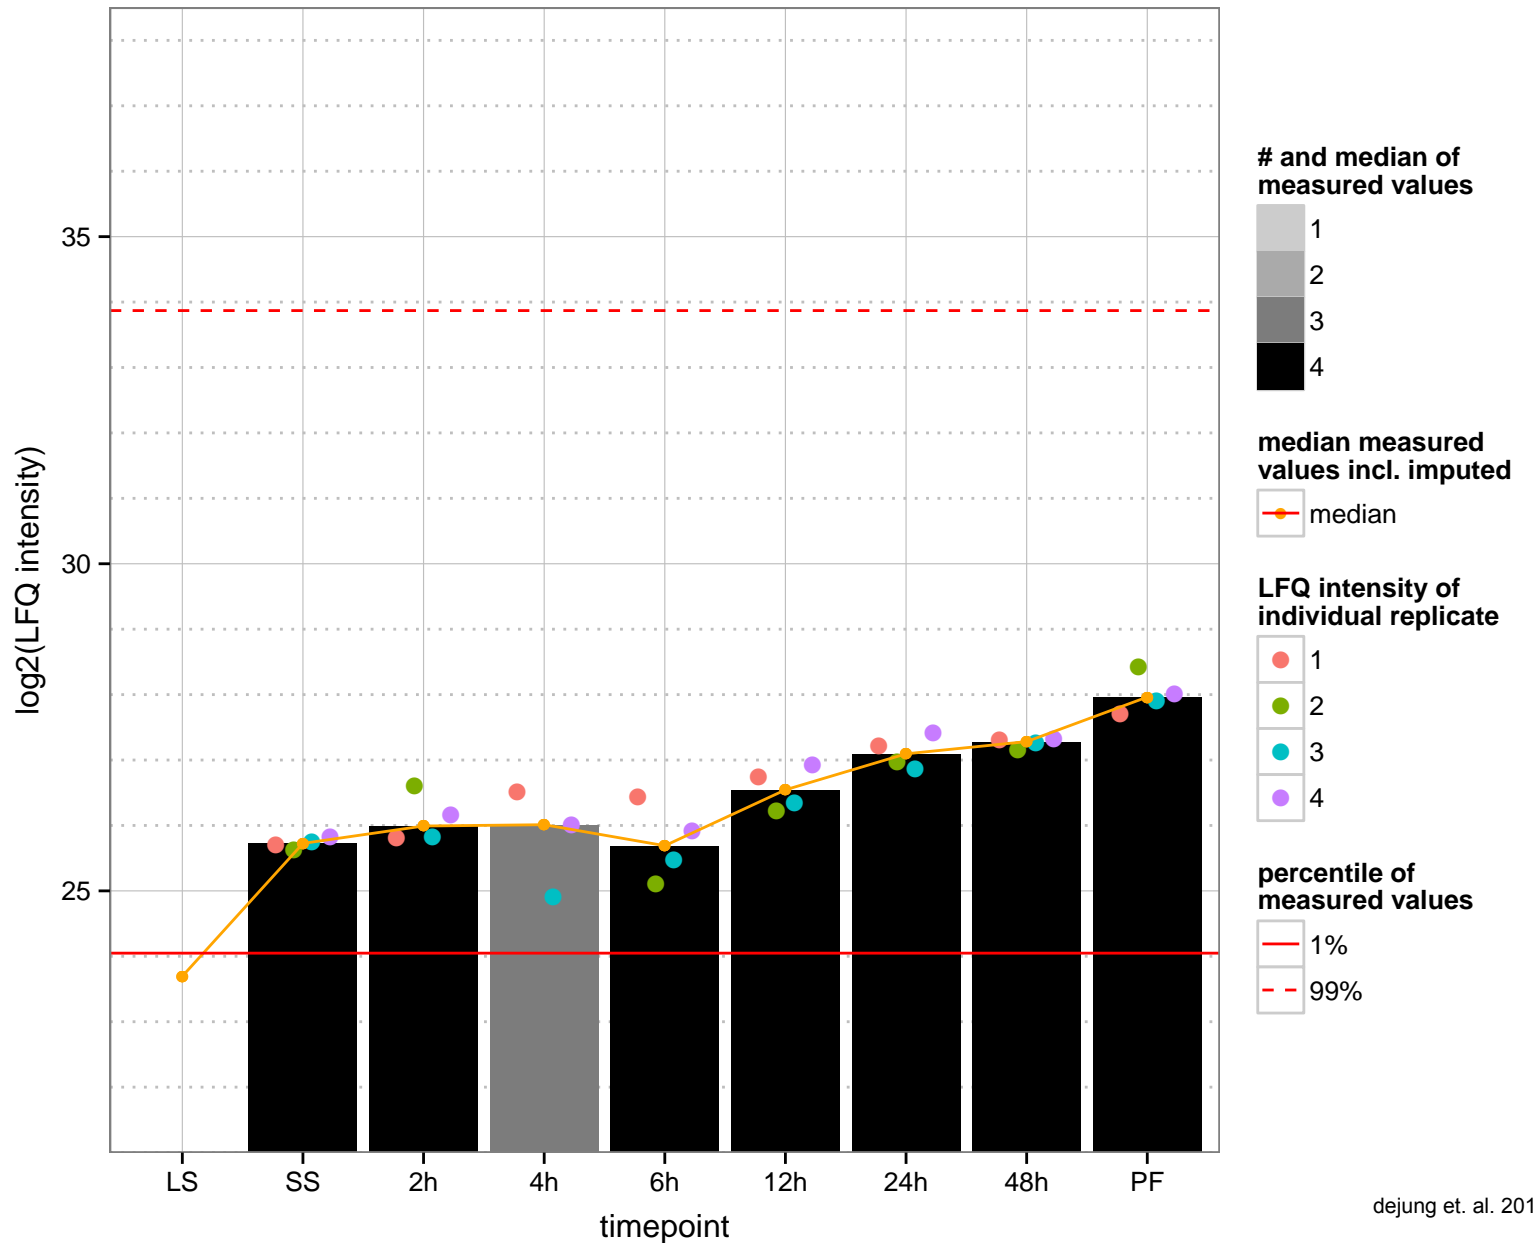

hypothetical protein, conserved  
 Tb927.11.2930  
 AGOF: null  
 AGOC: mitochondrion  
 AGOP: null  
 PGO: null  
 PGOC: null  
 PGOP: null

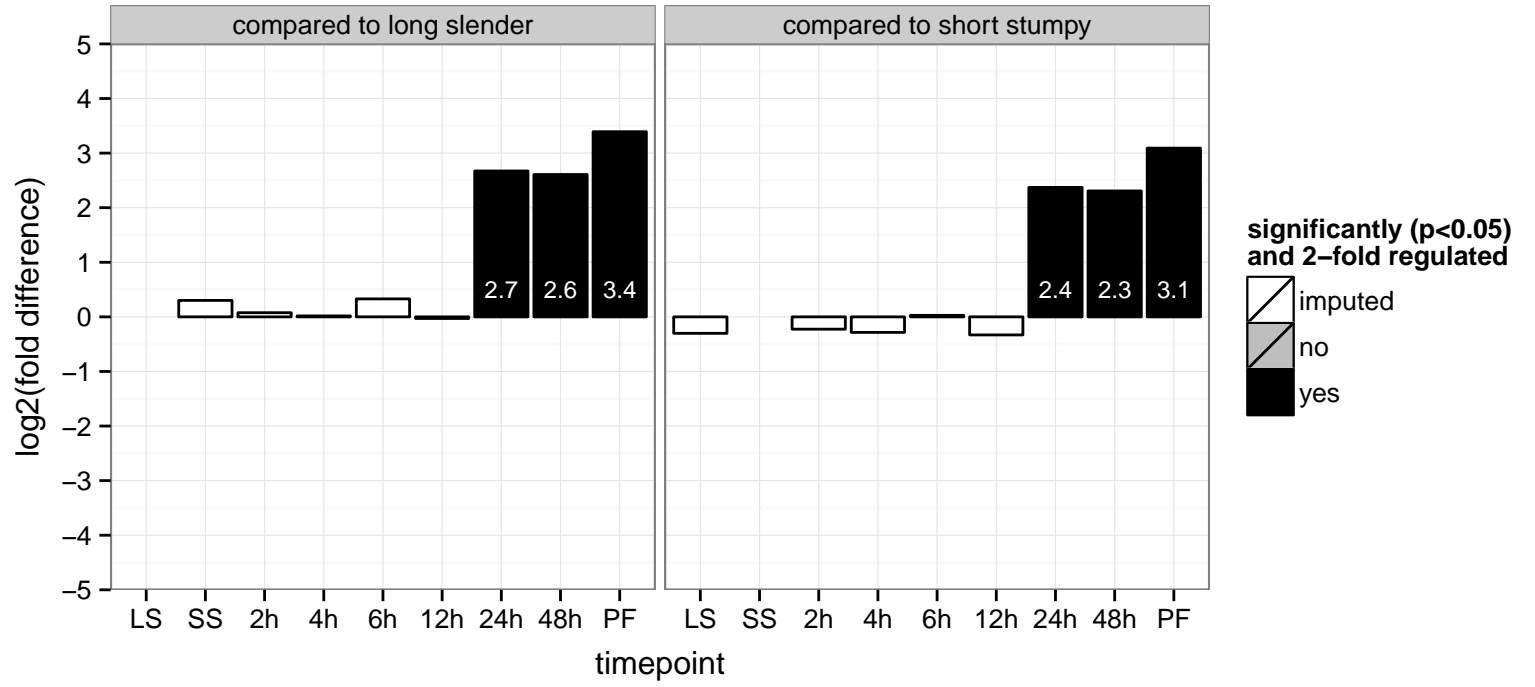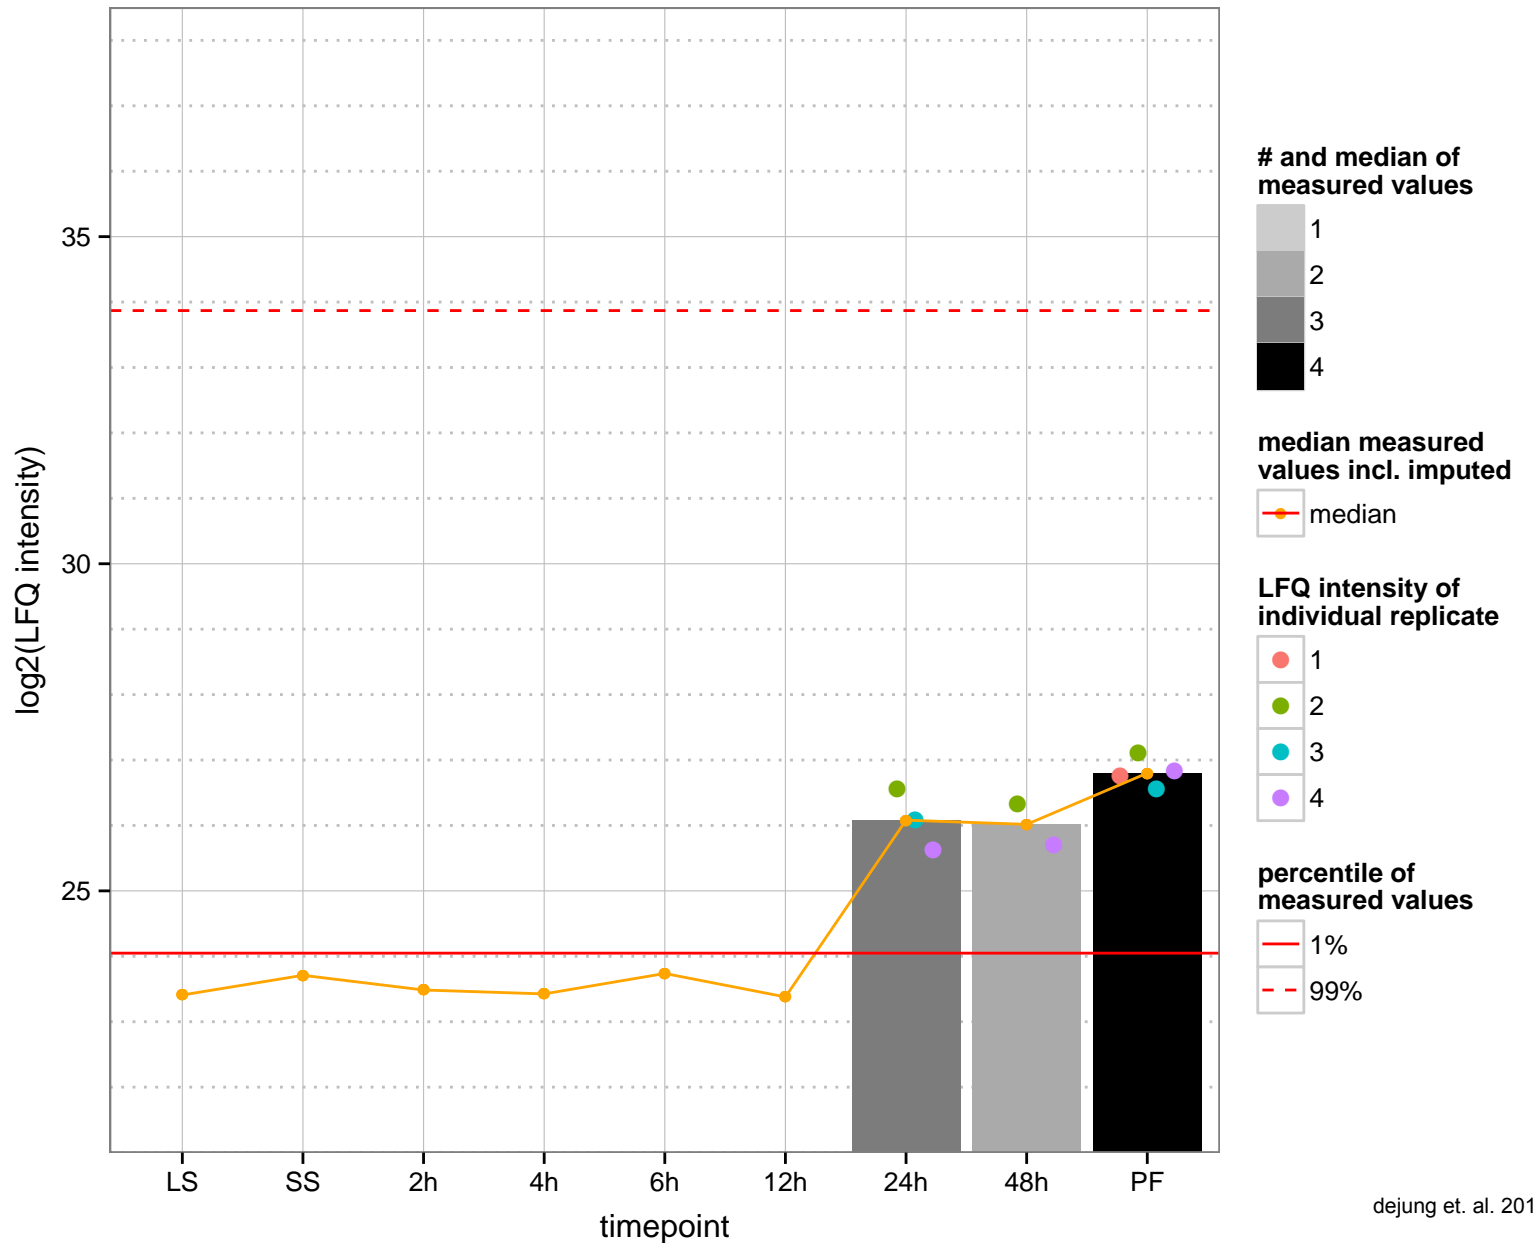

hypothetical protein, conserved  
 Tb927.11.4180  
 AGOF: null  
 AGOC: null  
 AGOP: null  
 PGOF: null  
 PGO: null  
 PGOP: null

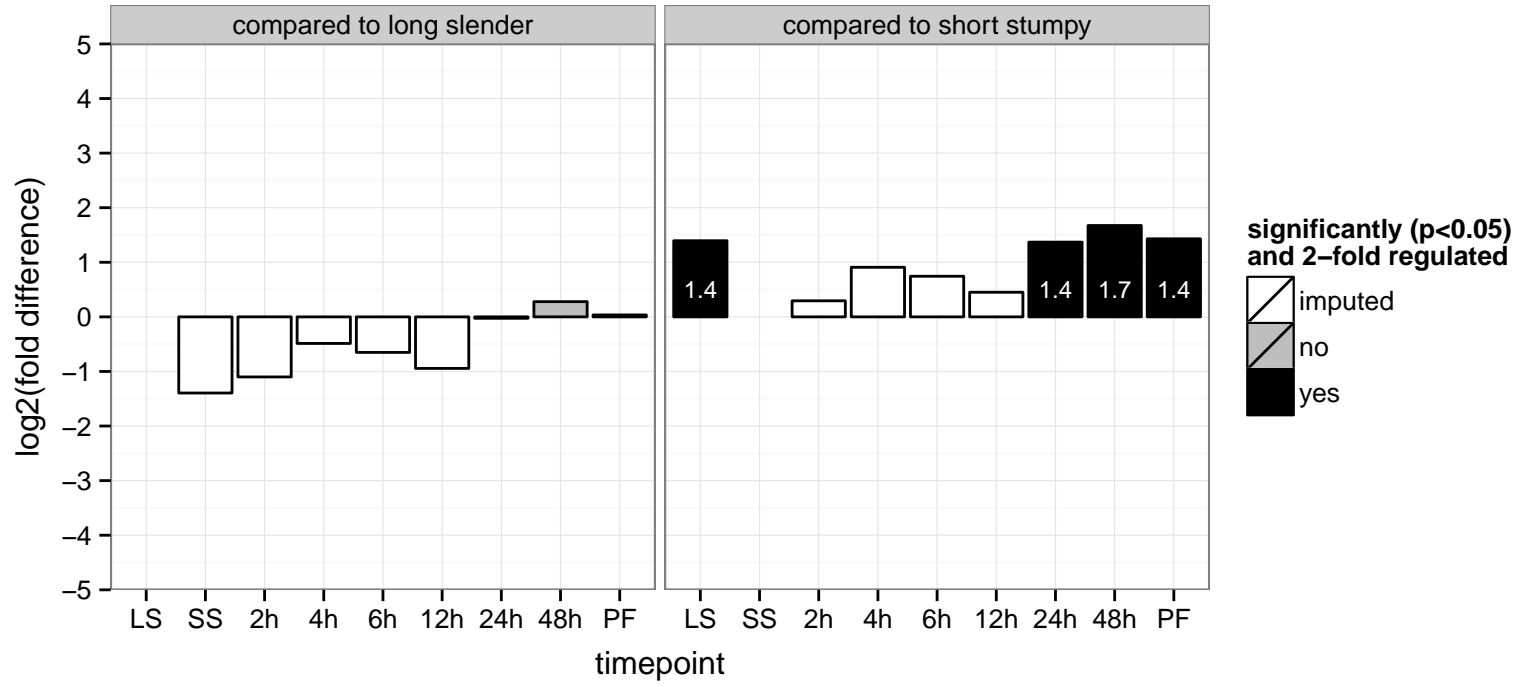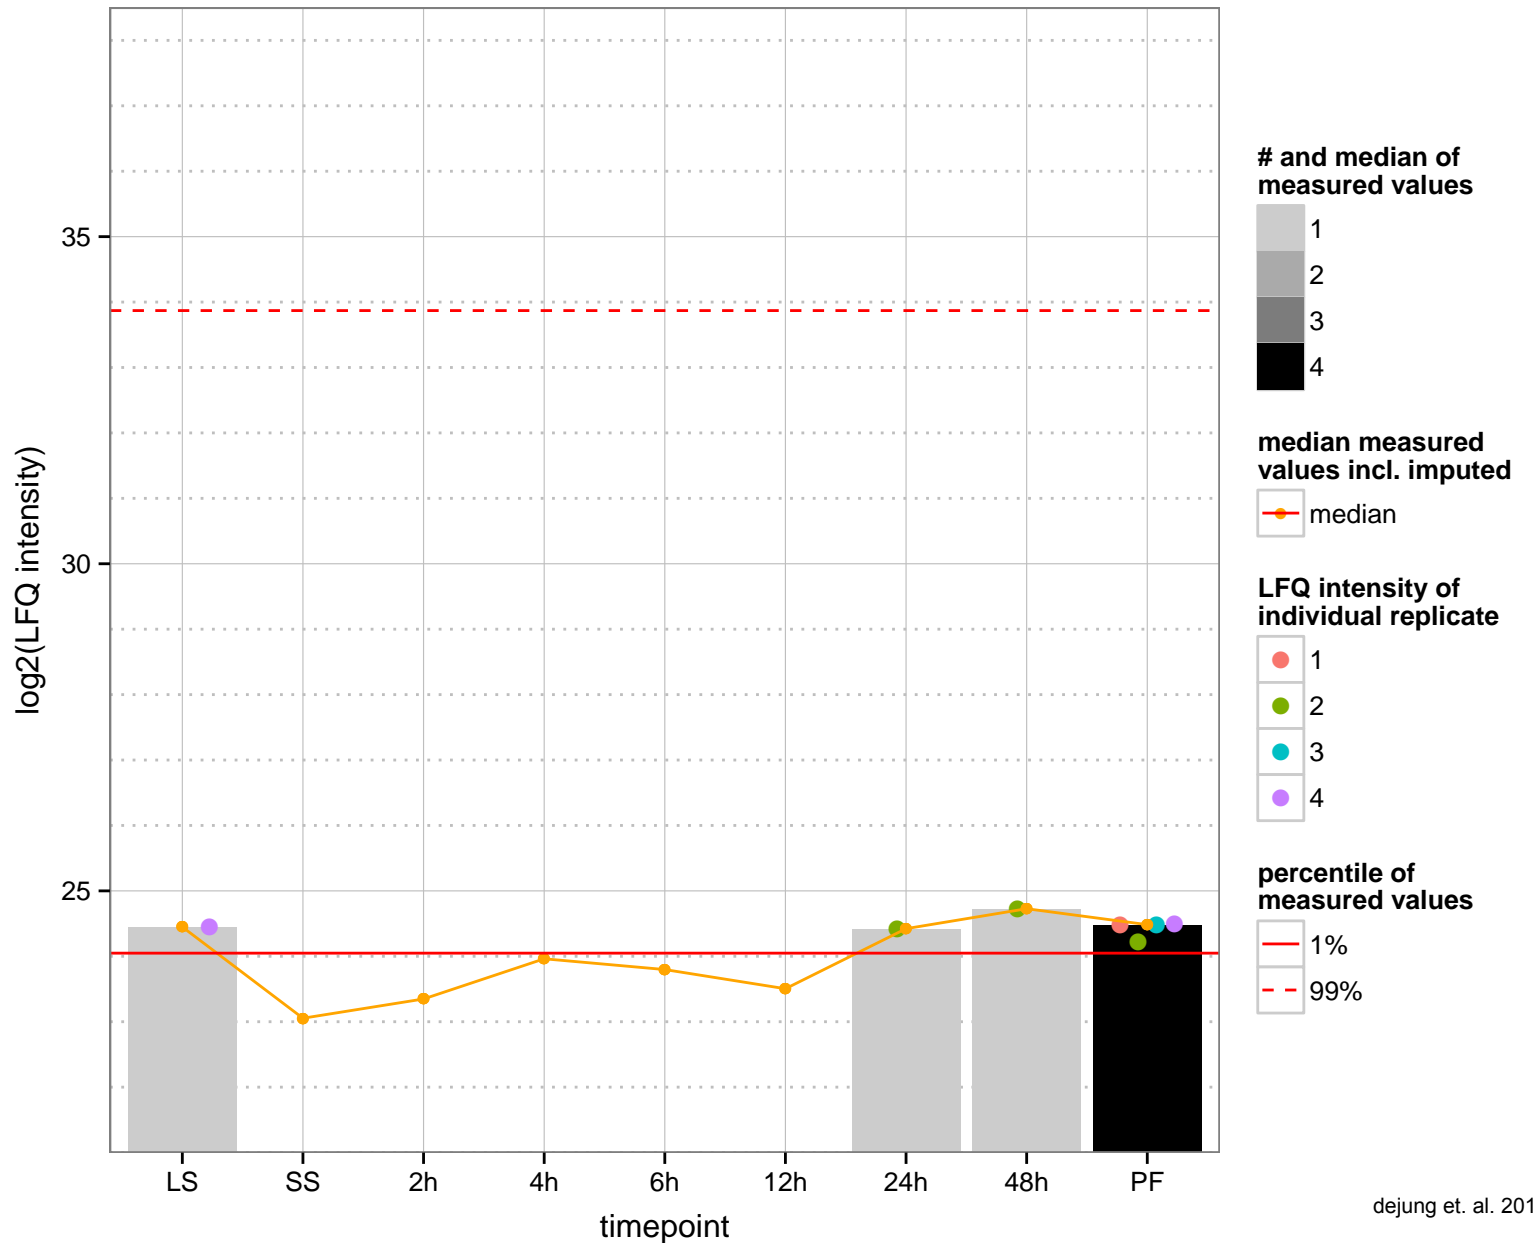

prostaglandin f synthase

Tb927.11.4700

AGOF: D-arabinose 1-dehydrogenase [NAD(P)+] activity, aldo-keto reductase (NADP) activity

AGOC: null

AGOP: D-arabinose catabolic process, oxidation-reduction process

PGOF: oxidoreductase activity

PGOC: null

PGOP: oxidation-reduction process

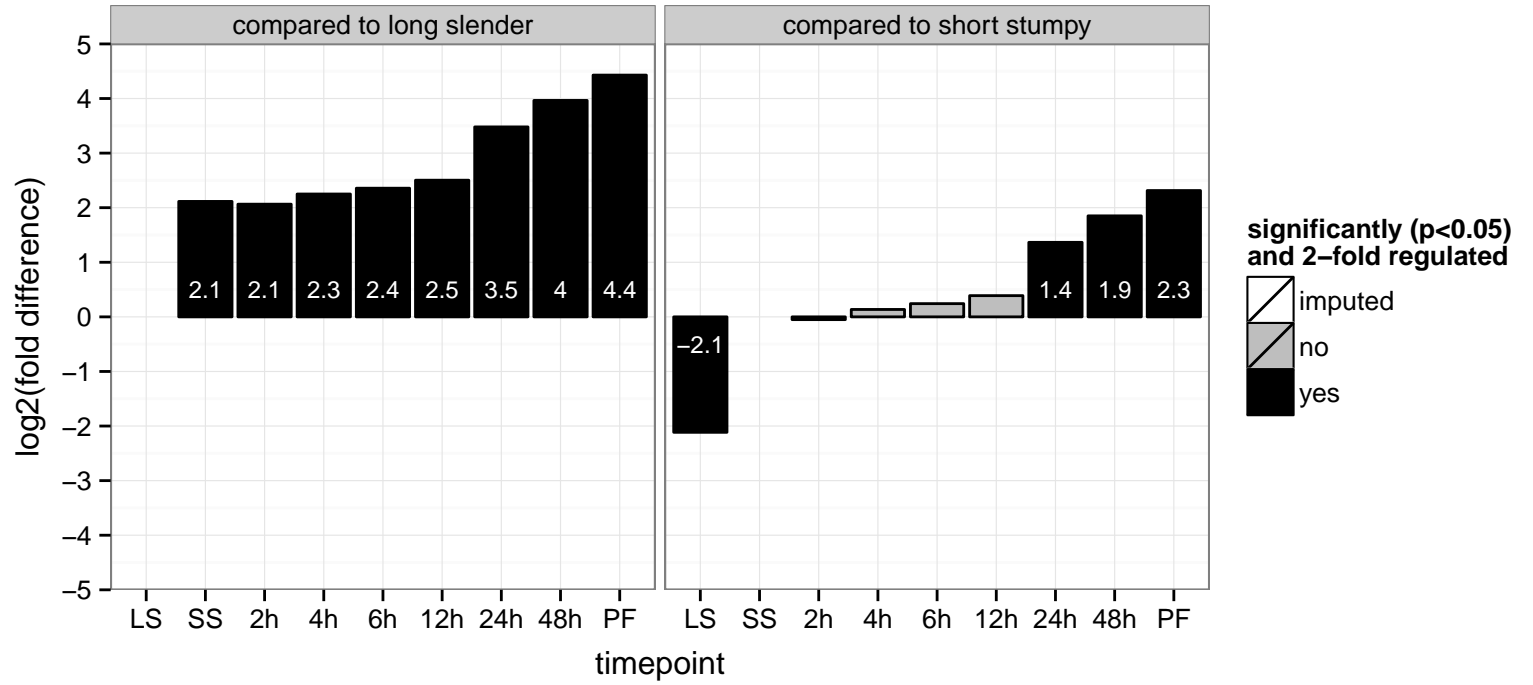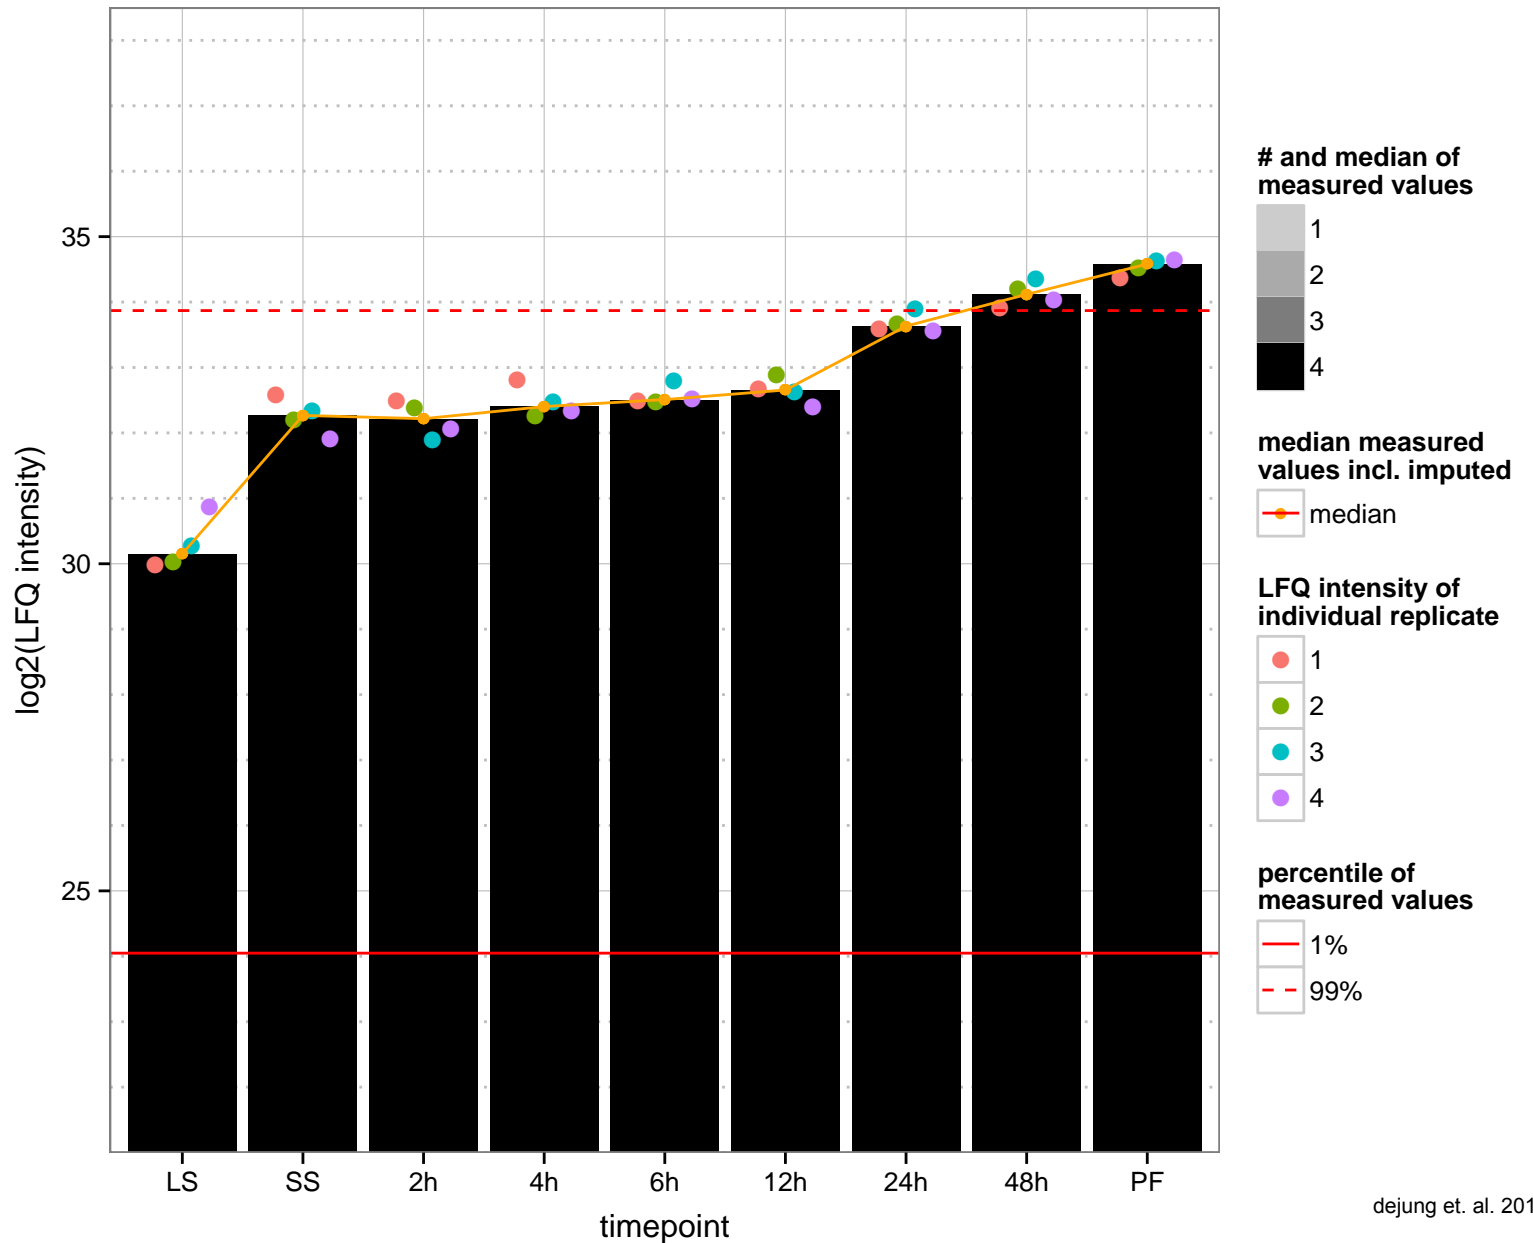



predicted ankyrin repeat family protein  
 Tb927.11.4910  
 AGOF: null  
 AGOC: null  
 AGOP: null  
 PGO: protein binding  
 PGOC: null  
 PGOP: null

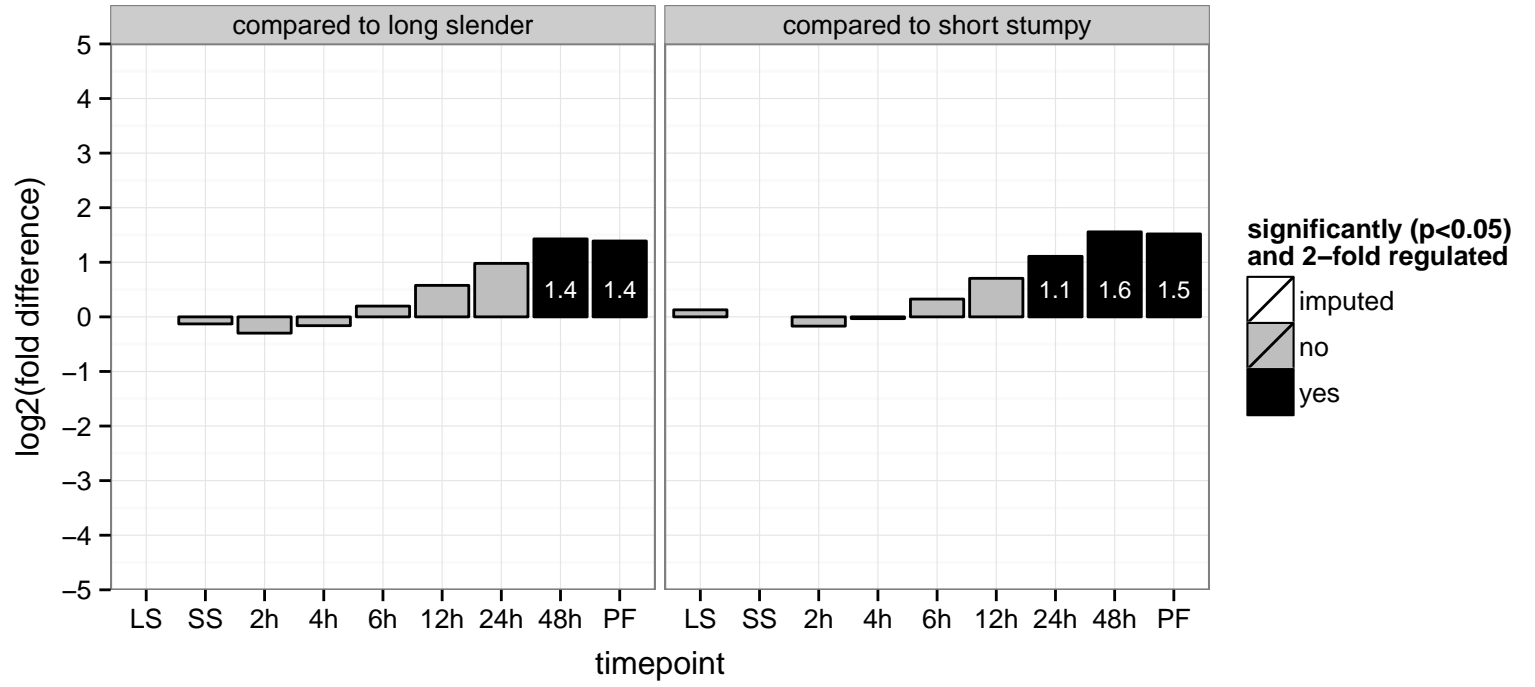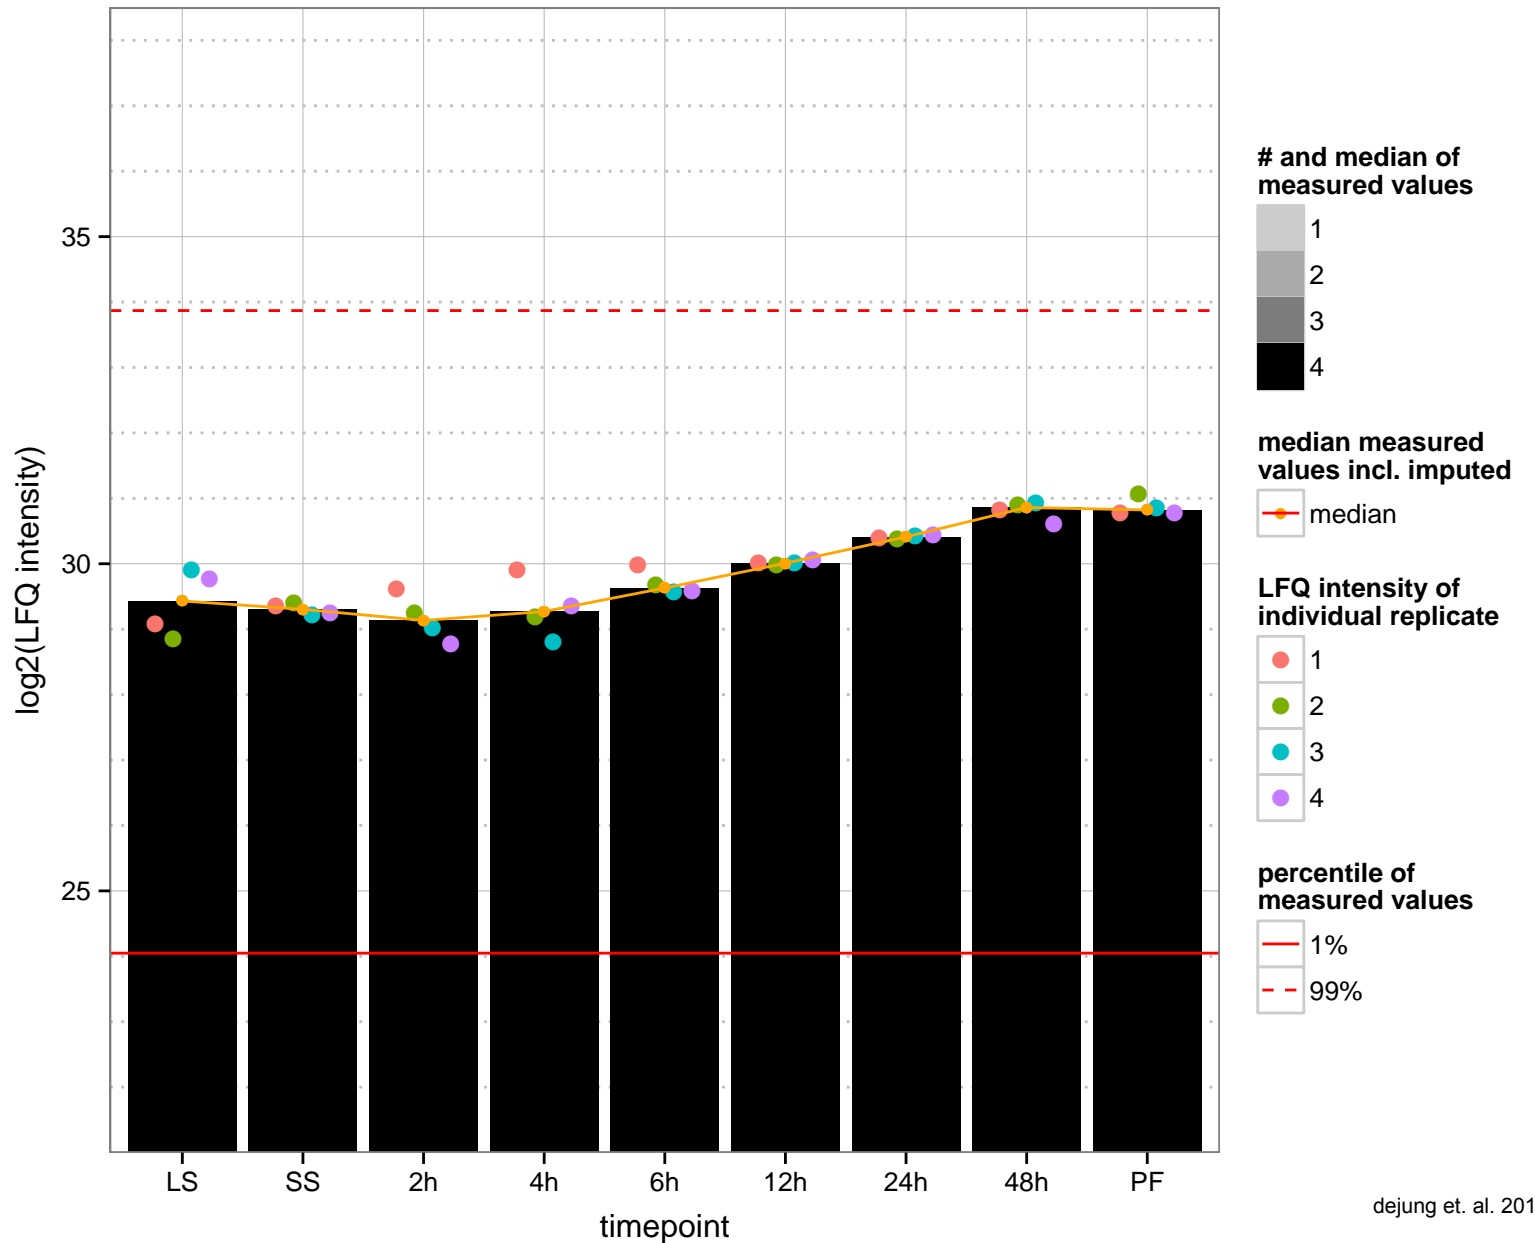

RNA-binding protein, UBP2 (UBP2)  
 Tb927.11.510  
 AGOF: RNA binding, mRNA binding  
 AGOC: cytoplasm, nucleus  
 AGOP: RNA processing  
 PGO: nucleic acid binding  
 PGO: null  
 PGO: null

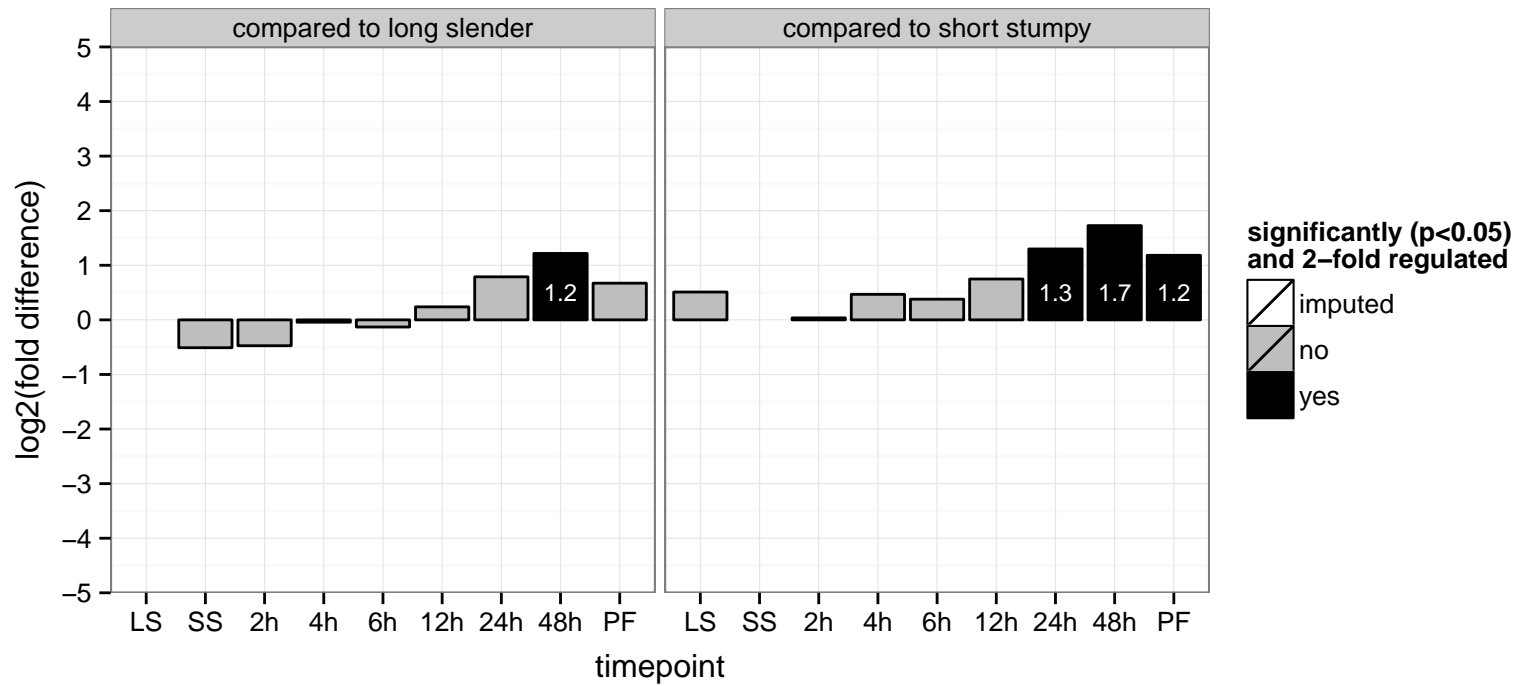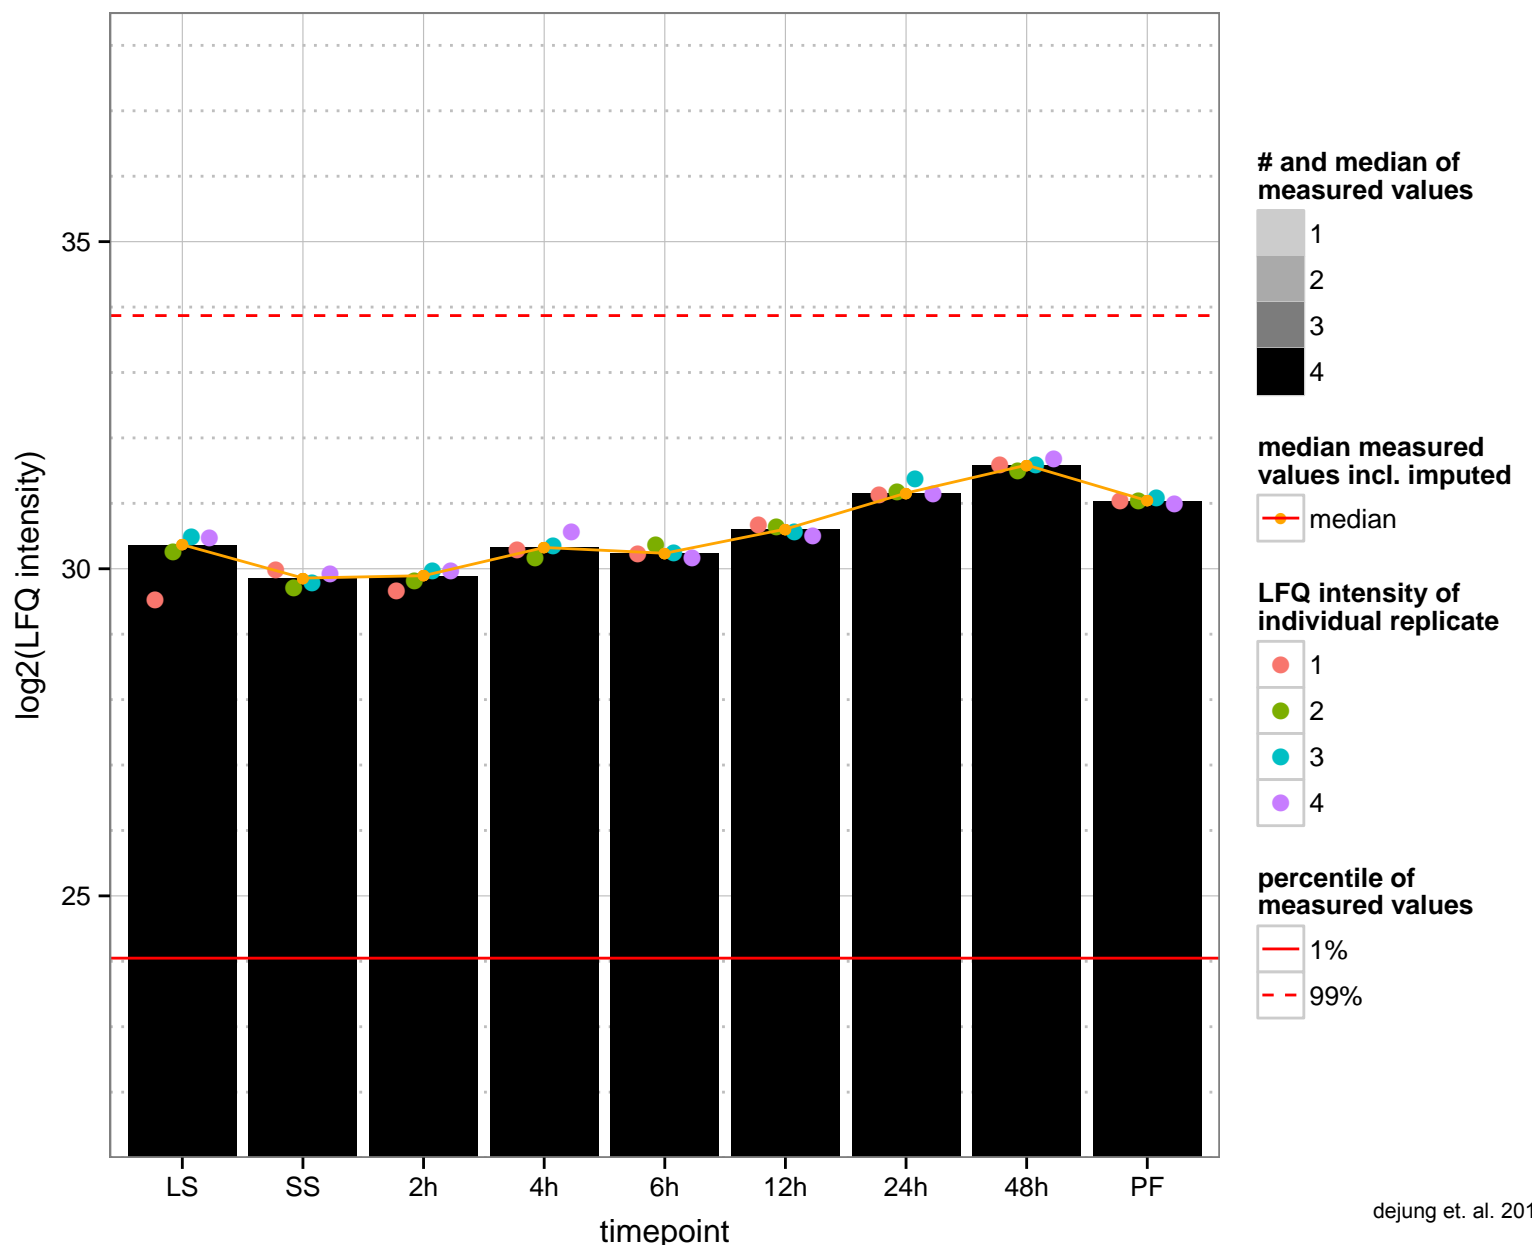

hypothetical protein, conserved  
 Tb927.11.5600  
 AGOF: null  
 AGOC: mitochondrion  
 AGOP: null  
 PGO: null  
 PGO: null  
 PGO: null

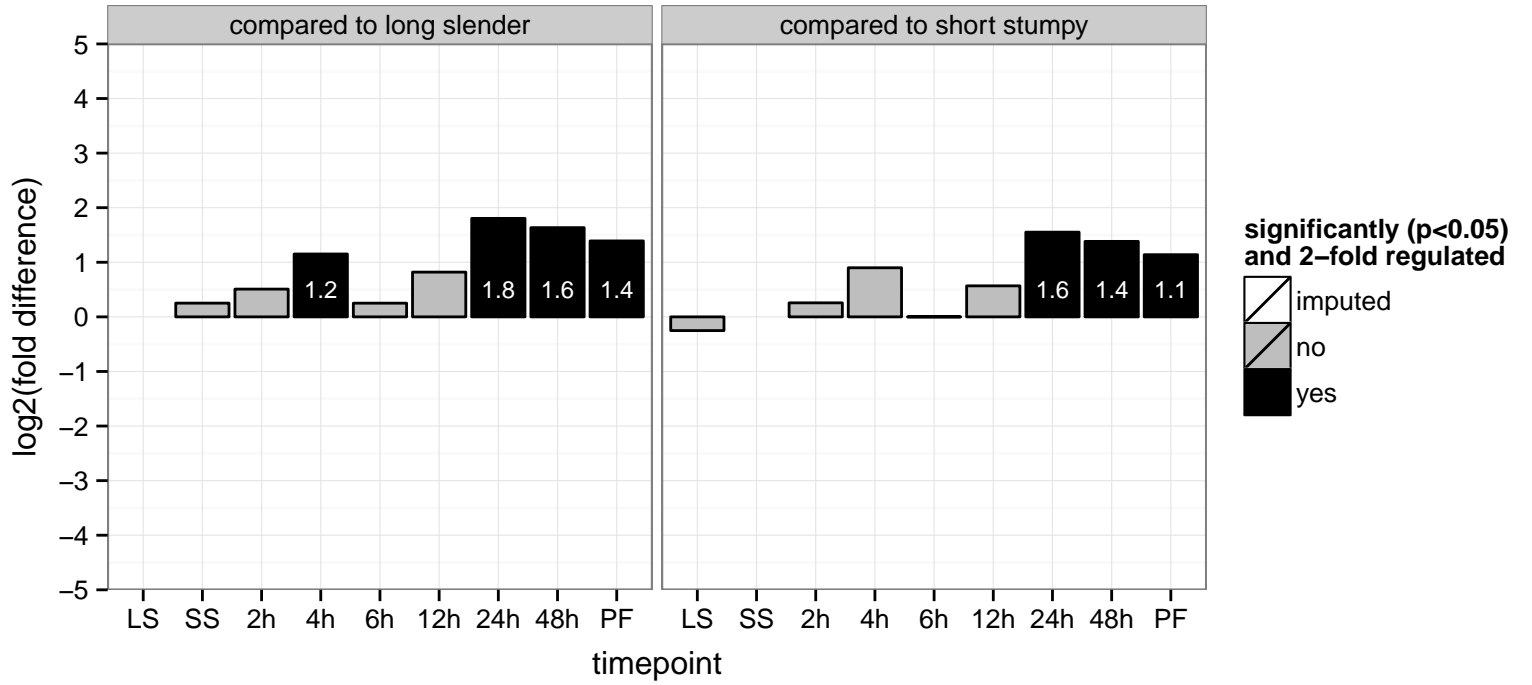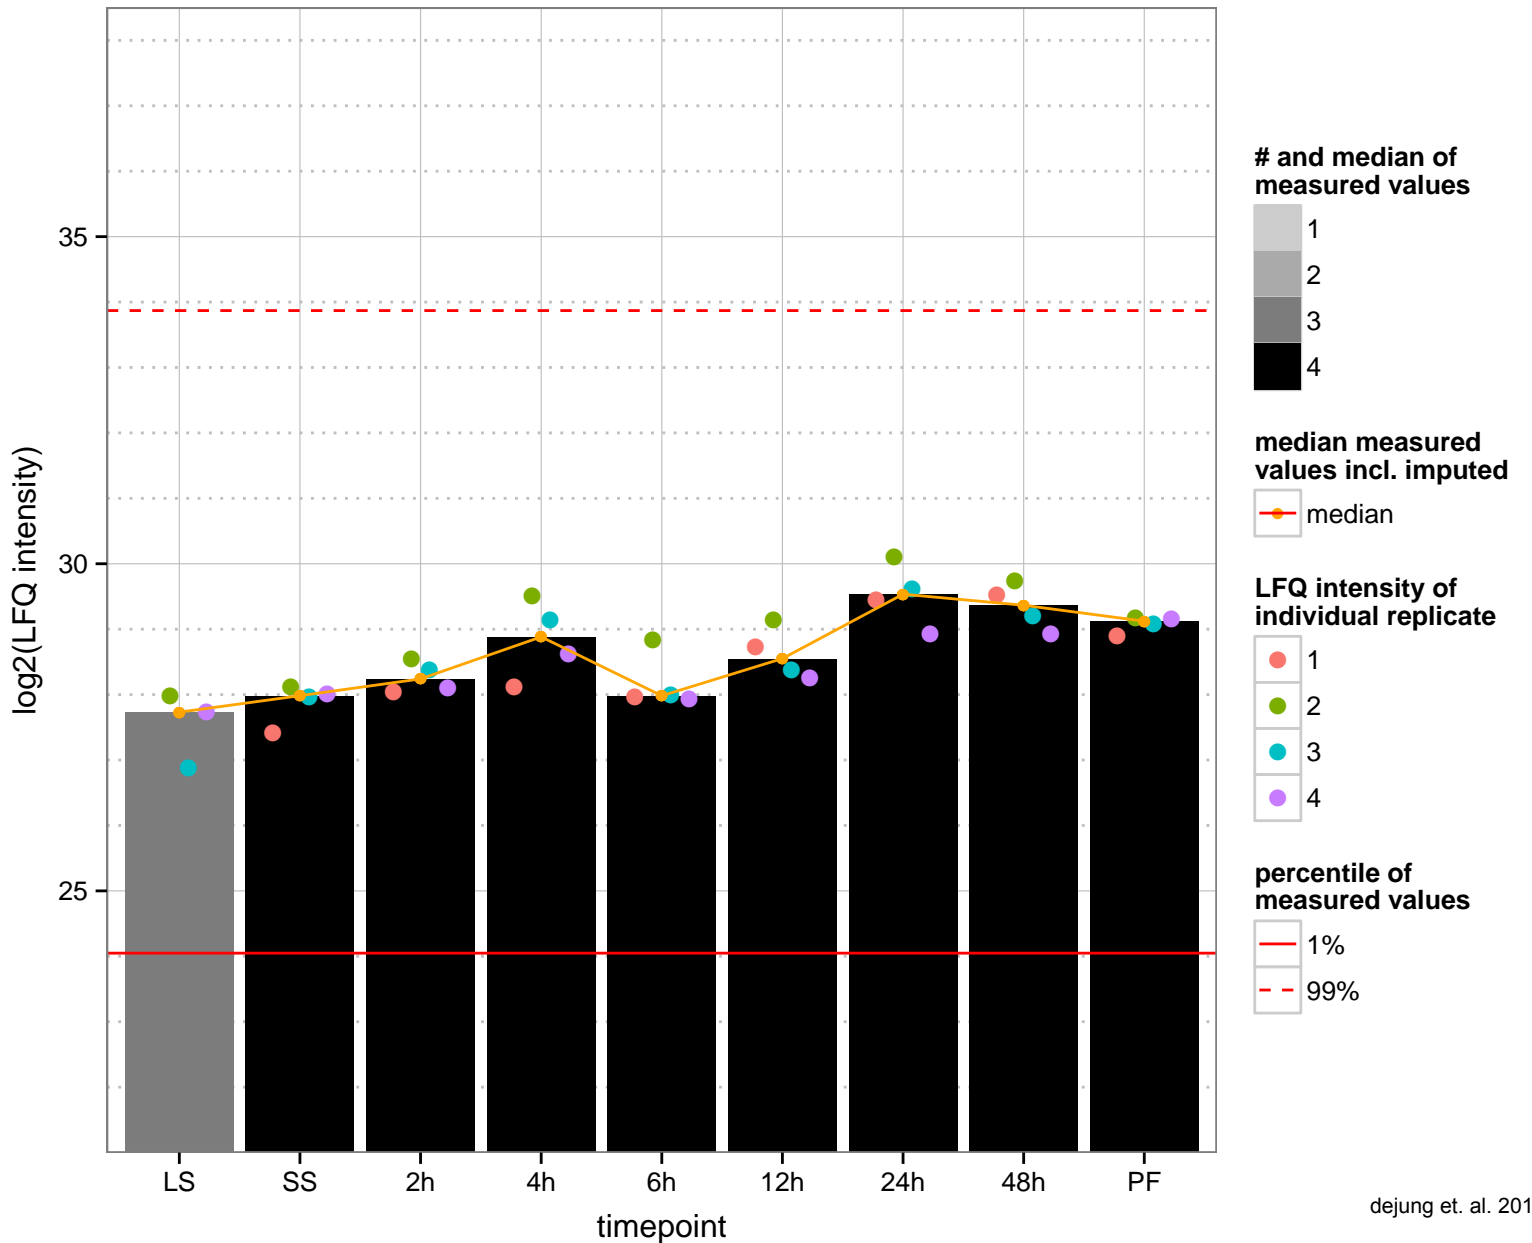

Protein translation factor SUI1 homolog, putative  
 Tb927.11.5840  
 AGOF: translation initiation factor activity  
 AGOC: null  
 AGOP: translation, translational initiation  
 PGO: translation initiation factor activity  
 PGOC: null  
 PGOP: translational initiation

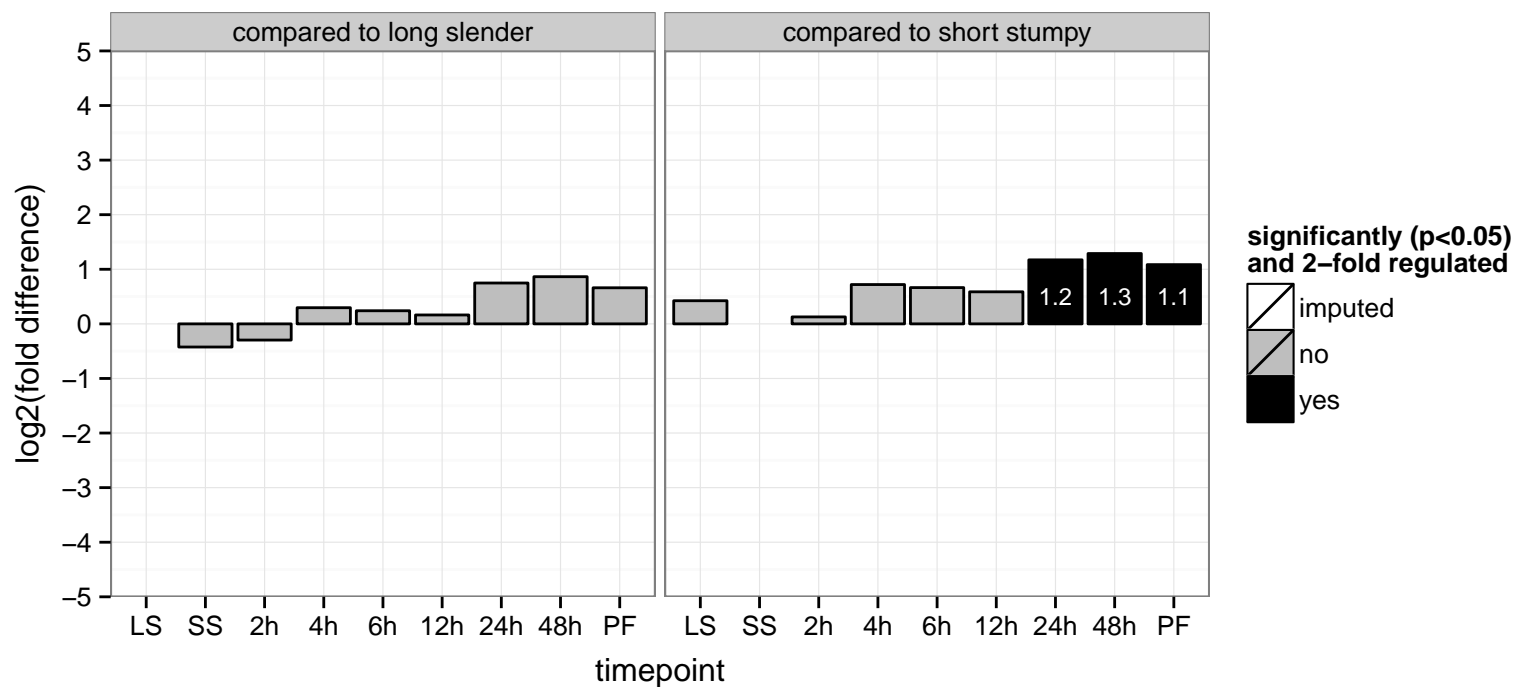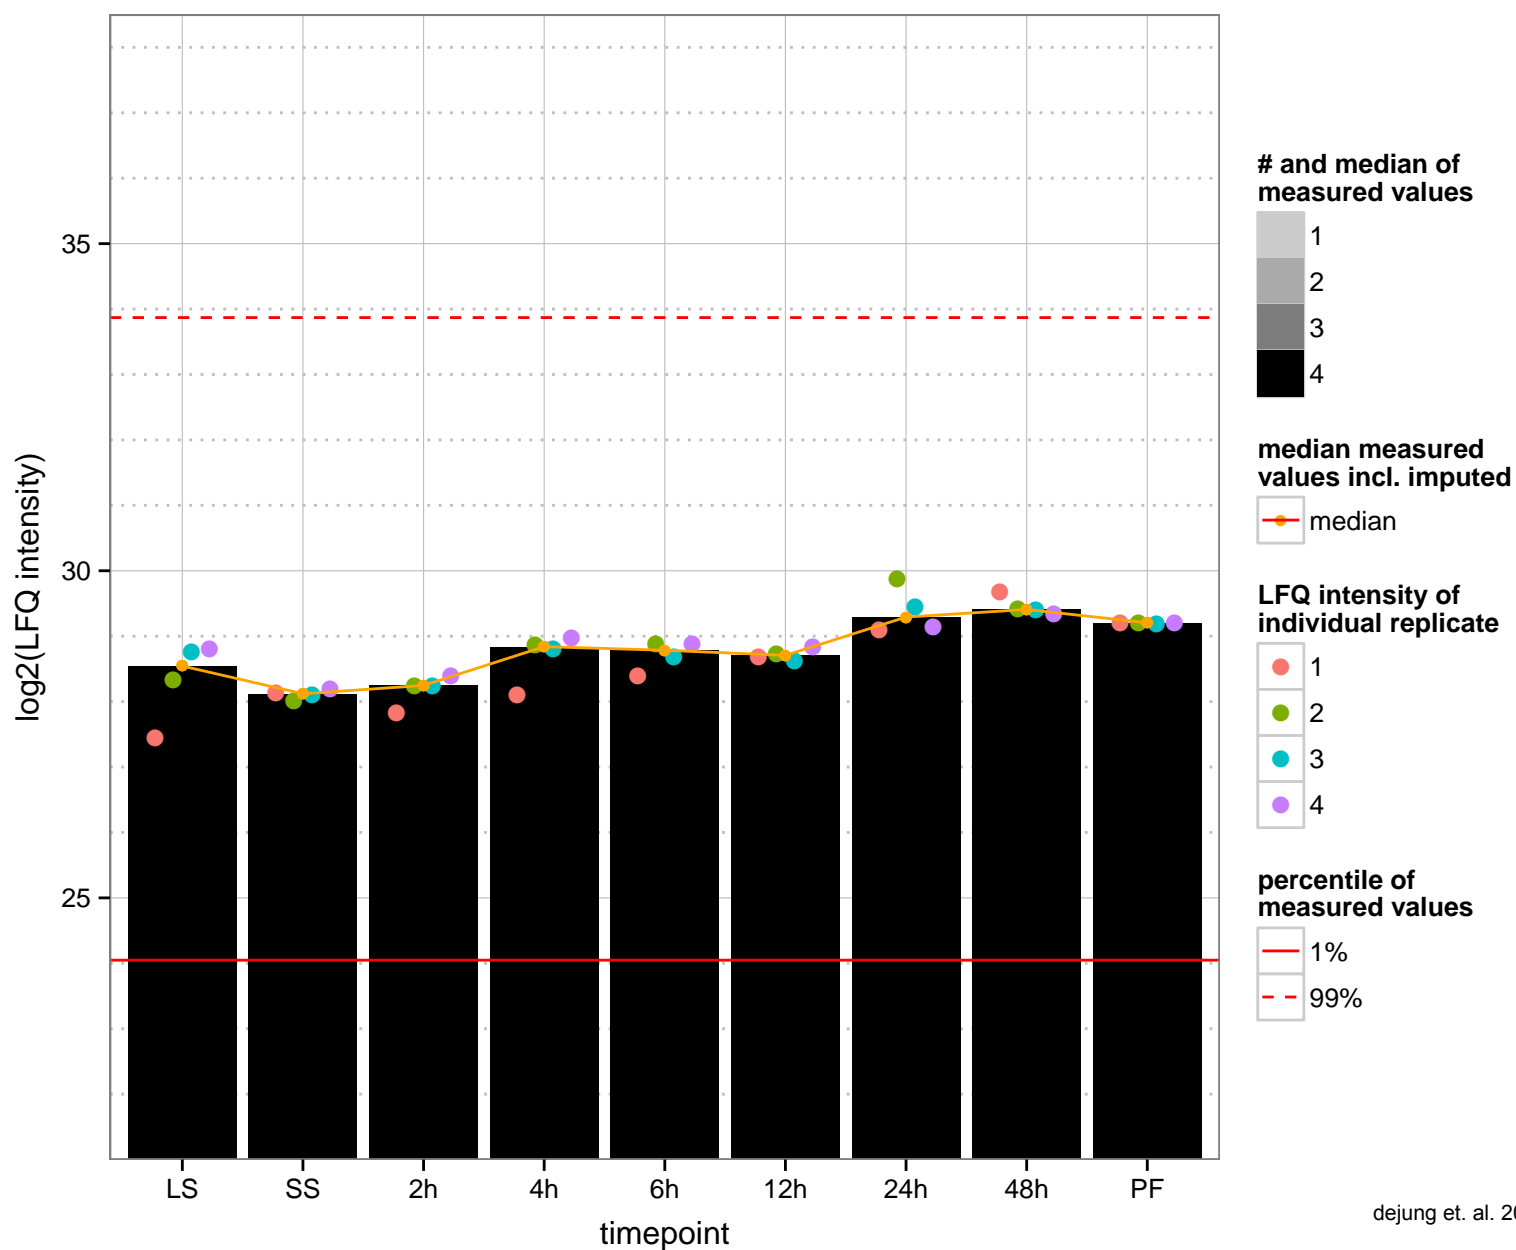

60S ribosomal protein L28, putative  
 Tb927.11.6200;Tb927.11.6180  
 AGOF: structural constituent of ribosome  
 AGOC: intracellular, ribosome  
 AGOP: translation  
 PGO: null  
 PGOC: null  
 PGOP: null

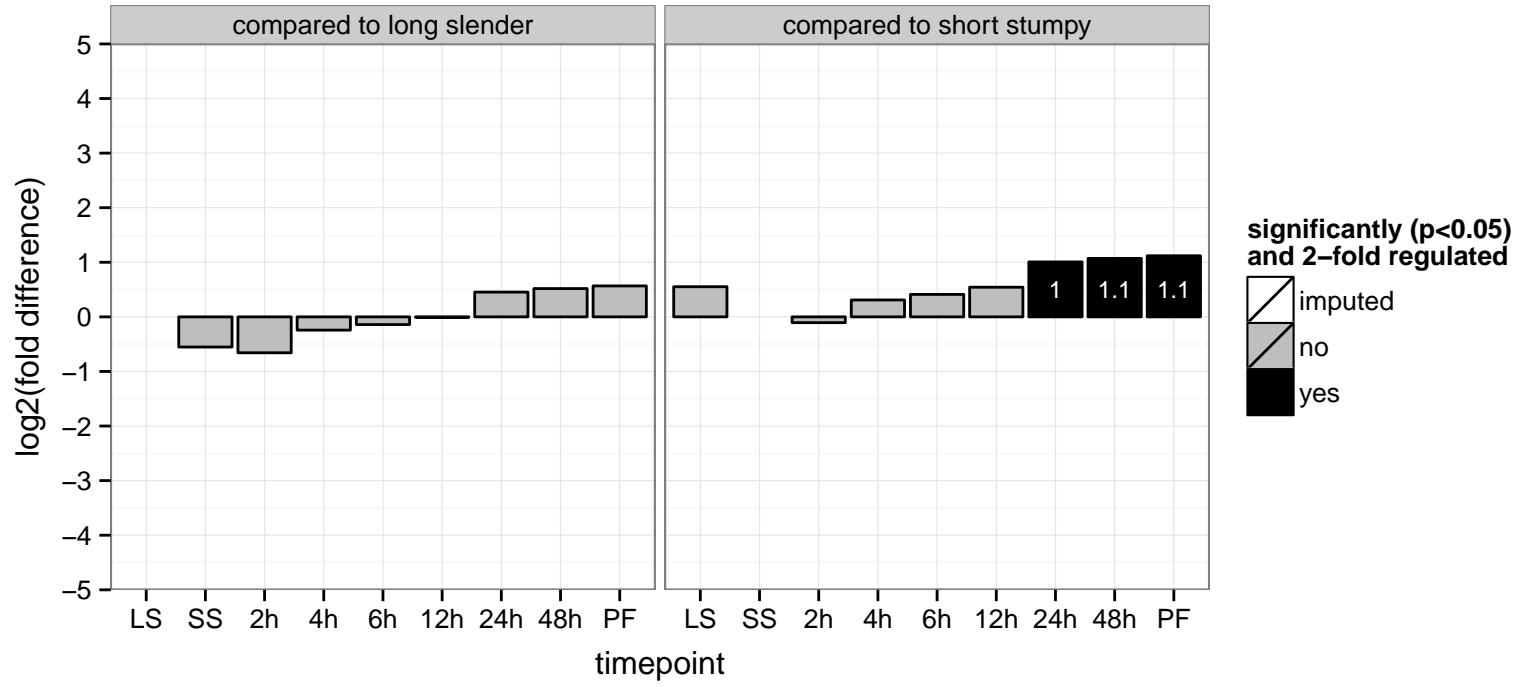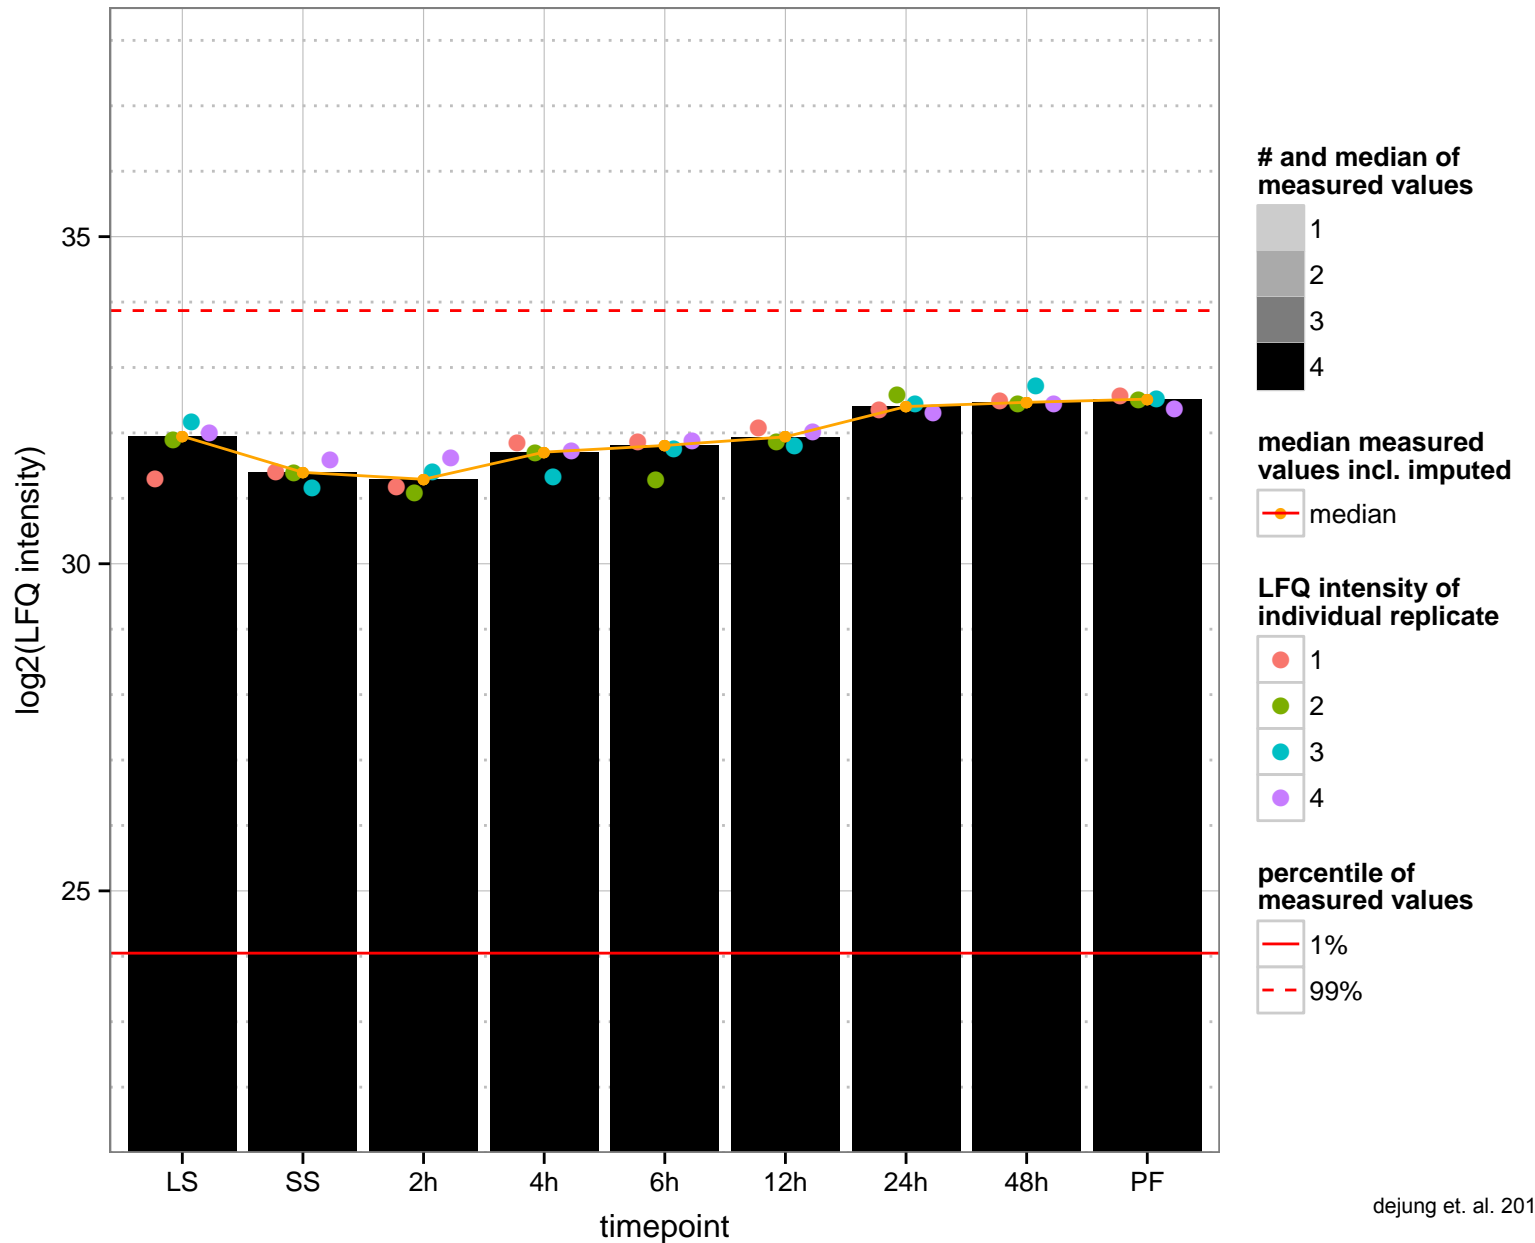

hypothetical protein, conserved  
 Tb927.11.6250  
 AGOF: null  
 AGOC: mitochondrial inner membrane, mitochondrion  
 AGOP: null  
 PGO: null  
 PGO: null  
 PGO: null

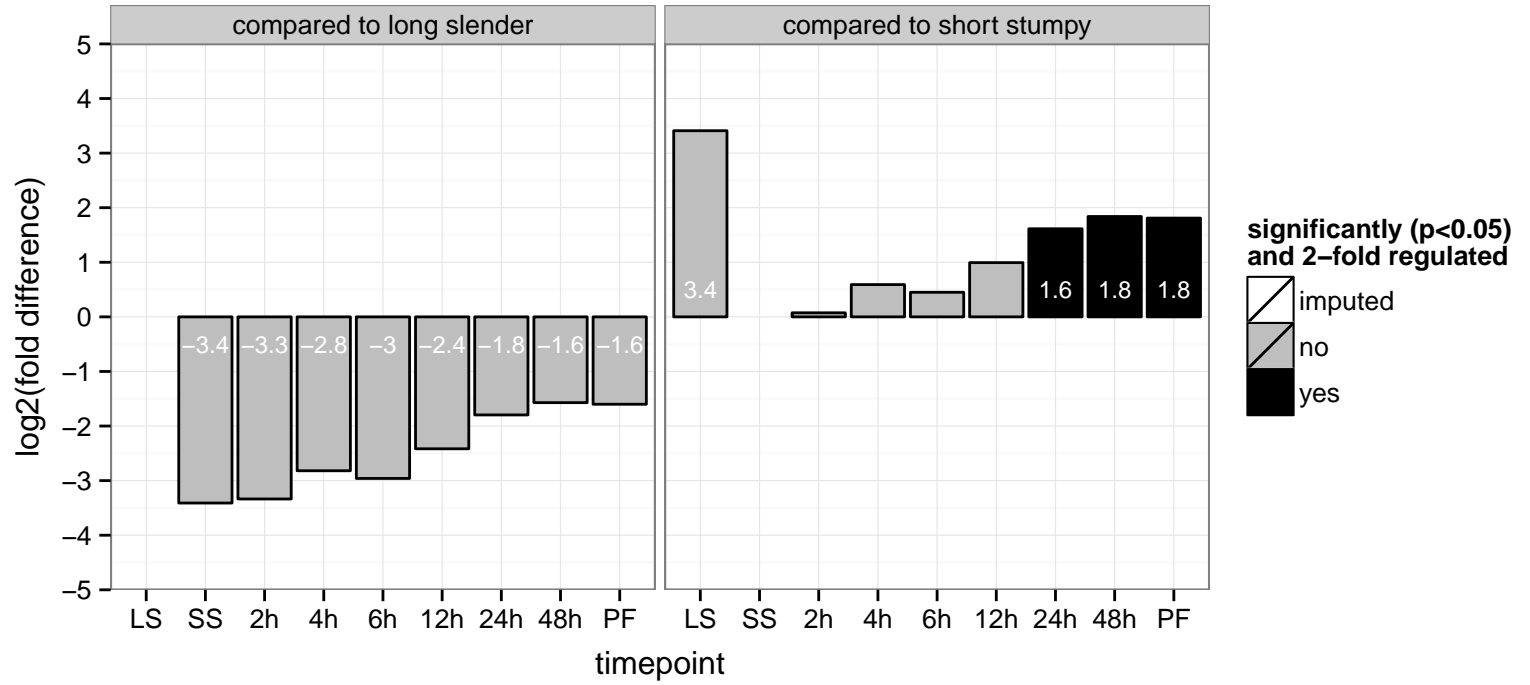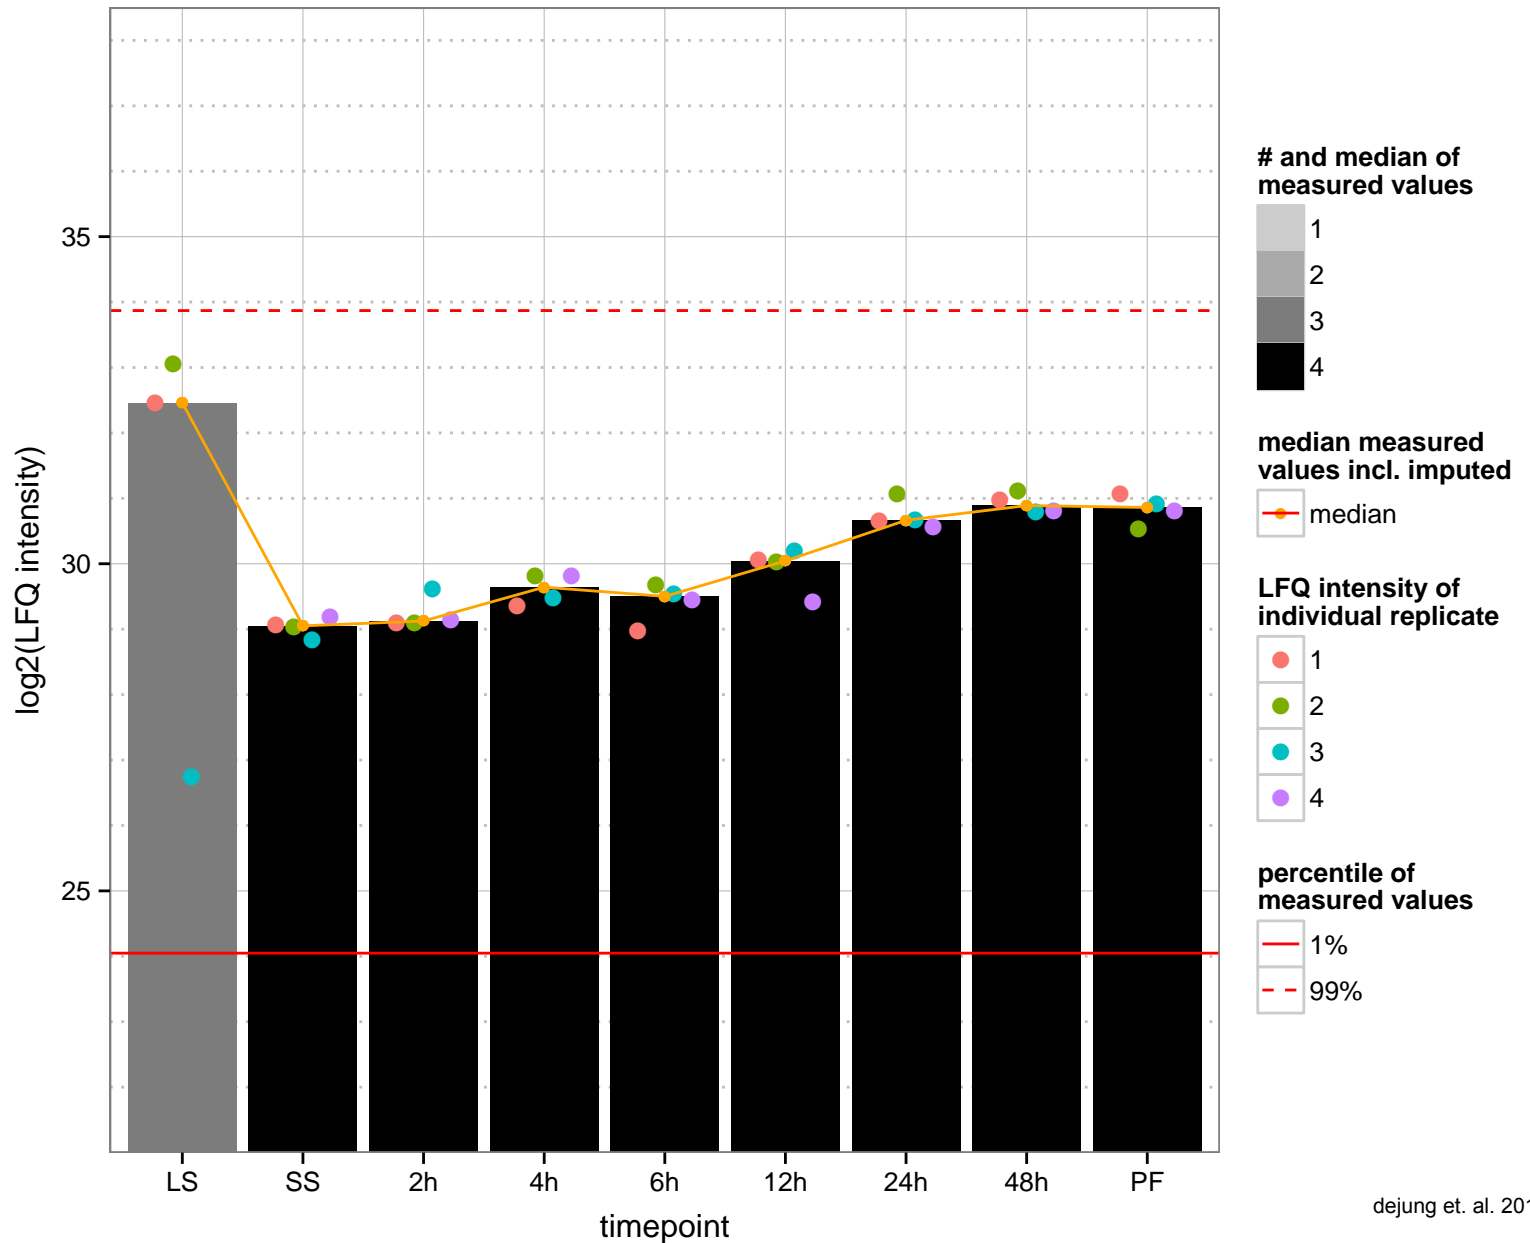

pumilio/PUF RNA binding protein 10, putative  
 Tb927.11.6740  
 AGOF: RNA binding  
 AGOC: null  
 AGOP: mRNA metabolic process  
 PGO: RNA binding, binding  
 PGO: null  
 PGO: null

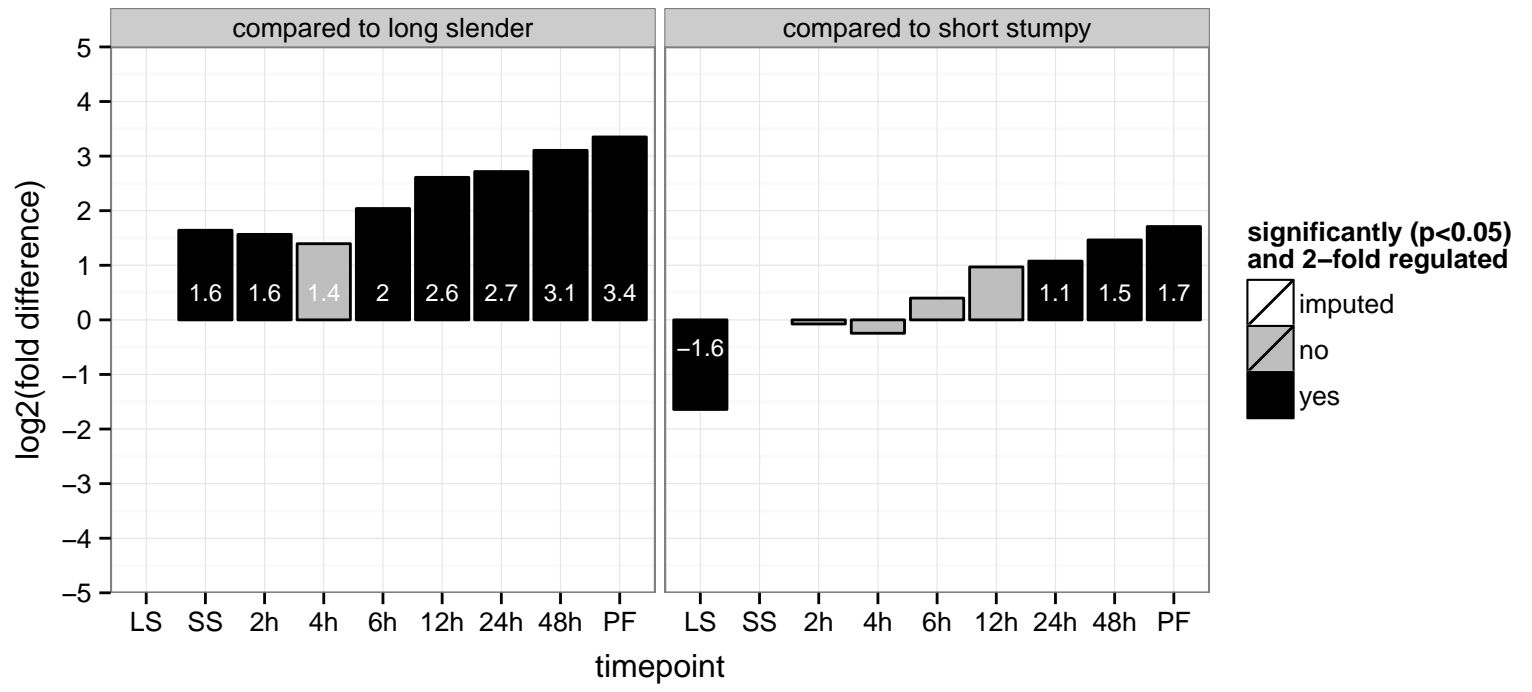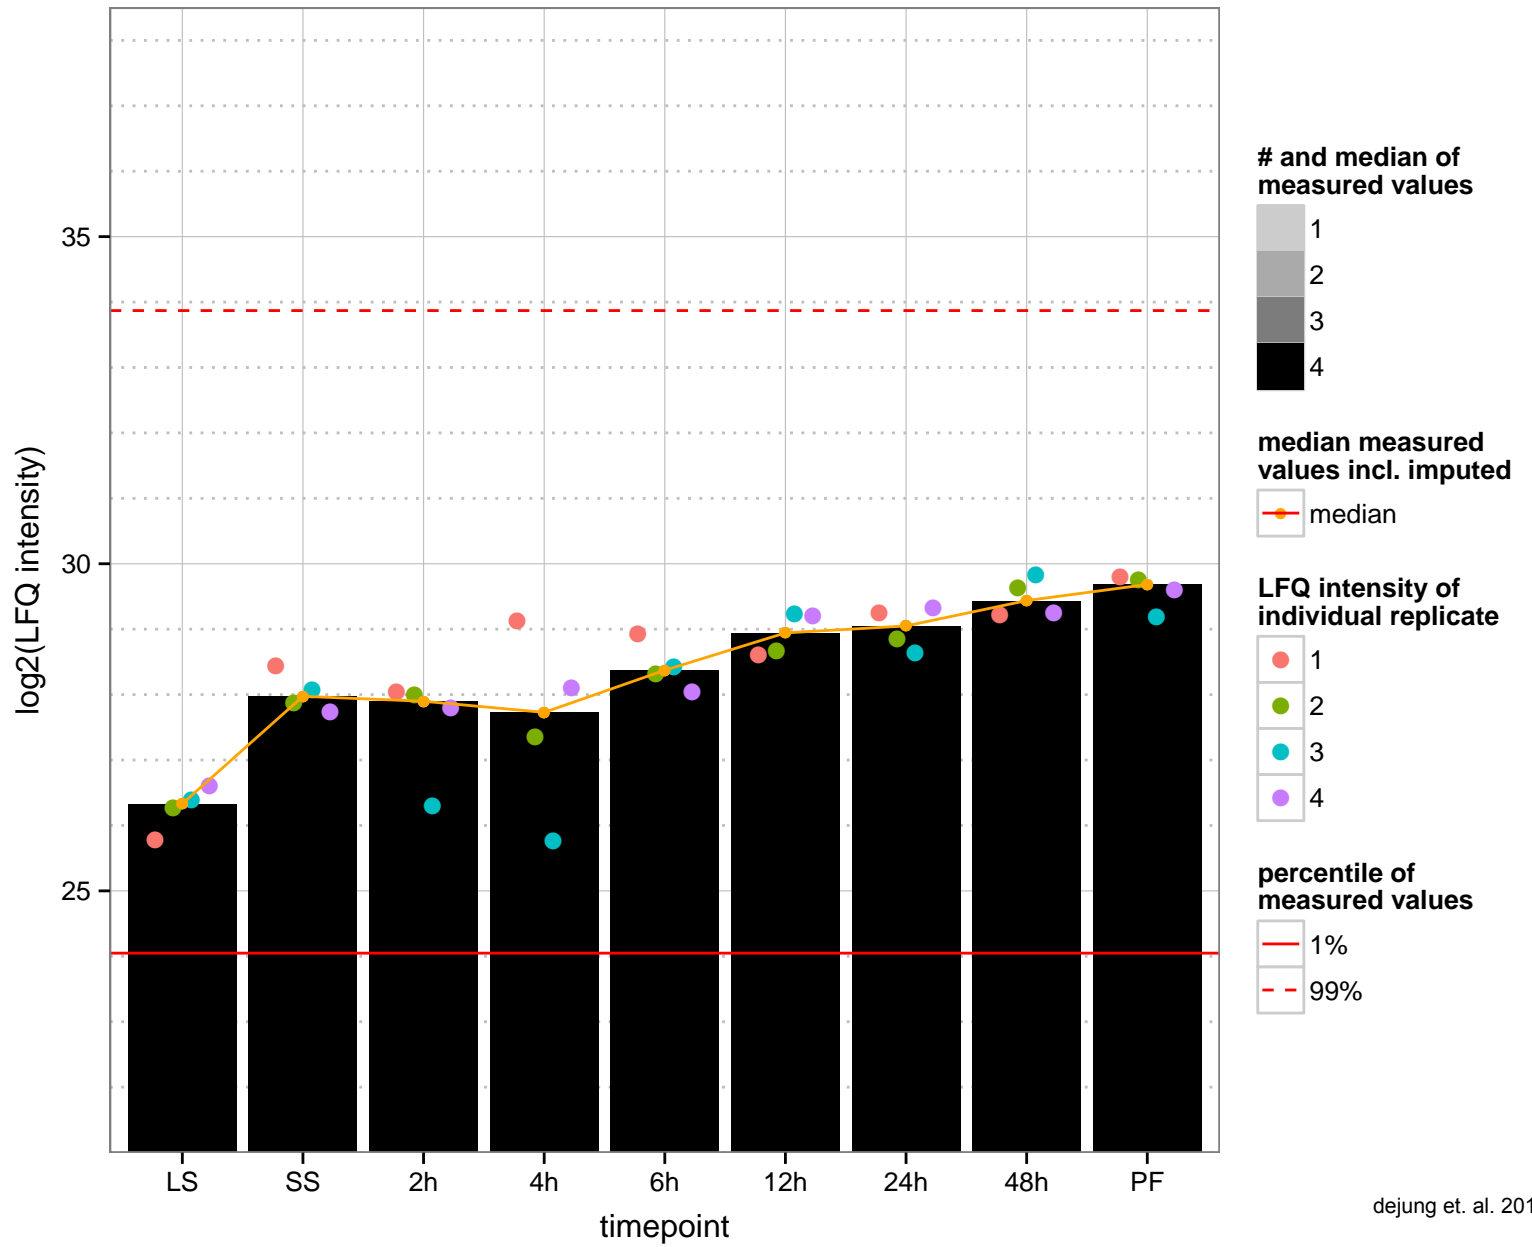

eukaryotic translation initiation factor 5A, putative (eIF-5A)

Tb927.11.740

AGOF: RNA binding, ribosome binding, translation elongation factor activity, translation initiation factor activity

AGOC: cytoplasm

AGOP: peptidyl-lysine modification to hypusine, positive regulation of translational elongation, positive regulation of translation

PGOF: RNA binding, ribosome binding, translation elongation factor activity

PGOC: null

PGOP: peptidyl-lysine modification to hypusine, positive regulation of translational elongation, positive regulation of translation

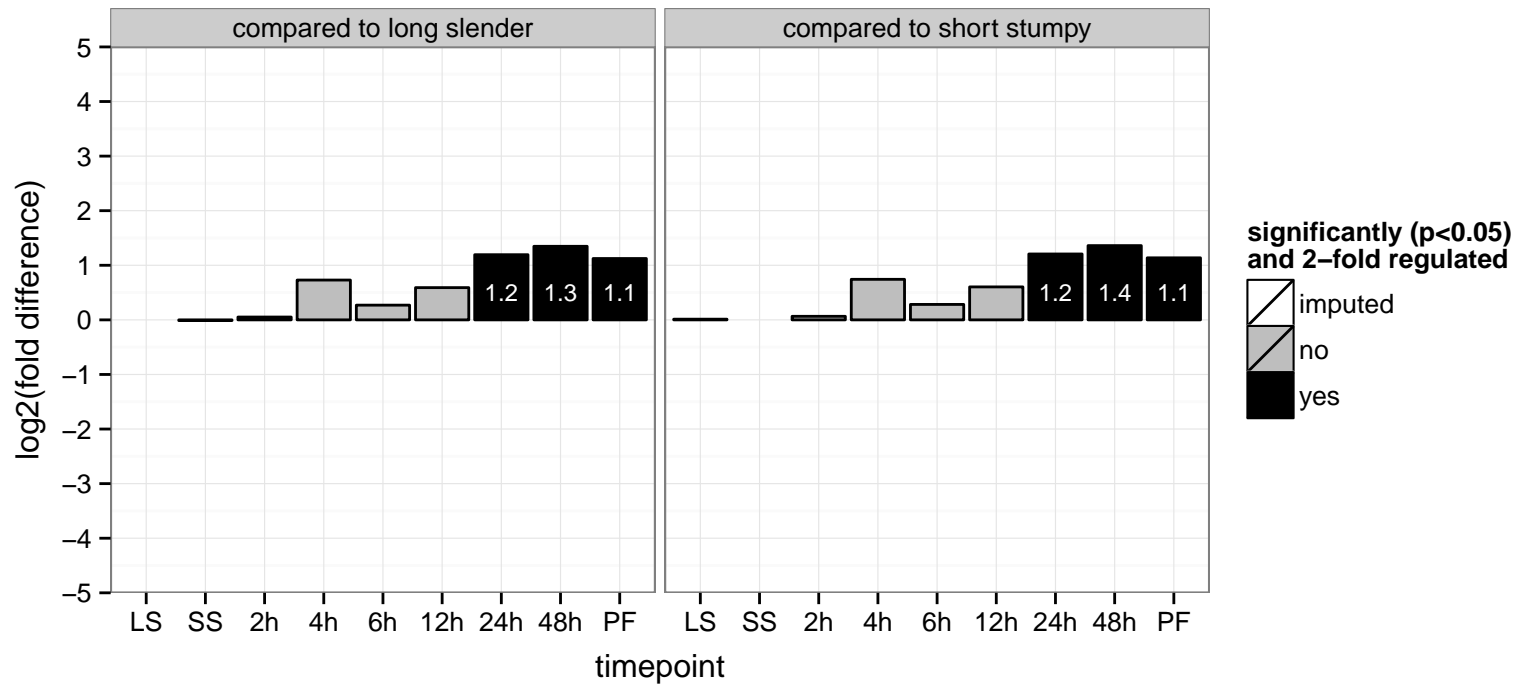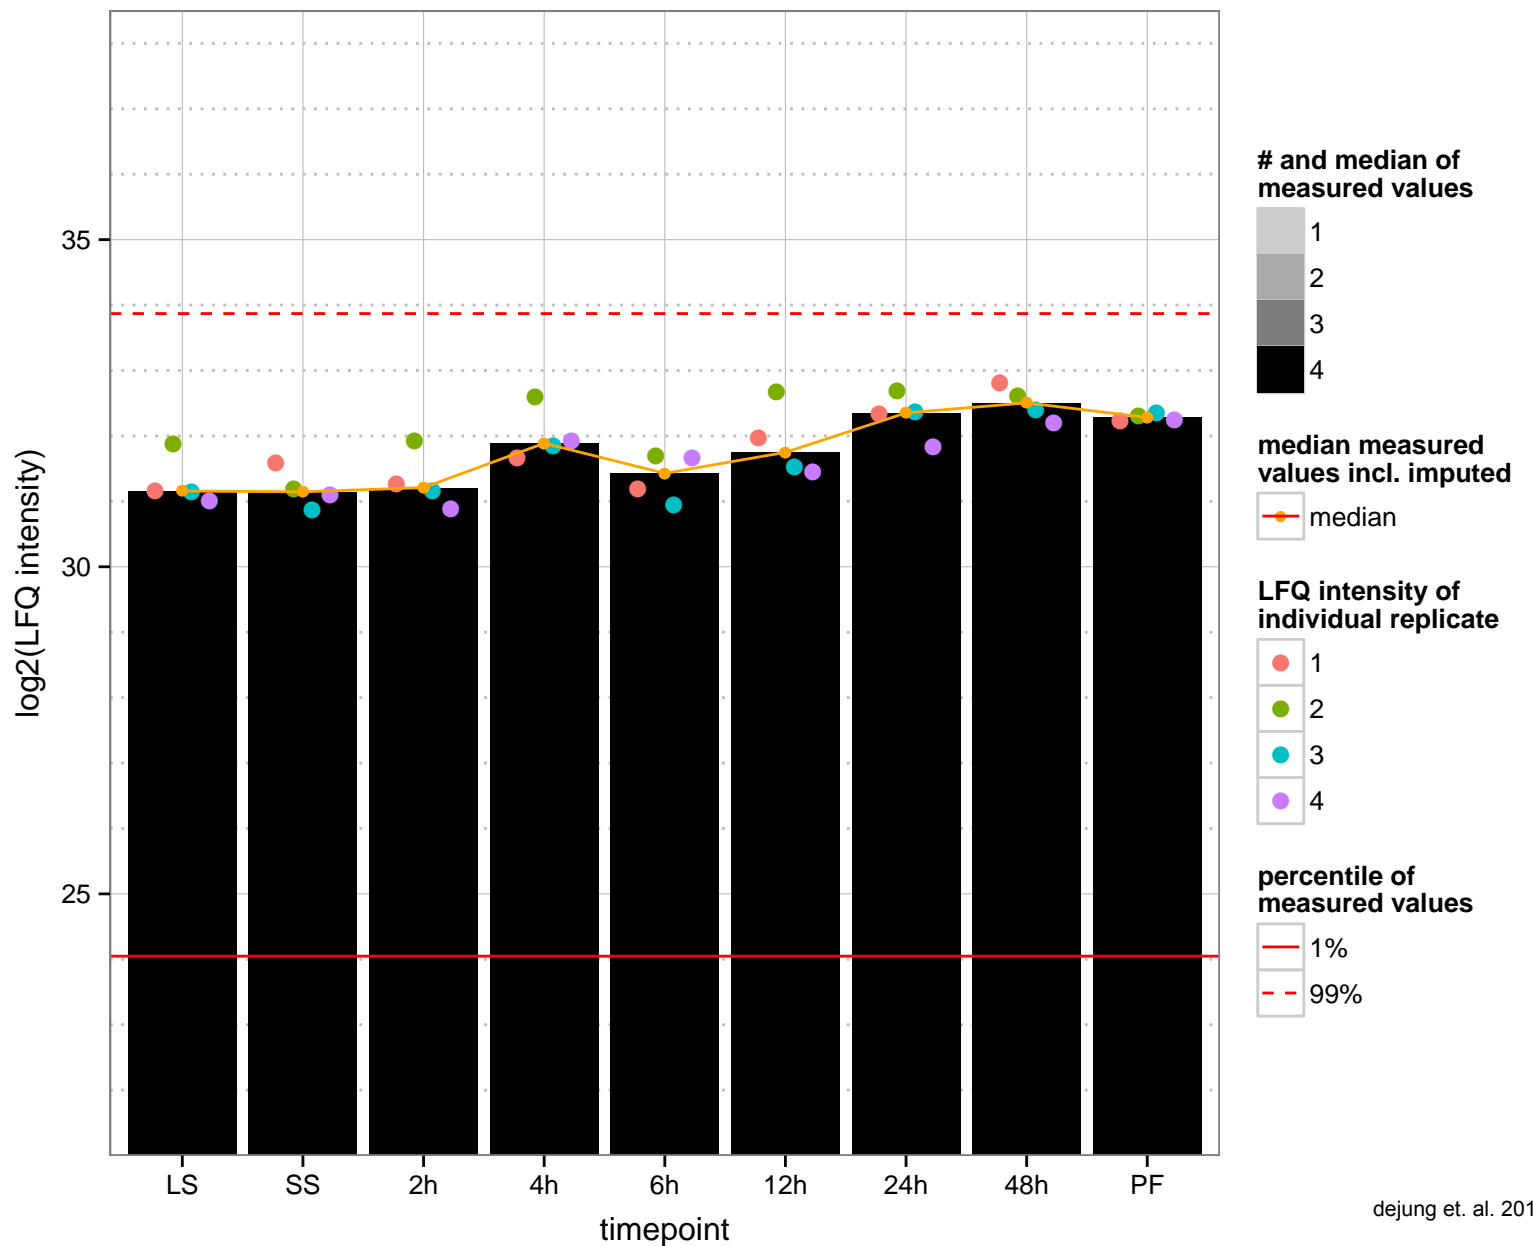



hypothetical protein, conserved  
 Tb927.11.7790  
 AGOF: null  
 AGOC: mitochondrion  
 AGOP: null  
 PGO: null  
 PGOC: null  
 PGOP: null

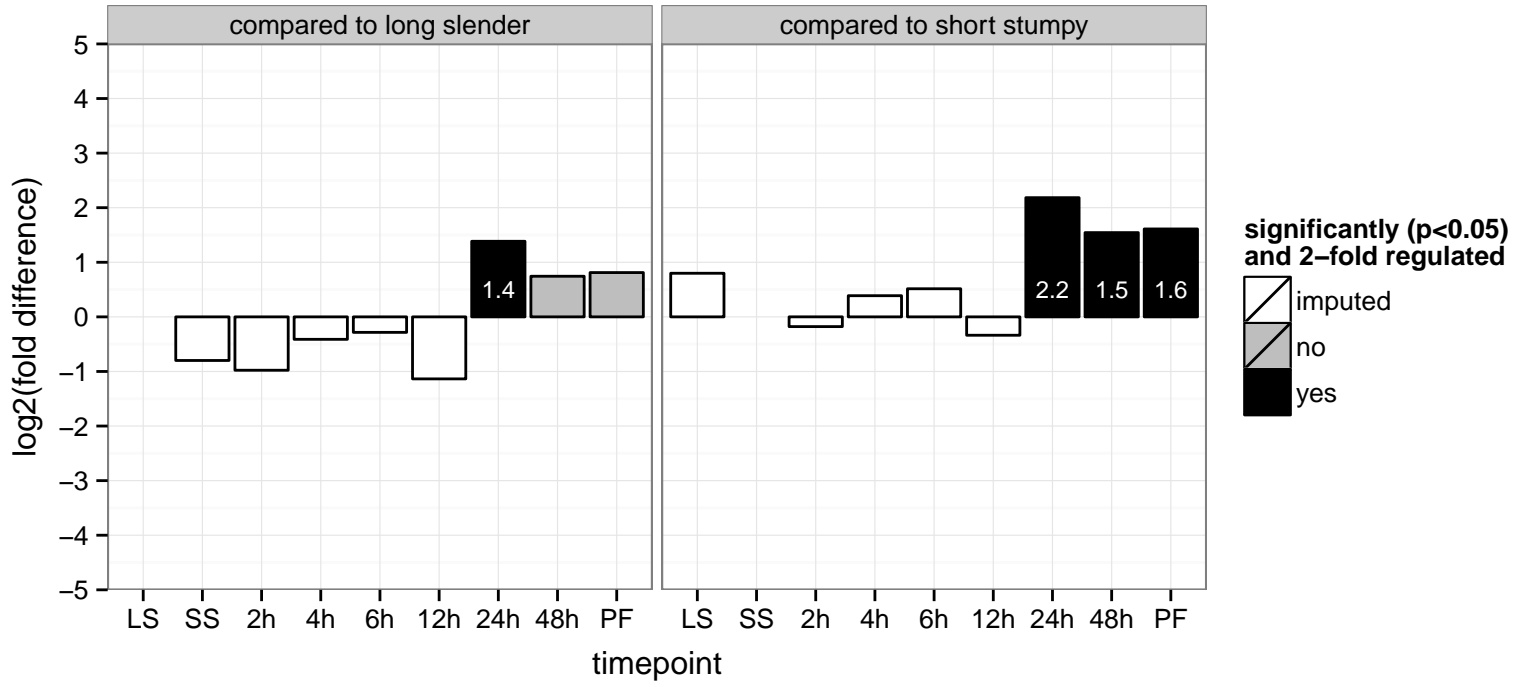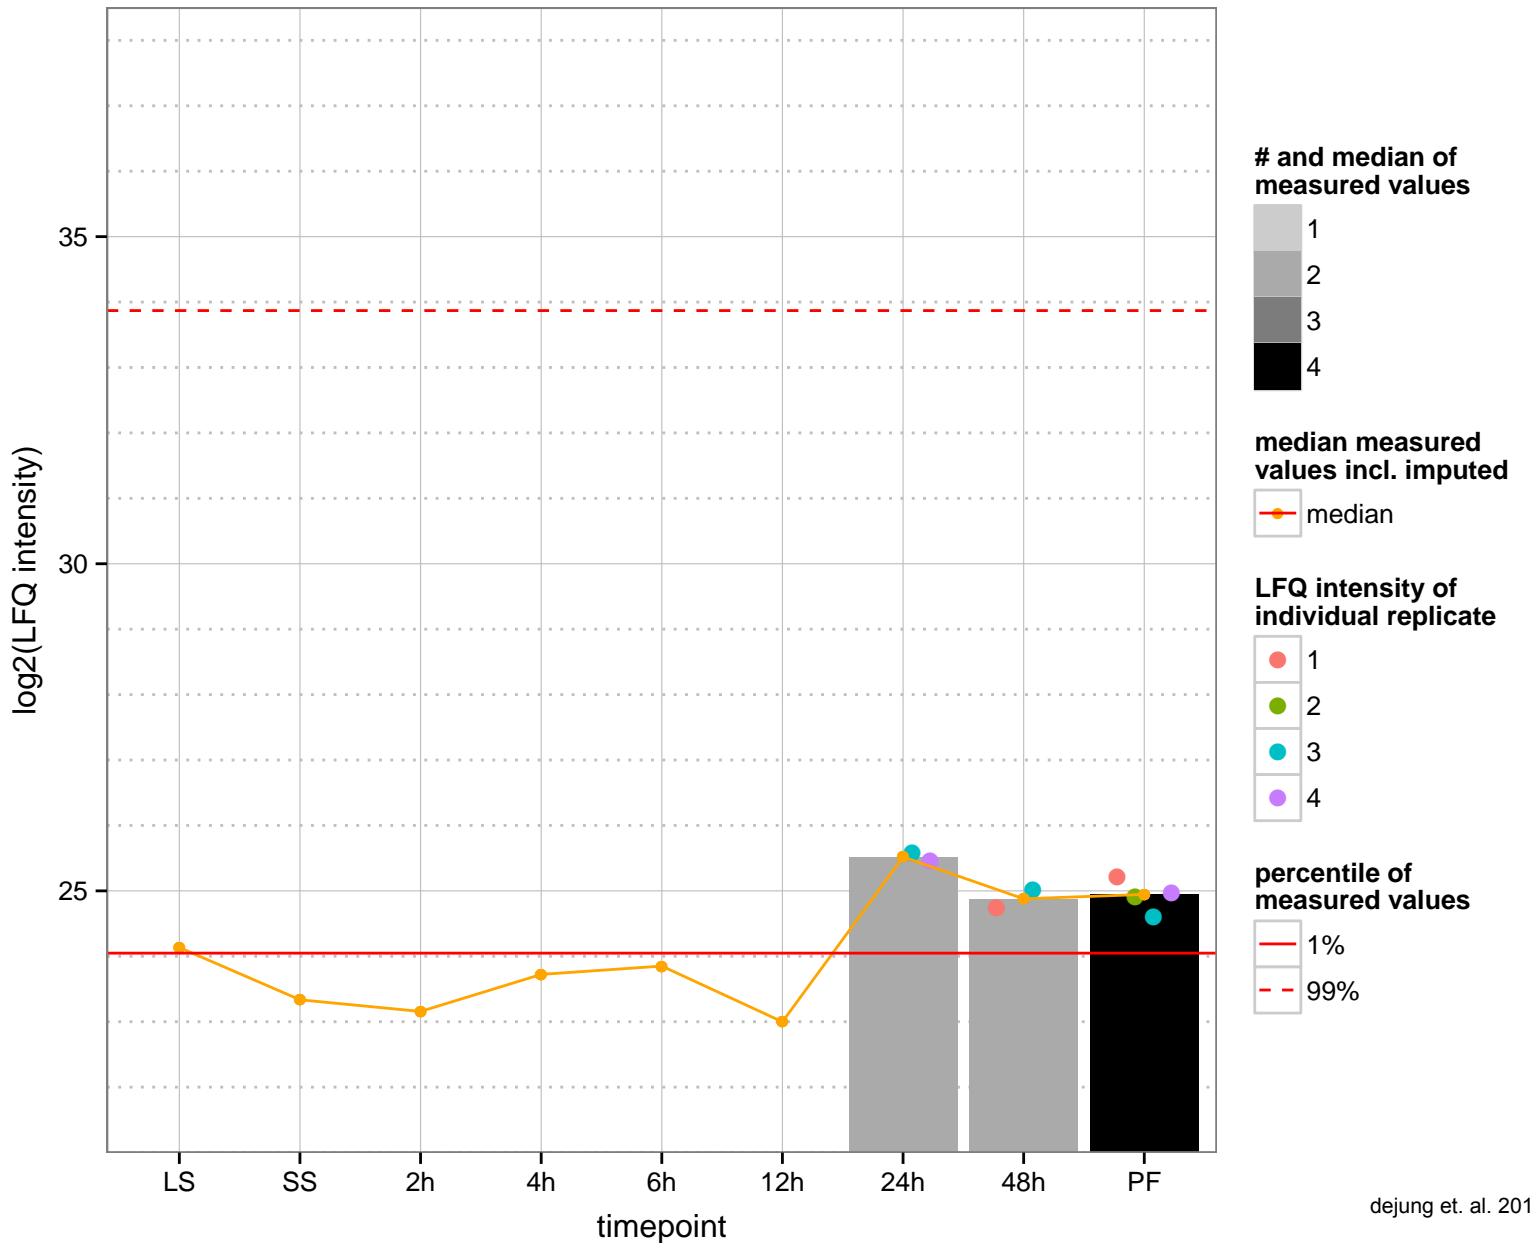

hypothetical protein, conserved  
 Tb927.11.9570  
 AGOF: null  
 AGOC: null  
 AGOP: null  
 PGO: null  
 PGOC: null  
 PGOP: null

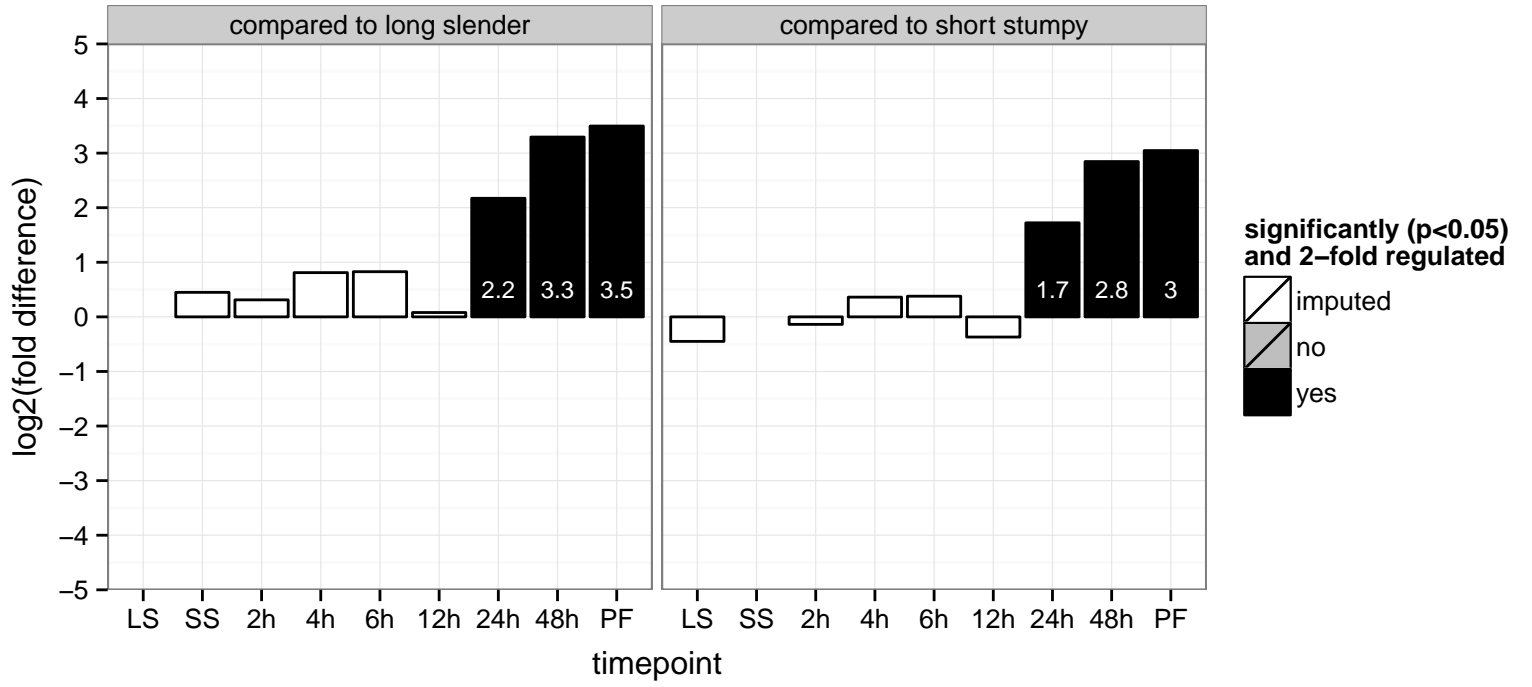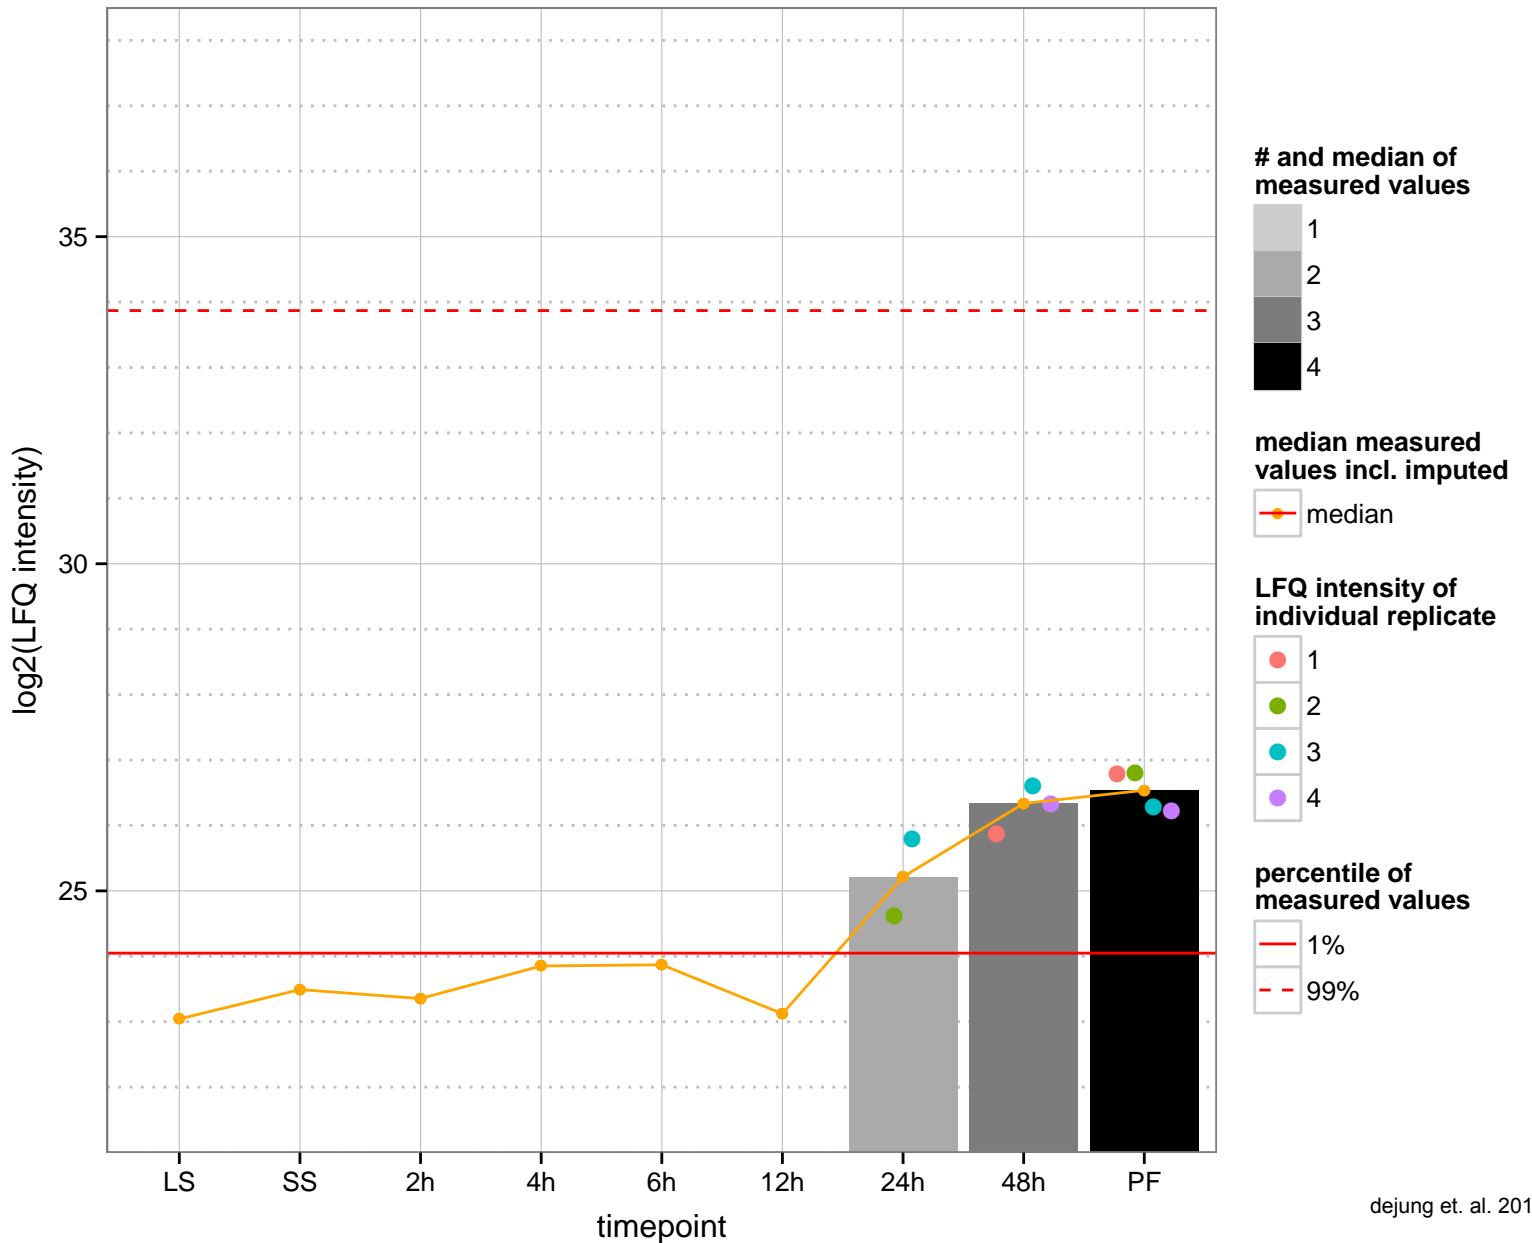

hypothetical protein, conserved  
 Tb927.11.9970  
 AGOF: null  
 AGOC: null  
 AGOP: null  
 PGOF: null  
 PGO C: null  
 PGOP: null

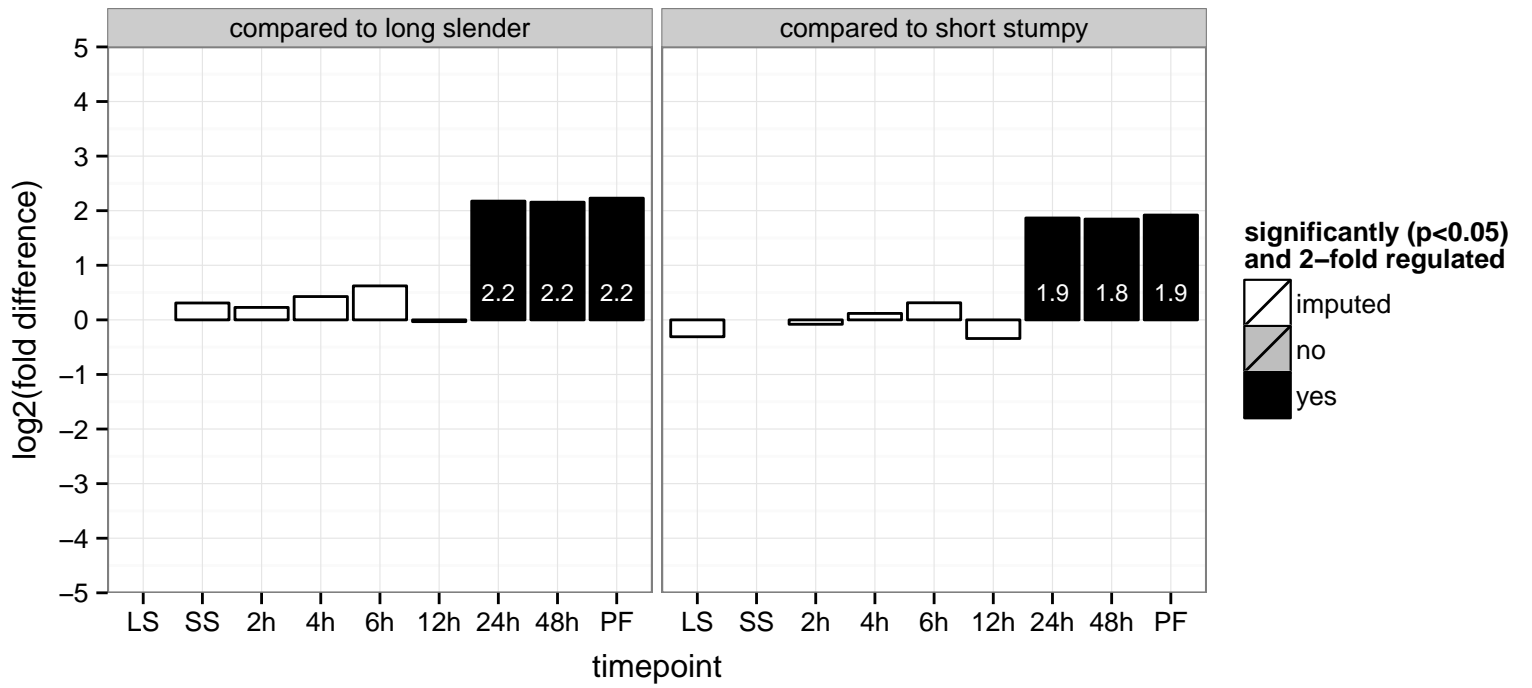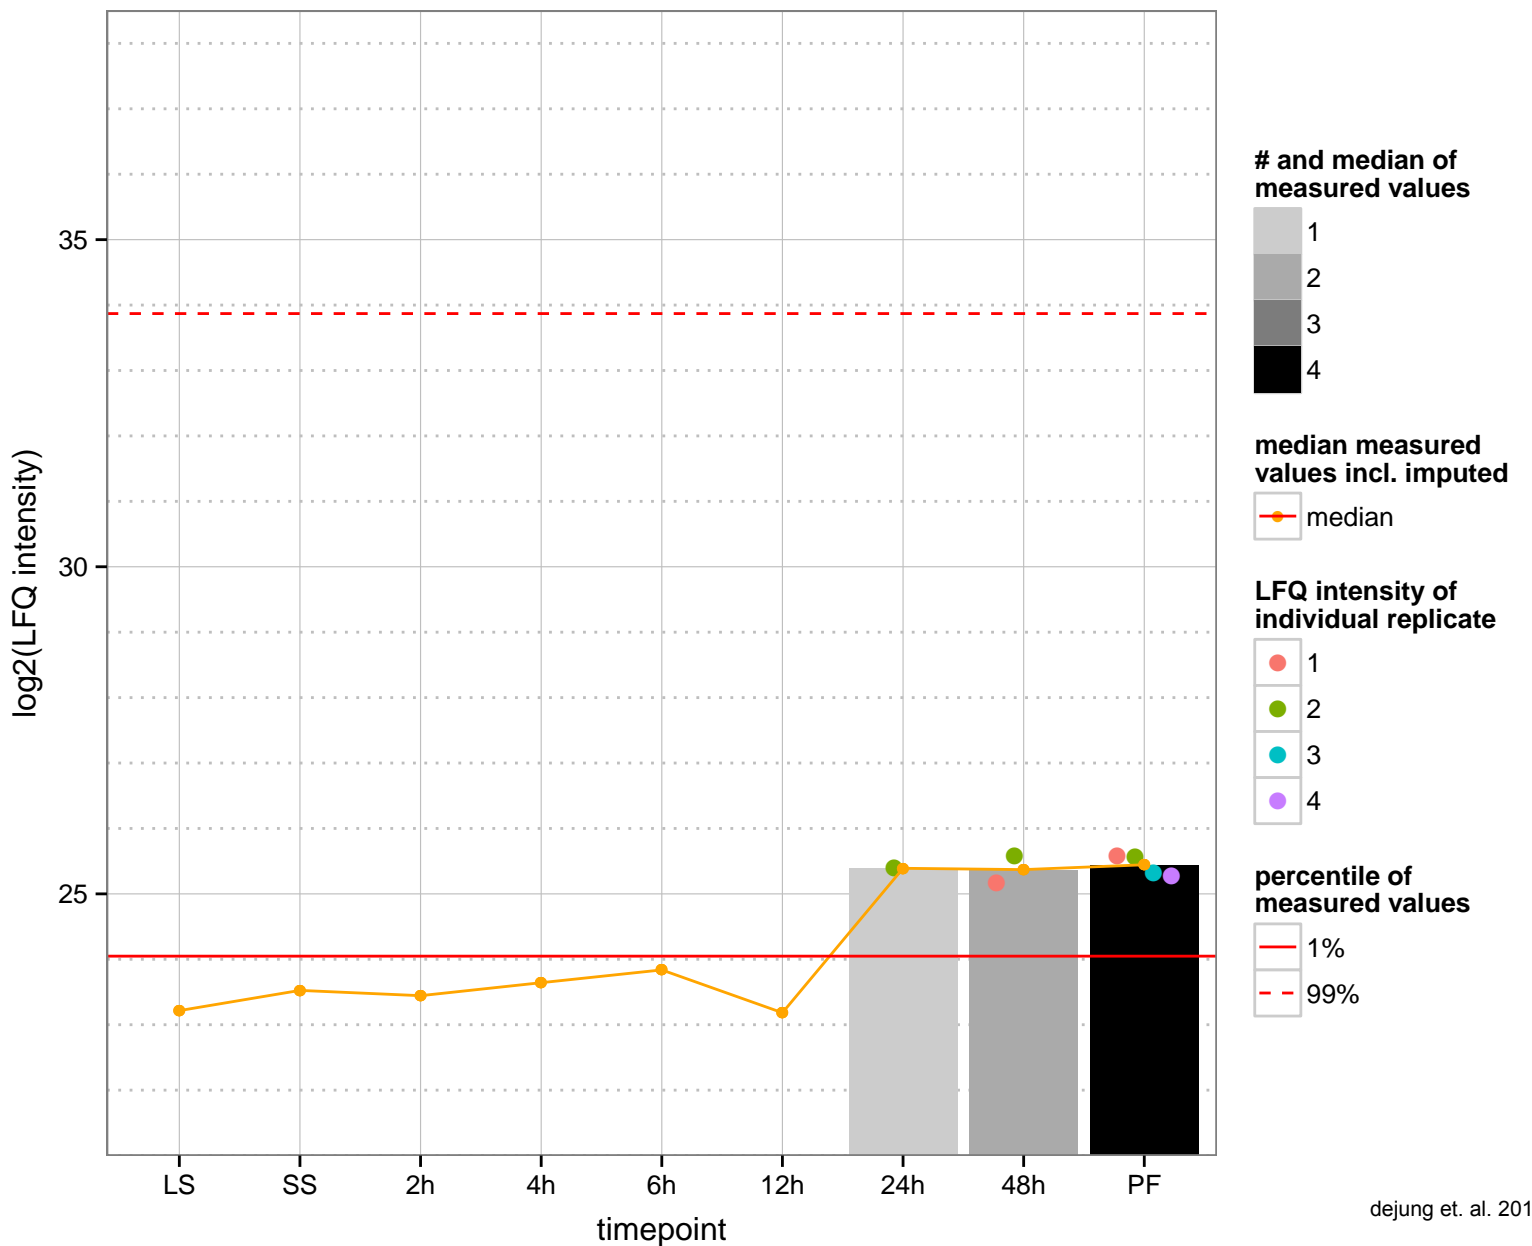

hypothetical protein, conserved  
 Tb927.2.3610  
 AGOF: null  
 AGOC: mitochondrion  
 AGOP: null  
 PGO: null  
 PGO: null  
 PGO: null

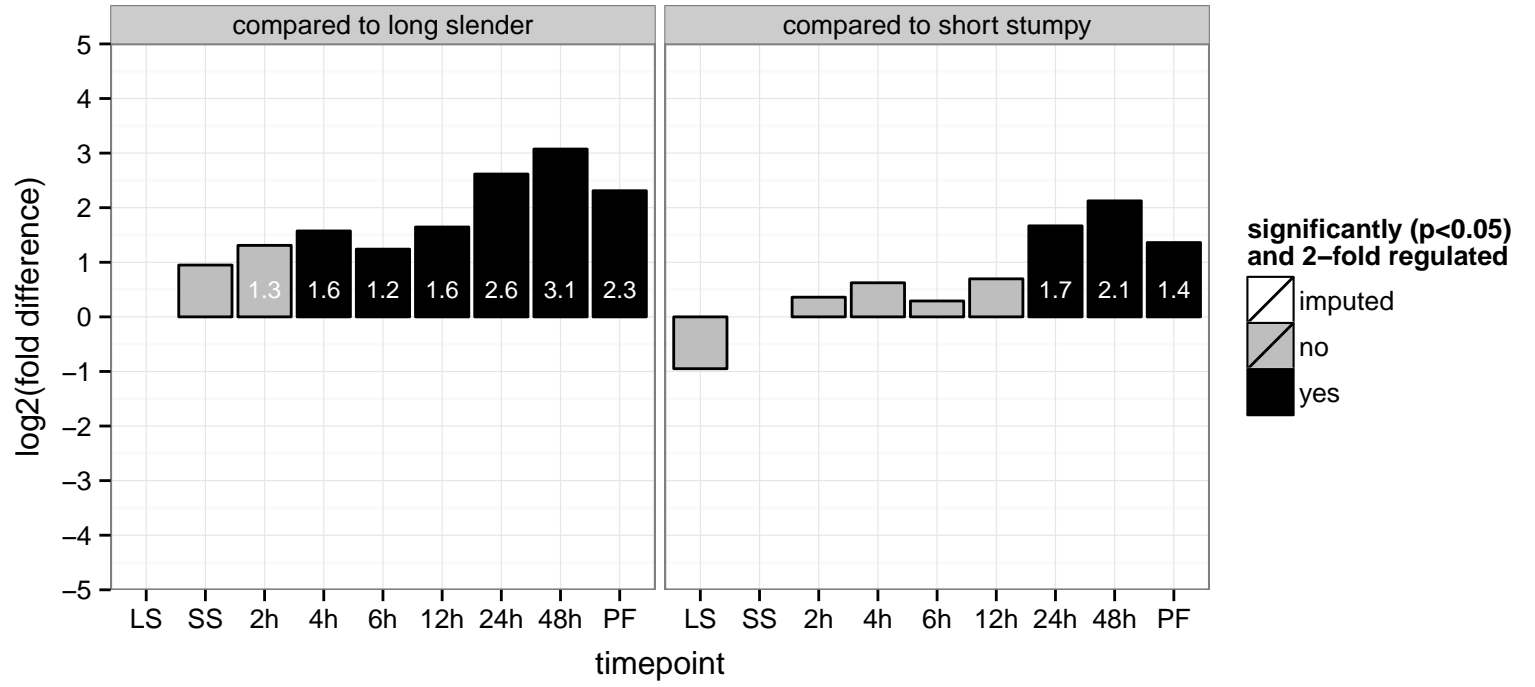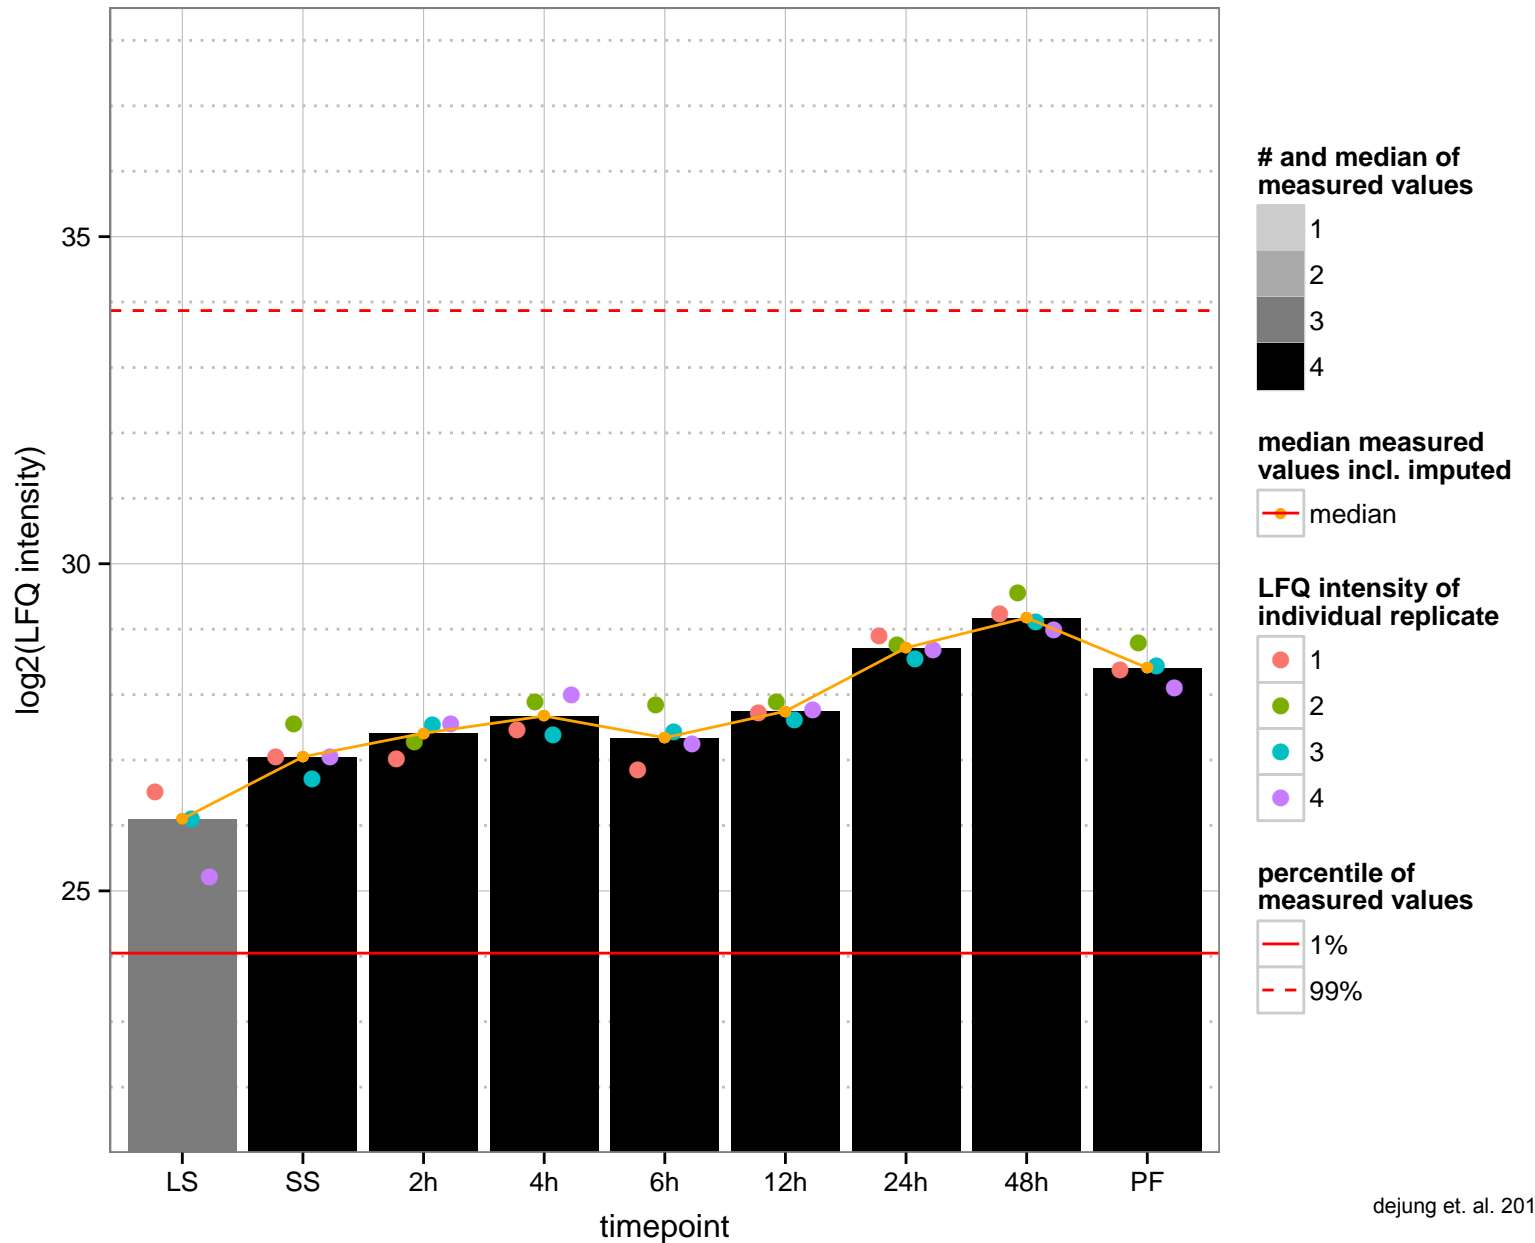

ubiquitin-conjugating enzyme, putative

Tb927.2.3720

AGOF: ubiquitin-protein ligase activity

AGOC: nucleus

AGOP: cellular protein modification process, post-translational protein modification, regulation of protein metabolic process

PGOF: acid-amino acid ligase activity

PGOC: null

PGOP: null

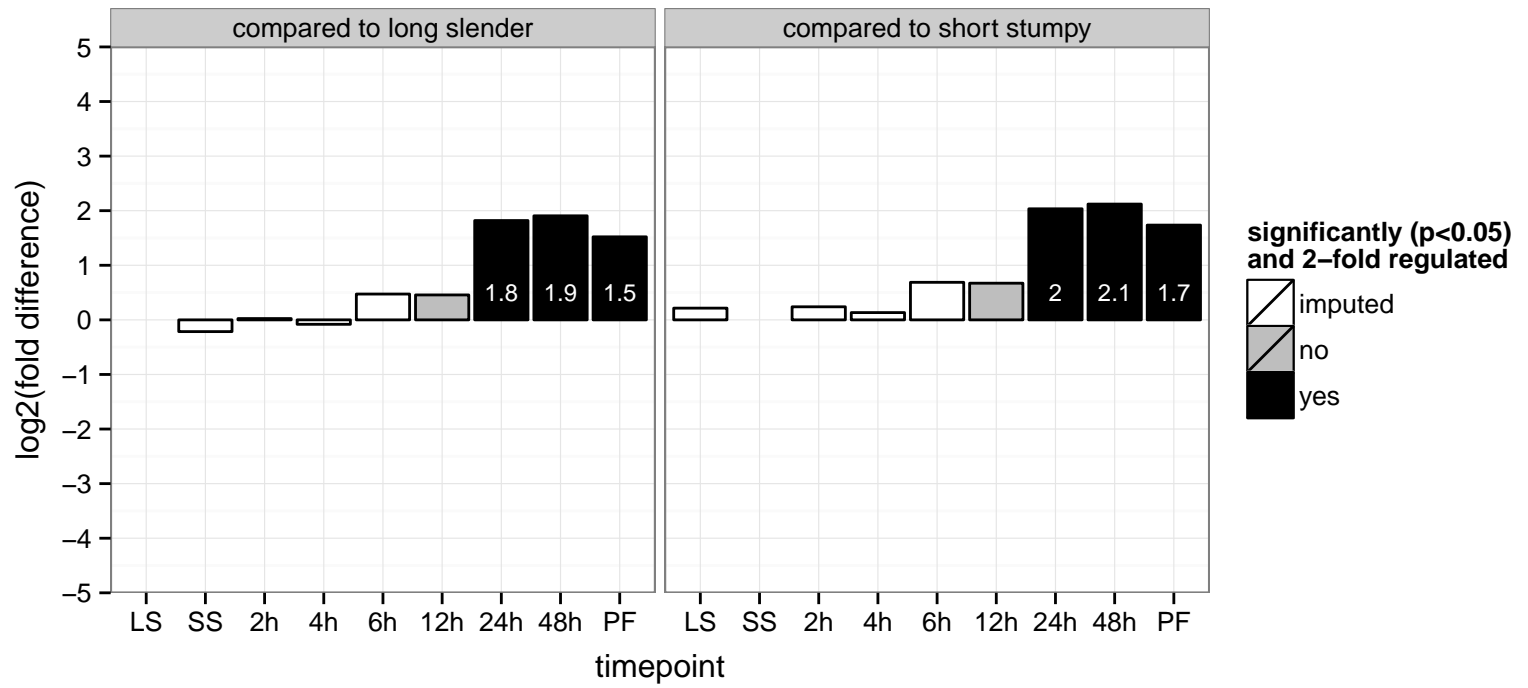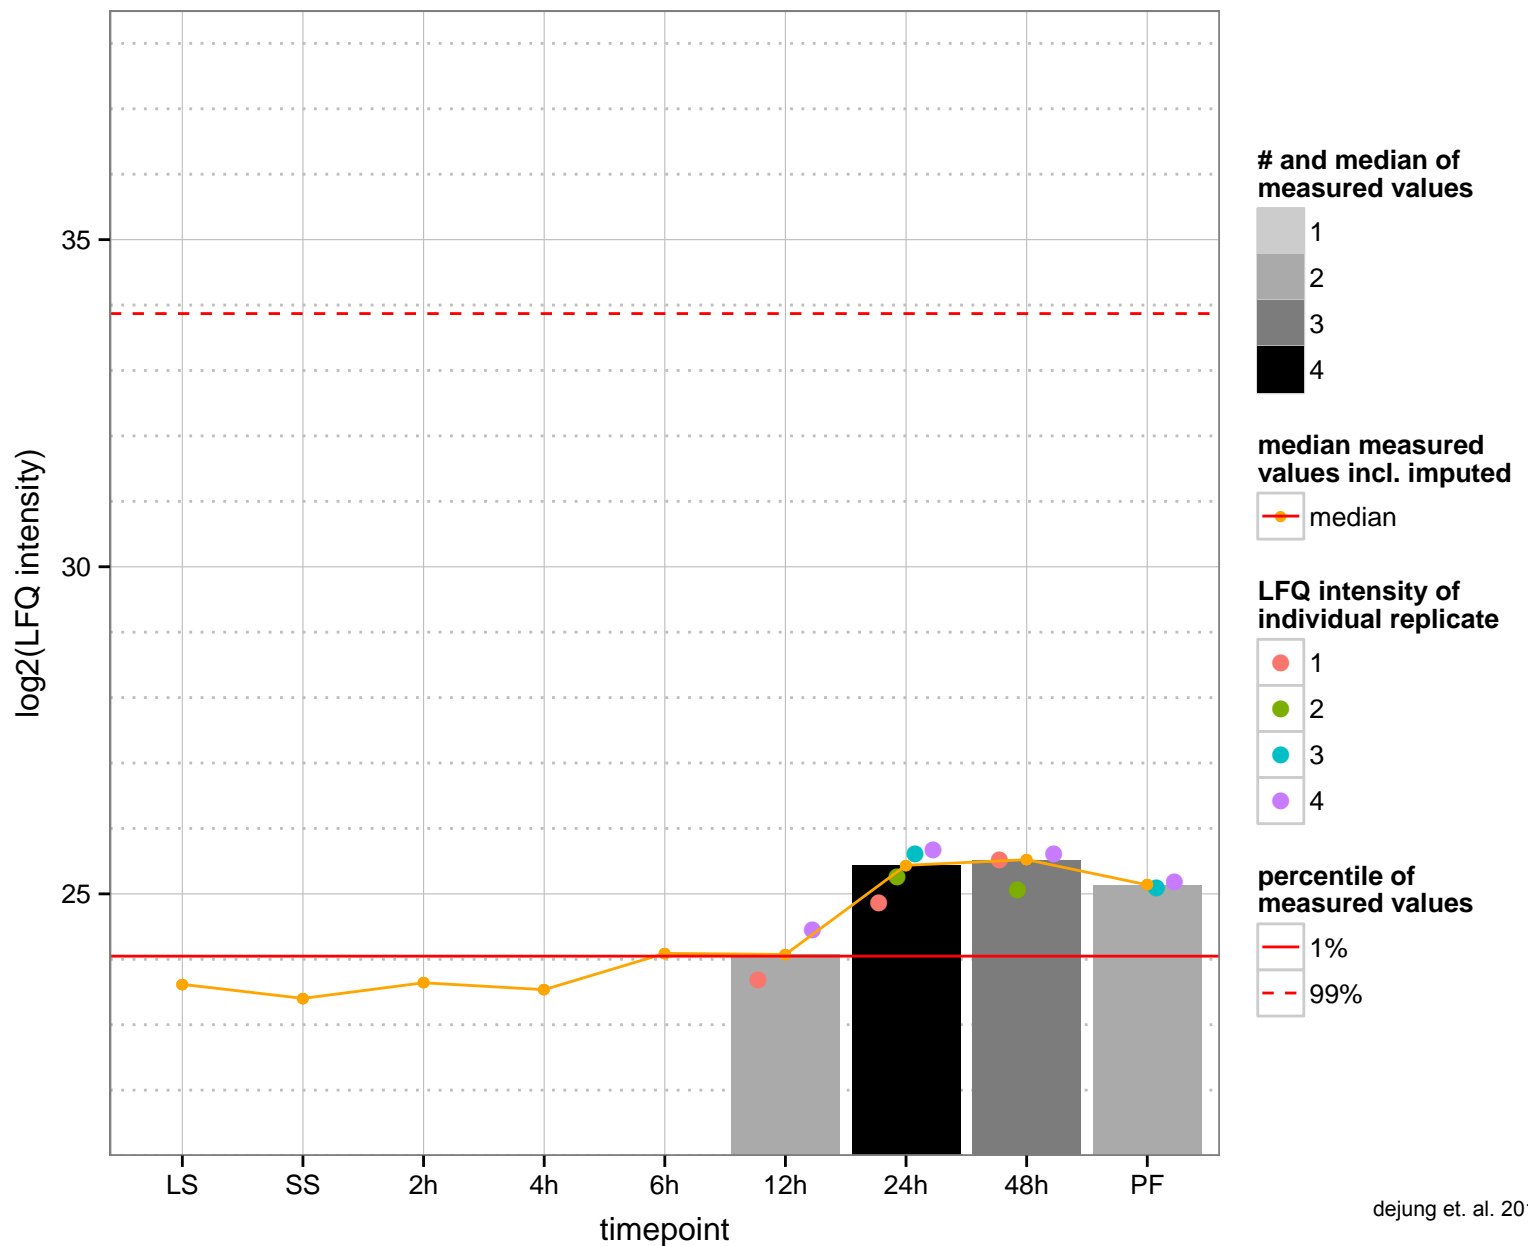

glycosomal phosphoenolpyruvate carboxykinase (PEPCK)

Tb927.2.4210

AGOF: ATP binding, microtubule binding, phosphoenolpyruvate carboxykinase (ATP) activity

AGOC: glycosome, vesicle membrane

AGOP: gluconeogenesis

PGOF: ATP binding, phosphoenolpyruvate carboxykinase (ATP) activity, phosphoenolpyruvate carboxykinase activity, purine metabolism

PGOC: null

PGOP: gluconeogenesis

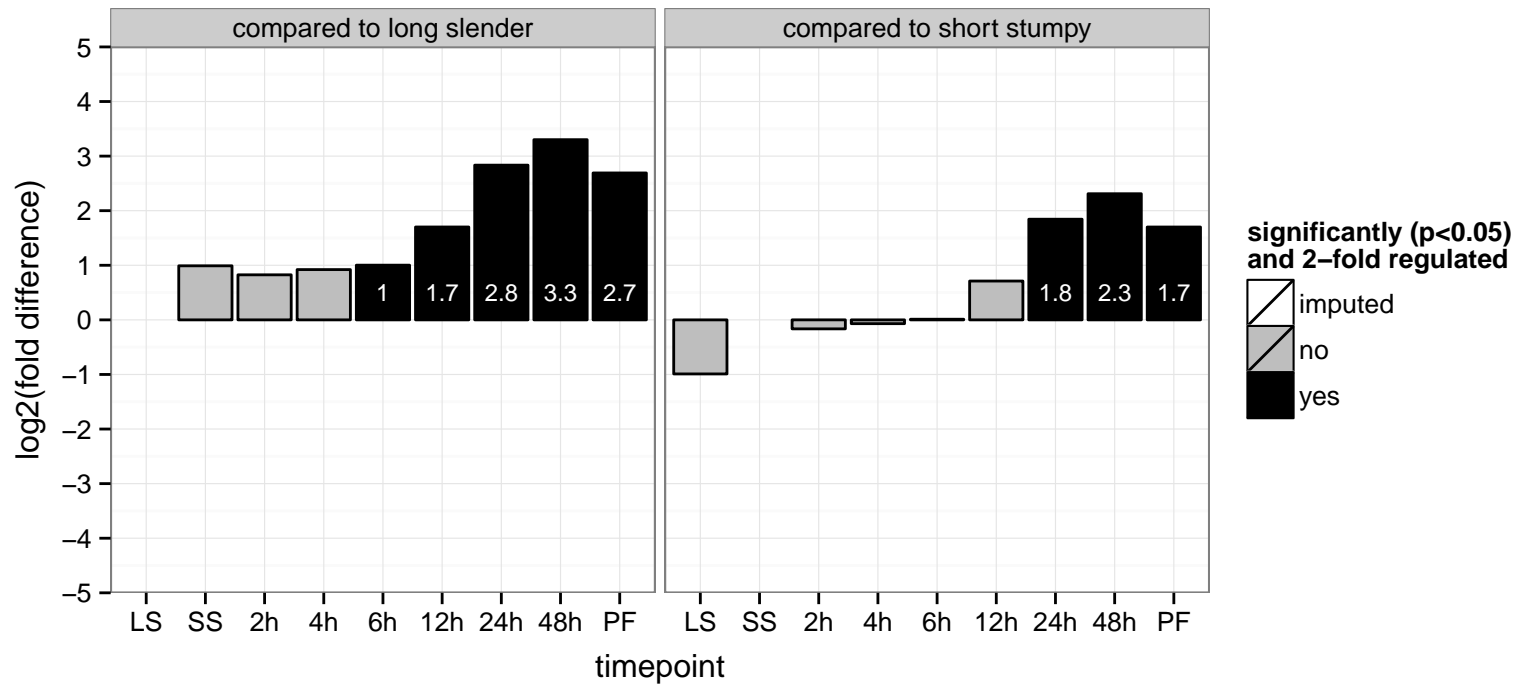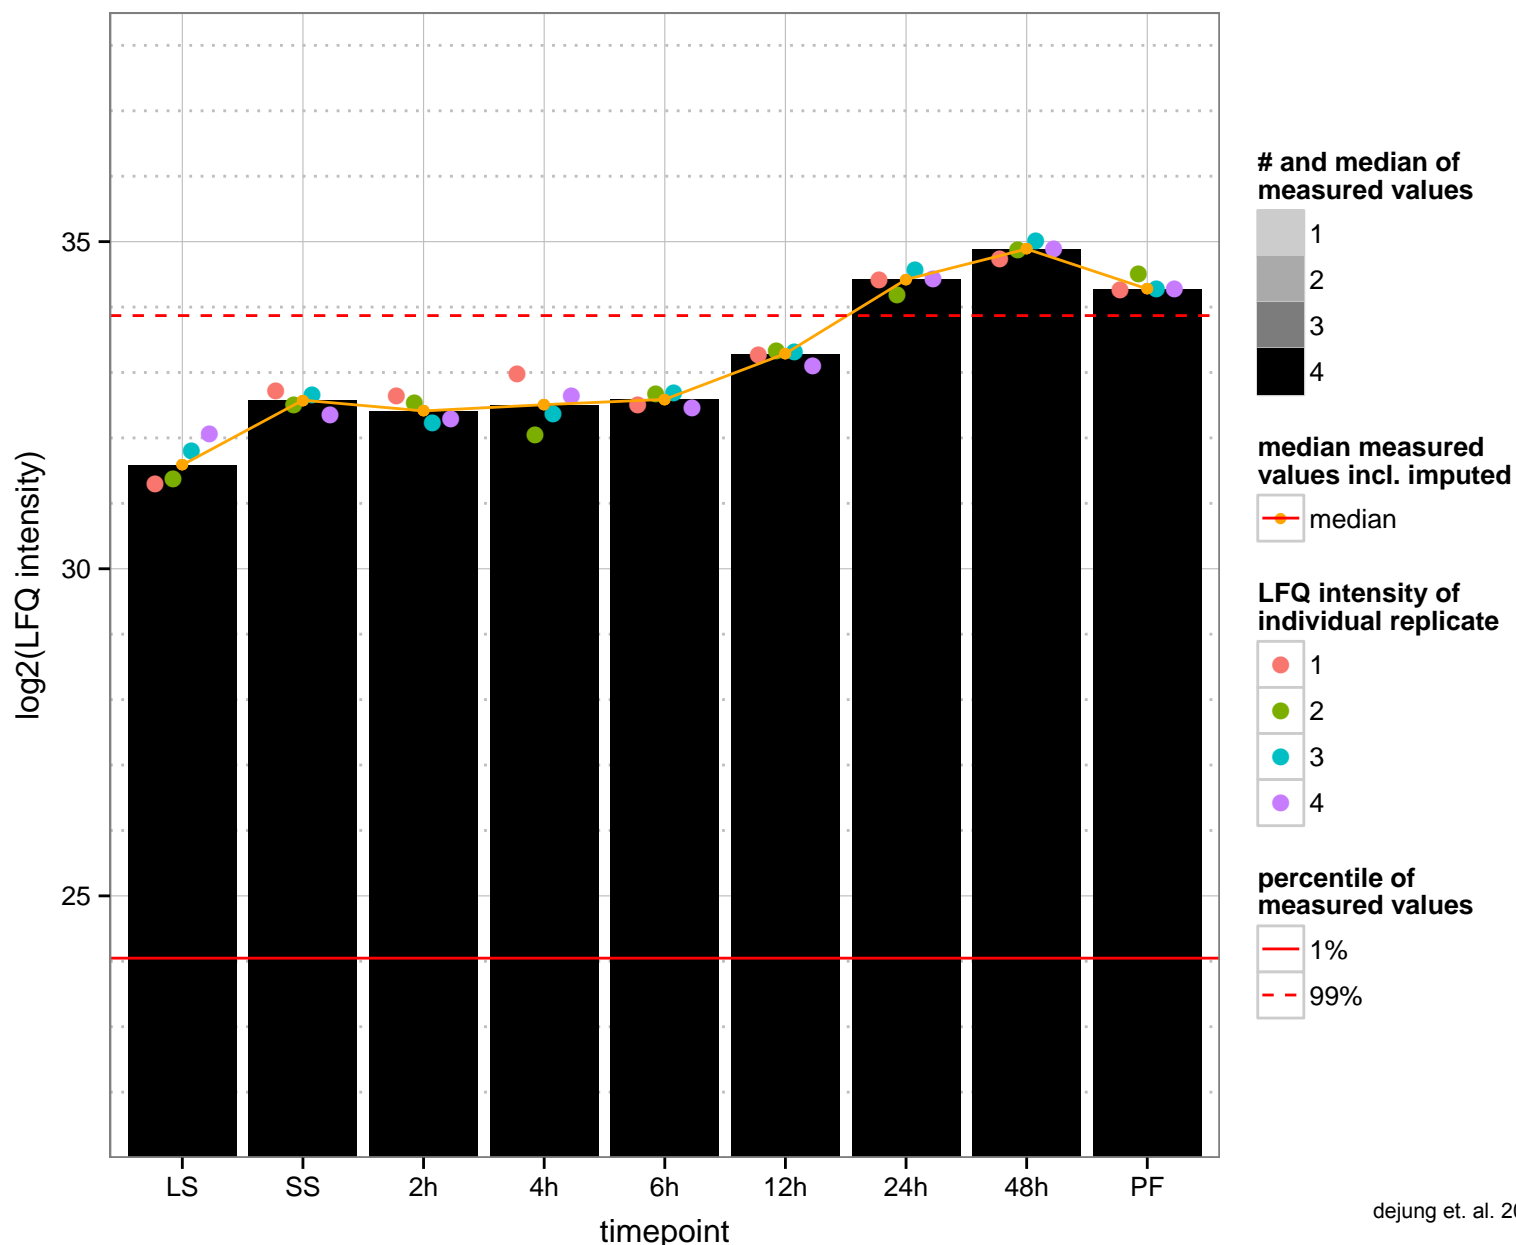

hypothetical protein, conserved  
 Tb927.2.4980  
 AGOF: null  
 AGOC: nucleus  
 AGOP: null  
 PGO: methyltransferase activity  
 PGOC: null  
 PGOP: null

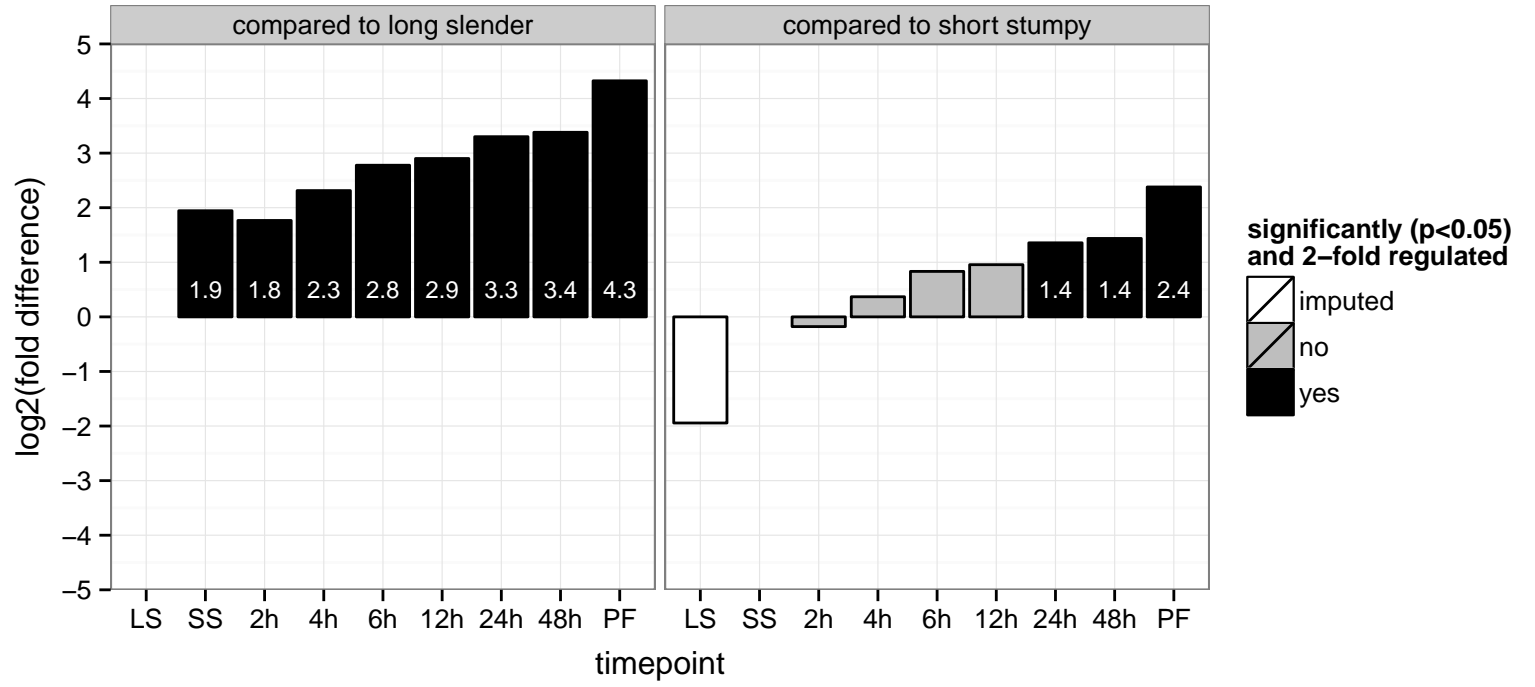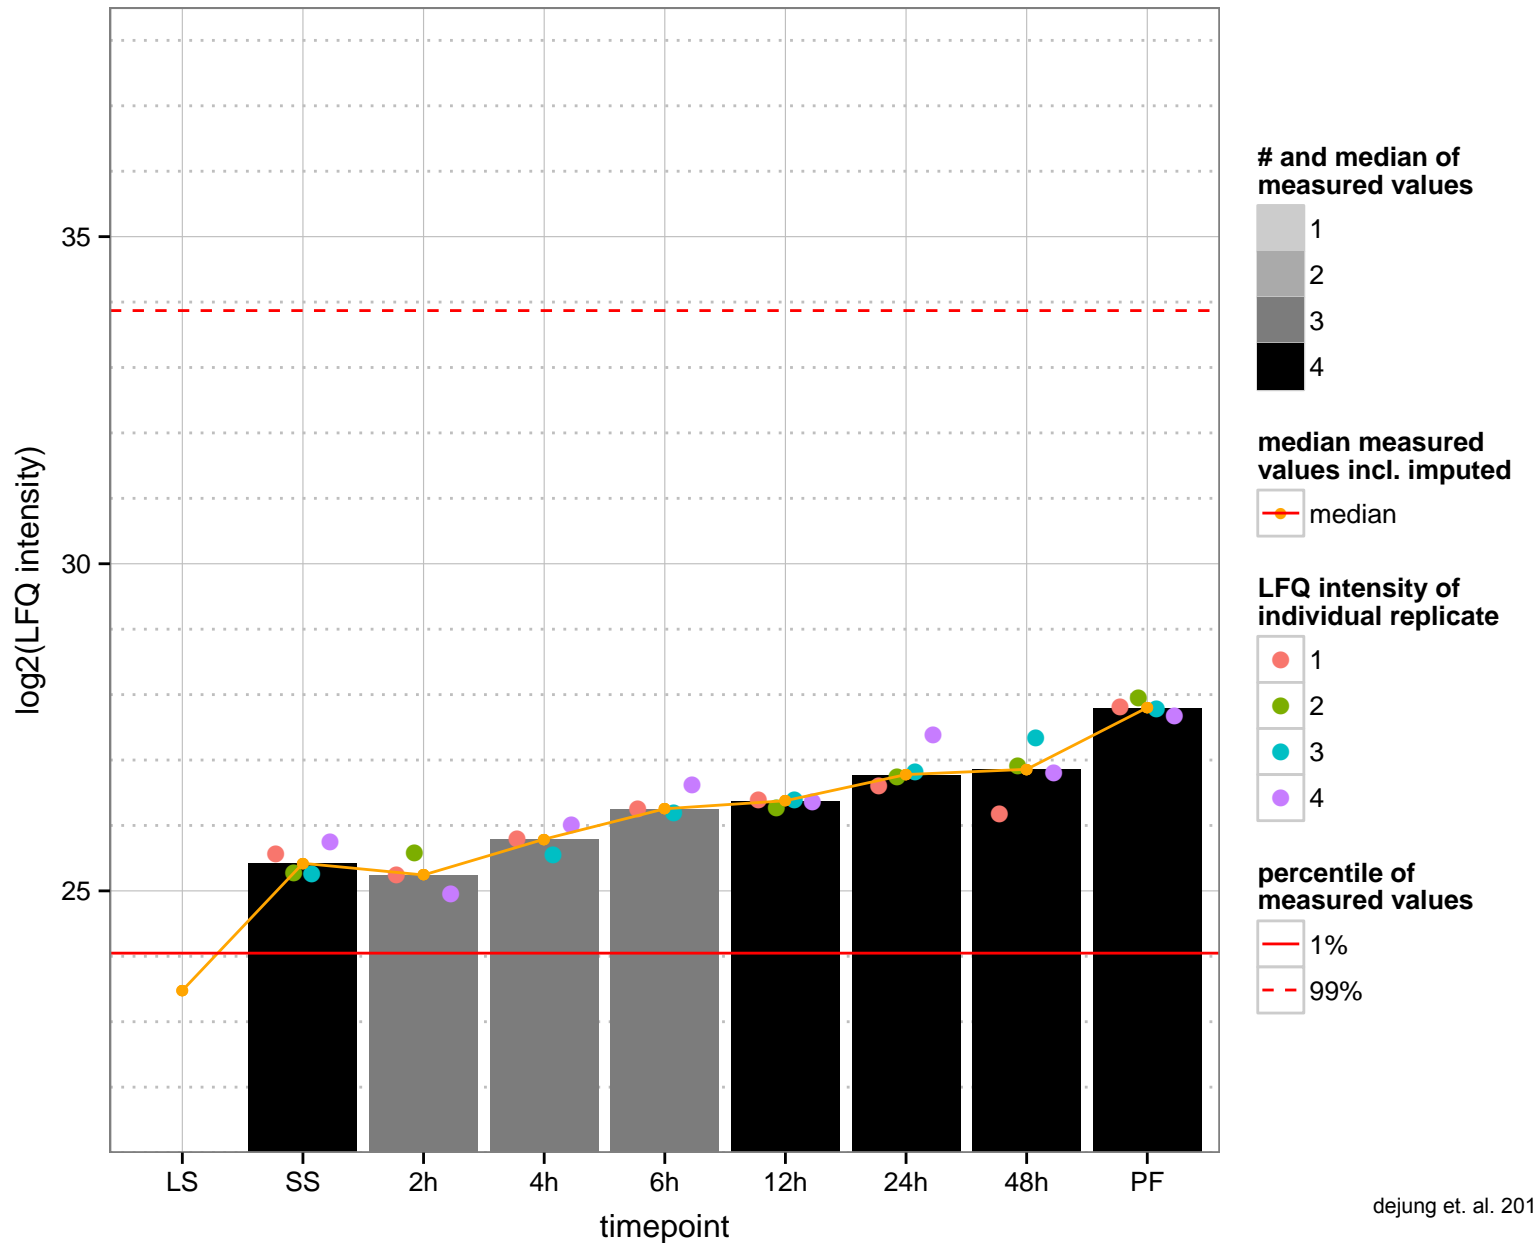

hypothetical protein, conserved  
 Tb927.2.6100  
 AGOF: null  
 AGOC: null  
 AGOP: null  
 PGOF: null  
 PGO: null  
 PGOP: null

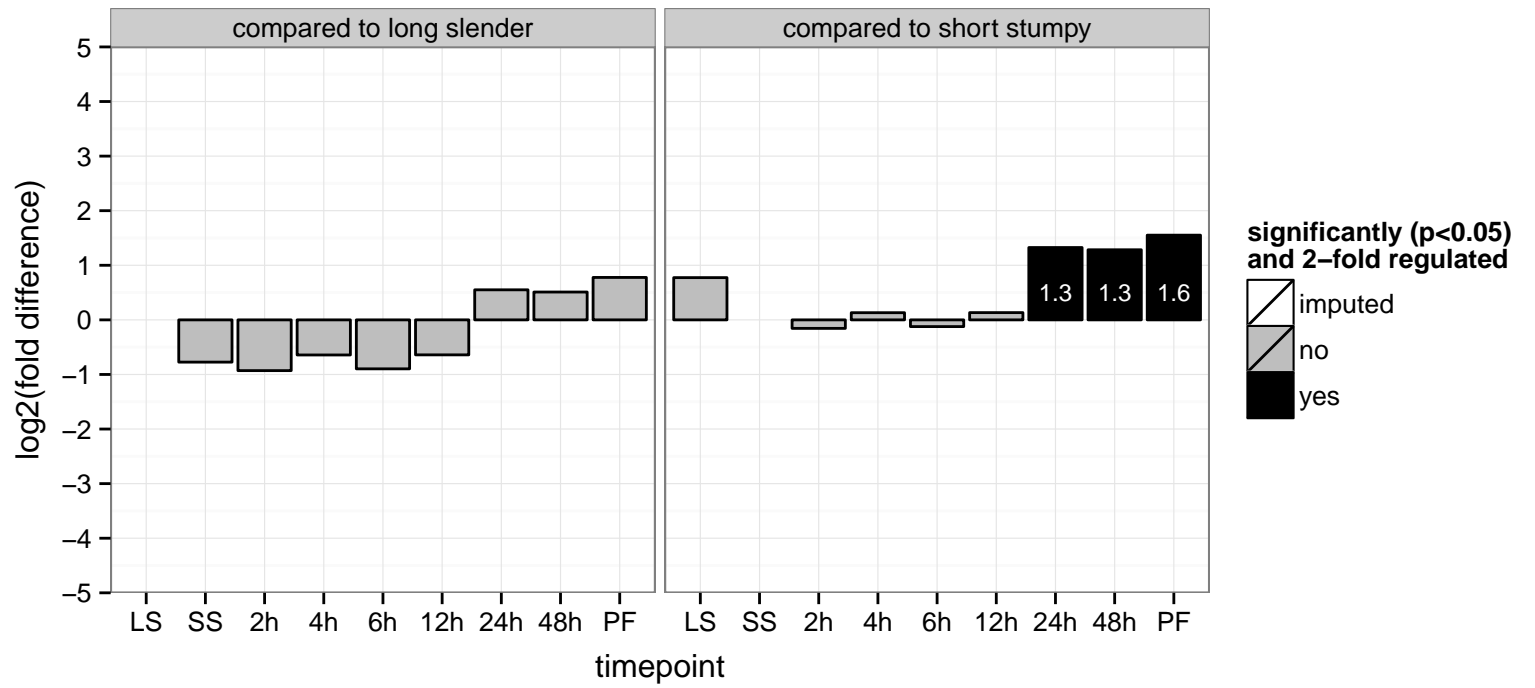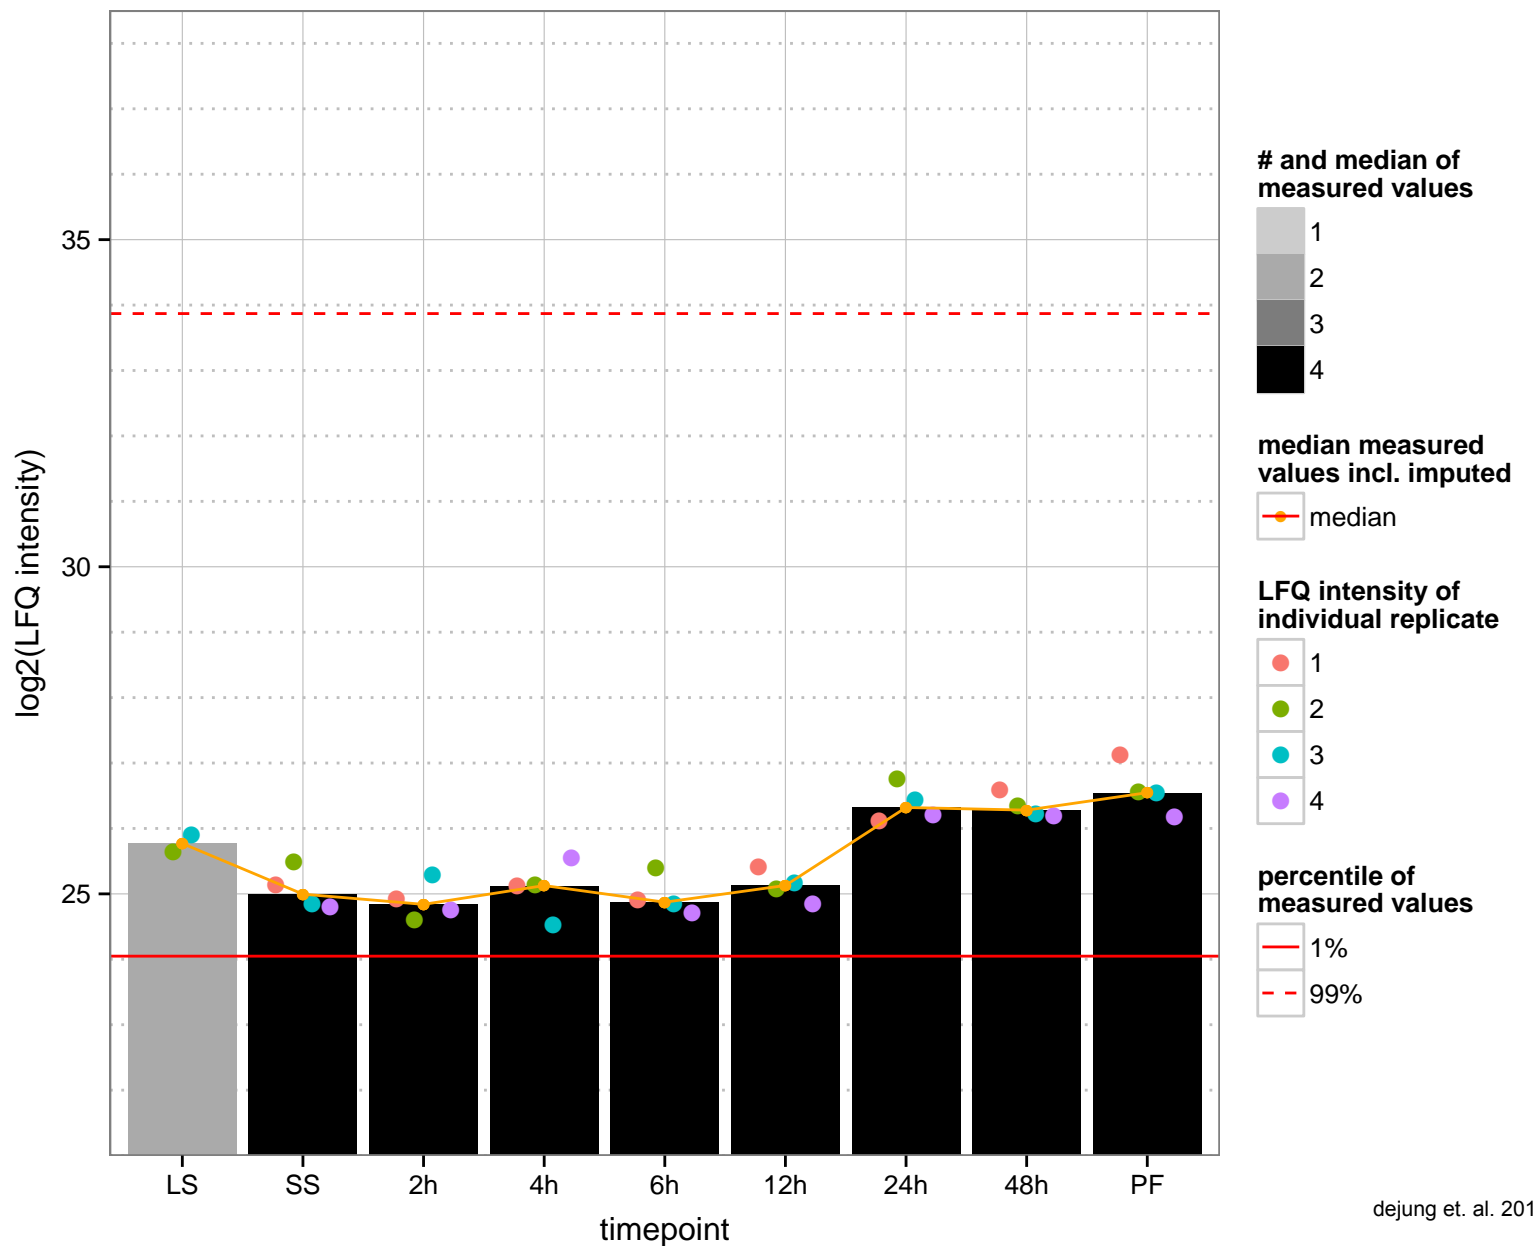



ATP synthase beta chain, mitochondrial precursor, ATP synthase F1, beta subunit

Tb927.3.1380

AGOF: ATP binding, GTP binding, hydrogen ion transporting ATP synthase activity, rotational mechanism, hydrogen-exporting

AGOC: mitochondrial inner membrane, mitochondrial proton-transporting ATP synthase complex, catalytic core F(1), mitoch

AGOP: ATP synthesis coupled proton transport, proton transport

PGOF: ATP binding, hydrogen ion transporting ATP synthase activity, rotational mechanism, hydrogen-exporting ATPase activ

PGOC: proton-transporting ATP synthase complex, catalytic core F(1), proton-transporting two-sector ATPase complex, cata

PGOP: ATP hydrolysis coupled proton transport, ATP metabolic process, ATP synthesis coupled proton transport, proton trans

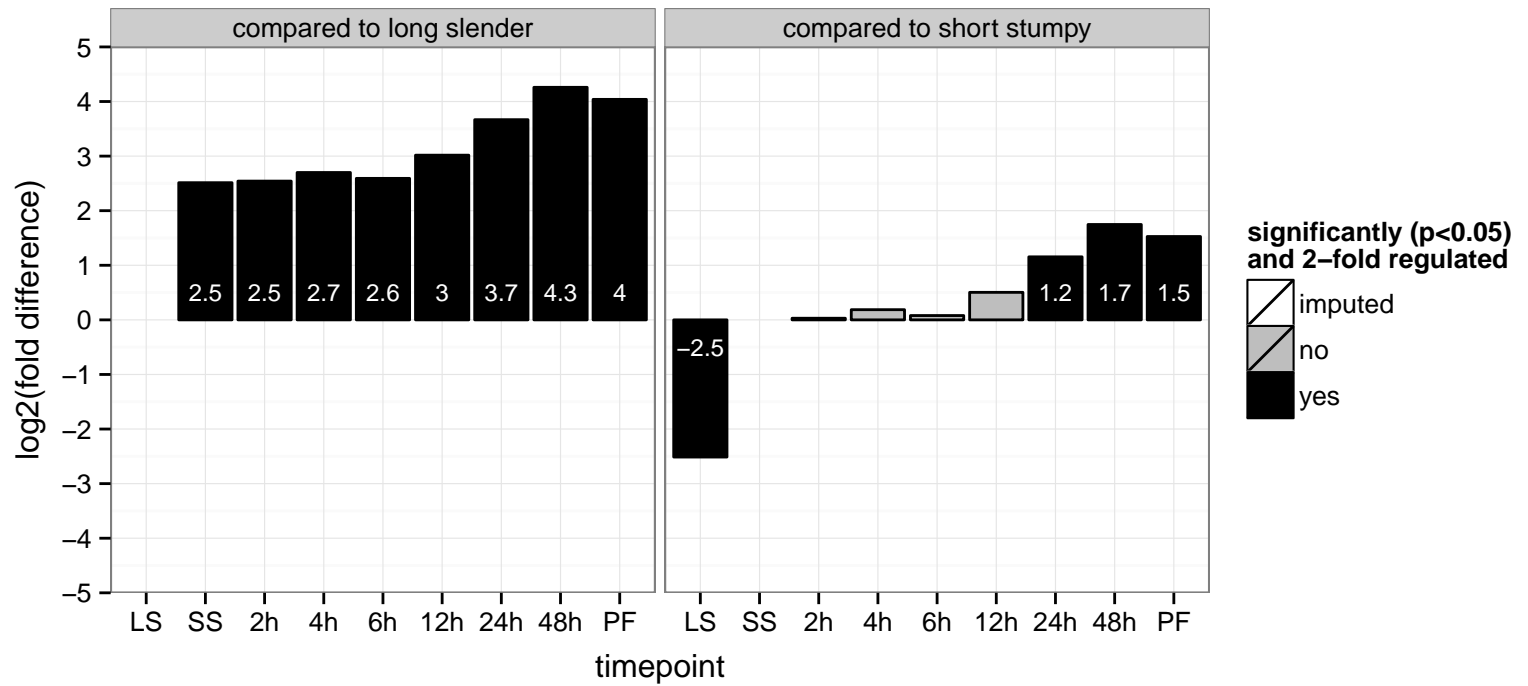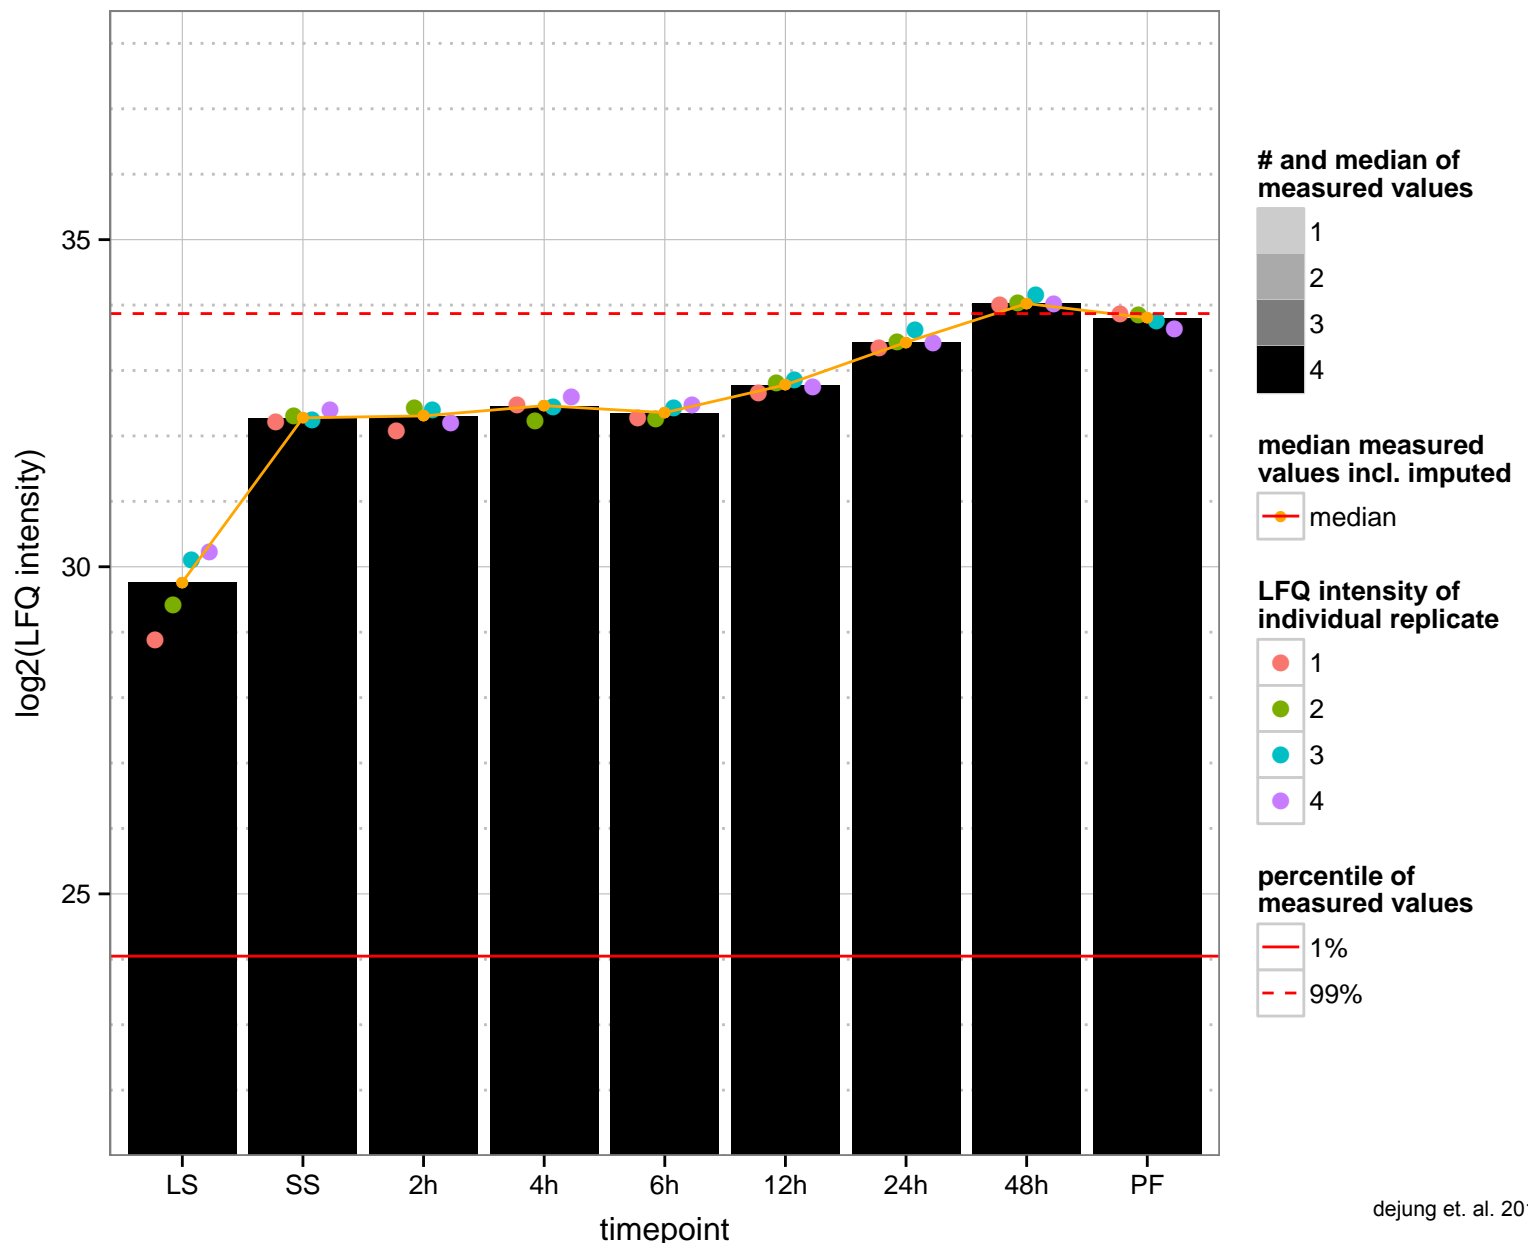

hypothetical protein, conserved  
 Tb927.3.1690  
 AGOF: null  
 AGOC: mitochondrion  
 AGOP: null  
 PGO: null  
 PGOC: null  
 PGOP: null

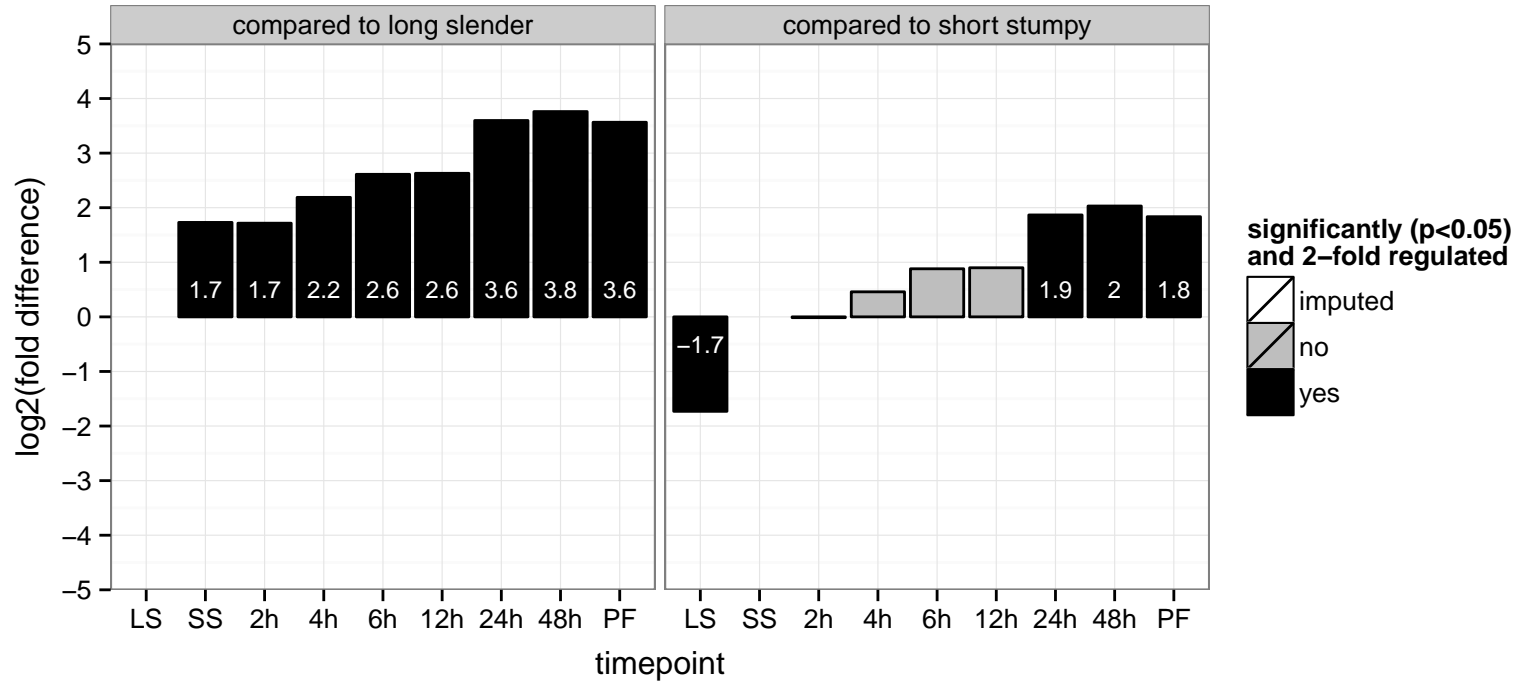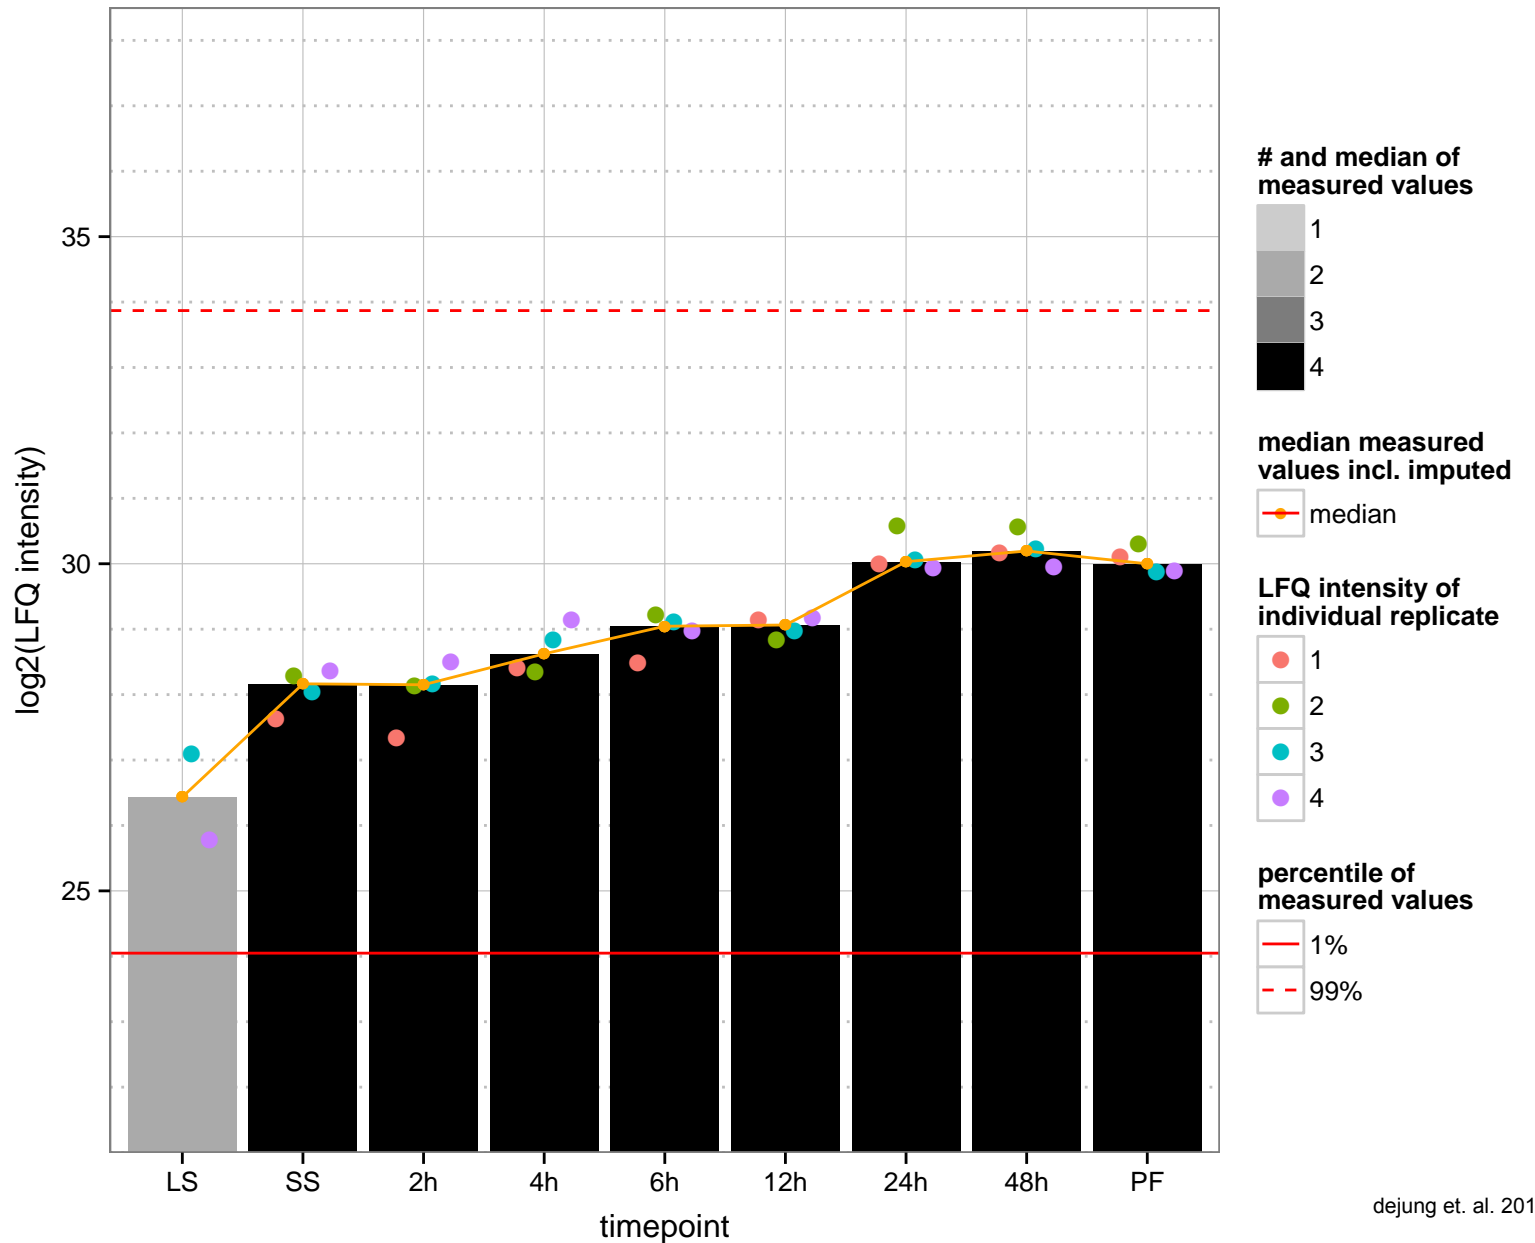

hypothetical protein, conserved  
 Tb927.3.1810  
 AGOF: null  
 AGOC: mitochondrion  
 AGOP: null  
 PGO: null  
 PGOC: null  
 PGOP: null

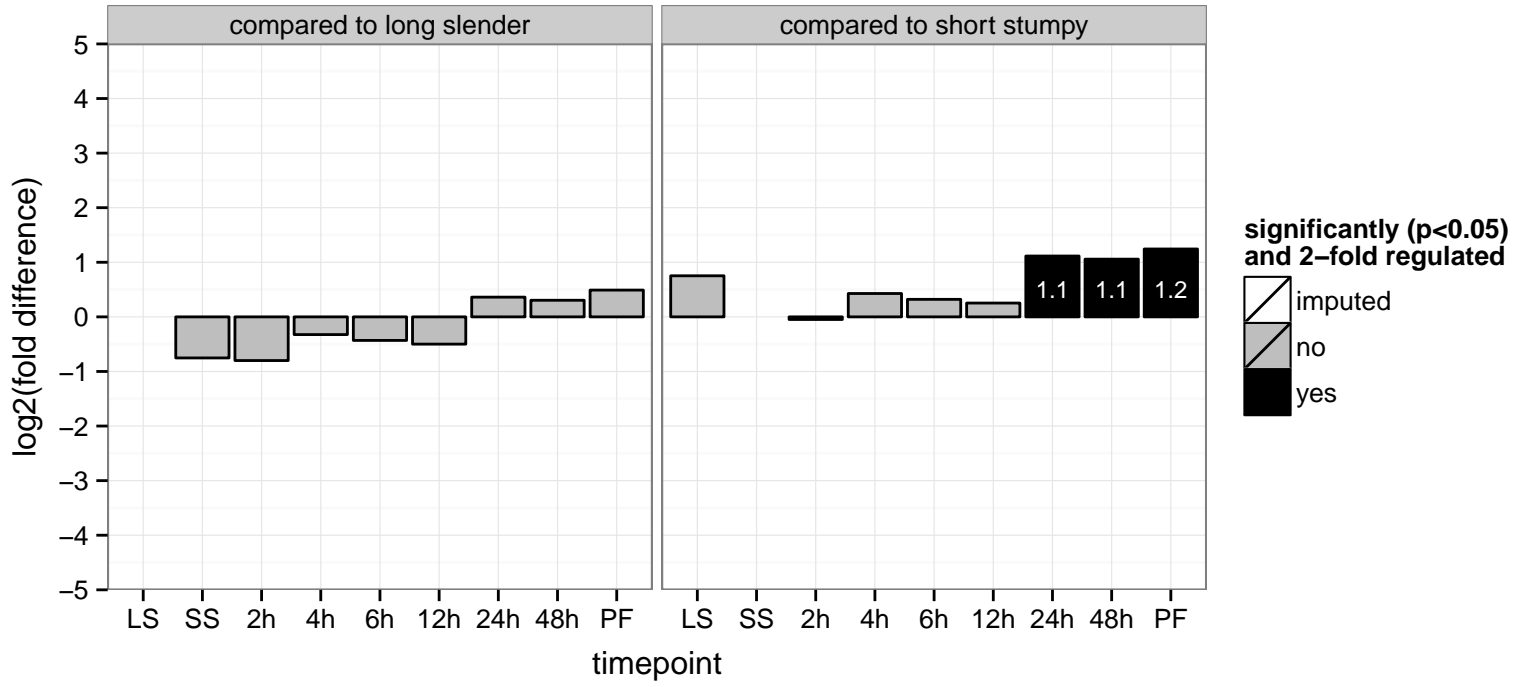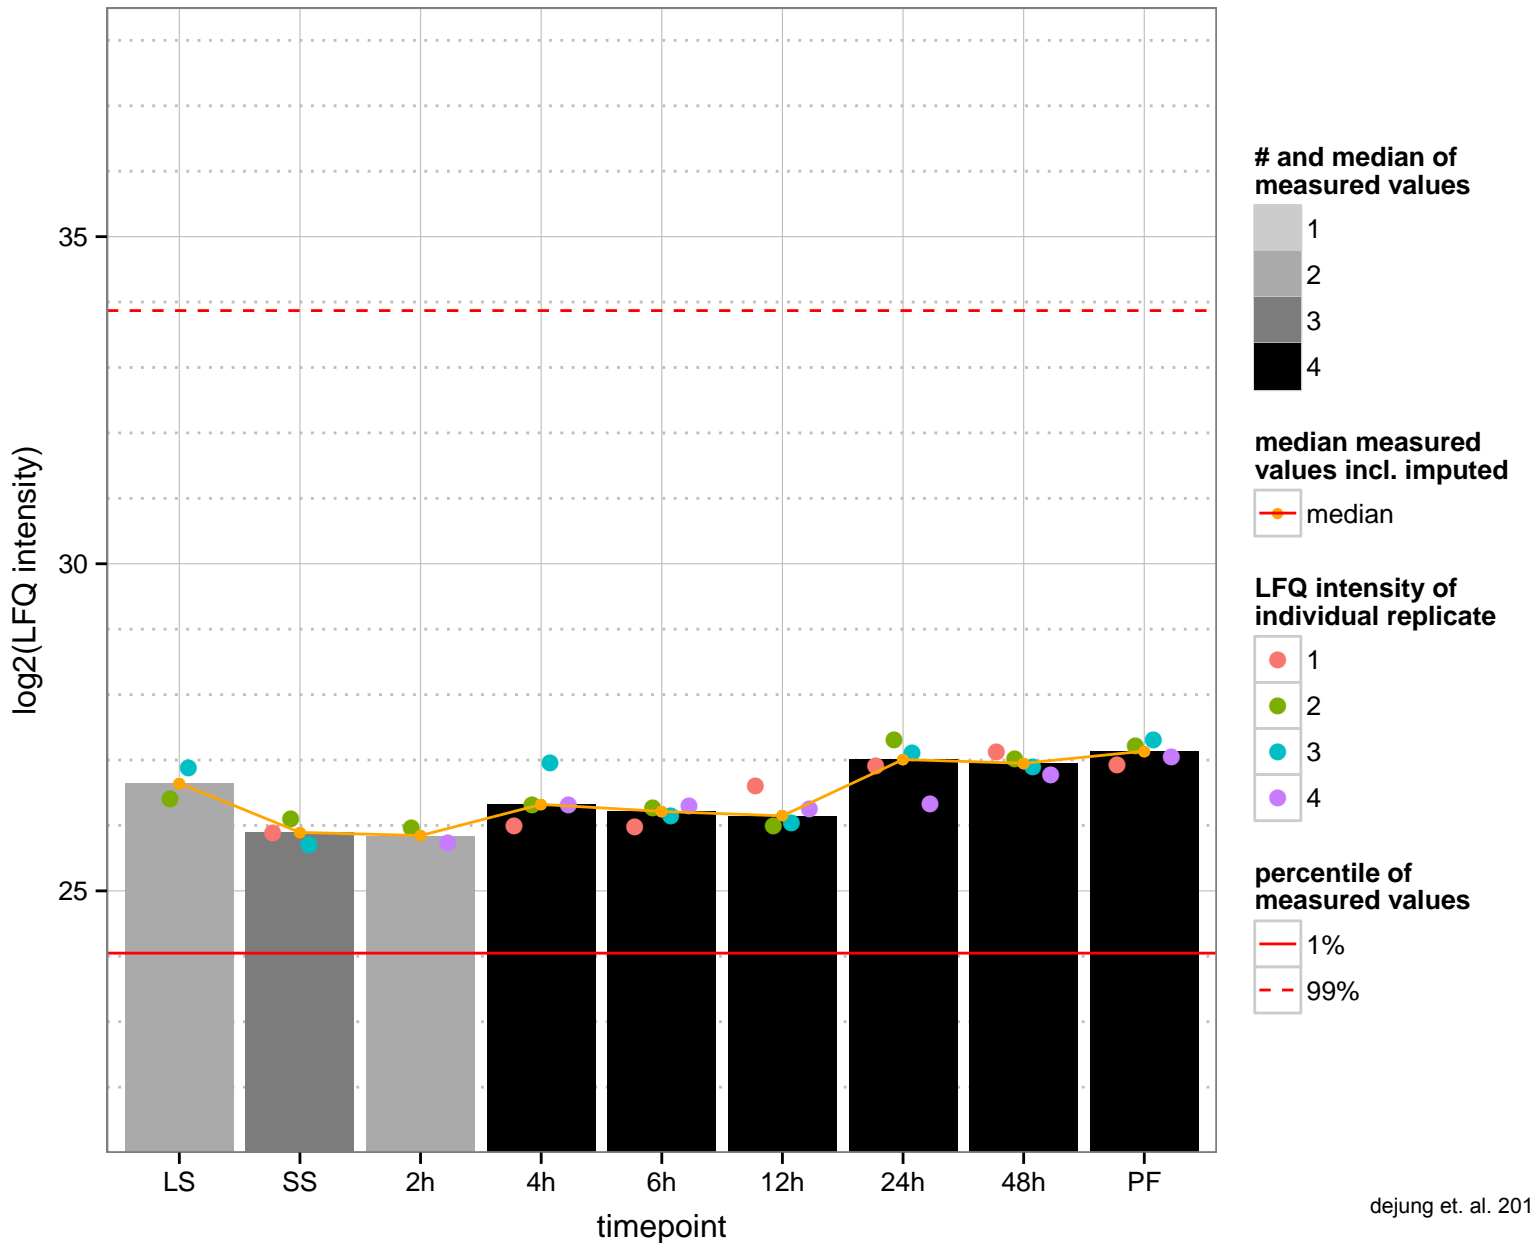

protein phosphatase 2C, putative  
 Tb927.3.2150  
 AGOF: phosphoprotein phosphatase activity  
 AGOC: null  
 AGOP: null  
 PGOF: catalytic activity  
 PGOC: null  
 PGOP: null

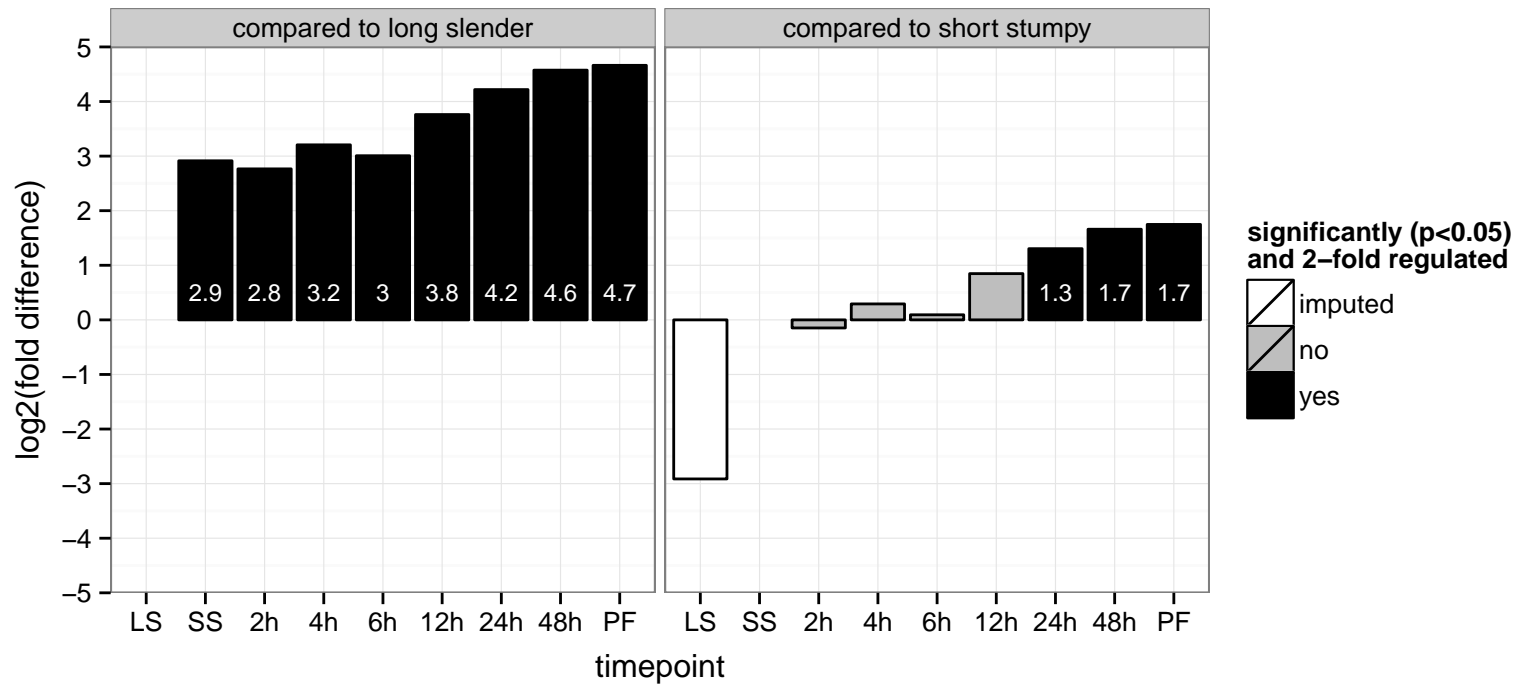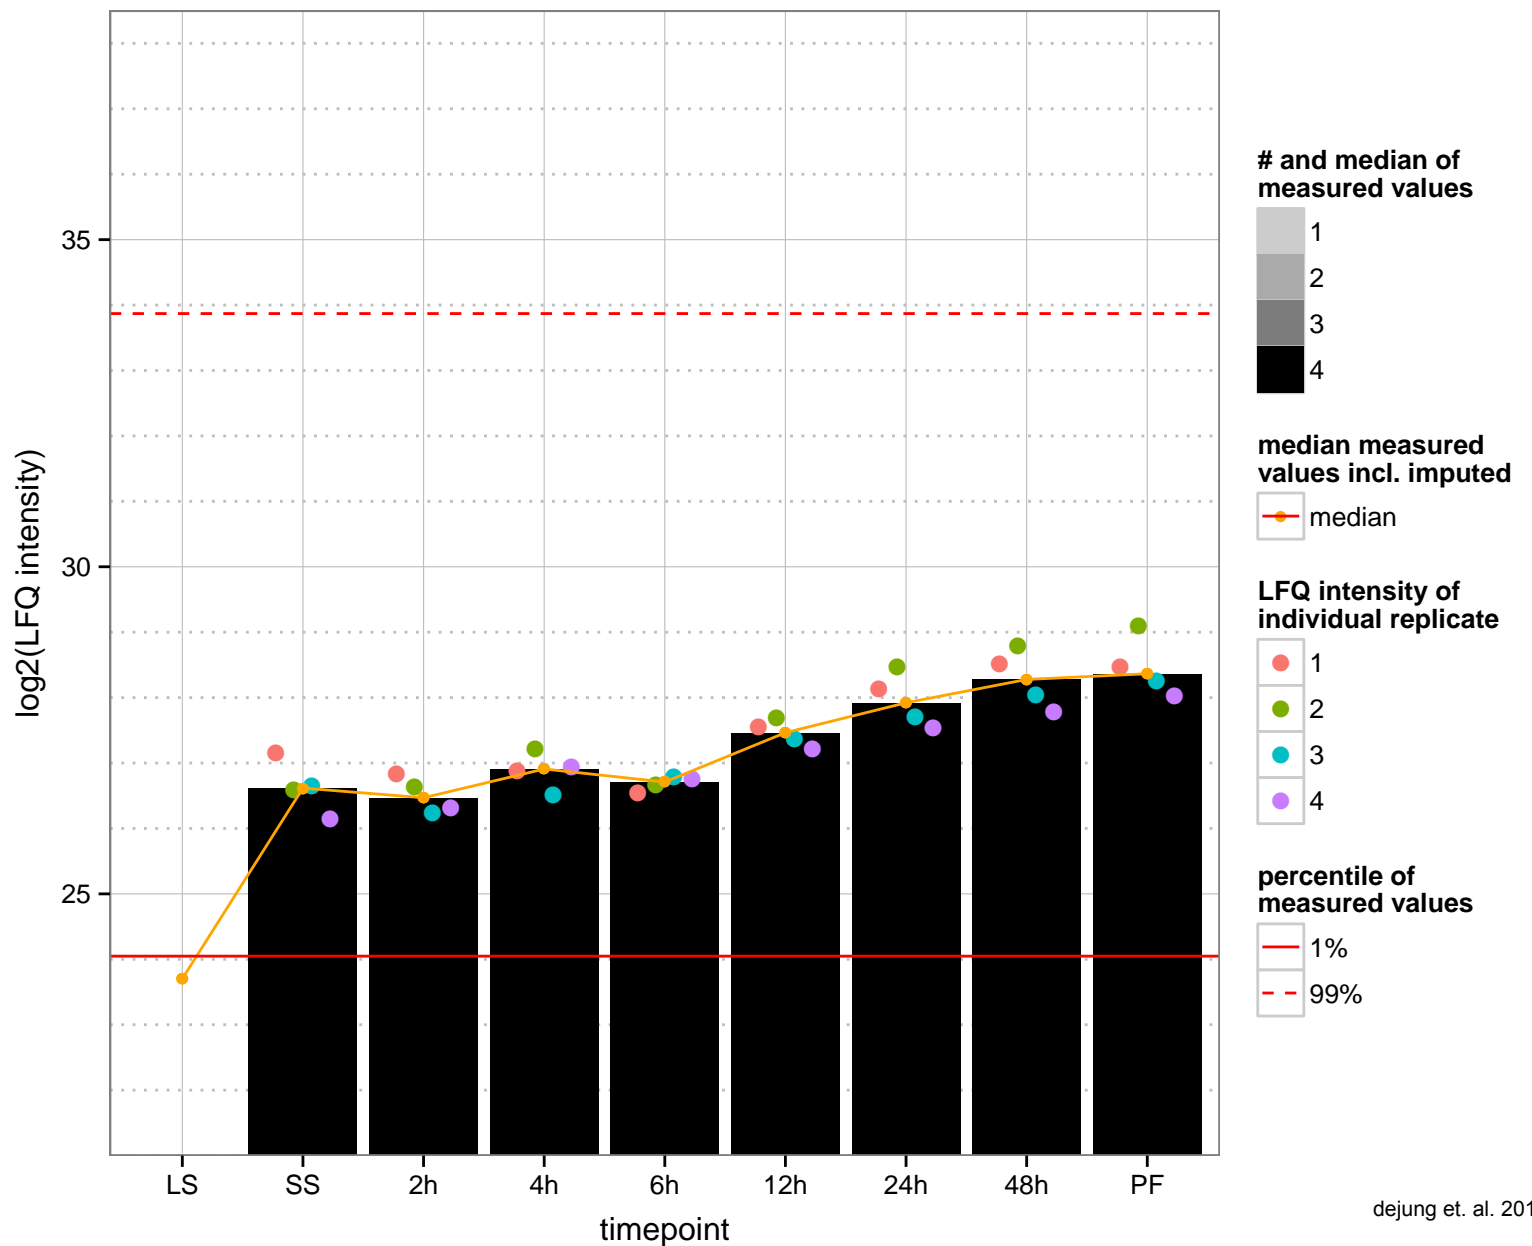

hypothetical protein, conserved  
 Tb927.3.2750  
 AGOF: null  
 AGOC: null  
 AGOP: null  
 PGO: null  
 PGO: null  
 PGO: null

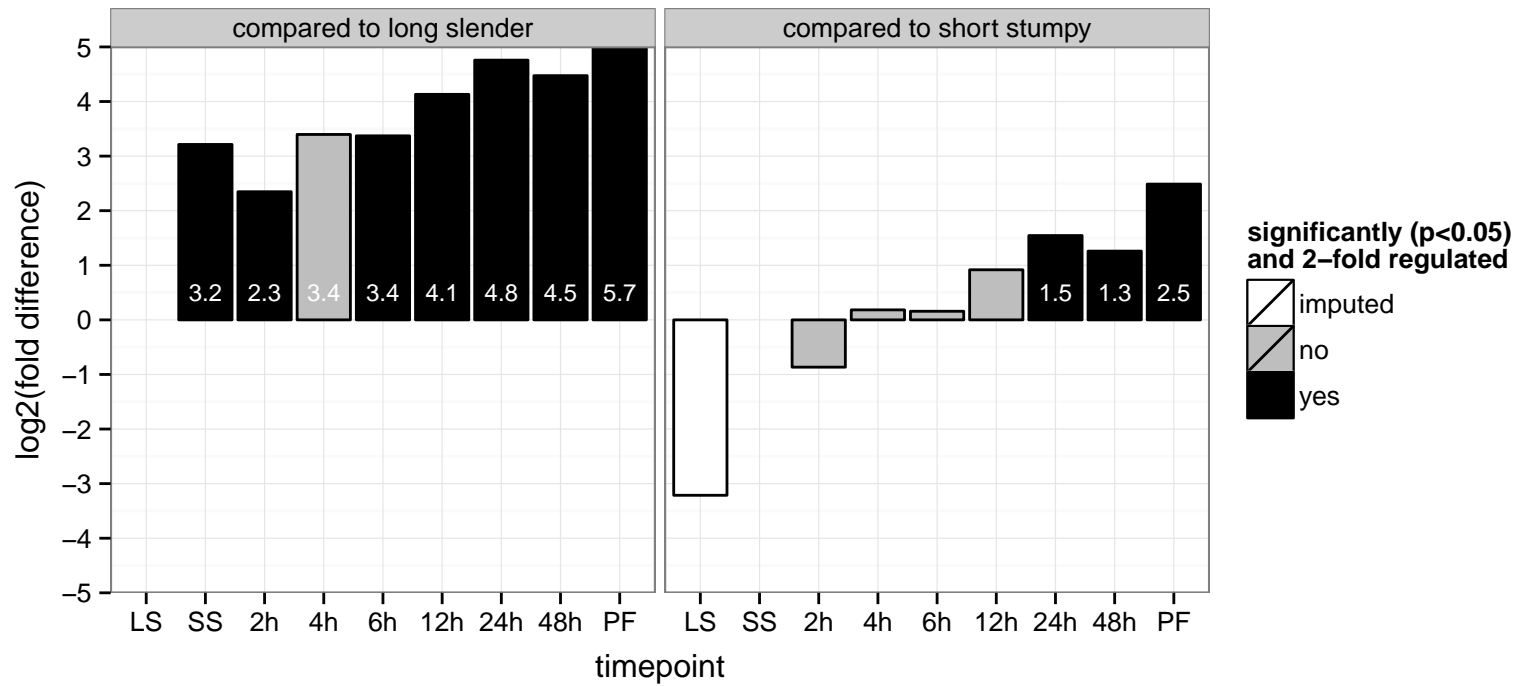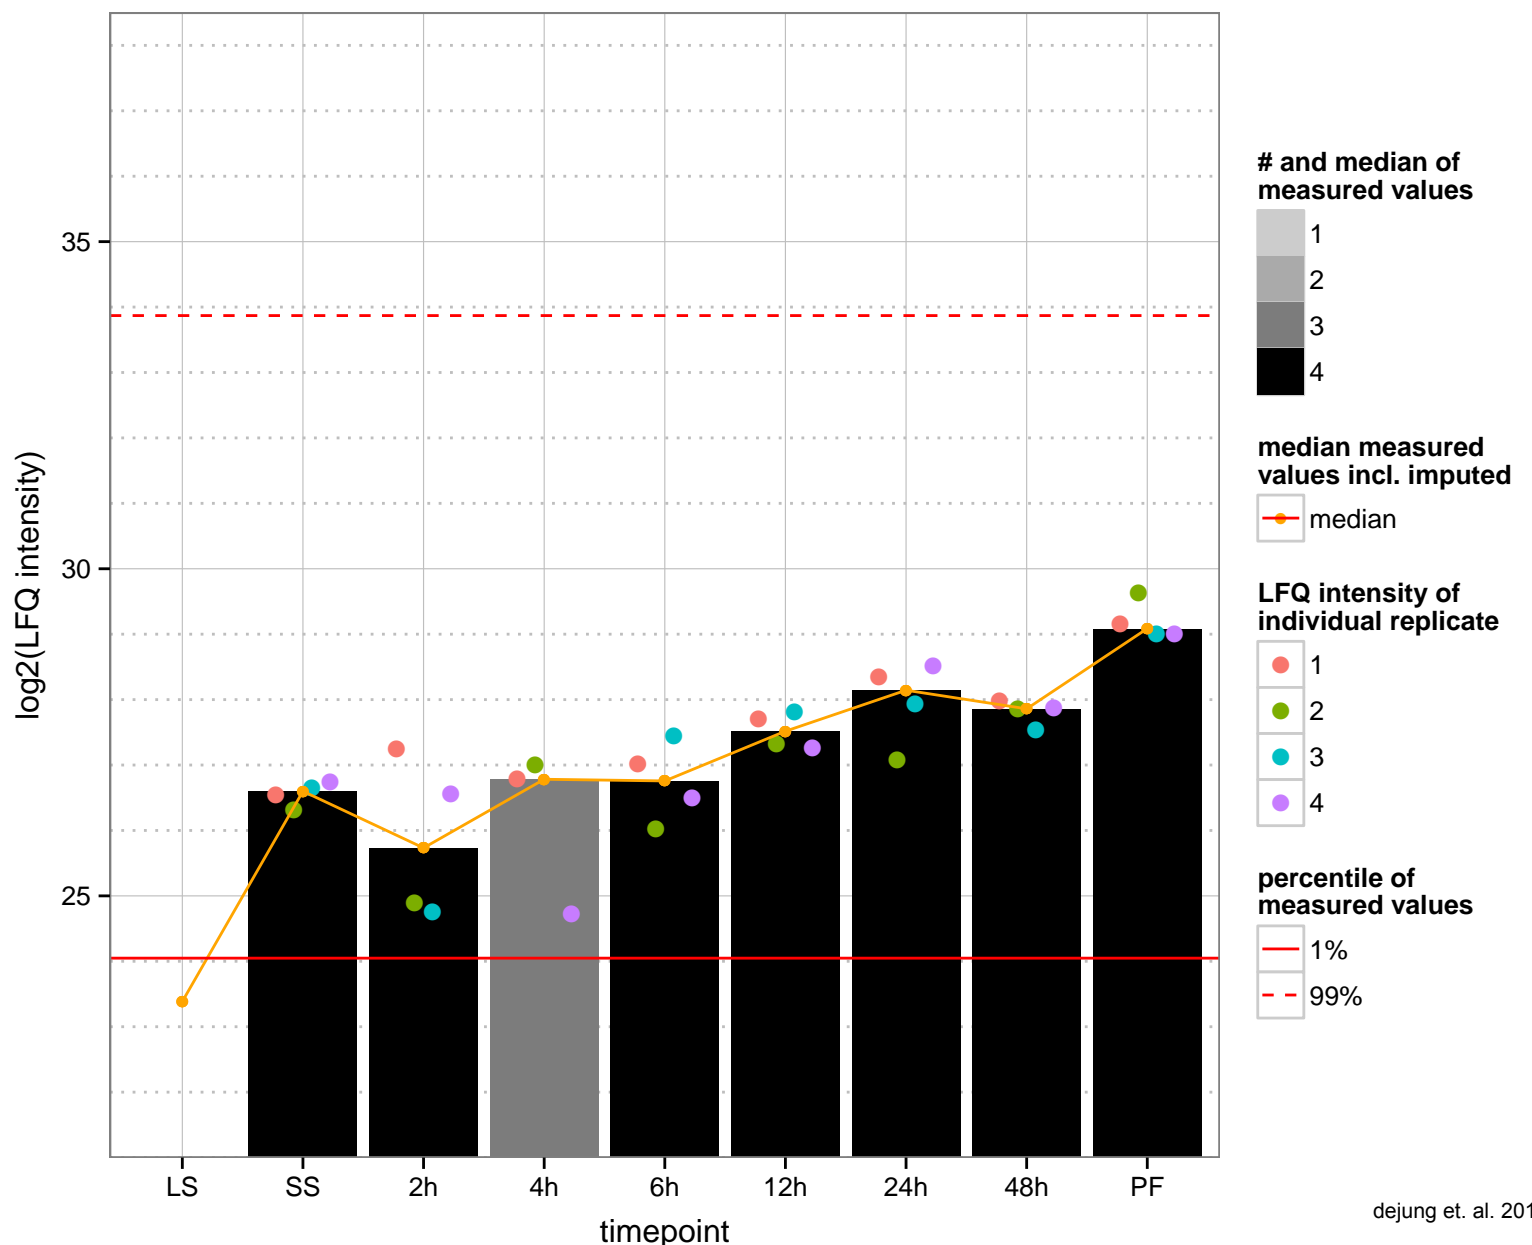

eukaryotic initiation factor 2a, putative  
 Tb927.3.2900  
 AGOF: RNA binding, translation initiation factor activity  
 AGOC: eukaryotic translation initiation factor 2 complex  
 AGOP: translation  
 PGOF: RNA binding, translation initiation factor activity  
 PGOC: eukaryotic translation initiation factor 2 complex  
 PGOP: null

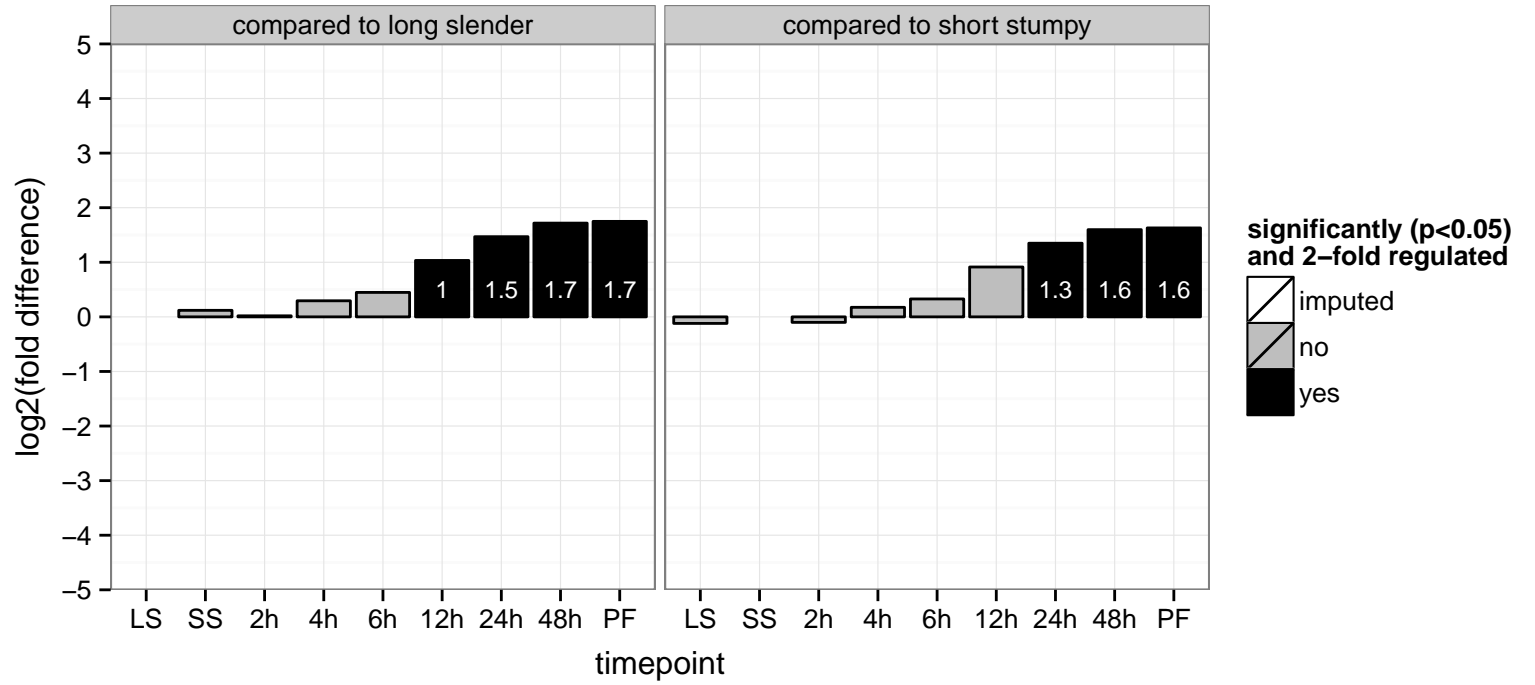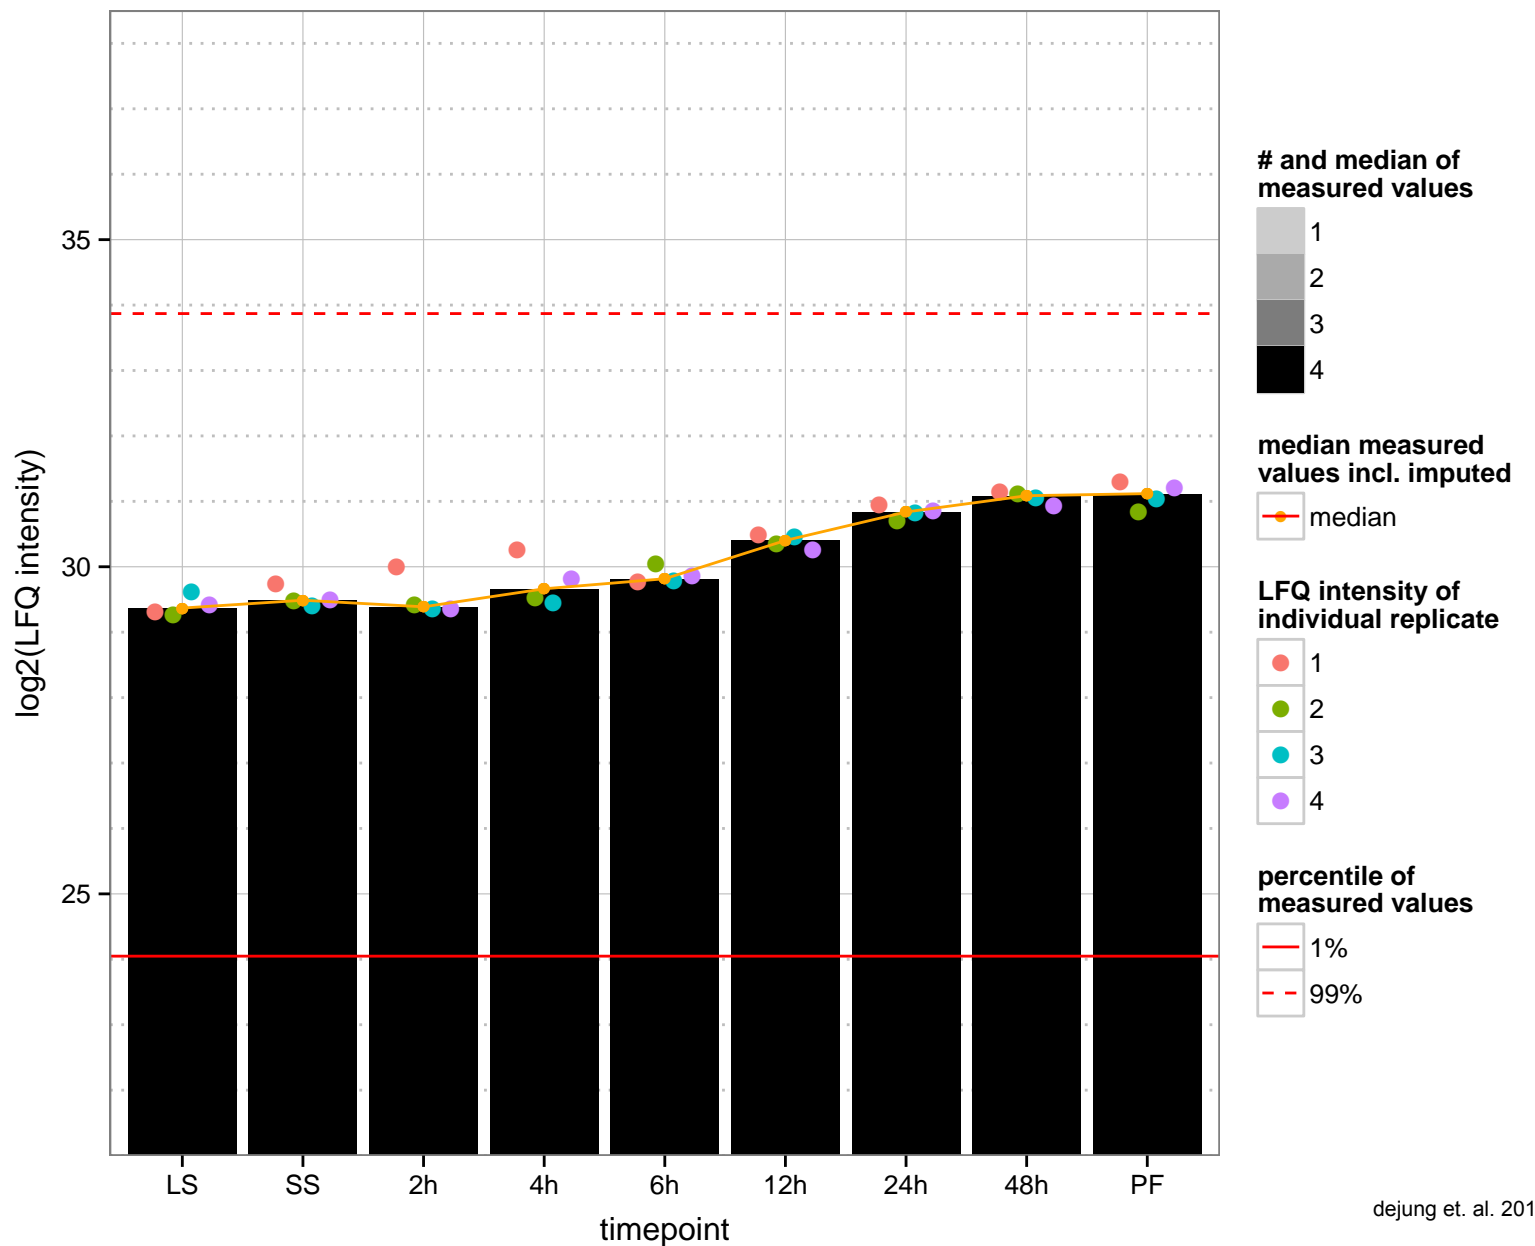

hypothetical protein, conserved  
 Tb927.3.3170  
 AGOF: null  
 AGOC: null  
 AGOP: intracellular signal transduction  
 PGO: null  
 PGO: null  
 PGO: null  
 PGO: intracellular signal transduction

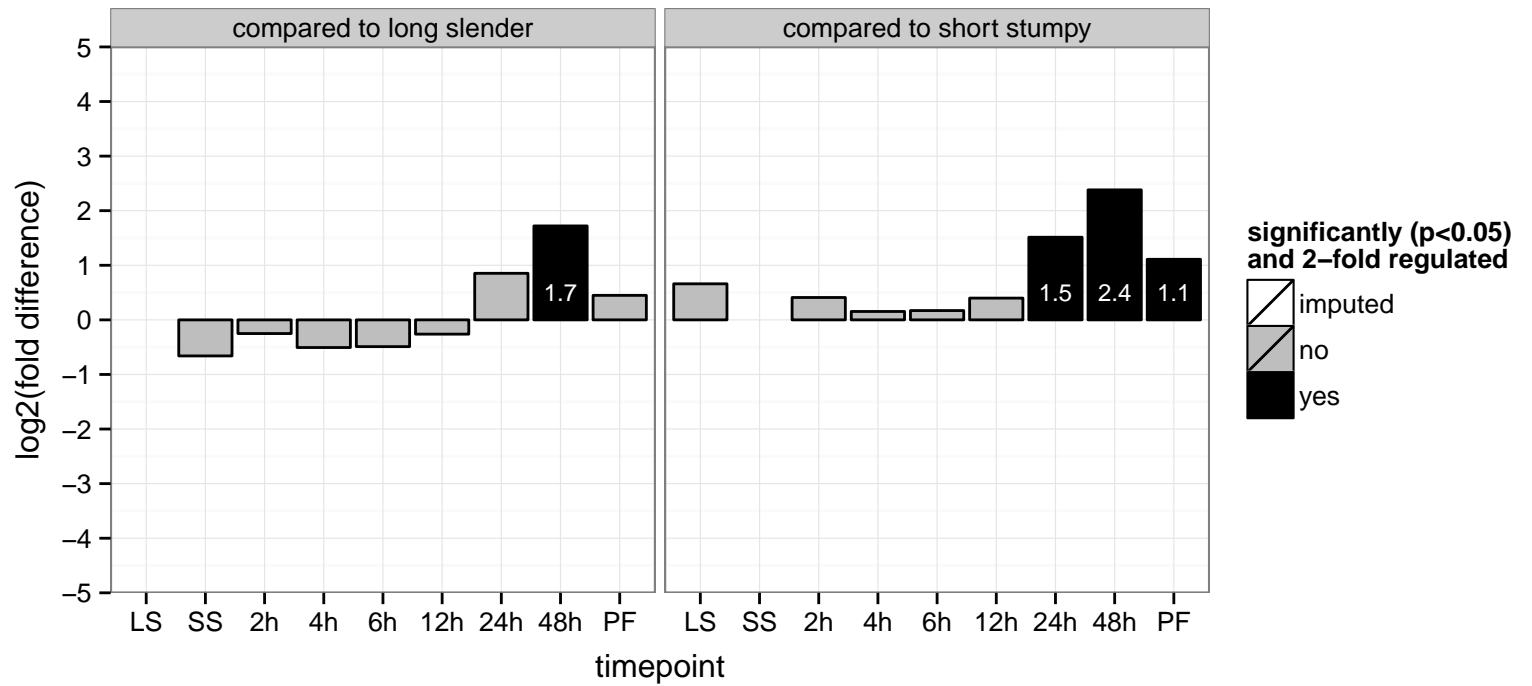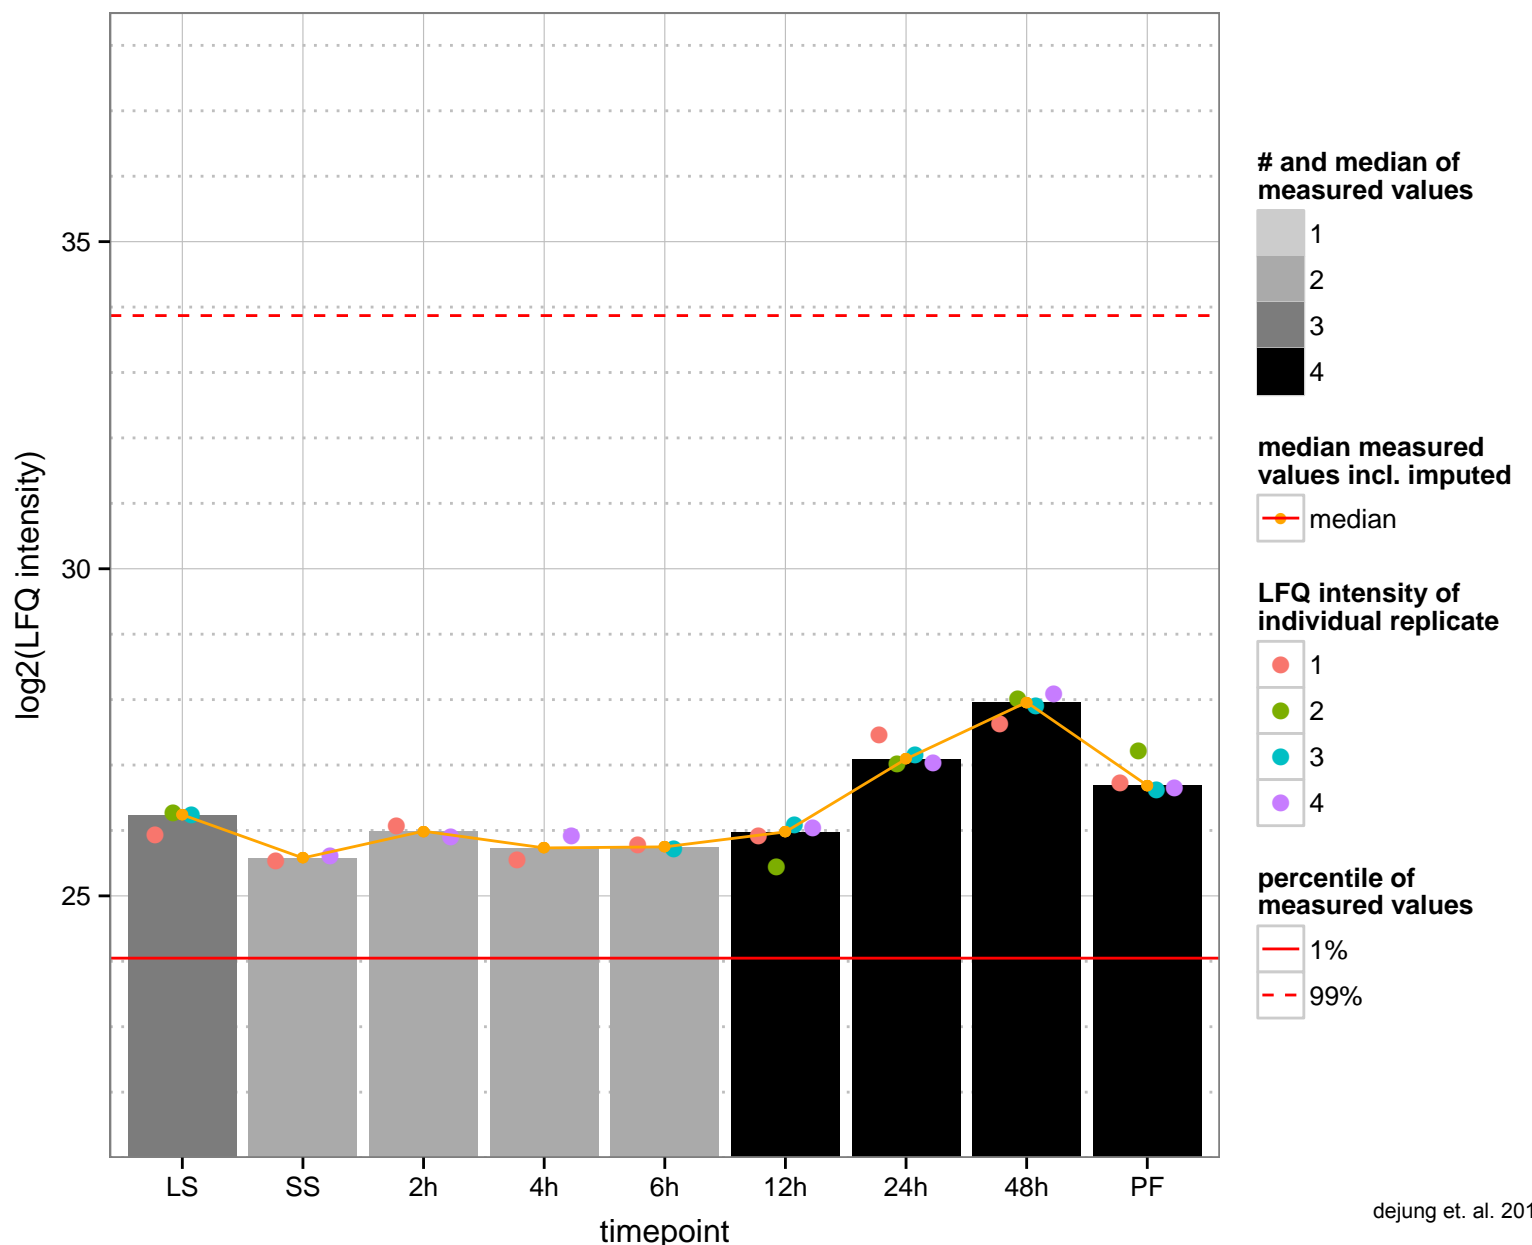

hypothetical protein, conserved  
 Tb927.3.3460  
 AGOF: null  
 AGOC: null  
 AGOP: null  
 PGO: null  
 PGO: null  
 PGO: null

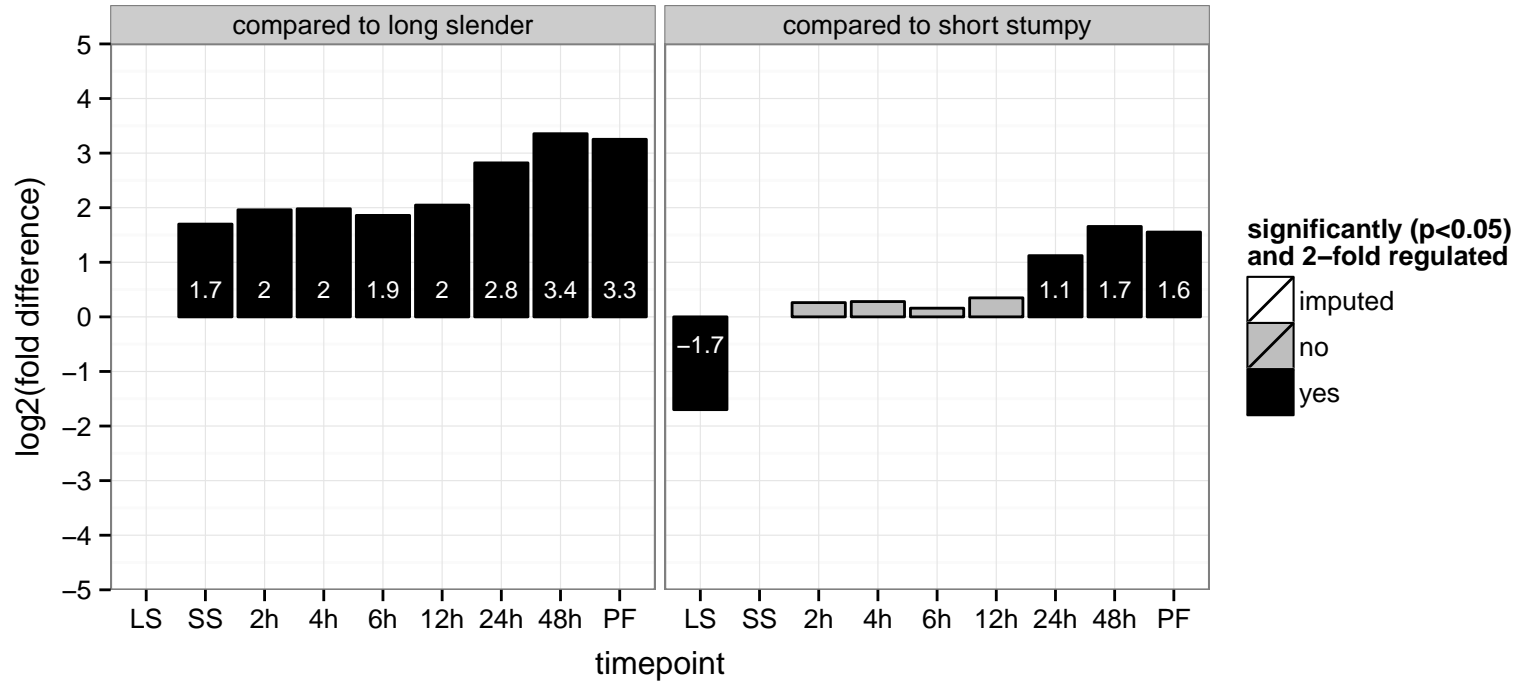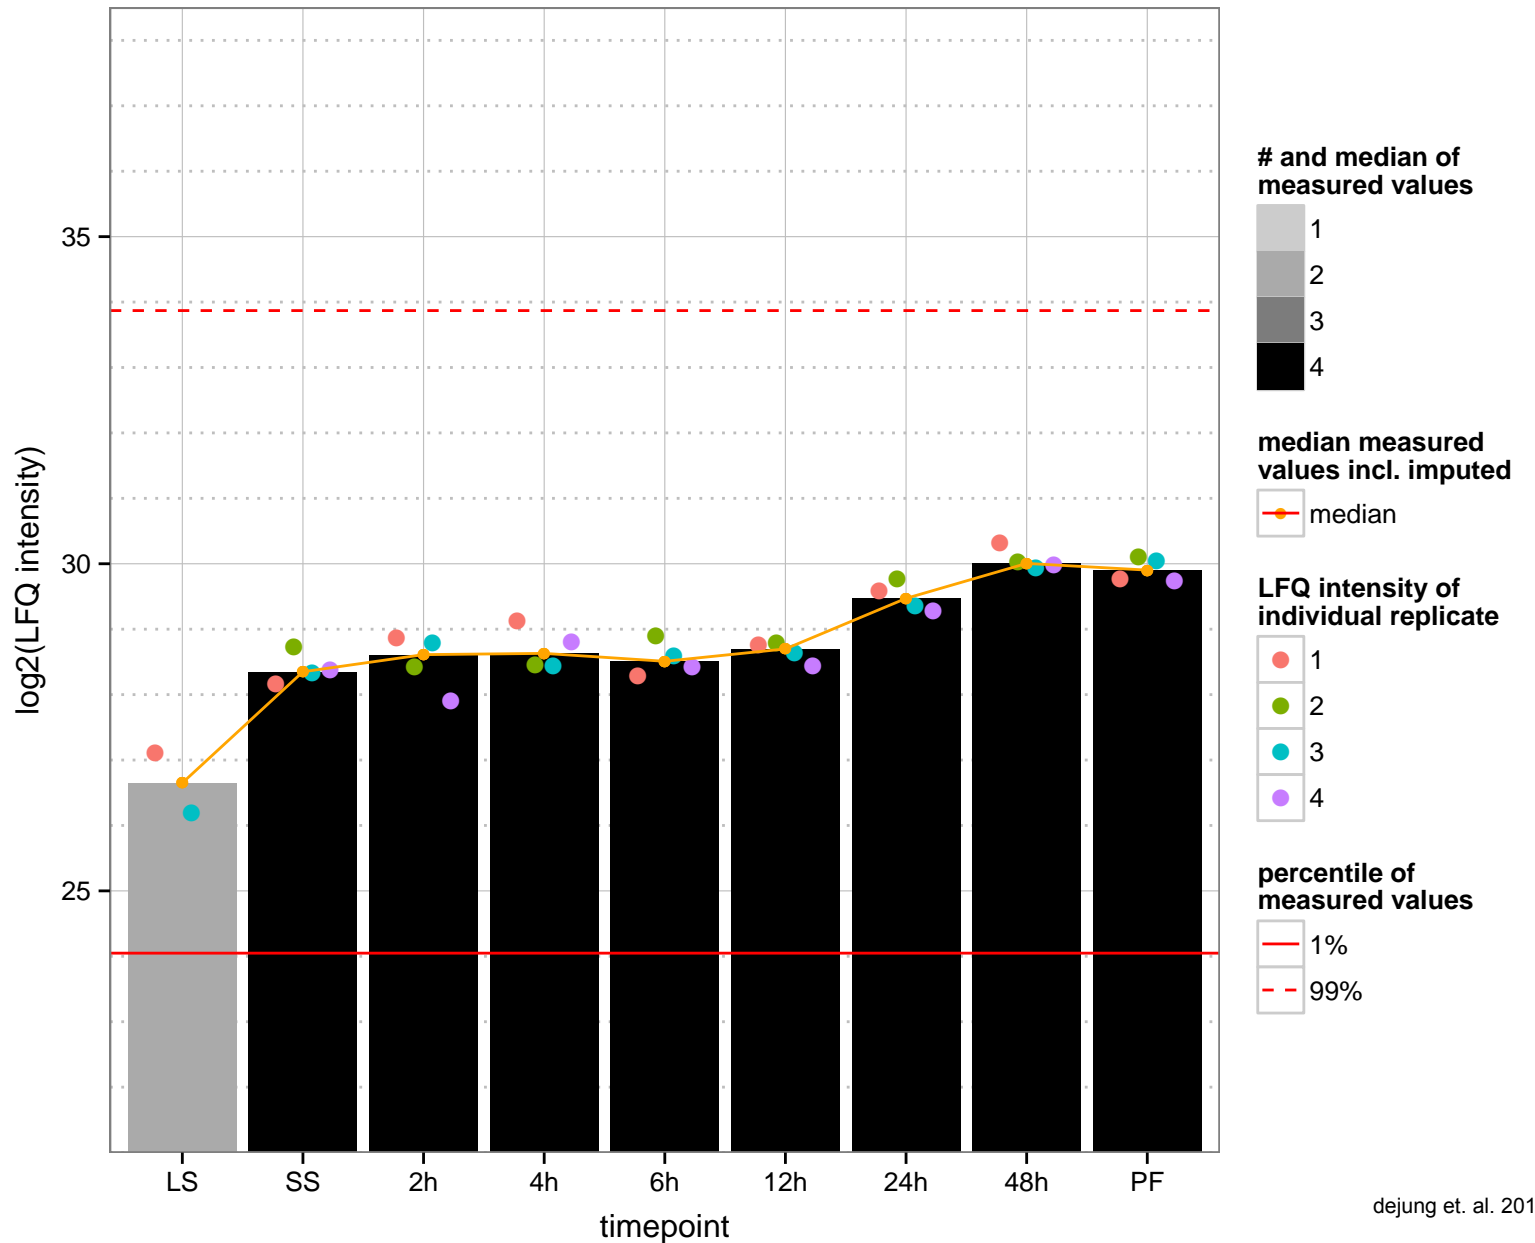



peroxisomal targeting signal type 2 receptor, putative, peroxin 7, peroxin 7 (PEX7)  
 Tb927.3.3610  
 AGOF: peroxisome matrix targeting signal-2 binding  
 AGOC: cytoplasm, peroxisome  
 AGOP: null  
 PGO: protein binding  
 PGOC: null  
 PGOP: null

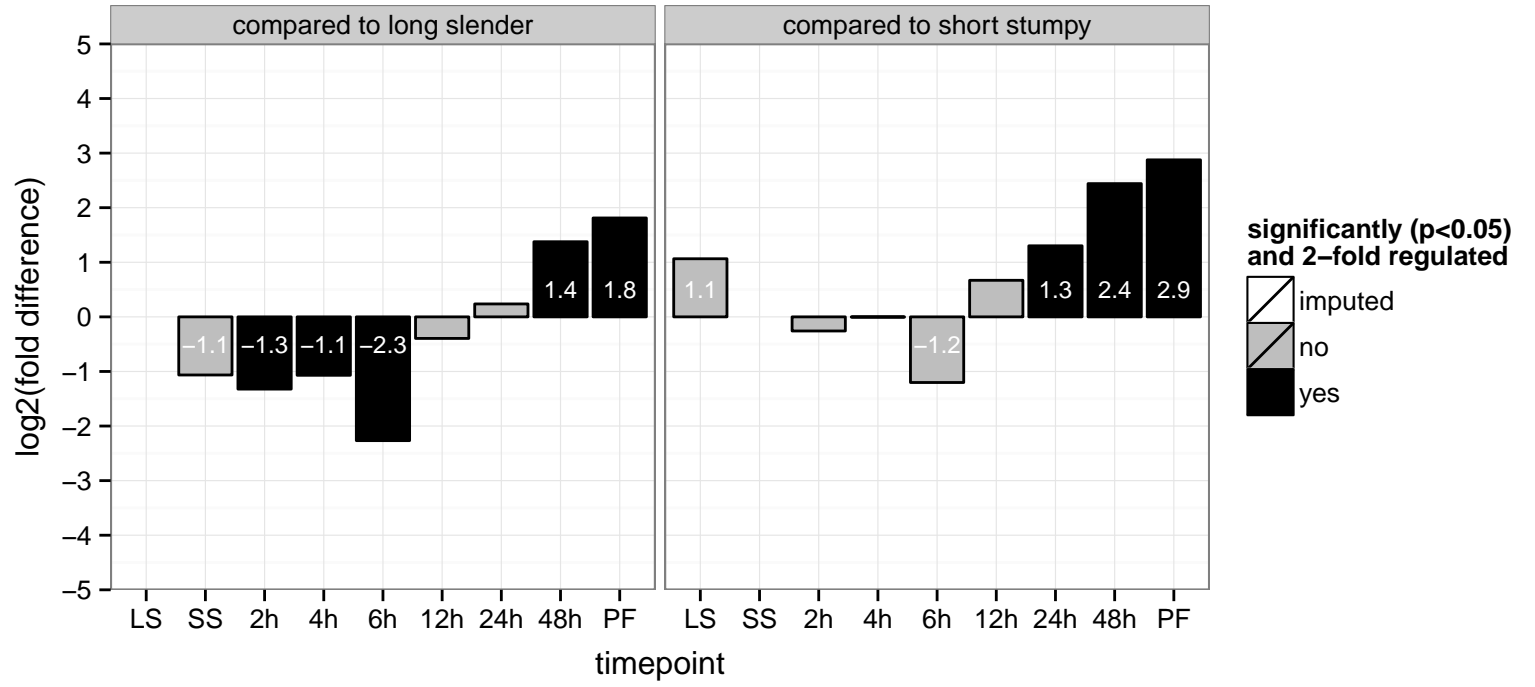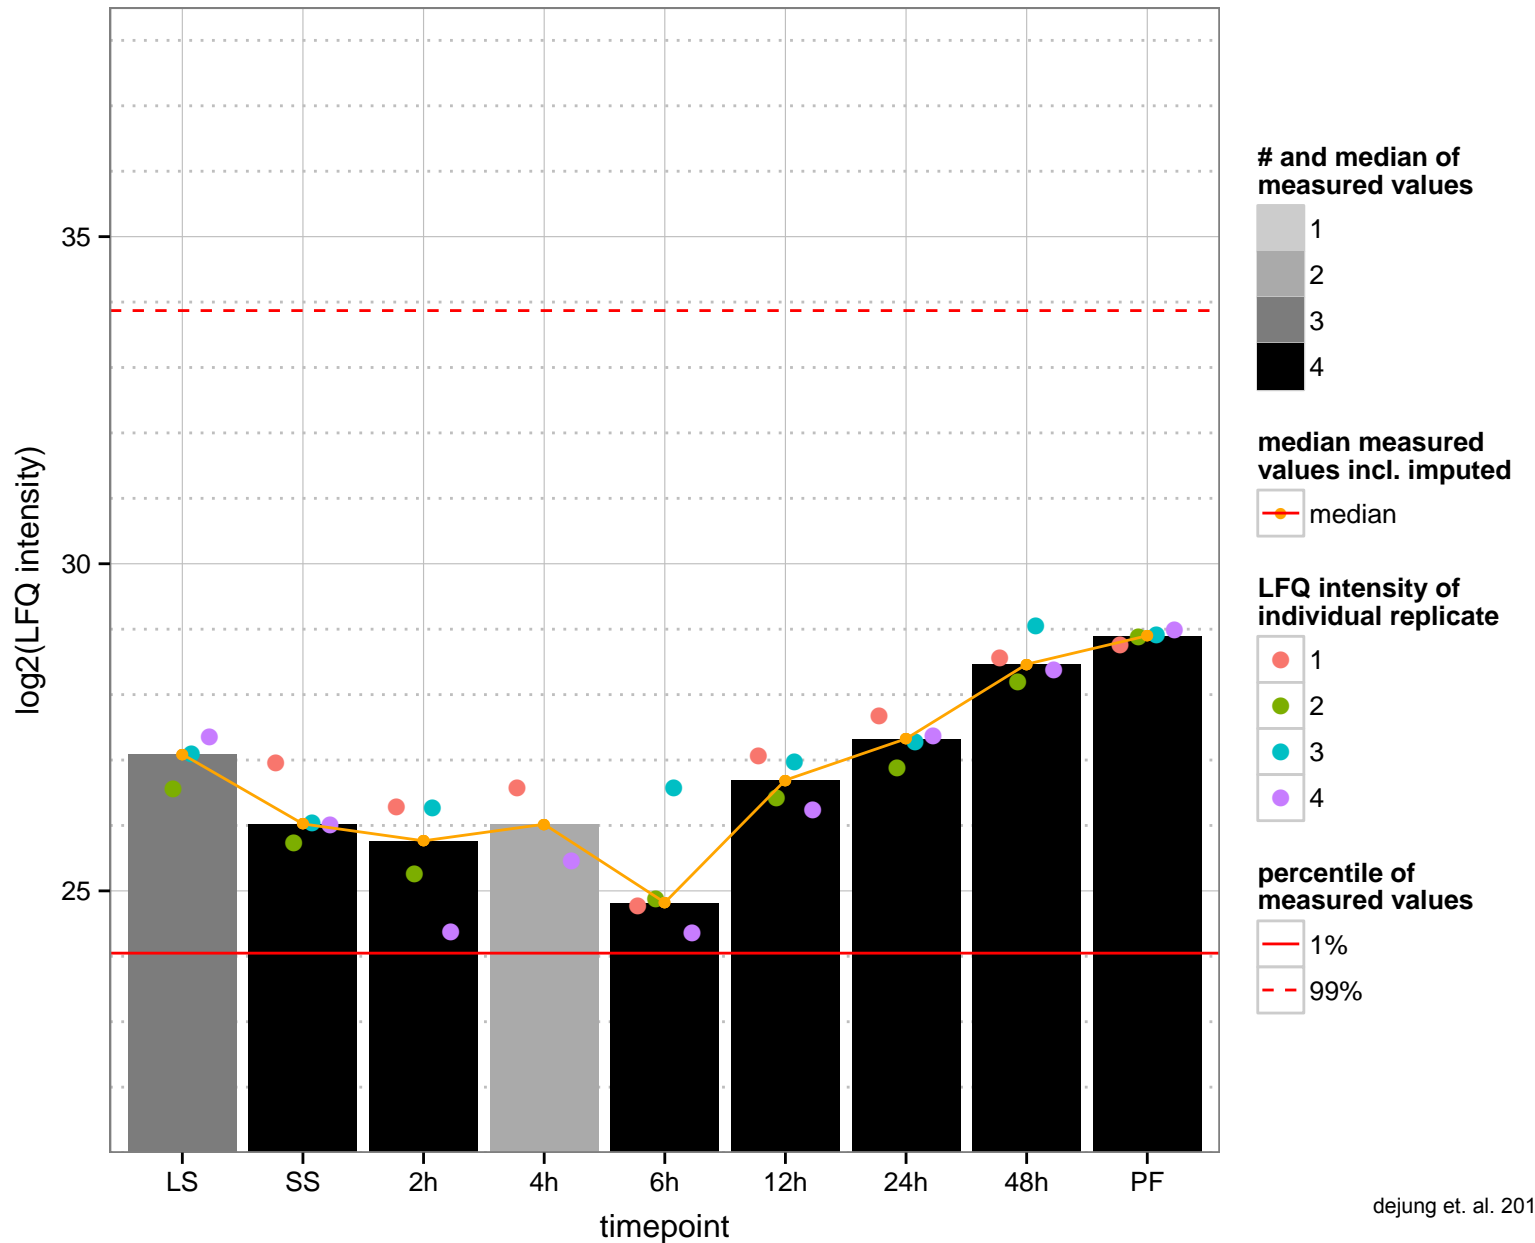

SNF1/AMP-activated kinase catalytic subunit, putative

Tb927.3.4560

AGOF: ATP binding, protein serine/threonine kinase activity, protein tyrosine kinase activity

AGOC: null

AGOP: modulation of development of symbiont involved in interaction with host, protein phosphorylation, quorum sensing involved in

PGOF: ATP binding, protein kinase activity, protein serine/threonine kinase activity, transferase activity, transferring phosphoryl group

PGOC: null

PGOP: protein phosphorylation

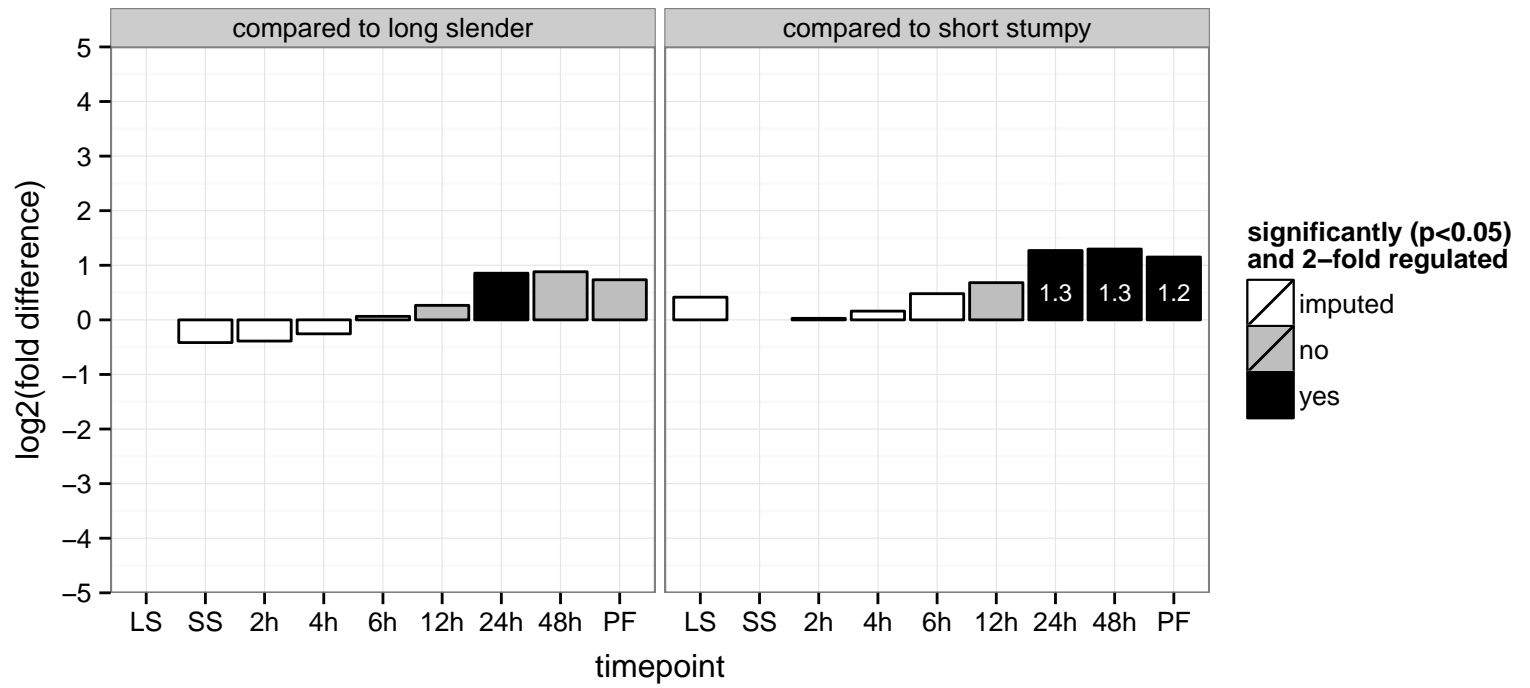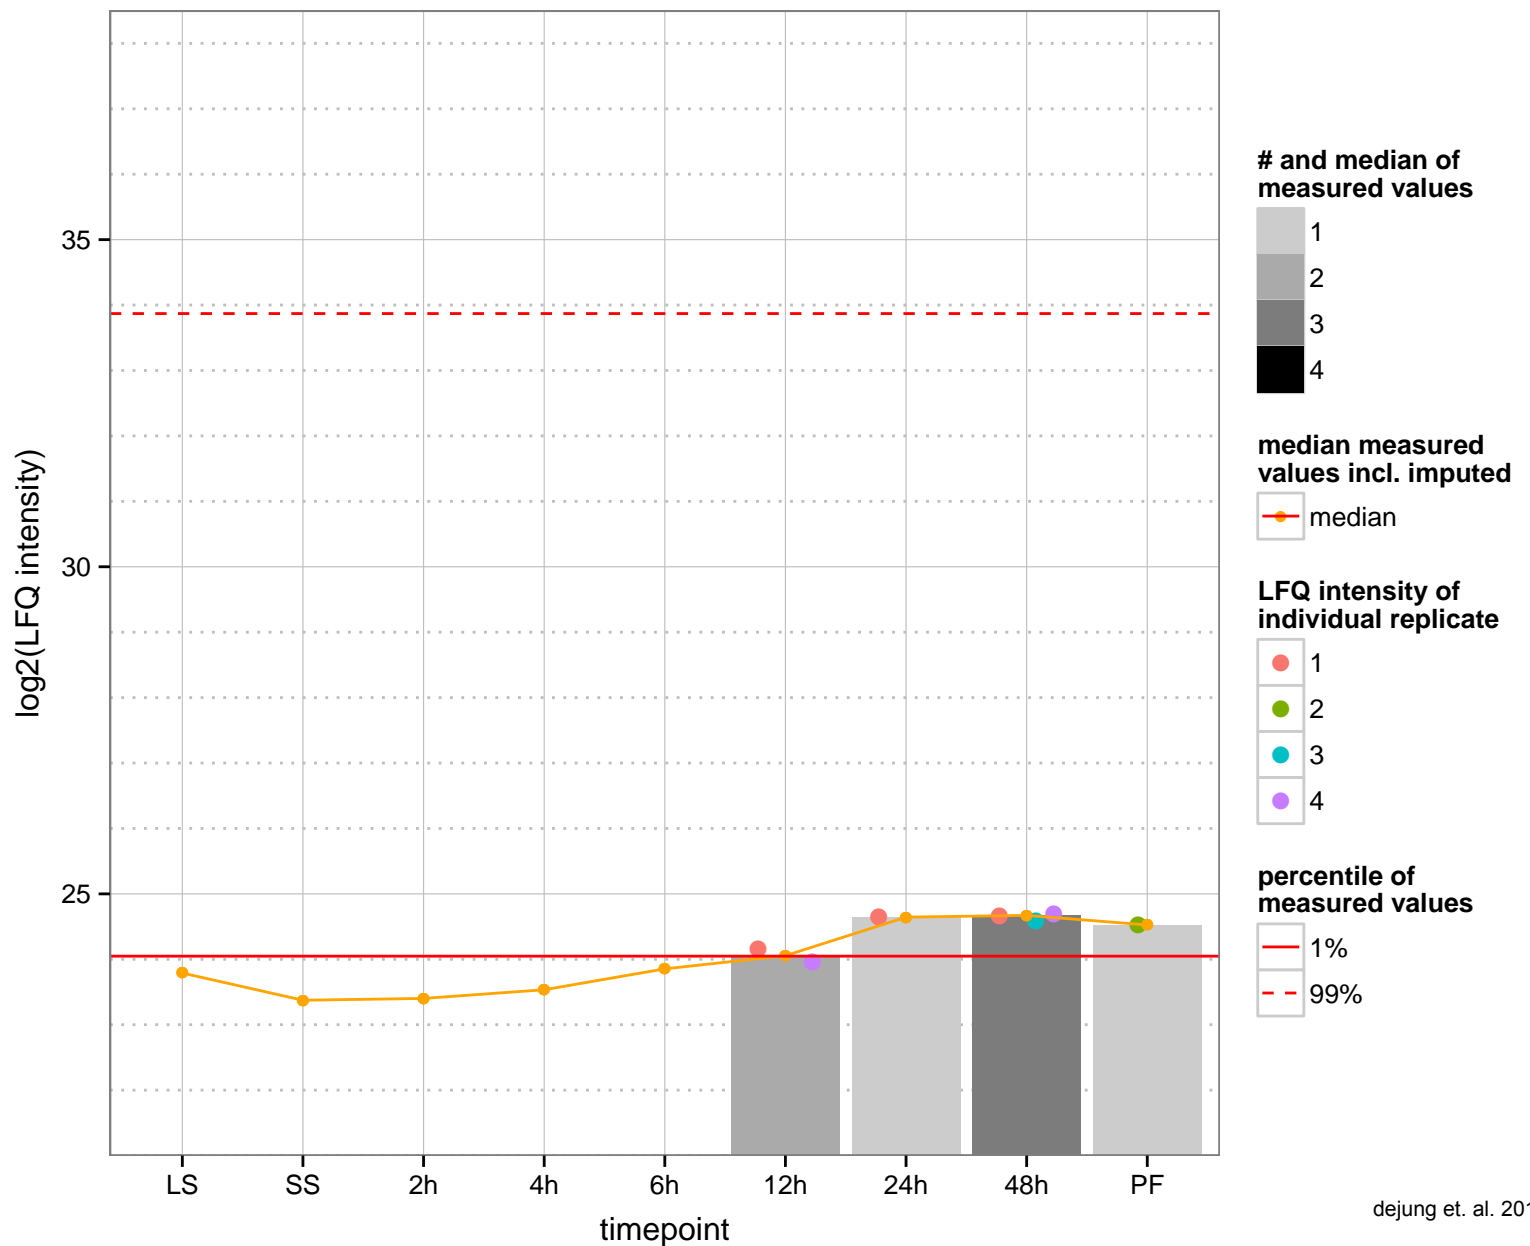

hypothetical protein, conserved  
 Tb927.4.1280  
 AGOF: null  
 AGOC: null  
 AGOP: null  
 PGO: protein binding  
 PGO: null  
 PGO: null

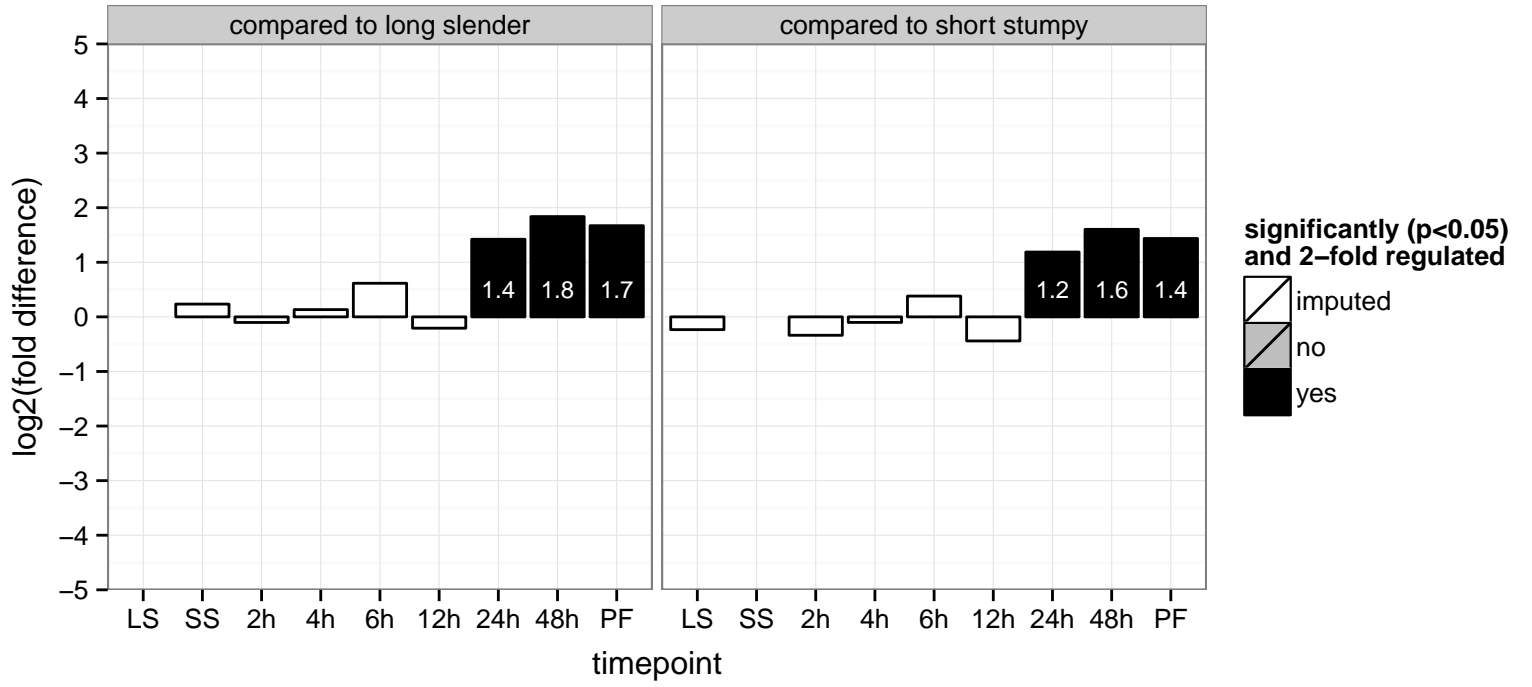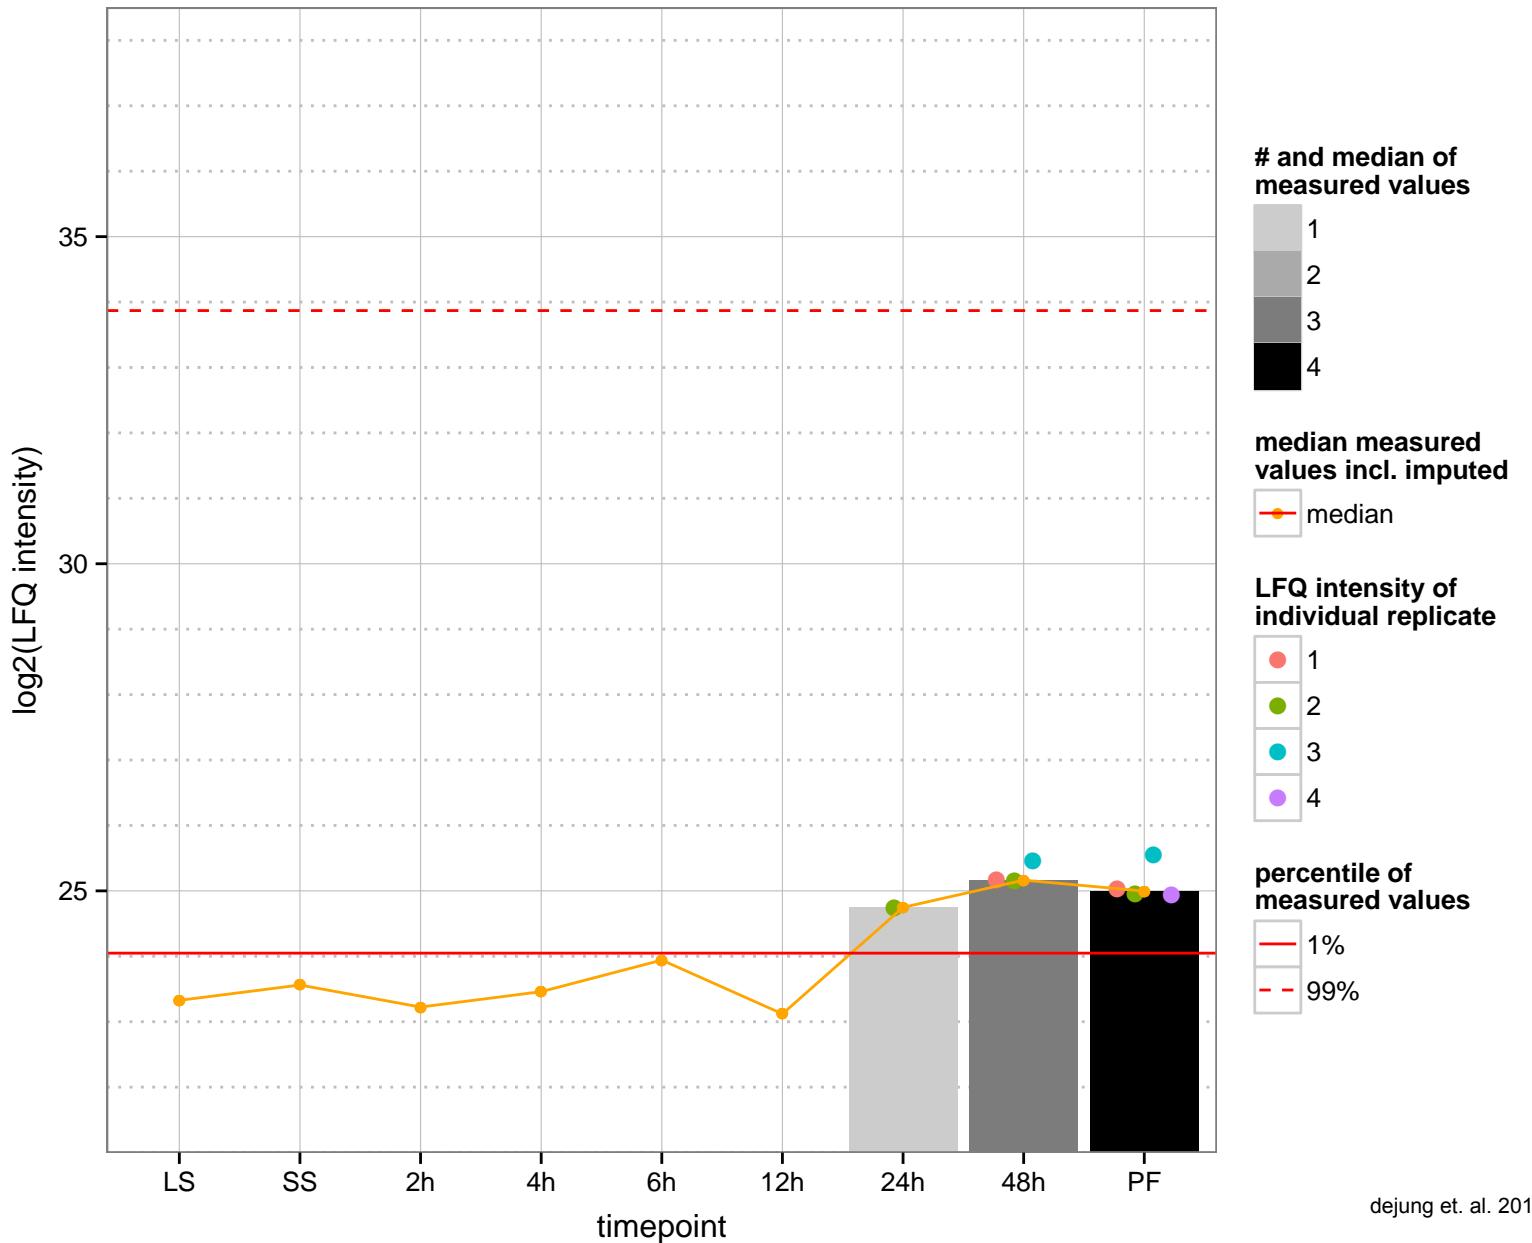

RNA editing associated helicase 2, mitochondrial RNA binding complex 1 subunit (REH2)

Tb927.4.1500

AGOF: 3'-5' RNA helicase activity, ATP binding, RNA binding, double-stranded RNA binding, helicase activity, mRNA binding

AGOC: intracellular, mitochondrial mRNA editing complex, mitochondrion

AGOP: cytidine to uridine editing, mRNA modification, mRNA stabilization

PGOF: ATP binding, ATP-dependent helicase activity, double-stranded RNA binding, helicase activity, nucleic acid binding

PGOC: intracellular

PGOP: null

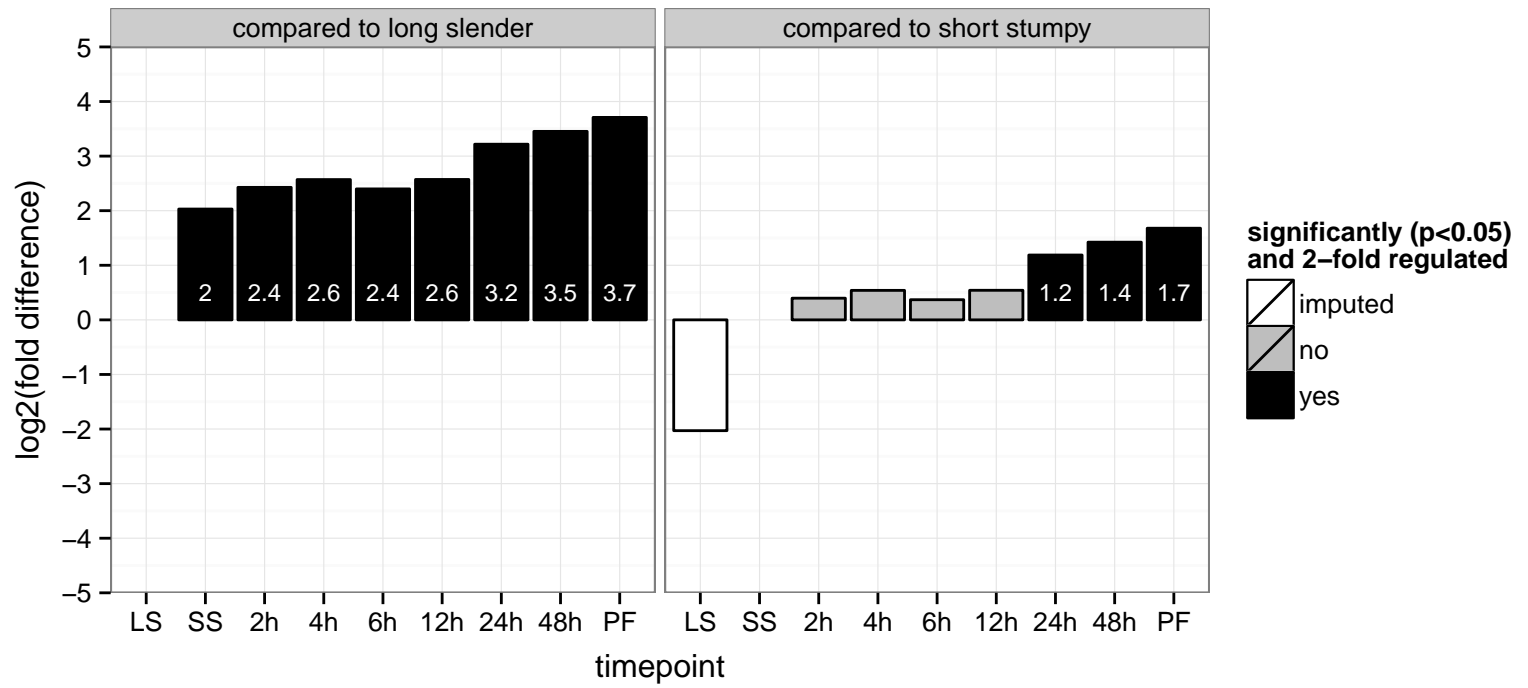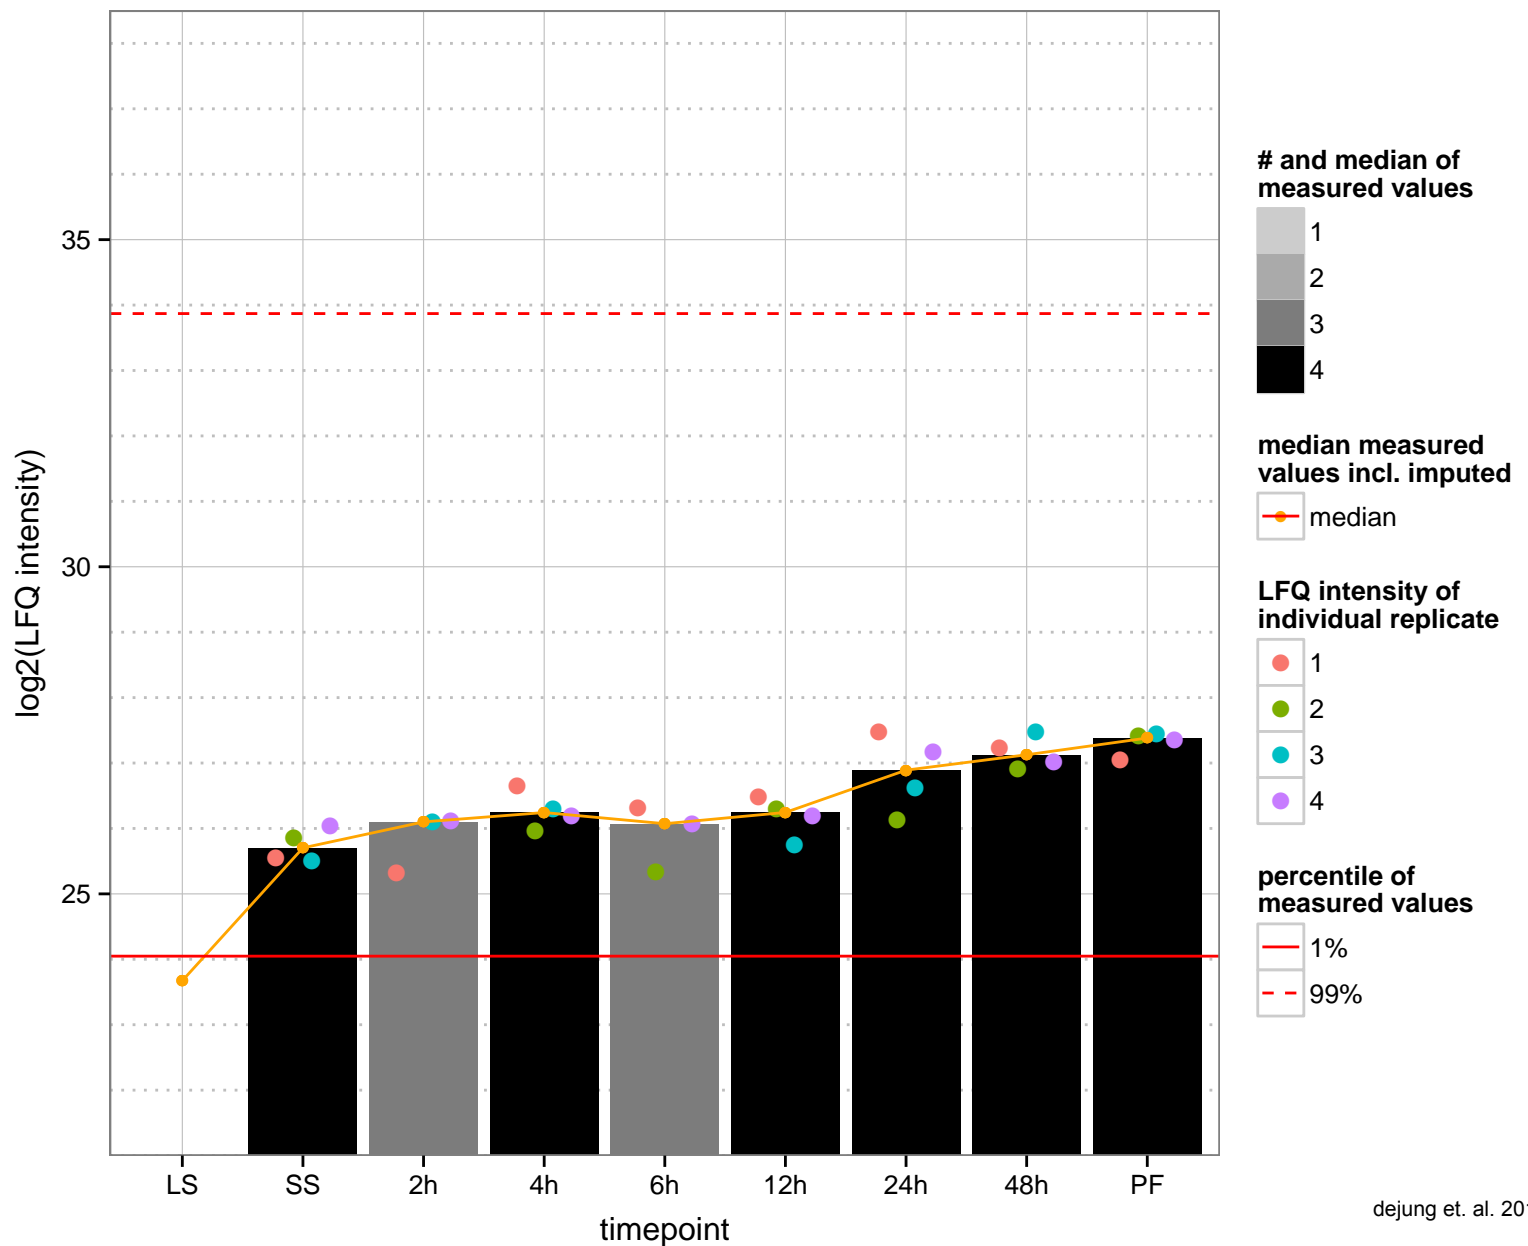

hypothetical protein, conserved  
 Tb927.4.2680  
 AGOF: null  
 AGOC: null  
 AGOP: null  
 PGO: ATP binding, kinase activity  
 PGOC: null  
 PGOP: null

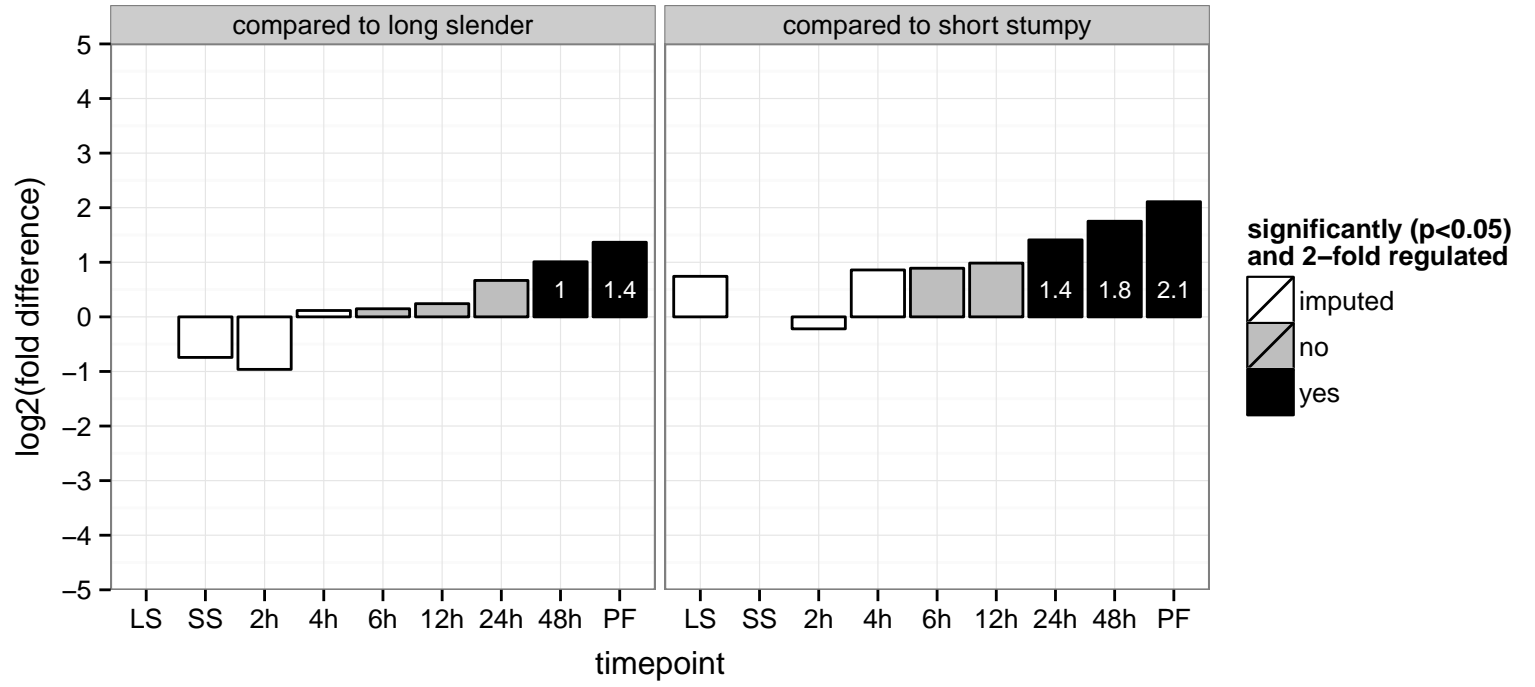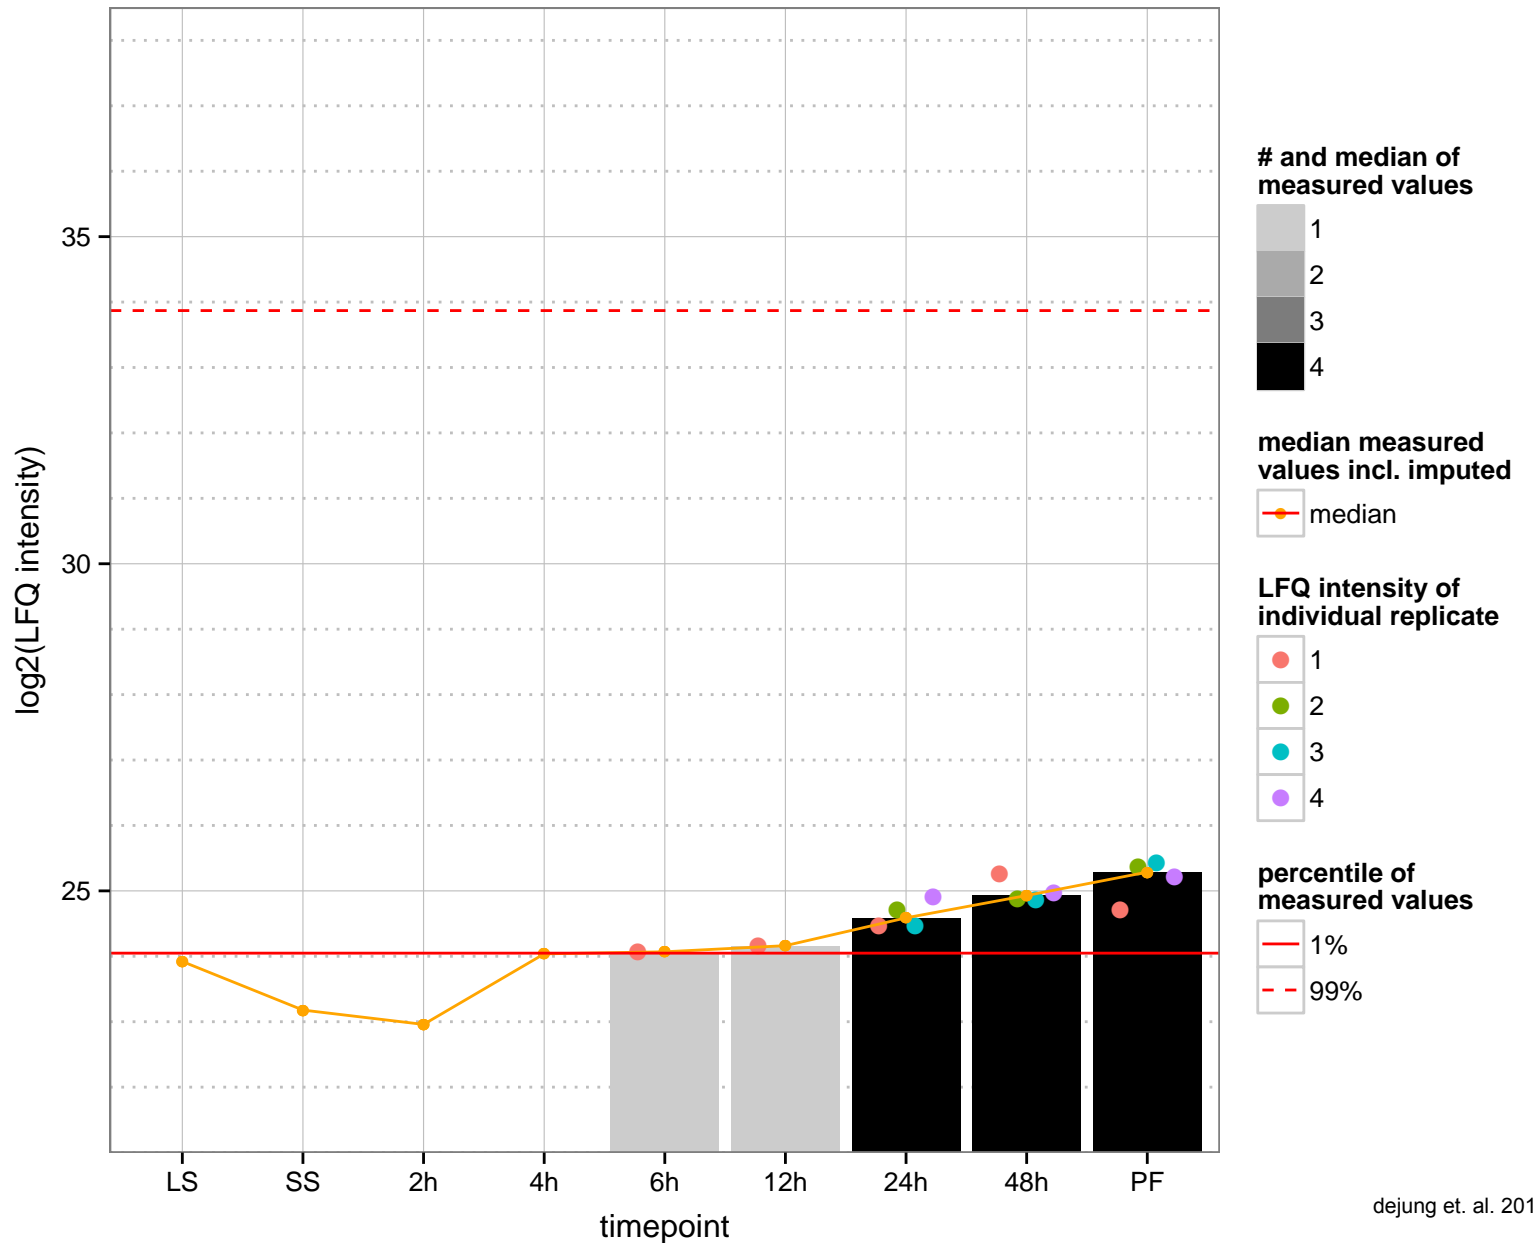

hypothetical protein, conserved  
 Tb927.4.3450  
 AGOF: null  
 AGOC: mitochondrion  
 AGOP: null  
 PGO: null  
 PGO: null  
 PGO: null

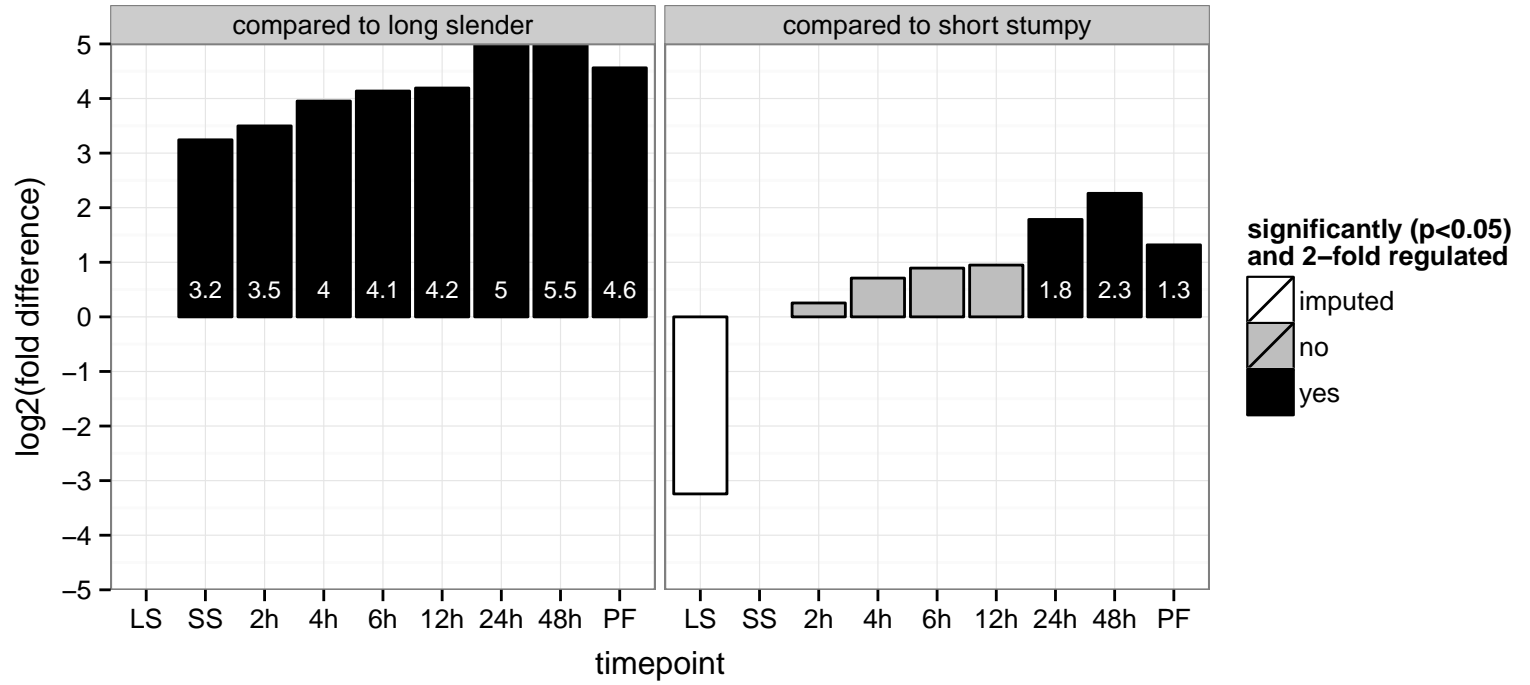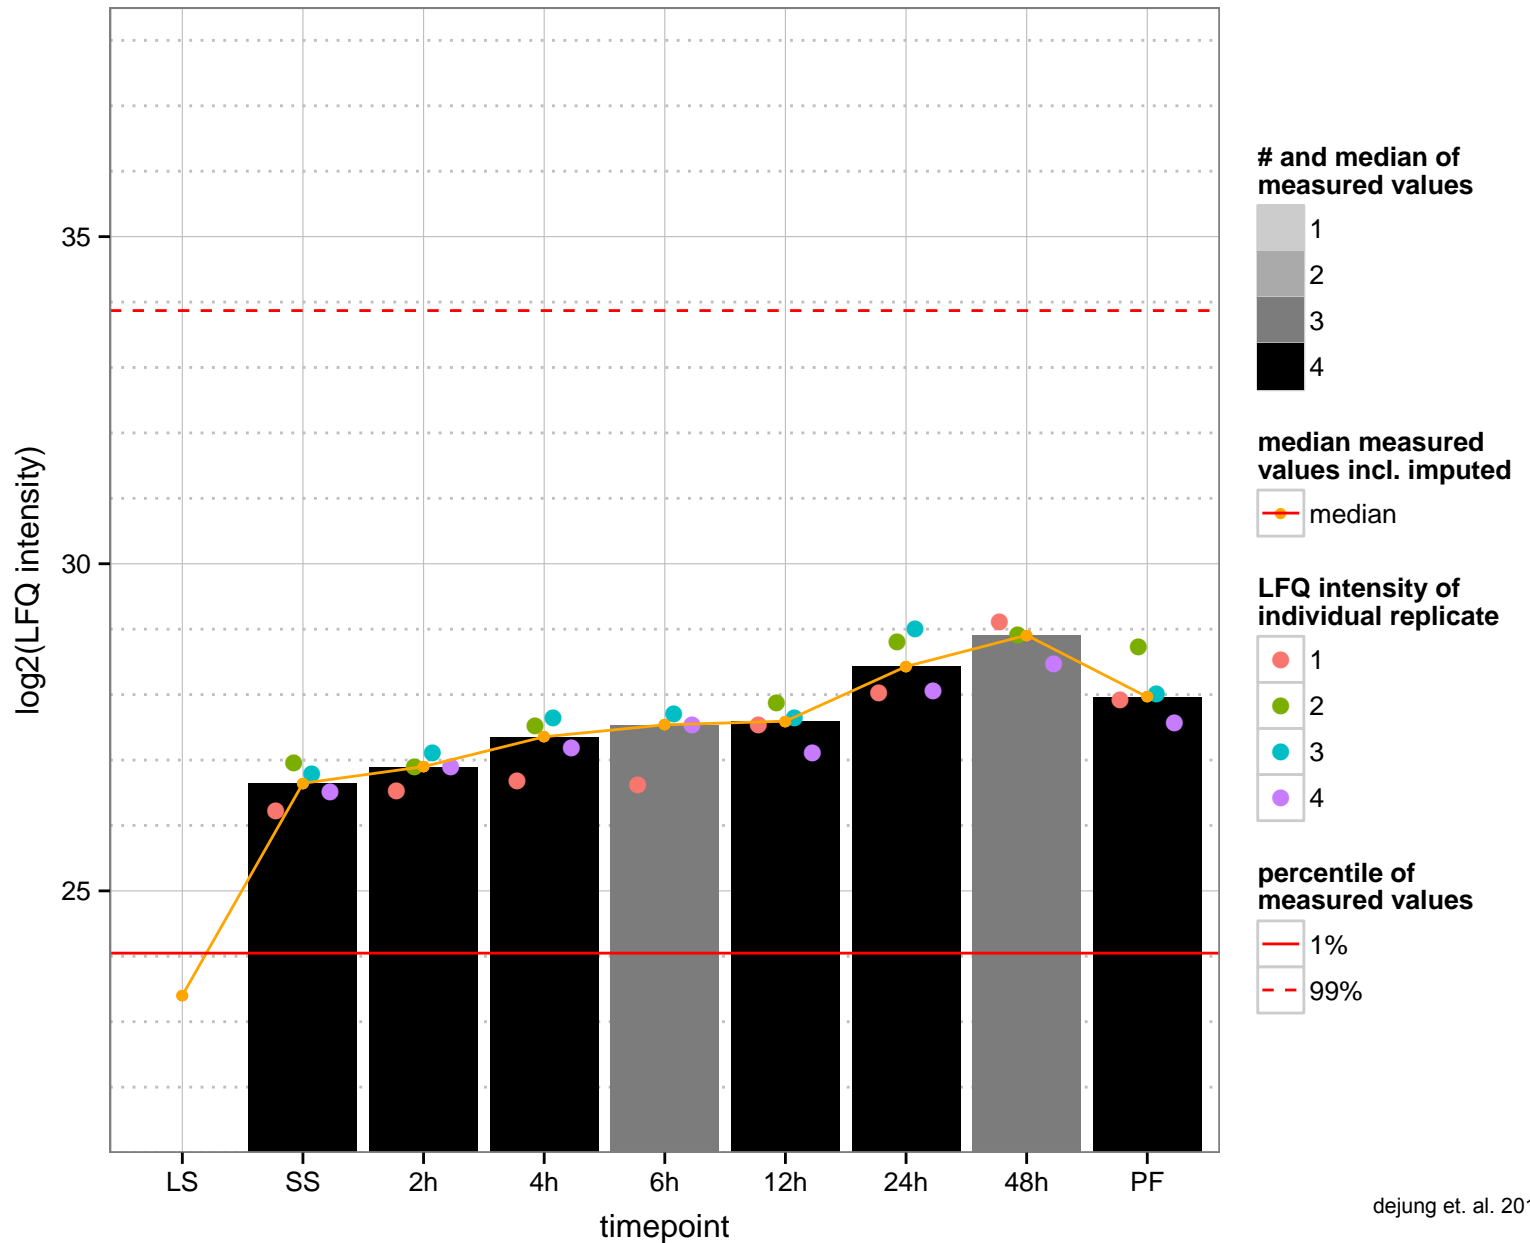

Double RNA binding domain protein 7 (DRBD7)  
 Tb927.4.400  
 AGOF: RNA binding  
 AGOC: cytoplasm  
 AGOP: RNA processing  
 PGO: nucleic acid binding  
 PGO: null  
 PGOP: null

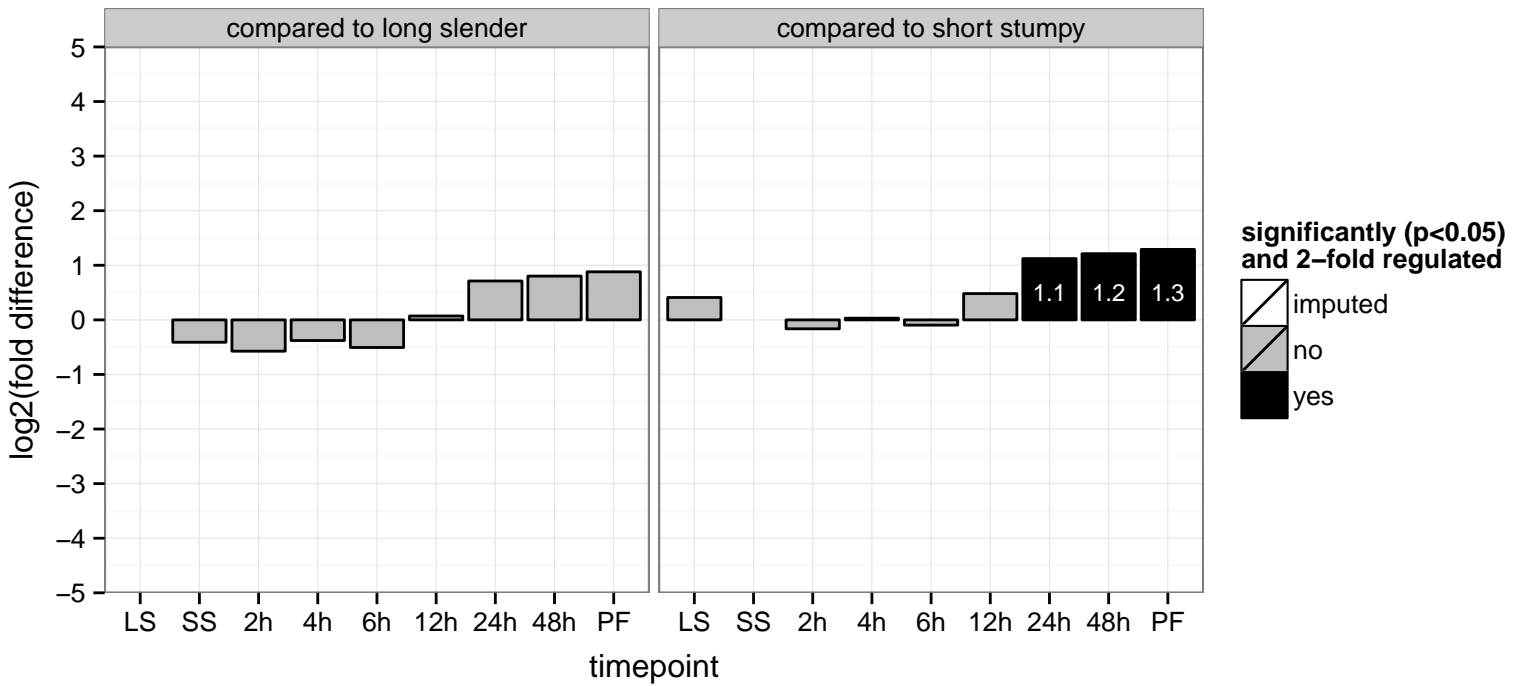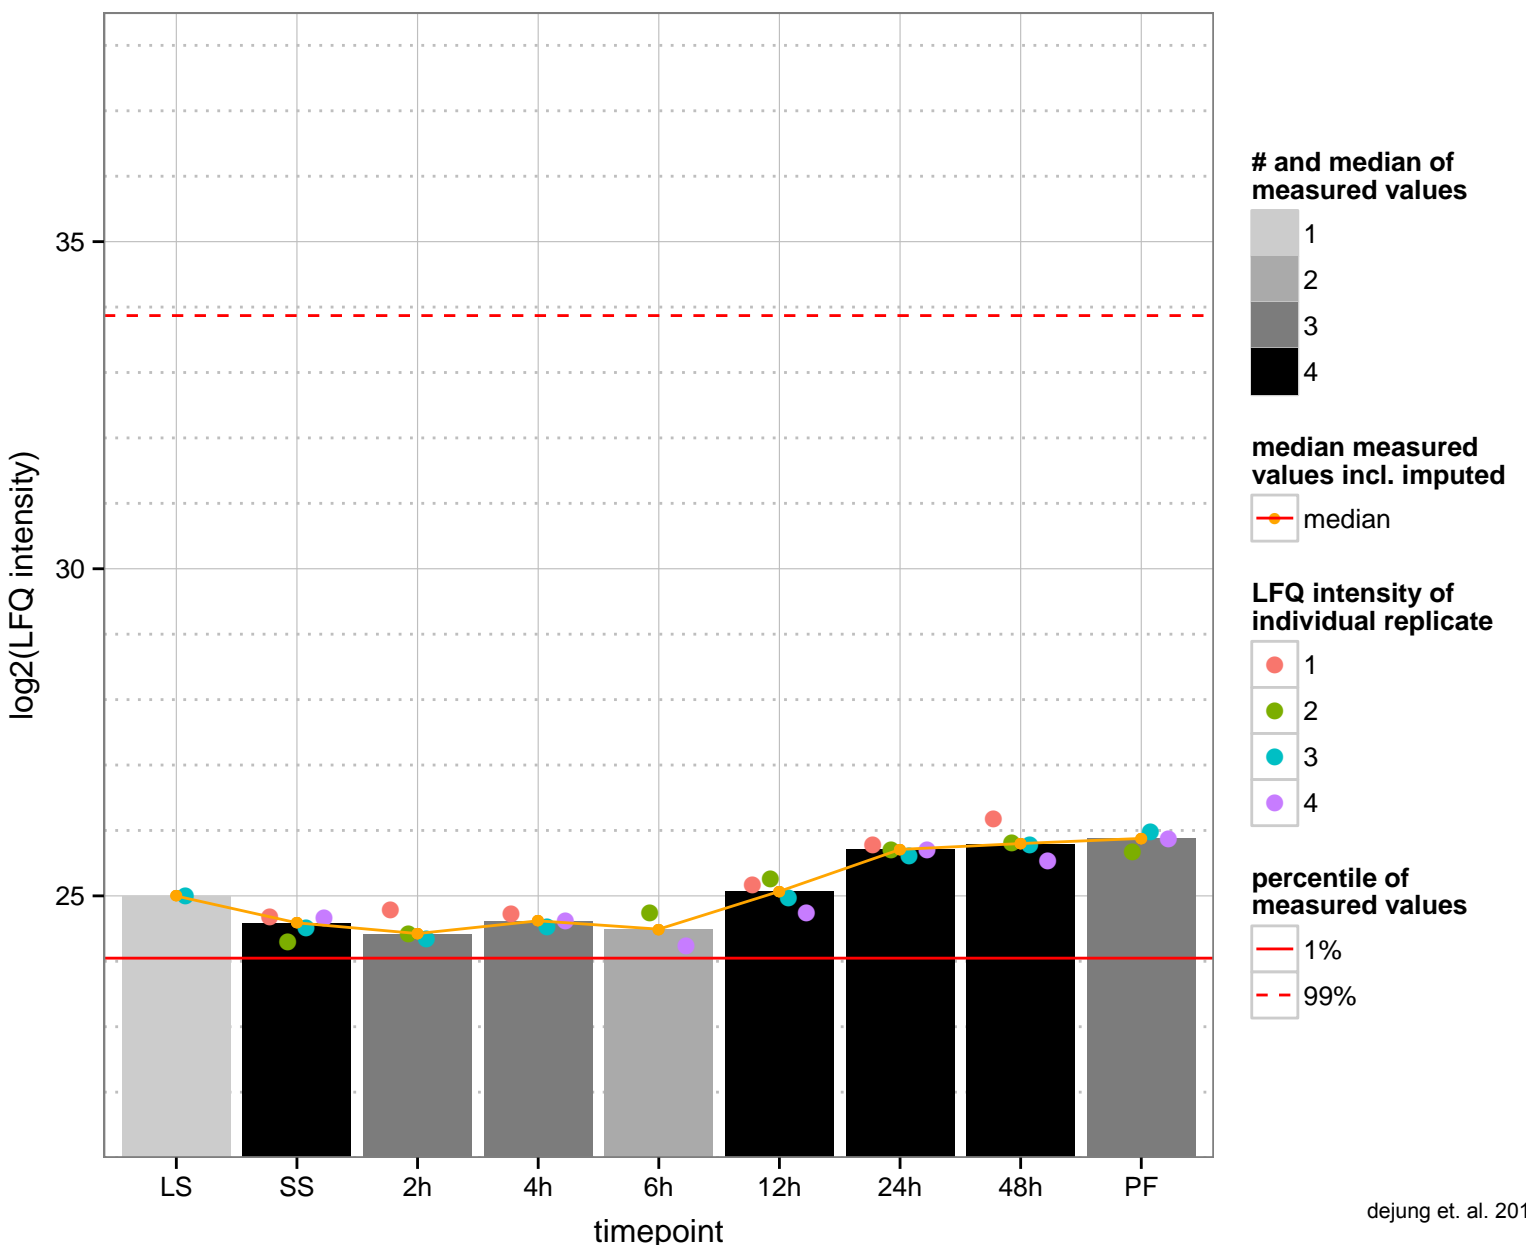

hypothetical protein, conserved  
 Tb927.4.4570  
 AGOF: sequence-specific DNA binding transcription factor activity  
 AGOC: null  
 AGOP: regulation of transcription, DNA-dependent  
 PGO: null  
 PGOC: null  
 PGOP: null

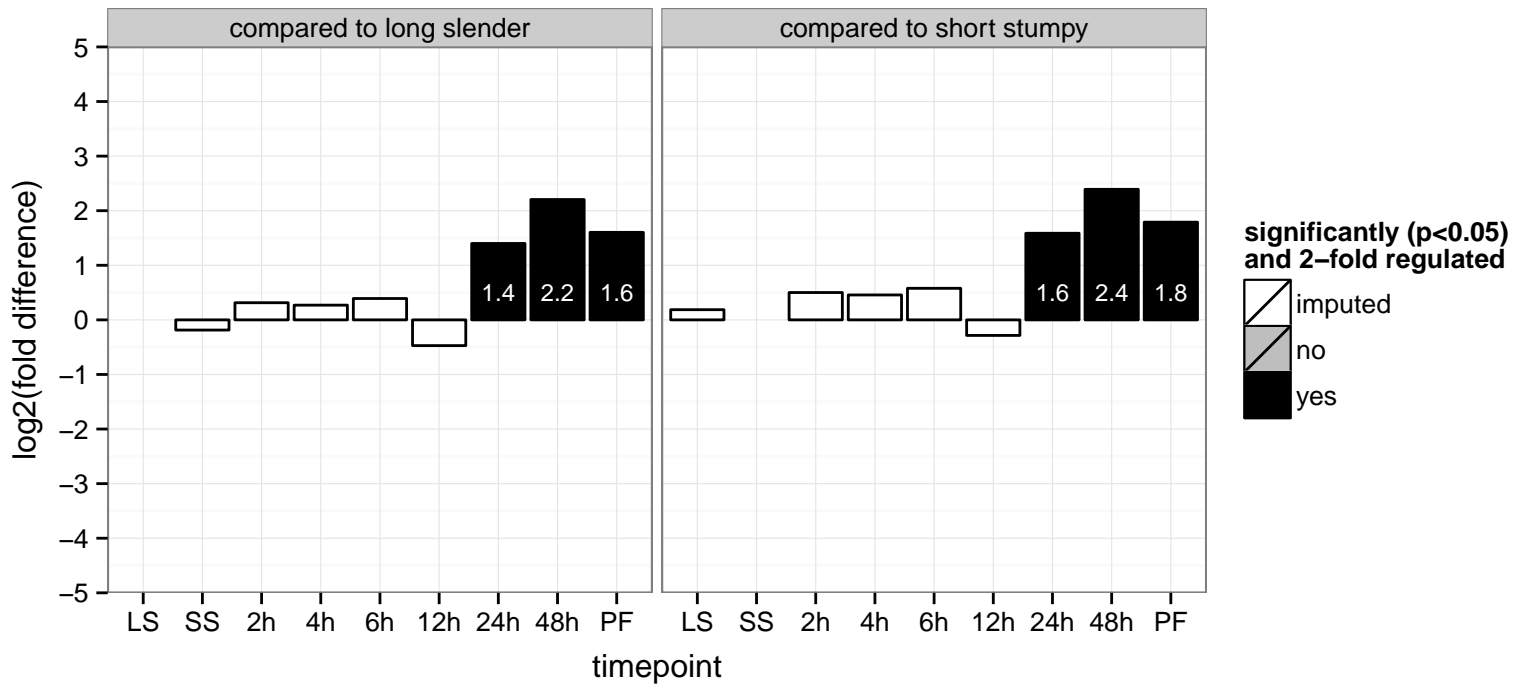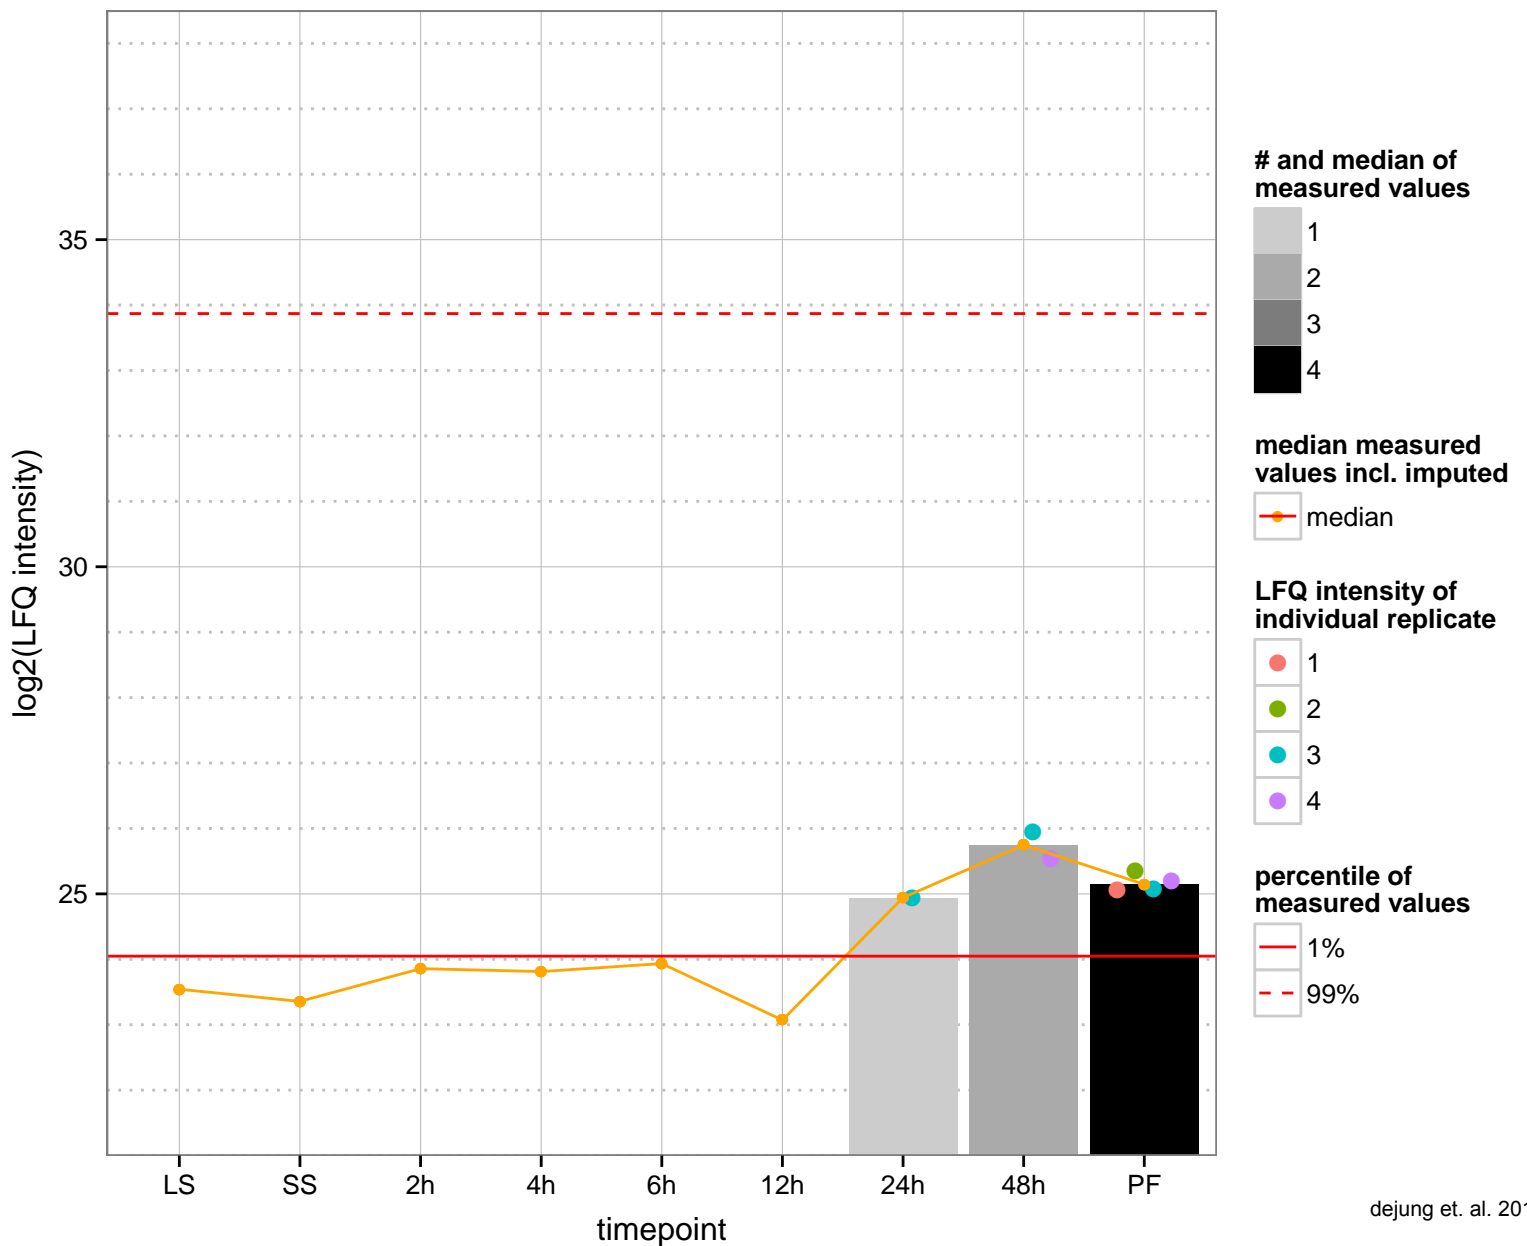



cytochrome oxidase subunit VIII (COXVIII)  
 Tb927.4.4620  
 AGOF: null  
 AGOC: mitochondrion  
 AGOP: null  
 PGO: null  
 PGO: null  
 PGO: null

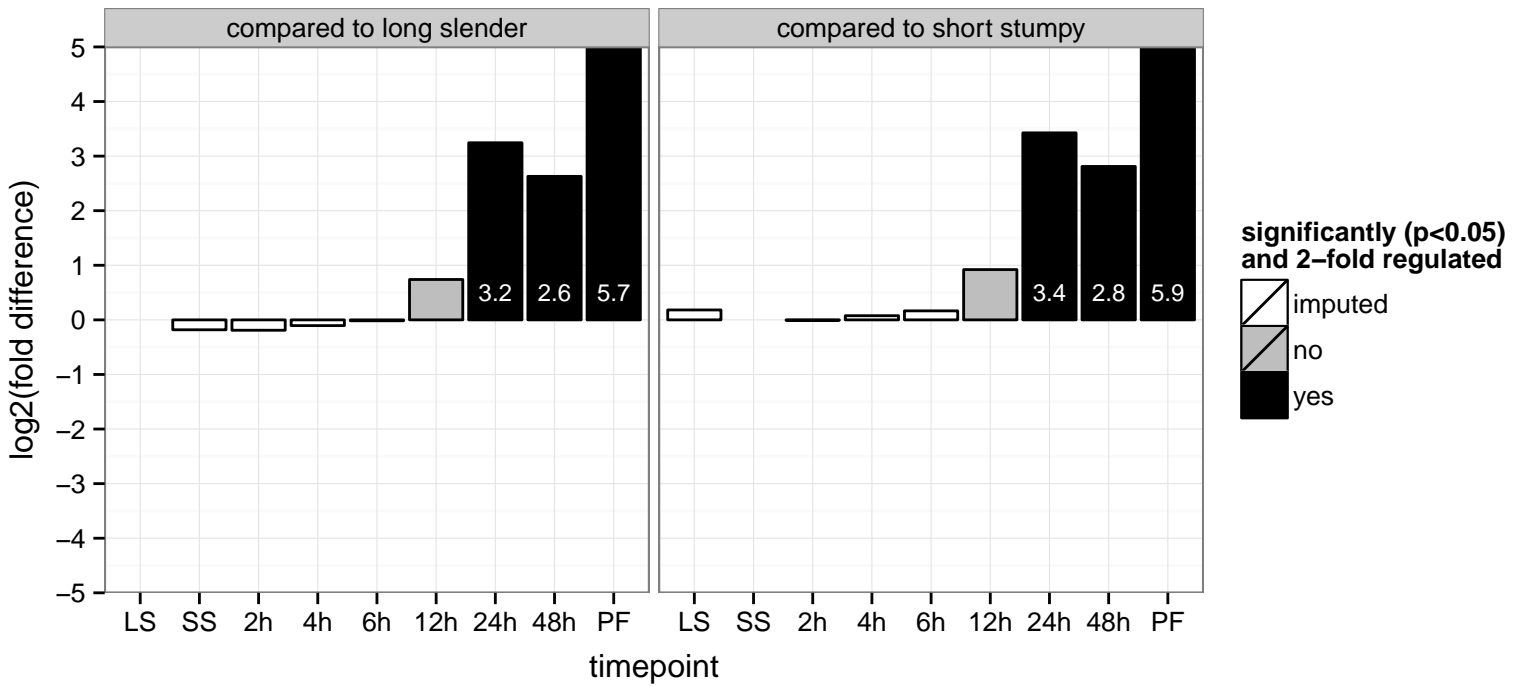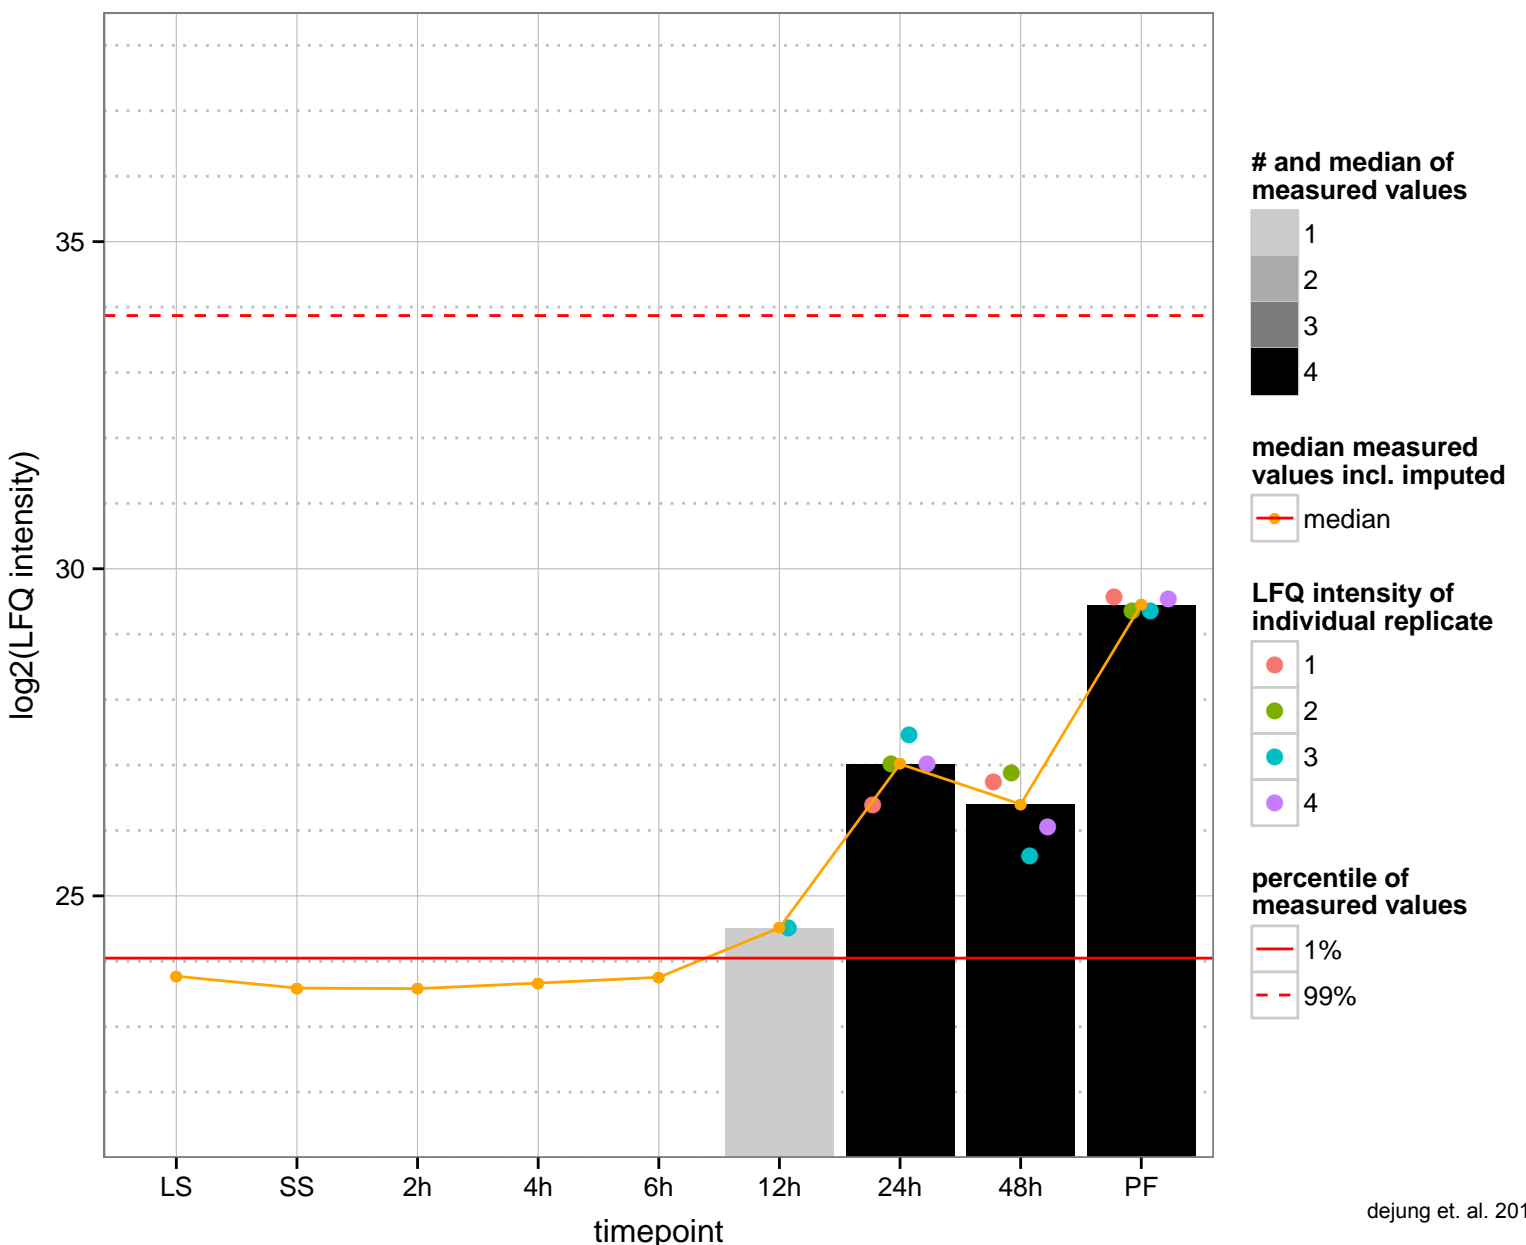

hypothetical protein, conserved  
 Tb927.4.4940  
 AGOF: null  
 AGOC: null  
 AGOP: null  
 PGO: null  
 PGO: null  
 PGO: null

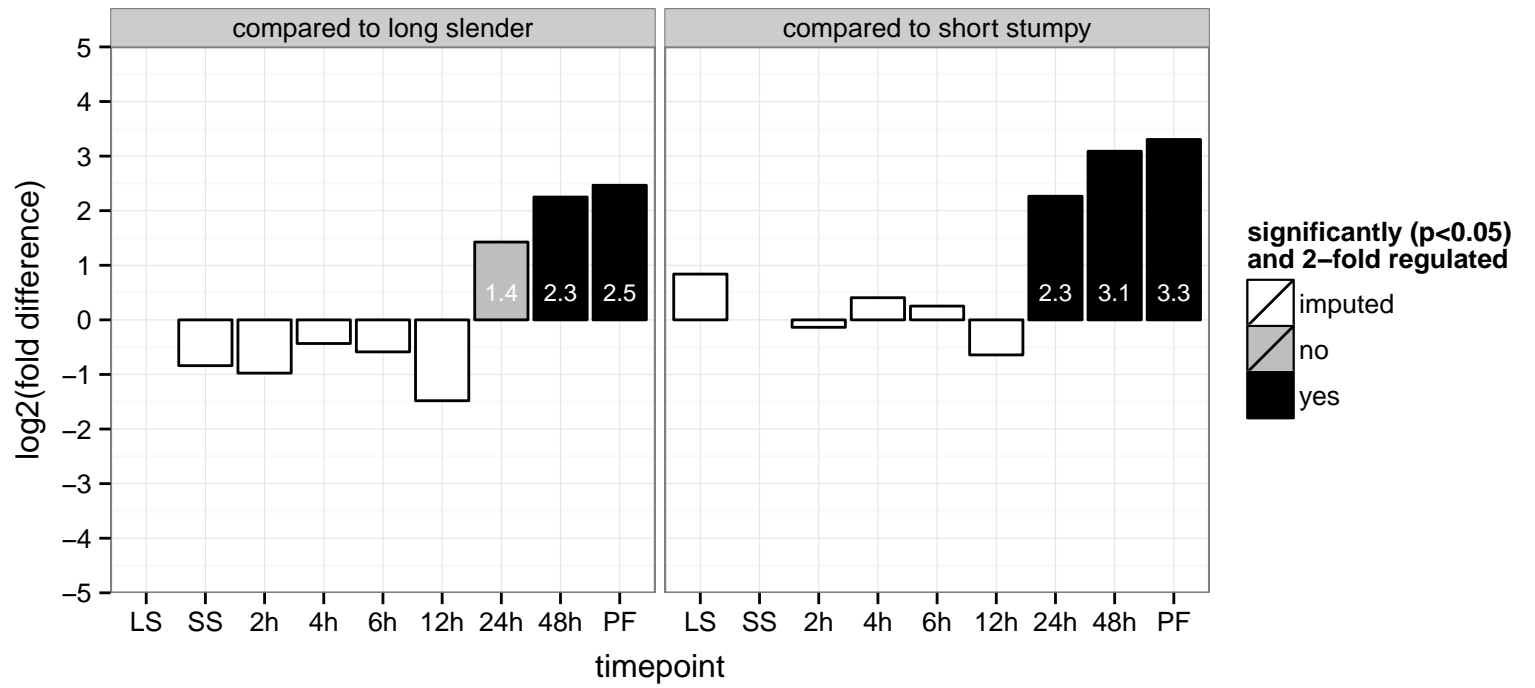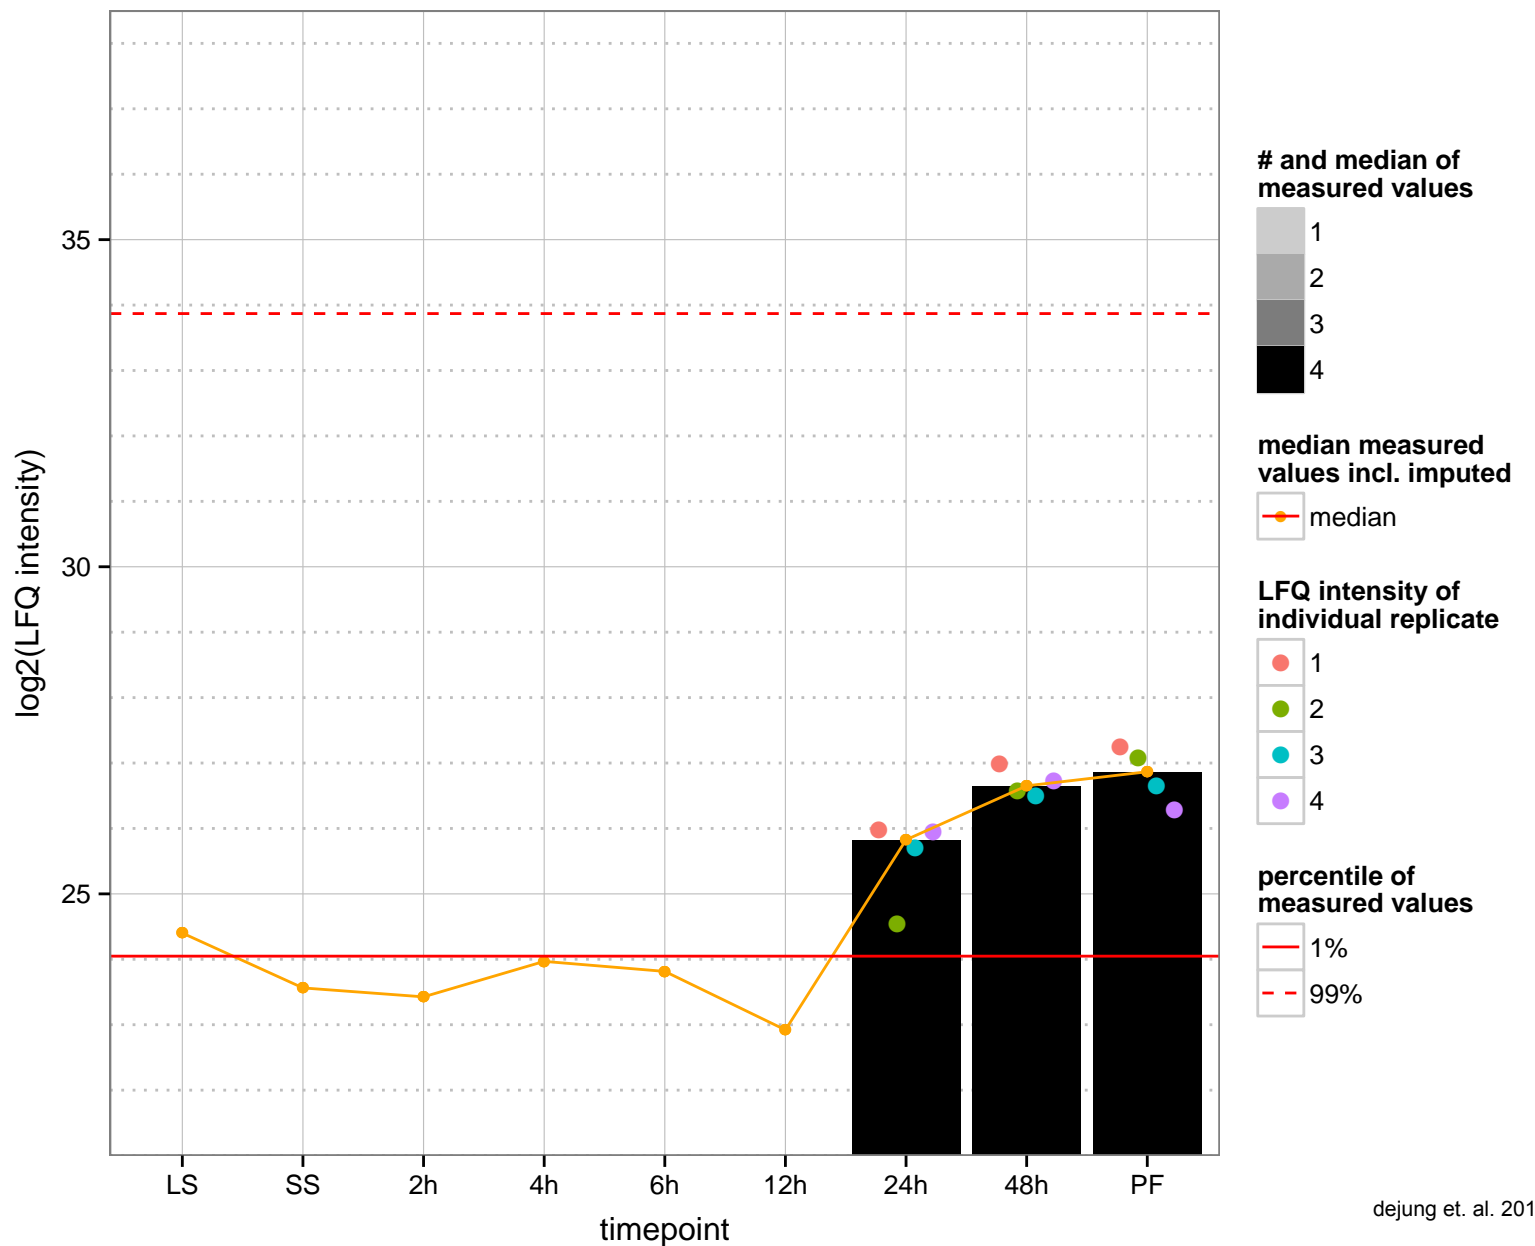

50S ribosomal protein L14, putative  
 Tb927.4.930  
 AGOF: structural constituent of ribosome  
 AGOC: intracellular, large ribosomal subunit, ribosome  
 AGOP: translation  
 PGO: structural constituent of ribosome  
 PGO: ribosome  
 PGO: translation

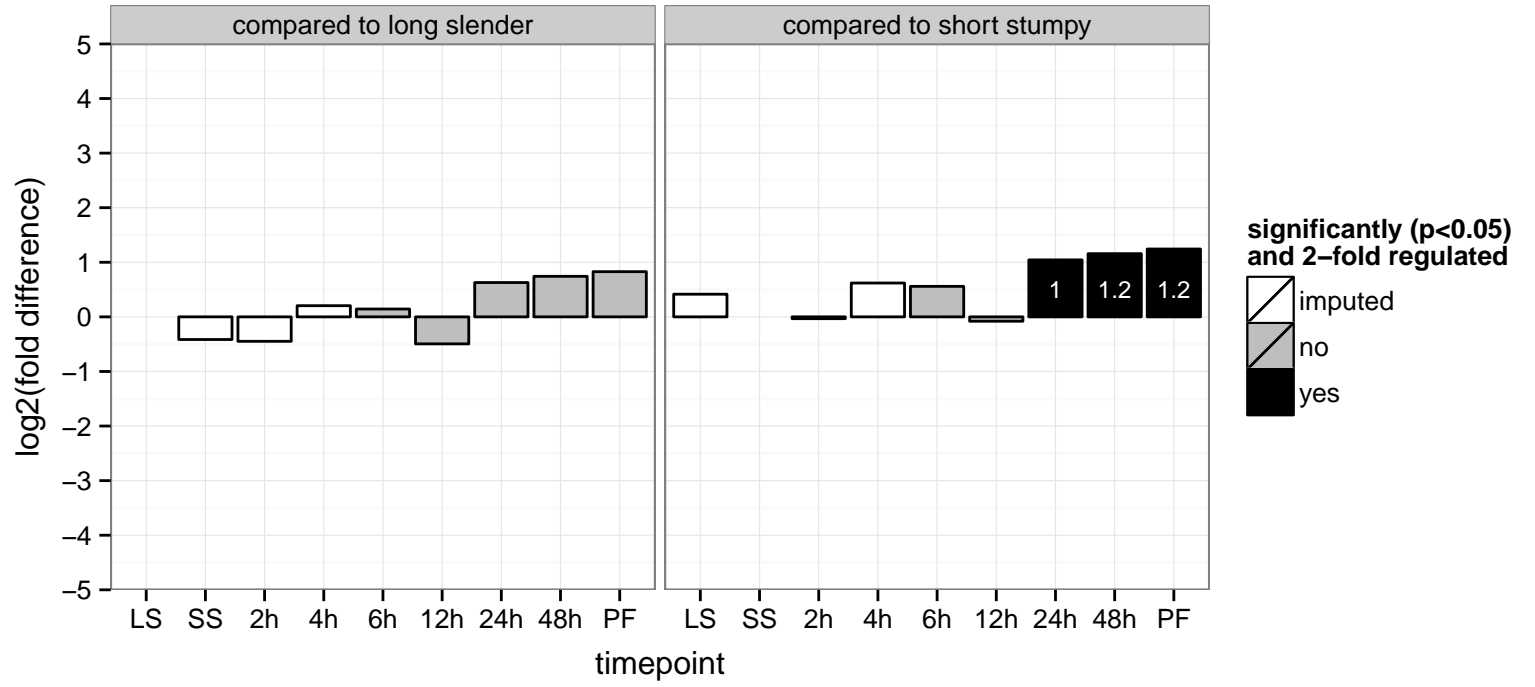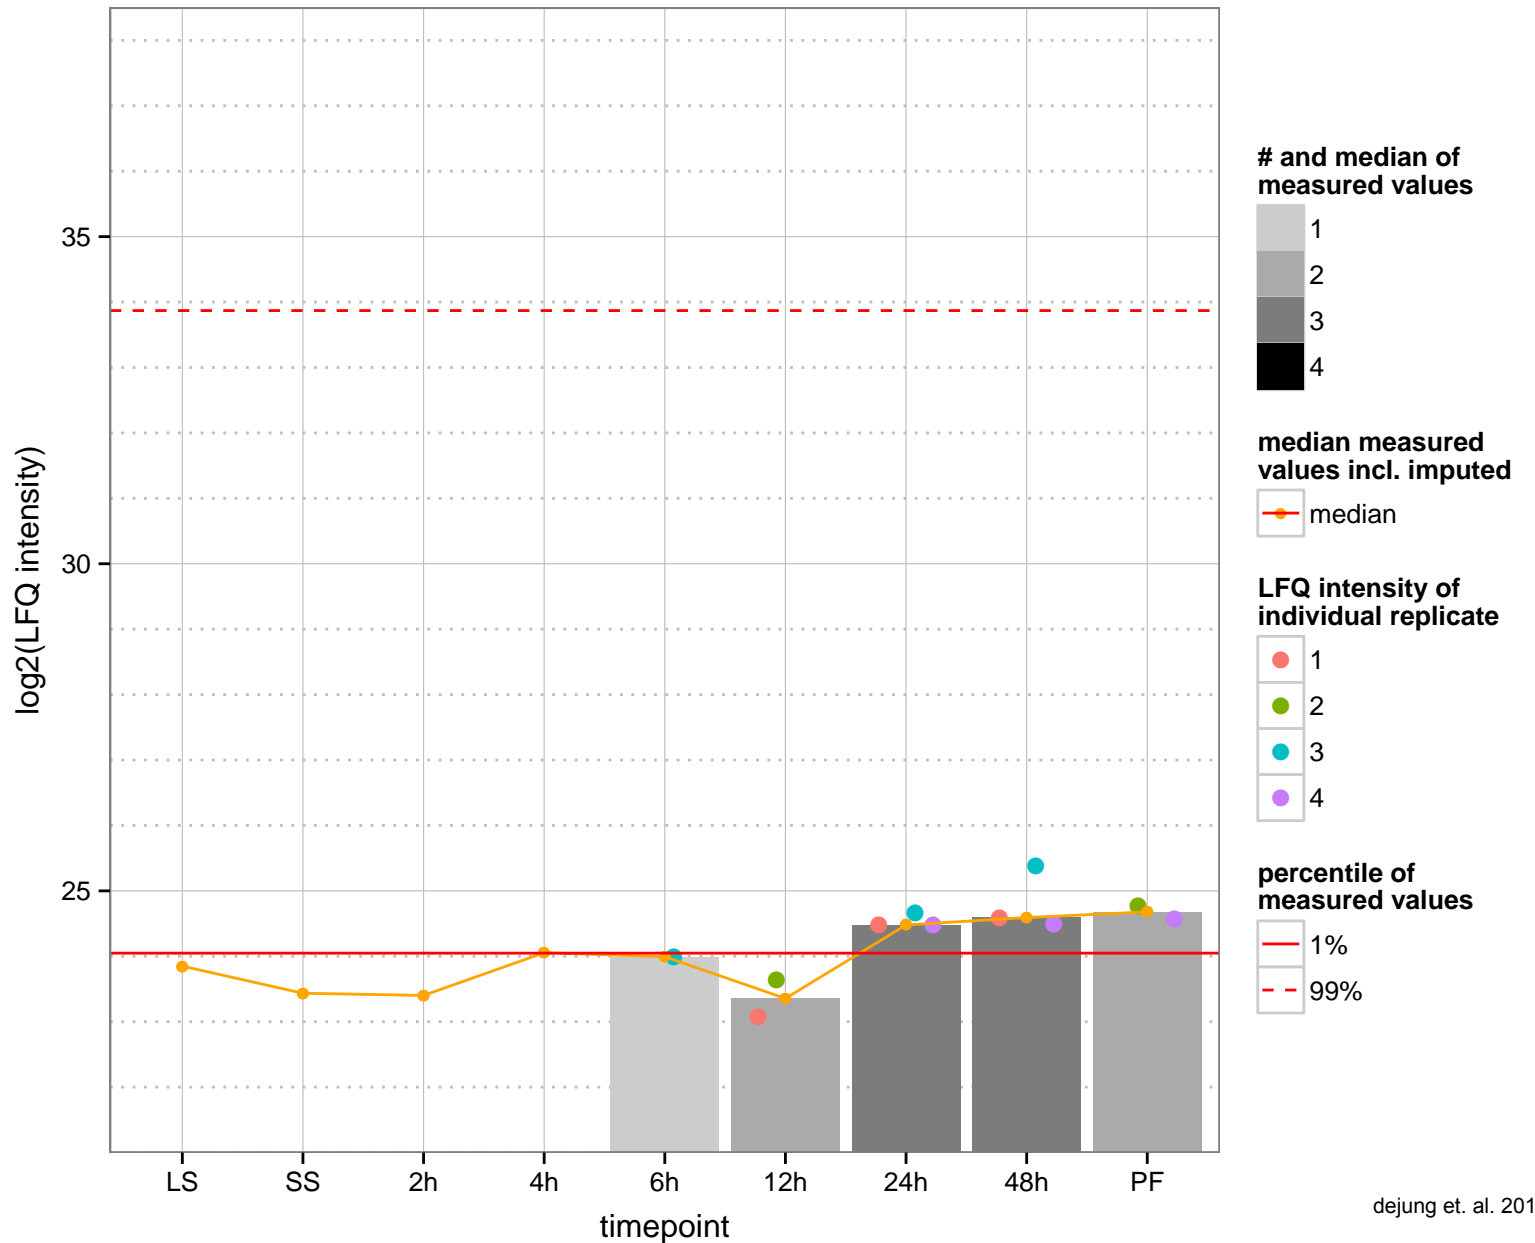

peroxisome targeting signal 1 receptor (TbPEX5)  
 Tb927.5.1100  
 AGOF: null  
 AGOC: null  
 AGOP: null  
 PGOF: protein binding  
 PGO: null  
 PGOP: null

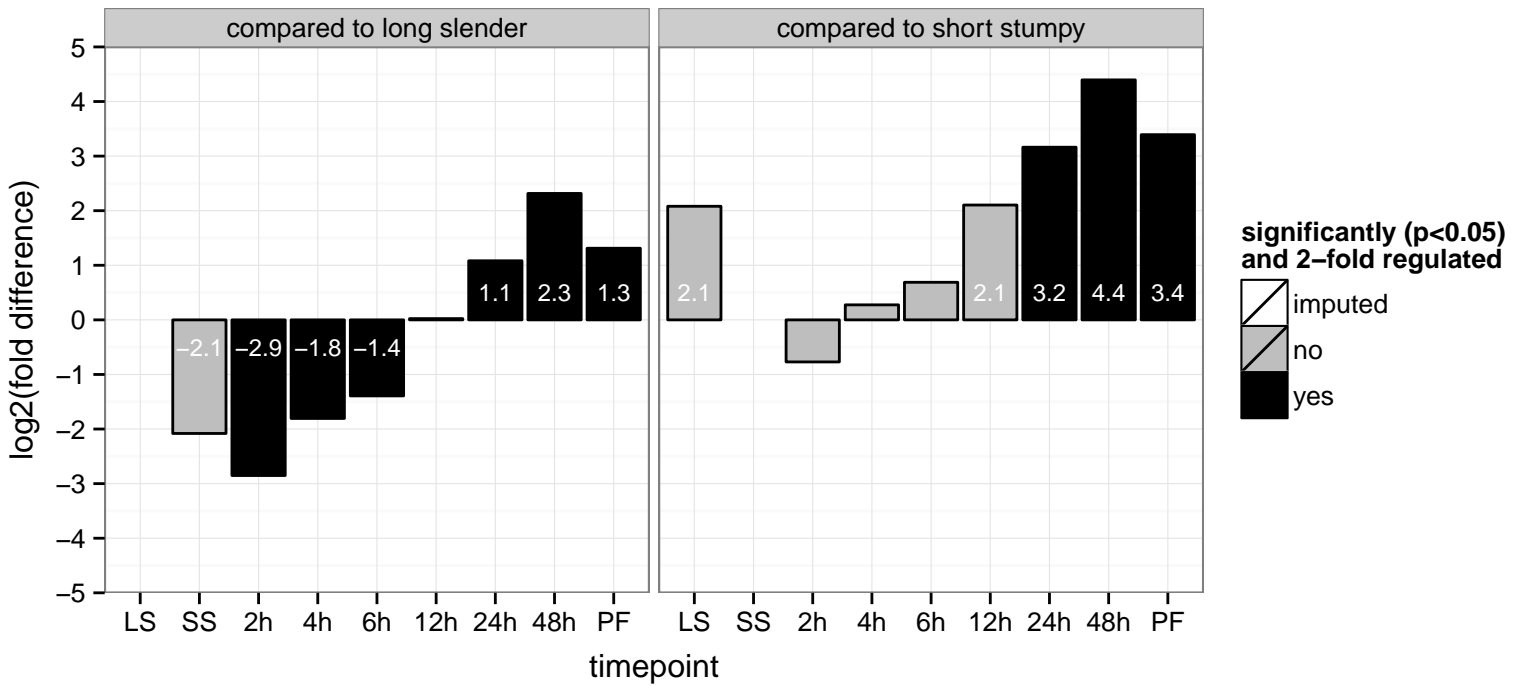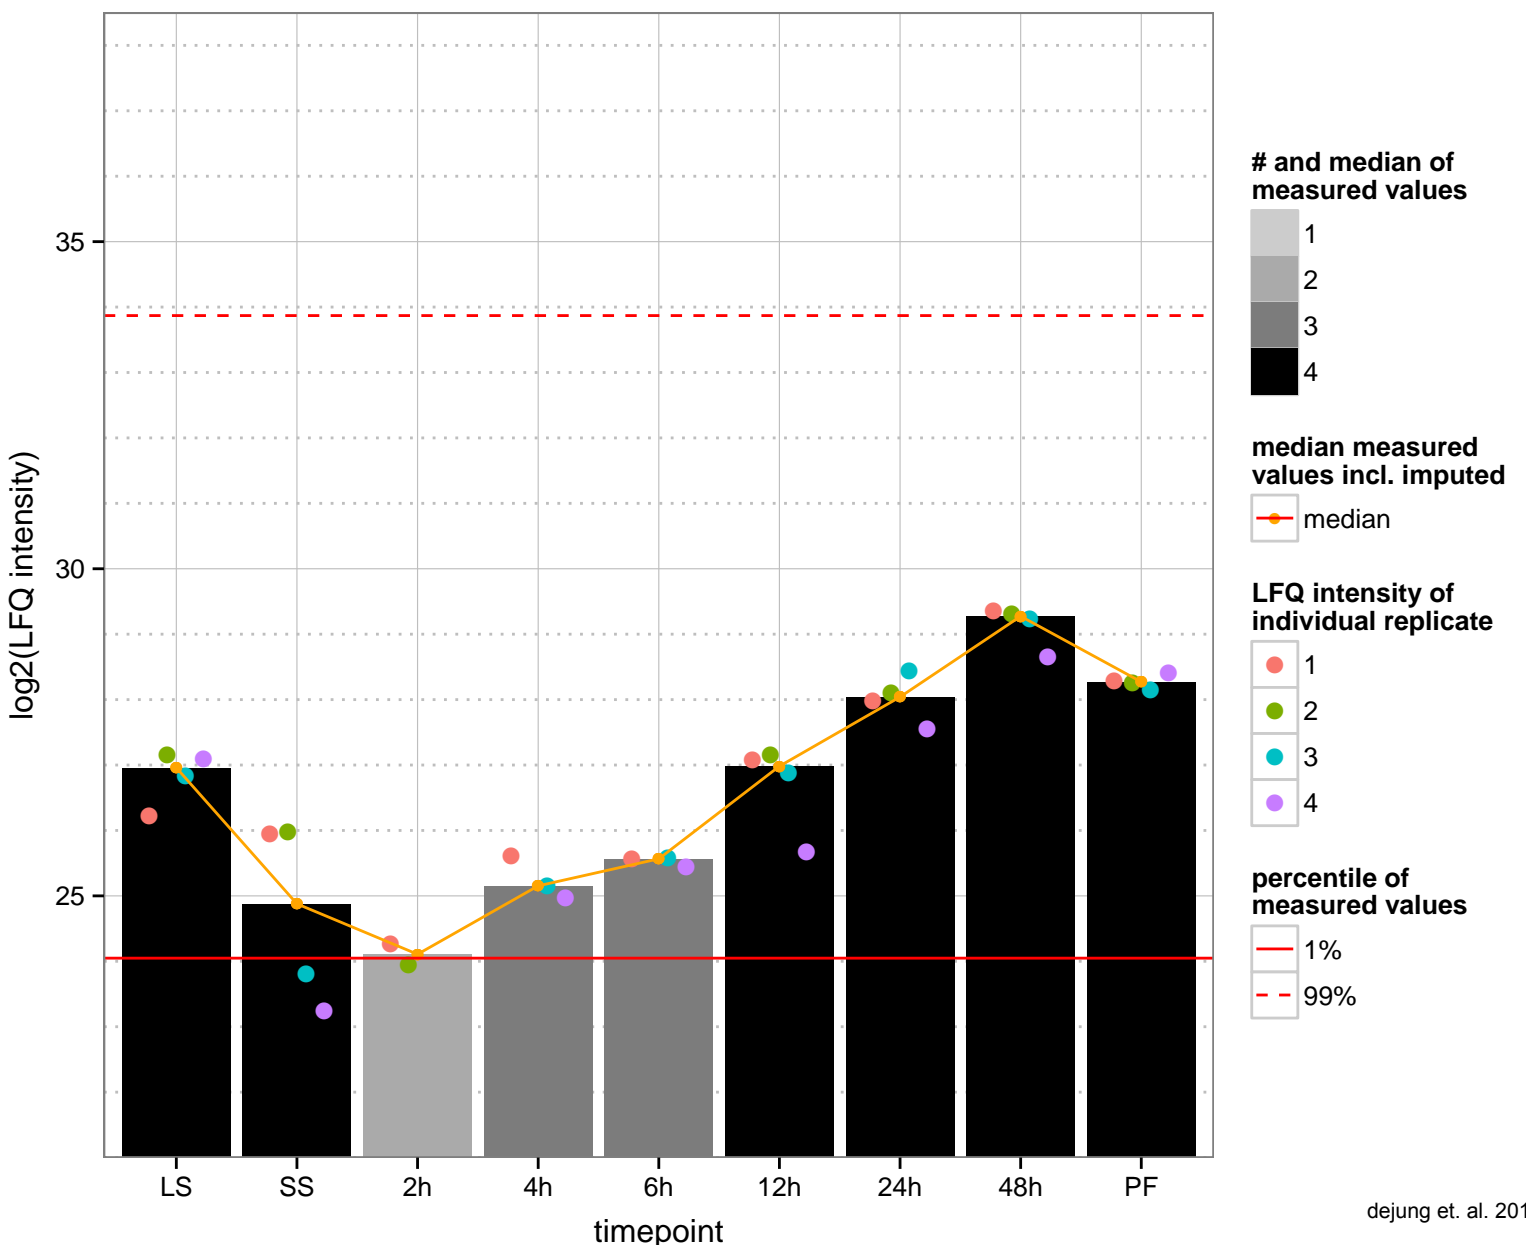

RNA helicase Prp43

Tb927.5.1150

AGOF: ATP binding, helicase activity, nucleic acid binding, nucleoside-triphosphatase activity

AGOC: null

AGOP: RNA splicing

PGOF: ATP binding, ATP-dependent helicase activity, helicase activity, nucleic acid binding, nucleoside-triphosphatase activity

PGOC: null

PGOP: null

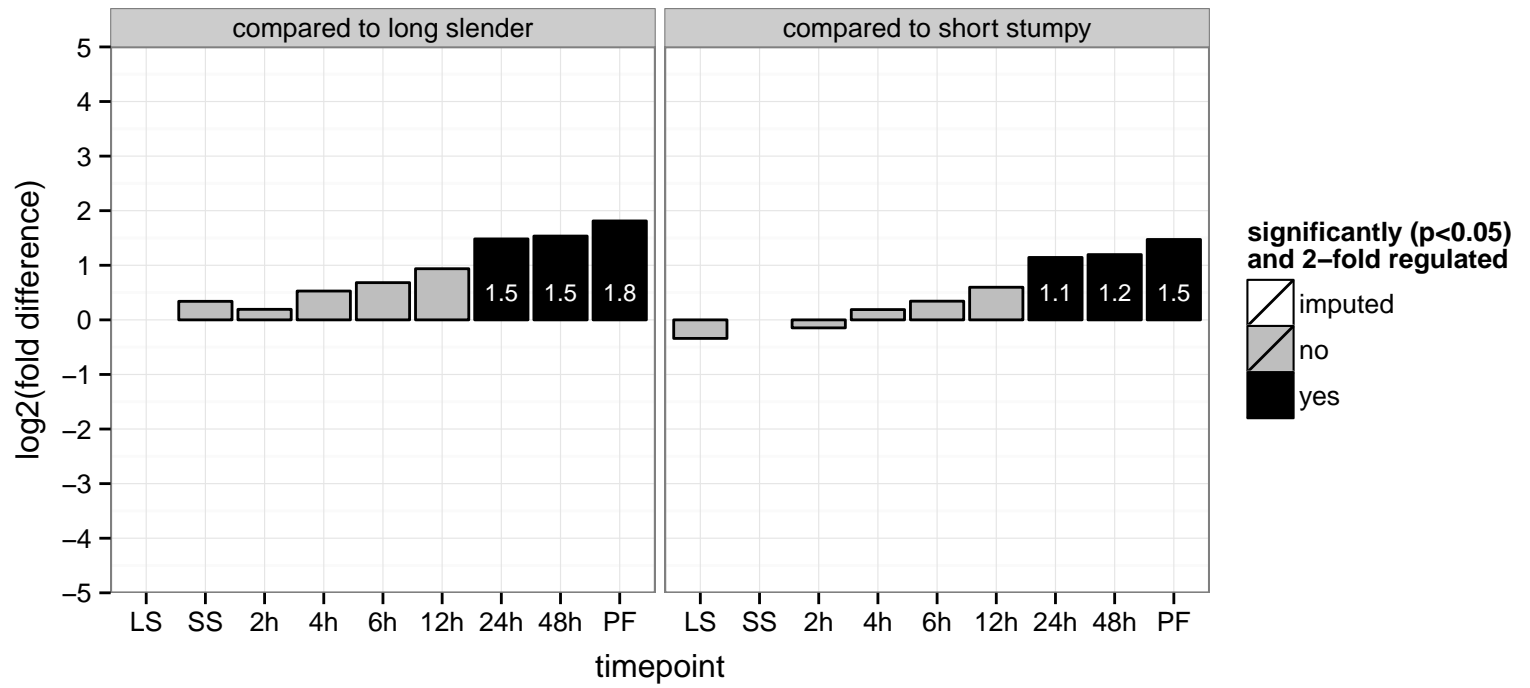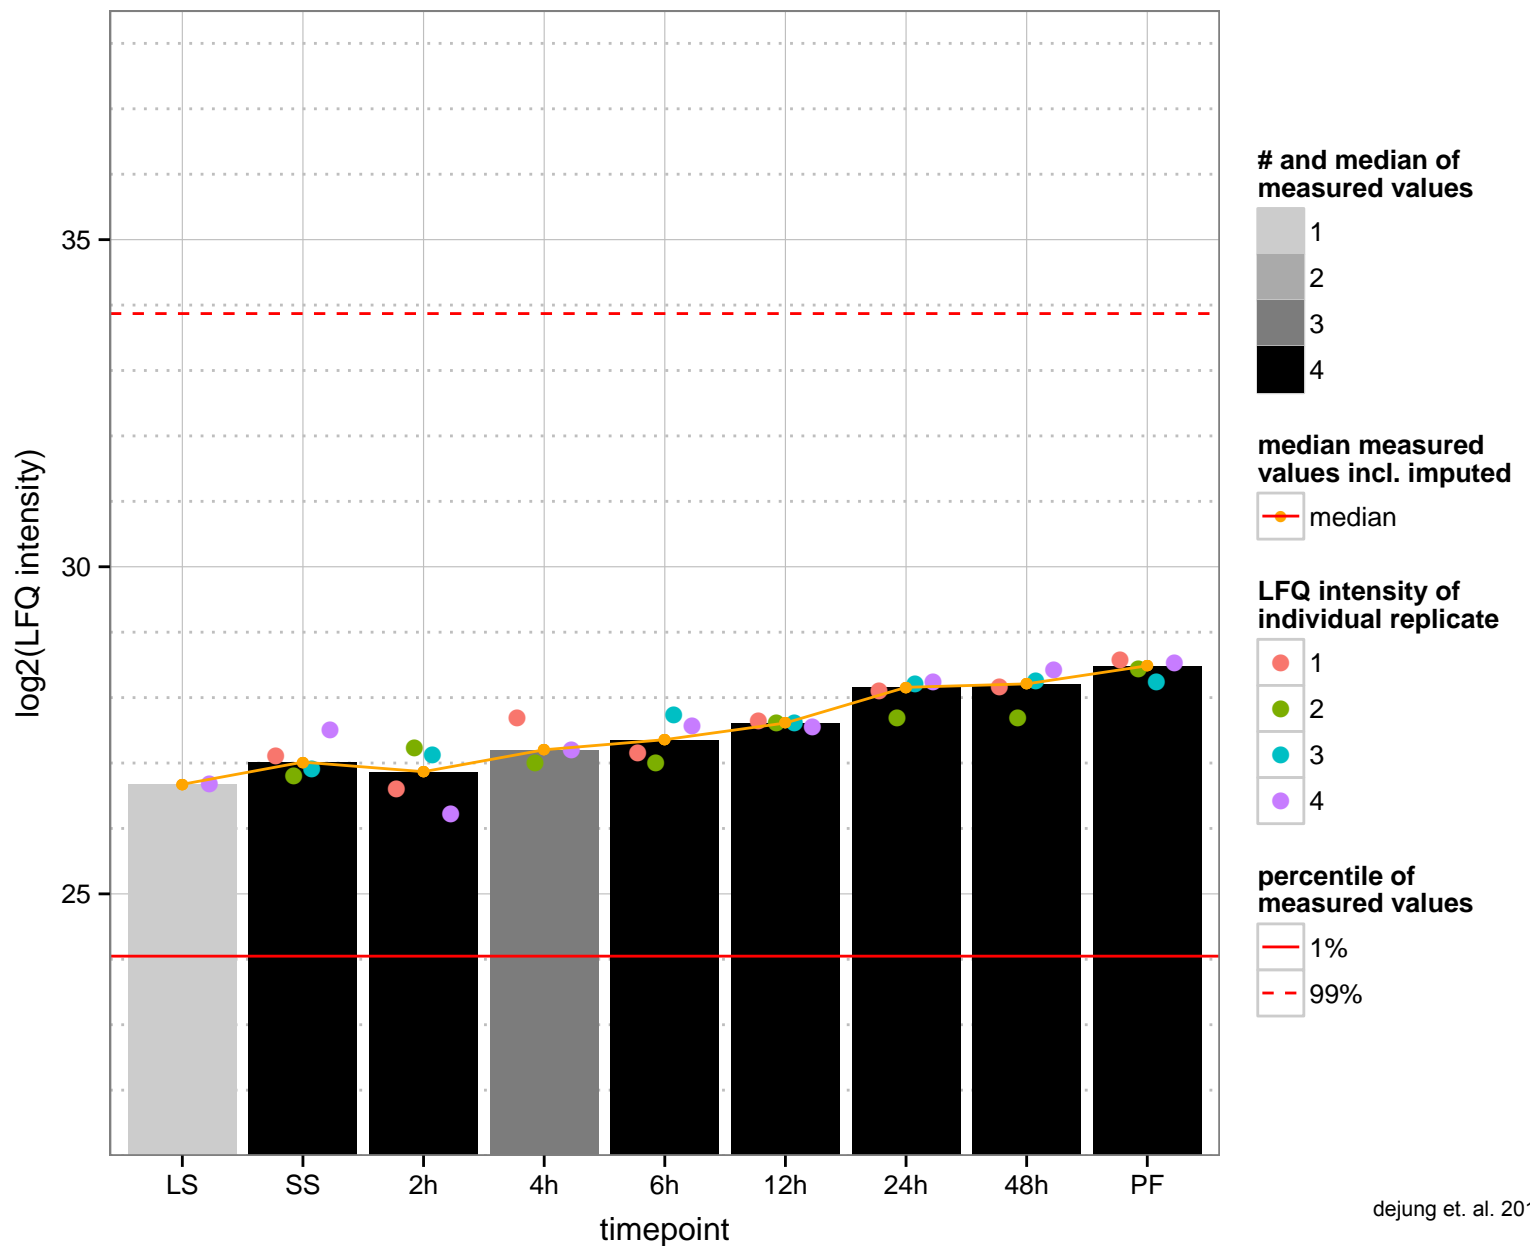

hypothetical protein, conserved  
 Tb927.5.2800  
 AGOF: null  
 AGOC: null  
 AGOP: null  
 PGOF: null  
 PGO C: null  
 PGOP: null

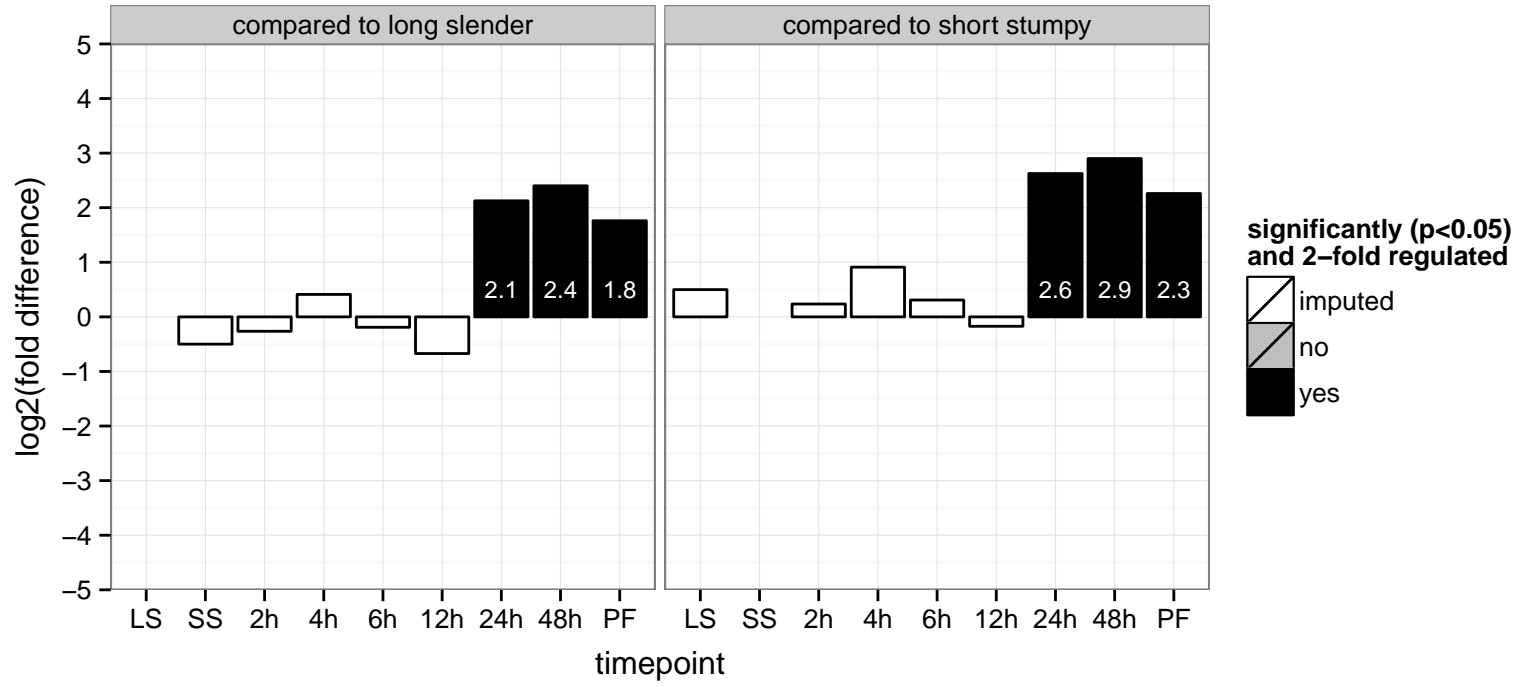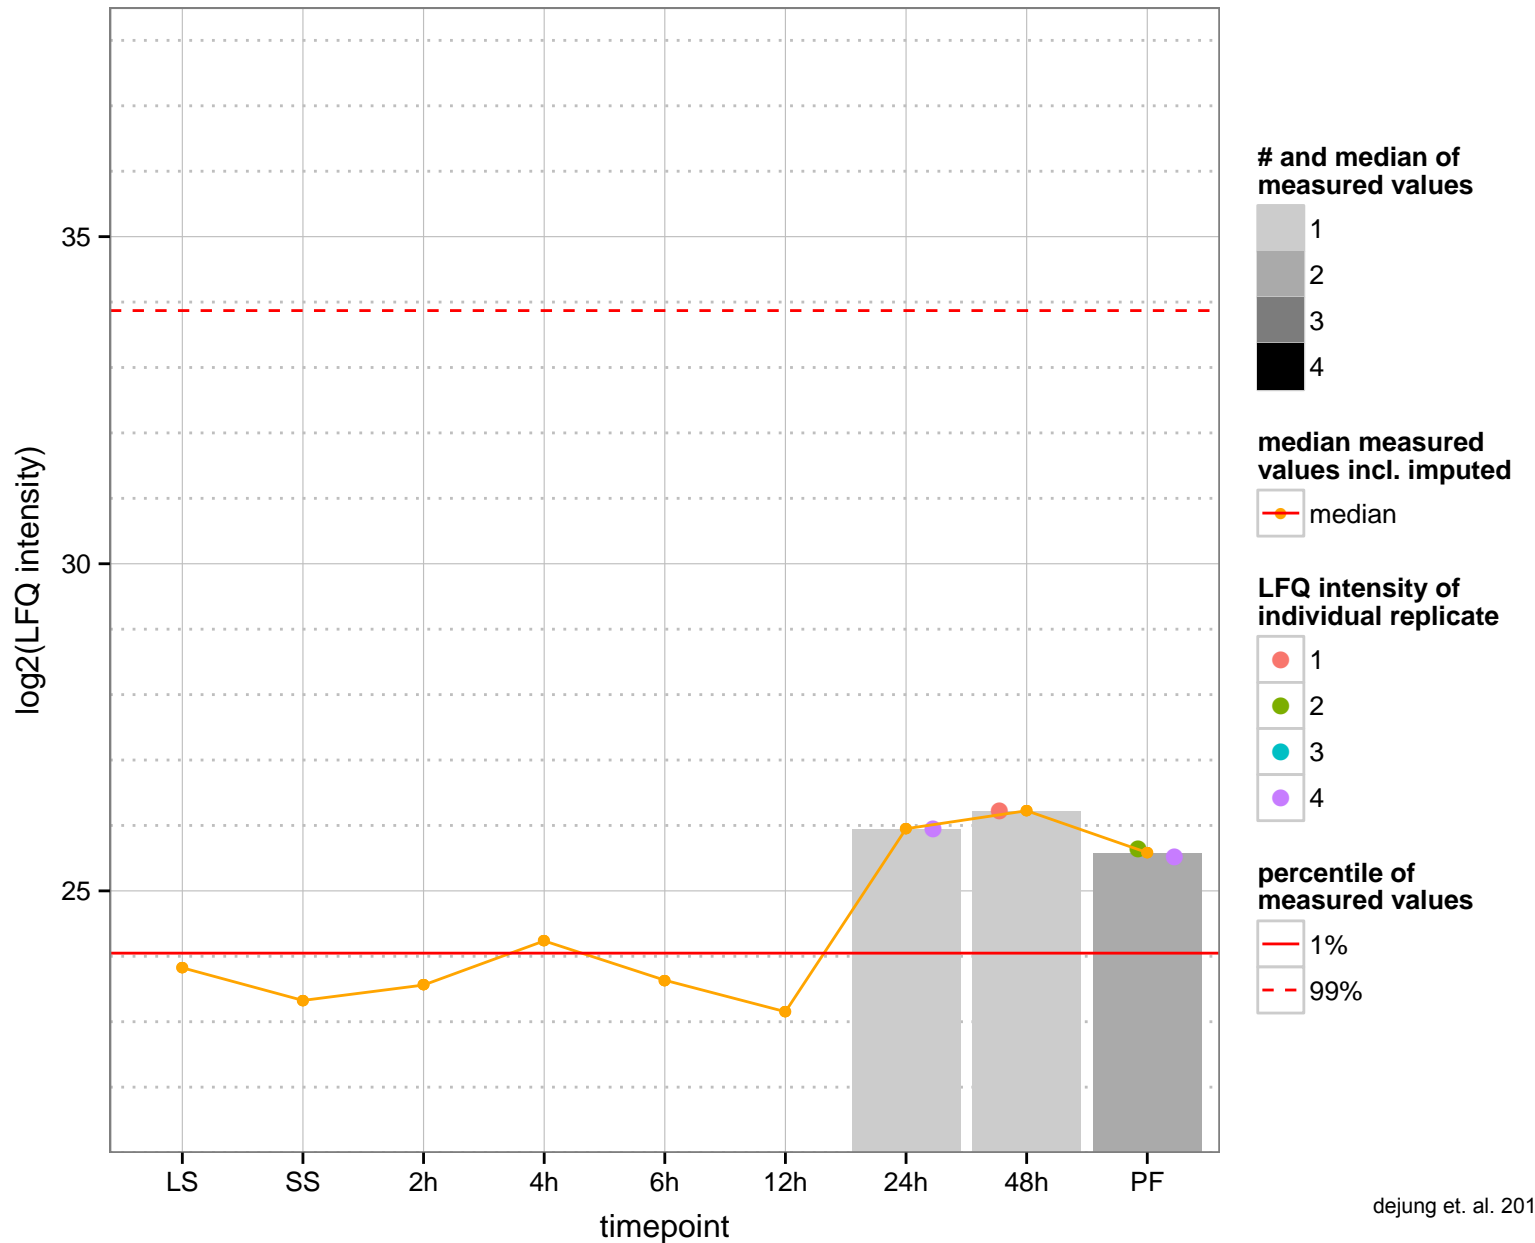

hypothetical protein, conserved  
 Tb927.5.2930  
 AGOF: null  
 AGOC: mitochondrion  
 AGOP: null  
 PGO: null  
 PGO: null  
 PGO: null

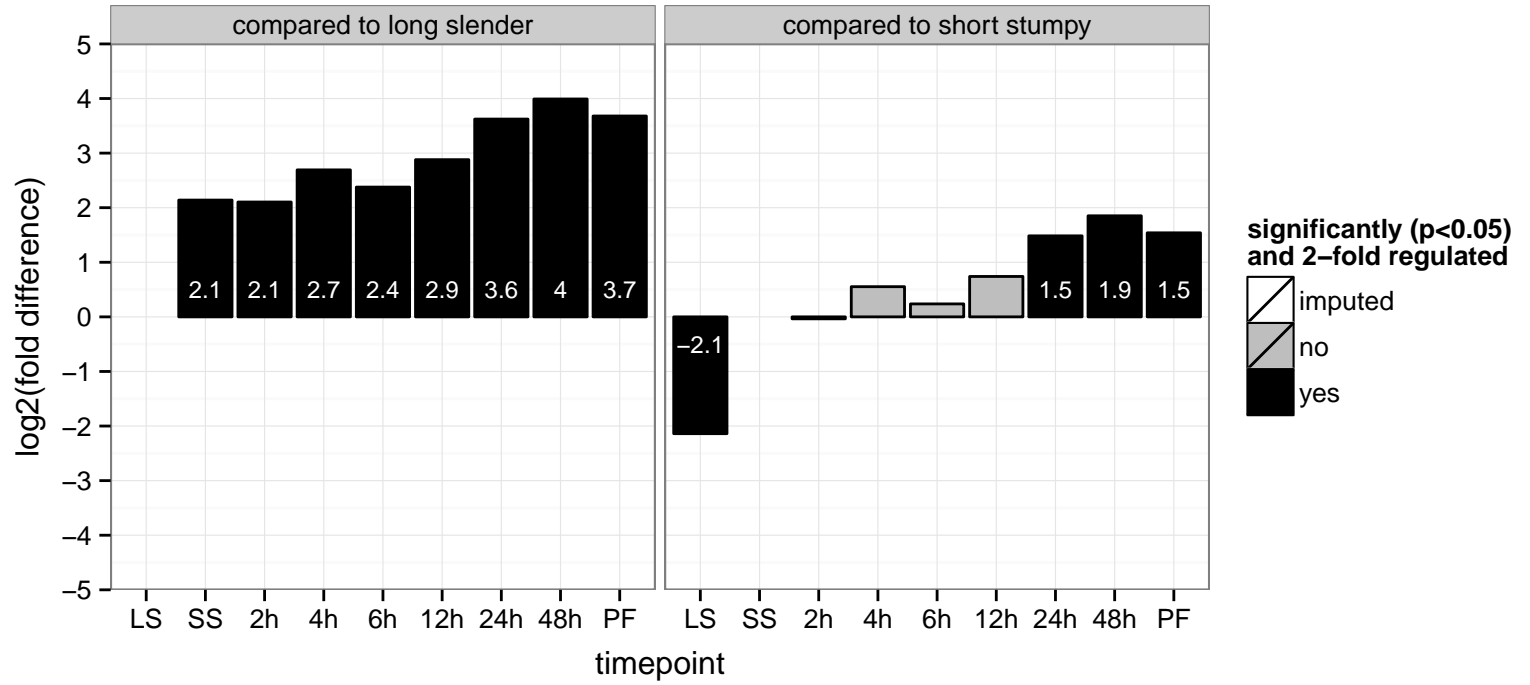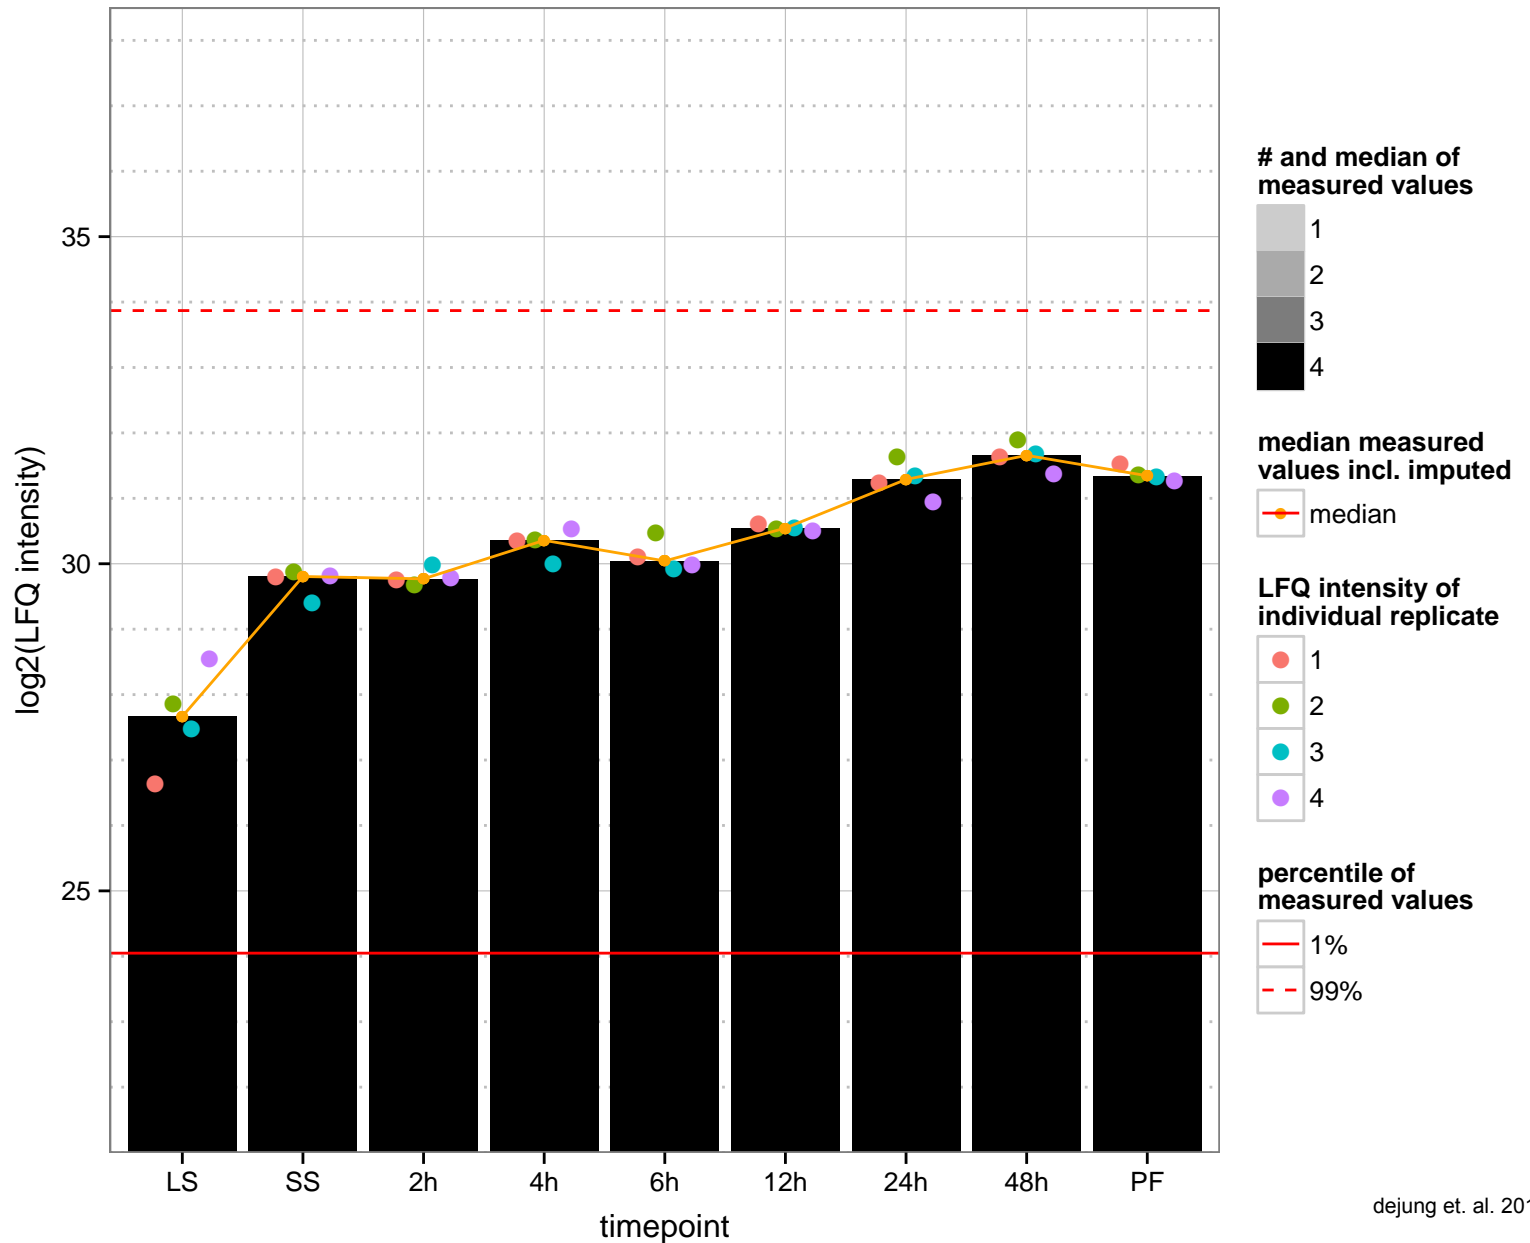

poly(ADP-ribose) polymerase, putative  
 Tb927.5.3050  
 AGOF: NAD+ ADP-ribosyltransferase activity  
 AGOC: nucleus  
 AGOP: protein ADP-ribosylation  
 PGOF: NAD+ ADP-ribosyltransferase activity  
 PGO: null  
 PGOP: protein ADP-ribosylation

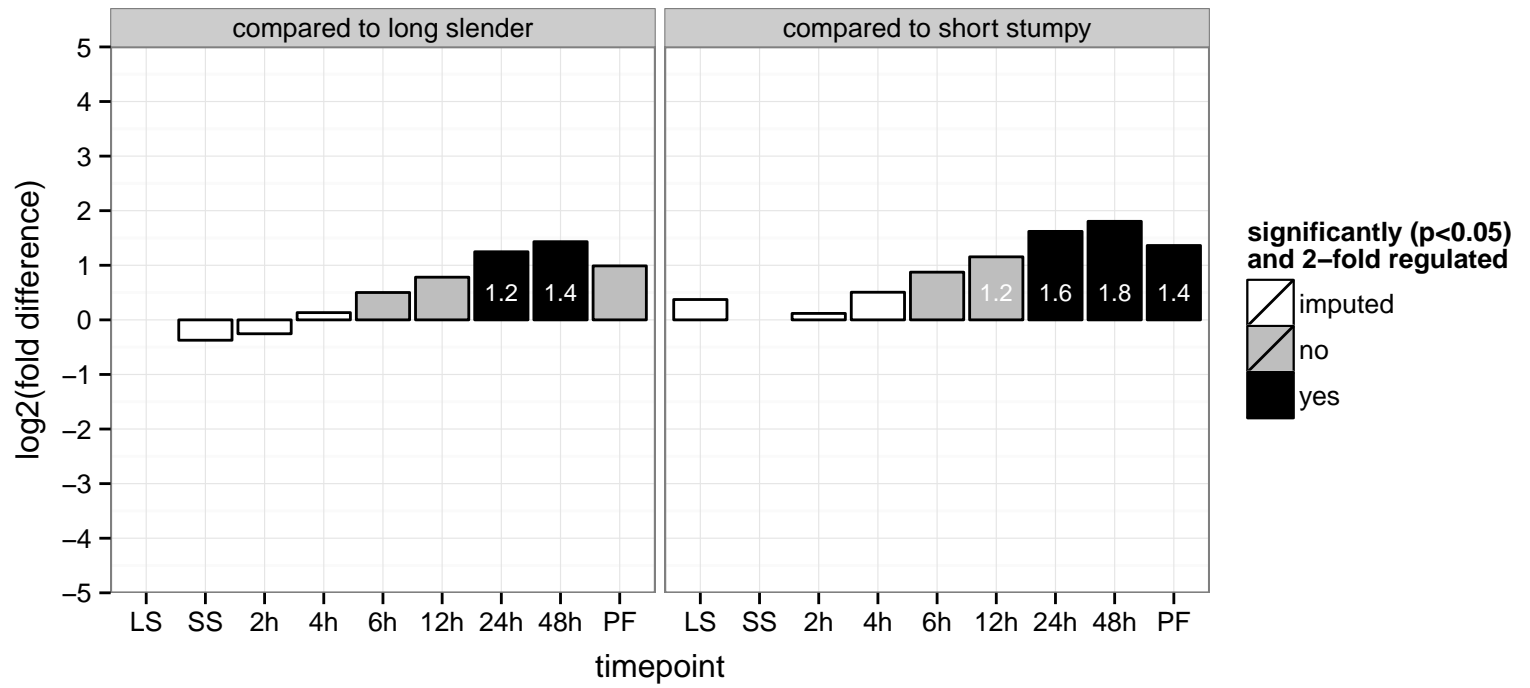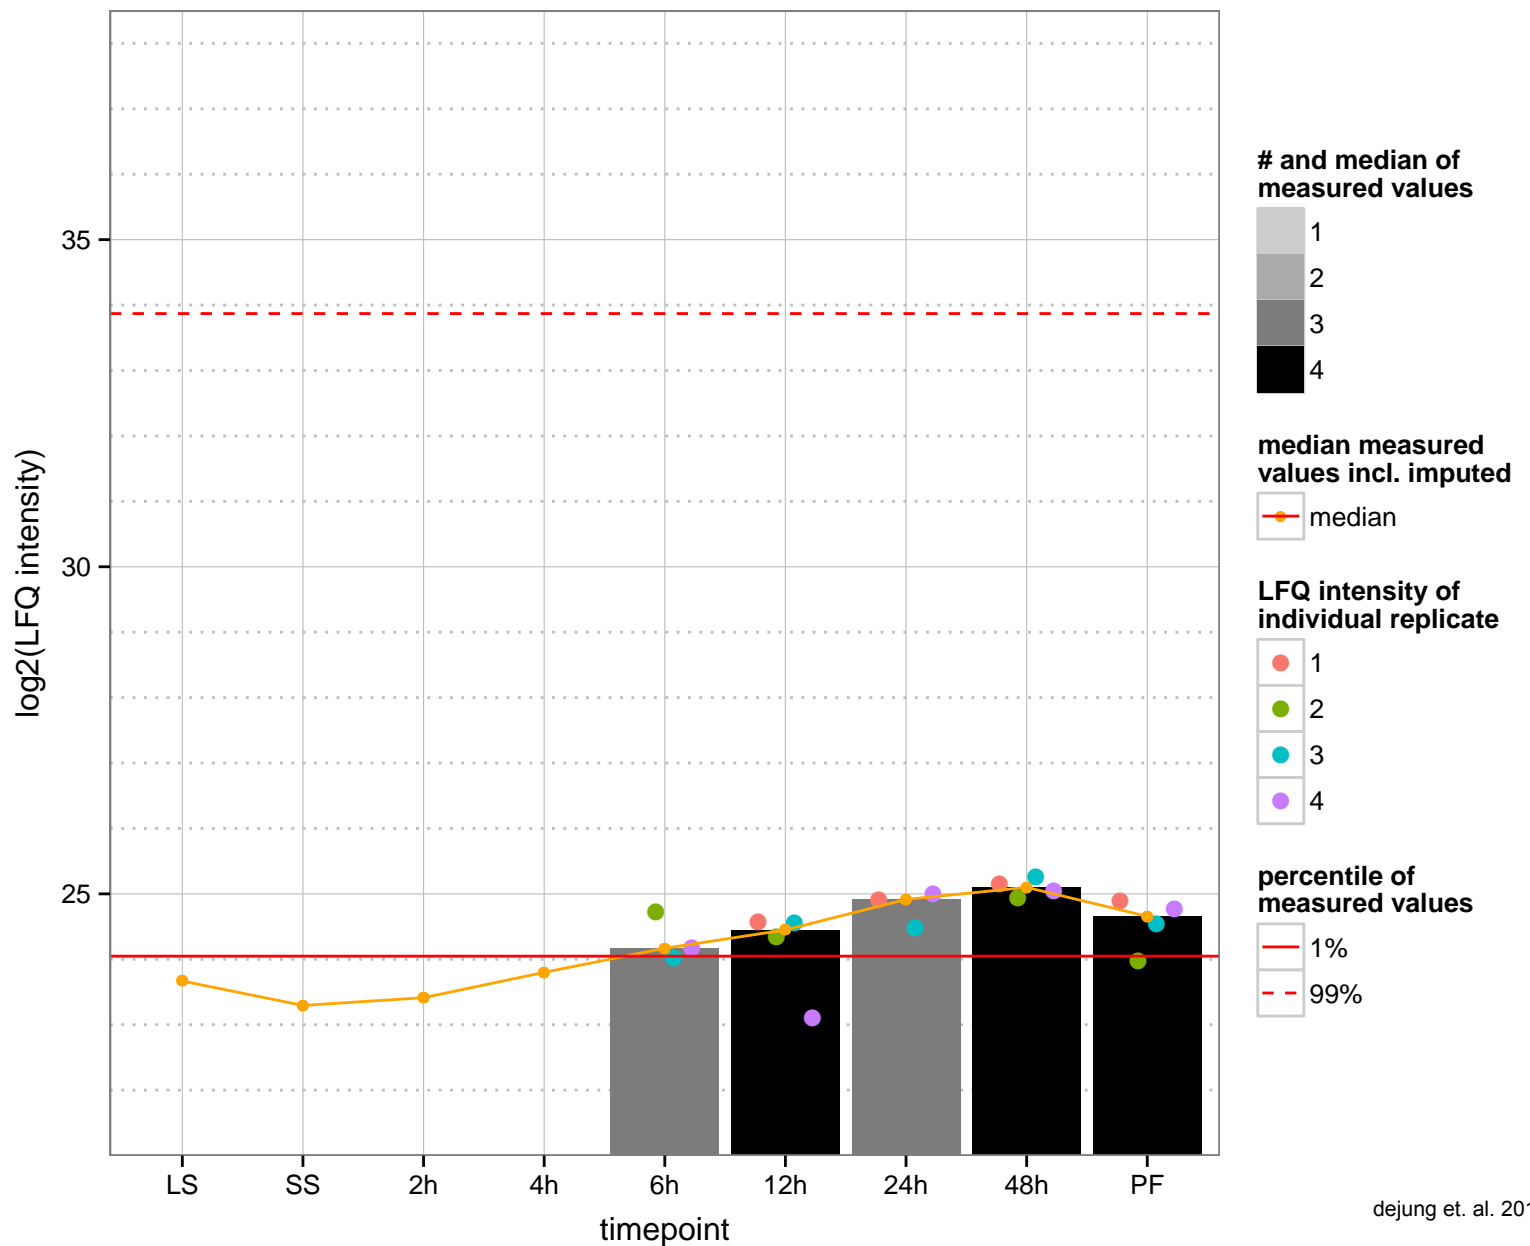



hypothetical protein, conserved  
 Tb927.5.4040  
 AGOF: null  
 AGOC: mitochondrion  
 AGOP: cell wall macromolecule catabolic process  
 PGO: null  
 PGOC: null  
 PGOP: cell wall macromolecule catabolic process

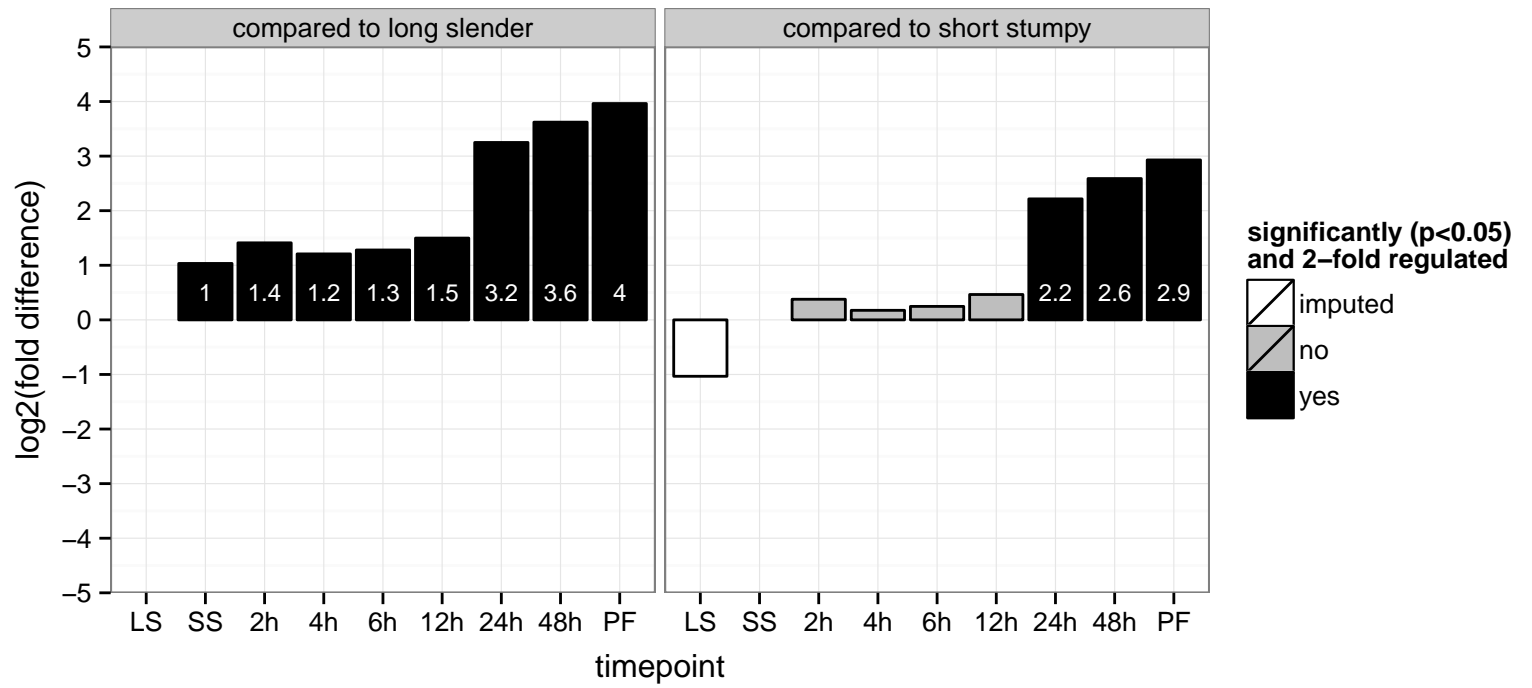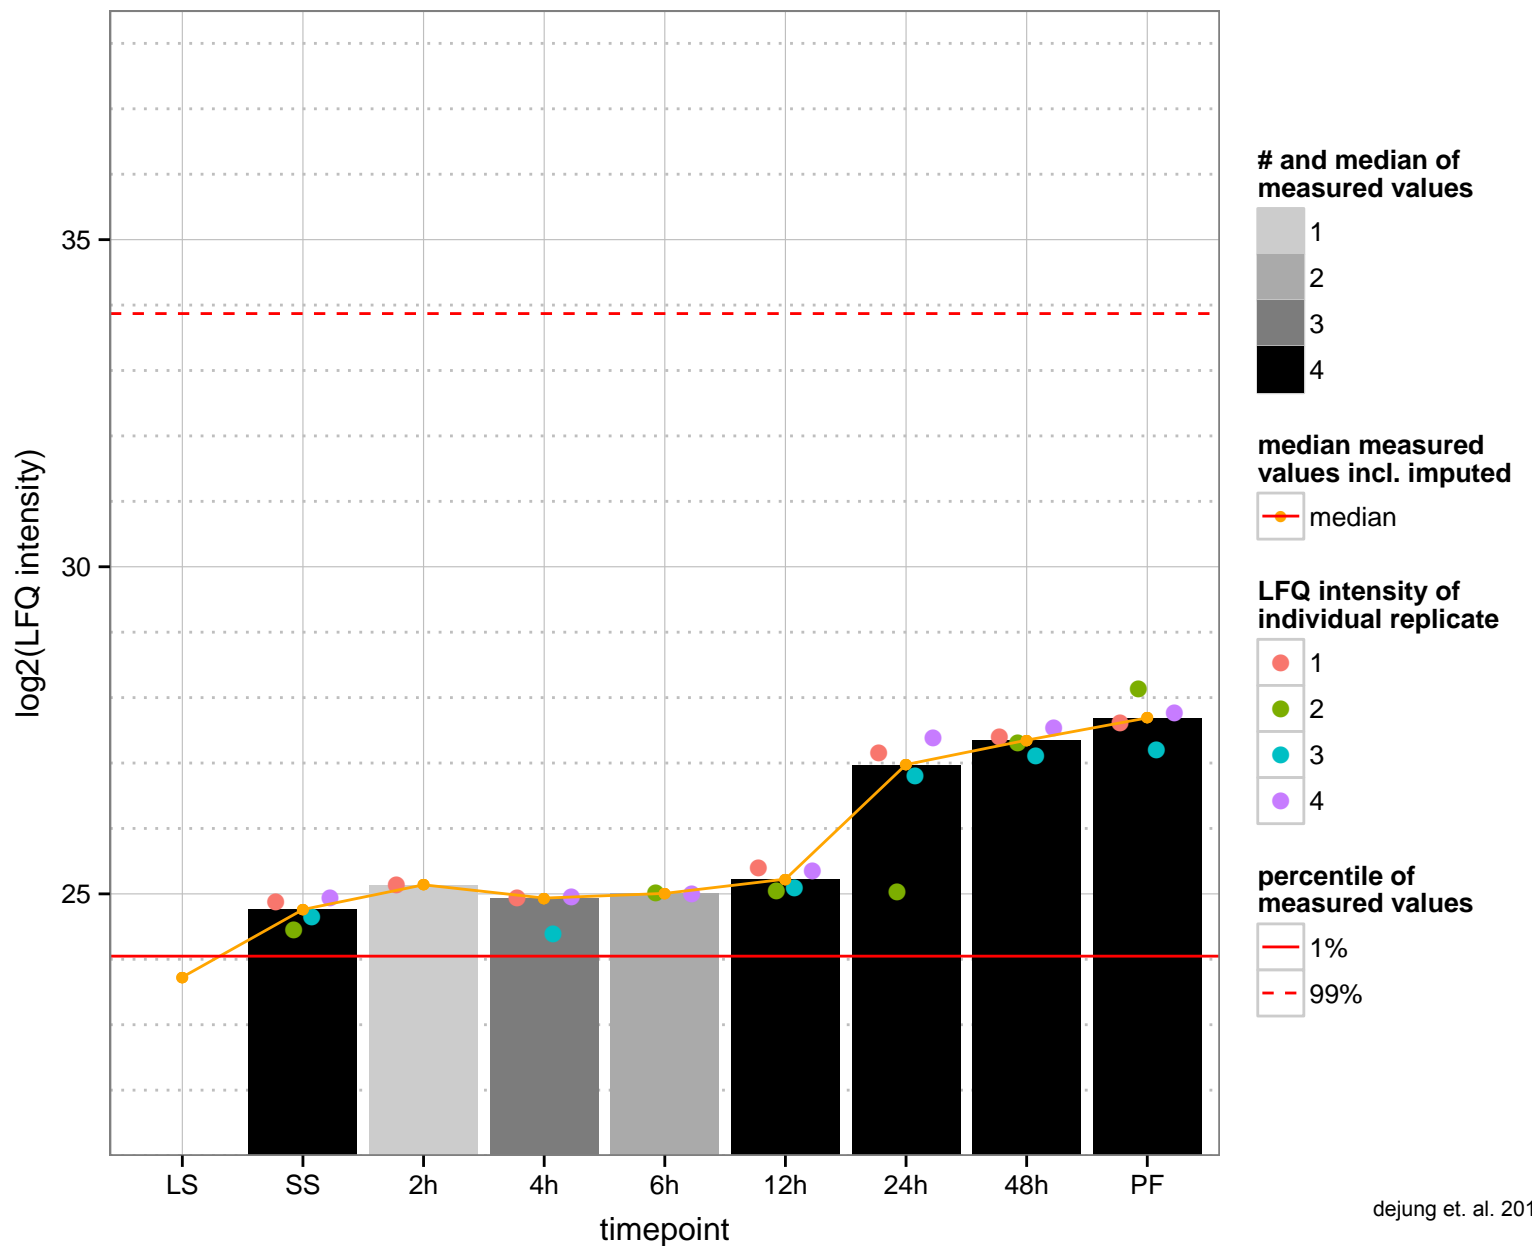

dihydrolipoamide branched chain transacylase, putative

Tb927.5.4330

AGOF: cofactor binding, dihydrolipoyllysine-residue (2-methylpropanoyl)transferase activity, transferase activity, transferring a

AGOC: mitochondrion

AGOP: fatty-acyl-CoA biosynthetic process

PGOF: transferase activity, transferring acyl groups

PGOC: null

PGOP: metabolic process

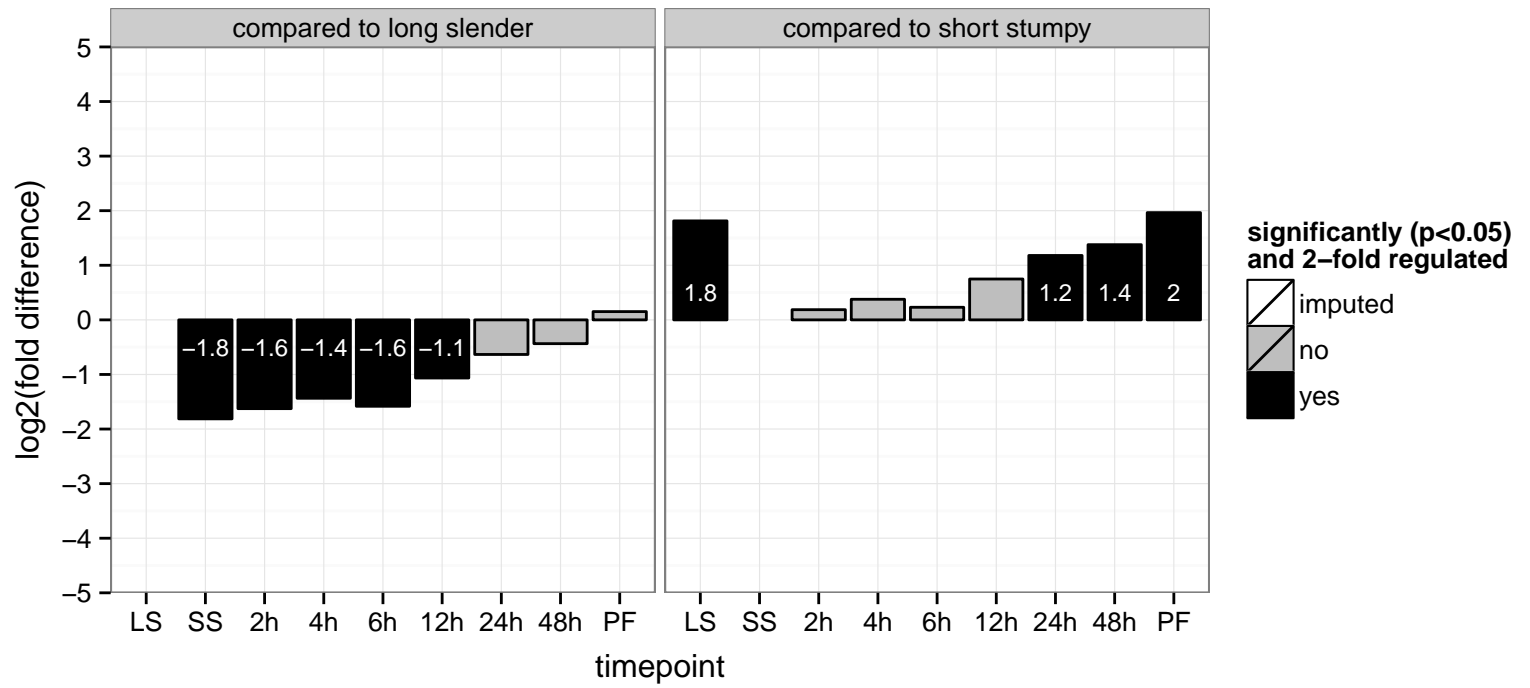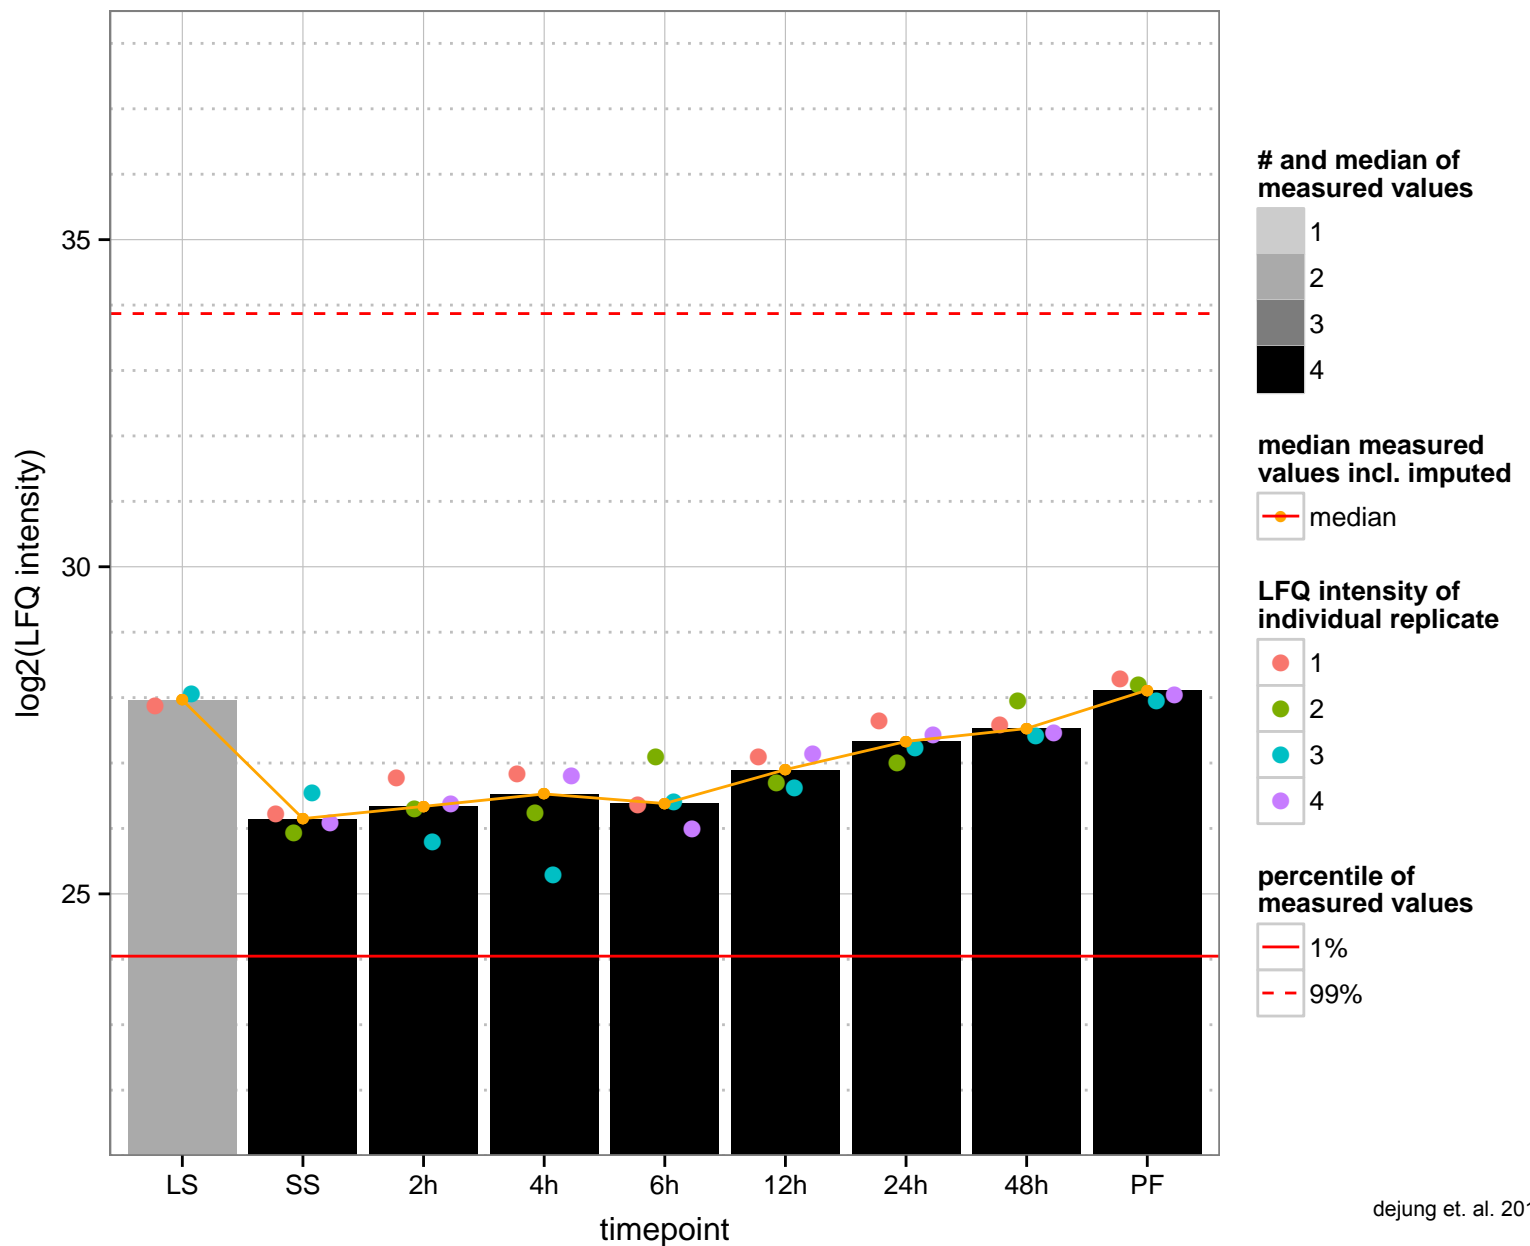

NADH-dependent fumarate reductase, putative, hypothetical protein, NADH-dependent fumarate reductase (FRDg)  
 Tb927.5.930;Tb11.v5.0613  
 AGOF: null, electron carrier activity, fumarate reductase (NADH) activity, succinate dehydrogenase activity  
 AGOC: null, glycosome  
 AGOP: null, metabolic process, thiamine biosynthetic process  
 PGO: oxidoreductase activity, null, succinate dehydrogenase activity  
 PGOC: null  
 PGO: oxidation-reduction process, null

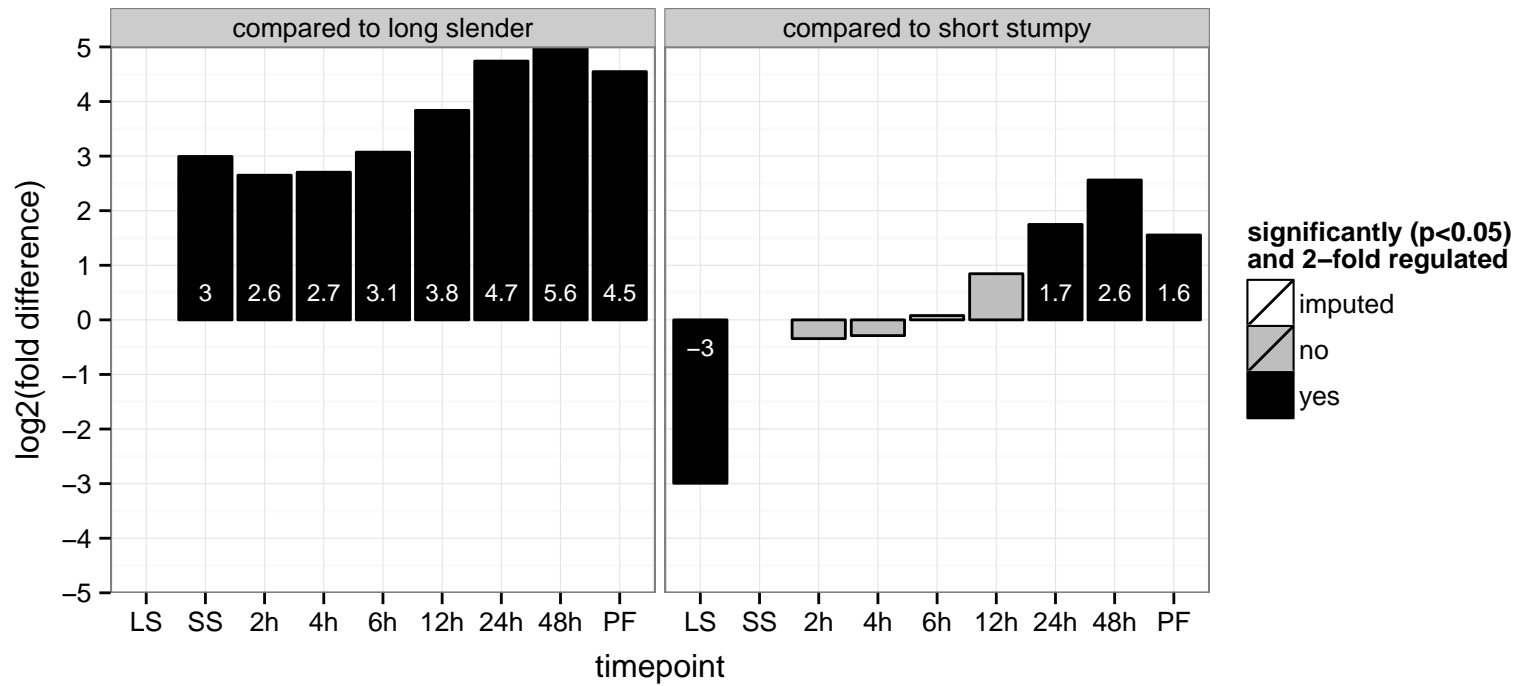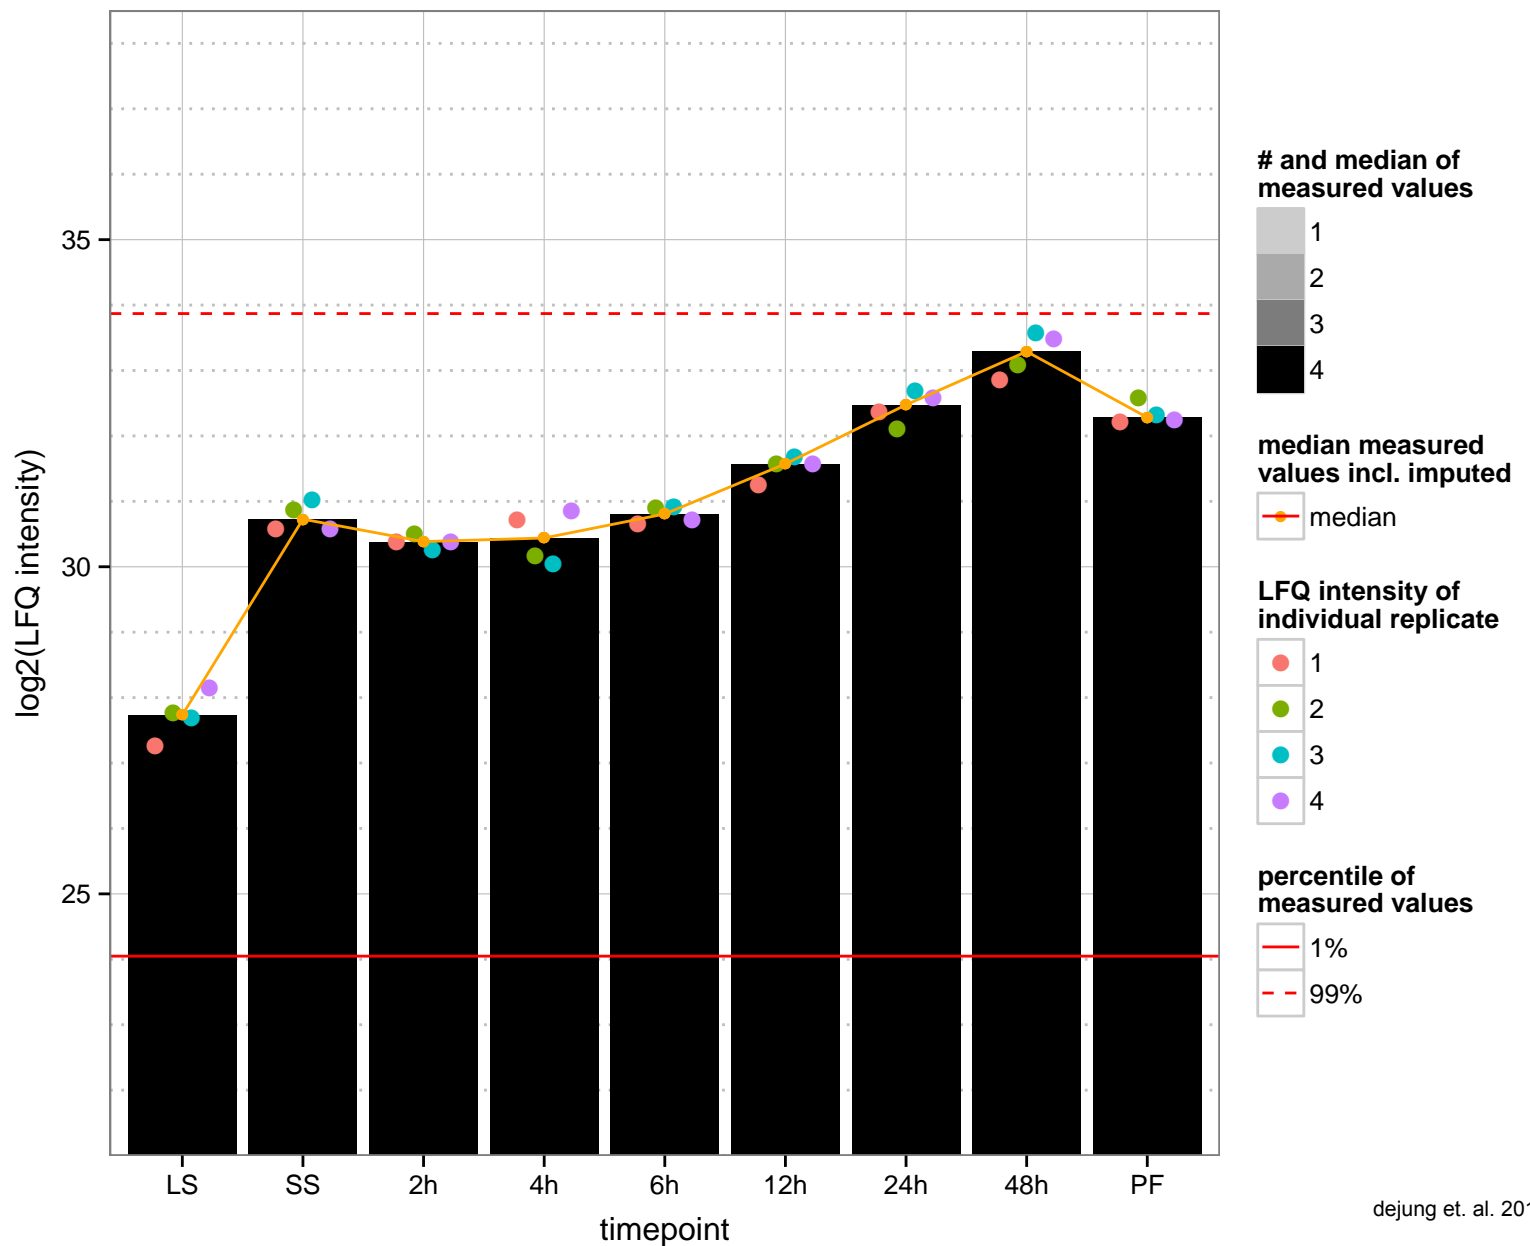

hypothetical protein, conserved  
 Tb927.6.2180  
 AGOF: null  
 AGOC: mitochondrion  
 AGOP: null  
 PGO: null  
 PGOC: null  
 PGOP: null

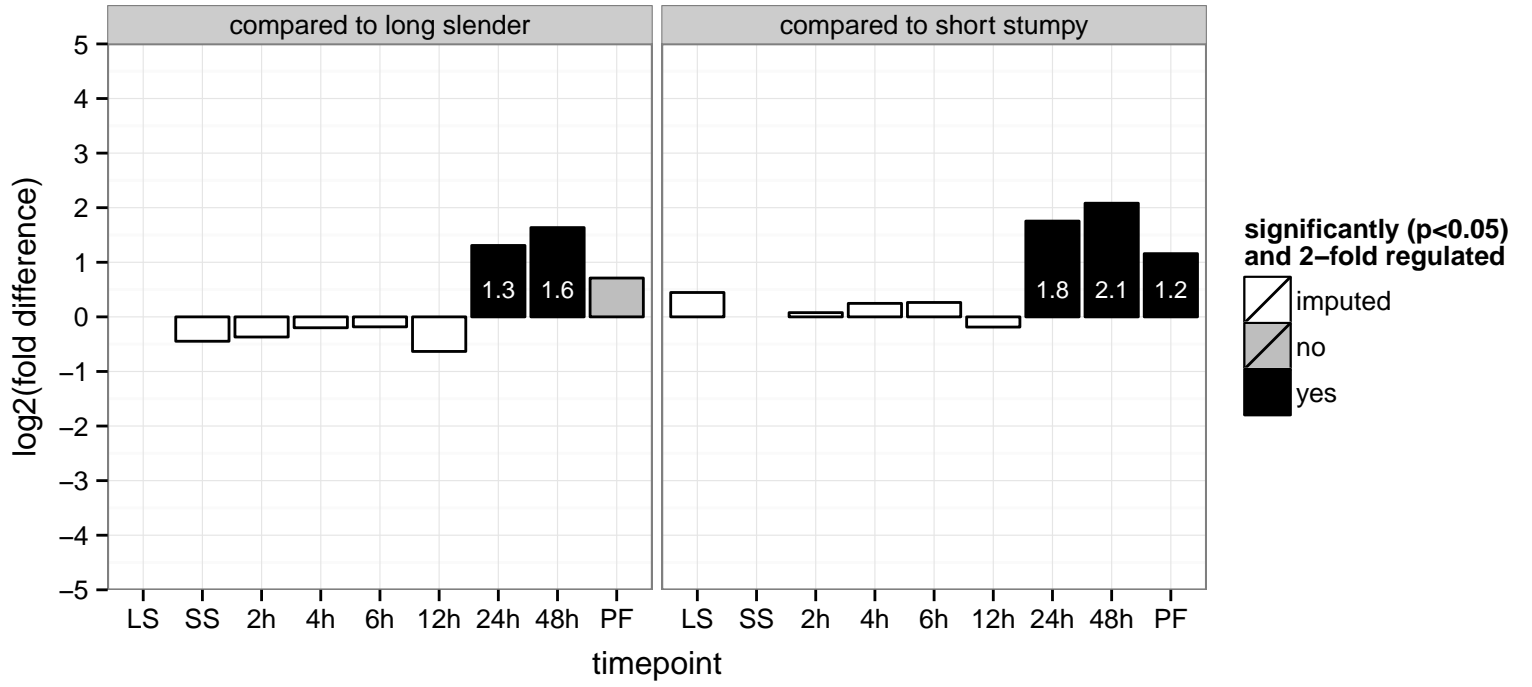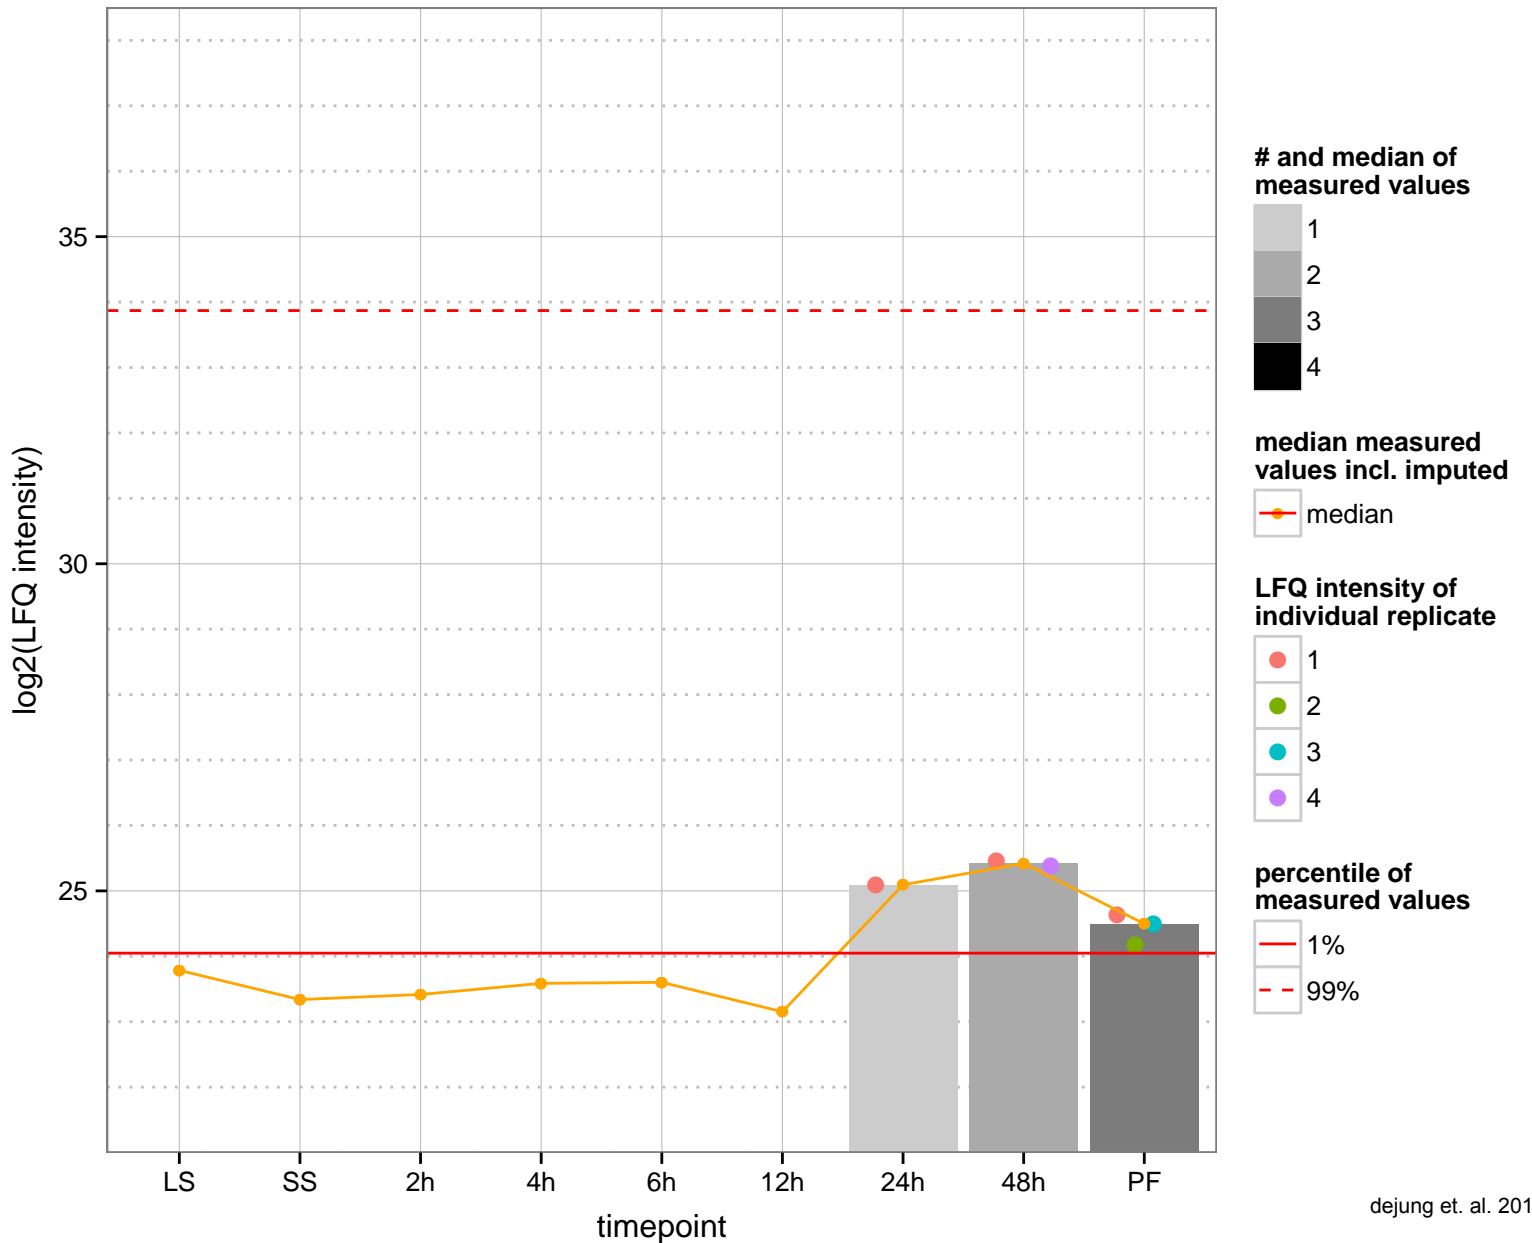

hypothetical protein, conserved  
 Tb927.6.2320;Tb927.6.2260  
 AGOF: null  
 AGOC: null  
 AGOP: null  
 PGO: null  
 PGO: null  
 PGO: null

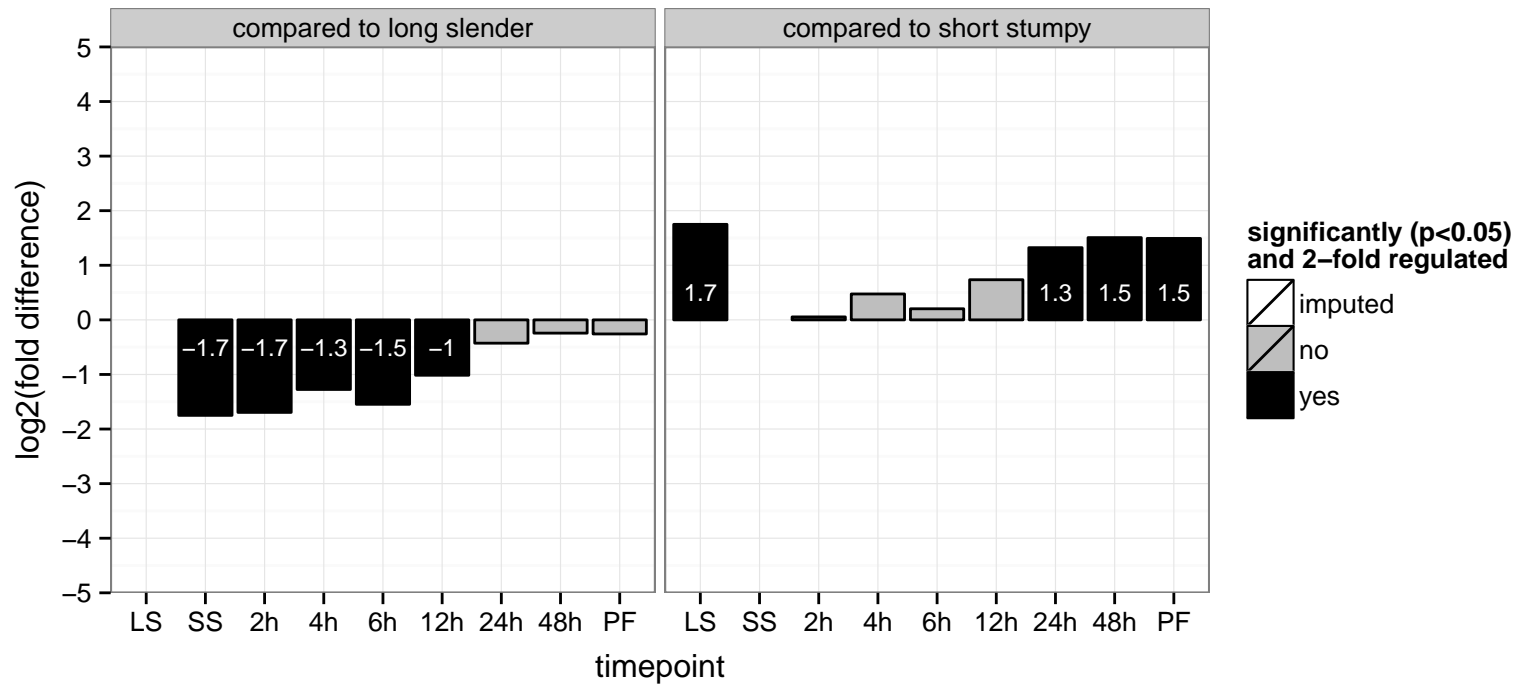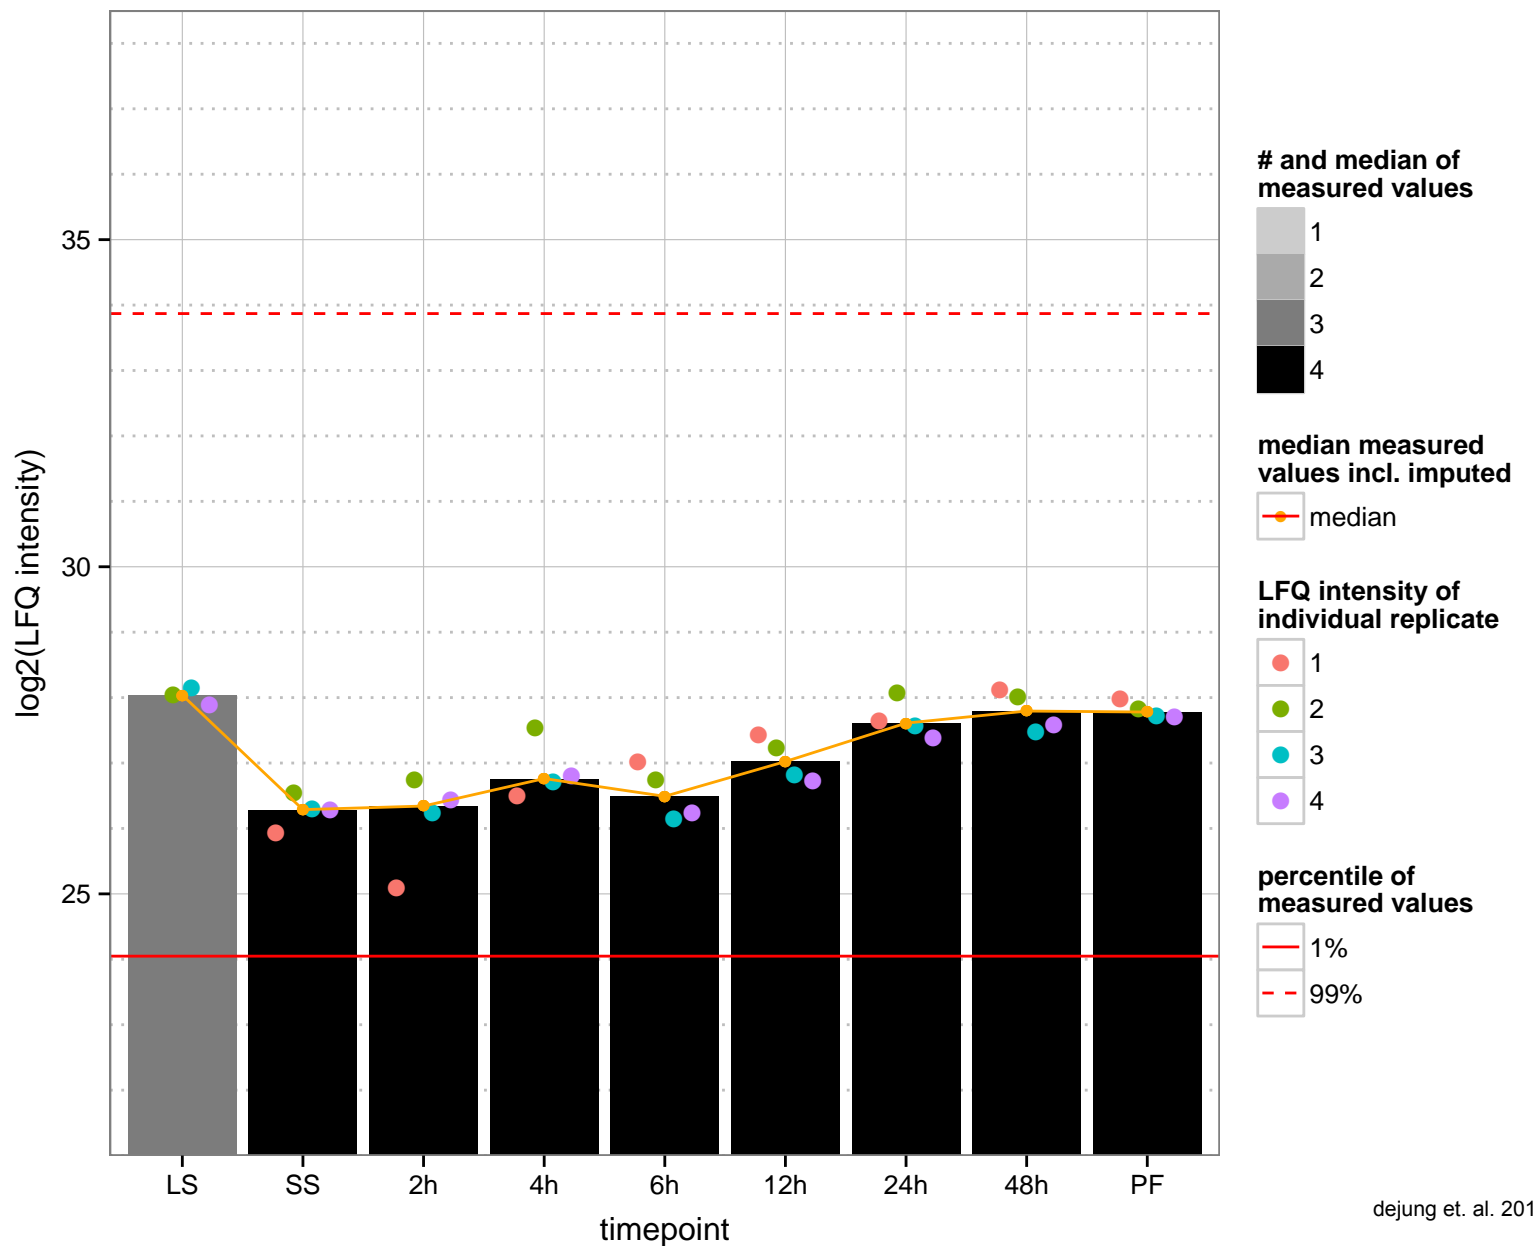

hypothetical protein, conserved  
 Tb927.6.2490  
 AGOF: null  
 AGOC: mitochondrion  
 AGOP: null  
 PGO: null  
 PGO: null  
 PGO: null

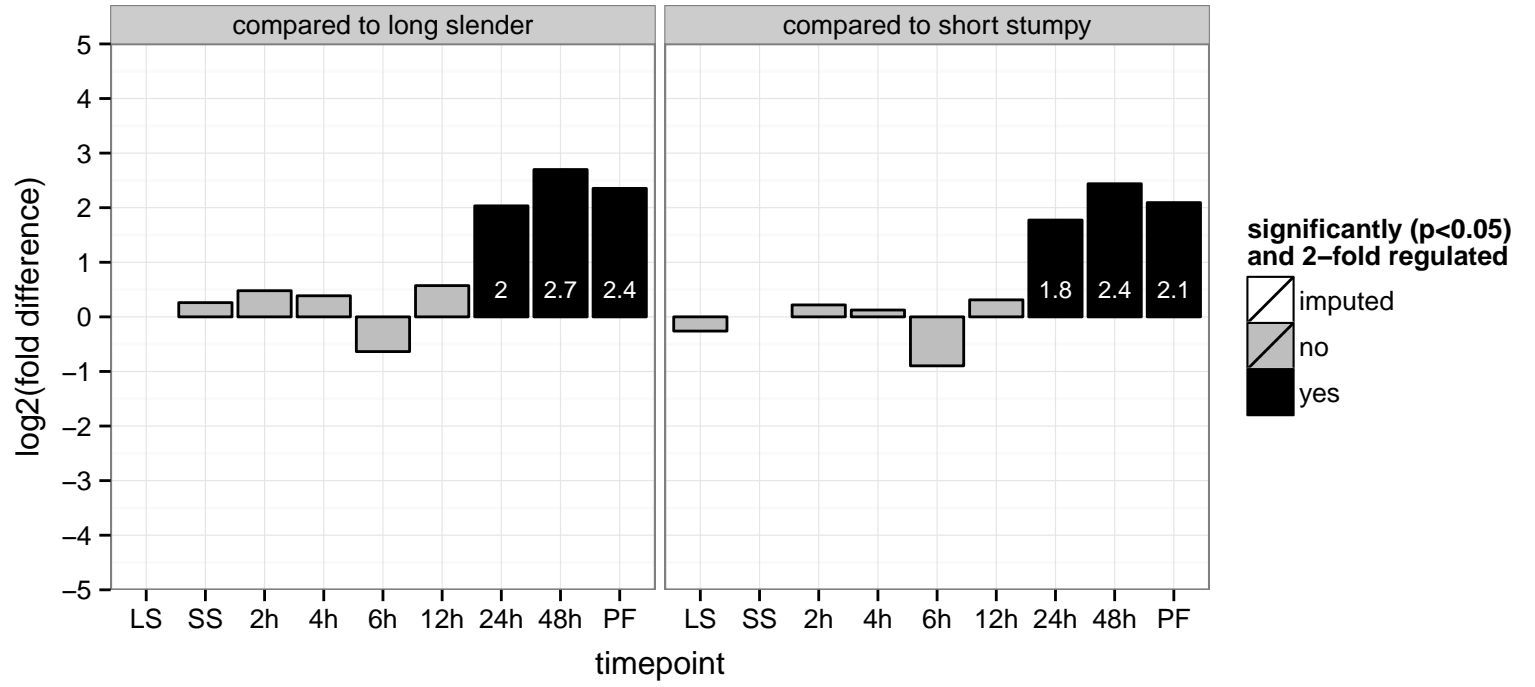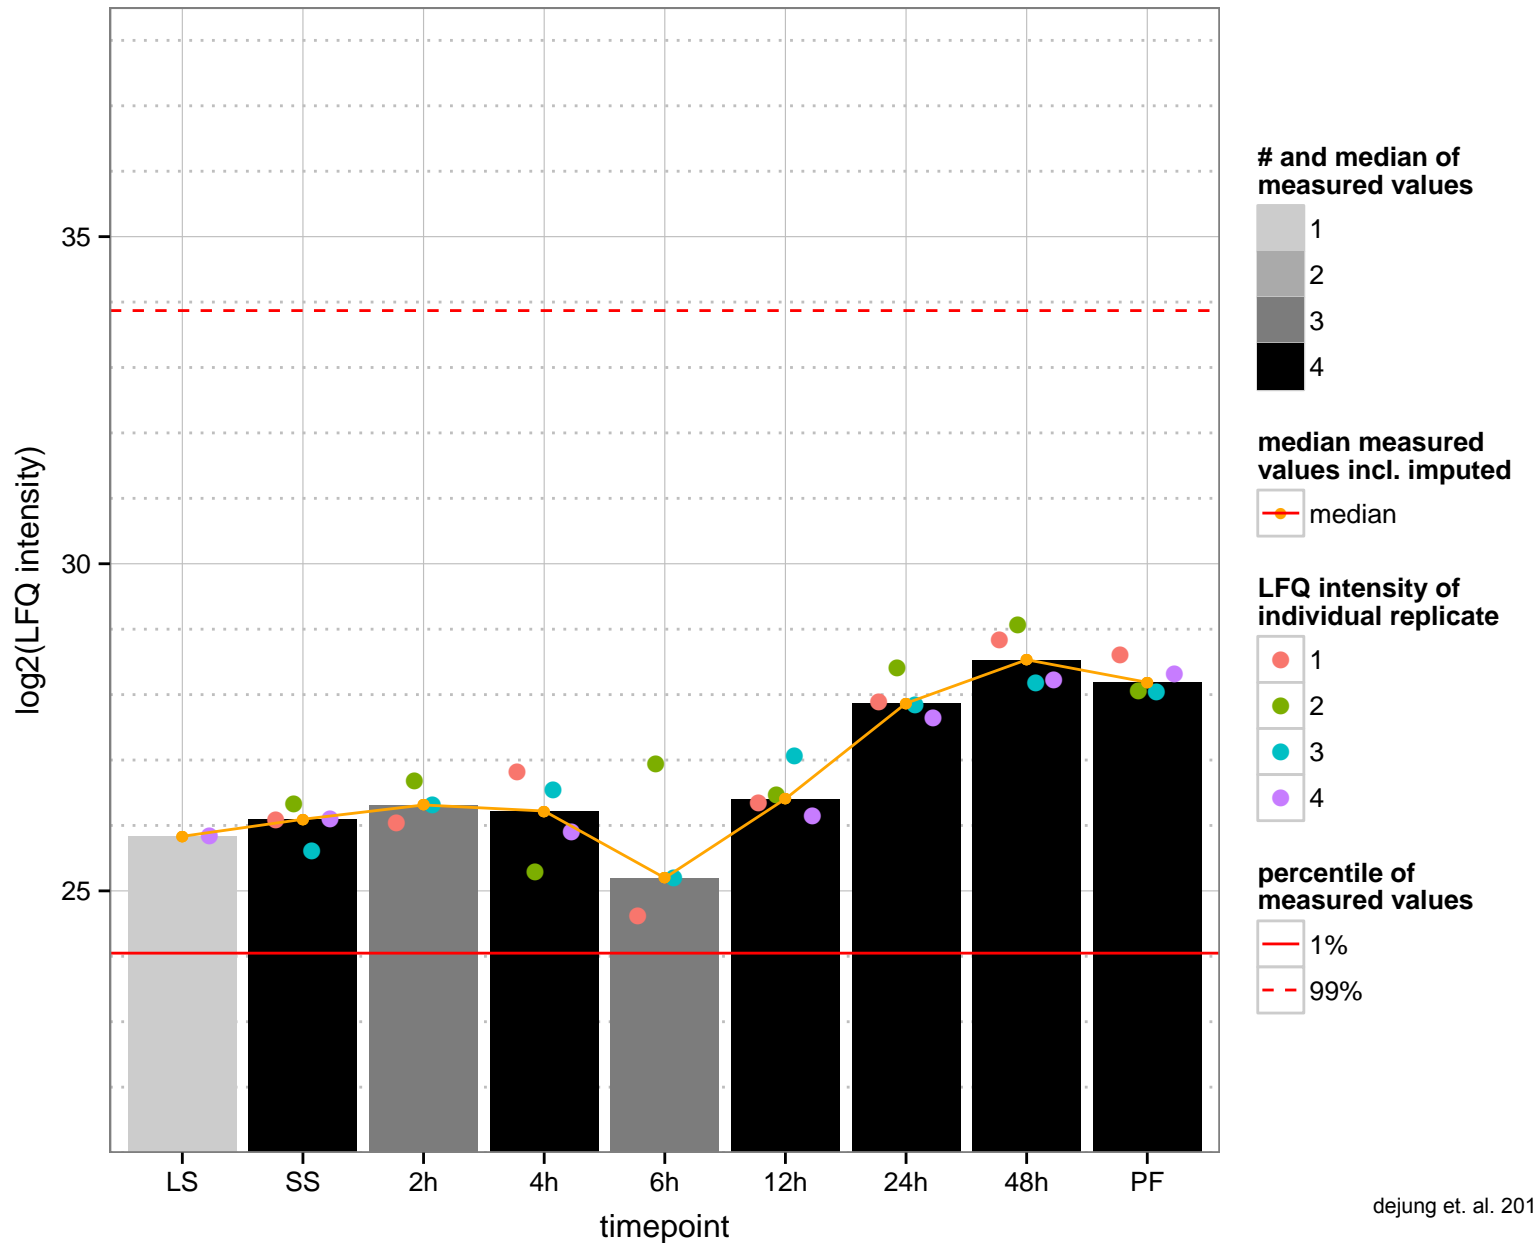

hypothetical protein, conserved  
 Tb927.6.2570  
 AGOF: null  
 AGOC: null  
 AGOP: null  
 PGO: null  
 PGOC: null  
 PGOP: null

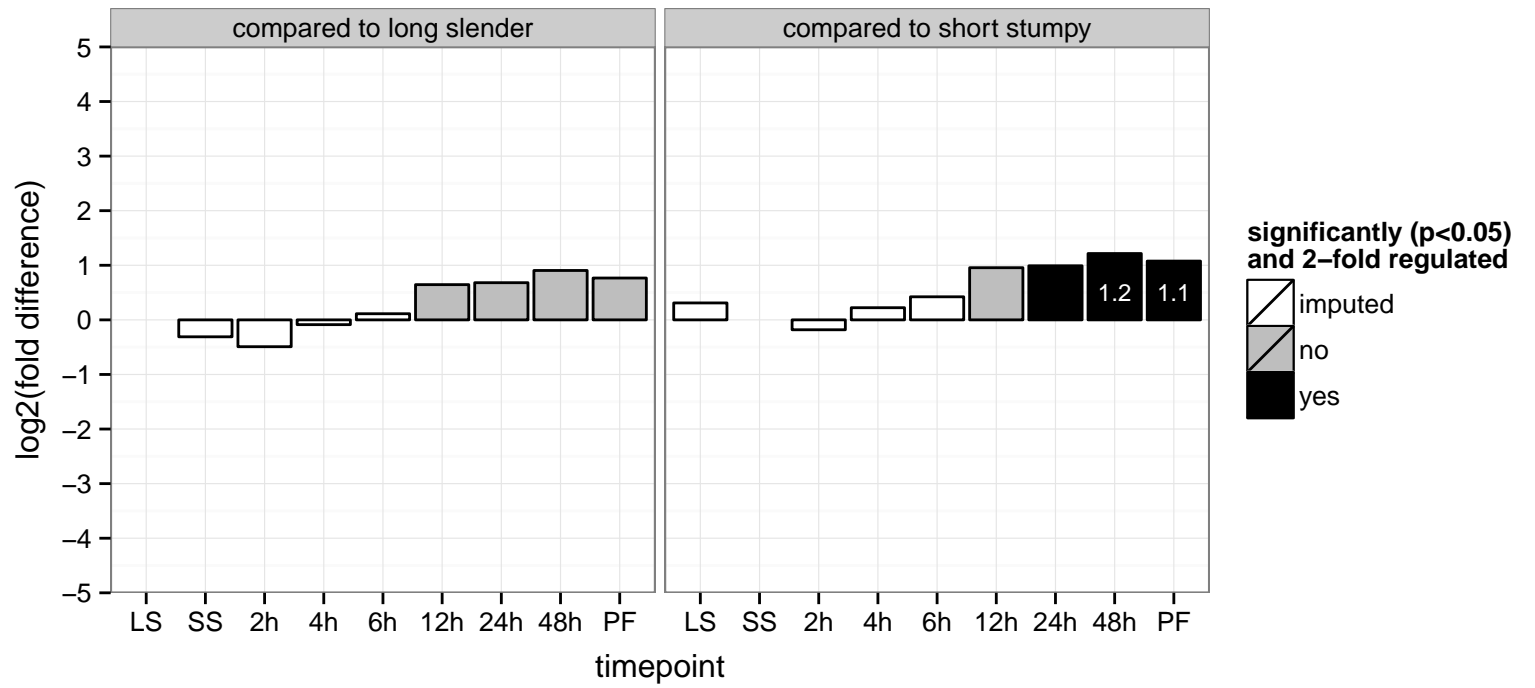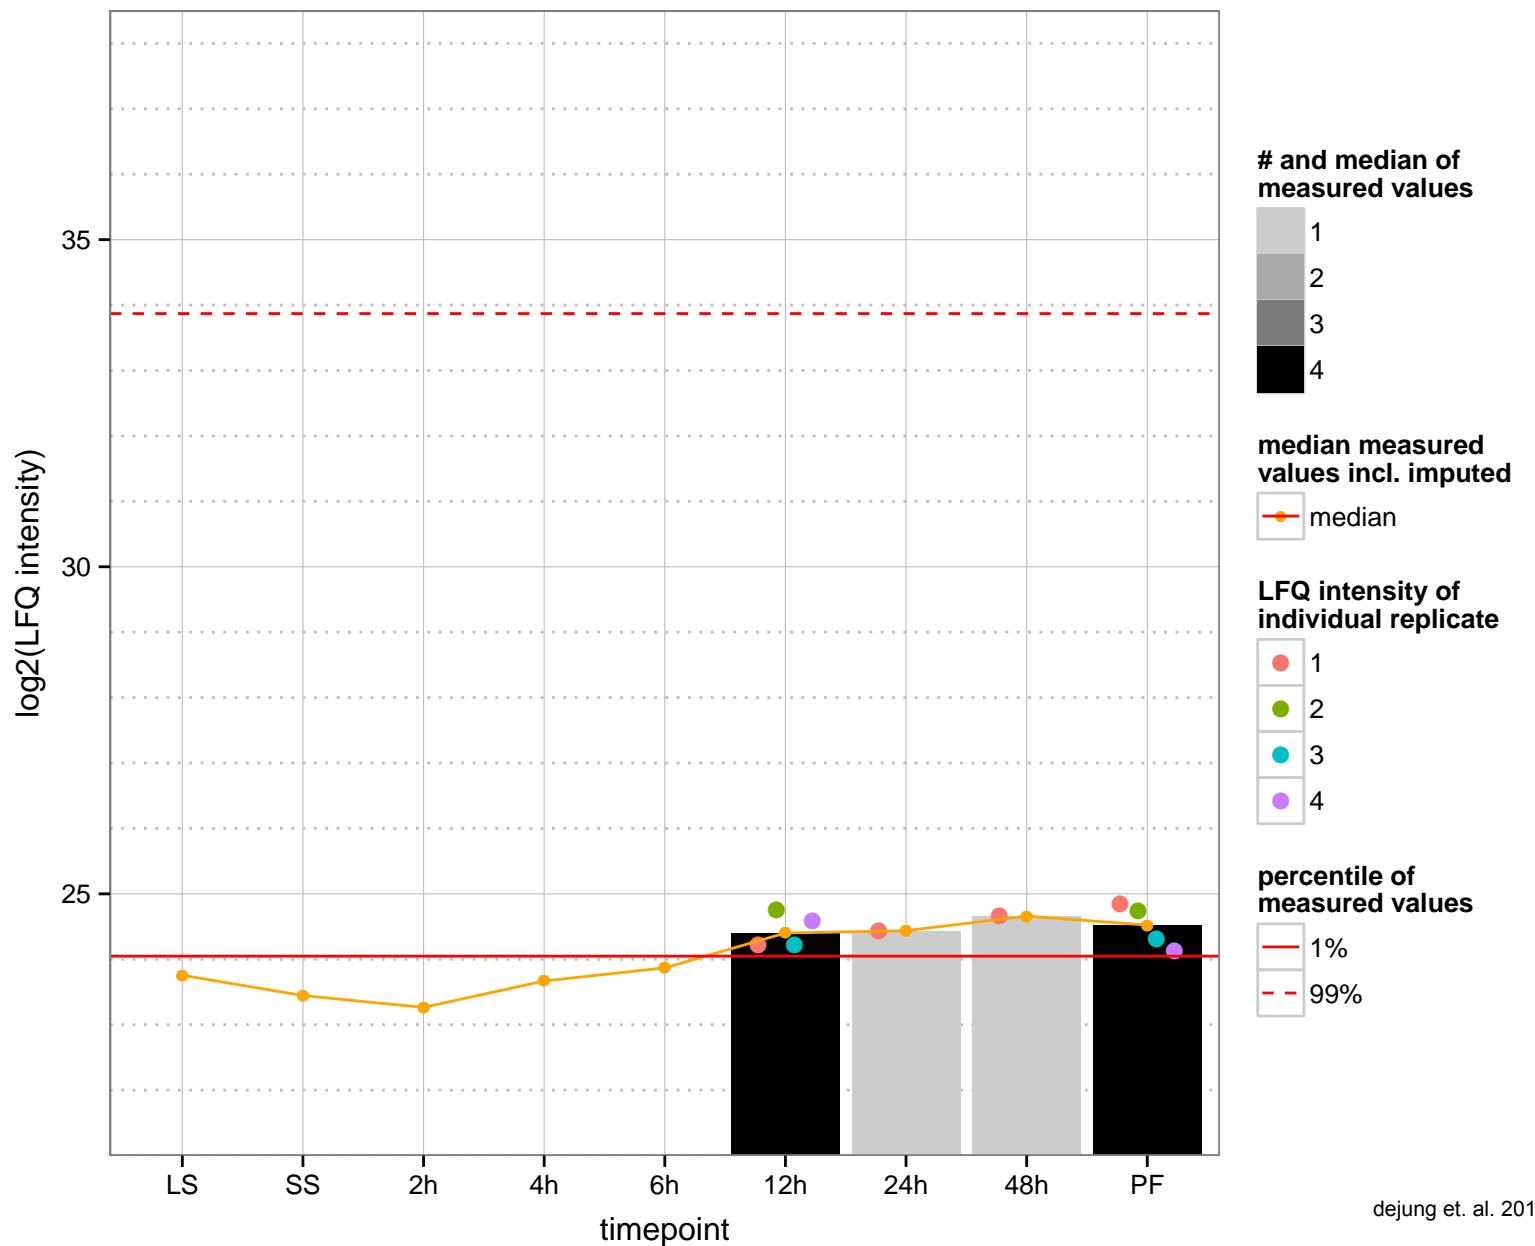

superoxide dismutase, putative  
 Tb927.6.4030  
 AGOF: metal ion binding, superoxide dismutase activity  
 AGOC: mitochondrion  
 AGOP: oxidation–reduction process, superoxide metabolic process  
 PGOF: metal ion binding, superoxide dismutase activity  
 PGO: null  
 PGOP: oxidation–reduction process, superoxide metabolic process

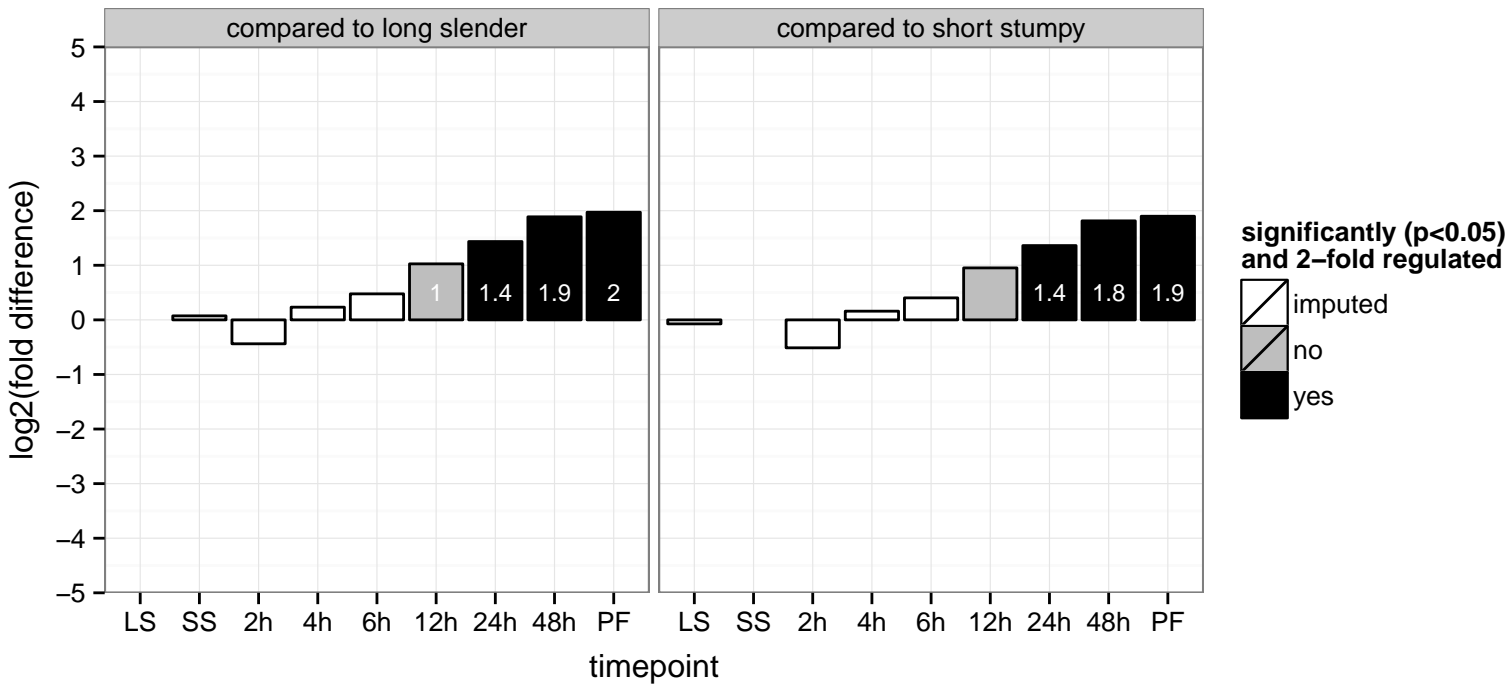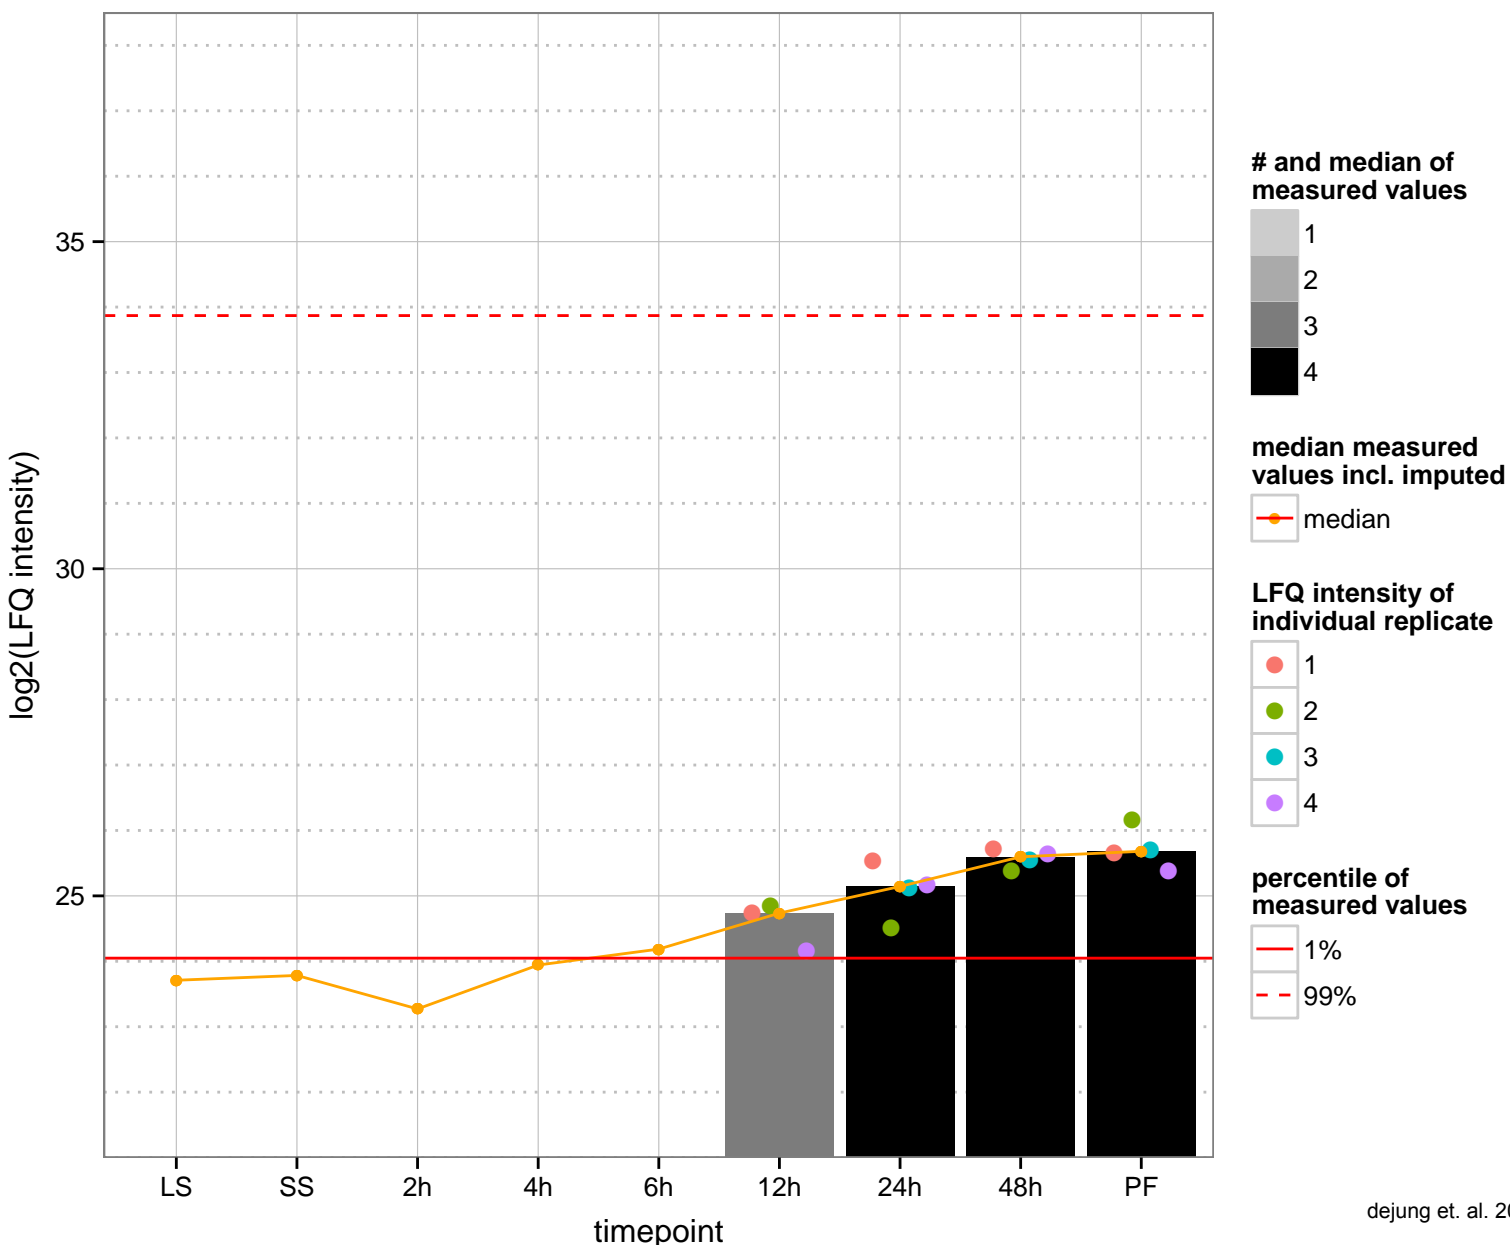



hypothetical protein, conserved  
 Tb927.6.4070  
 AGOF: null  
 AGOC: mitochondrion  
 AGOP: null  
 PGO: null  
 PGO: null  
 PGO: null

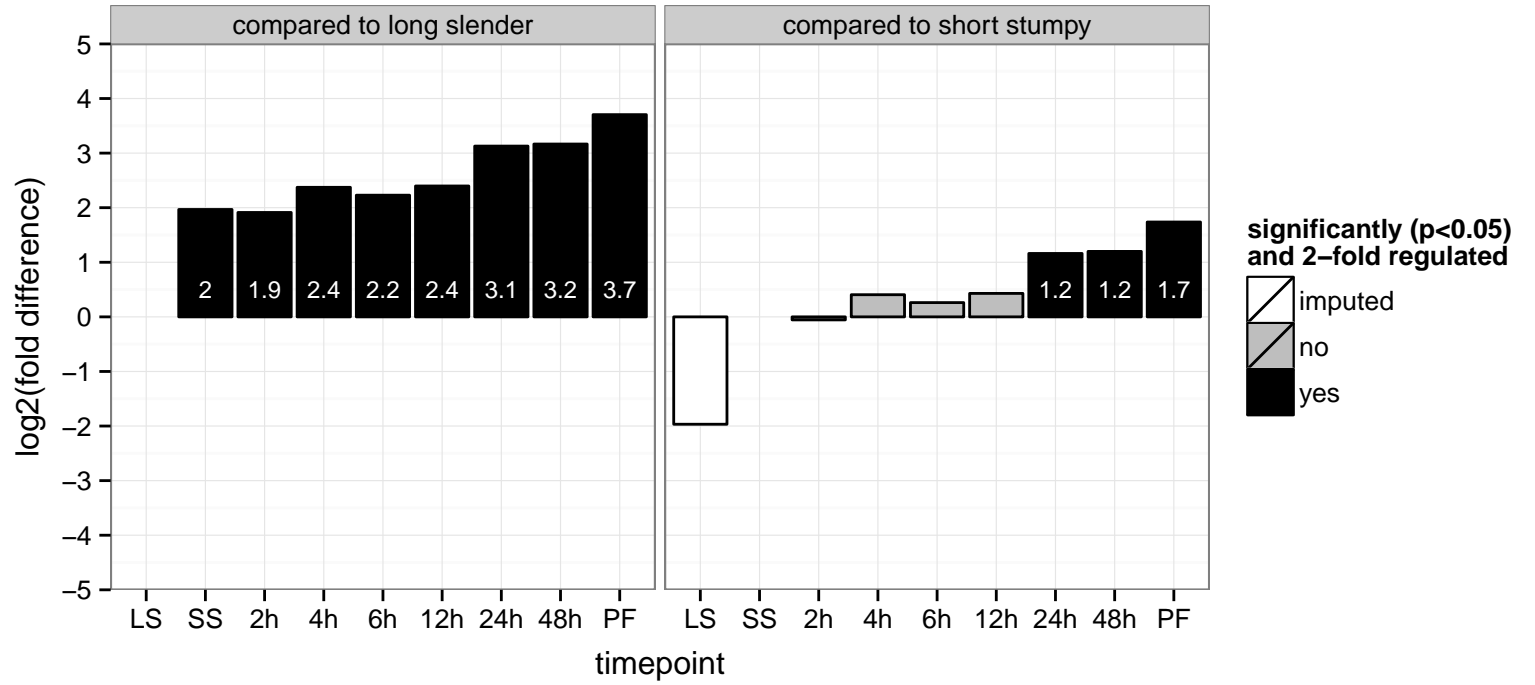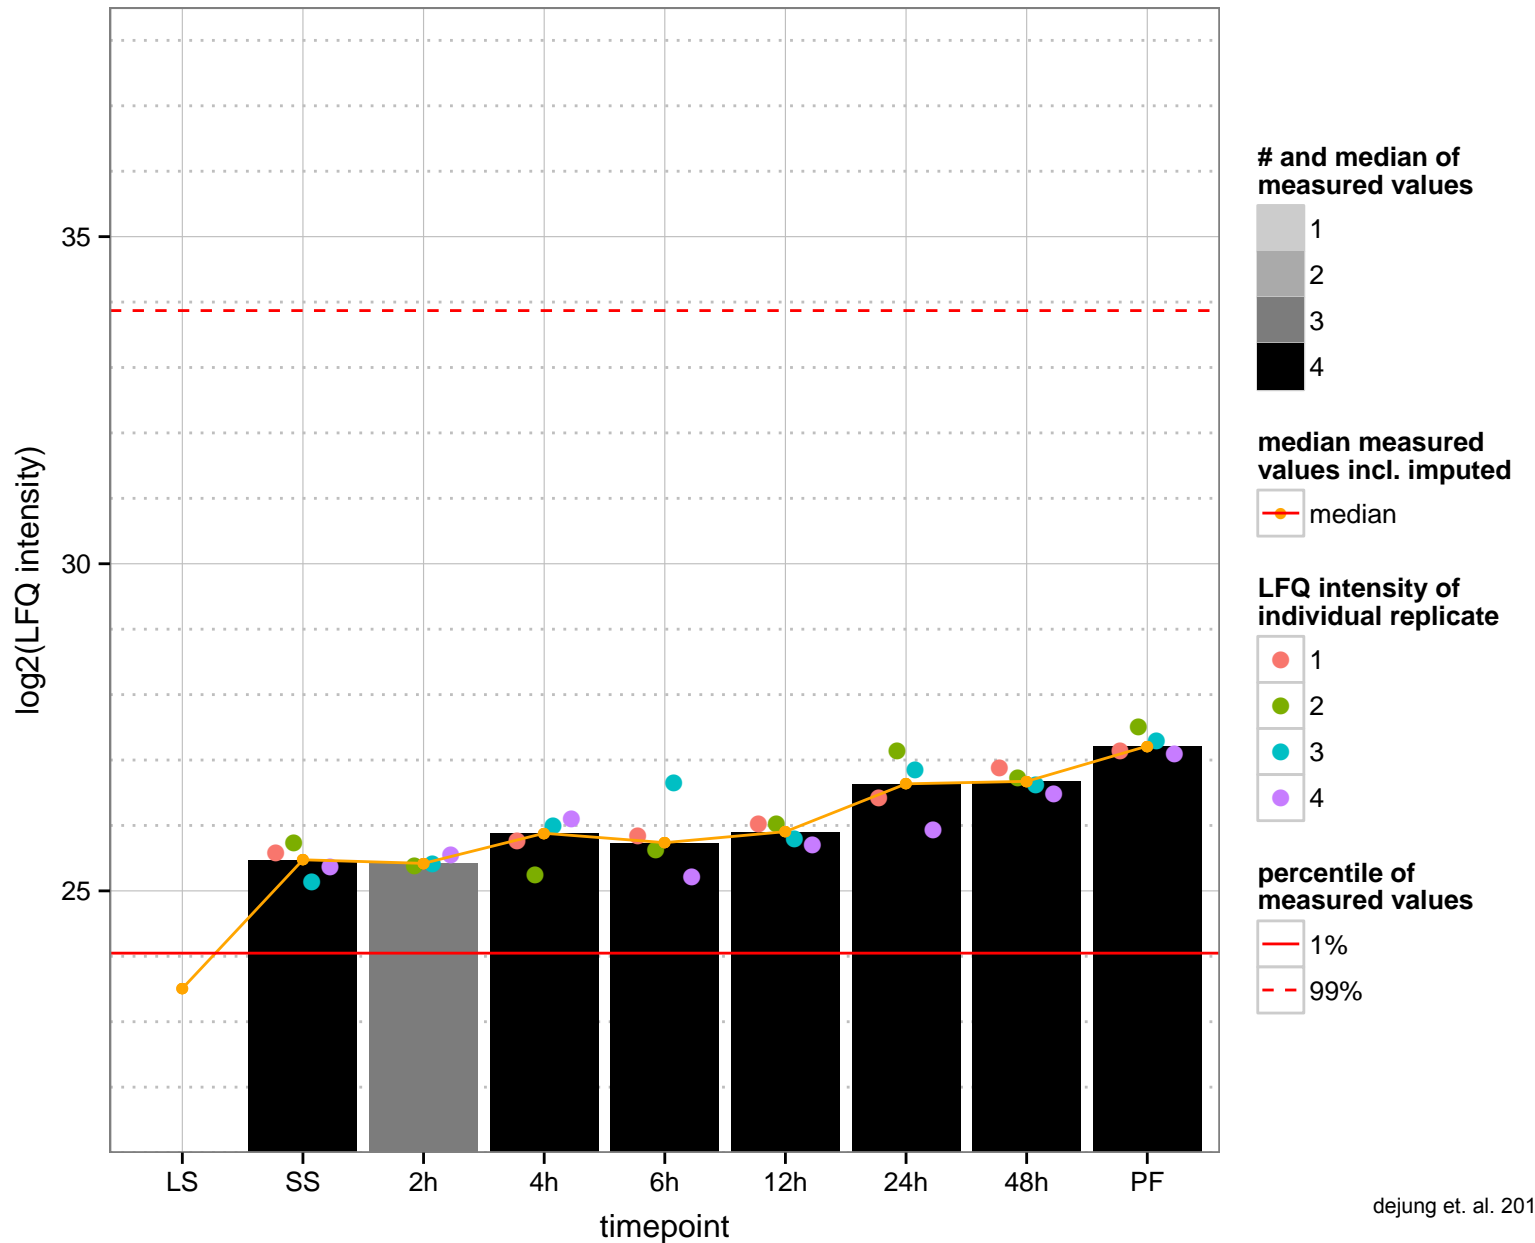

RNA-binding protein, putative (RBP17)  
 Tb927.6.4530  
 AGOF: RNA binding  
 AGOC: null  
 AGOP: RNA processing  
 PGO: nucleic acid binding  
 PGO: null  
 PGO: null

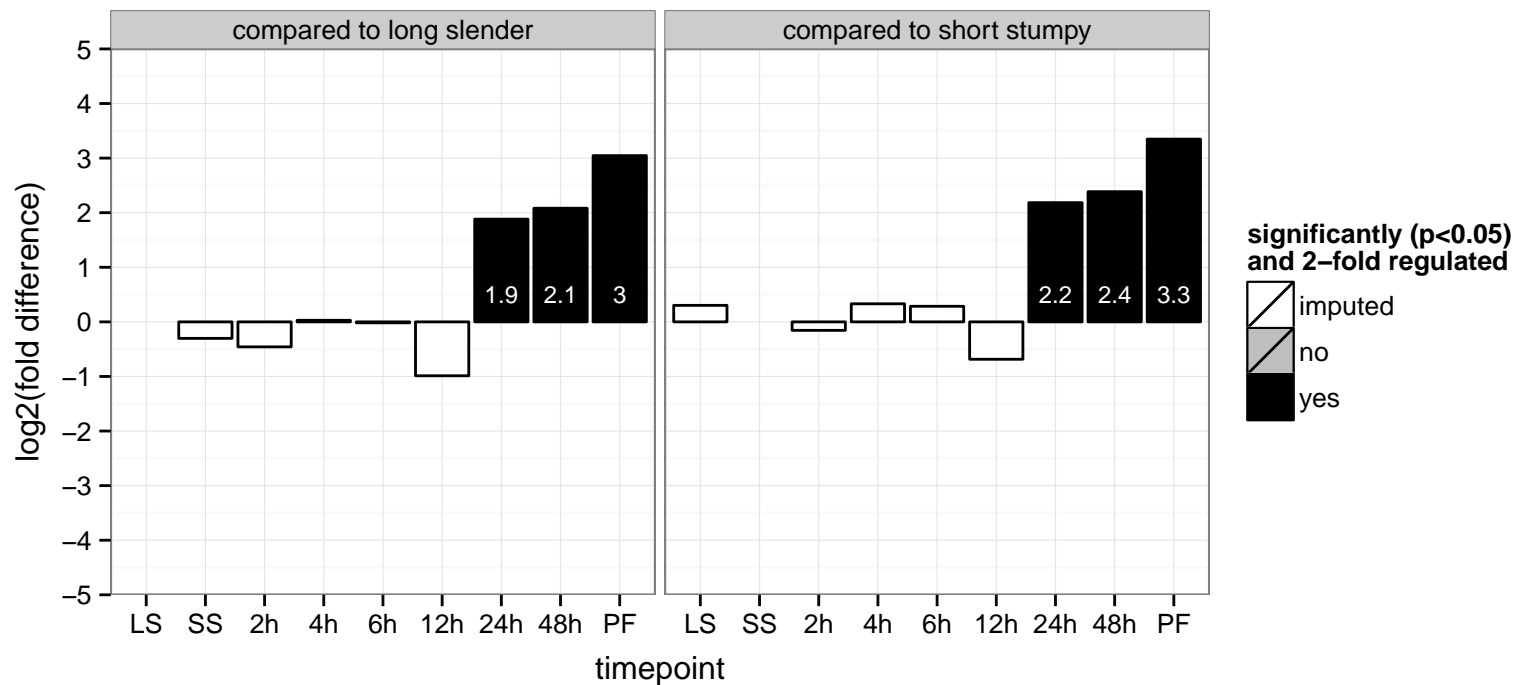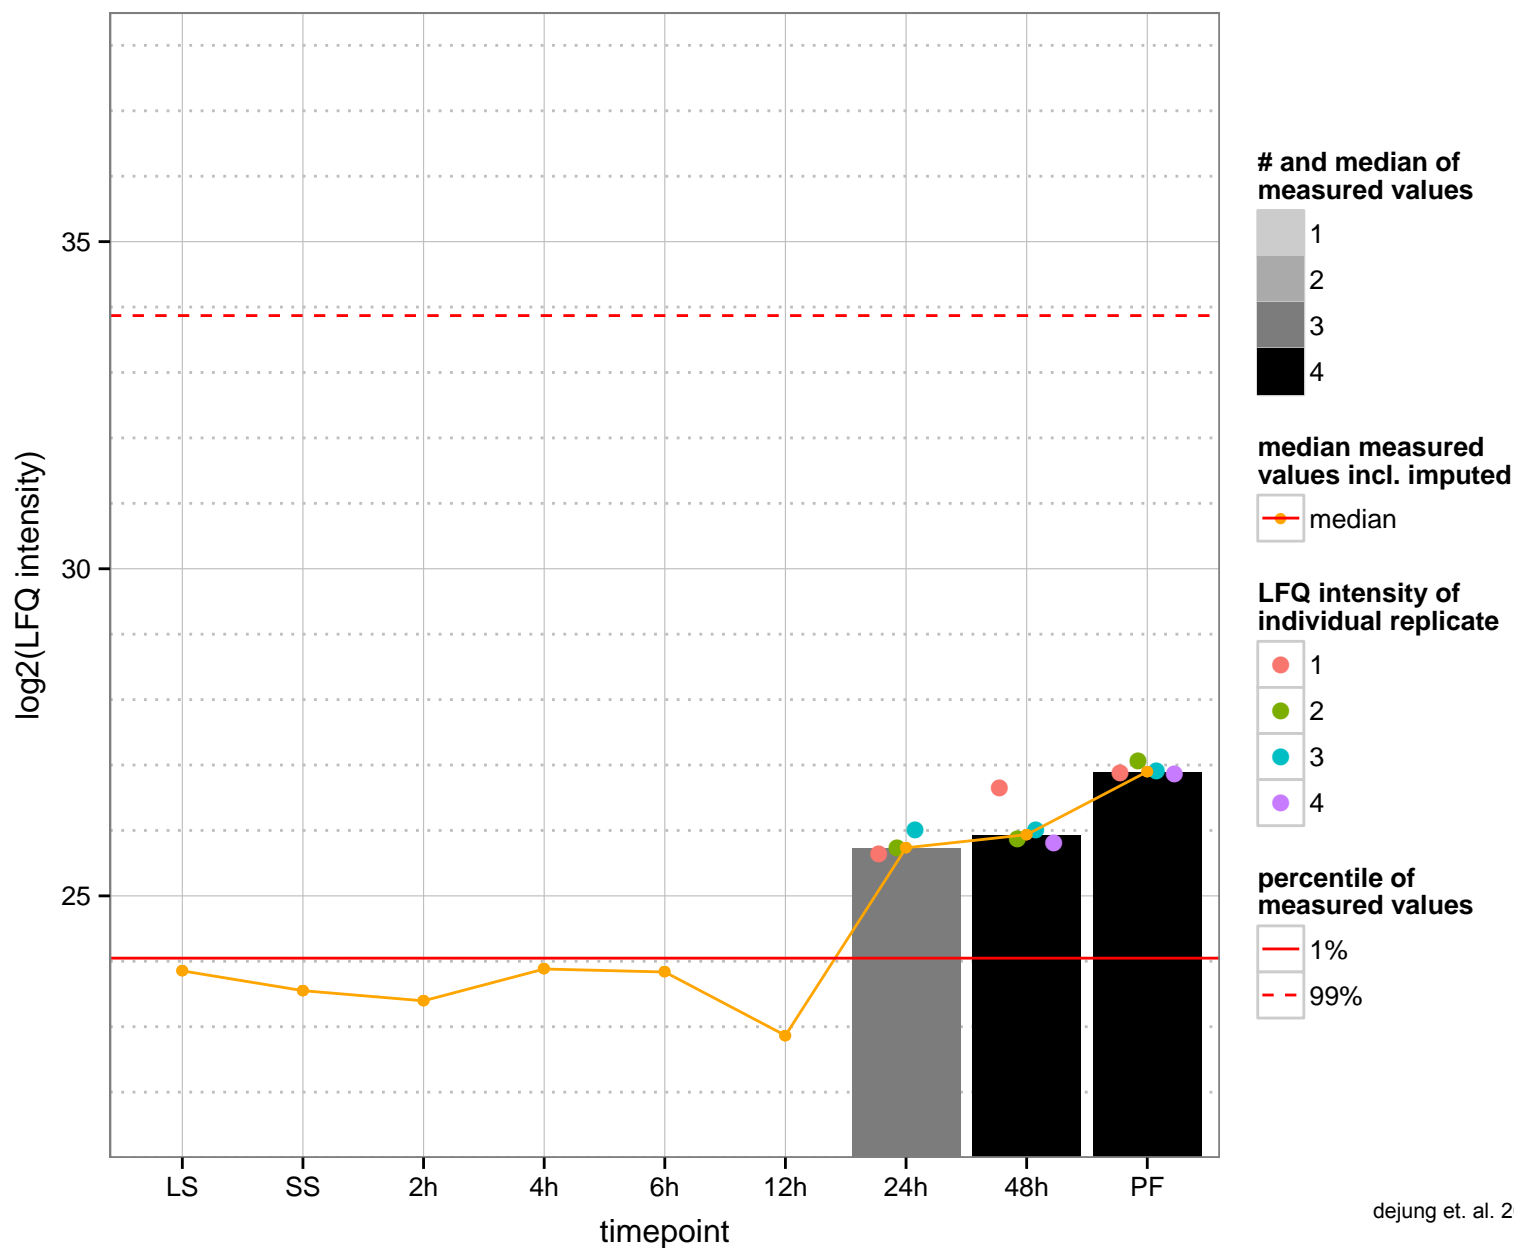

hypothetical protein, conserved  
 Tb927.6.590  
 AGOF: null  
 AGOC: mitochondrion  
 AGOP: null  
 PGO: null  
 PGO: null  
 PGO: null

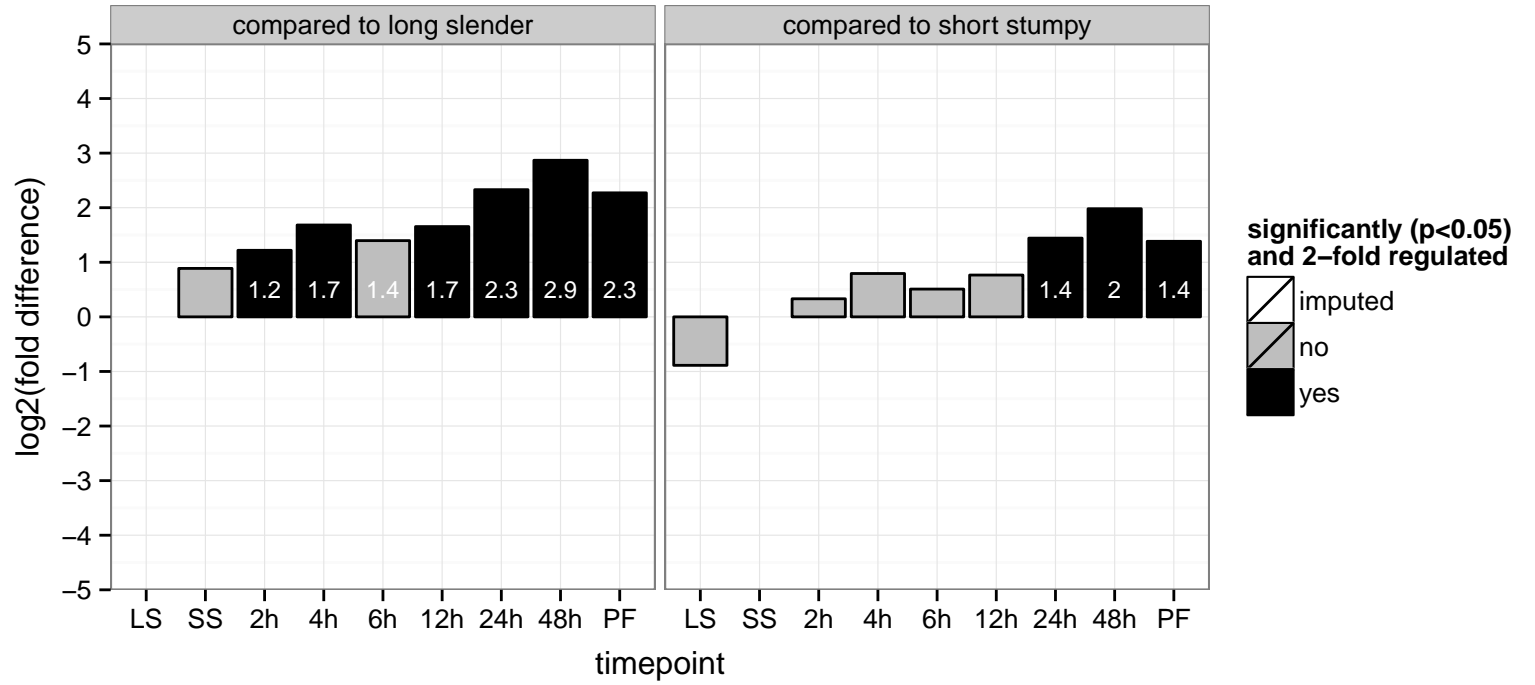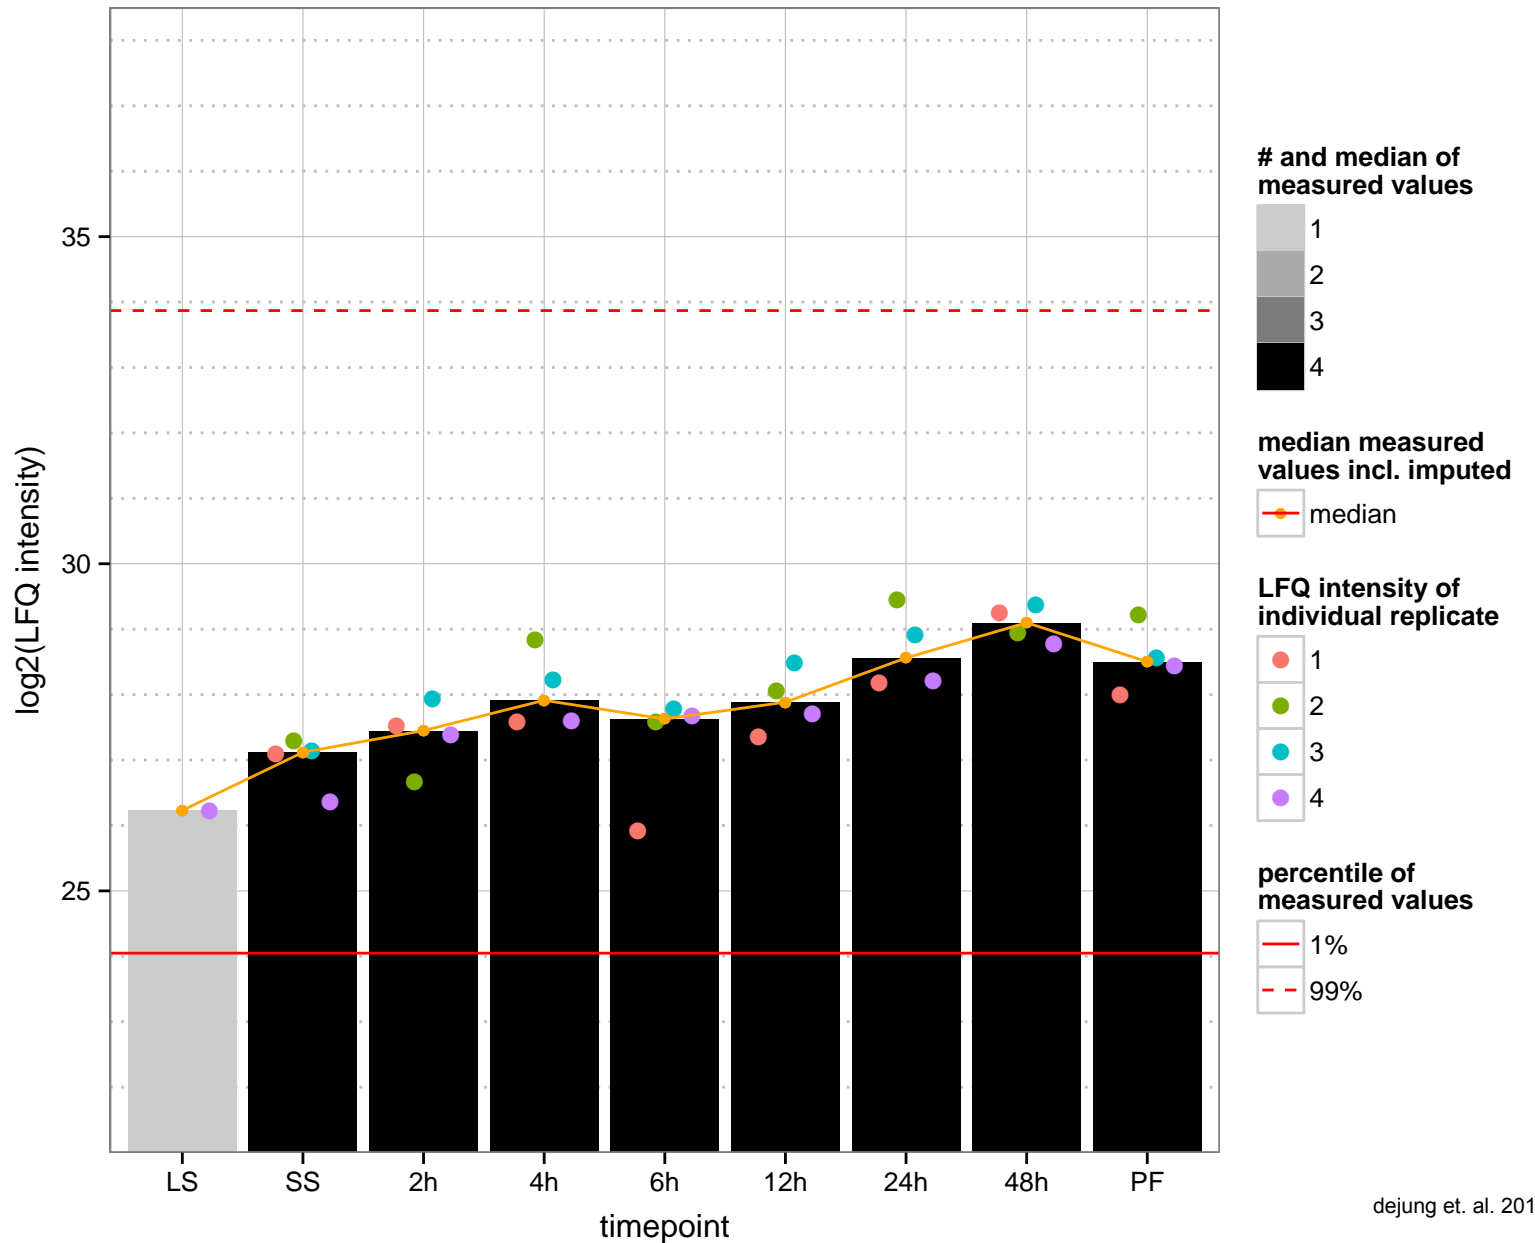

60S ribosomal protein L7, putative  
 Tb927.7.1730;Tb927.7.1750;Tb927.7.1740  
 AGOF: structural constituent of ribosome  
 AGOC: intracellular, large ribosomal subunit, ribosome  
 AGOP: ribosome biogenesis, translation  
 PGO: null  
 PGO: null  
 PGO: null

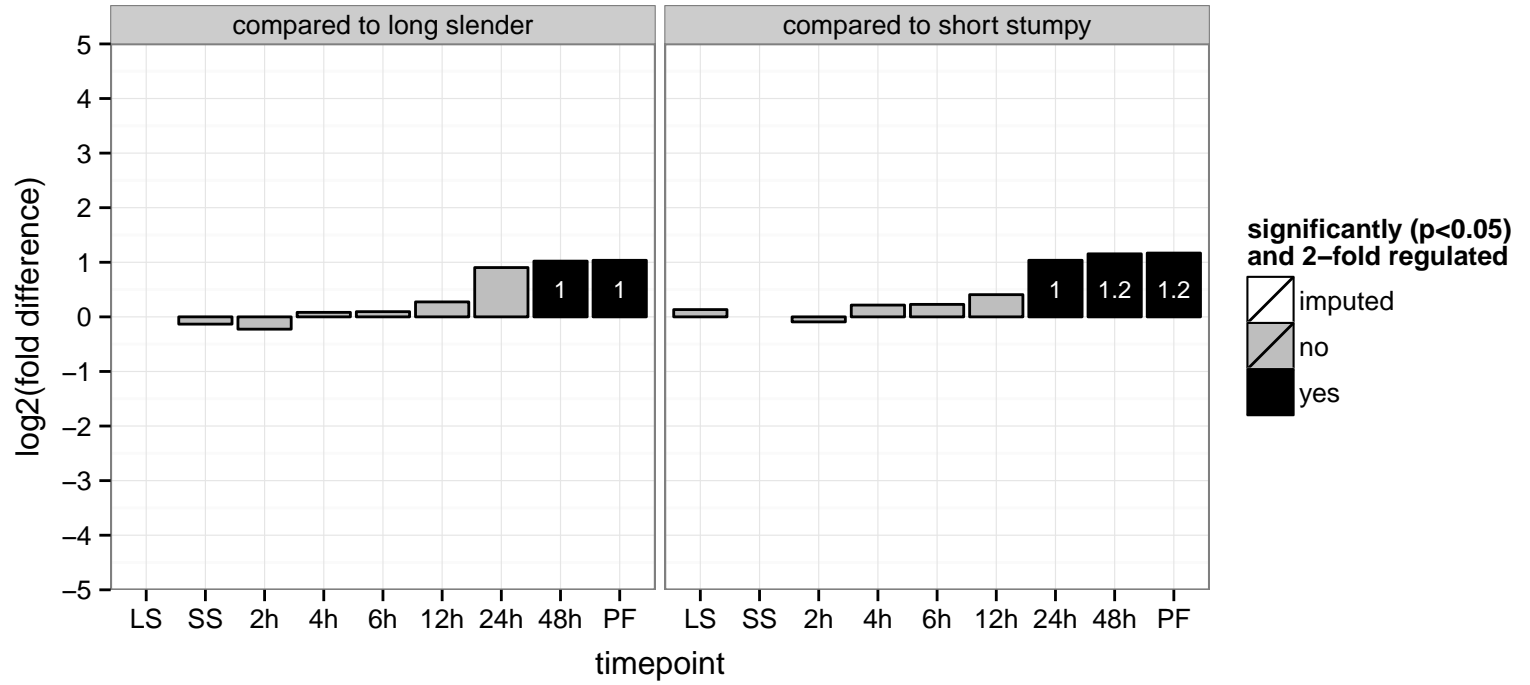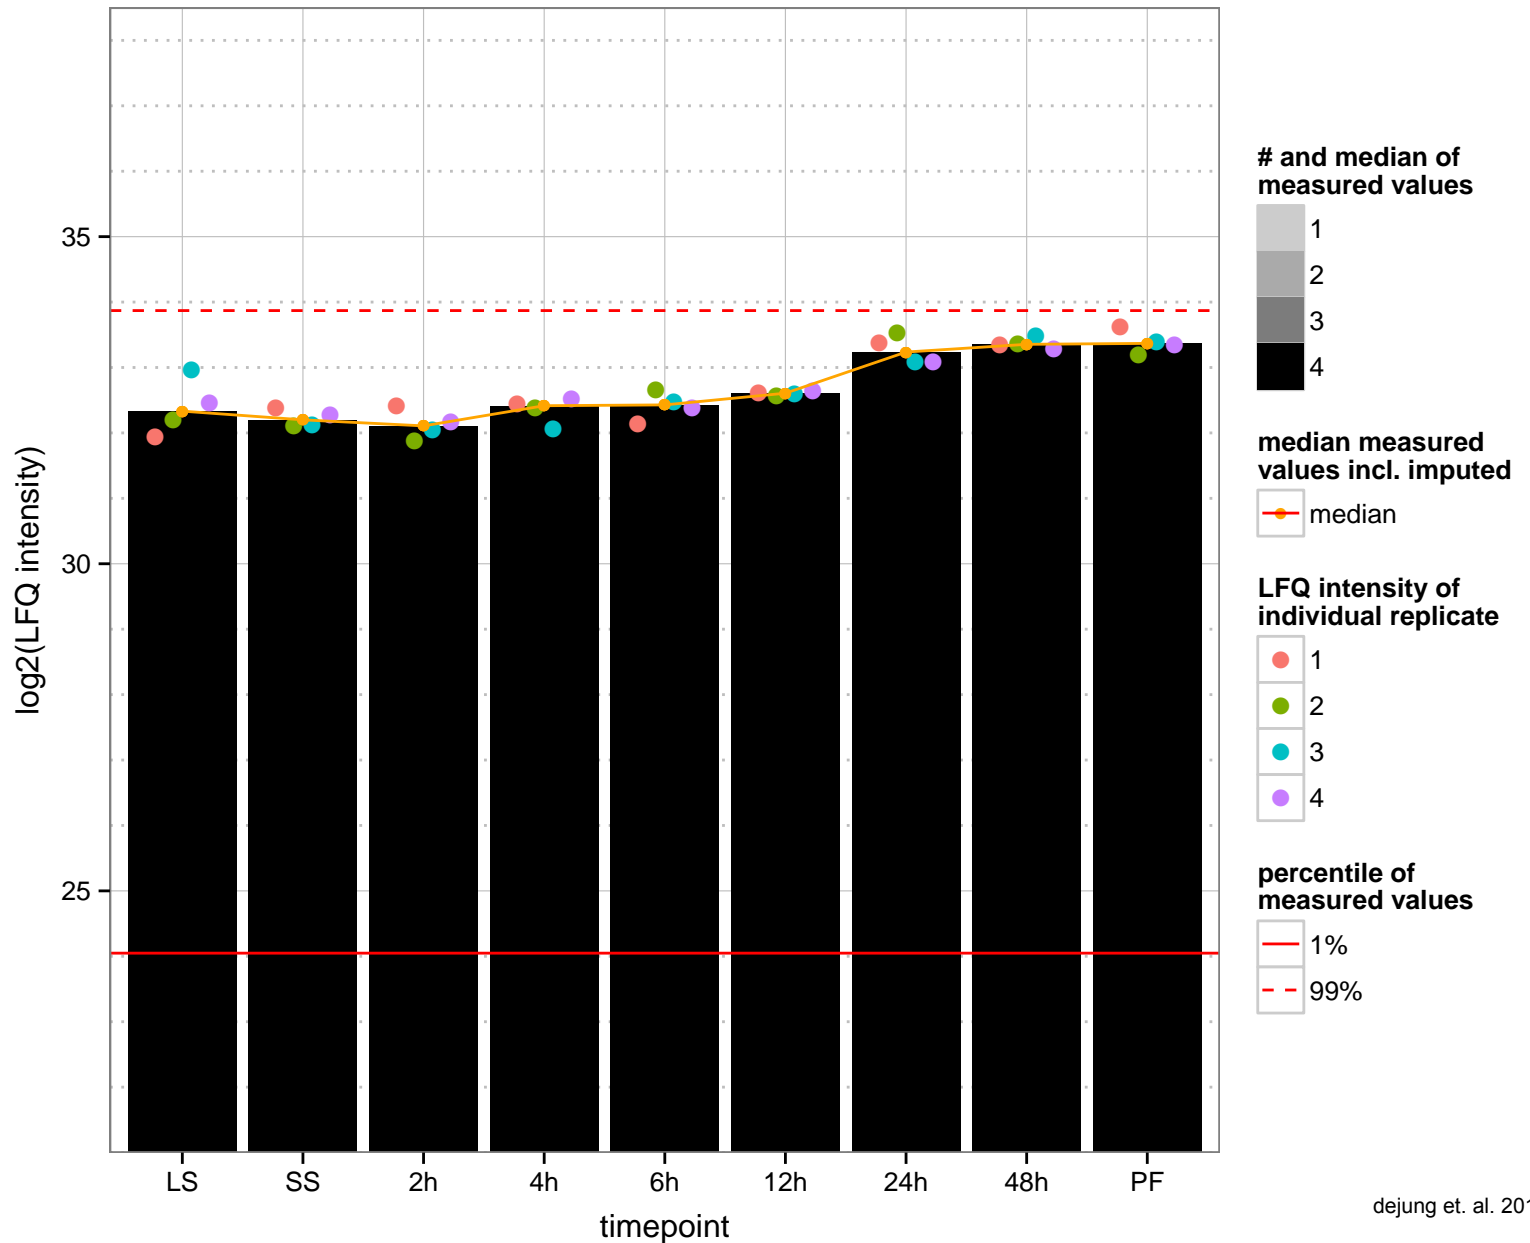

Adenine phosphoribosyltransferase, putative  
 Tb927.7.1780  
 AGOF: null  
 AGOC: null  
 AGOP: purine ribonucleoside salvage  
 PGO: null  
 PGO: null  
 PGO: null  
 PGO: nucleoside metabolic process

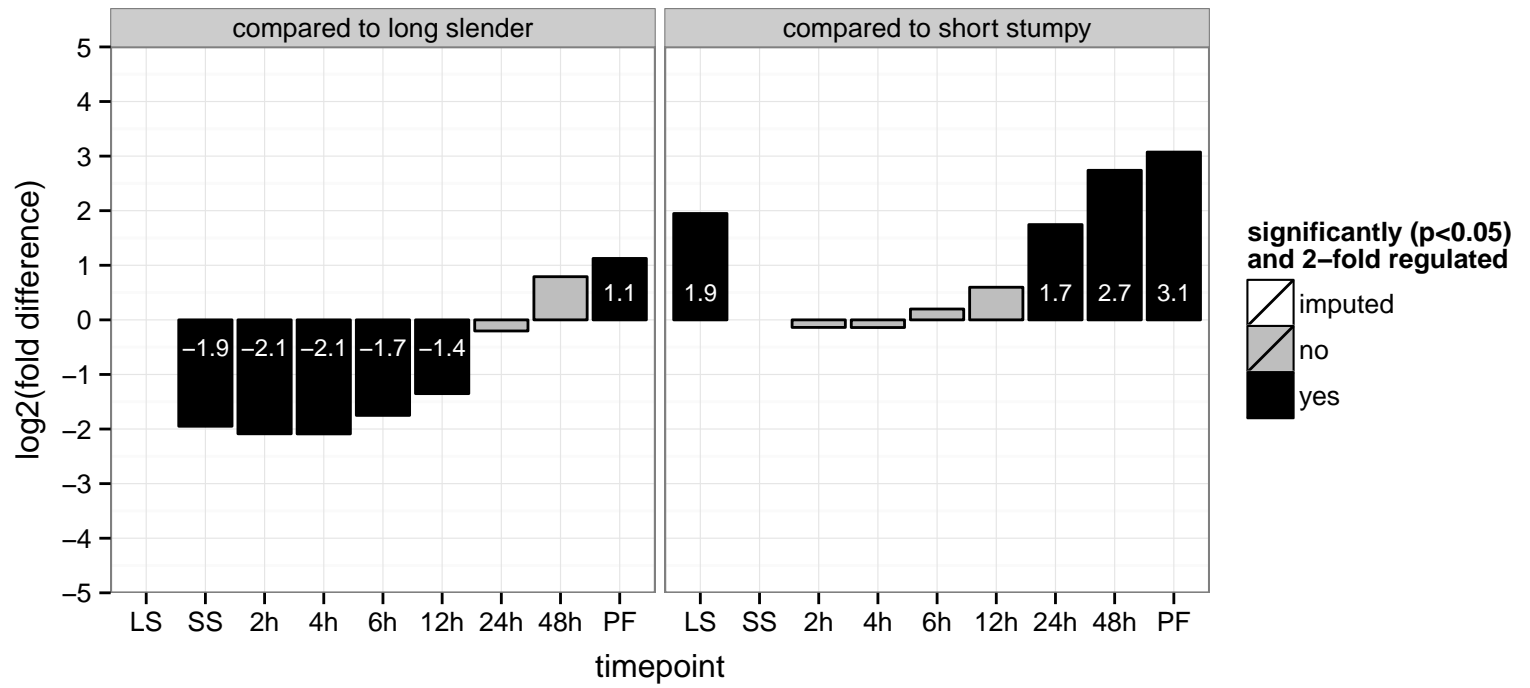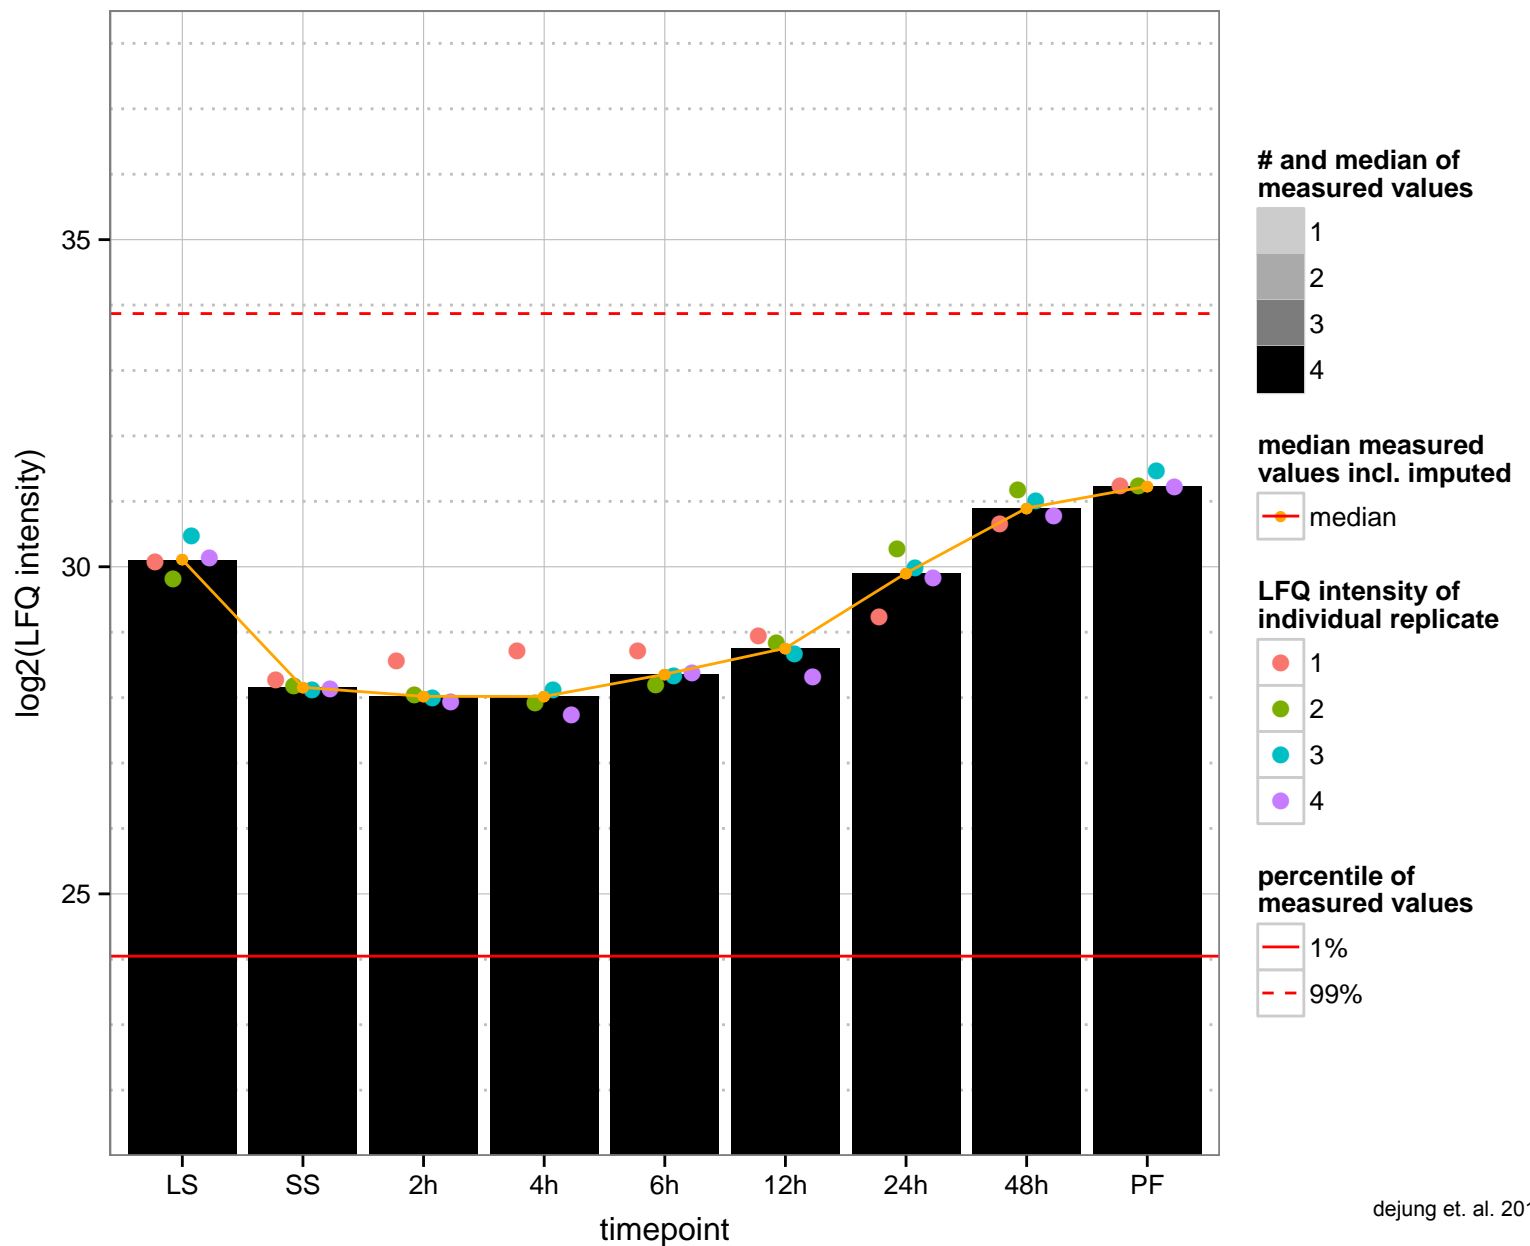

hypothetical protein, conserved  
 Tb927.7.2220  
 AGOF: null  
 AGOC: mitochondrion  
 AGOP: null  
 PGO: null  
 PGOC: null  
 PGOP: null

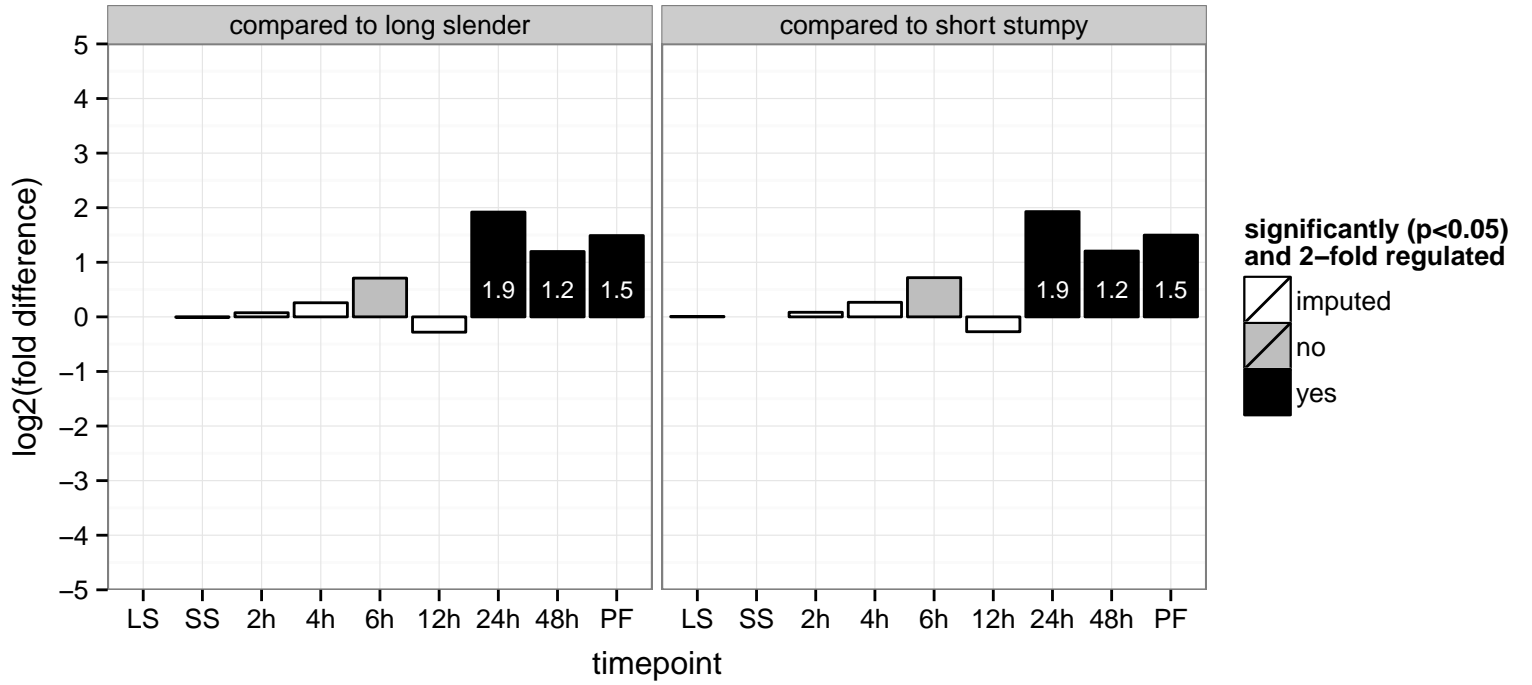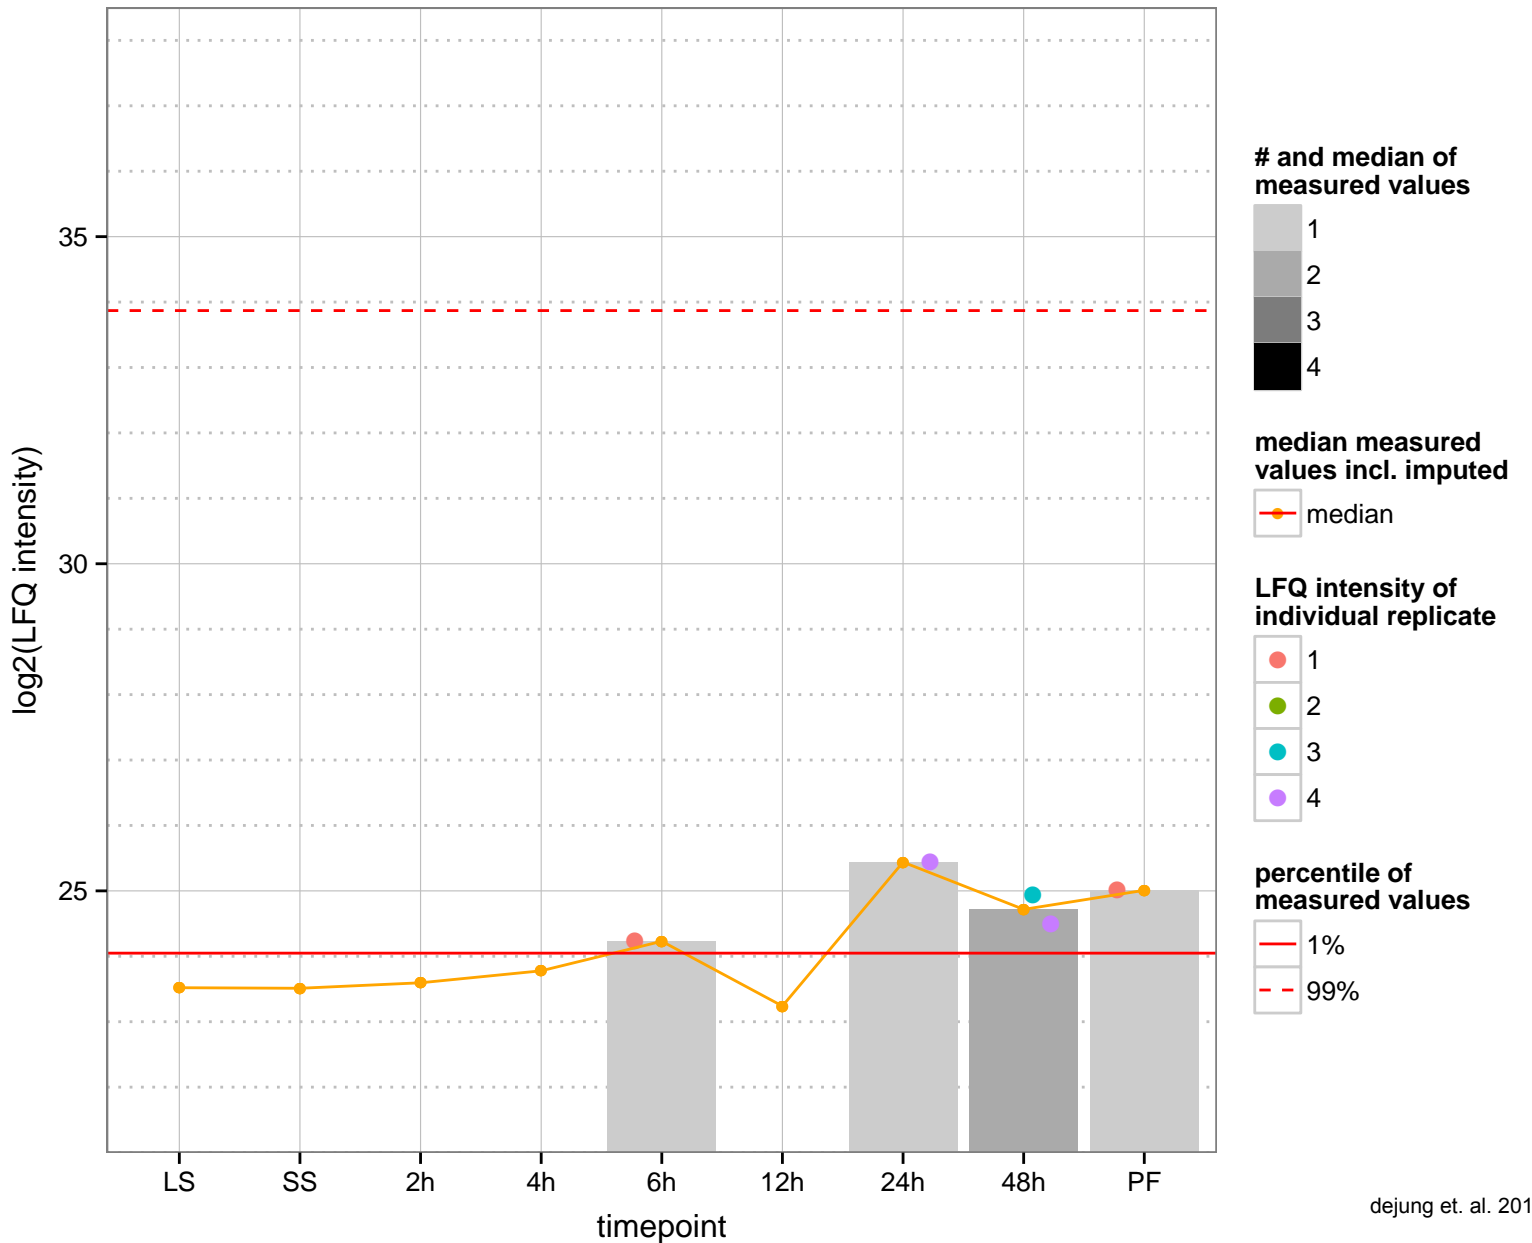

tyrosyl-tRNA synthetase, putative  
 Tb927.7.2400  
 AGOF: tRNA binding  
 AGOC: null  
 AGOP: null  
 PGO: tRNA binding  
 PGOC: null  
 PGOP: null

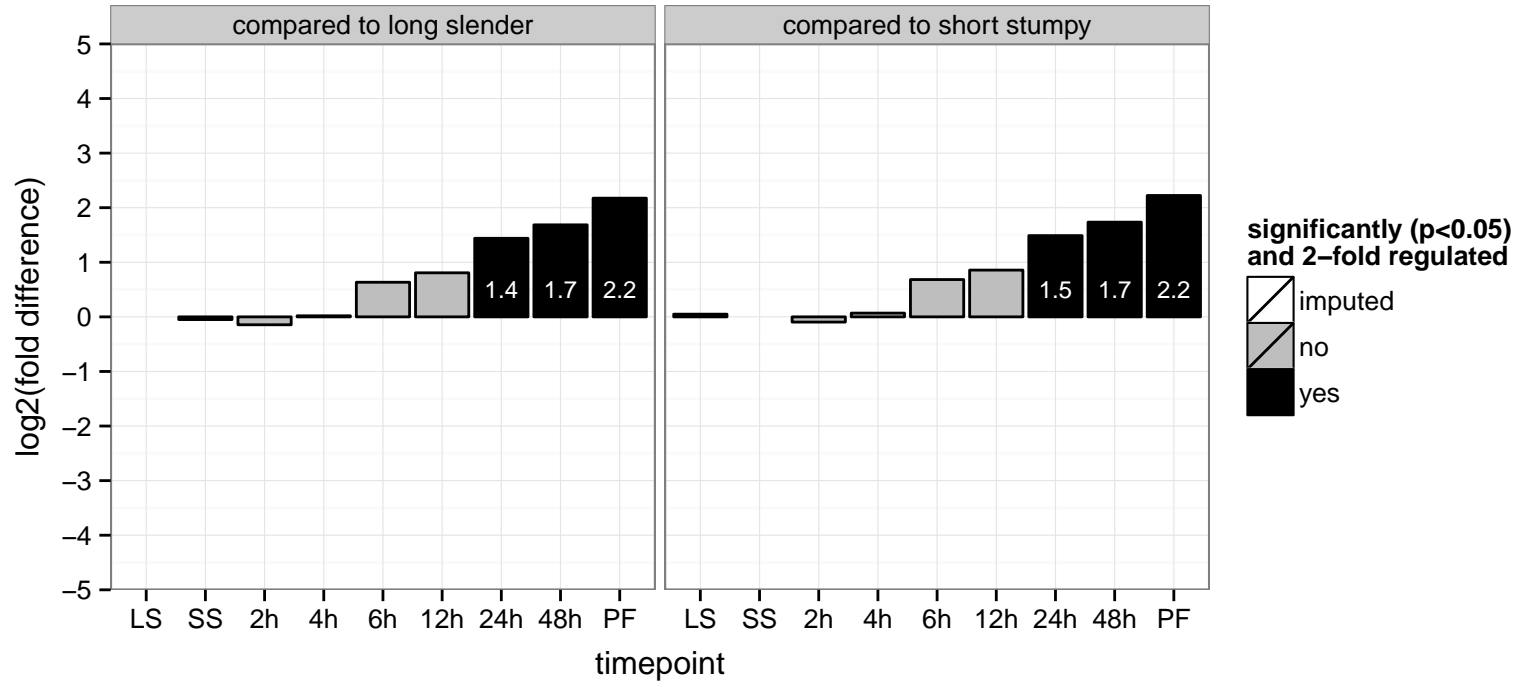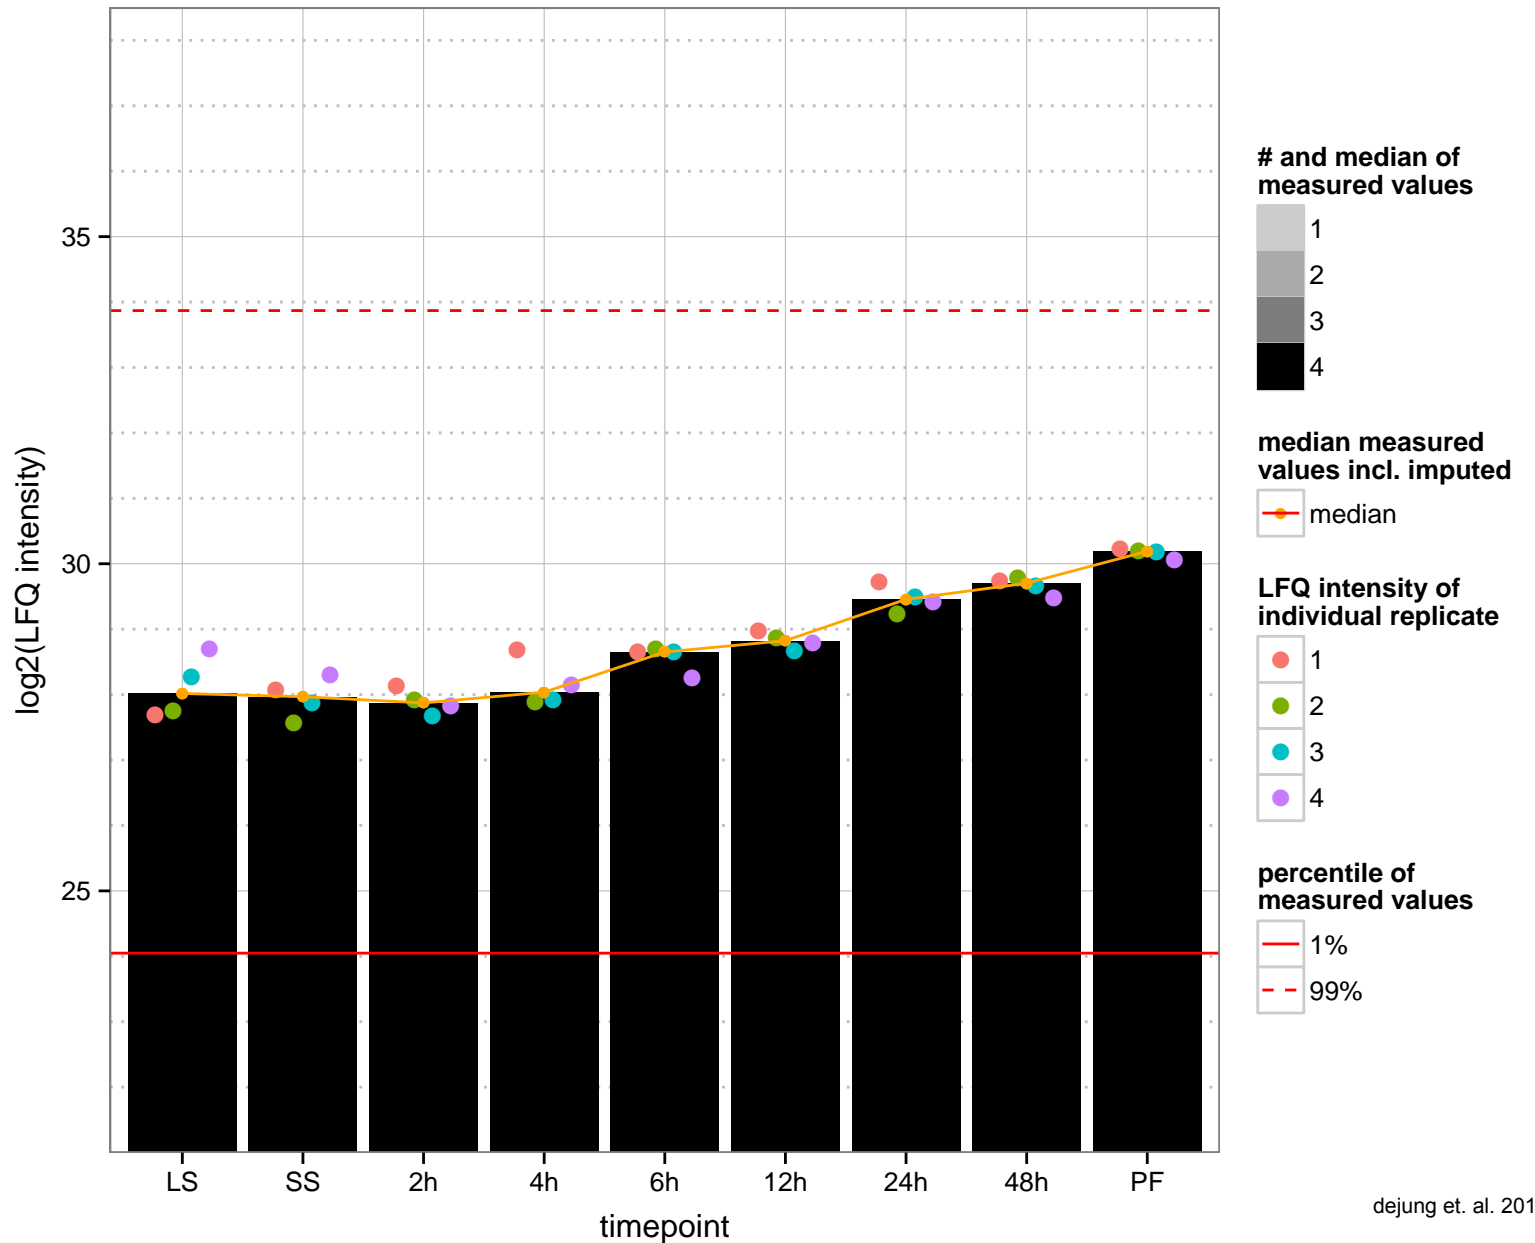

NADH-cytochrome b5 reductase, putative (B5R)  
 Tb927.7.2700  
 AGOF: electron carrier activity, oxidoreductase activity  
 AGOC: mitochondrion  
 AGOP: null  
 PGO: oxidoreductase activity  
 PGOC: null  
 PGO: oxidation-reduction process

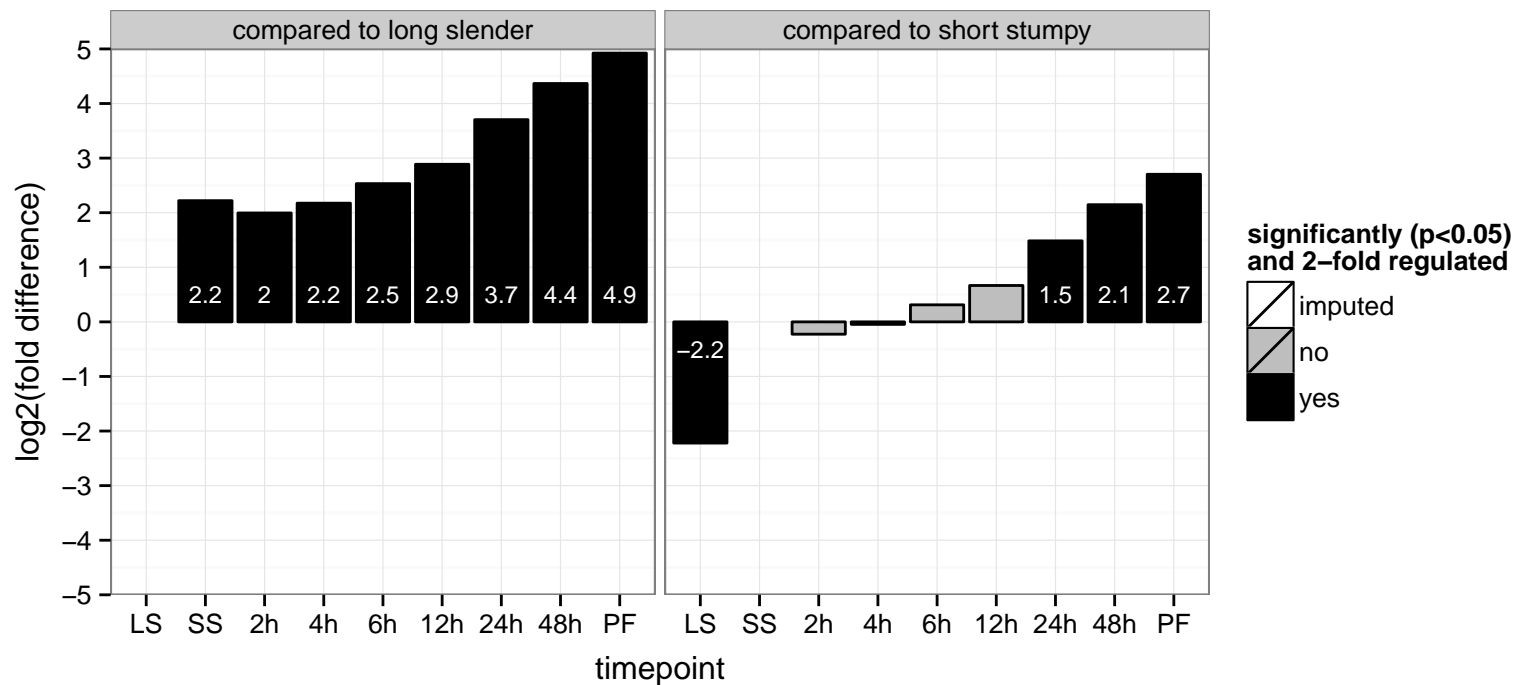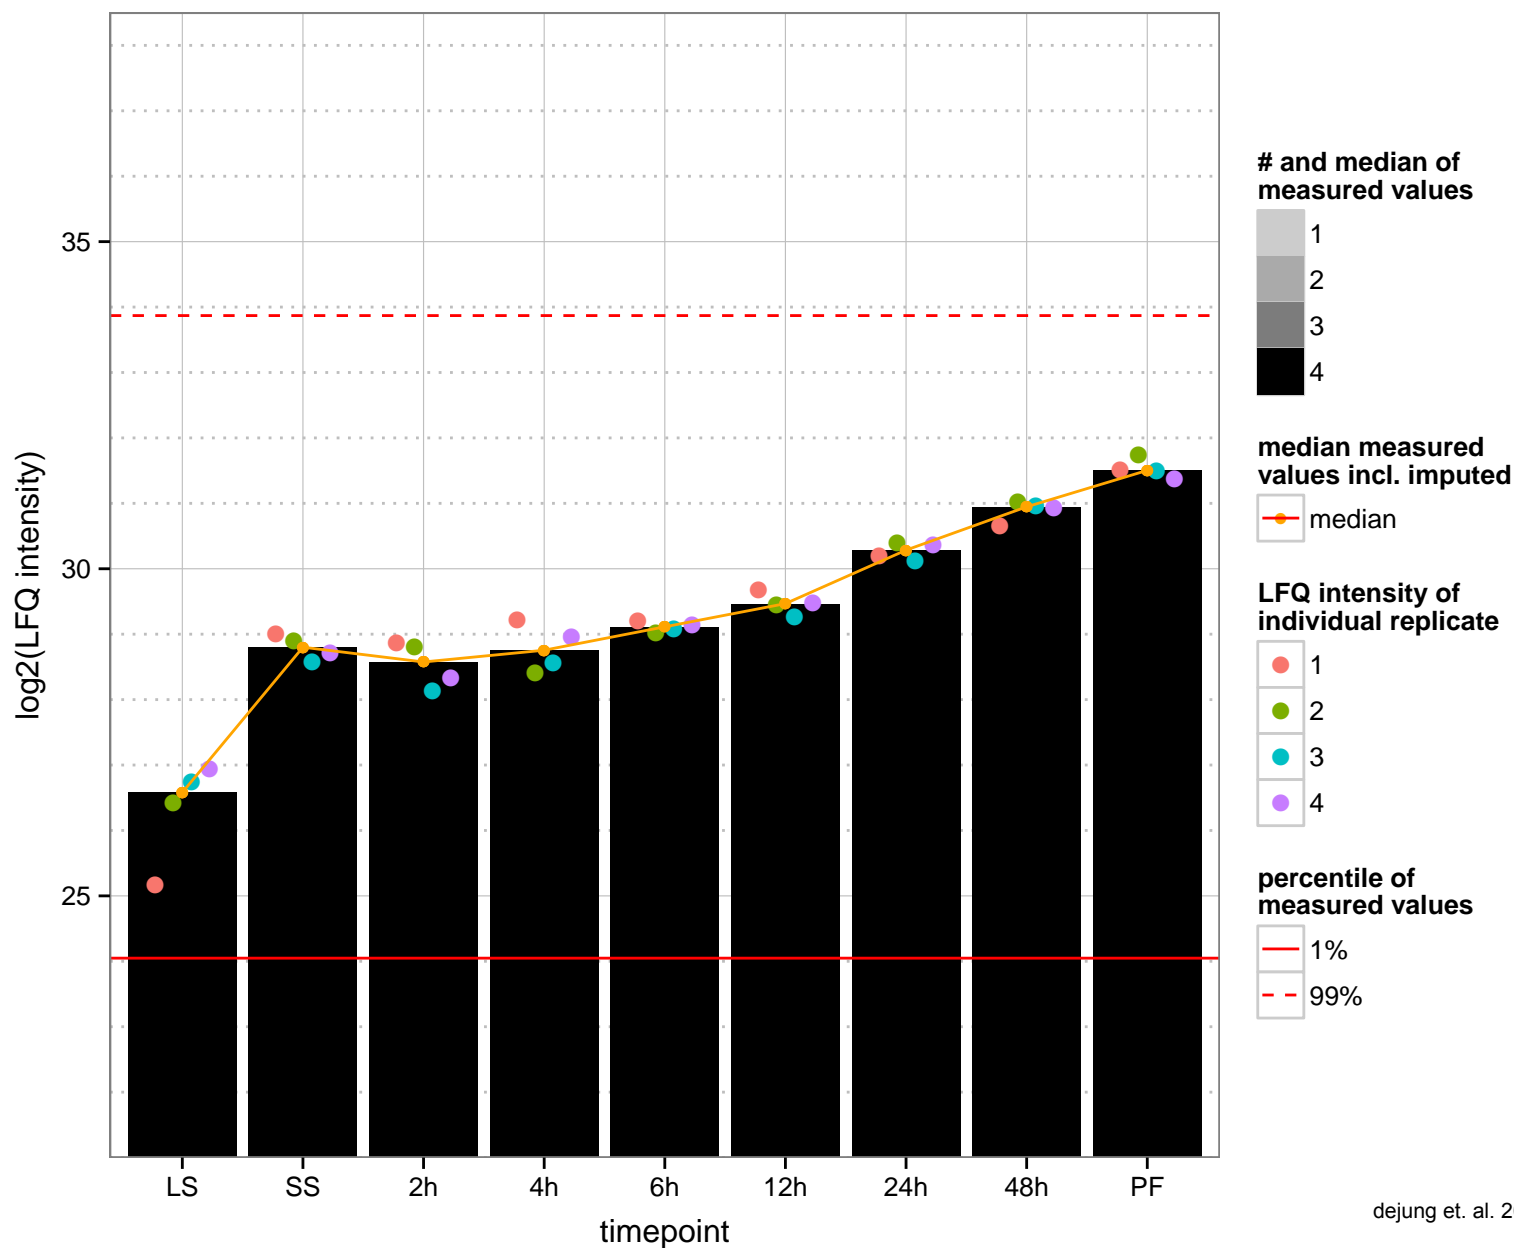



NADH-cytochrome b5 reductase, putative  
 Tb927.7.2710  
 AGOF: electron carrier activity, oxidoreductase activity  
 AGOC: null  
 AGOP: null  
 PGOF: oxidoreductase activity  
 PGOC: null  
 PGO: oxidation-reduction process

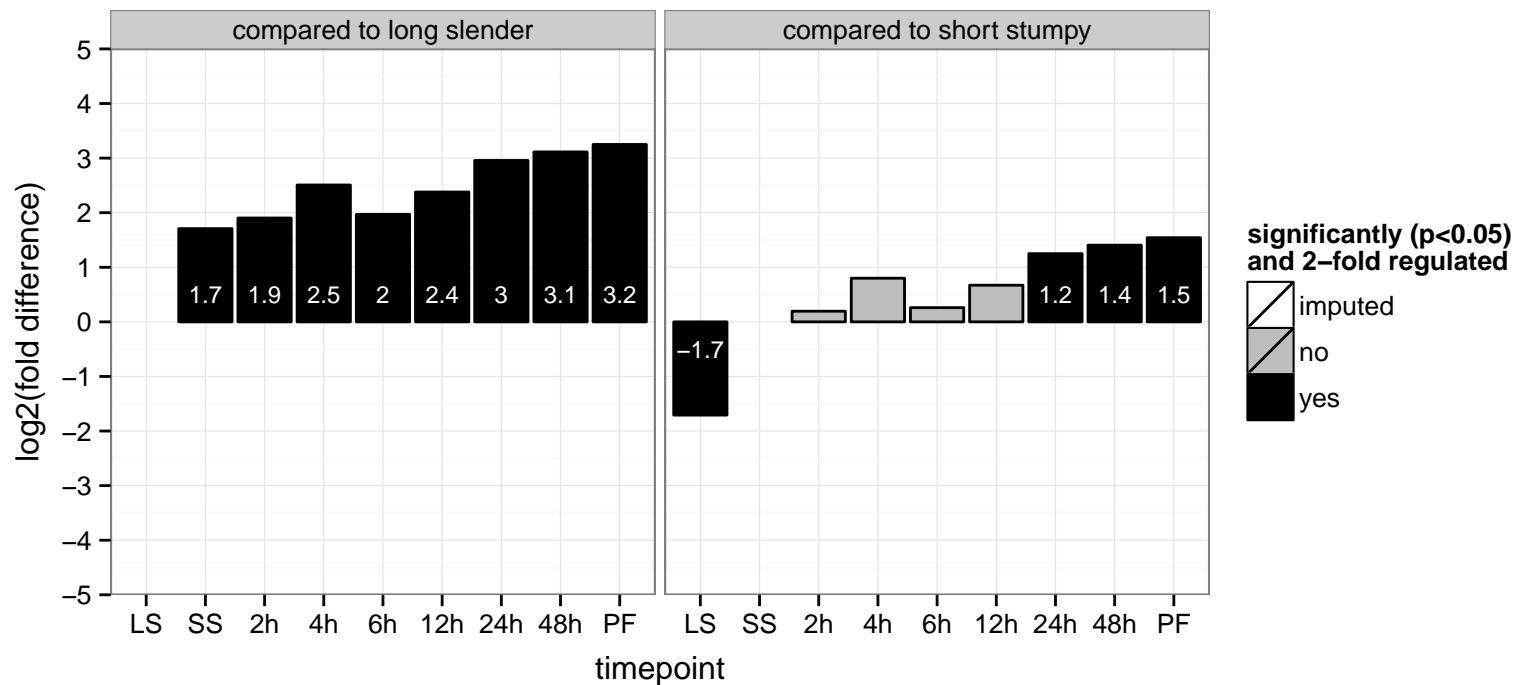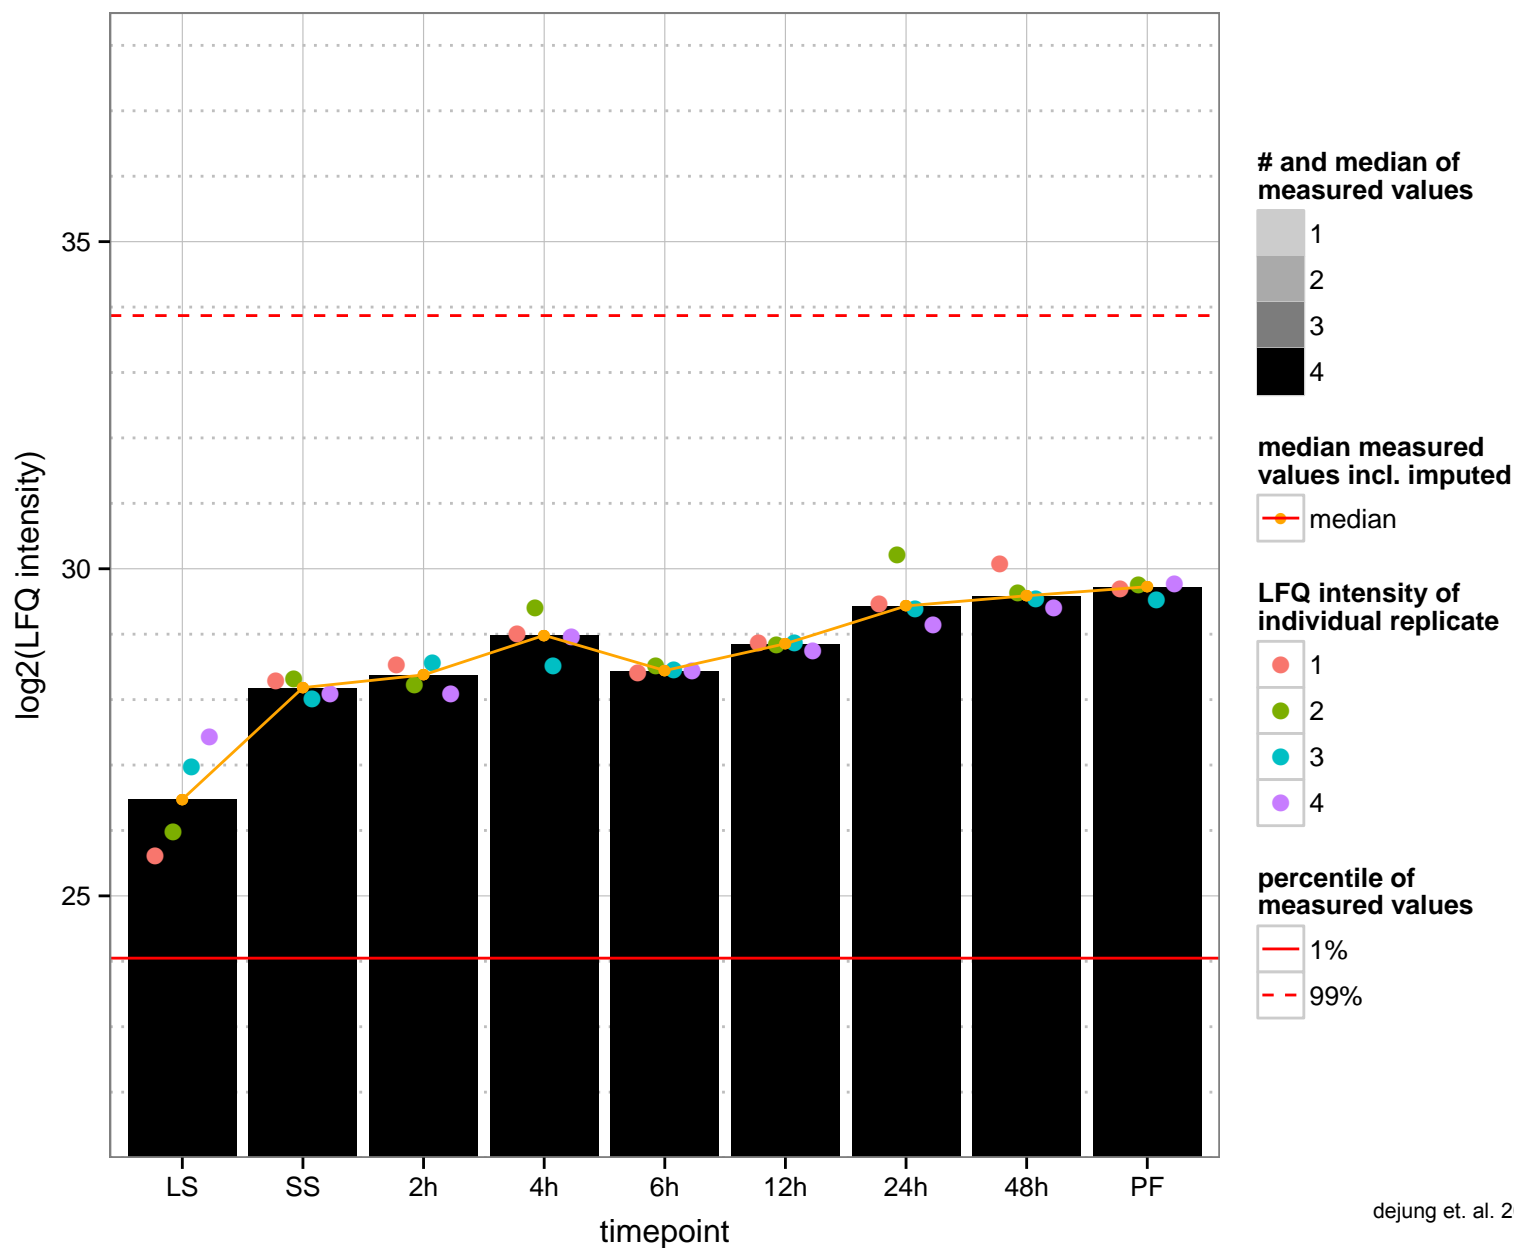

cyclophilin-type peptidyl-prolyl cis-trans isomerase, putative (PPlase)

Tb927.7.280

AGOF: peptidyl-prolyl cis-trans isomerase activity

AGOC: null

AGOP: protein folding

PGOF: peptidyl-prolyl cis-trans isomerase activity

PGOC: null

PGOP: protein folding

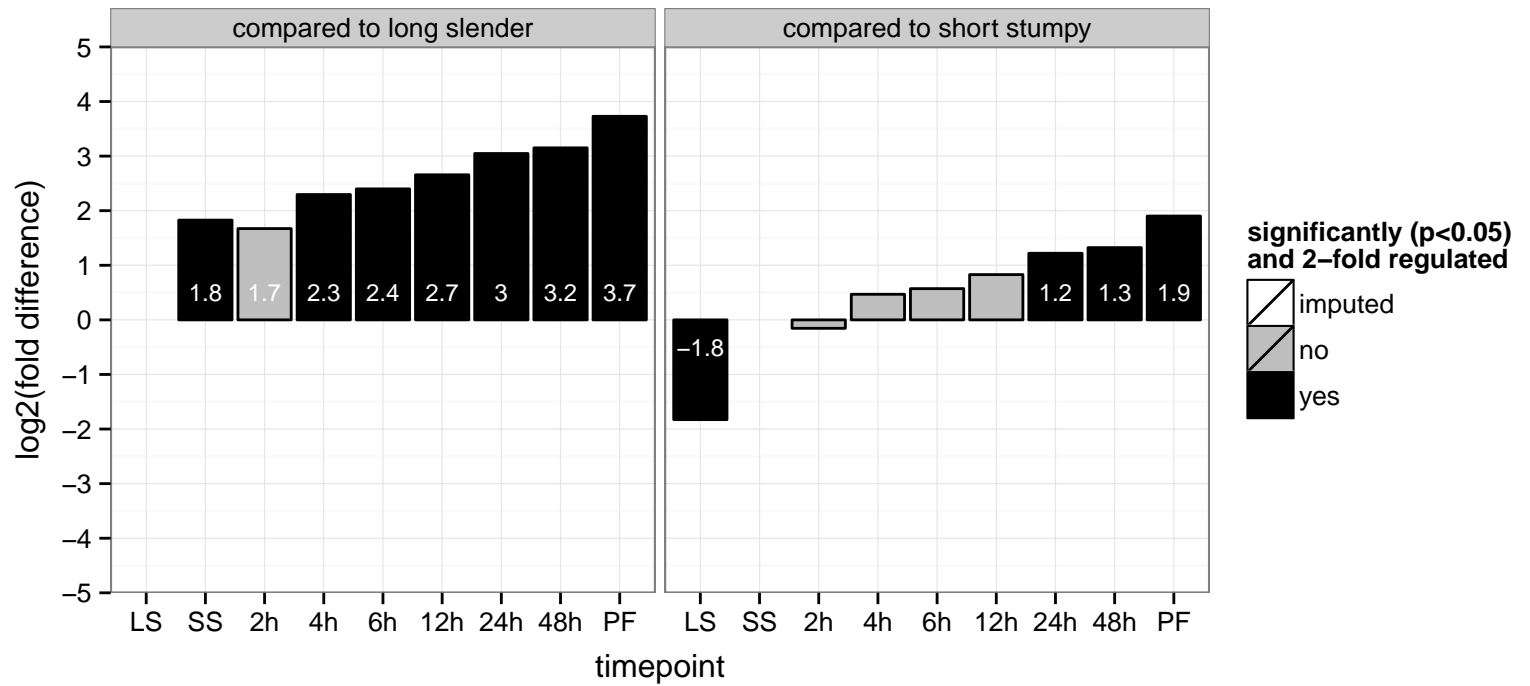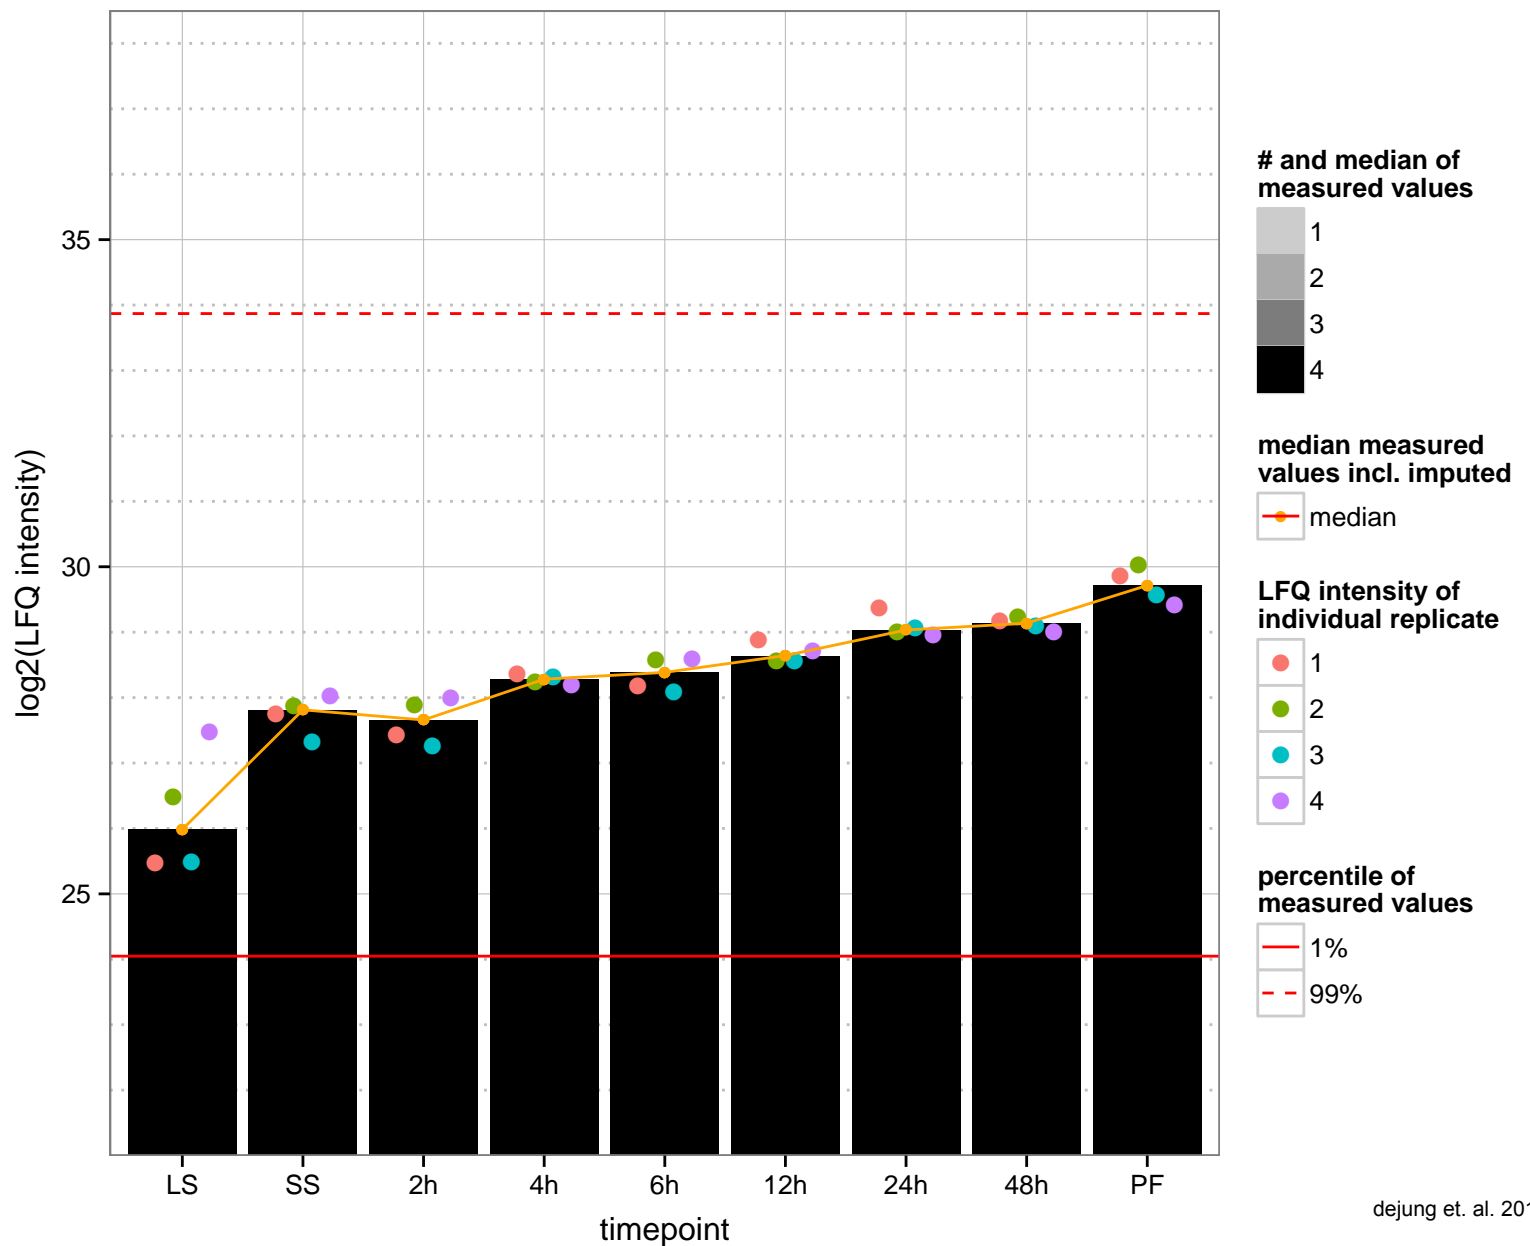

hypothetical protein, conserved  
 Tb927.7.3590  
 AGOF: null  
 AGOC: mitochondrion  
 AGOP: null  
 PGO: null  
 PGO: null  
 PGO: null

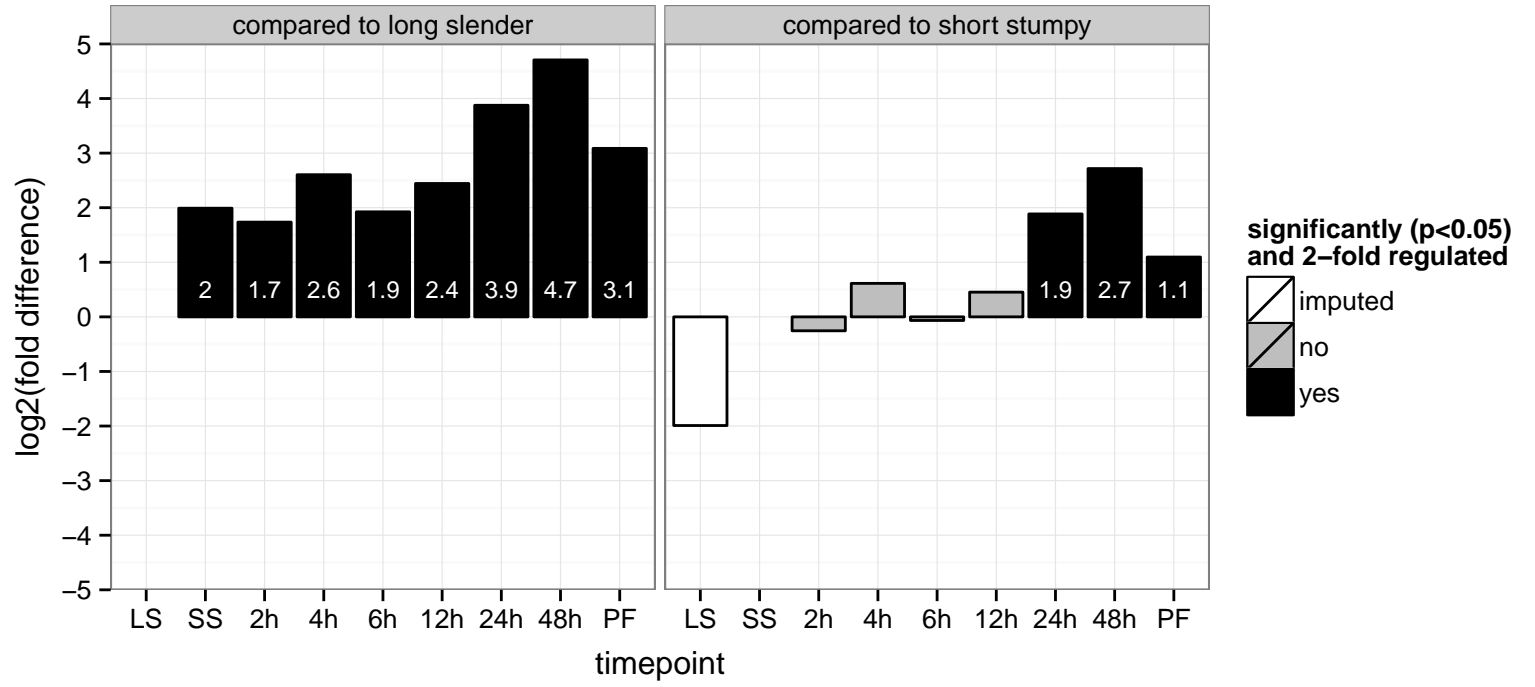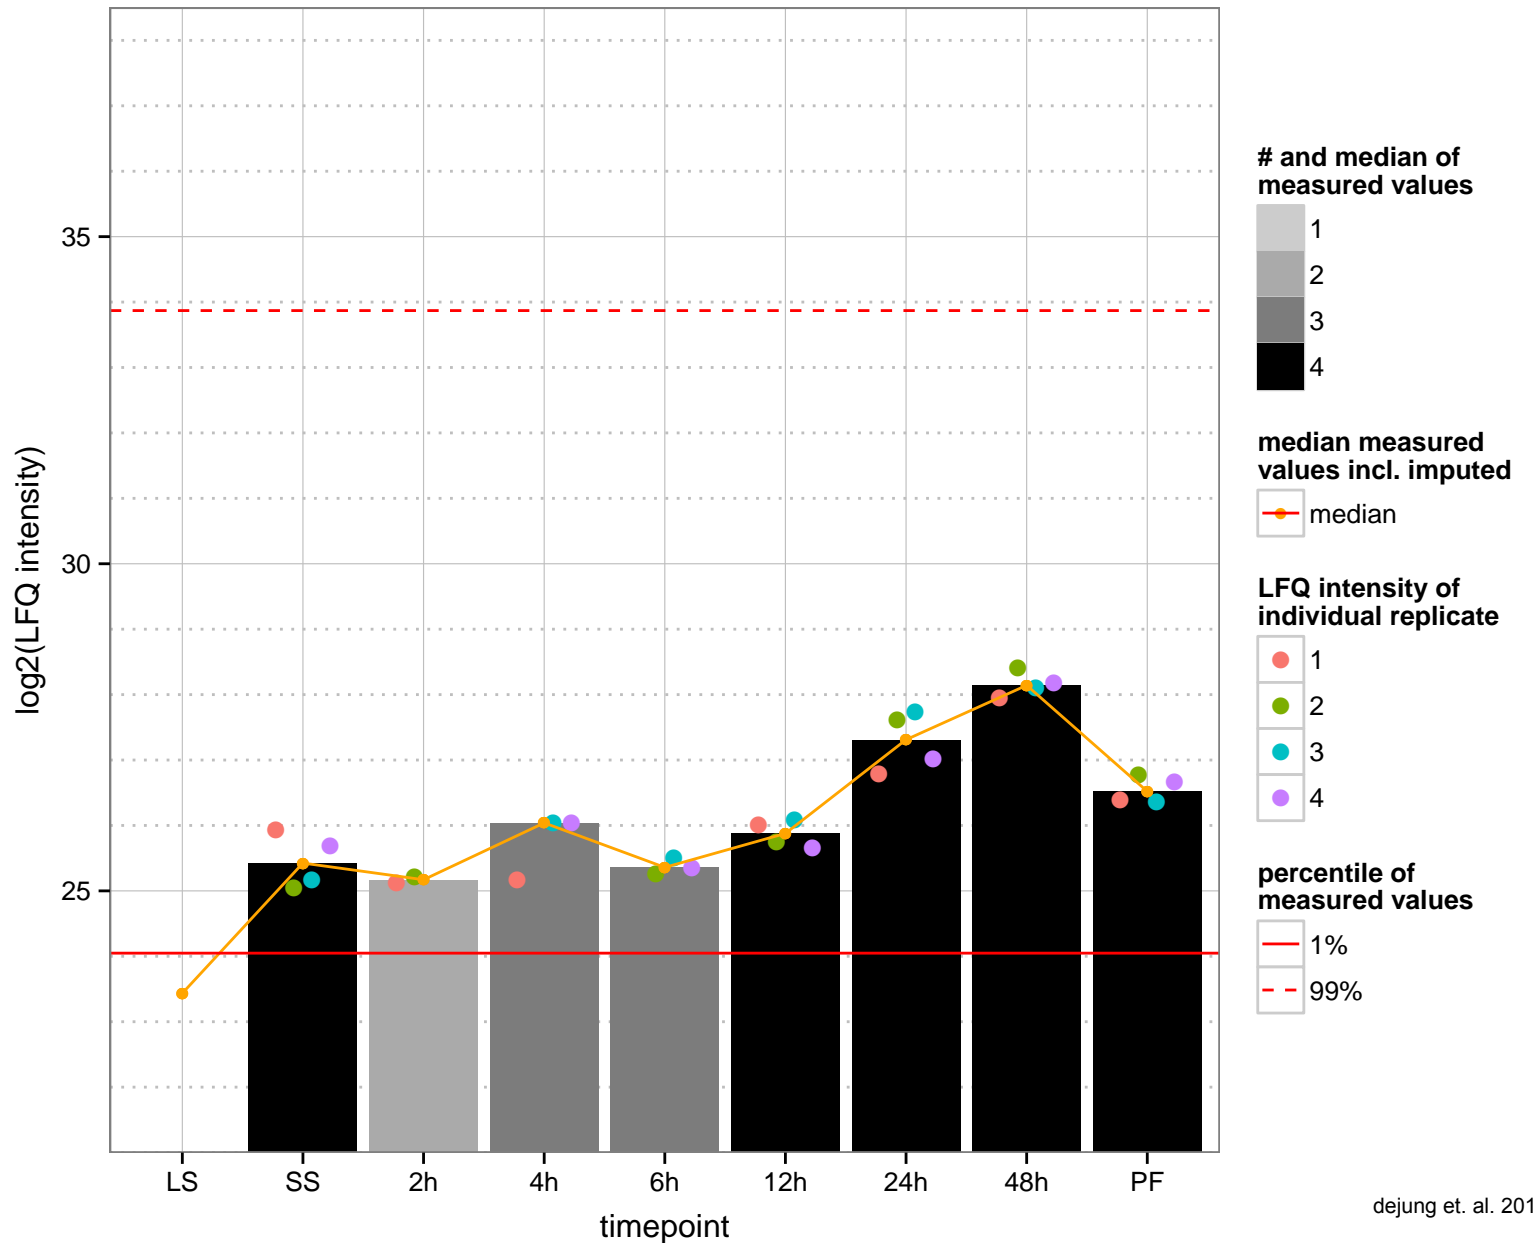

mitochondrial carrier protein, ADP/ATP mitochondrial translocase, putative, adenine nucleotide mitochondrial translocator, putative  
 Tb927.7.3940  
 AGOF: null  
 AGOC: mitochondrial inner membrane, mitochondrial part  
 AGOP: transport  
 PGO: null  
 PGO: null  
 PGO: null

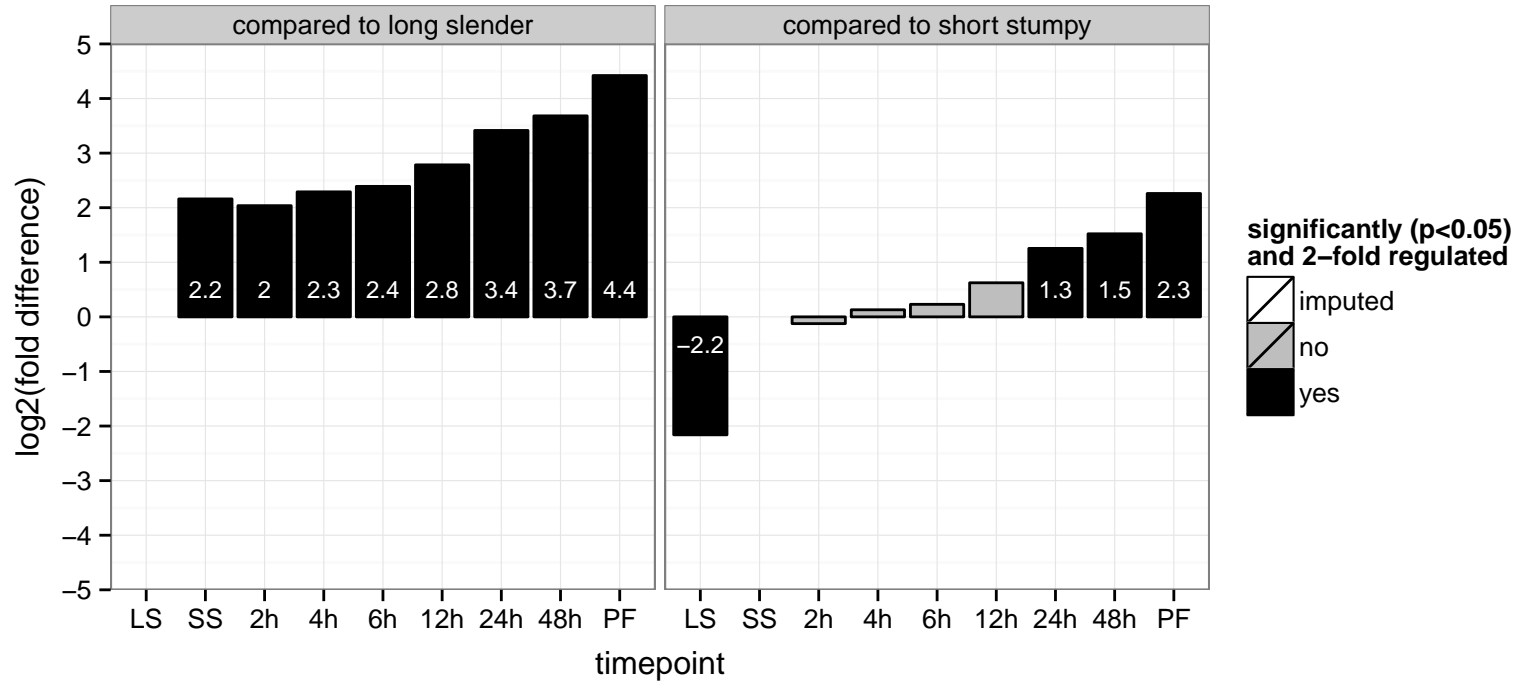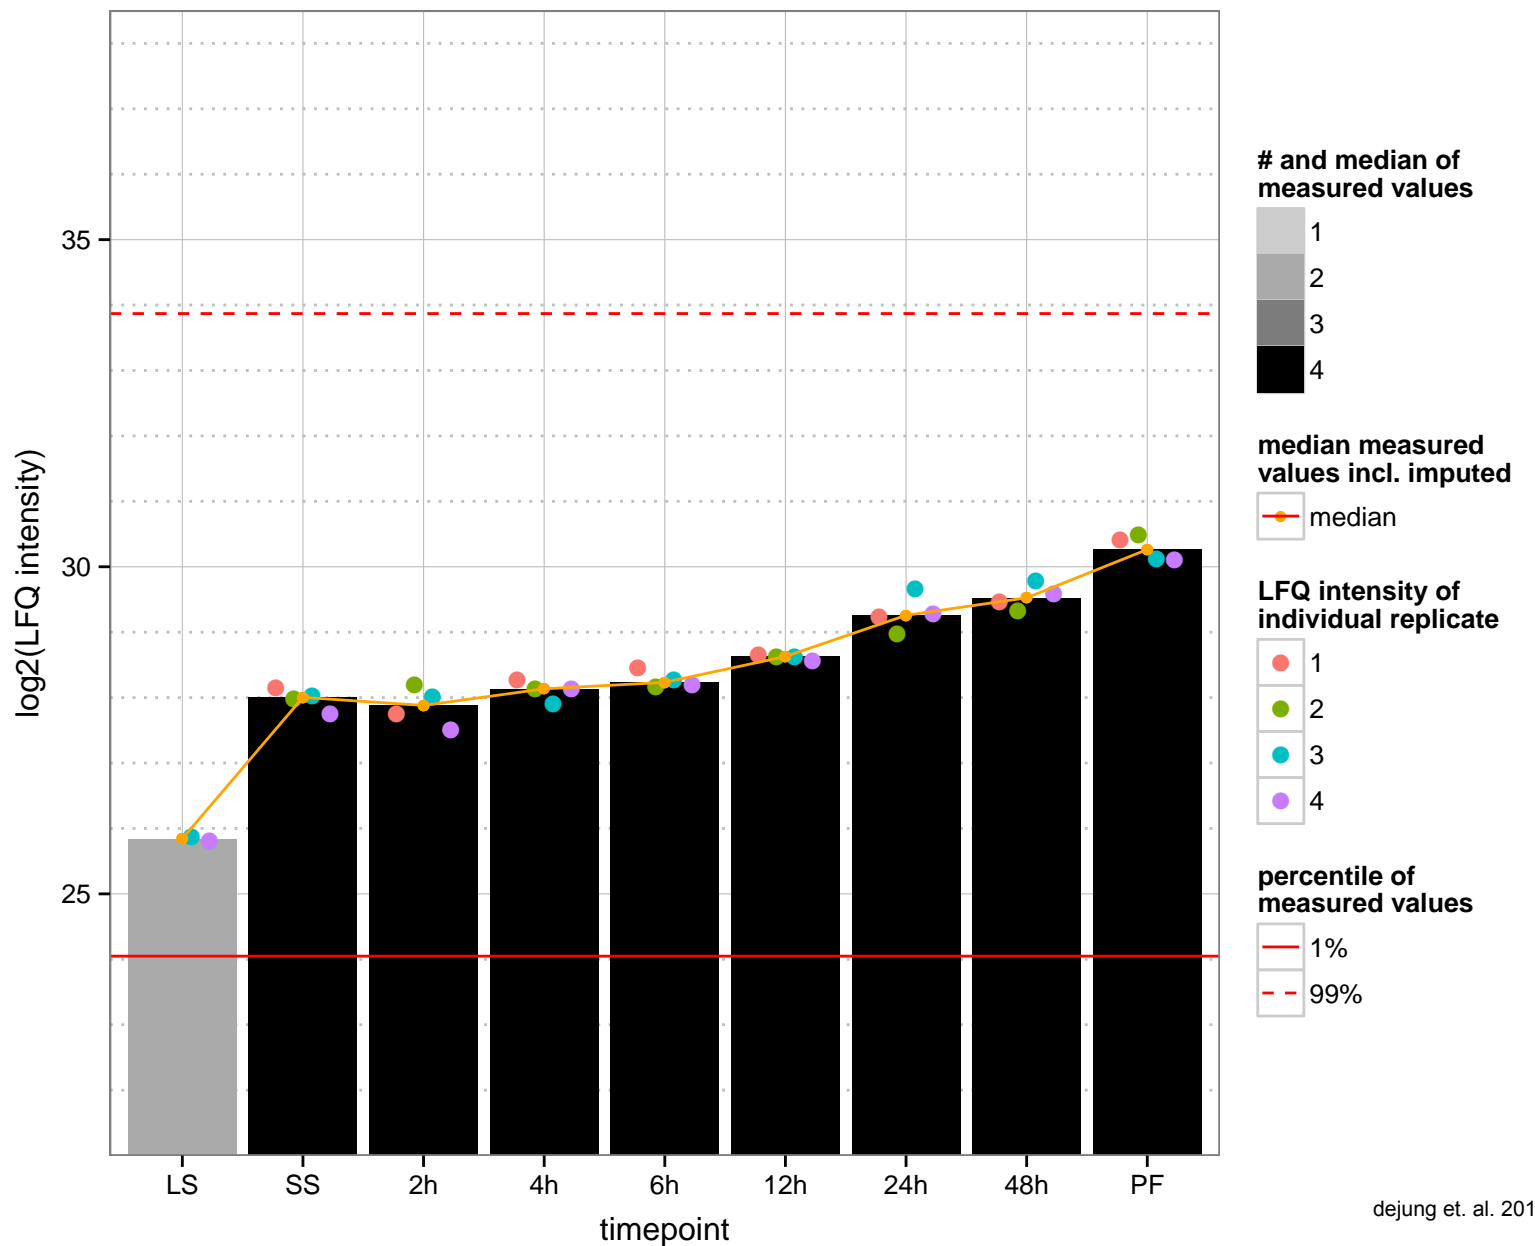

deoxyuridine triphosphatase, putative, dUTP diphosphatase  
 Tb927.7.5160  
 AGOF: null  
 AGOC: null  
 AGOP: null  
 PGO: null  
 PGOC: null  
 PGOP: null

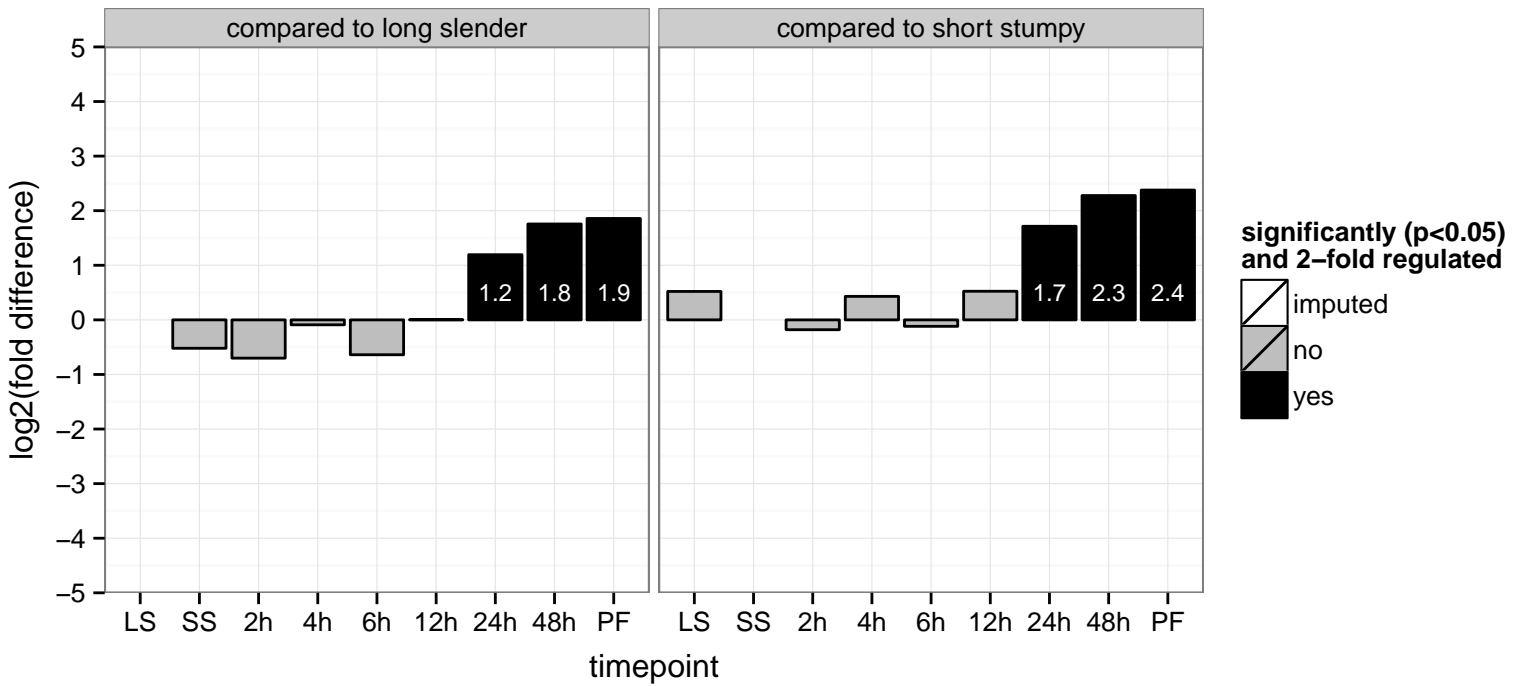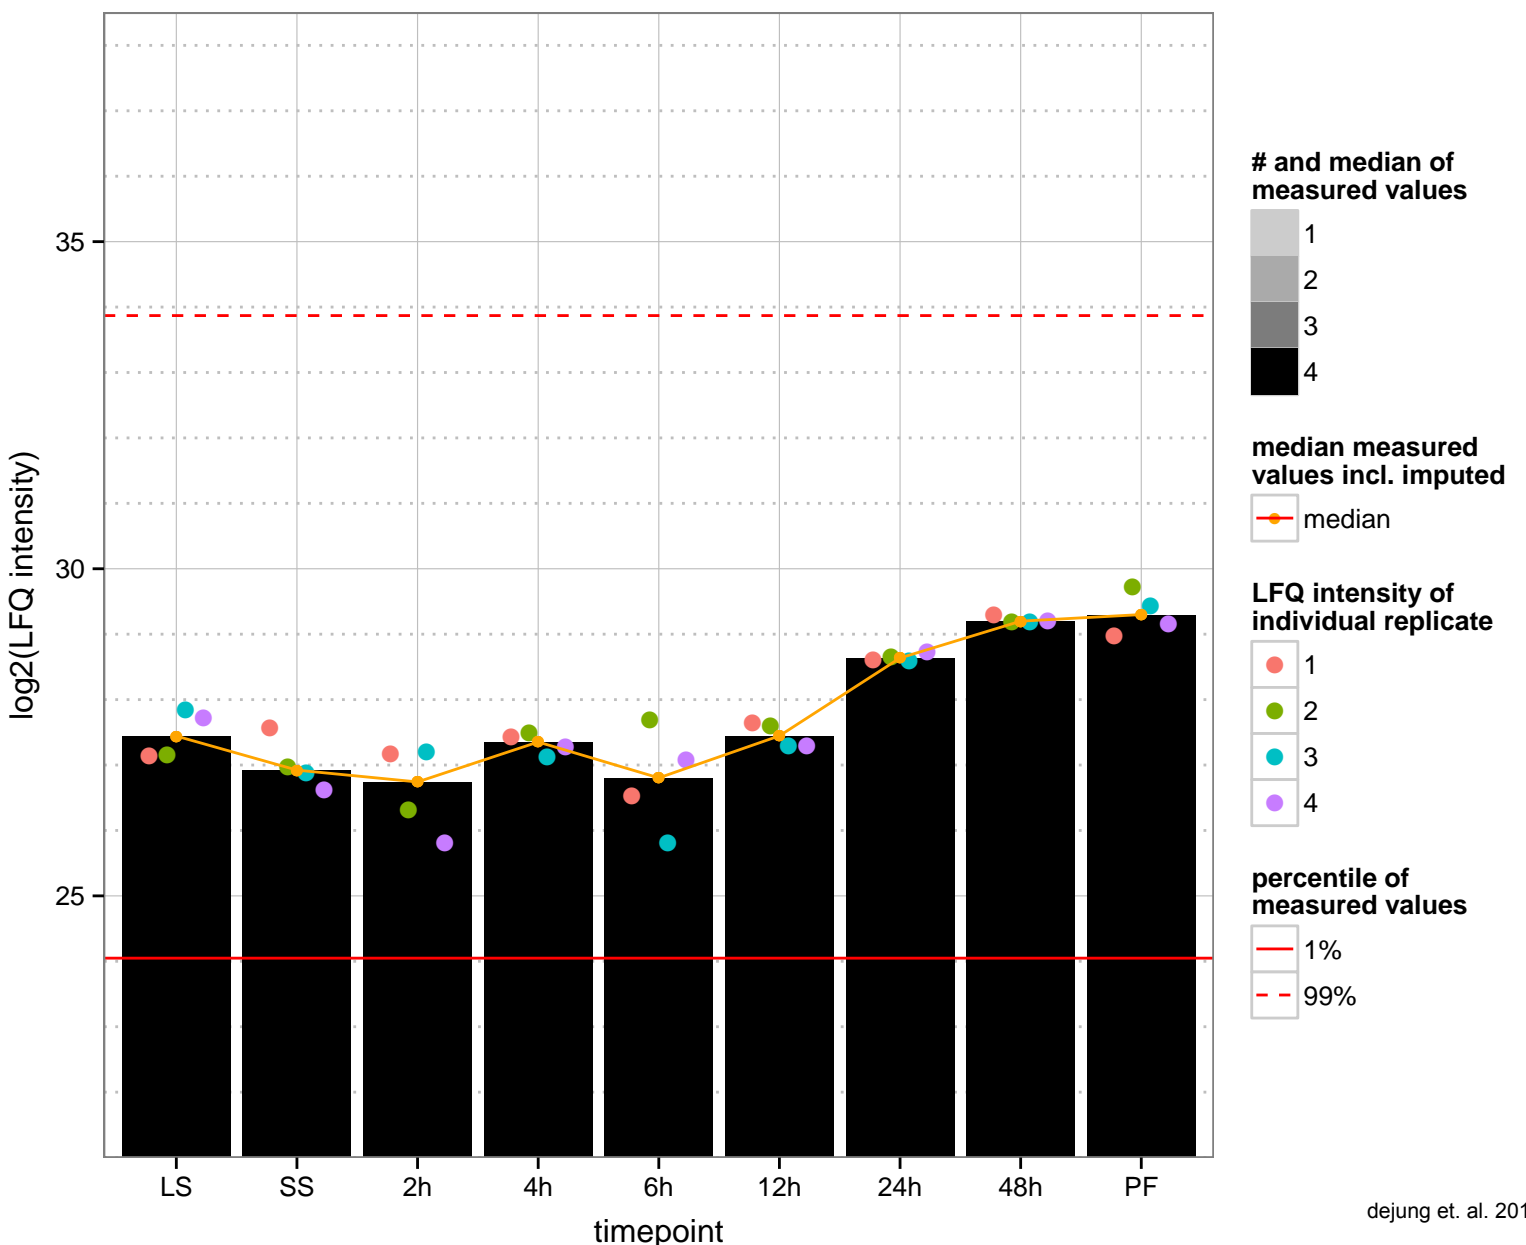

hypothetical protein, conserved  
 Tb927.7.6670  
 AGOF: null  
 AGOC: null  
 AGOP: null  
 PGO: null  
 PGOC: null  
 PGOP: null

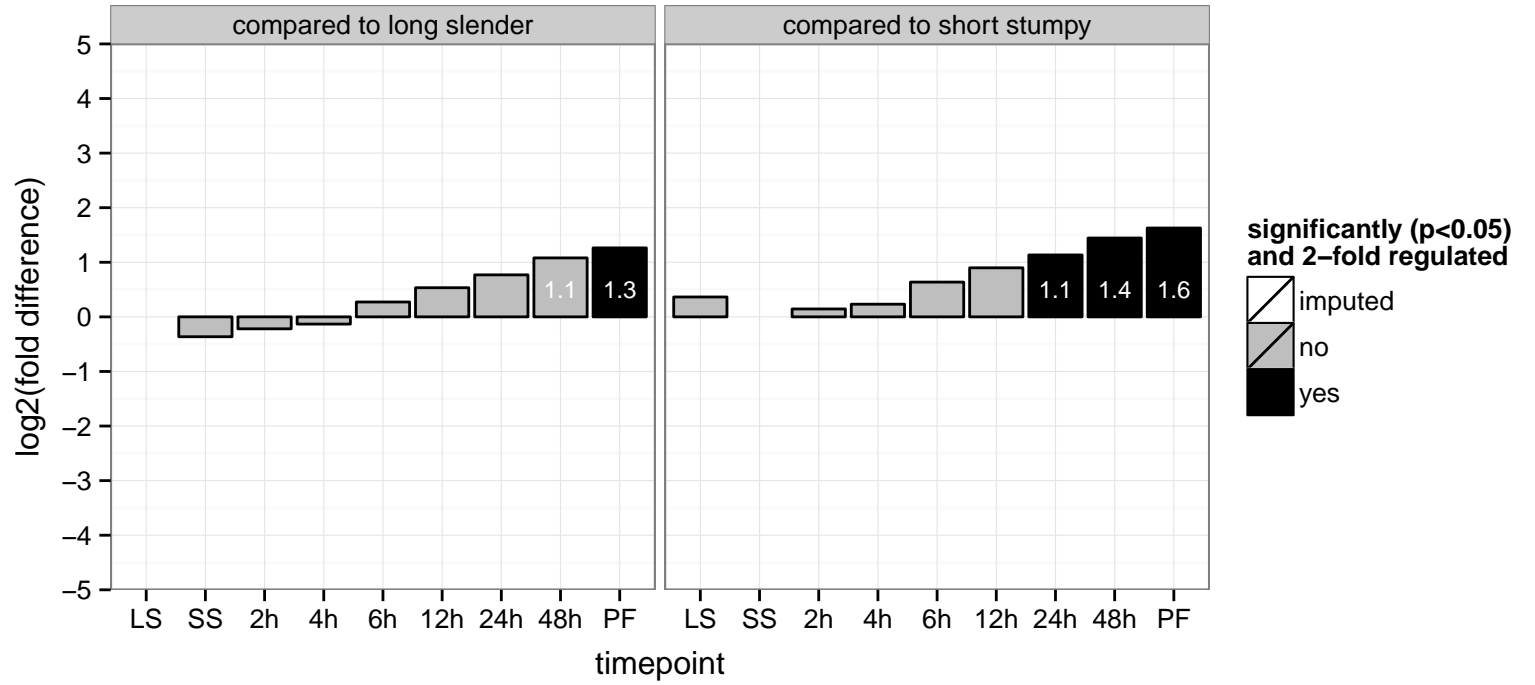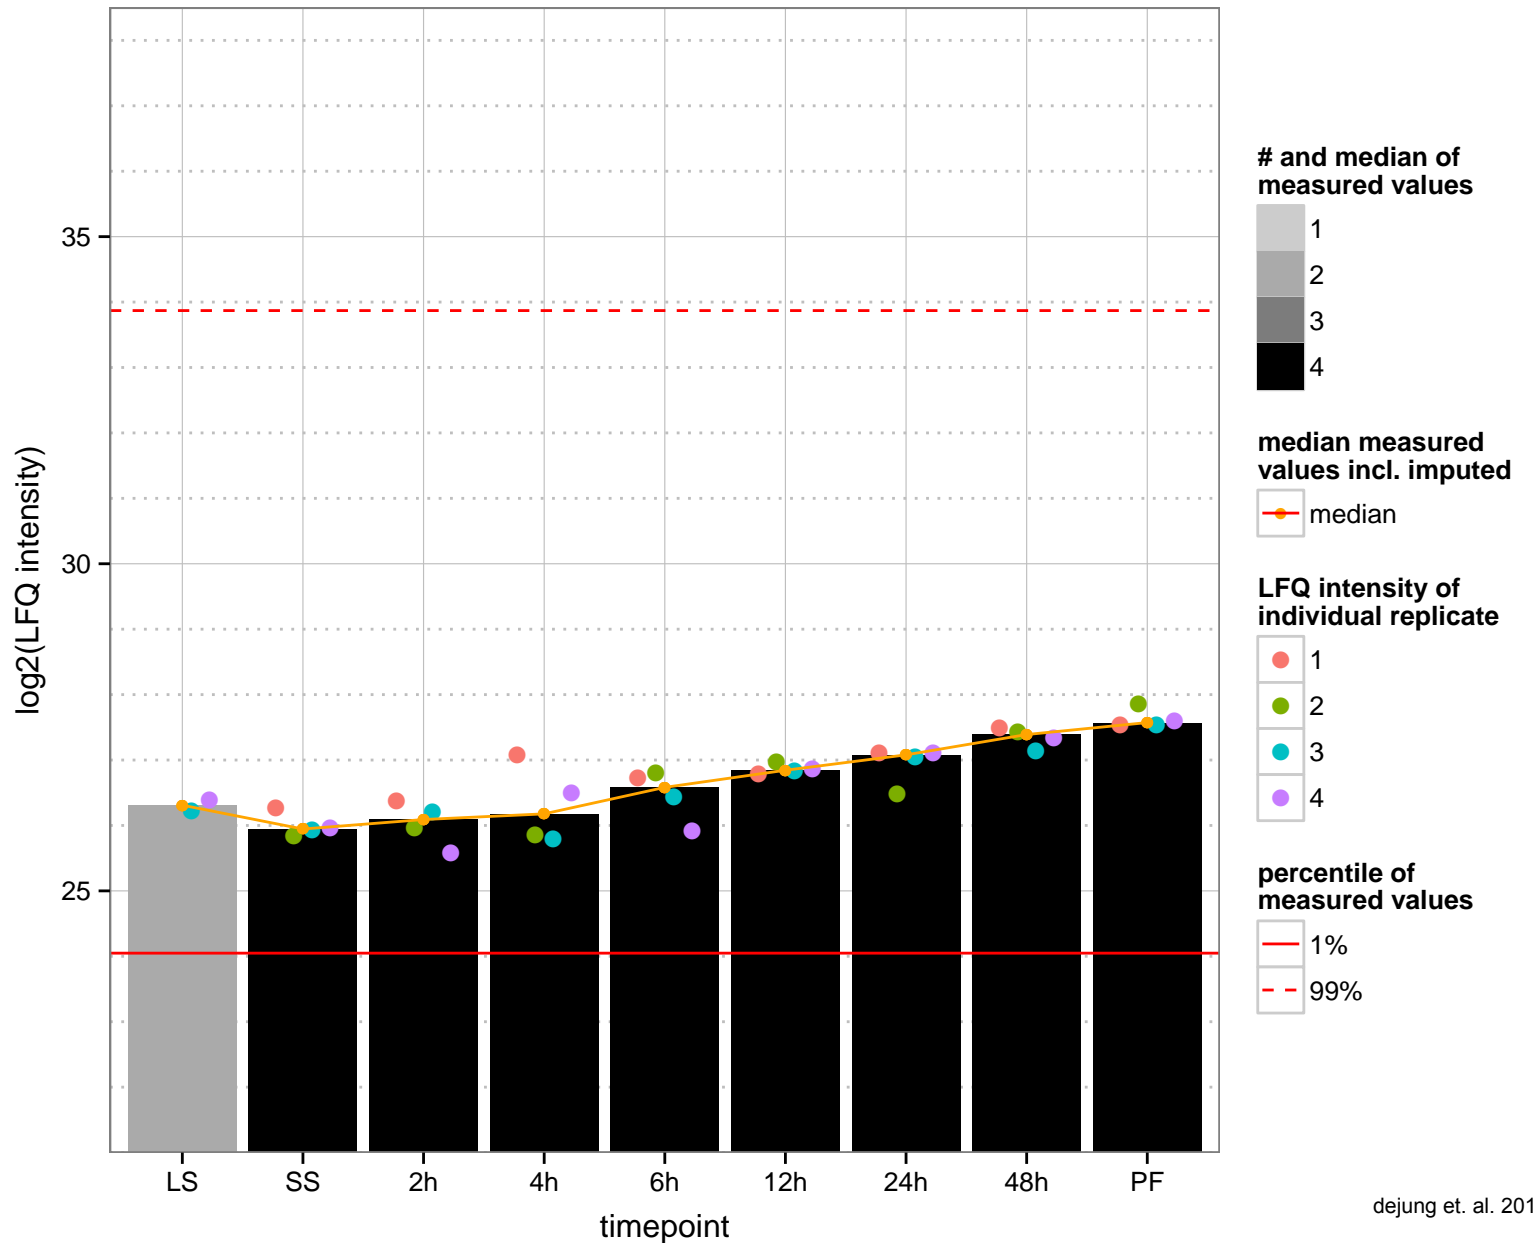

hypothetical protein, conserved  
 Tb927.7.6800  
 AGOF: null  
 AGOC: mitochondrion  
 AGOP: null  
 PGO: null  
 PGO: null  
 PGO: null

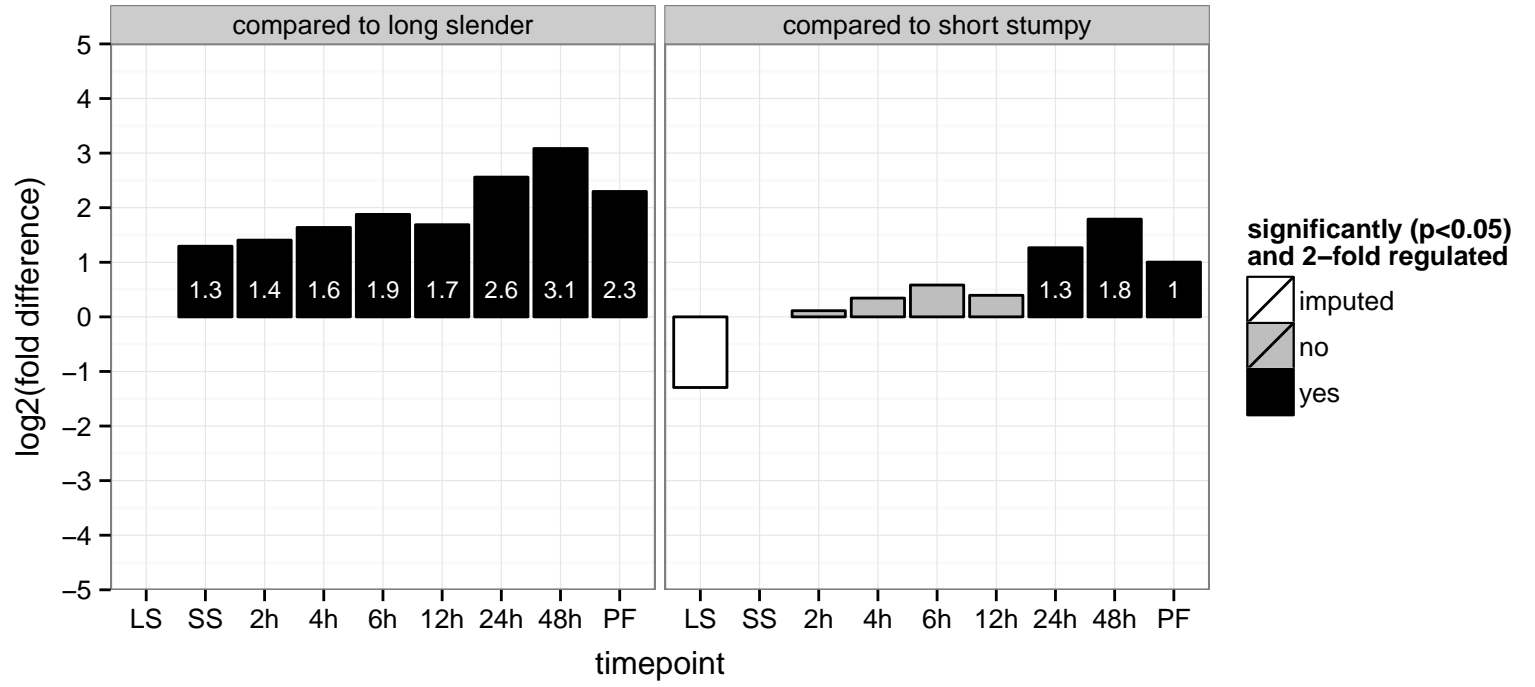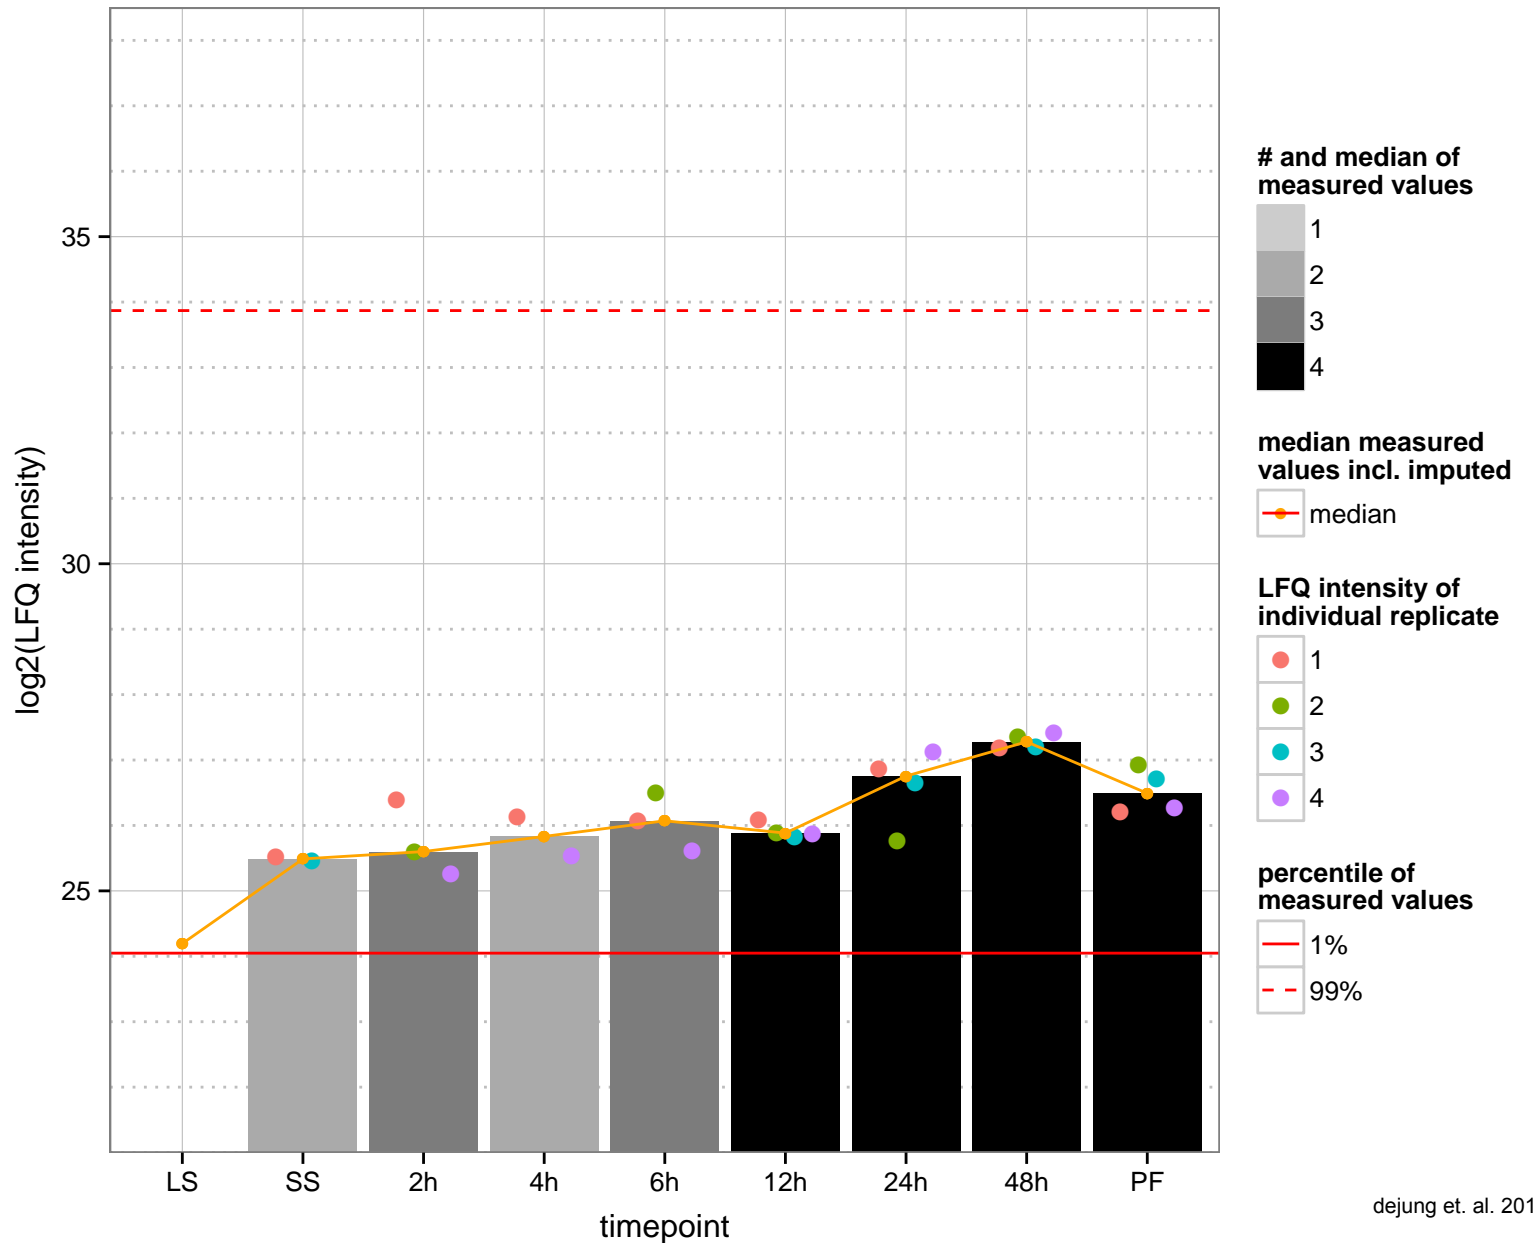

hypothetical protein, conserved  
 Tb927.7.7090  
 AGOF: null  
 AGOC: mitochondrion  
 AGOP: null  
 PGO: null  
 PGOC: null  
 PGOP: null

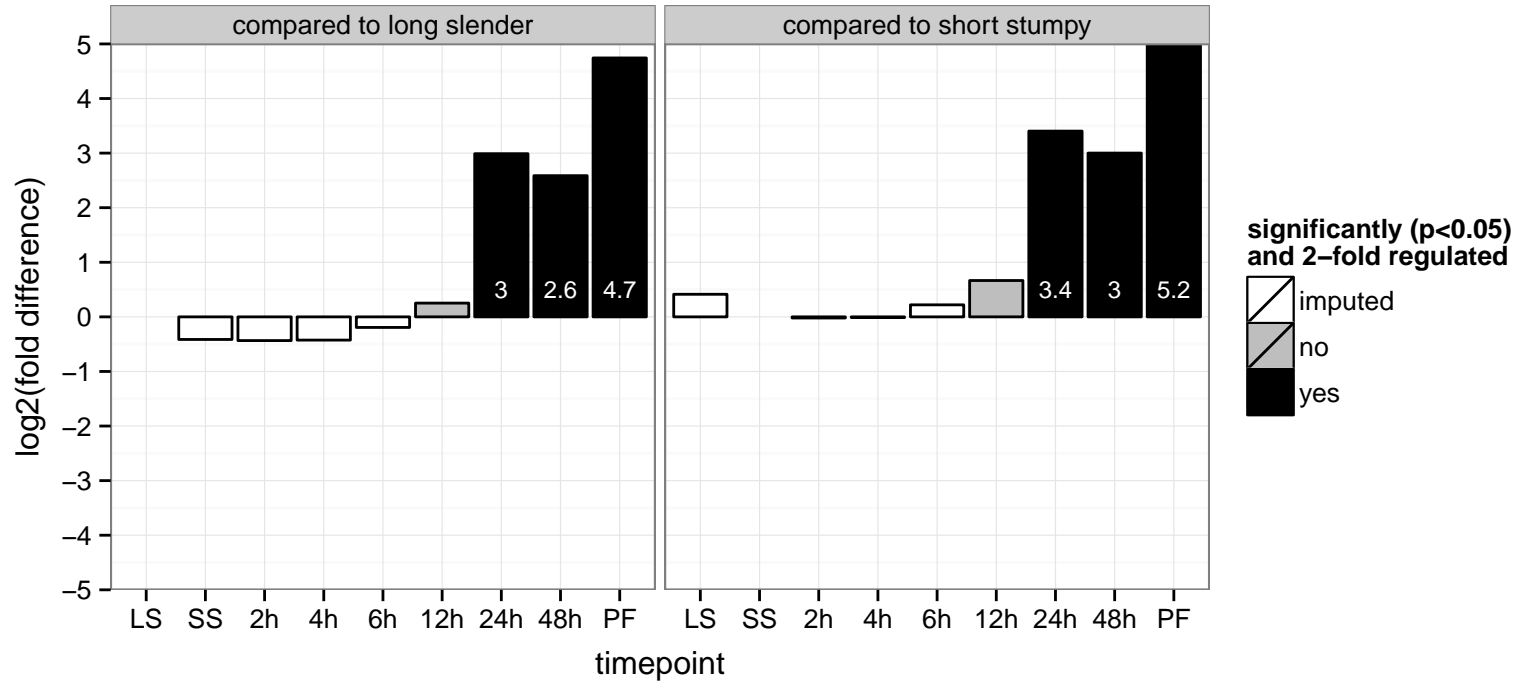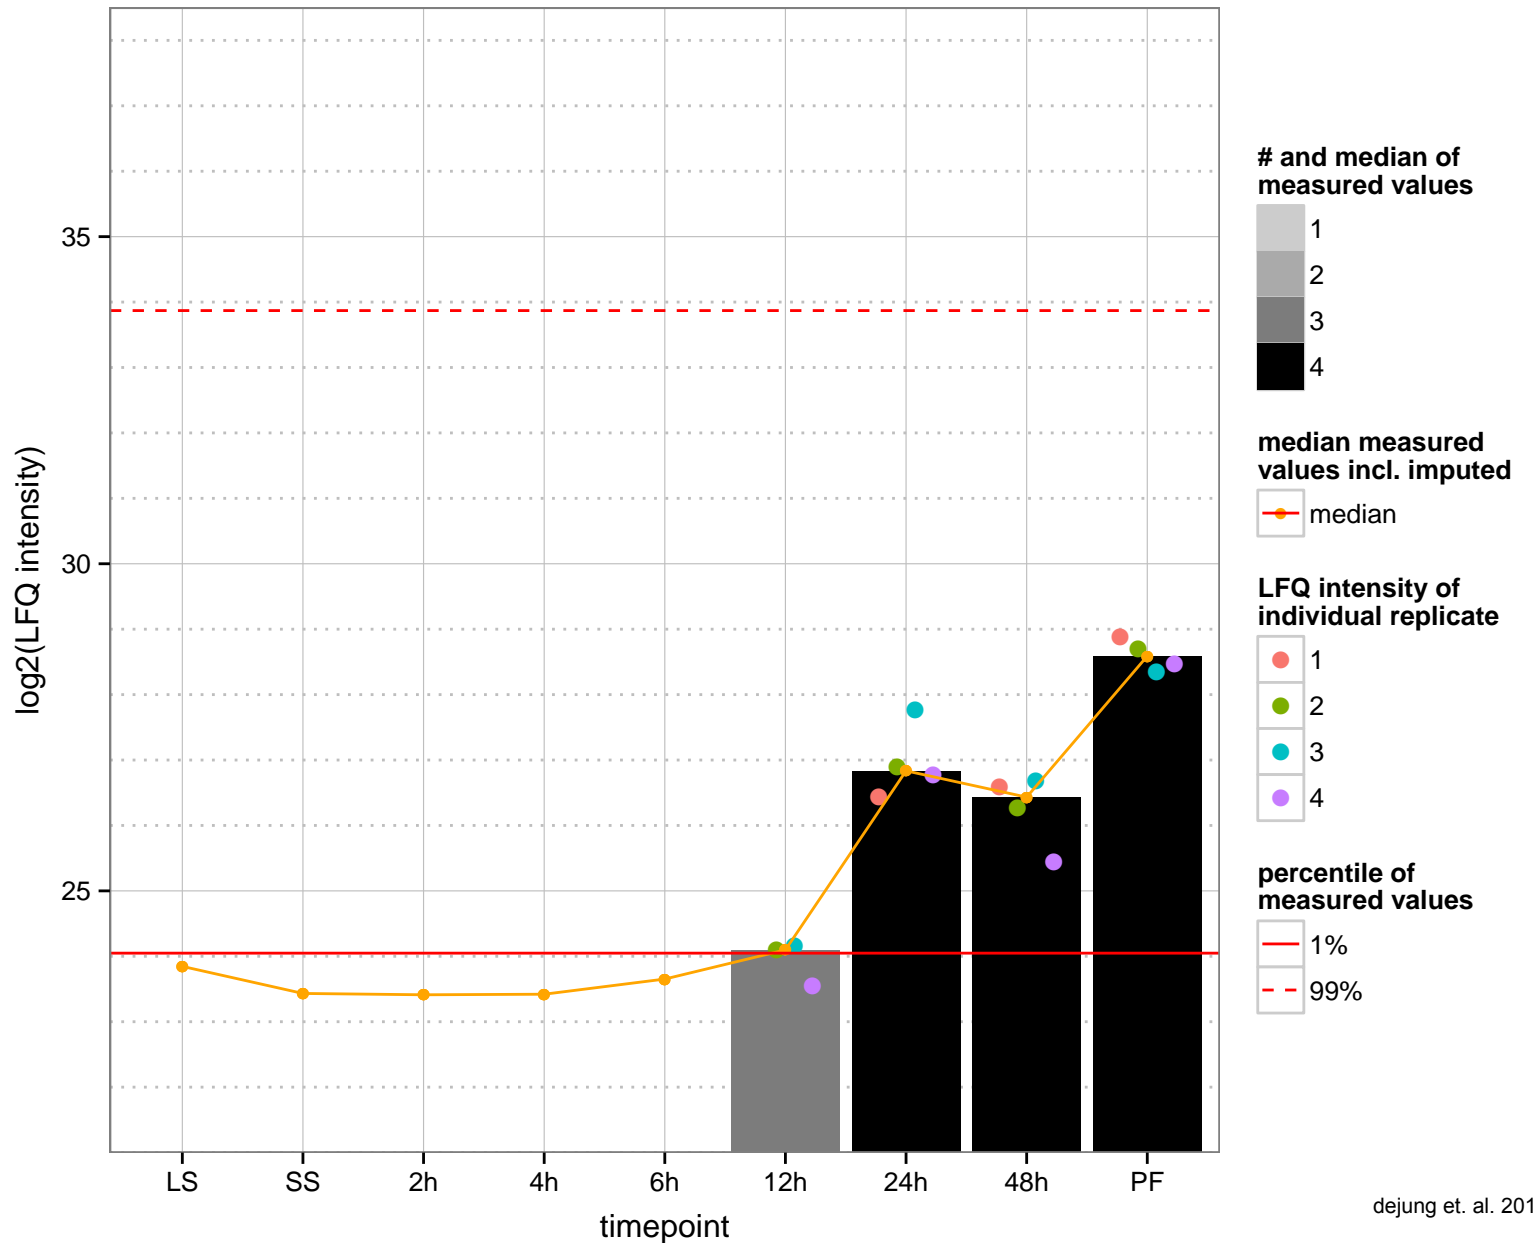



hypothetical protein, conserved  
 Tb927.7.730  
 AGOF: null  
 AGOC: null  
 AGOP: ciliary or flagellar motility  
 PGO: protein binding  
 PGOC: null  
 PGOP: null

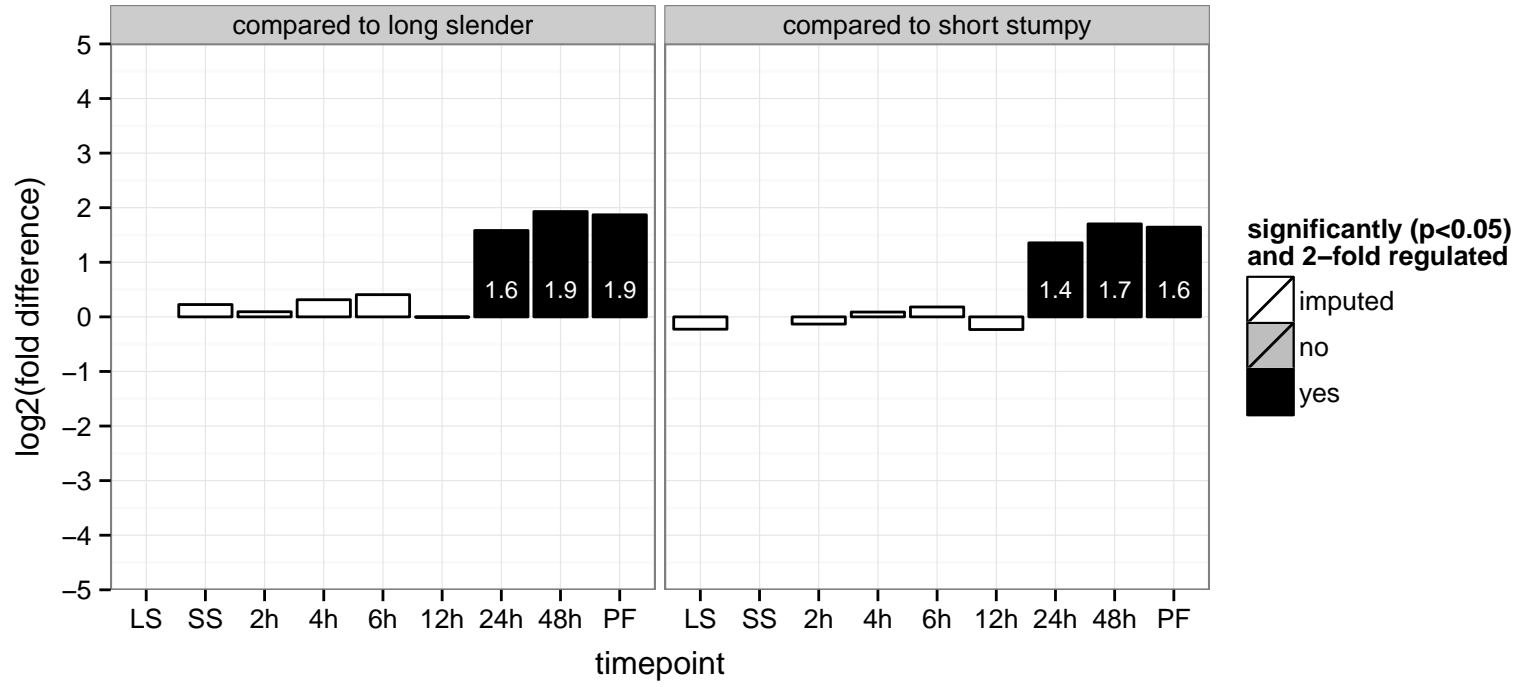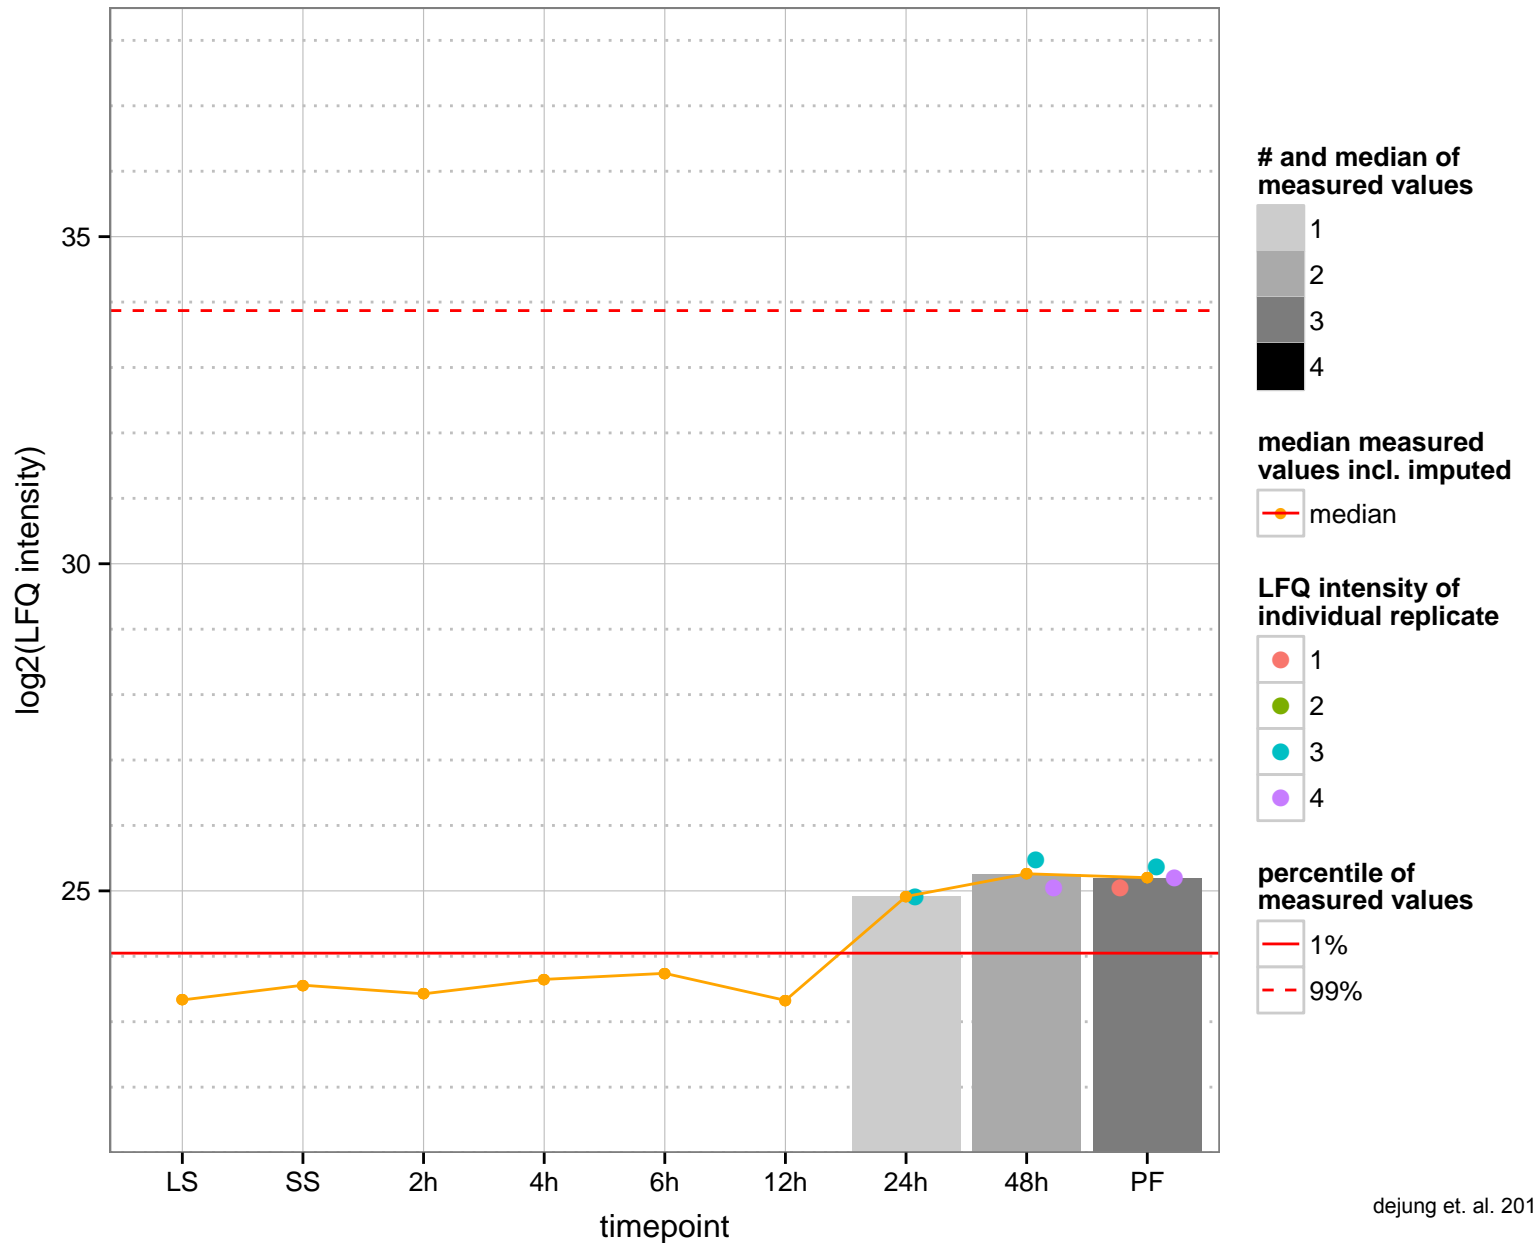

ATP synthase alpha chain, mitochondrial precursor, ATP synthase F1, alpha subunit  
 Tb927.7.7430;Tb927.7.7420

AGOF: hydrogen ion transporting ATP synthase activity, rotational mechanism, proton-transporting ATPase activity

AGOC: mitochondrial inner membrane, mitochondrion, proton-transporting ATP synthase complex, catalytic core F(1), proton

AGOP: ATP synthesis coupled proton transport

PGOF: ATP binding, hydrogen ion transporting ATP synthase activity, rotational mechanism, hydrolase activity, acting on acid

PGOC: proton-transporting ATP synthase complex, catalytic core F(1), proton-transporting two-sector ATPase complex, cata

PGOP: ATP hydrolysis coupled proton transport, ATP synthesis coupled proton transport

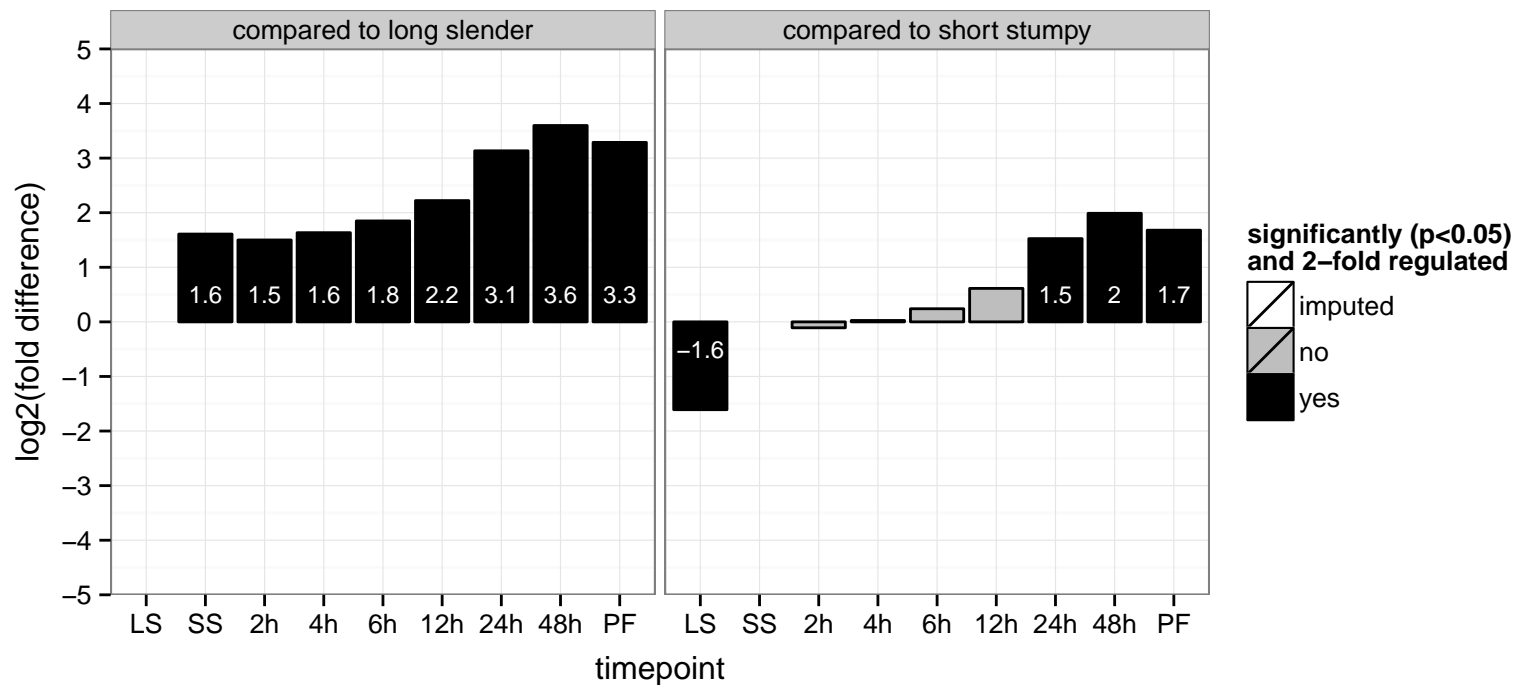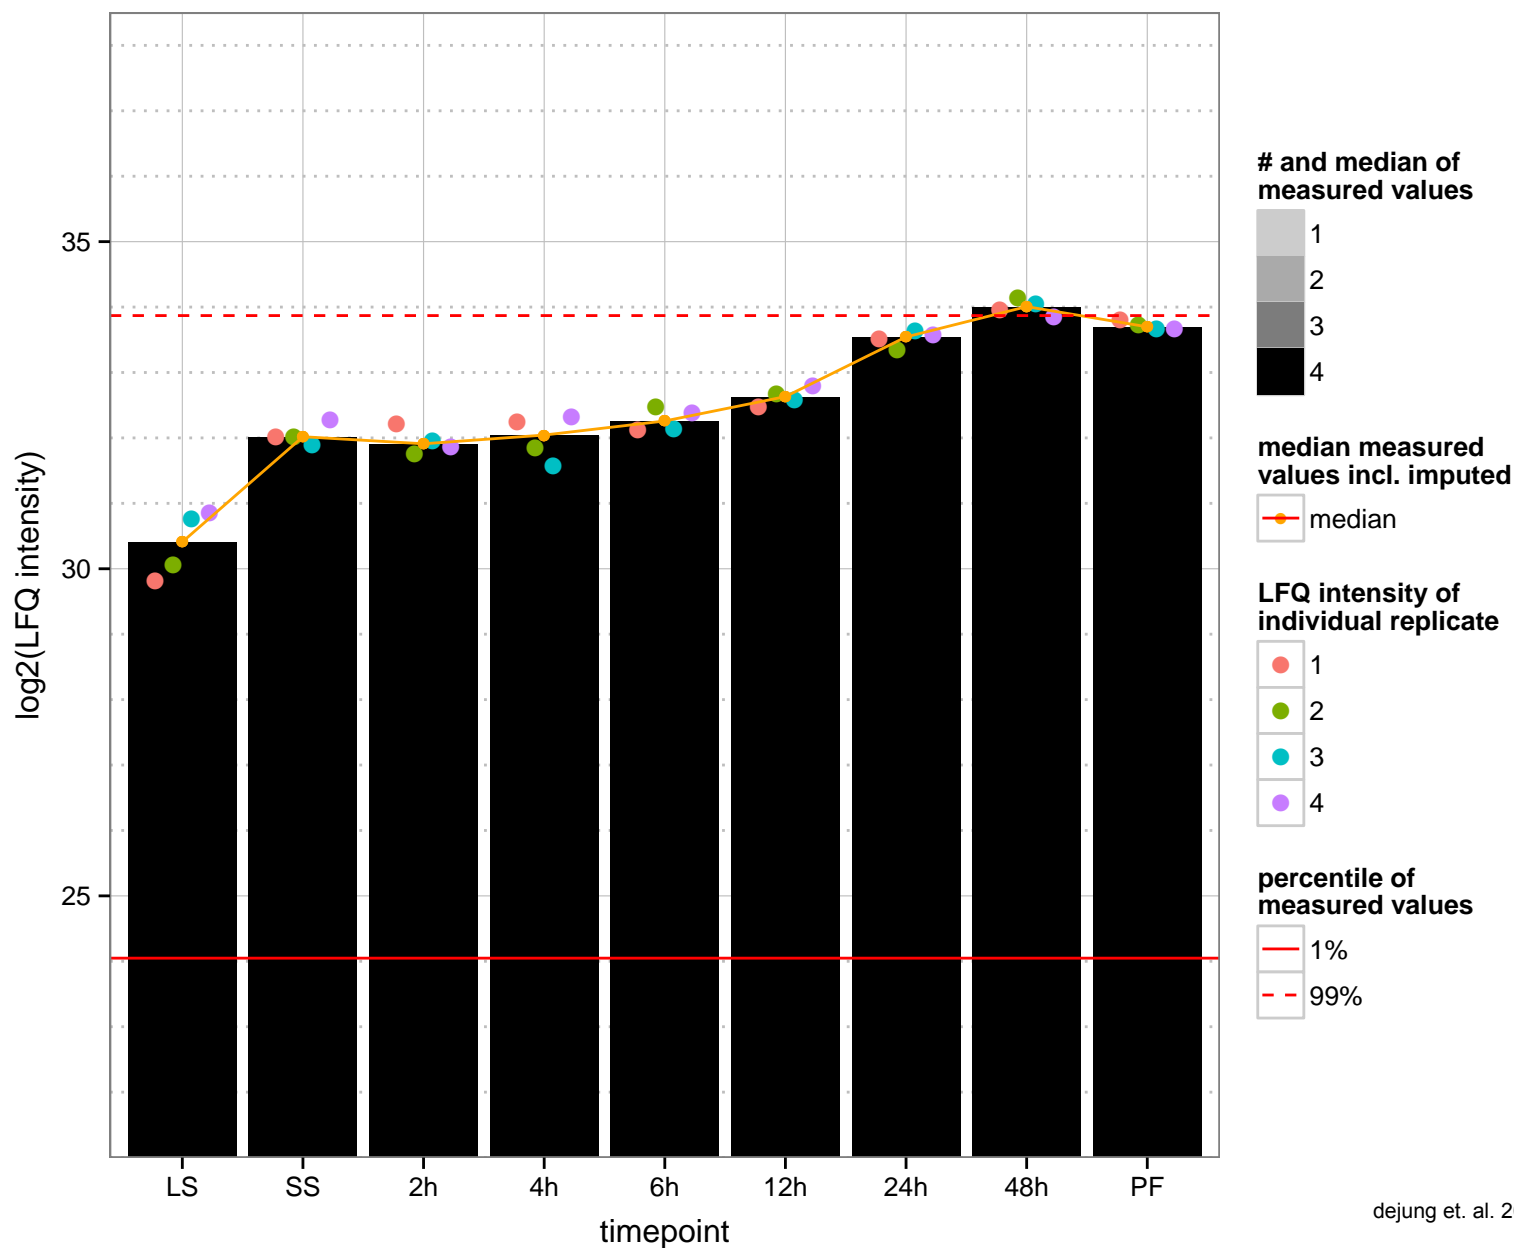

hypothetical protein, conserved  
 Tb927.7.7460  
 AGOF: null  
 AGOC: null  
 AGOP: null  
 PGO: null  
 PGO: null  
 PGO: null

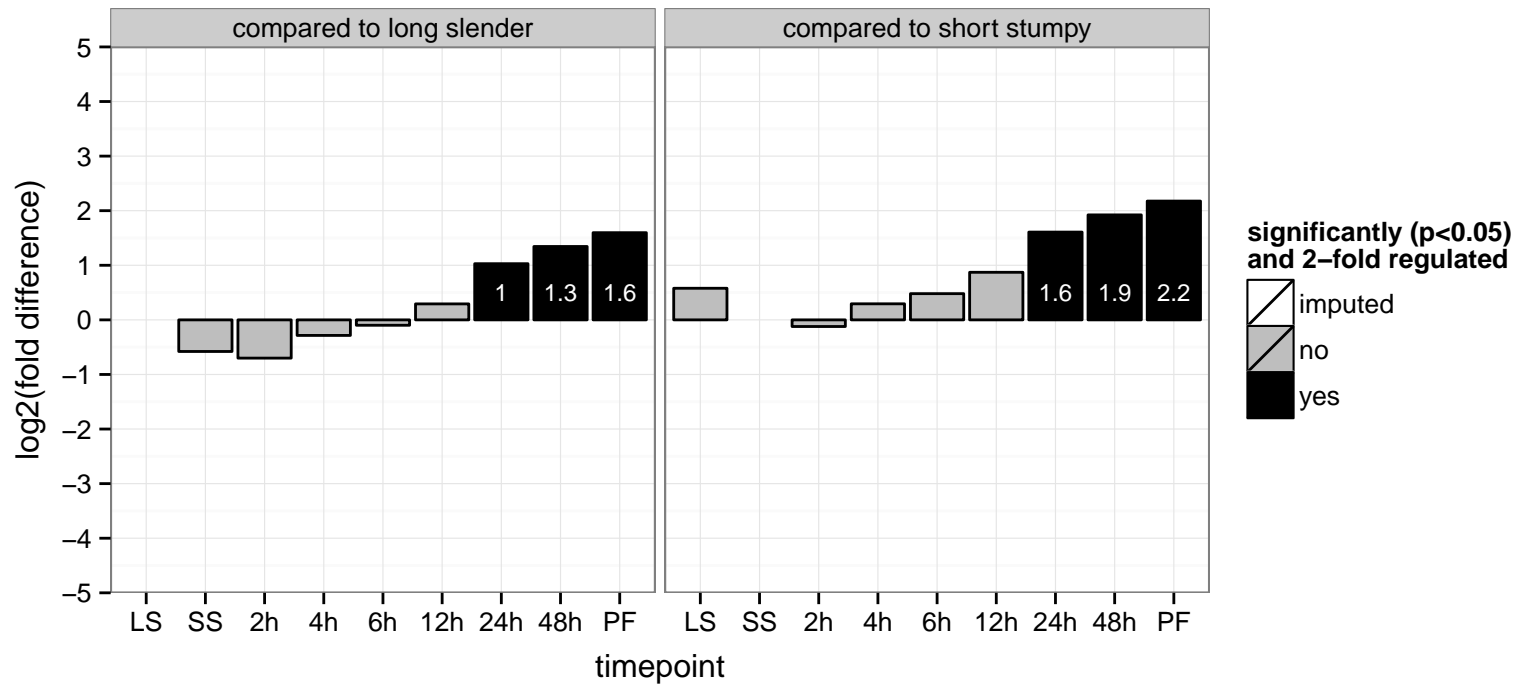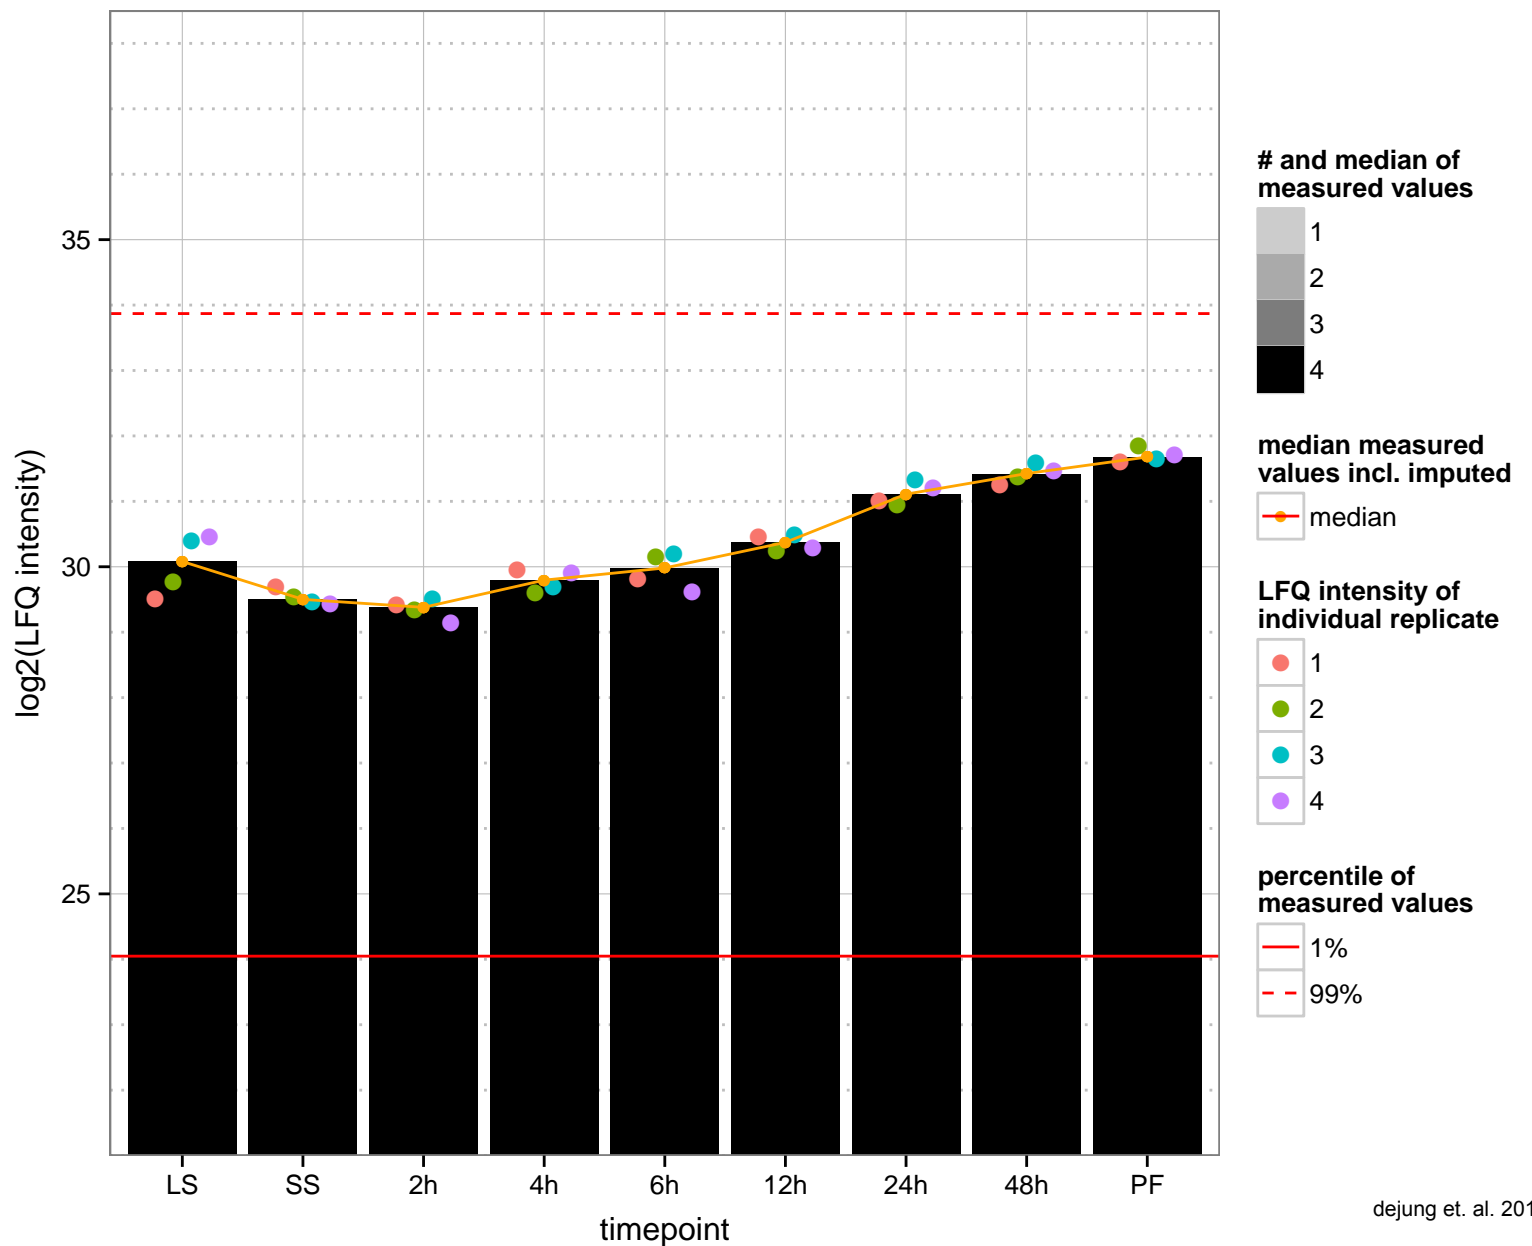

hypothetical protein, conserved  
 Tb927.7.840  
 AGOF: null  
 AGOC: mitochondrial inner membrane, mitochondrion  
 AGOP: null  
 PGO: null  
 PGO: null  
 PGO: null

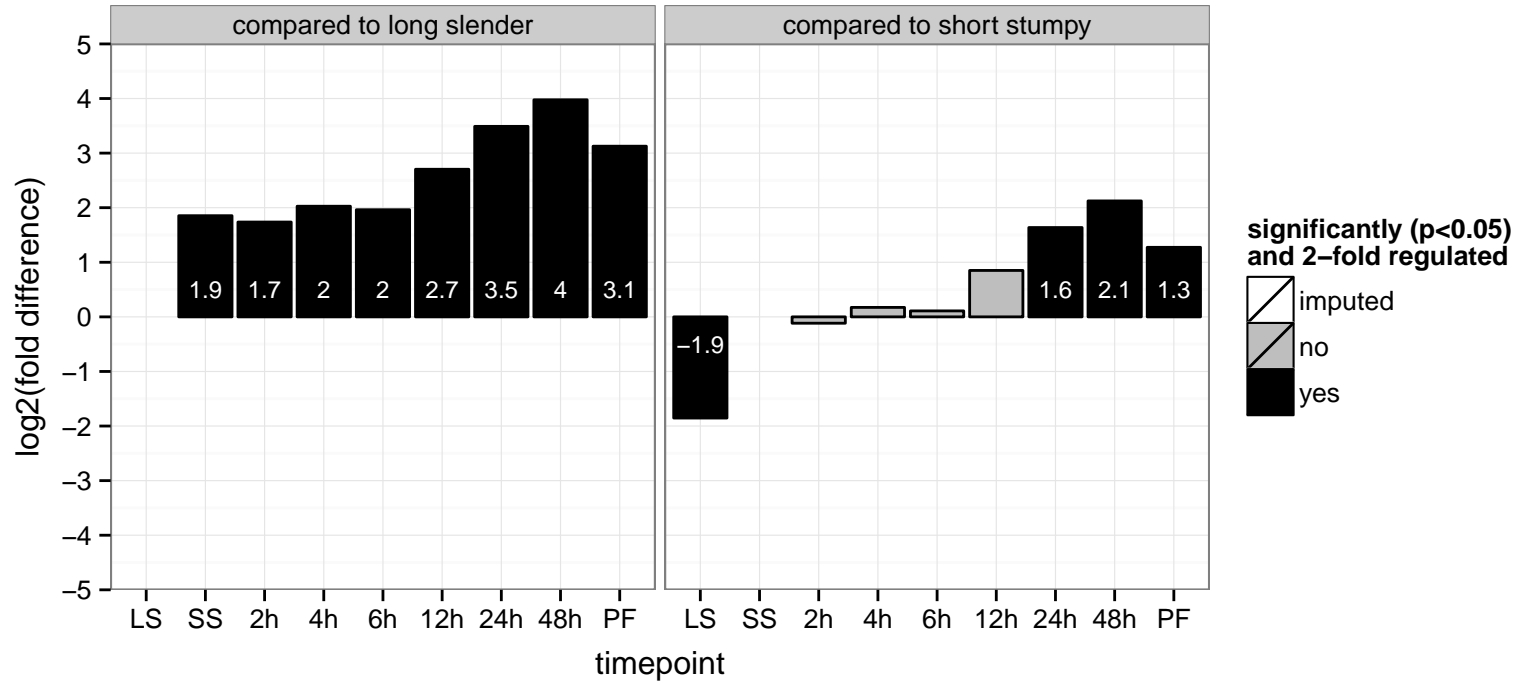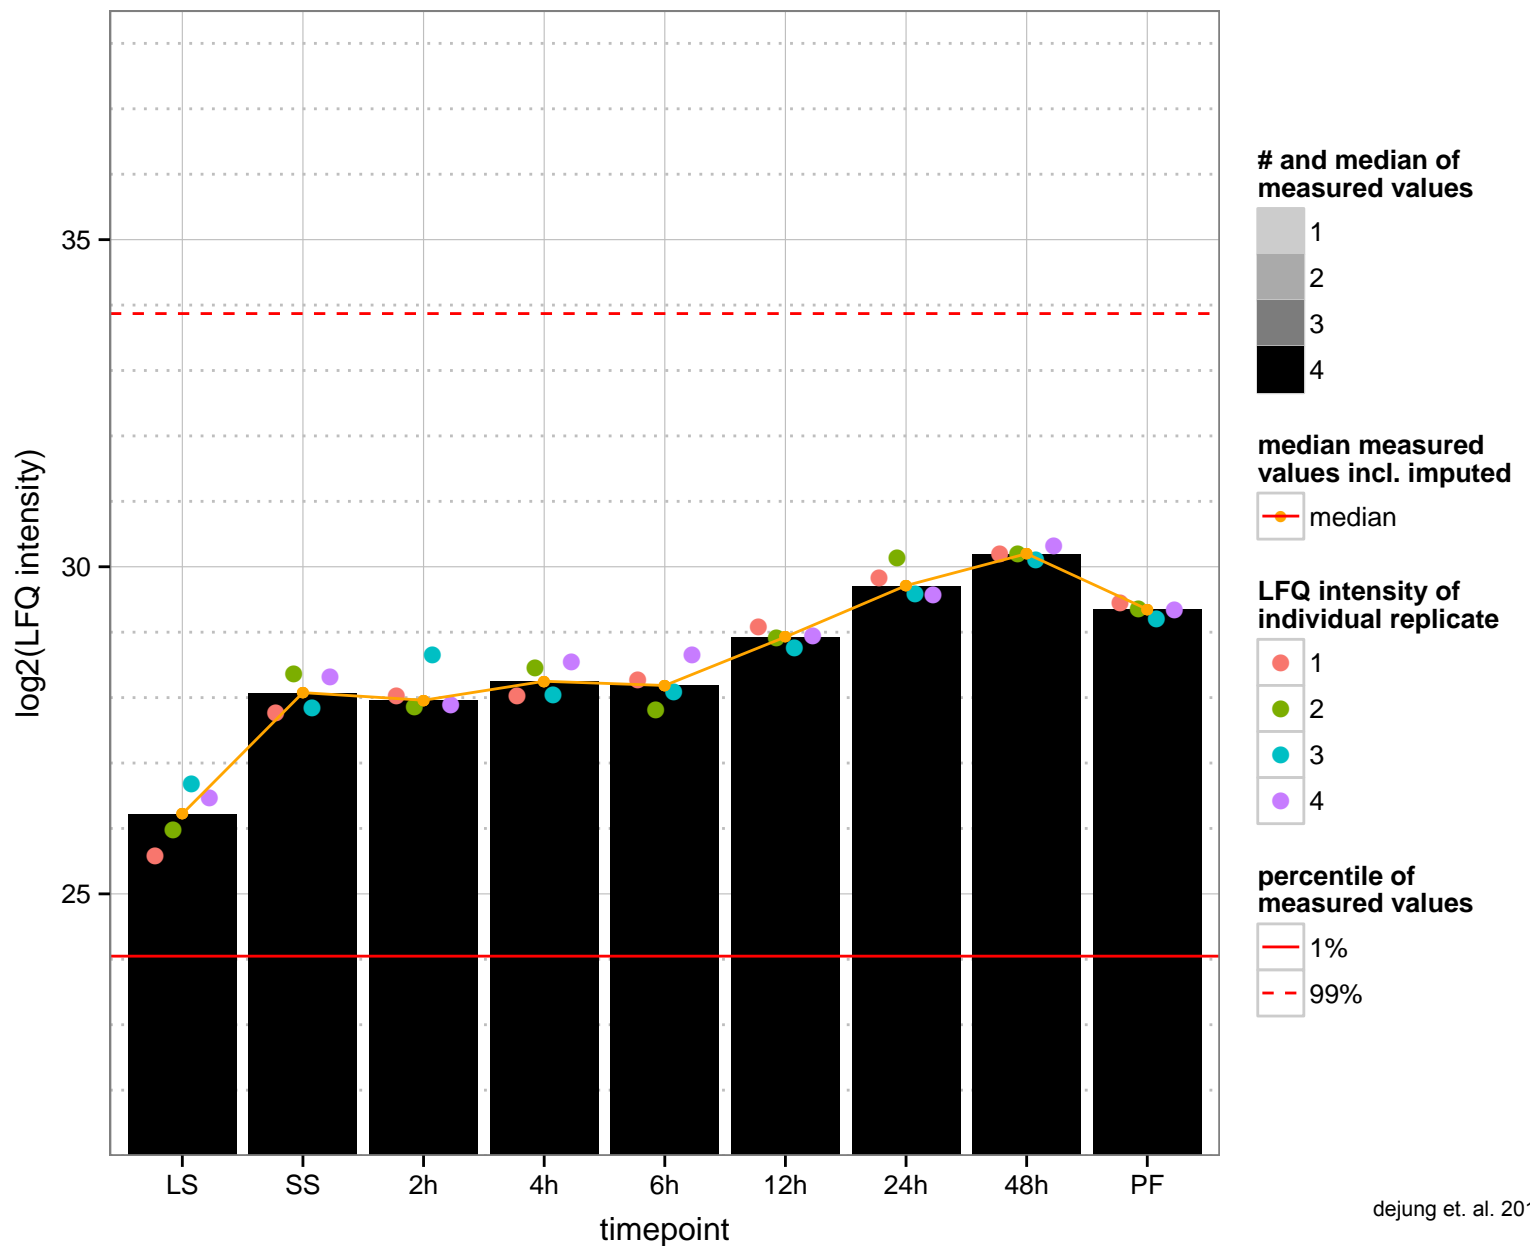

hypothetical protein, conserved  
 Tb927.7.900  
 AGOF: null  
 AGOC: null  
 AGOP: null  
 PGO: null  
 PGOC: null  
 PGOP: null

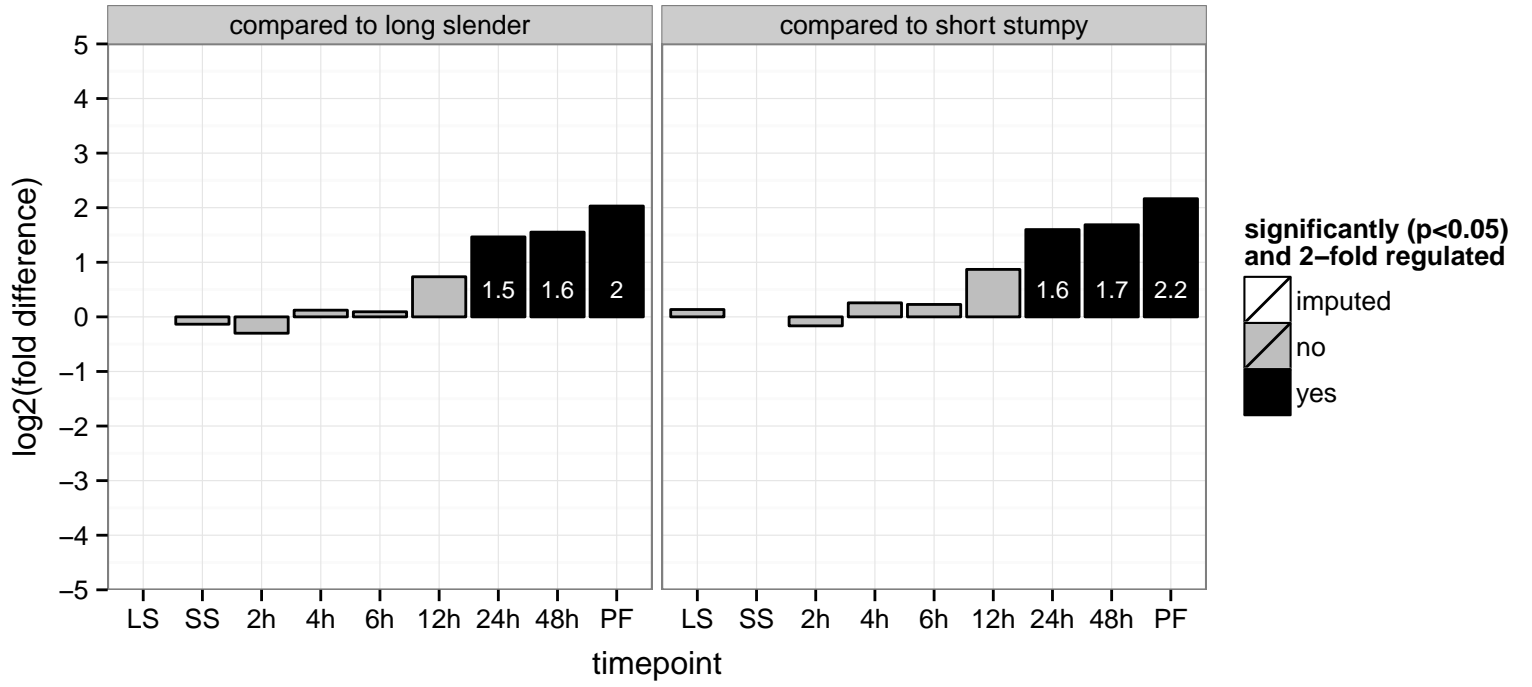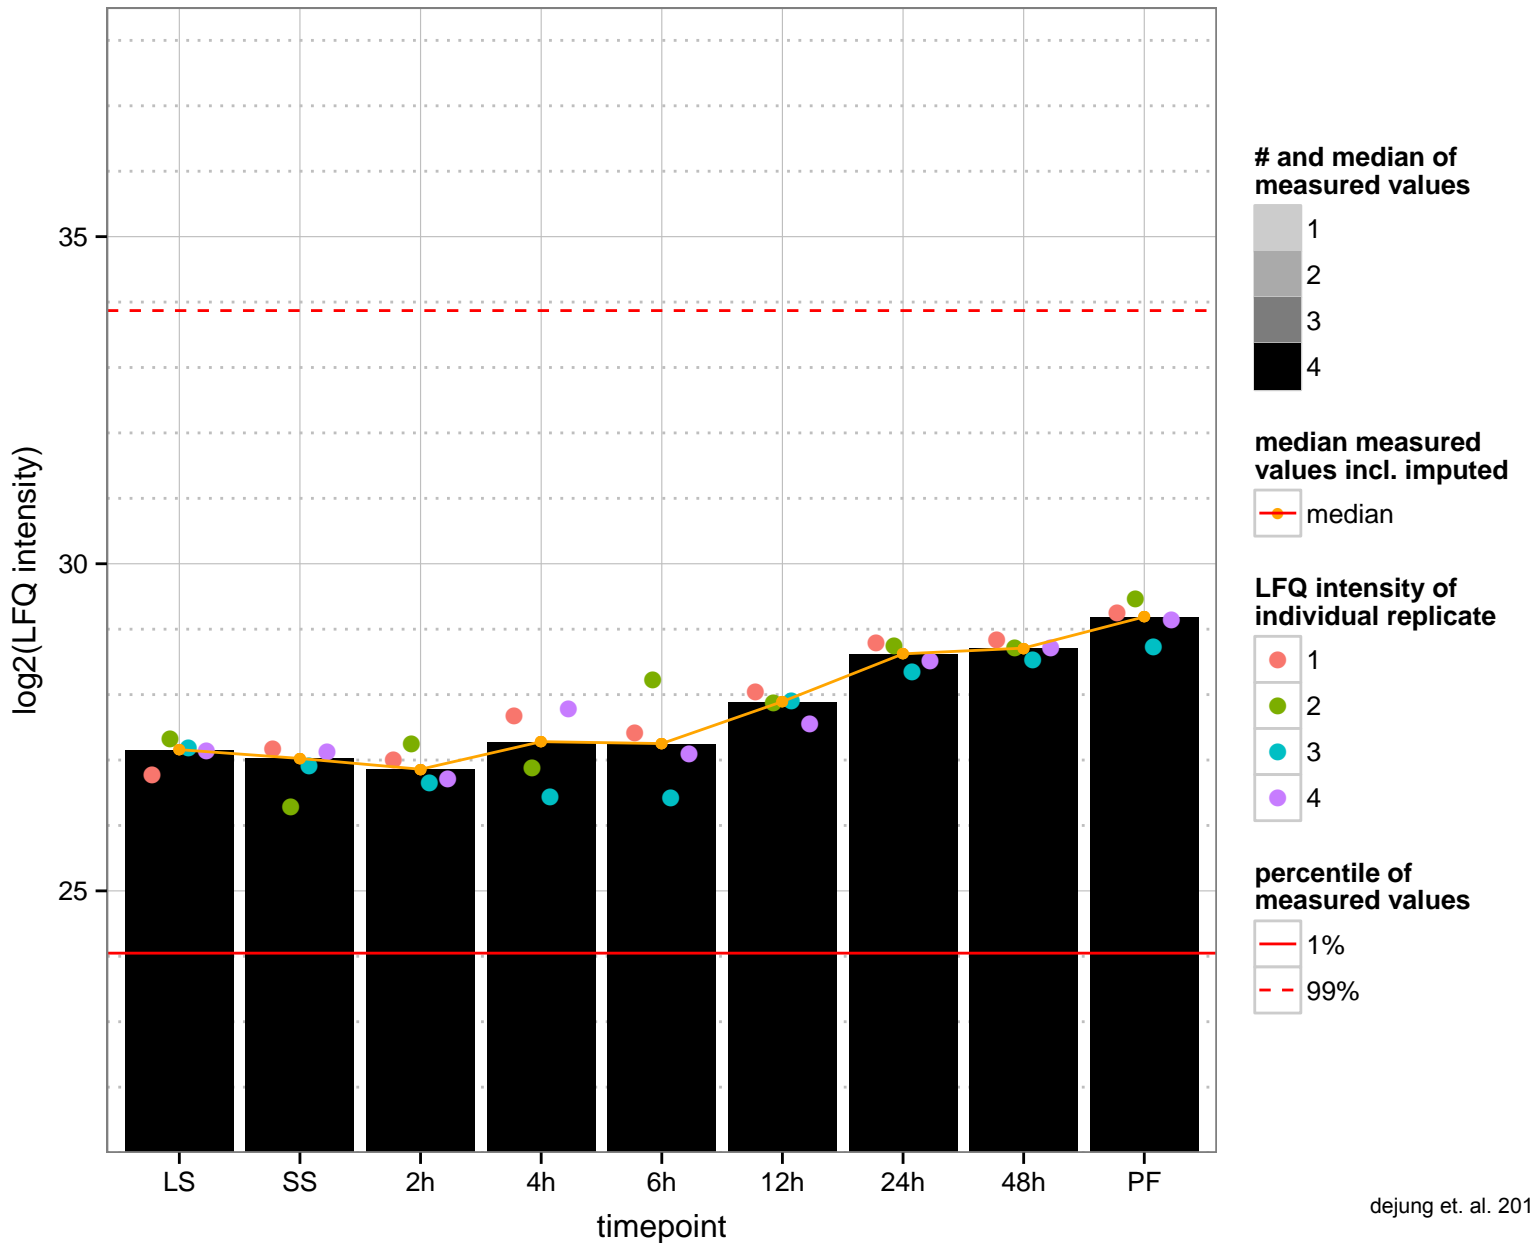

hypothetical protein, conserved  
 Tb927.8.1500  
 AGOF: null  
 AGOC: null  
 AGOP: null  
 PGO: null  
 PGOC: null  
 PGOP: null

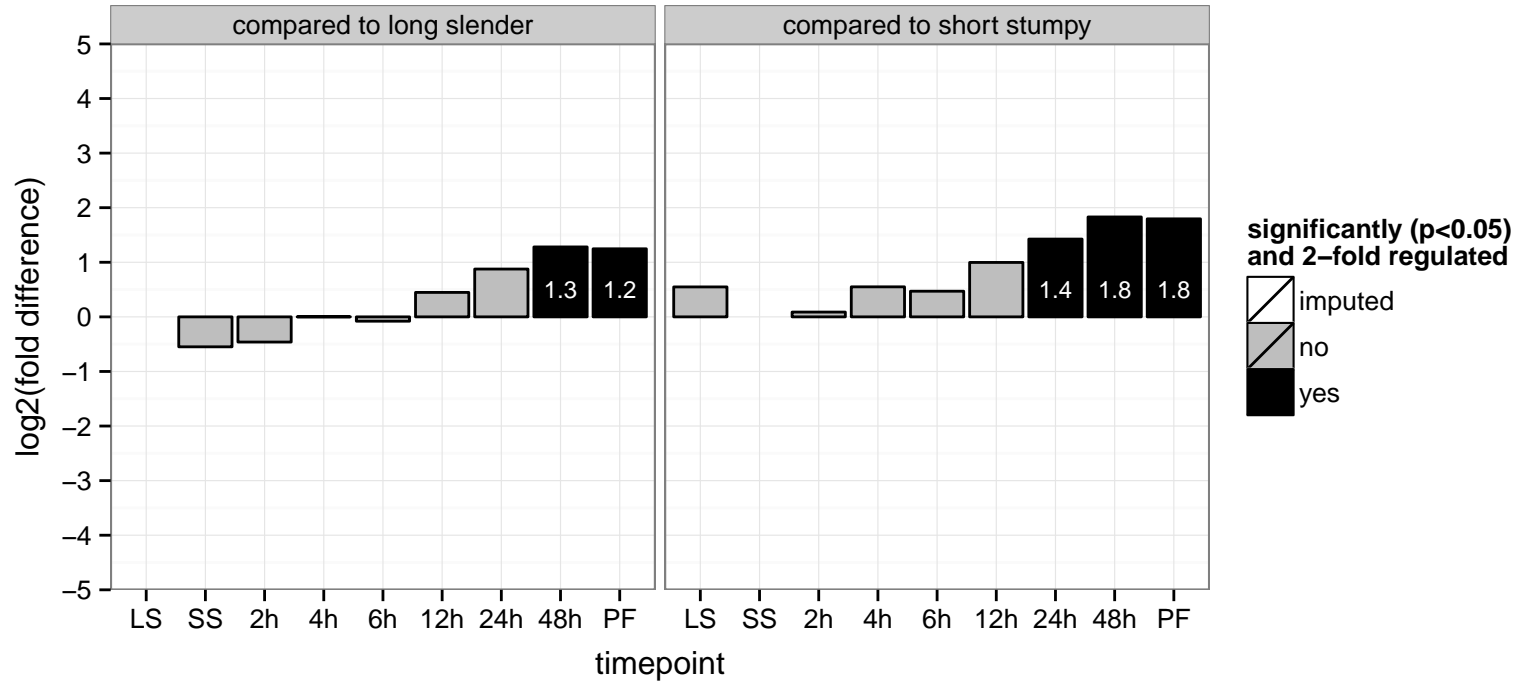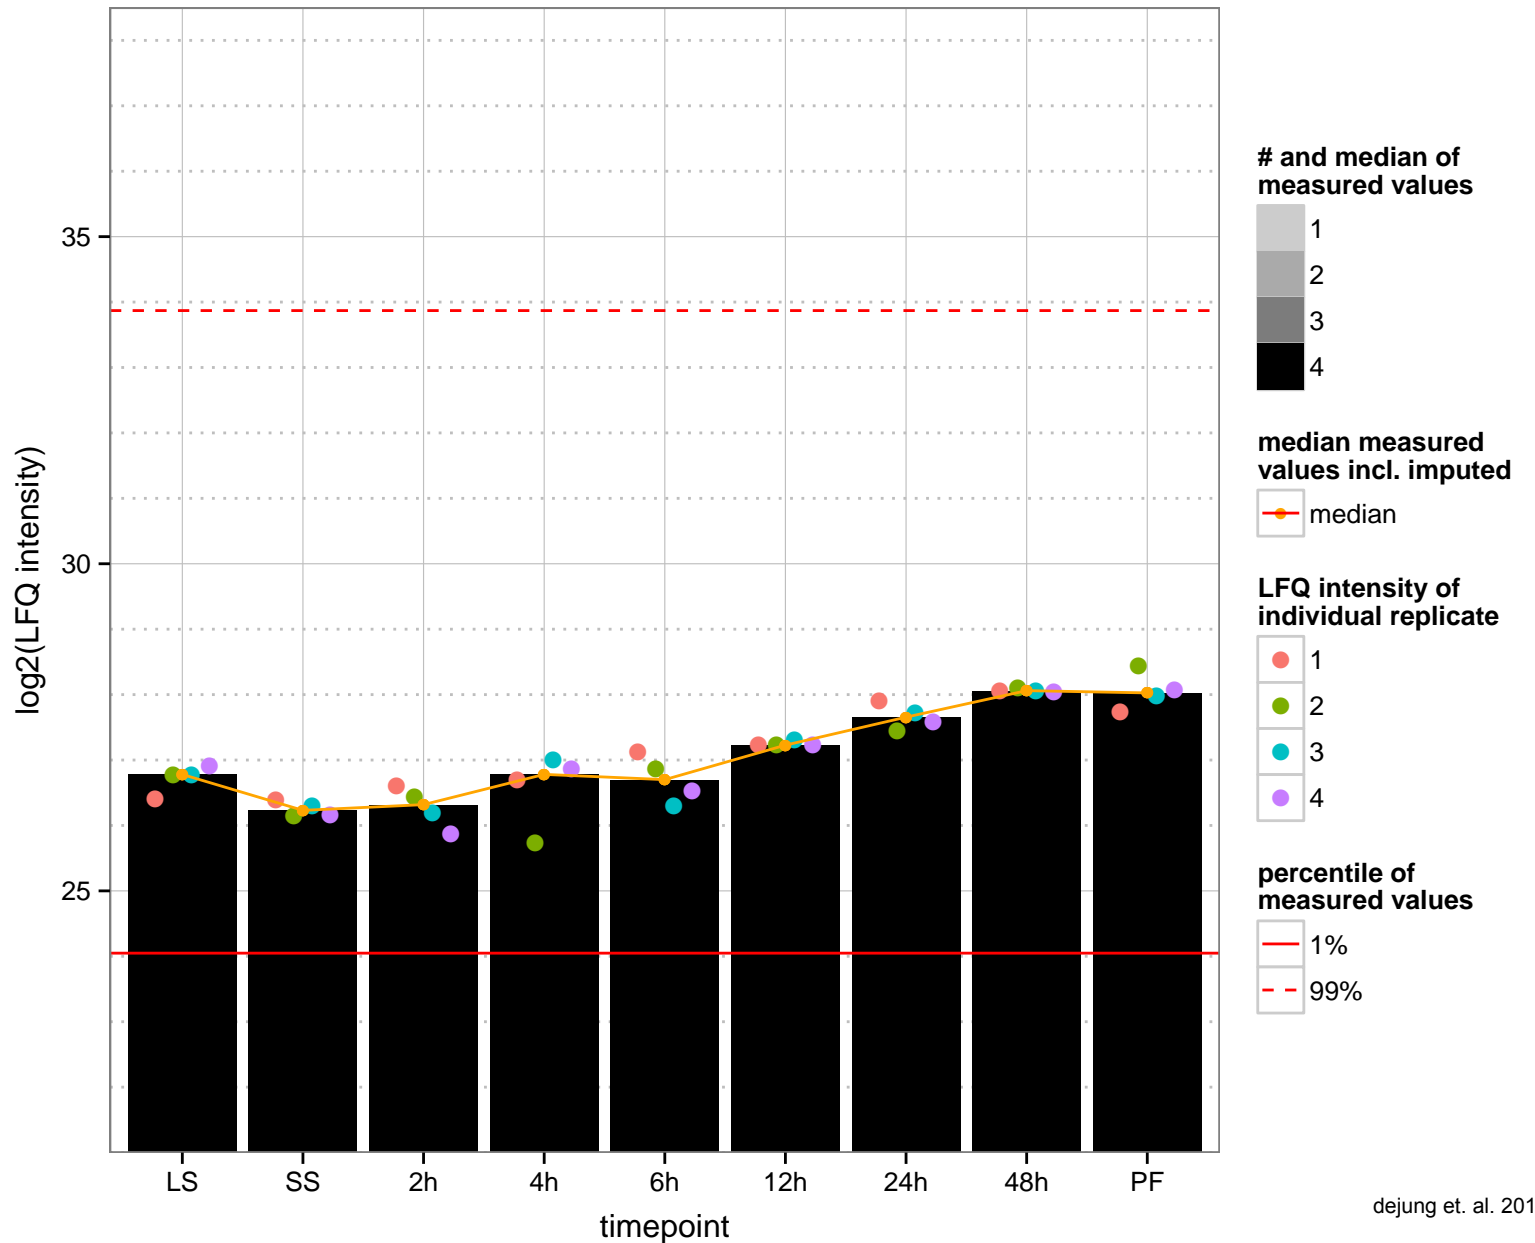

hypothetical protein, conserved  
 Tb927.8.1790  
 AGOF: null  
 AGOC: null  
 AGOP: null  
 PGO: null  
 PGOC: null  
 PGOP: null

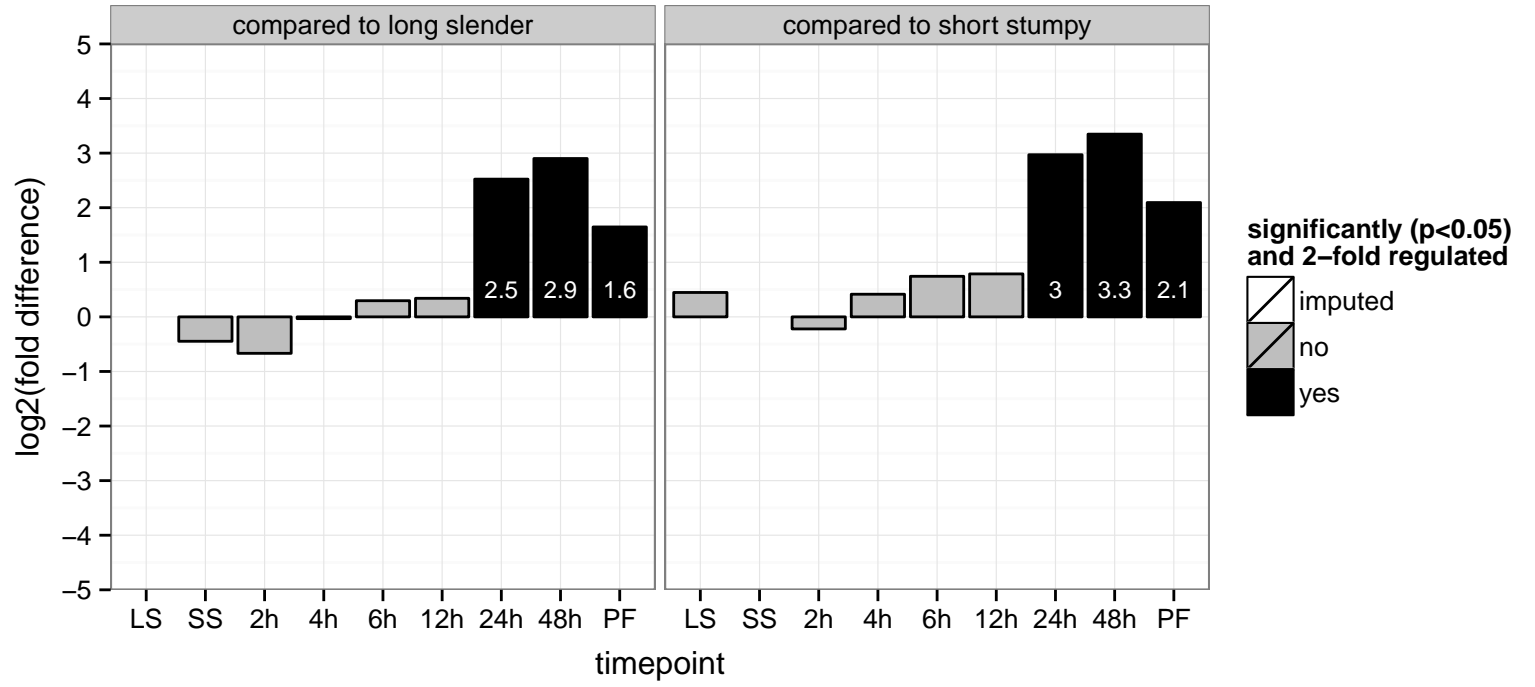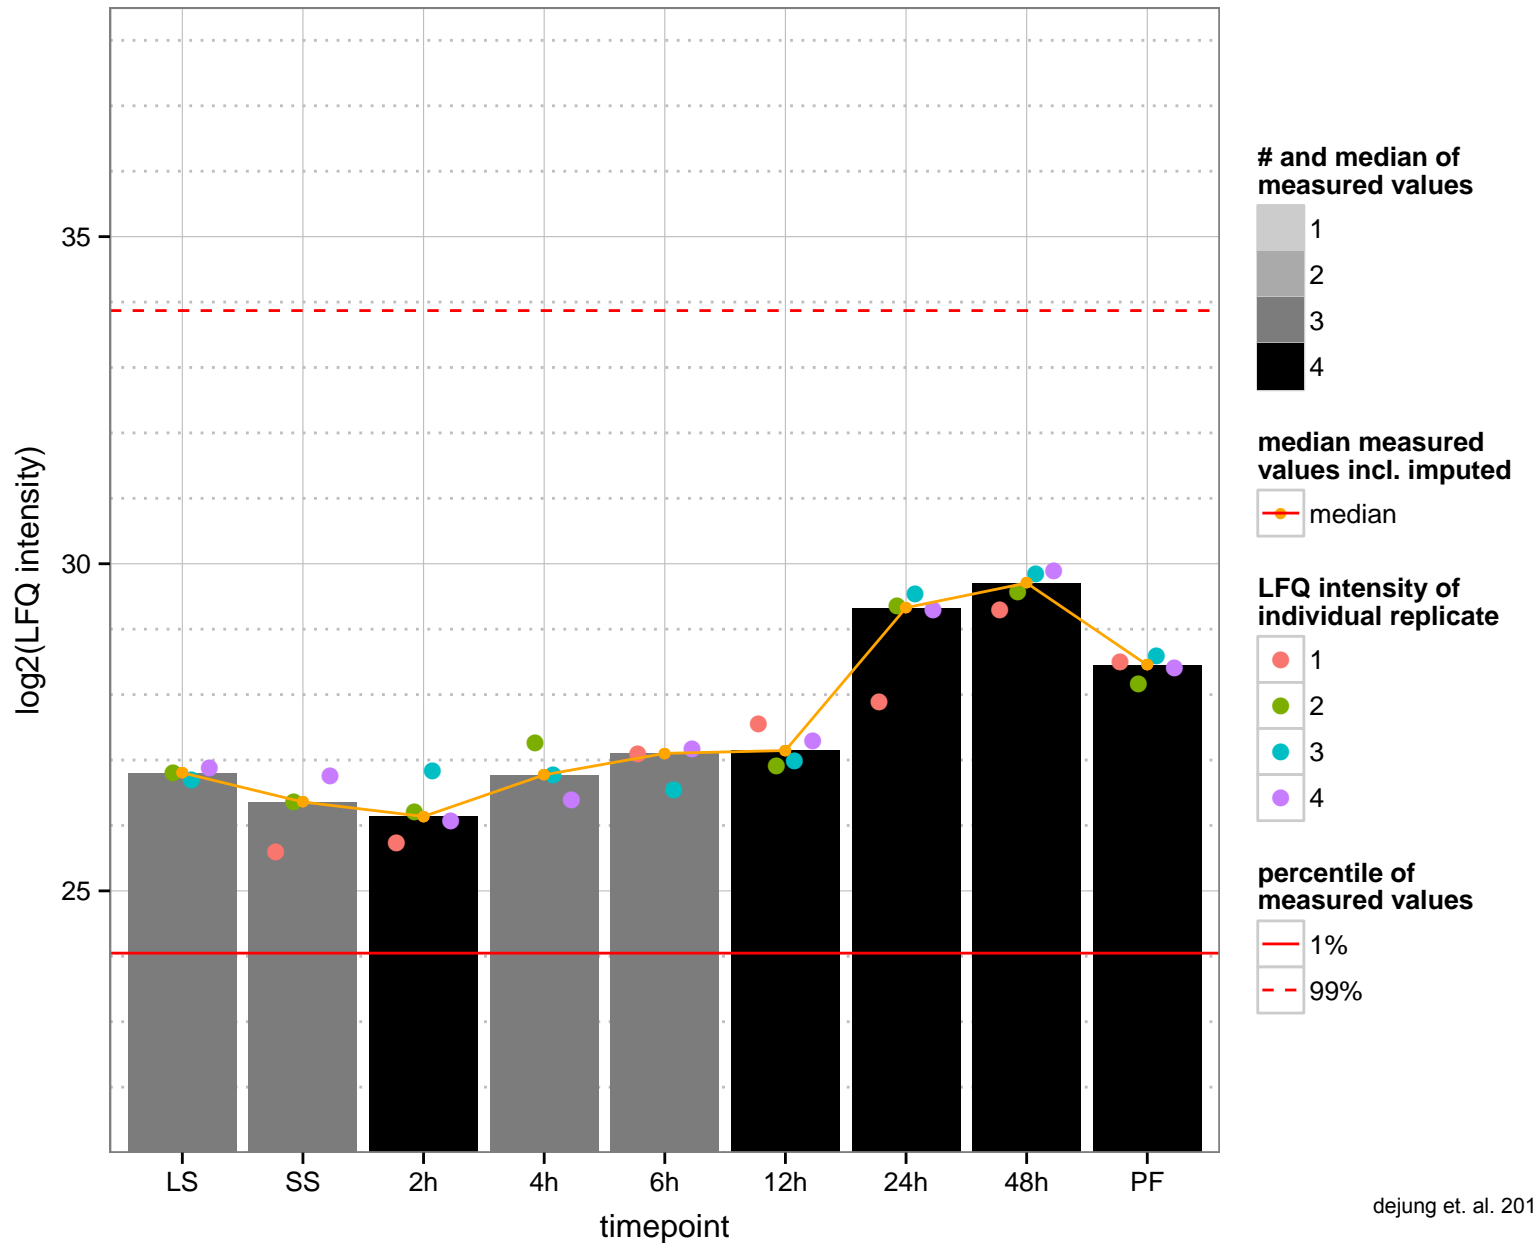

hypothetical protein, conserved  
 Tb927.8.2030  
 AGOF: null  
 AGOC: null  
 AGOP: null  
 PGO: null  
 PGO: null  
 PGO: null

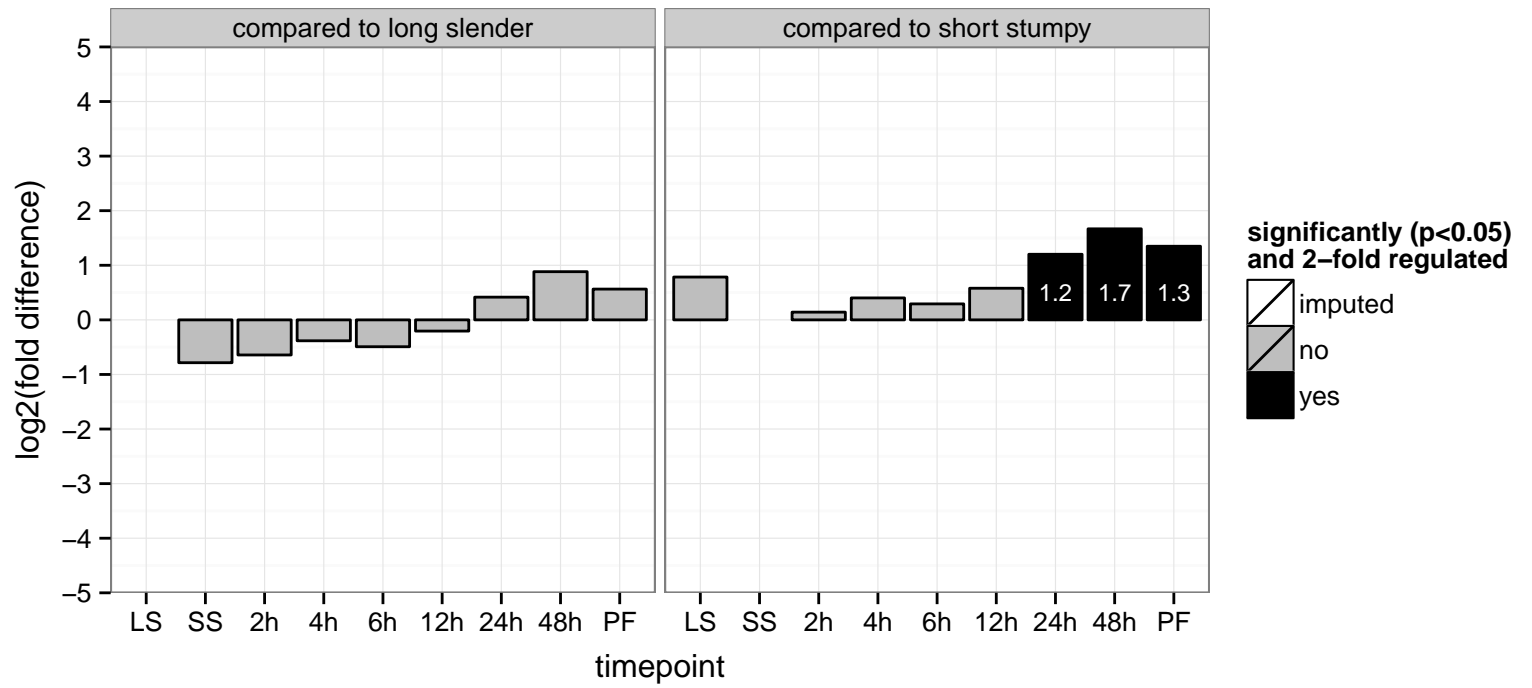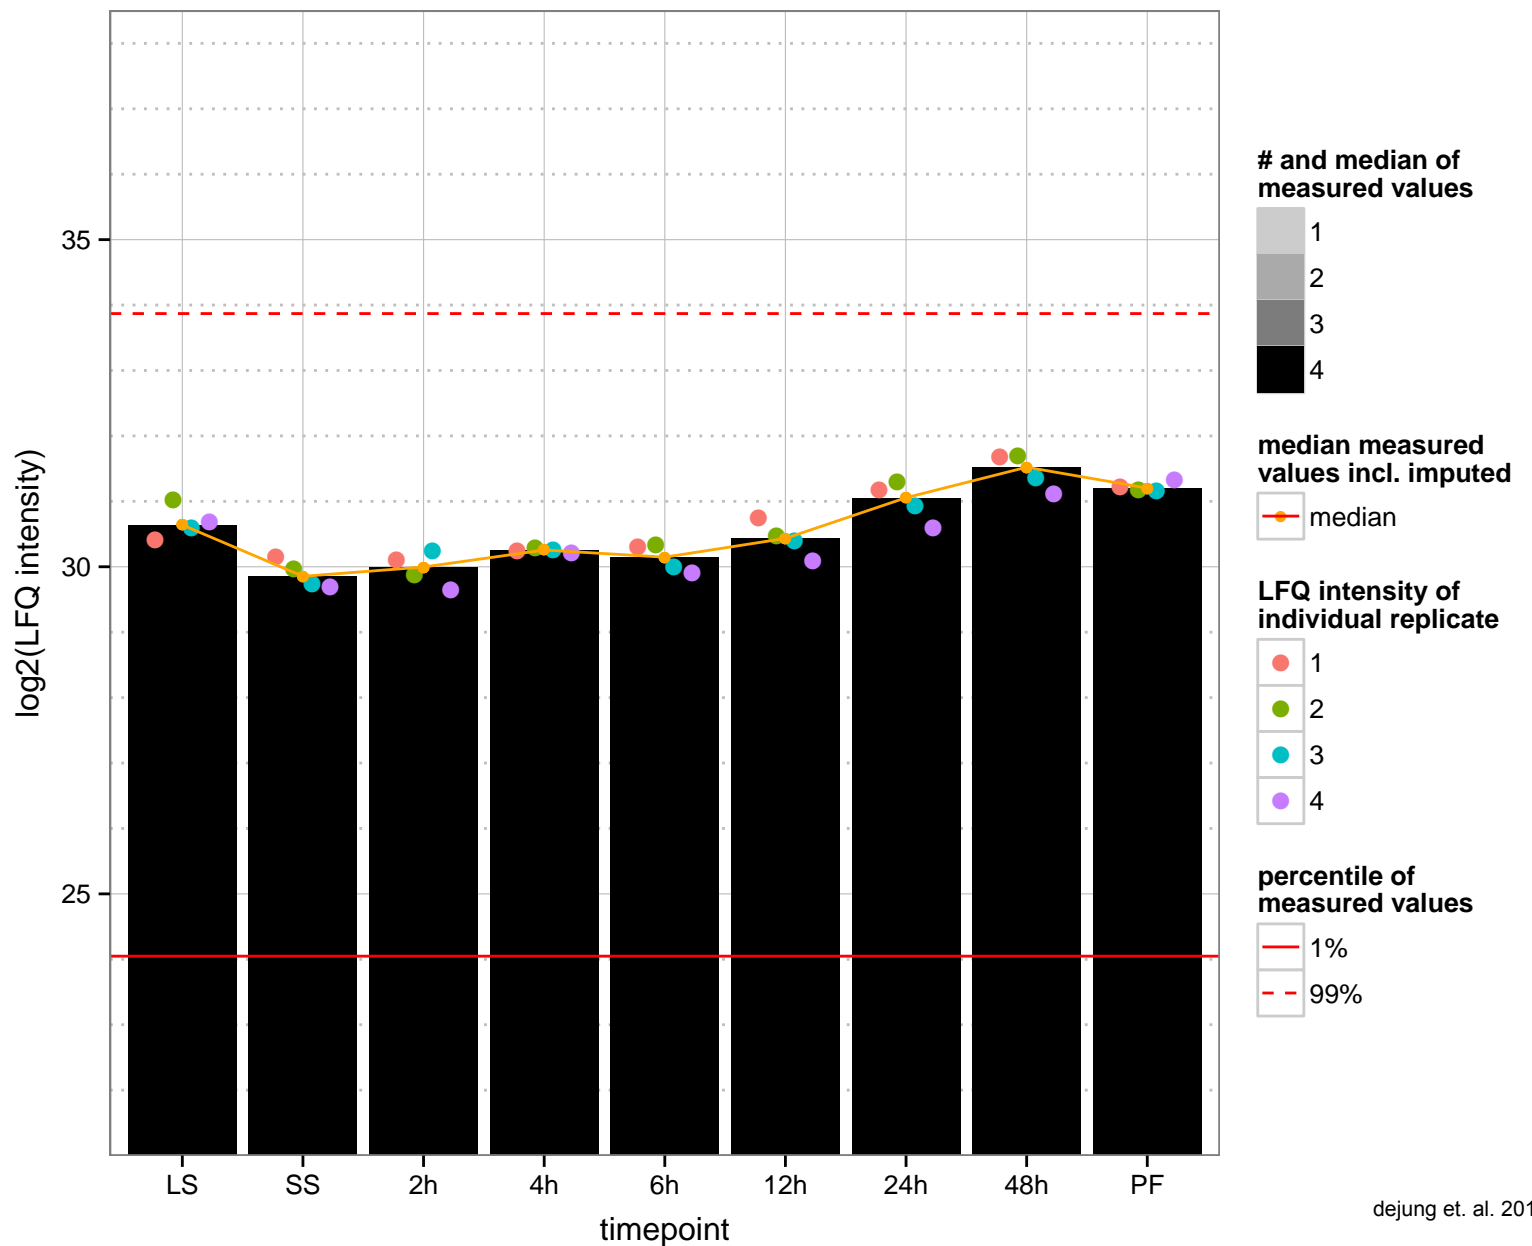



kinesin, putative  
 Tb927.8.2630  
 AGOF: ATP binding, microtubule motor activity, motor activity  
 AGOC: kinesin complex, microtubule associated complex  
 AGOP: microtubule-based movement  
 PGOF: ATP binding, microtubule motor activity  
 PGO: null  
 PGOP: microtubule-based movement

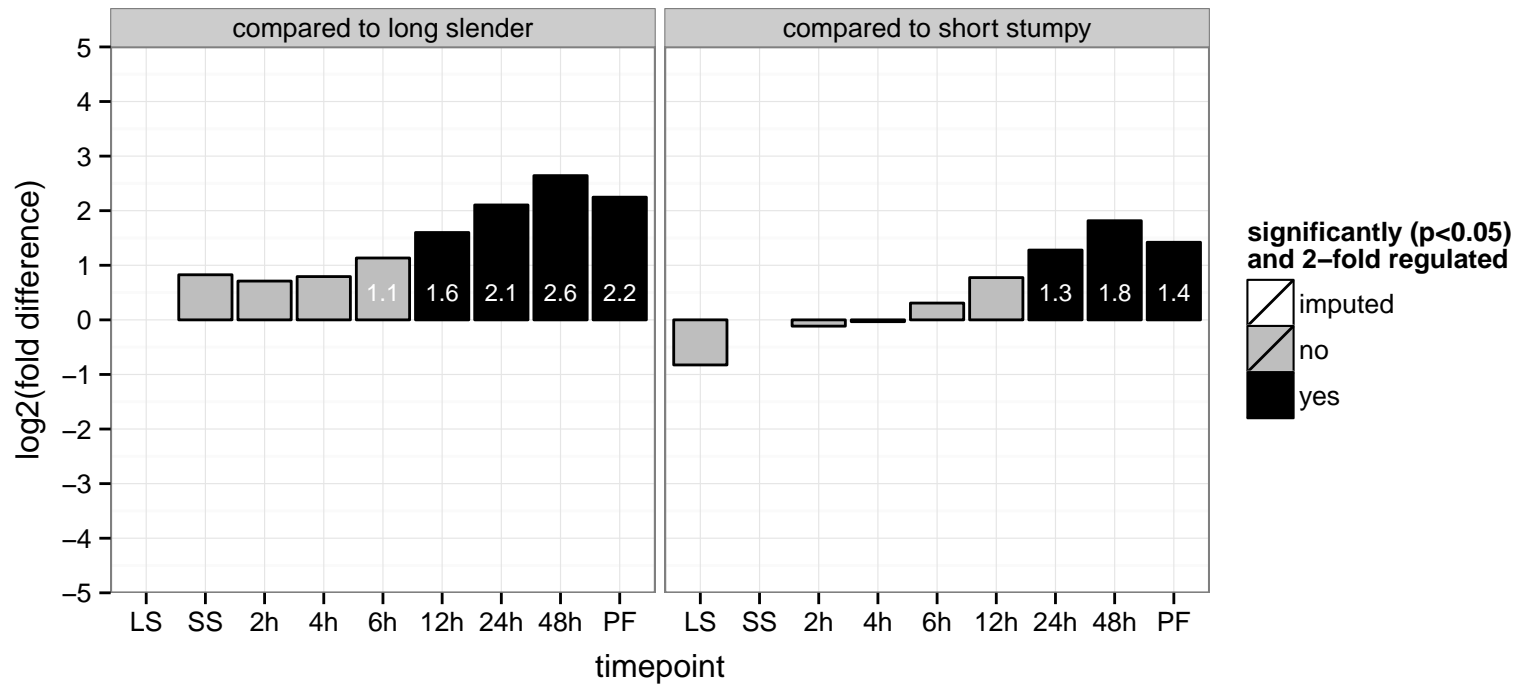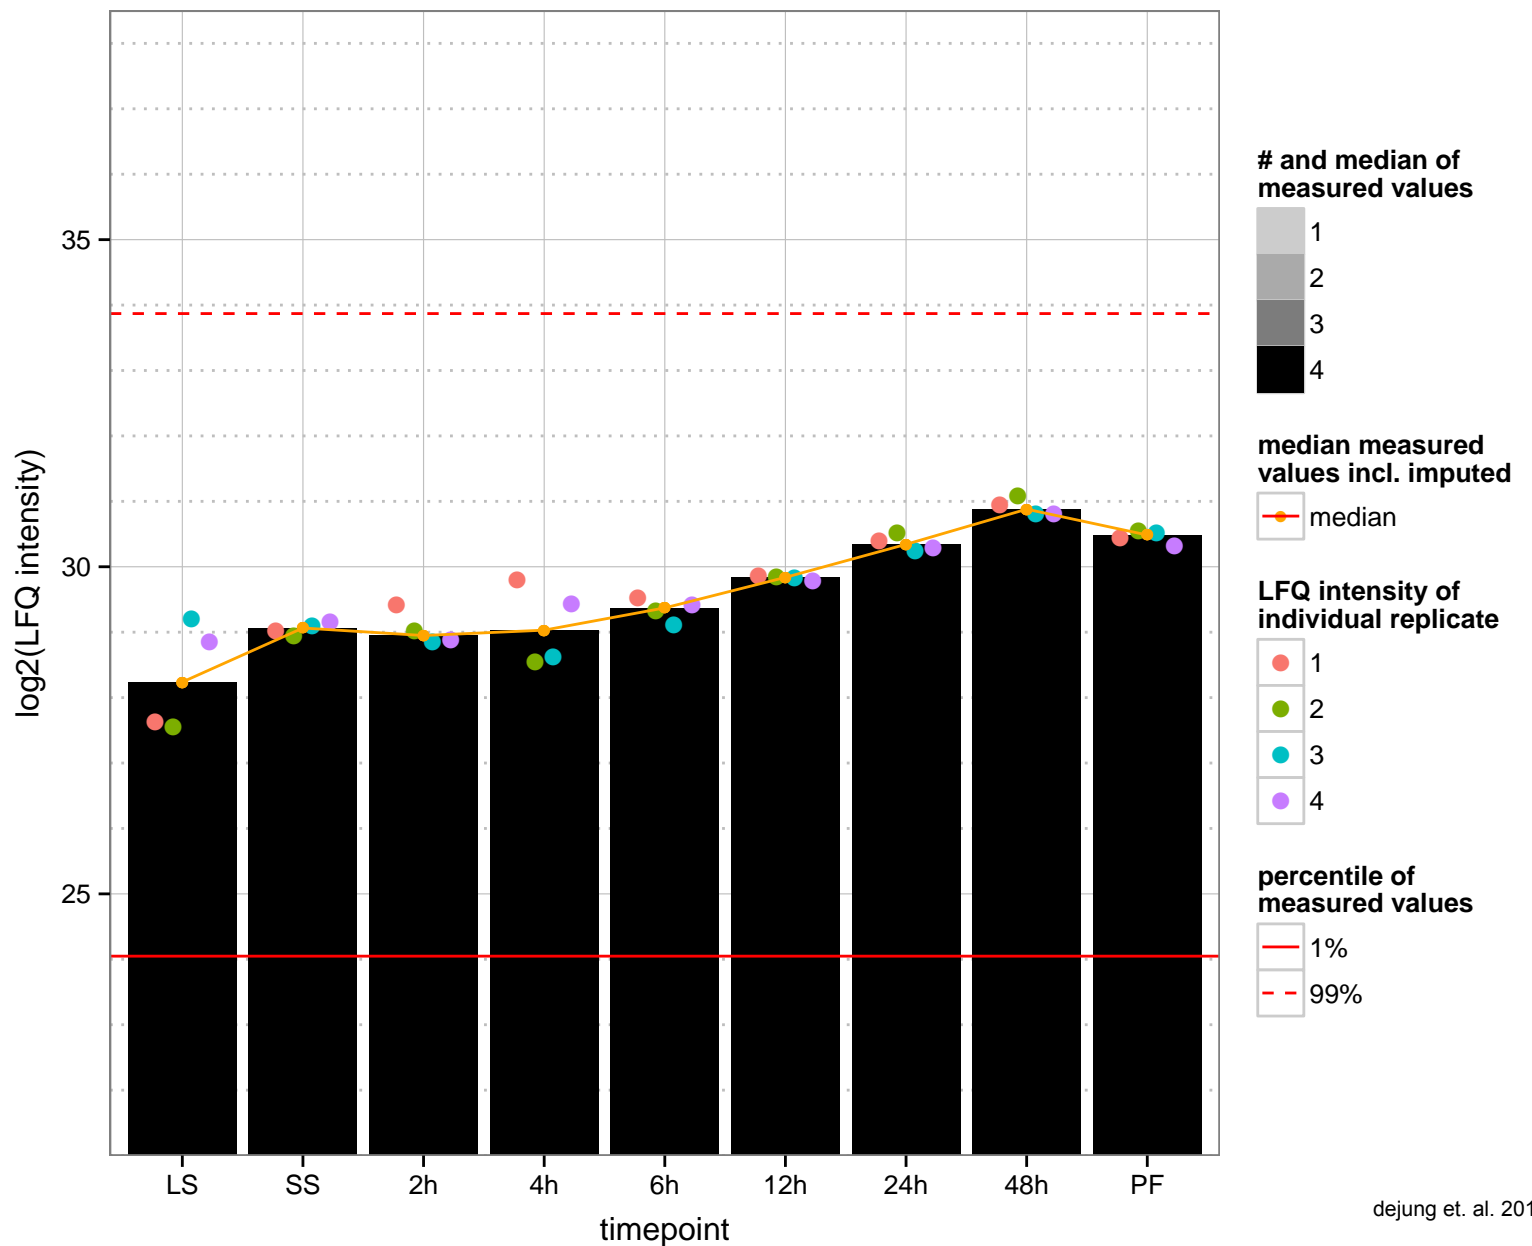

DNA repair and recombination helicase protein PIF5 (PIF5)

Tb927.8.3560

AGOF: 5'-3' DNA helicase activity, nucleoside-triphosphatase activity, nucleotide binding

AGOC: mitochondrion

AGOP: DNA replication, Okazaki fragment processing, DNA replication, removal of RNA primer

PGOF: nucleoside-triphosphatase activity, nucleotide binding

PGOC: null

PGOP: null

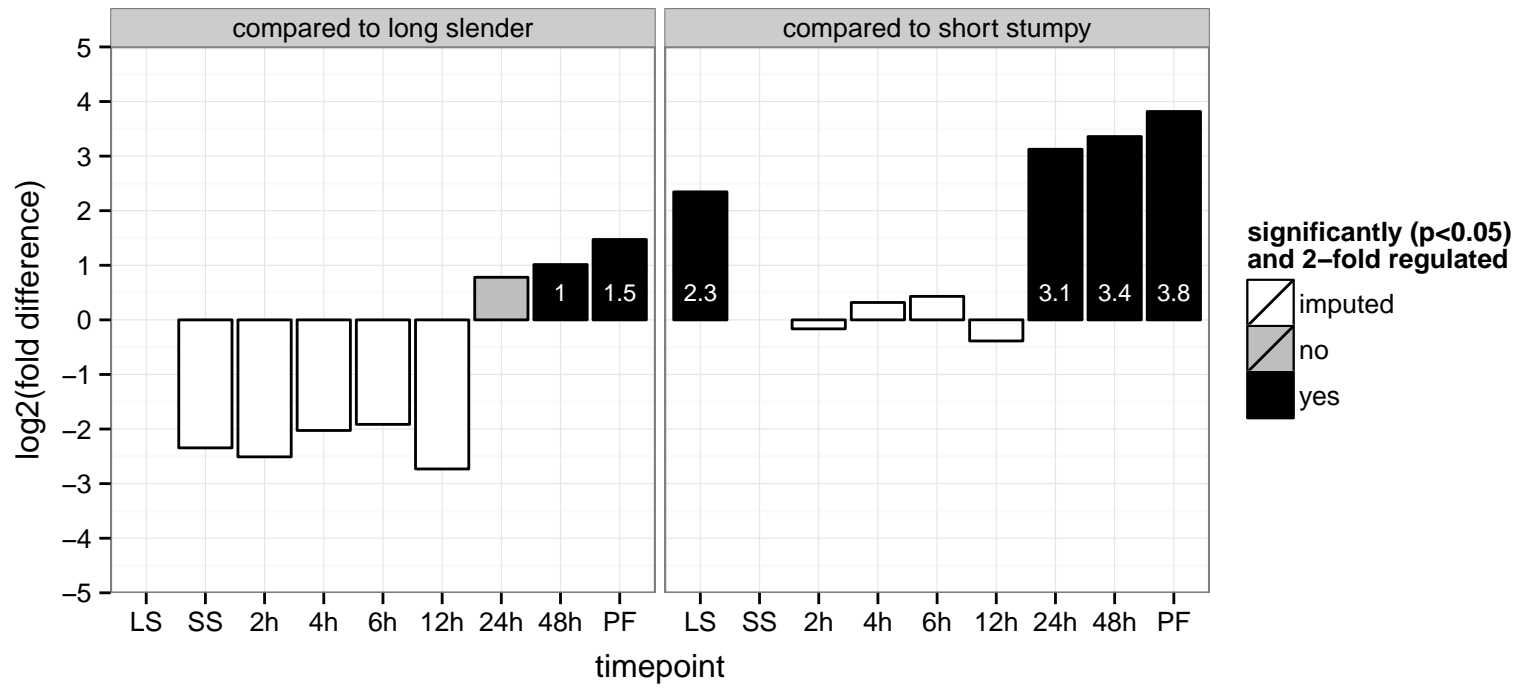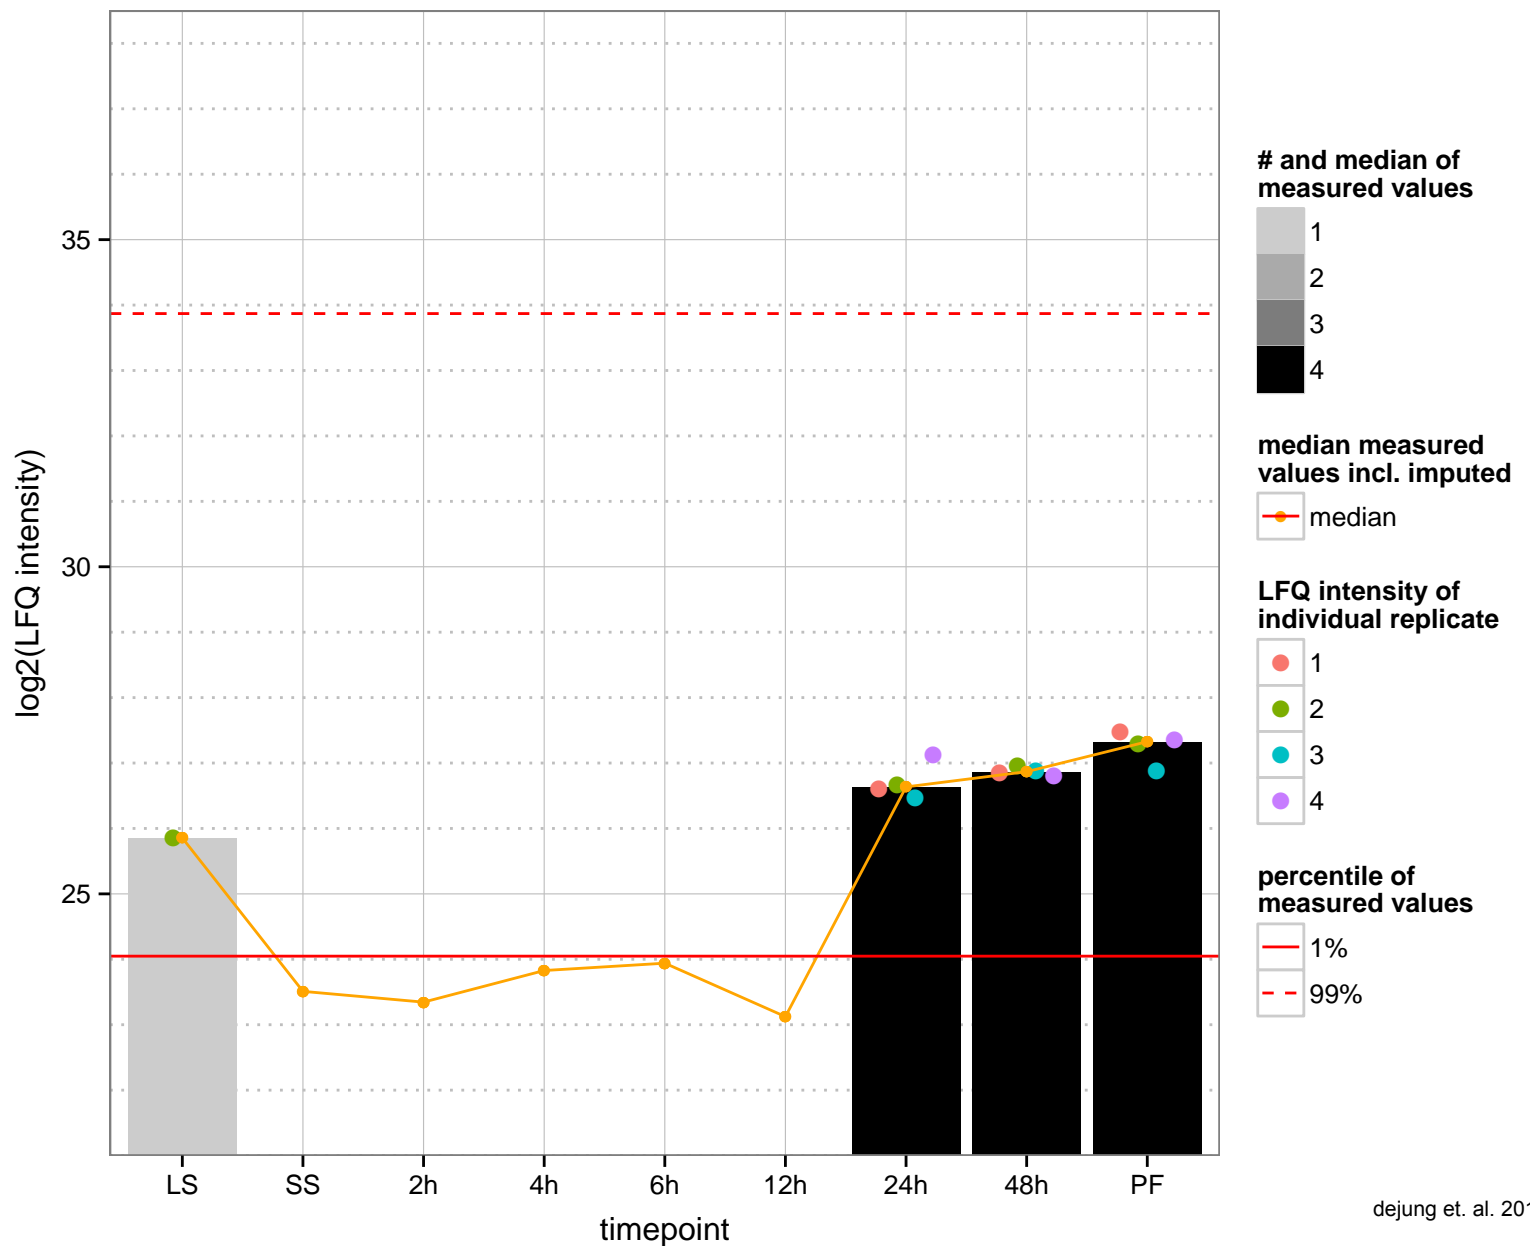

hypothetical protein, conserved  
 Tb927.8.4230  
 AGOF: null  
 AGOC: null  
 AGOP: null  
 PGO: null  
 PGOC: null  
 PGOP: null

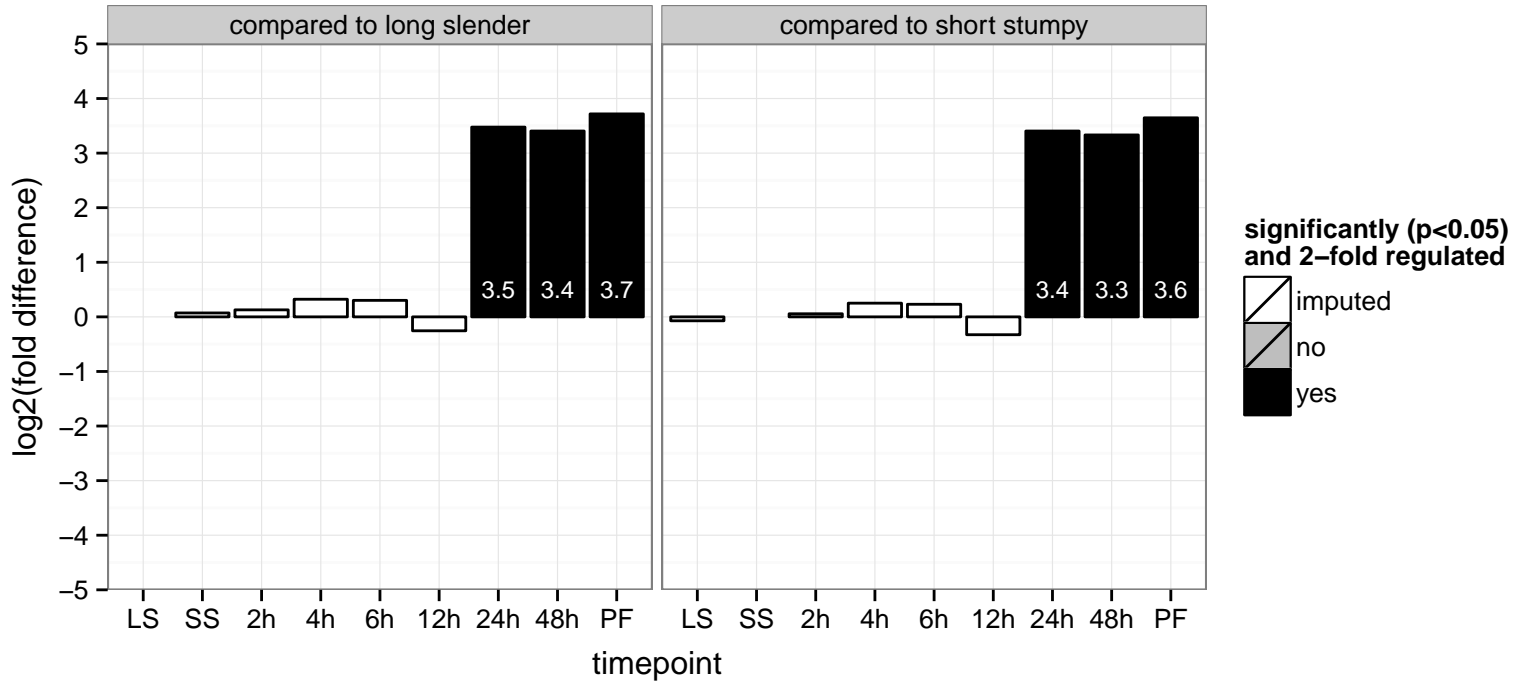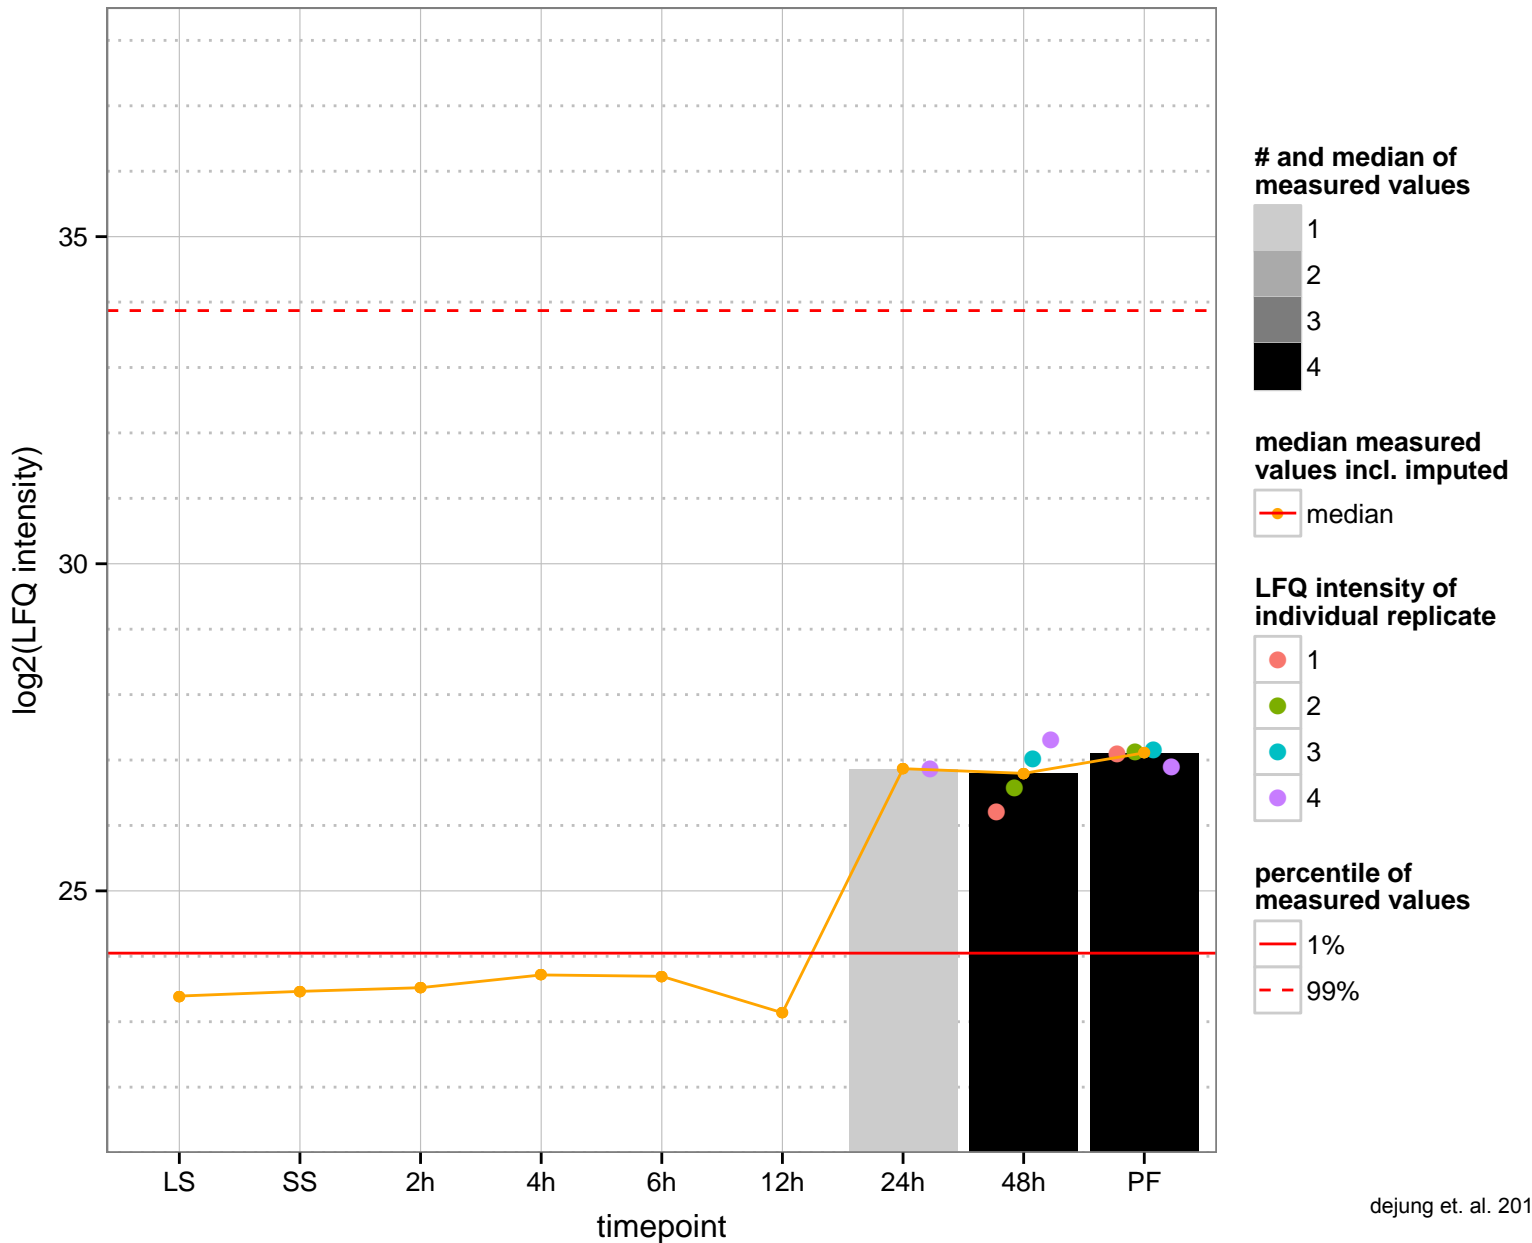

hypothetical protein, conserved  
 Tb927.8.4380  
 AGOF: null  
 AGOC: mitochondrion  
 AGOP: null  
 PGO: null  
 PGO: null  
 PGO: null

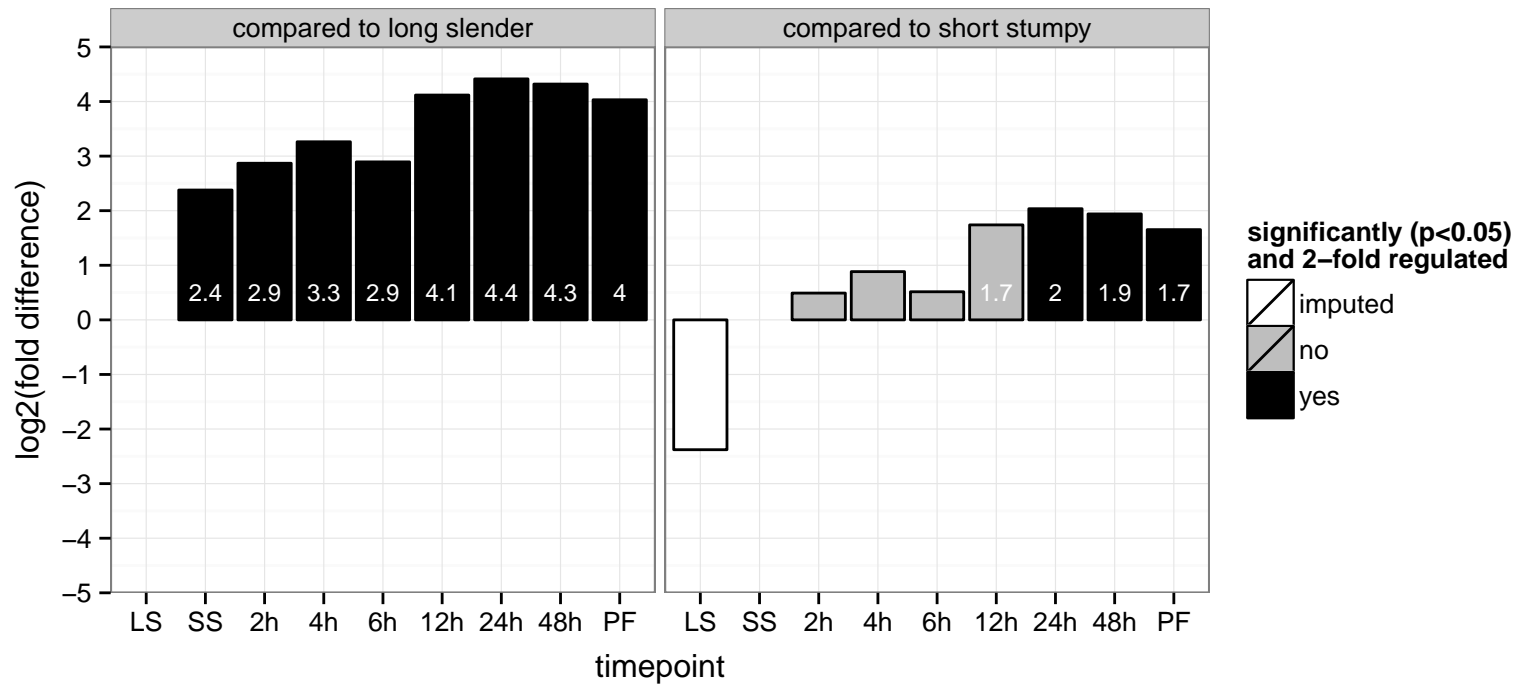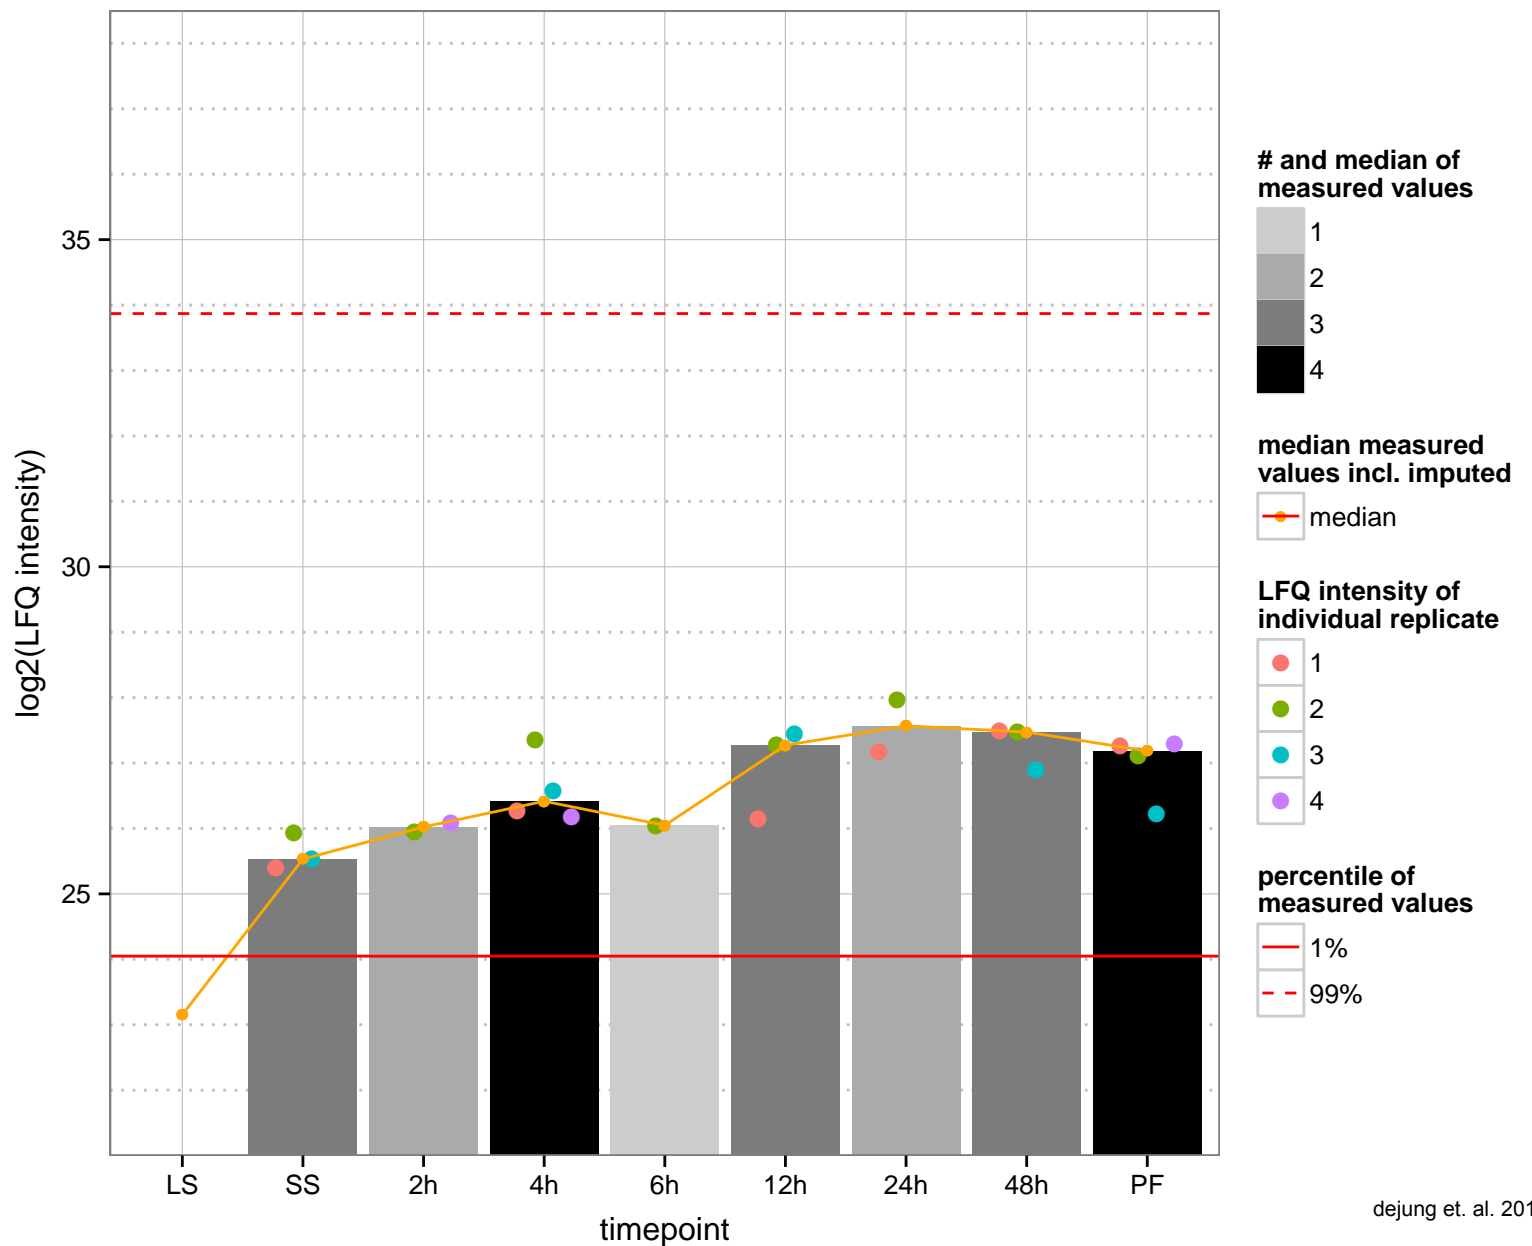

hypothetical protein, conserved, eukaryotic translation initiation factor 4 gamma, putative (eIF4G3)  
 Tb927.8.4820;Tb11.v5.0659  
 AGOF: null  
 AGOC: null  
 AGOP: null, RNA metabolic process, translation  
 PGO: DNA binding, RNA binding, binding, protein binding  
 PGO: null  
 PGO: null

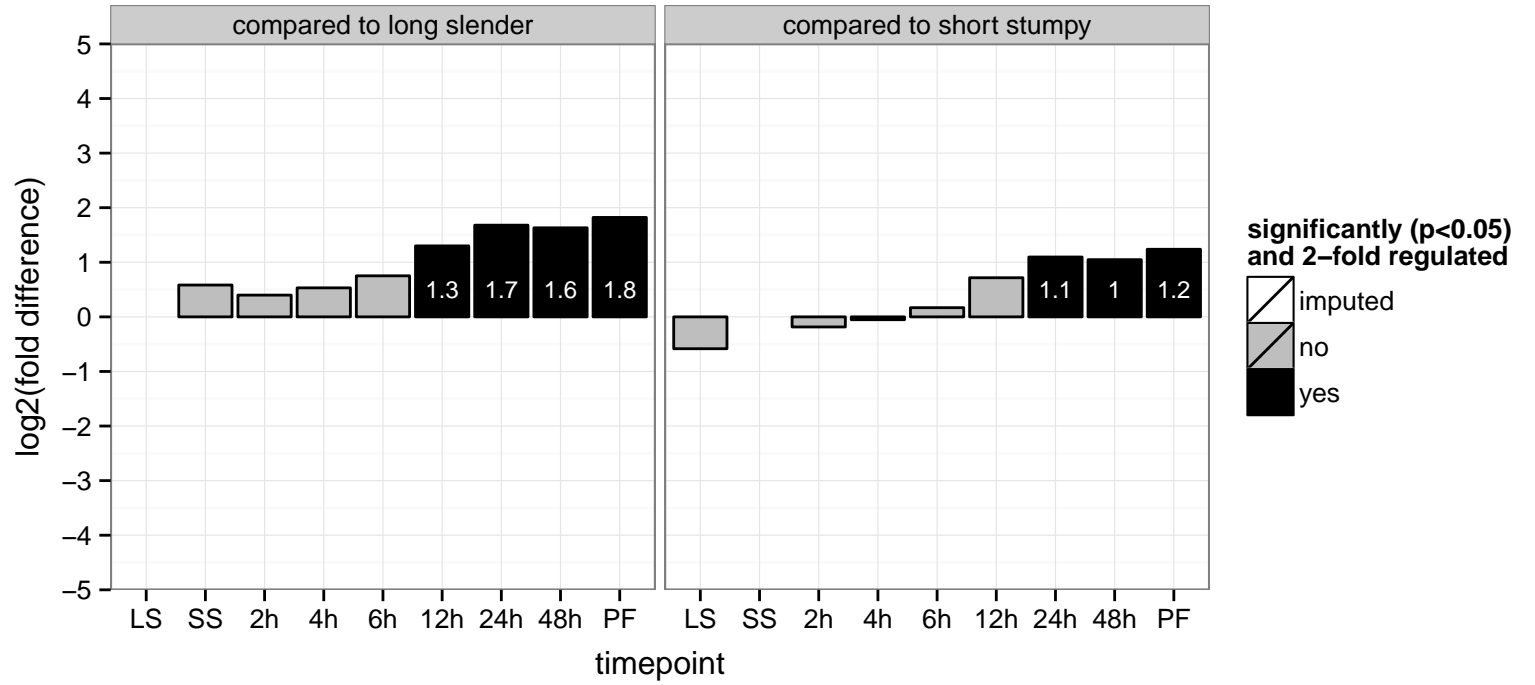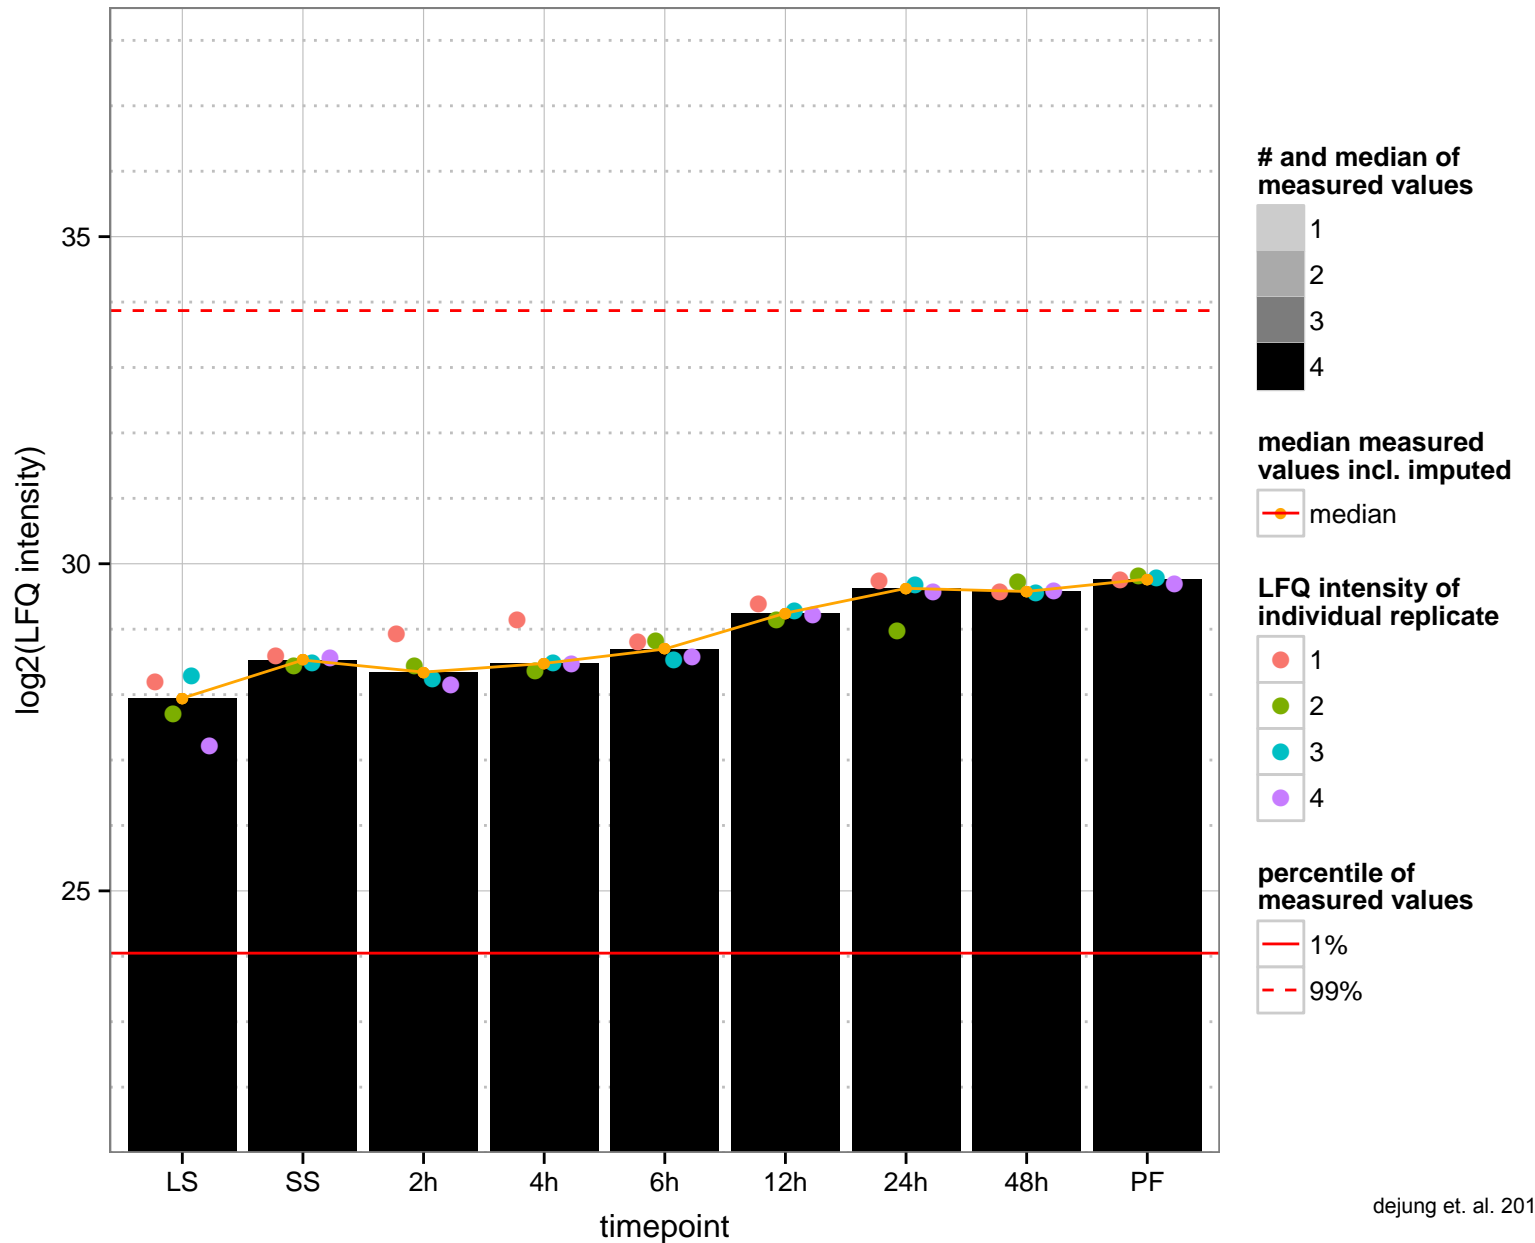

DNA polymerase alpha catalytic subunit, DNA polymerase I  
Tb927.8.4880

AGOF: DNA binding, DNA-directed DNA polymerase activity, nucleotide binding

AGOC: DNA-directed RNA polymerase I complex, nucleus

AGOP: DNA replication, lagging strand elongation

PGOF: DNA binding, DNA-directed DNA polymerase activity, nucleic acid binding, nucleotide binding

PGOC: null

PGOP: DNA replication, nucleobase-containing compound metabolic process

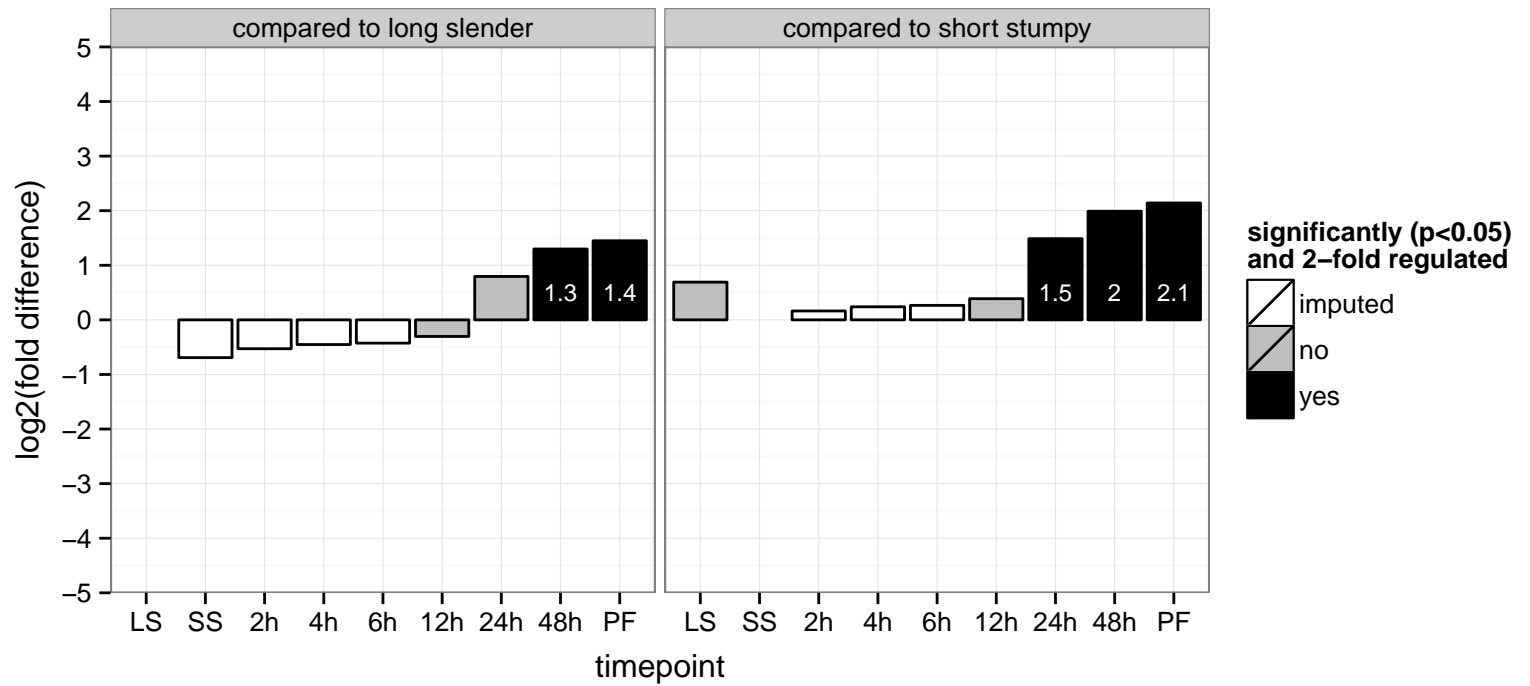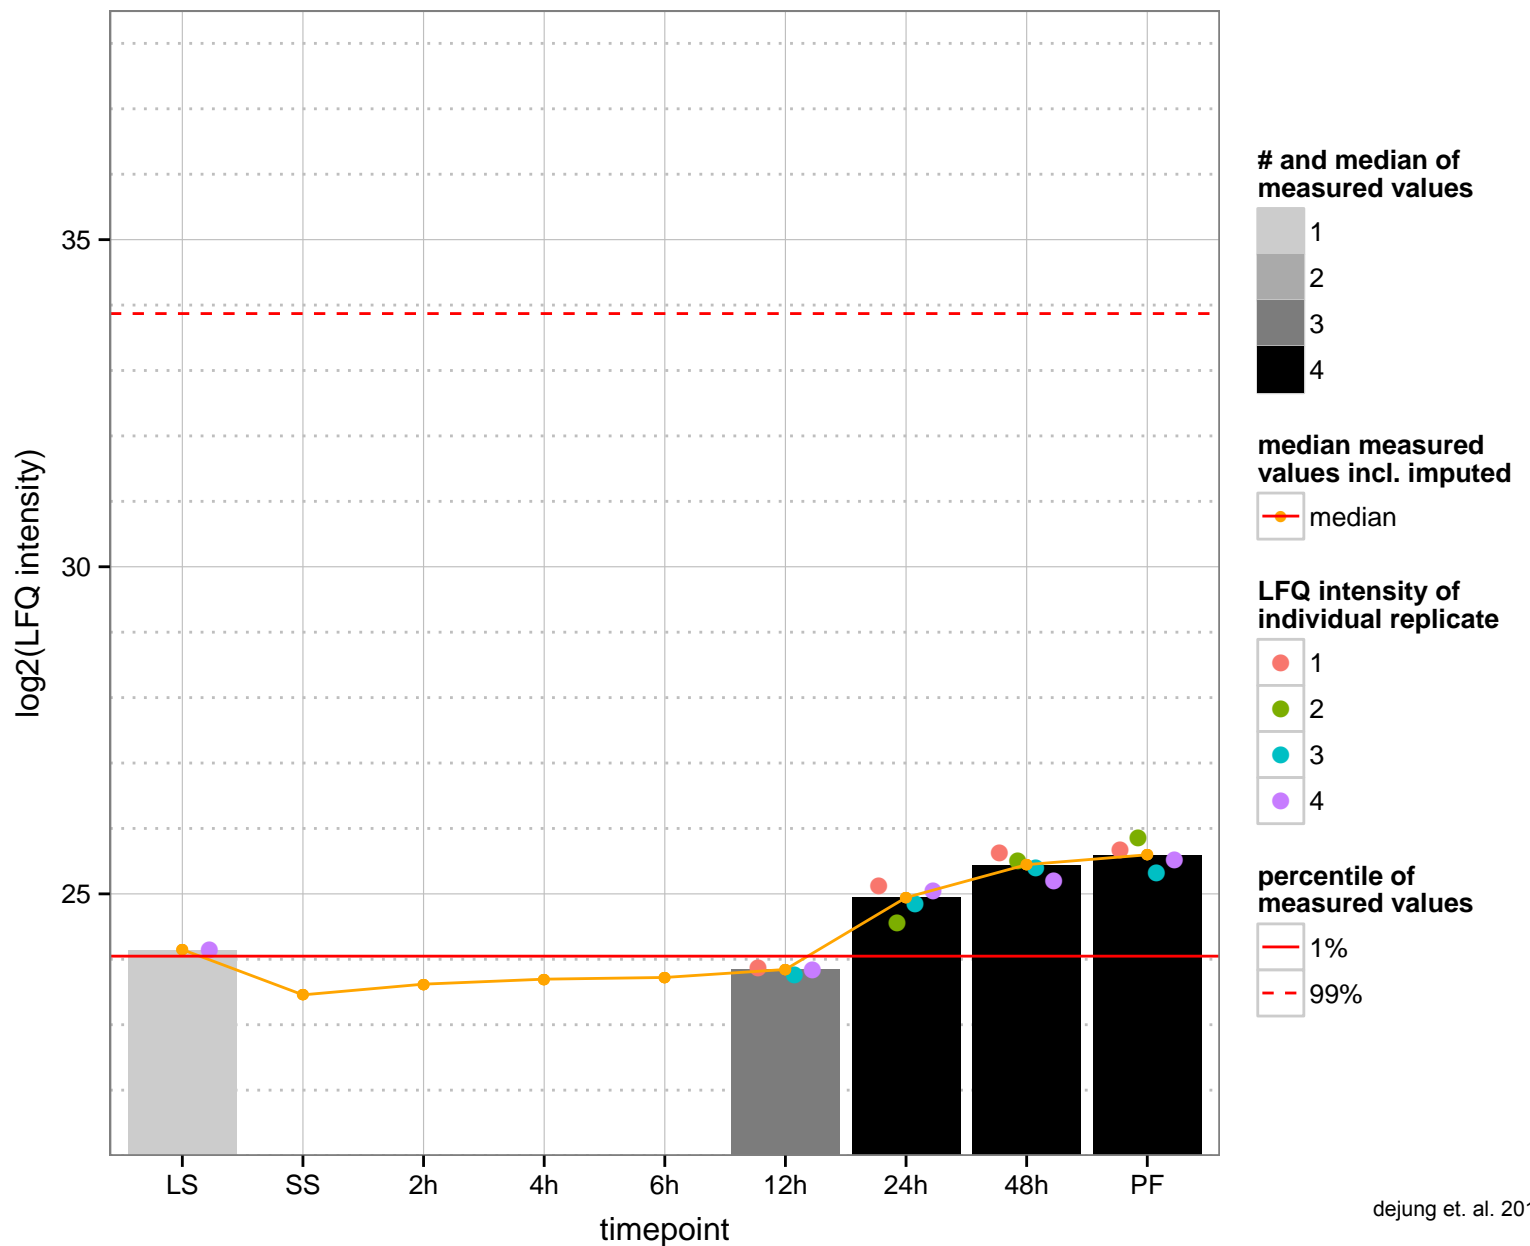

hypothetical protein, conserved  
 Tb927.8.4920  
 AGOF: null  
 AGOC: mitochondrion  
 AGOP: null  
 PGO: null  
 PGOC: null  
 PGOP: null

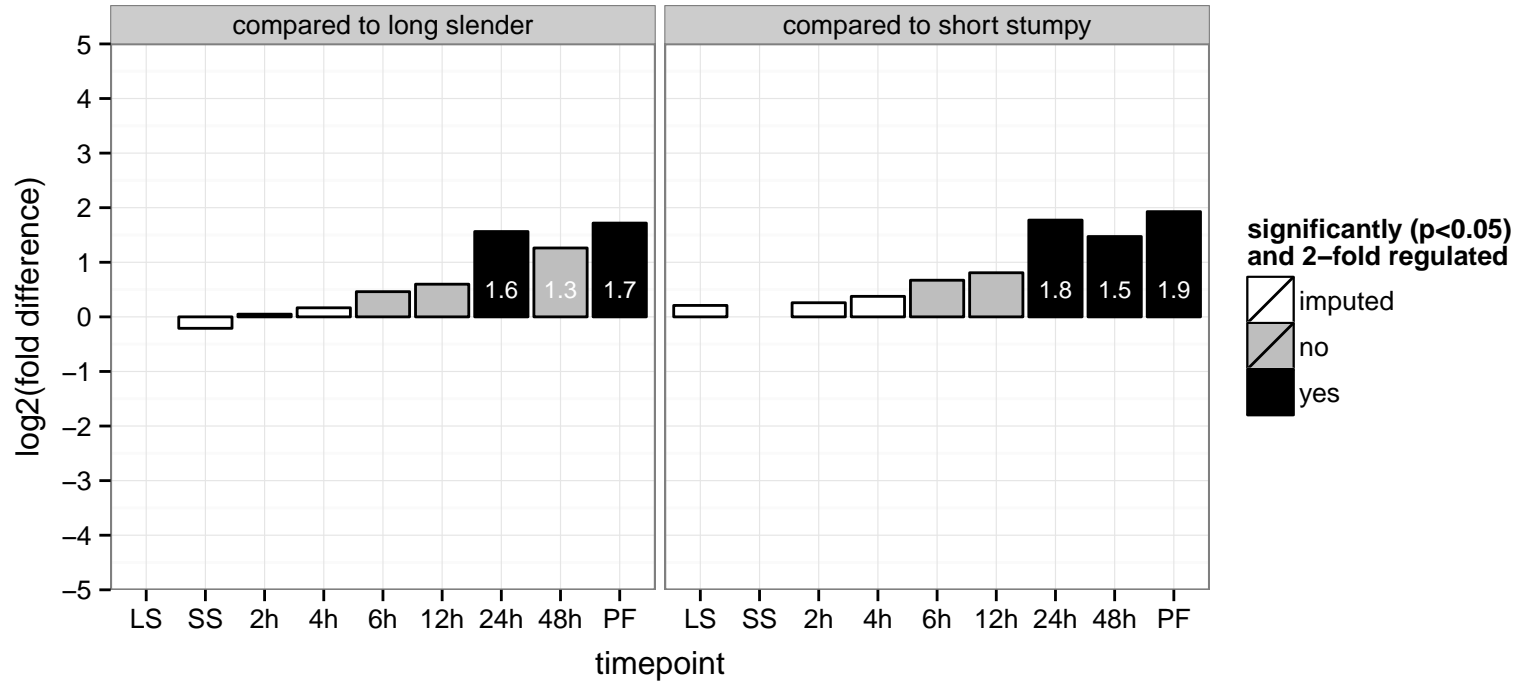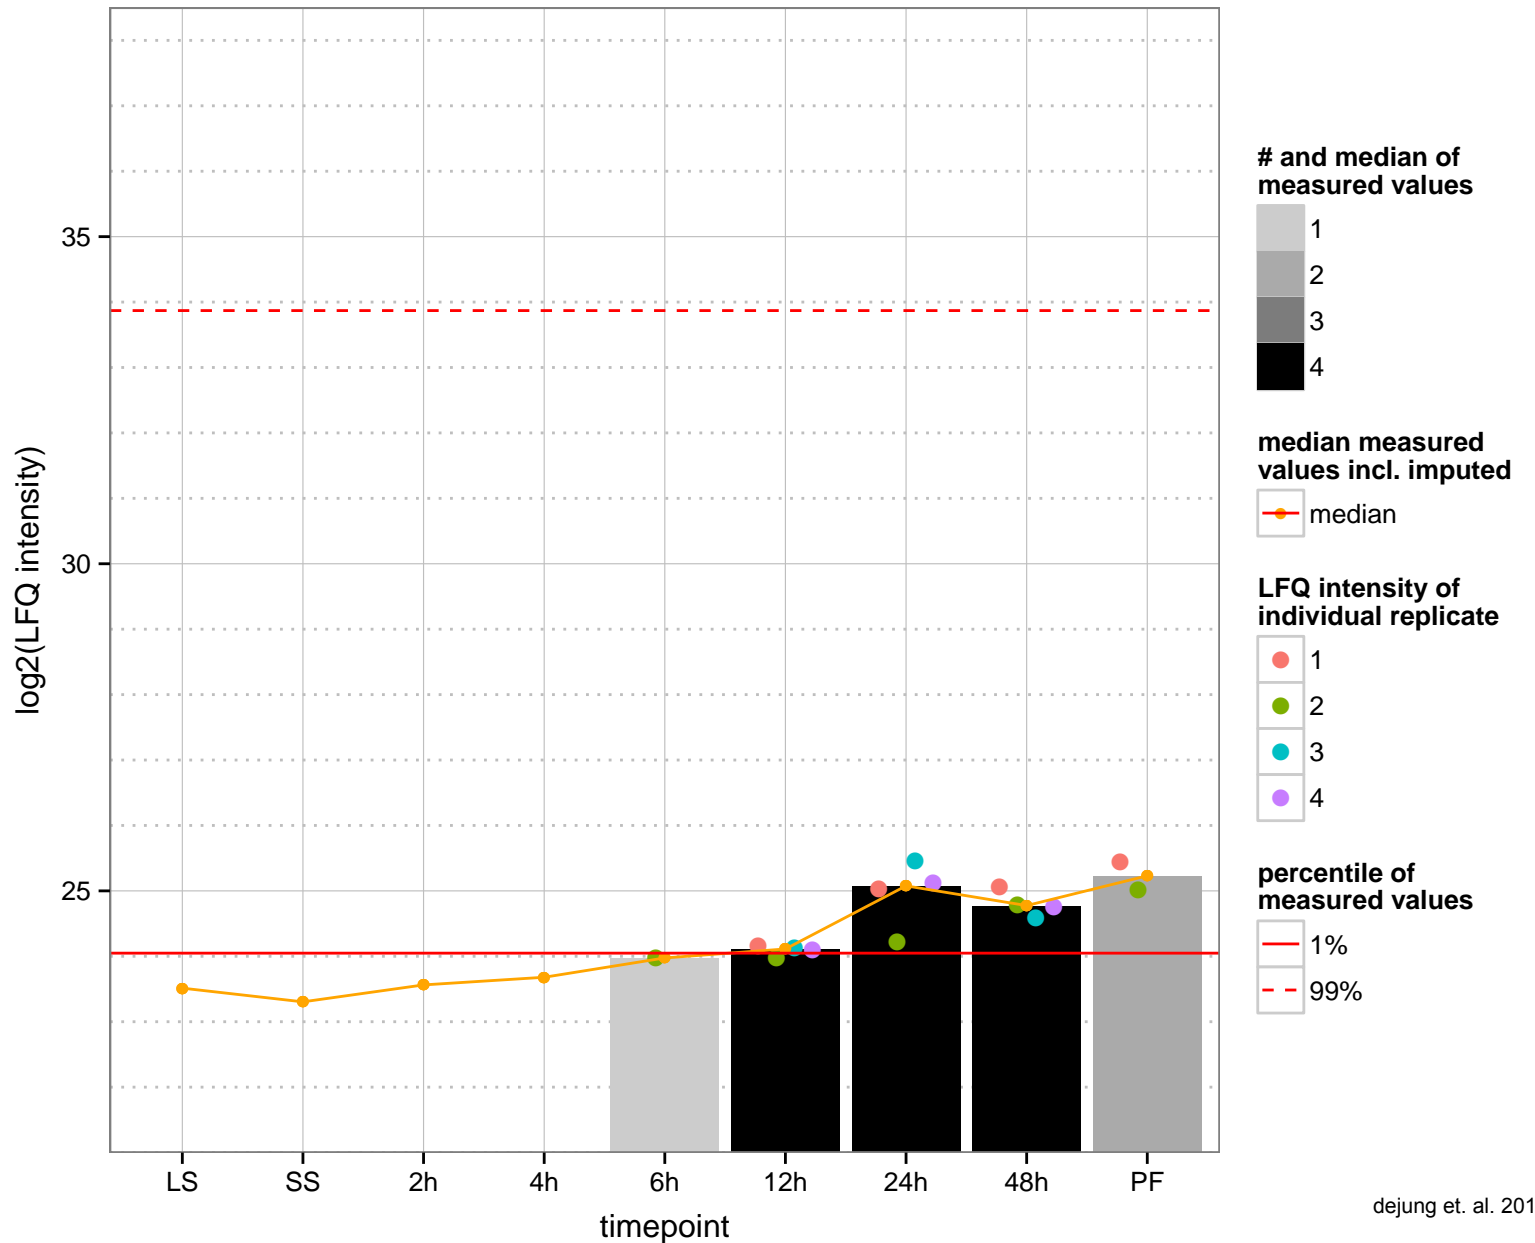

DNA-directed rna polymerase I largest subunit, putative, DNA-directed RNA polymerase I largest subunit (RPA190)  
 Tb927.8.5090  
 AGOF: null, DNA binding, DNA-directed RNA polymerase activity, zinc ion binding  
 AGOC: null, nucleus  
 AGOP: null, transcription, DNA-dependent  
 PGOF: DNA binding, DNA-directed RNA polymerase activity  
 PGO: null  
 PGOP: transcription, DNA-dependent

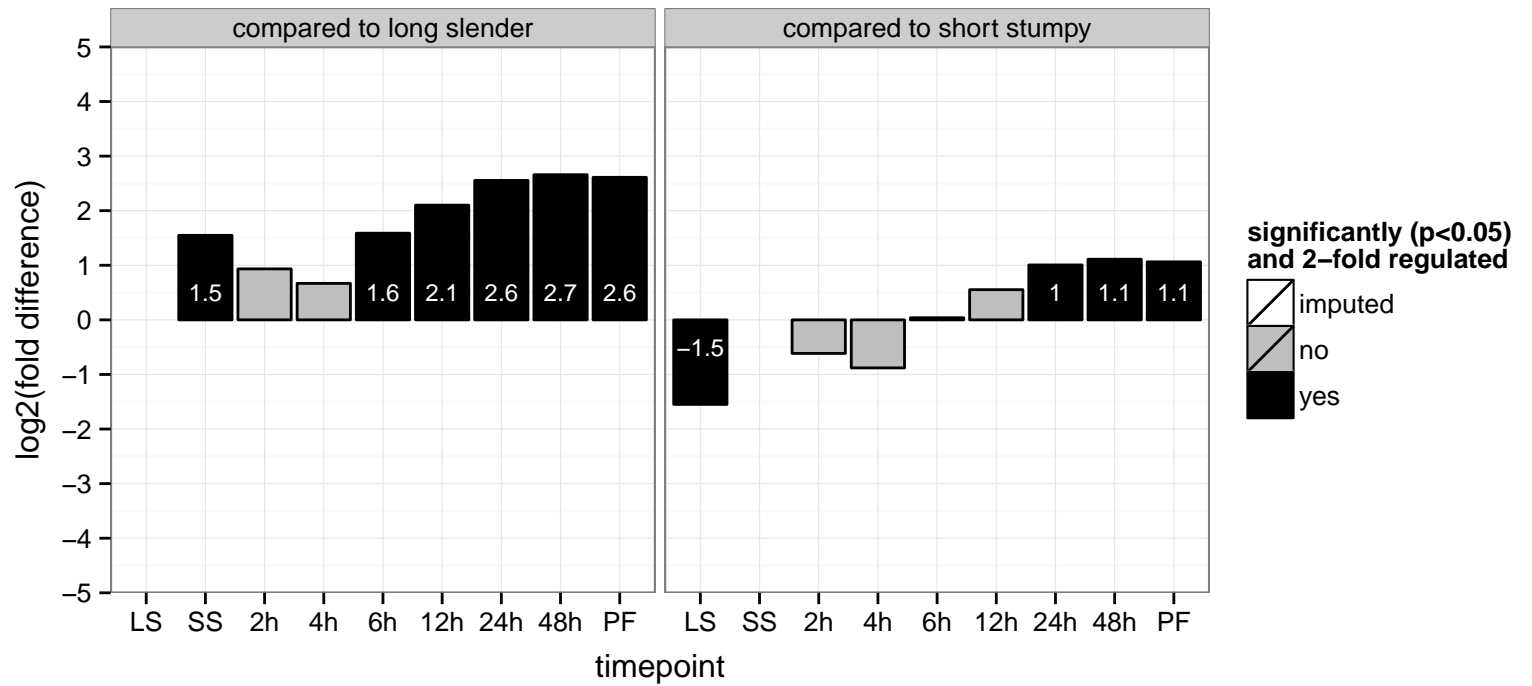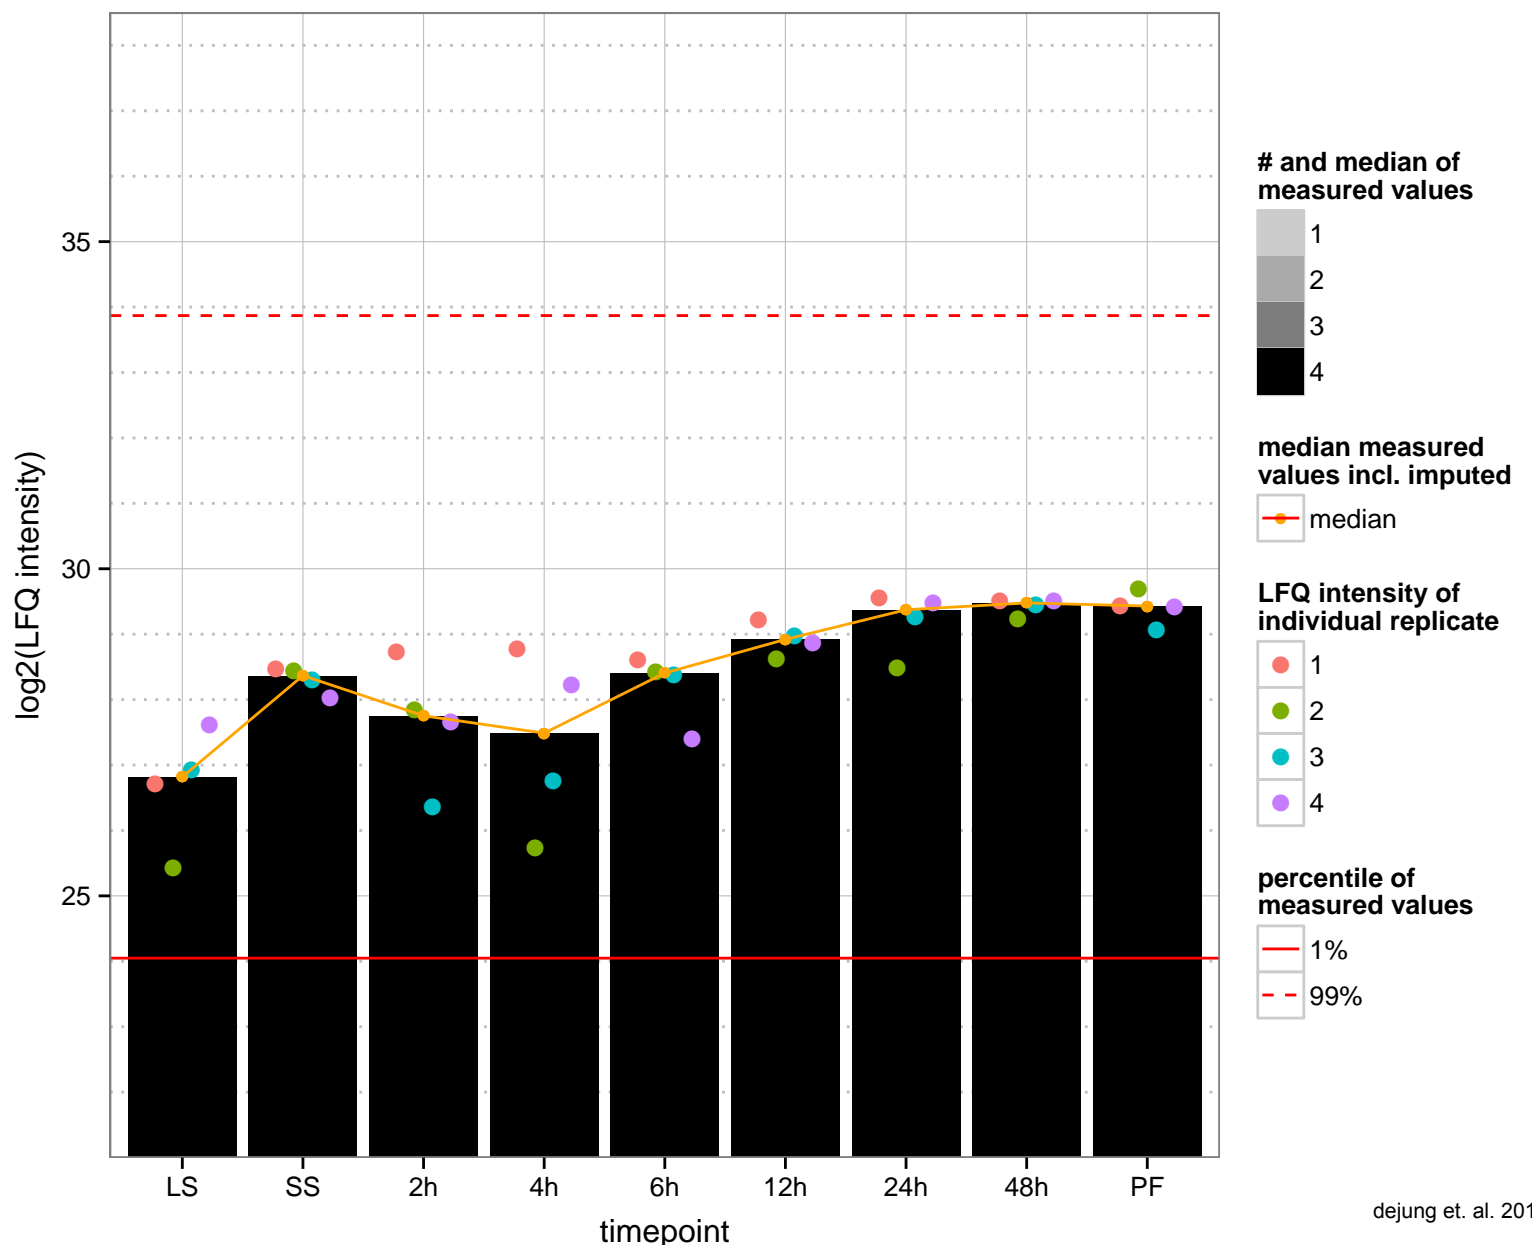



hypothetical protein, conserved  
 Tb927.8.5420  
 AGOF: methyltransferase activity  
 AGOC: integral to membrane, mitochondrion  
 AGOP: metabolic process  
 PGO: methyltransferase activity  
 PGOC: null  
 PGOP: metabolic process

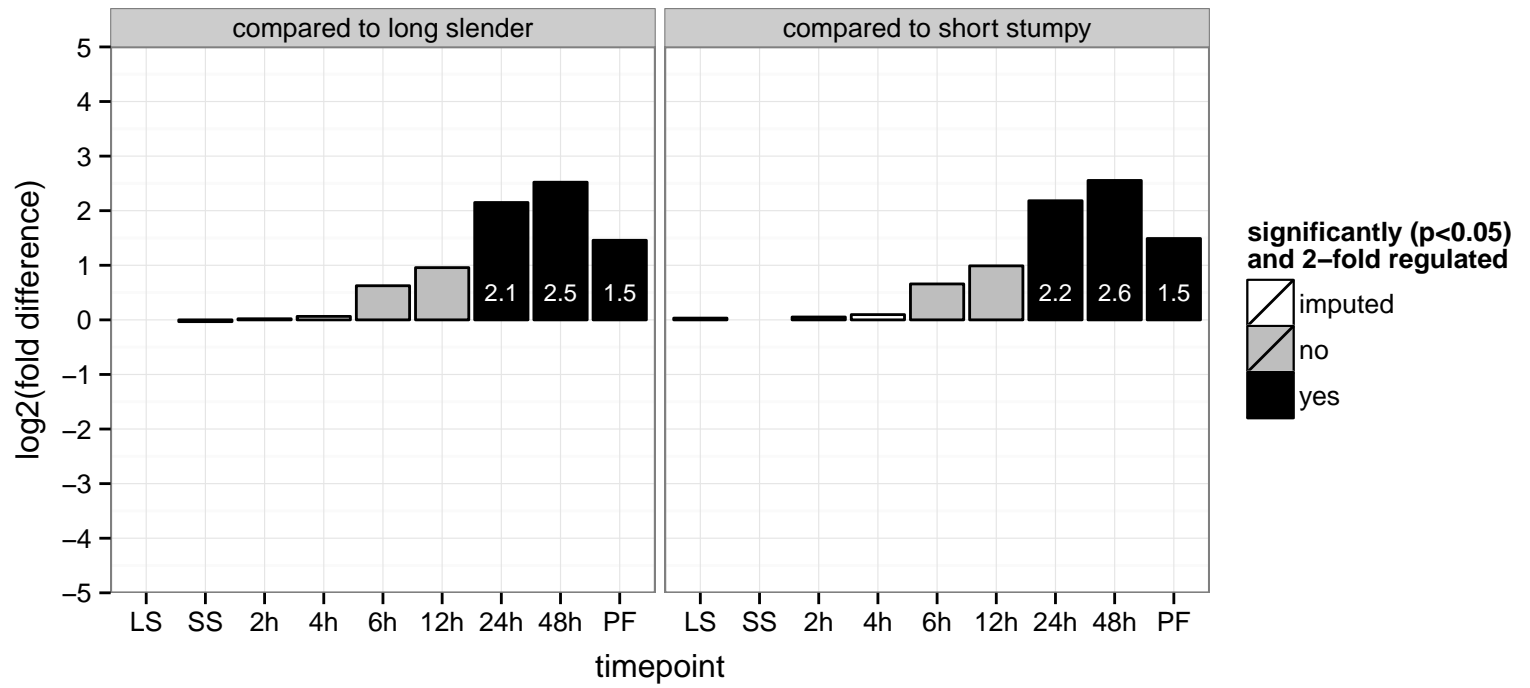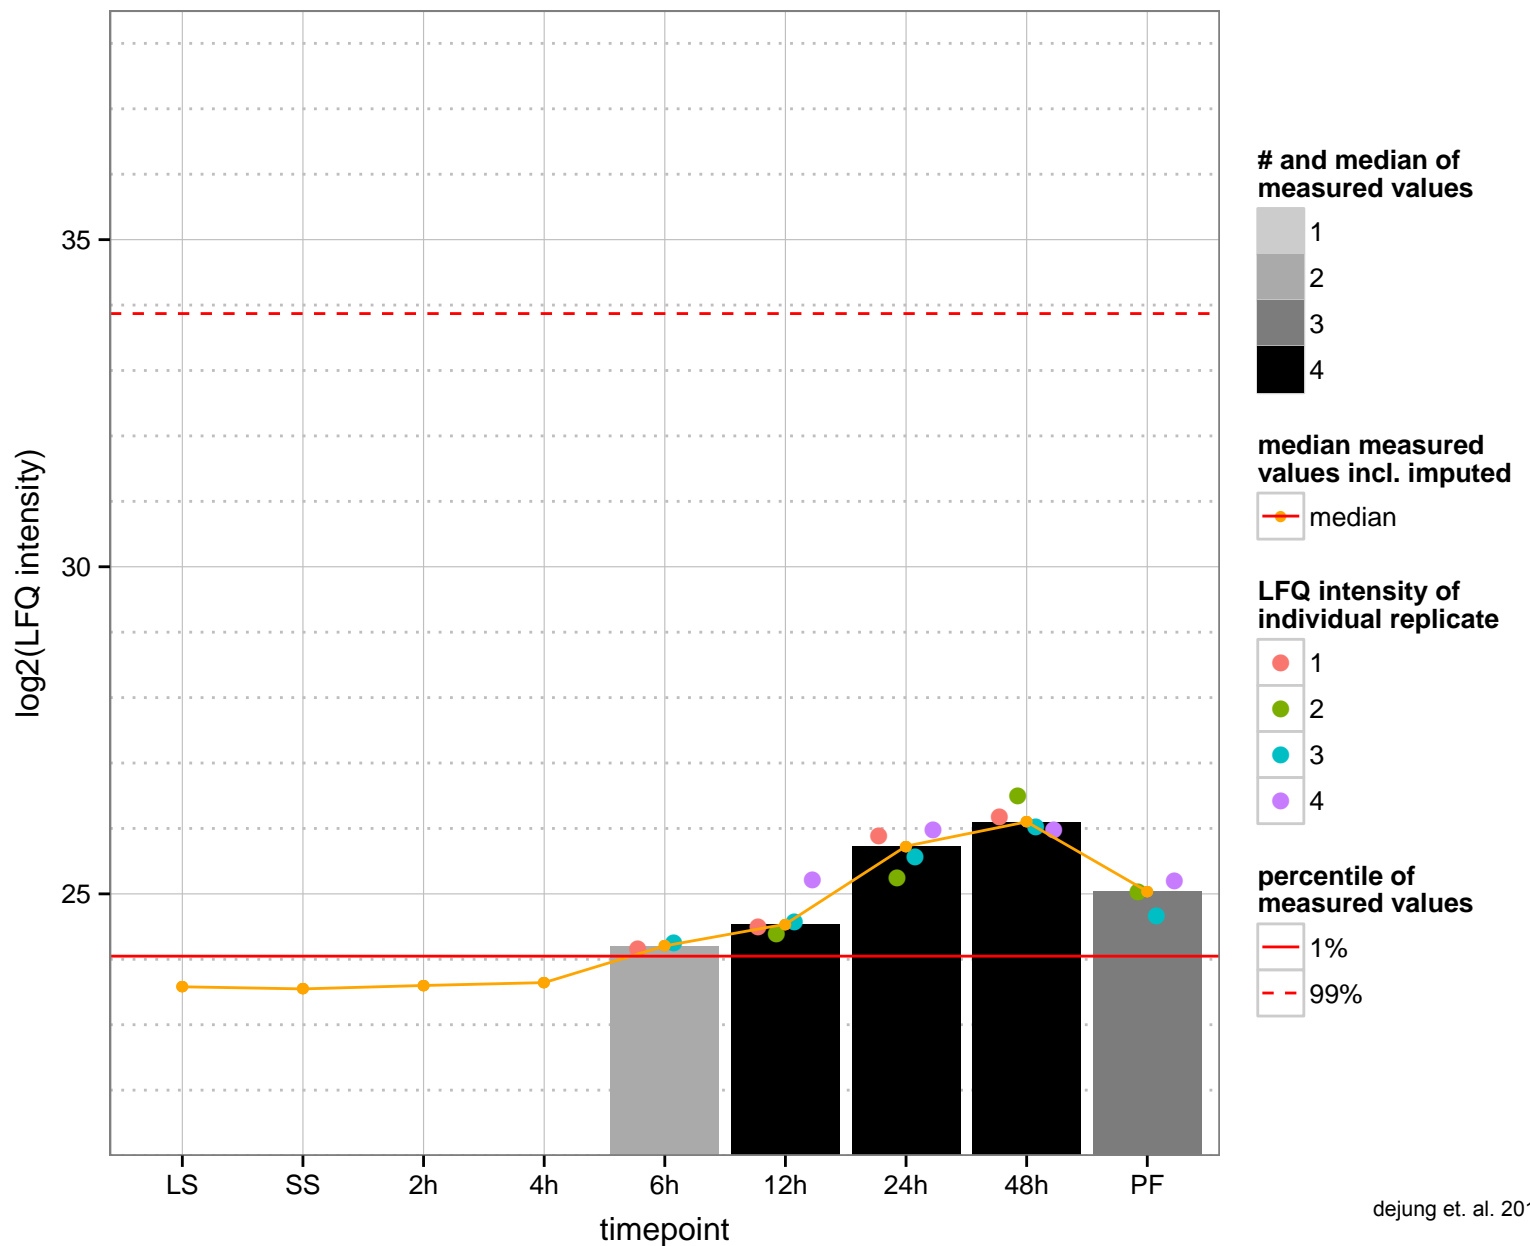

hypothetical protein, conserved  
 Tb927.8.5640  
 AGOF: sequence-specific DNA binding transcription factor activity  
 AGOC: mitochondrion  
 AGOP: null  
 PGO: null  
 PGO: null  
 PGO: null

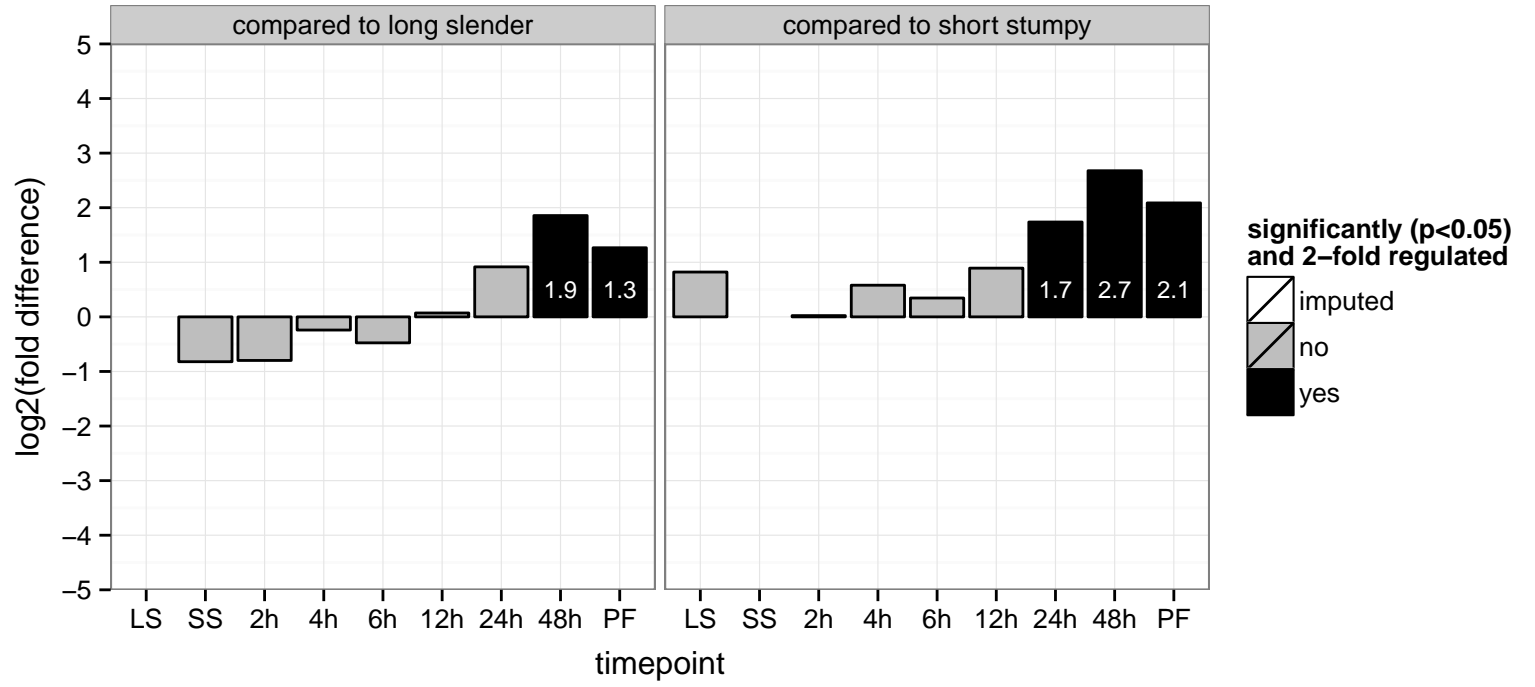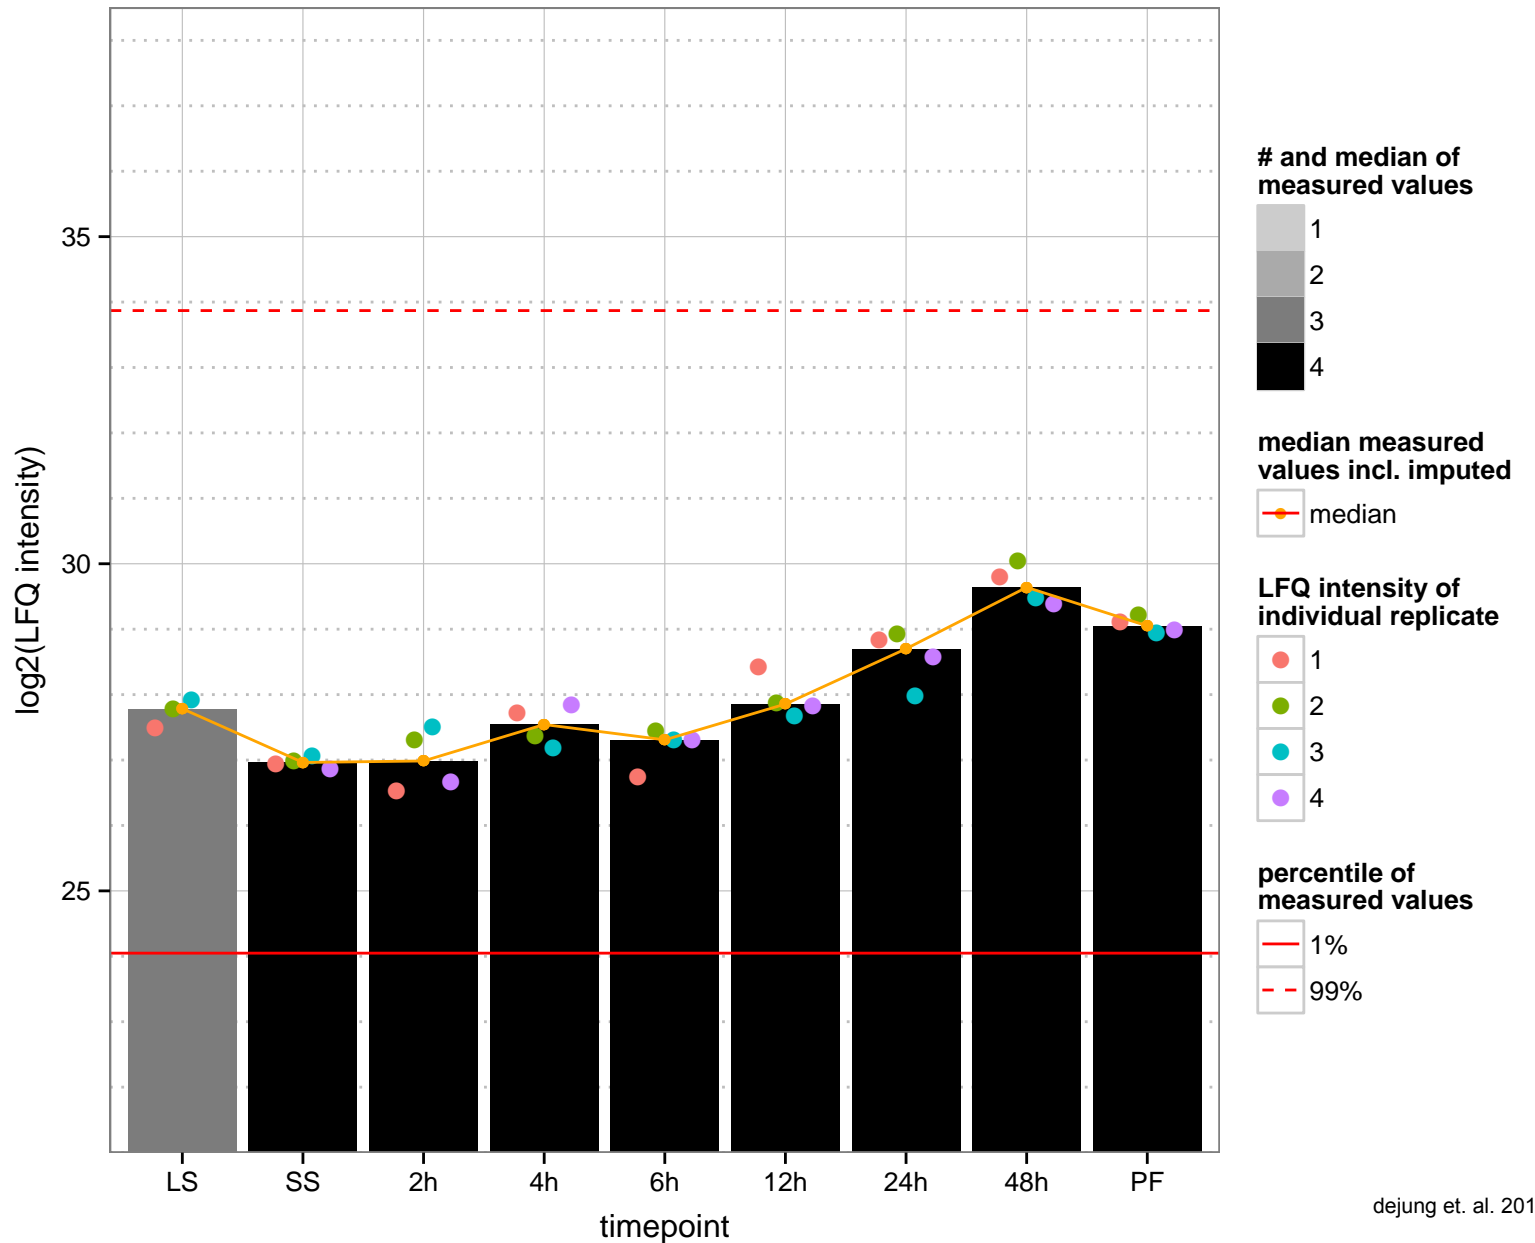

succinate dehydrogenase flavoprotein, putative

Tb927.8.6580

AGOF: electron carrier activity, flavin adenine dinucleotide binding, succinate dehydrogenase activity

AGOC: mitochondrion

AGOP: electron transport chain, oxidation–reduction process, tricarboxylic acid cycle

PGOF: flavin adenine dinucleotide binding, oxidoreductase activity, acting on the CH–CH group of donors

PGOC: null

PGOP: electron transport chain, oxidation–reduction process, tricarboxylic acid cycle

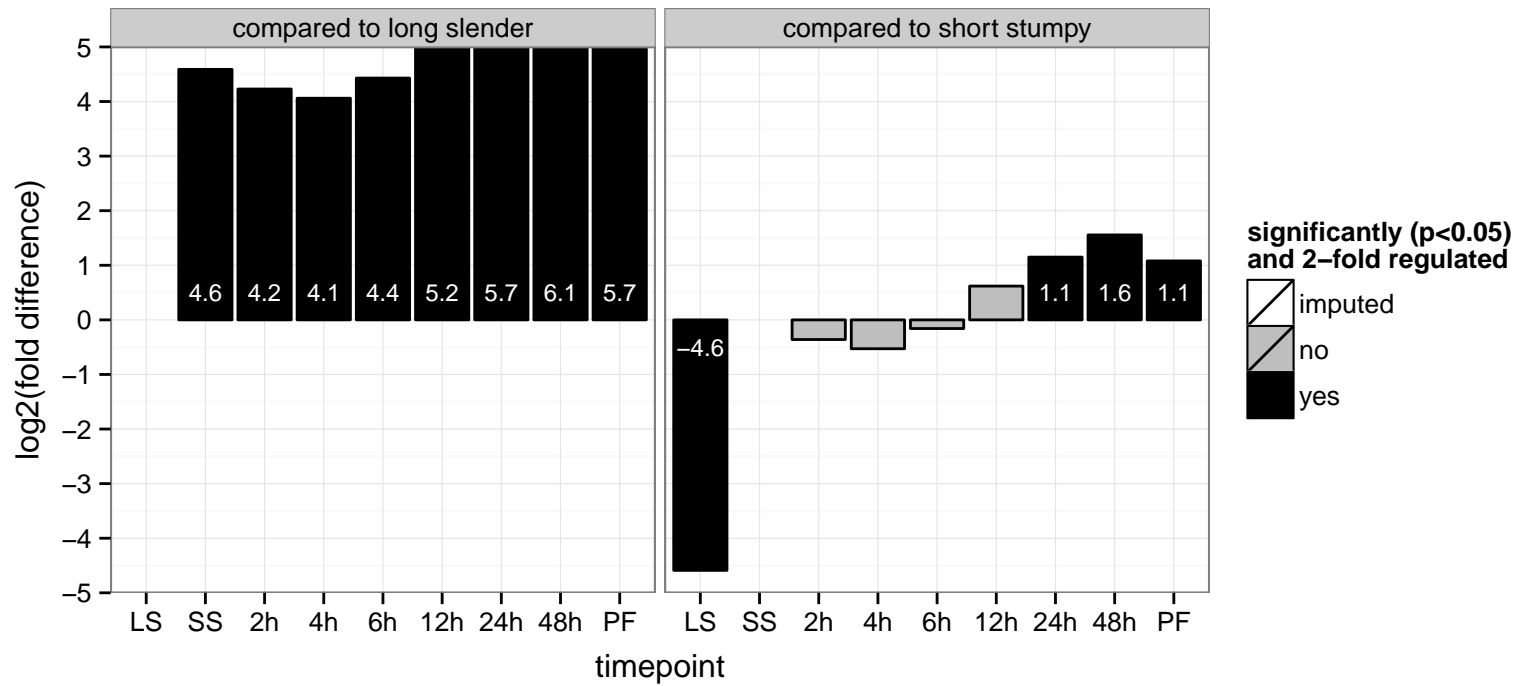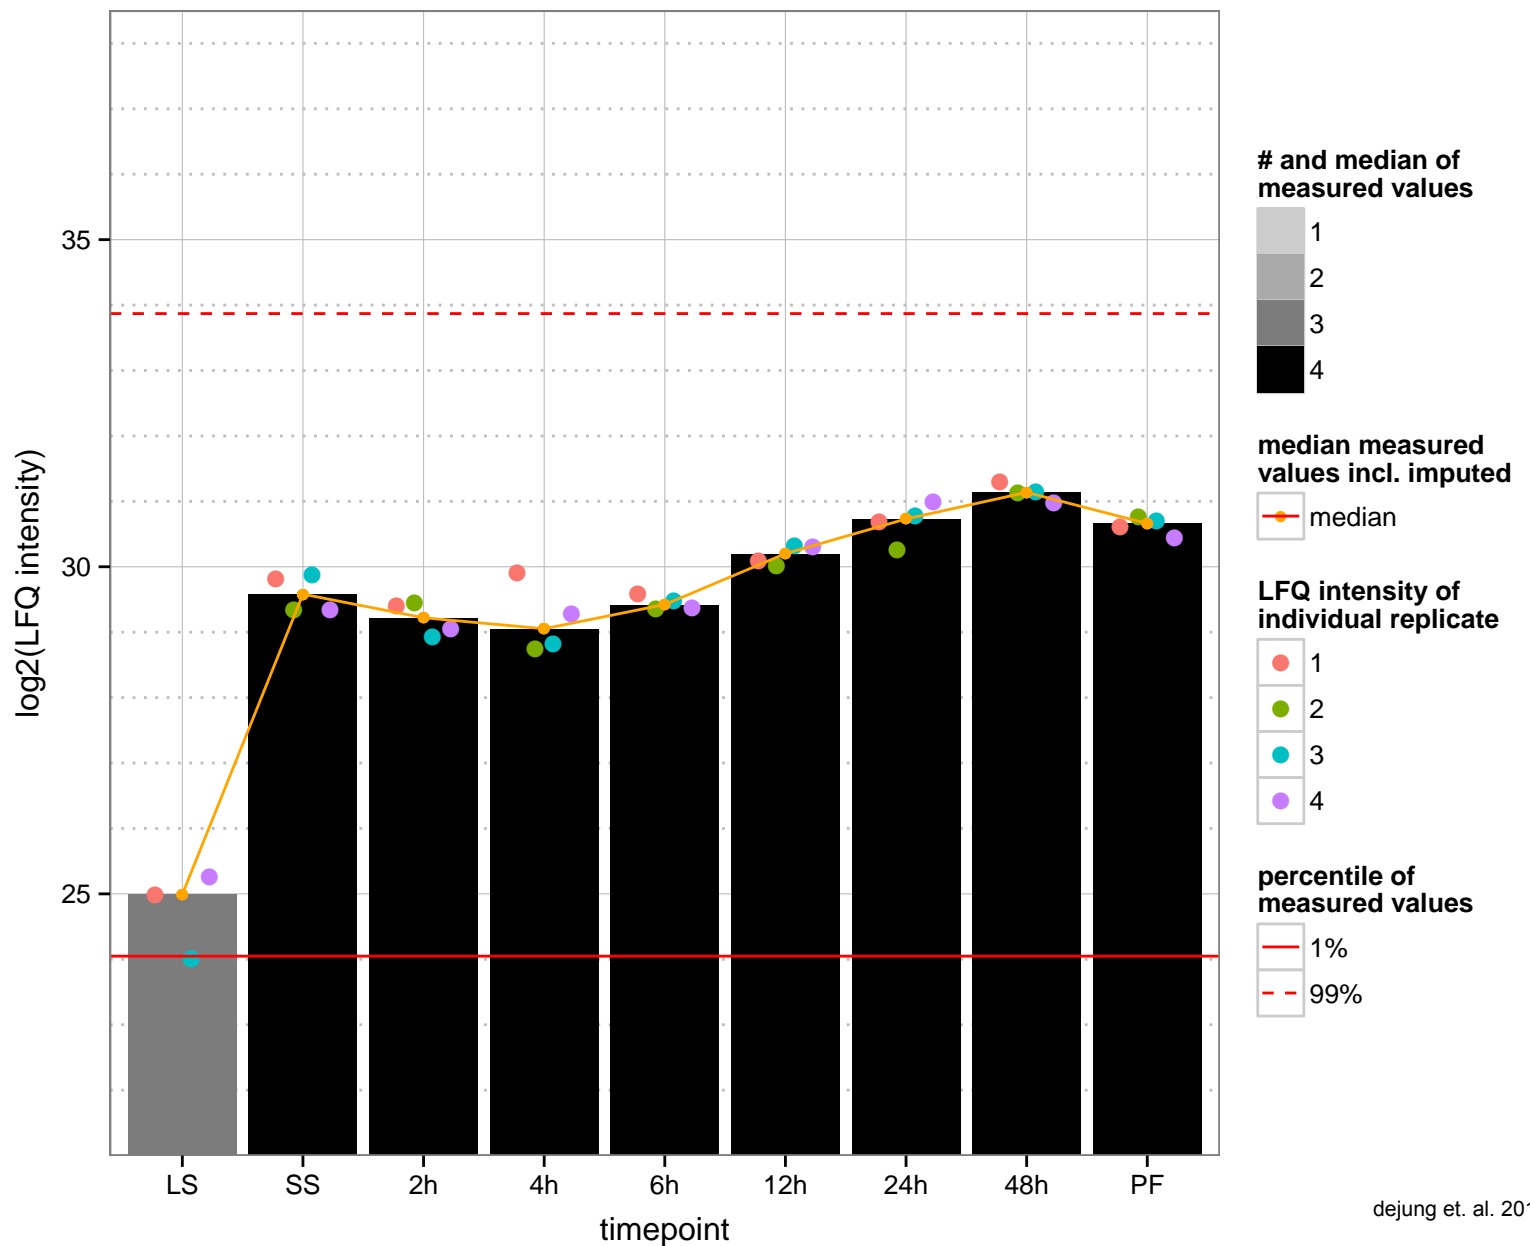

dihydroceramide synthase, putative  
 Tb927.8.7730  
 AGOF: very long-chain fatty acid-CoA ligase activity  
 AGOC: cytosol, integral to membrane  
 AGOP: ceramide biosynthetic process  
 PGO: null  
 PGO: integral to membrane  
 PGO: null

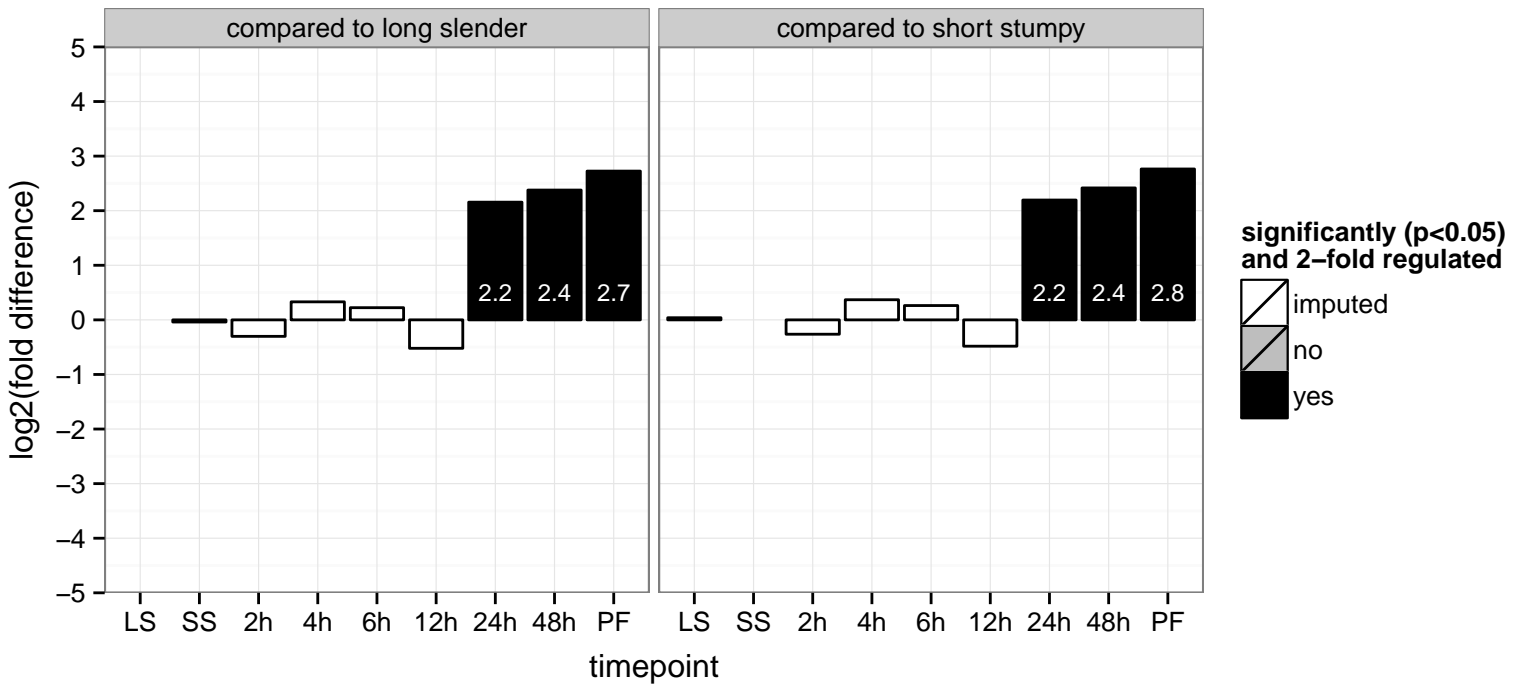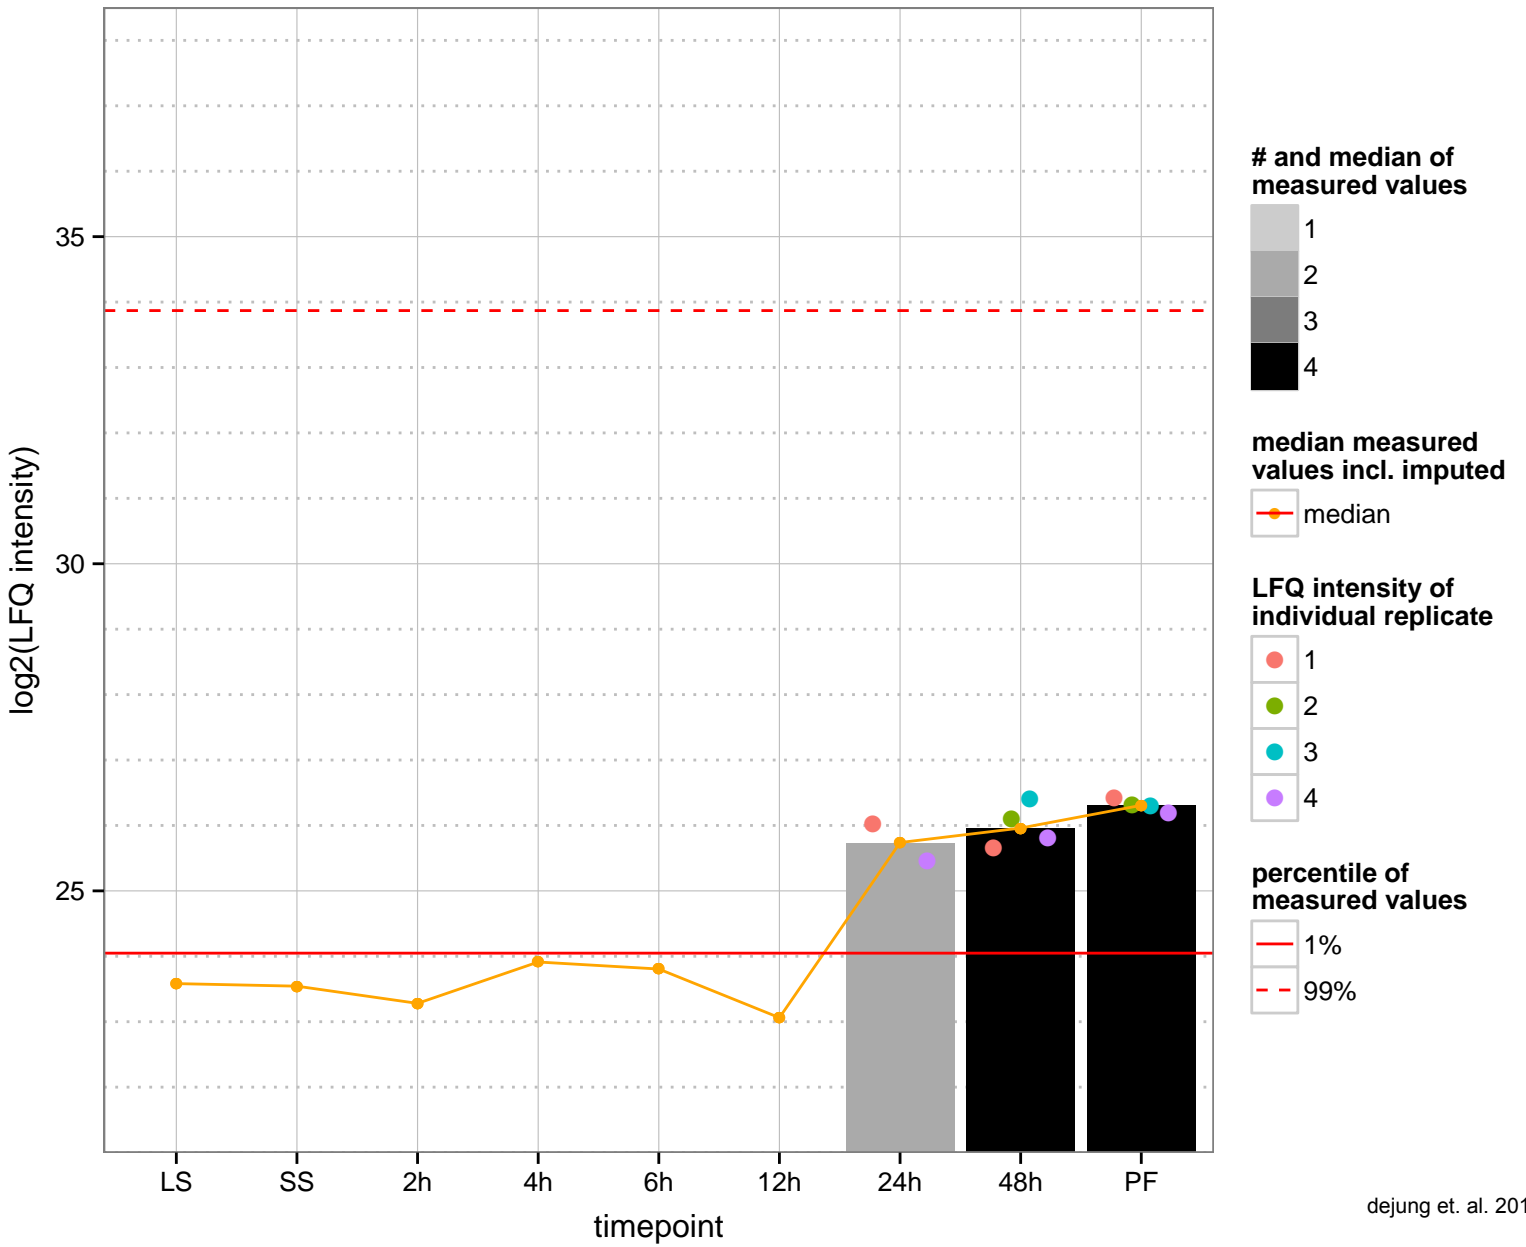

60S ribosomal protein L27a, 60S ribosomal protein L28, 60S ribosomal protein L29, 60S ribosomal protein L29 (RPL27A)  
 Tb927.9.11490;Tb927.9.11470  
 AGOF: RNA binding, structural constituent of ribosome  
 AGOC: intracellular, ribosome  
 AGOP: translation, null  
 PGO: null  
 PGOC: null  
 PGOP: null

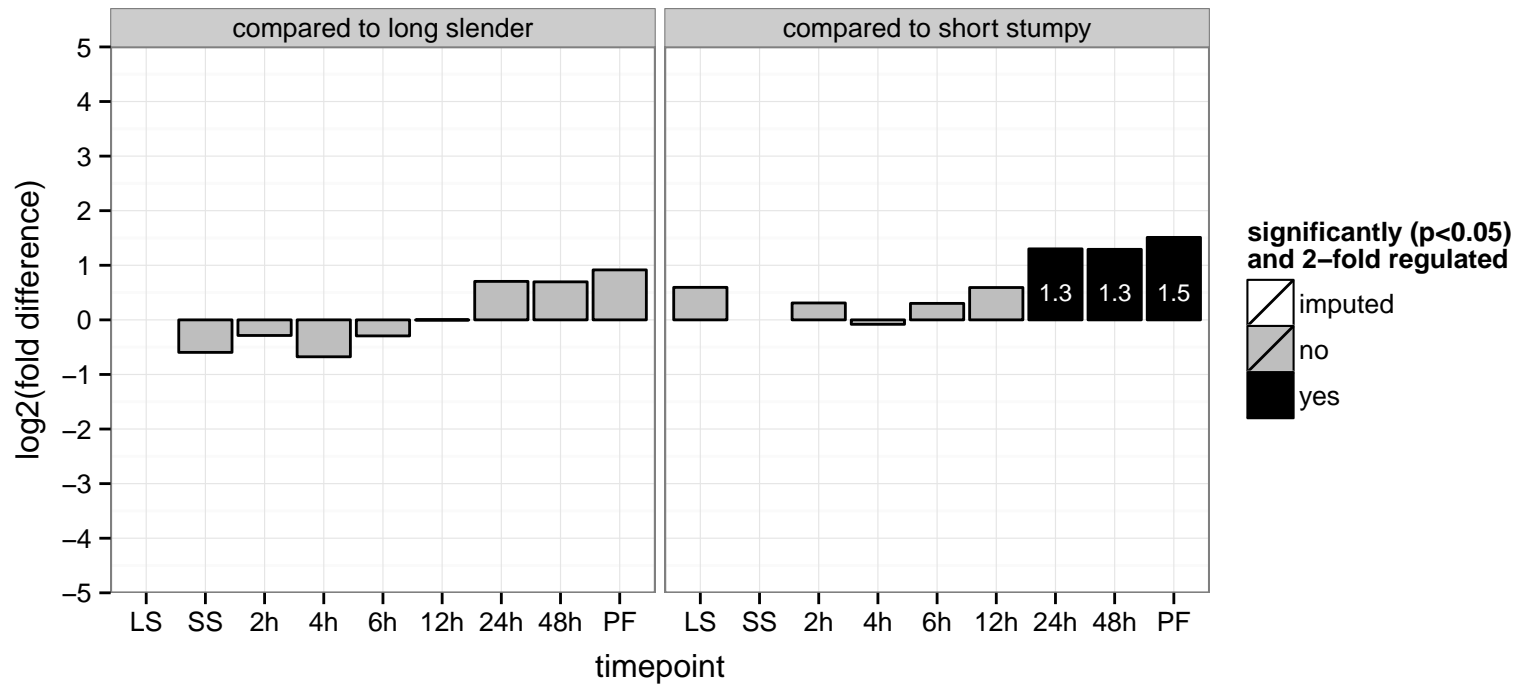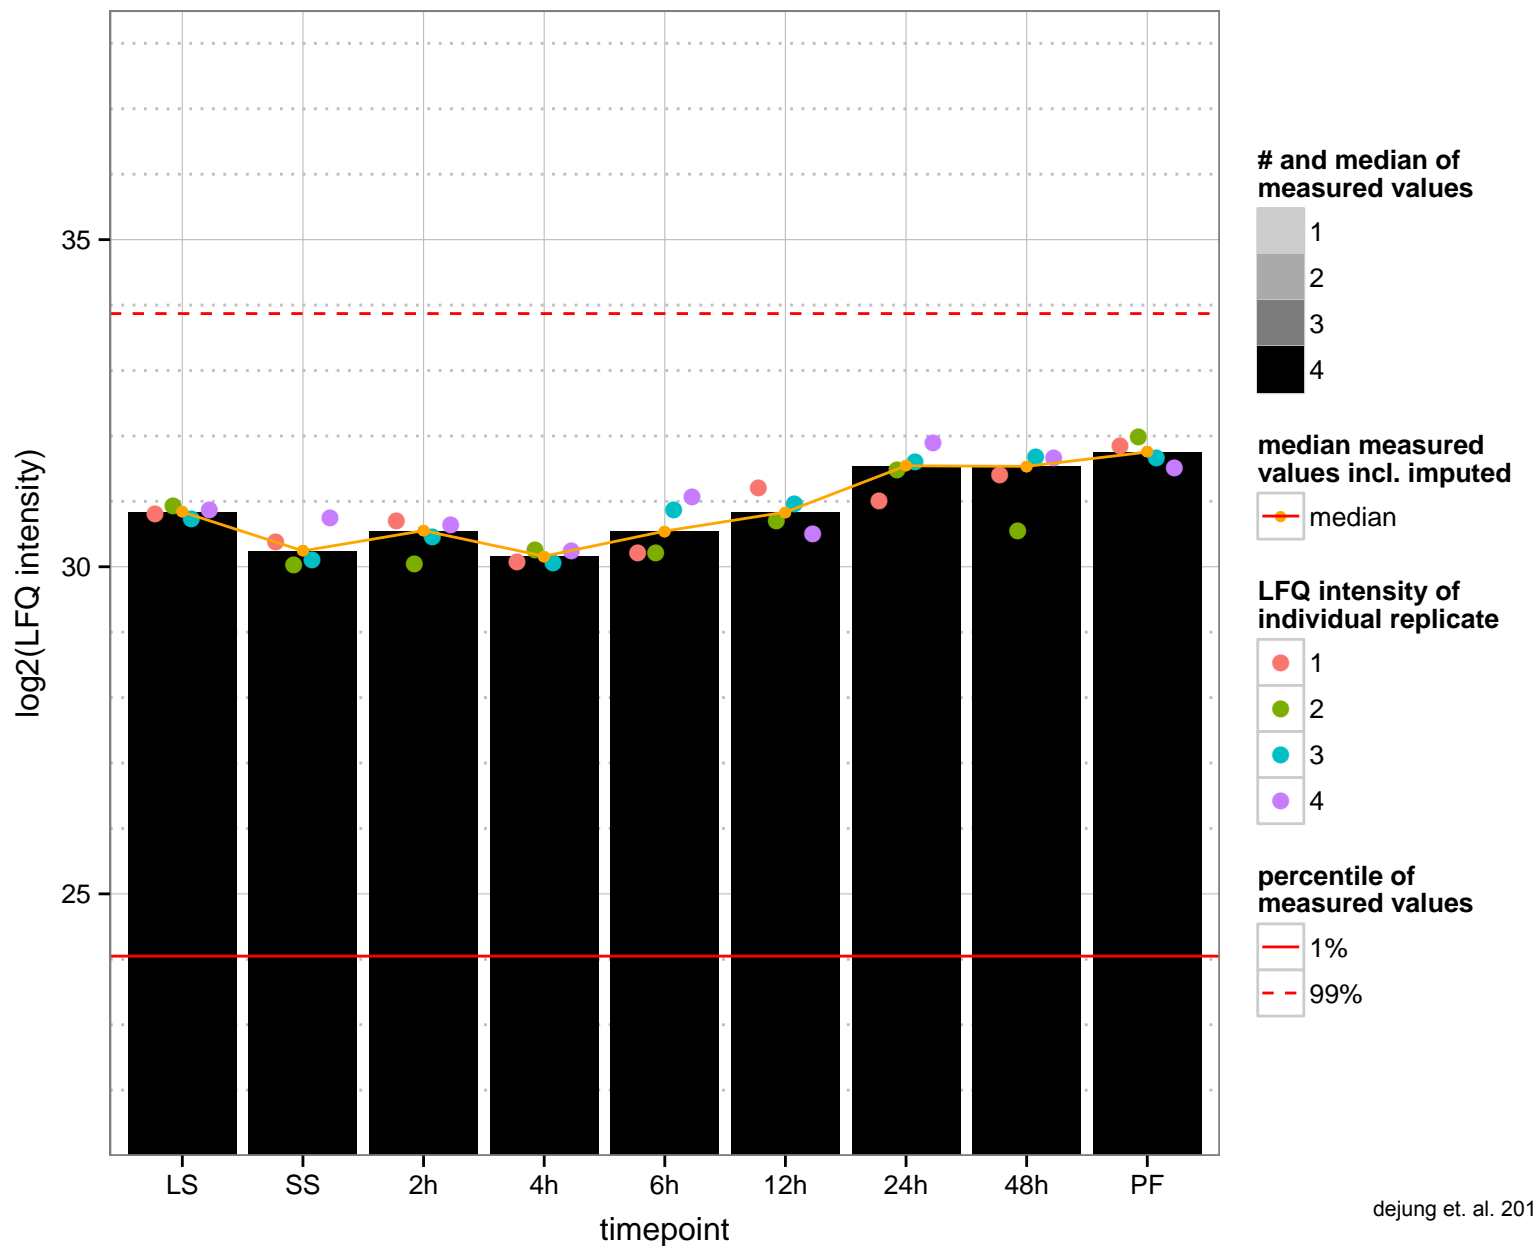

hypothetical protein, conserved  
 Tb927.9.12160  
 AGOF: null  
 AGOC: mitochondrion  
 AGOP: null  
 PGO: null  
 PGO: null  
 PGO: null

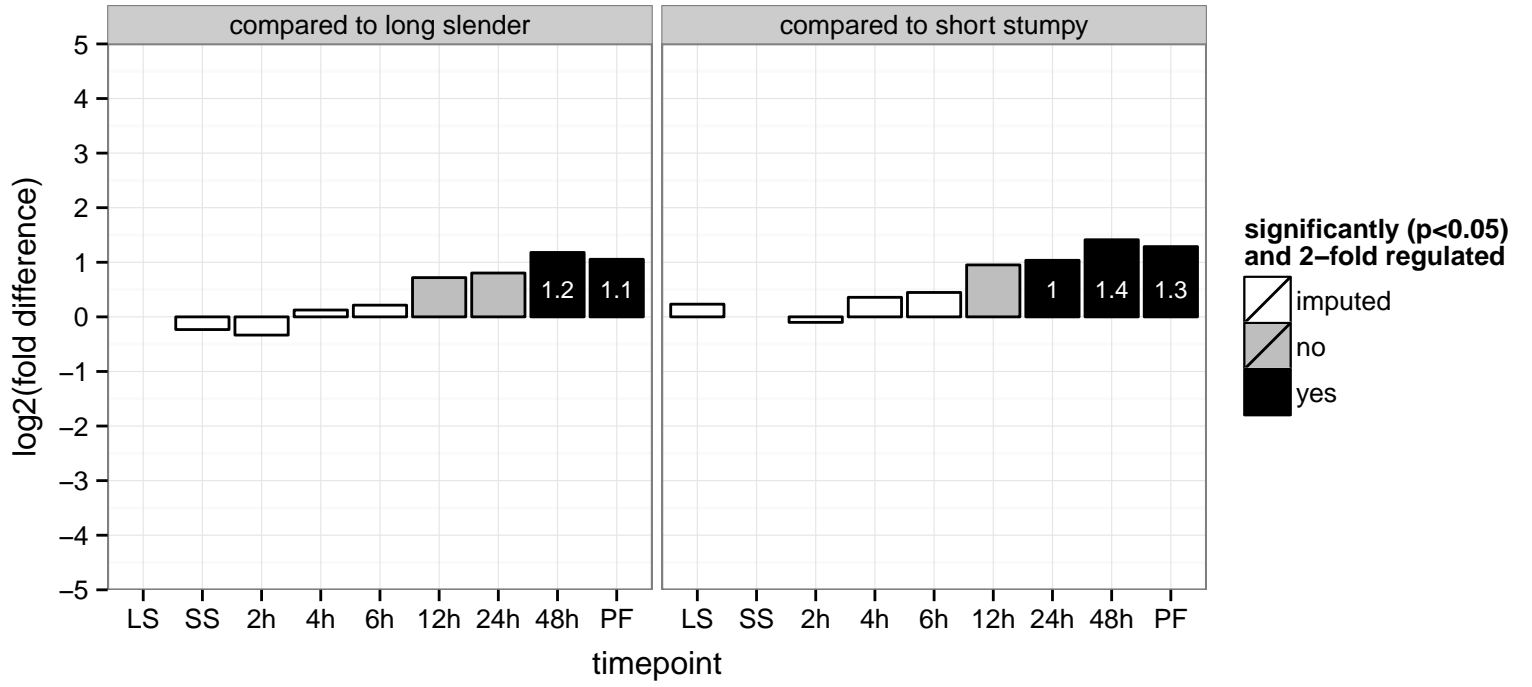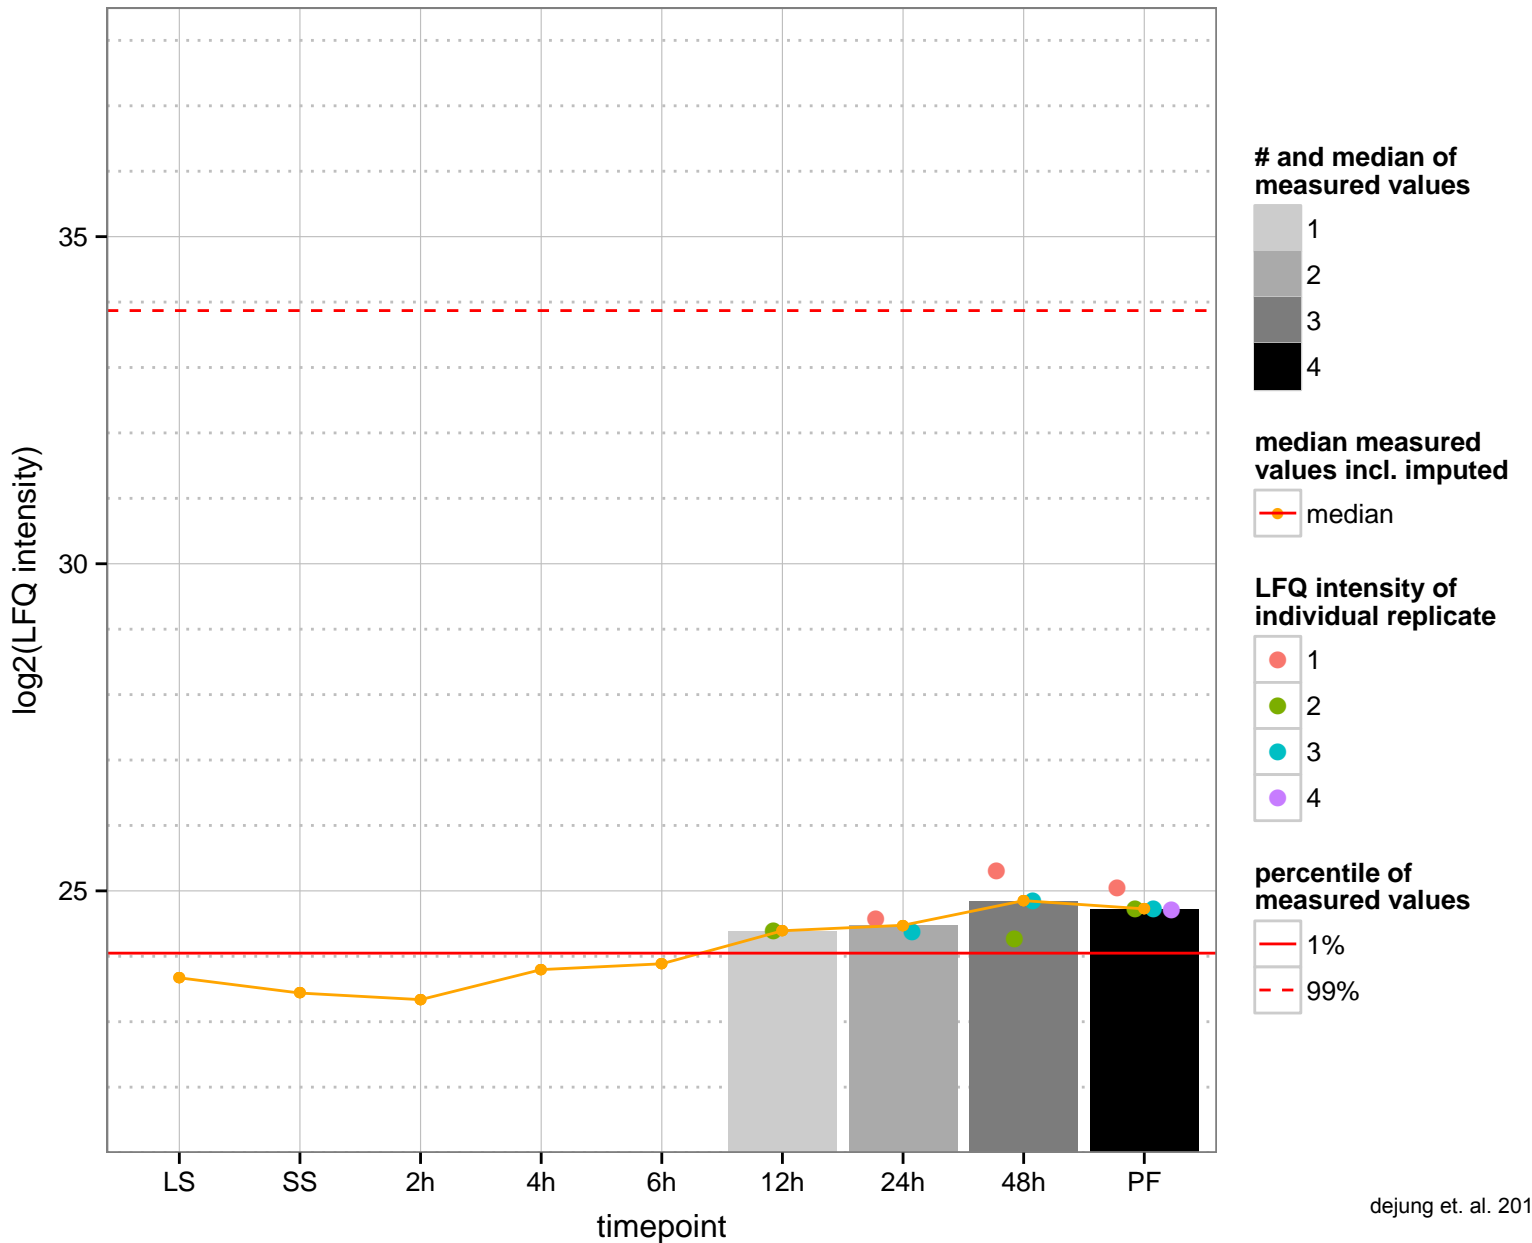

hypothetical protein, conserved  
 Tb927.9.12770  
 AGOF: null  
 AGOC: mitochondrion  
 AGOP: null  
 PGO: null  
 PGO: null  
 PGO: null

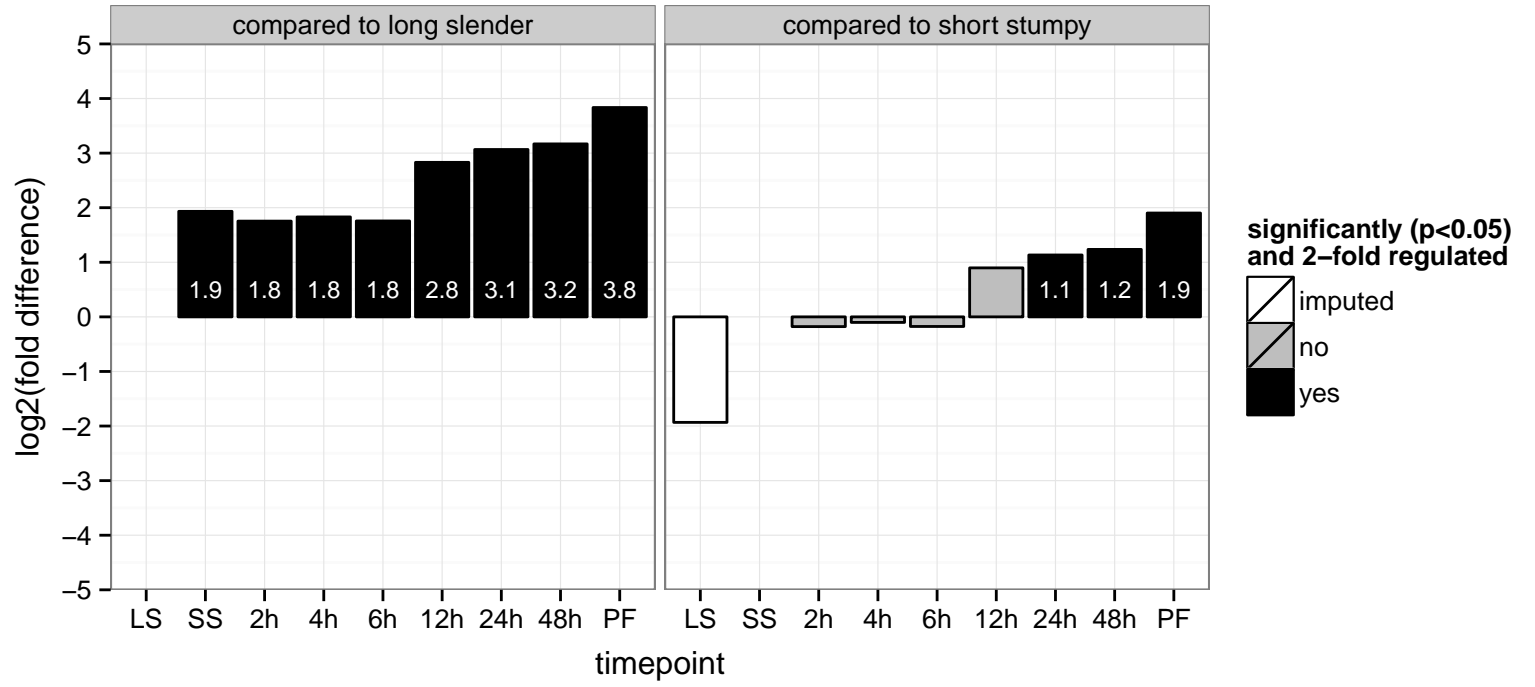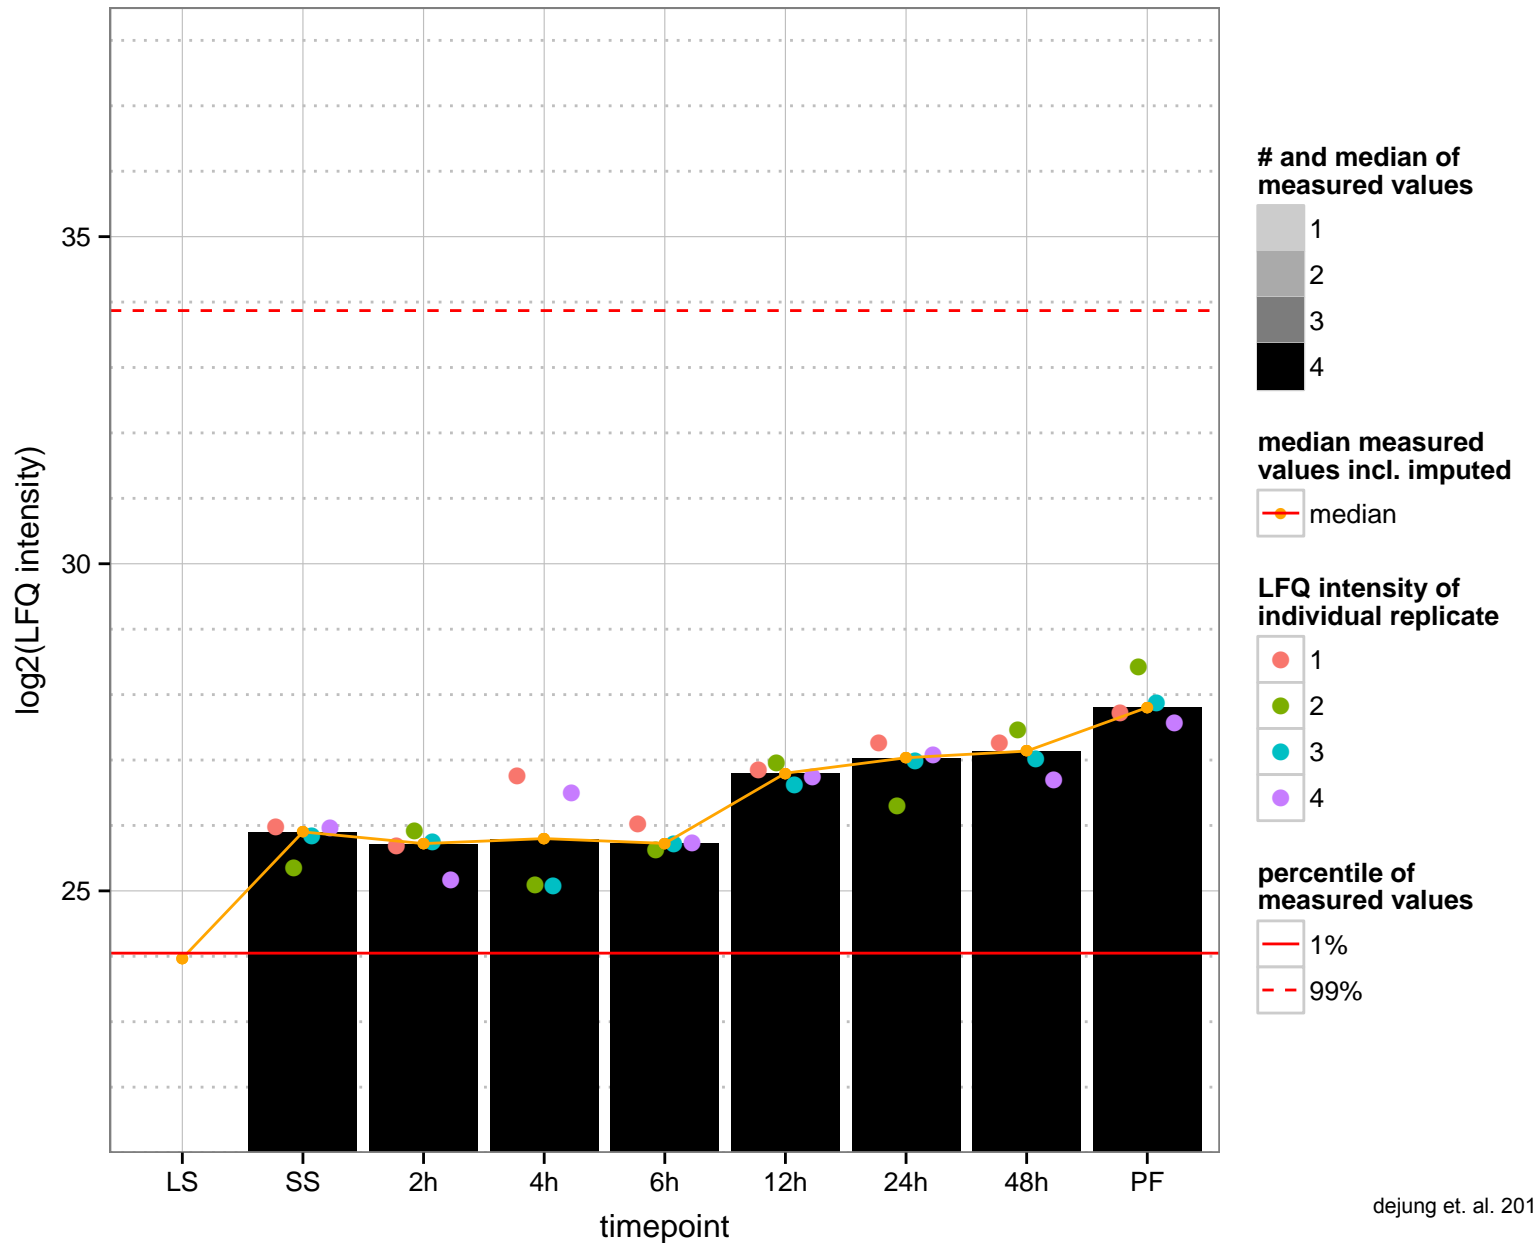

aminopeptidase P, putative, metallo-peptidase, Clan MG, Family M24  
 Tb927.9.13490  
 AGOF: aminopeptidase activity, manganese ion binding  
 AGOC: null  
 AGOP: cellular process  
 PGOF: aminopeptidase activity, manganese ion binding  
 PGO: null  
 PGO: cellular process

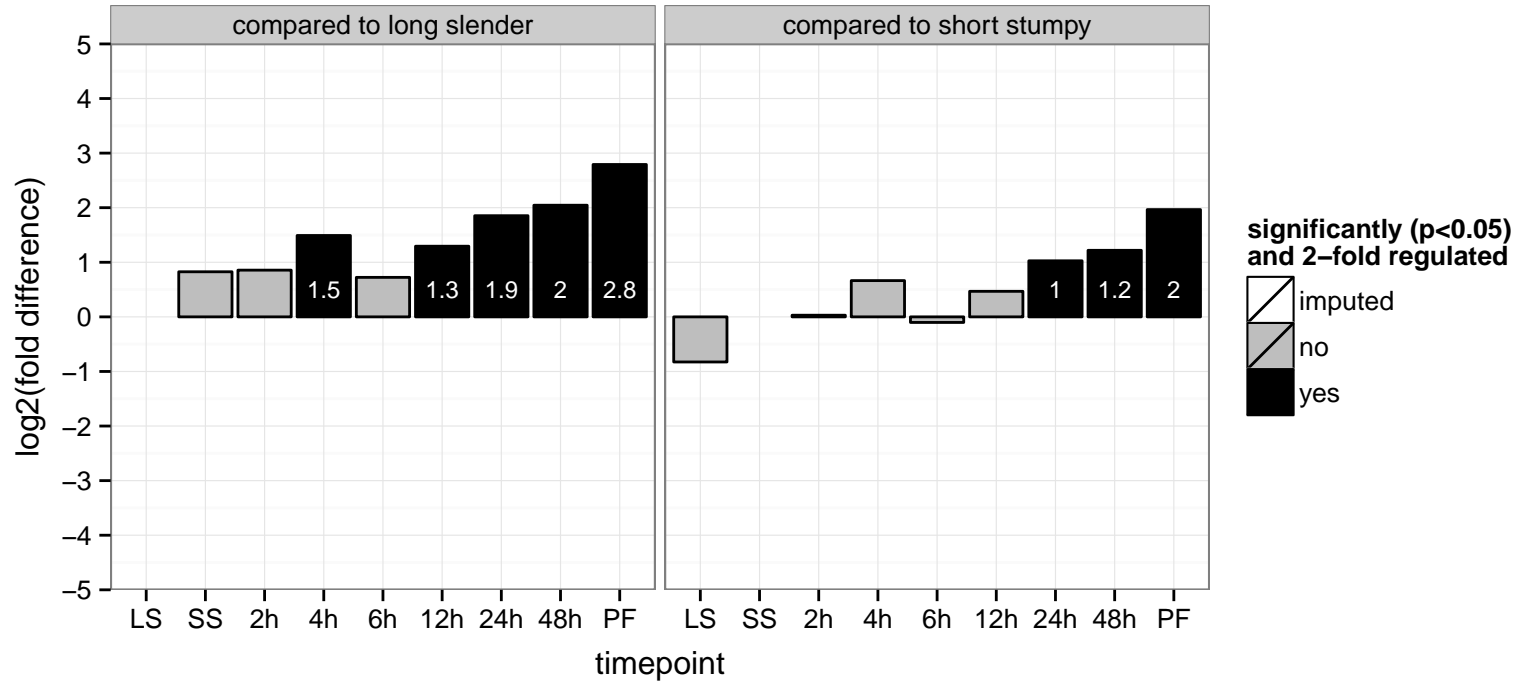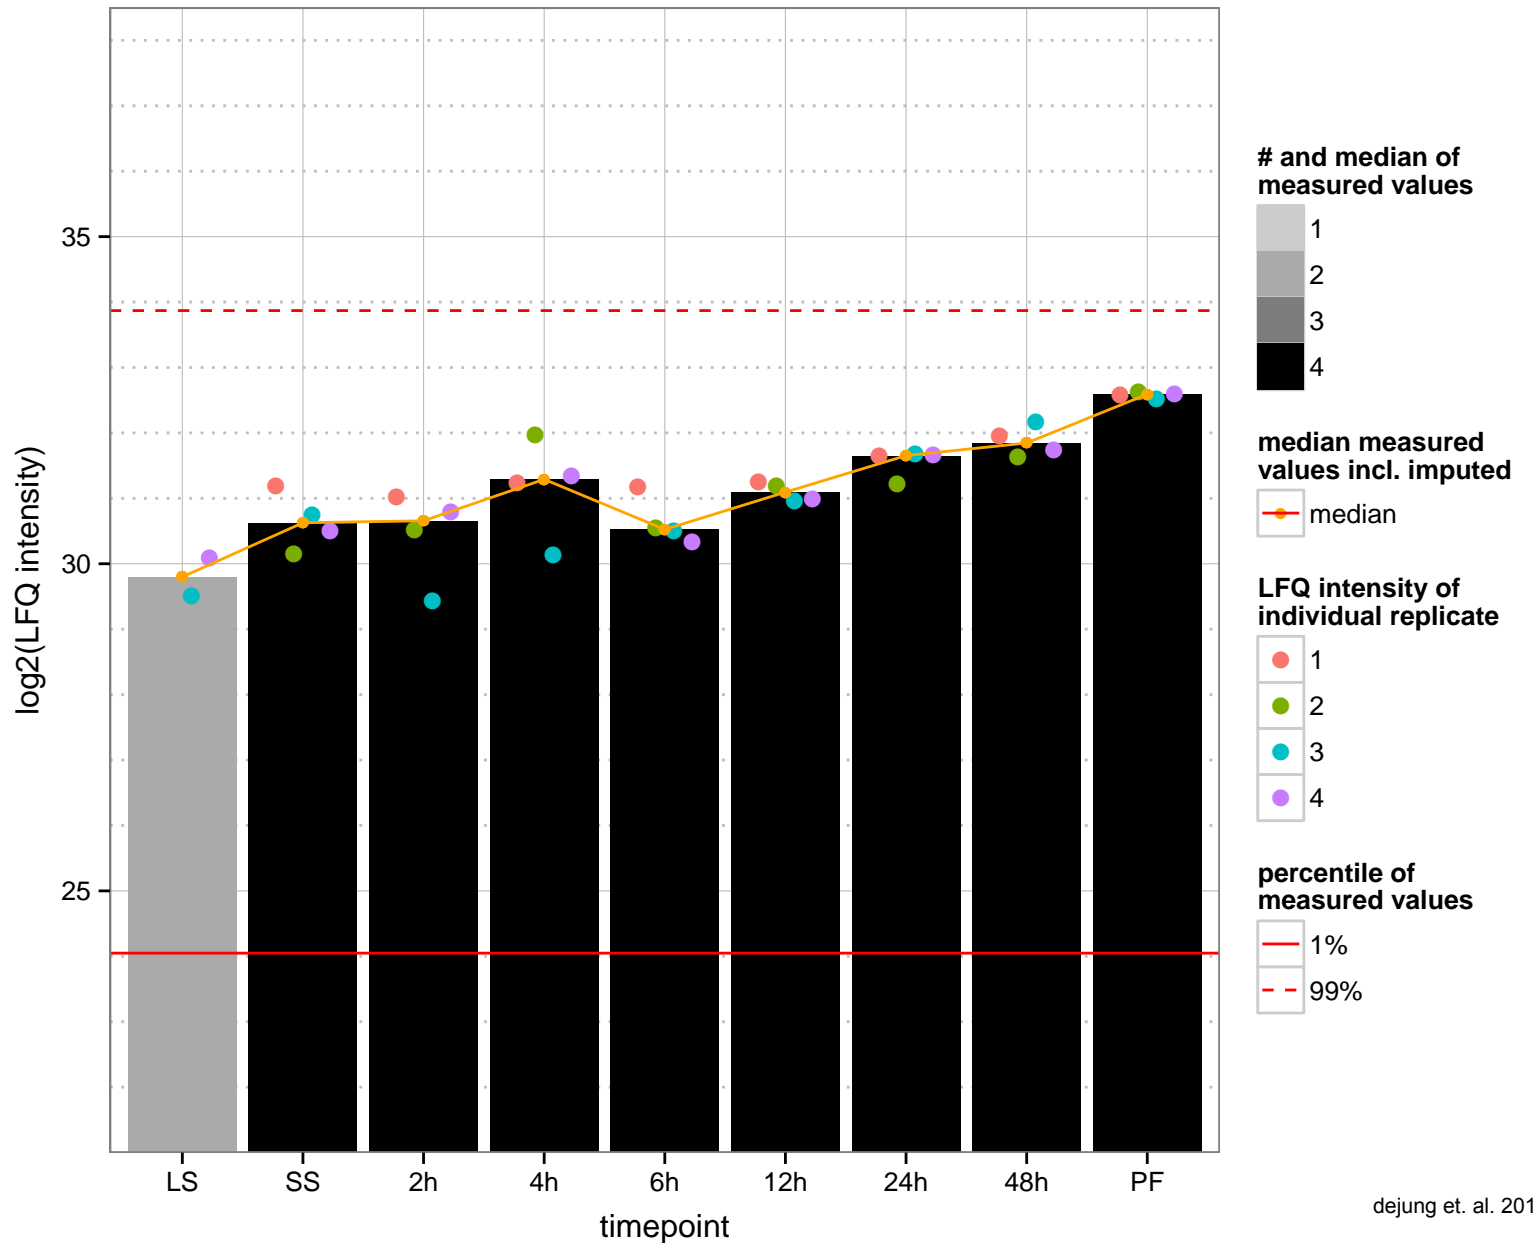



hypothetical protein, conserved  
 Tb927.9.13580  
 AGOF: null  
 AGOC: mitochondrion  
 AGOP: null  
 PGO: null  
 PGOC: null  
 PGOP: null

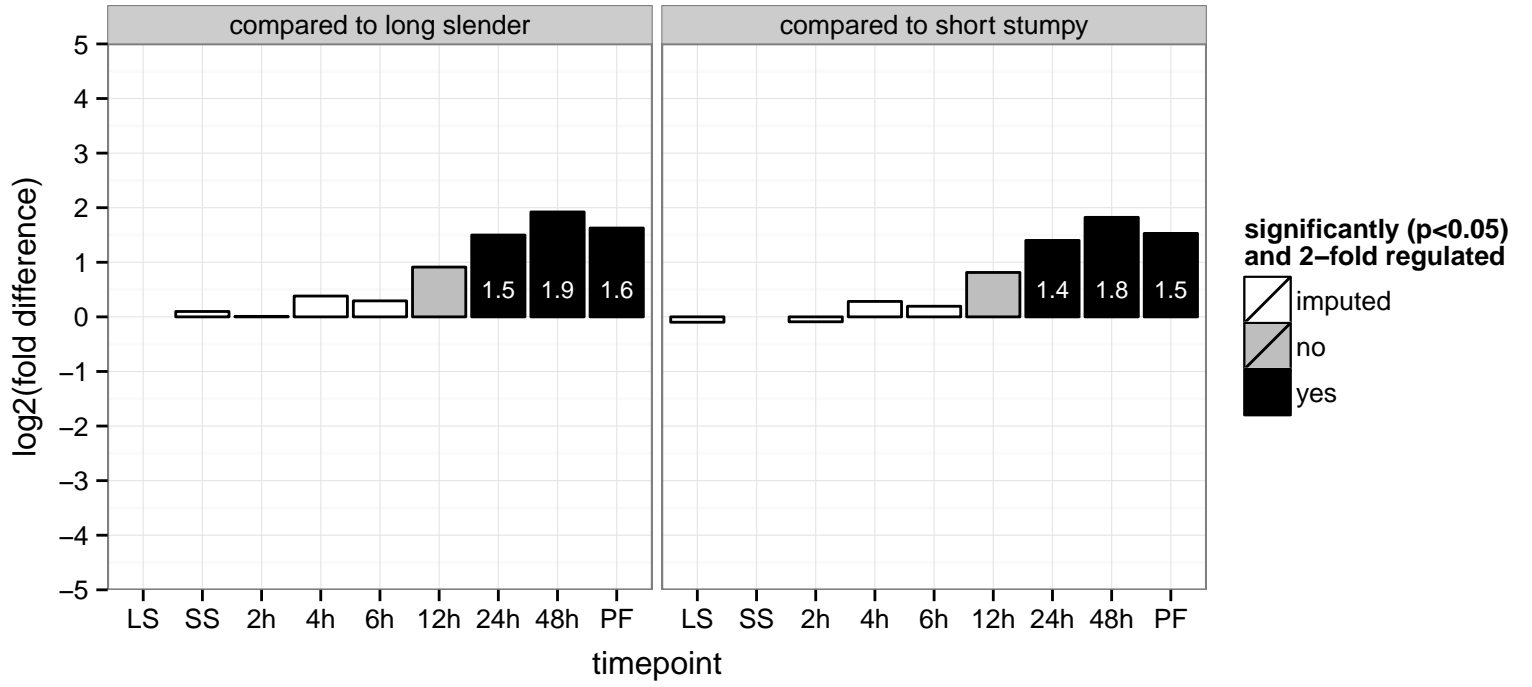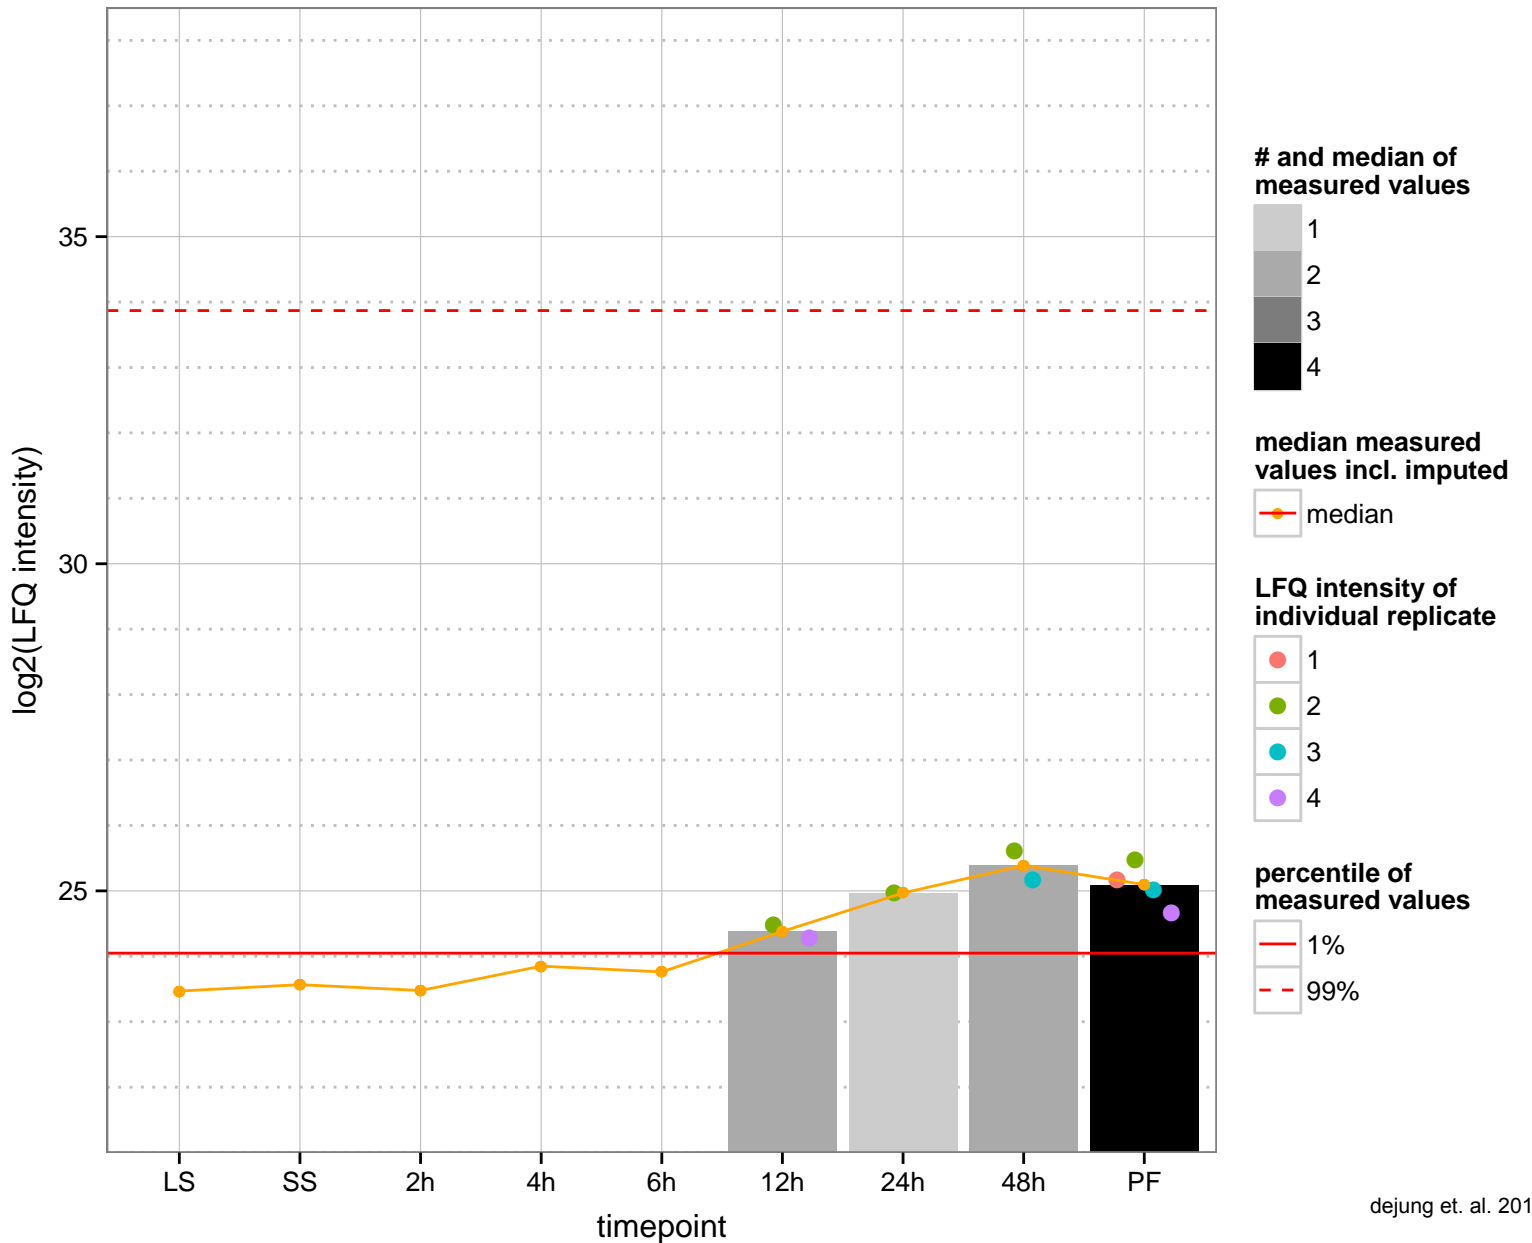

RNA 3'-terminal phosphate cyclase-like protein  
 Tb927.9.14410  
 AGOF: RNA-3'-phosphate cyclase activity  
 AGOC: nucleus  
 AGOP: null  
 PGO: catalytic activity  
 PGOC: nucleolus  
 PGOP: RNA processing, ribosome biogenesis

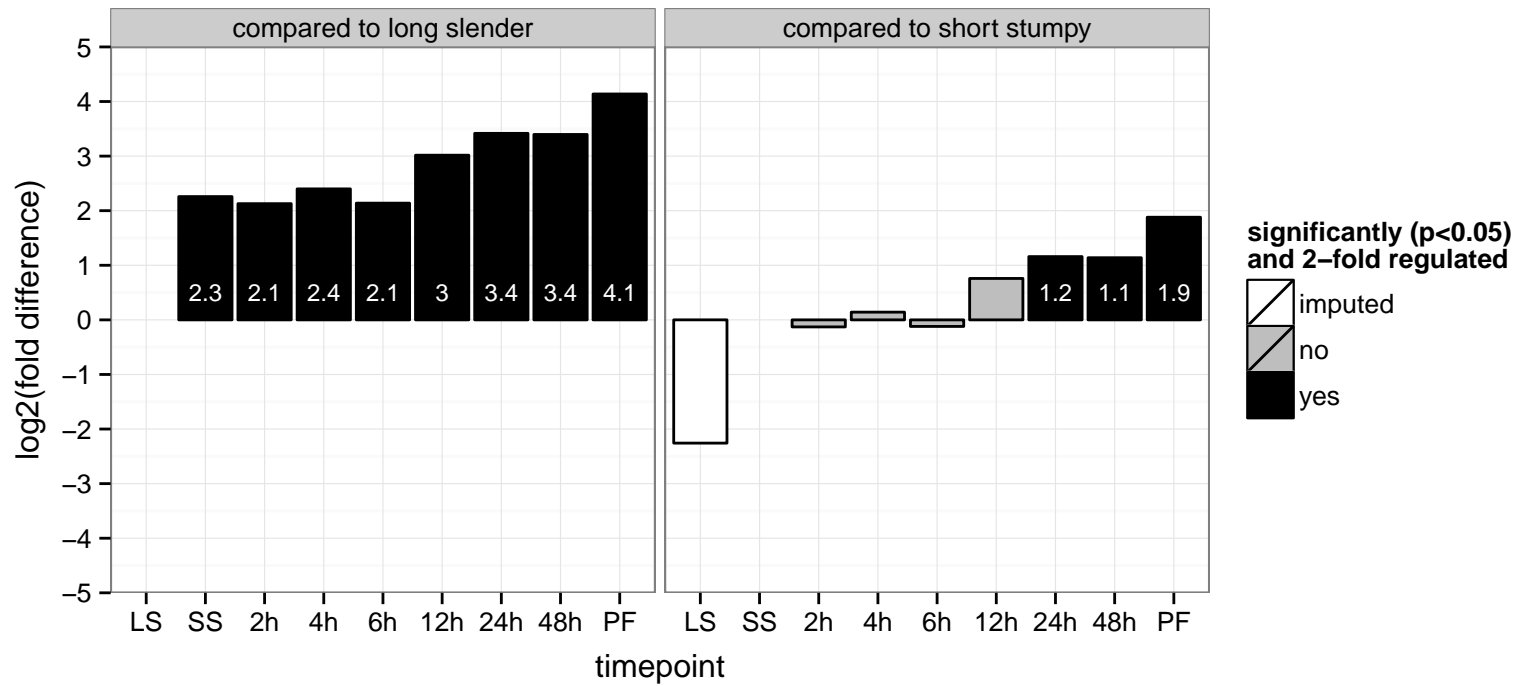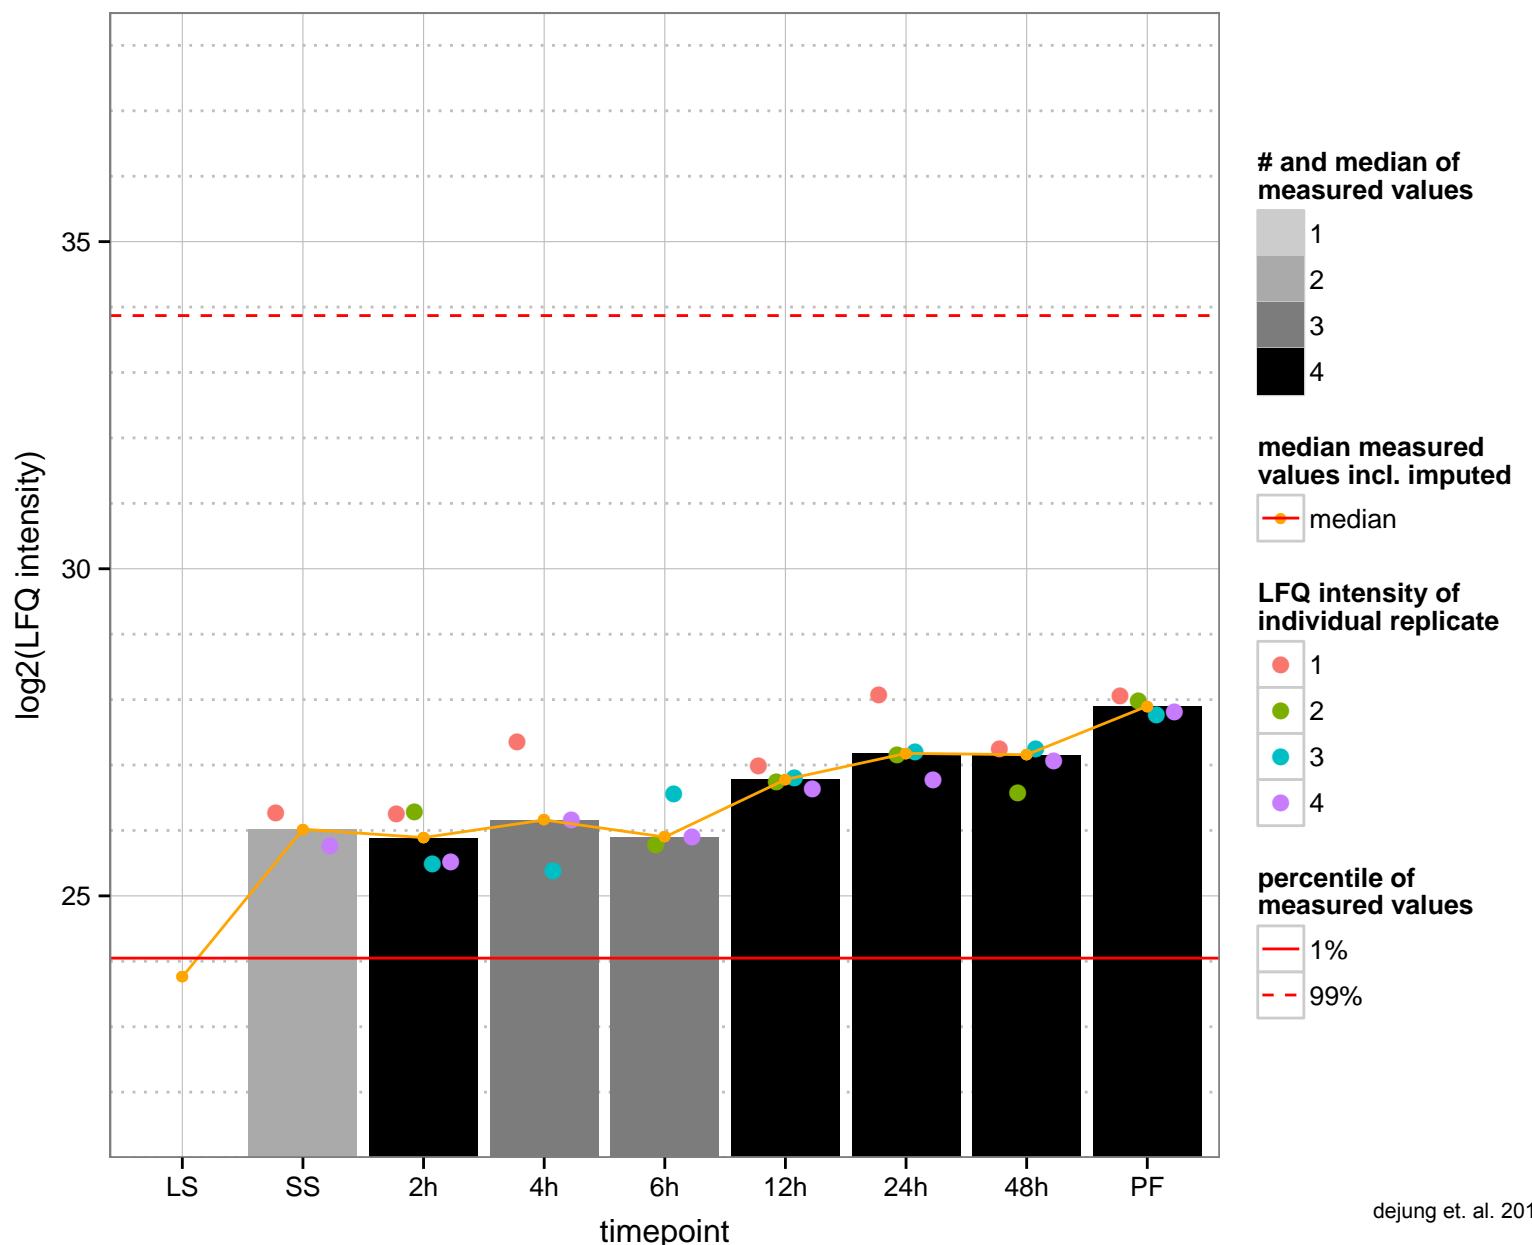

cyclophilin-like protein, putative (PPIase)  
 Tb927.9.14420  
 AGOF: peptidyl-prolyl cis-trans isomerase activity  
 AGOC: integral to membrane, mitochondrion  
 AGOP: protein folding  
 PGO: peptidyl-prolyl cis-trans isomerase activity  
 PGO: null  
 PGO: protein folding

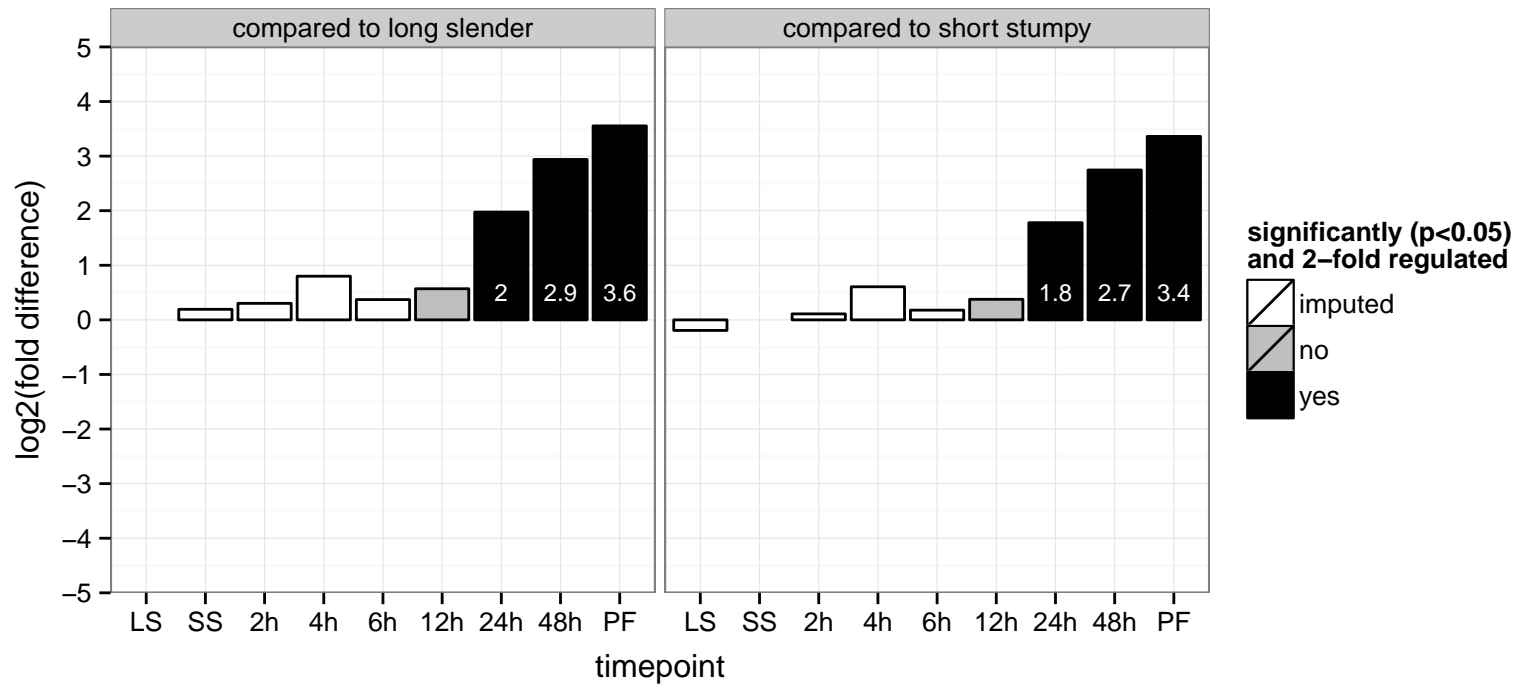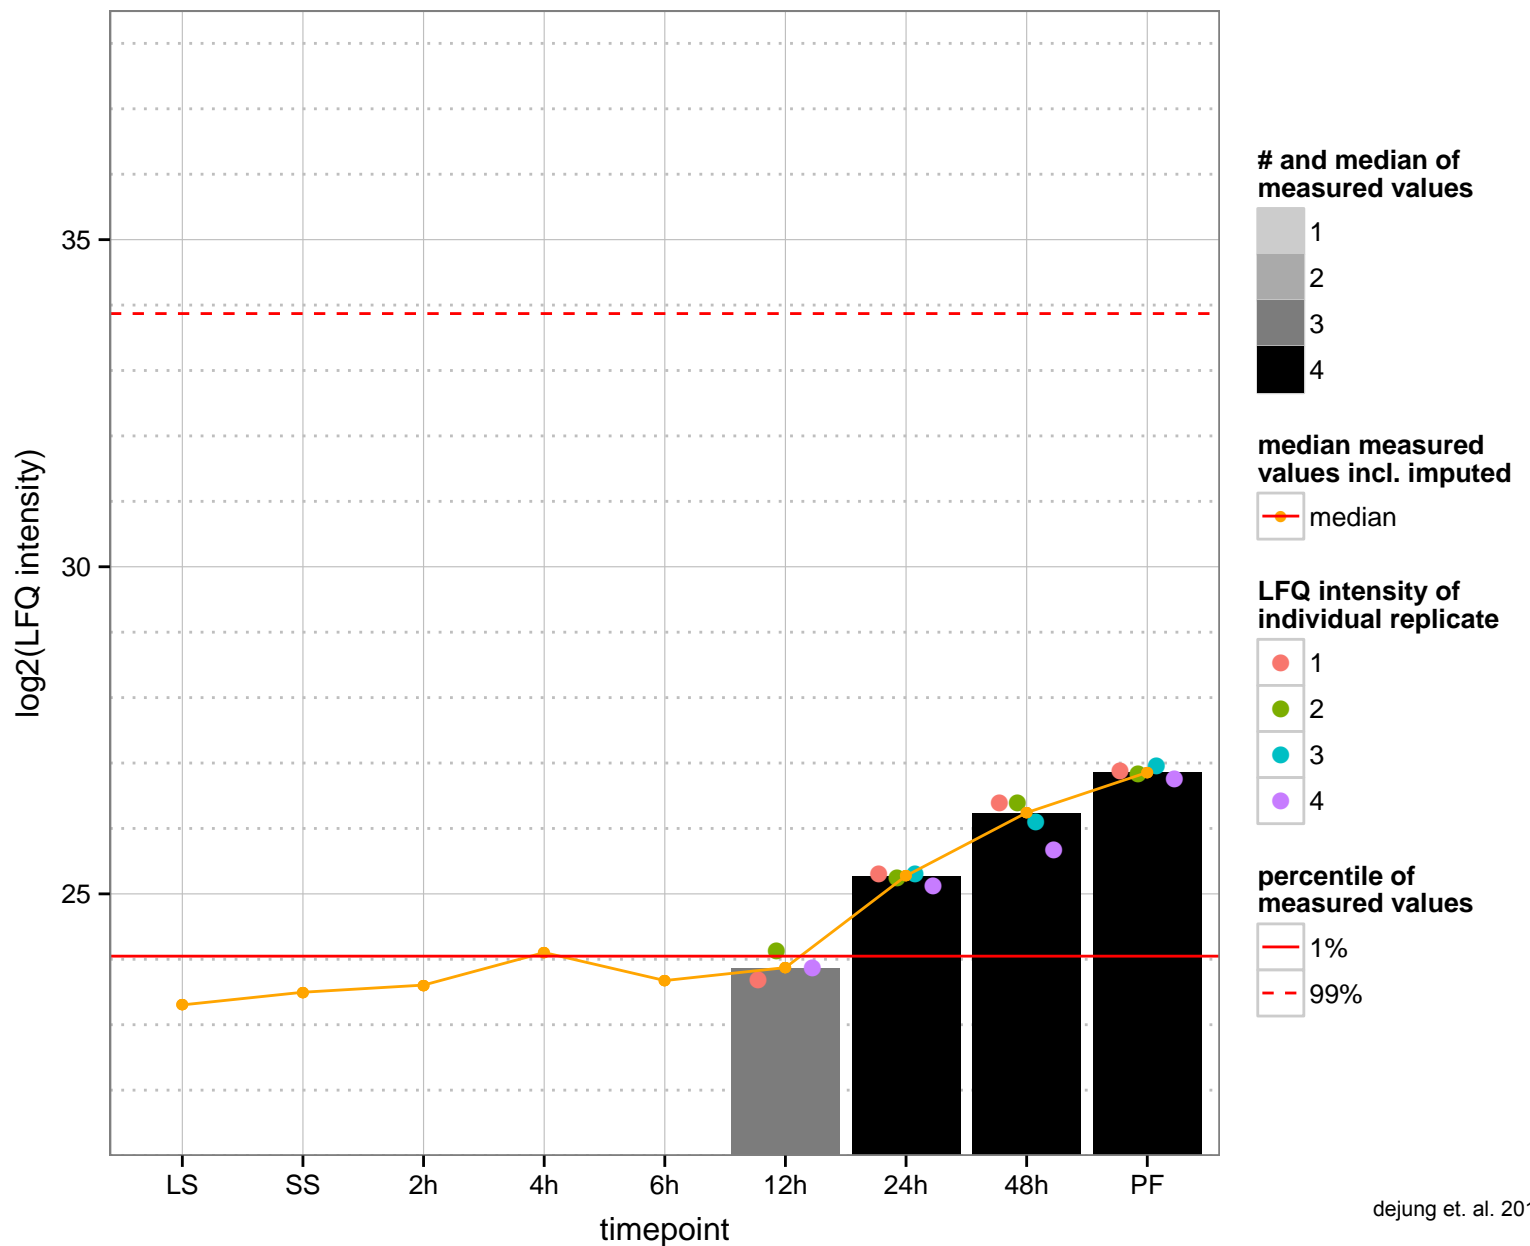

hypothetical protein, conserved

Tb927.9.1510

AGOF: ATP binding, catalytic activity

AGOC: null

AGOP: null

PGOF: ATP binding, D-alanine-D-alanine ligase activity, metal ion binding, protein binding

PGOC: null

PGOP: null

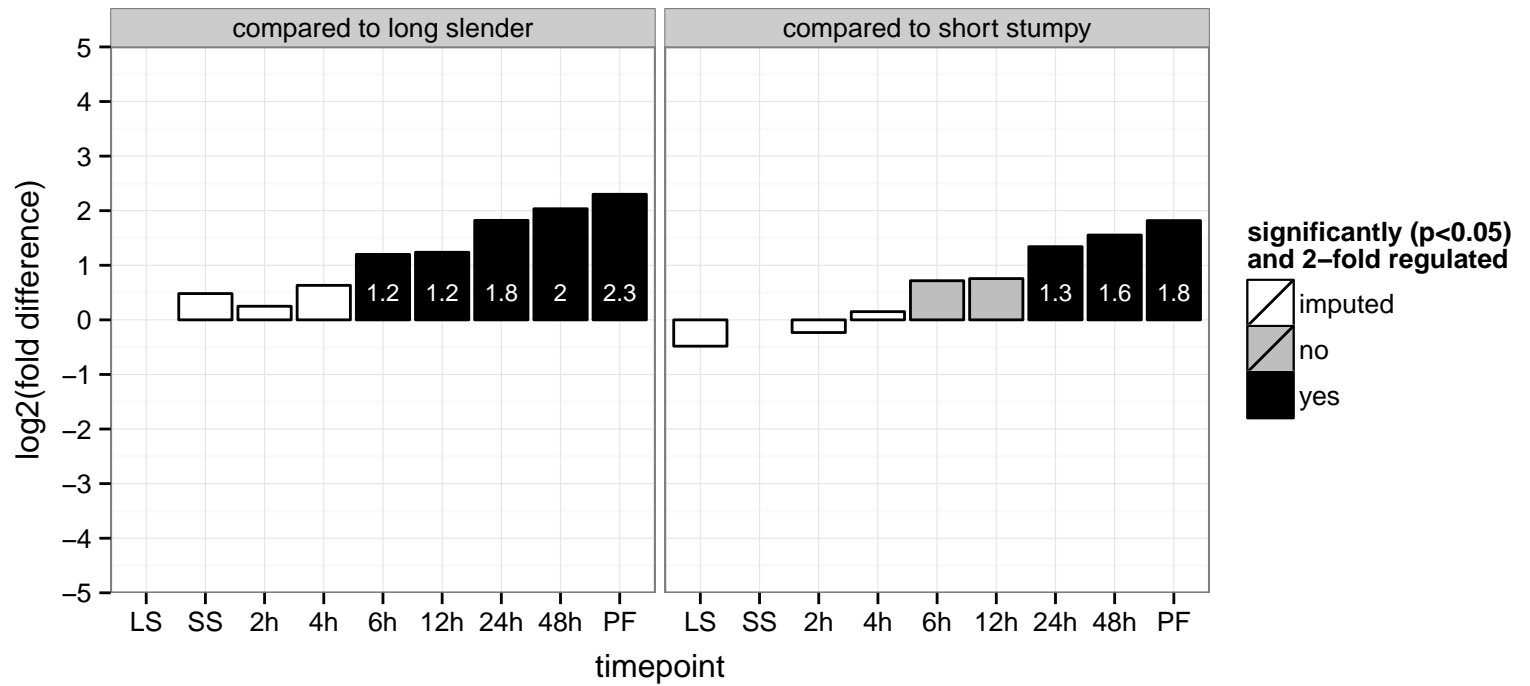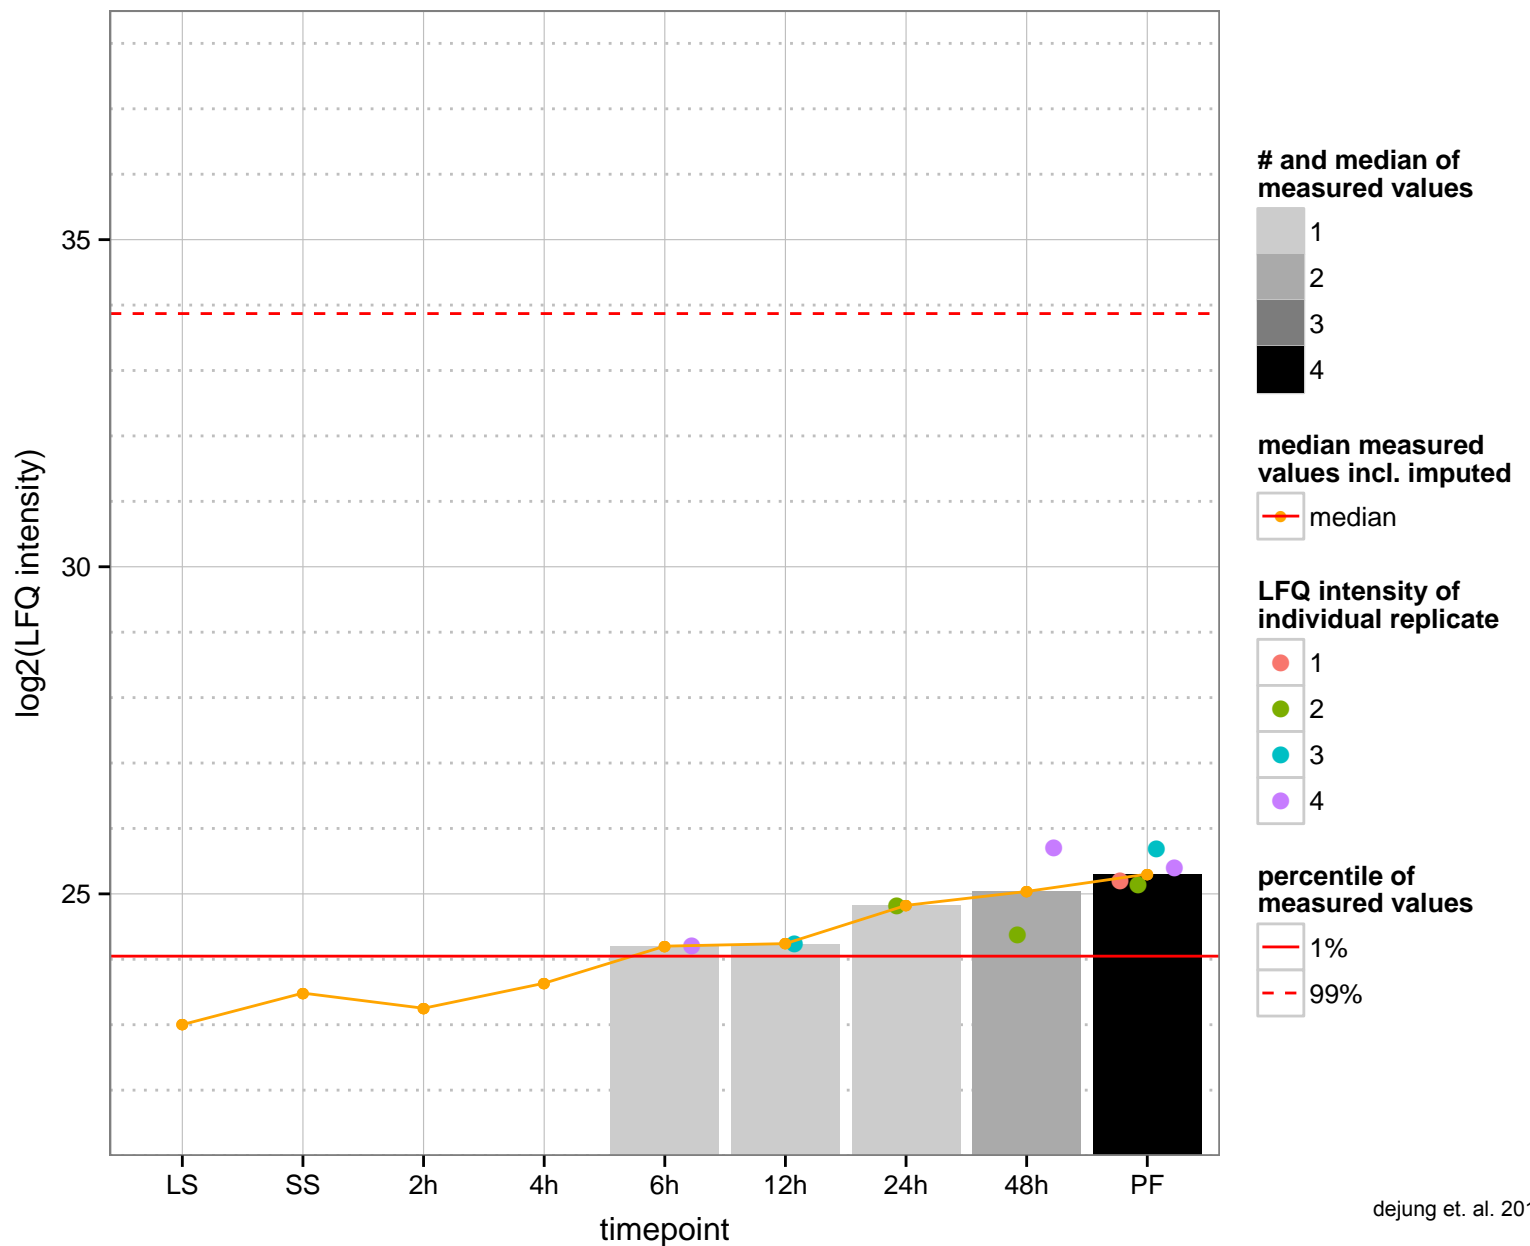

60S ribosomal protein L35, putative  
 Tb927.9.1850;Tb927.9.1810  
 AGOF: structural constituent of ribosome  
 AGOC: intracellular, ribosome  
 AGOP: translation  
 PGOF: null, structural constituent of ribosome  
 PGO: null, intracellular, ribosome  
 PGOP: null, translation

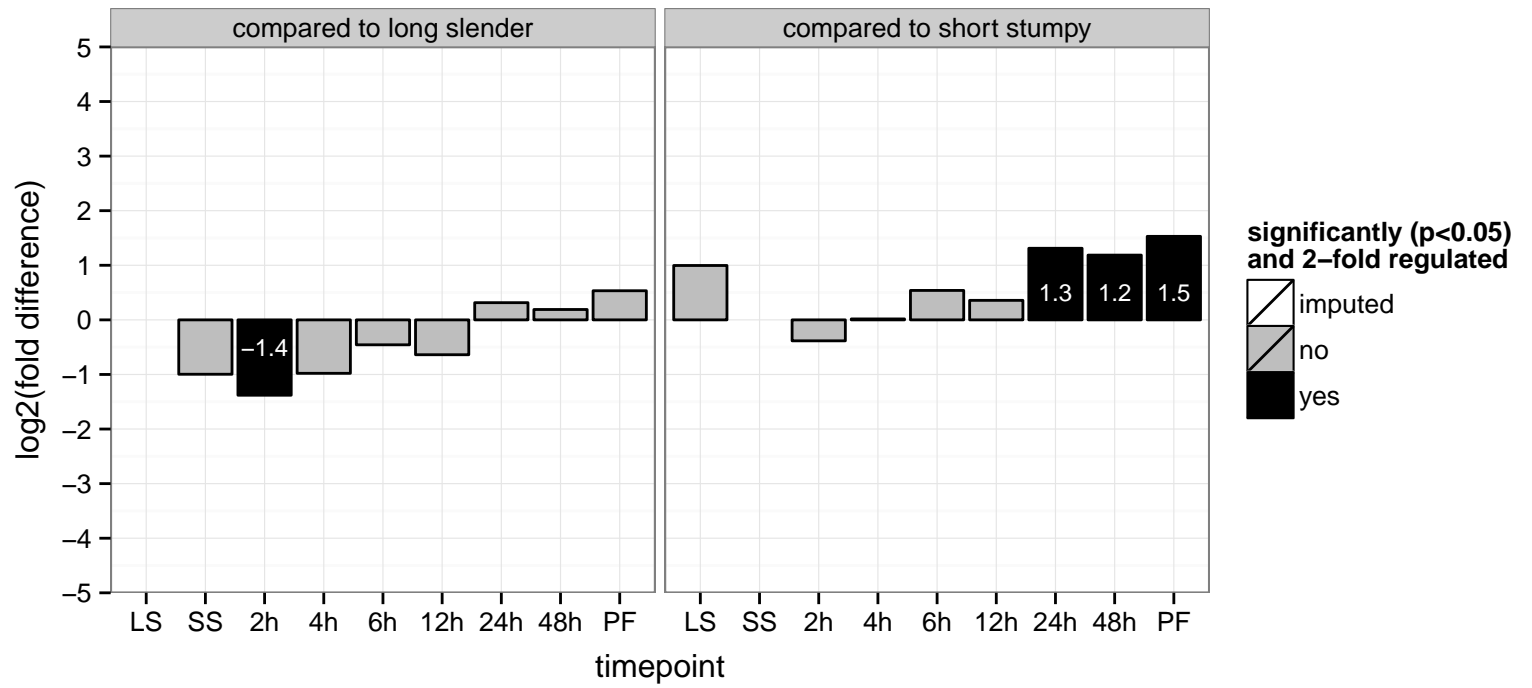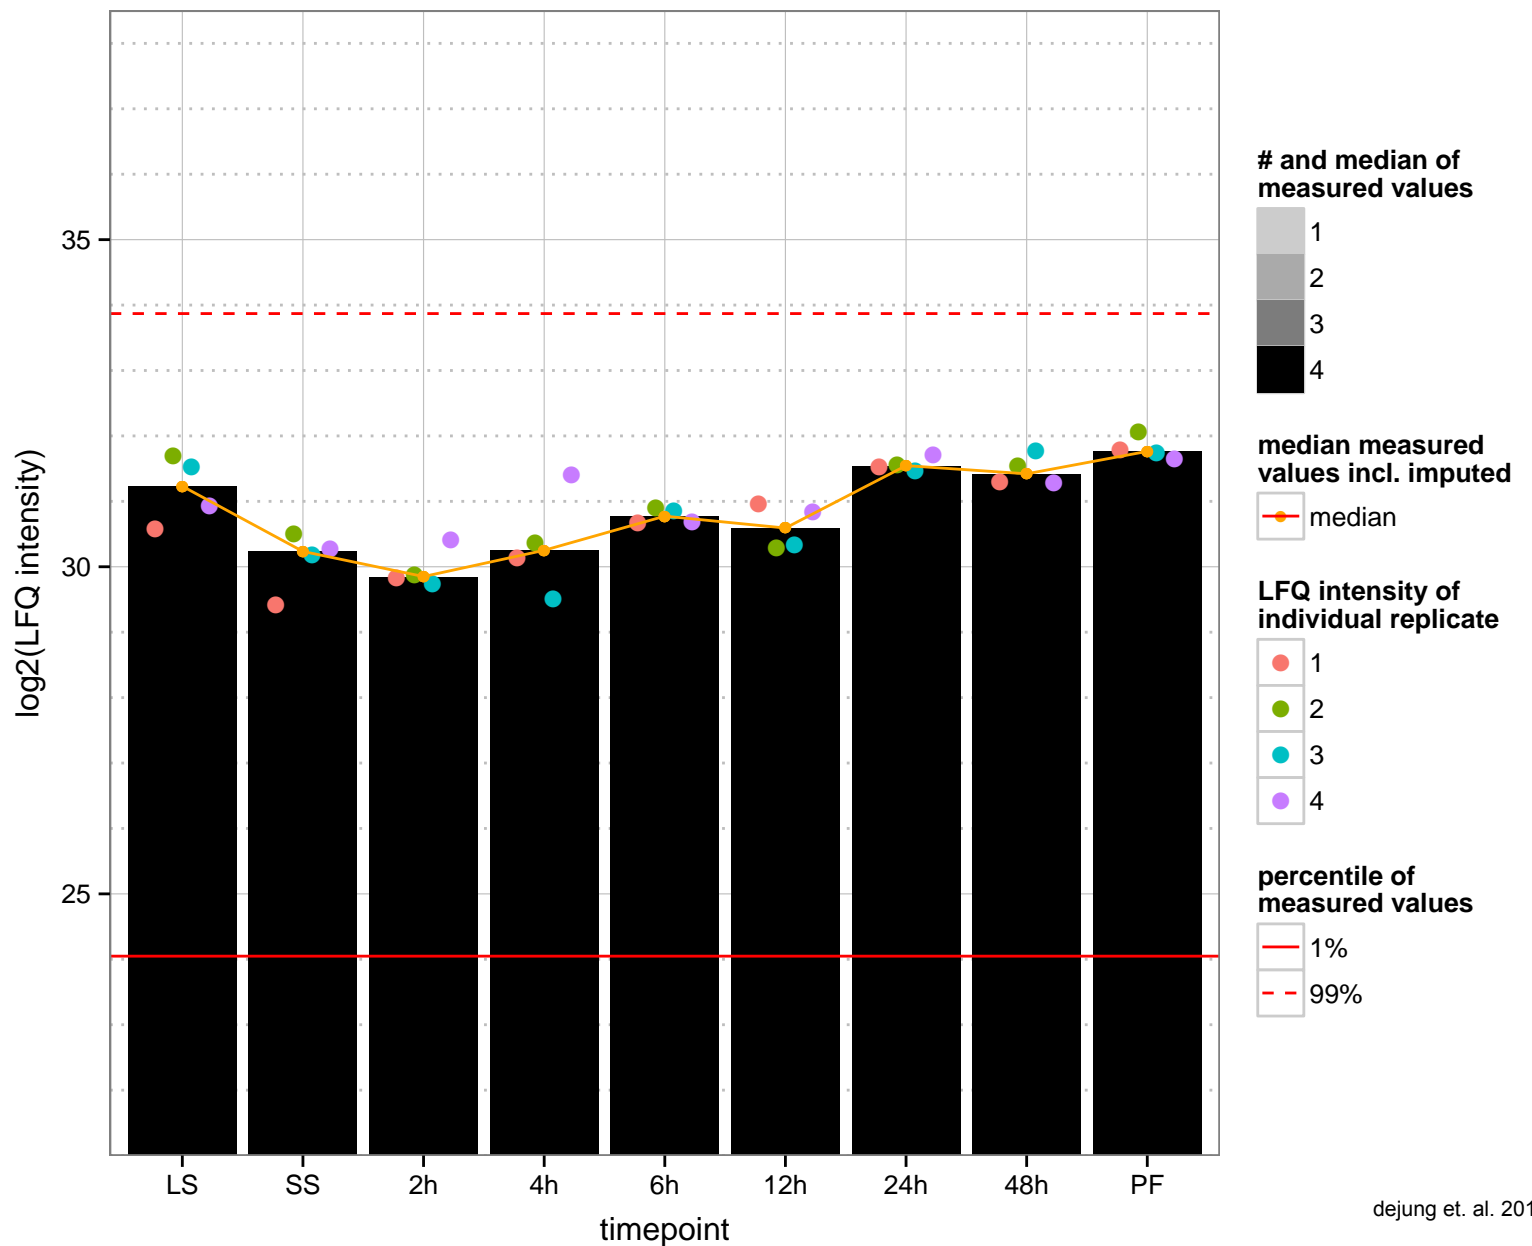

hypothetical protein, conserved  
 Tb927.9.2120  
 AGOF: null  
 AGOC: null  
 AGOP: null  
 PGOF: null  
 PGOC: null  
 PGOP: null

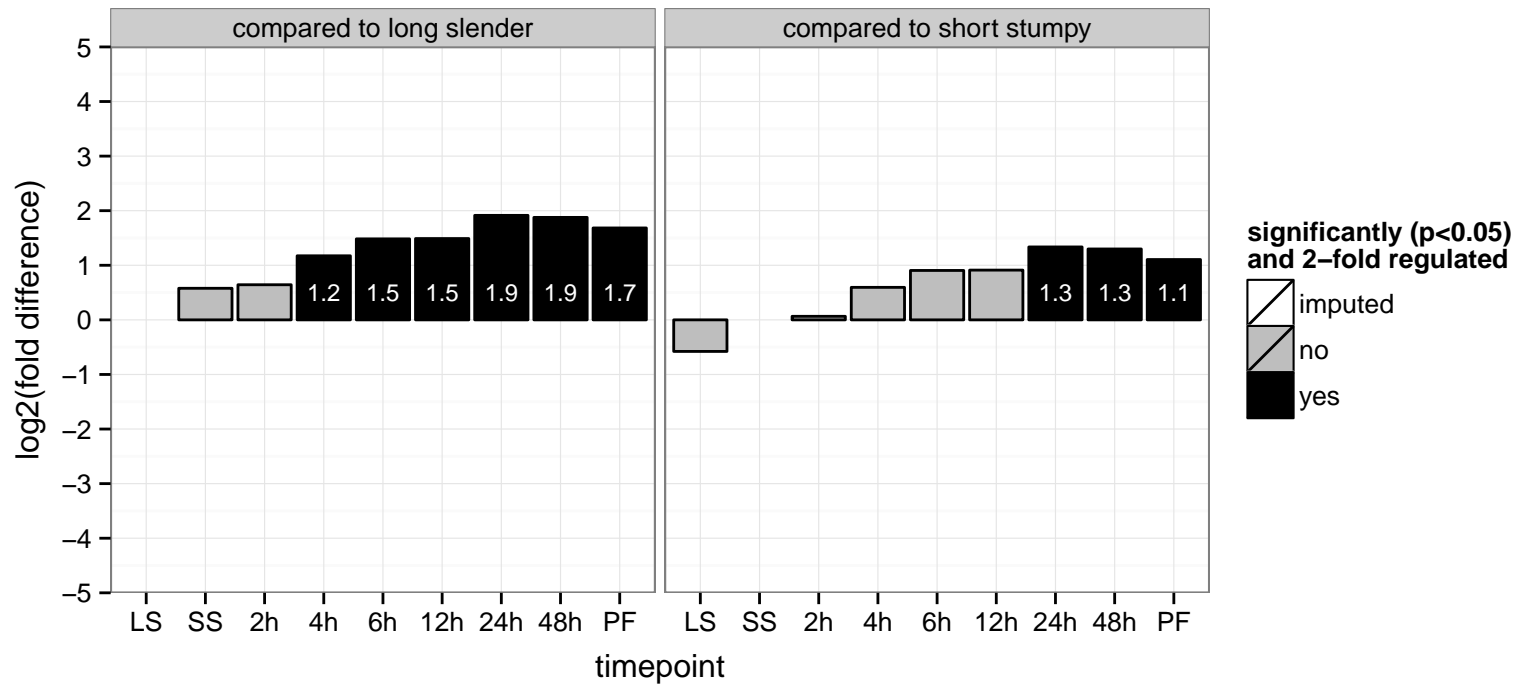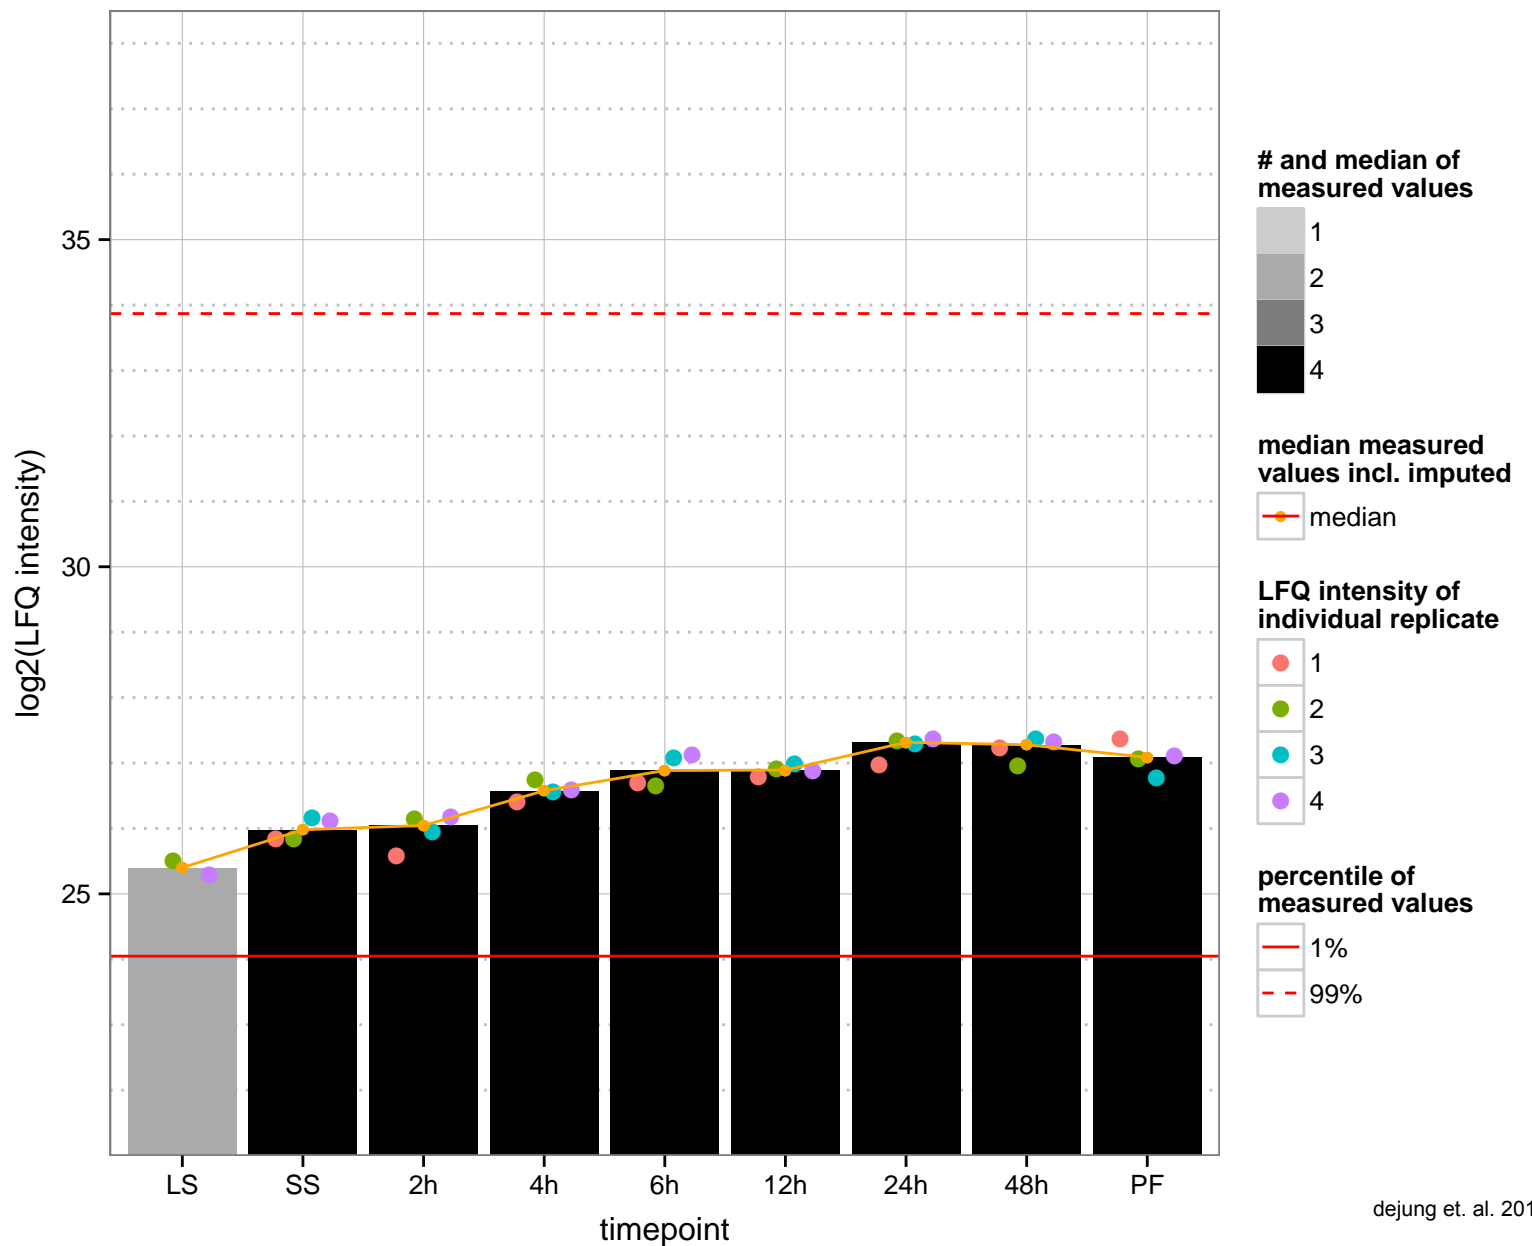

electron transport protein SCO1/SCO2, putative  
 Tb927.9.2450  
 AGOF: copper ion binding  
 AGOC: mitochondrial inner membrane  
 AGOP: oxidation-reduction process  
 PGO: null  
 PGOC: null  
 PGOP: null

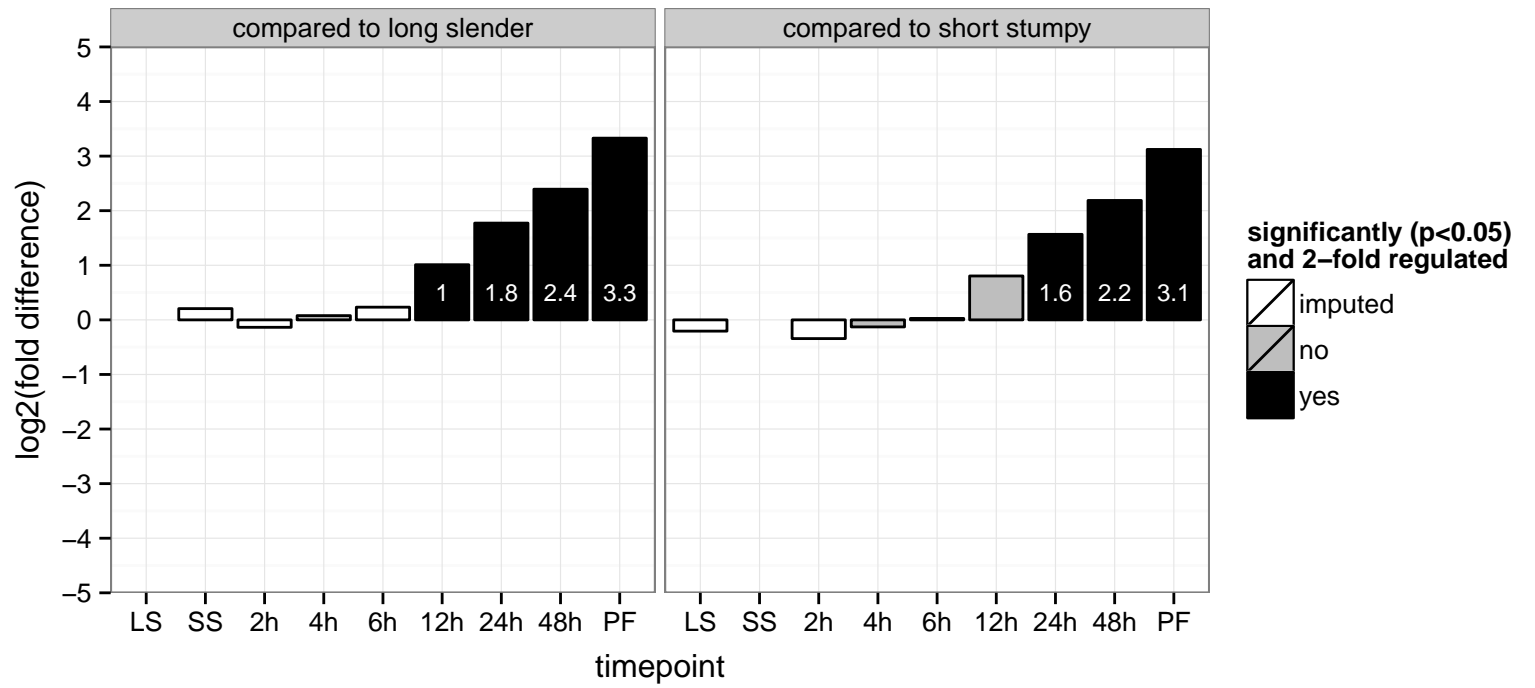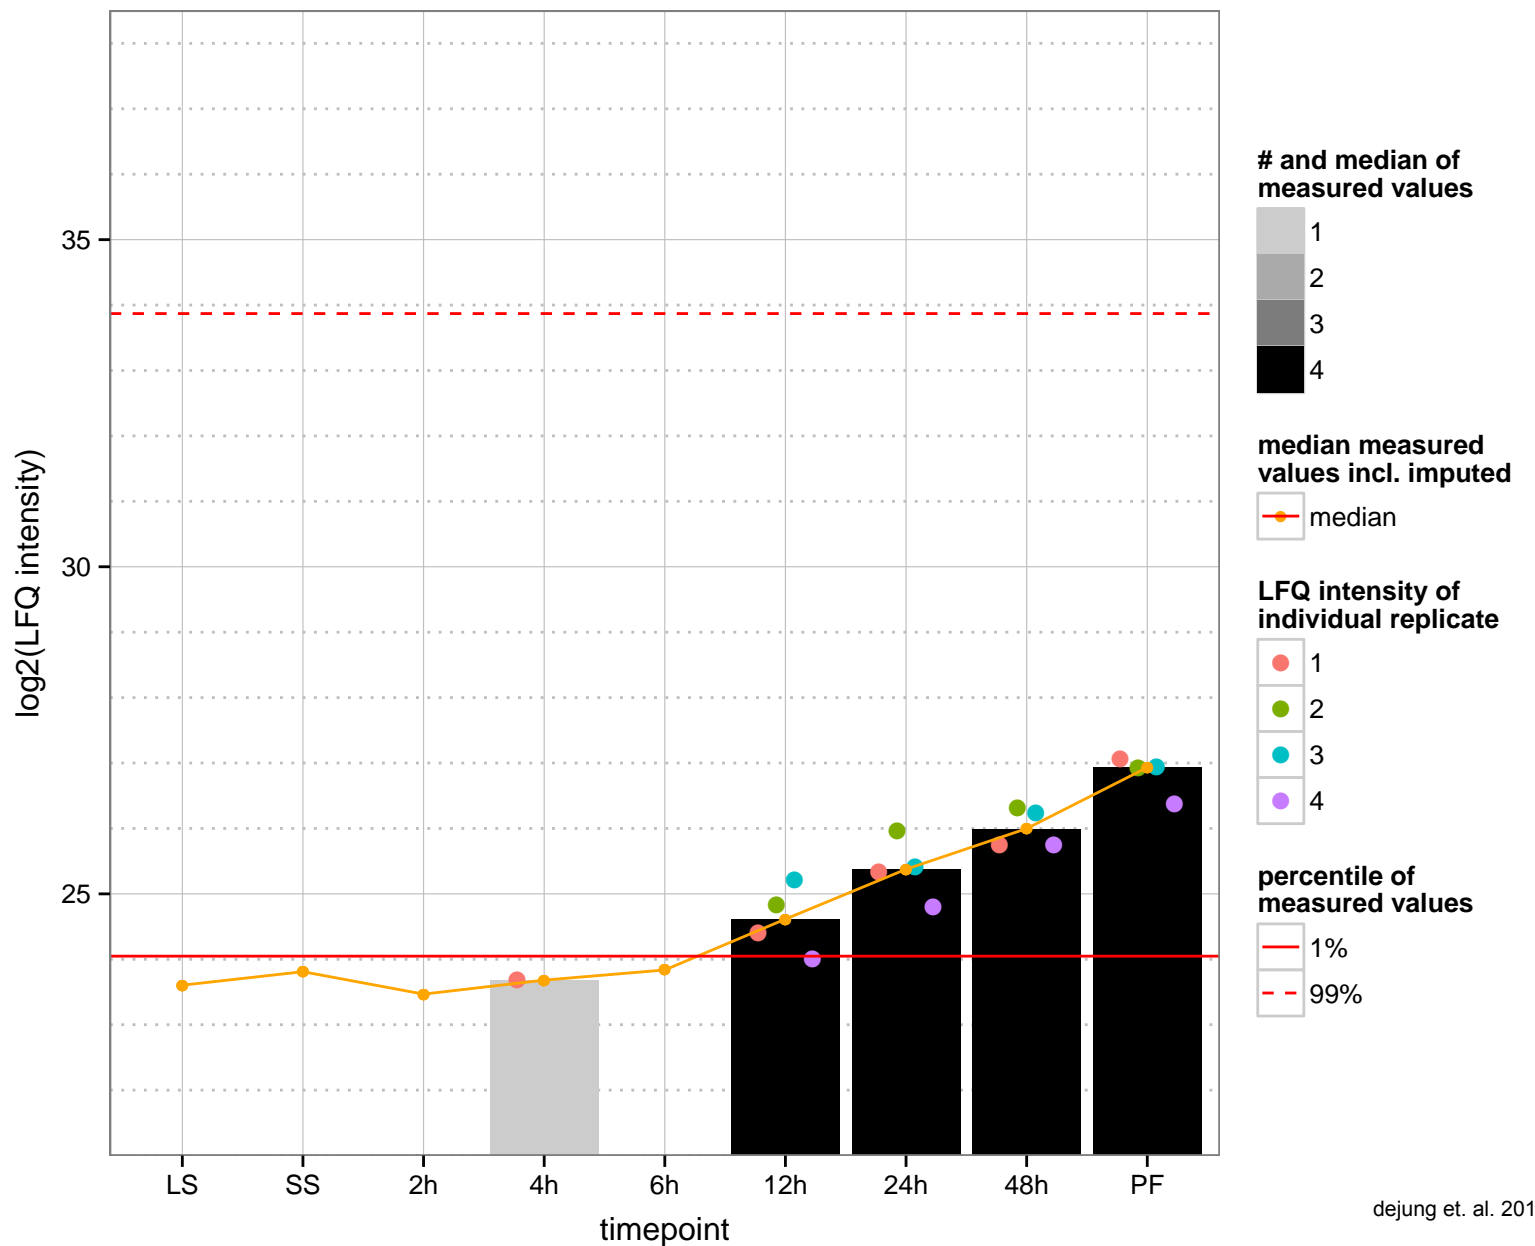

fatty acyl CoA synthetase 2 (ACS2)  
 Tb927.9.4200  
 AGOF: fatty-acyl-CoA synthase activity  
 AGOC: membrane  
 AGOP: fatty acid metabolic process  
 PGO: catalytic activity  
 PGOC: null  
 PGOP: metabolic process

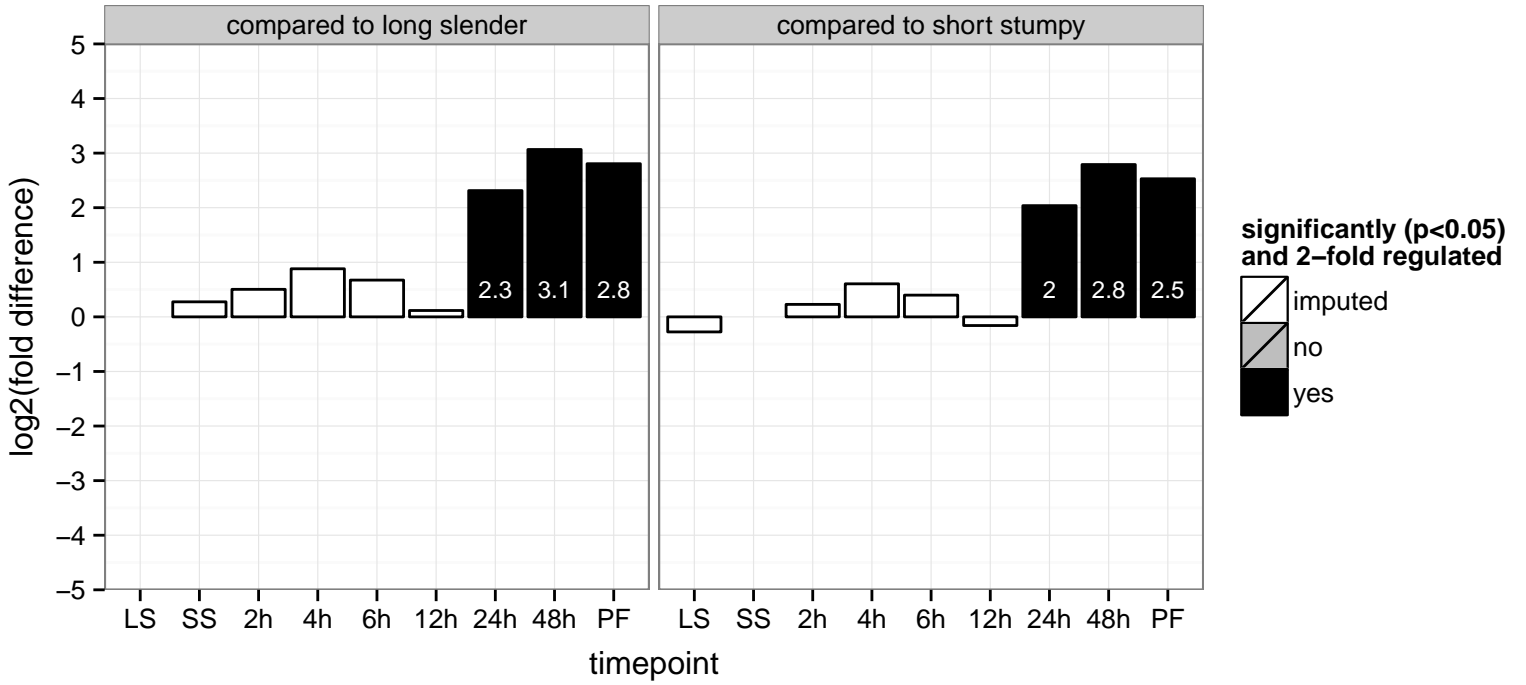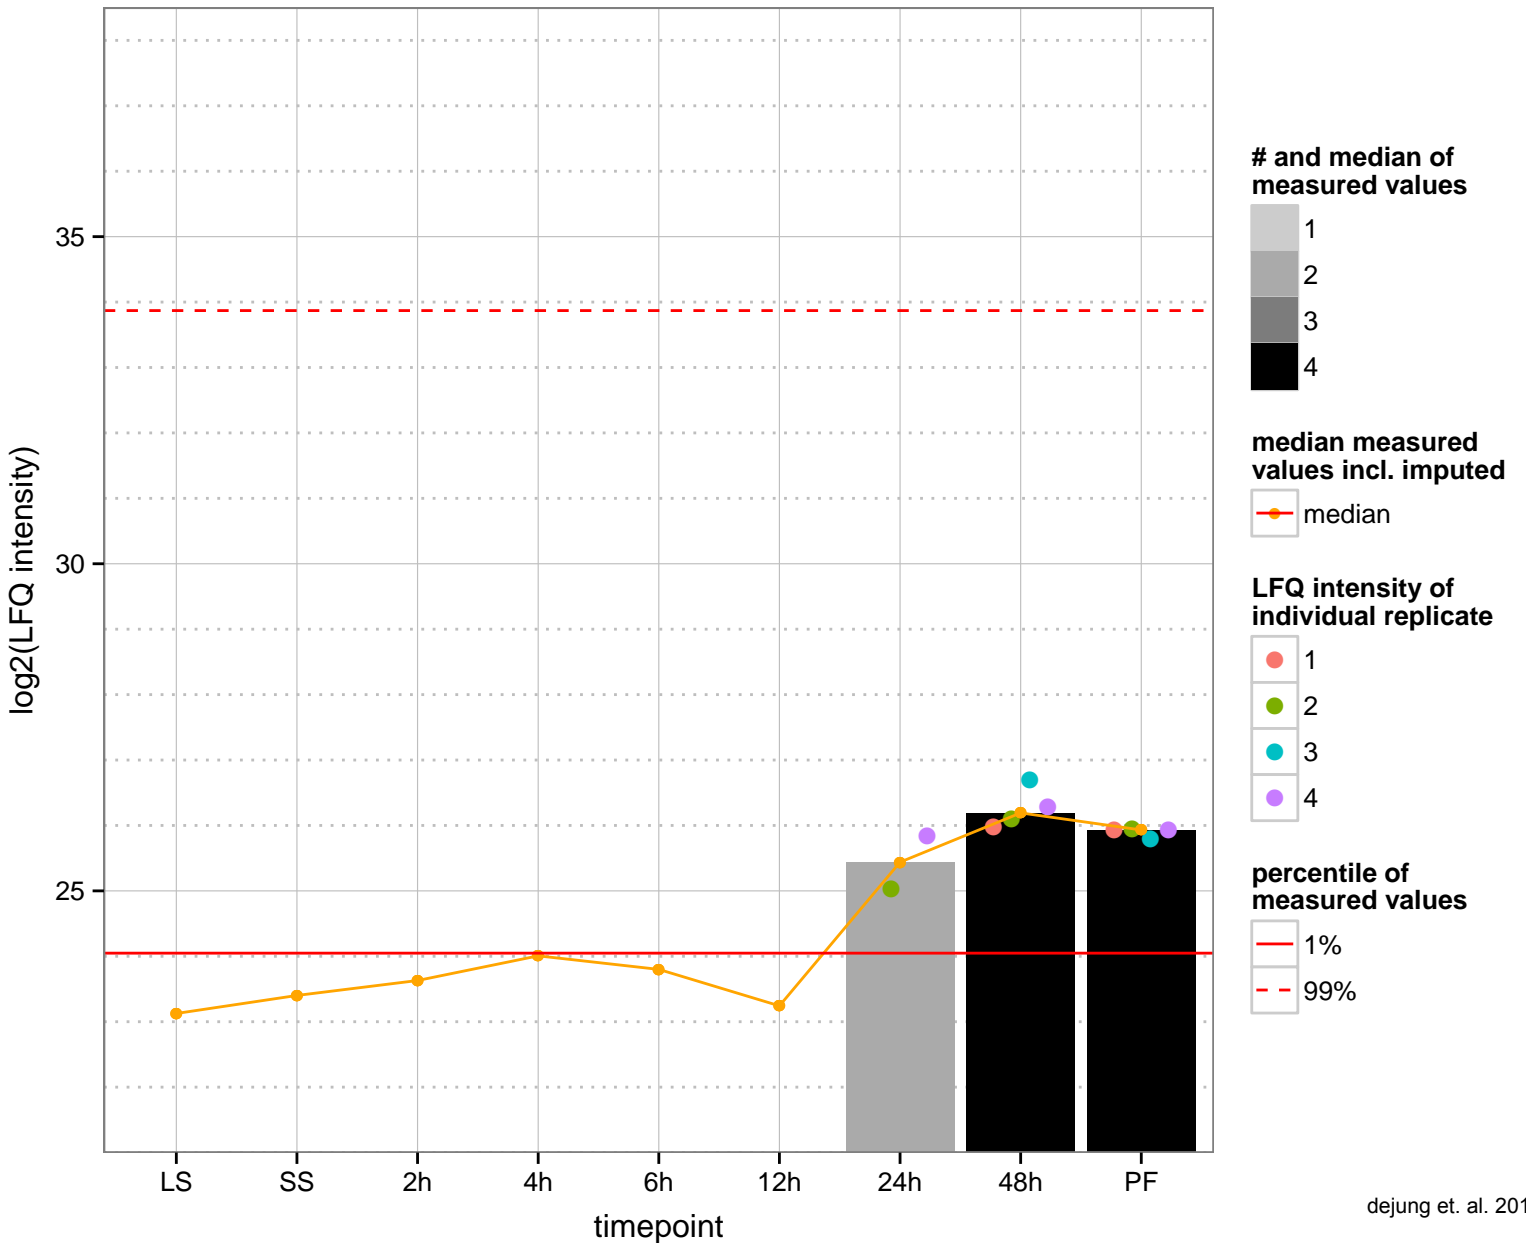



60S acidic ribosomal protein, putative  
 Tb927.9.5690  
 AGOF: structural constituent of ribosome  
 AGOC: intracellular, ribosome  
 AGOP: translation, translational elongation  
 PGO: structural constituent of ribosome  
 PGO: intracellular, ribosome  
 PGO: translational elongation

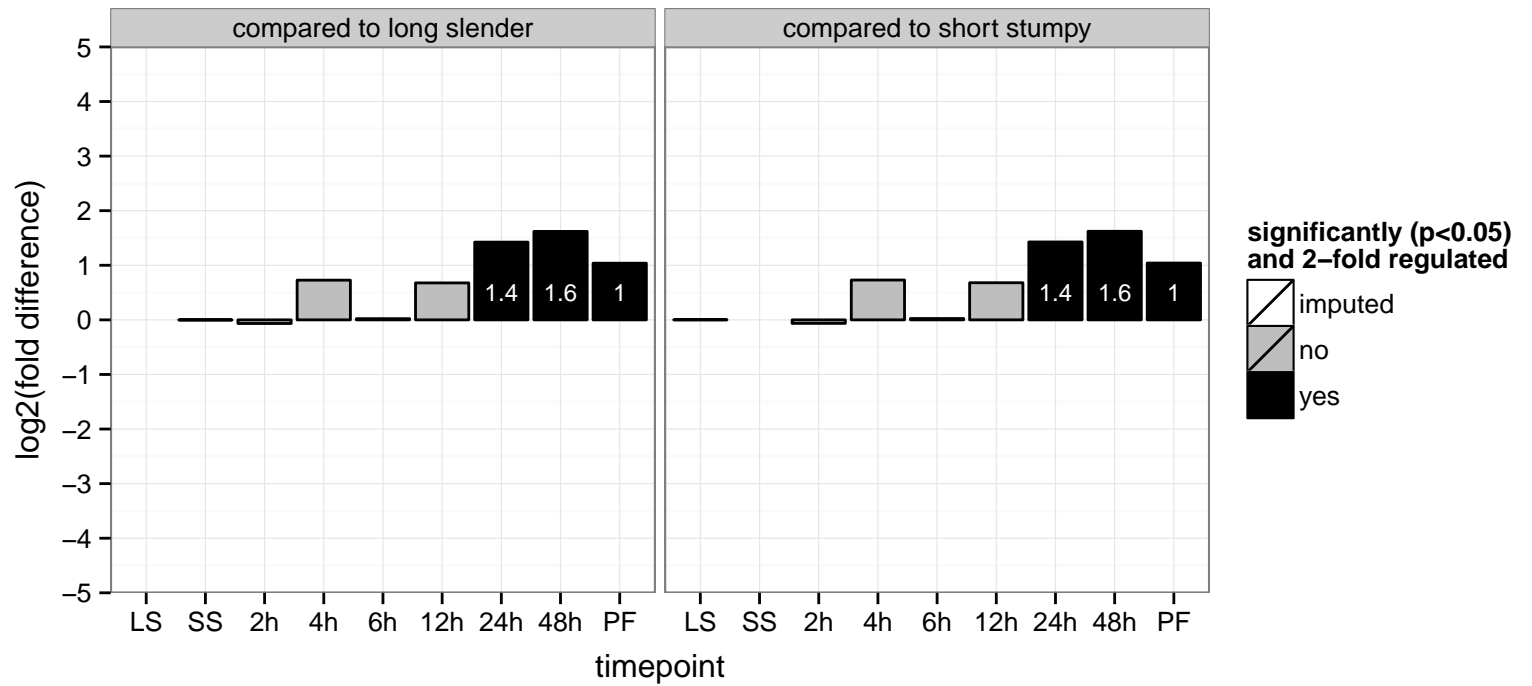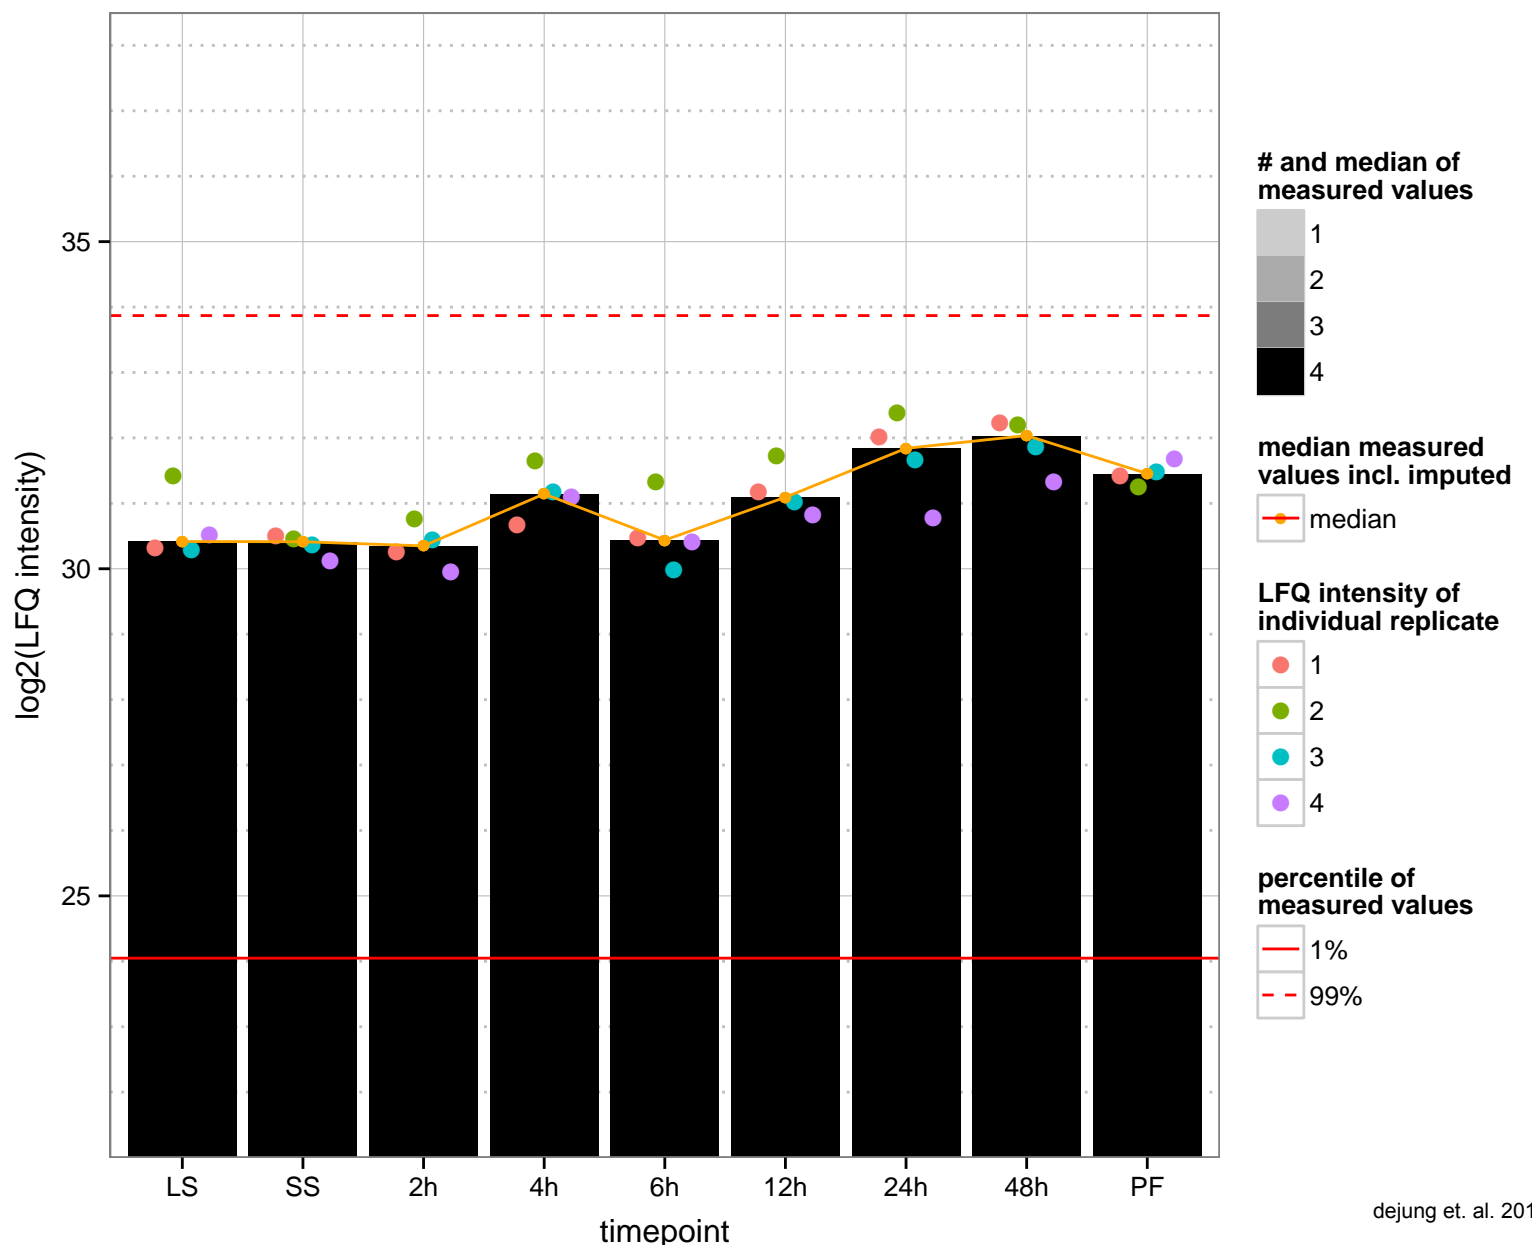

succinate dehydrogenase, putative  
 Tb927.9.5960  
 AGOF: iron-sulfur cluster binding, oxidoreductase activity  
 AGOC: mitochondrion  
 AGOP: null  
 PGOF: iron-sulfur cluster binding  
 PGOC: null  
 PGOP: null

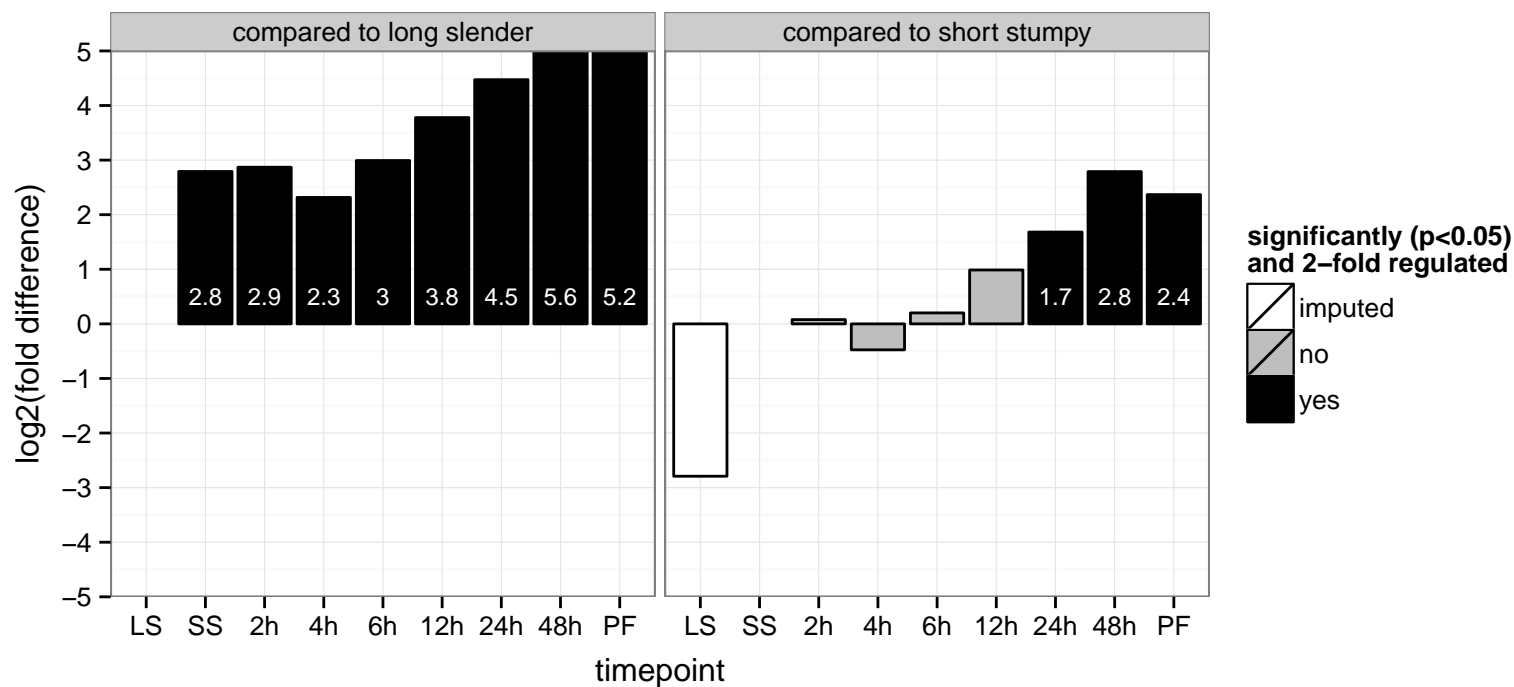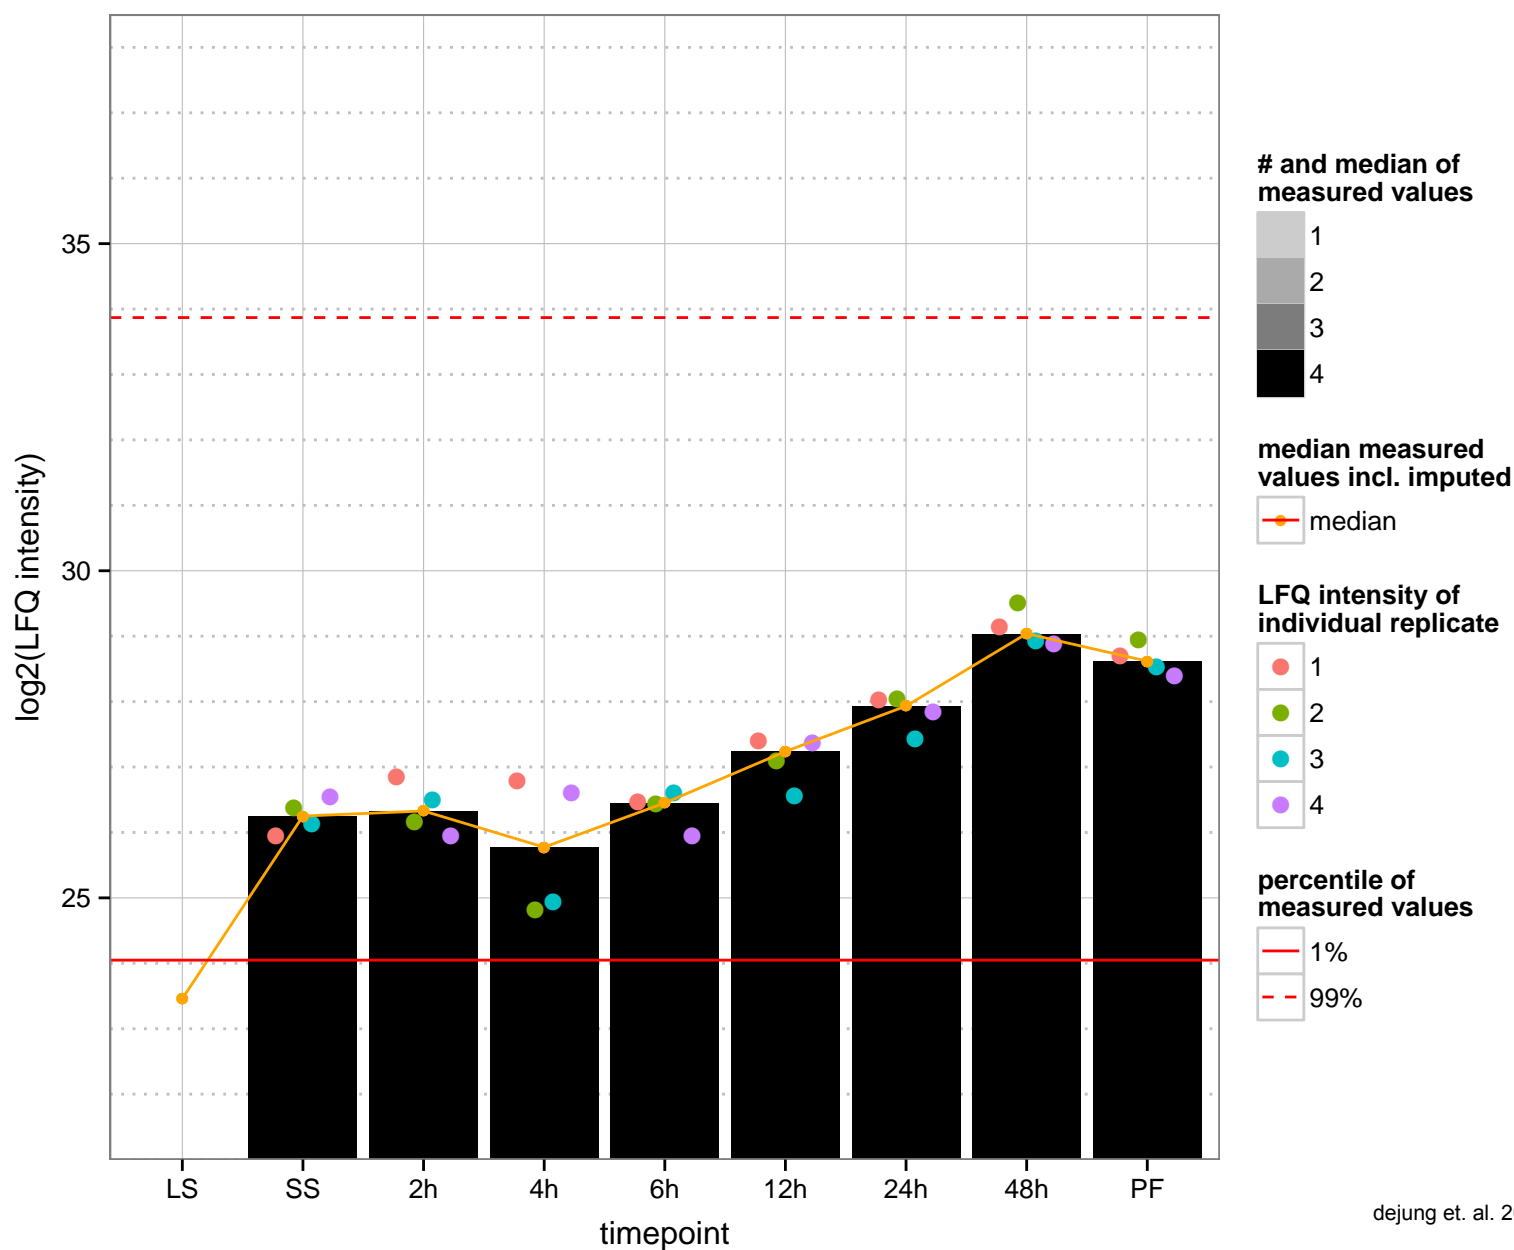

hypothetical protein, conserved  
 Tb927.9.7830  
 AGOF: null  
 AGOC: mitochondrial membrane, mitochondrion  
 AGOP: null  
 PGO: null  
 PGO: null  
 PGO: null

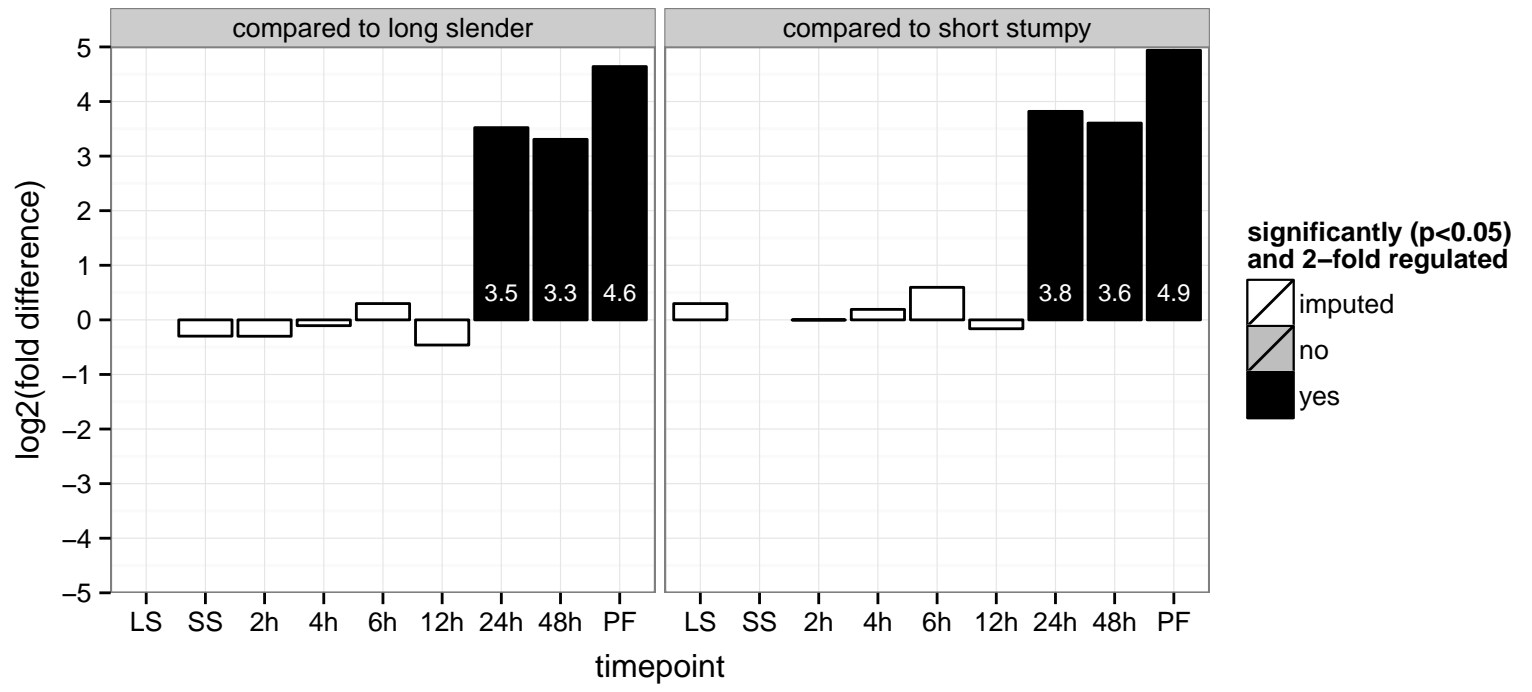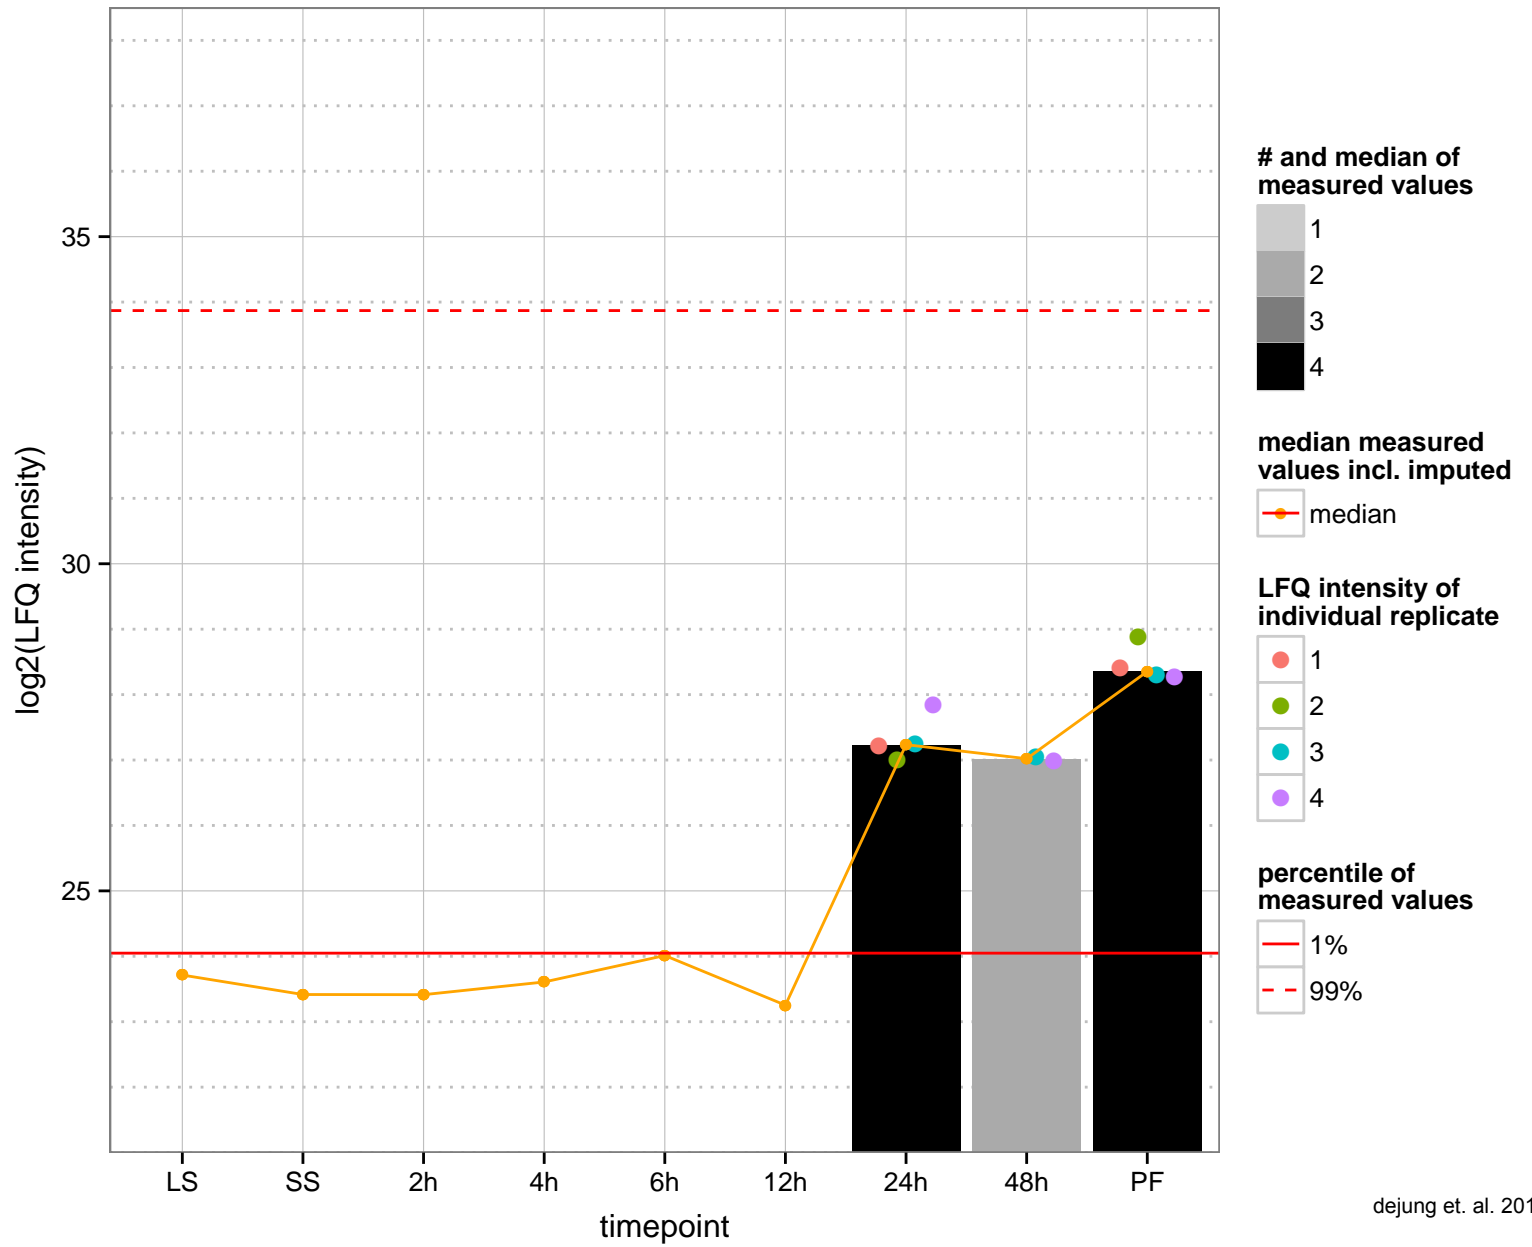

nascent polypeptide associated complex subunit, putative  
 Tb927.9.8130;Tb927.9.8100  
 AGOF: transcription coactivator activity  
 AGOC: nascent polypeptide-associated complex  
 AGOP: 'de novo' cotranslational protein folding, translation  
 PGO: null  
 PGOC: null  
 PGOP: null

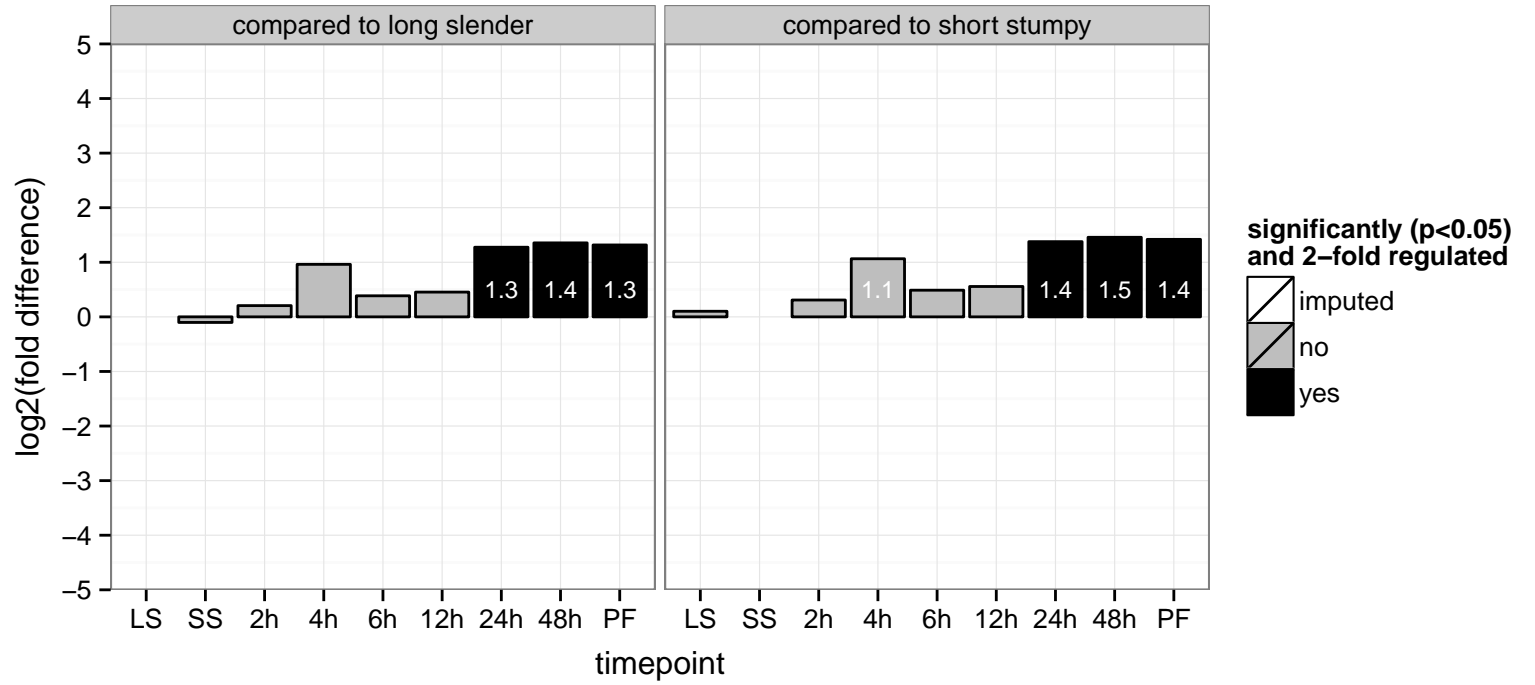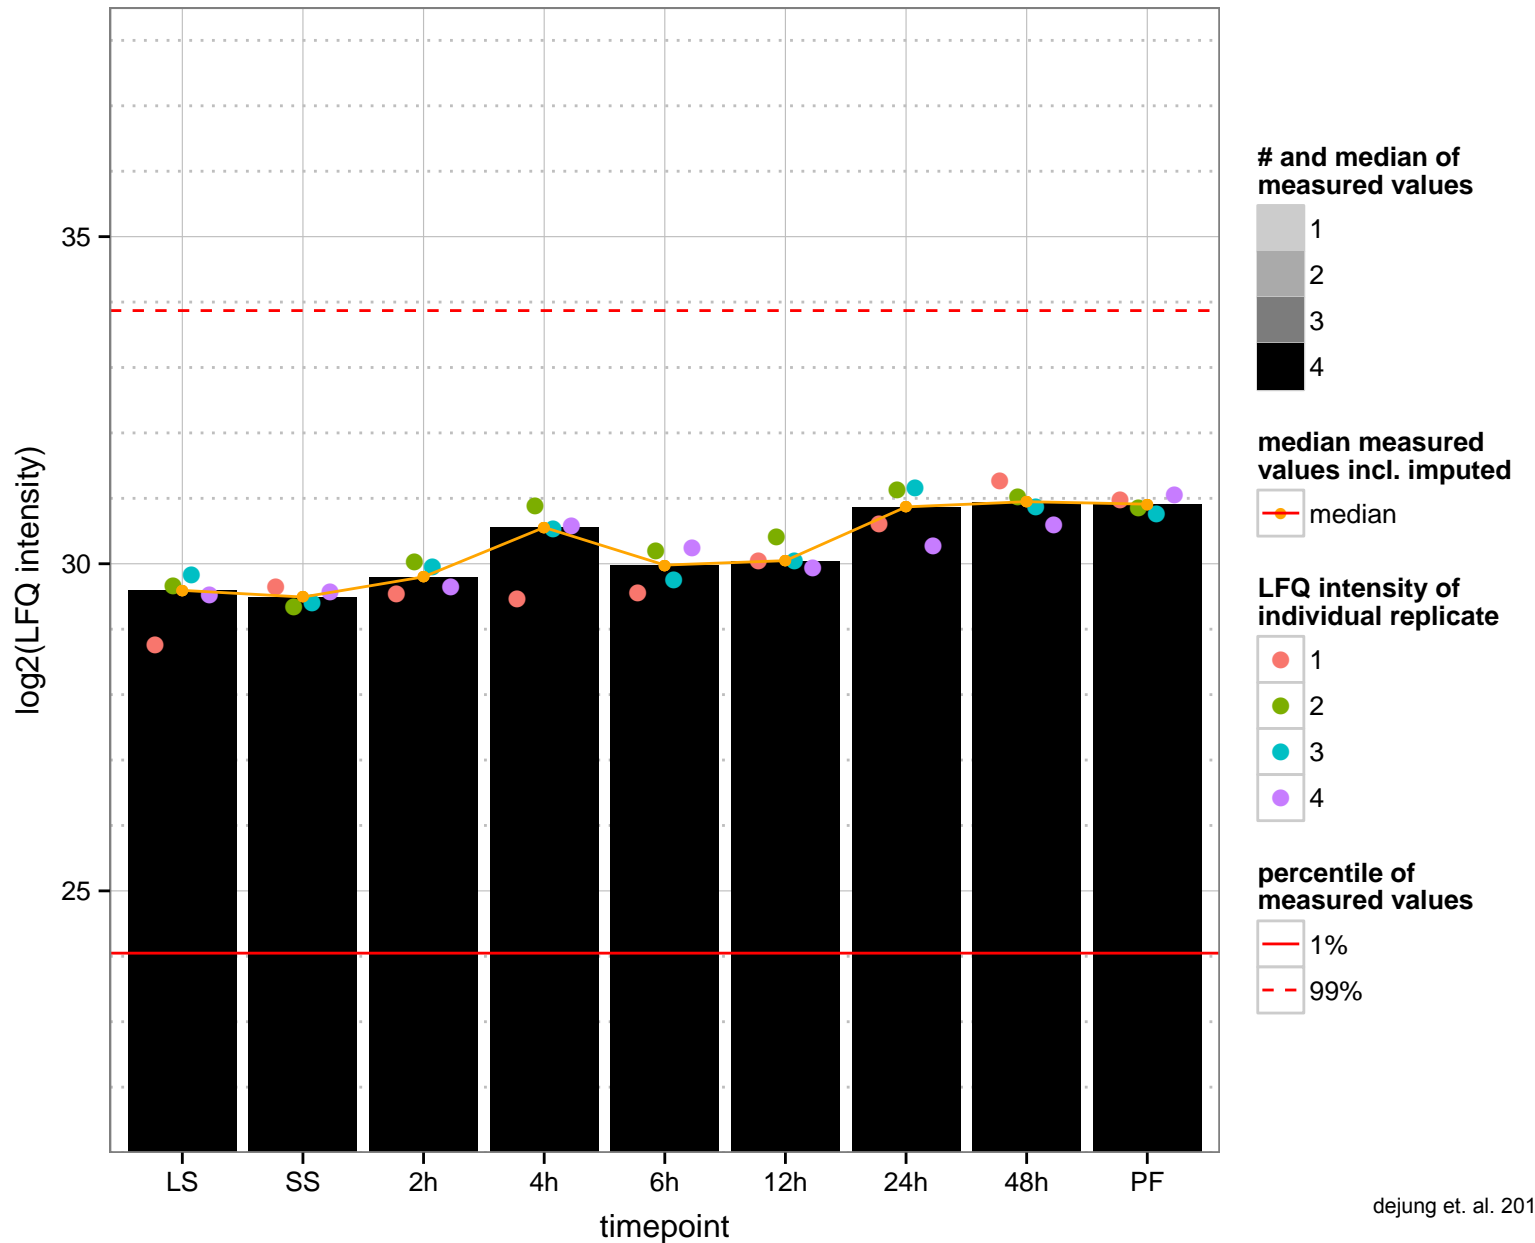

ribosome-interacting GTPase 2, putative (RBG2)  
 Tb927.9.9020  
 AGOF: GTP binding  
 AGOC: cytoplasm, intracellular  
 AGOP: cytoplasmic translation  
 PGO: GTP binding  
 PGOC: null  
 PGOP: null

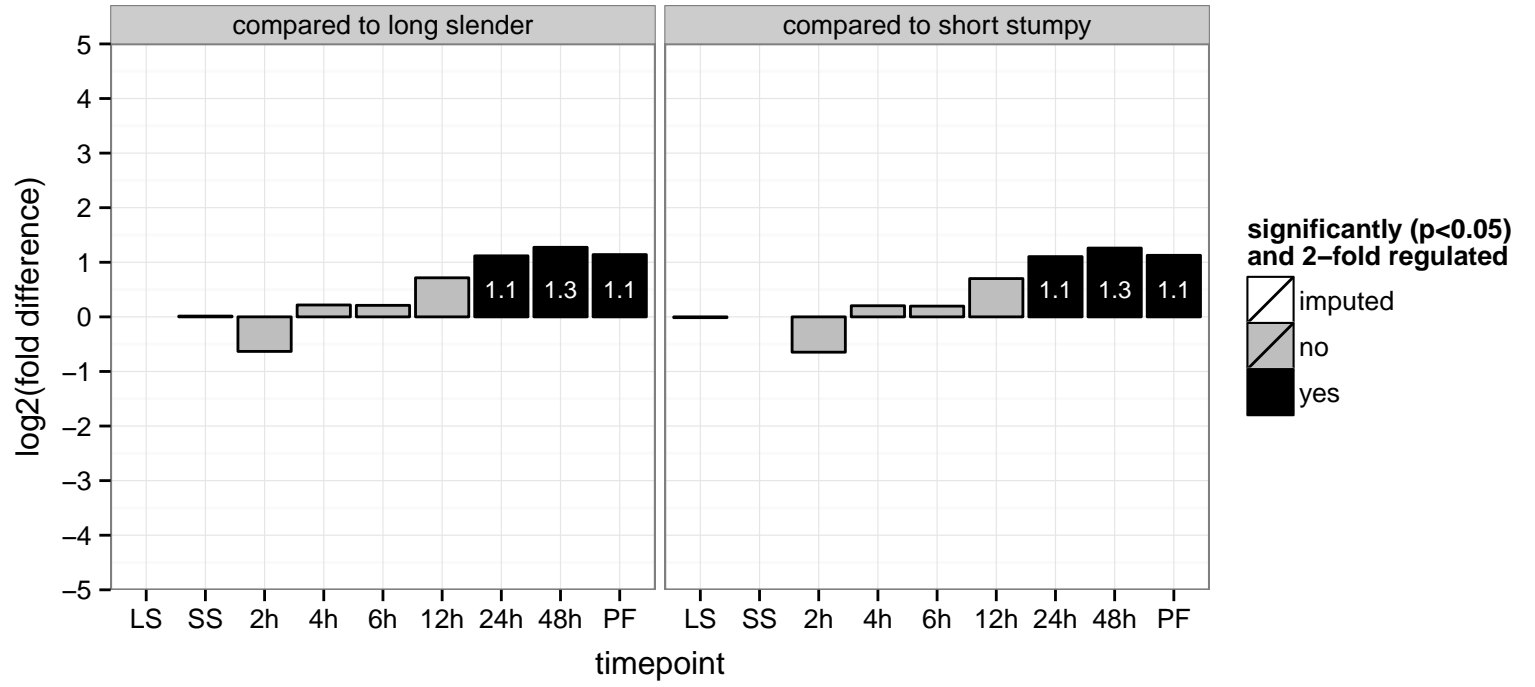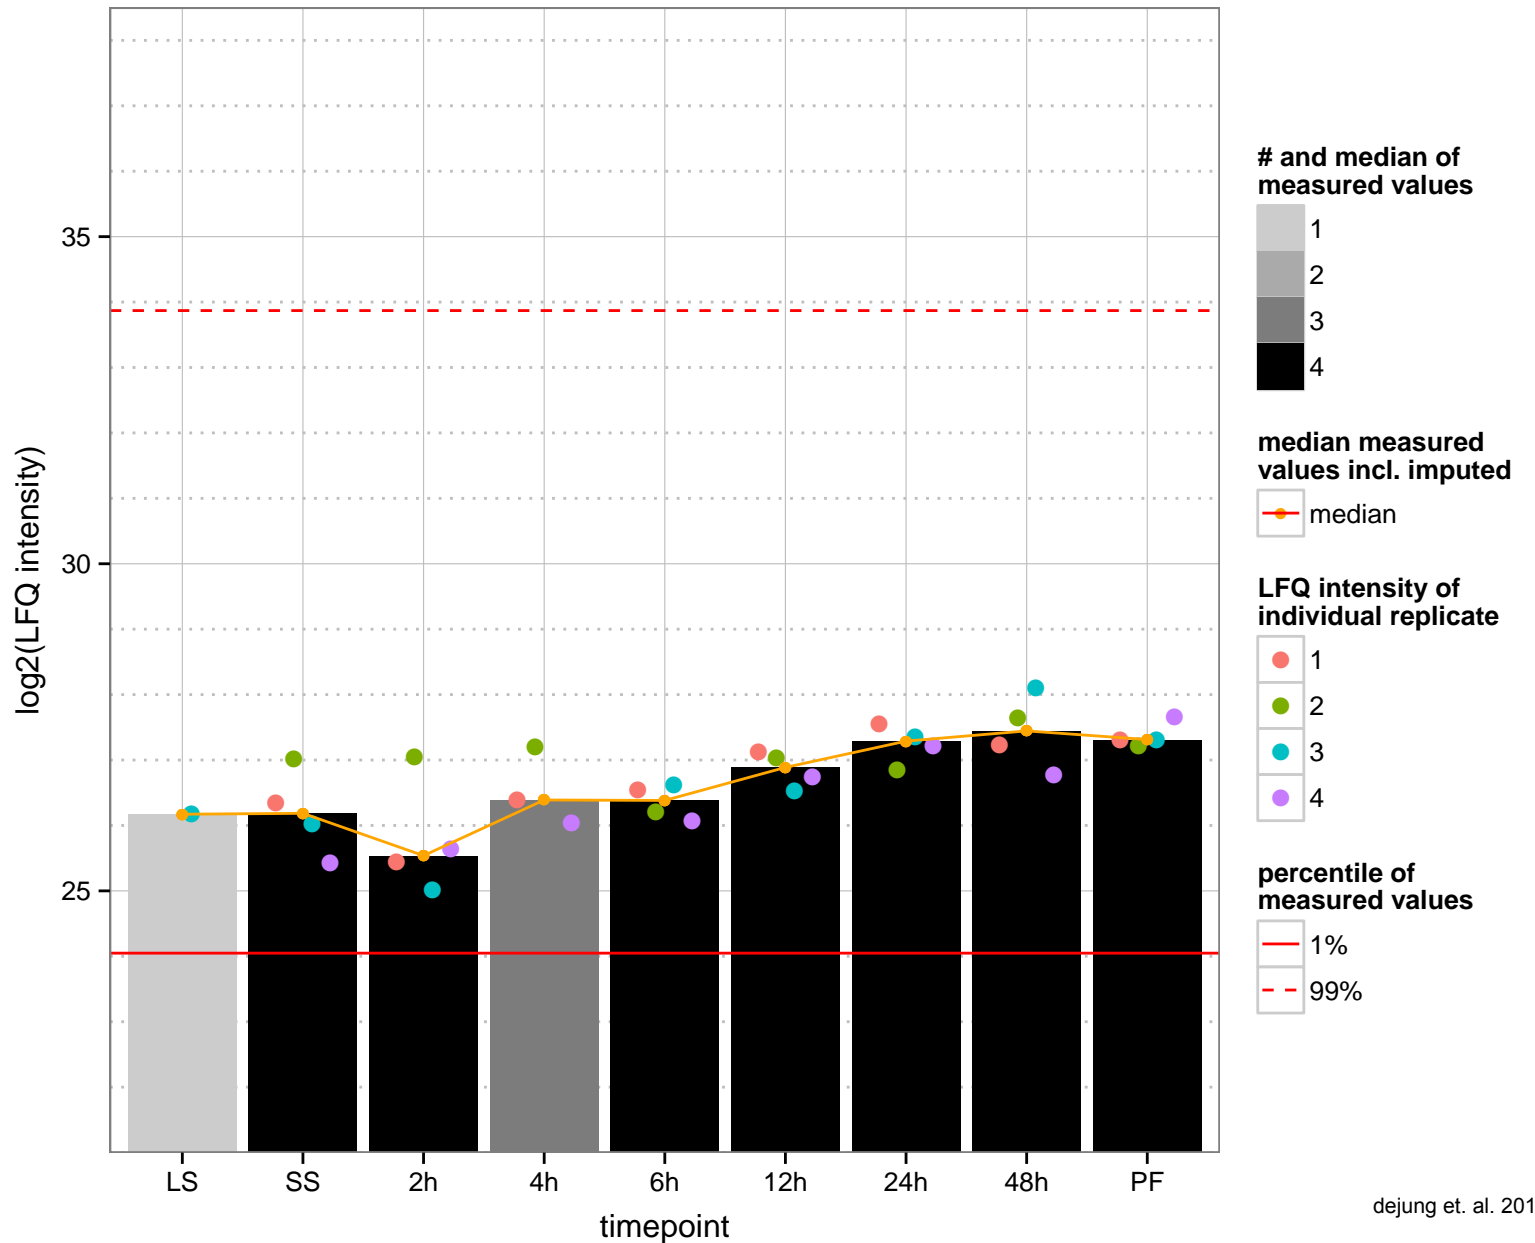

zinc finger protein family member, putative (ZC3H28)  
 Tb927.9.9450  
 AGOF: RNA binding, zinc ion binding  
 AGOC: null  
 AGOP: null  
 PGO: nucleic acid binding, zinc ion binding  
 PGOC: null  
 PGOP: null

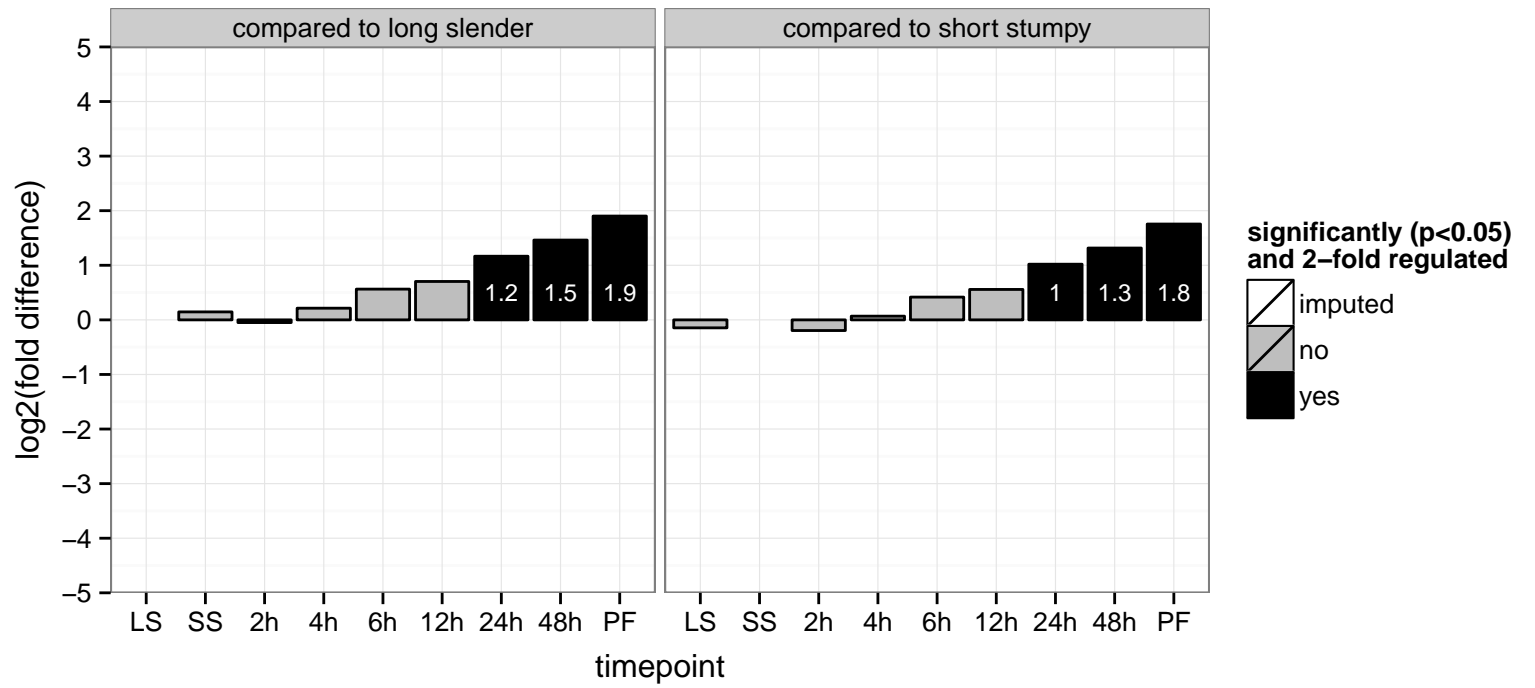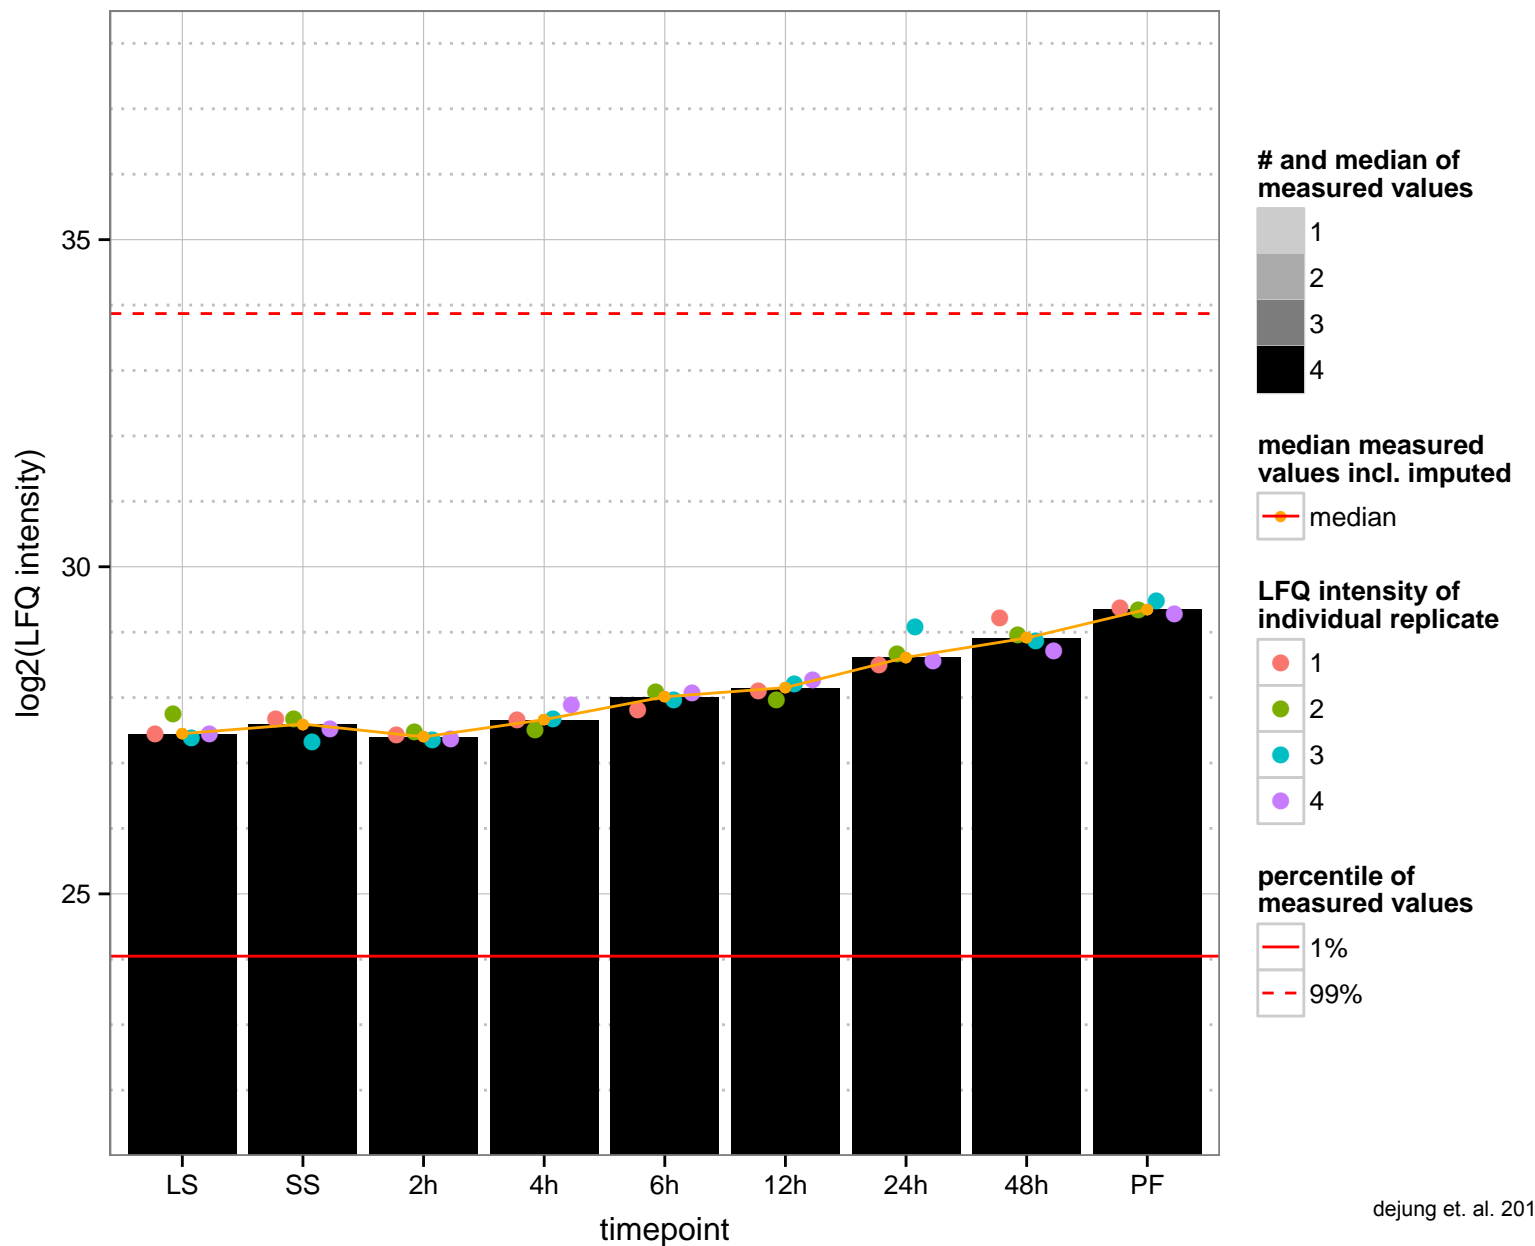

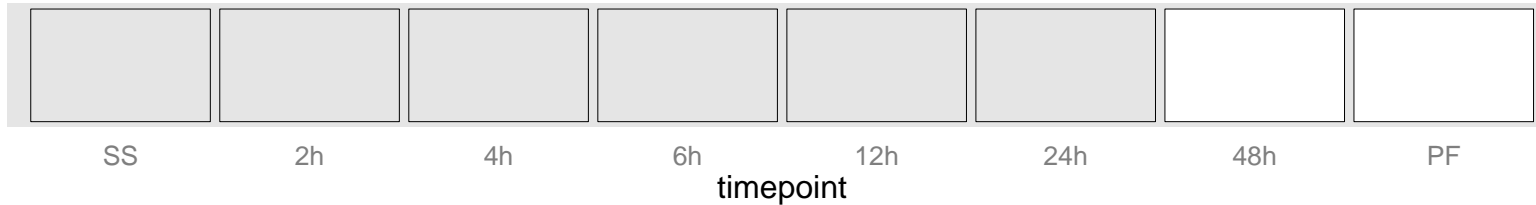

**regulated**  **not regulated**  **significant down**  **significant up**

hypothetical protein, BAC from homologous region on chr5, conserved  
 Tb927.5.4570;Tb05.5K5.210  
 AGOF: null  
 AGOC: null  
 AGOP: null  
 PGO: null  
 PGOC: null  
 PGOP: null

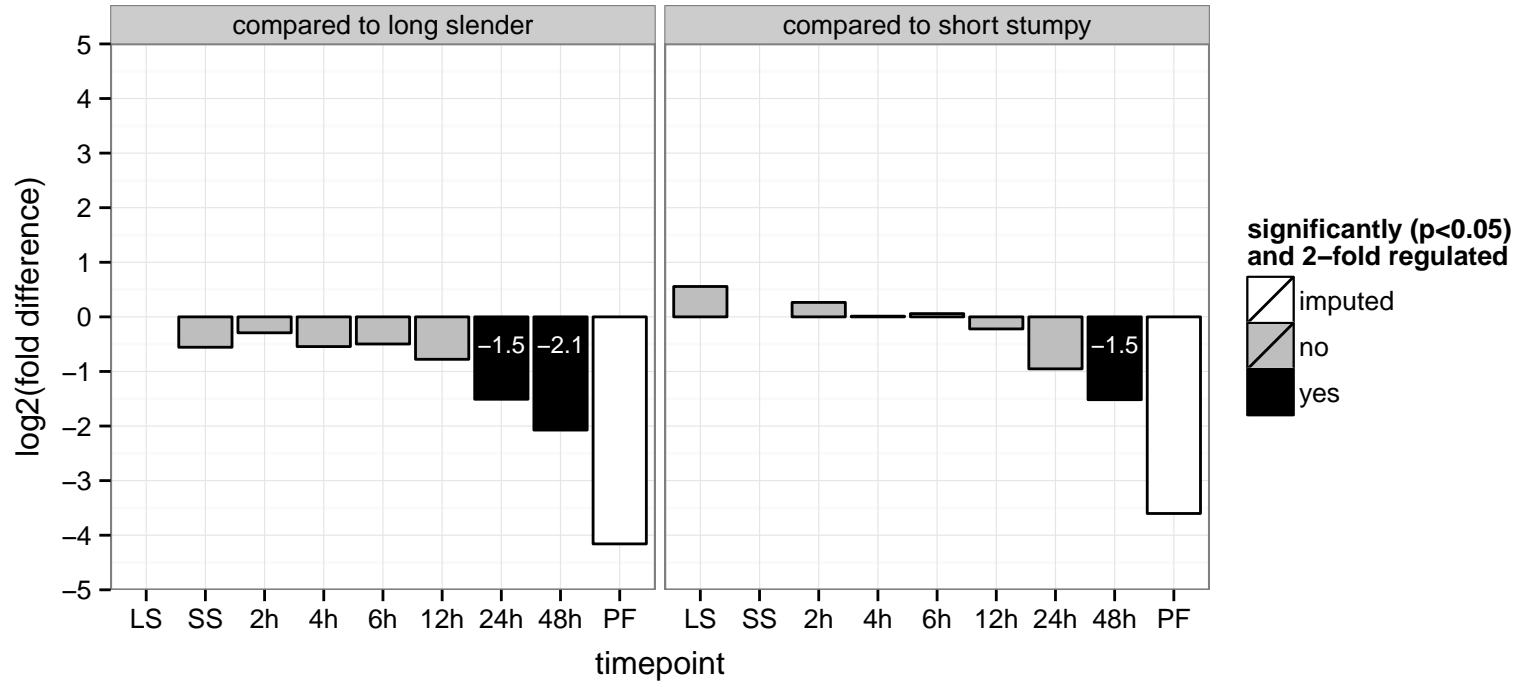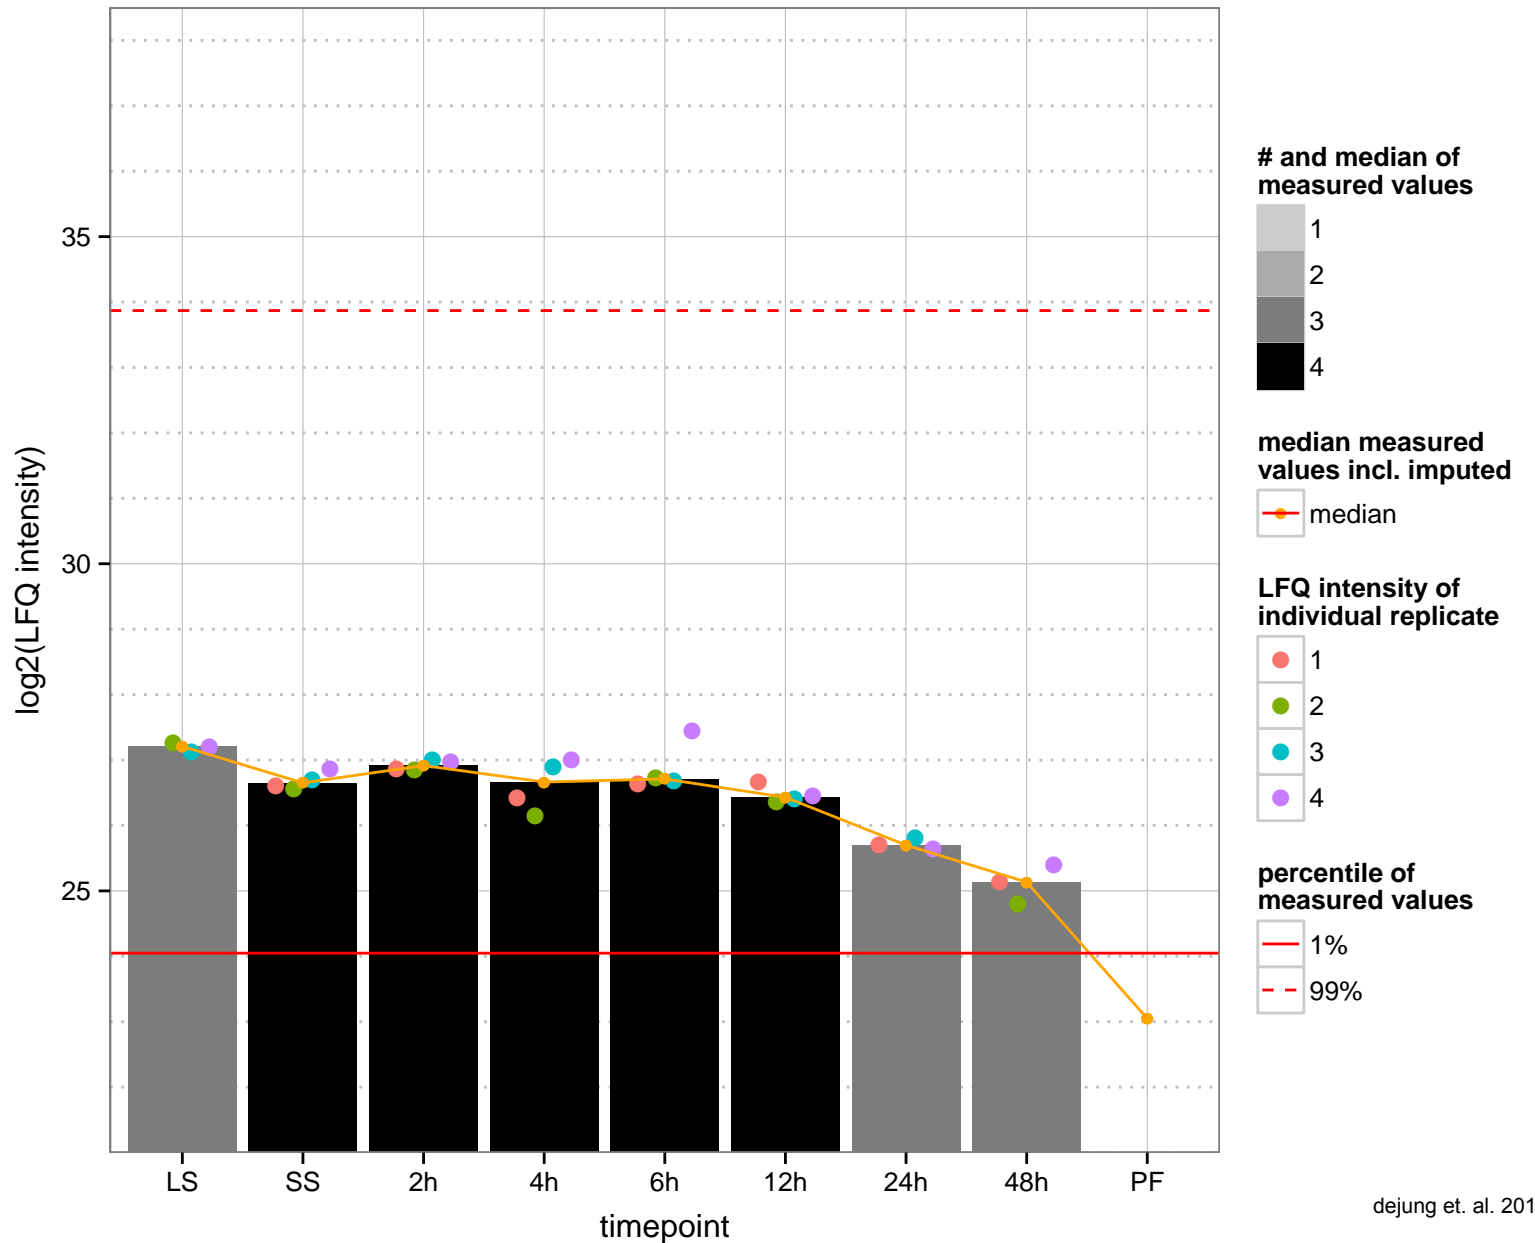



hypothetical protein, chrIX additional, unordered contigs  
 Tb927.9.15870;Tb09.v4.0015  
 AGOF: null  
 AGOC: null  
 AGOP: null  
 PGO: null  
 PGOC: null  
 PGOP: null

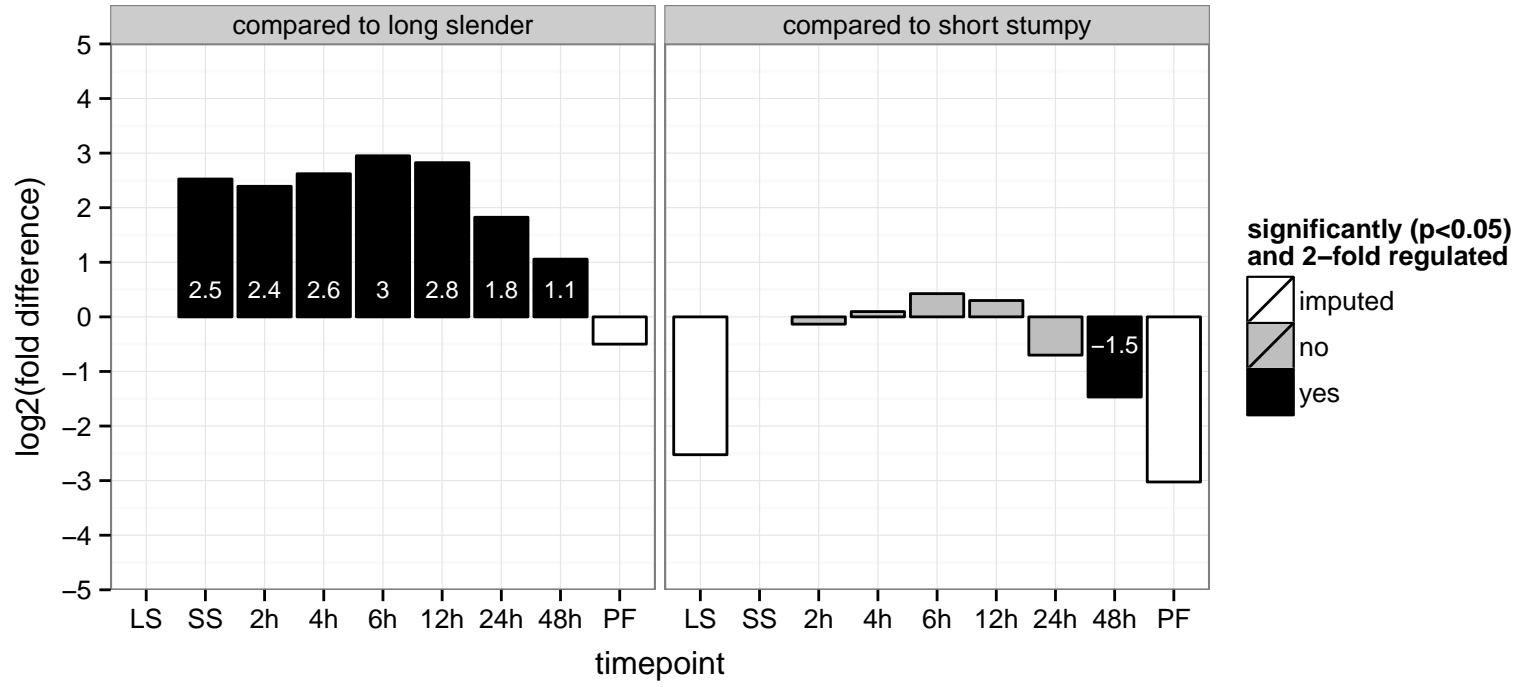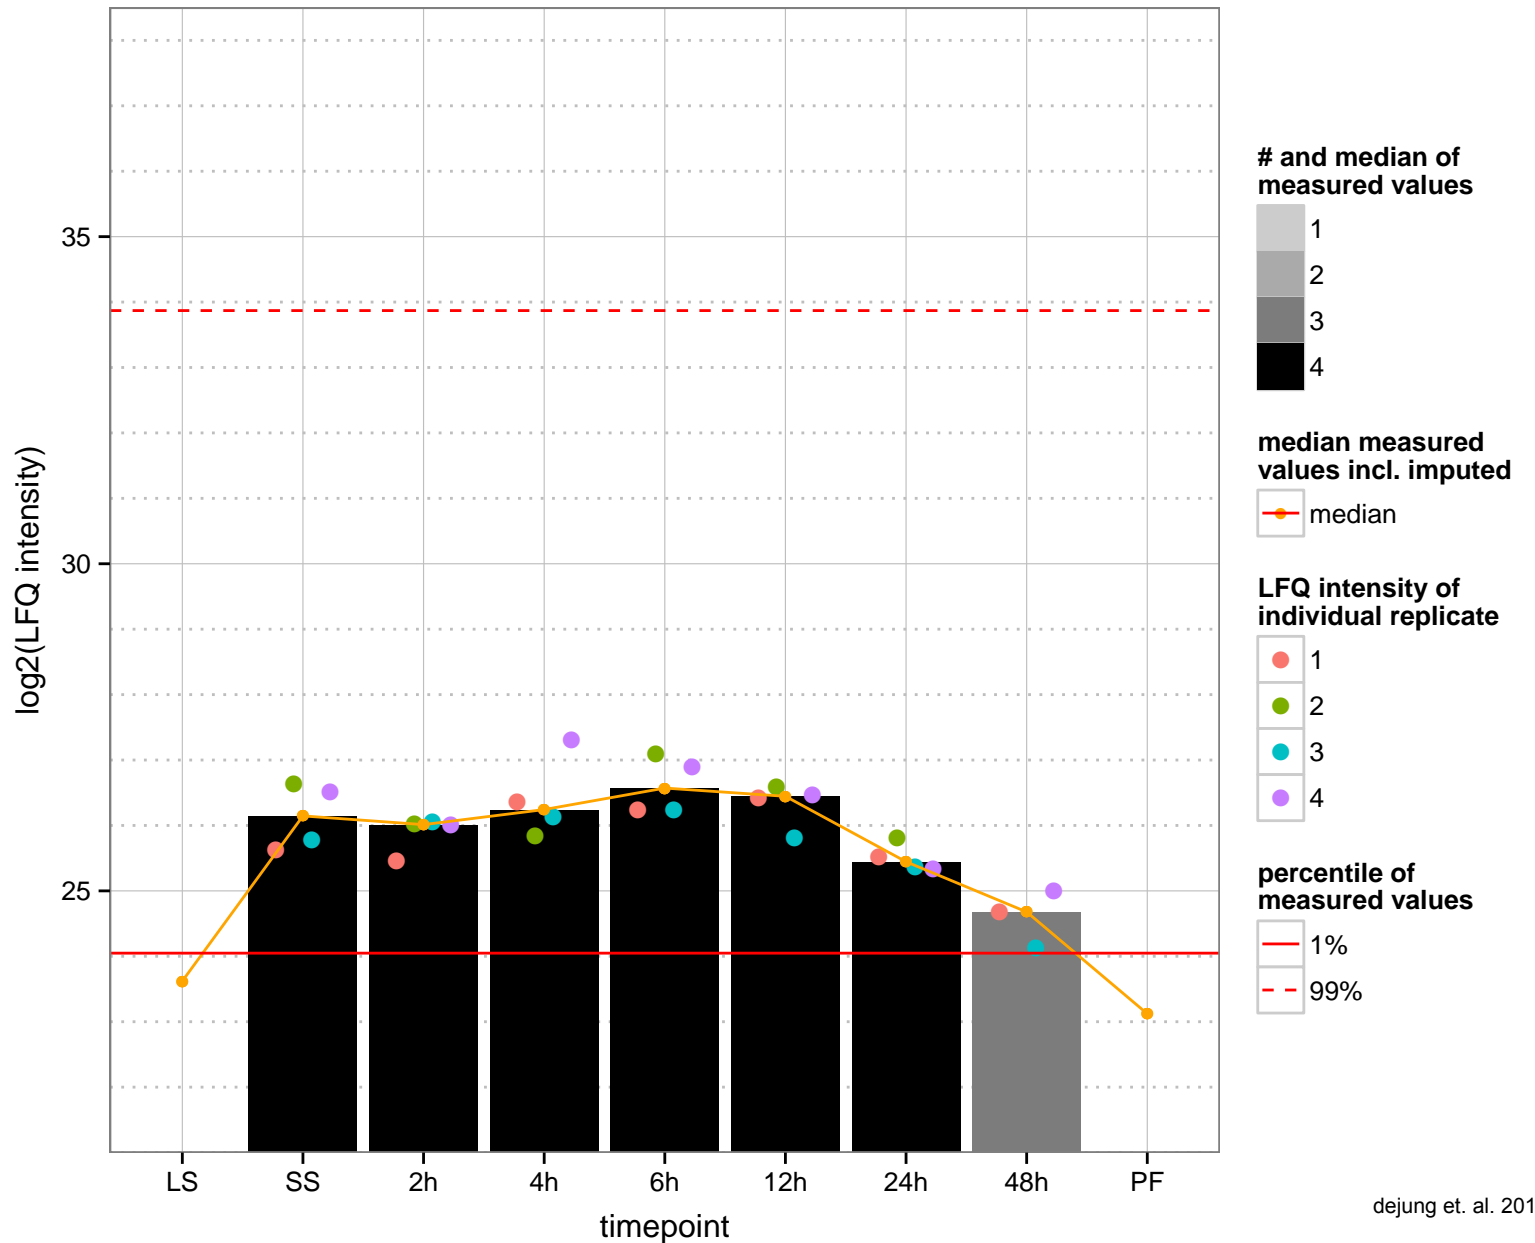

hypothetical protein, conserved  
 Tb927.7.4500;Tb11.v5.0263  
 AGOF: null, phosphatidylinositol binding  
 AGOC: null  
 AGOP: null, cell communication  
 PGO: phosphatidylinositol binding, protein binding  
 PGO: null  
 PGO: cell communication

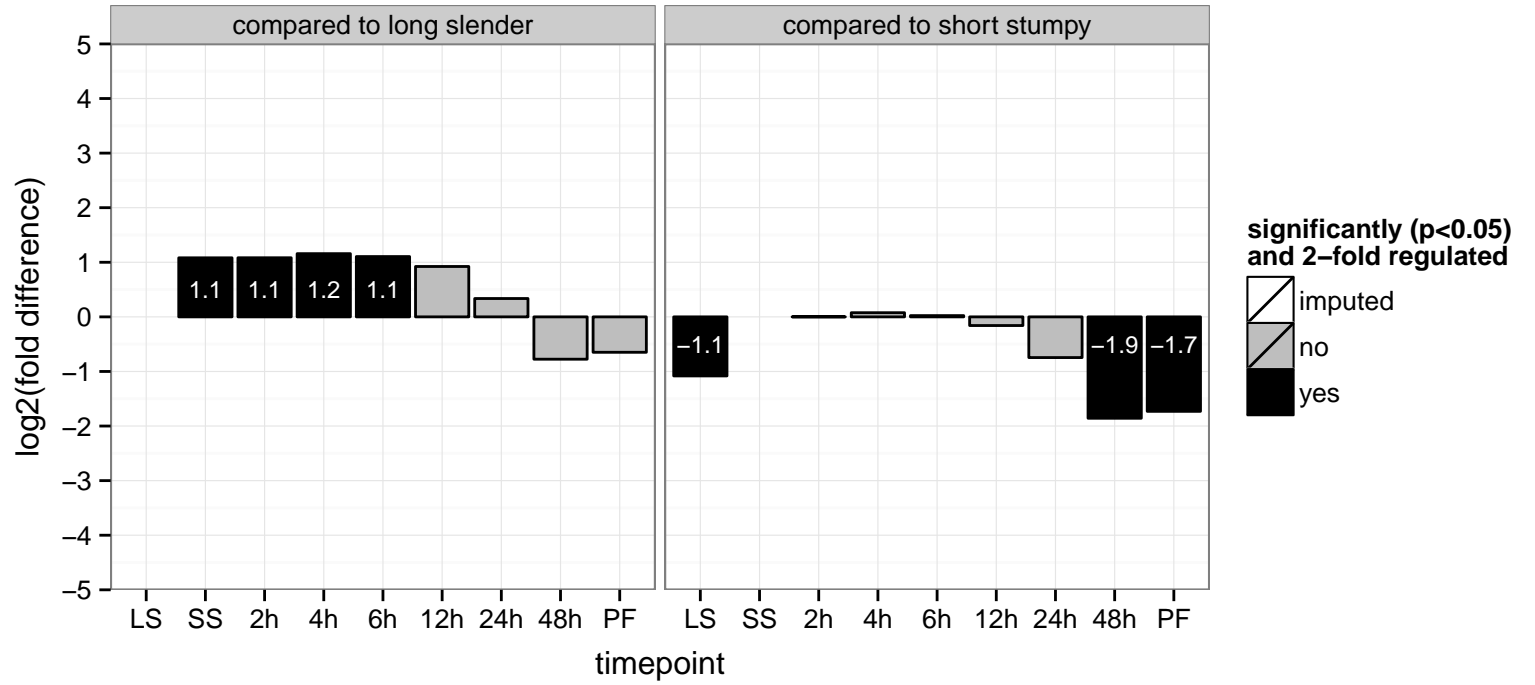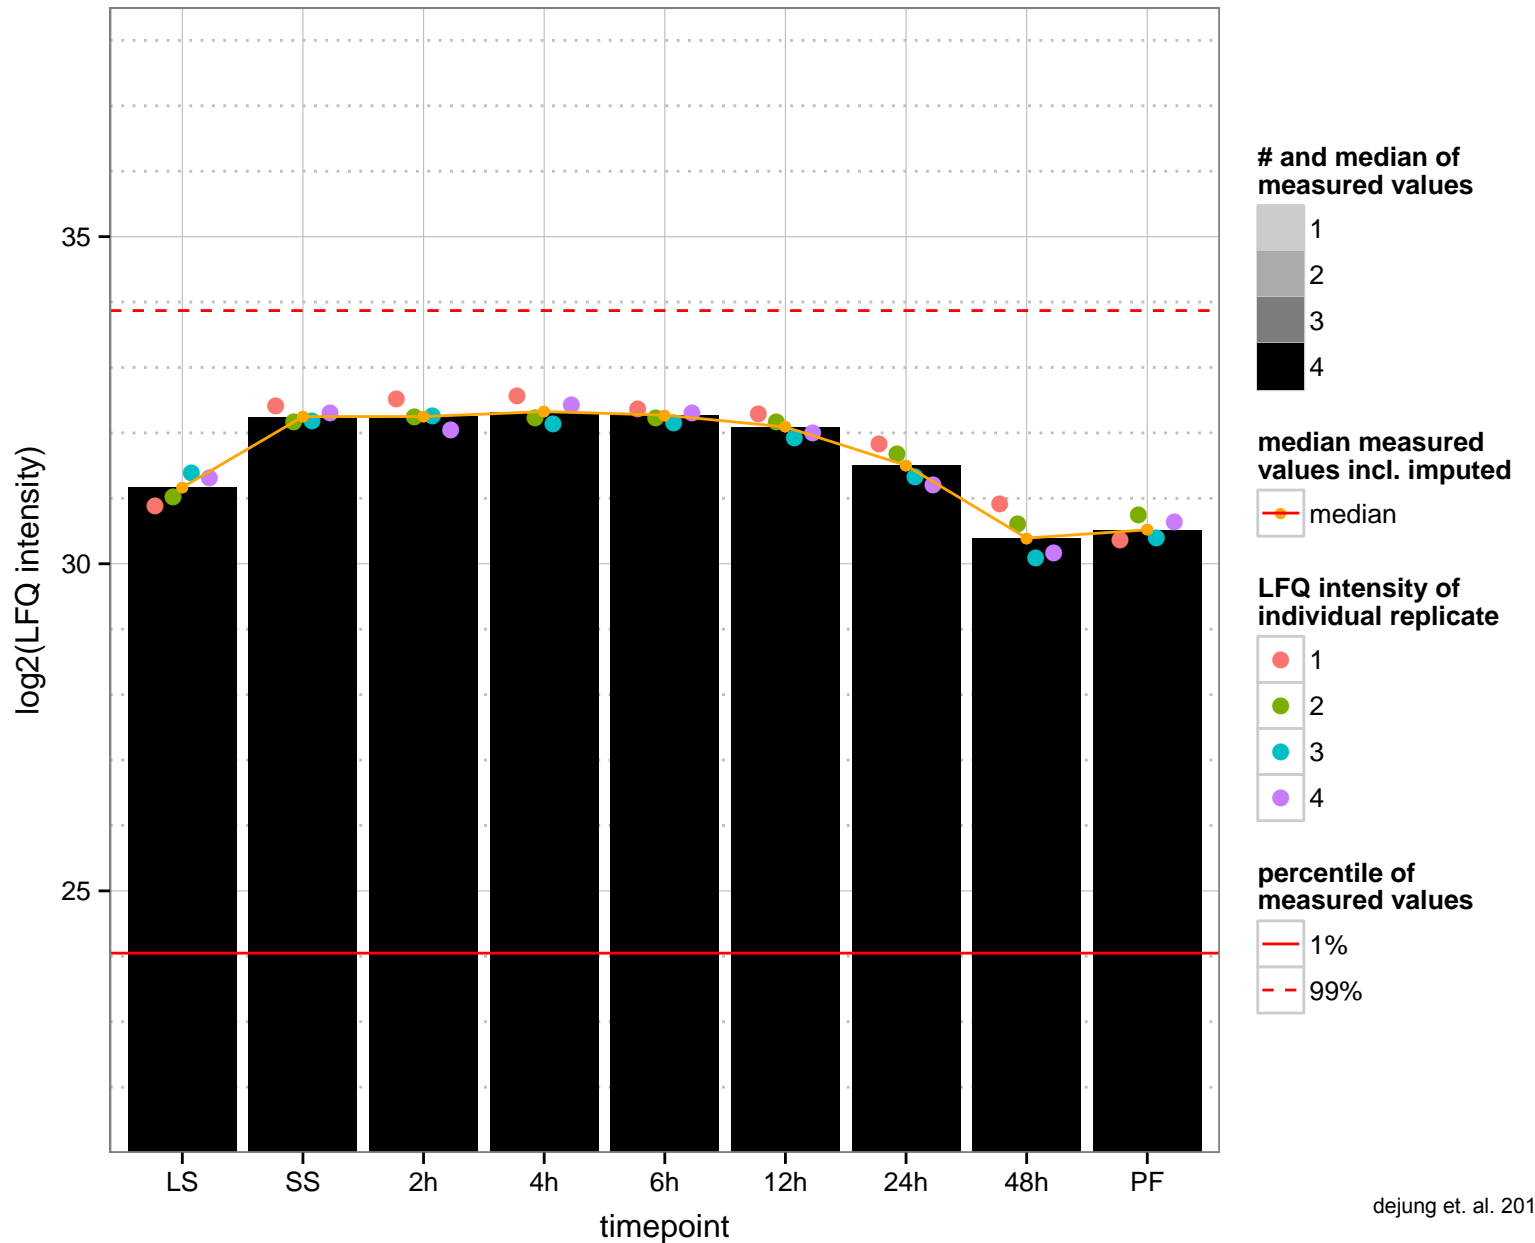

adenylosuccinate synthetase, putative  
 Tb927.11.3650;Tb11.v5.0435  
 AGOF: null, GTP binding, adenylosuccinate synthase activity, magnesium ion binding  
 AGOC: null  
 AGOP: null, purine nucleotide biosynthetic process  
 PGOF: GTP binding, adenylosuccinate synthase activity, magnesium ion binding  
 PGO: cytoplasm  
 PGO: purine nucleotide biosynthetic process

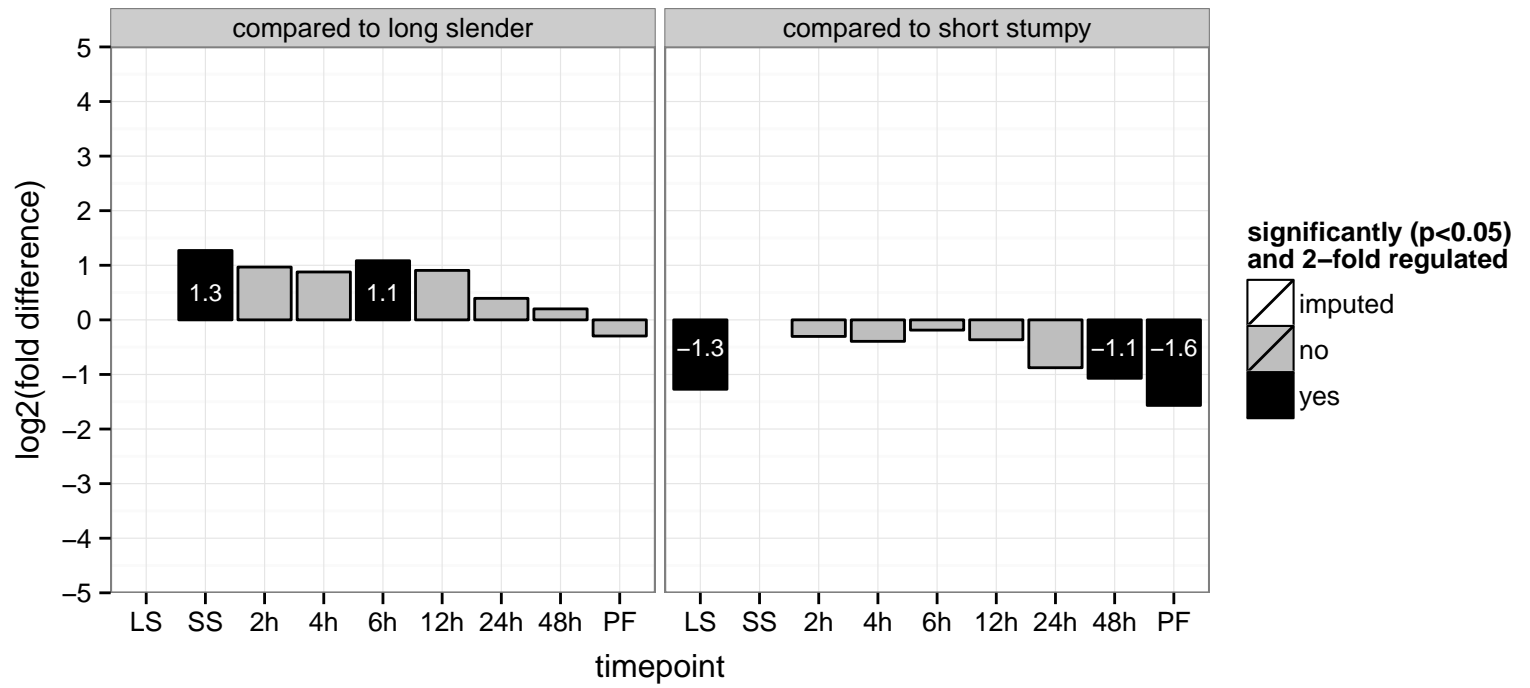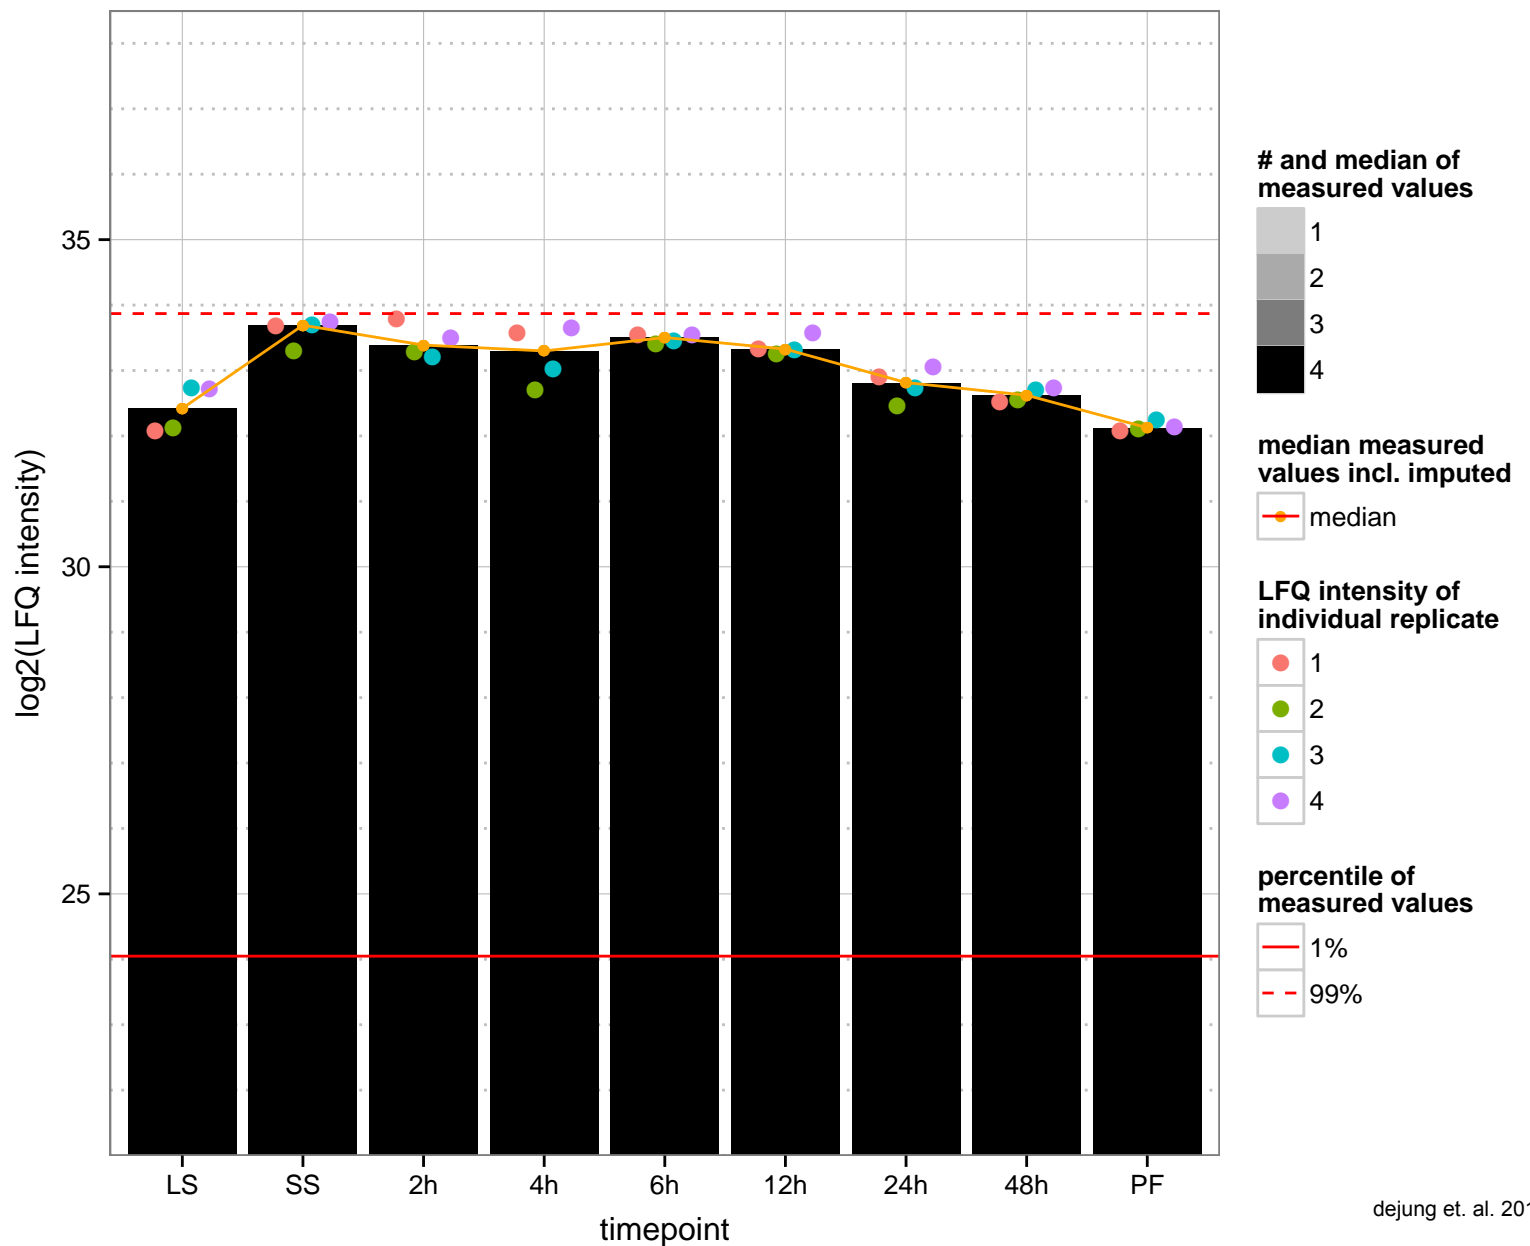

vesicular-fusion protein nsf, putative, N-ethylmaleimide sensitive factor (NsF)  
 Tb927.1.1560;Tb11.v5.0464  
 AGOF: null, ATP binding, ATPase activity  
 AGOC: null  
 AGOP: null, exocytosis  
 PGOF: ATP binding, nucleoside-triphosphatase activity, nucleotide binding  
 PGOC: null  
 PGOP: null

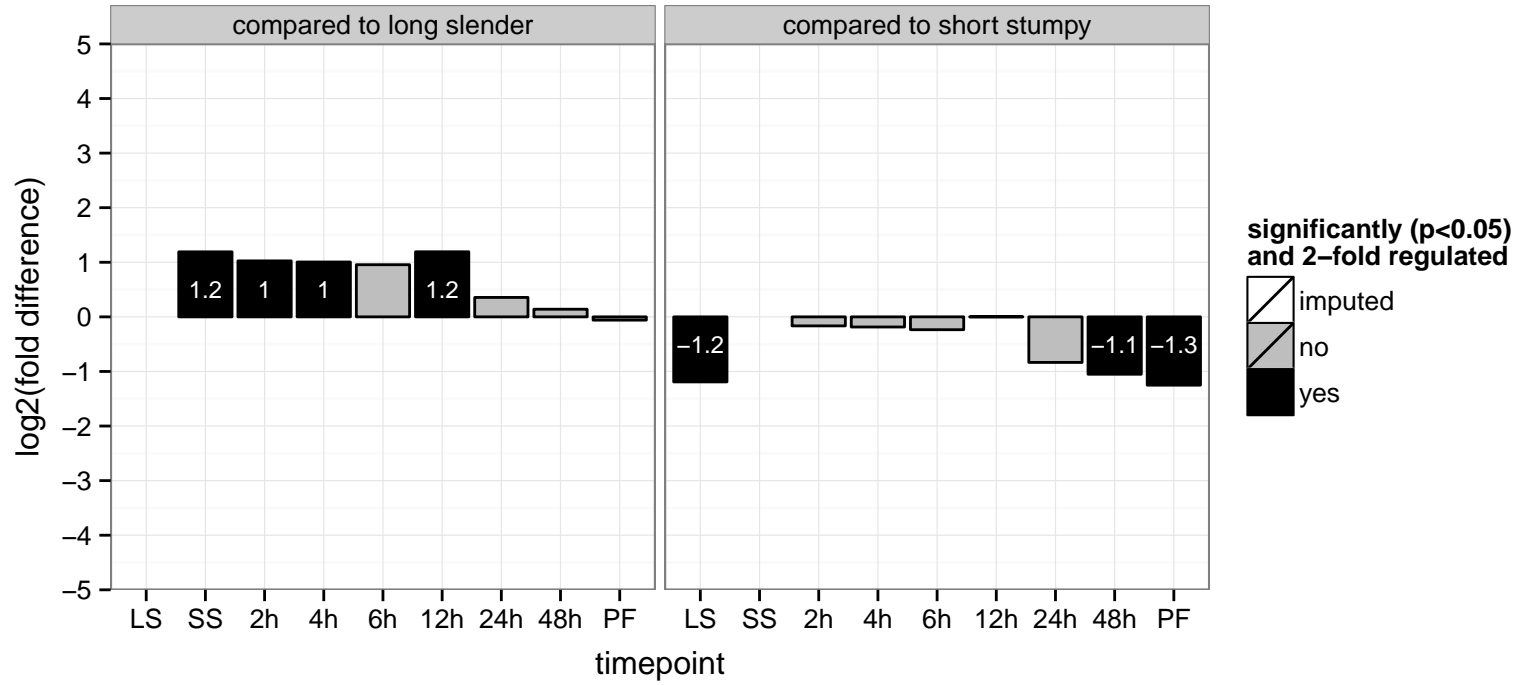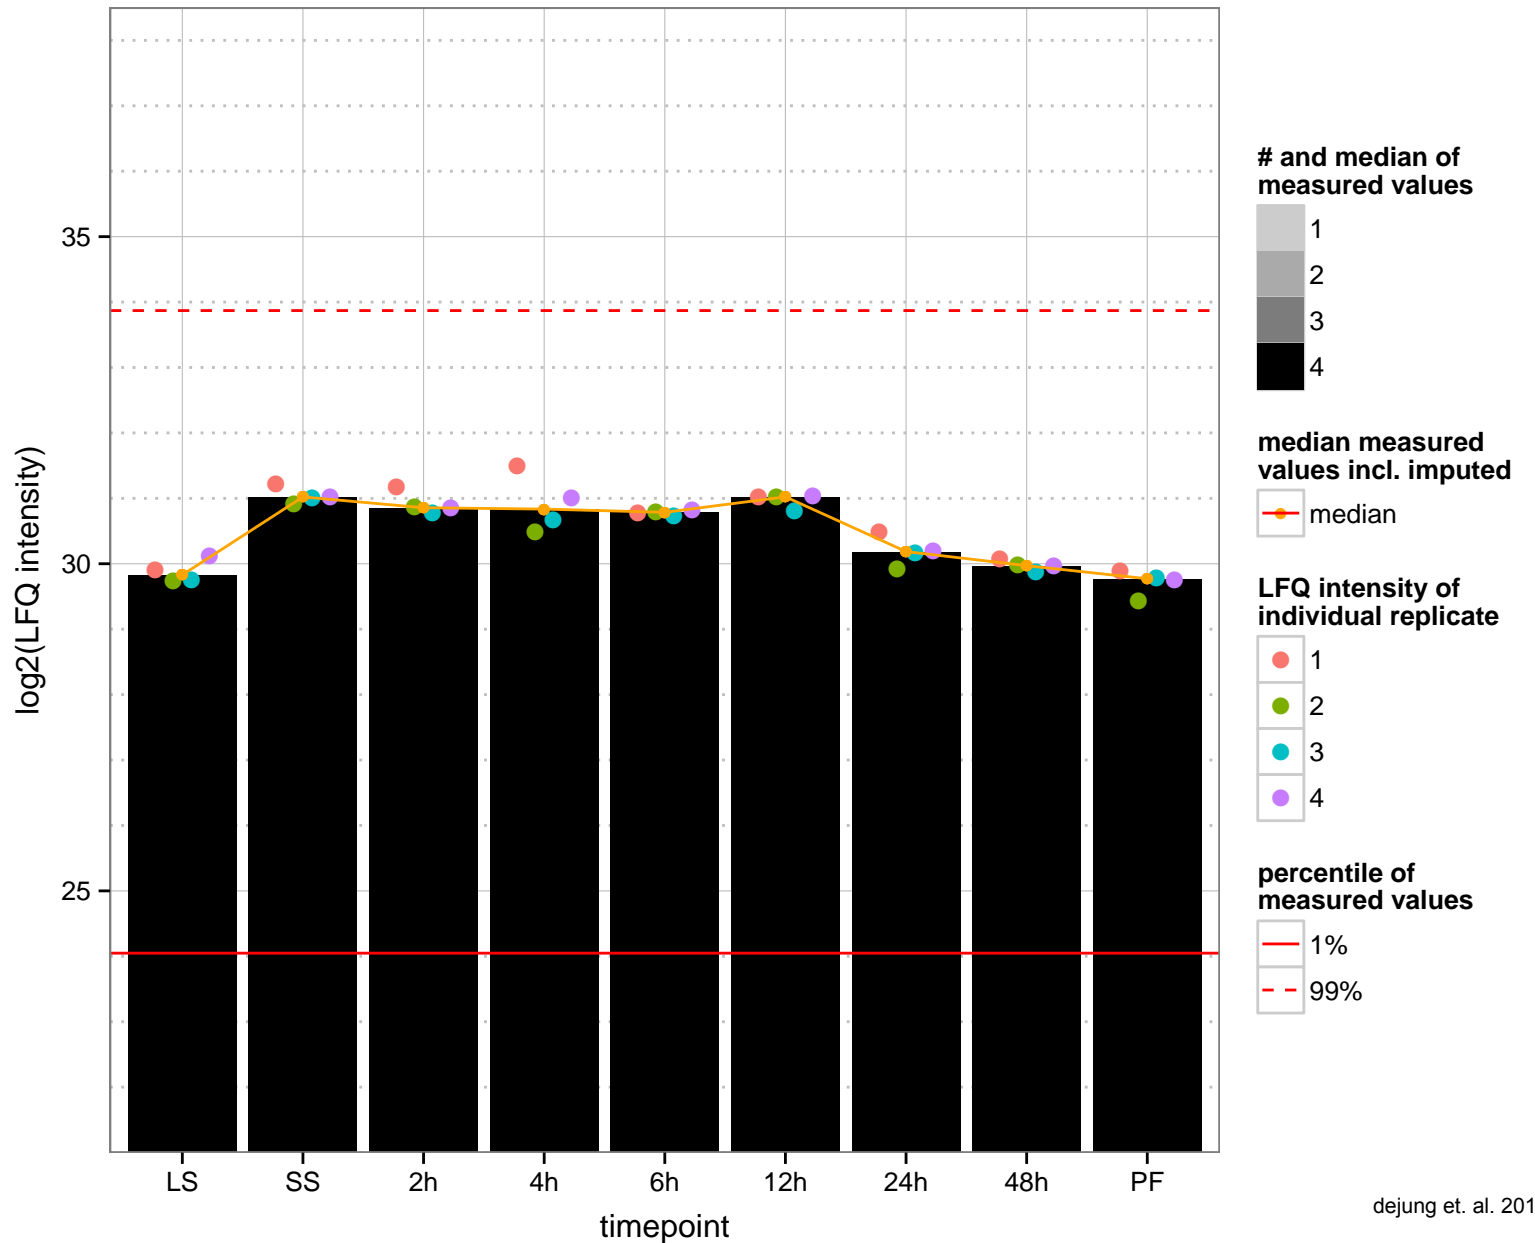

fructose-bisphosphate aldolase, glycosomal, putative, glycosomal (ALD)  
 Tb927.10.5620;Tb11.v5.0531  
 AGOF: null, fructose-bisphosphate aldolase activity  
 AGOC: null, glycosome  
 AGOP: null, glycolysis  
 PGOF: fructose-bisphosphate aldolase activity  
 PGO: null  
 PGOP: glycolysis

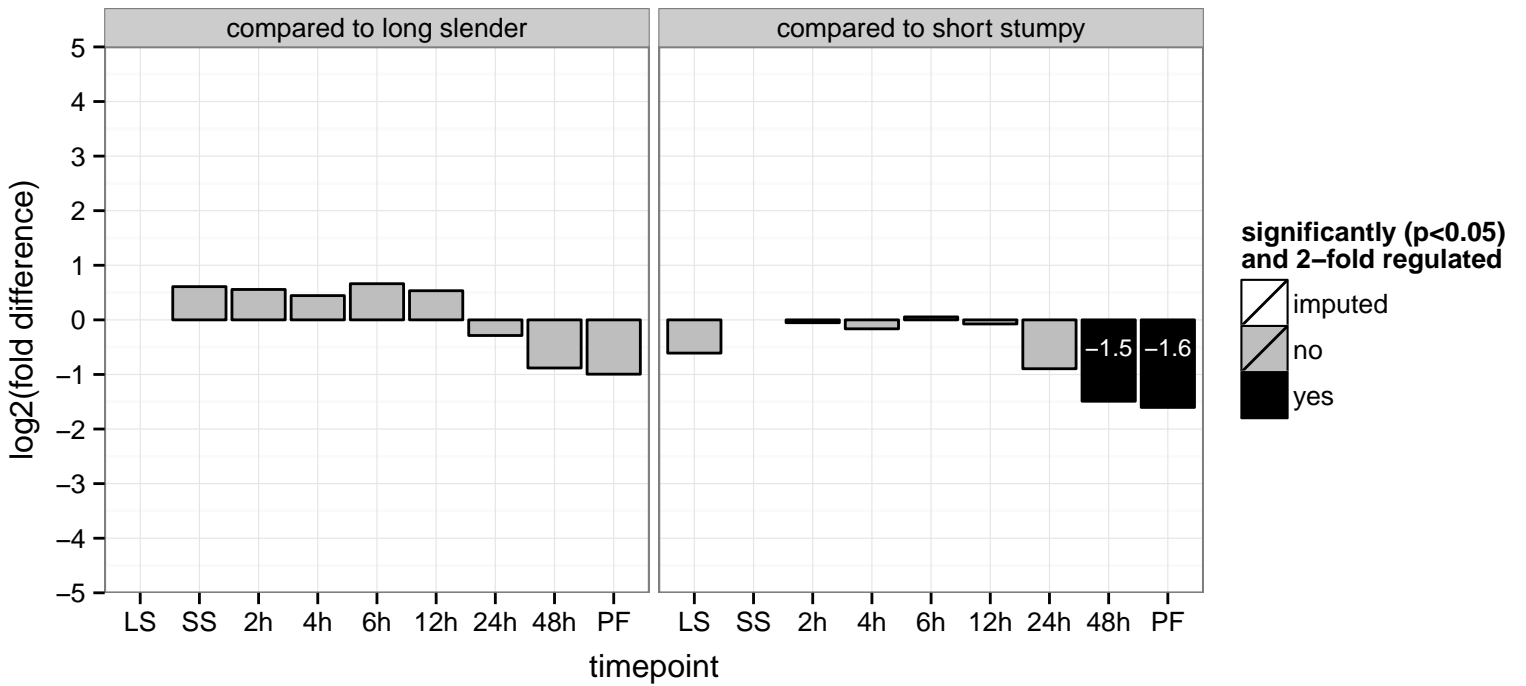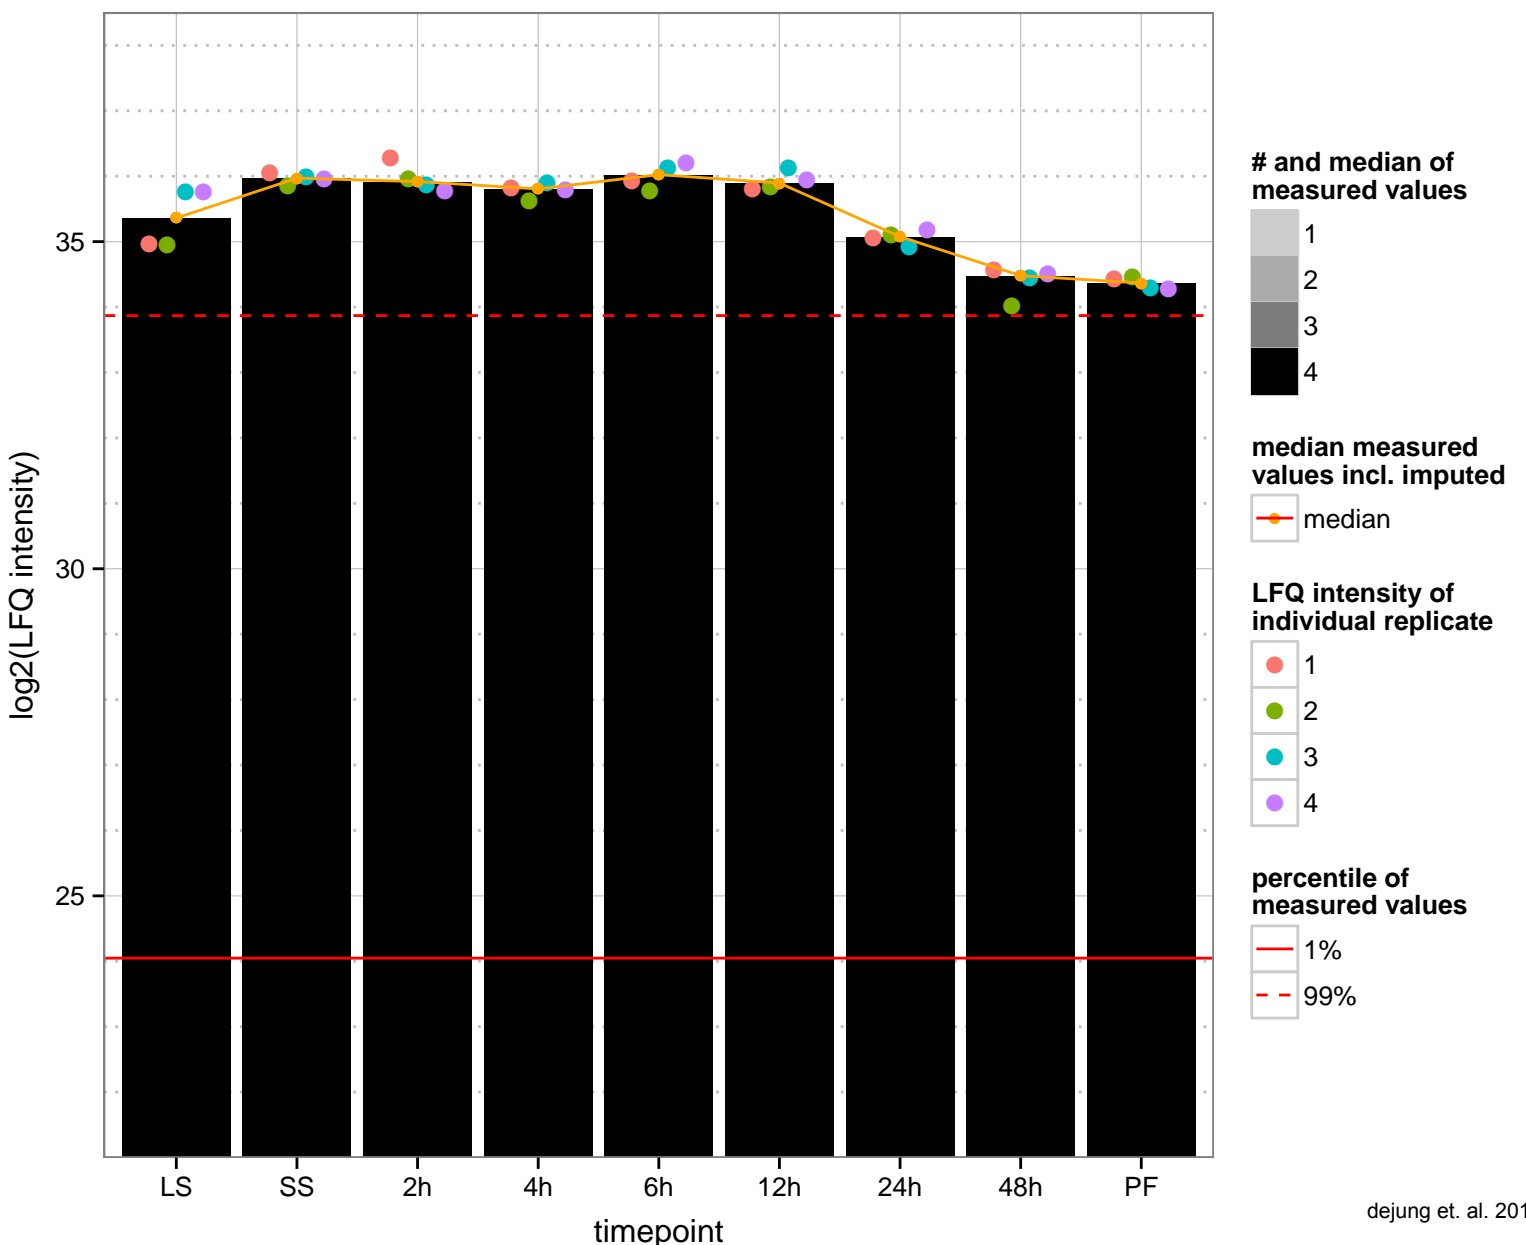

protein disulfide isomerase, bloodstream– specific protein 2 precursor  
 Tb927.10.8230;Tb11.v5.0668  
 AGOF: null, protein disulfide isomerase activity  
 AGOC: null, cytoplasm  
 AGOP: null, cell redox homeostasis, protein folding  
 PGO: isomerase activity  
 PGO: null  
 PGO: cell redox homeostasis

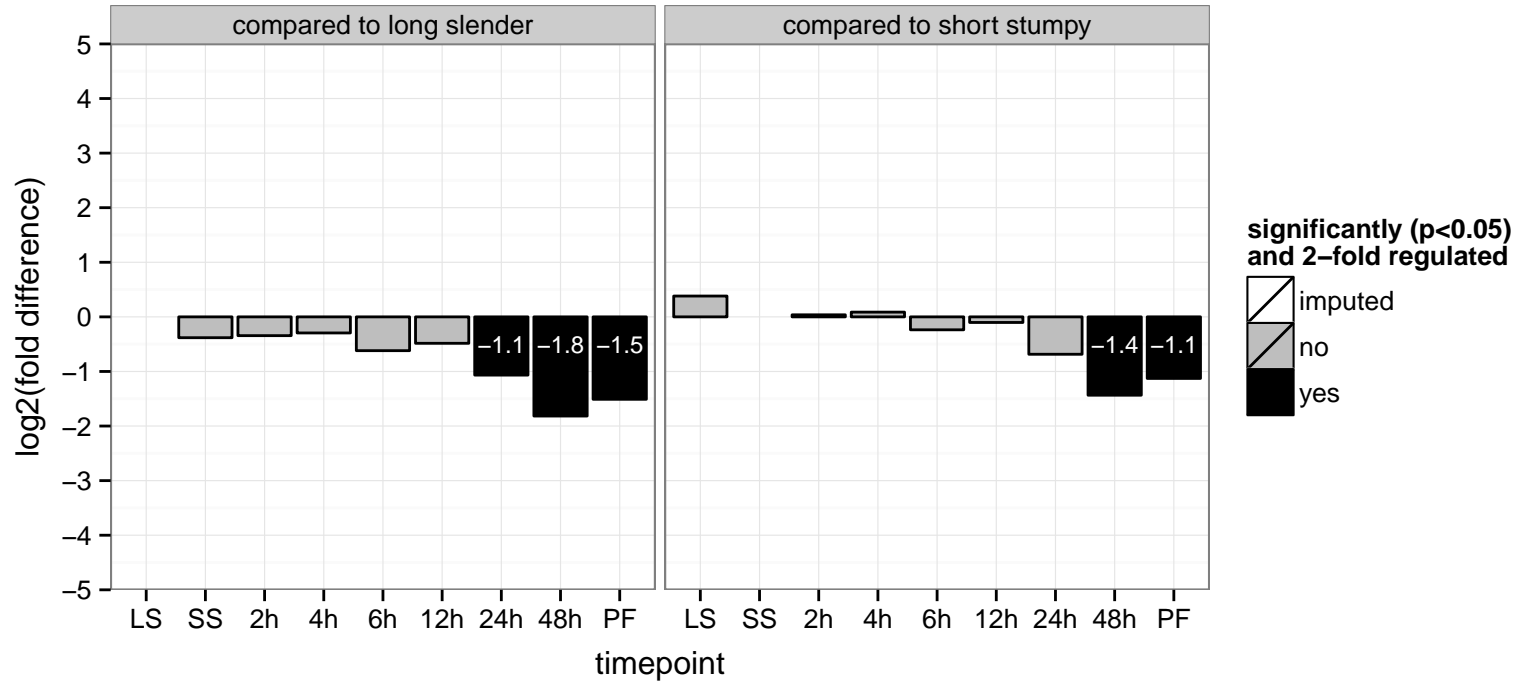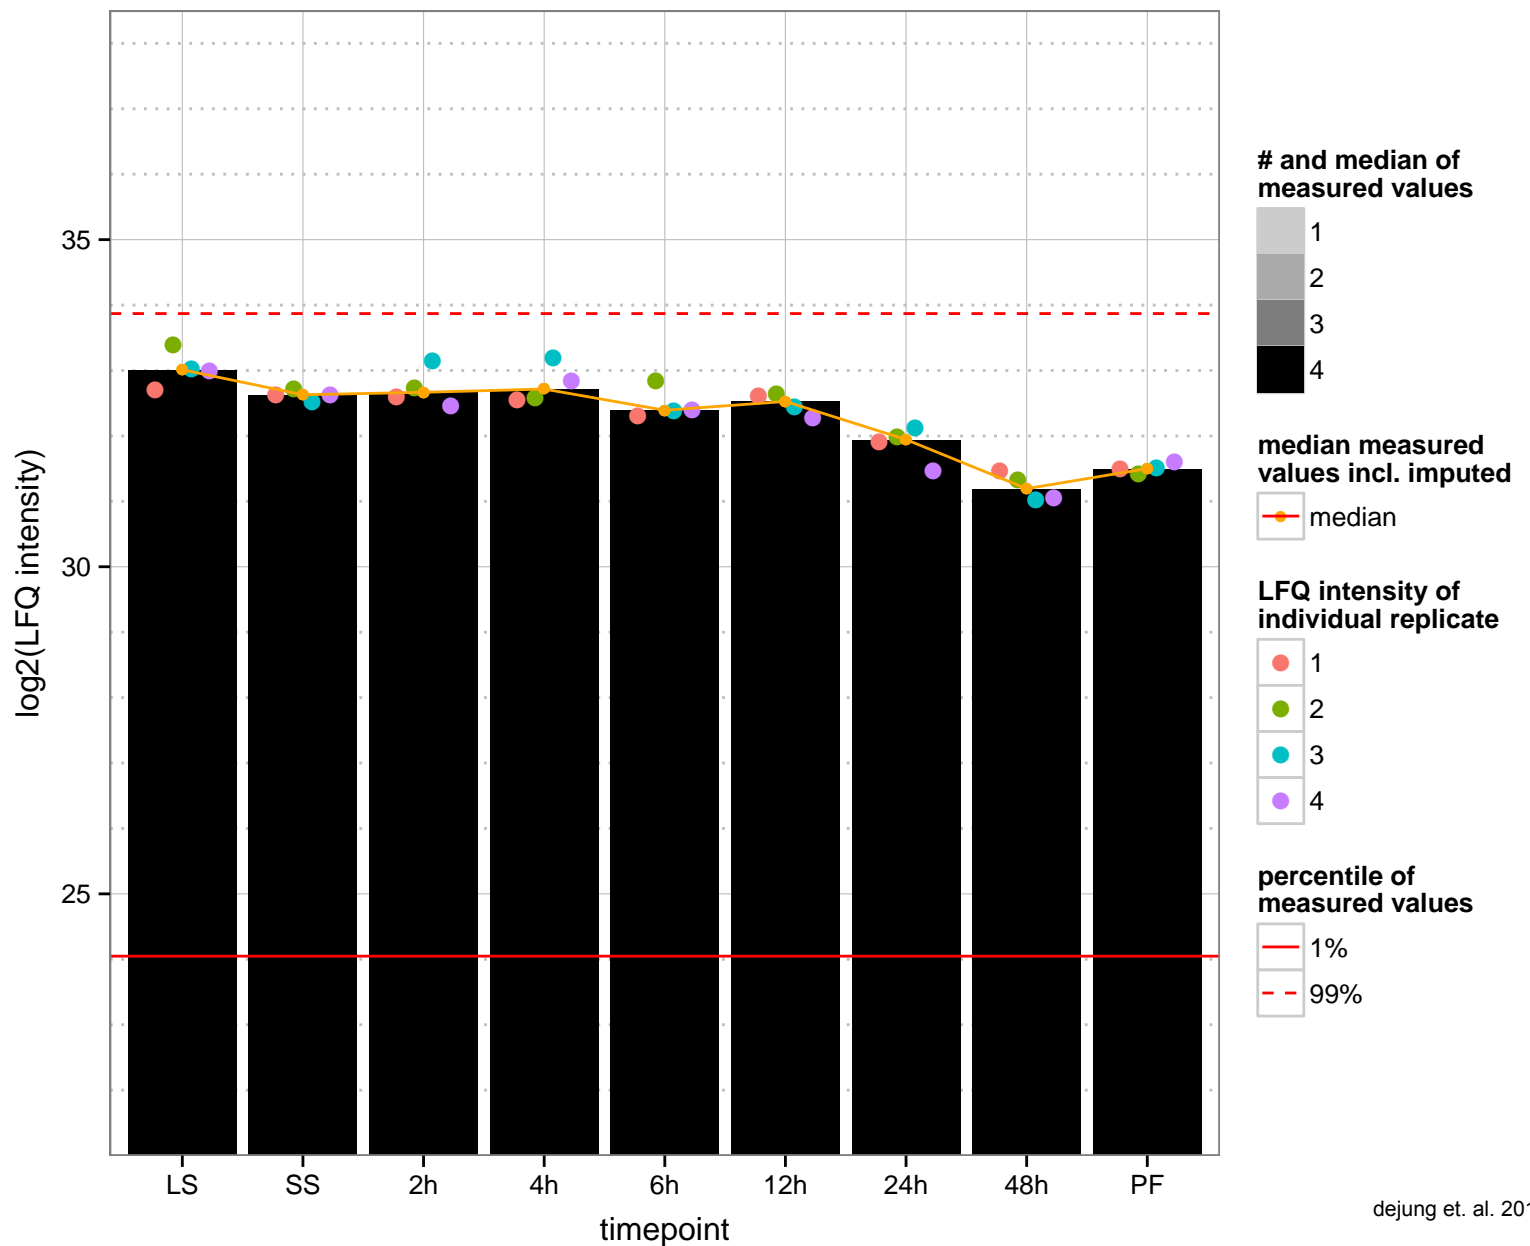

hypothetical protein, conserved  
 Tb927.1.2970  
 AGOF: null  
 AGOC: null  
 AGOP: null  
 PGO: null  
 PGOC: null  
 PGOP: null

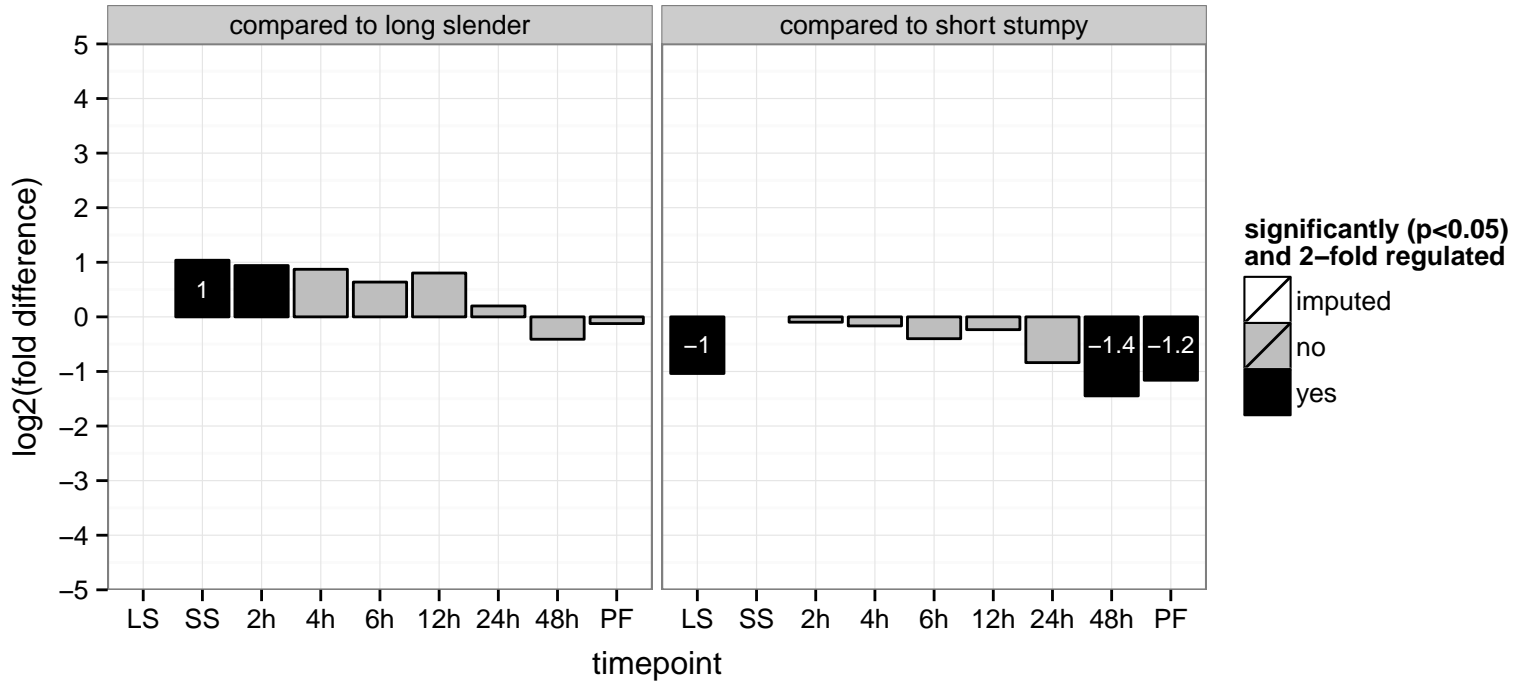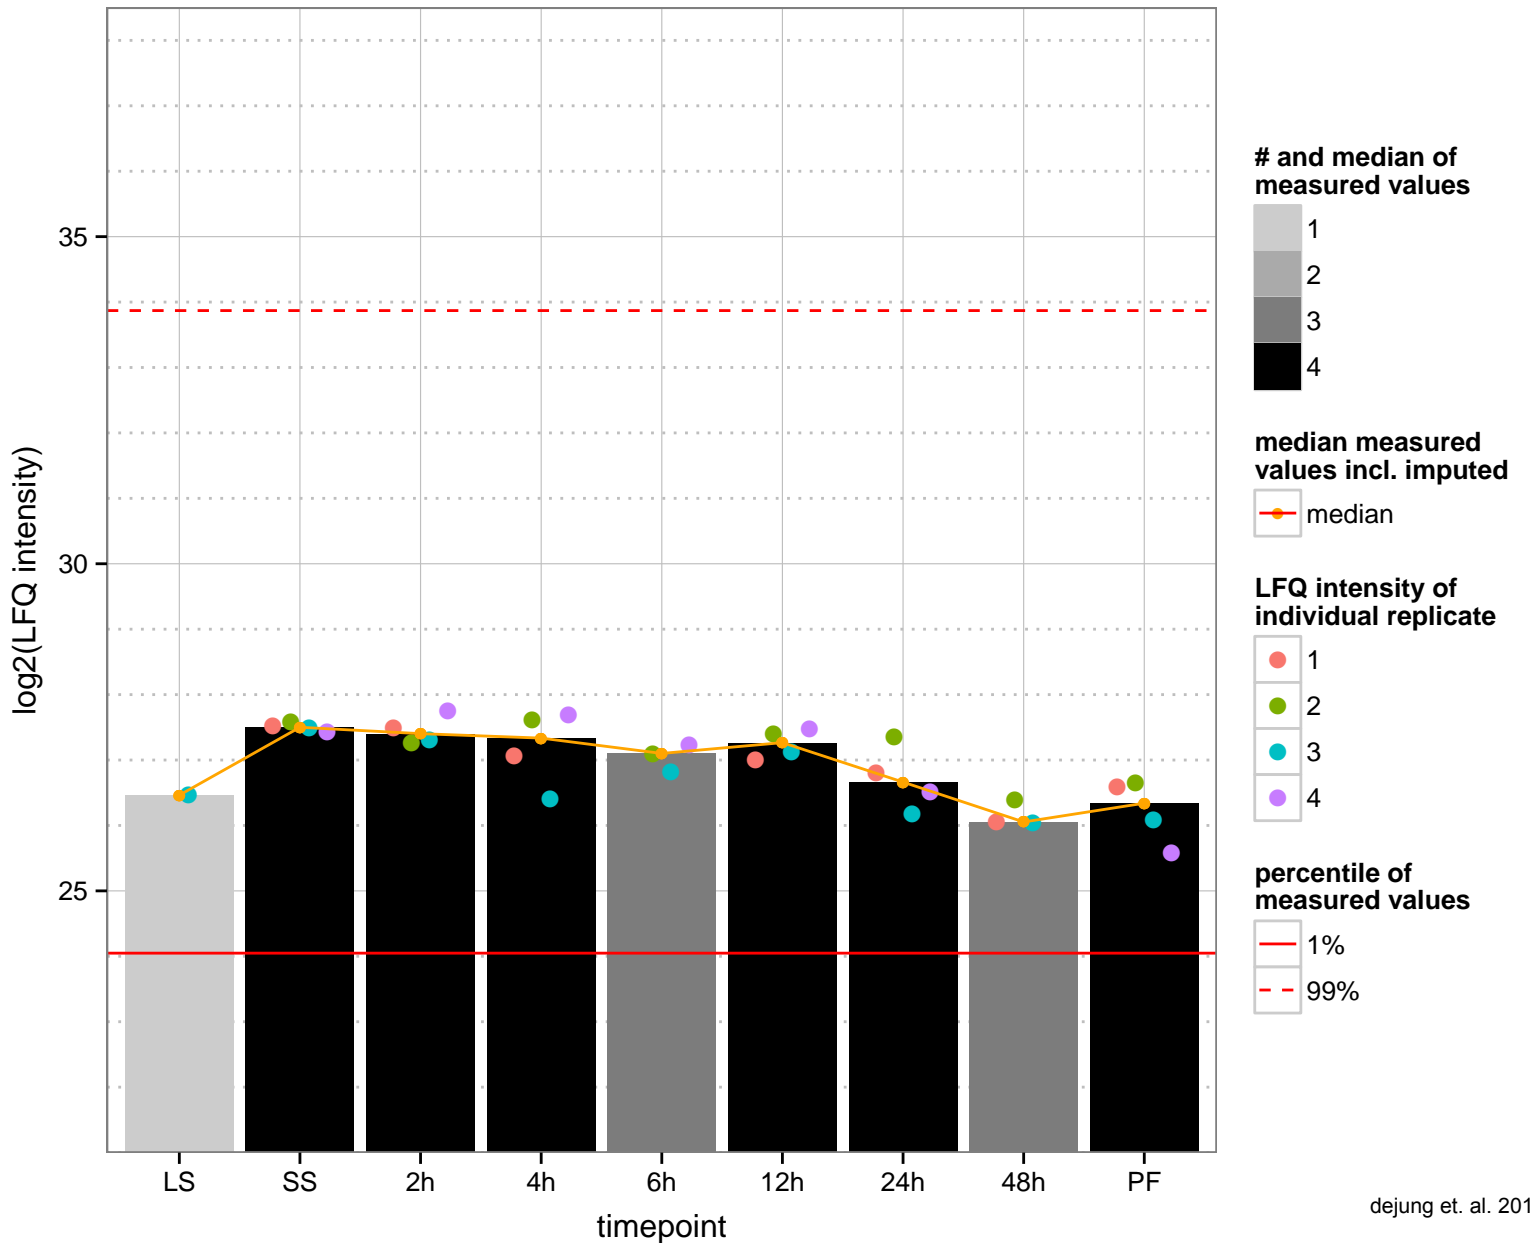

acetyltransferase, putative  
 Tb927.1.4490  
 AGOF: N-acetyltransferase activity, palmitoyl-CoA oxidase activity  
 AGOC: null  
 AGOP: metabolic process  
 PGOF: N-acetyltransferase activity  
 PGOC: null  
 PGOP: null

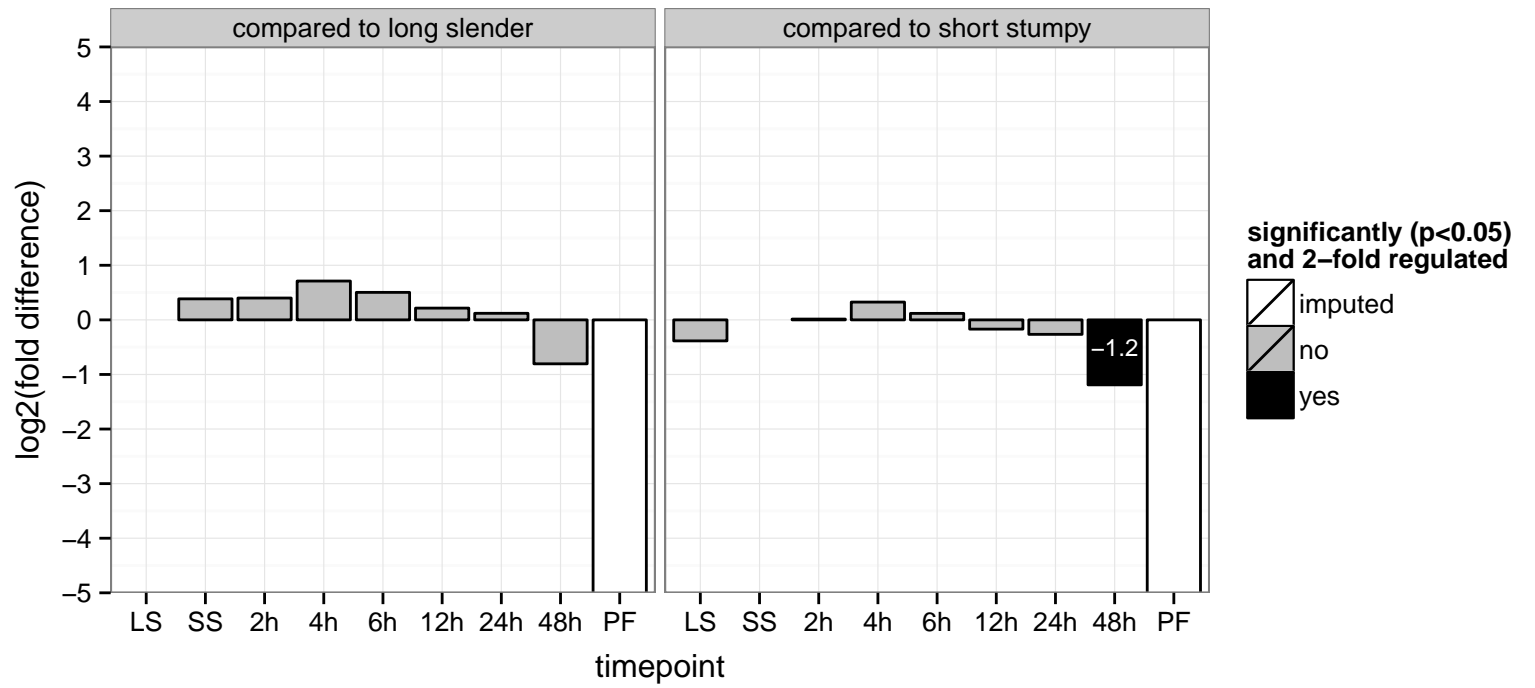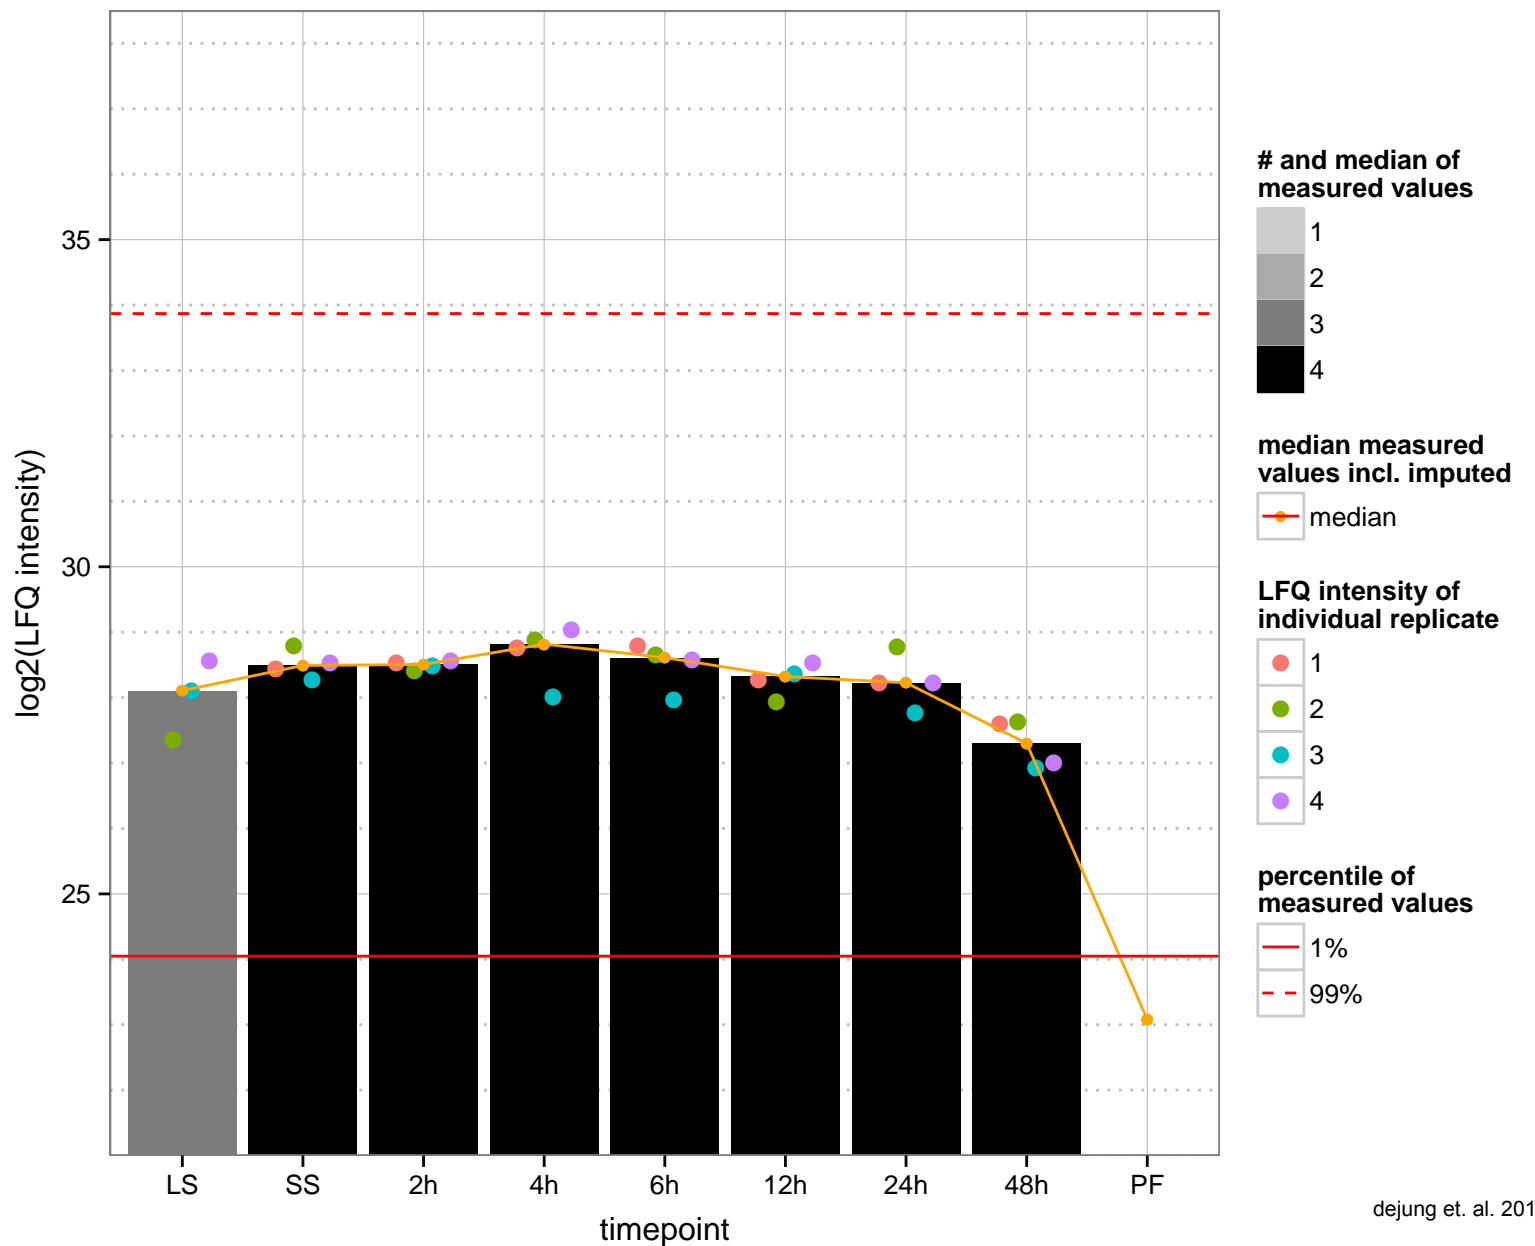



serine carboxypeptidase III precursor, putative (CBP1), serine peptidase, Clan SC, Family S10  
 Tb927.10.1040;Tb11.v5.0638;Tb927.10.1050  
 AGOF: null, serine-type carboxypeptidase activity  
 AGOC: null  
 AGOP: null, proteolysis  
 PGO: serine-type carboxypeptidase activity  
 PGO: null  
 PGO: proteolysis

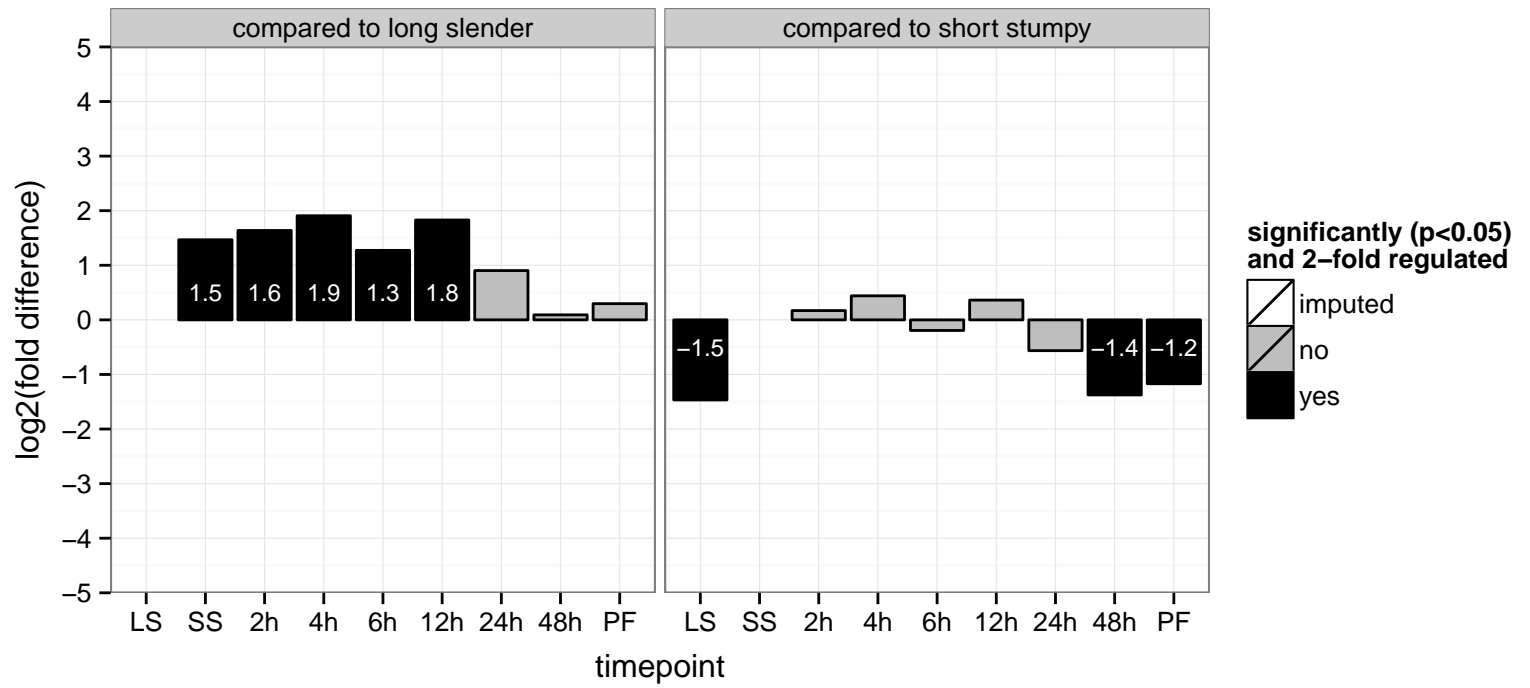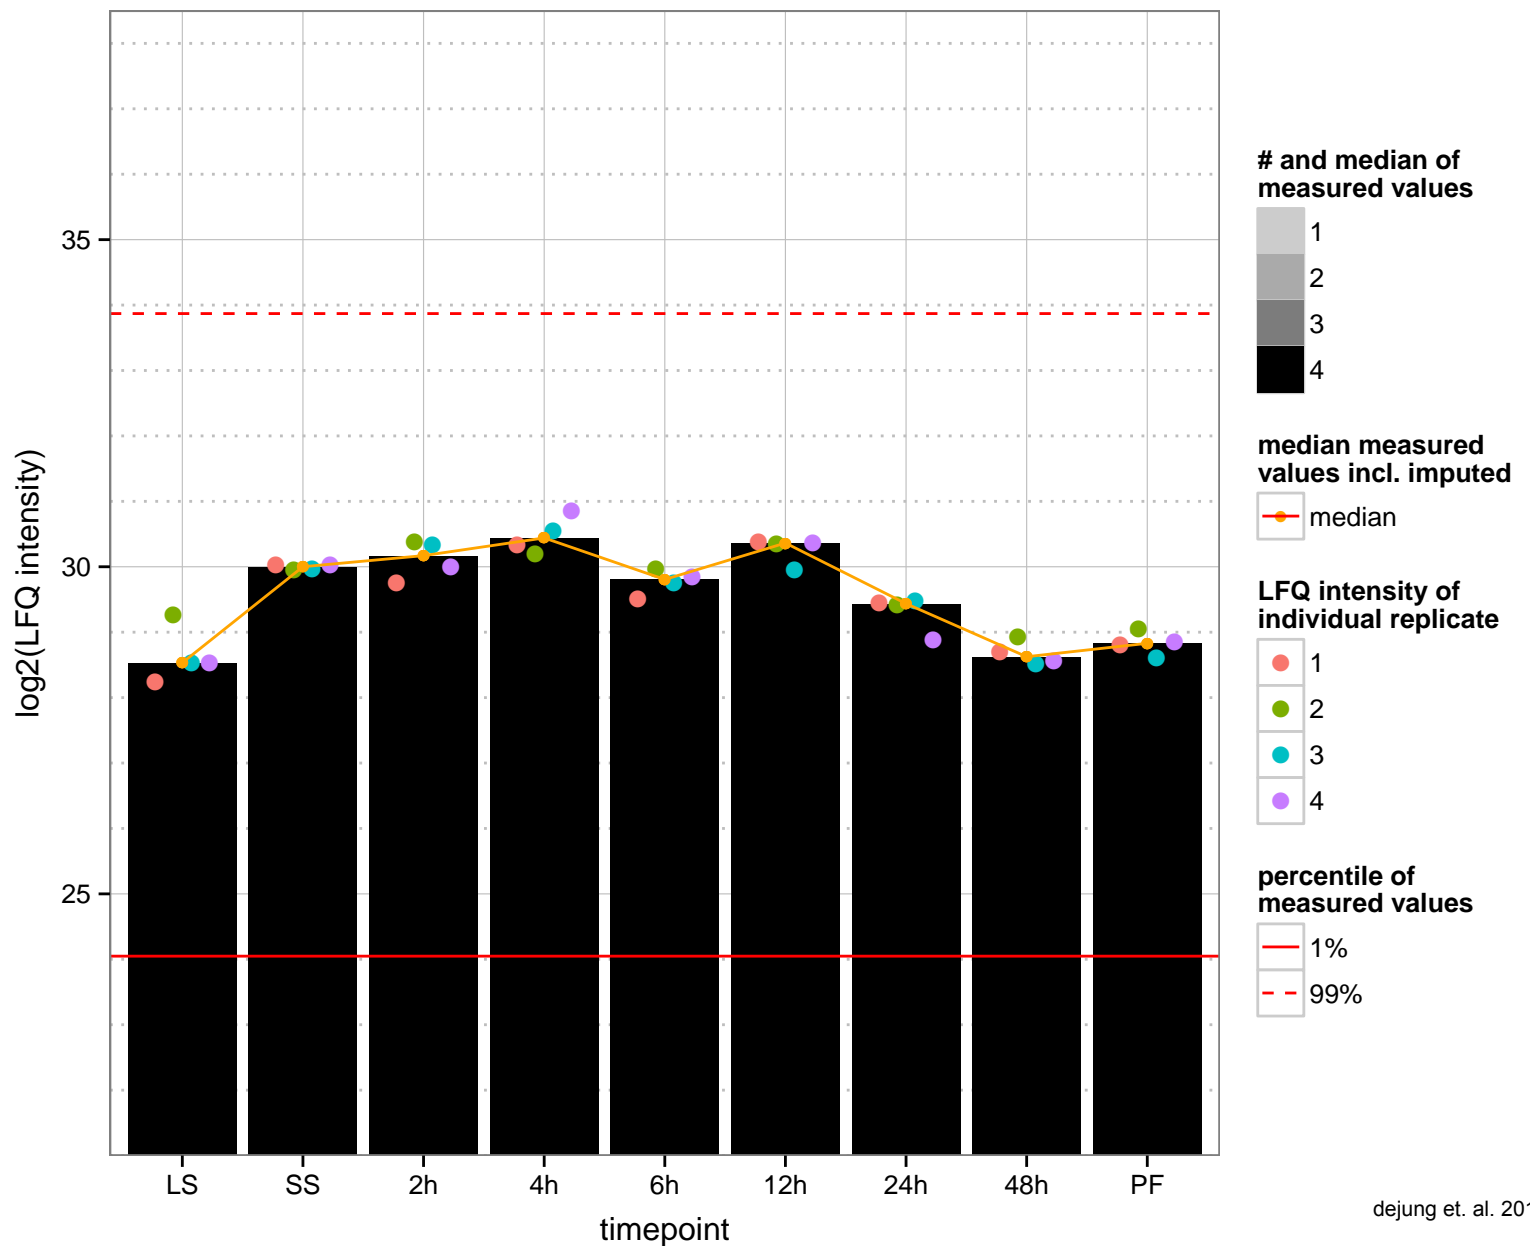

hypothetical protein, conserved  
 Tb927.10.11140  
 AGOF: null  
 AGOC: null  
 AGOP: null  
 PGO: null  
 PGOC: null  
 PGOP: null

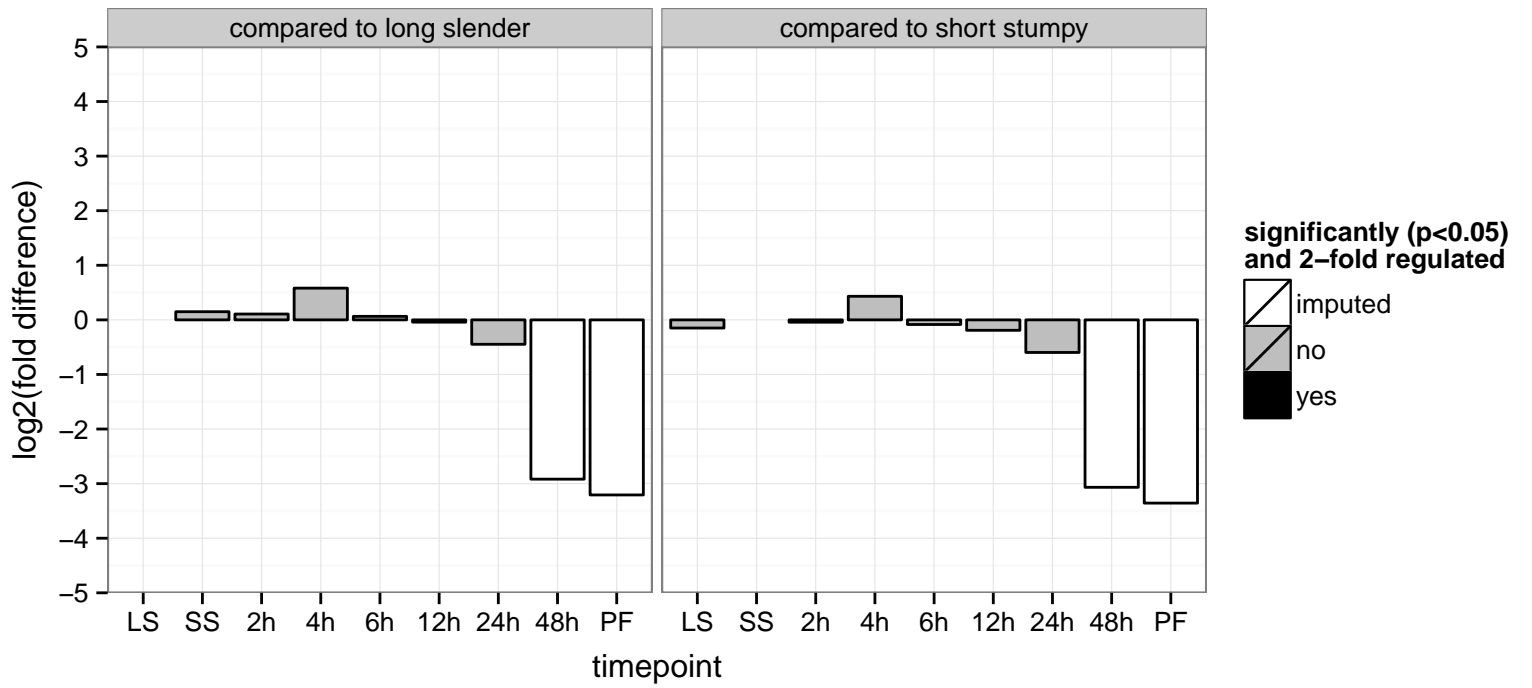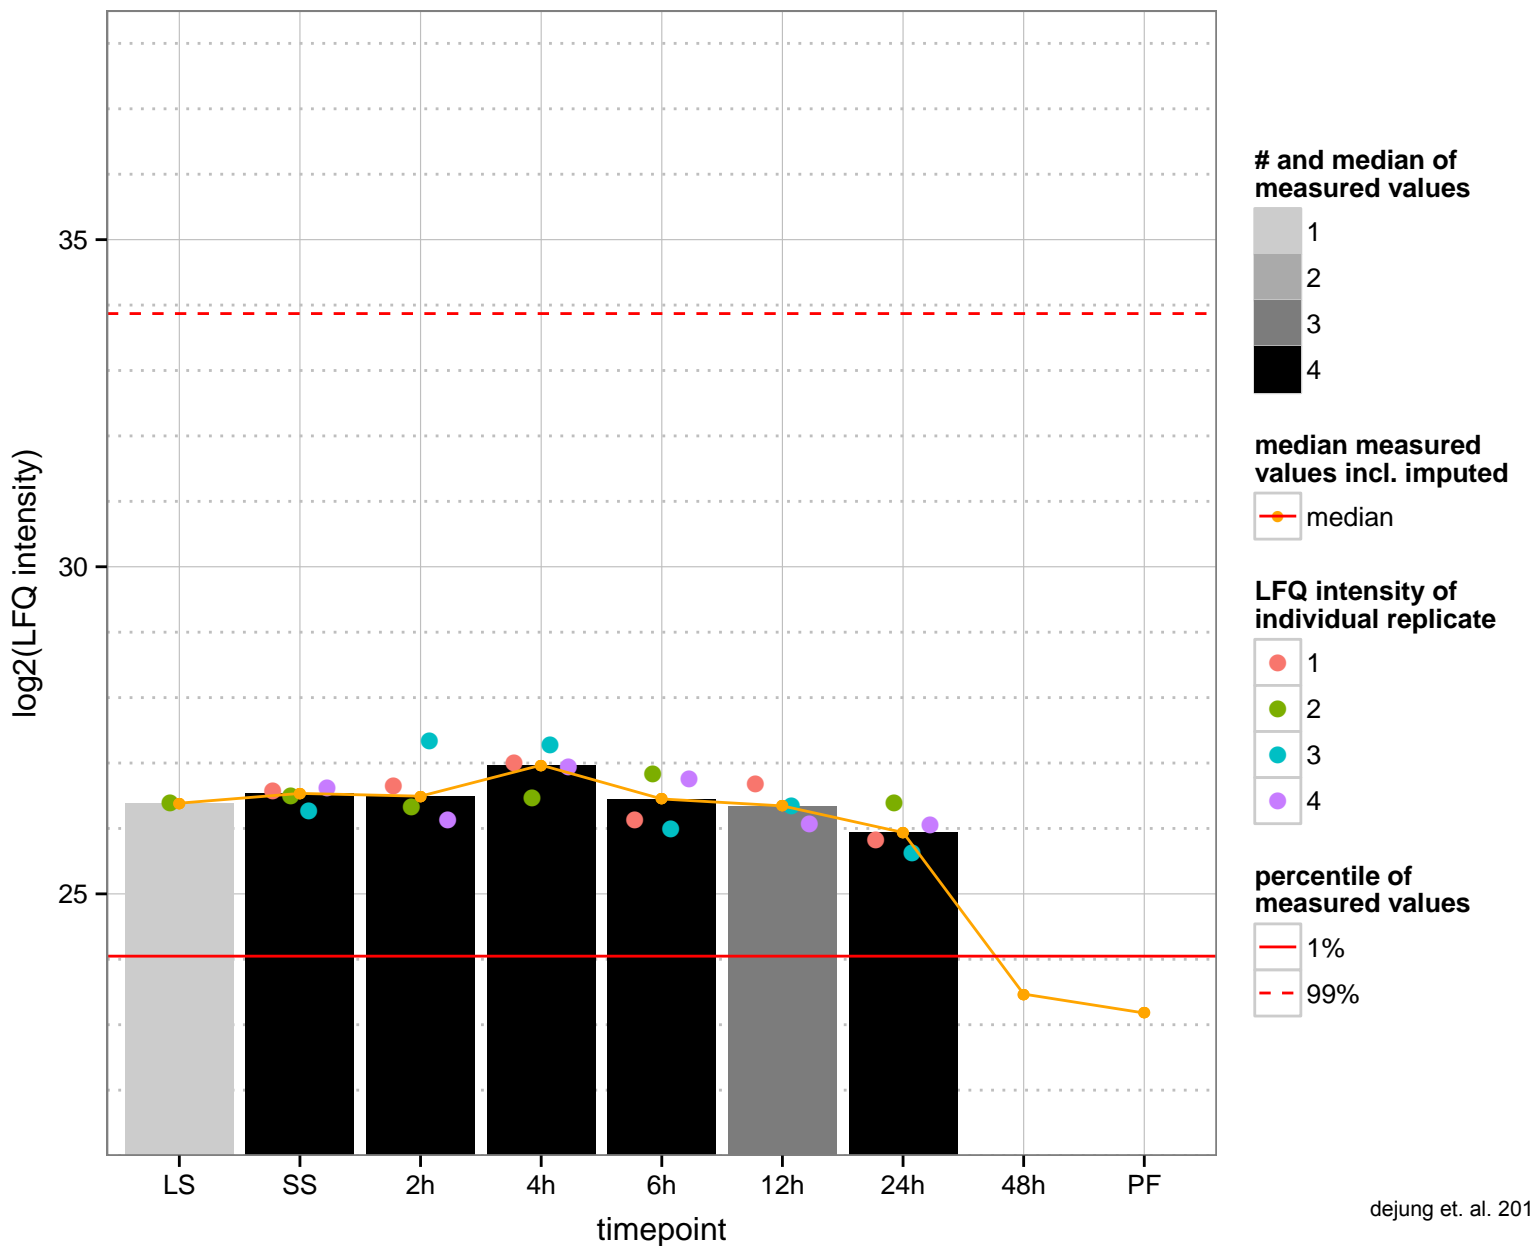

chloride channel protein, putative  
Tb927.10.11680  
AGOF: hormone activity, voltage-gated chloride channel activity  
AGOC: extracellular region, membrane  
AGOP: chloride transport  
PGOF: ion channel activity, protein binding, voltage-gated chloride channel activity  
PGOC: membrane  
PGOP: chloride transport, transmembrane transport

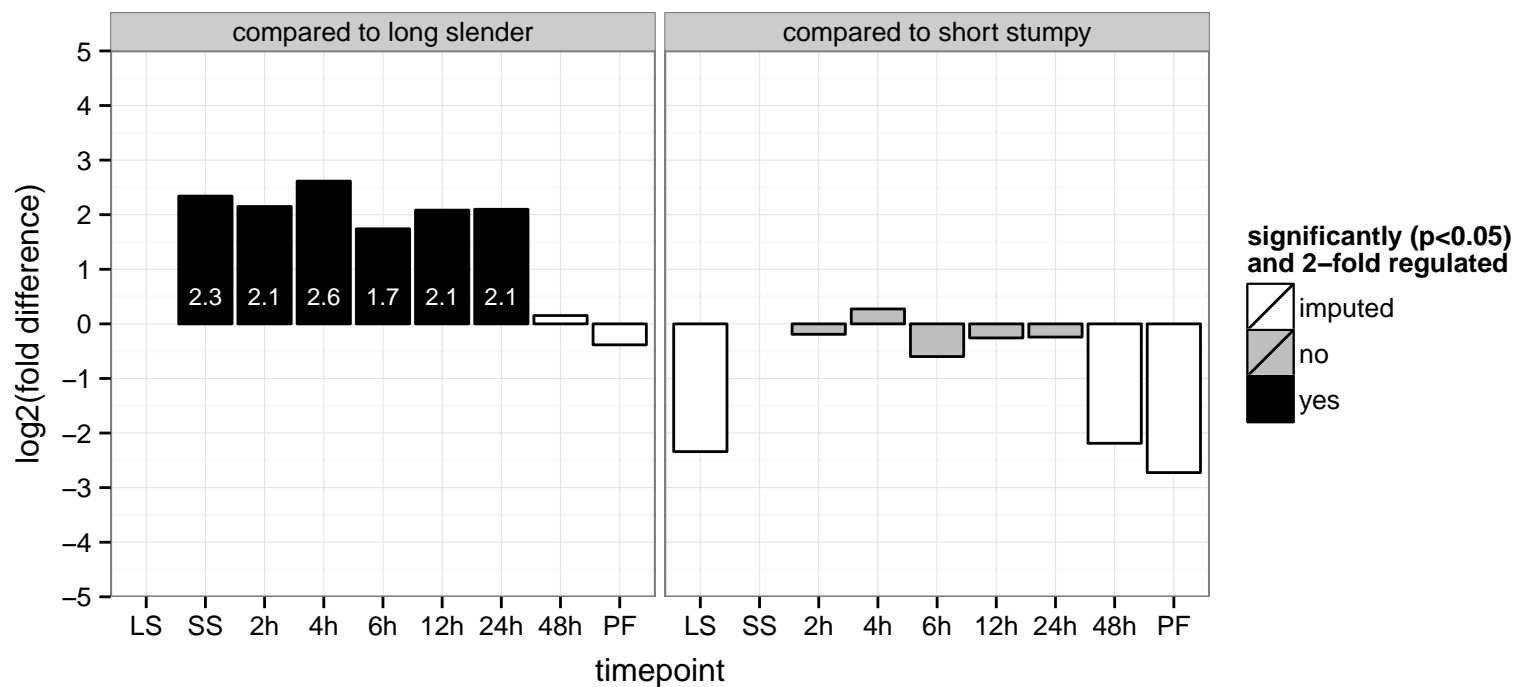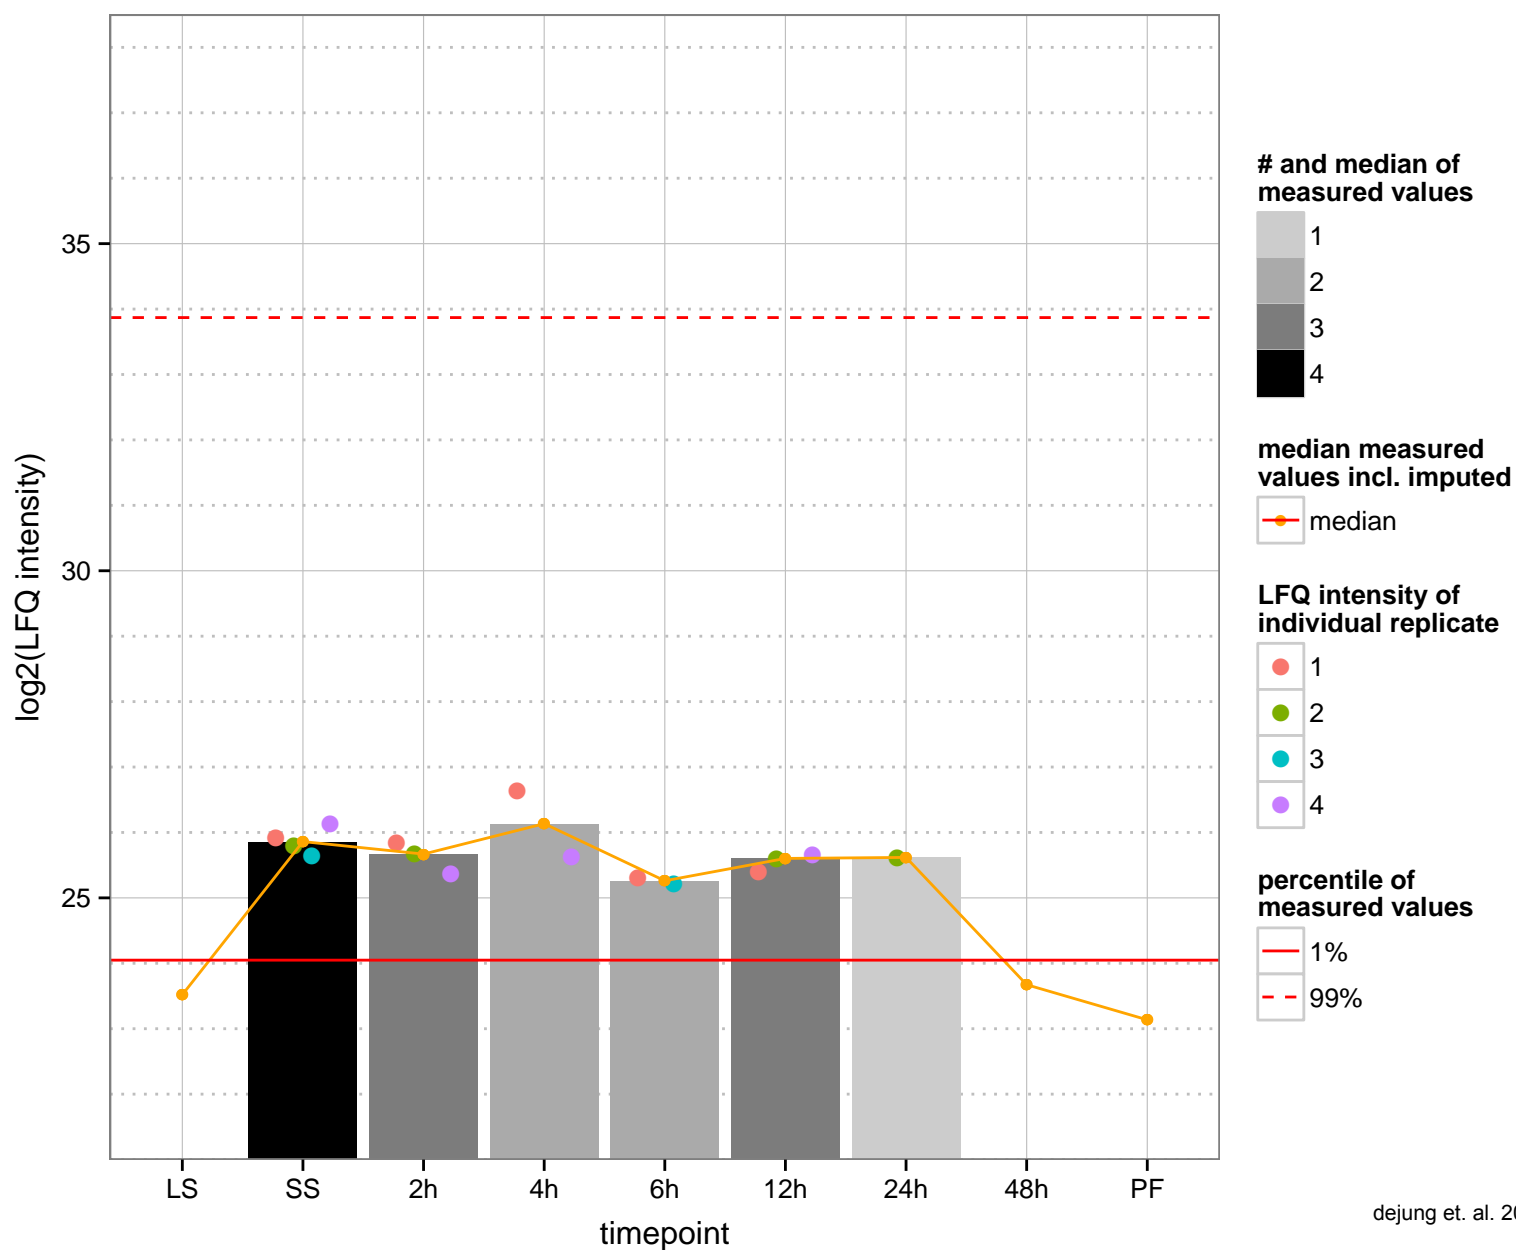

hypothetical protein, conserved  
 Tb927.10.12010  
 AGOF: null  
 AGOC: null  
 AGOP: null  
 PGO: null  
 PGOC: null  
 PGOP: null

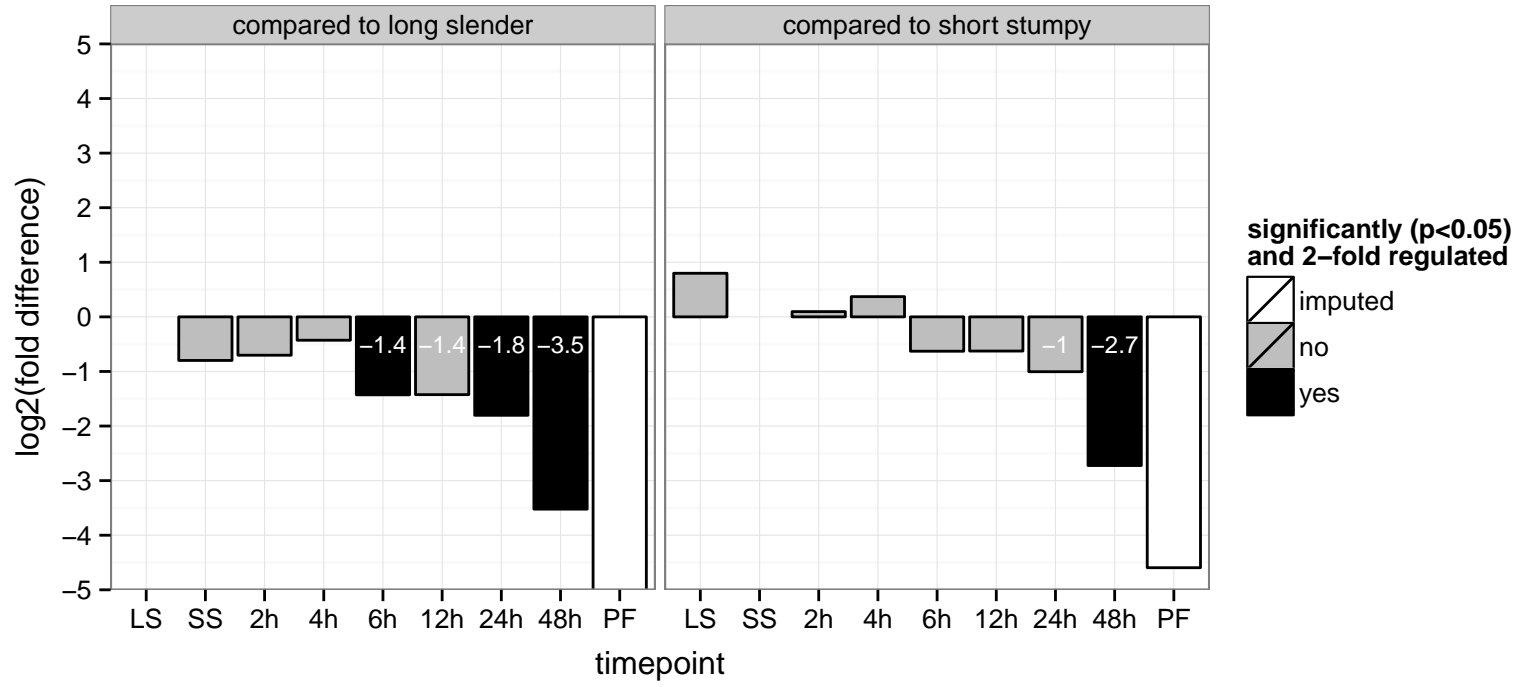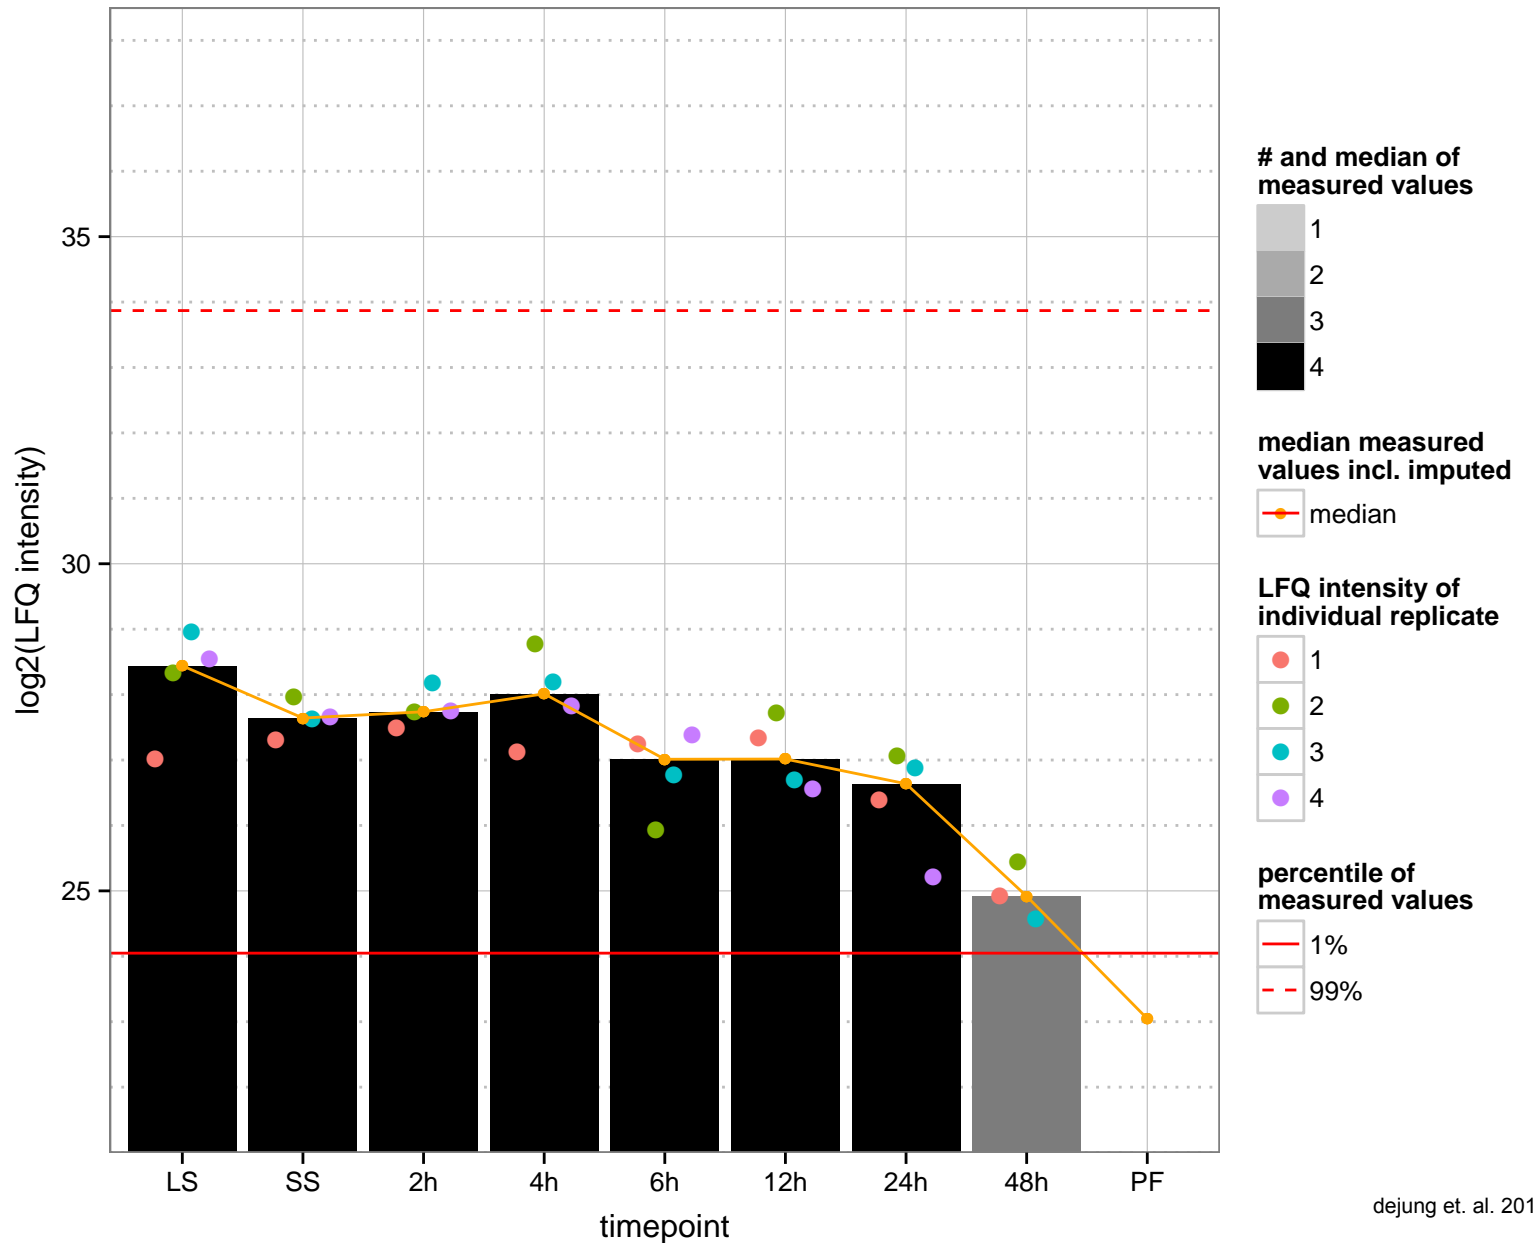

hypothetical protein, conserved  
 Tb927.10.1230  
 AGOF: null  
 AGOC: null  
 AGOP: null  
 PGO: null  
 PGOC: null  
 PGOP: null

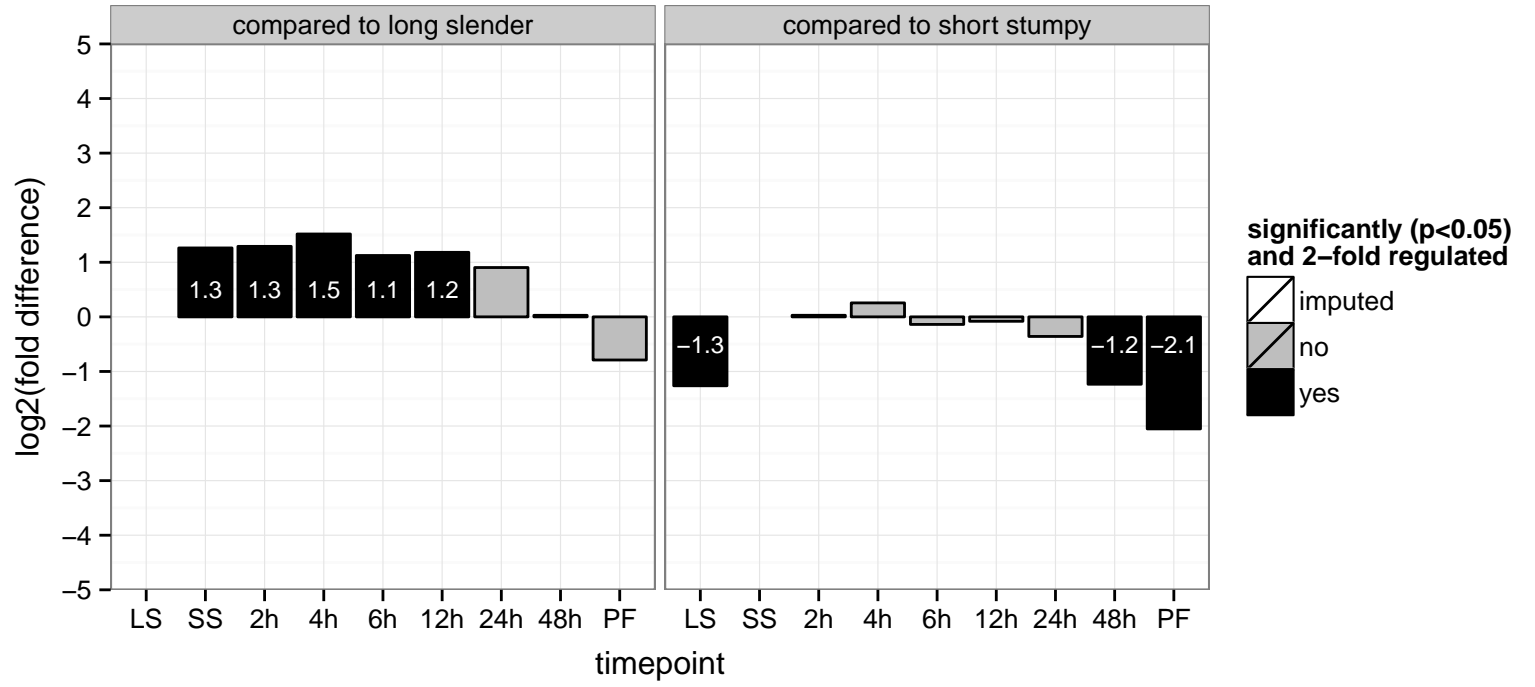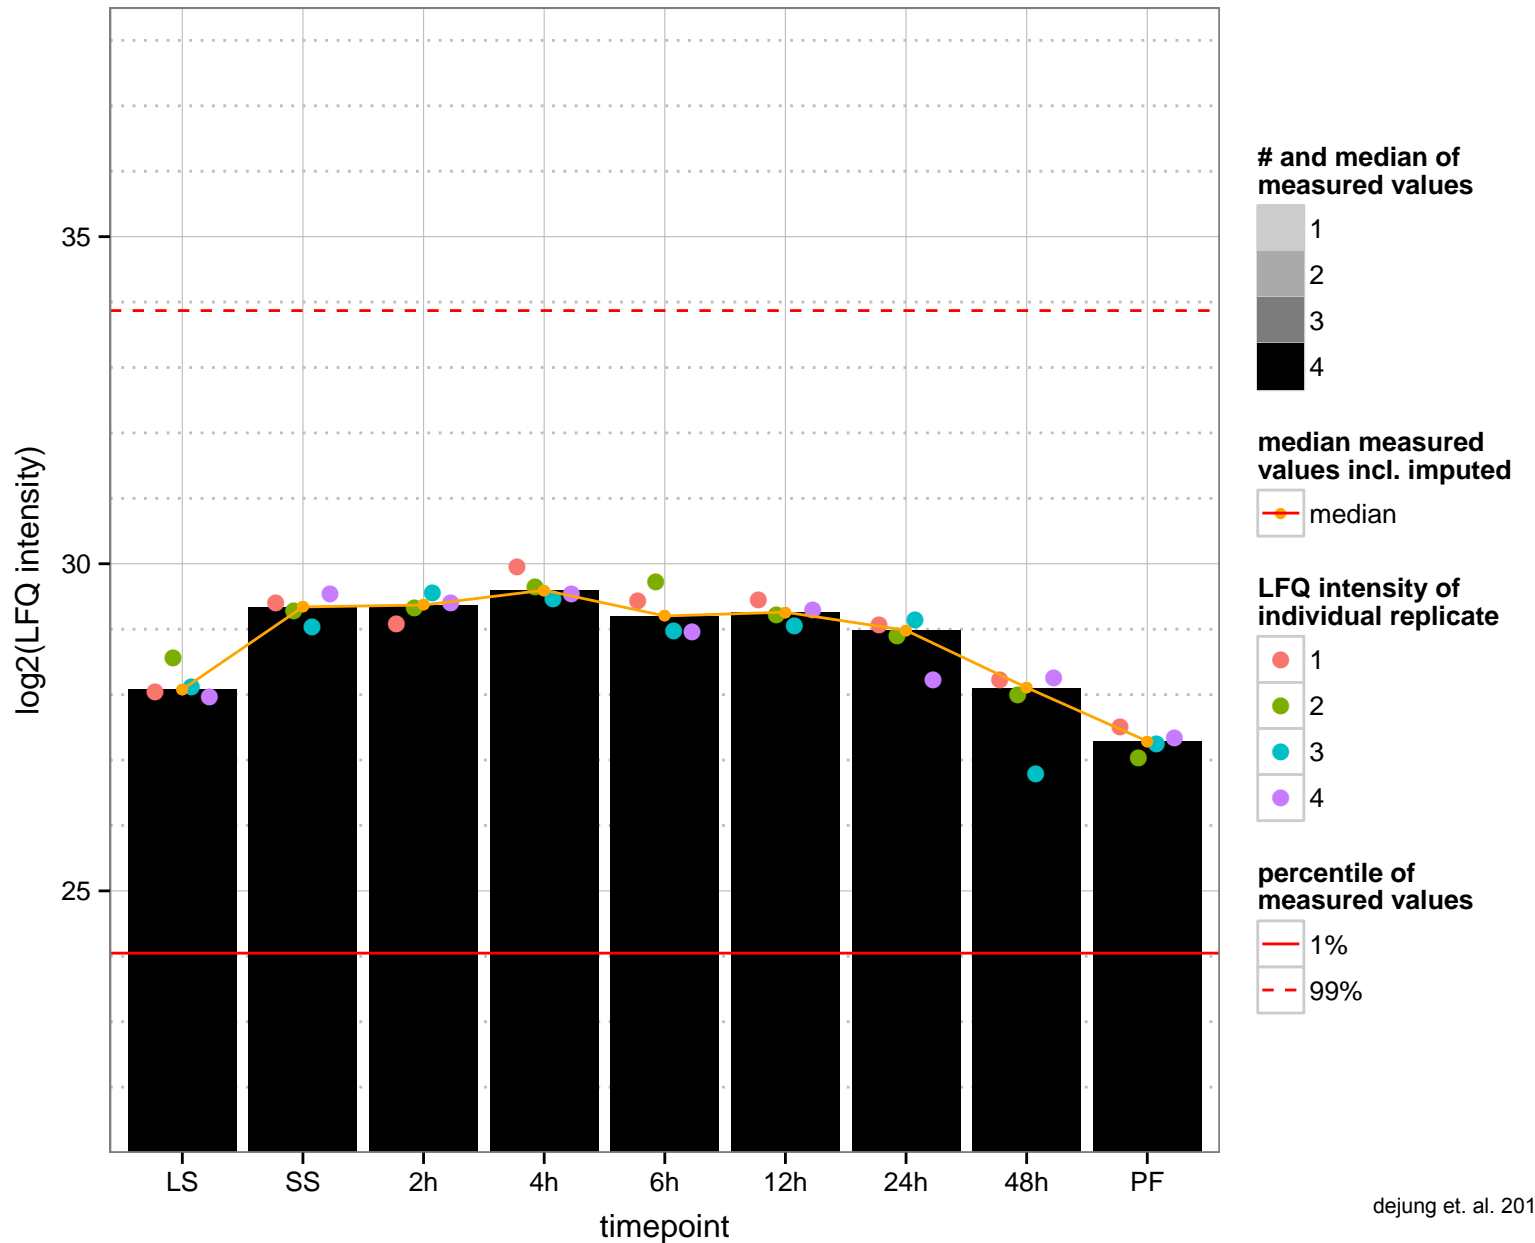

cholinephosphate cytidyltransferase A, putative

Tb927.10.12810

AGOF: cytidyltransferase activity, nucleotidyltransferase activity

AGOC: cytosol

AGOP: biosynthetic process, phosphatidylcholine biosynthetic process

PGOF: catalytic activity, nucleotidyltransferase activity, phosphotransferase activity, for other substituted phosphate groups

PGOC: membrane

PGOP: biosynthetic process, phospholipid biosynthetic process

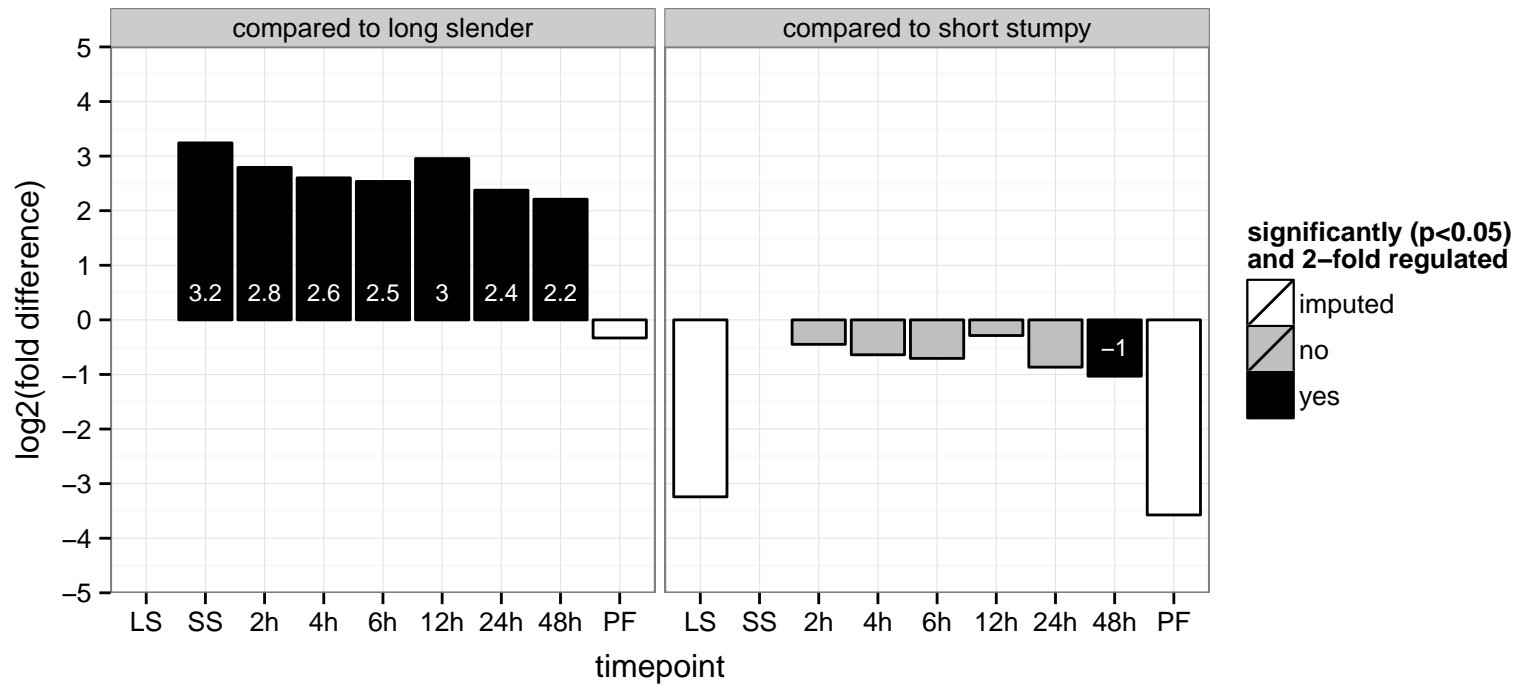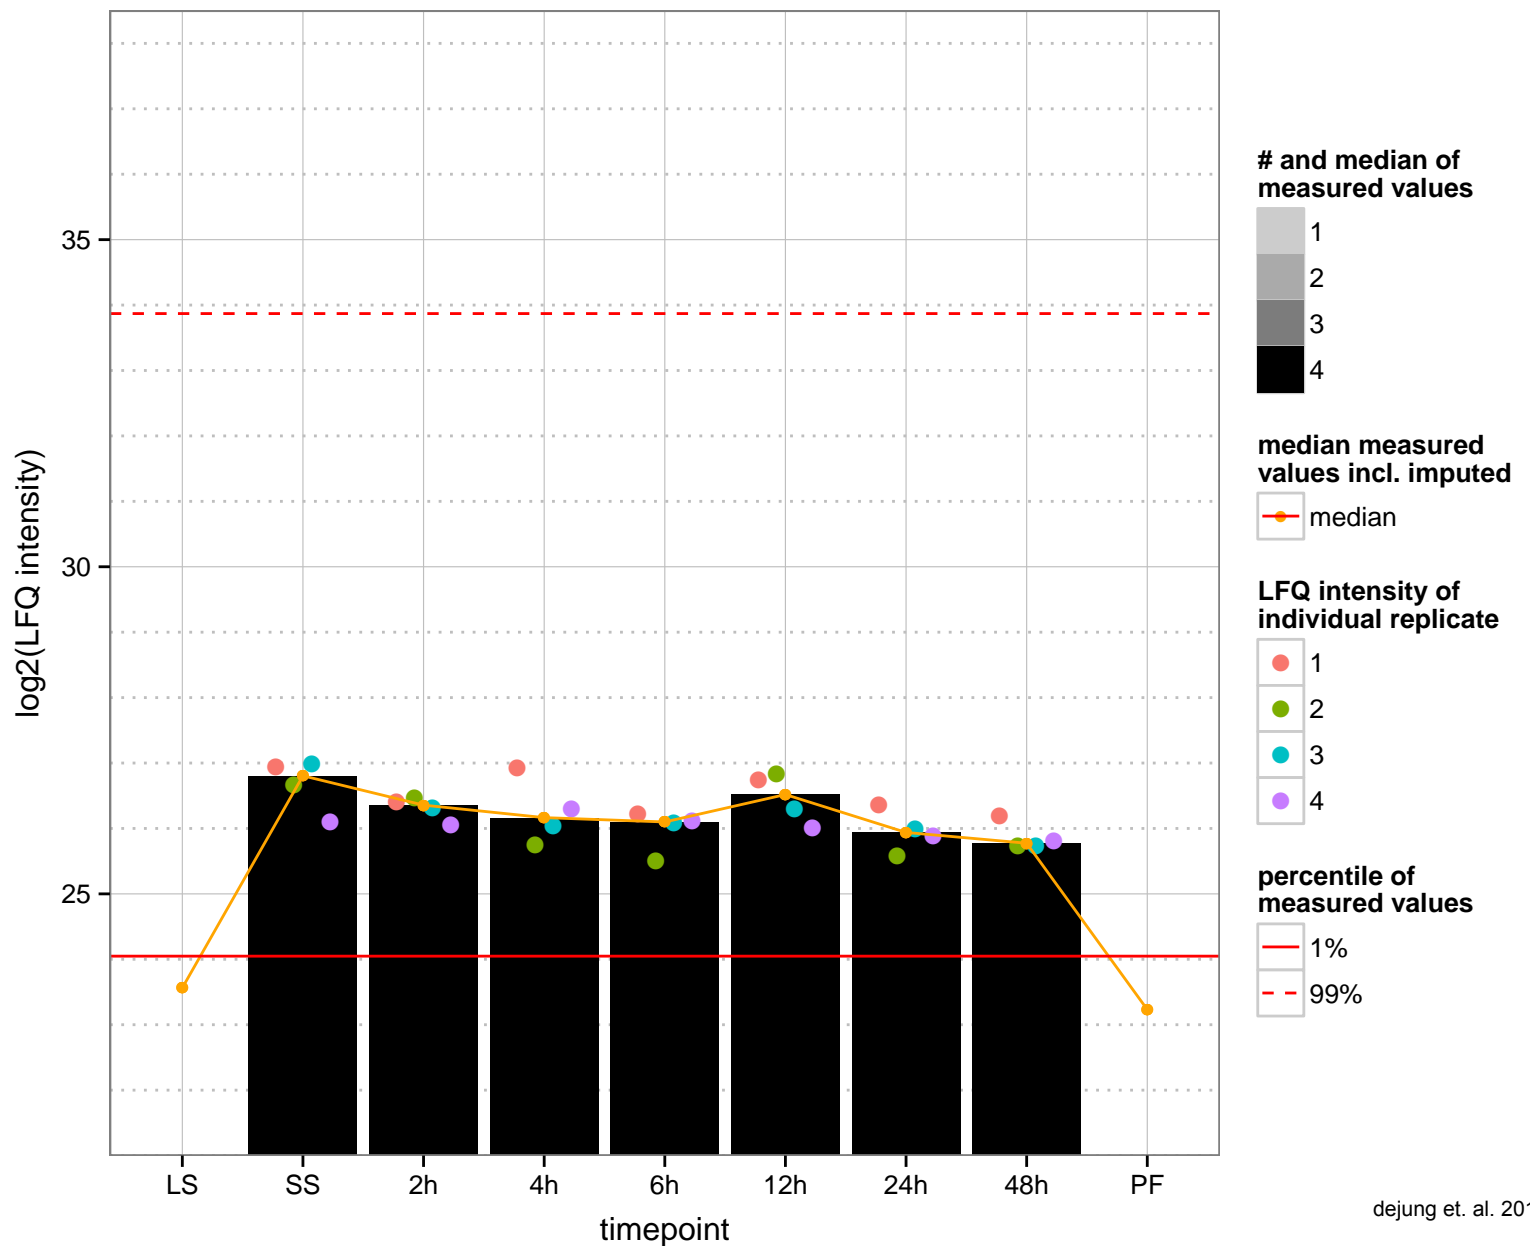

predicted zinc finger protein  
 Tb927.10.12940  
 AGOF: zinc ion binding  
 AGOC: null  
 AGOP: null  
 PGOF: protein binding, zinc ion binding  
 PGO: null  
 PGOP: null

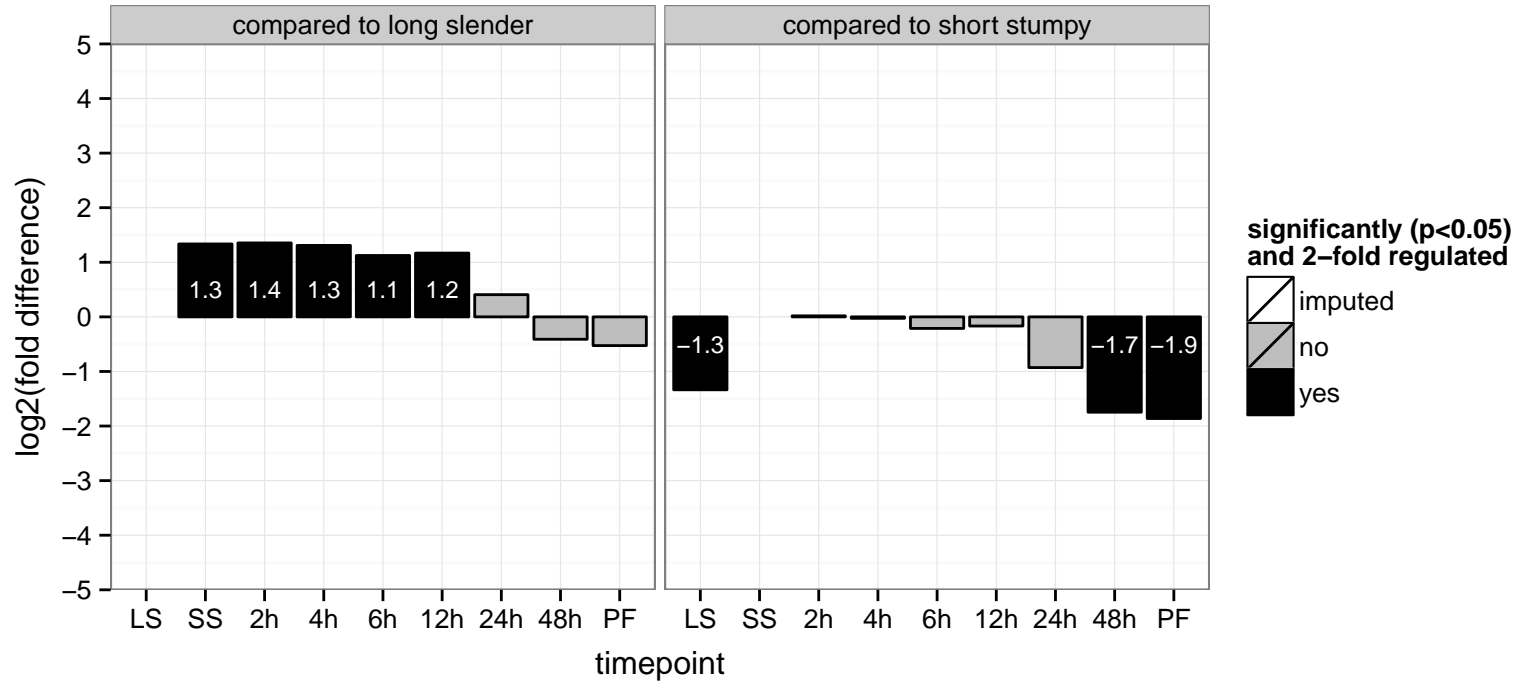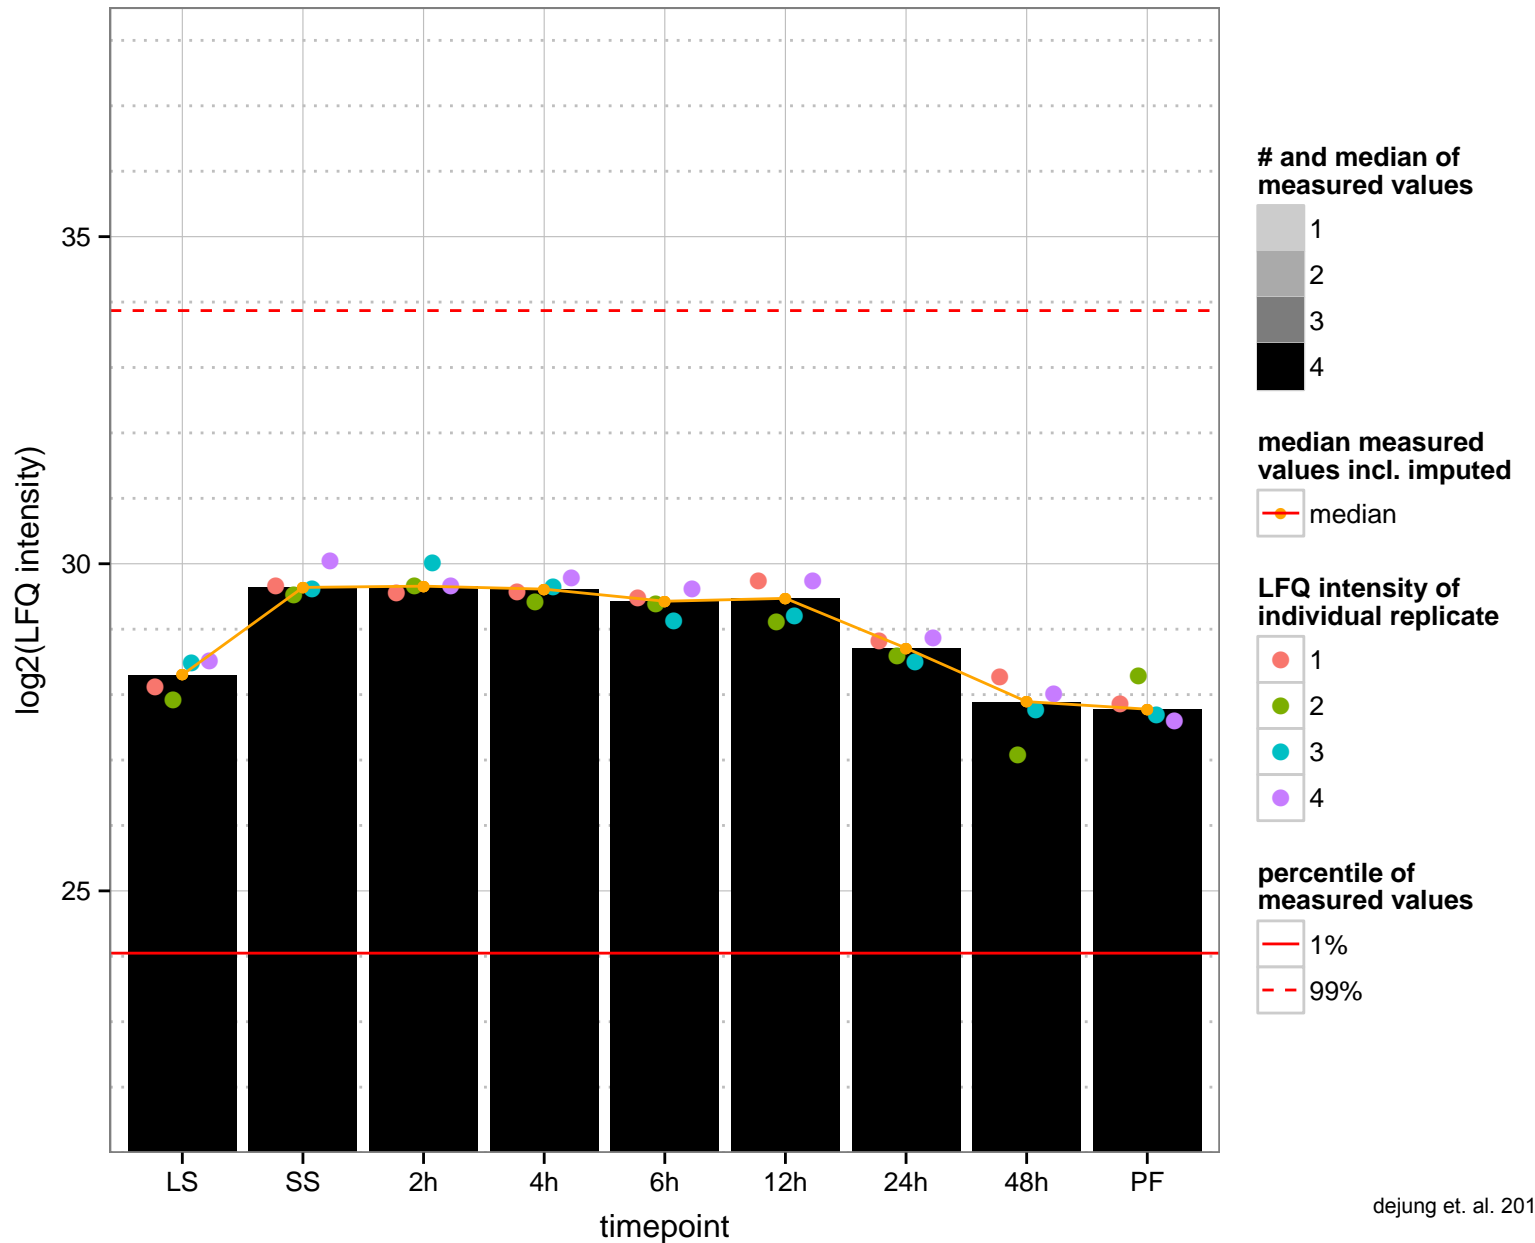

Ras-related protein Rab5A (RAB5A)

Tb927.10.12960

AGOF: GTP binding, GTPase activity

AGOC: intracellular

AGOP: intracellular protein transport, nucleocytoplasmic transport, small GTPase mediated signal transduction

PGOF: GTP binding, GTPase activity

PGOC: intracellular, membrane

PGOP: GTP catabolic process, intracellular protein transport, nucleocytoplasmic transport, protein transport, signal transduction

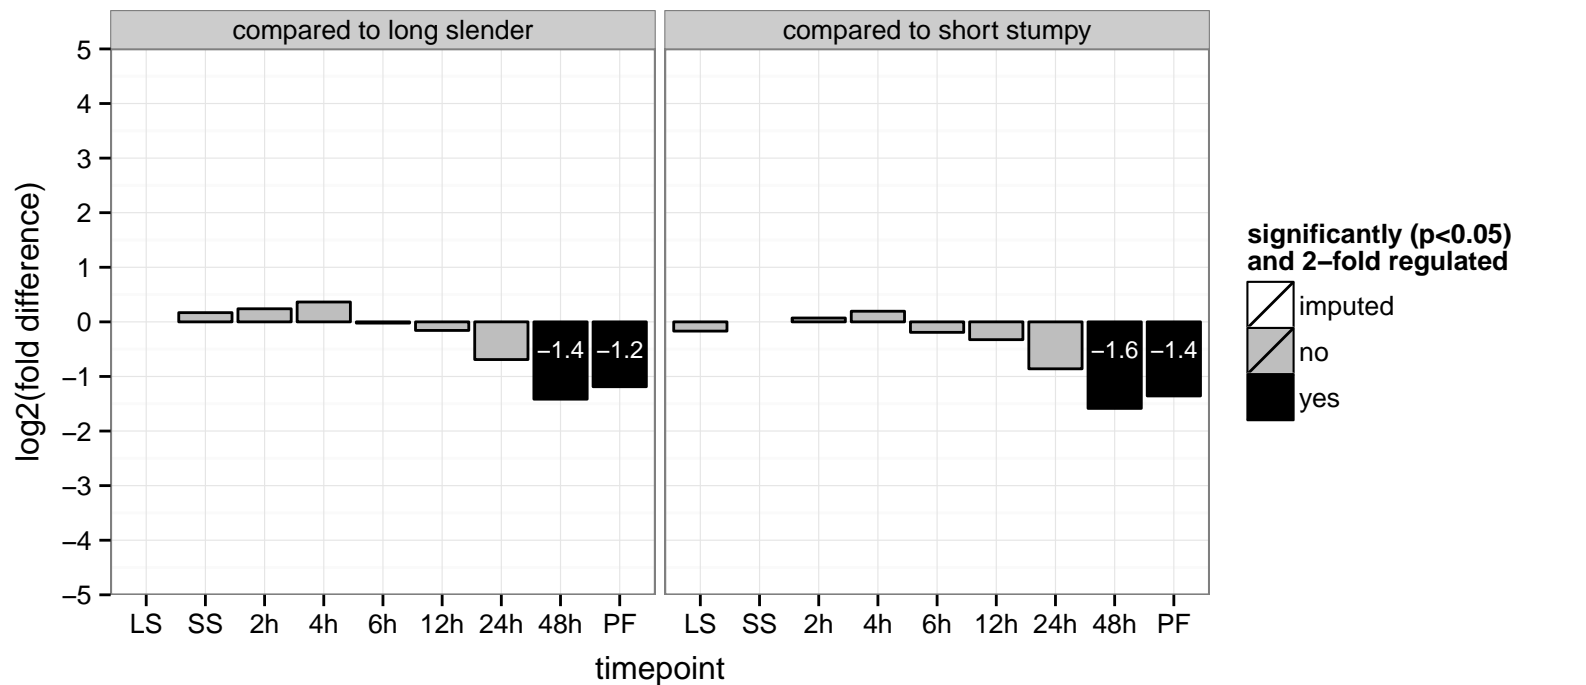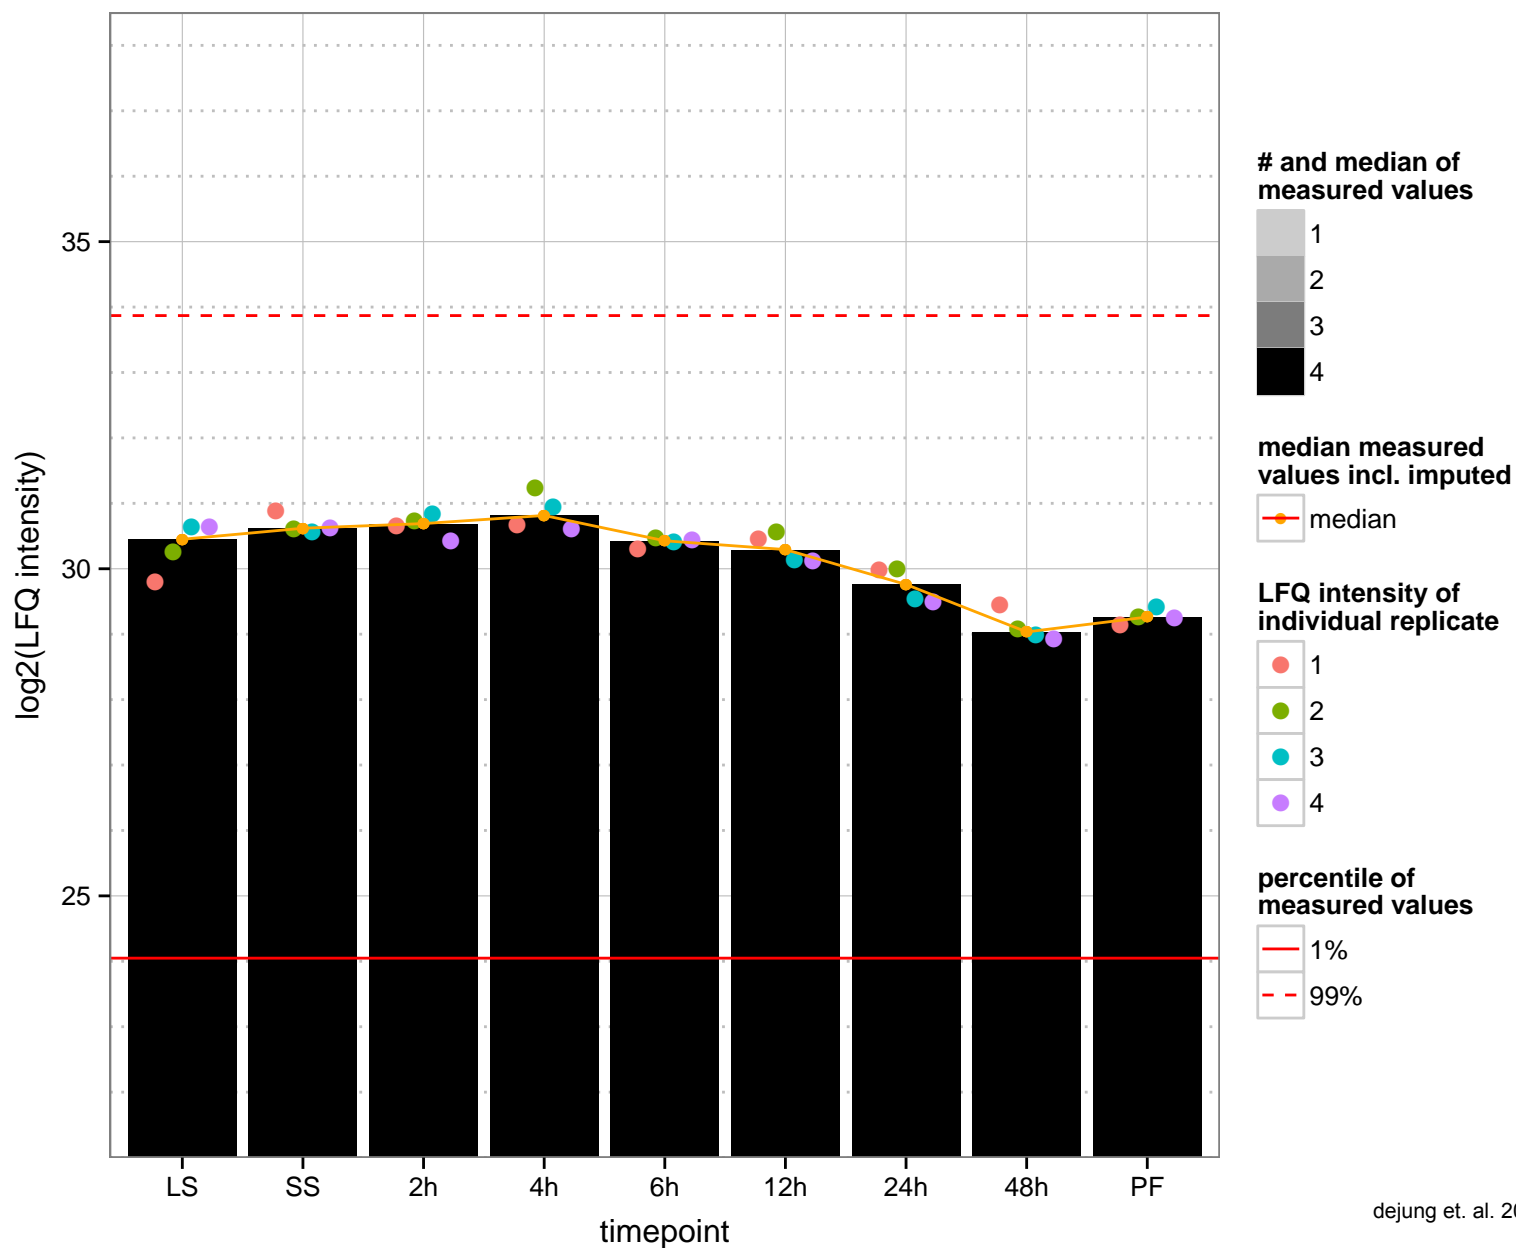



RNA-binding protein, putative (RBP12)  
 Tb927.10.13540  
 AGOF: RNA binding  
 AGOC: null  
 AGOP: RNA processing  
 PGO: nucleic acid binding  
 PGO: null  
 PGO: null

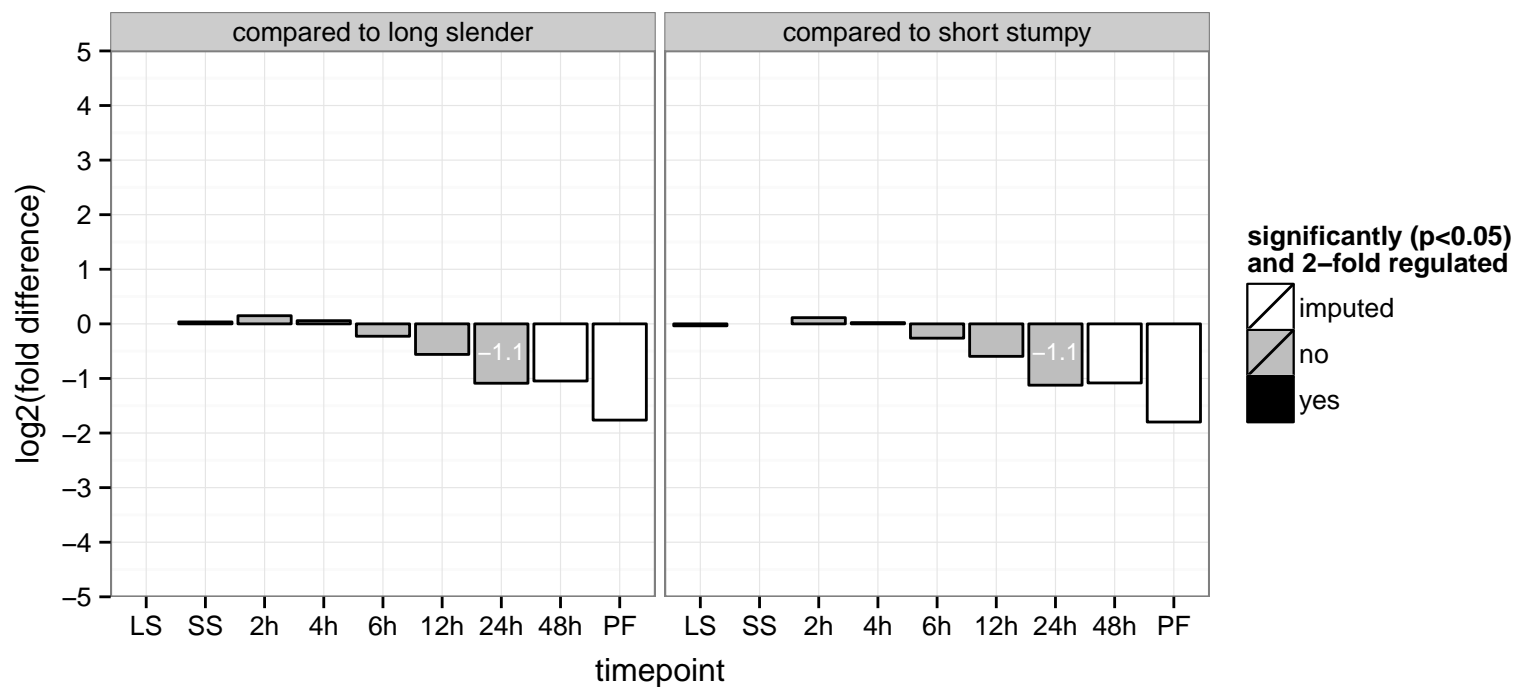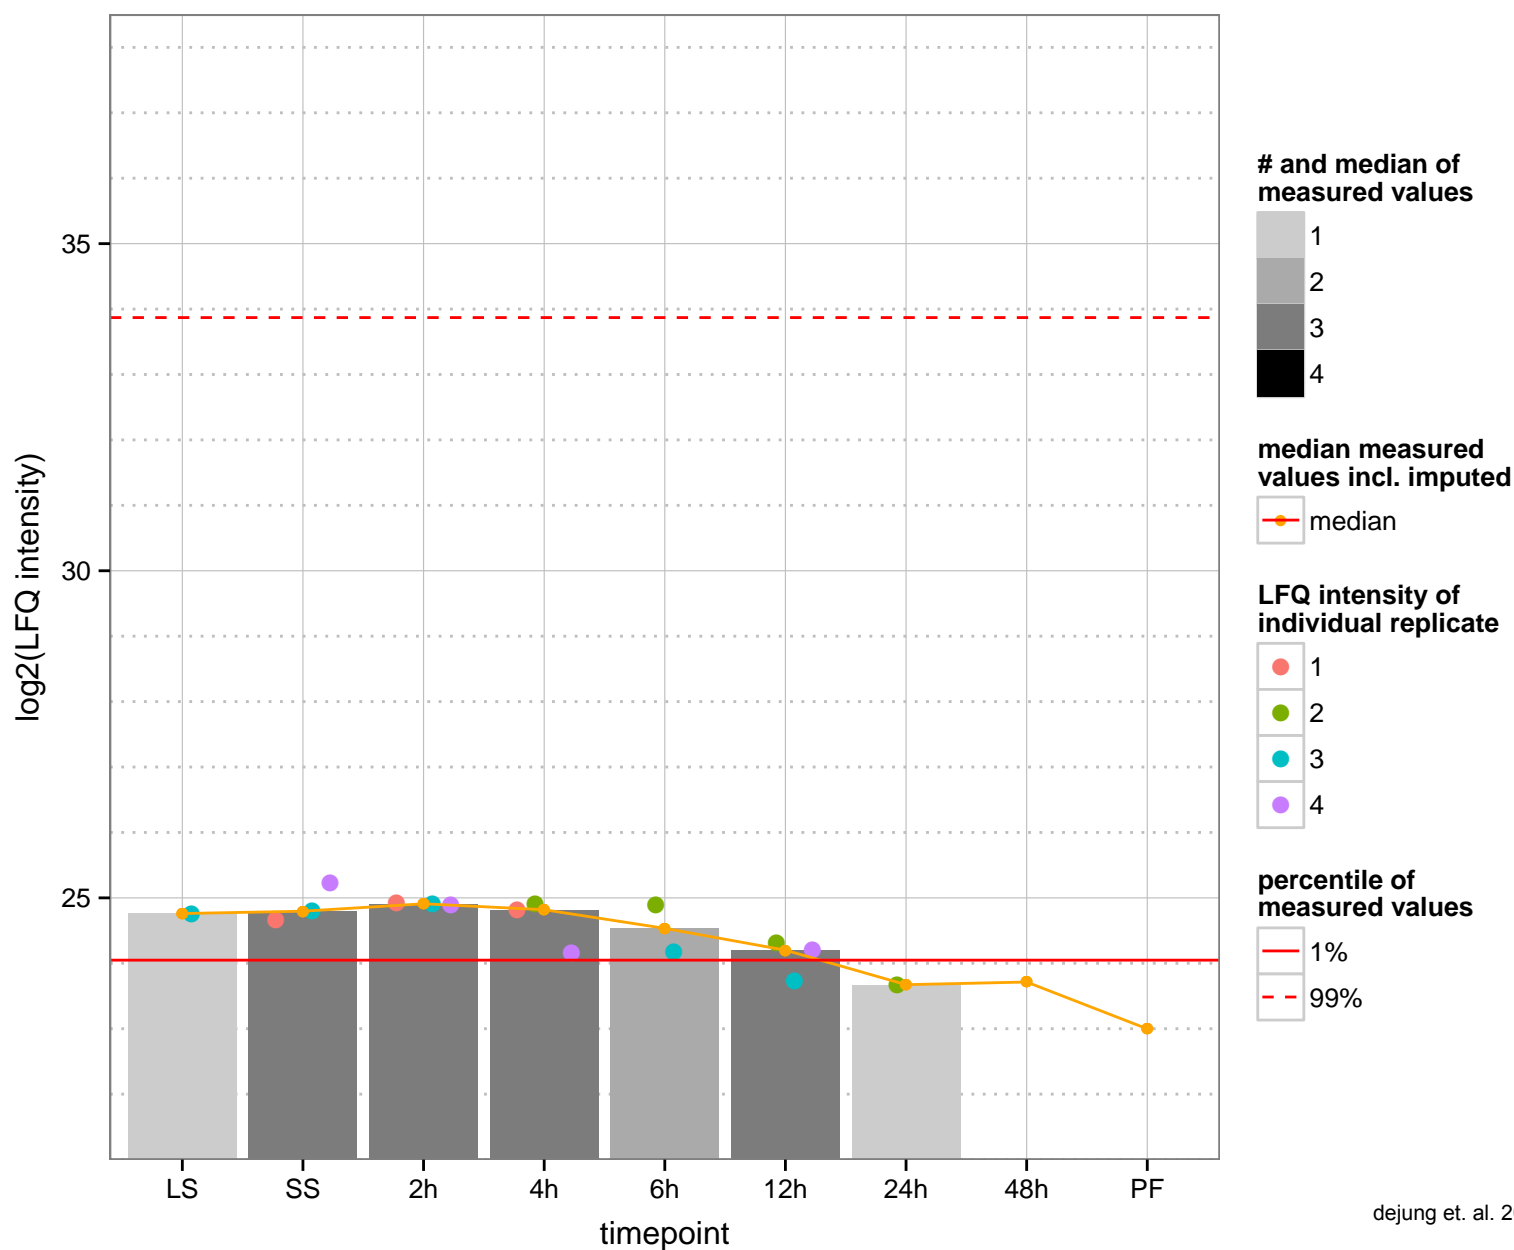

hypothetical protein, conserved  
 Tb927.10.1430  
 AGOF: null  
 AGOC: null  
 AGOP: null  
 PGO: null  
 PGOC: null  
 PGOP: null

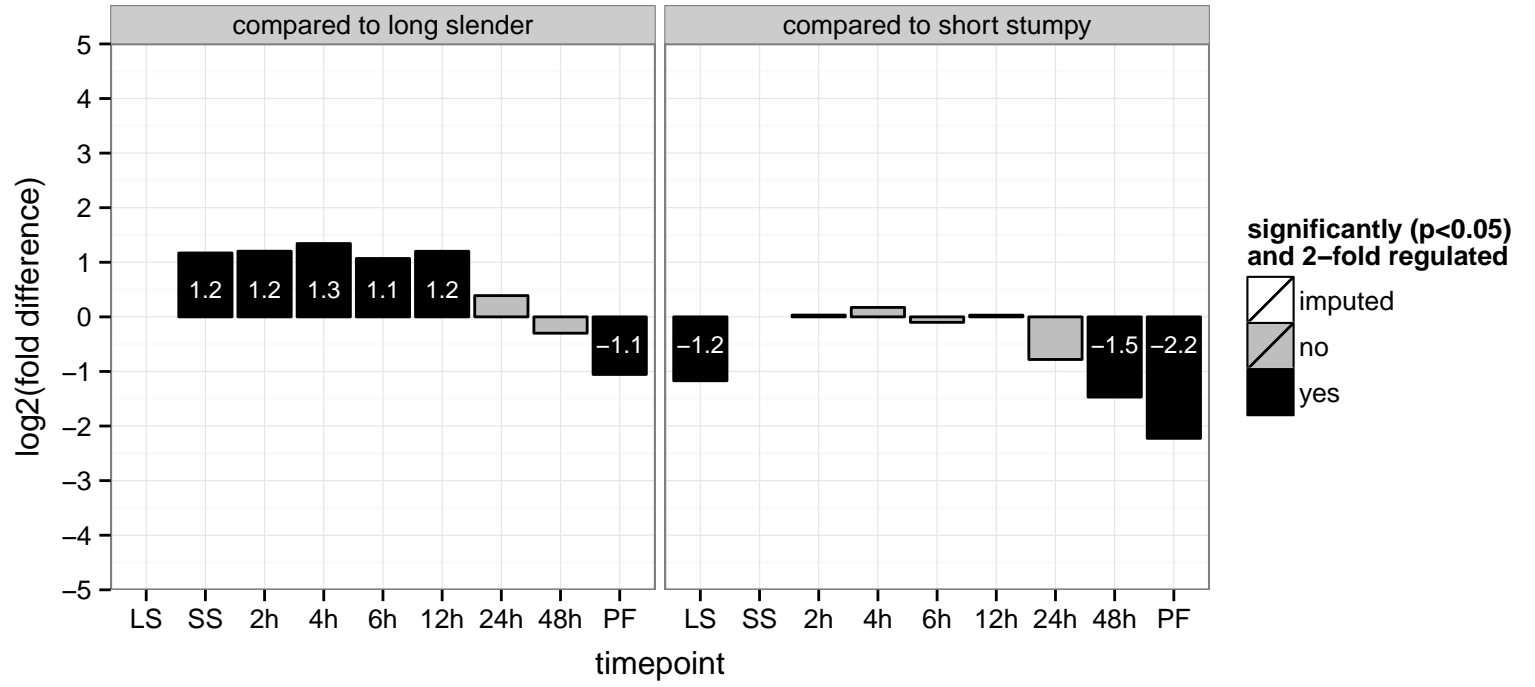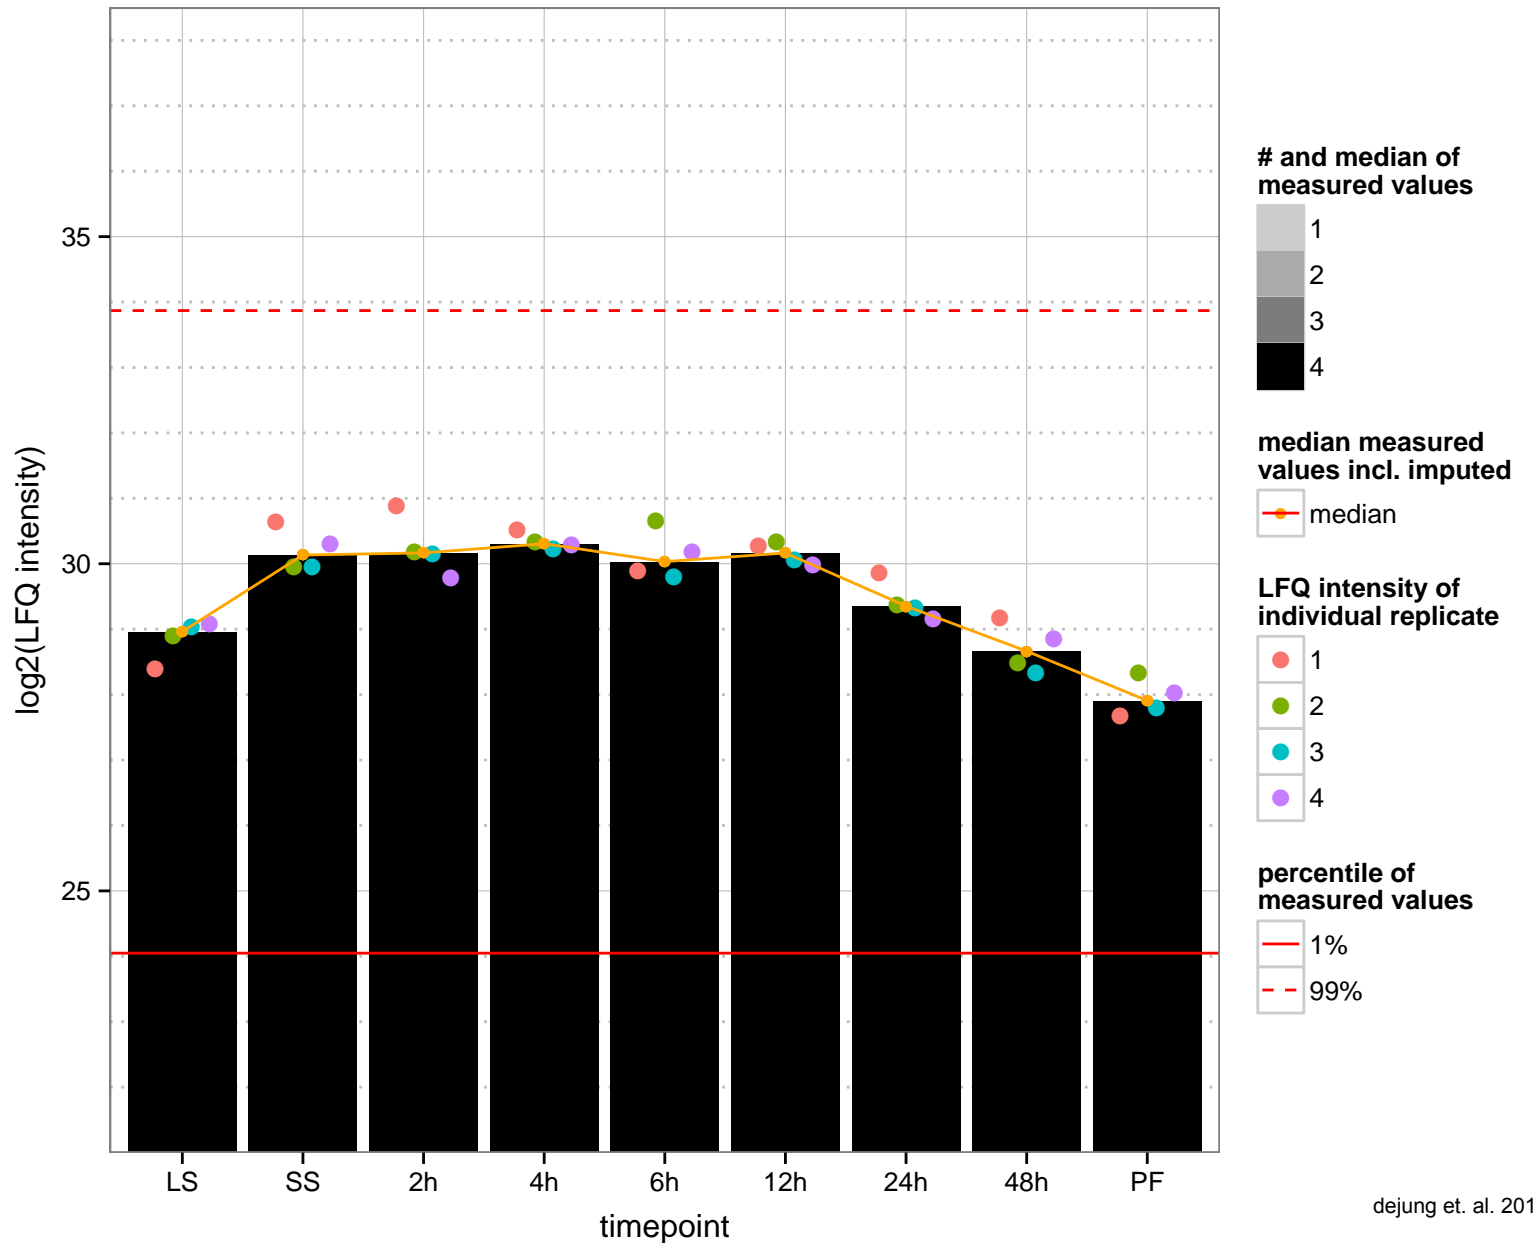

syntaxin, putative  
 Tb927.10.14690  
 AGOF: transporter activity  
 AGOC: membrane  
 AGOP: vesicle-mediated transport  
 PGO: protein binding  
 PGO: null  
 PGO: null

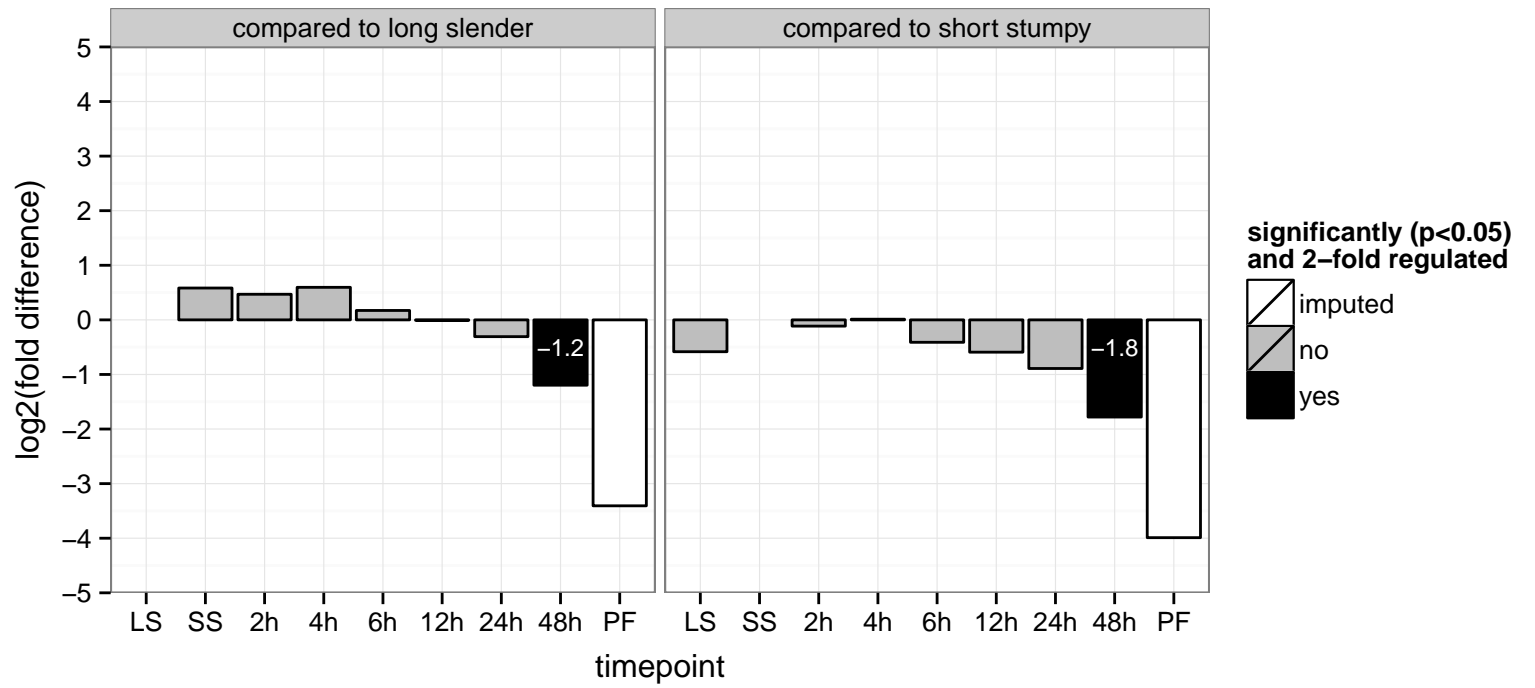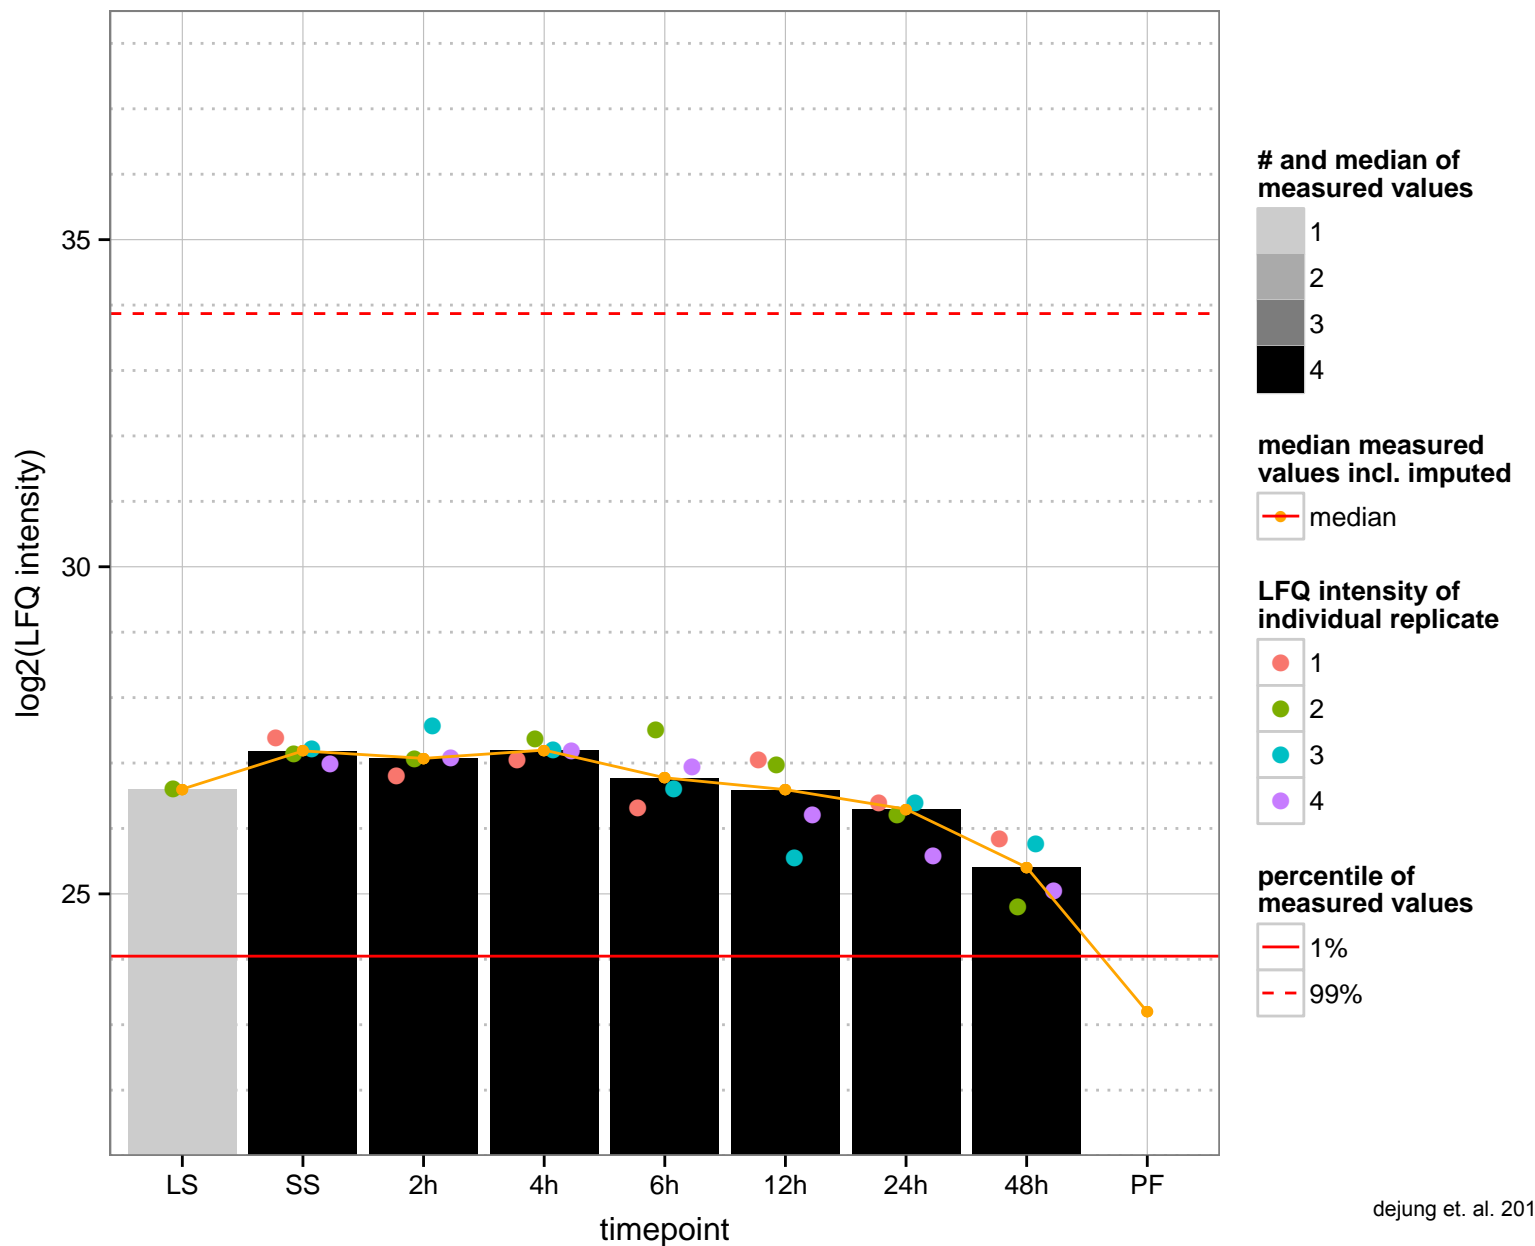

ras-related protein Rab21, putative (RAB21)

Tb927.10.1520

AGOF: GTP binding, GTPase activity

AGOC: intracellular

AGOP: intracellular protein transport, nucleocytoplasmic transport, small GTPase mediated signal transduction

PGOF: GTP binding, GTPase activity

PGOC: intracellular, membrane

PGOP: GTP catabolic process, intracellular protein transport, nucleocytoplasmic transport, protein transport, signal transduction

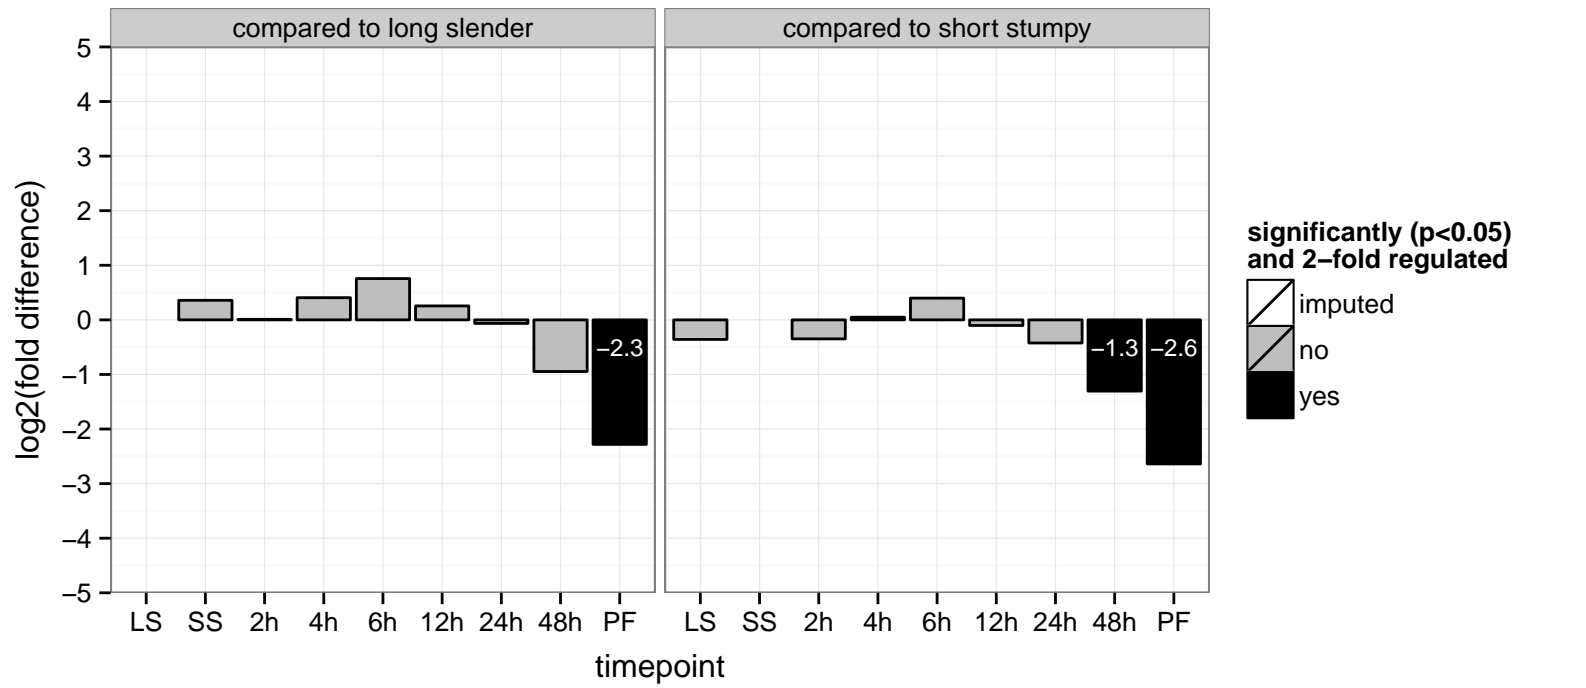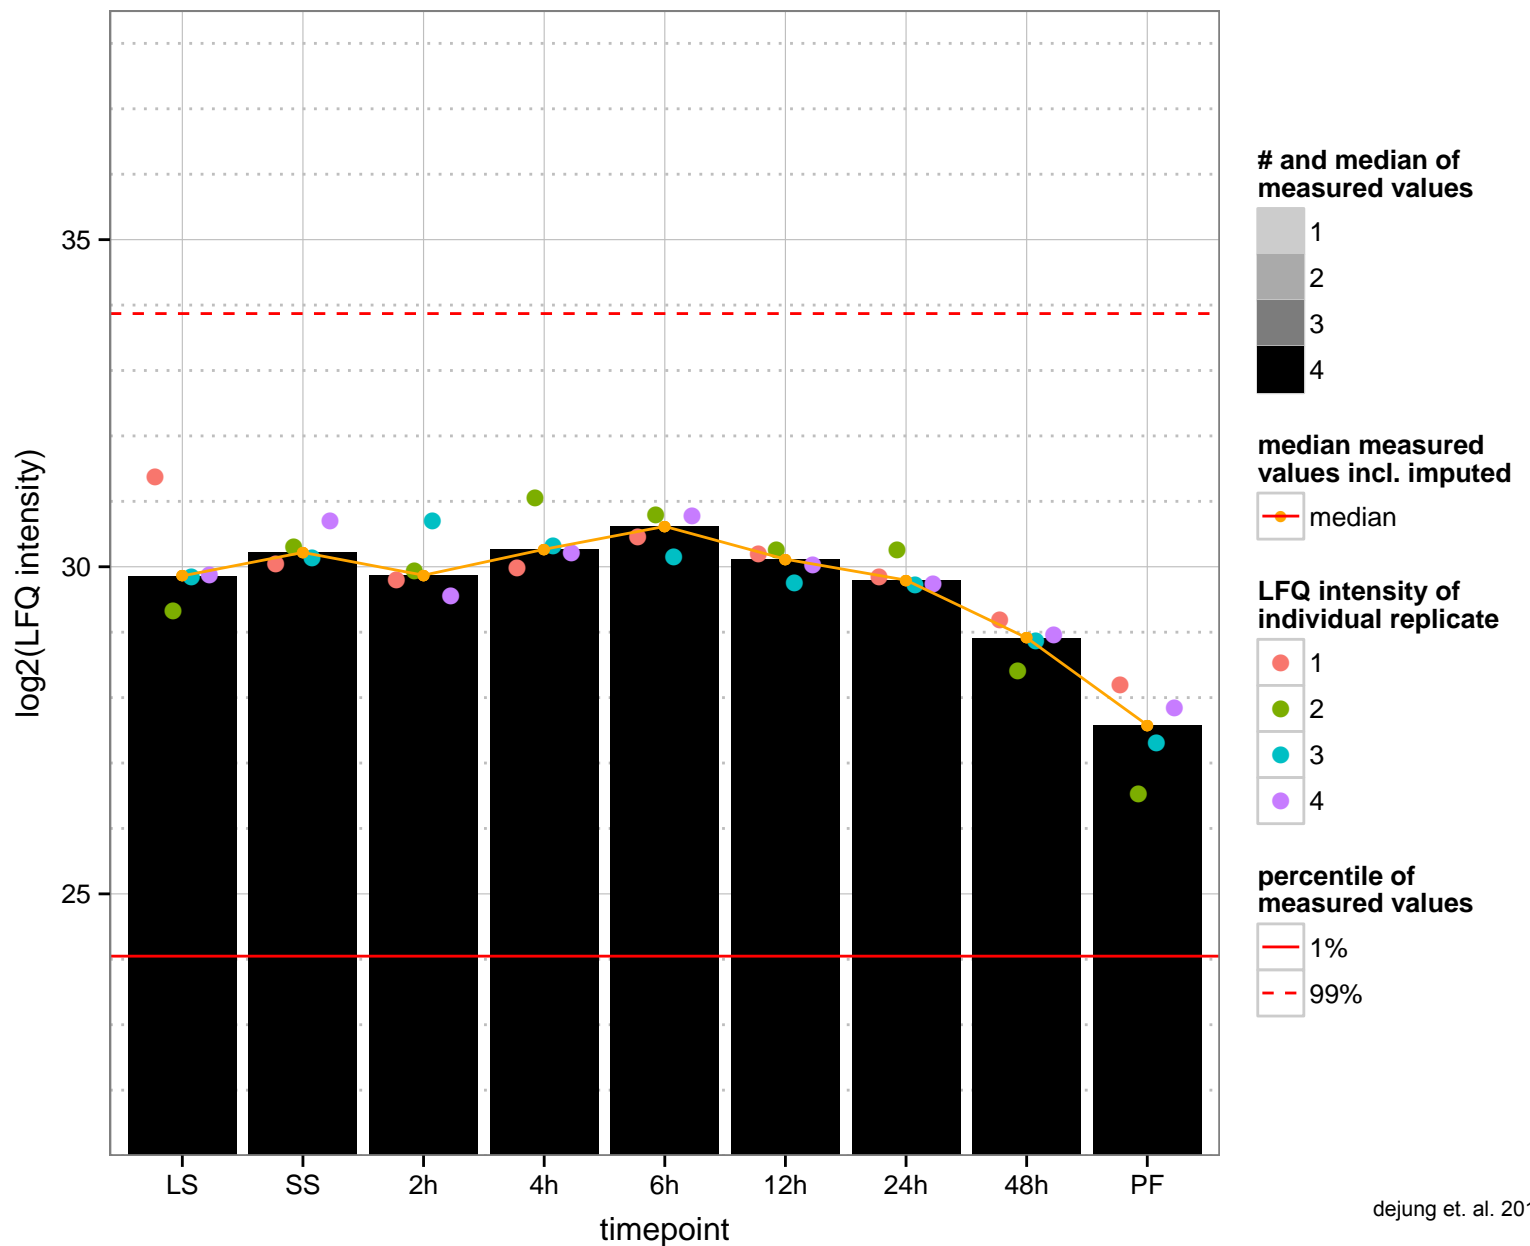

hypothetical protein, conserved  
 Tb927.10.15200  
 AGOF: null  
 AGOC: null  
 AGOP: null  
 PGOF: null  
 PGO C: null  
 PGOP: null

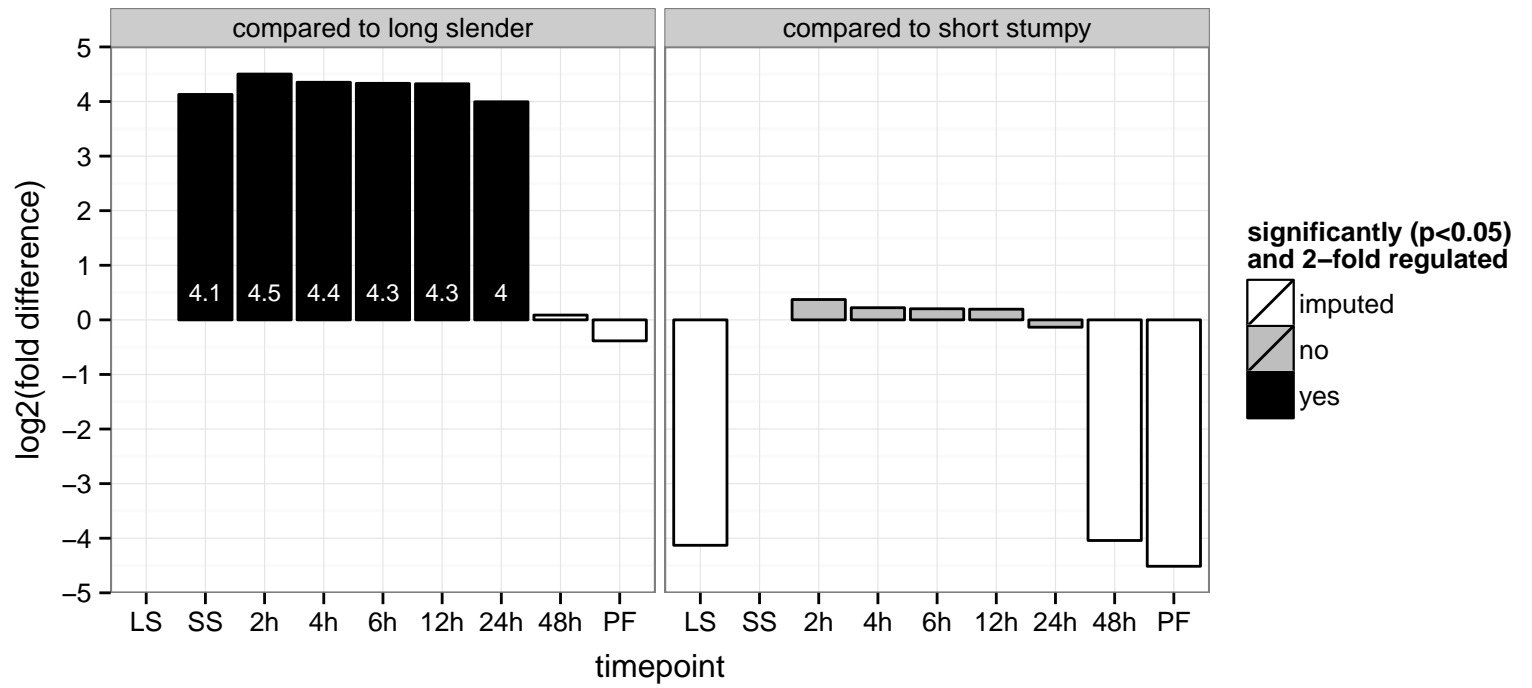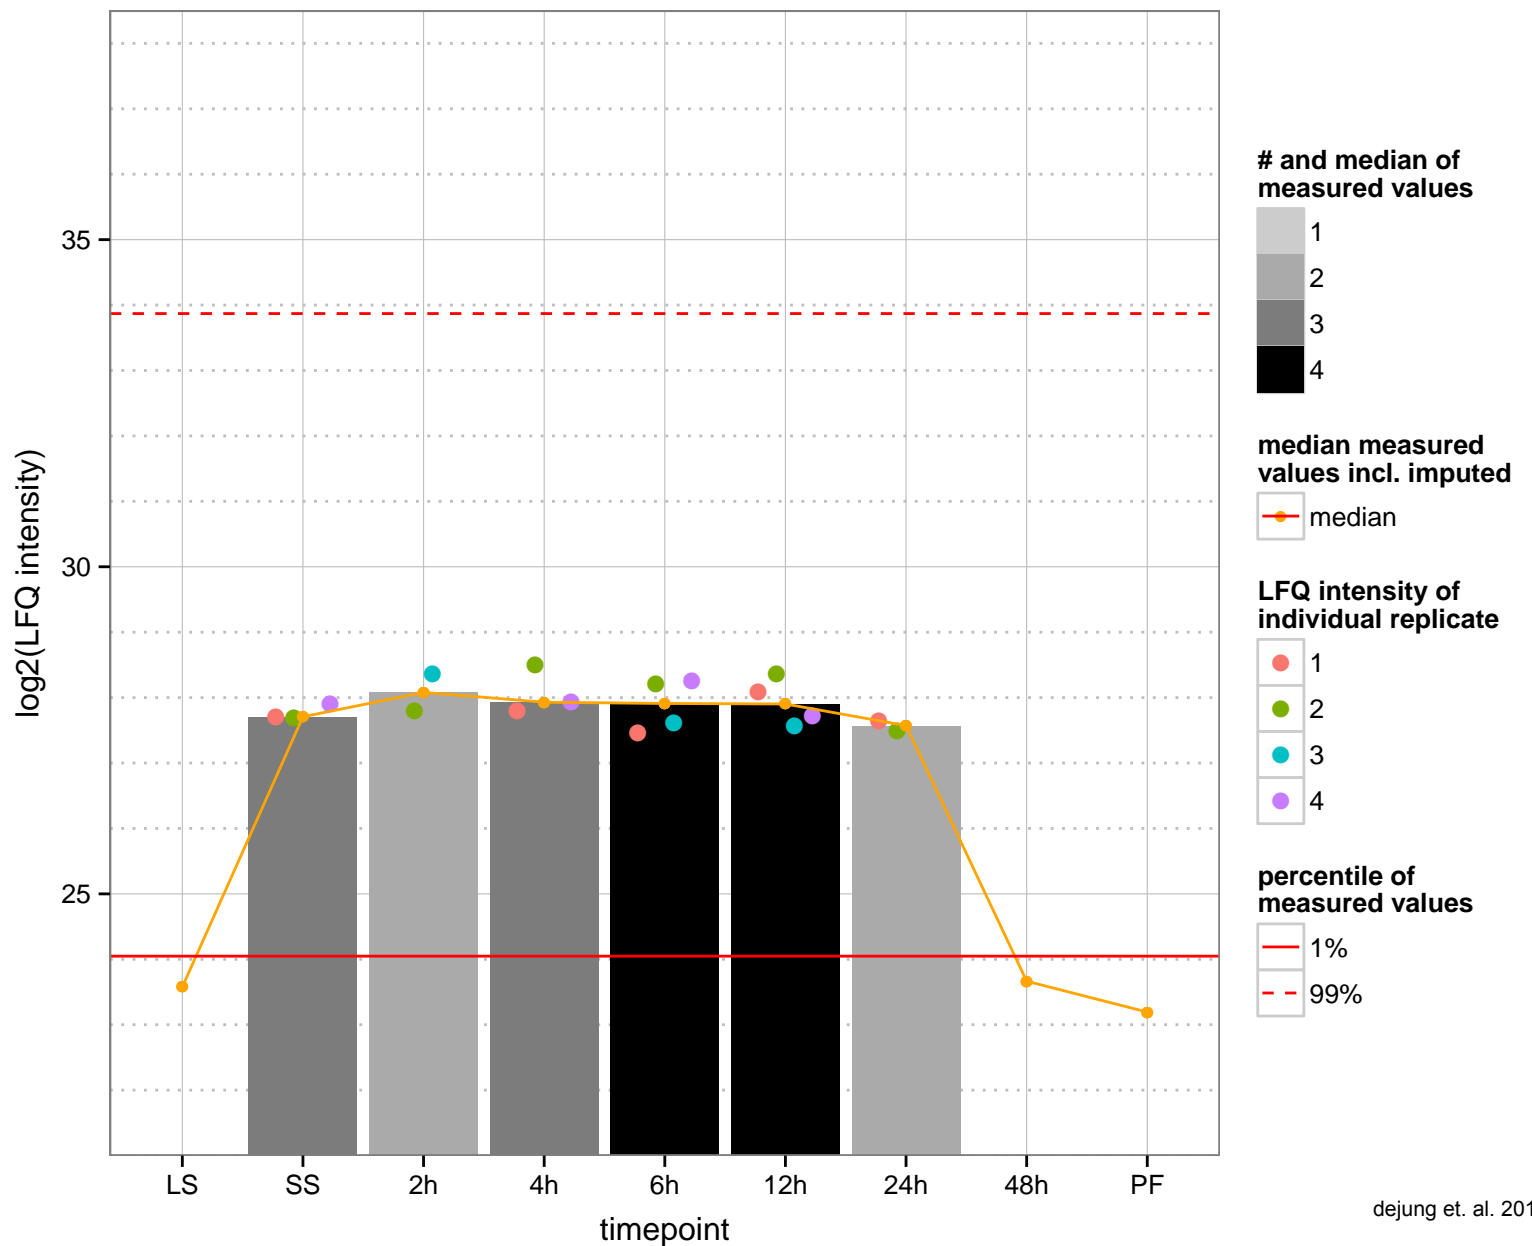

fatty acyl CoA synthetase, putative, Long-chain-fatty-acid--CoA ligase 5 (EC 6.2.1.3) (Long-chain acyl-CoA synthetase 5)  
 Tb927.10.3260  
 AGOF: null, catalytic activity, long-chain fatty acid-CoA ligase activity  
 AGOC: null  
 AGOP: null, fatty acid elongation  
 PGO: catalytic activity  
 PGOC: null  
 PGOP: metabolic process

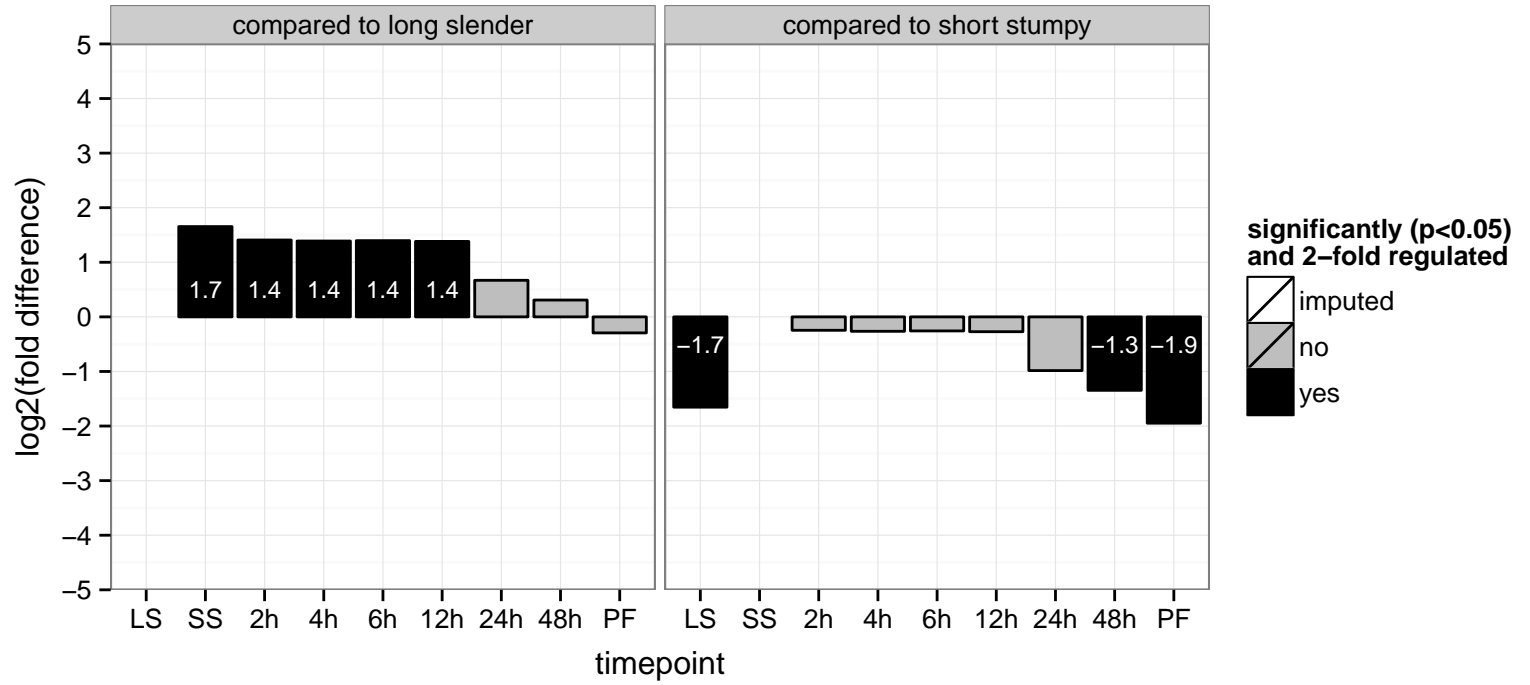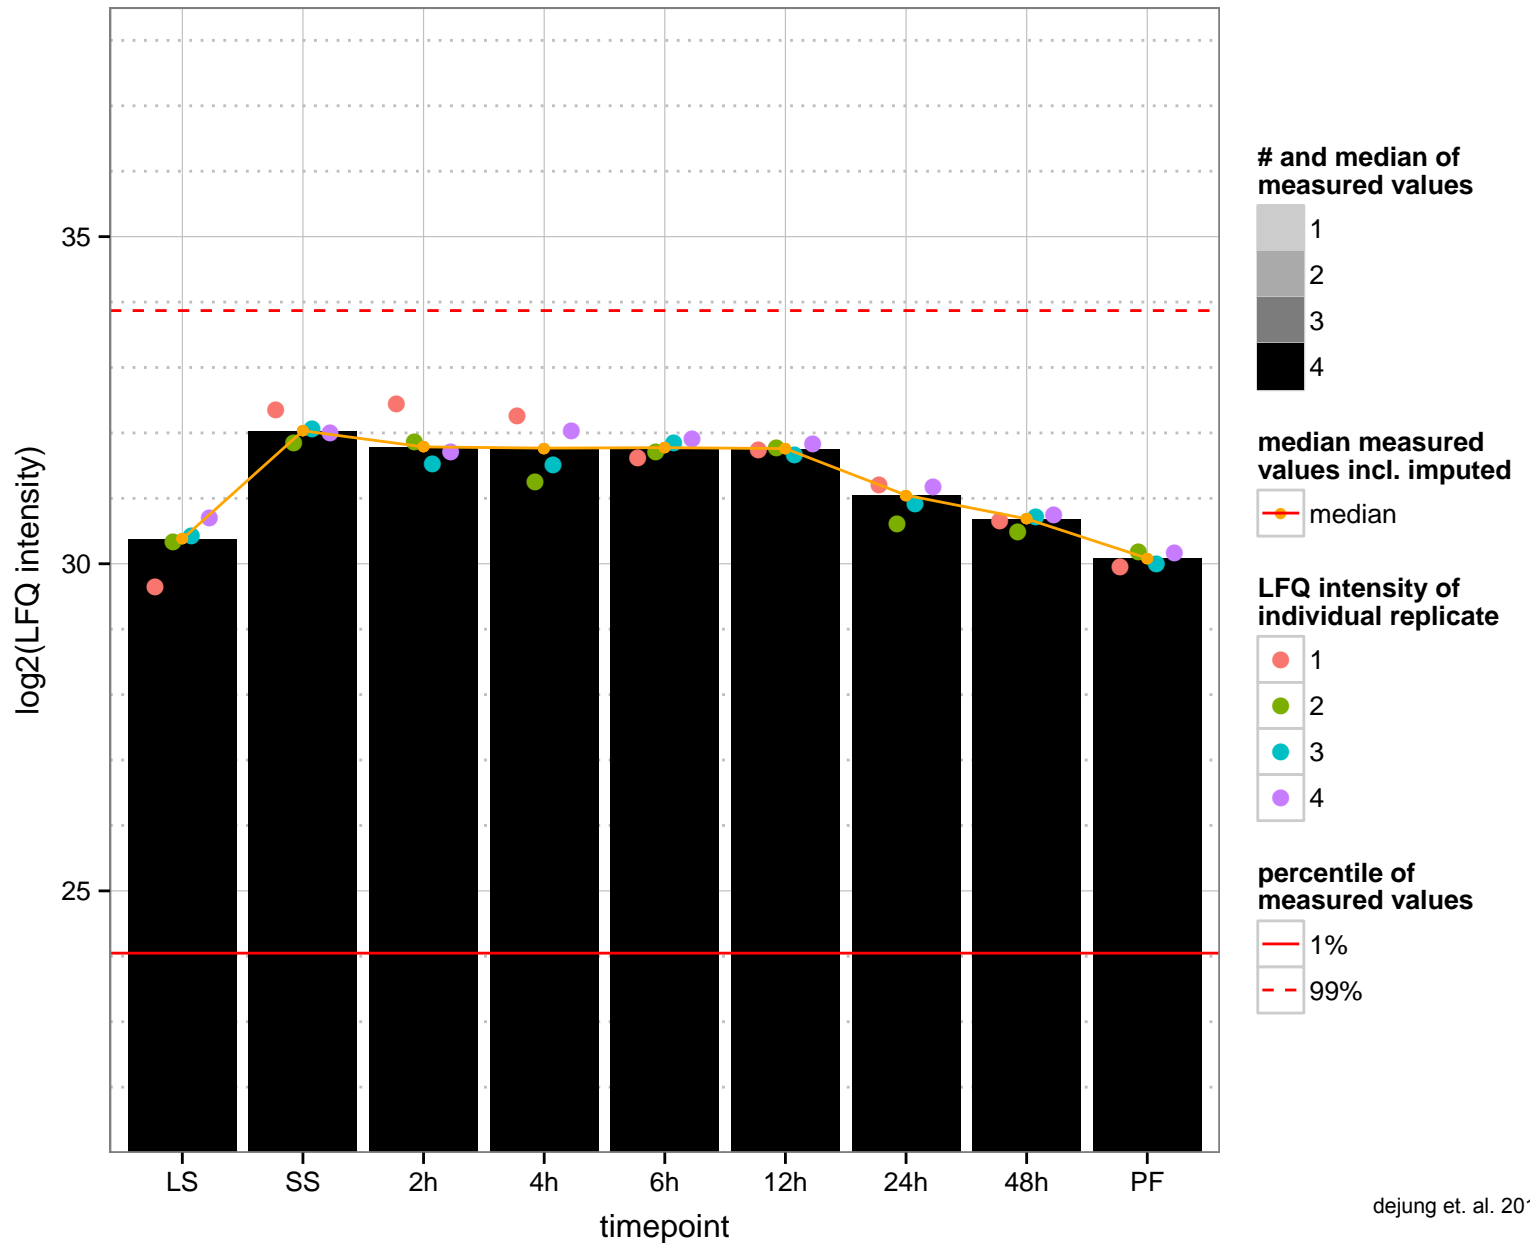

aspartate aminotransferase

Tb927.10.3660

AGOF: L-aspartate:2-oxoglutarate aminotransferase activity, pyridoxal phosphate binding

AGOC: cytoplasm

AGOP: L-methionine salvage from methylthioadenosine, biosynthetic process

PGOF: pyridoxal phosphate binding, transferase activity

PGOC: null

PGOP: biosynthetic process

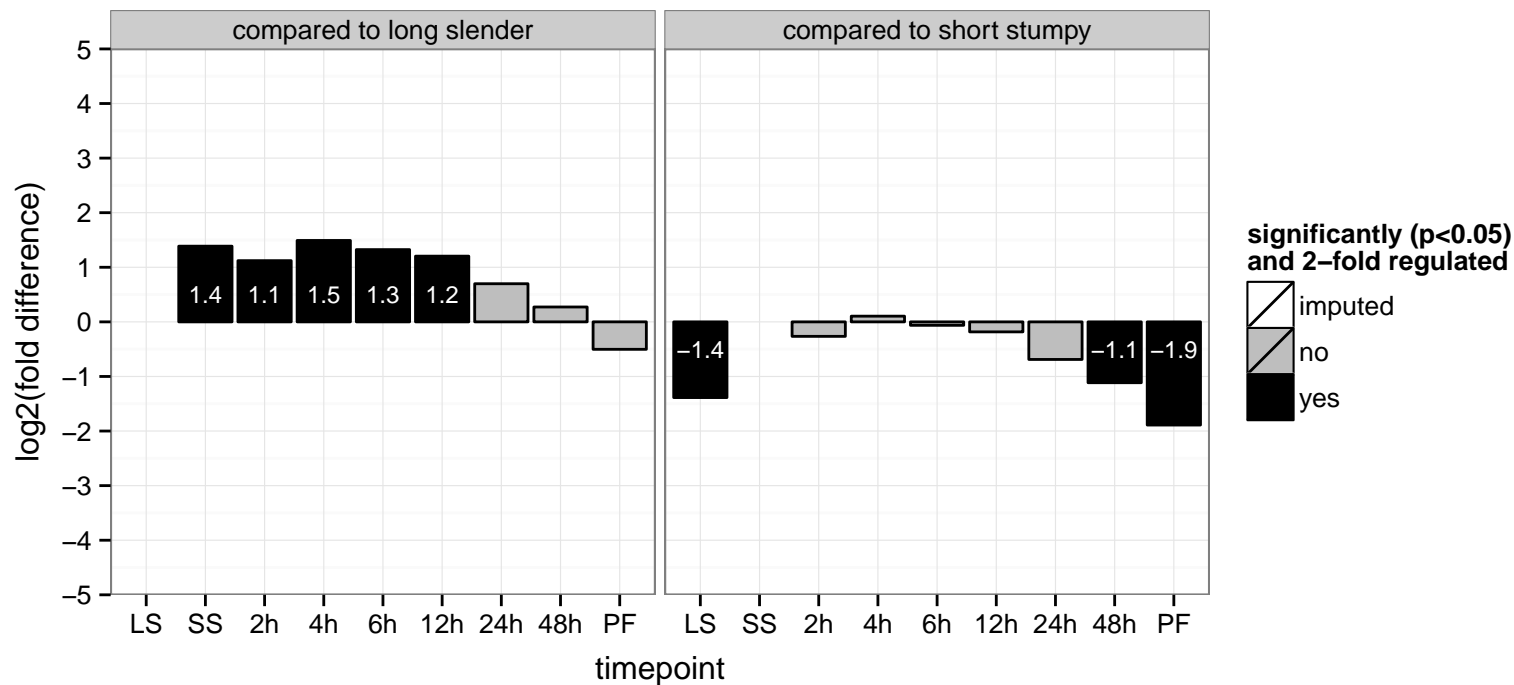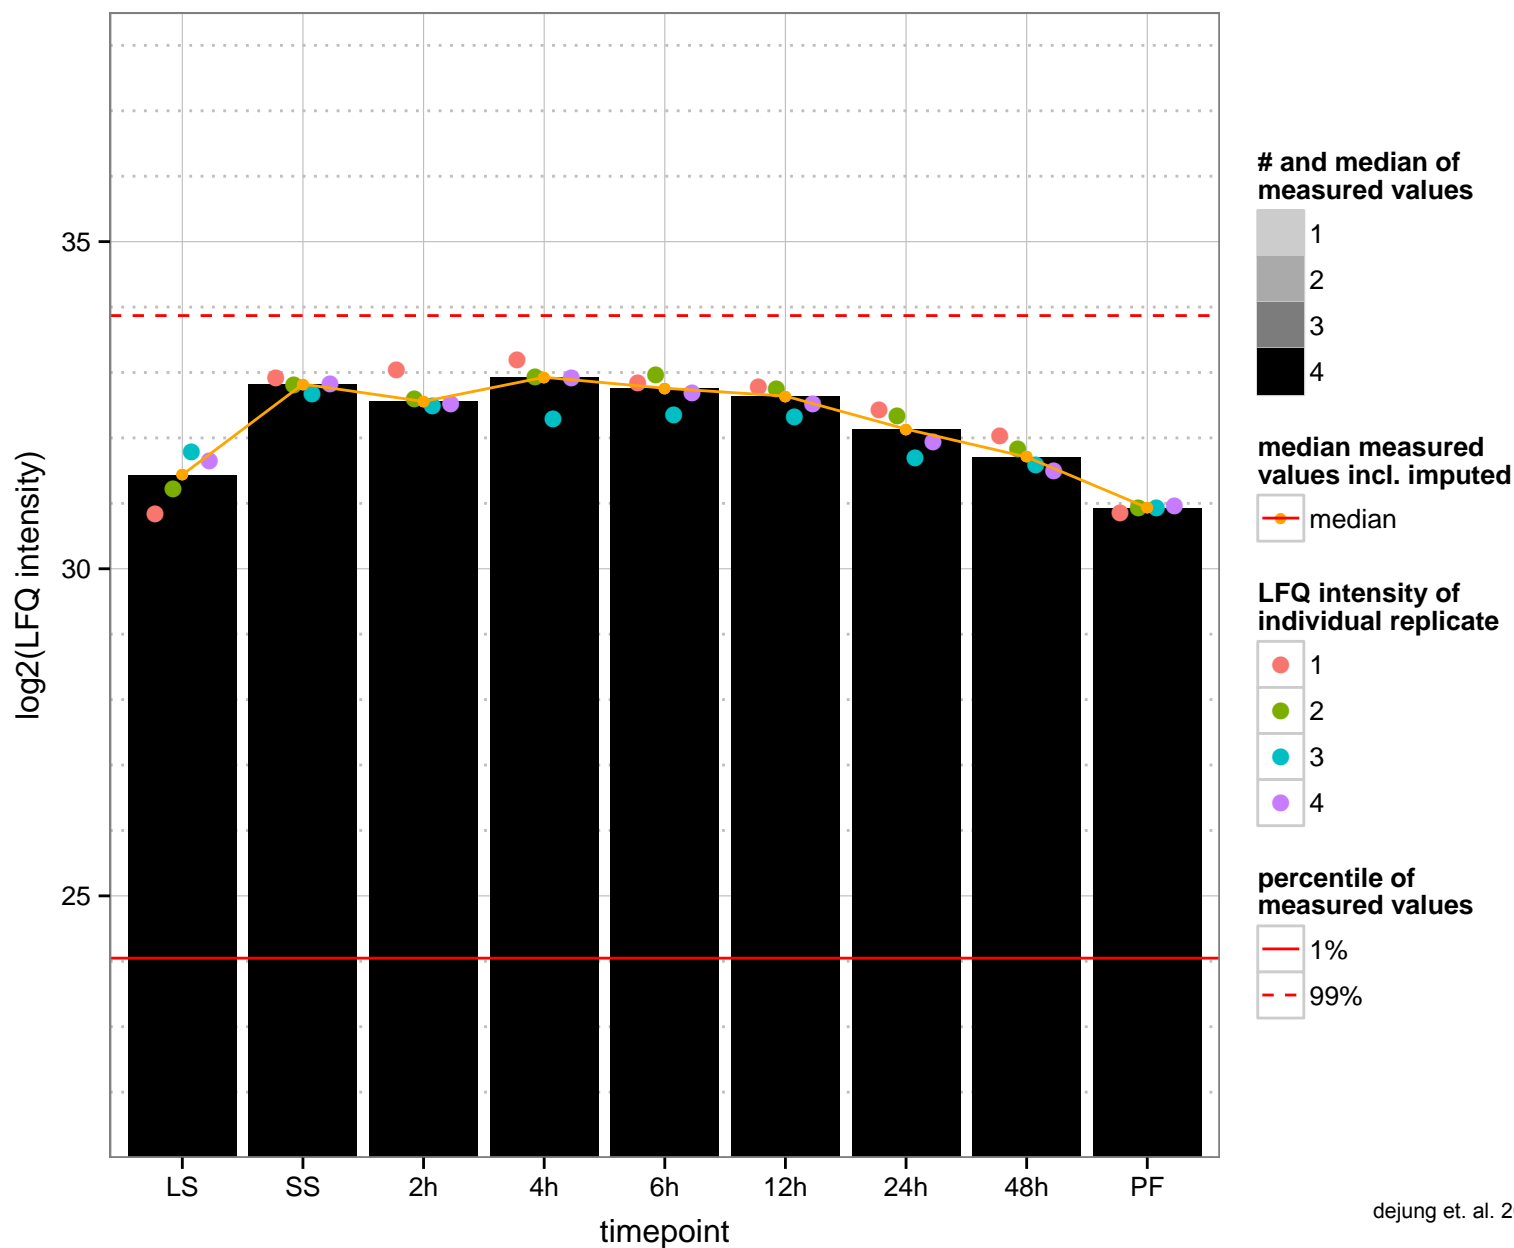

hypothetical protein, conserved  
 Tb927.10.3670  
 AGOF: null  
 AGOC: null  
 AGOP: null  
 PGO: null  
 PGOC: null  
 PGOP: null

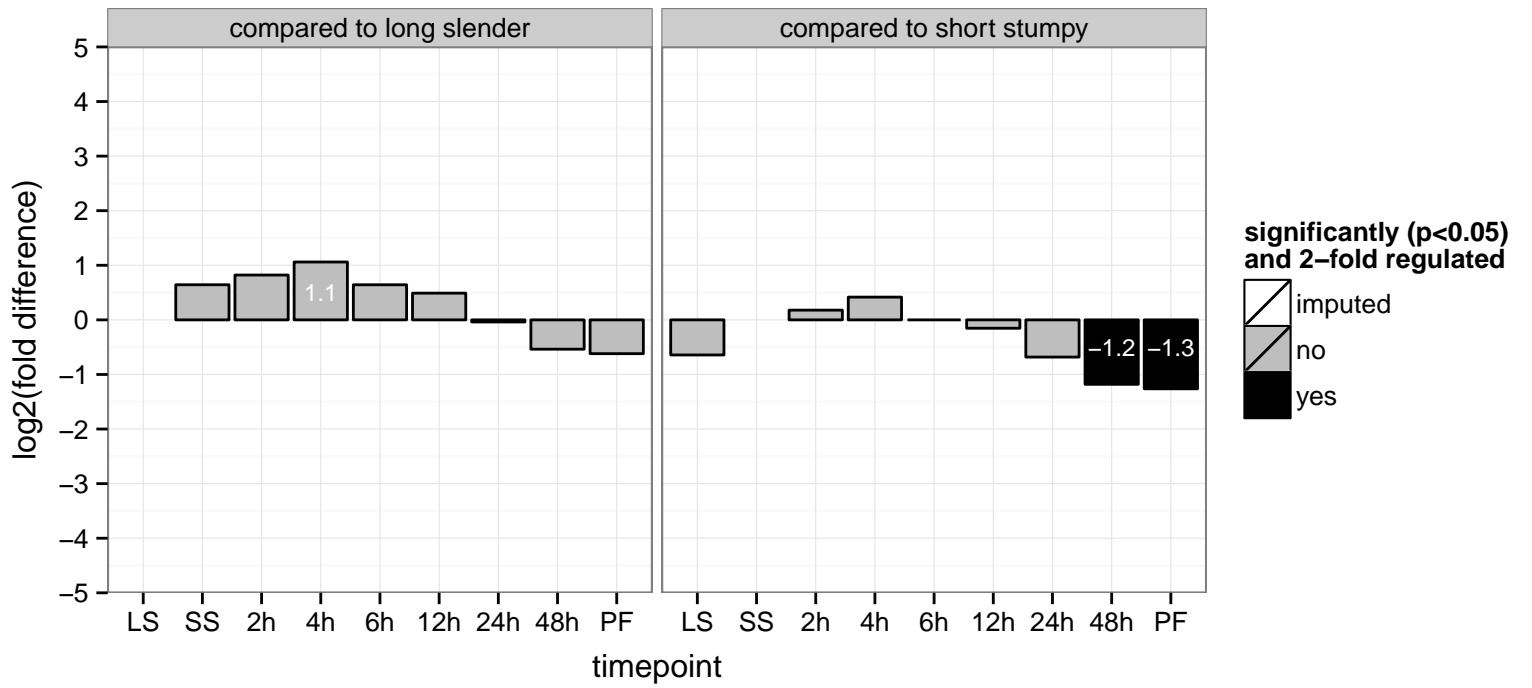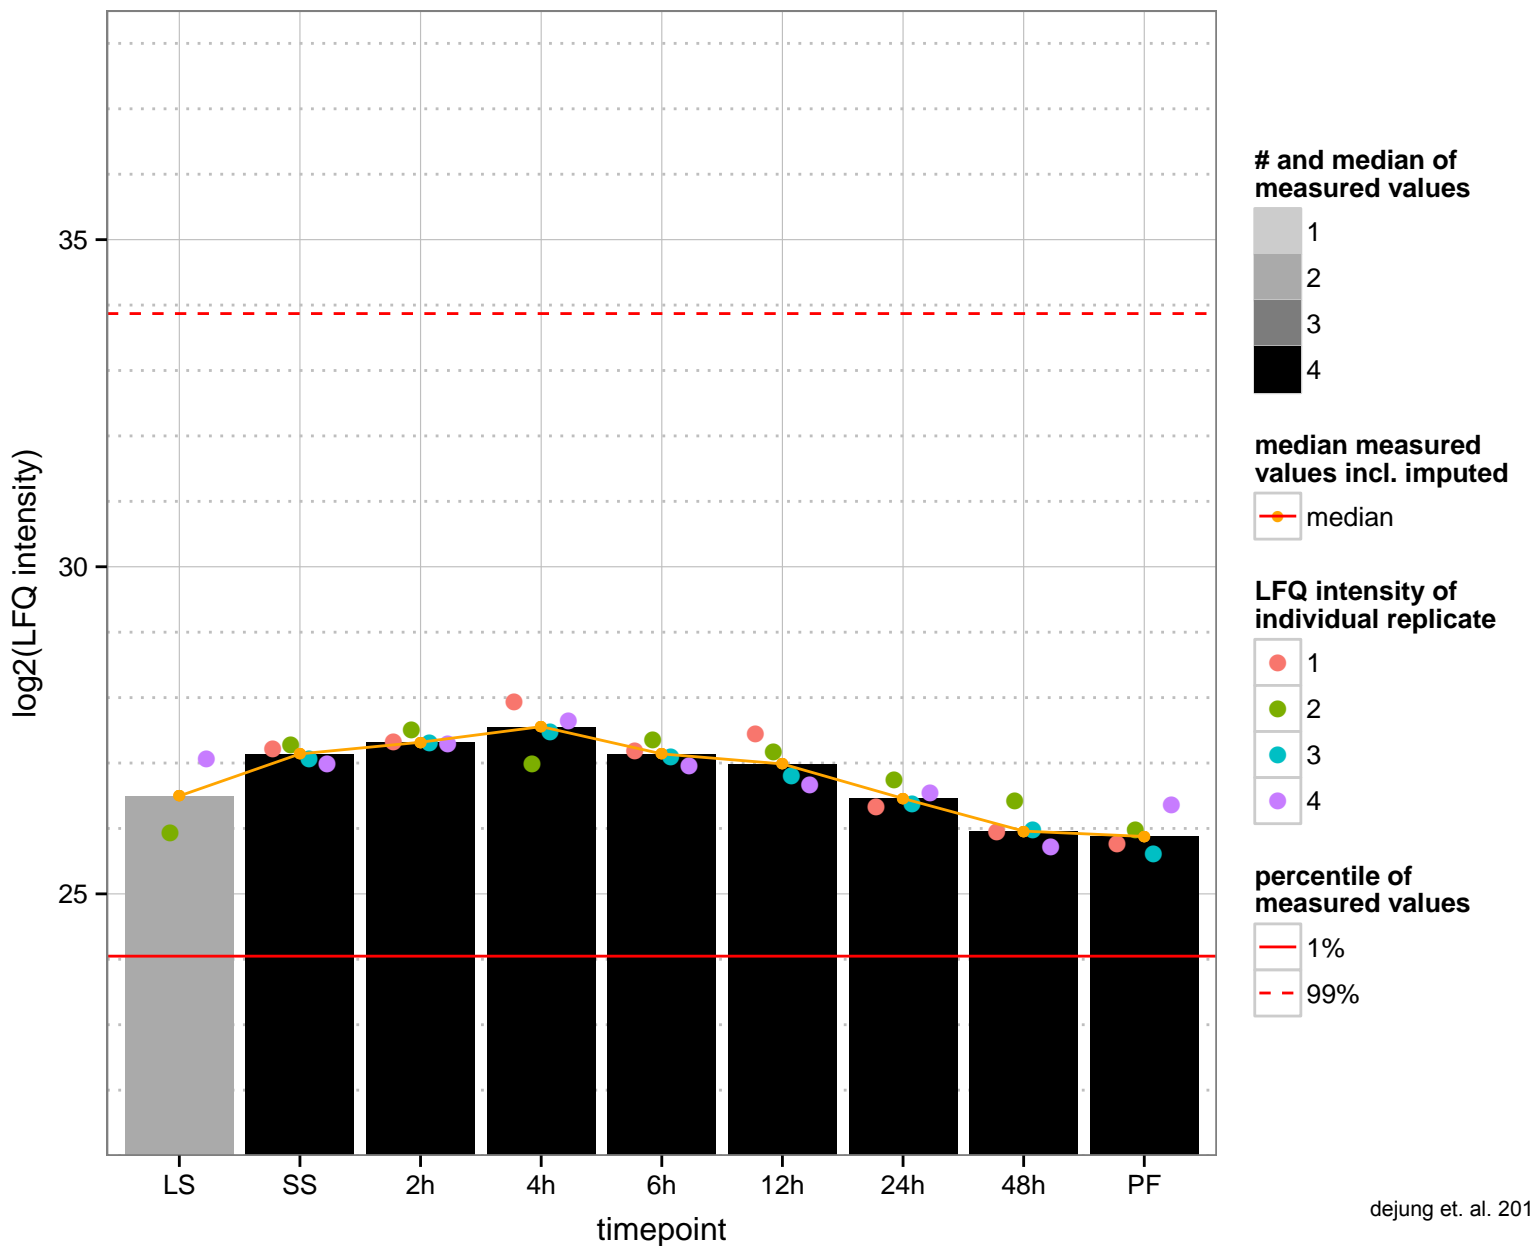



hypothetical protein, conserved  
 Tb927.10.390  
 AGOF: null  
 AGOC: null  
 AGOP: null  
 PGOF: null  
 PGO: null  
 PGOP: null

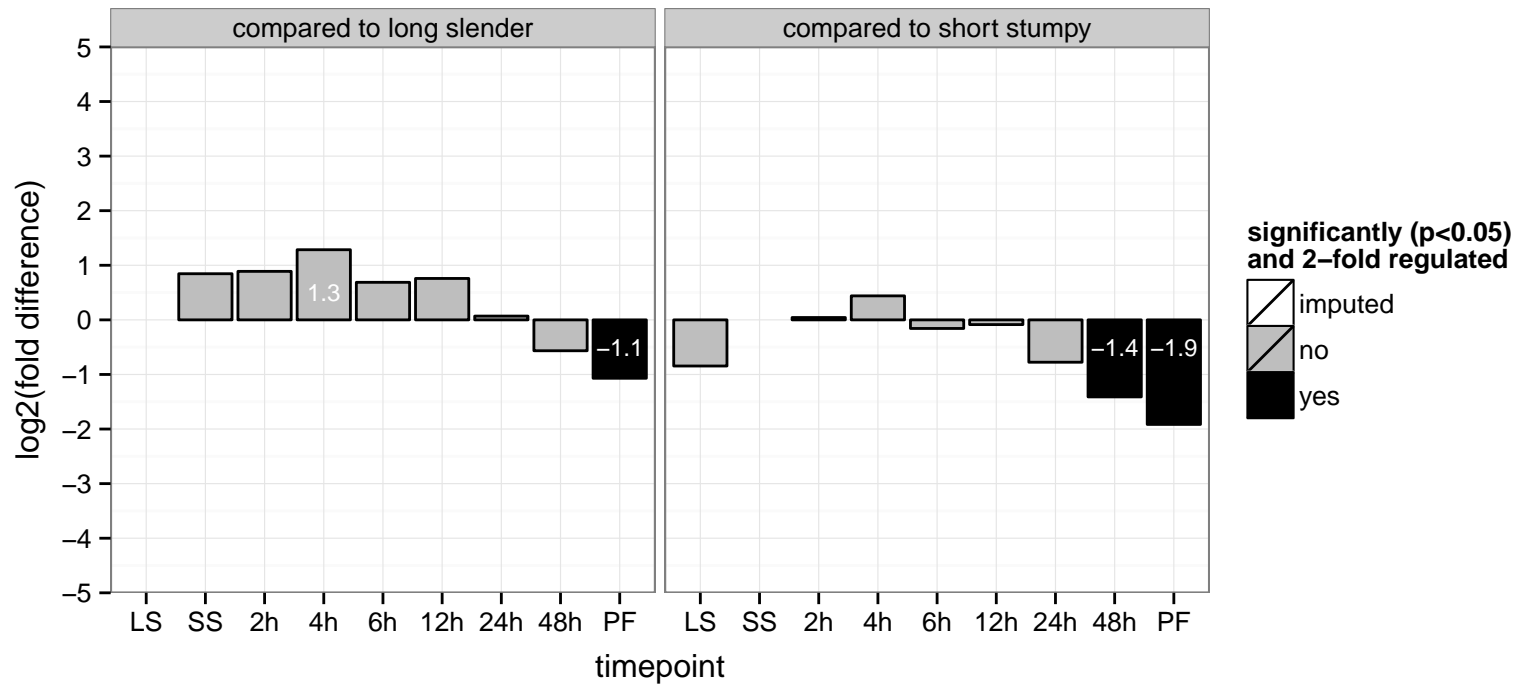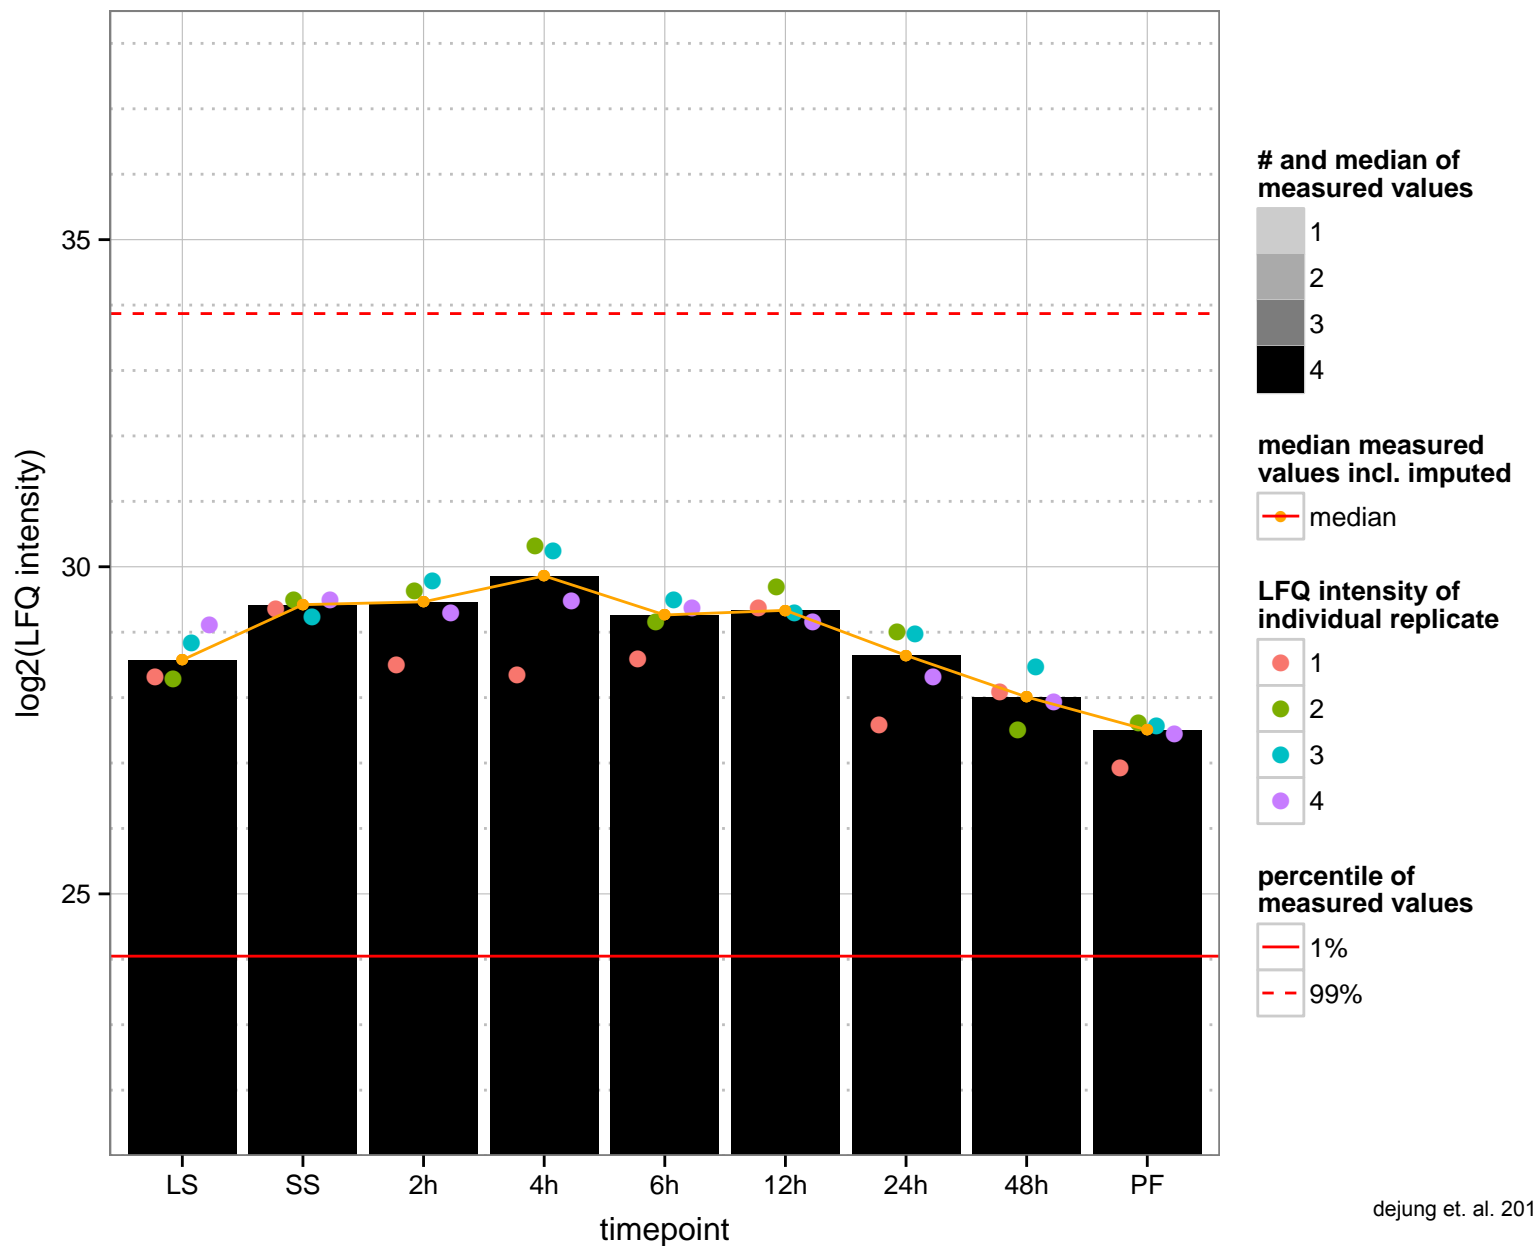

phosphatidylinositol-4-phosphate 5-kinase, putative  
 Tb927.10.4770  
 AGOF: 1-phosphatidylinositol-4-phosphate 5-kinase activity  
 AGOC: null  
 AGOP: phosphatidylinositol metabolic process  
 PGO: phosphatidylinositol phosphate kinase activity  
 PGO: null  
 PGO: phosphatidylinositol metabolic process

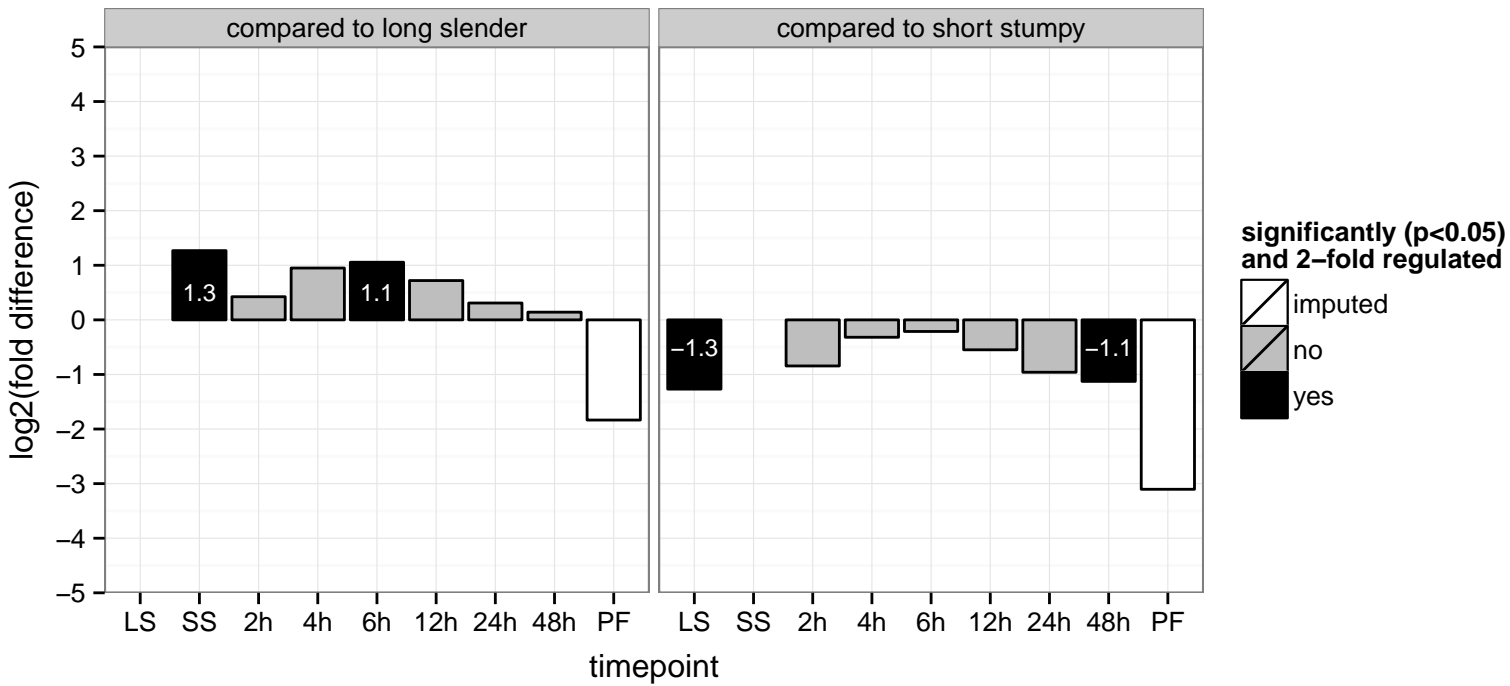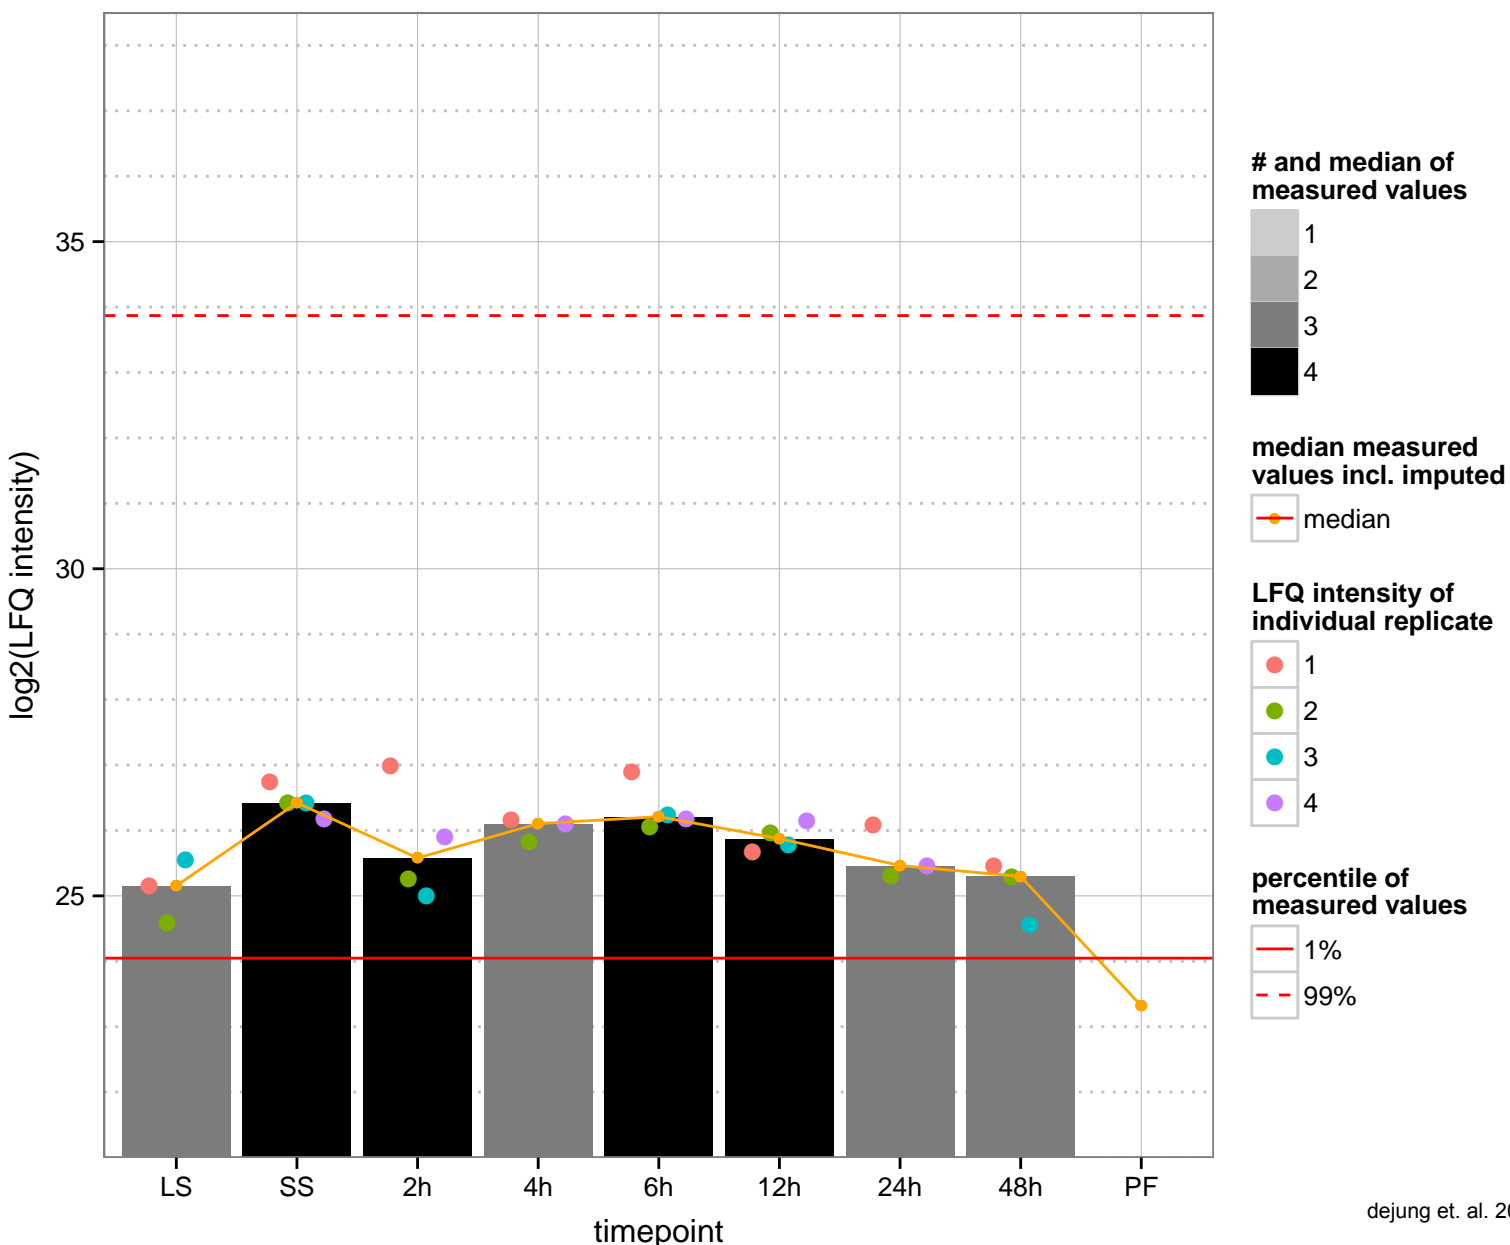

mitogen-activated protein kinase 2, putative (MPK2)

Tb927.10.5140

AGOF: ATP binding, protein kinase activity, protein serine/threonine kinase activity, protein tyrosine kinase activity

AGOC: null

AGOP: cytokinesis after mitosis, protein phosphorylation

PGOF: ATP binding, protein kinase activity, transferase activity, transferring phosphorus-containing groups

PGOC: null

PGOP: protein phosphorylation

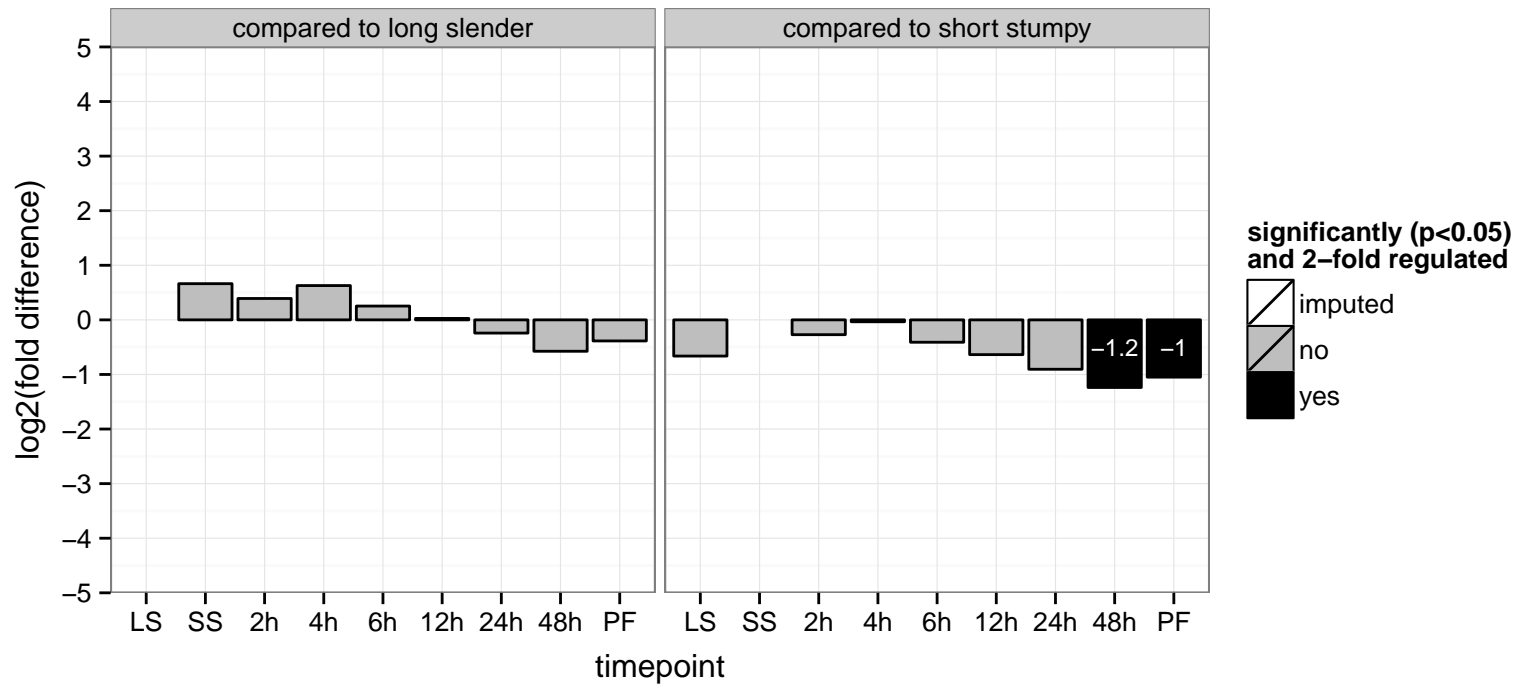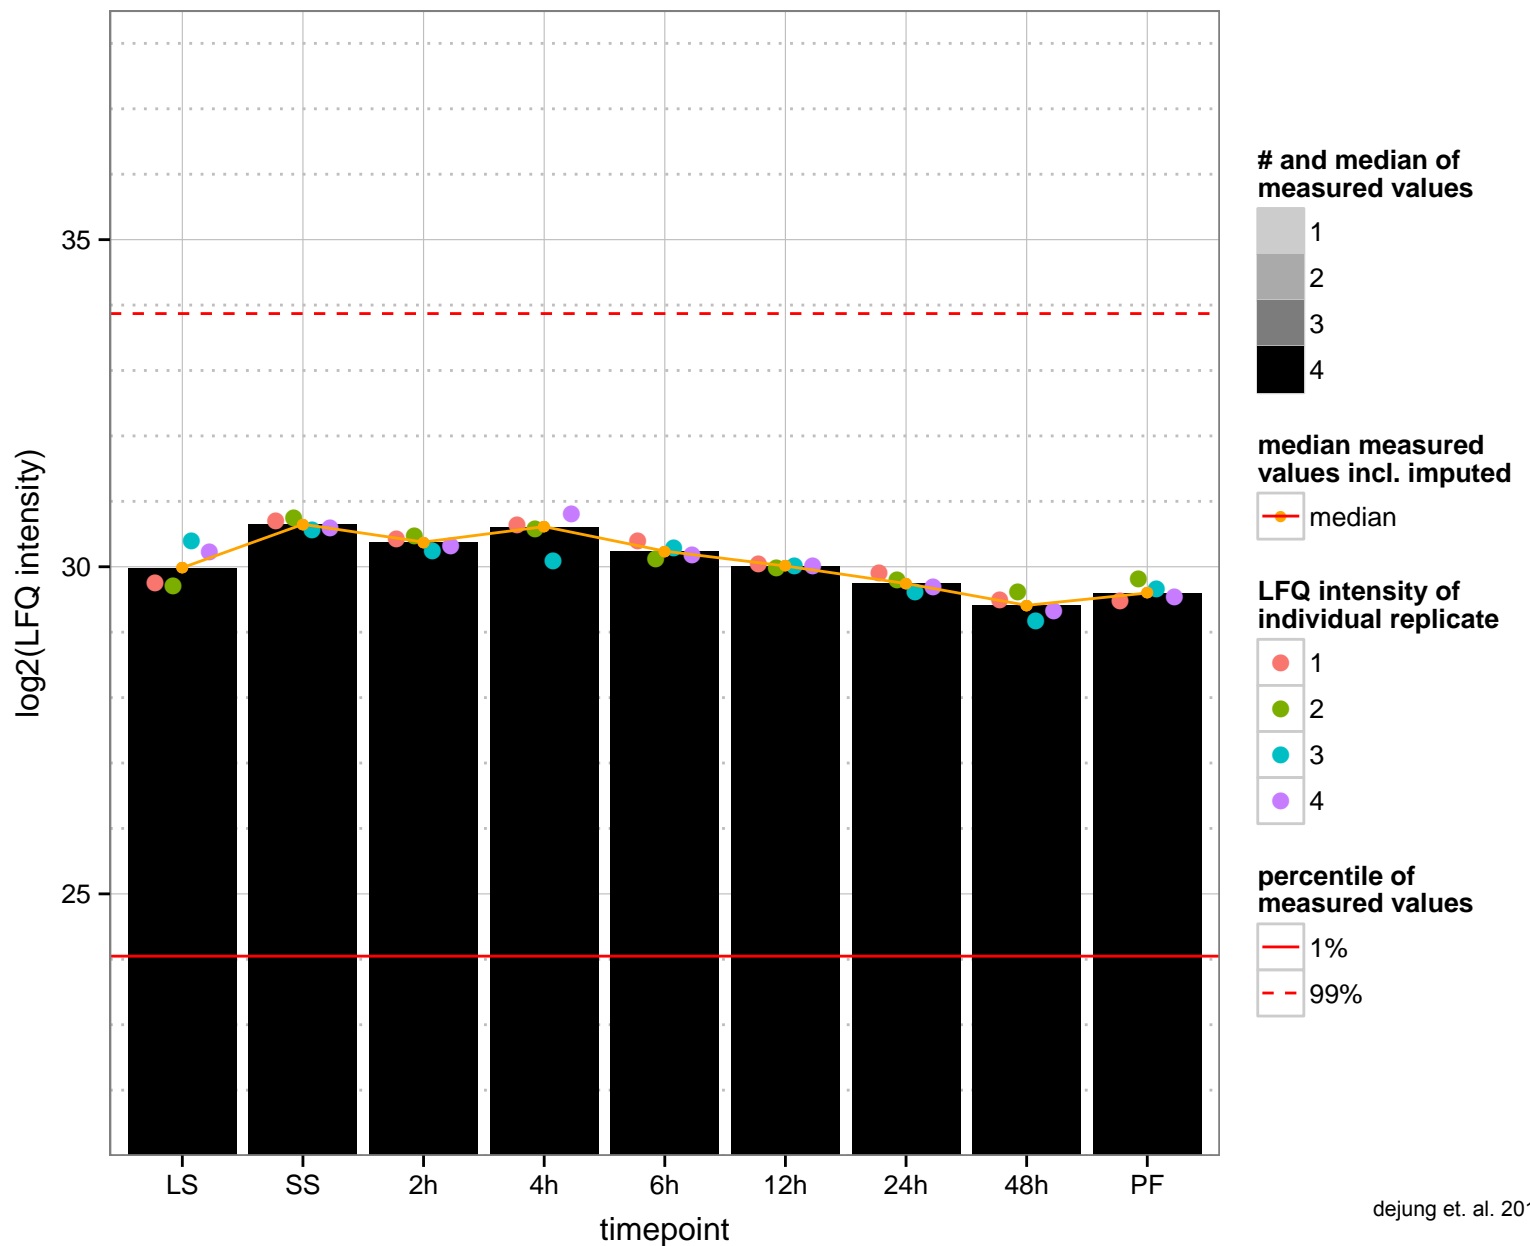

hypothetical protein, conserved  
 Tb927.10.5810  
 AGOF: null  
 AGOC: null  
 AGOP: null  
 PGO: null  
 PGOC: null  
 PGOP: null

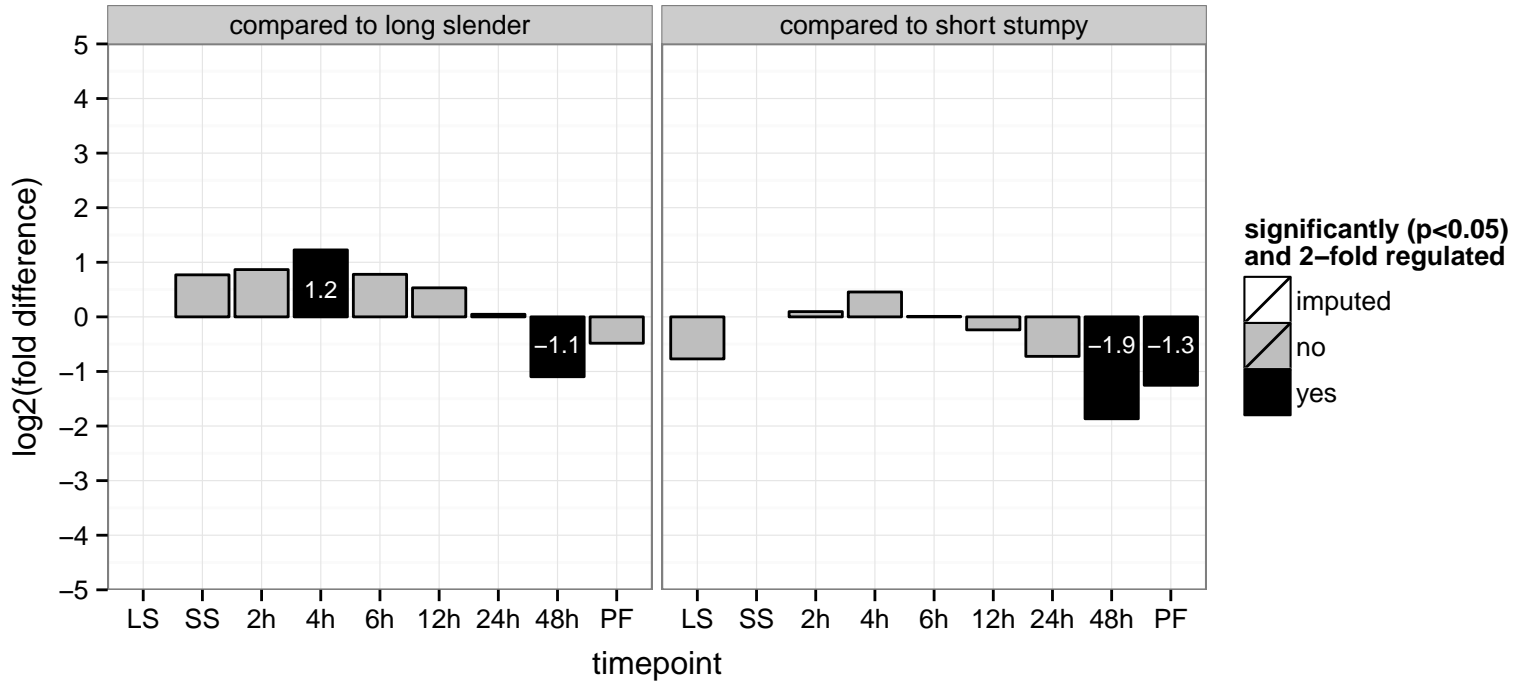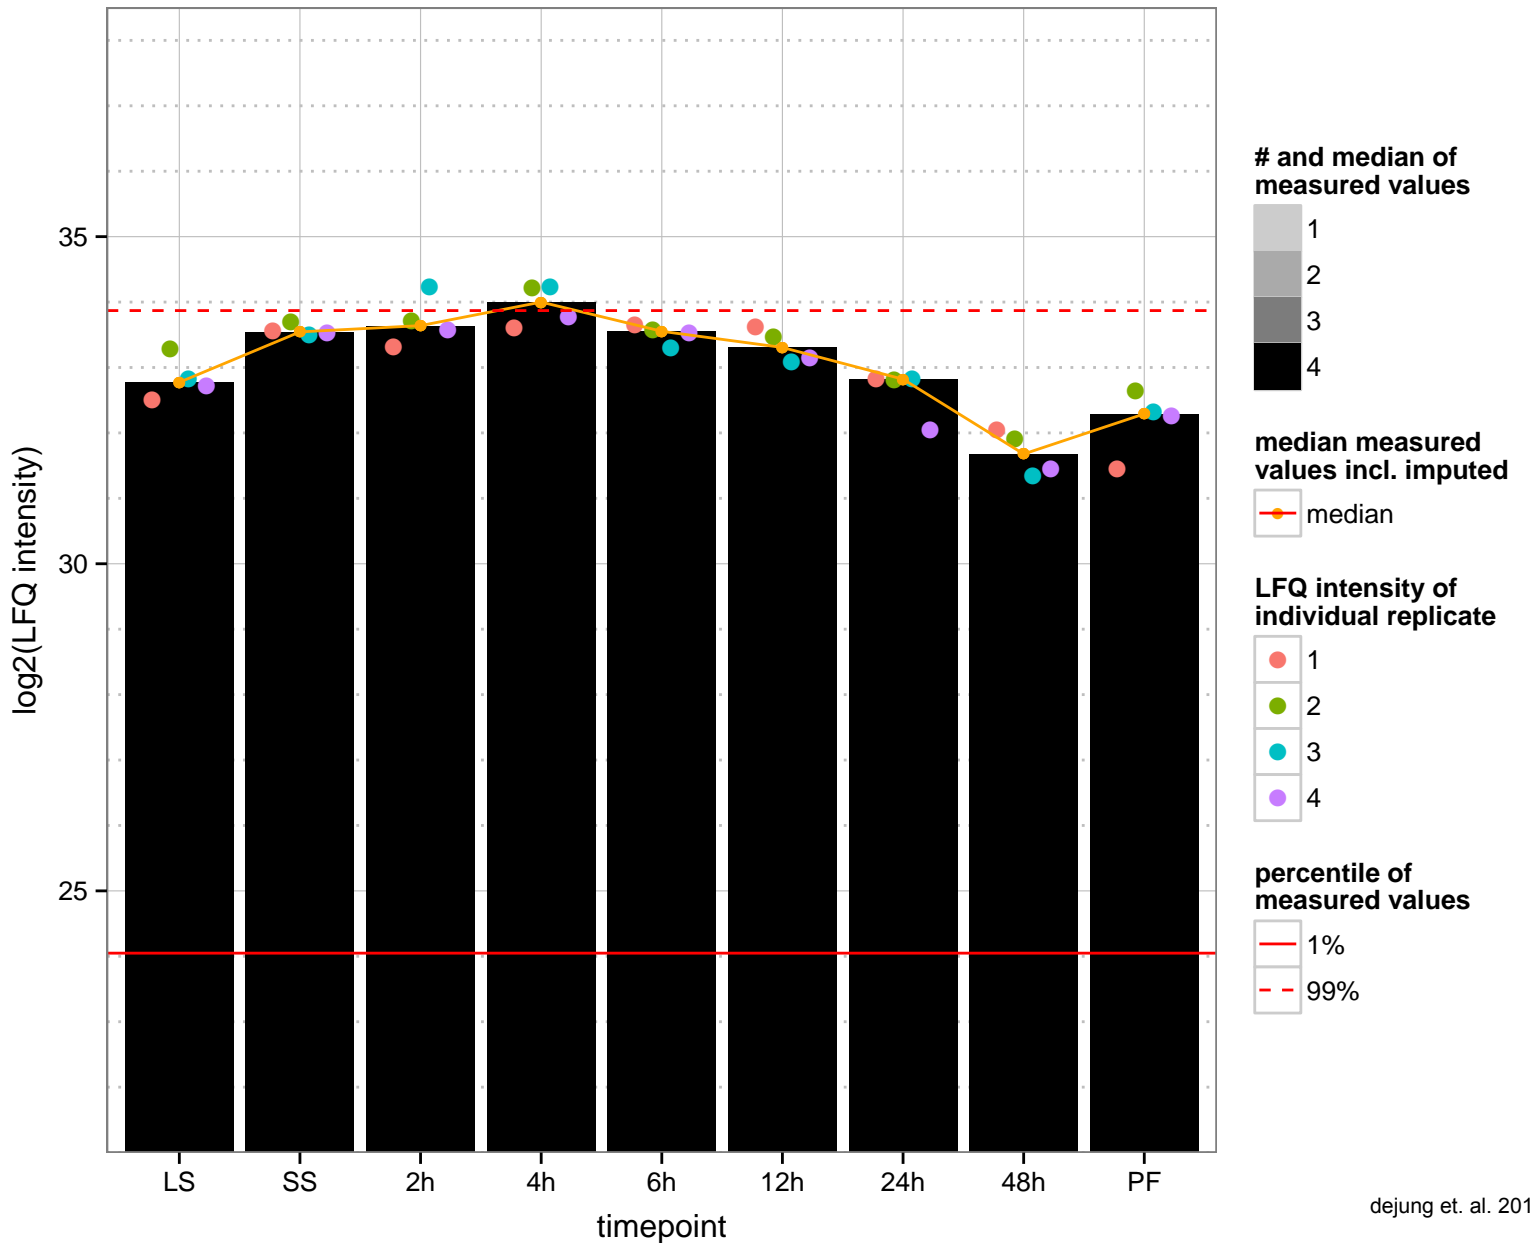

clathrin heavy chain, putative, clathrin heavy chain (CHC)  
 Tb927.10.6050;Tb11.v5.0198  
 AGOF: null, structural molecule activity  
 AGOC: null, clathrin coat of coated pit, clathrin coat of trans-Golgi network vesicle  
 AGOP: null, intracellular protein transport, vesicle-mediated transport  
 PGO: binding, structural molecule activity  
 PGOC: null, clathrin coat of coated pit, clathrin coat of trans-Golgi network vesicle  
 PGOP: intracellular protein transport, vesicle-mediated transport

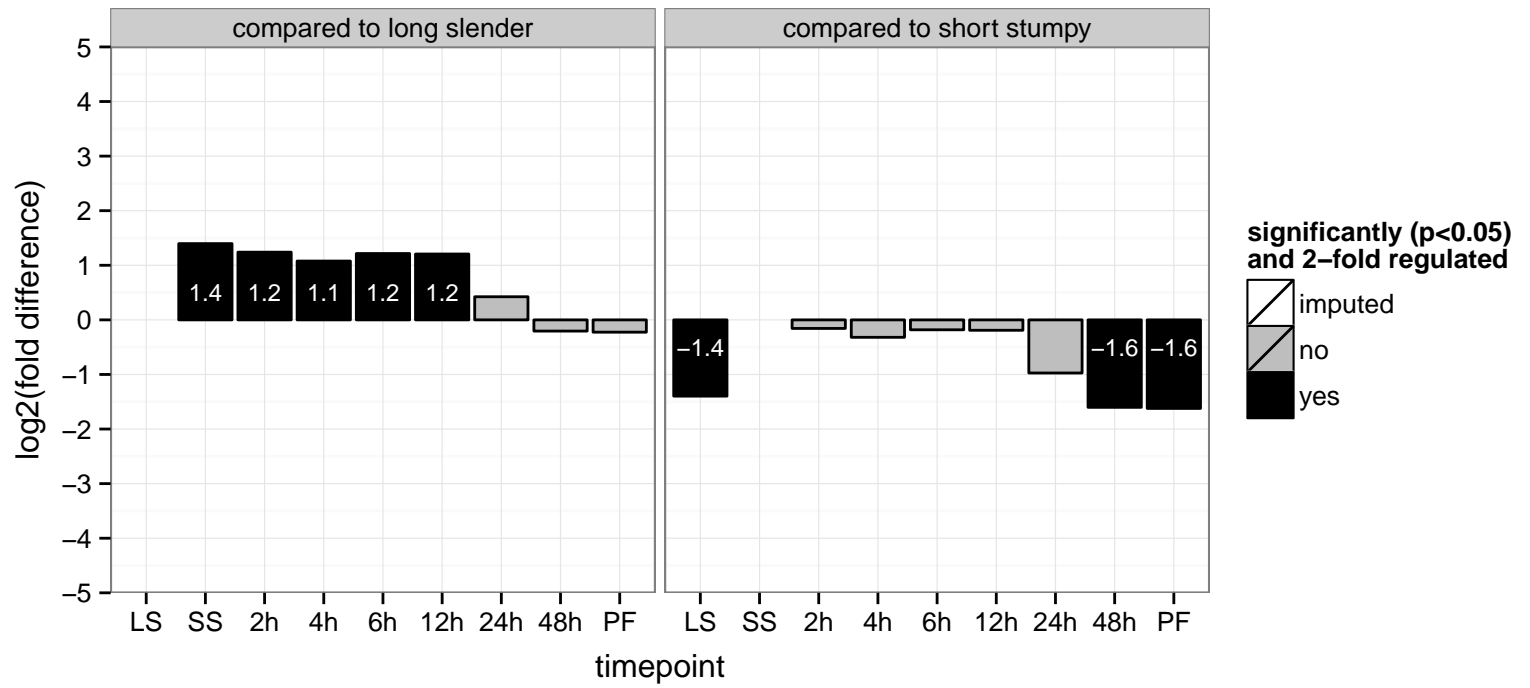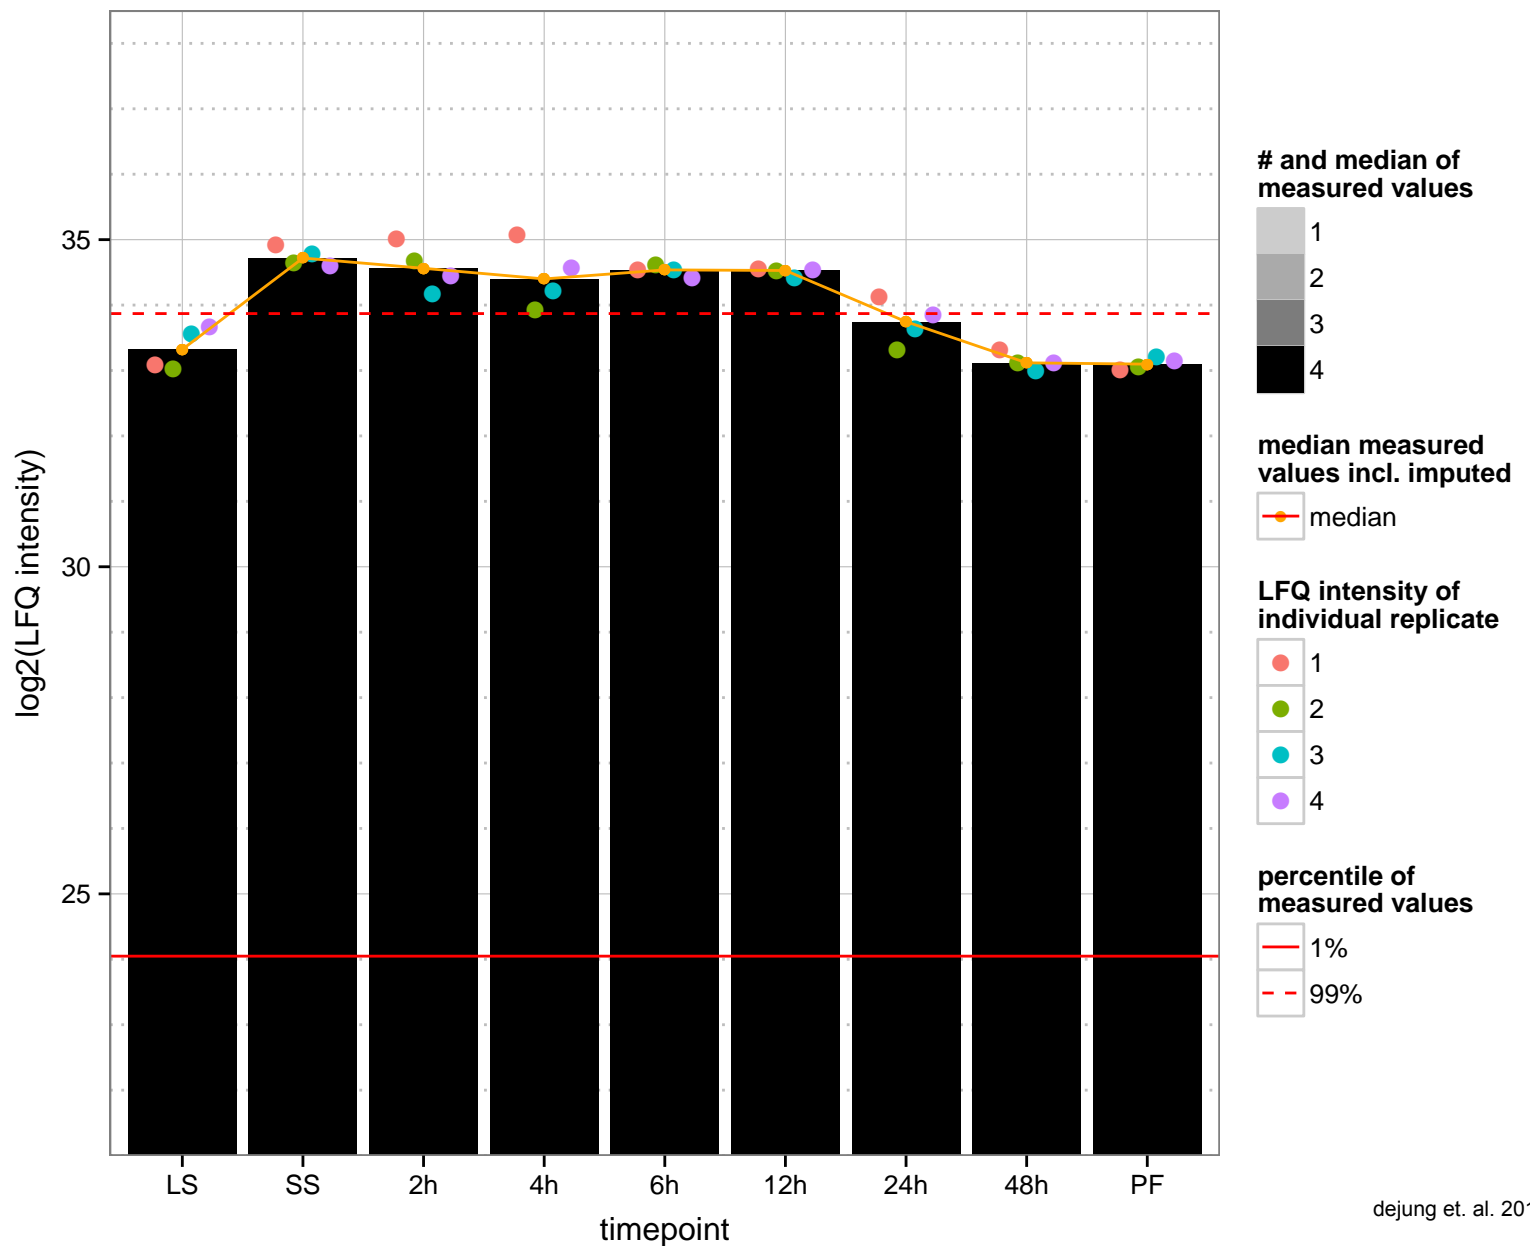

alternative oxidase (AOX)

Tb927.10.7090

AGOF: alternative oxidase activity, ferric iron binding, oxidoreductase activity

AGOC: mitochondrial envelope, mitochondrial inner membrane, mitochondrion

AGOP: oxidation–reduction process, respiratory gaseous exchange

PGOF: null

PGOC: mitochondrial envelope

PGOP: oxidation–reduction process, respiratory gaseous exchange

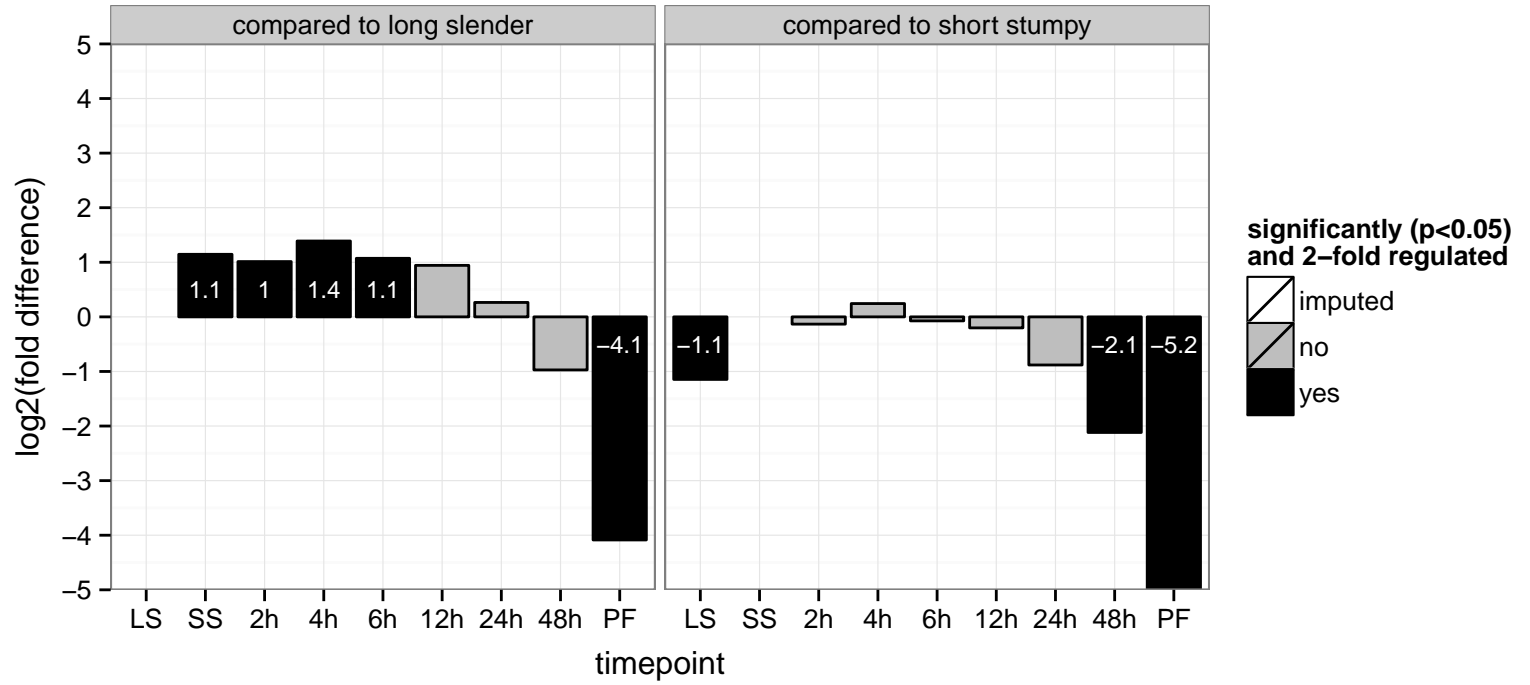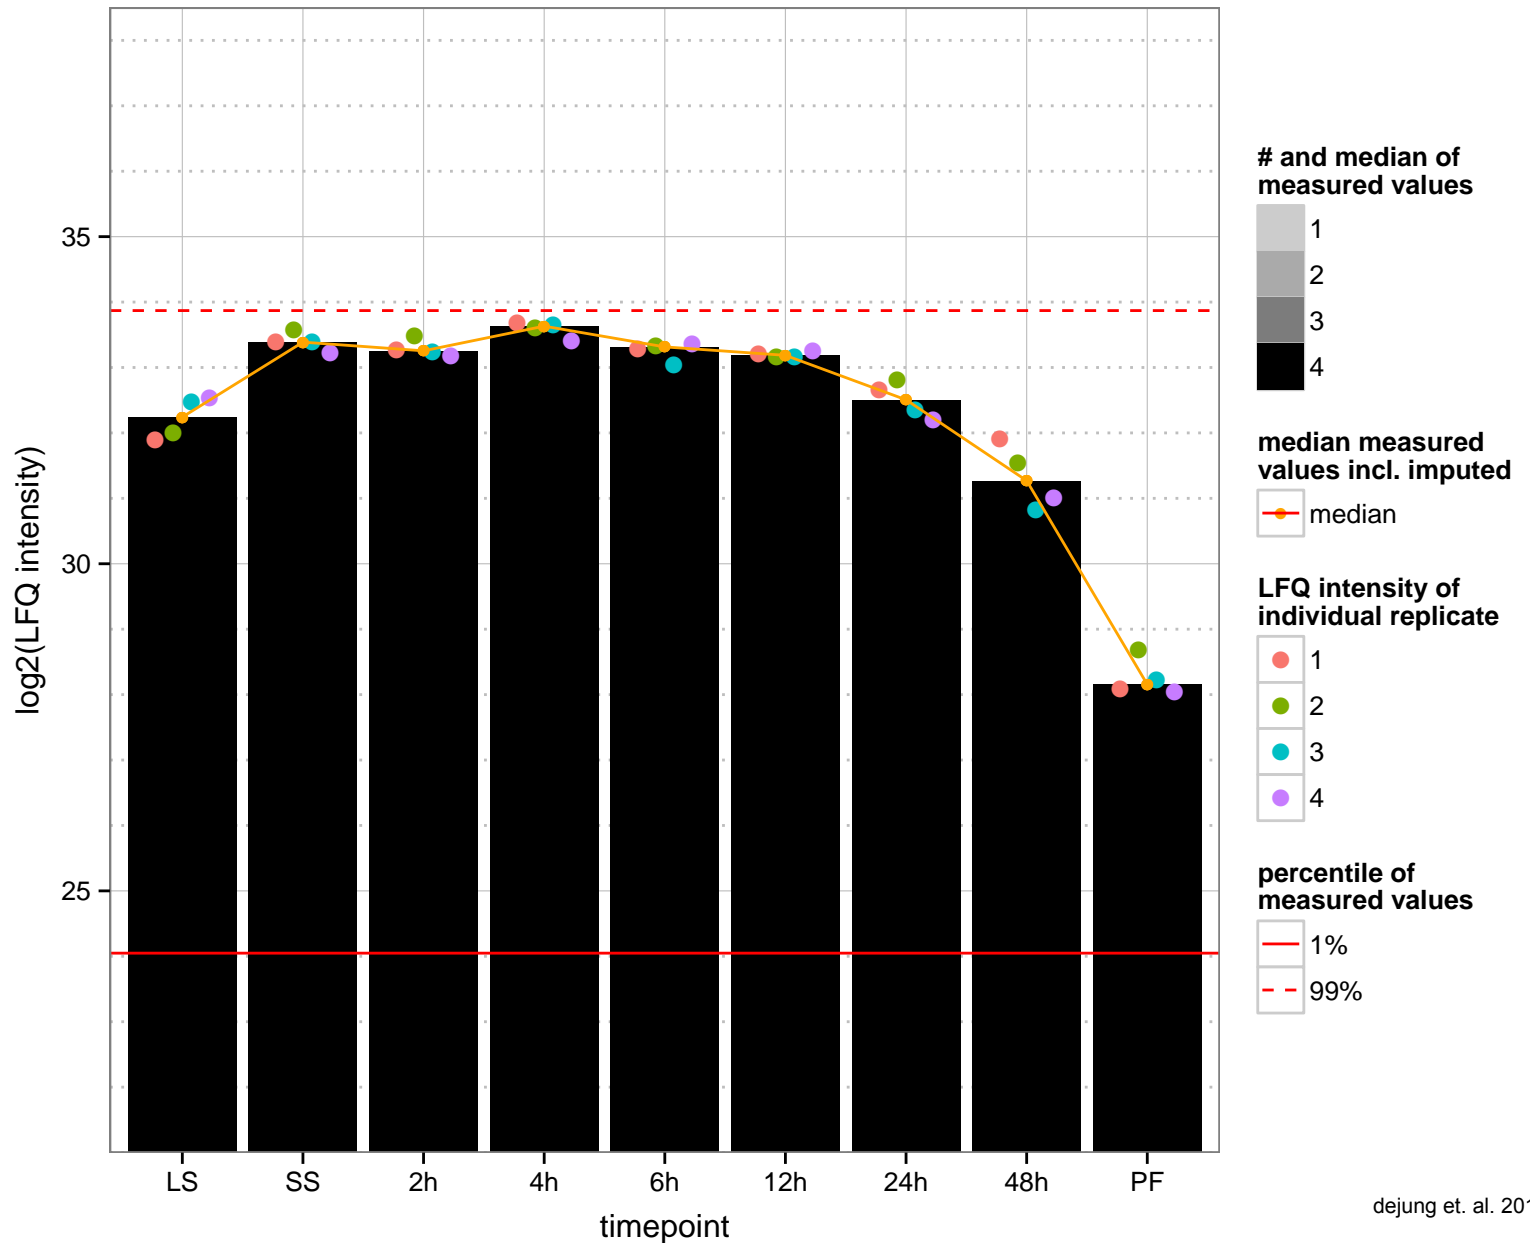

inositol-3-phosphate synthase, putative  
 Tb927.10.7110  
 AGOF: inositol-3-phosphate synthase activity  
 AGOC: null  
 AGOP: inositol biosynthetic process, metabolic process, phospholipid biosynthetic process  
 PGOF: inositol-3-phosphate synthase activity  
 PGO: null  
 PGO: inositol biosynthetic process, phospholipid biosynthetic process

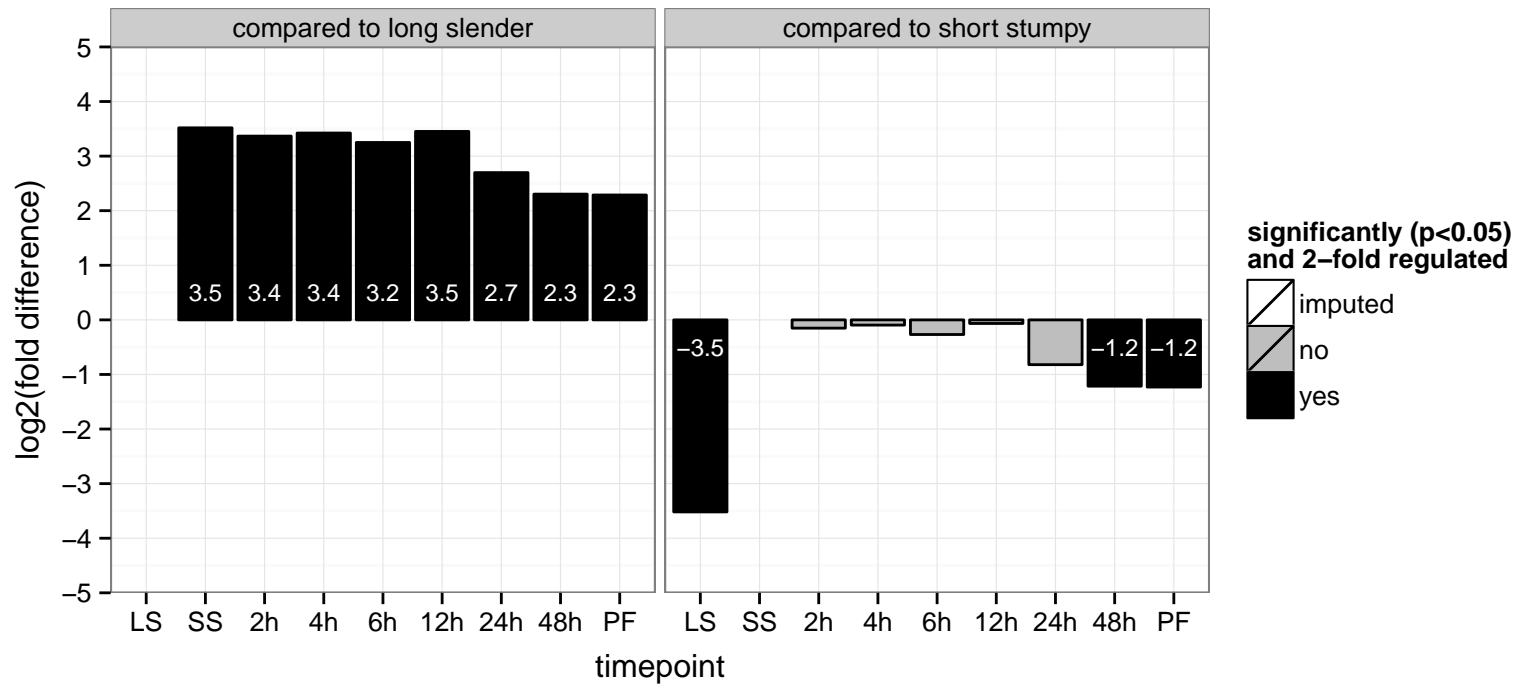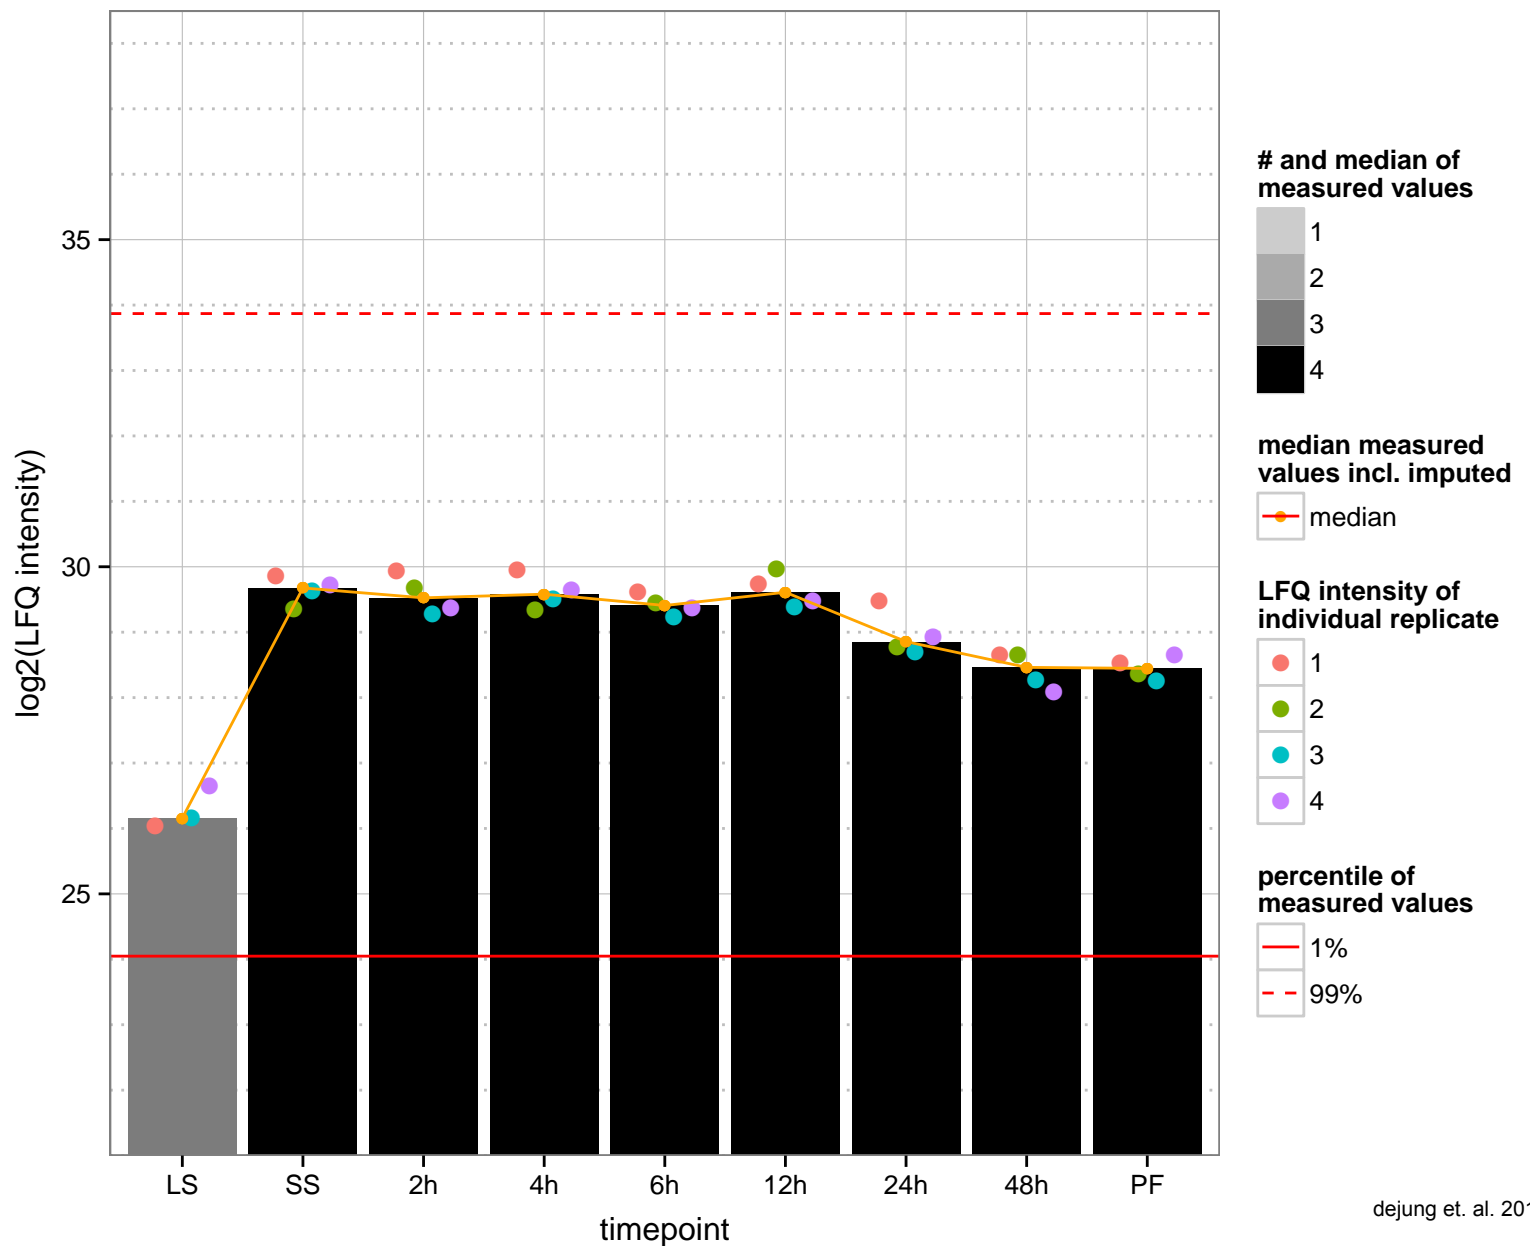

hypothetical protein, conserved  
 Tb927.10.7820  
 AGOF: null  
 AGOC: null  
 AGOP: null  
 PGO: null  
 PGOC: null  
 PGOP: null

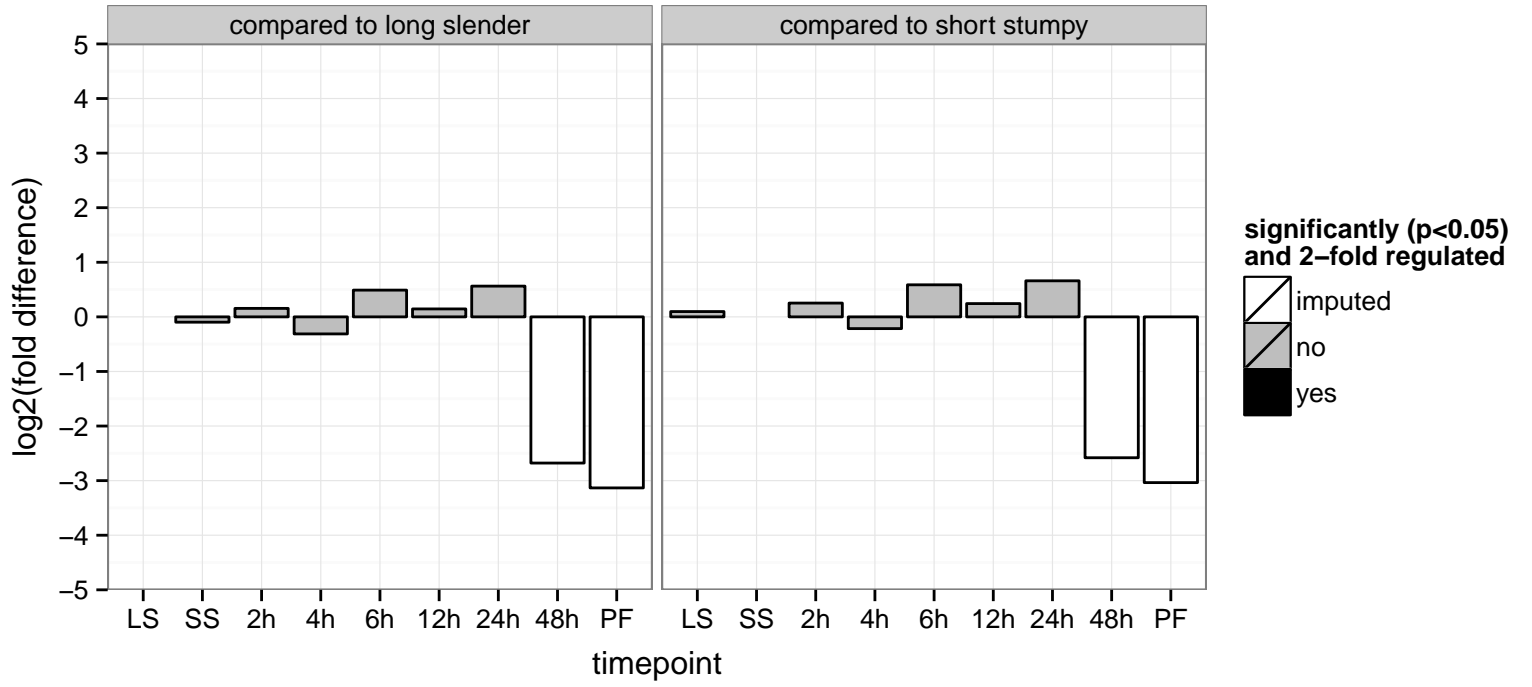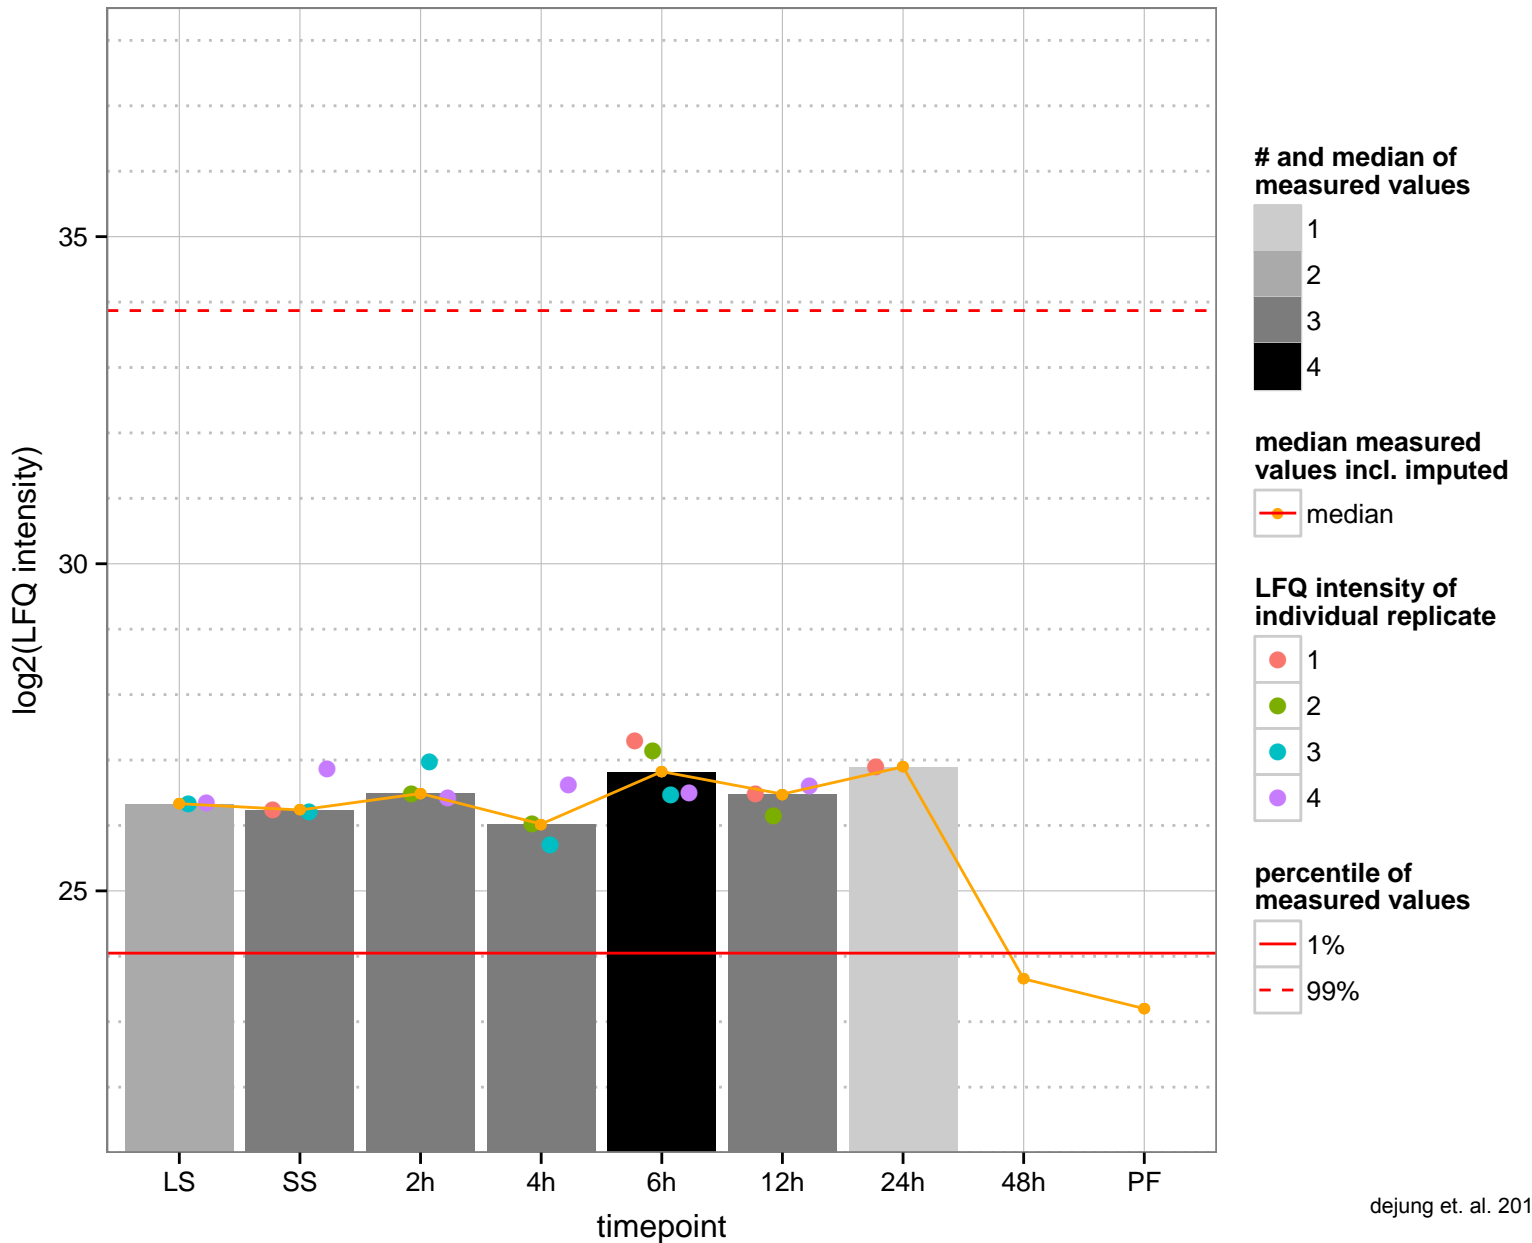



DNA-(apurinic or apyrimidinic site) lyase, putative  
 Tb927.11.10640  
 AGOF: endonuclease activity  
 AGOC: null  
 AGOP: DNA repair  
 PGO: nuclease activity  
 PGOC: null  
 PGOP: DNA repair

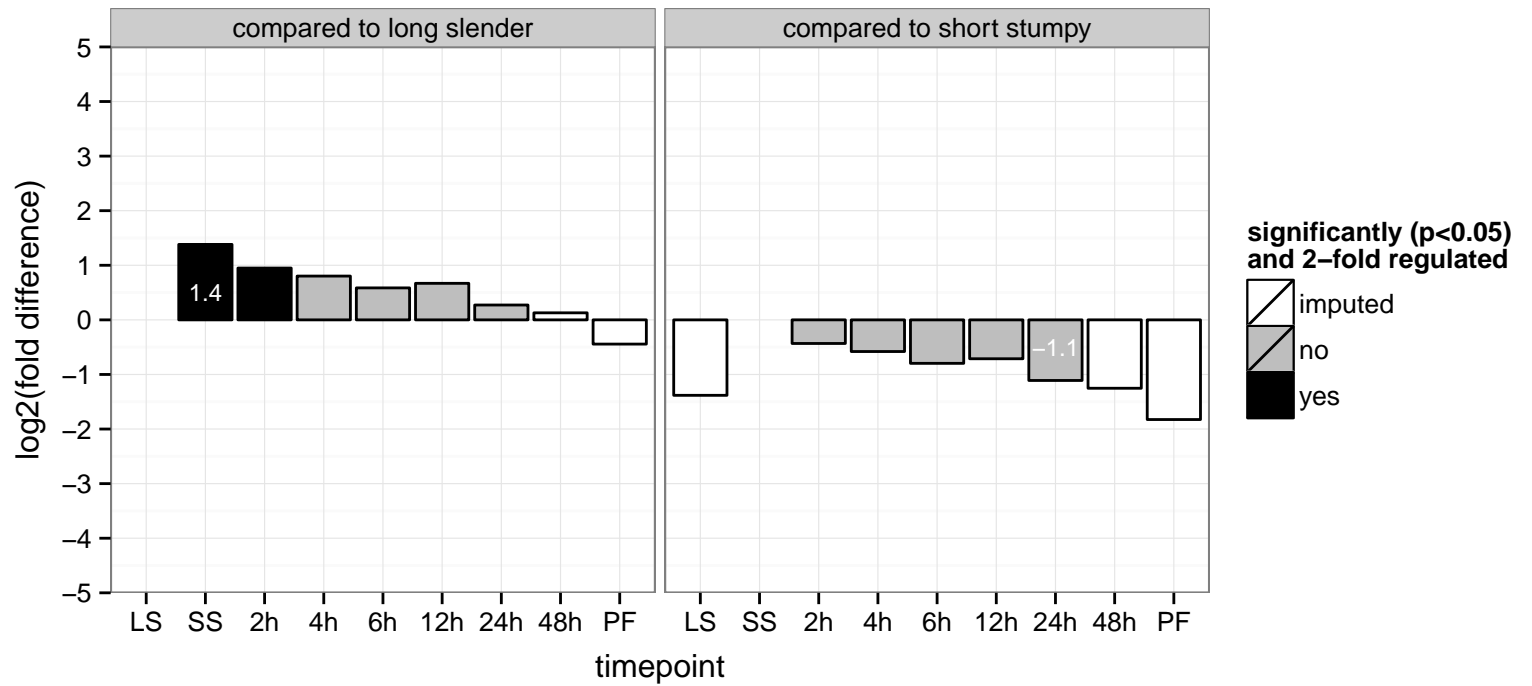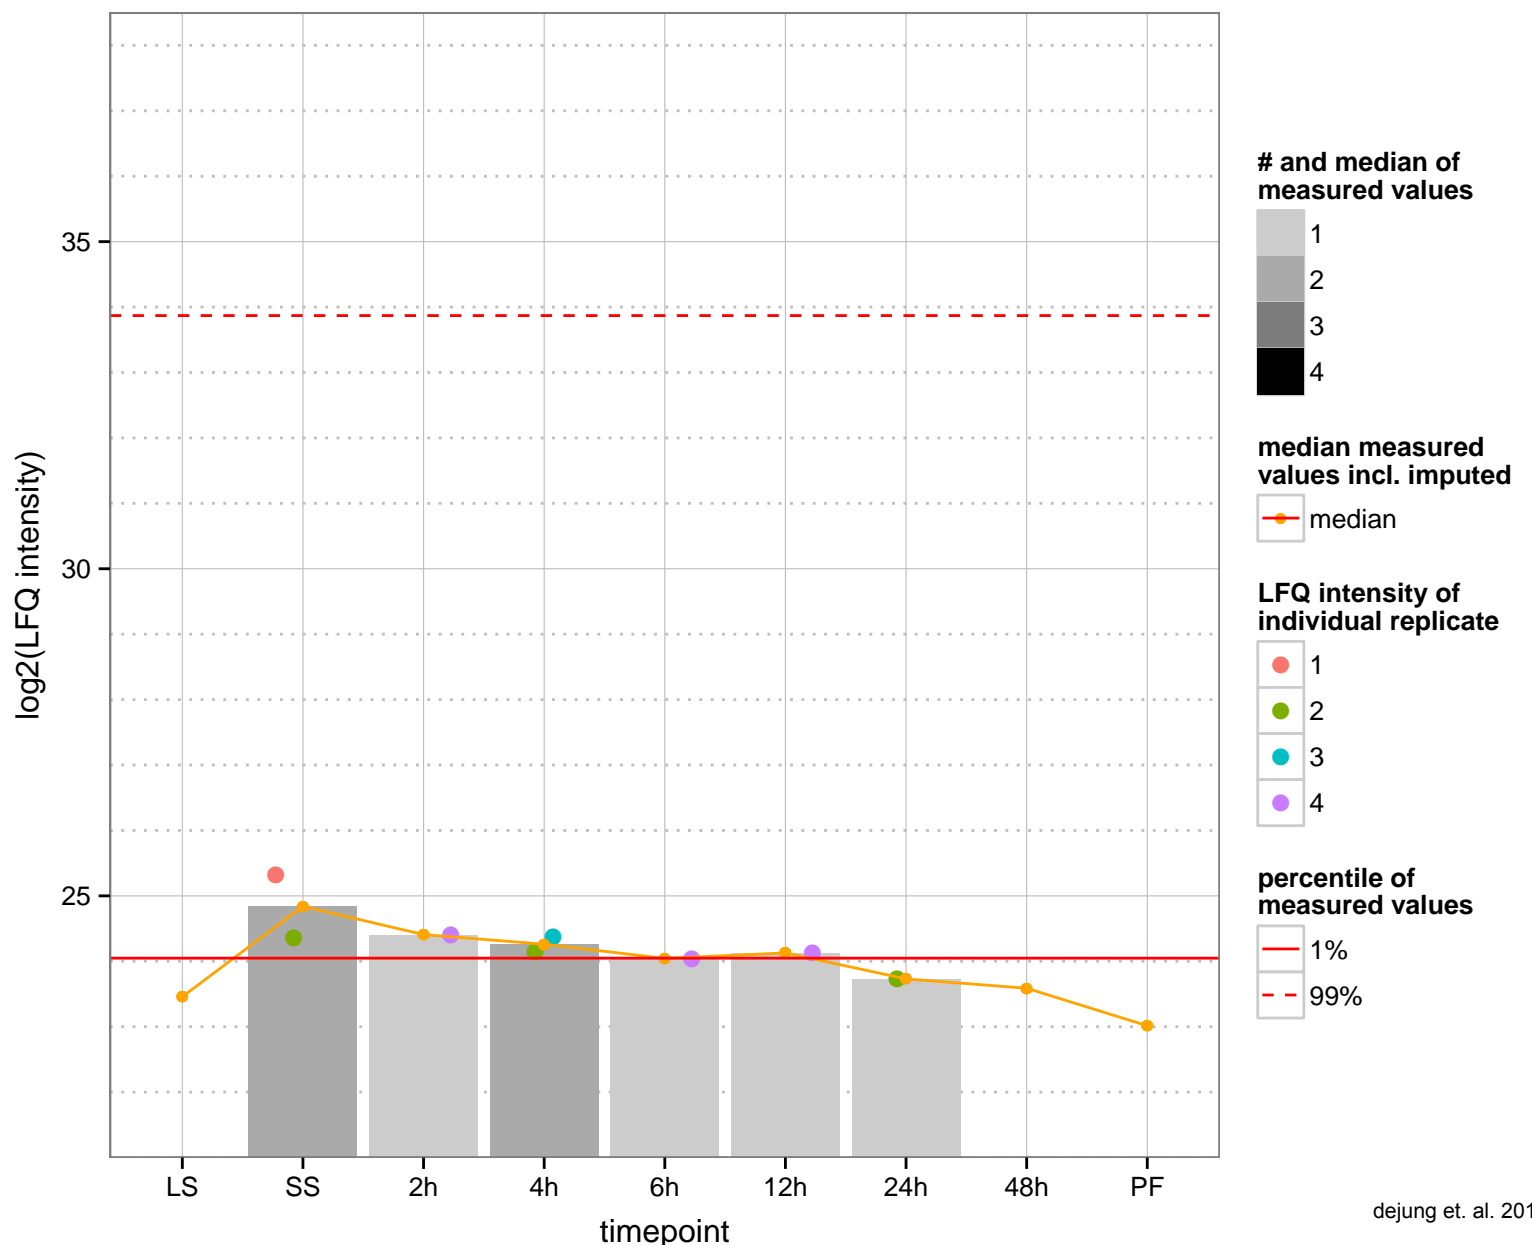

trans-sialidase, putative  
 Tb927.11.11410  
 AGOF: exo-alpha-sialidase activity  
 AGOC: null  
 AGOP: pathogenesis  
 PGO: null  
 PGOC: null  
 PGOP: null

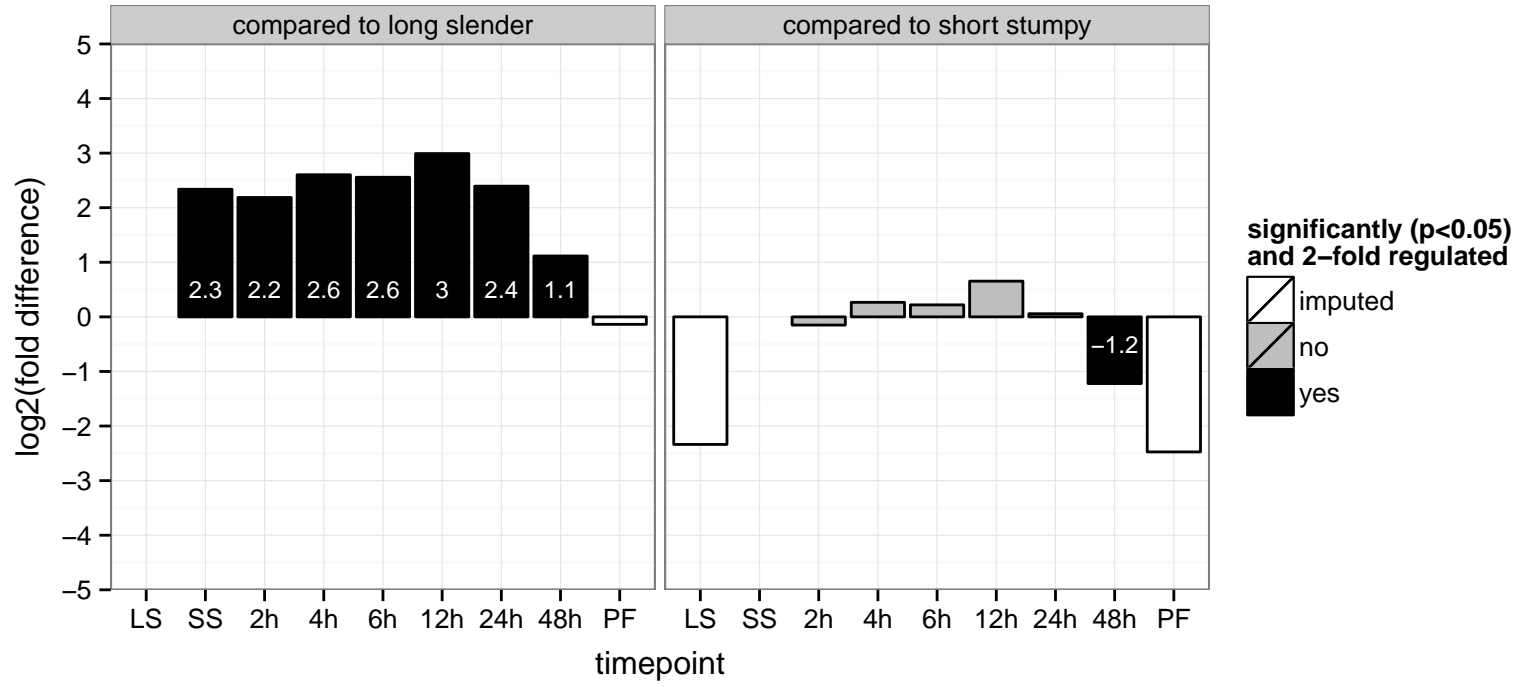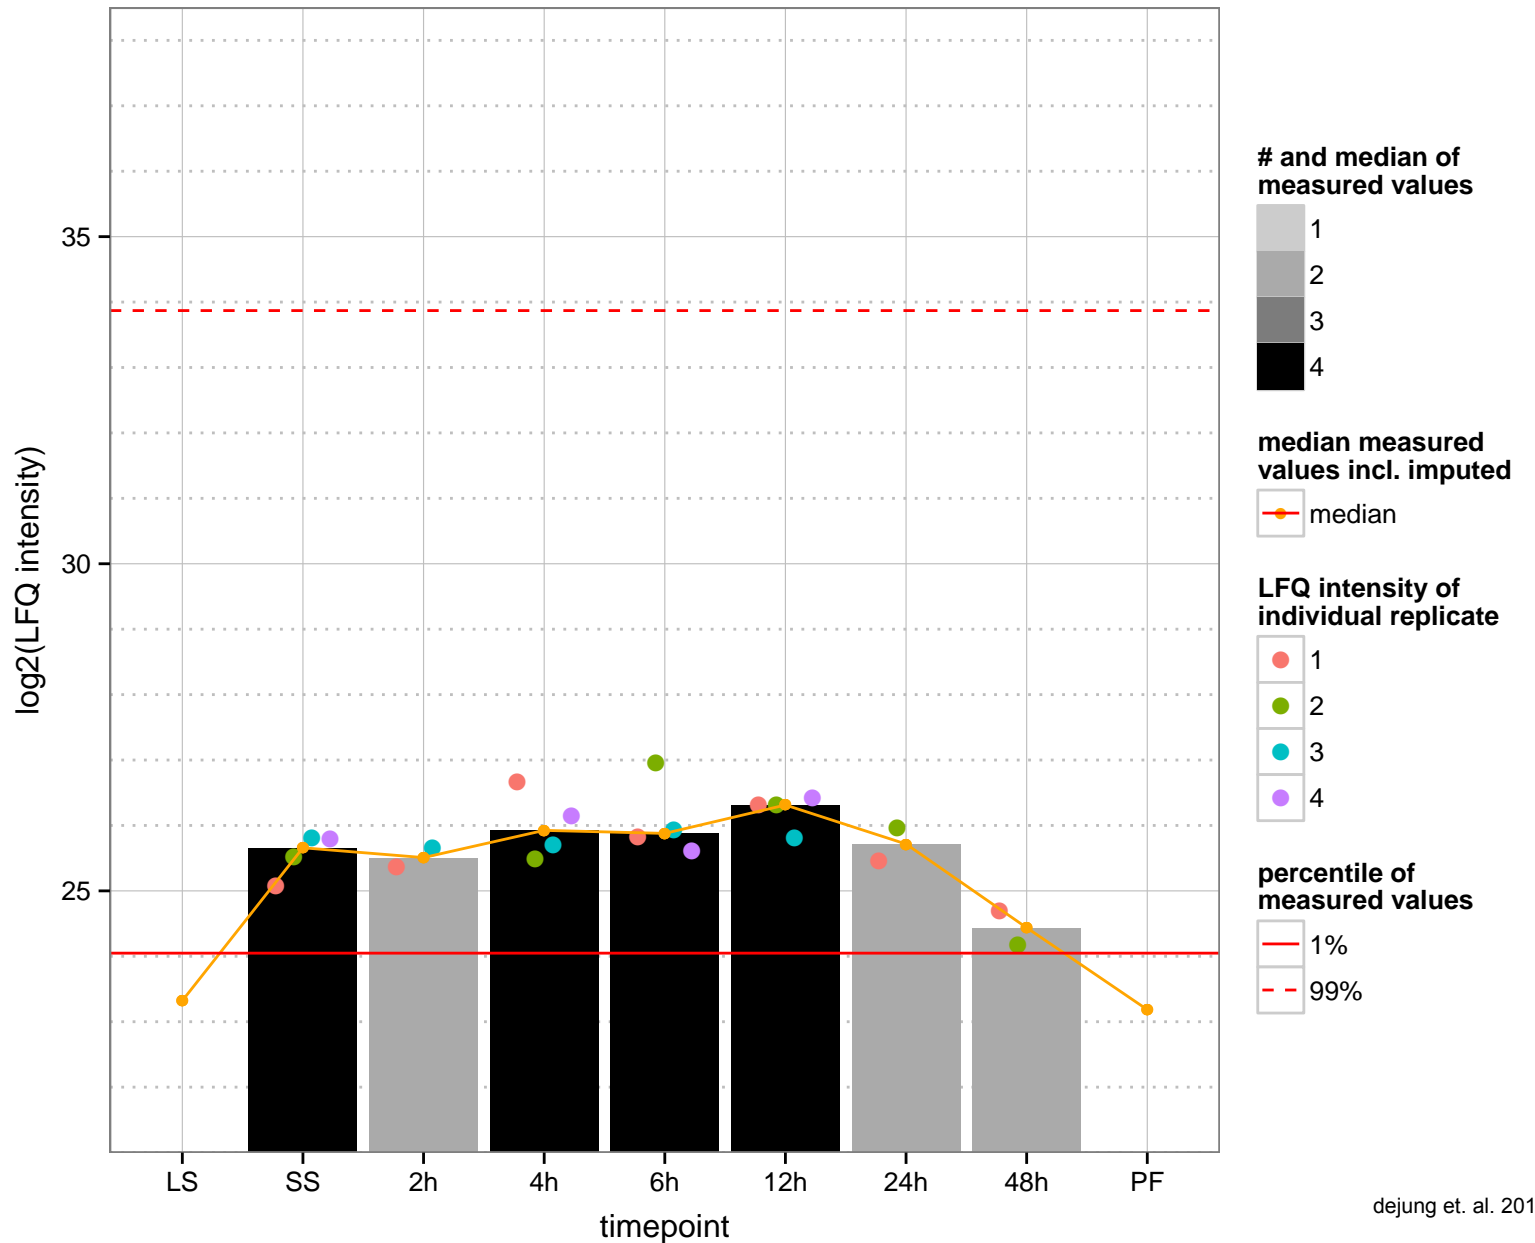

Trichohyalin, putative

Tb927.11.11480

AGOF: null

AGOC: null

AGOP: modulation of development of symbiont involved in interaction with host, quorum sensing involved in interaction with host

PGOF: null

PGOC: null

PGOP: null

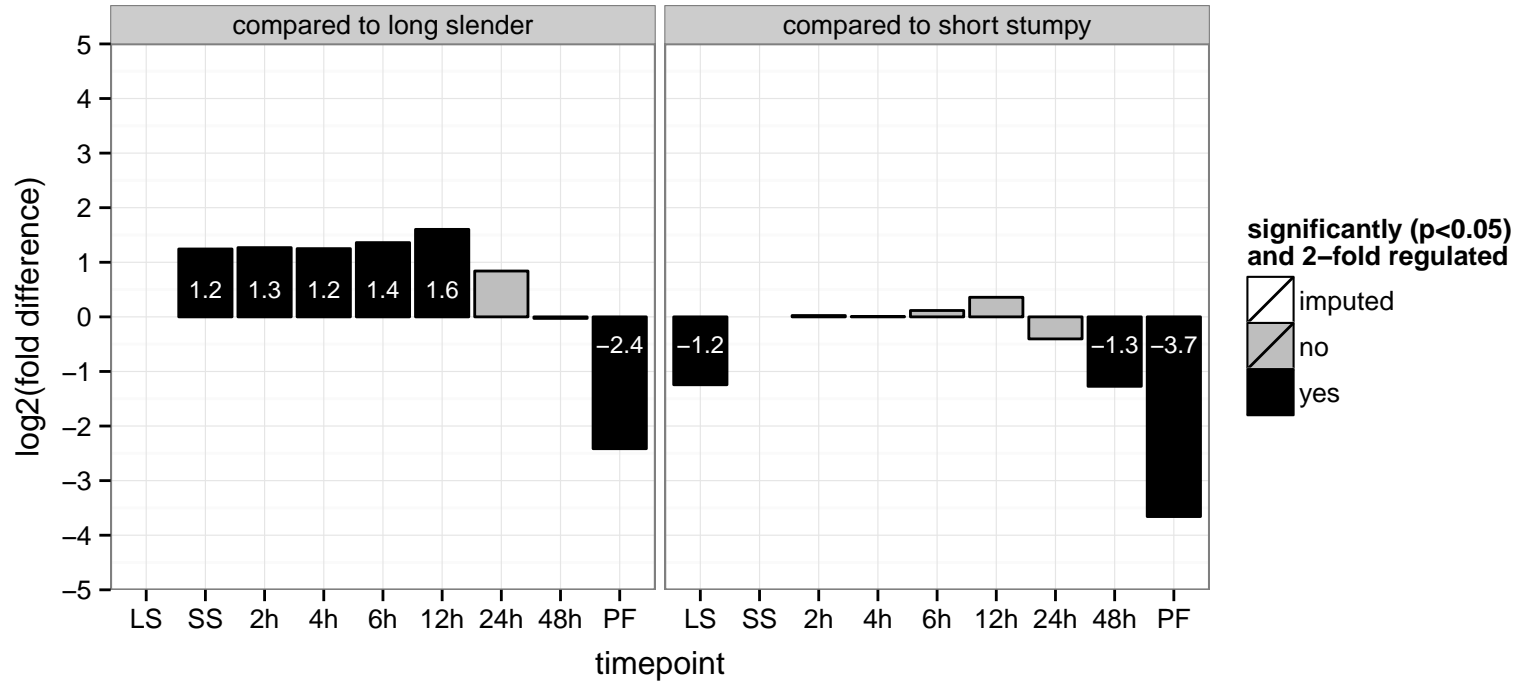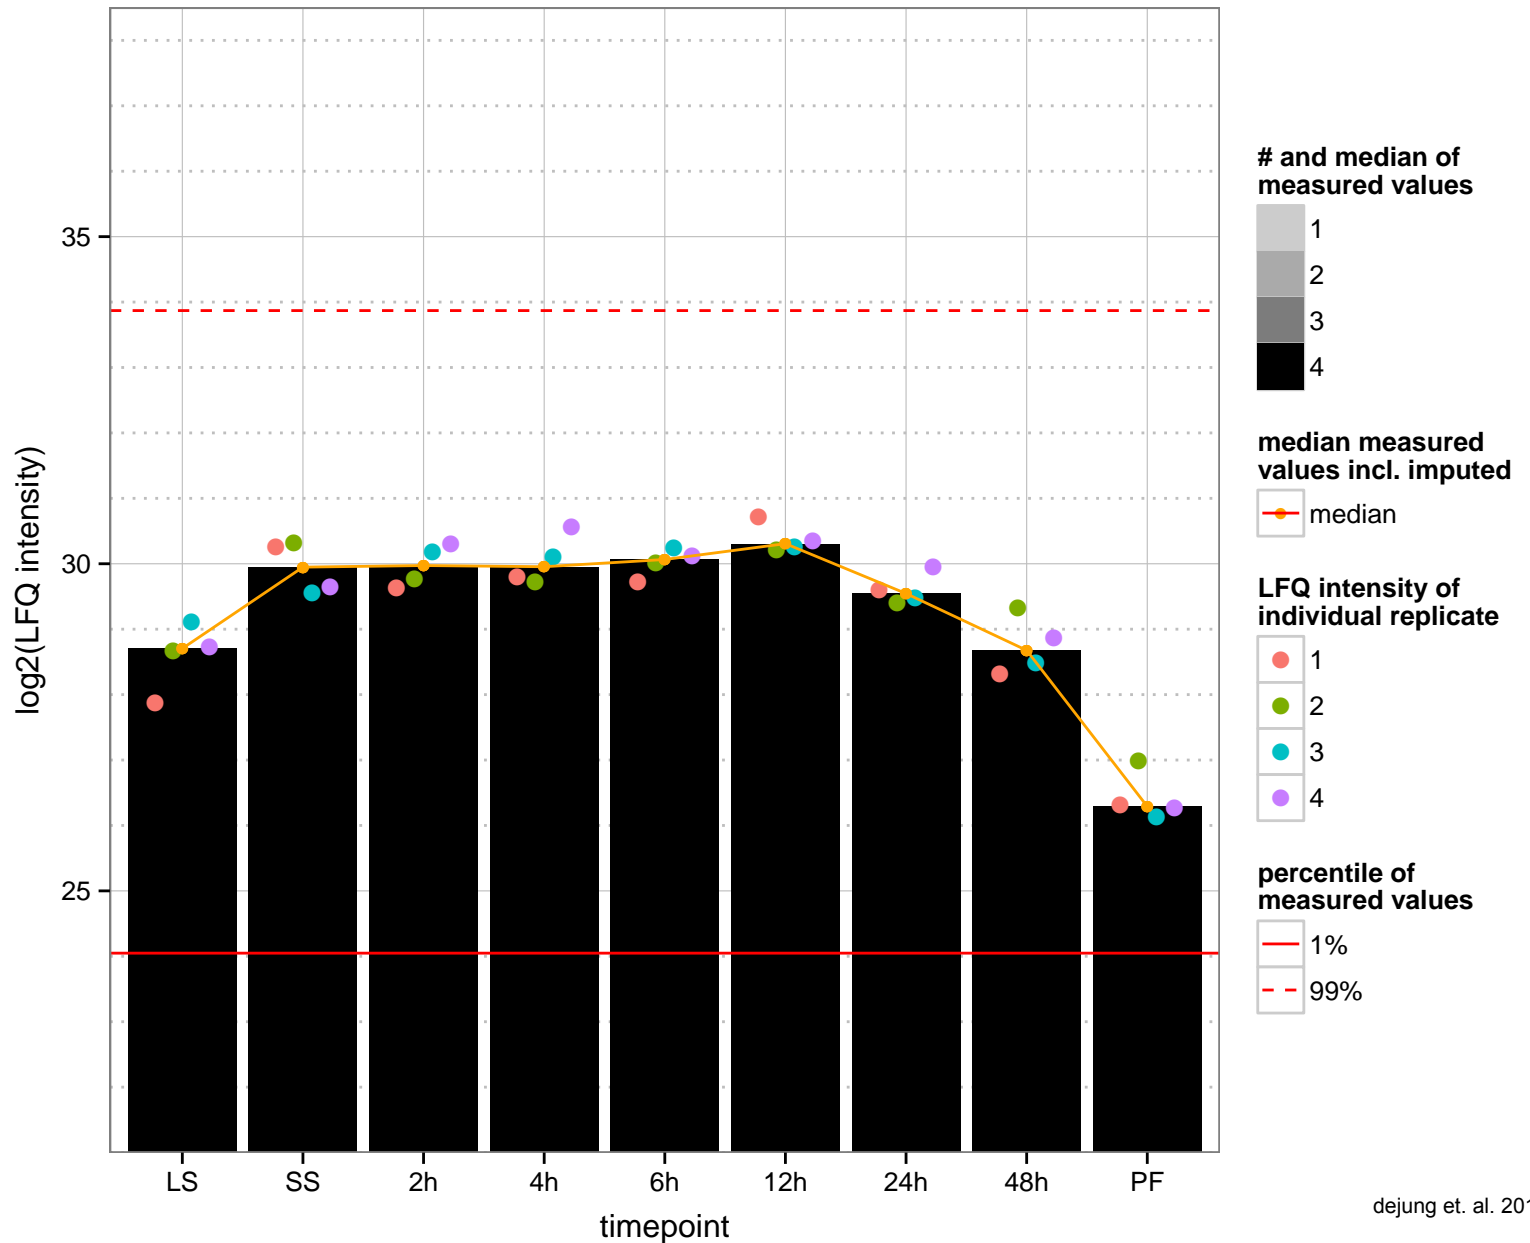

microtubule-associated protein, corset-associated protein 15 (CAP15)

Tb927.11.11980

AGOF: null

AGOC: null

AGOP: null

PGOF: null

PGOC: null

PGOP: null

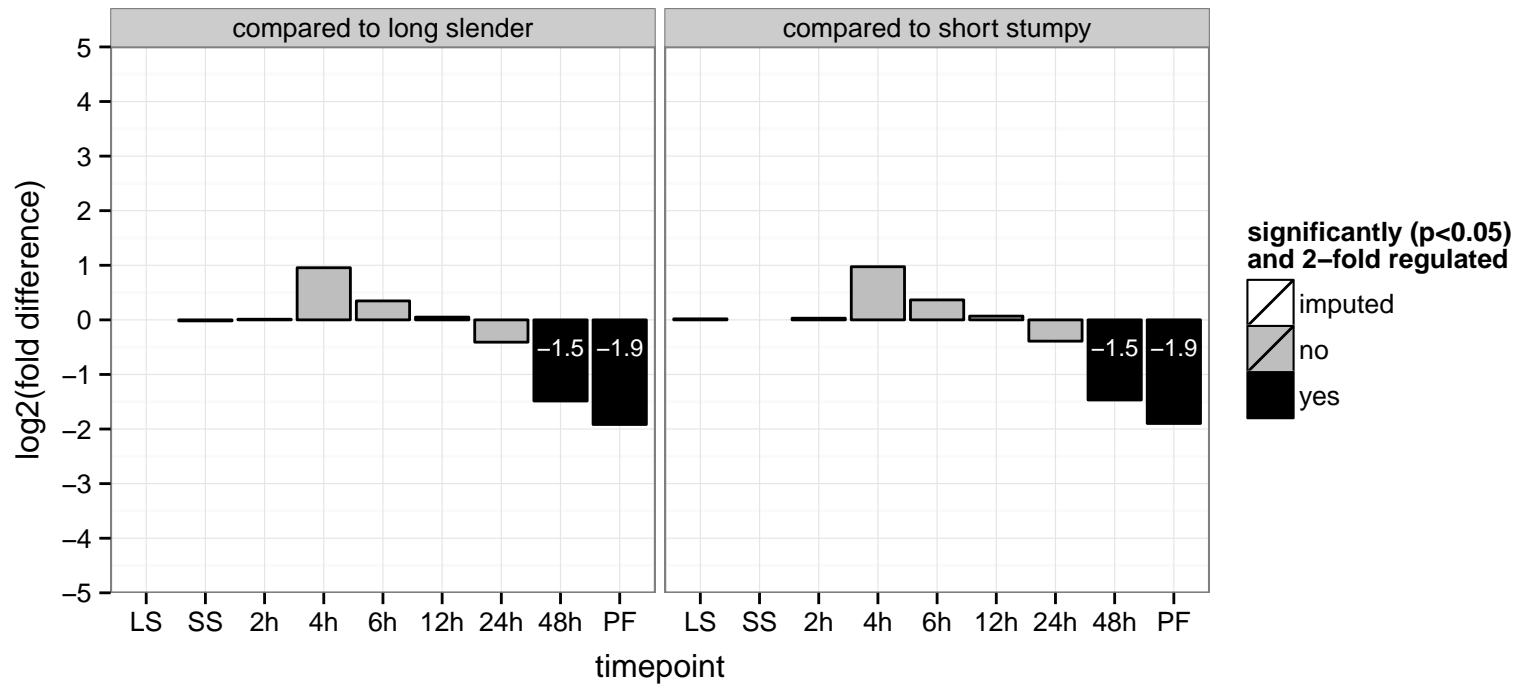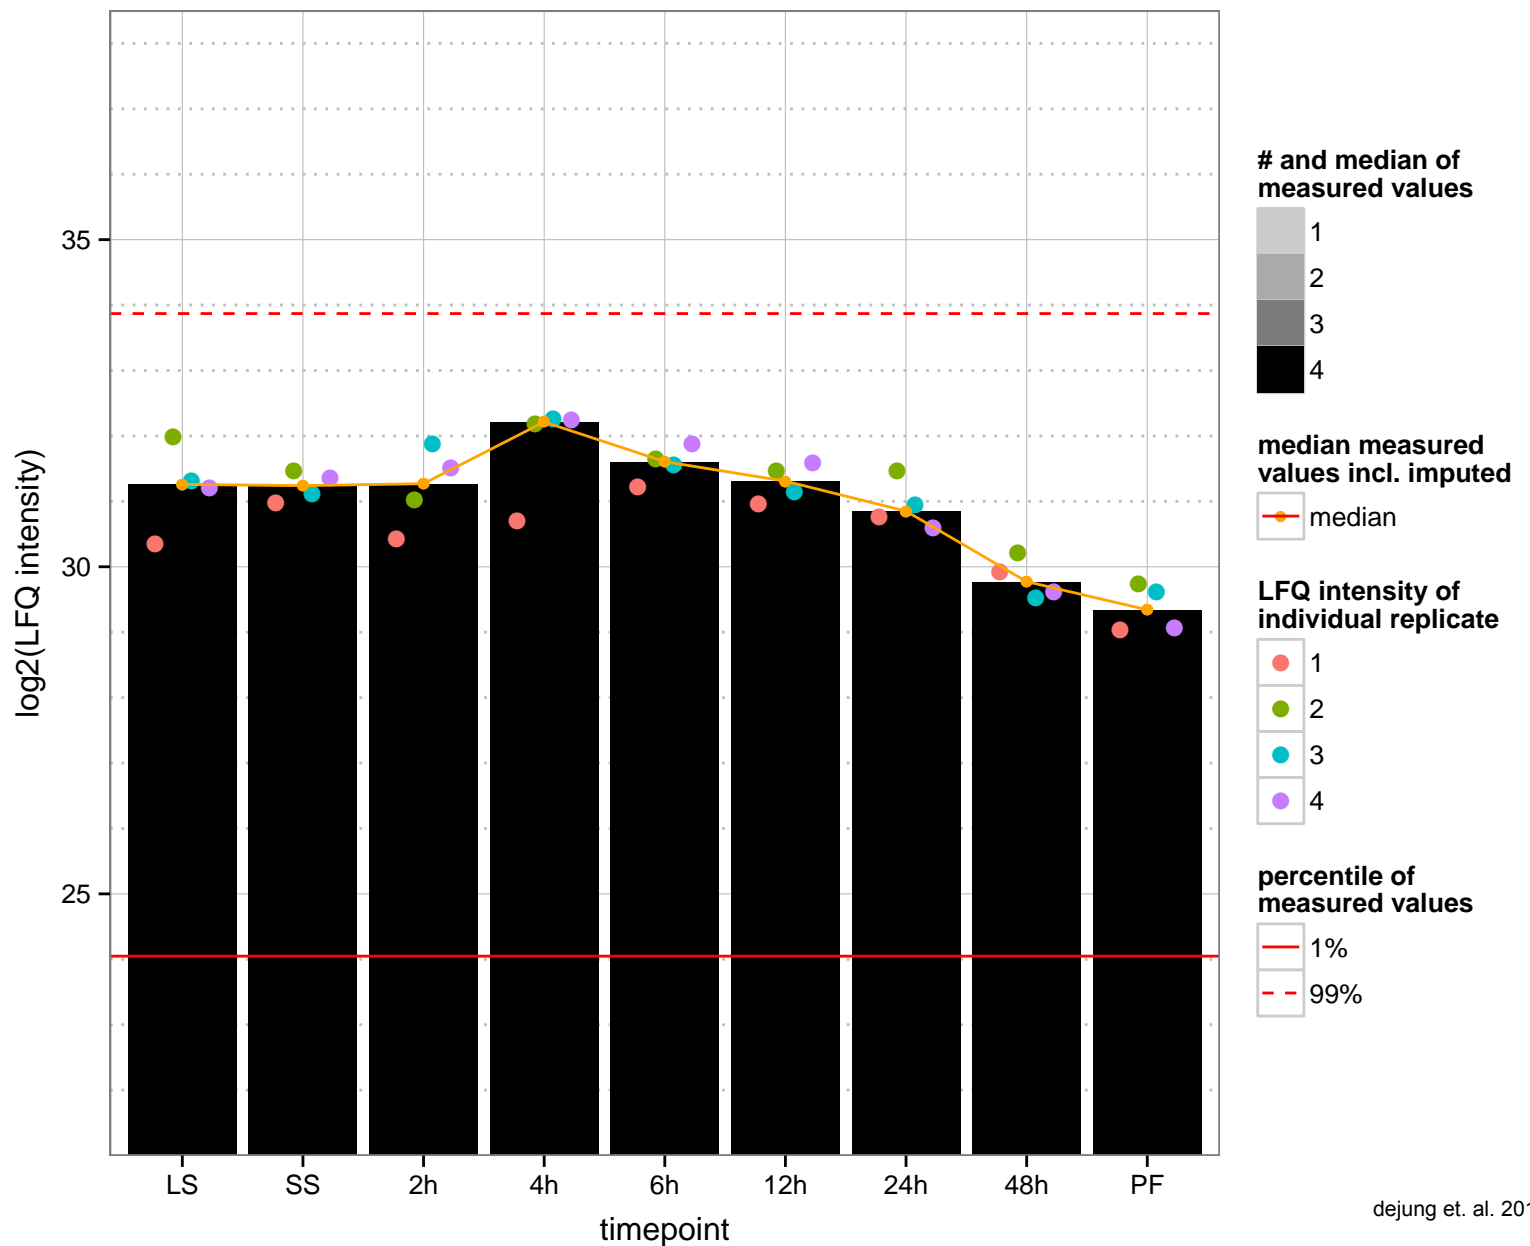

hypothetical protein, conserved  
 Tb927.11.12060  
 AGOF: null  
 AGOC: null  
 AGOP: null  
 PGO: null  
 PGOC: integral to peroxisomal membrane  
 PGOP: peroxisome fission

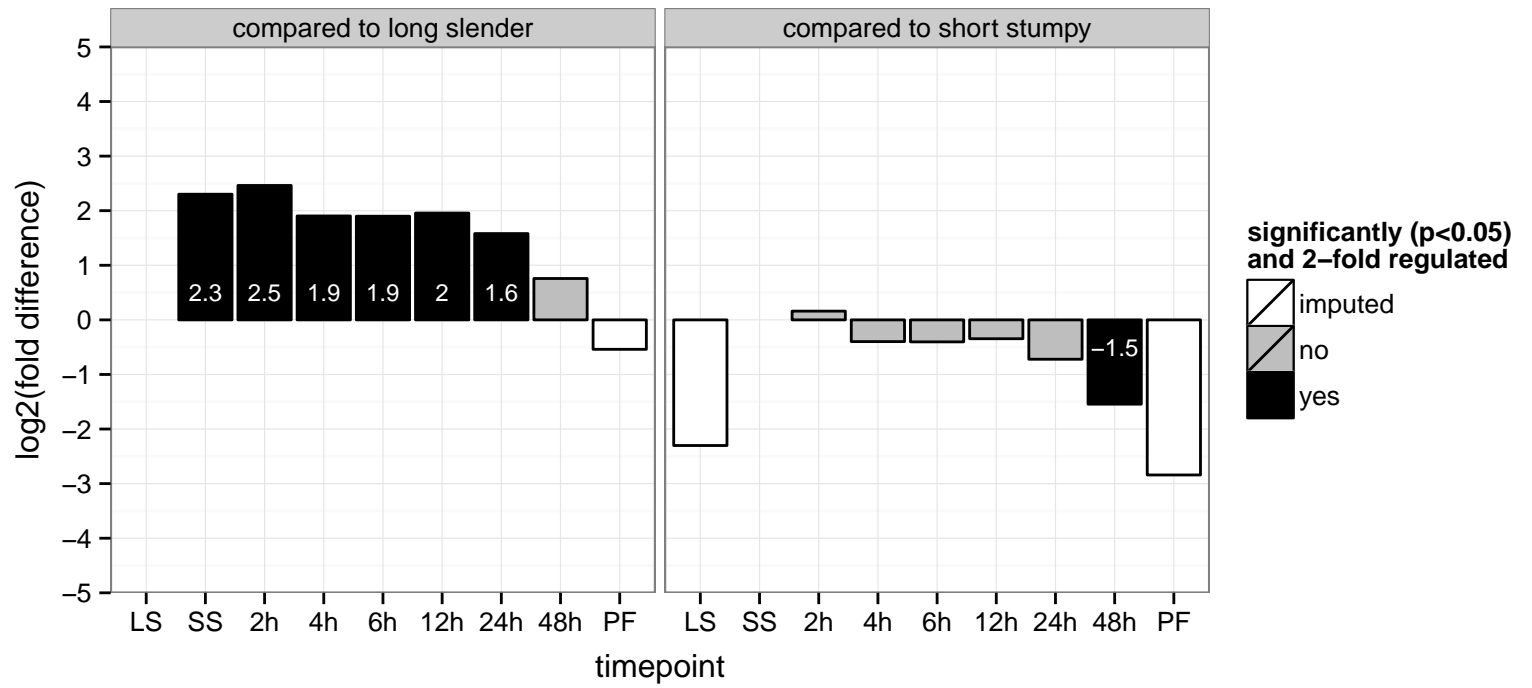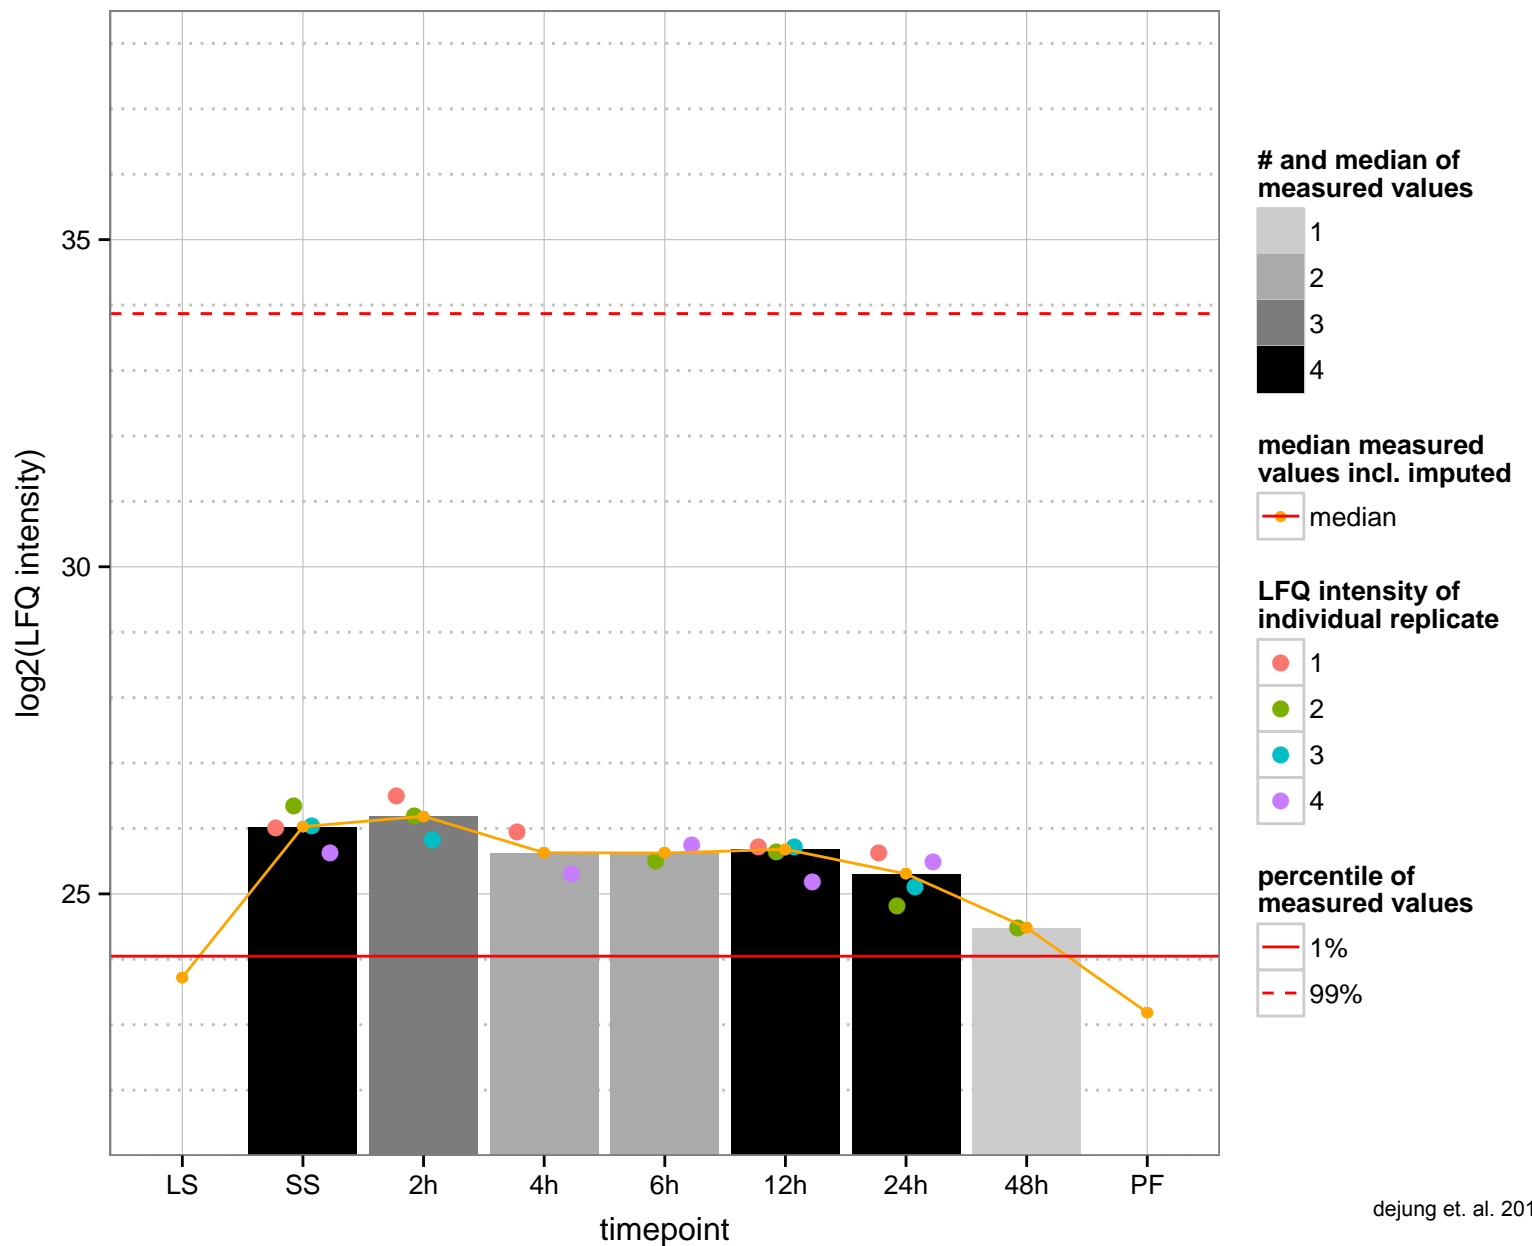

hypothetical protein, conserved  
 Tb927.11.12870  
 AGOF: null  
 AGOC: null  
 AGOP: null  
 PGO: null  
 PGOC: null  
 PGOP: null

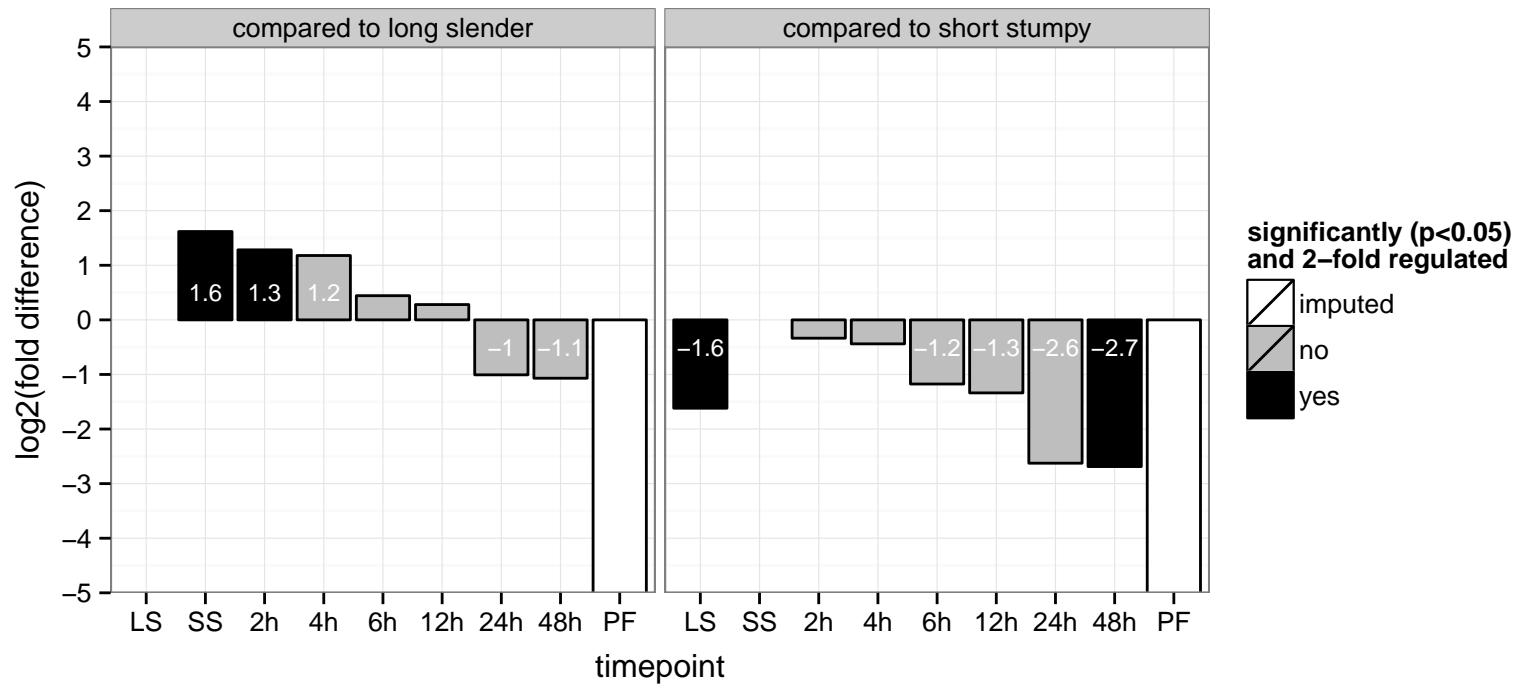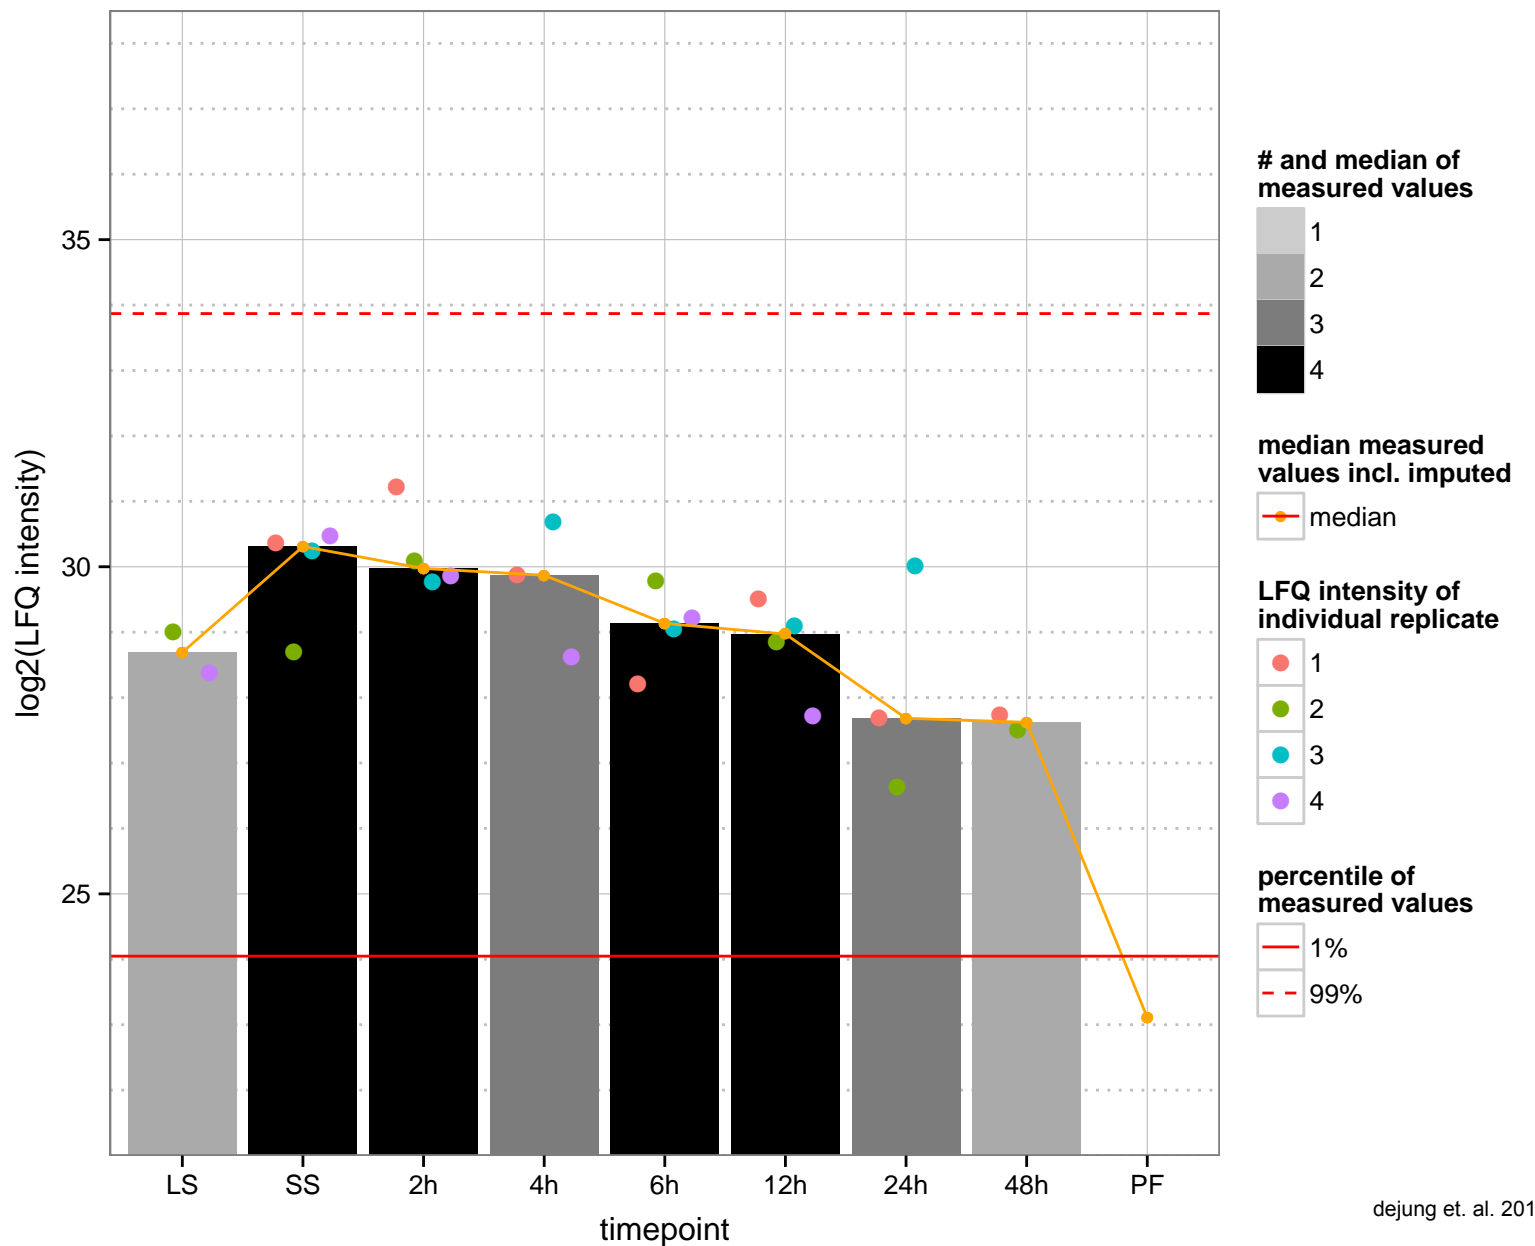

kinesin-II 85 Kd subunit, putative  
 Tb927.11.13920  
 AGOF: ATP binding, microtubule motor activity, motor activity  
 AGOC: kinesin complex, microtubule associated complex  
 AGOP: microtubule-based movement  
 PGOF: ATP binding, microtubule motor activity  
 PGO: null  
 PGOP: microtubule-based movement

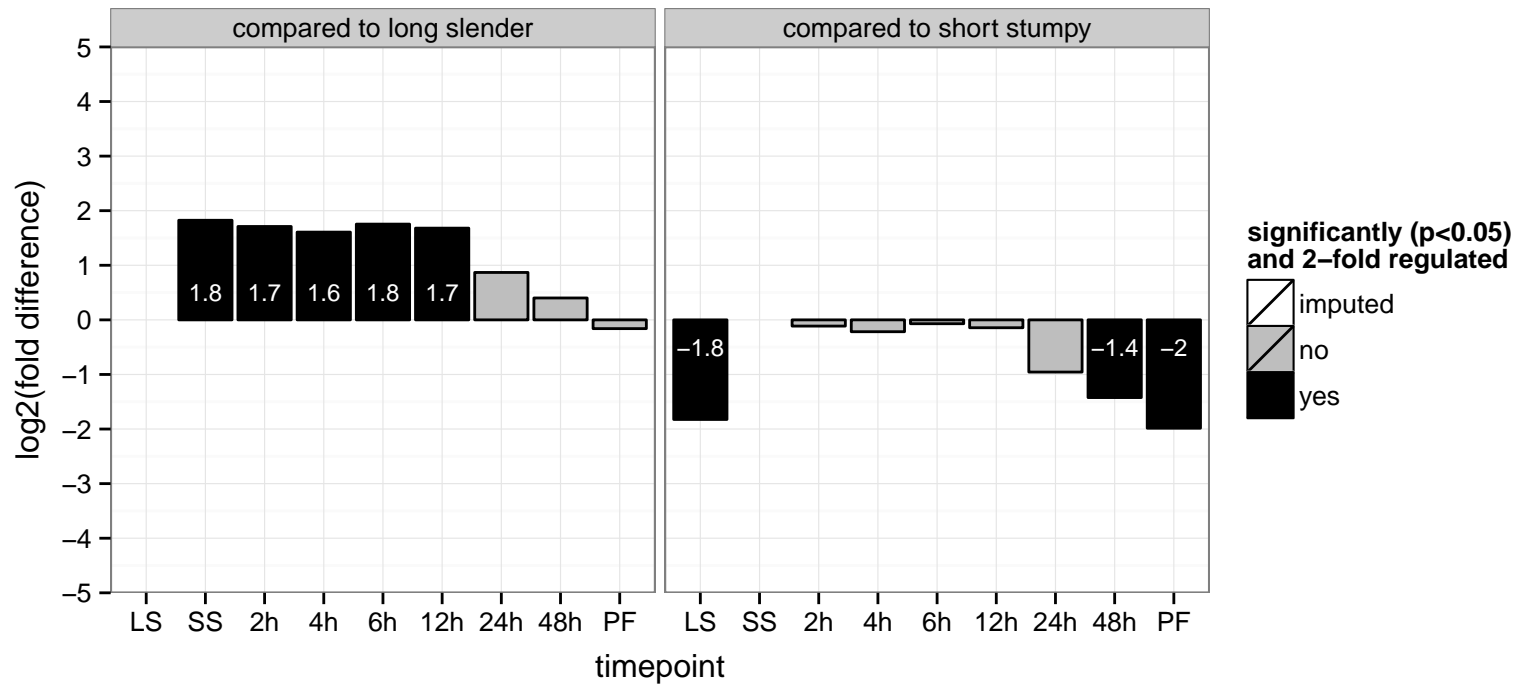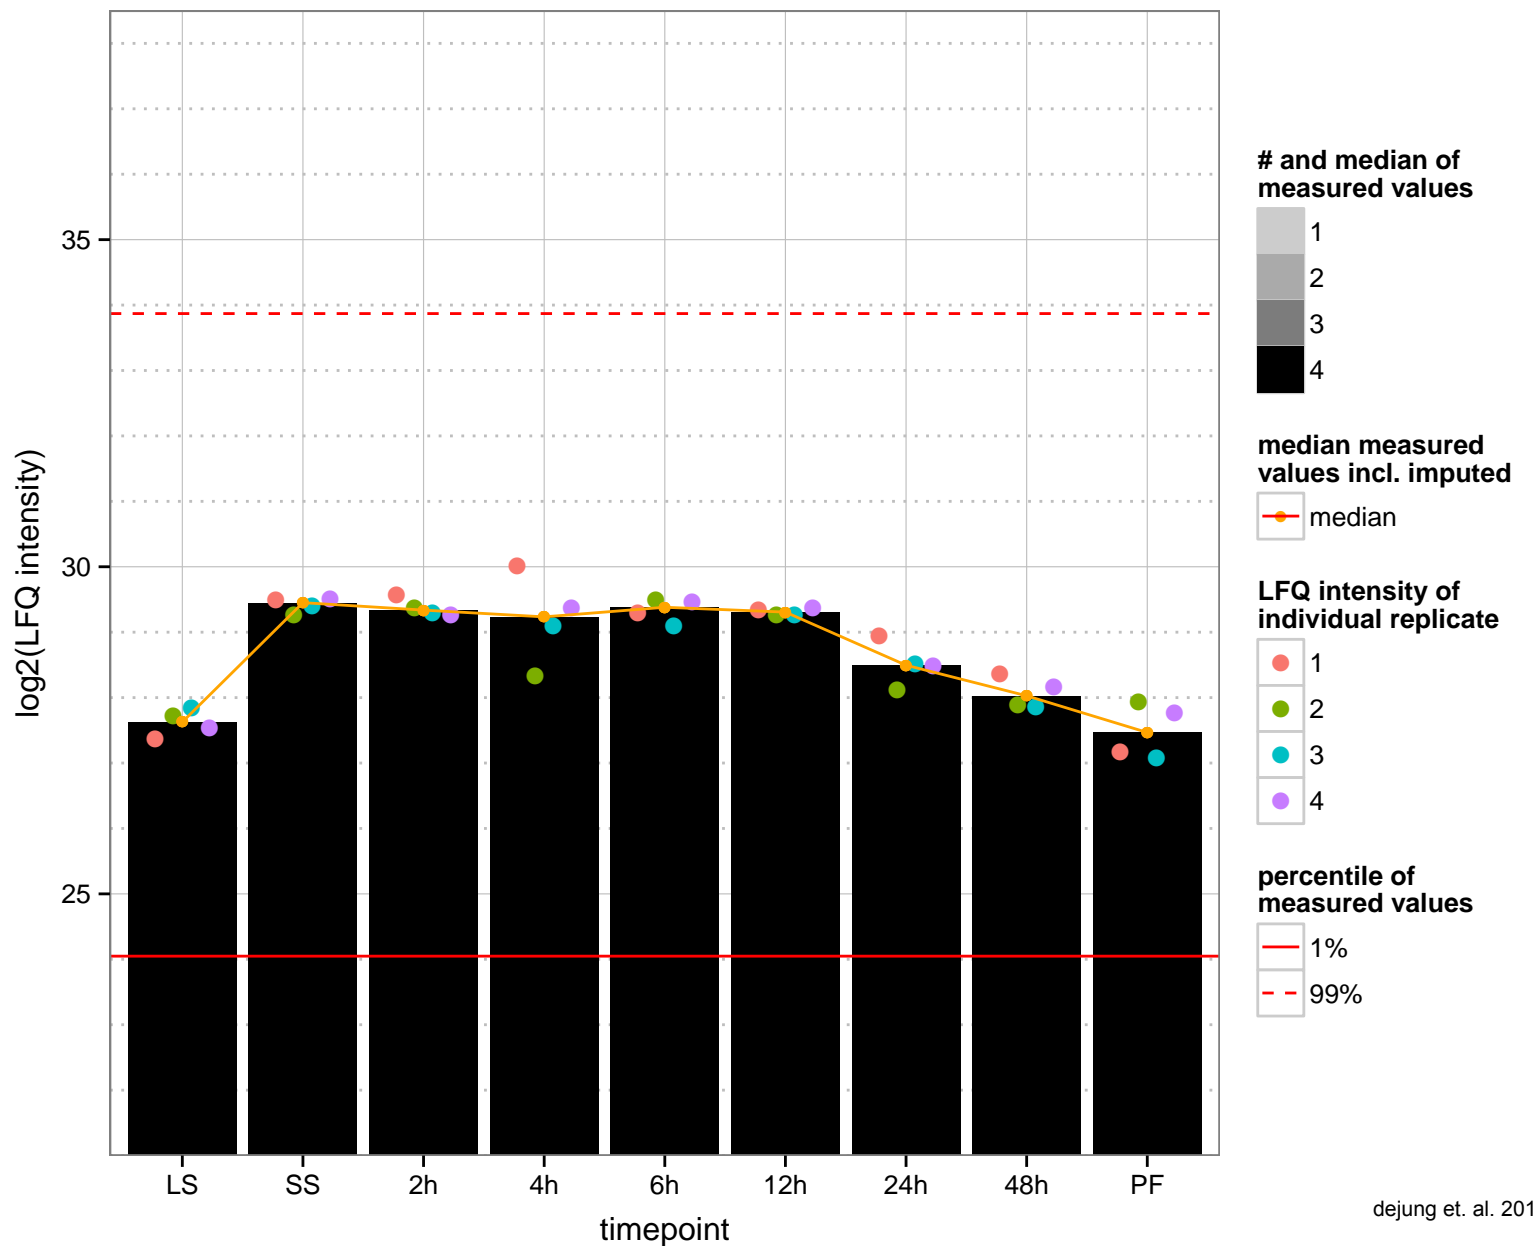

hypothetical protein, conserved  
 Tb927.11.2320  
 AGOF: null  
 AGOC: null  
 AGOP: null  
 PGO: null  
 PGOC: null  
 PGOP: null

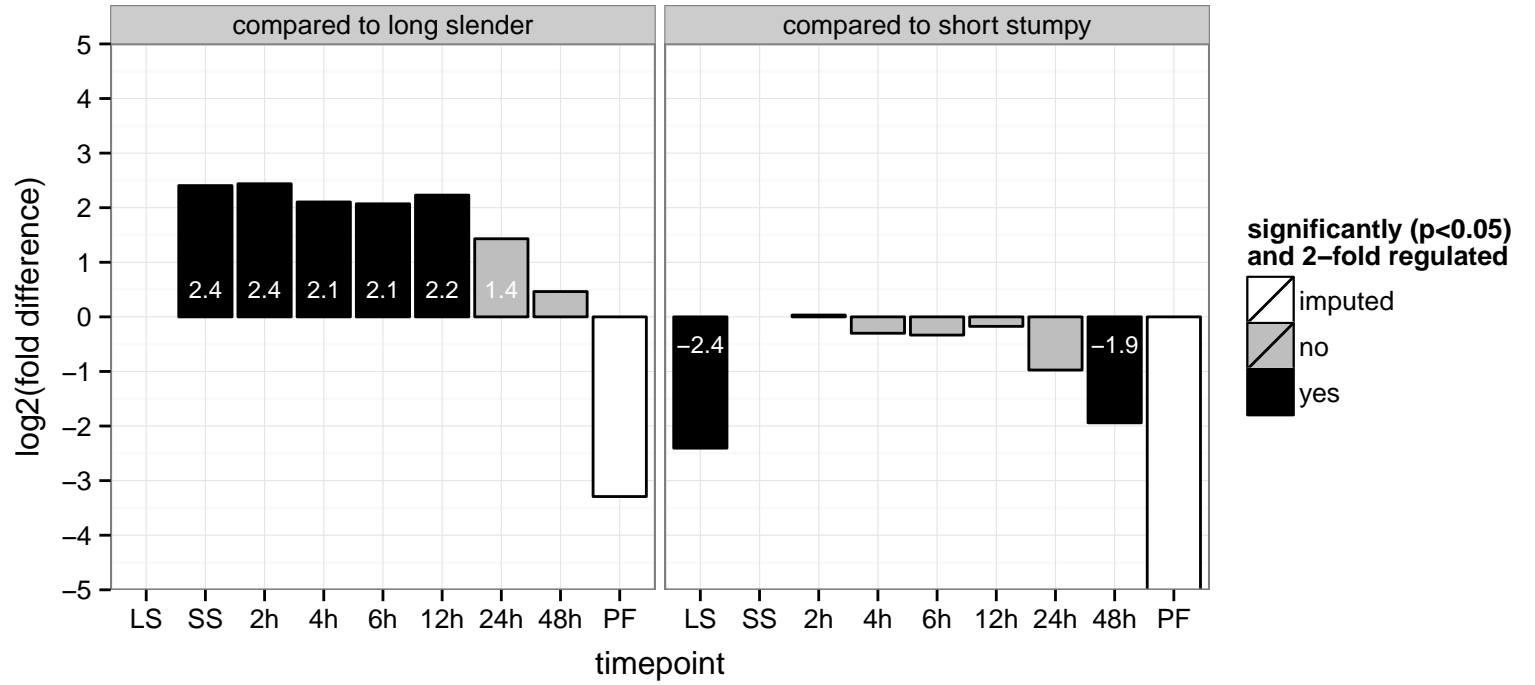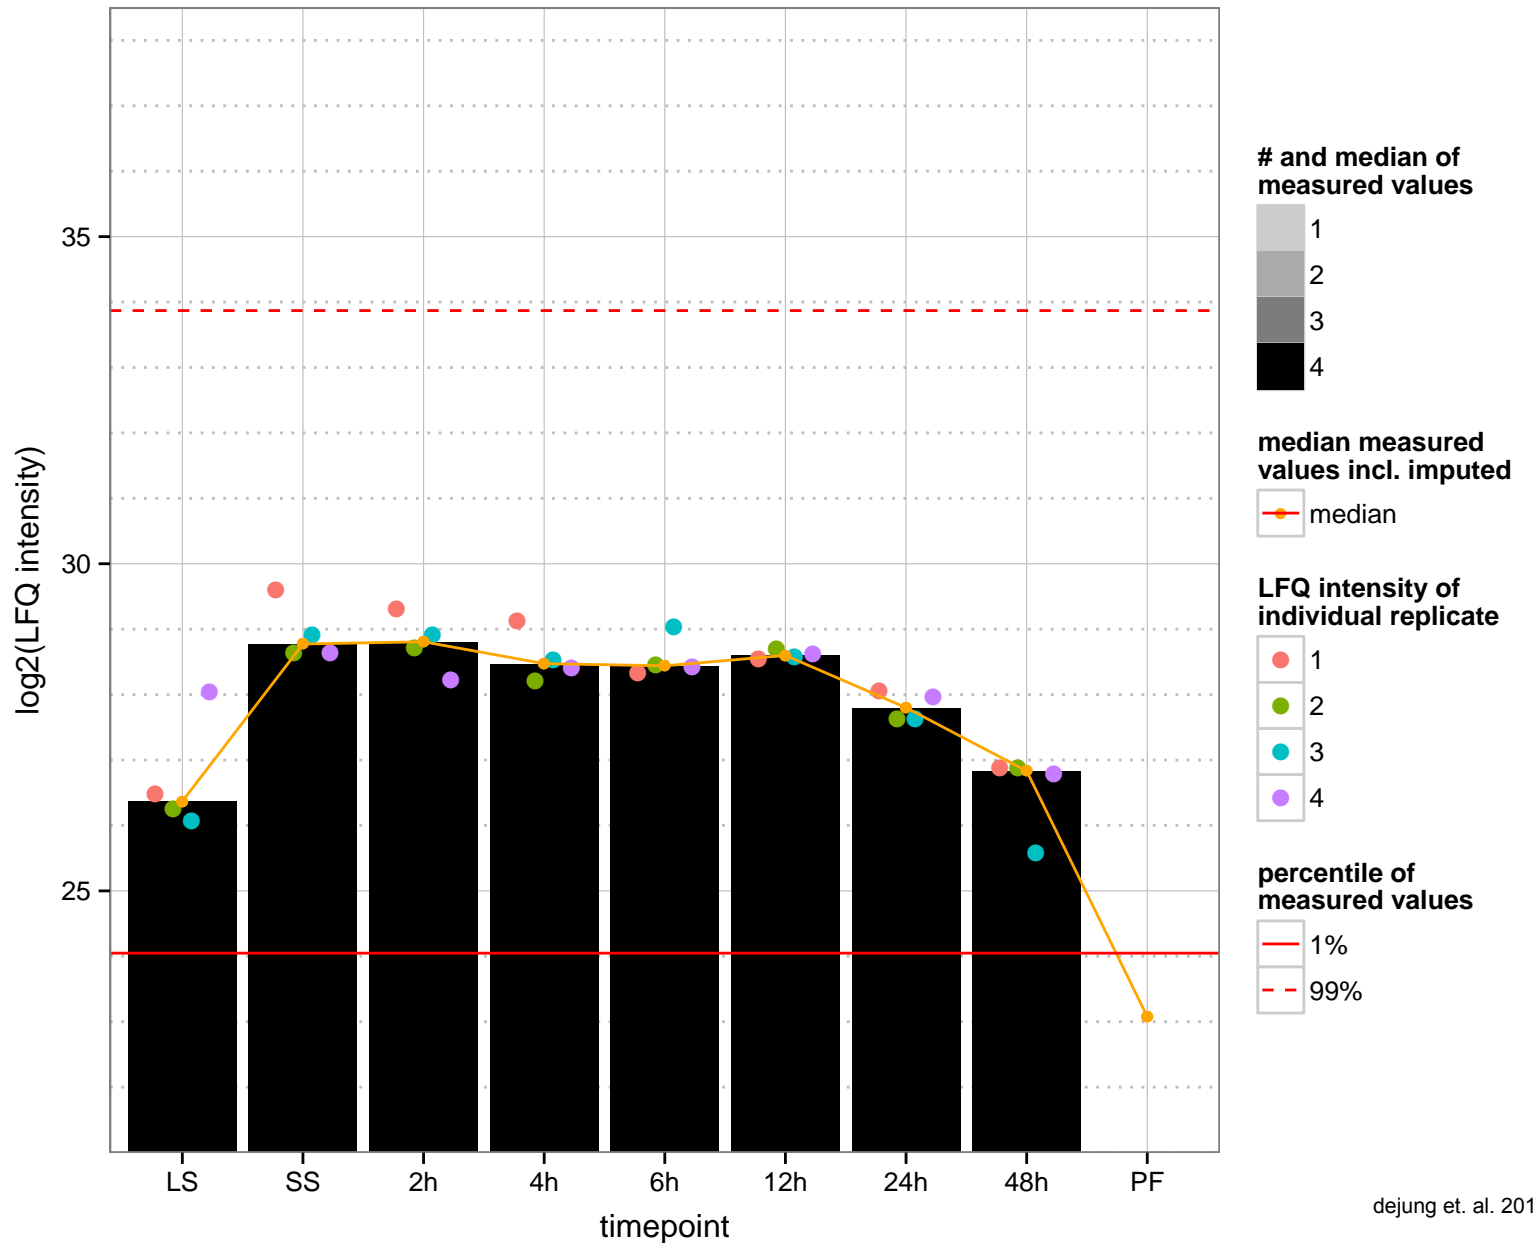



hypothetical protein, conserved  
 Tb927.11.2400  
 AGOF: null  
 AGOC: null  
 AGOP: null  
 PGO: null  
 PGOC: null  
 PGOP: null

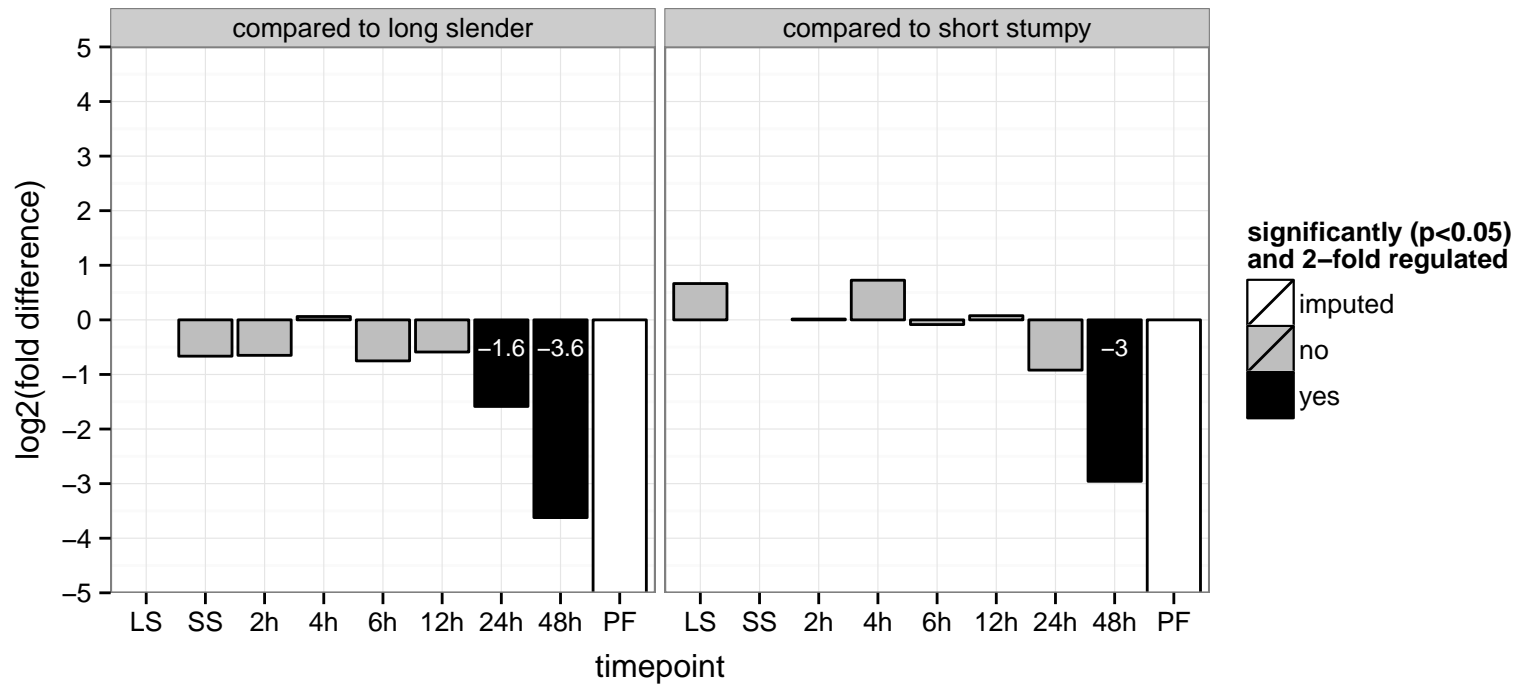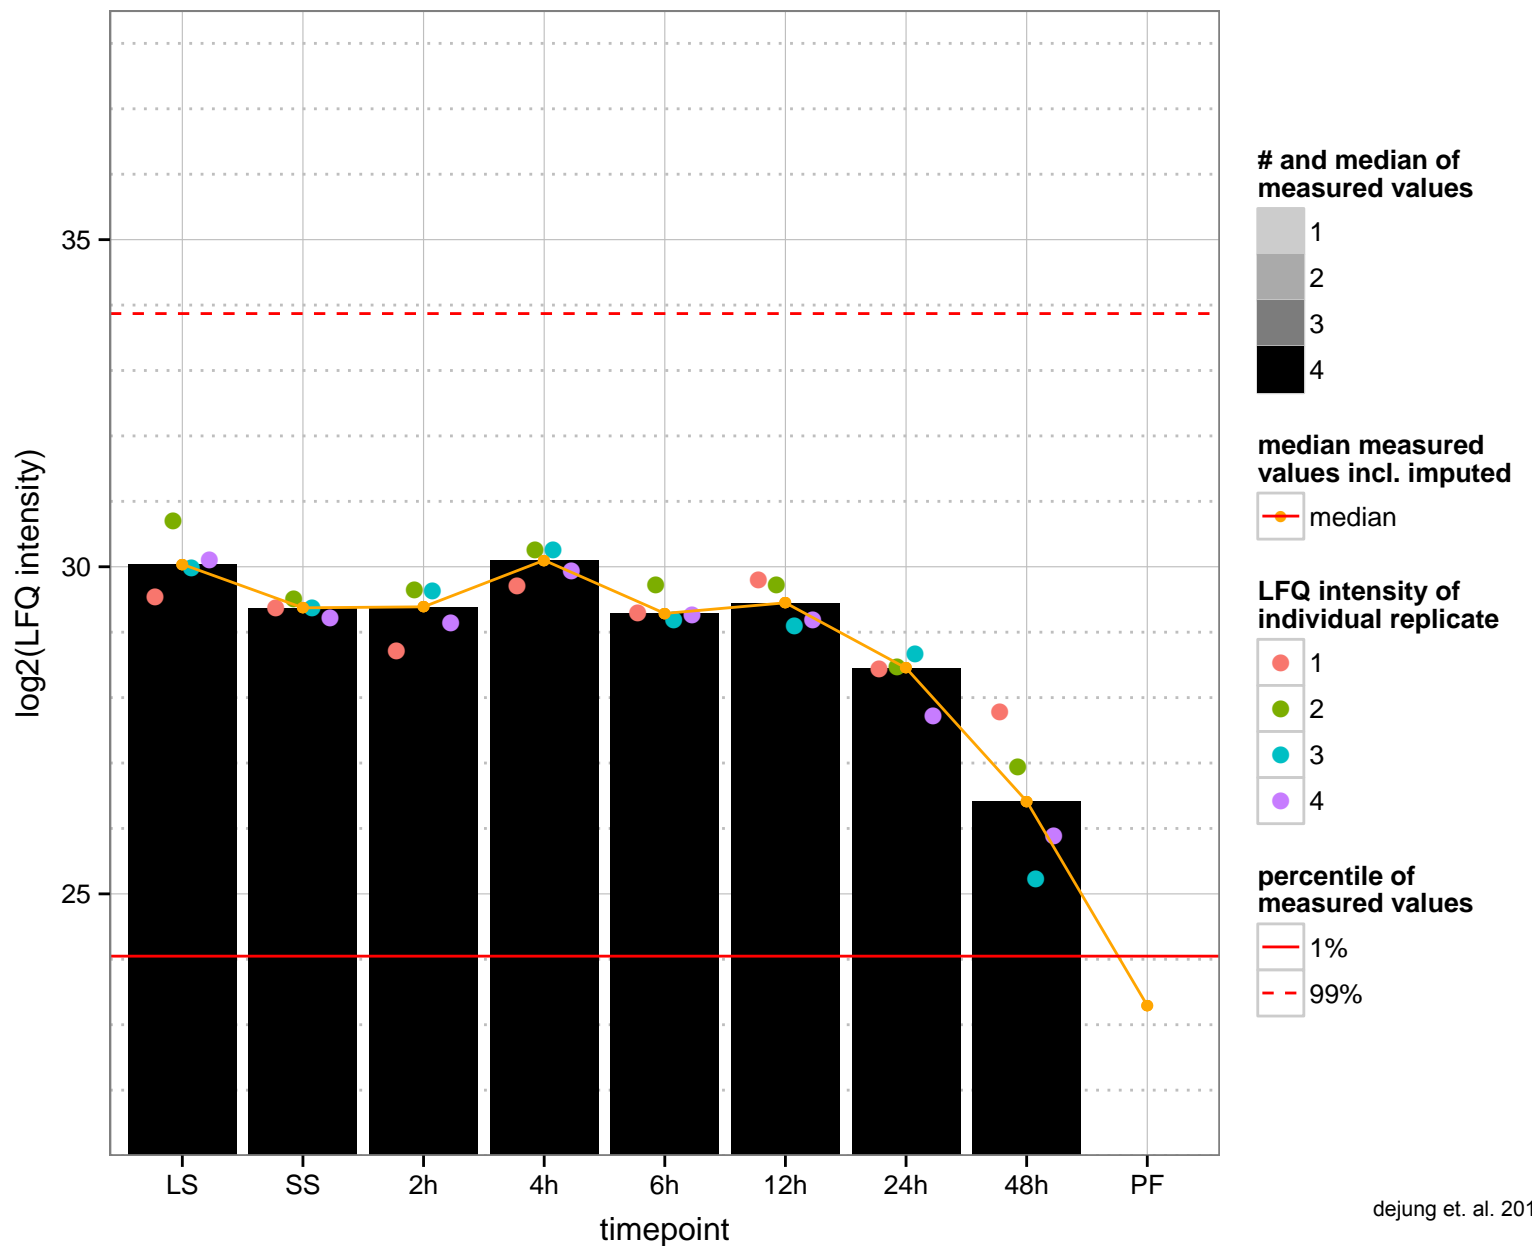

Cytoplasmic dynein 2 heavy chain (DYNC2H1), putative, Cytoplasmic dynein 2 heavy chain (DYNC2H2), putative (DHC1b)  
 Tb927.11.2430  
 AGOF: ATP binding, ATPase activity, microtubule motor activity  
 AGOC: dynein complex  
 AGOP: chromosome segregation, microtubule-based movement, minus-end-directed vesicle transport along microtubule, m  
 PGO: ATP binding, ATPase activity, microtubule motor activity  
 PGO: dynein complex  
 PGO: microtubule-based movement

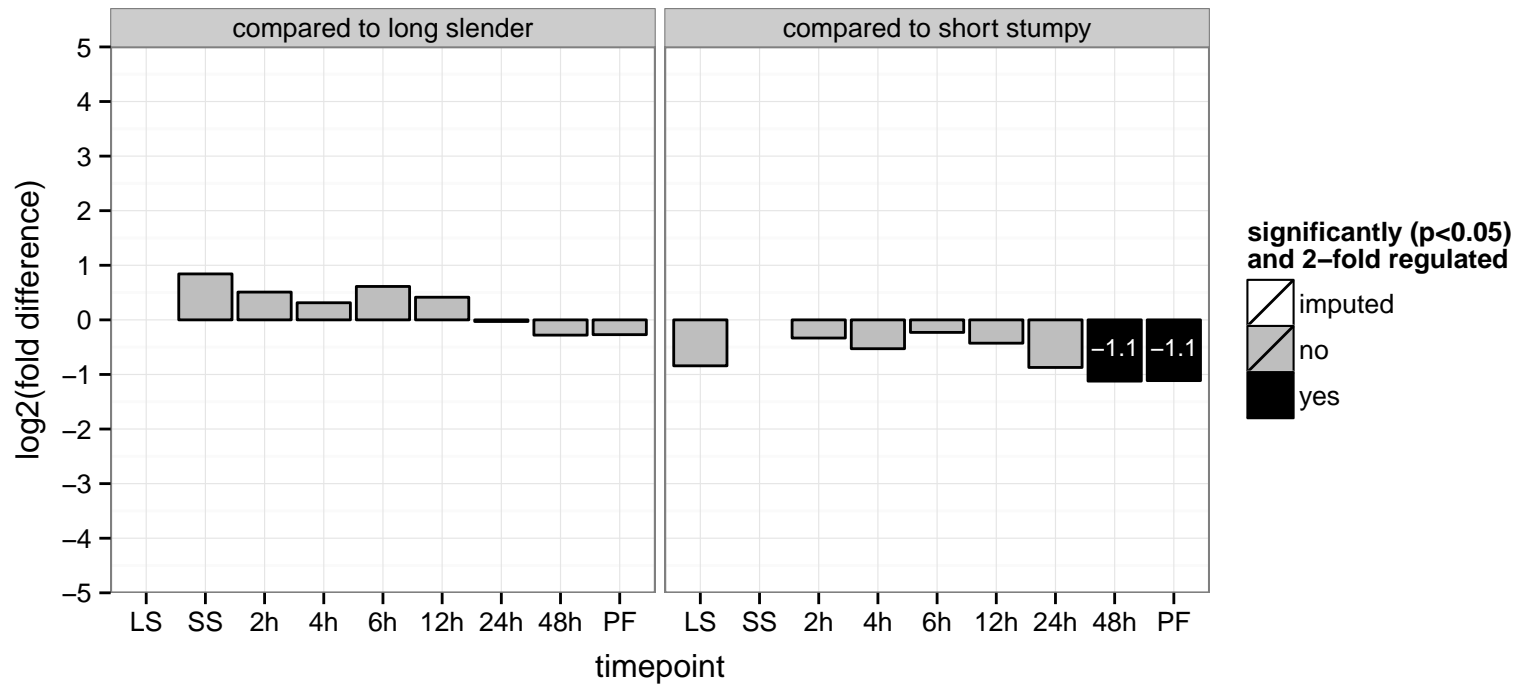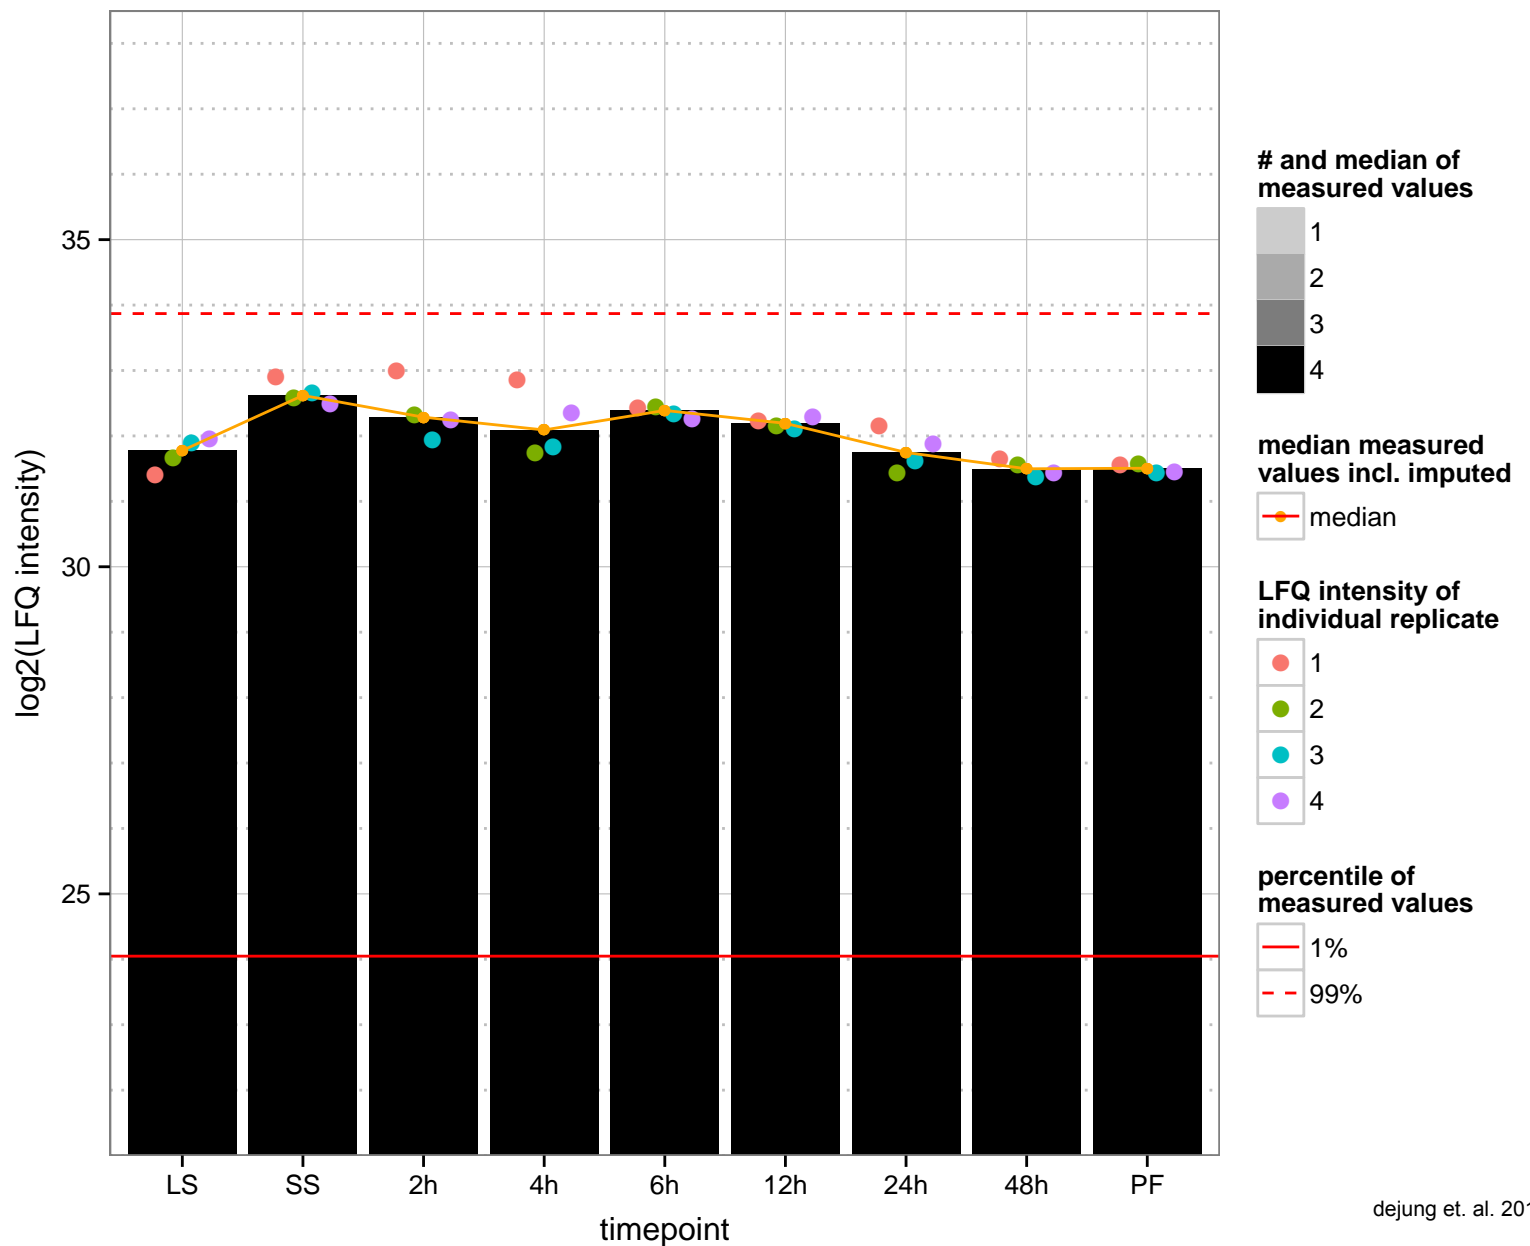

UDP-galactose 4-epimerase (galE)

Tb927.11.2730

AGOF: UDP-glucose 4-epimerase activity, coenzyme binding

AGOC: null

AGOP: galactose metabolic process

PGOF: UDP-glucose 4-epimerase activity, catalytic activity, coenzyme binding

PGOC: null

PGOP: cellular metabolic process, galactose metabolic process

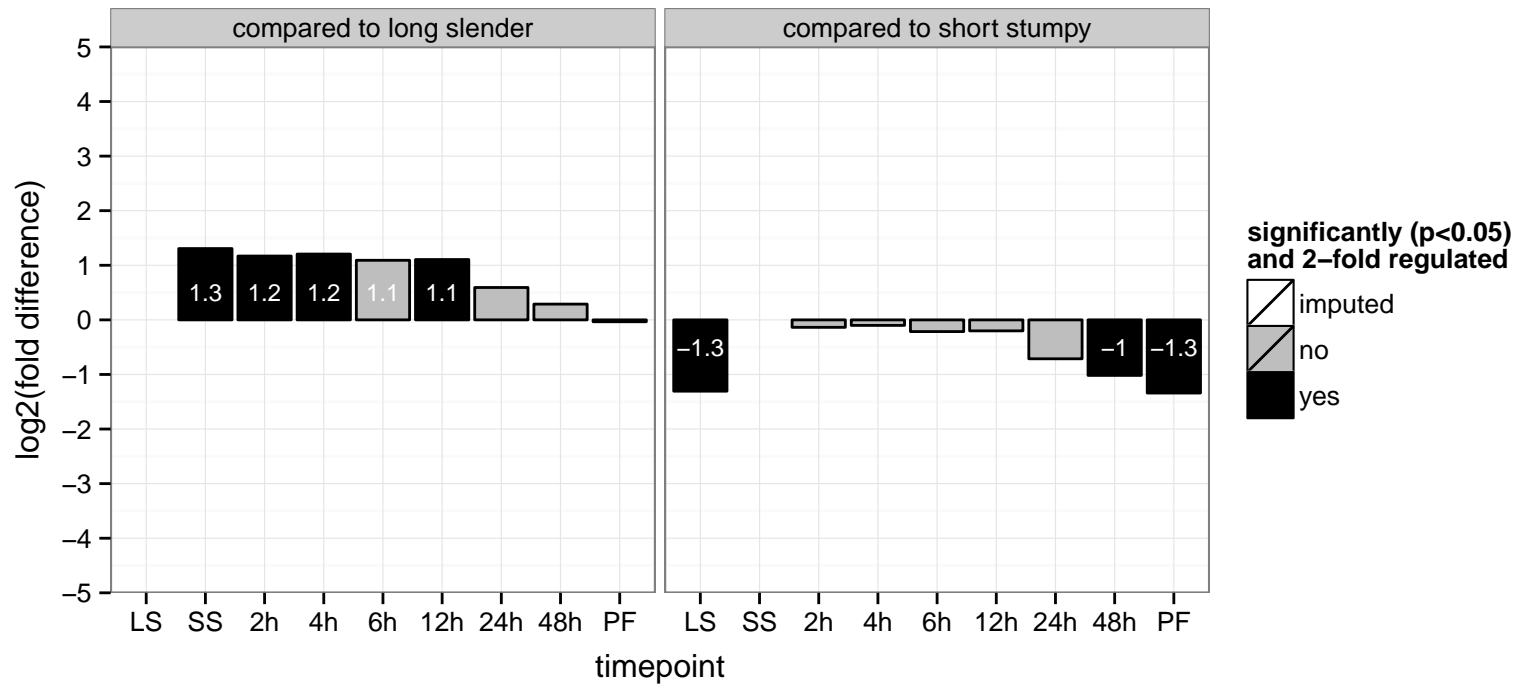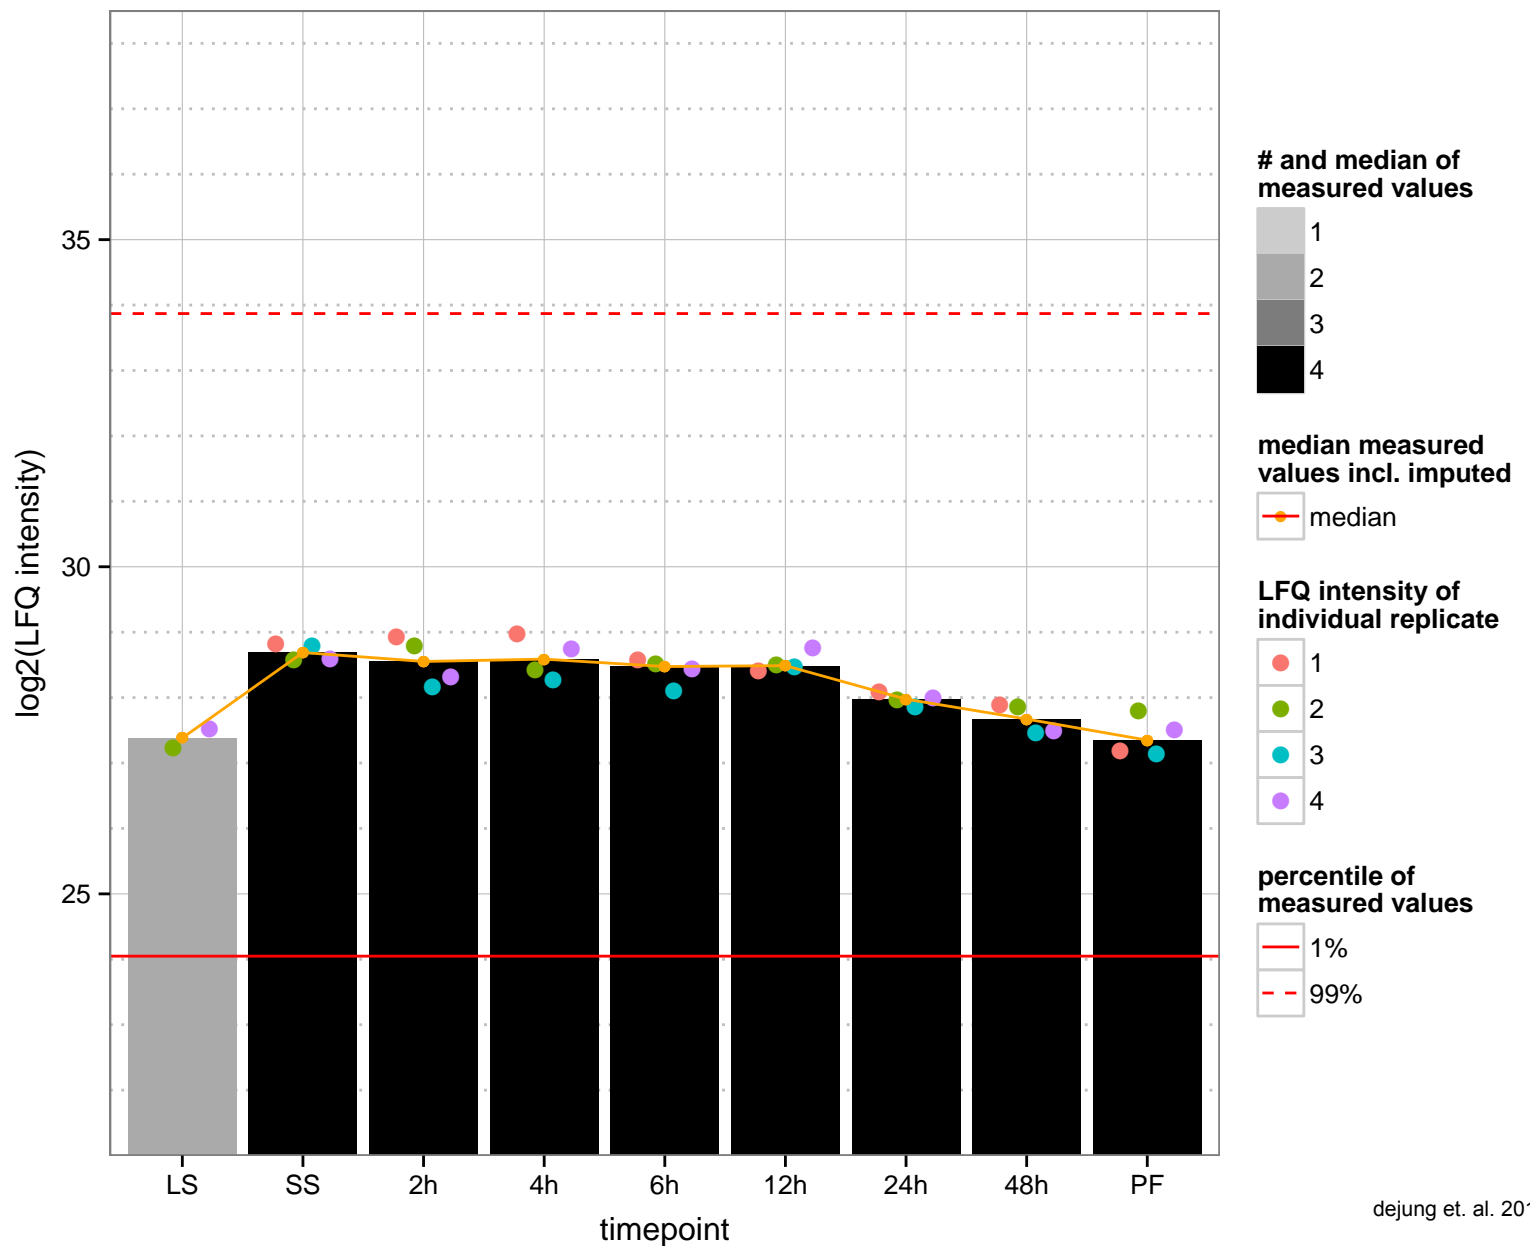

ubiquitin-conjugating enzyme, putative, ubiquitin-conjugating enzyme-like protein

Tb927.11.3310

AGOF: ubiquitin-protein ligase activity

AGOC: null

AGOP: cellular protein modification process, post-translational protein modification, regulation of protein metabolic process

PGOF: acid-amino acid ligase activity

PGOC: null

PGOP: null

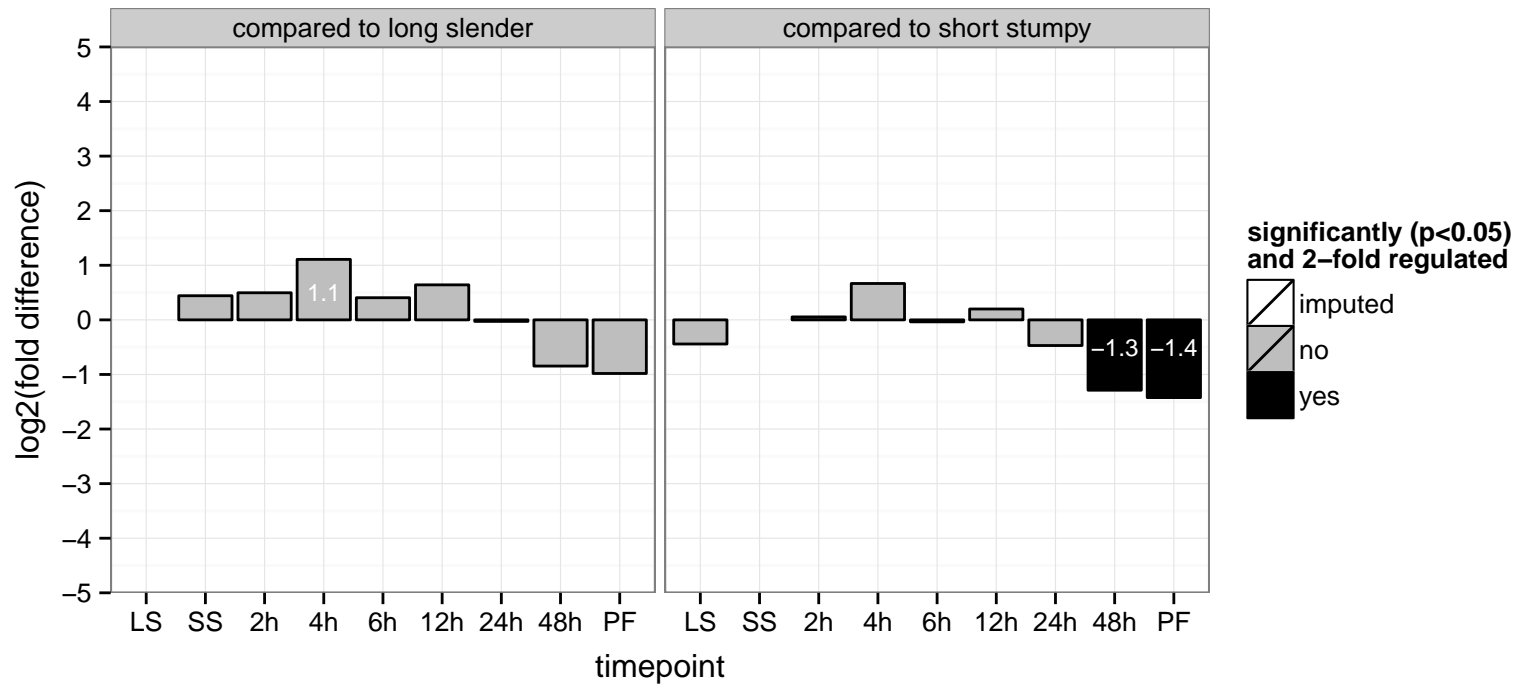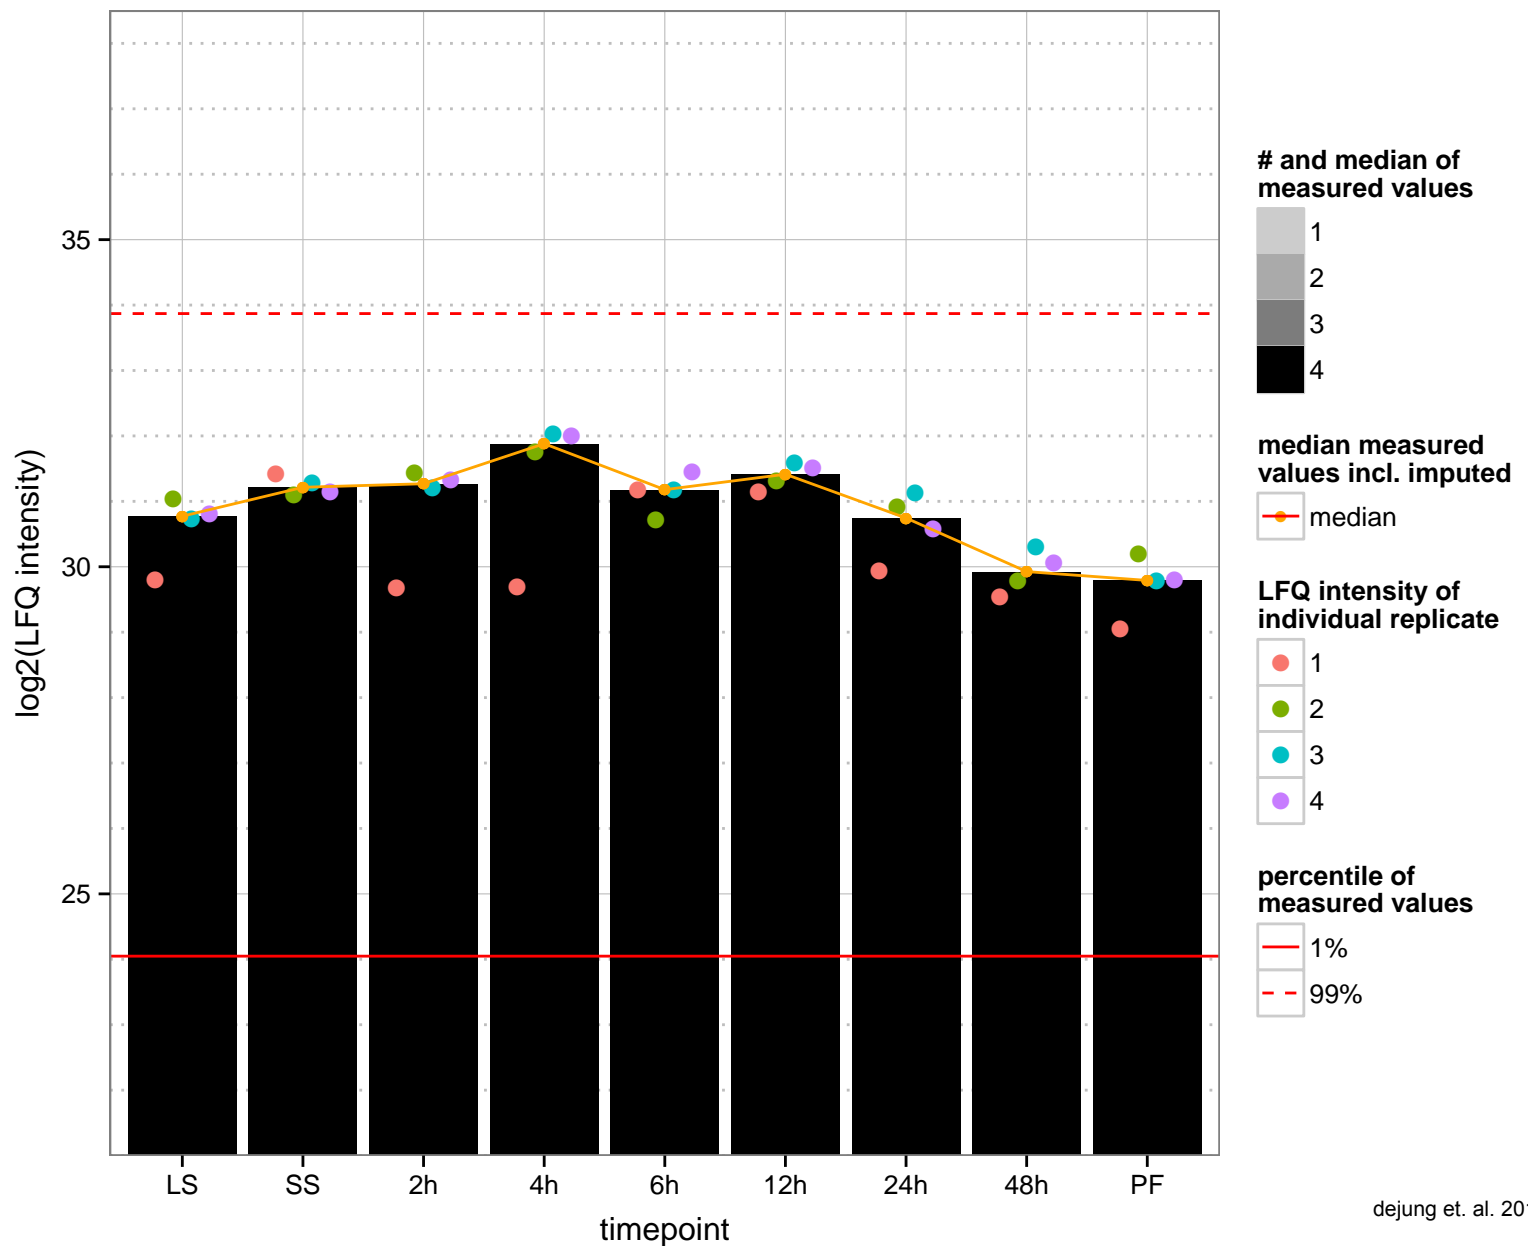

kinetoplastid-specific dual specificity phosphatase, putative  
 Tb927.11.4170  
 AGOF: protein tyrosine/serine/threonine phosphatase activity  
 AGOC: null  
 AGOP: protein dephosphorylation  
 PGO: phosphatase activity, protein tyrosine/serine/threonine phosphatase activity  
 PGO: null  
 PGO: dephosphorylation, protein dephosphorylation

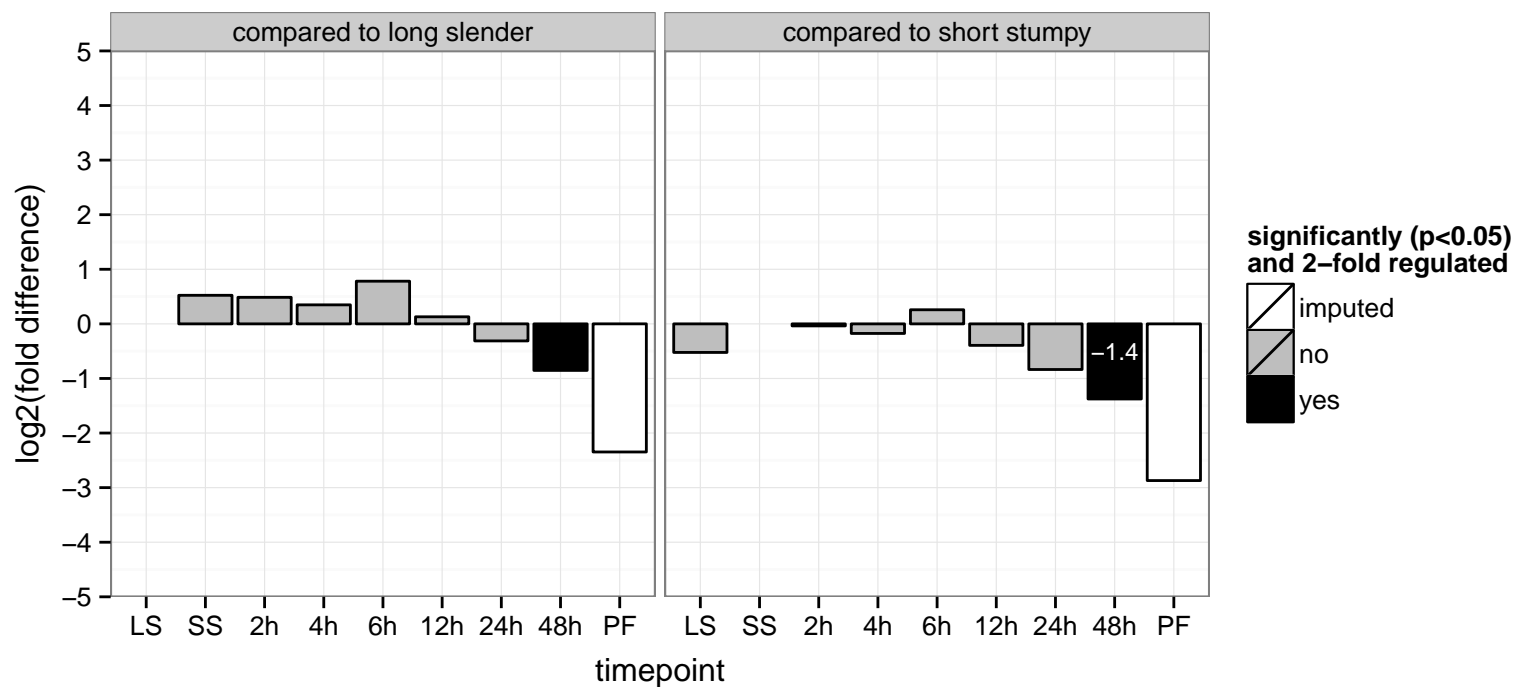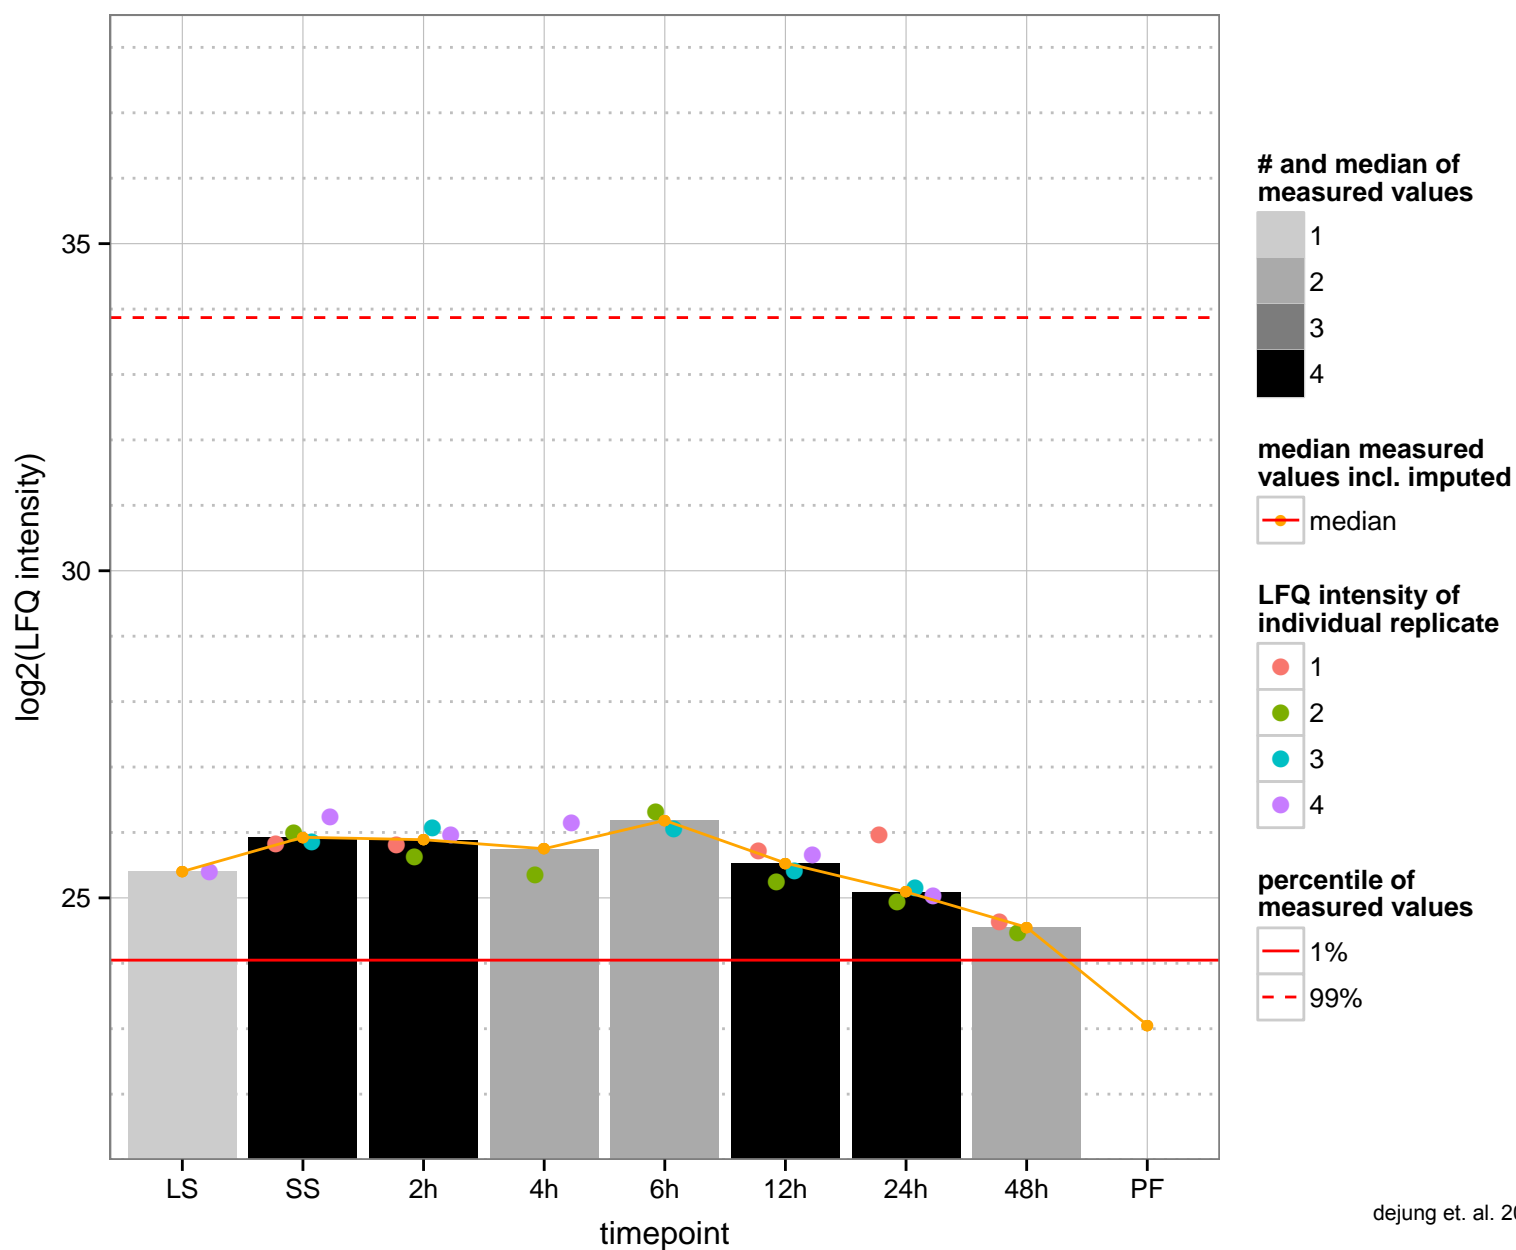

Ras-related protein Rab5B (RAB5B)

Tb927.11.4570

AGOF: GTP binding, GTPase activity

AGOC: intracellular

AGOP: intracellular protein transport, nucleocytoplasmic transport, small GTPase mediated signal transduction

PGOF: GTP binding, GTPase activity

PGOC: intracellular, membrane

PGOP: GTP catabolic process, intracellular protein transport, nucleocytoplasmic transport, protein transport, signal transduction

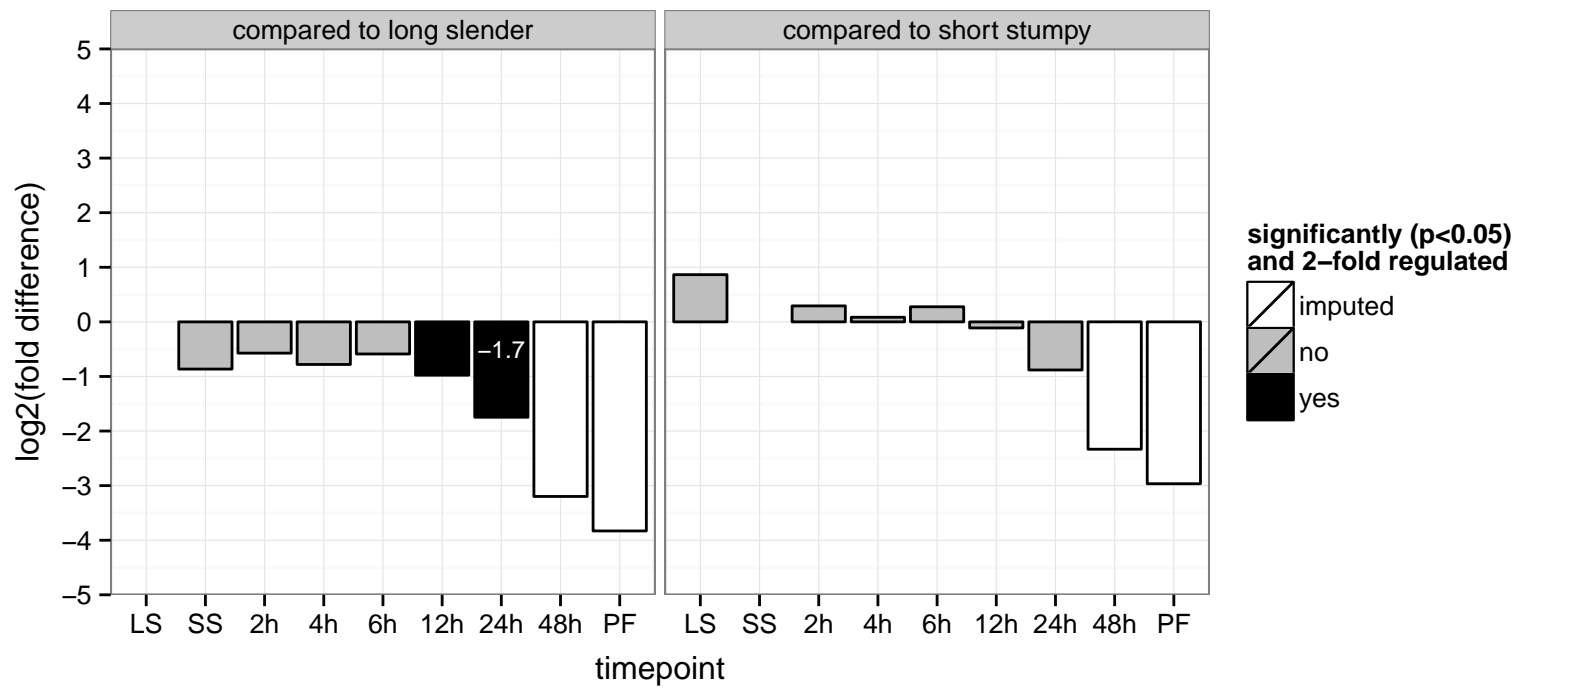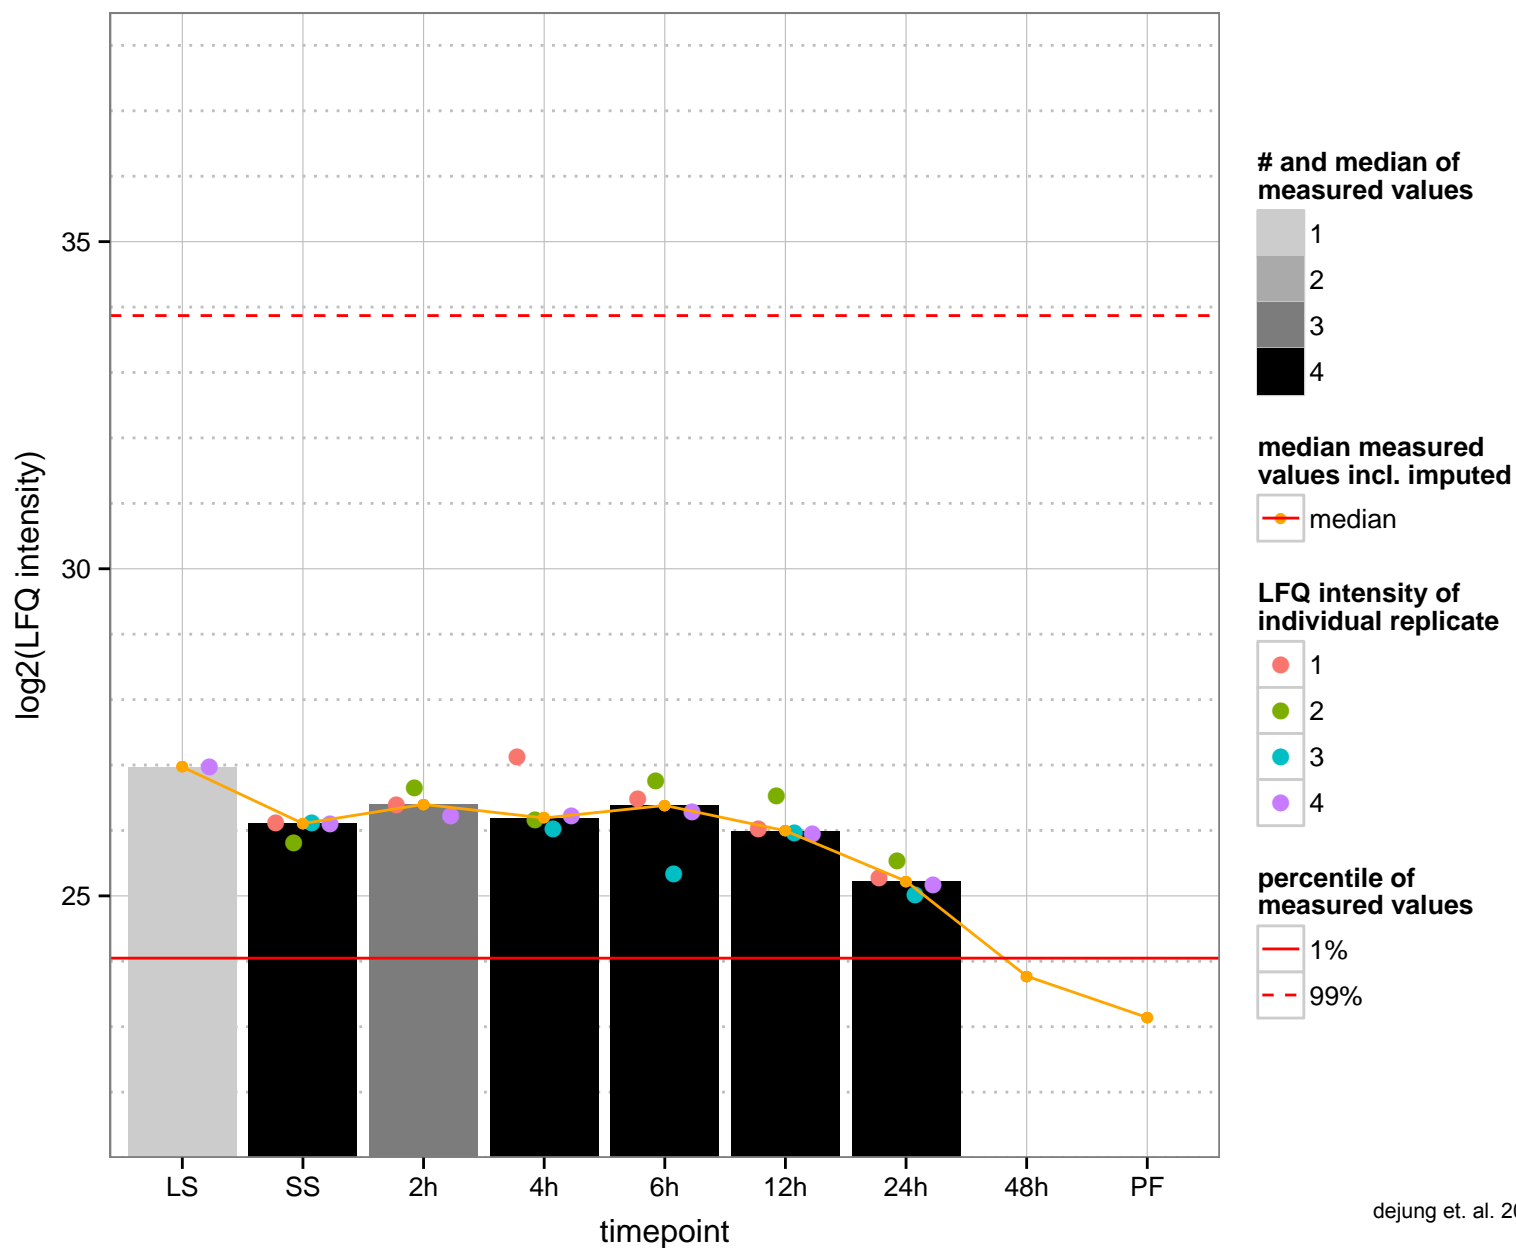

hypothetical protein, conserved  
 Tb927.11.4860  
 AGOF: zinc ion binding  
 AGOC: null  
 AGOP: null  
 PGOF: protein binding, zinc ion binding  
 PGOC: null  
 PGOP: null

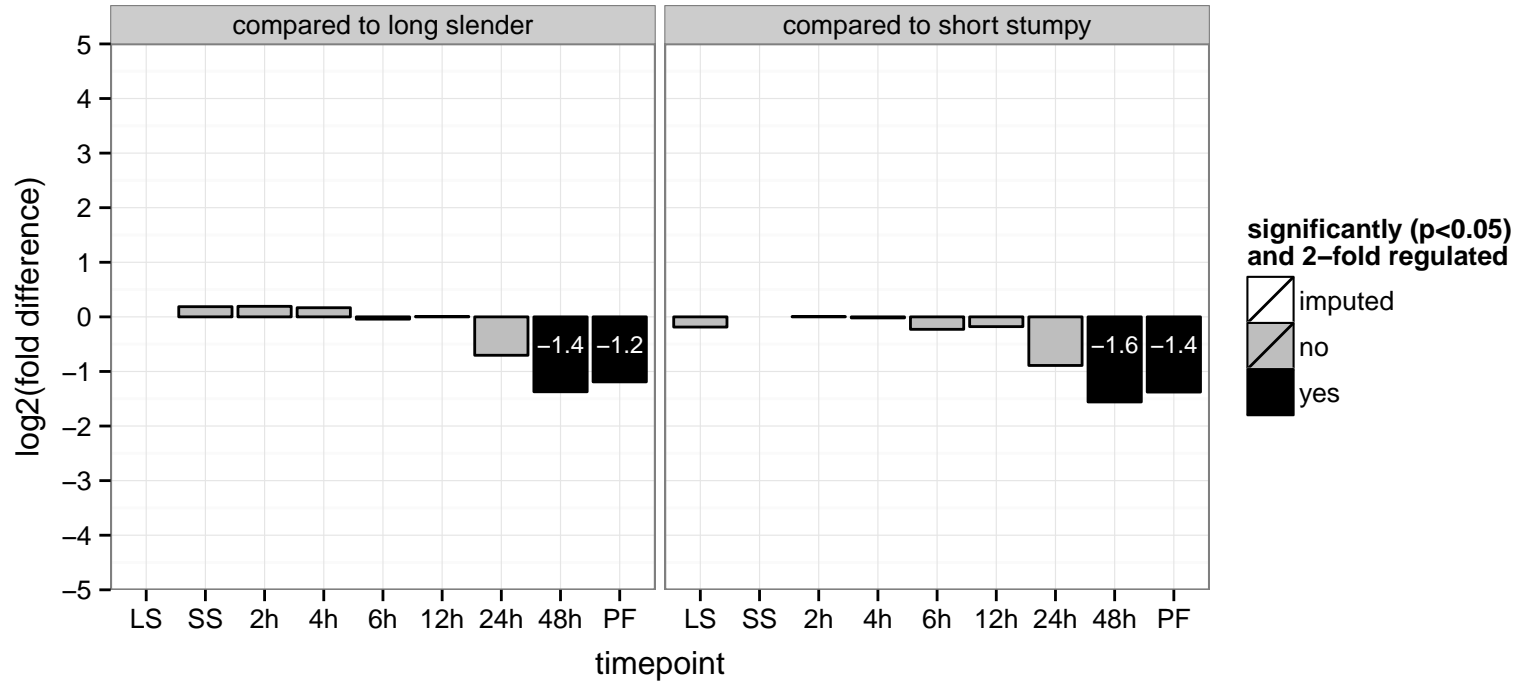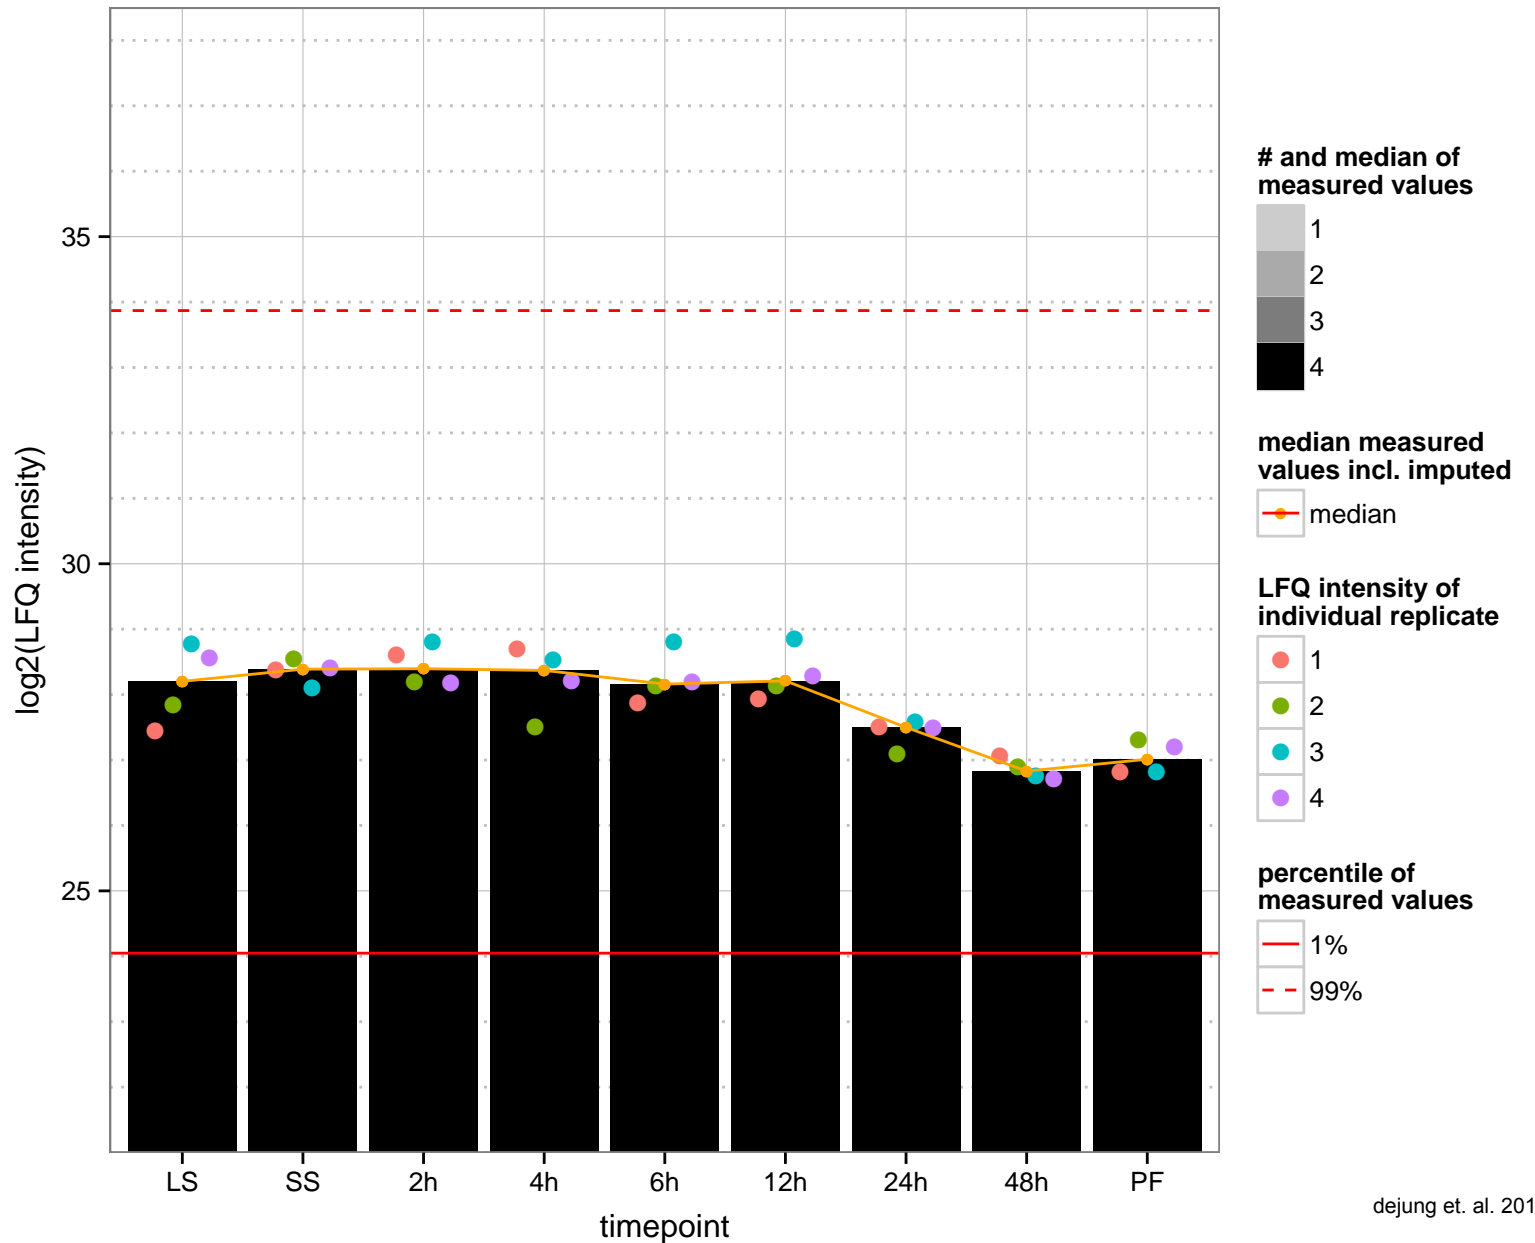

hypothetical protein, conserved  
 Tb927.11.6390  
 AGOF: null  
 AGOC: null  
 AGOP: null  
 PGOF: null  
 PGO: null  
 PGOP: null

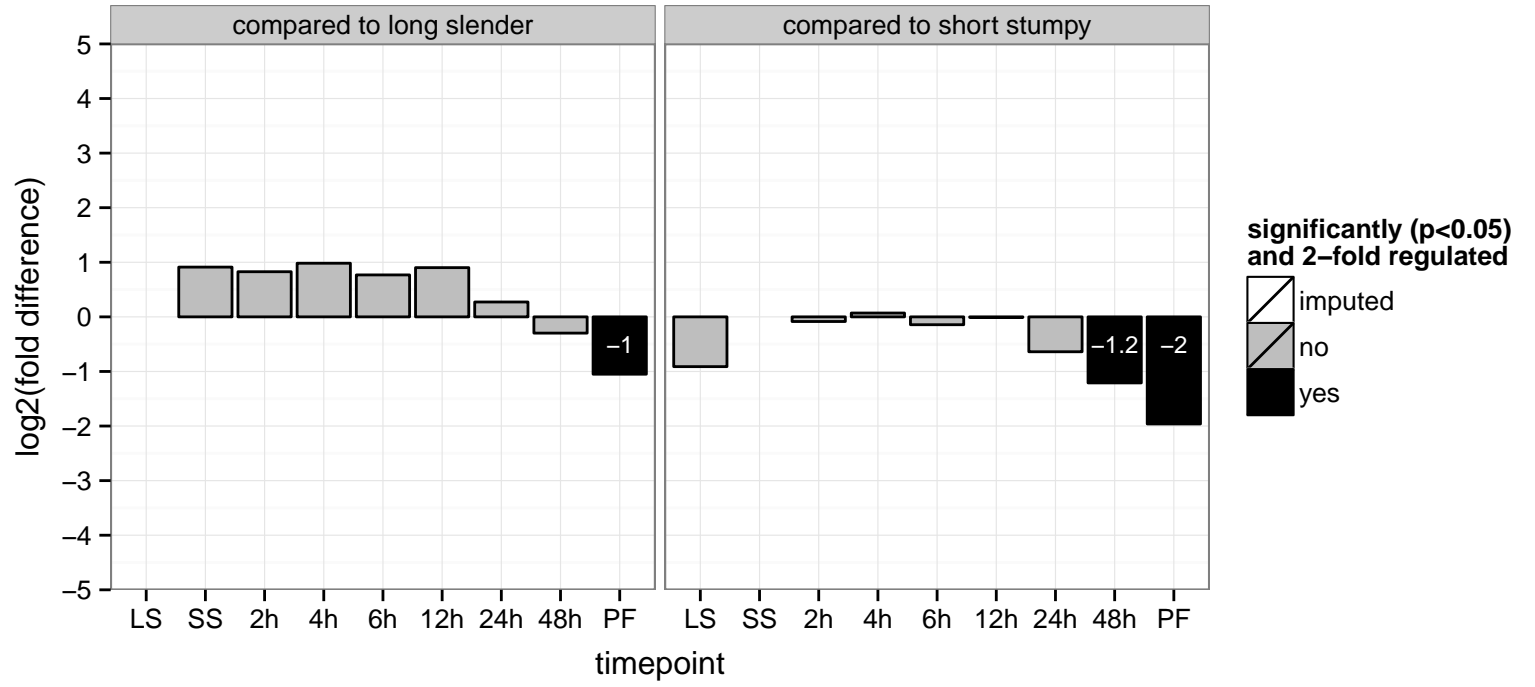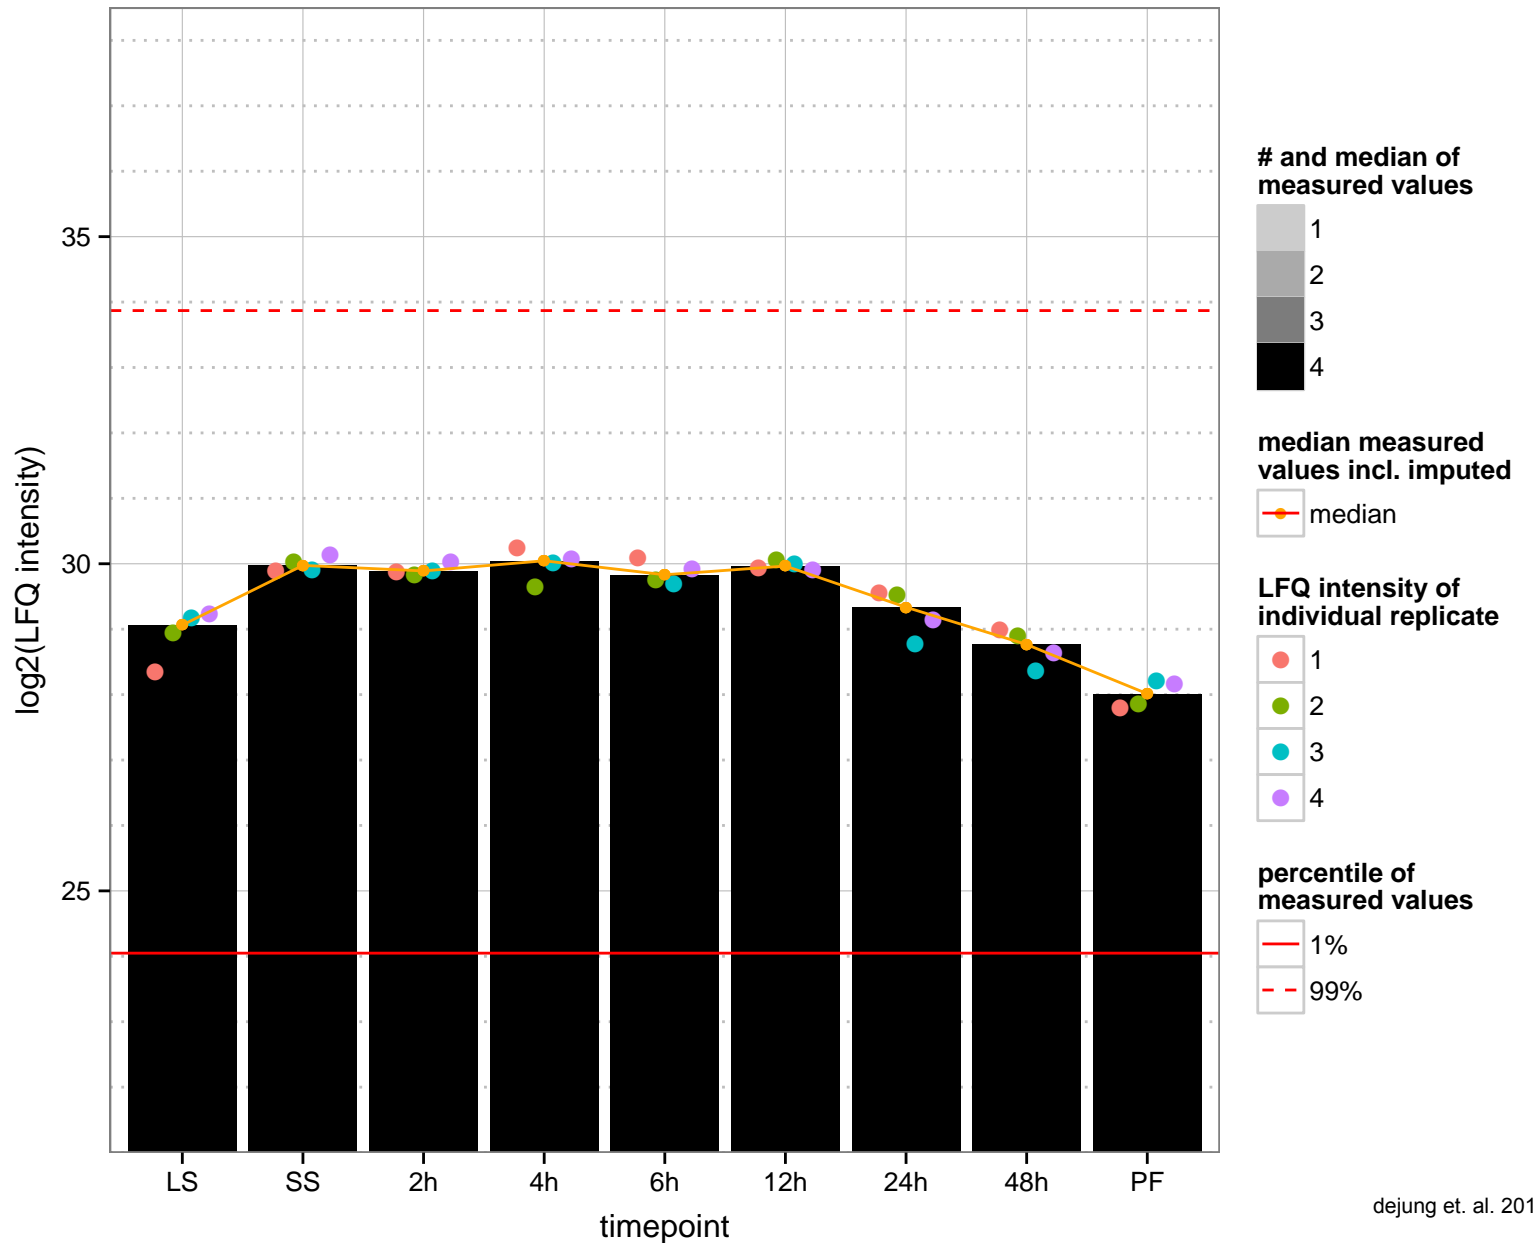



hypothetical protein, conserved  
 Tb927.11.7570  
 AGOF: ATP binding, catalytic activity  
 AGOC: null  
 AGOP: null  
 PGOF: ATP binding, metal ion binding  
 PGOC: null  
 PGOP: null

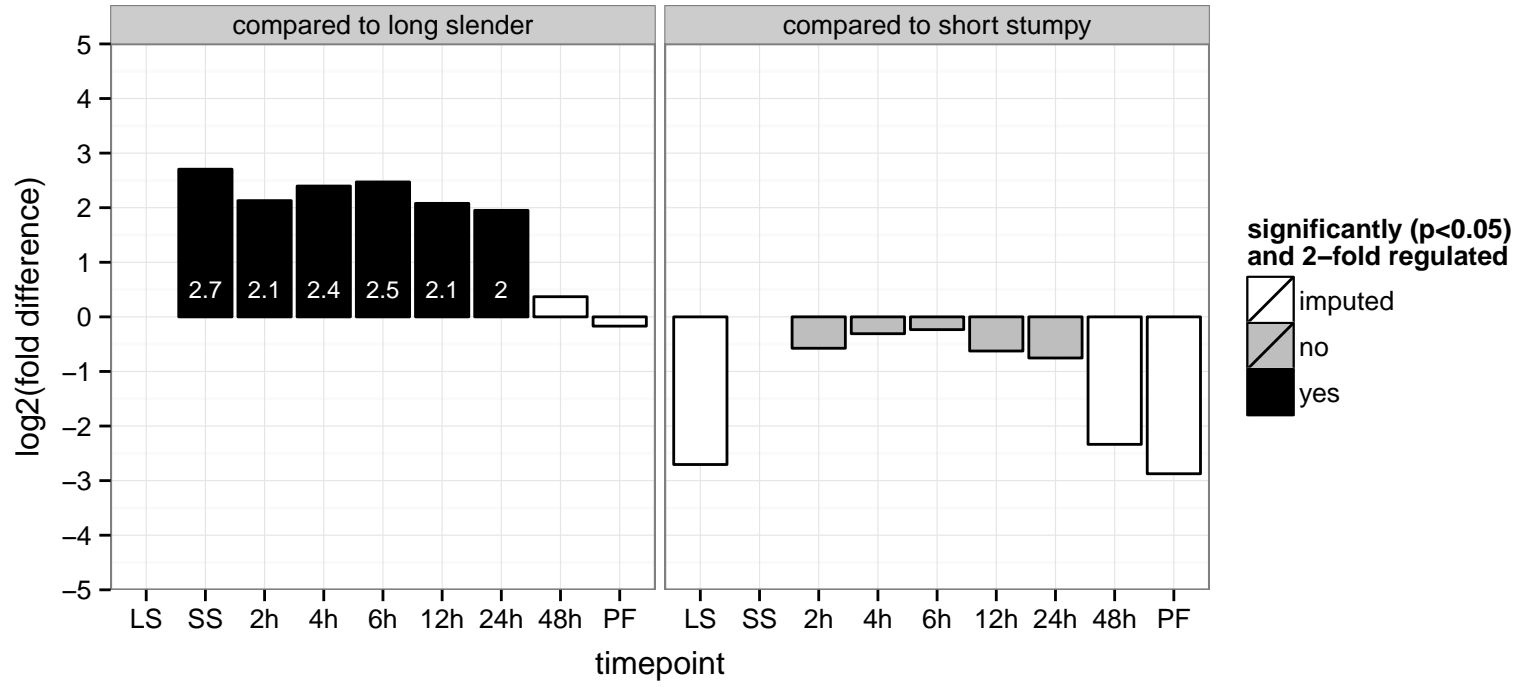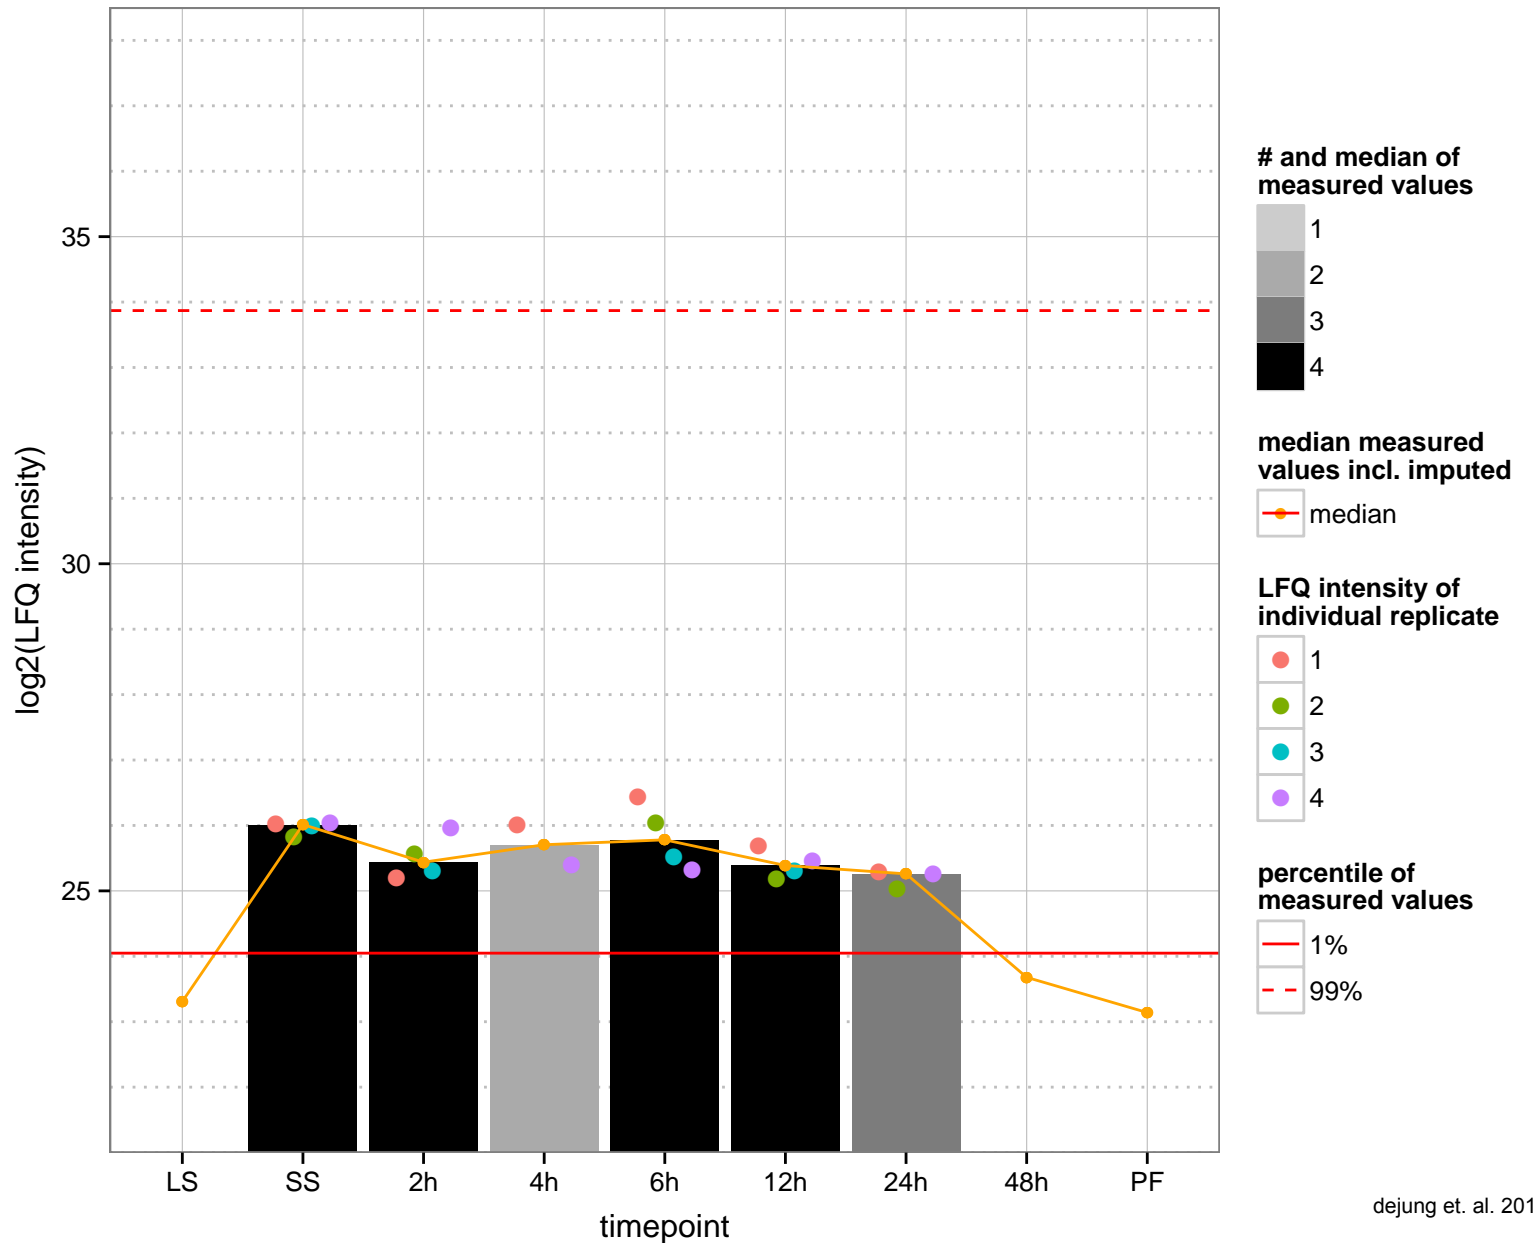

haloacid dehalogenase-like hydrolase, putative  
 Tb927.11.8440  
 AGOF: hydrolase activity  
 AGOC: null  
 AGOP: metabolic process  
 PGOF: catalytic activity, hydrolase activity  
 PGO: null  
 PGOP: metabolic process

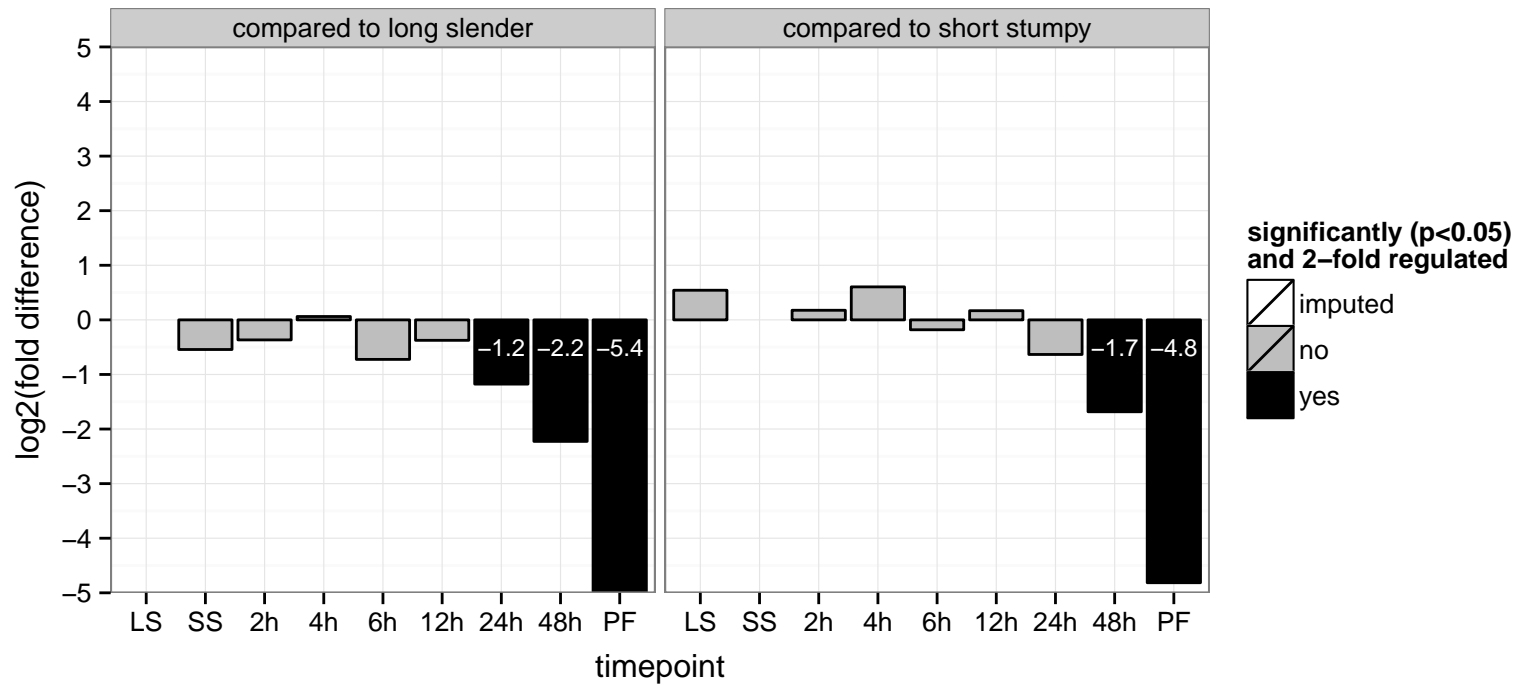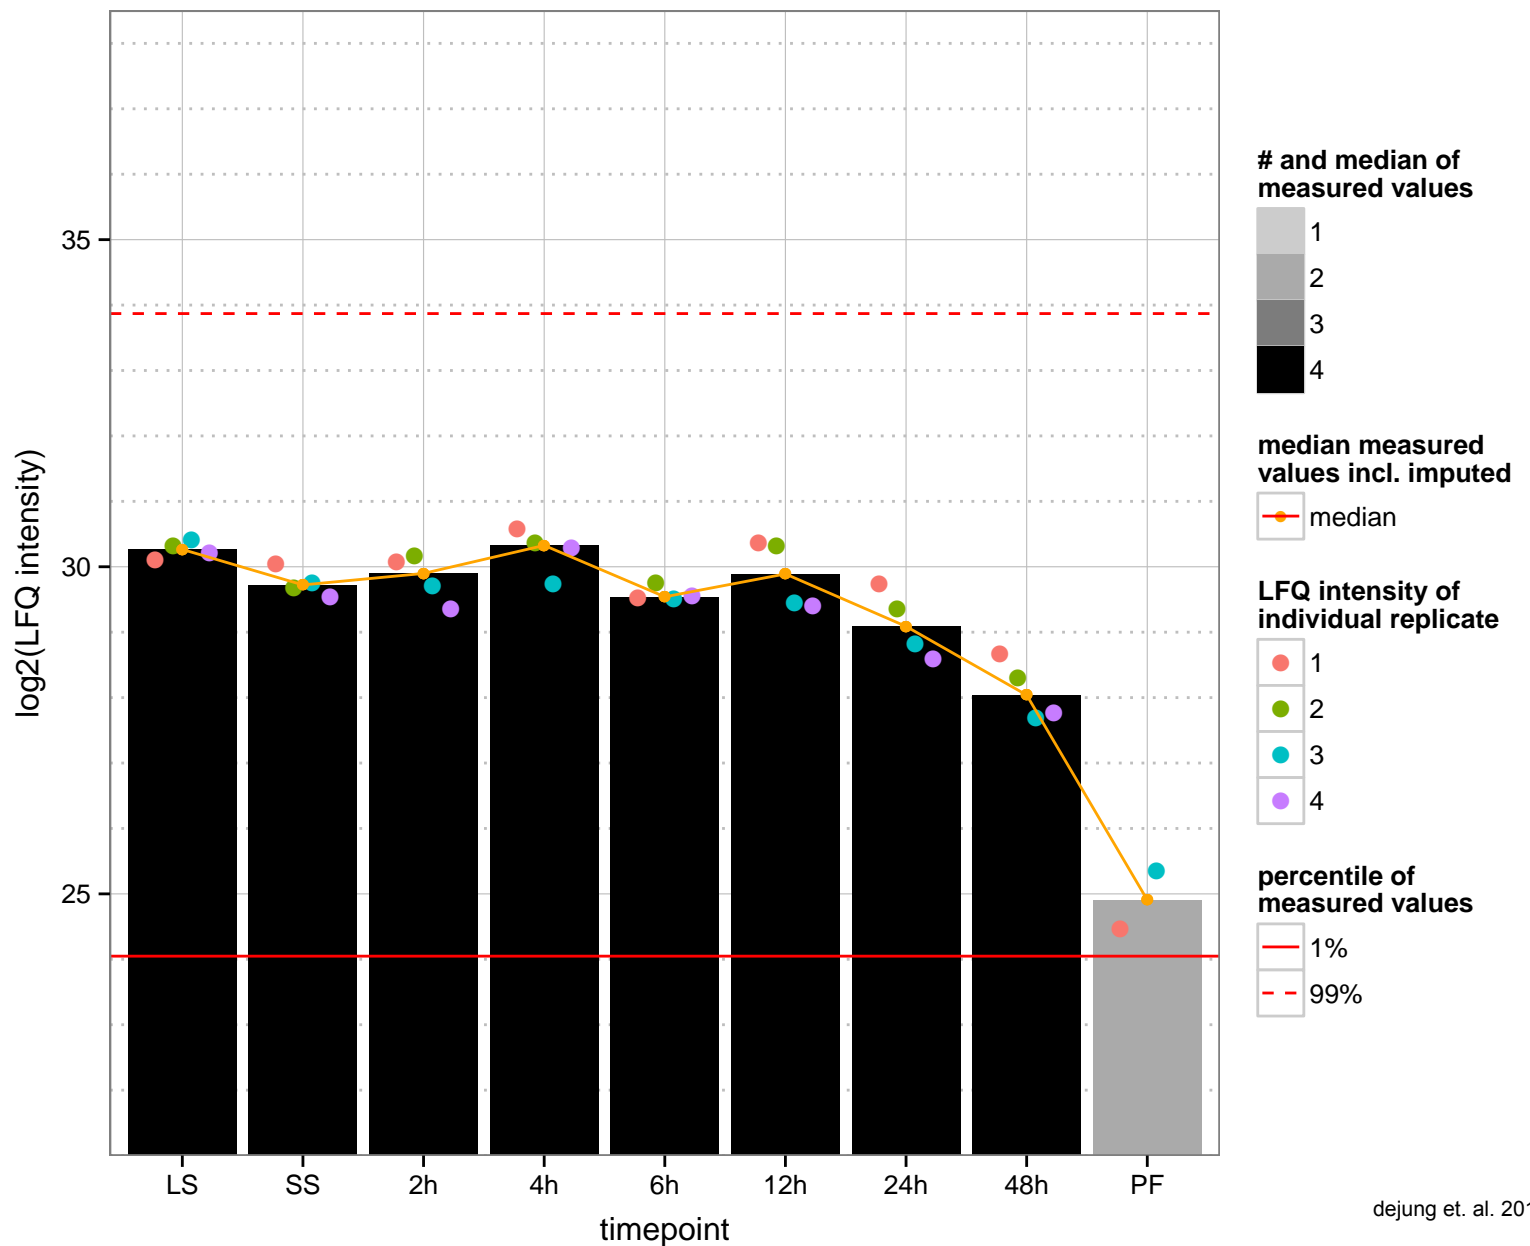

target SNARE, putative  
 Tb927.11.8790  
 AGOF: SNAP receptor activity  
 AGOC: integral to membrane, membrane  
 AGOP: membrane fusion, vesicle-mediated transport  
 PGO: protein binding  
 PGOC: membrane  
 PGOP: vesicle-mediated transport

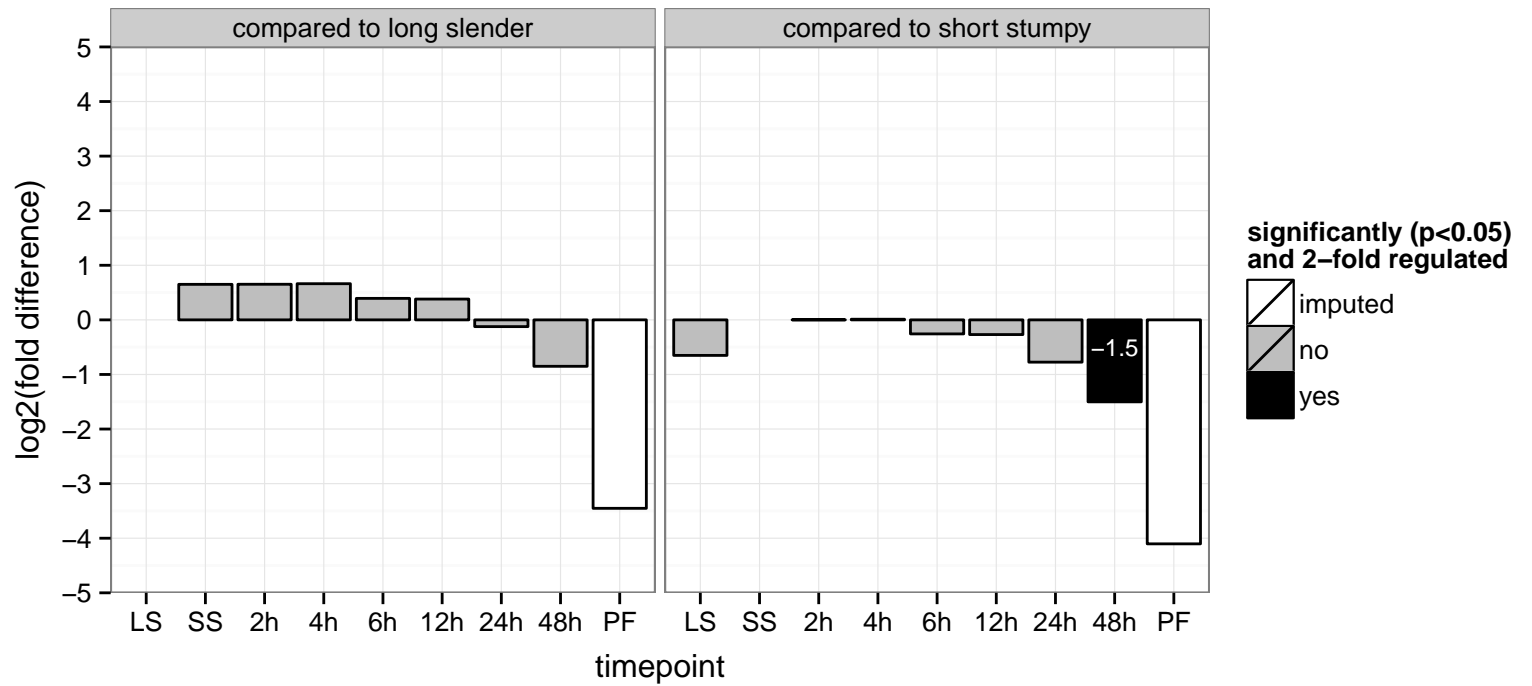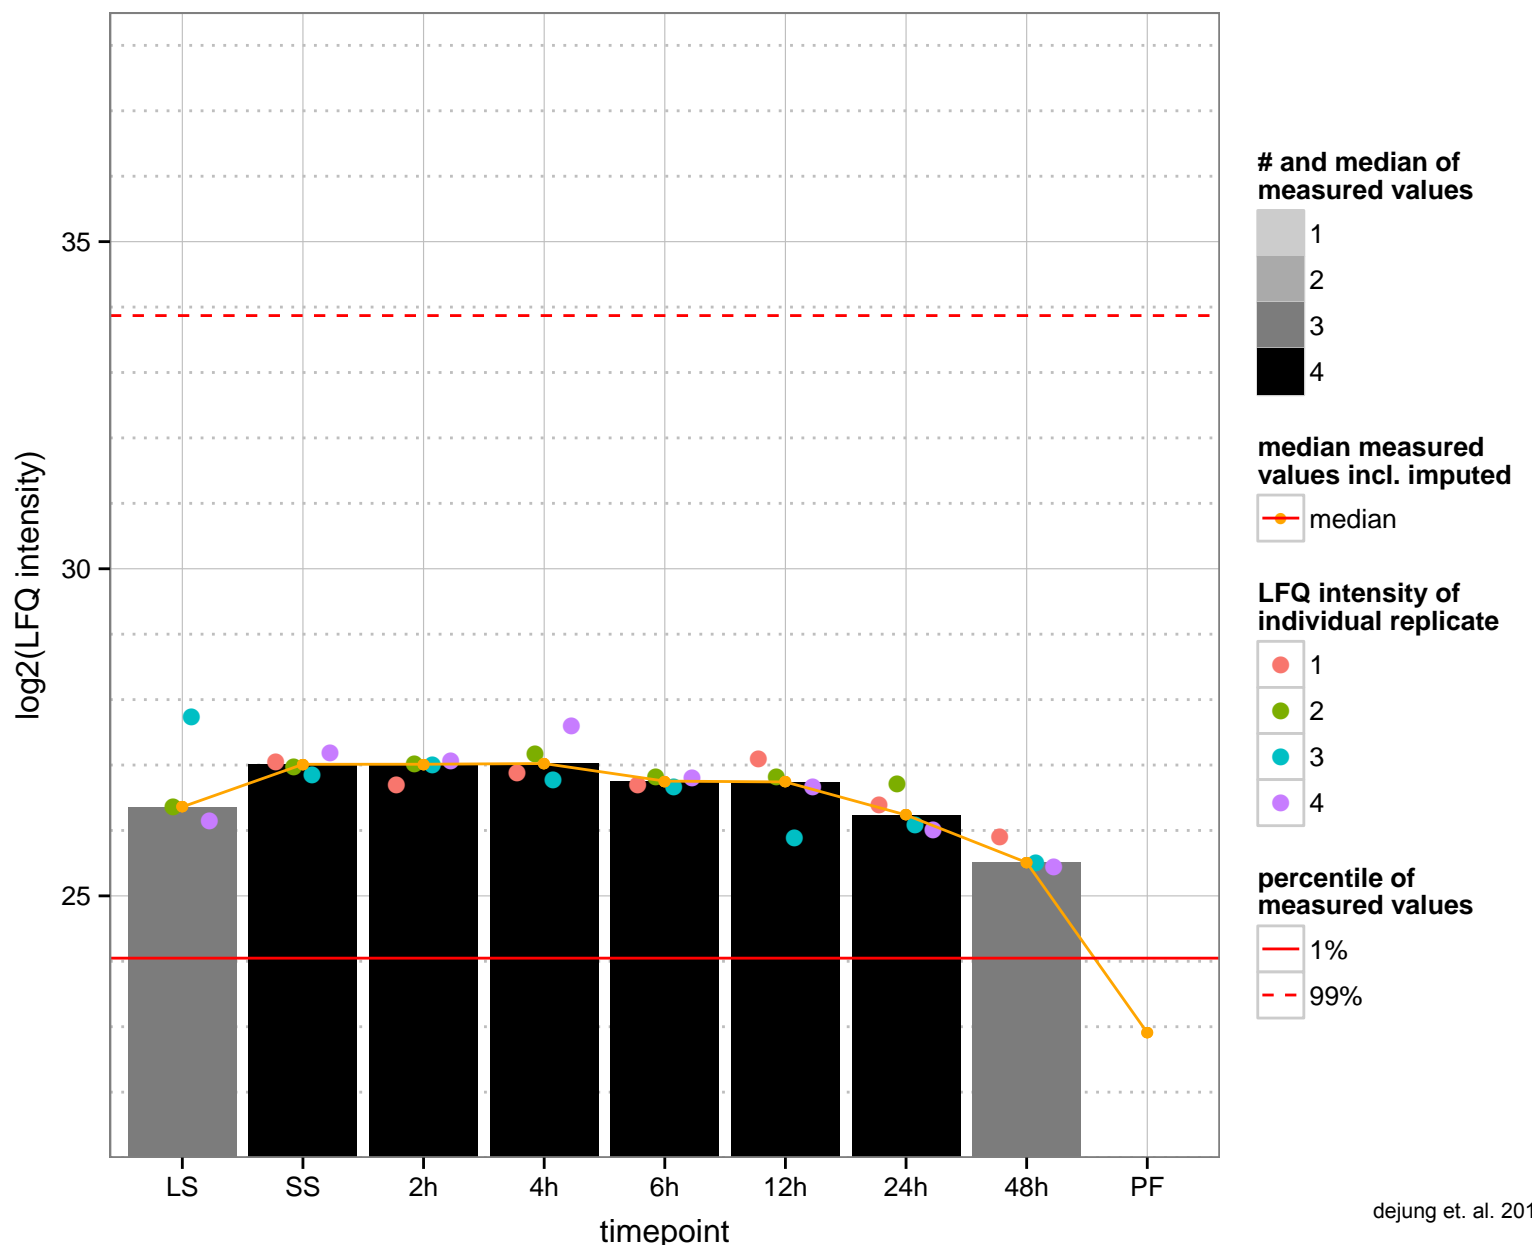

ATP synthase, putative

Tb927.11.9420

AGOF: proton-transporting ATPase activity, rotational mechanism

AGOC: proton-transporting two-sector ATPase complex, catalytic domain

AGOP: ATP synthesis coupled proton transport

PGOF: proton-transporting ATPase activity, rotational mechanism

PGOC: proton-transporting two-sector ATPase complex, catalytic domain

PGOP: ATP hydrolysis coupled proton transport

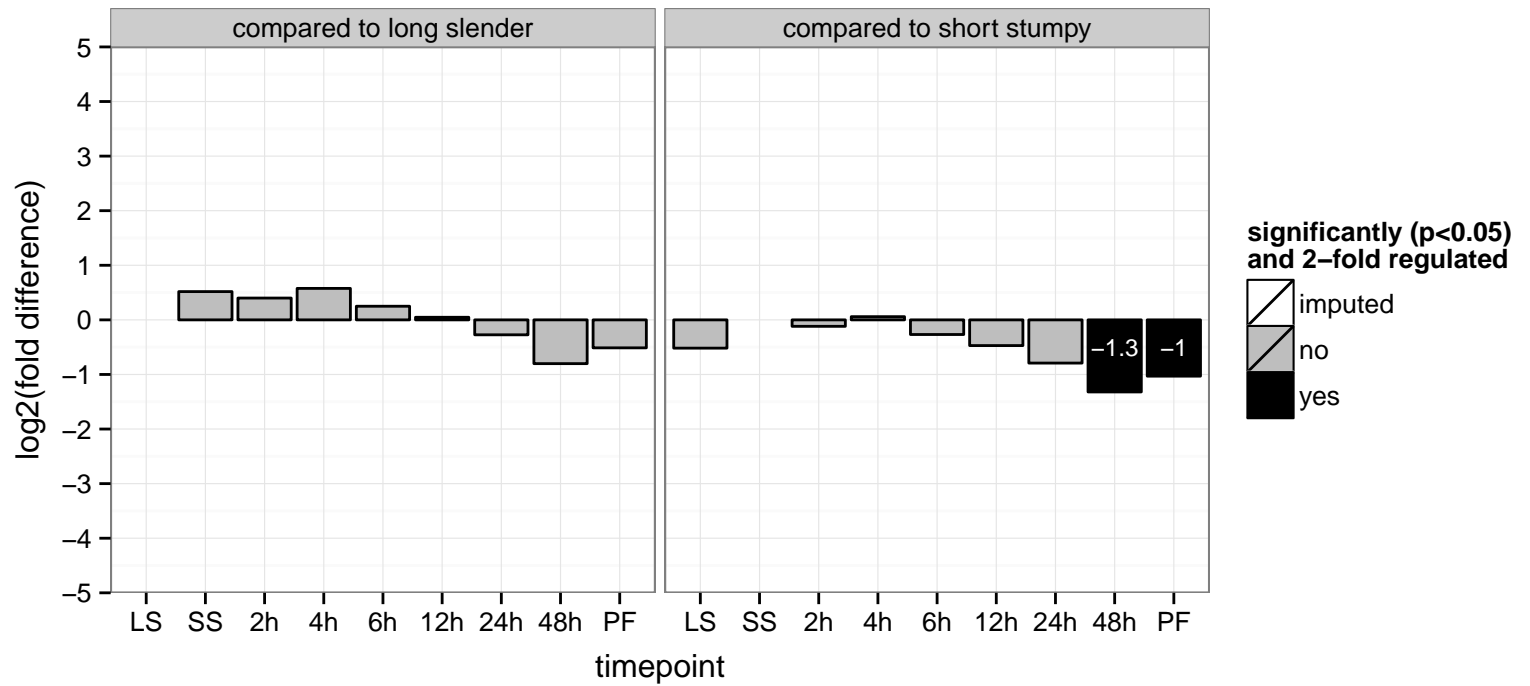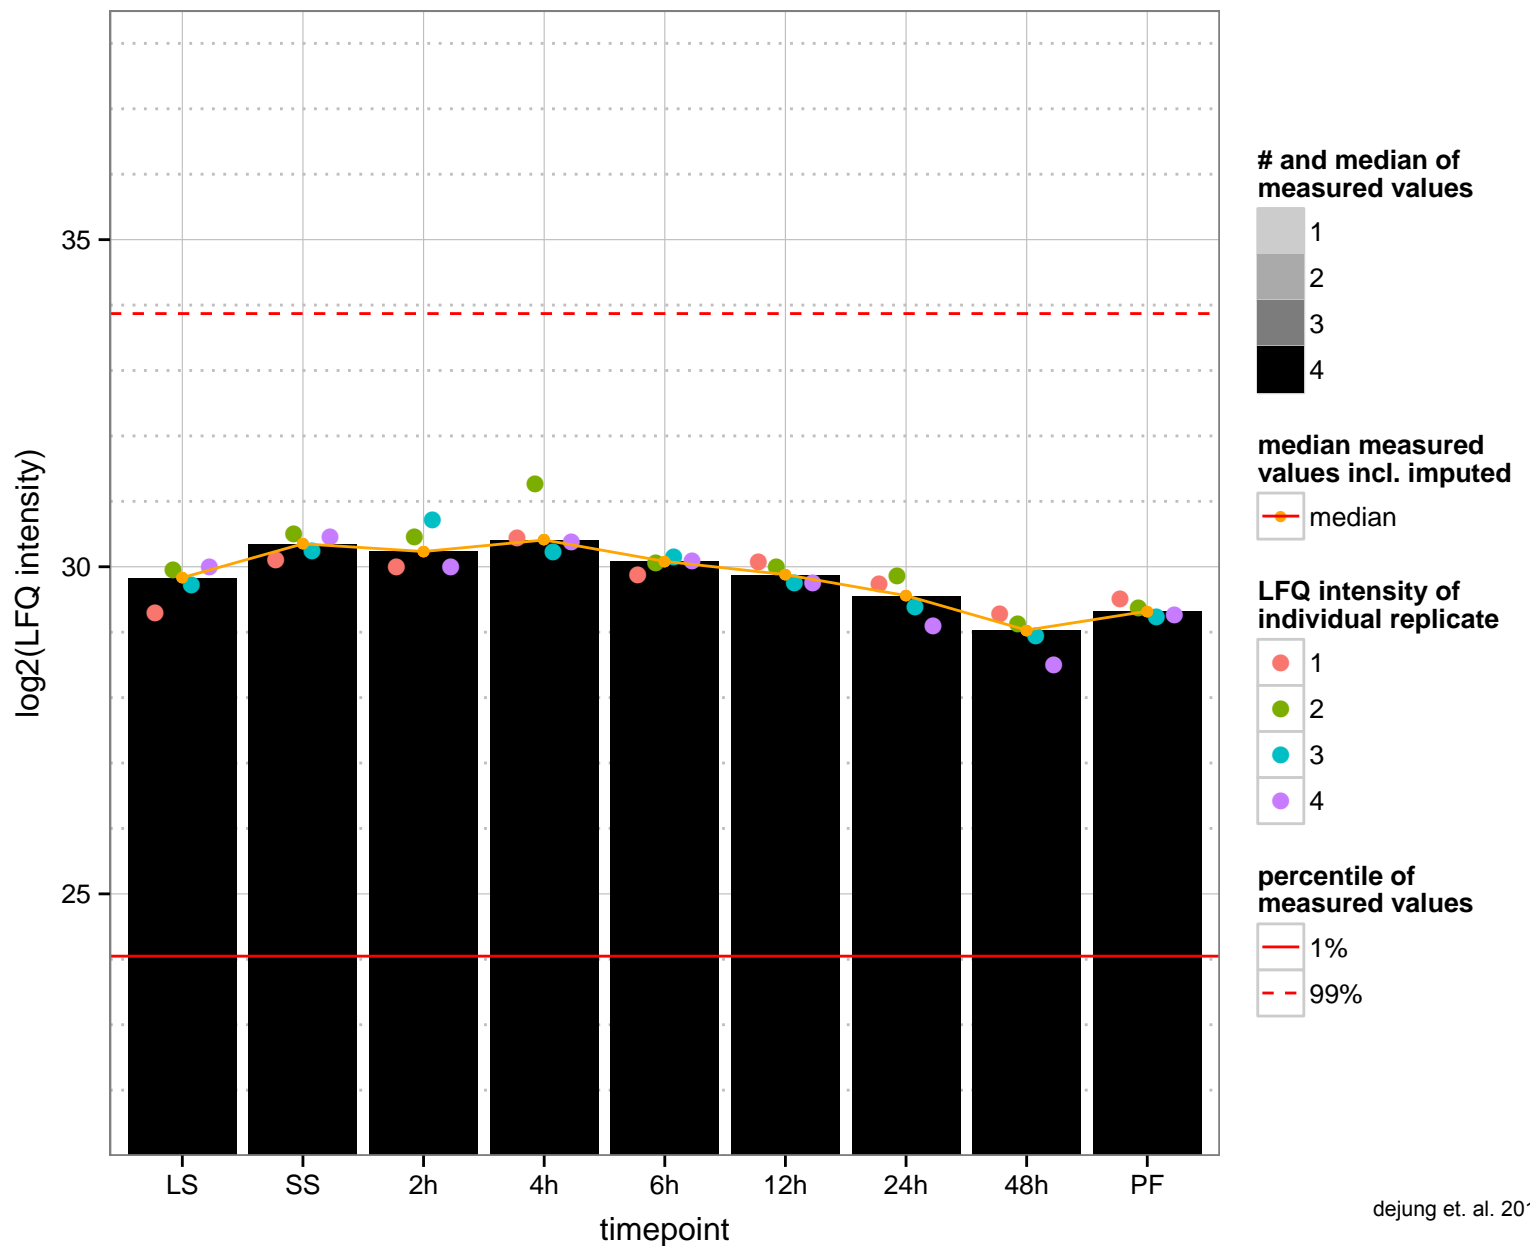

histone H4 variant  
 Tb927.2.2670  
 AGOF: DNA binding  
 AGOC: nucleosome, nucleus  
 AGOP: chromosome organization, nucleosome assembly  
 PGO: DNA binding  
 PGOC: nucleosome, nucleus  
 PGOP: nucleosome assembly

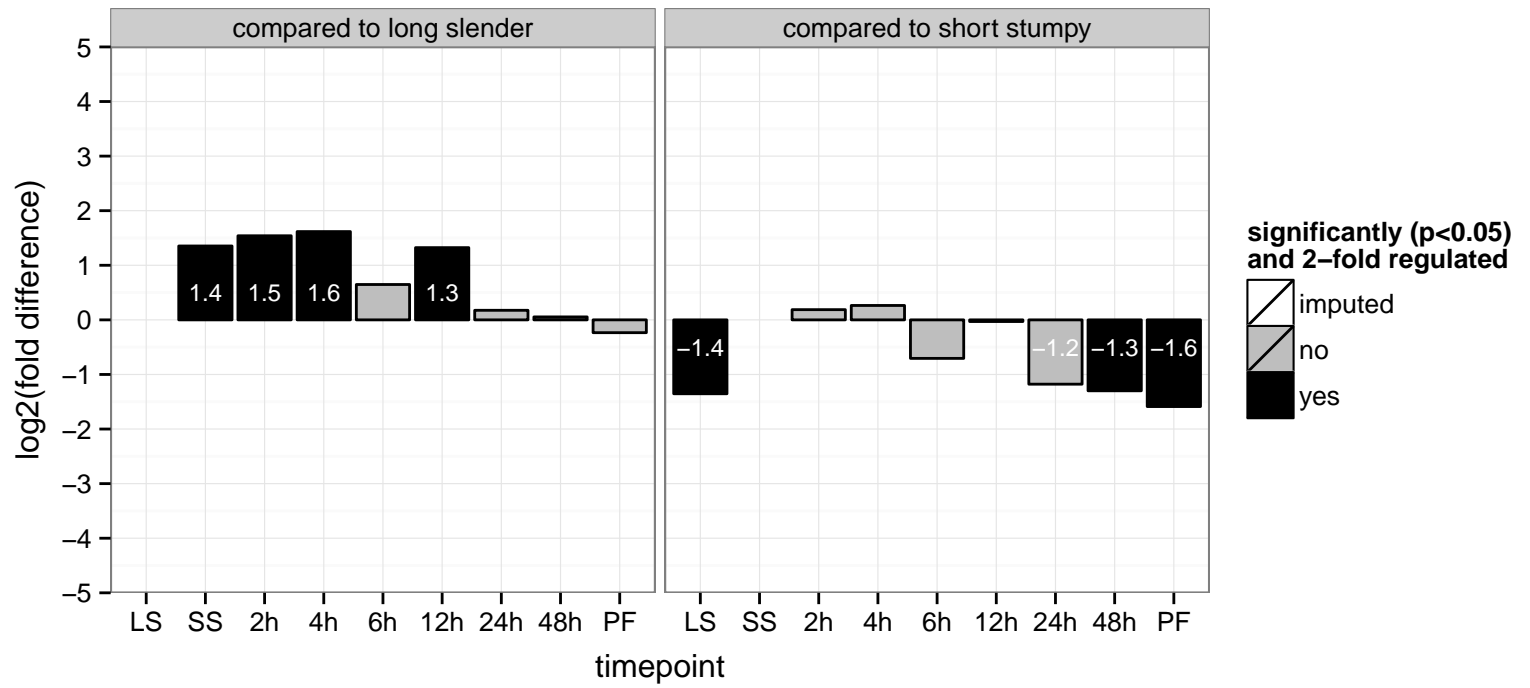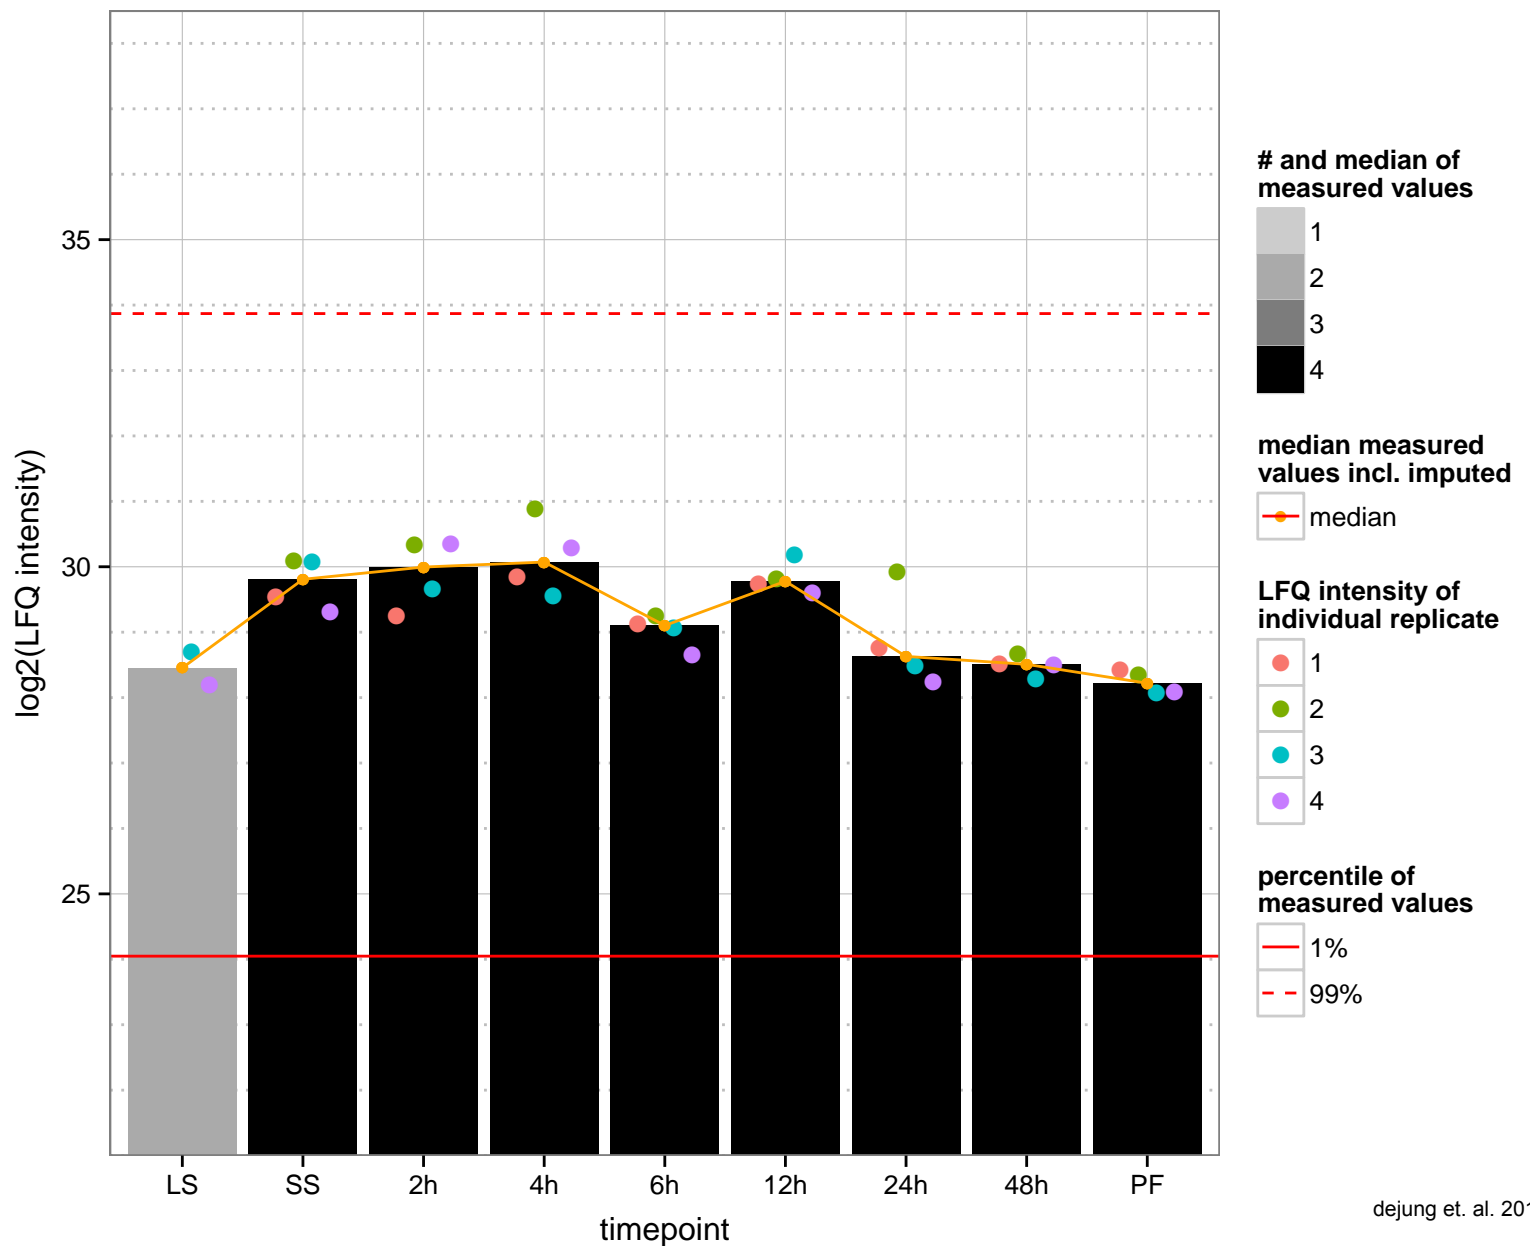

hypothetical protein, conserved  
 Tb927.2.2770  
 AGOF: null  
 AGOC: null  
 AGOP: null  
 PGO: null  
 PGOC: null  
 PGOP: null

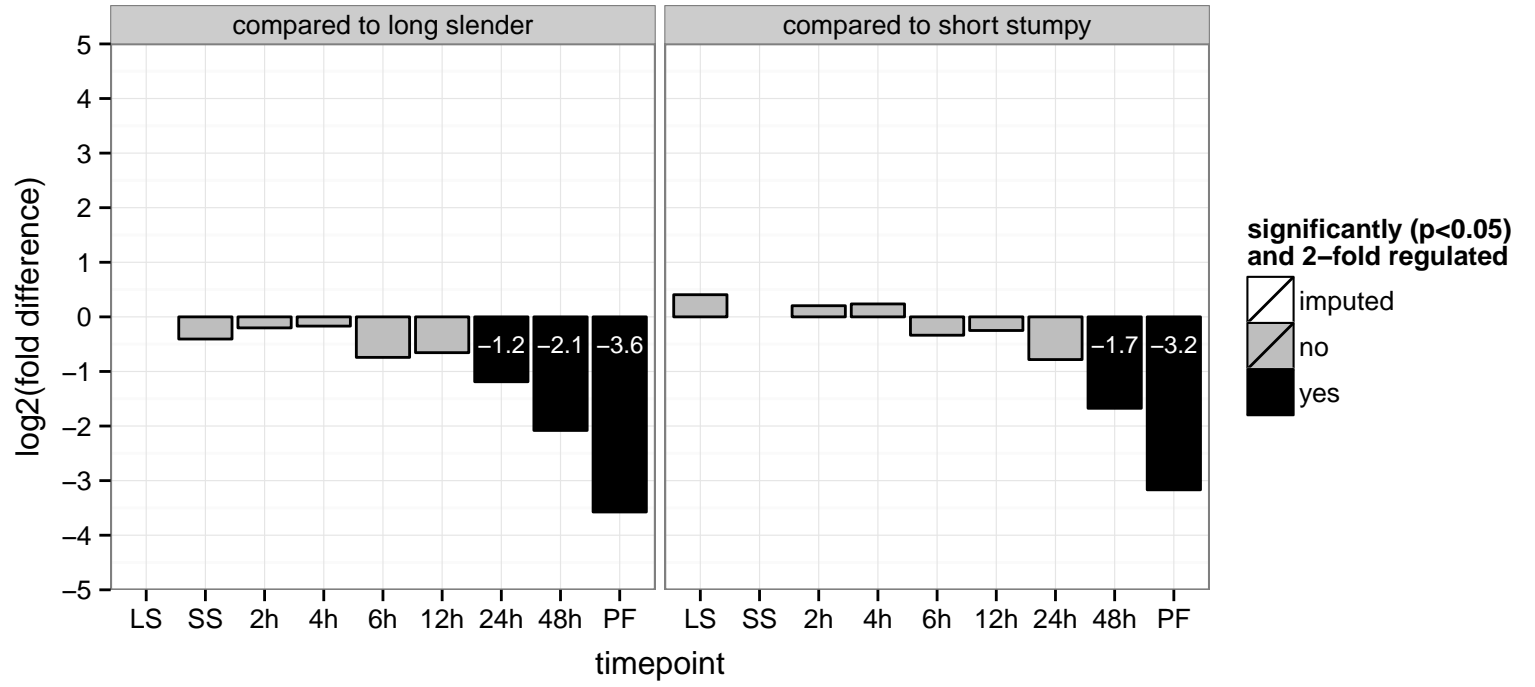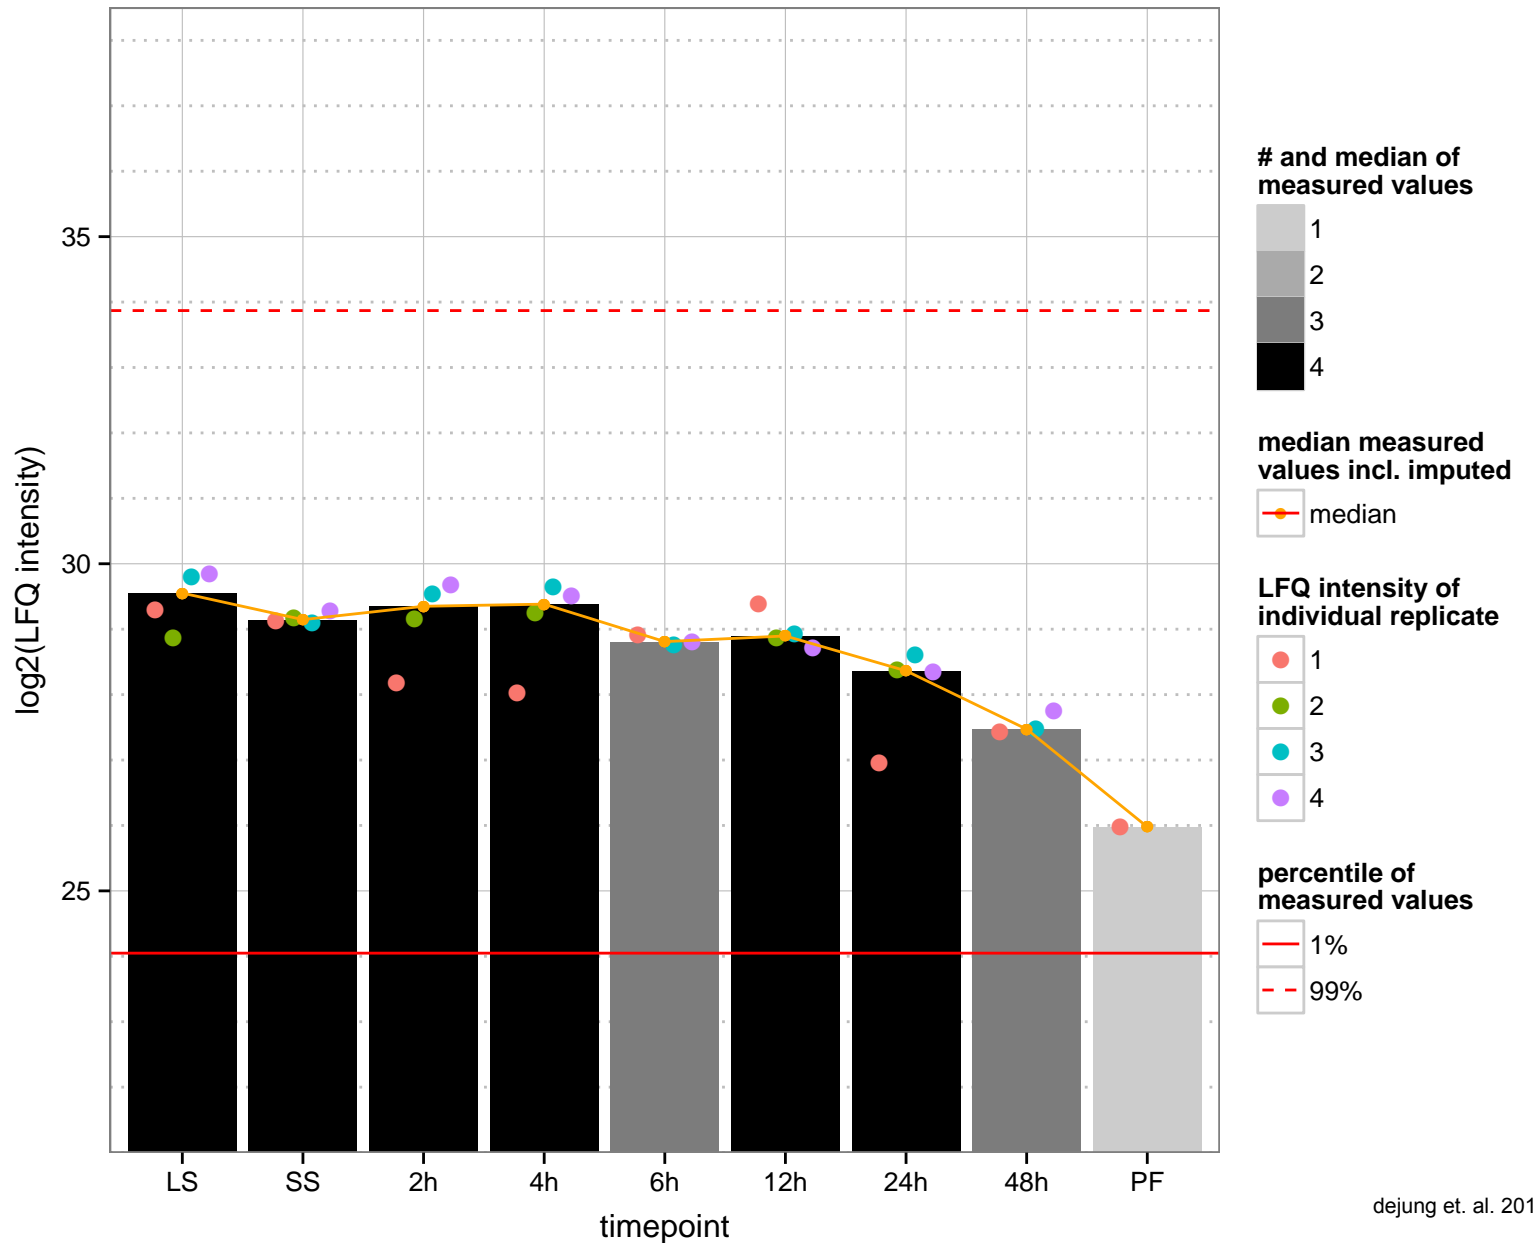

GTP-binding elongation factor Tu family, putative

Tb927.2.3620

AGOF: GTP binding, GTPase activity, translation elongation factor activity

AGOC: null

AGOP: translational elongation

PGOF: GTP binding, GTPase activity

PGOC: null

PGOP: null

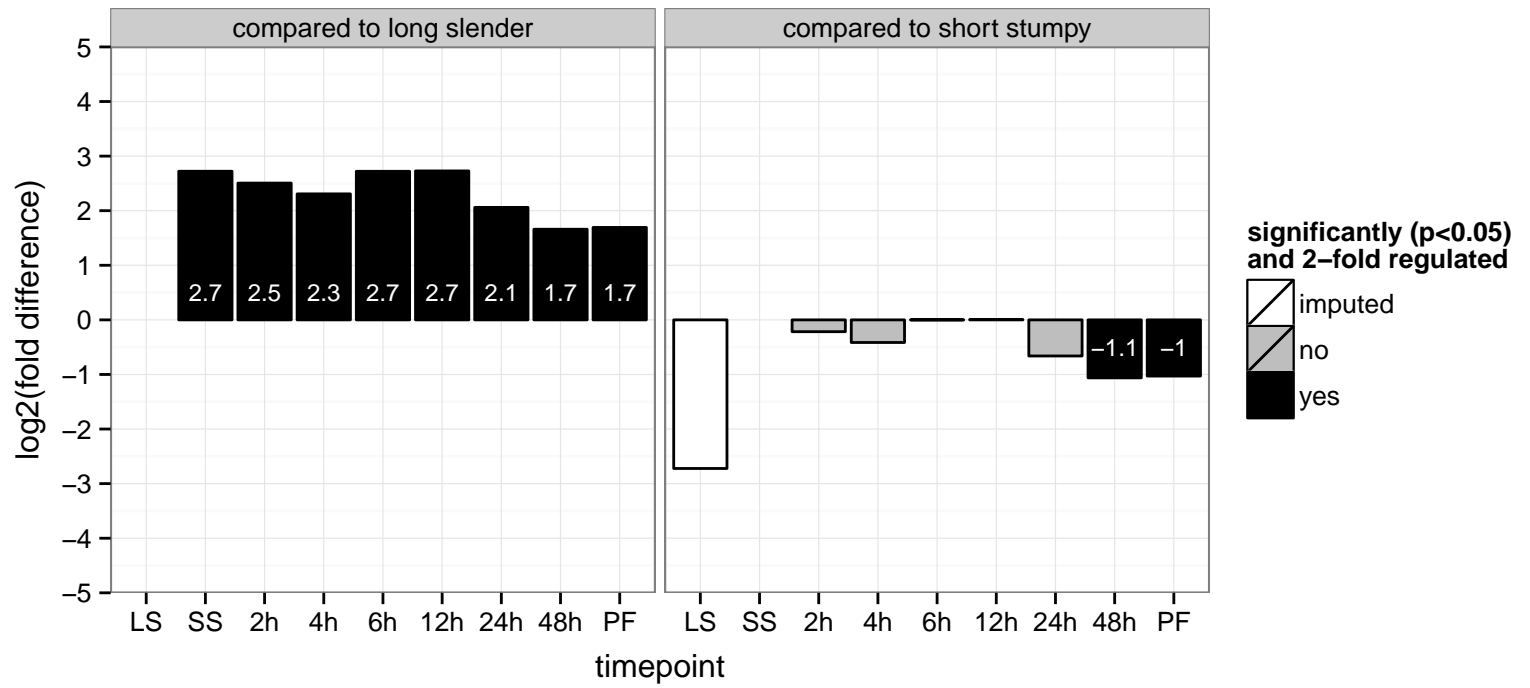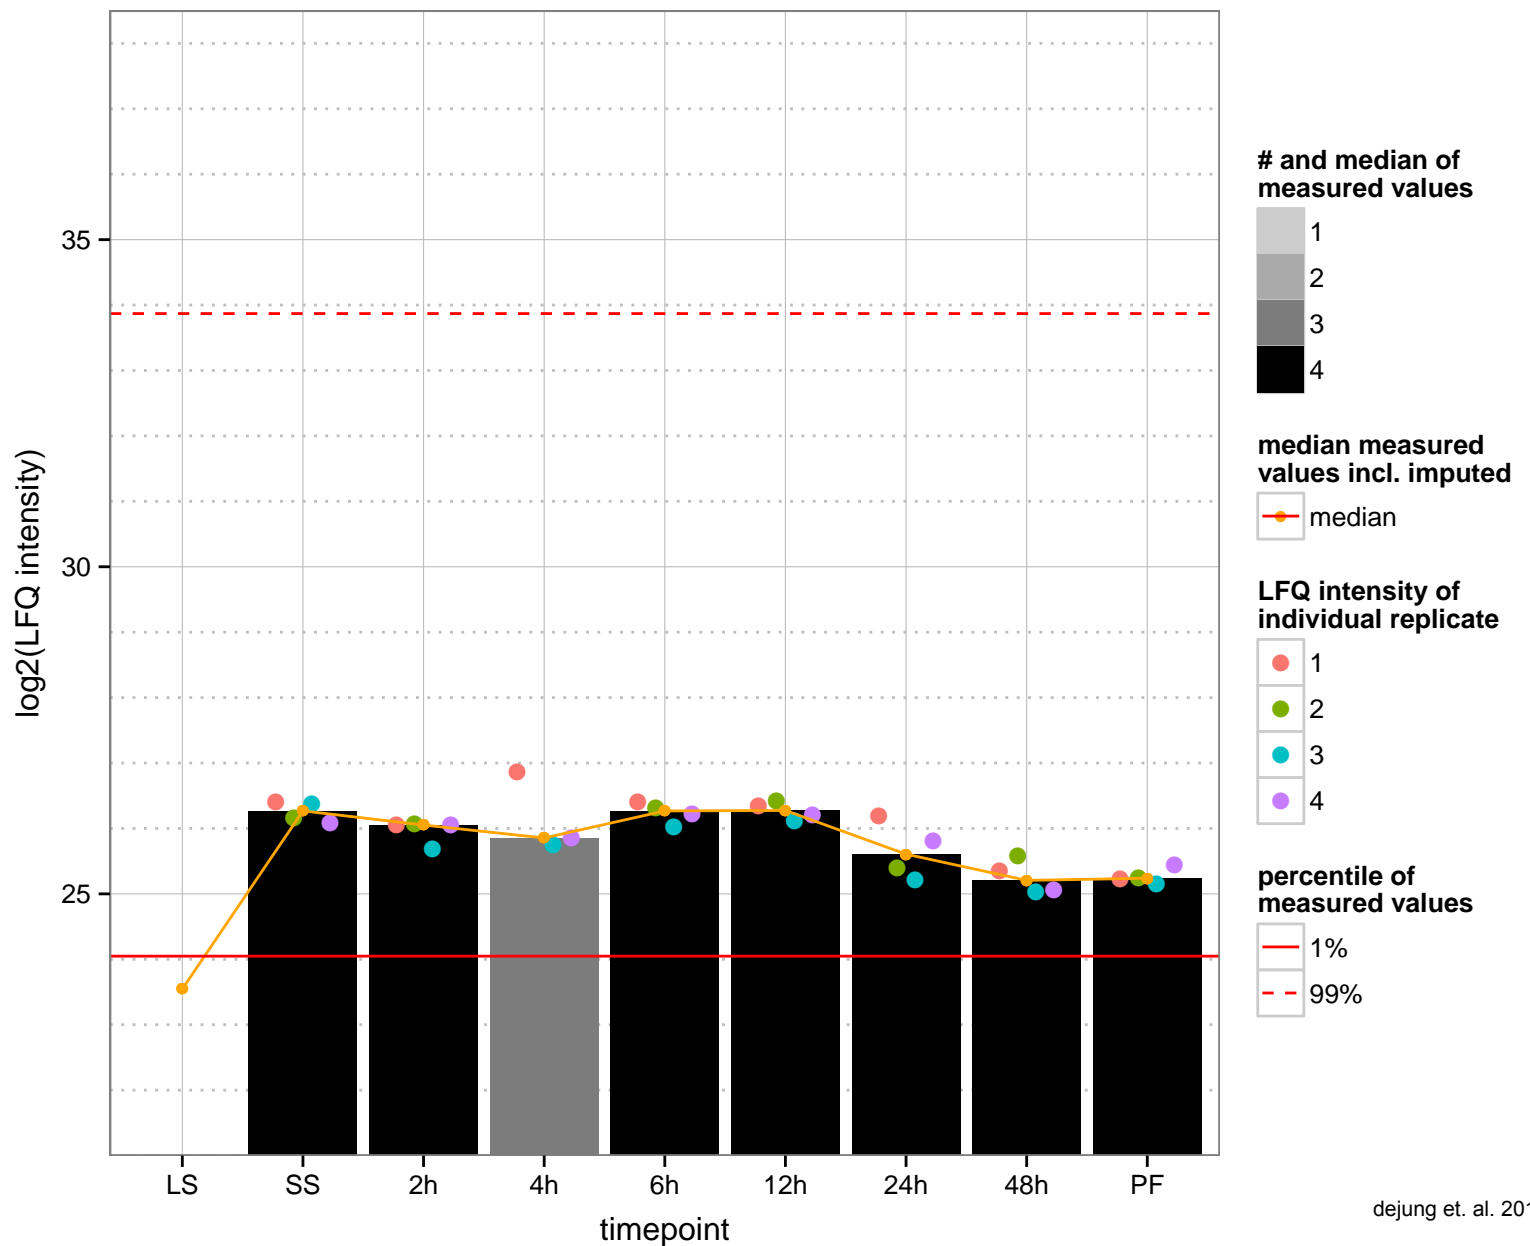

heterogeneous nuclear ribonucleoprotein H/F, putative (HNRNPH)

Tb927.2.3880

AGOF: mRNA binding

AGOC: nucleus

AGOP: RNA processing

PGOF: nucleic acid binding

PGOC: null

PGOP: null

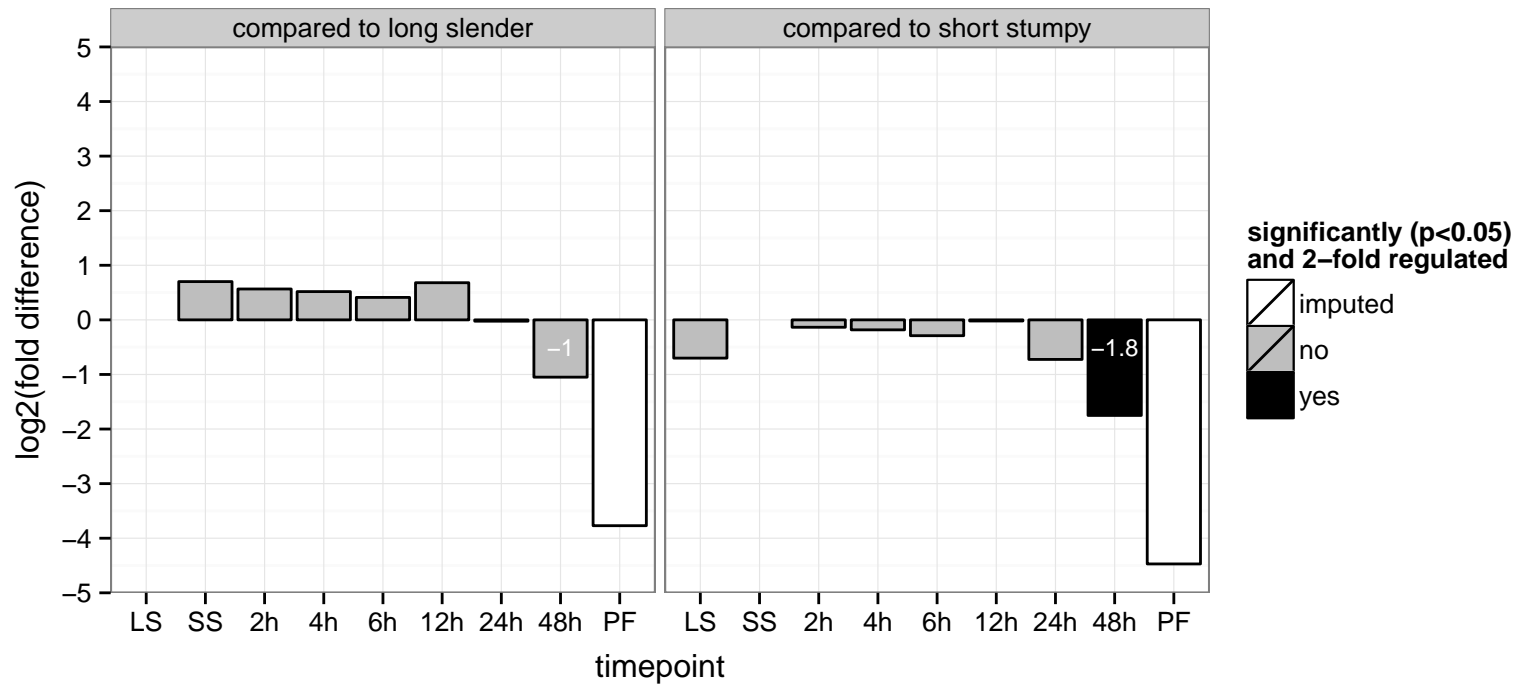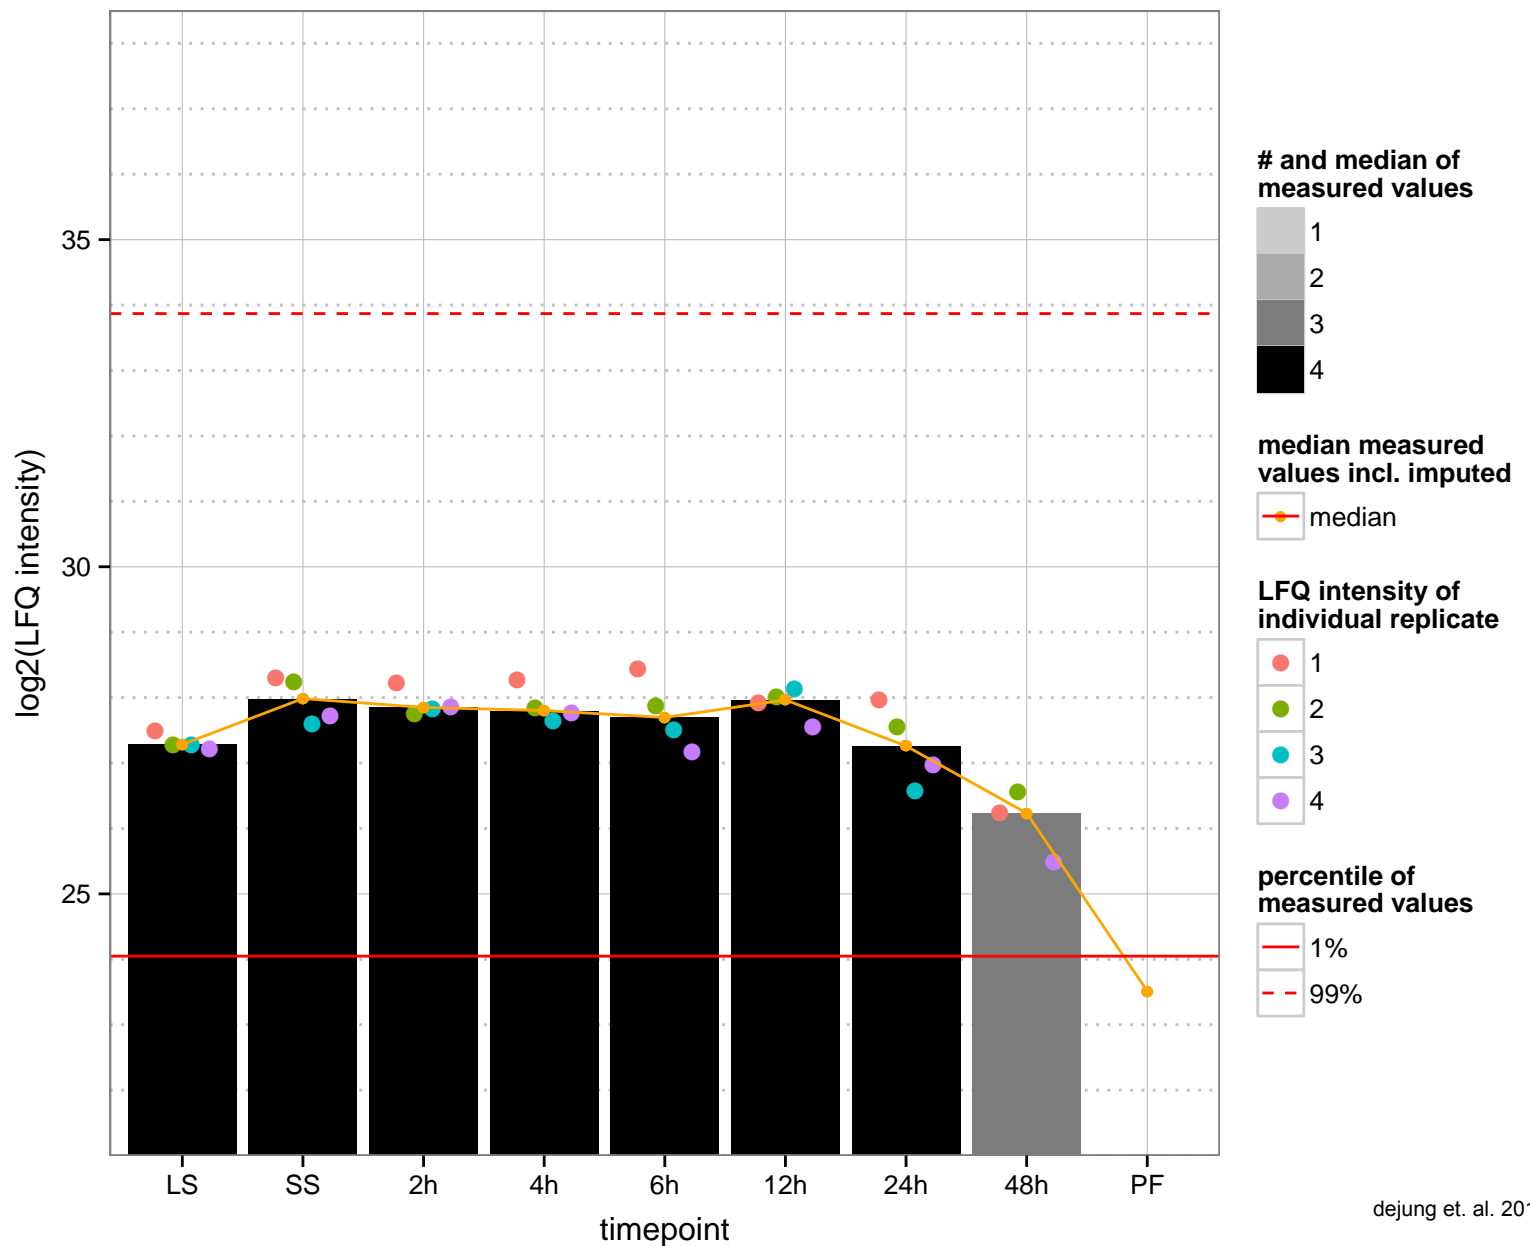



trypanothione synthetase, putative, trypanothione synthetase (TRYS)  
 Tb927.2.4370;Tb11.v5.0653  
 AGOF: null, trypanothione-disulfide reductase activity  
 AGOC: null, cytosol  
 AGOP: null, trypanothione biosynthetic process  
 PGO: null  
 PGO: null  
 PGO: null

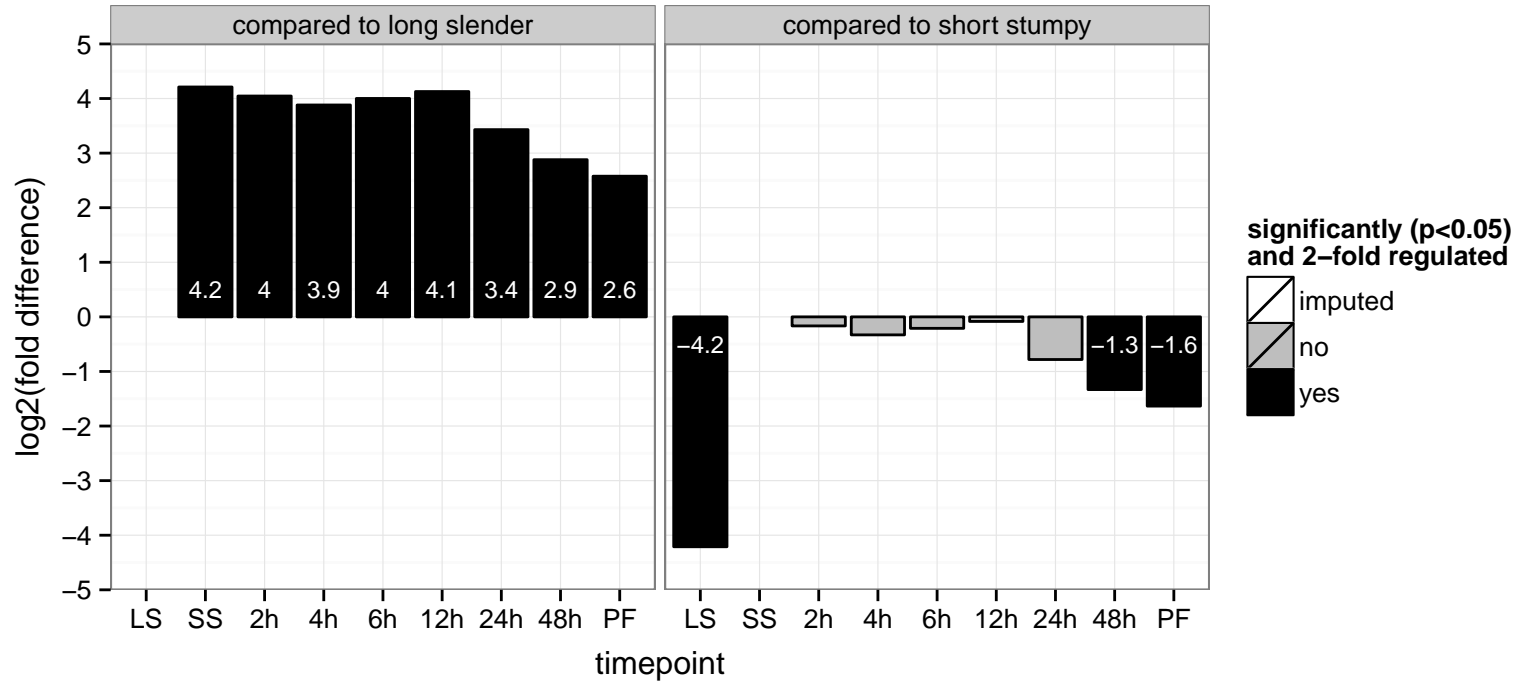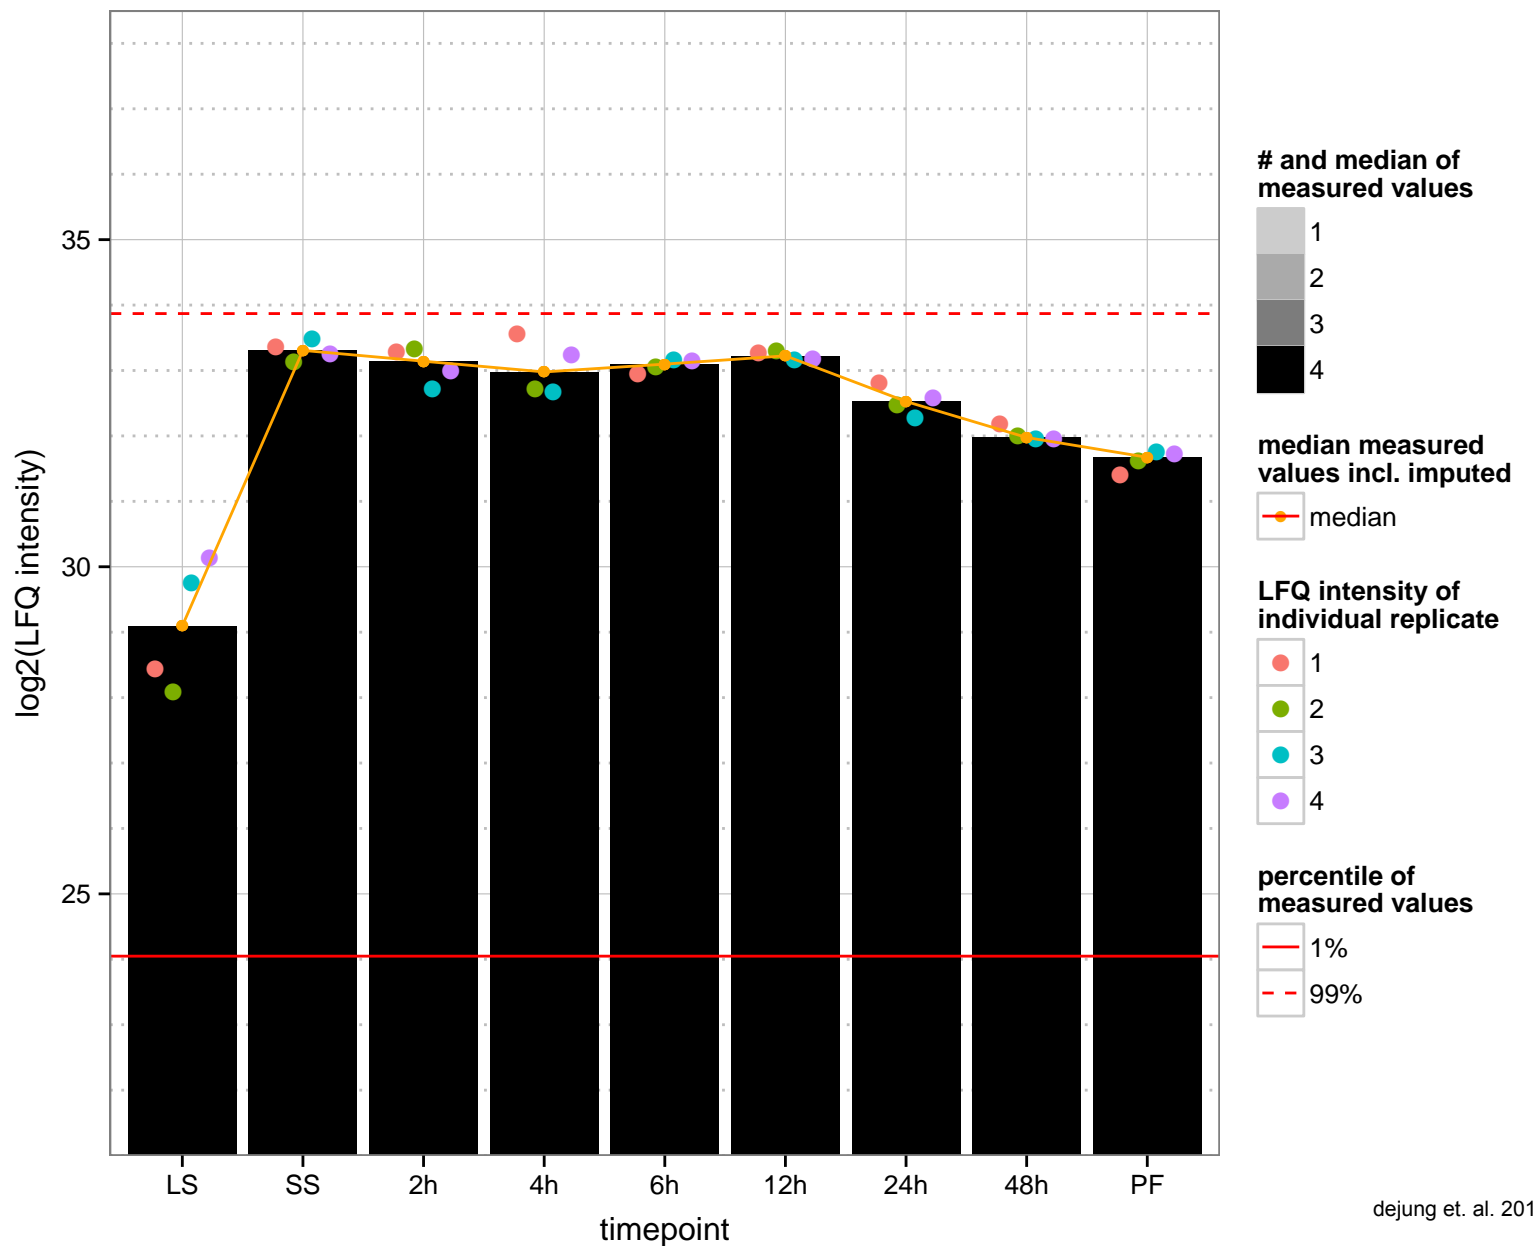

sedoheptulose-1, 7-bisphosphatase (SBPase)  
 Tb927.2.5800  
 AGOF: molecular\_function, phosphoric ester hydrolase activity  
 AGOC: glycosome  
 AGOP: carbohydrate metabolic process  
 PGO: phosphoric ester hydrolase activity  
 PGOC: null  
 PGOP: carbohydrate metabolic process

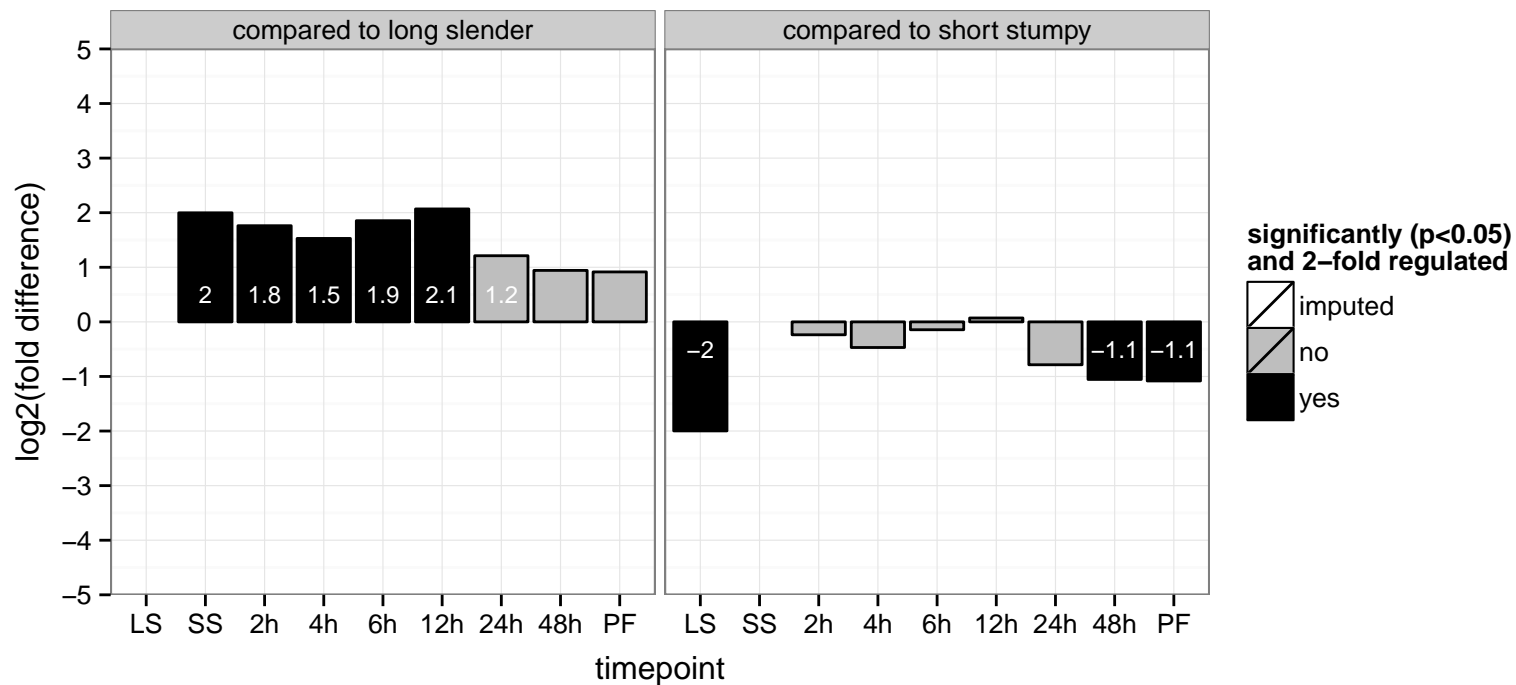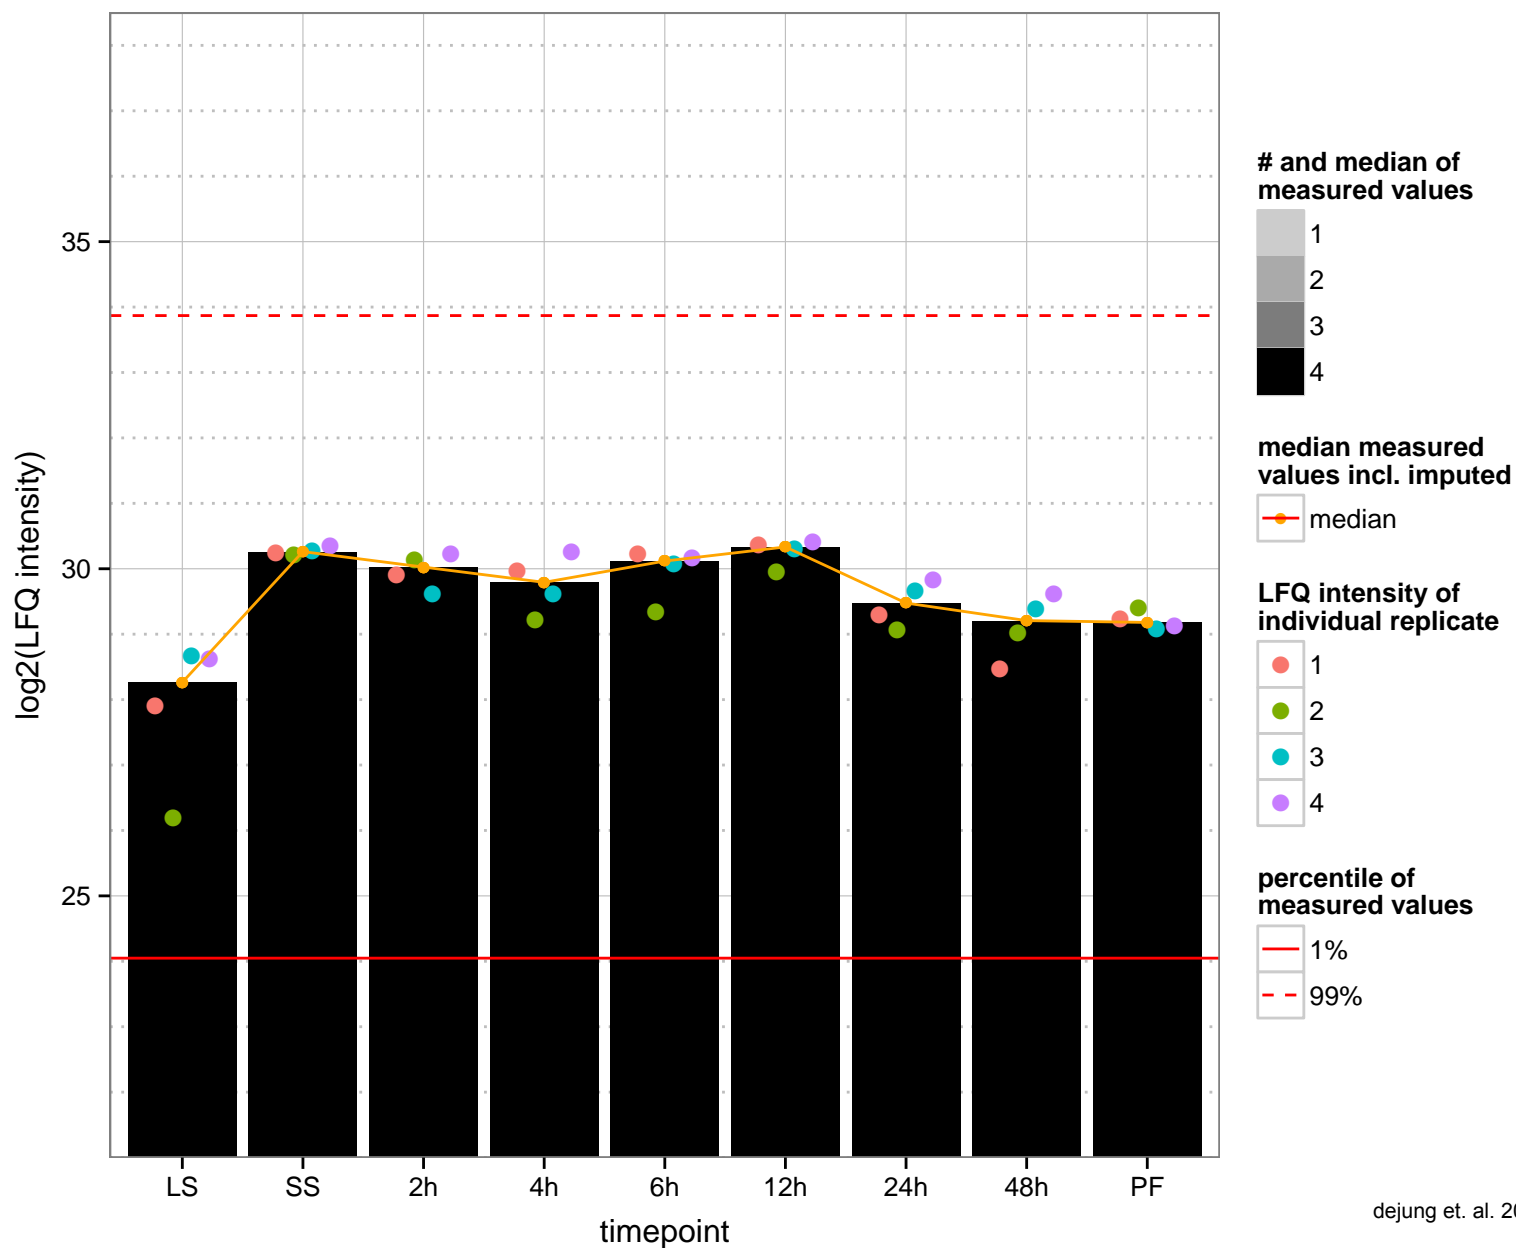

hypothetical protein, conserved  
 Tb927.3.1390  
 AGOF: null  
 AGOC: null  
 AGOP: null  
 PGOF: null  
 PGO: null  
 PGOP: null

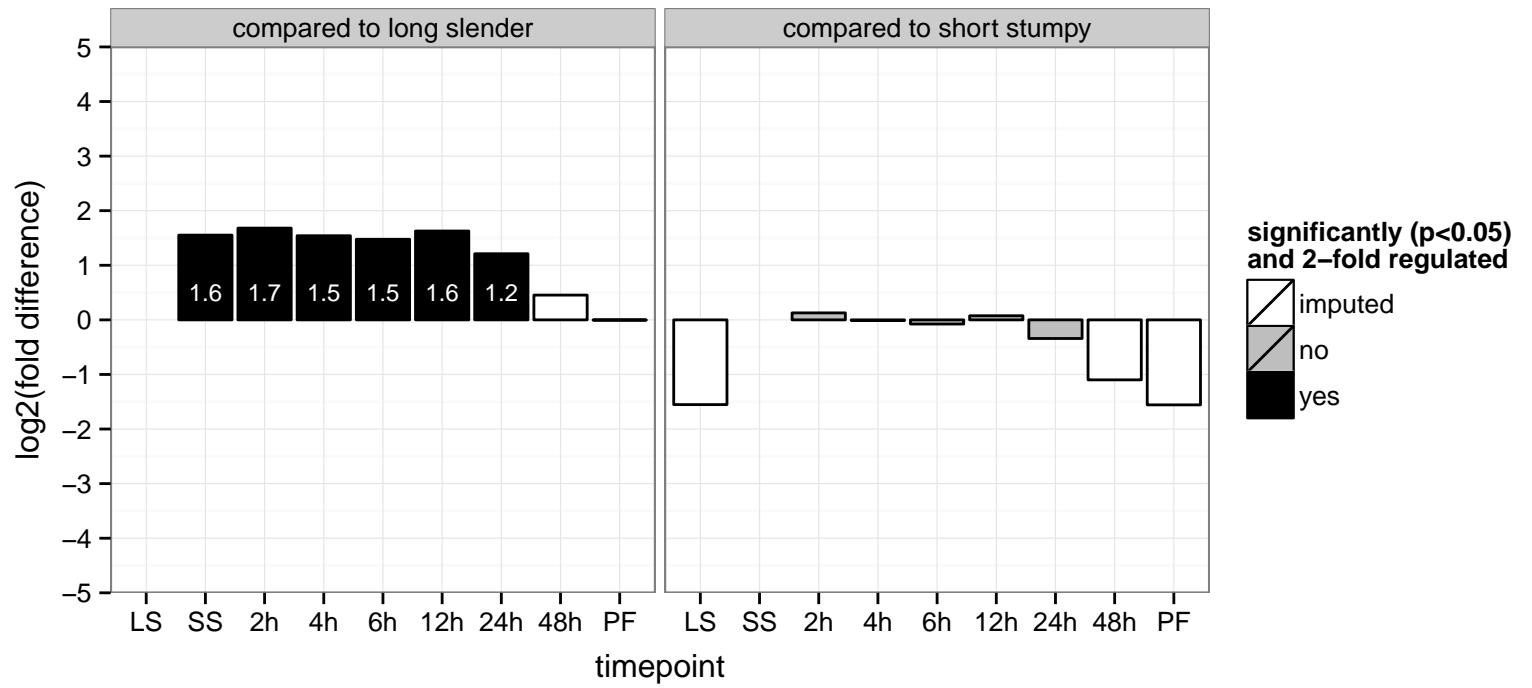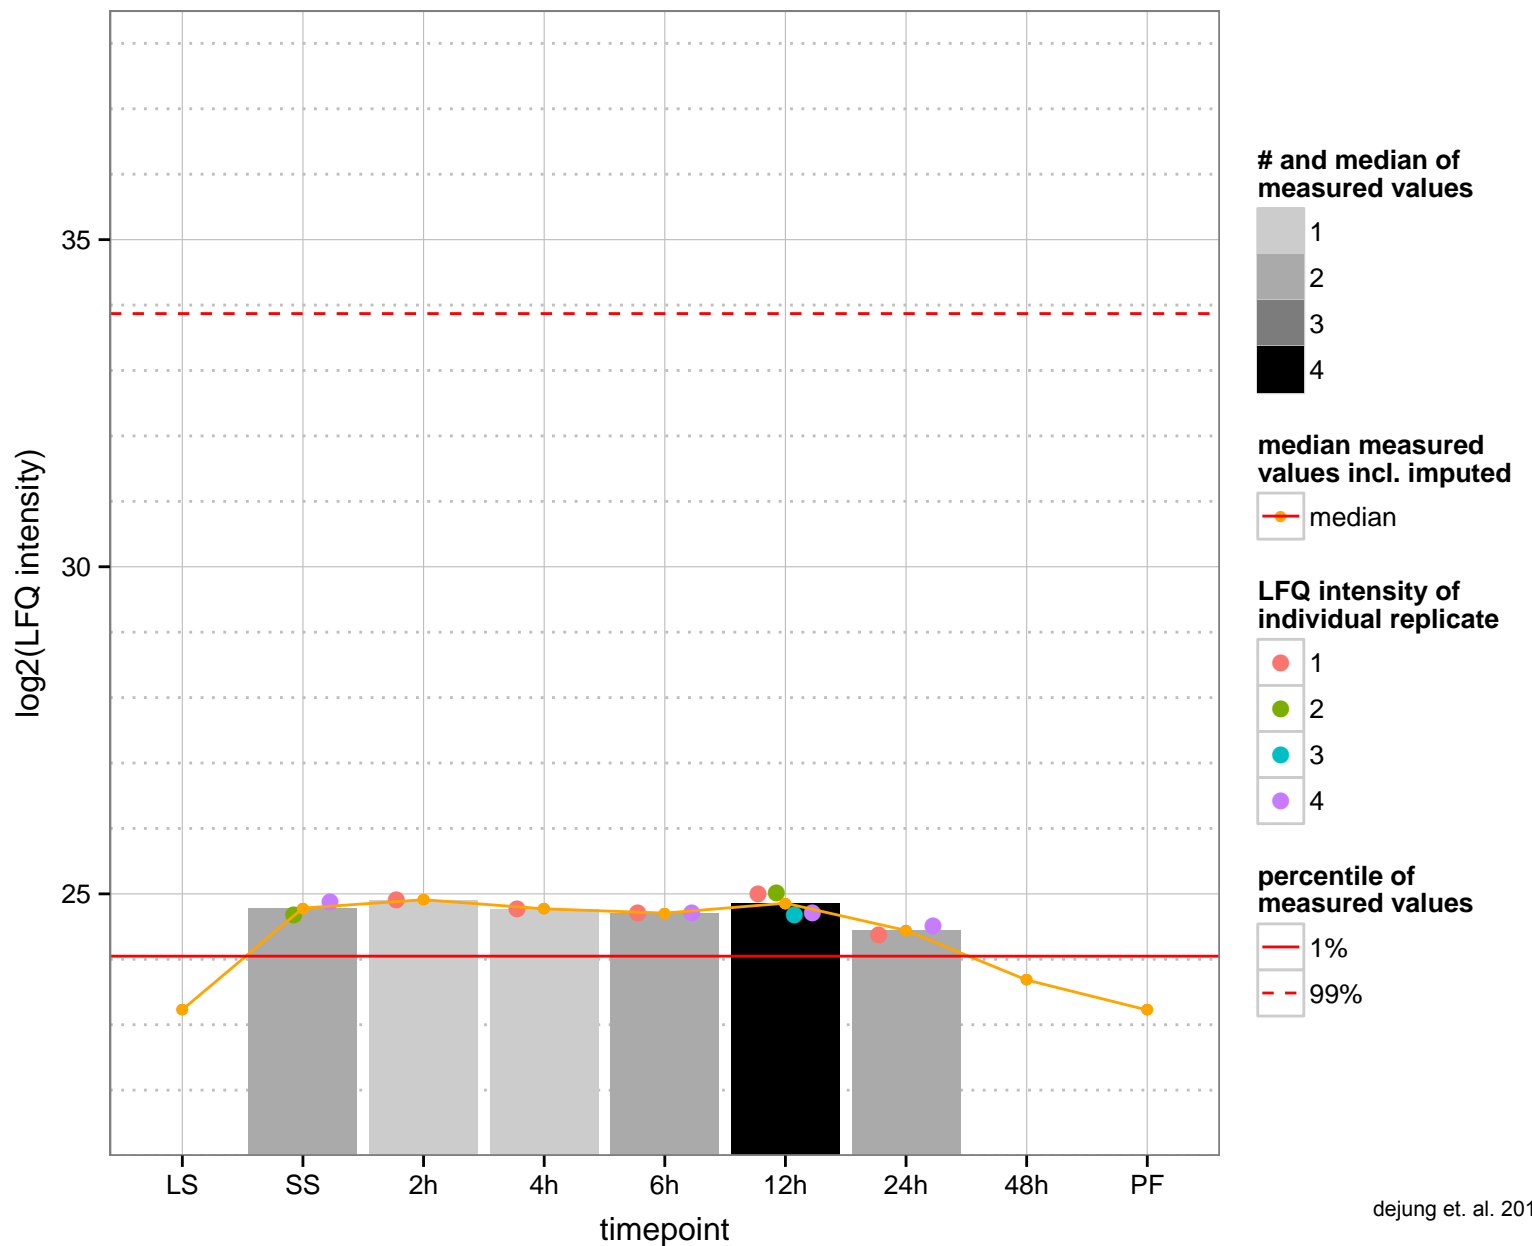

dynaminn, putative, vacuolar sortin protein 1  
 Tb927.3.4720  
 AGOF: GTP binding, GTPase activity  
 AGOC: null  
 AGOP: null  
 PGOF: GTP binding, GTPase activity  
 PGOC: null  
 PGOP: null

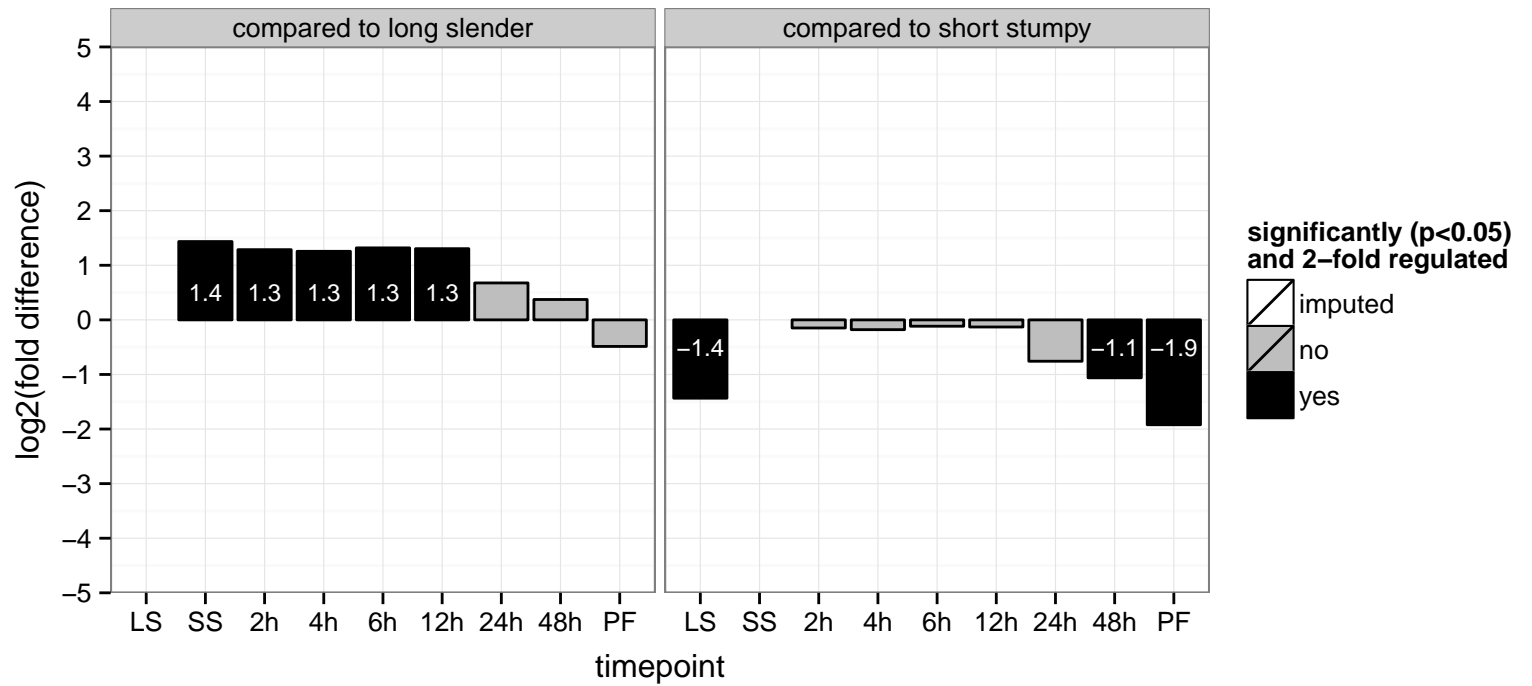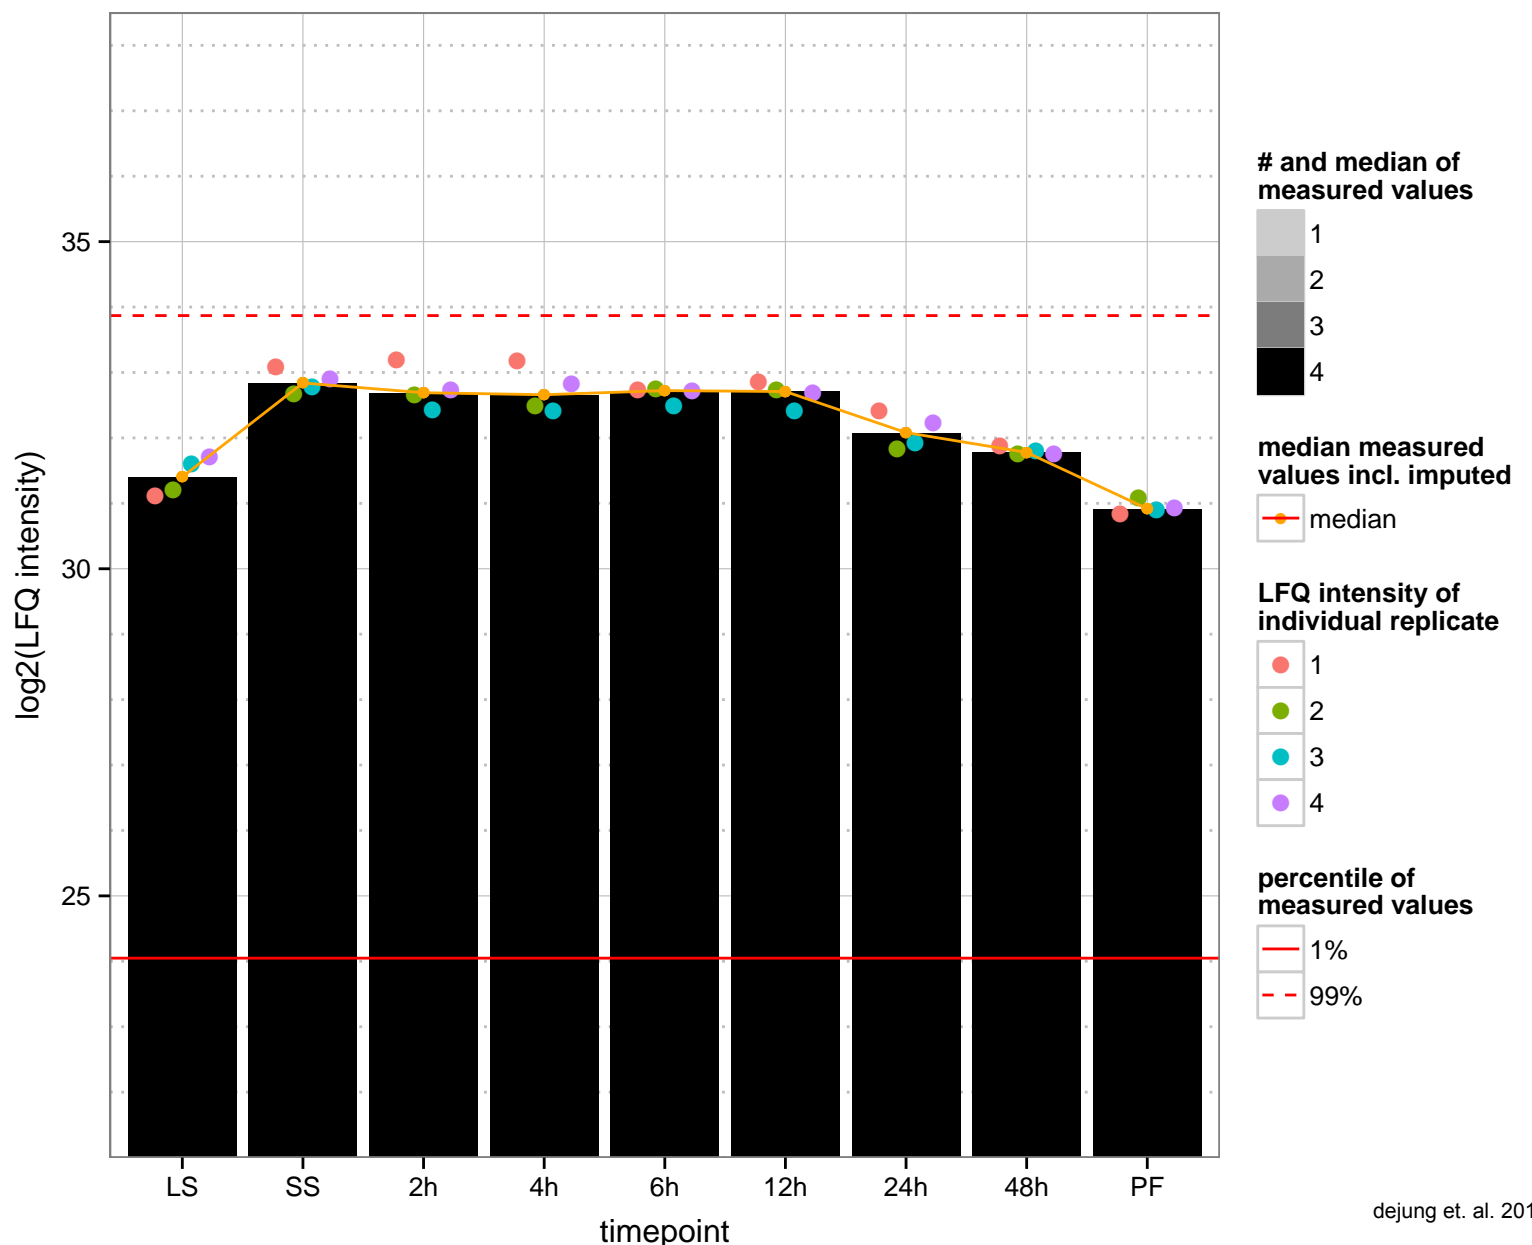

flagellar transport protein, putative (PIFTB2)  
 Tb927.3.5490  
 AGOF: null  
 AGOC: null  
 AGOP: null  
 PGOF: protein binding  
 PGO: null  
 PPOP: null

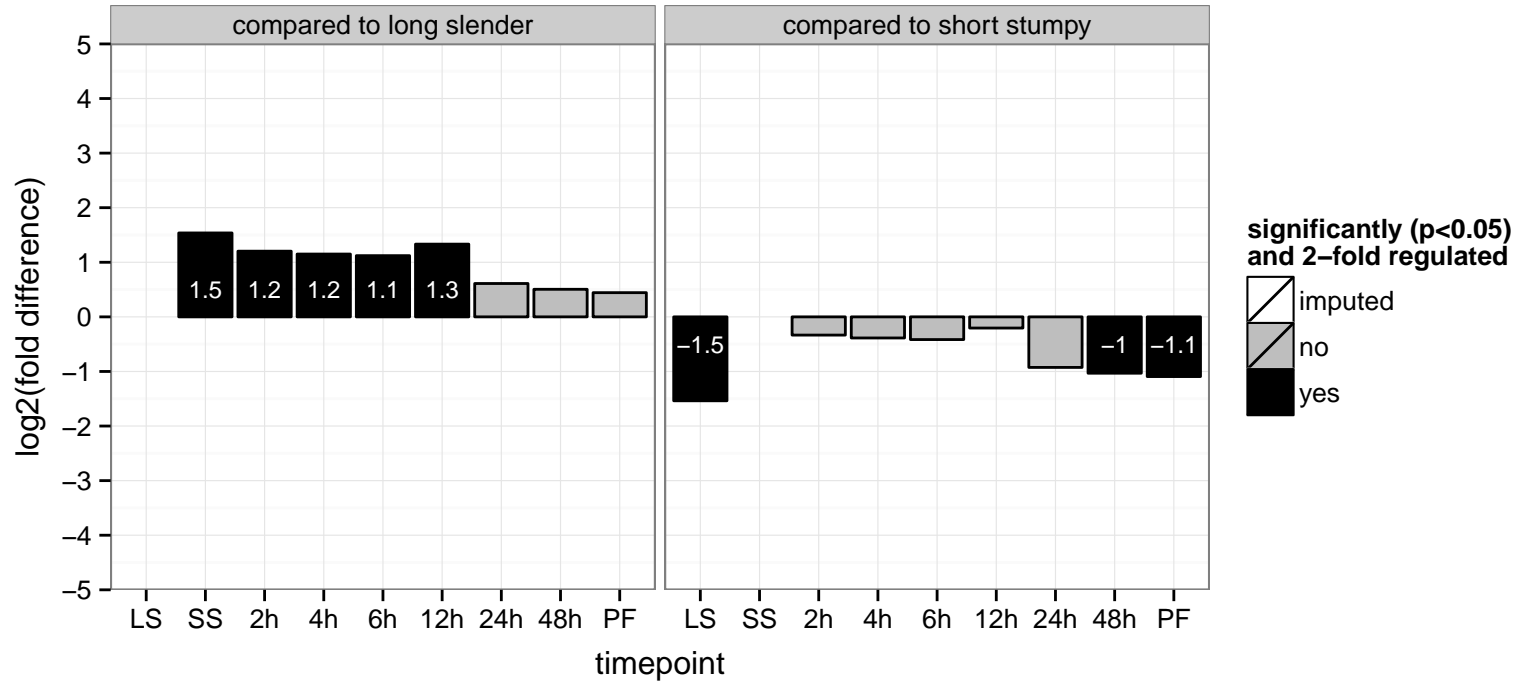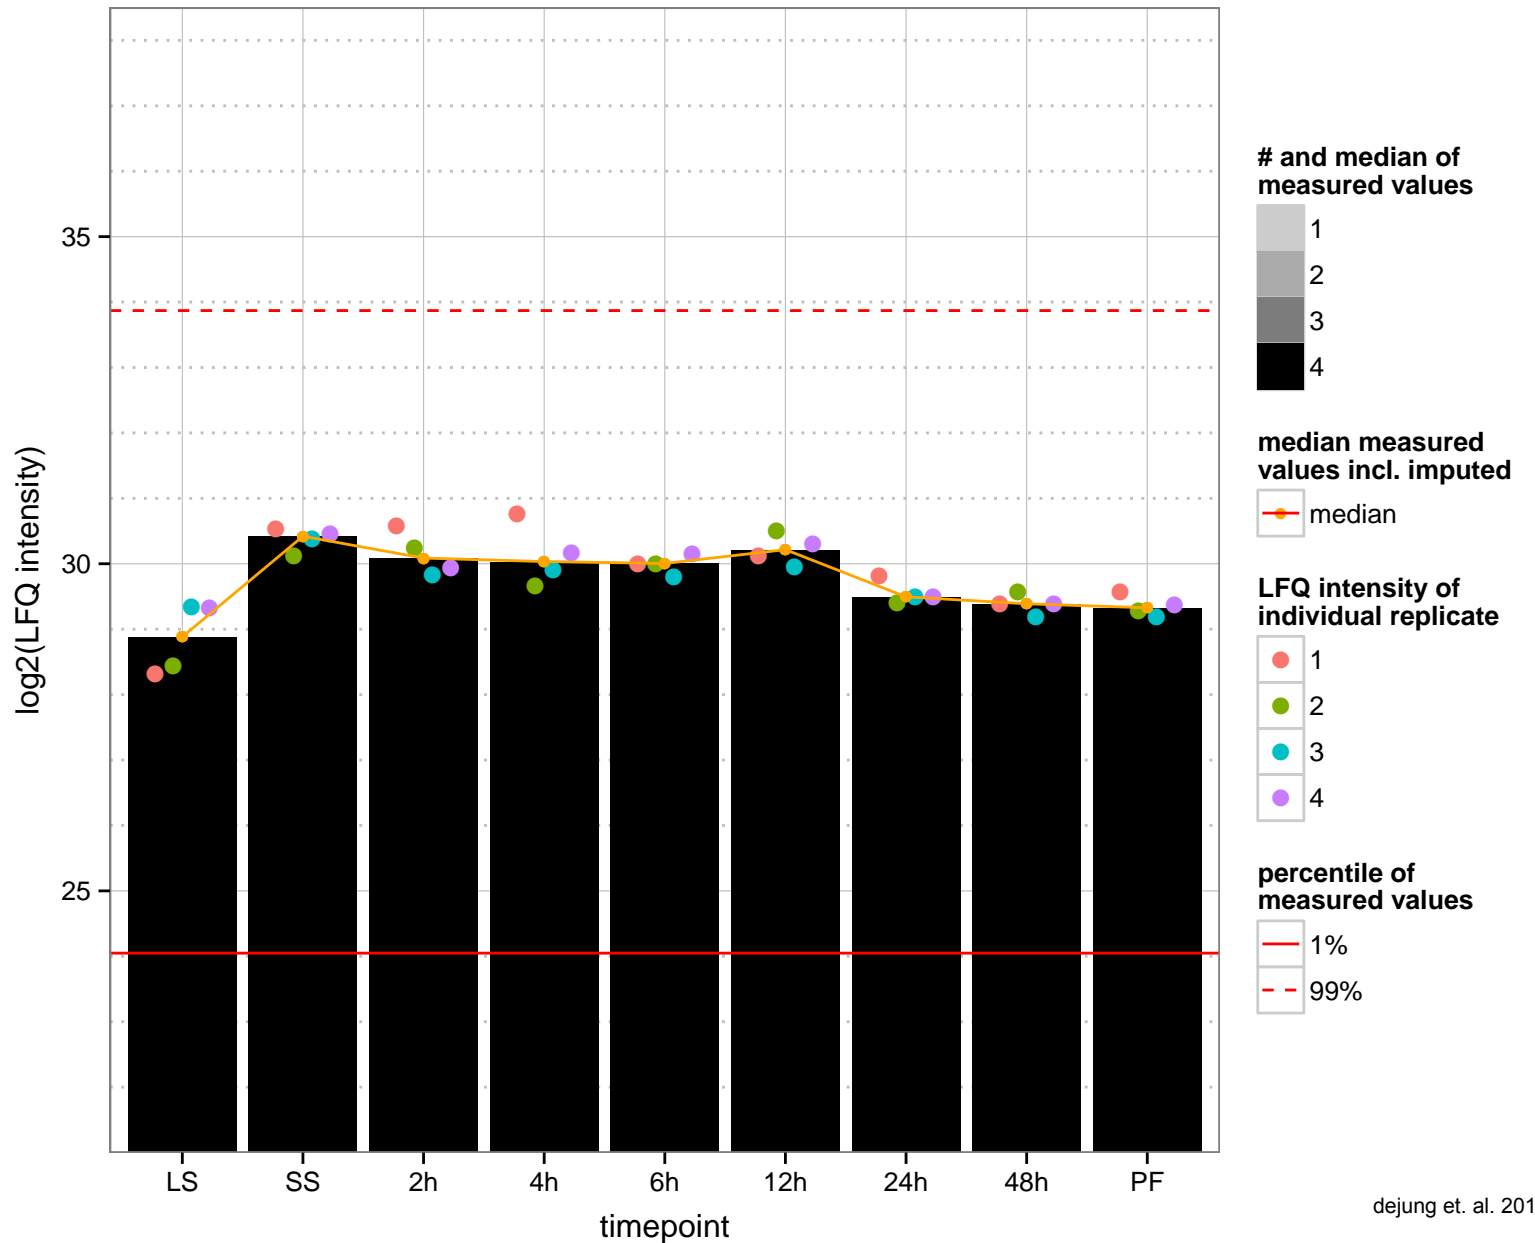

ALBA-Domain Protein (ALBA4)  
 Tb927.4.2030  
 AGOF: nucleic acid binding  
 AGOC: cytoplasm, cytoplasmic stress granule  
 AGOP: null  
 PGO: nucleic acid binding  
 PGOC: null  
 PGOP: null

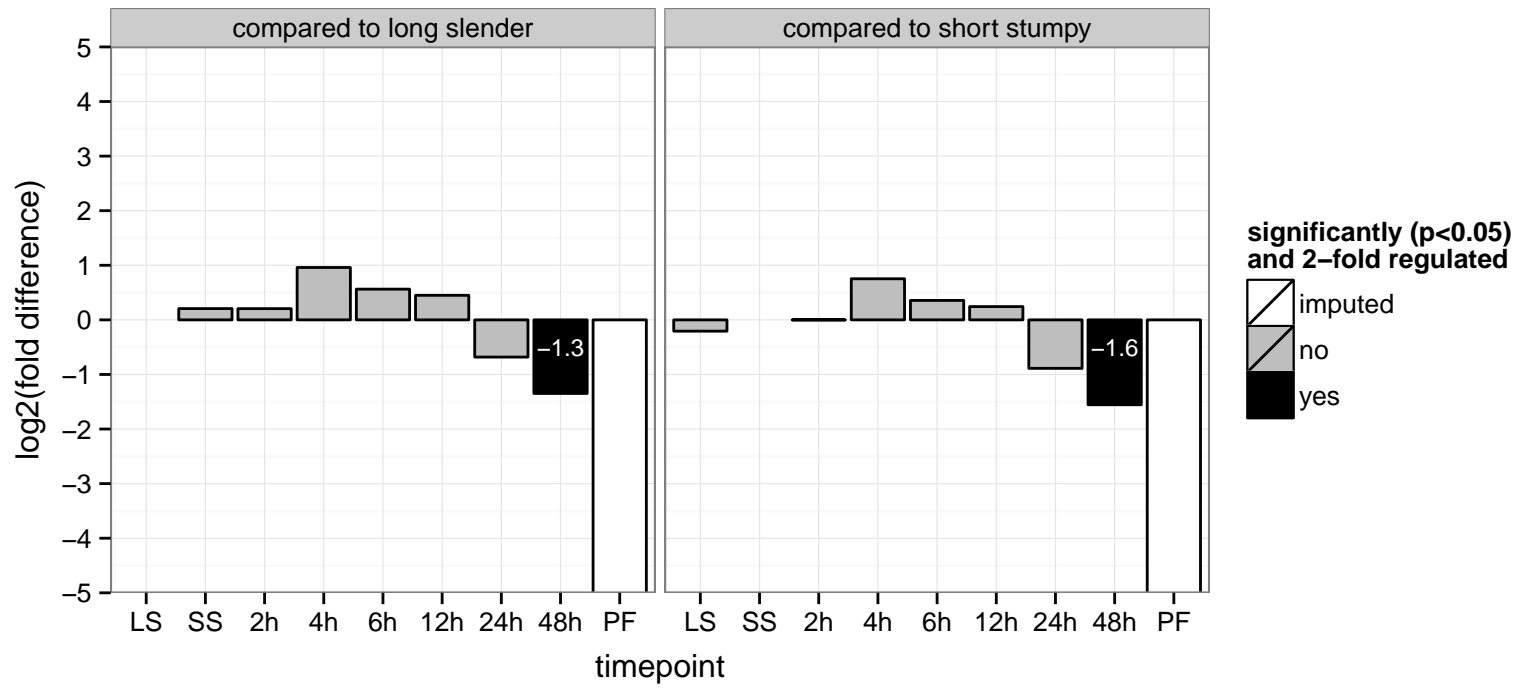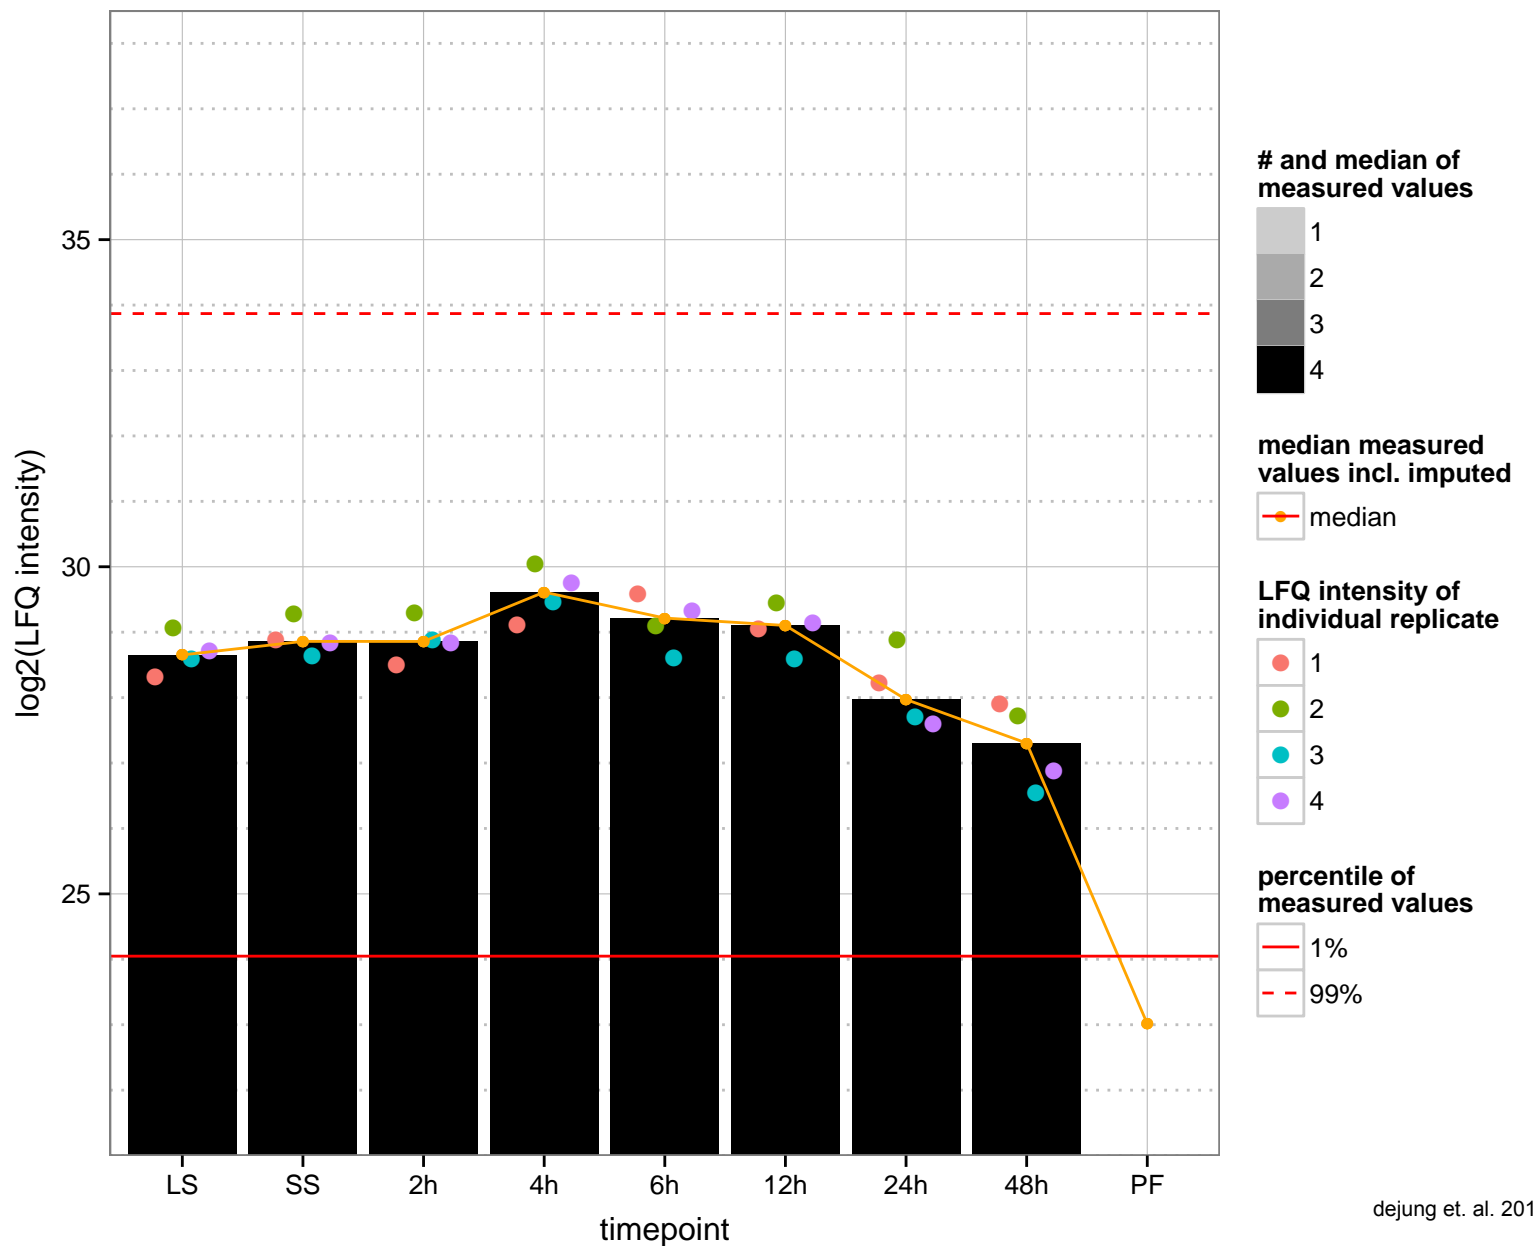

hypothetical protein, conserved  
 Tb927.4.2170  
 AGOF: null  
 AGOC: null  
 AGOP: null  
 PGO: null  
 PGOC: null  
 PGOP: null

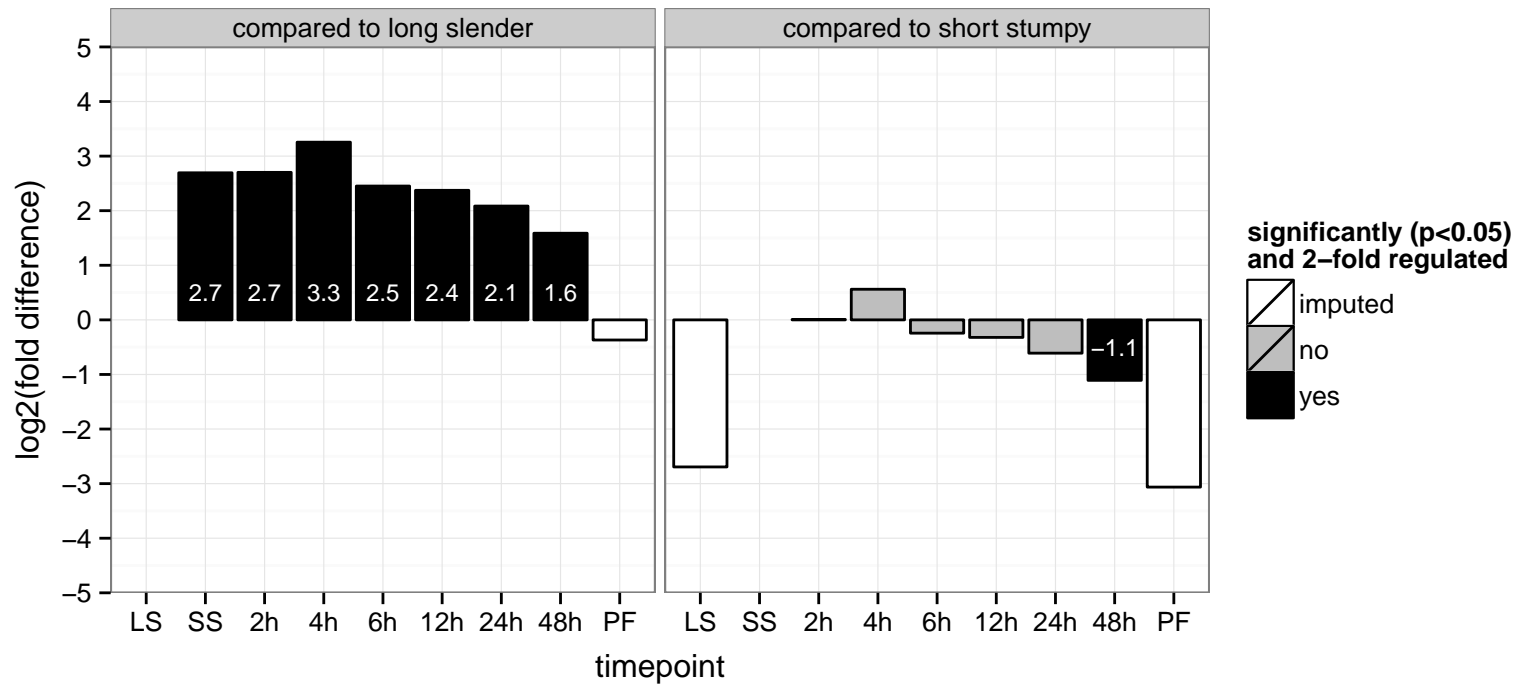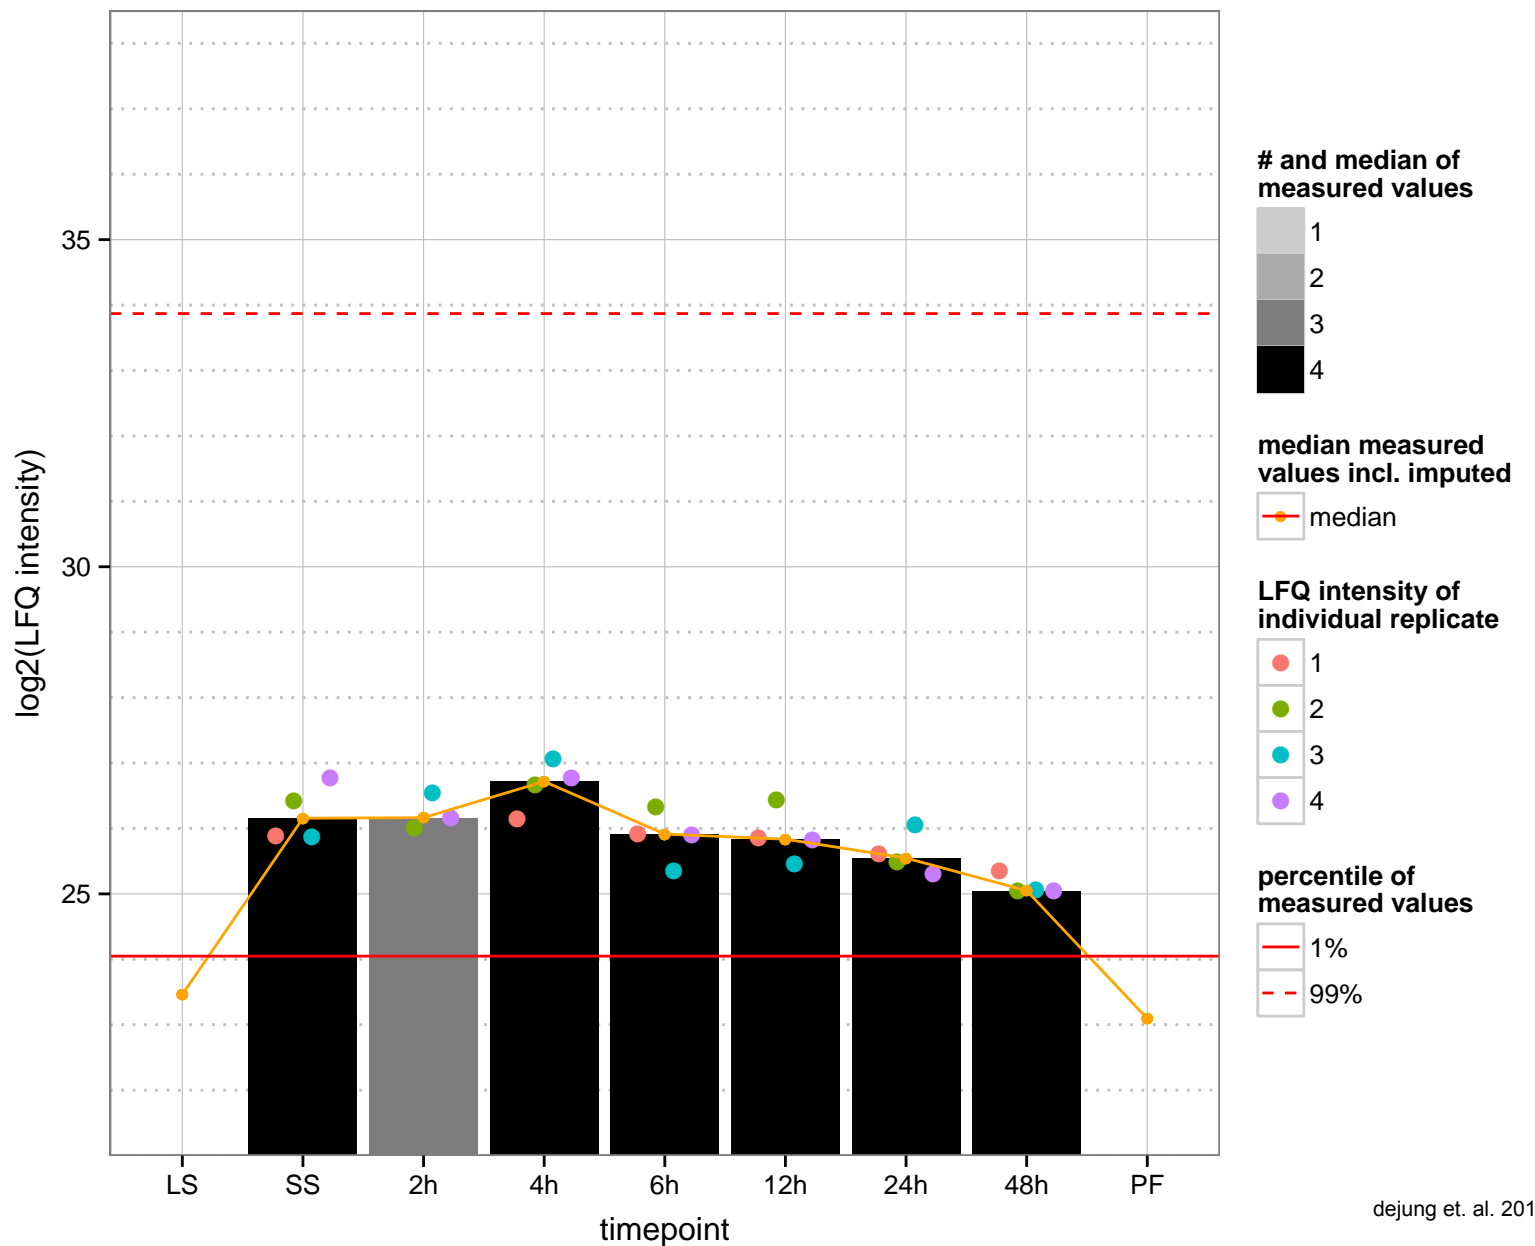

hypothetical protein, conserved  
 Tb927.4.2640  
 AGOF: null  
 AGOC: null  
 AGOP: null  
 PGO: protein binding  
 PGOC: null  
 PGOP: null

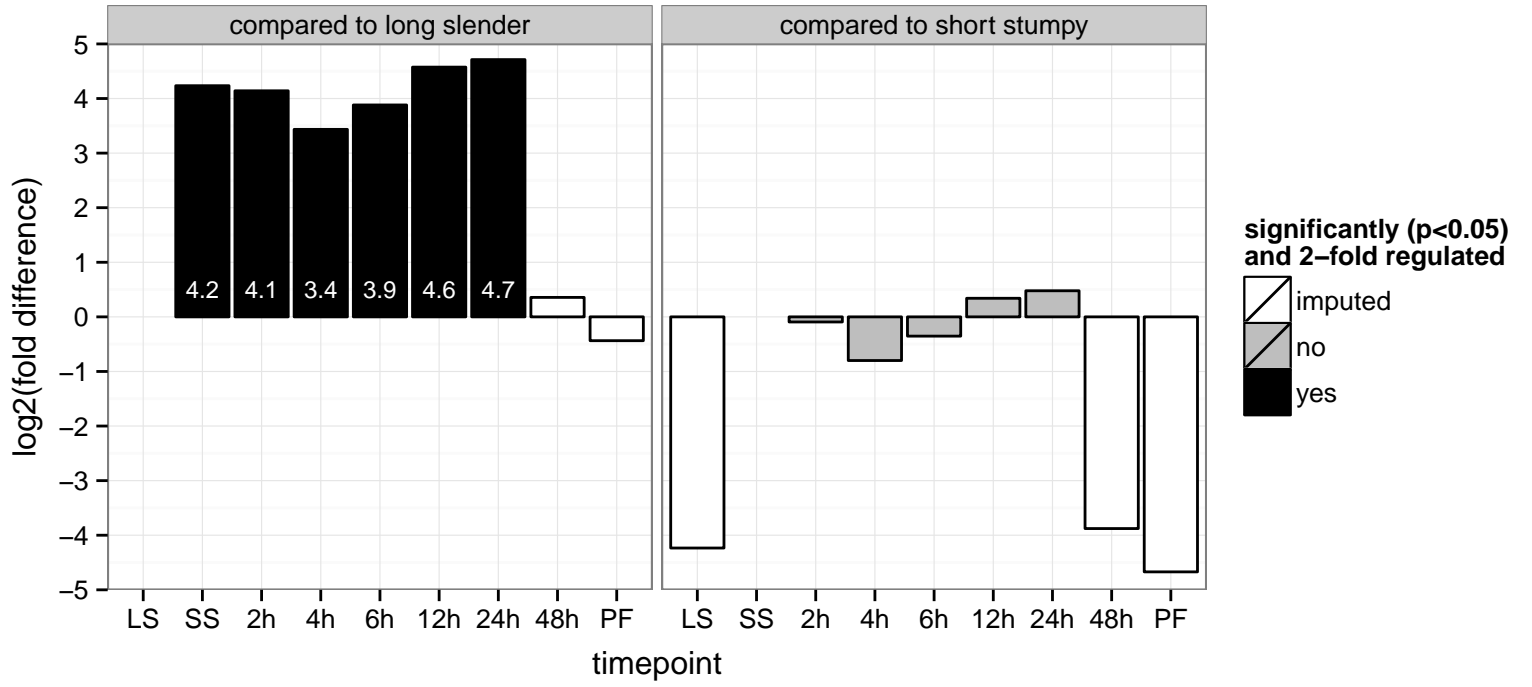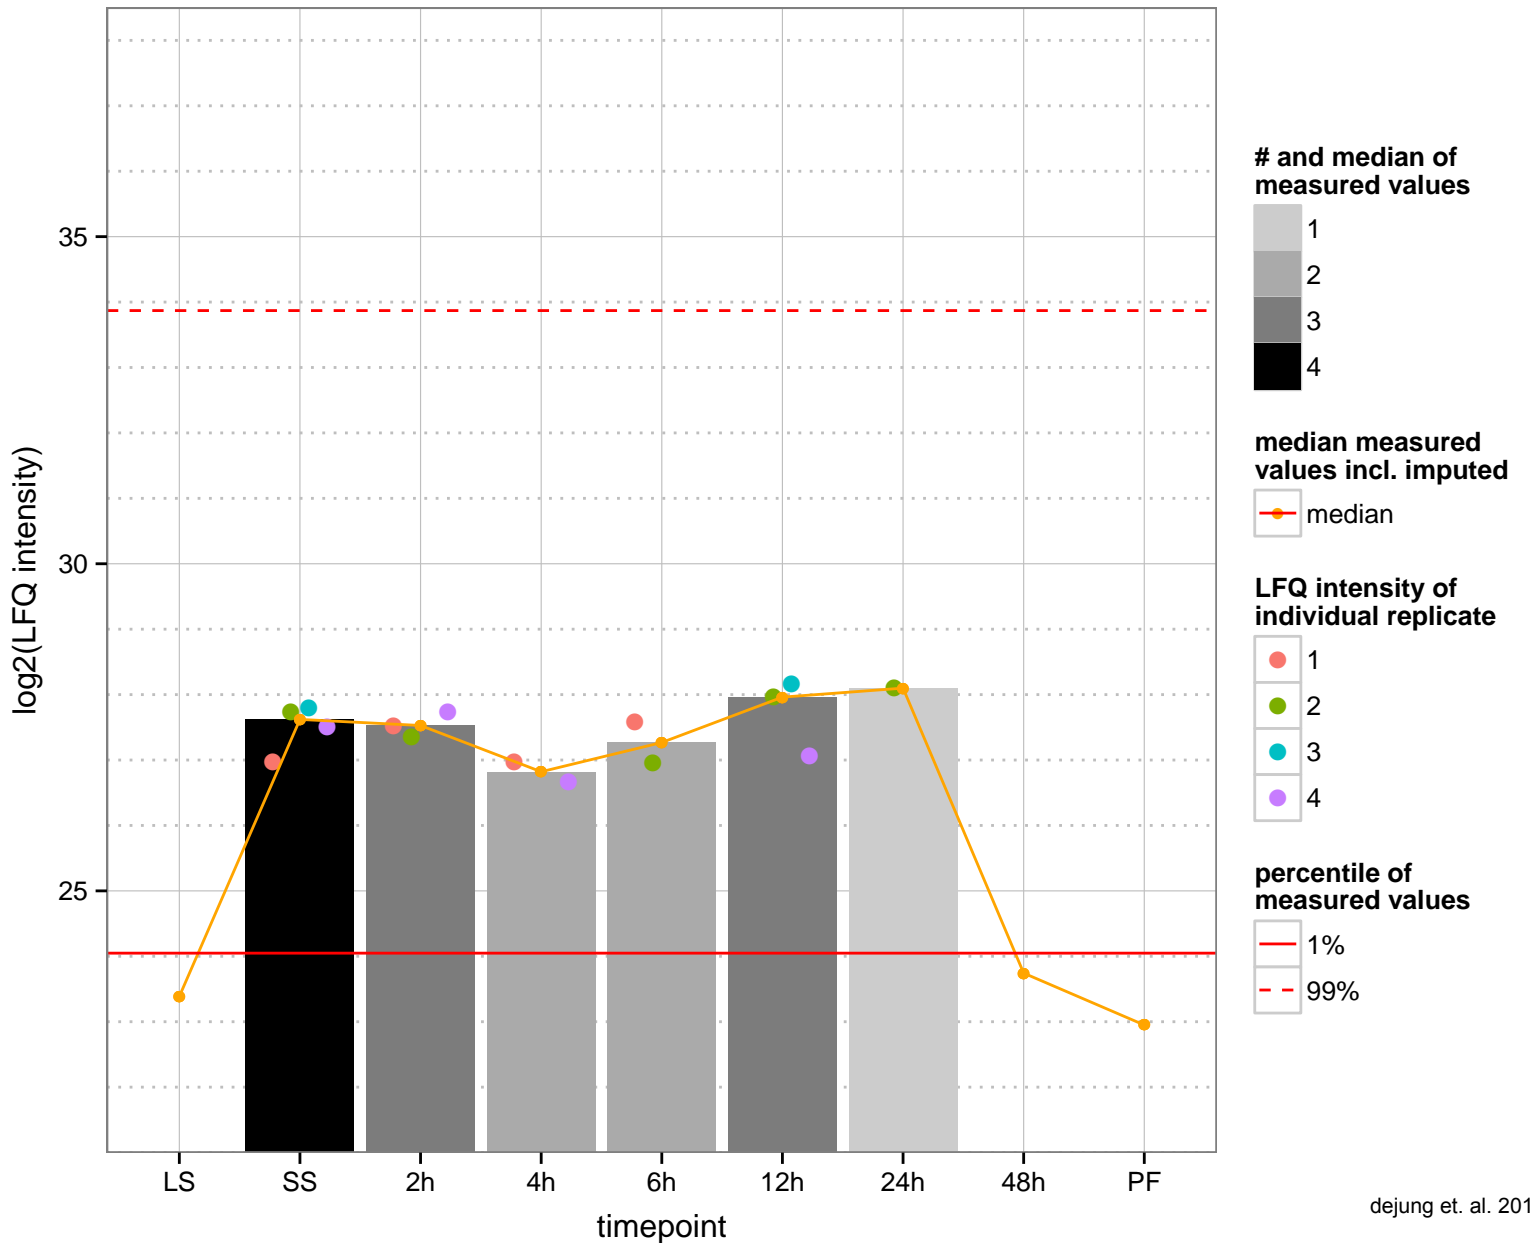



hypothetical protein, conserved  
 Tb927.4.2760  
 AGOF: null  
 AGOC: null  
 AGOP: null  
 PGO: null  
 PGOC: null  
 PGOP: null

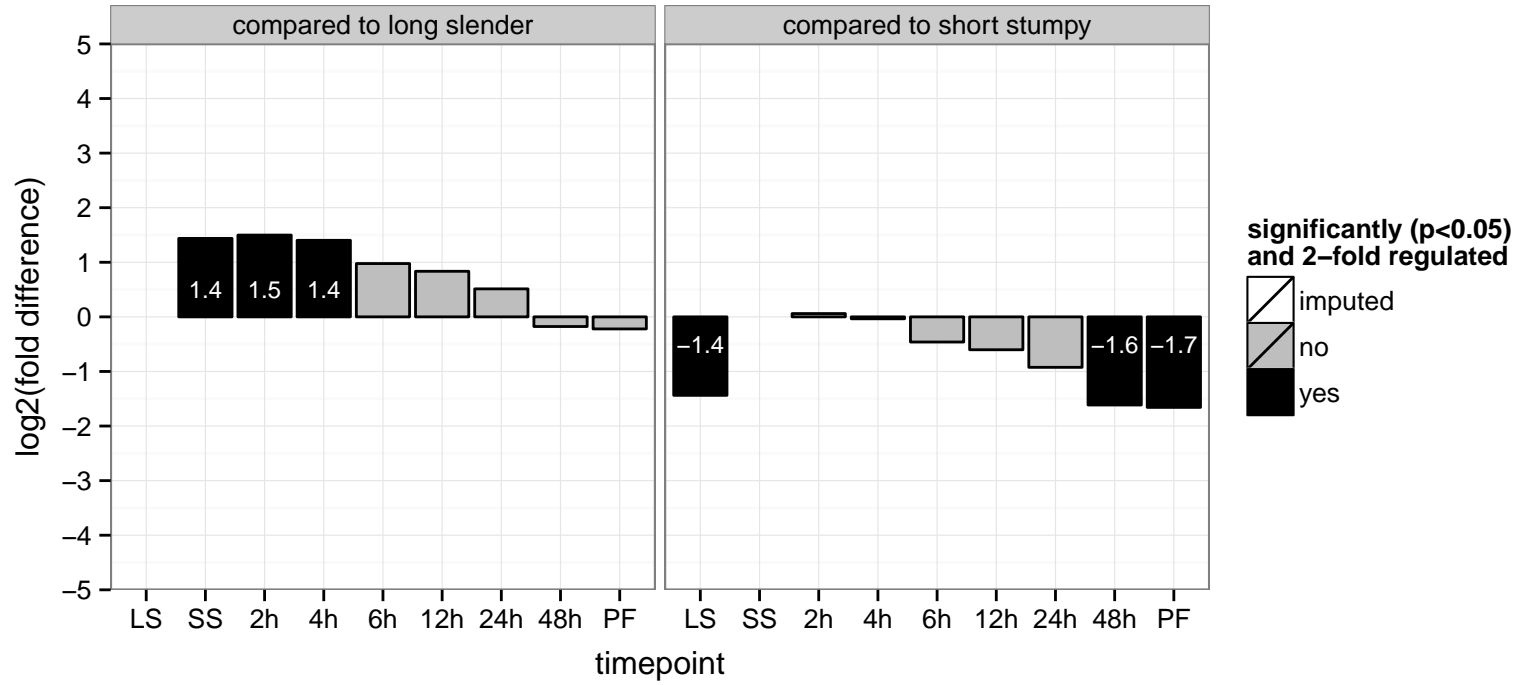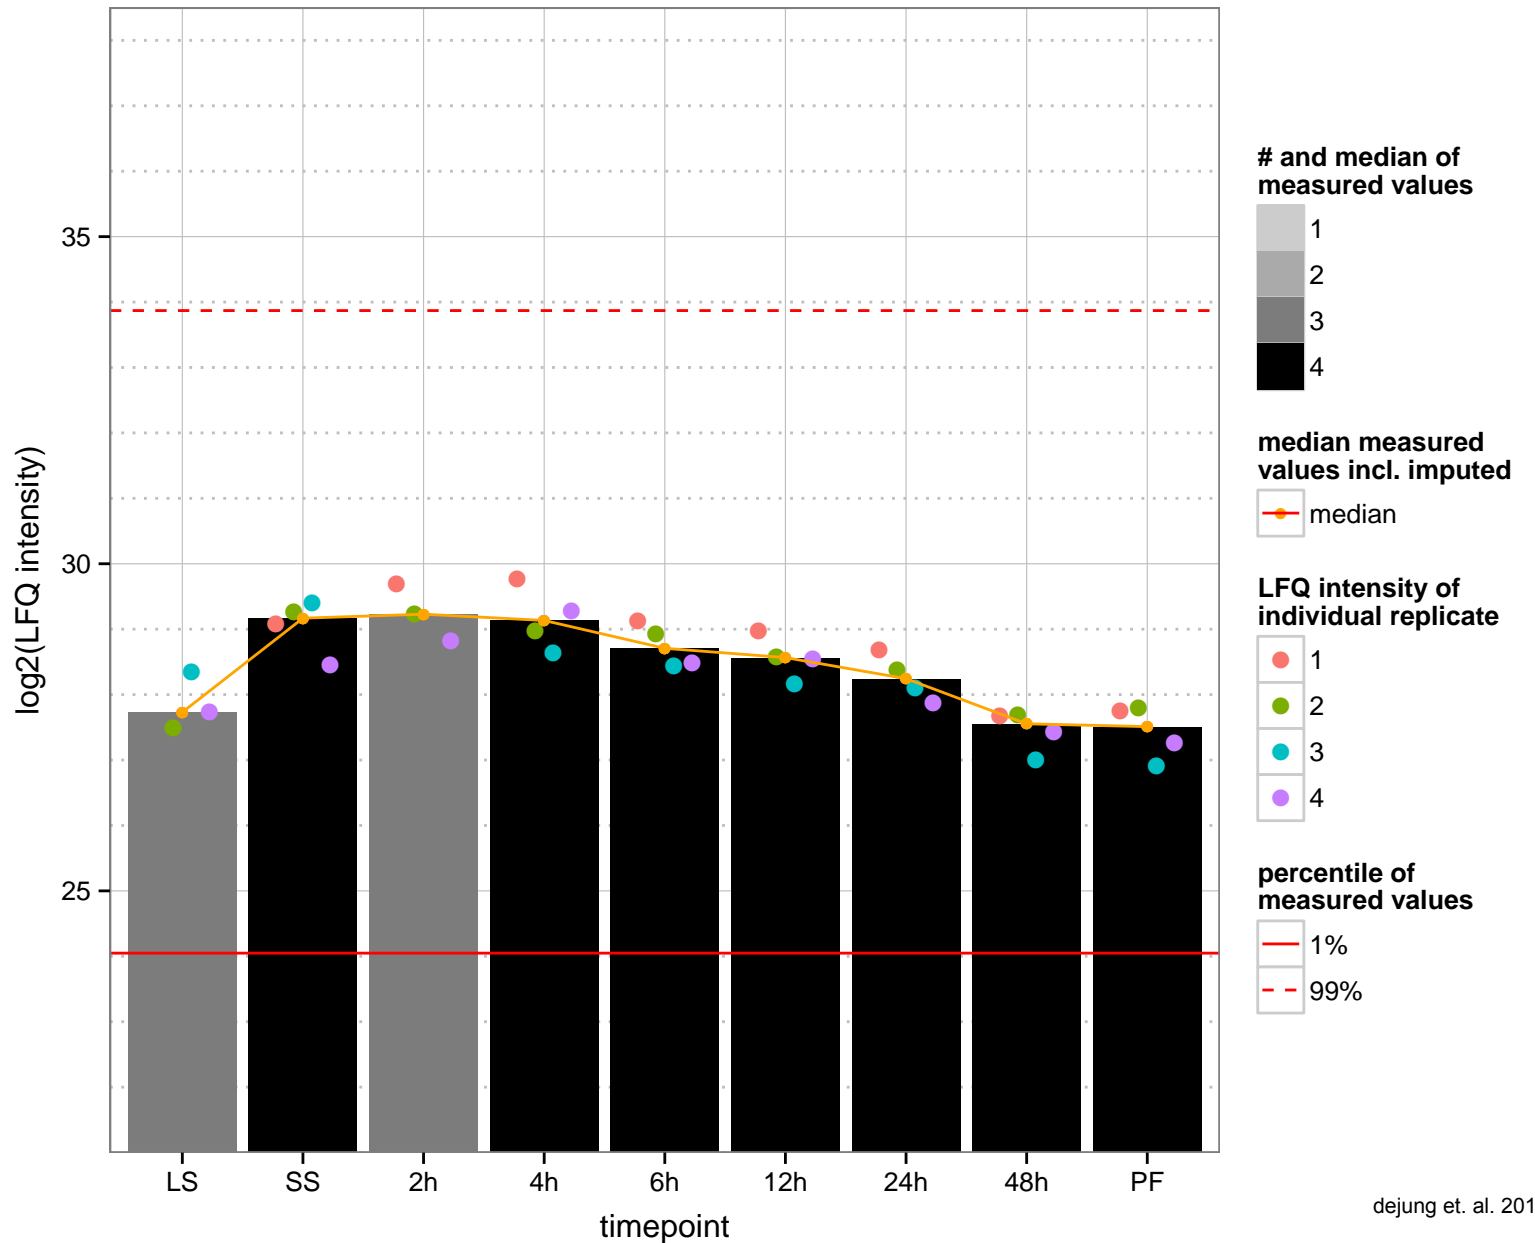

hypothetical protein, conserved  
 Tb927.4.3400  
 AGOF: null  
 AGOC: null  
 AGOP: null  
 PGO: binding  
 PGOC: null  
 PGOP: null

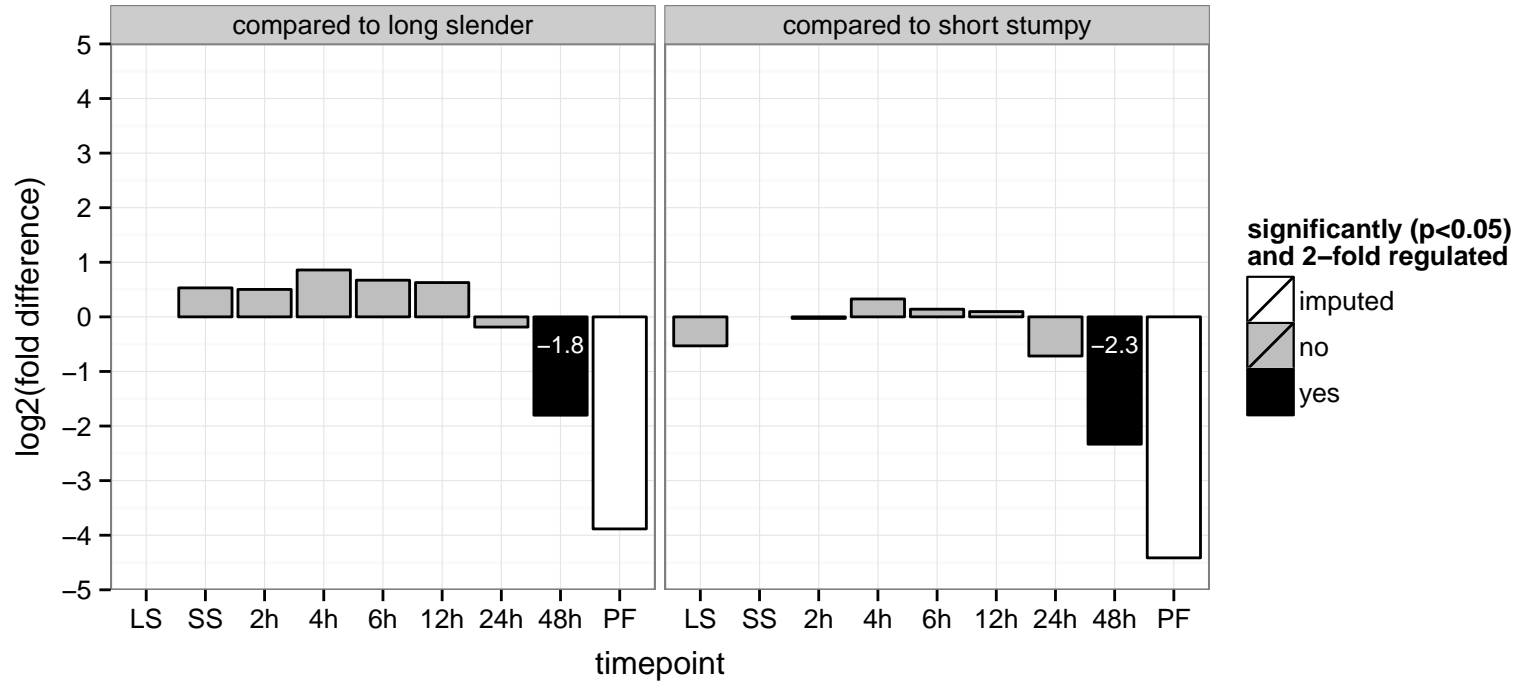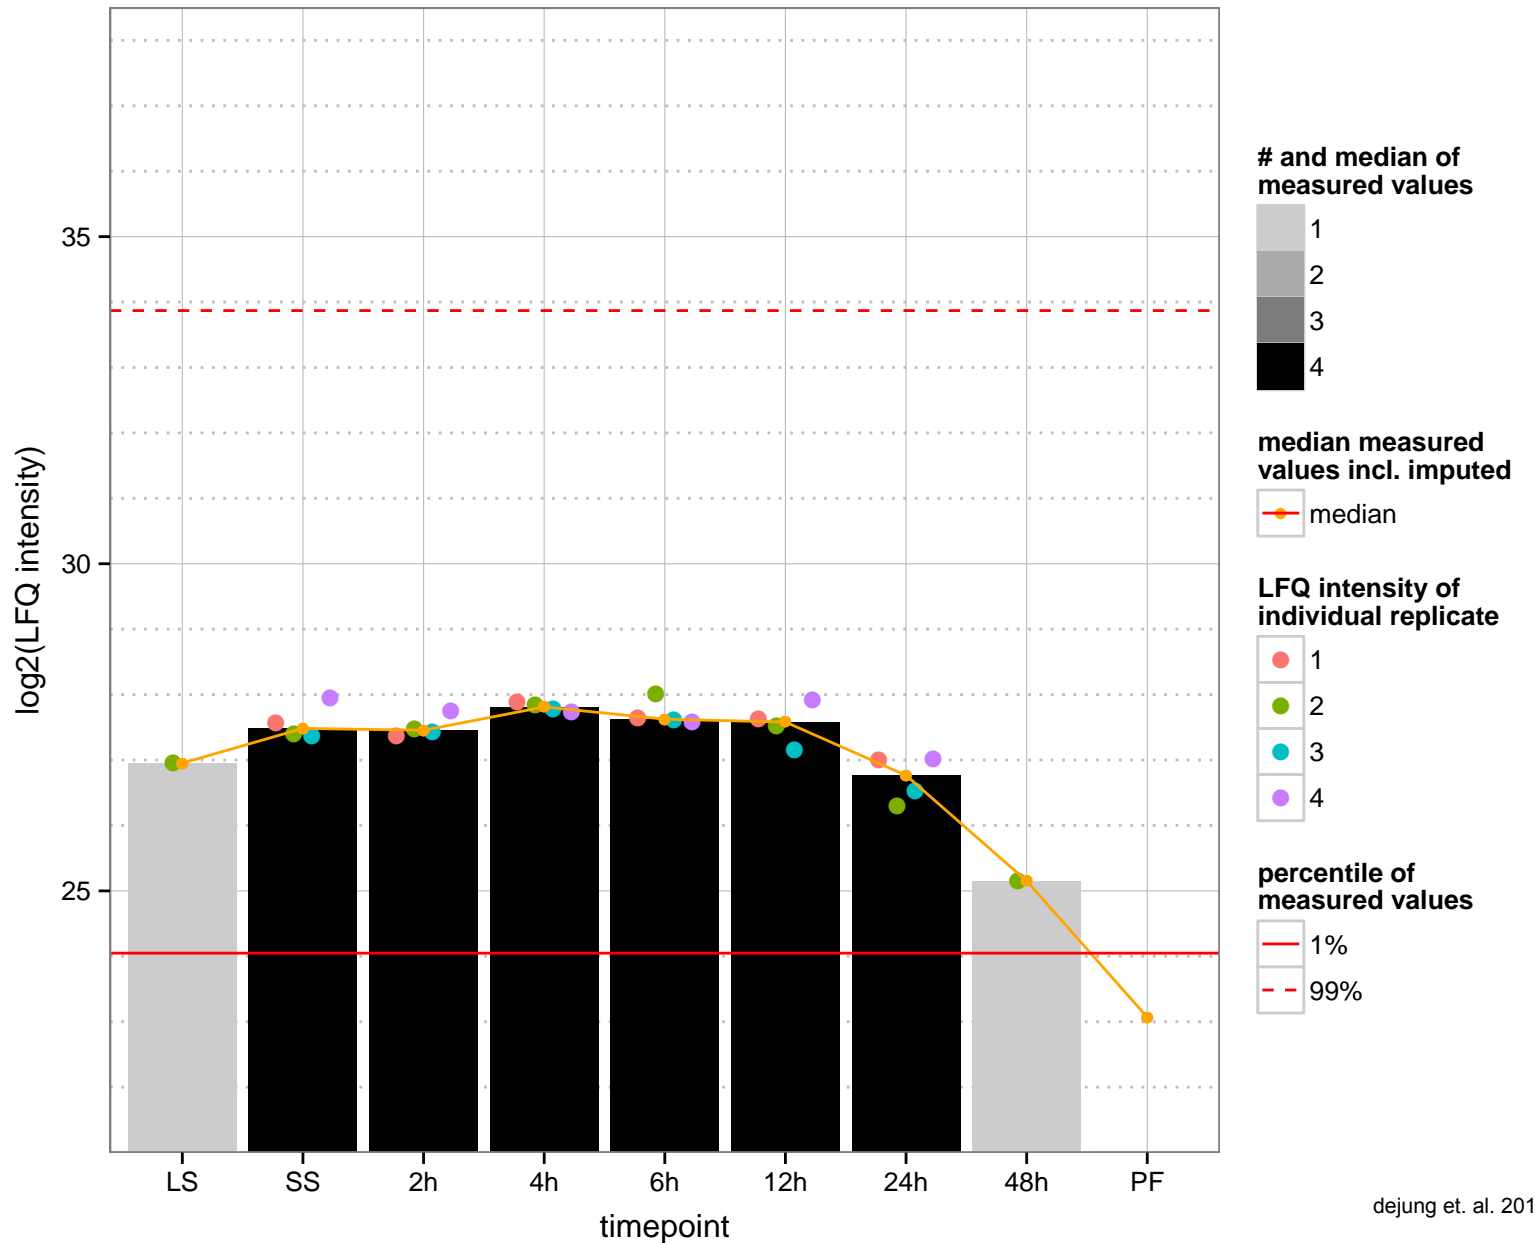

hypothetical protein, conserved  
 Tb927.4.3970  
 AGOF: null  
 AGOC: null  
 AGOP: null  
 PGO: null  
 PGOC: null  
 PGOP: null

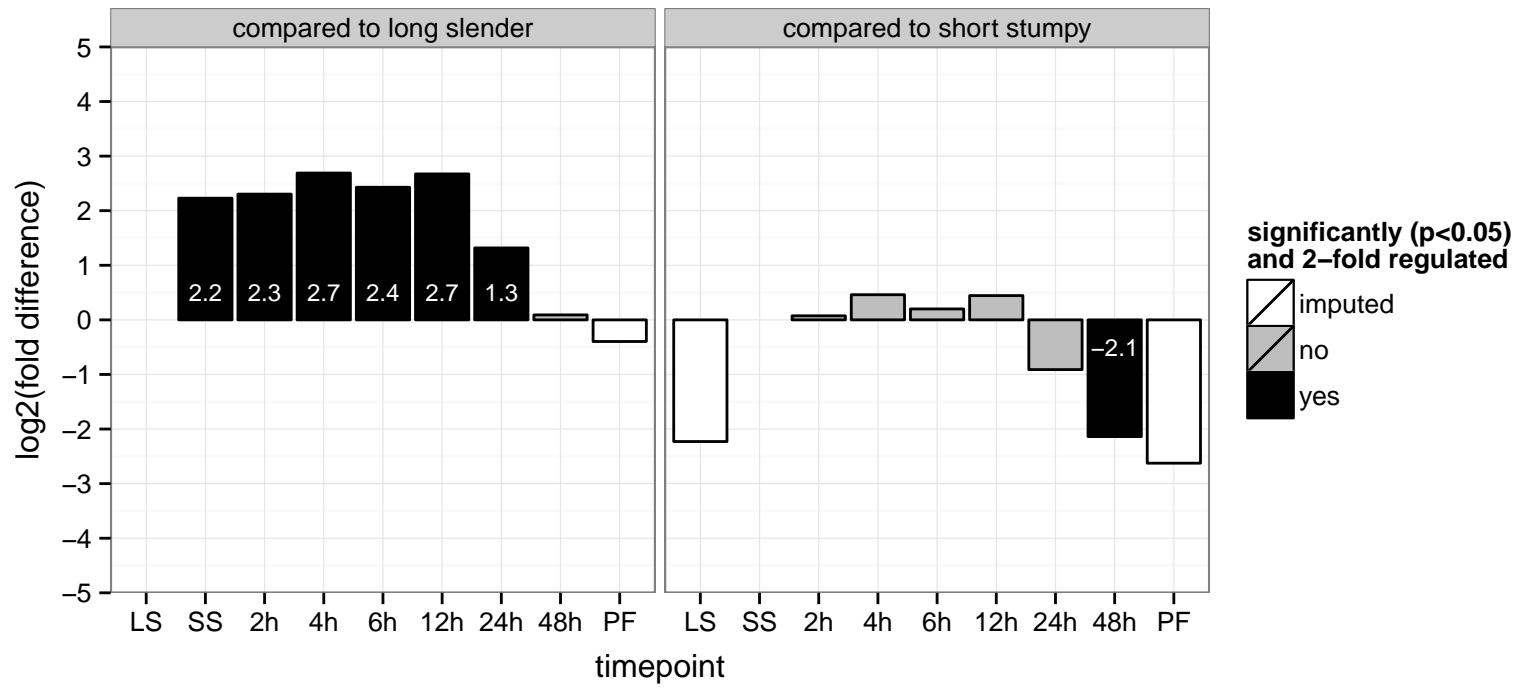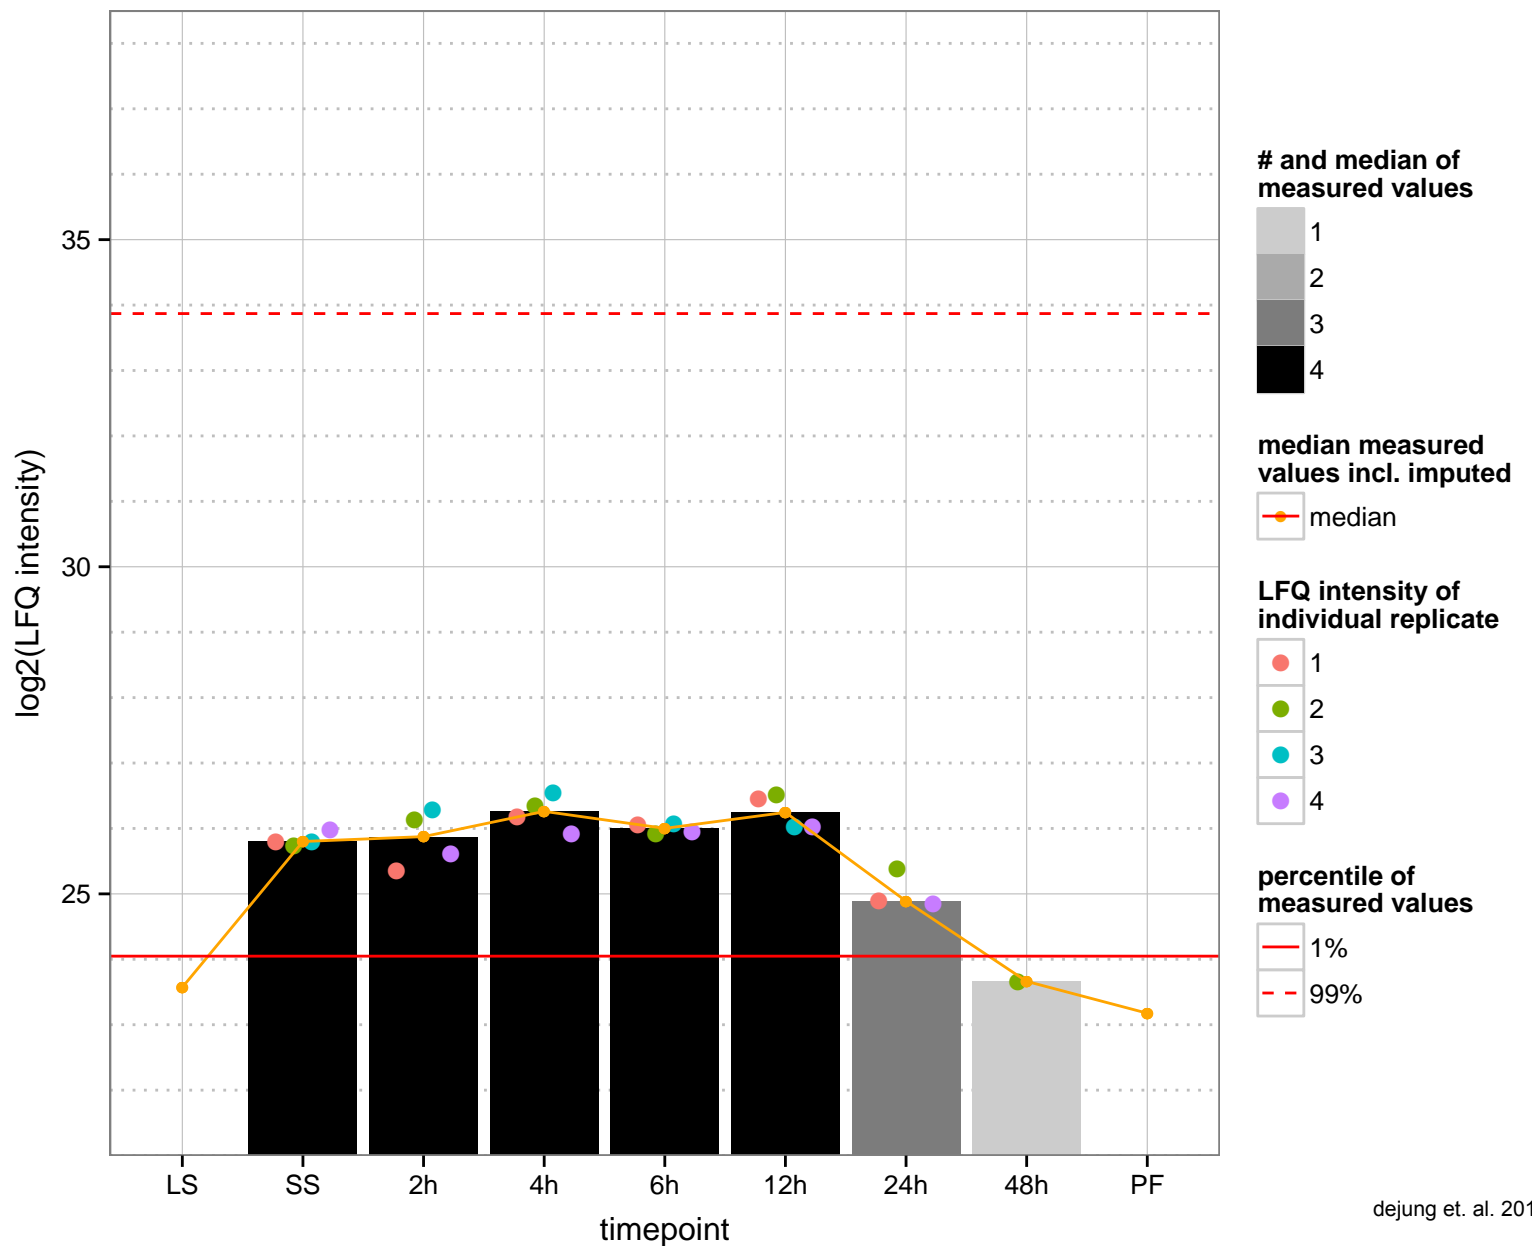

hypothetical protein, conserved  
 Tb927.4.610  
 AGOF: phosphatidylinositol binding  
 AGOC: null  
 AGOP: cell communication  
 PGO: phosphatidylinositol binding, protein binding  
 PGO: null  
 PGO: cell communication

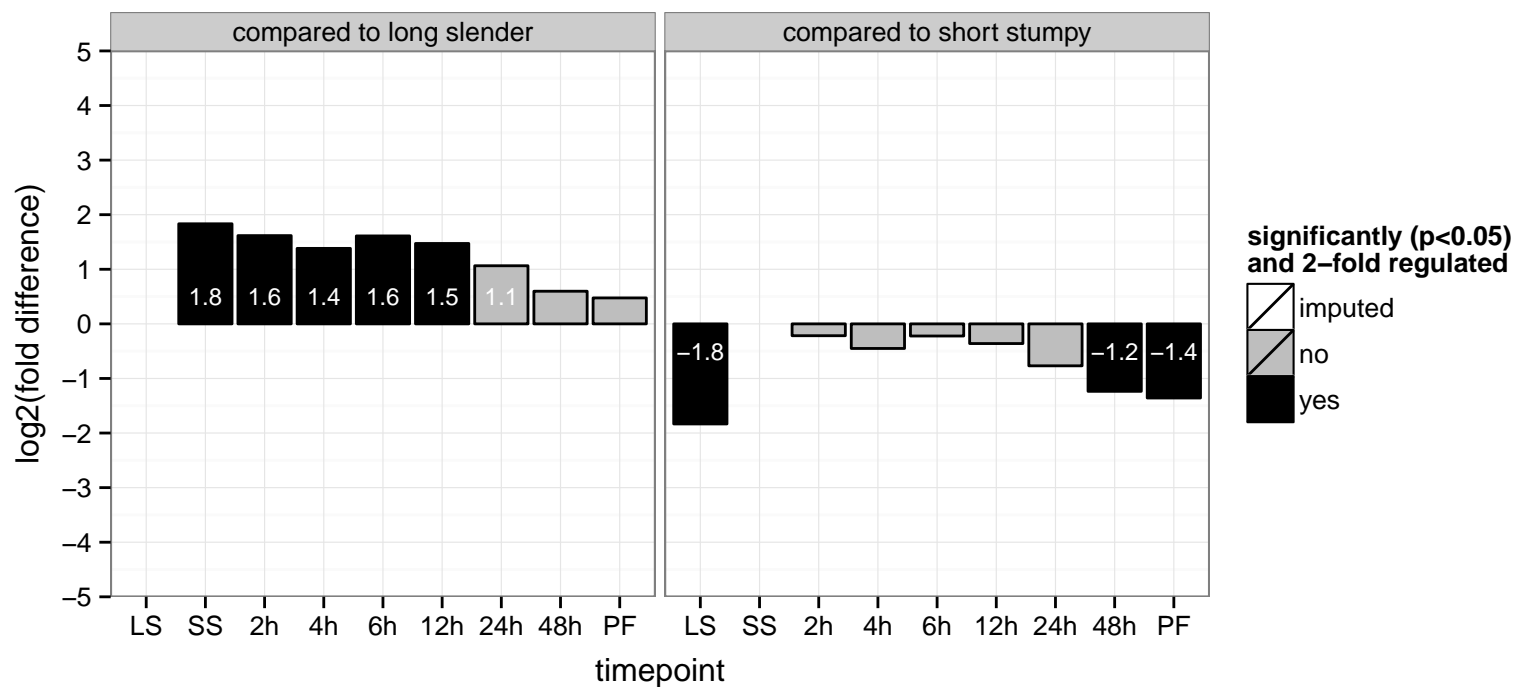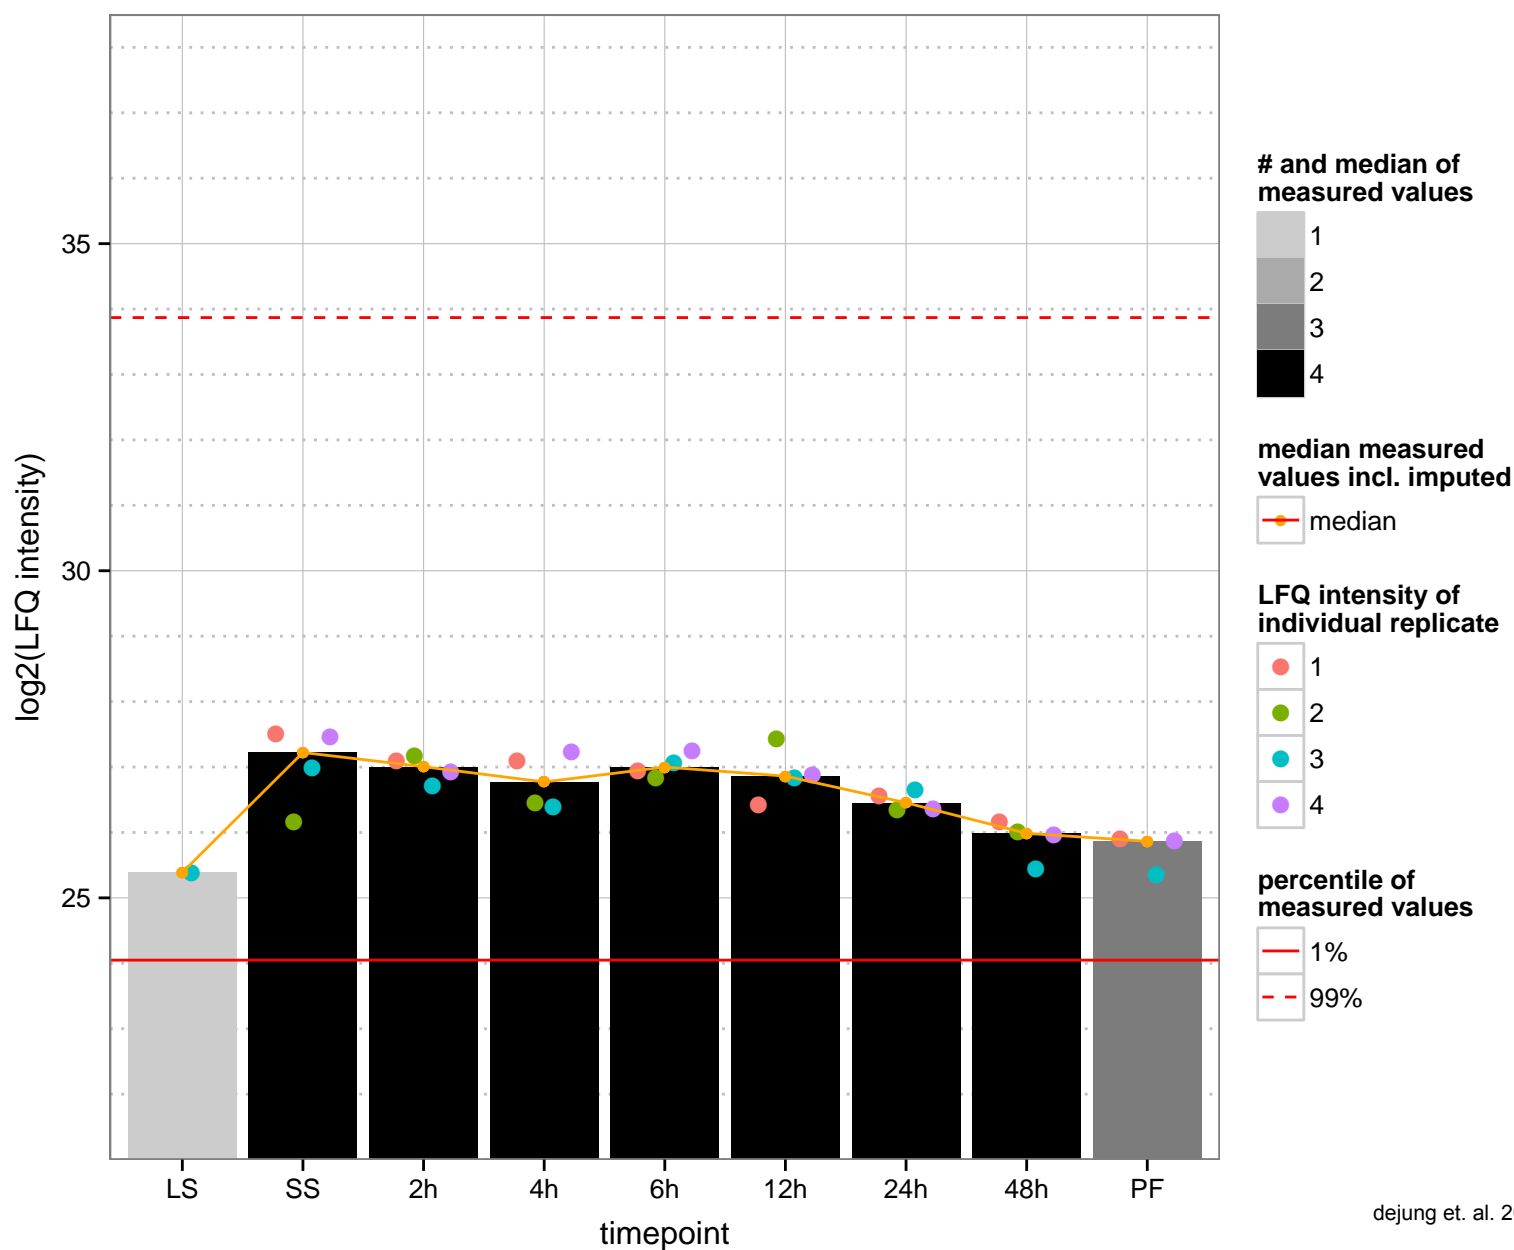

hypothetical protein, conserved  
 Tb927.5.1160  
 AGOF: null  
 AGOC: null  
 AGOP: null  
 PGO: null  
 PGOC: null  
 PGOP: null

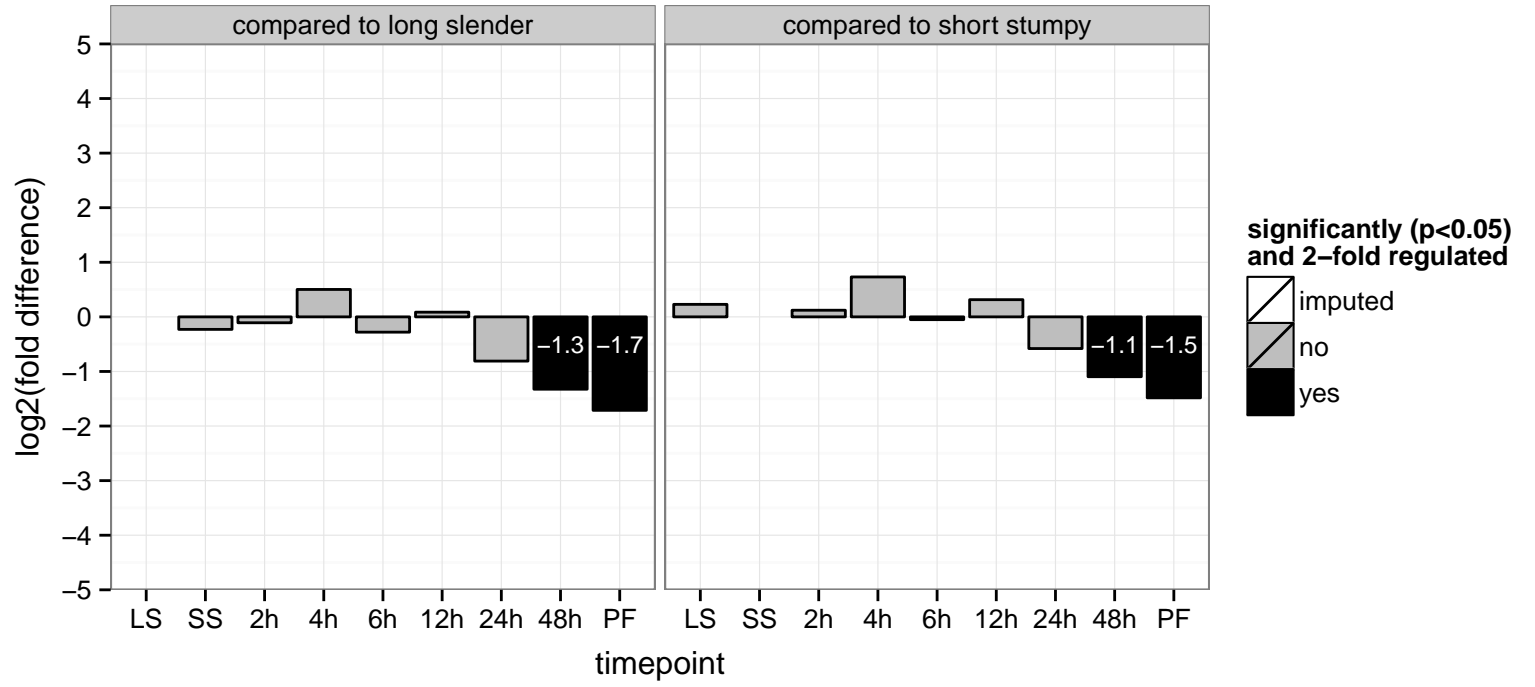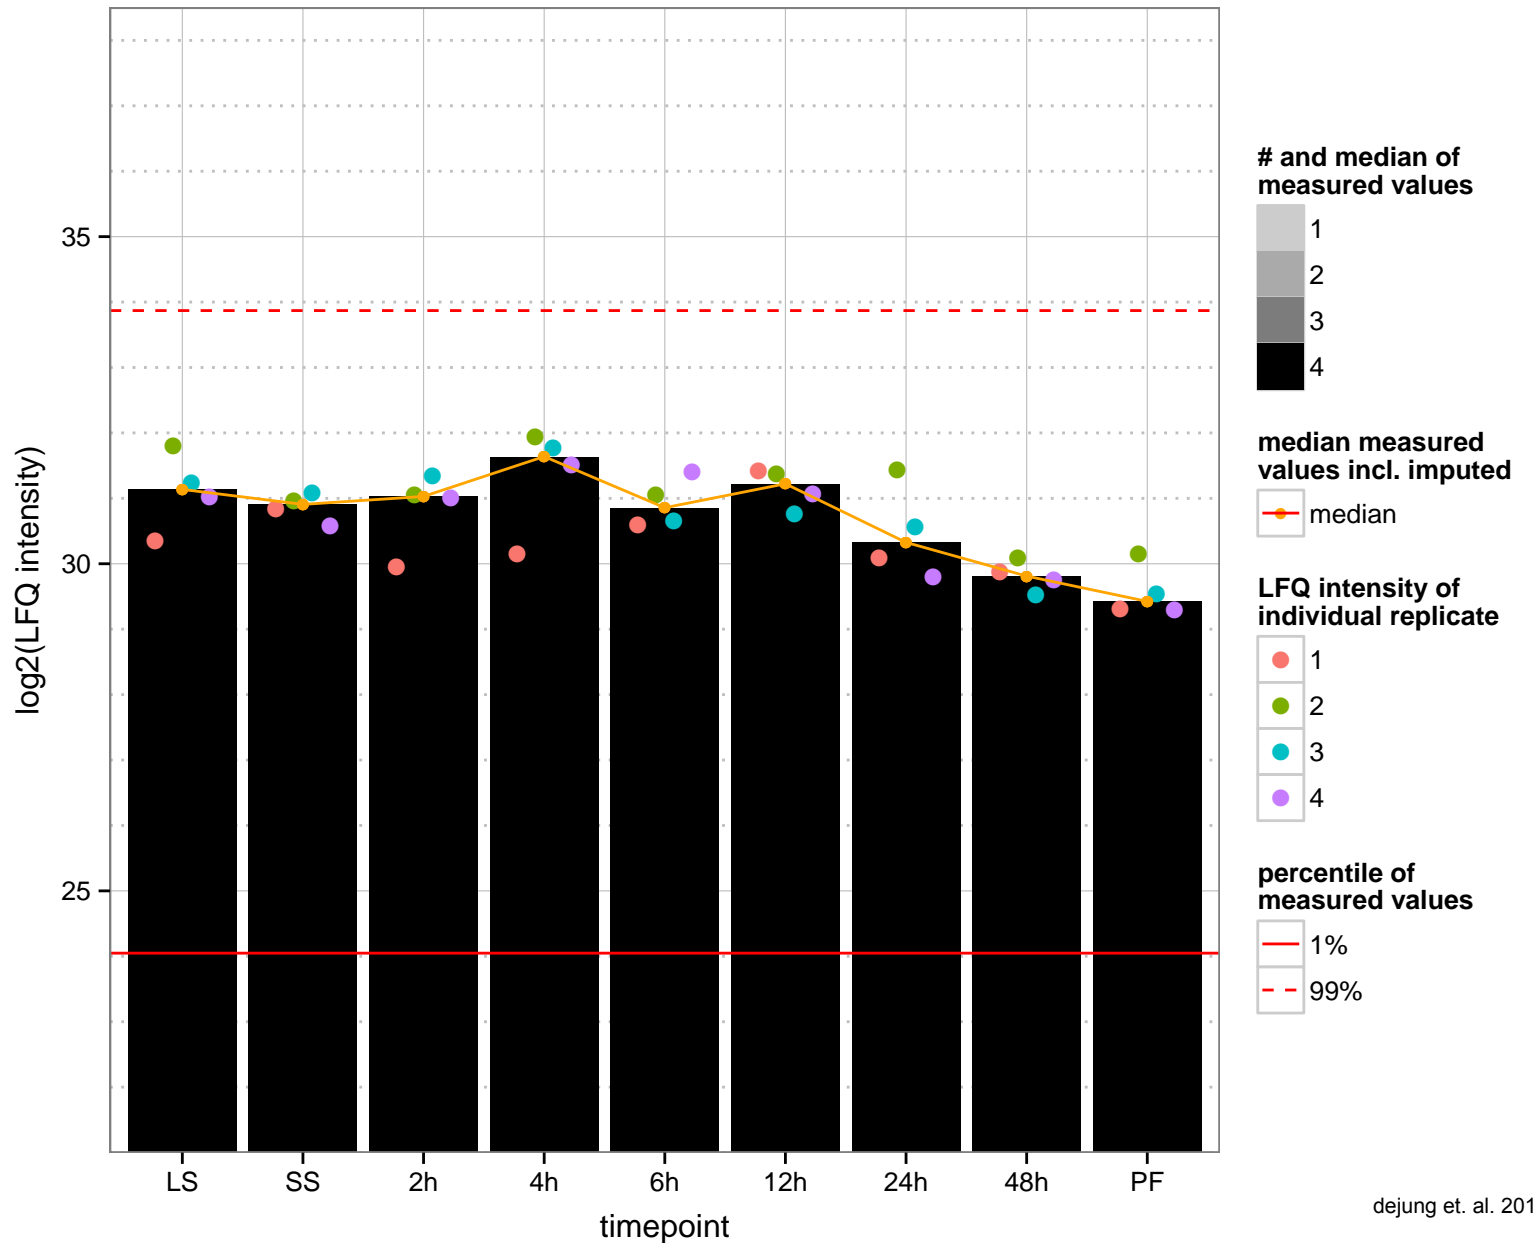

hypothetical protein, conserved  
 Tb927.5.1260  
 AGOF: transporter activity  
 AGOC: integral to membrane  
 AGOP: transport  
 PGOF: sulfate transmembrane transporter activity  
 PGO: integral to membrane  
 PGOP: sulfate transport

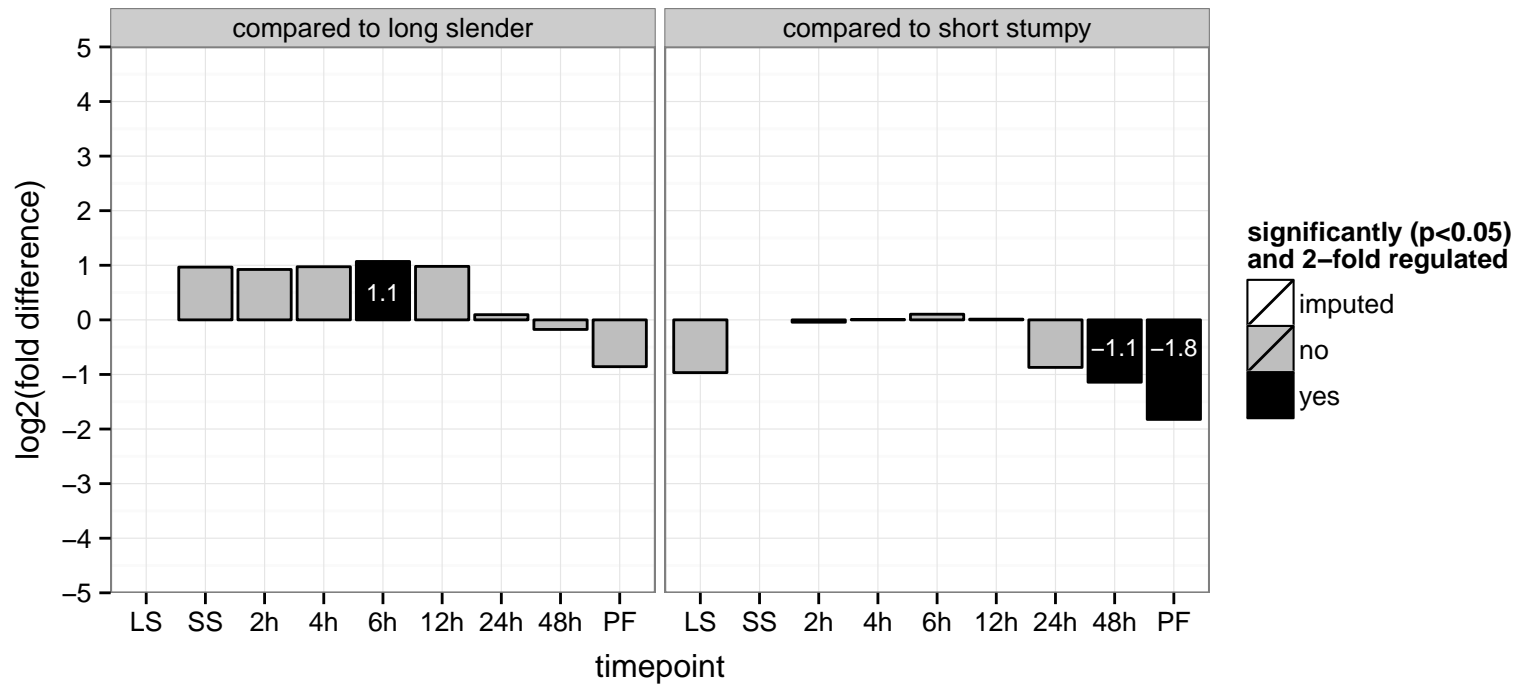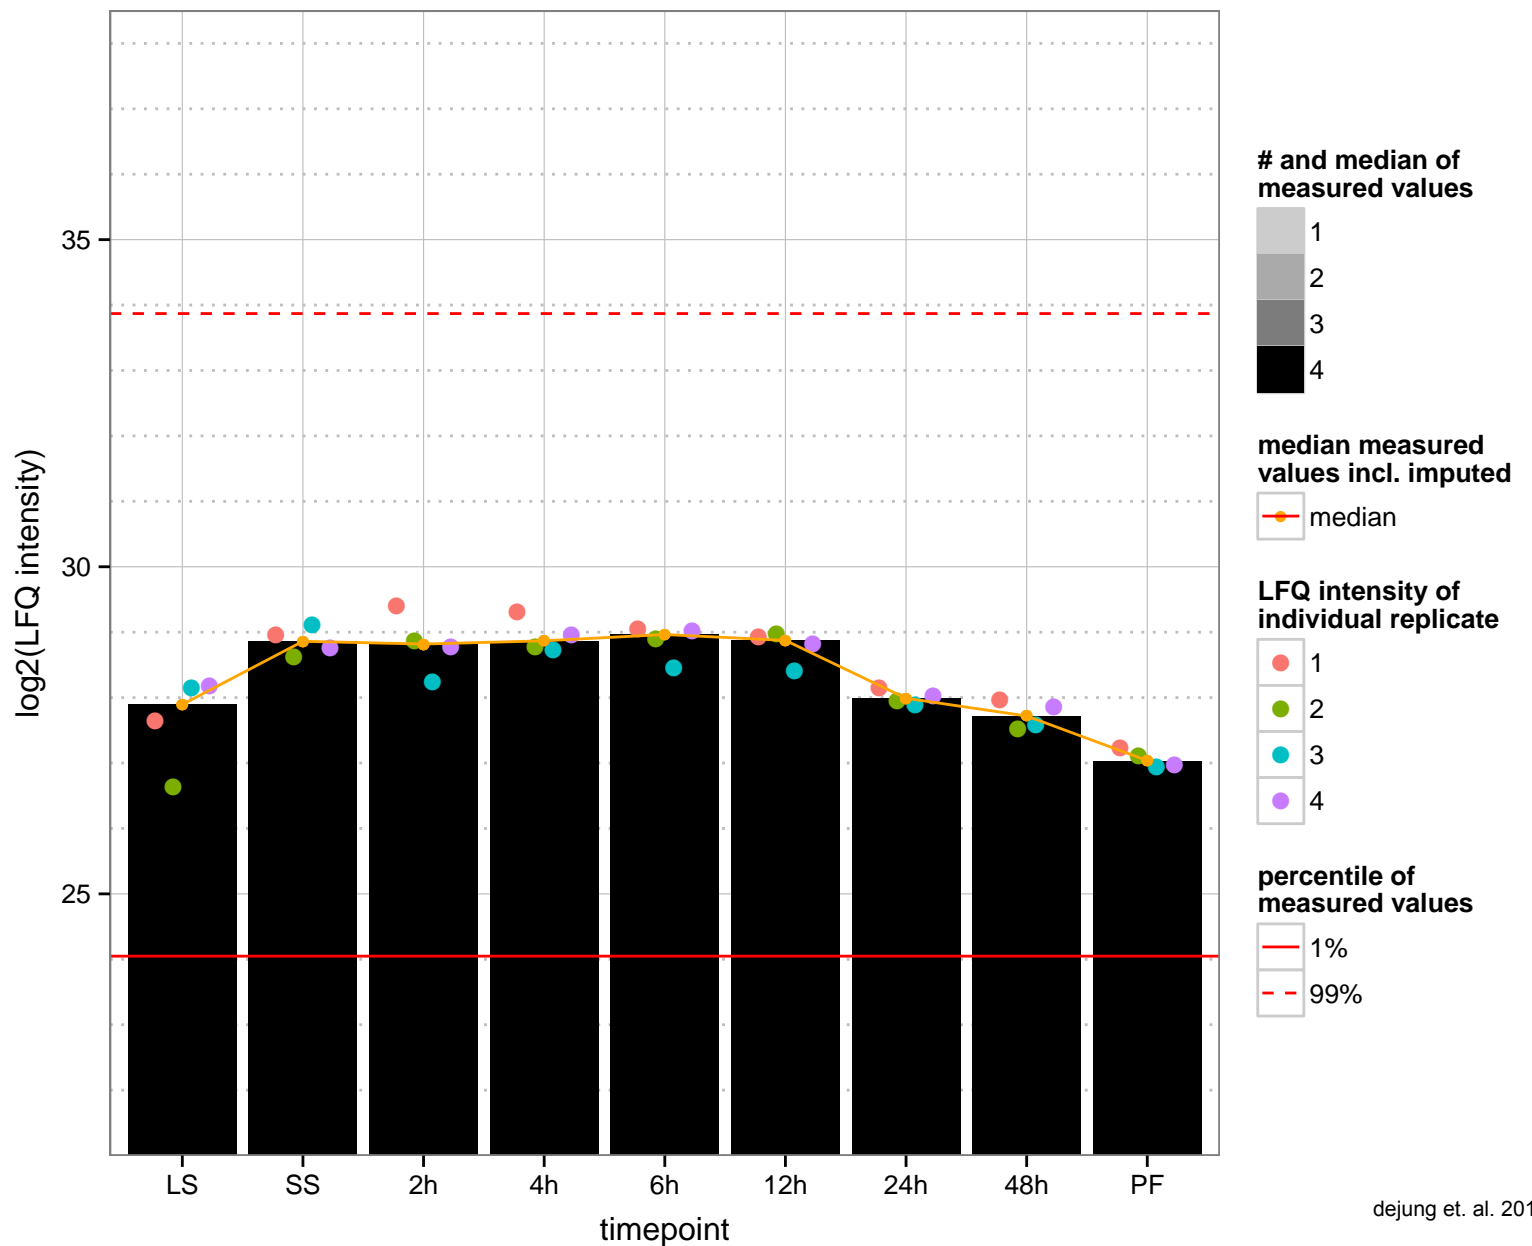

inositol-1(or 4)-monophosphatase 1, putative (IMPase 1)  
 Tb927.5.2690  
 AGOF: null  
 AGOC: null  
 AGOP: null  
 PGO: null  
 PGOC: null  
 PGOP: phosphatidylinositol phosphorylation

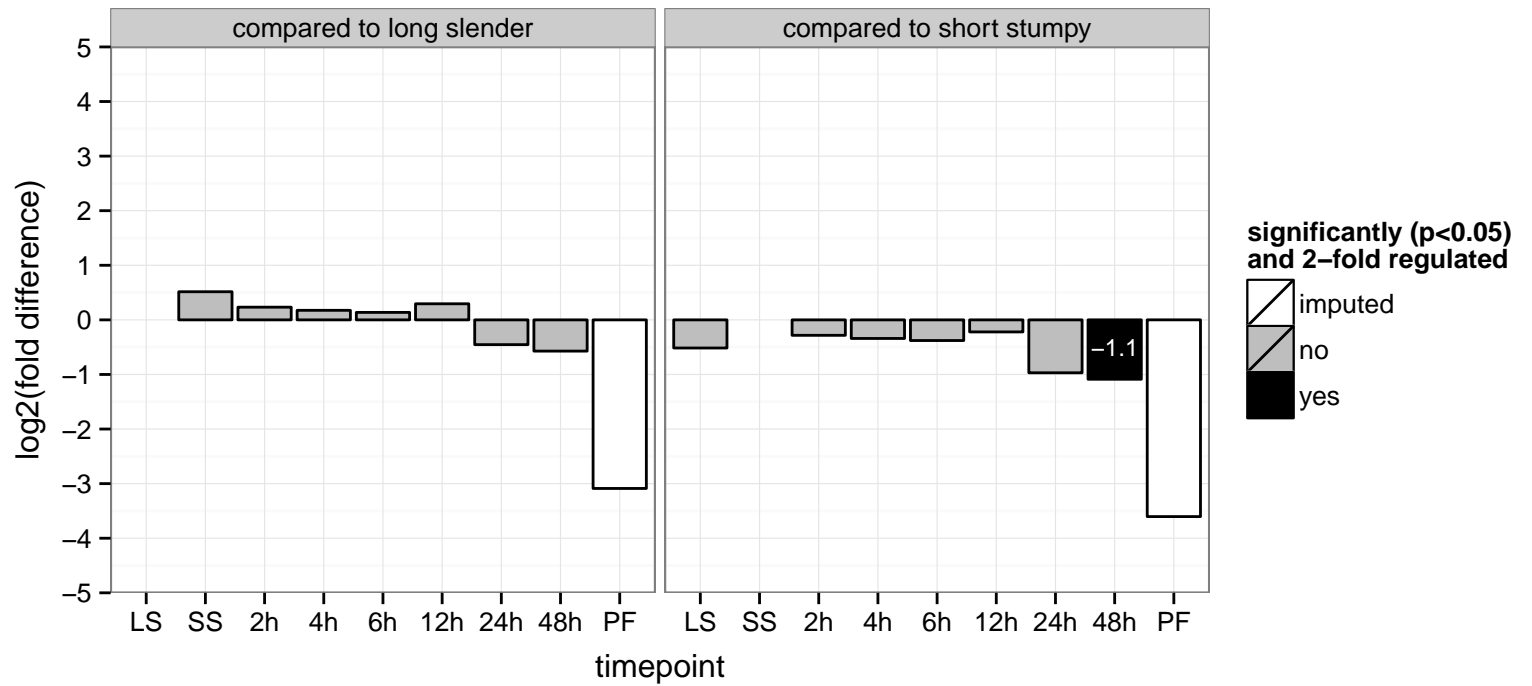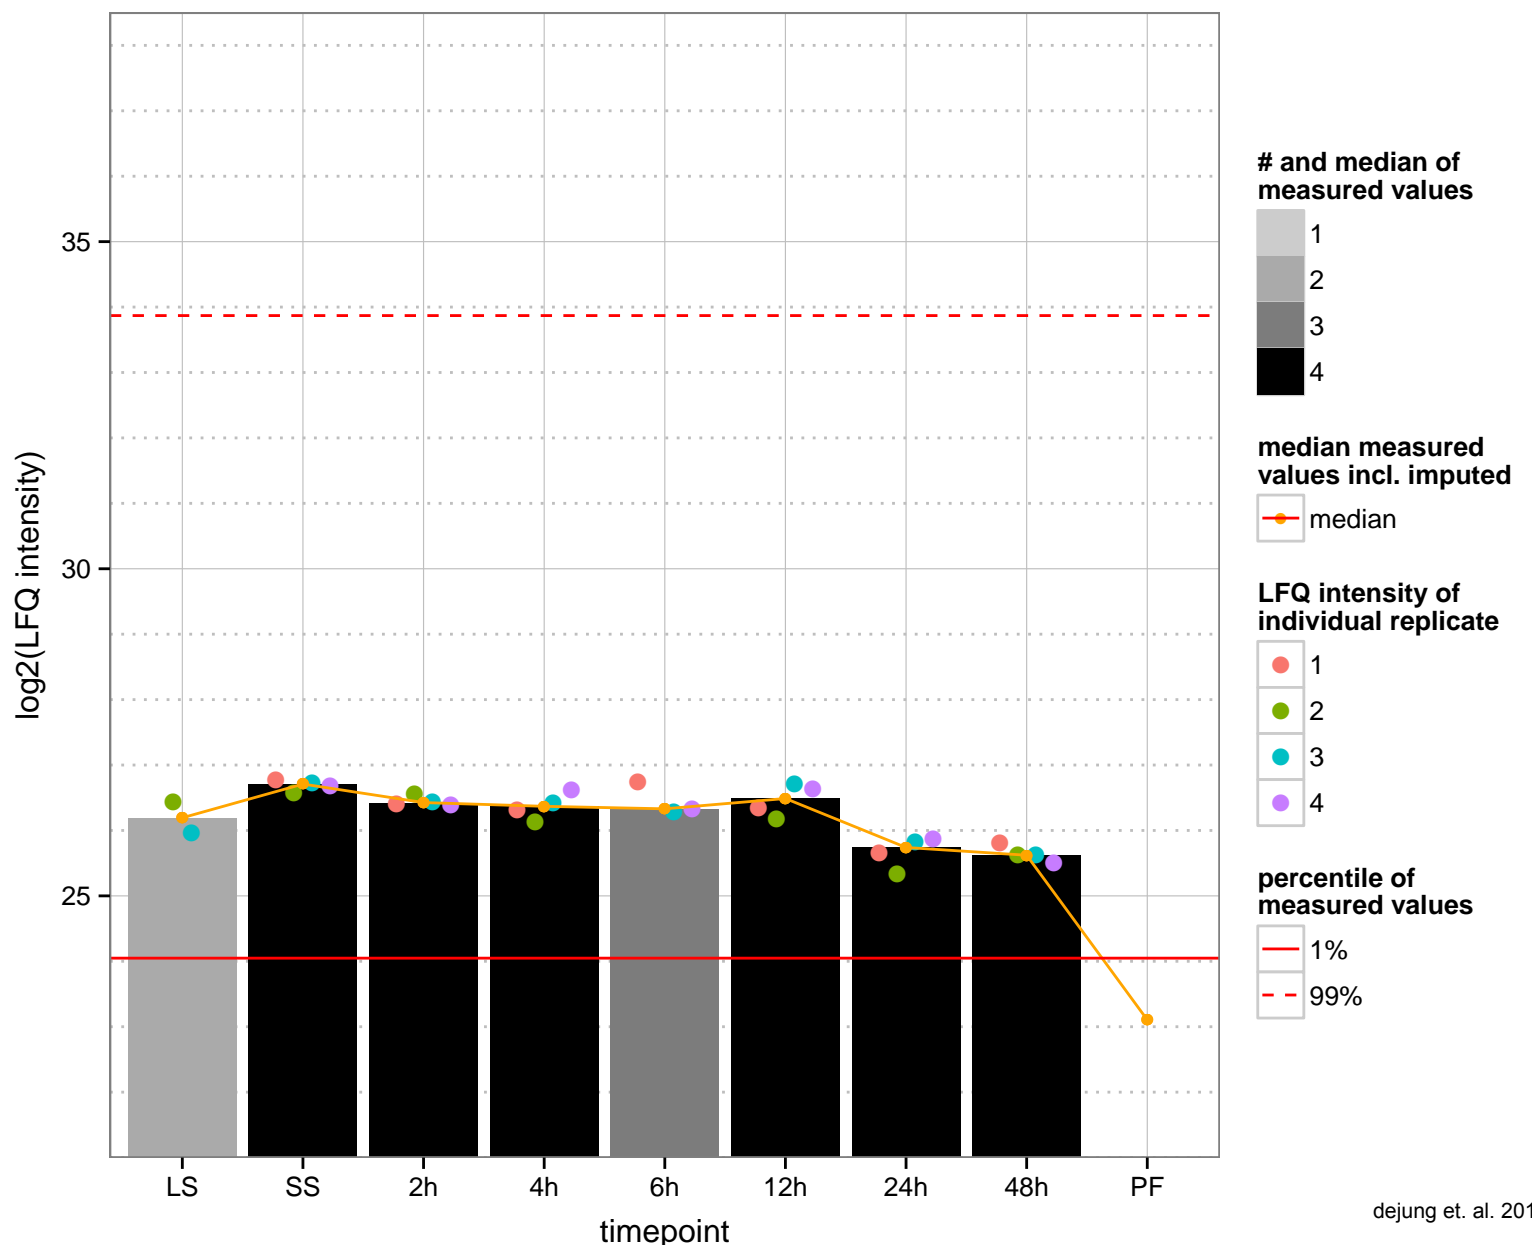

vesicle-associated membrane protein, putative, synaptobrevin, putative (VAMP)  
 Tb927.5.3560  
 AGOF: null  
 AGOC: integral to membrane  
 AGOP: vesicle-mediated transport  
 PGO: null  
 PGO: integral to membrane  
 PGO: transport, vesicle-mediated transport

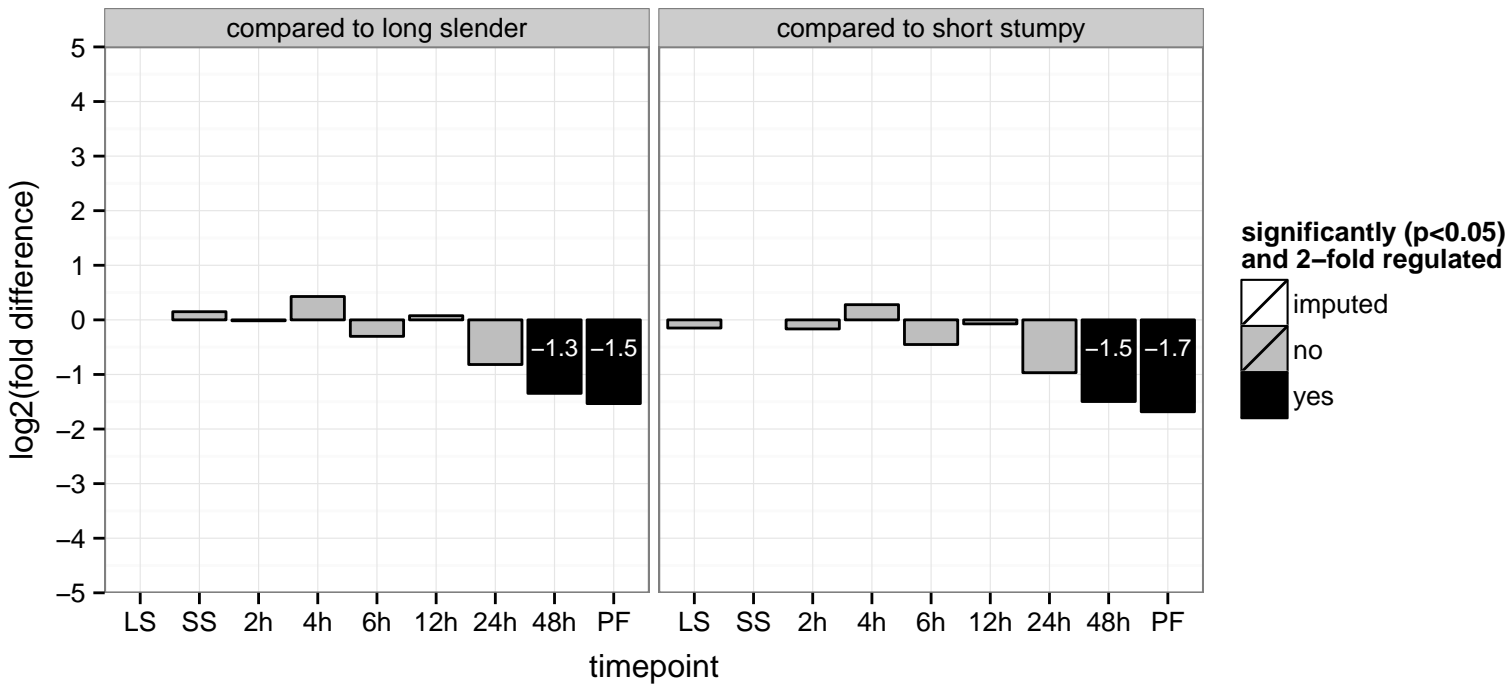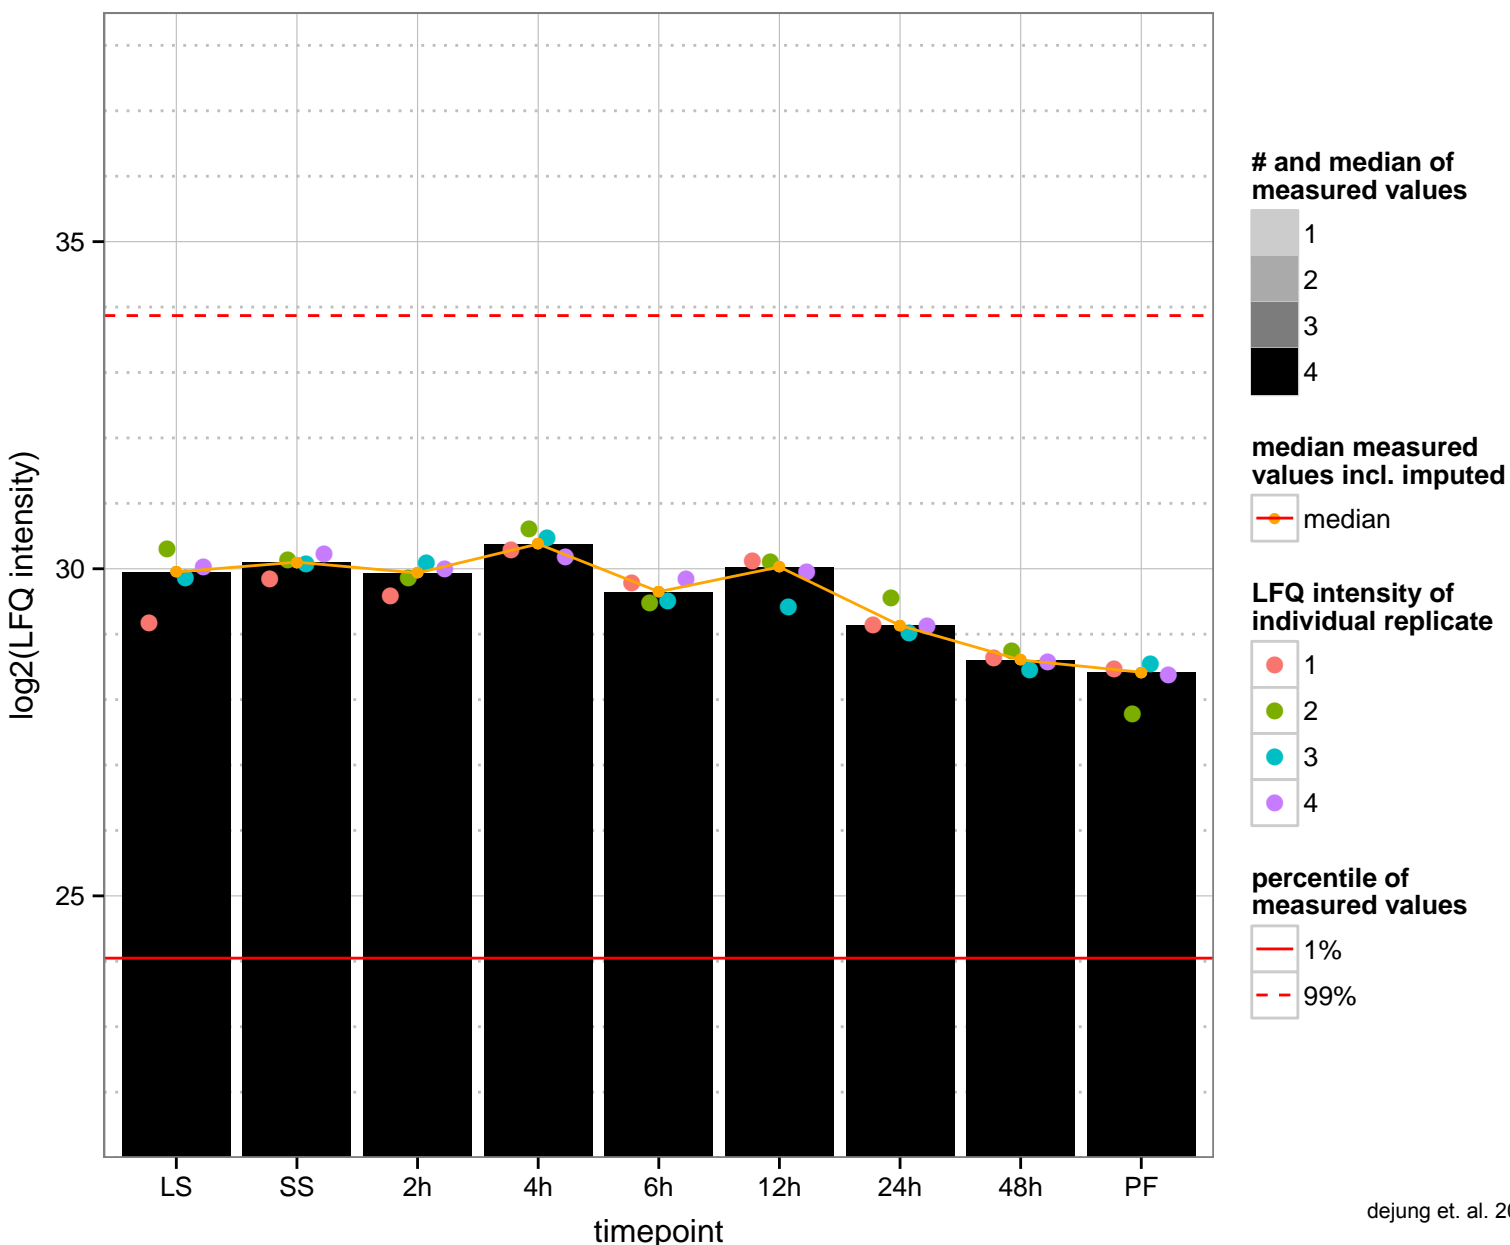



cysteine peptidase, Clan CA, family C1, Cathepsin L-like (CP), Cathepsin L-like (Rhodesain)  
 Tb927.6.980;Tb927.6.970;Tb927.6.960;Tb927.6.1020;Tb927.6.1010  
 AGOF: cysteine-type peptidase activity  
 AGOC: null  
 AGOP: proteolysis  
 PGOF: cysteine-type endopeptidase activity, cysteine-type peptidase activity, null  
 PGOC: null  
 PGOP: proteolysis, null

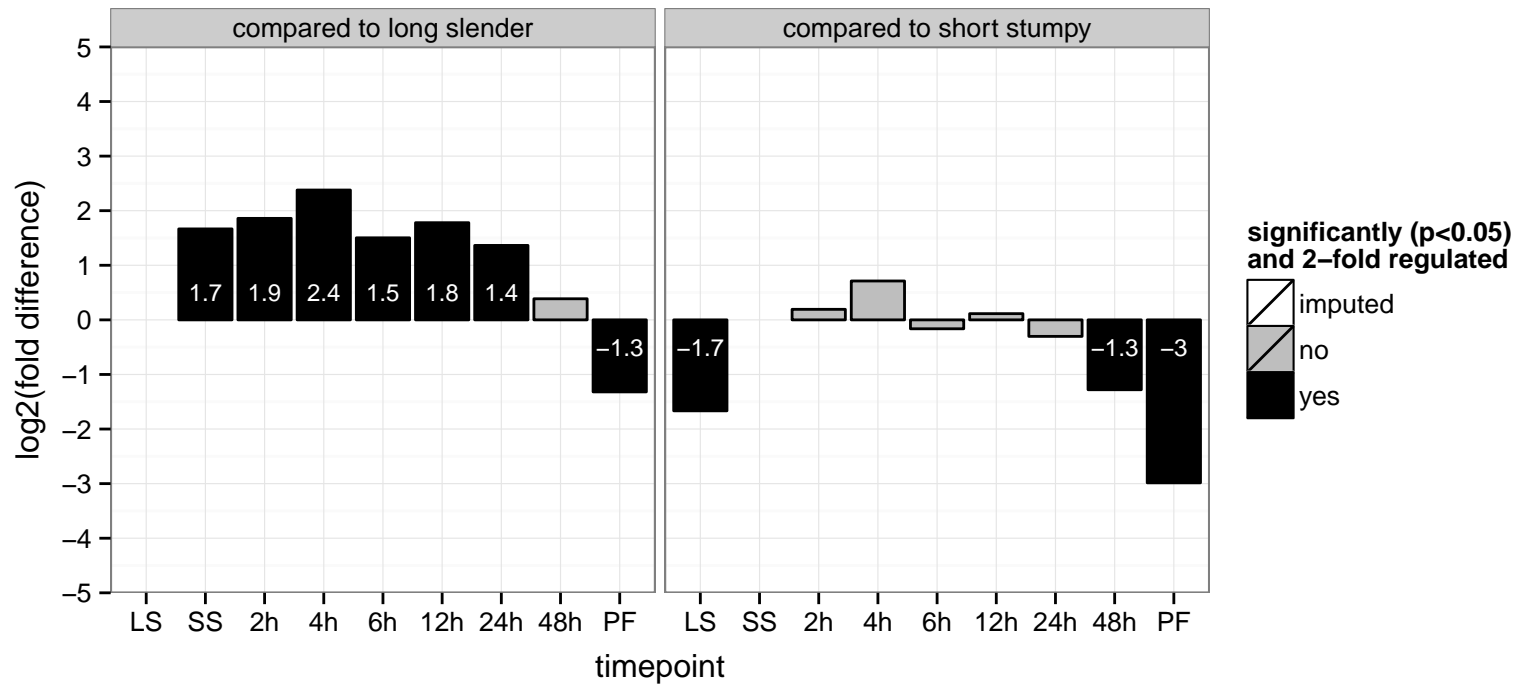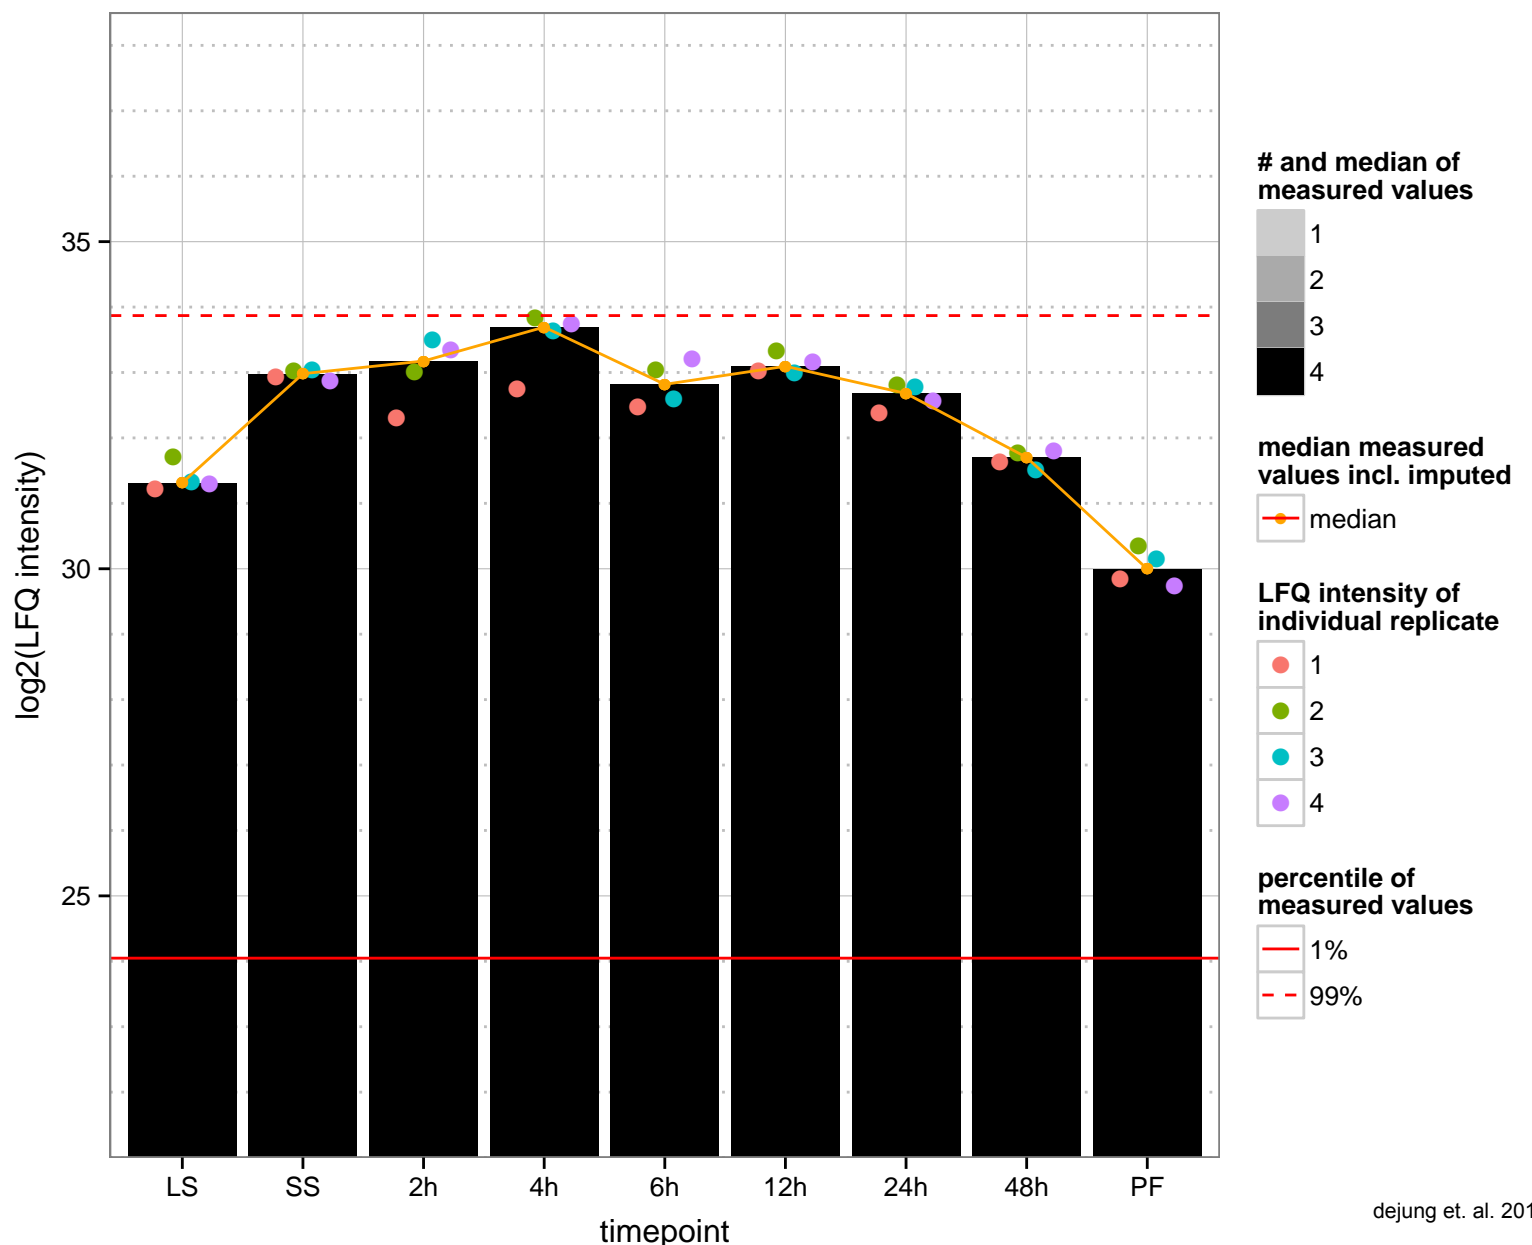

cyclin 3, mitotic cyclin, putative (CYC3)  
 Tb927.6.1460  
 AGOF: molecular\_function  
 AGOC: null  
 AGOP: G1/S transition of mitotic cell cycle  
 PGOF: null  
 PGO: null  
 PGOP: null

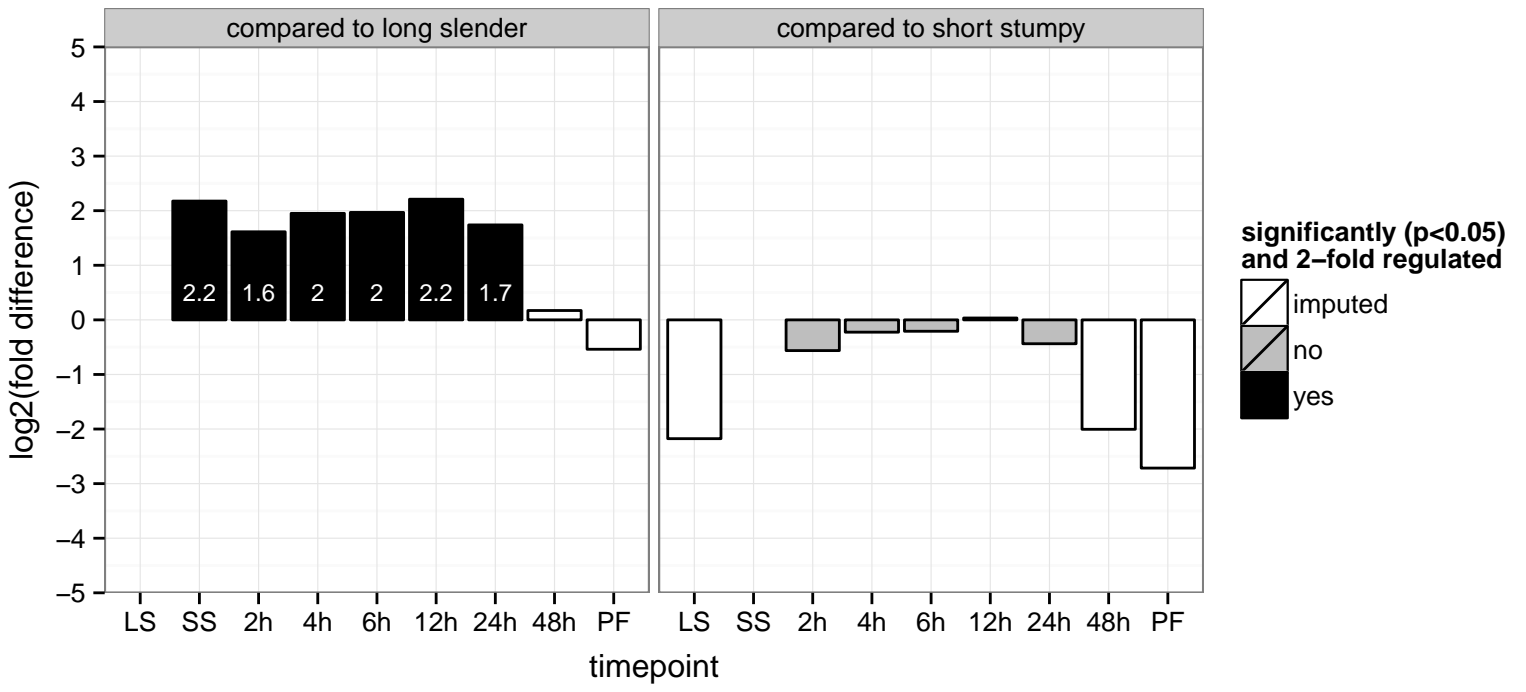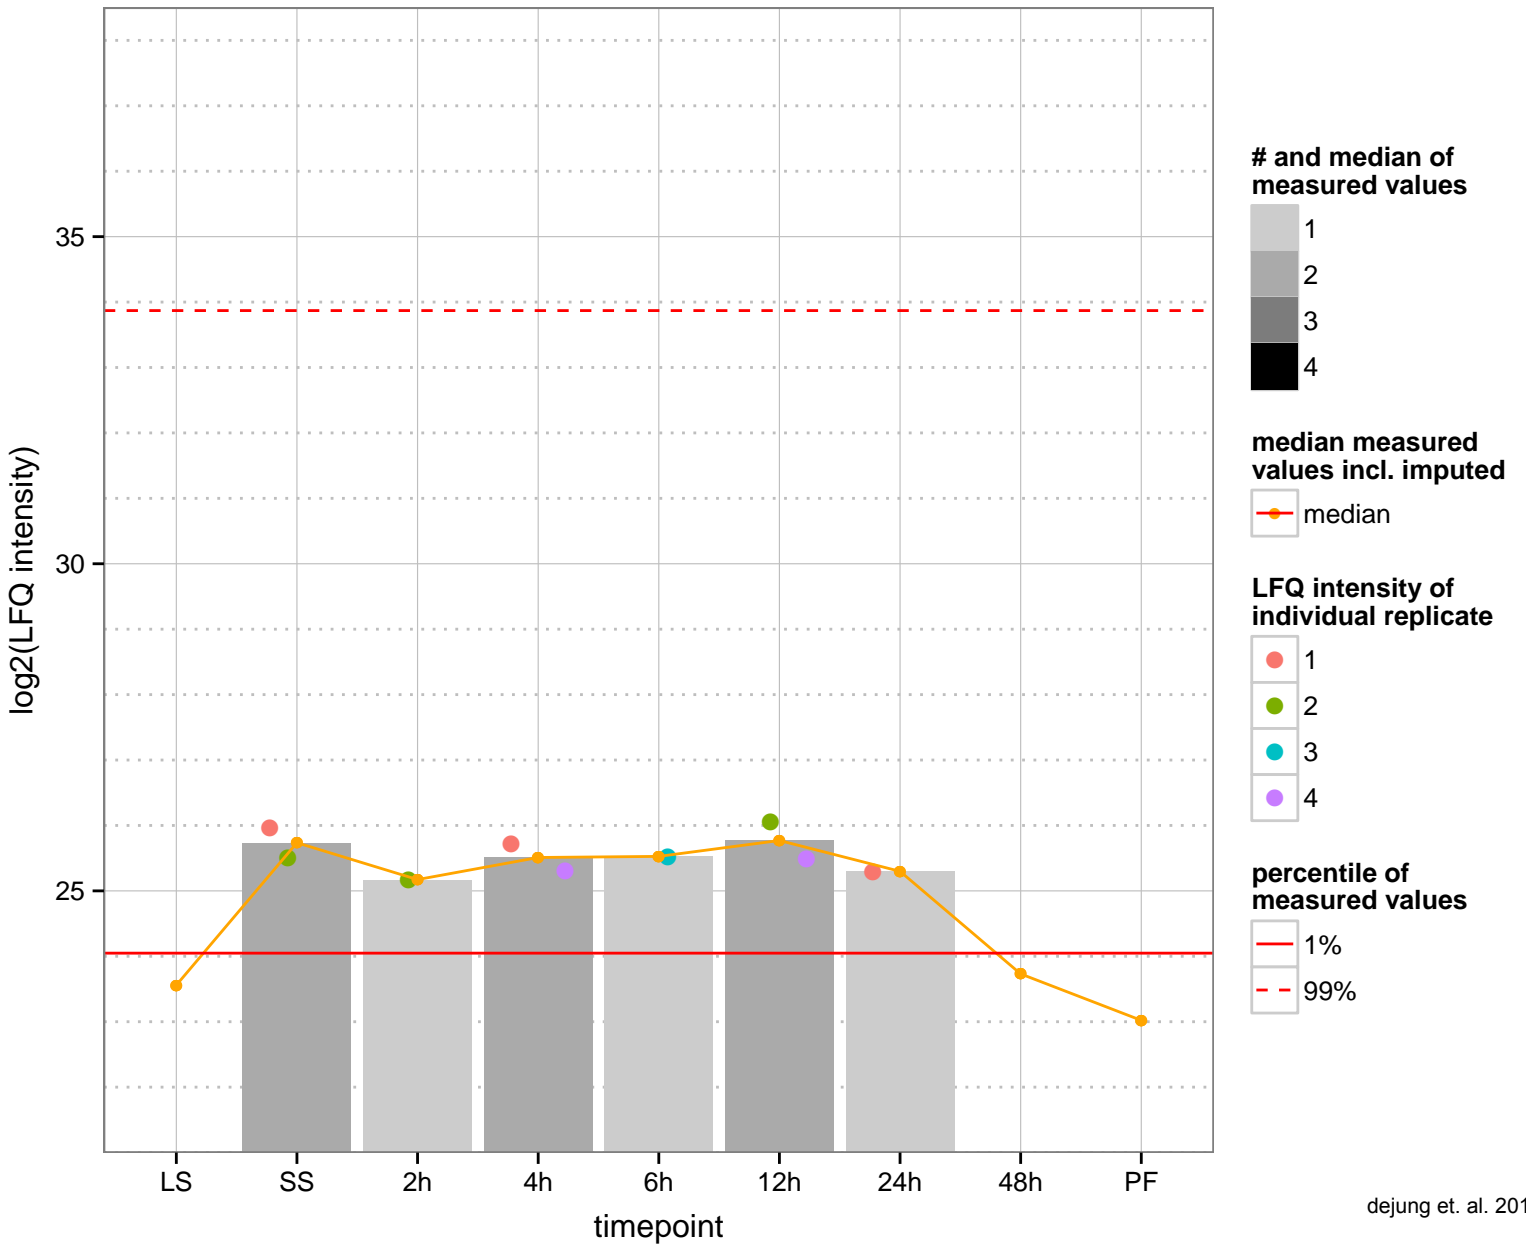

hypothetical protein, conserved  
 Tb927.6.1530  
 AGOF: null  
 AGOC: null  
 AGOP: null  
 PGO: null  
 PGOC: null  
 PGOP: null

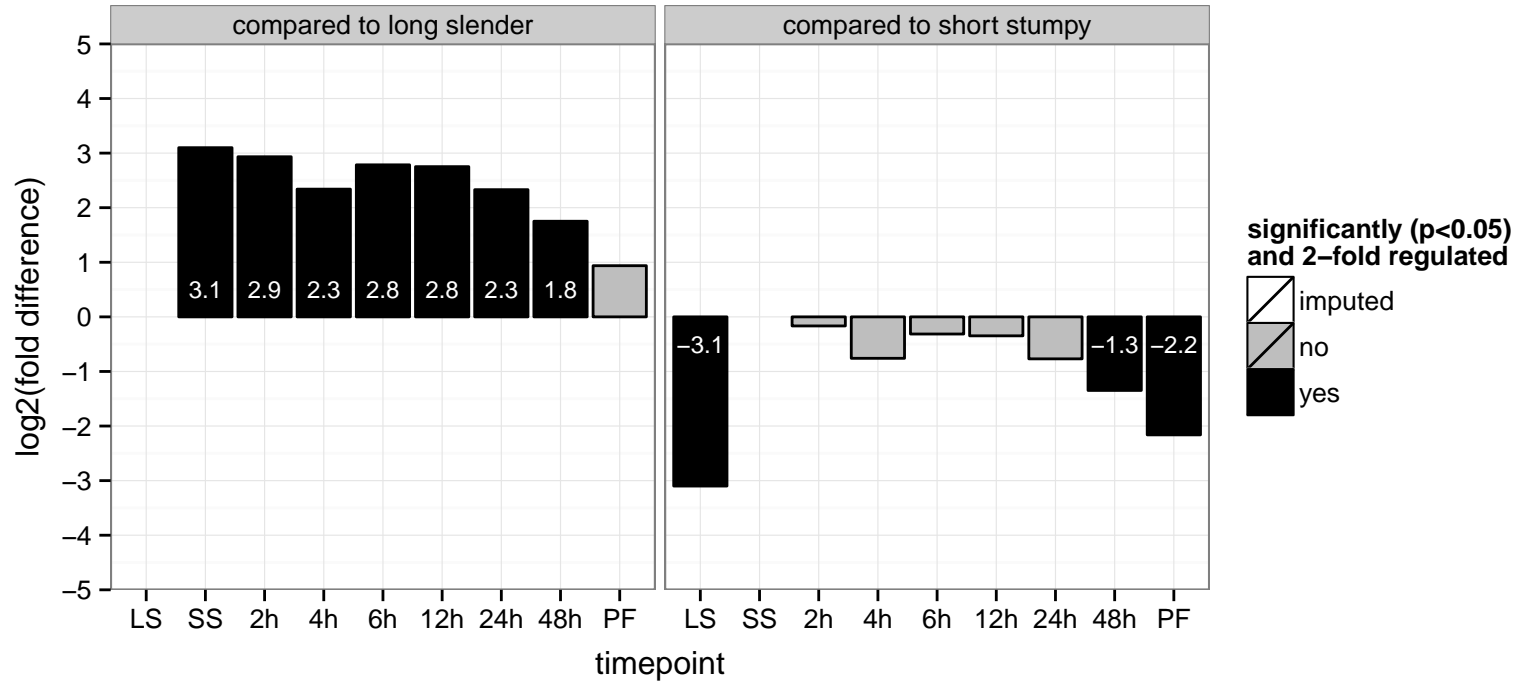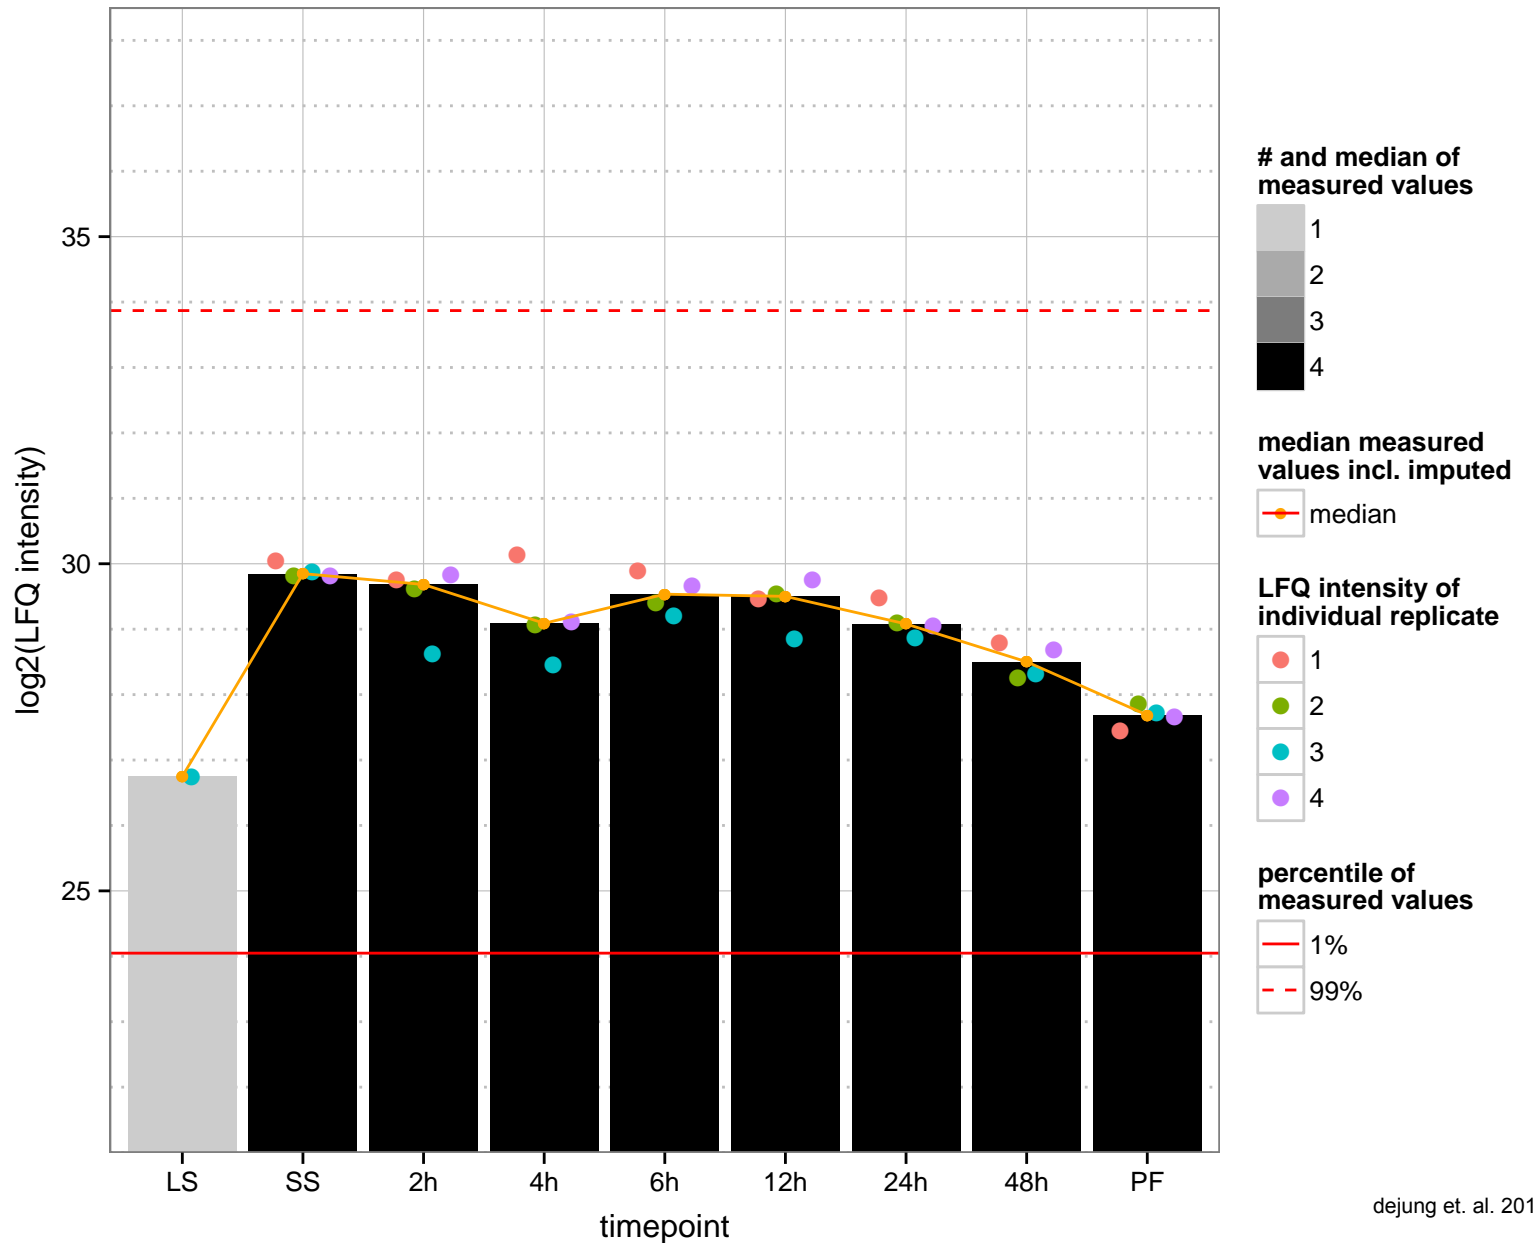

hypothetical protein, conserved  
 Tb927.6.3240  
 AGOF: null  
 AGOC: null  
 AGOP: null  
 PGOF: null  
 PGO: null  
 PGOP: null

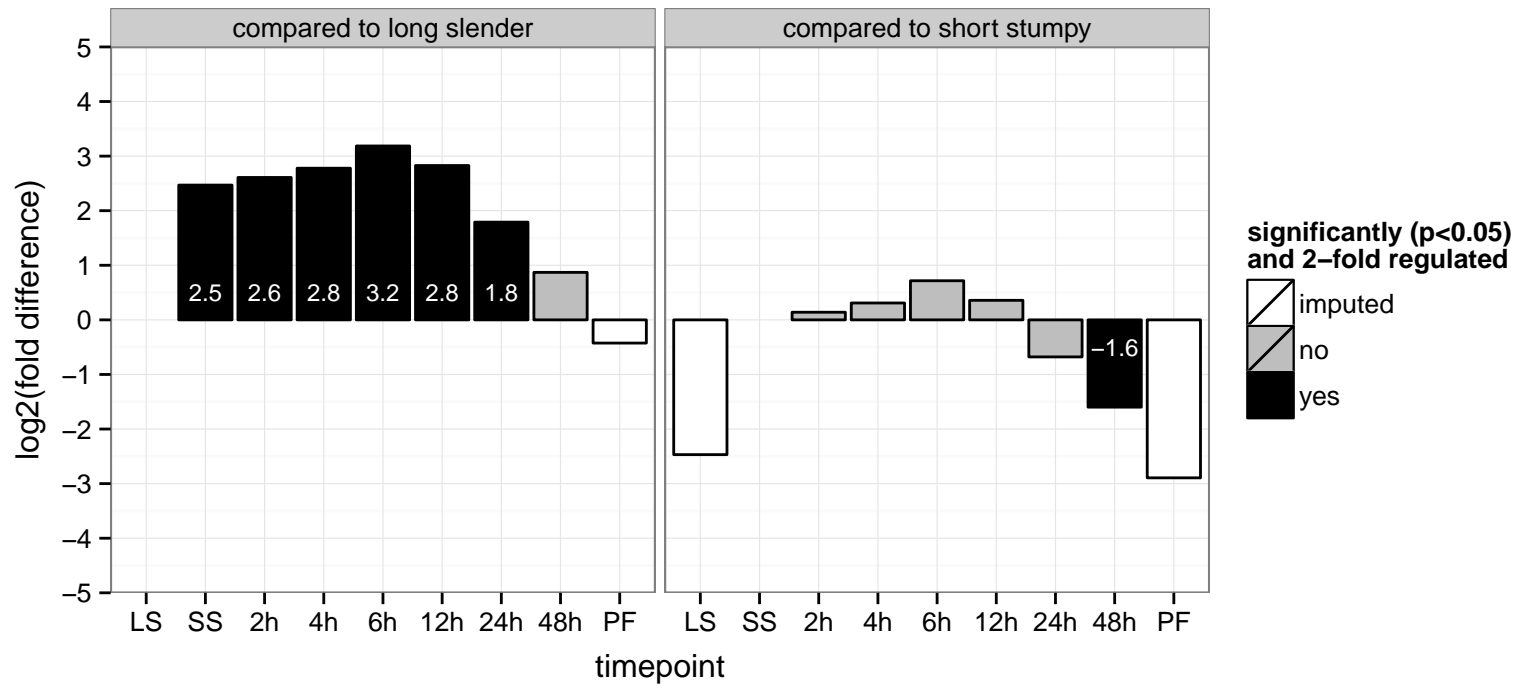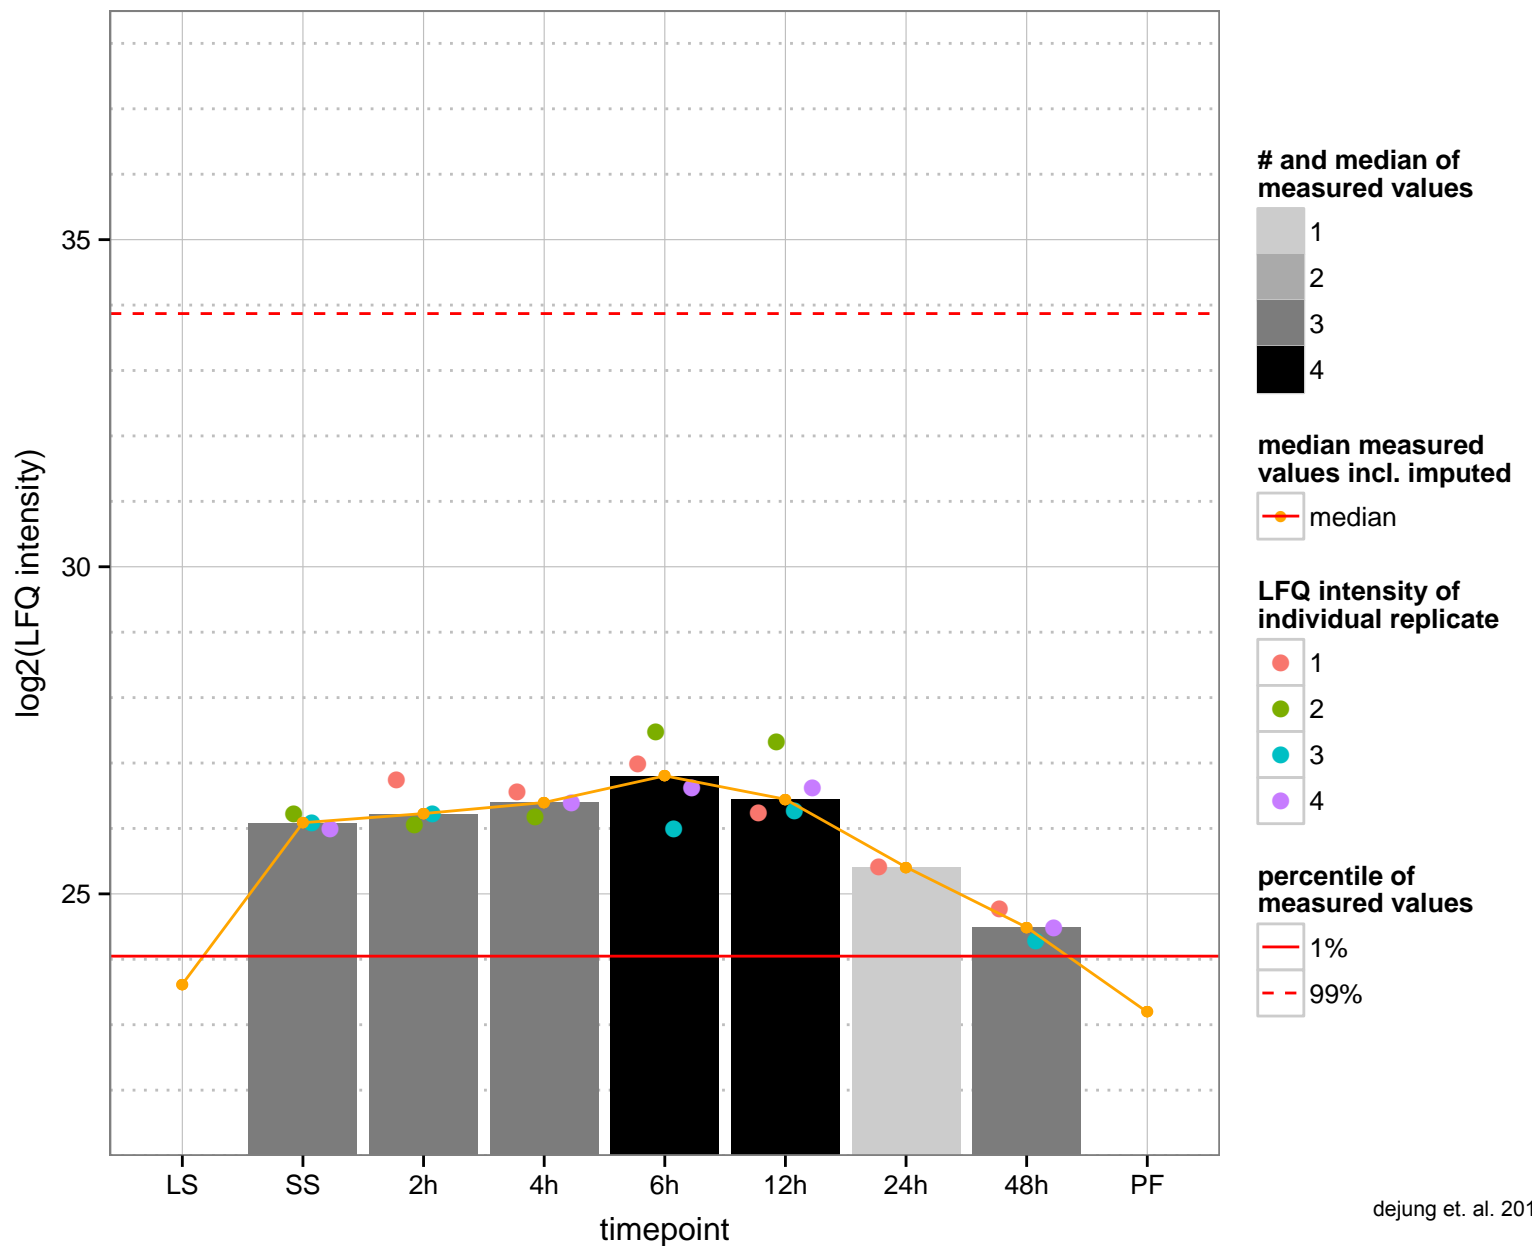

hypothetical protein, conserved  
 Tb927.6.3720  
 AGOF: null  
 AGOC: null  
 AGOP: null  
 PGO: protein binding  
 PGO: null  
 PGO: null

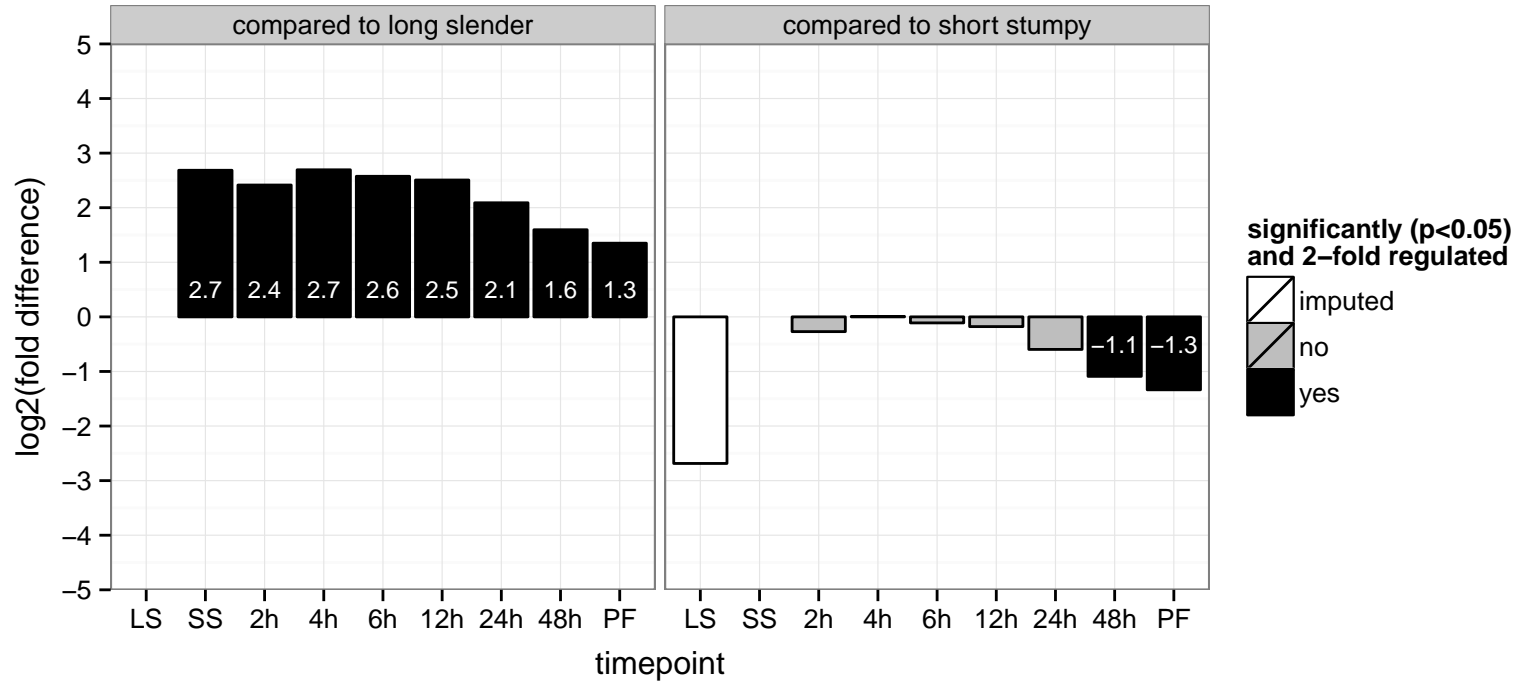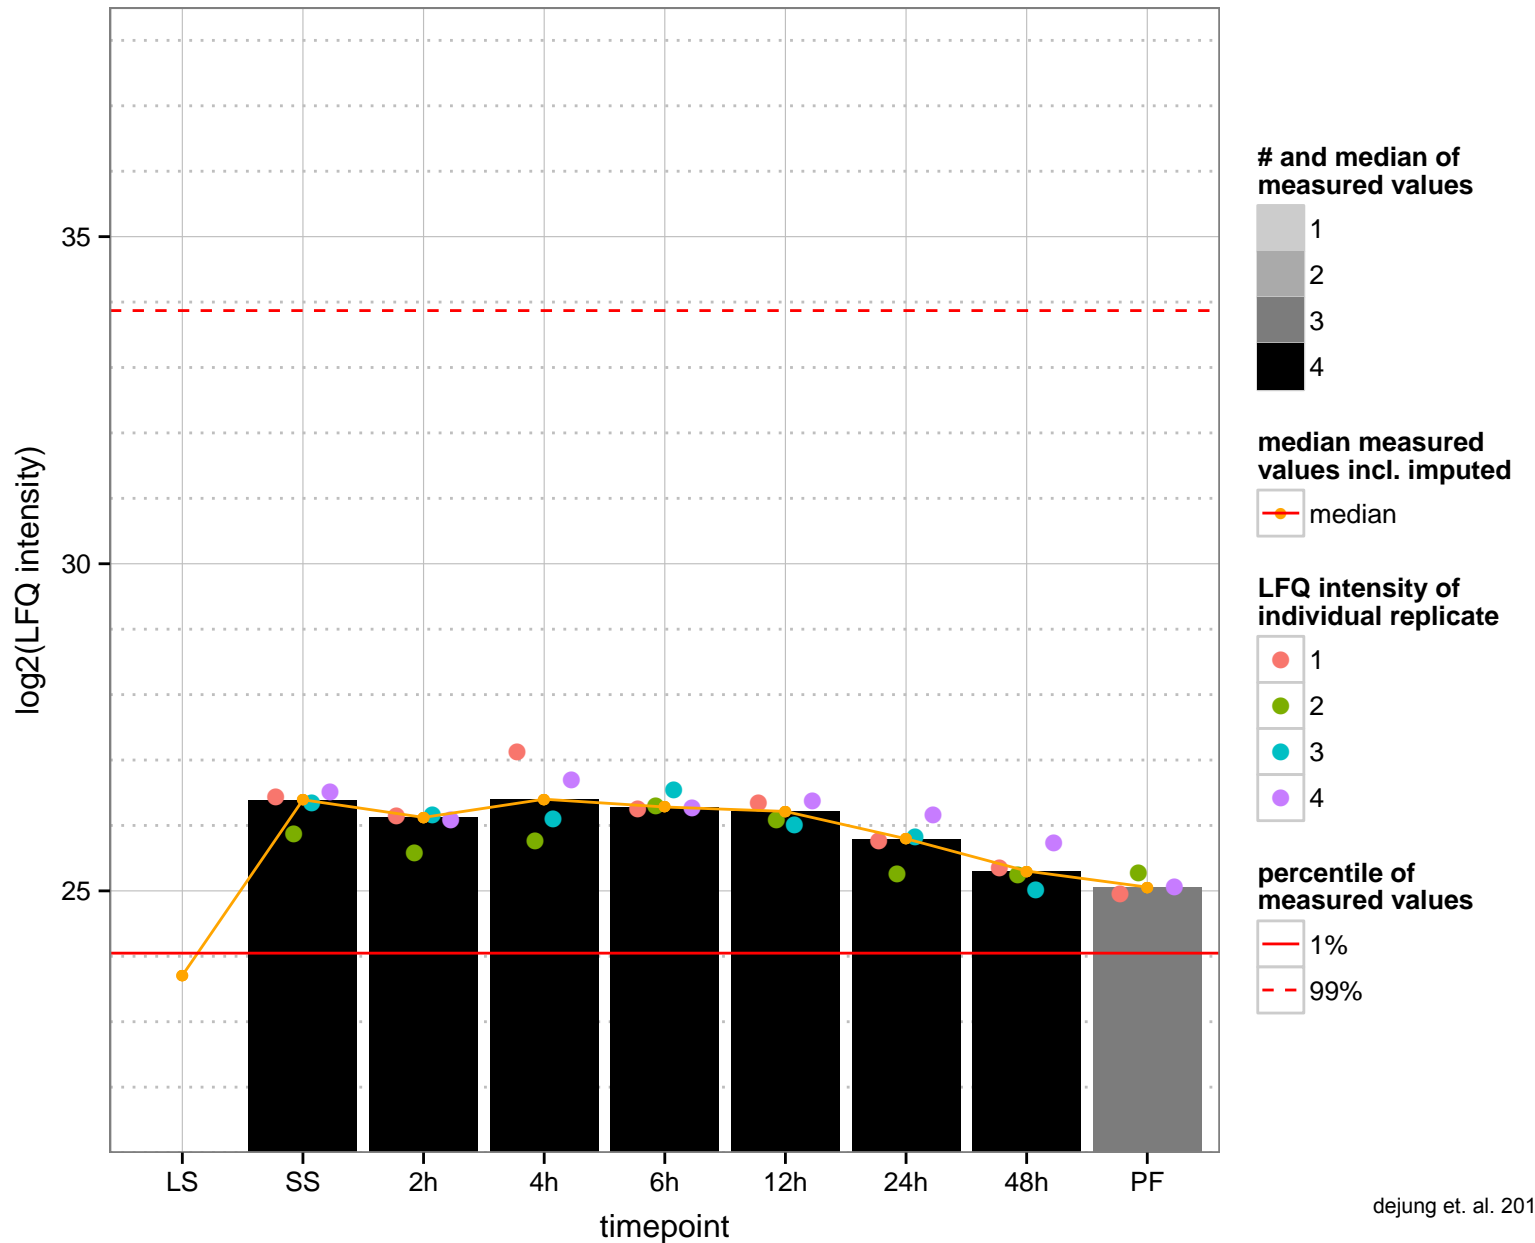

hypothetical protein, conserved  
 Tb927.6.4550  
 AGOF: null  
 AGOC: null  
 AGOP: null  
 PGO: null  
 PGOC: null  
 PGOP: null

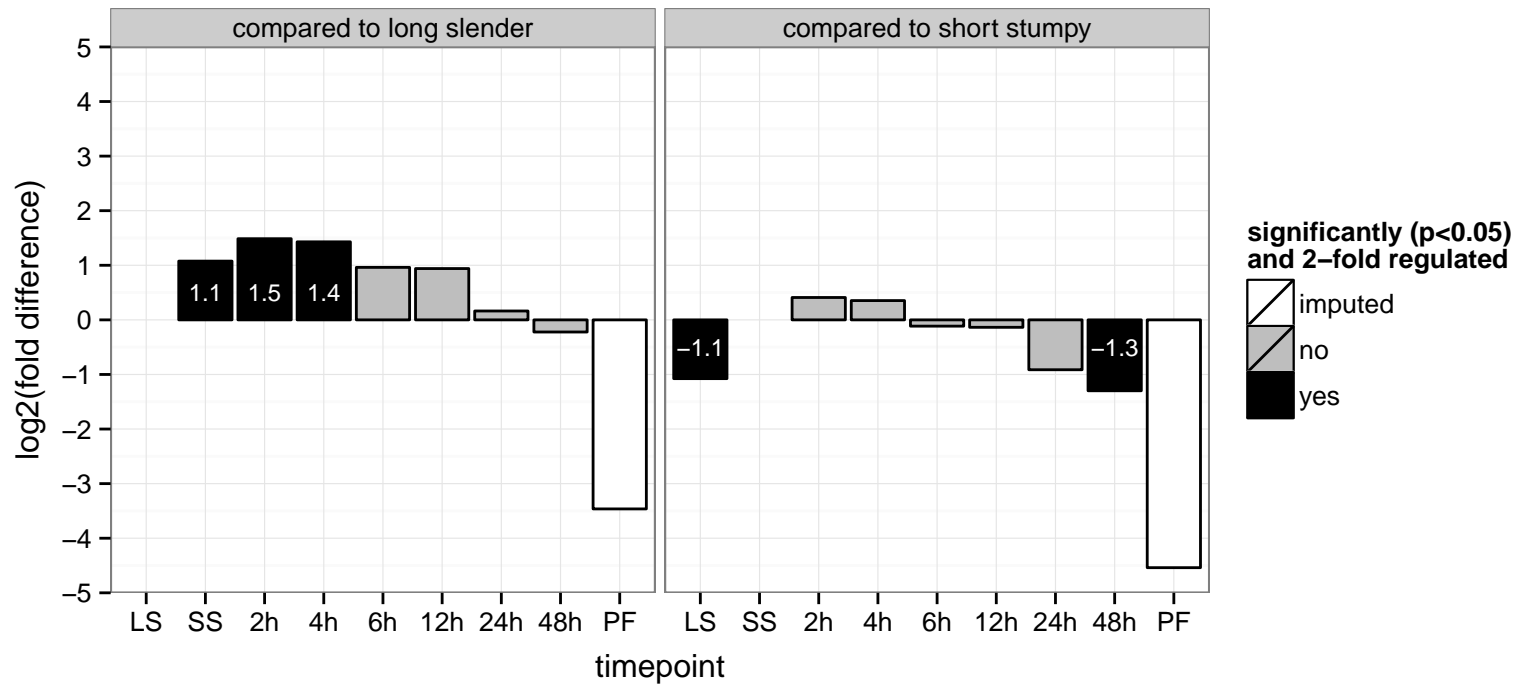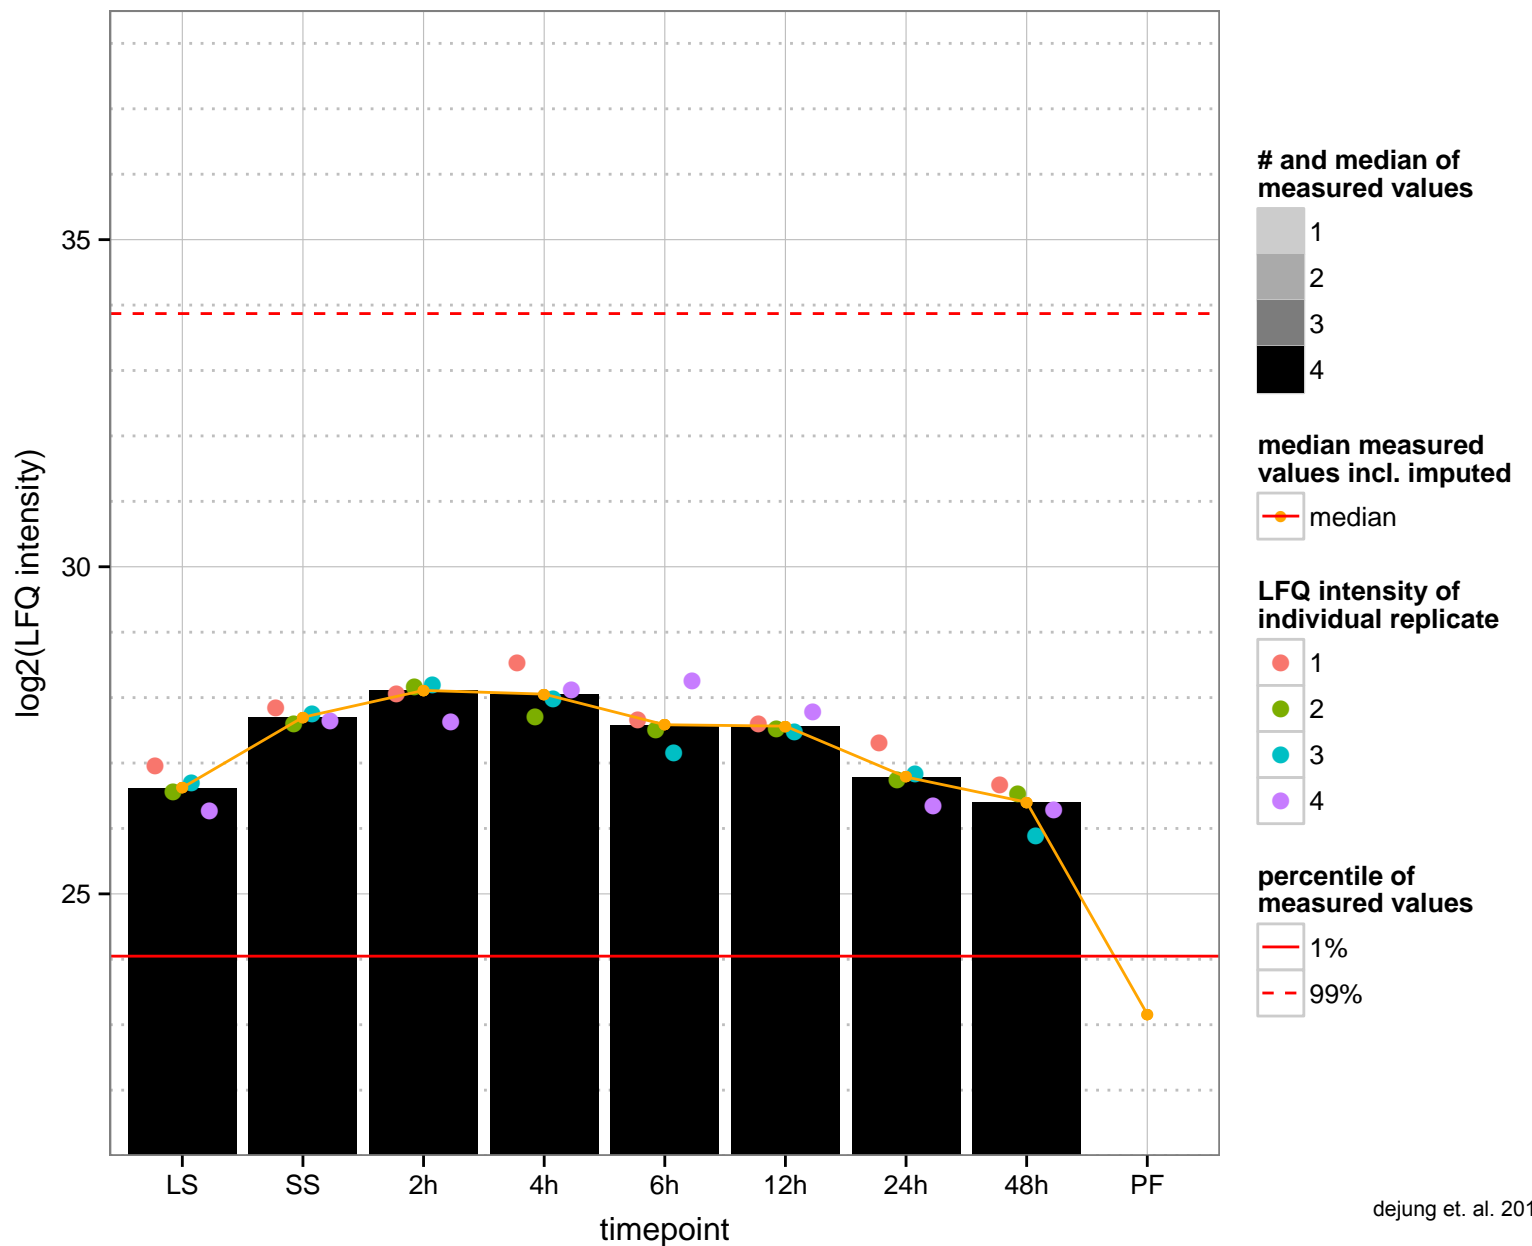

C-1-tetrahydrofolate synthase, cytoplasmic, putative

Tb927.7.1600

AGOF: catalytic activity

AGOC: null

AGOP: folic acid-containing compound biosynthetic process

PGOF: catalytic activity, methylenetetrahydrofolate dehydrogenase (NADP+) activity

PGOC: null

PGOP: folic acid-containing compound biosynthetic process, oxidation-reduction process

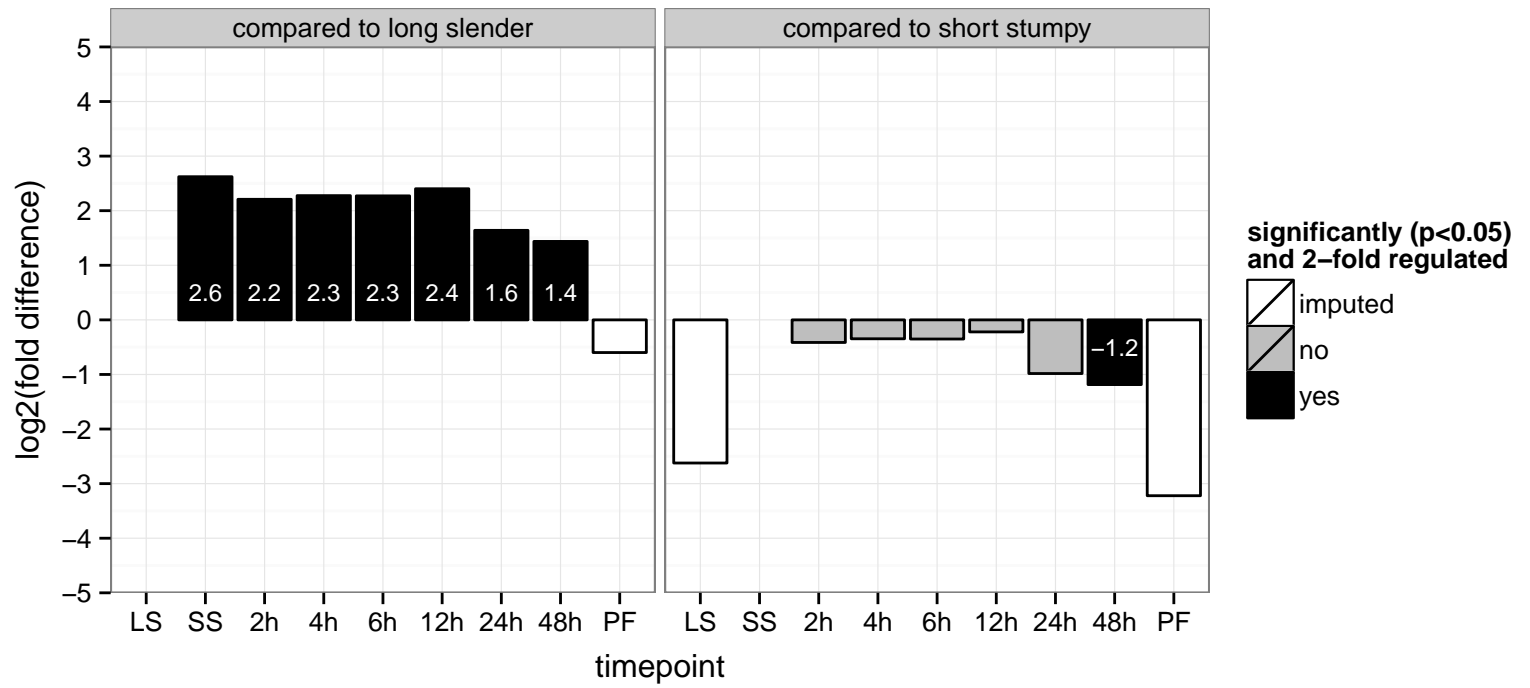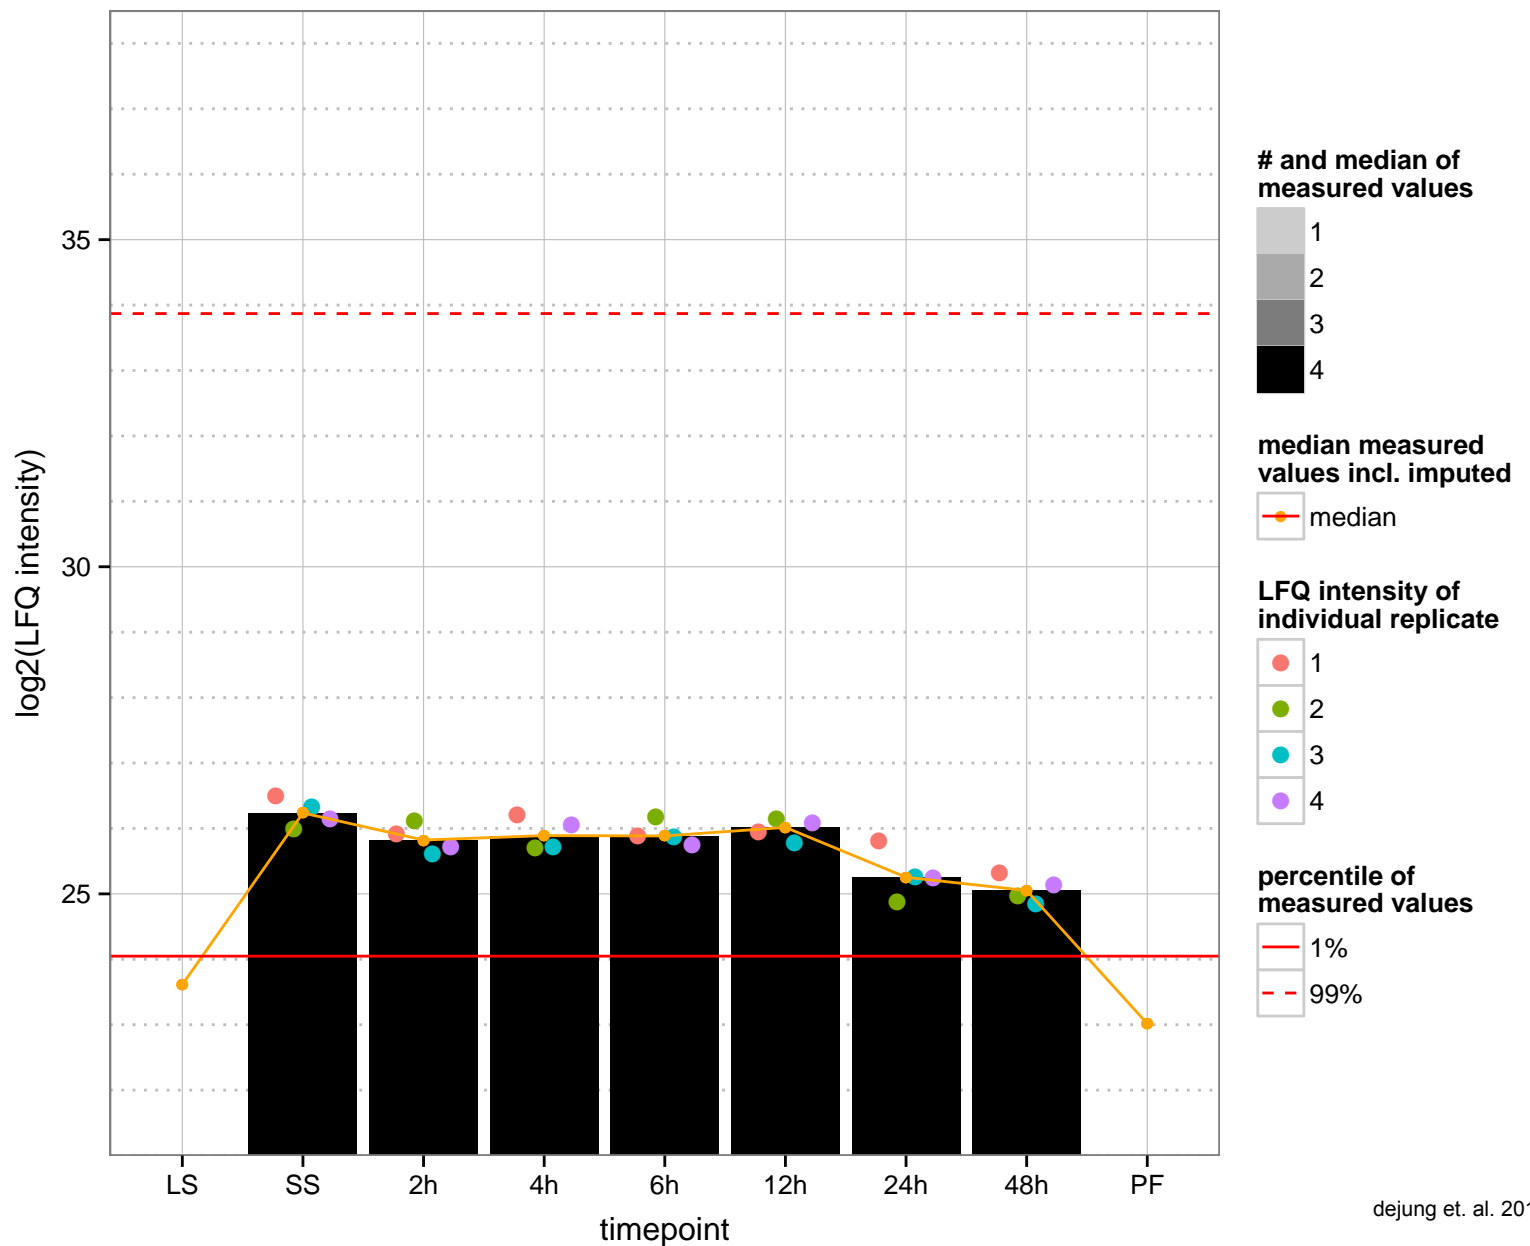

hypothetical protein, conserved  
 Tb927.7.2650  
 AGOF: null  
 AGOC: null  
 AGOP: null  
 PGO: null  
 PGOC: null  
 PGOP: null

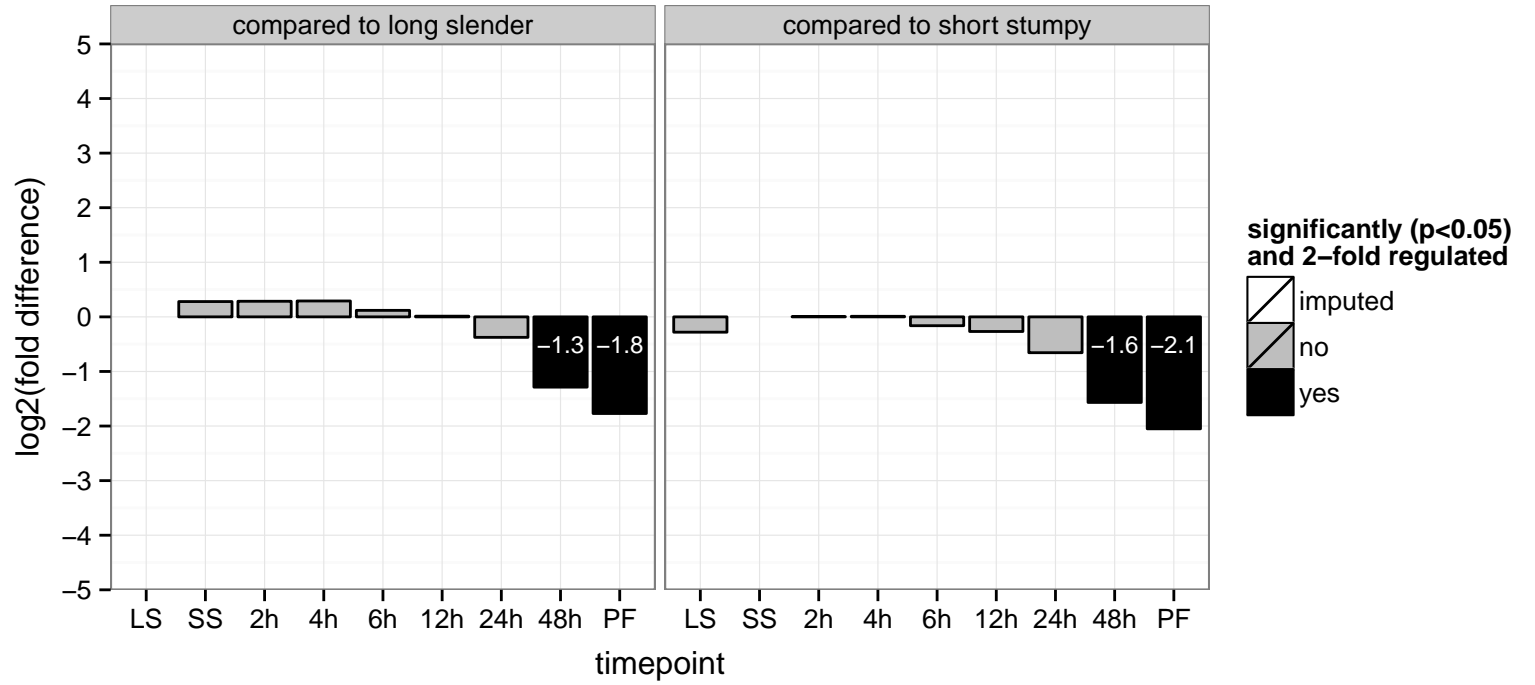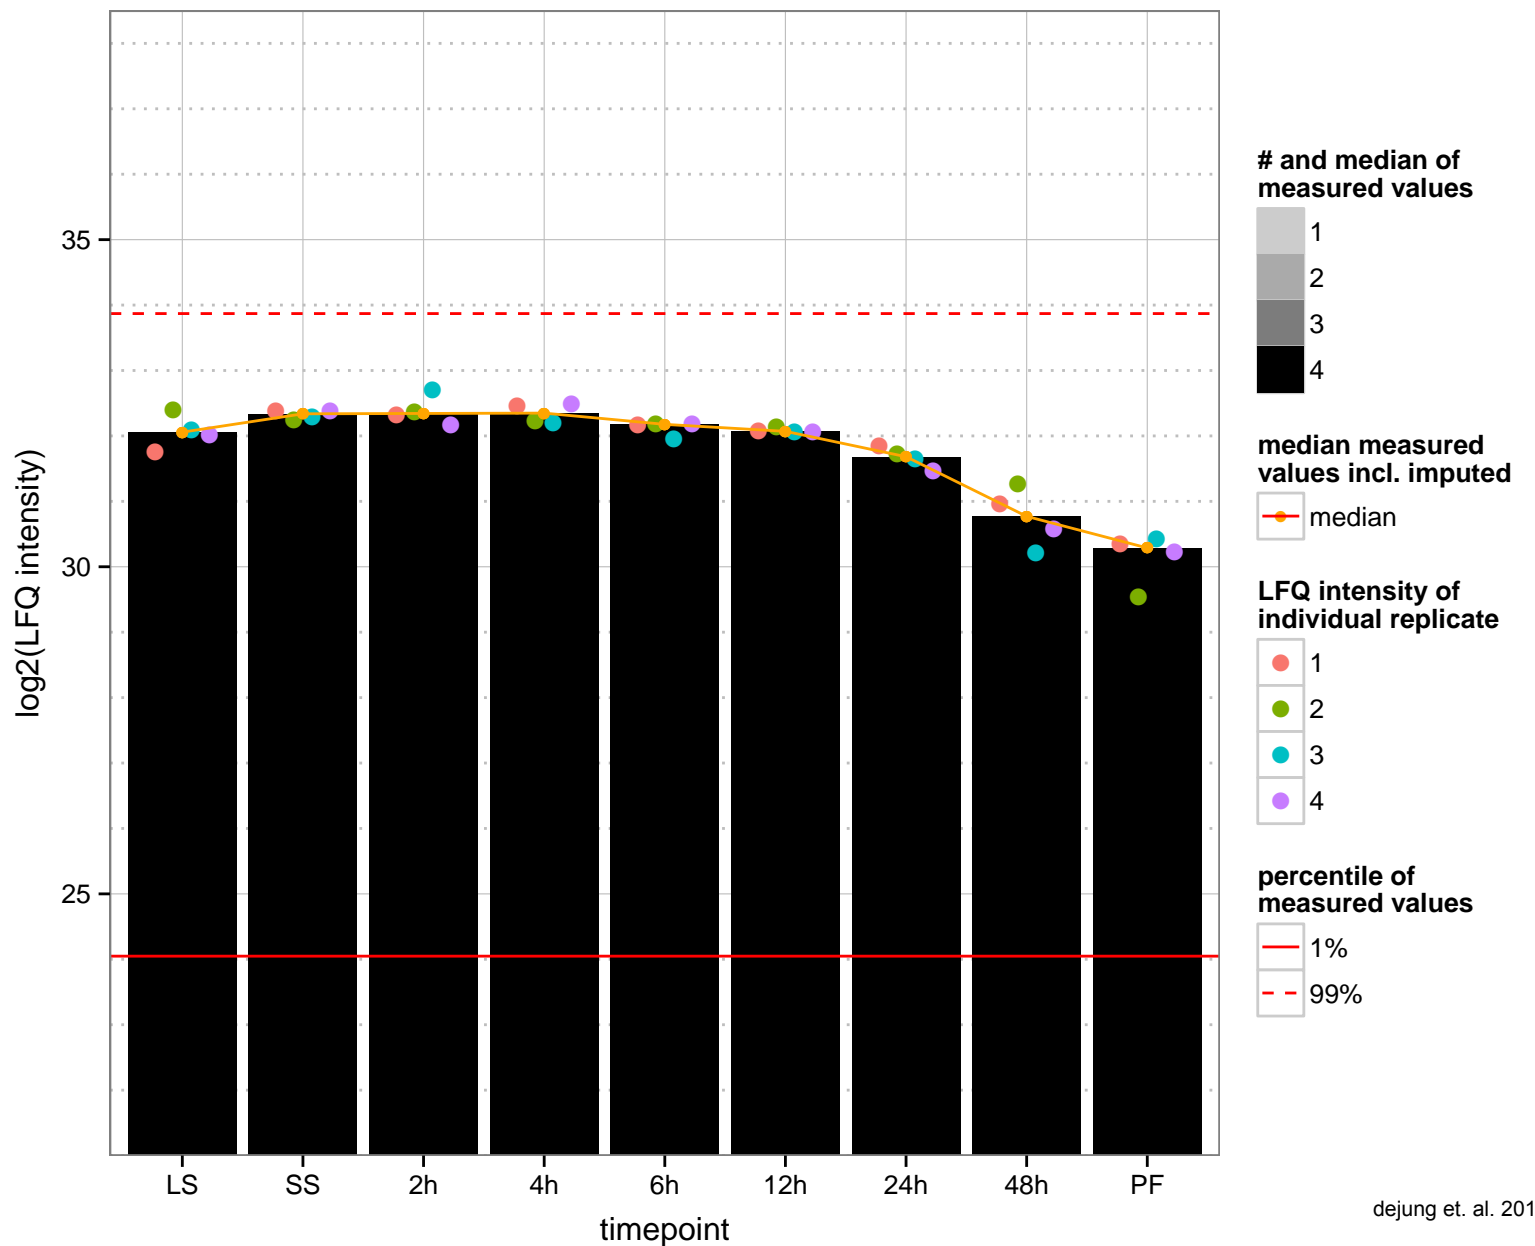



hypothetical protein, conserved  
 Tb927.7.510;Tb11.v5.0890  
 AGOF: null  
 AGOC: null  
 AGOP: null  
 PGO: null  
 PGOC: null  
 PGOP: null

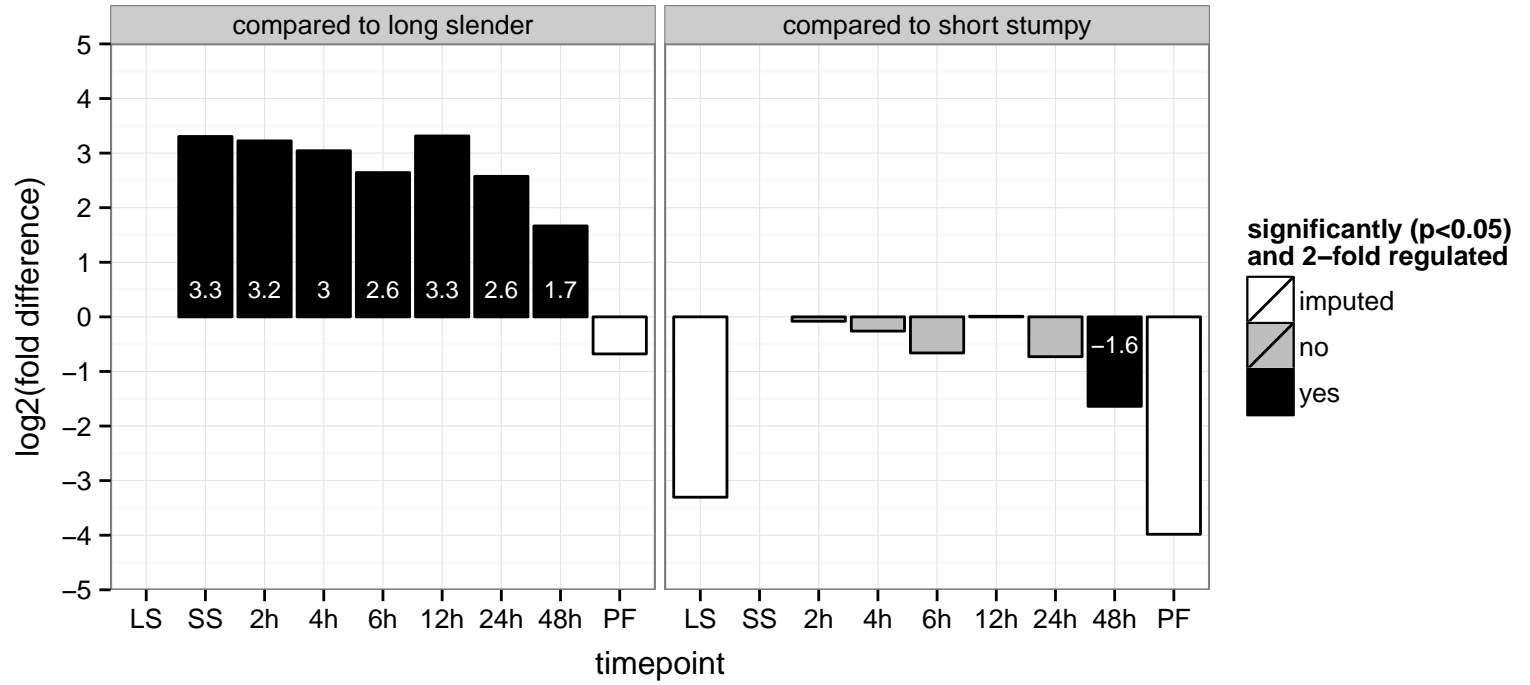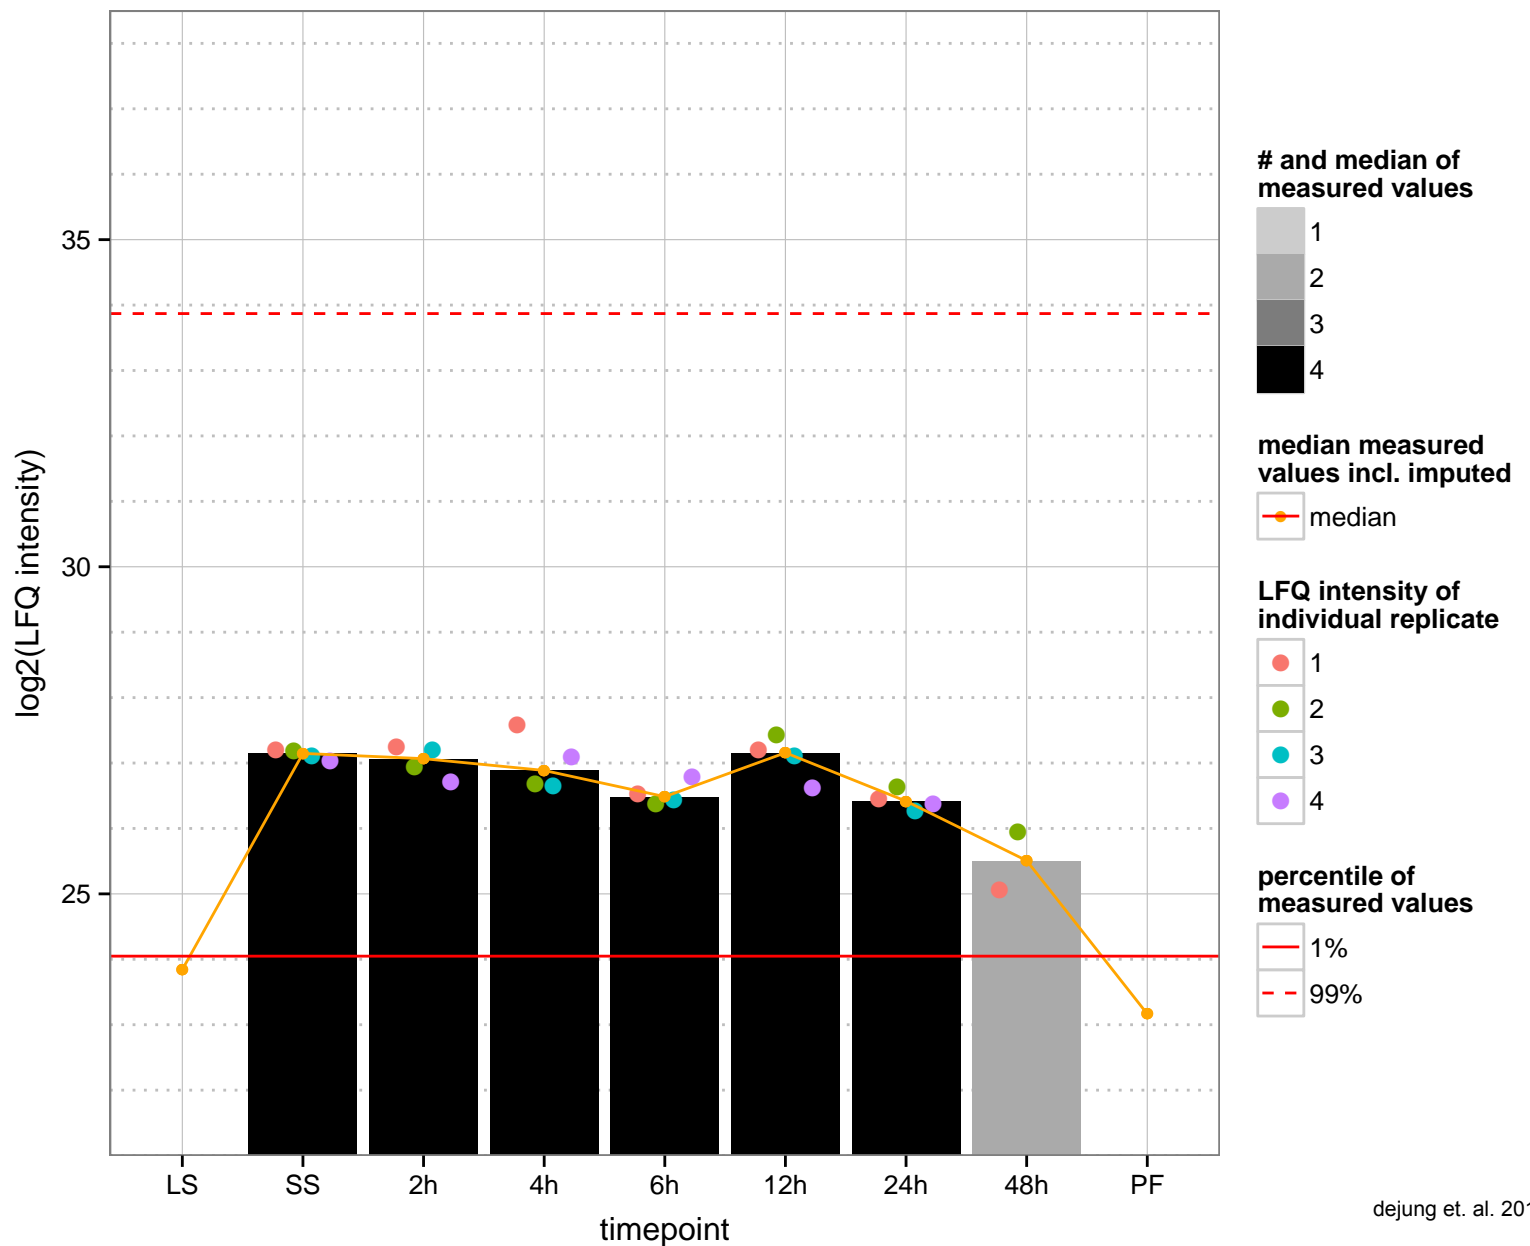

hypothetical protein, conserved  
 Tb927.7.530  
 AGOF: zinc ion binding  
 AGOC: null  
 AGOP: null  
 PGOF: metal ion binding  
 PGOC: null  
 PGOP: null

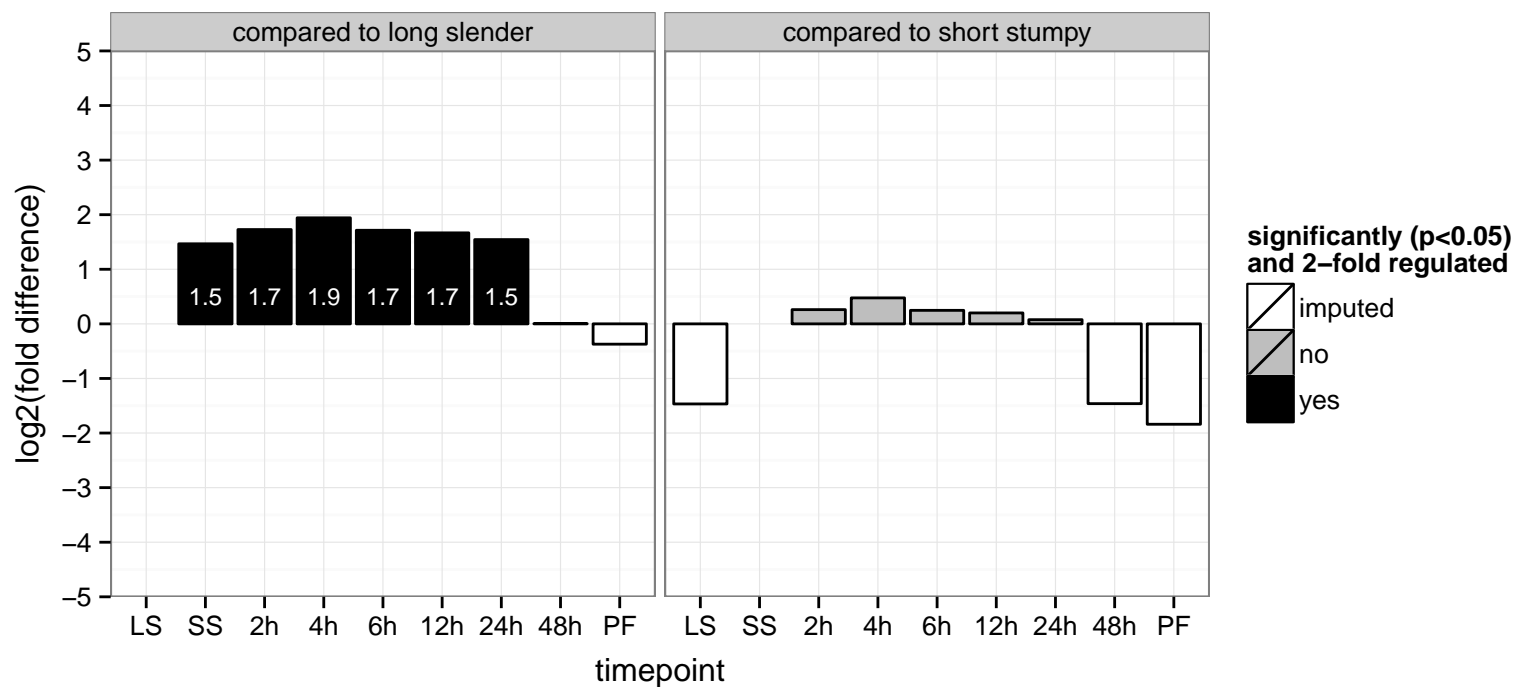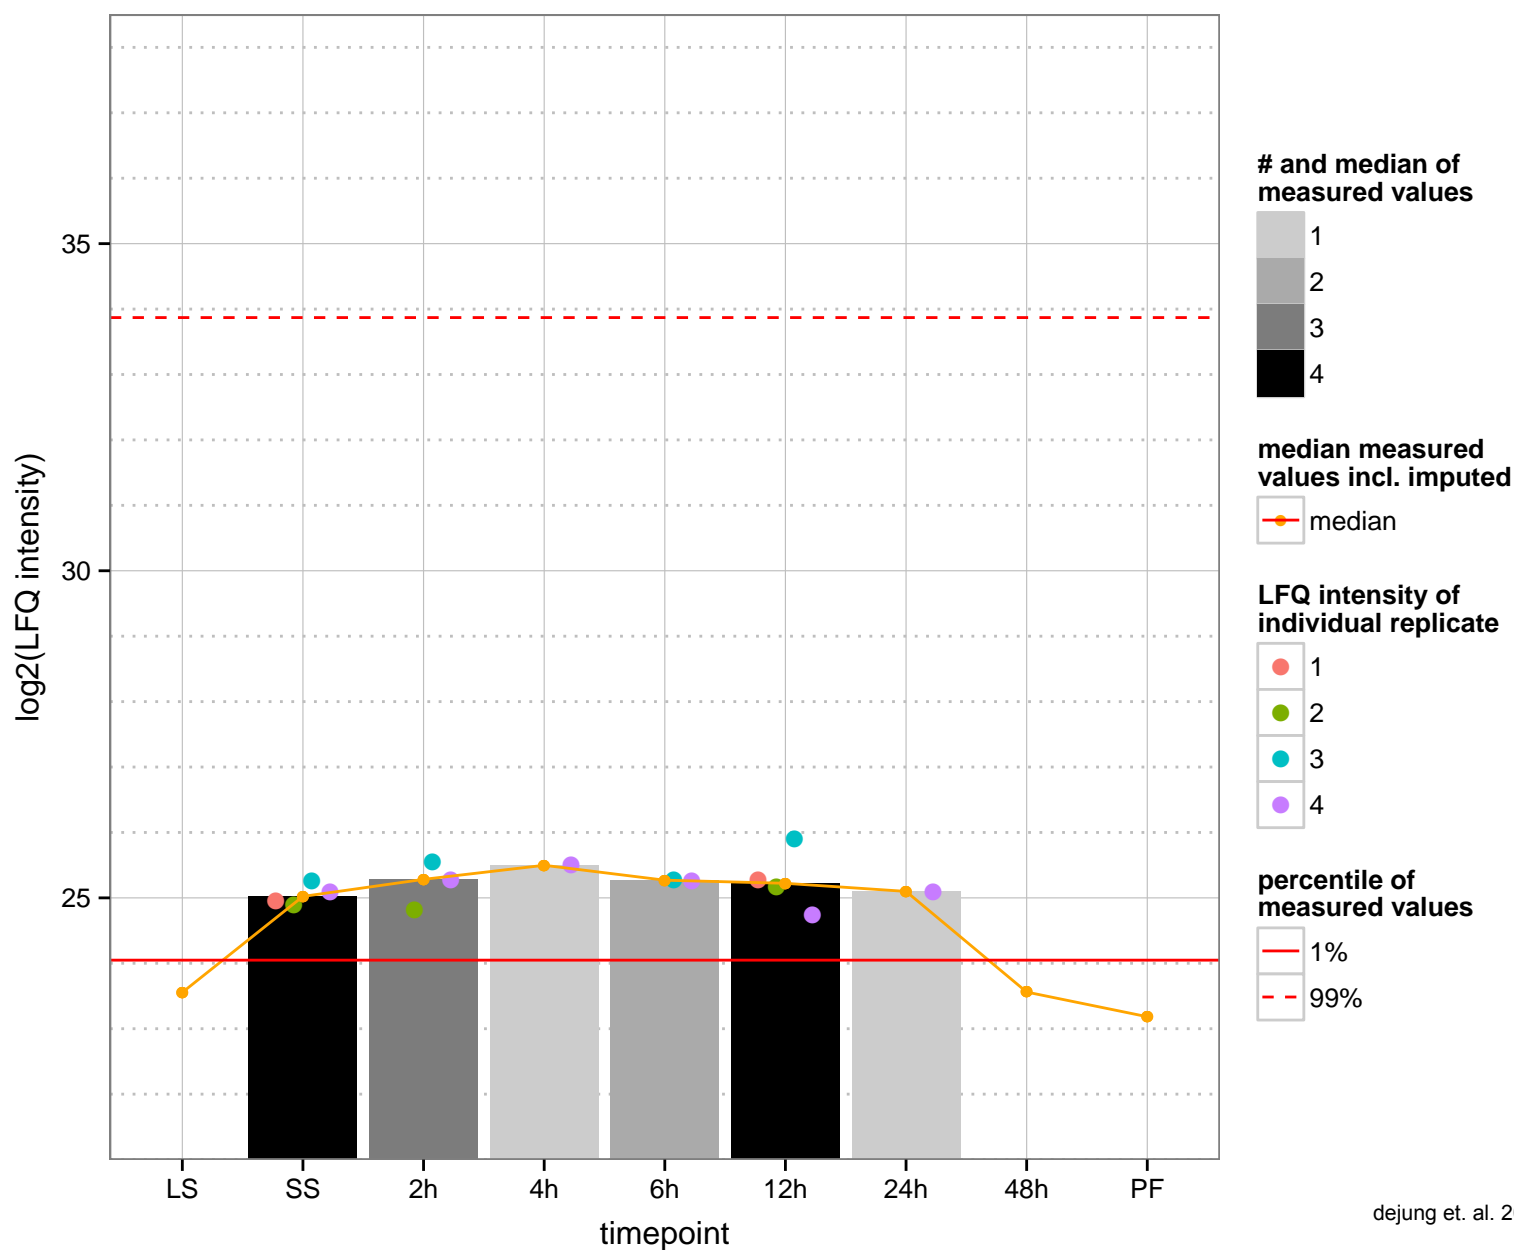

hypothetical protein, conserved  
 Tb927.8.2080  
 AGOF: null  
 AGOC: null  
 AGOP: null  
 PGOF: ATP binding, RNA ligase (ATP) activity  
 PGO: null  
 PGOP: tRNA splicing, via endonucleolytic cleavage and ligation

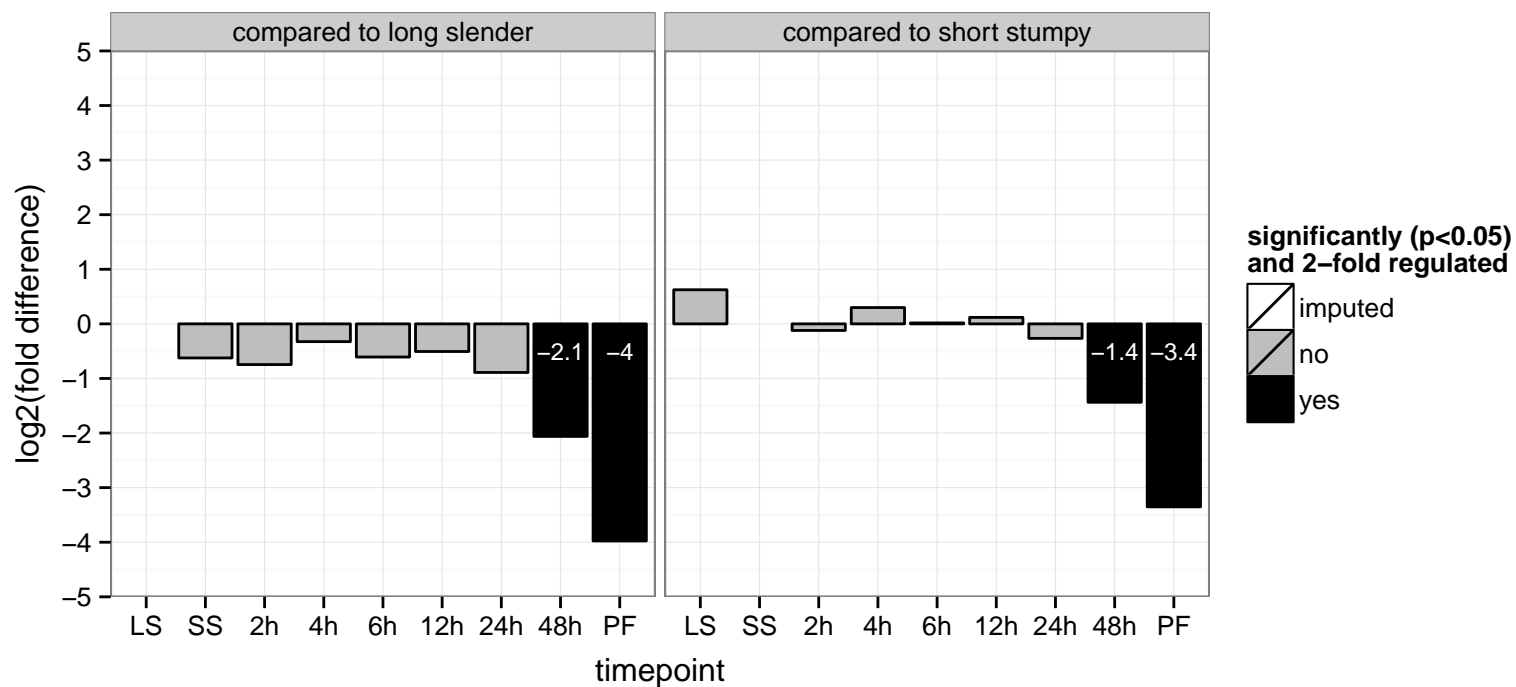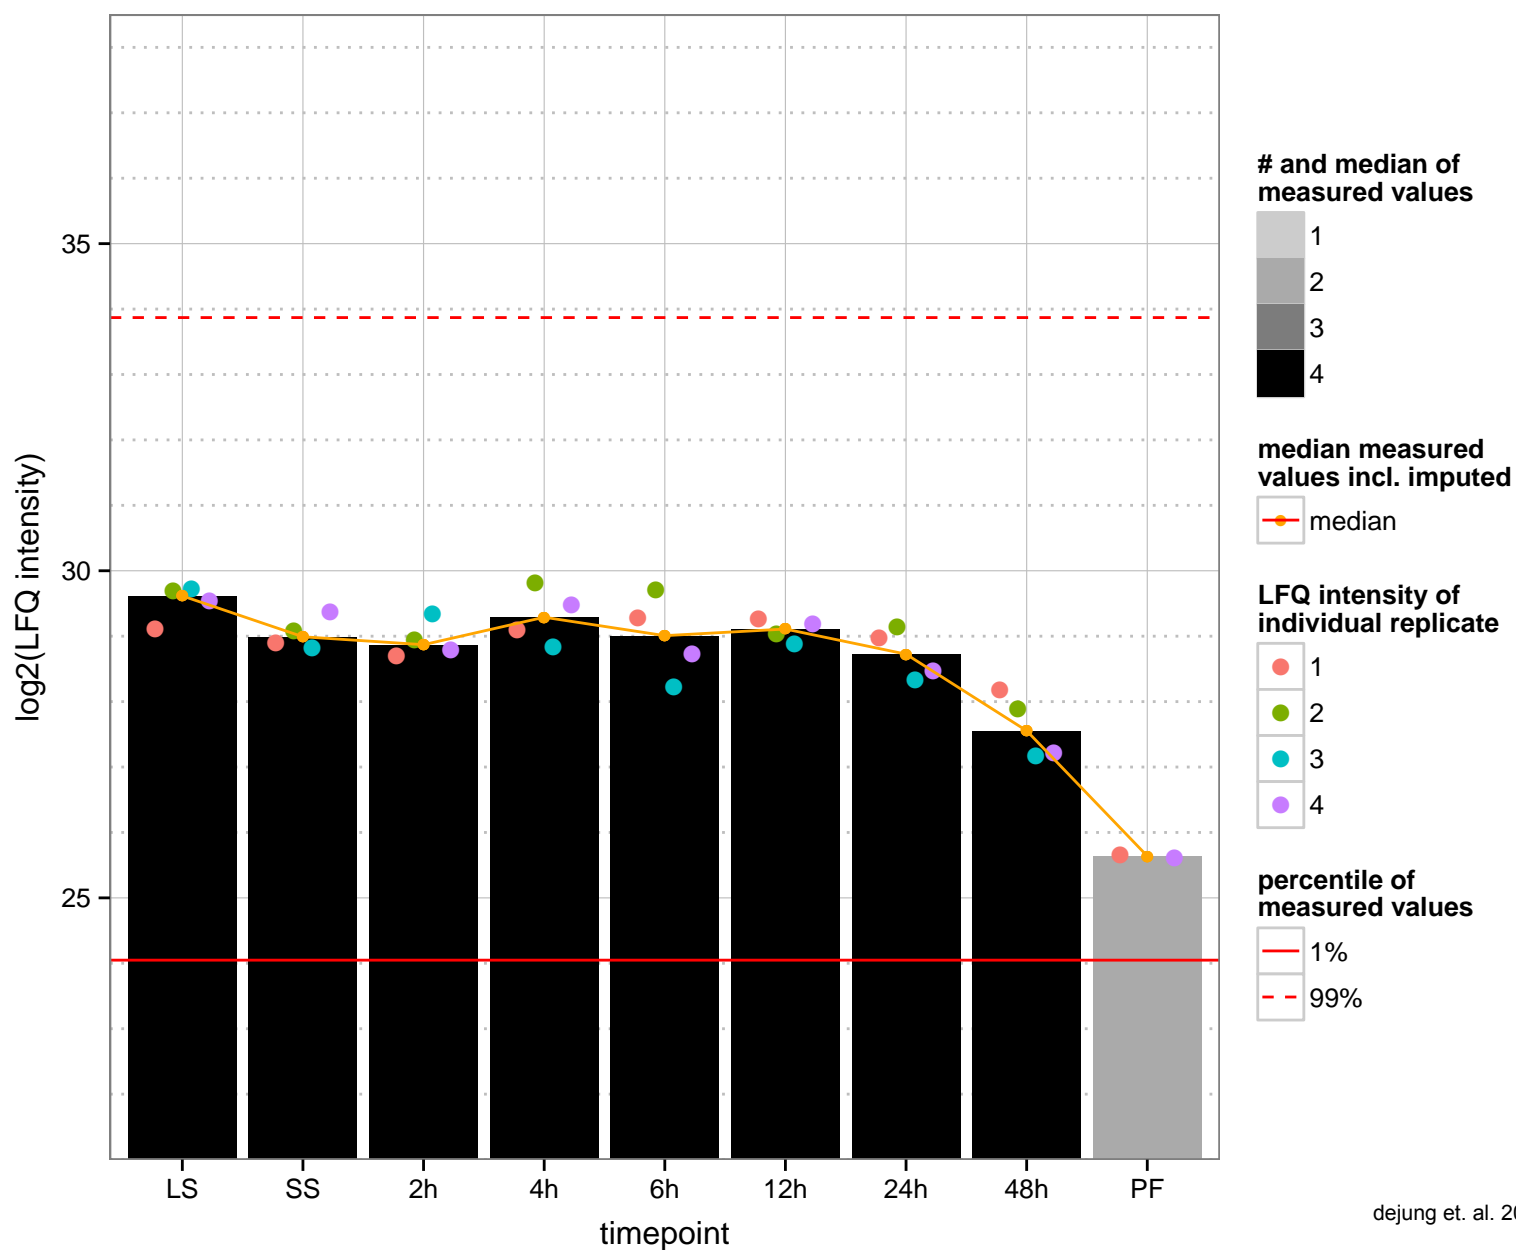

hypothetical protein, conserved  
Tb927.8.2250  
AGOF: null  
AGOC: null  
AGOP: null  
PGOF: ATP binding, RNA ligase (ATP) activity  
PGOC: null  
PGOP: tRNA splicing, via endonucleolytic cleavage and ligation

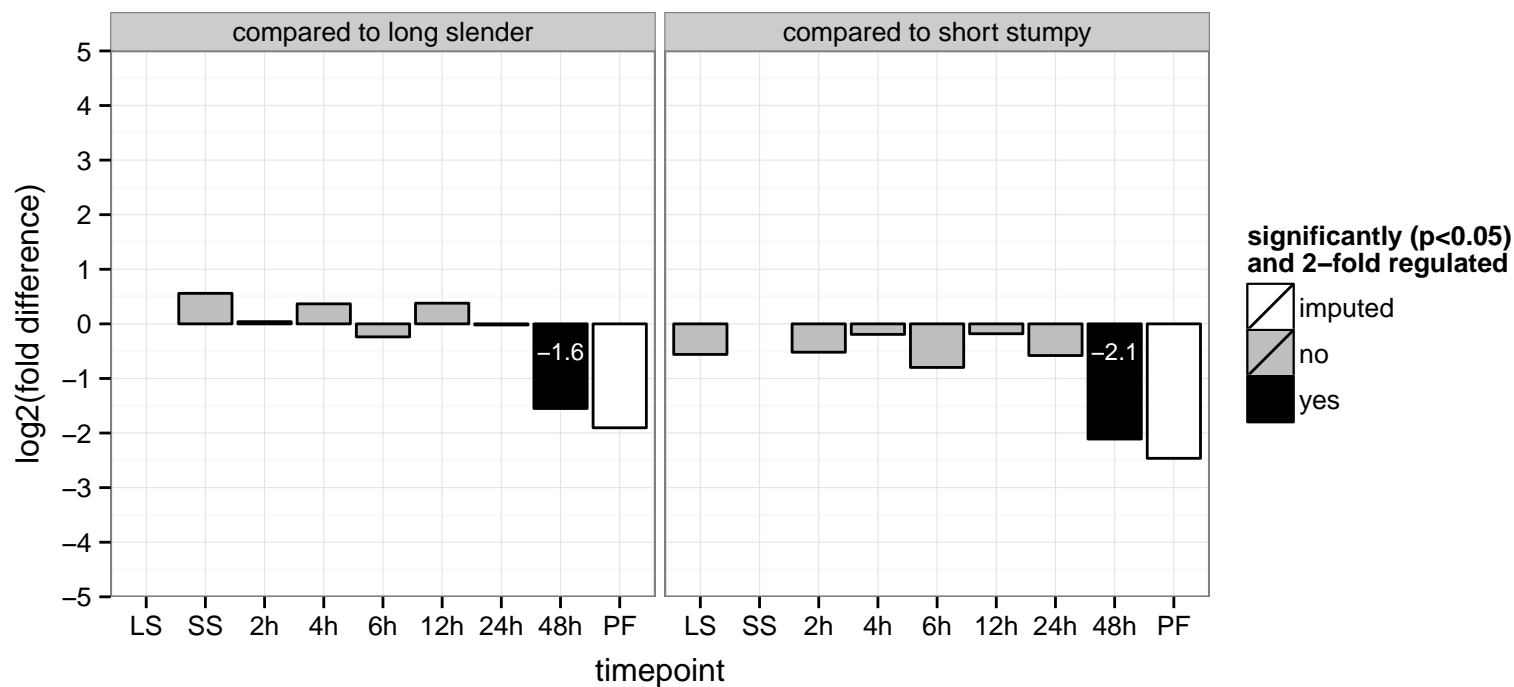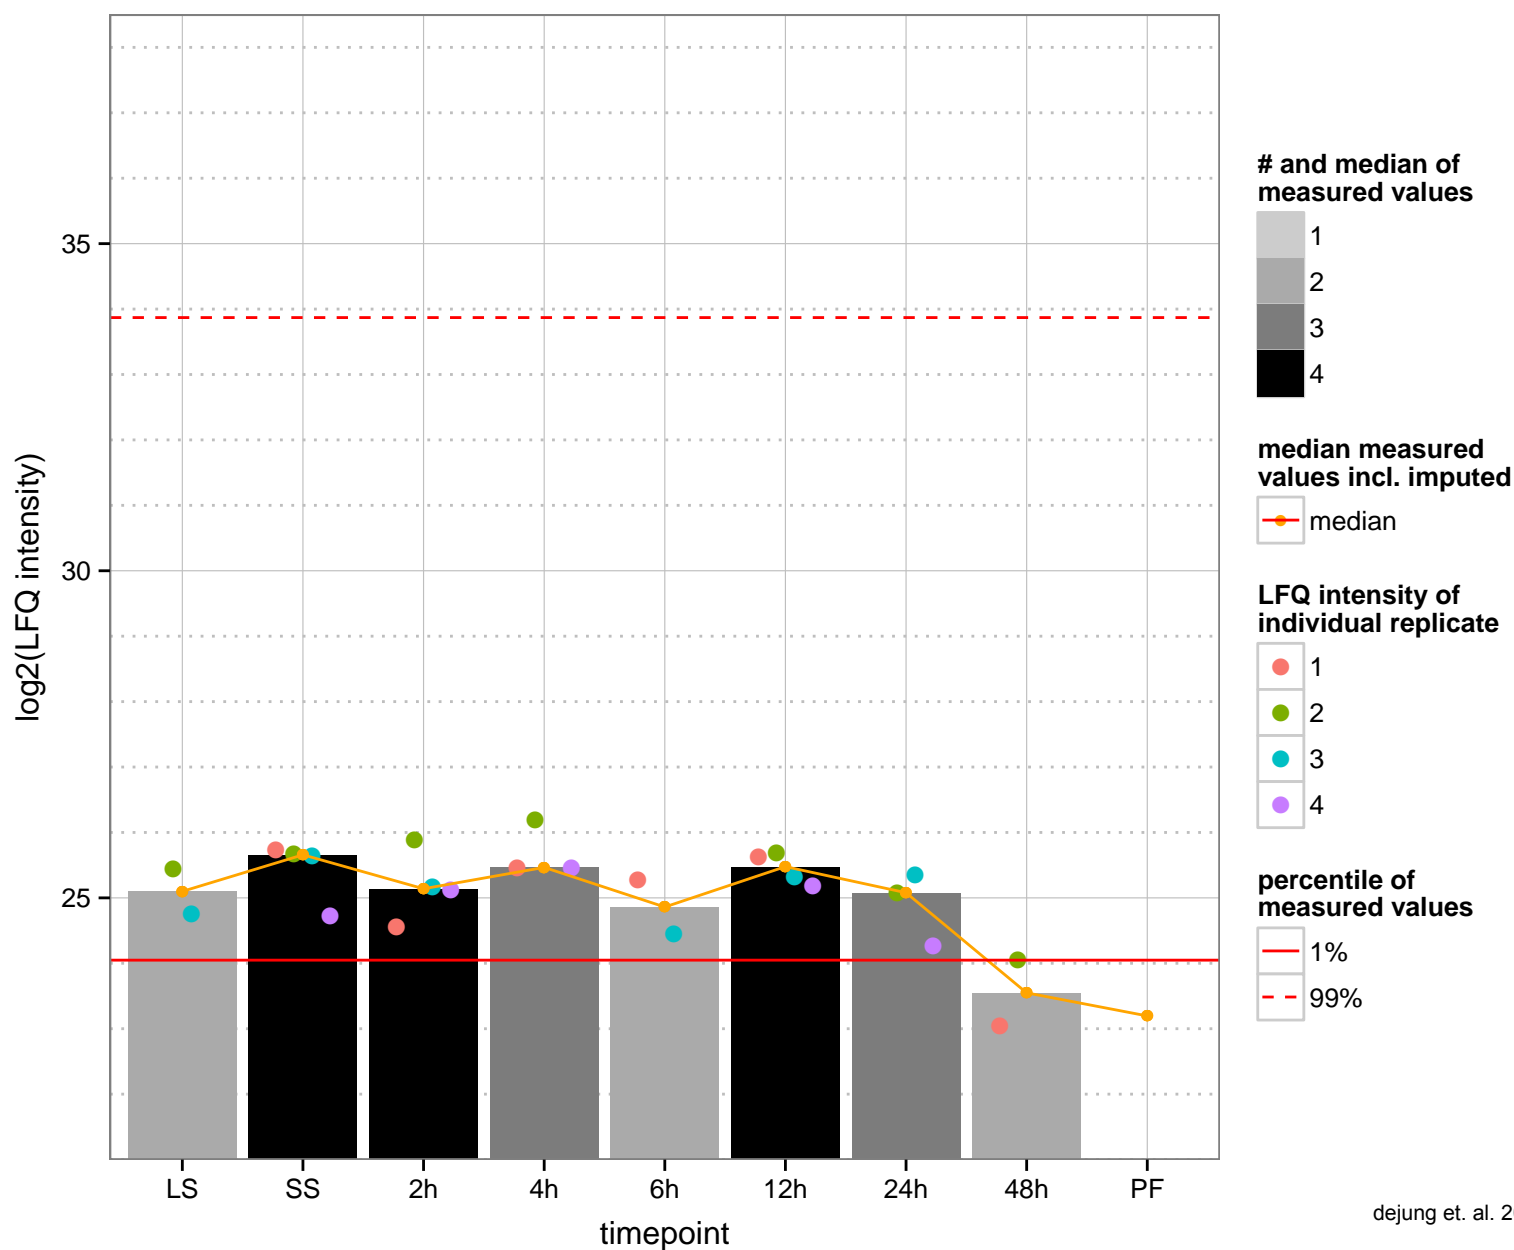

hypothetical protein, conserved  
 Tb927.8.3520  
 AGOF: null  
 AGOC: null  
 AGOP: null  
 PGO: null  
 PGOC: null  
 PGOP: null

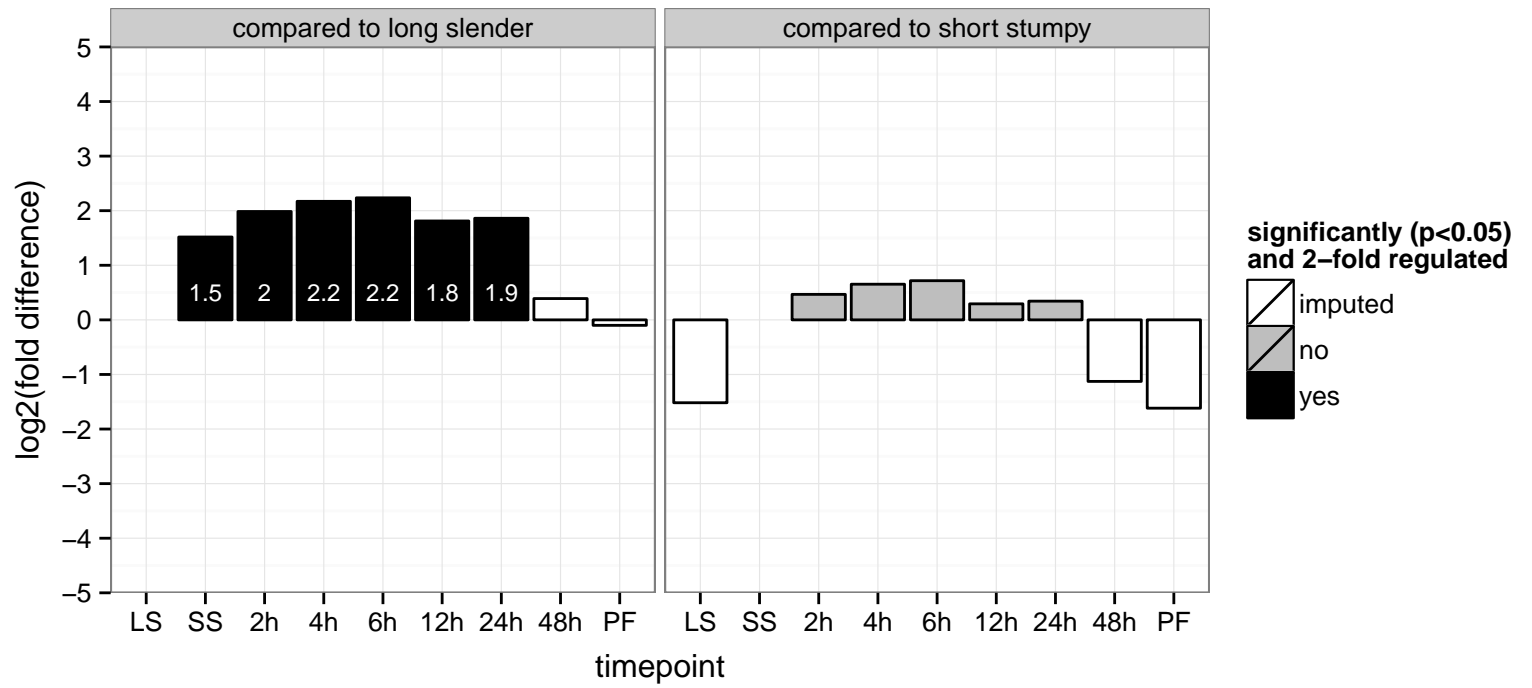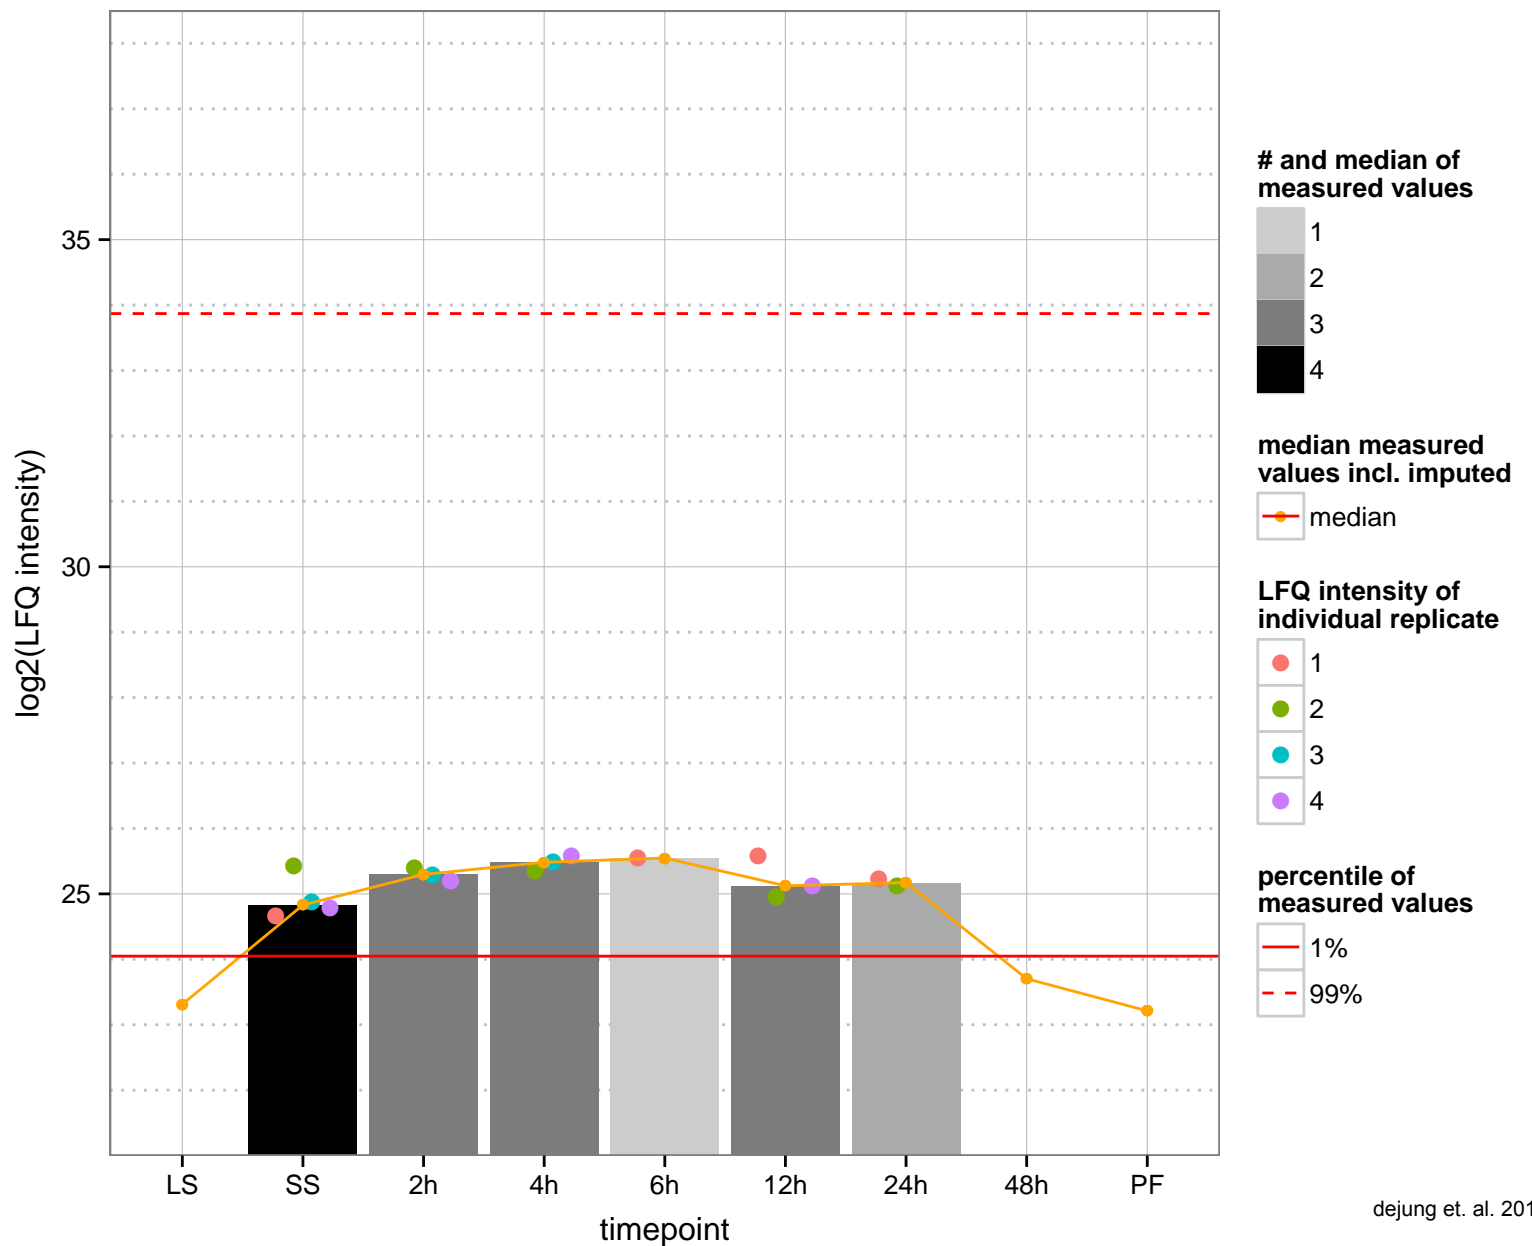

flagellum–adhesion glycoprotein, putative  
 Tb927.8.4060  
 AGOF: null  
 AGOC: flagellar pocket, integral to membrane, motile cilium  
 AGOP: null  
 PGO: null  
 PGOC: null  
 PGOP: null

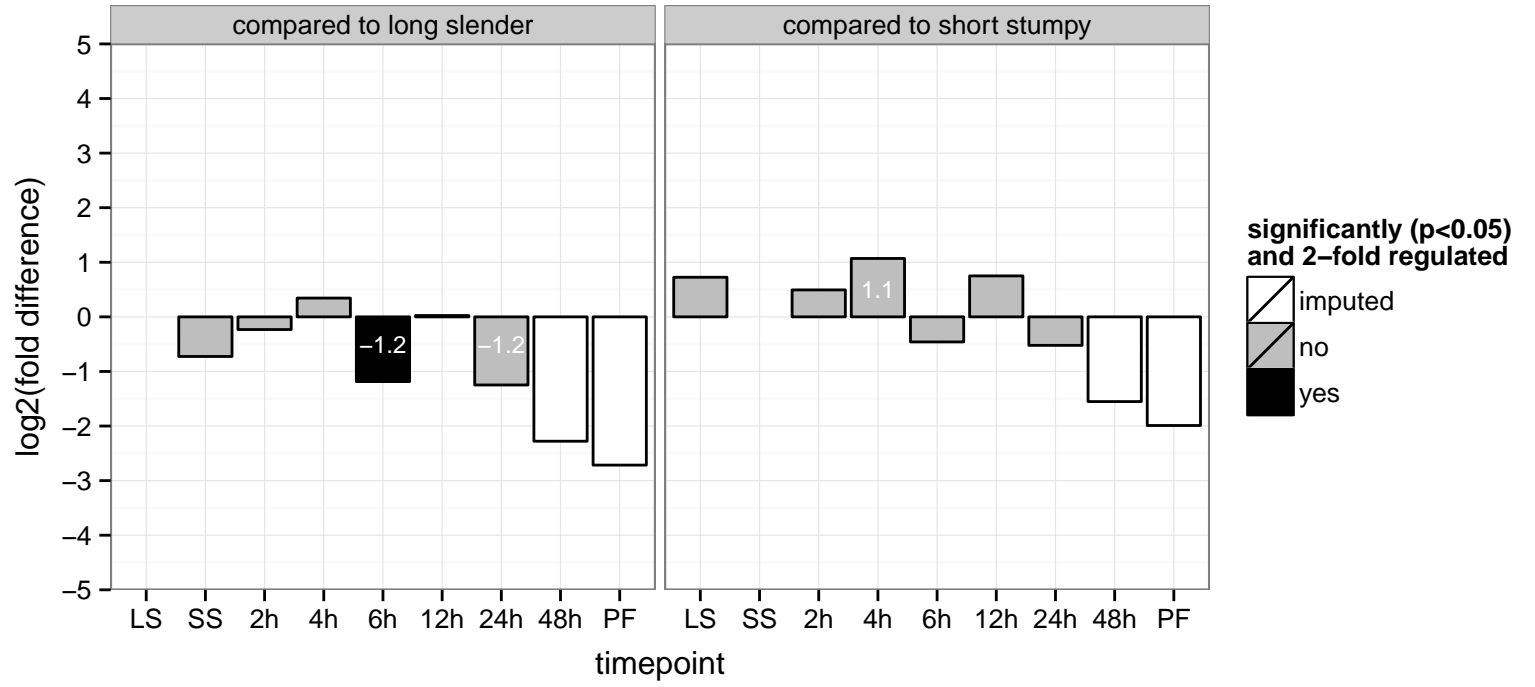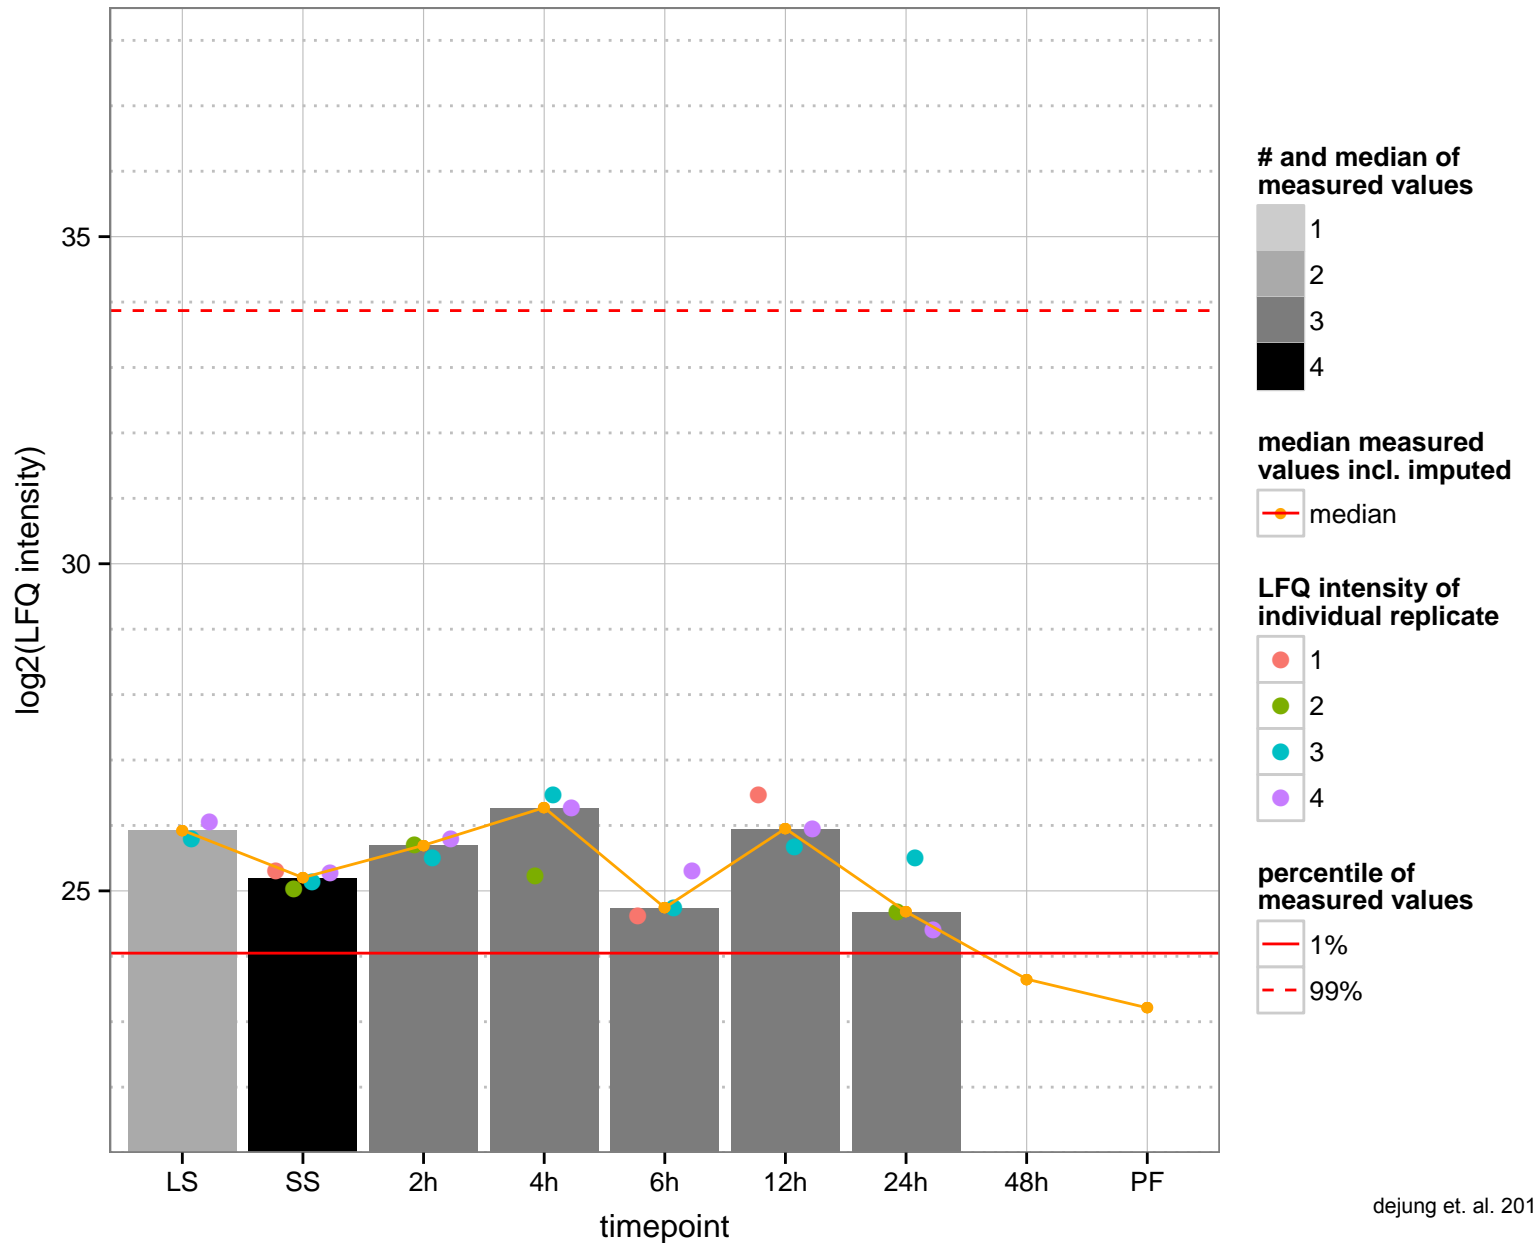

small GTP-binding protein Rab11, Rab11A GTPase (RAB11)

Tb927.8.4330

AGOF: GTP binding, GTPase activity

AGOC: contractile vacuole, endomembrane system, endosome, intracellular

AGOP: endosomal transport, intracellular protein transport, nucleocytoplasmic transport, small GTPase mediated signal transduction

PGOF: GTP binding, GTPase activity

PGOC: intracellular, membrane

PGOP: GTP catabolic process, intracellular protein transport, nucleocytoplasmic transport, protein transport, signal transduction

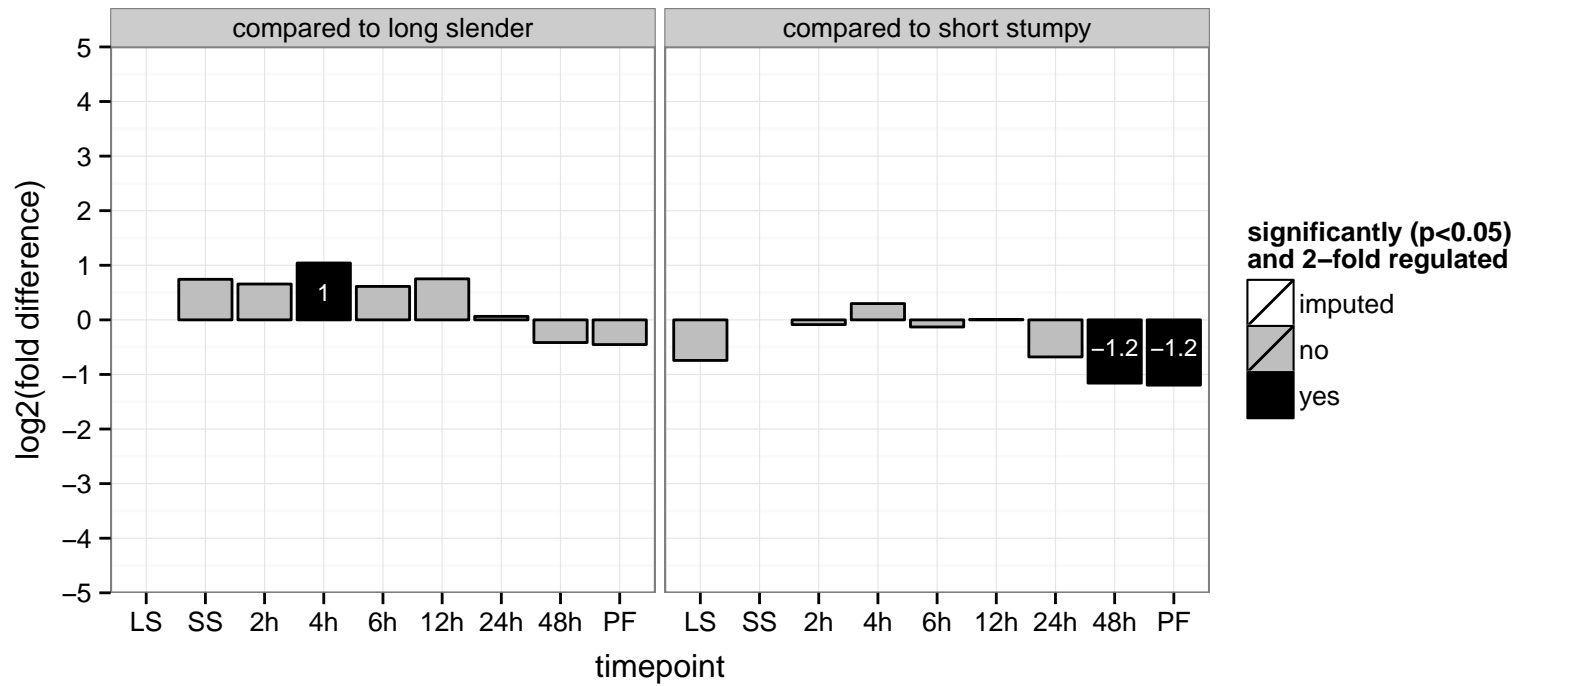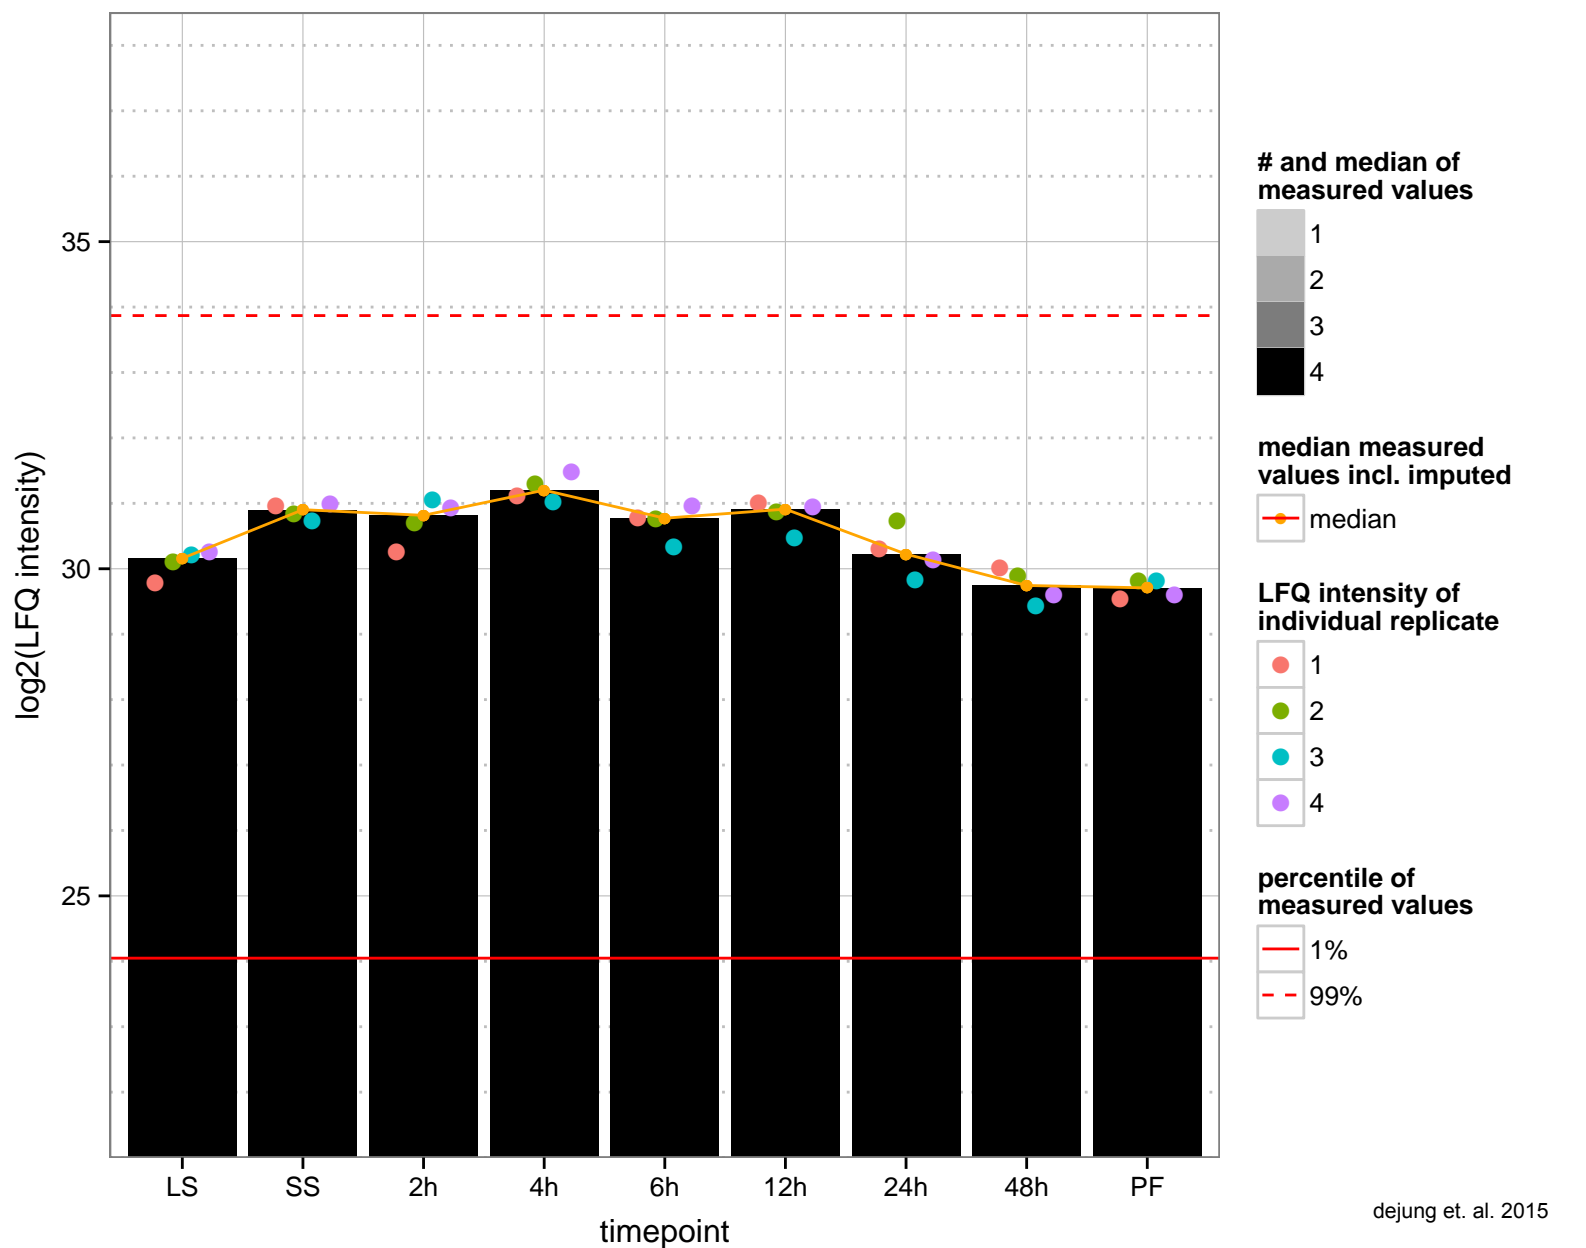

hypothetical protein, conserved  
 Tb927.8.5240  
 AGOF: null  
 AGOC: membrane  
 AGOP: null  
 PGO: null  
 PGO: null  
 PGO: null

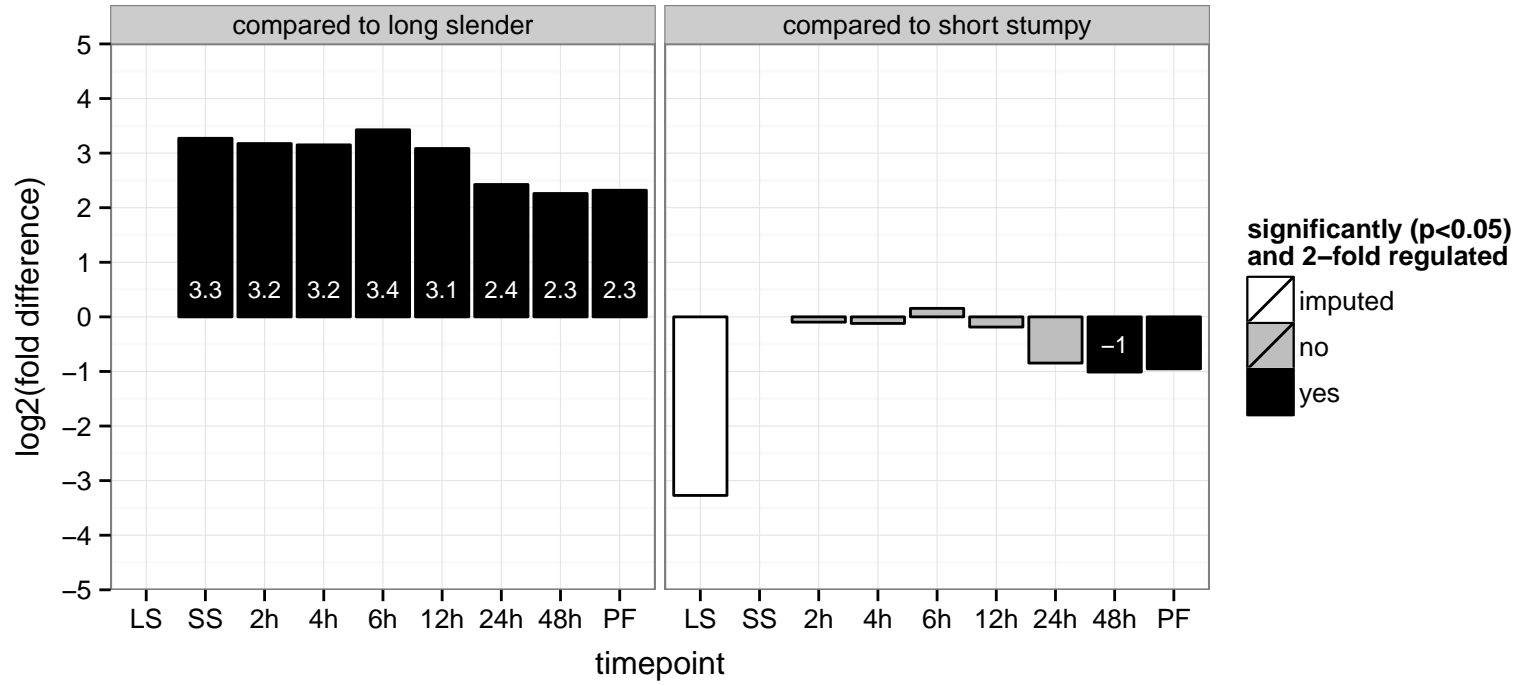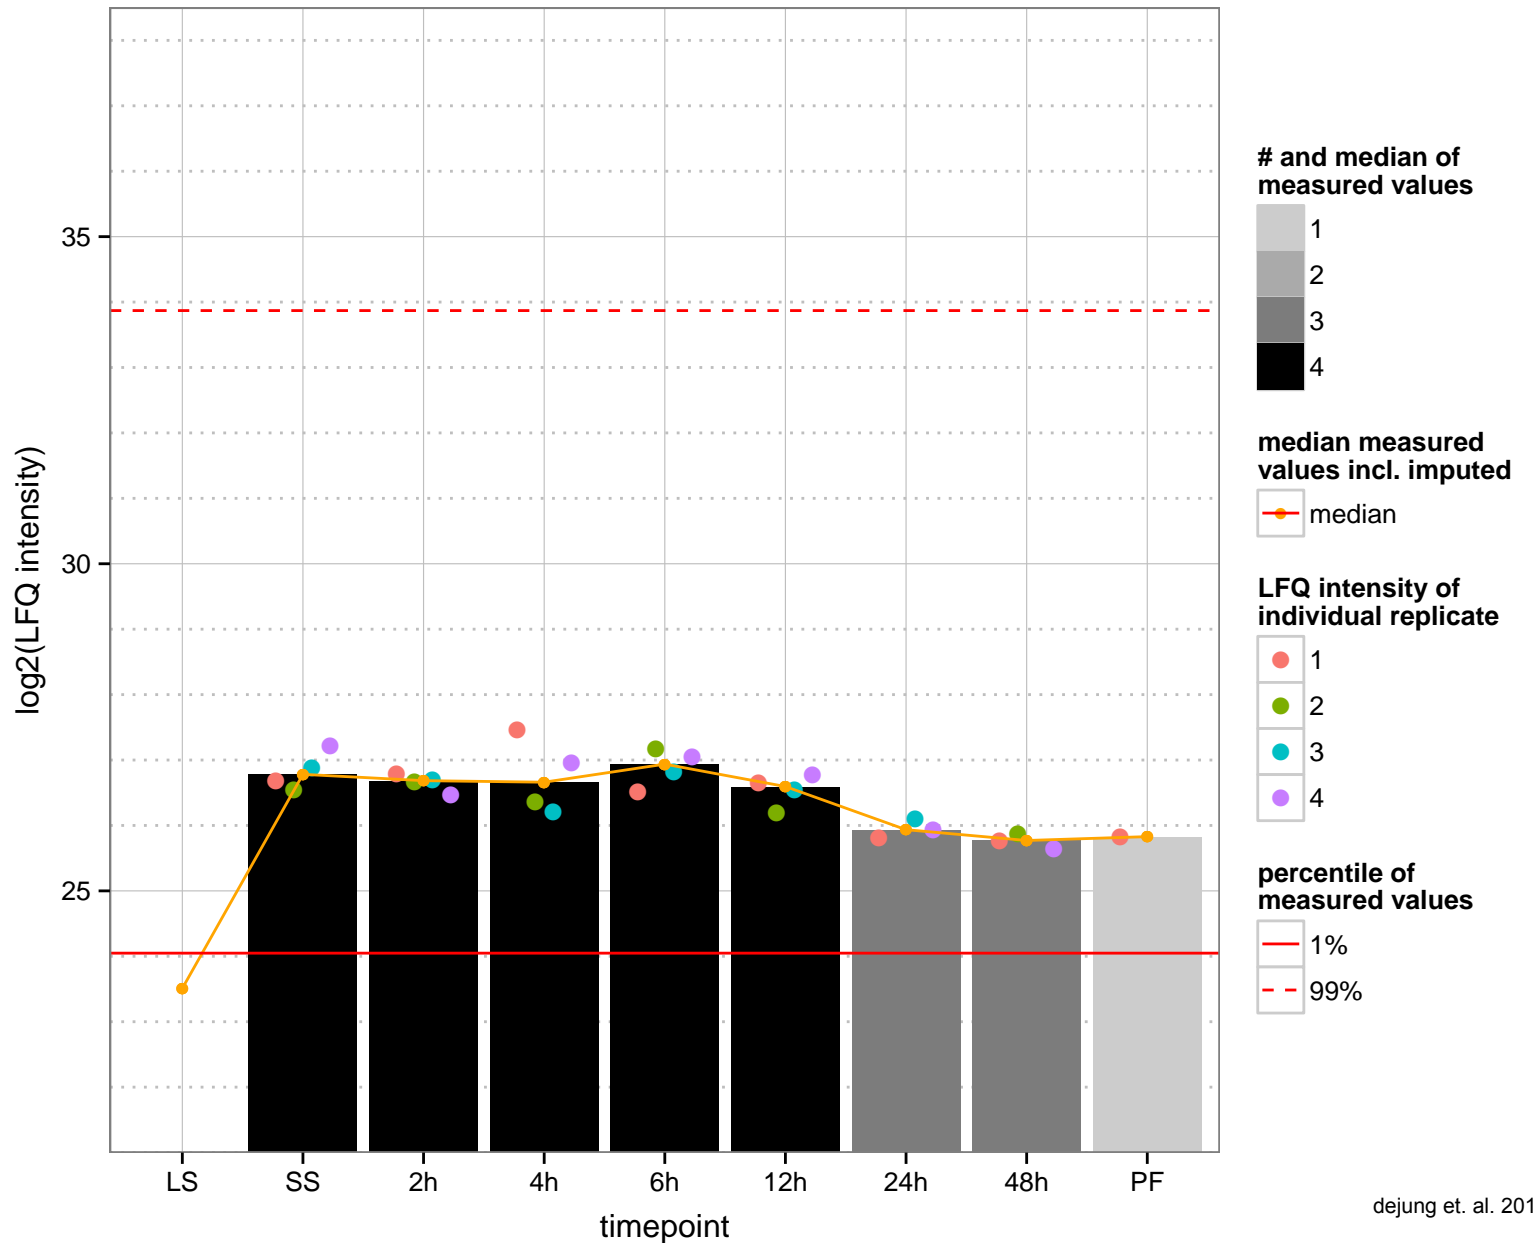



hypothetical protein, conserved  
 Tb927.8.6620  
 AGOF: null  
 AGOC: integral to membrane, mitochondrion  
 AGOP: null  
 PGO: protein binding  
 PGOC: null  
 PGOP: null

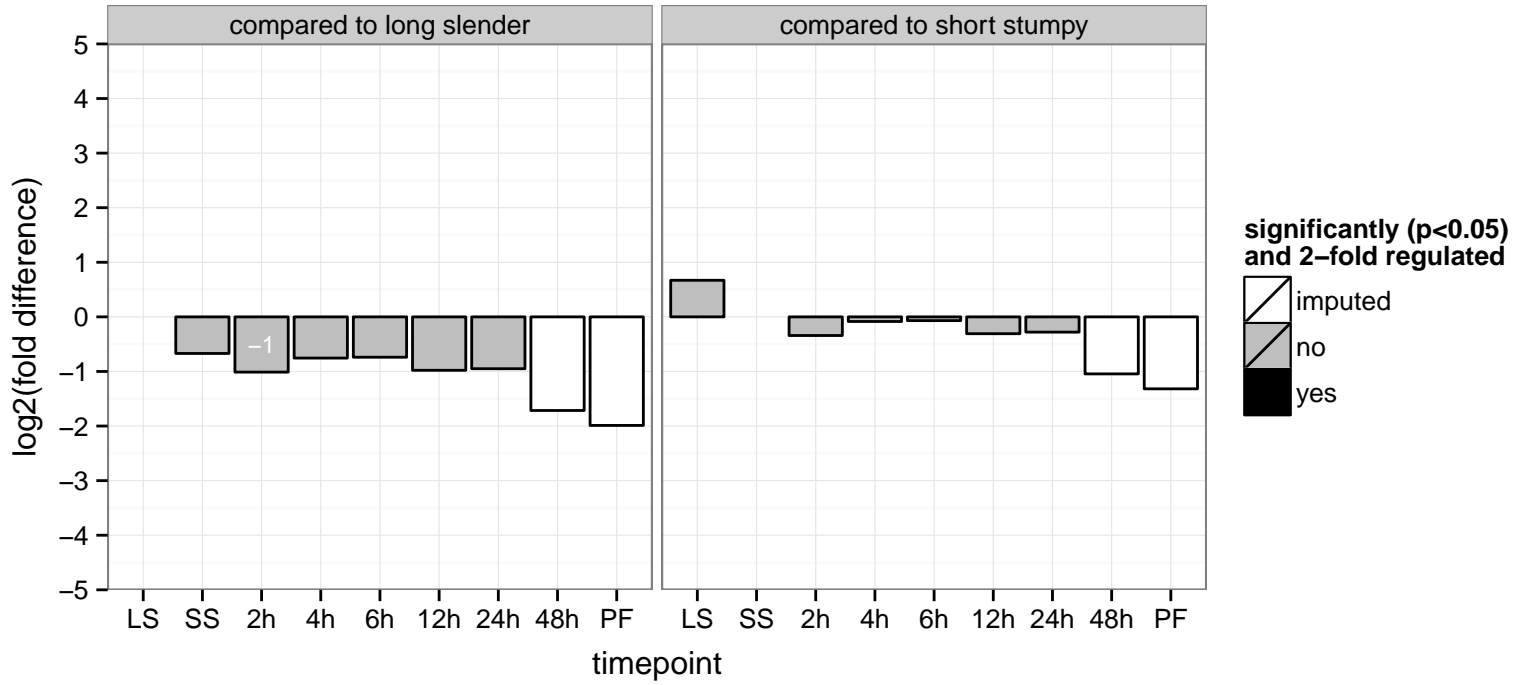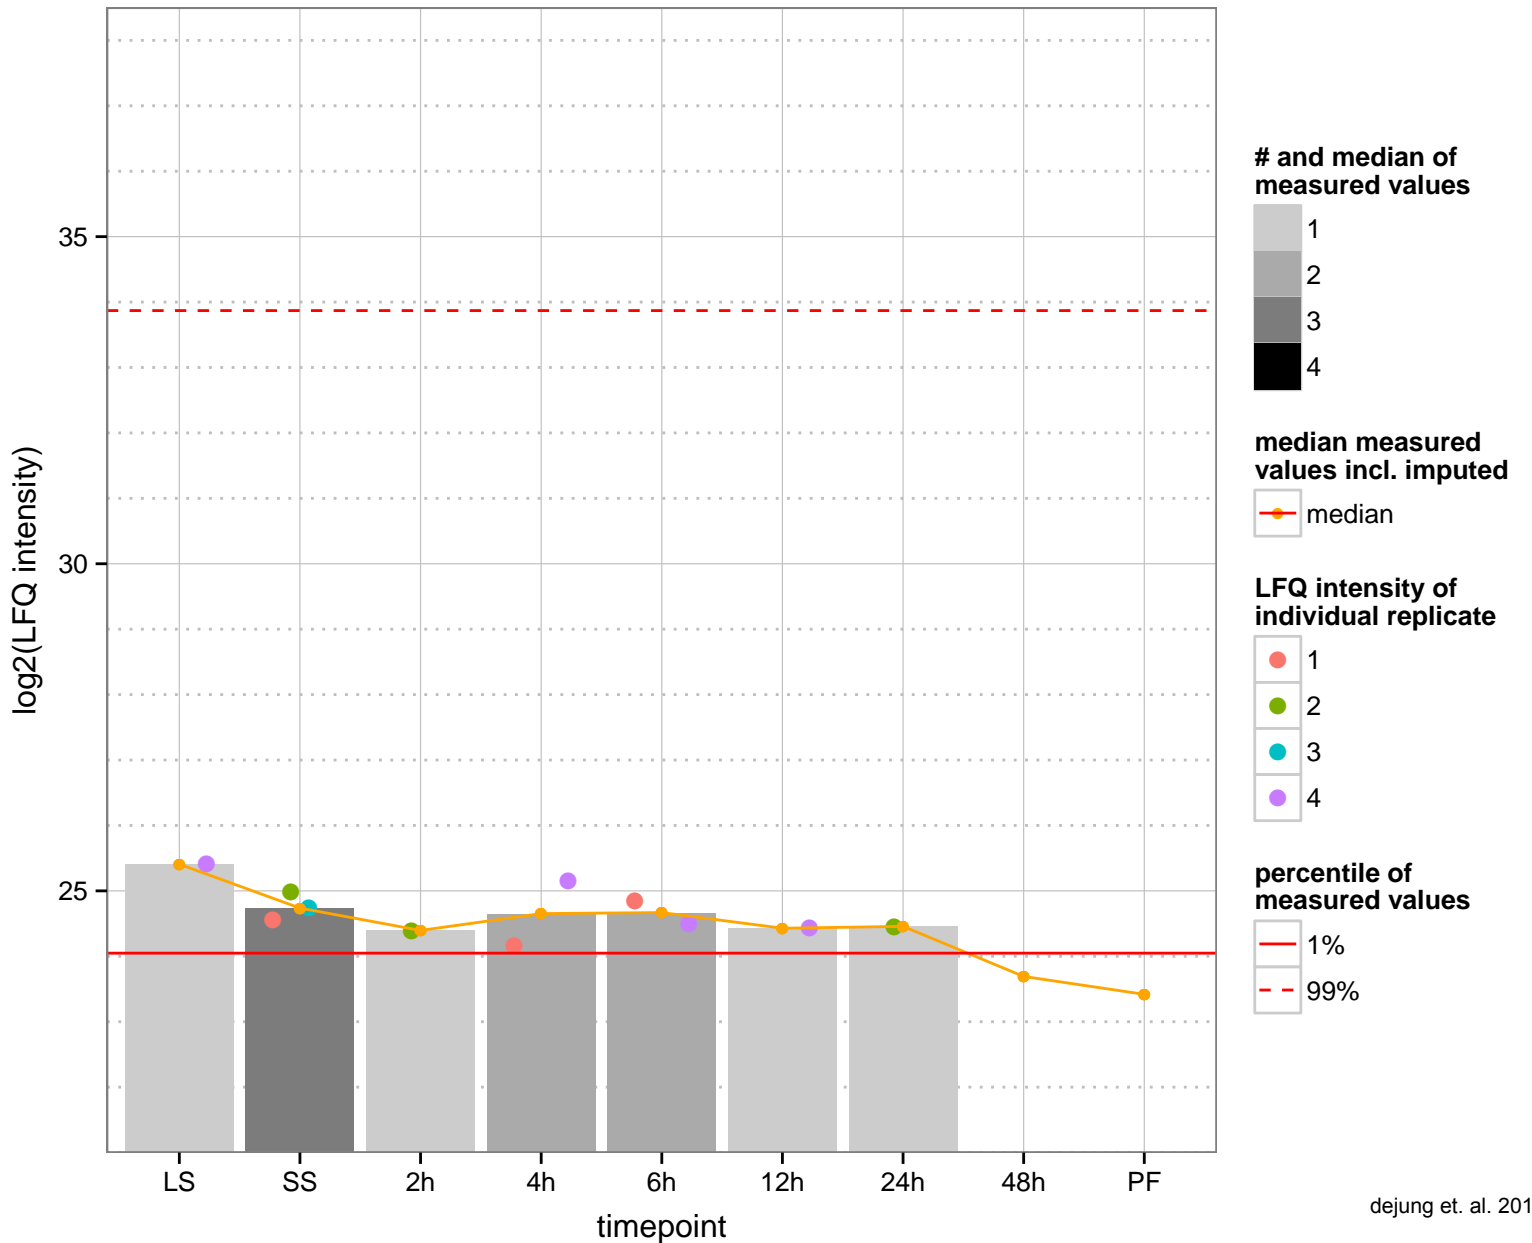

hypothetical protein, conserved  
 Tb927.8.7720  
 AGOF: null  
 AGOC: integral to membrane  
 AGOP: null  
 PGO: null  
 PGOC: null  
 PGOP: null

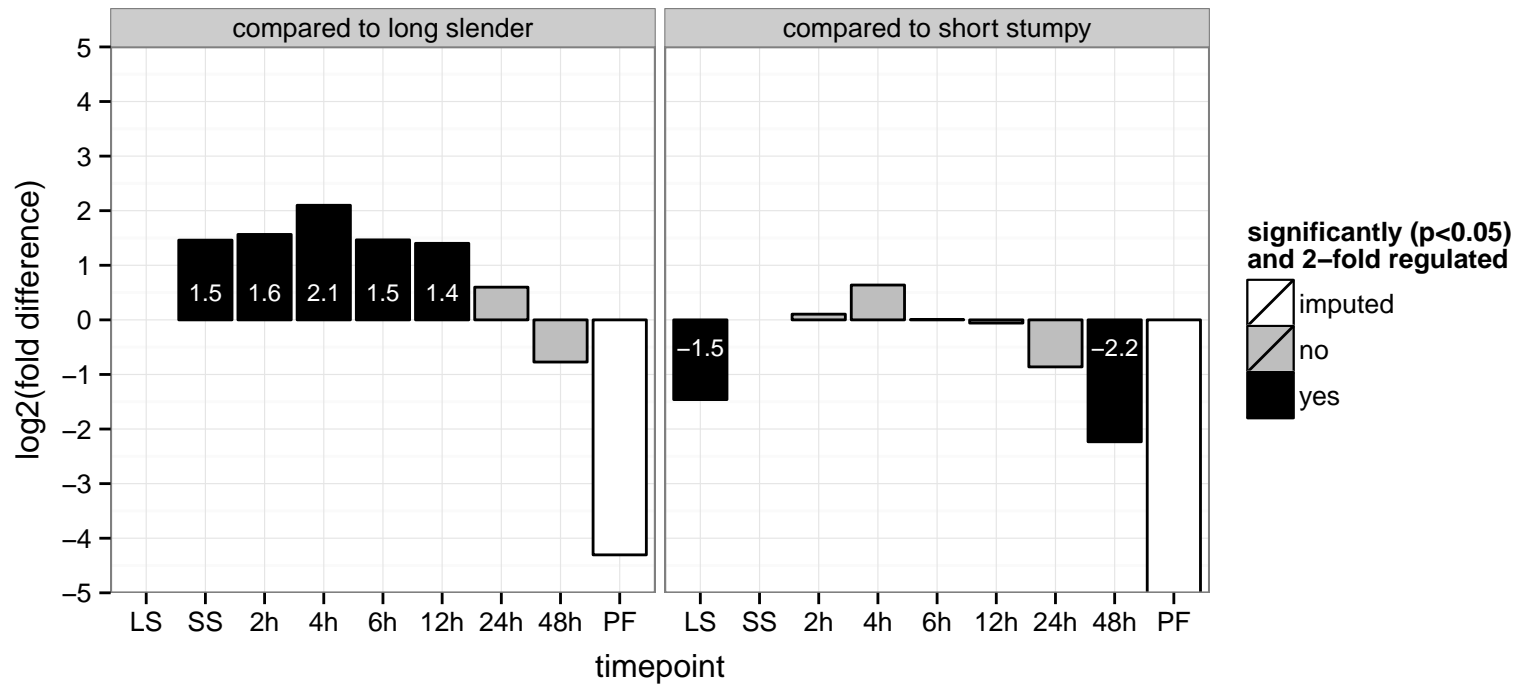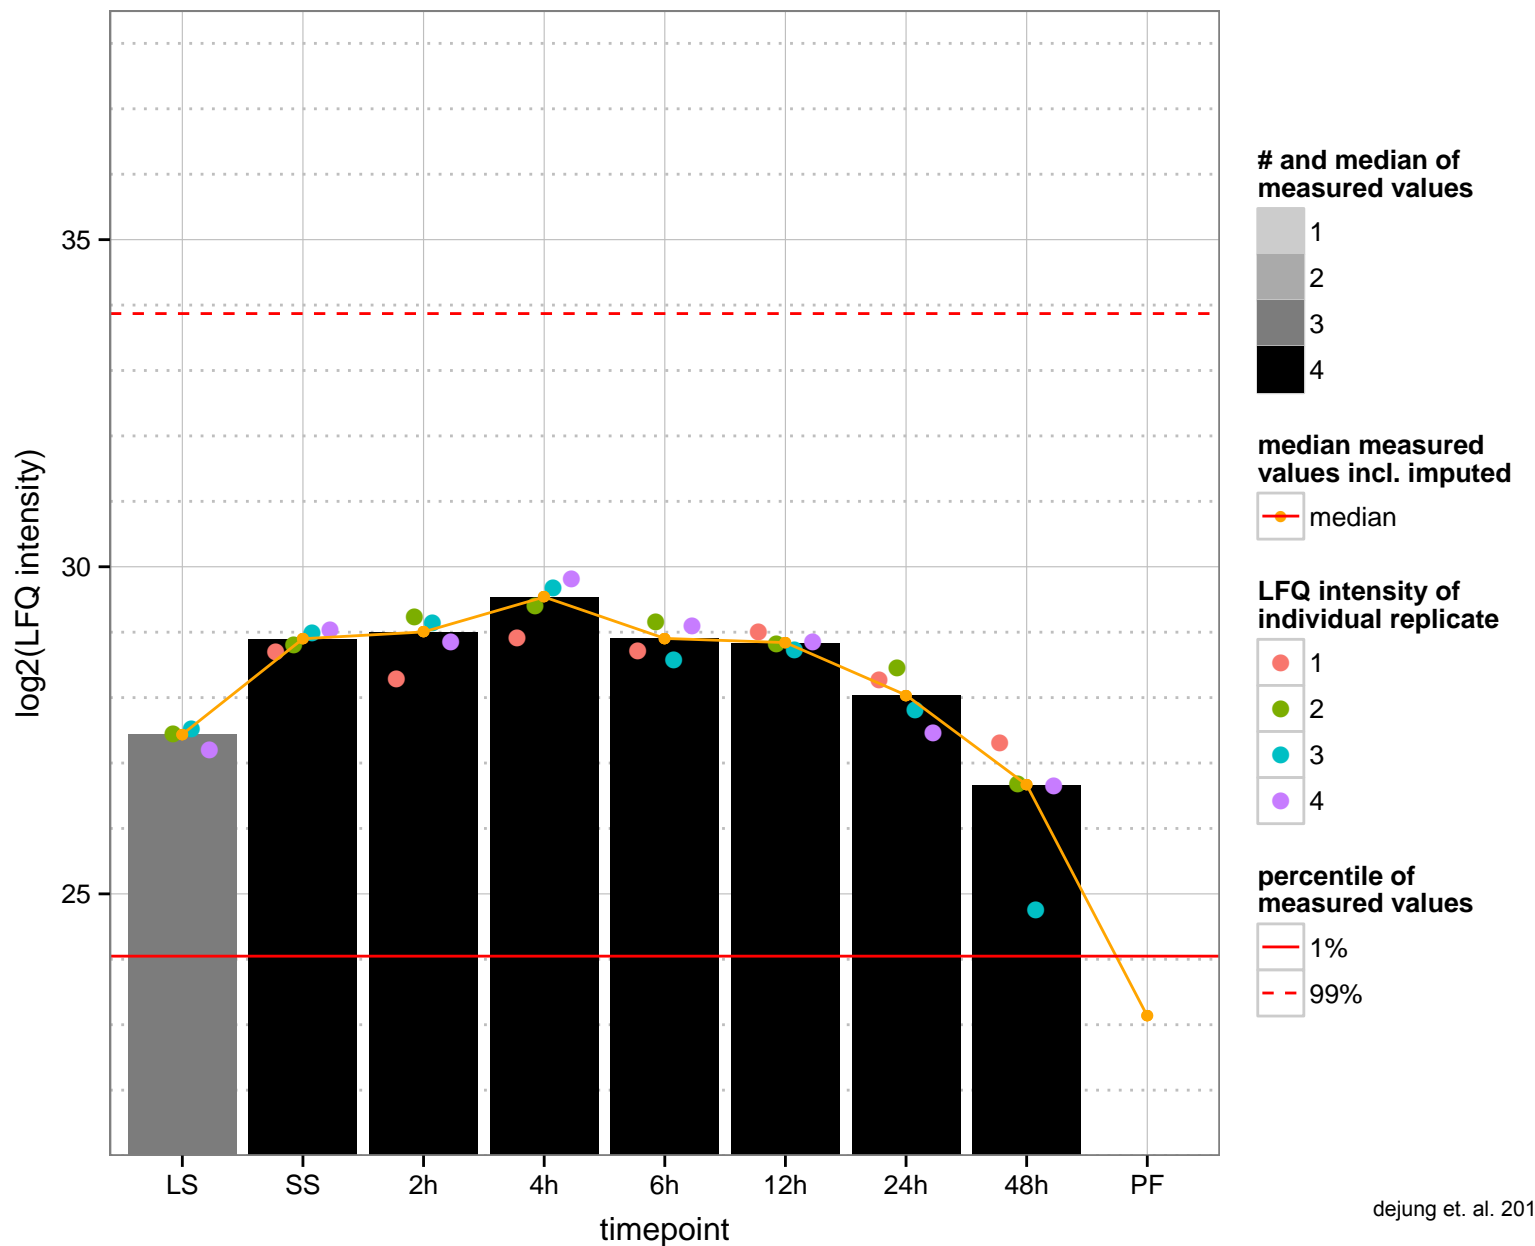

hypothetical protein, conserved  
 Tb927.8.8000  
 AGOF: null  
 AGOC: null  
 AGOP: null  
 PGO: null  
 PGOC: null  
 PGOP: null

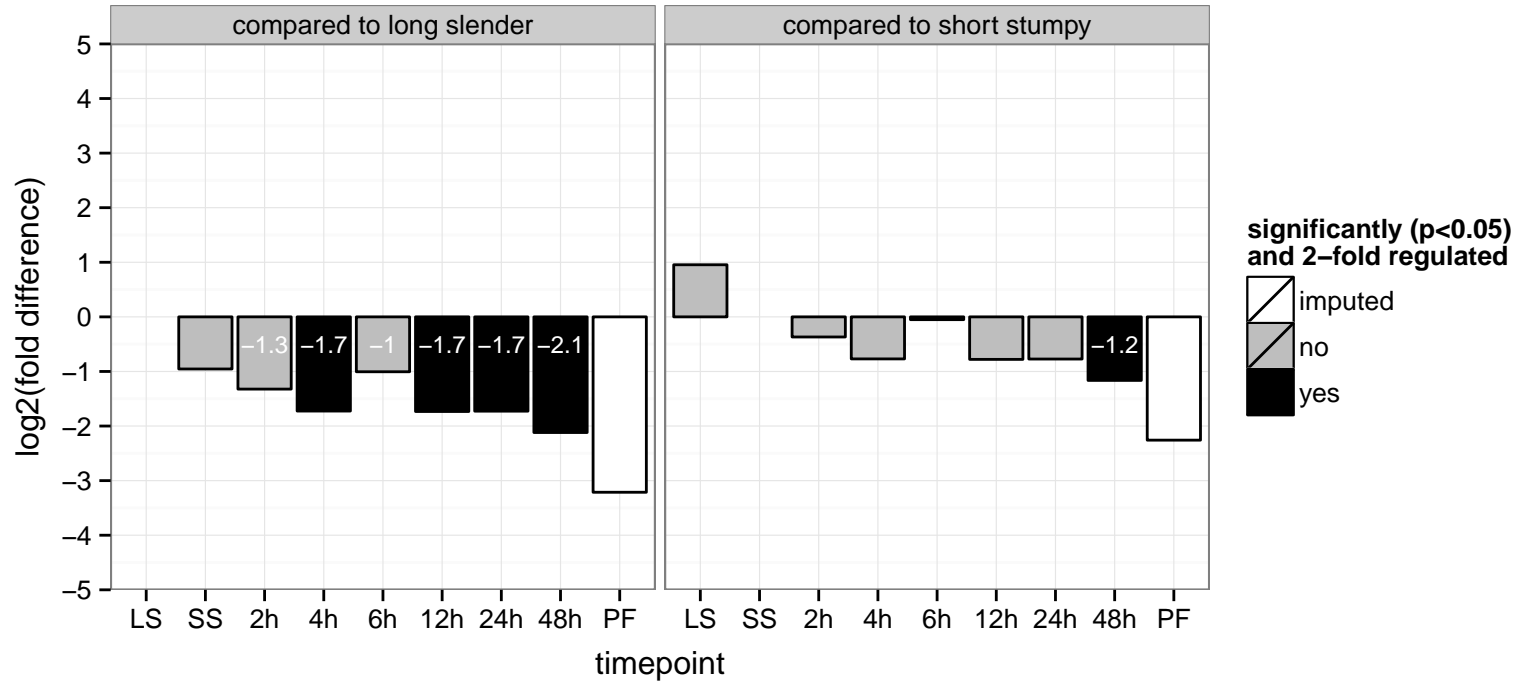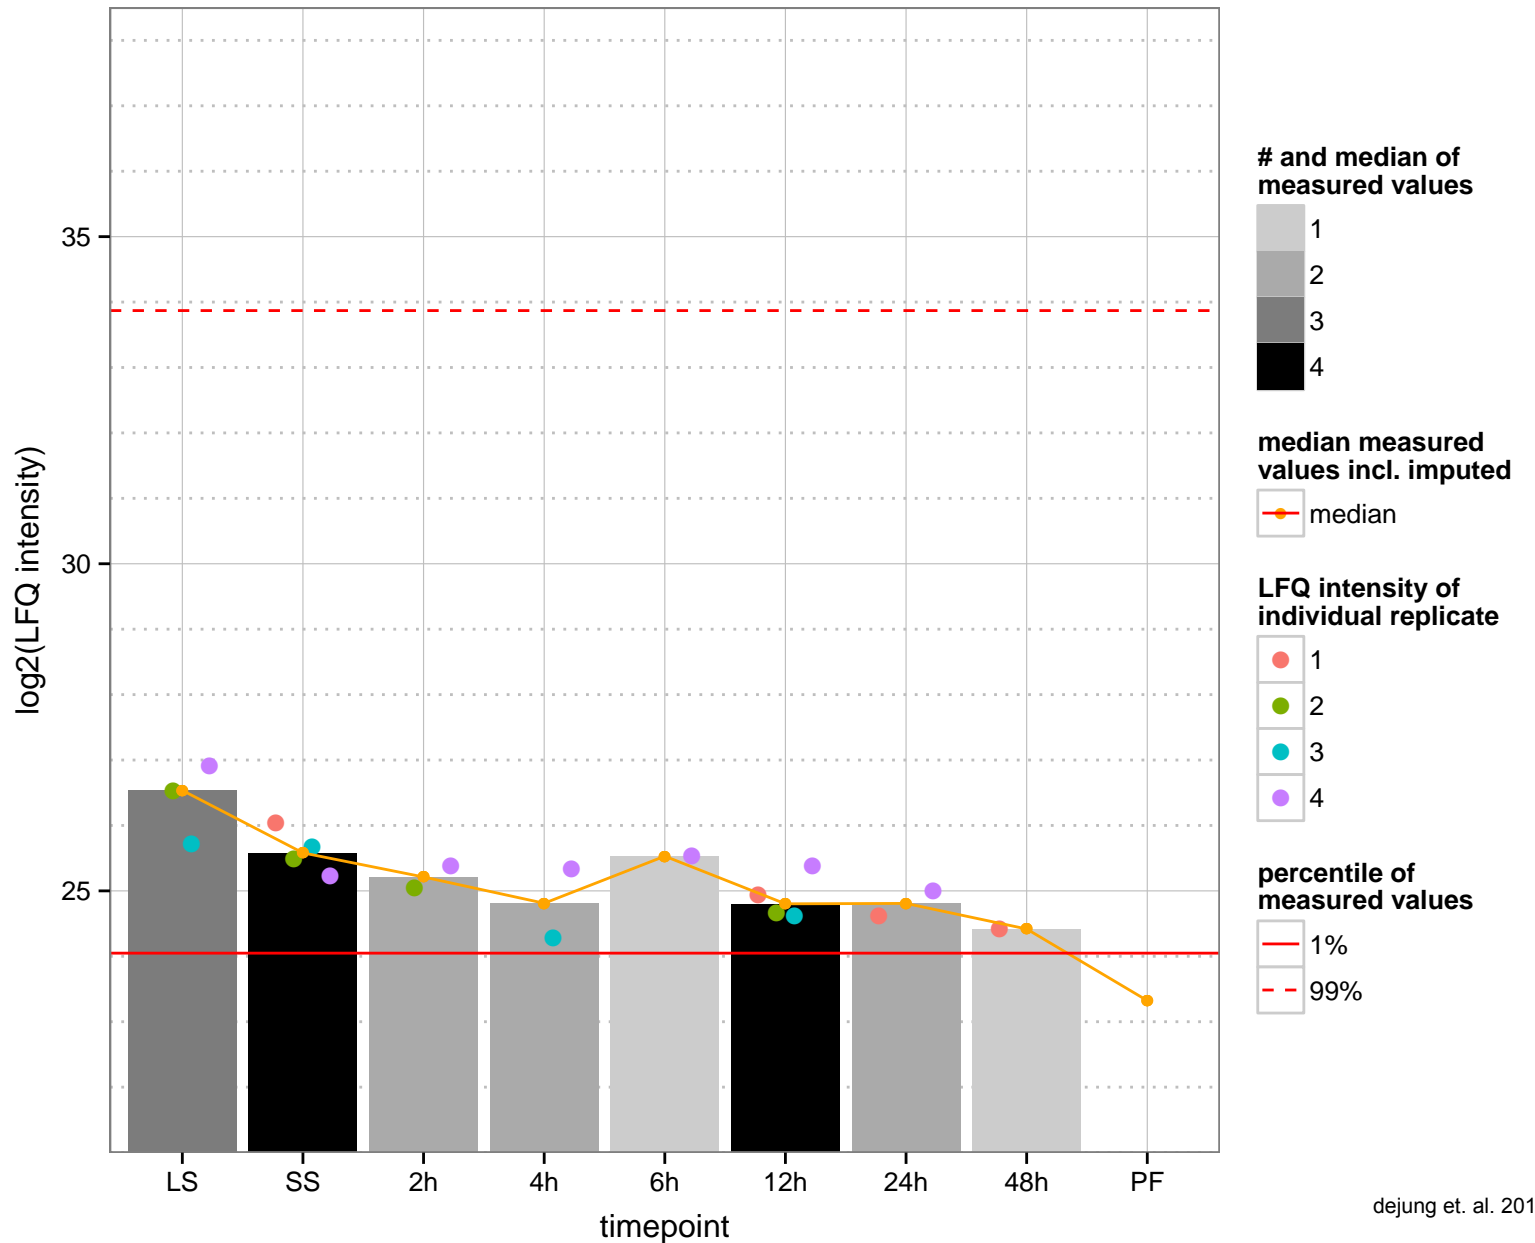

hypothetical protein, conserved  
 Tb927.8.8030  
 AGOF: null  
 AGOC: integral to membrane  
 AGOP: transport  
 PGO: null  
 PGO: integral to membrane  
 PGOP: transport

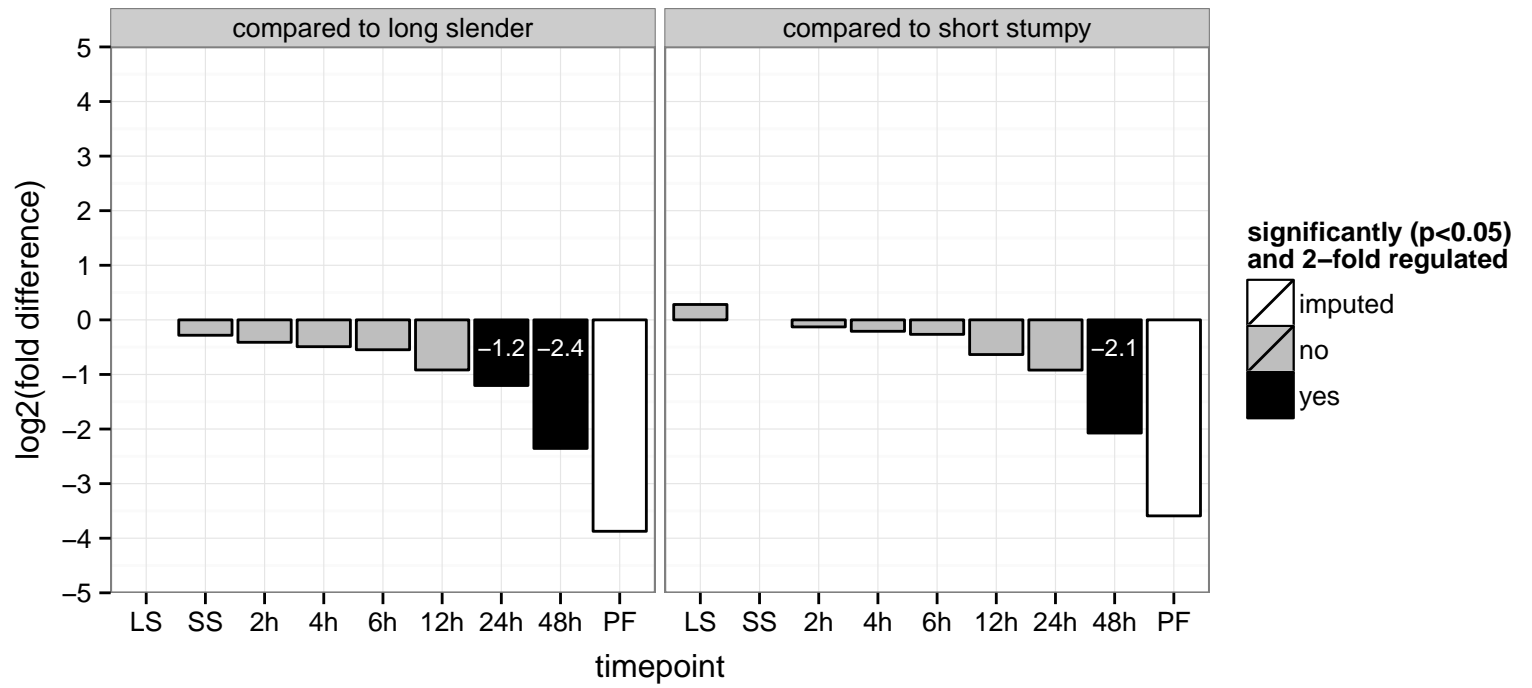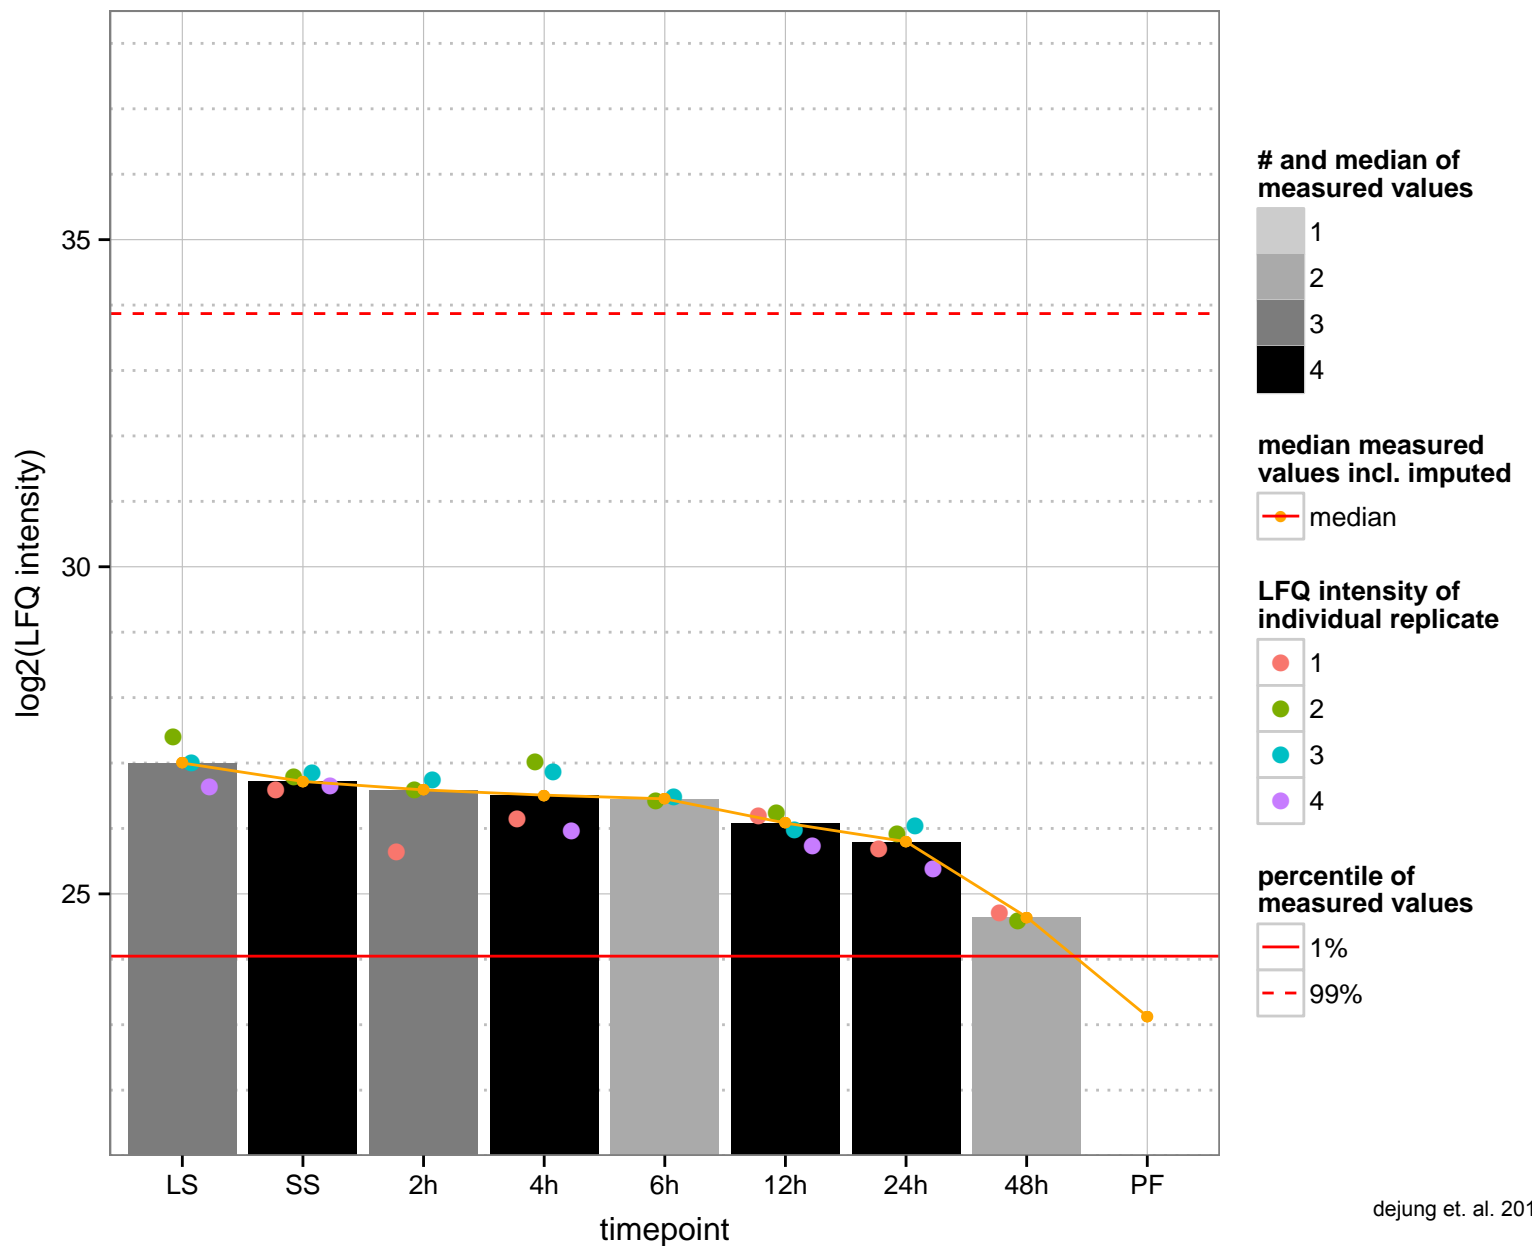

small GTPase, putative, GTP-binding protein, putative (RAB7)

Tb927.9.11000

AGOF: GTP binding, GTPase activity

AGOC: intracellular

AGOP: protein transport, small GTPase mediated signal transduction

PGOF: GTP binding, GTPase activity

PGOC: membrane

PGOP: GTP catabolic process, protein transport, signal transduction, small GTPase mediated signal transduction

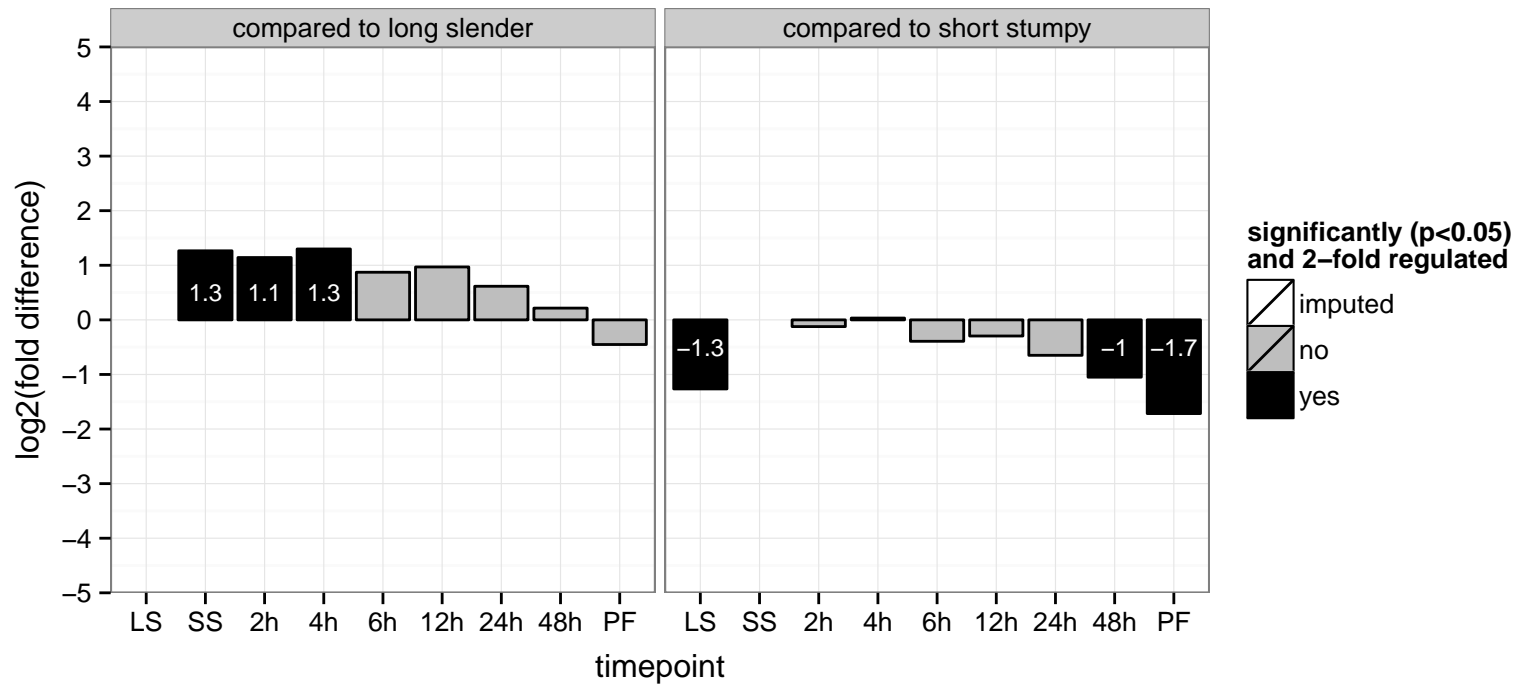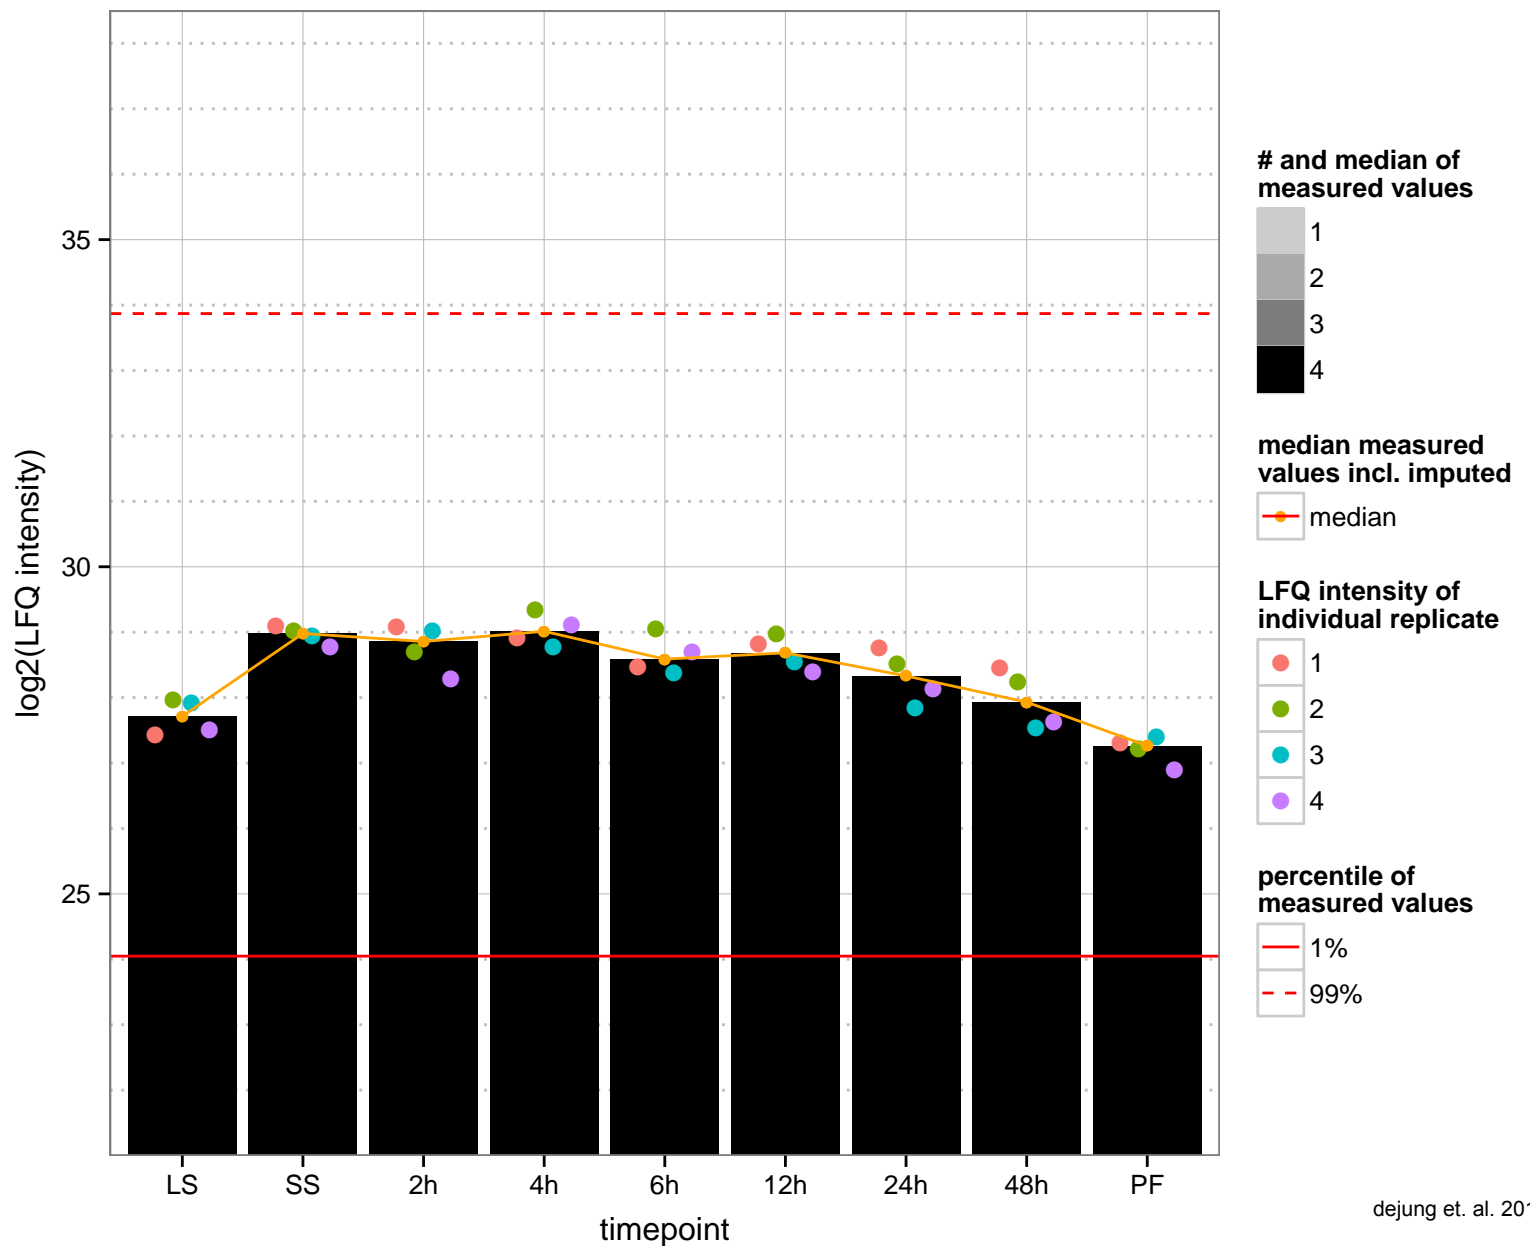

cAMP-dependent protein kinase catalytic subunit 2 (PKAC2)

Tb927.9.11030

AGOF: ATP binding, protein serine/threonine kinase activity, protein tyrosine kinase activity

AGOC: null

AGOP: null

PGOF: ATP binding, protein kinase activity, protein serine/threonine kinase activity, transferase activity, transferring phosphorus

PGOC: null

PGOP: protein phosphorylation

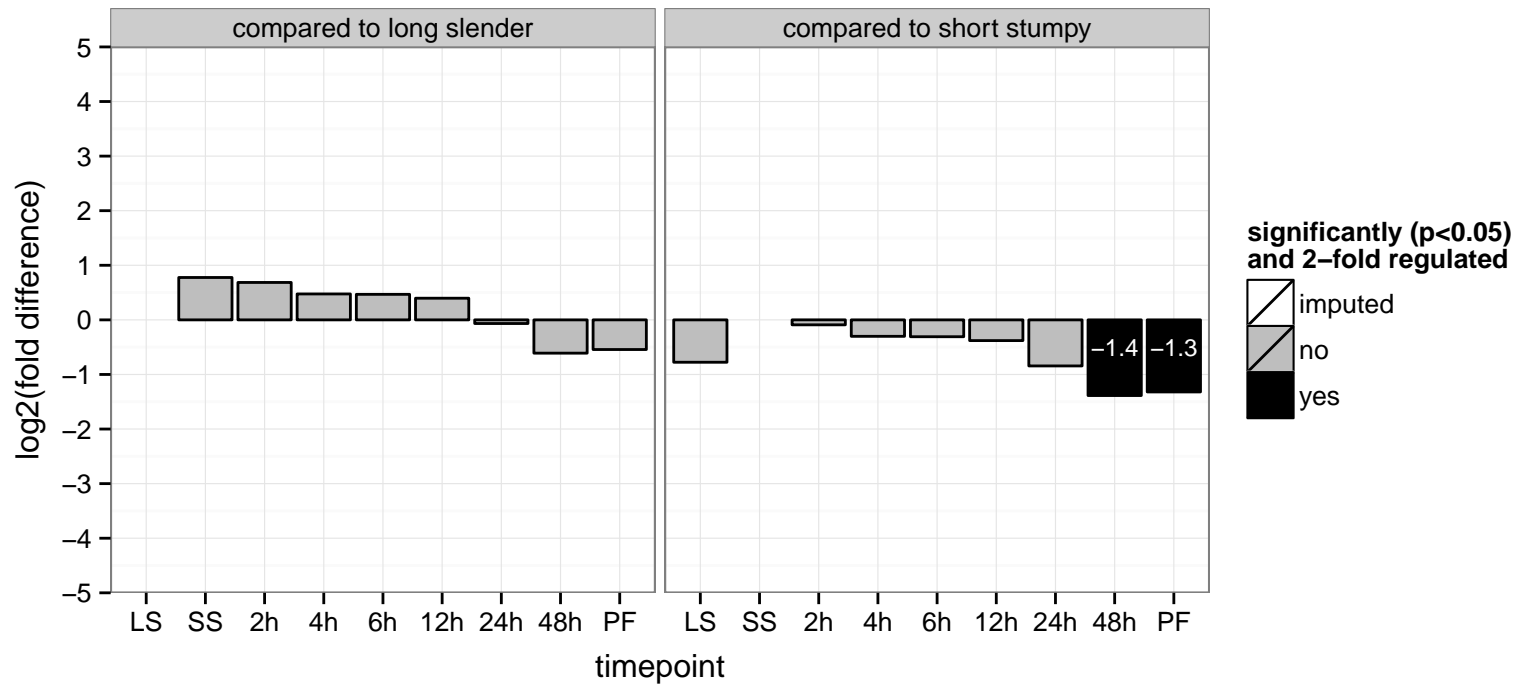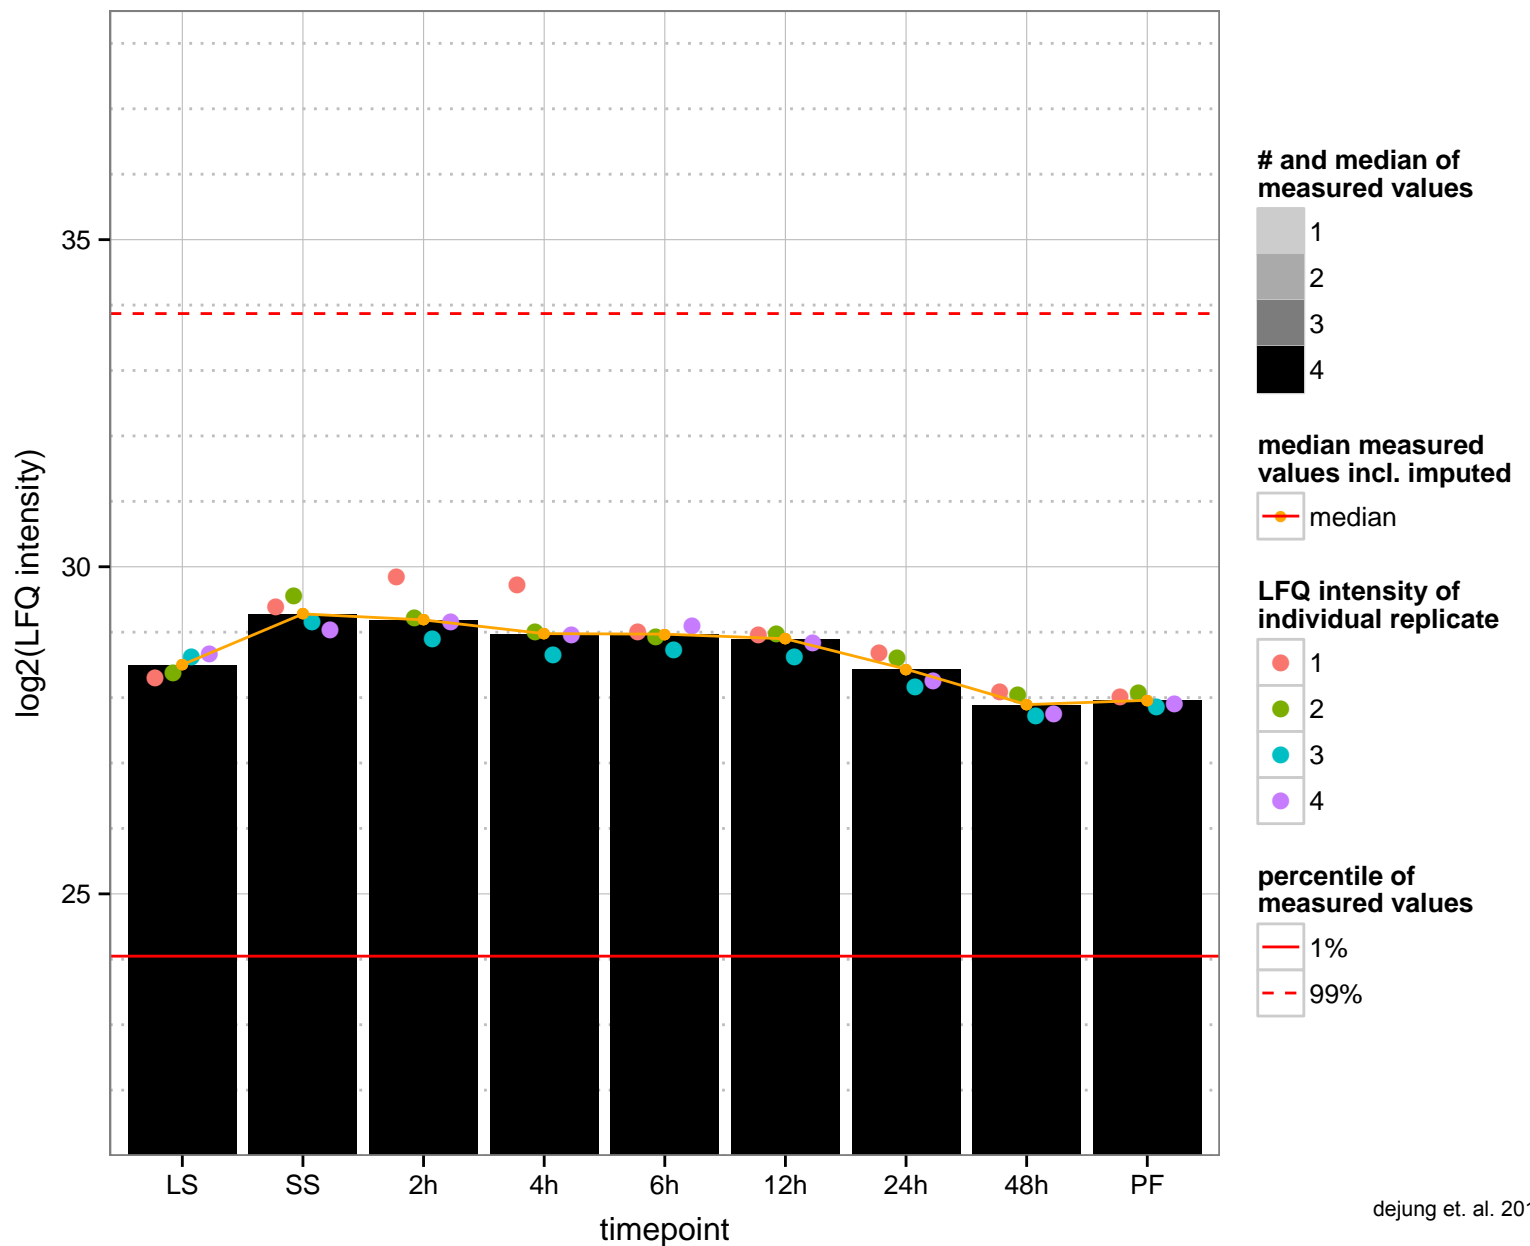

cAMP-dependent protein kinase catalytic subunit 1 (PKAC1)

Tb927.9.11100

AGOF: ATP binding, protein serine/threonine kinase activity, protein tyrosine kinase activity

AGOC: null

AGOP: protein phosphorylation

PGOF: ATP binding, protein kinase activity, protein serine/threonine kinase activity, transferase activity, transferring phosphorus

PGOC: null

PGOP: protein phosphorylation

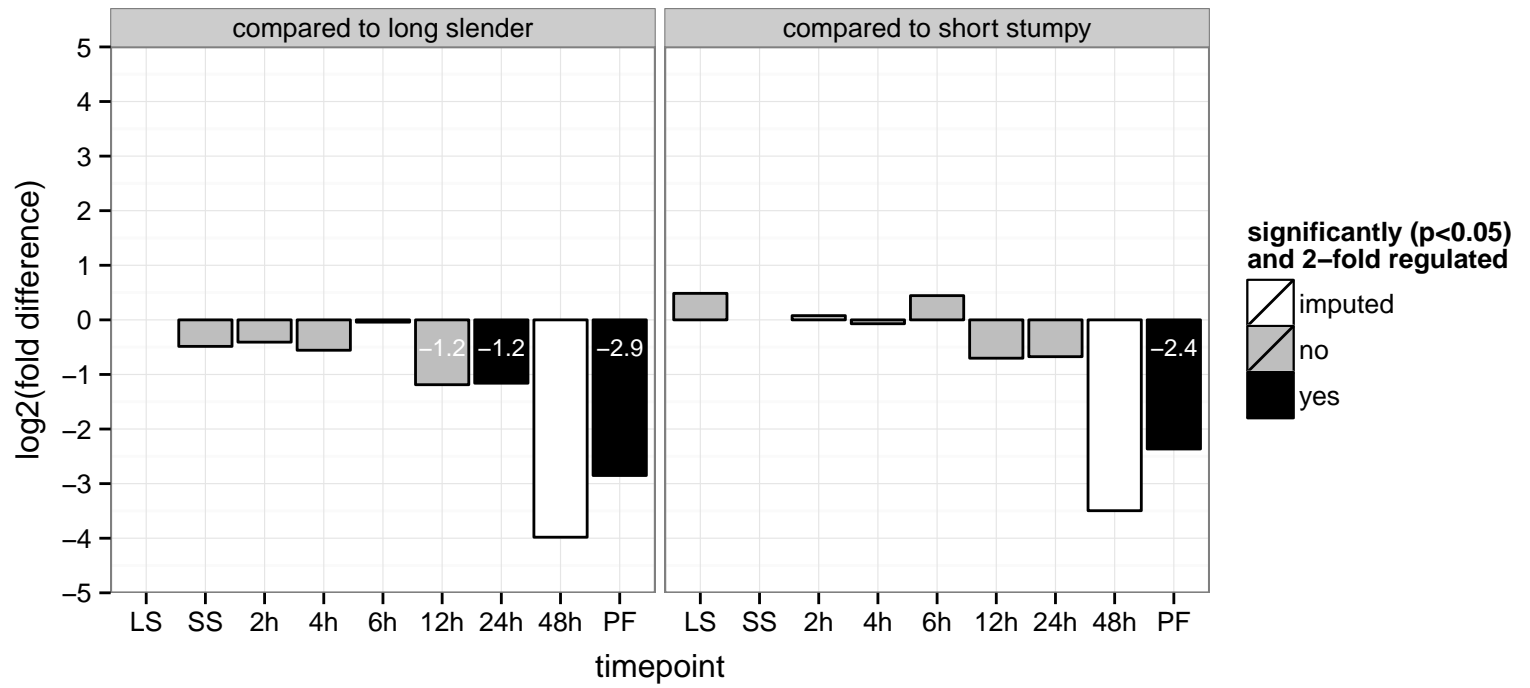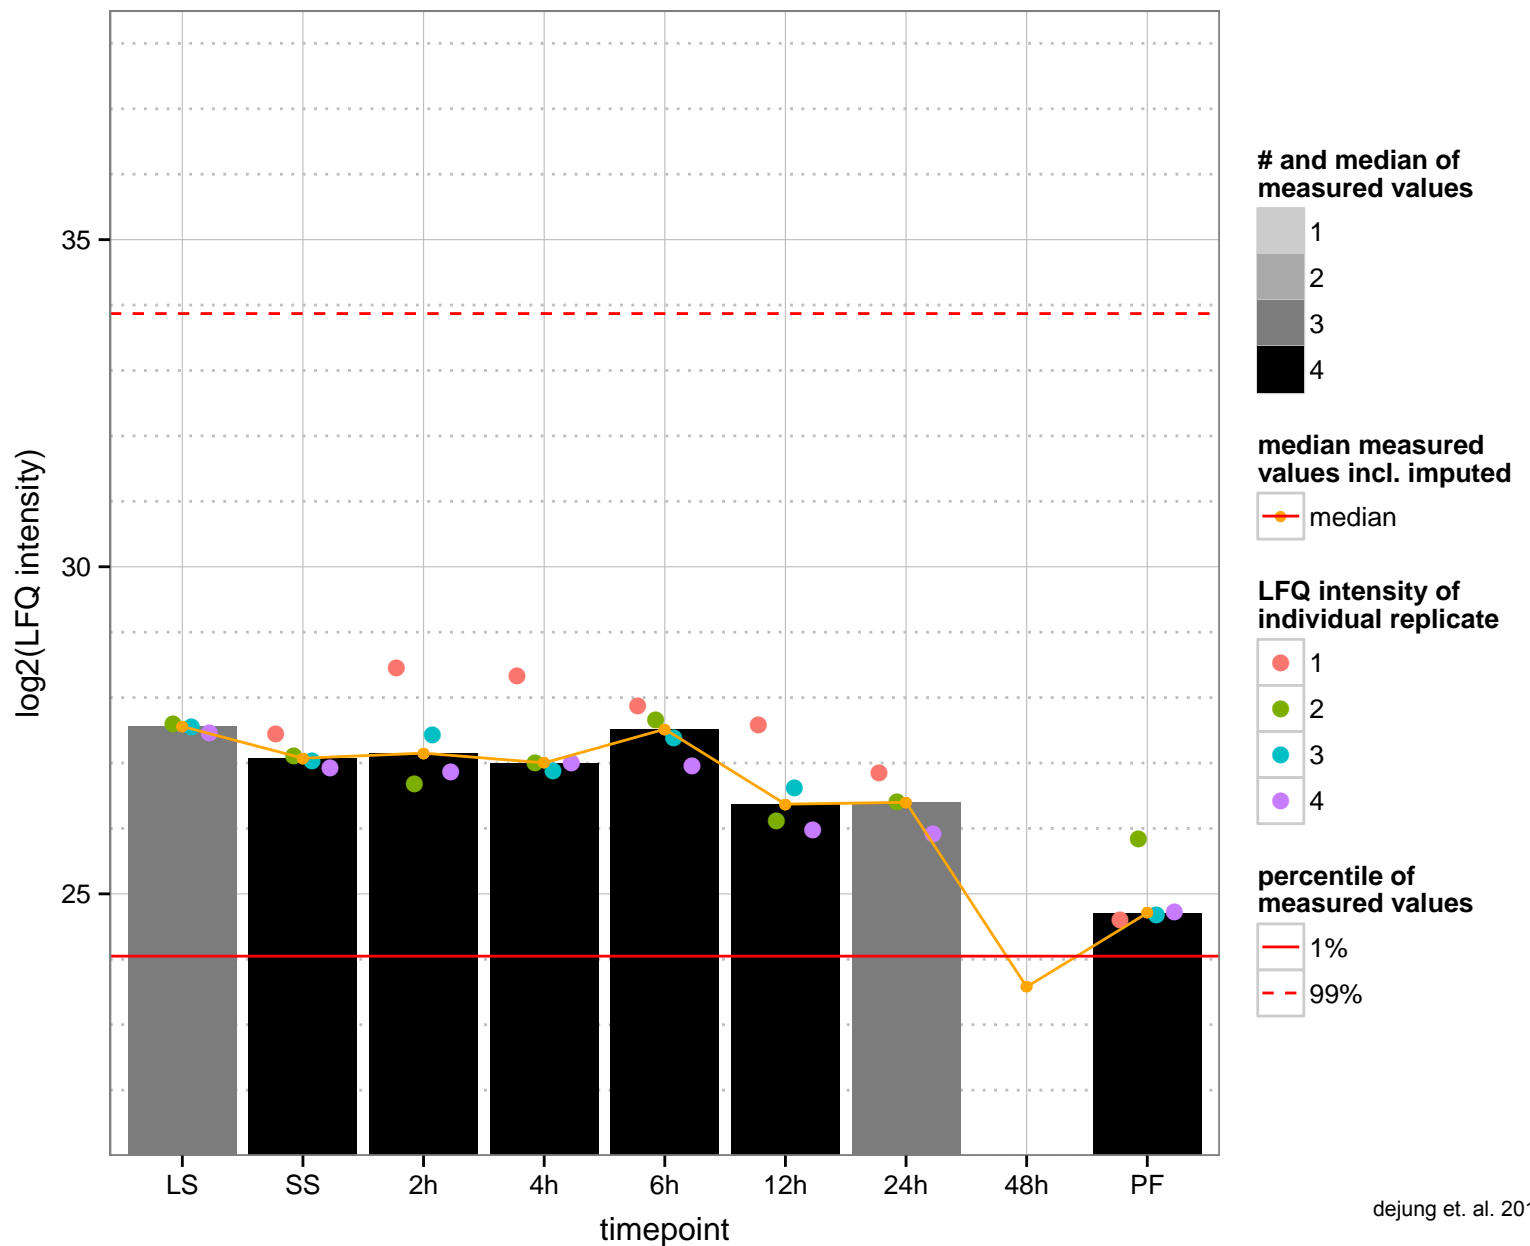

ubiquitin-activating enzyme E1, putative, putative (UBA2)

Tb927.9.12650

AGOF: null, ATP binding, small protein activating enzyme activity, ubiquitin-protein ligase activity

AGOC: null, mitochondrion

AGOP: null, cellular protein modification process

PGOF: catalytic activity, ATP binding, catalytic activity, small protein activating enzyme activity

PGOC: null

PGOP: null, cellular protein modification process

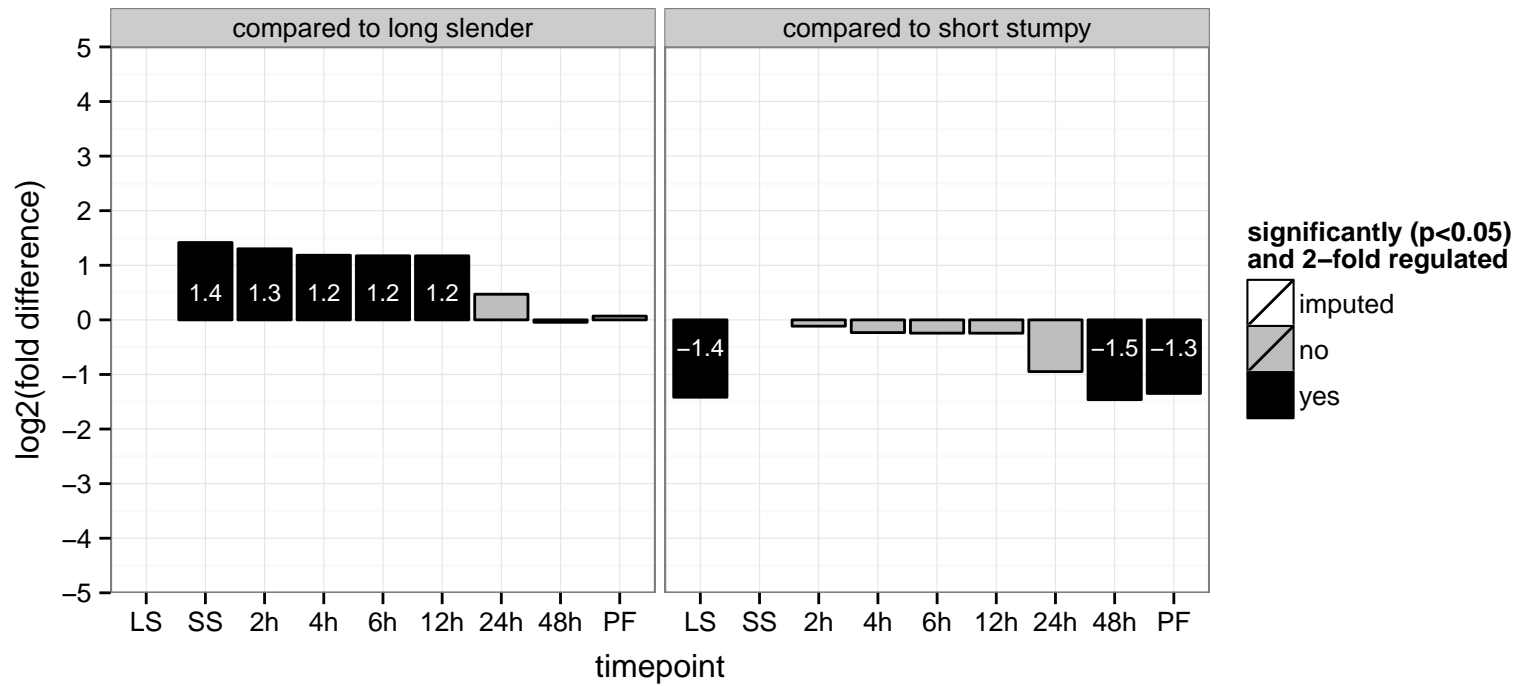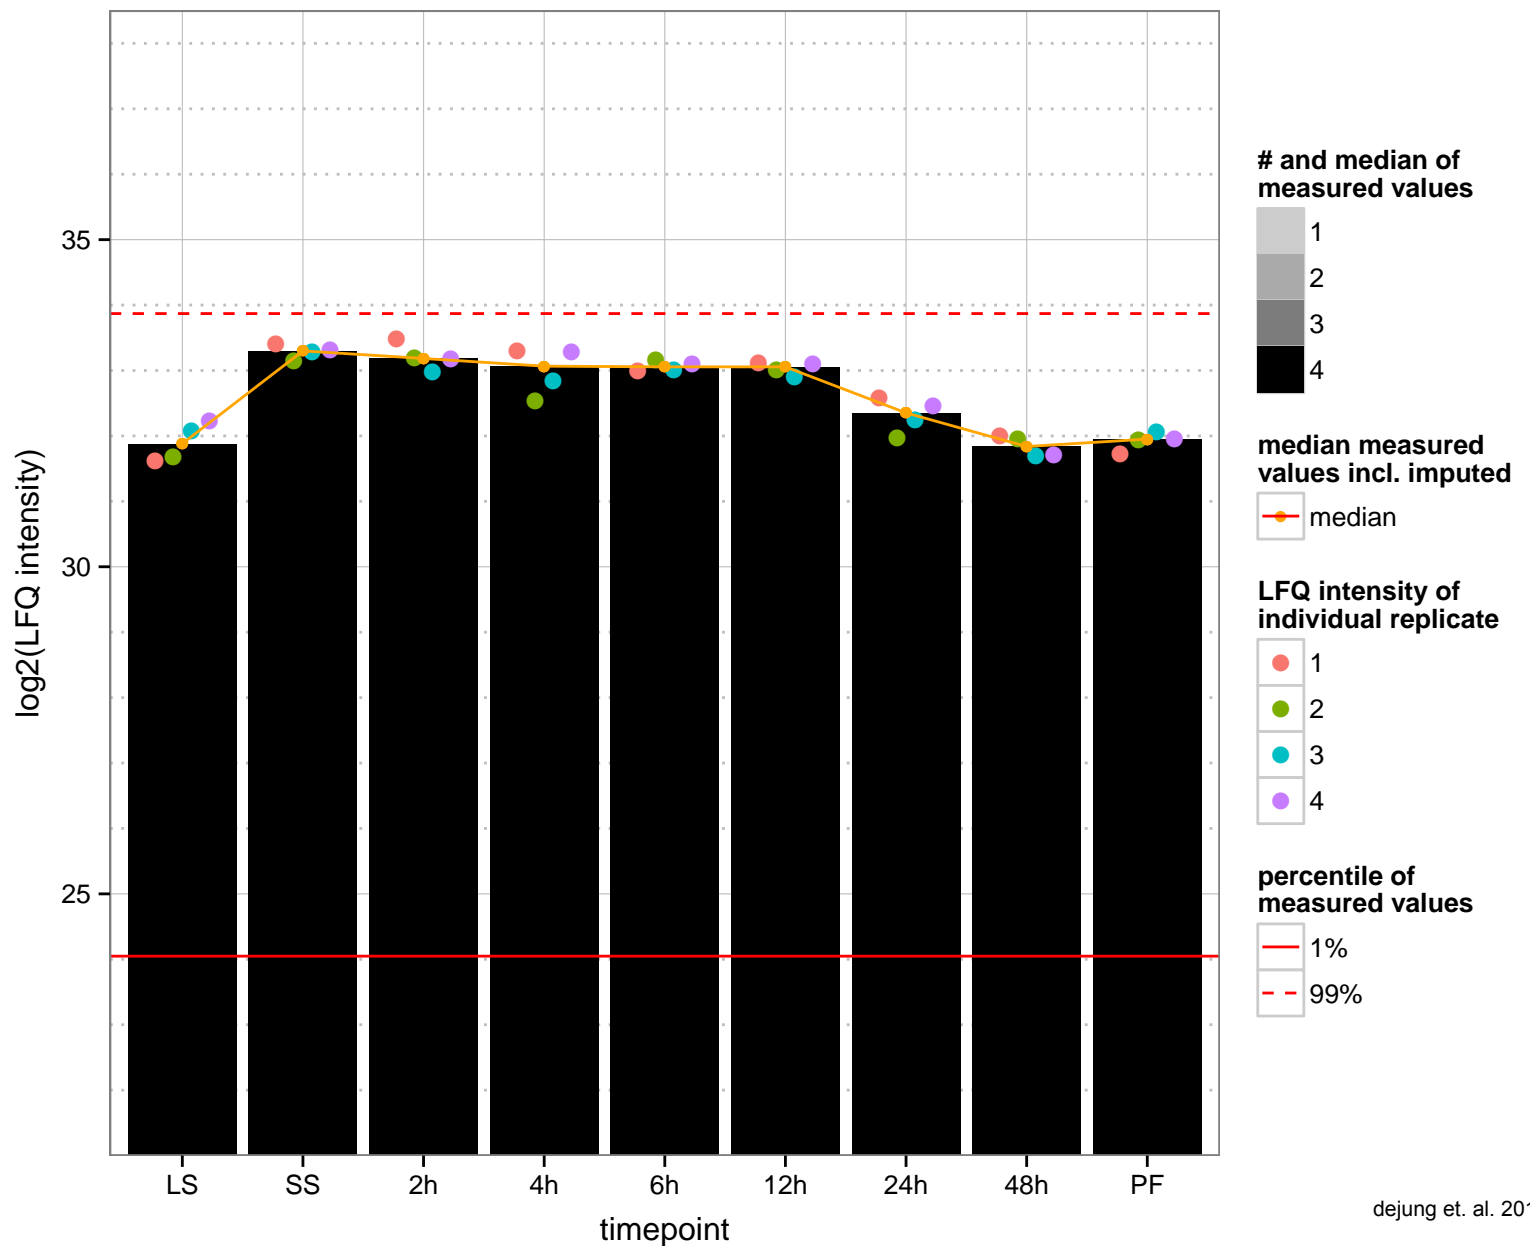



predicted heat shock factor binding protein  
 Tb927.9.13070  
 AGOF: null  
 AGOC: null  
 AGOP: null  
 PGO: null  
 PGOC: null  
 PGOP: null

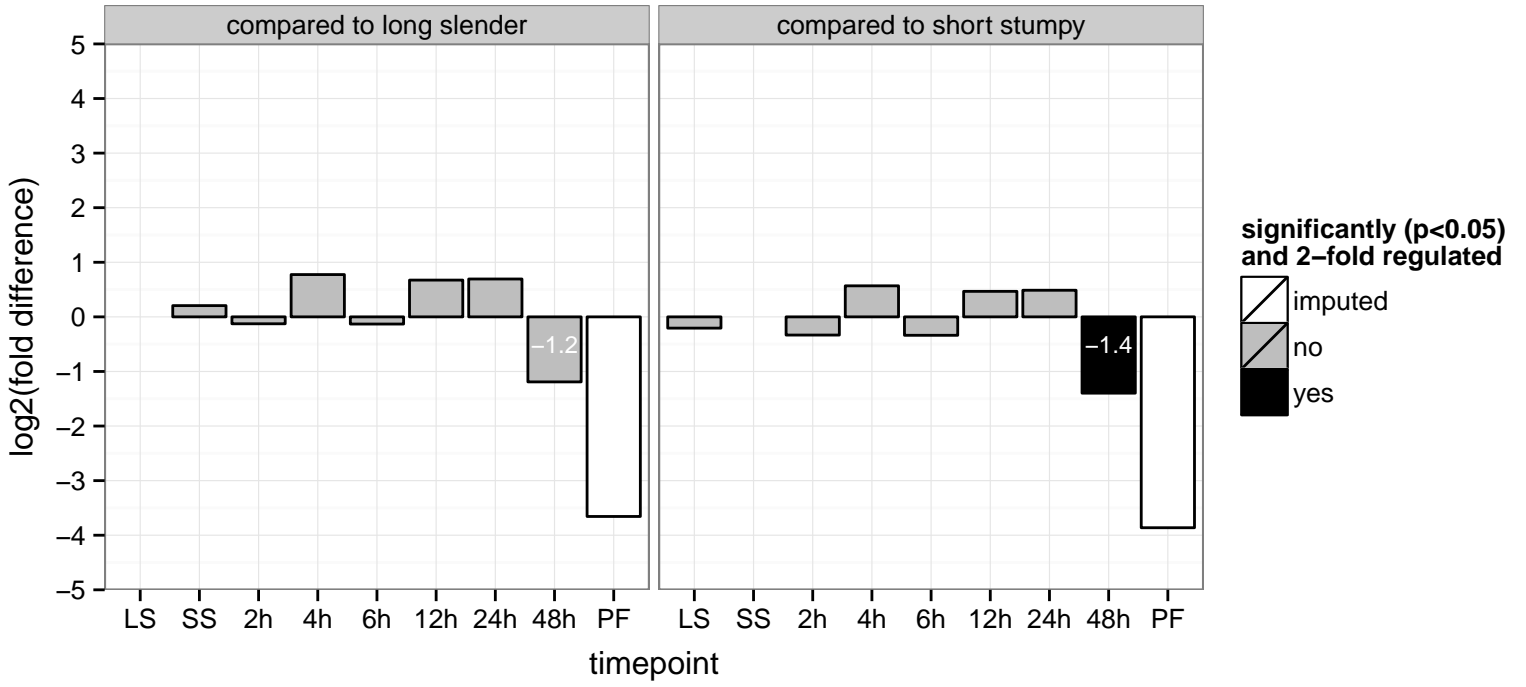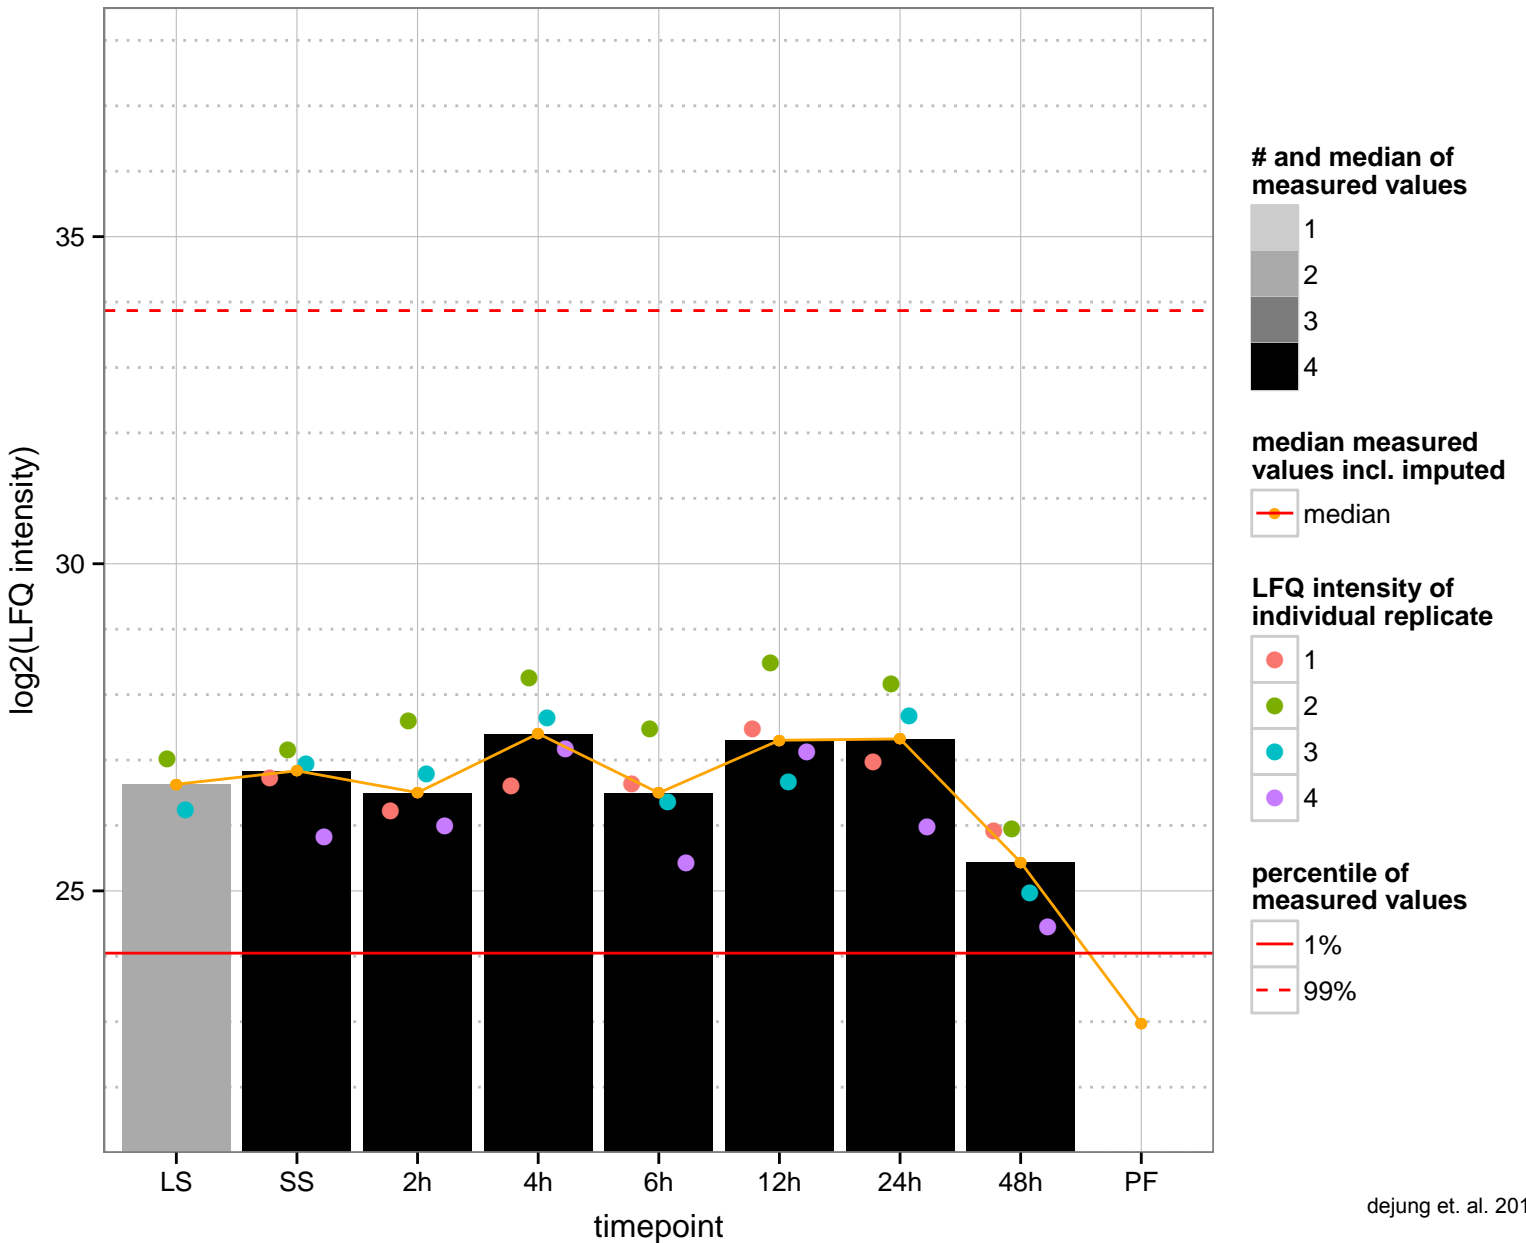

phosphoinositide-binding protein, putative

Tb927.9.13380

AGOF: oxidoreductase activity, phosphatidylinositol binding, transition metal ion binding

AGOC: null

AGOP: cell communication, intracellular signal transduction

PGOF: phosphatidylinositol binding, protein binding

PGOC: null

PGOP: cell communication

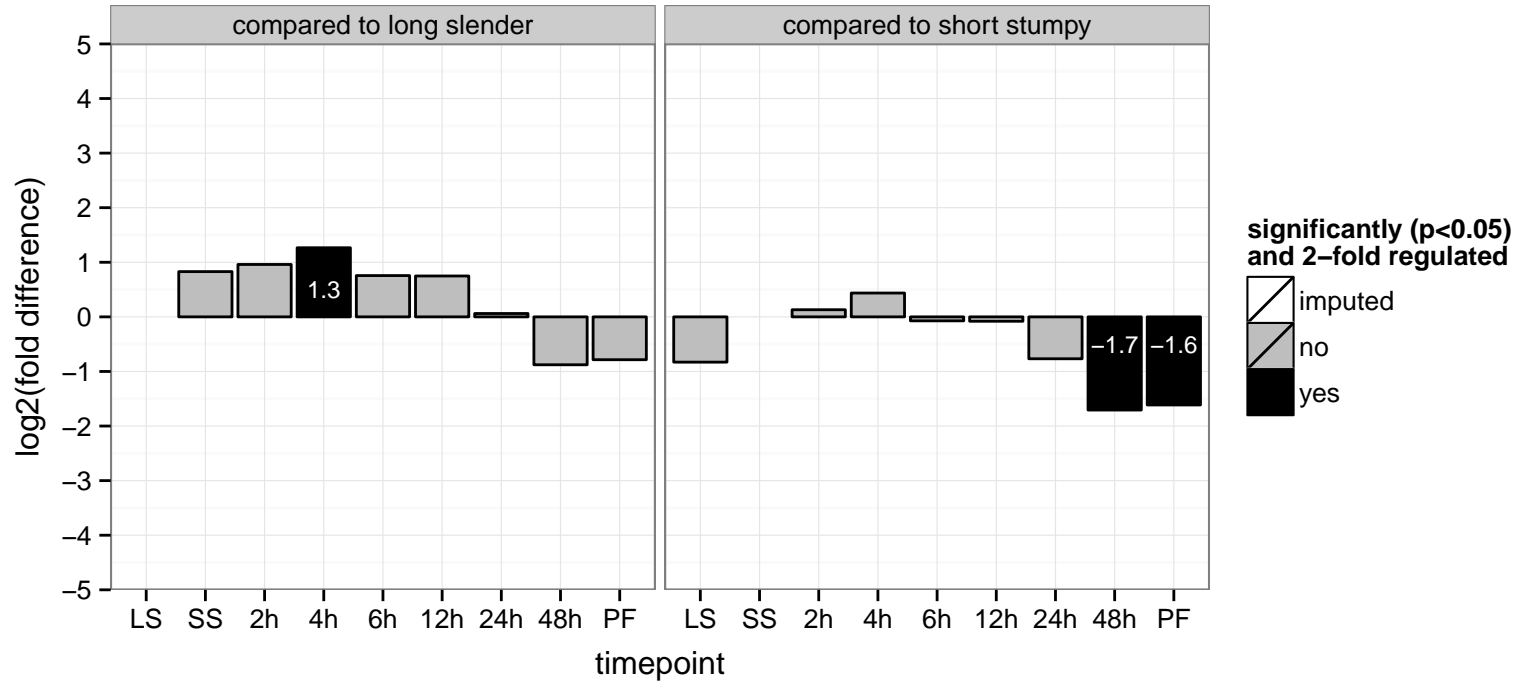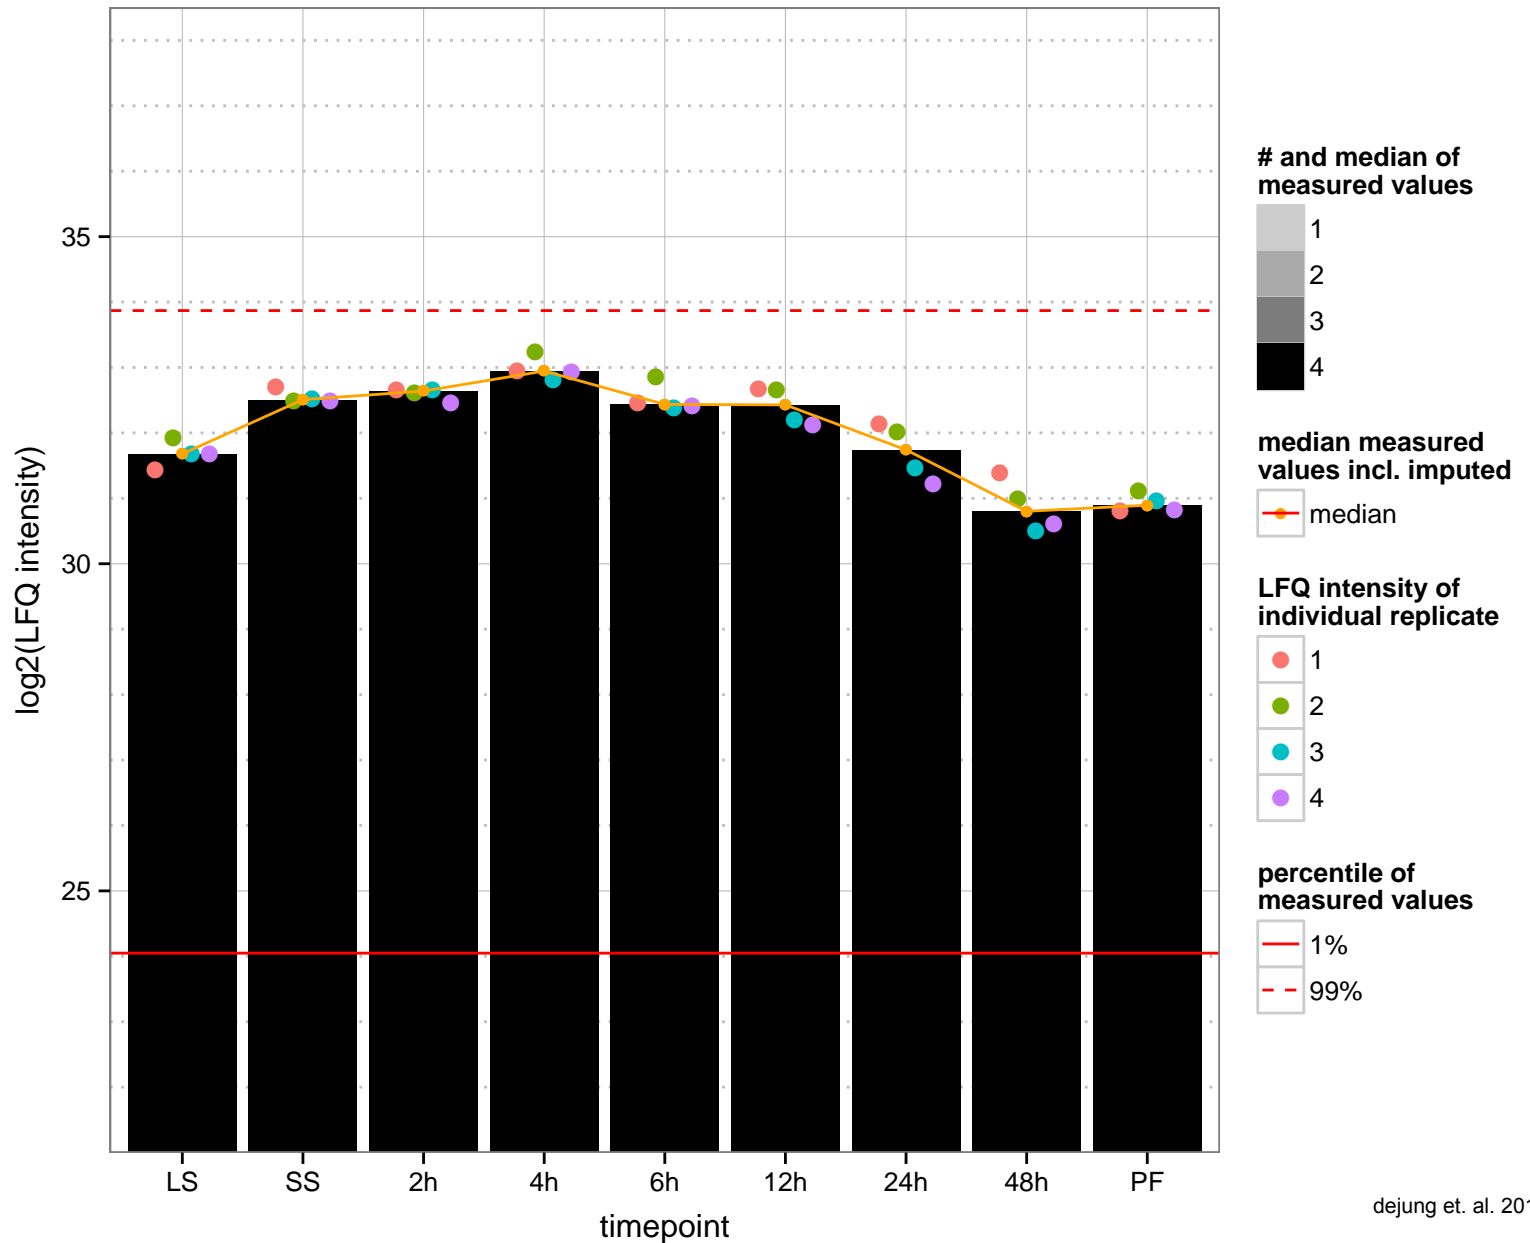

hypothetical protein, conserved  
 Tb927.9.14100  
 AGOF: null  
 AGOC: null  
 AGOP: null  
 PGOF: null  
 PGO: null  
 PGOP: null

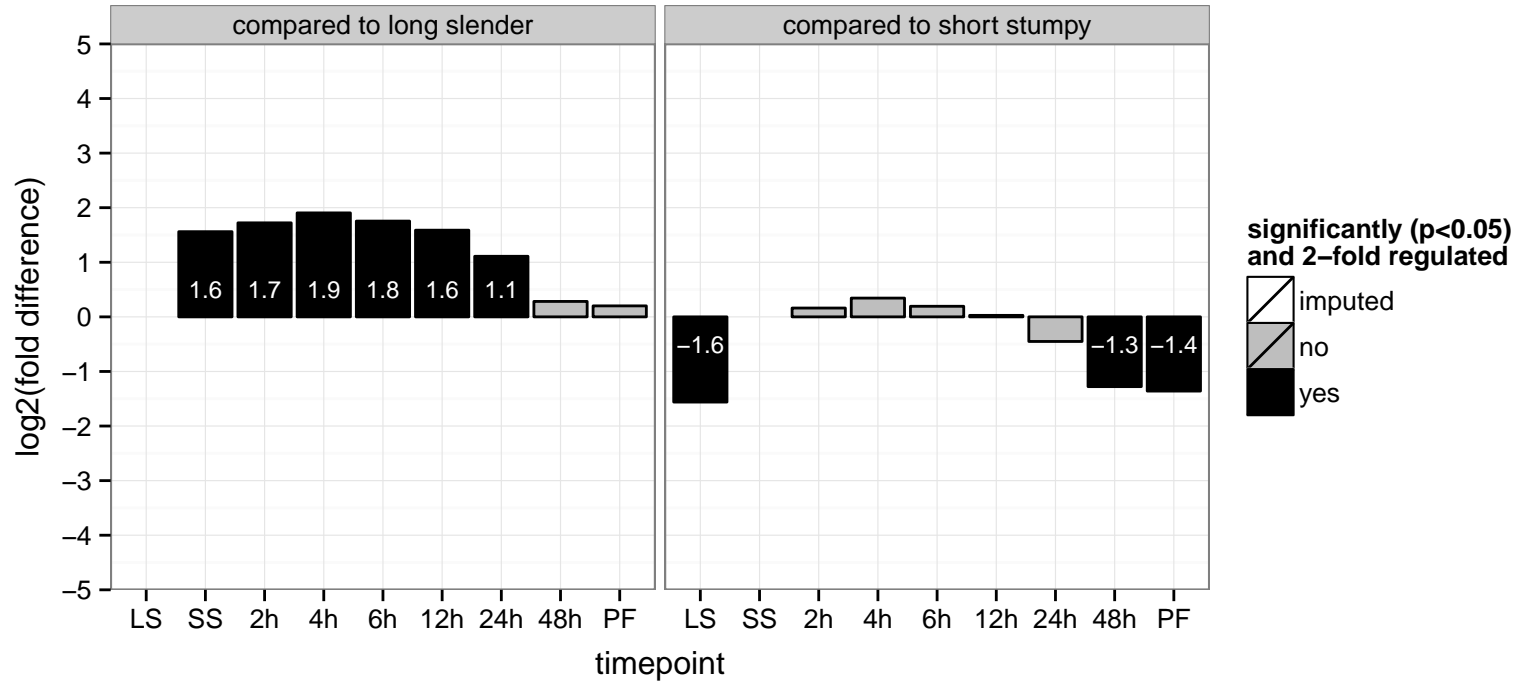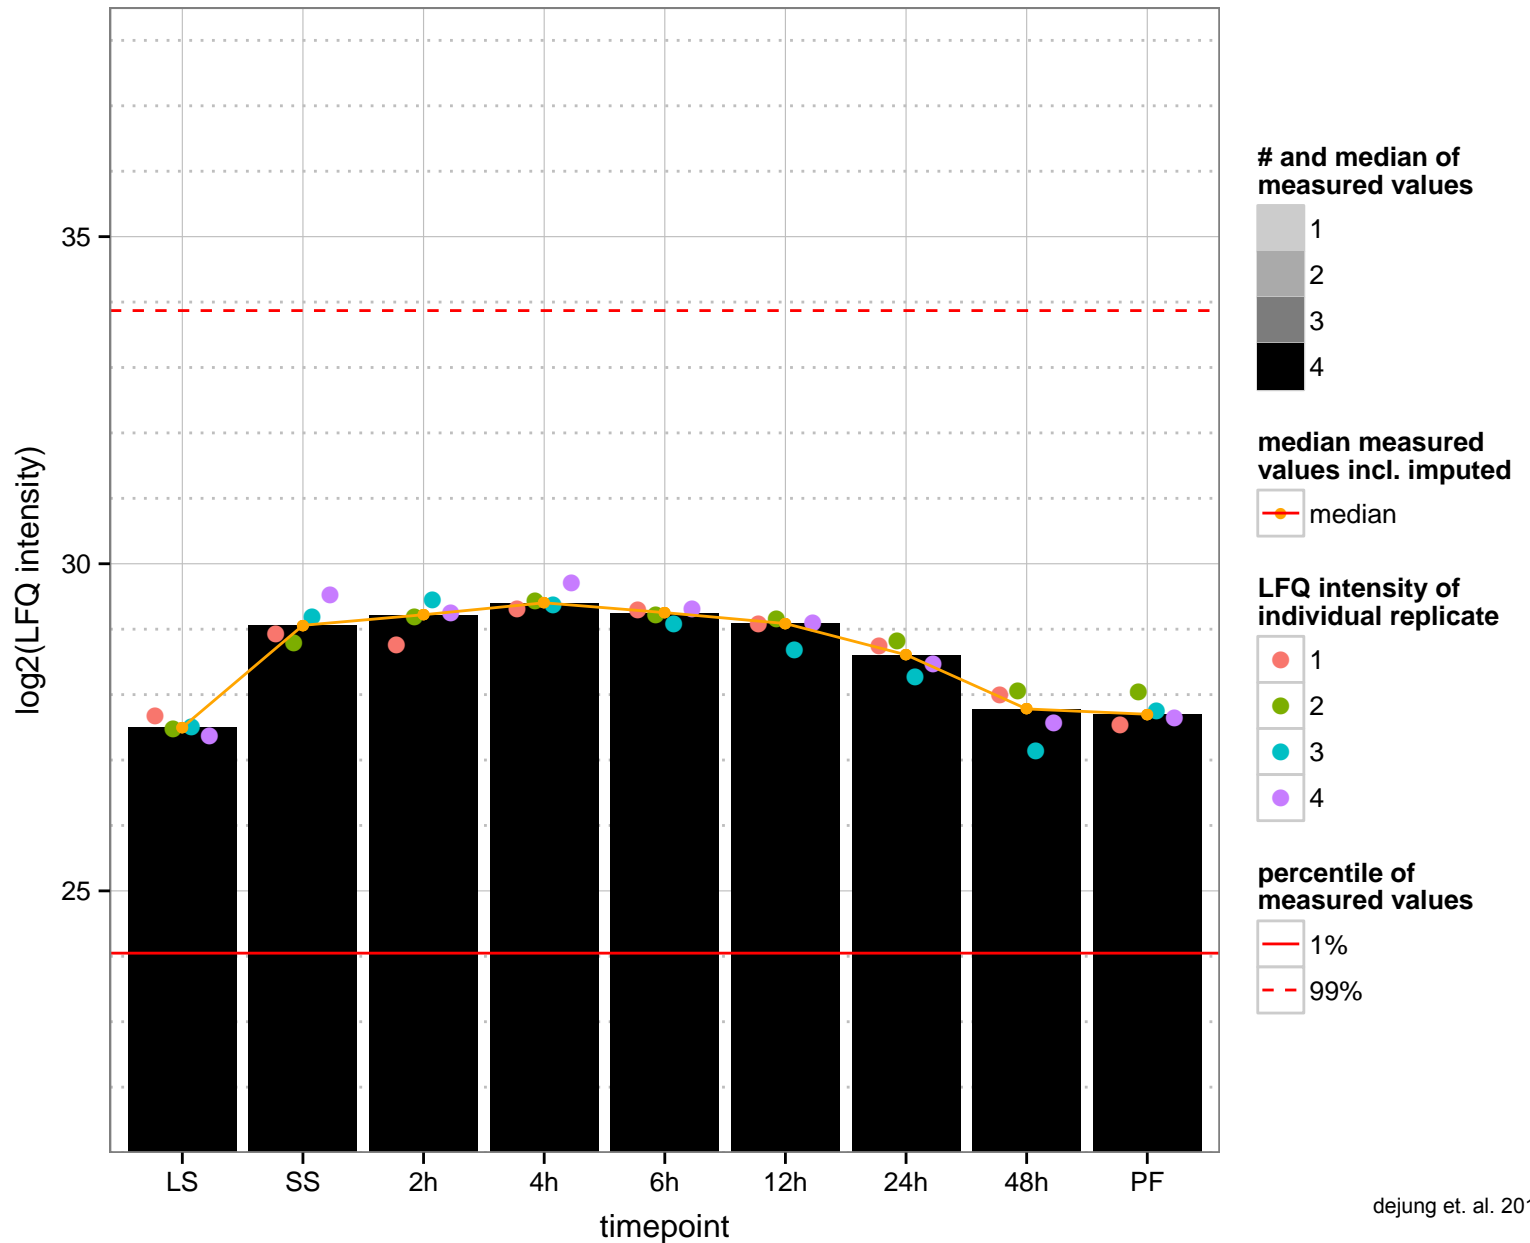

Lys-63-specific deubiquitinase BRCC36, putative, JAB-MPN domain protein

Tb927.9.1680

AGOF: metallopeptidase activity, polyubiquitin binding, ubiquitin thiolesterase activity

AGOC: BRCA1-A complex, BRISC complex, nuclear ubiquitin ligase complex, nucleus

AGOP: G2/M transition DNA damage checkpoint, double-strand break repair, histone H2A K63-linked deubiquitination, prote

PGOF: protein binding

PGOC: null

PGOP: null

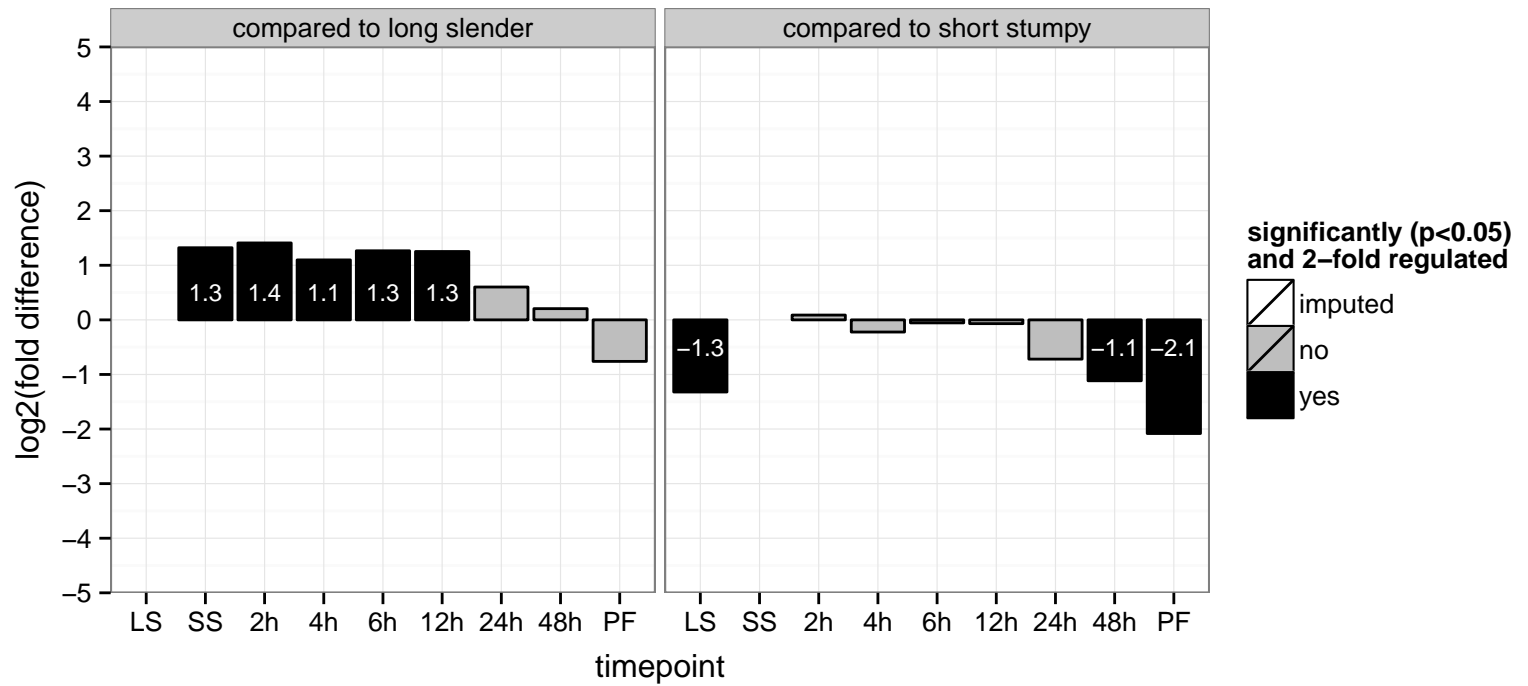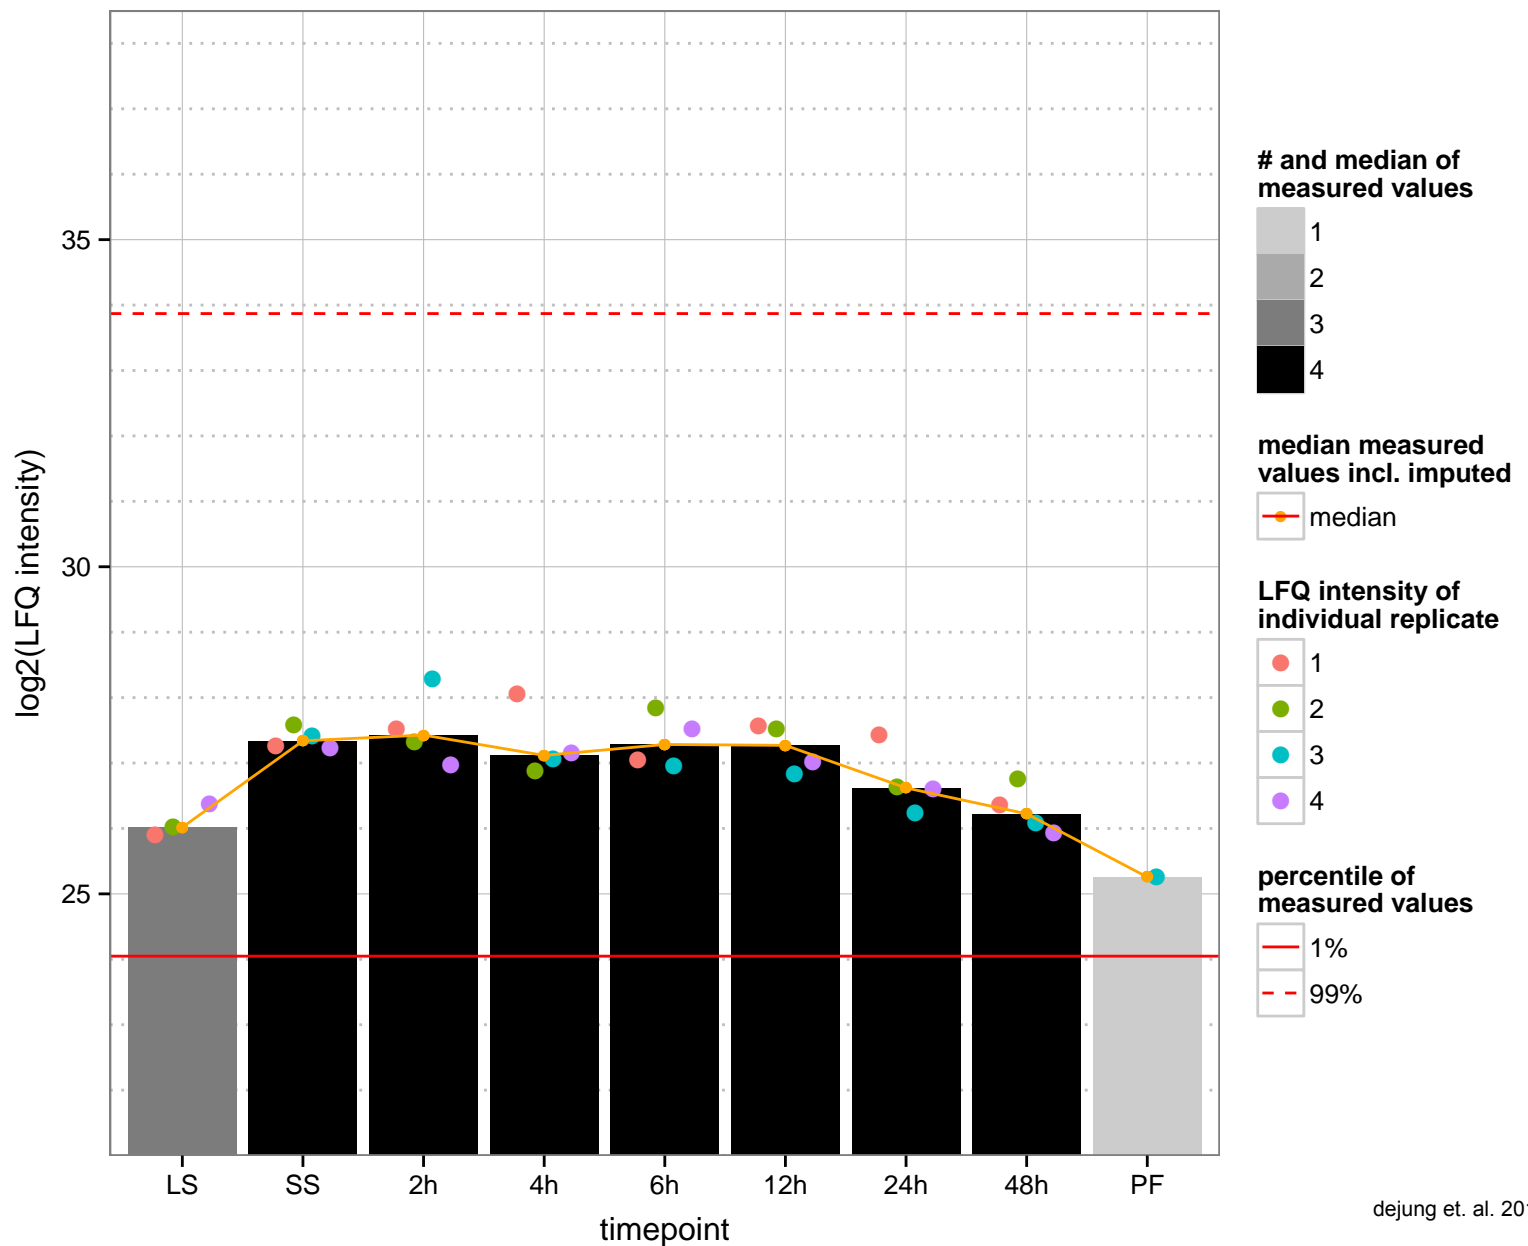

GTPase activating protein, putative  
 Tb927.9.4370  
 AGOF: Rab GTPase activator activity, protein kinase activity  
 AGOC: intracellular  
 AGOP: regulation of Rab GTPase activity  
 PGO: Rab GTPase activator activity  
 PGO: intracellular  
 PGOP: regulation of Rab GTPase activity

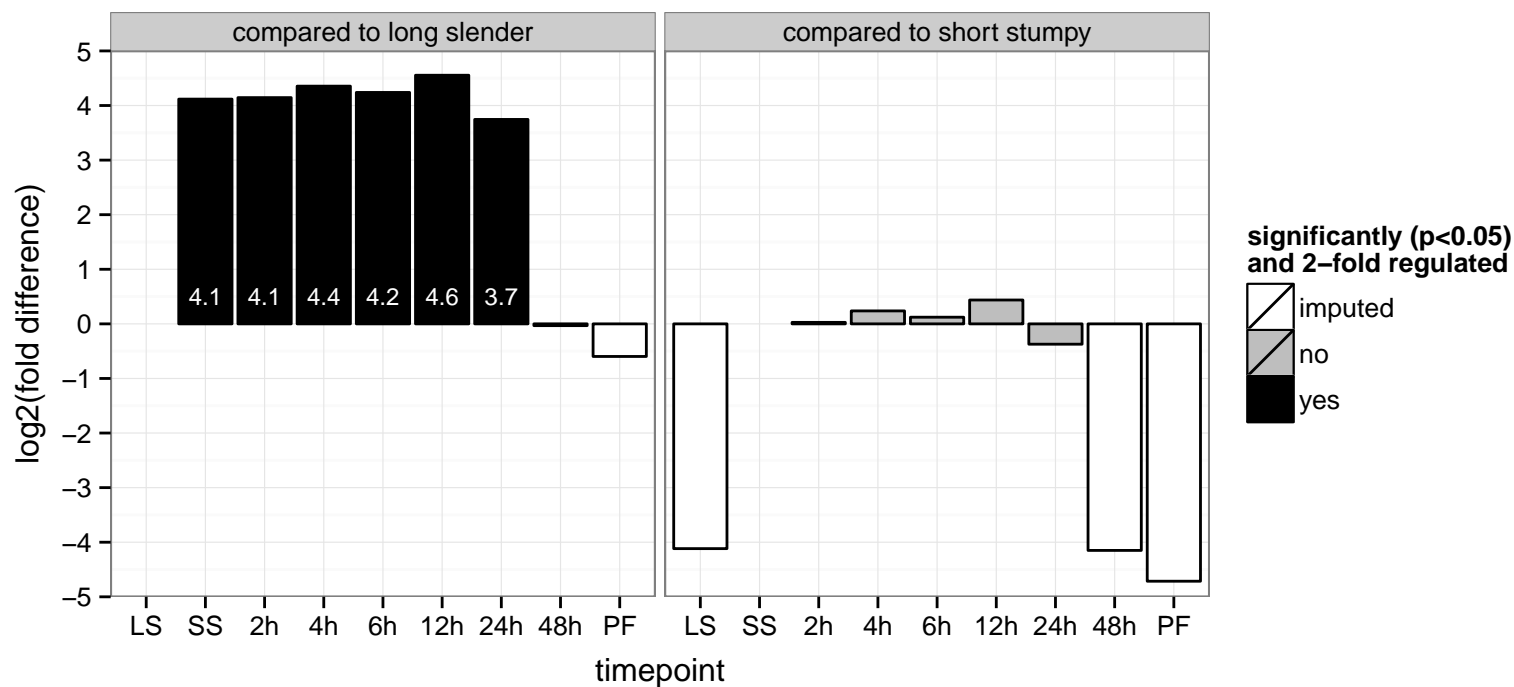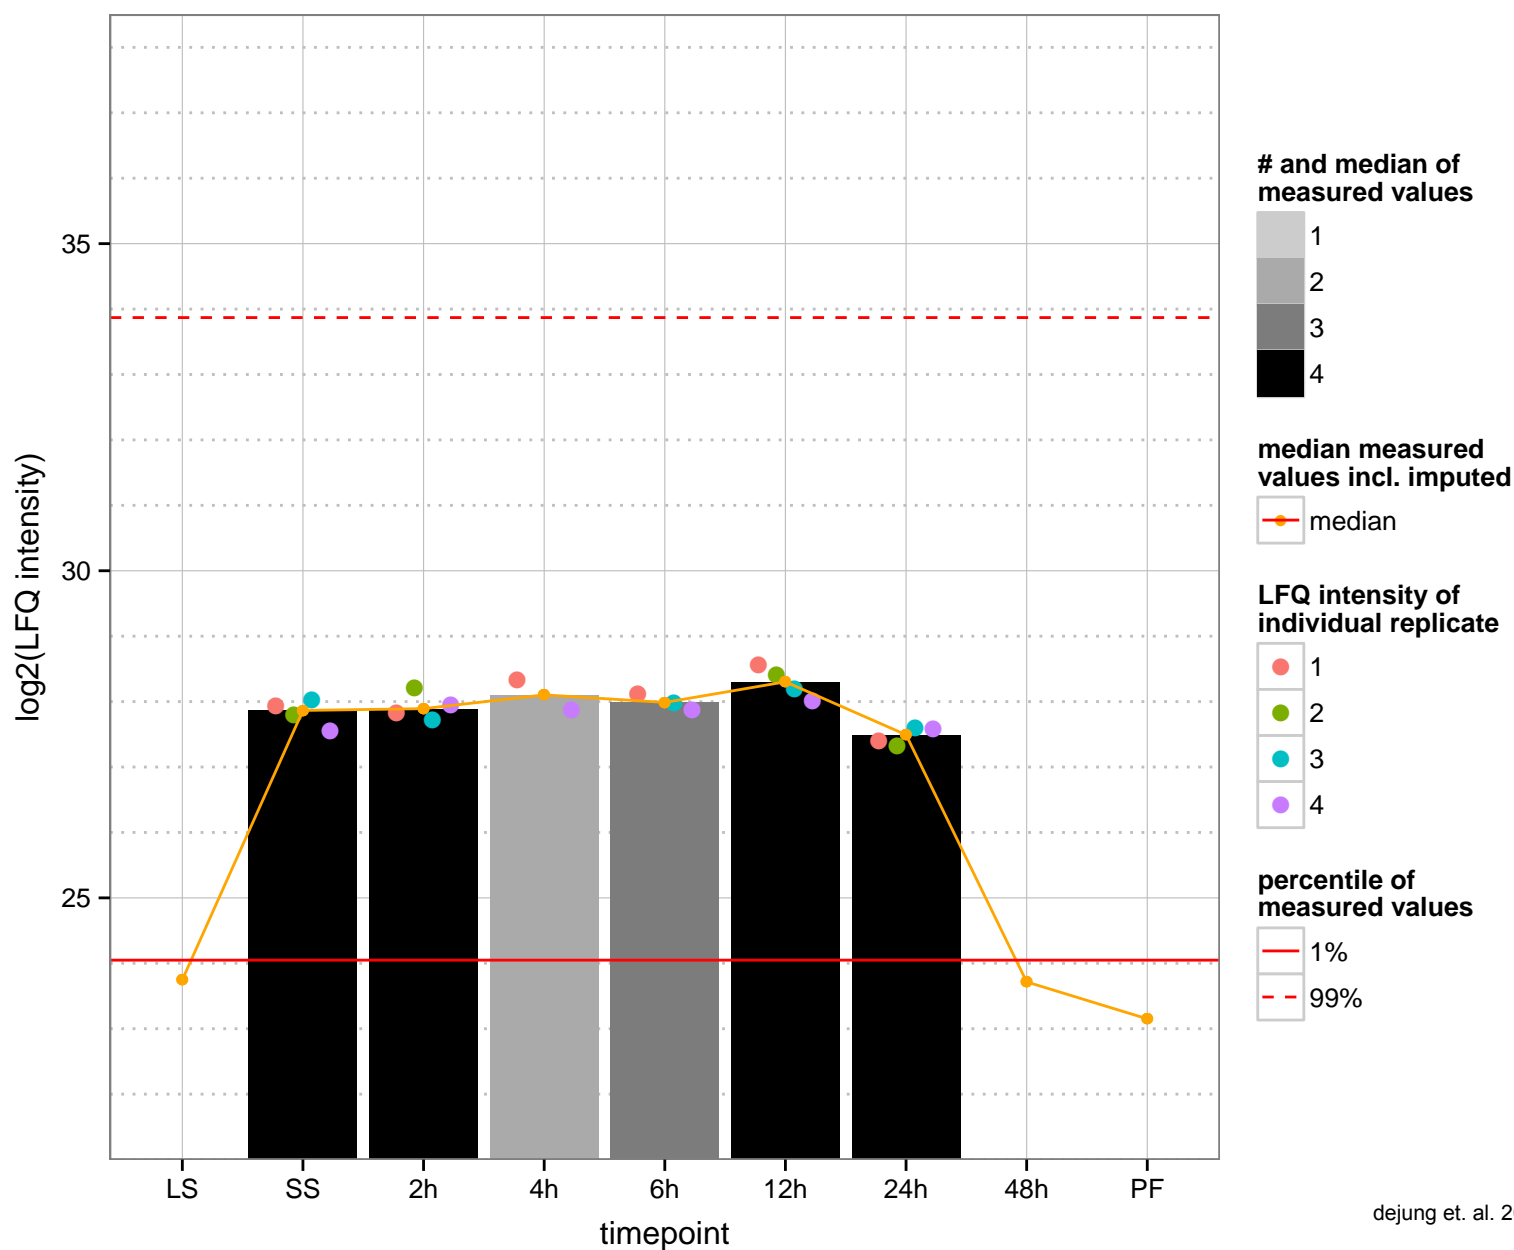

inositol/phosphatidylinositol phosphatase, putative  
 Tb927.9.5680  
 AGOF: null  
 AGOC: intracellular  
 AGOP: signal transduction  
 PGO: null  
 PGO: intracellular  
 PGO: phosphatidylinositol phosphorylation, signal transduction

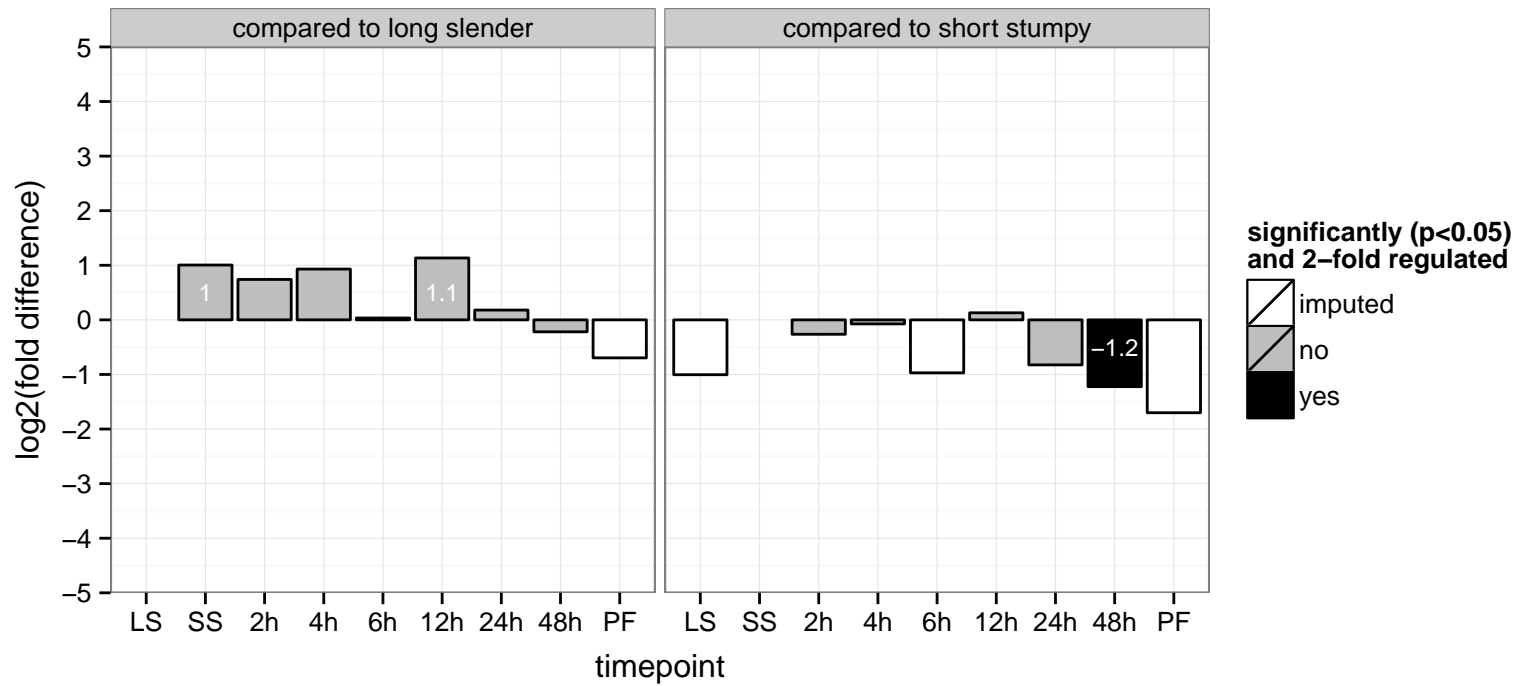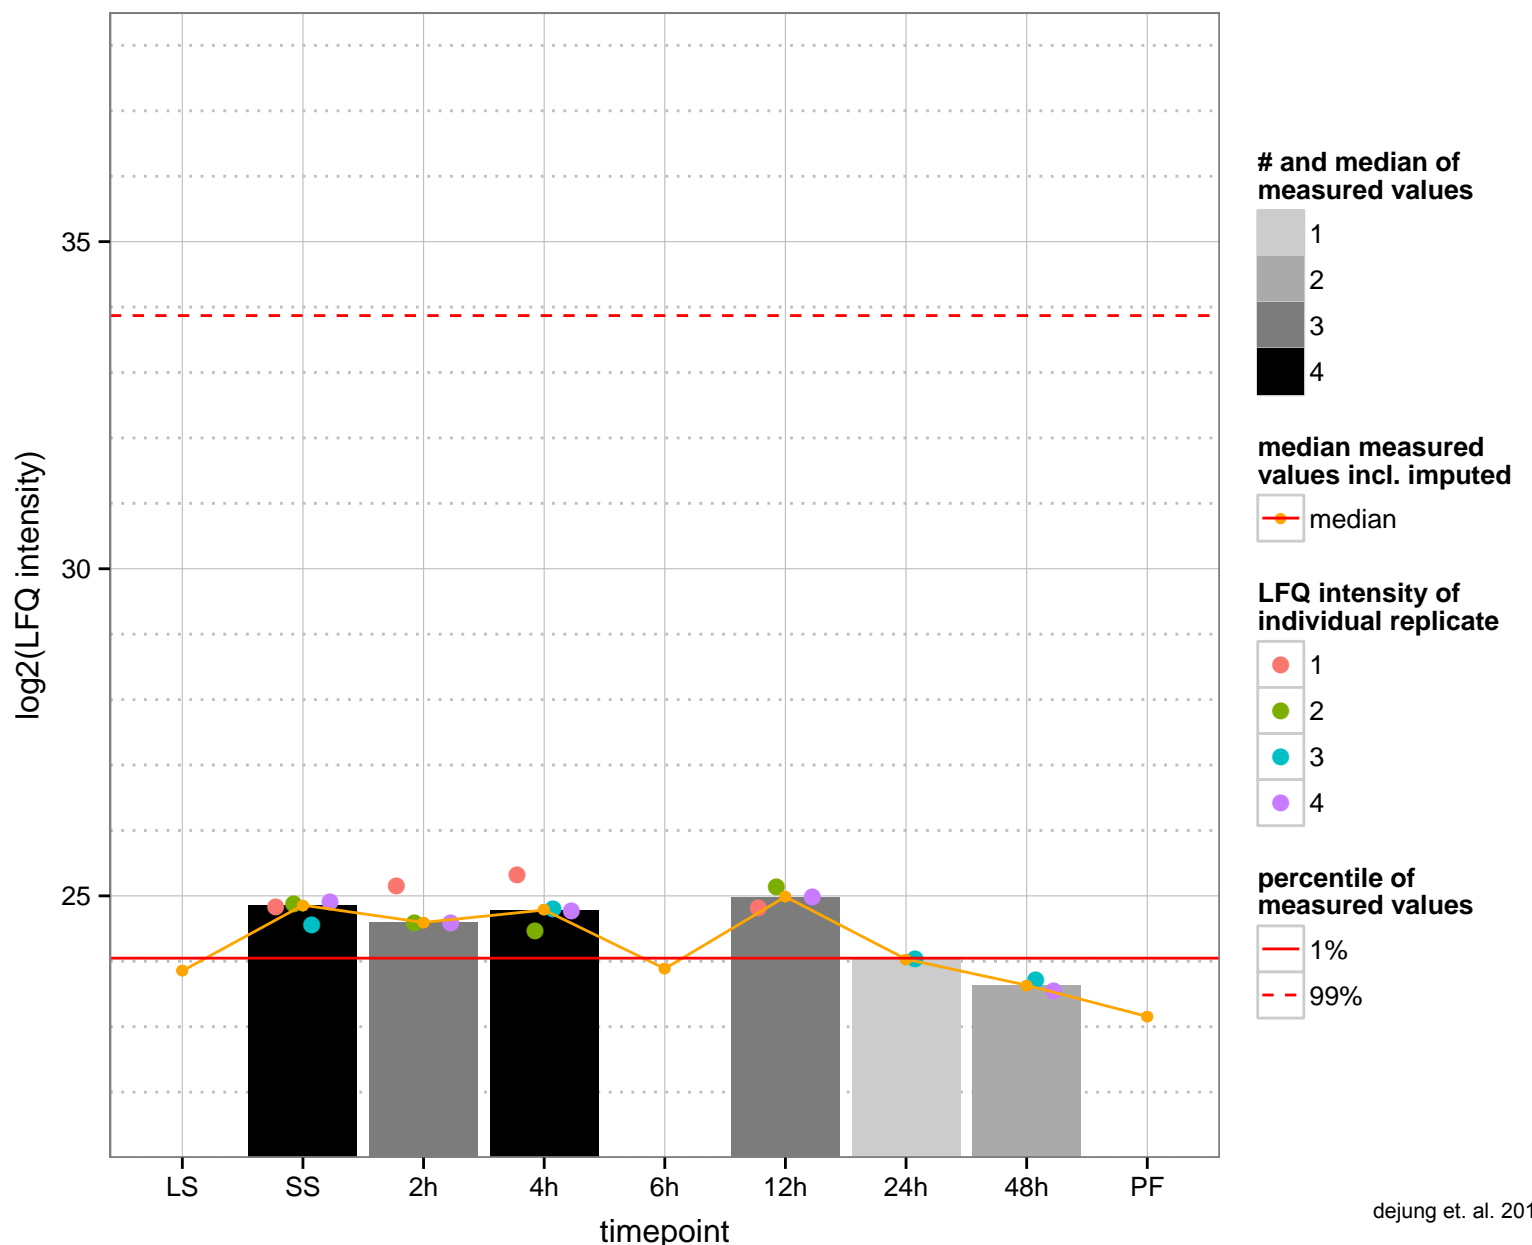

hypothetical protein  
 Tb927.9.6530  
 AGOF: null  
 AGOC: null  
 AGOP: null  
 PGO: null  
 PGOC: null  
 PGOP: null

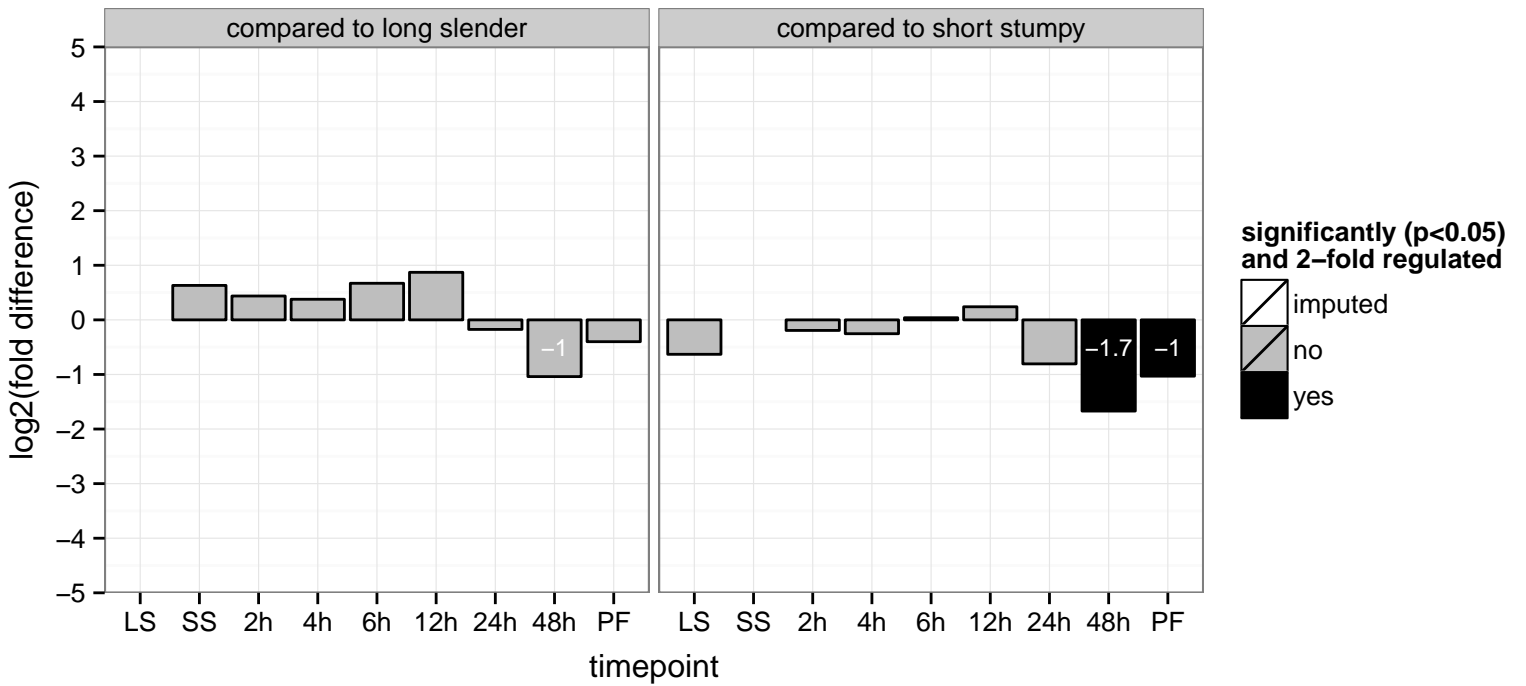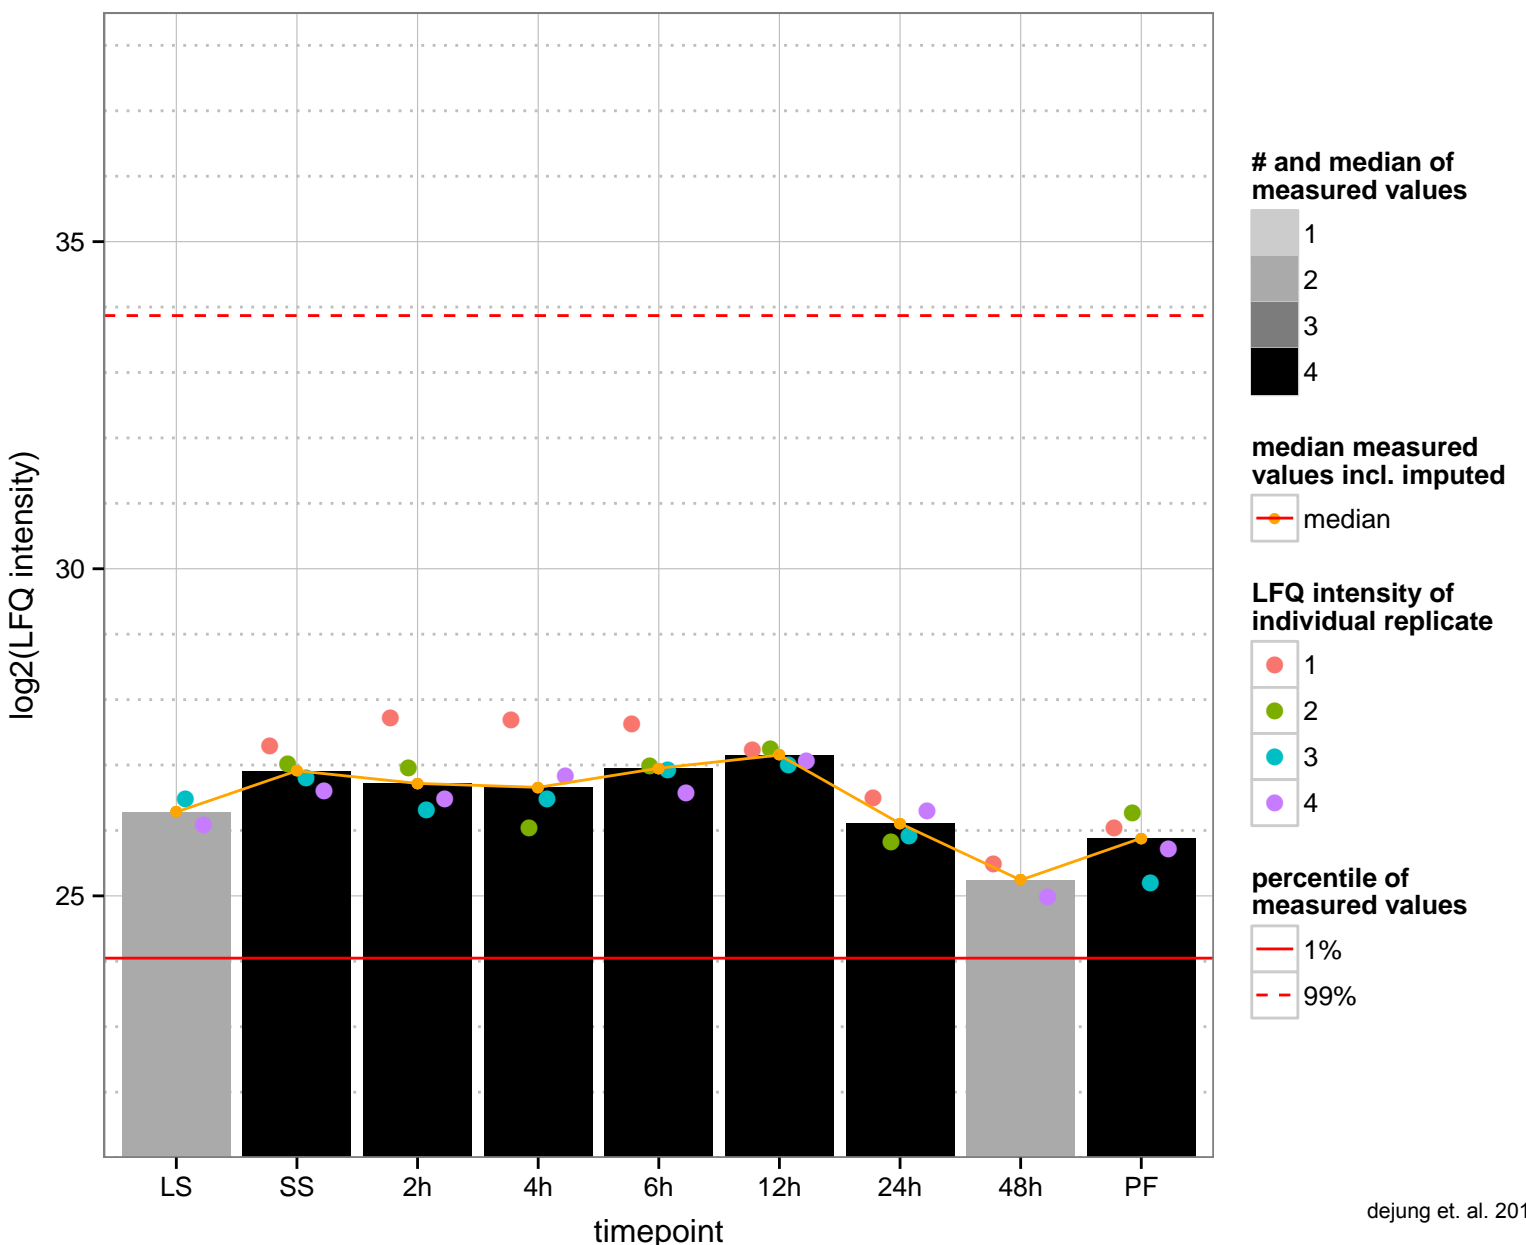

ADP-ribosylation factor-like protein, putative (ARL1B)

Tb927.9.7230

AGOF: GTP binding

AGOC: intracellular

AGOP: intracellular protein transport, small GTPase mediated signal transduction

PGOF: GTP binding

PGOC: intracellular

PGOP: intracellular protein transport, protein transport, small GTPase mediated signal transduction

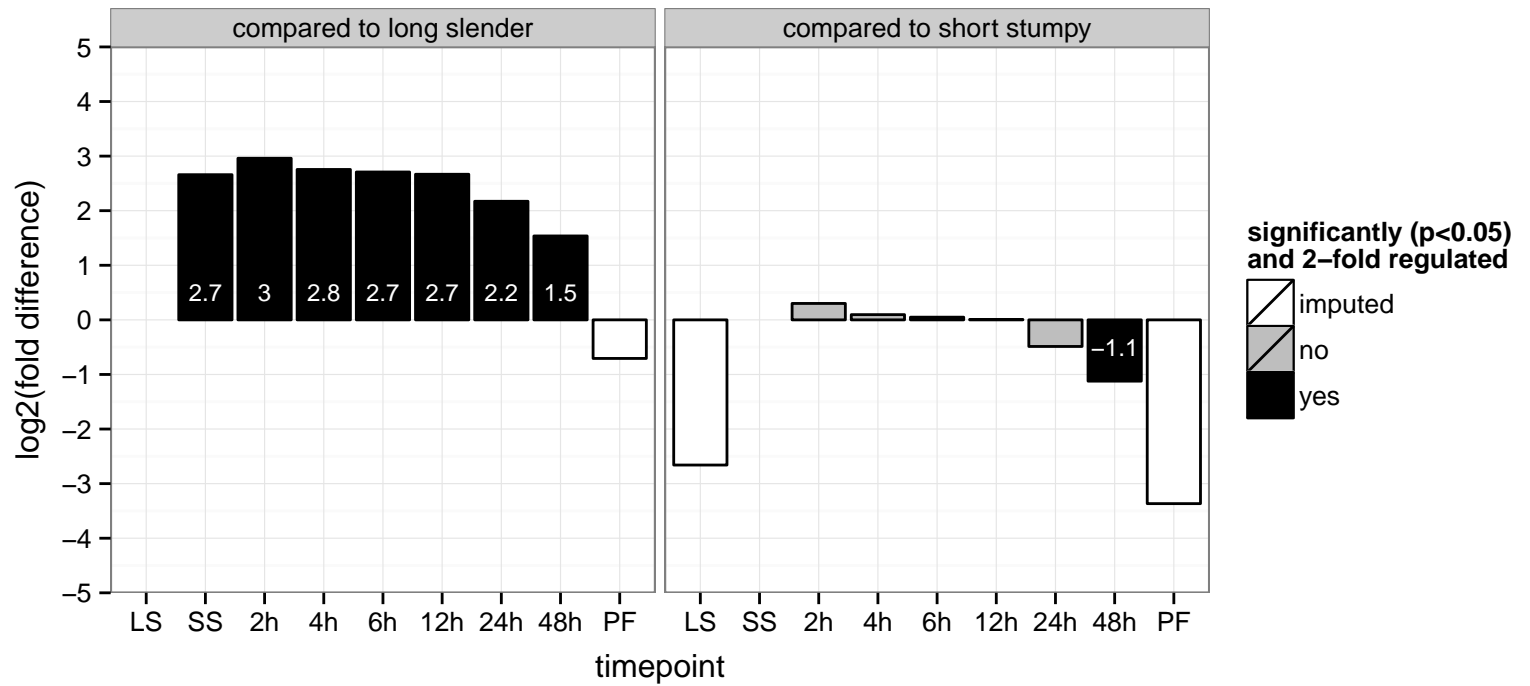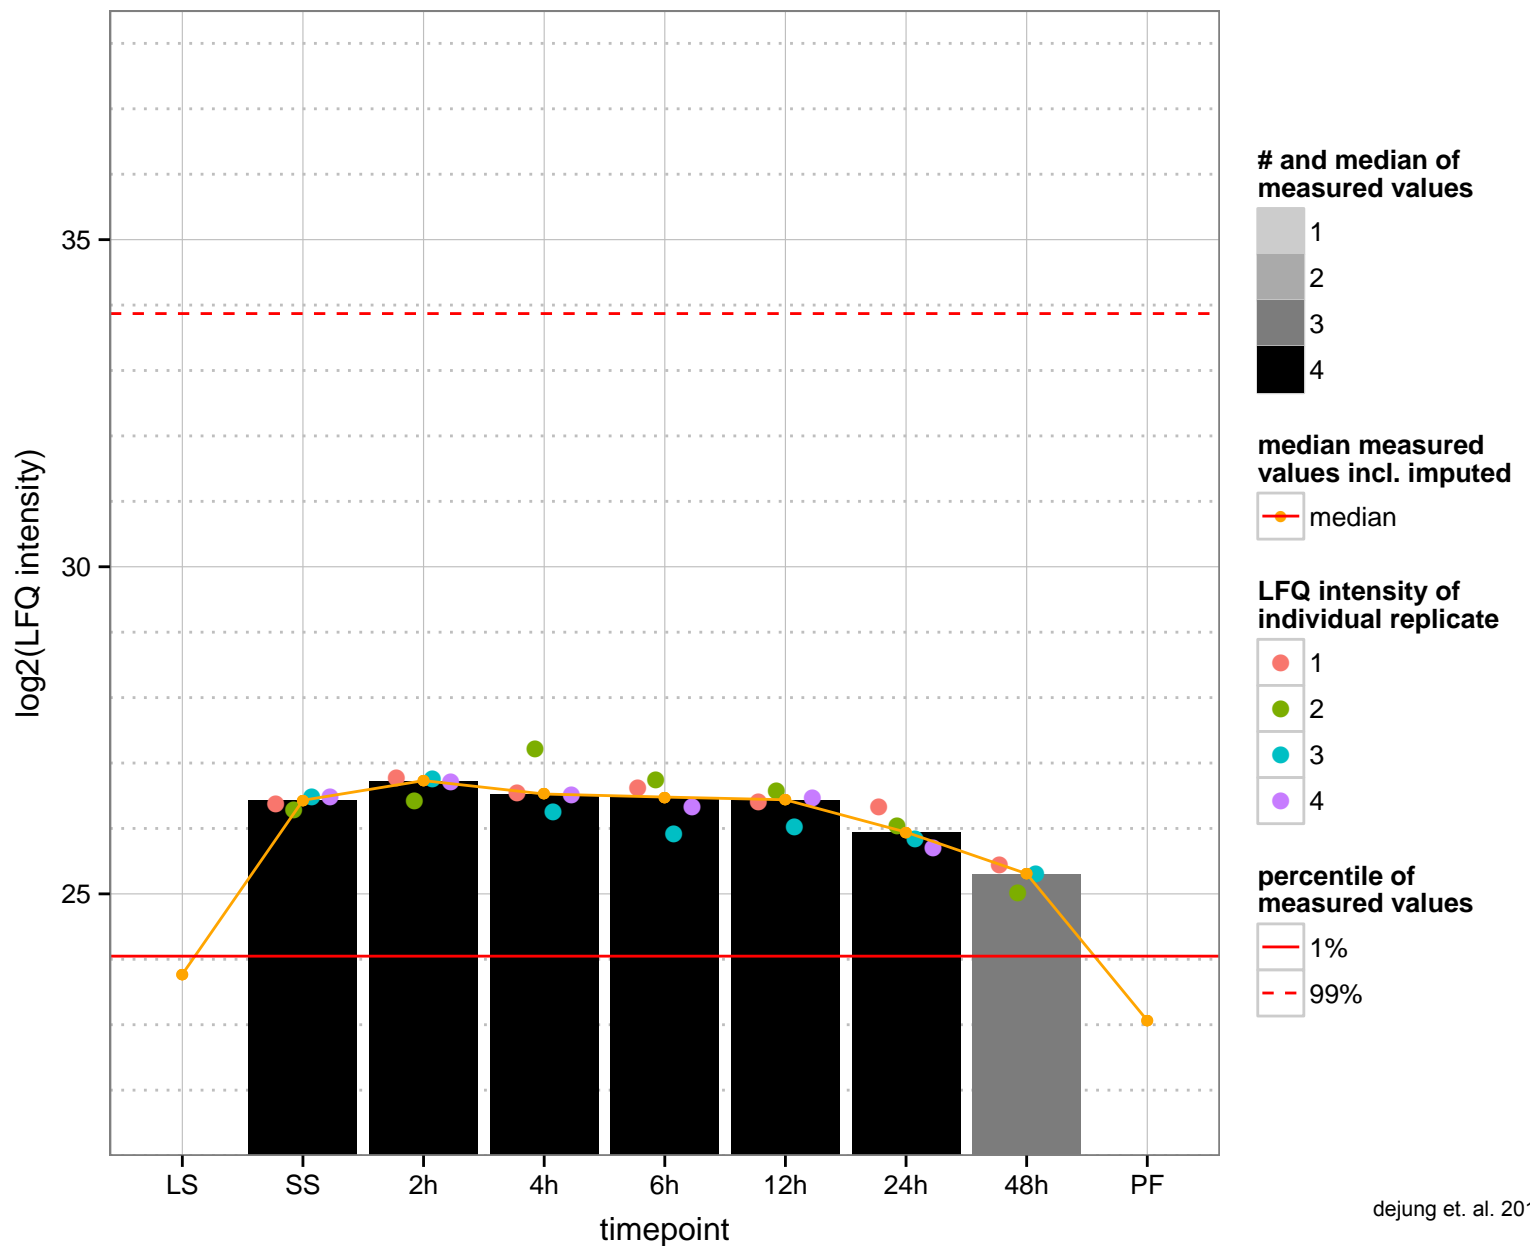



hypothetical protein, conserved  
 Tb927.9.7520  
 AGOF: null  
 AGOC: null  
 AGOP: null  
 PGO: protein binding  
 PGOC: null  
 PGOP: null

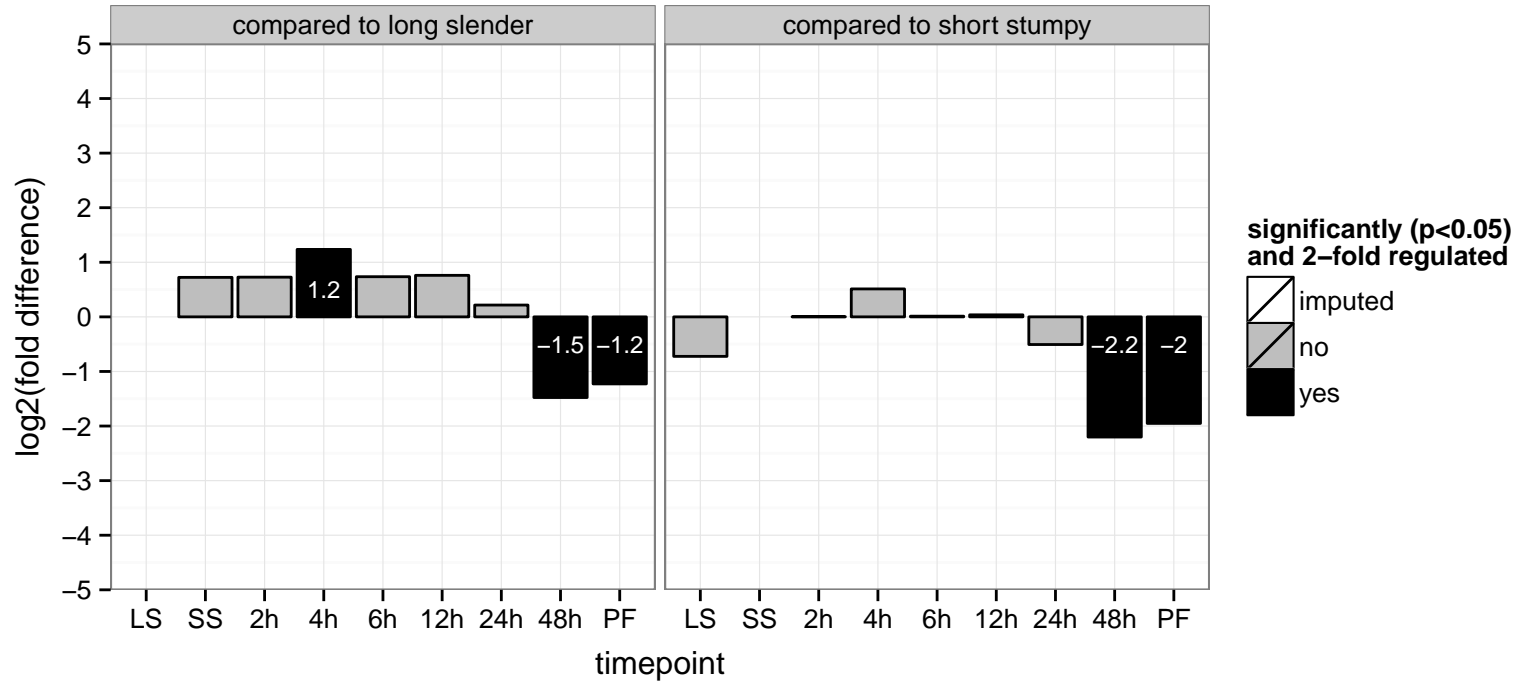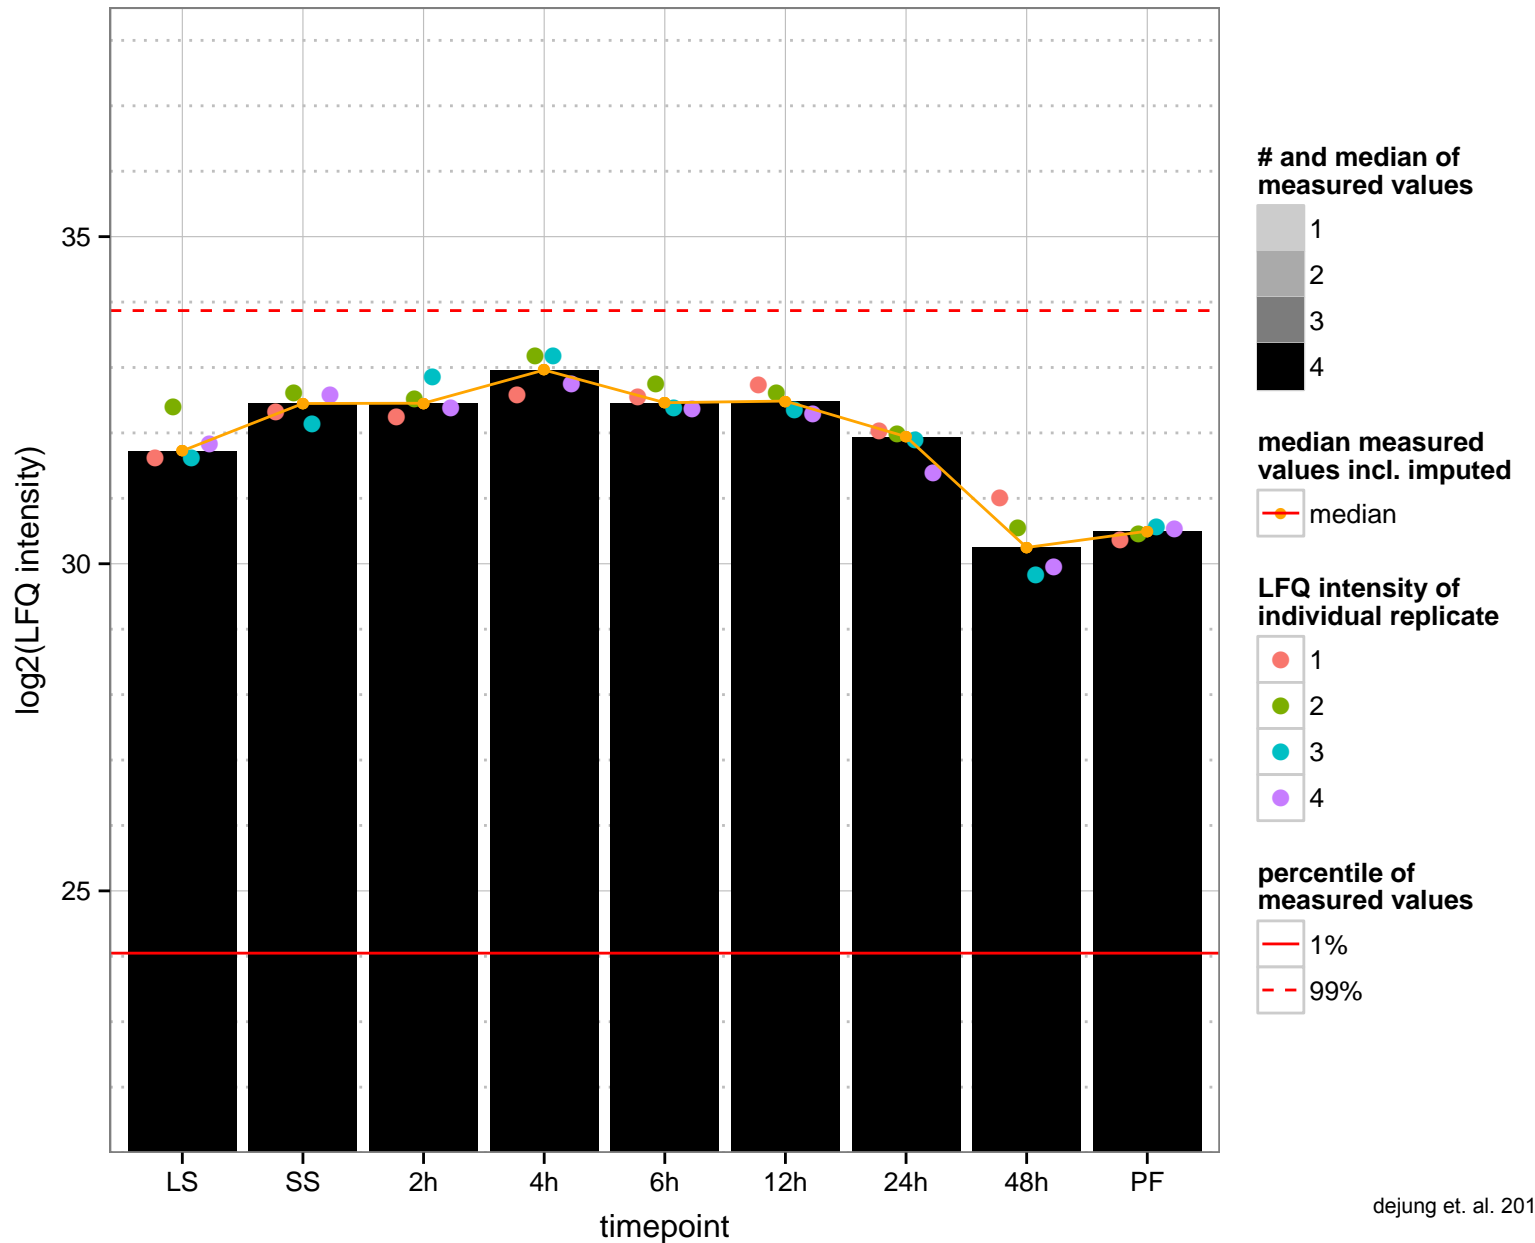

ubiquitin-conjugating enzyme E2, putative, ubiquitin carrier protein, ubiquitin-protein ligase  
Tb927.9.8000

AGOF: ubiquitin-protein ligase activity

AGOC: null

AGOP: cellular protein modification process, post-translational protein modification, regulation of protein metabolic process

PGOF: acid-amino acid ligase activity

PGOC: null

PGOP: null

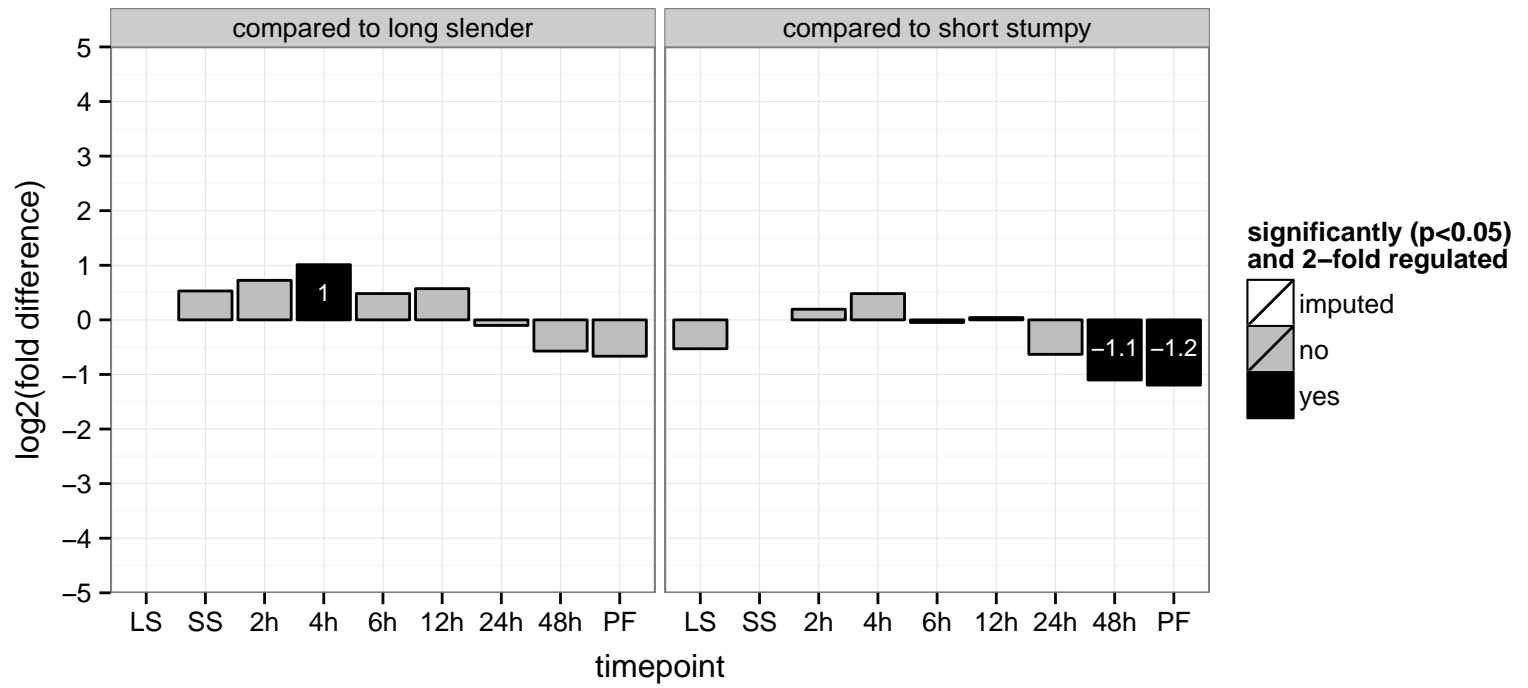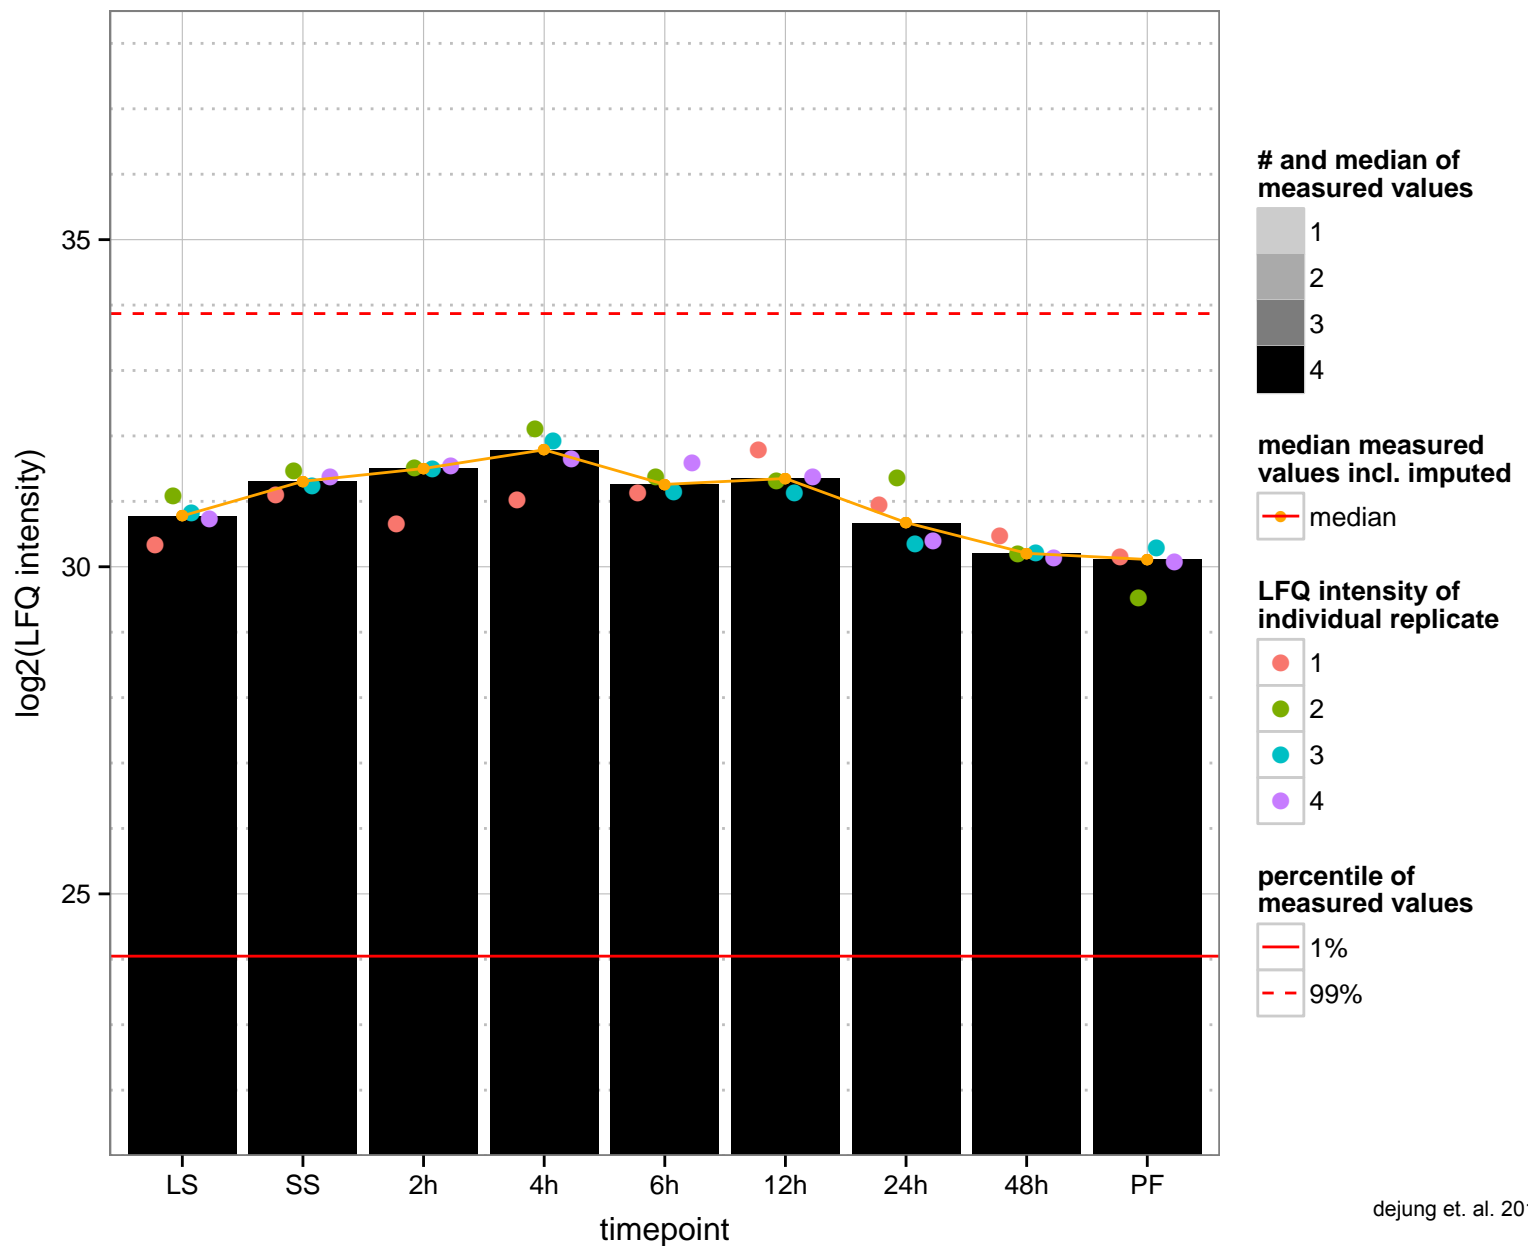

hypothetical protein, conserved  
 Tb927.9.8060  
 AGOF: null  
 AGOC: null  
 AGOP: null  
 PGOF: null  
 PGOC: null  
 PGOP: null

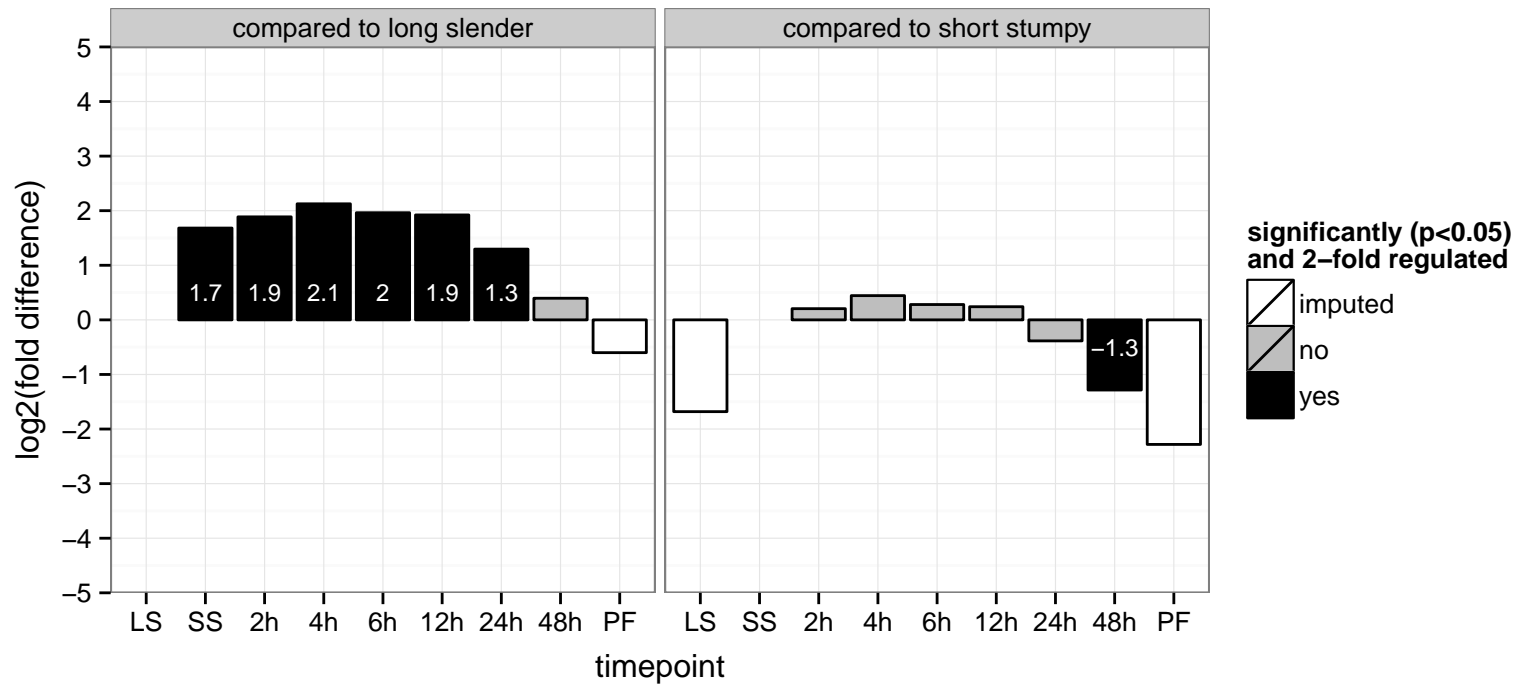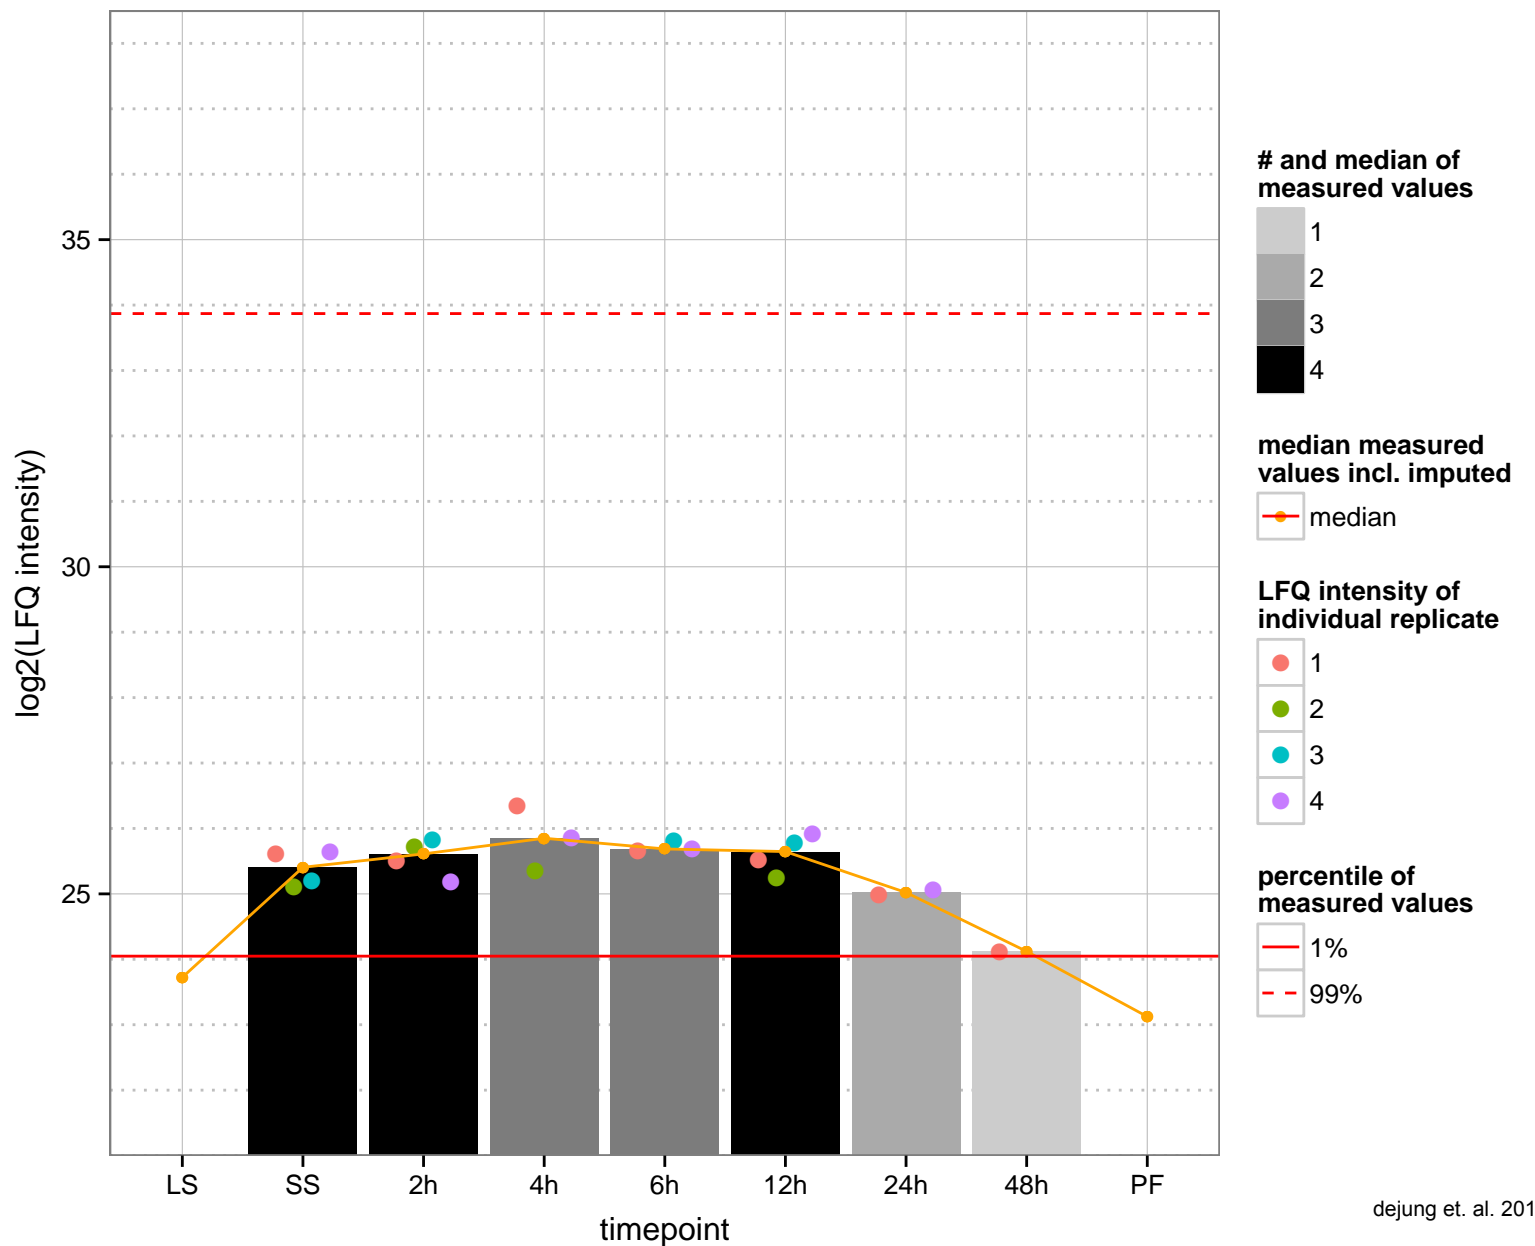

fructose-1, 6-bisphosphatase (FBPase)  
 Tb927.9.8720  
 AGOF: fructose 1, 6-bisphosphate 1-phosphatase activity  
 AGOC: null  
 AGOP: carbohydrate metabolic process  
 PGO: phosphoric ester hydrolase activity  
 PGOC: null  
 PGOP: carbohydrate metabolic process

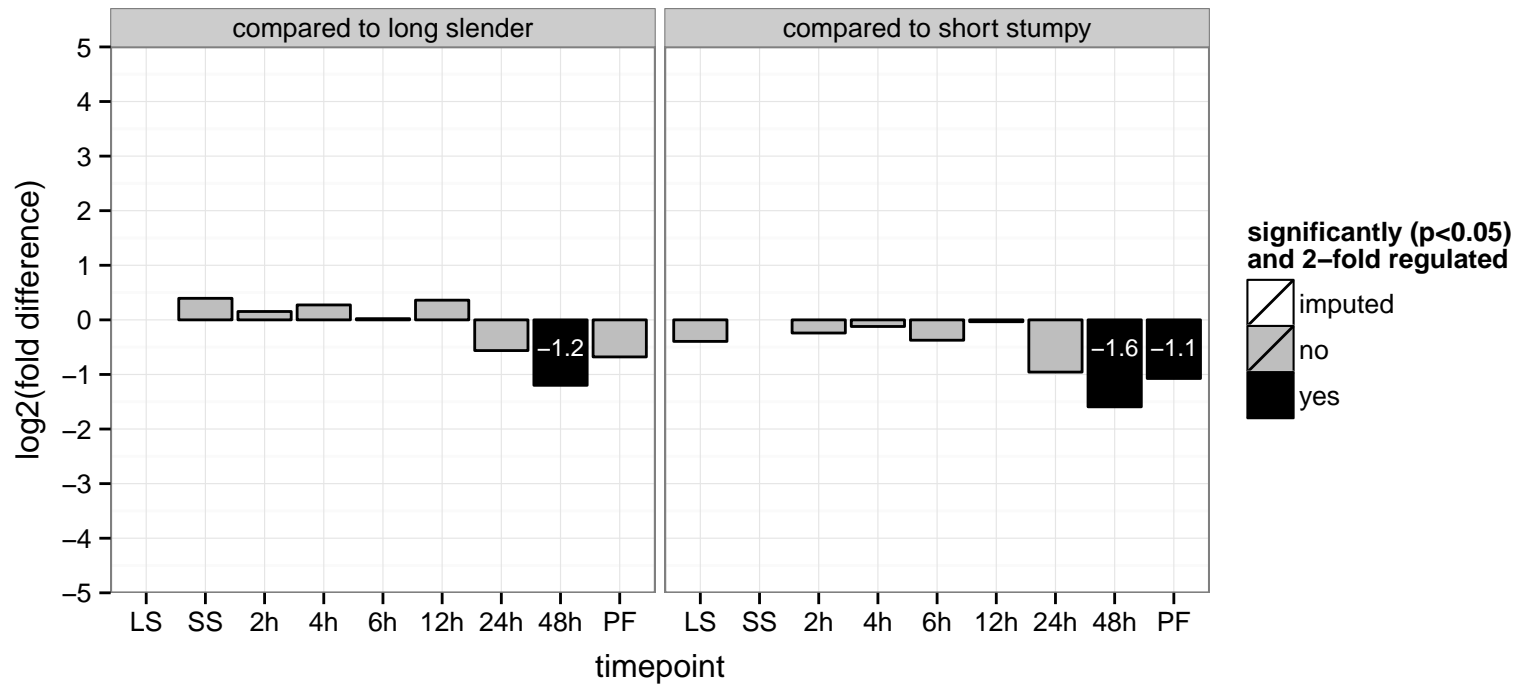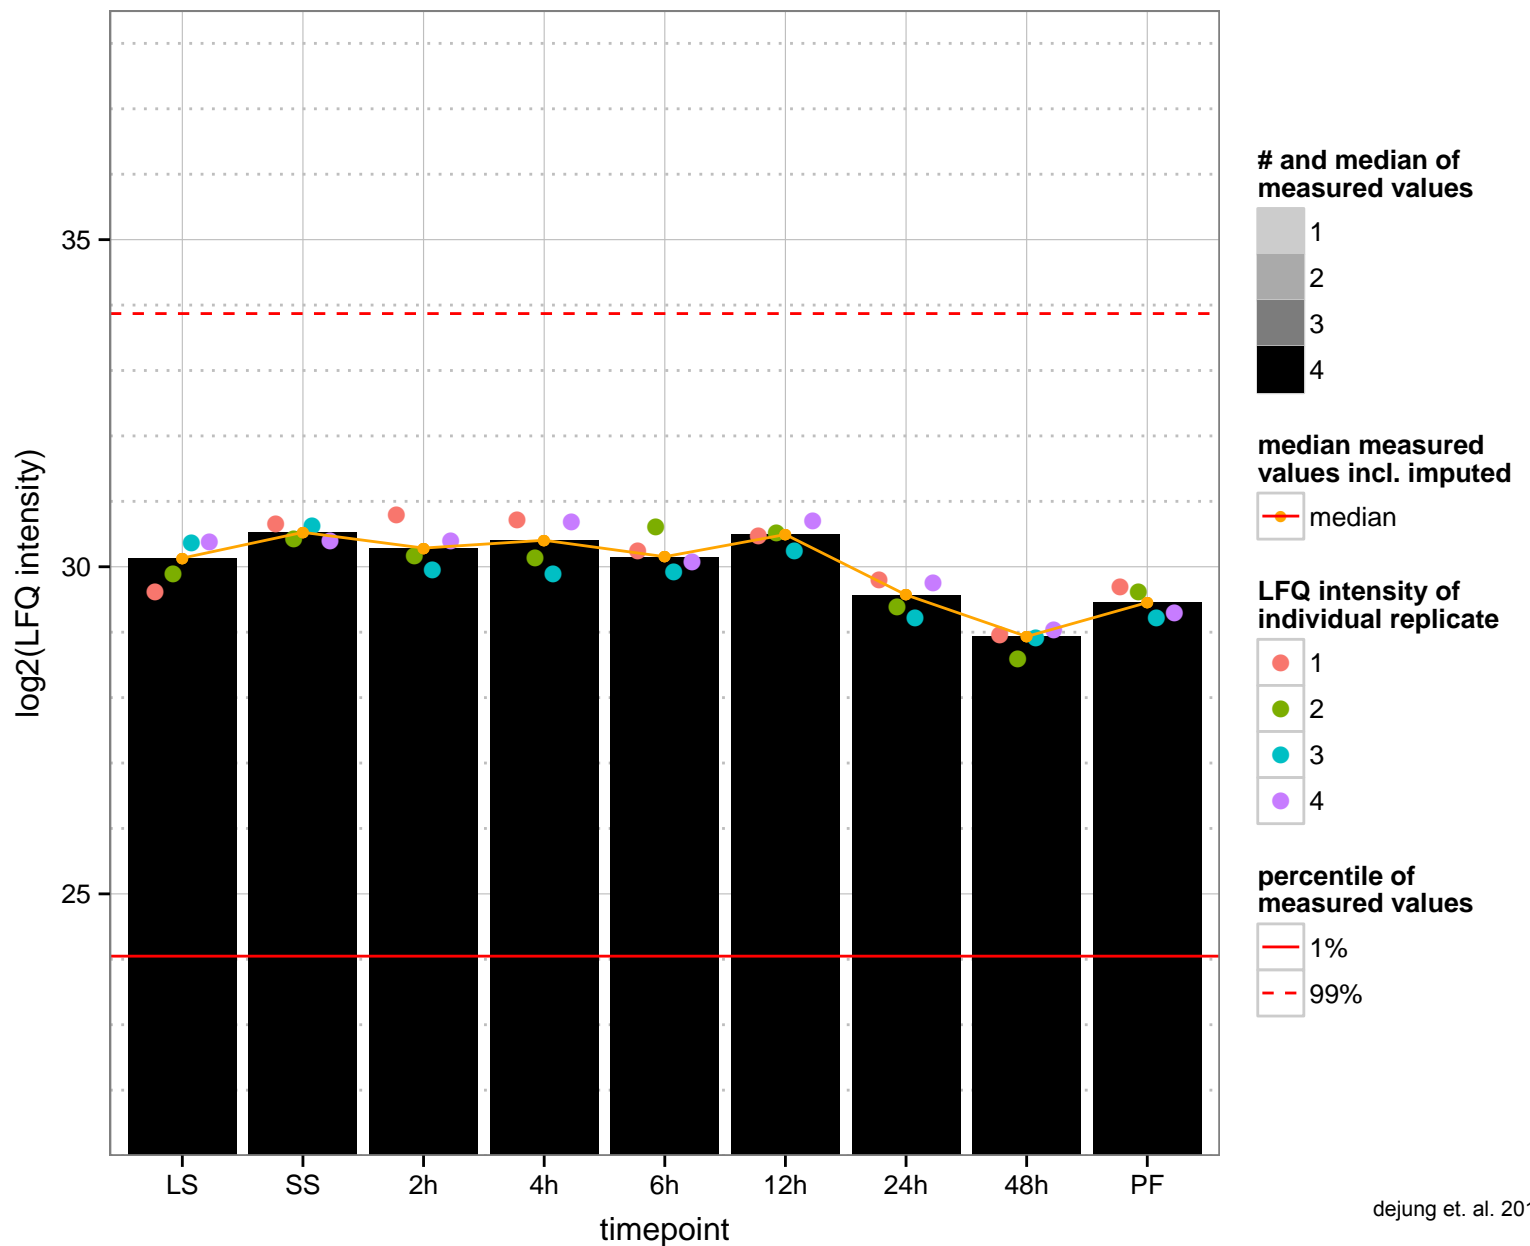

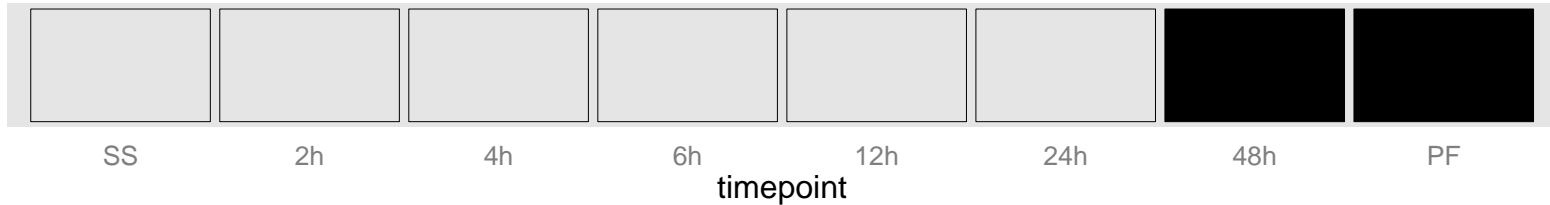

**regulated**  not regulated  significant down  significant up

serine/threonine protein phosphatase, putative, BAC from homologous region on chr5, kinetoplast-specific phospho-protein  
 Tb927.5.4380;Tb05.5K5.30  
 AGOF: hydrolase activity, protein serine/threonine phosphatase activity  
 AGOC: null  
 AGOP: null, protein dephosphorylation  
 PGO: hydrolase activity  
 PGOC: null  
 PGOP: null

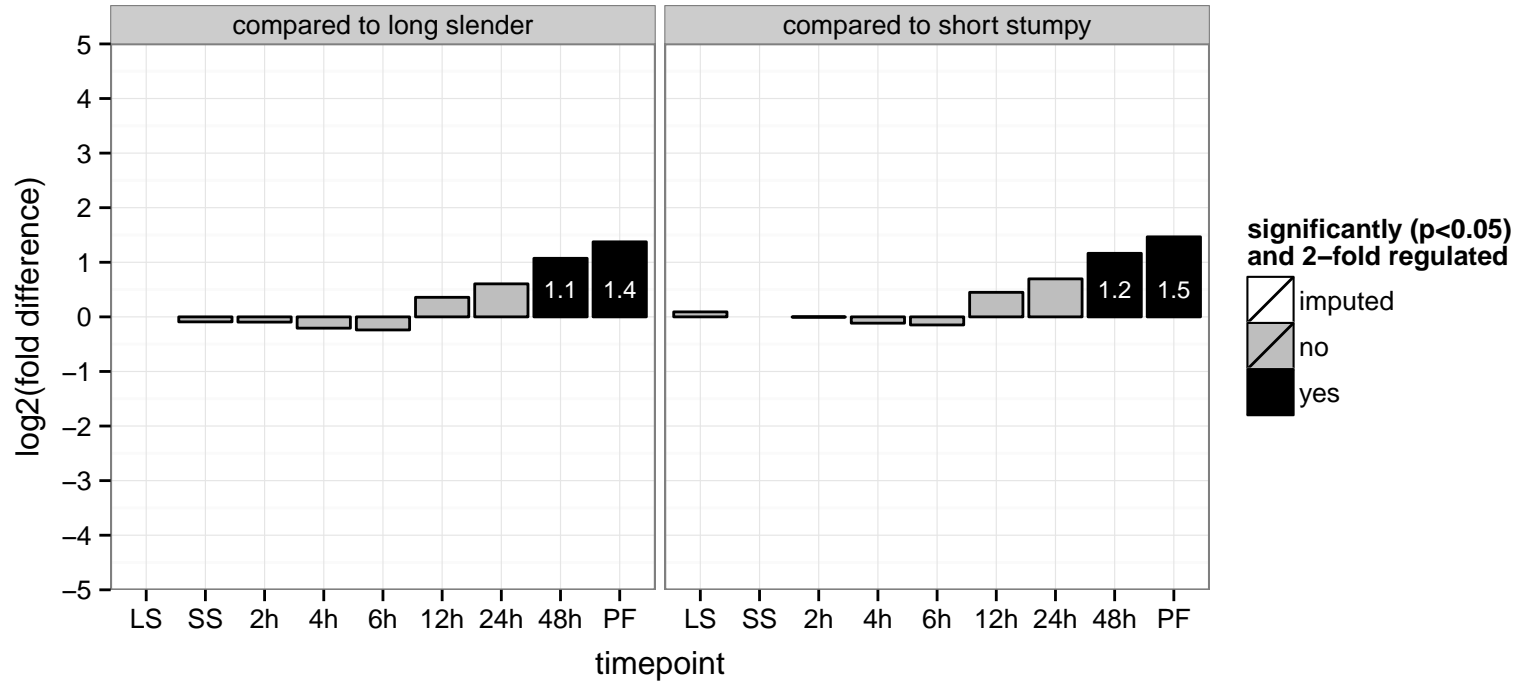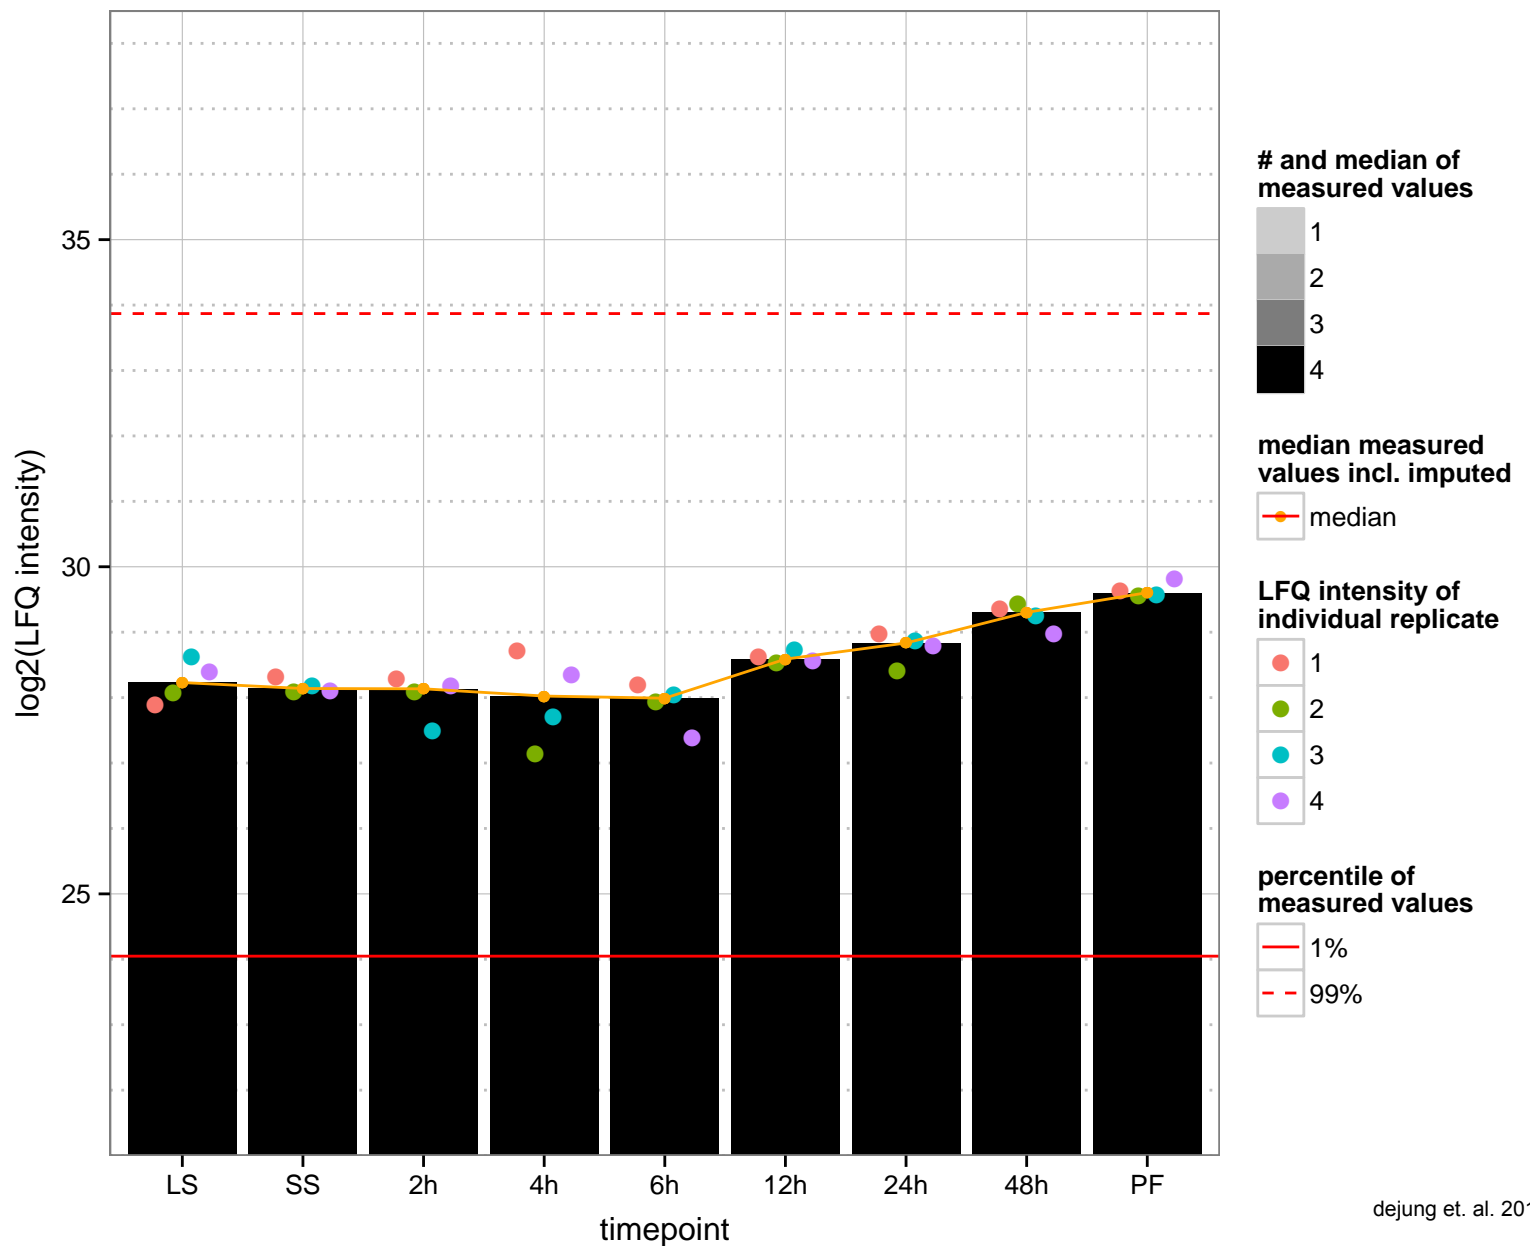

60S ribosomal protein L21e, putative, chrXI additional, unordered contigs, ribosomal protein L21E (60S)  
 Tb927.4.1100;Tb927.11.680;Tb11.0880  
 AGOF: structural constituent of ribosome  
 AGOC: intracellular, ribosome  
 AGOP: translation  
 PGOF: structural constituent of ribosome  
 PGO: intracellular, ribosome  
 PGOP: translation

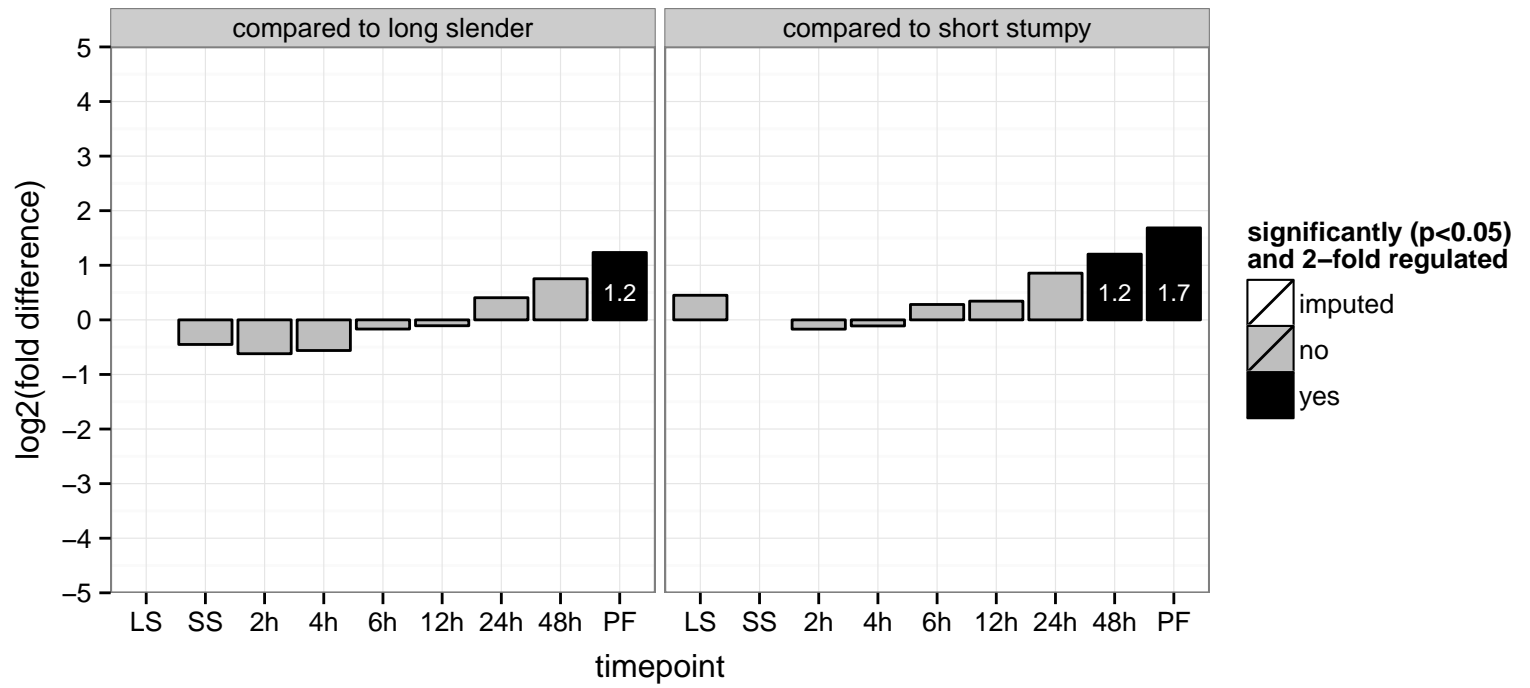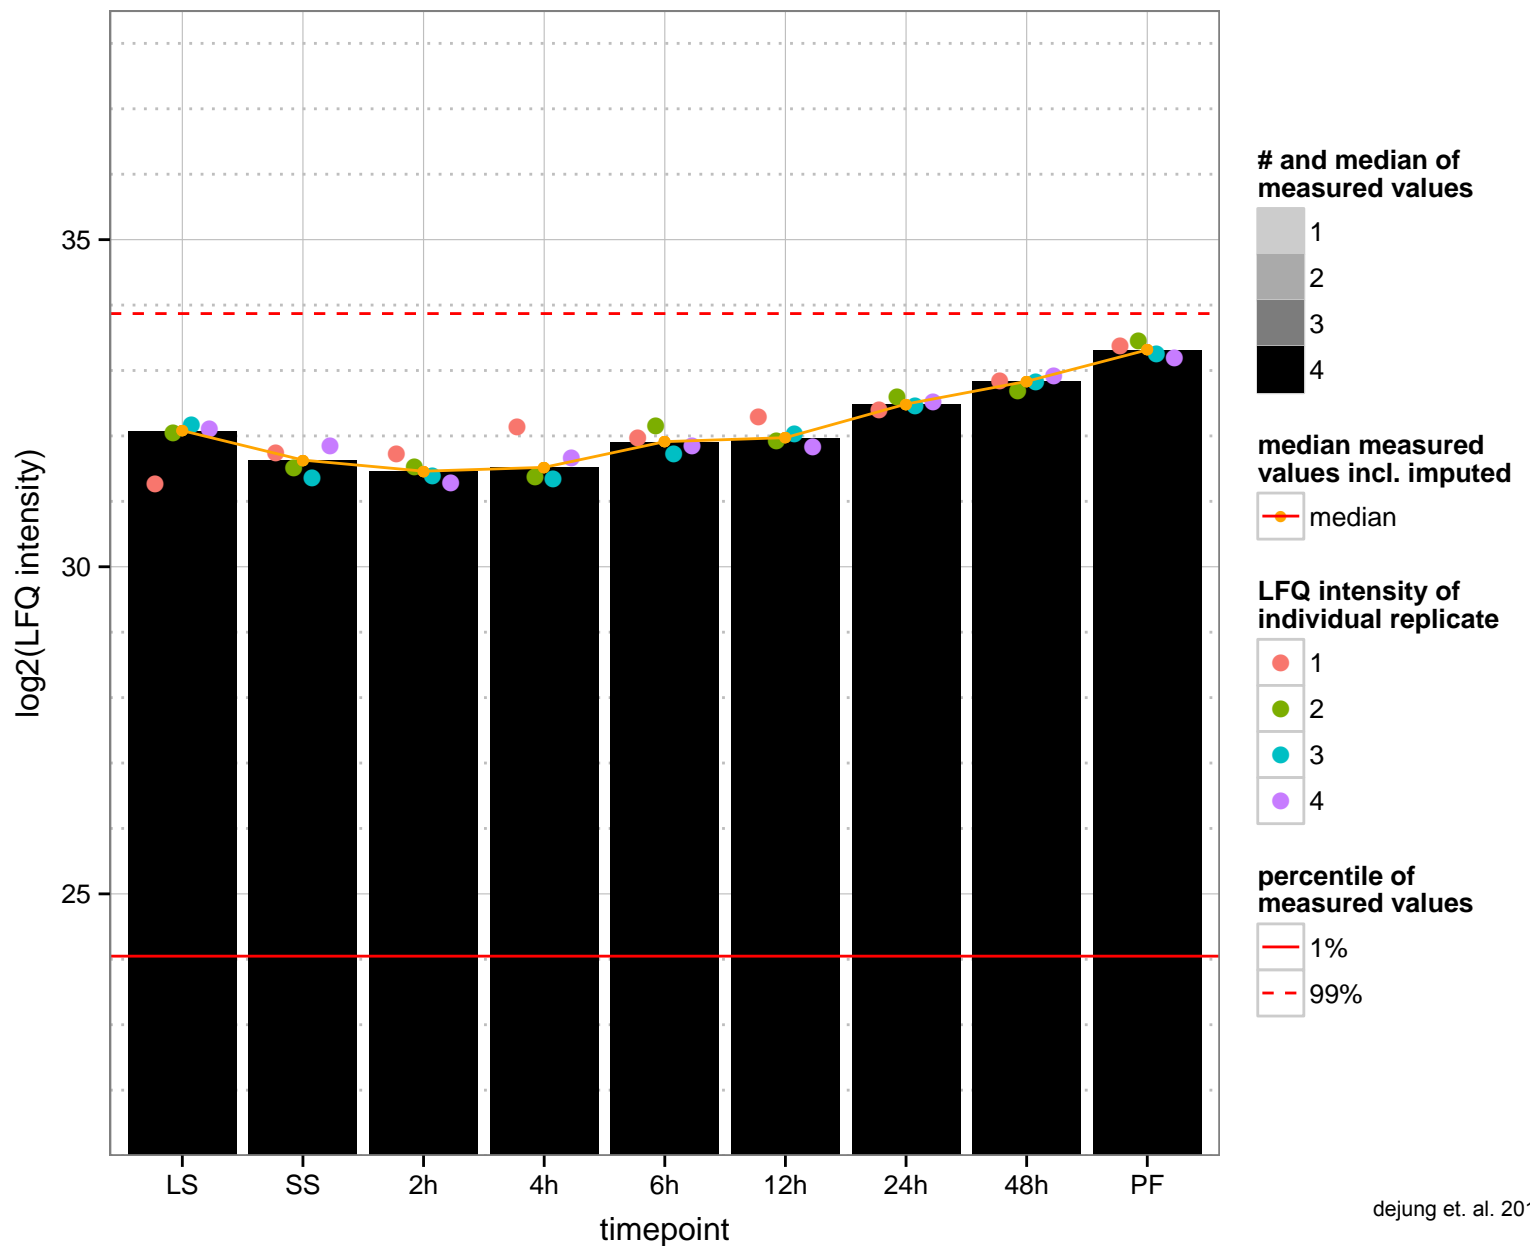

hypothetical protein, chrXI additional, unordered contigs, methionine aminopeptidase, putative, metallo- peptidase, Clan MG, Tb927.10.15270;Tb11.v5.0998;Tb11.1240  
 AGOF: aminopeptidase activity, metalloexopeptidase activity, null  
 AGOC: null  
 AGOP: cellular process, proteolysis, null  
 PGOF: aminopeptidase activity, metalloexopeptidase activity, zinc ion binding  
 PGO: null  
 PGO: cellular process, proteolysis

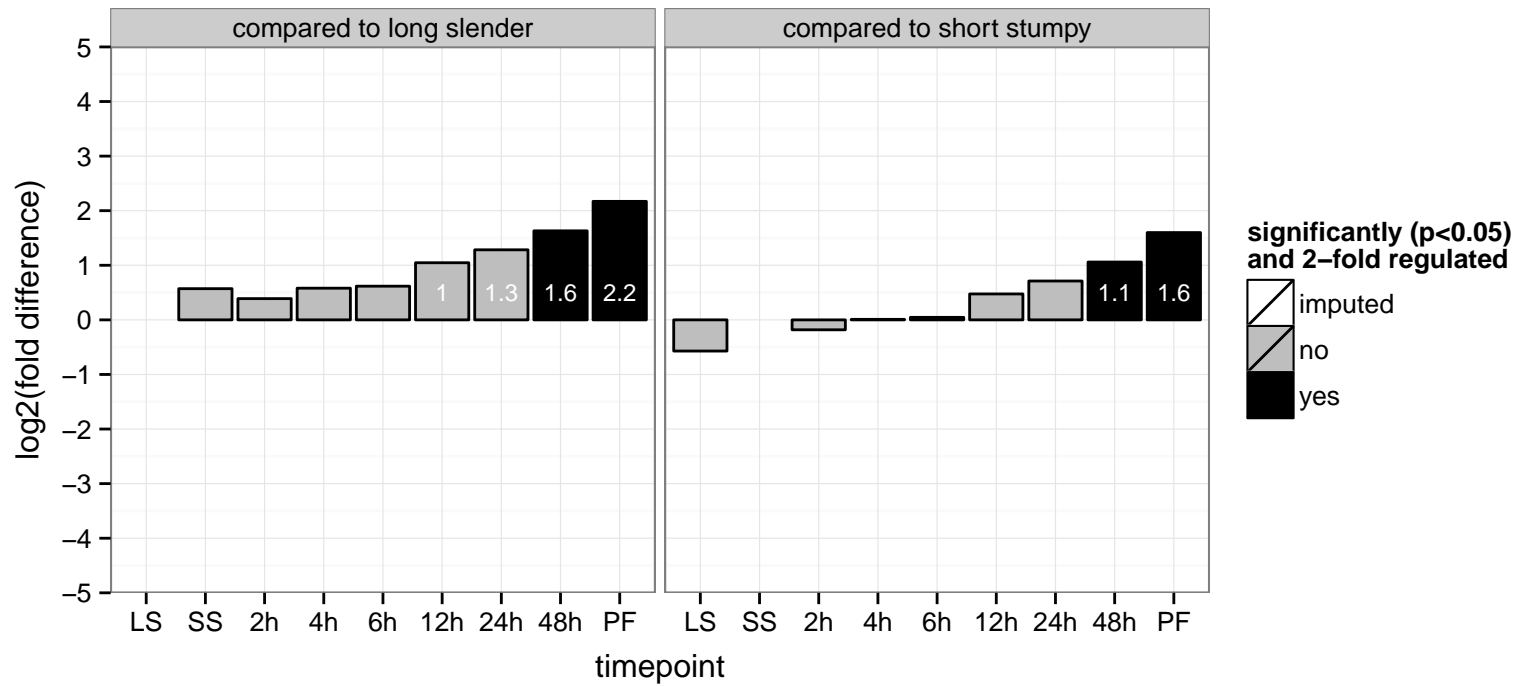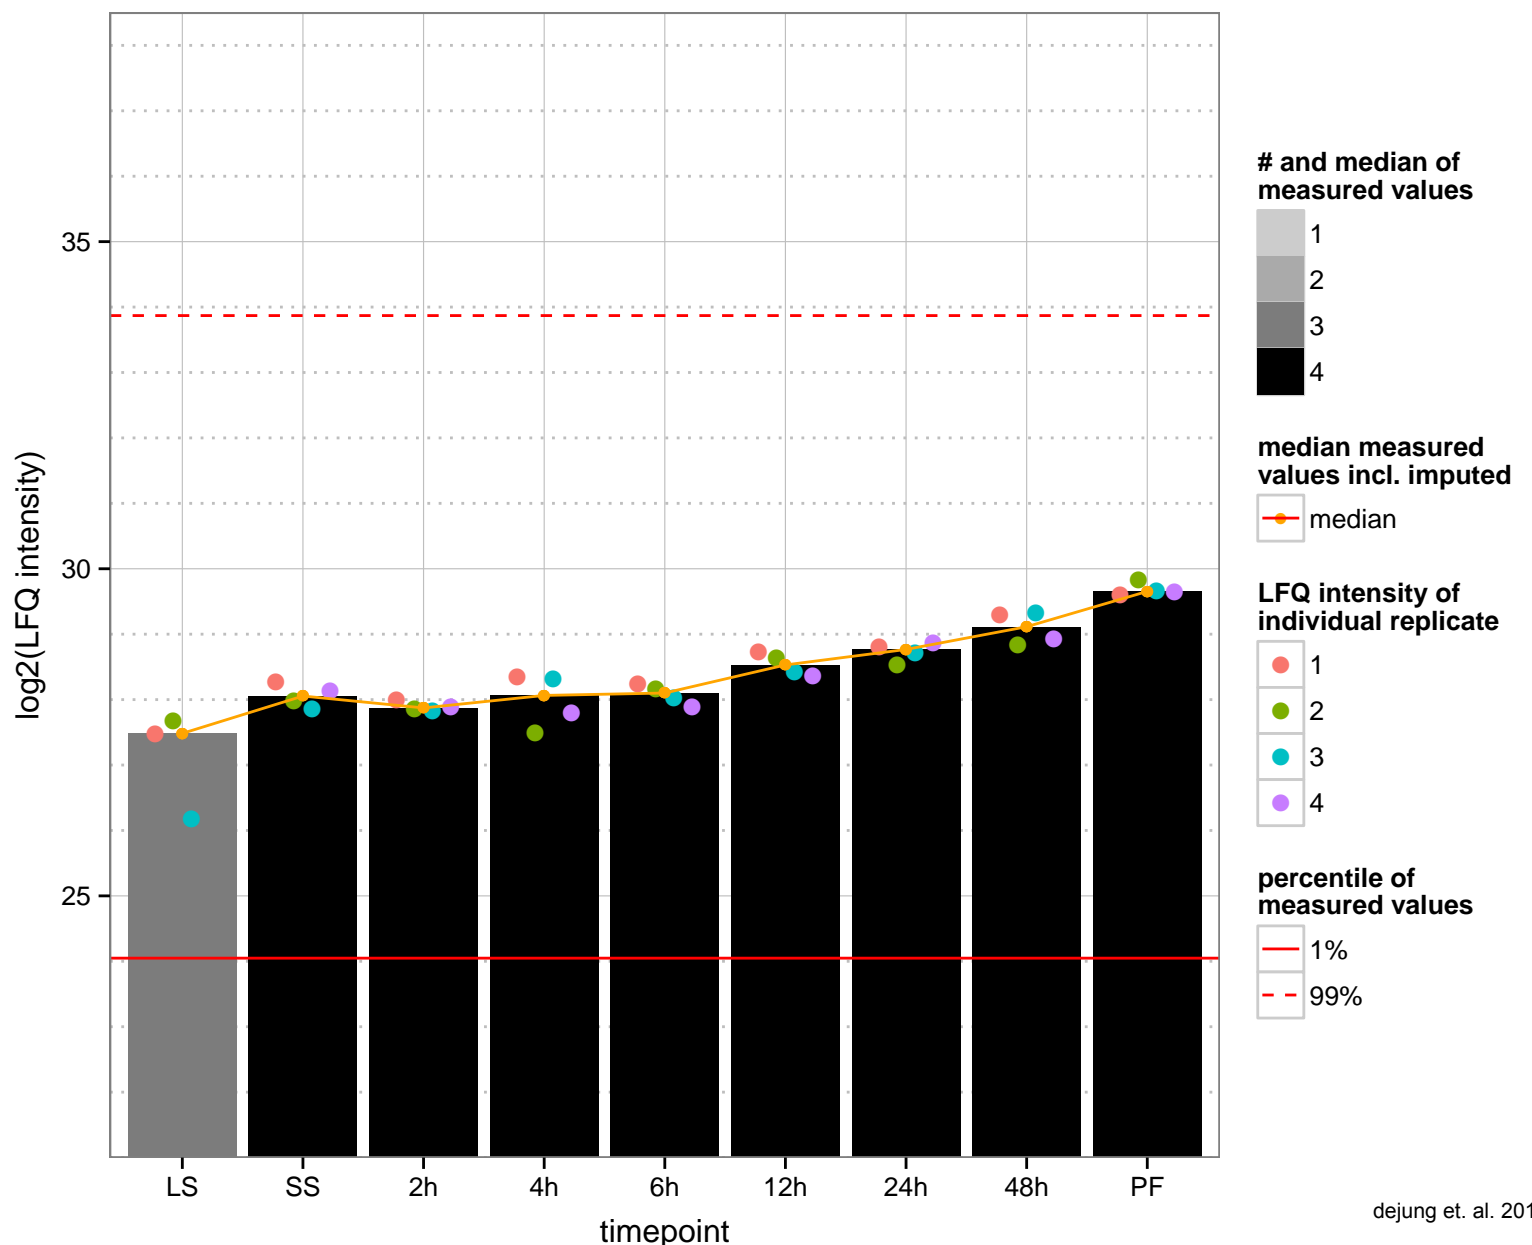



hypothetical protein, conserved  
 Tb927.7.4890;Tb11.v5.0170  
 AGOF: null  
 AGOC: null  
 AGOP: null  
 PGO: null  
 PGOC: null  
 PGOP: null

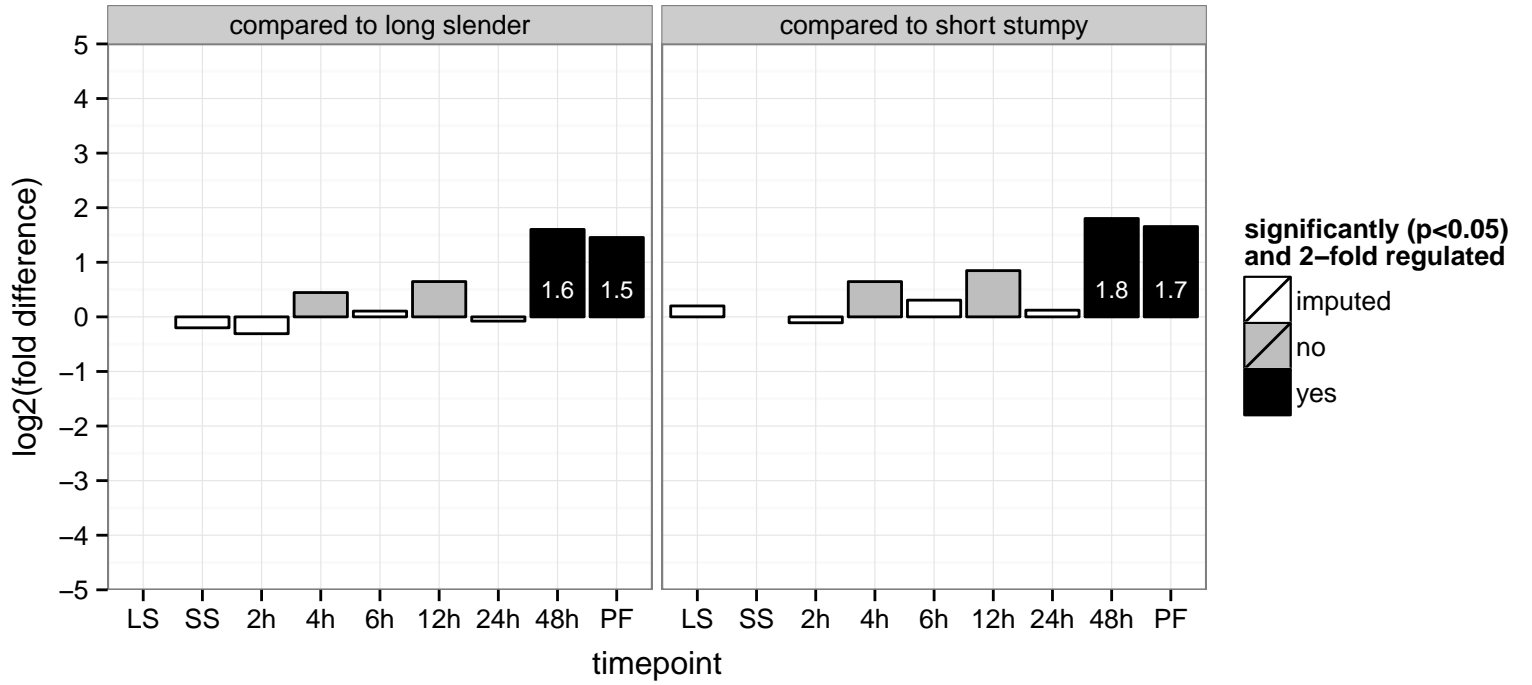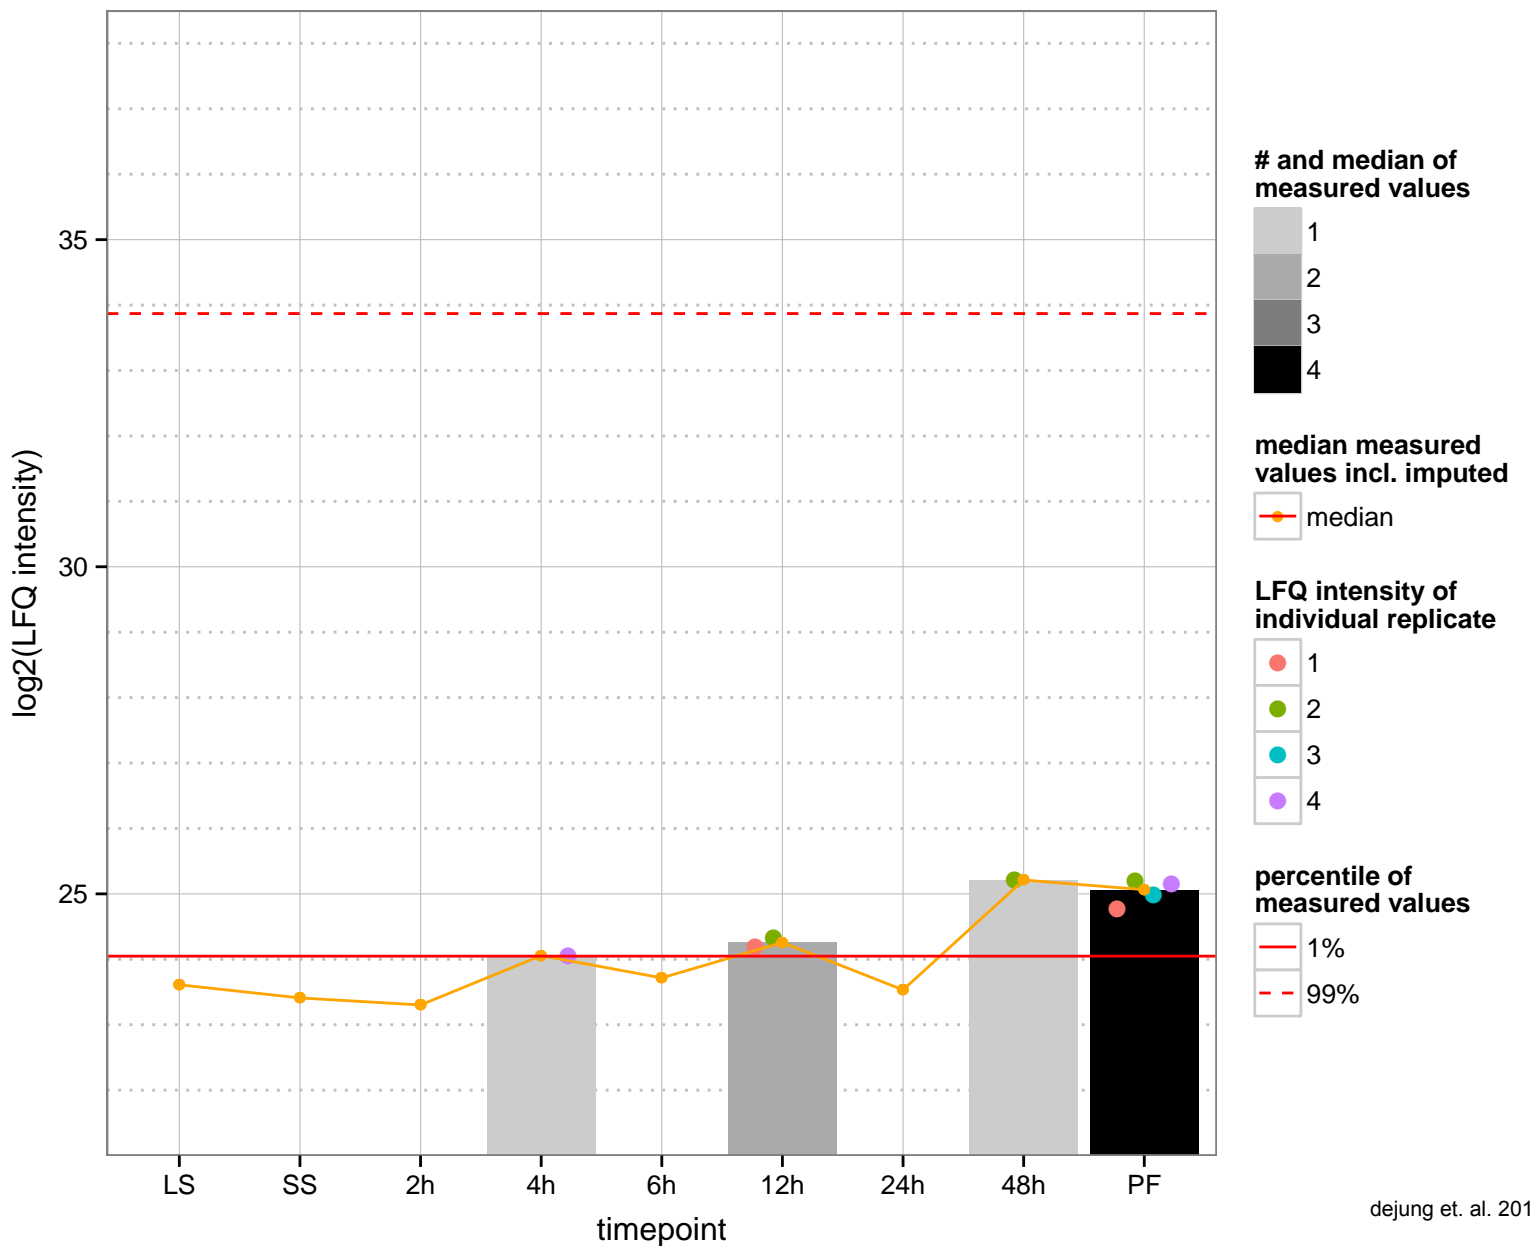

pantothenate kinase subunit, putative  
 Tb927.11.7290;Tb11.v5.0254  
 AGOF: null, ATP binding, pantothenate kinase activity  
 AGOC: null  
 AGOP: null, coenzyme A biosynthetic process  
 PGO: ATP binding, catalytic activity, pantothenate kinase activity  
 PGO: null  
 PGO: coenzyme A biosynthetic process, metabolic process

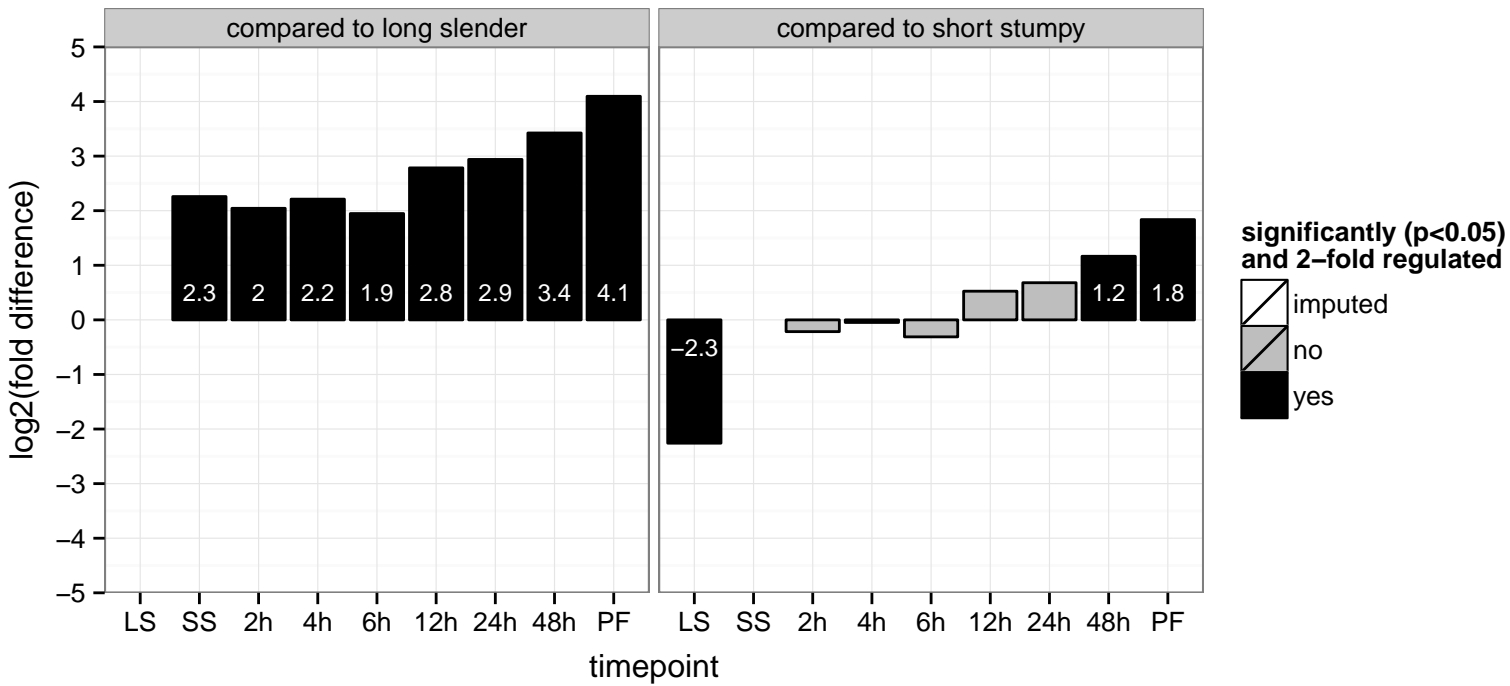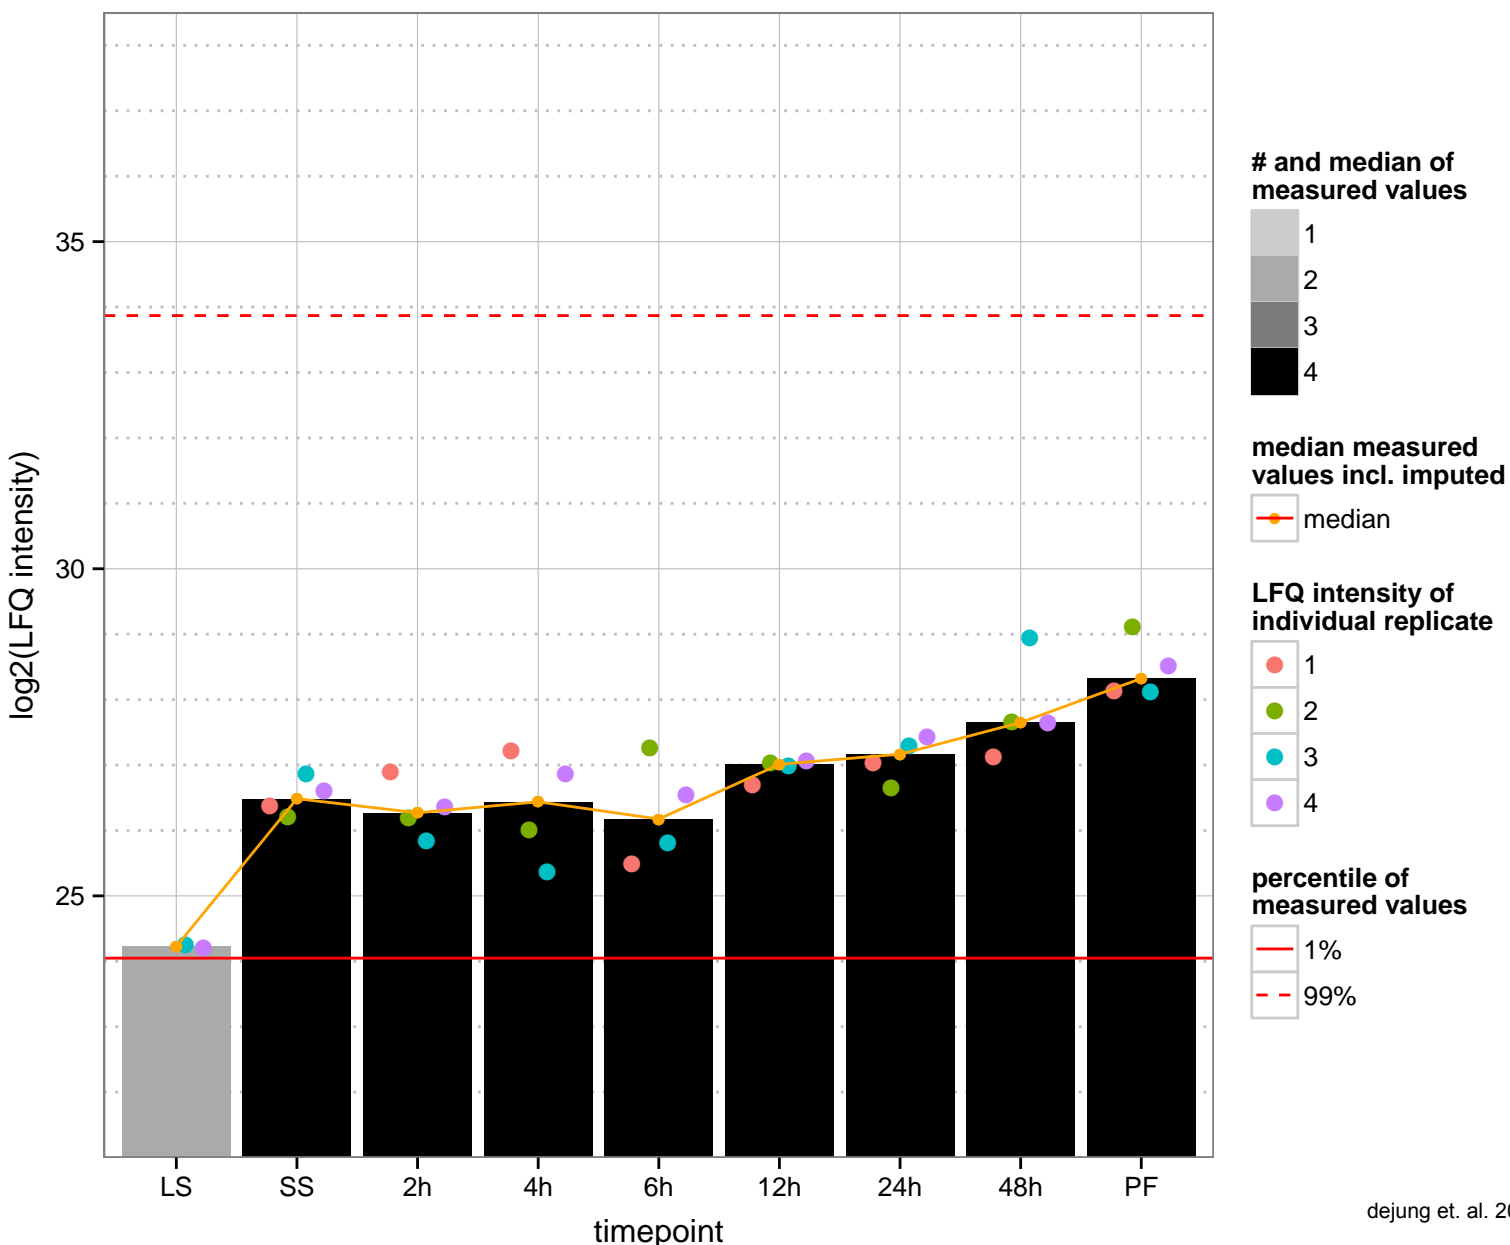

hypothetical protein, conserved  
 Tb927.1.3270  
 AGOF: null  
 AGOC: null  
 AGOP: null  
 PGO: null  
 PGOC: null  
 PGOP: null

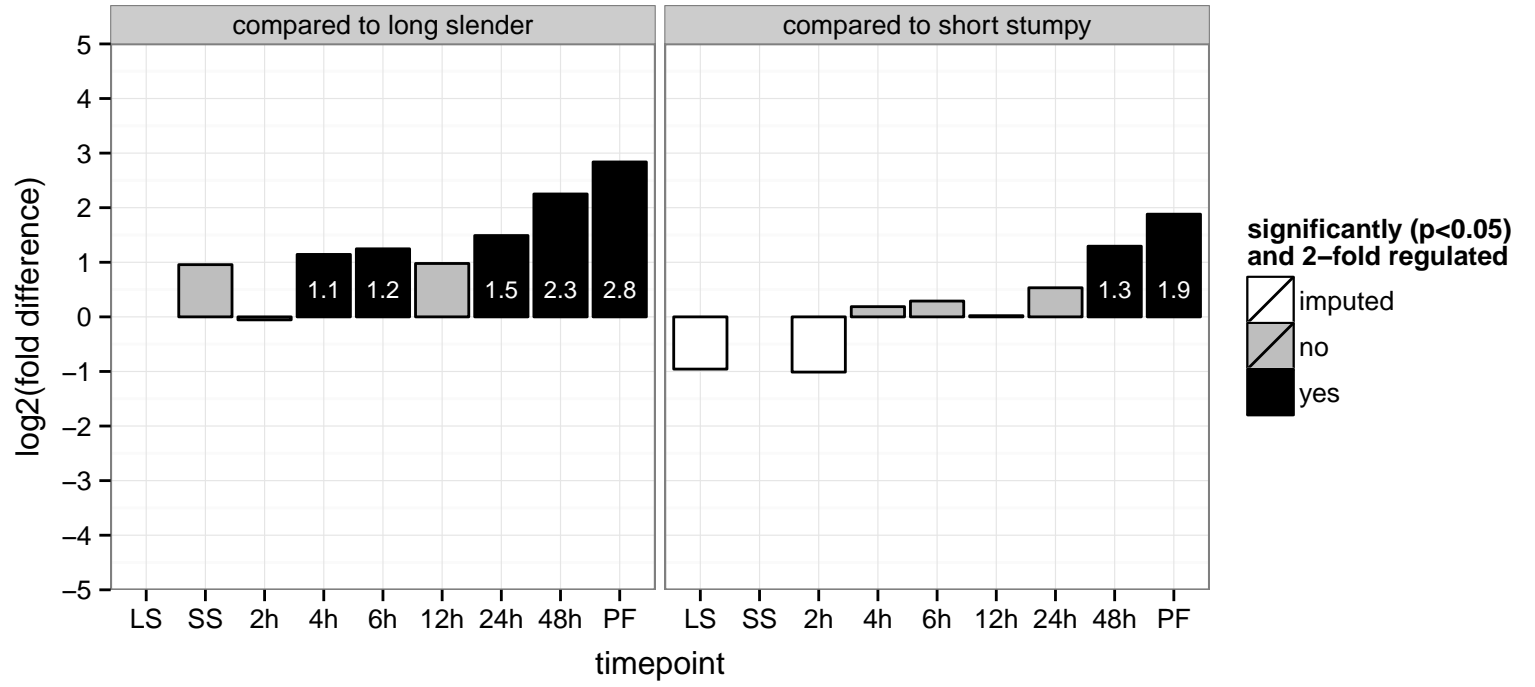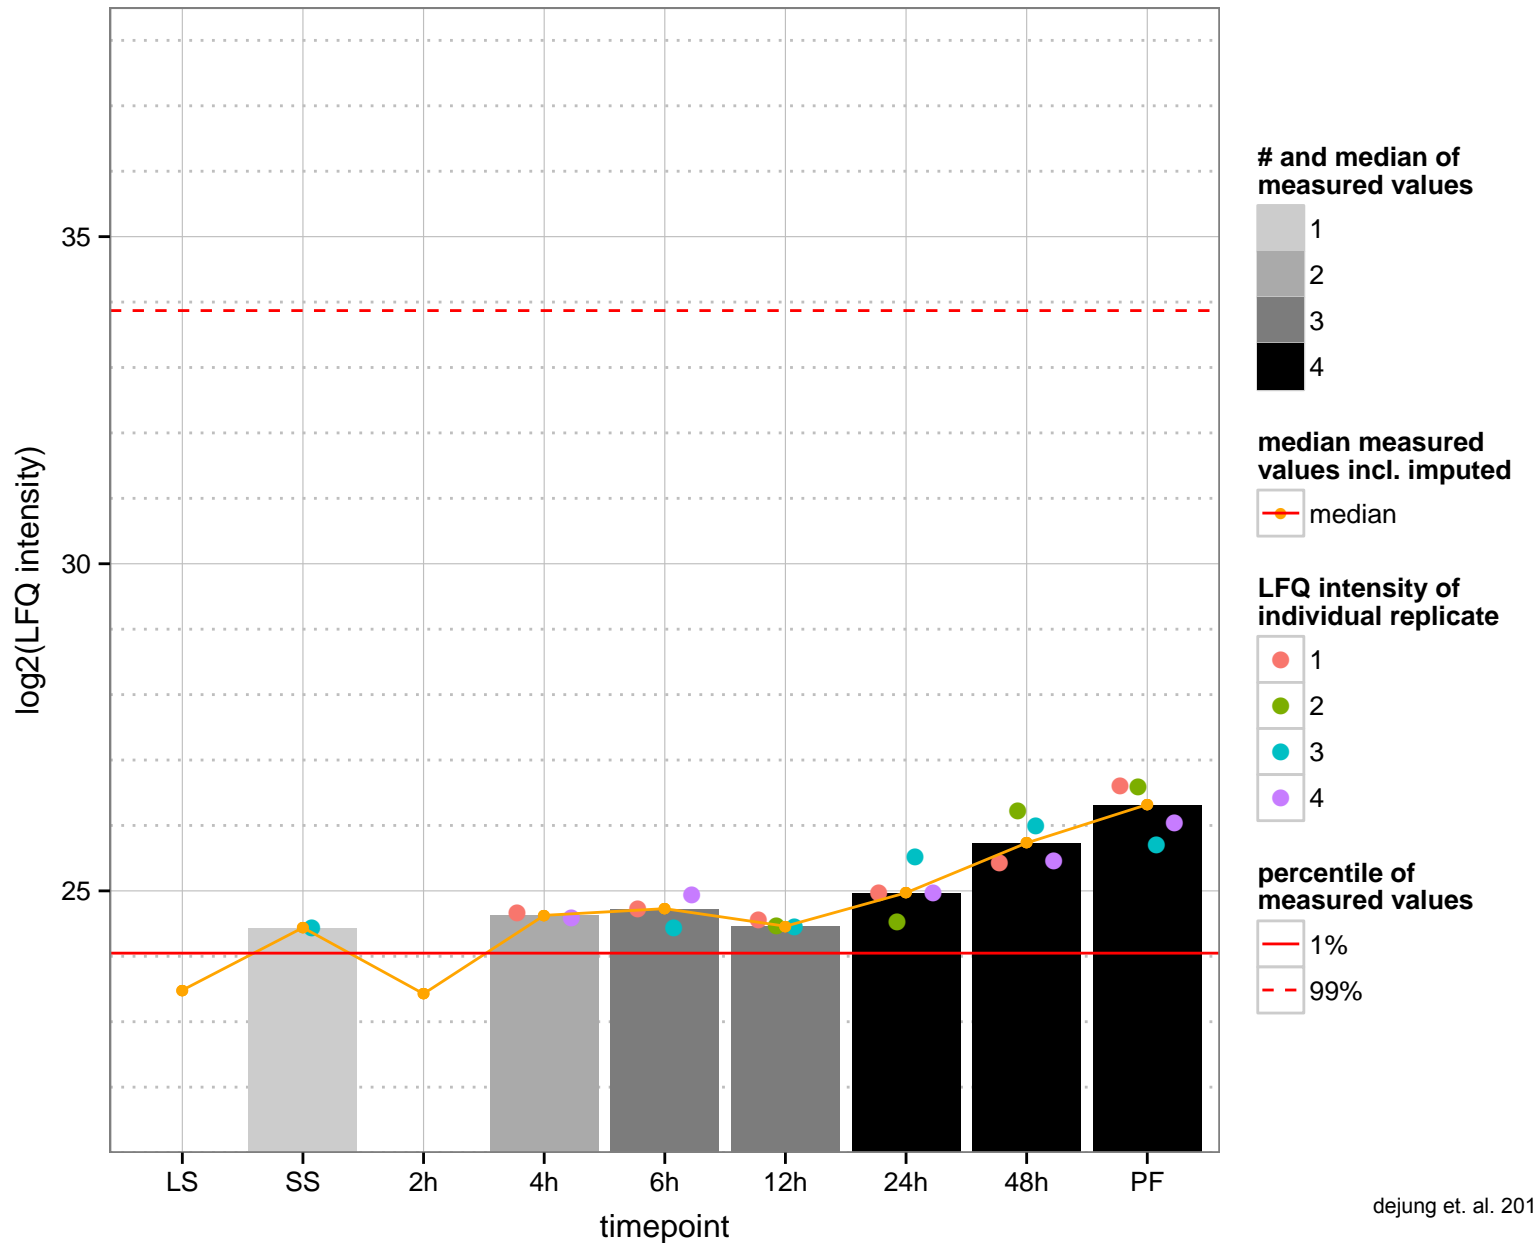

protein tyrosine phosphatase, putative  
 Tb927.10.10610  
 AGOF: protein tyrosine phosphatase activity  
 AGOC: membrane, mitochondrial inner membrane  
 AGOP: null  
 PGO: null  
 PGO: null  
 PGO: null

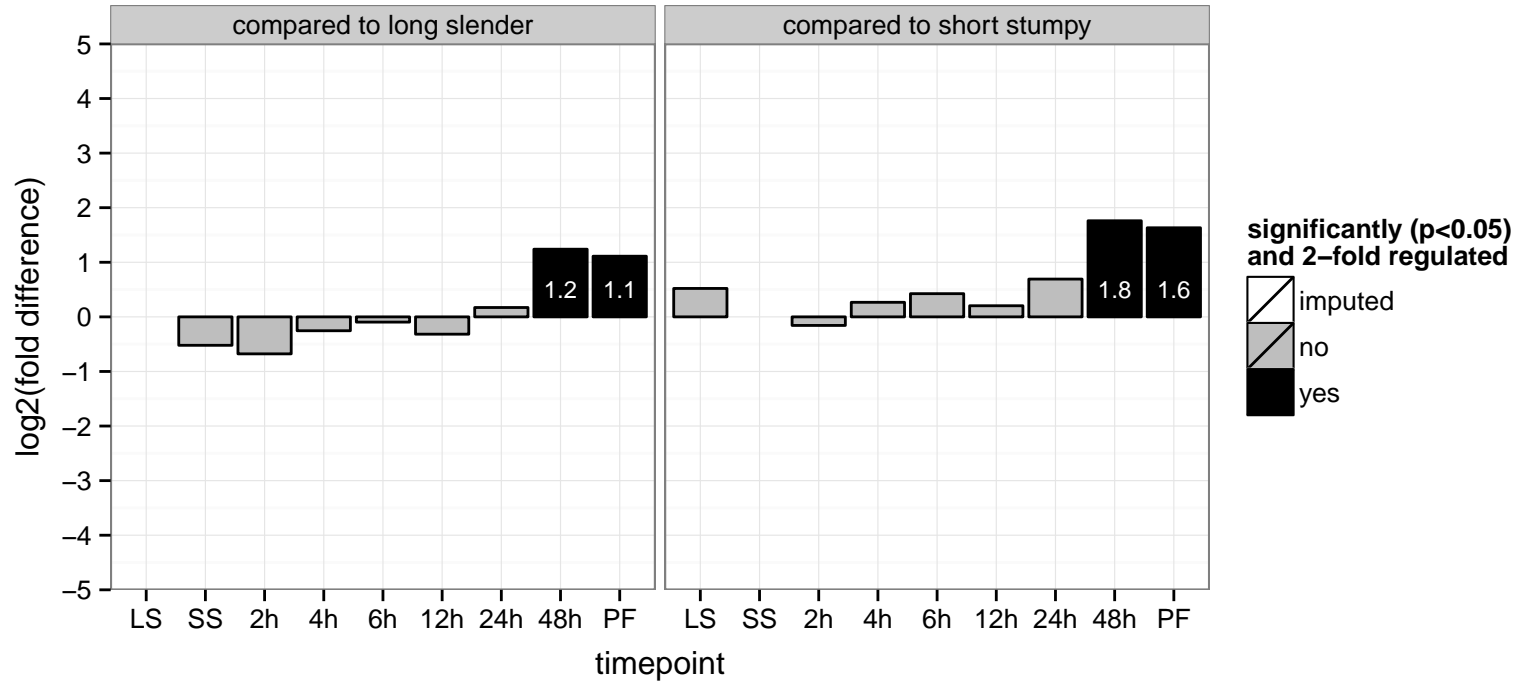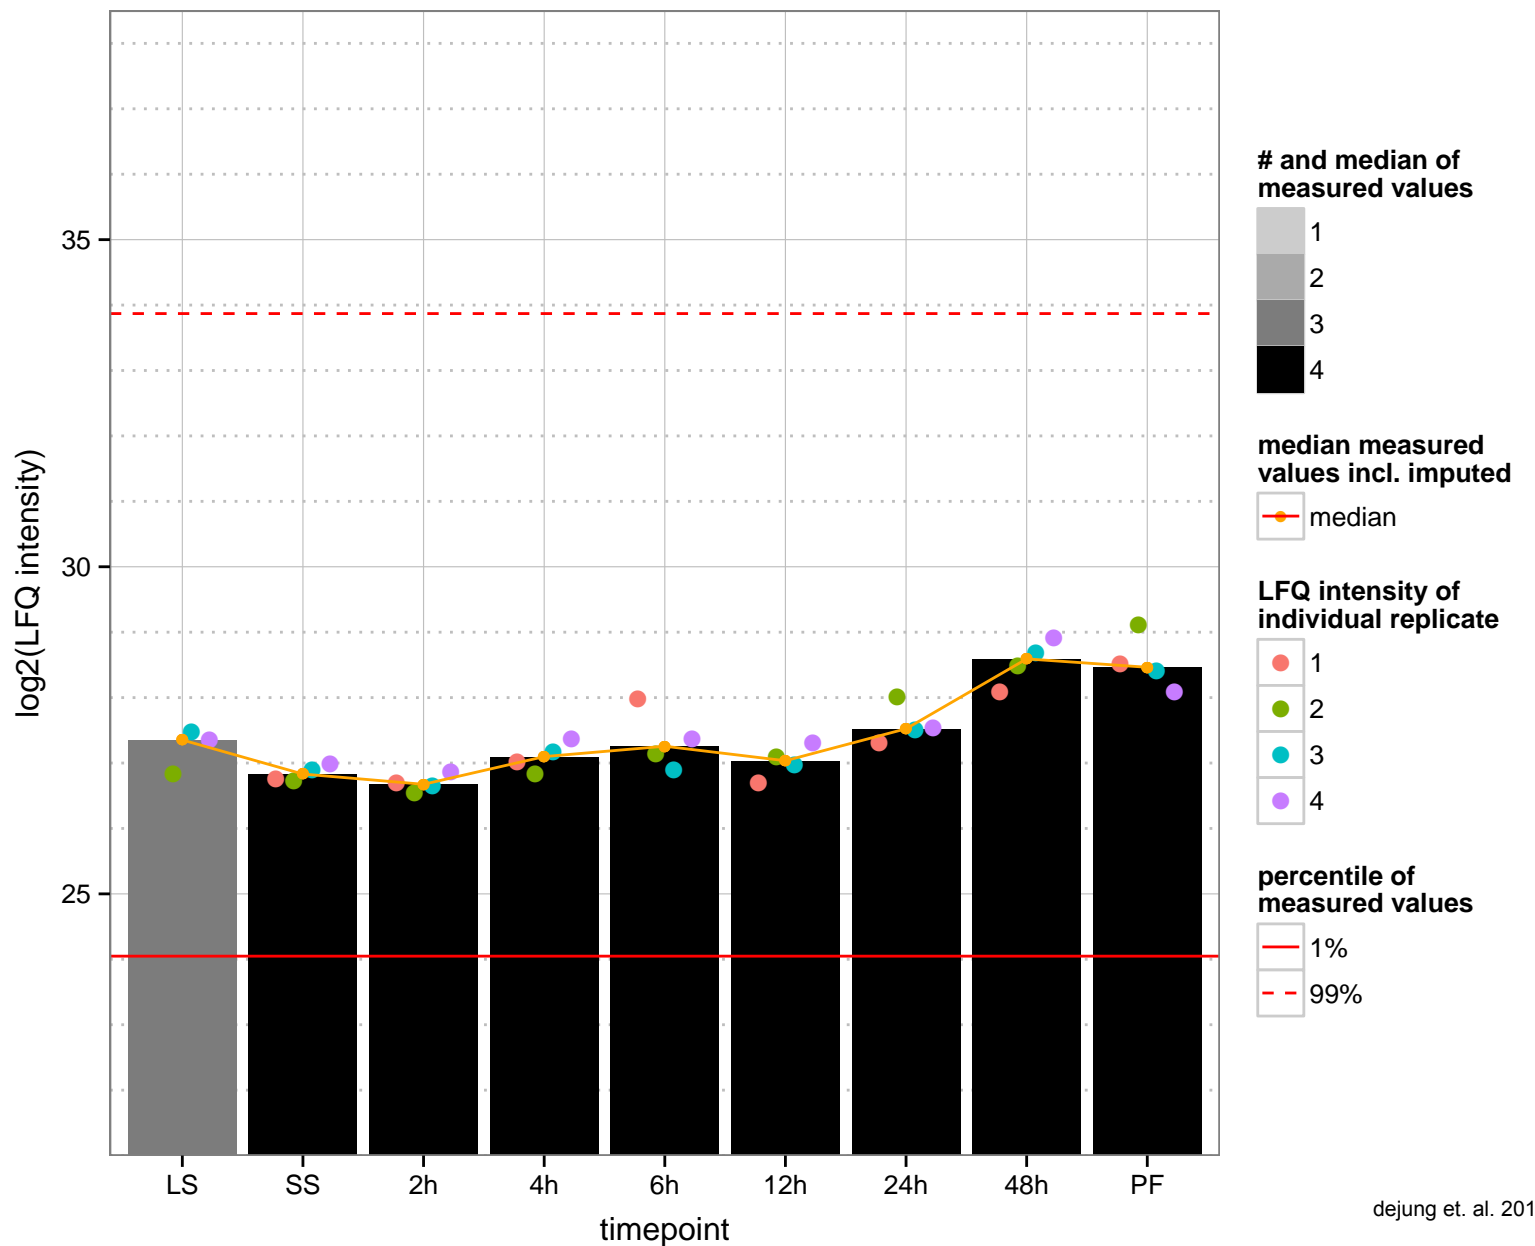

ATP-binding cassette sub-family F member 1, putative, ATPase, putative (ABCF1)

Tb927.10.10880

AGOF: ATP binding, ATPase activity, coupled to transmembrane movement of substances

AGOC: ATP-binding cassette (ABC) transporter complex, integral to membrane, internal side of plasma membrane

AGOP: transport

PGOF: ATP binding, ATPase activity, nucleoside-triphosphatase activity, nucleotide binding

PGOC: null

PGOP: null

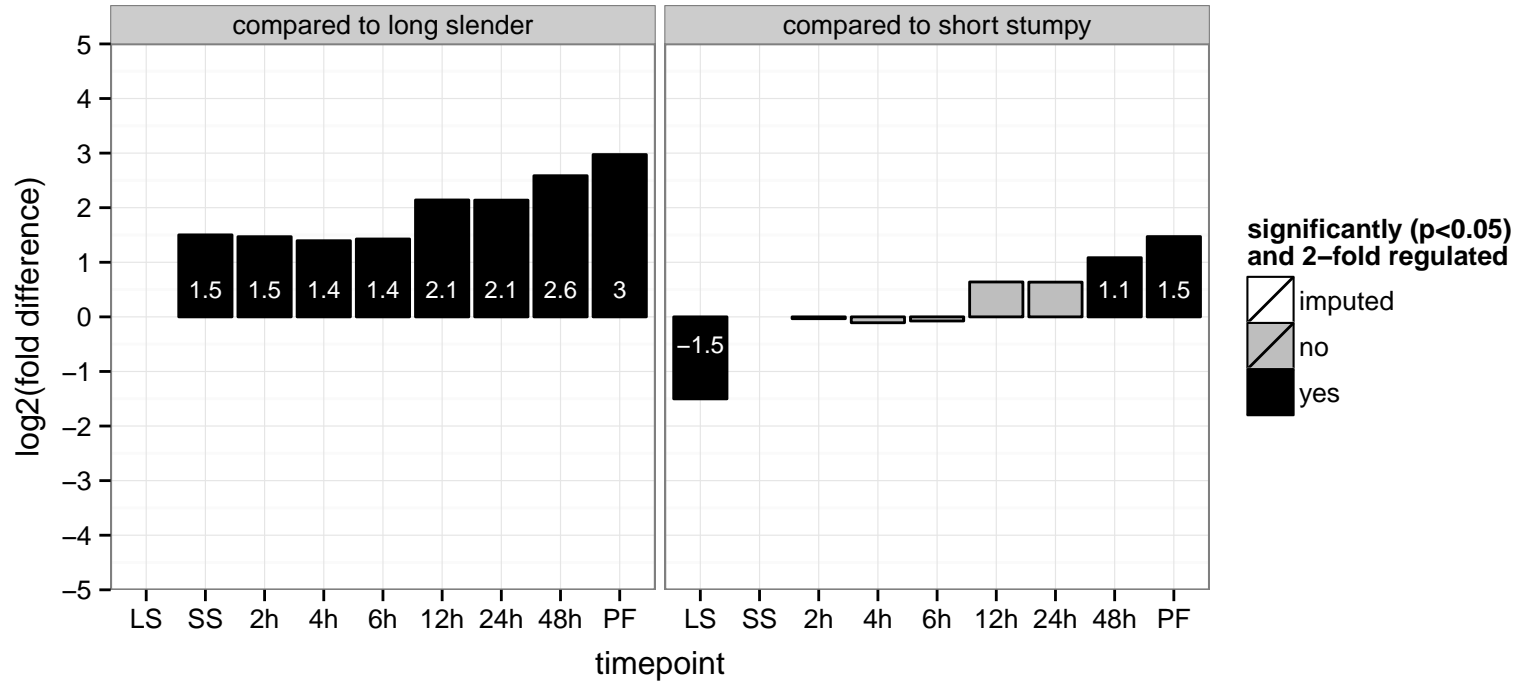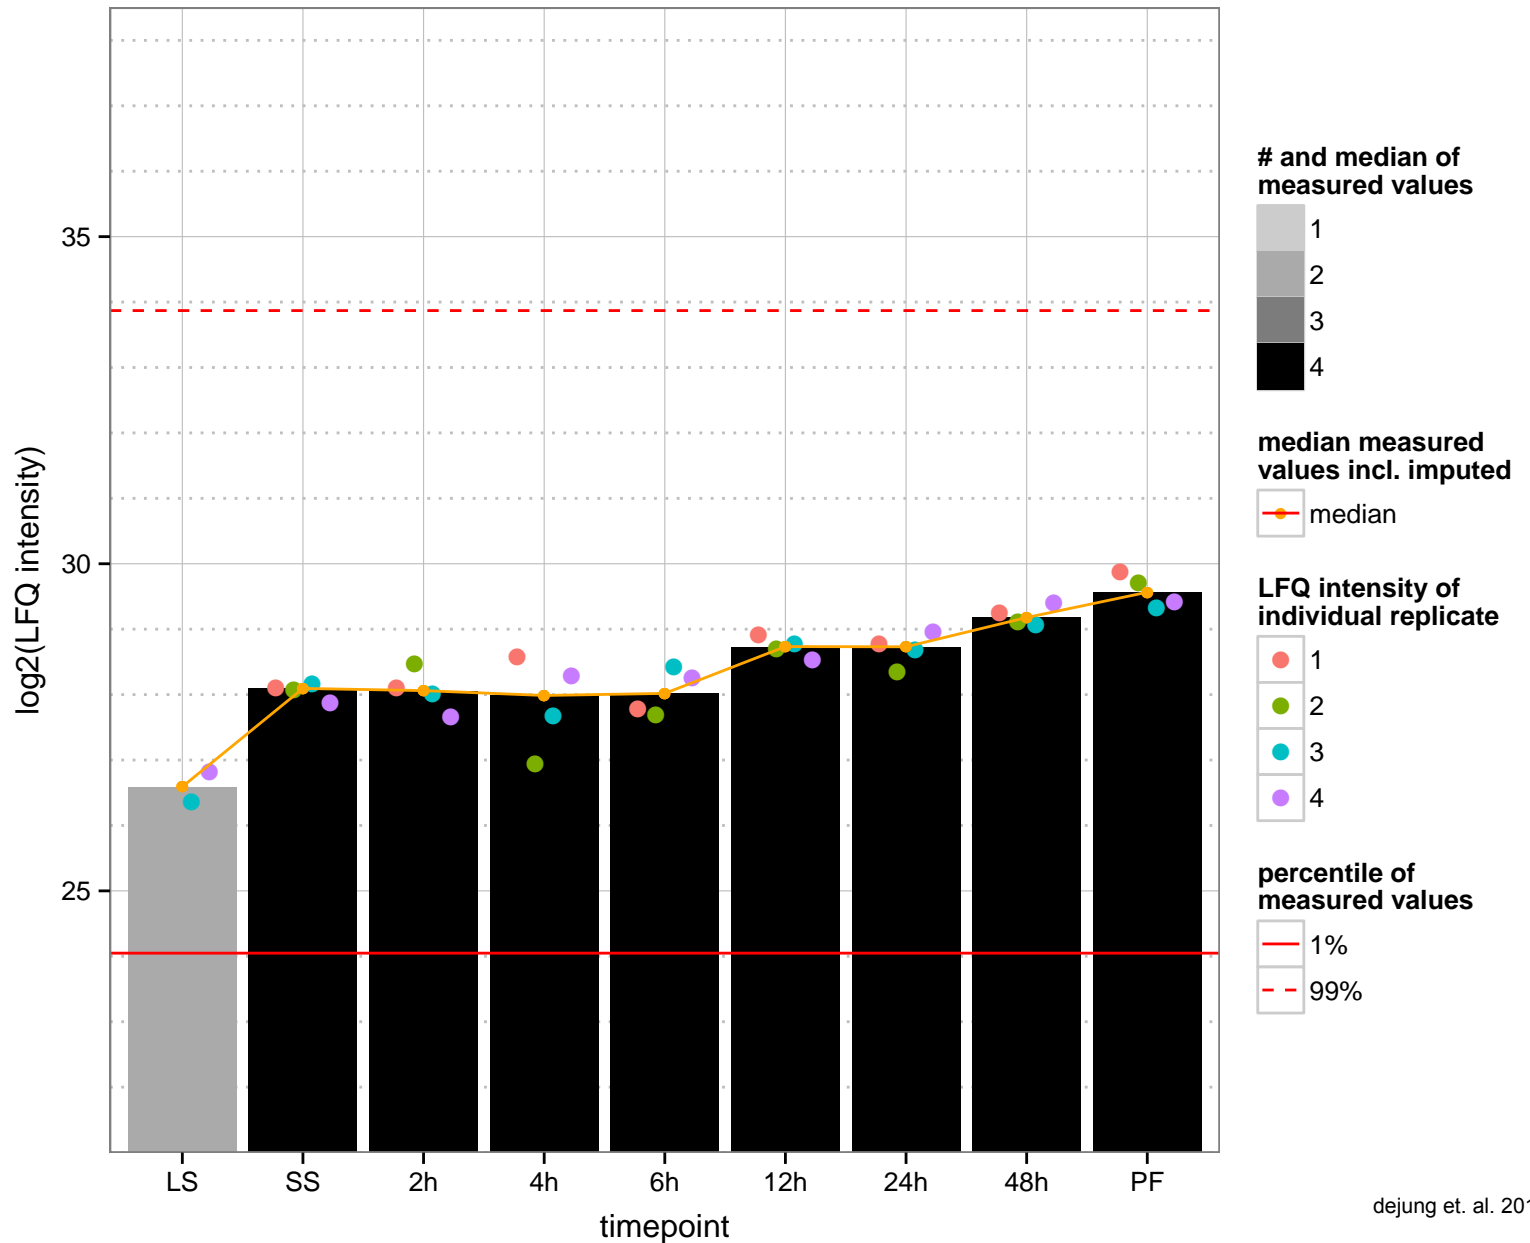

60S ribosomal protein L6, putative  
 Tb927.10.11390  
 AGOF: structural constituent of ribosome  
 AGOC: intracellular, organellar large ribosomal subunit, ribosome  
 AGOP: translation  
 PGO: structural constituent of ribosome  
 PGO: intracellular, ribosome  
 PGO: translation

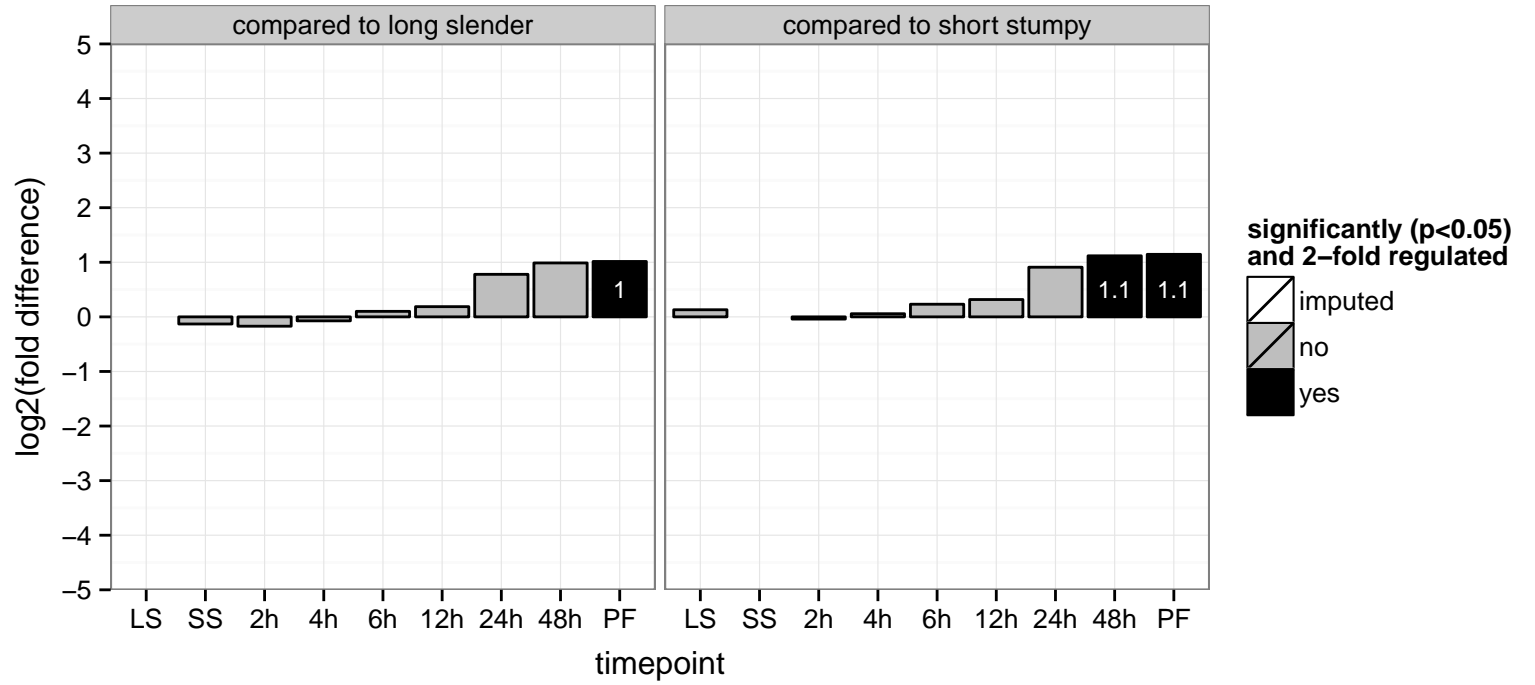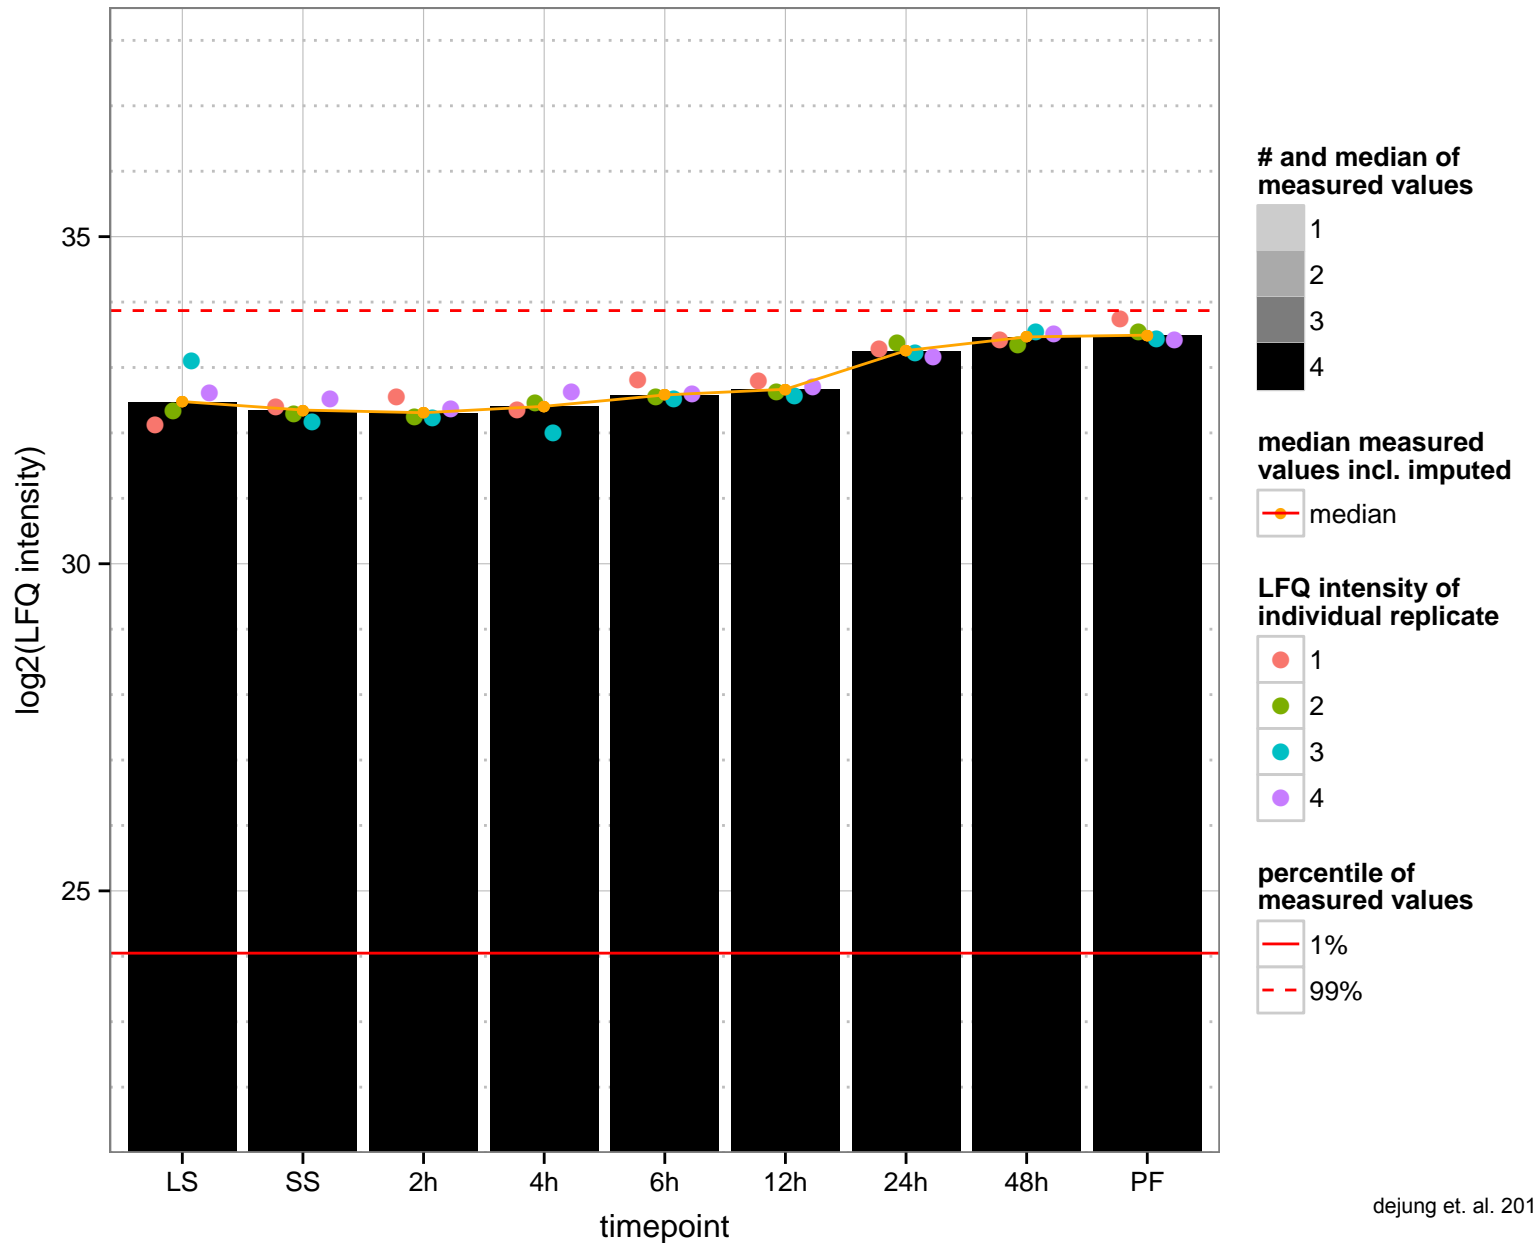

3-ketoacyl-CoA reductase, putative  
 Tb927.10.12240  
 AGOF: oxidoreductase activity  
 AGOC: endoplasmic reticulum  
 AGOP: metabolic process  
 PGOF: oxidoreductase activity  
 PGO: null  
 PGOP: metabolic process

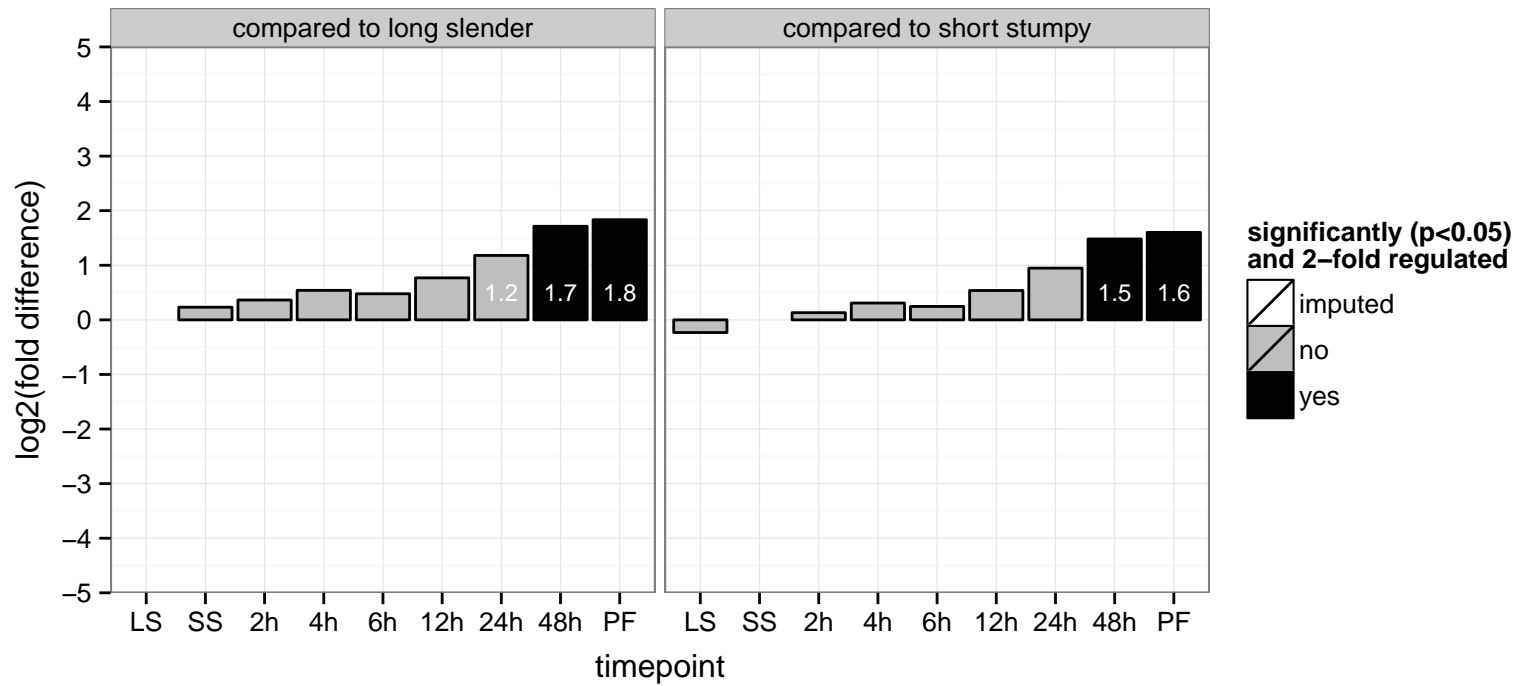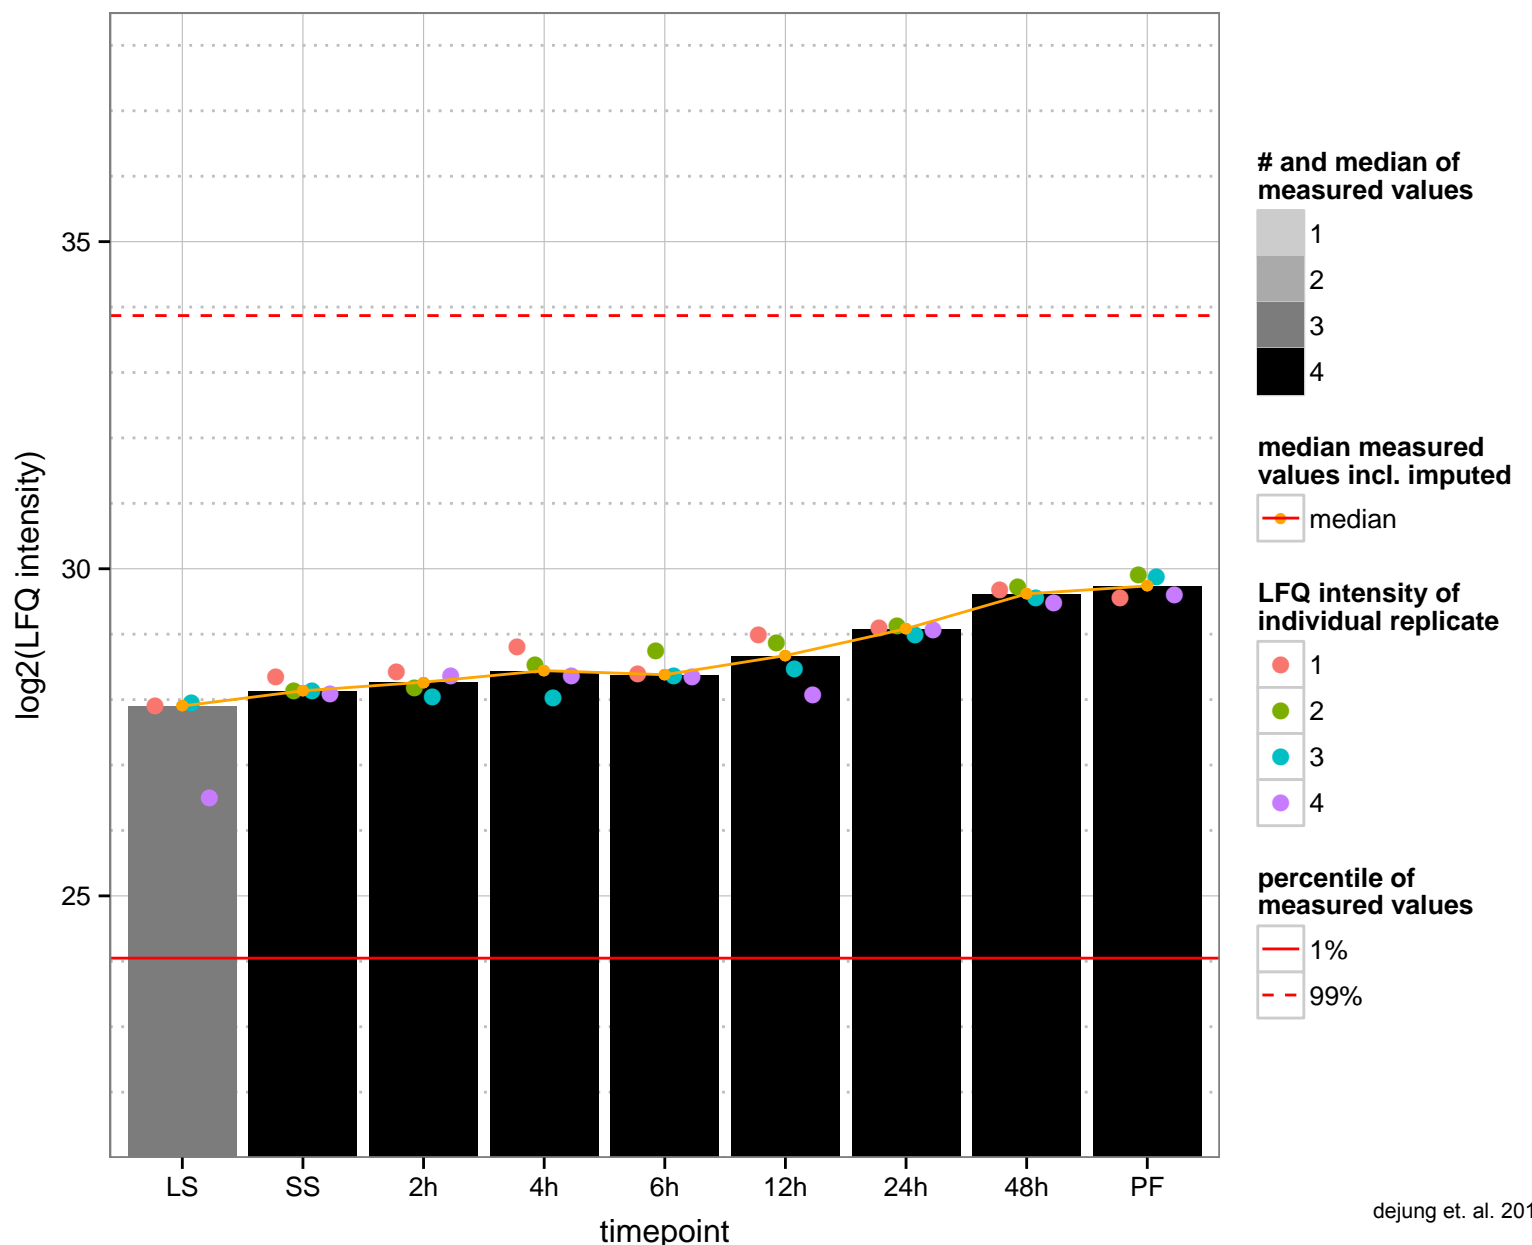

cytosolic nonspecific dipeptidase, putative, peptidase (M20/M25/M40 family)  
 Tb927.10.12260  
 AGOF: hydrolase activity, metallopeptidase activity, protein dimerization activity  
 AGOC: null  
 AGOP: proteolysis  
 PGO: hydrolase activity  
 PGO: null  
 PGO: metabolic process

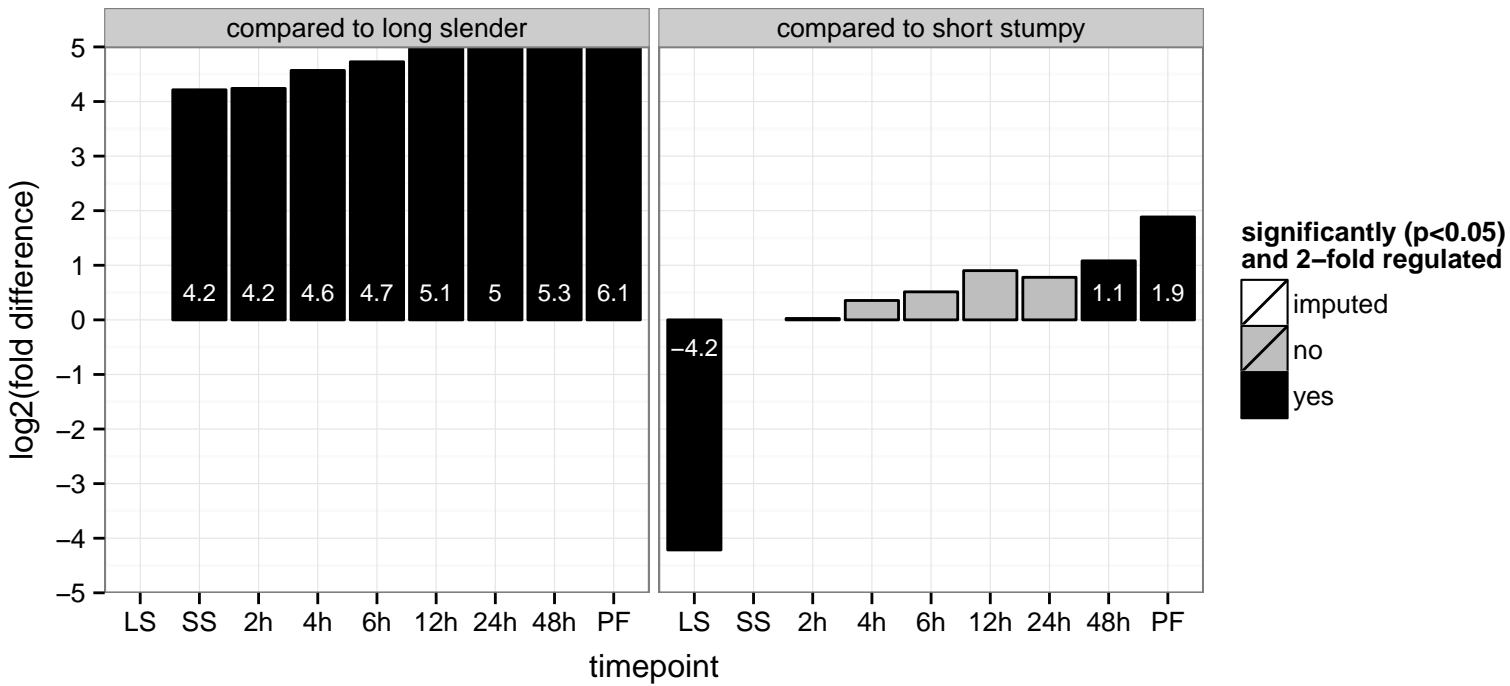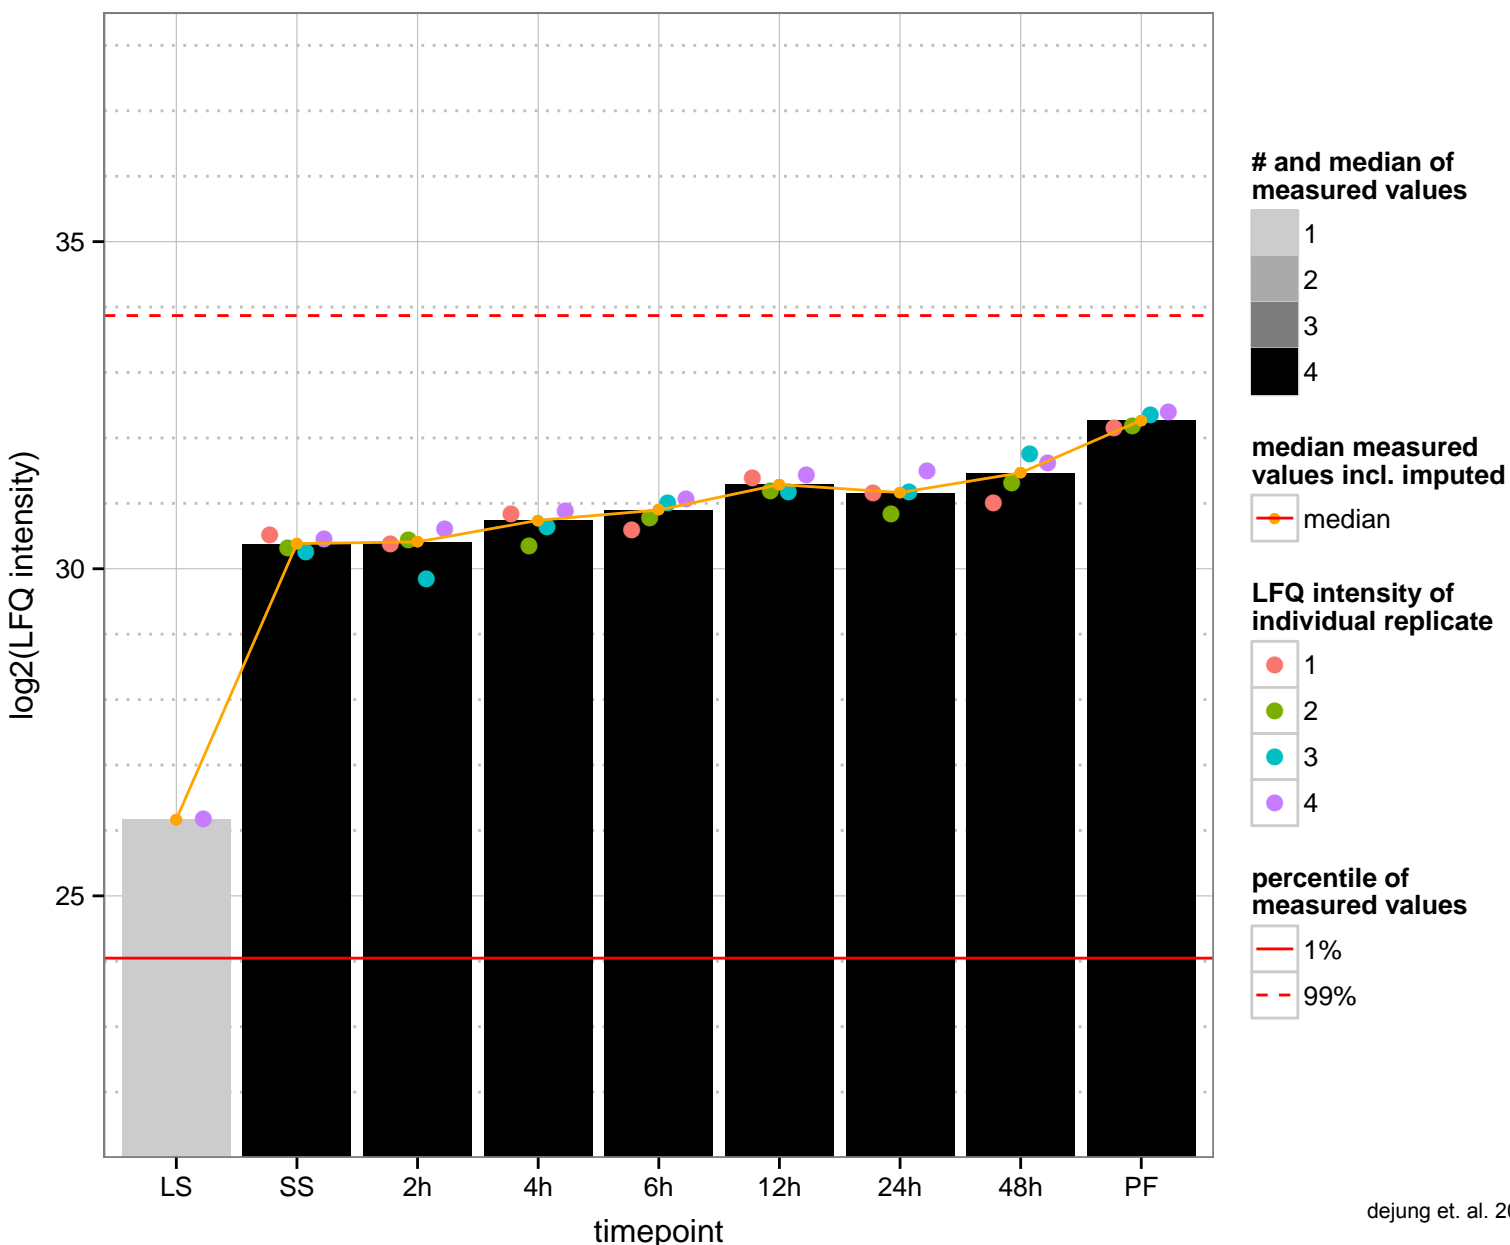



pumilio/PUF RNA binding protein 2 (PUF2)  
 Tb927.10.12660  
 AGOF: RNA binding  
 AGOC: cytoplasm  
 AGOP: mRNA metabolic process  
 PGO: RNA binding, binding  
 PGO: null  
 PGO: null

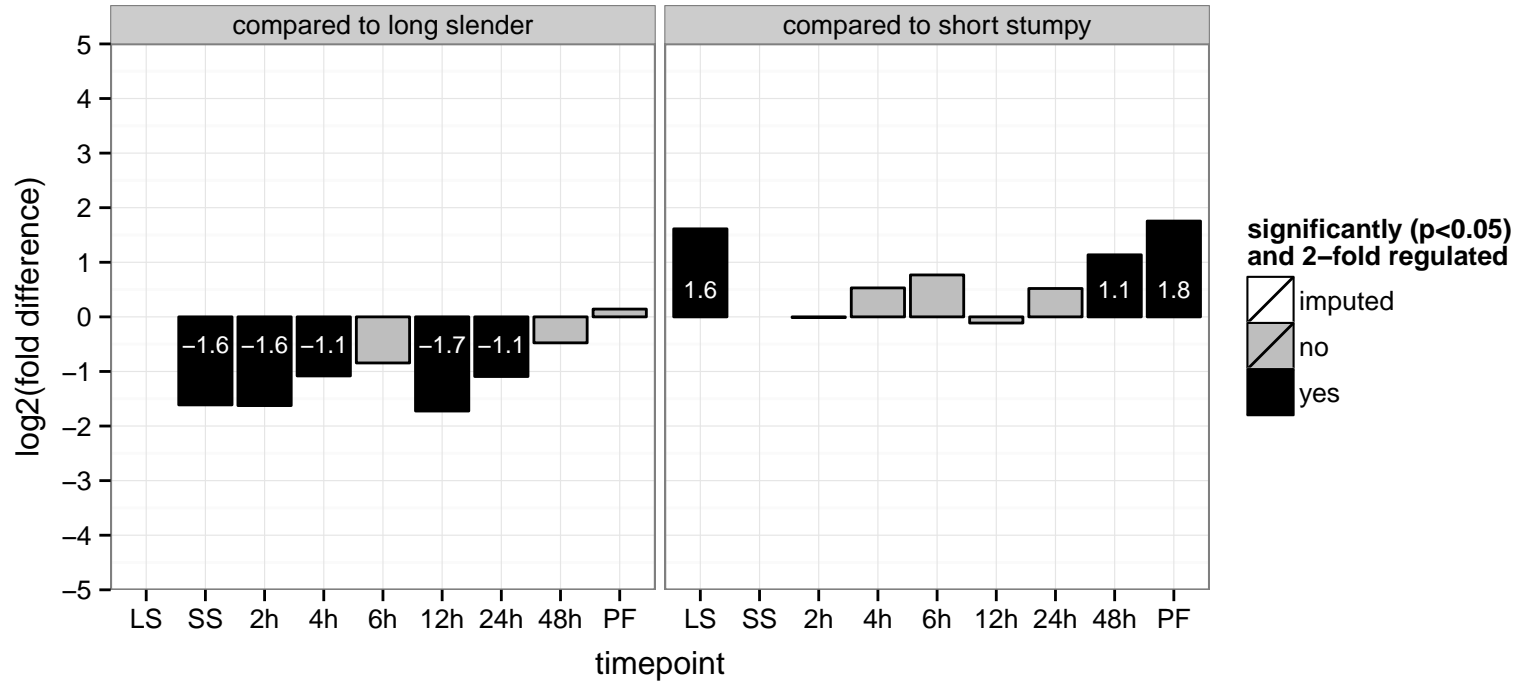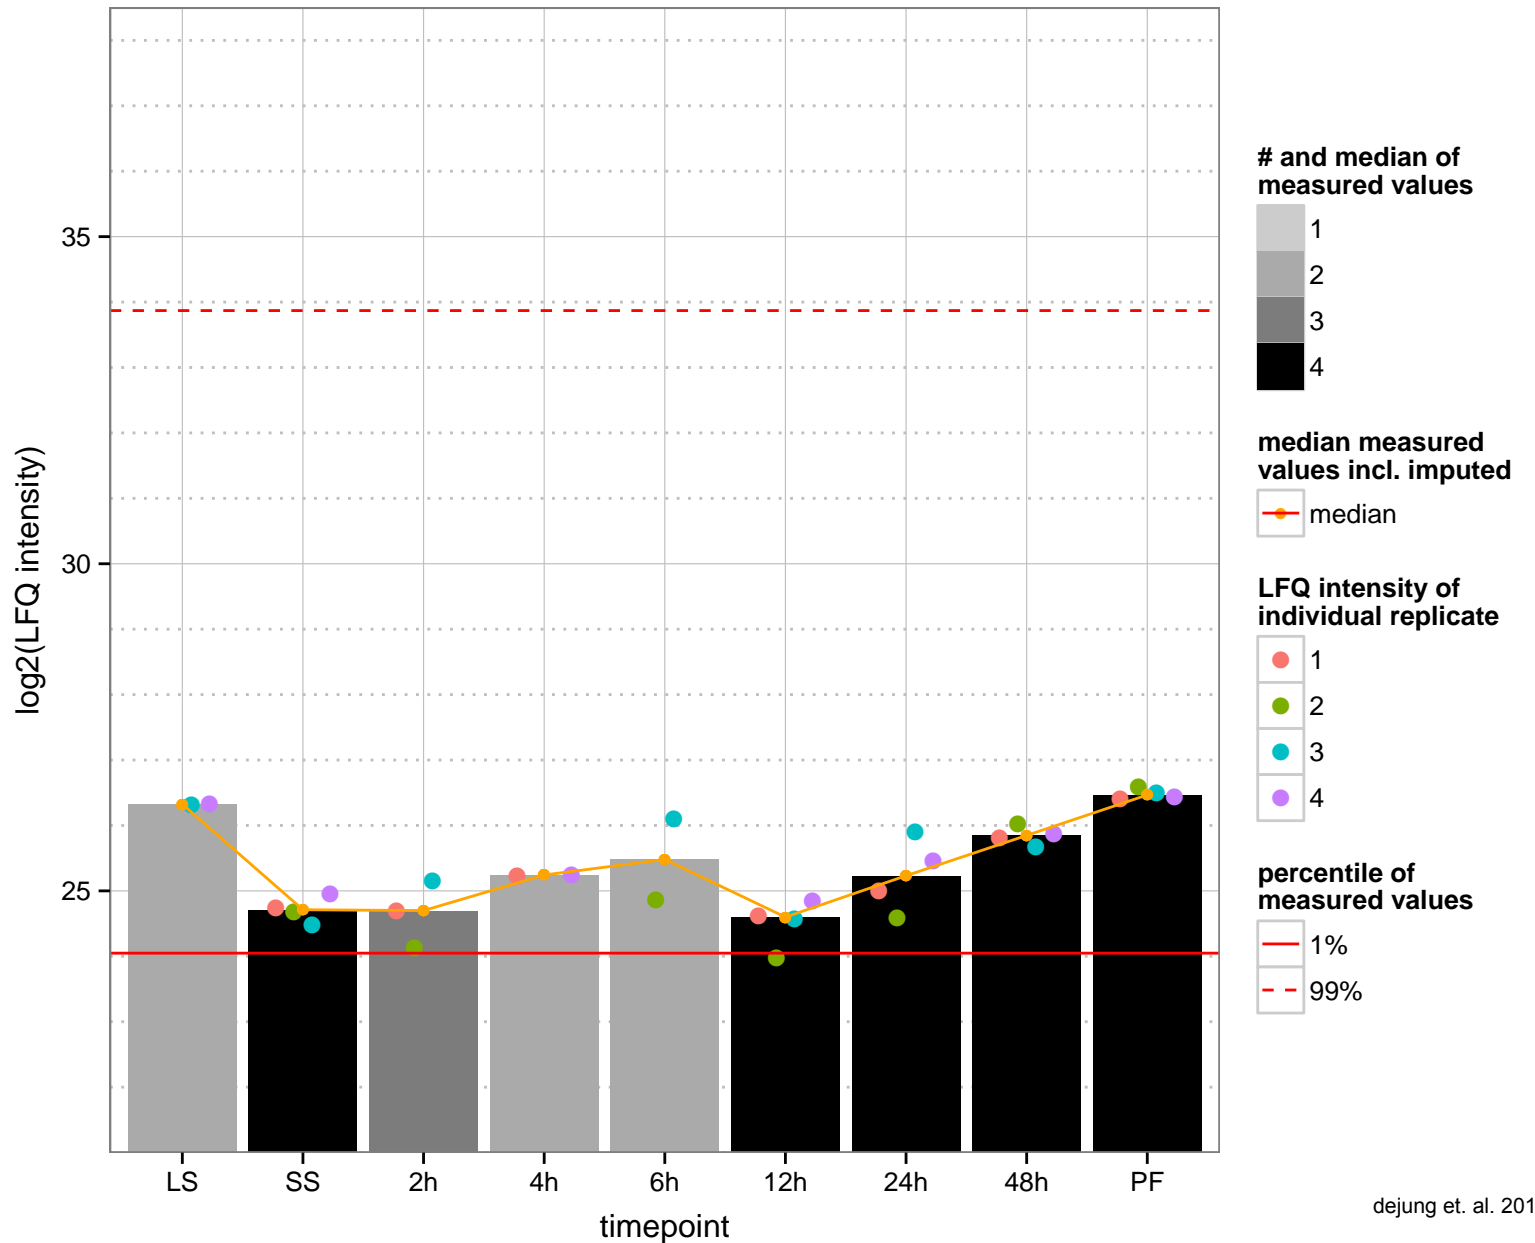

tubulin-specific chaperone, putative  
 Tb927.10.13950  
 AGOF: null  
 AGOC: null  
 AGOP: null  
 PGO: null  
 PGOC: null  
 PGOP: null

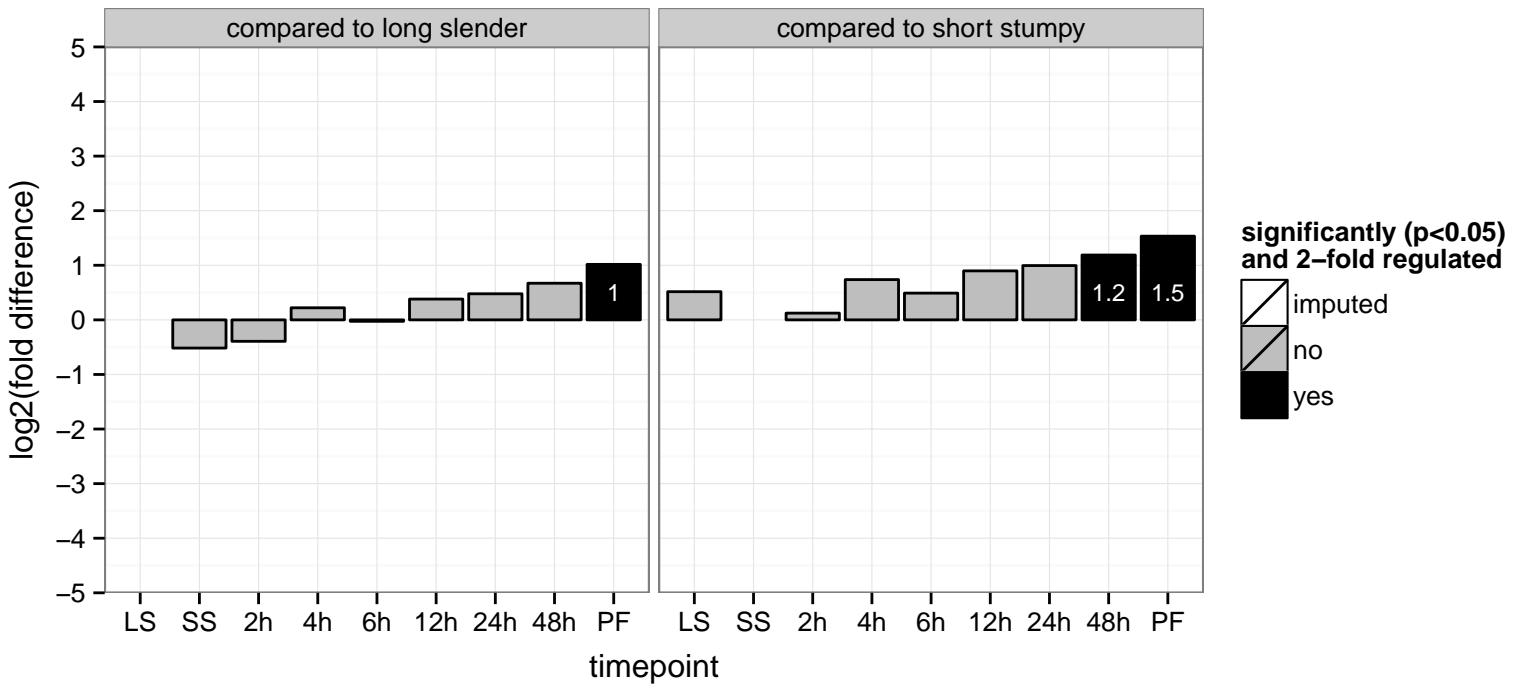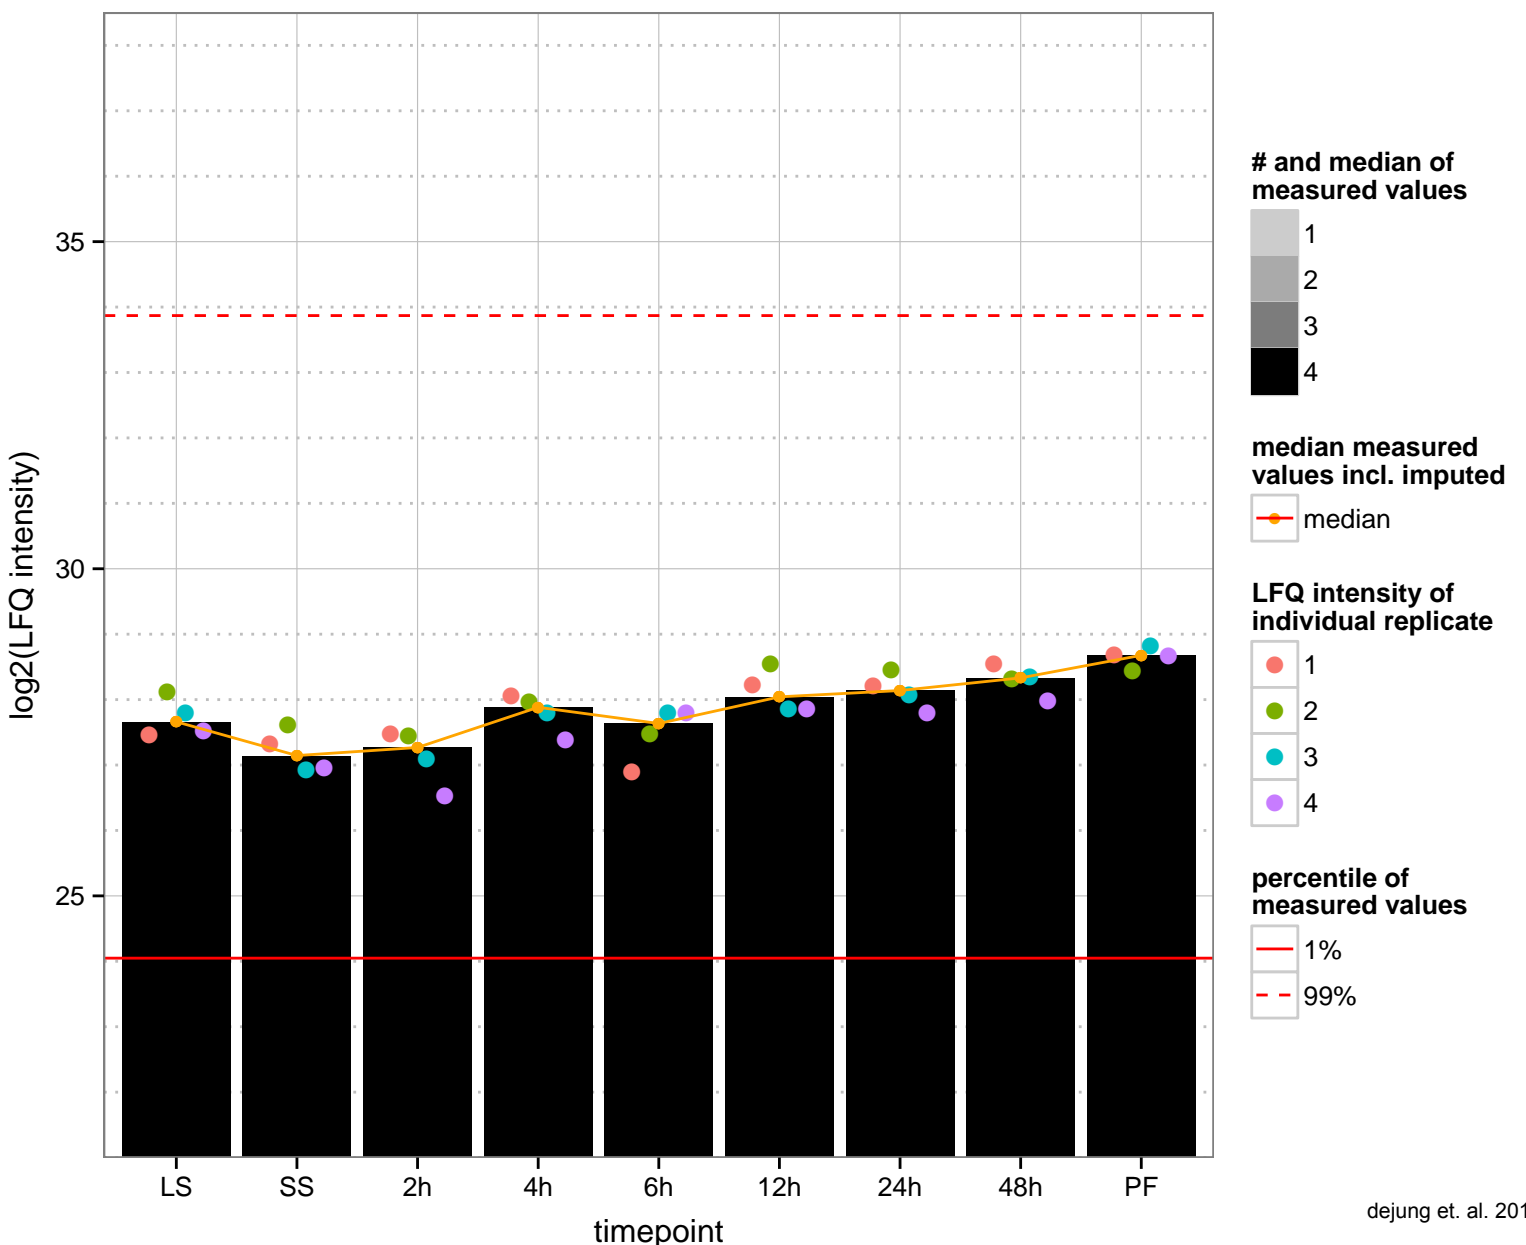

60S ribosomal protein L17, putative  
 Tb927.11.4820;Tb927.10.14580  
 AGOF: structural constituent of ribosome  
 AGOC: intracellular, large ribosomal subunit, ribosome  
 AGOP: translation  
 PGOF: structural constituent of ribosome  
 PGOC: intracellular, large ribosomal subunit, ribosome  
 PGOP: translation

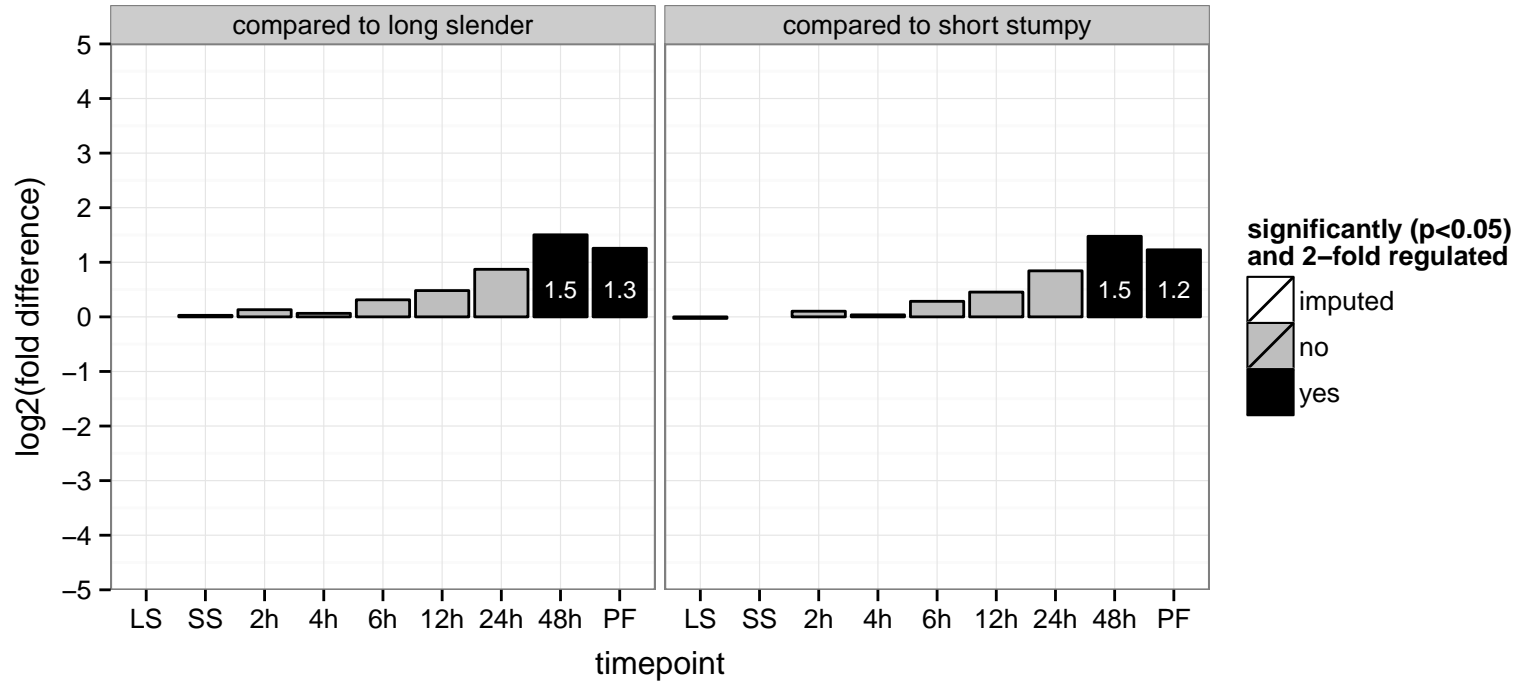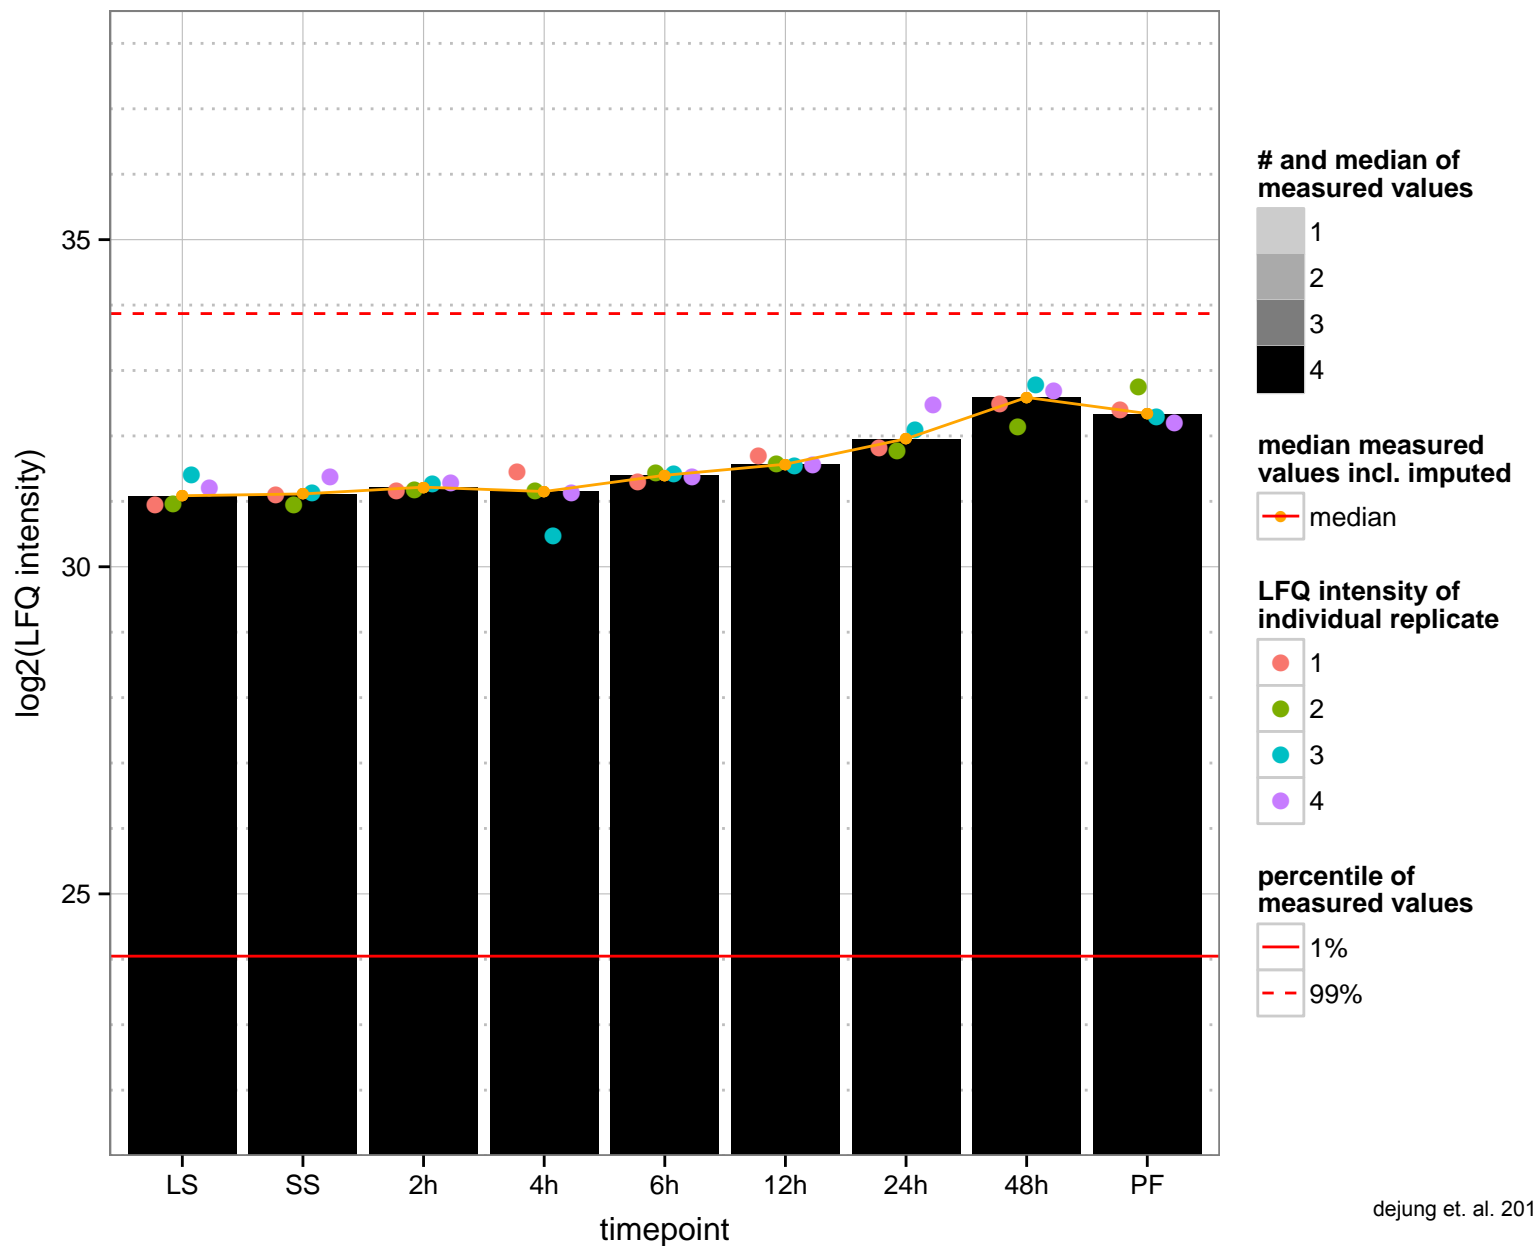

hypothetical protein, conserved  
 Tb927.10.15220  
 AGOF: null  
 AGOC: endoplasmic reticulum  
 AGOP: null  
 PGO: null  
 PGOC: null  
 PGOP: null

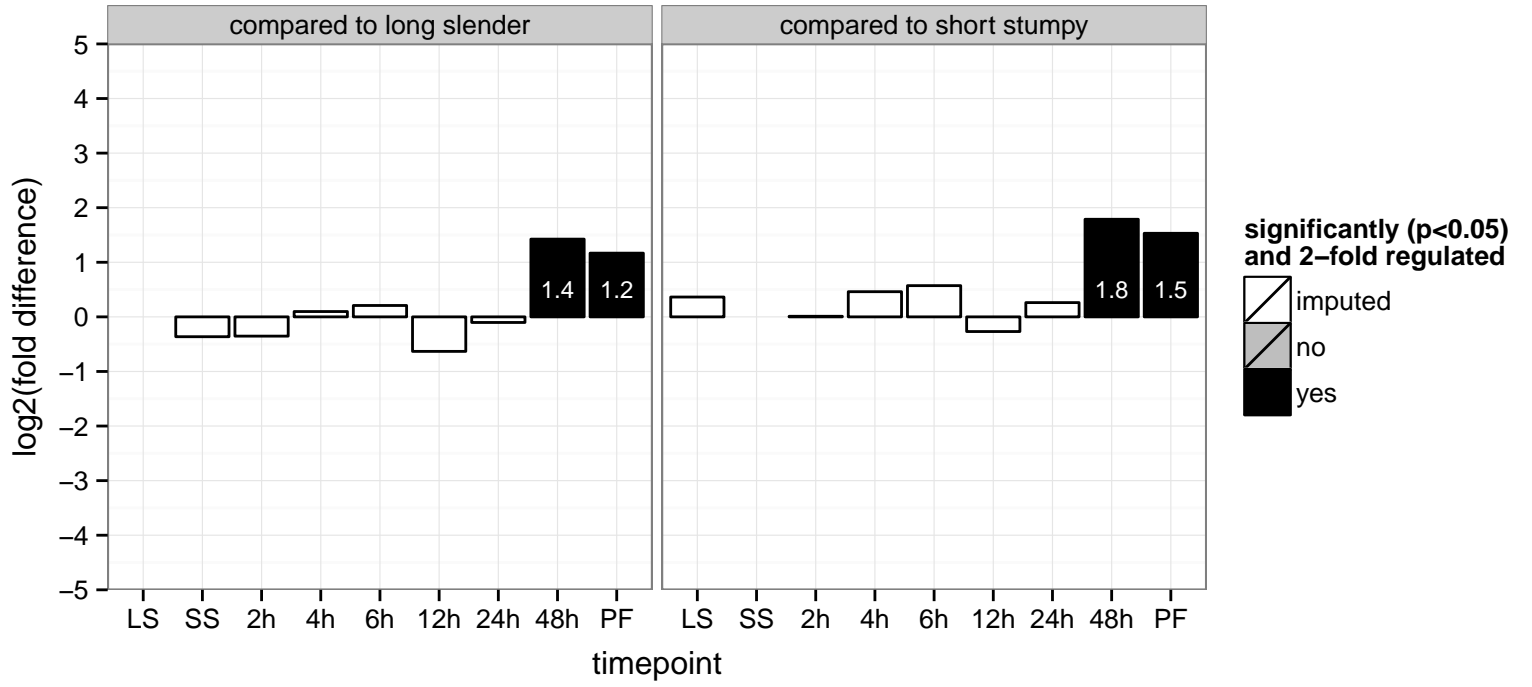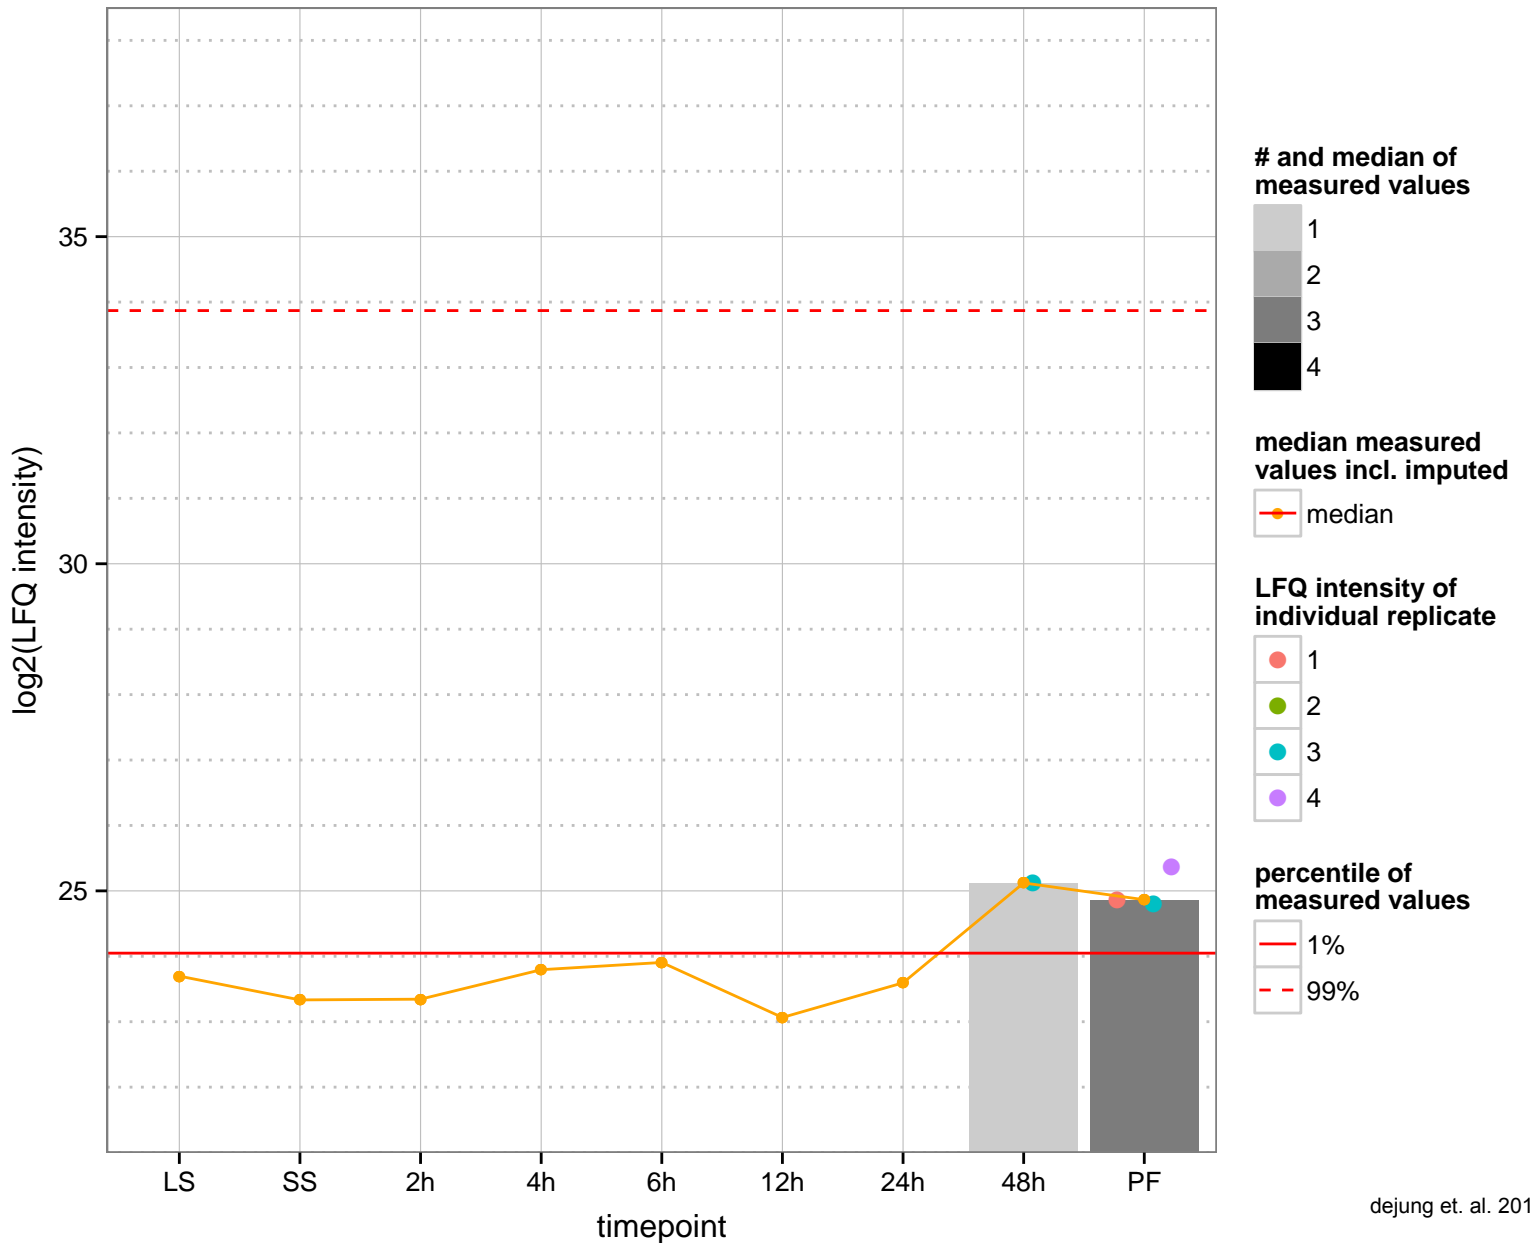

ABC transporter, putative, ABC transport system ATP-binding protein

Tb927.10.15530;Tb11.v5.0748

AGOF: null, ATP binding, ATPase activity, uncoupled

AGOC: null, integral to membrane, internal side of plasma membrane

AGOP: null, regulation of ribosome biogenesis, ribosomal small subunit export from nucleus, transport

PGOF: ATP binding, ATPase activity, nucleoside-triphosphatase activity, nucleotide binding

PGOC: null

PGOP: null

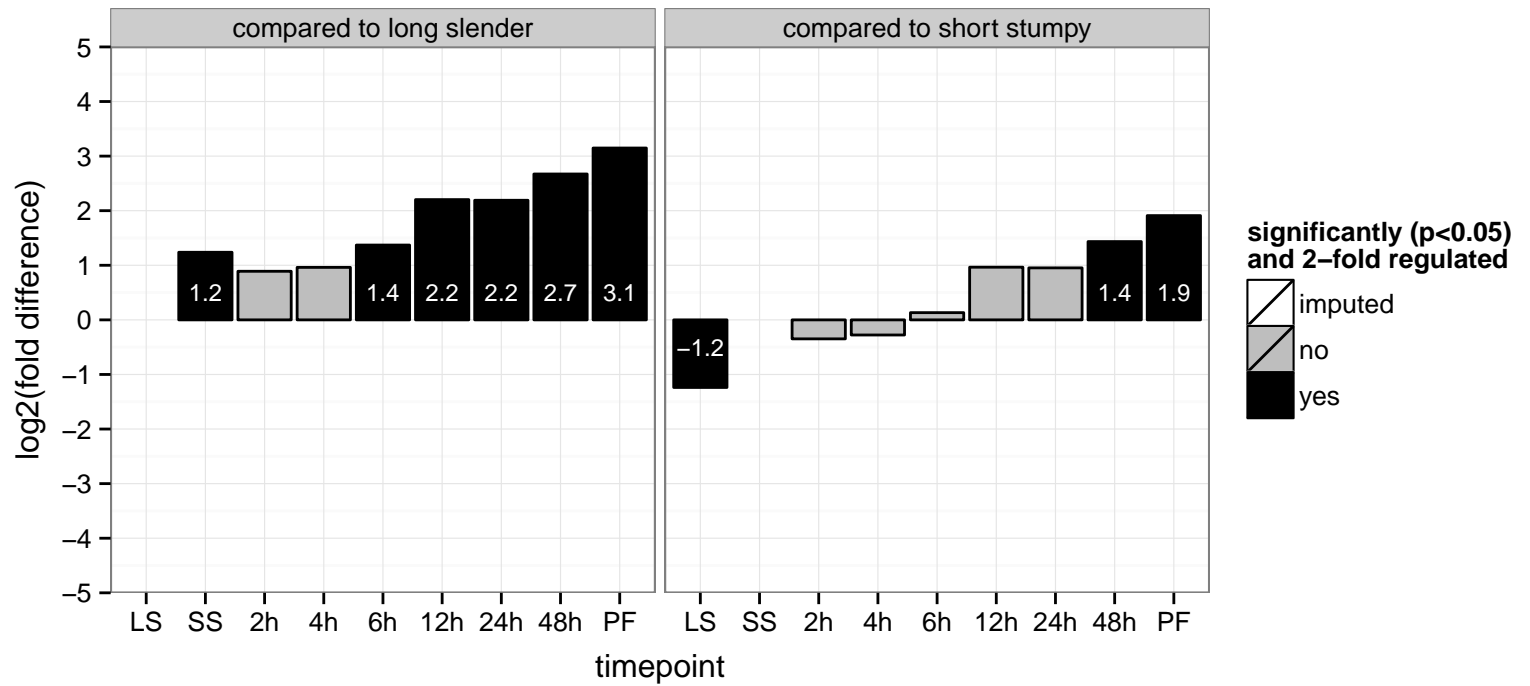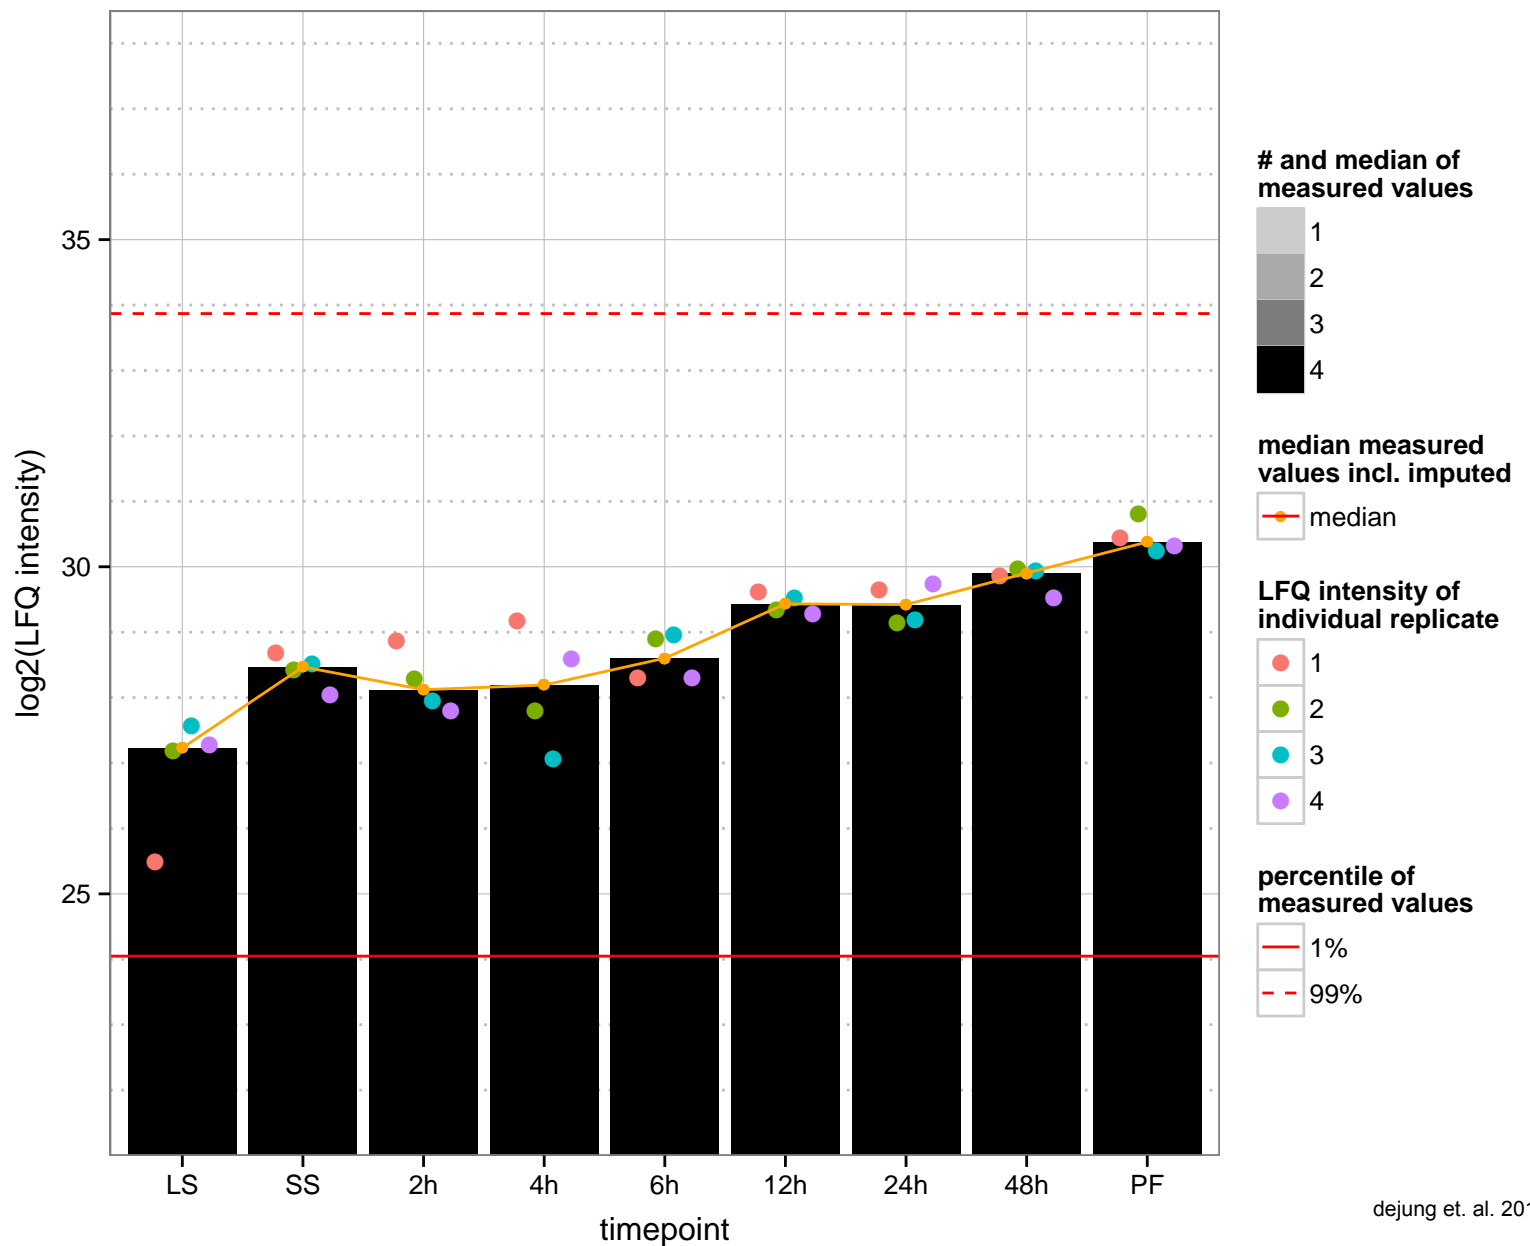

glucose-6-phosphate 1-dehydrogenase (G6PD)

Tb927.10.2490

AGOF: glucose-6-phosphate dehydrogenase activity

AGOC: cytoplasm, glycosome

AGOP: cell proliferation, oxidation-reduction process, pentose-phosphate shunt, oxidative branch, response to drug, response to stress

PGOF: NADP binding, glucose-6-phosphate dehydrogenase activity

PGOC: null

PGOP: glucose metabolic process, oxidation-reduction process

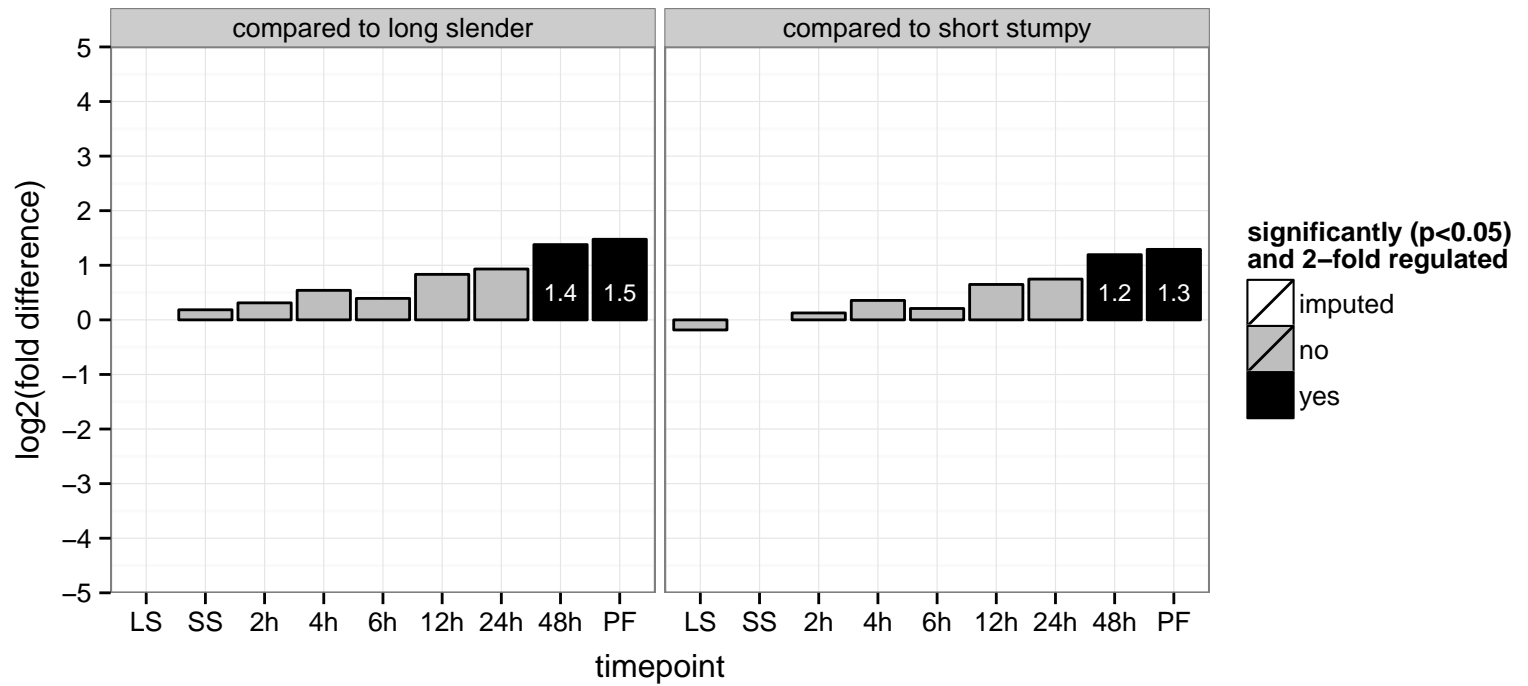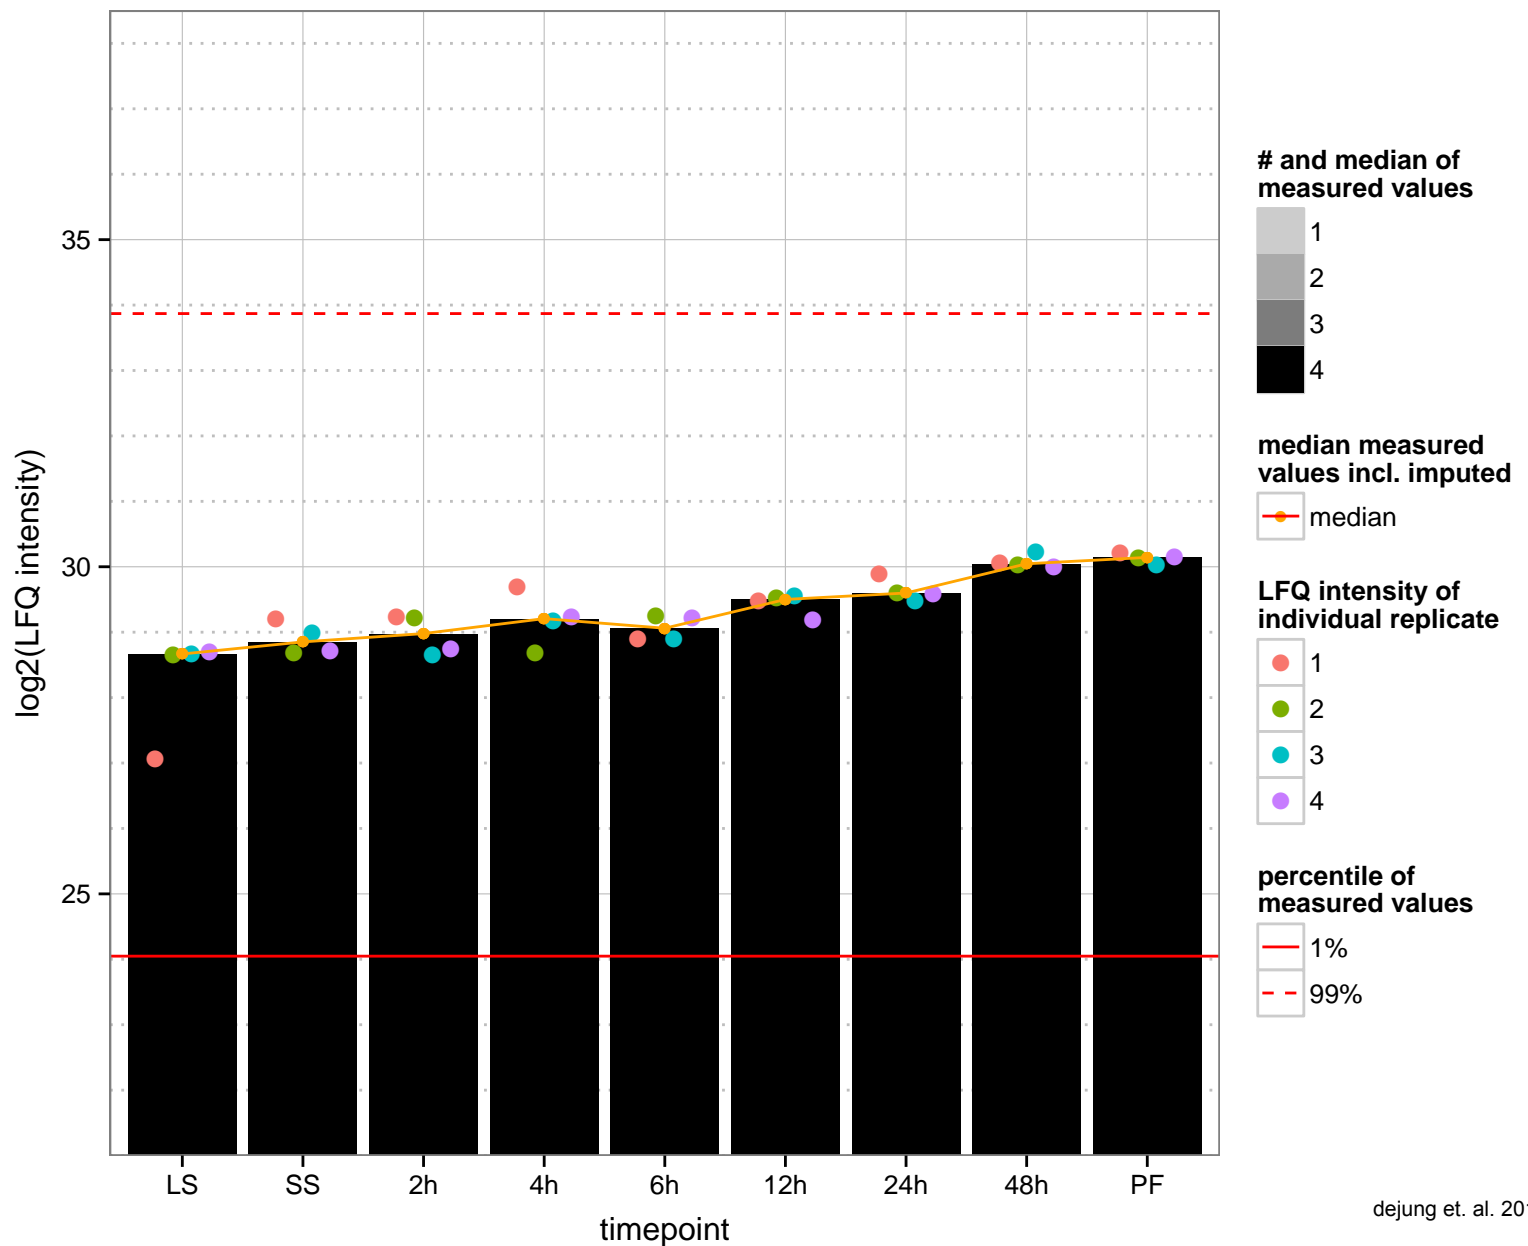

DNA primase large subunit, putative (pril)  
 Tb927.10.3110  
 AGOF: DNA primase activity  
 AGOC: alpha DNA polymerase:primase complex  
 AGOP: DNA replication, synthesis of RNA primer  
 PGO: DNA primase activity, nucleotidyltransferase activity  
 PGO: null  
 PGO: DNA replication, synthesis of RNA primer

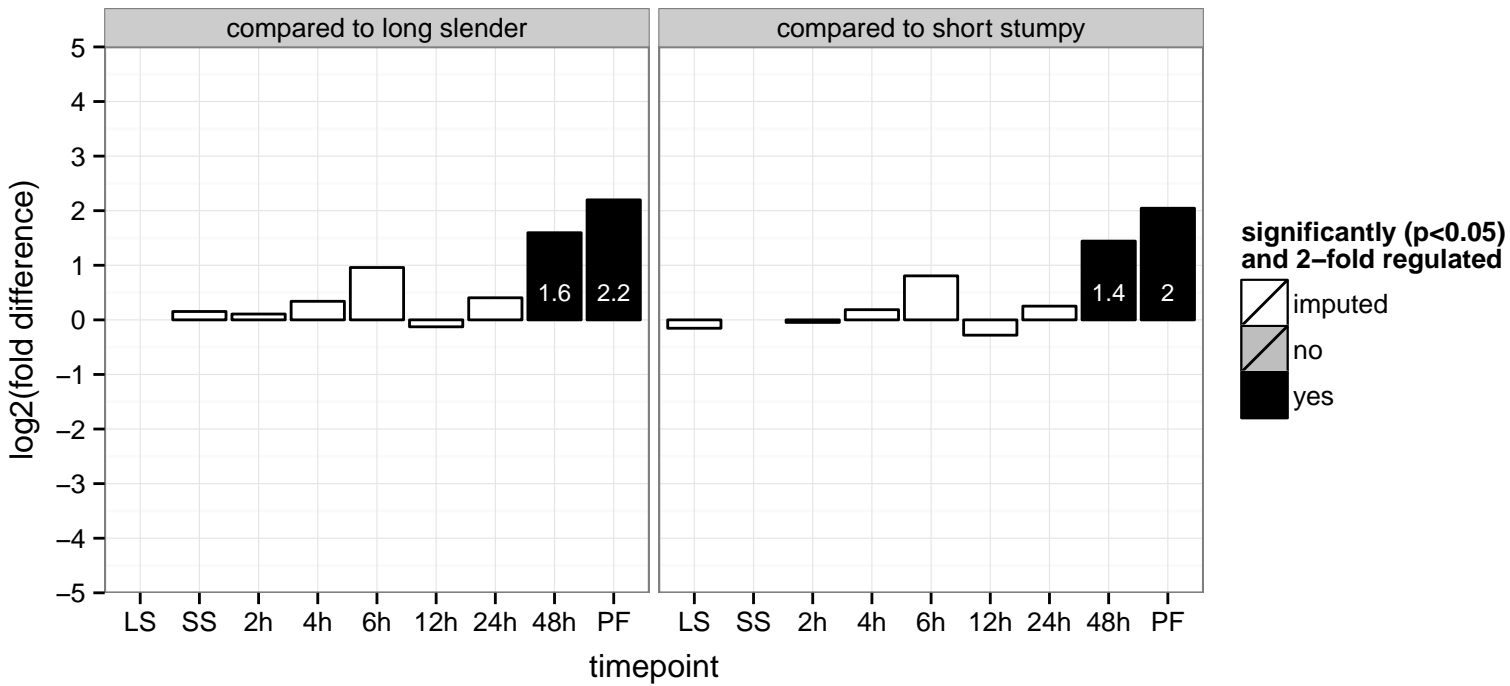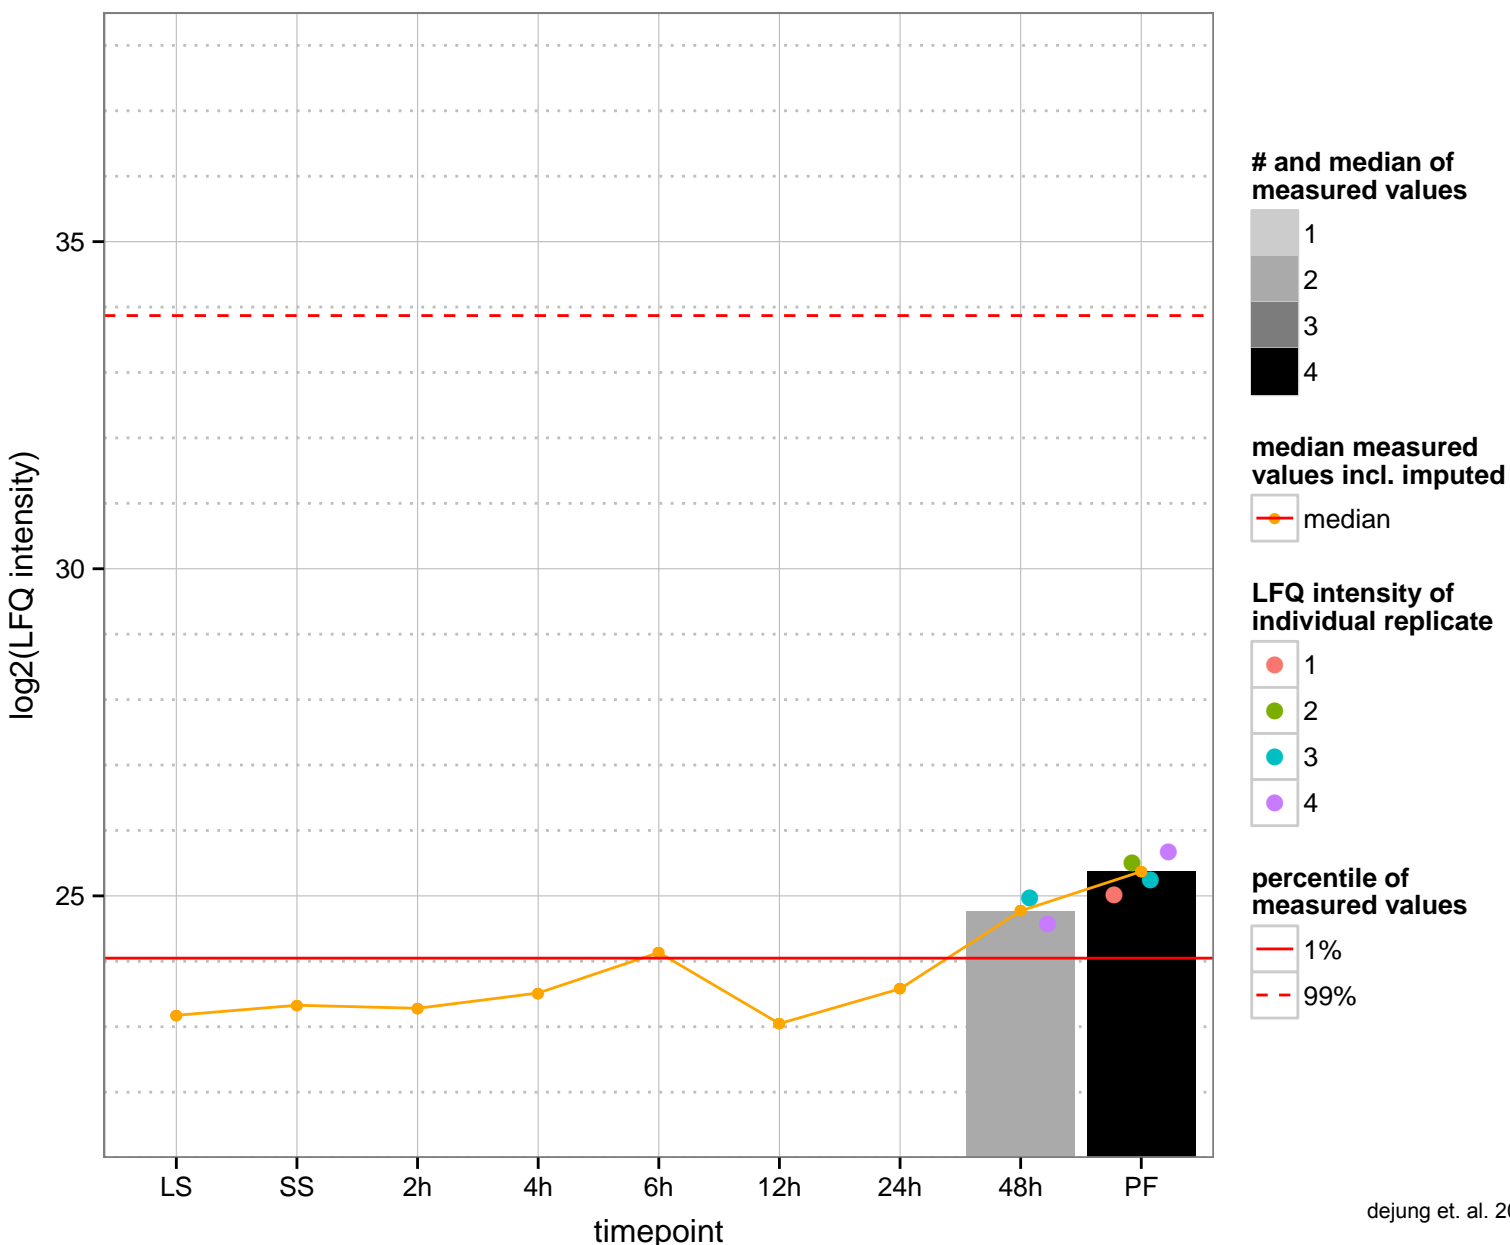

ABC transporter, putative  
 Tb927.10.3170;Tb11.v5.0791  
 AGOF: null, ATP binding, ATPase activity, coupled to transmembrane movement of substances  
 AGOC: null, integral to membrane, internal side of plasma membrane  
 AGOP: null, transport  
 PGOF: ATP binding, ATPase activity, nucleoside-triphosphatase activity, nucleotide binding  
 PGOC: null  
 PGOP: null

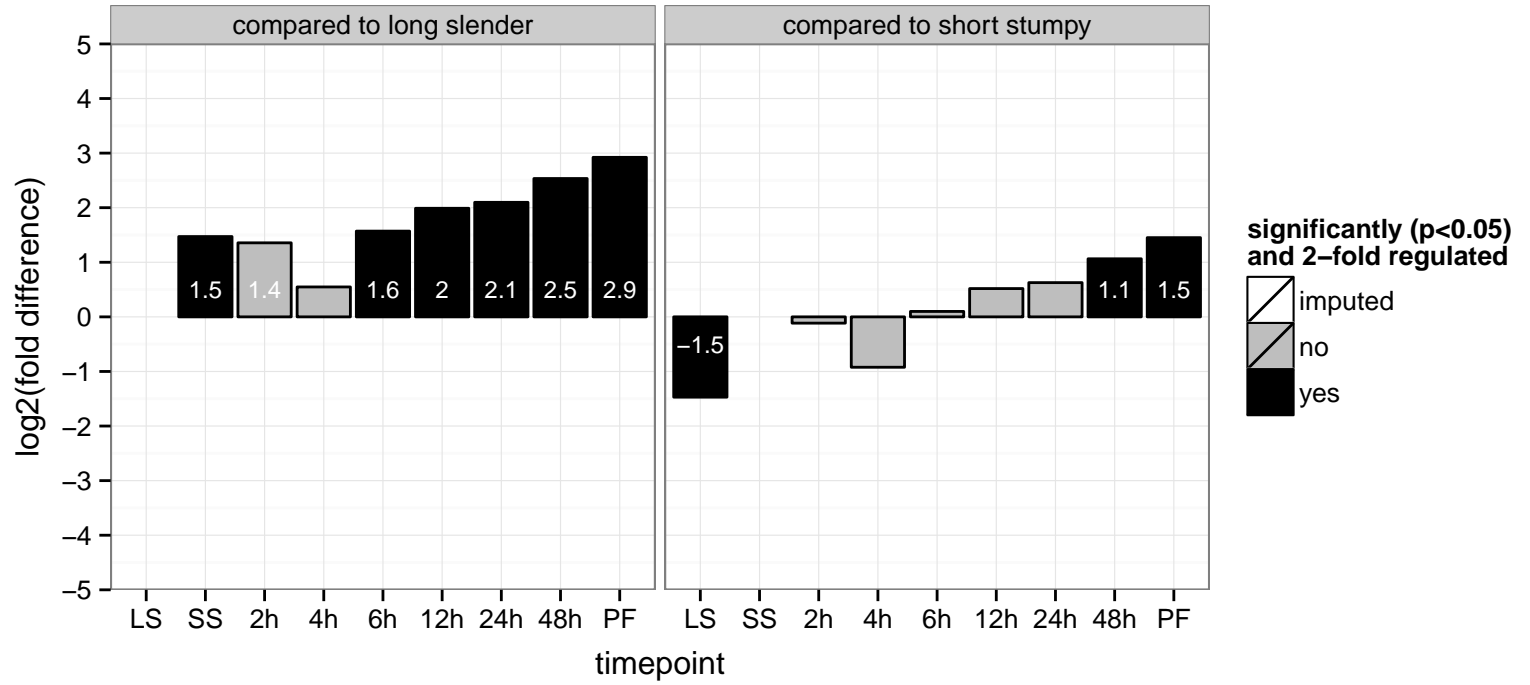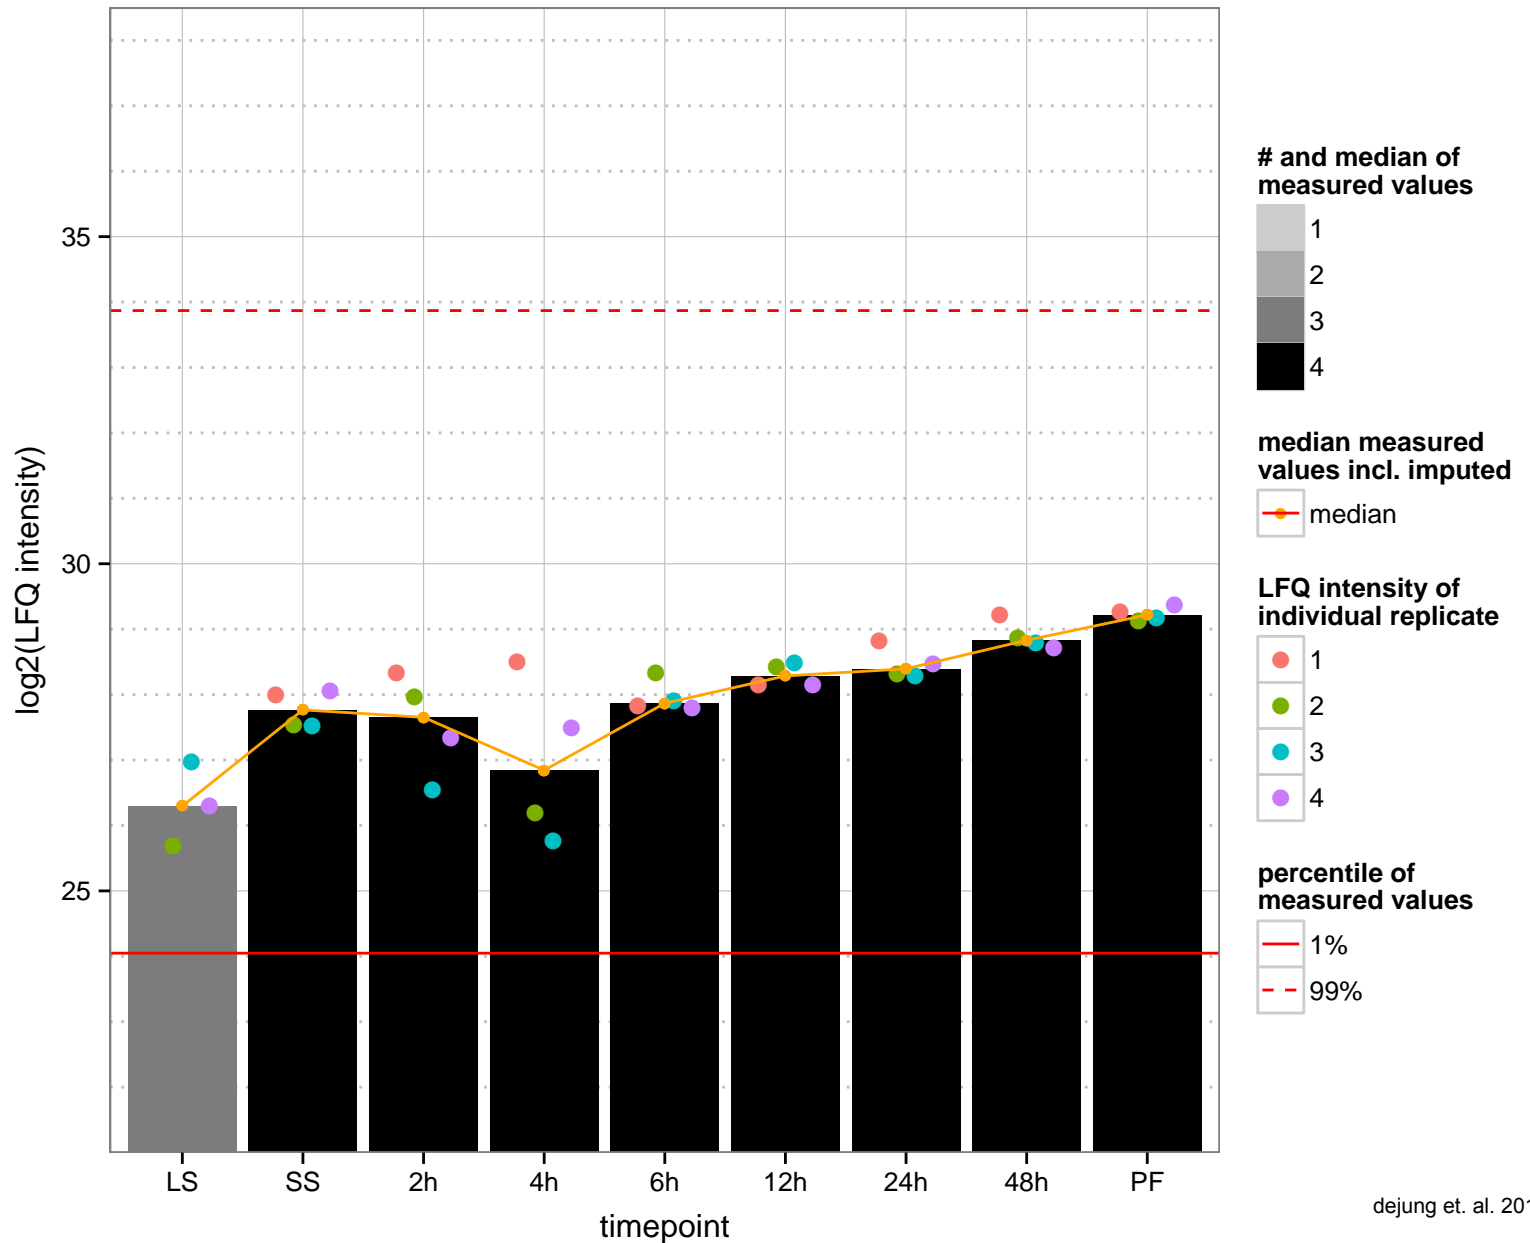



40S ribosomal protein S10, putative  
 Tb927.10.5370;Tb927.10.5360  
 AGOF: RNA binding  
 AGOC: cytoplasm  
 AGOP: translation  
 PGO: null  
 PGOC: null  
 PGOP: null

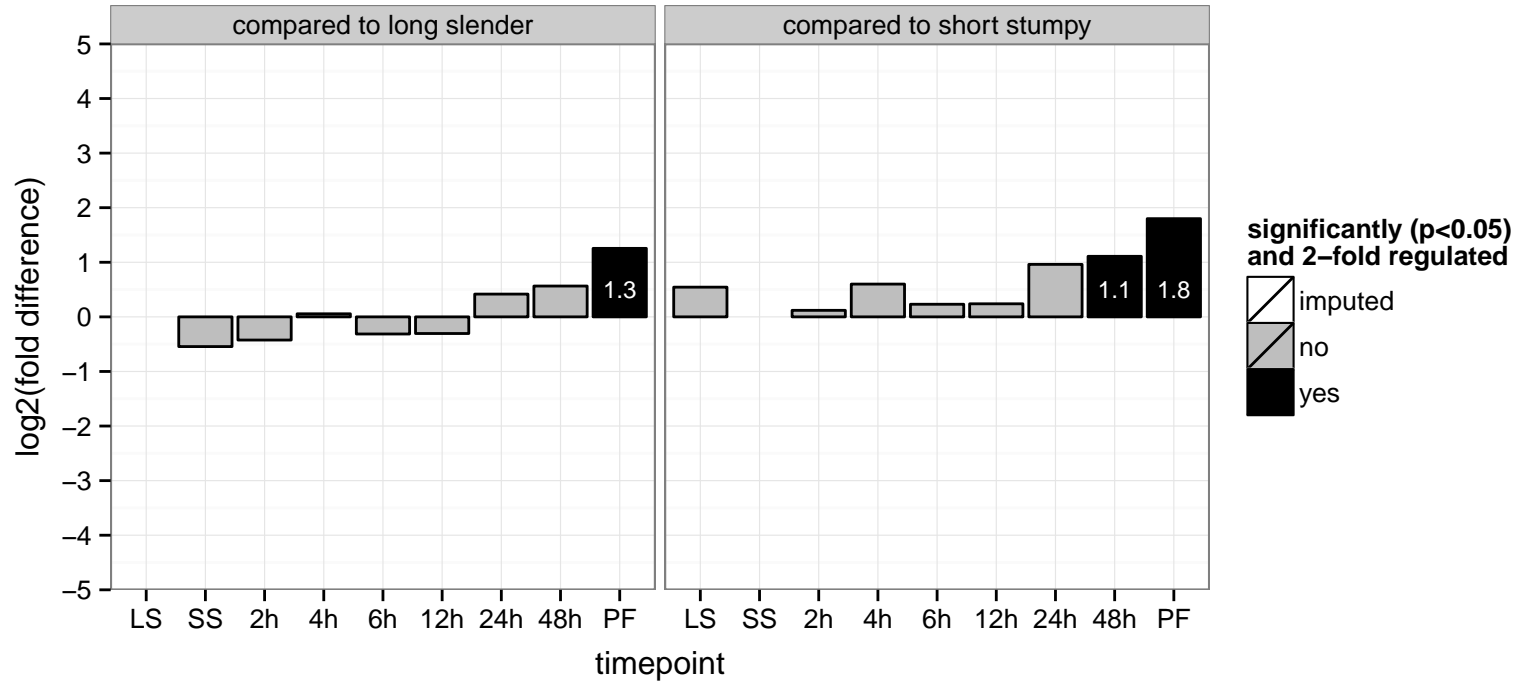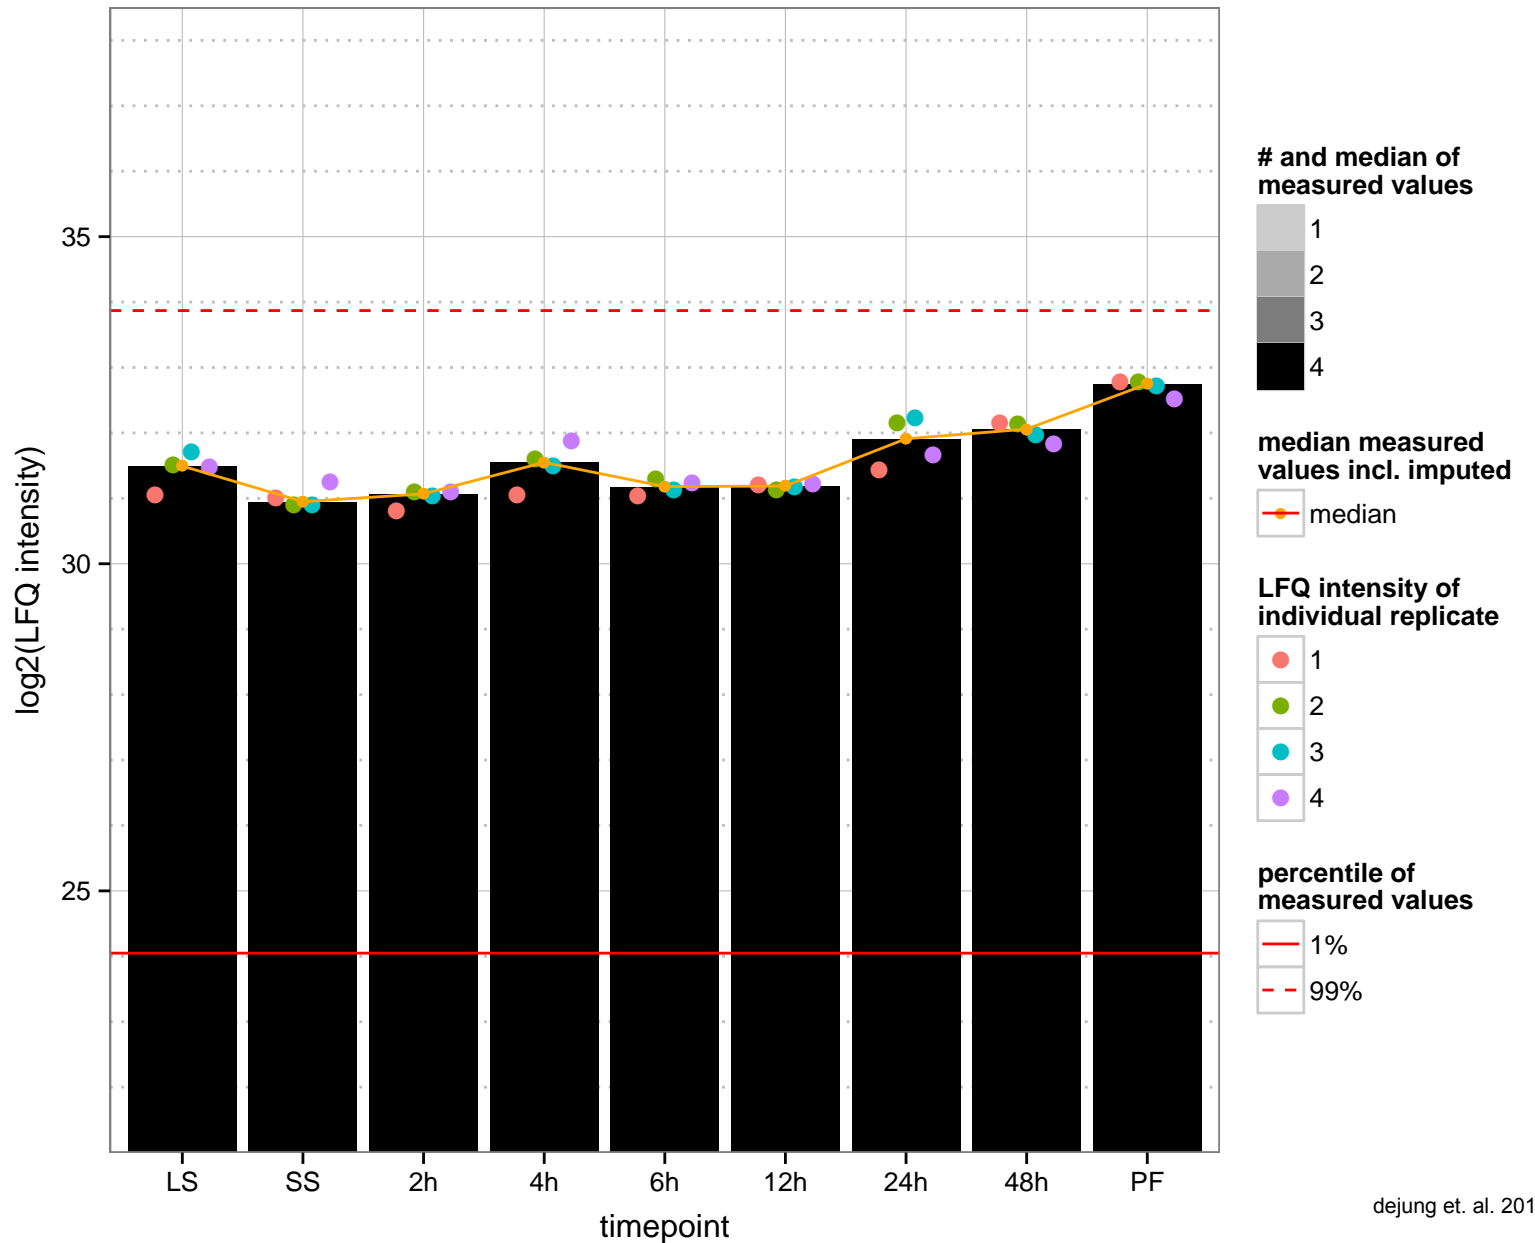

60S ribosomal protein L24, putative  
 Tb927.10.5480;Tb927.10.5460  
 AGOF: structural constituent of ribosome  
 AGOC: intracellular, ribosome  
 AGOP: translation  
 PGO: null  
 PGOC: null  
 PGOP: null

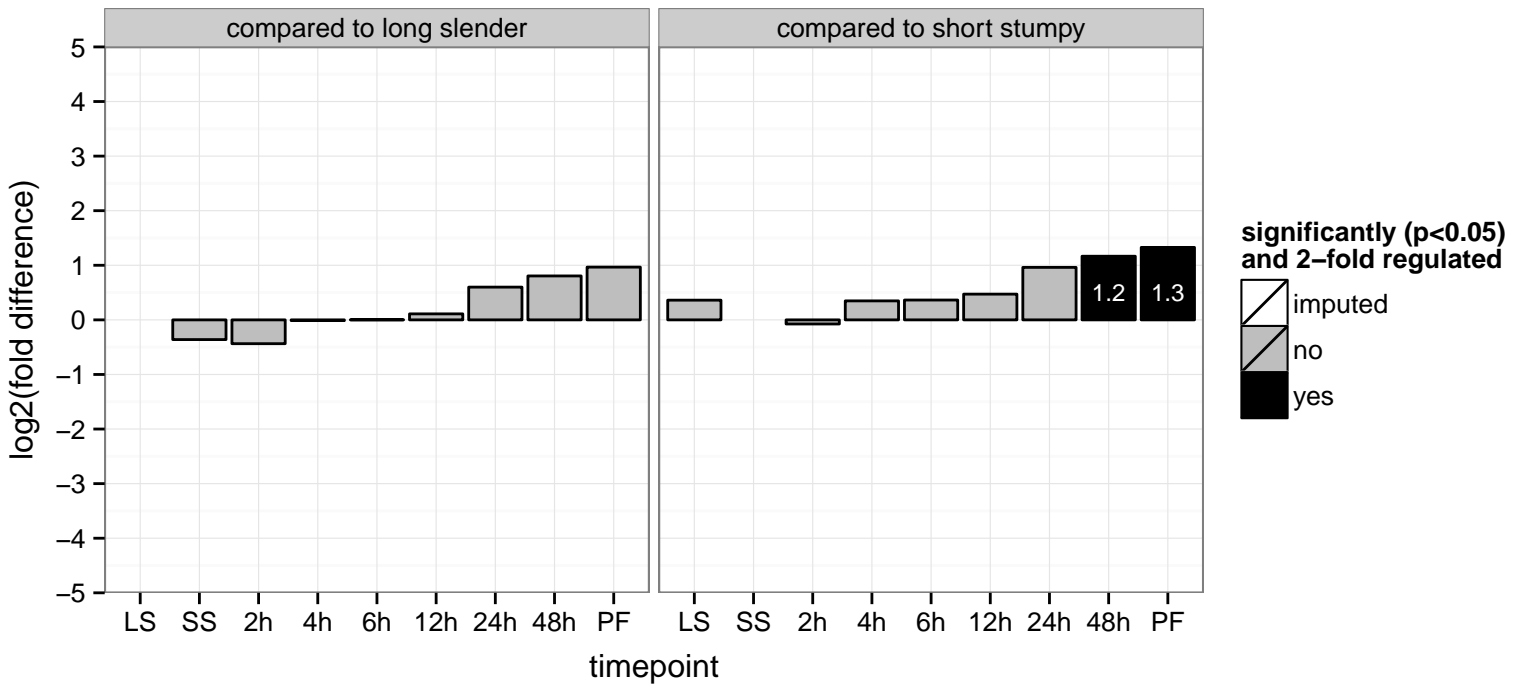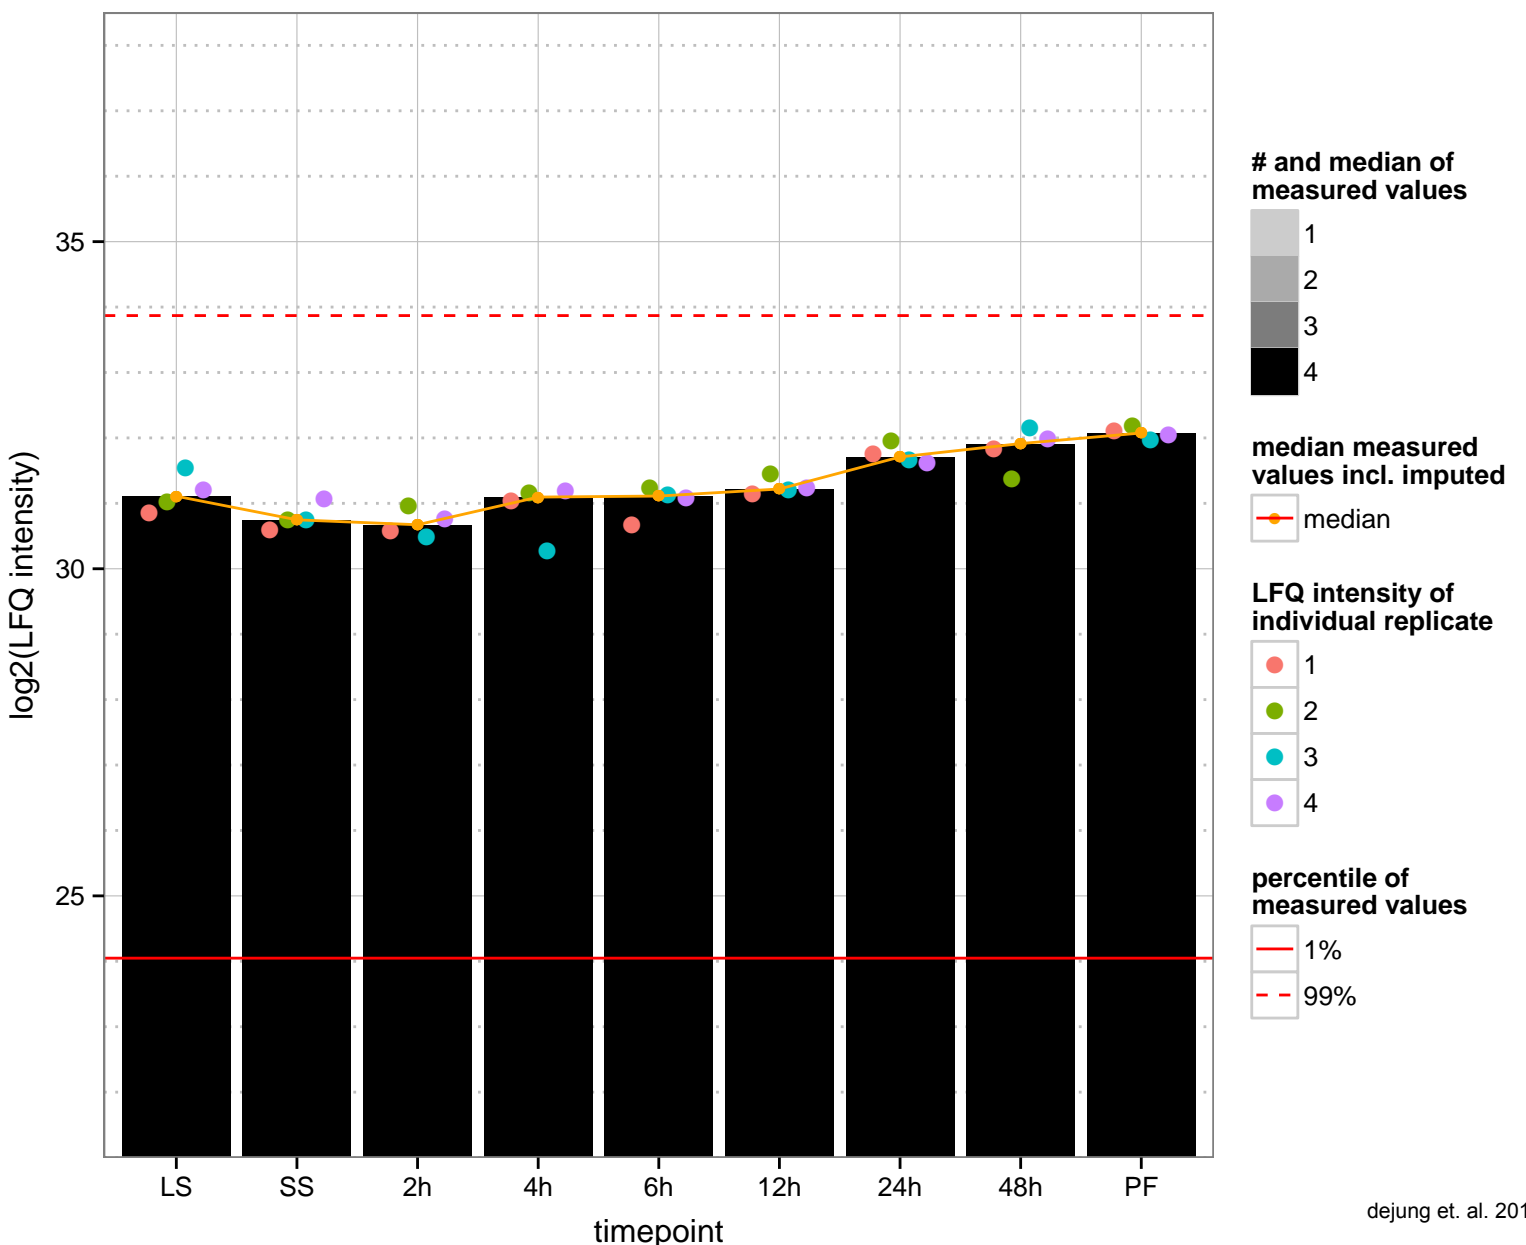

structural maintenance of chromosome 4, putative, dual specificity protein phosphatase, putative (SMC4)

Tb927.10.740

AGOF: null, ATP binding

AGOC: null, chromosome, condensin complex, nucleus

AGOP: null, chromosome organization, chromosome segregation, mitosis

PGOF: null, ATP binding, protein binding

PGOC: null, chromosome

PGOP: null, chromosome organization, DNA recombination, DNA repair, chromosome condensation, chromosome organization

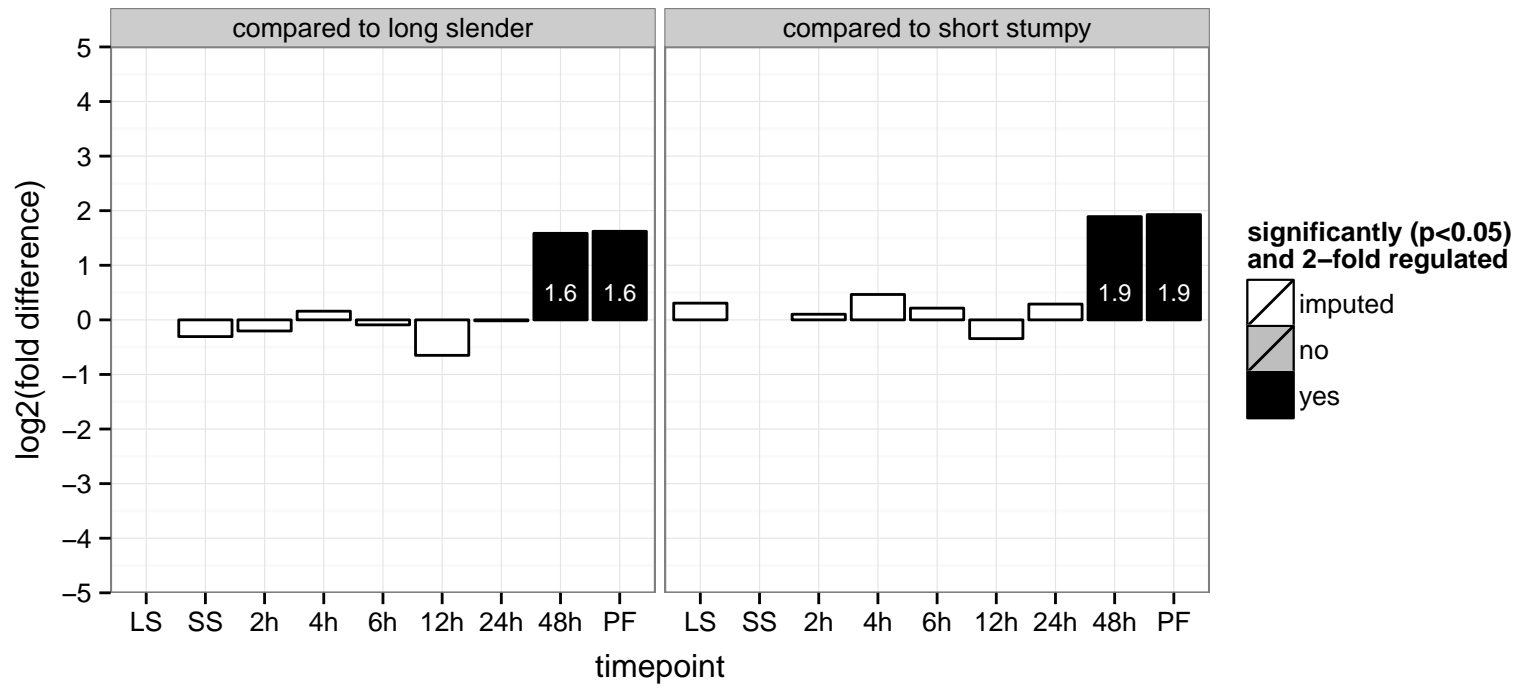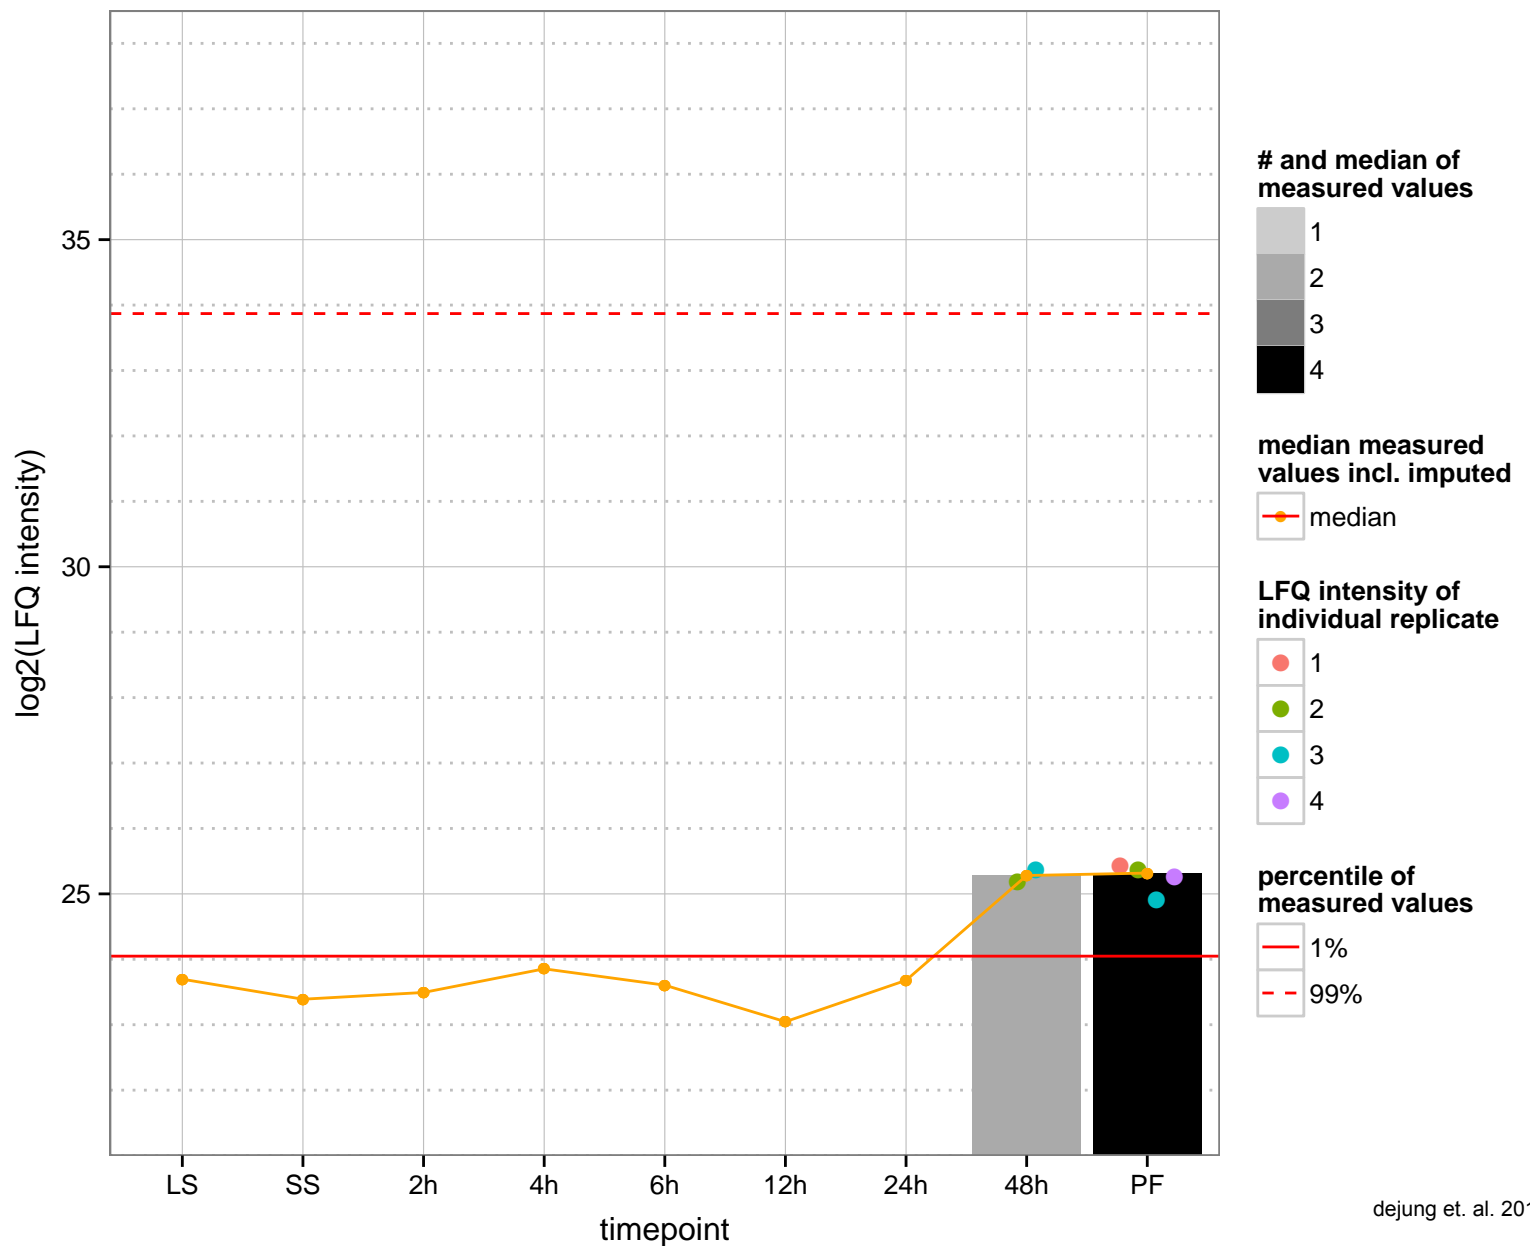

hypothetical protein, conserved  
 Tb927.10.770  
 AGOF: null  
 AGOC: mitochondrion  
 AGOP: null  
 PGO: translation release factor activity  
 PGO: null  
 PGO: translational termination

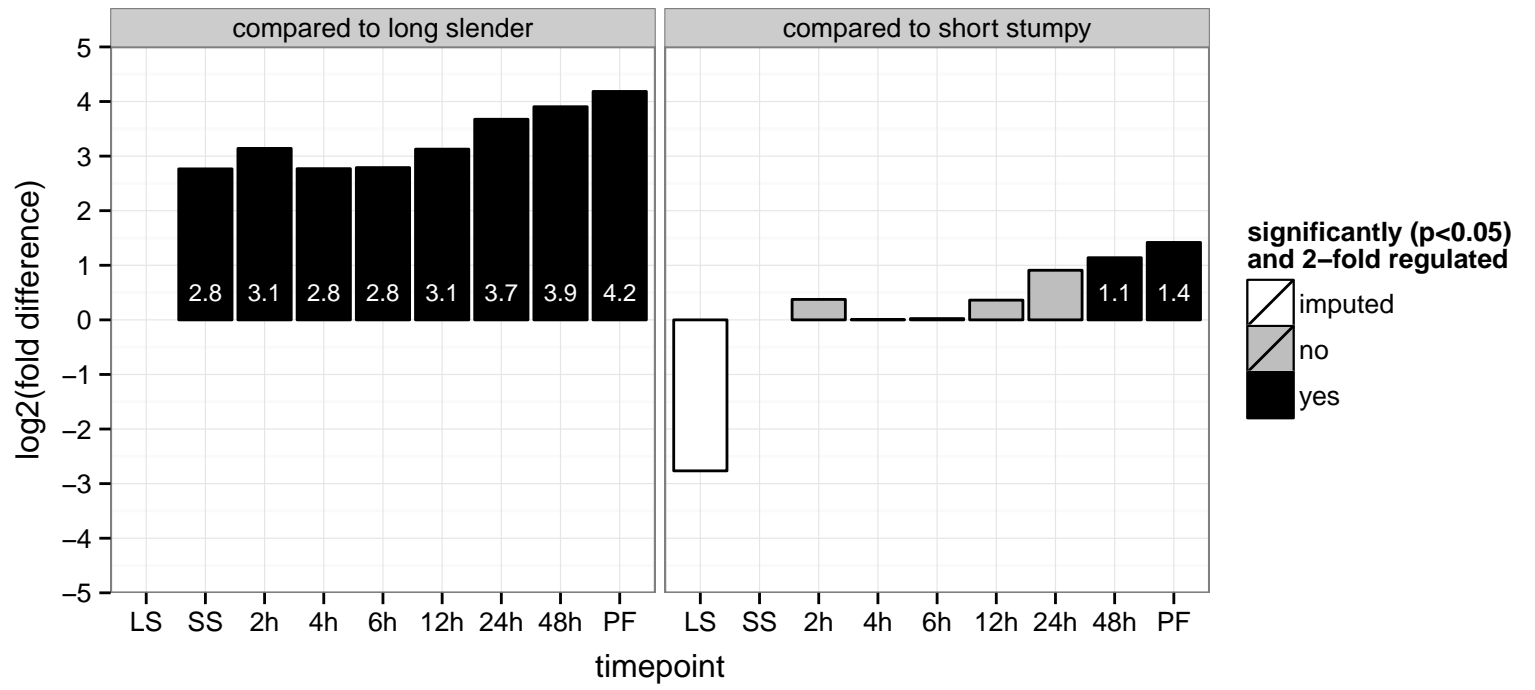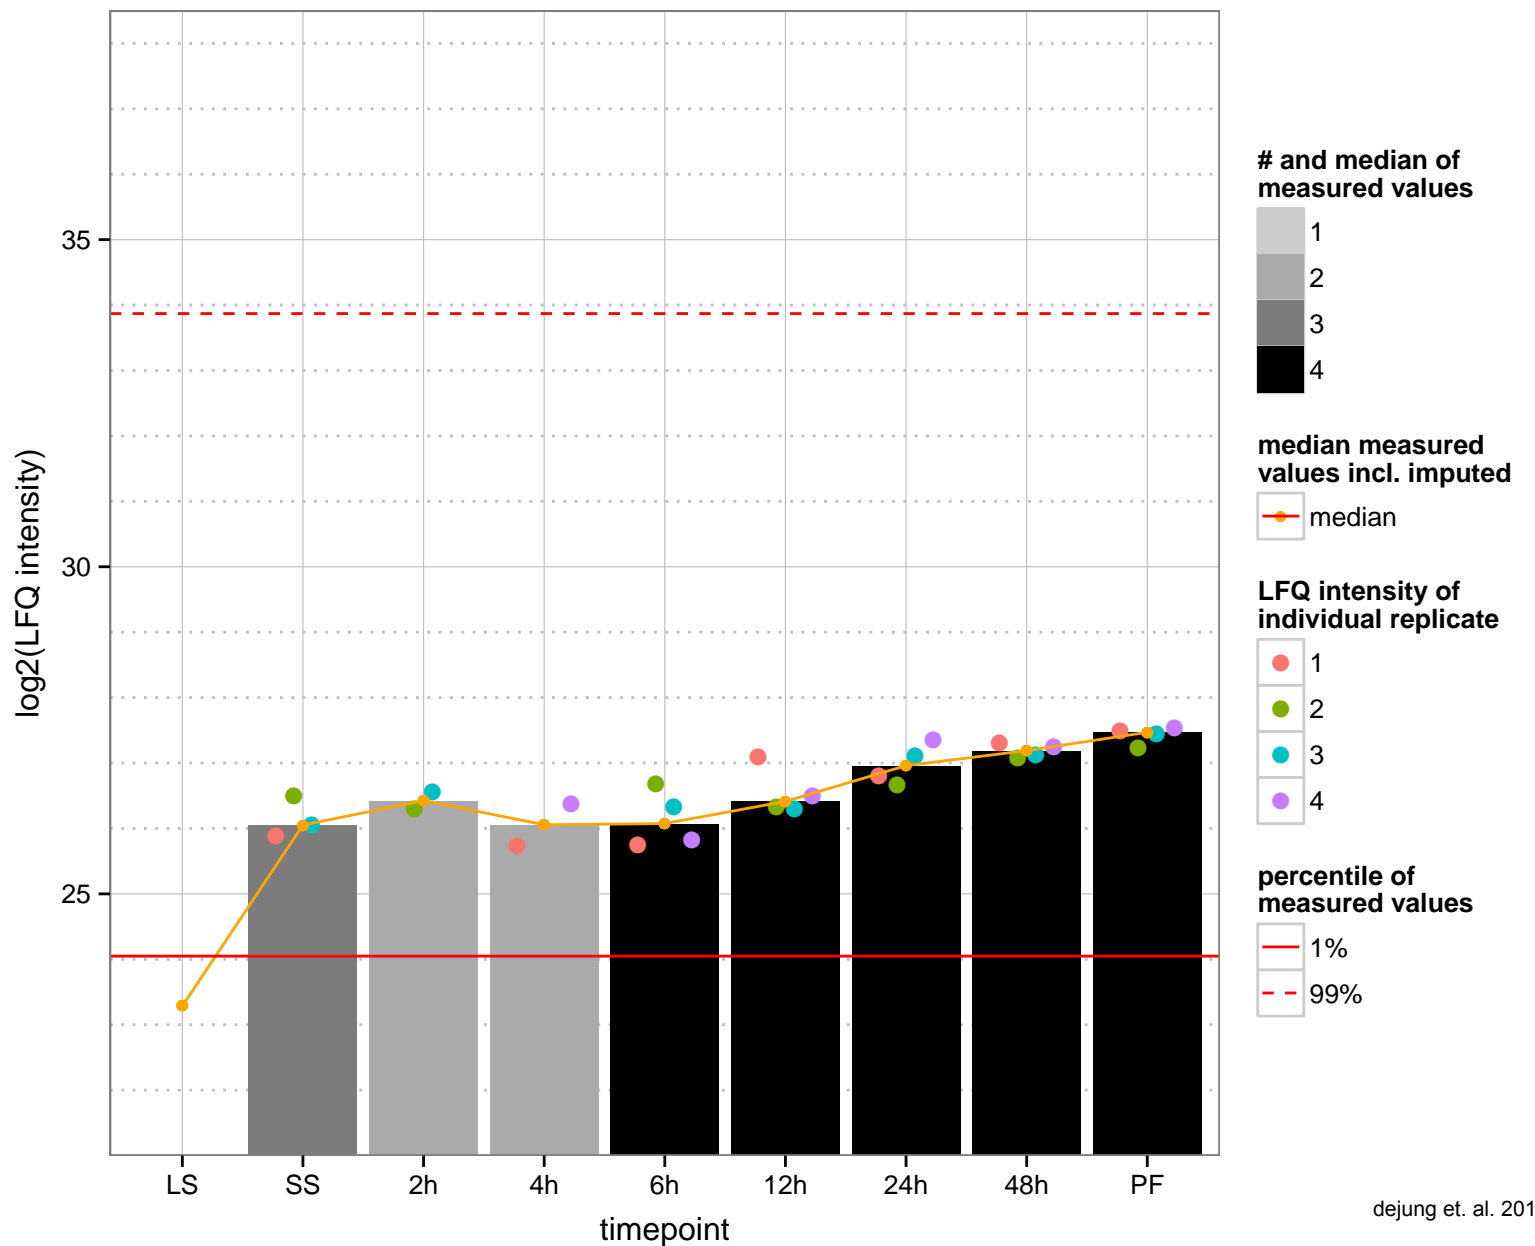

ABC transporter, putative

Tb927.10.7700

AGOF: ATP binding, ATPase activity, coupled to transmembrane movement of substances

AGOC: integral to membrane, internal side of plasma membrane, membrane

AGOP: transport

PGOF: ATP binding, ATPase activity, nucleoside-triphosphatase activity, nucleotide binding

PGOC: membrane

PGOP: null

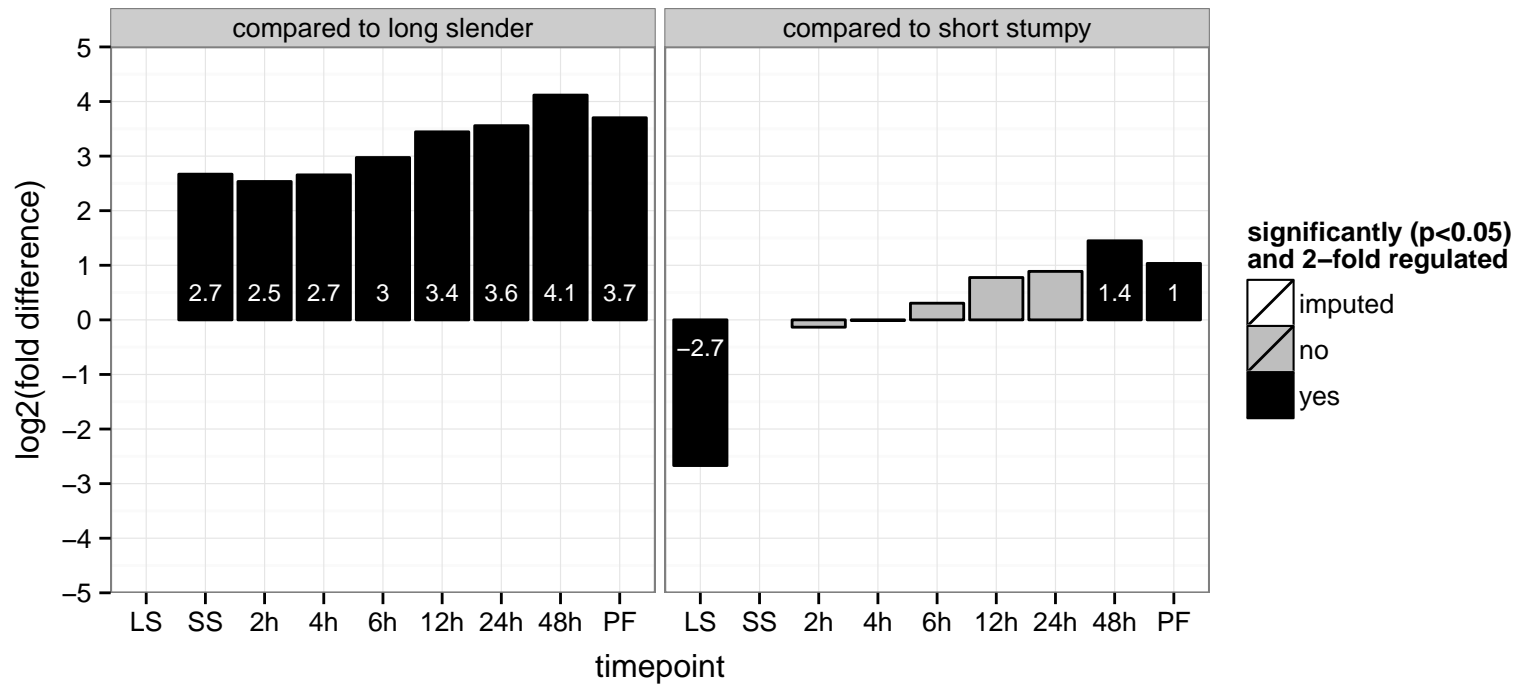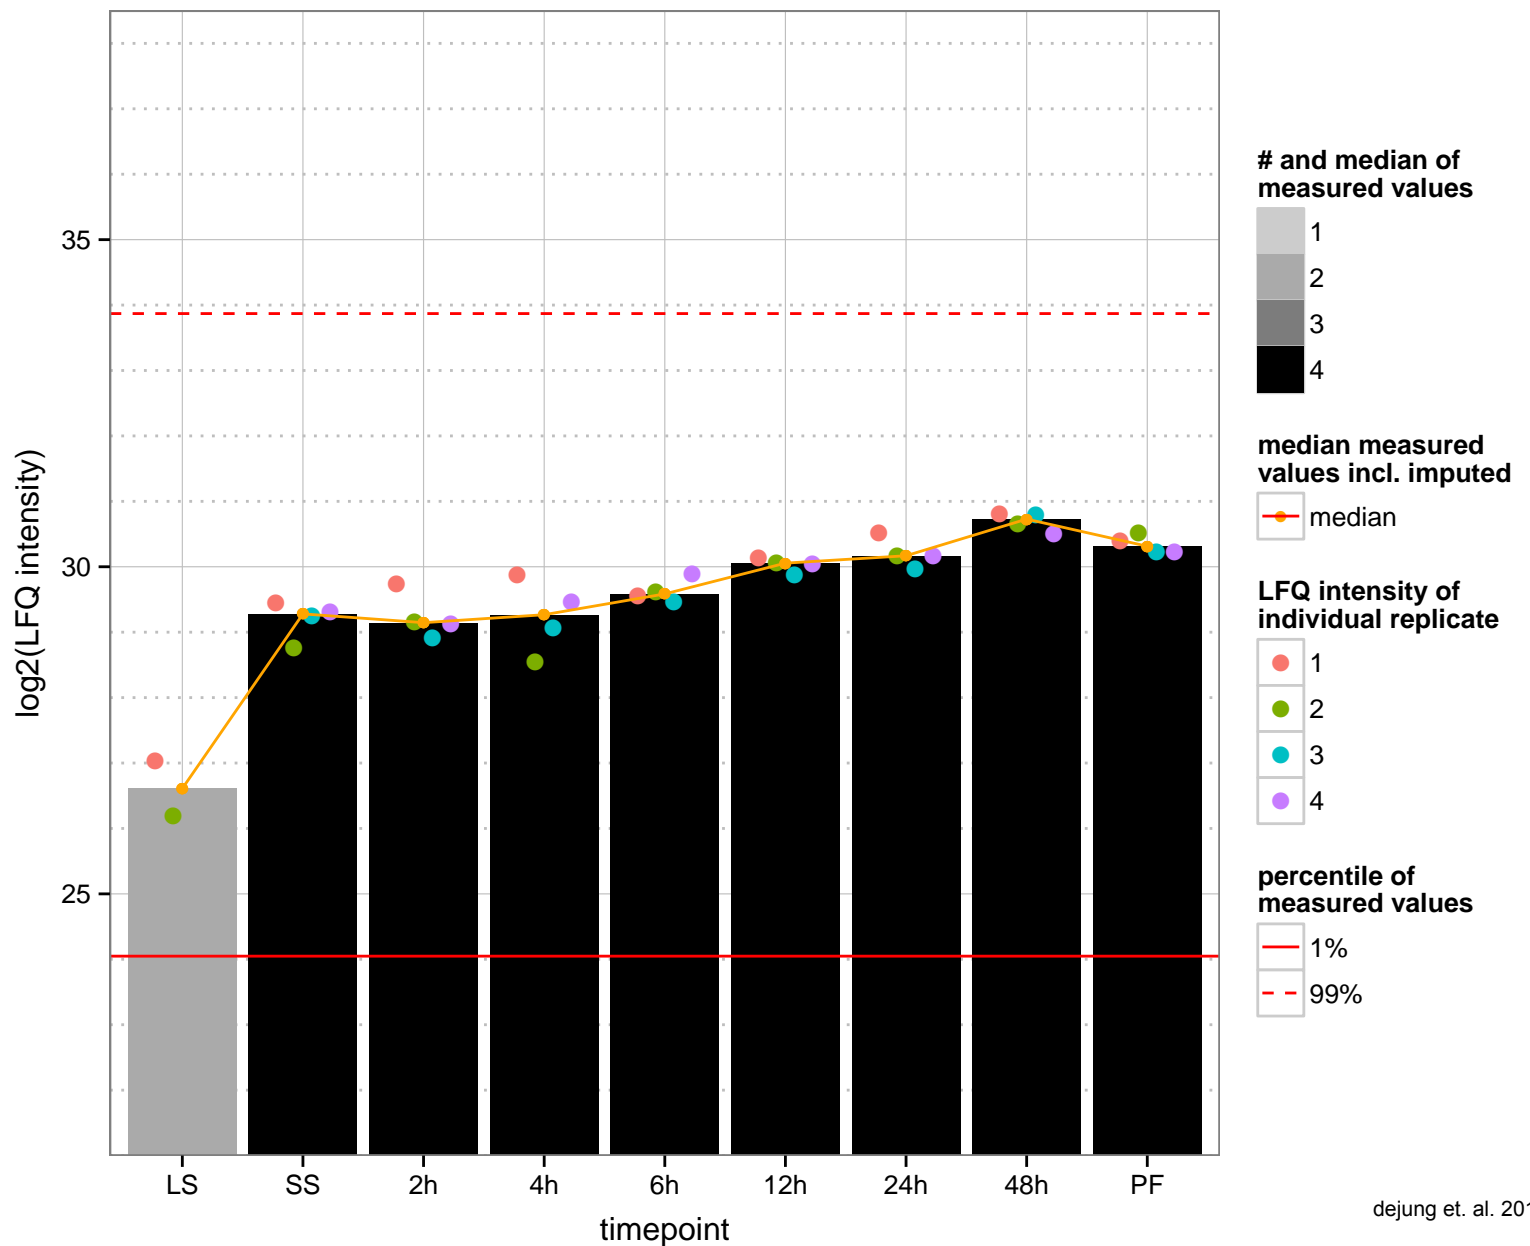

hypothetical protein, conserved  
 Tb927.10.8630  
 AGOF: null  
 AGOC: mitochondrion  
 AGOP: null  
 PGO: null  
 PGO: null  
 PGO: null

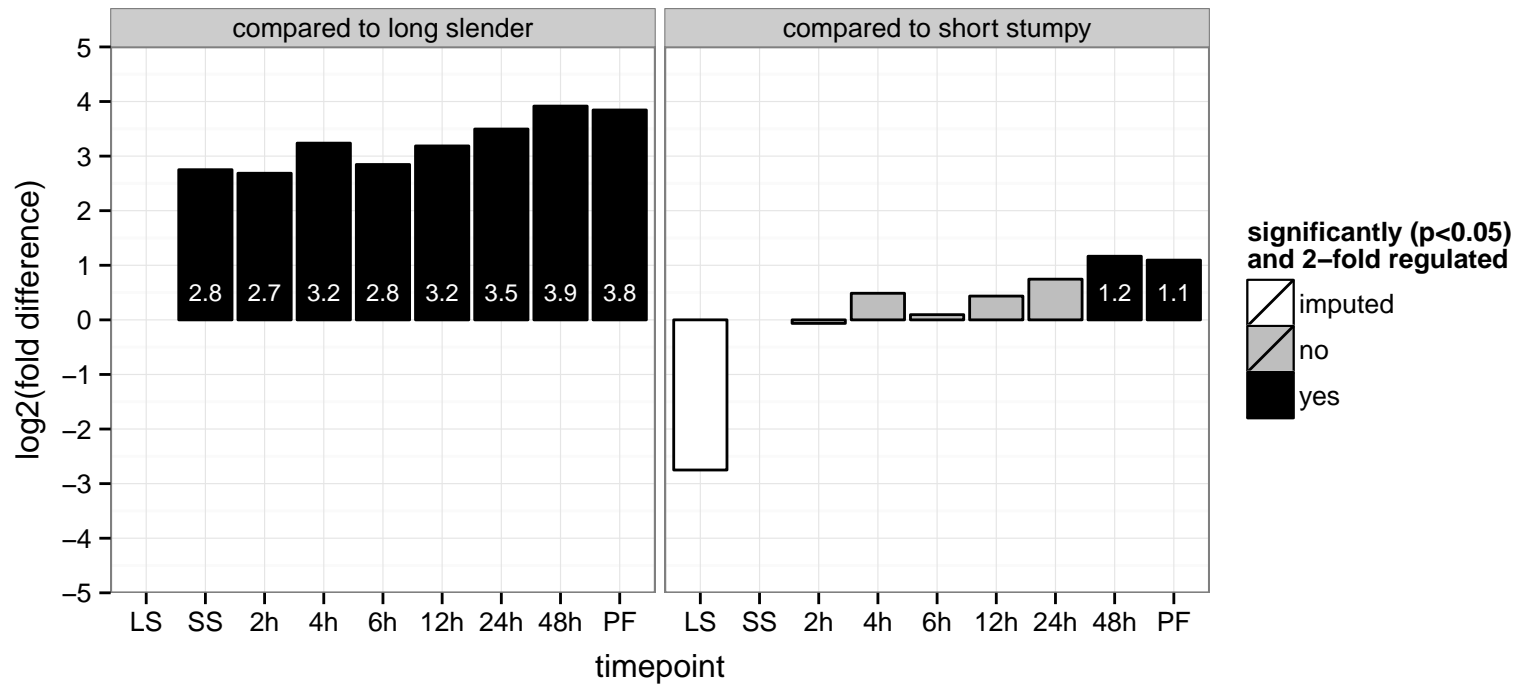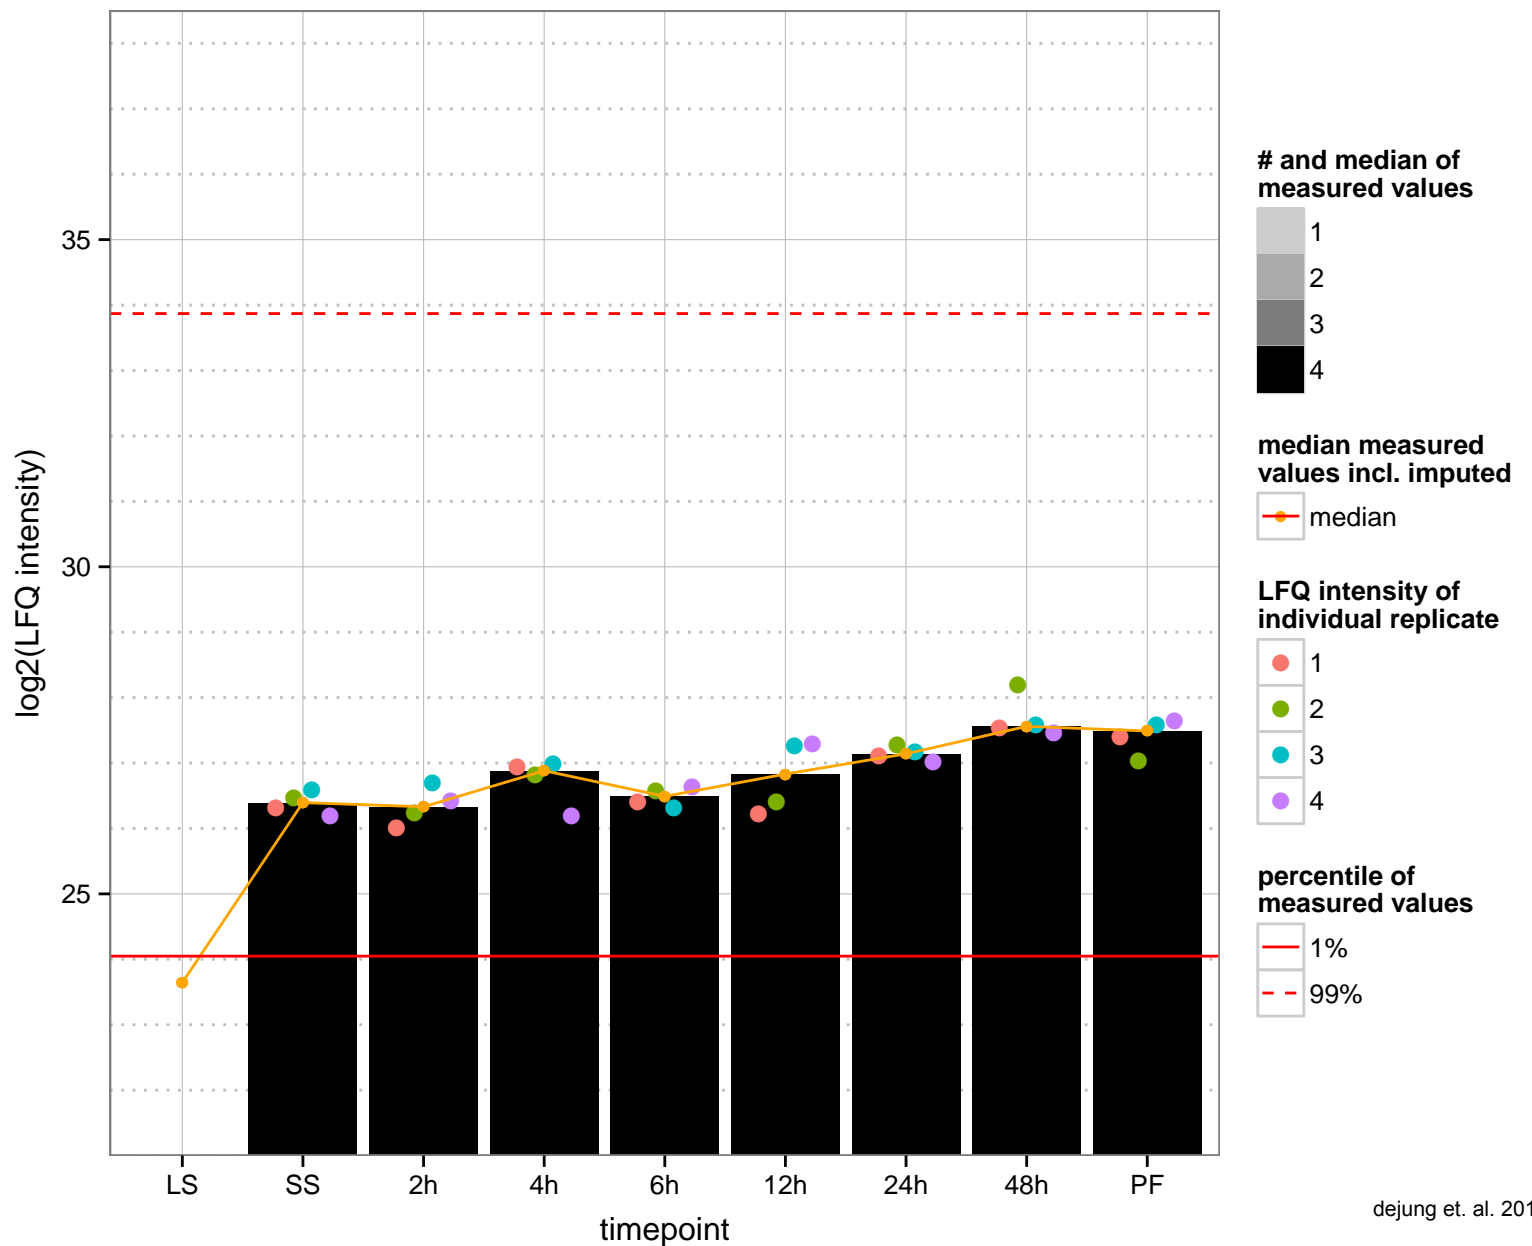

hypothetical protein, conserved

Tb927.10.8730

AGOF: ATP binding, protein kinase activity

AGOC: mitochondrial inner membrane, mitochondrion

AGOP: protein phosphorylation

PGOF: ATP binding, protein kinase activity, transferase activity, transferring phosphorus-containing groups

PGOC: null

PGOP: protein phosphorylation

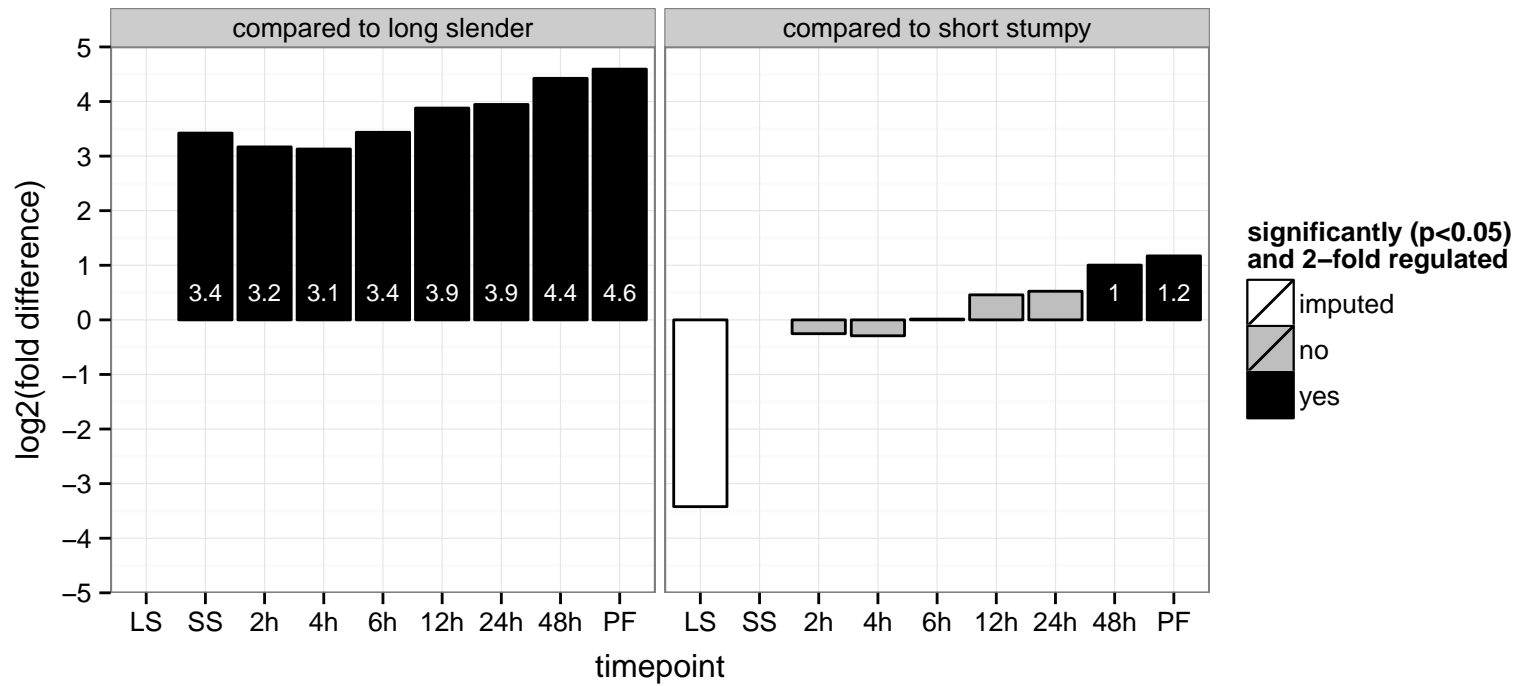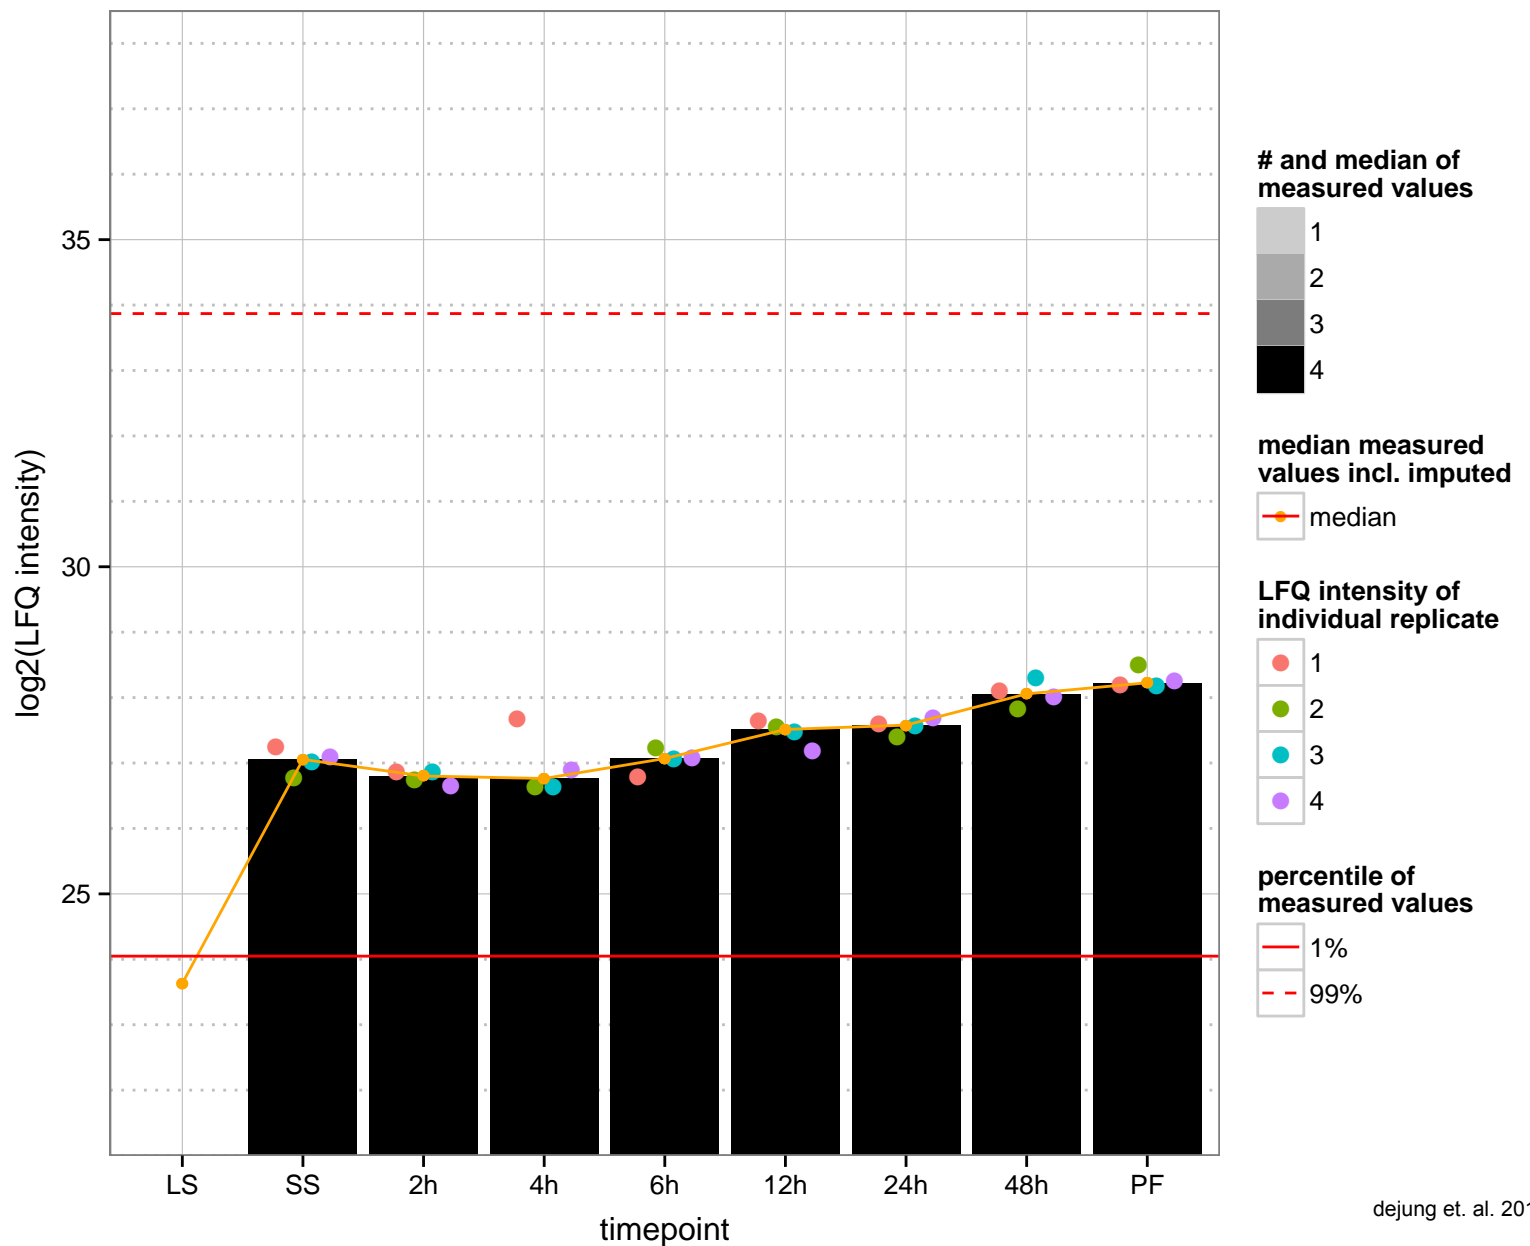

hypothetical protein, conserved

Tb927.11.10320

AGOF: endodeoxyribonuclease activity, producing 5'-phosphomonoesters

AGOC: null

AGOP: null

PGOF: endodeoxyribonuclease activity, producing 5'-phosphomonoesters

PGOC: null

PGOP: null

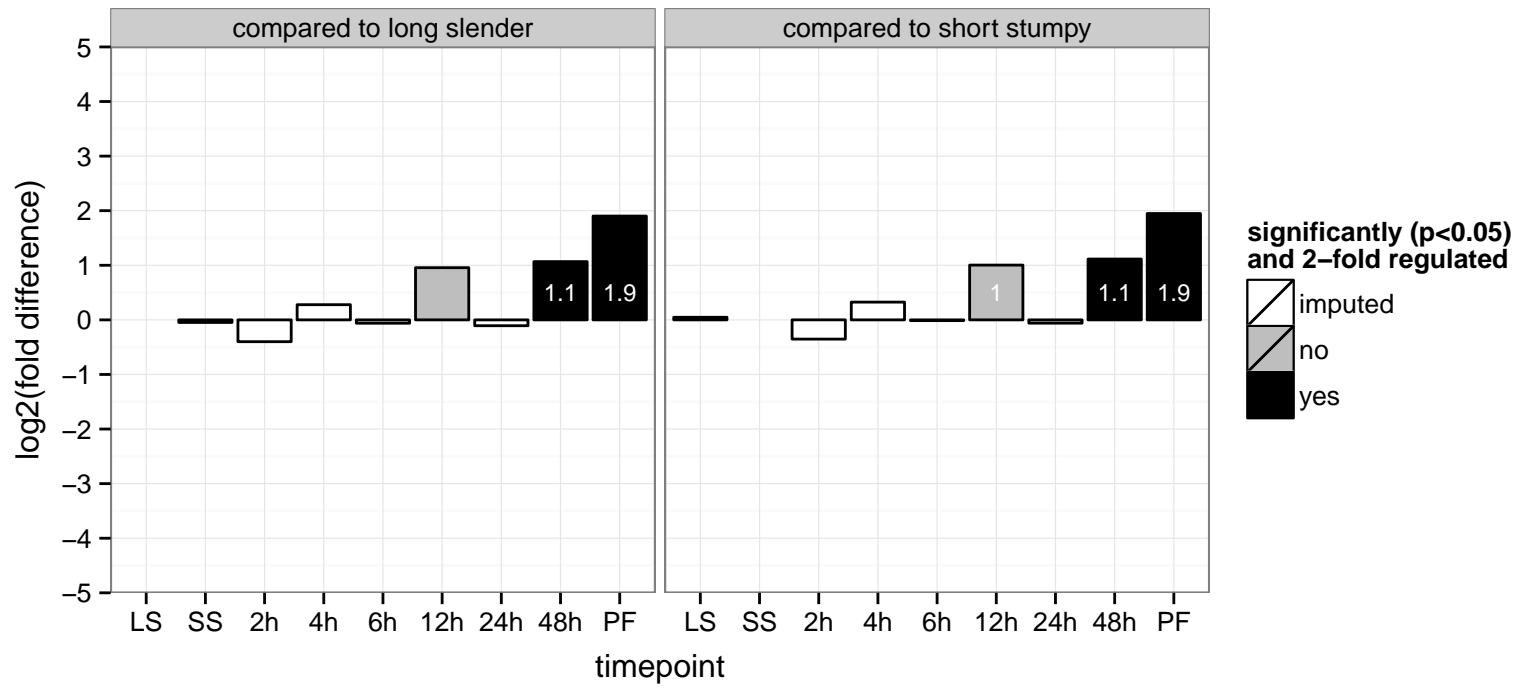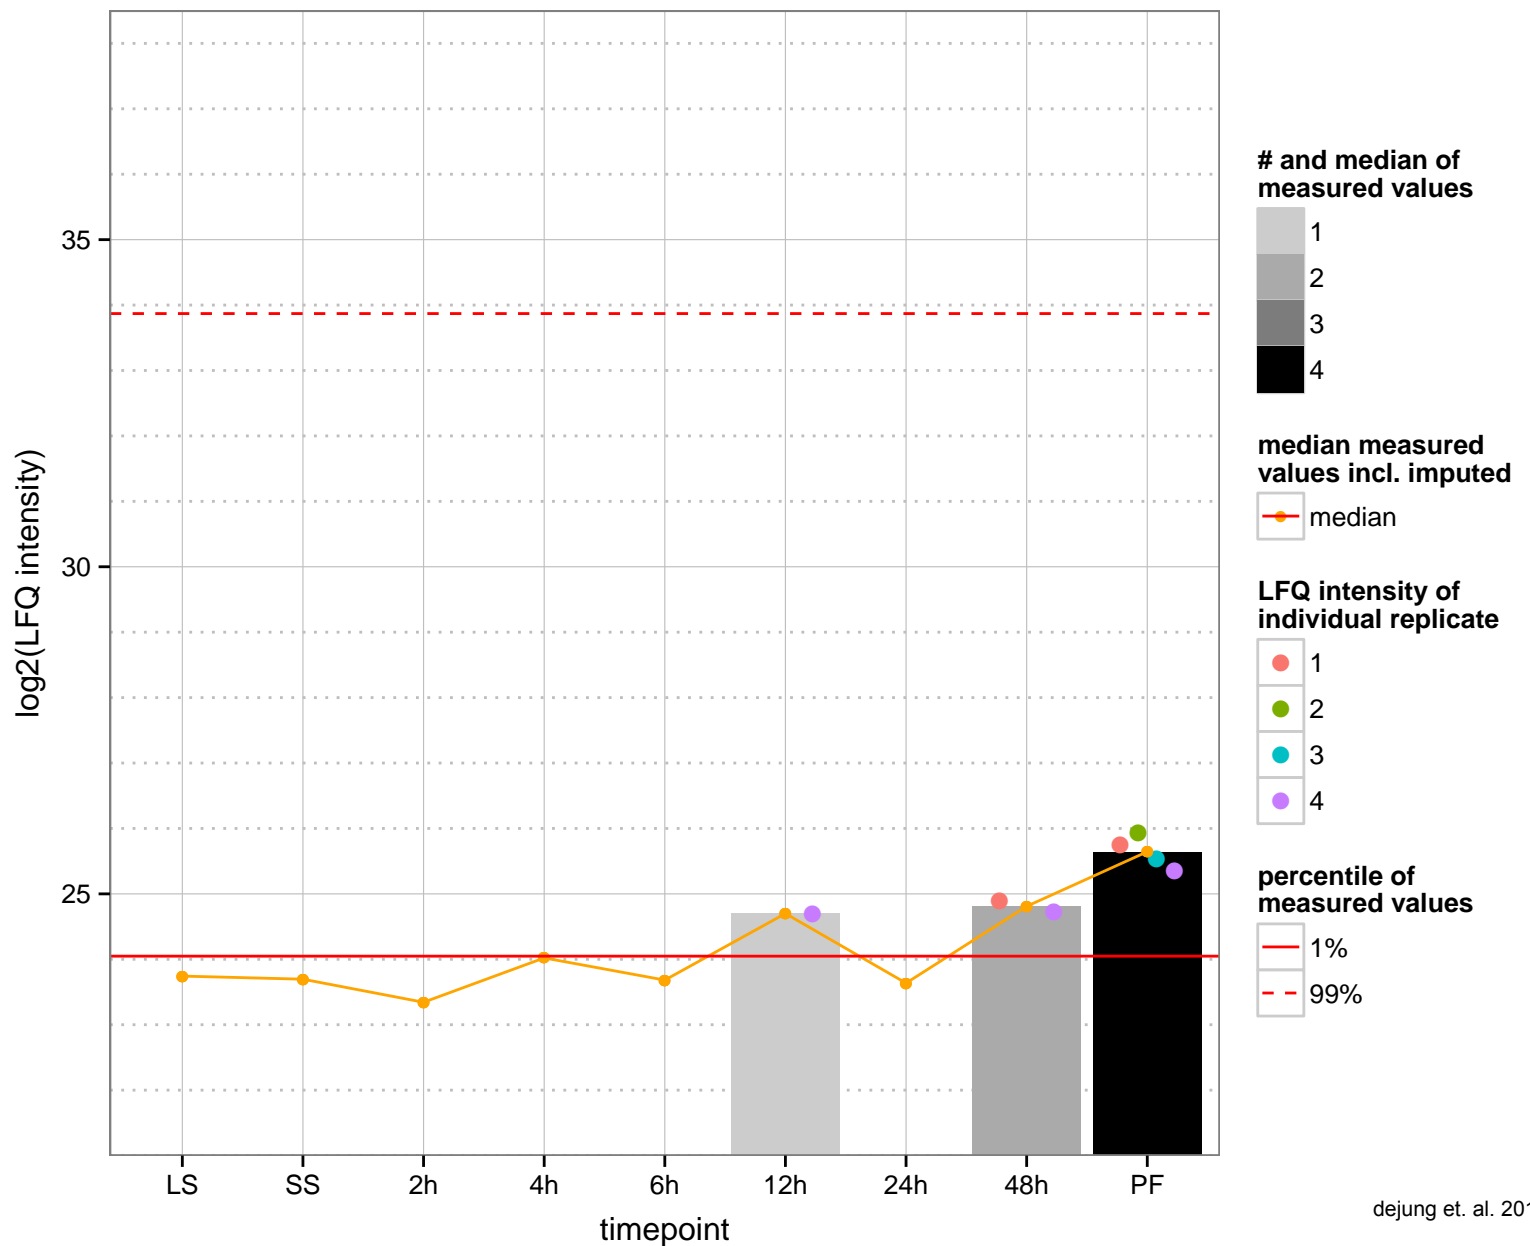



hypothetical protein, conserved  
 Tb927.11.11460  
 AGOF: null  
 AGOC: mitochondrion  
 AGOP: null  
 PGO: null  
 PGO: null  
 PGO: null

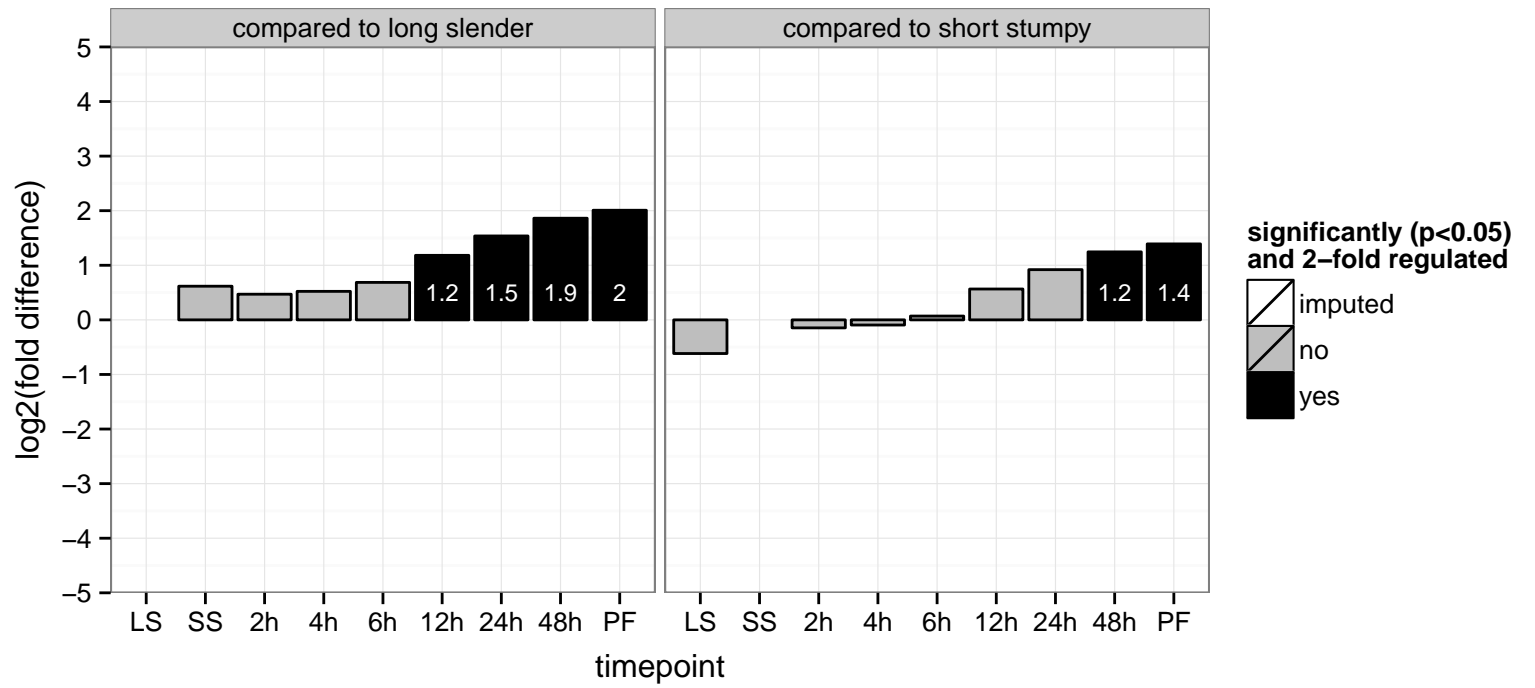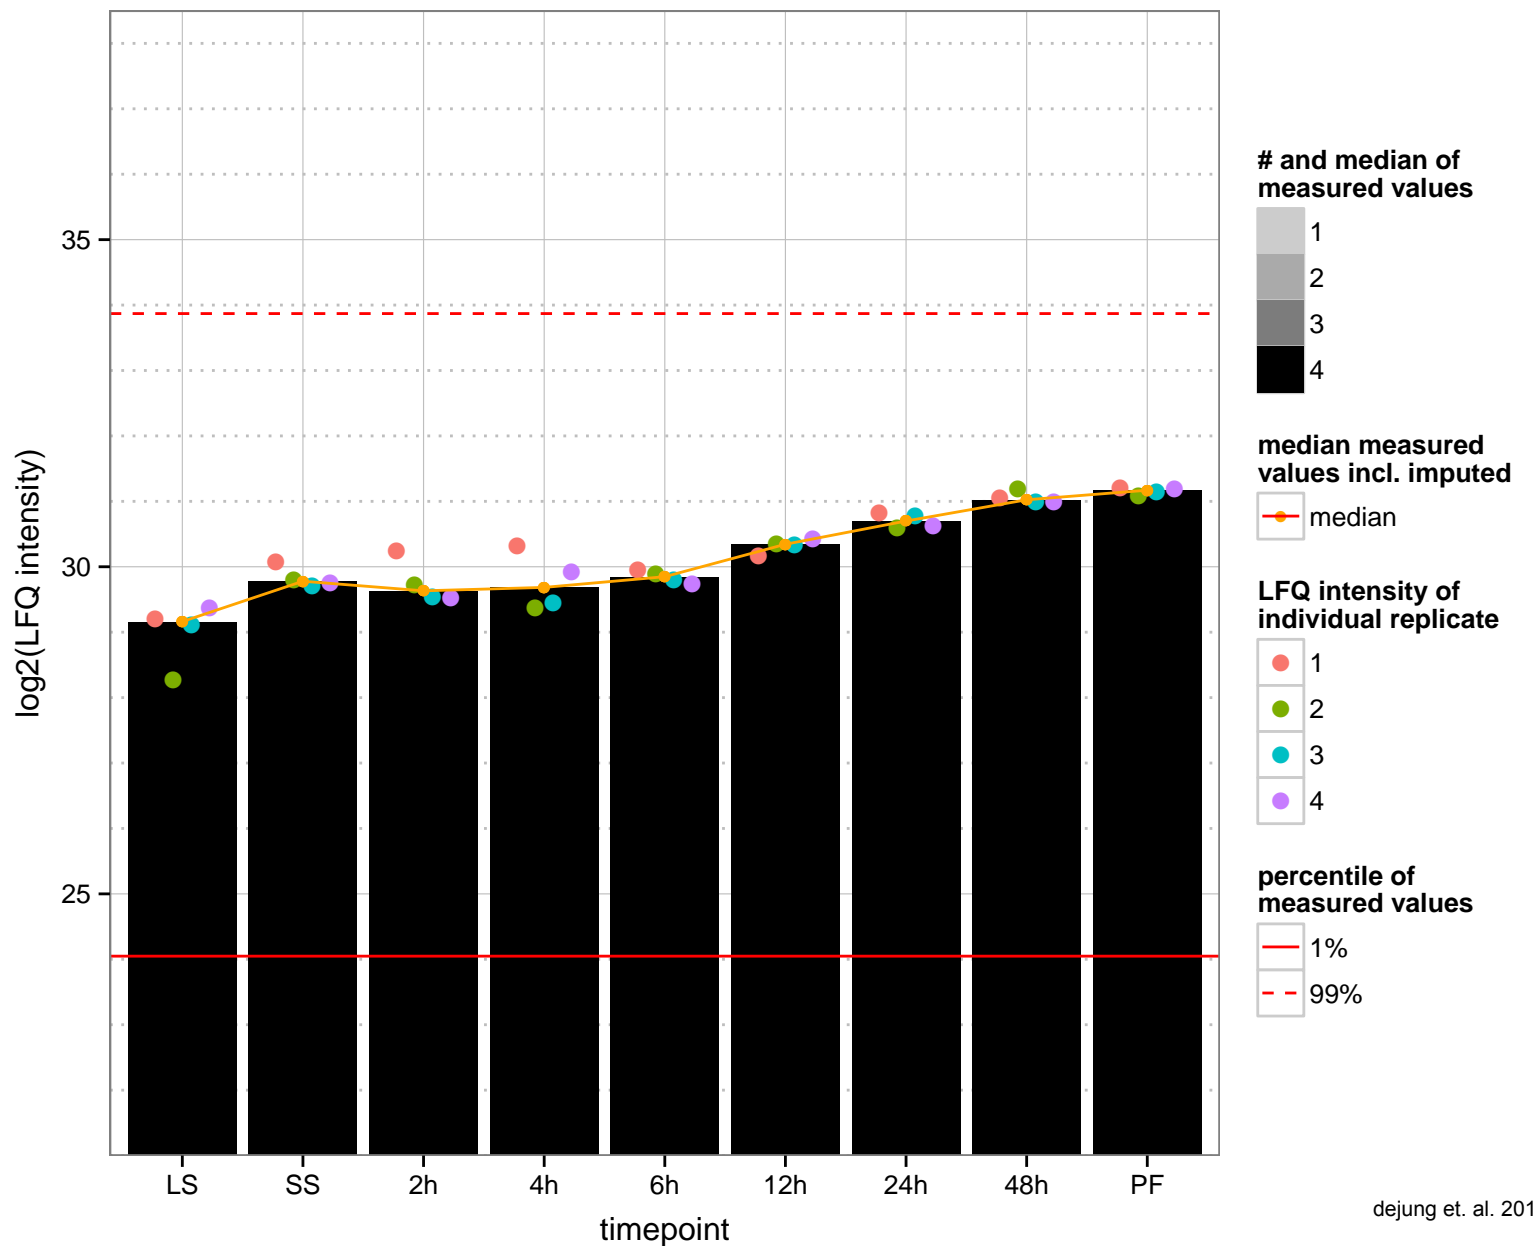

glutaredoxin, putative

Tb927.11.1370

AGOF: disulfide oxidoreductase activity, electron carrier activity, protein disulfide isomerase activity, protein disulfide oxidoreductase activity

AGOC: mitochondrion

AGOP: cell redox homeostasis, oxidation-reduction process

PGOF: electron carrier activity, protein disulfide oxidoreductase activity

PGOC: null

PGOP: cell redox homeostasis

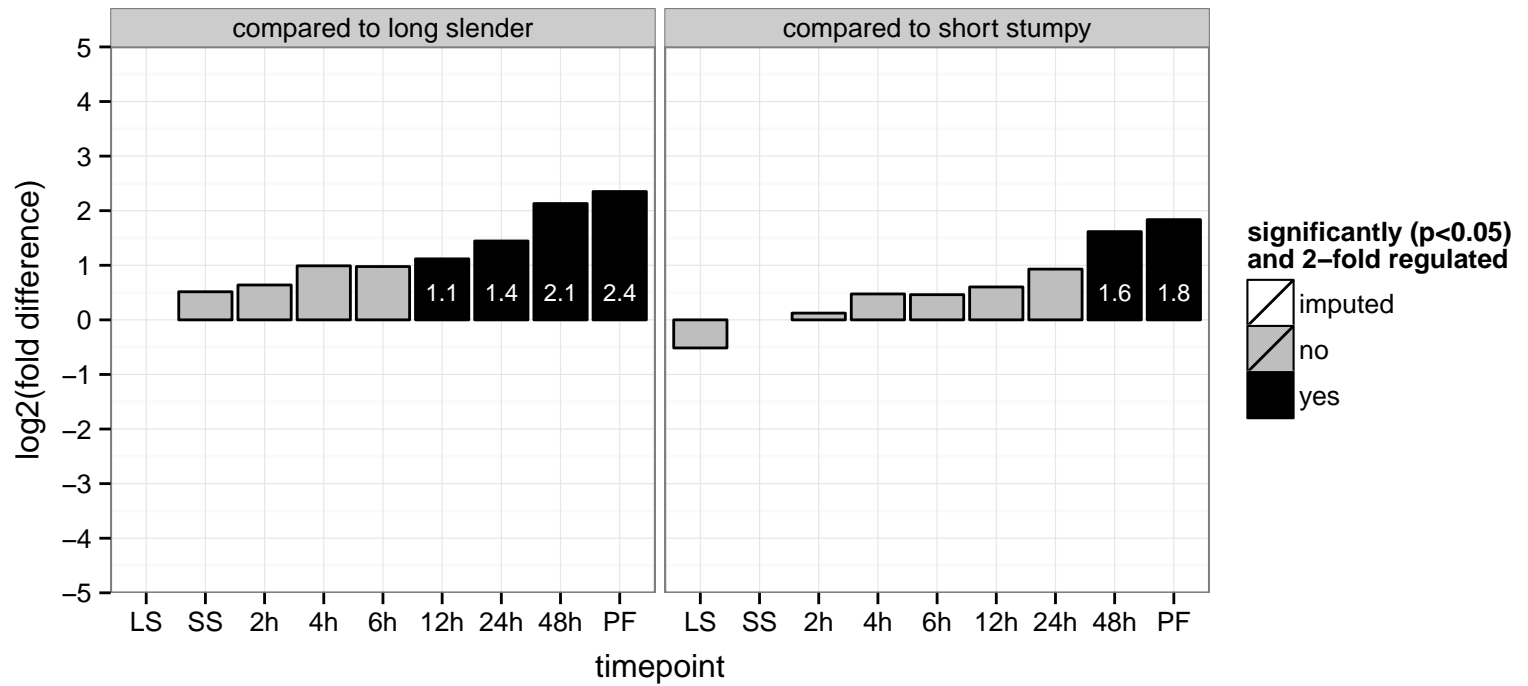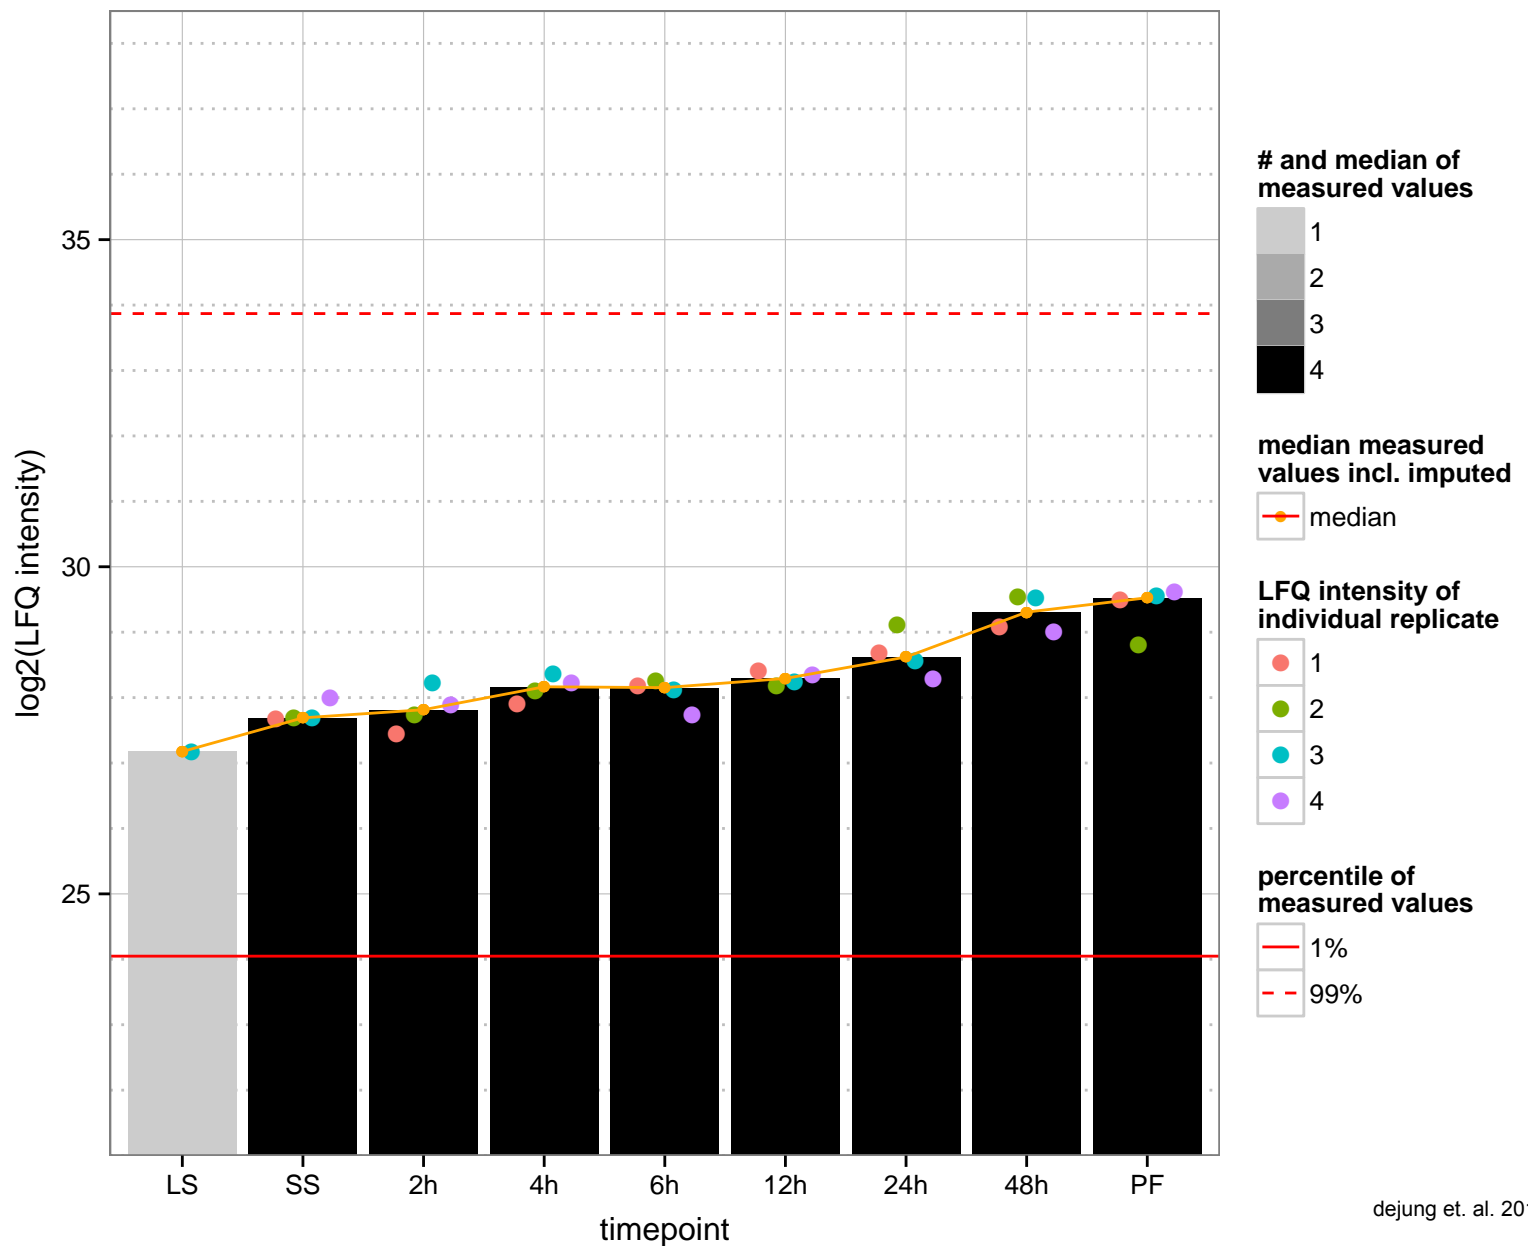

hypothetical protein, conserved  
 Tb927.11.14170  
 AGOF: null  
 AGOC: null  
 AGOP: null  
 PGO: null  
 PGOC: null  
 PGOP: null

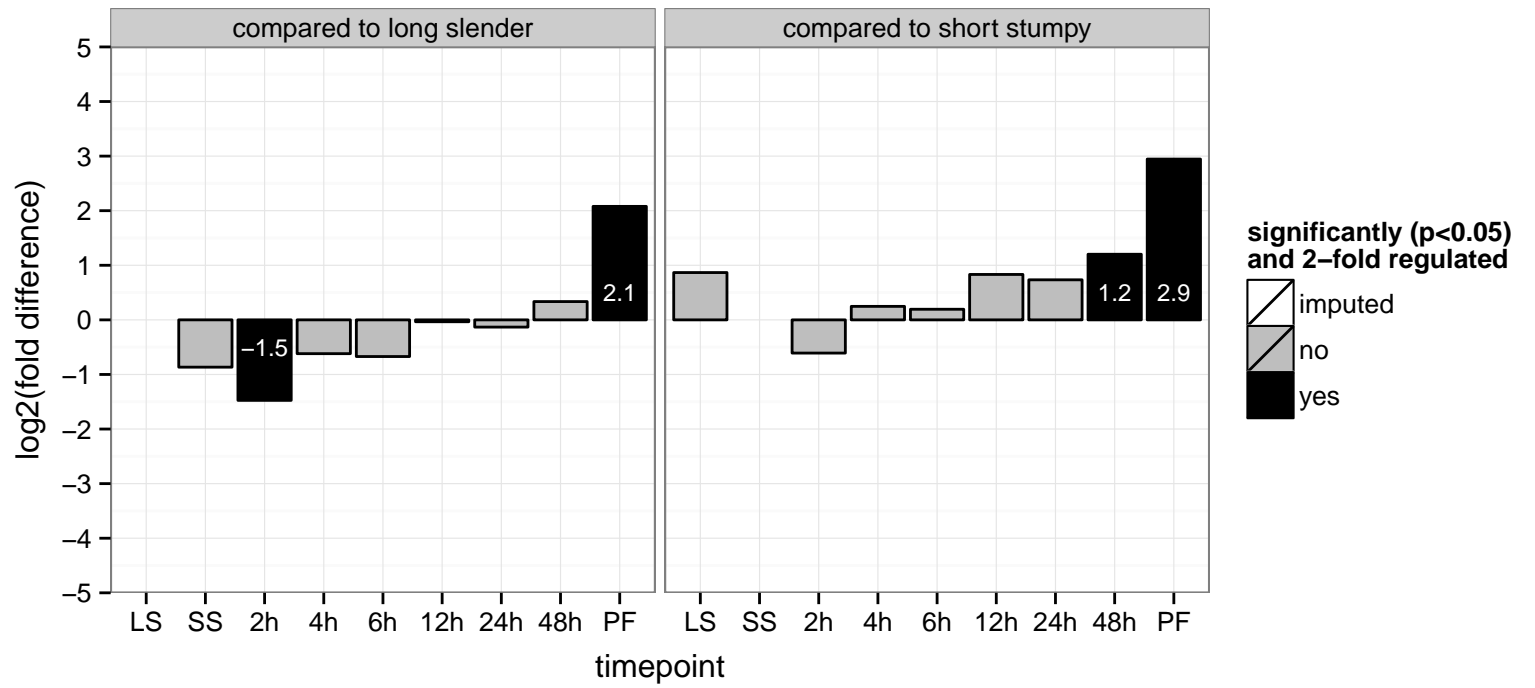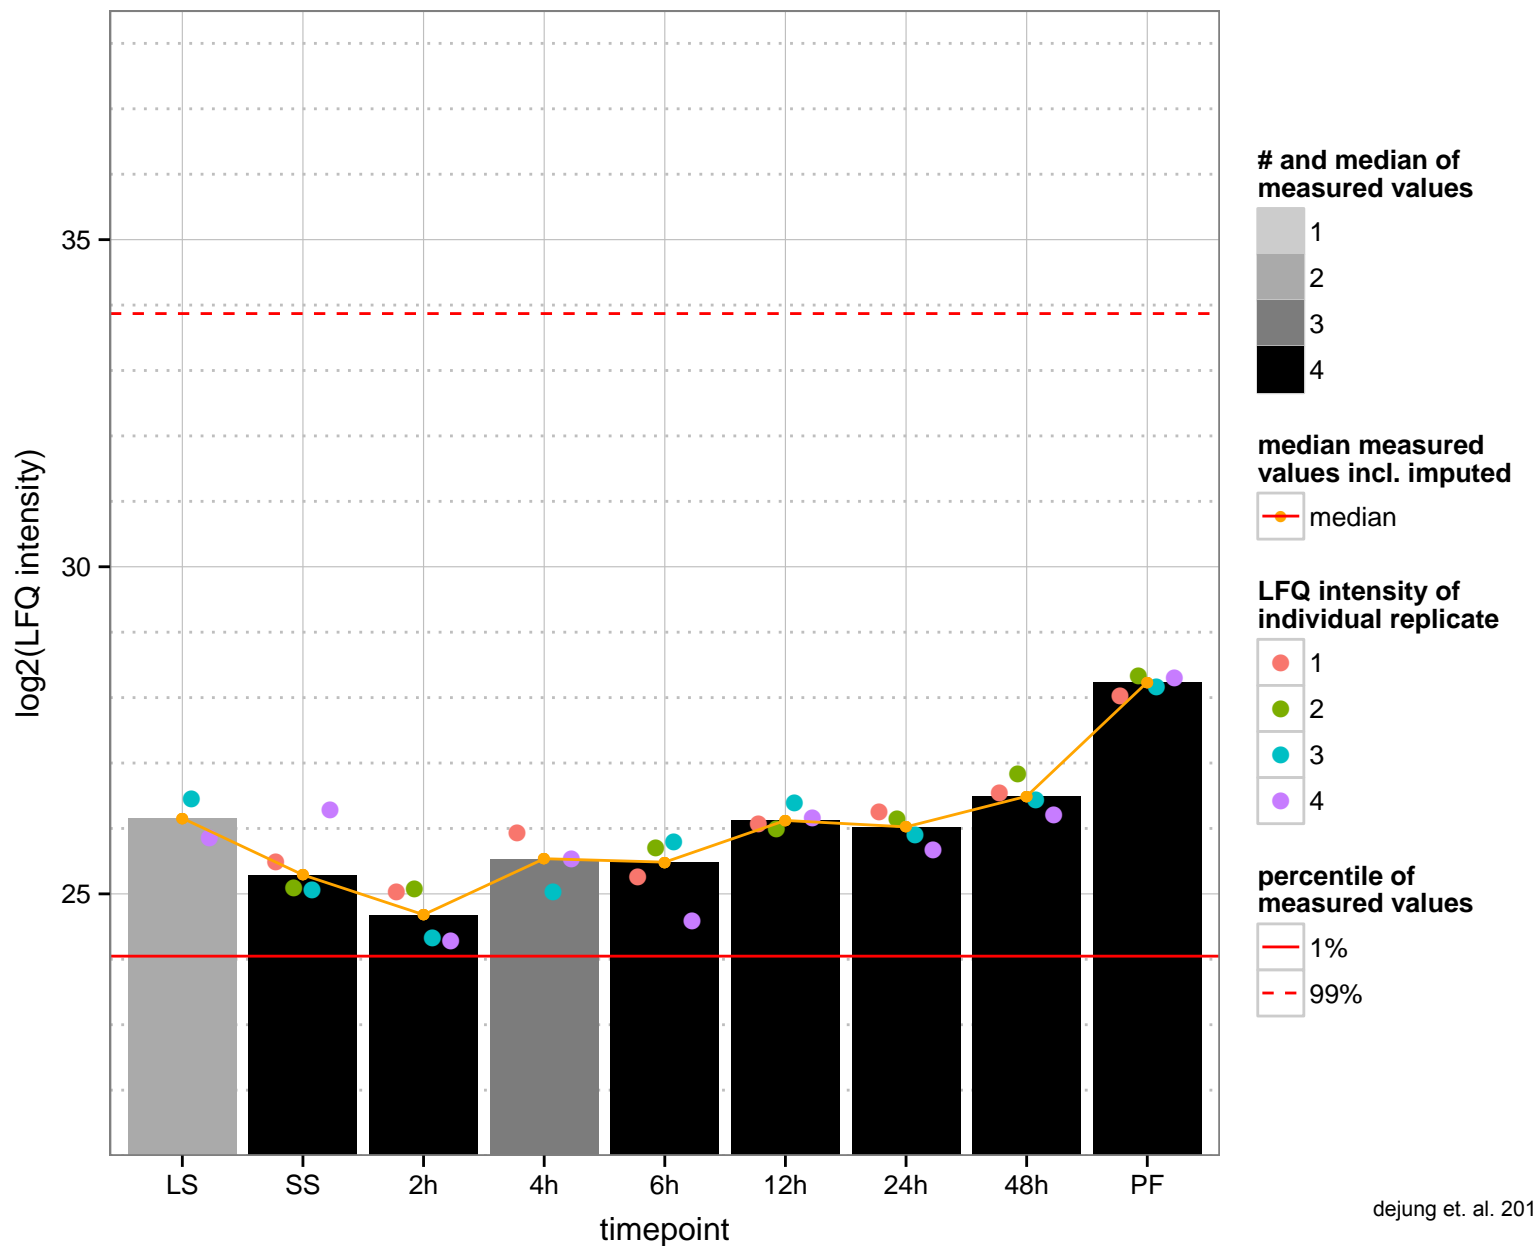

ubiquitin-conjugating enzyme E2, putative, ubiquitin carrier protein, ubiquitin-protein ligase

Tb927.11.14200

AGOF: ubiquitin-protein ligase activity

AGOC: null

AGOP: cellular protein modification process, post-translational protein modification, regulation of protein metabolic process

PGOF: acid-amino acid ligase activity

PGOC: null

PGOP: null

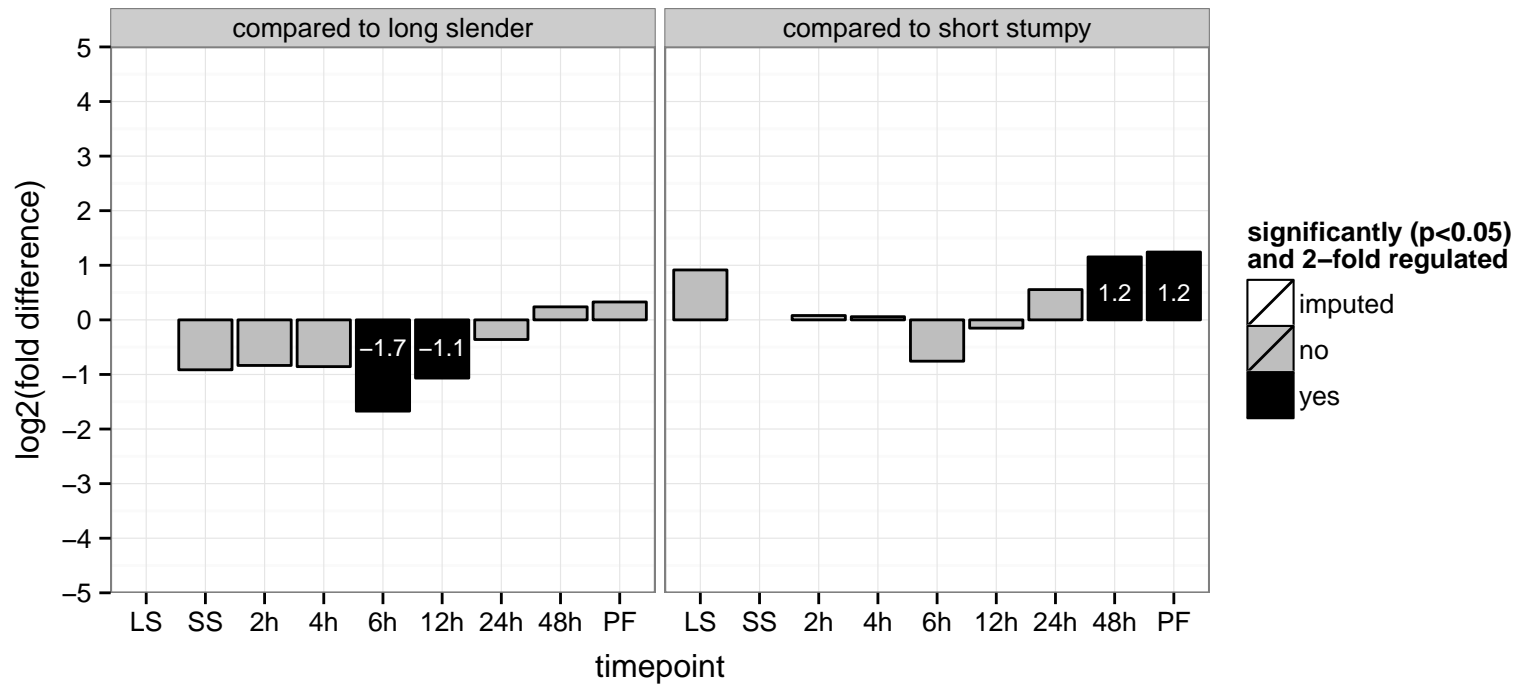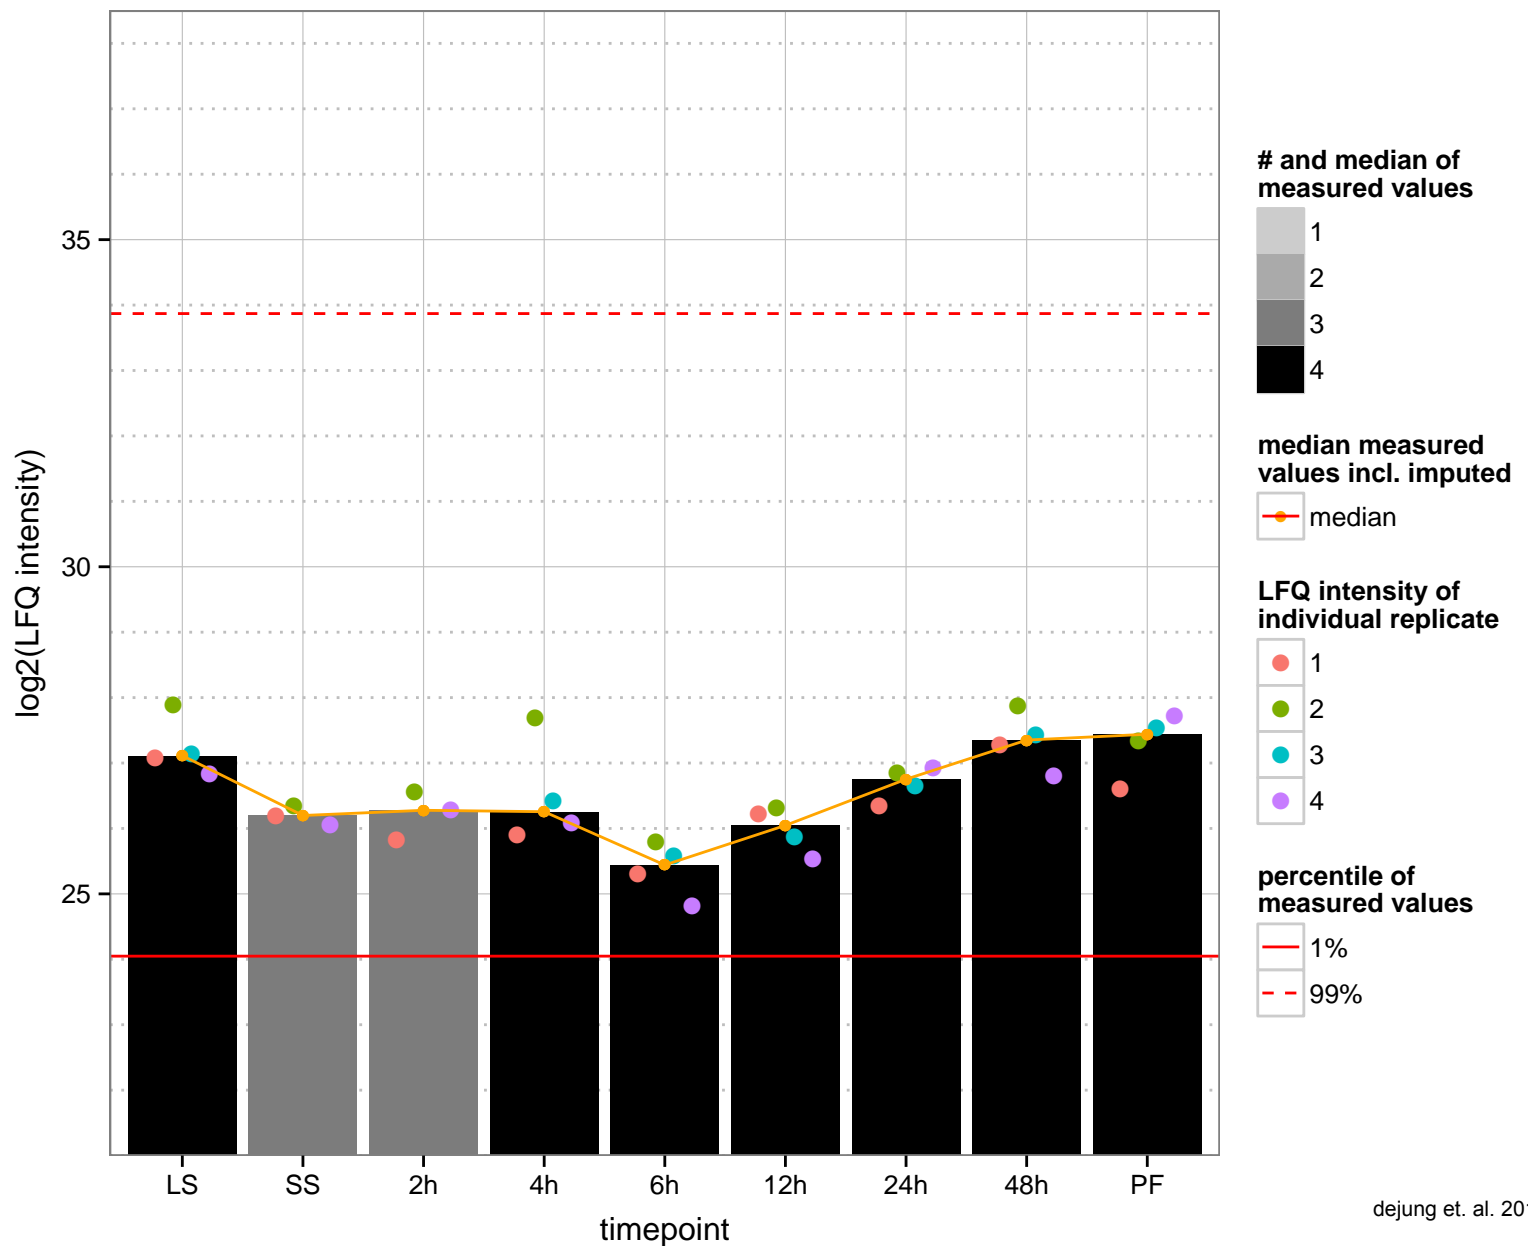

hypothetical protein, conserved  
 Tb927.11.14980  
 AGOF: null  
 AGOC: mitochondrion  
 AGOP: null  
 PGO: null  
 PGOC: null  
 PGOP: null

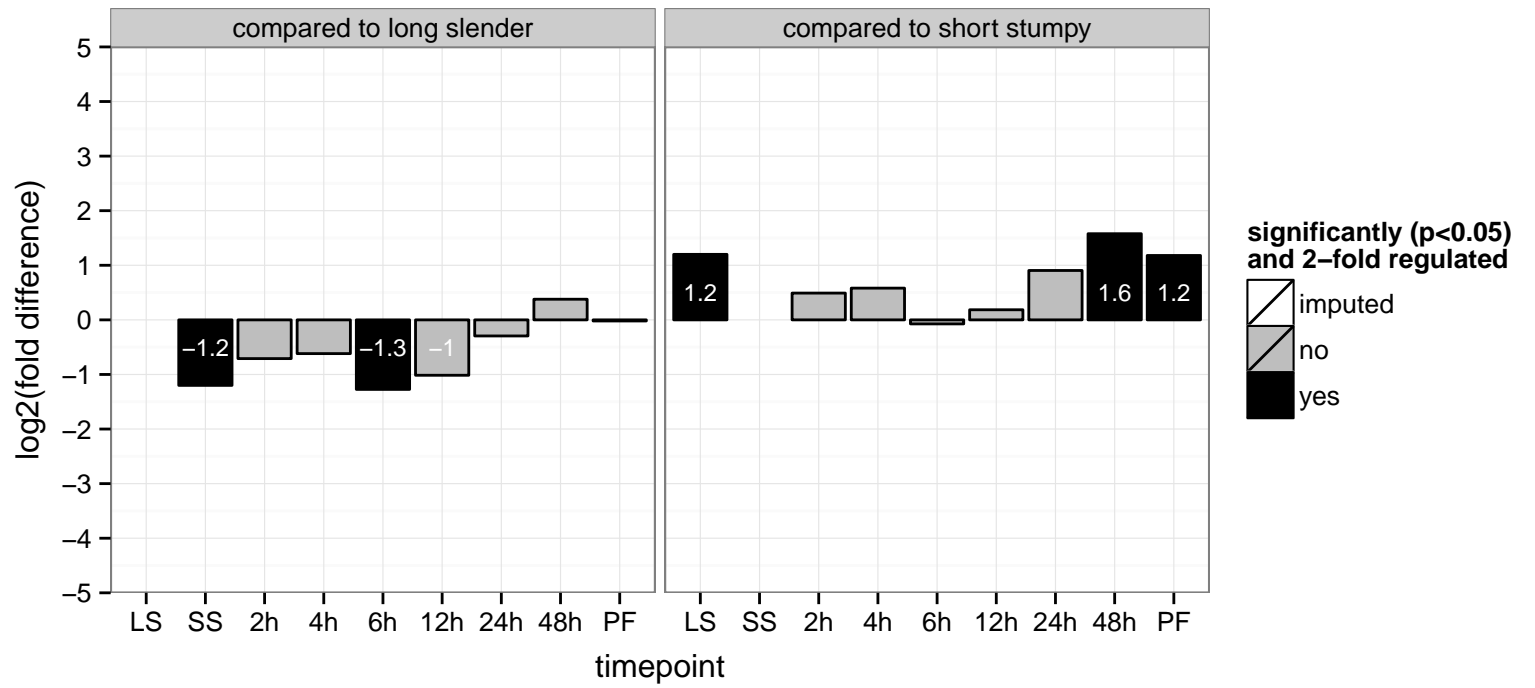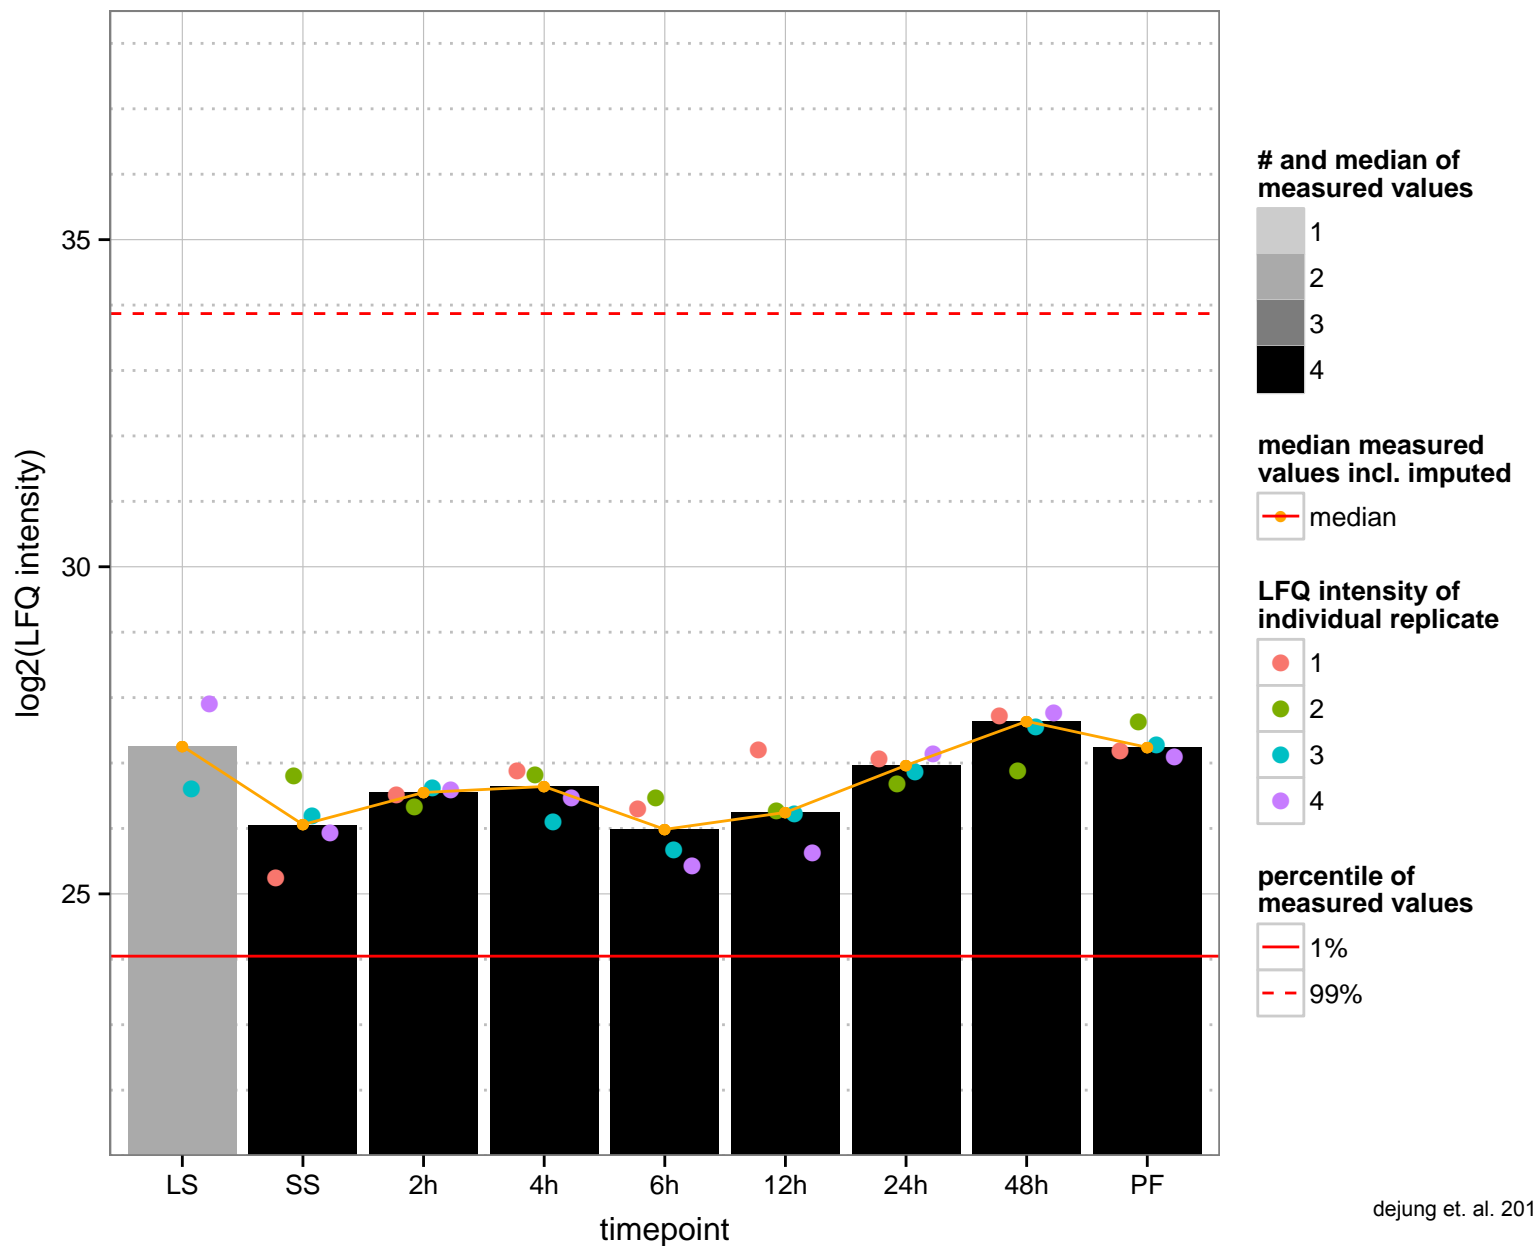

hypothetical protein, conserved  
 Tb927.11.2120  
 AGOF: null  
 AGOC: null  
 AGOP: null  
 PGO: binding  
 PGO: null  
 PGO: null

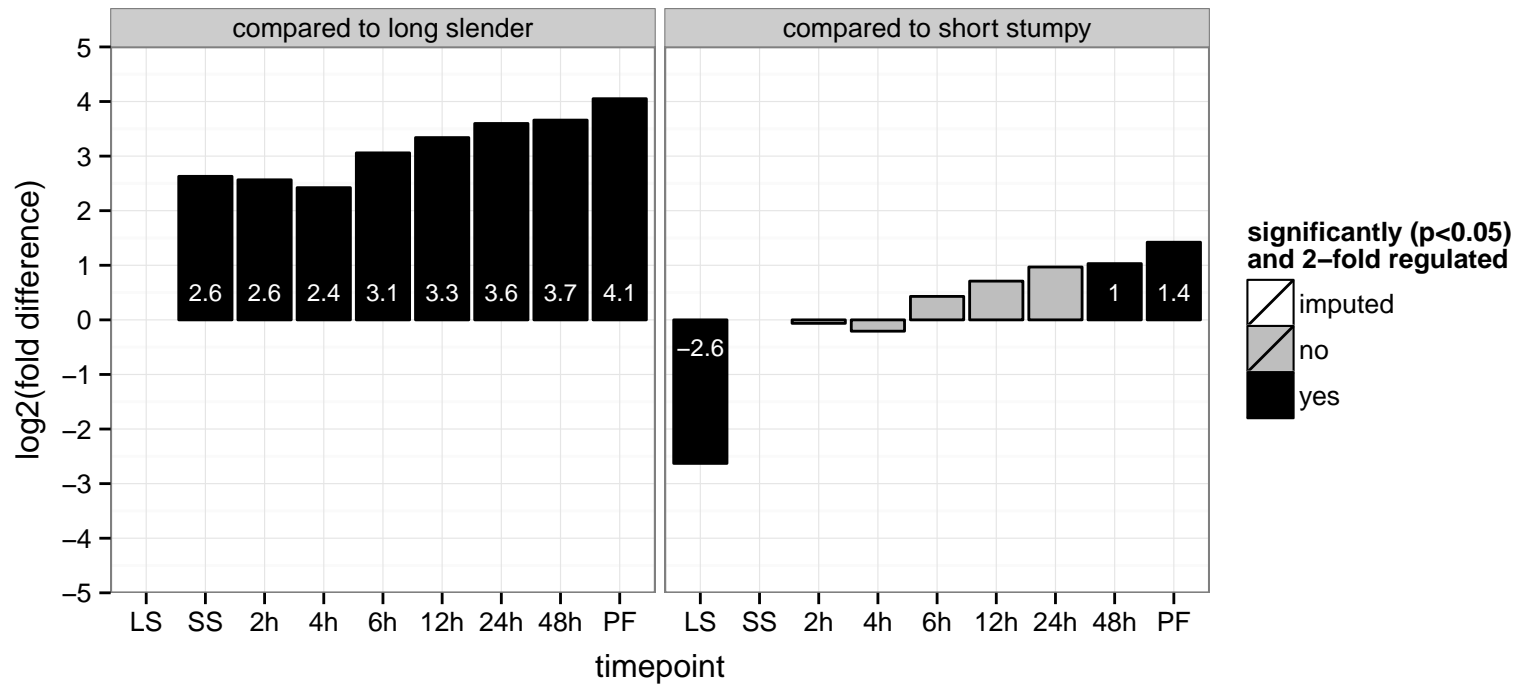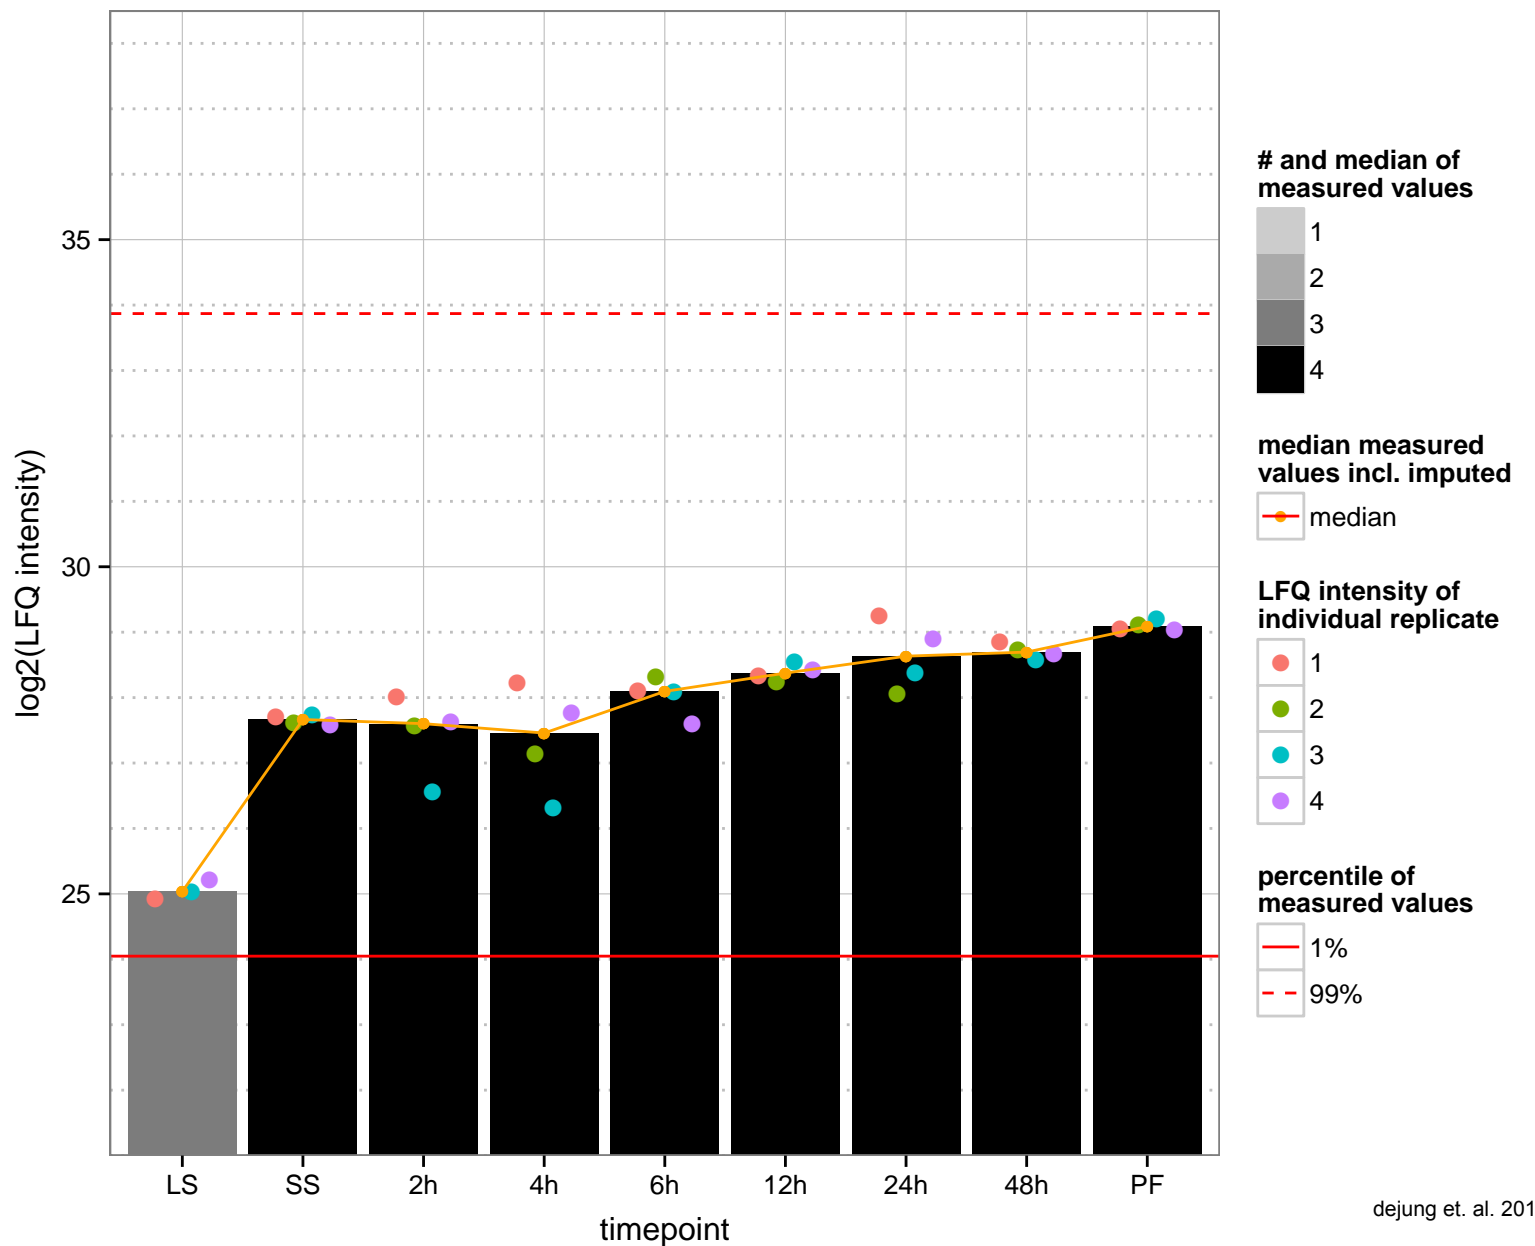

hypothetical protein, conserved  
 Tb927.11.2840  
 AGOF: null  
 AGOC: null  
 AGOP: null  
 PGO: phosphatase activity  
 PGOC: null  
 PGOP: null

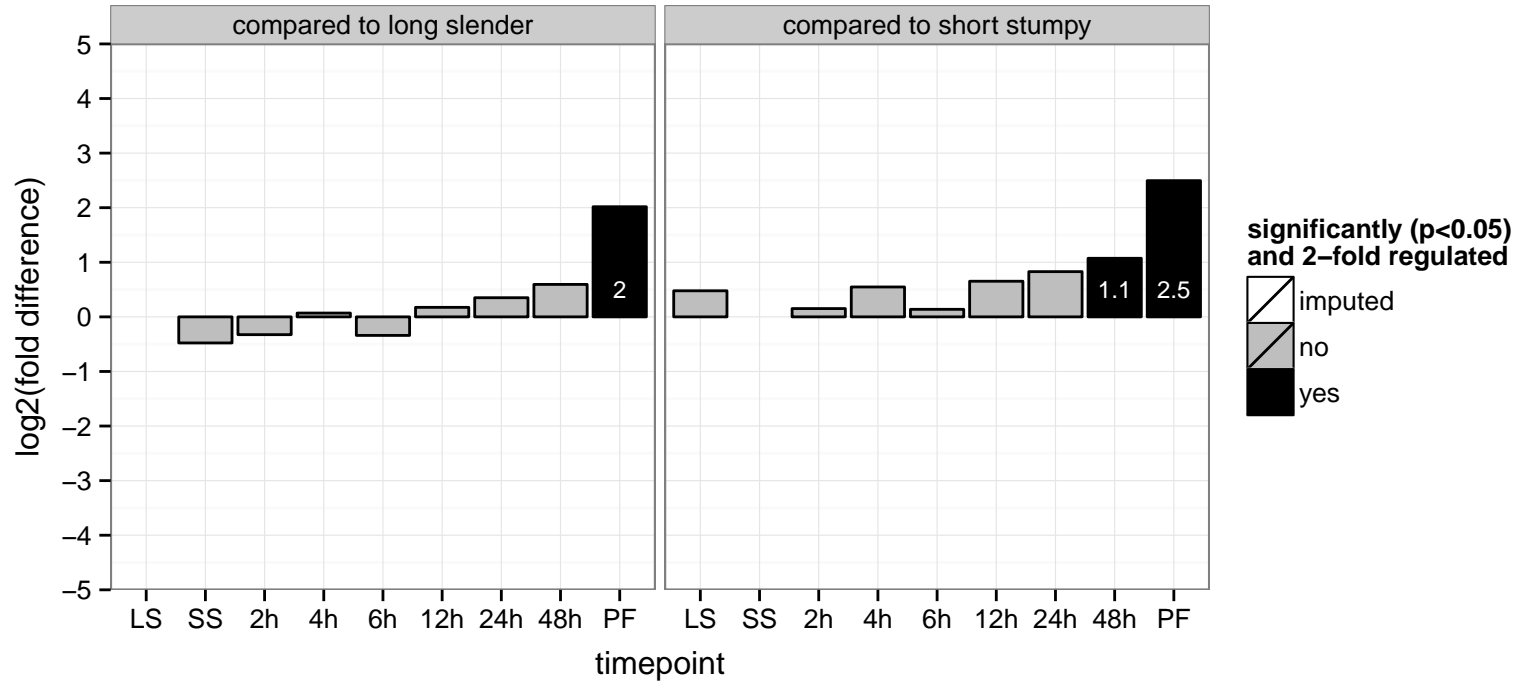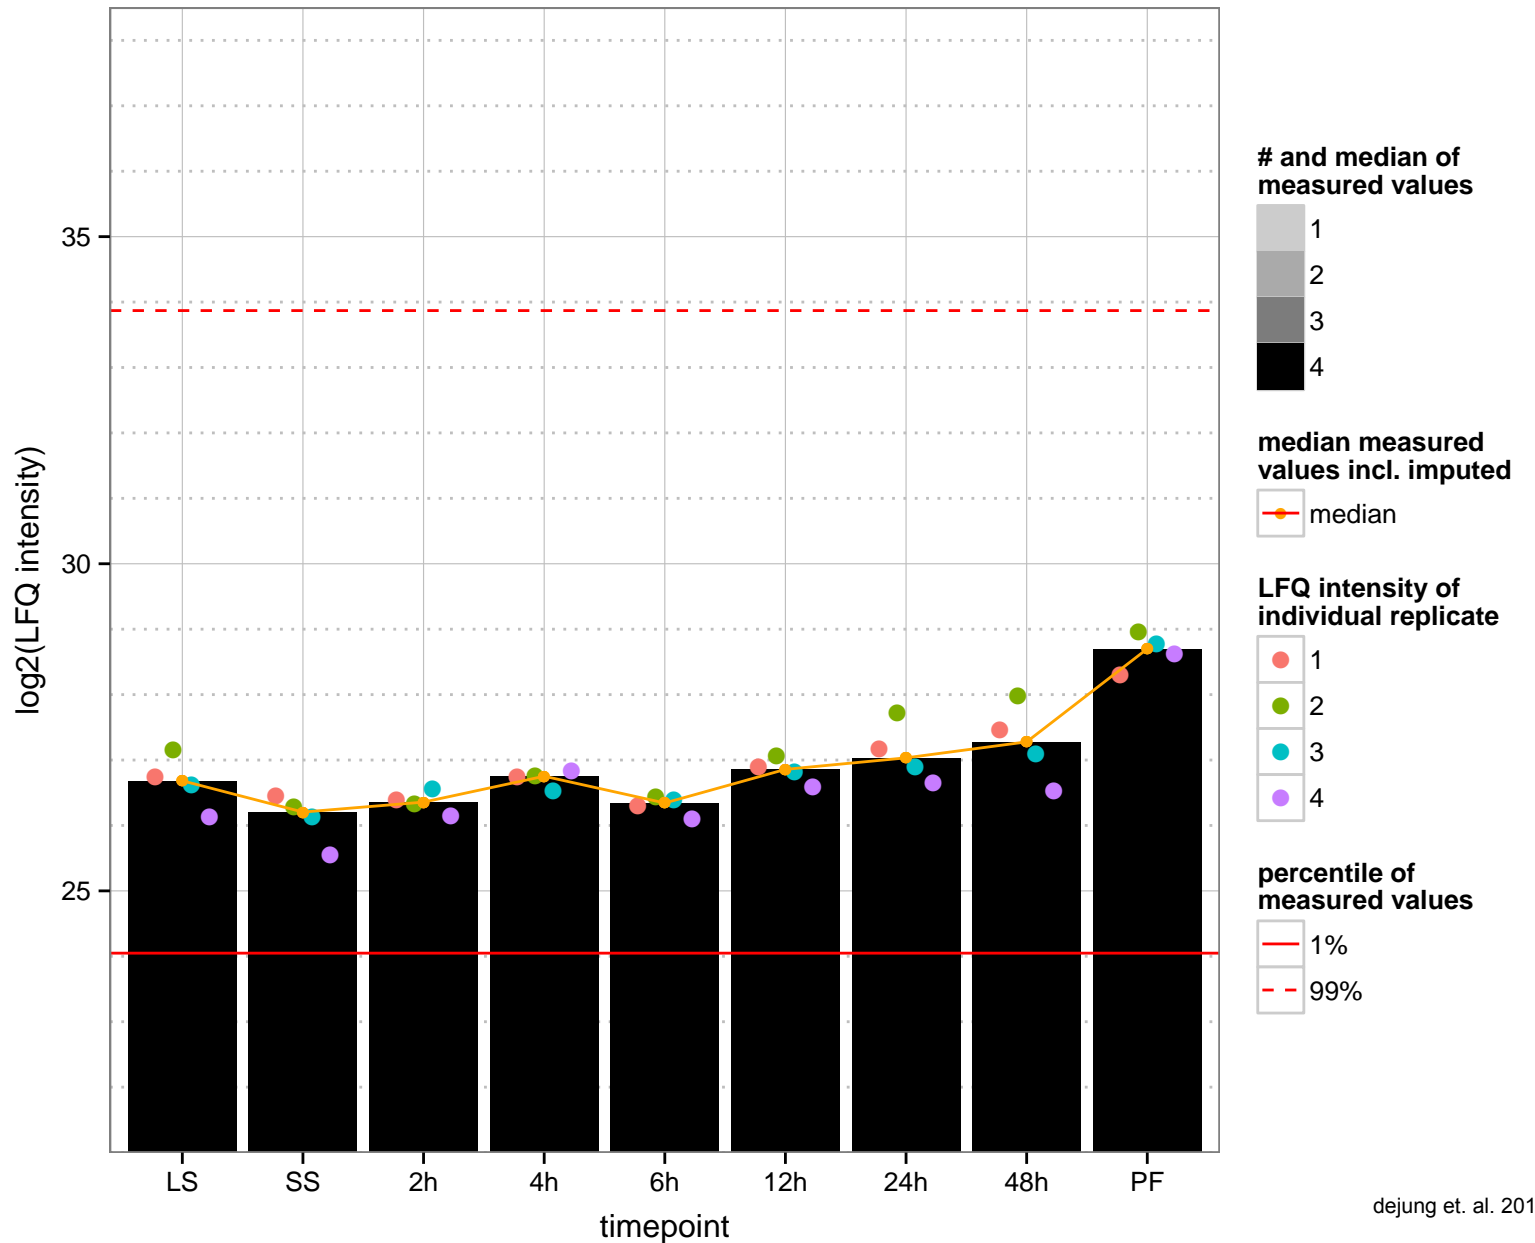

Ribosome assembly protein rrb1, putative  
 Tb927.11.3070  
 AGOF: null  
 AGOC: nucleolus  
 AGOP: ribosome biogenesis  
 PGO: protein binding  
 PGOC: null  
 PGOP: null

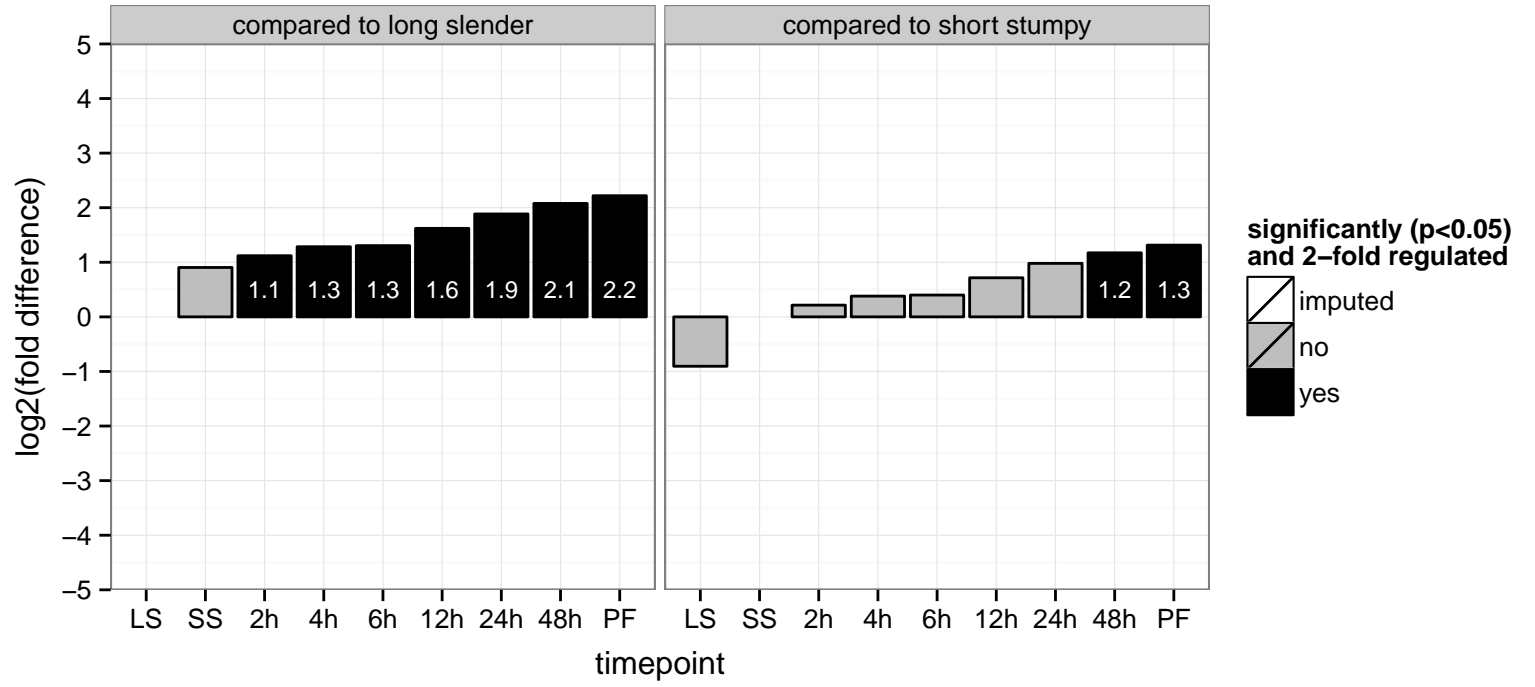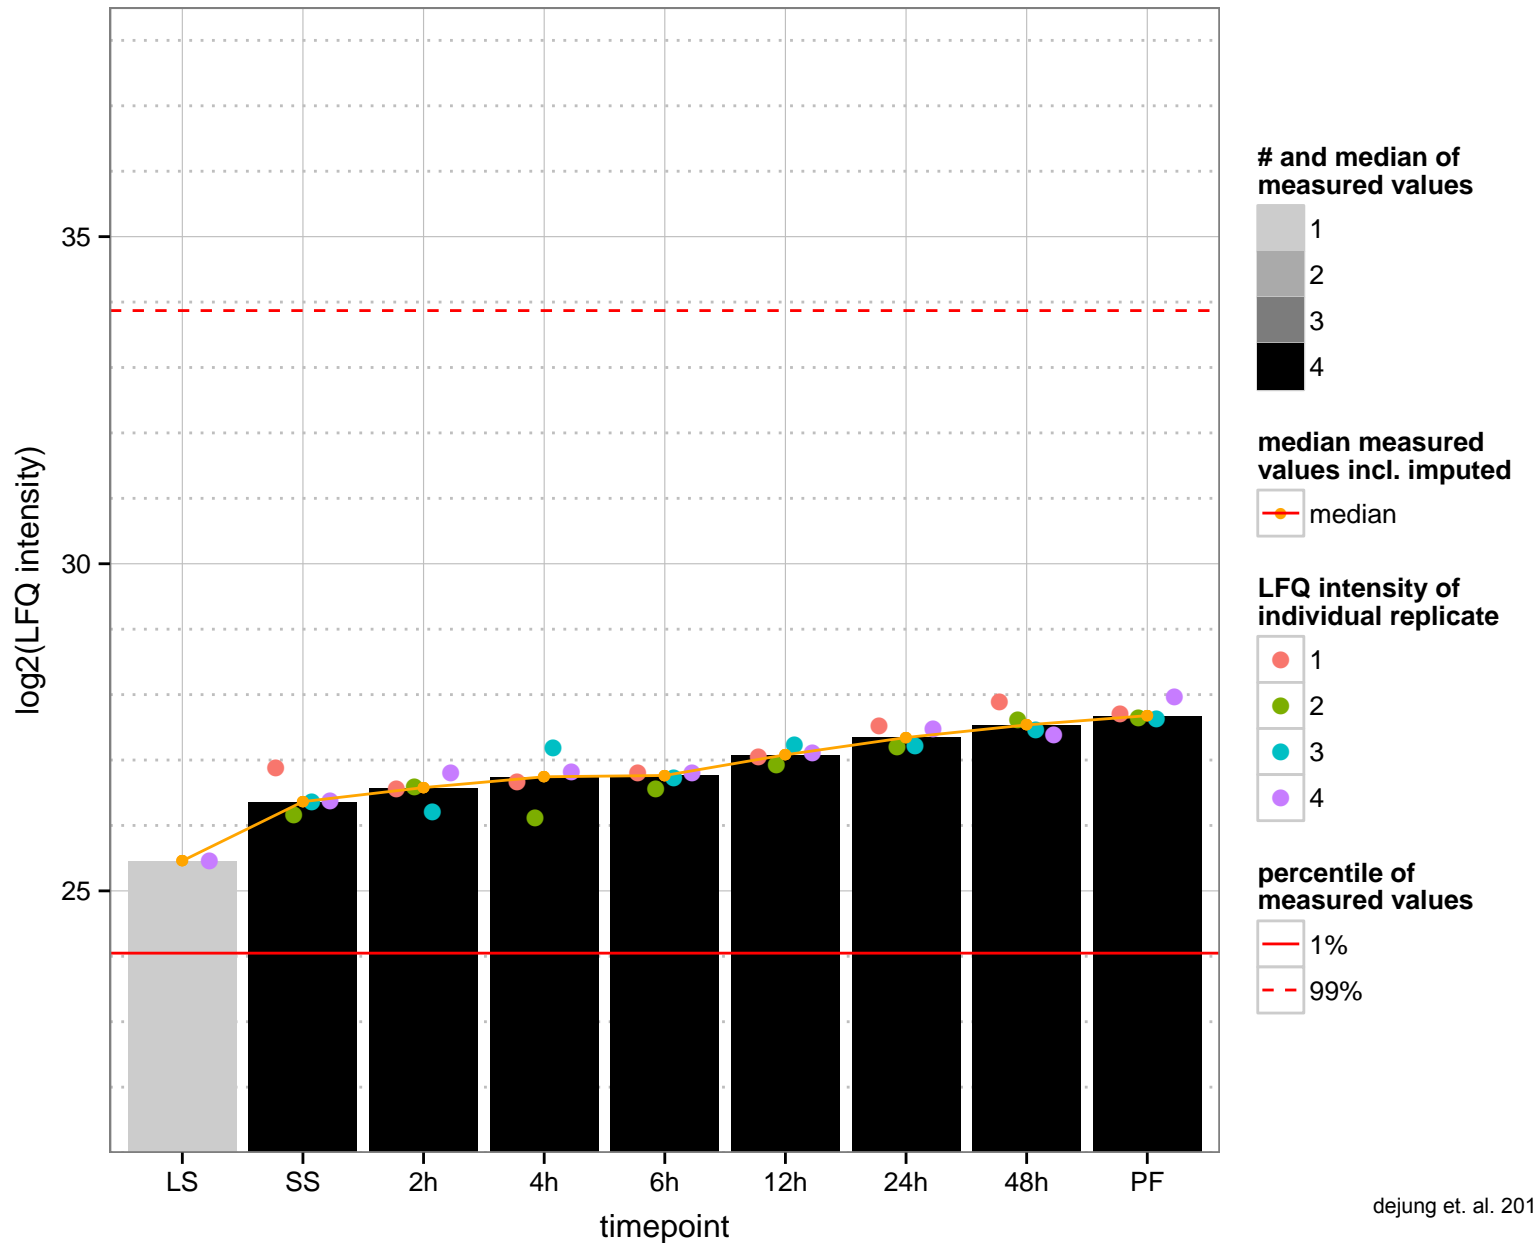



hypothetical protein, conserved  
 Tb927.11.4420  
 AGOF: null  
 AGOC: null  
 AGOP: null  
 PGO: null  
 PGOC: null  
 PGOP: null

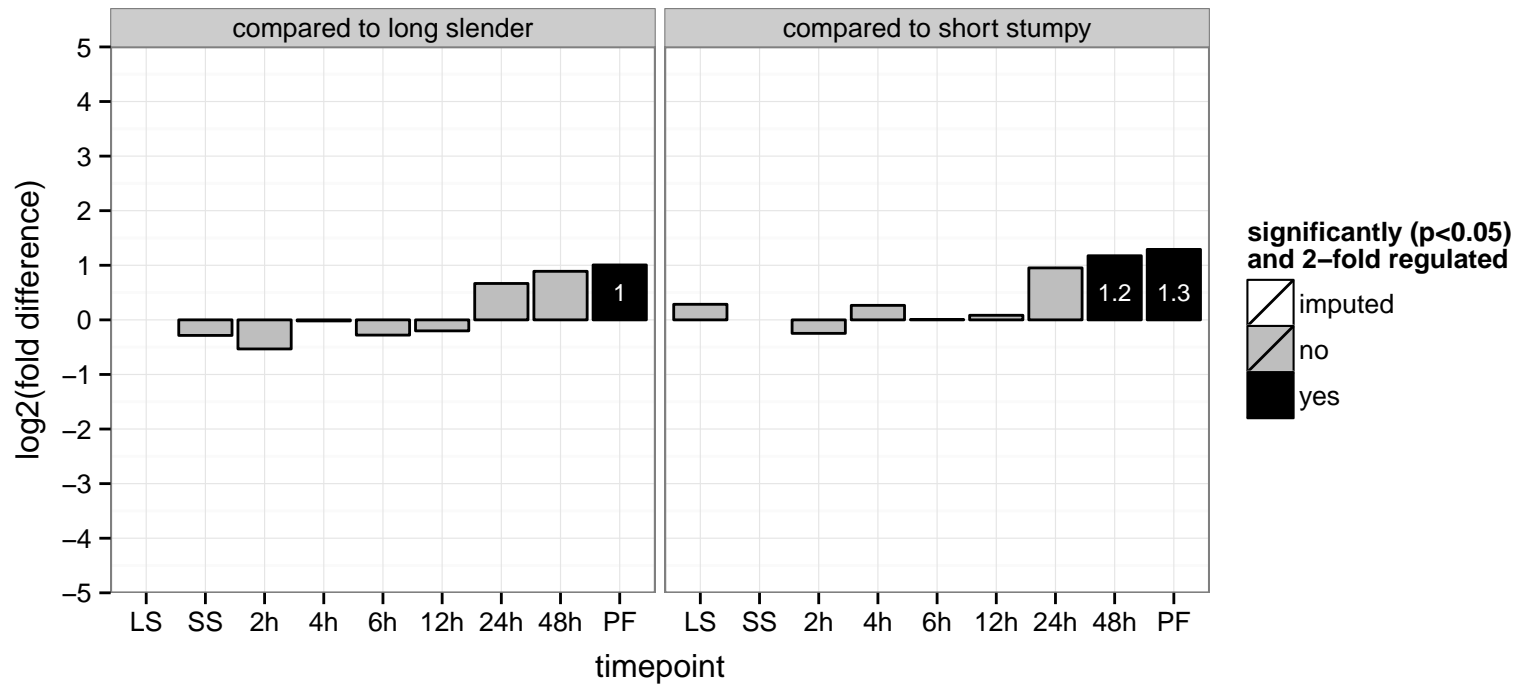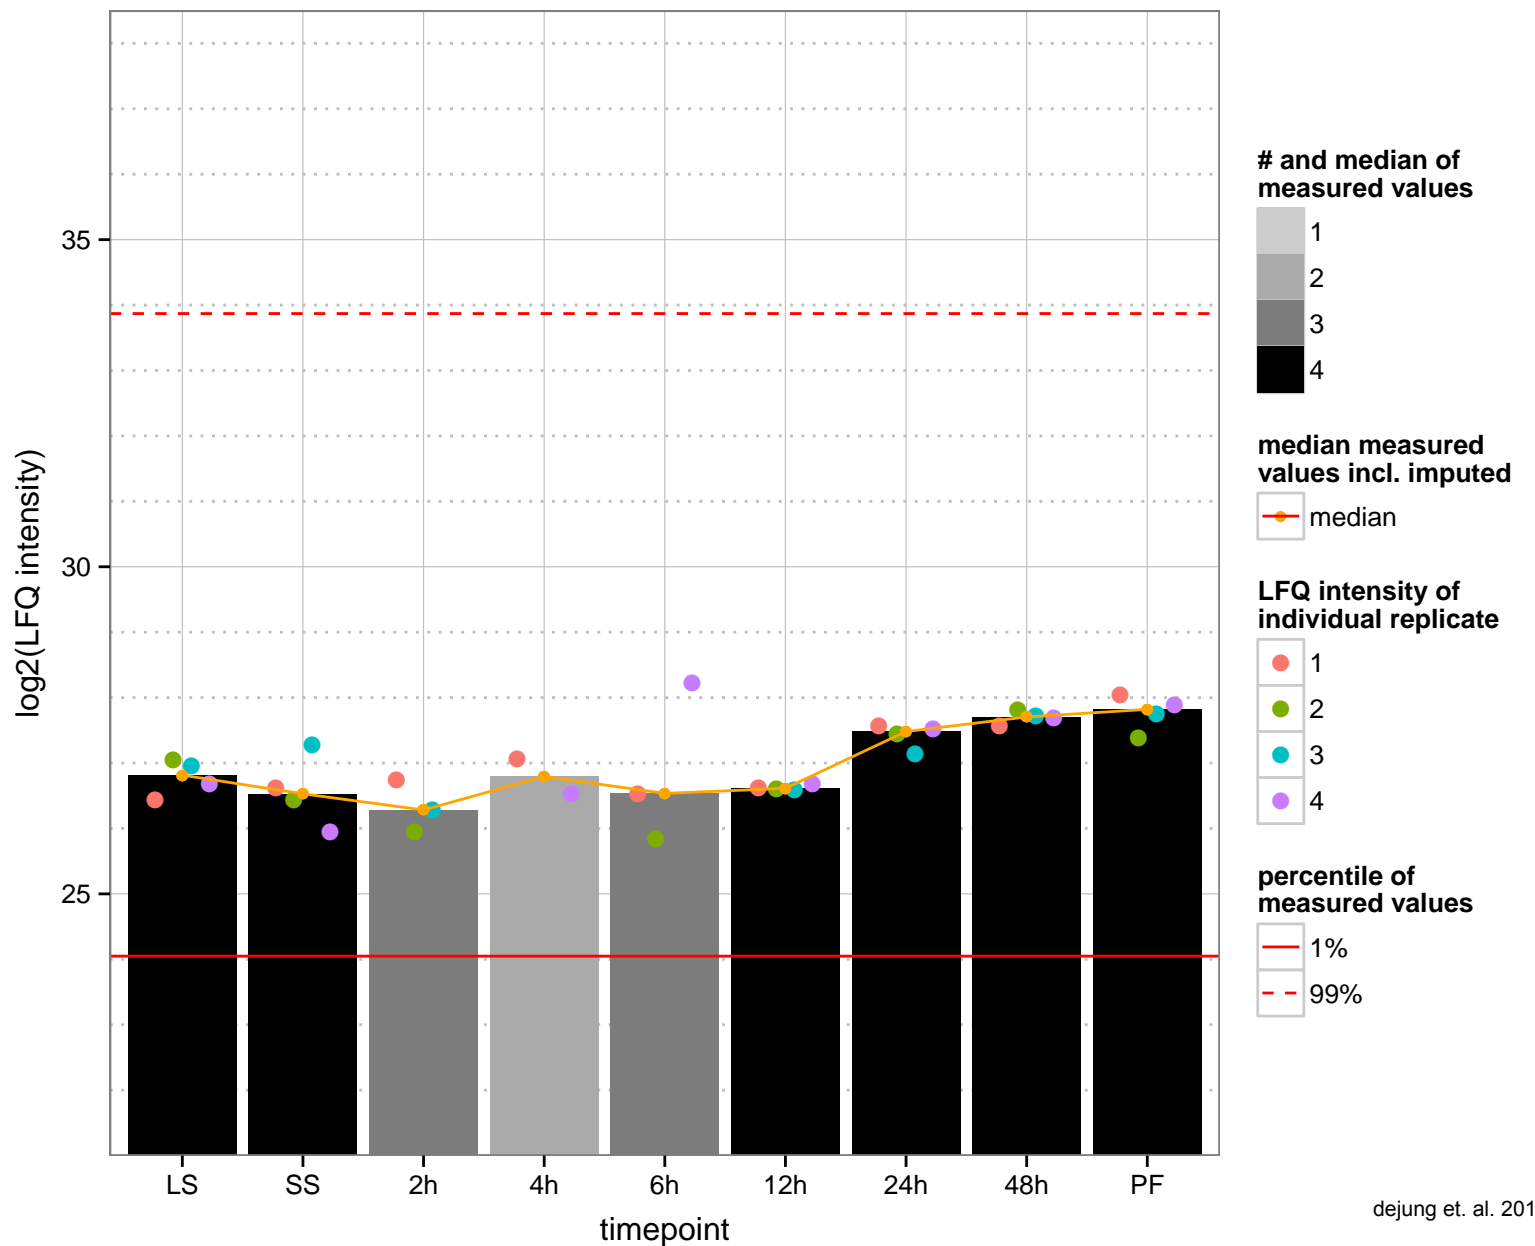

pyruvate dehydrogenase (lipoamide) kinase, putative  
 Tb927.11.4780  
 AGOF: ATP binding, pyruvate dehydrogenase (acetyl-transferring) kinase activity  
 AGOC: mitochondrion  
 AGOP: null  
 PGO: ATP binding  
 PGO: null  
 PGOP: null

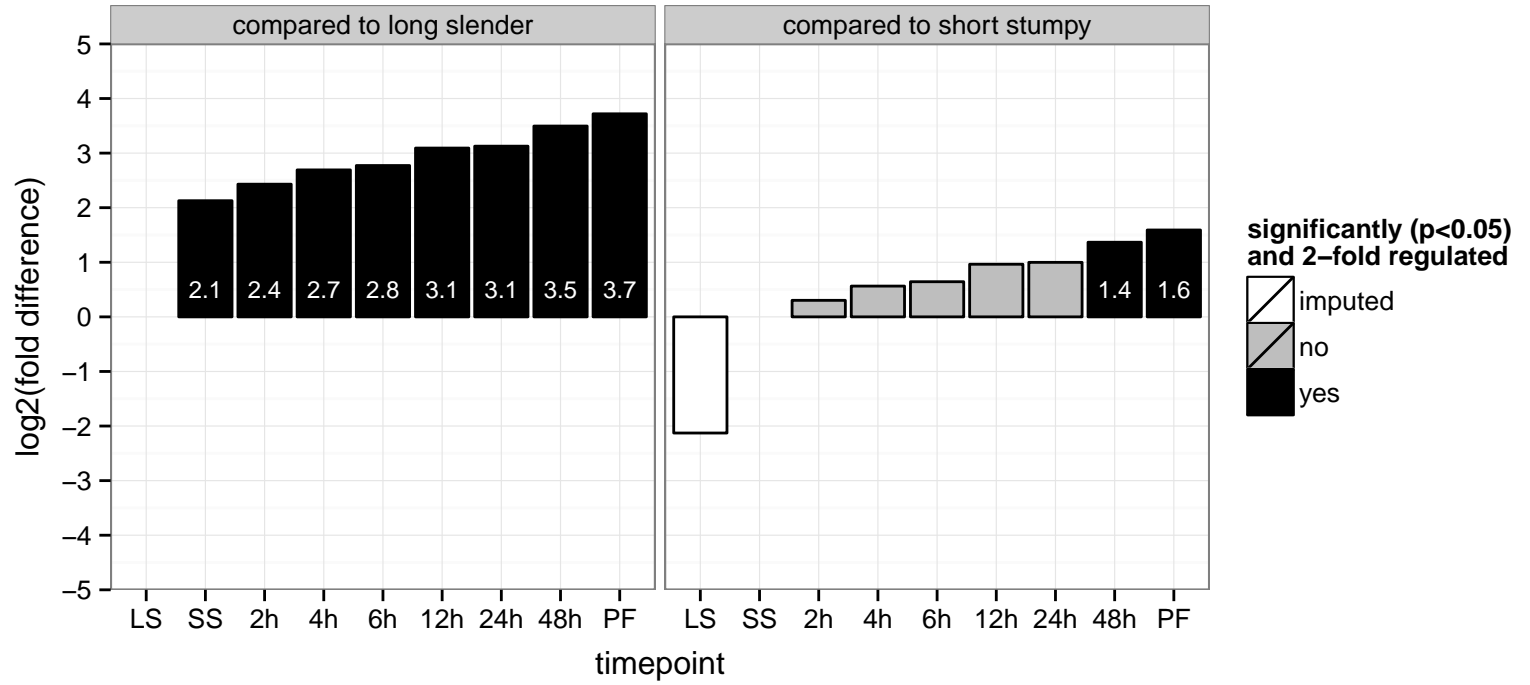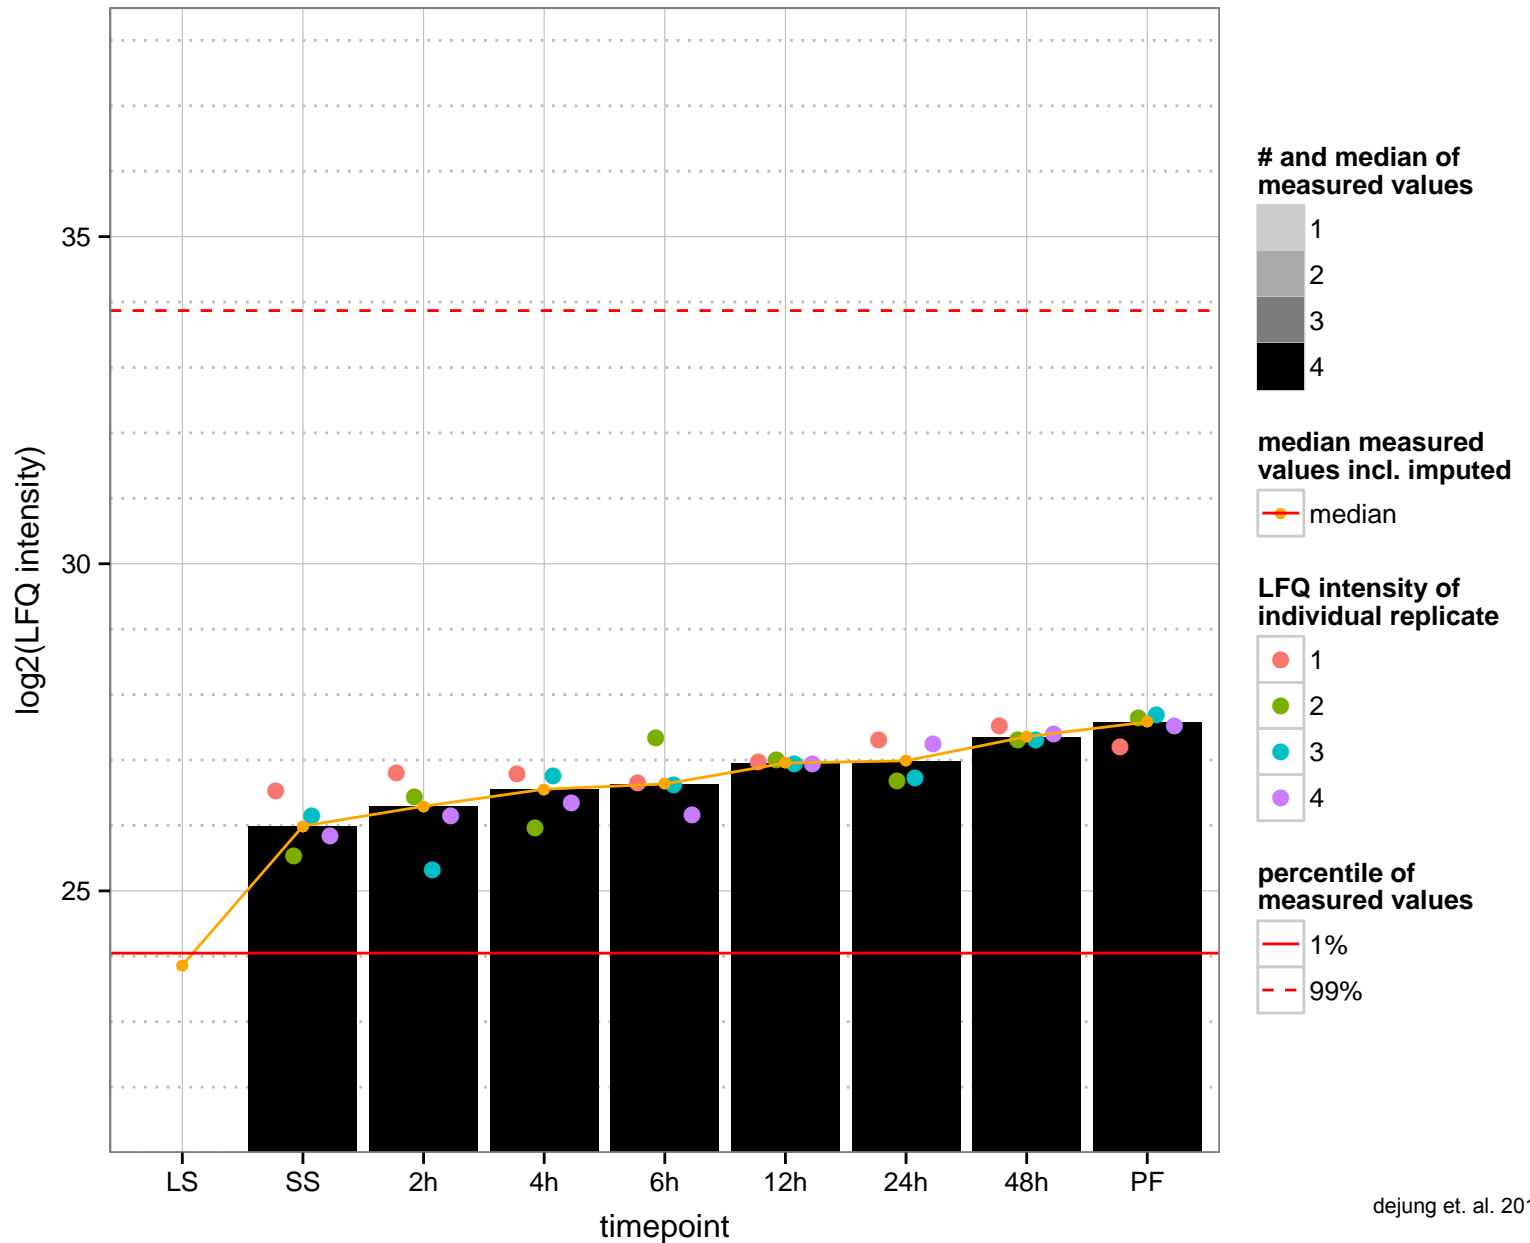

chaperone protein DNAj, putative  
 Tb927.11.5220  
 AGOF: heat shock protein binding  
 AGOC: null  
 AGOP: protein folding  
 PGOF: heat shock protein binding  
 PGO: null  
 PGOP: null

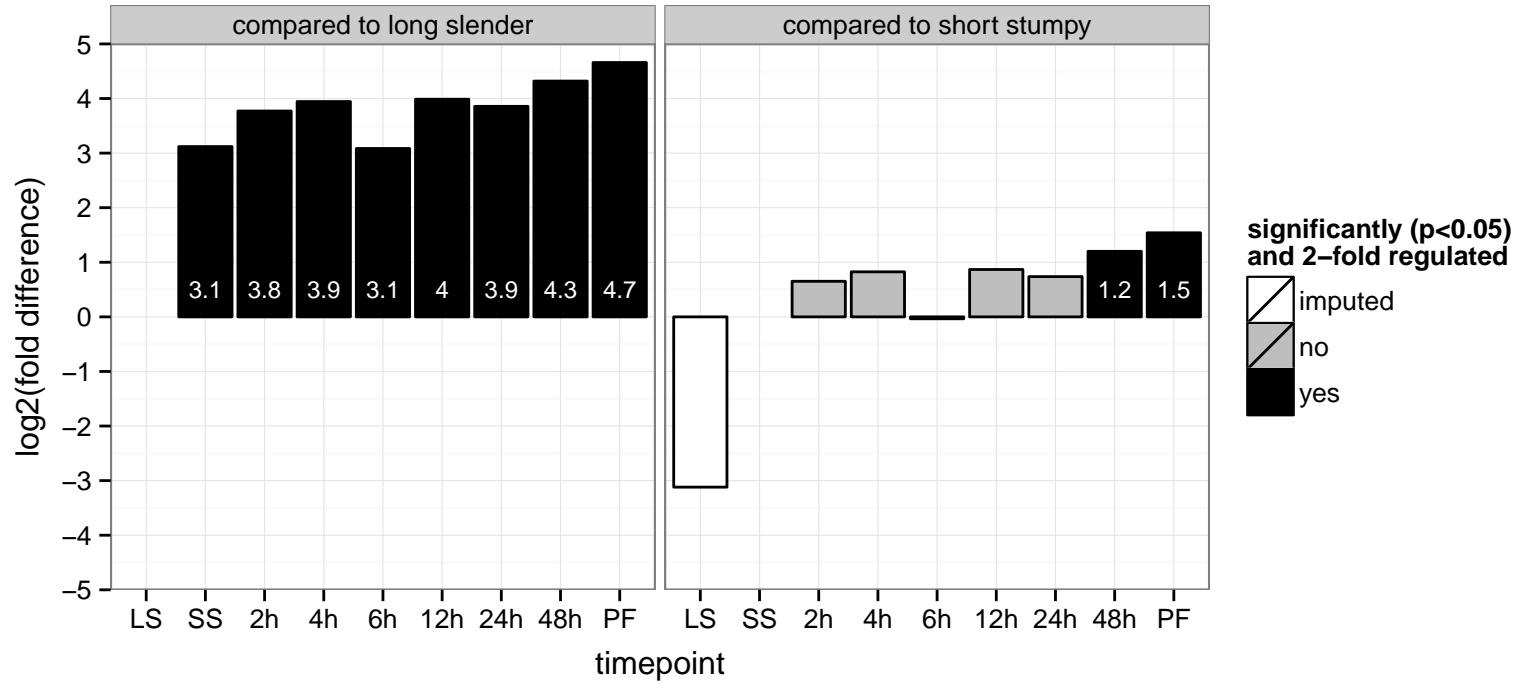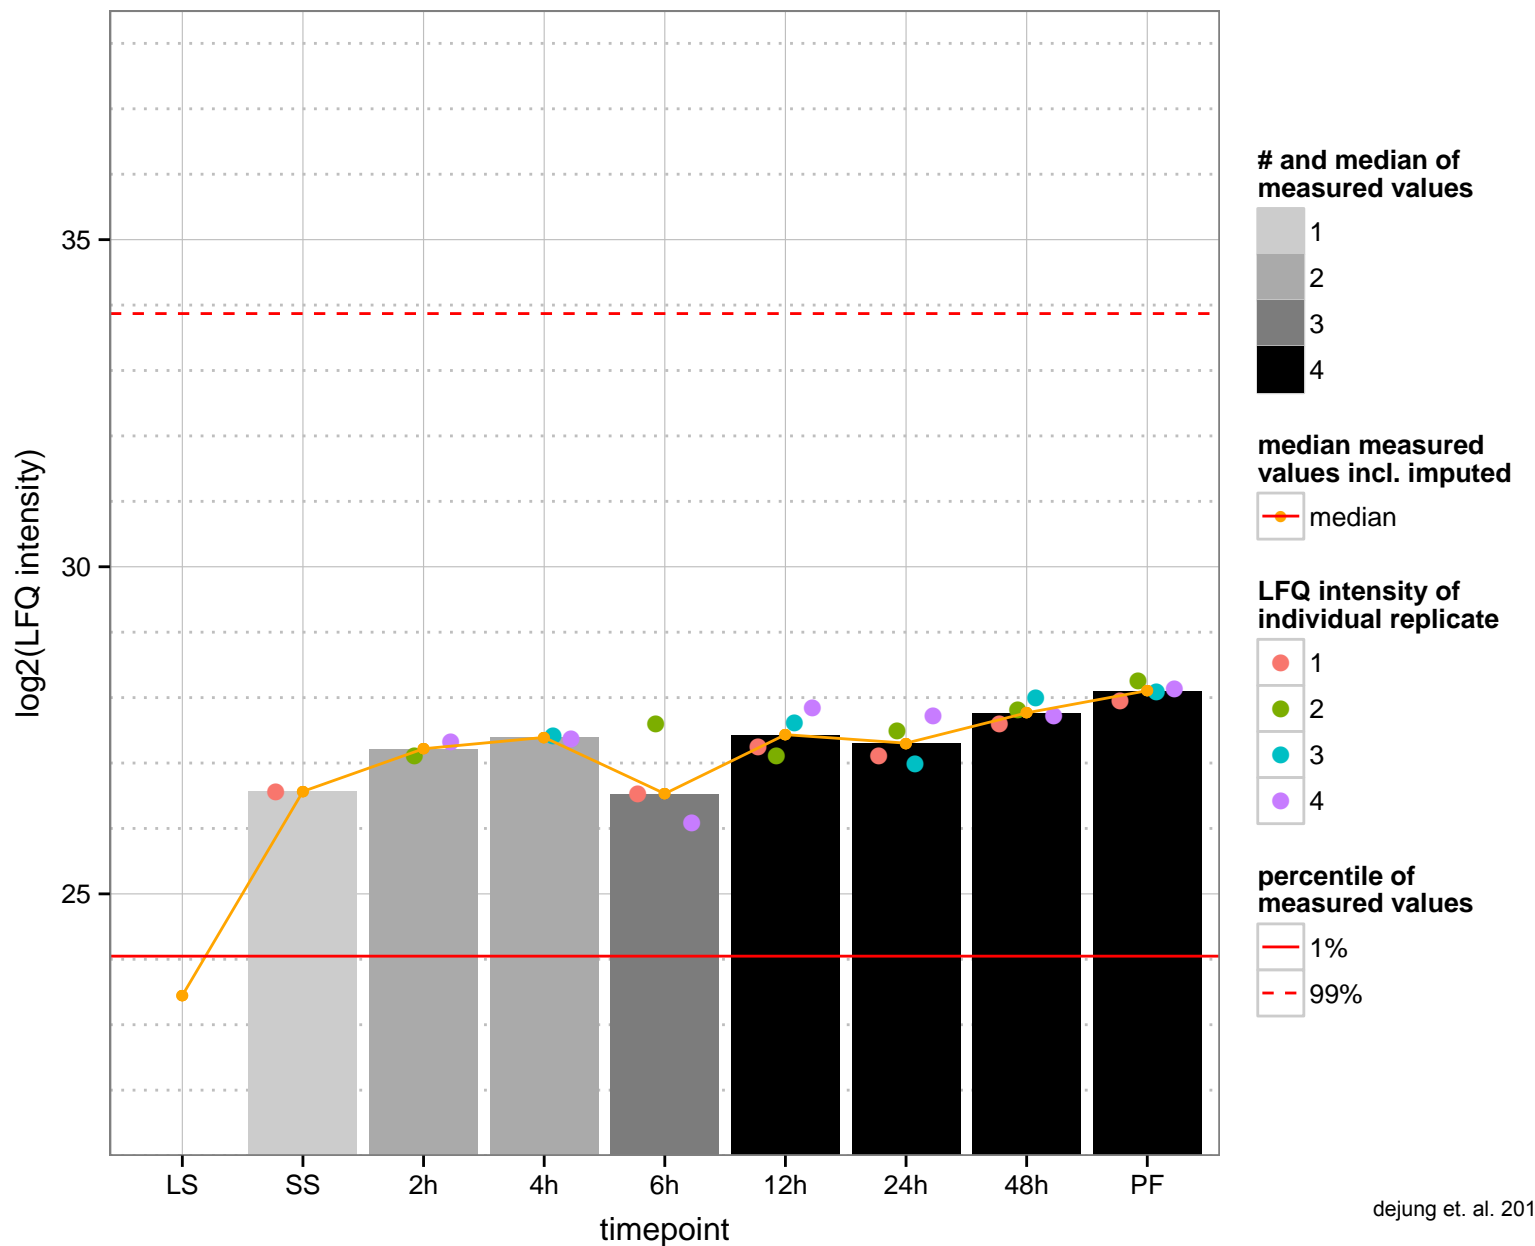

hypothetical protein, conserved  
 Tb927.11.6000  
 AGOF: structural constituent of ribosome  
 AGOC: intracellular, mitochondrion, ribosome  
 AGOP: translation  
 PGOF: structural constituent of ribosome  
 PGO: ribosome  
 PGOP: translation

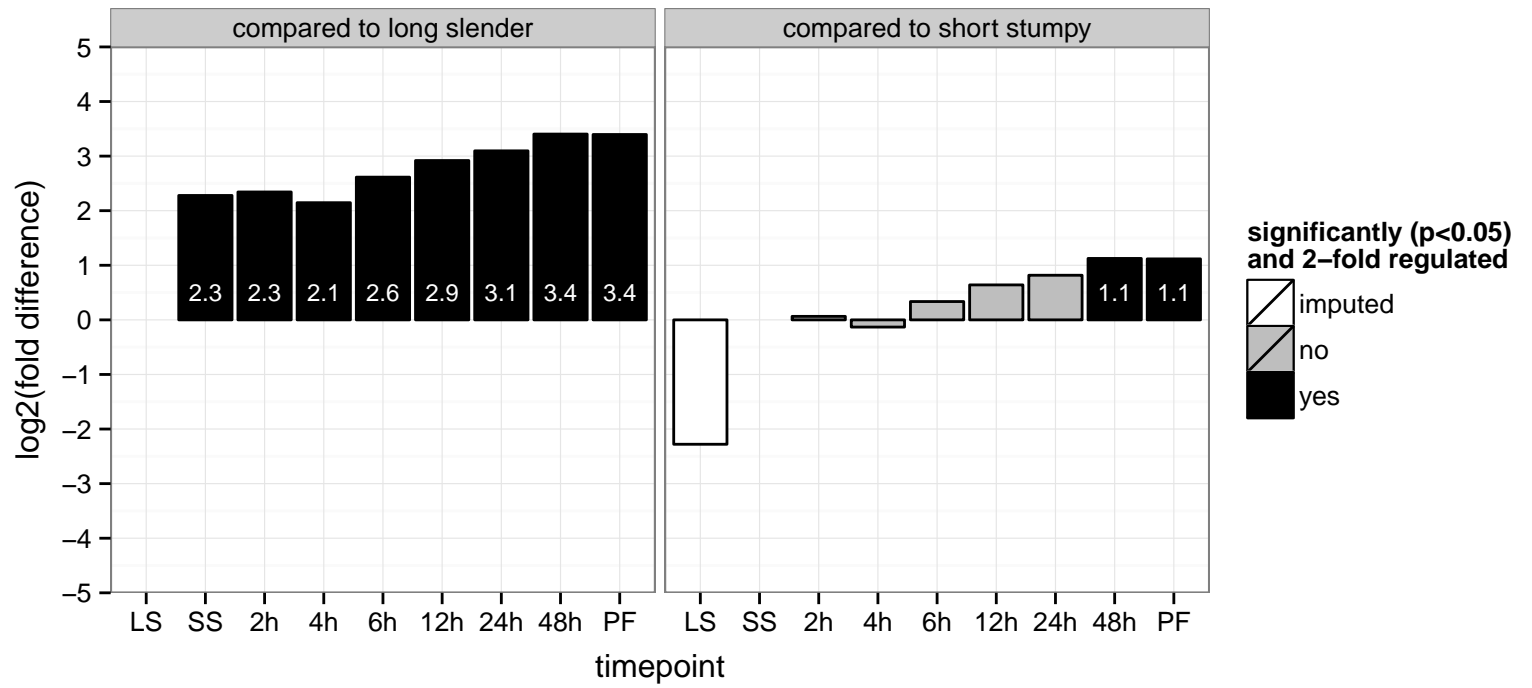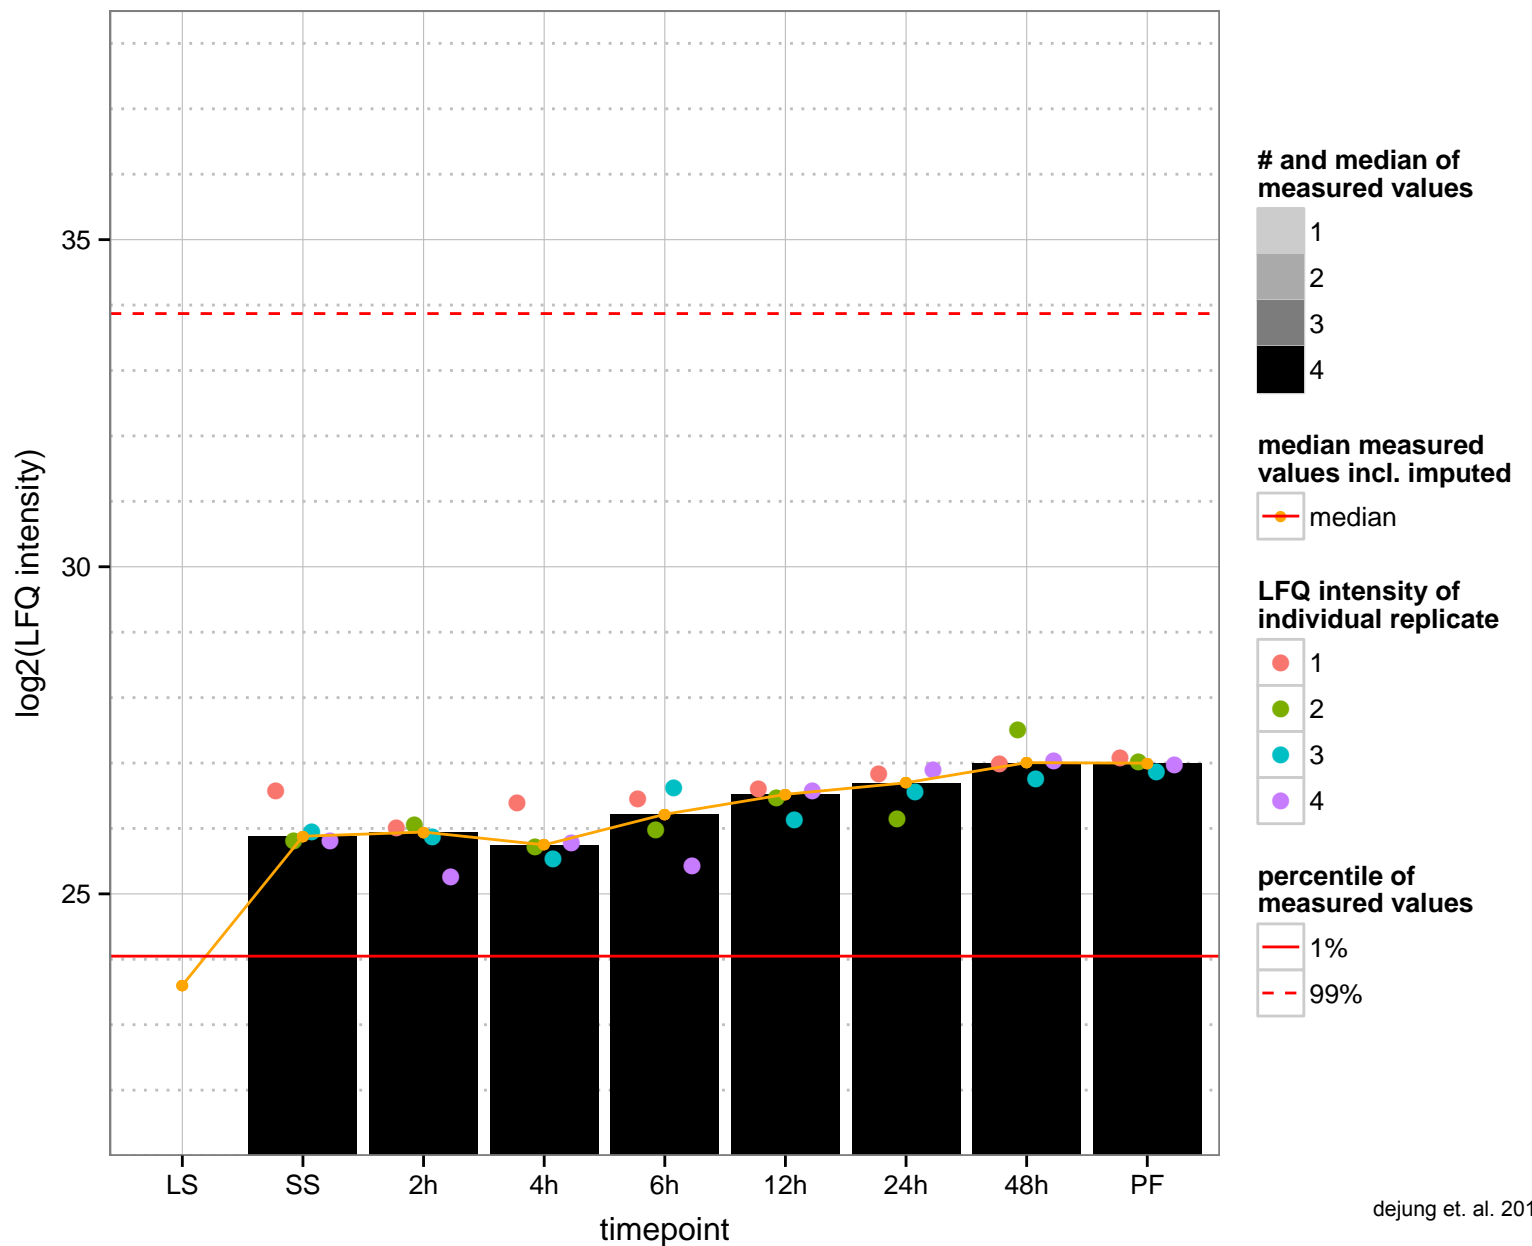

40S ribosomal protein S5, putative  
 Tb927.11.6300  
 AGOF: structural constituent of ribosome  
 AGOC: intracellular, ribosome, small ribosomal subunit  
 AGOP: translation  
 PGOF: structural constituent of ribosome  
 PGO: intracellular, ribosome, small ribosomal subunit  
 PGOP: translation

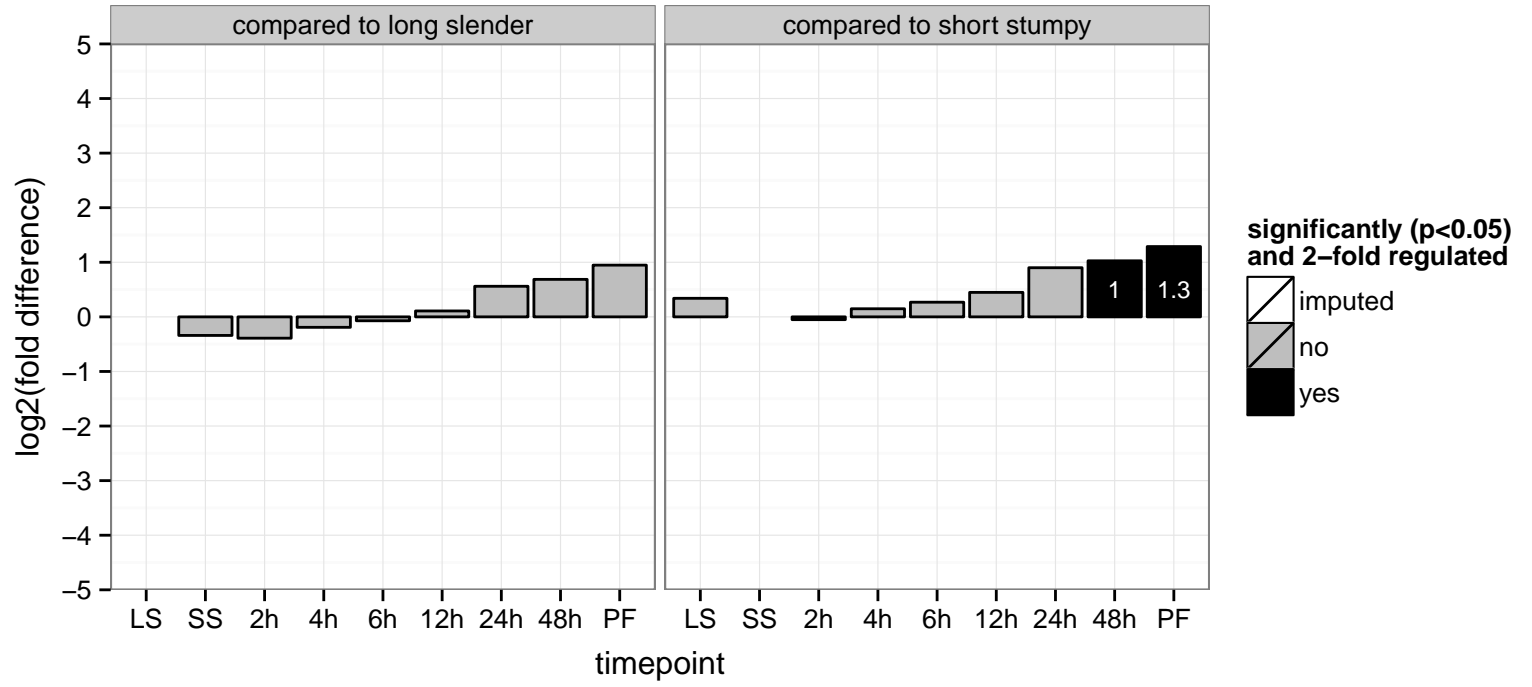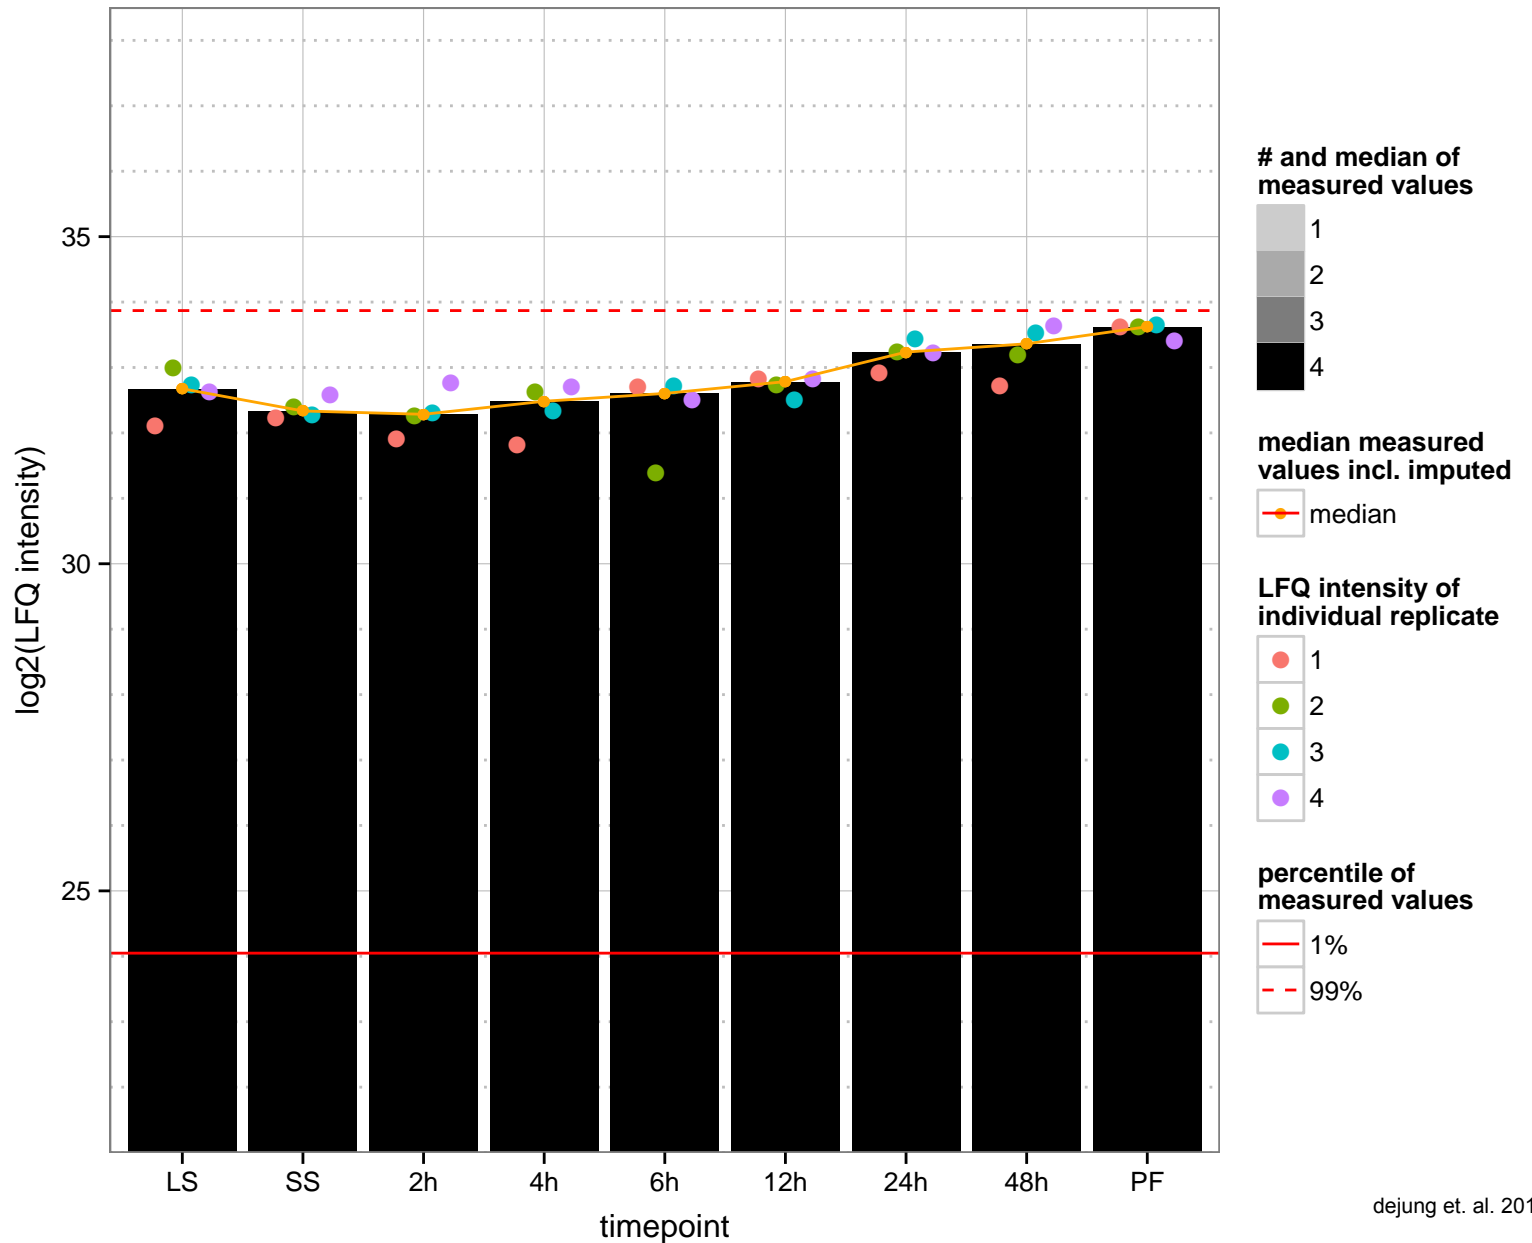

hypothetical protein, conserved  
 Tb927.11.6420  
 AGOF: null  
 AGOC: null  
 AGOP: null  
 PGO: binding  
 PGO: null  
 PGO: null

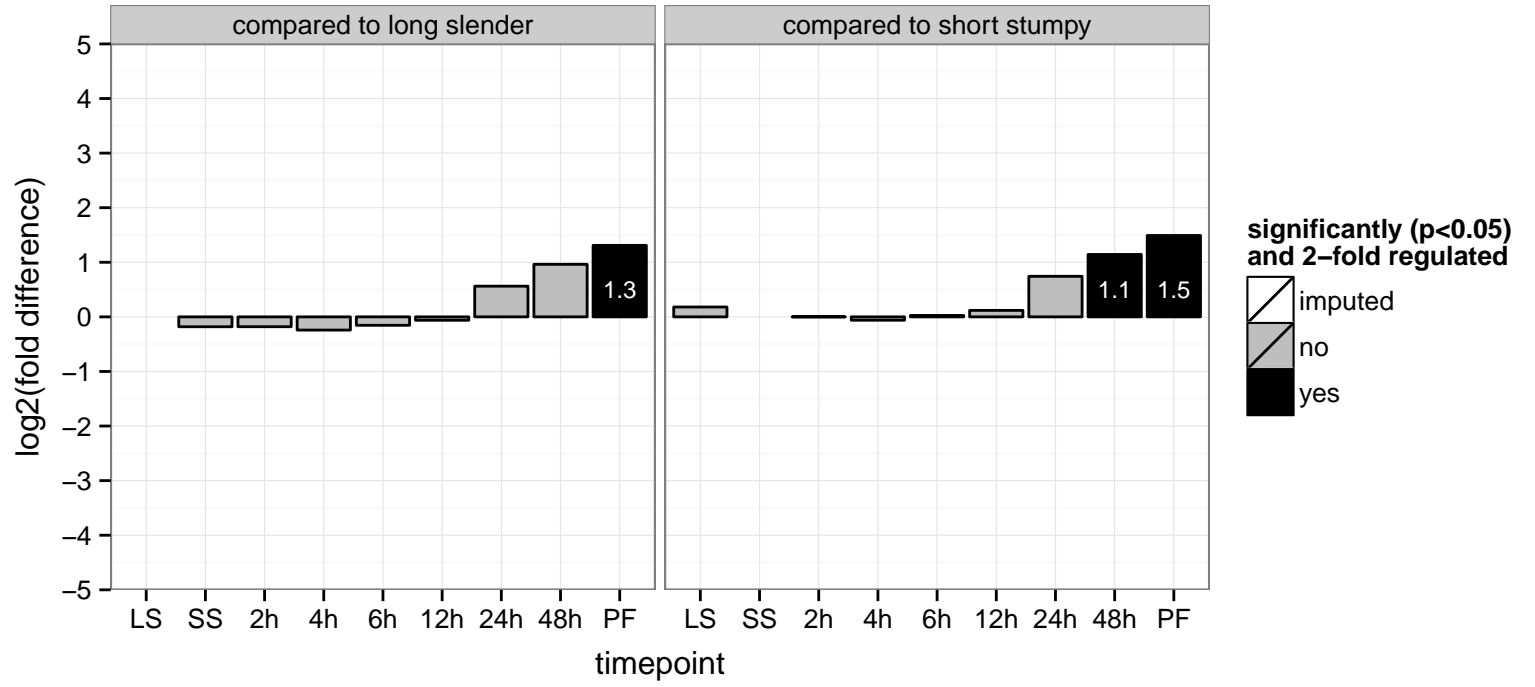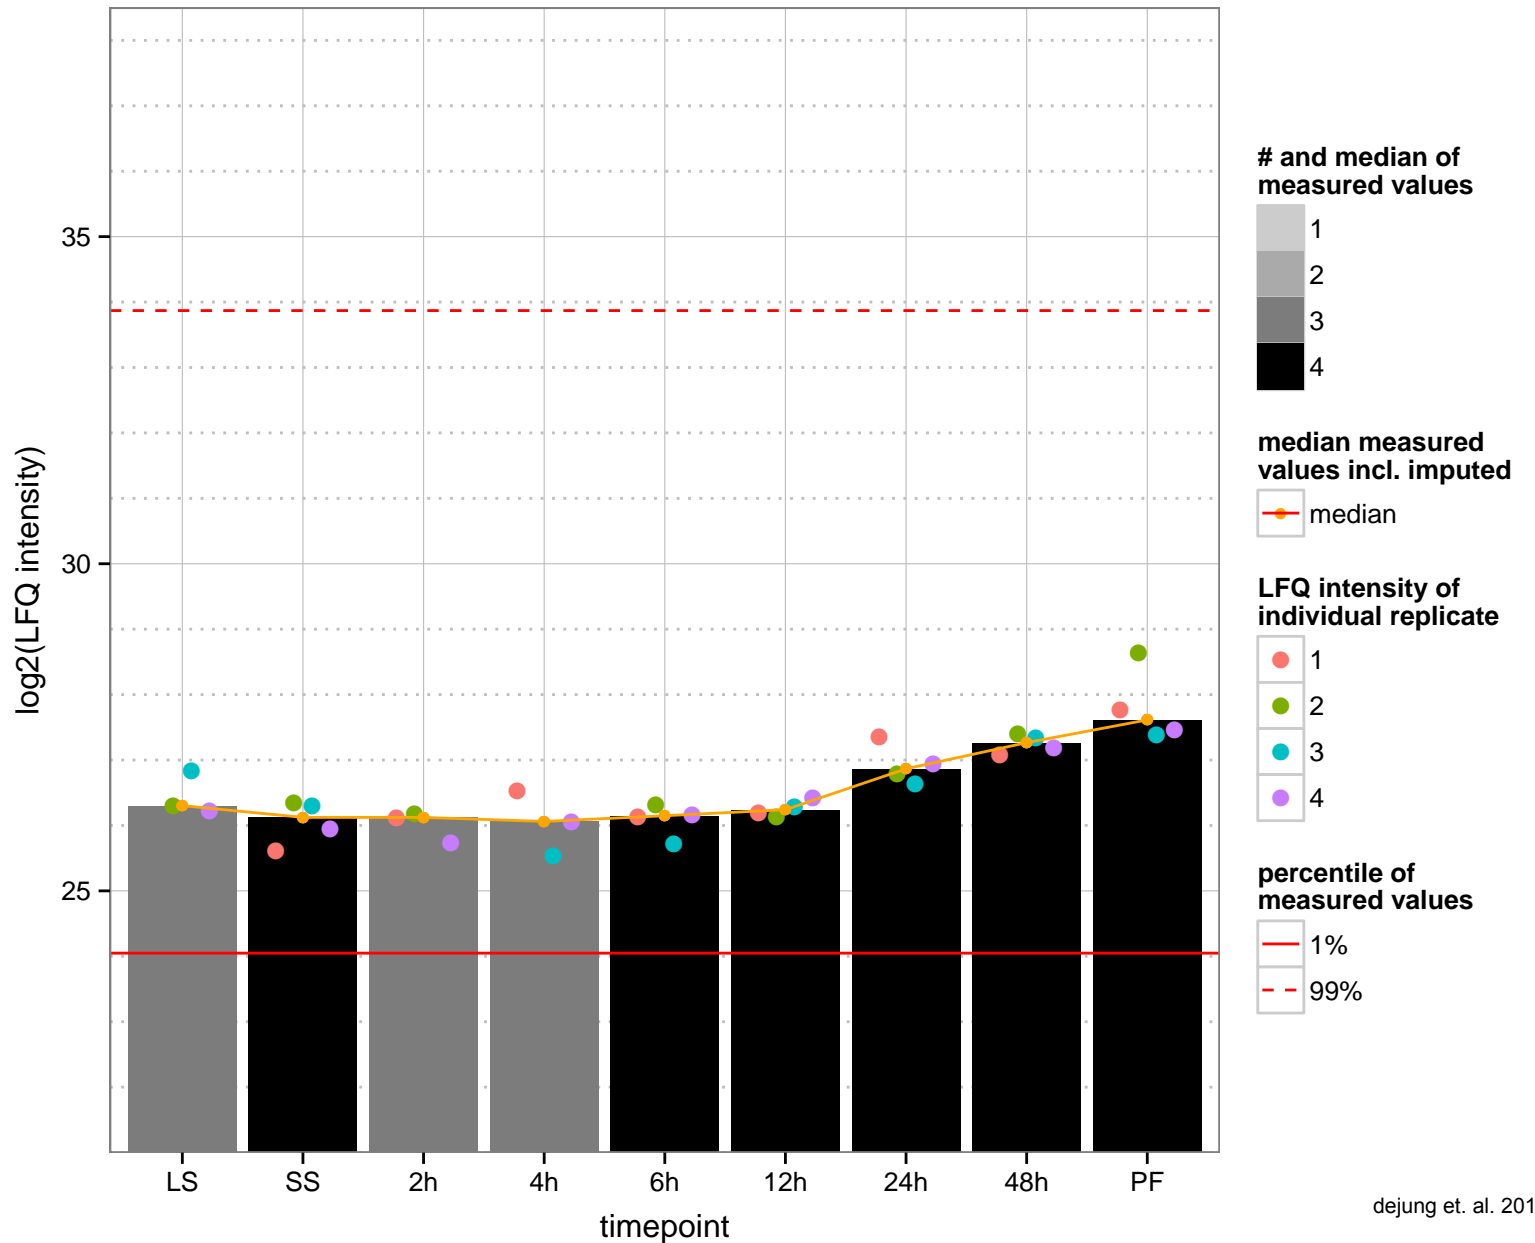

40S ribosomal protein S21, putative  
 Tb927.11.6510;Tb927.11.6500  
 AGOF: structural constituent of ribosome  
 AGOC: intracellular, ribosome  
 AGOP: translation  
 PGOF: structural constituent of ribosome  
 PGO: intracellular, ribosome  
 PGOP: translation

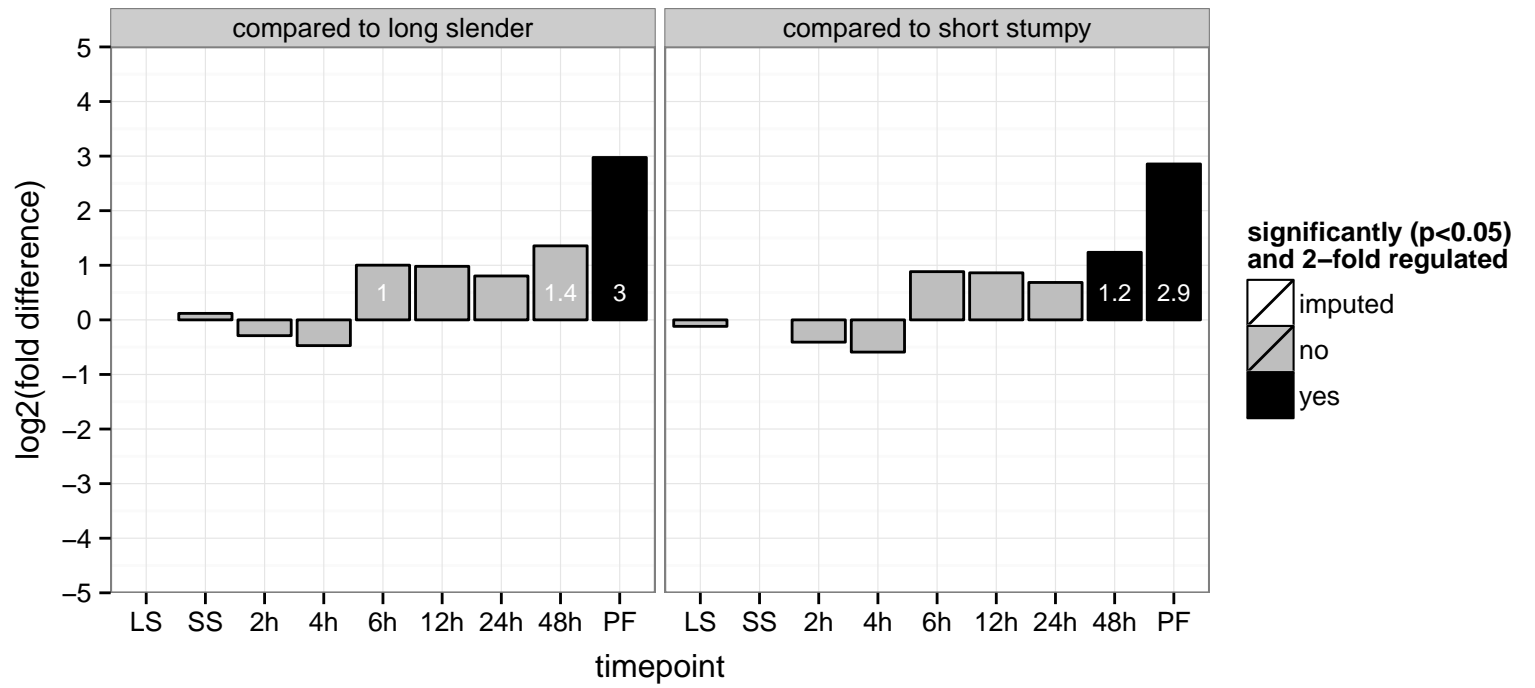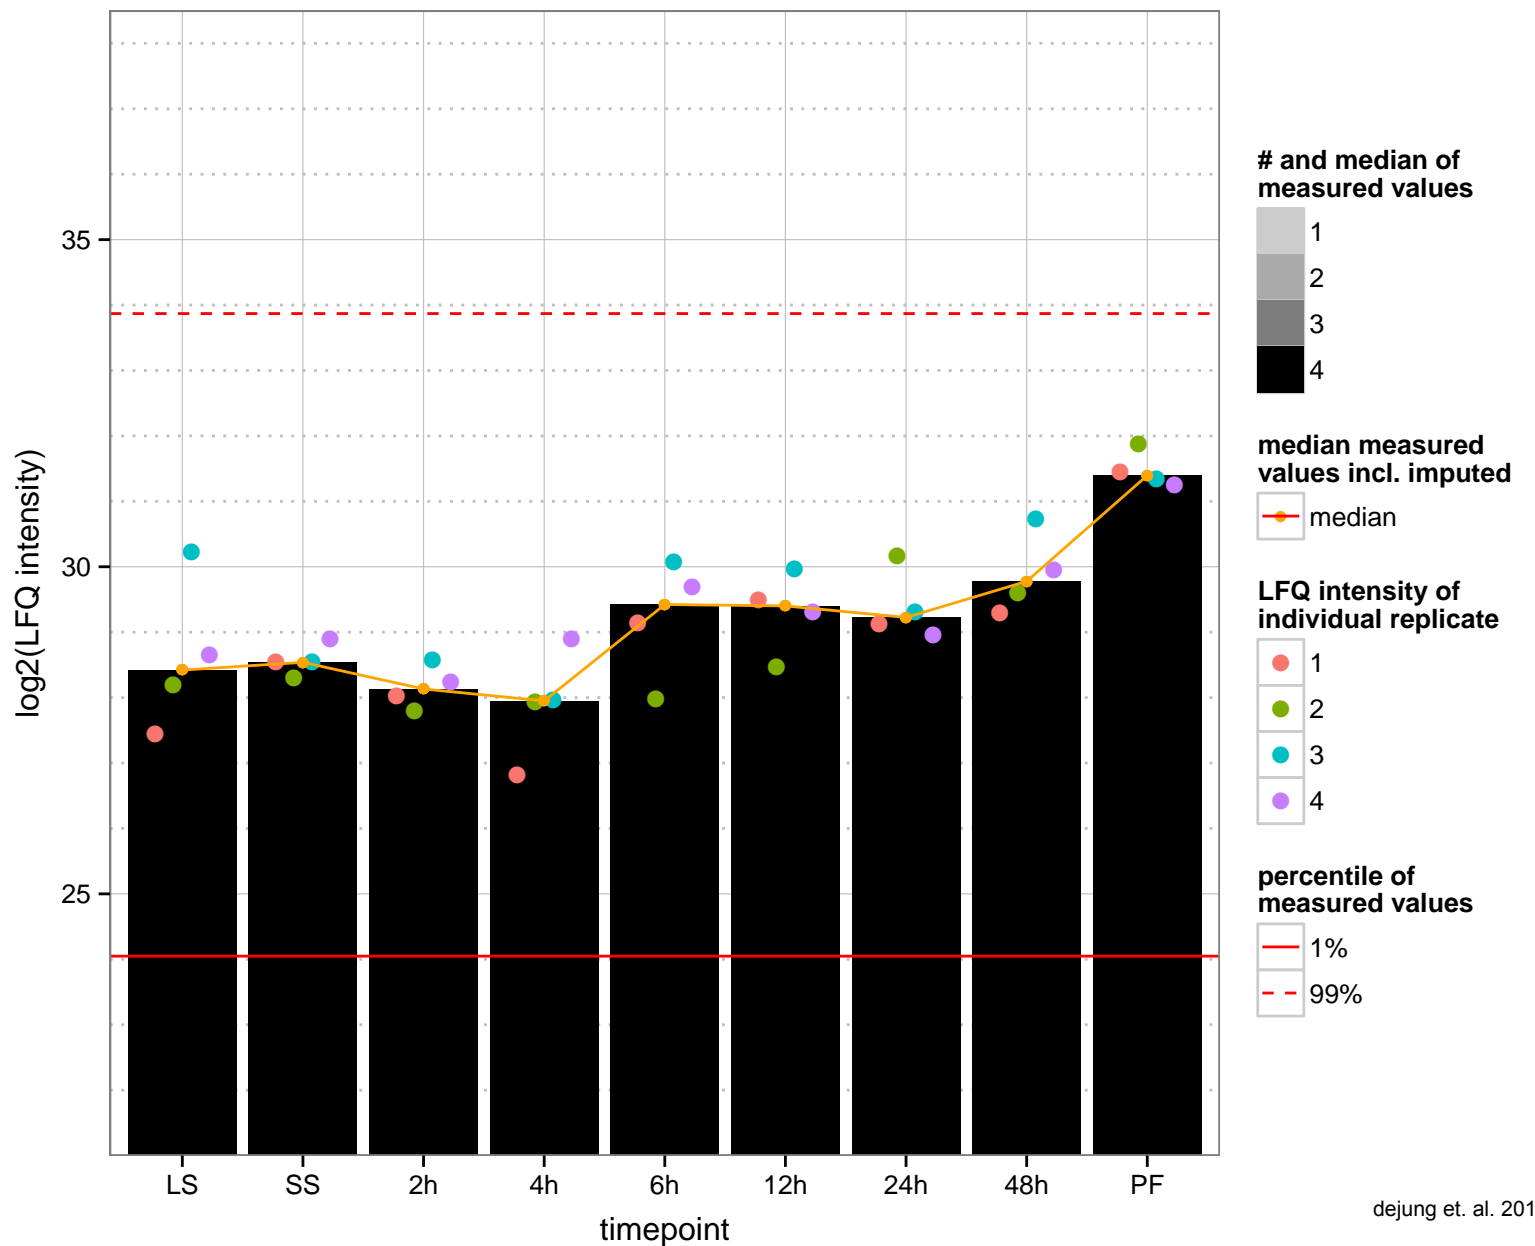

tubulin-tyrosine ligase-like protein, putative, putative (TTL)

Tb927.11.6810

AGOF: null, tubulin-tyrosine ligase activity

AGOC: null

AGOP: null, cellular protein modification process

PGOF: null, tubulin-tyrosine ligase activity

PGOC: null

PGOP: null, cellular protein modification process

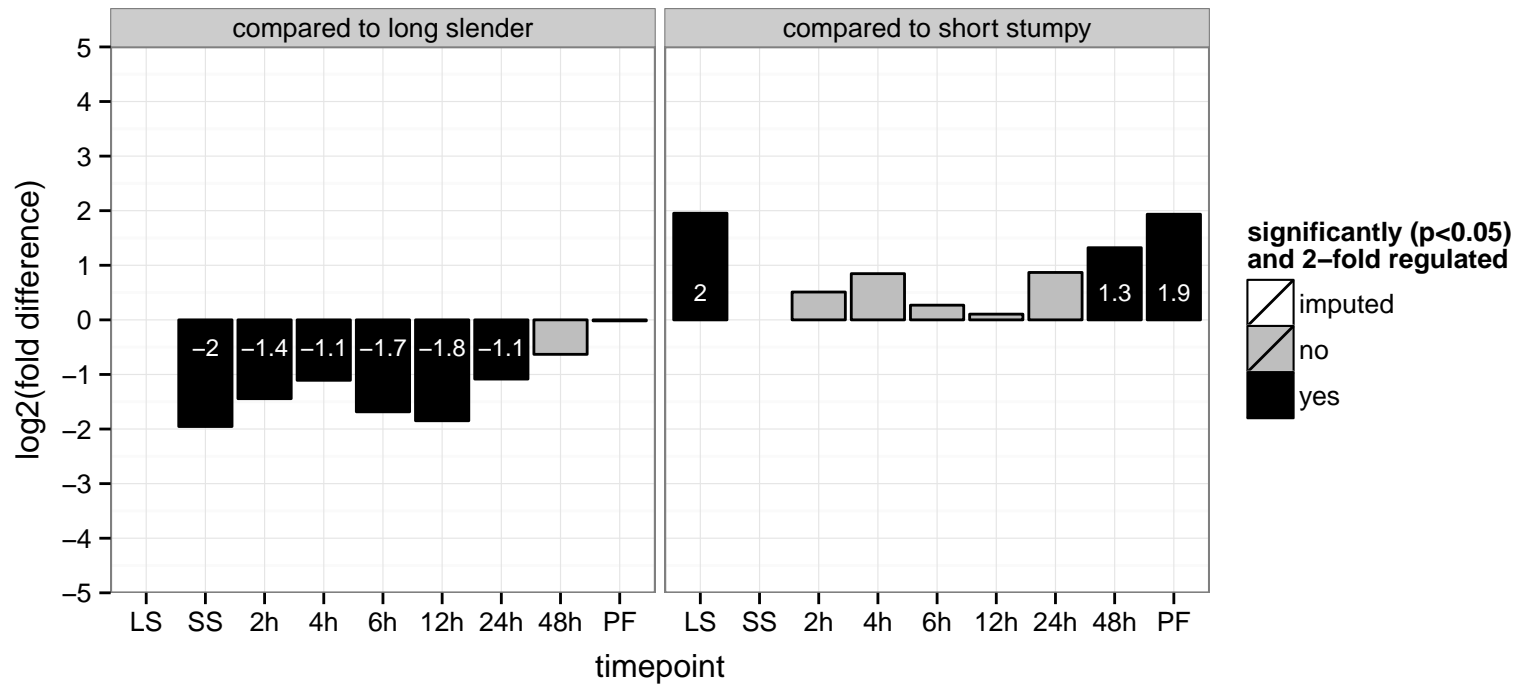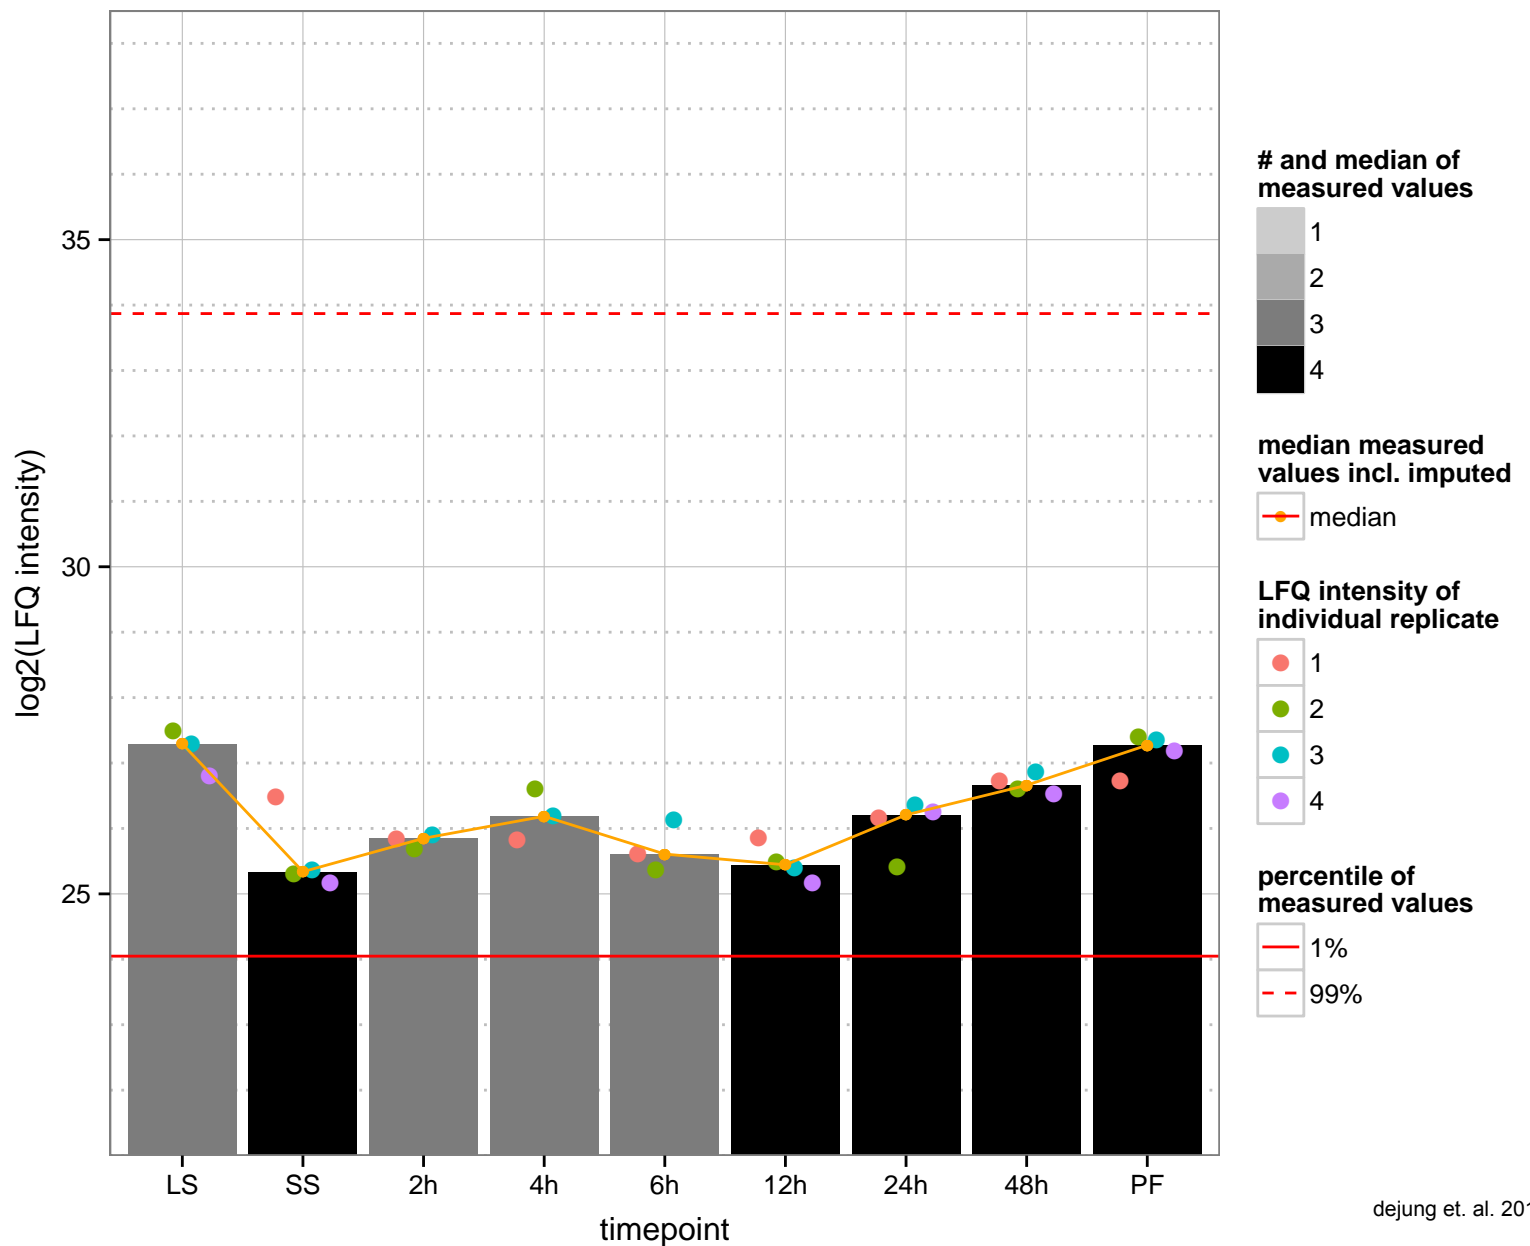



ribosomal protein S26, putative  
 Tb927.11.8200  
 AGOF: structural constituent of ribosome  
 AGOC: intracellular, ribosome  
 AGOP: translation  
 PGOF: structural constituent of ribosome  
 PGO: intracellular, ribosome  
 PGOP: translation

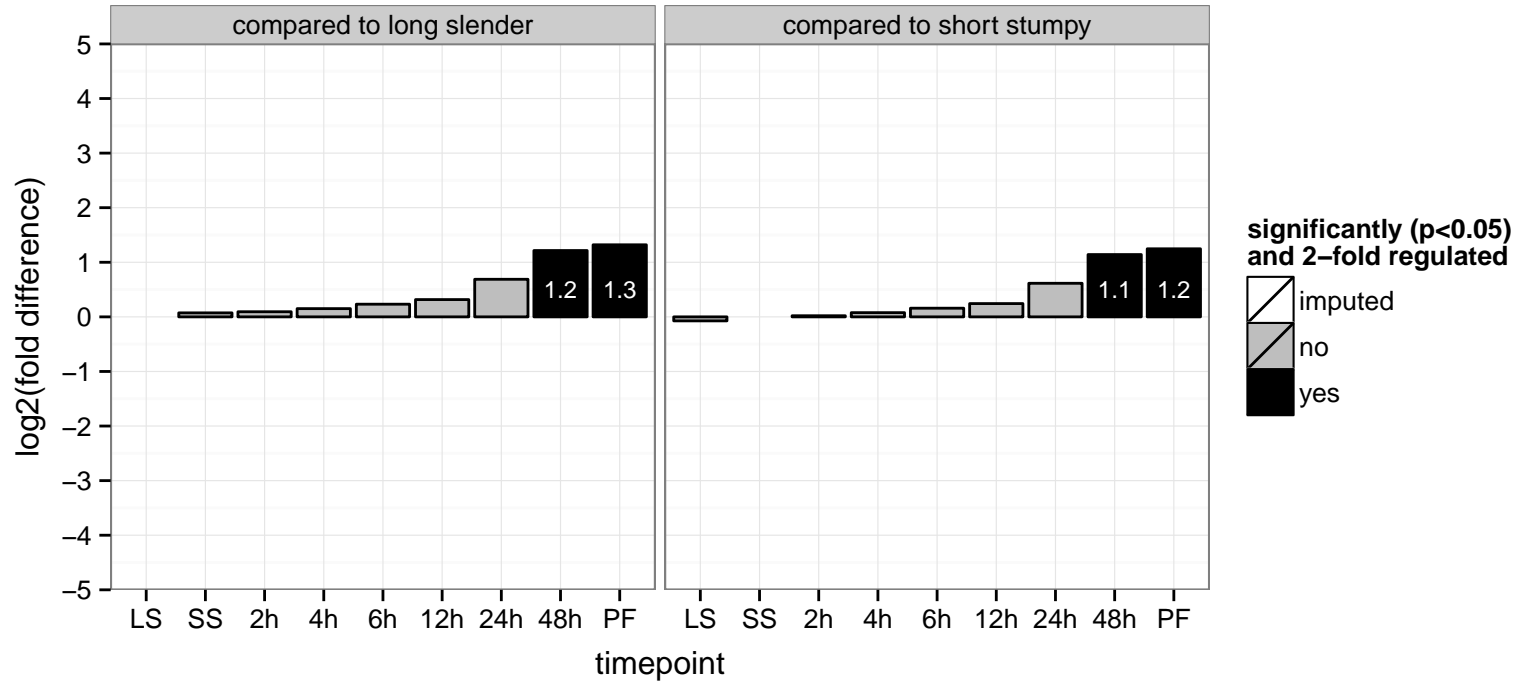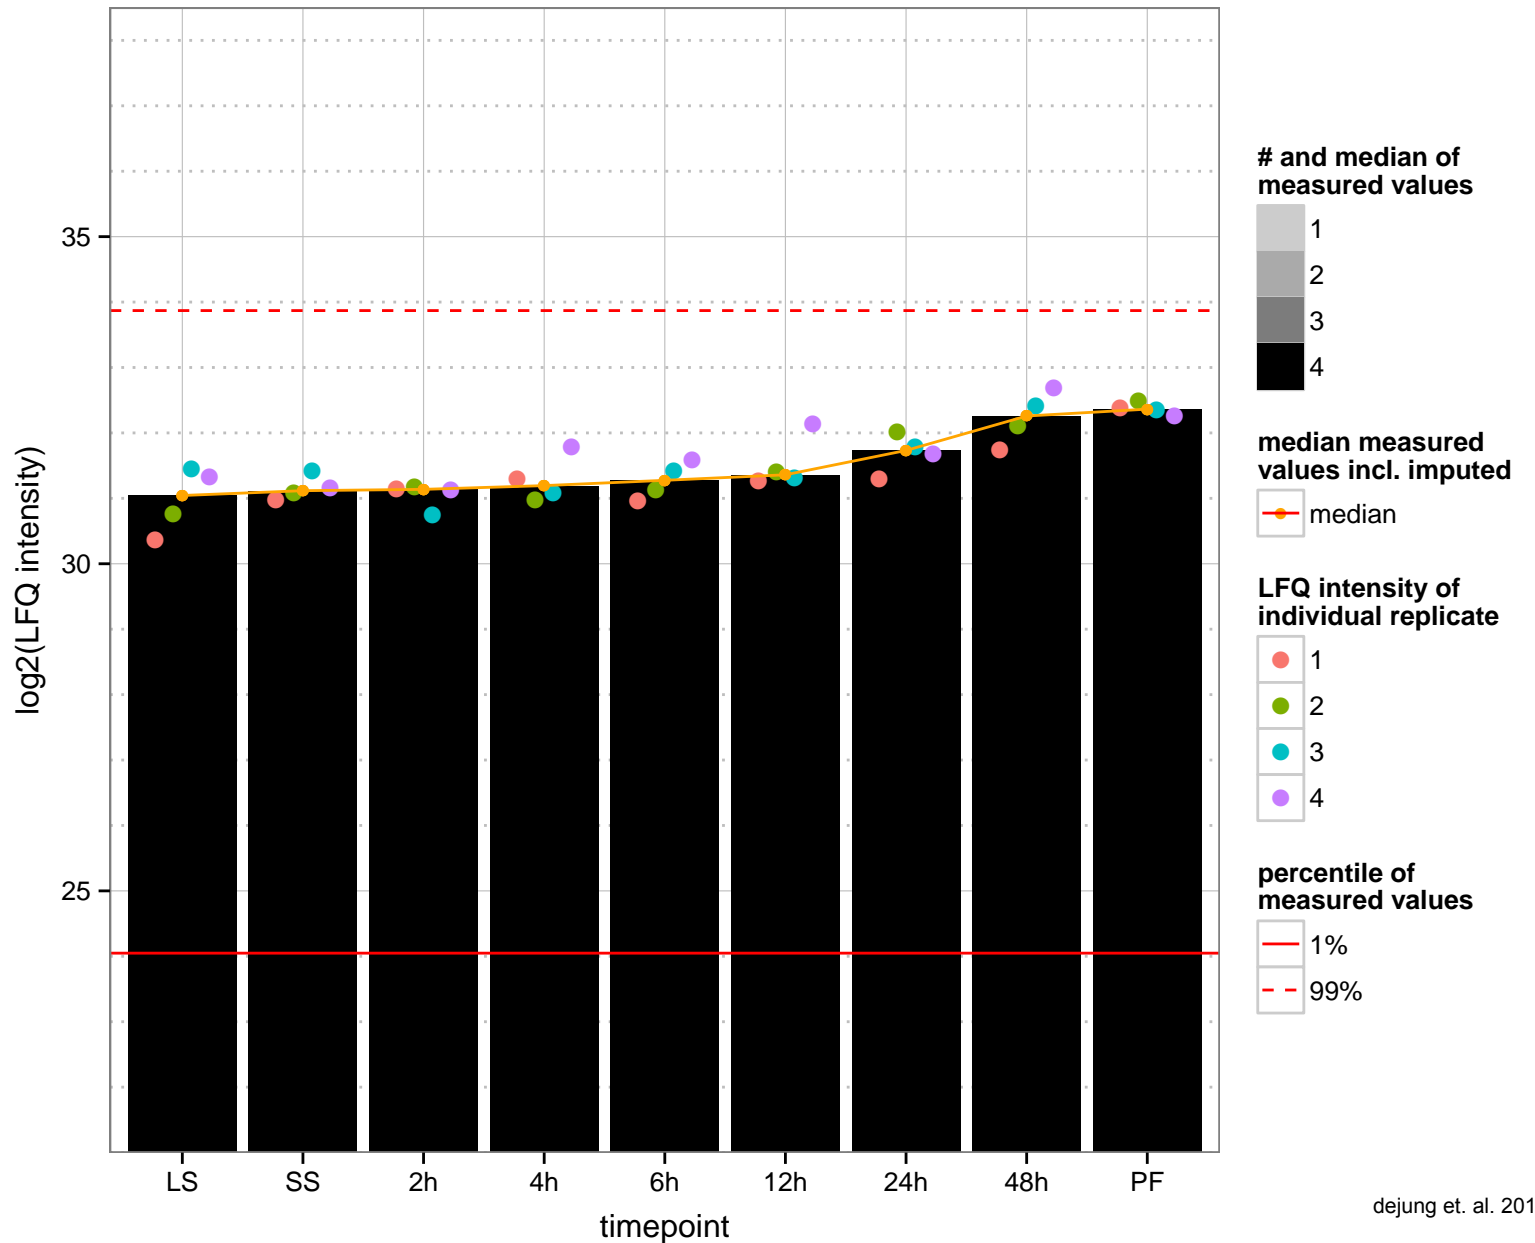

hypothetical protein, conserved  
 Tb927.11.870  
 AGOF: null  
 AGOC: mitochondrion  
 AGOP: null  
 PGOF: structural constituent of ribosome  
 PGO: intracellular, ribosome  
 PGOP: translation

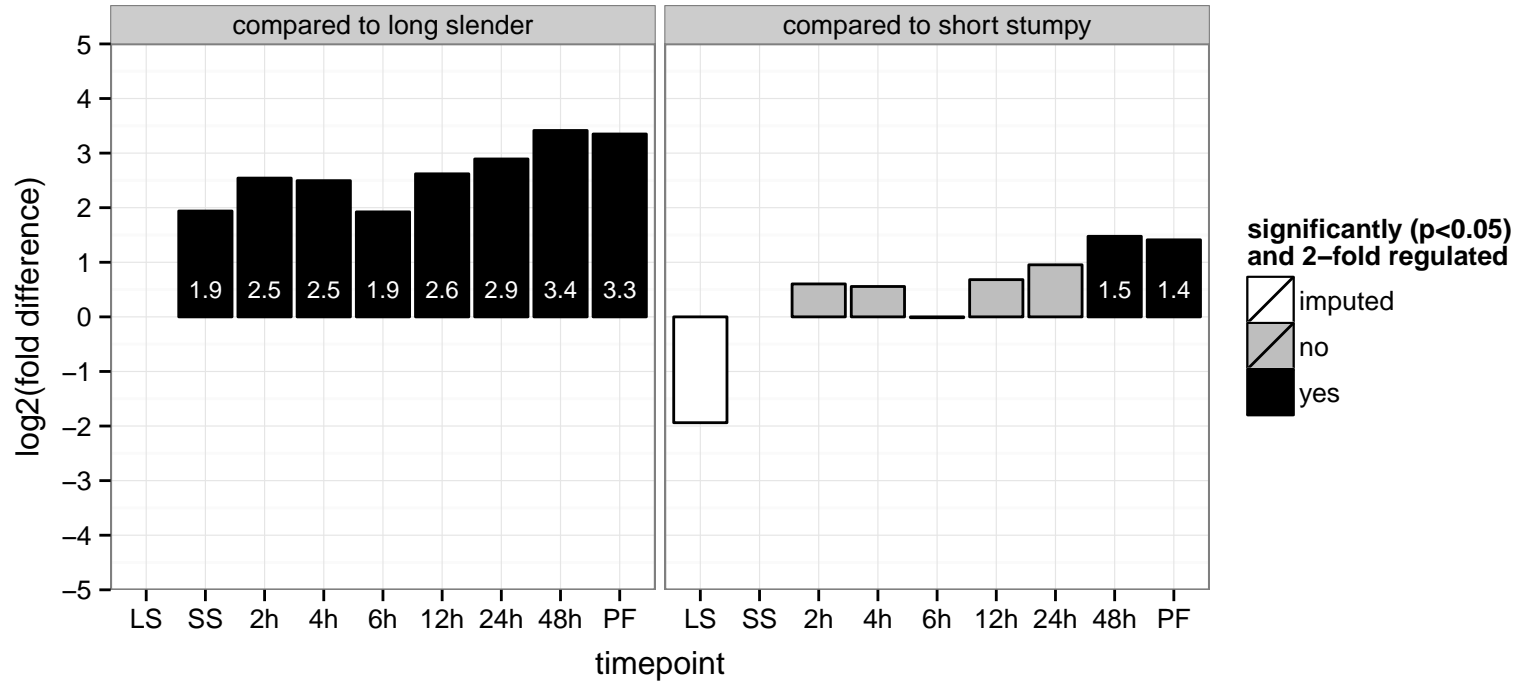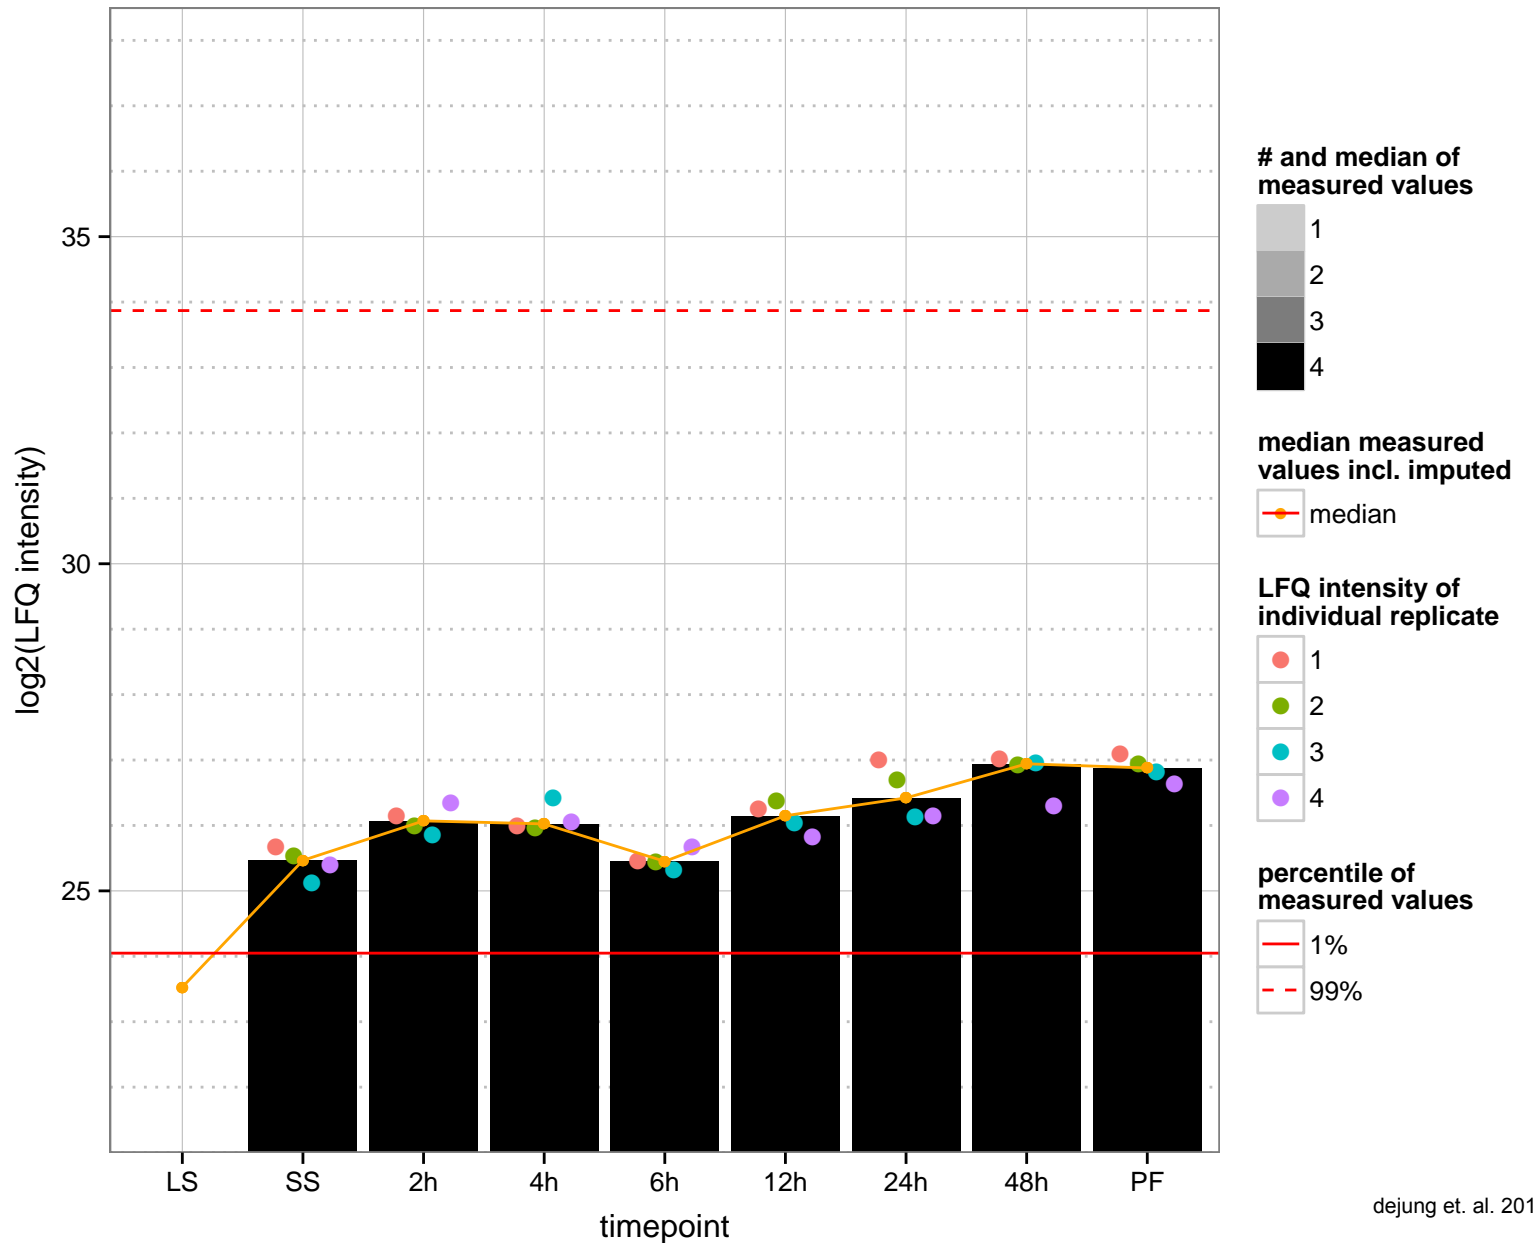

hypothetical protein, conserved  
 Tb927.11.8880  
 AGOF: null  
 AGOC: null  
 AGOP: null  
 PGO: null  
 PGO: null  
 PGO: null

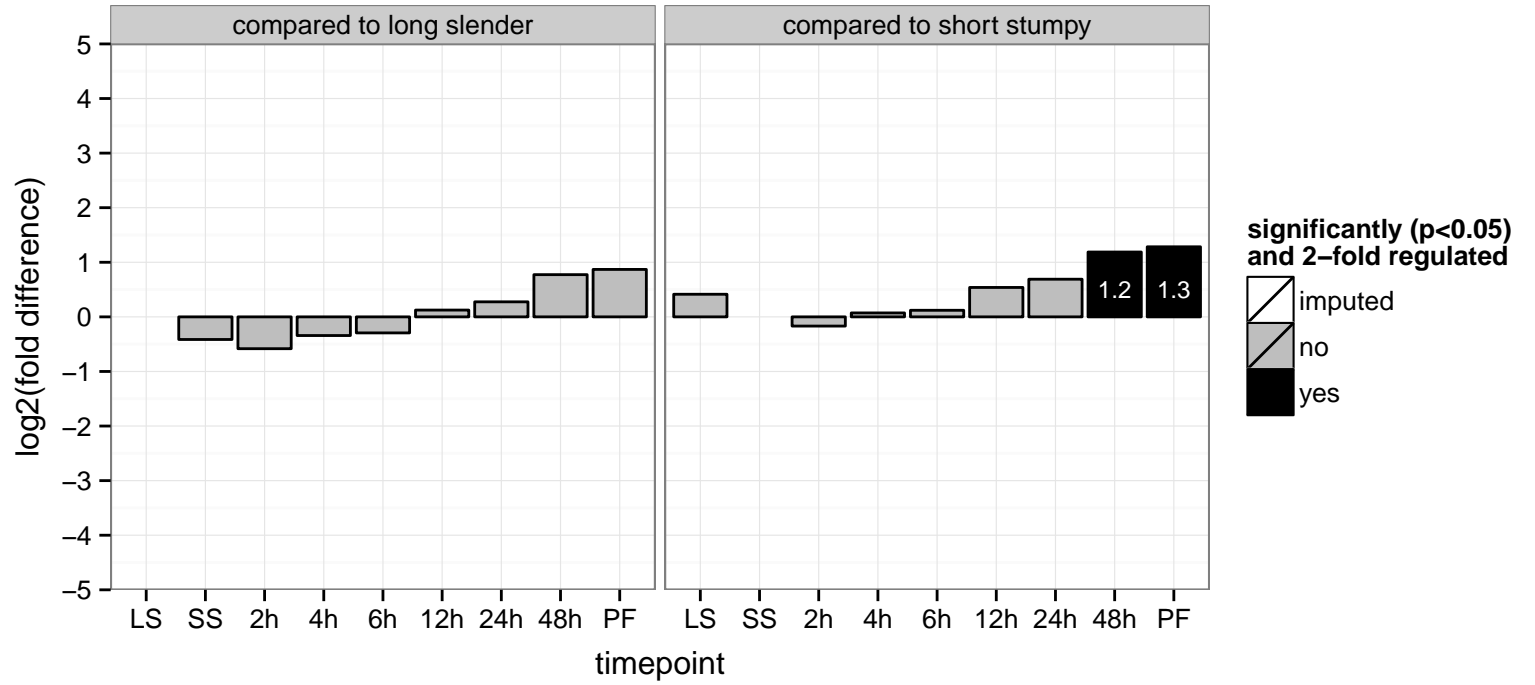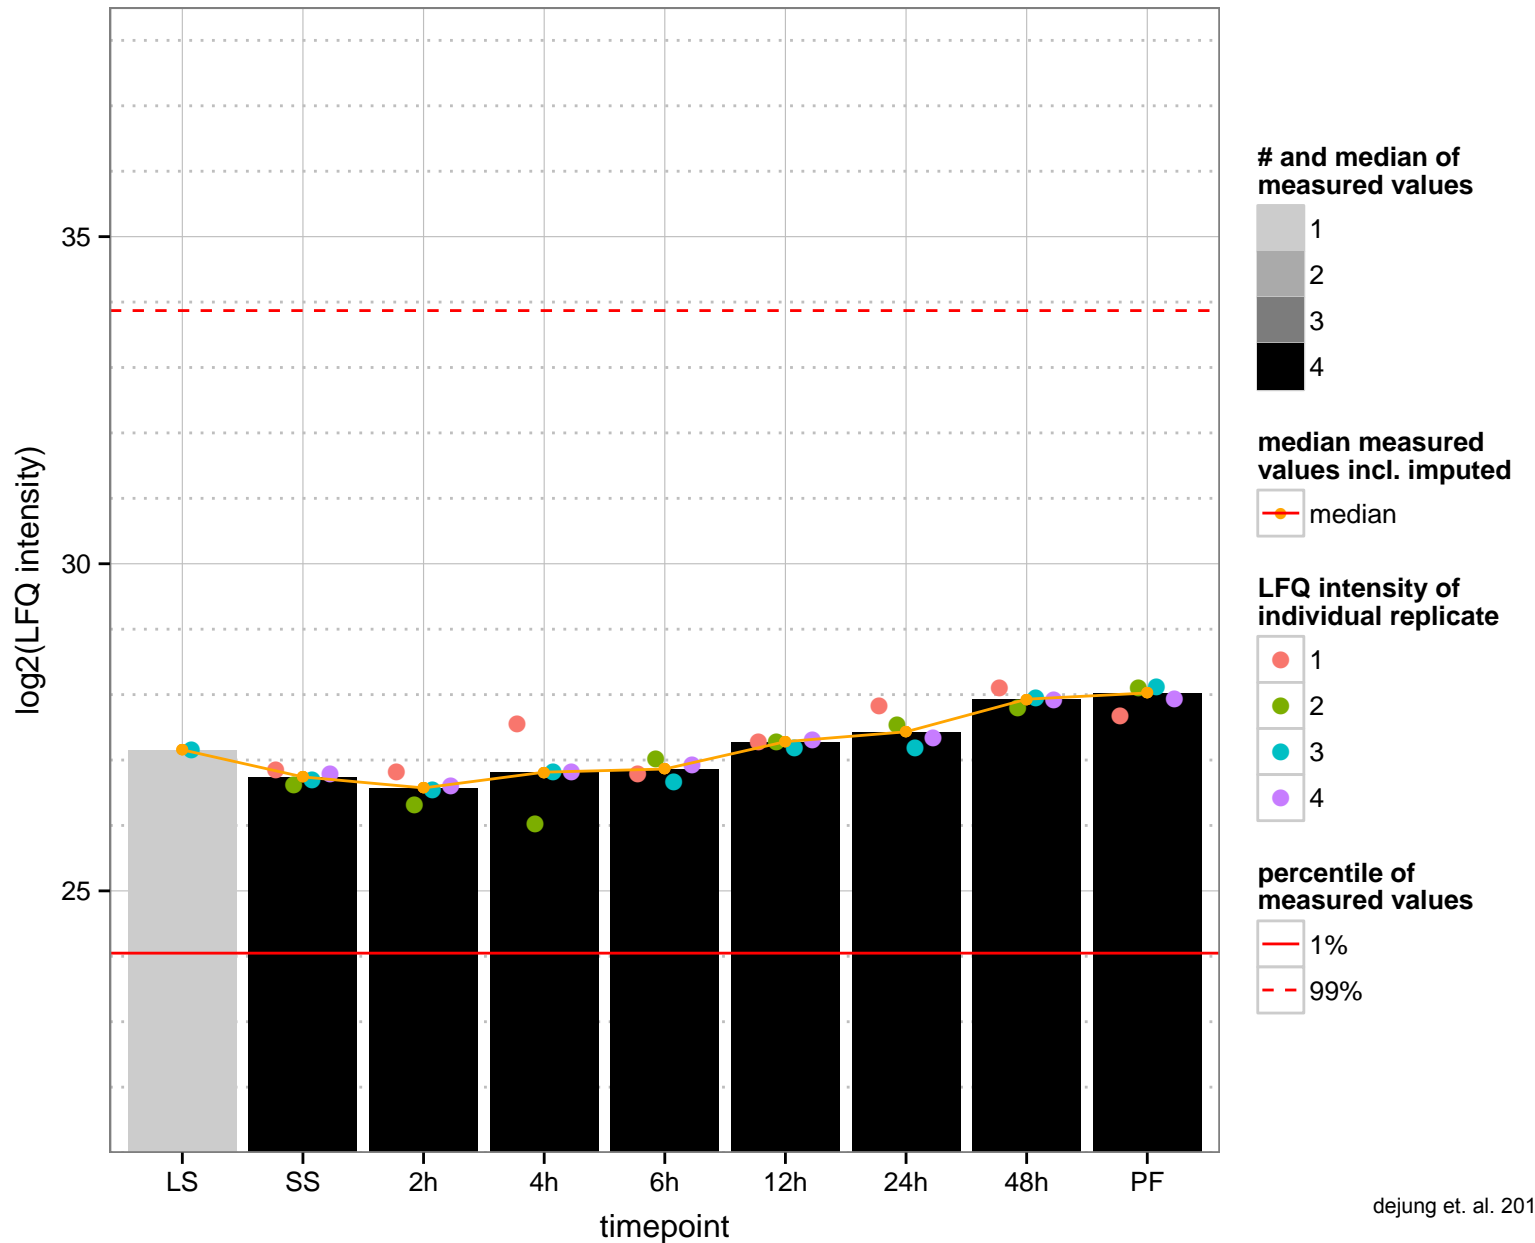

glycine synthase, putative (GCVT1)  
 Tb927.11.9670  
 AGOF: aminomethyltransferase activity  
 AGOC: cytoplasm, mitochondrion  
 AGOP: glycine decarboxylation via glycine cleavage system  
 PGO: aminomethyltransferase activity  
 PGOC: cytoplasm  
 PGOP: glycine catabolic process

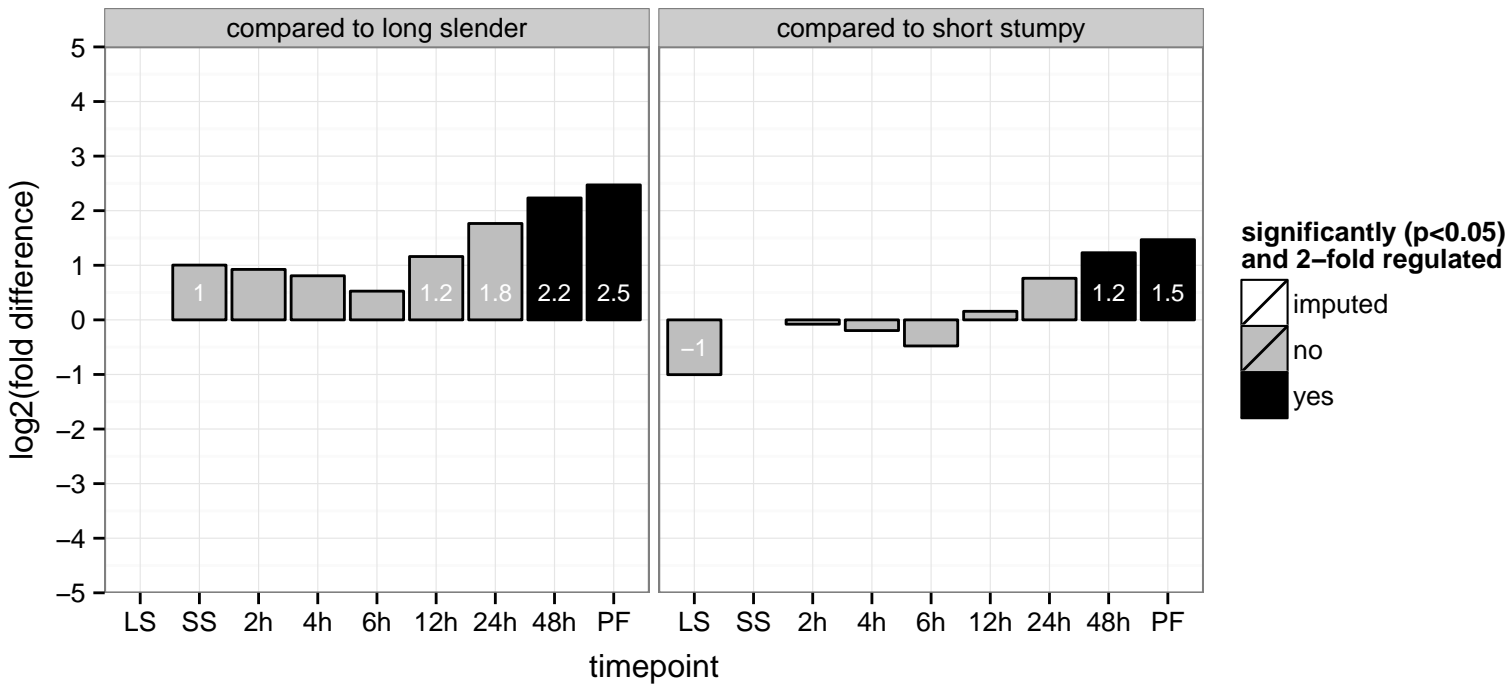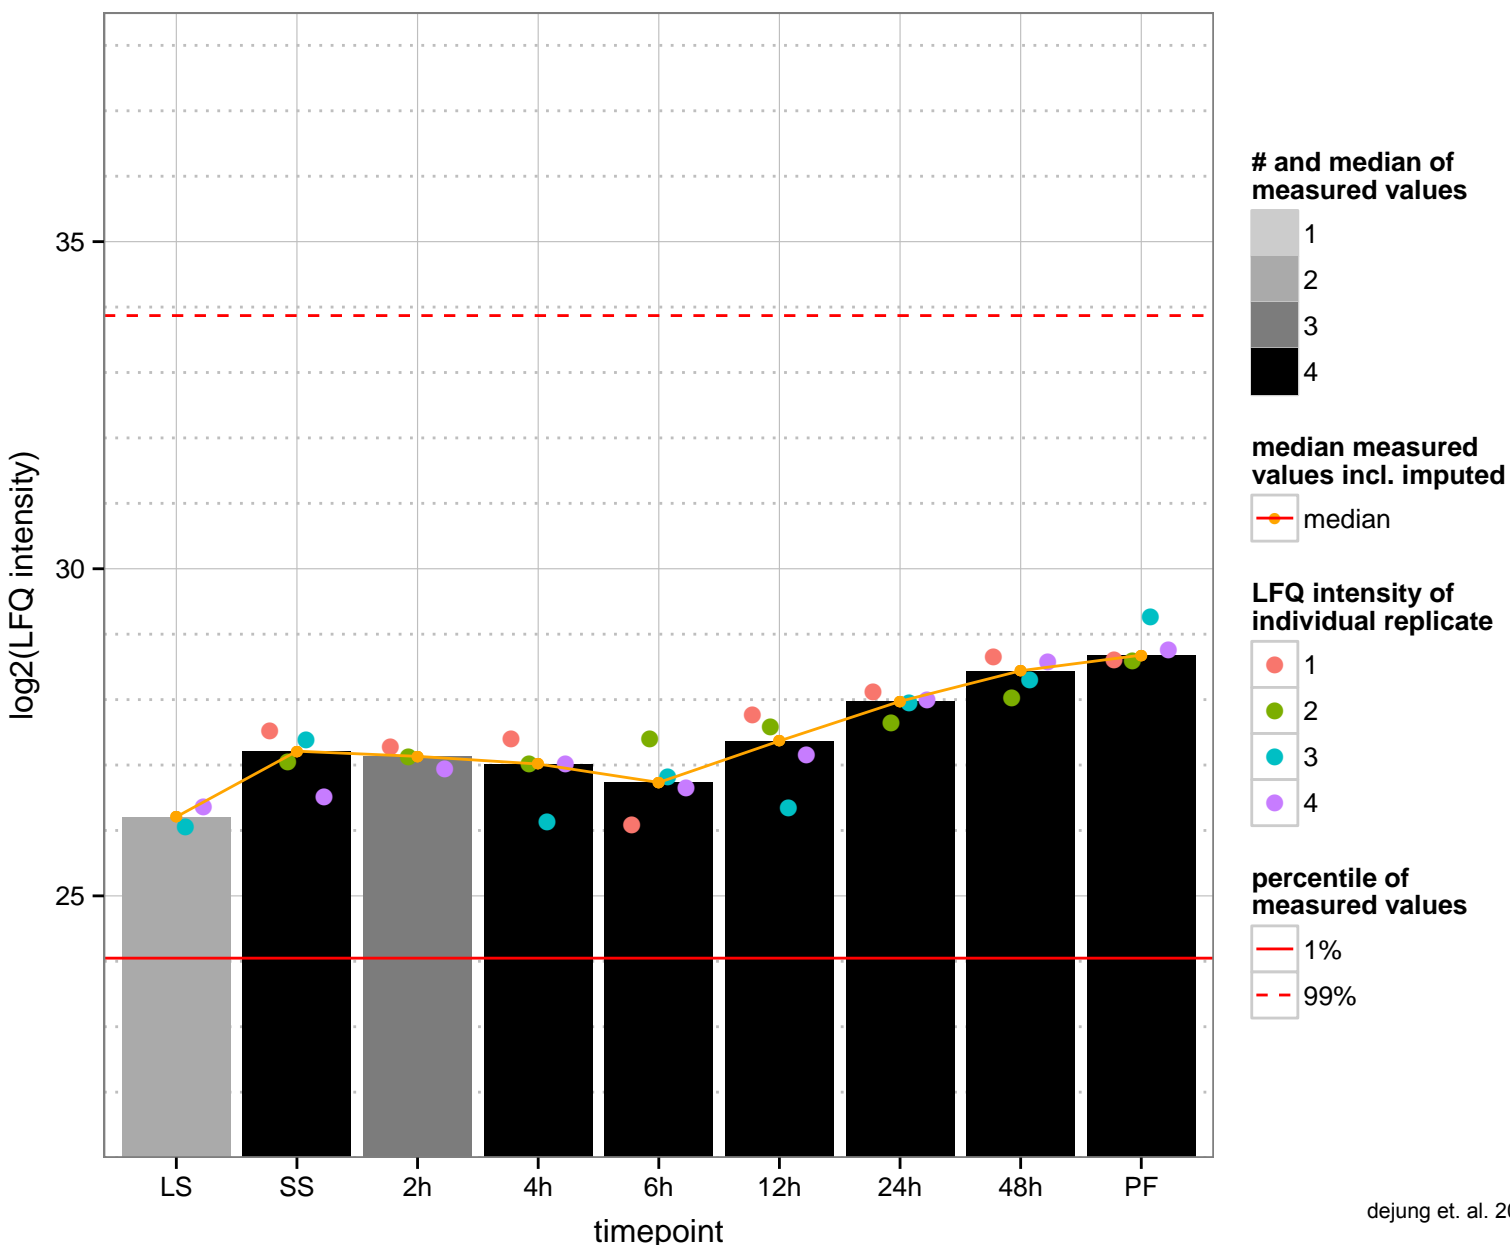

hypothetical protein, conserved  
 Tb927.11.9820  
 AGOF: null  
 AGOC: null  
 AGOP: null  
 PGOF: null  
 PGOC: null  
 PGOP: null

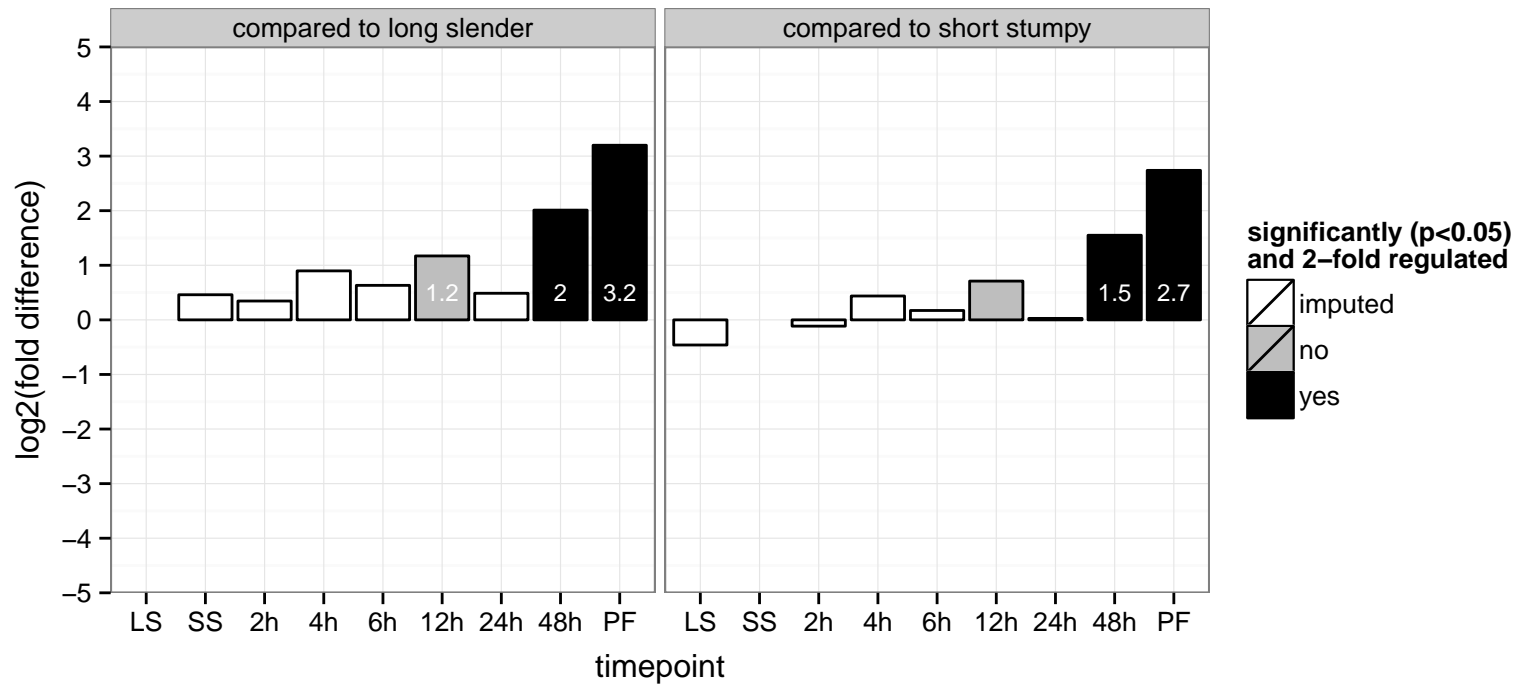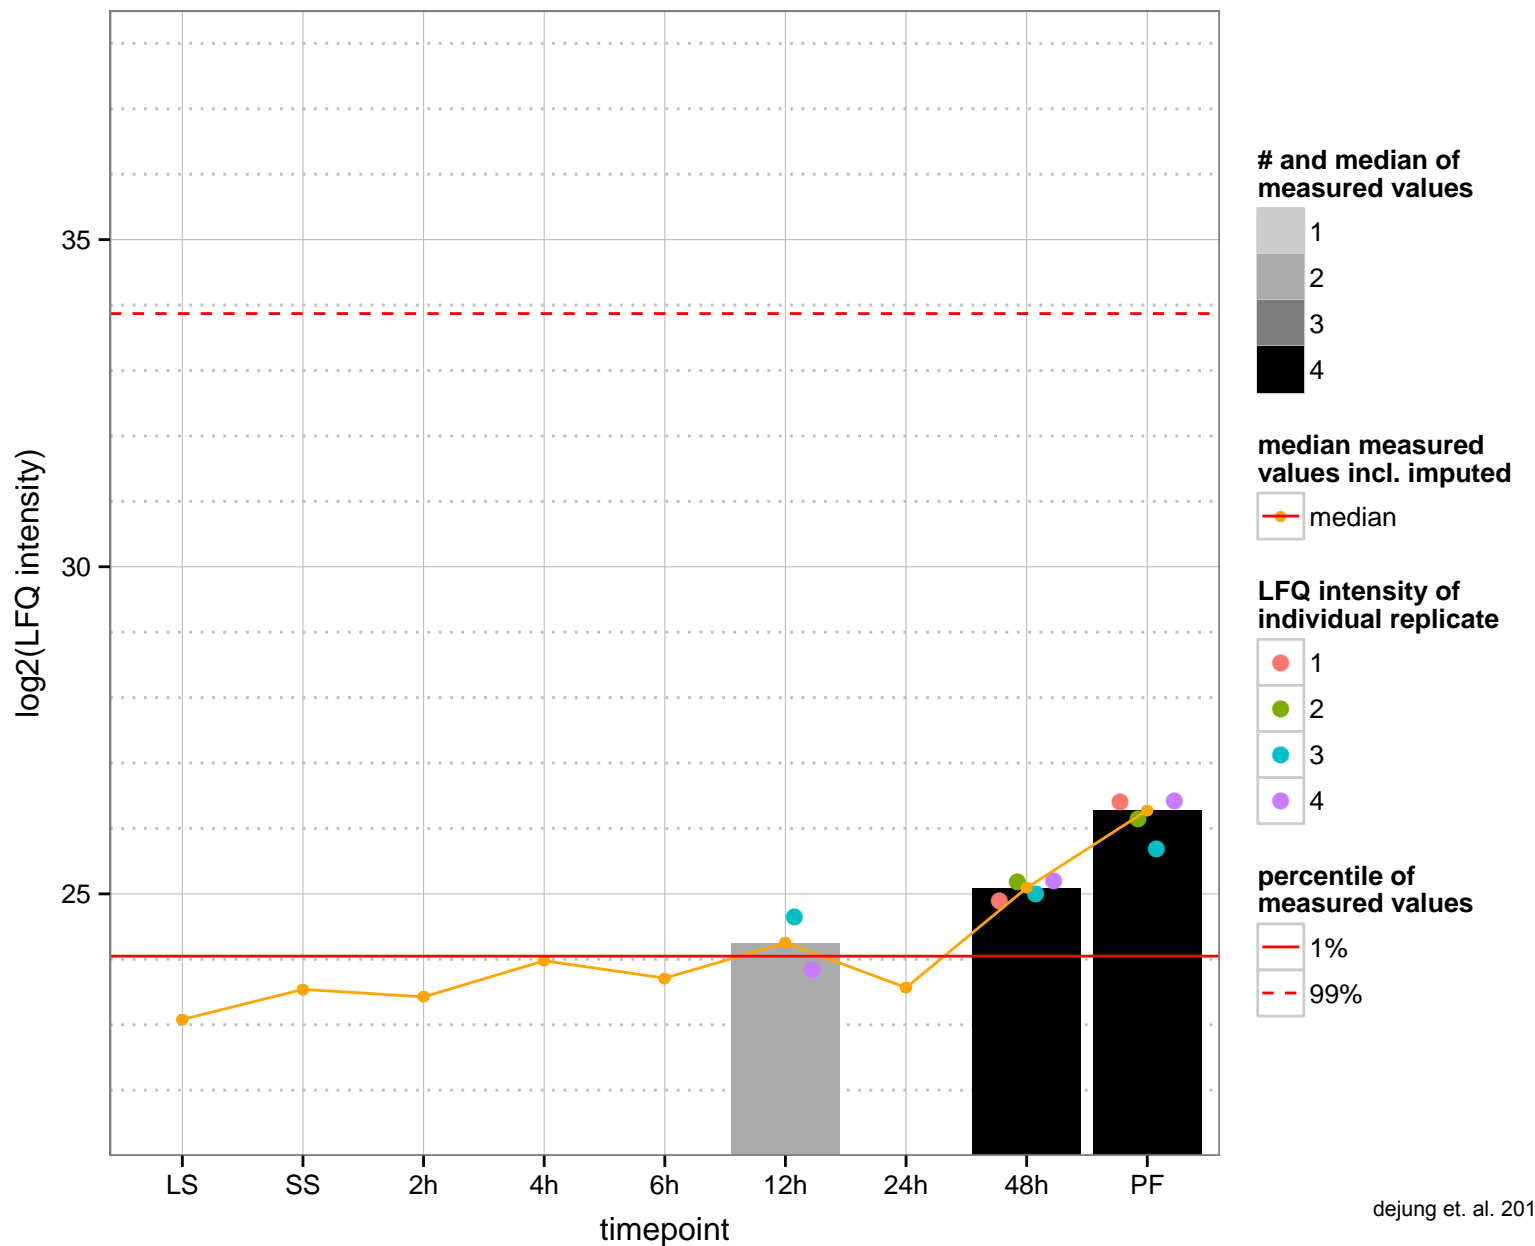

voltage-dependent anion-selective channel (VDAC), voltage-dependent anion-selective channel  
 Tb927.2.2520;Tb927.2.2510  
 AGOF: porin activity, voltage-gated anion channel activity, null  
 AGOC: eukaryotic translation initiation factor 4F complex, mitochondrial outer membrane, pore complex, integral to mitochondrion  
 AGOP: ion transport, mitochondrial transport  
 PGO: null  
 PGO: null  
 PGO: null

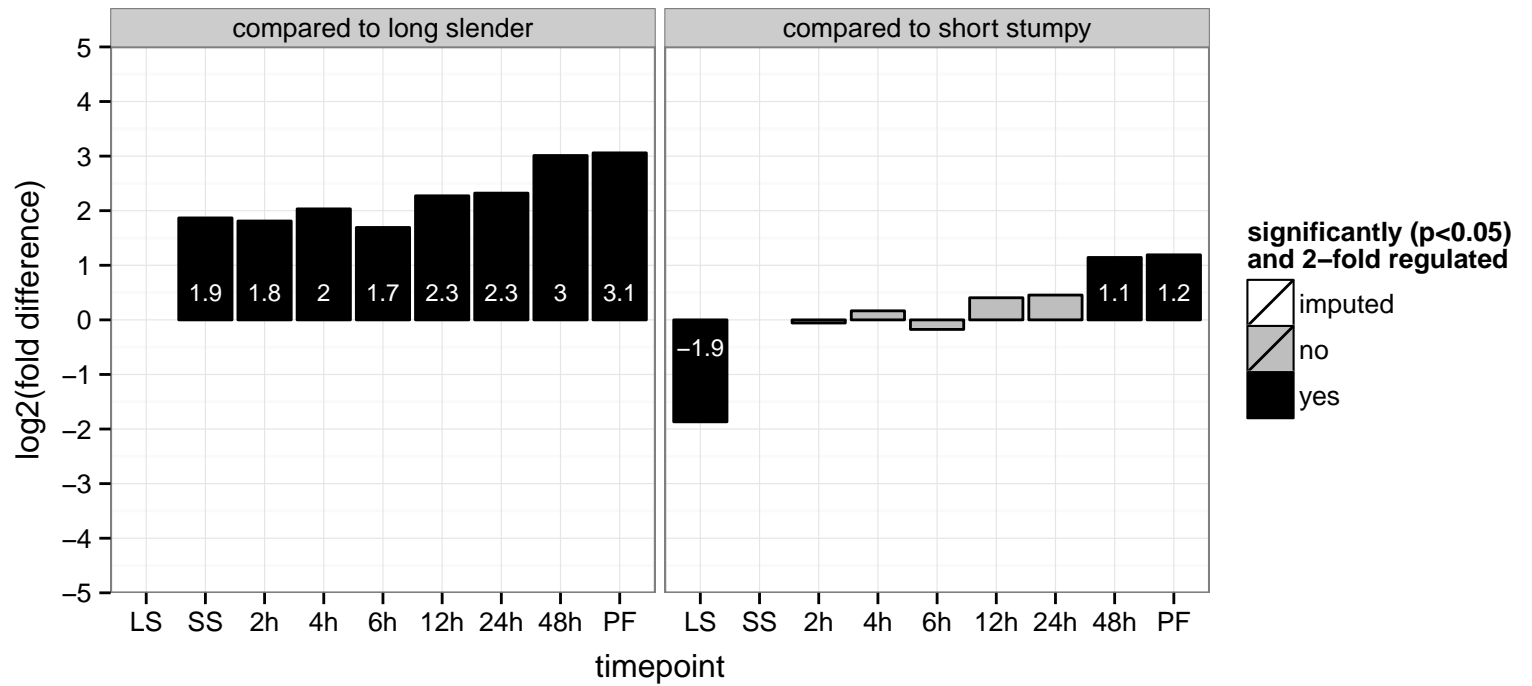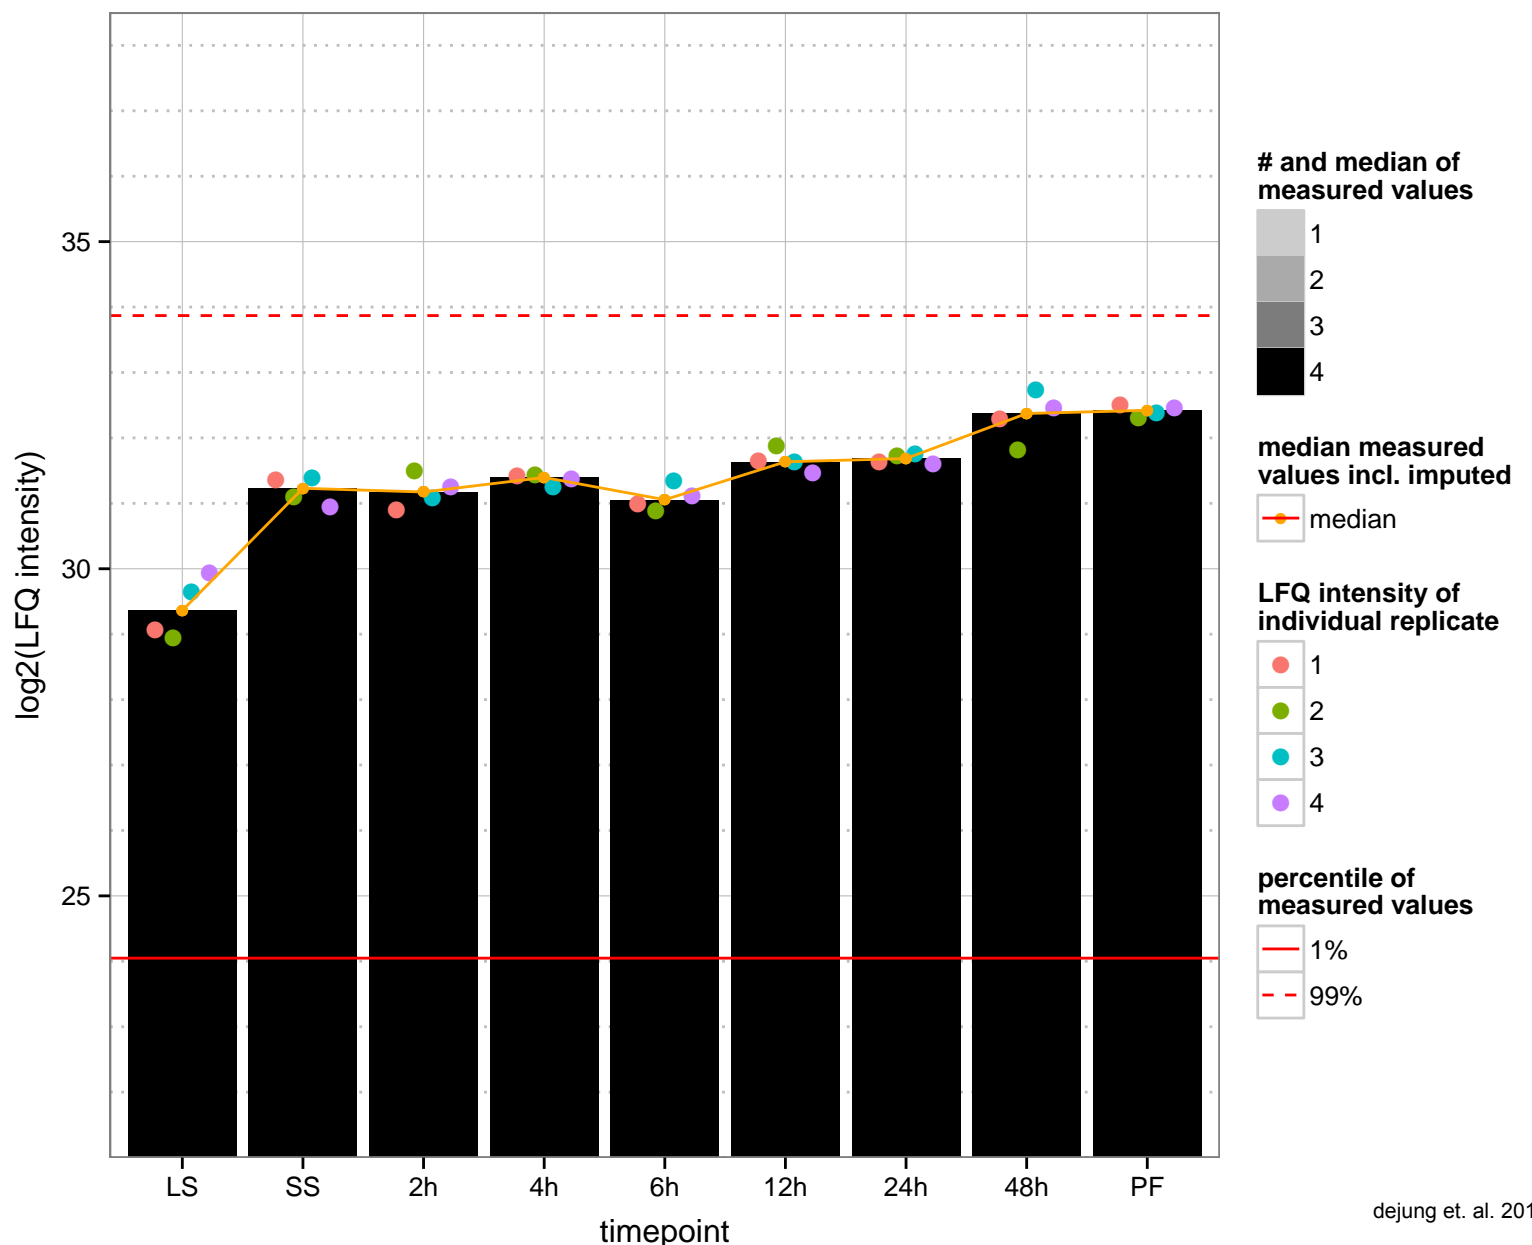

enoyl-CoA hydratase/Enoyl-CoA isomerase/3-hydroxyacyl-CoA dehydrogenase, putative  
 Tb927.2.4130  
 AGOF: isomerase activity, oxidoreductase activity  
 AGOC: mitochondrion  
 AGOP: fatty acid metabolic process, metabolic process  
 PGO: 3-hydroxyacyl-CoA dehydrogenase activity, catalytic activity, oxidoreductase activity  
 PGOC: null  
 PGOP: fatty acid metabolic process, metabolic process, oxidation-reduction process

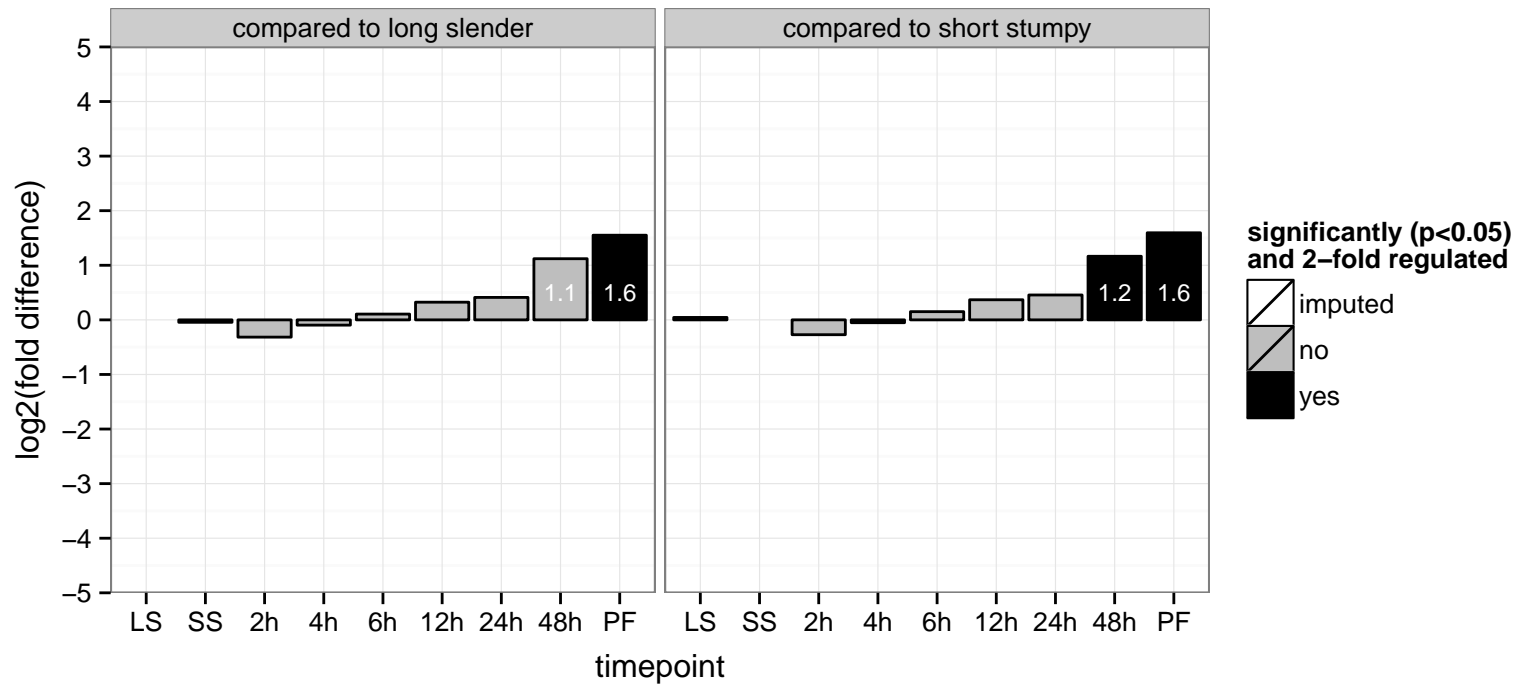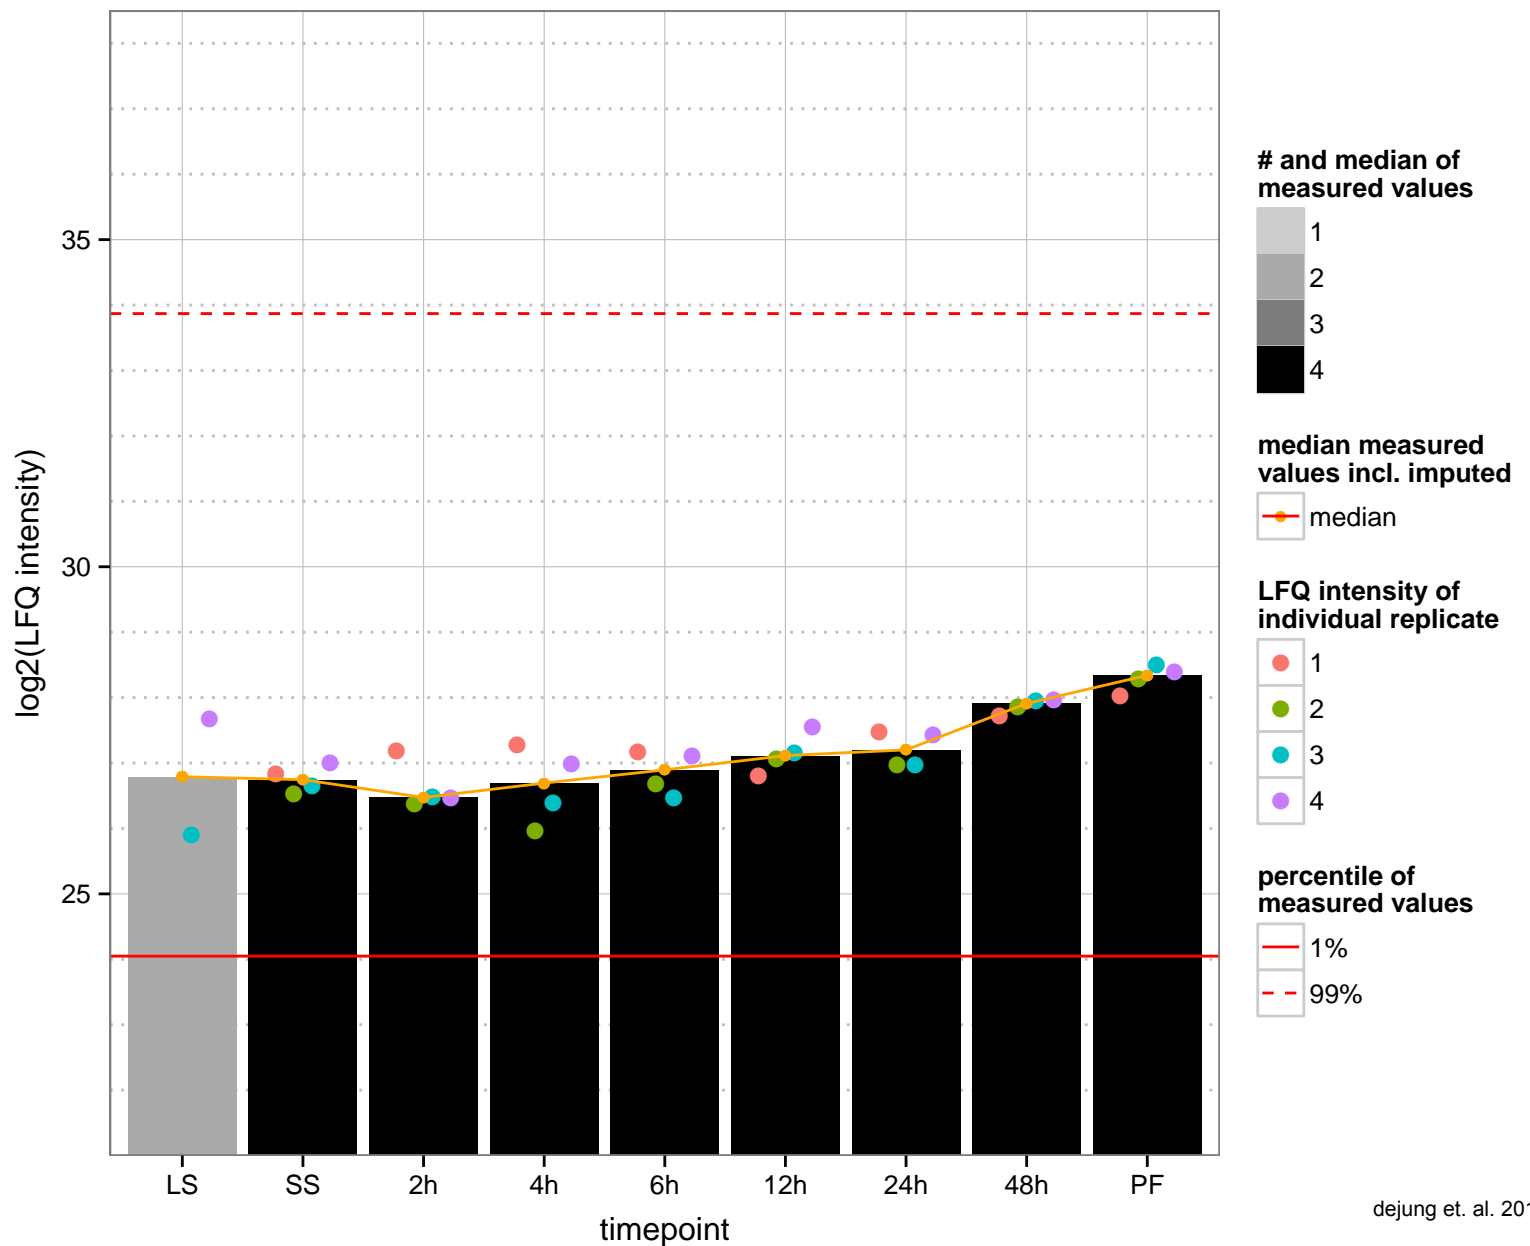

ATP-dependent DEAD/H RNA helicase, putative

Tb927.3.2600

AGOF: ATP binding, ATP-dependent helicase activity, helicase activity, nucleic acid binding

AGOC: null

AGOP: null

PGOF: ATP binding, ATP-dependent helicase activity, helicase activity, nucleic acid binding

PGOC: null

PGOP: null

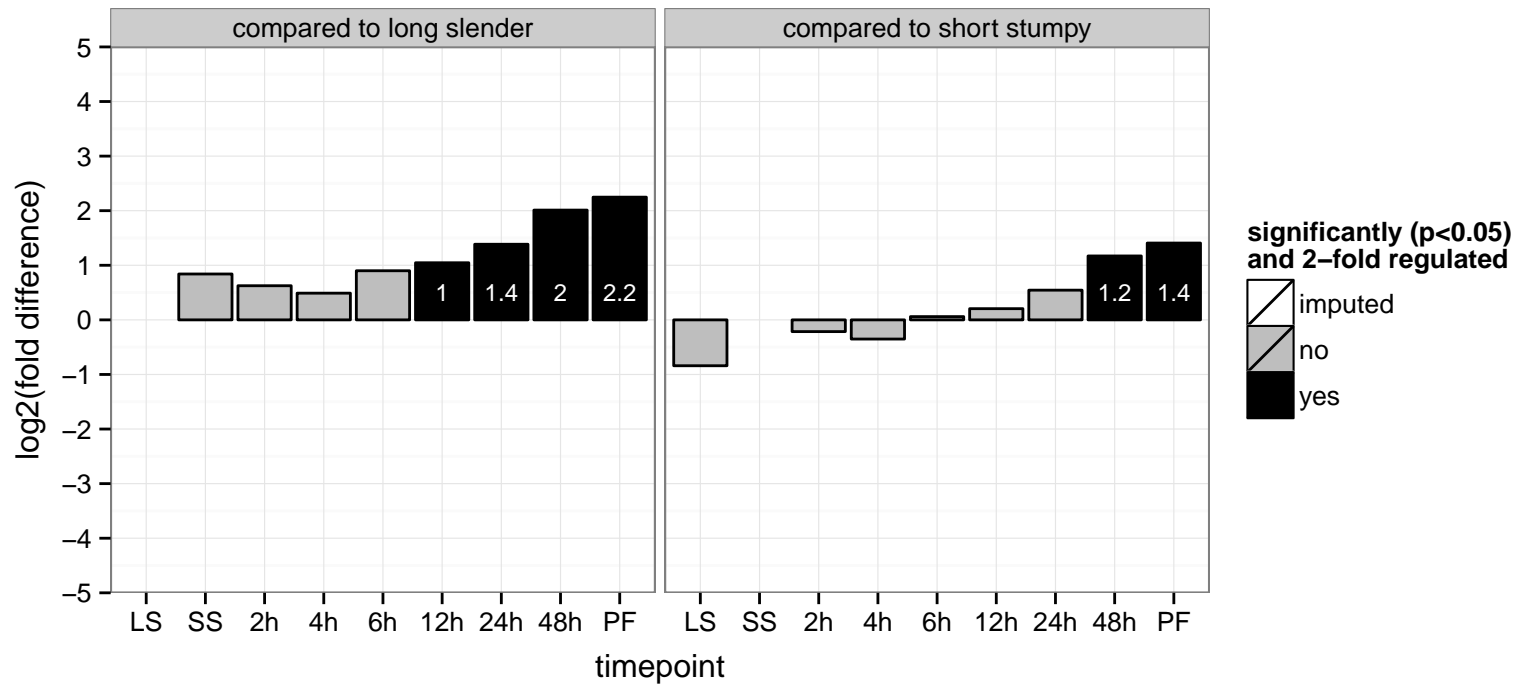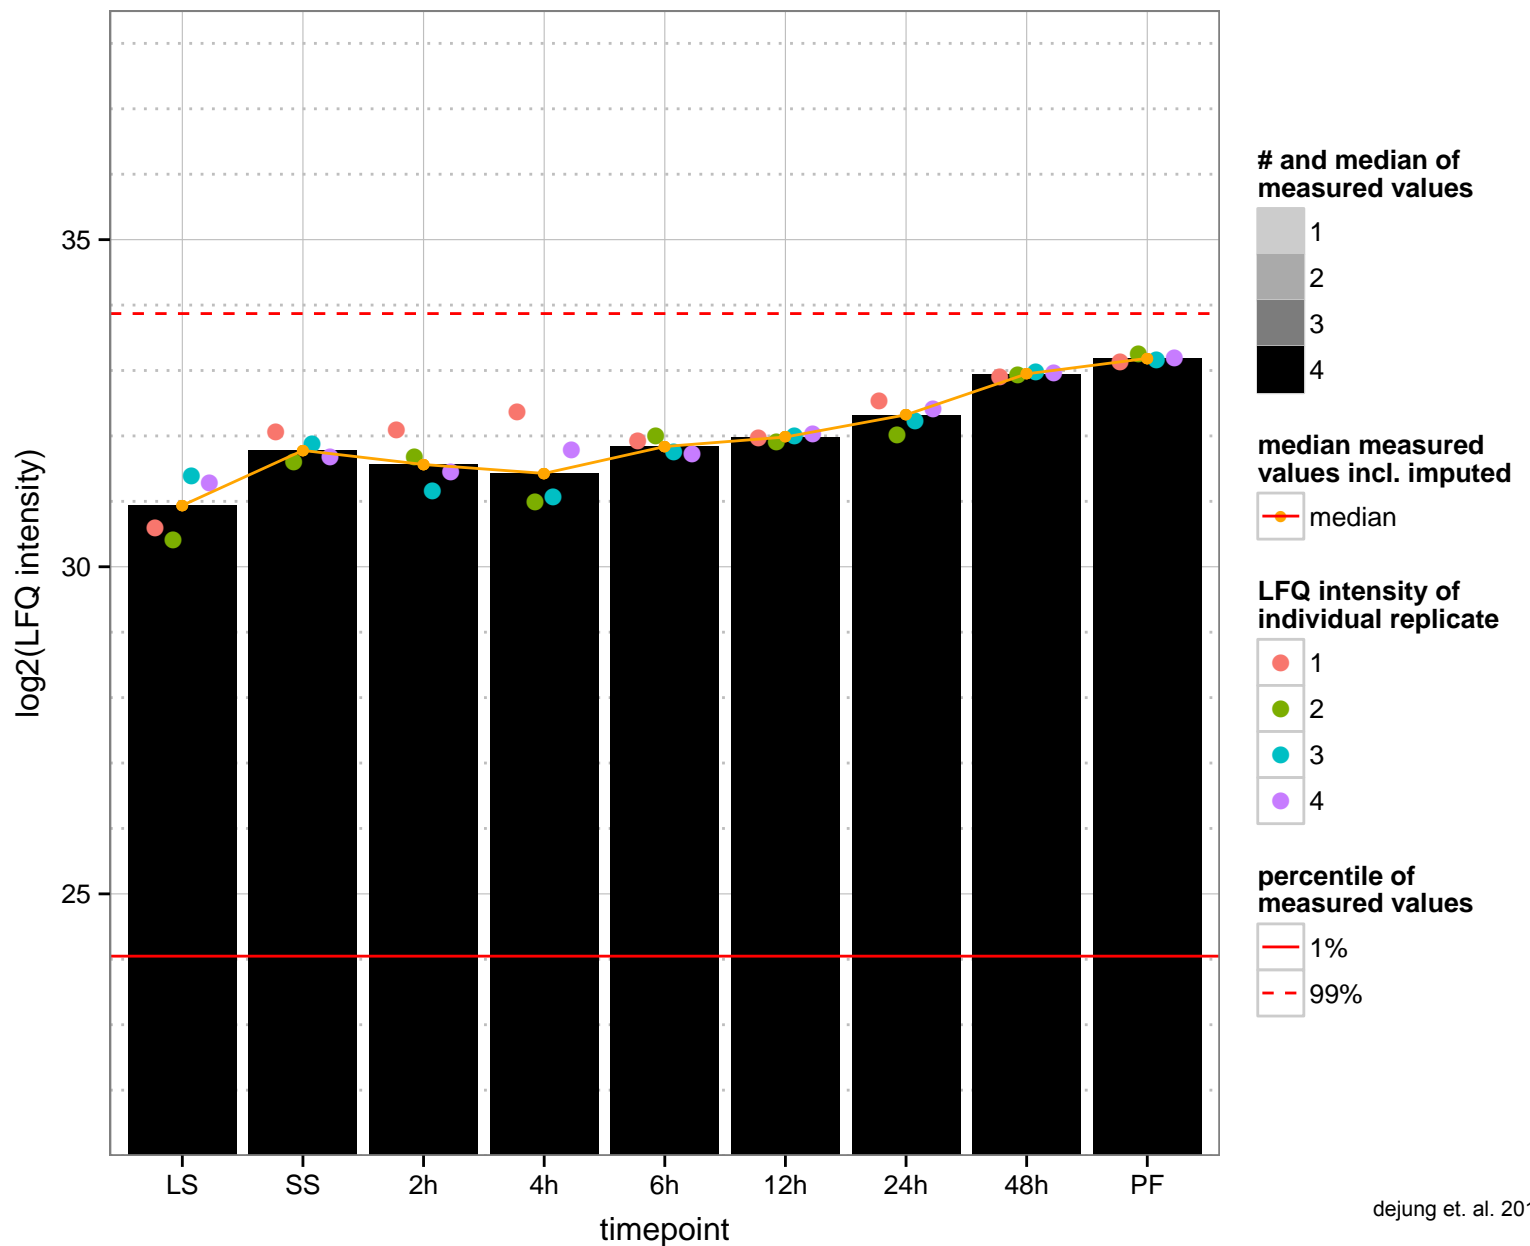



hypothetical protein, conserved  
 Tb927.3.3130  
 AGOF: null  
 AGOC: null  
 AGOP: null  
 PGO: protein binding  
 PGO: null  
 PGO: null

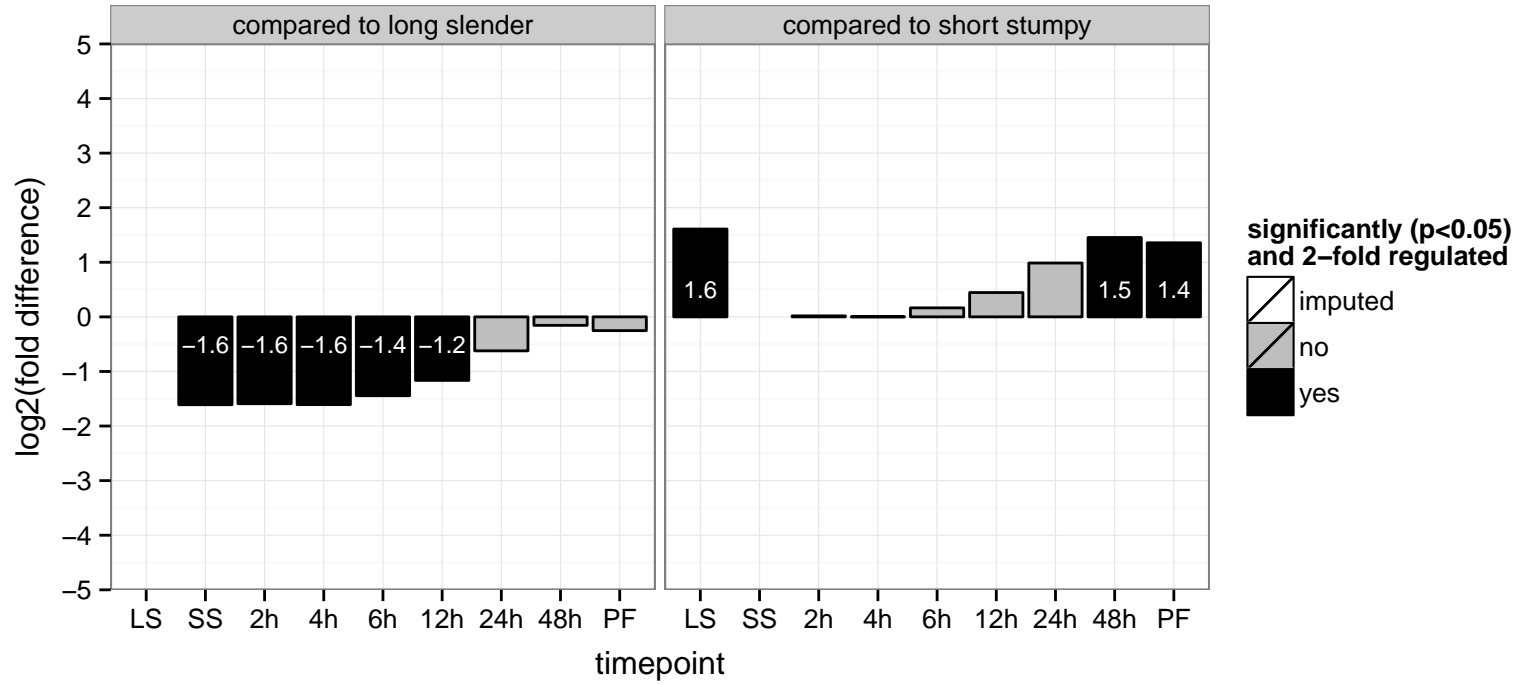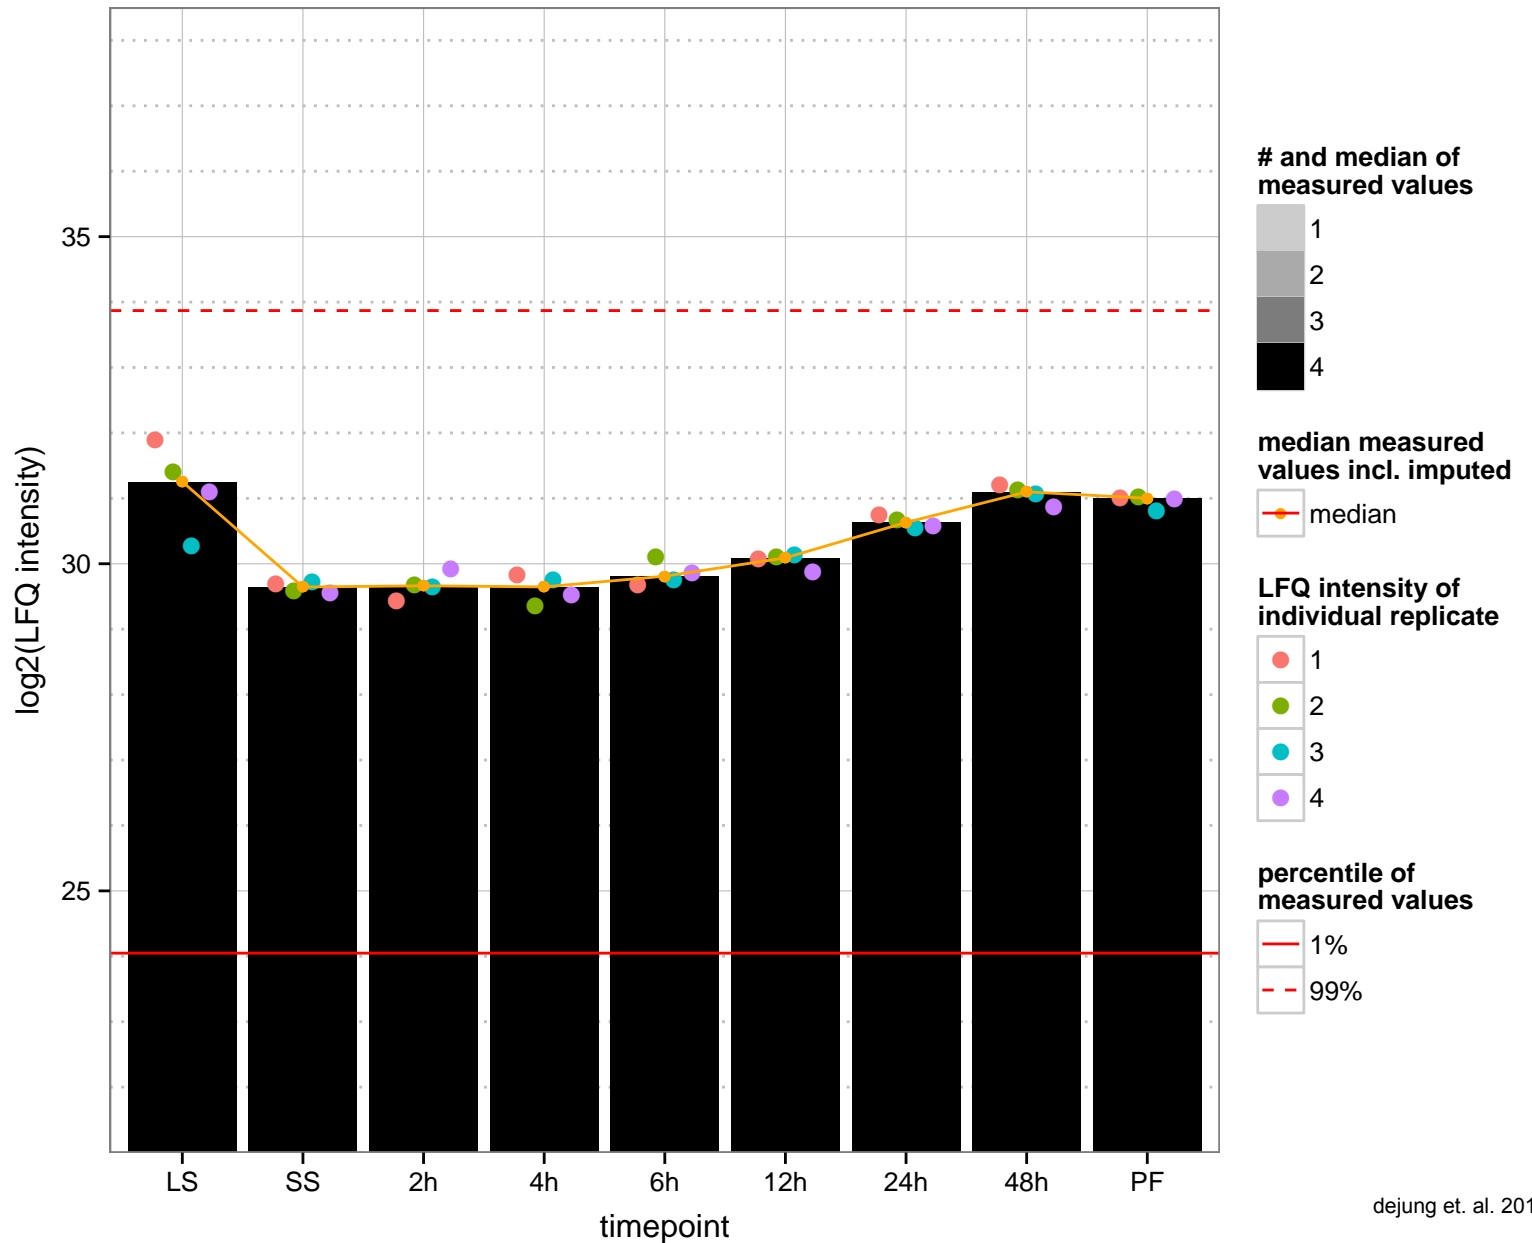

hypothetical protein, conserved (pseudogene), conserved, frameshift  
 Tb927.3.4980  
 AGOF: null  
 AGOC: null  
 AGOP: null  
 PGO: null  
 PGOC: null  
 PGOP: null

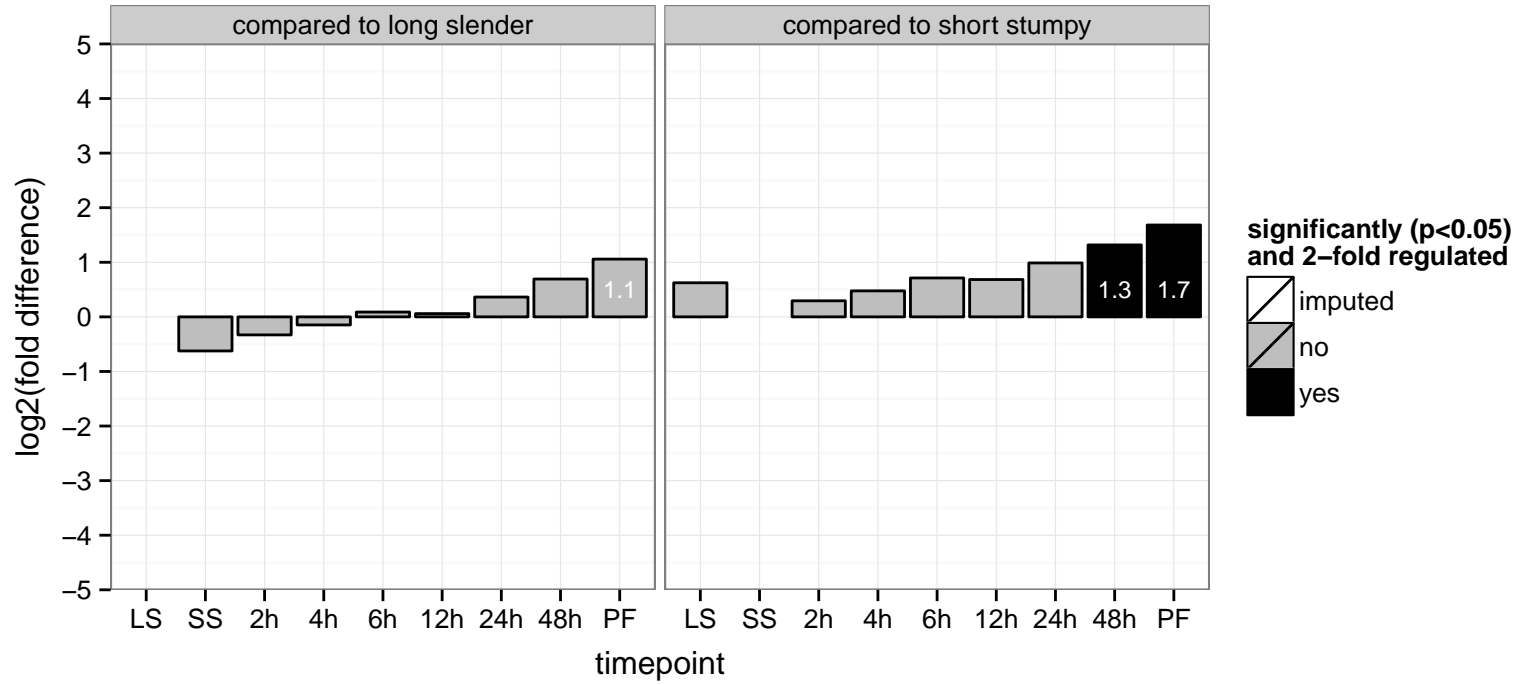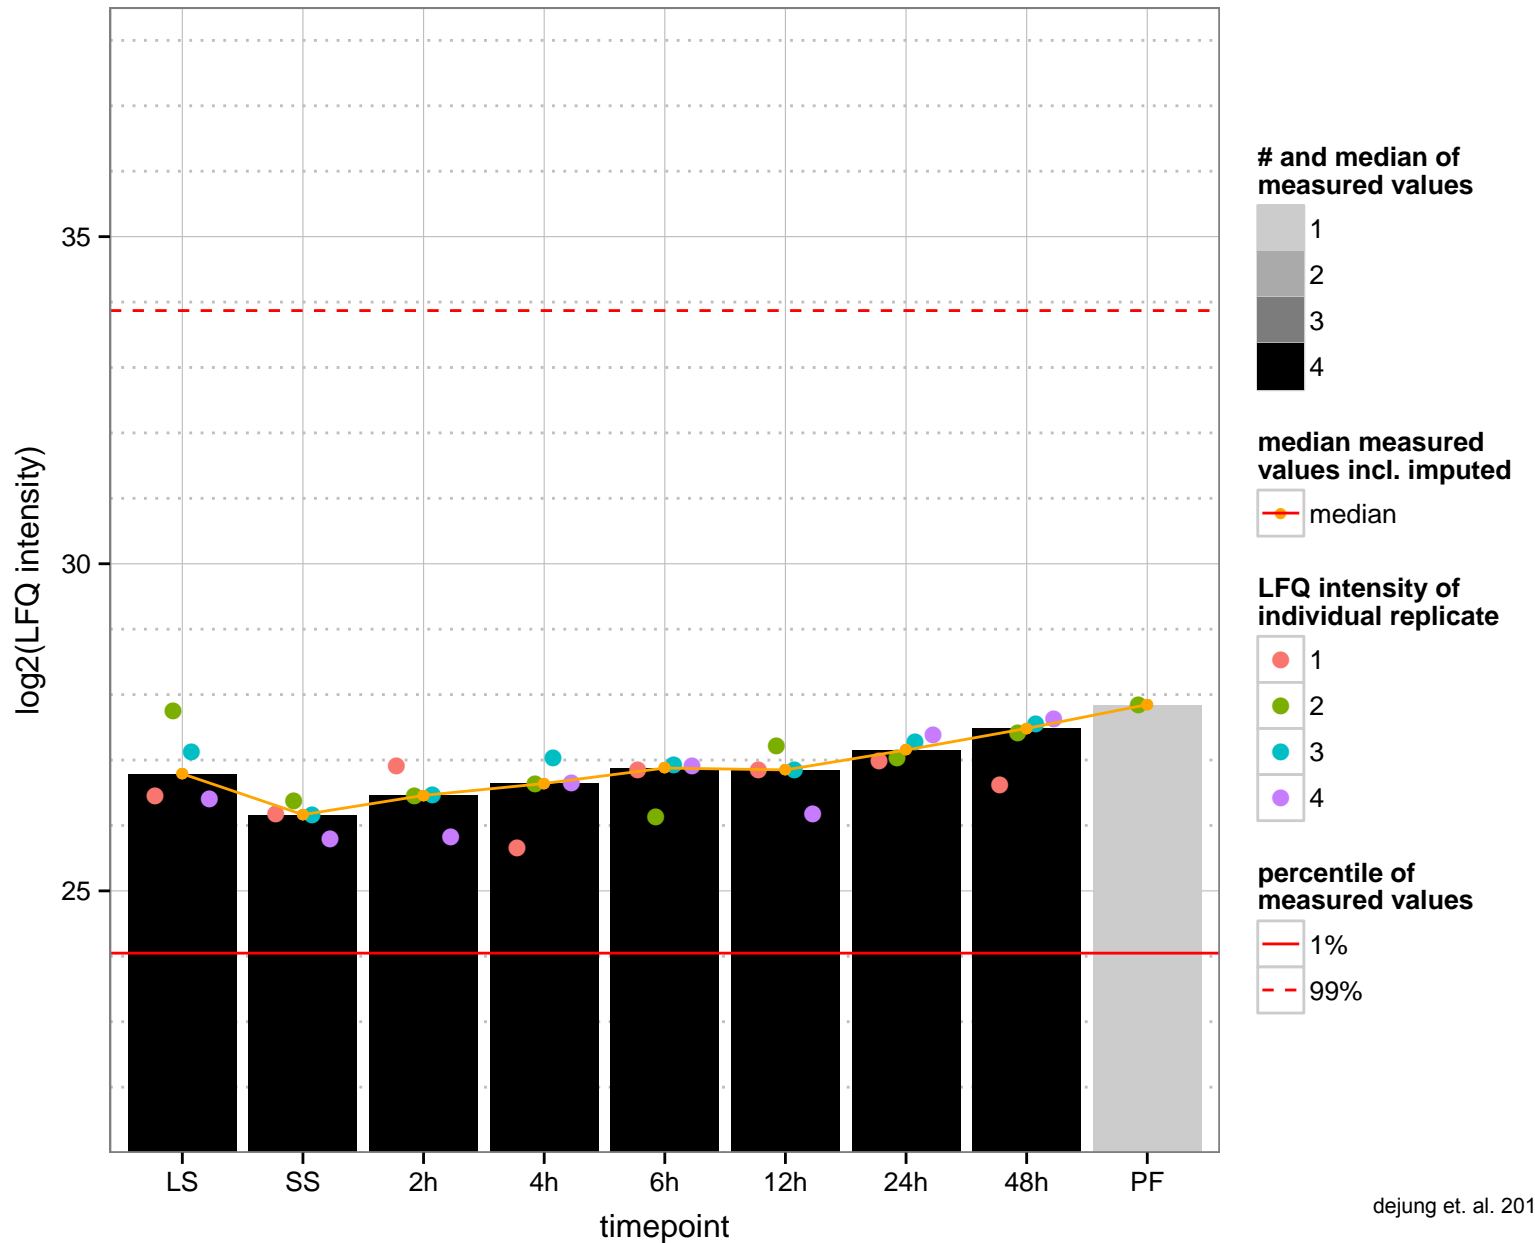

hypothetical protein, conserved  
 Tb927.3.5130  
 AGOF: exonuclease activity, nucleic acid binding  
 AGOC: intracellular  
 AGOP: null  
 PGOF: exonuclease activity, nucleic acid binding  
 PGO: intracellular  
 PGOP: null

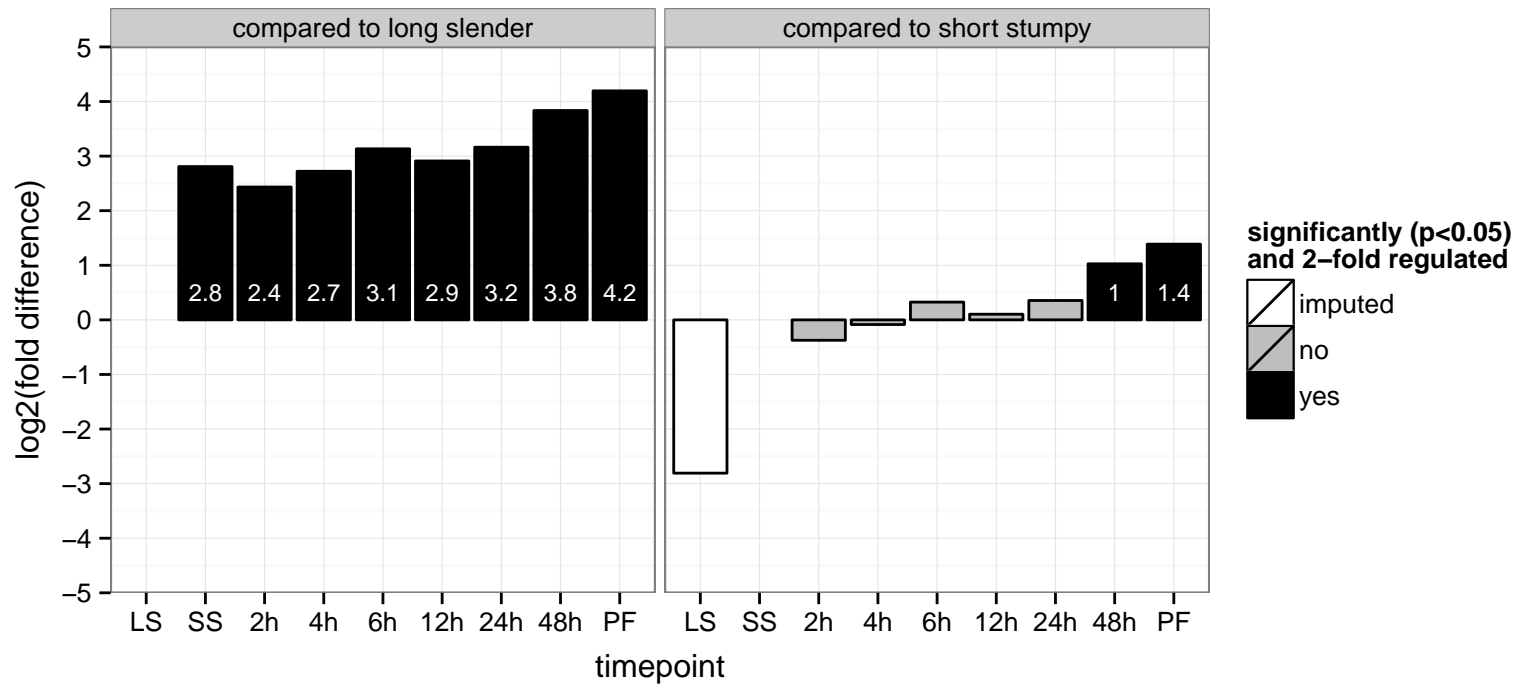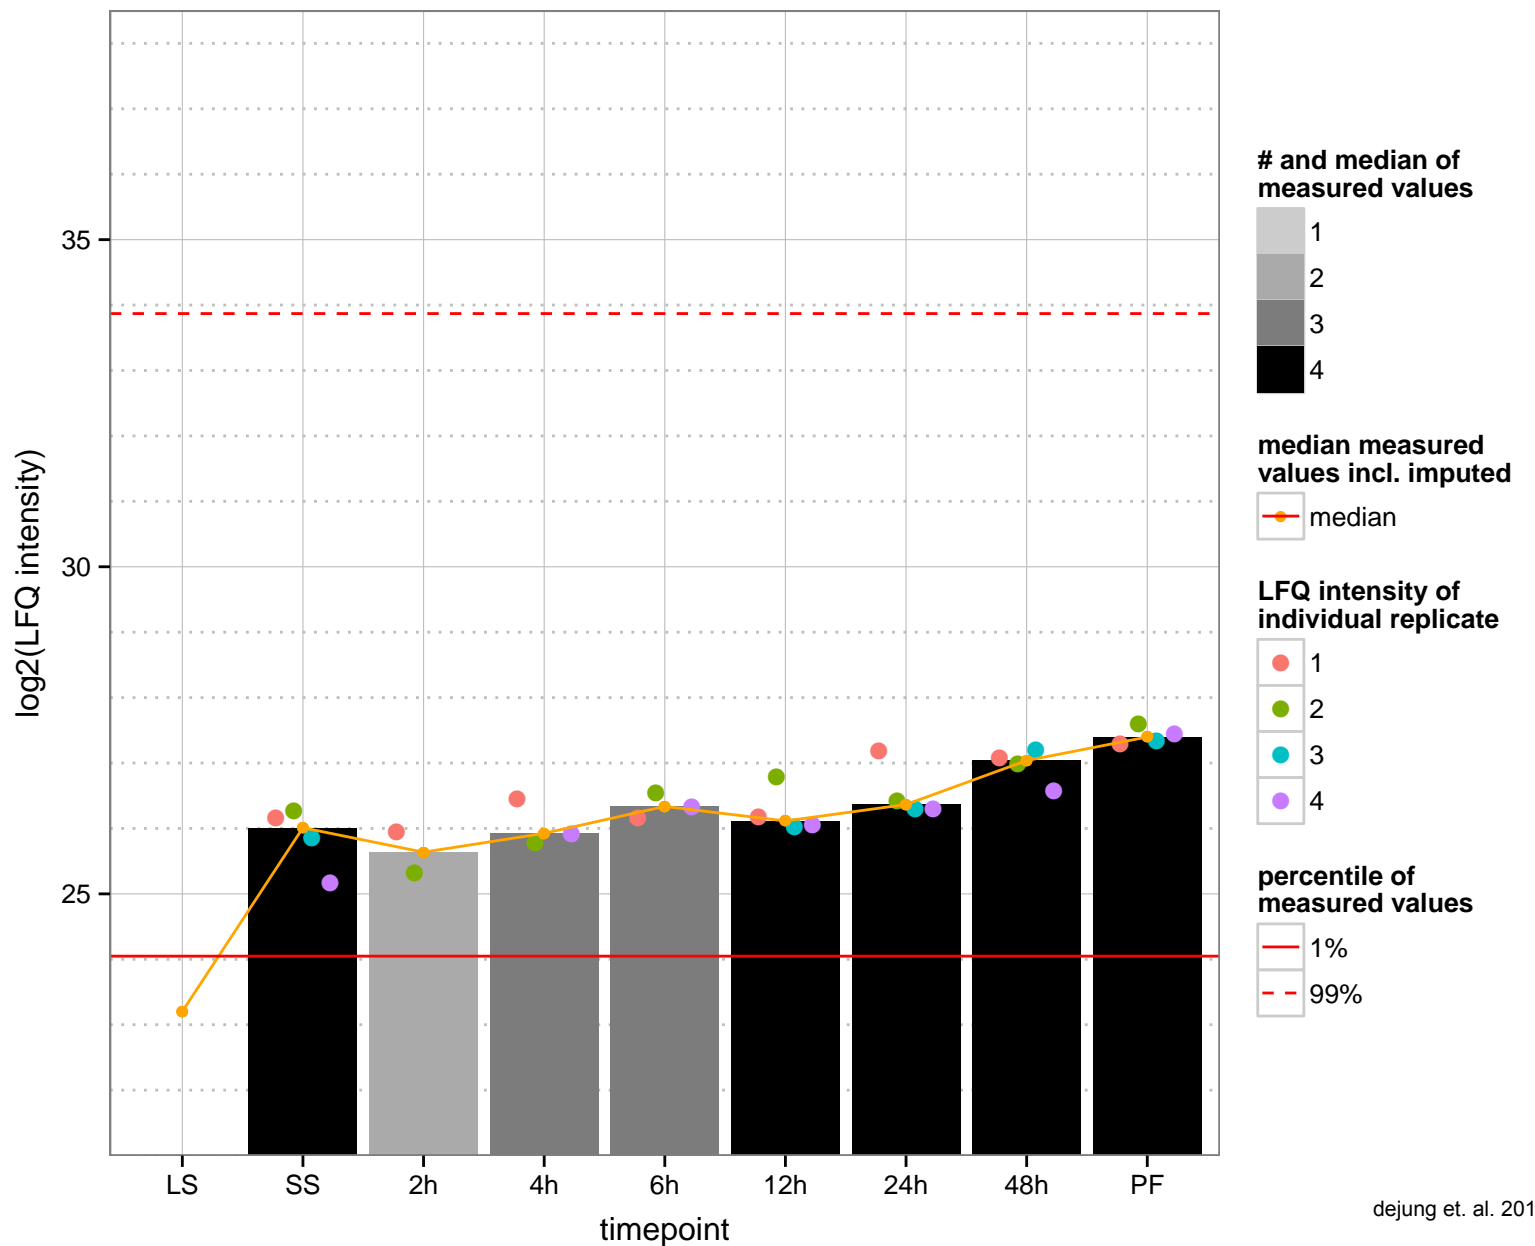

hypothetical protein, conserved  
 Tb927.4.1360  
 AGOF: carbohydrate binding, isomerase activity  
 AGOC: null  
 AGOP: carbohydrate metabolic process  
 PGOF: carbohydrate binding, catalytic activity, isomerase activity  
 PGO: null  
 PGOP: carbohydrate metabolic process

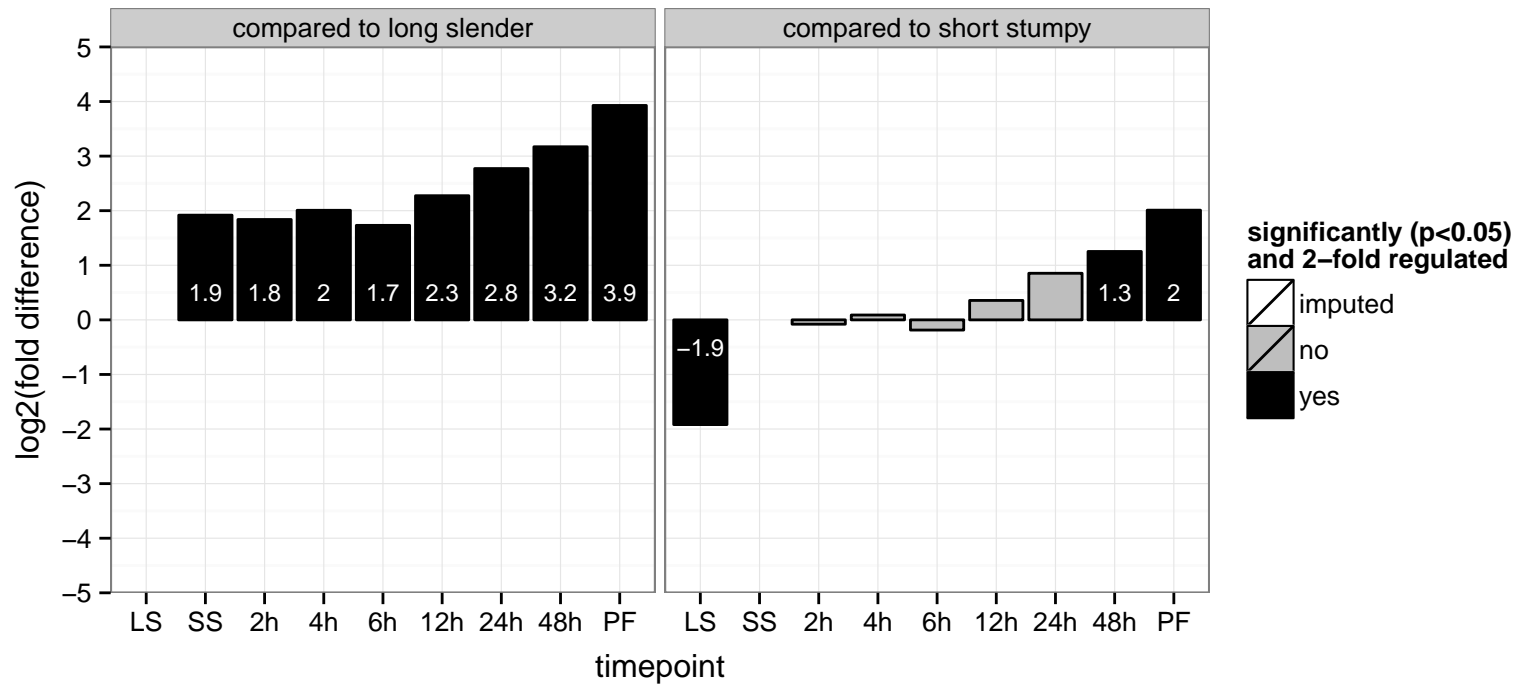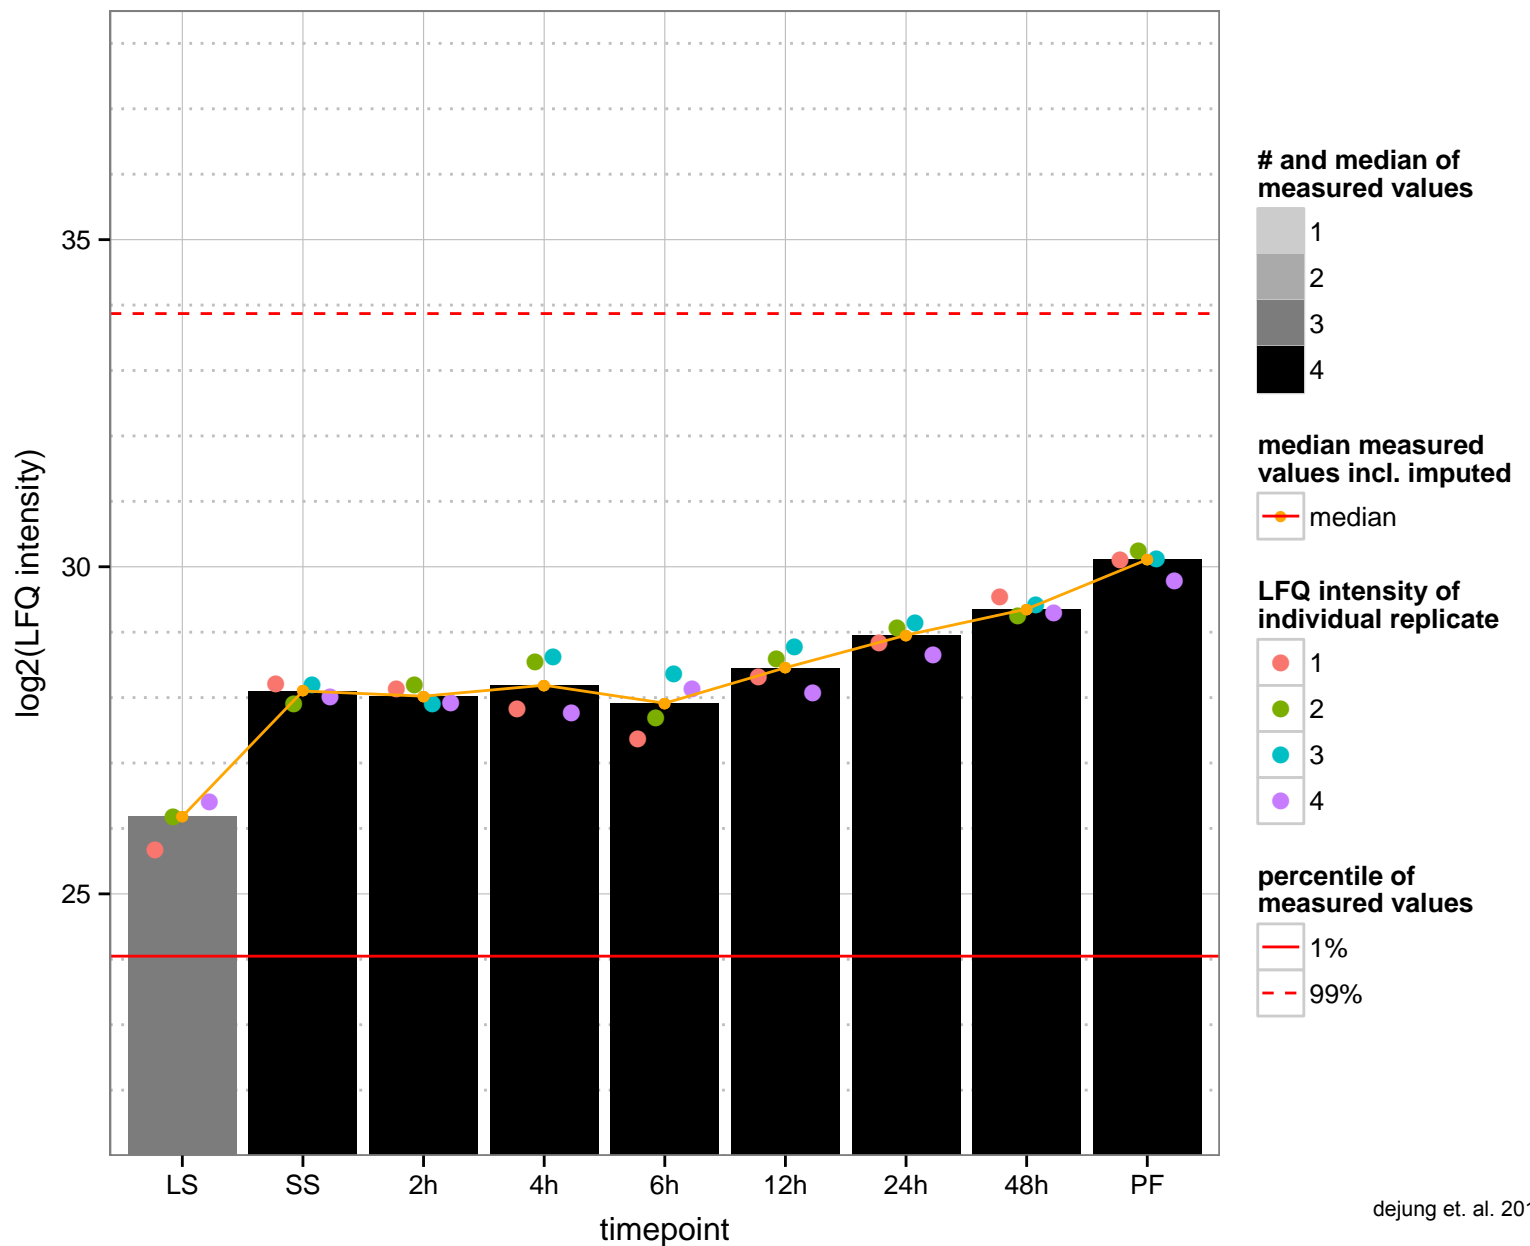

60S ribosomal protein L35a, putative  
 Tb927.4.2180  
 AGOF: structural constituent of ribosome  
 AGOC: intracellular, ribosome  
 AGOP: translation  
 PGOF: structural constituent of ribosome  
 PGO: intracellular, ribosome  
 PGOP: translation

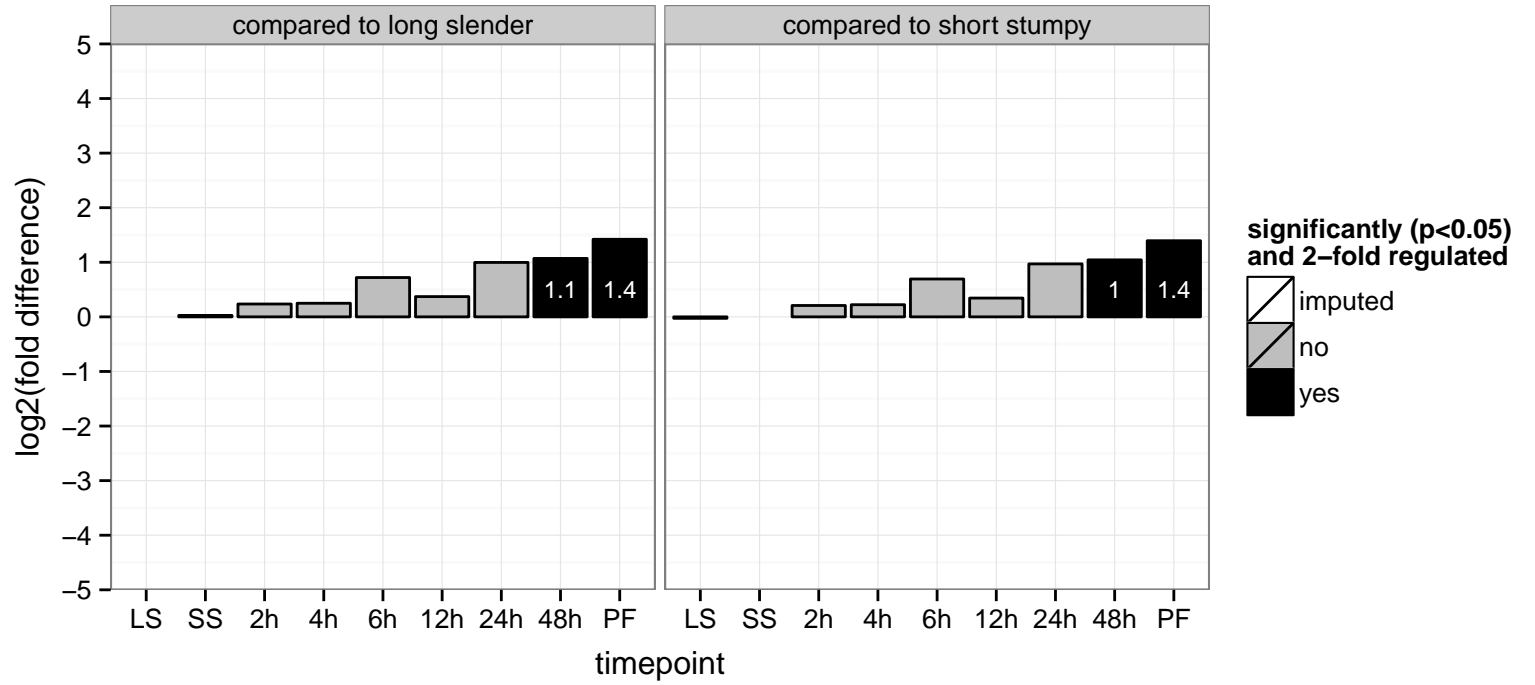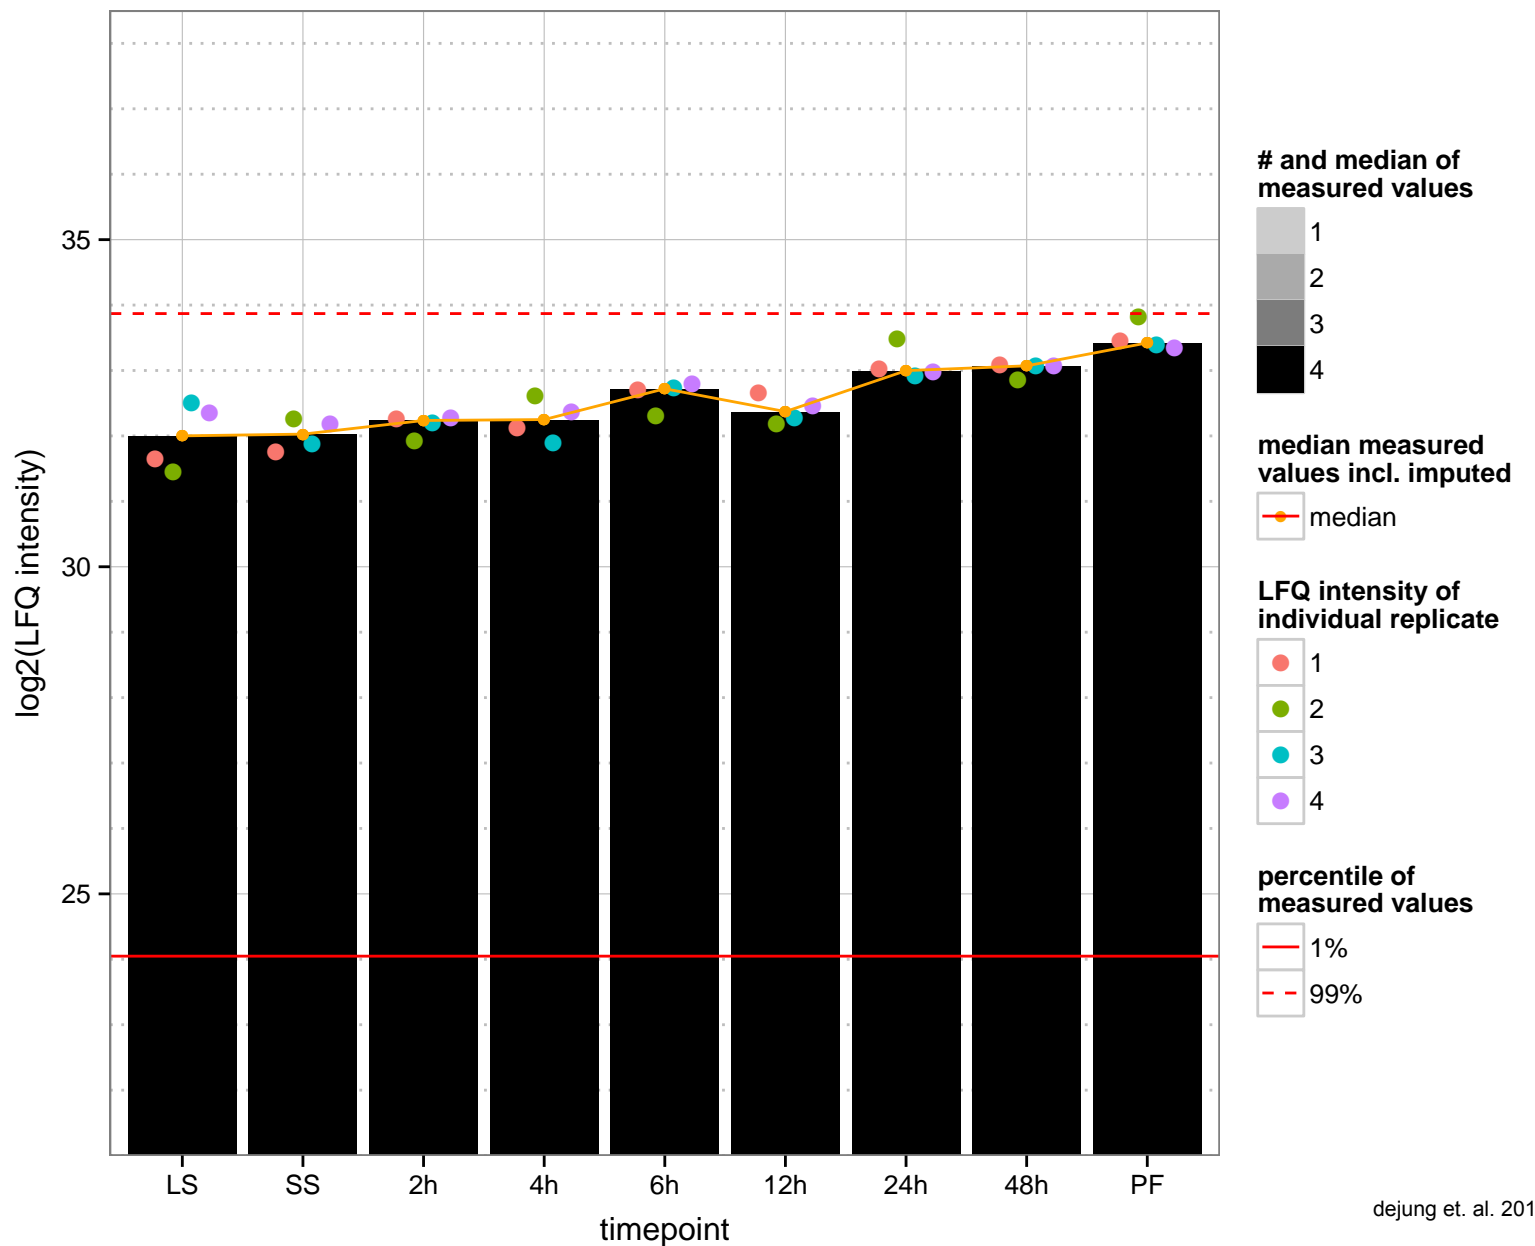

ATP-dependent RNA helicase, putative

Tb927.4.3890

AGOF: ATP binding, helicase activity, nucleic acid binding

AGOC: null

AGOP: null

PGOF: ATP binding, ATP-dependent helicase activity, helicase activity, nucleic acid binding

PGOC: null

PGOP: null

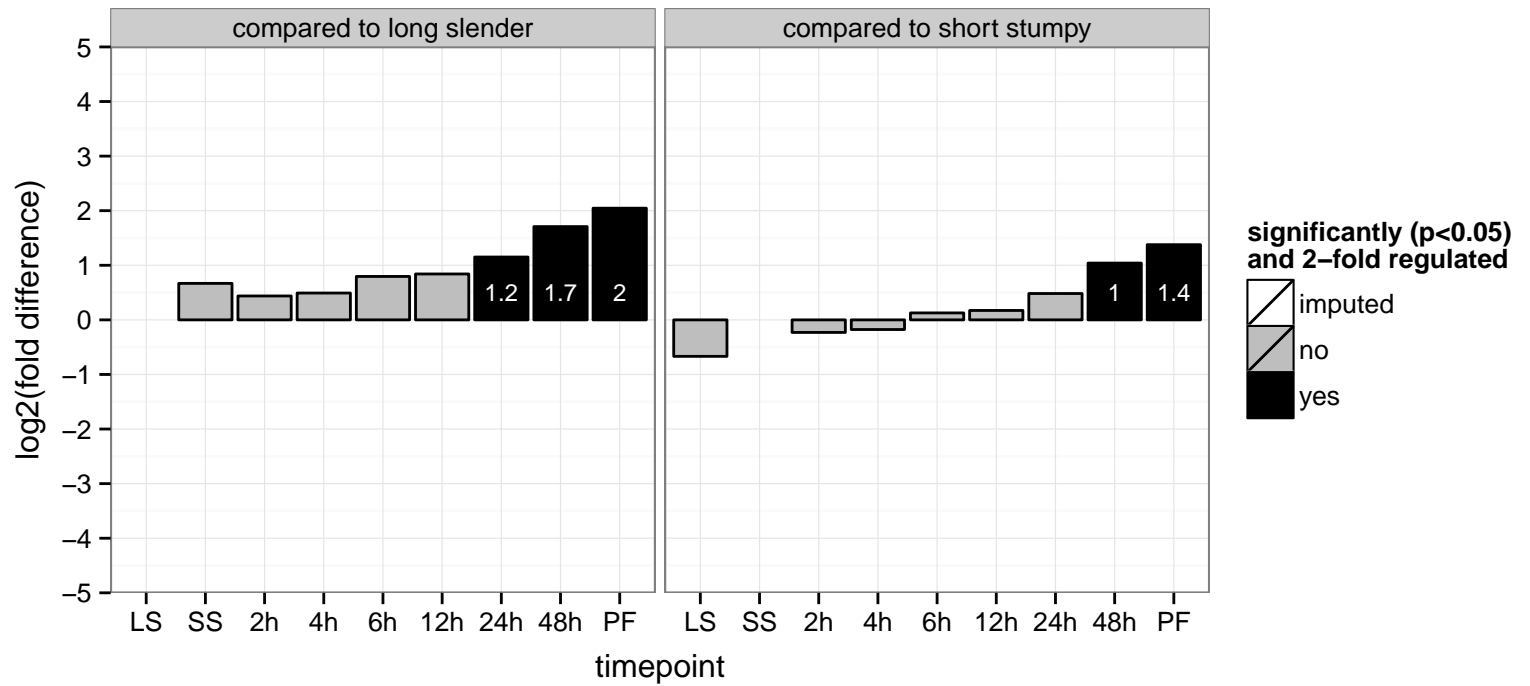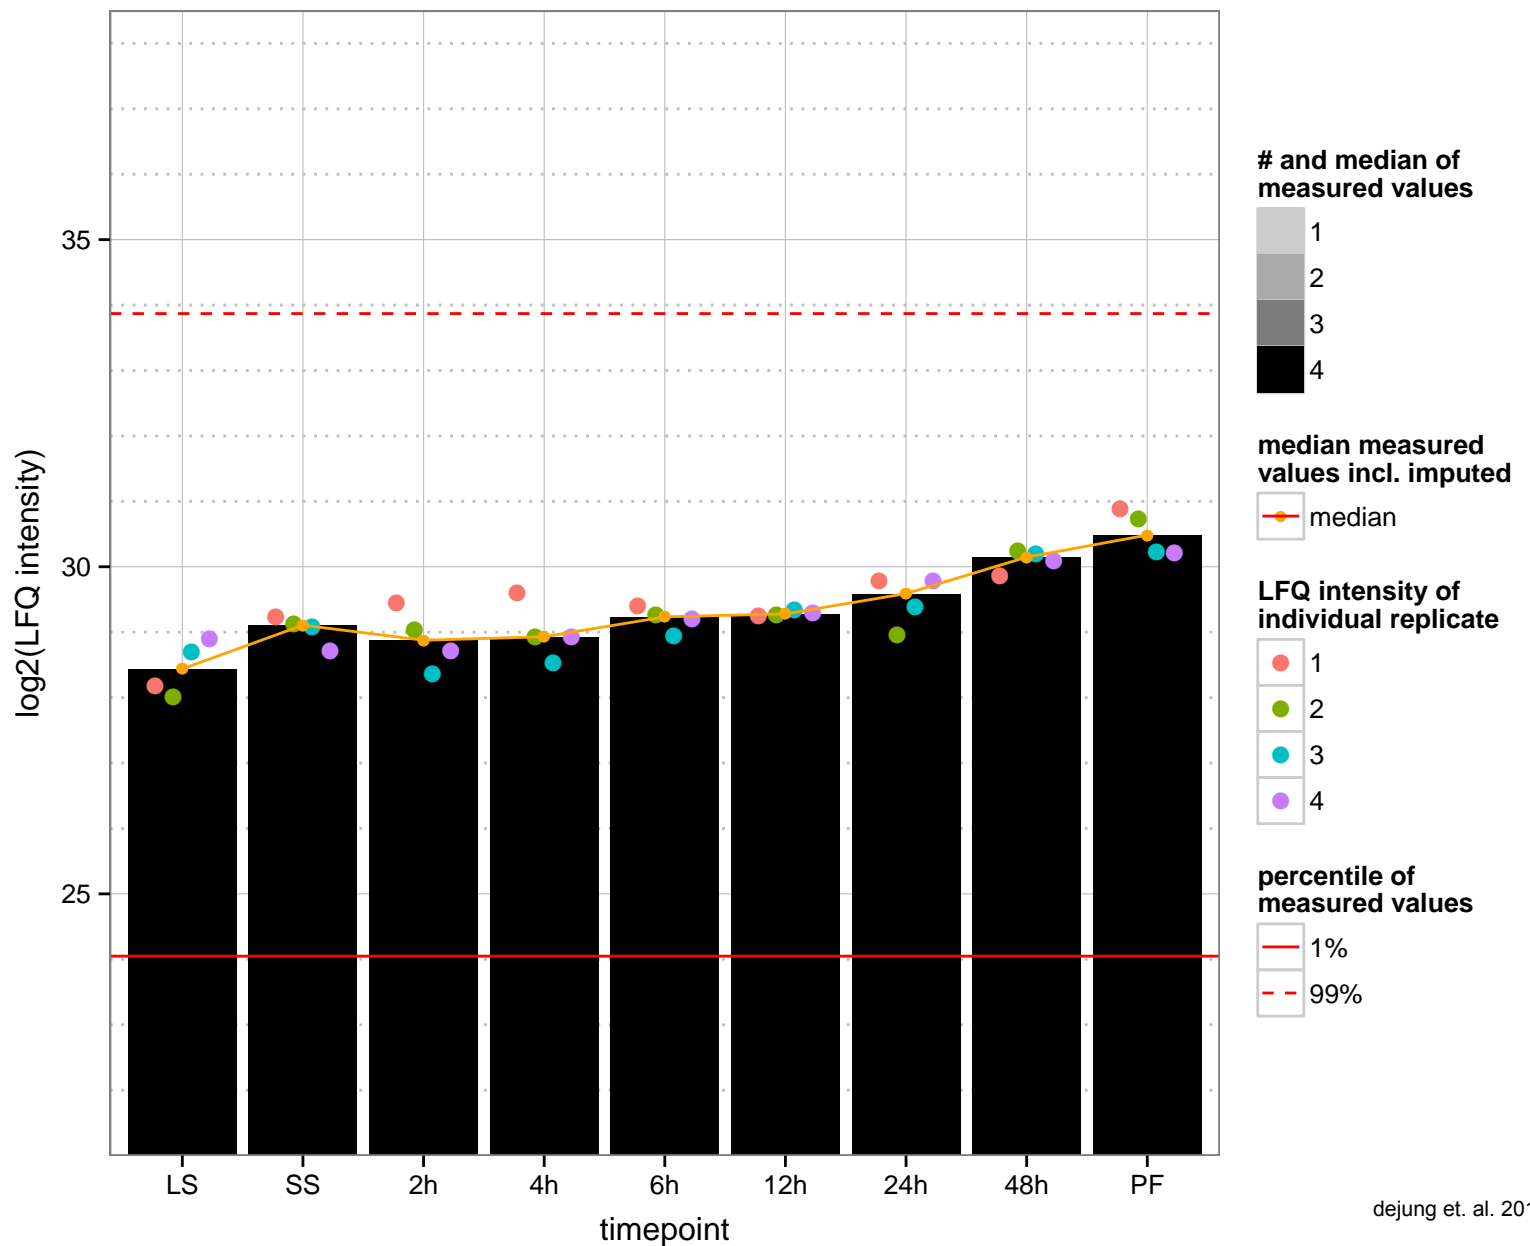

hypothetical protein, conserved  
 Tb927.4.4040  
 AGOF: null  
 AGOC: null  
 AGOP: null  
 PGO: null  
 PGO: null  
 PGO: null

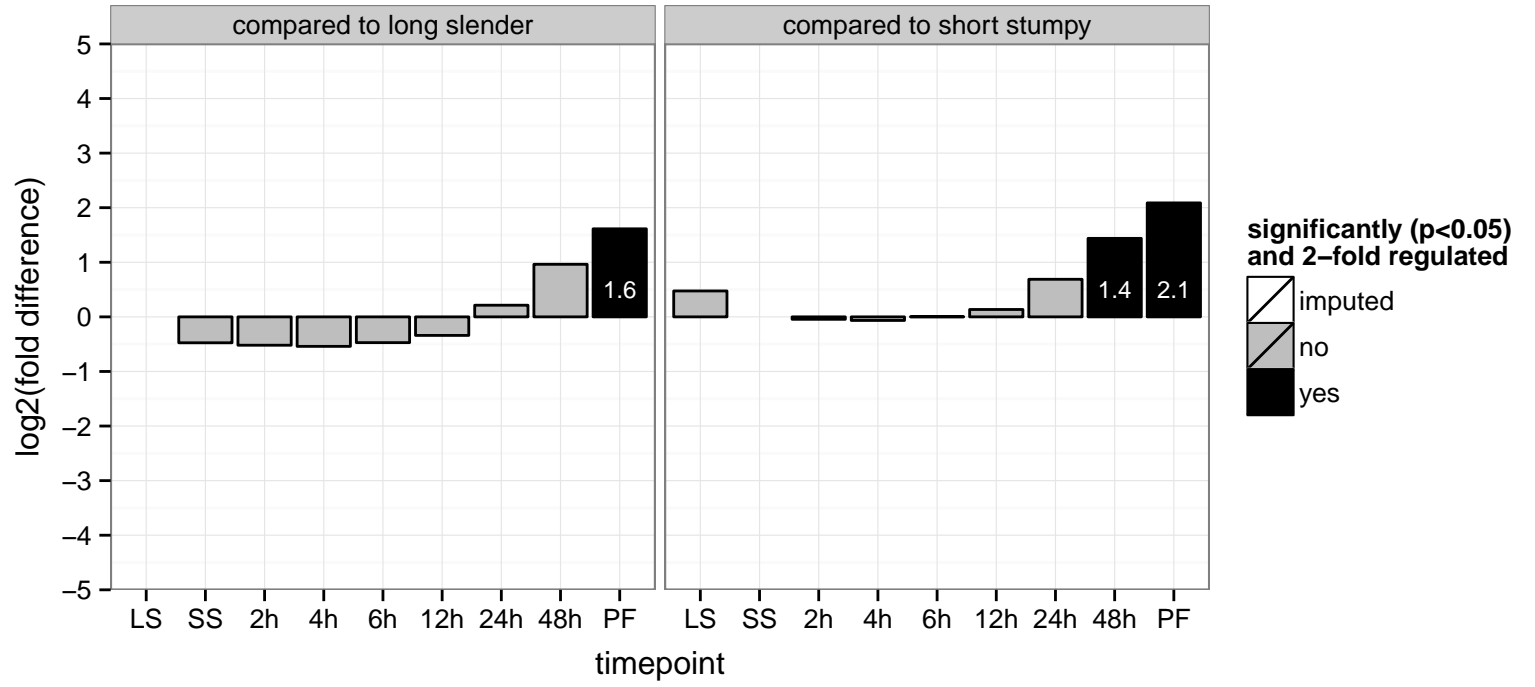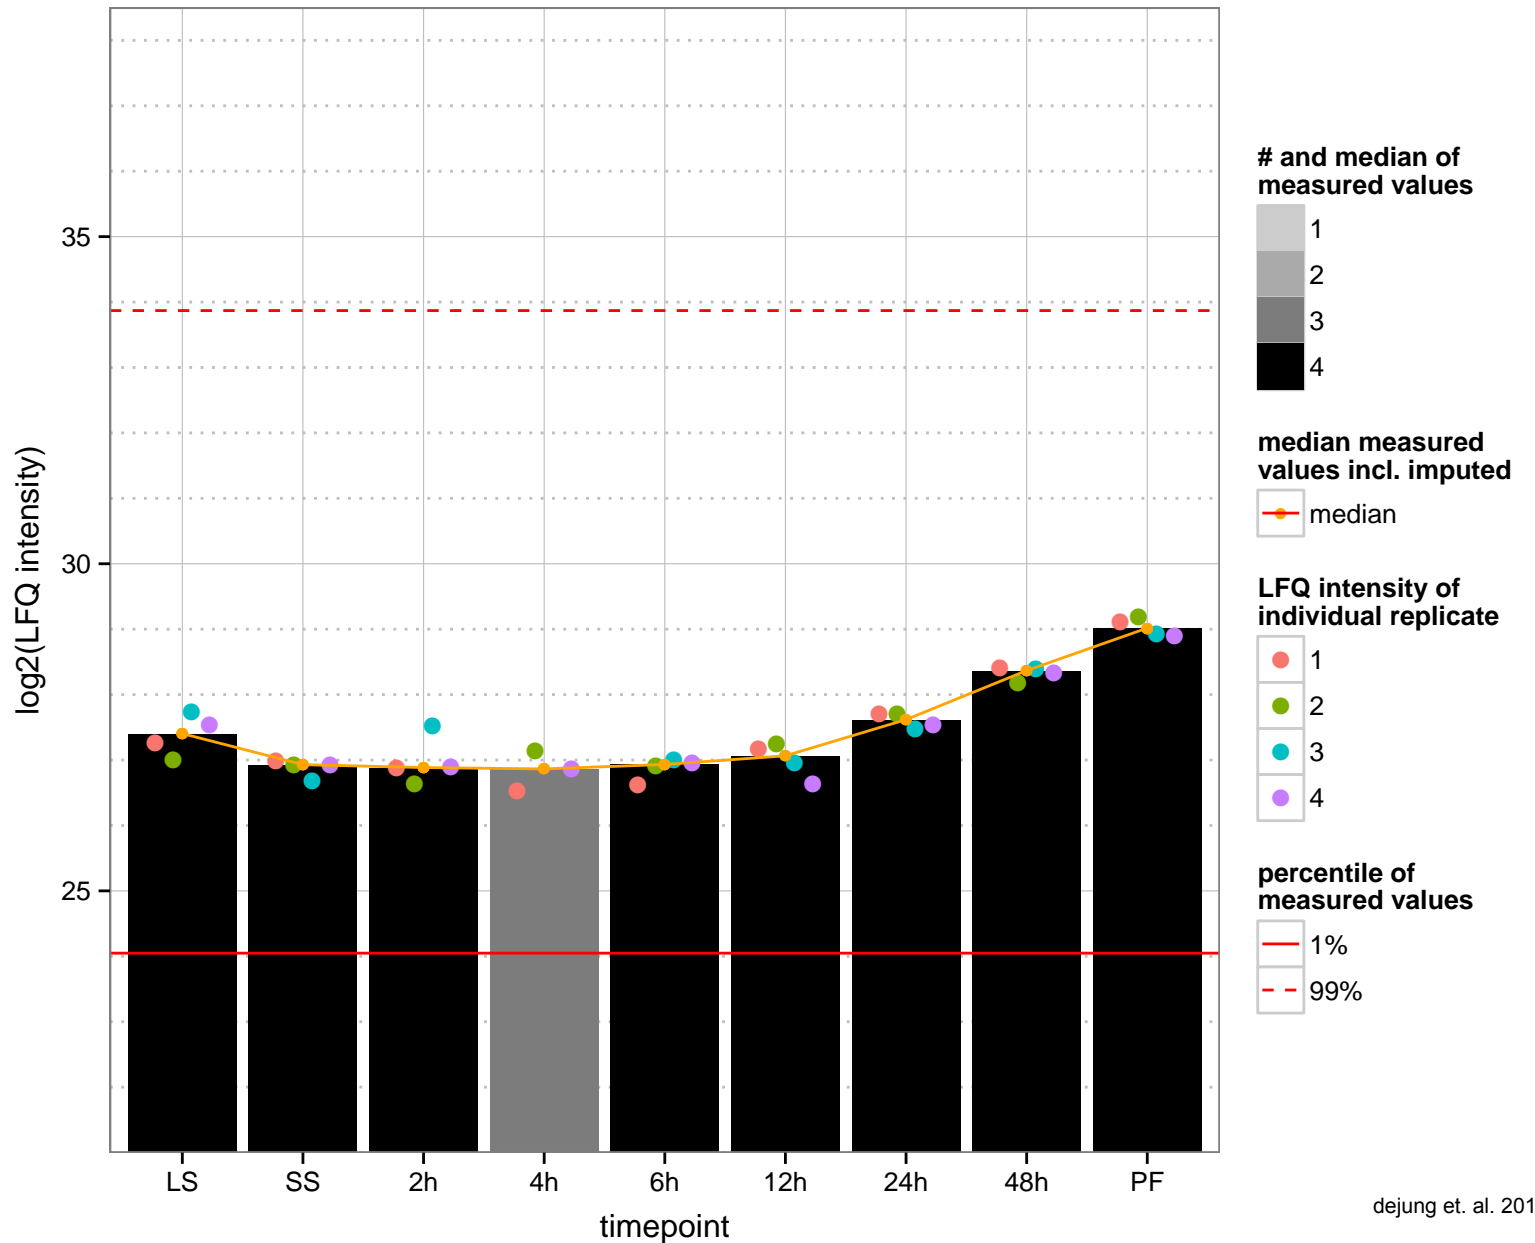

ATP-dependent zinc metallopeptidase, putative, metallo-peptidase, Clan MA(E) Family M41

Tb927.4.4210

AGOF: ATP binding, metalloendopeptidase activity, nucleoside-triphosphatase activity, zinc ion binding

AGOC: integral to membrane, mitochondrial inner membrane

AGOP: proteolysis

PGOF: ATP binding, metalloendopeptidase activity, nucleoside-triphosphatase activity, nucleotide binding

PGOC: null

PGOP: proteolysis

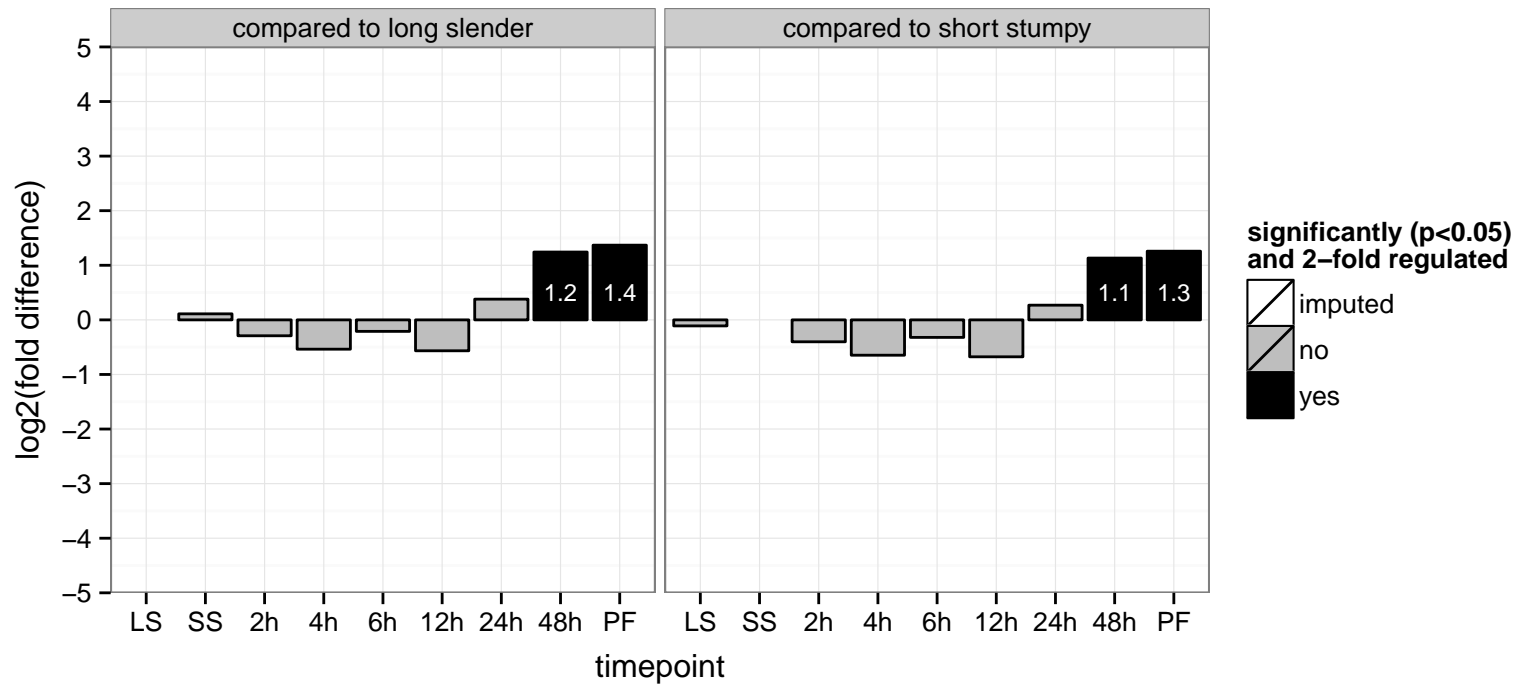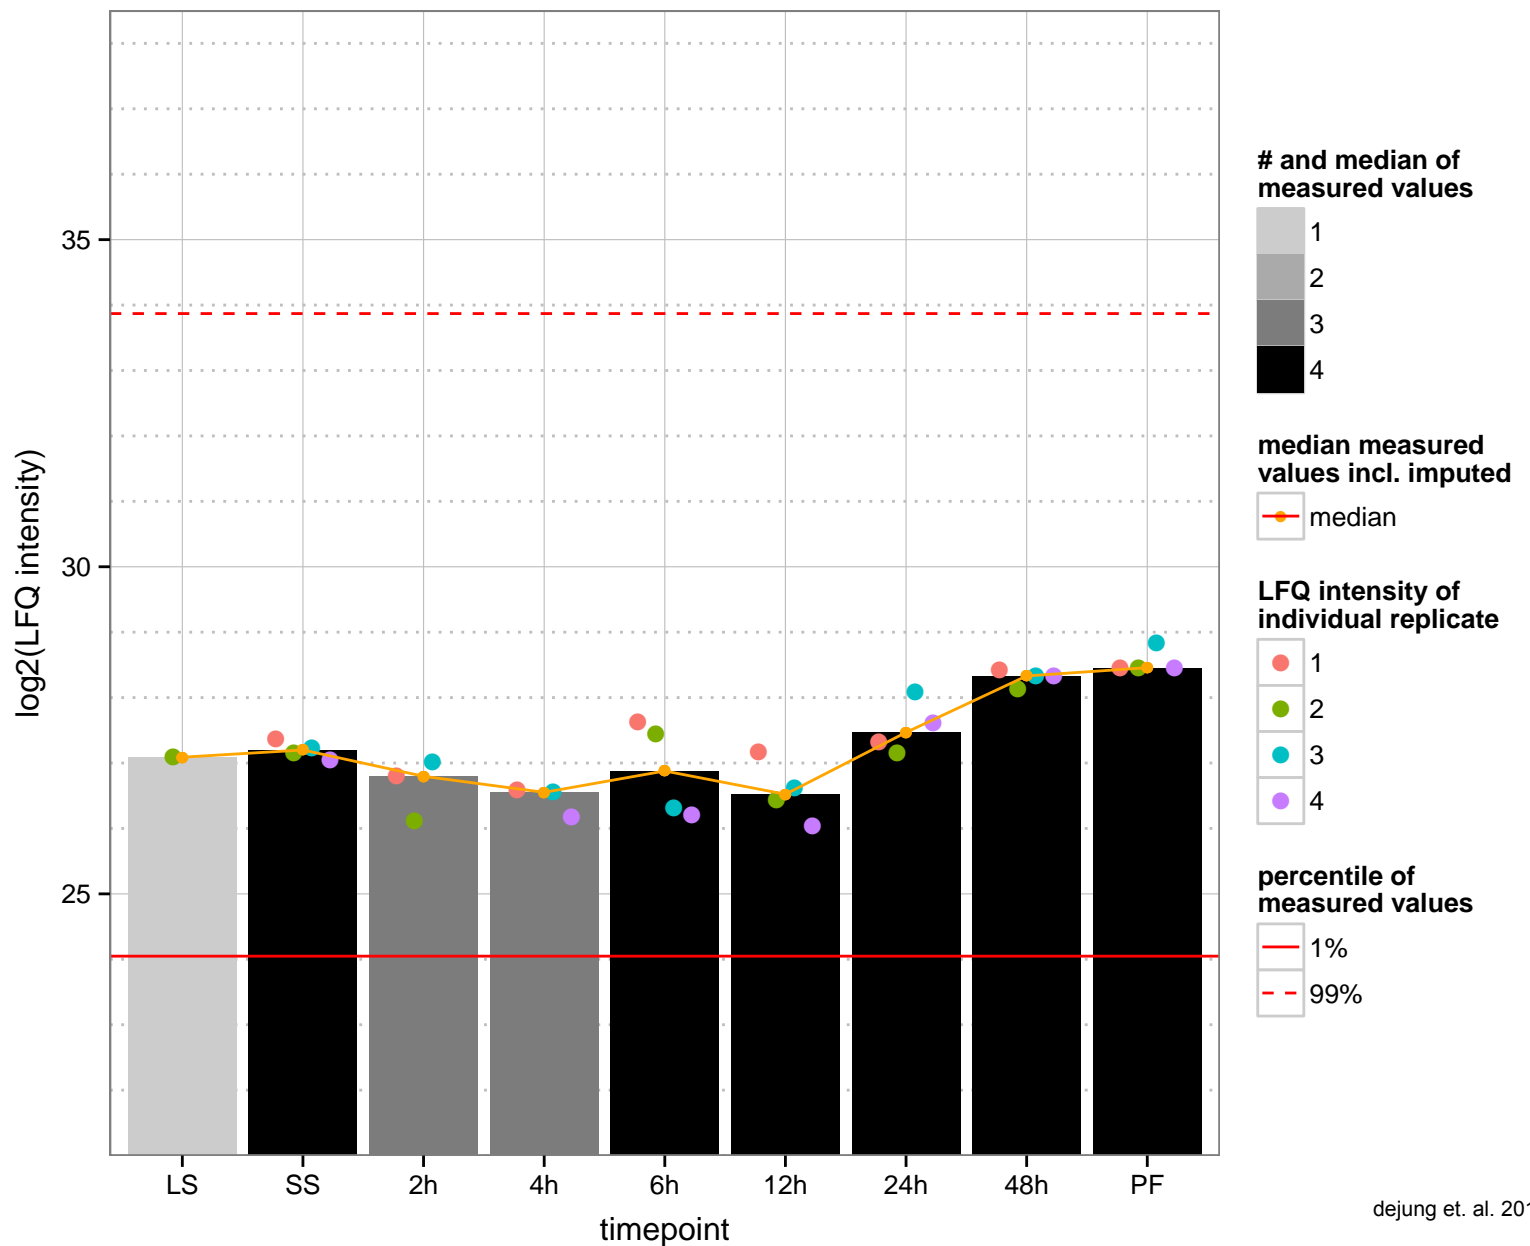



short-chain dehydrogenase, putative  
 Tb927.5.1210  
 AGOF: oxidoreductase activity  
 AGOC: mitochondrial inner membrane  
 AGOP: metabolic process  
 PGOF: oxidoreductase activity  
 PGO: null  
 PGOP: metabolic process

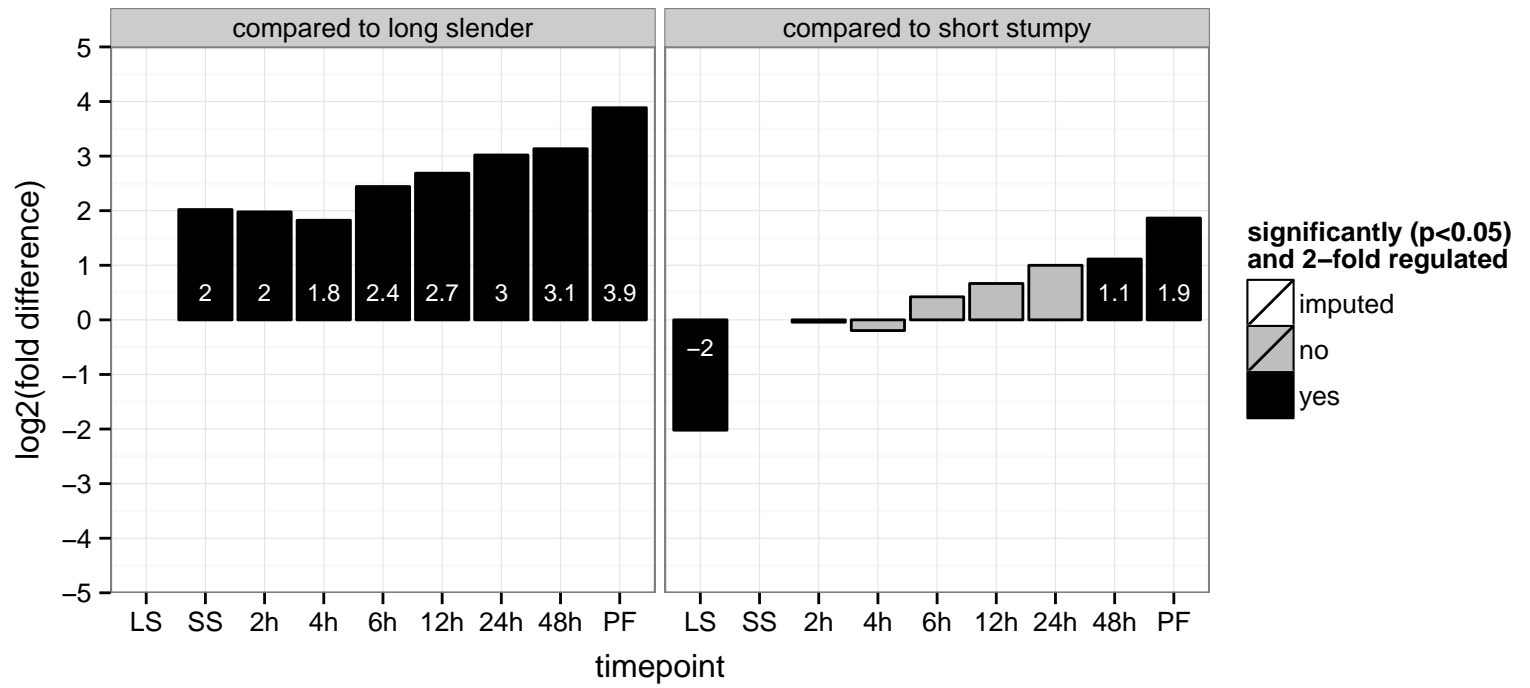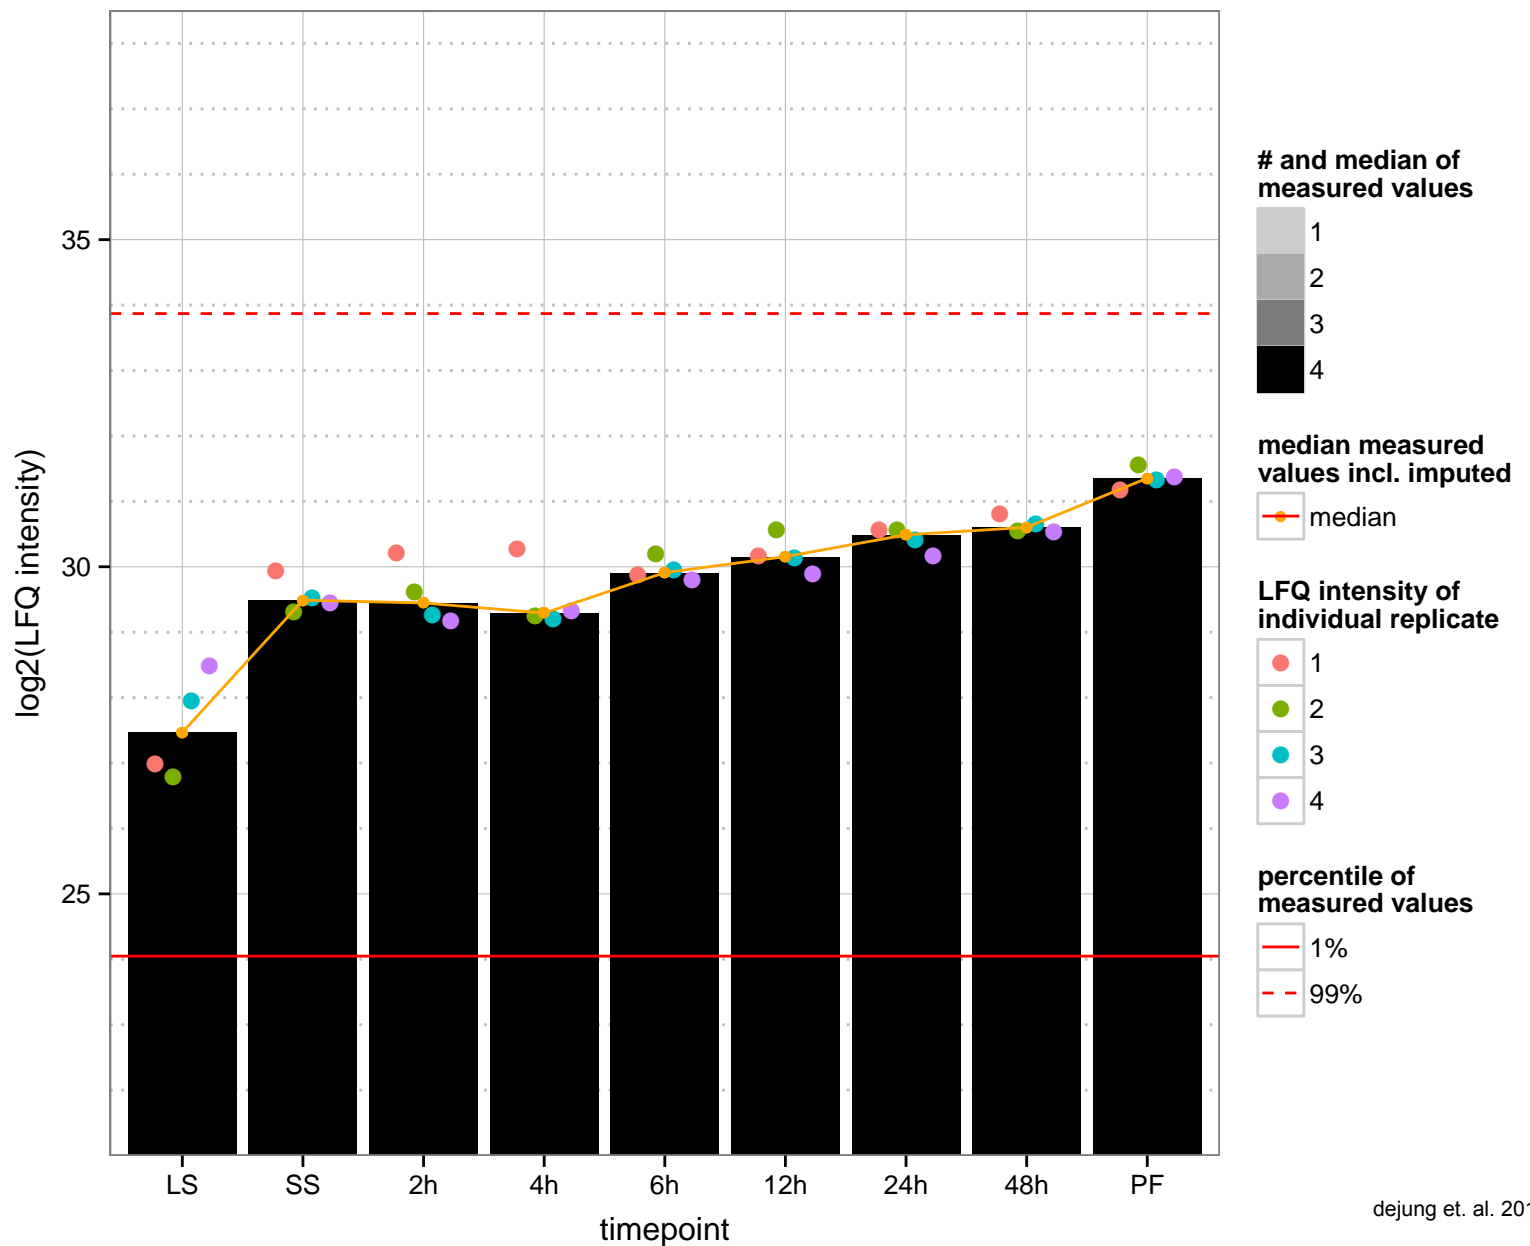

hypothetical protein, conserved  
 Tb927.5.1790  
 AGOF: null  
 AGOC: mitochondrion  
 AGOP: null  
 PGO: null  
 PGO: null  
 PGO: null

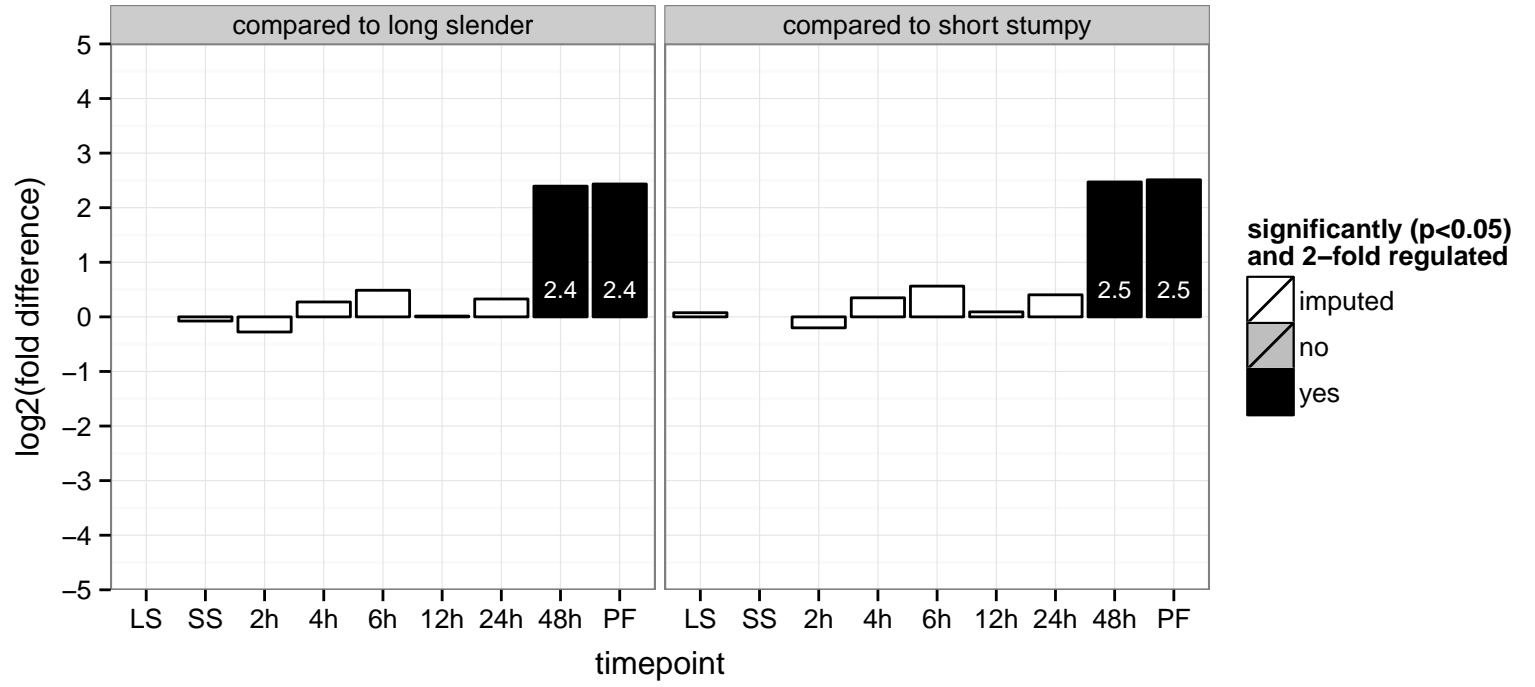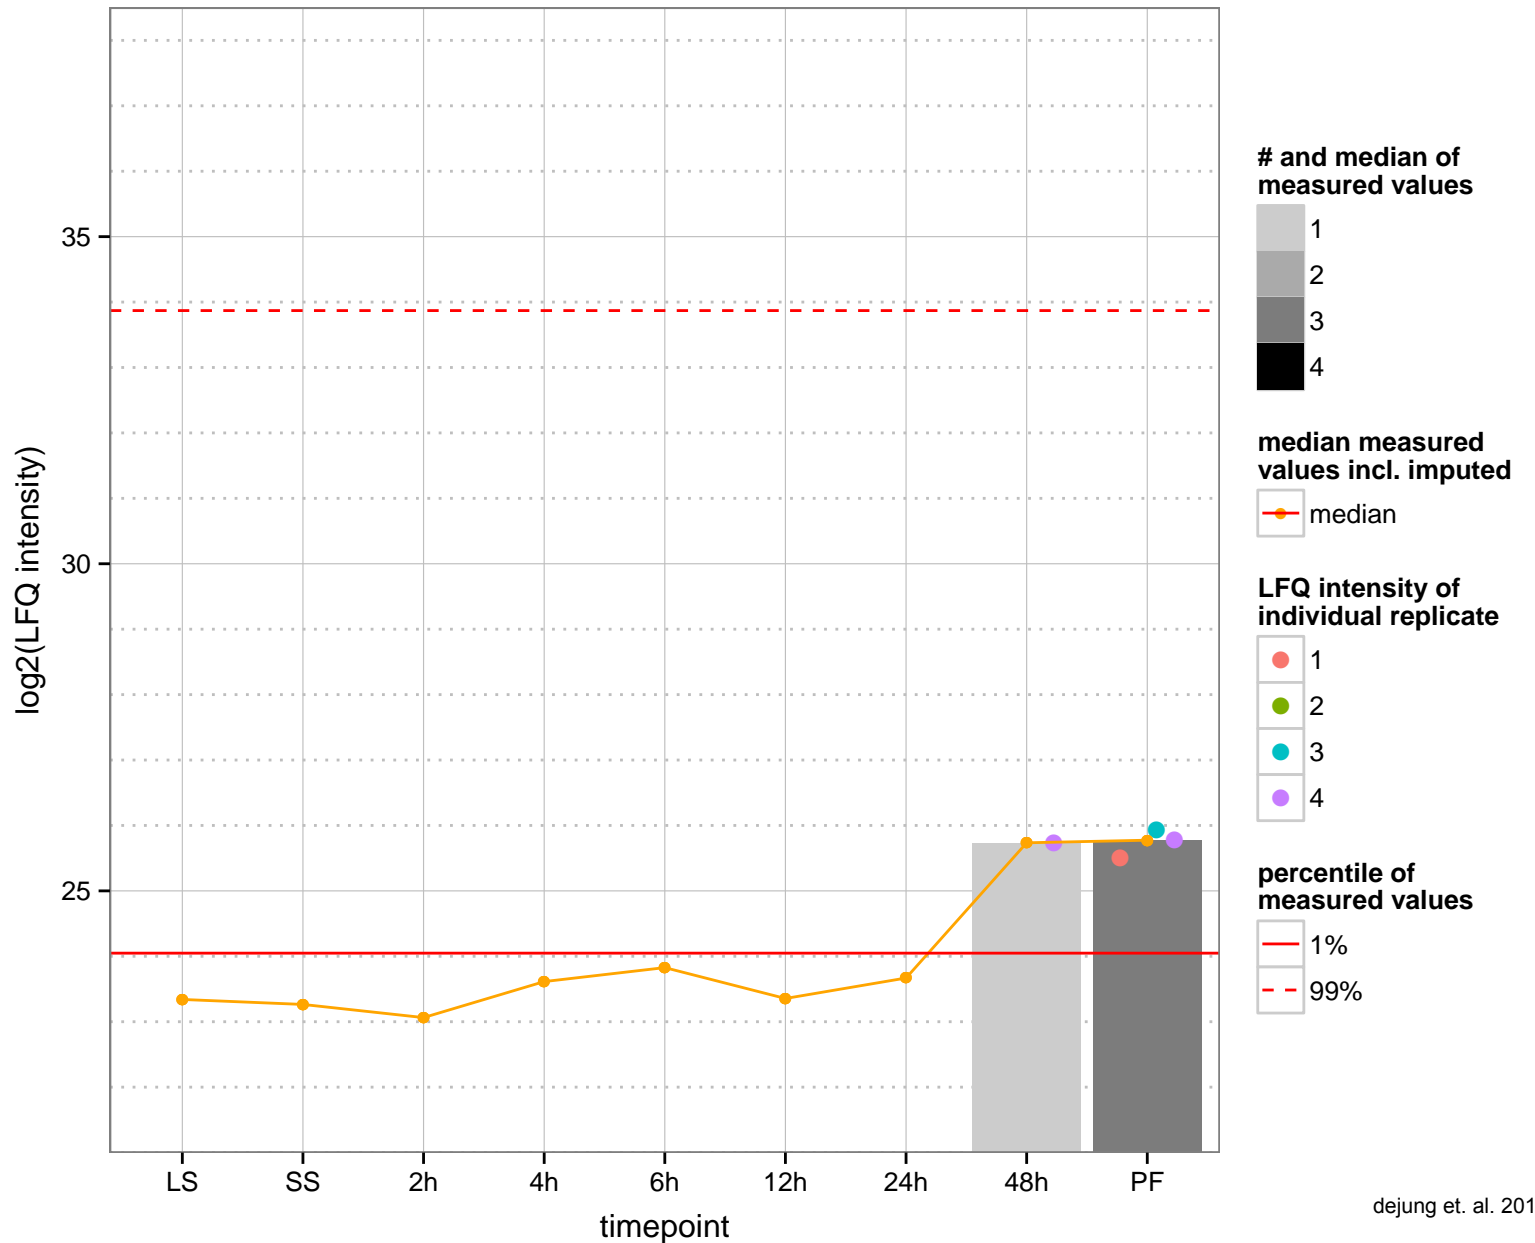

regulator of nonsense transcripts UPF1 (upf1)

Tb927.5.2140

AGOF: ATP binding, DNA binding, helicase activity, nucleoside-triphosphatase activity, zinc ion binding

AGOC: cytoplasm

AGOP: nuclear-transcribed mRNA catabolic process, nonsense-mediated decay

PGOF: ATP binding, DNA binding, helicase activity, nucleoside-triphosphatase activity, nucleotide binding, zinc ion binding

PGOC: cytoplasm

PGOP: nuclear-transcribed mRNA catabolic process, nonsense-mediated decay

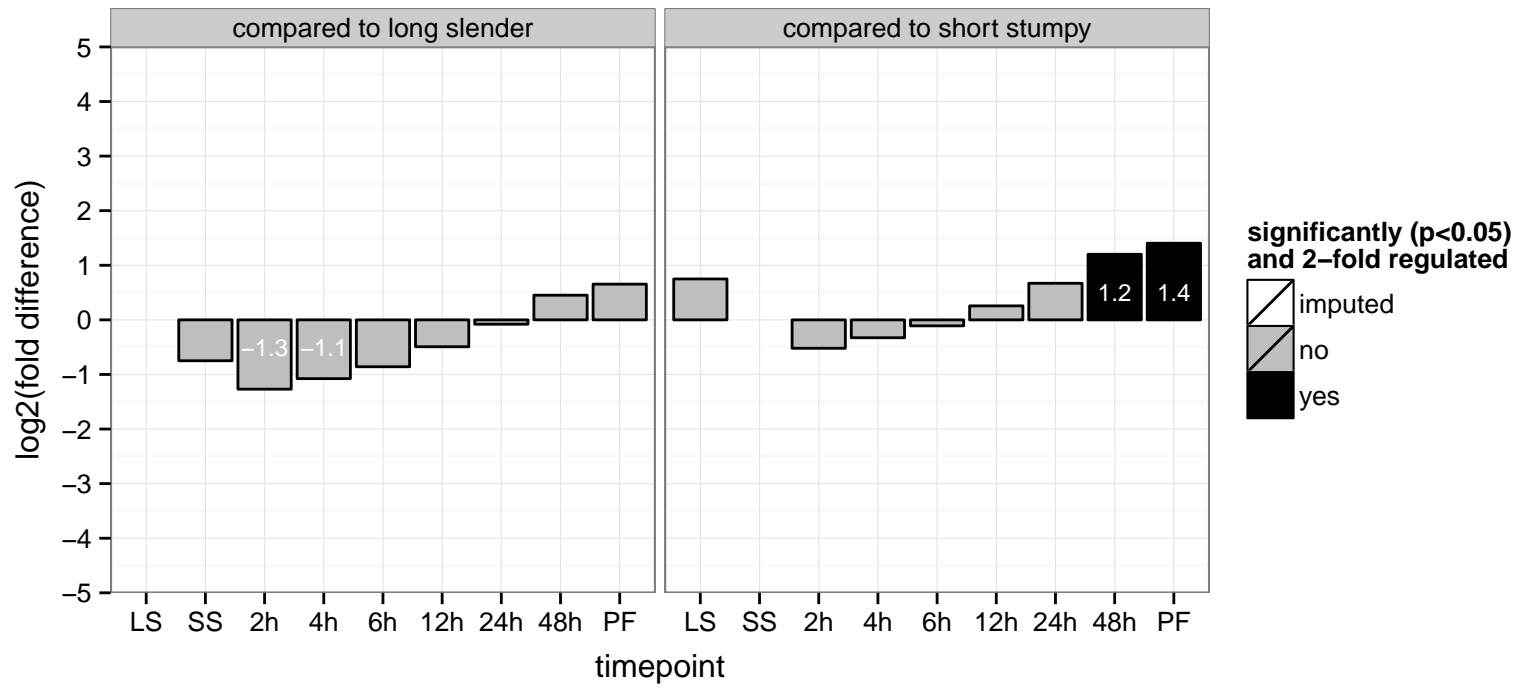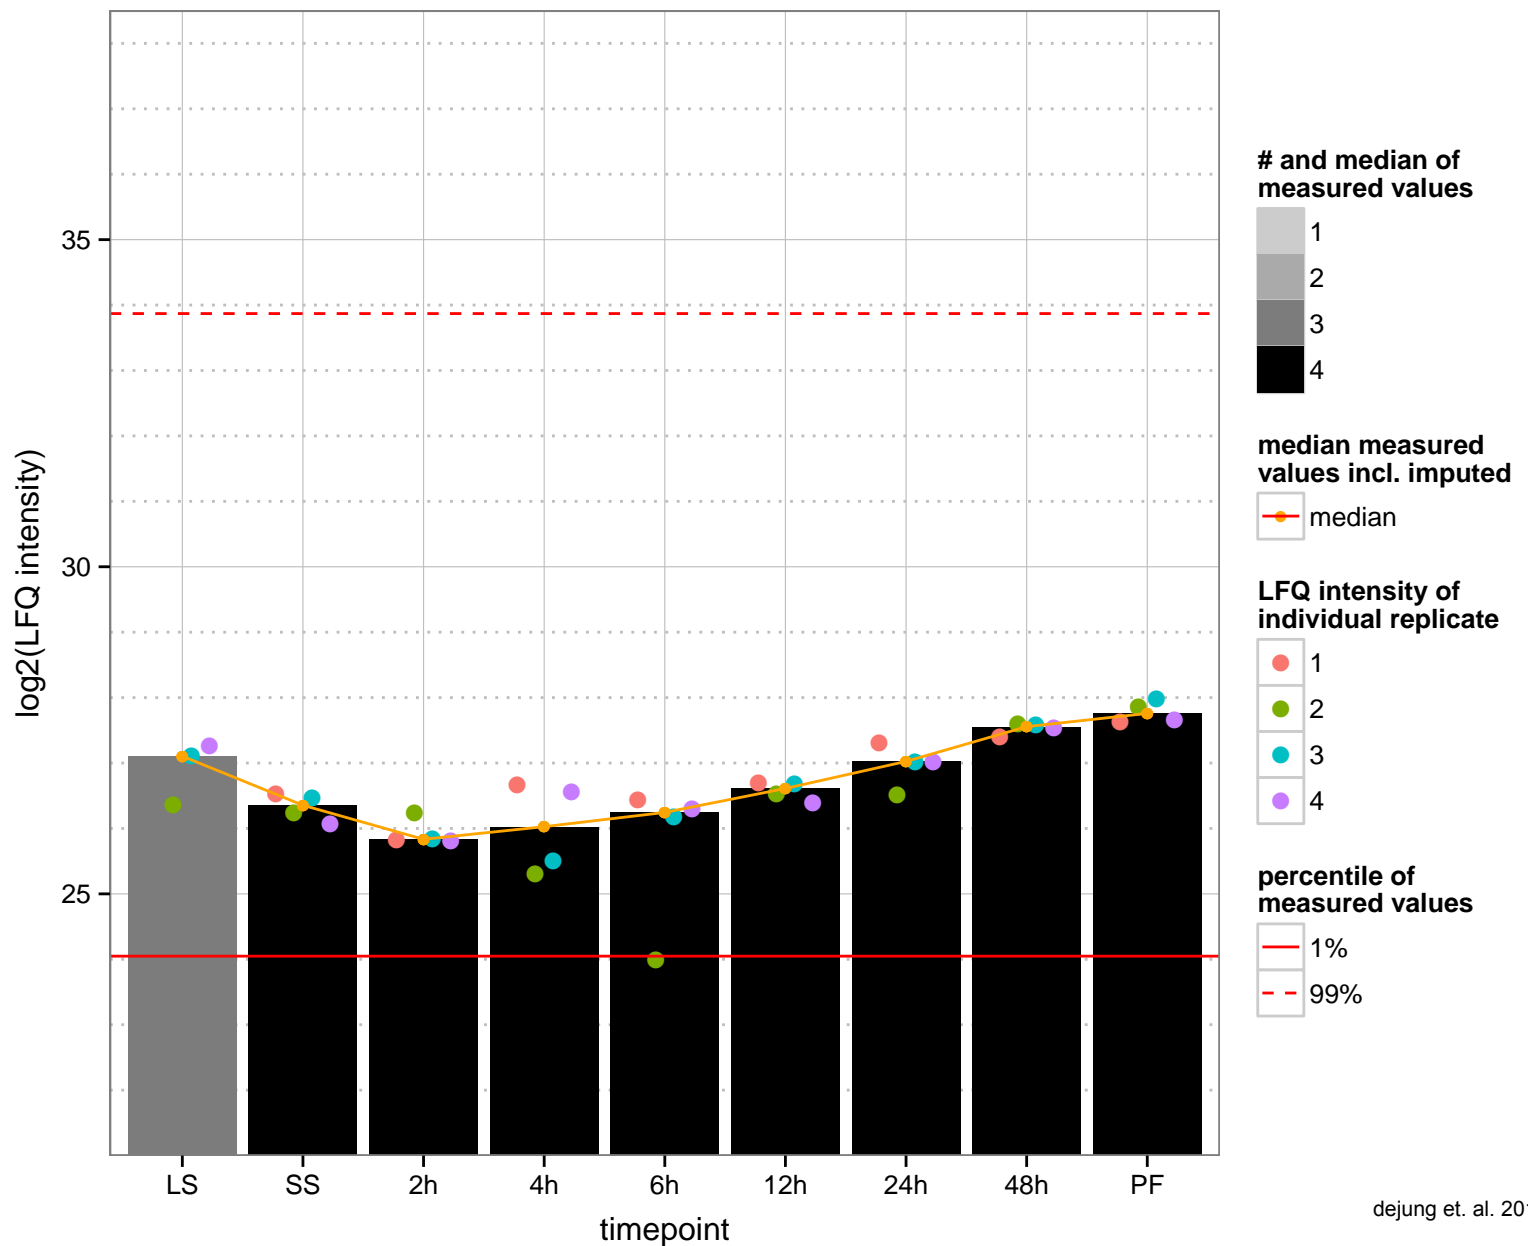

hypothetical protein, conserved  
 Tb927.5.2320  
 AGOF: null  
 AGOC: null  
 AGOP: null  
 PGOF: null  
 PGO: null  
 PGOP: null

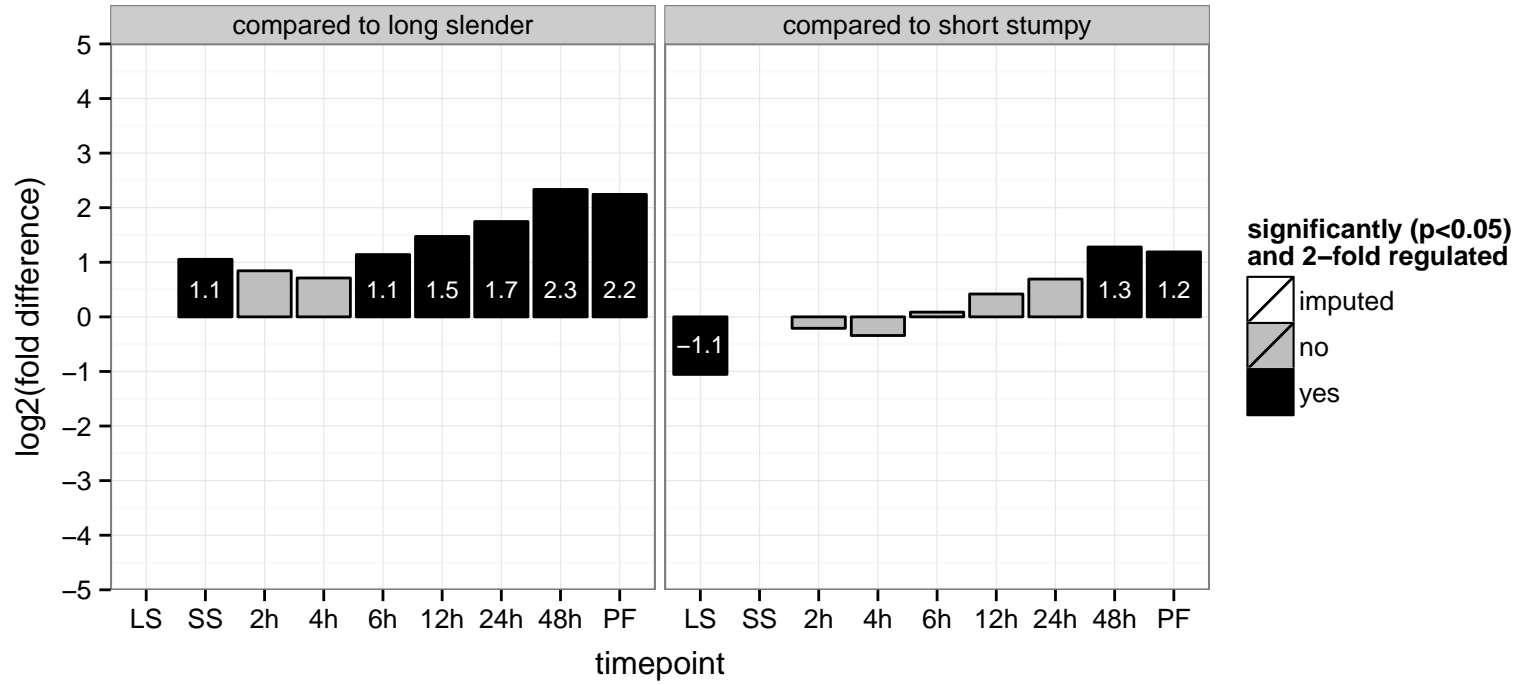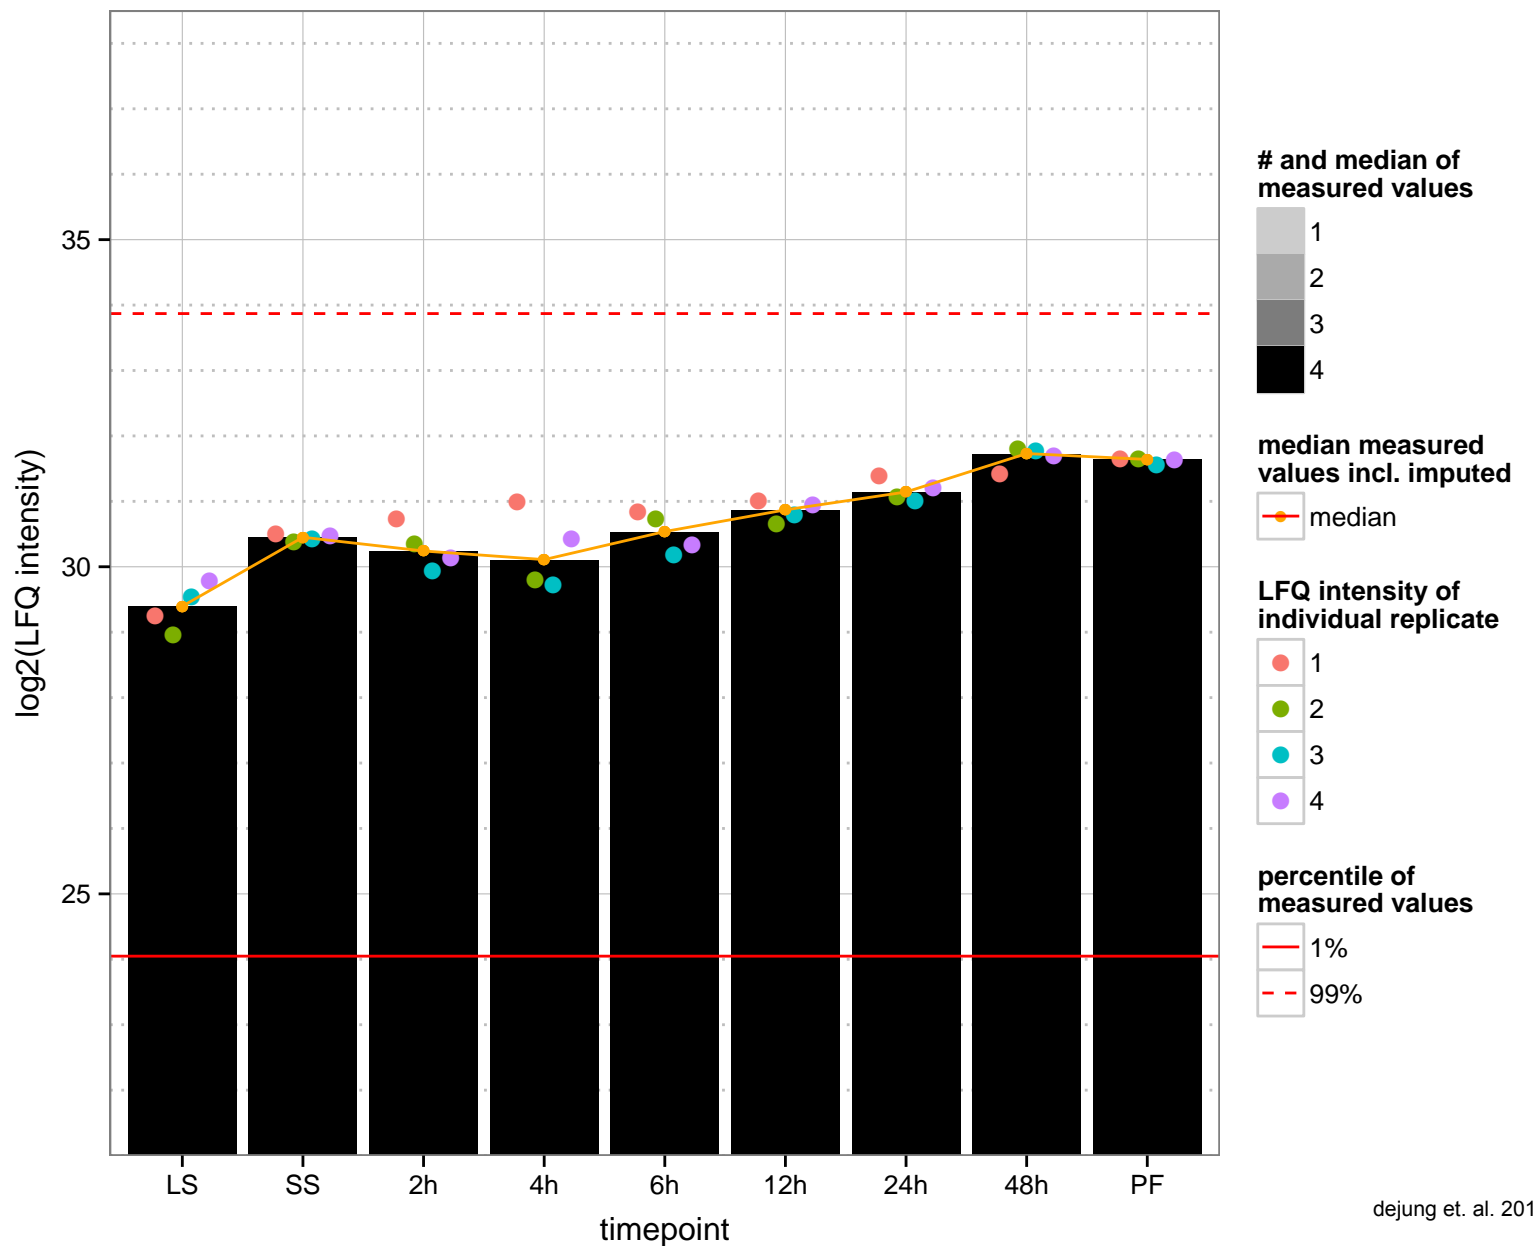

mitochondrial DNA polymerase beta

Tb927.5.2780

AGOF: DNA binding, DNA-directed DNA polymerase activity, catalytic activity

AGOC: mitochondrion

AGOP: DNA repair, DNA replication

PGOF: DNA binding, DNA-directed DNA polymerase activity, catalytic activity, nucleotidyltransferase activity

PGOC: null

PGOP: null

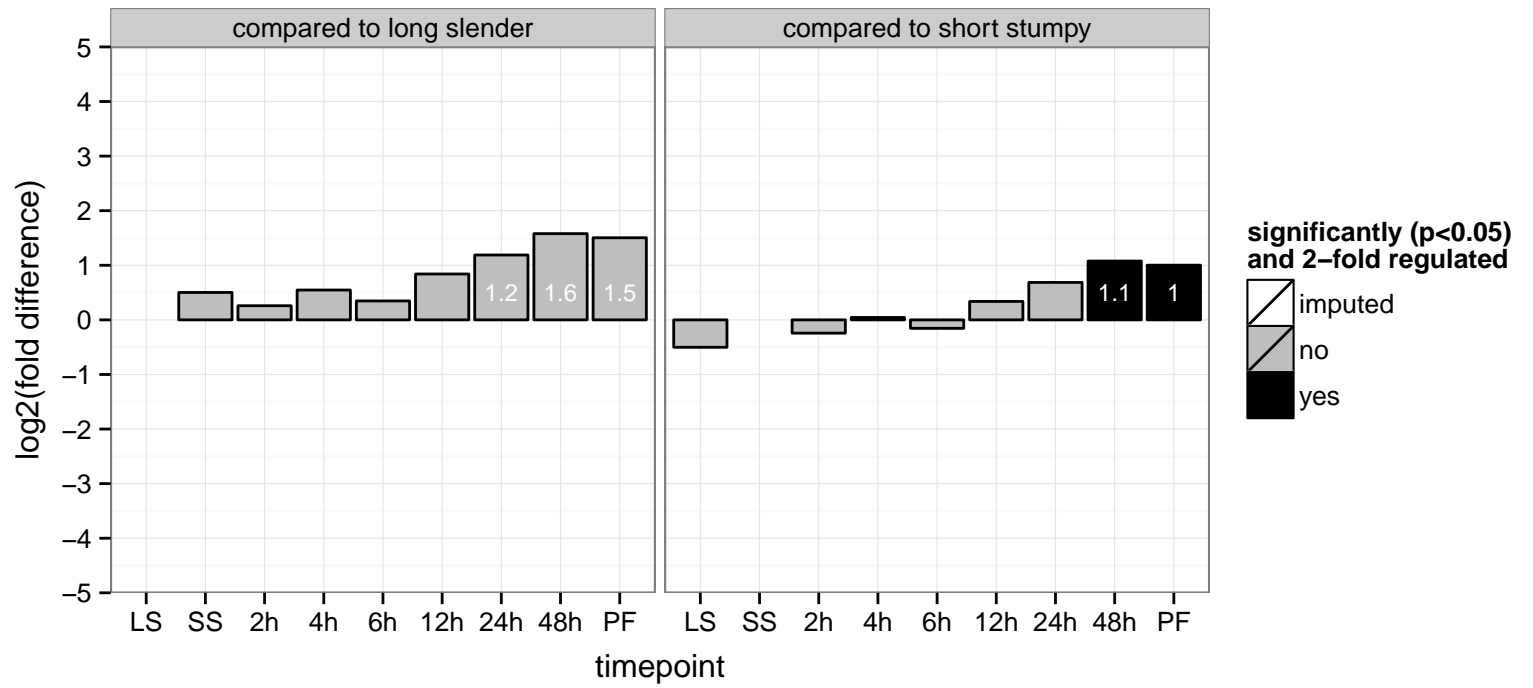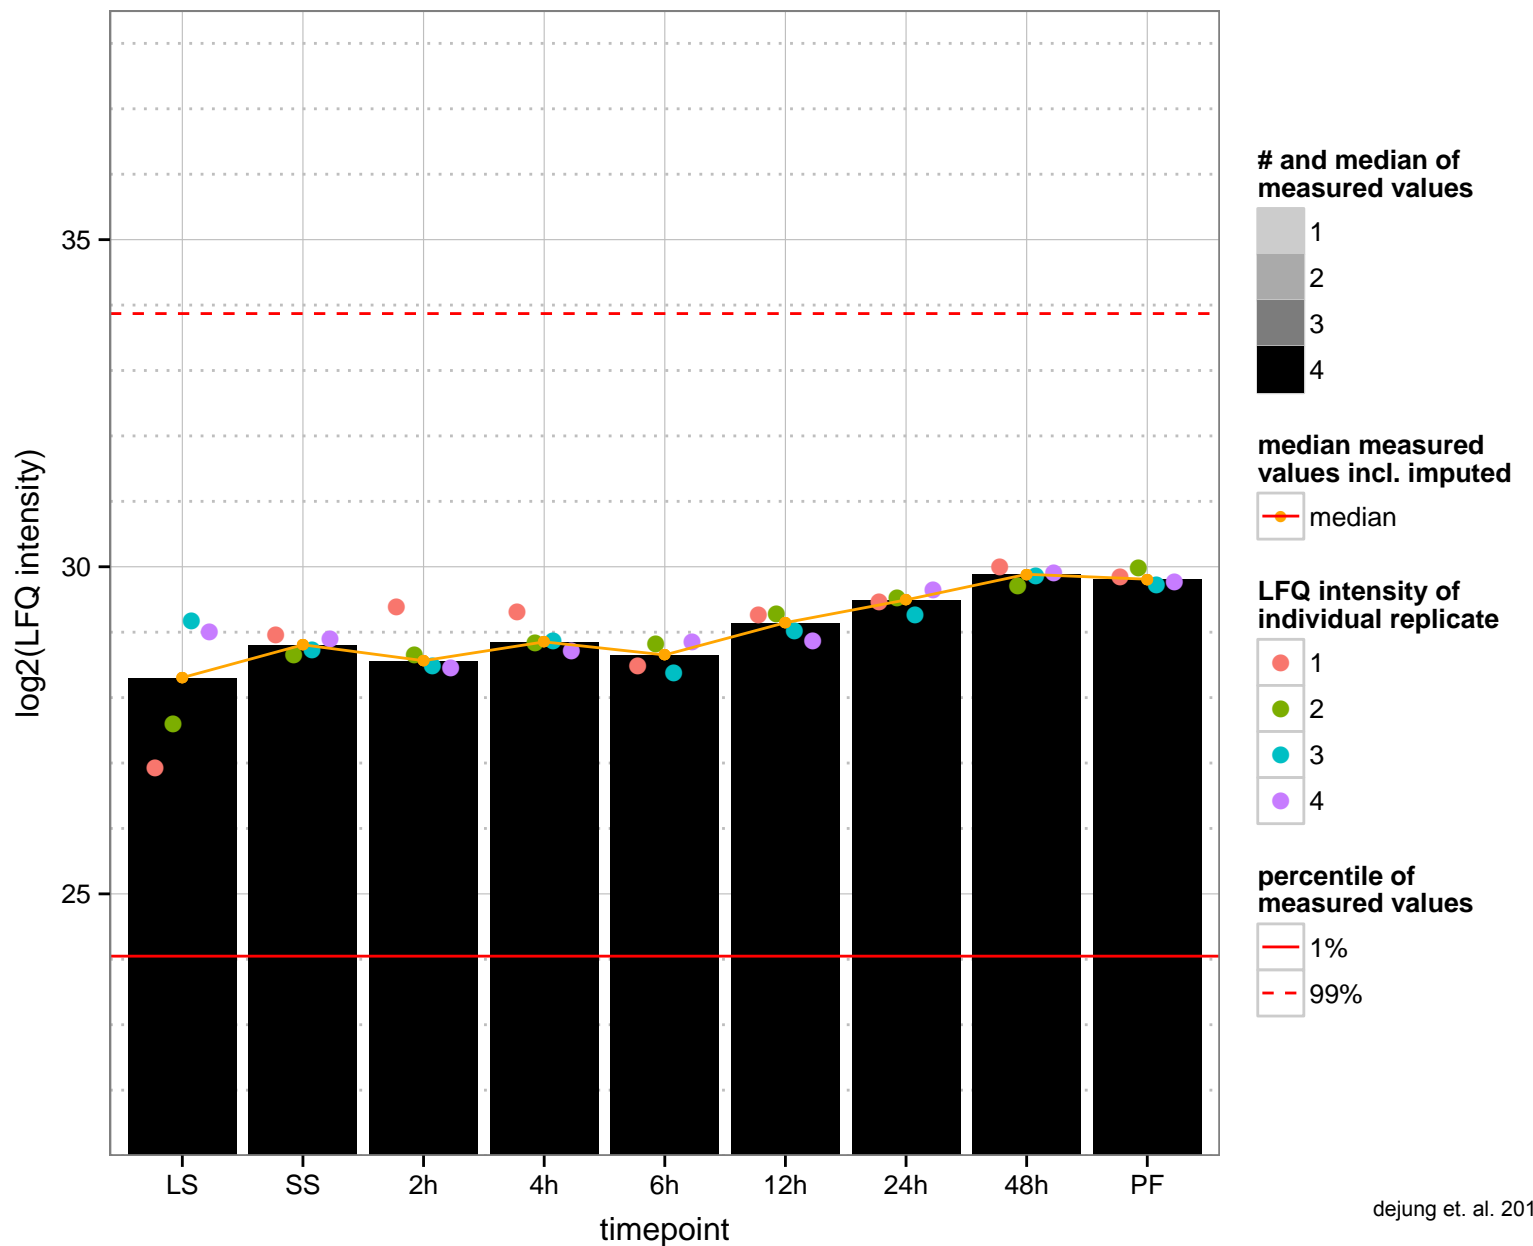

mitochondrial DNA polymerase beta-PAK (Pol beta-PAK)

Tb927.5.2790

AGOF: DNA binding, DNA-directed DNA polymerase activity, catalytic activity

AGOC: kinetoplast

AGOP: DNA replication

PGOF: DNA binding, DNA-directed DNA polymerase activity, catalytic activity, nucleotidyltransferase activity

PGOC: null

PGOP: null

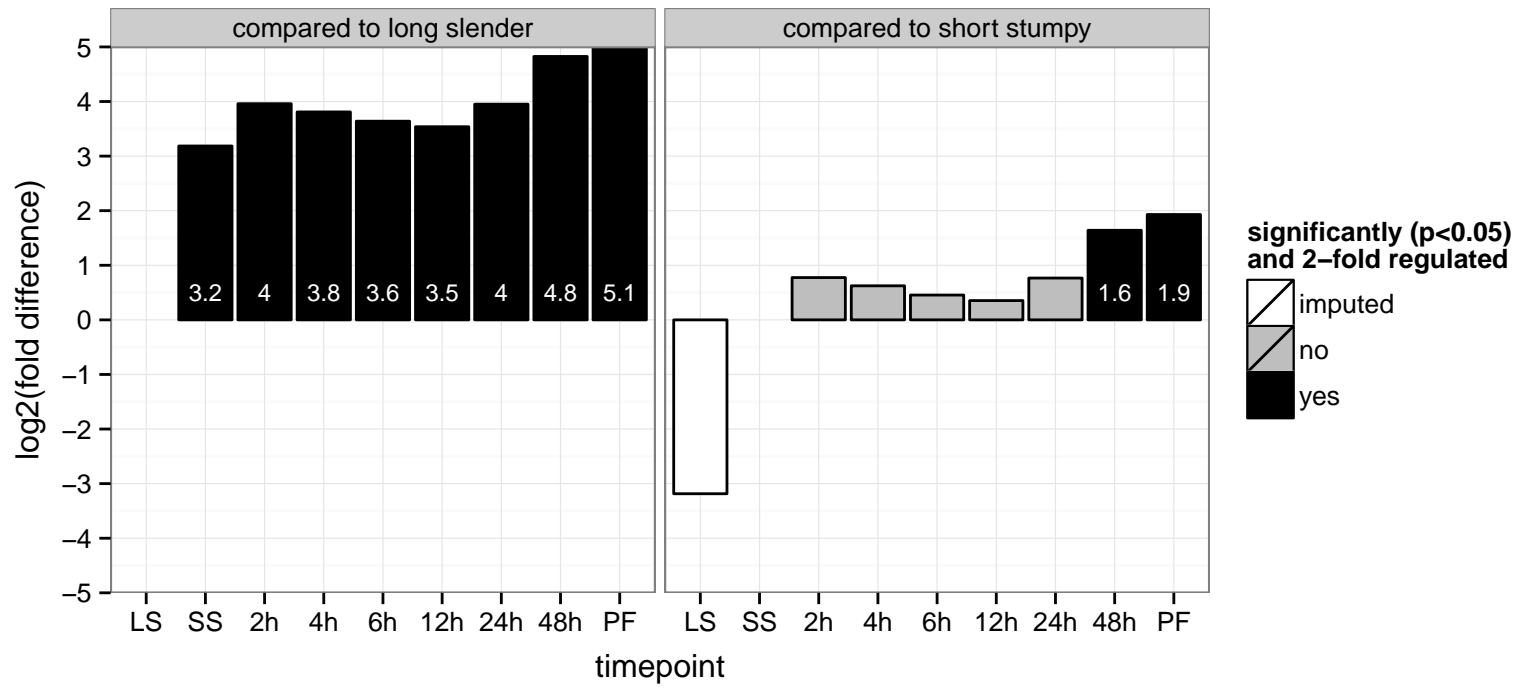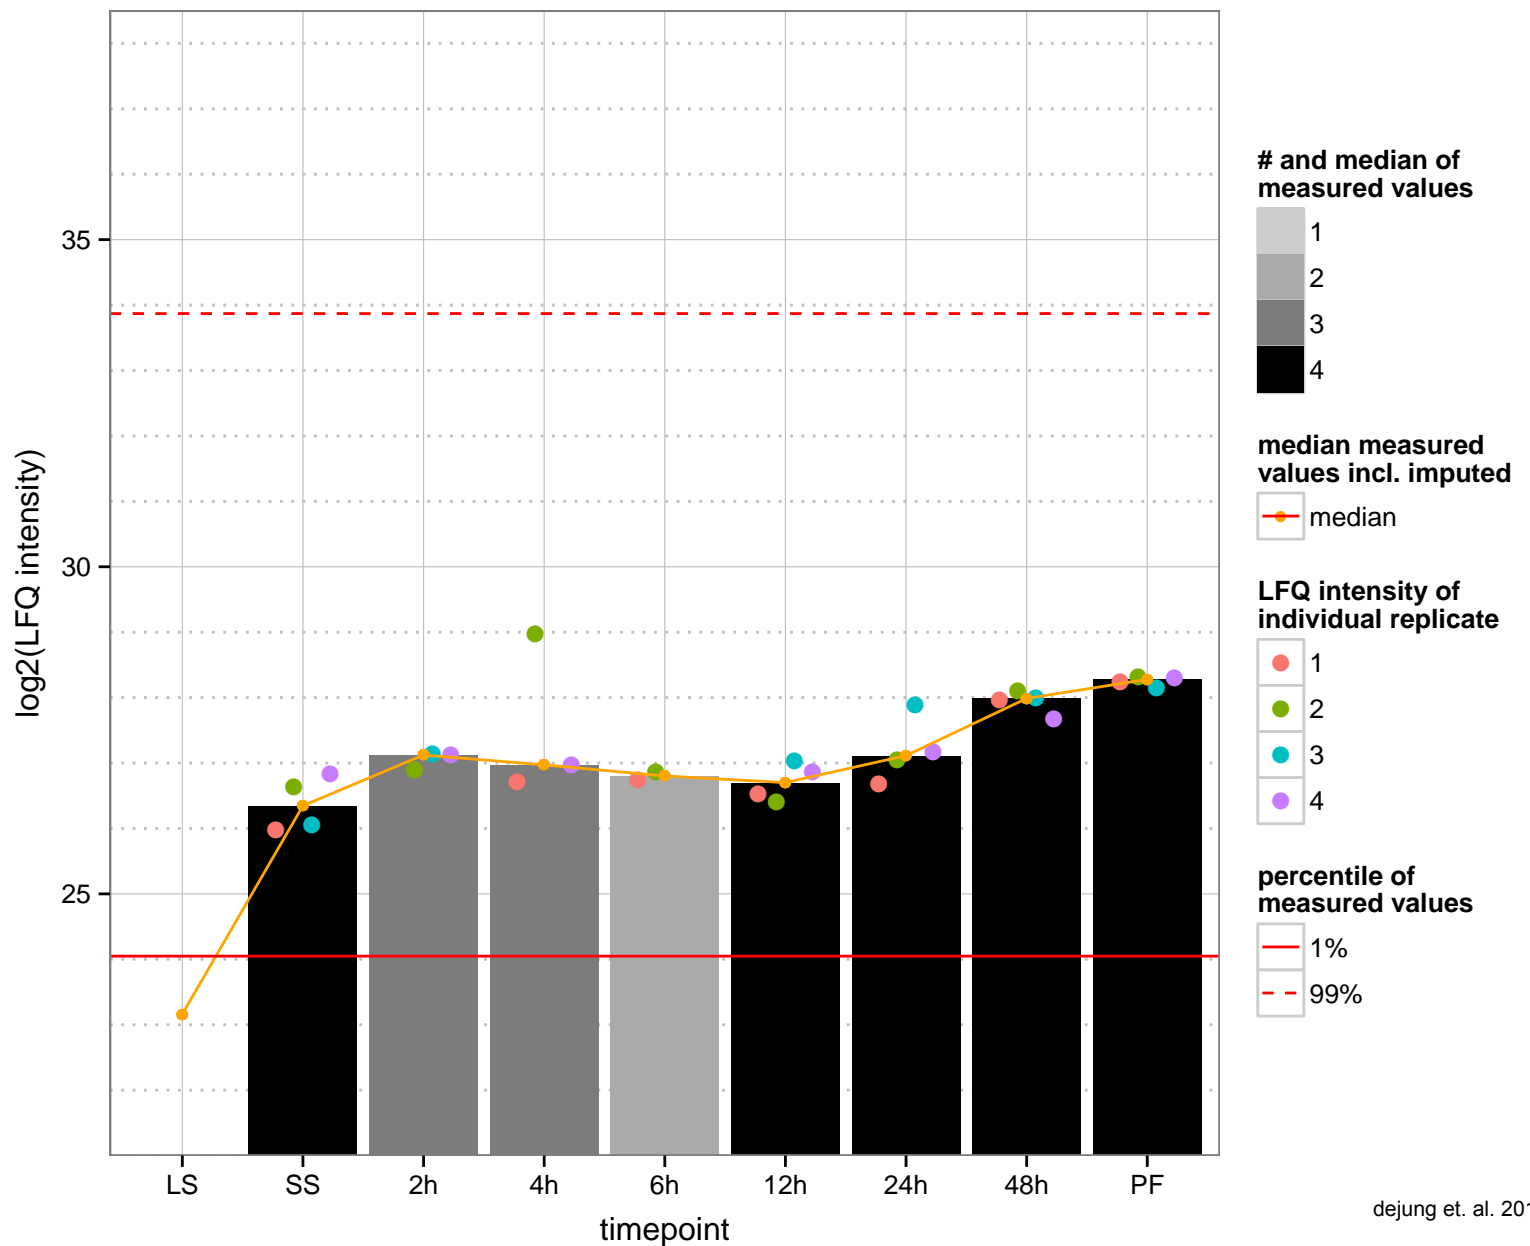

hypothetical protein, conserved  
 Tb927.5.3680  
 AGOF: null  
 AGOC: null  
 AGOP: null  
 PGOF: phosphatidylinositol N-acetylglucosaminyltransferase activity  
 PGOC: null  
 PGOP: null

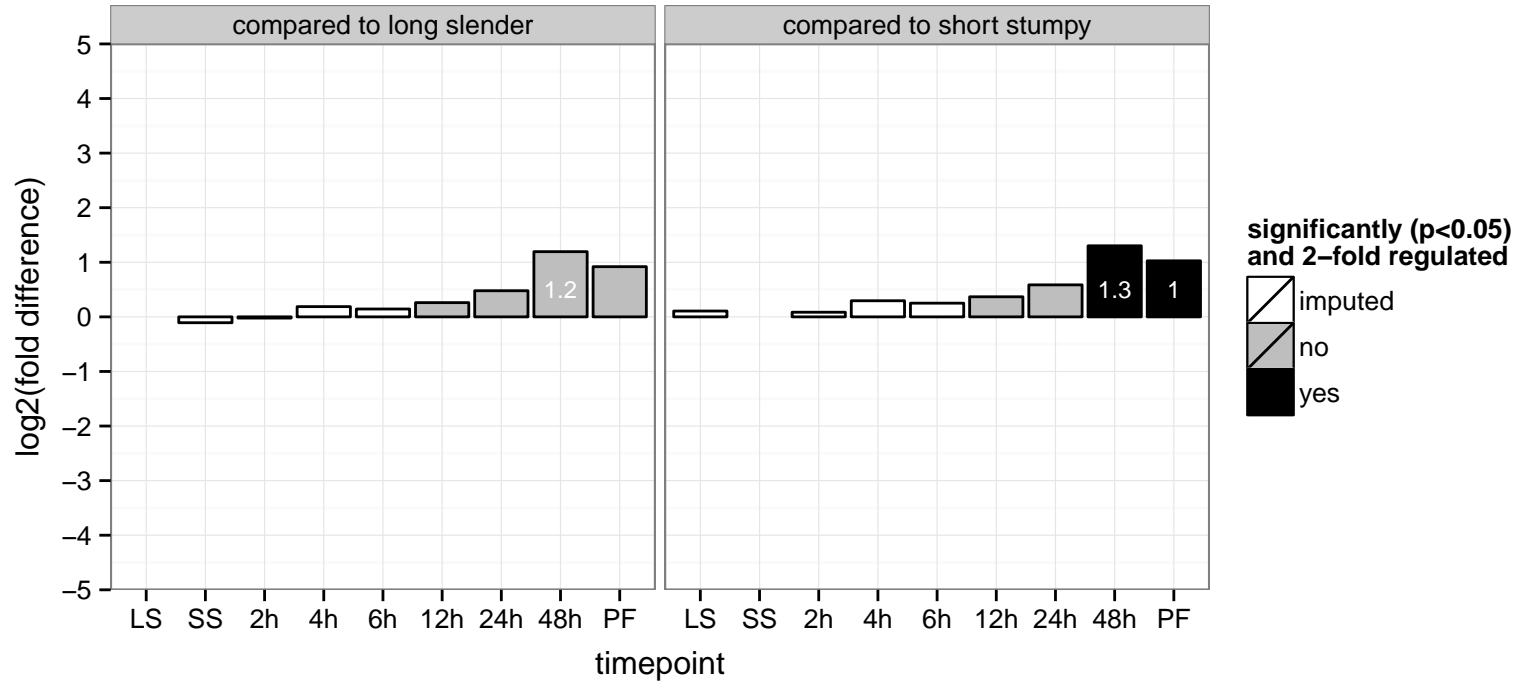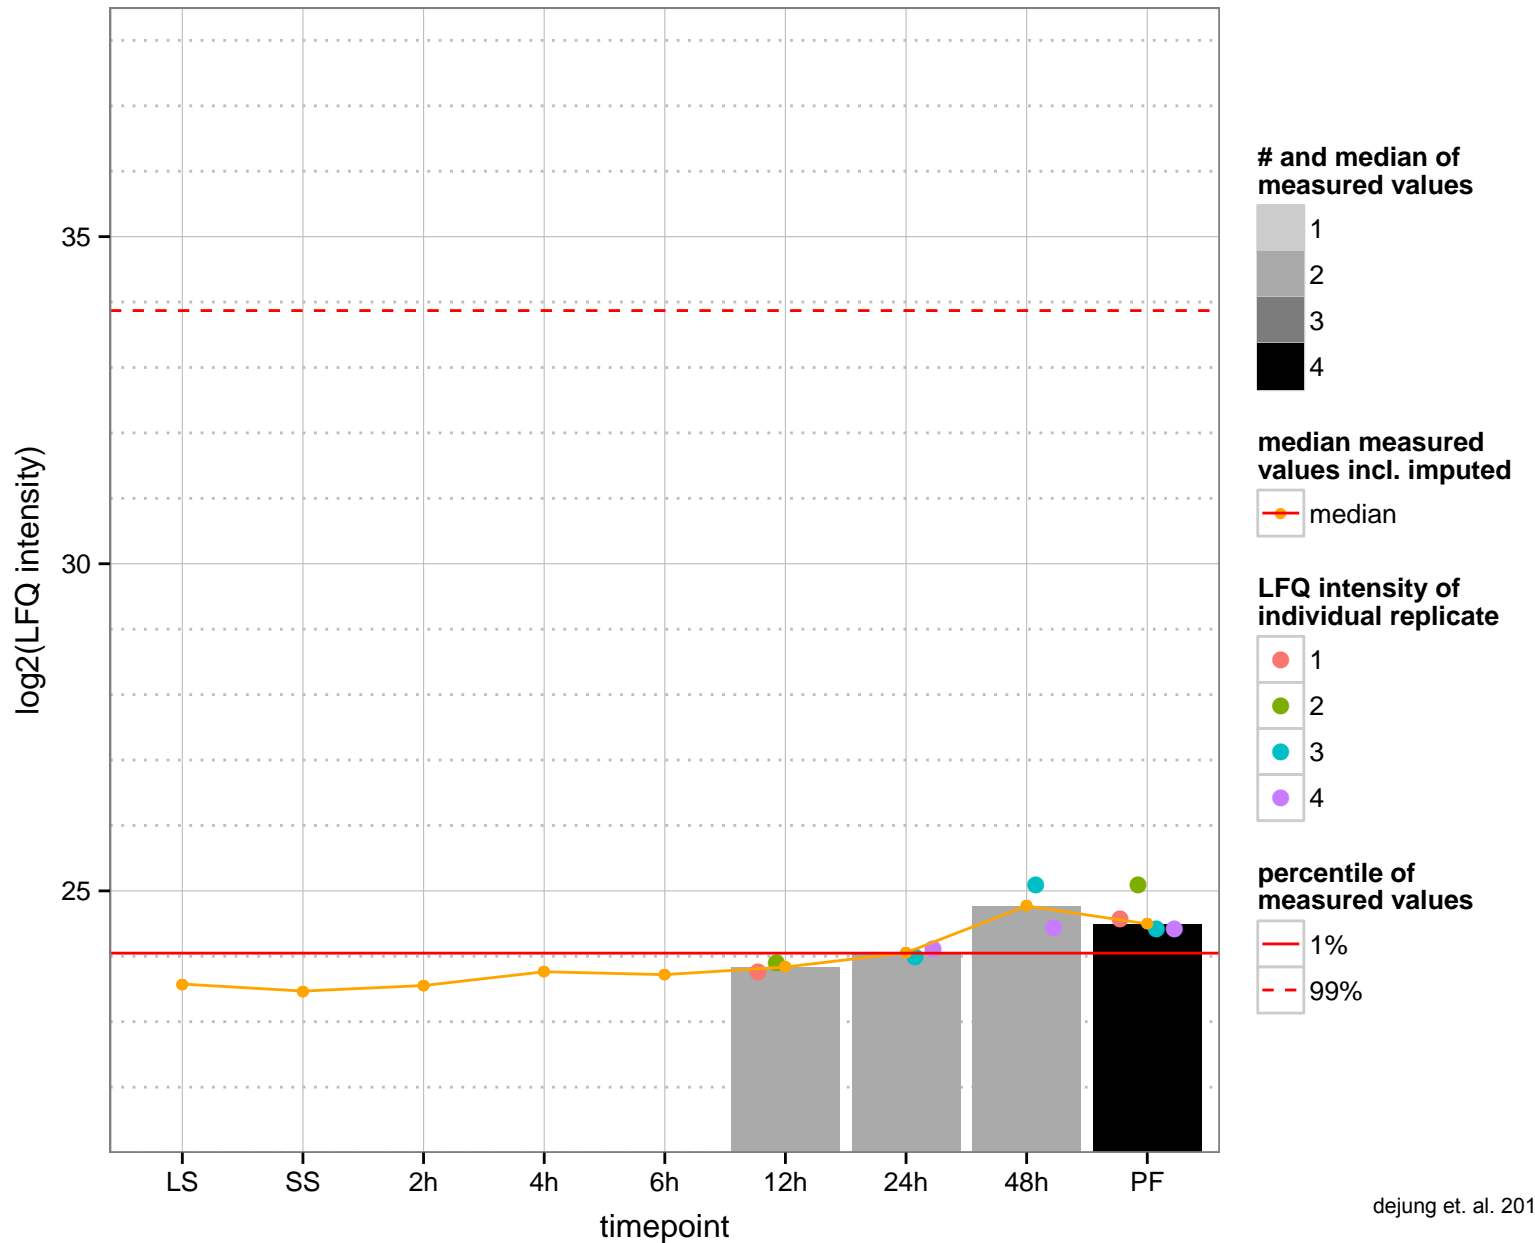

monothiol glutaredoxin, putative

Tb927.5.950

AGOF: electron carrier activity, glutathione–disulfide reductase activity, protein disulfide oxidoreductase activity

AGOC: null

AGOP: cell redox homeostasis, oxidation–reduction process

PGOF: electron carrier activity, protein disulfide oxidoreductase activity

PGOC: null

PGOP: cell redox homeostasis

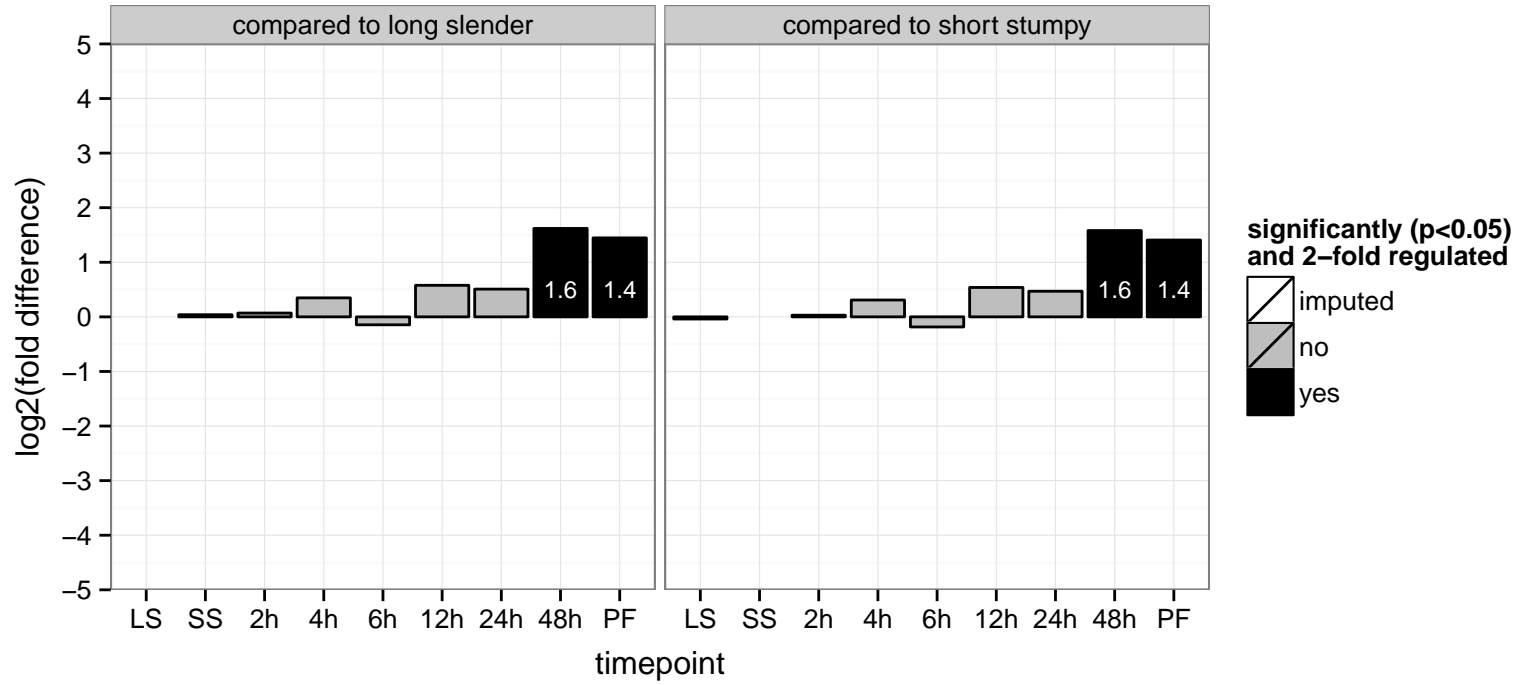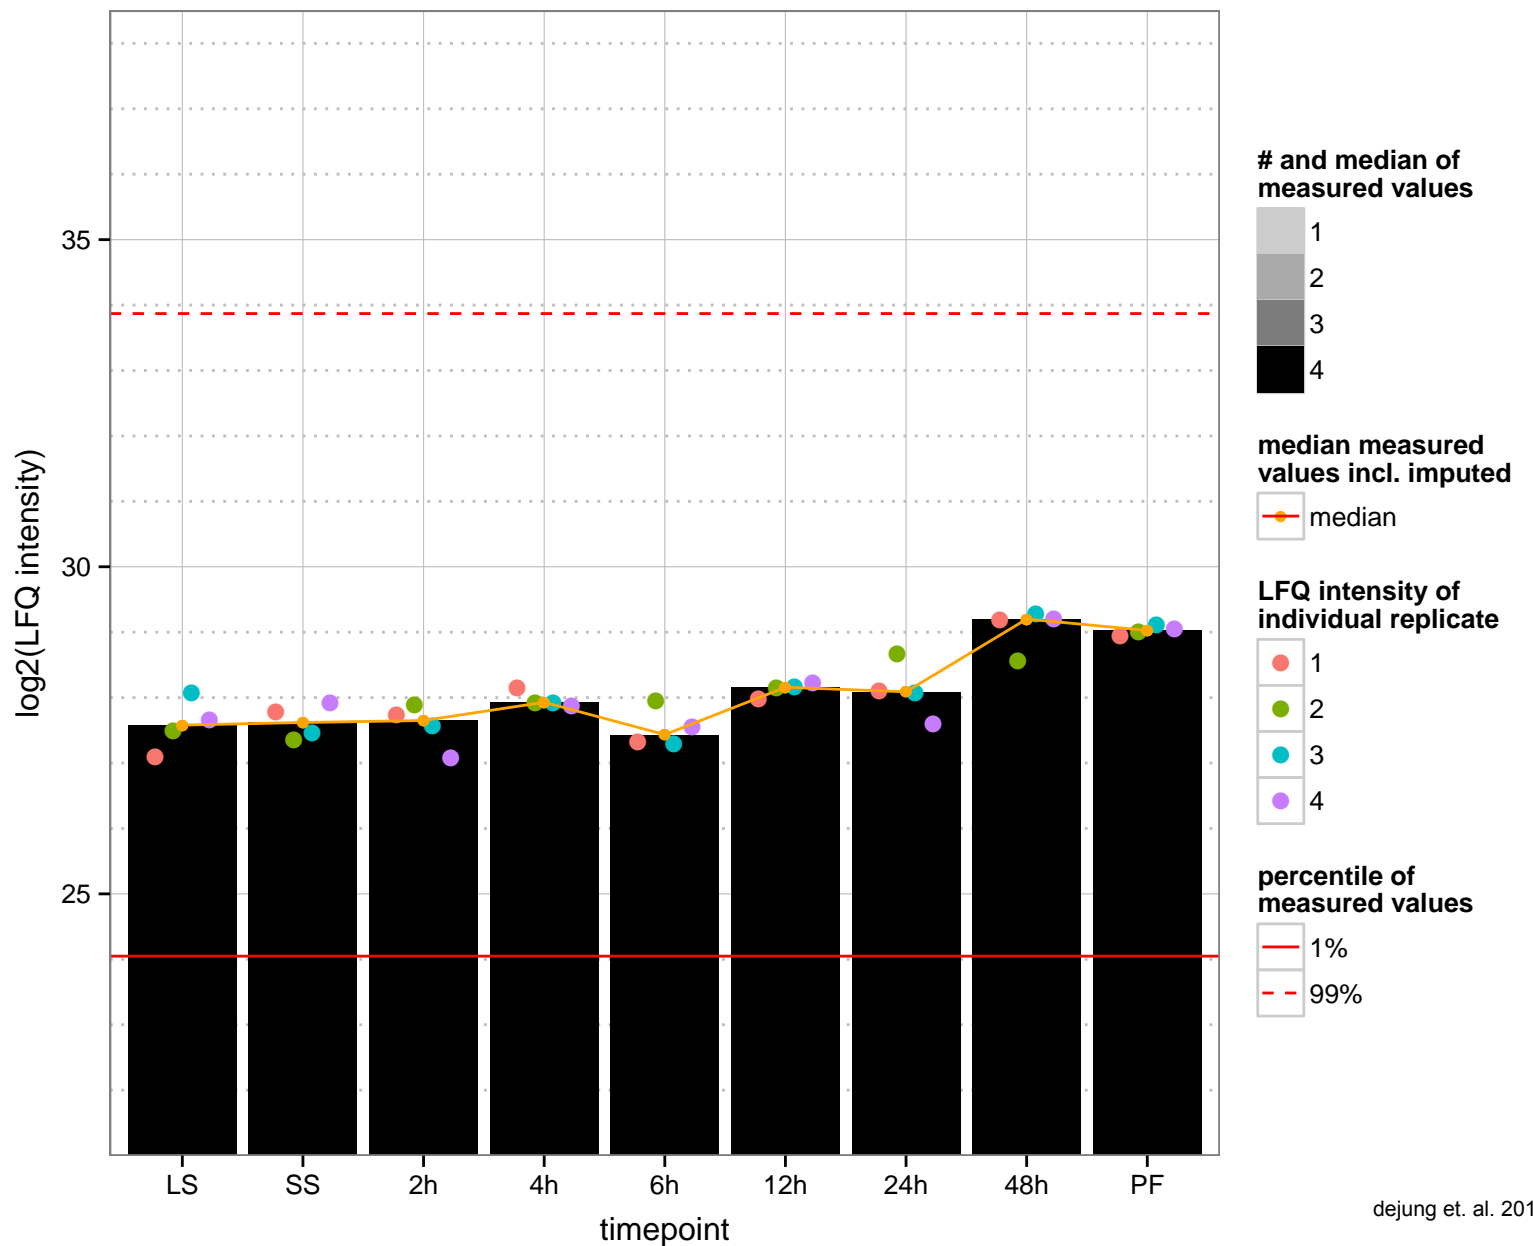



hypothetical protein, conserved  
 Tb927.6.1430  
 AGOF: null  
 AGOC: null  
 AGOP: null  
 PGO: protein binding  
 PGOC: null  
 PGOP: null

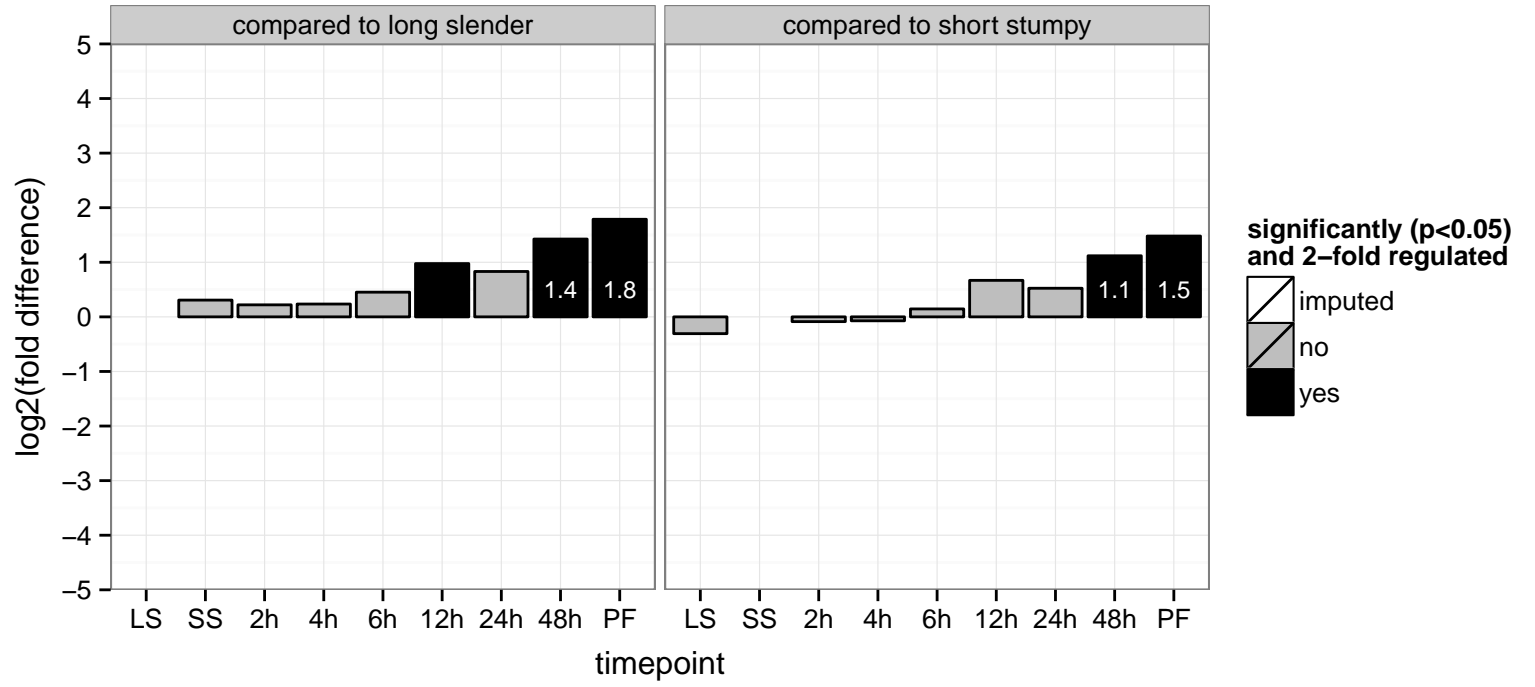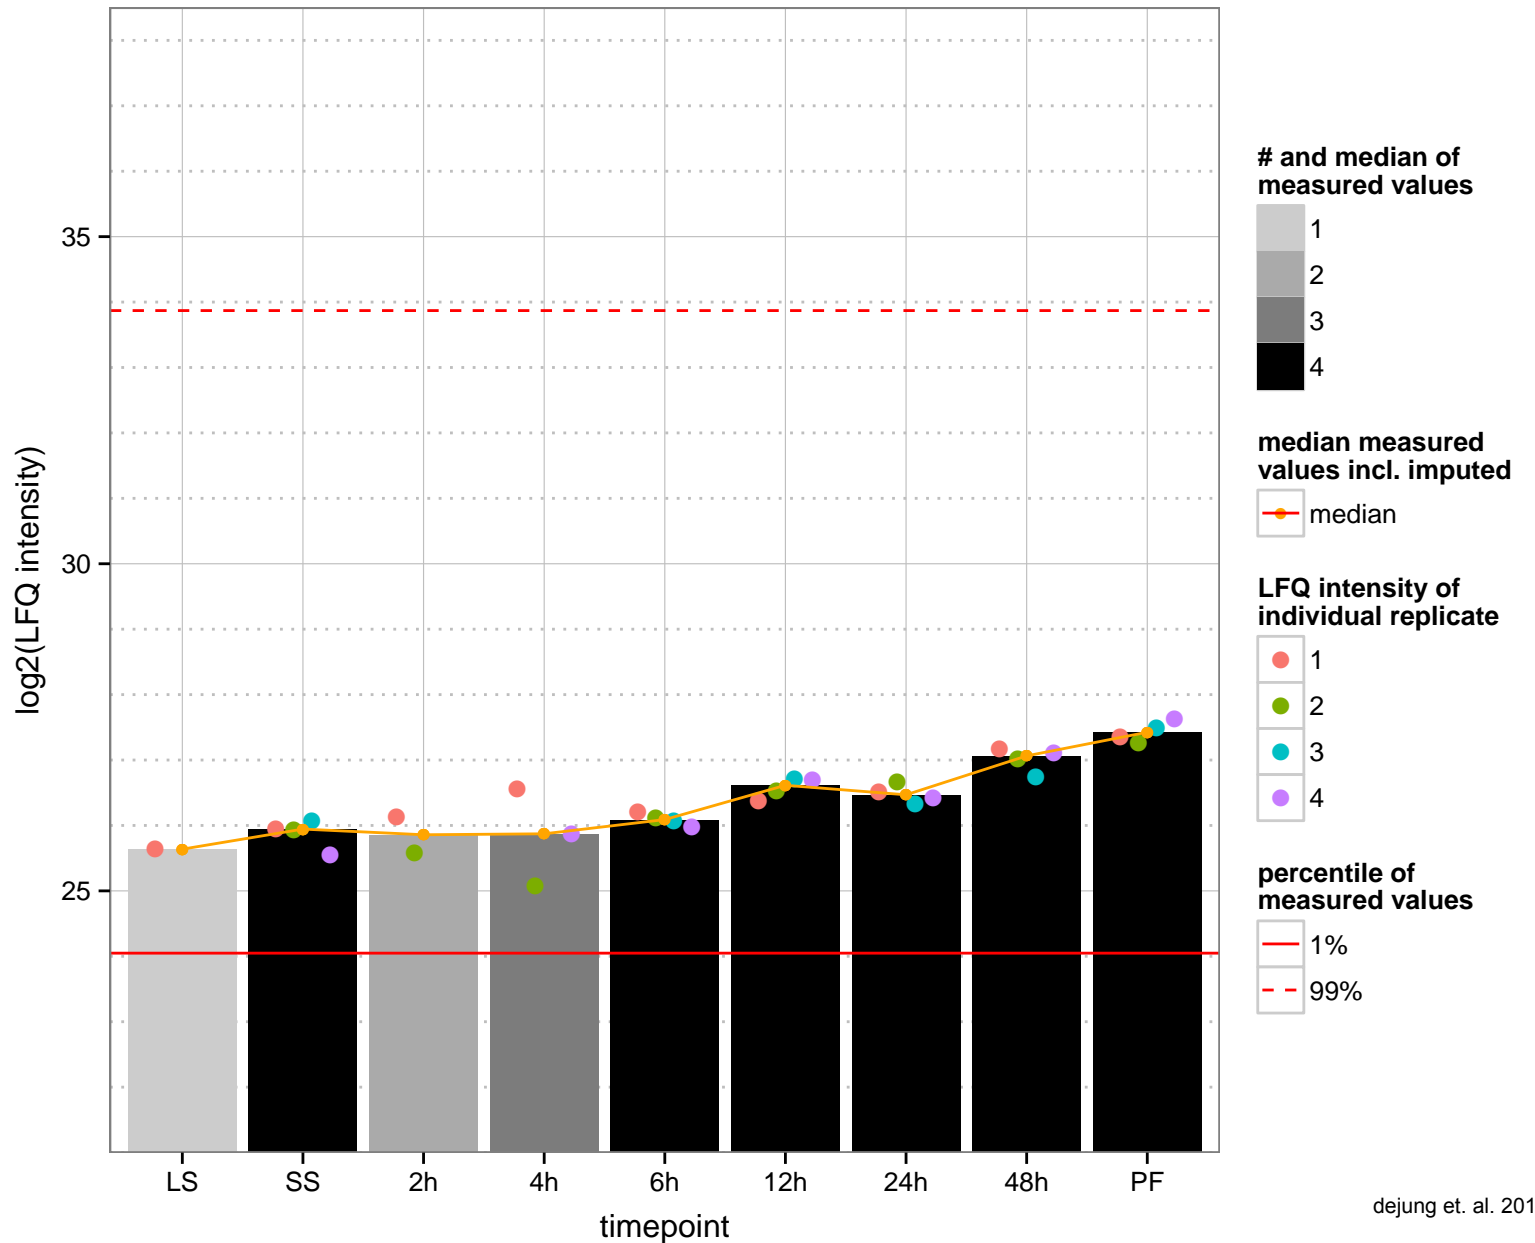

hypothetical protein, conserved  
 Tb927.6.1440  
 AGOF: null  
 AGOC: mitochondrion  
 AGOP: null  
 PGO: null  
 PGOC: null  
 PGOP: null

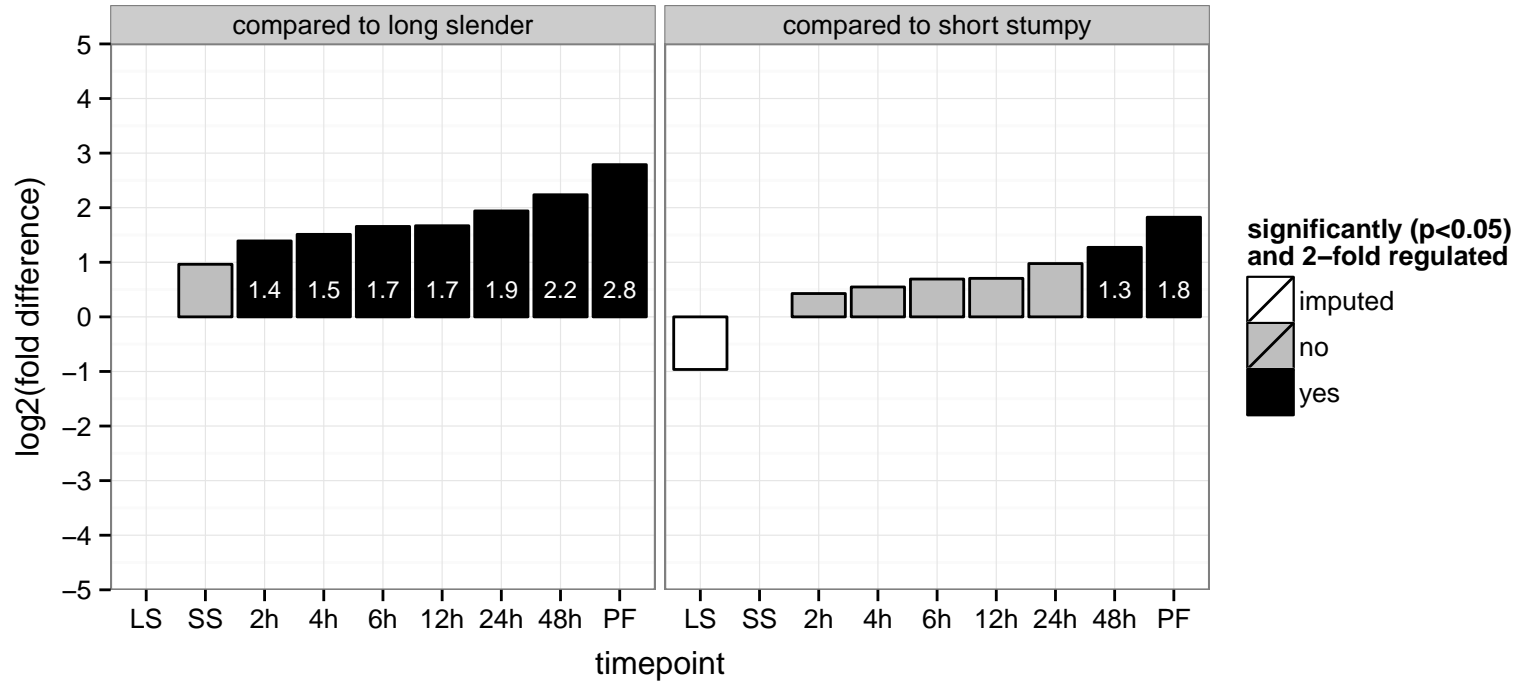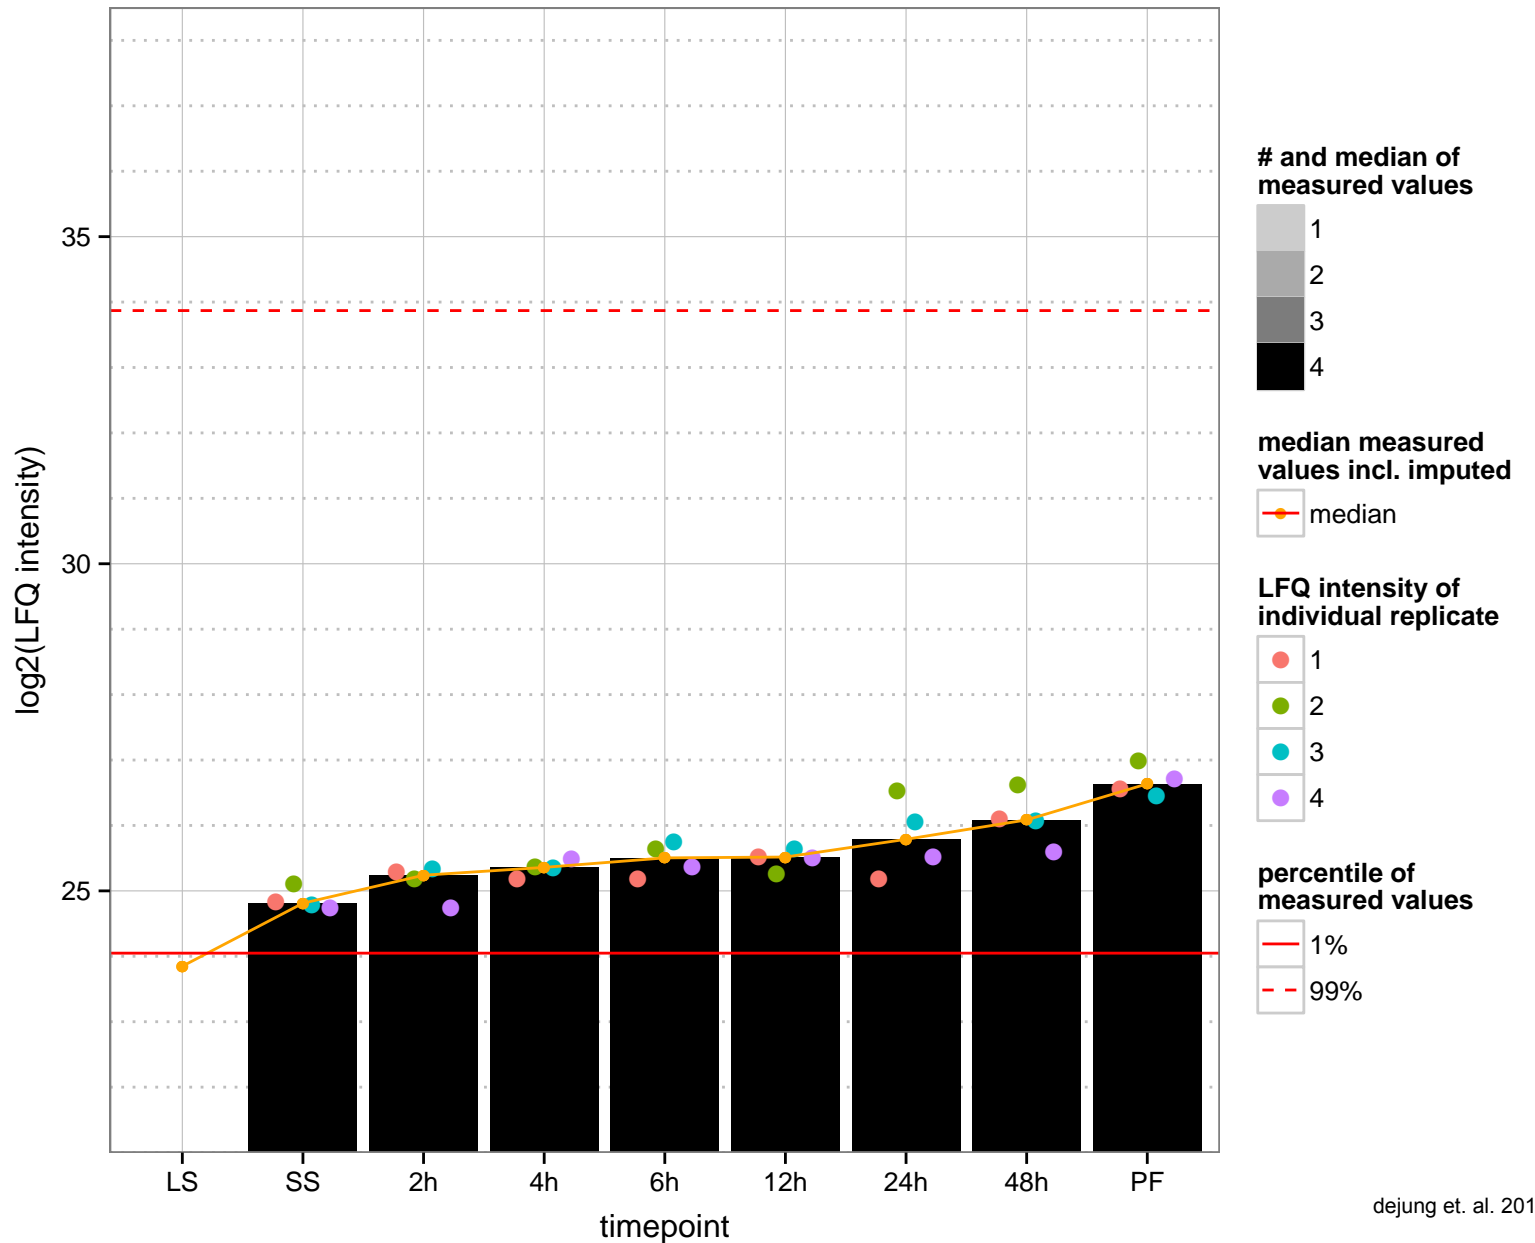

hypothetical protein, conserved  
 Tb927.6.2010  
 AGOF: catalytic activity  
 AGOC: mitochondrion  
 AGOP: metabolic process  
 PGO: catalytic activity  
 PGO: null  
 PGO: metabolic process

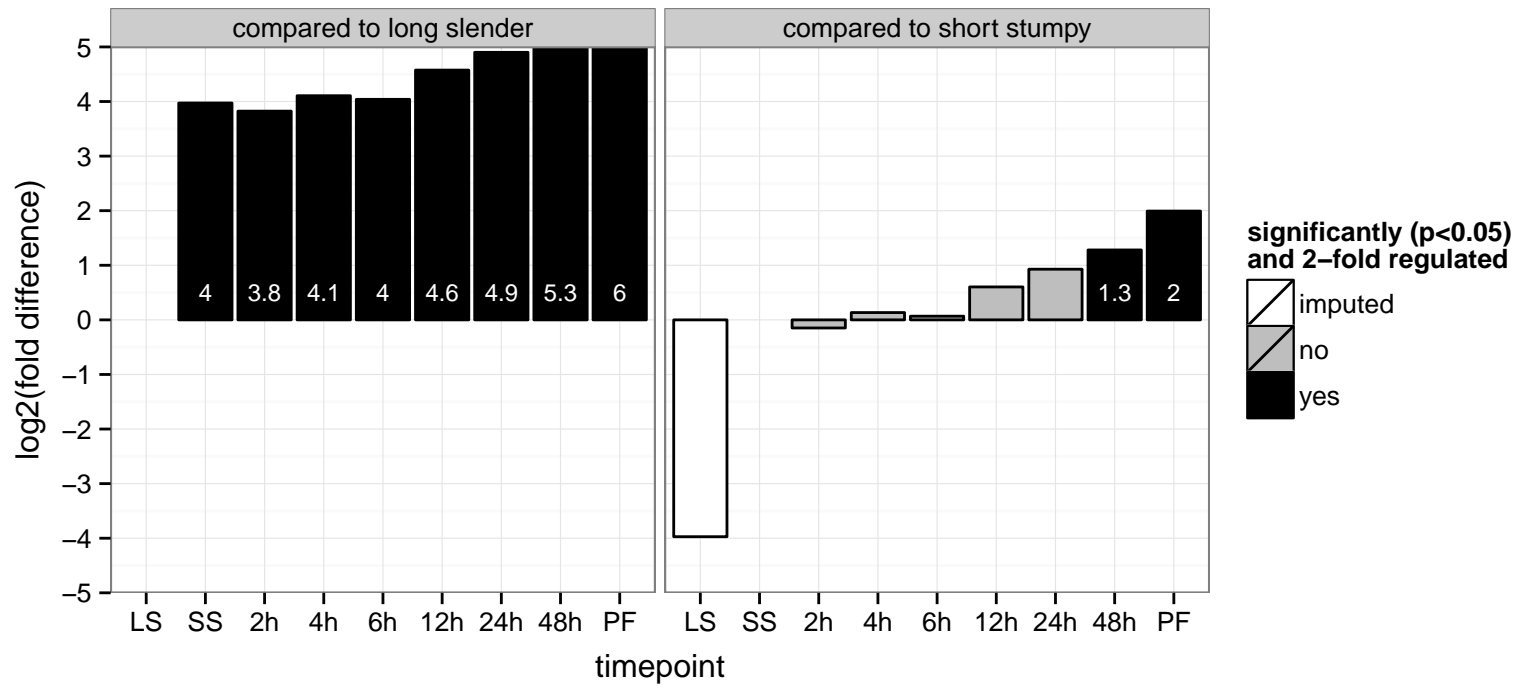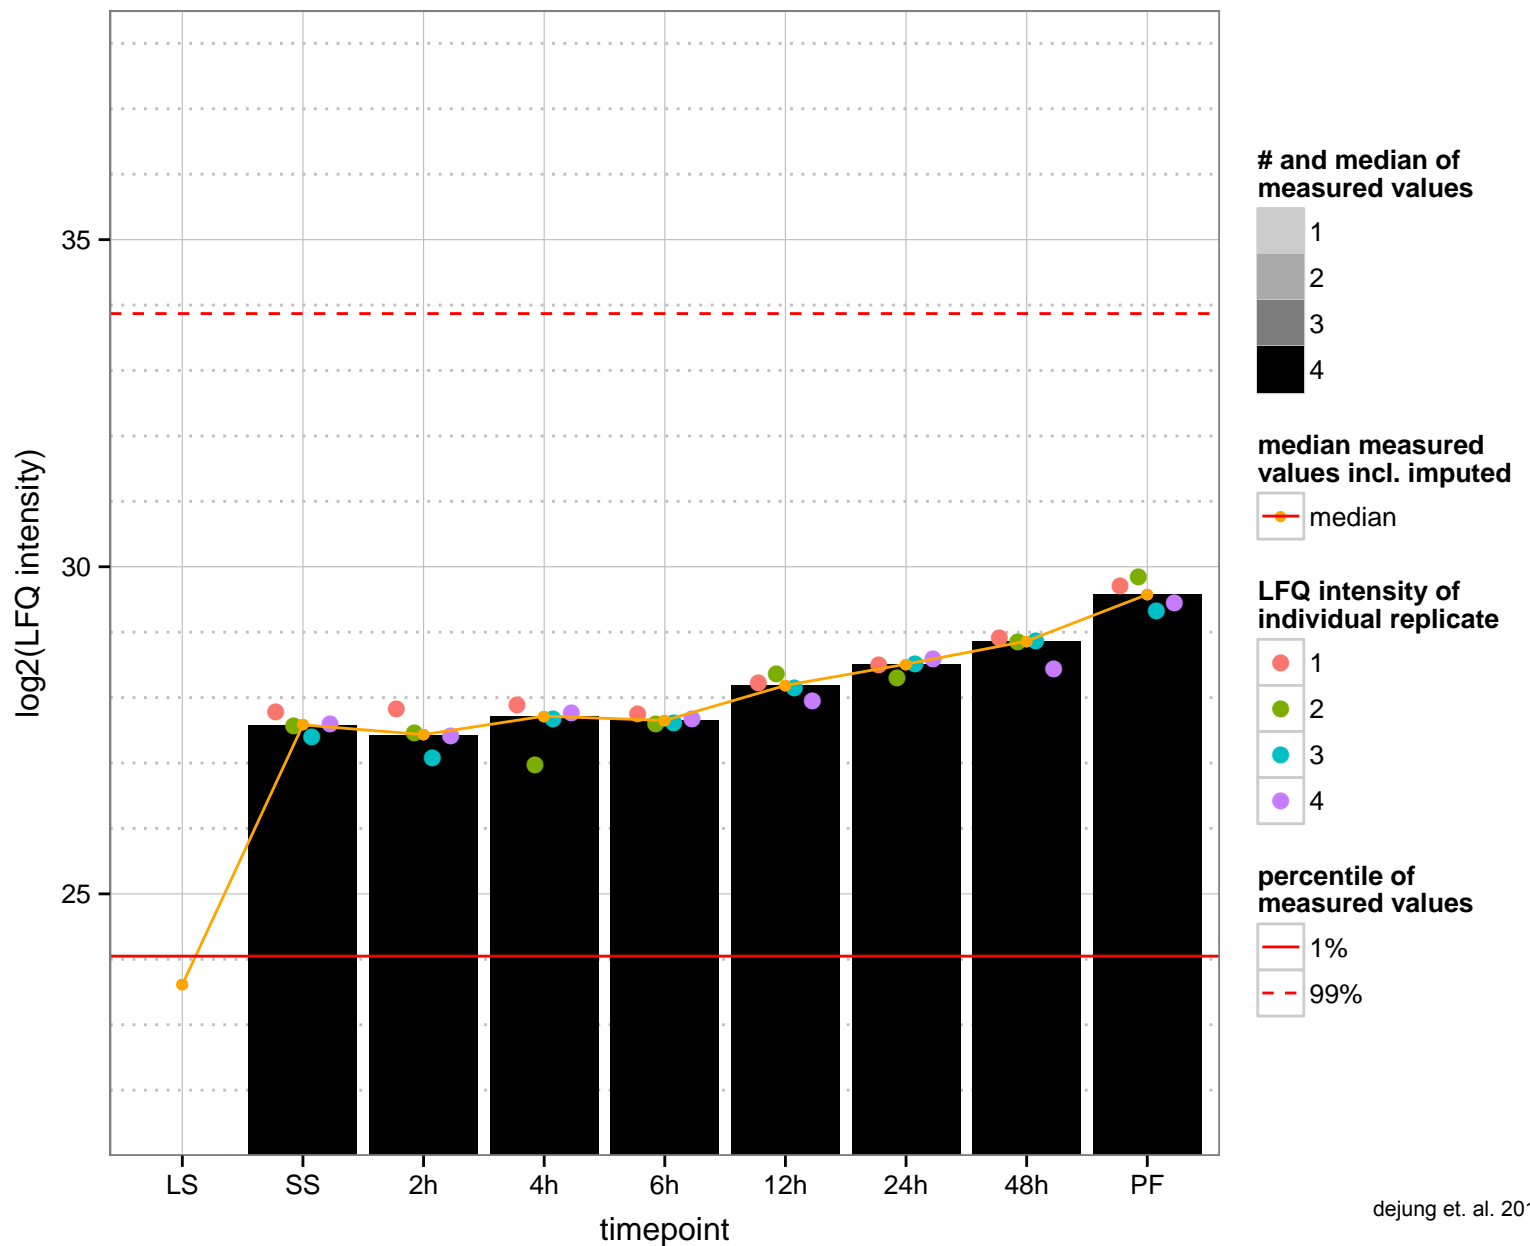

hypothetical protein, conserved  
 Tb927.6.3220;Tb11.v5.0720  
 AGOF: null  
 AGOC: null  
 AGOP: null  
 PGOF: null  
 PGO: null  
 PGOP: null

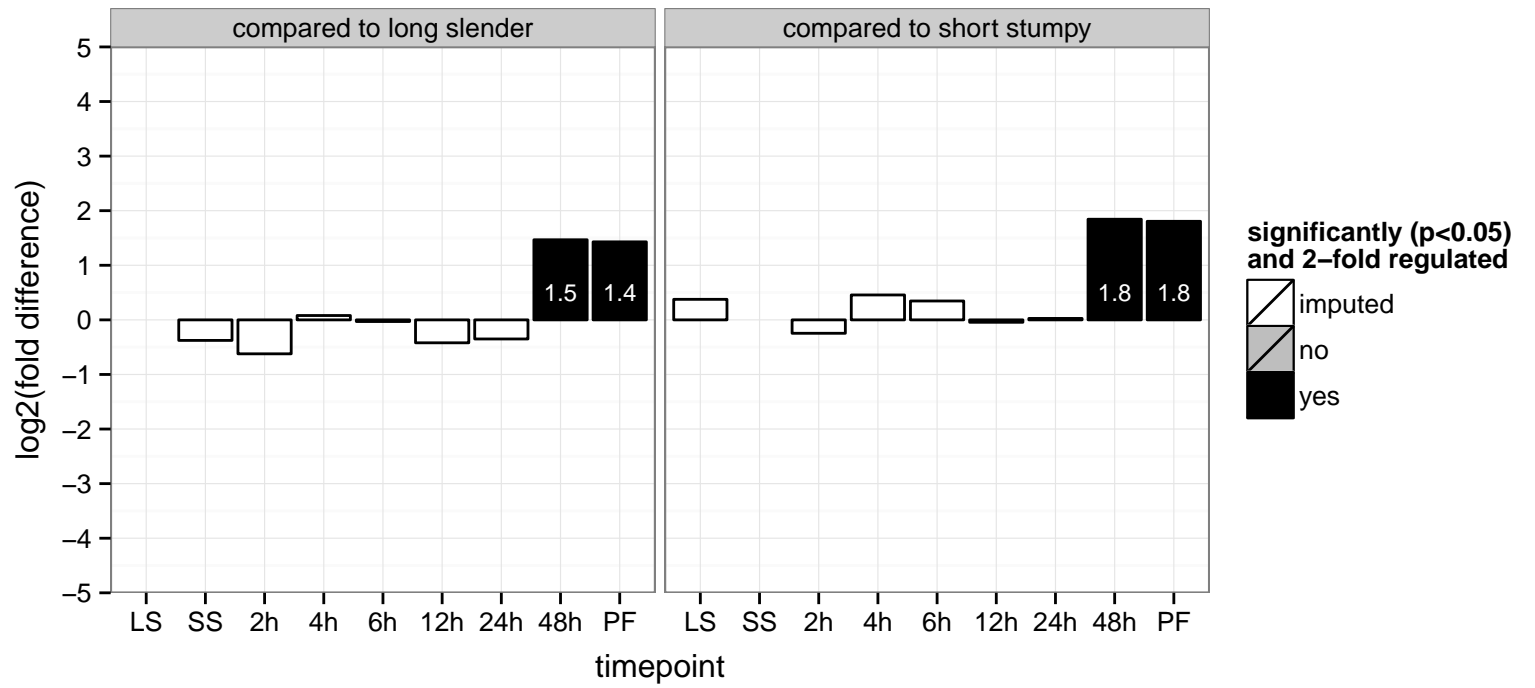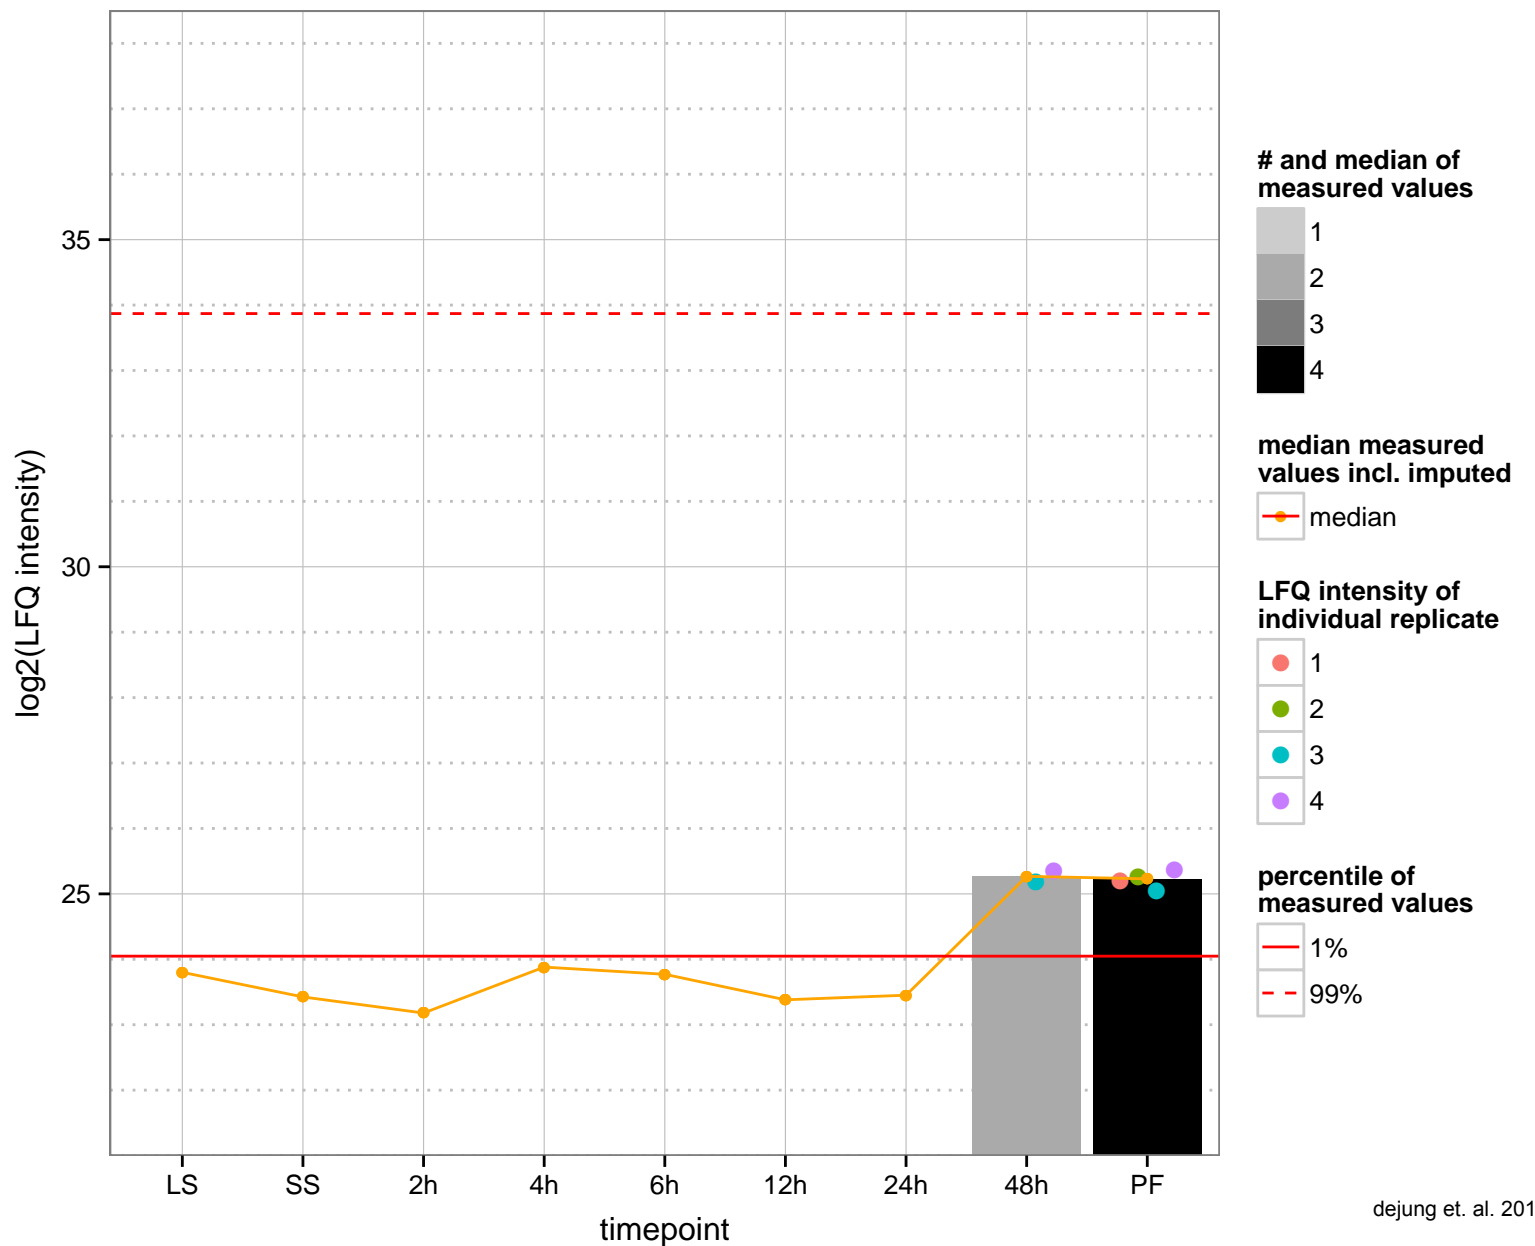

hypothetical protein, conserved  
 Tb927.6.3930  
 AGOF: null  
 AGOC: mitochondrion  
 AGOP: null  
 PGO: null  
 PGO: null  
 PGO: null

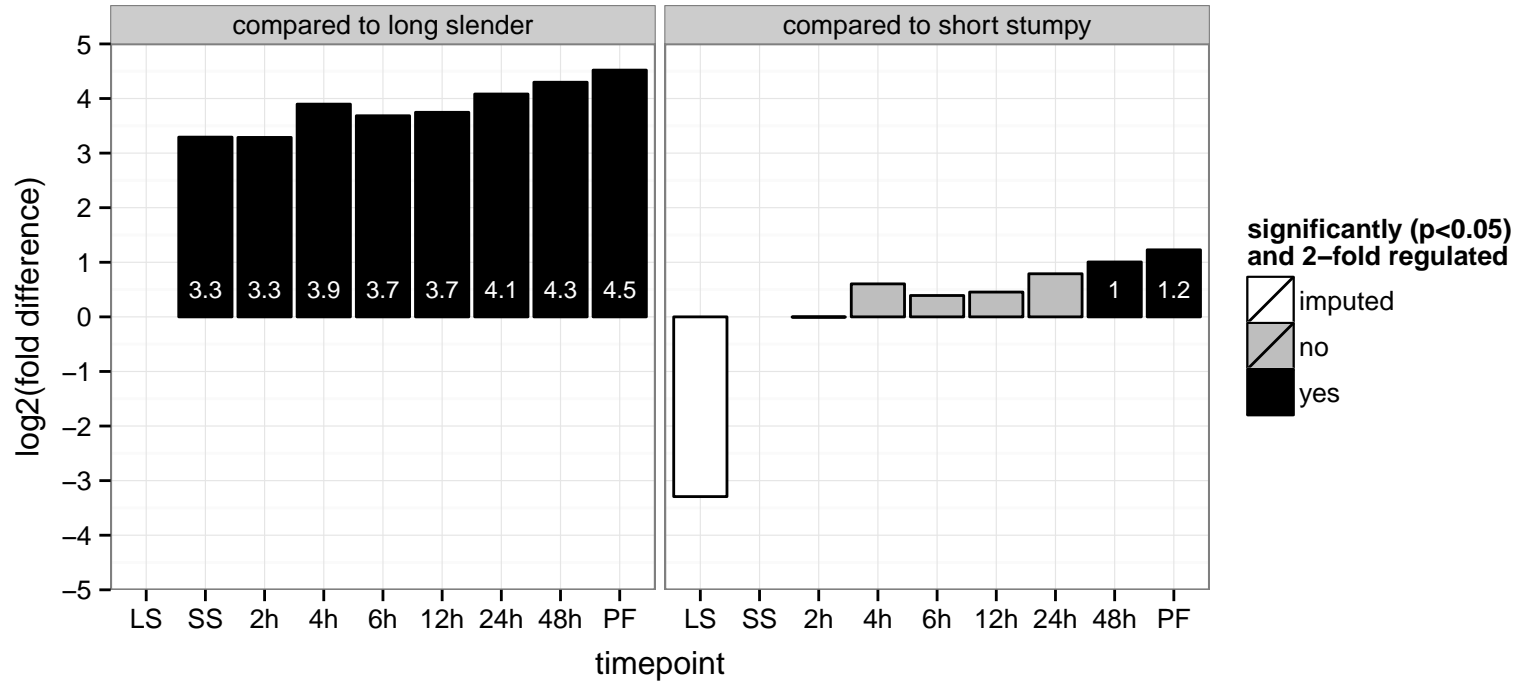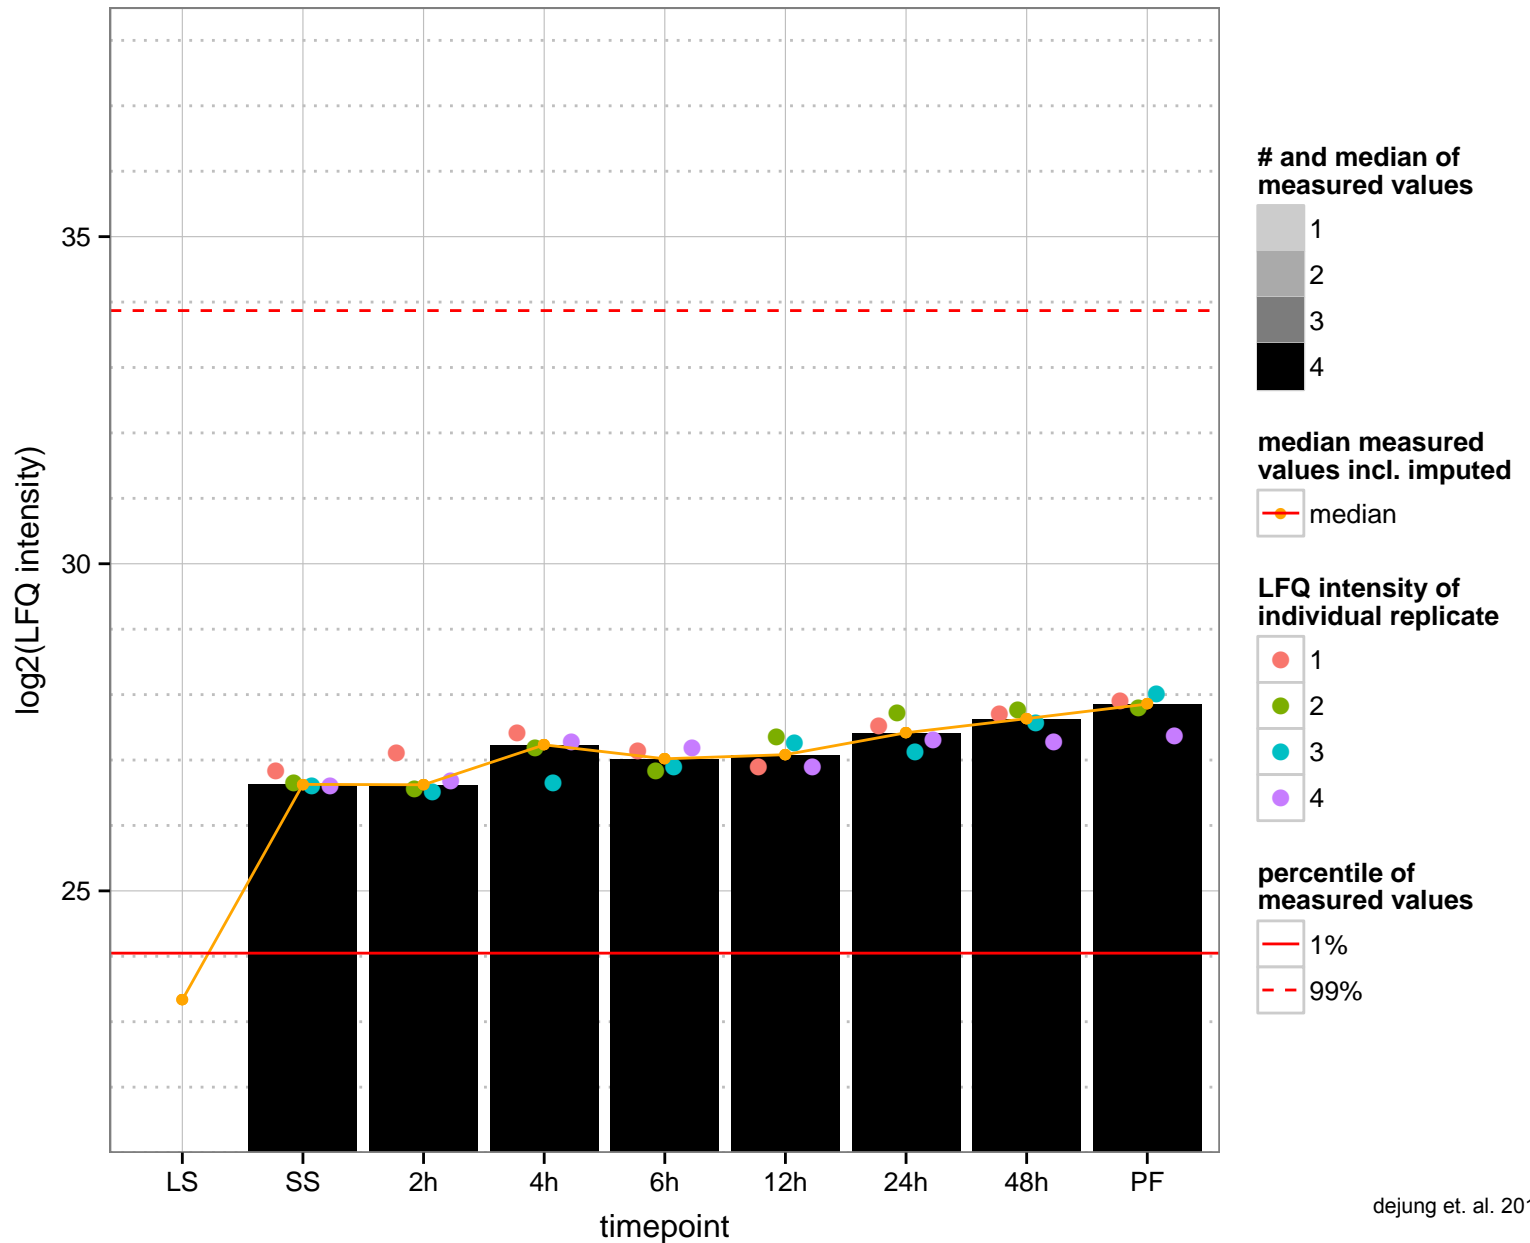

hypothetical protein, conserved  
 Tb927.6.4200  
 AGOF: null  
 AGOC: mitochondrion  
 AGOP: null  
 PGO: null  
 PGO: null  
 PGO: null

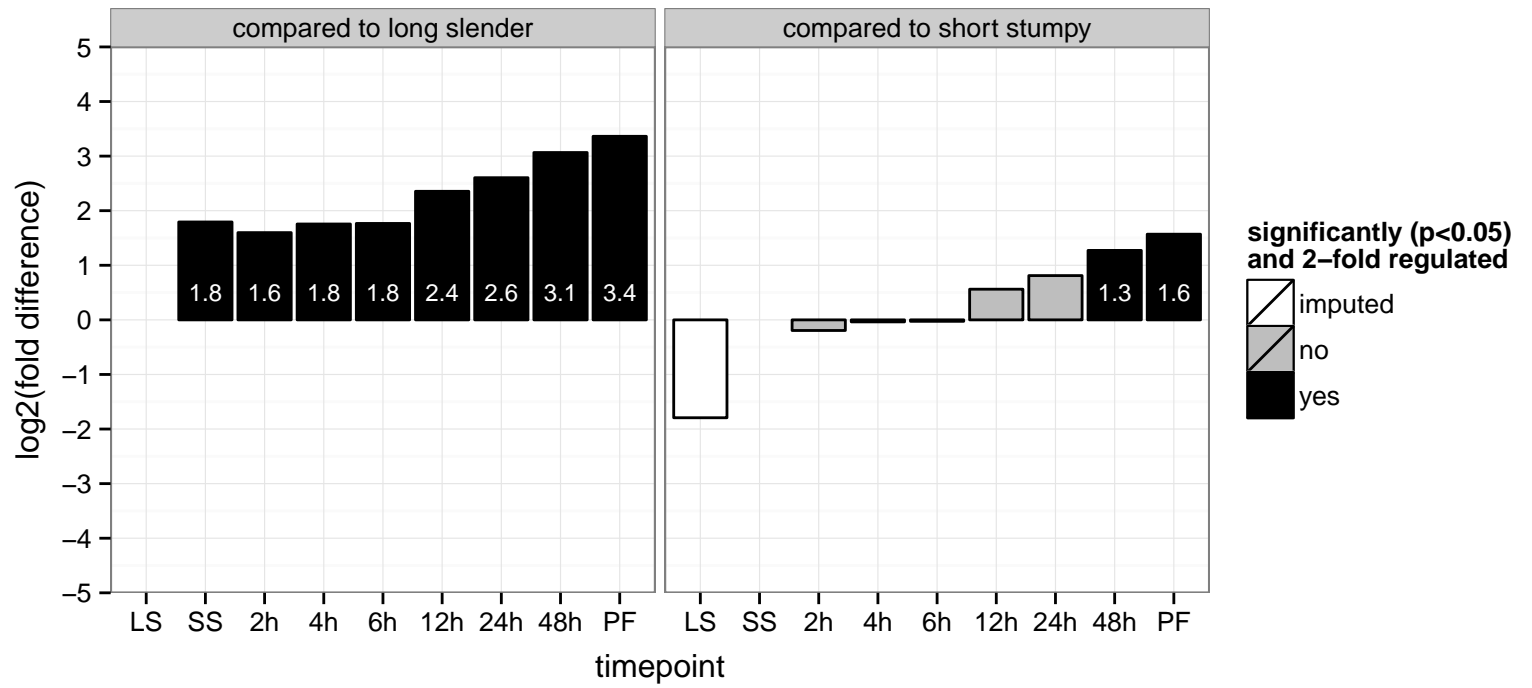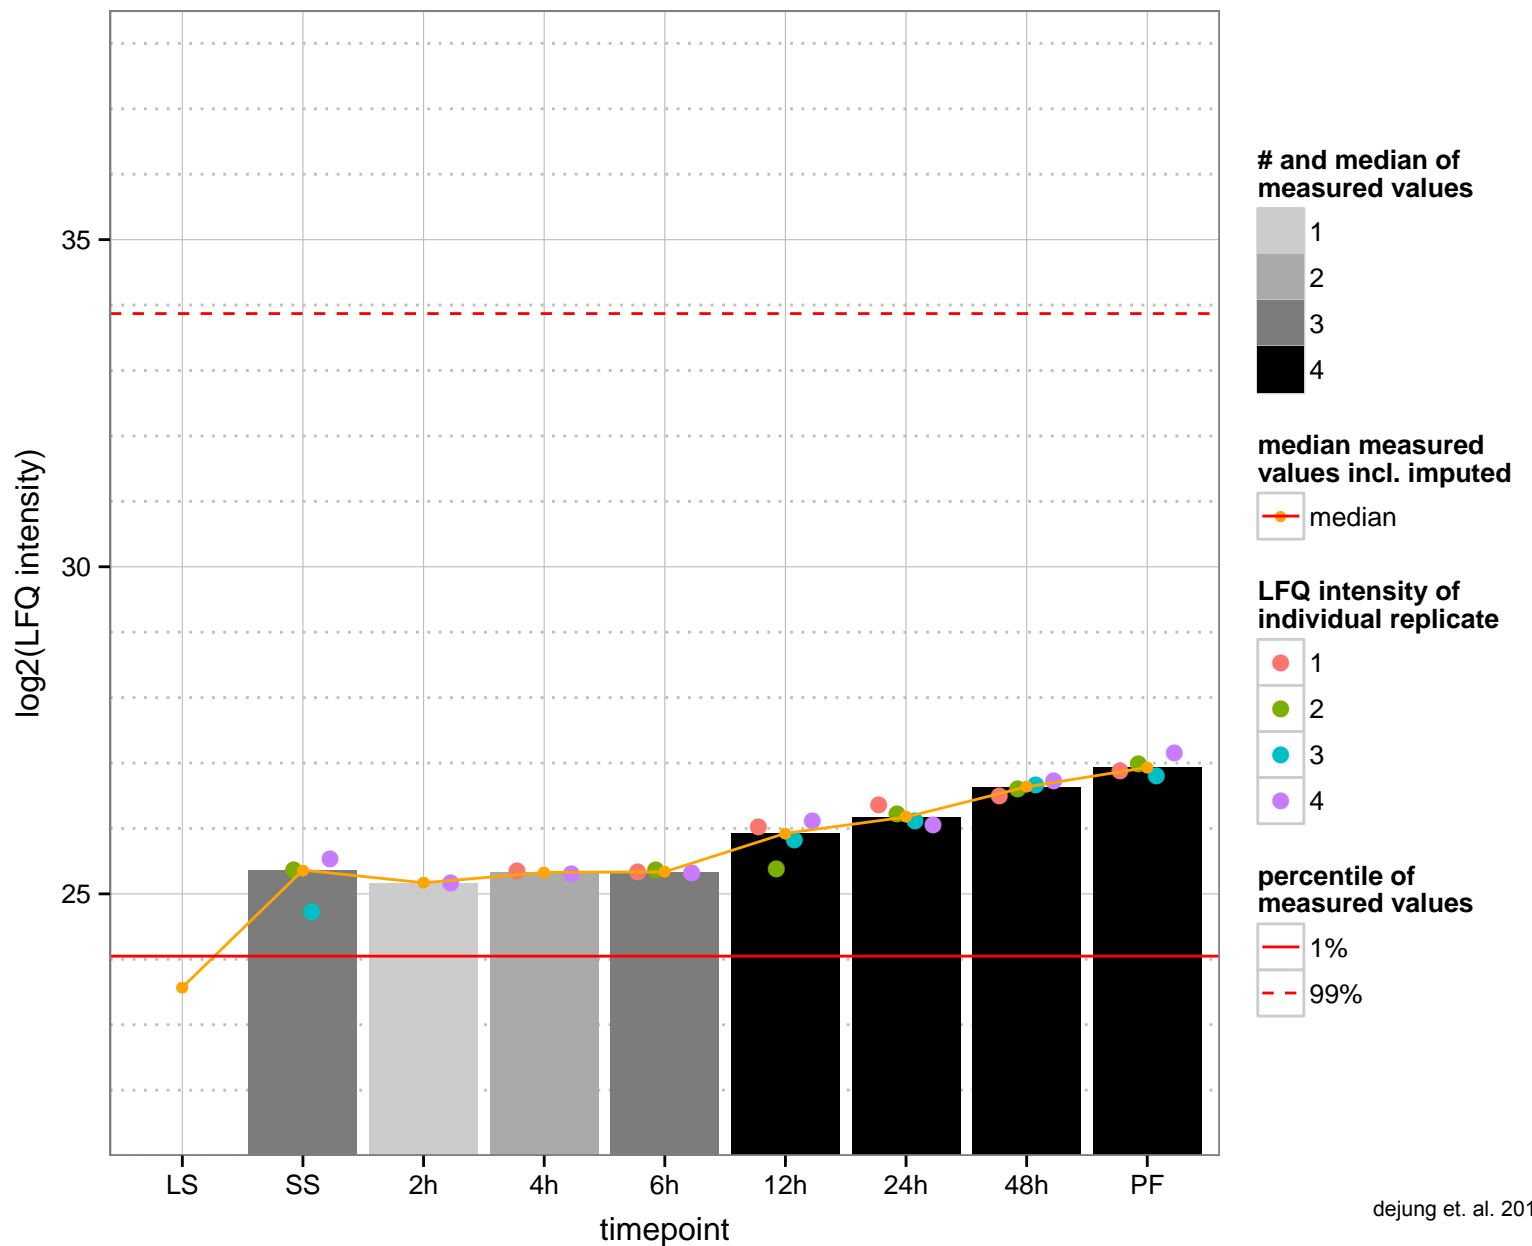

valyl-tRNA synthetase, putative (ValRS)

Tb927.6.4480

AGOF: ATP binding, valine-tRNA ligase activity

AGOC: cytoplasm

AGOP: translation, valyl-tRNA aminoacylation

PGOF: ATP binding, aminoacyl-tRNA editing activity, aminoacyl-tRNA ligase activity, nucleotide binding, valine-tRNA ligase activity

PGOC: cytoplasm

PGOP: tRNA aminoacylation for protein translation, valyl-tRNA aminoacylation

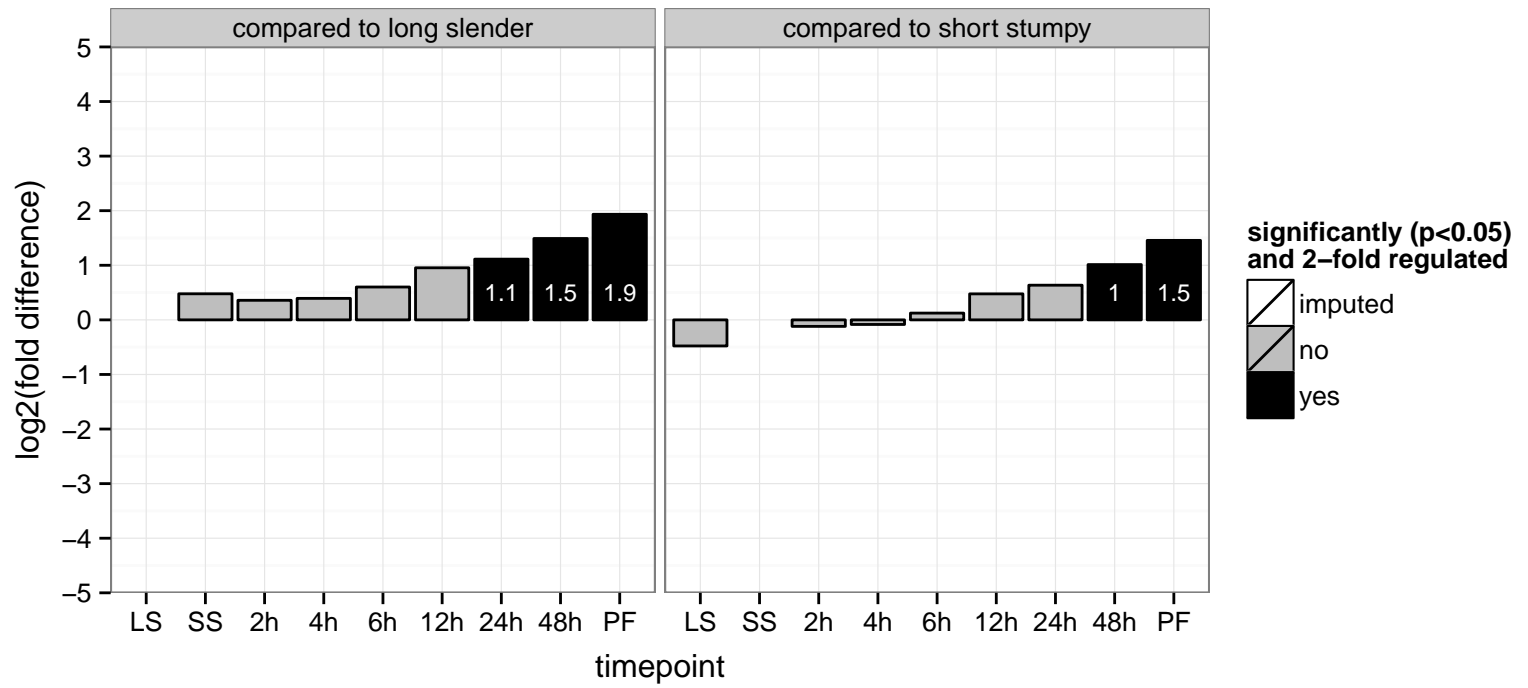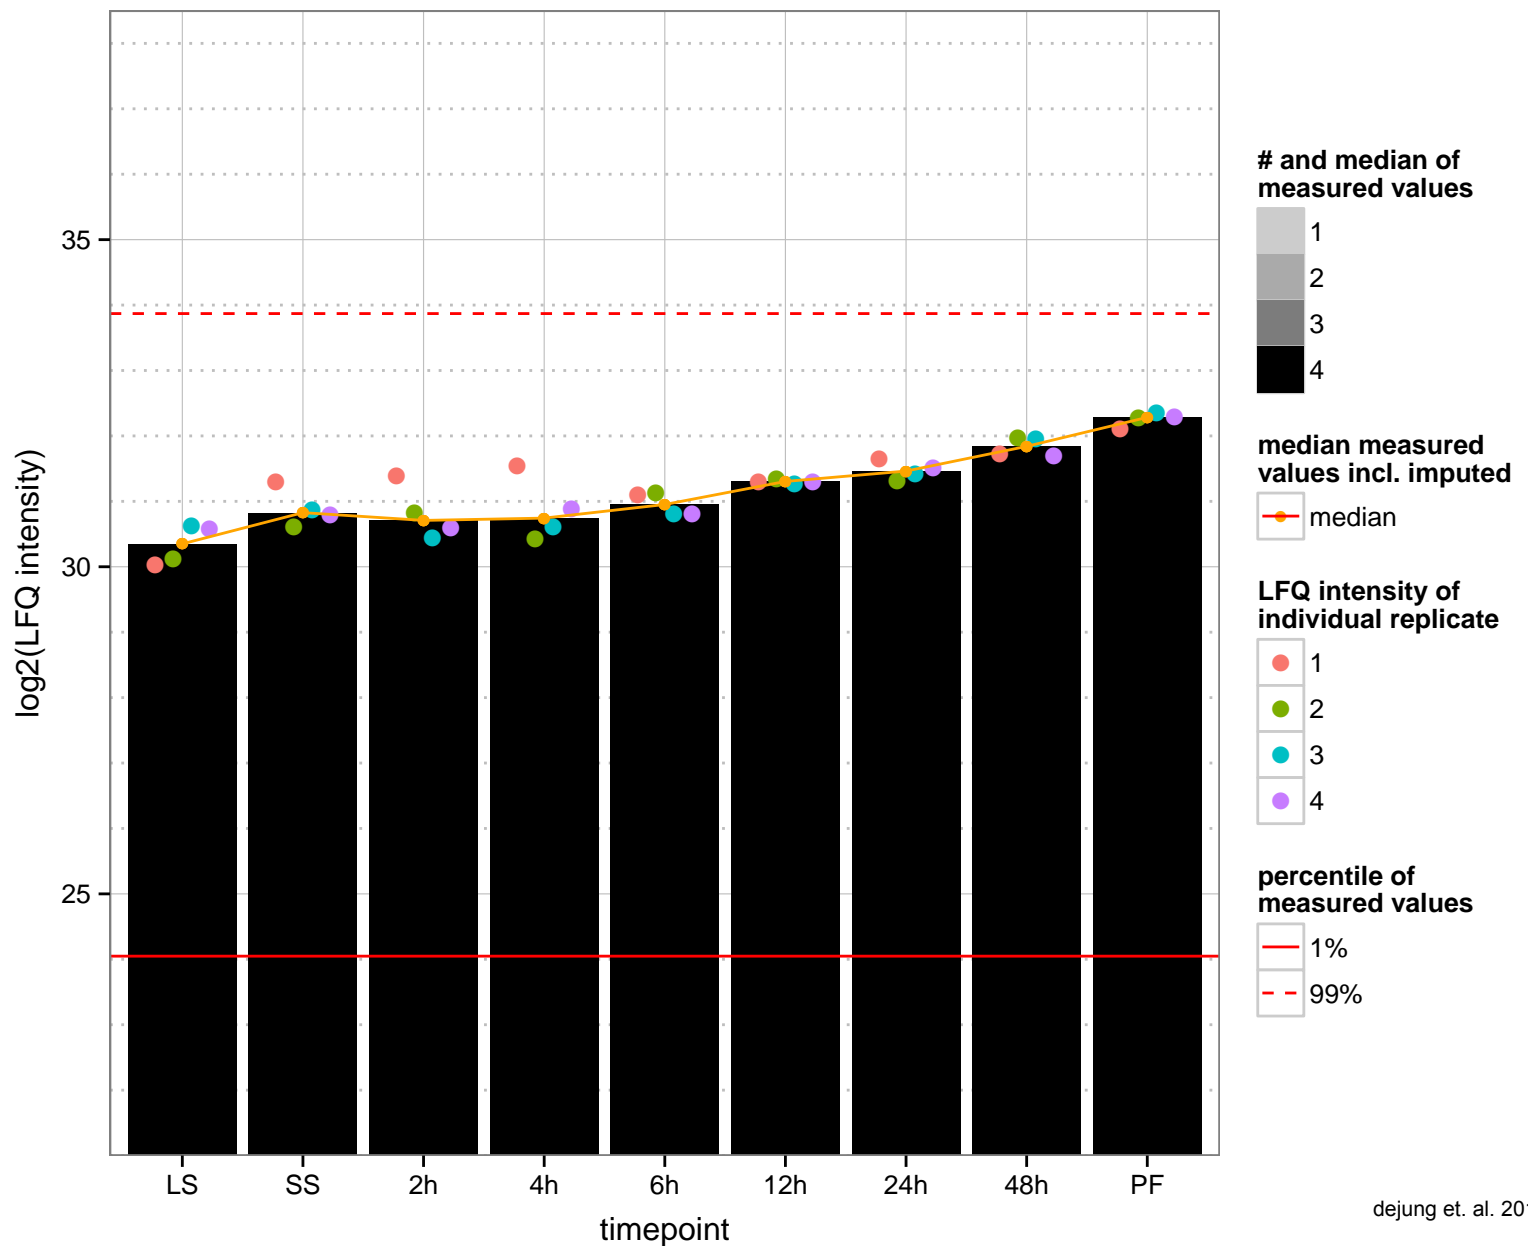

hypothetical protein, conserved  
 Tb927.6.4750  
 AGOF: null  
 AGOC: null  
 AGOP: null  
 PGO: protein binding  
 PGOC: null  
 PGOP: null

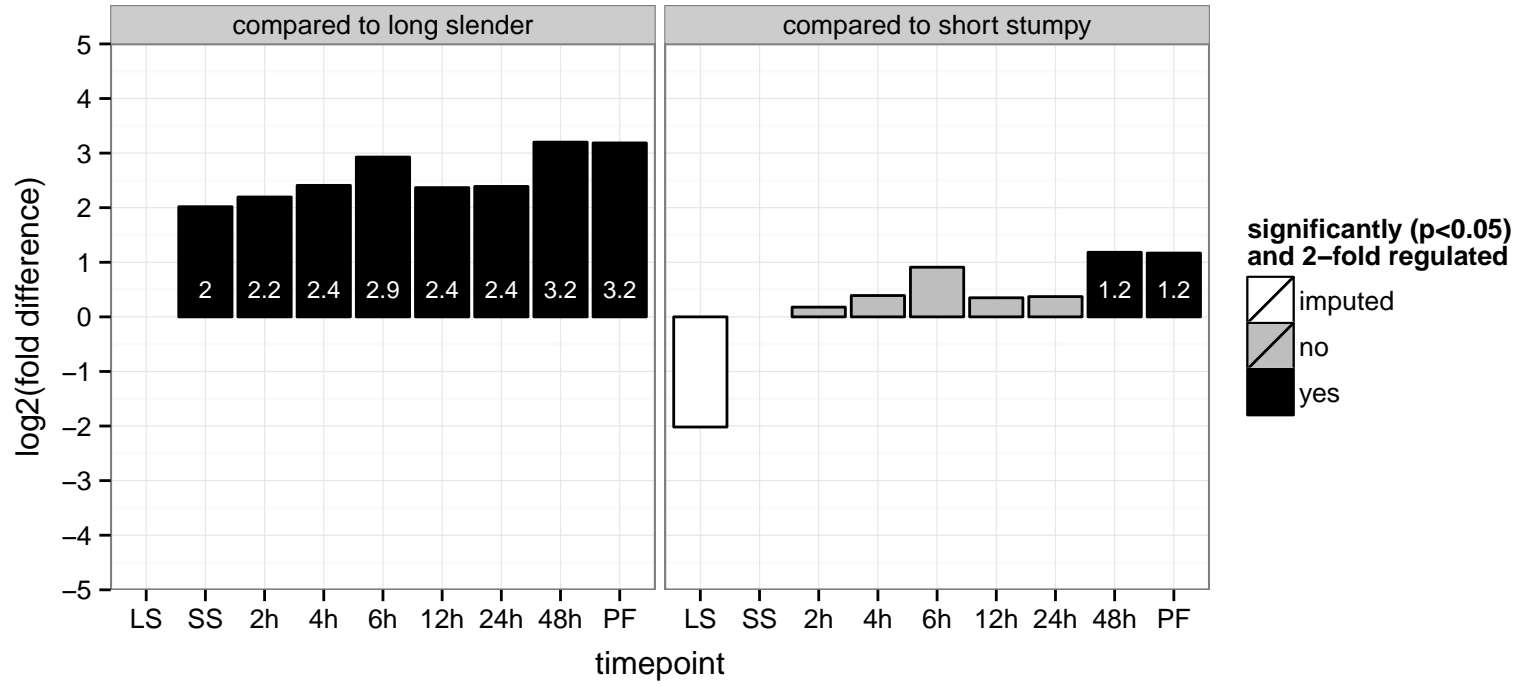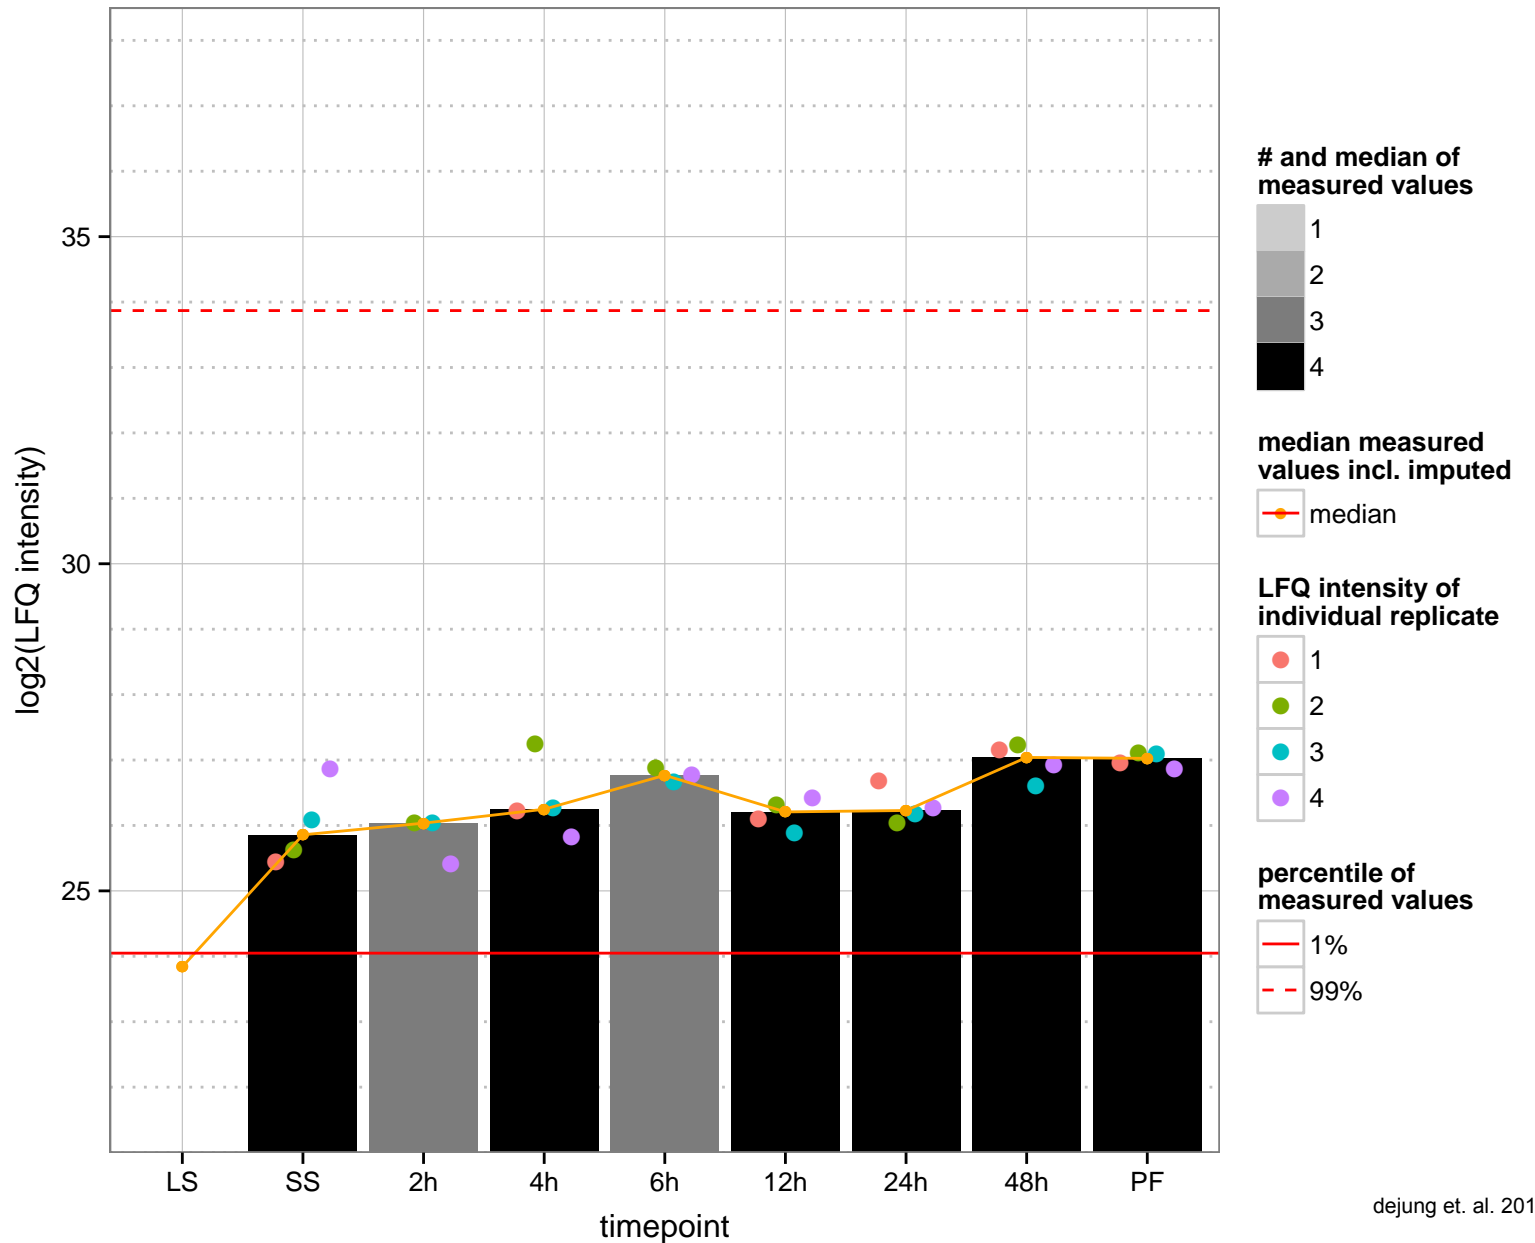



N-acetyltransferase, putative  
 Tb927.7.2360  
 AGOF: N-acetyltransferase activity  
 AGOC: null  
 AGOP: metabolic process  
 PGOF: N-acetyltransferase activity  
 PGO: null  
 PGOP: null

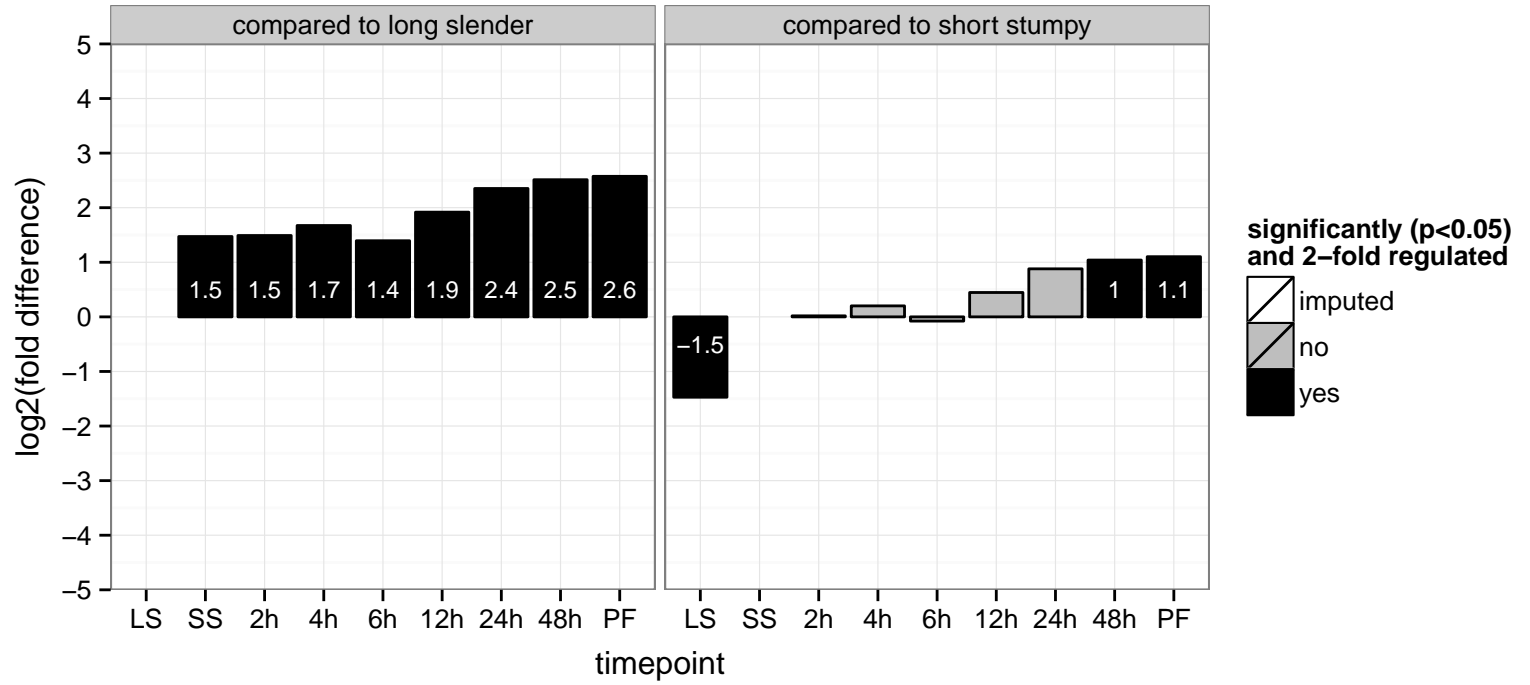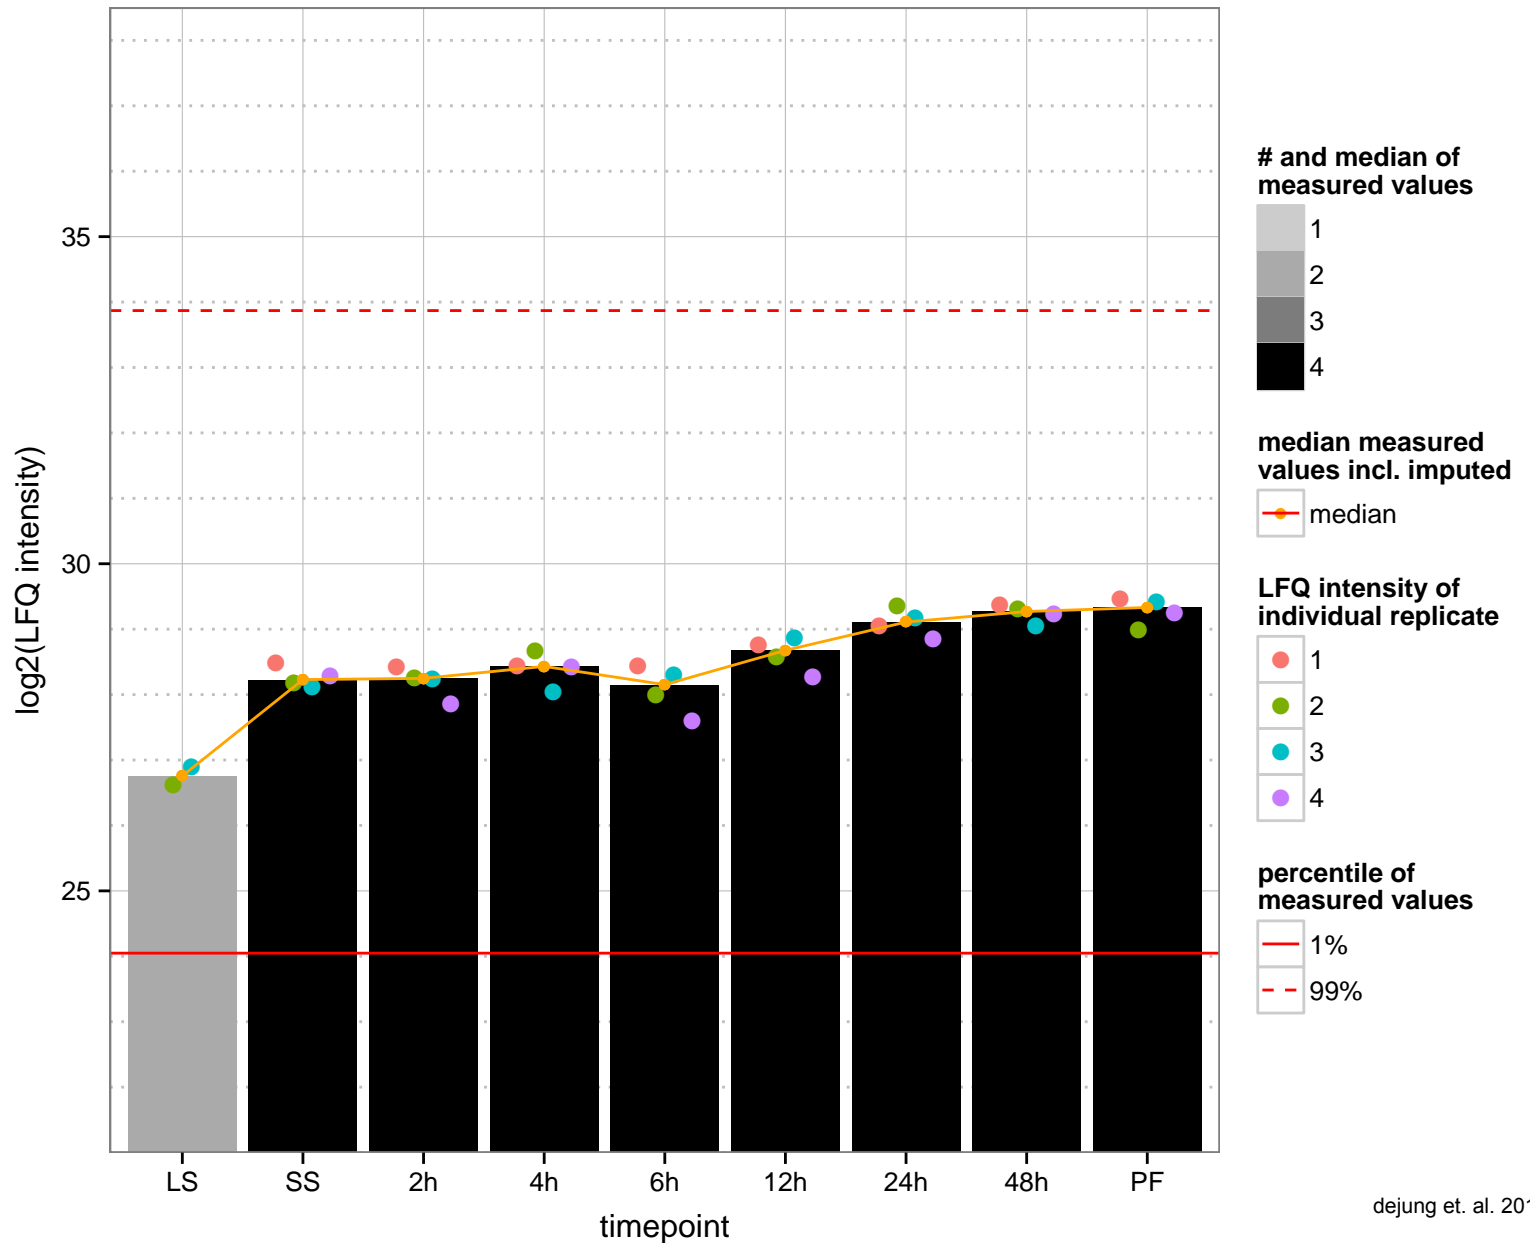

hypothetical protein, conserved  
 Tb927.7.2410  
 AGOF: GTP binding  
 AGOC: intracellular, mitochondrion  
 AGOP: null  
 PGO: GTP binding, GTPase activity  
 PGOC: null  
 PGOP: null

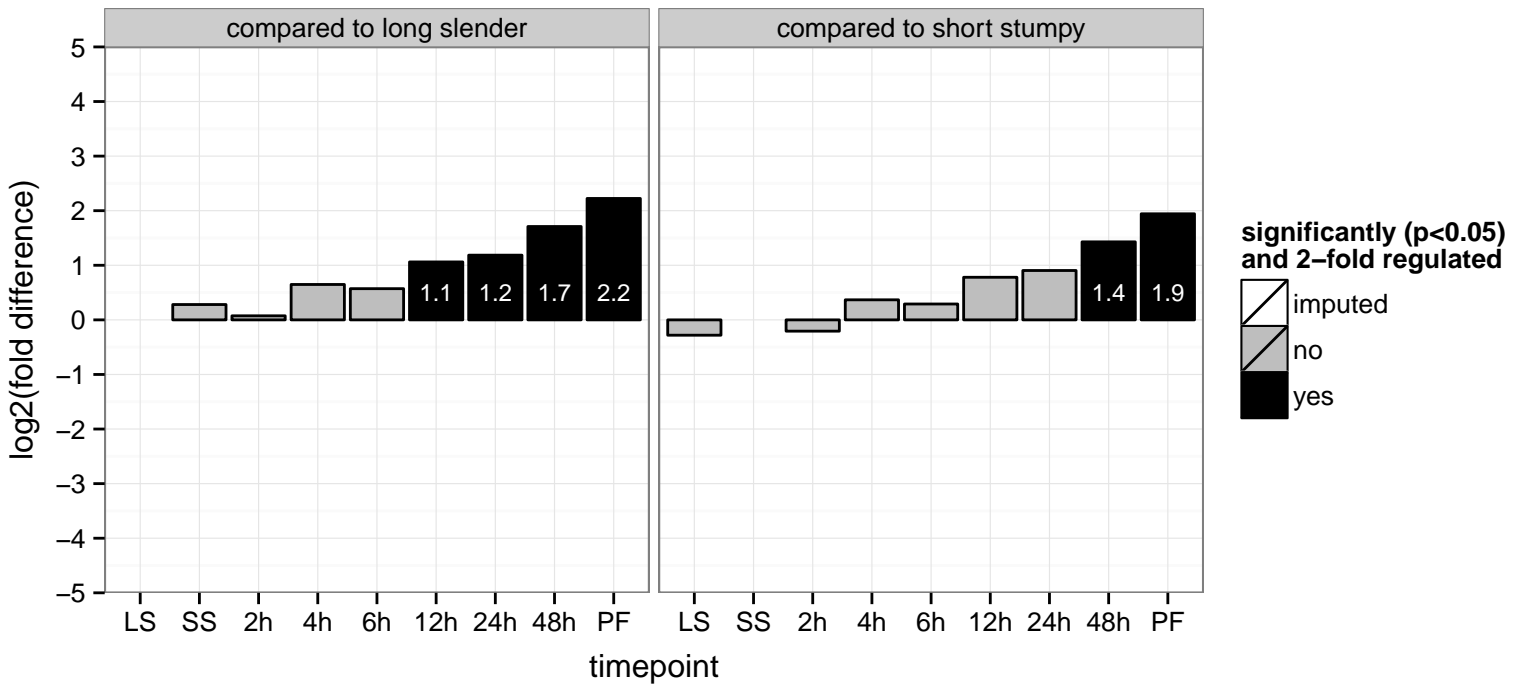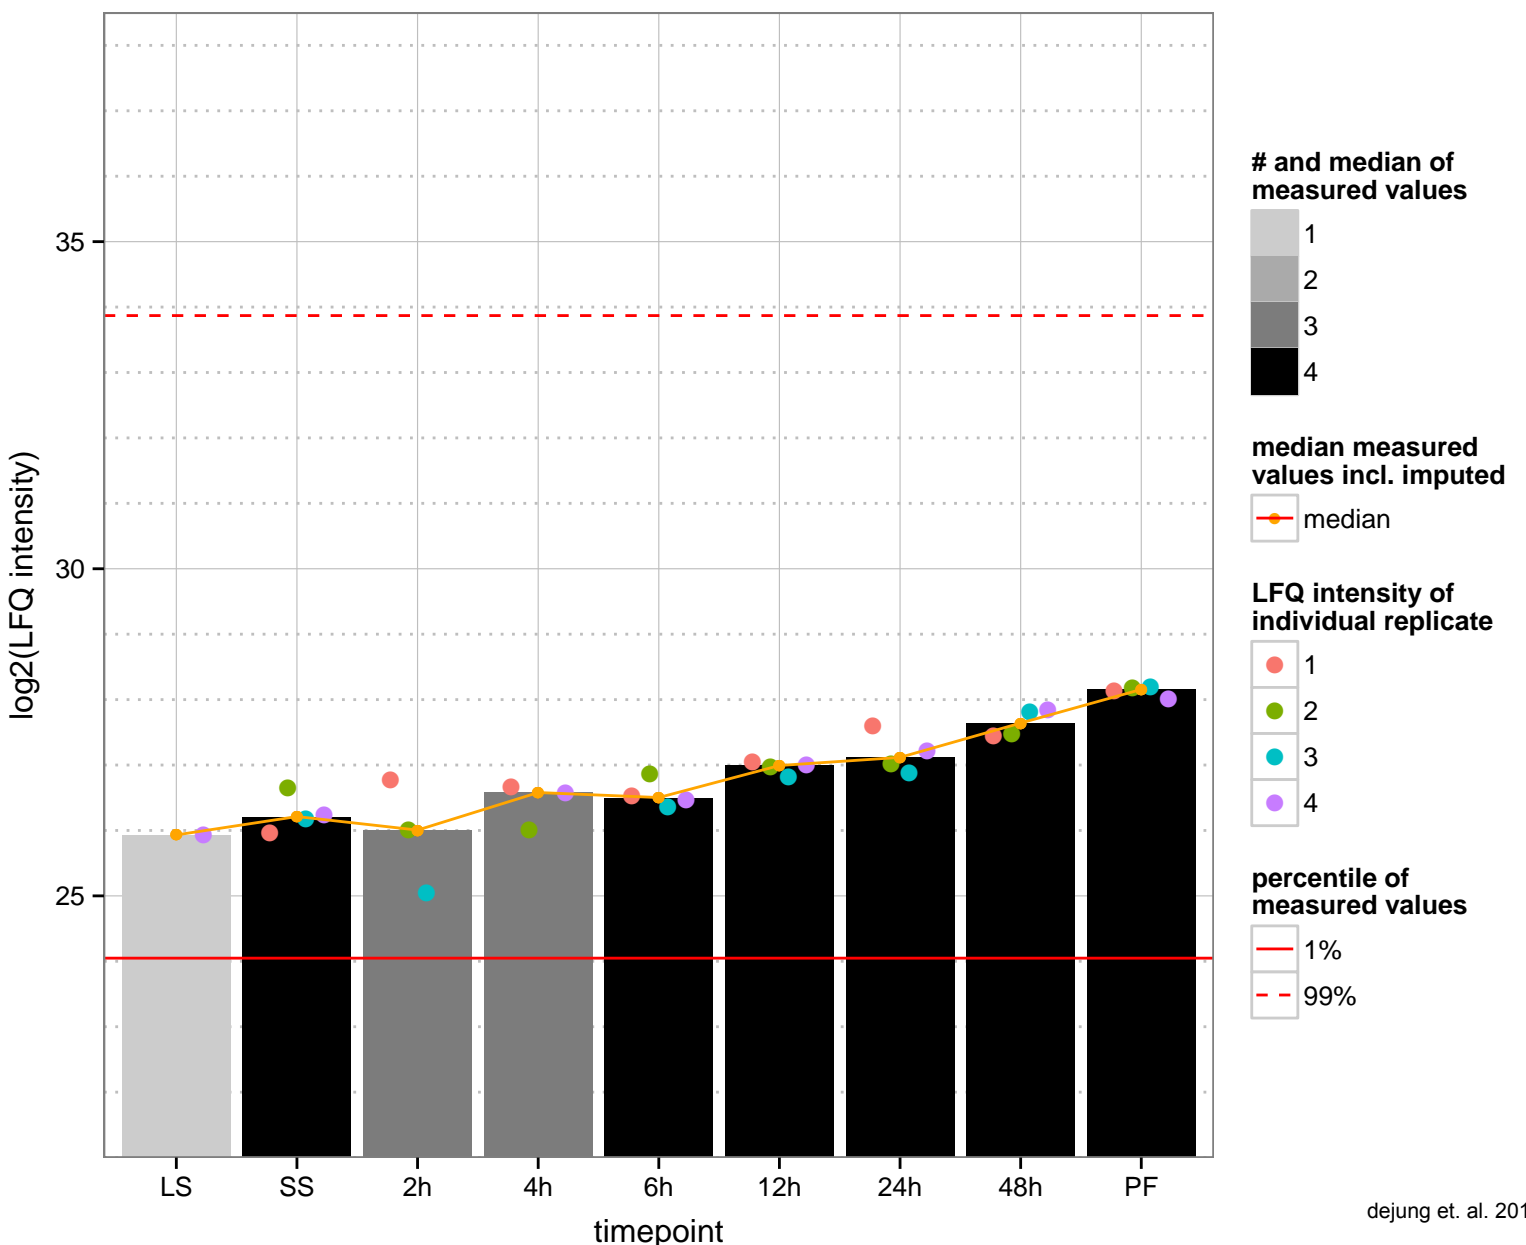

hypothetical protein, conserved  
 Tb927.7.3030;Tb927.7.2990  
 AGOF: null  
 AGOC: mitochondrion, null  
 AGOP: null  
 PGO: null  
 PGOC: null  
 PGOP: null

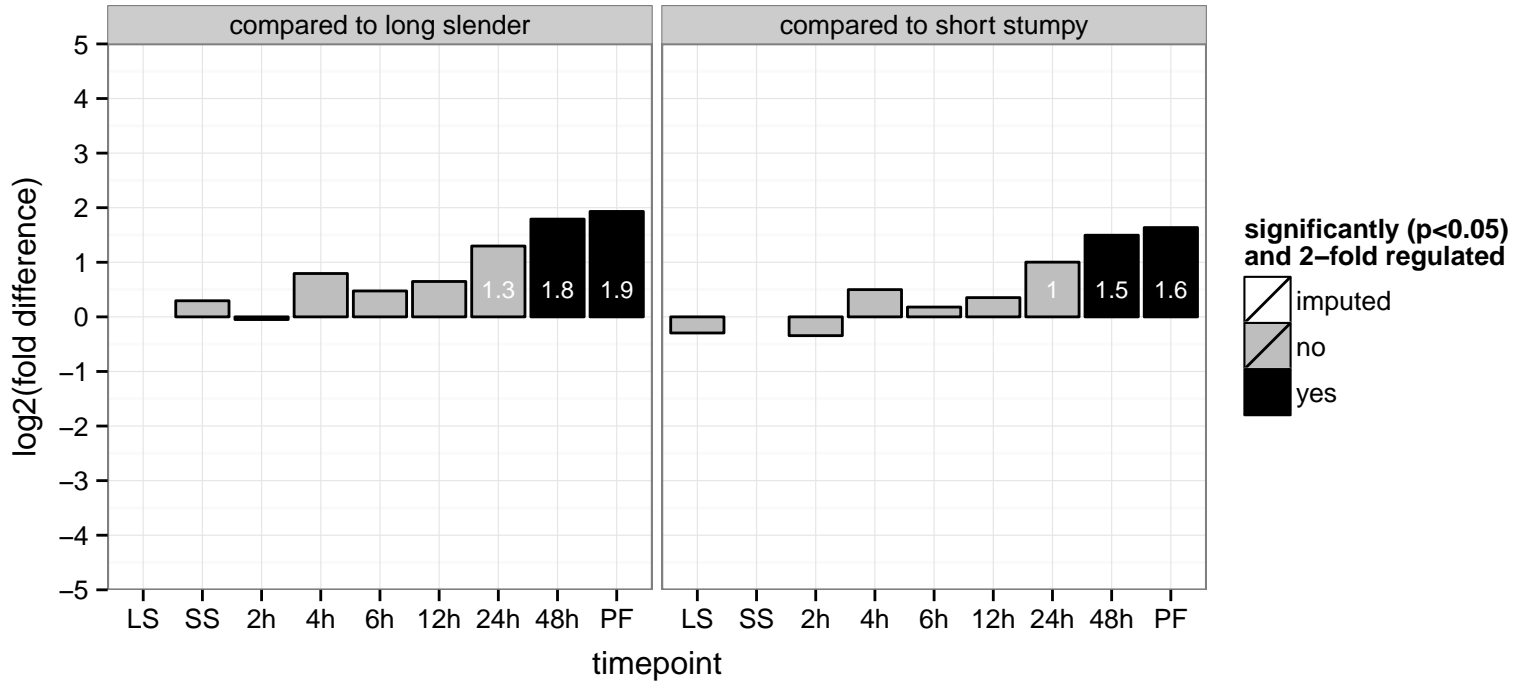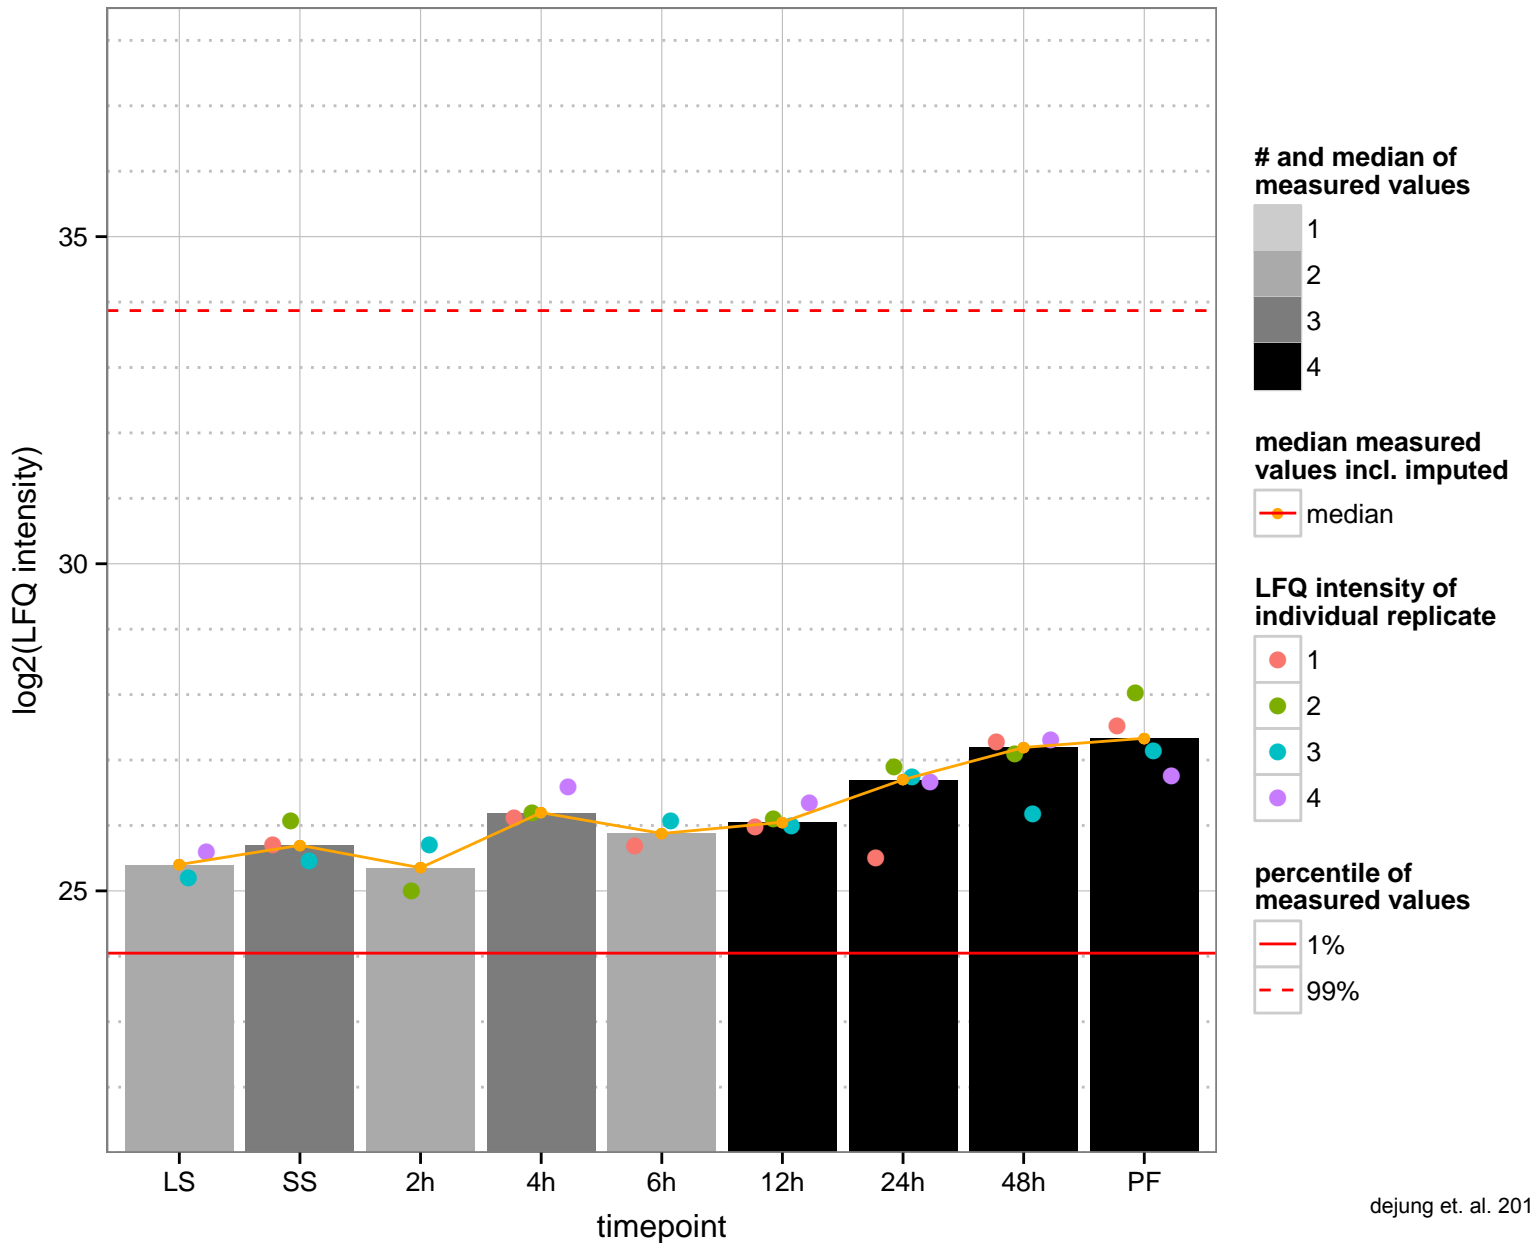

hypothetical protein, conserved  
 Tb927.7.4880  
 AGOF: null  
 AGOC: null  
 AGOP: null  
 PGO: null  
 PGO: null  
 PGO: null

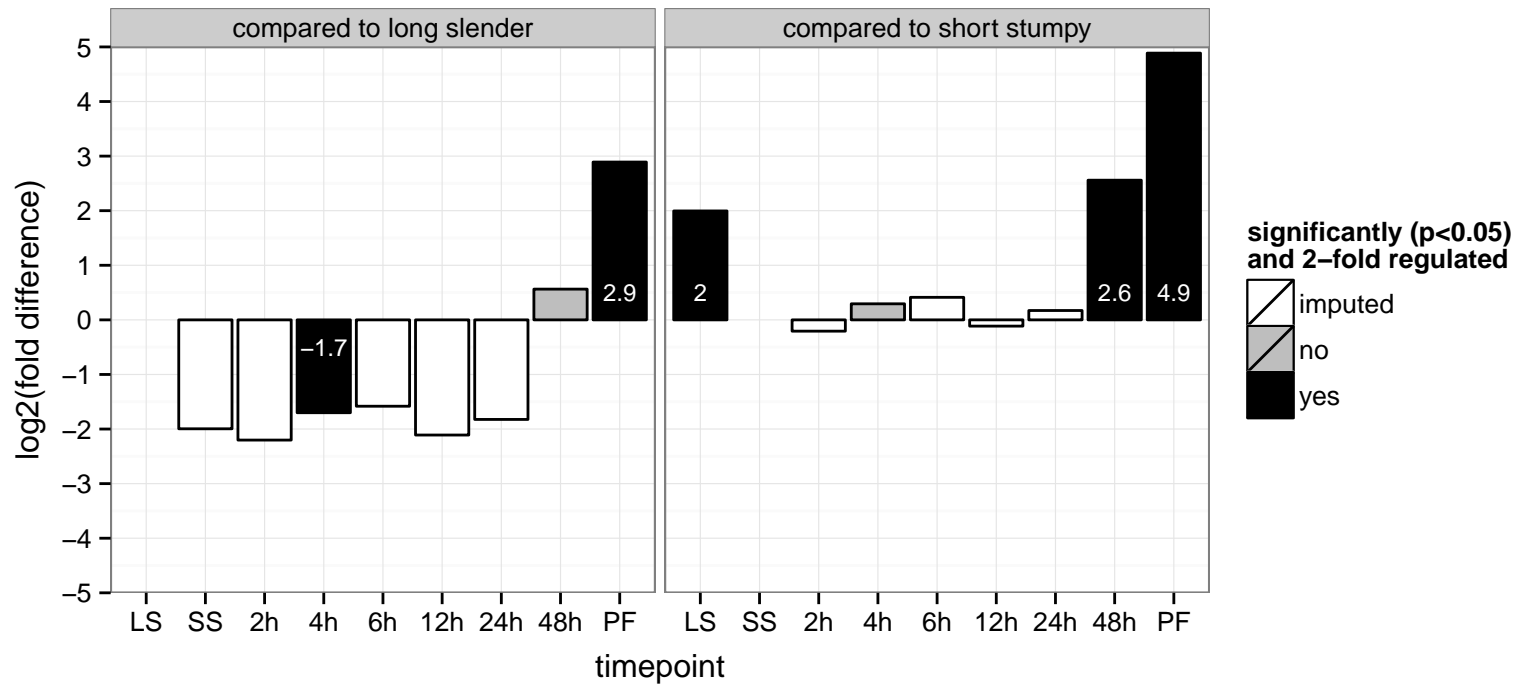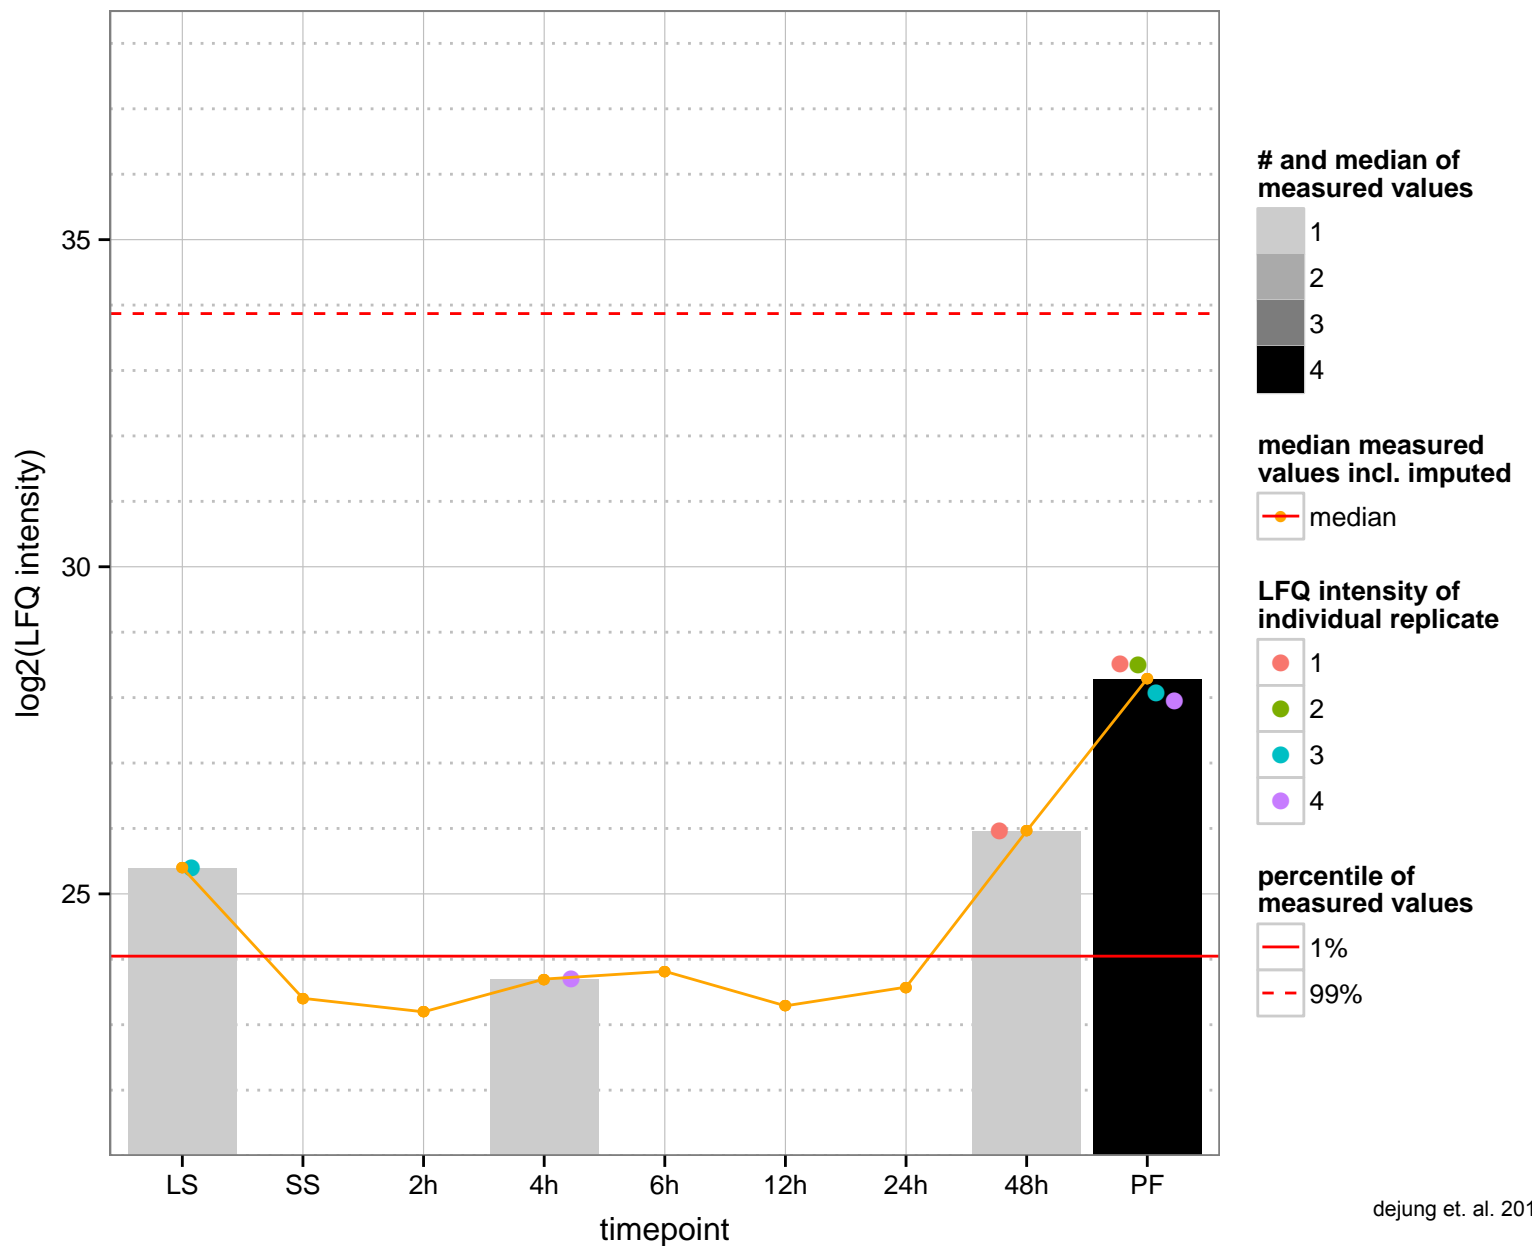

60S ribosomal protein L23a, 60S ribosomal protein L25, putative  
 Tb927.7.5180;Tb927.7.5170  
 AGOF: RNA binding, structural constituent of ribosome  
 AGOC: intracellular, ribosome  
 AGOP: ribosome biogenesis, translation  
 PGO: structural constituent of ribosome, null  
 PGO: intracellular, ribosome, null  
 PGO: translation, null

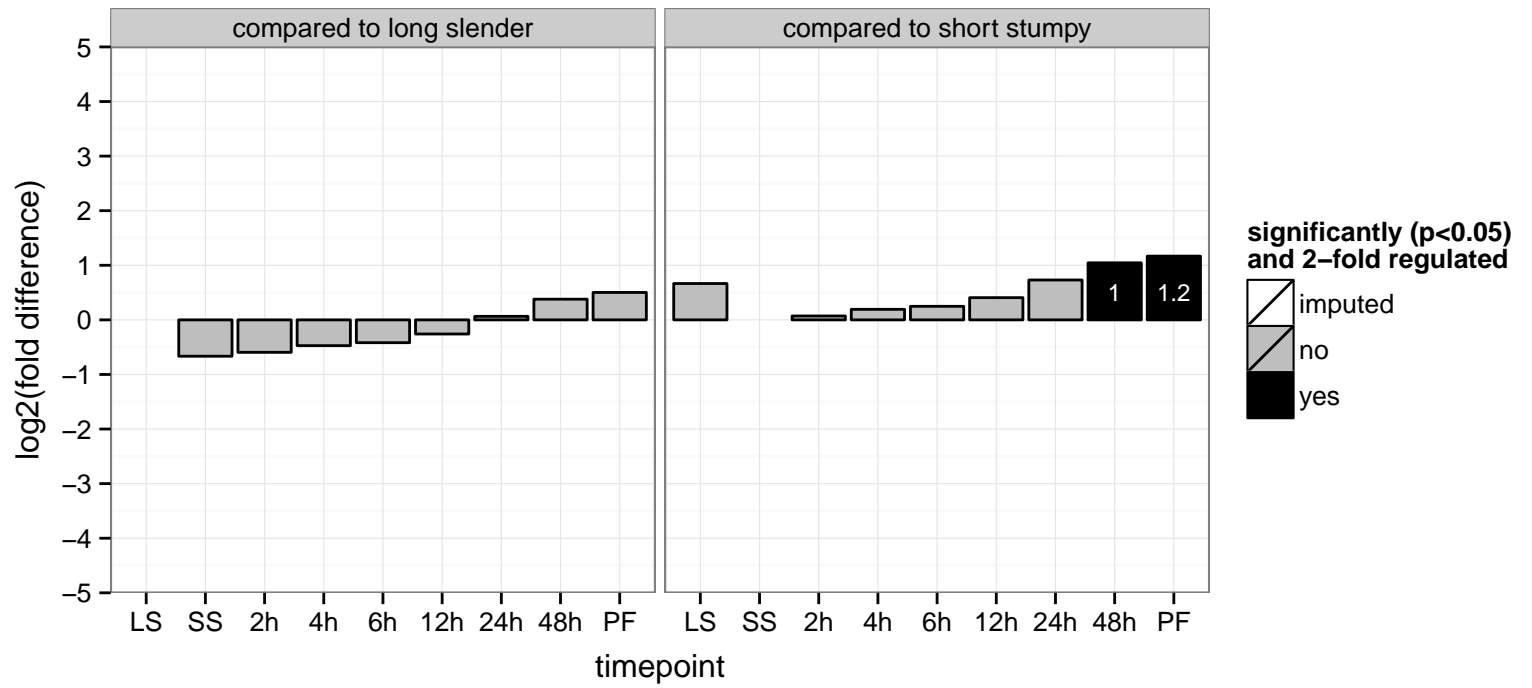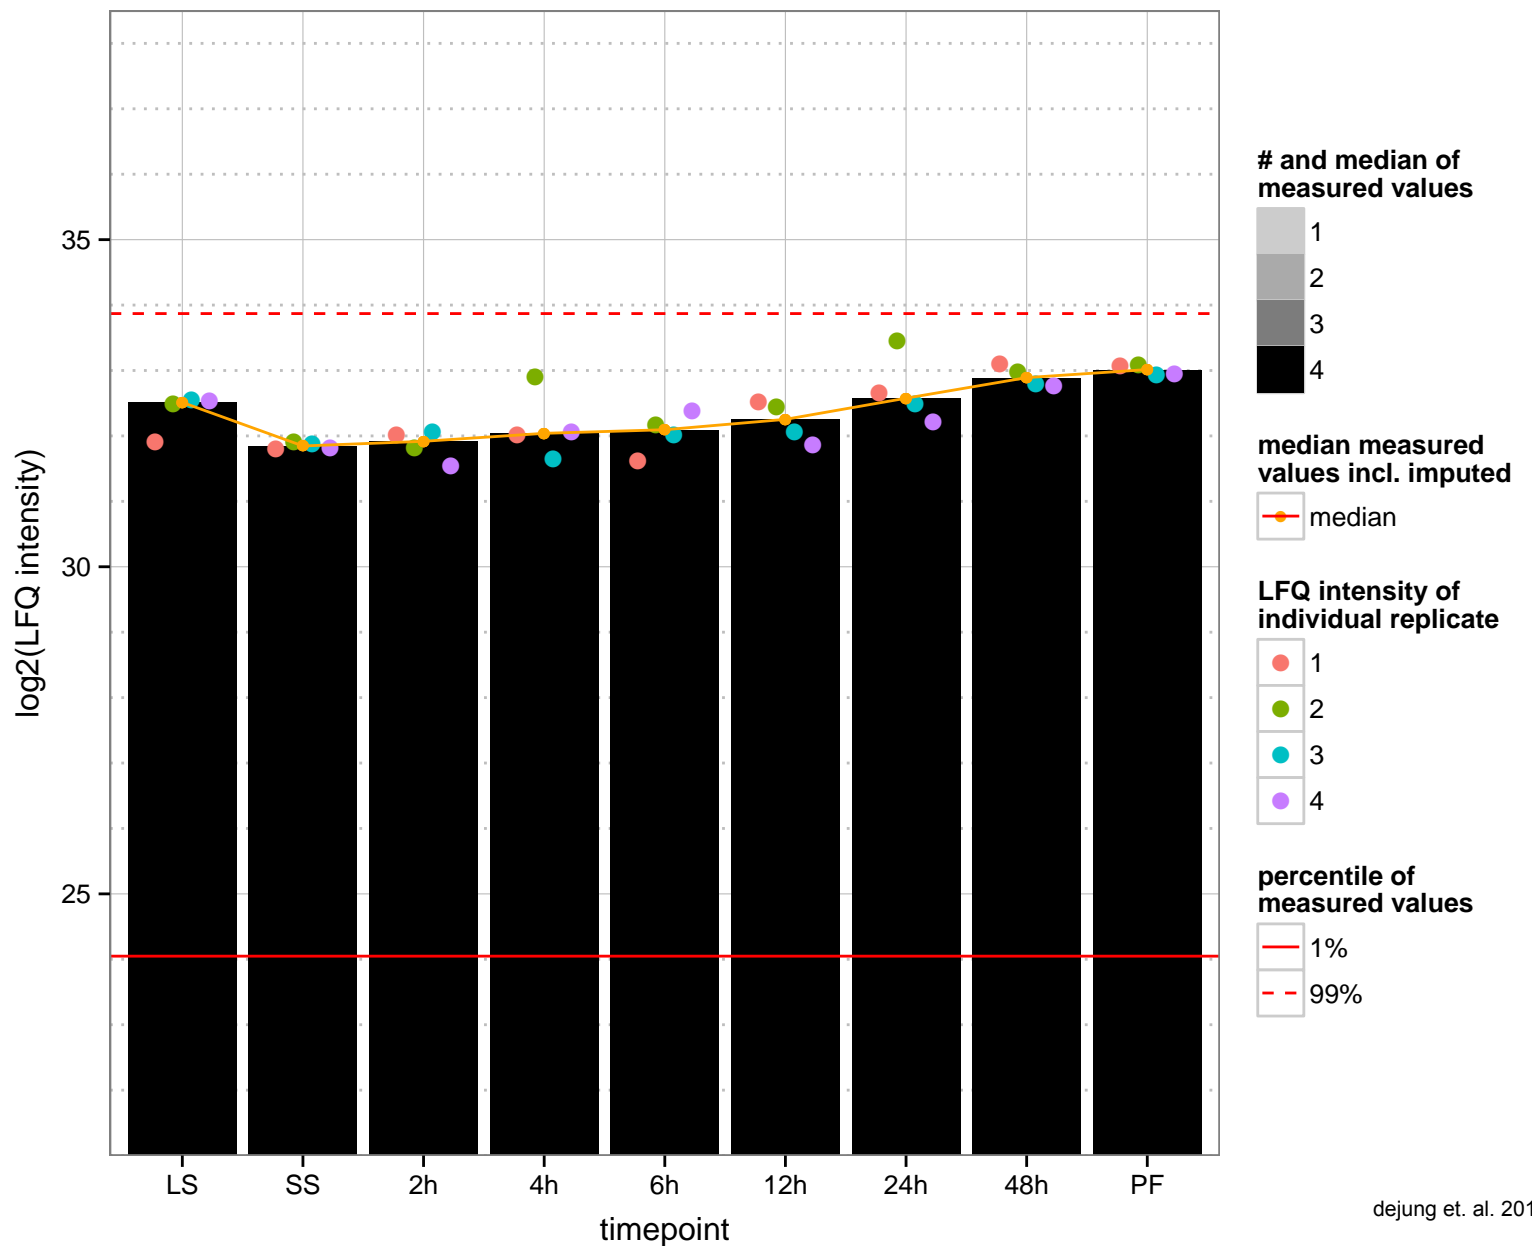

hypothetical protein, conserved  
 Tb927.7.5210  
 AGOF: phosphatase activity  
 AGOC: null  
 AGOP: null  
 PGO: phosphatase activity  
 PGOC: null  
 PGOP: null

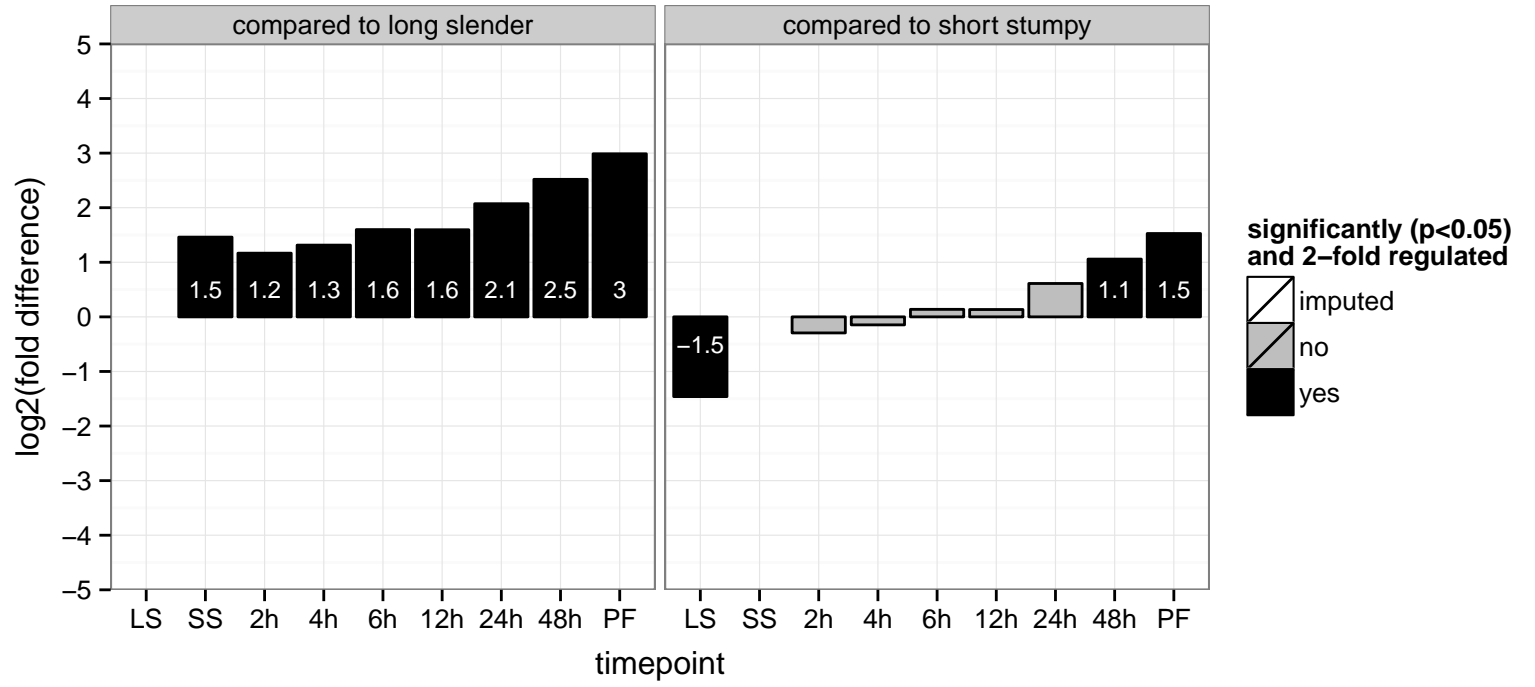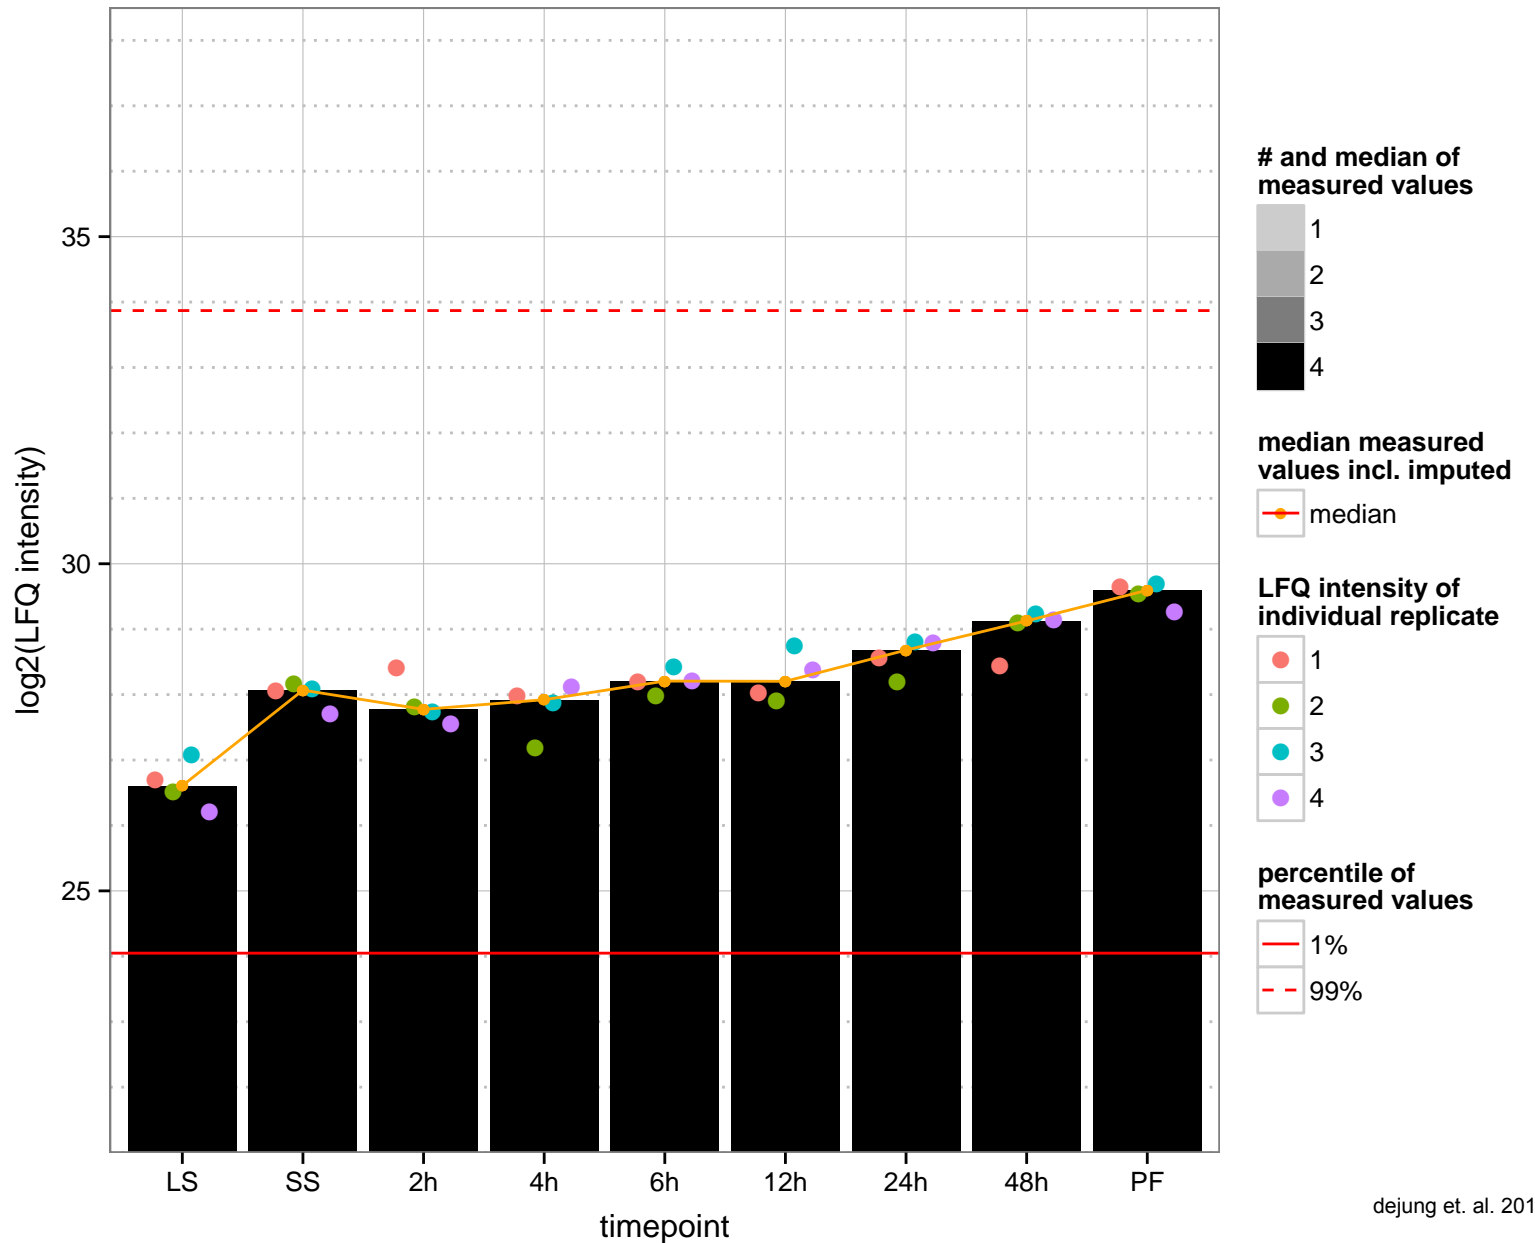

dihydrofolate reductase–thymidylate synthase (DHFR–TS)

Tb927.7.5480

AGOF: dihydrofolate reductase activity, thymidylate synthase activity

AGOC: null

AGOP: dTMP biosynthetic process, glycine biosynthetic process, nucleotide biosynthetic process, one–carbon metabolic process

PGOF: dihydrofolate reductase activity, thymidylate synthase activity

PGOC: null

PGOP: dTMP biosynthetic process, glycine biosynthetic process, nucleotide biosynthetic process, one–carbon metabolic process

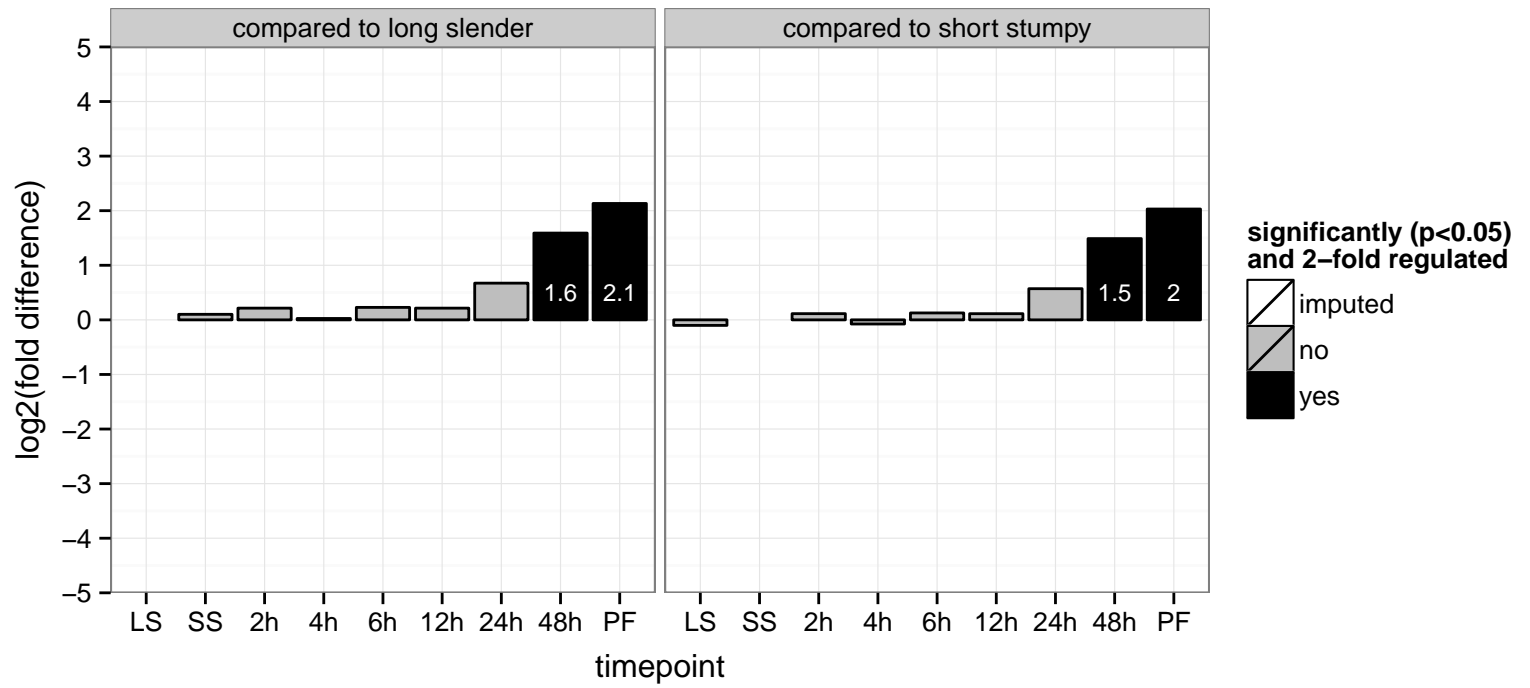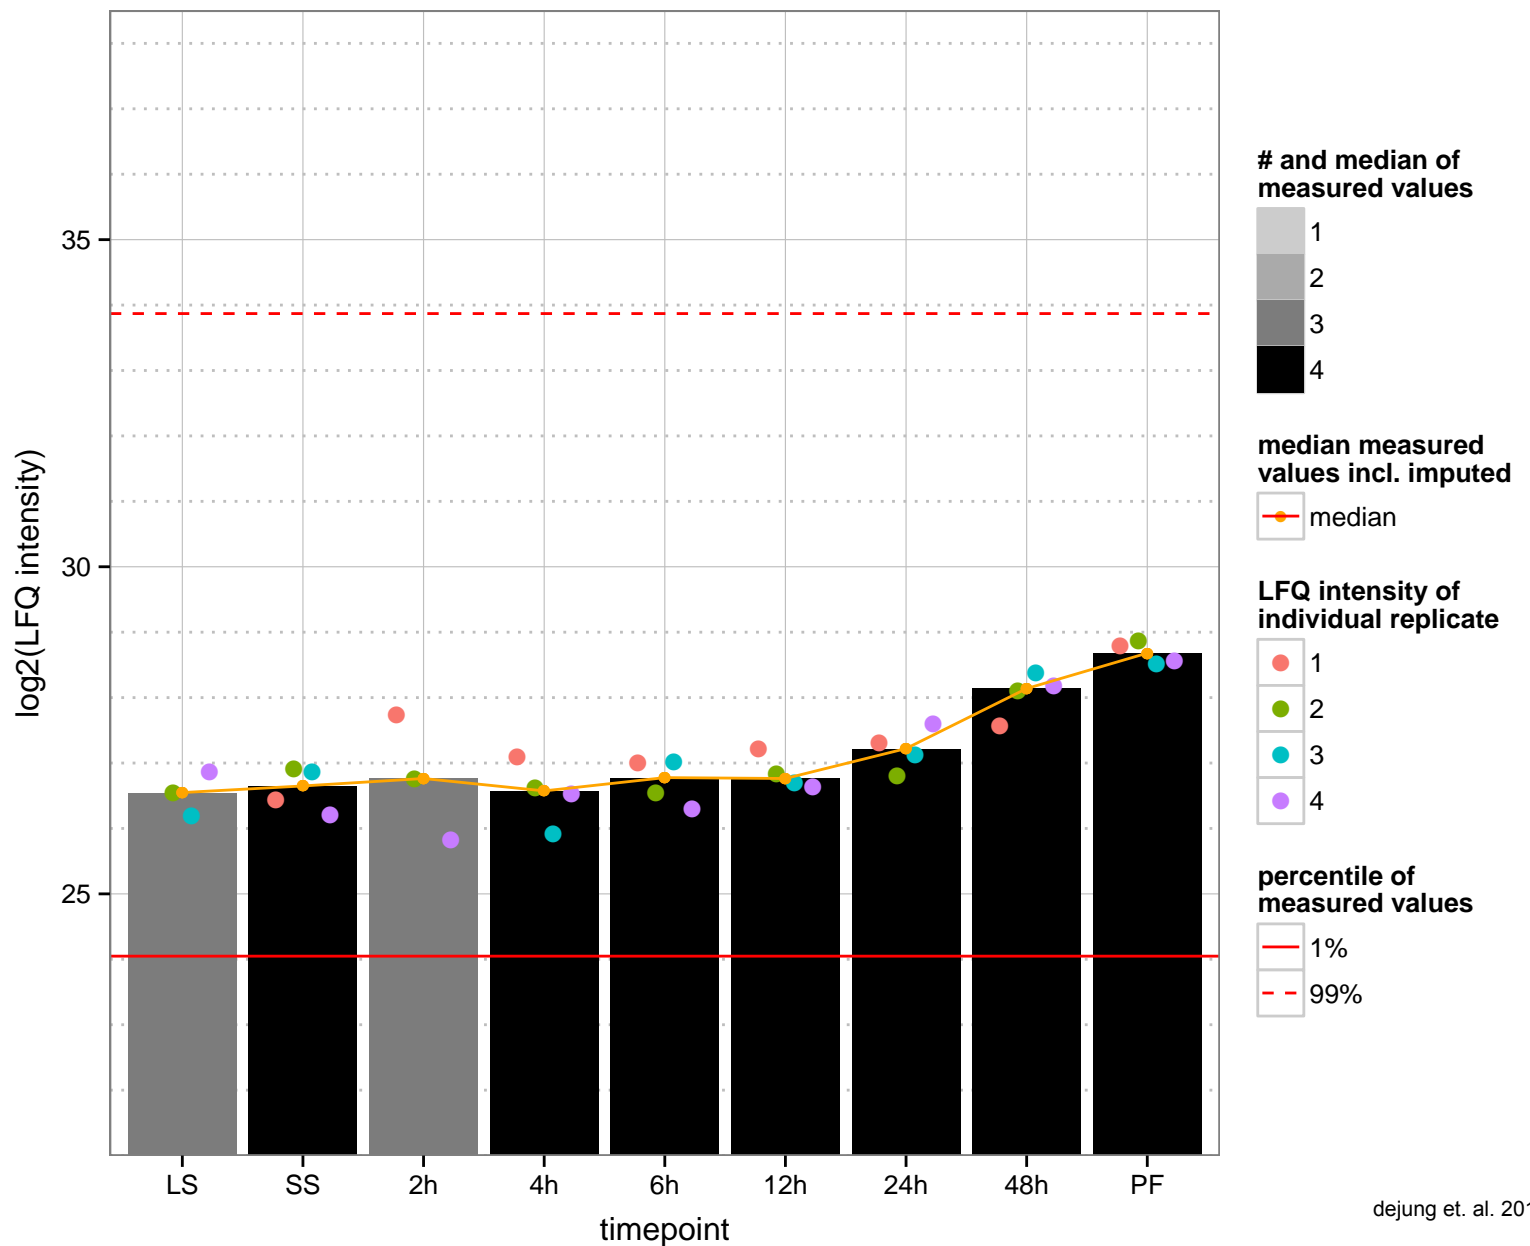

hypothetical protein, conserved

Tb927.7.5670

AGOF: null

AGOC: null

AGOP: null

PGOF: oxidoreductase activity, oxidoreductase activity, acting on paired donors, with incorporation or reduction of molecular oxygen

PGOC: null

PGOP: oxidation-reduction process

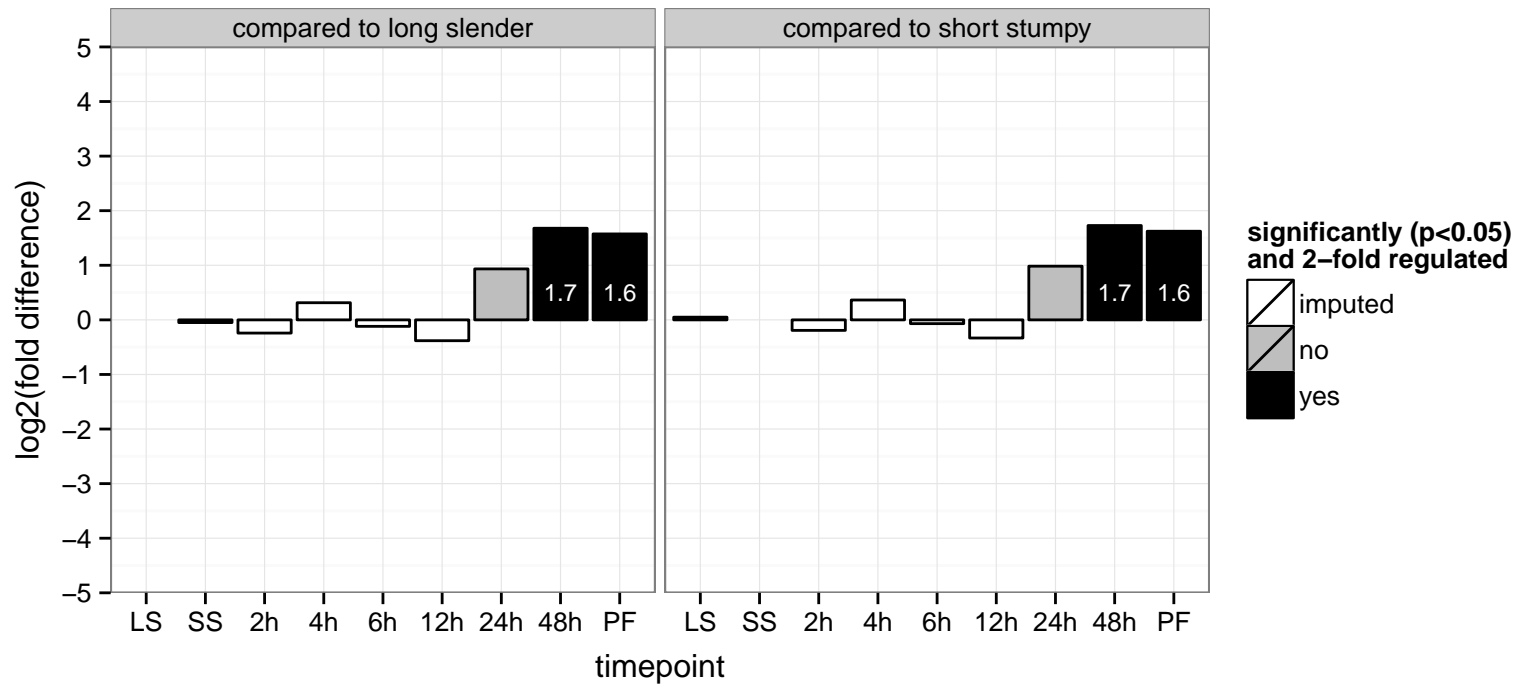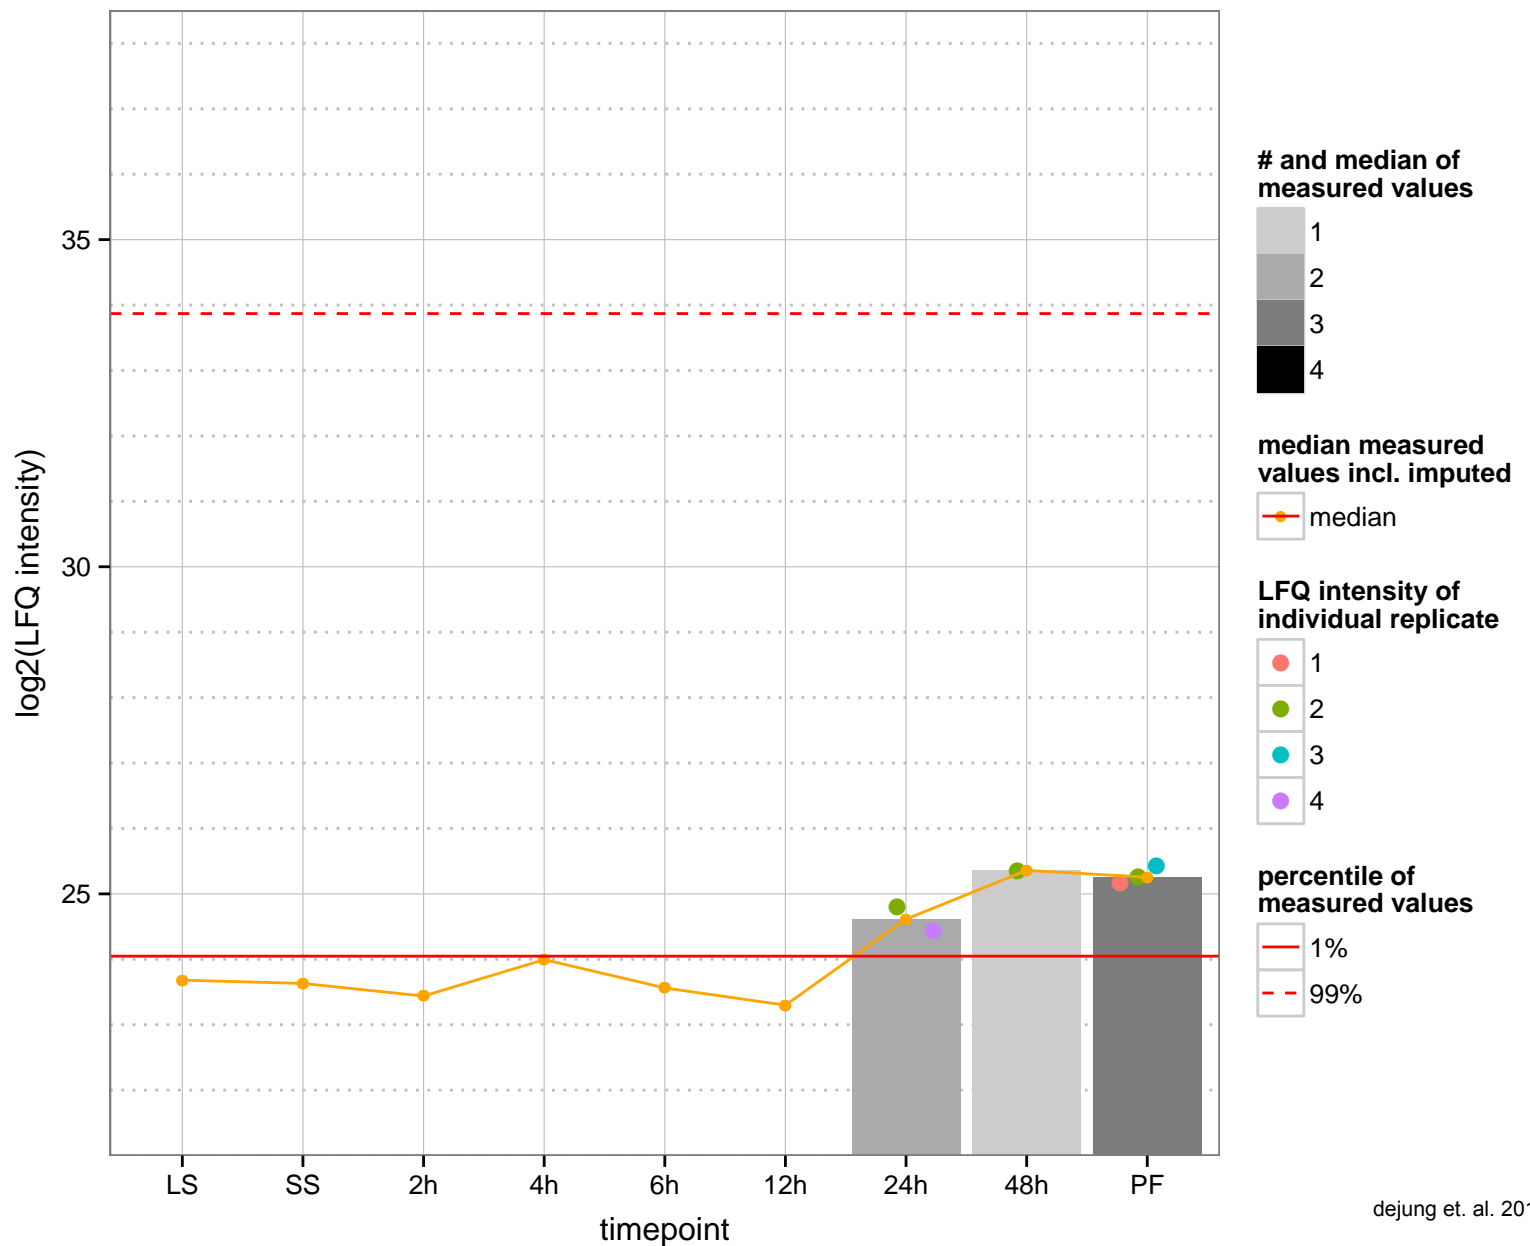



hypothetical protein, conserved  
 Tb927.7.6620  
 AGOF: null  
 AGOC: null  
 AGOP: null  
 PGO: null  
 PGOC: null  
 PGOP: null

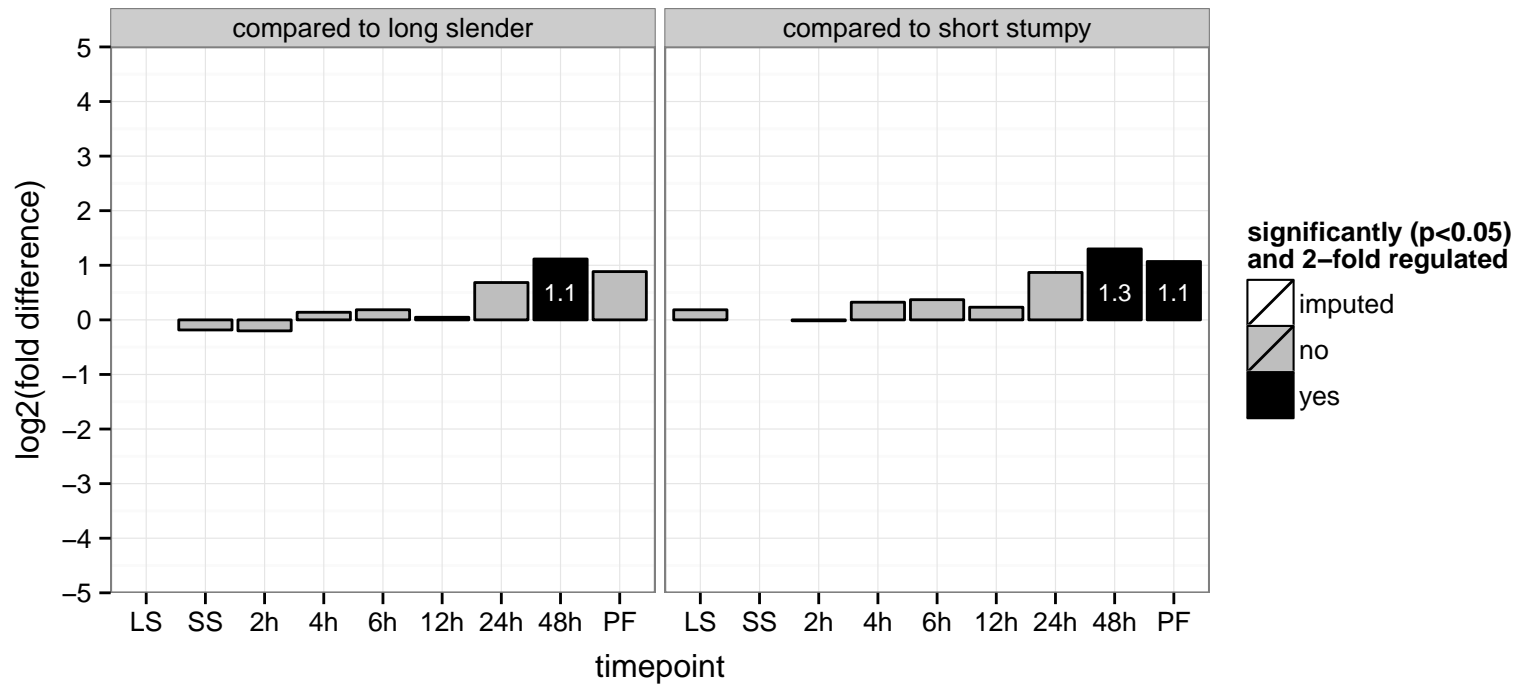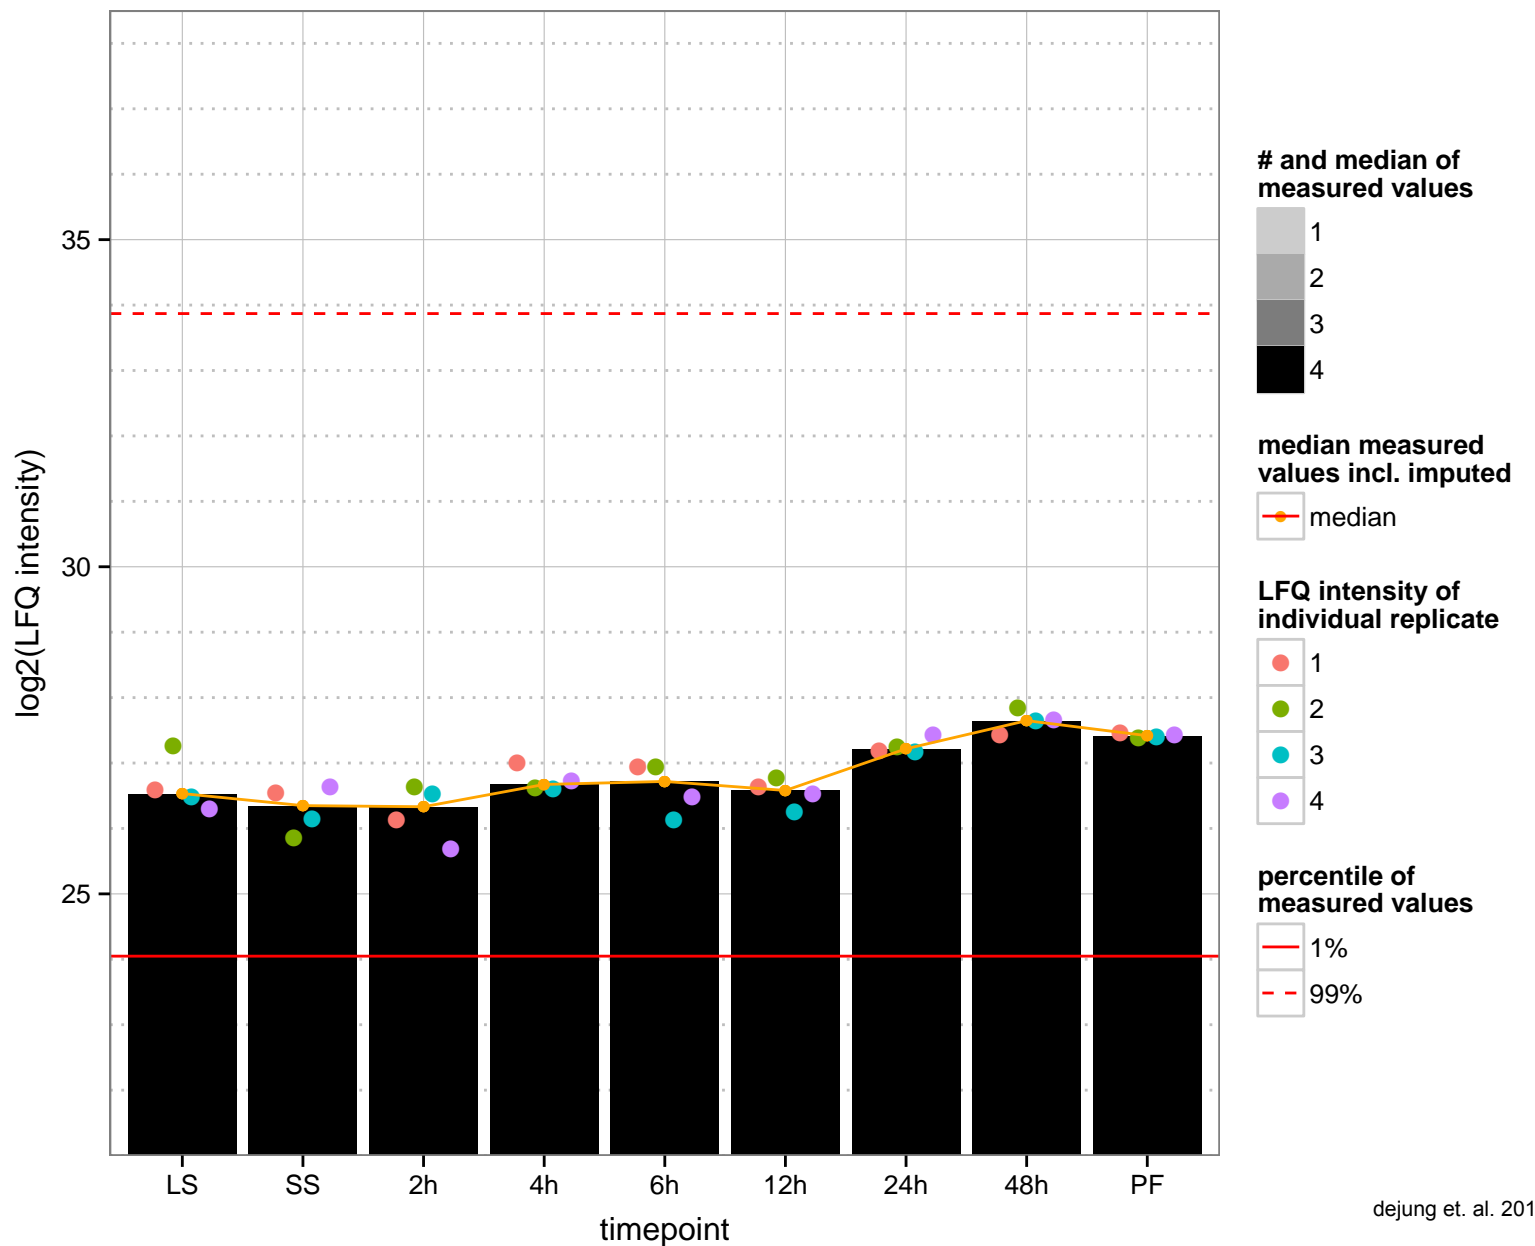

hypothetical protein, conserved  
 Tb927.7.7050  
 AGOF: null  
 AGOC: null  
 AGOP: null  
 PGOF: null  
 PGOC: null  
 PGOP: null

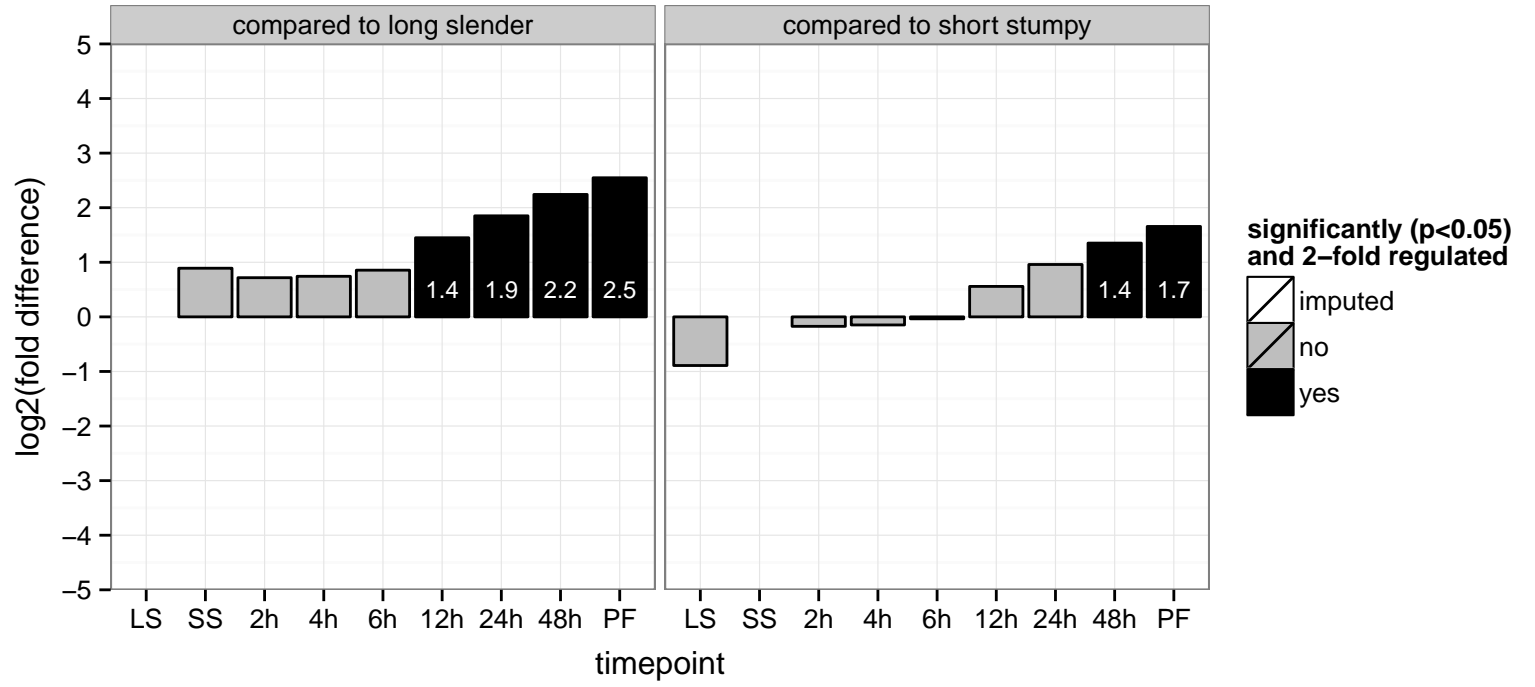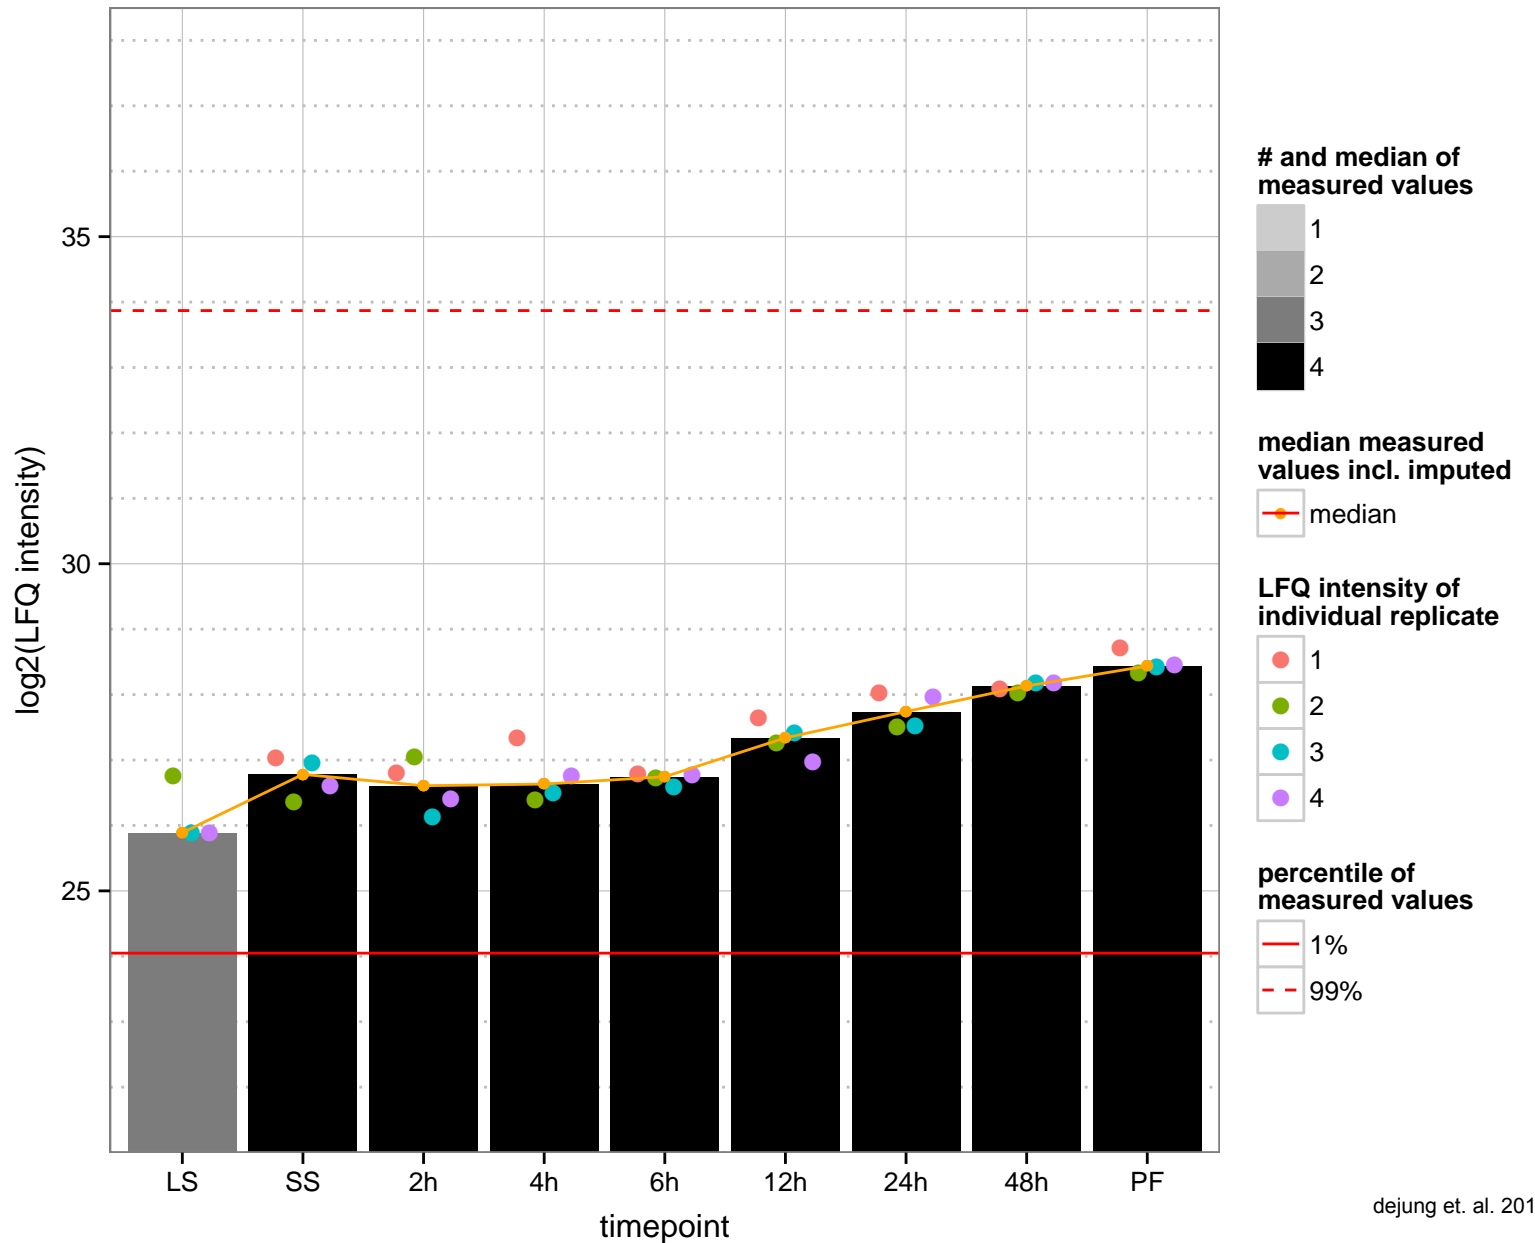

60S ribosomal protein L7a, putative  
 Tb927.8.1340;Tb927.8.1330  
 AGOF: structural constituent of ribosome  
 AGOC: ribosome  
 AGOP: translation  
 PGO: null  
 PGOC: null  
 PGOP: null

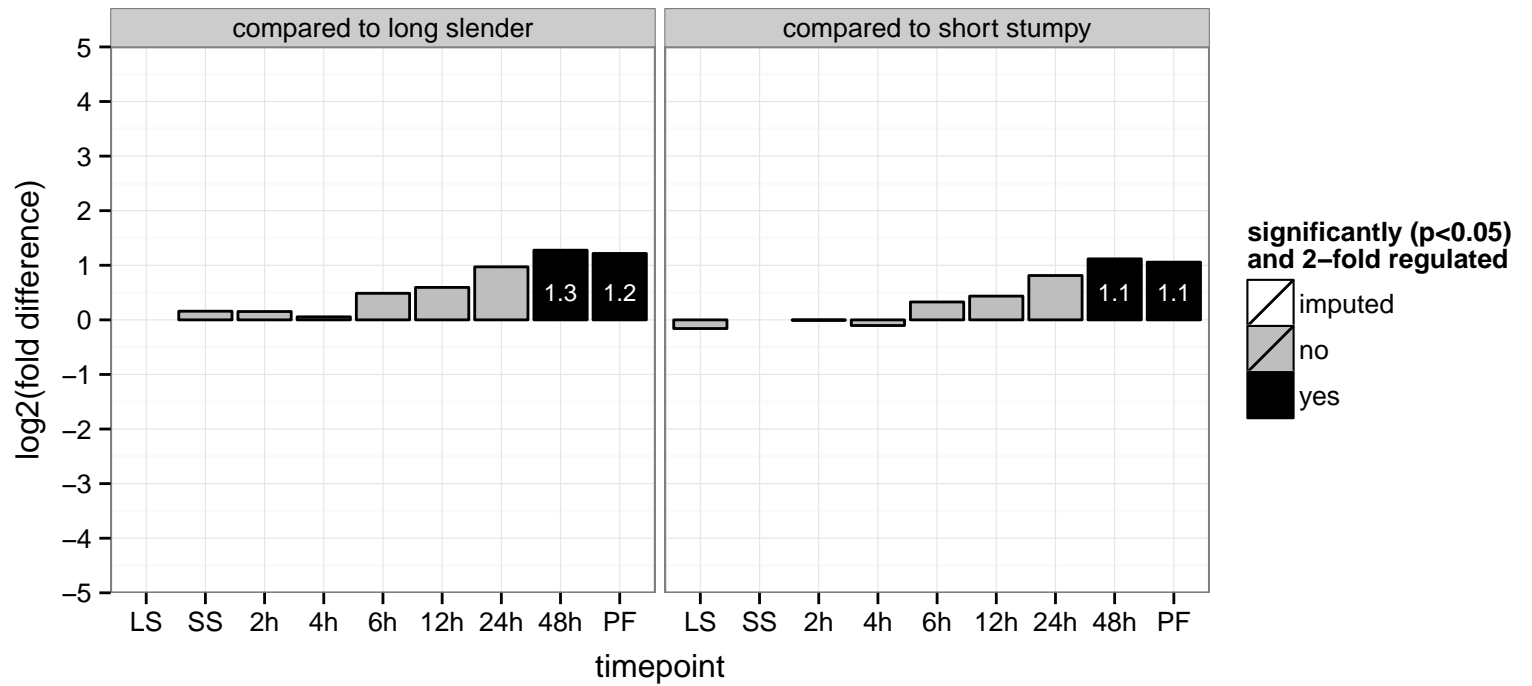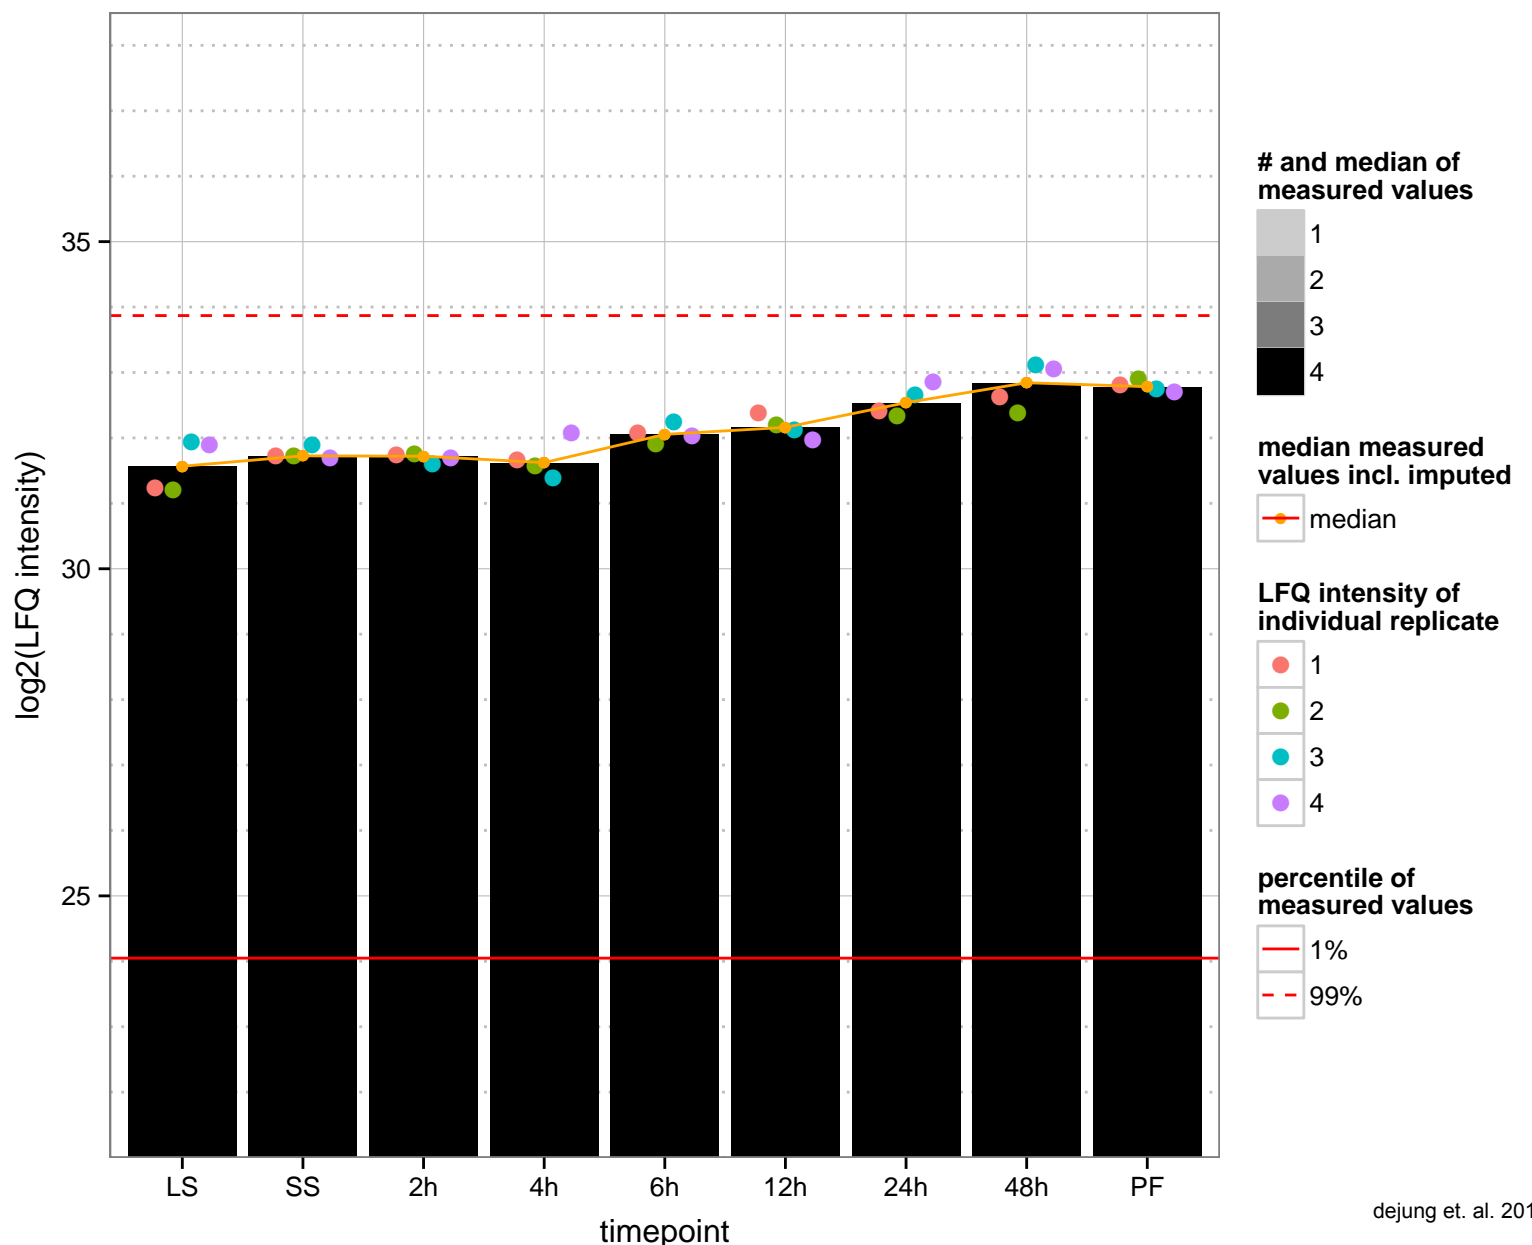

ATP-dependent DEAD/H RNA helicase, putative (DBP2.1)

Tb927.8.1510

AGOF: ATP binding, ATP-dependent helicase activity, helicase activity, nucleic acid binding

AGOC: null

AGOP: nucleobase-containing compound metabolic process

PGOF: ATP binding, ATP-dependent helicase activity, helicase activity, nucleic acid binding

PGOC: null

PGOP: null

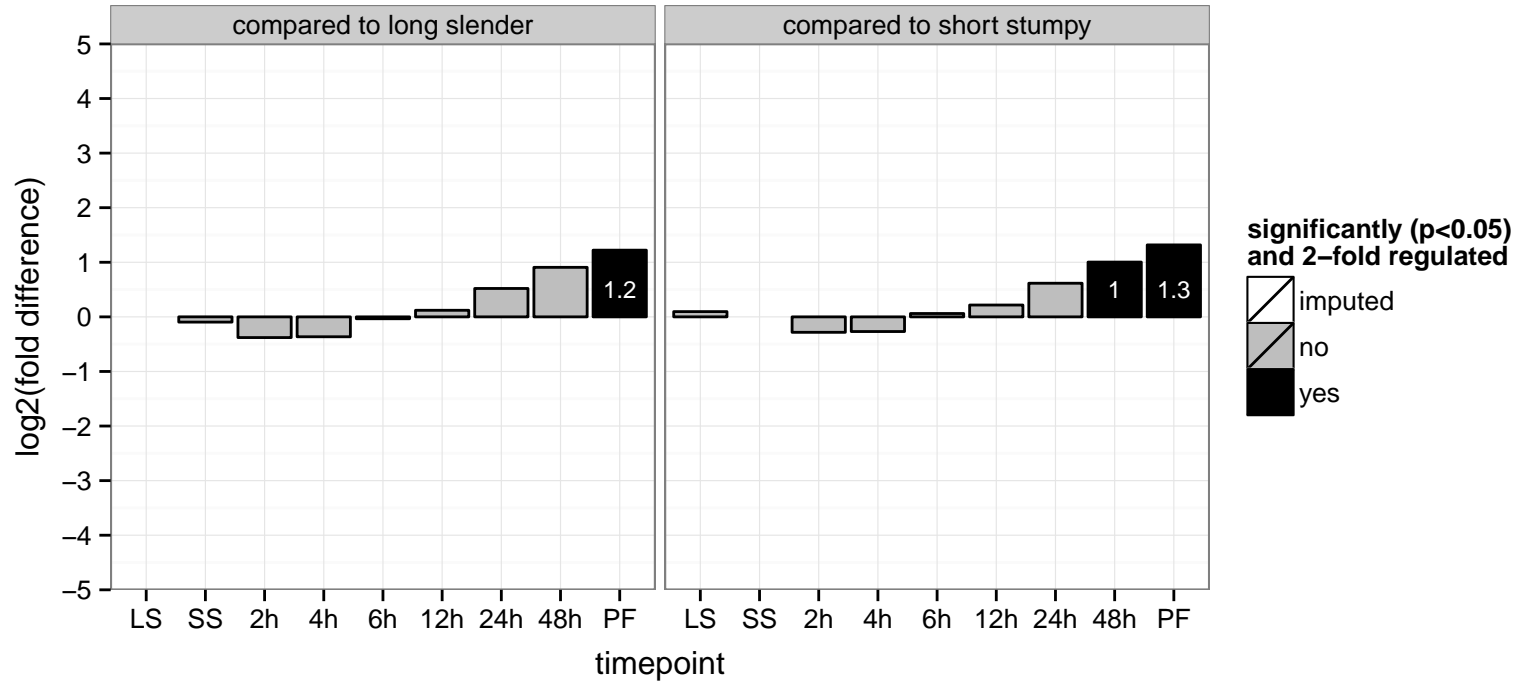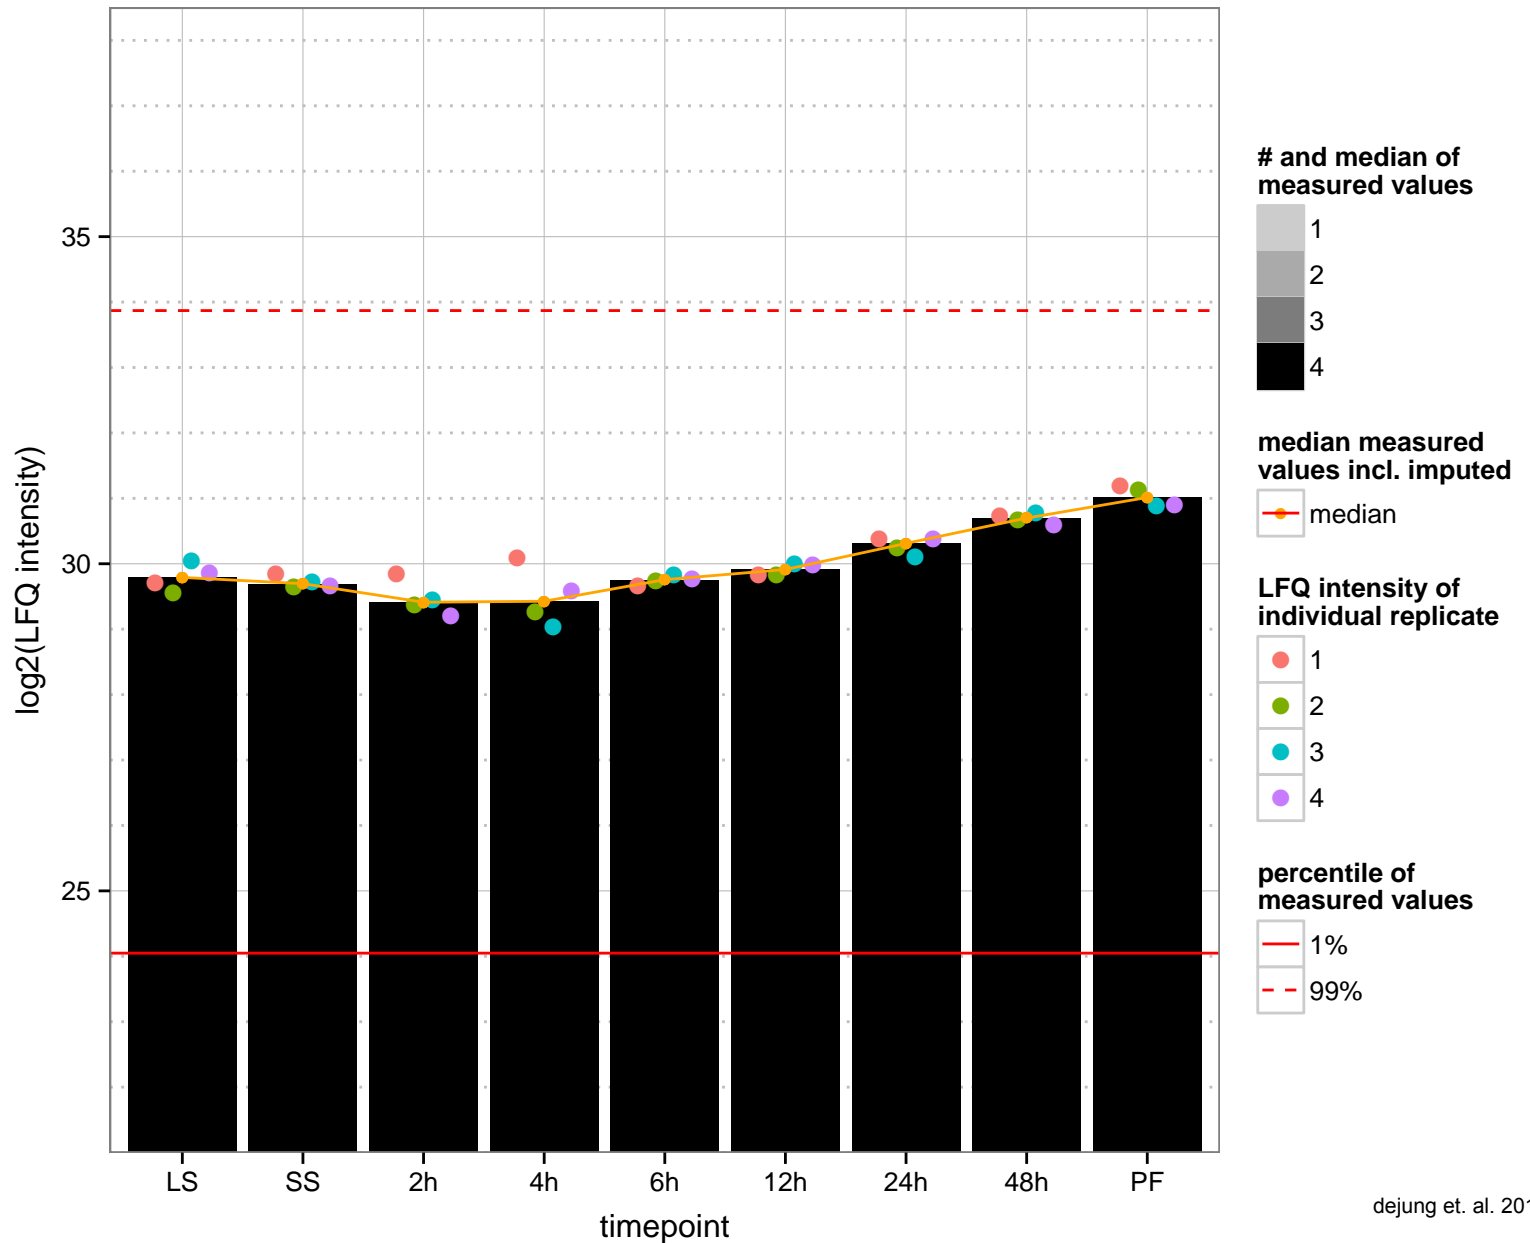

hypothetical protein, conserved  
 Tb927.8.1570  
 AGOF: null  
 AGOC: null  
 AGOP: null  
 PGO: null  
 PGOC: null  
 PGOP: null

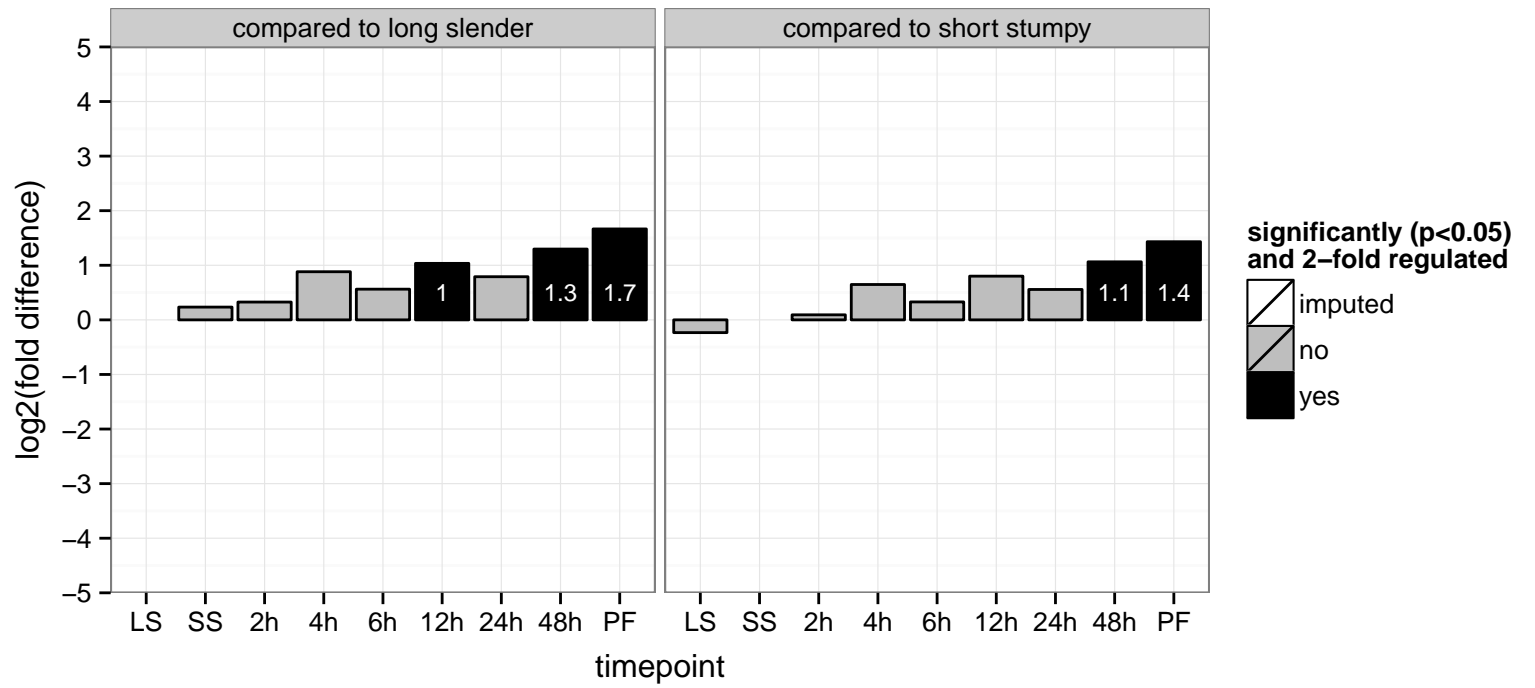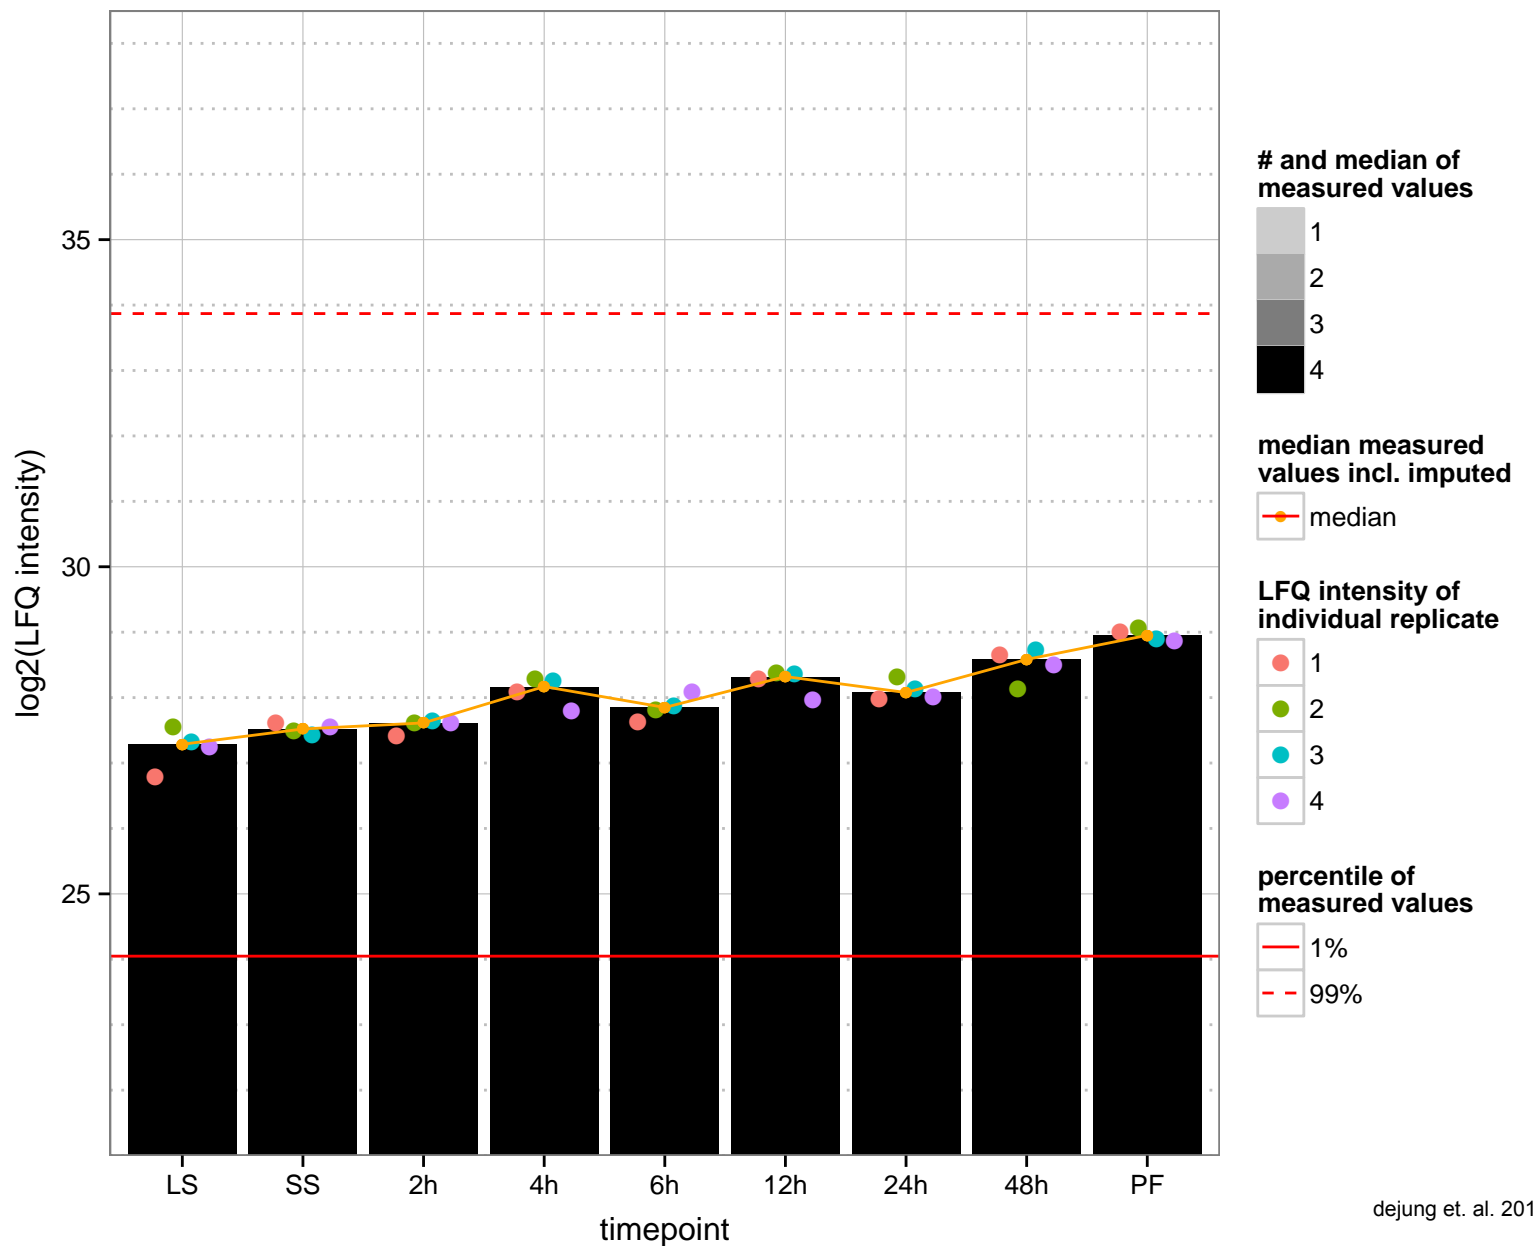

electron transfer protein, putative

Tb927.8.3380

AGOF: electron carrier activity, iron-sulfur cluster binding, oxidoreductase activity

AGOC: null

AGOP: oxidation-reduction process, tricarboxylic acid cycle

PGOF: electron carrier activity, iron-sulfur cluster binding, oxidoreductase activity

PGOC: null

PGOP: oxidation-reduction process, tricarboxylic acid cycle

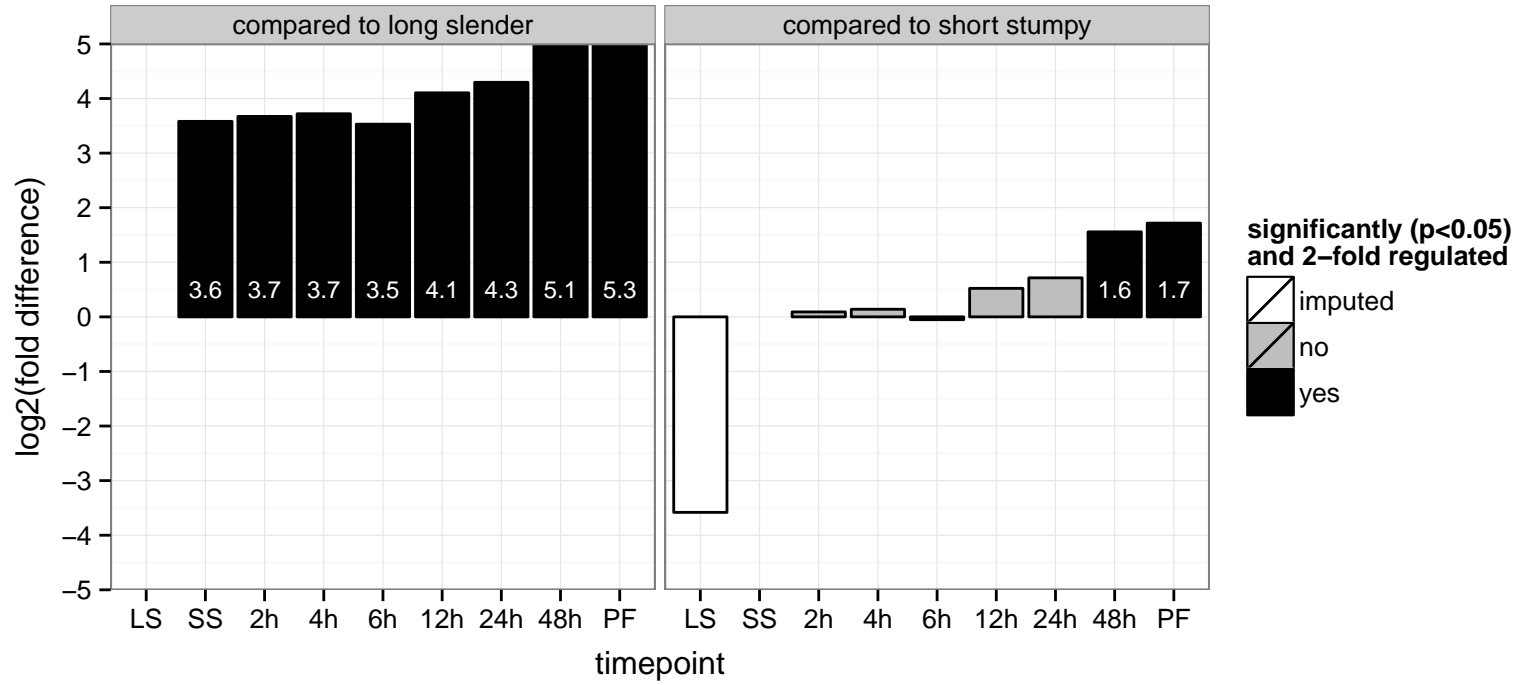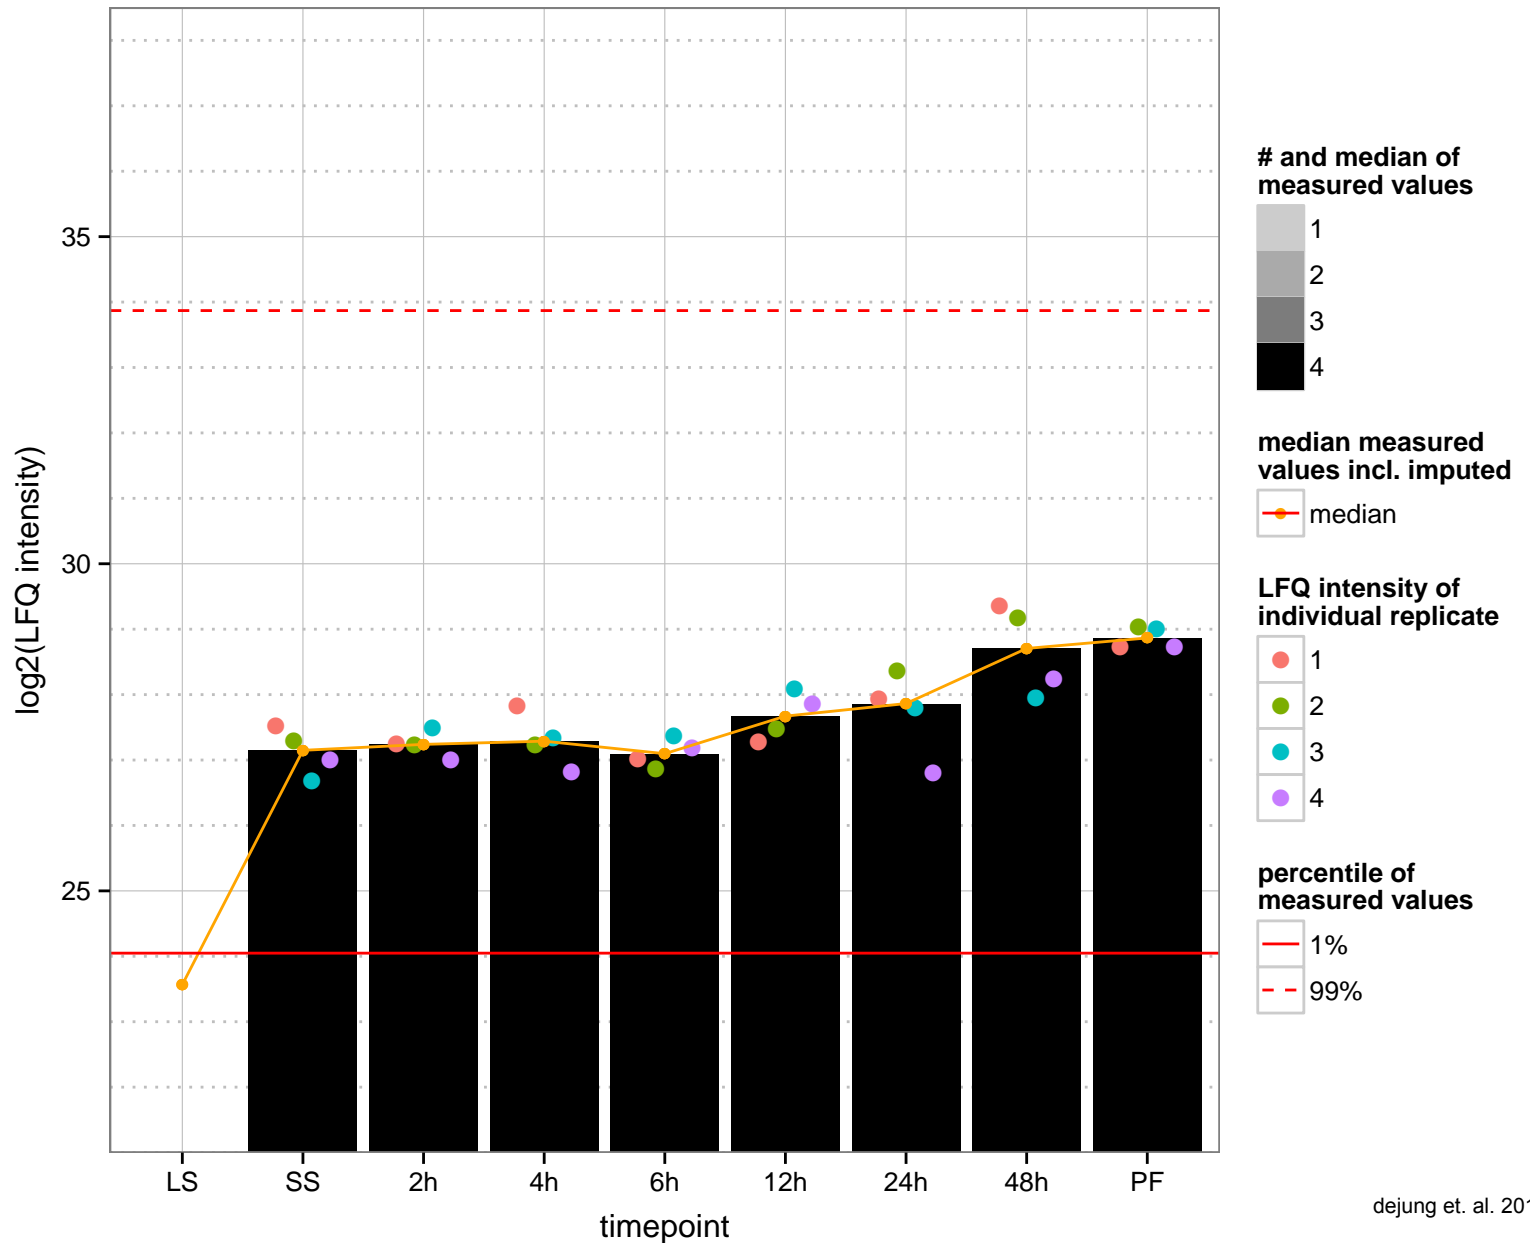

hypothetical protein, conserved  
 Tb927.8.4290  
 AGOF: null  
 AGOC: null  
 AGOP: null  
 PGO: null  
 PGOC: null  
 PGOP: null

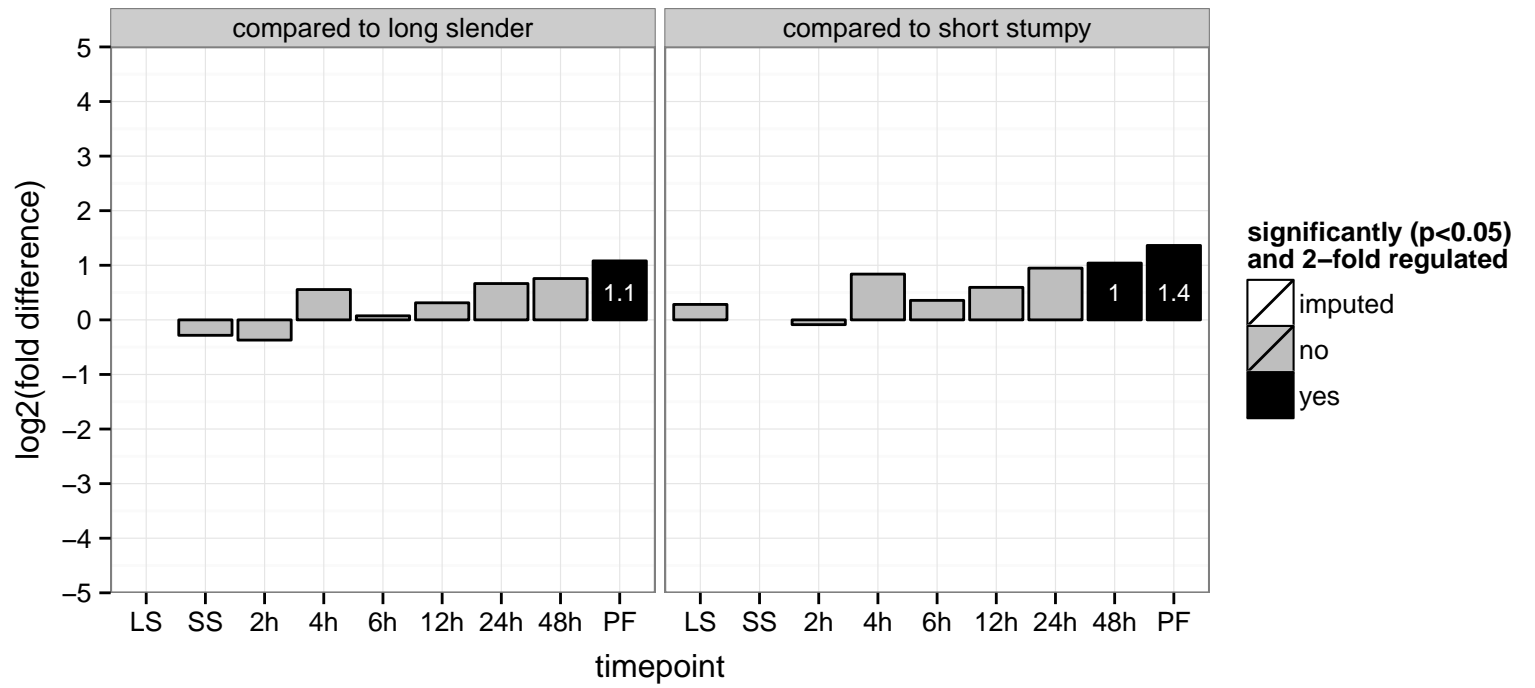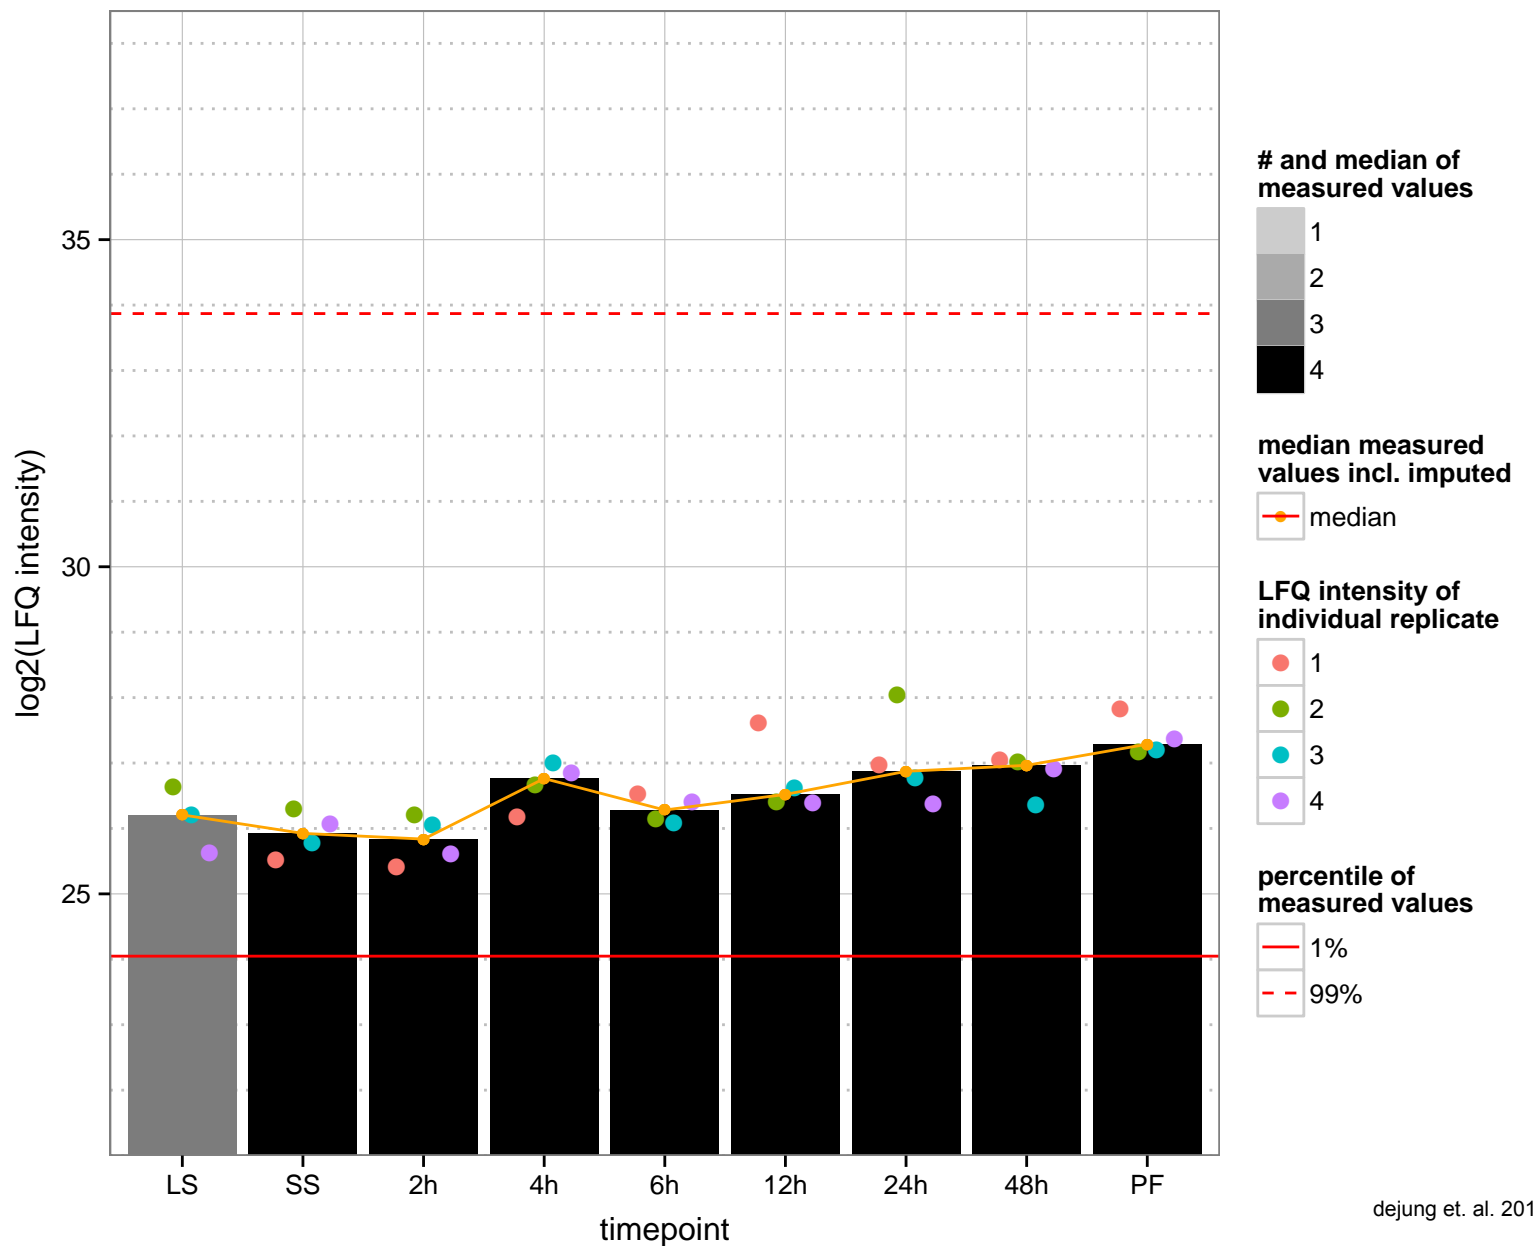

RNA-binding protein, putative (RBP11)  
 Tb927.8.4450  
 AGOF: RNA binding  
 AGOC: null  
 AGOP: RNA processing  
 PGO: nucleic acid binding  
 PGO: null  
 PGOP: null

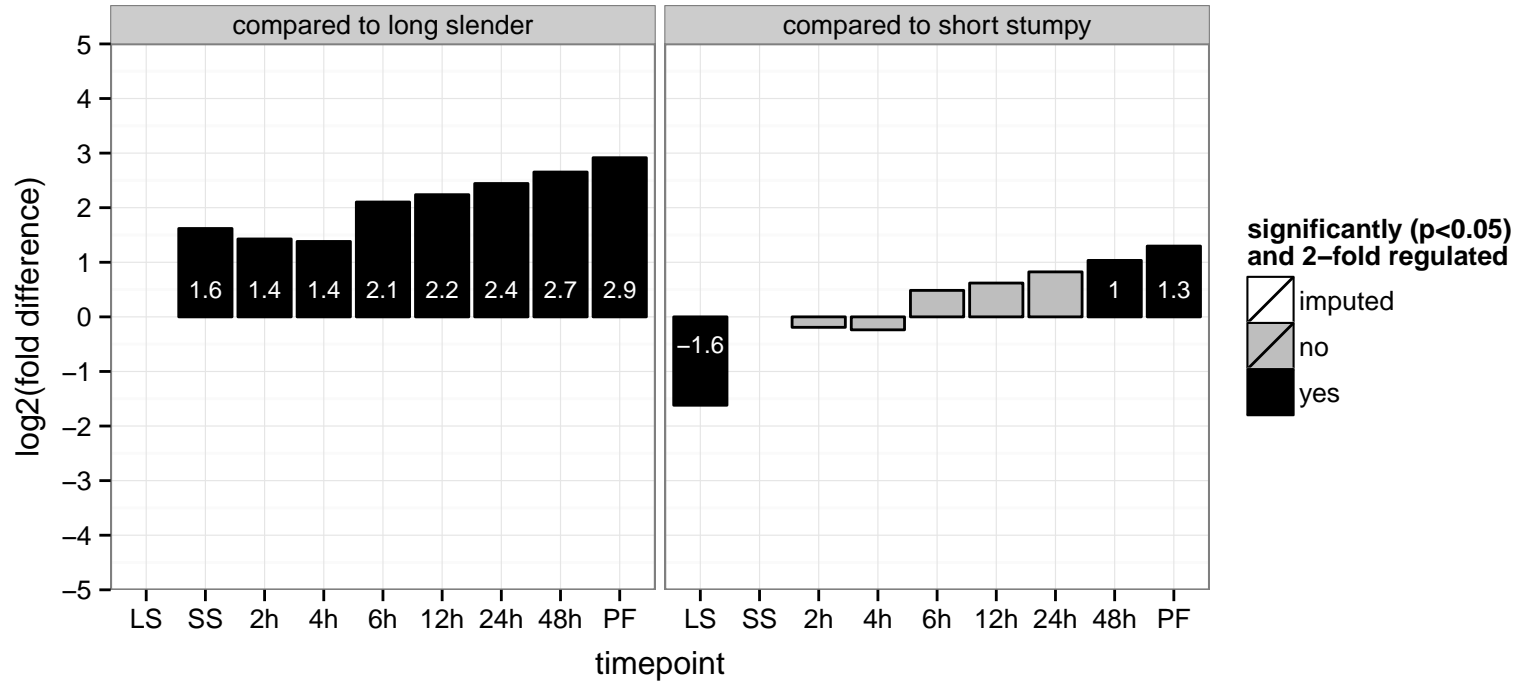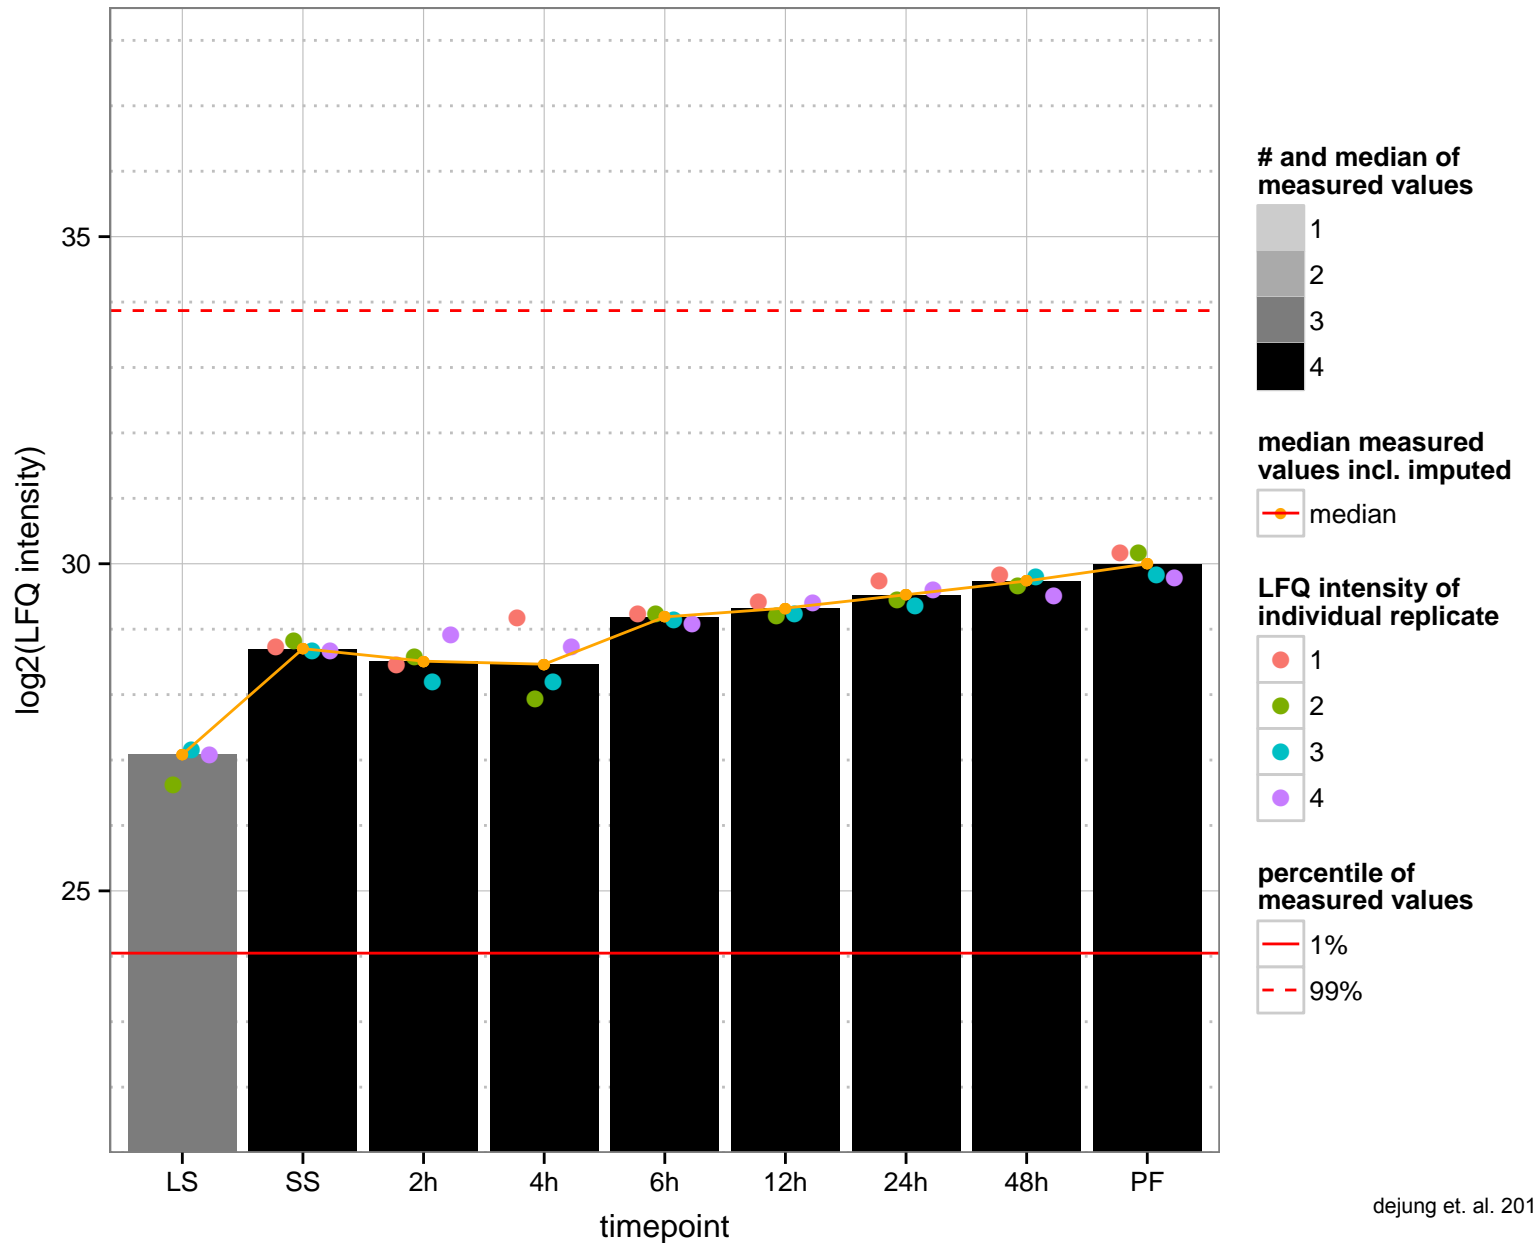



phosphatase of regenerating liver-type phosphatase, putative

Tb927.8.5780

AGOF: phosphoprotein phosphatase activity

AGOC: null

AGOP: protein dephosphorylation

PGOF: phosphatase activity, protein tyrosine/serine/threonine phosphatase activity

PGOC: null

PGOP: dephosphorylation, protein dephosphorylation

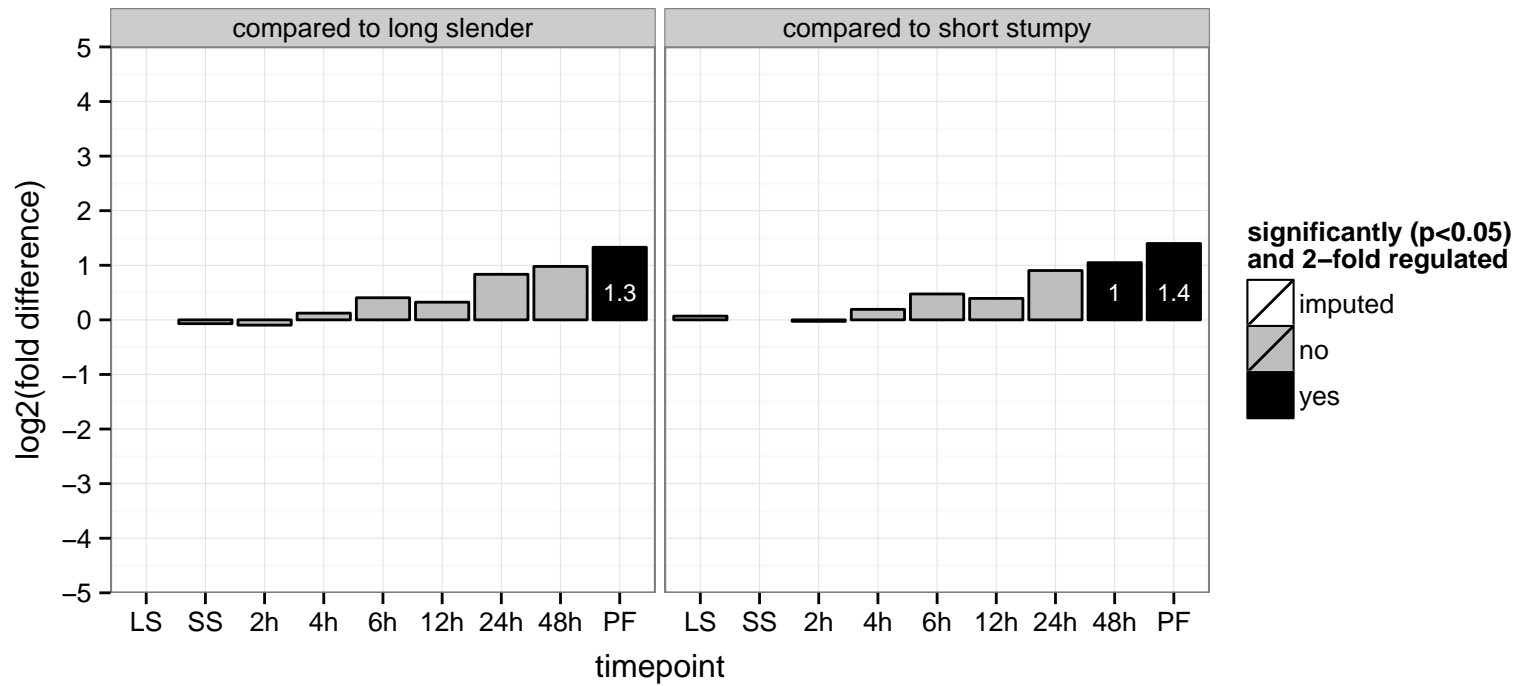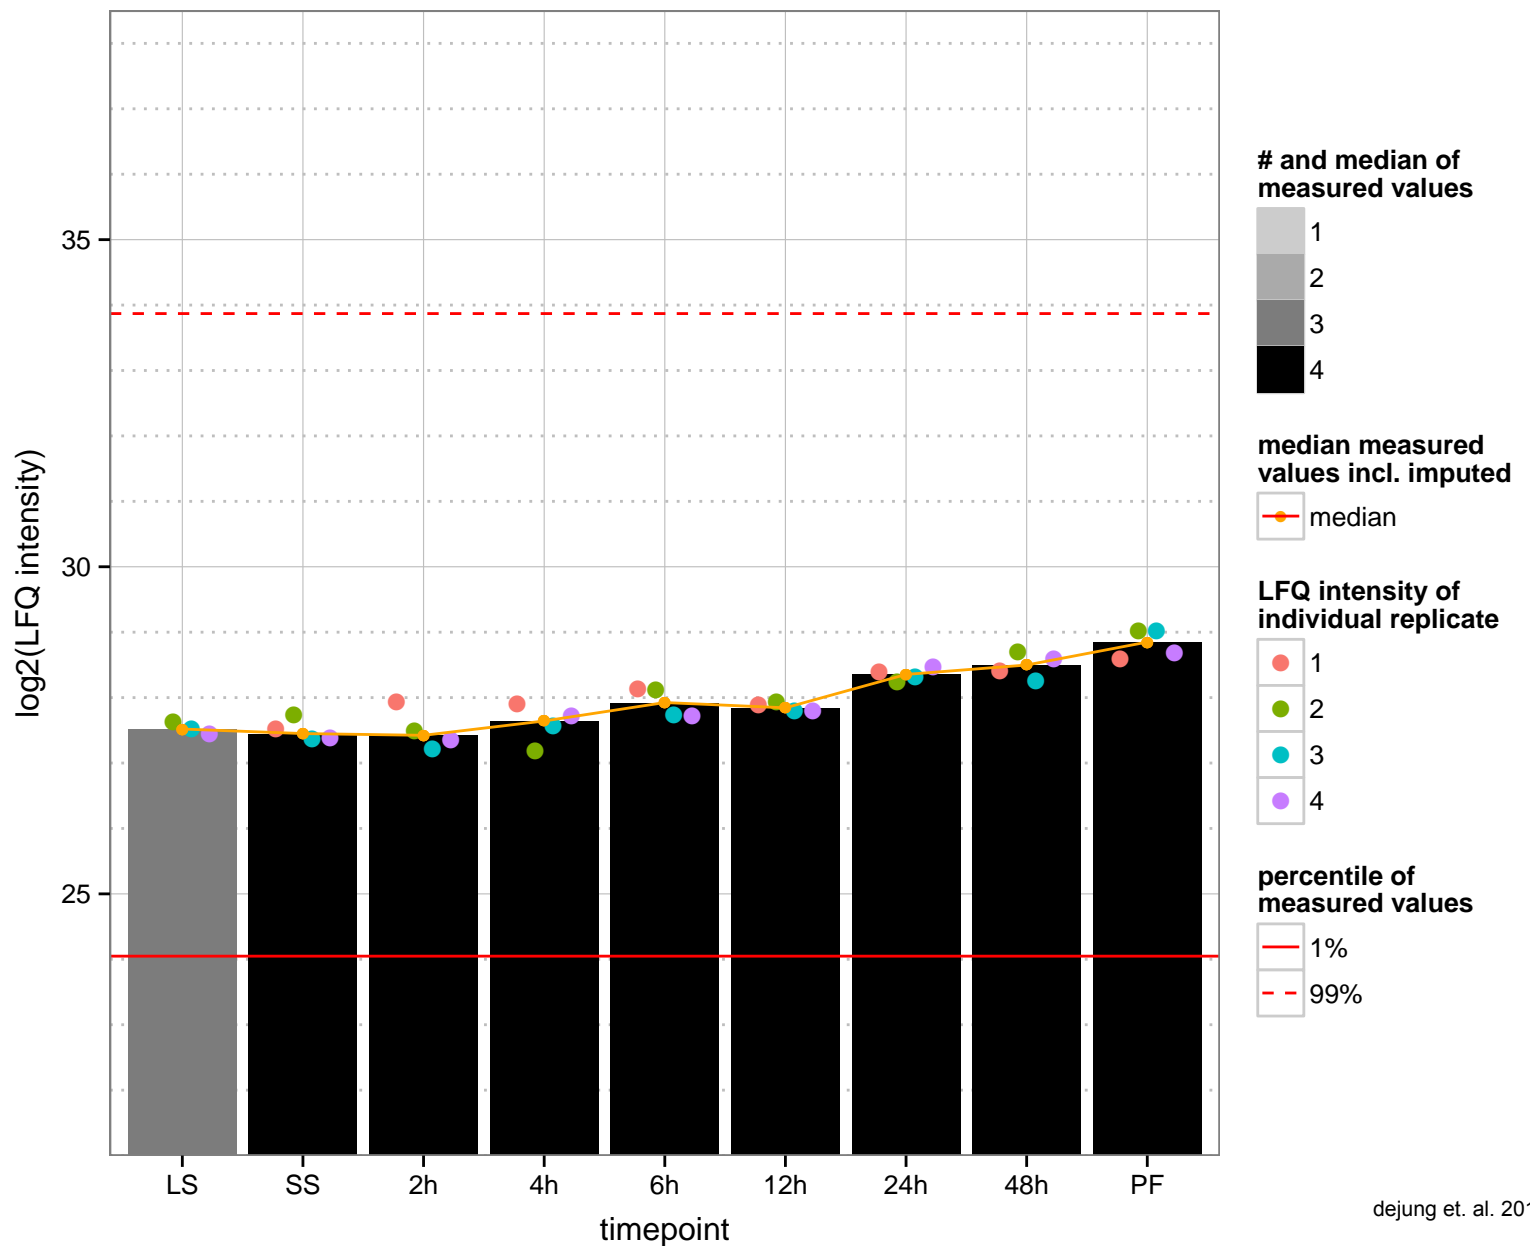

3-hydroxy-3-methylglutaryl-CoA synthase, putative (HMGS)  
 Tb927.8.6110  
 AGOF: hydroxymethylglutaryl-CoA synthase activity  
 AGOC: null  
 AGOP: ergosterol biosynthetic process  
 PGOF: catalytic activity, hydroxymethylglutaryl-CoA synthase activity  
 PGOC: null  
 PGOB: isoprenoid biosynthetic process, metabolic process

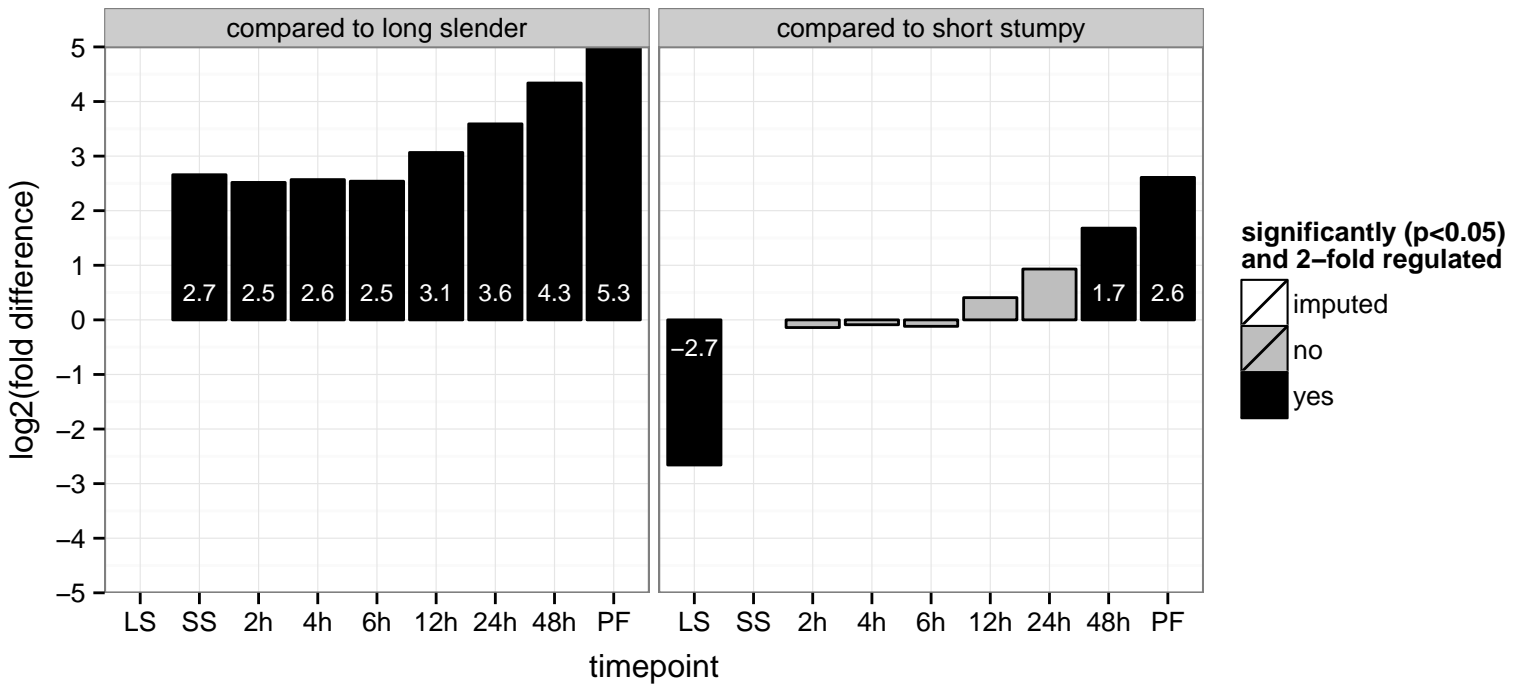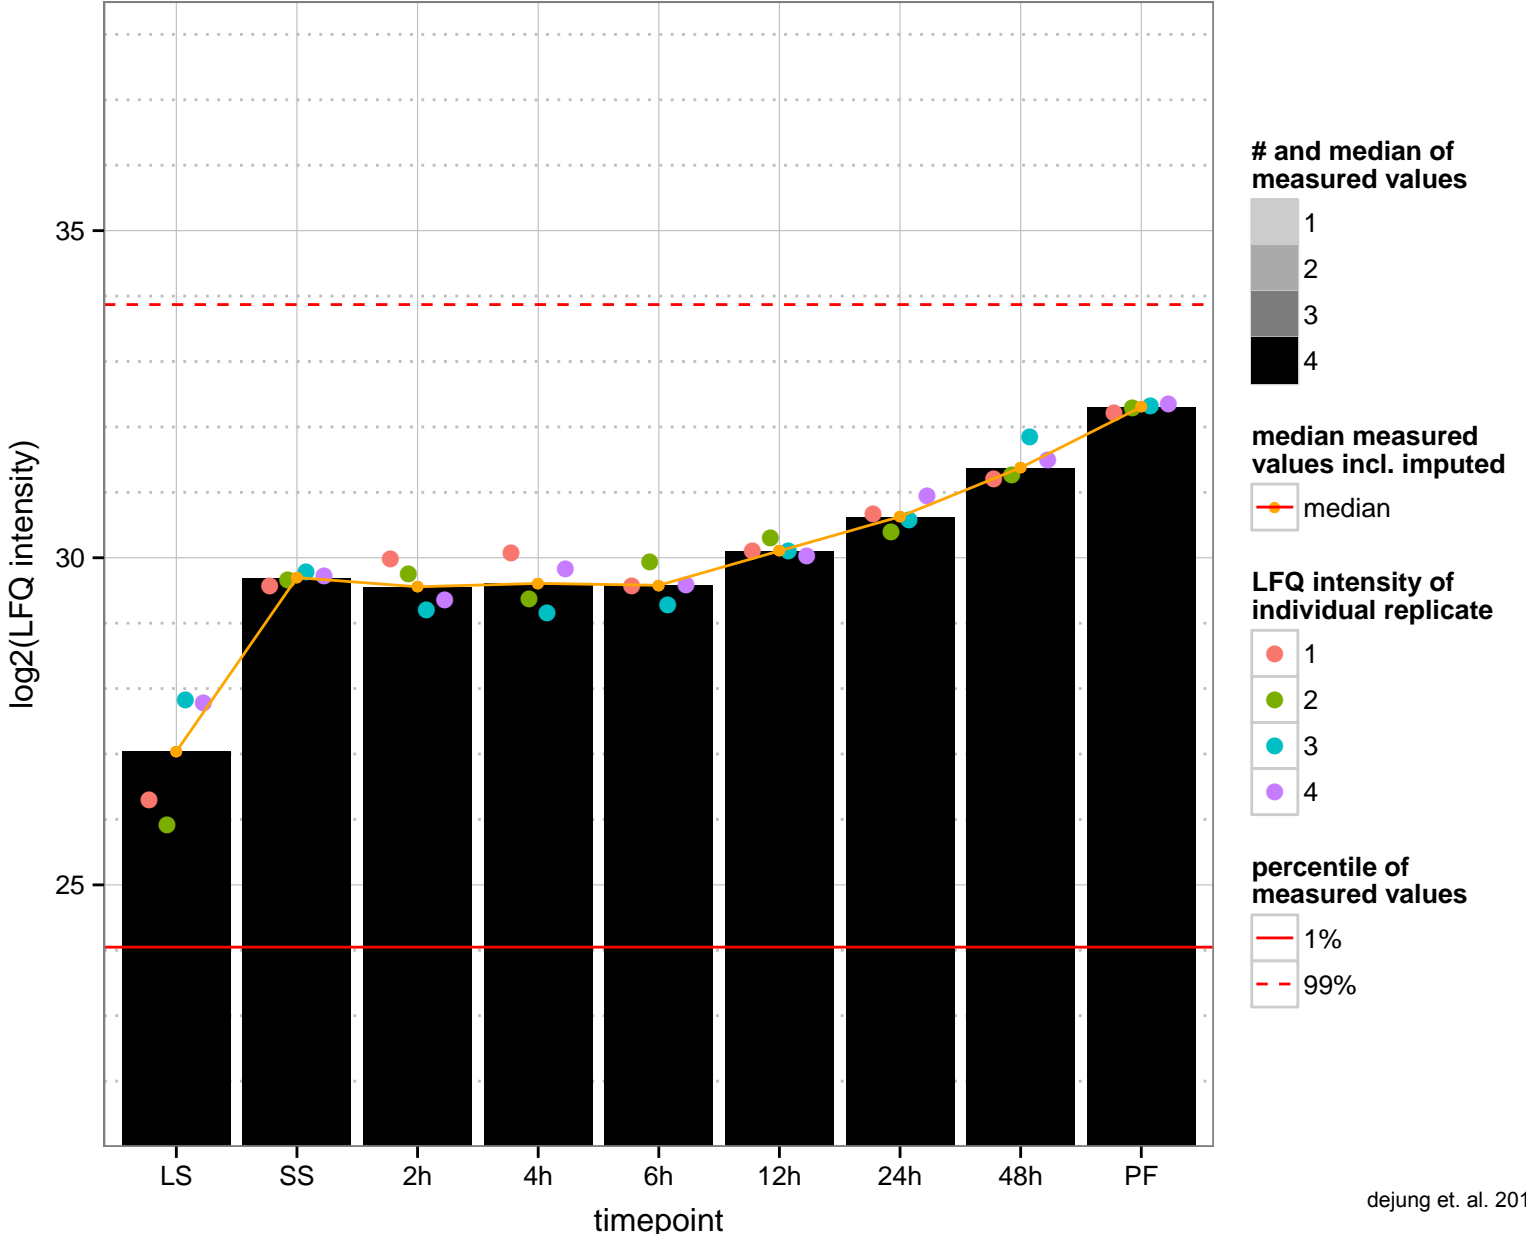

hypothetical protein, conserved  
 Tb927.8.6330  
 AGOF: null  
 AGOC: null  
 AGOP: null  
 PGO: protein binding  
 PGOC: null  
 PGOP: null

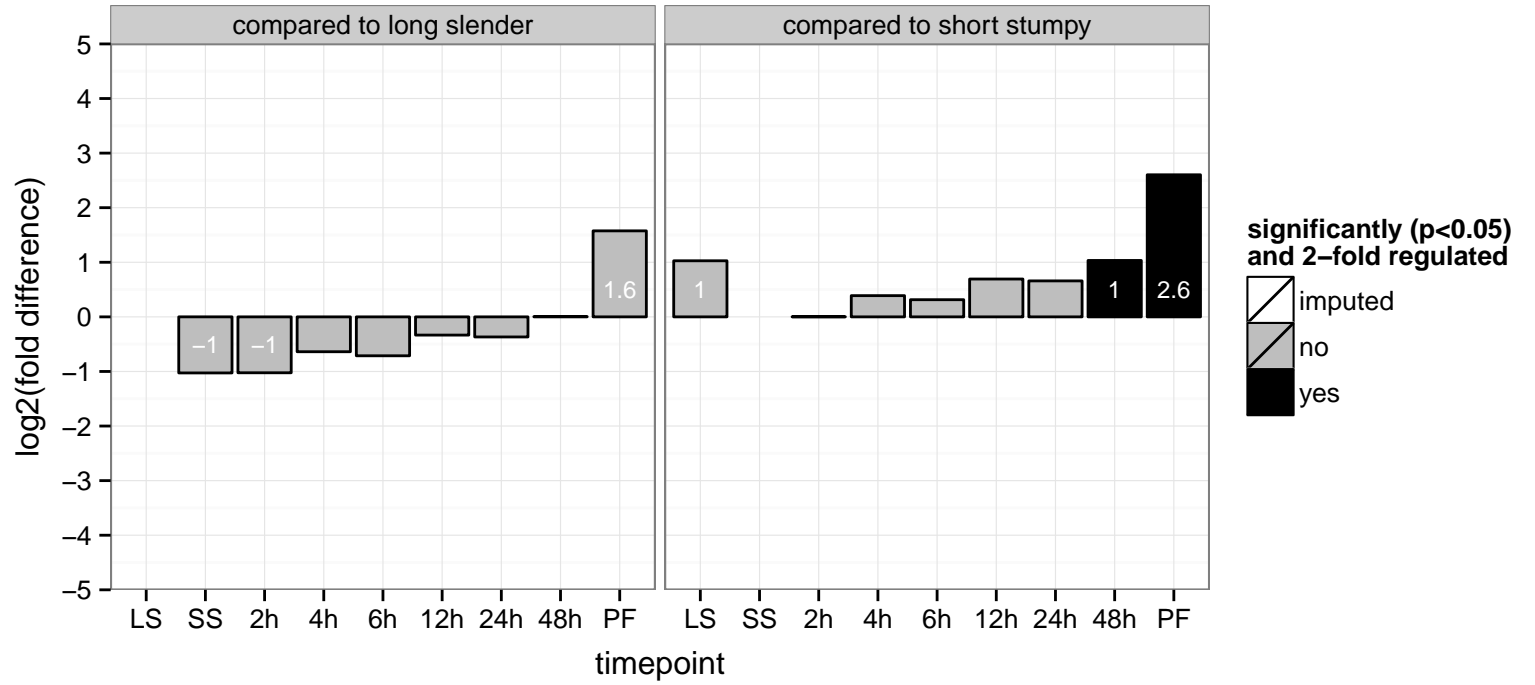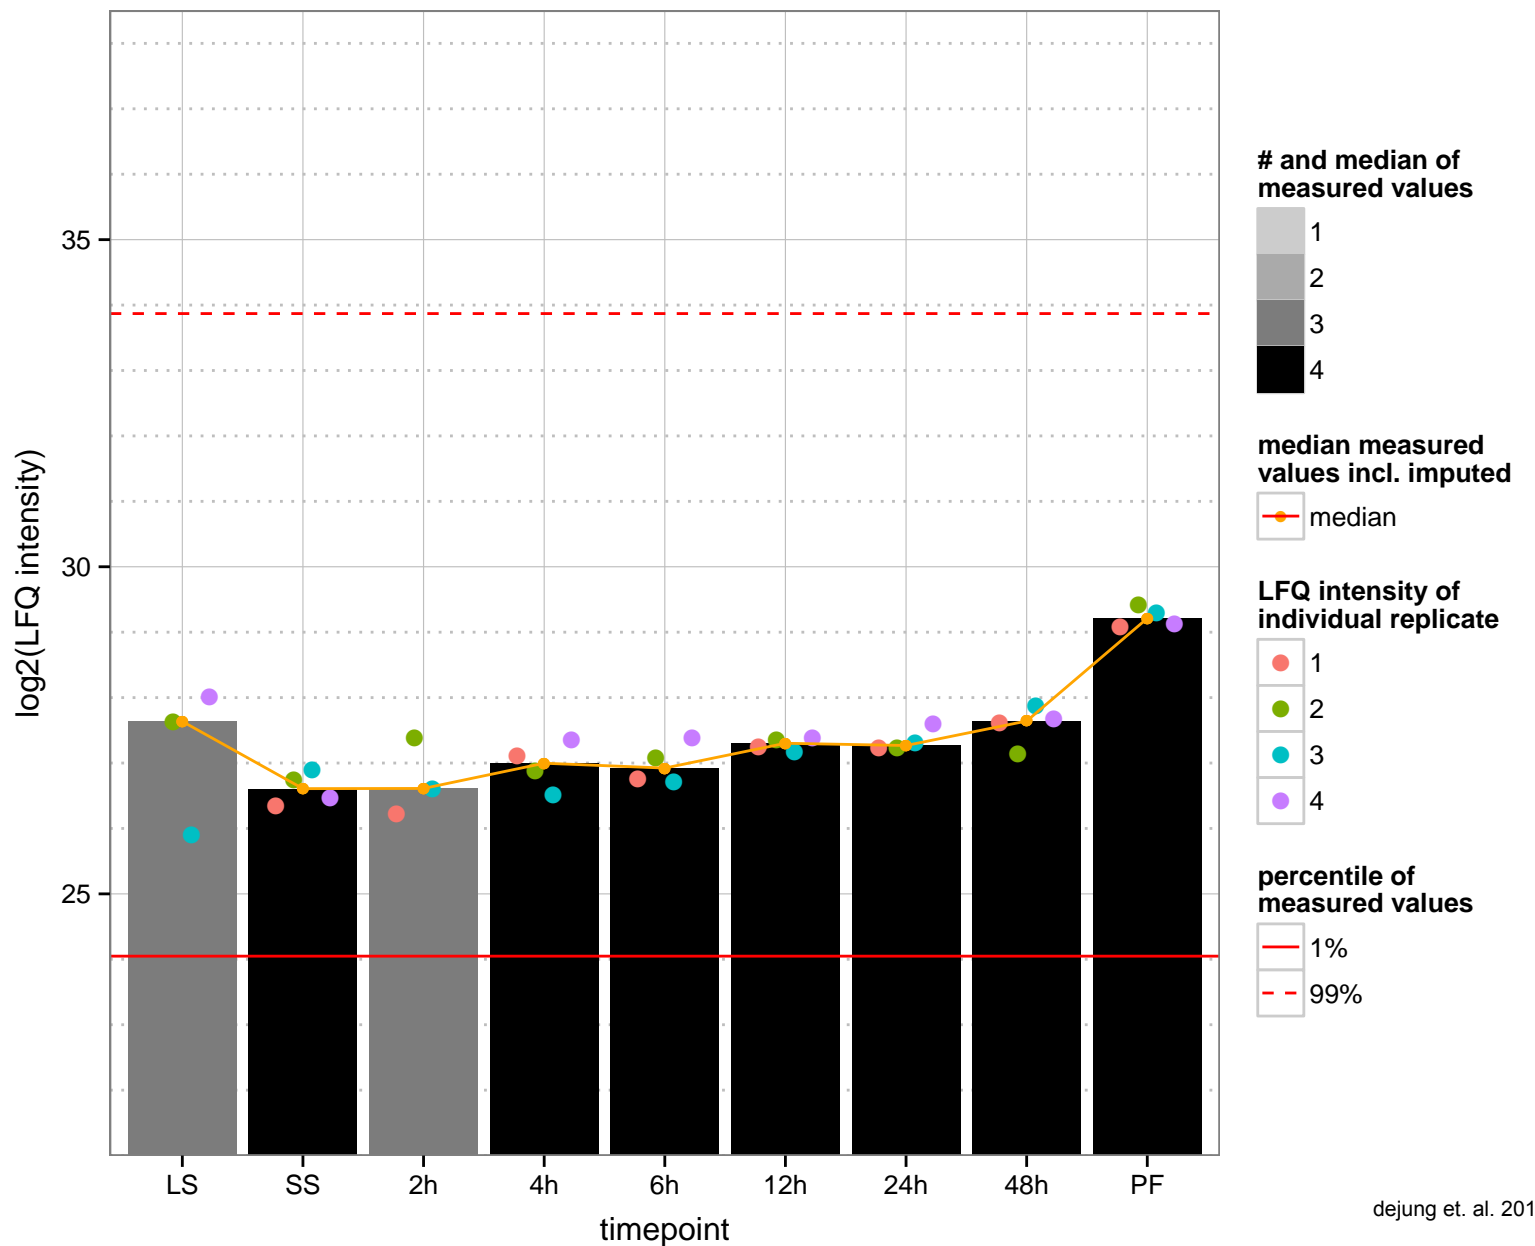

3-methylcrotonyl-CoA carboxylase alpha subunit, putative

Tb927.8.6970

AGOF: ATP binding, biotin binding, methylcrotonoyl-CoA carboxylase activity

AGOC: mitochondrion

AGOP: pyrimidine nucleobase biosynthetic process, urea cycle

PGOF: ATP binding, biotin carboxylase activity, catalytic activity, ligase activity, metal ion binding

PGOC: null

PGOP: metabolic process

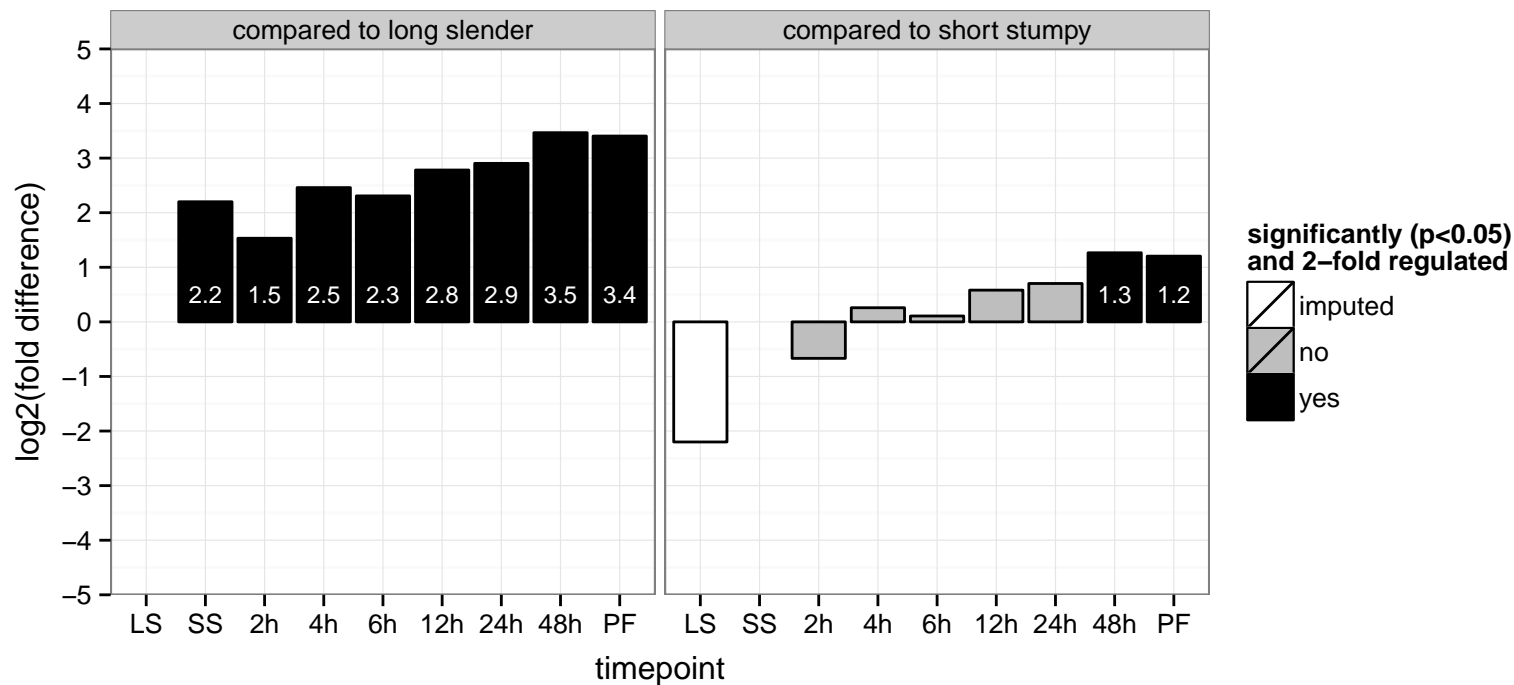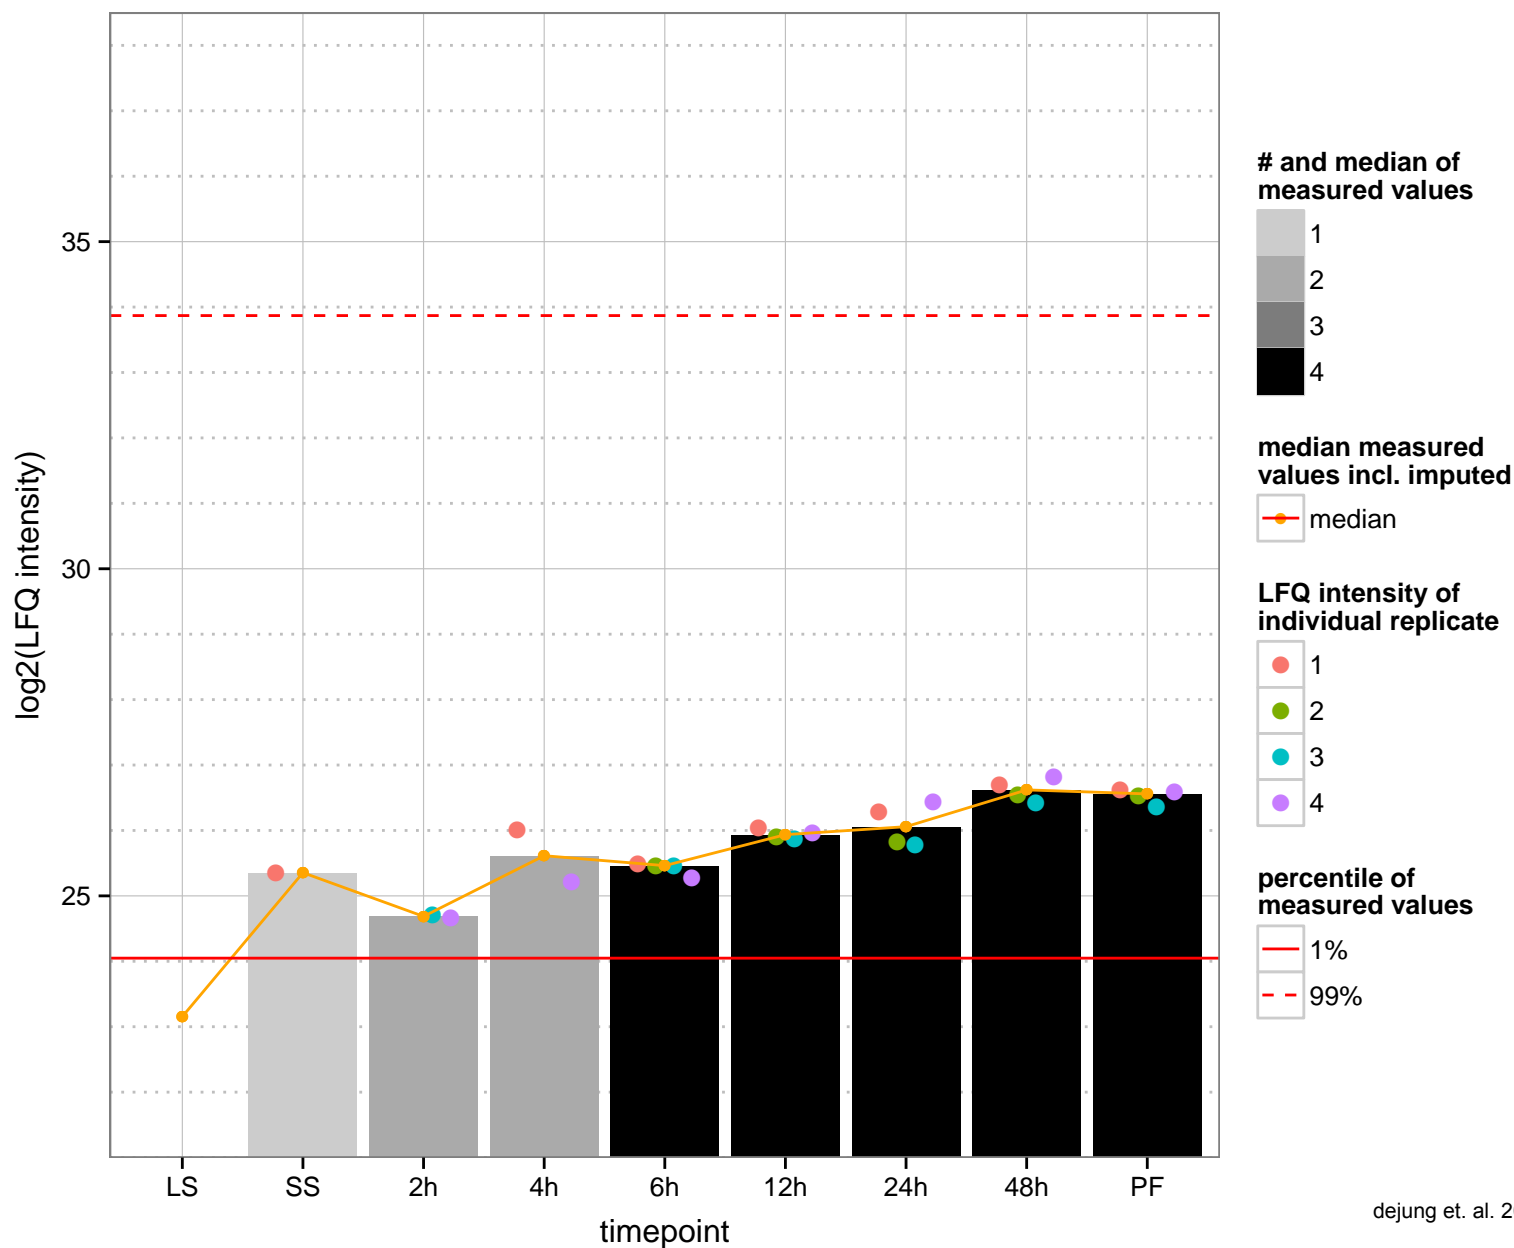

hypothetical protein, conserved  
 Tb927.8.7040  
 AGOF: null  
 AGOC: mitochondrion  
 AGOP: null  
 PGO: null  
 PGO: null  
 PGO: null

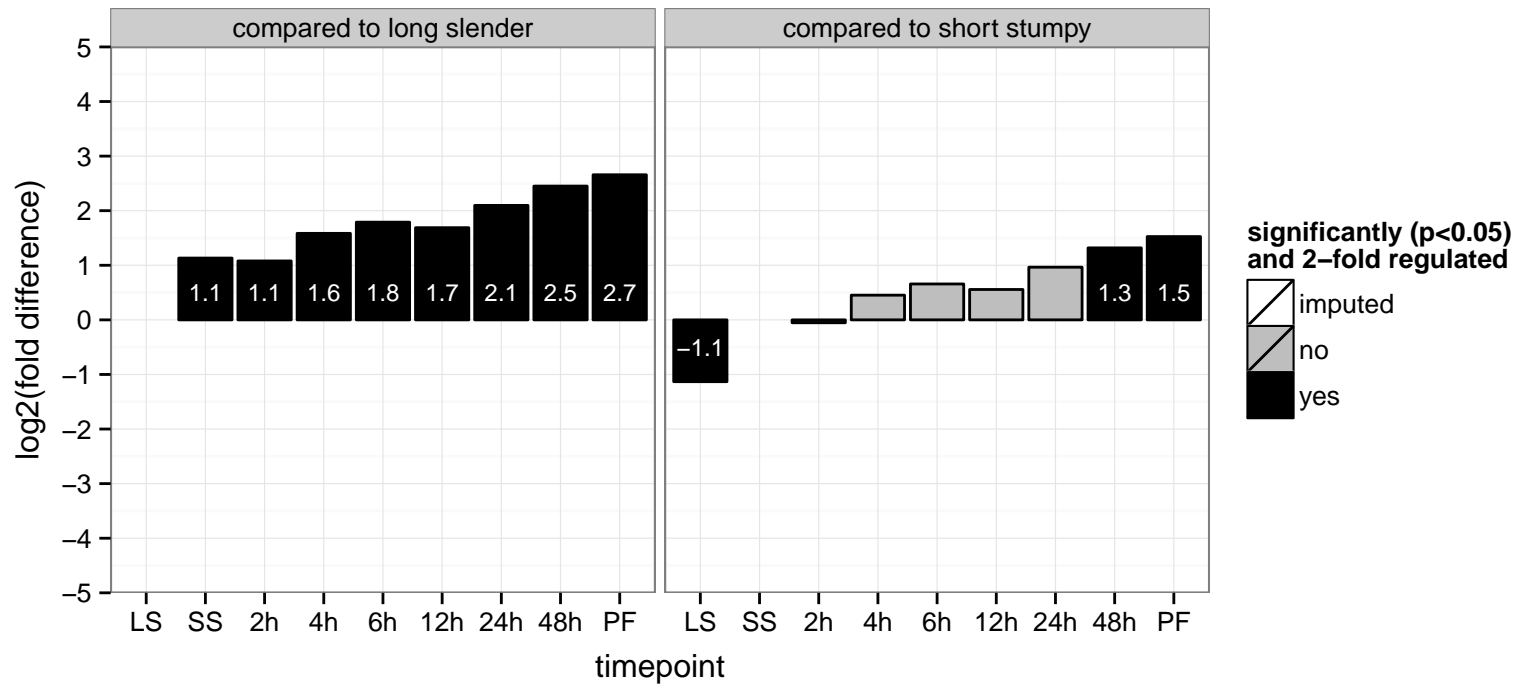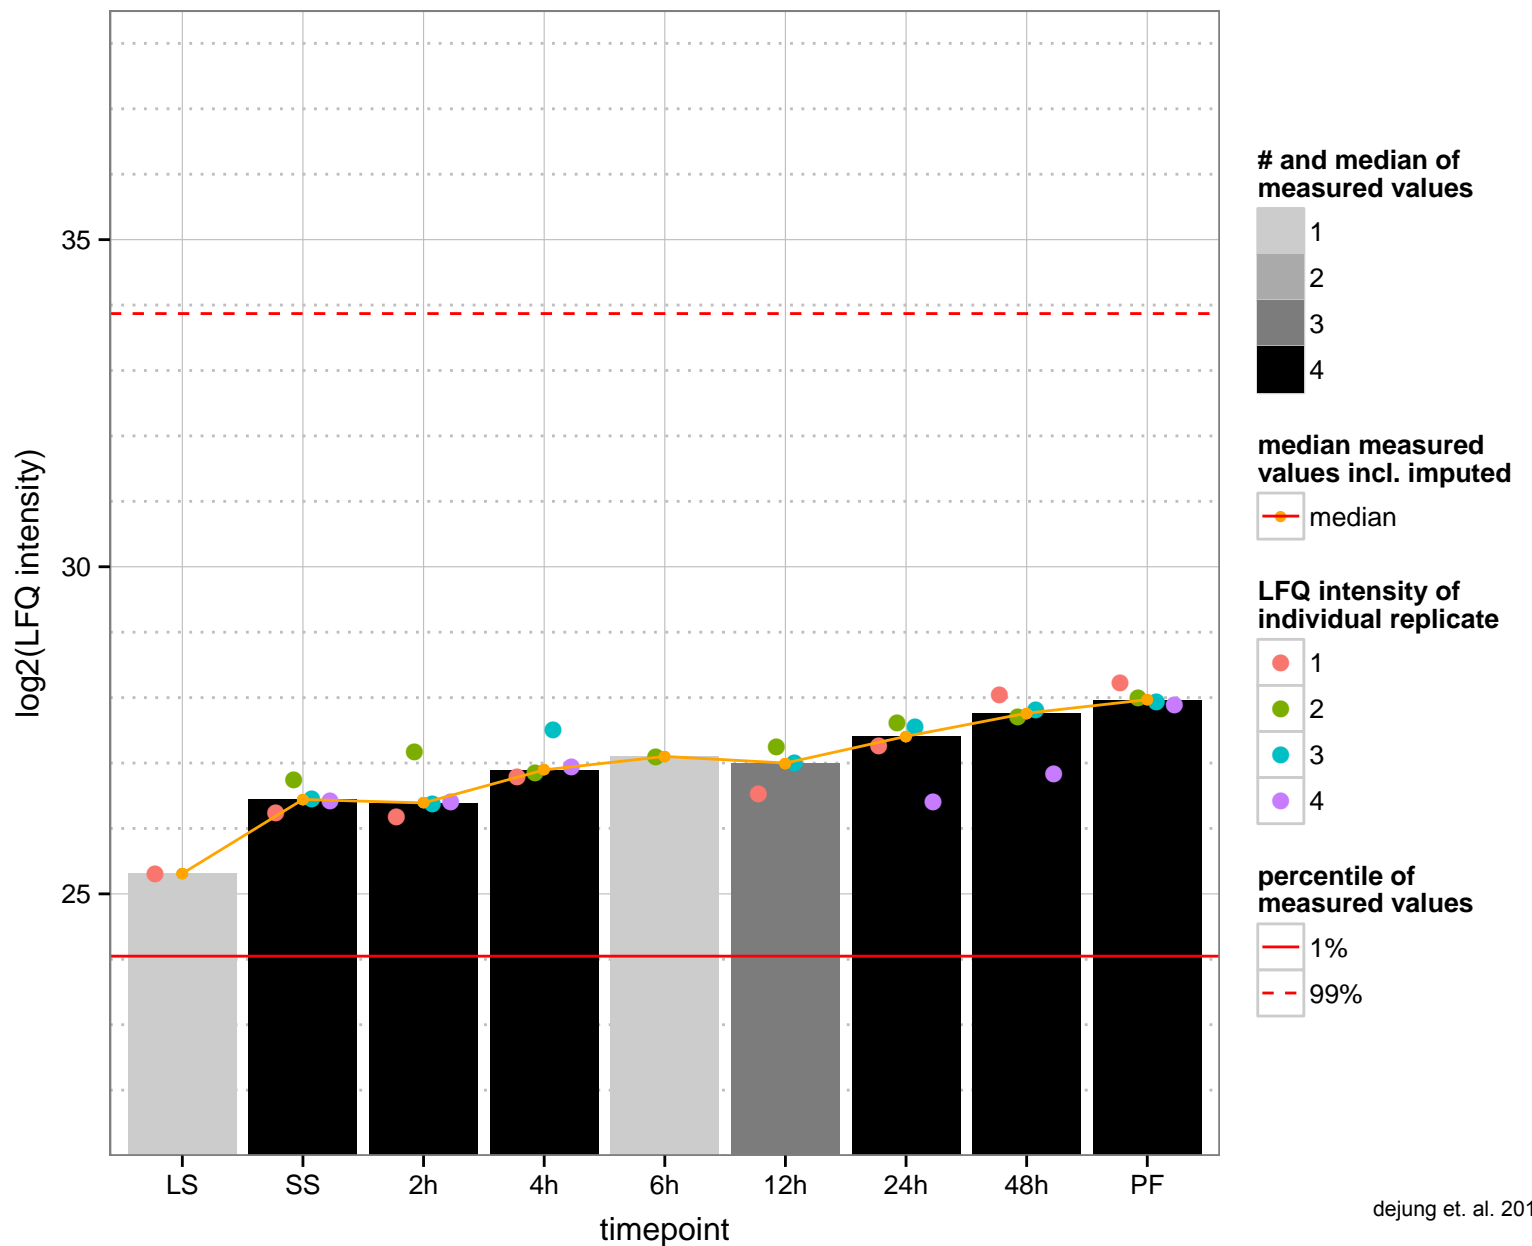

Polyadenylate-binding protein 2 (Poly(A)-binding protein 2) (Poly(A)-binding protein II) (PABII) (Polyadenylate-binding nuclea  
Tb927.9.10770  
AGOF: RNA binding, poly(A) RNA binding  
AGOC: null  
AGOP: RNA processing  
PGOF: RNA binding, nucleic acid binding  
PGOC: null  
PGOP: null

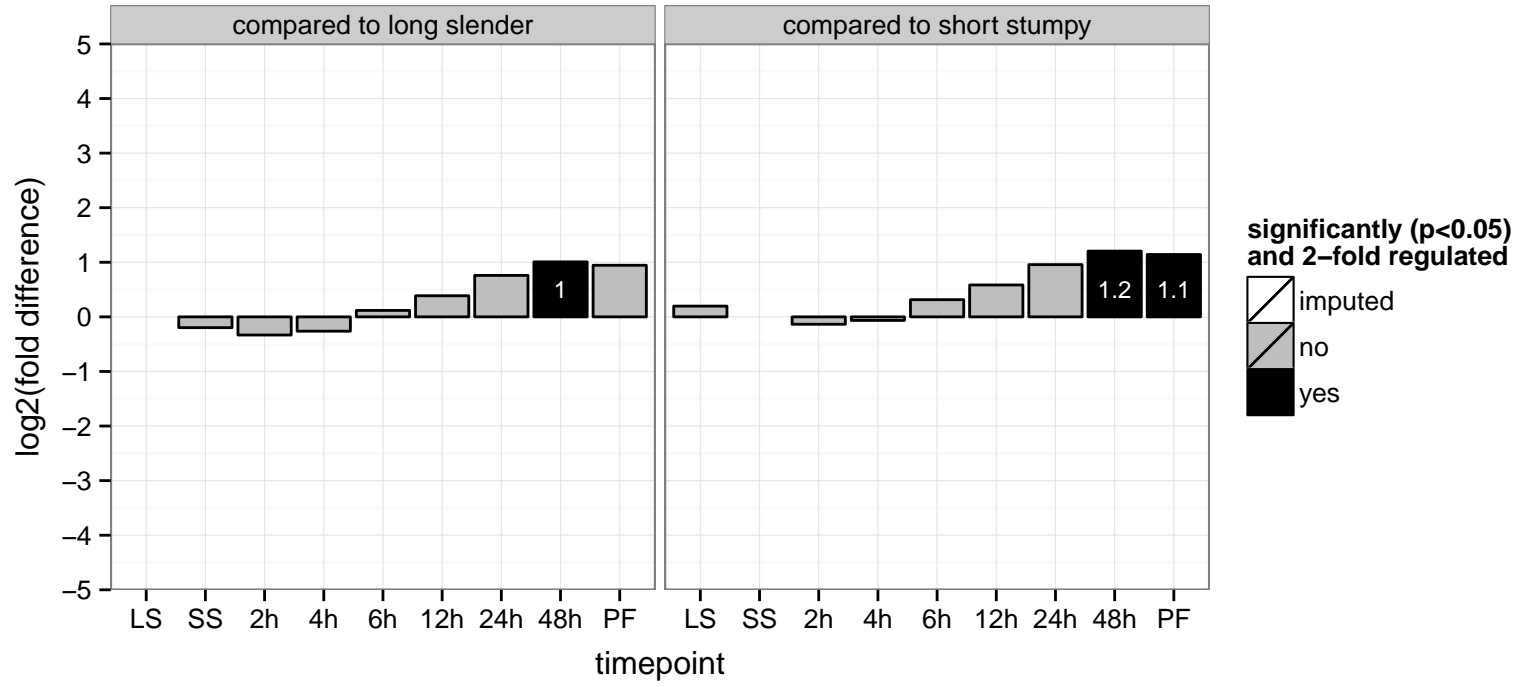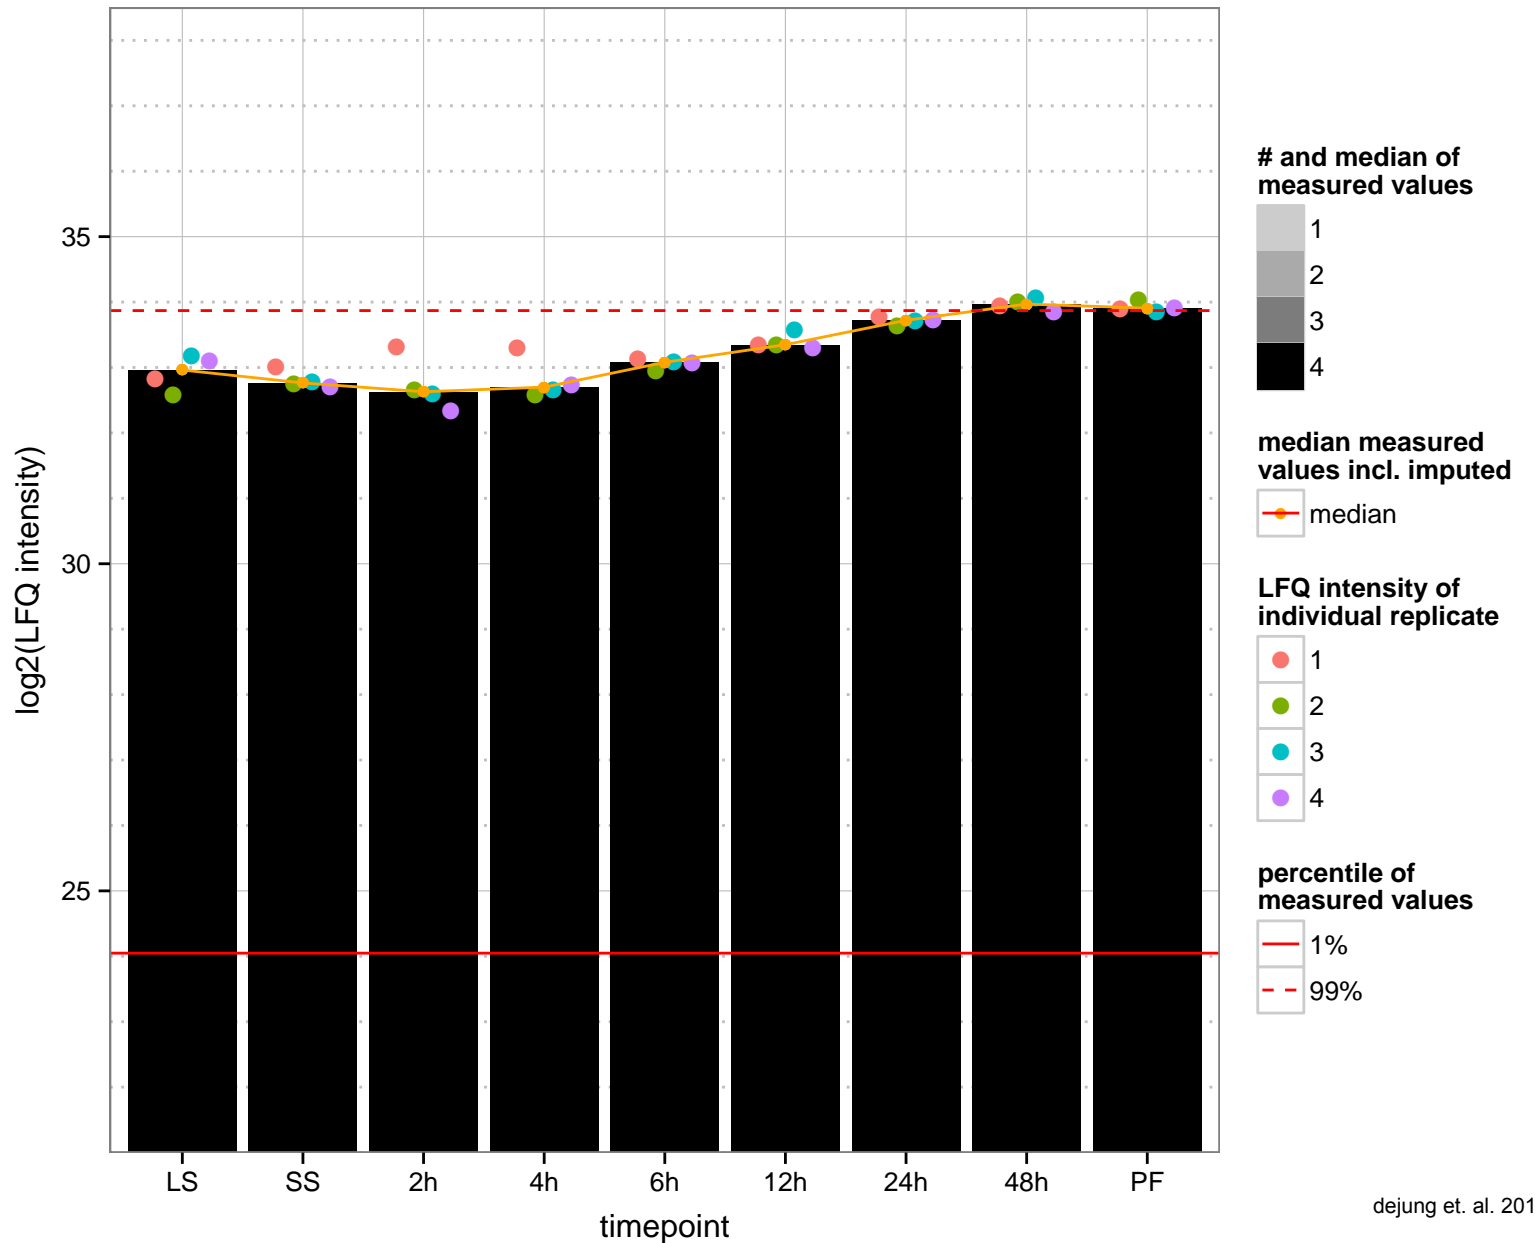

kinetoplastid membrane protein KMP-11, unspecified product, kinetoplastid membrane protein KMP-11 (KMP-11)  
 Tb927.9.13920;Tb927.9.13880;Tb927.9.13820  
 AGOF: null  
 AGOC: mitochondrion, null  
 AGOP: defense response, positive regulation of cell proliferation, null  
 PGO: null  
 PGOC: null  
 PGOP: defense response, positive regulation of cell proliferation, null

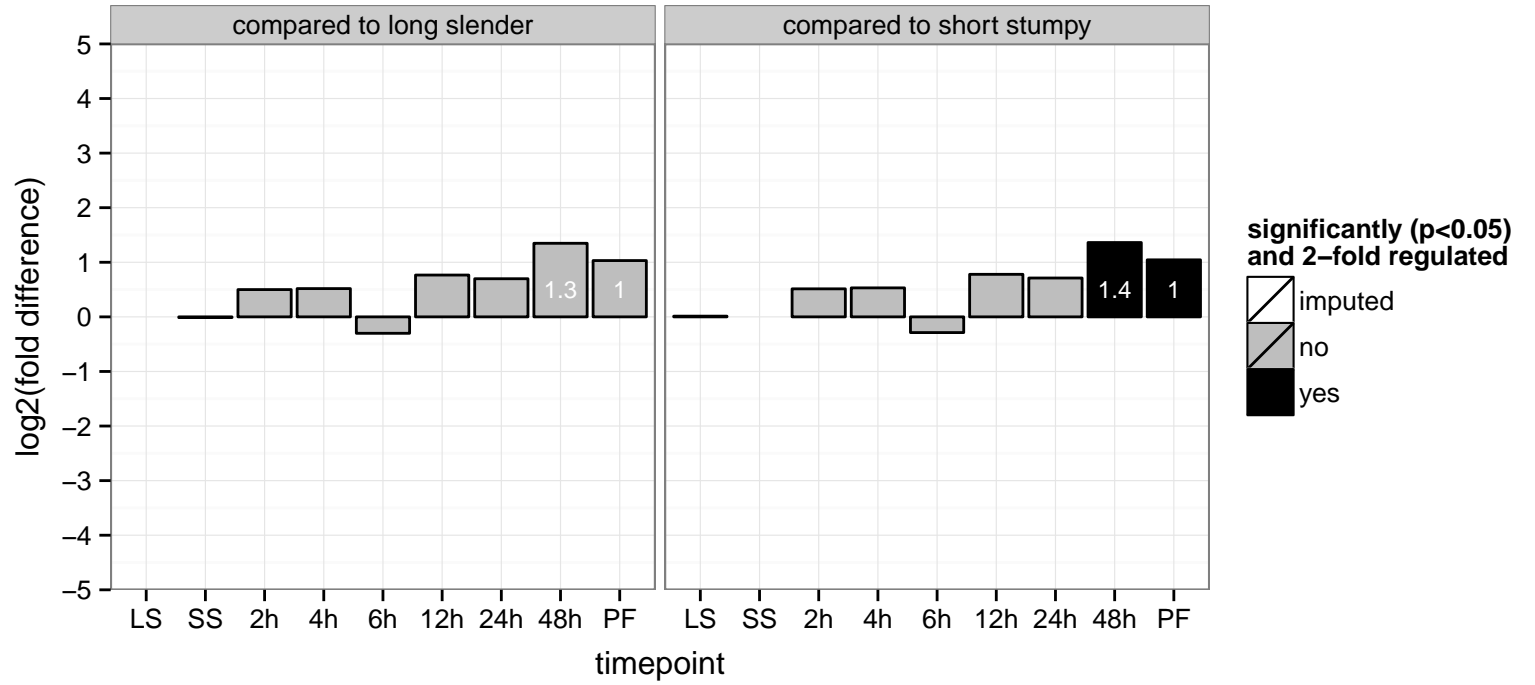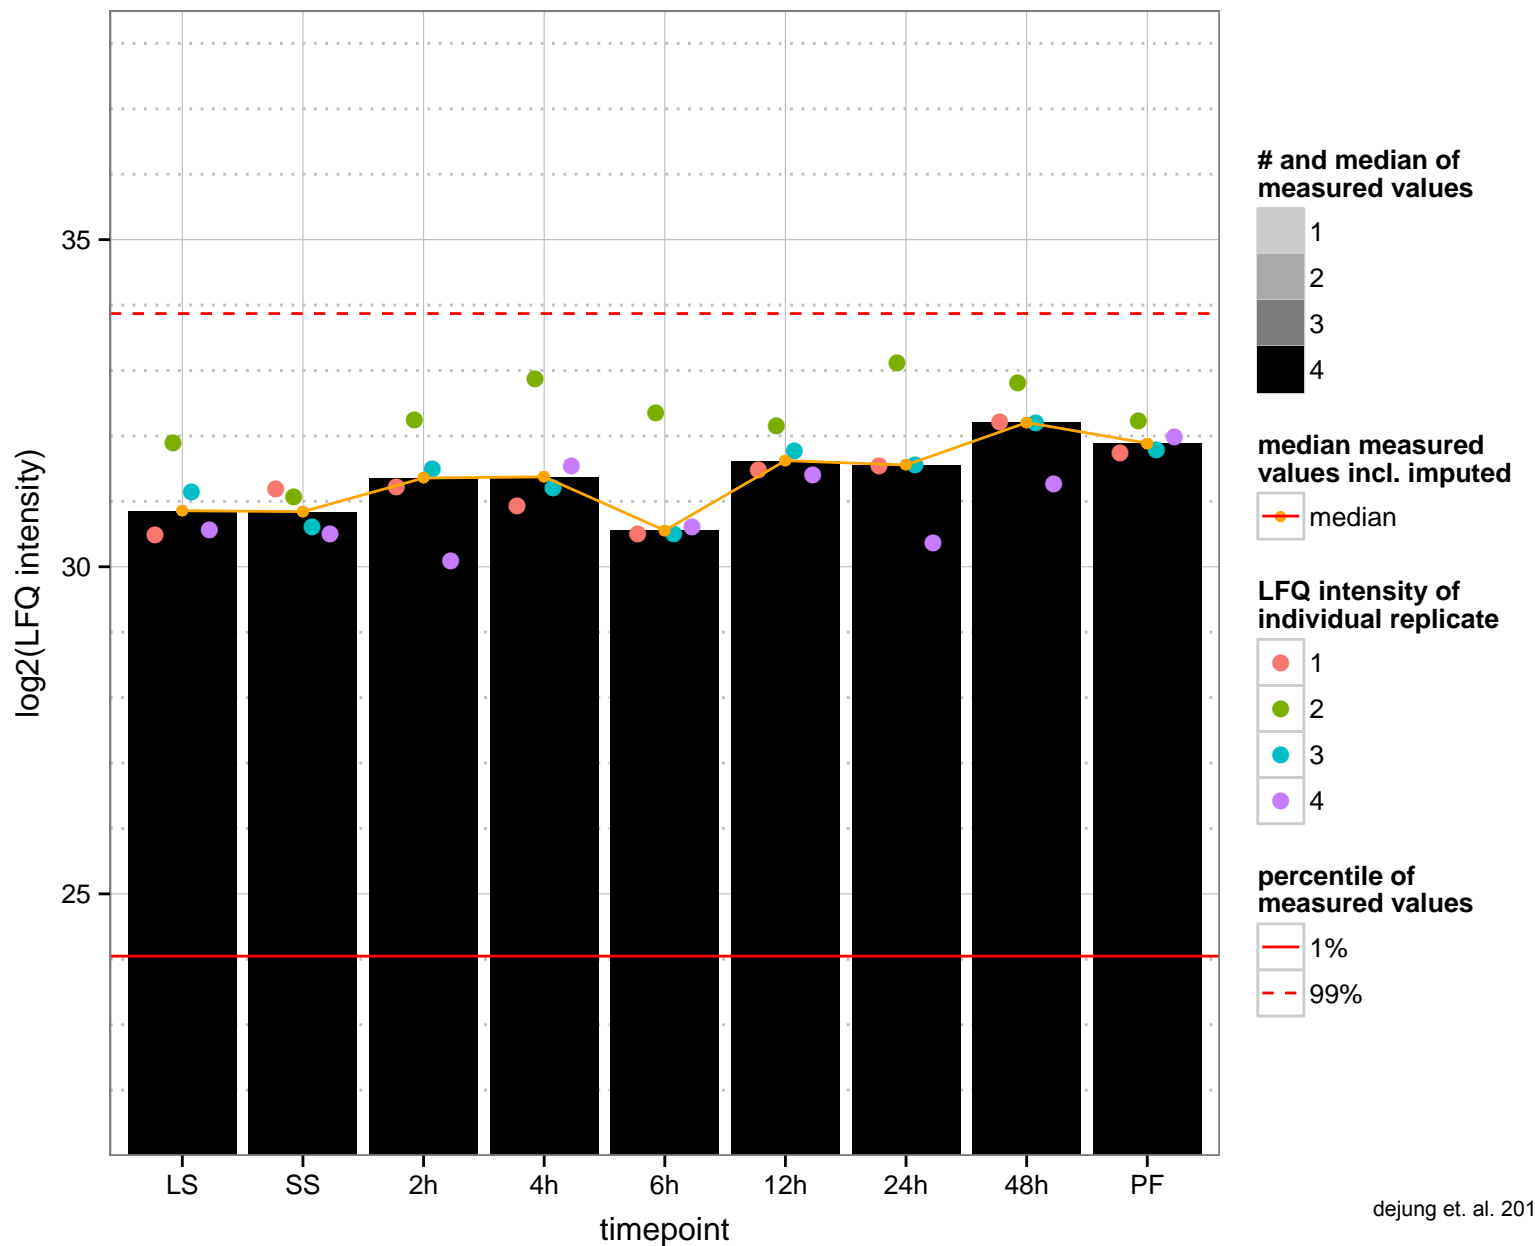

hypothetical protein, conserved  
 Tb927.9.2900  
 AGOF: null  
 AGOC: null  
 AGOP: null  
 PGOF: binding  
 PGO: null  
 PGOP: null

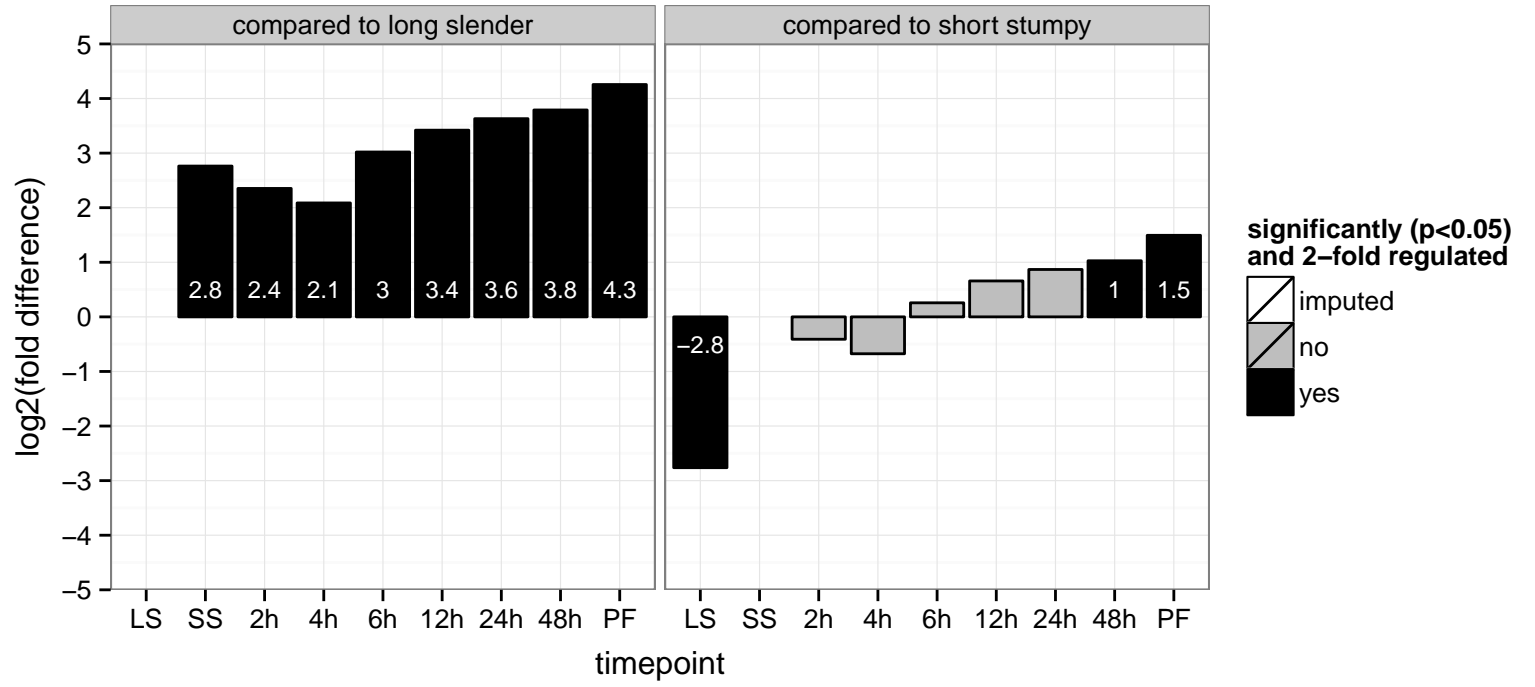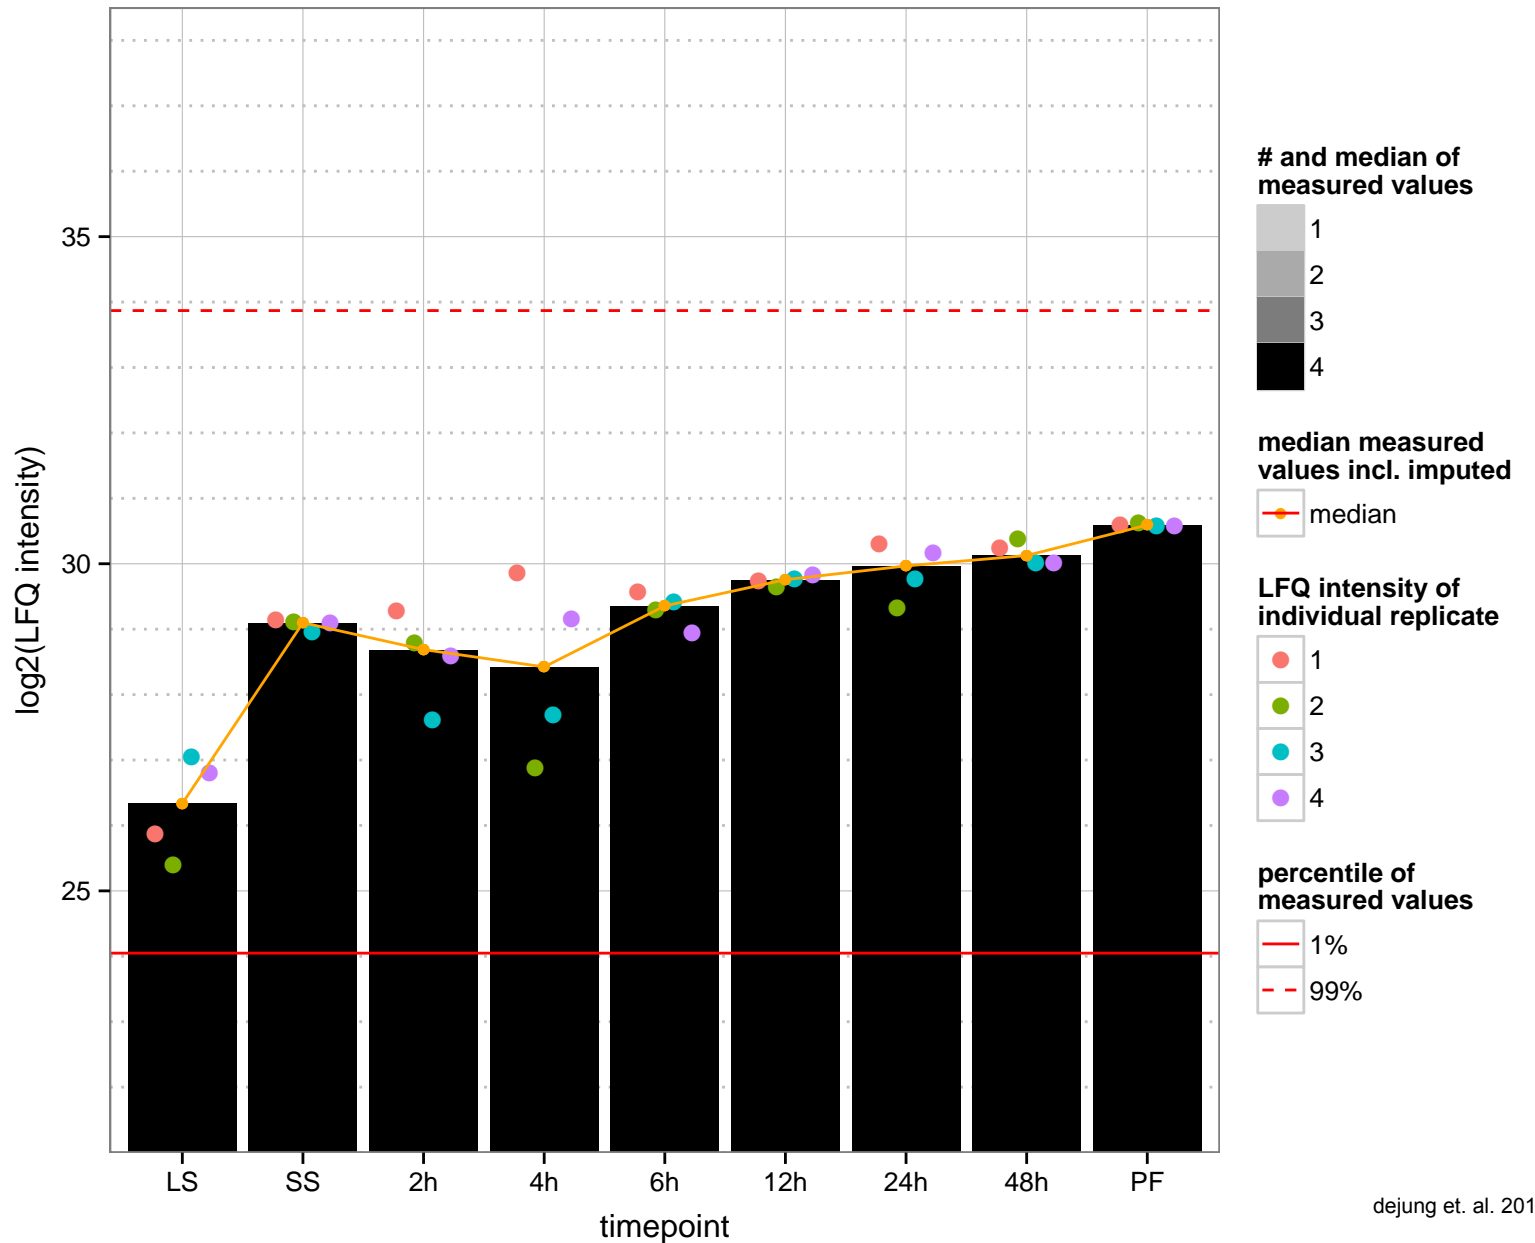



kinesin (Kif-13-1)

Tb927.9.3650

AGOF: ATP binding, microtubule motor activity, motor activity

AGOC: microtubule associated complex, nucleus

AGOP: microtubule-based movement, mitotic spindle organization, regulation of chromosome segregation

PGOF: ATP binding, microtubule motor activity

PGOC: null

PGOP: microtubule-based movement

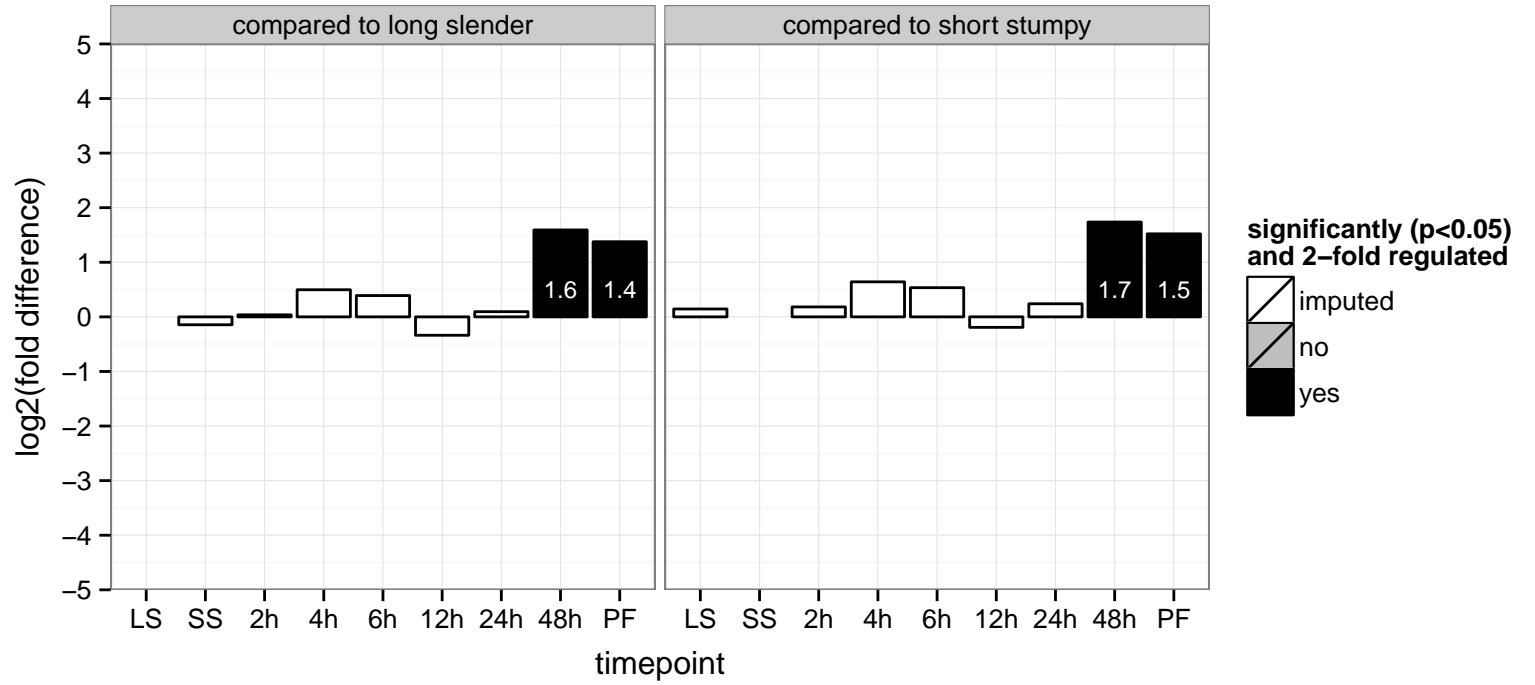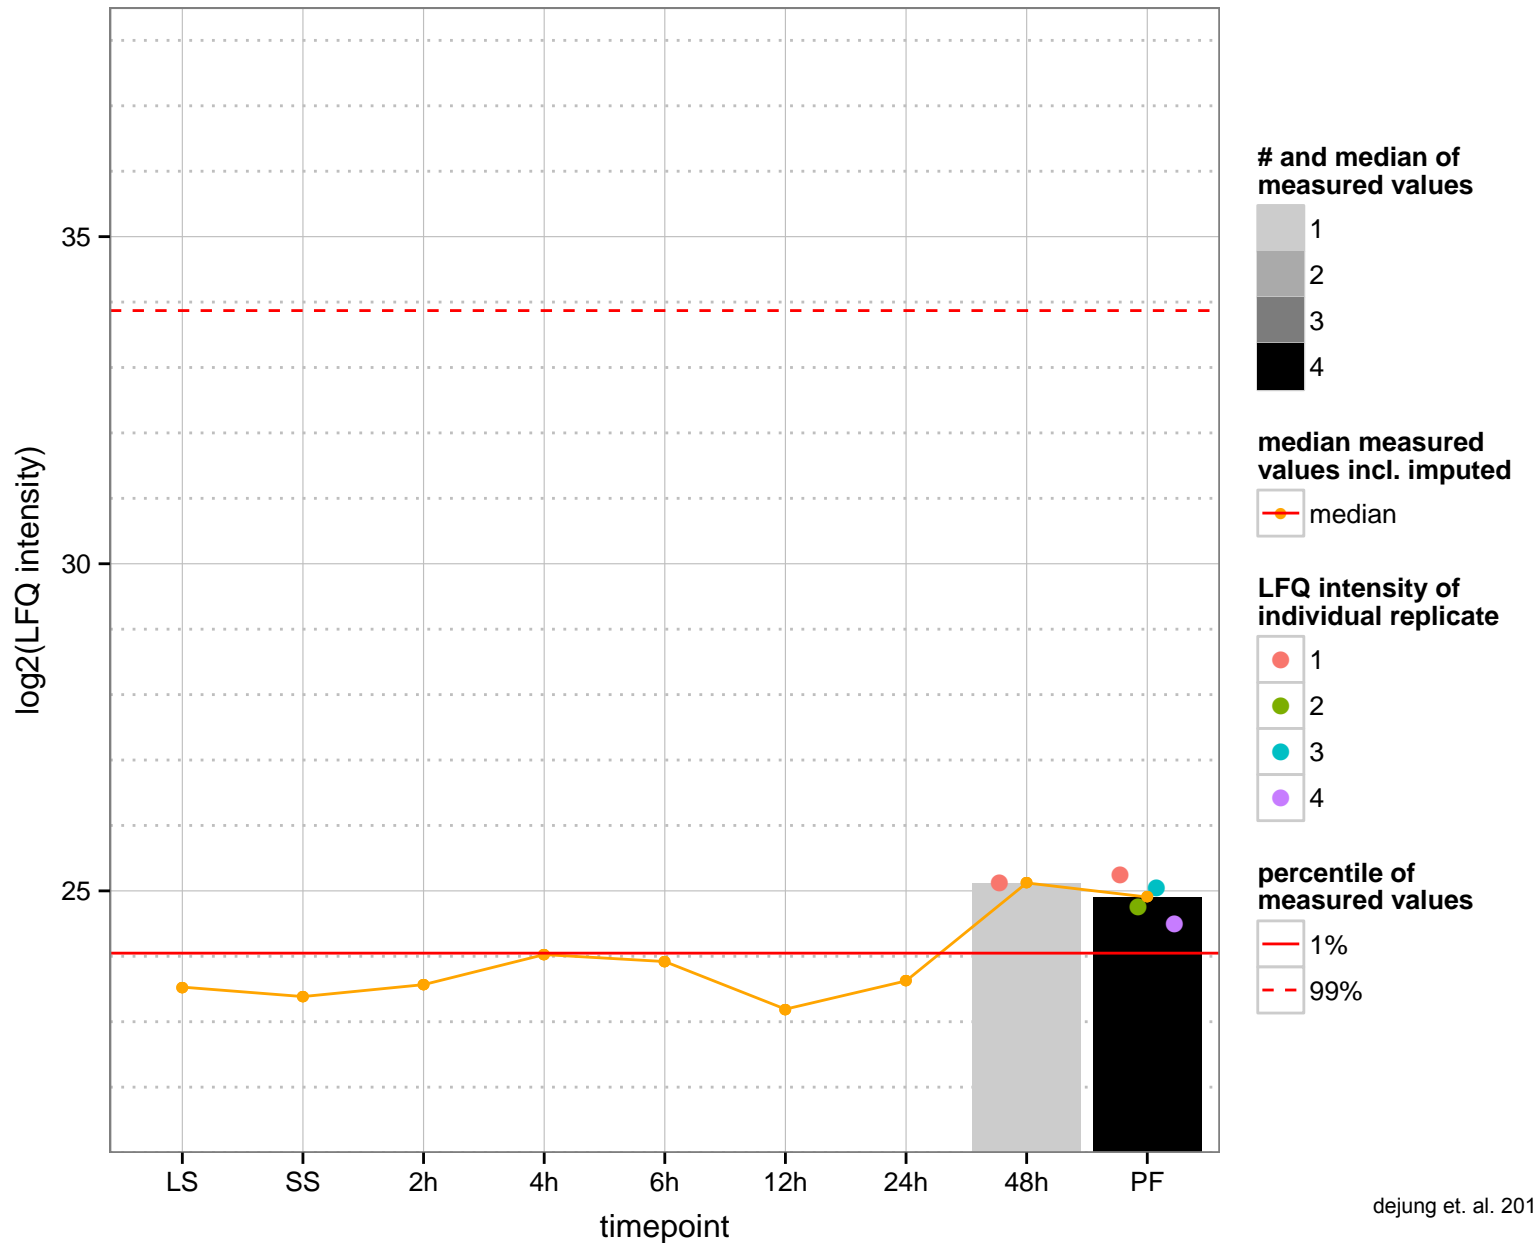

condensin subunit 1, putative  
 Tb927.9.4900  
 AGOF: null  
 AGOC: condensin complex  
 AGOP: mitotic chromosome condensation  
 PGO: binding  
 PGO: null  
 PGO: null

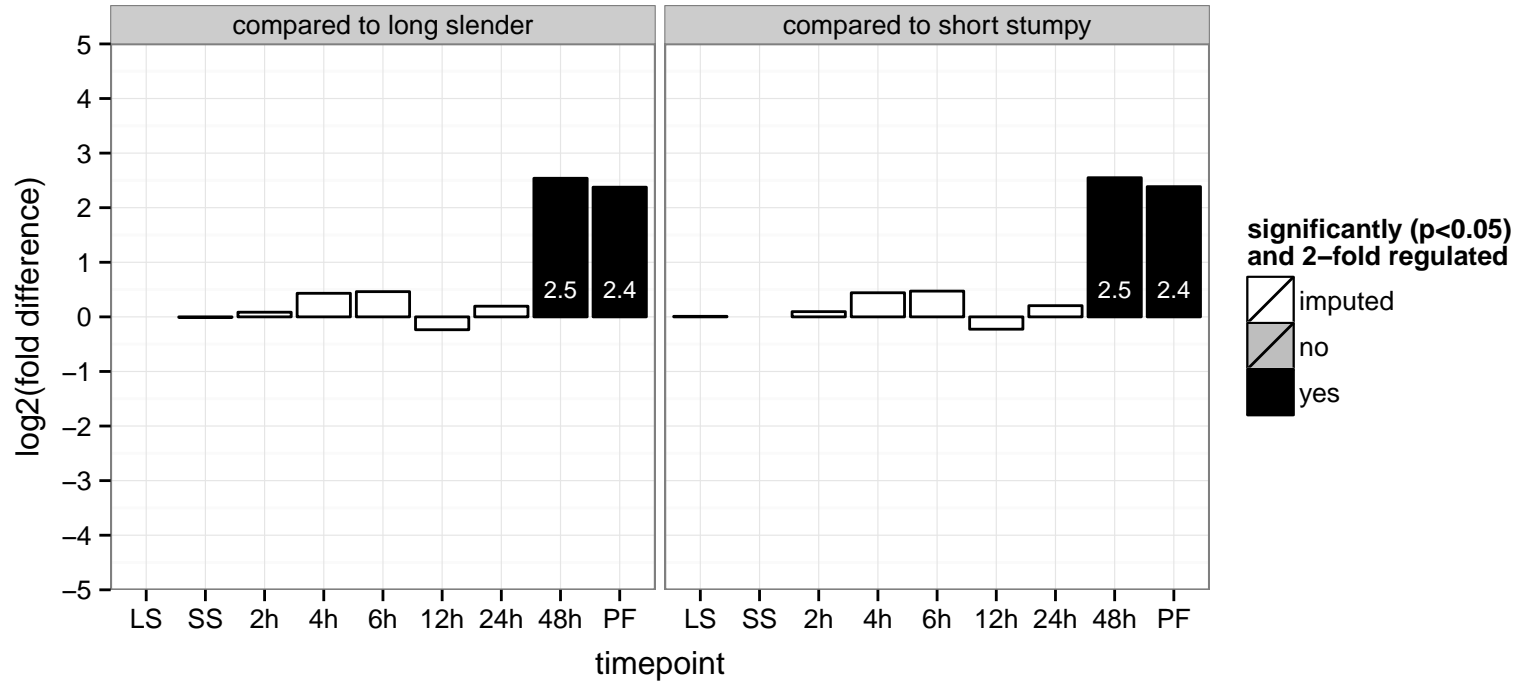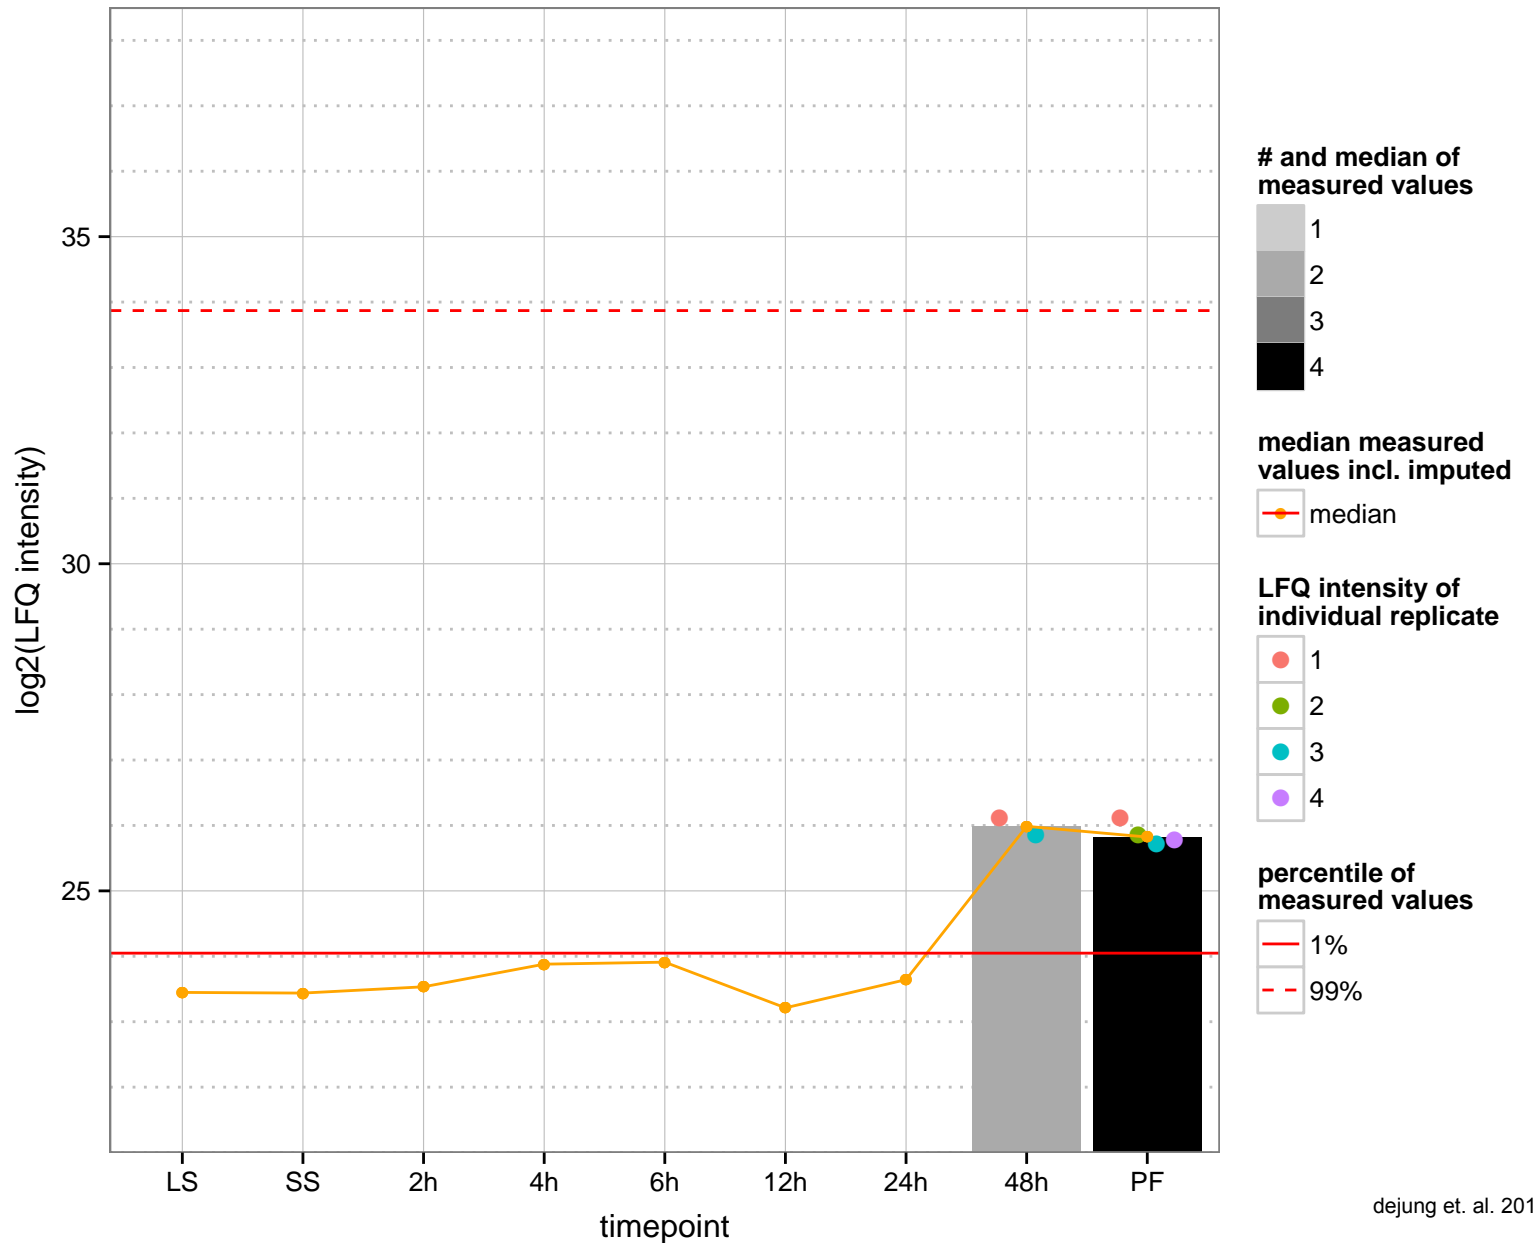

glutamate dehydrogenase (GDH)

Tb927.9.5900

AGOF: glutamate dehydrogenase (NAD+) activity, oxidoreductase activity

AGOC: mitochondrion

AGOP: cellular amino acid metabolic process, glutamate catabolic process to 2-oxoglutarate, oxidation-reduction process

PGOF: glutamate dehydrogenase (NAD+) activity, oxidoreductase activity

PGOC: null

PGOP: cellular amino acid metabolic process, glutamate catabolic process to 2-oxoglutarate, oxidation-reduction process

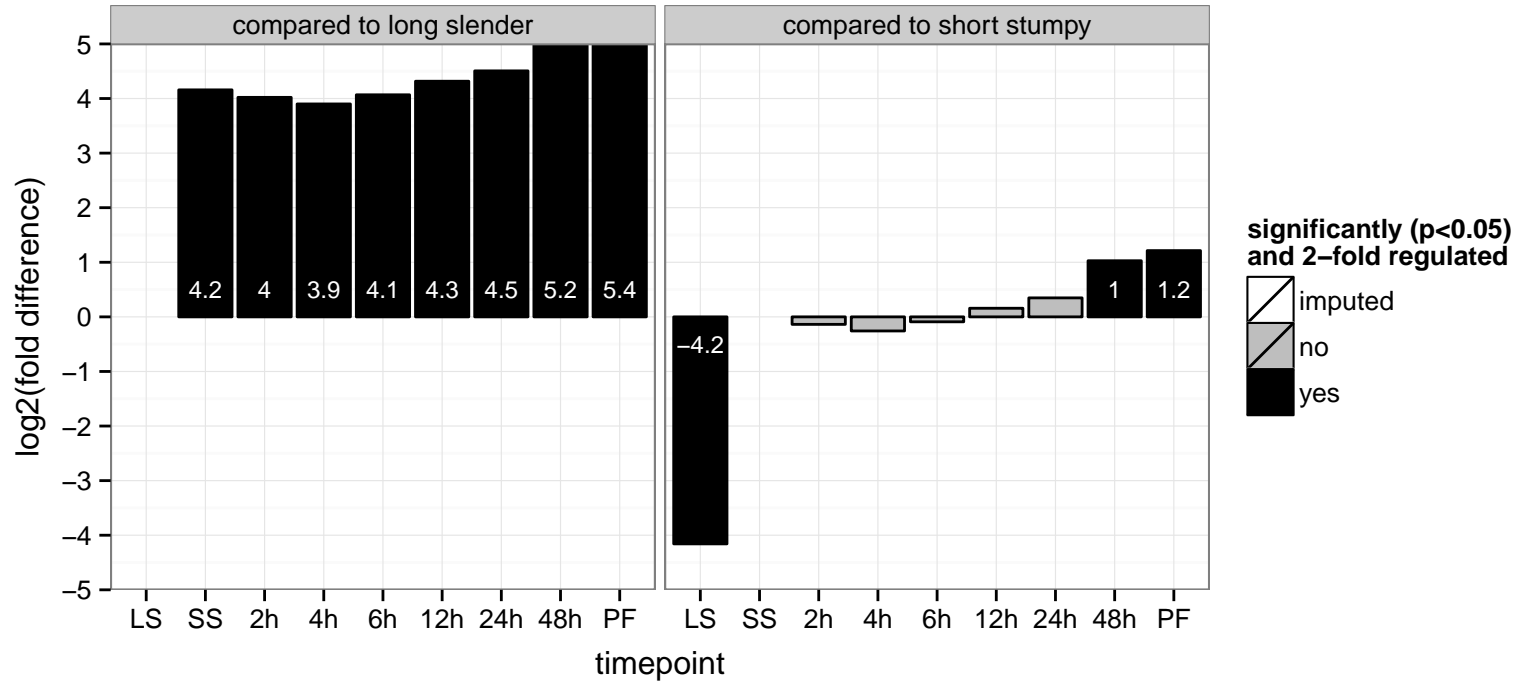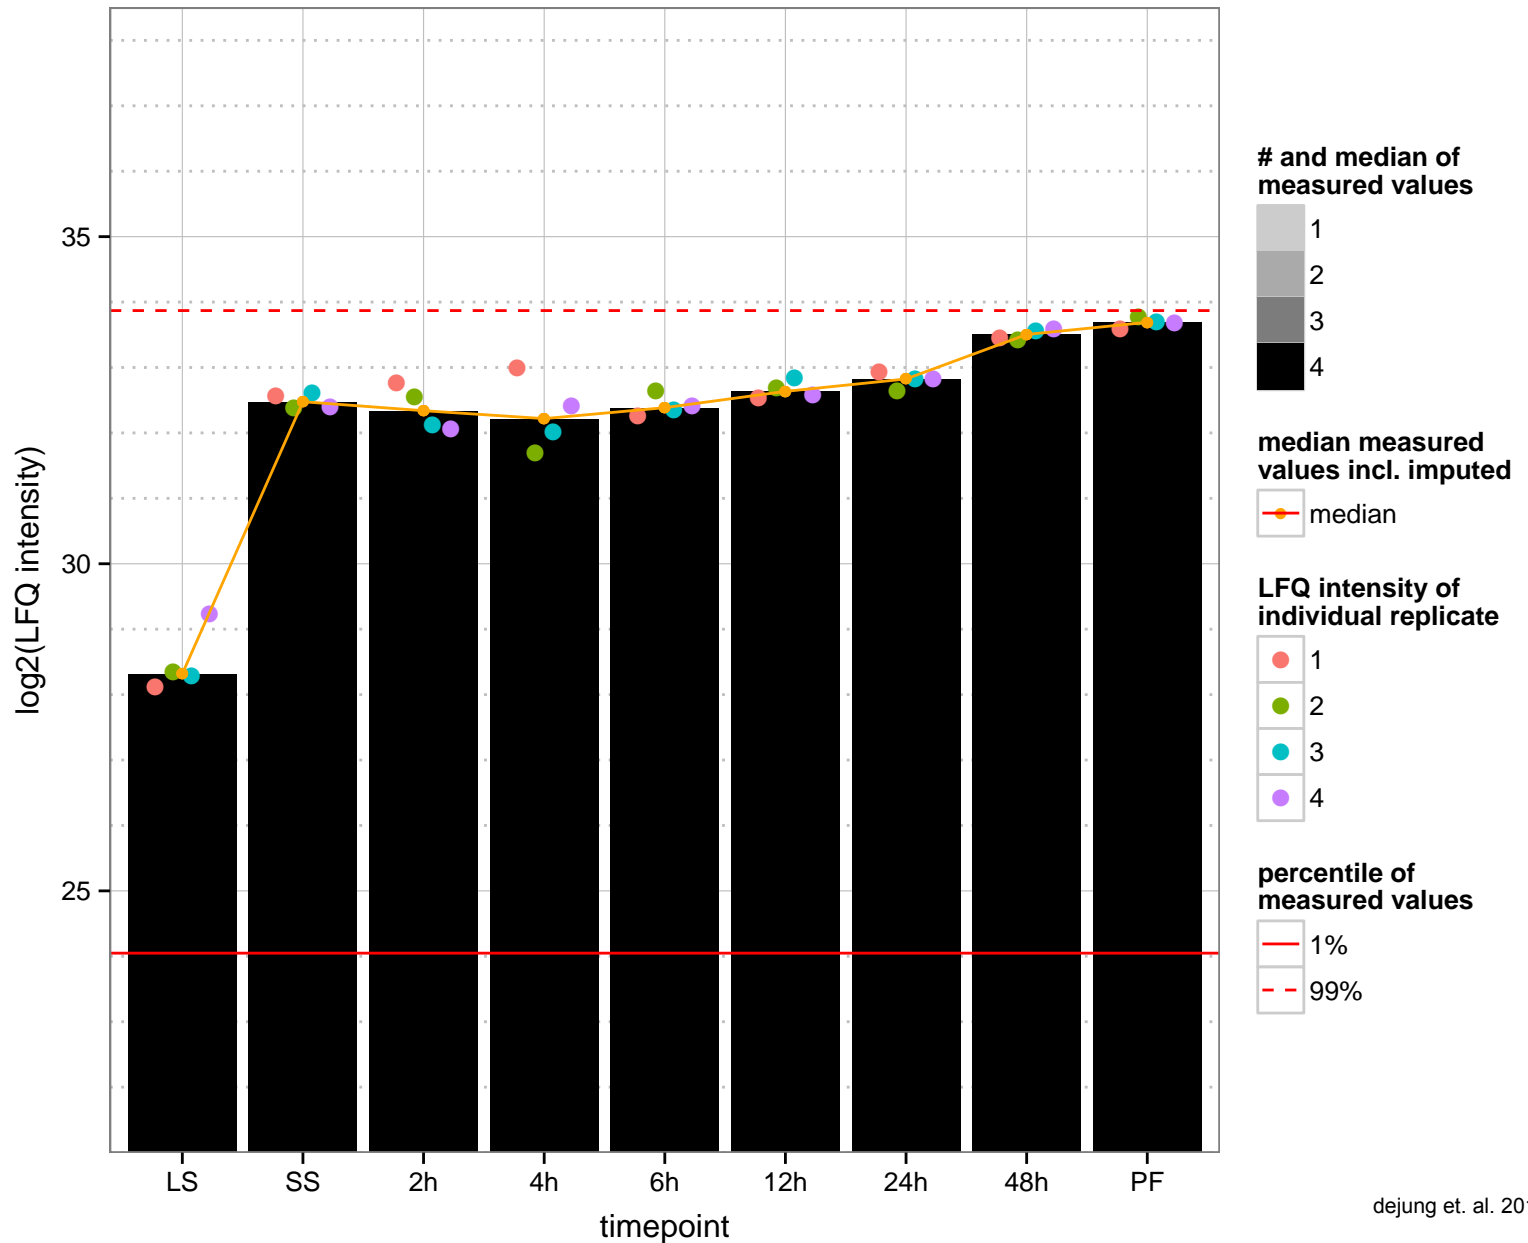

ABC transporter, putative

Tb927.9.6310

AGOF: ATP binding, ATPase activity, coupled to transmembrane movement of substances

AGOC: integral to membrane, internal side of plasma membrane, membrane

AGOP: transport

PGOF: ATP binding, ATPase activity, nucleoside-triphosphatase activity, nucleotide binding

PGOC: membrane

PGOP: null

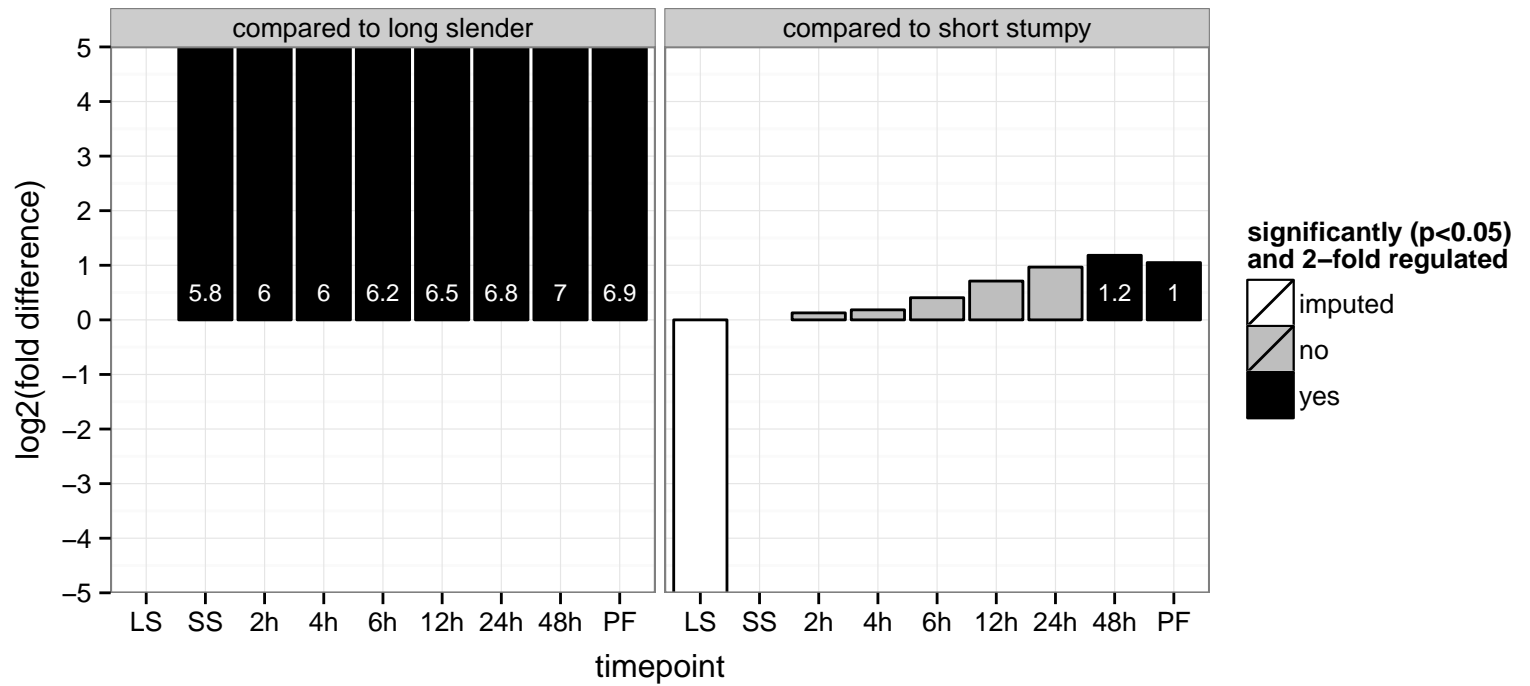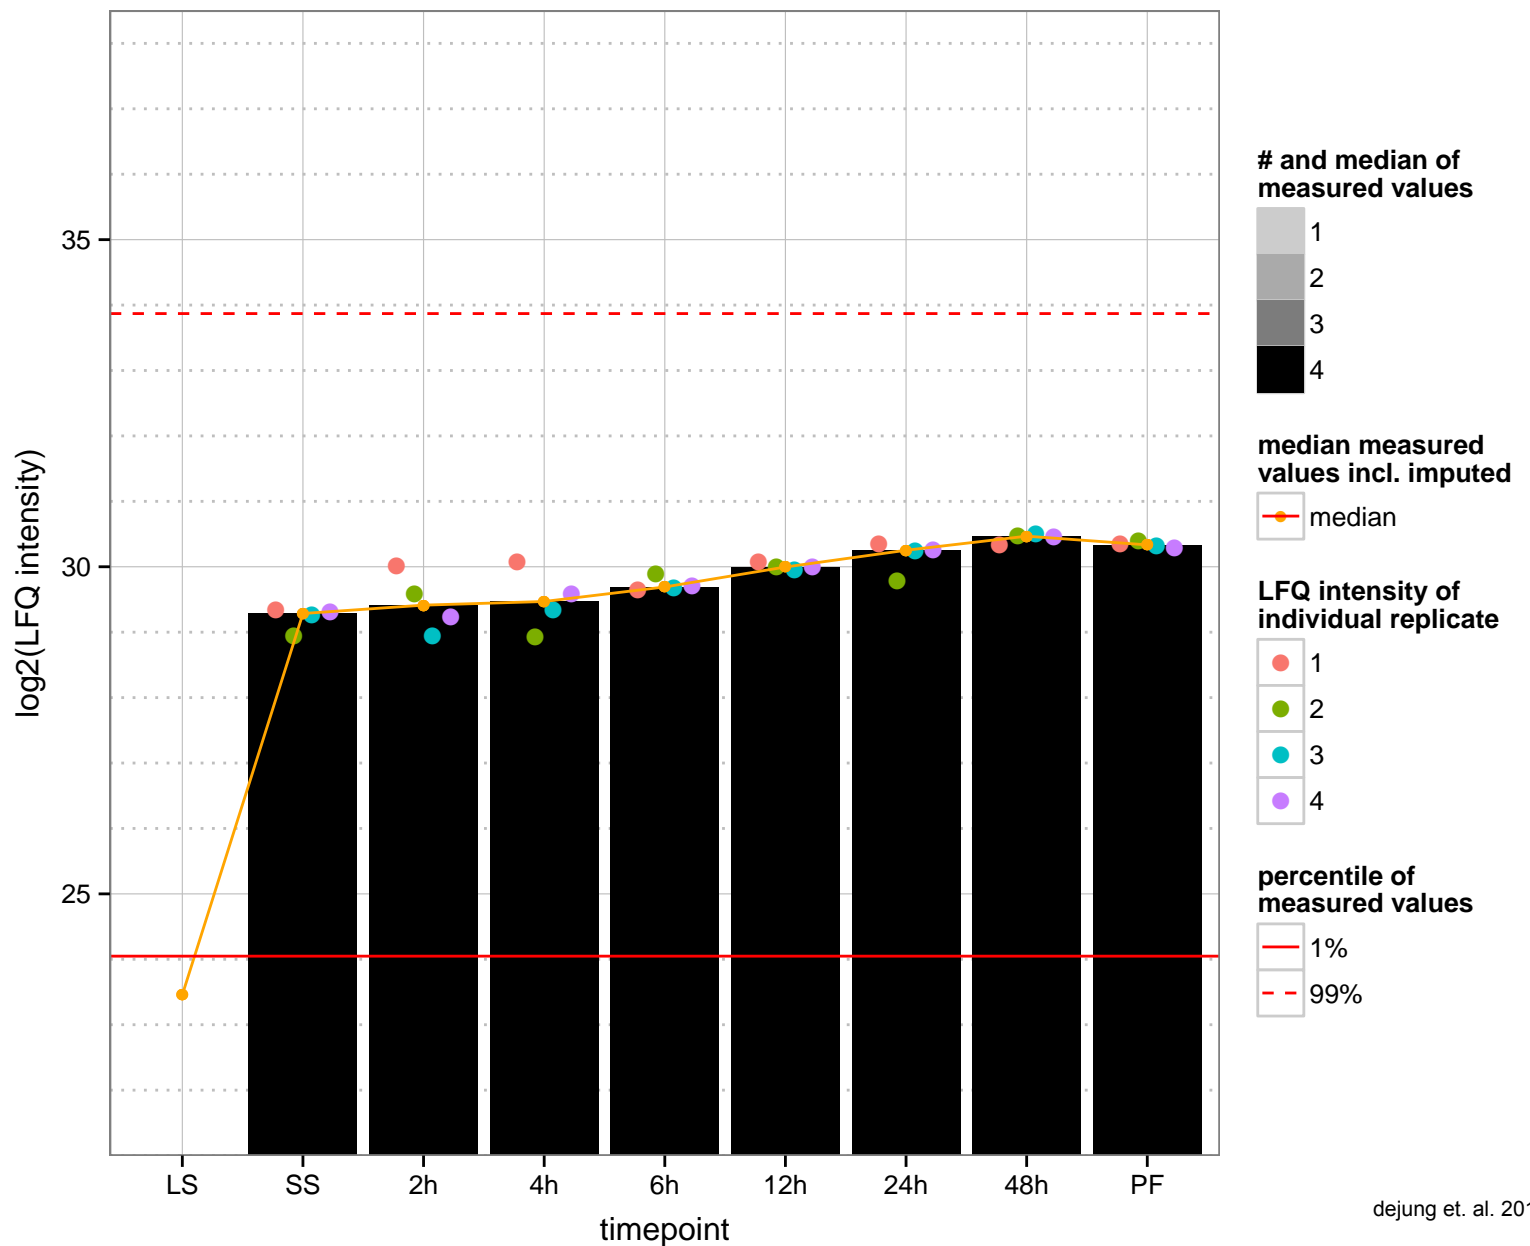

oxidoreductase, putative  
 Tb927.9.7190  
 AGOF: alcohol dehydrogenase activity, zinc-dependent, oxidoreductase activity, zinc ion binding  
 AGOC: mitochondrion  
 AGOP: metabolic process  
 PGO: oxidoreductase activity  
 PGO: null  
 PGO: oxidation-reduction process

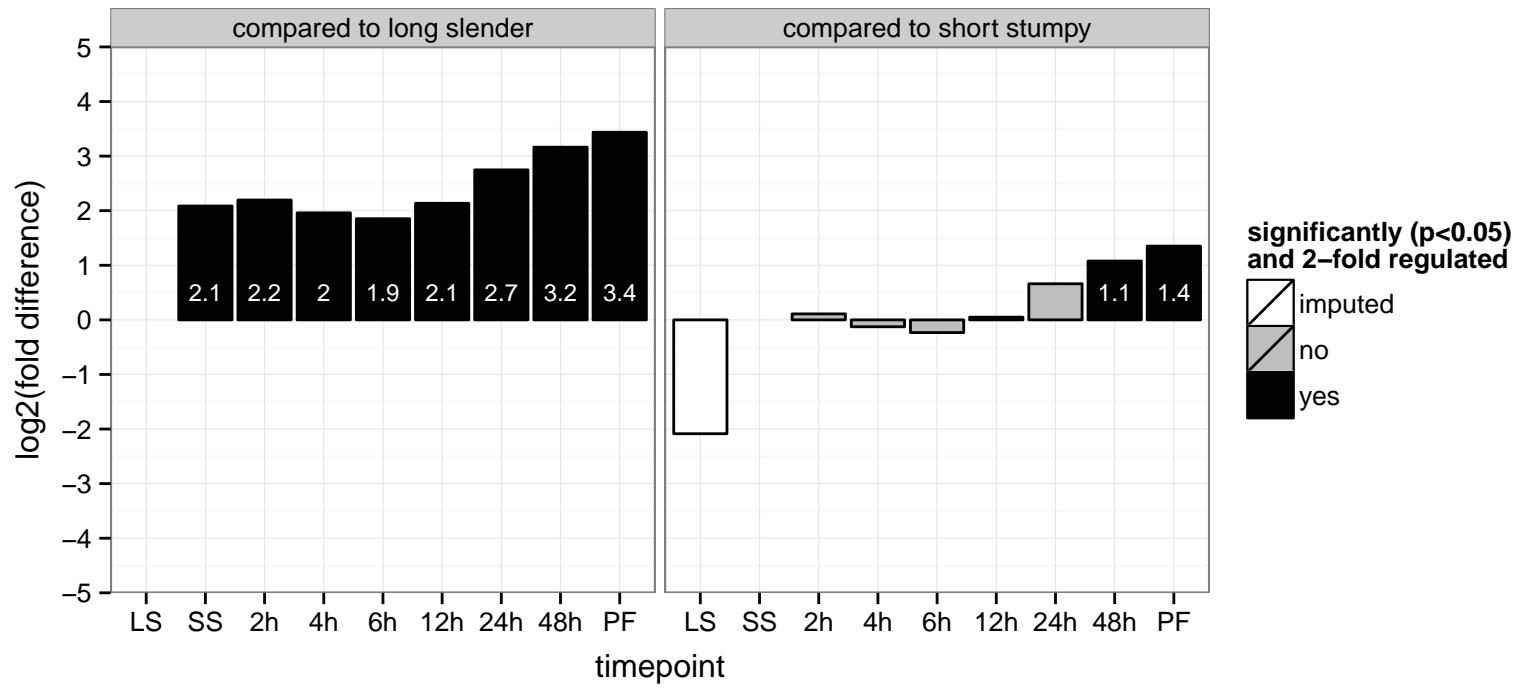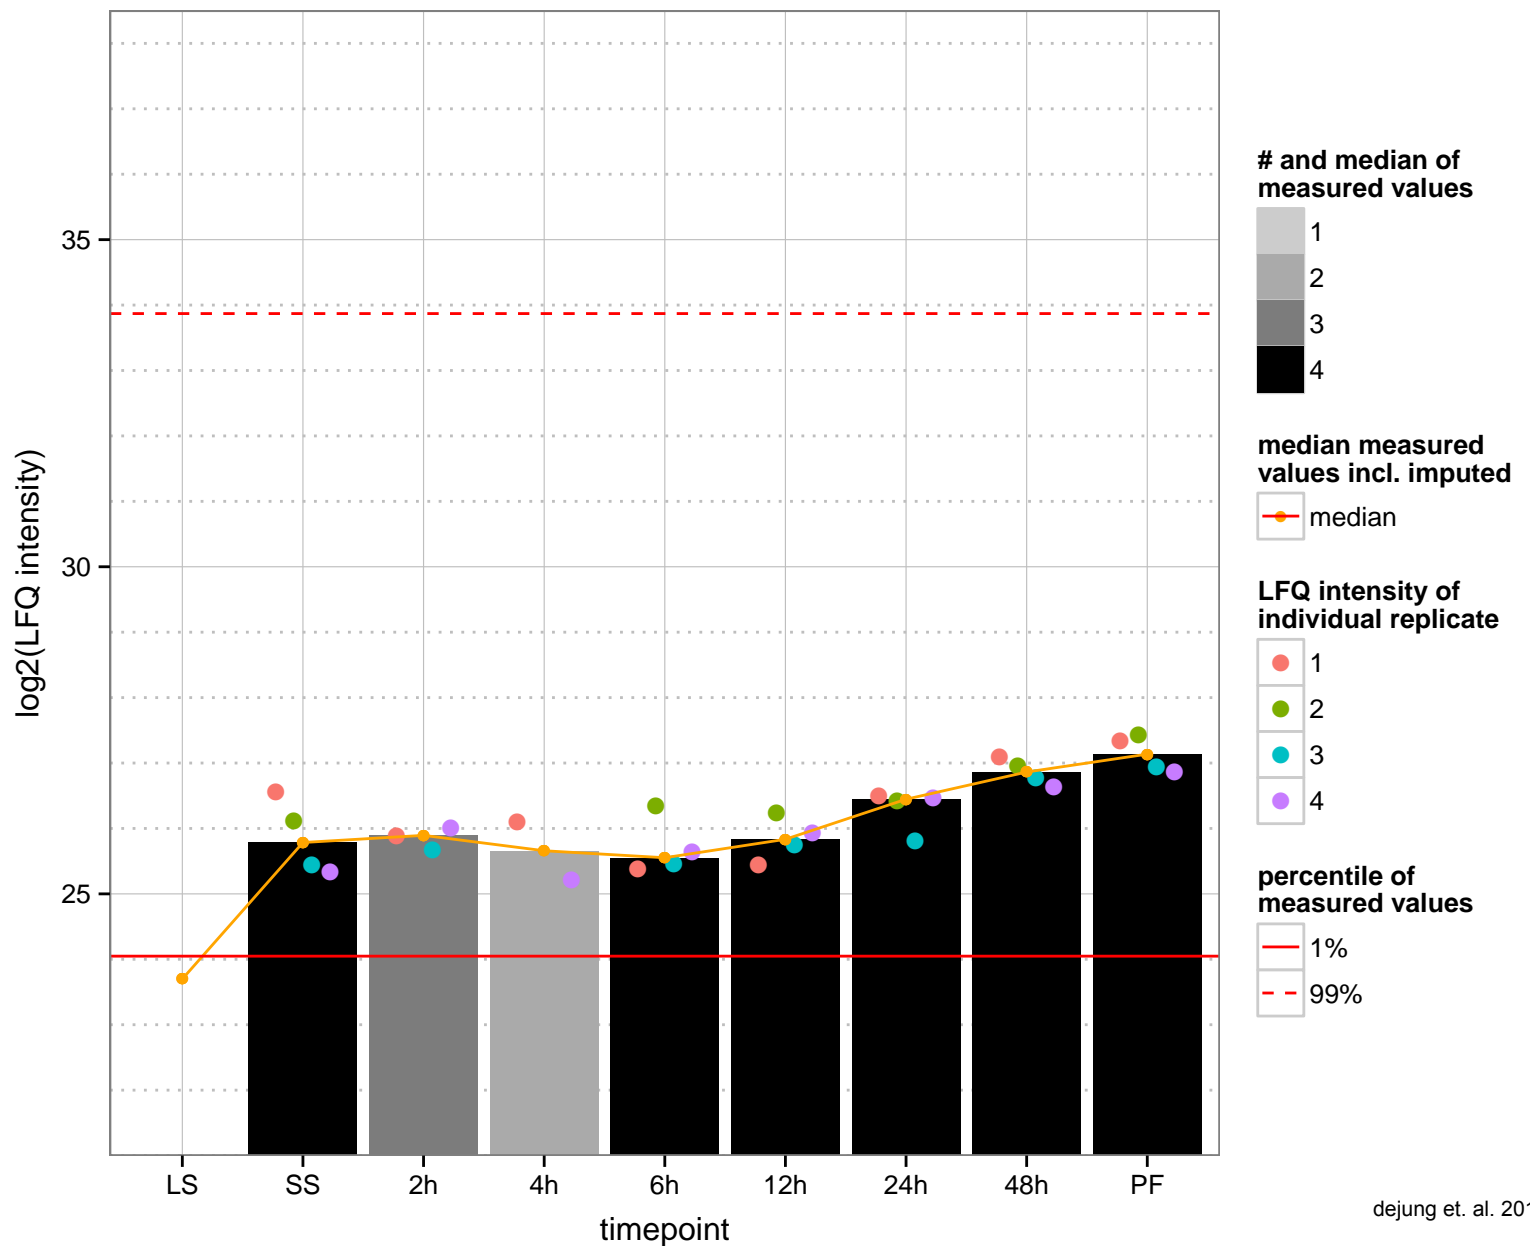

60S ribosomal protein L10, putative, QM-like protein (QM), QM-like protein  
 Tb927.9.8420;Tb927.9.8070  
 AGOF: structural constituent of ribosome  
 AGOC: intracellular, ribosome  
 AGOP: translation  
 PGOF: structural constituent of ribosome  
 PGO: intracellular, ribosome  
 PGOP: translation

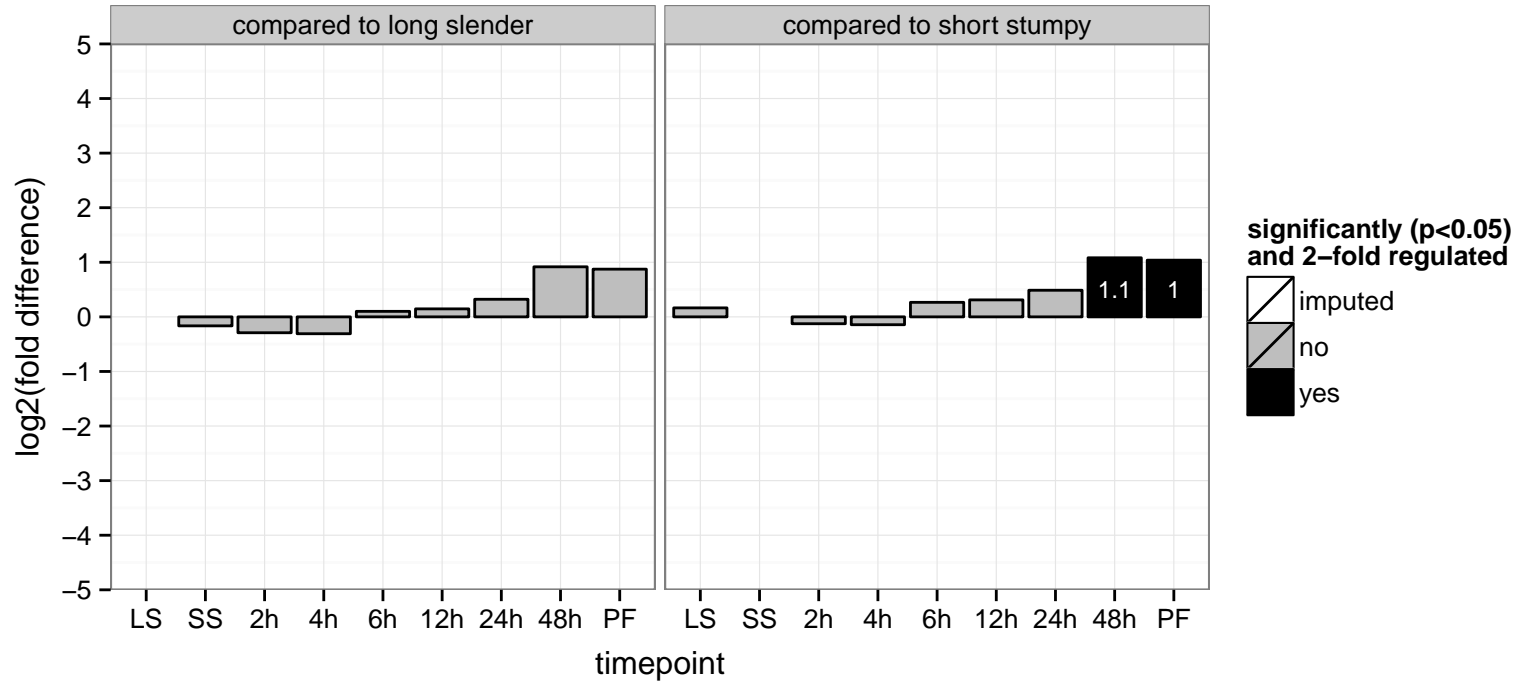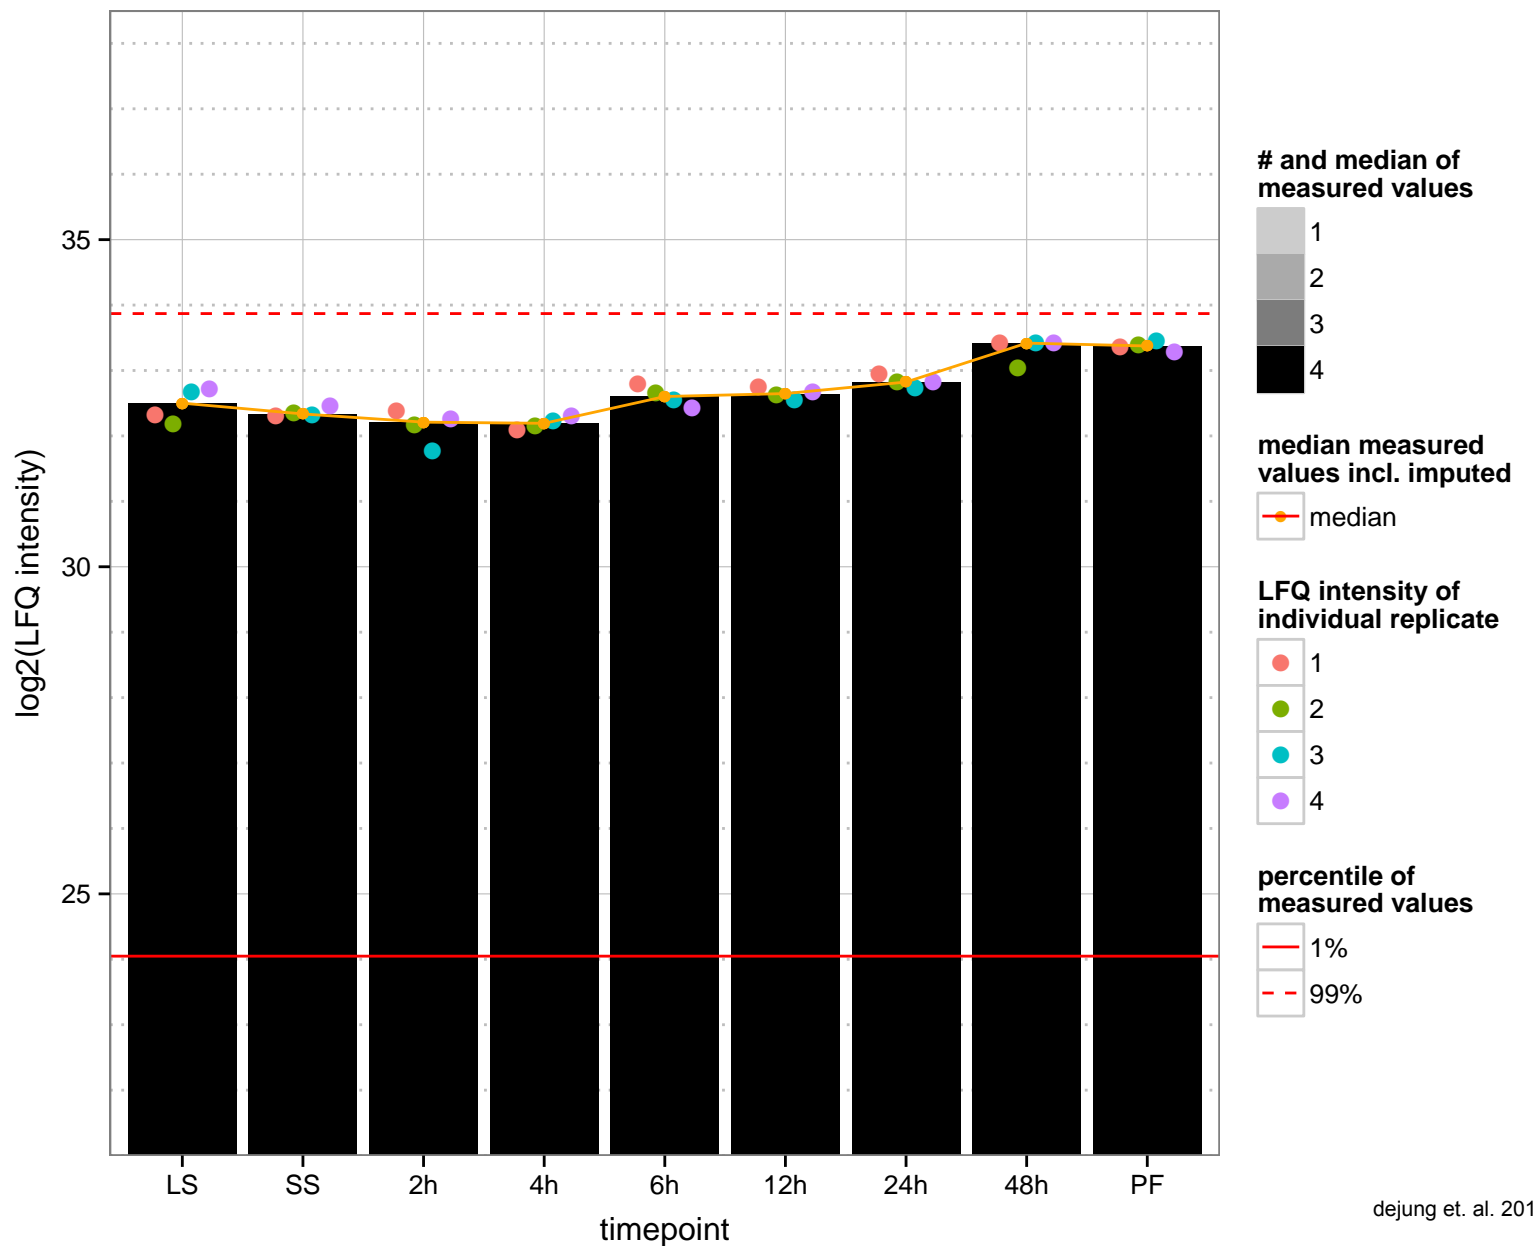

adenylate kinase (ADKG)

Tb927.9.8450

AGOF: ATP binding, adenylate kinase activity, cytidylate kinase activity, uridylylate kinase activity

AGOC: null

AGOP: nucleobase-containing compound metabolic process, nucleobase-containing small molecule interconversion

PGOF: ATP binding, nucleobase-containing compound kinase activity

PGOC: null

PGOP: nucleobase-containing compound metabolic process

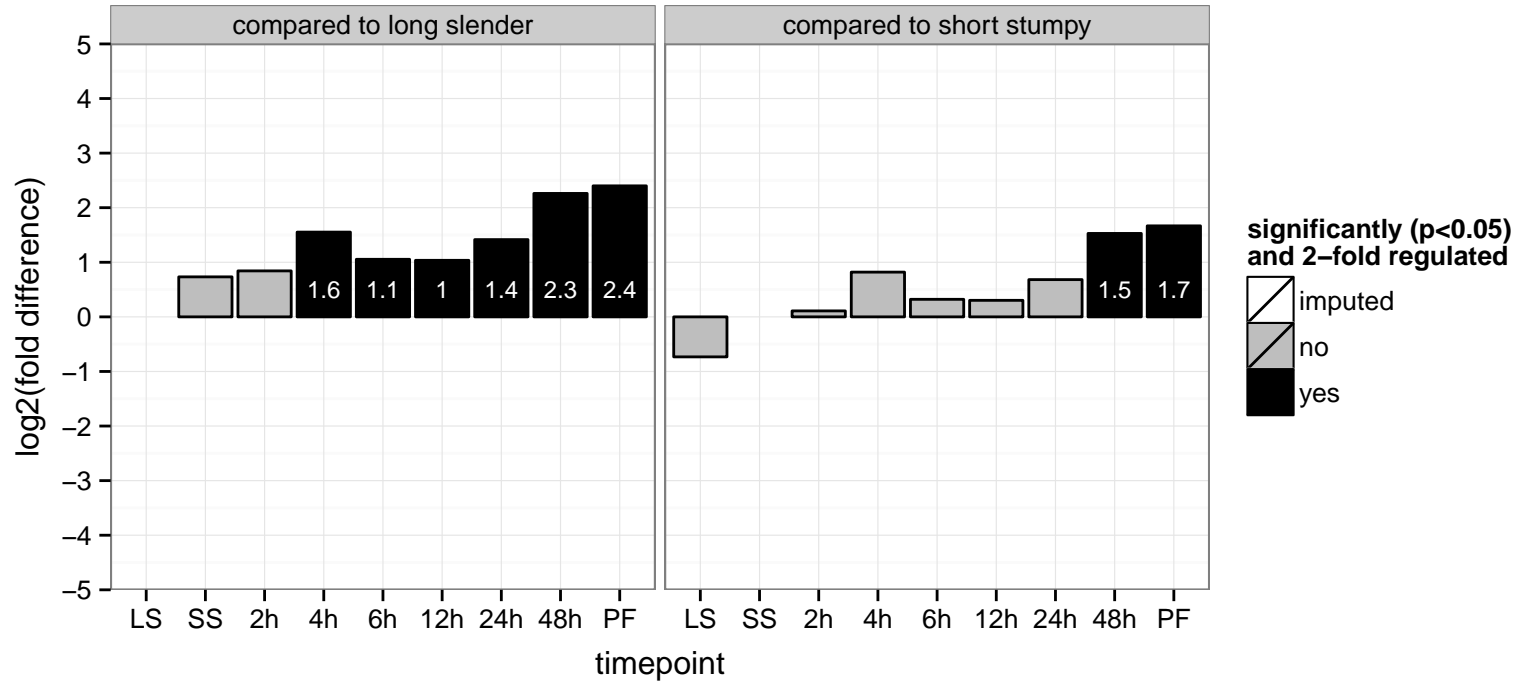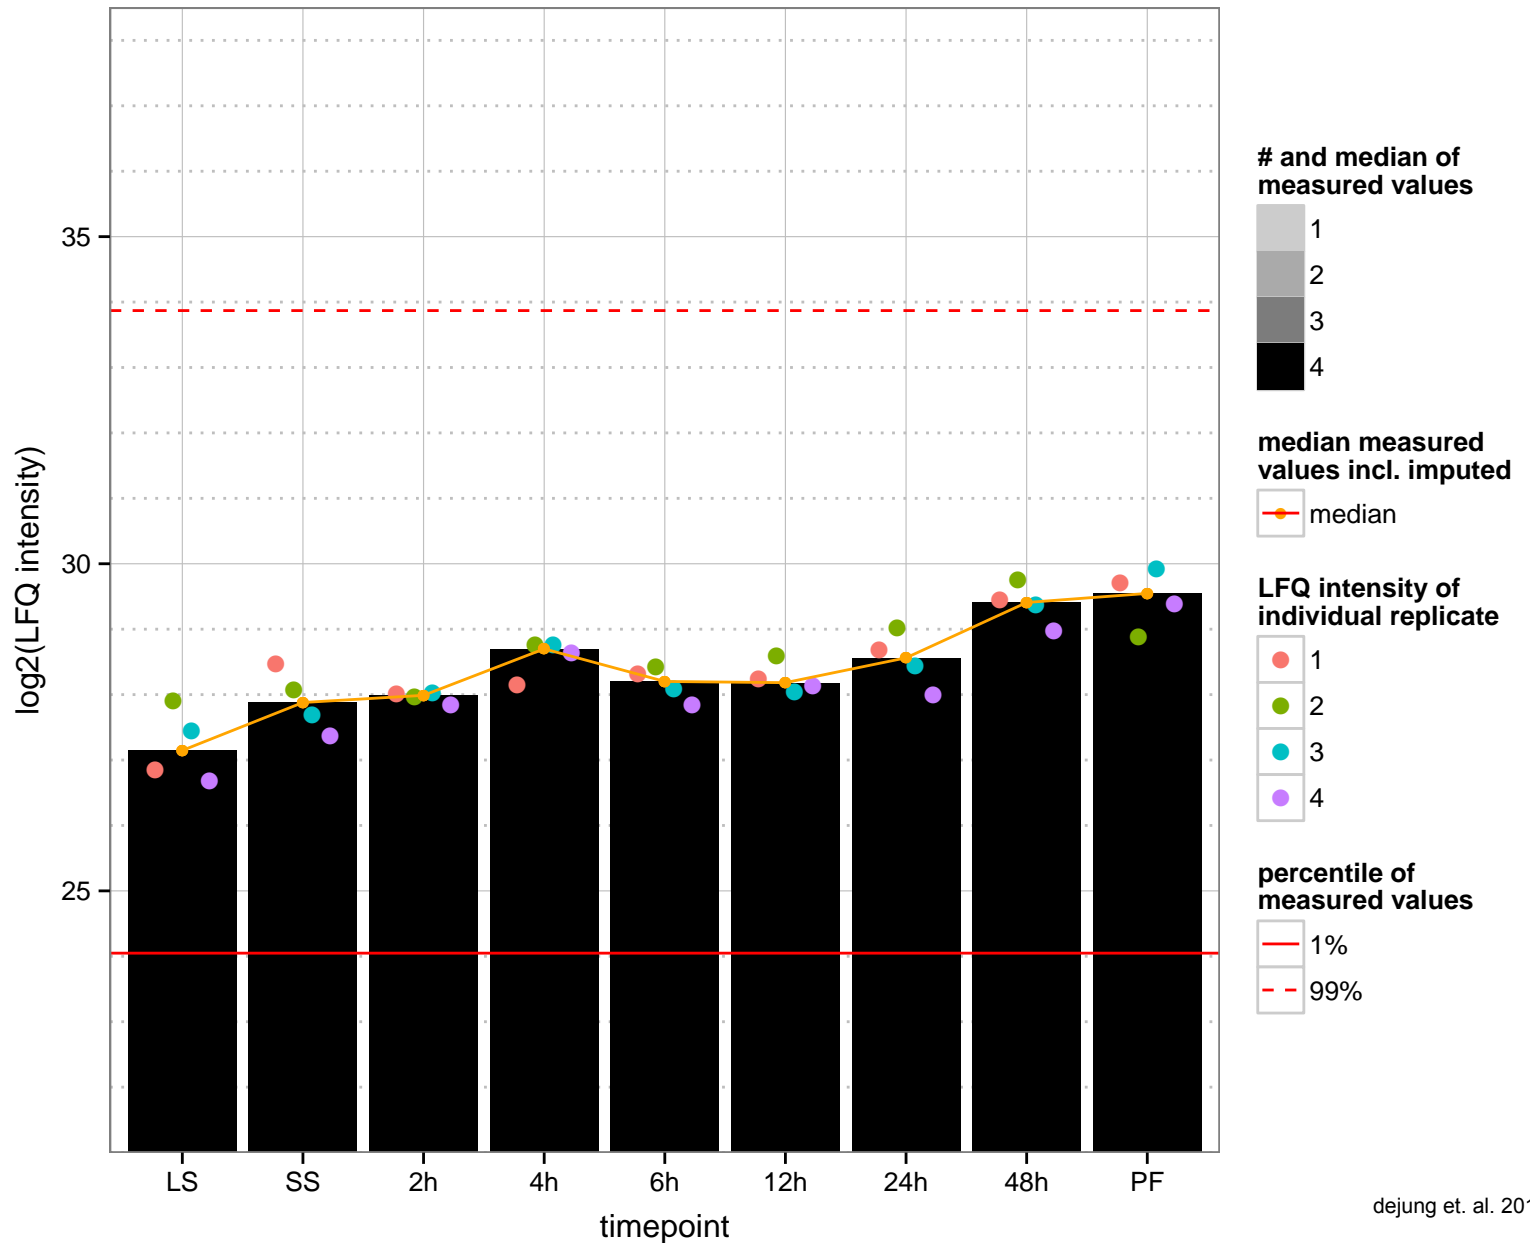

hypothetical protein, conserved  
 Tb927.9.8520  
 AGOF: null  
 AGOC: null  
 AGOP: null  
 PGO: null  
 PGOC: null  
 PGOP: null

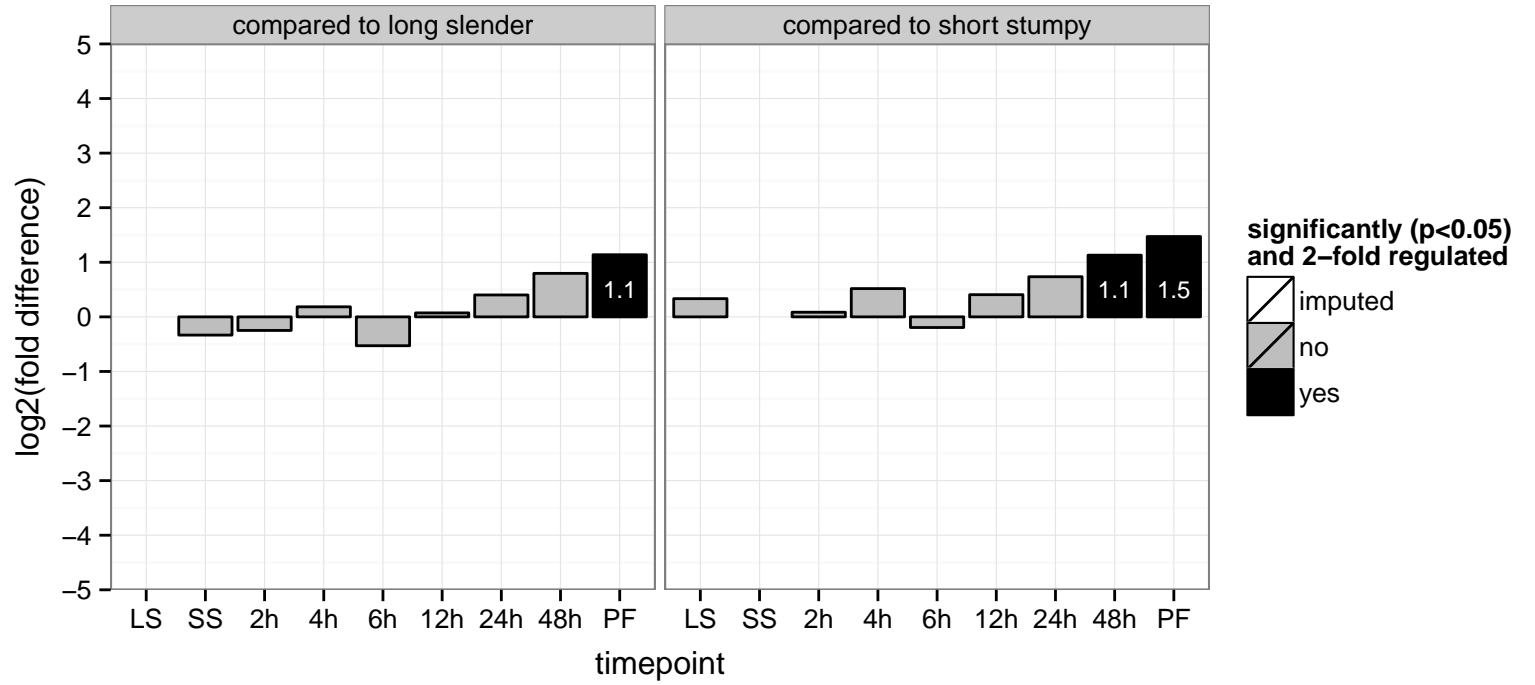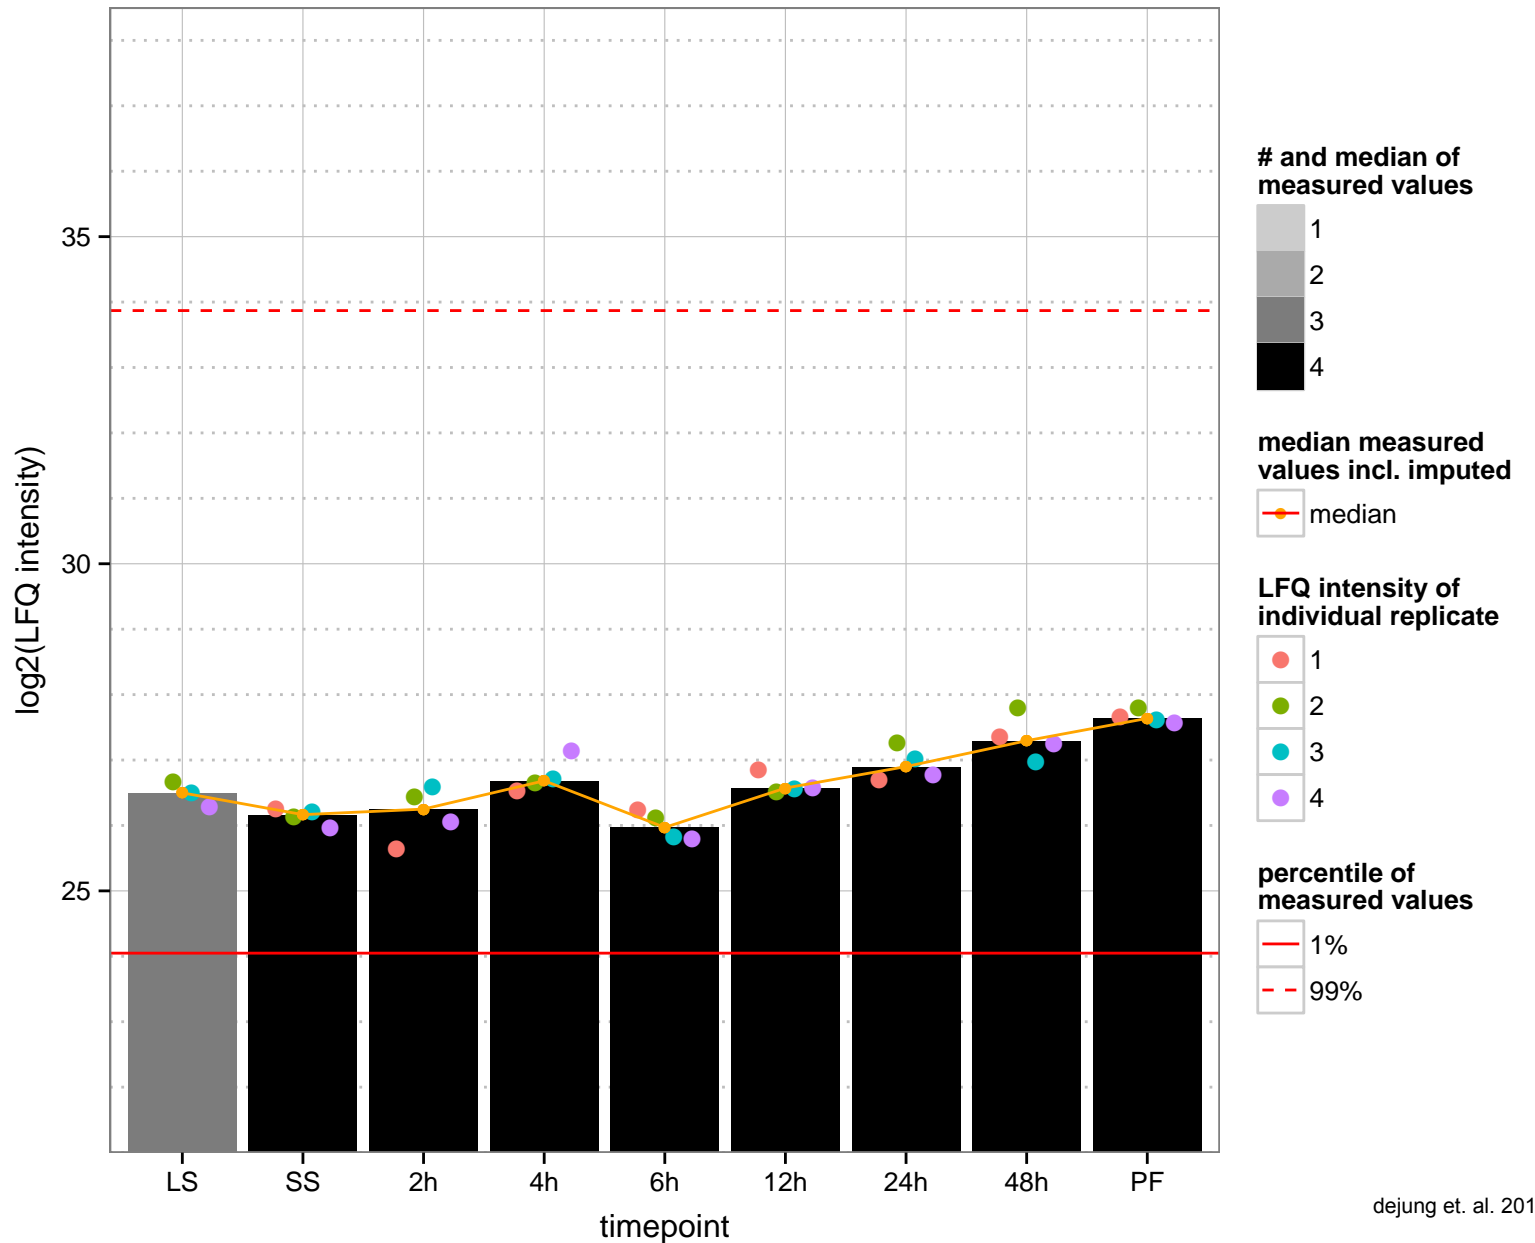



isopentenyl-diphosphate delta-isomerase (type II) (idi1)

Tb927.9.9000

AGOF: FMN binding, oxidoreductase activity

AGOC: cytoplasm

AGOP: isoprenoid biosynthetic process

PGOF: FMN binding, isopentenyl-diphosphate delta-isomerase activity, oxidoreductase activity

PGOC: cytoplasm

PGOP: isoprenoid biosynthetic process

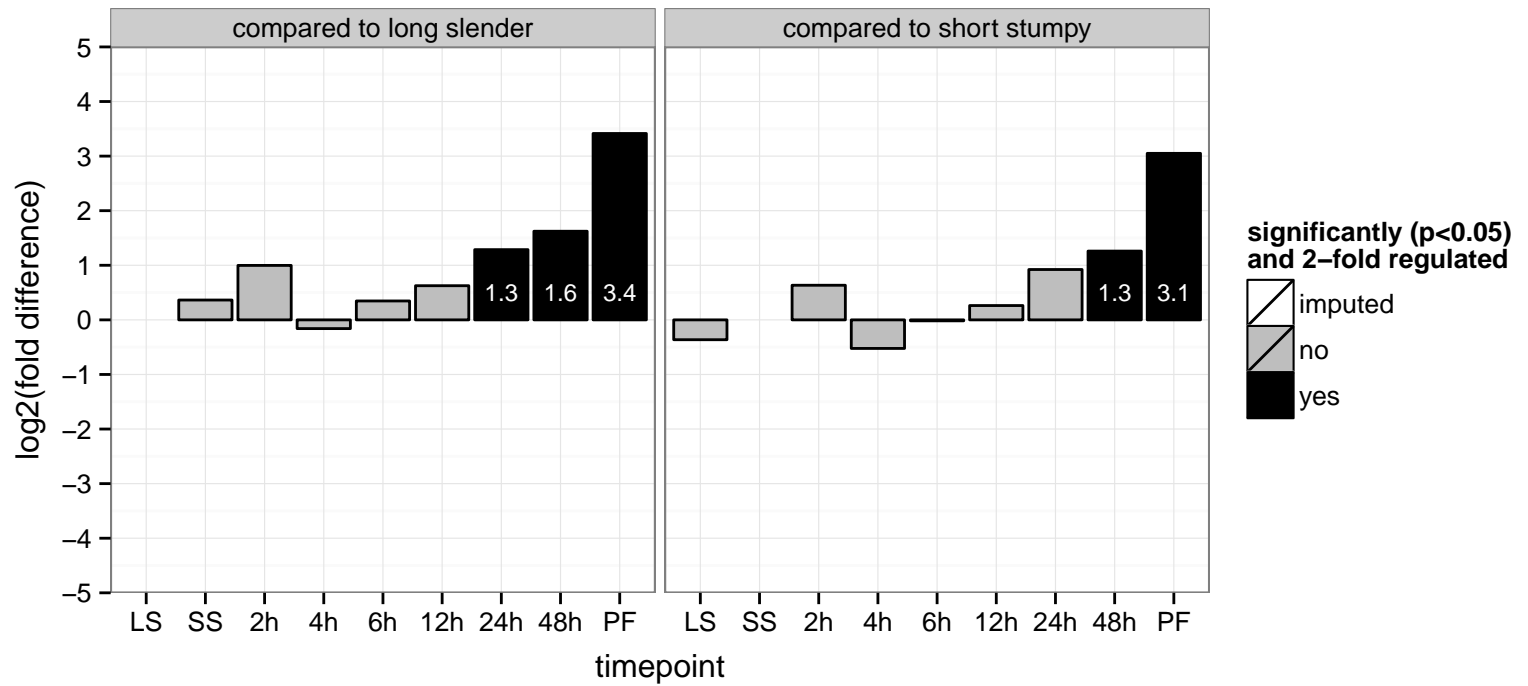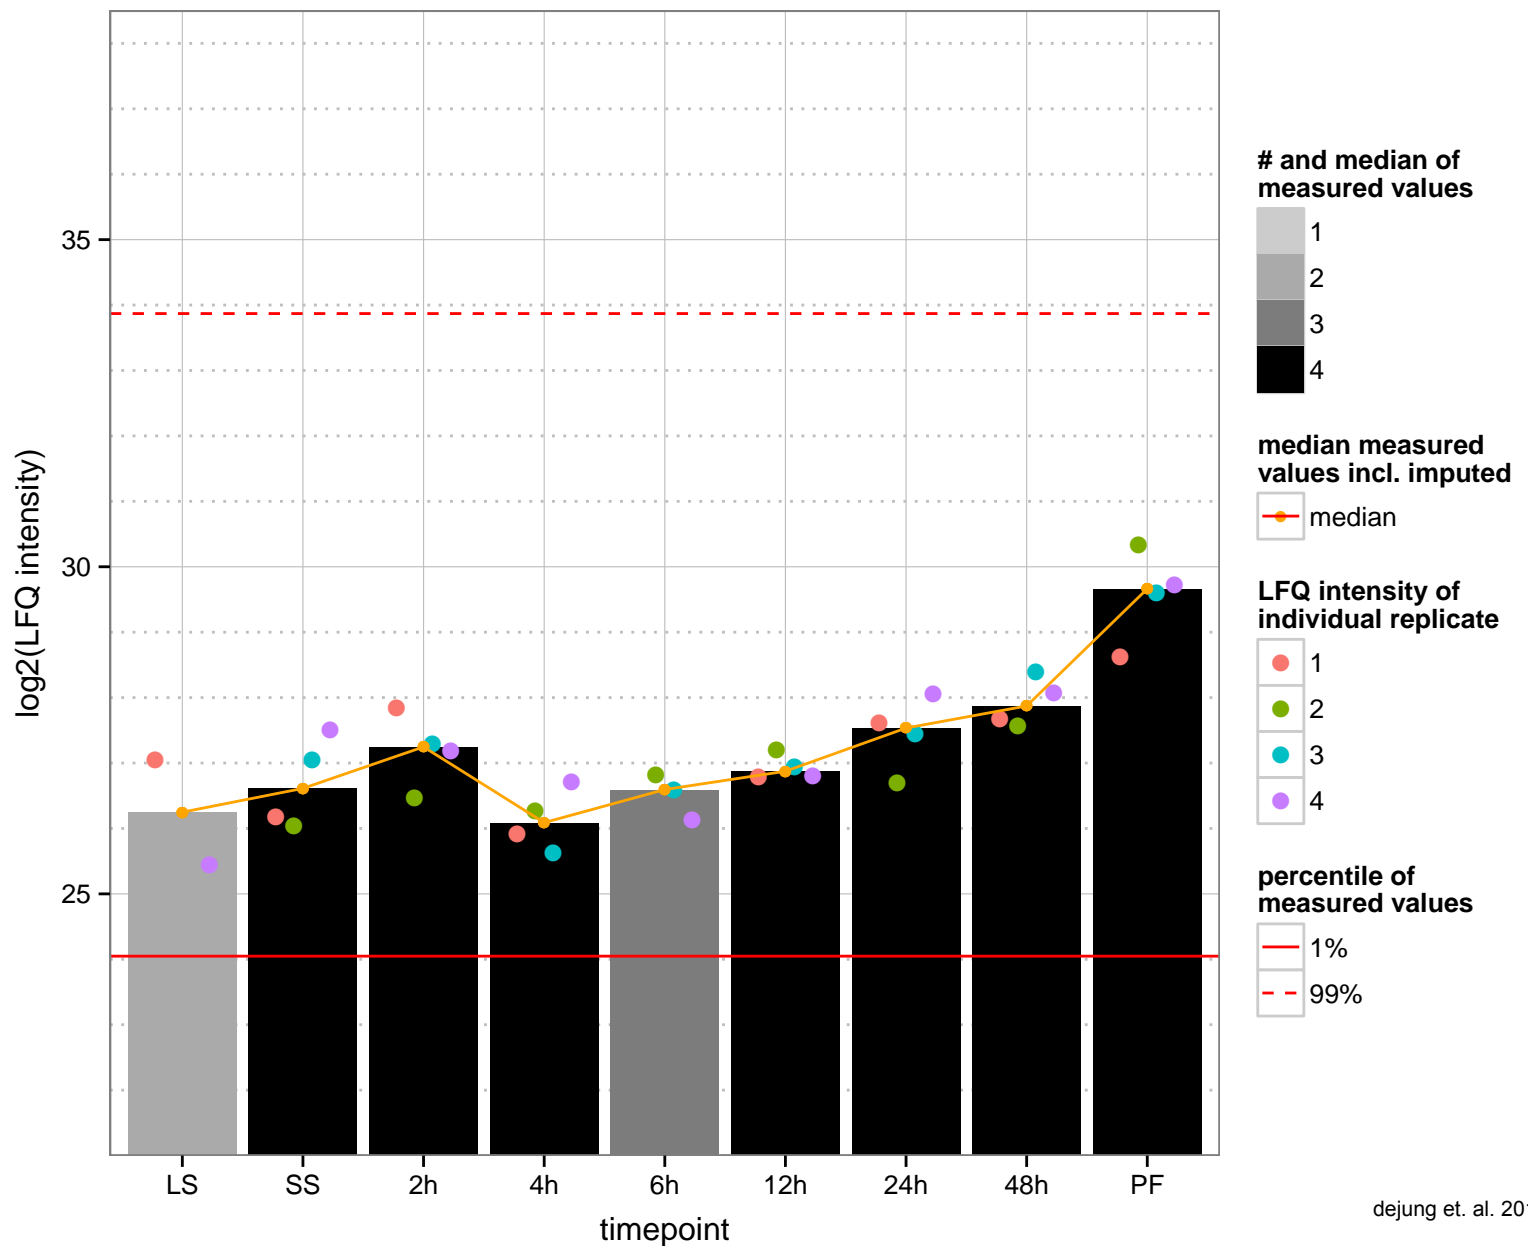

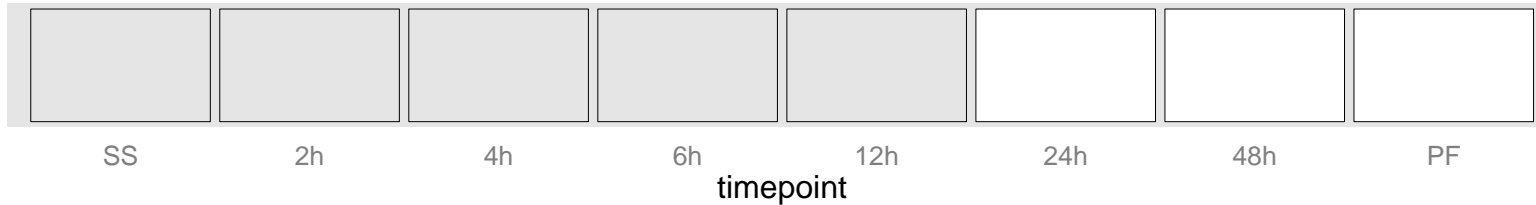

**regulated**  **not regulated**  **significant down**  **significant up**

expression site– associated gene (ESAG) protein, putative, expression site associated gene 5 (ESAG5) protein, chrIX additional  
 Tb927.9.15890;Tb11.v5.0463;Tb09.v4.0016  
 AGOF: lipid binding, null  
 AGOC: null, plasma membrane  
 AGOP: null  
 PGO: lipid binding  
 PGOC: null  
 PGOP: null

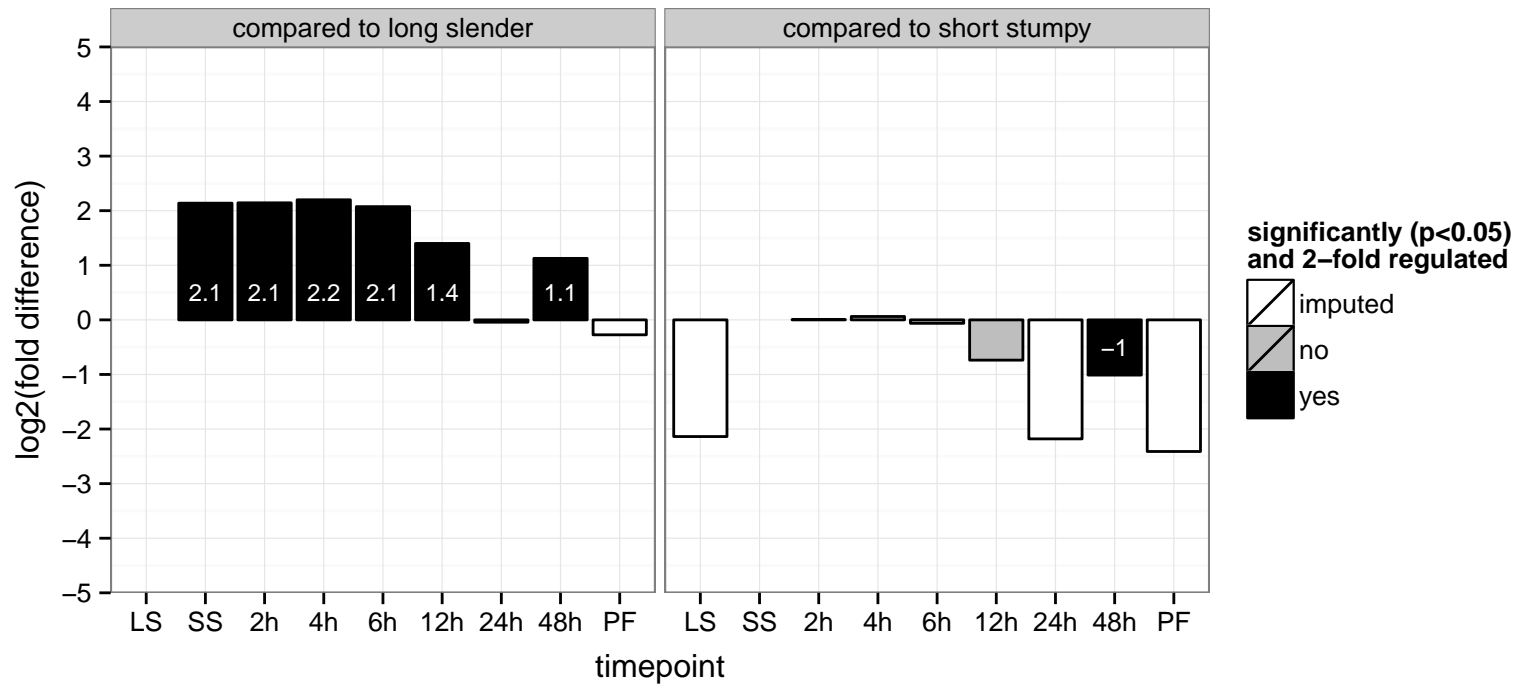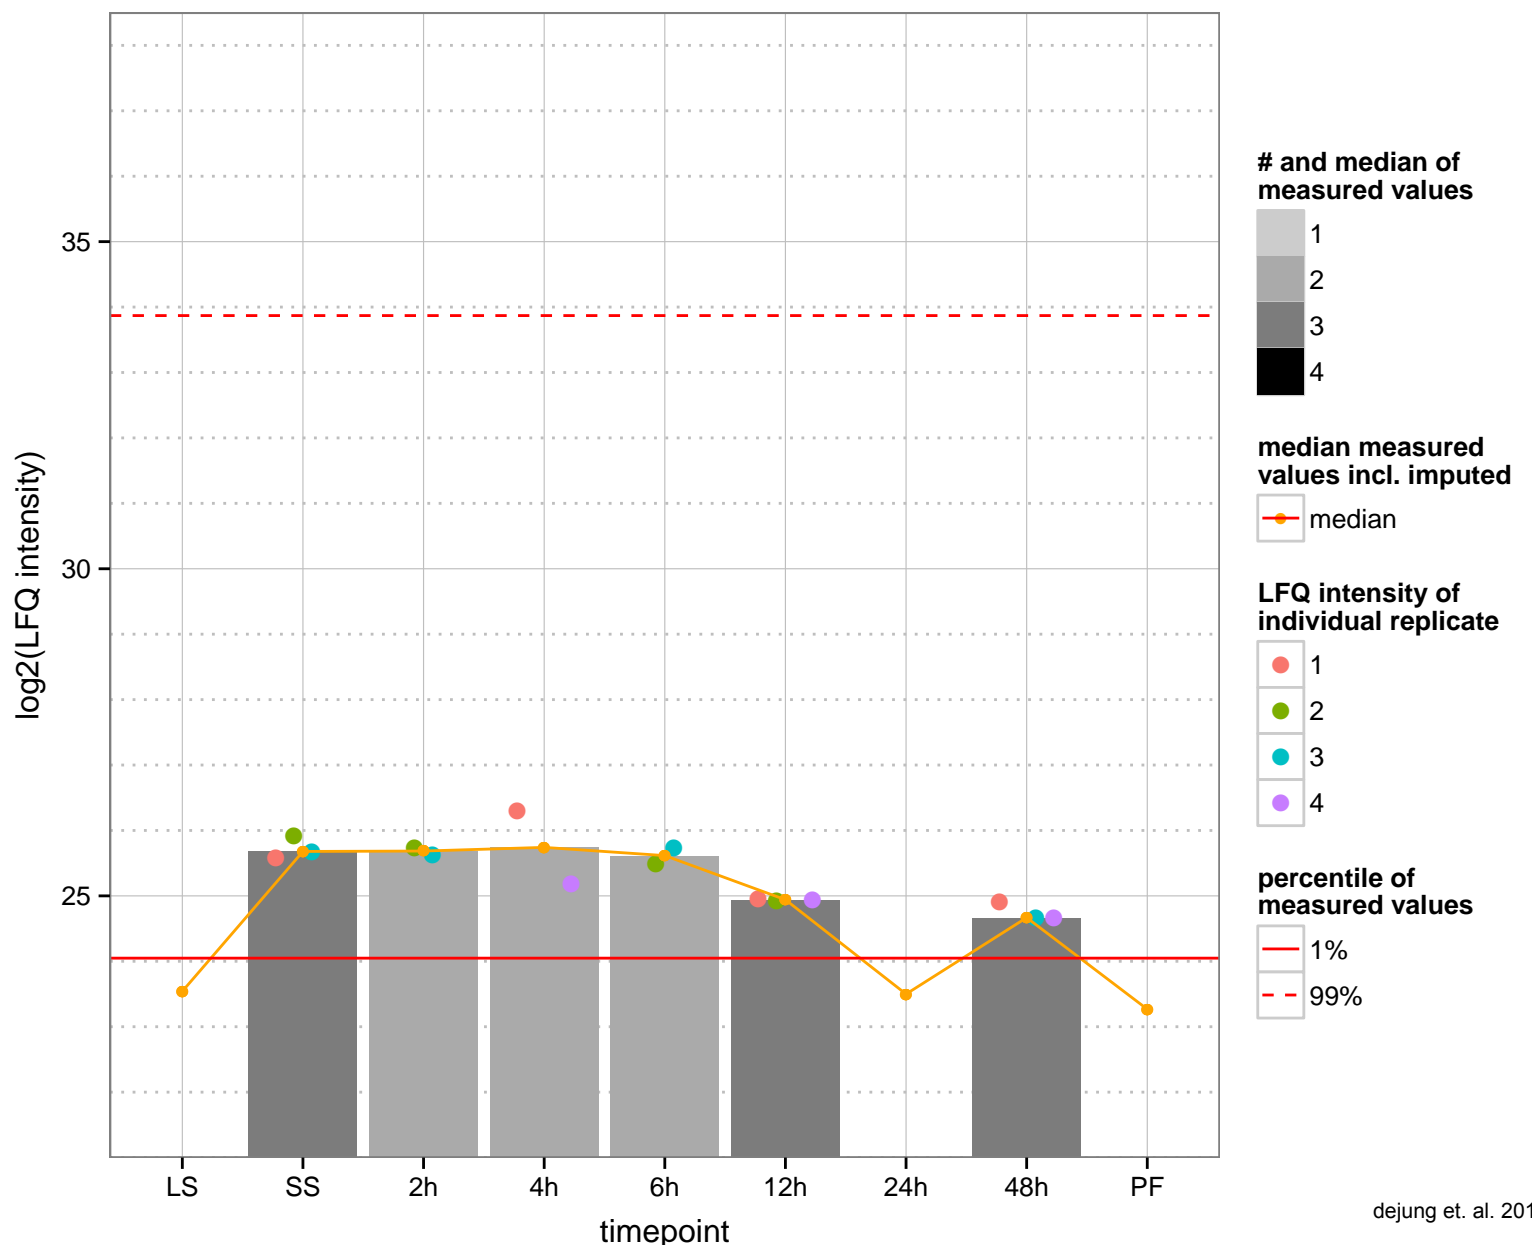

cell-division control protein 2 homolog 6, putative, protein kinase, cdc2-related kinase, putative (CRK6)  
 Tb927.11.1180;Tb11.v5.0387  
 AGOF: null, ATP binding, protein serine/threonine kinase activity, protein tyrosine kinase activity  
 AGOC: null  
 AGOP: null, growth, protein phosphorylation  
 PGOF: ATP binding, protein kinase activity, transferase activity, transferring phosphorus-containing groups  
 PGOC: null  
 PGOP: protein phosphorylation

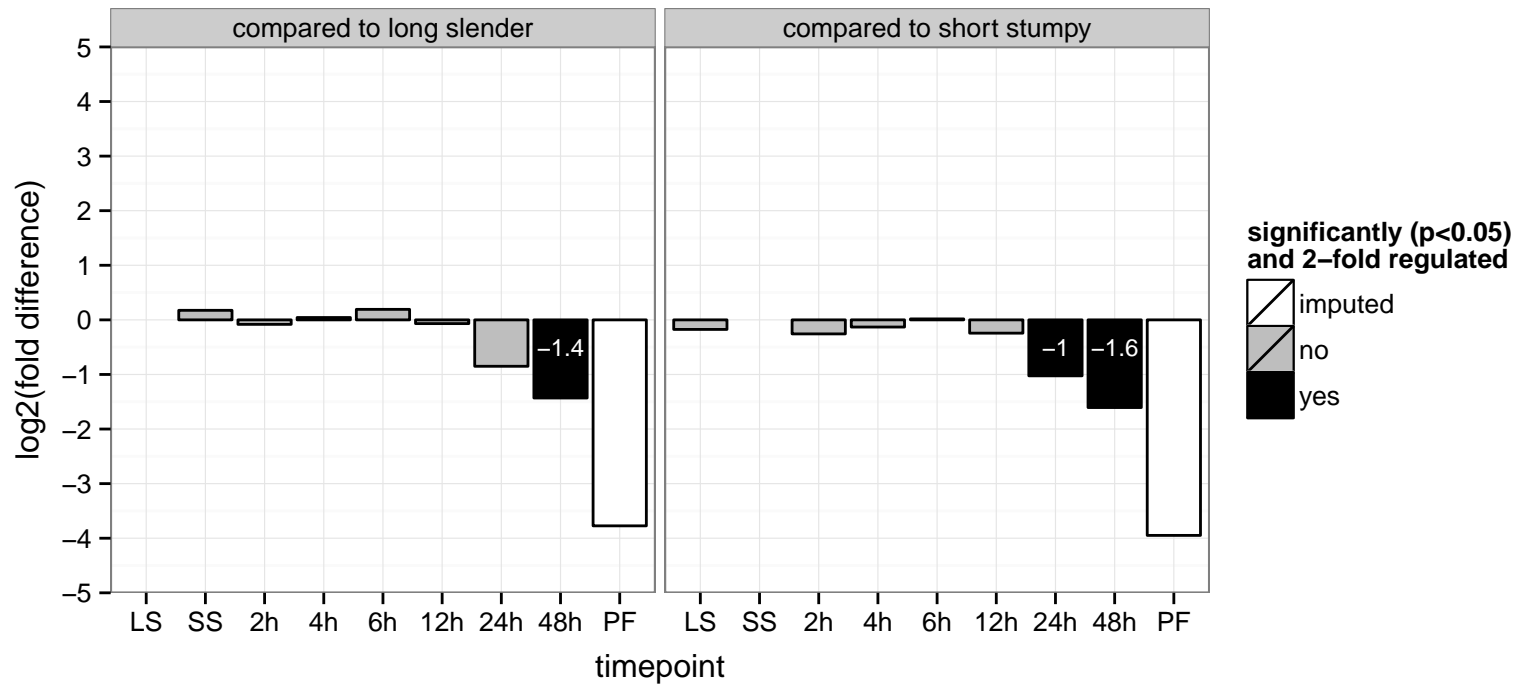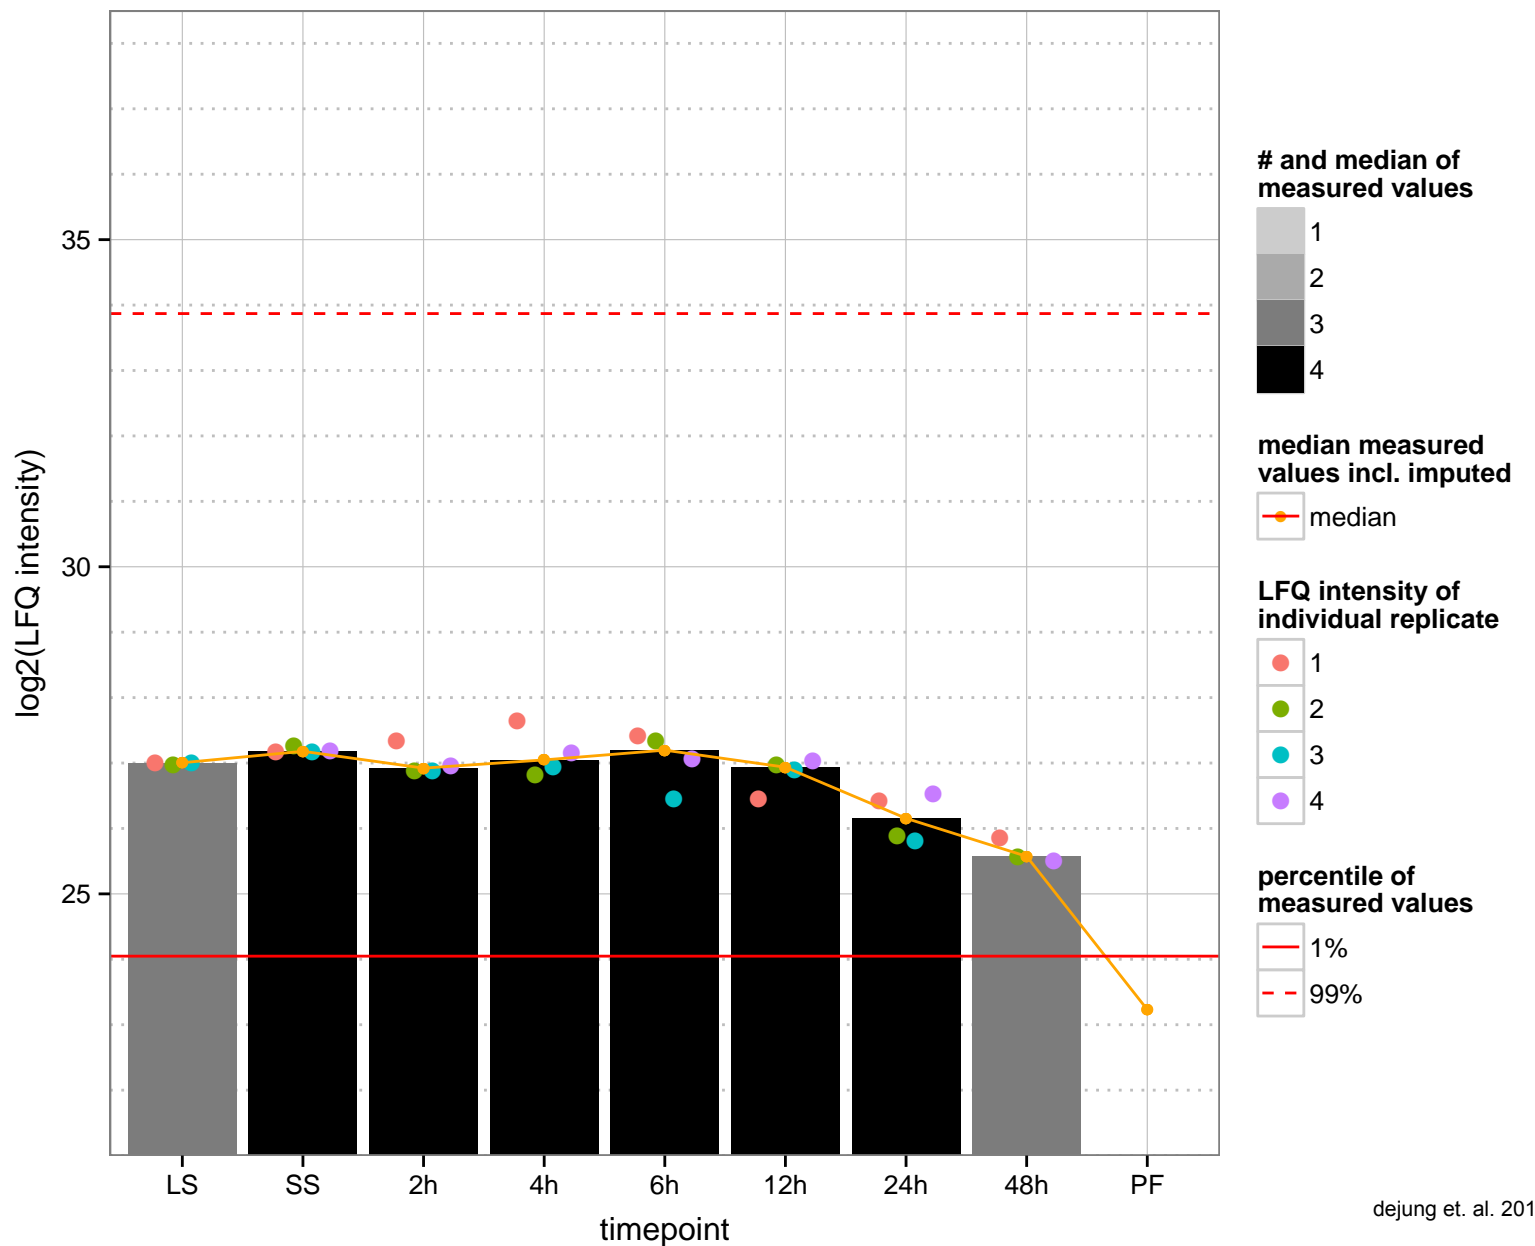

glycerol uptake protein, putative  
 Tb927.10.15910;Tb11.v5.0406  
 AGOF: null  
 AGOC: null  
 AGOP: null  
 PGO: null  
 PGOC: null  
 PGOP: null

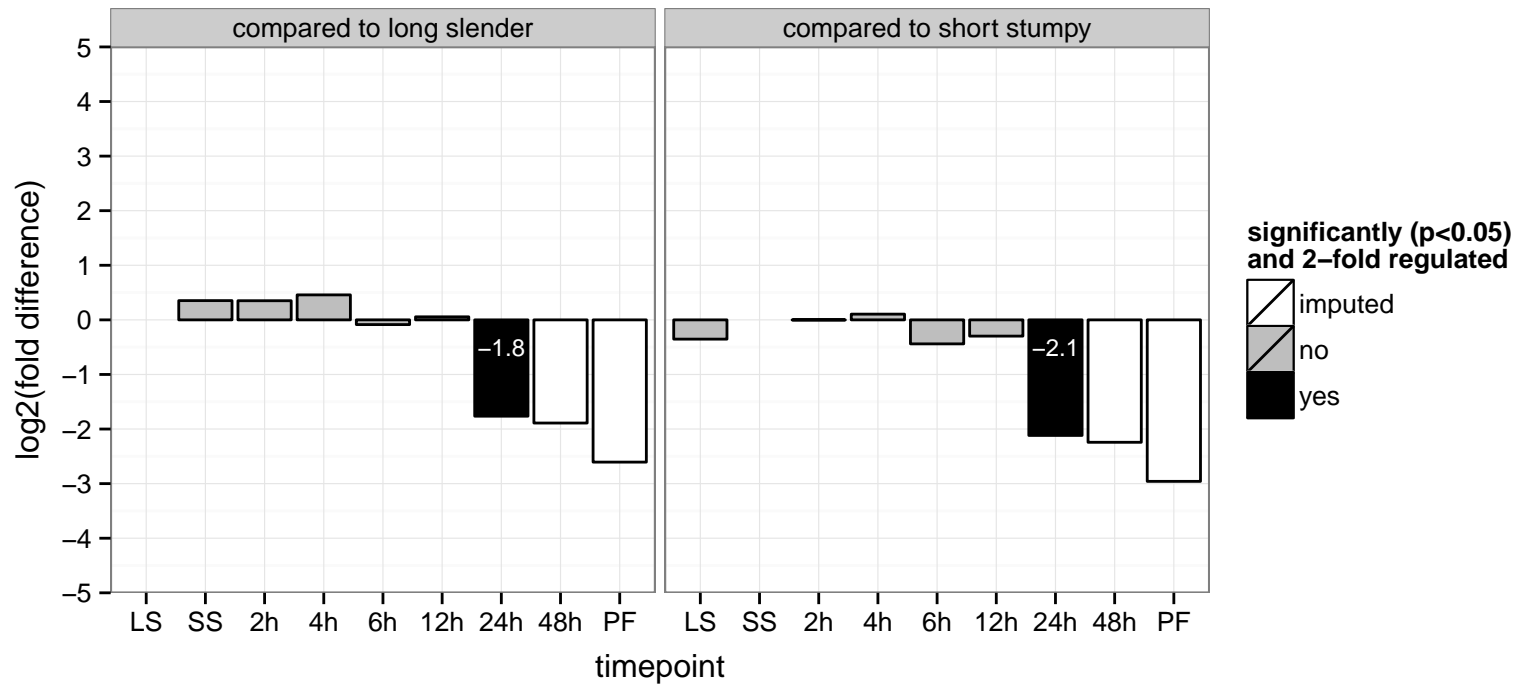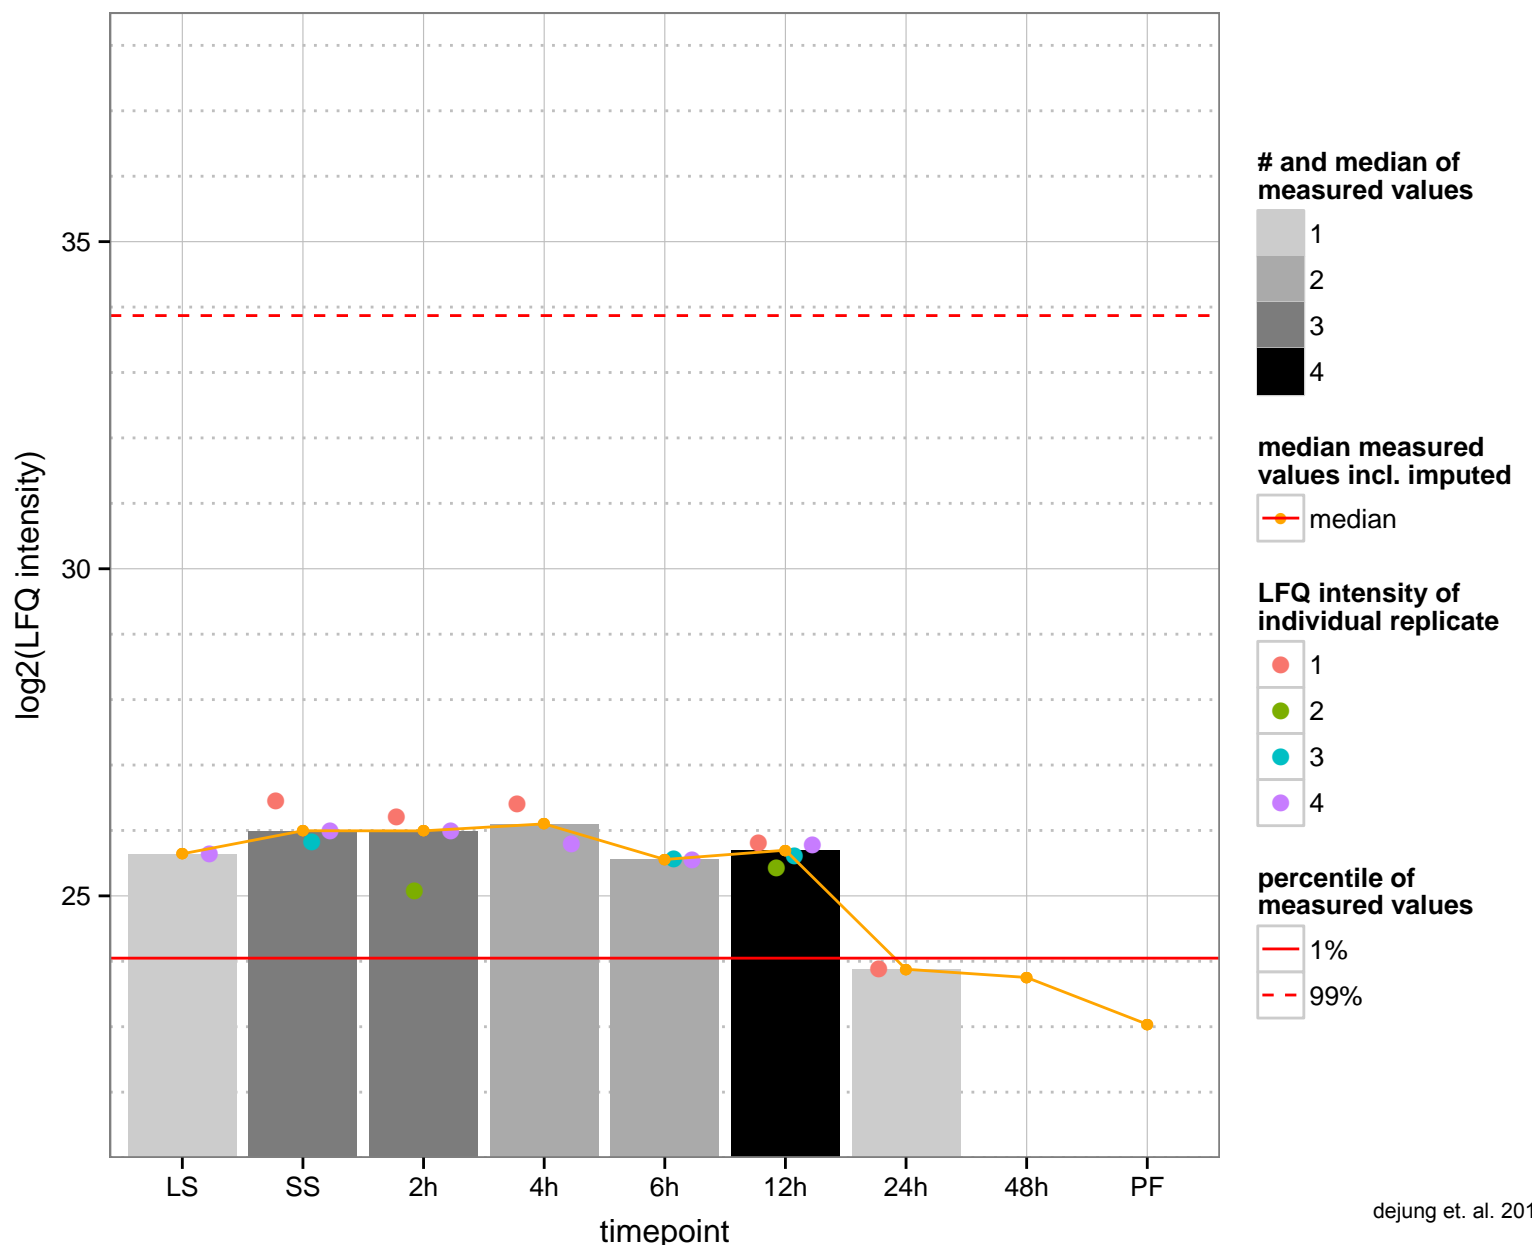

protein kinase A regulatory subunit, putative, protein kinase A regulatory subunit (PKA-R)

Tb927.11.4610;Tb11.v5.0587

AGOF: null, cAMP-dependent protein kinase regulator activity

AGOC: null, cAMP-dependent protein kinase complex

AGOP: null, intracellular signal transduction, modulation of development of symbiont involved in interaction with host, protein p

PGOF: null

PGOC: null

PGOP: null

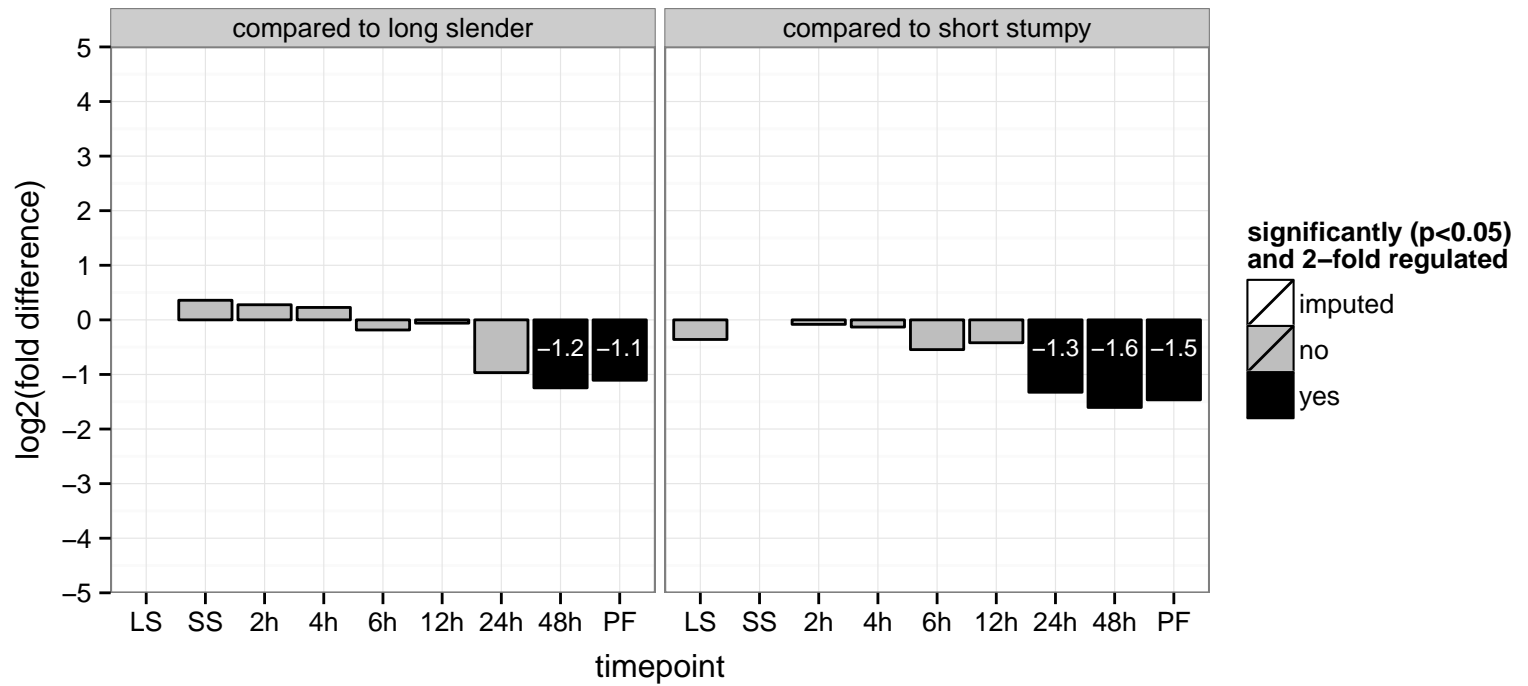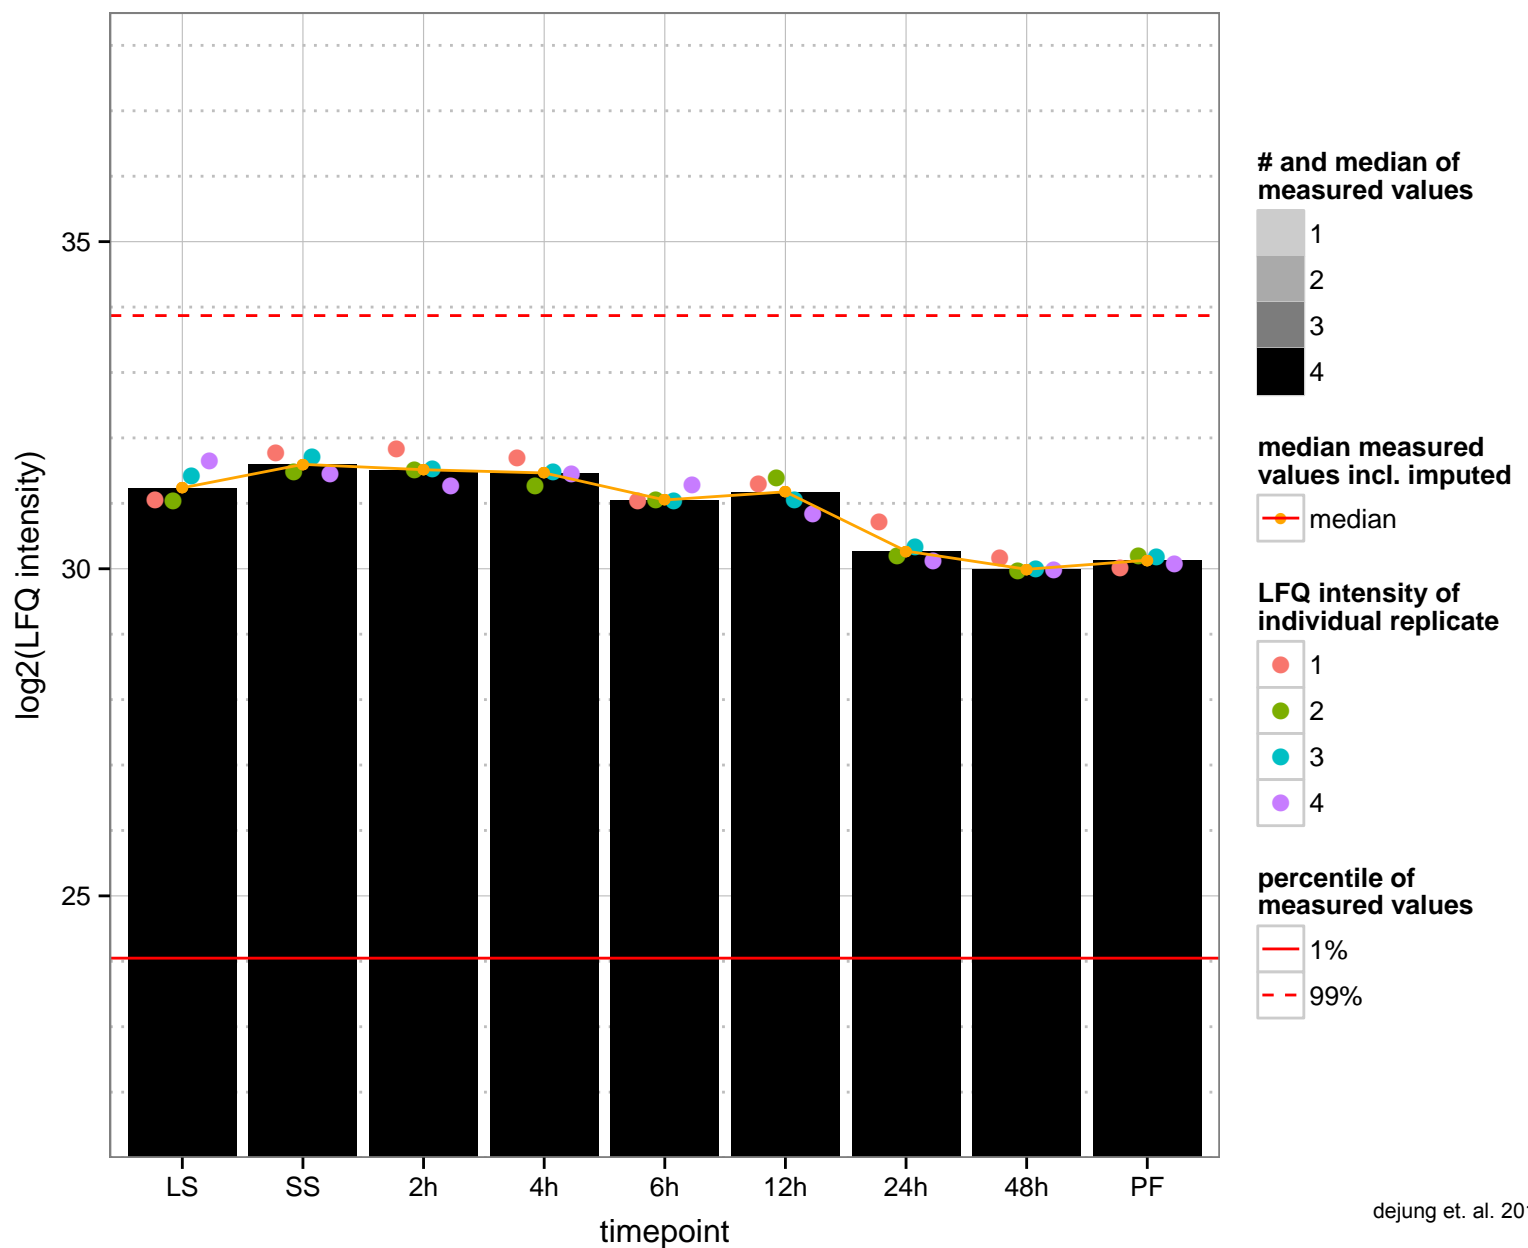

kinesin, putative, C-terminal motor kinesin, putative (TBKIFC1)

Tb927.10.14890;Tb11.v5.0636

AGOF: null, ATP binding, microtubule motor activity, motor activity

AGOC: null, cytoplasm, cytoplasmic microtubule, kinesin complex, kinesin complex, microtubule associated complex

AGOP: null, intracellular protein transport, microtubule-based movement, microtubule-based movement

PGOF: ATP binding, microtubule motor activity

PGOC: null

PGOP: microtubule-based movement, intracellular protein transport, microtubule-based movement

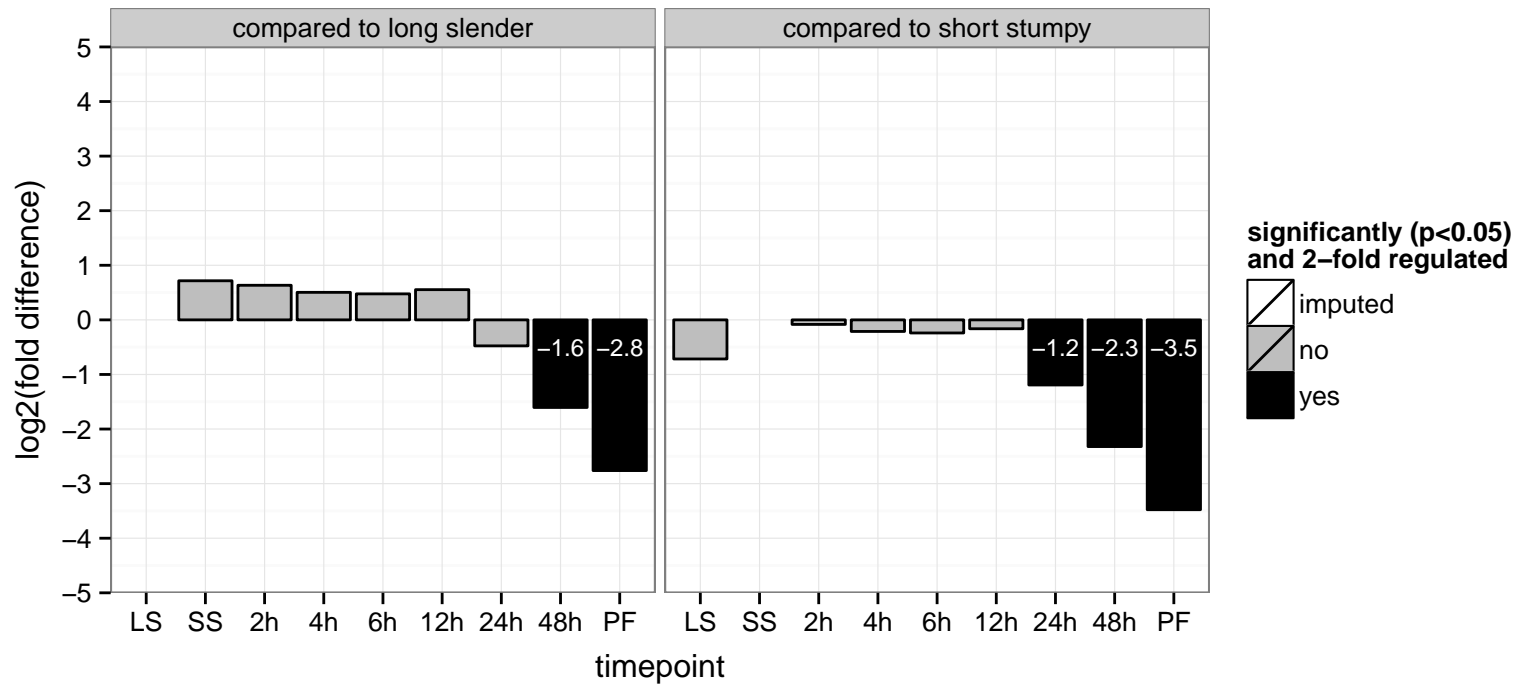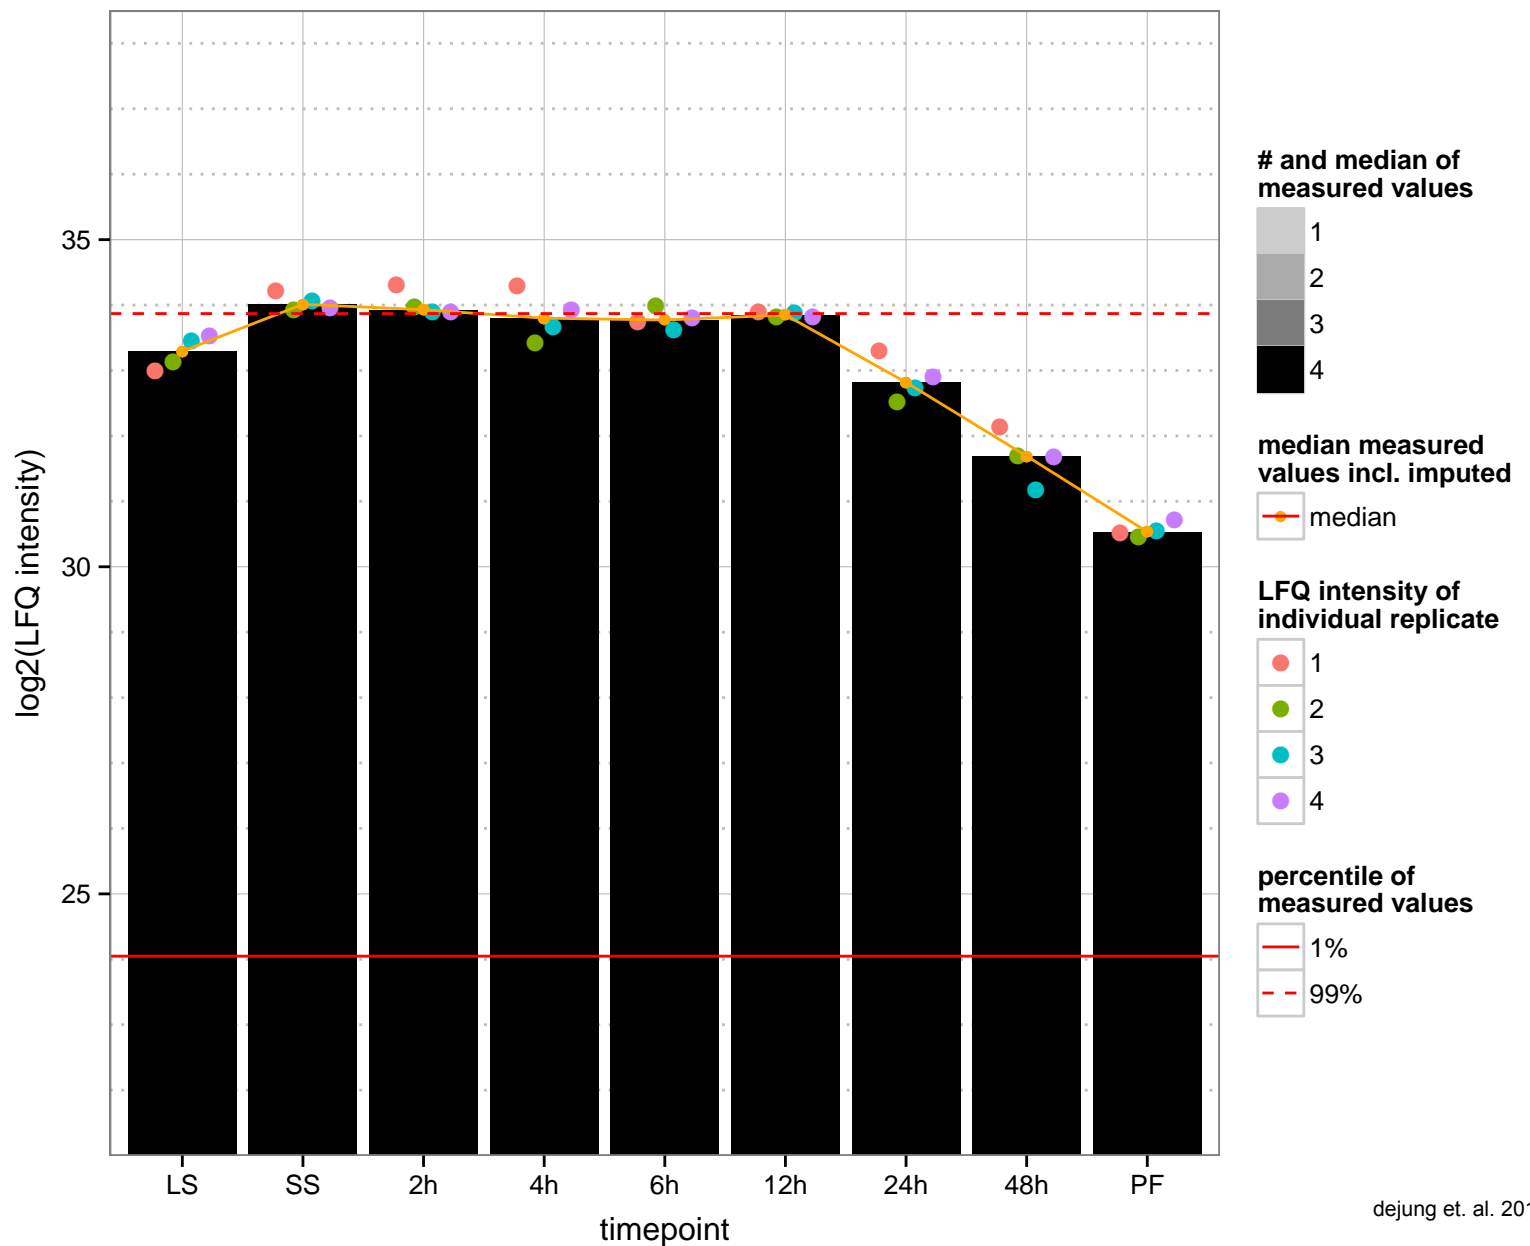

expression site-associated gene (ESAG) protein, putative, expression site-associated gene 5 (ESAG5) protein  
 Tb11.v5.0826;Tb927.7.6860  
 AGOF: null, lipid binding  
 AGOC: null  
 AGOP: null  
 PGOF: lipid binding  
 PGO: null  
 PGOP: null

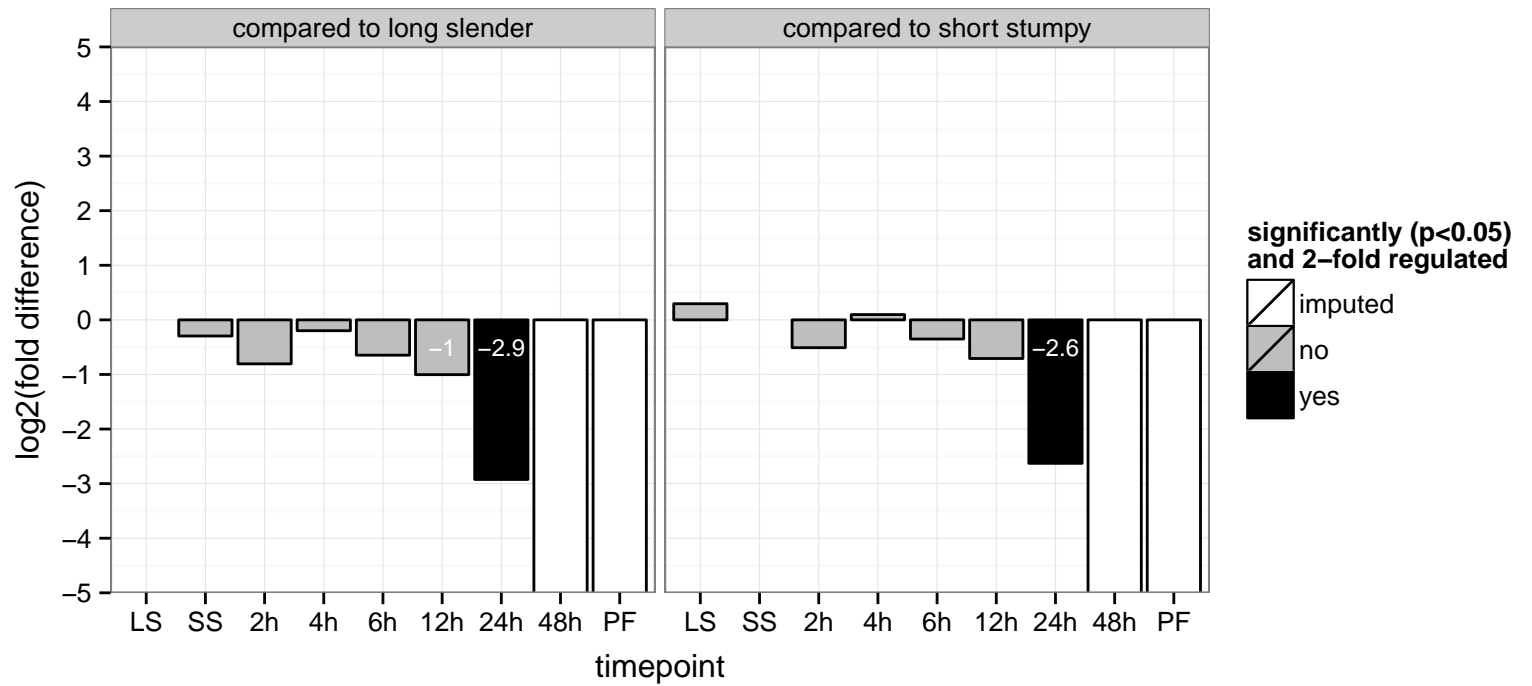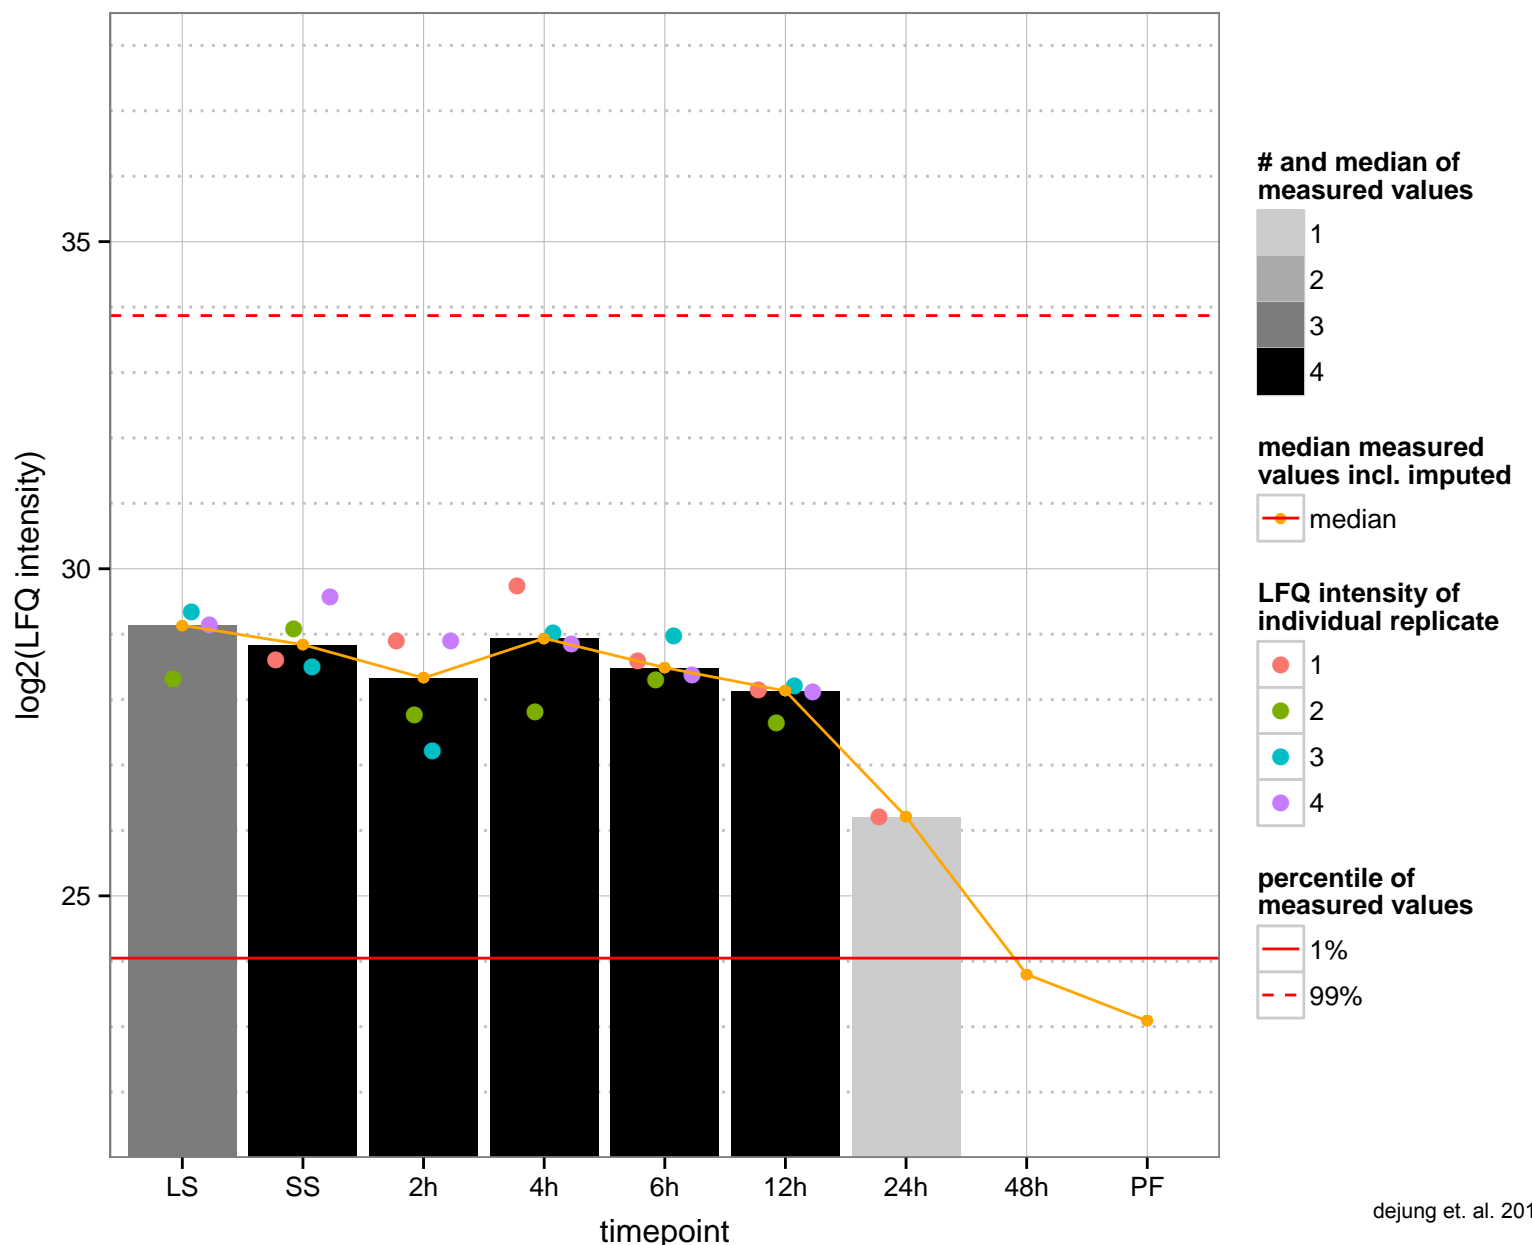



aminoacylase, putative, N-acyl-L-amino acid amidohydrolase  
 Tb927.1.3000  
 AGOF: hydrolase activity, metallopeptidase activity, protein dimerization activity  
 AGOC: null  
 AGOP: proteolysis  
 PGO: hydrolase activity  
 PGOC: null  
 PGOP: metabolic process

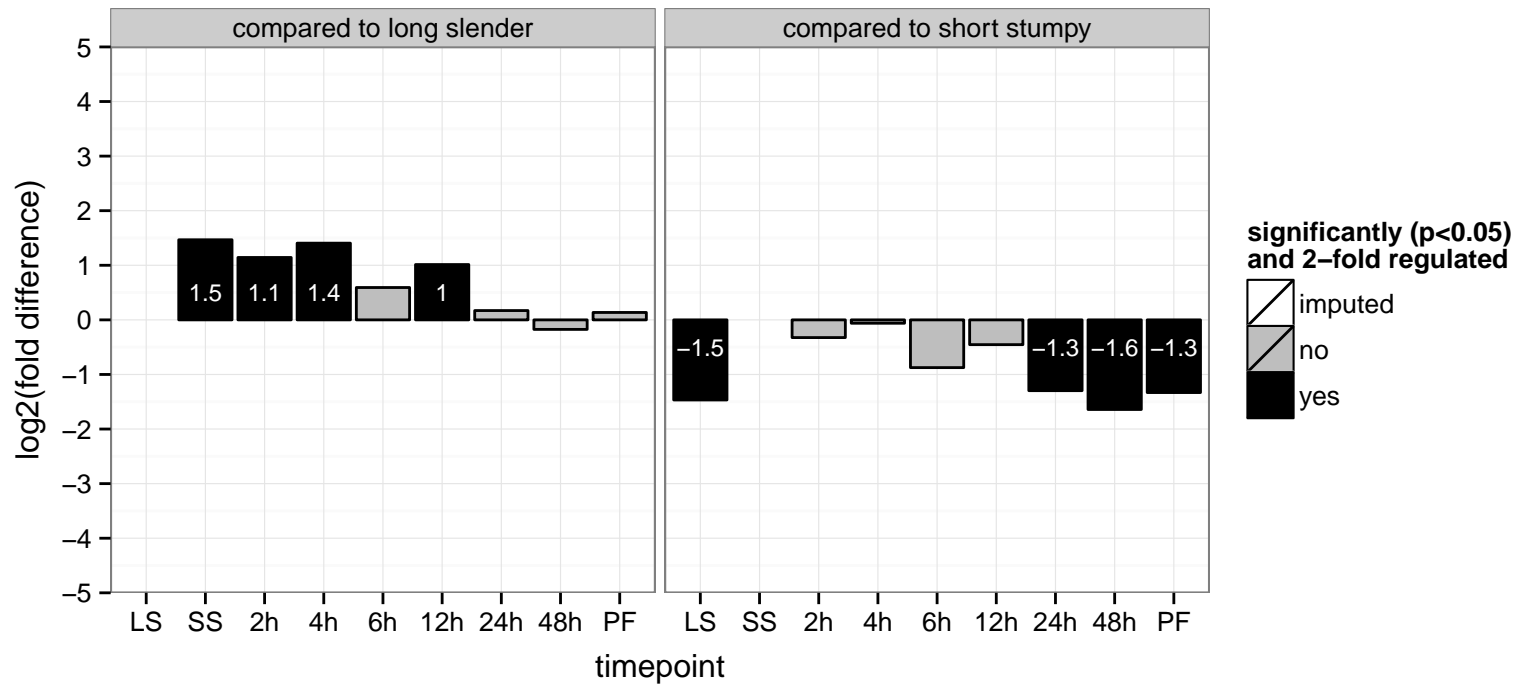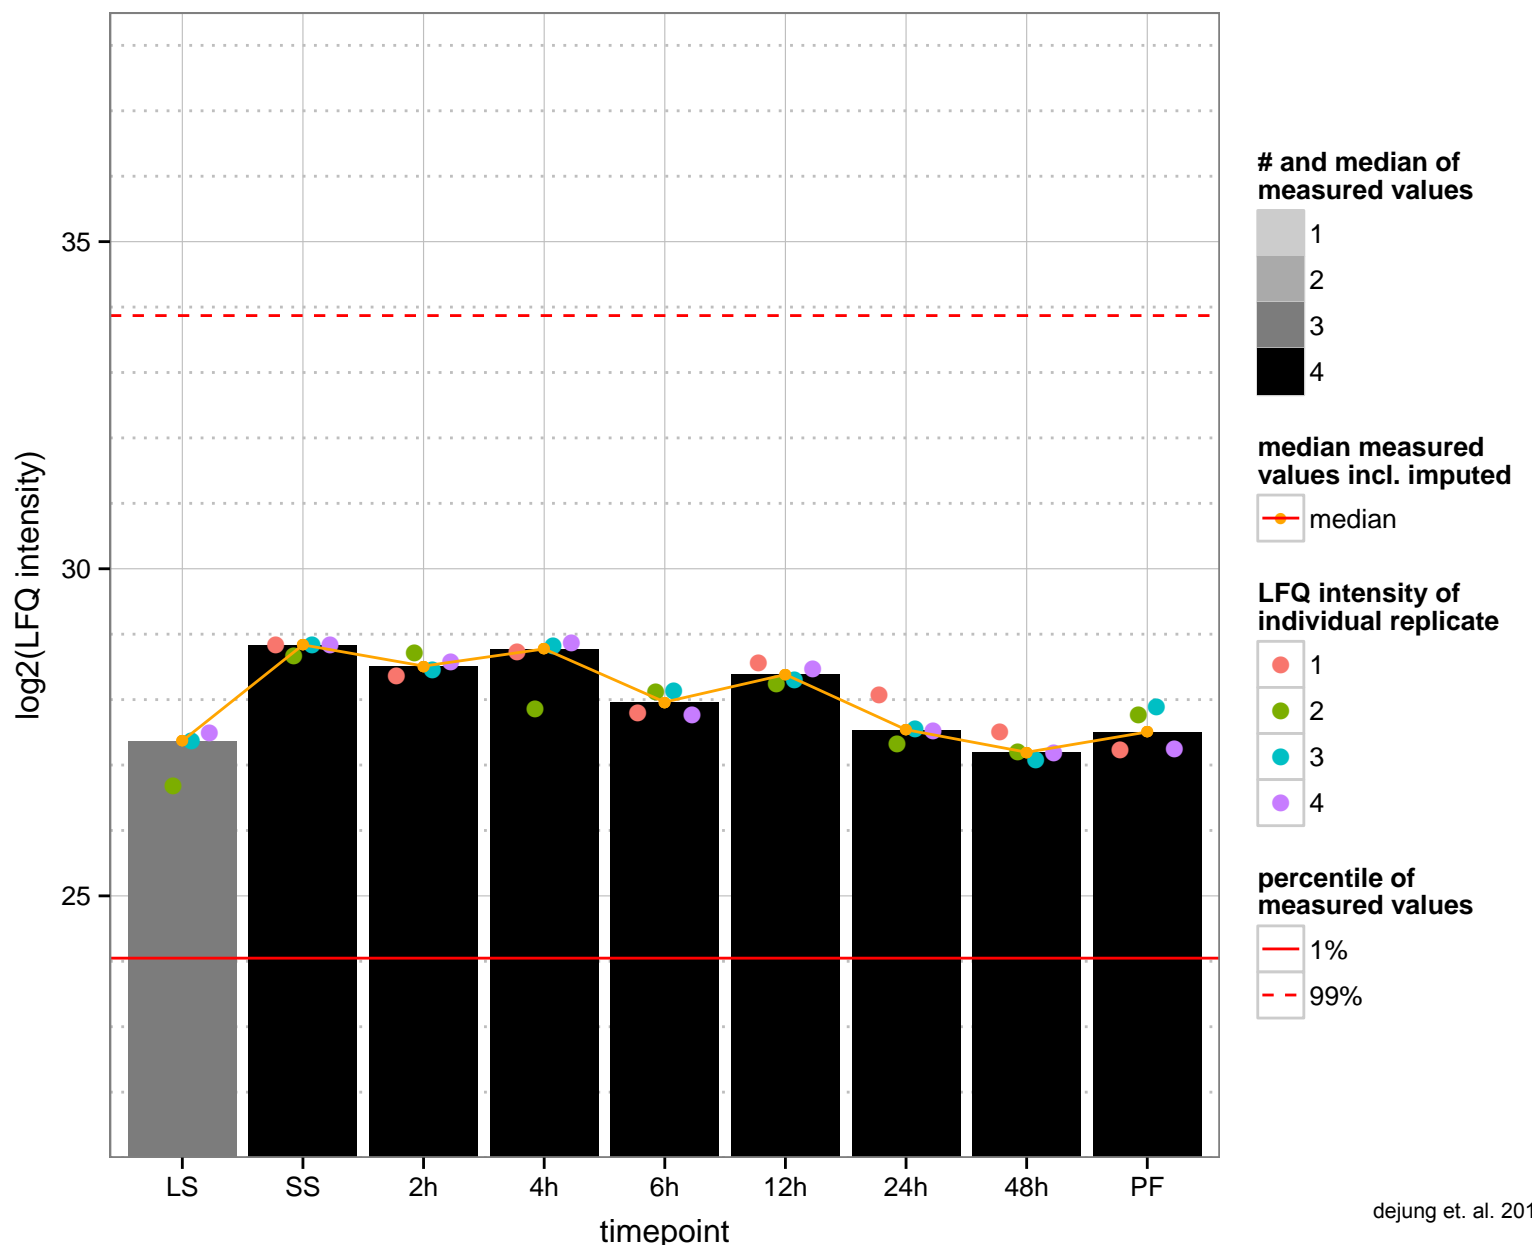

hypothetical protein, conserved  
 Tb927.1.3260  
 AGOF: null  
 AGOC: null  
 AGOP: null  
 PGOF: binding  
 PGO: null  
 PGOP: null

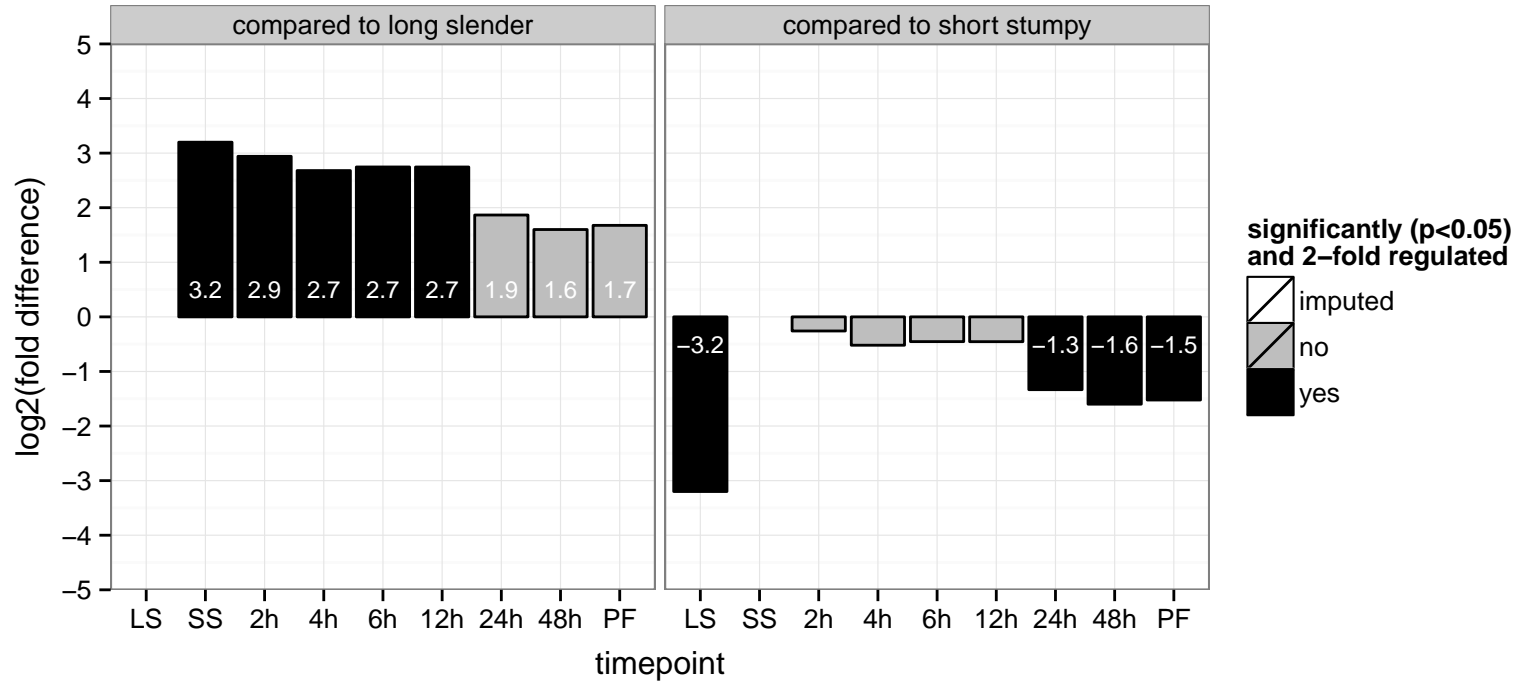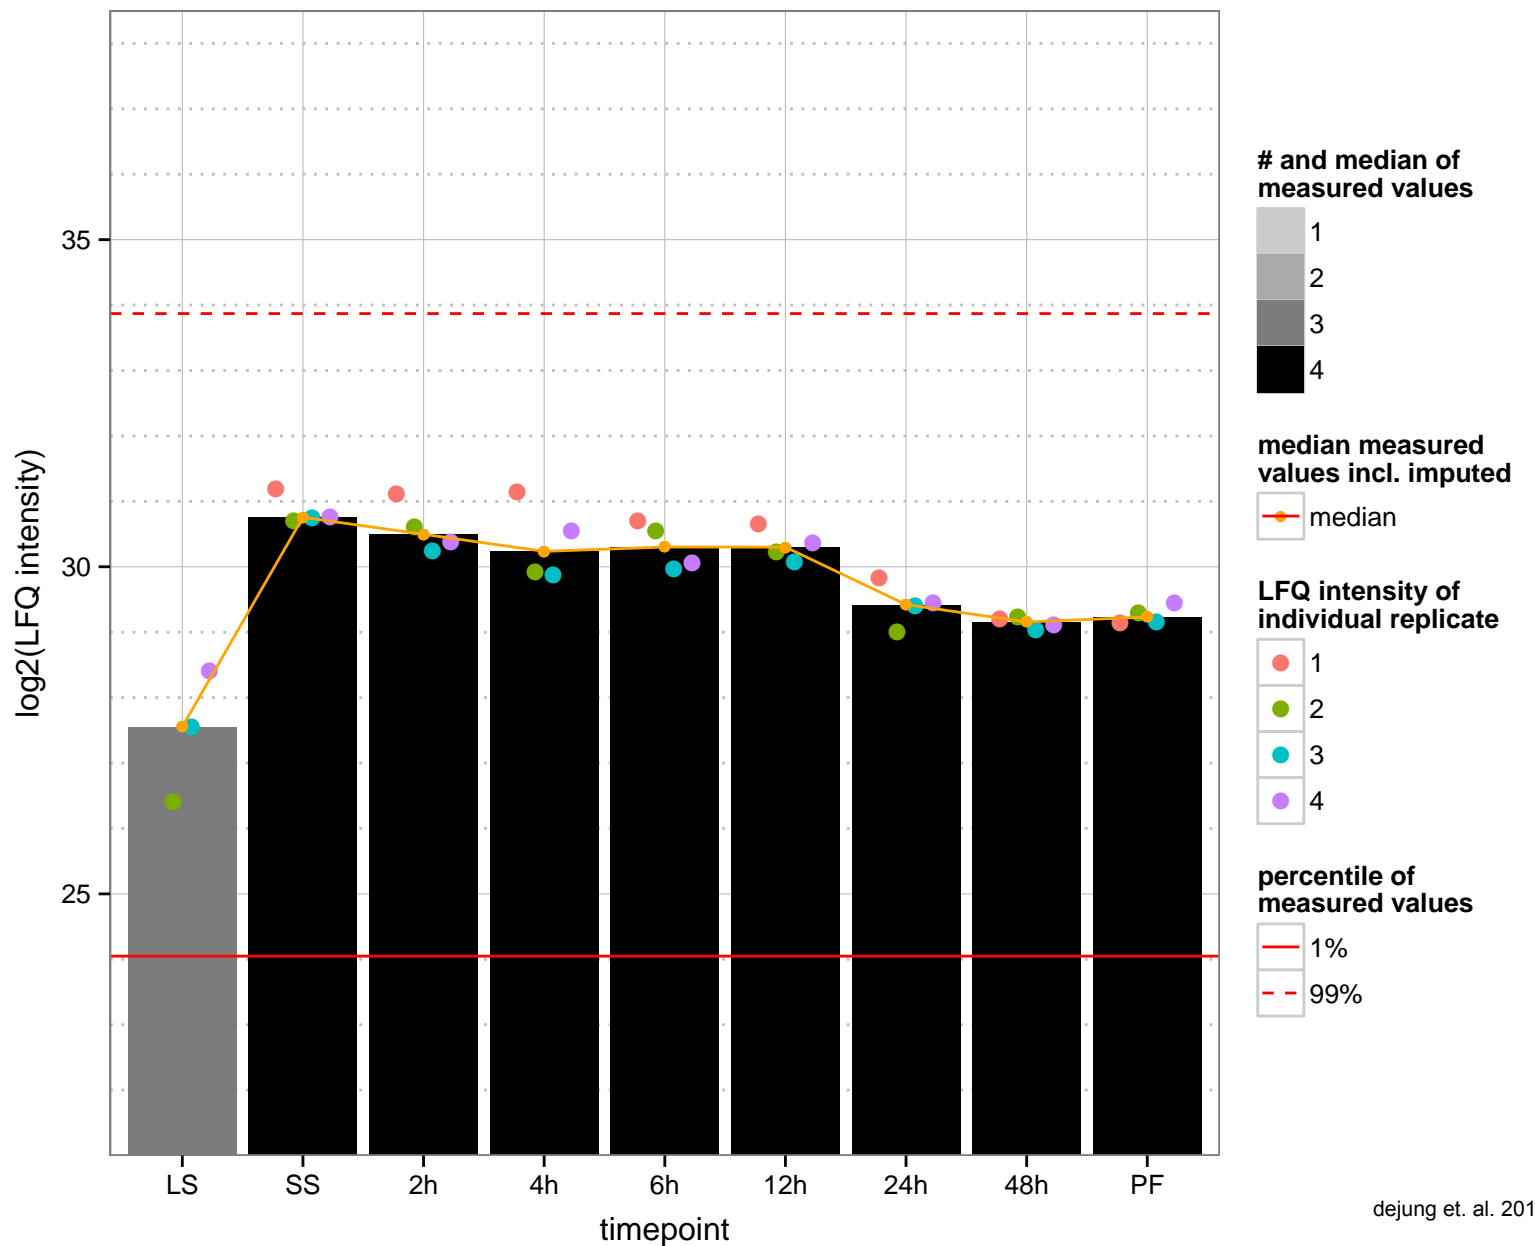

glucose-6-phosphate isomerase, glycosomal (PGI)  
 Tb927.1.3830  
 AGOF: glucose-6-phosphate isomerase activity  
 AGOC: glycosome  
 AGOP: gluconeogenesis, glycolysis  
 PGOF: glucose-6-phosphate isomerase activity  
 PGO: null  
 PGOP: gluconeogenesis, glycolysis

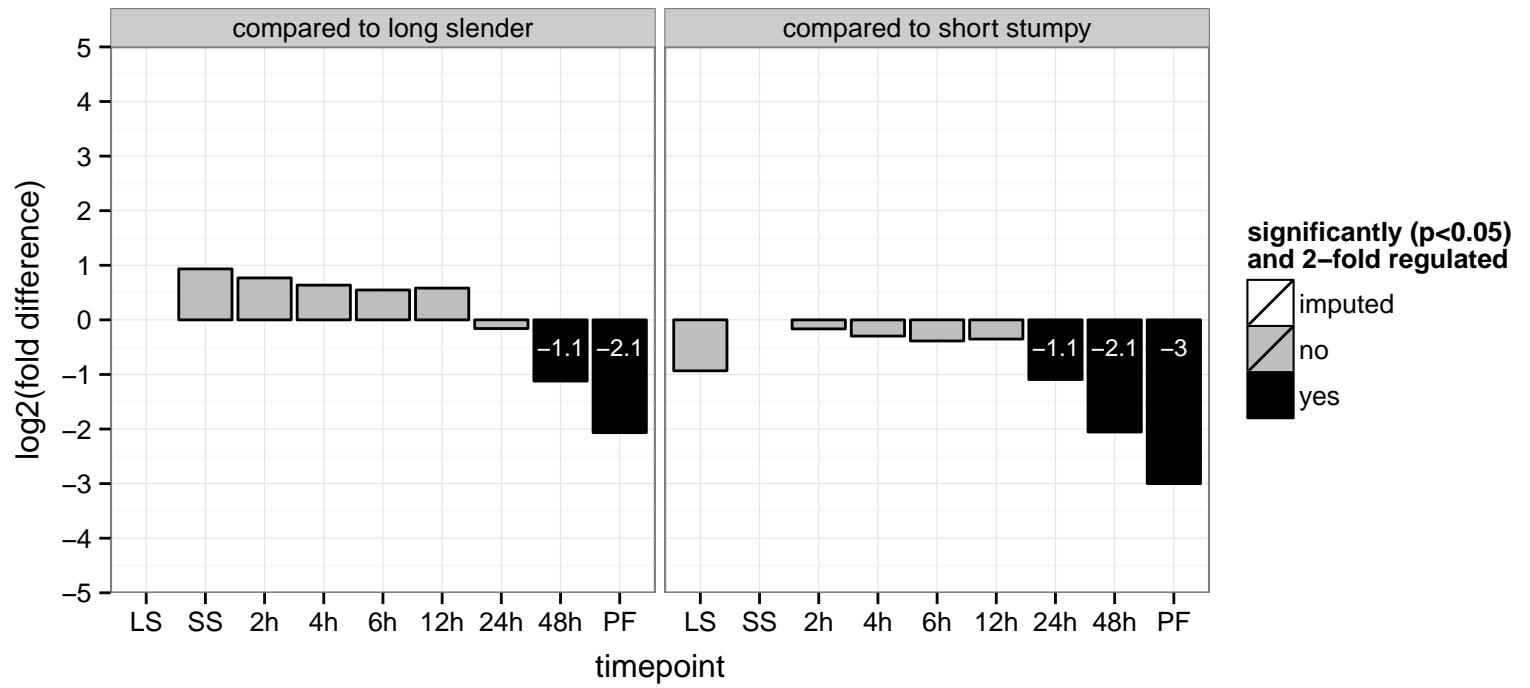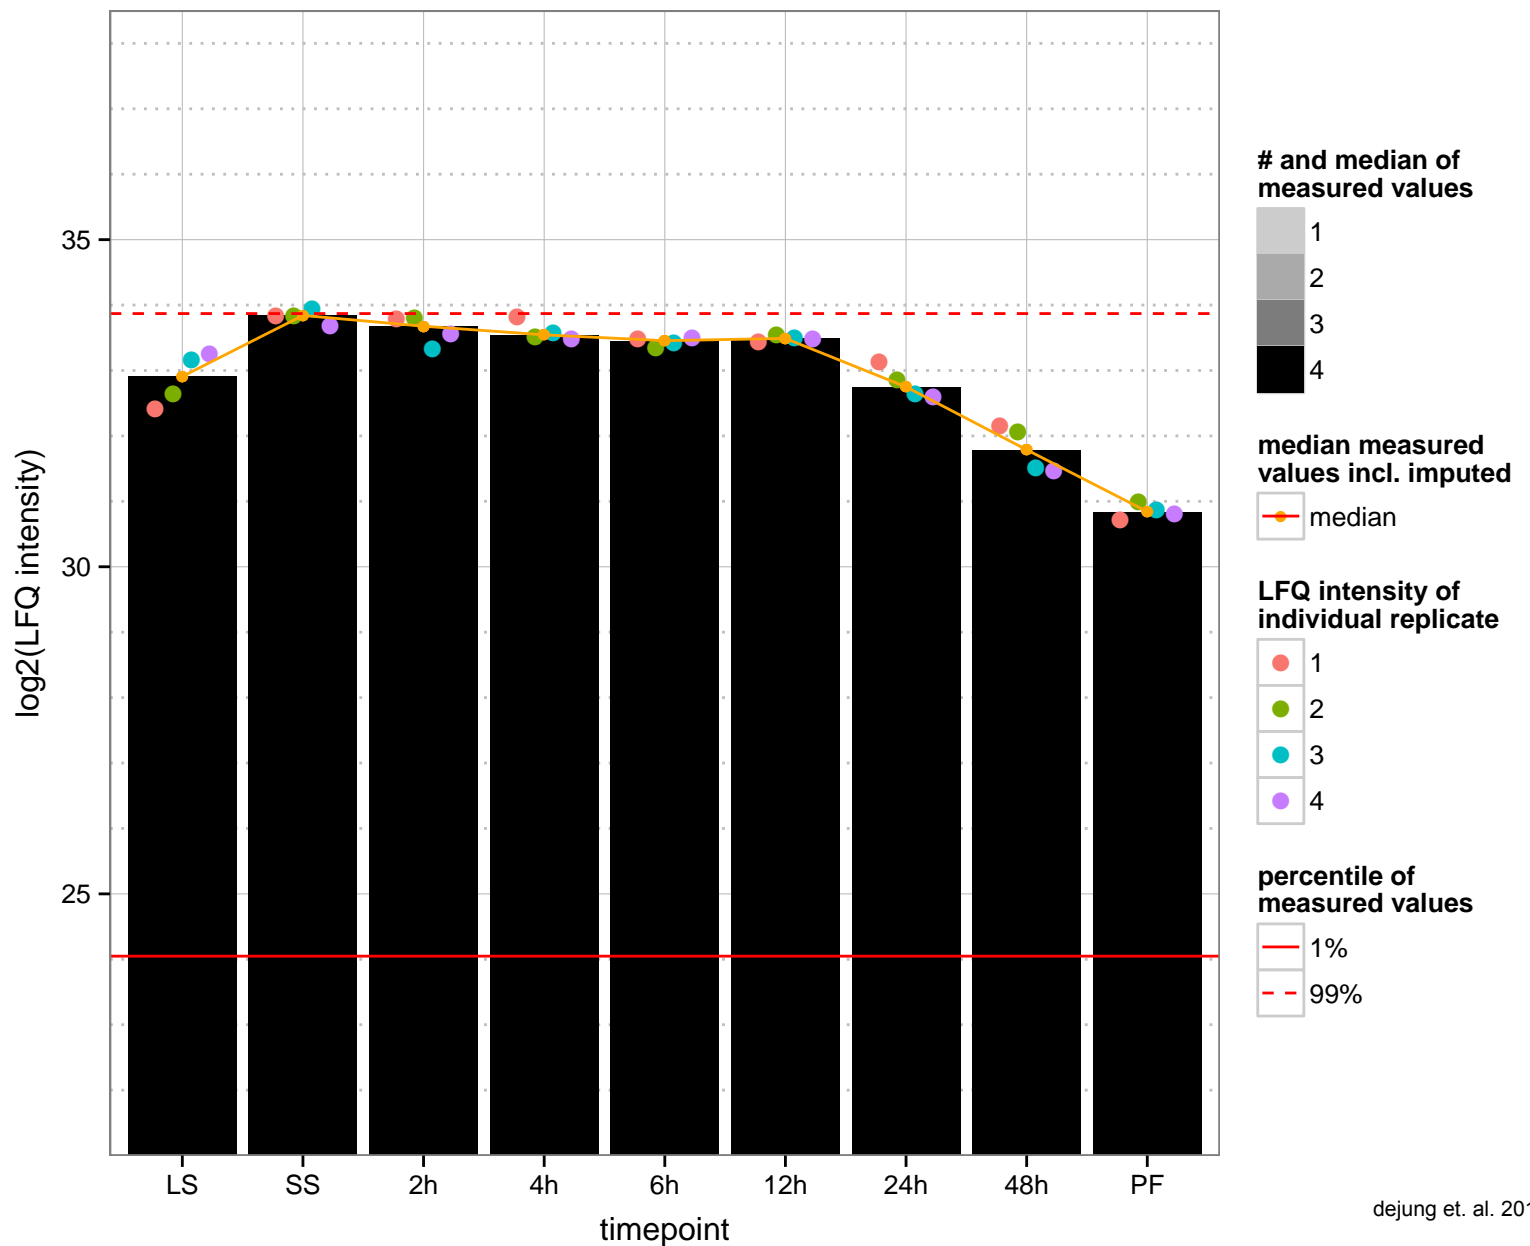

RNA-binding protein, putative (RBP7A)

Tb927.10.12090

AGOF: RNA binding

AGOC: null

AGOP: RNA processing, modulation of development of symbiont involved in interaction with host, quorum sensing involved in

PGOF: nucleic acid binding

PGOC: null

PGOP: null

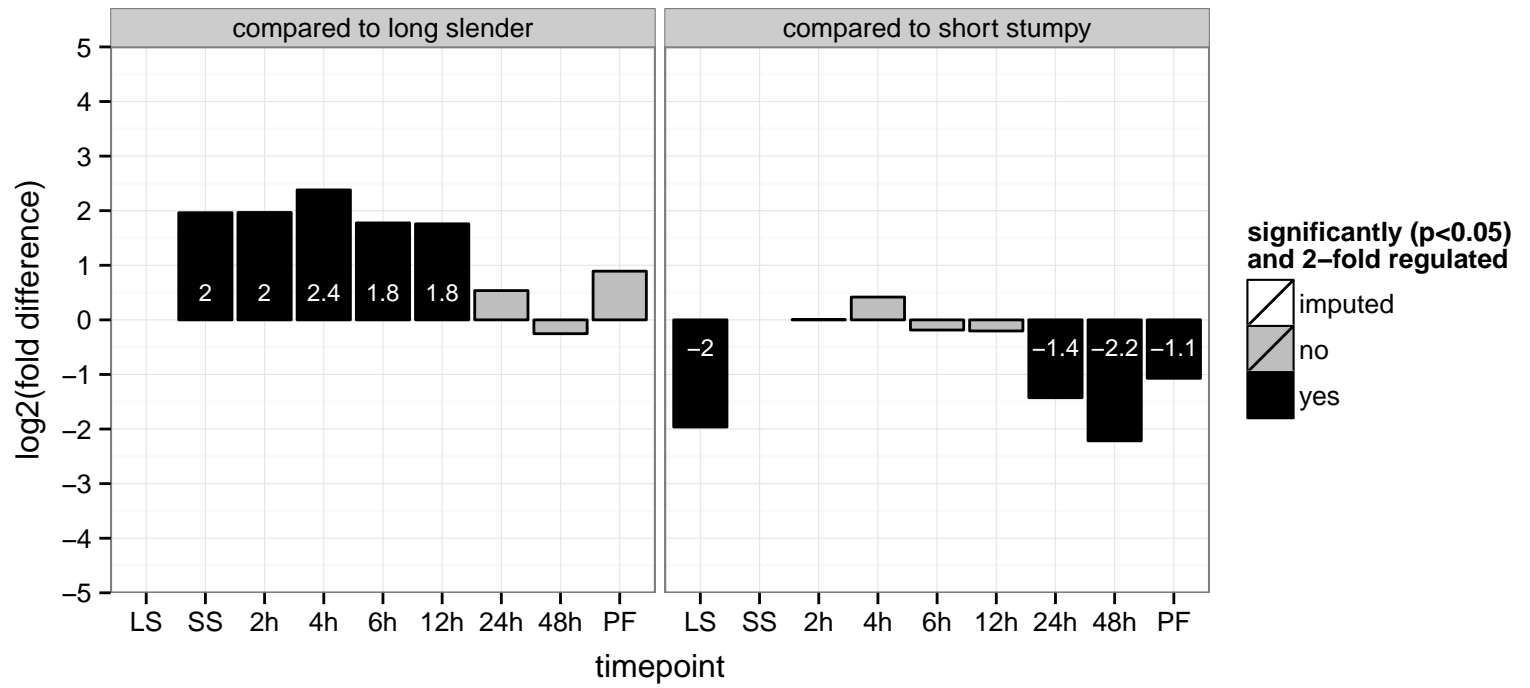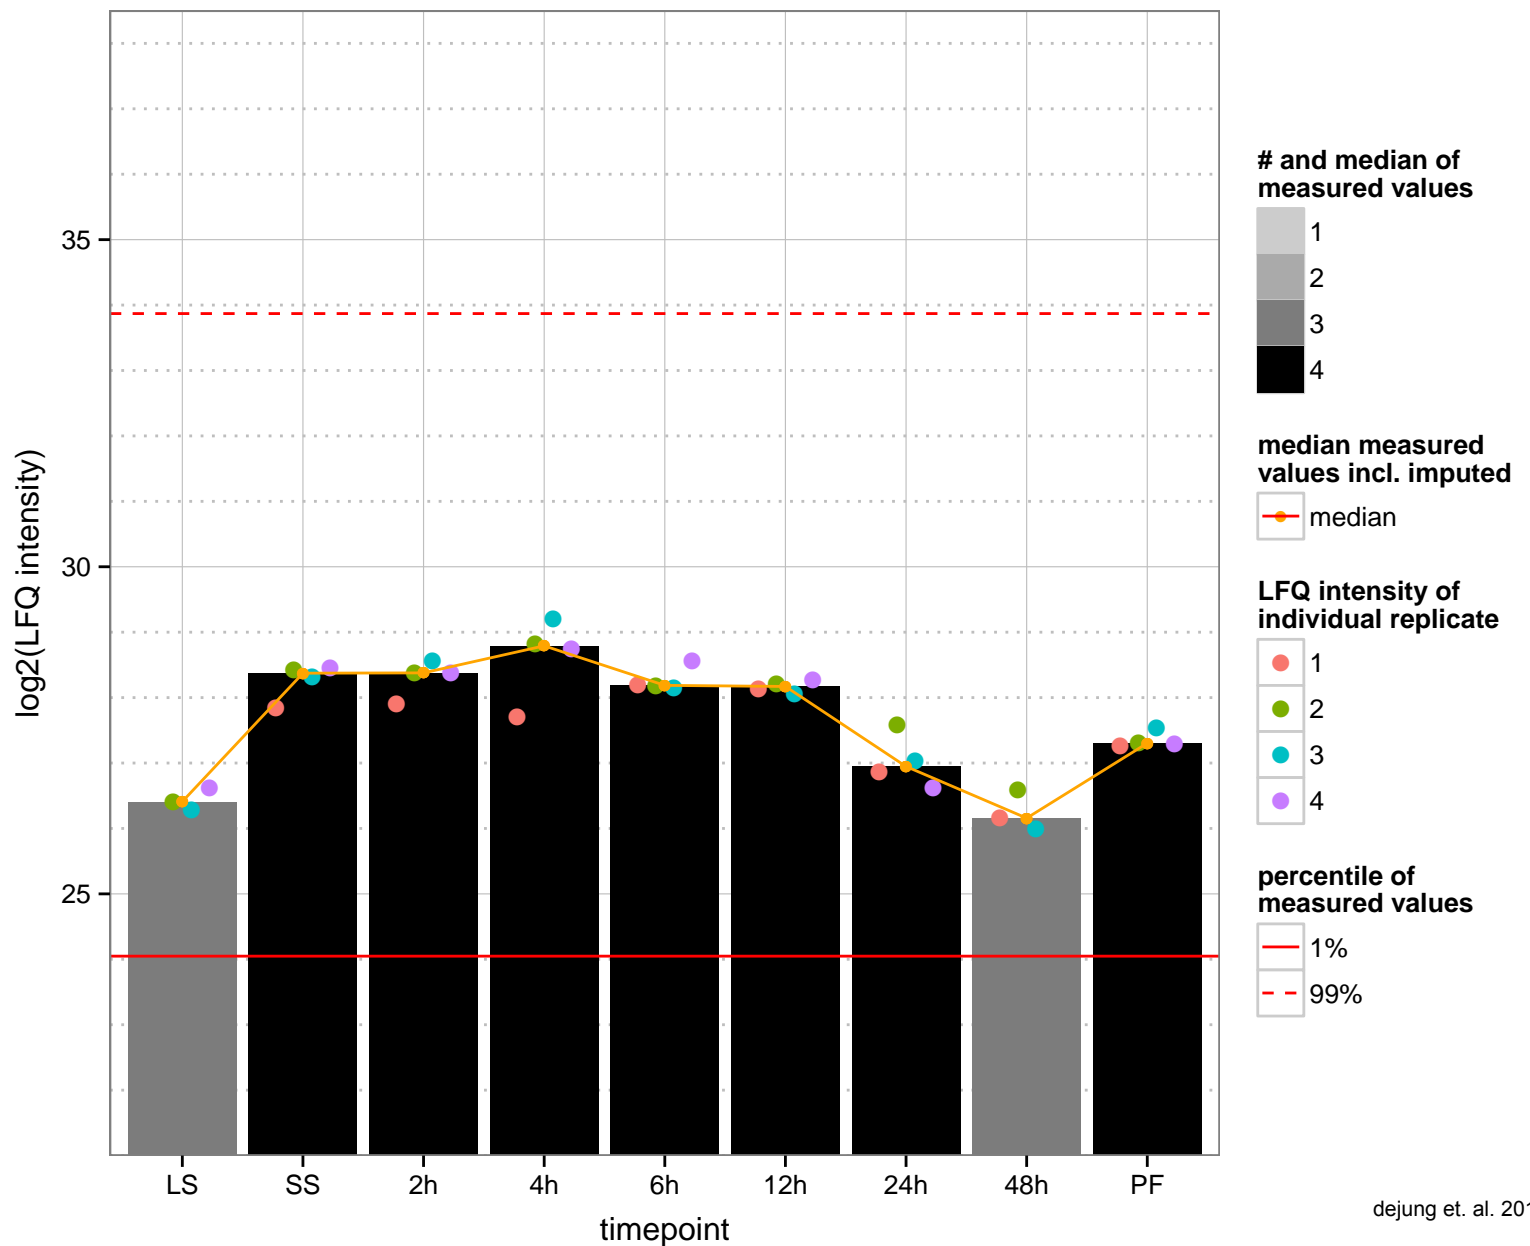

hypothetical protein, conserved  
 Tb927.10.12590  
 AGOF: null  
 AGOC: null  
 AGOP: null  
 PGOF: protein binding  
 PGO: null  
 PGOP: null

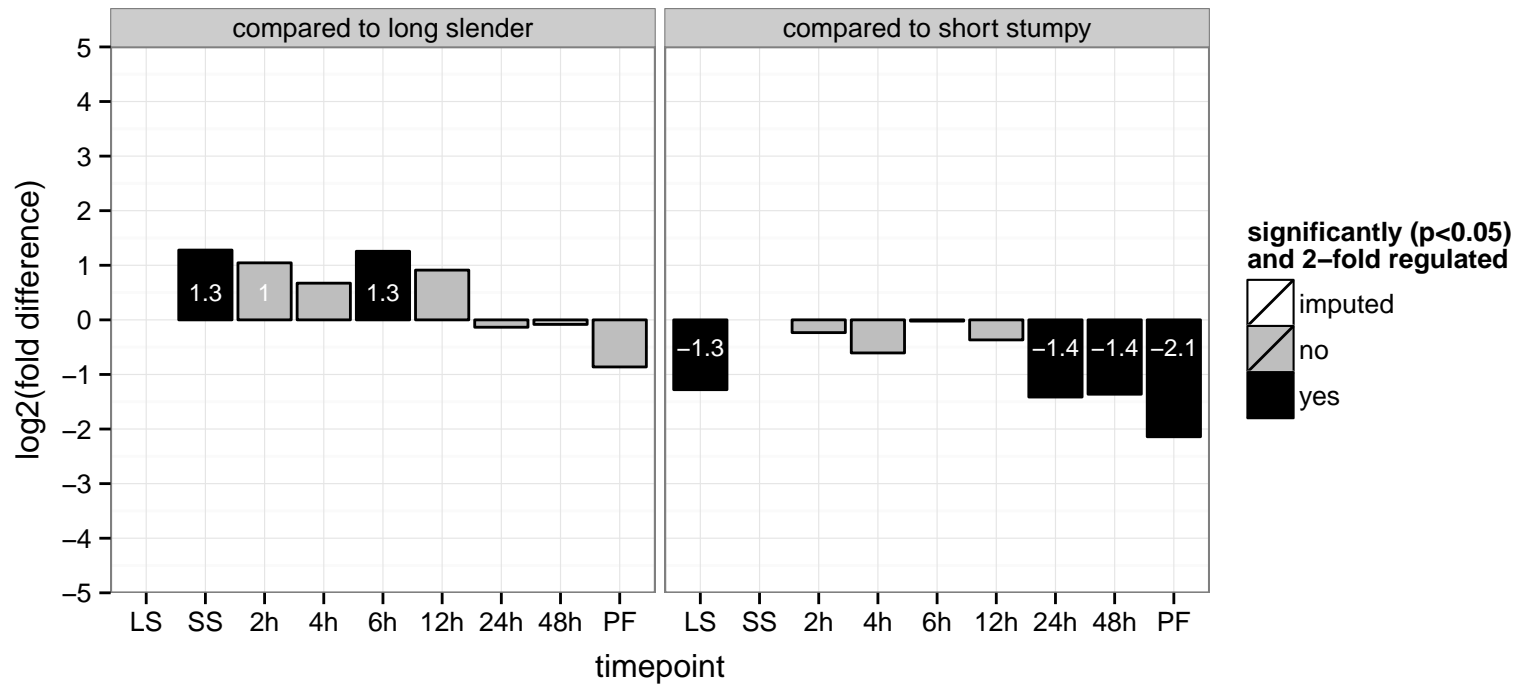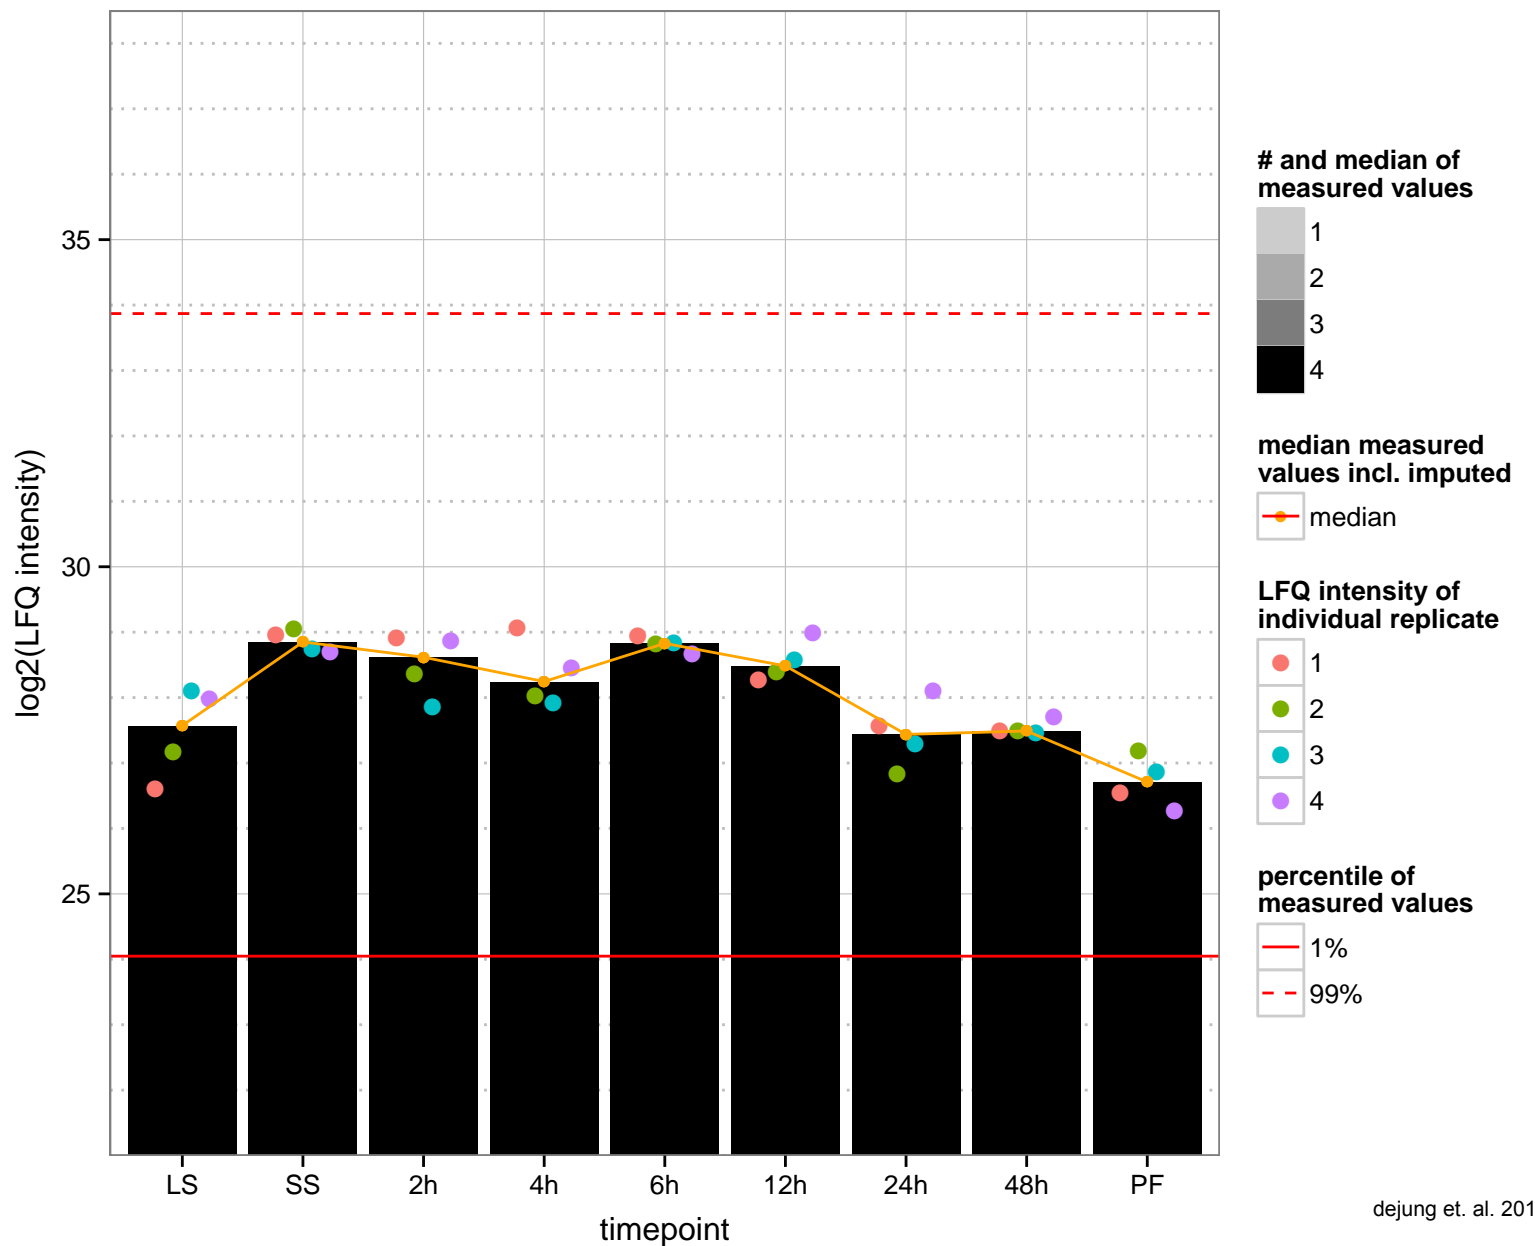

hypothetical protein, conserved  
 Tb927.10.12820  
 AGOF: null  
 AGOC: null  
 AGOP: null  
 PGO: null  
 PGOC: null  
 PGOP: null

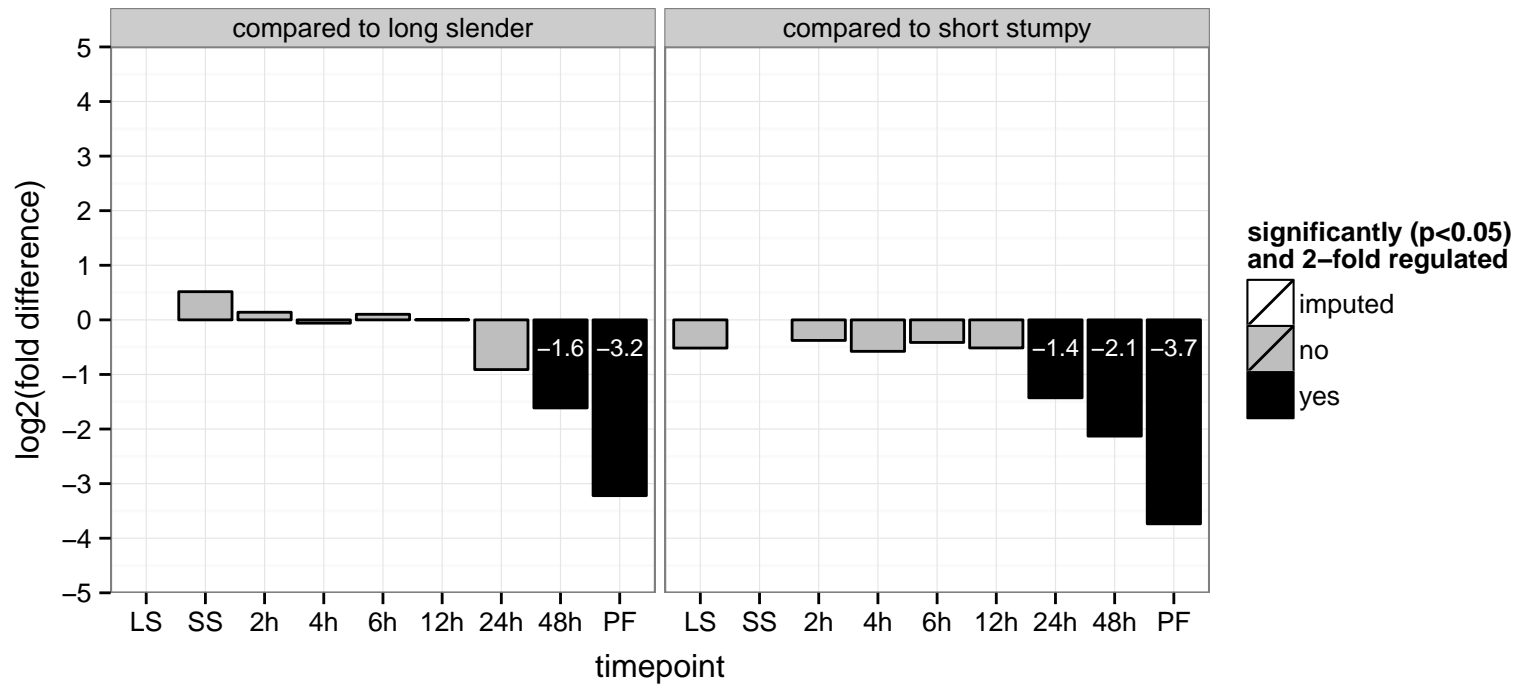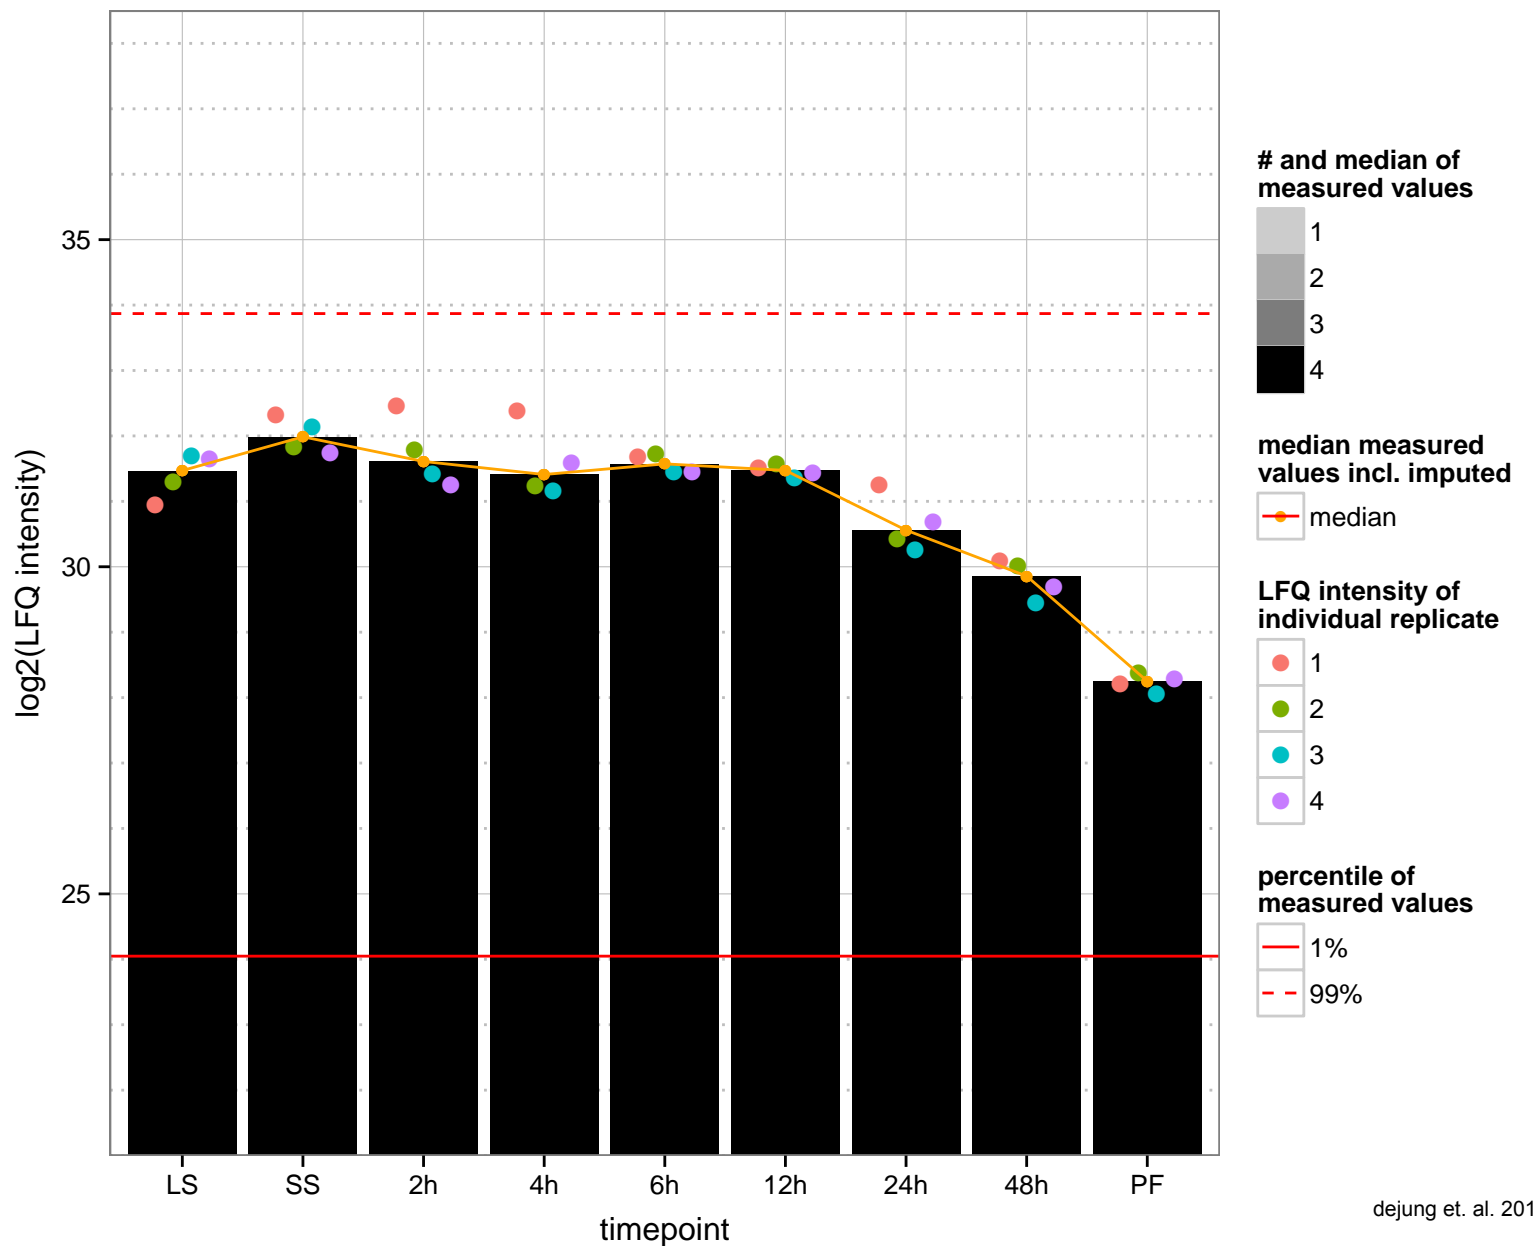

hypothetical protein, conserved  
 Tb927.10.13790  
 AGOF: null  
 AGOC: null  
 AGOP: null  
 PGO: null  
 PGOC: null  
 PGOP: null

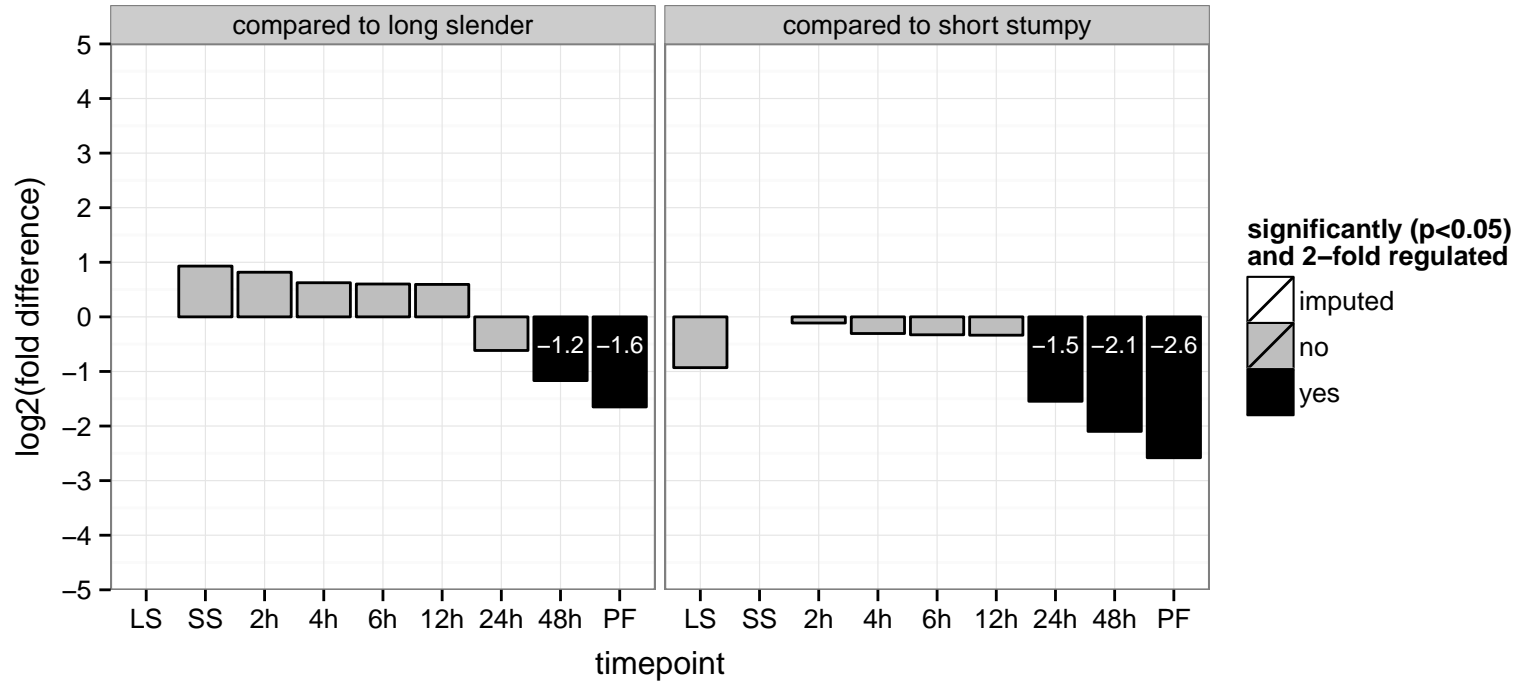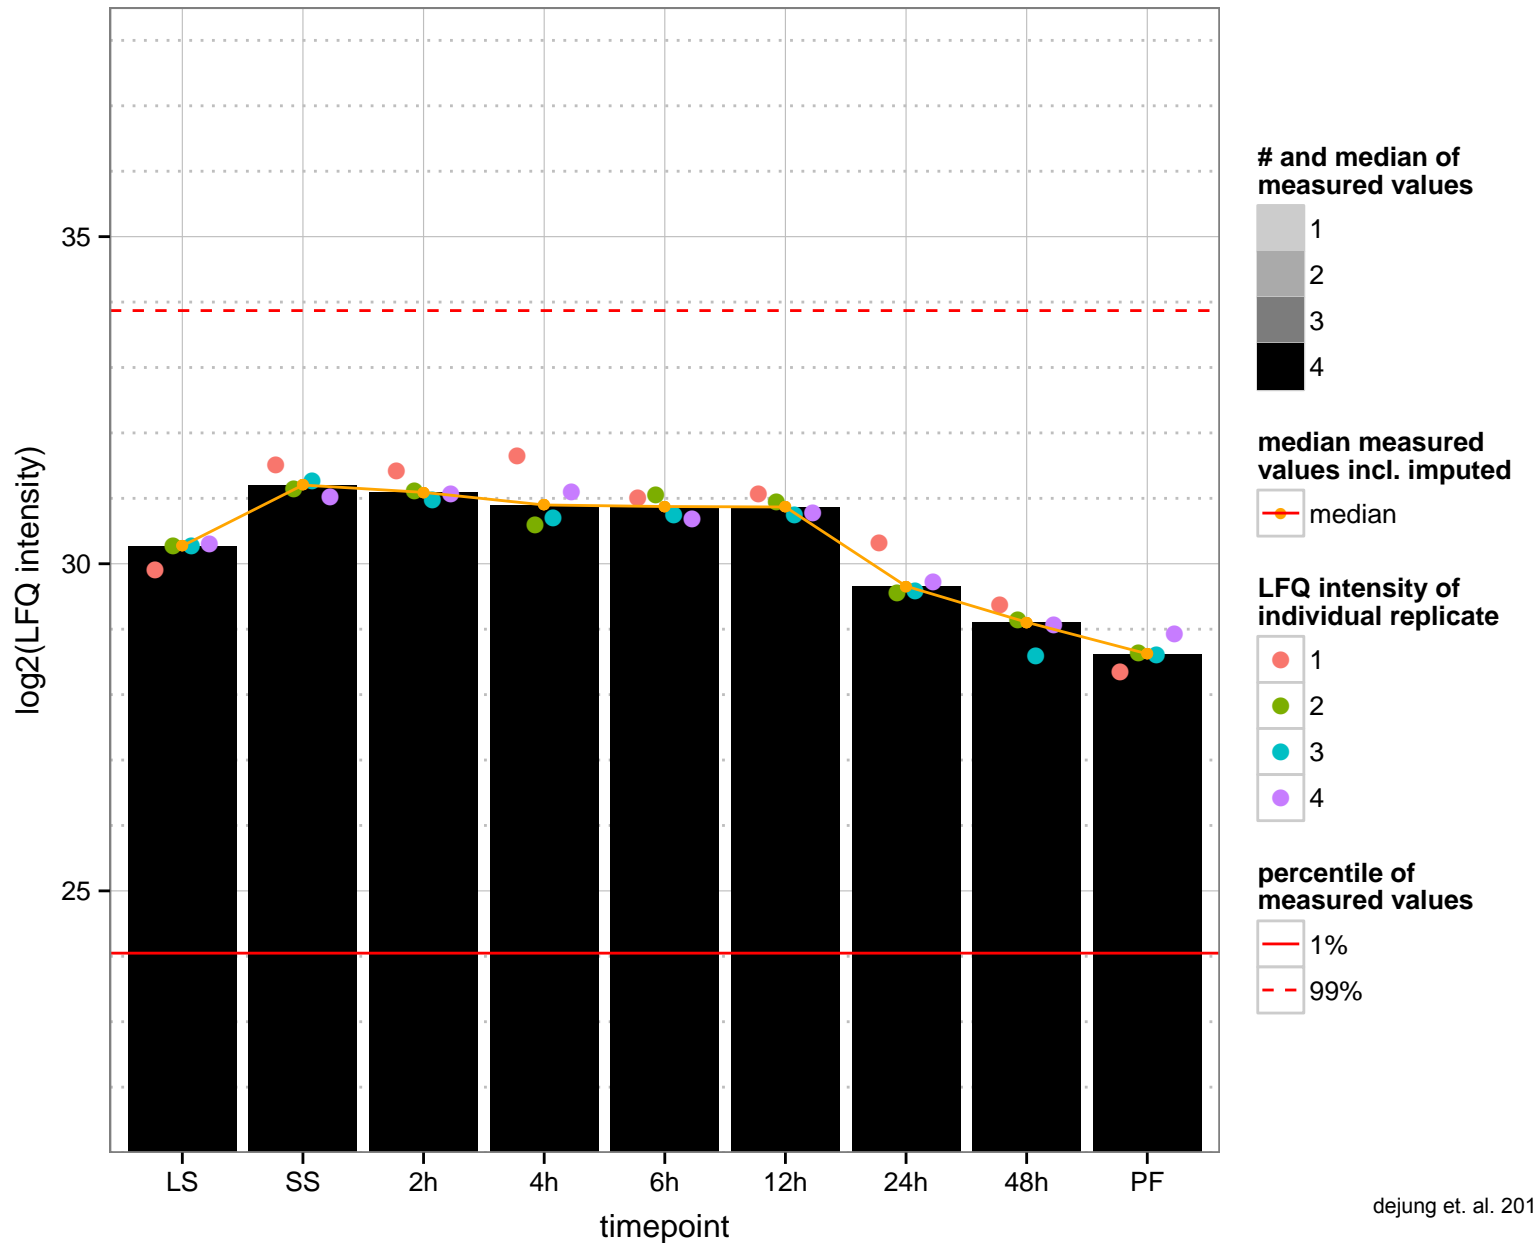

pyruvate kinase 1, putative, pyruvate kinase 1 (PYK1)

Tb927.10.14140;Tb11.v5.0605

AGOF: null, magnesium ion binding, potassium ion binding, pyruvate kinase activity

AGOC: null, cytoplasm

AGOP: null, glycolysis

PGOF: catalytic activity, magnesium ion binding, potassium ion binding, pyruvate kinase activity

PGOC: null

PGOP: glycolysis

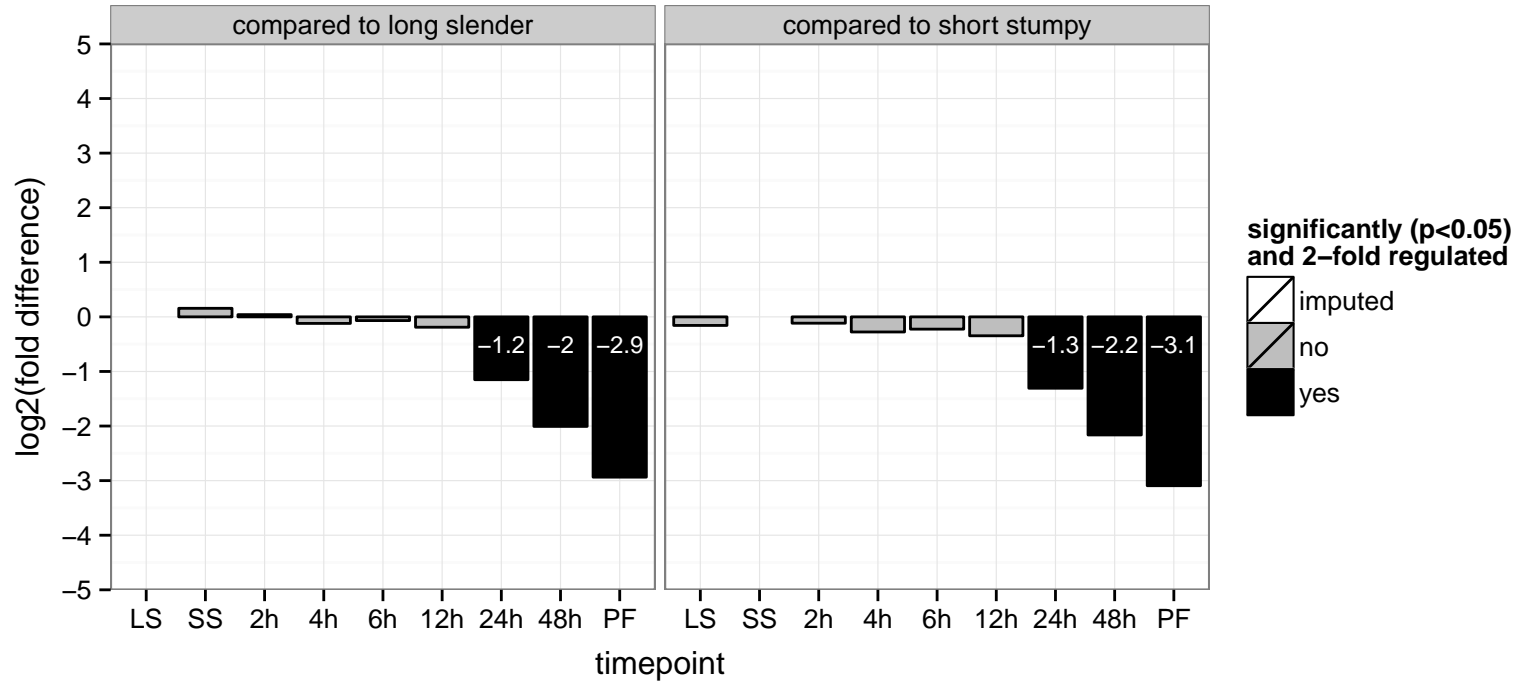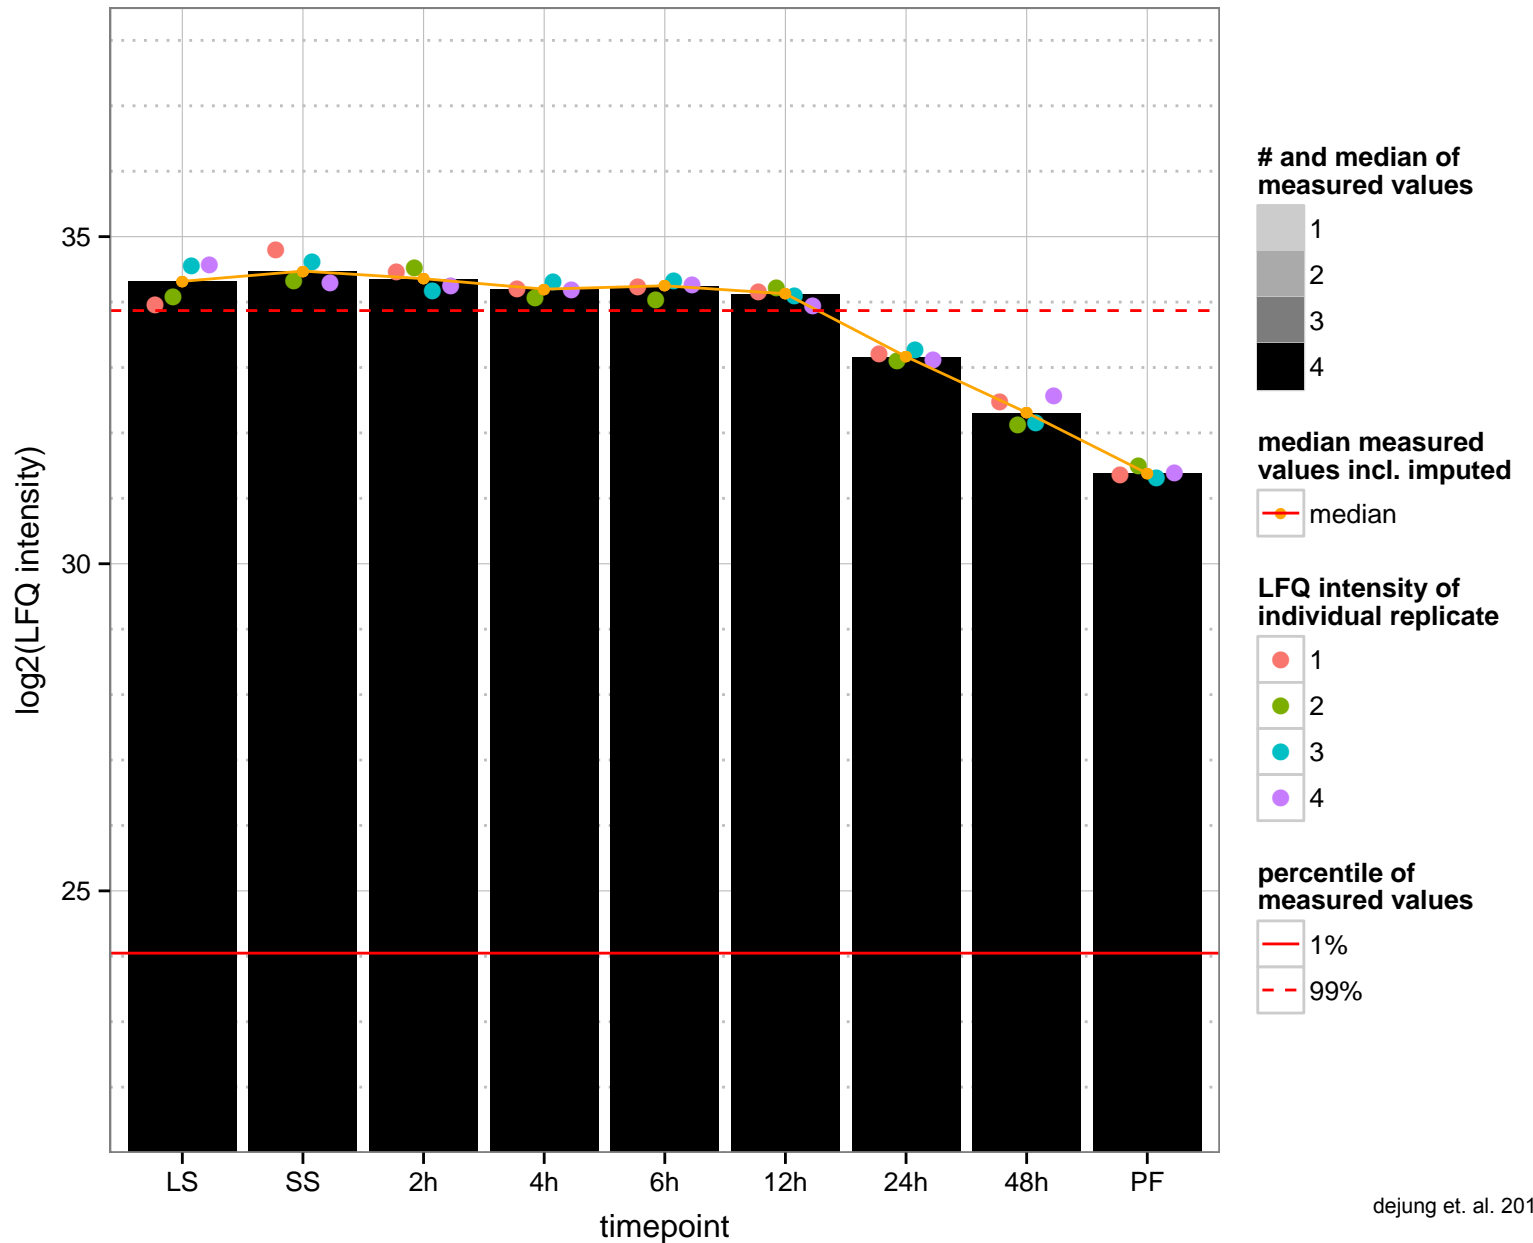



Aquaglyceroporin 3 (AQP3)  
 Tb927.10.14160  
 AGOF: glycerol channel activity, water channel activity  
 AGOC: plasma membrane  
 AGOP: glycerol transport  
 PGO: transporter activity  
 PGO: integral to membrane, membrane  
 PGO: transmembrane transport, transport, water transport

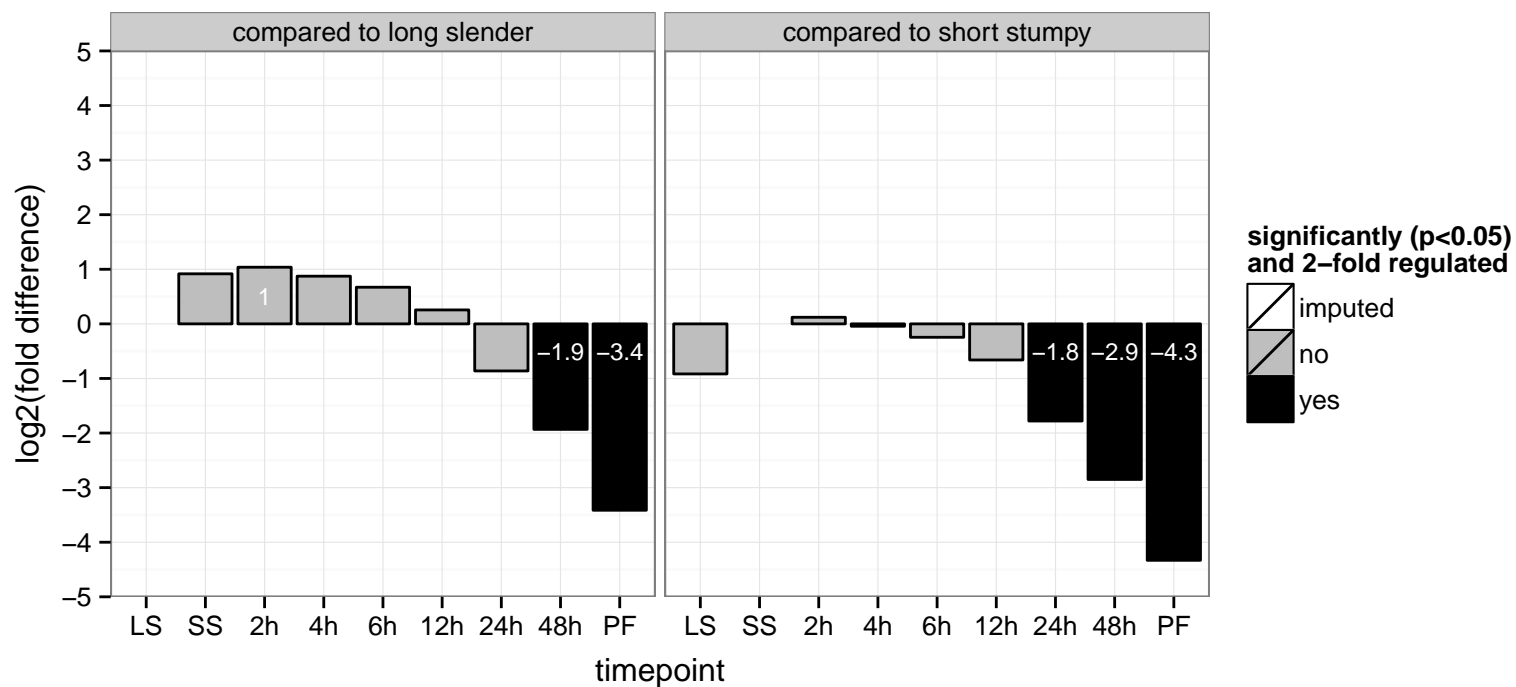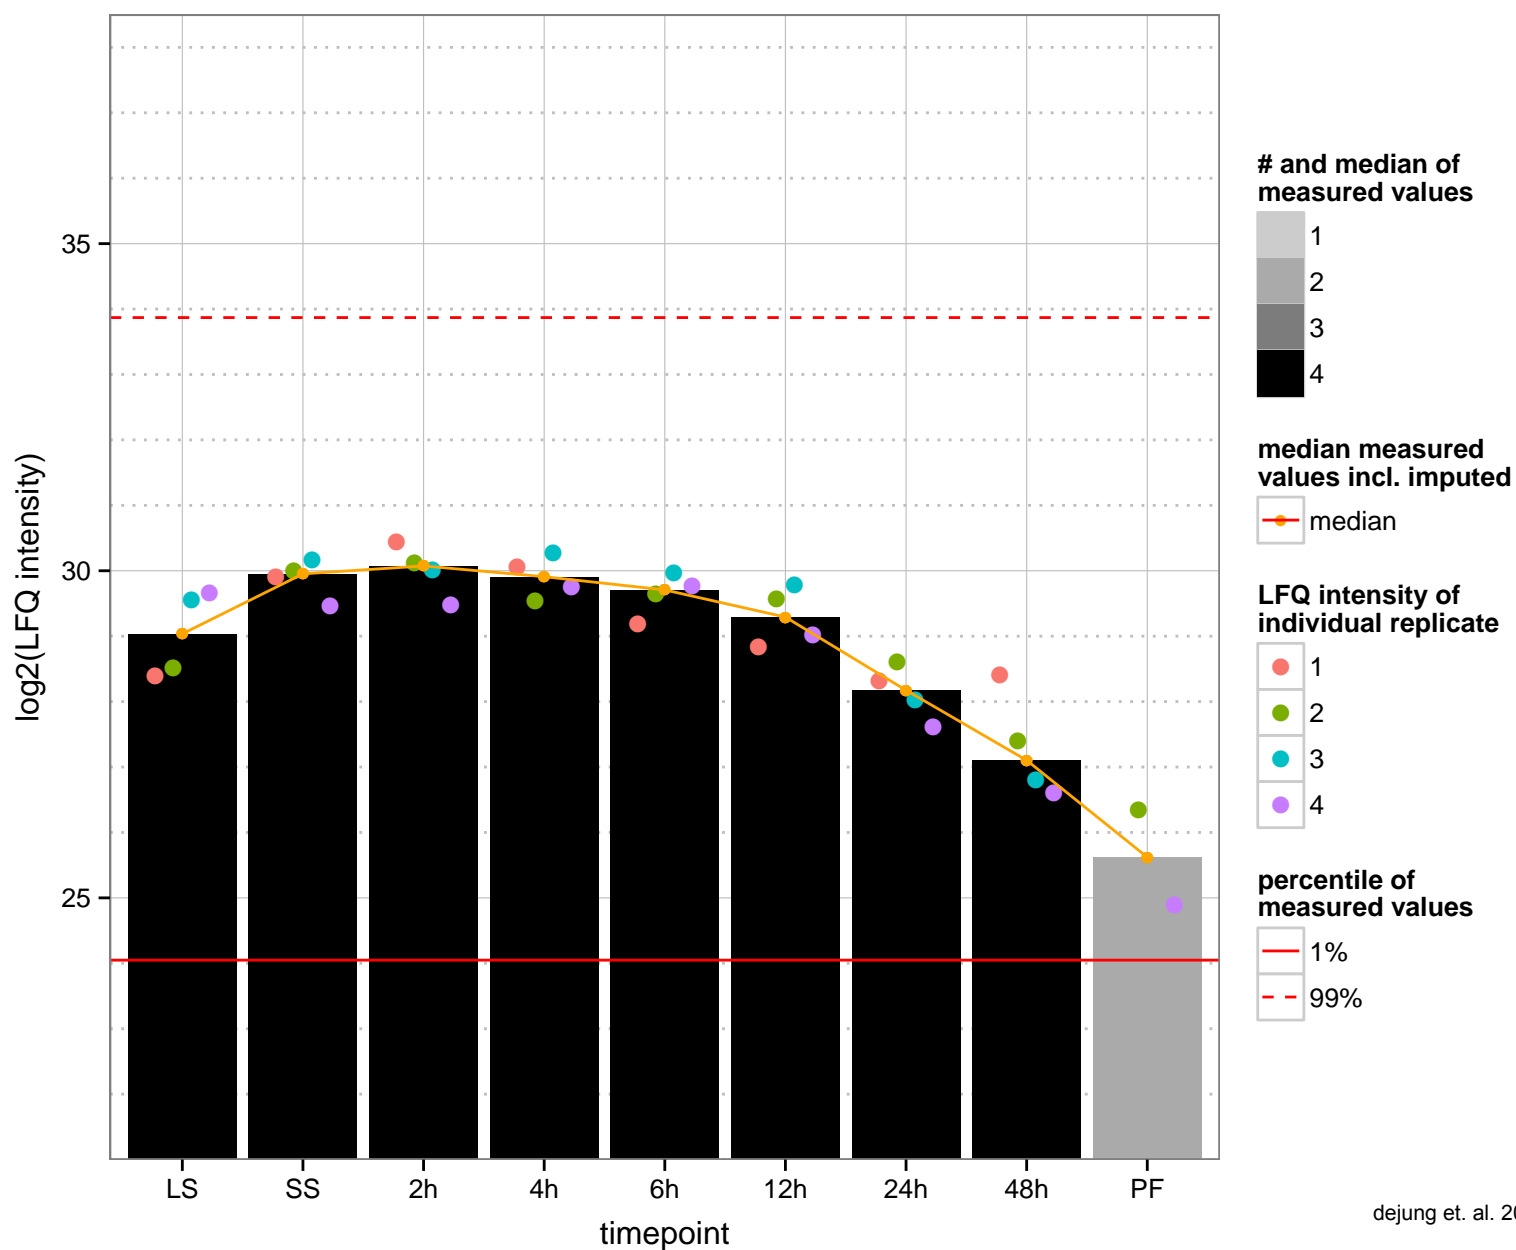

hypothetical protein, conserved  
 Tb927.10.15440  
 AGOF: null  
 AGOC: null  
 AGOP: null  
 PGO: null  
 PGOC: null  
 PGOP: null

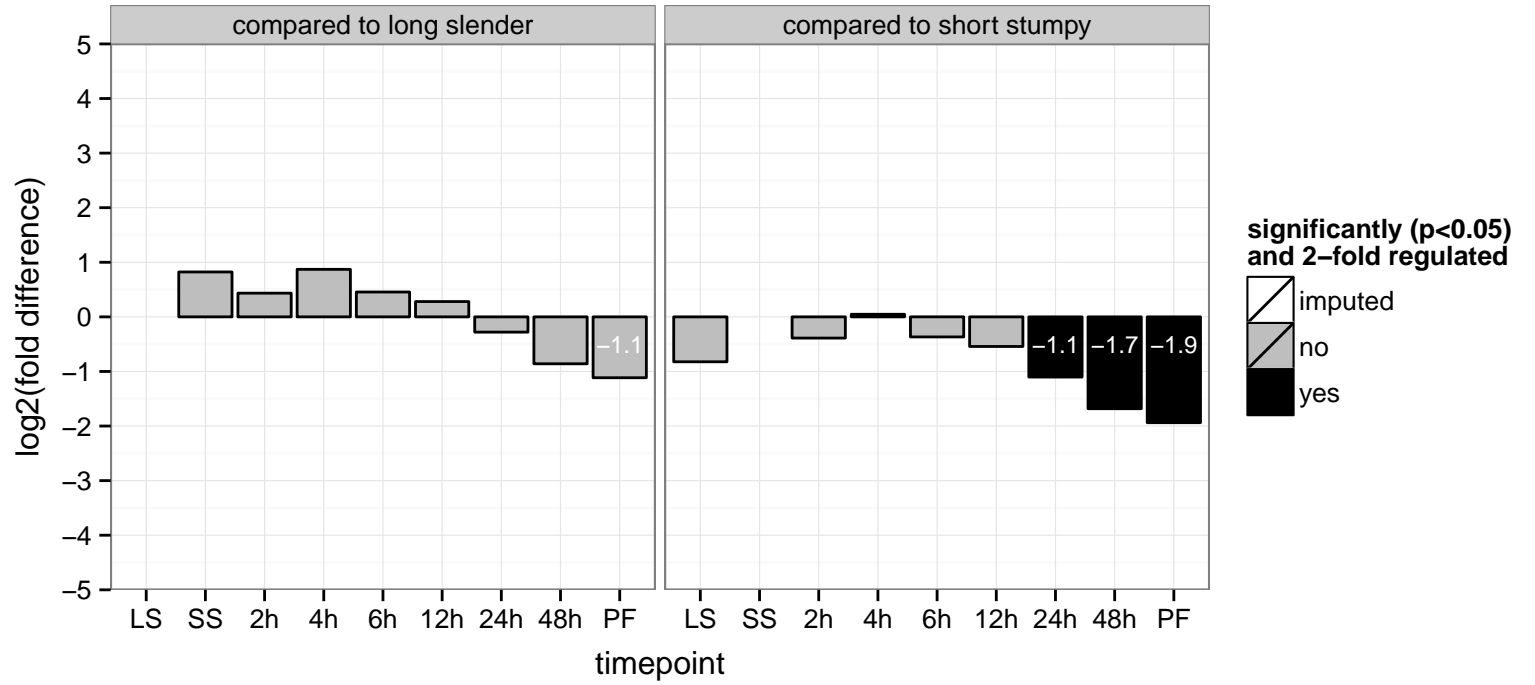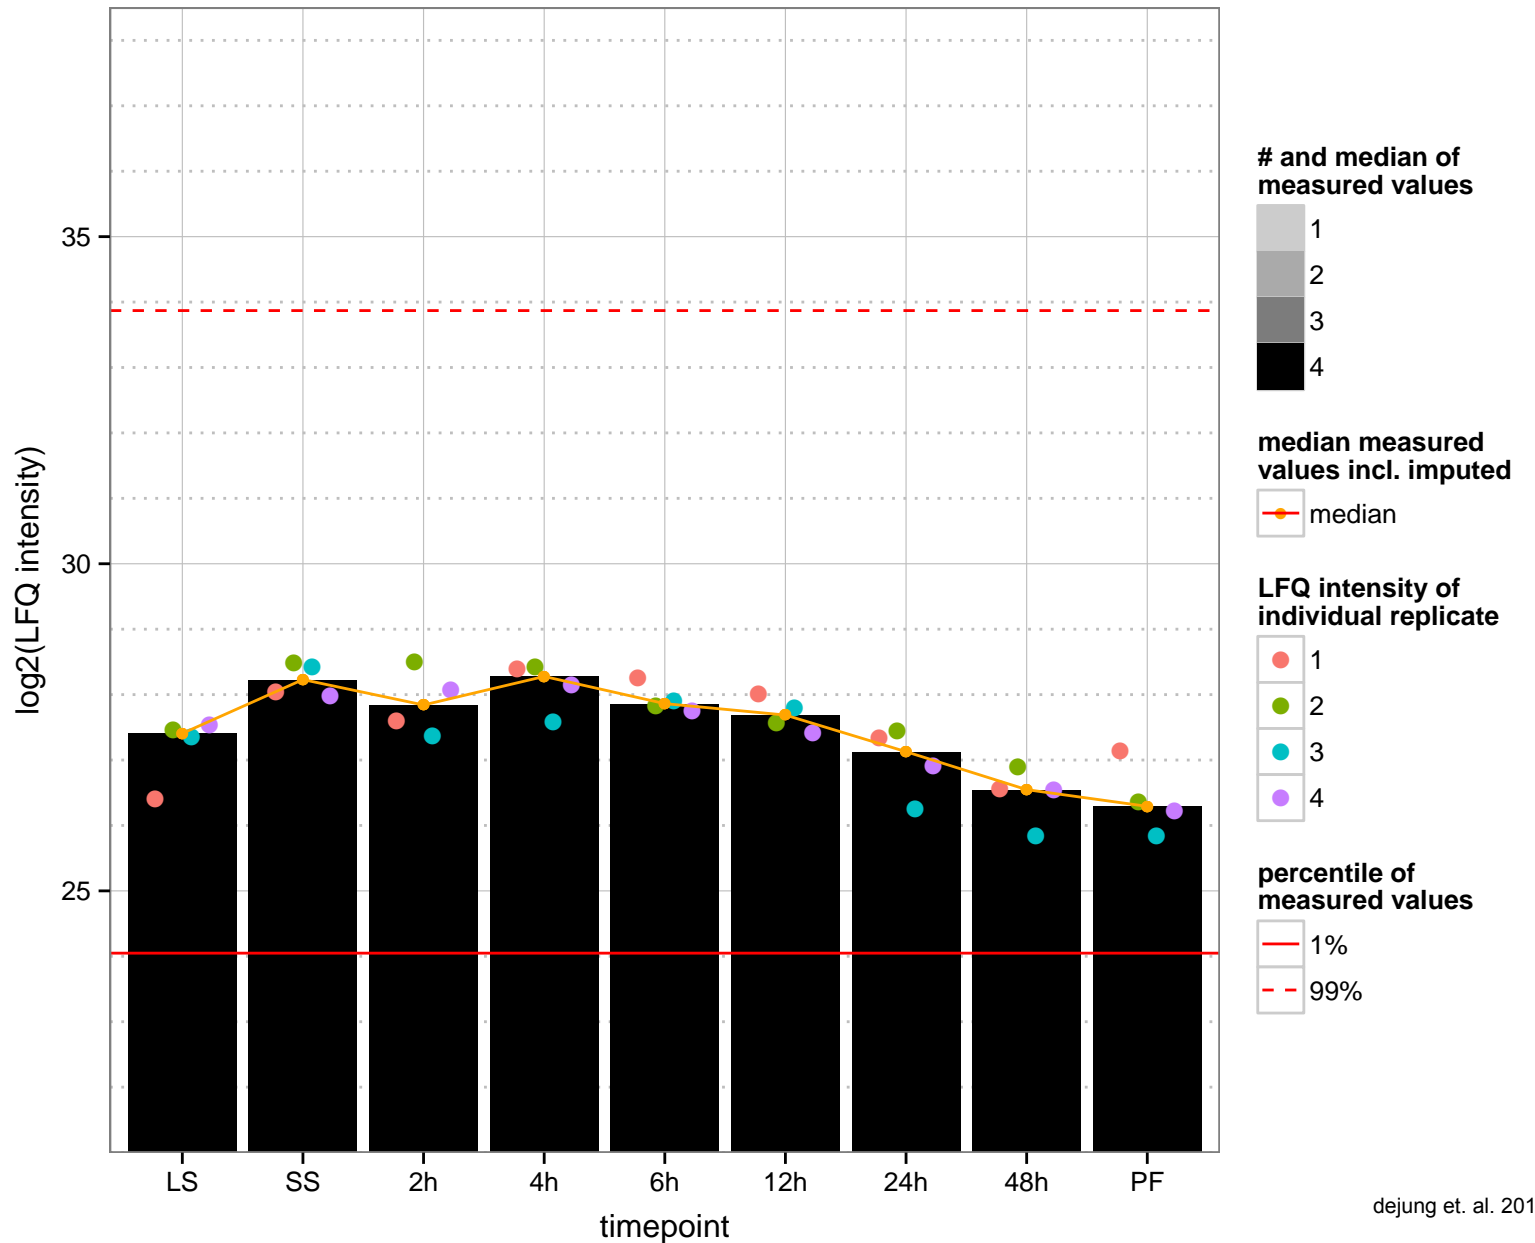

Metacaspase-4 (MCA4)  
 Tb927.10.2440  
 AGOF: cysteine-type endopeptidase activity, peptidase activity  
 AGOC: nucleus  
 AGOP: aerobic respiration, proteolysis  
 PGOF: cysteine-type endopeptidase activity  
 PGO: null  
 PGO: proteolysis

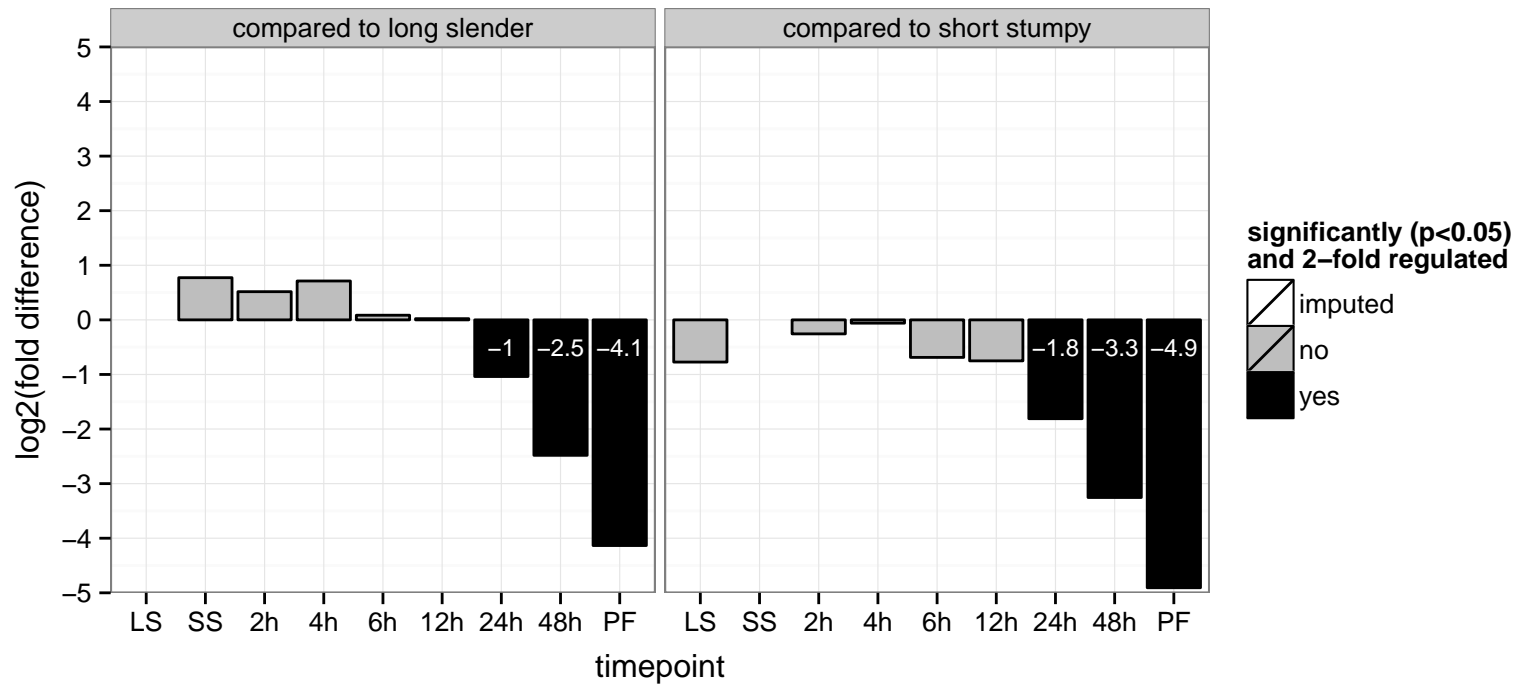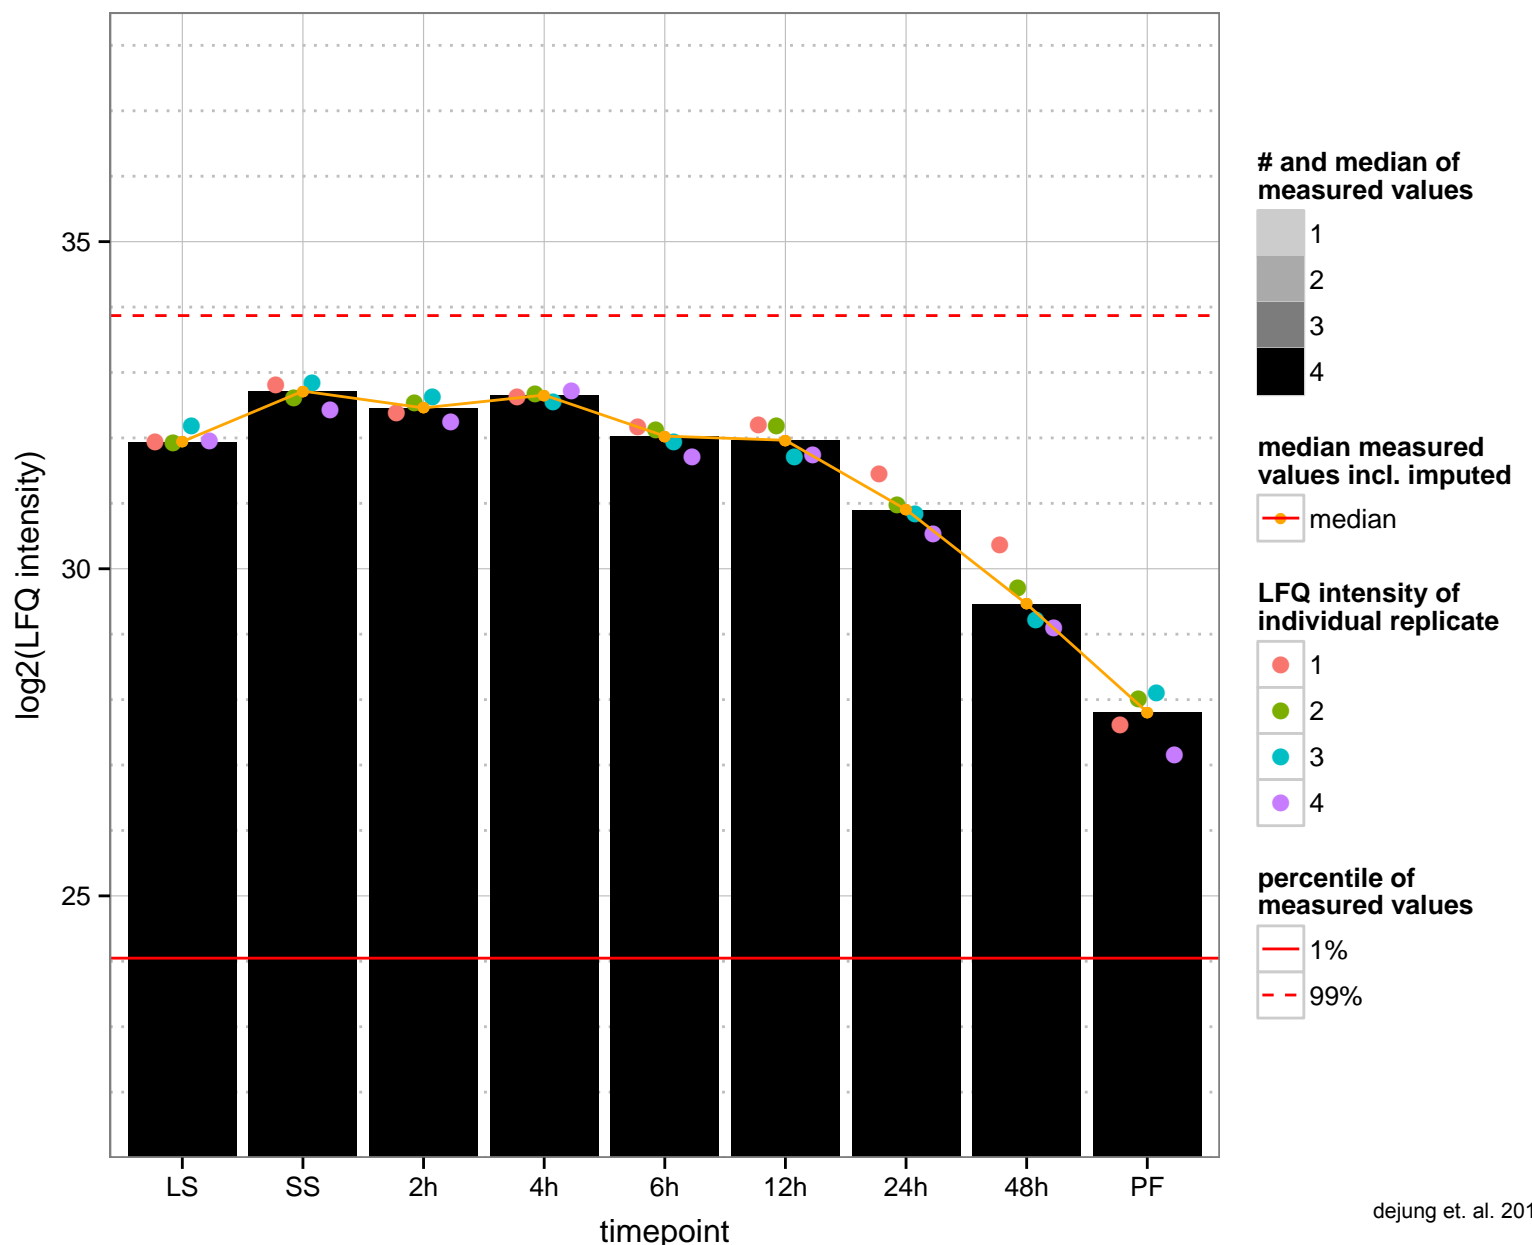

lysosomal alpha-mannosidase precursor, putative

Tb927.10.2570;Tb11.v5.0498

AGOF: null, alpha-mannosidase activity, carbohydrate binding, zinc ion binding

AGOC: null, lysosome

AGOP: null, carbohydrate metabolic process, mannose metabolic process

PGOF: carbohydrate binding, catalytic activity, hydrolase activity, hydrolyzing O-glycosyl compounds, mannosidase activity, z

PGOC: null

PGOP: carbohydrate metabolic process, mannose metabolic process

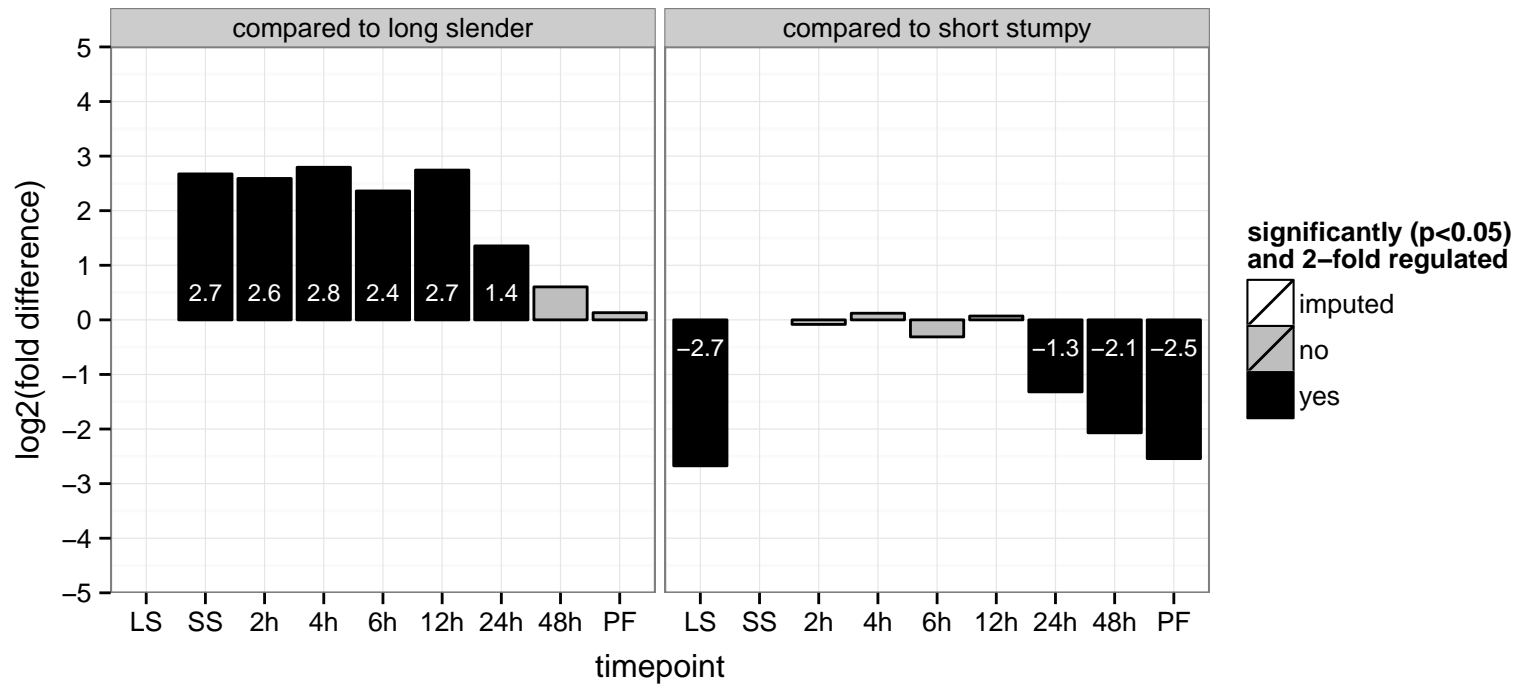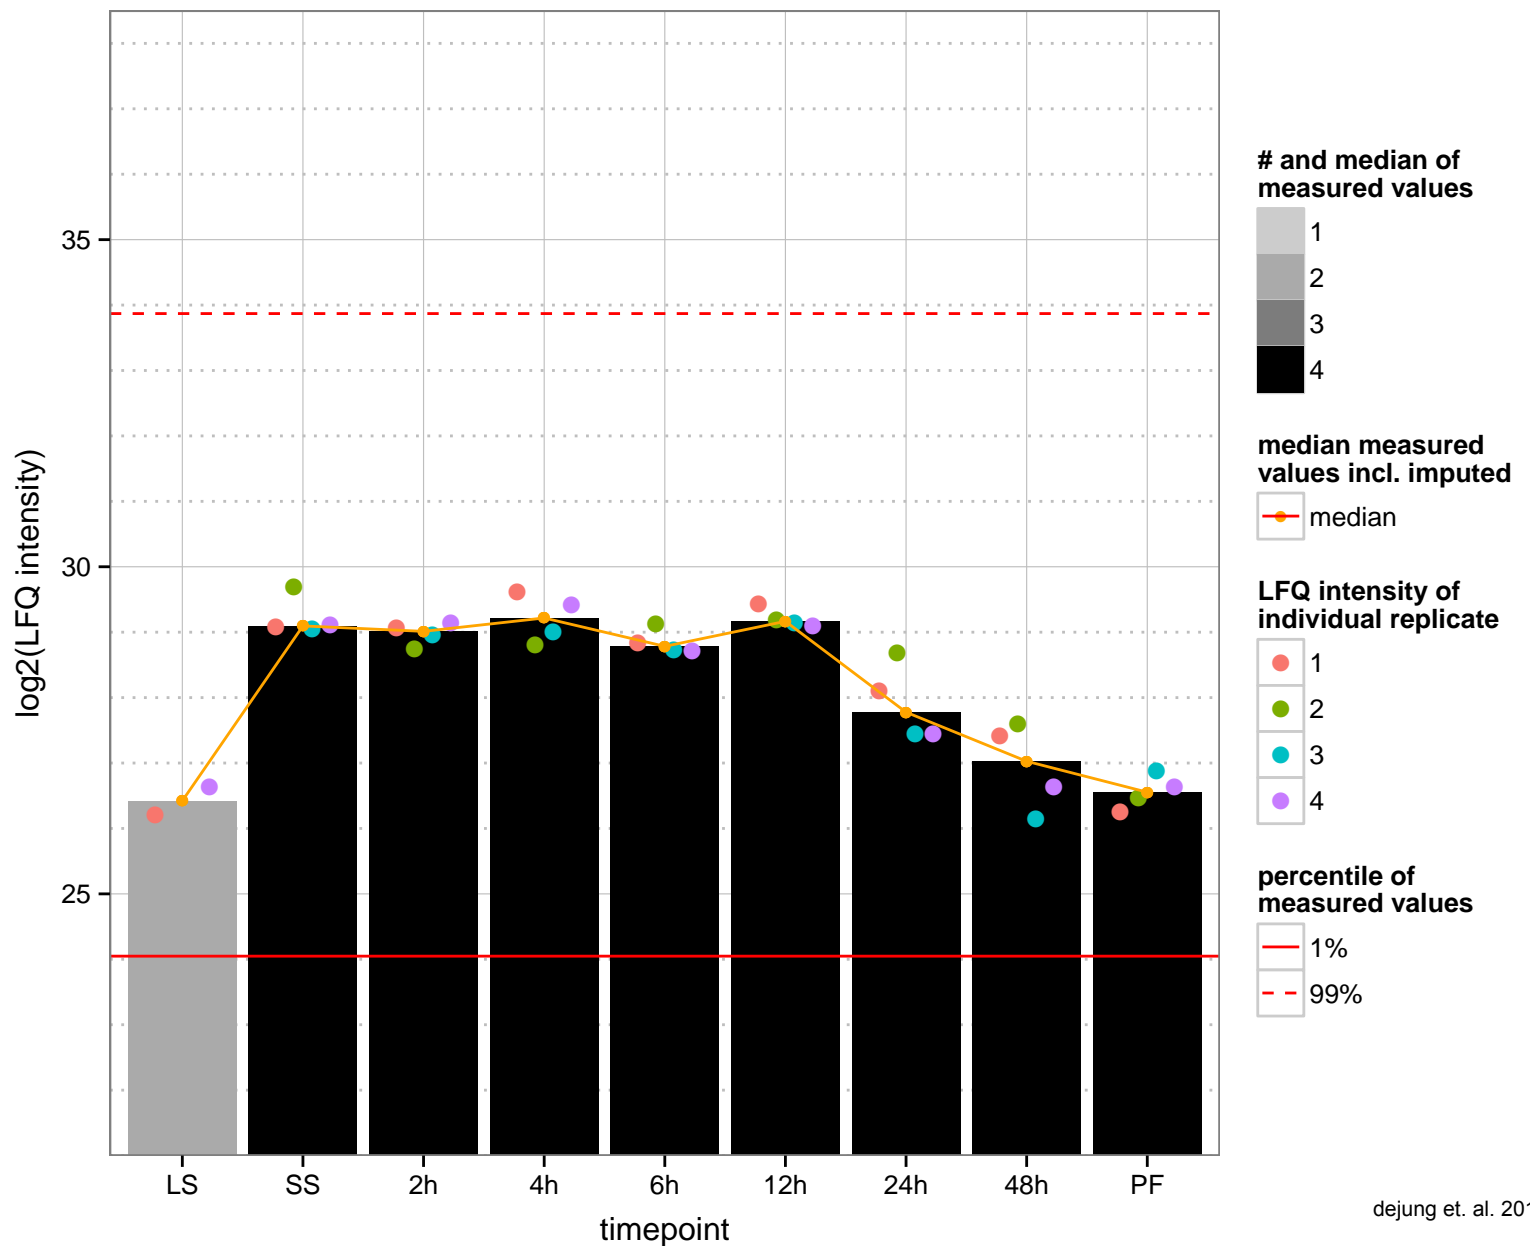

TFIIF-stimulated CTD phosphatase, putative  
 Tb927.10.4180  
 AGOF: null  
 AGOC: null  
 AGOP: null  
 PGOF: protein binding  
 PGO: null  
 PGOP: null

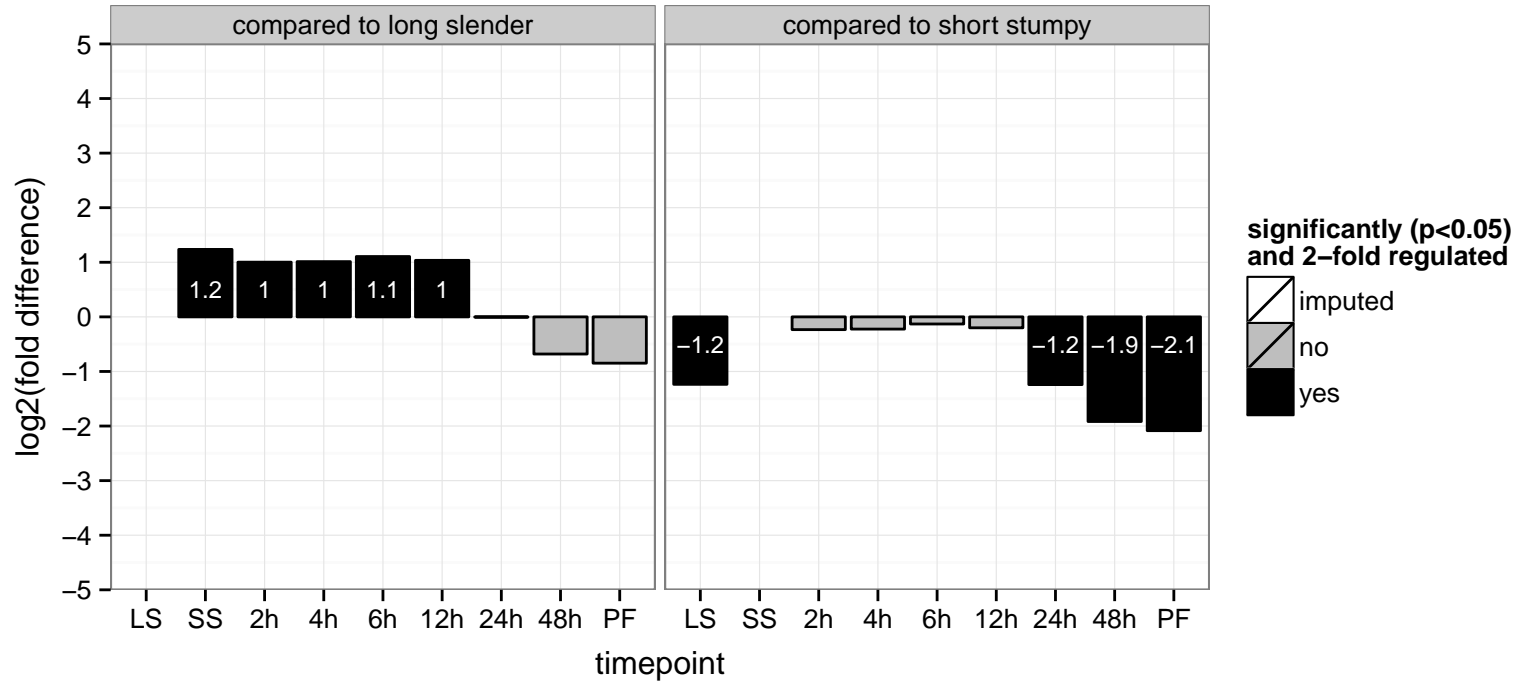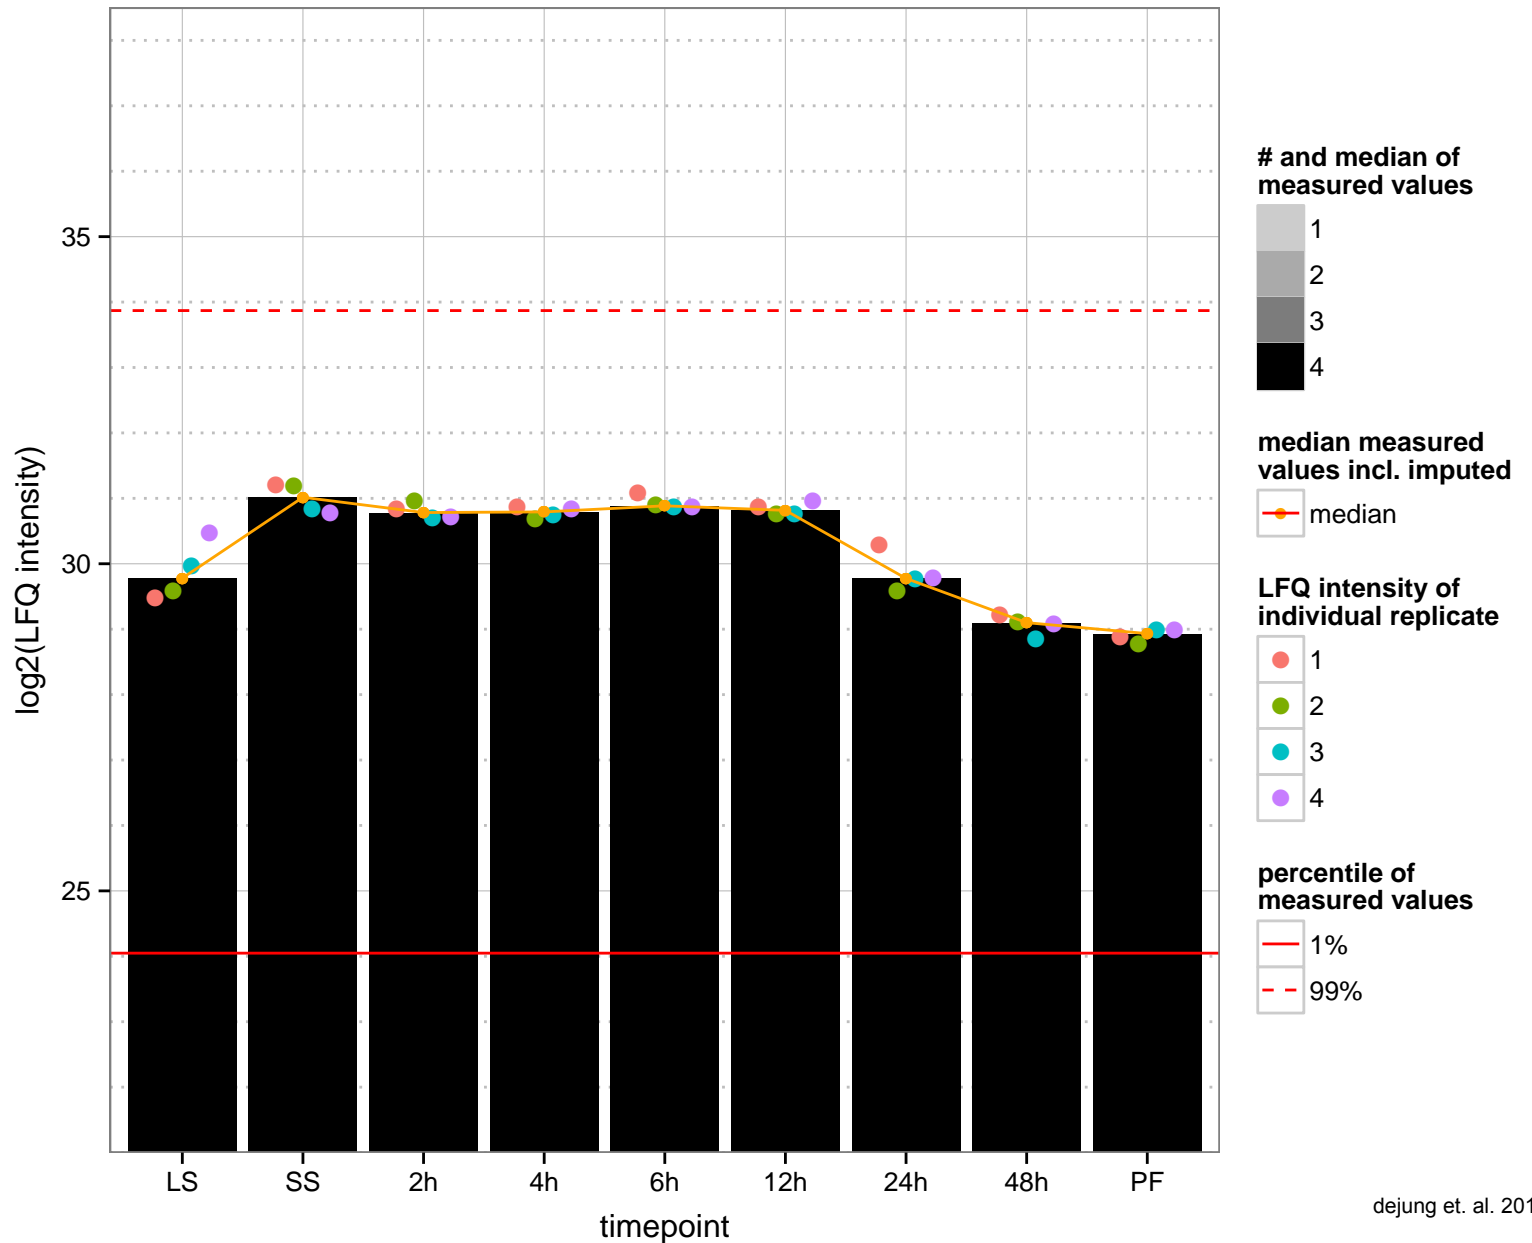

hypothetical protein, conserved, zinc finger protein family member, putative (ZC3H32)  
 Tb927.10.5250;Tb11.v5.0232  
 AGOF: null, RNA binding, zinc ion binding  
 AGOC: null  
 AGOP: null  
 PGOF: nucleic acid binding, zinc ion binding  
 PGO: null  
 PGOP: null

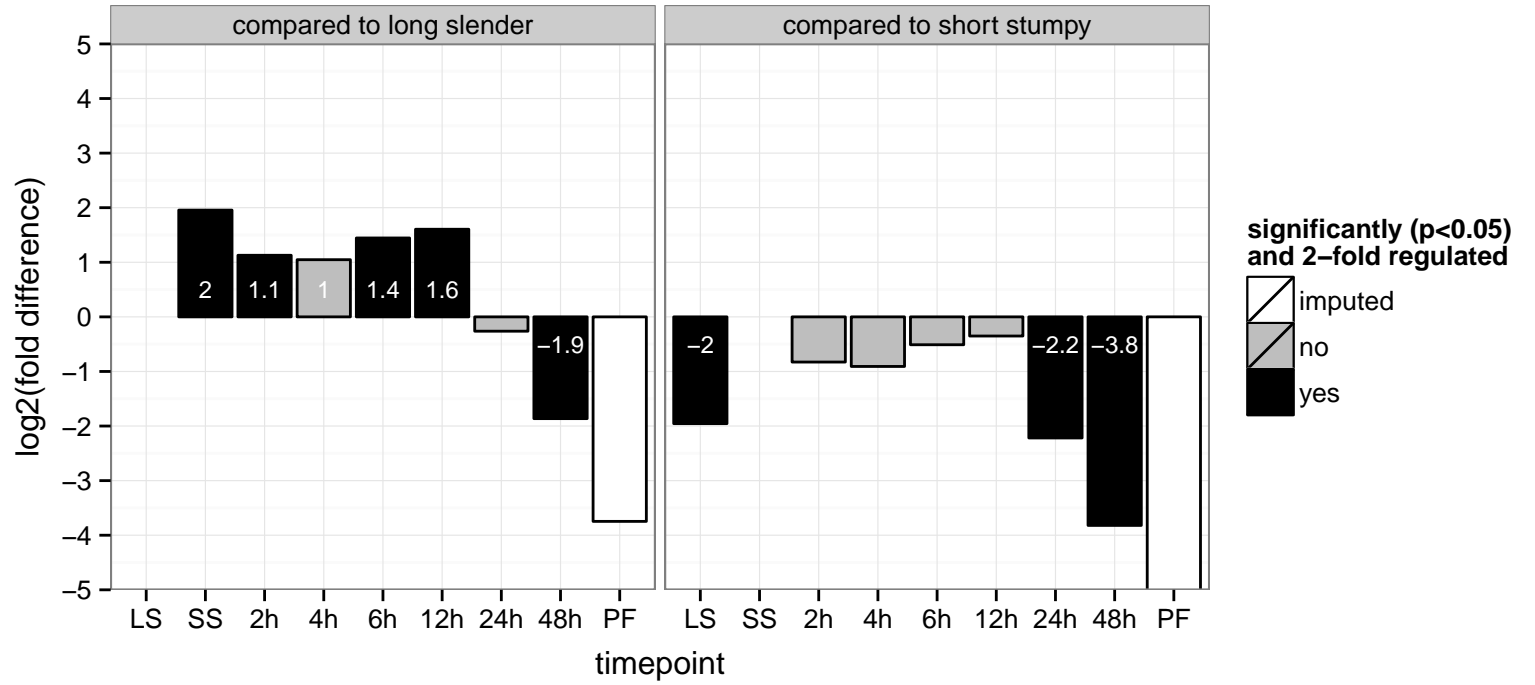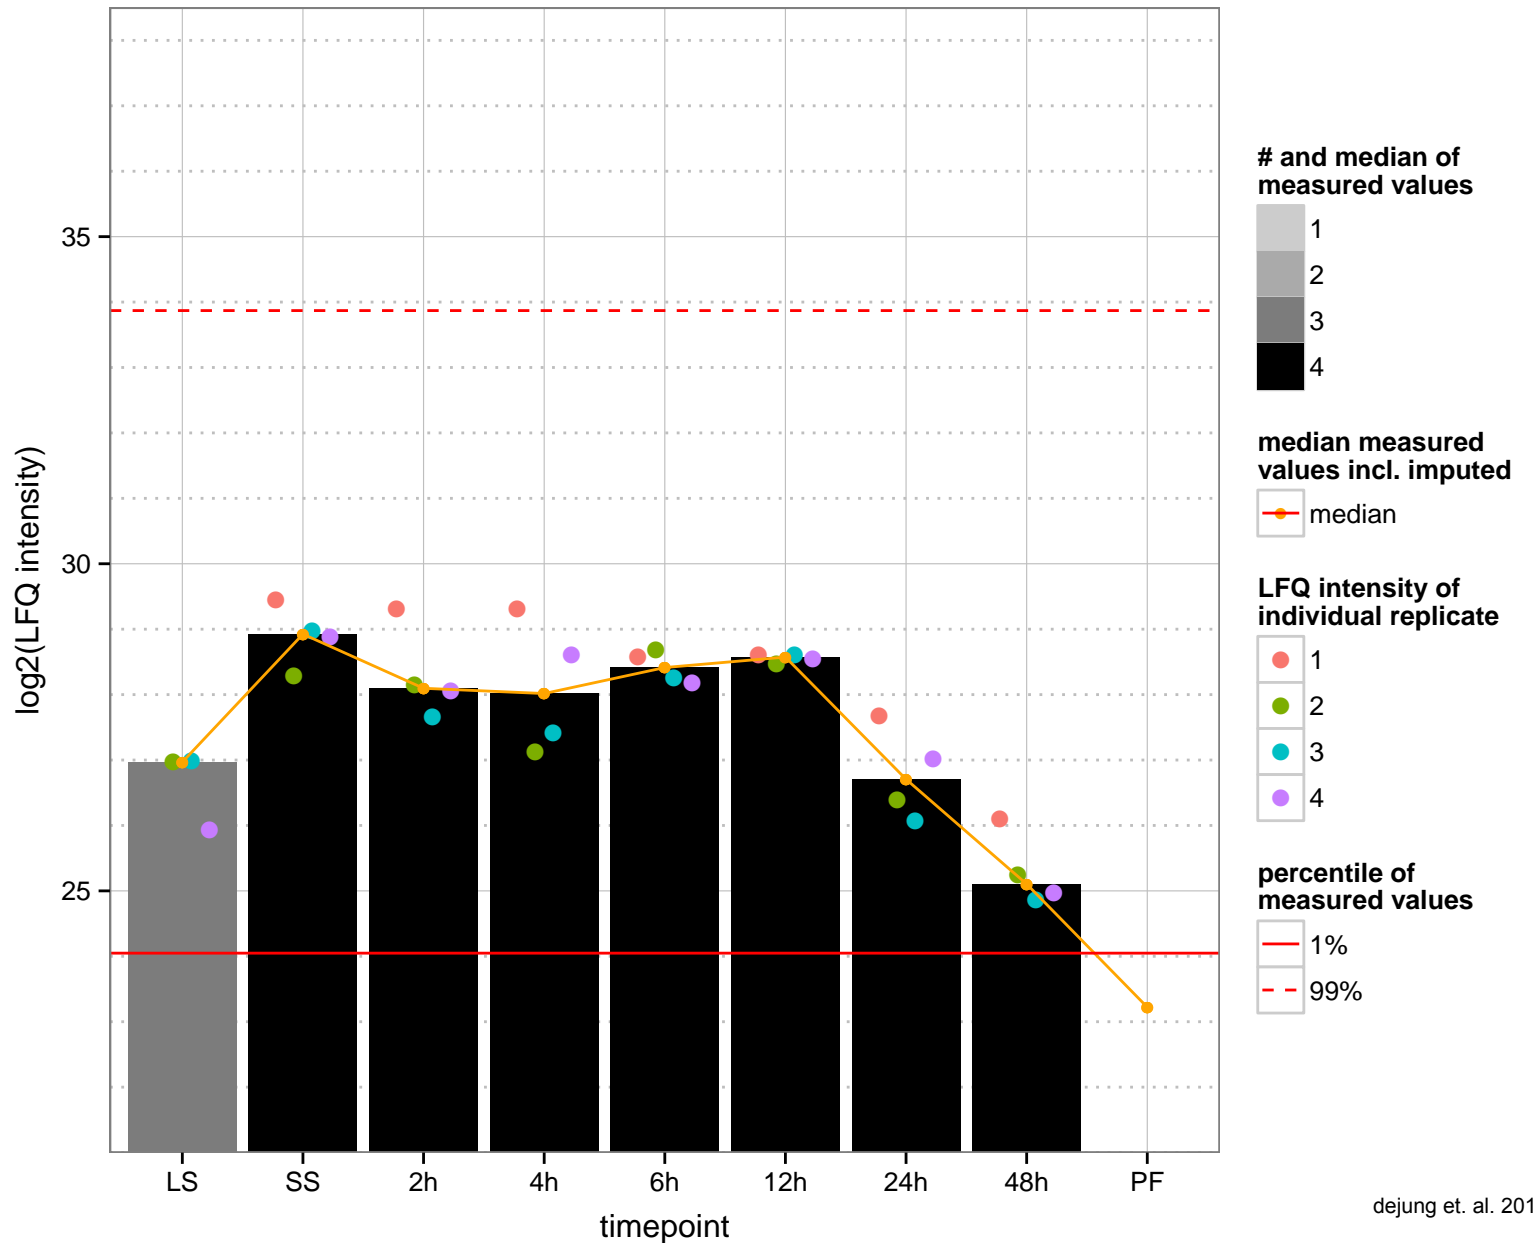

hypothetical protein, conserved  
 Tb927.10.6750;Tb927.10.6760  
 AGOF: null  
 AGOC: null  
 AGOP: null  
 PGO: null  
 PGOC: null  
 PGOP: null

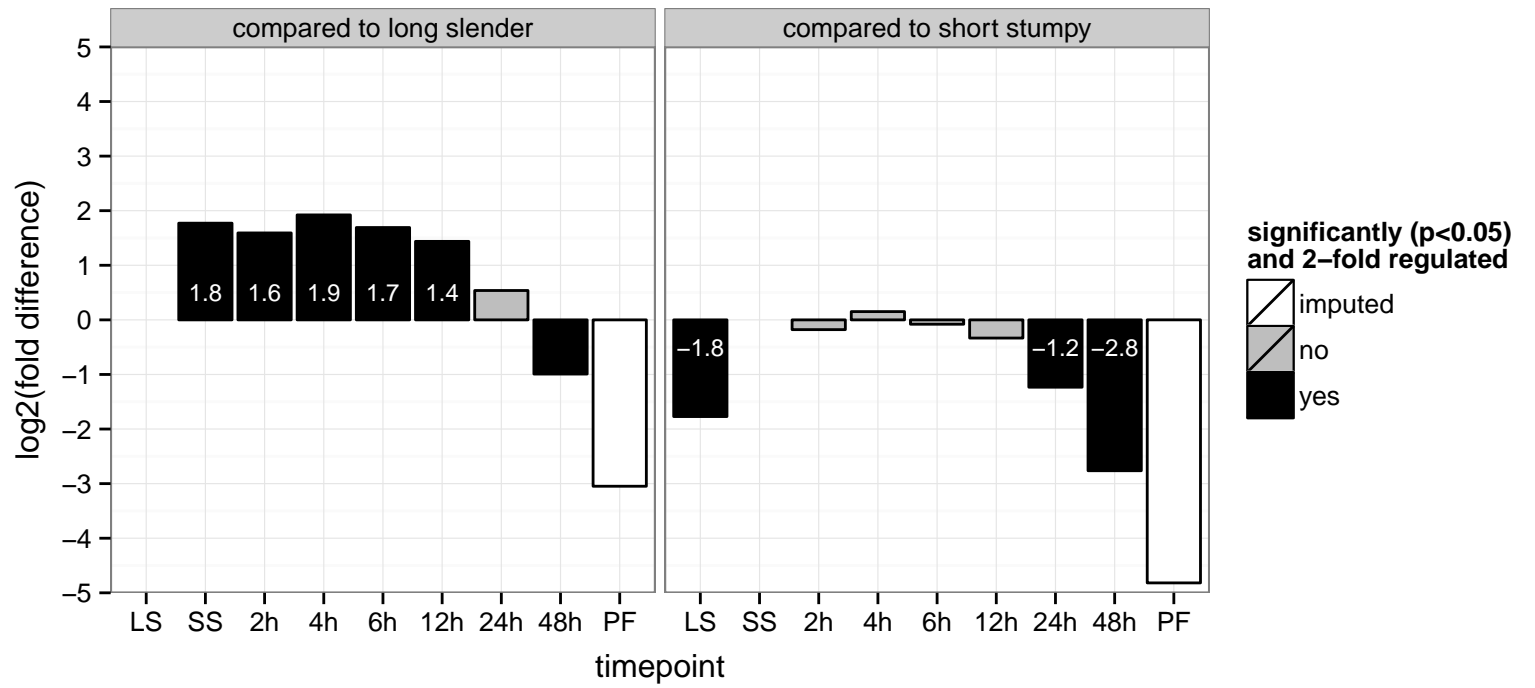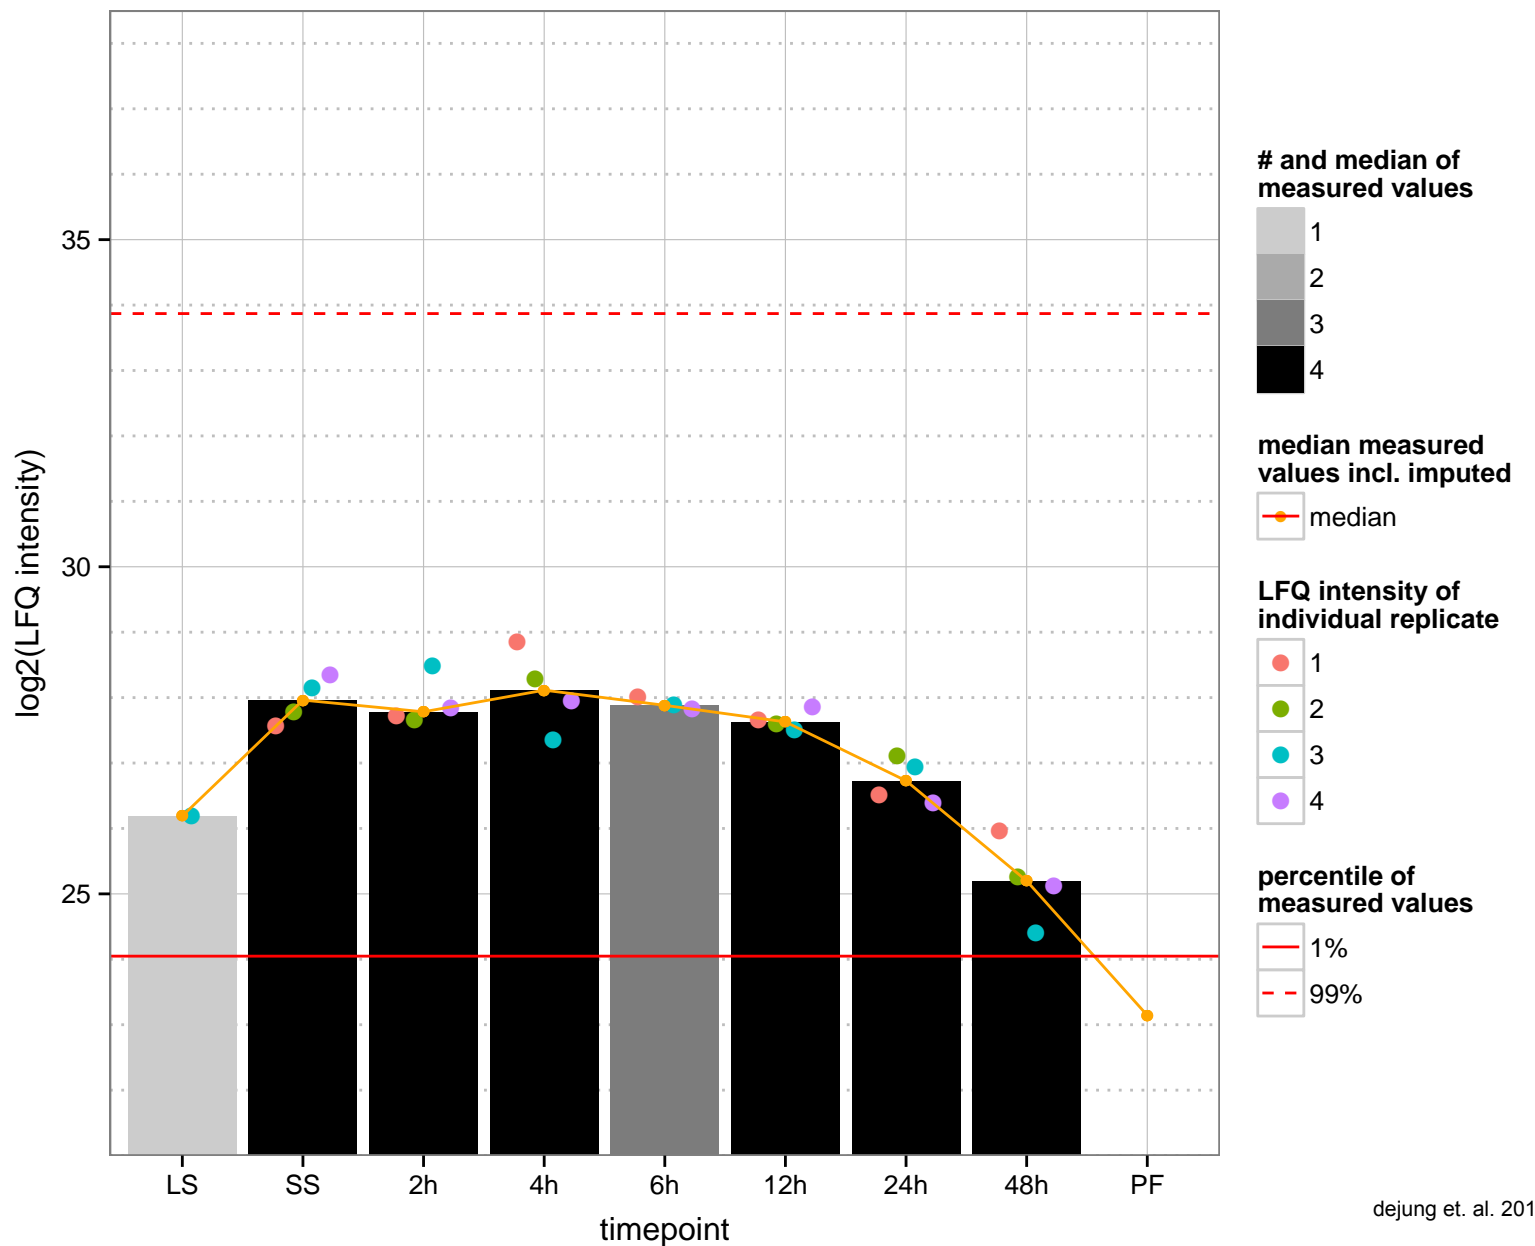

hypothetical protein, conserved  
 Tb927.10.840;Tb11.v5.0753  
 AGOF: null  
 AGOC: null  
 AGOP: null  
 PGOF: null, protein binding  
 PGO: null  
 PGOP: null

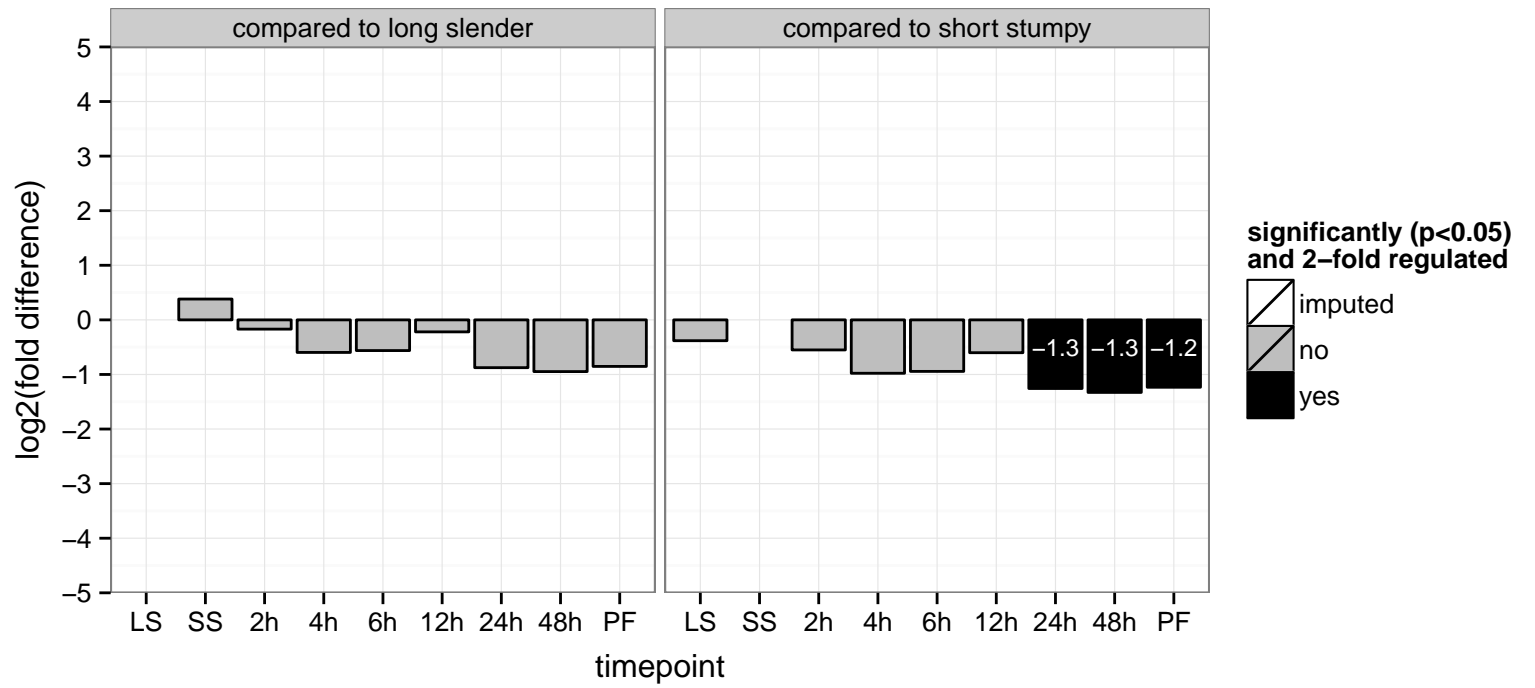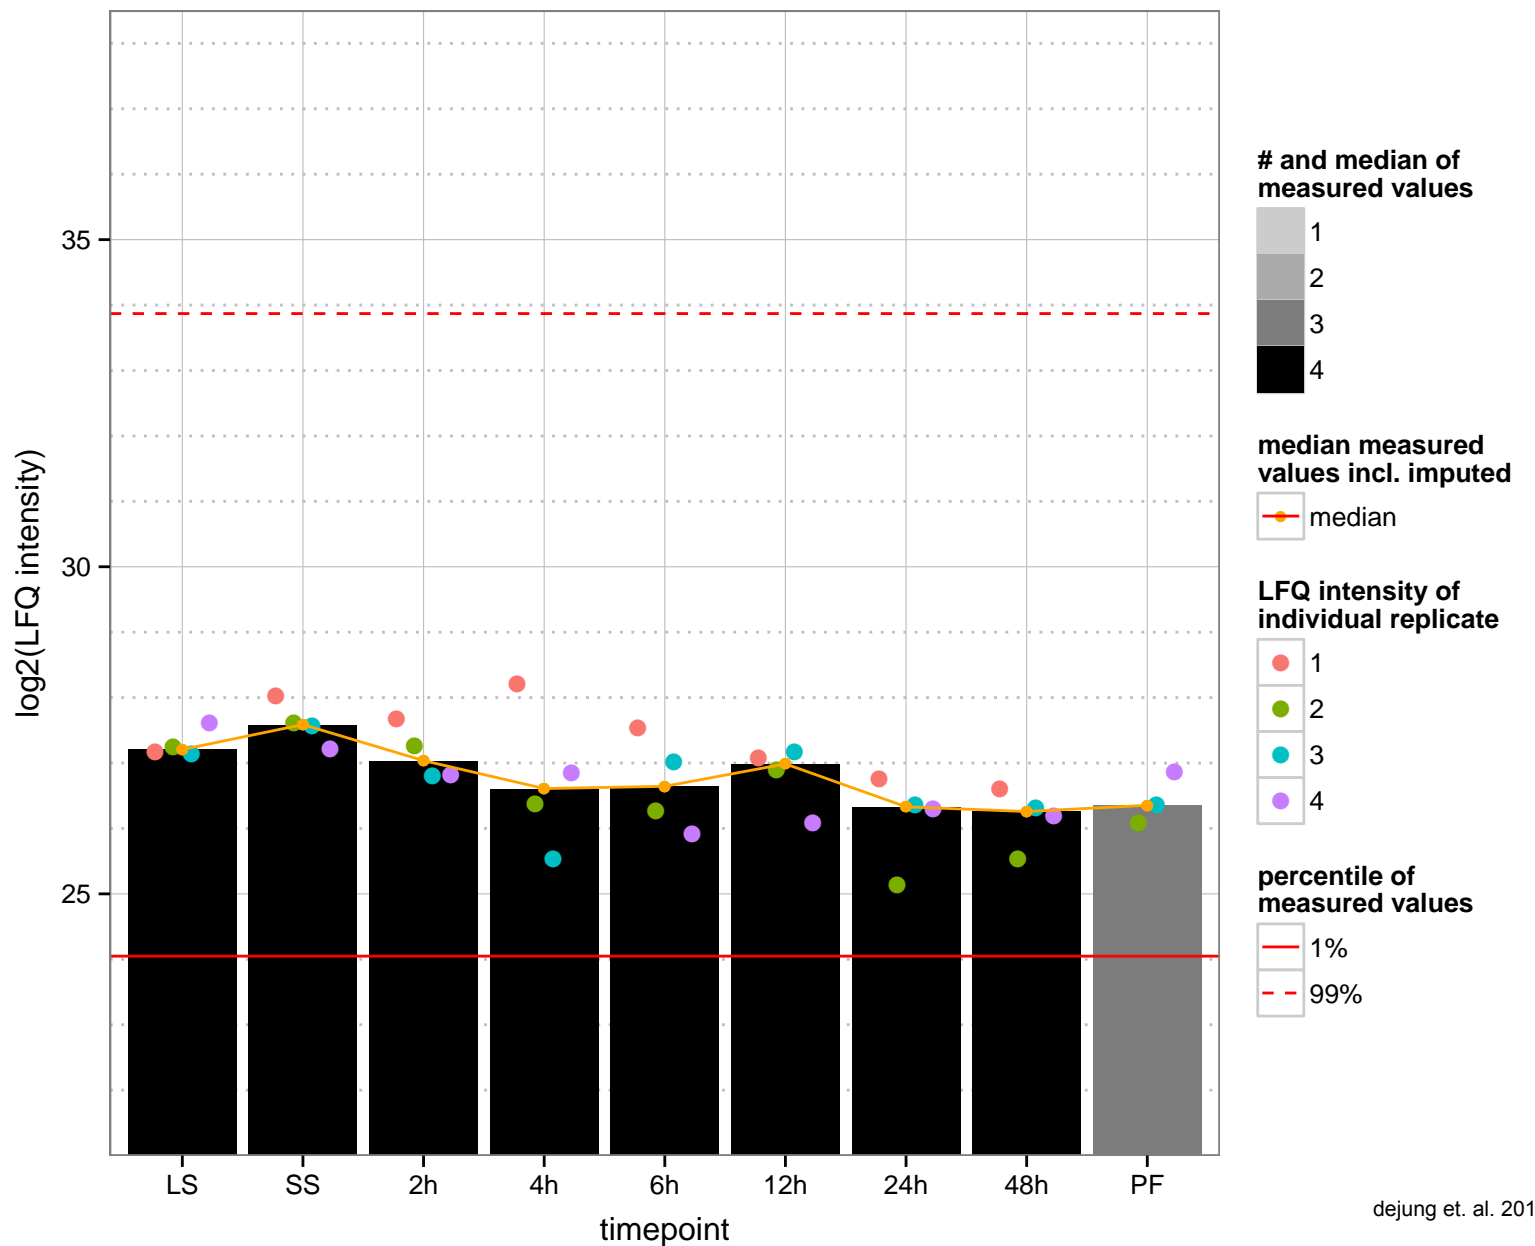



hypothetical protein, conserved  
 Tb927.10.9360  
 AGOF: oxidoreductase activity  
 AGOC: null  
 AGOP: null  
 PGOF: oxidoreductase activity  
 PGOC: null  
 PGOP: oxidation–reduction process

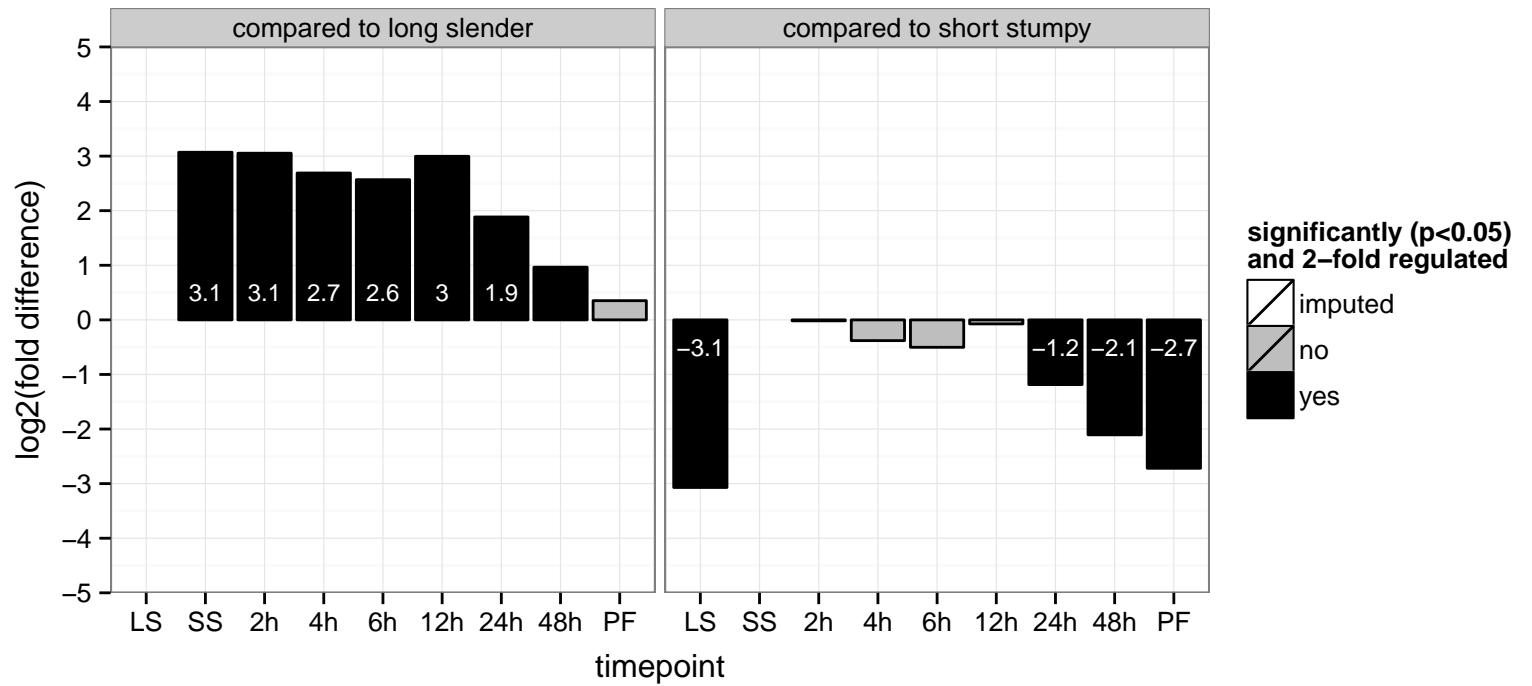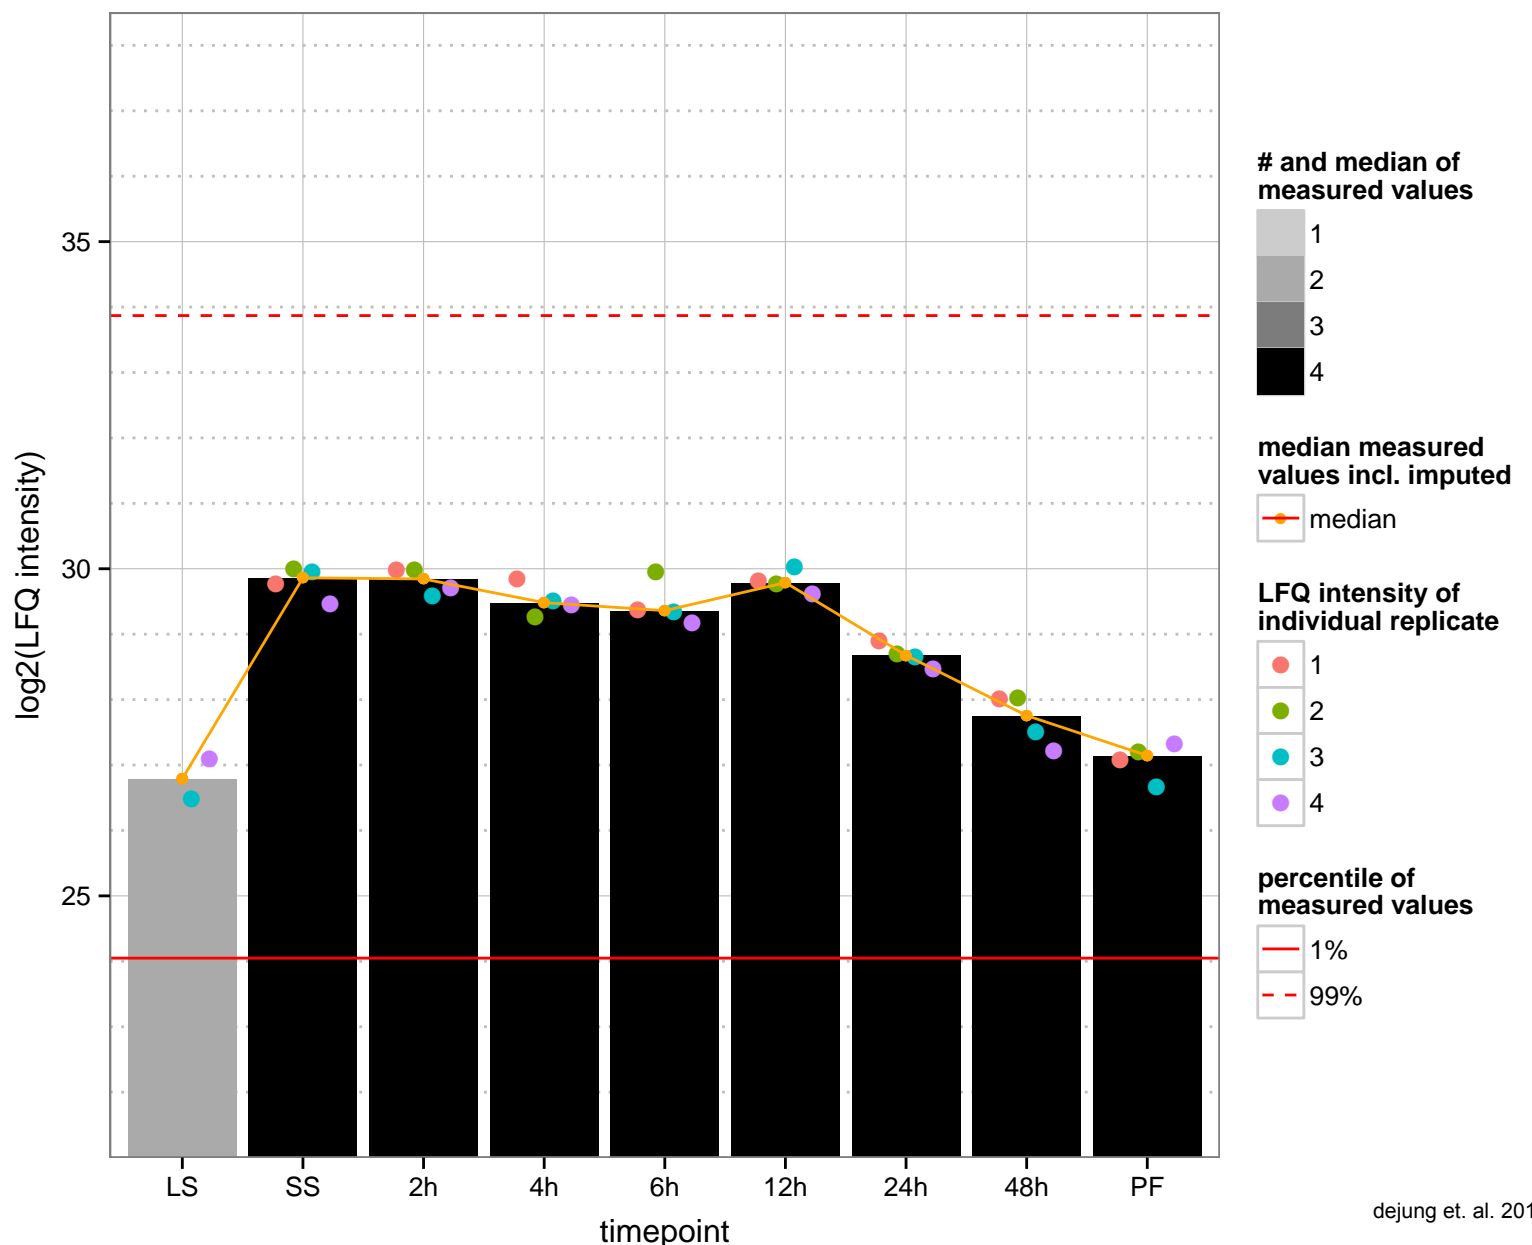

hypothetical protein, conserved  
 Tb927.11.11710  
 AGOF: null  
 AGOC: null  
 AGOP: null  
 PGO: null  
 PGO: null  
 PGO: null

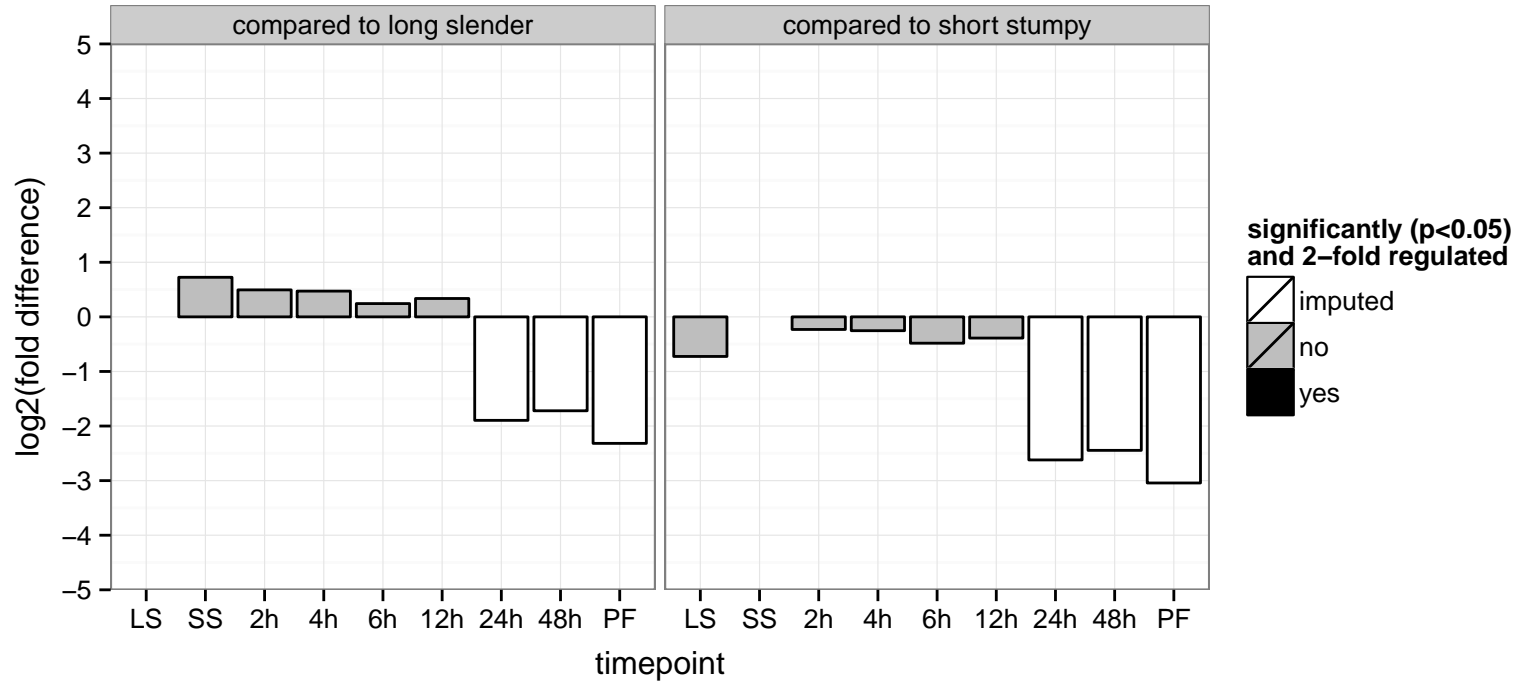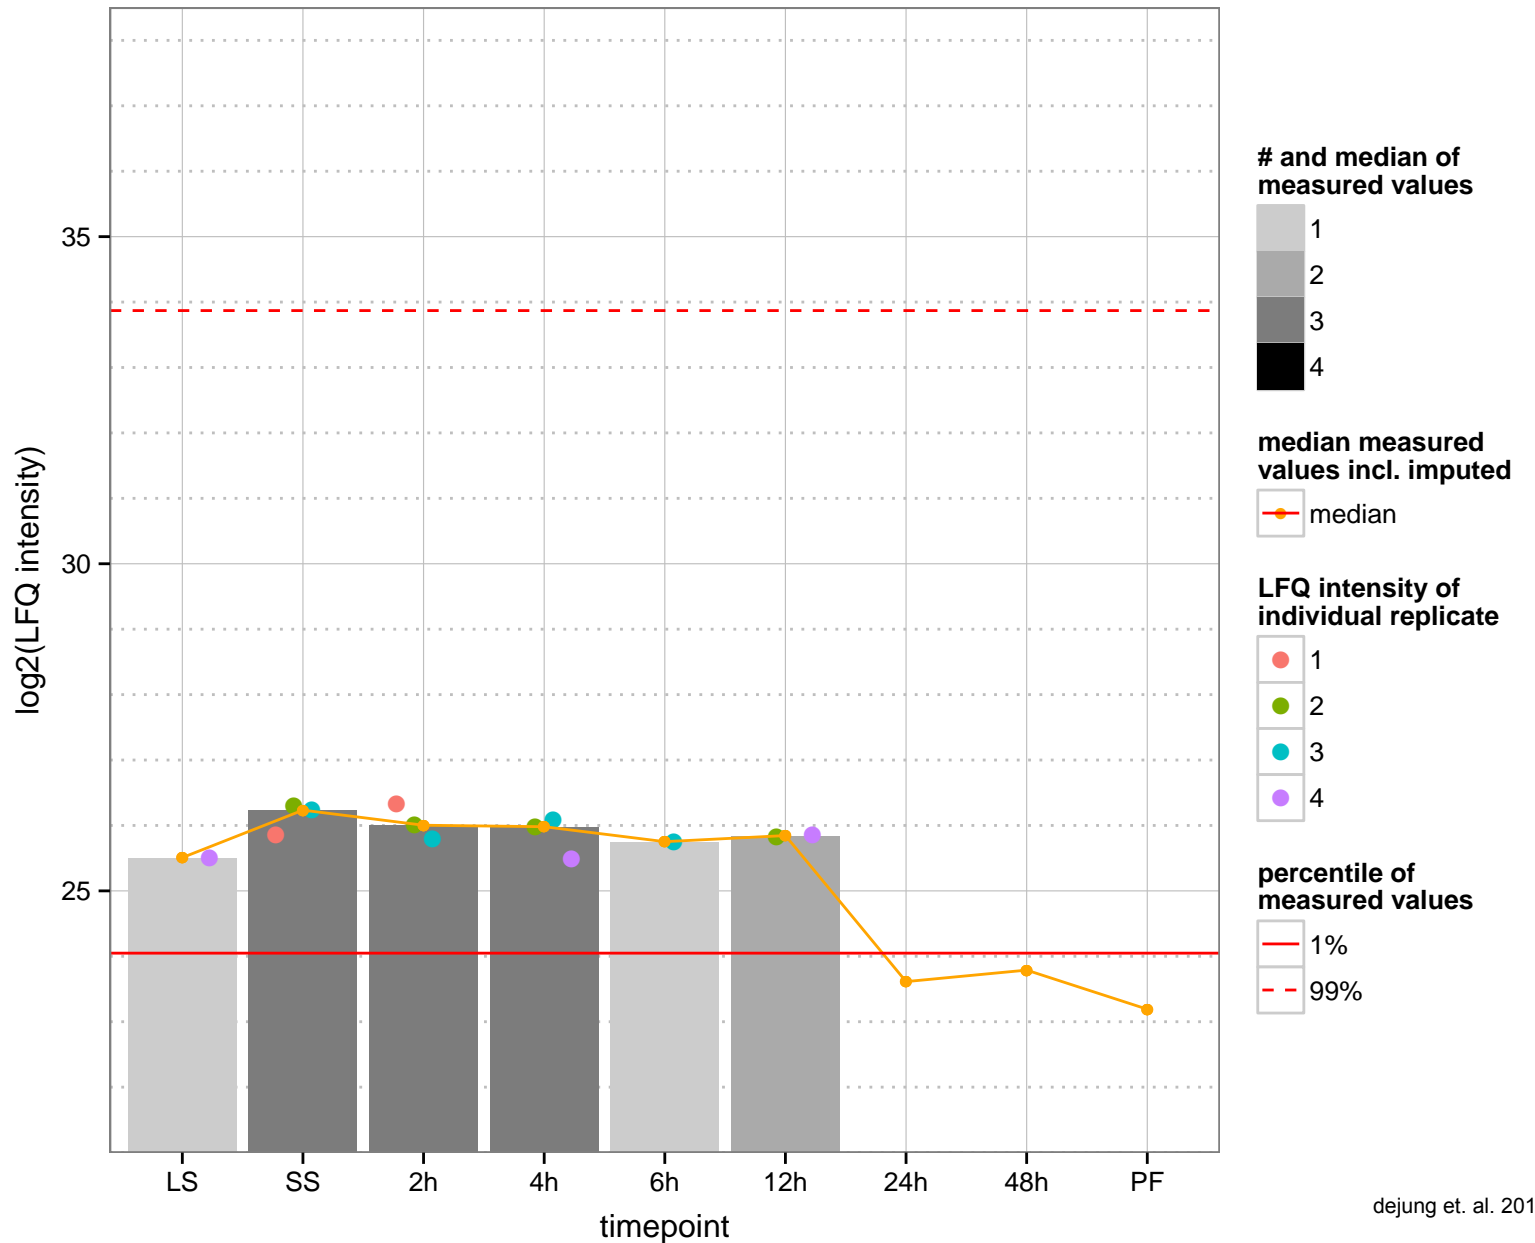

hypothetical protein, conserved  
 Tb927.11.1230  
 AGOF: null  
 AGOC: null  
 AGOP: null  
 PGO: null  
 PGOC: null  
 PGOP: null

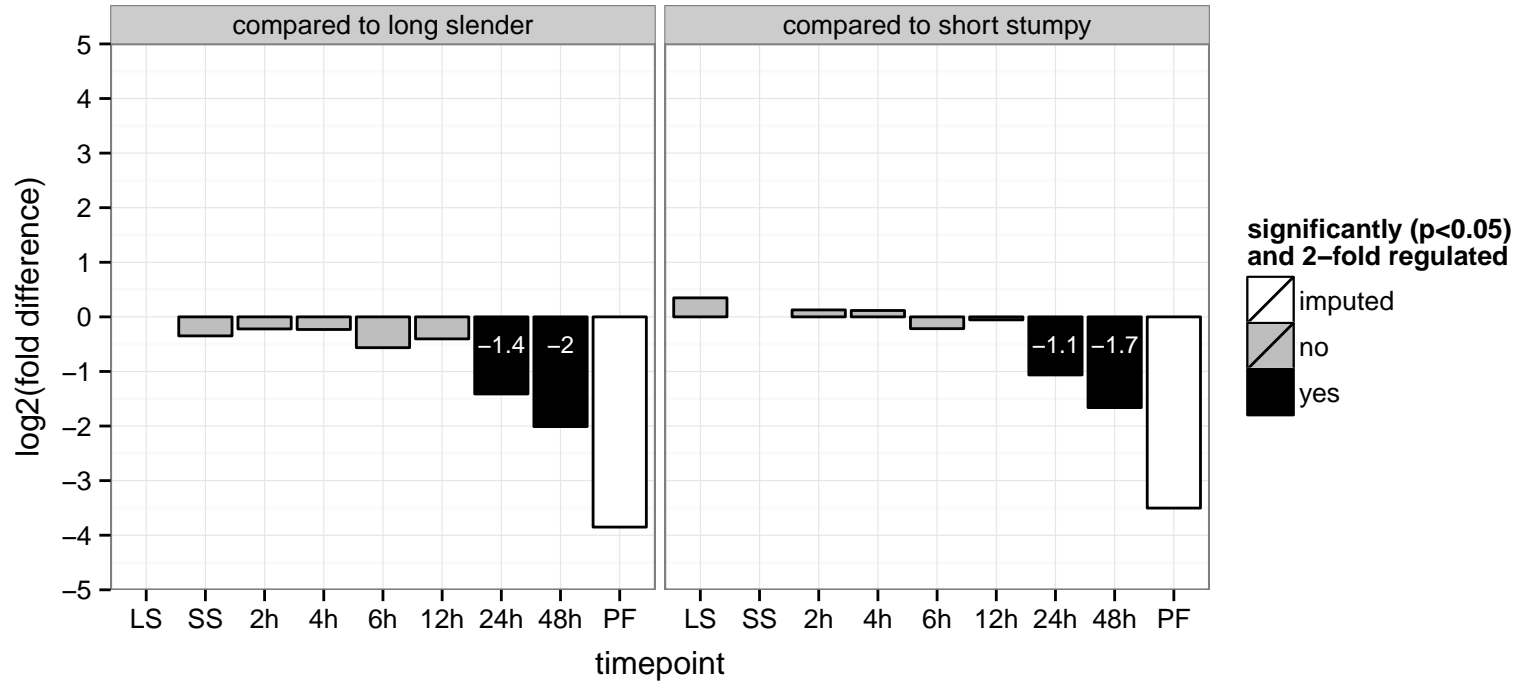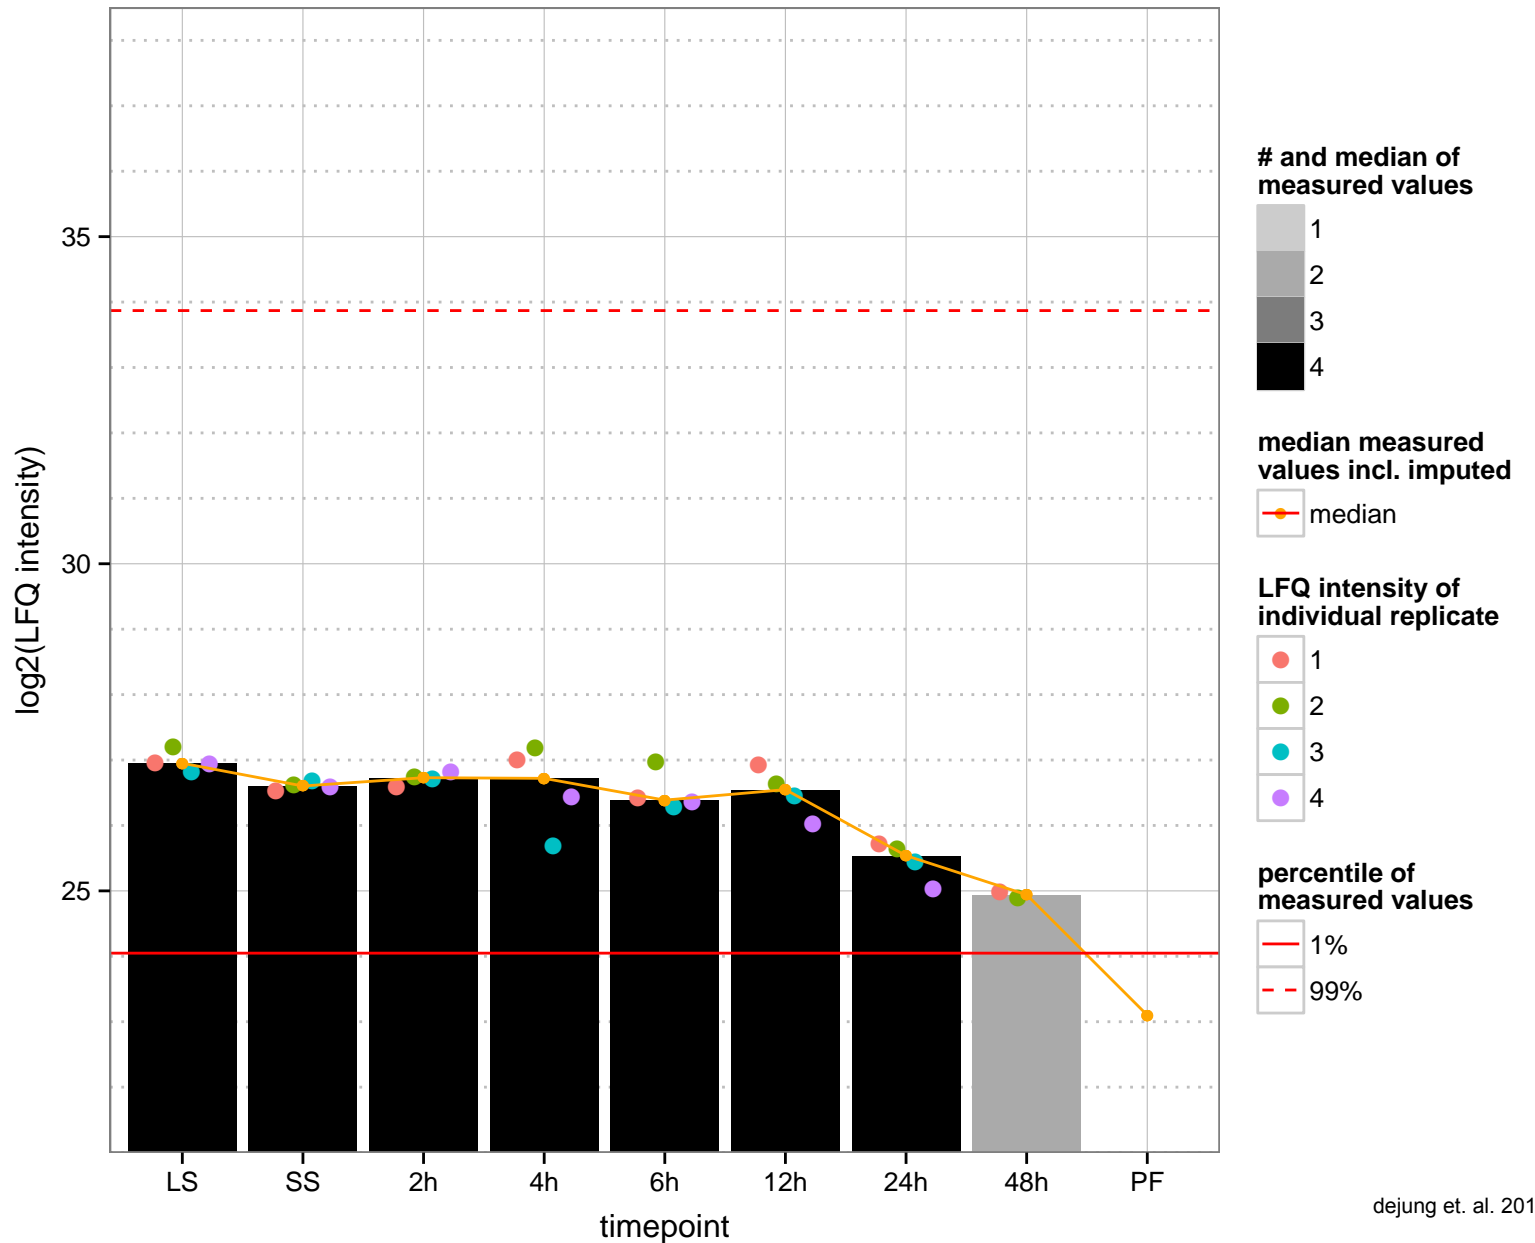

membrane-bound acid phosphatase 1 precursor (MBAP1)  
 Tb927.11.13130  
 AGOF: null  
 AGOC: integral to membrane, lysosomal membrane  
 AGOP: null  
 PGO: acid phosphatase activity  
 PGOC: null  
 PGOP: null

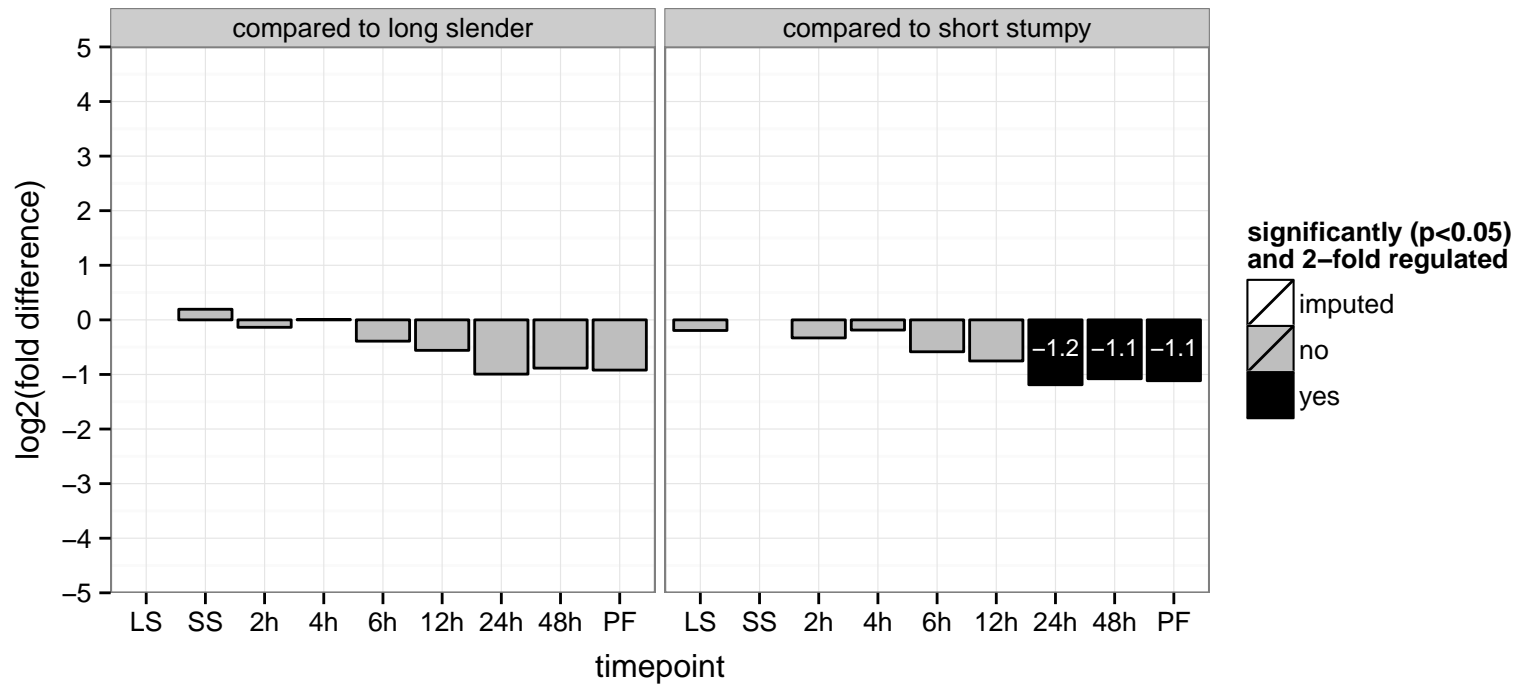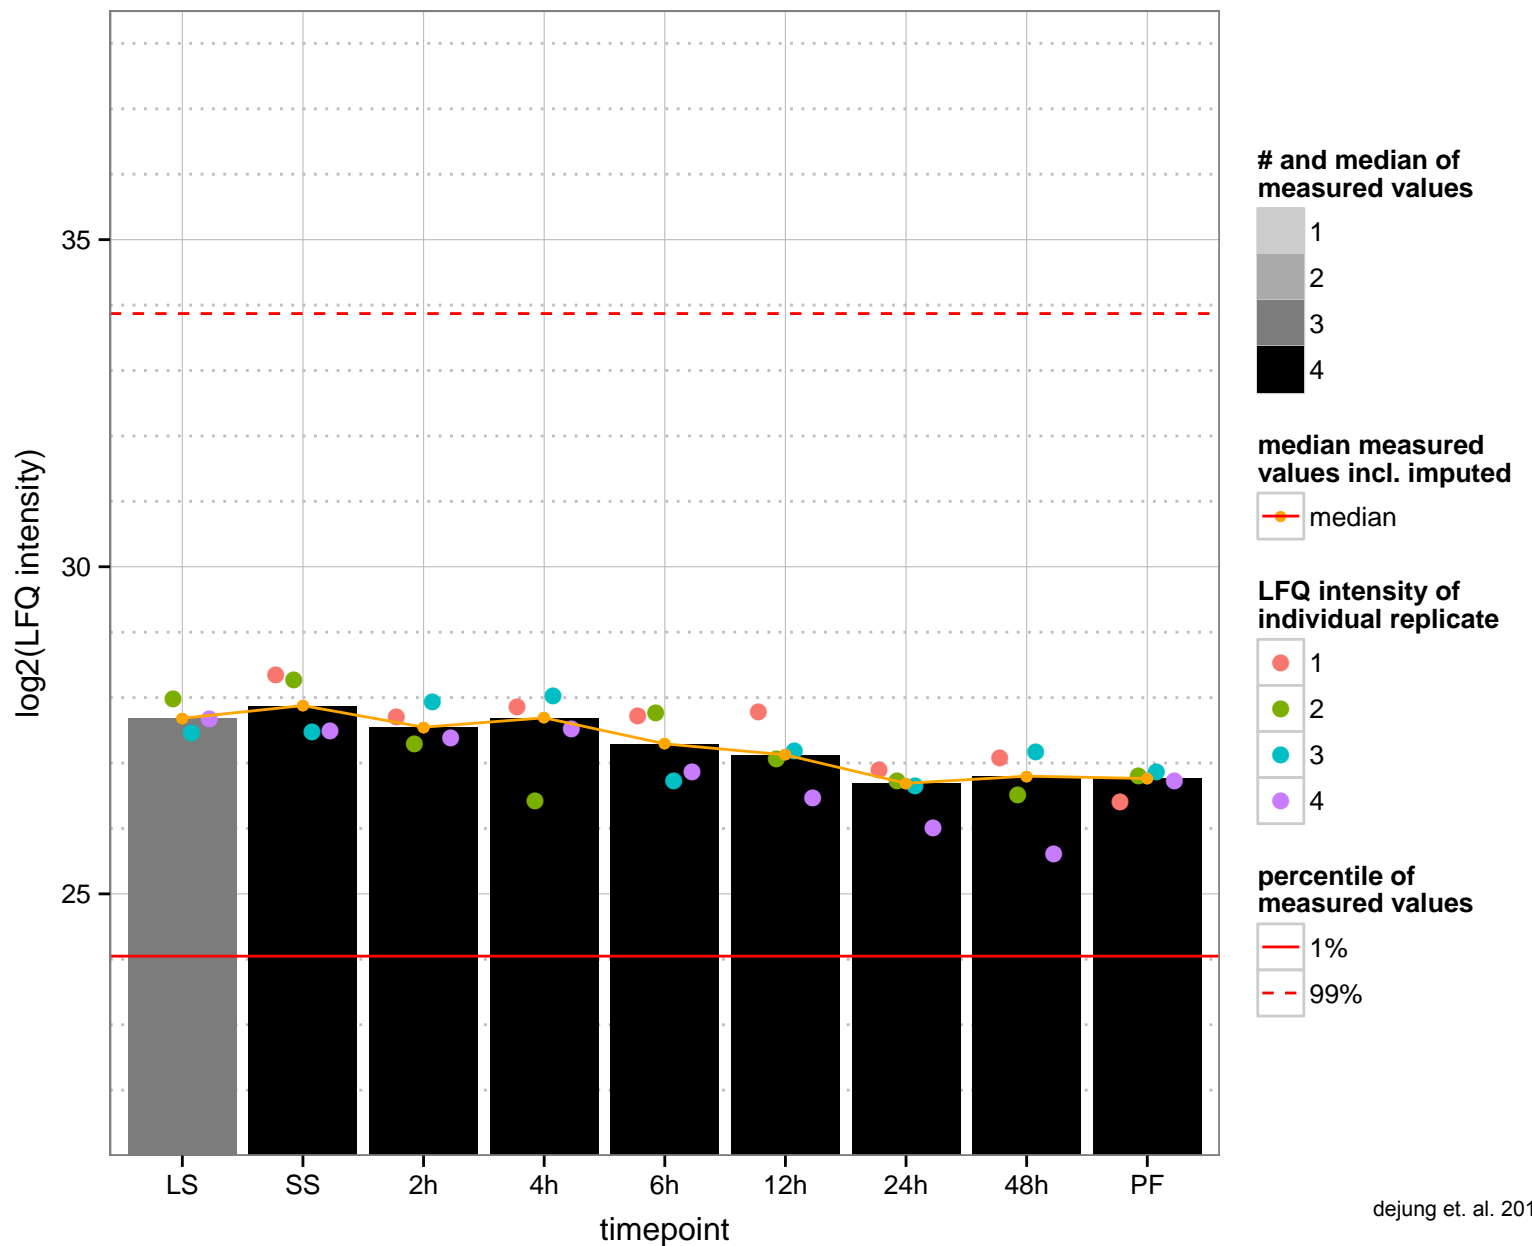

hypothetical protein, conserved  
 Tb927.11.15870  
 AGOF: null  
 AGOC: null  
 AGOP: null  
 PGO: null  
 PGOC: null  
 PGOP: null

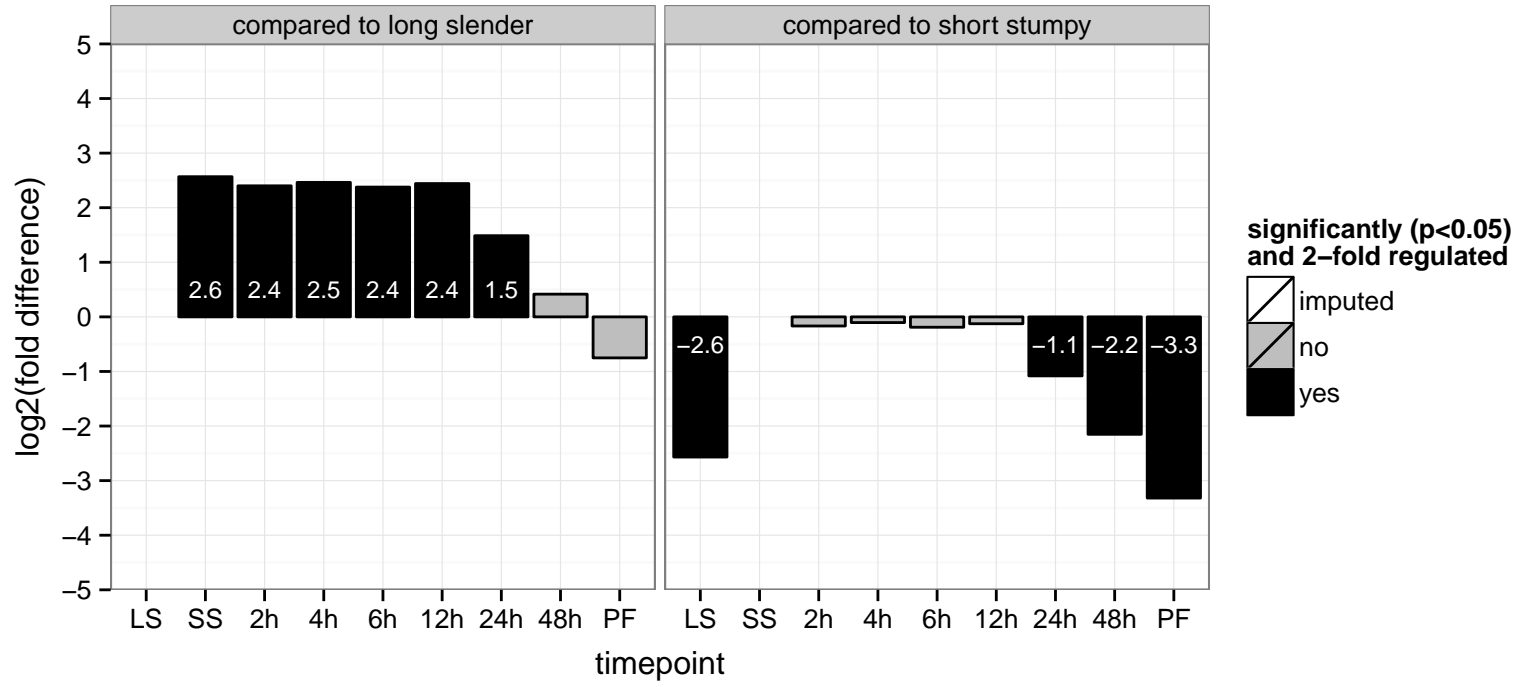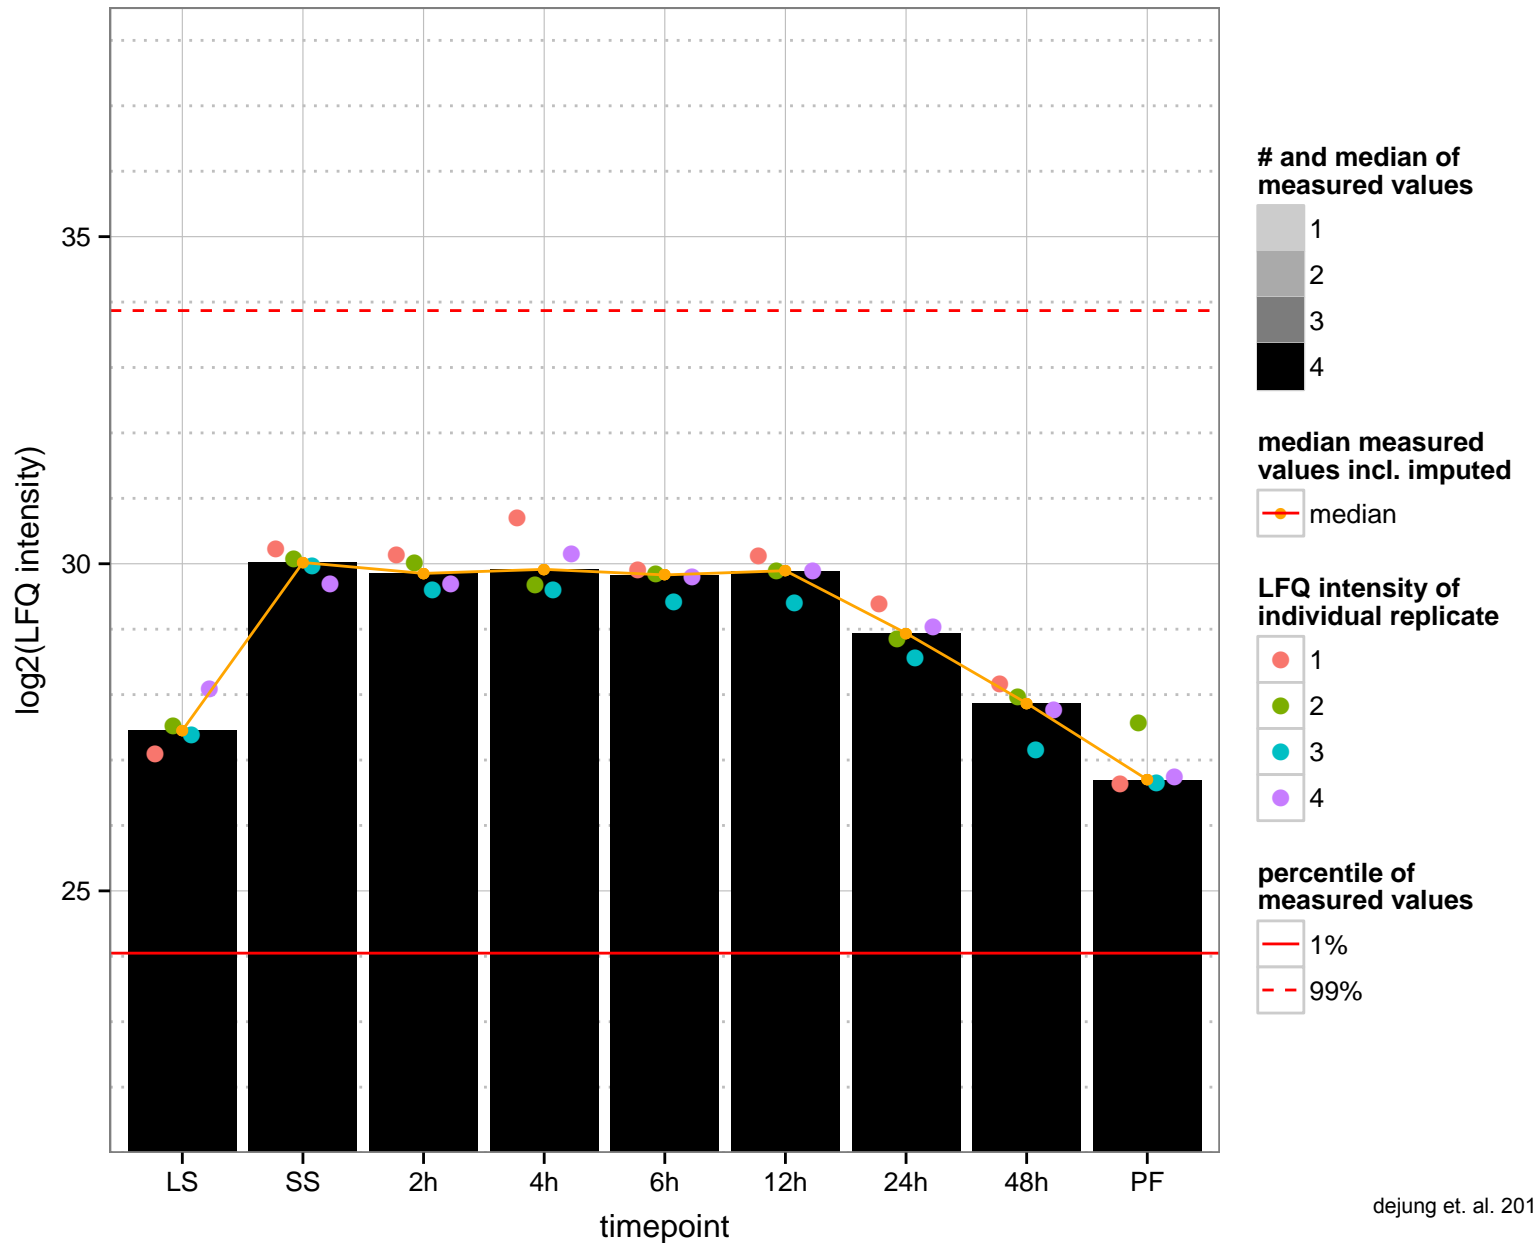

diacylglycerol acyltransferase, putative  
 Tb927.11.2210  
 AGOF: diacylglycerol O-acyltransferase activity  
 AGOC: integral to membrane  
 AGOP: triglyceride biosynthetic process  
 PGOF: transferase activity, transferring acyl groups other than amino-acyl groups  
 PGO: null  
 PGOP: null

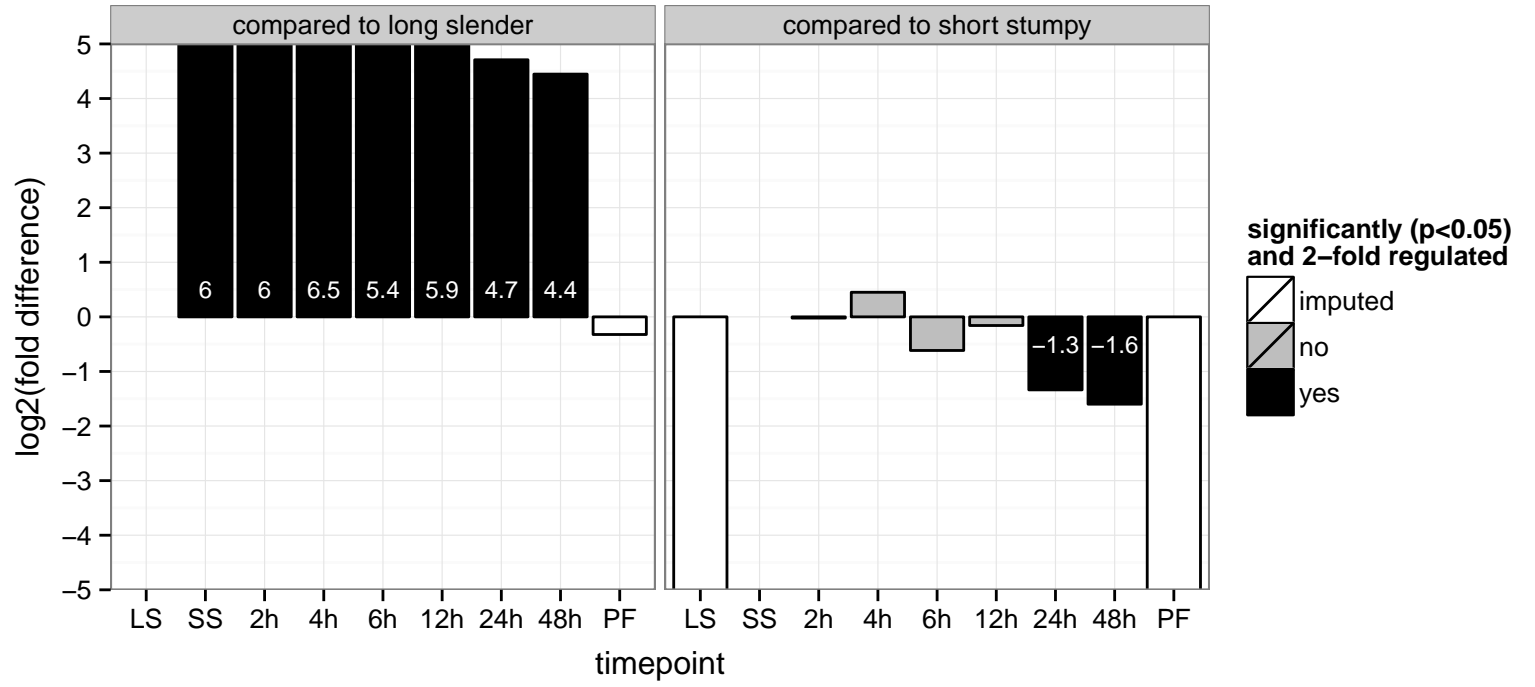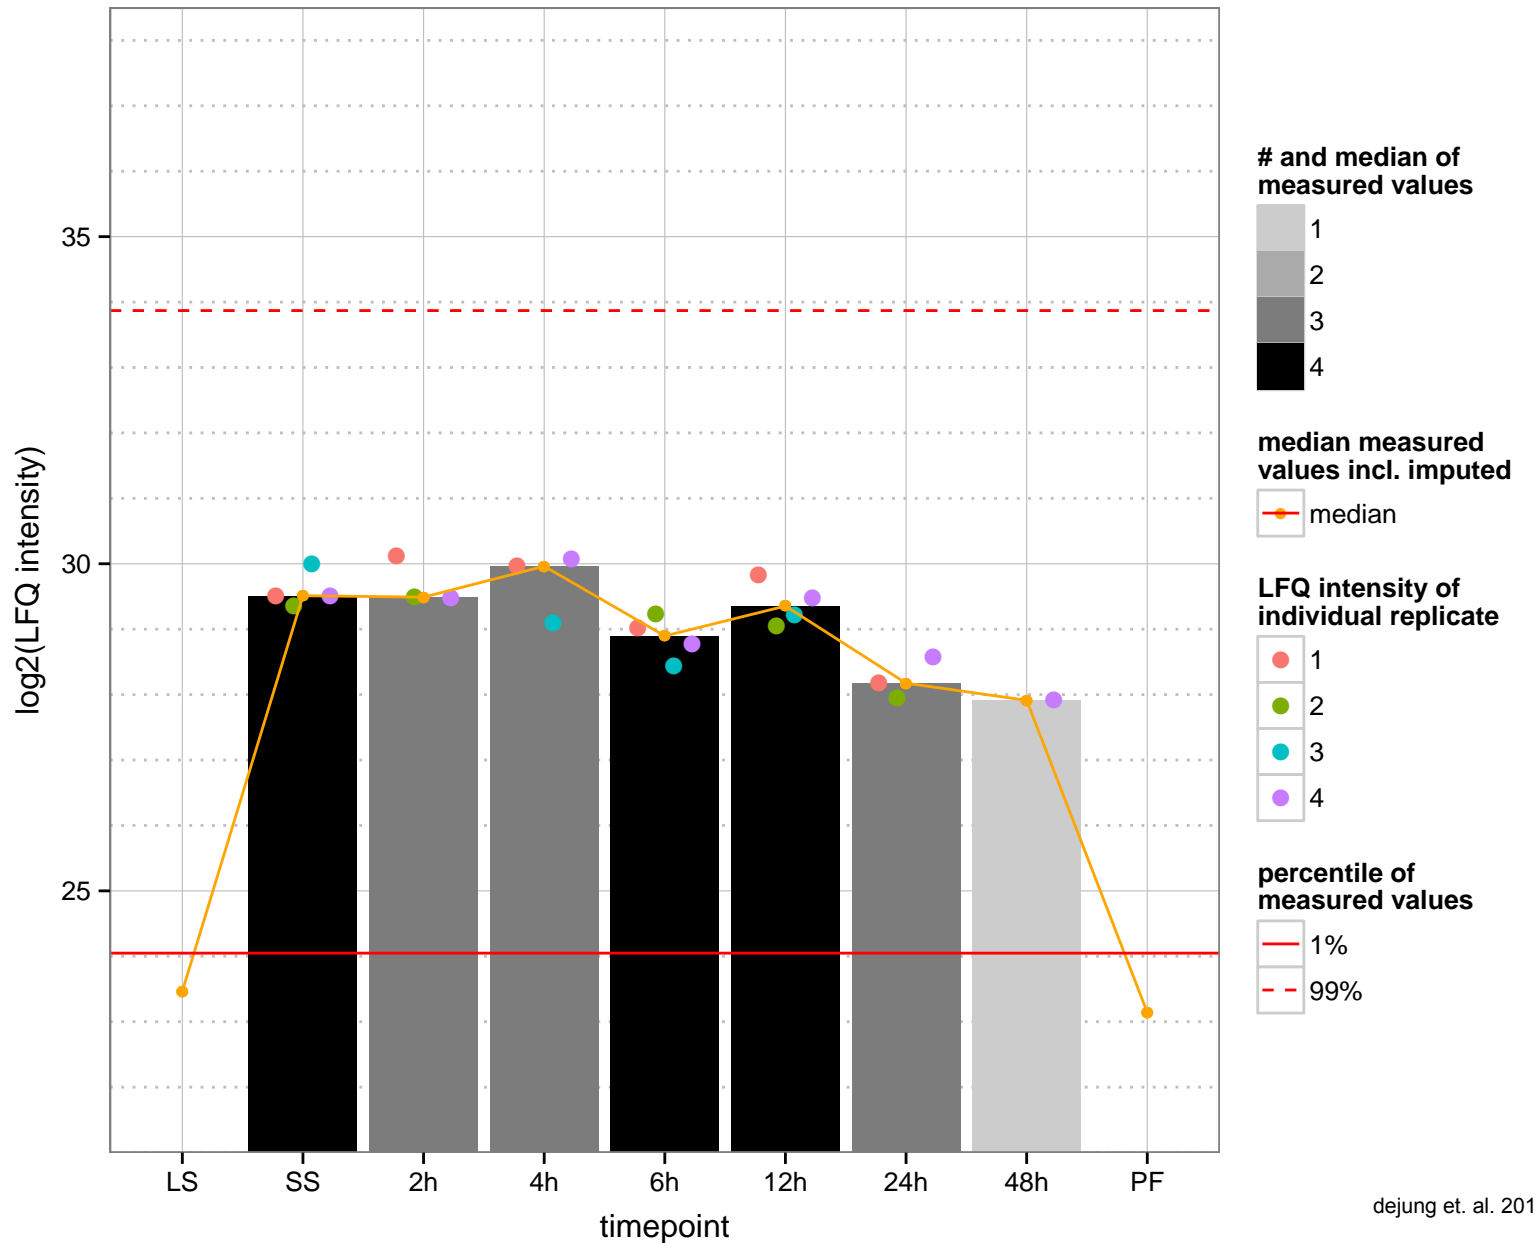

Unc104-like kinesin, putative

Tb927.11.2490

AGOF: ATP binding, microtubule motor activity, motor activity

AGOC: kinesin complex, microtubule associated complex

AGOP: microtubule-based movement, vesicle transport along microtubule

PGOF: ATP binding, microtubule motor activity, protein binding

PGOC: null

PGOP: microtubule-based movement

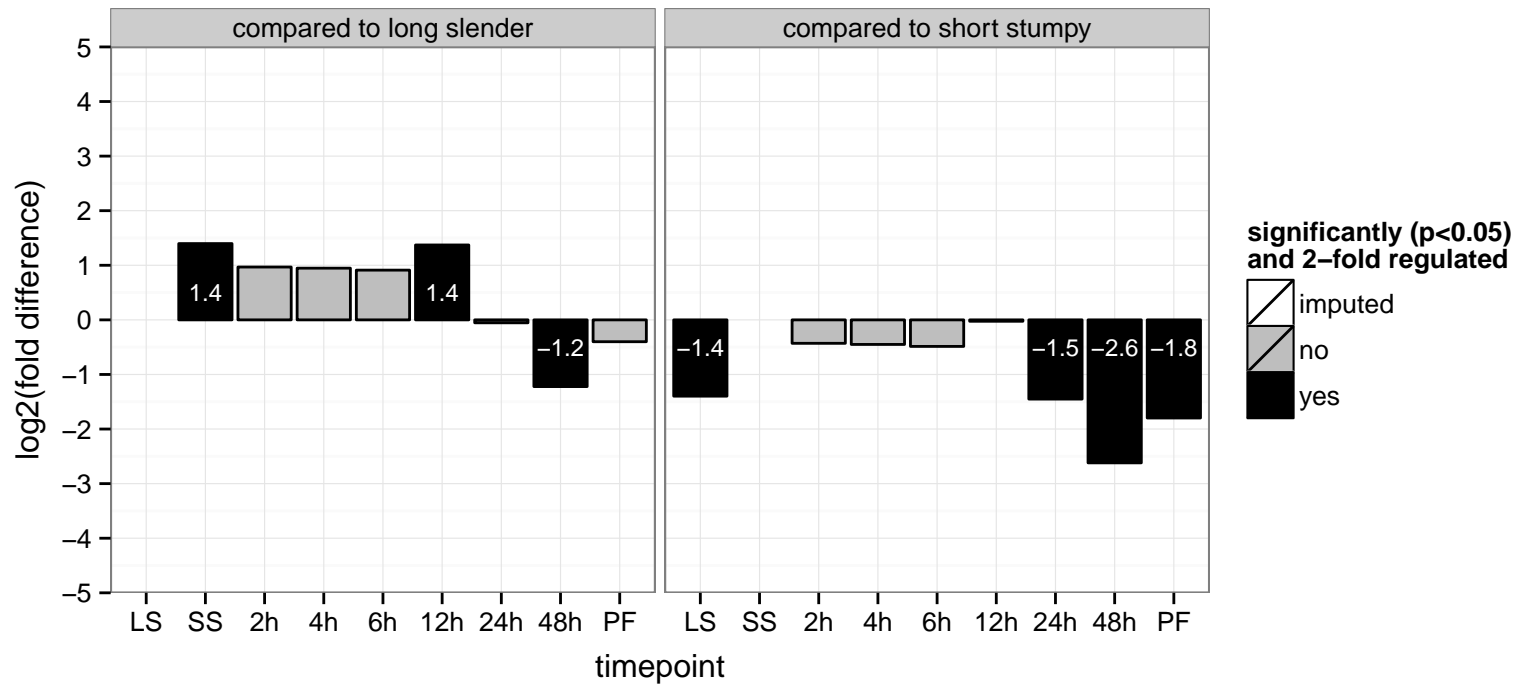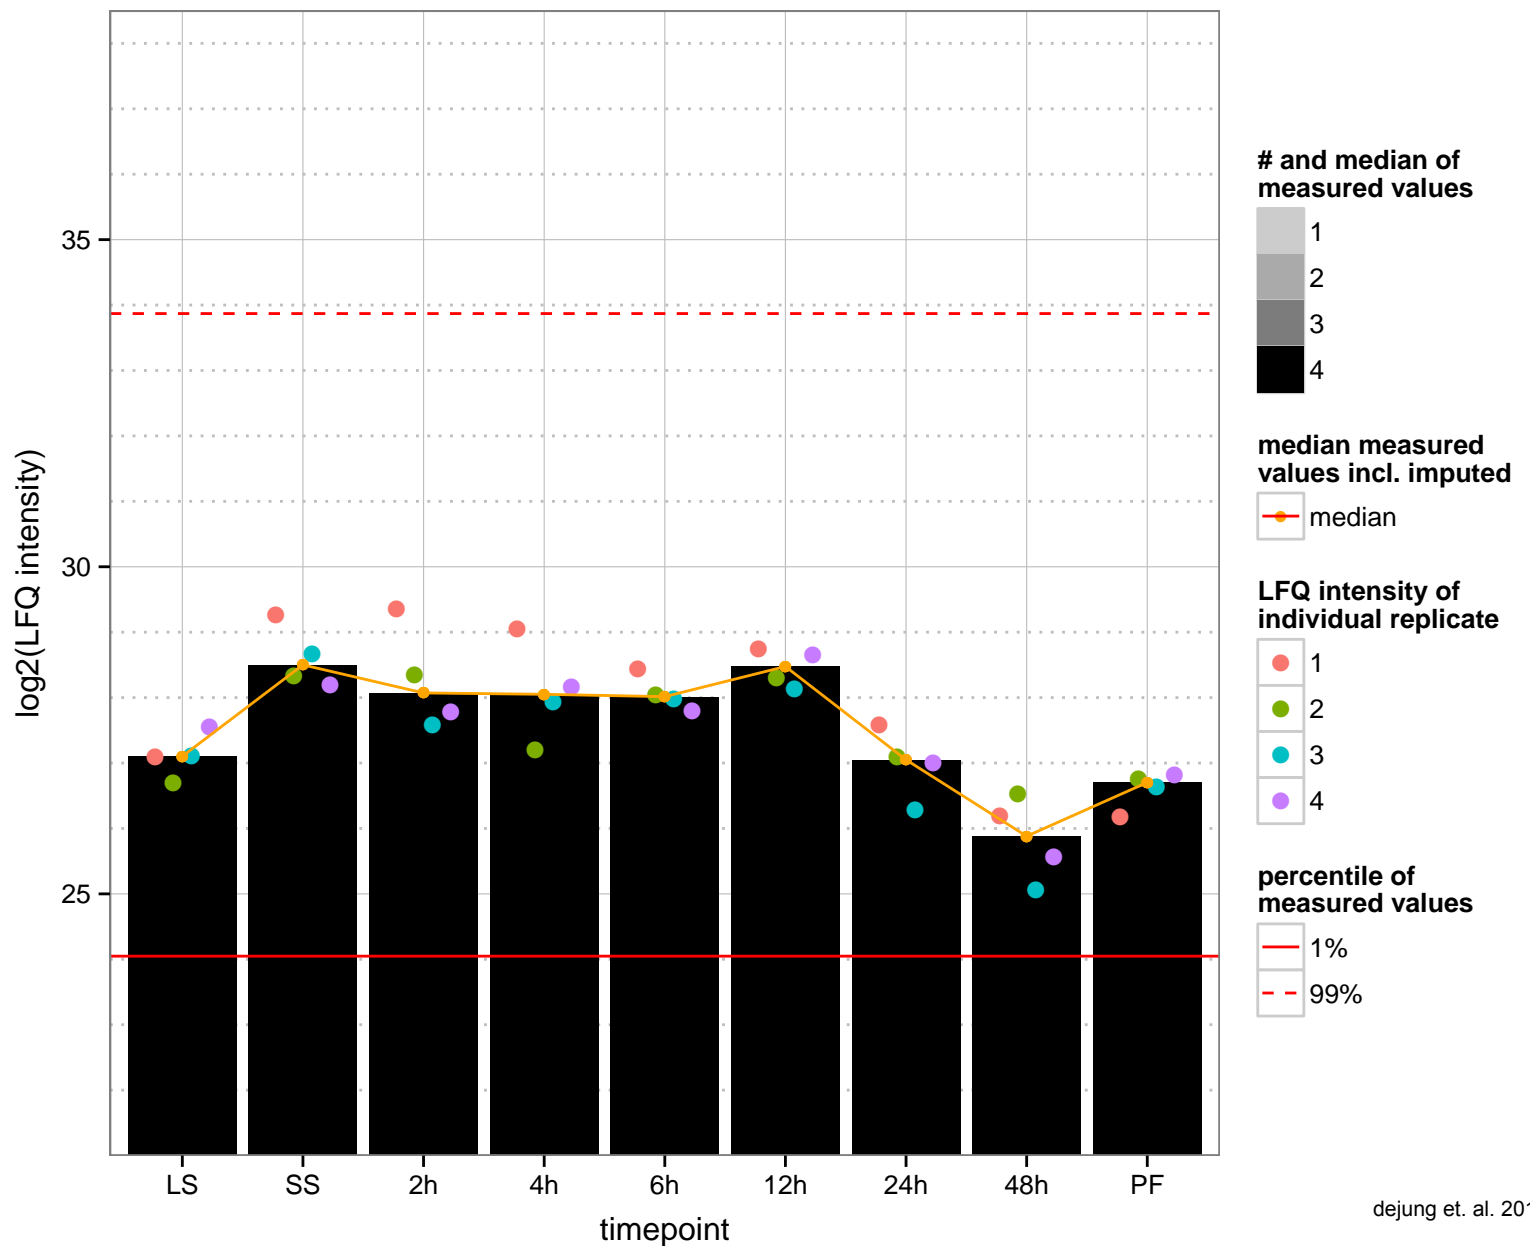

hypothetical protein, conserved  
 Tb927.11.2860  
 AGOF: null  
 AGOC: null  
 AGOP: null  
 PGO: protein binding  
 PGOC: null  
 PGOP: null

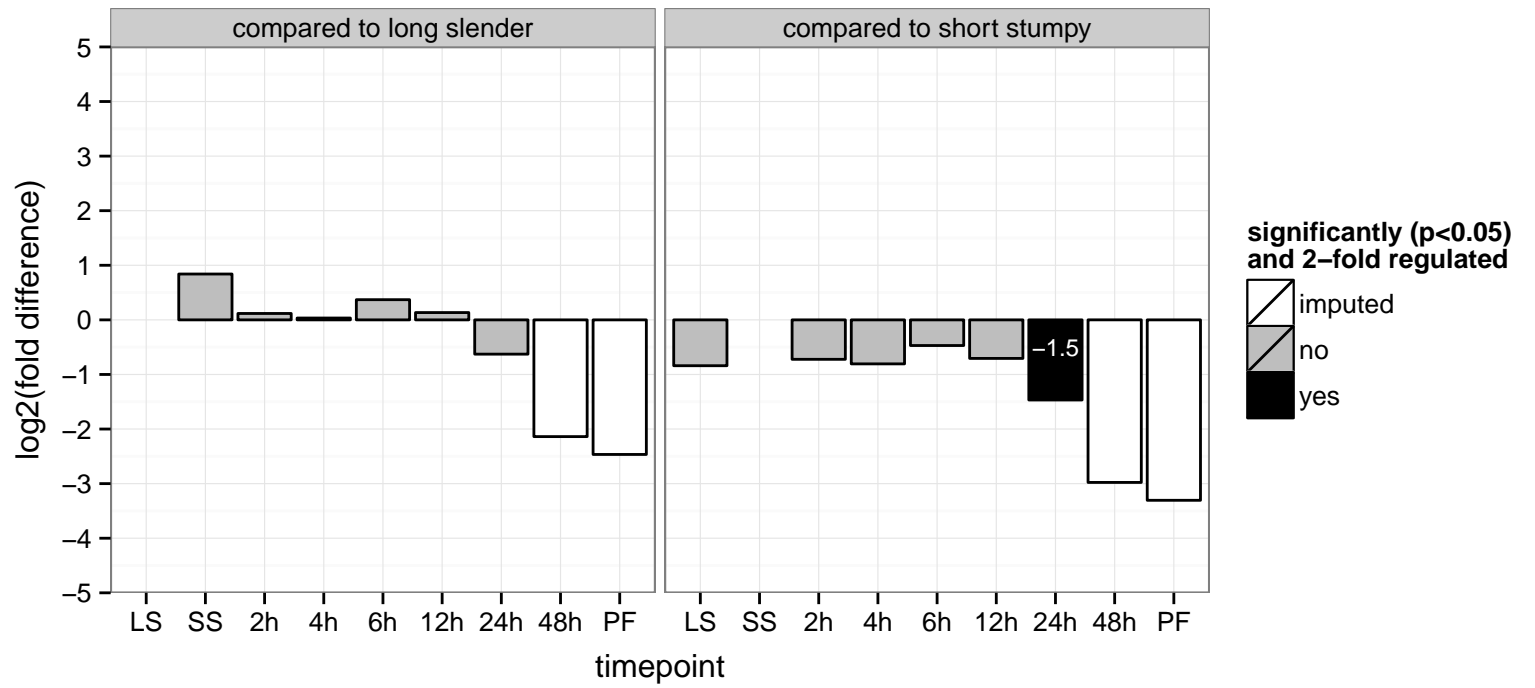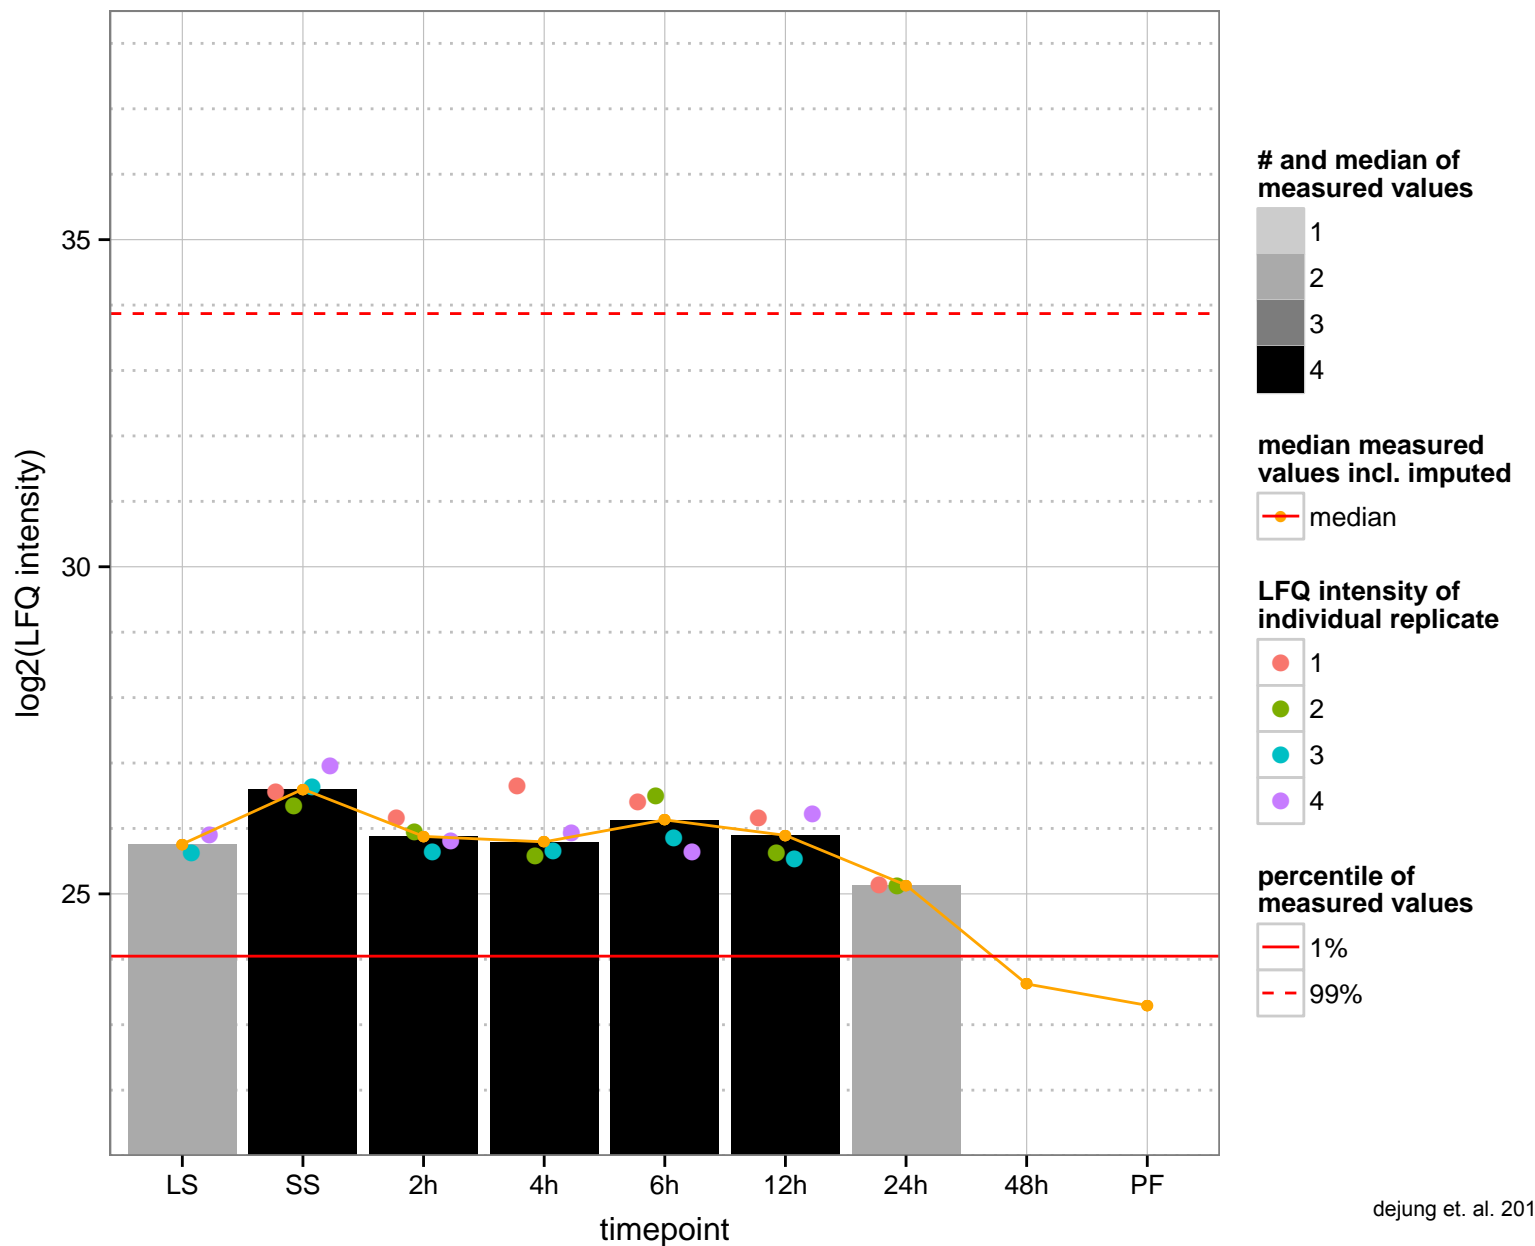



phosphatase and tensin homologue, putative

Tb927.11.290

AGOF: protein tyrosine/serine/threonine phosphatase activity

AGOC: null

AGOP: modulation of development of symbiont involved in interaction with host, protein dephosphorylation, quorum sensing in

PGOF: phosphatase activity, protein tyrosine/serine/threonine phosphatase activity

PGOC: null

PGOP: dephosphorylation, protein dephosphorylation

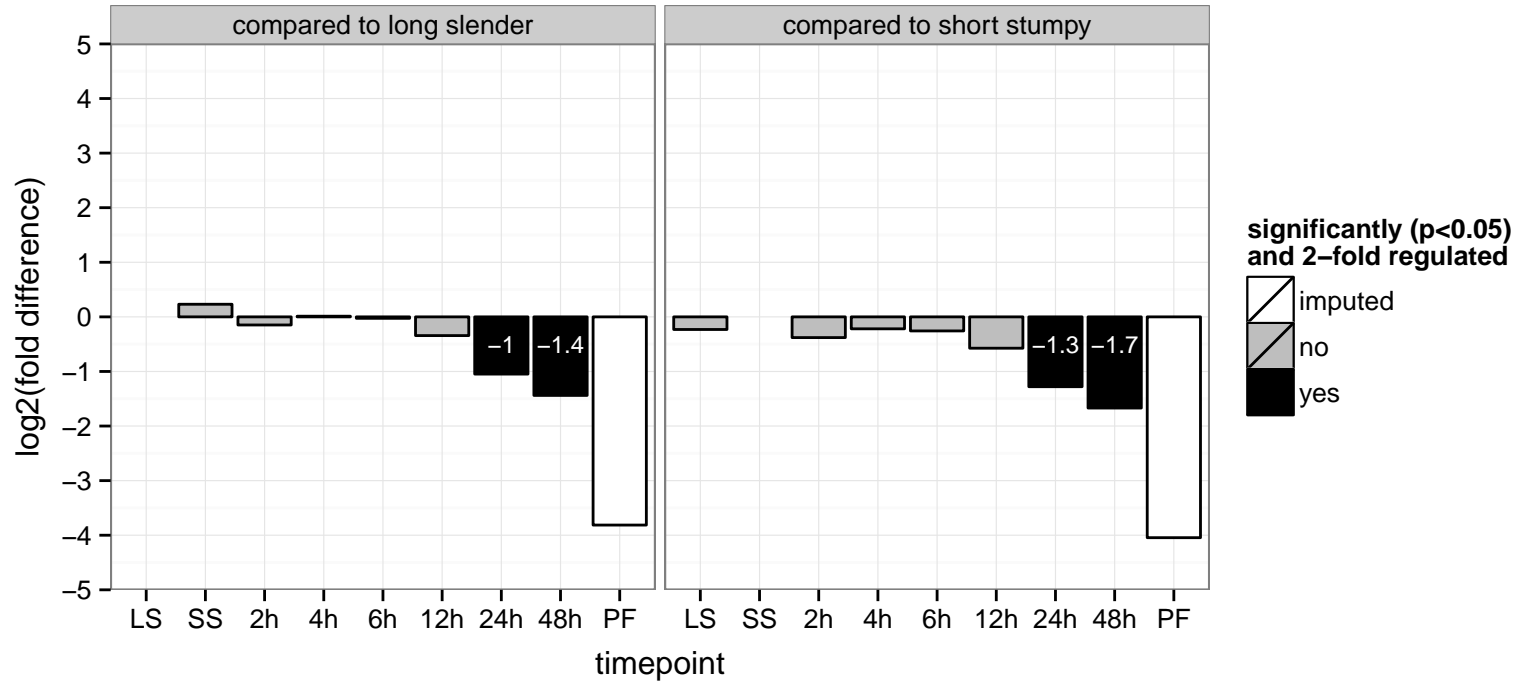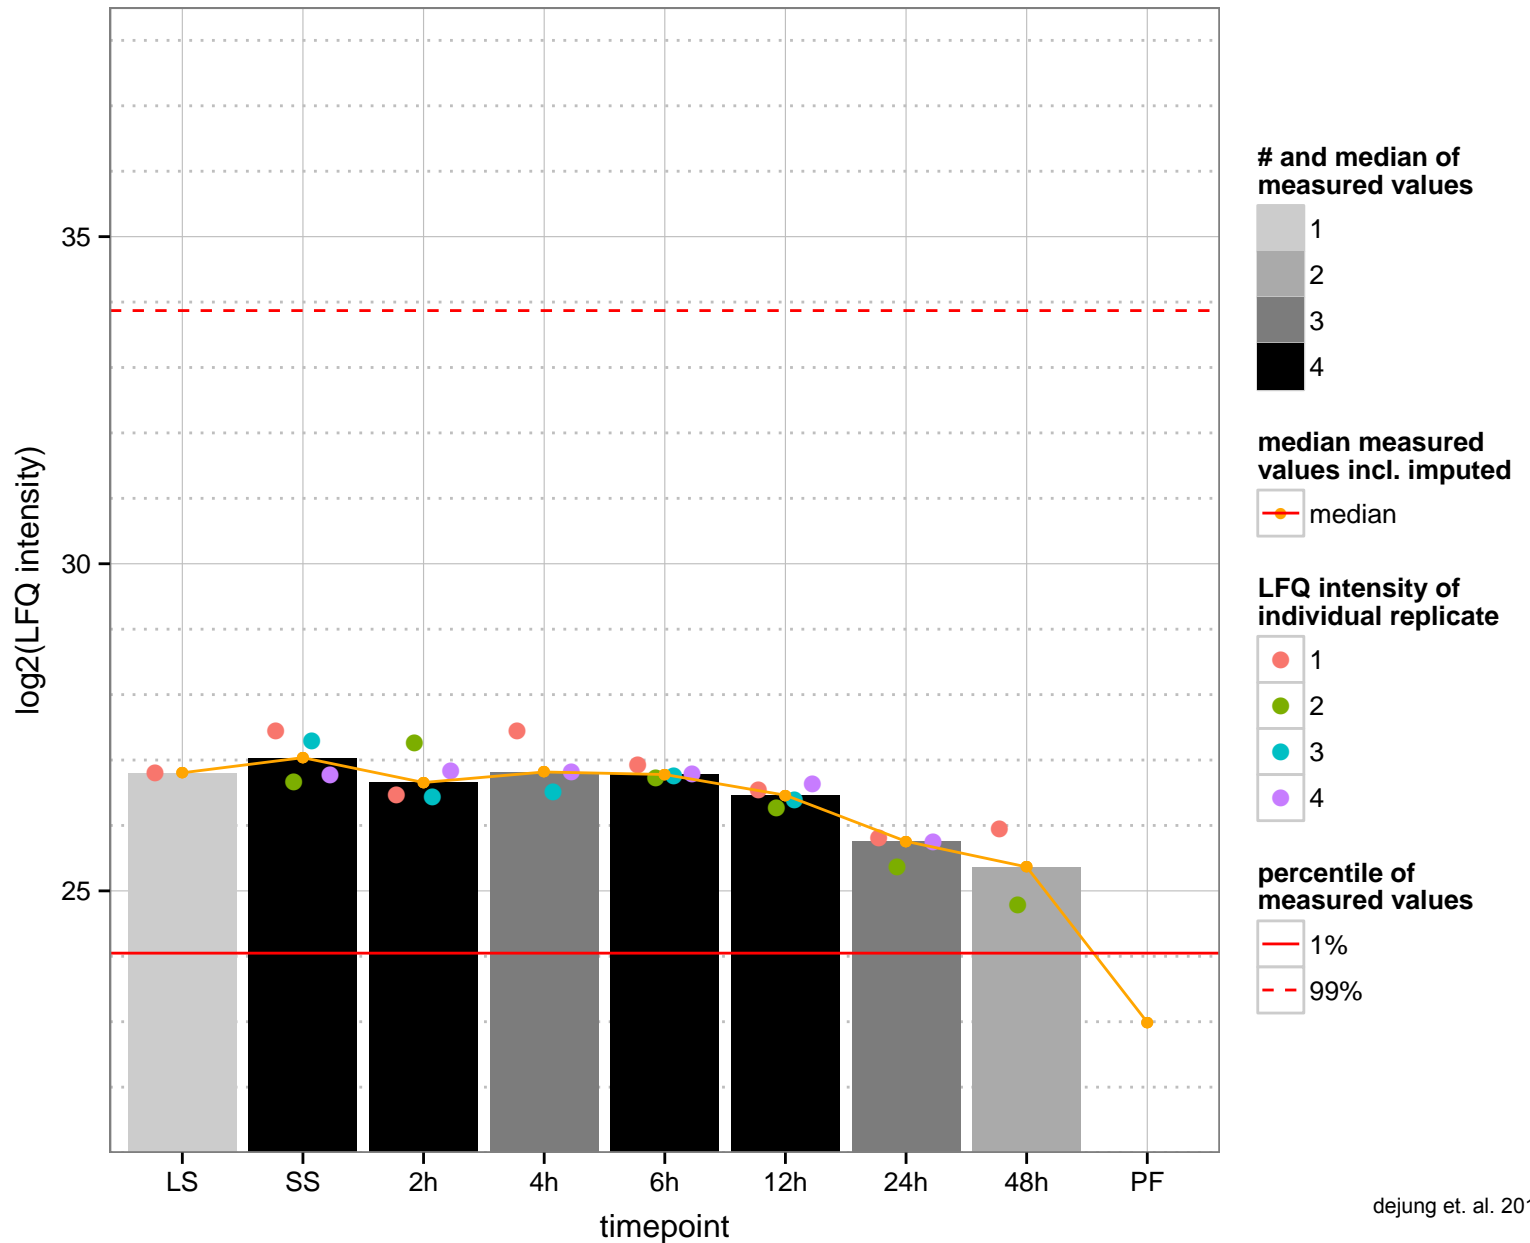

metacaspase, cysteine peptidase, Clan CD, family C13 (mca1)  
 Tb927.11.3220  
 AGOF: cysteine-type endopeptidase activity  
 AGOC: mitochondrion  
 AGOP: mitochondrion organization, proteolysis  
 PGOF: cysteine-type endopeptidase activity  
 PGO: null  
 PGOP: proteolysis

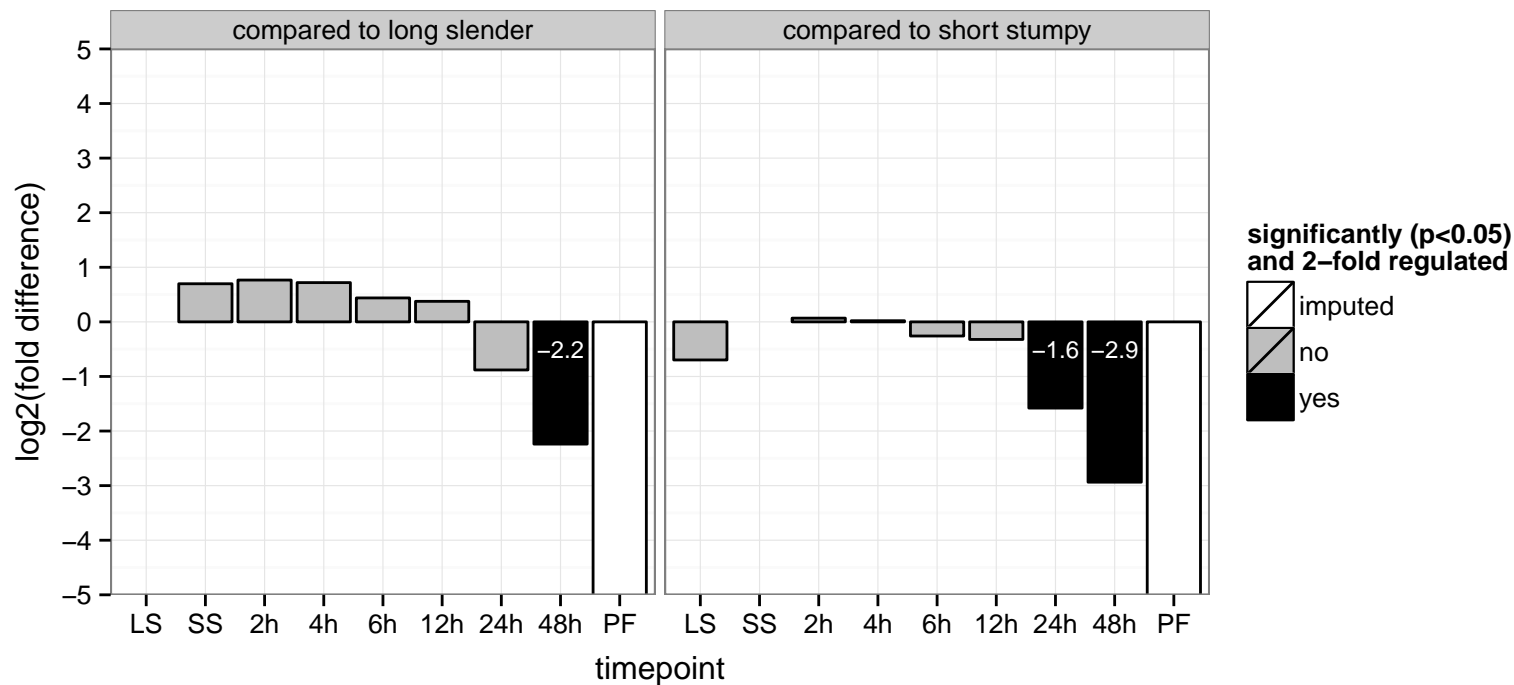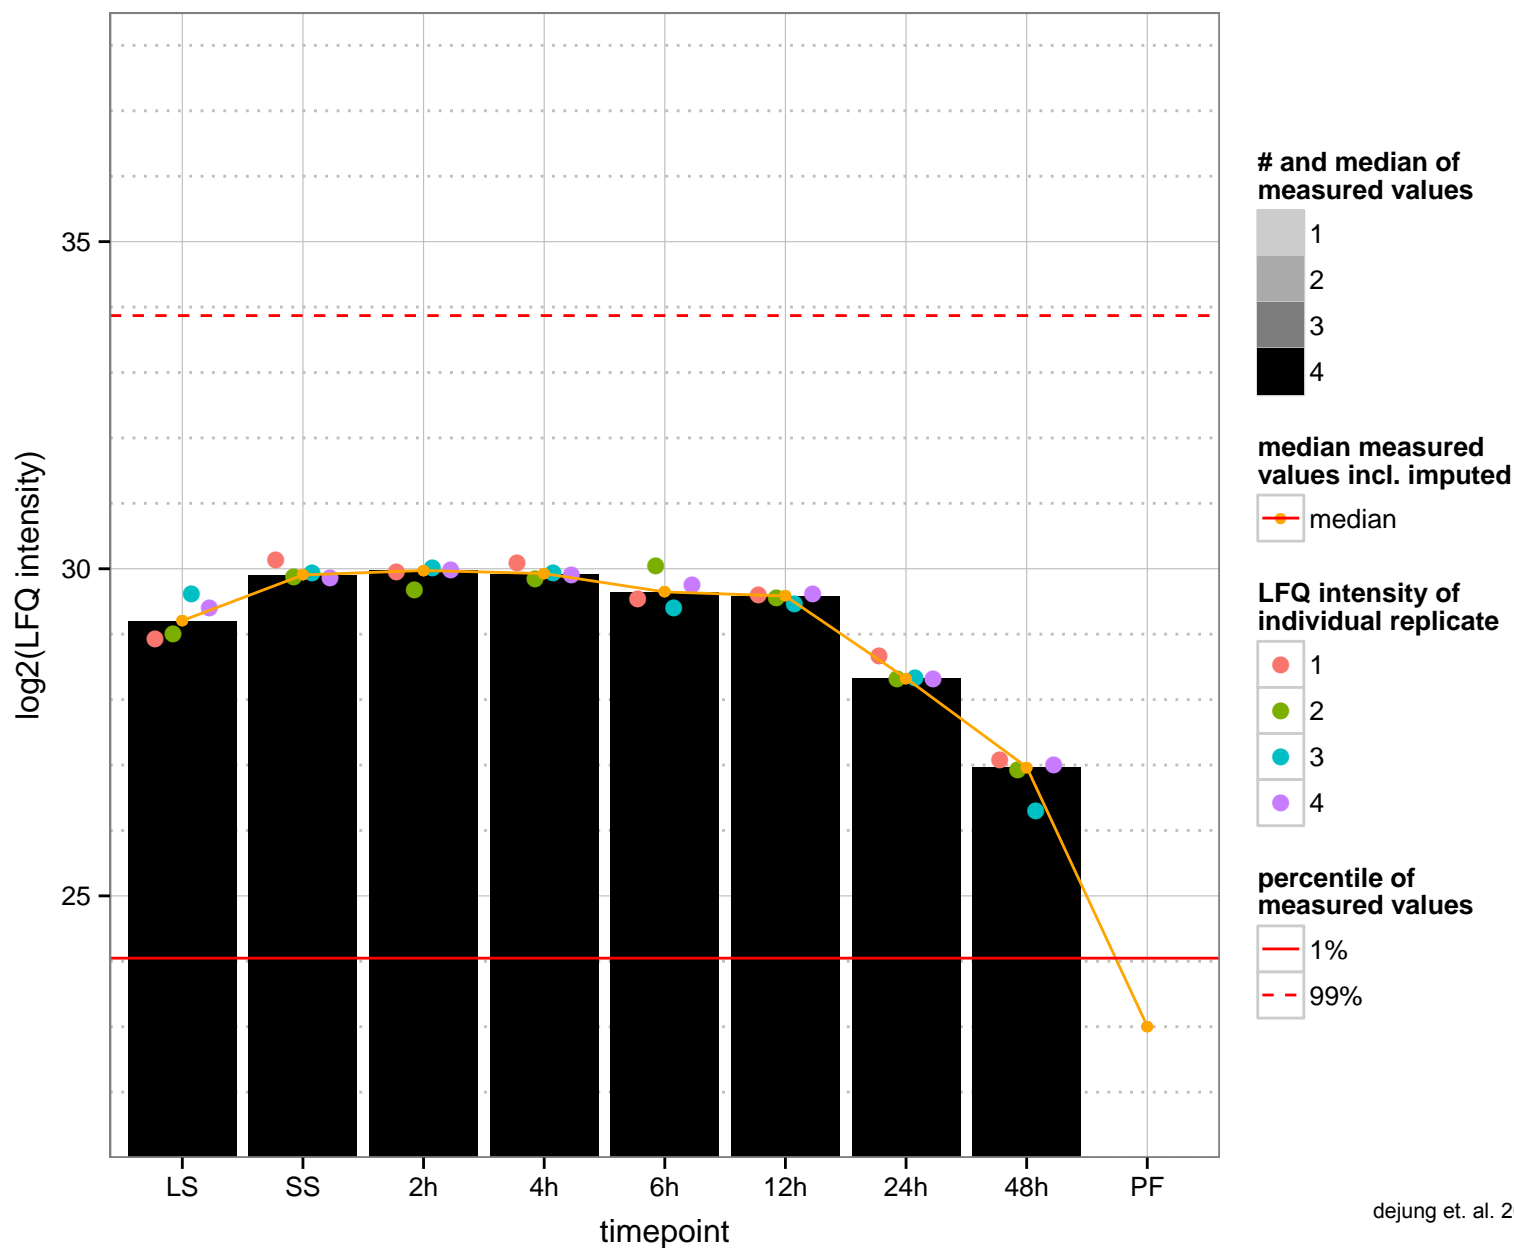

AMP deaminase, putative  
 Tb927.11.3850  
 AGOF: deaminase activity  
 AGOC: null  
 AGOP: purine ribonucleoside monophosphate biosynthetic process  
 PGO: deaminase activity  
 PGO: null  
 PGO: purine ribonucleoside monophosphate biosynthetic process

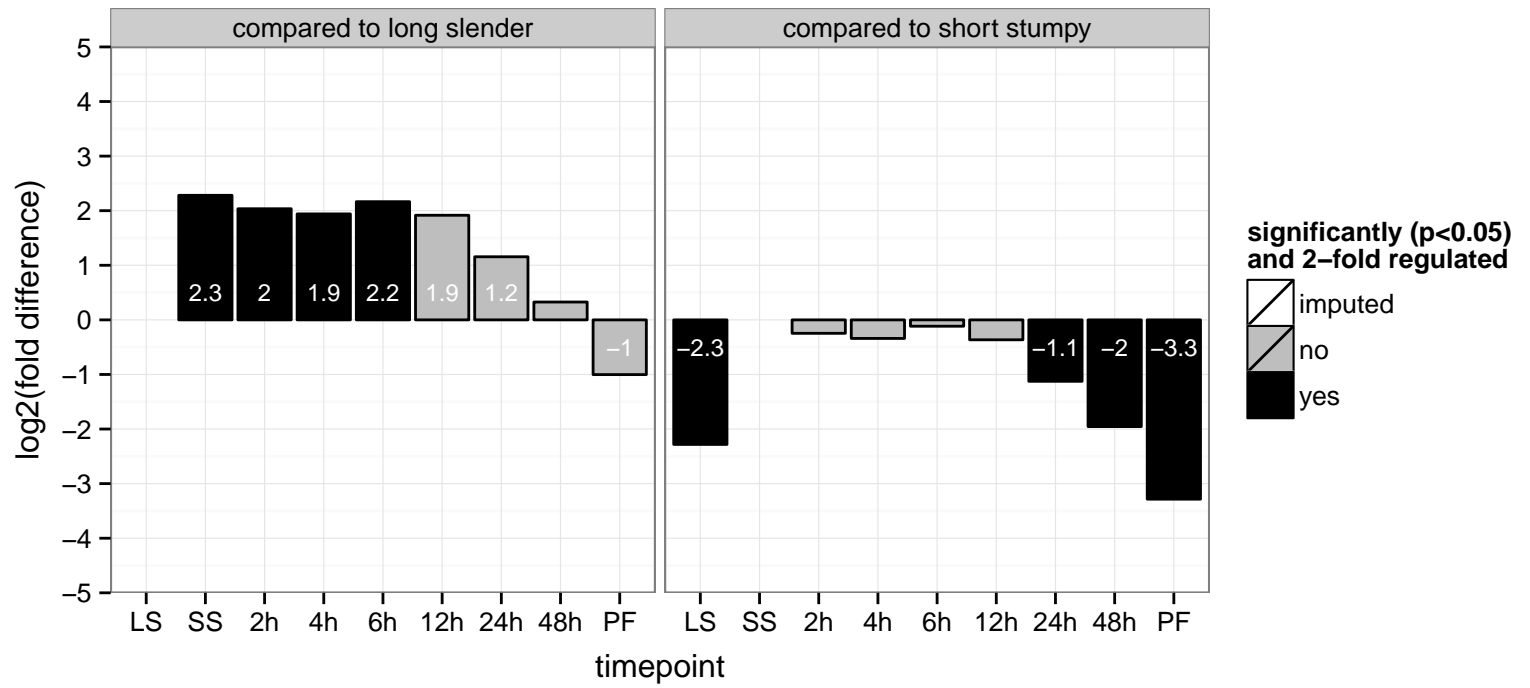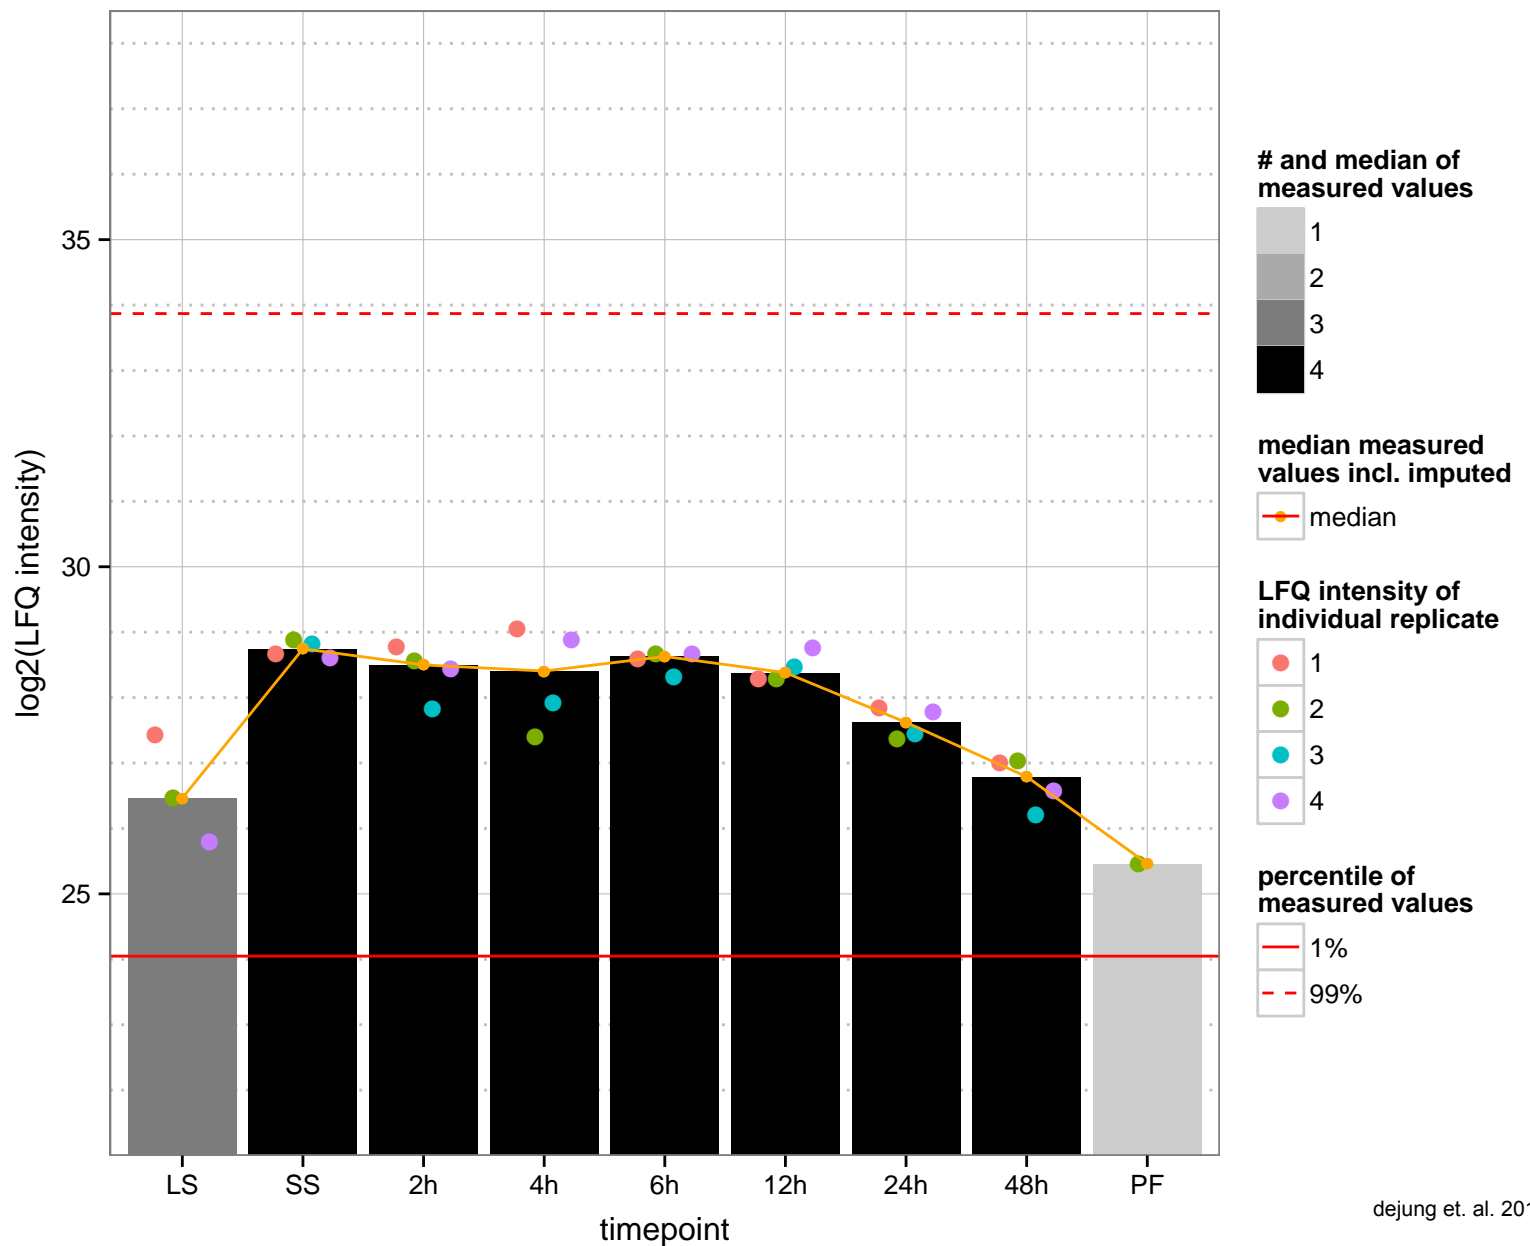

clathrin coat assembly protein, putative  
 Tb927.11.4800  
 AGOF: clathrin binding, phospholipid binding  
 AGOC: clathrin coat of coated pit, contractile vacuole  
 AGOP: receptor-mediated endocytosis  
 PGO: phospholipid binding  
 PGOC: null  
 PGOP: null

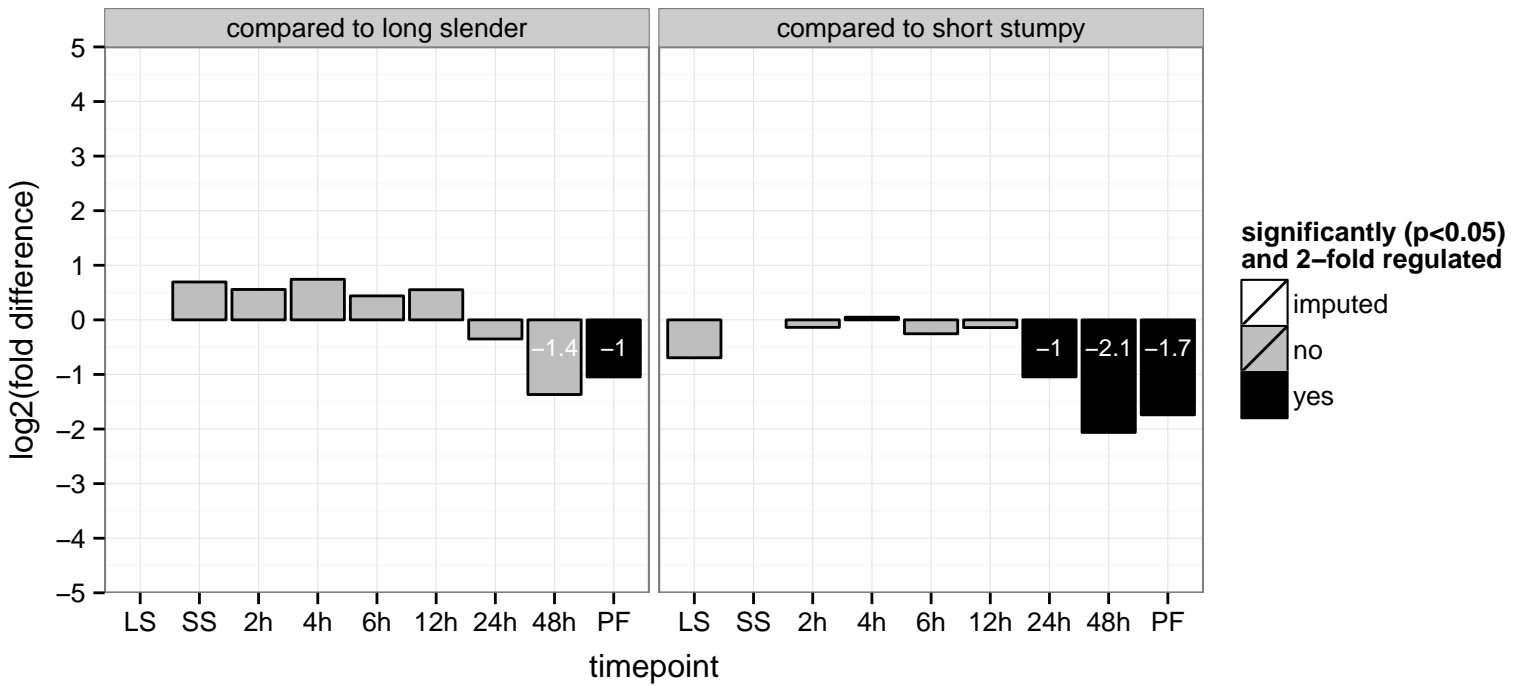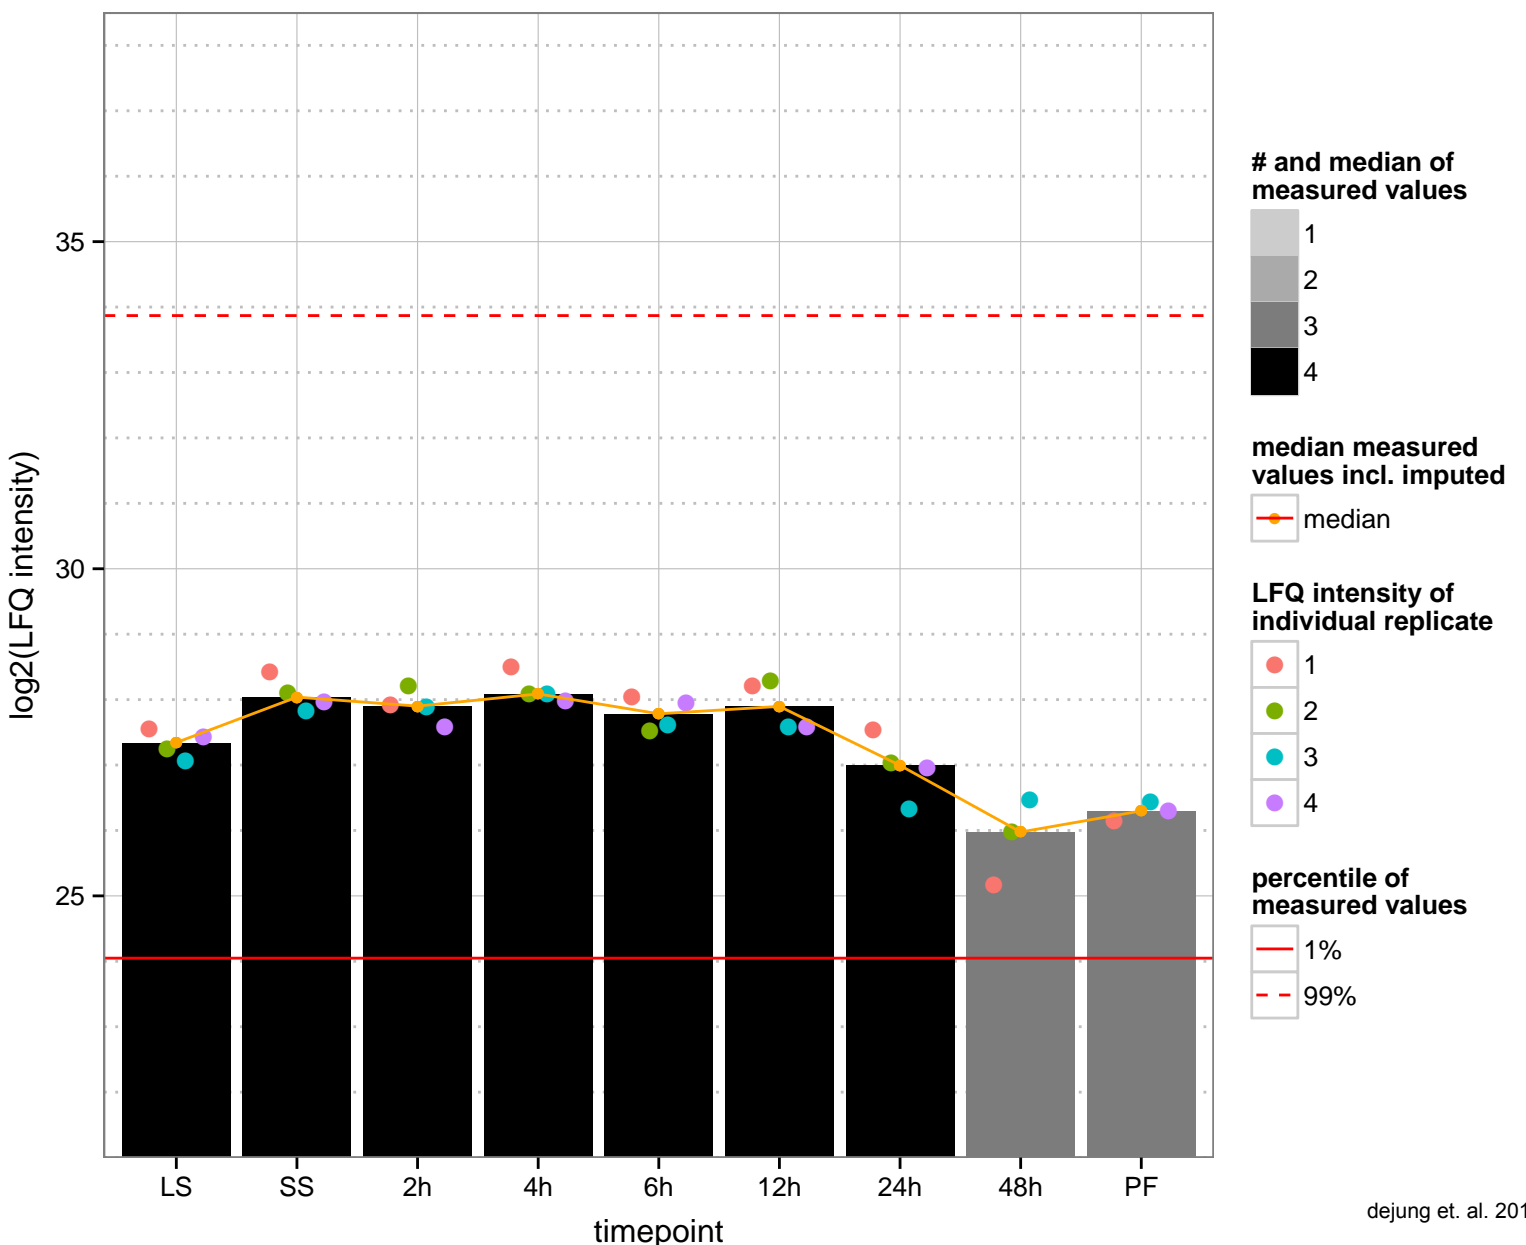

hypothetical protein, conserved  
 Tb927.11.5370  
 AGOF: null  
 AGOC: null  
 AGOP: null  
 PGO: null  
 PGOC: null  
 PGOP: null

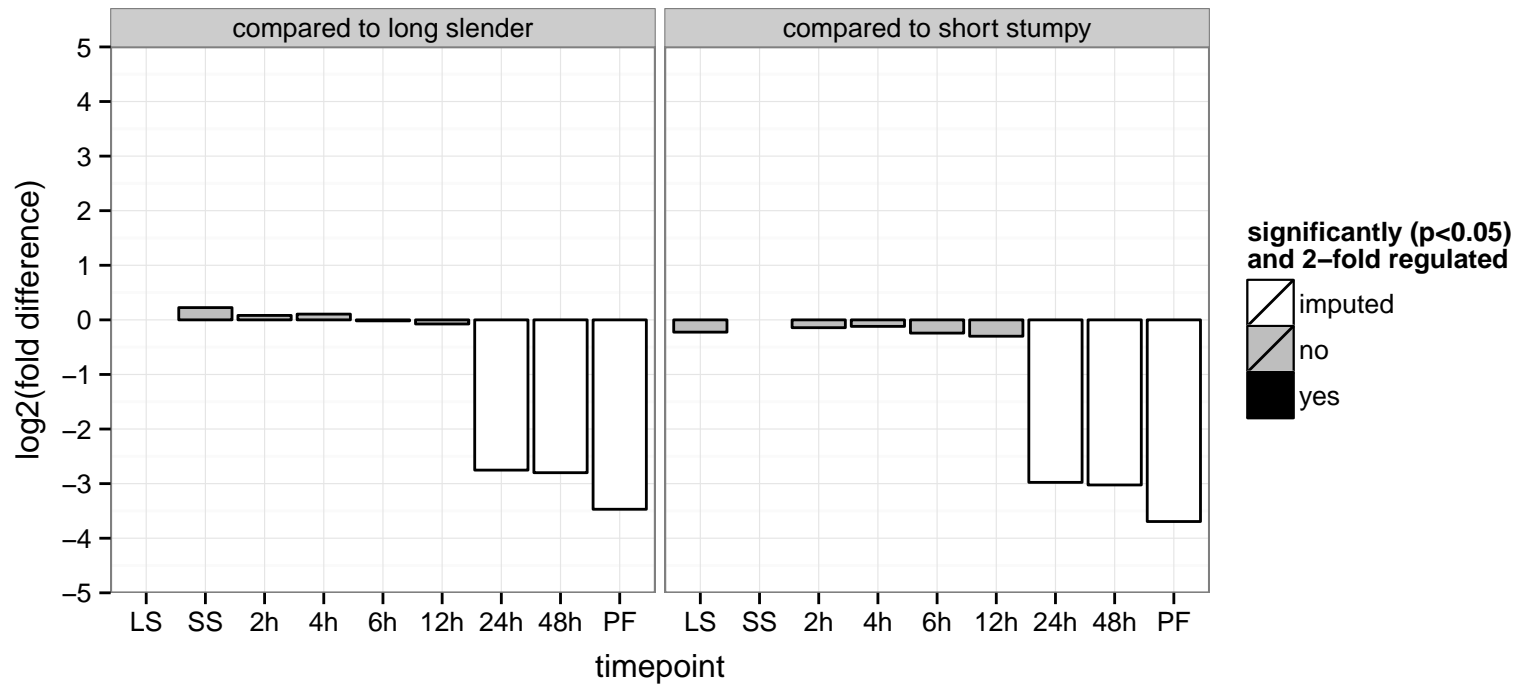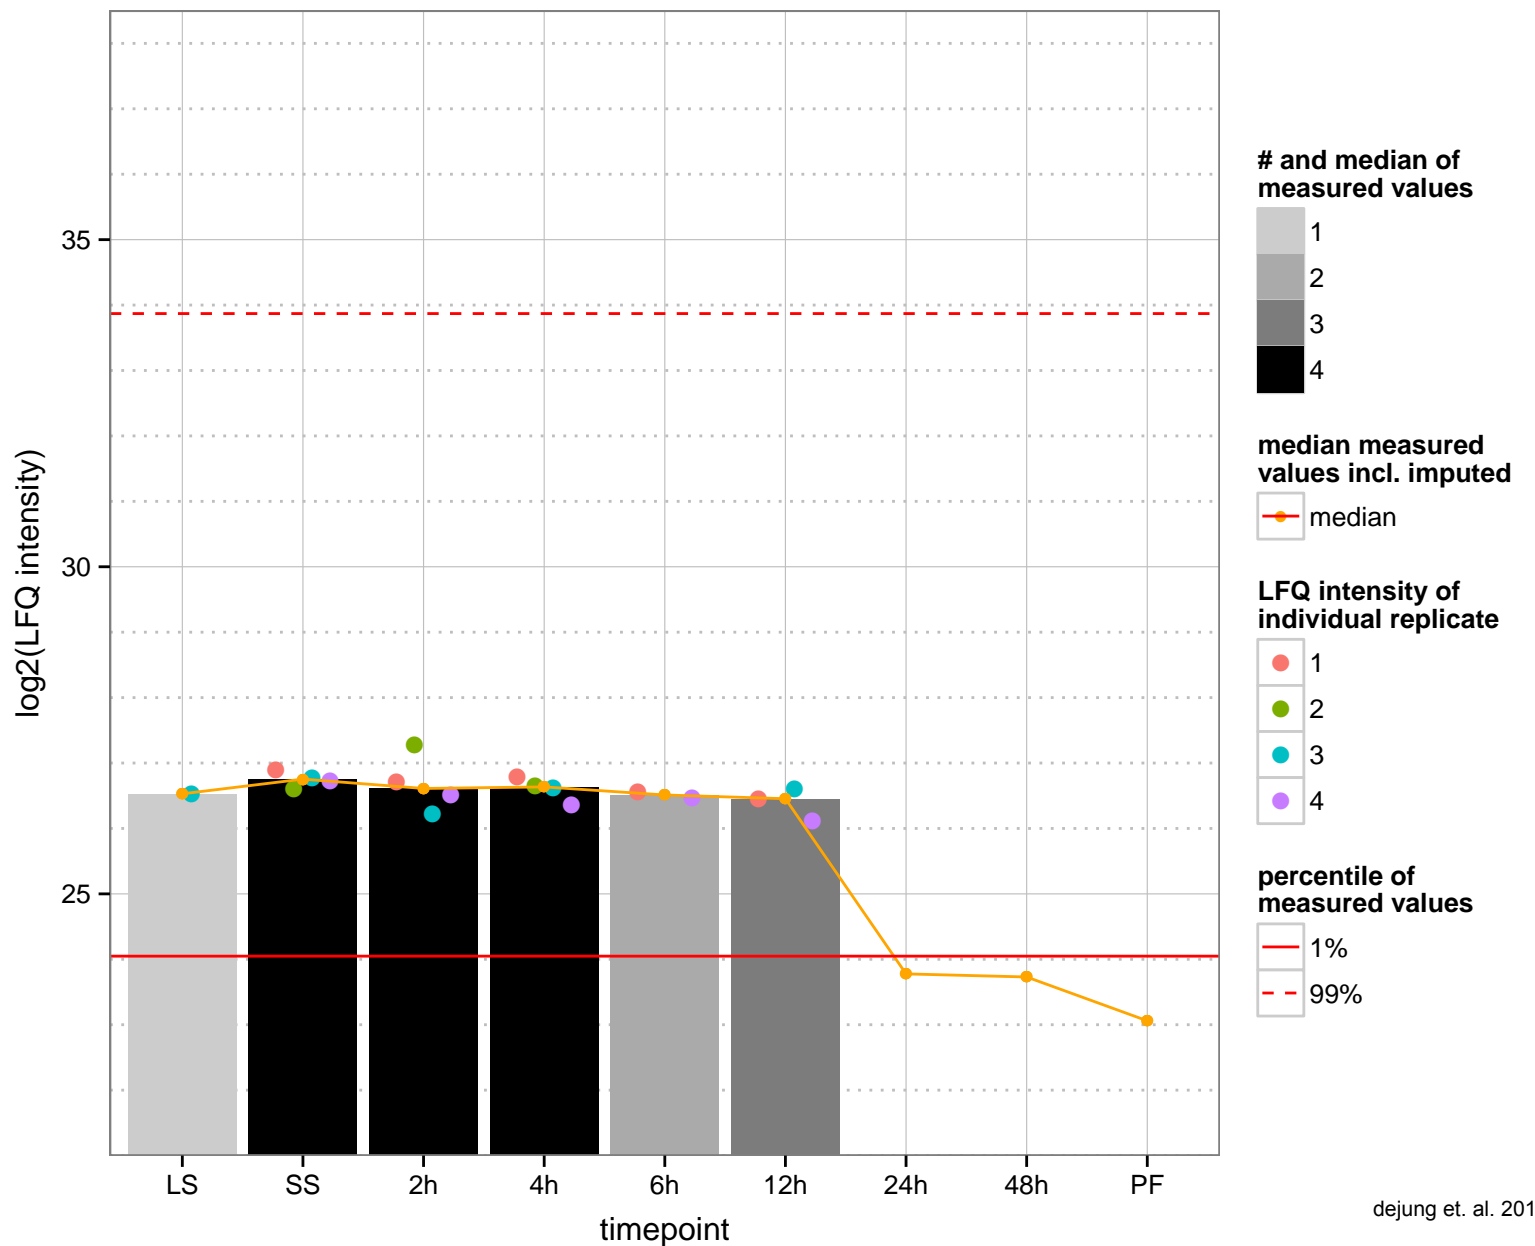

protein kinase, putative

Tb927.11.5860

AGOF: ATP binding, protein serine/threonine kinase activity, protein tyrosine kinase activity

AGOC: null

AGOP: protein phosphorylation

PGOF: ATP binding, protein kinase activity, transferase activity, transferring phosphorus-containing groups

PGOC: null

PGOP: protein phosphorylation

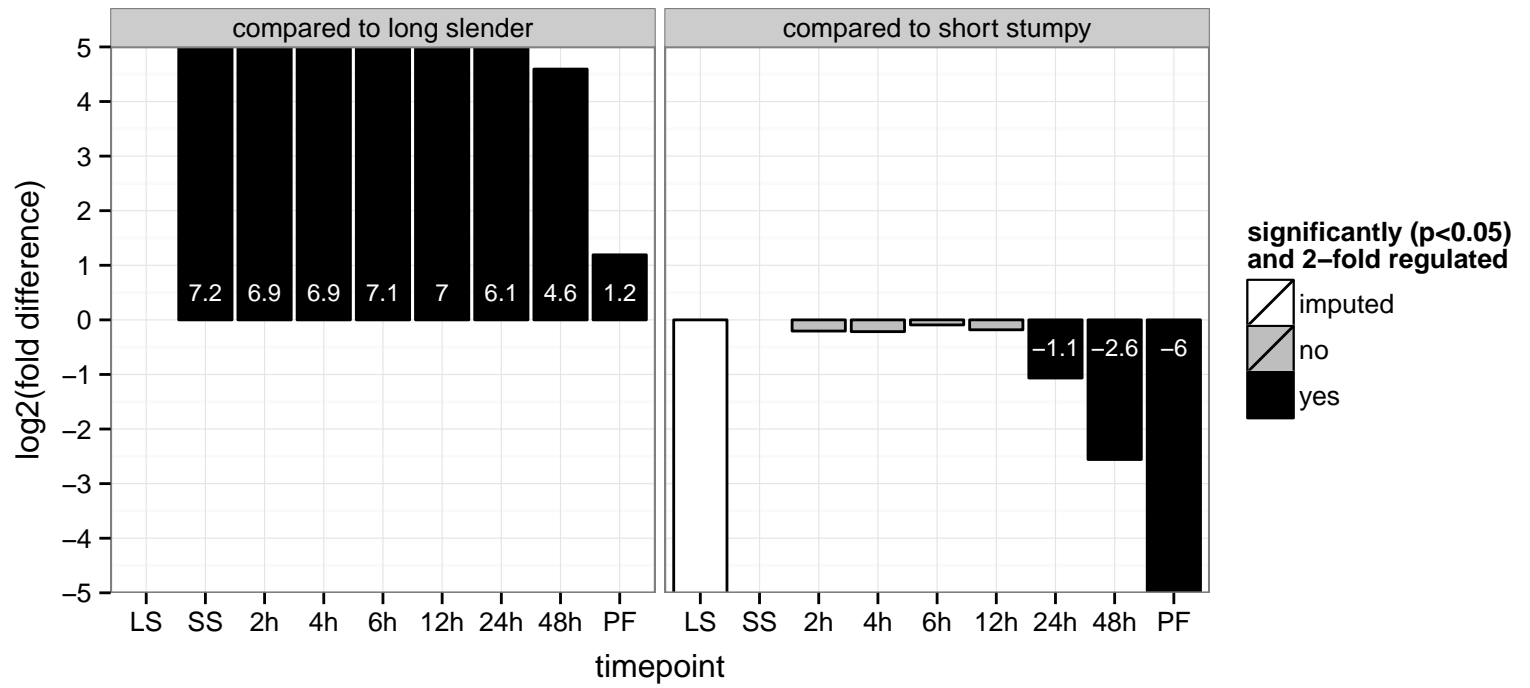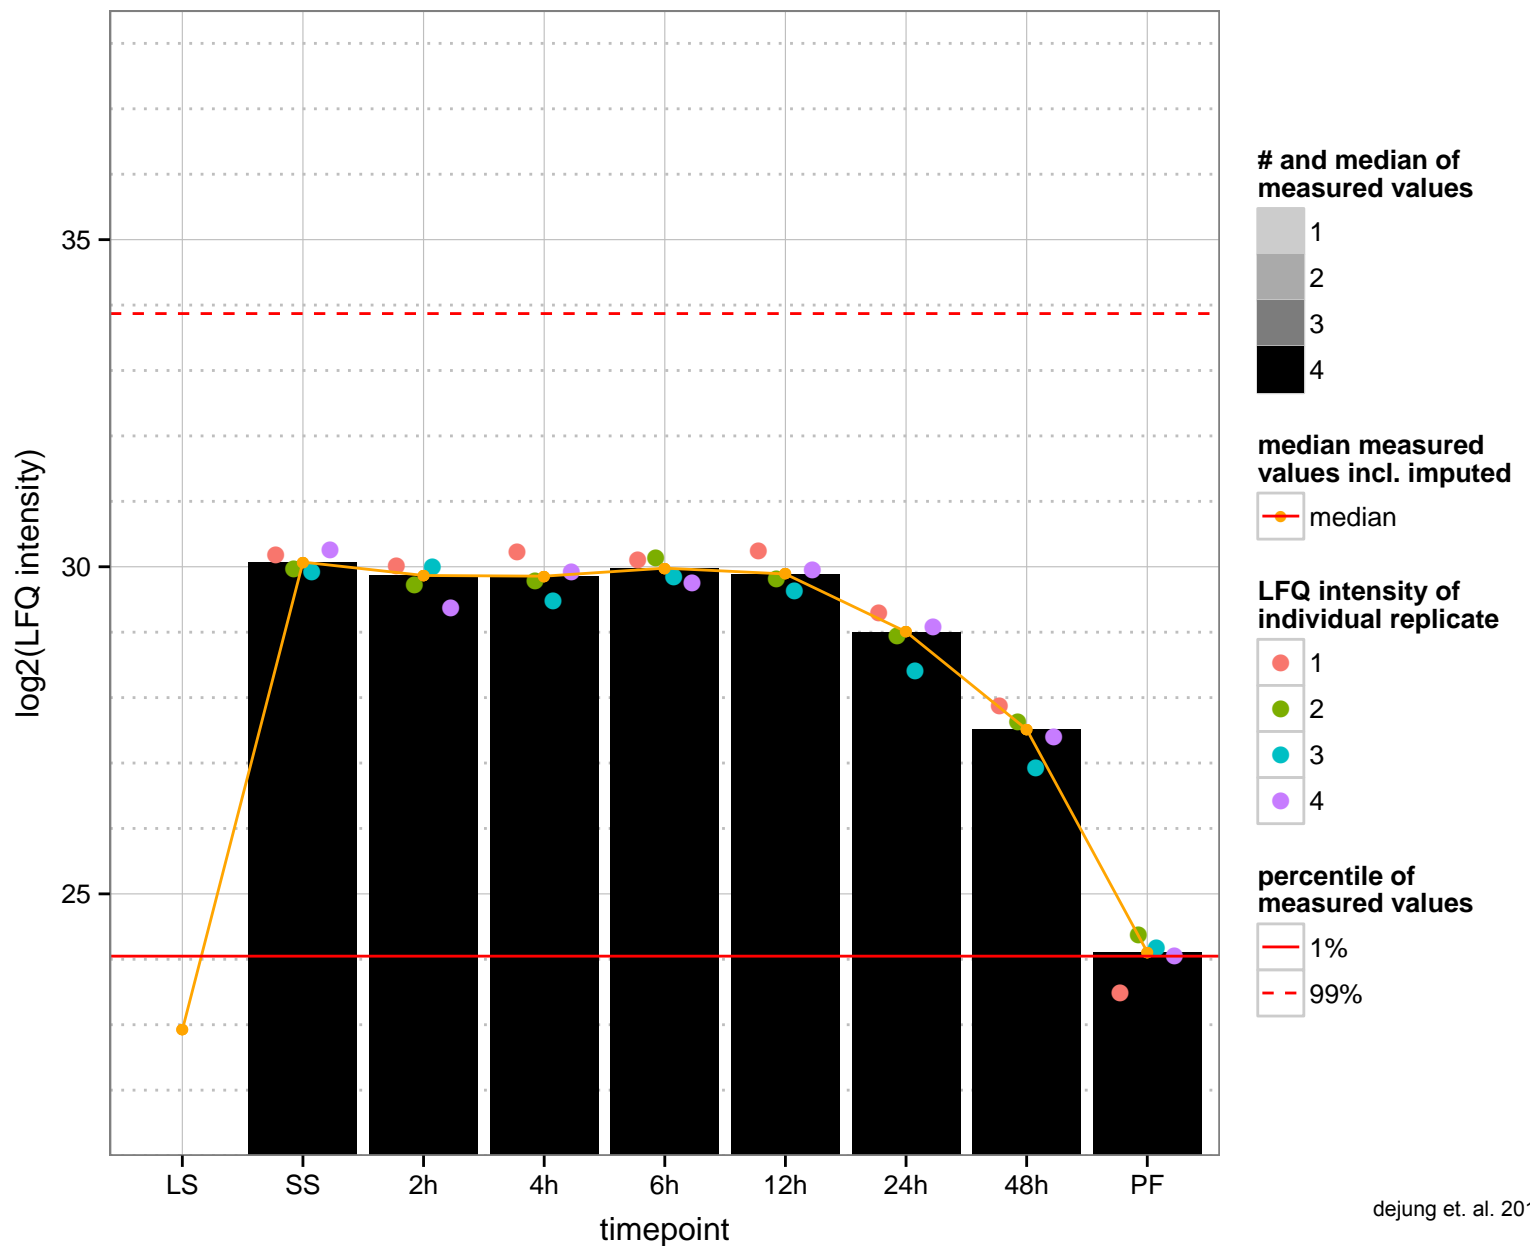

hypothetical protein, conserved  
 Tb927.11.5910  
 AGOF: null  
 AGOC: null  
 AGOP: null  
 PGOF: null  
 PGO: null  
 PGOP: null

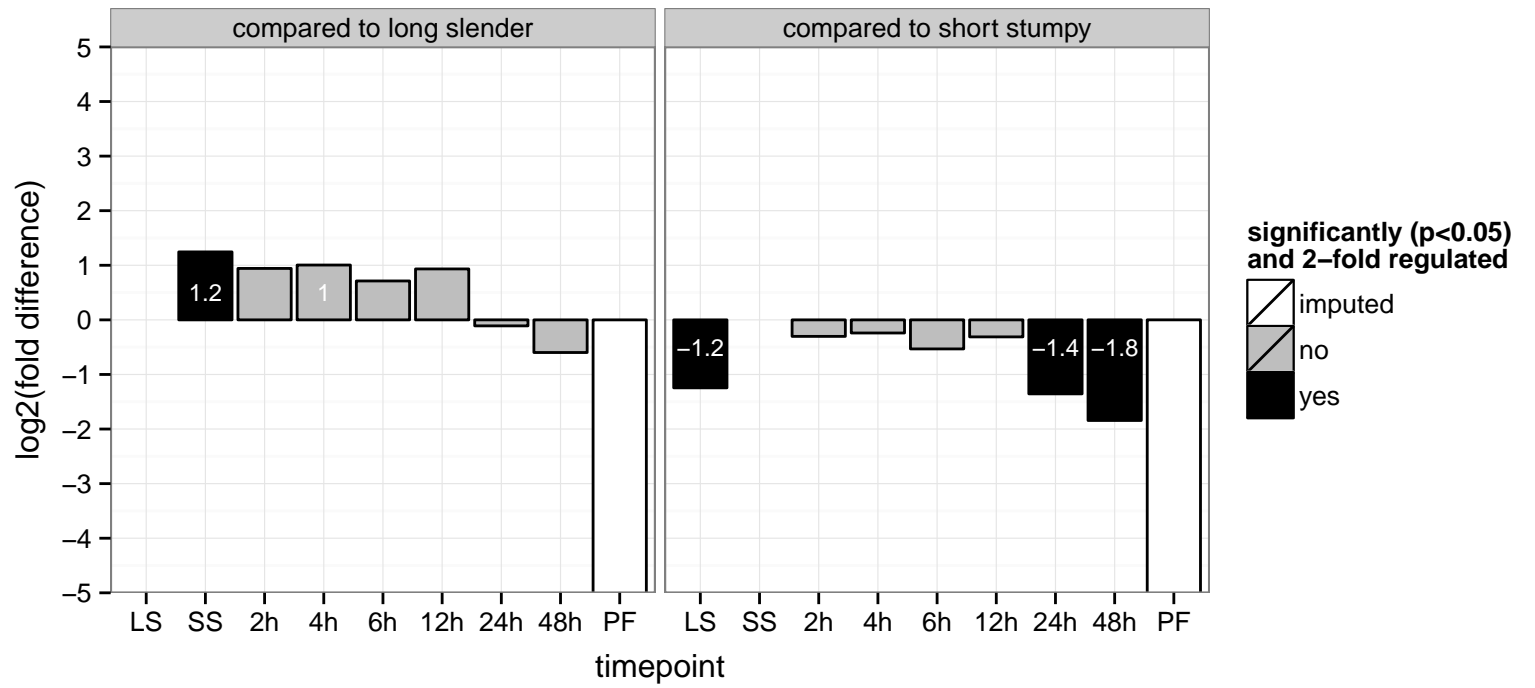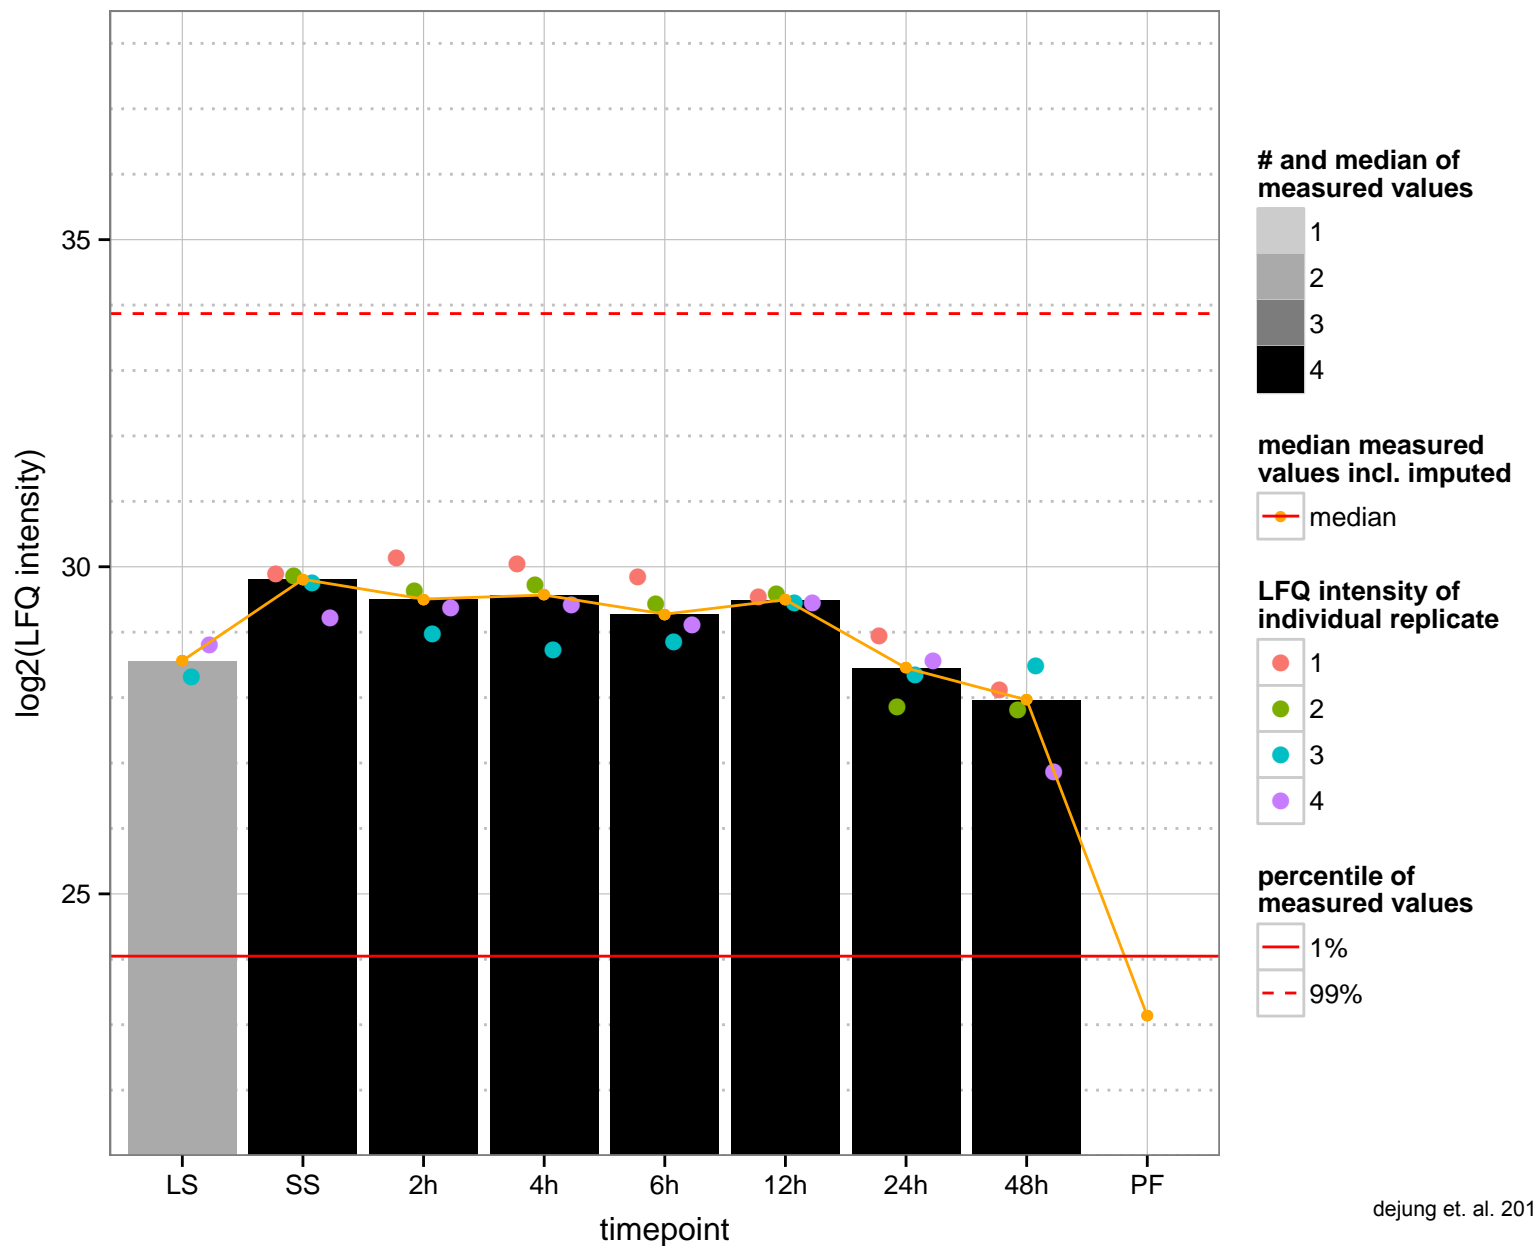

acidocalcisomal pyrophosphatase

Tb927.11.7080

AGOF: calcium ion binding, inorganic diphosphatase activity, magnesium ion binding, pyrophosphatase activity, zinc ion binding

AGOC: acidocalcisome, cytoplasm

AGOP: phosphate-containing compound metabolic process

PGOF: inorganic diphosphatase activity, magnesium ion binding

PGOC: cytoplasm

PGOP: phosphate-containing compound metabolic process

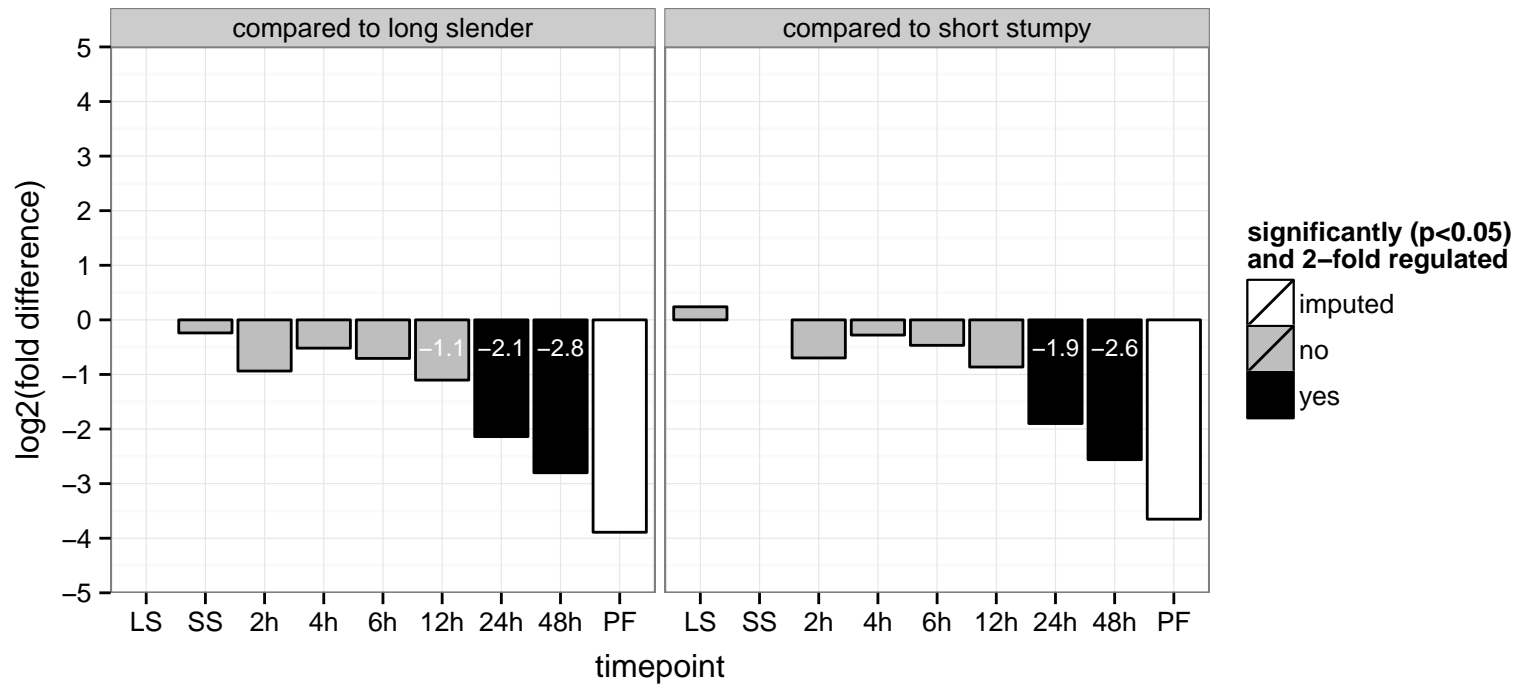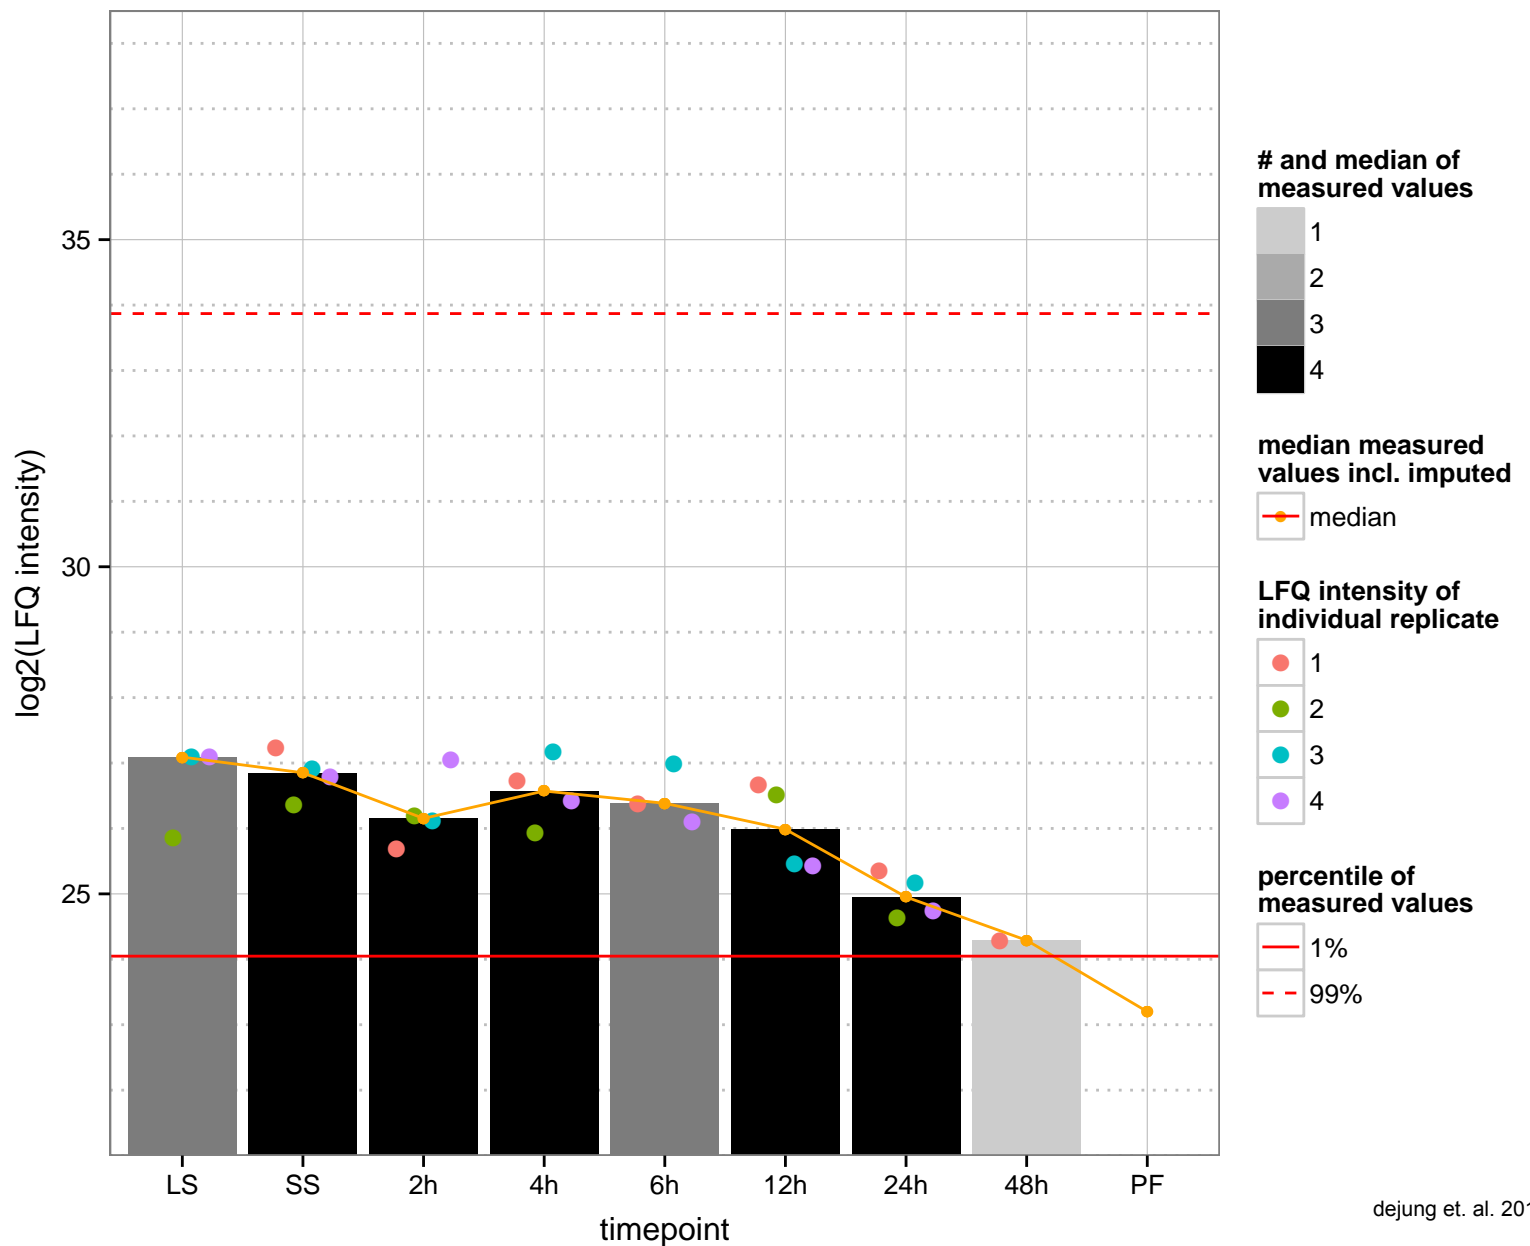



hypothetical protein, conserved  
 Tb927.11.7120  
 AGOF: null  
 AGOC: exocyst  
 AGOP: vesicle docking involved in exocytosis  
 PGO: null  
 PGO: null  
 PGO: null

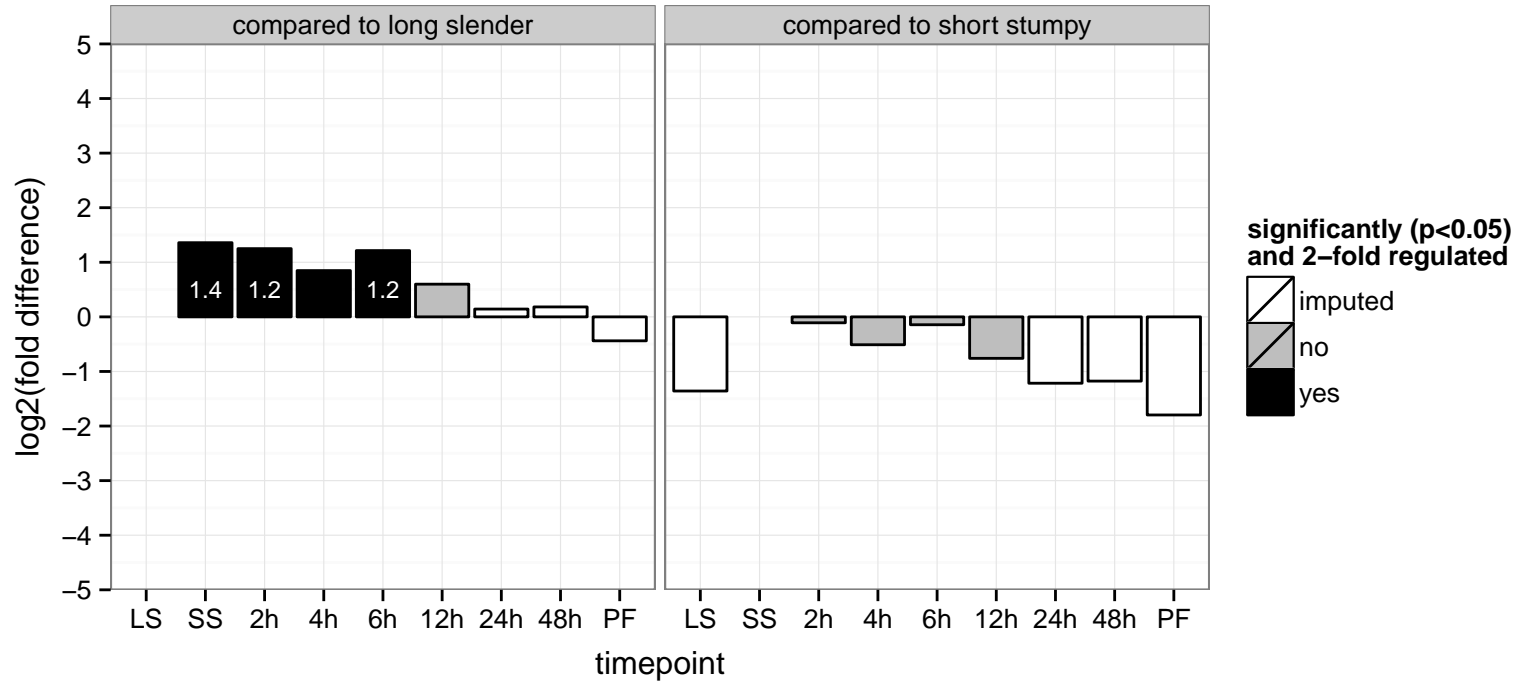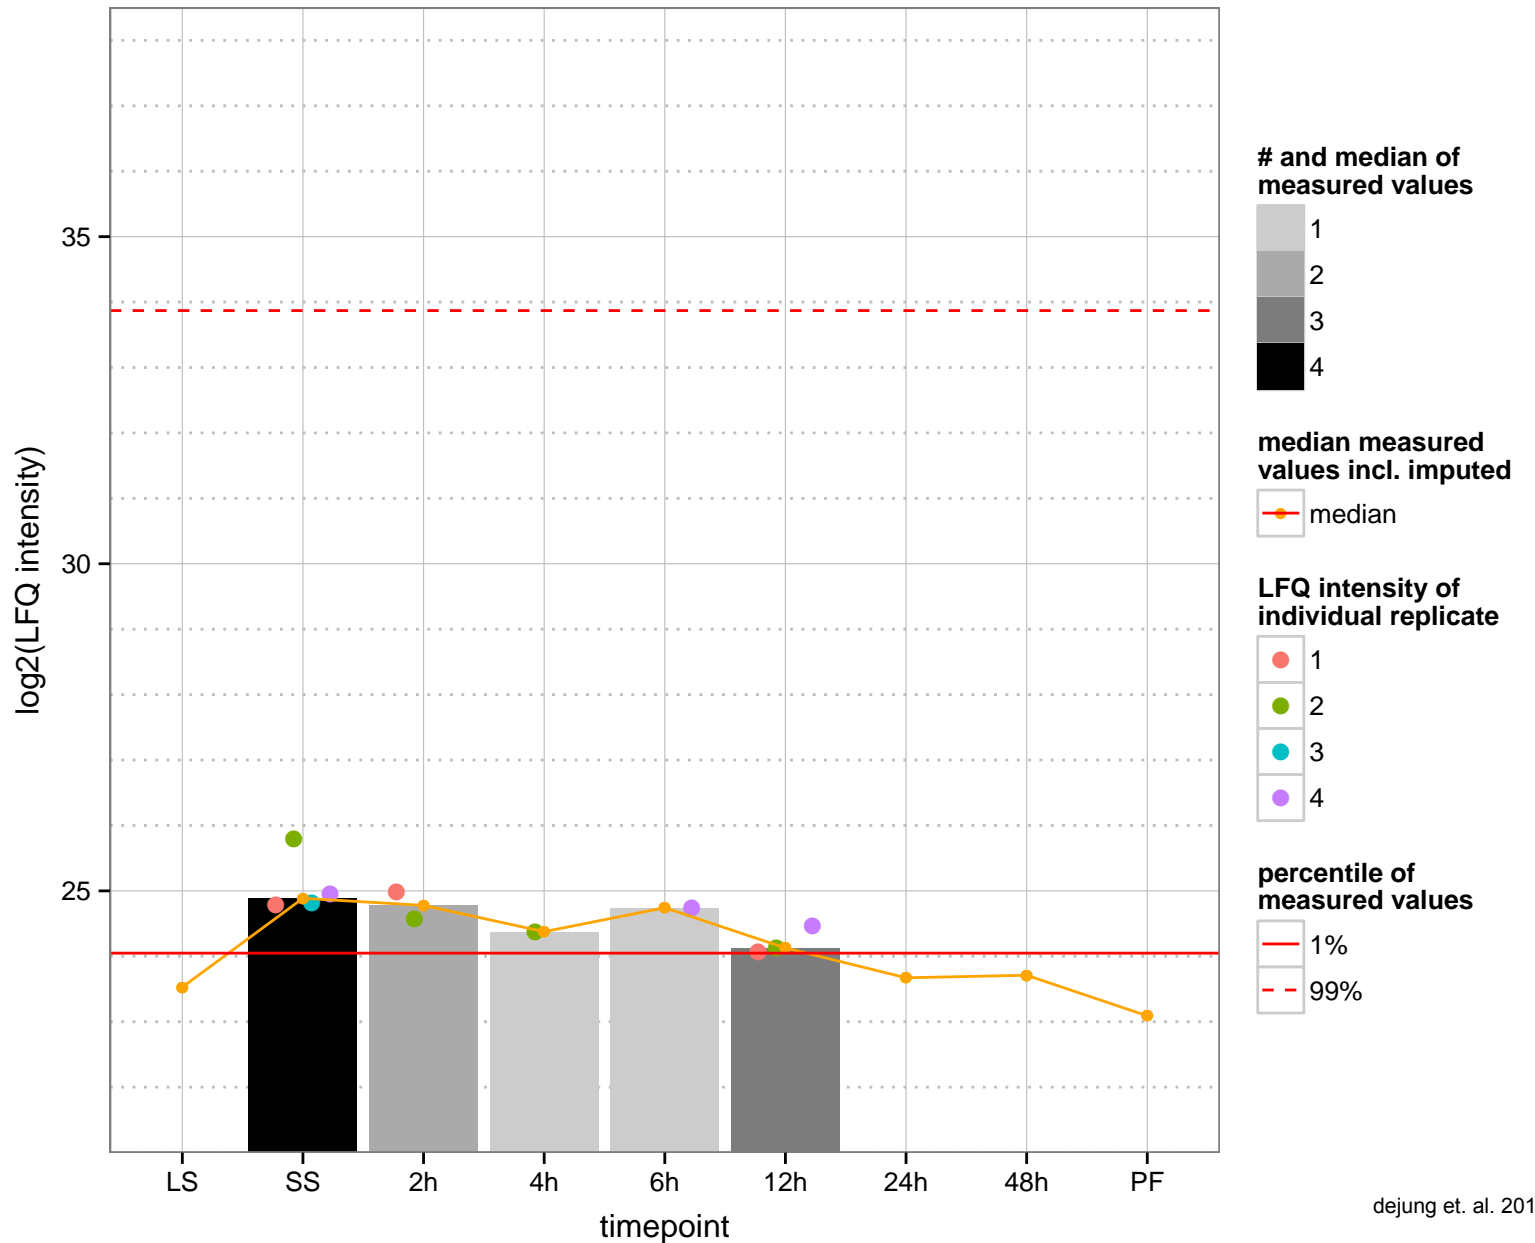

palmitoyl acyltransferase 9, putative  
 Tb927.11.7360  
 AGOF: zinc ion binding  
 AGOC: integral to membrane  
 AGOP: endocytosis, protein palmitoylation, transport  
 PGO: zinc ion binding  
 PGOC: null  
 PGOP: null

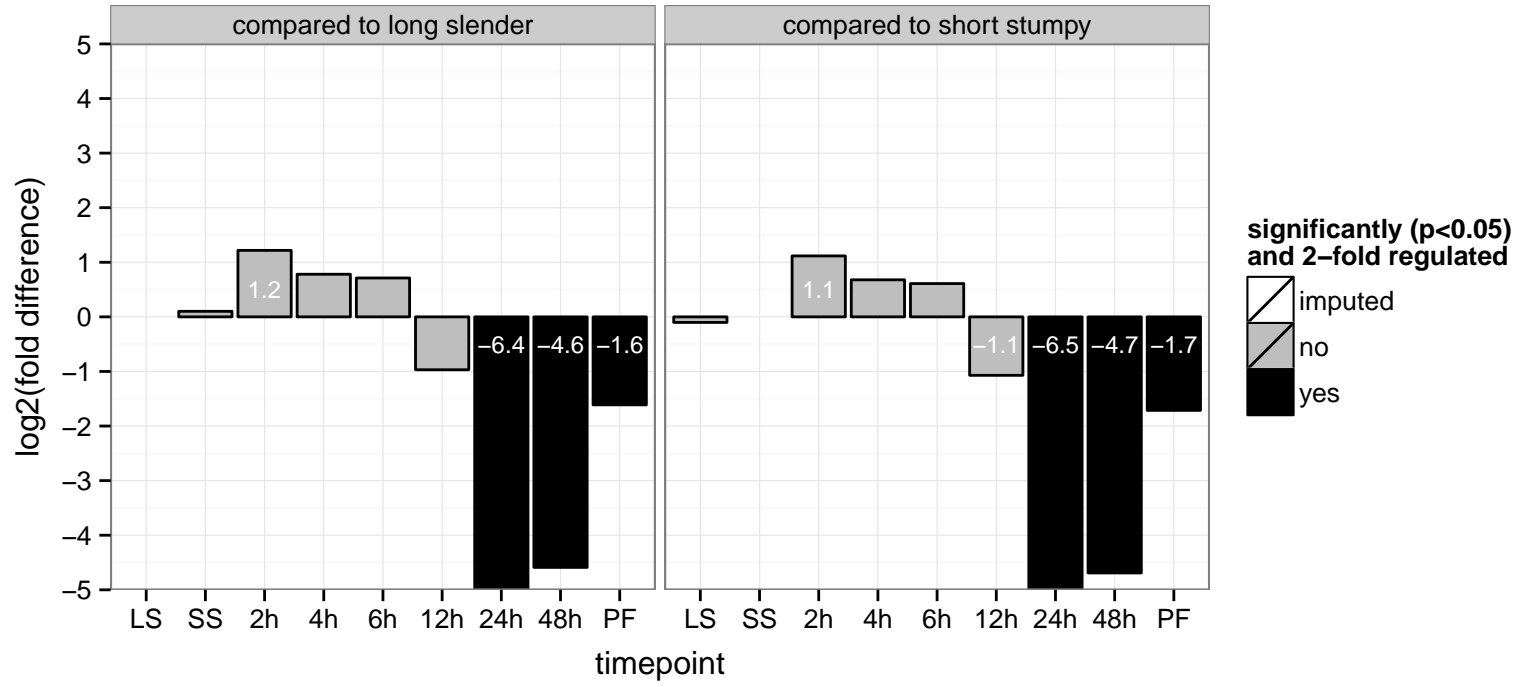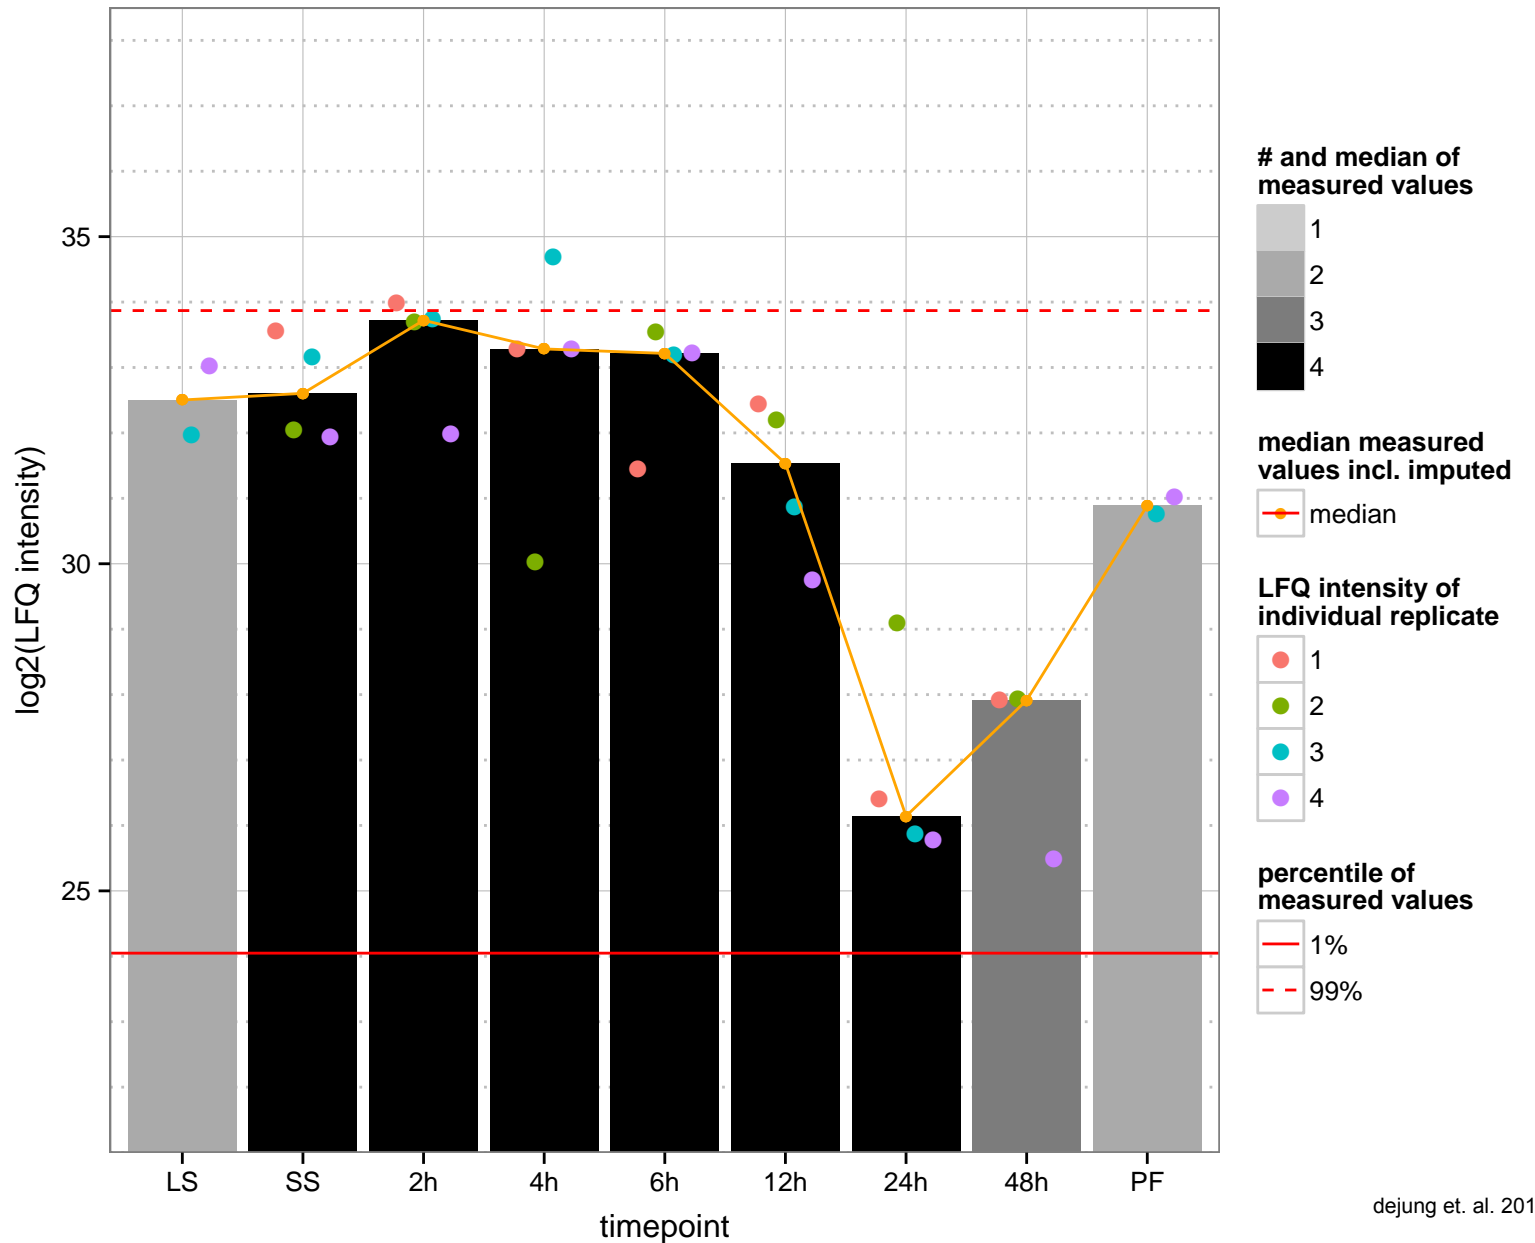

MSP-A, putative, chrXI additional, unordered contigs, Gp63-3 surface protease homolog, Gp63-1 surface protease homolog  
 Tb927.11.7710;Tb11.0380  
 AGOF: metalloendopeptidase activity, zinc ion binding, null  
 AGOC: membrane, null  
 AGOP: cell adhesion, proteolysis, null  
 PGO: metalloendopeptidase activity, zinc ion binding  
 PGOC: membrane  
 PGOP: cell adhesion, proteolysis

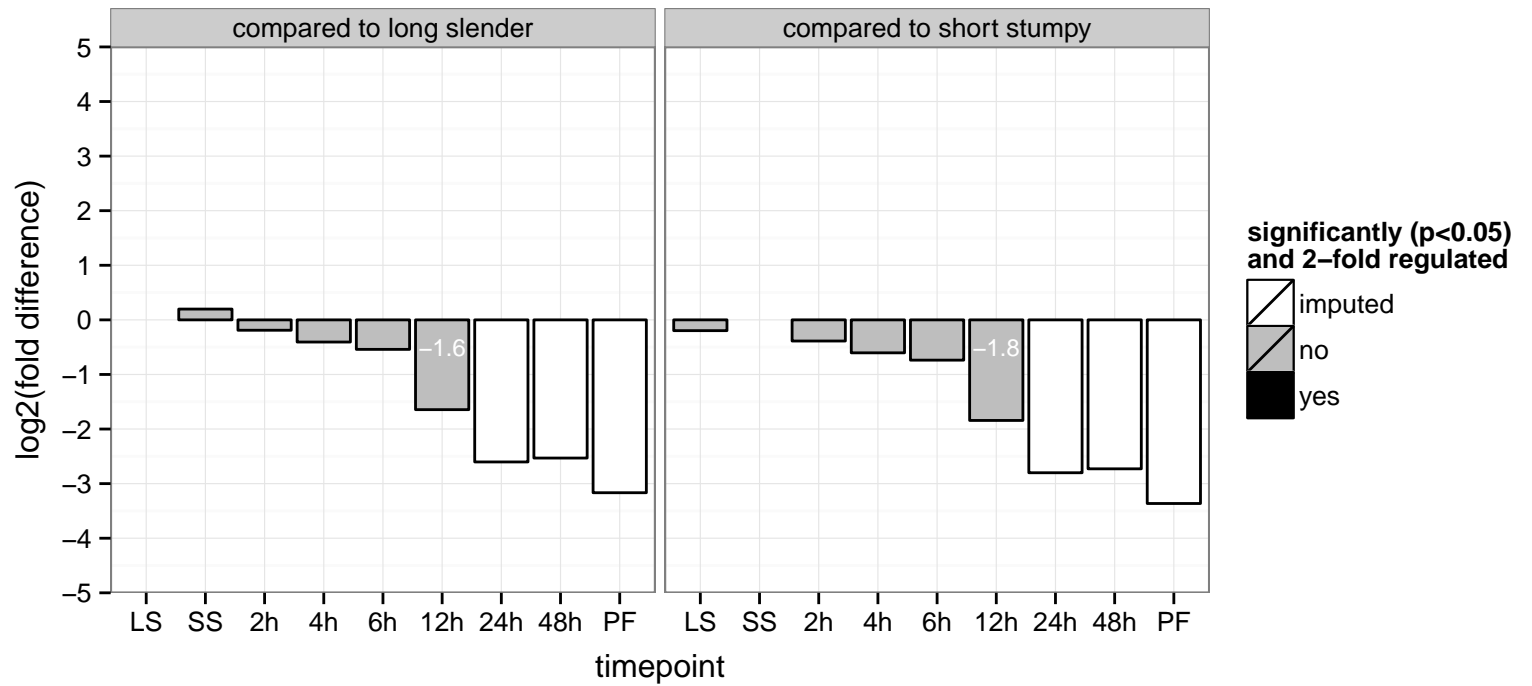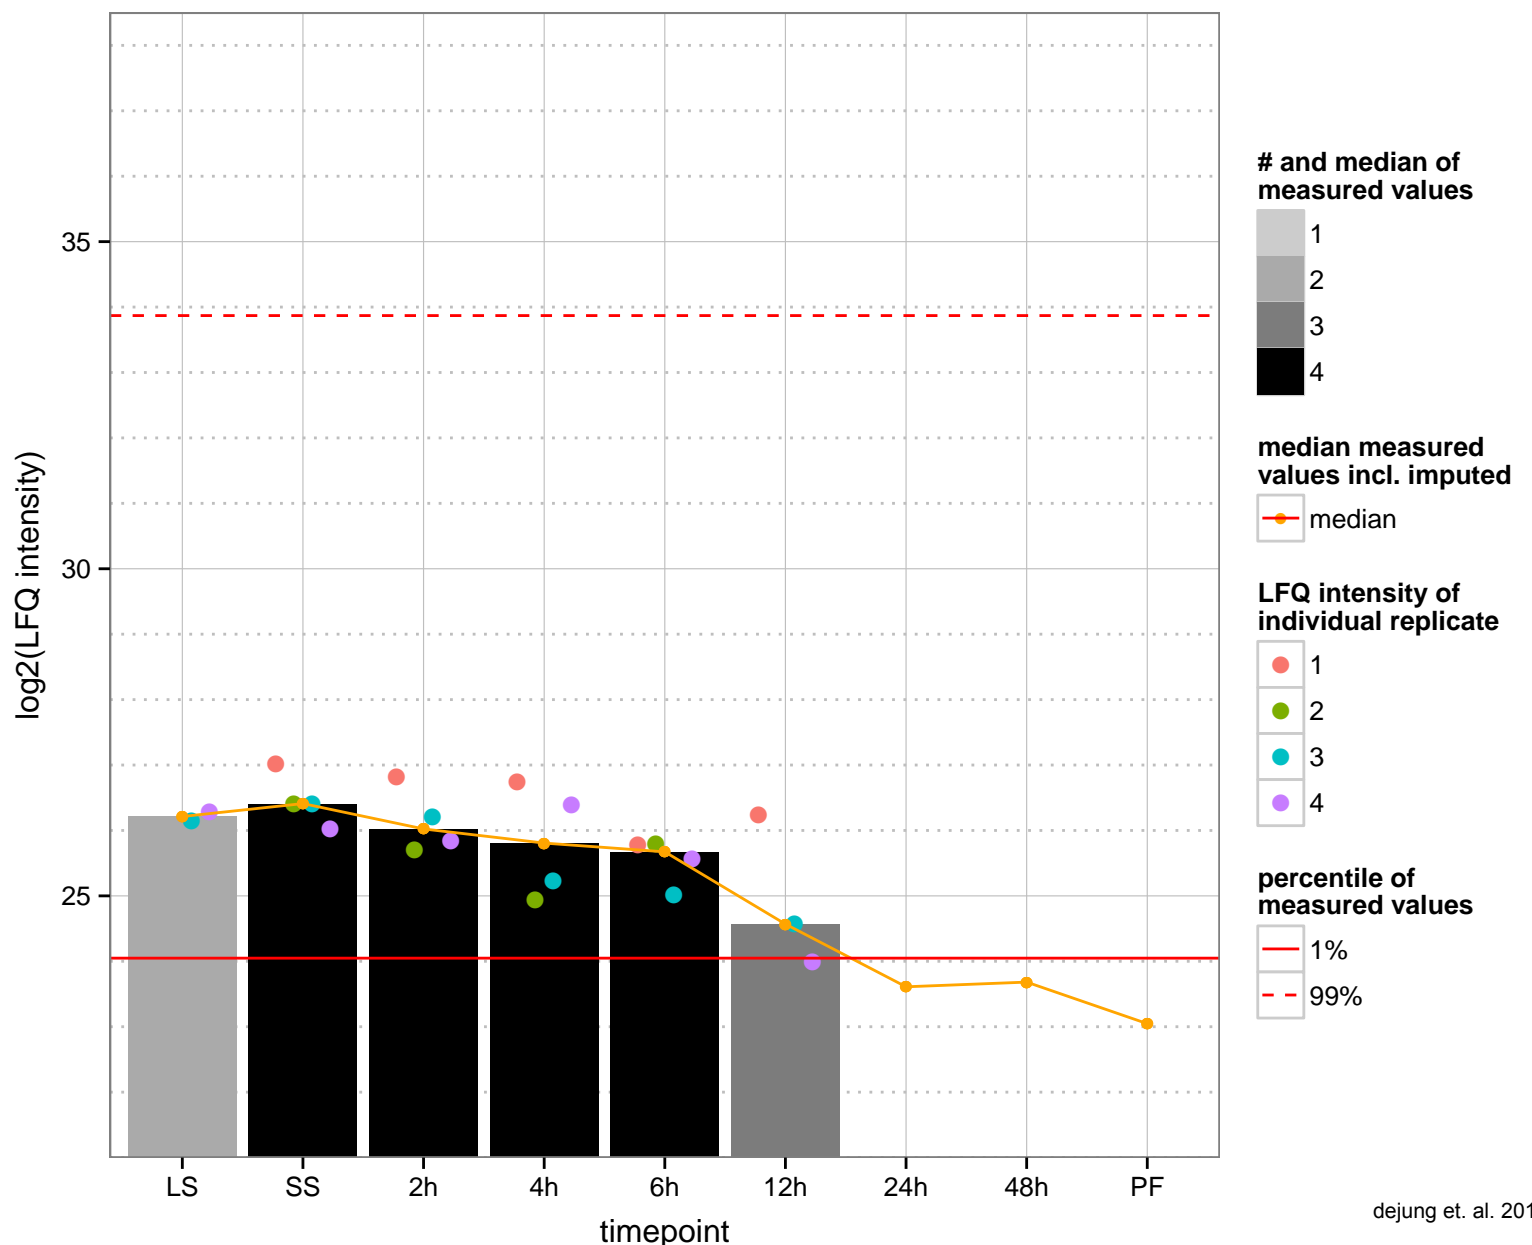

hypothetical protein, conserved  
 Tb927.11.810  
 AGOF: null  
 AGOC: null  
 AGOP: null  
 PGOF: null  
 PGO: null  
 PGOP: null

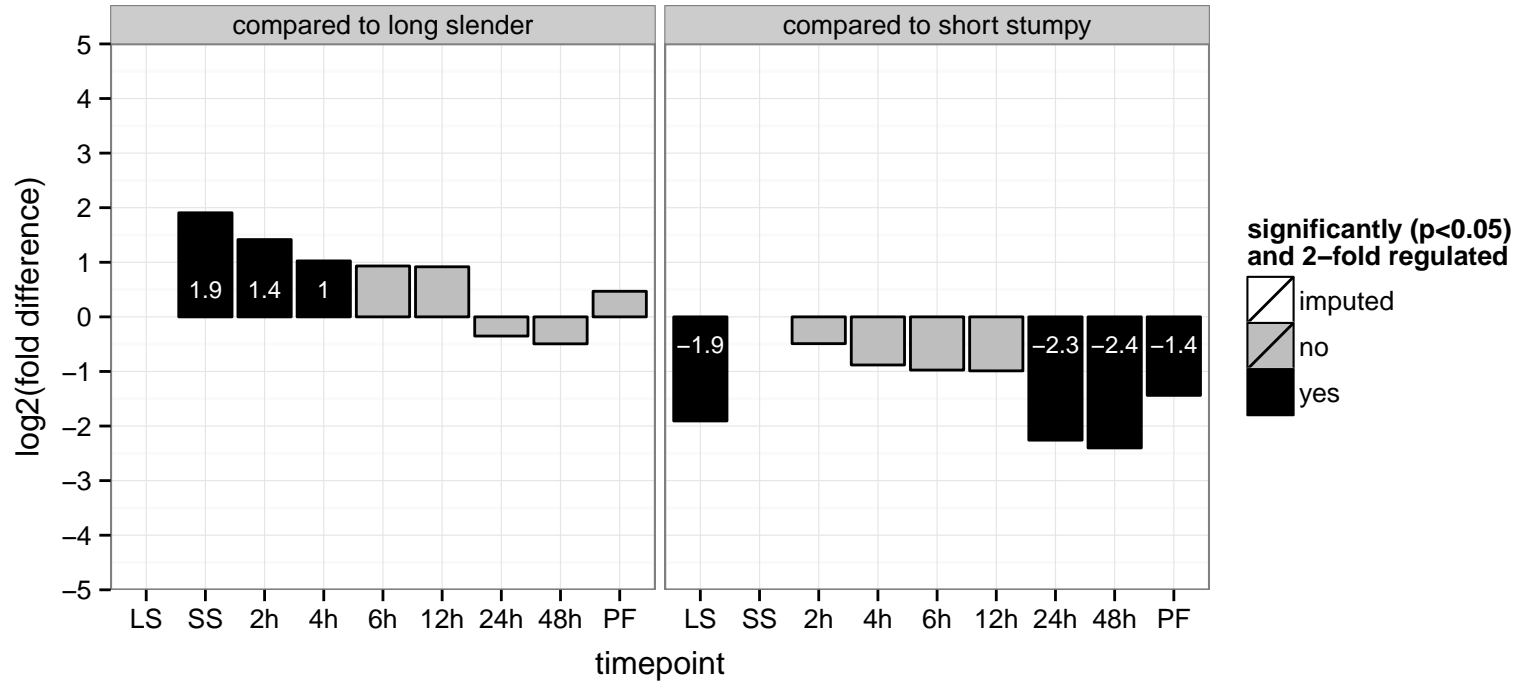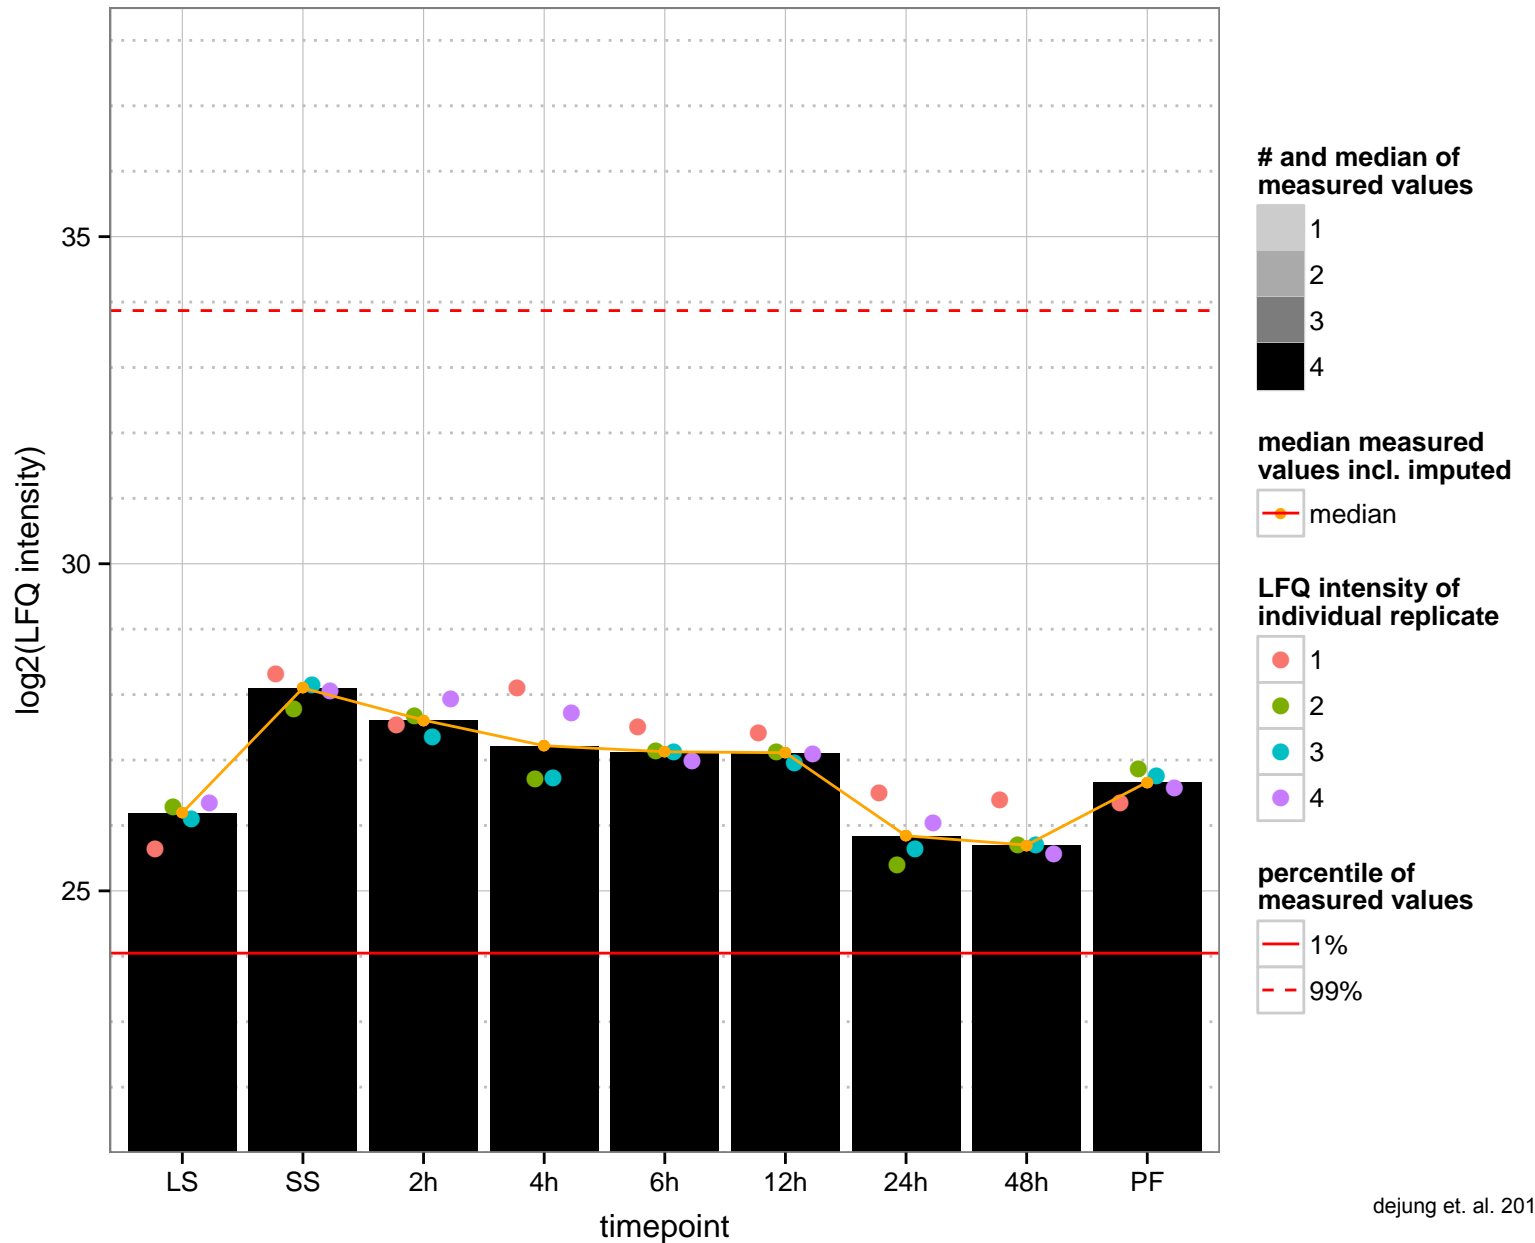

phosphonopyruvate decarboxylase-like protein, putative  
 Tb927.11.9350  
 AGOF: carboxy-lyase activity, thiamine pyrophosphate binding  
 AGOC: null  
 AGOP: null  
 PGO: catalytic activity, thiamine pyrophosphate binding  
 PGOC: null  
 PGOP: null

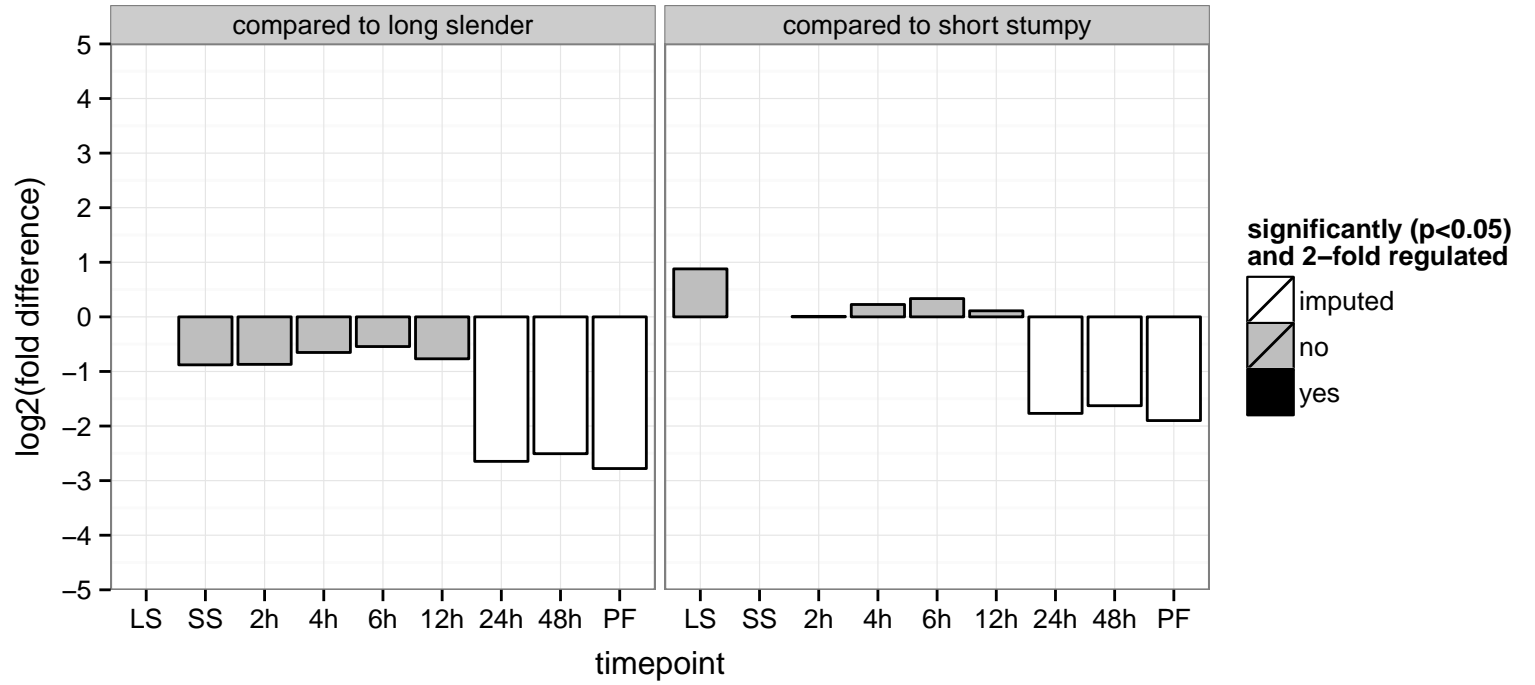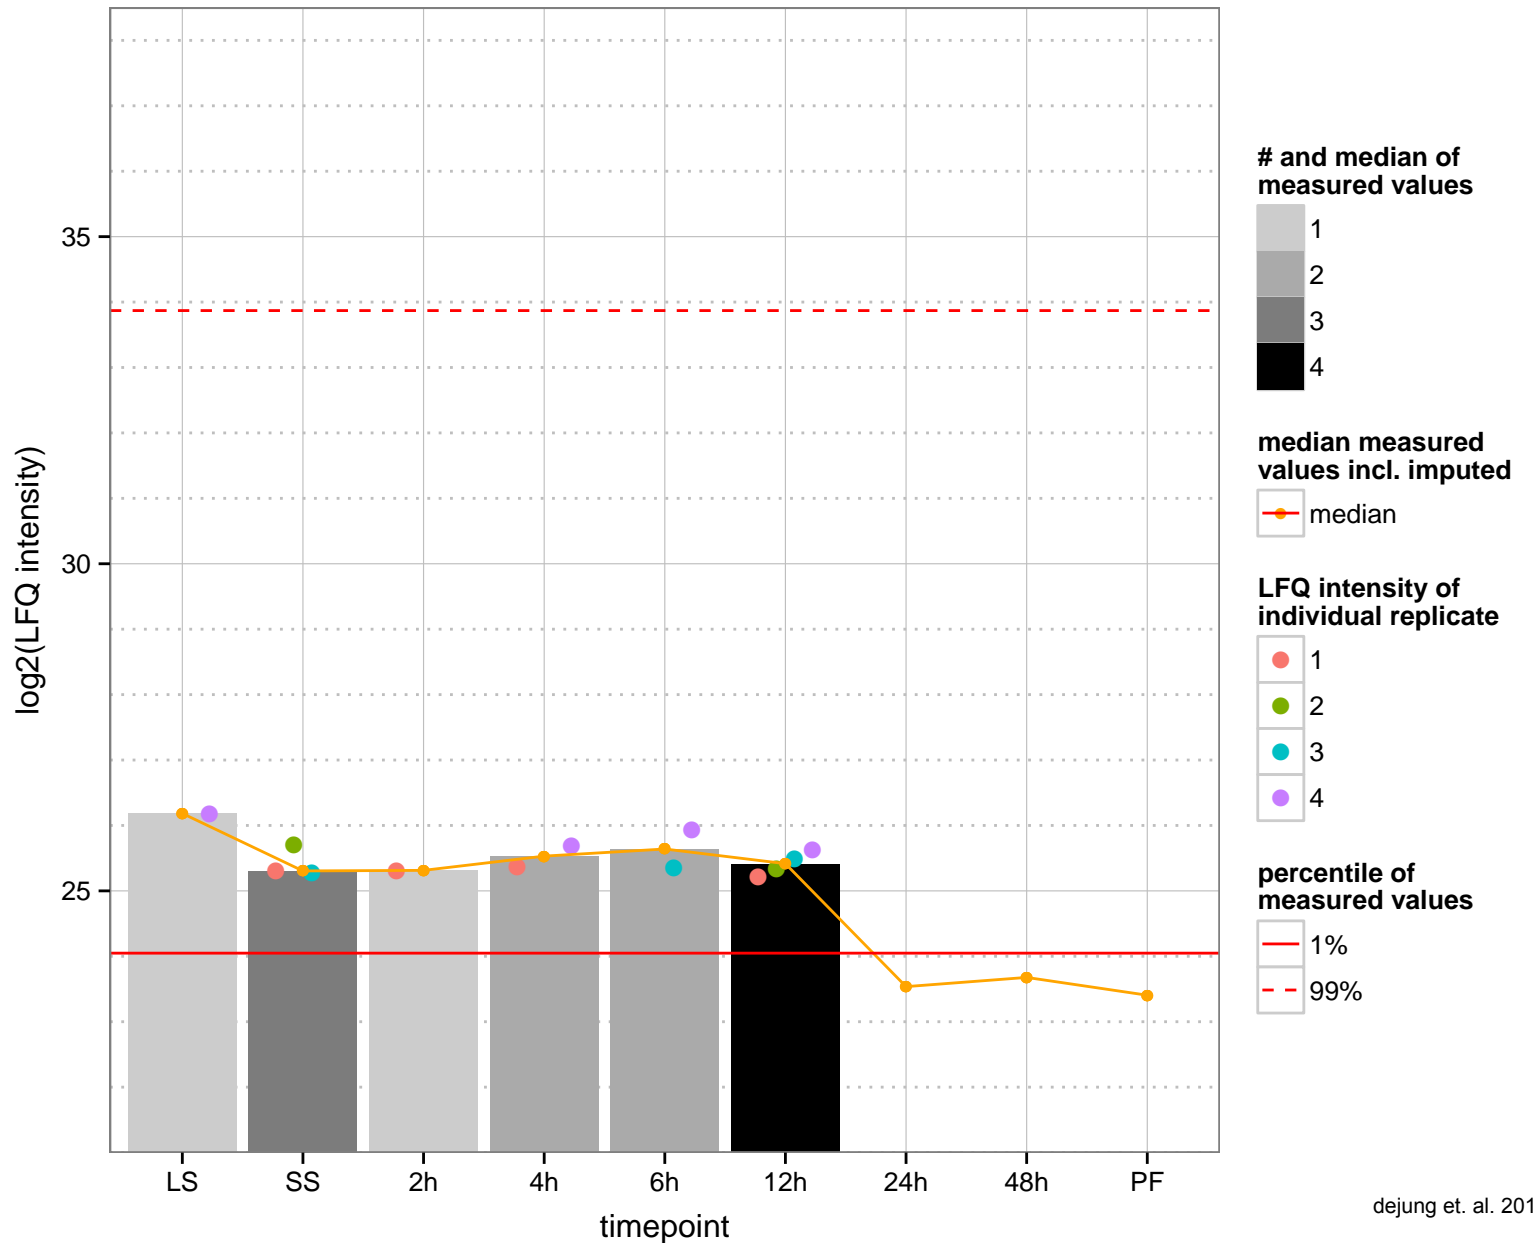

ADP-ribosylation factor GTPase activating protein, putative  
 Tb927.11.9470  
 AGOF: ARF GTPase activator activity, DNA binding, zinc ion binding  
 AGOC: nucleus  
 AGOP: regulation of ARF GTPase activity  
 PGOF: ARF GTPase activator activity, zinc ion binding  
 PGO: null  
 PGOP: regulation of ARF GTPase activity

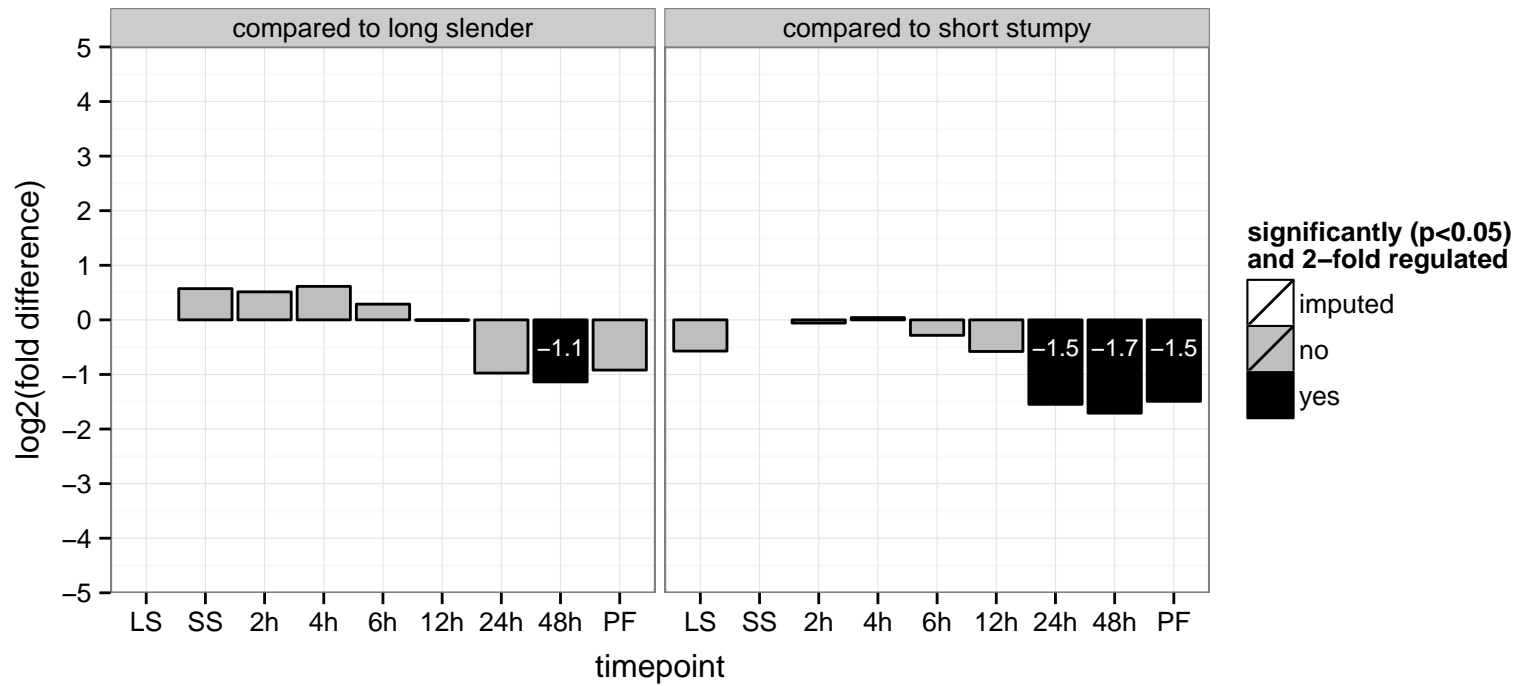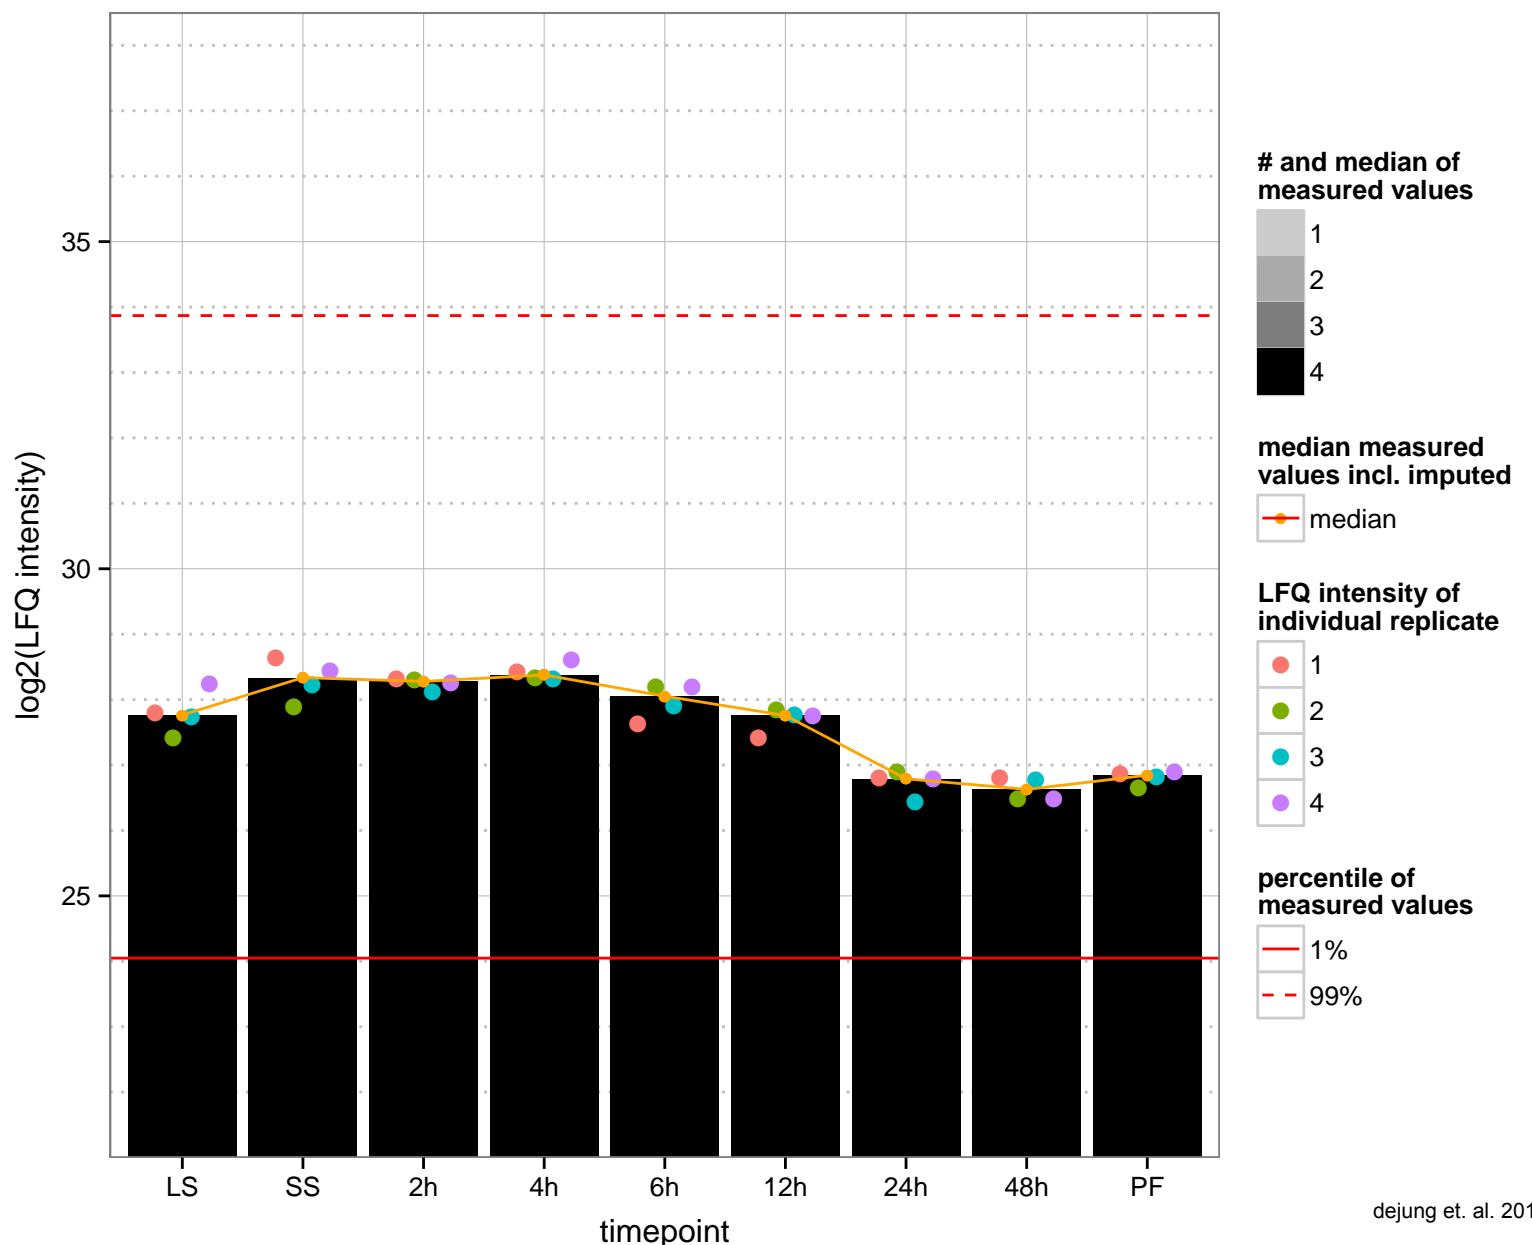

protein kinase, putative, NIMA/Nek Serine/threonine-protein kinase family

Tb927.2.2120

AGOF: ATP binding, protein kinase activity, protein serine/threonine kinase activity, protein tyrosine kinase activity

AGOC: null

AGOP: protein phosphorylation

PGOF: ATP binding, protein kinase activity, transferase activity, transferring phosphorus-containing groups

PGOC: null

PGOP: protein phosphorylation

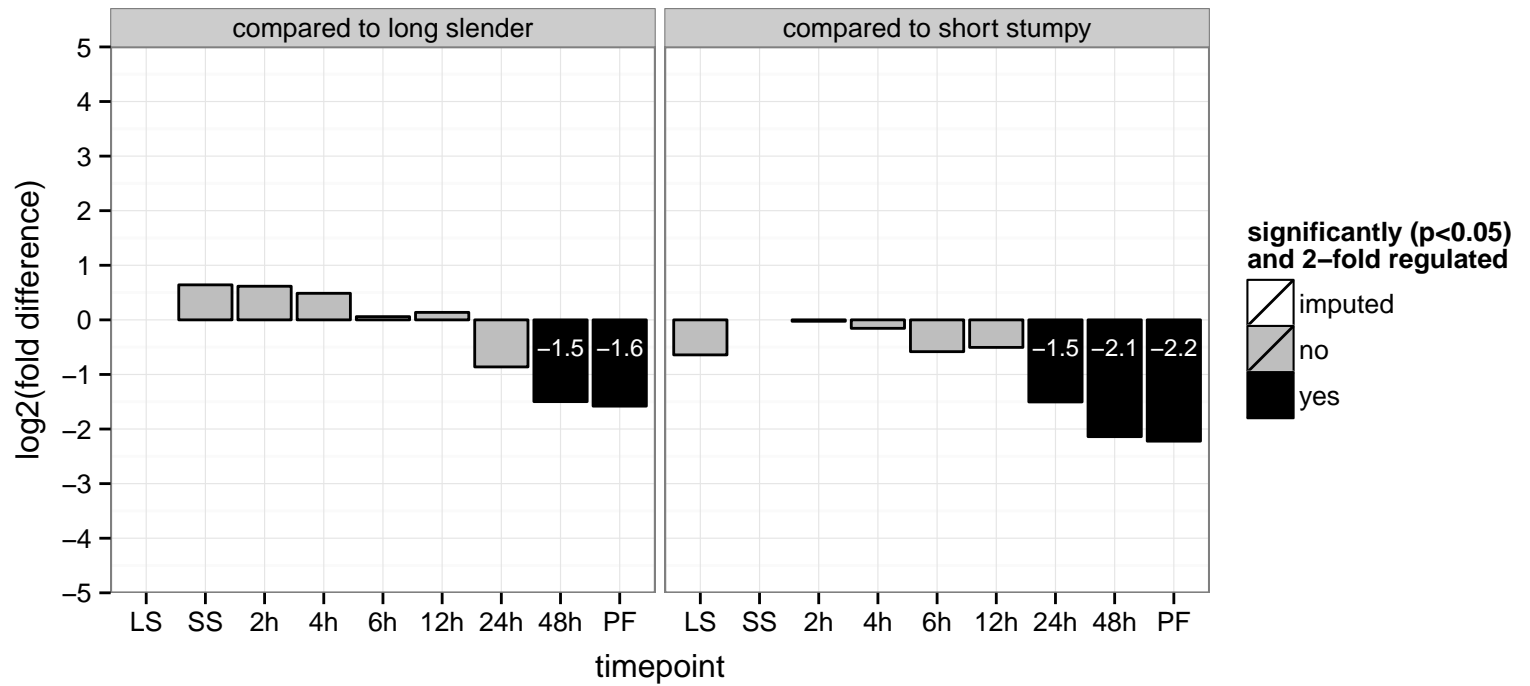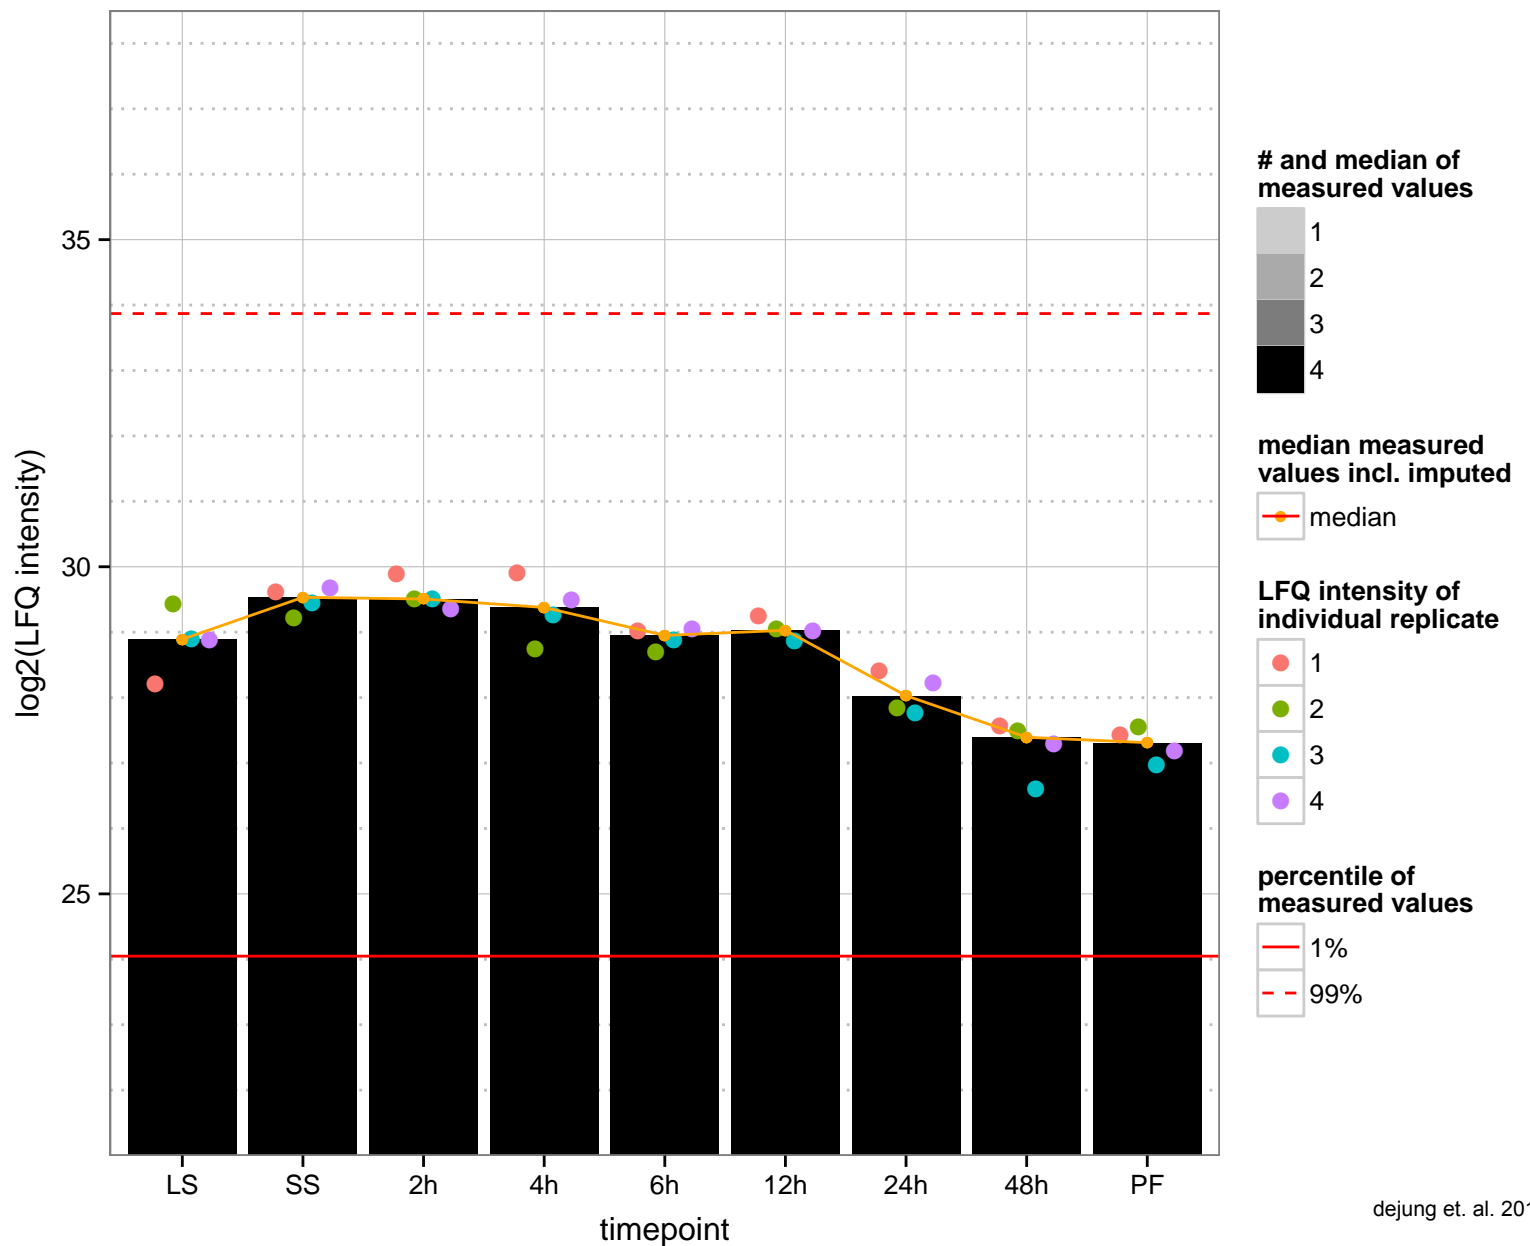

hypothetical protein, conserved  
 Tb927.2.5010  
 AGOF: null  
 AGOC: null  
 AGOP: null  
 PGO: phospholipid binding, protein binding  
 PGO: cell cortex  
 PGO: cortical protein anchoring

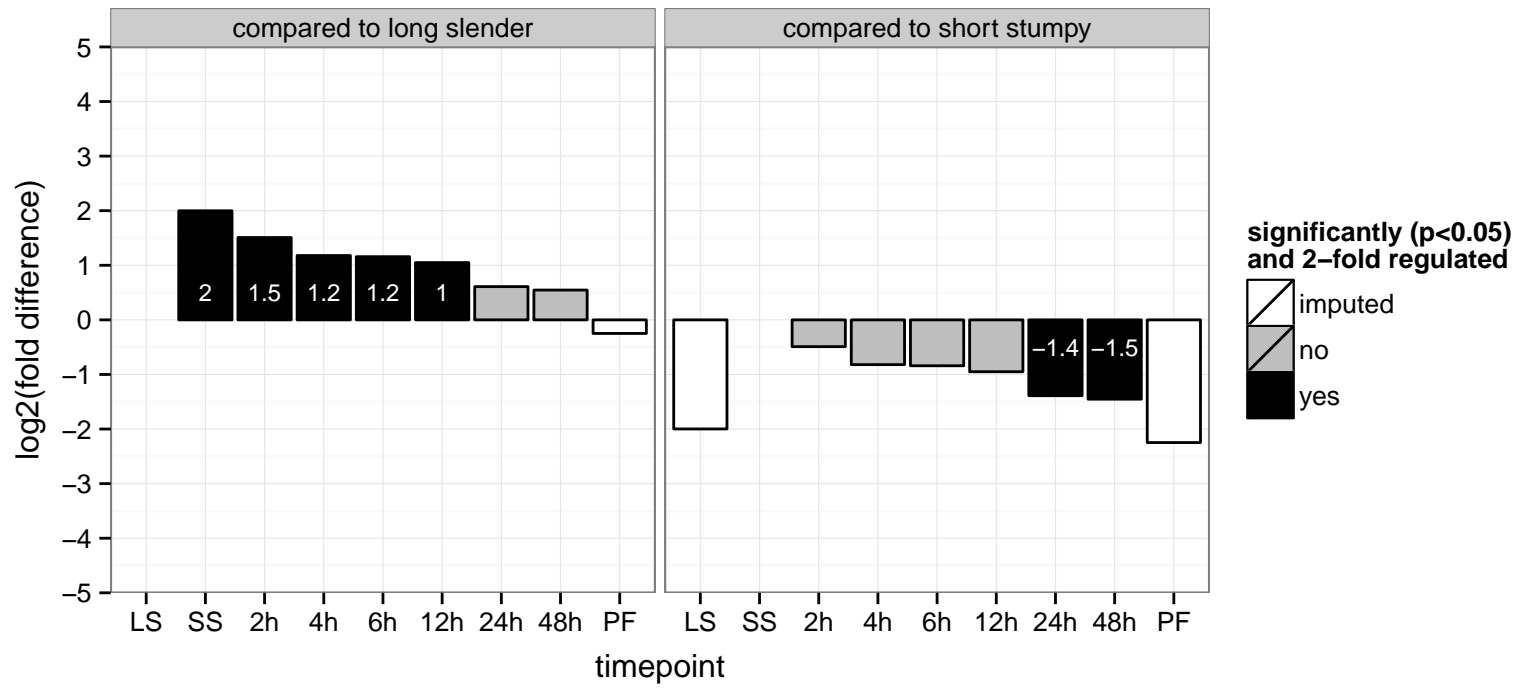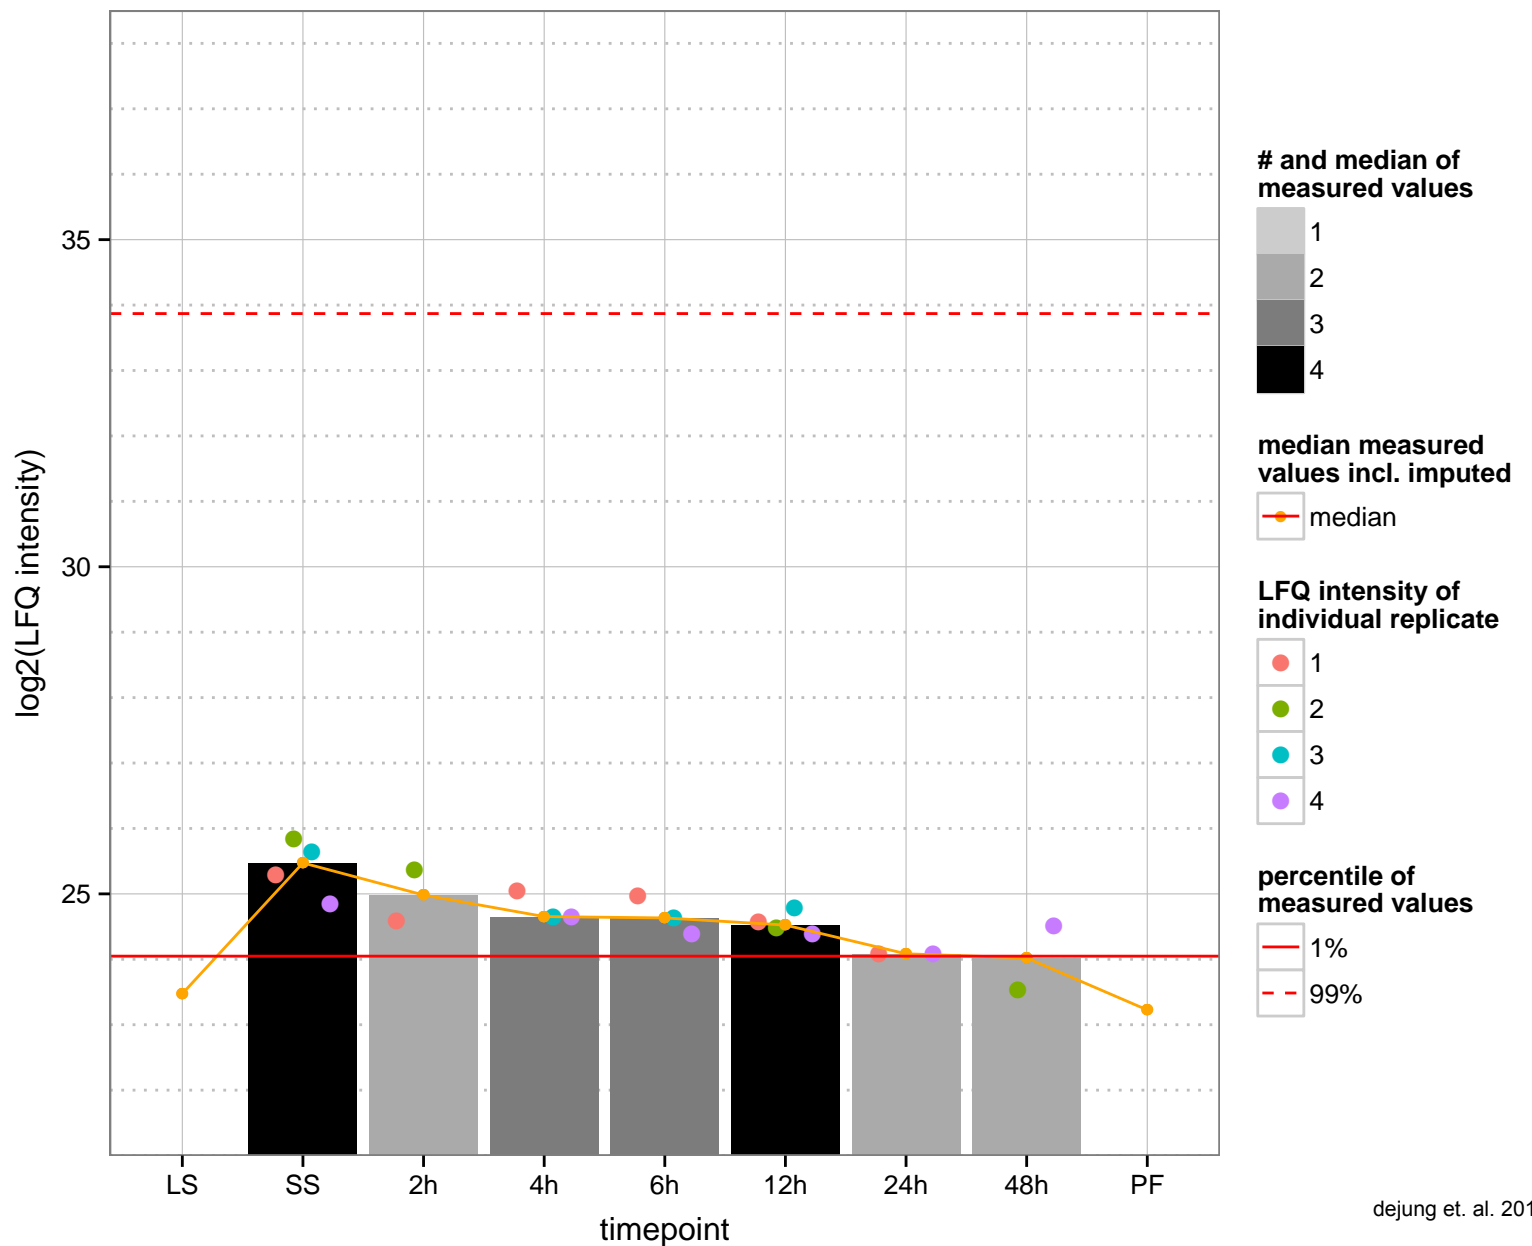



ATP-dependent Clp protease subunit, heat shock protein 104 (HSP104), putative, atp-dependent chaperone (HSP104)  
 Tb927.2.5980  
 AGOF: ATP binding, ATPase activity  
 AGOC: null  
 AGOP: protein metabolic process  
 PGO: ATP binding, nucleoside-triphosphatase activity, nucleotide binding  
 PGO: null  
 PGOP: protein metabolic process

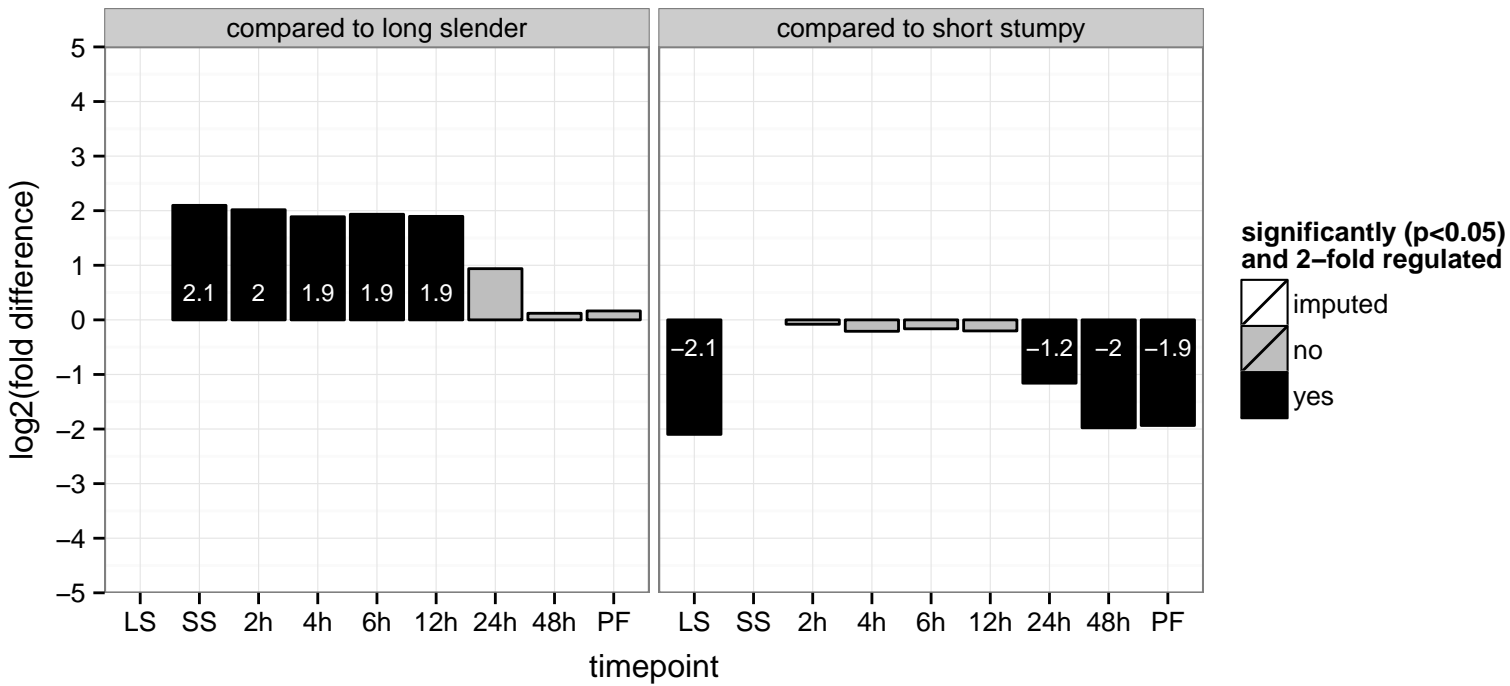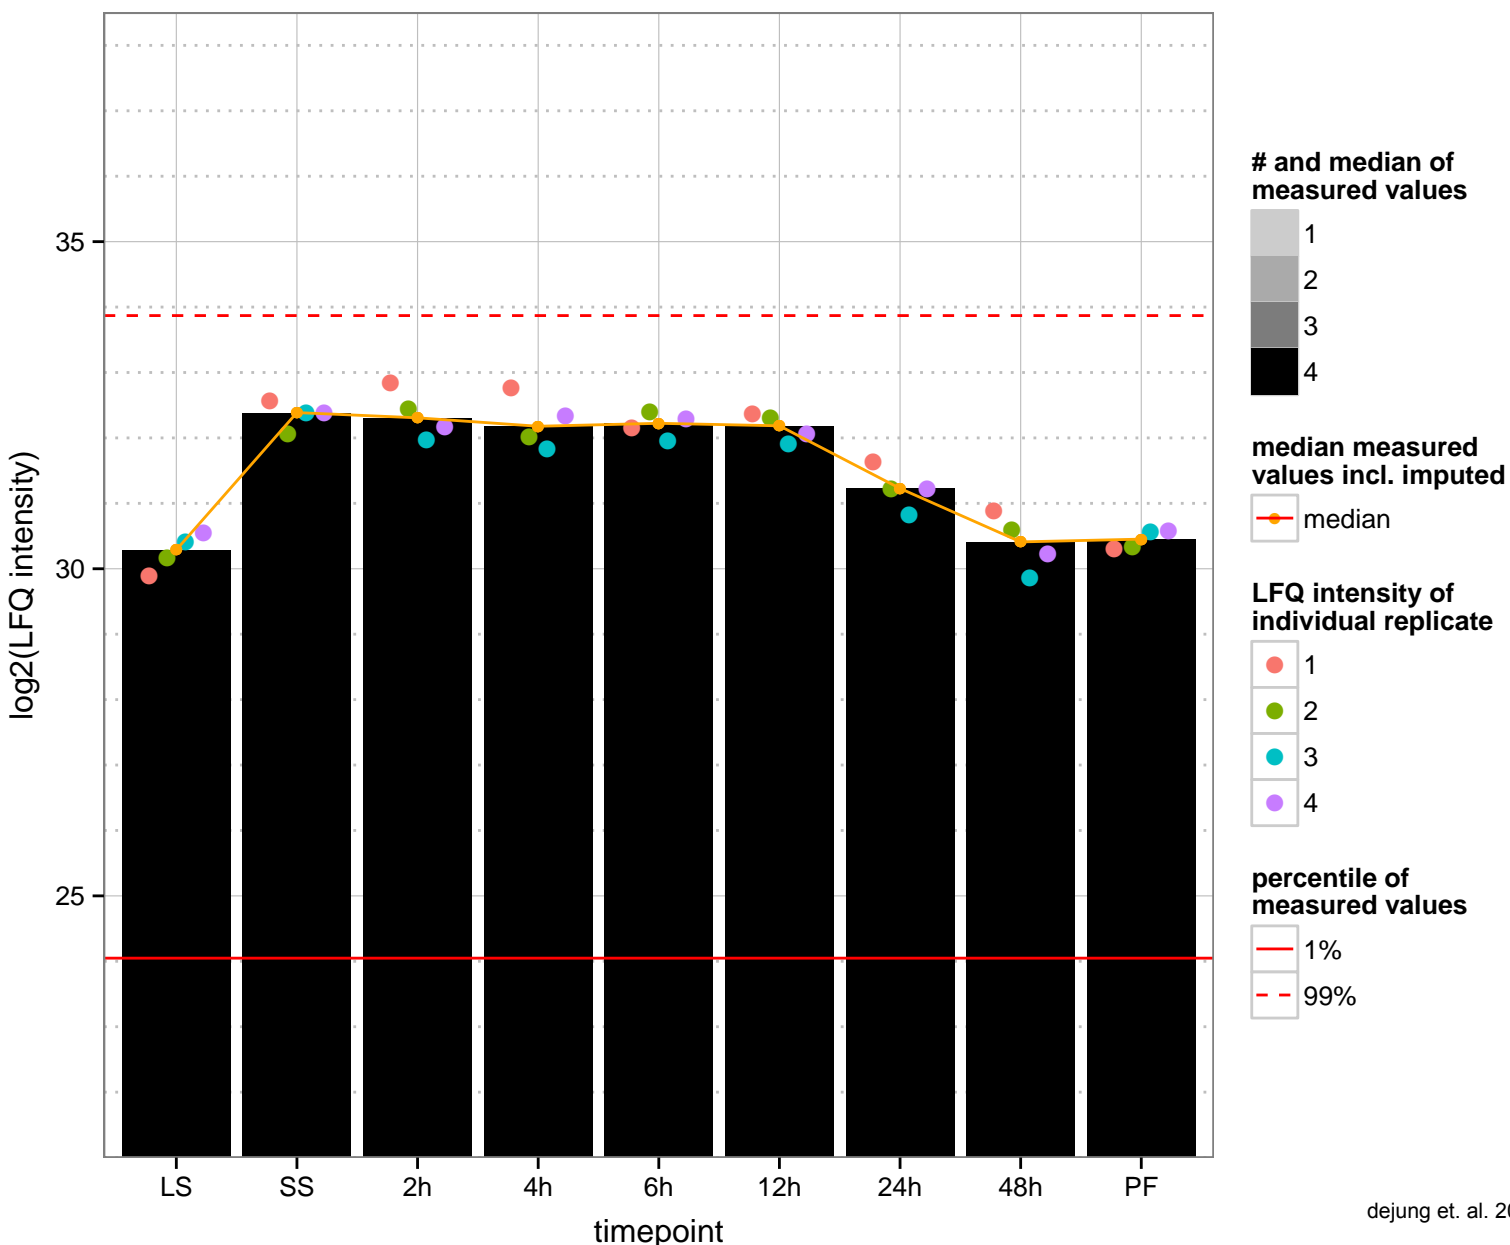

glycosylphosphatidylinositol-specific phospholipase C, VSG lipase (GPI-PLC)

Tb927.2.6000

AGOF: glycosylphosphatidylinositol diacylglycerol-lyase activity, phospholipase C activity

AGOC: plasma membrane

AGOP: GPI anchor release, glycerophospholipid metabolic process, intracellular signal transduction, lipid metabolic process

PGOF: glycosylphosphatidylinositol diacylglycerol-lyase activity, phospholipase C activity, phosphoric diester hydrolase activity

PGOC: null

PGOP: glycerophospholipid metabolic process, intracellular signal transduction, lipid metabolic process

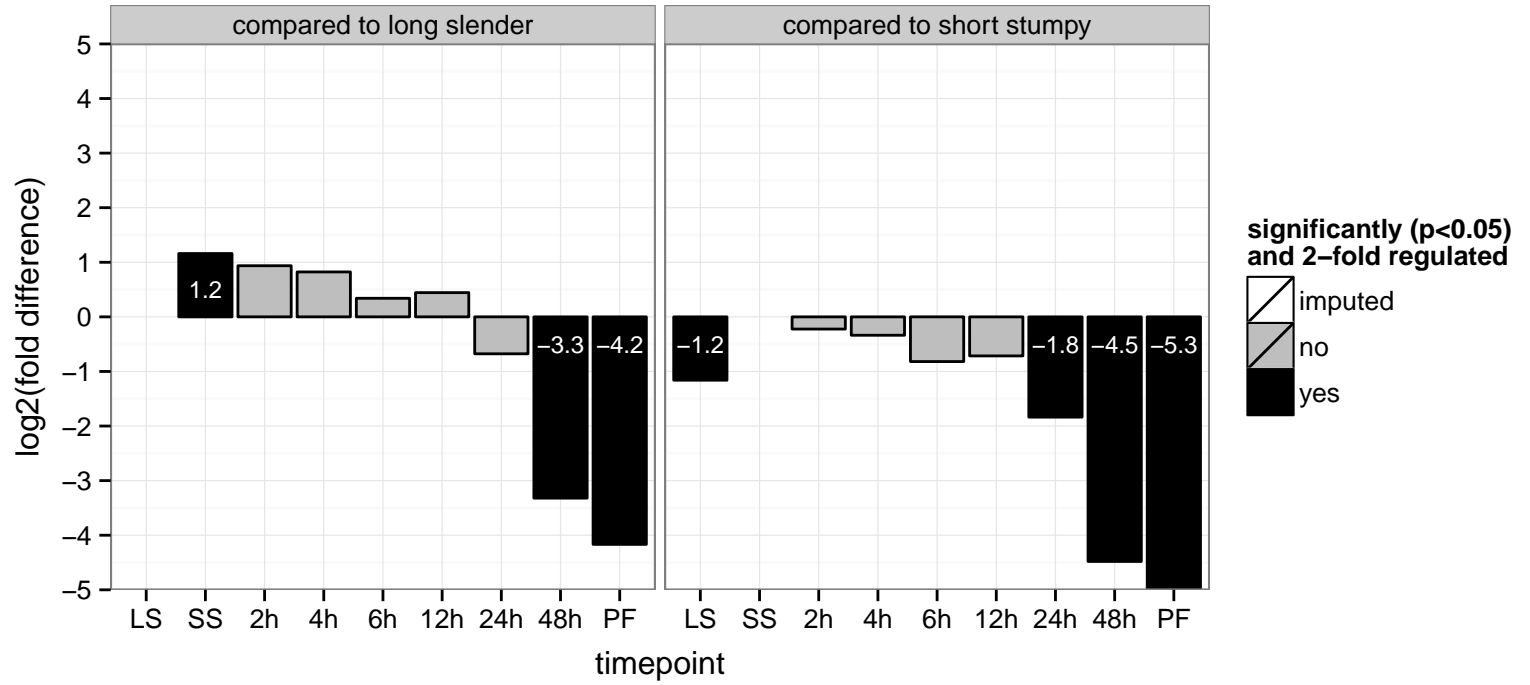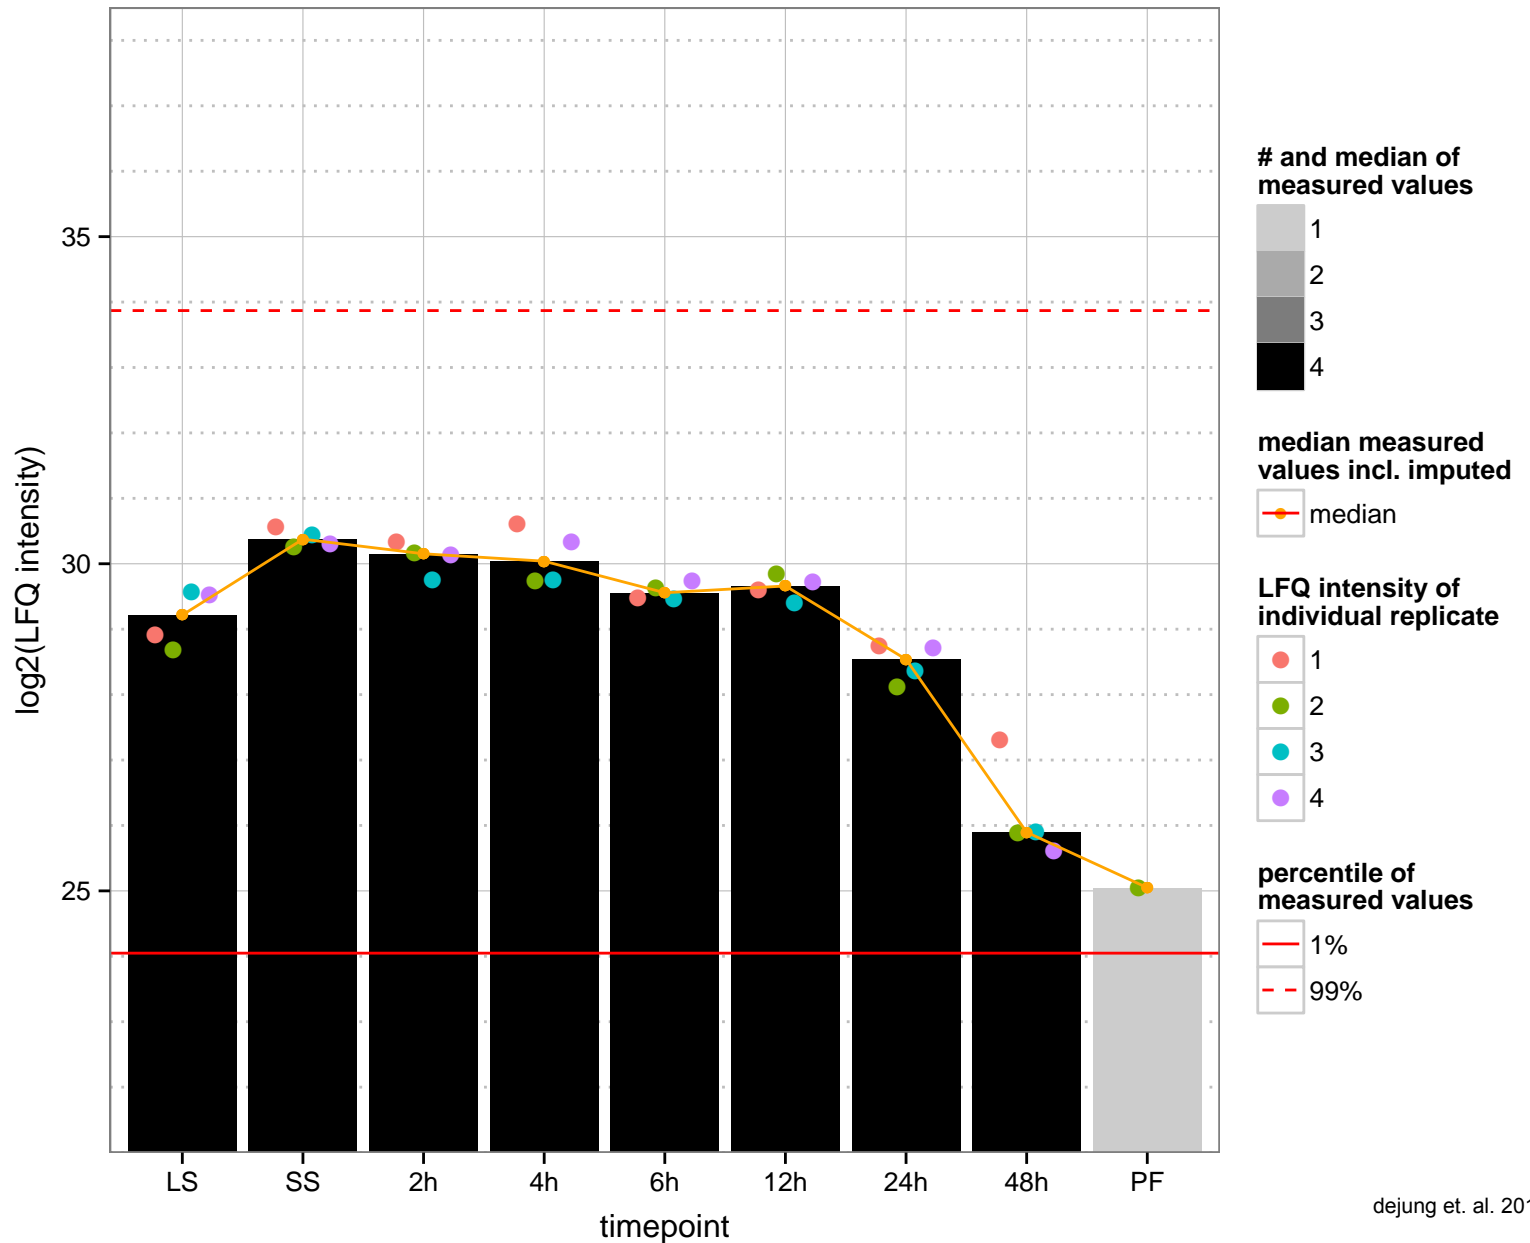

ATP-dependent phosphofructokinase (PFK)  
 Tb927.3.3270  
 AGOF: 6-phosphofructokinase activity, ATP binding  
 AGOC: 6-phosphofructokinase complex, glycosome  
 AGOP: glycolysis  
 PGOF: 6-phosphofructokinase activity, ATP binding  
 PGOC: 6-phosphofructokinase complex  
 PGOP: glycolysis

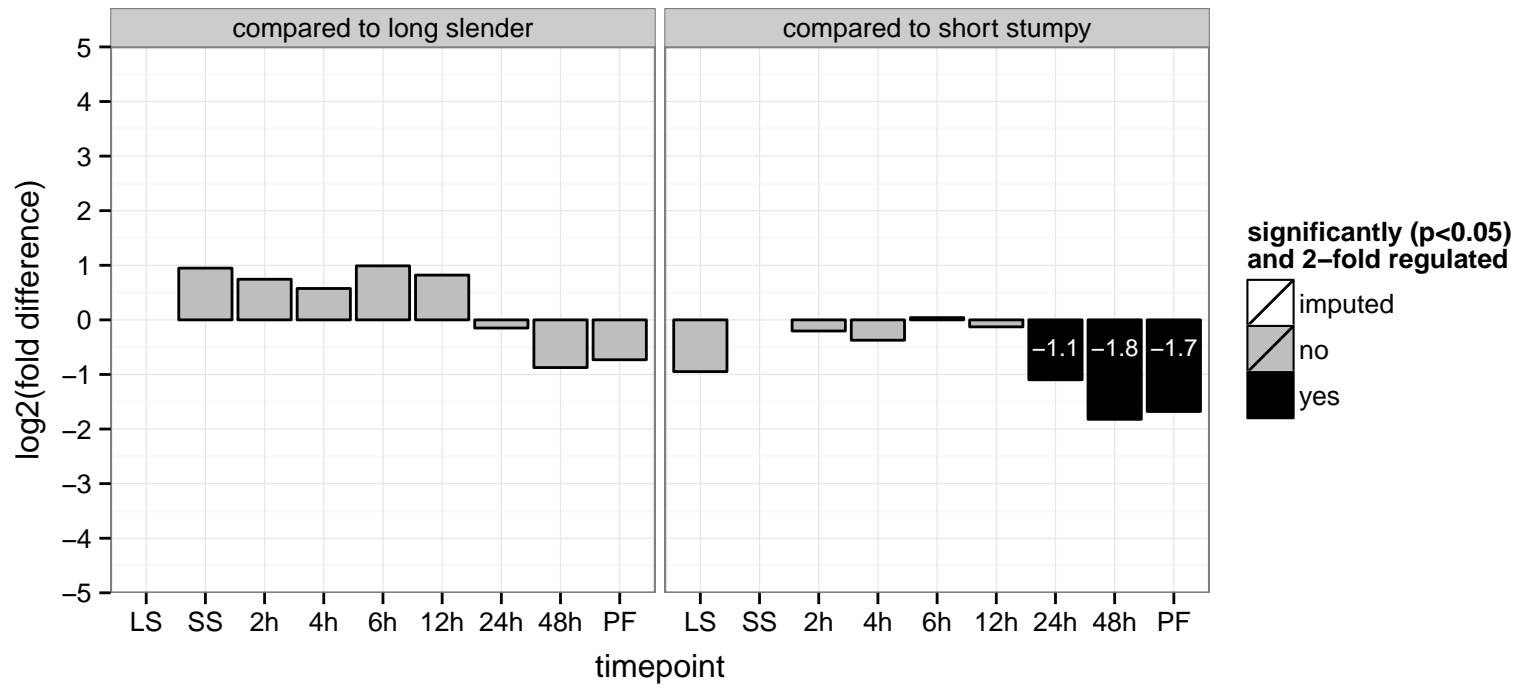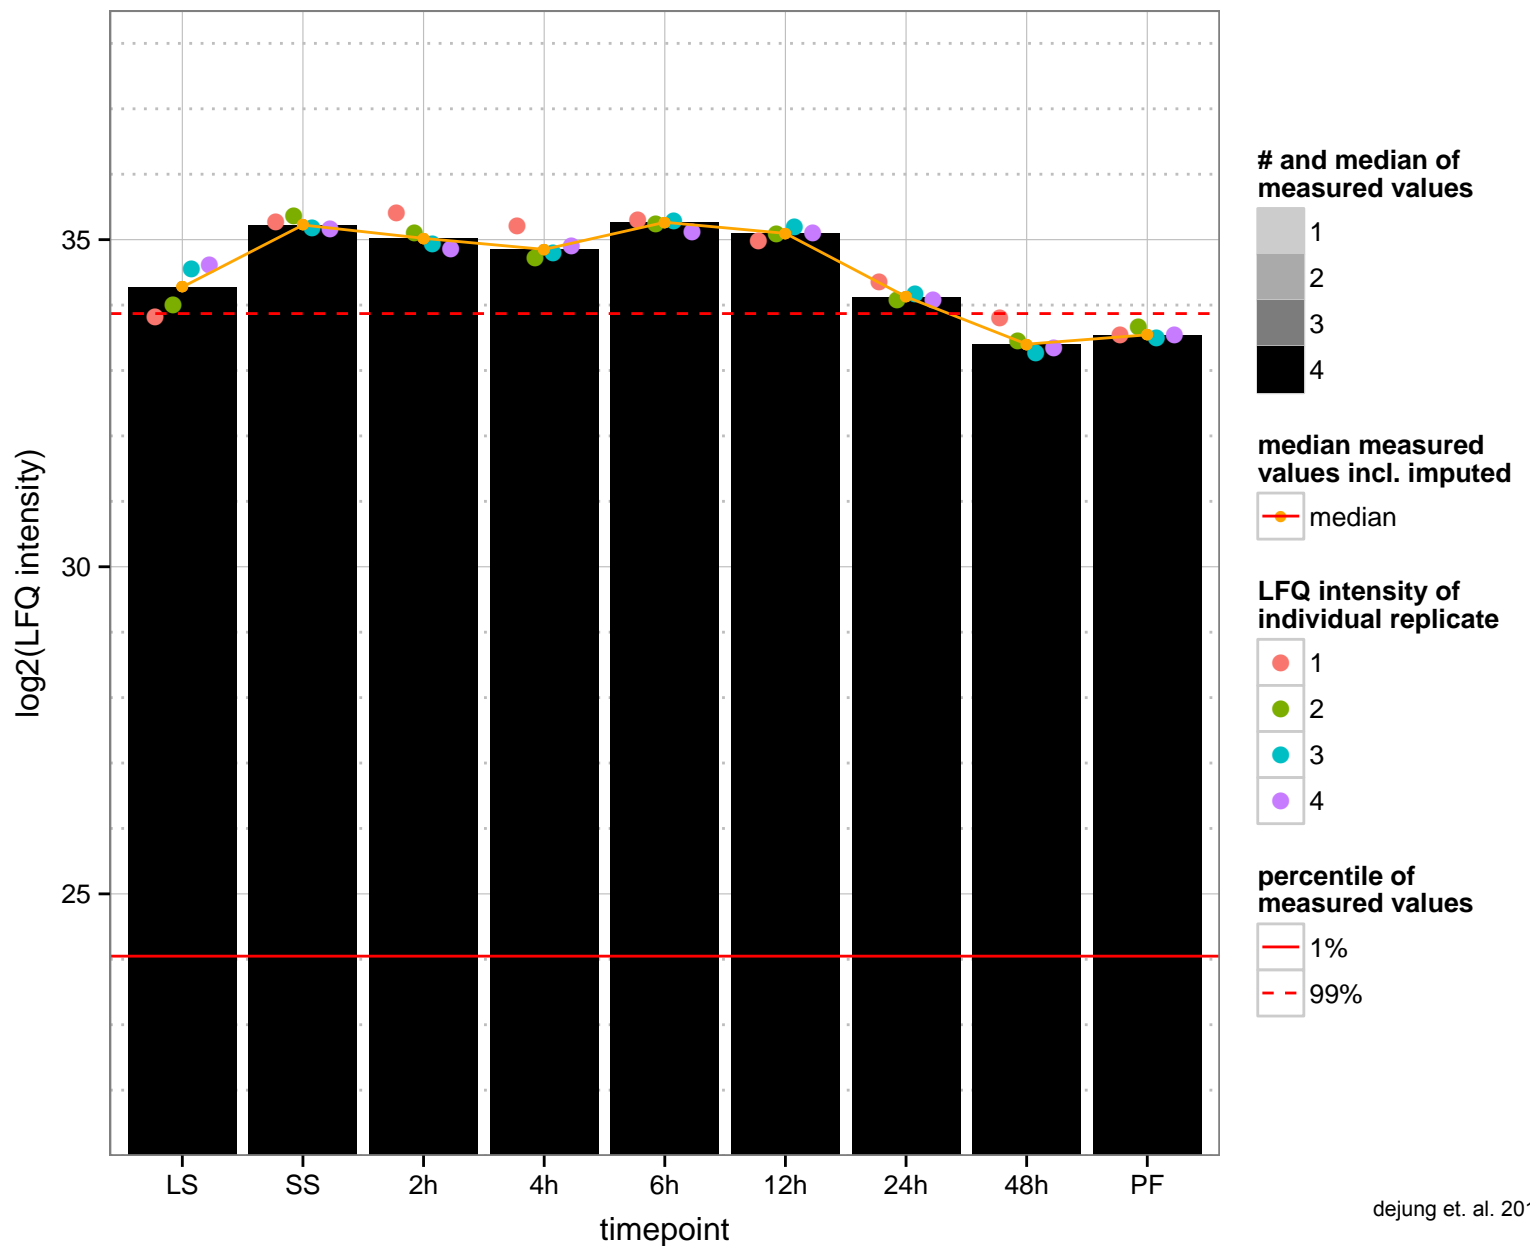

hypothetical protein, conserved  
 Tb927.3.4660  
 AGOF: null  
 AGOC: null  
 AGOP: null  
 PGO: protein binding  
 PGOC: null  
 PGOP: null

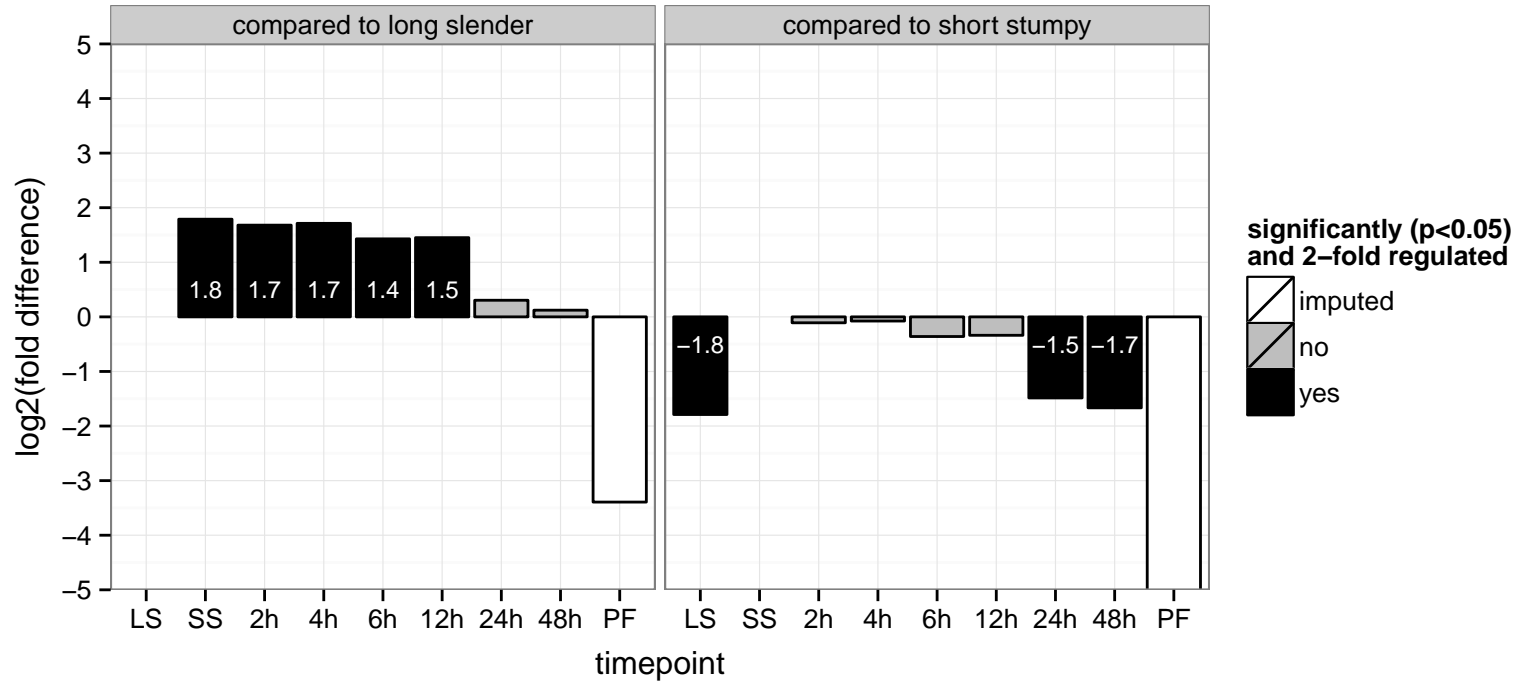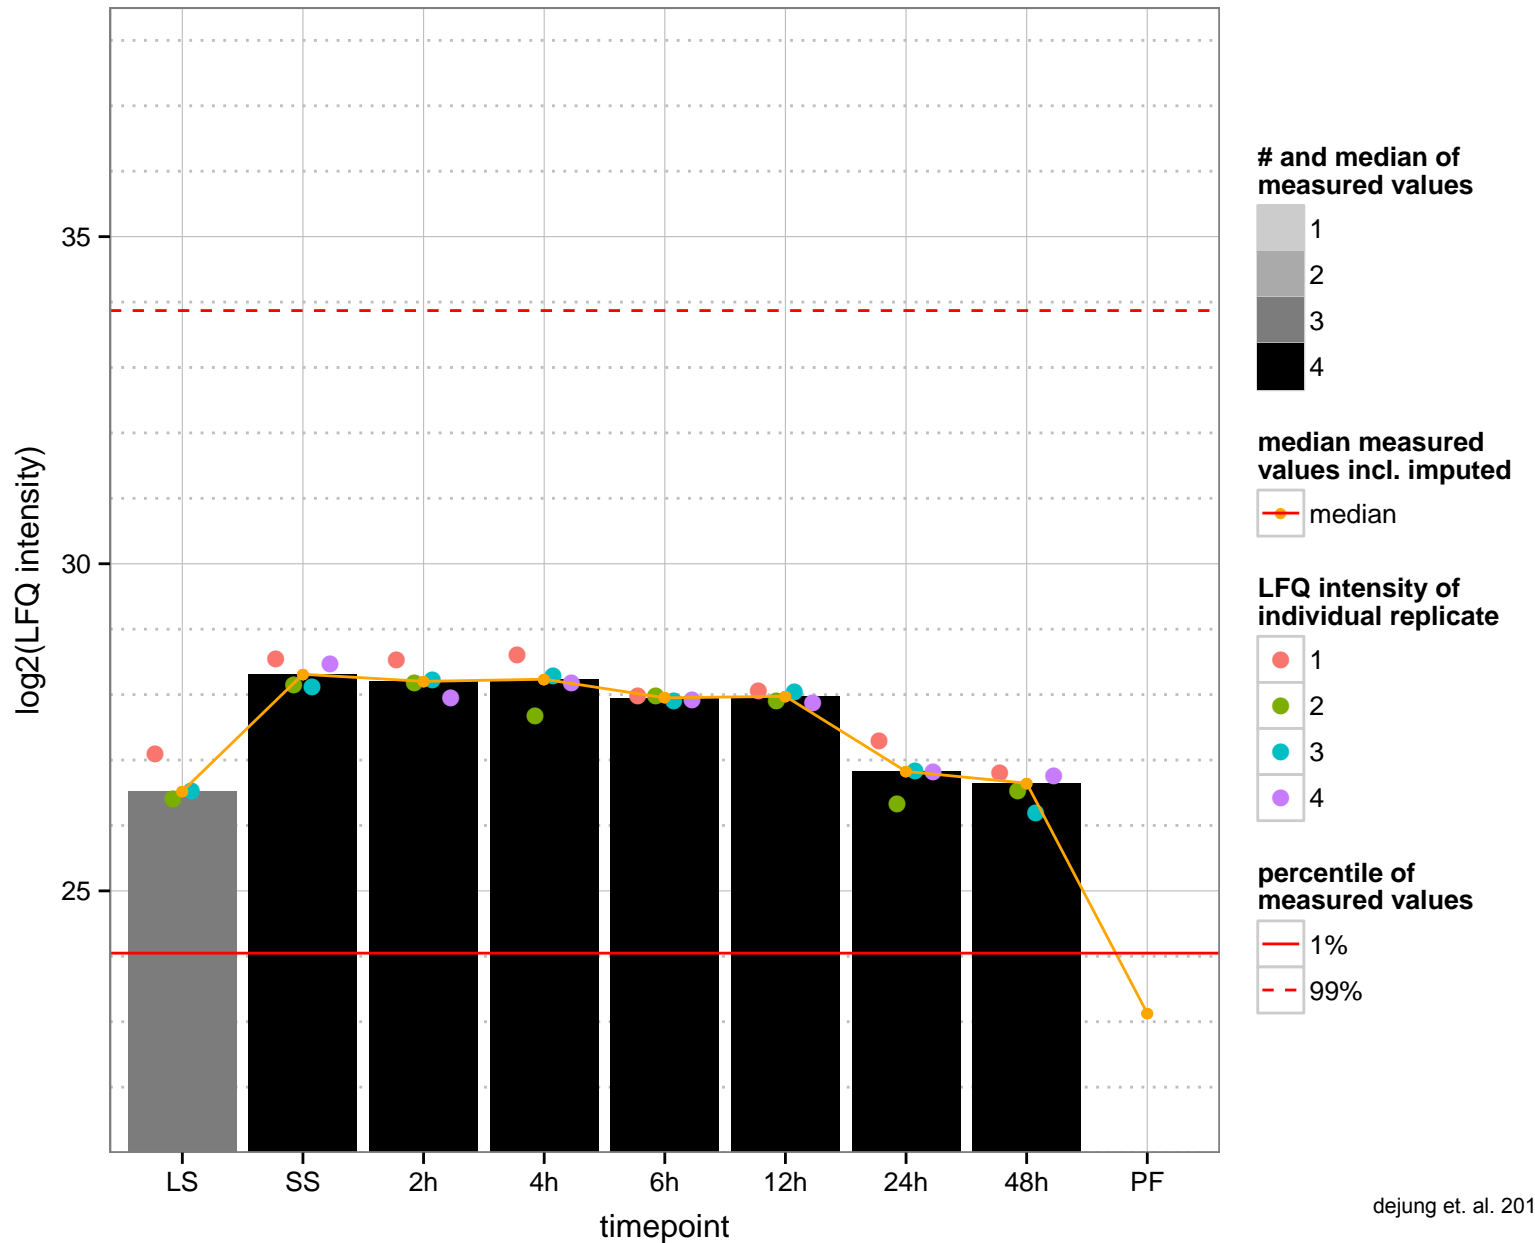

hypothetical protein, conserved  
 Tb927.3.4710  
 AGOF: null  
 AGOC: null  
 AGOP: null  
 PGO: null  
 PGOC: null  
 PGOP: null

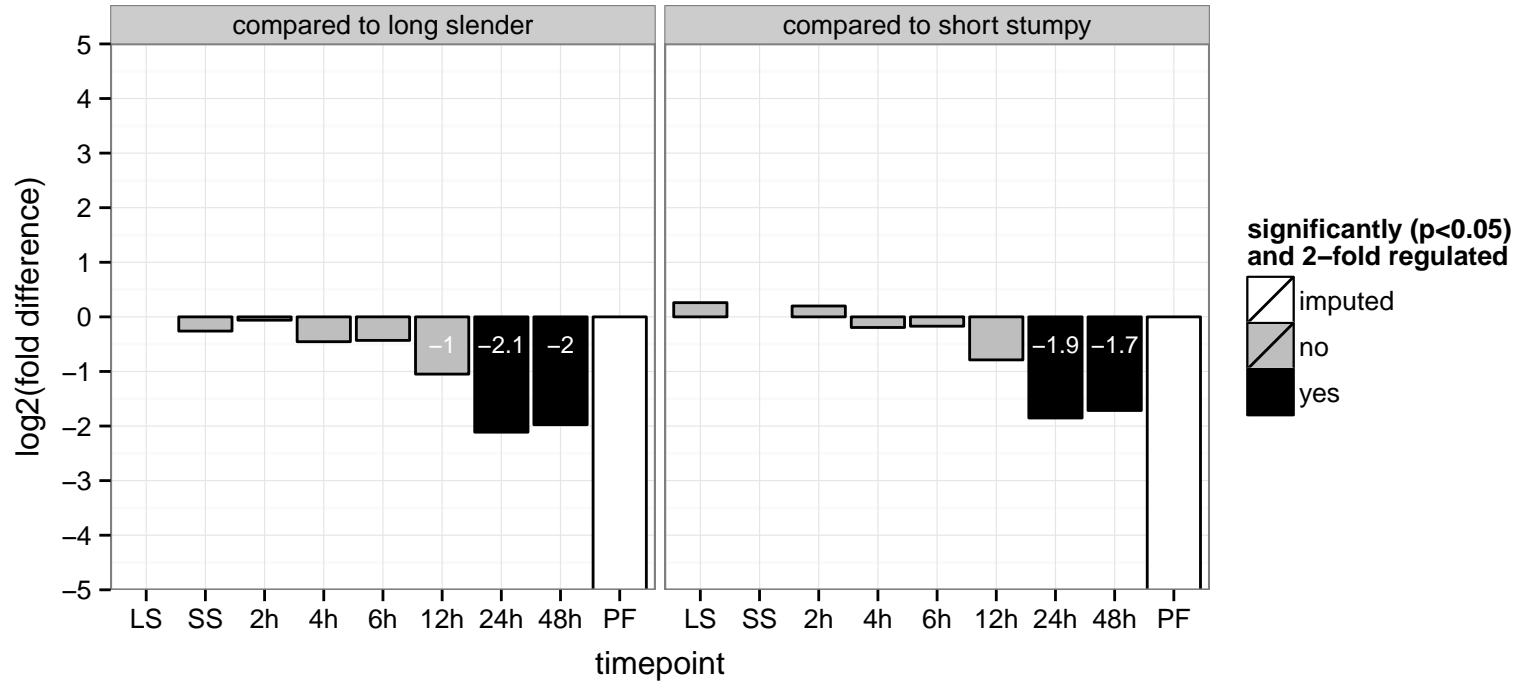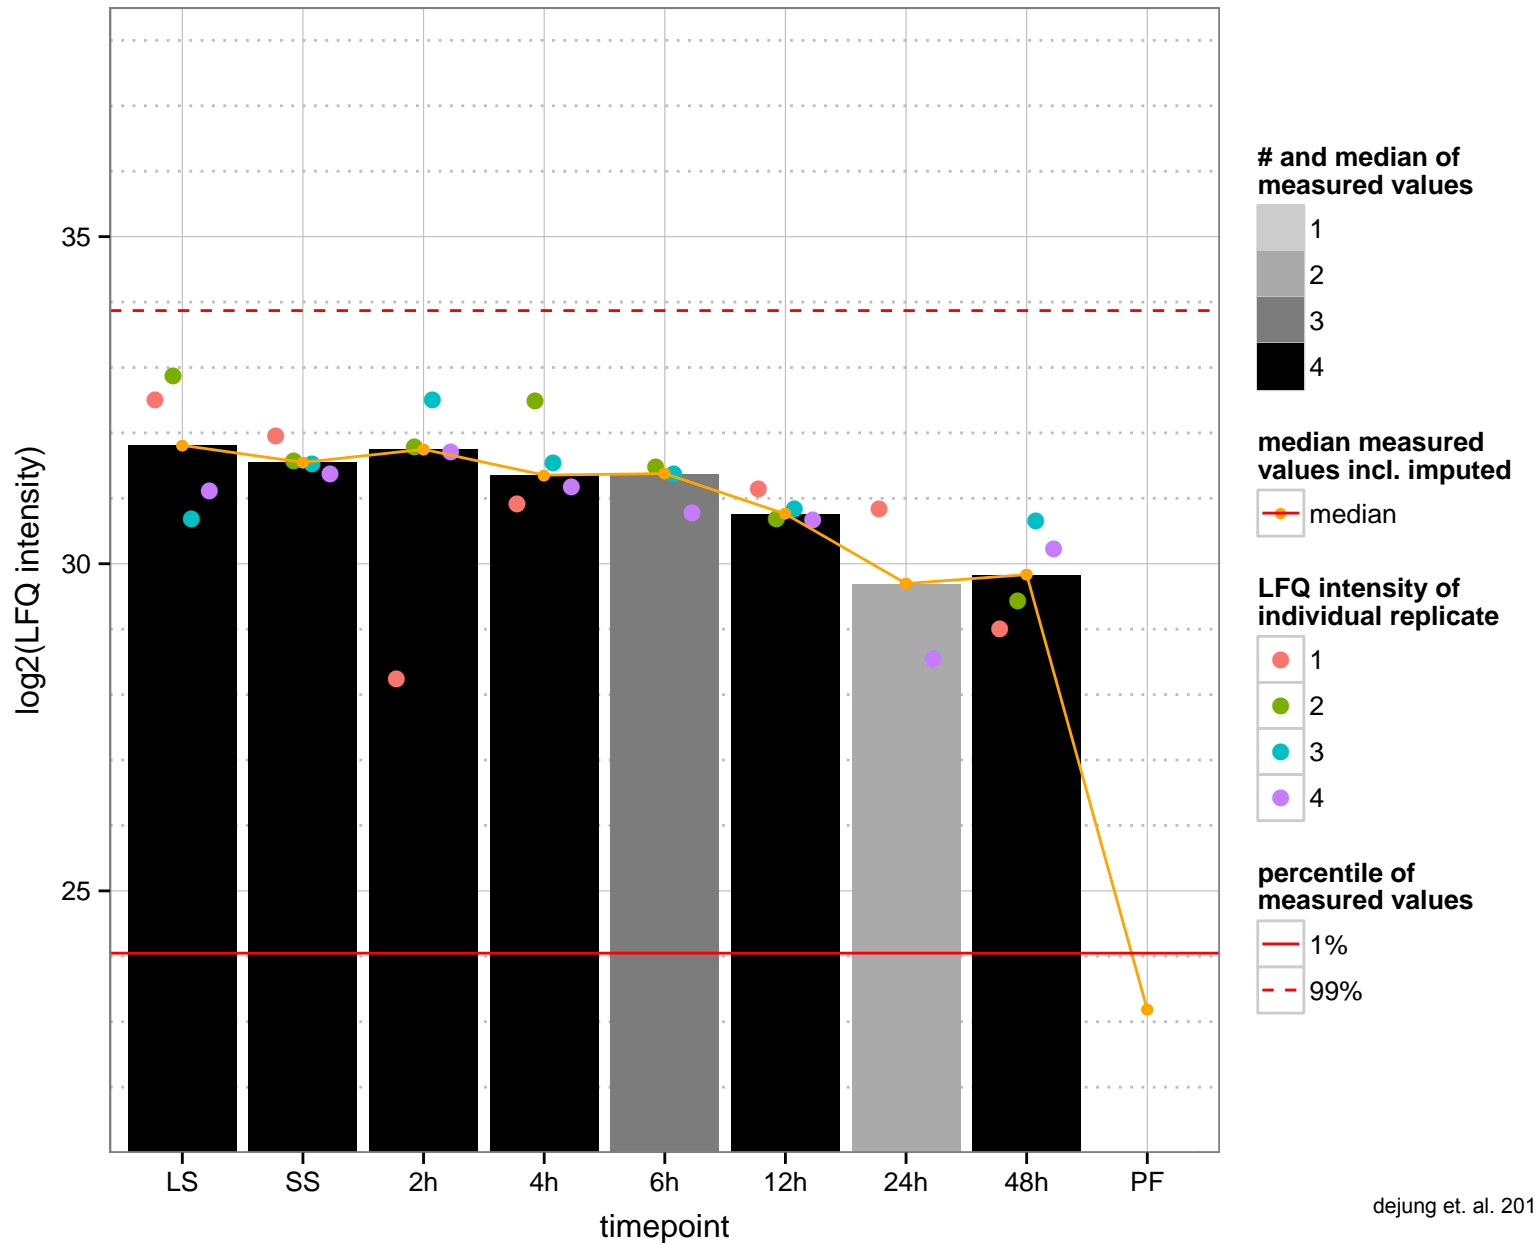

tryparedoxin 2, putative (TXN2)  
 Tb927.3.5090  
 AGOF: antioxidant activity, oxidoreductase activity  
 AGOC: null  
 AGOP: cell redox homeostasis  
 PGOF: null  
 PGO: null  
 PGOP: null

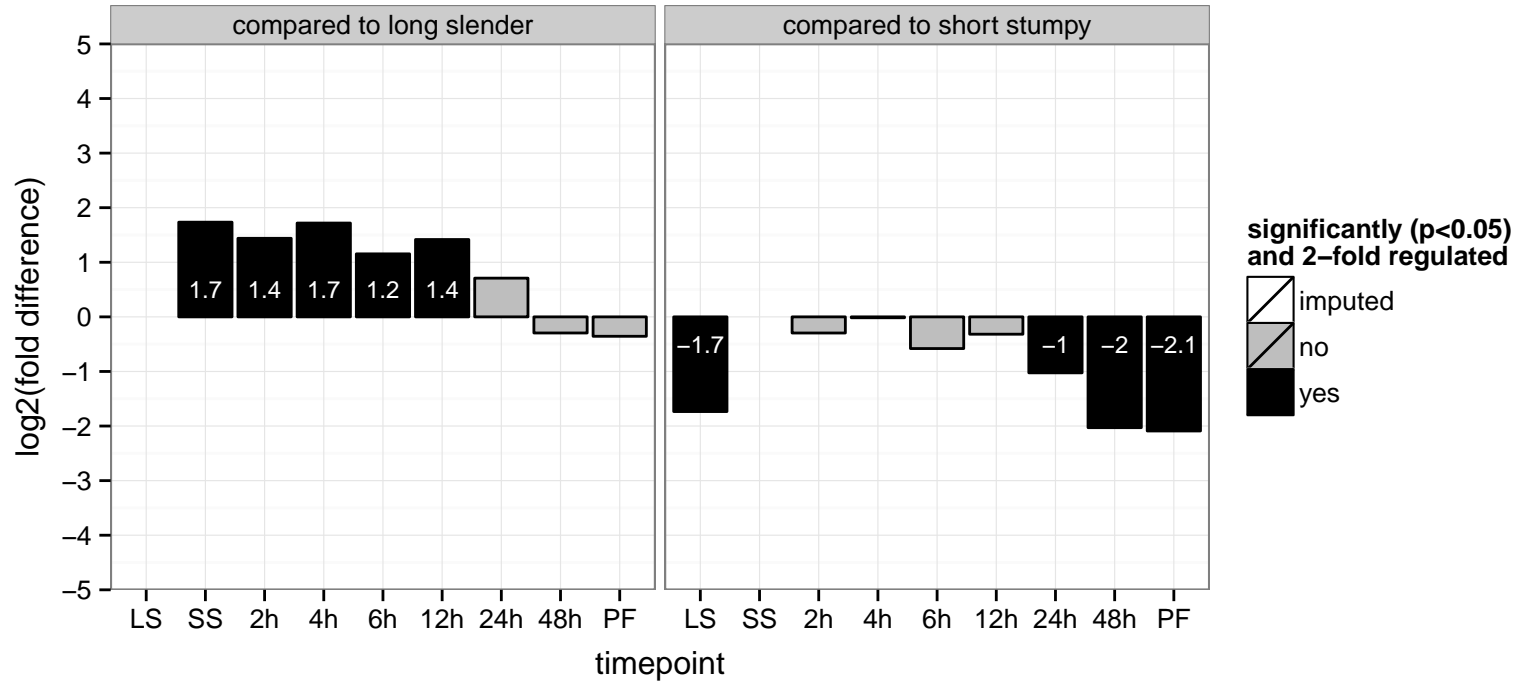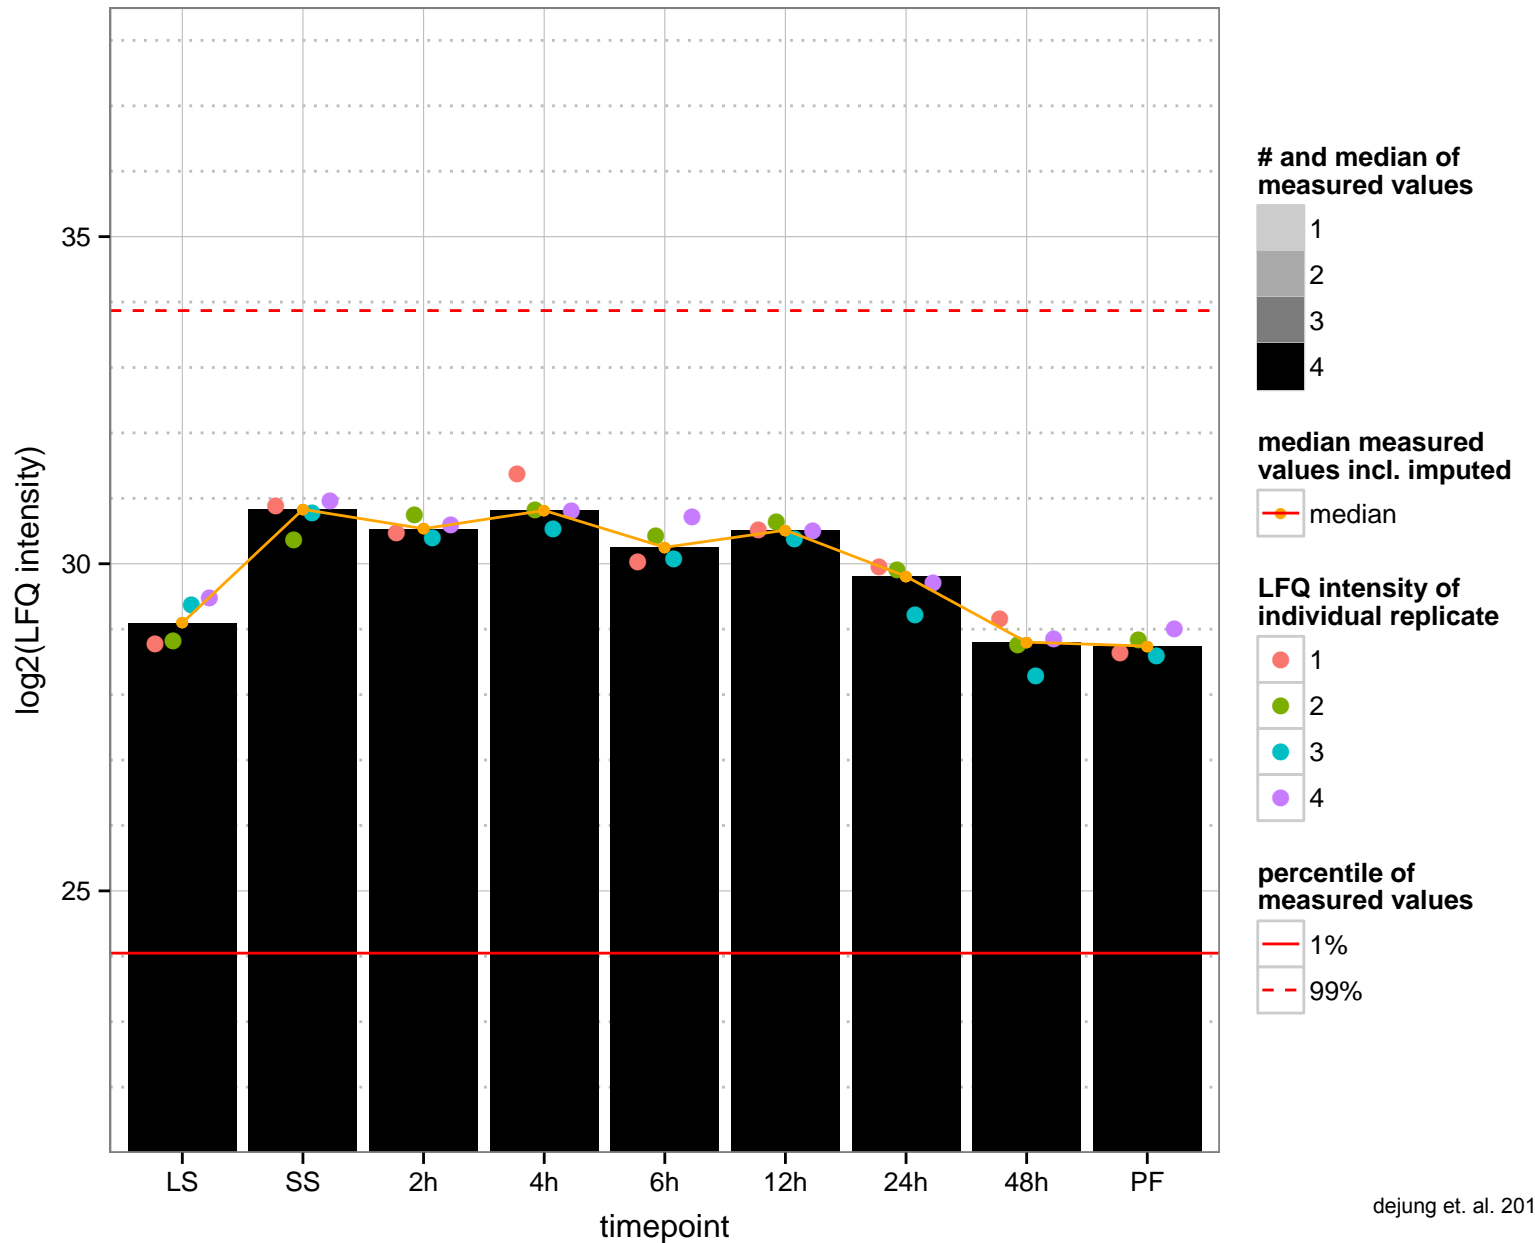

leucine-rich repeat protein (LRRP), putative  
 Tb927.4.1220  
 AGOF: null  
 AGOC: null  
 AGOP: null  
 PGO: null  
 PGOC: null  
 PGOP: null

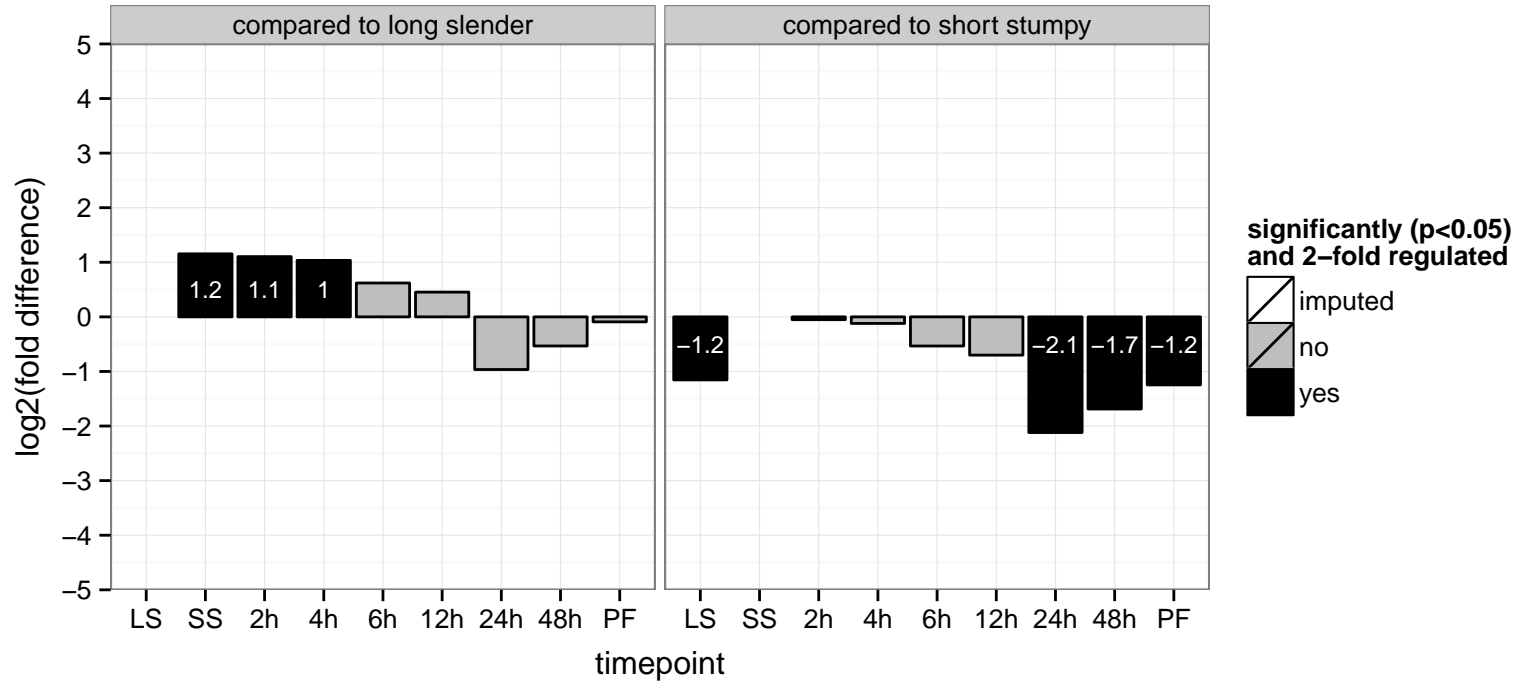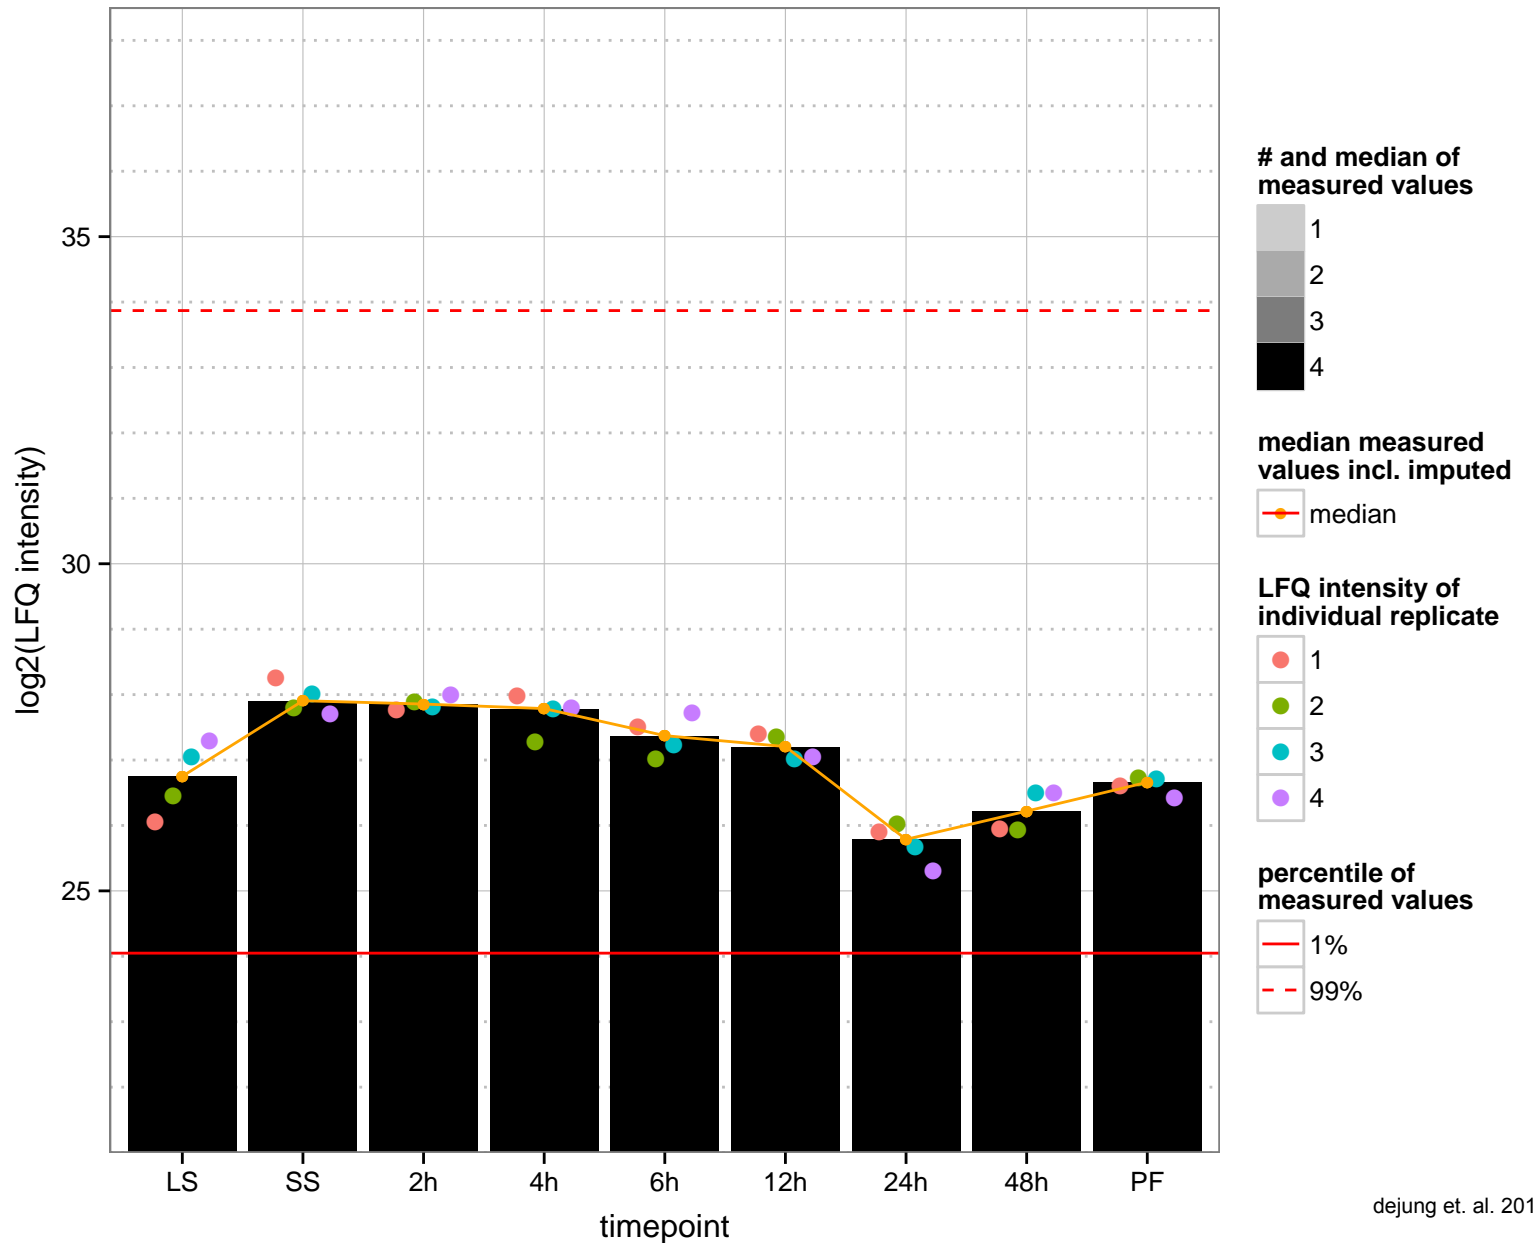

hypothetical protein, conserved  
 Tb927.4.2240  
 AGOF: catalytic activity  
 AGOC: null  
 AGOP: metabolic process  
 PGO: catalytic activity  
 PGO: null  
 PGO: metabolic process

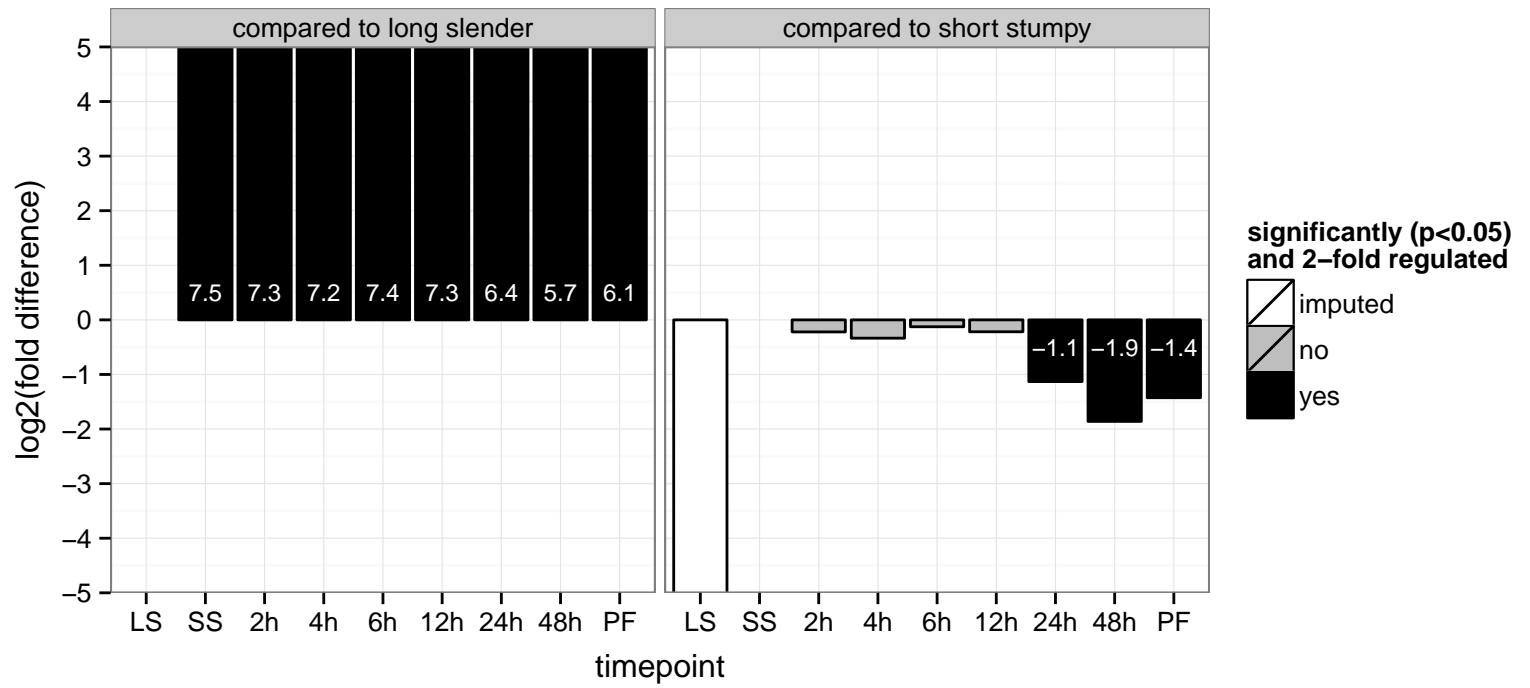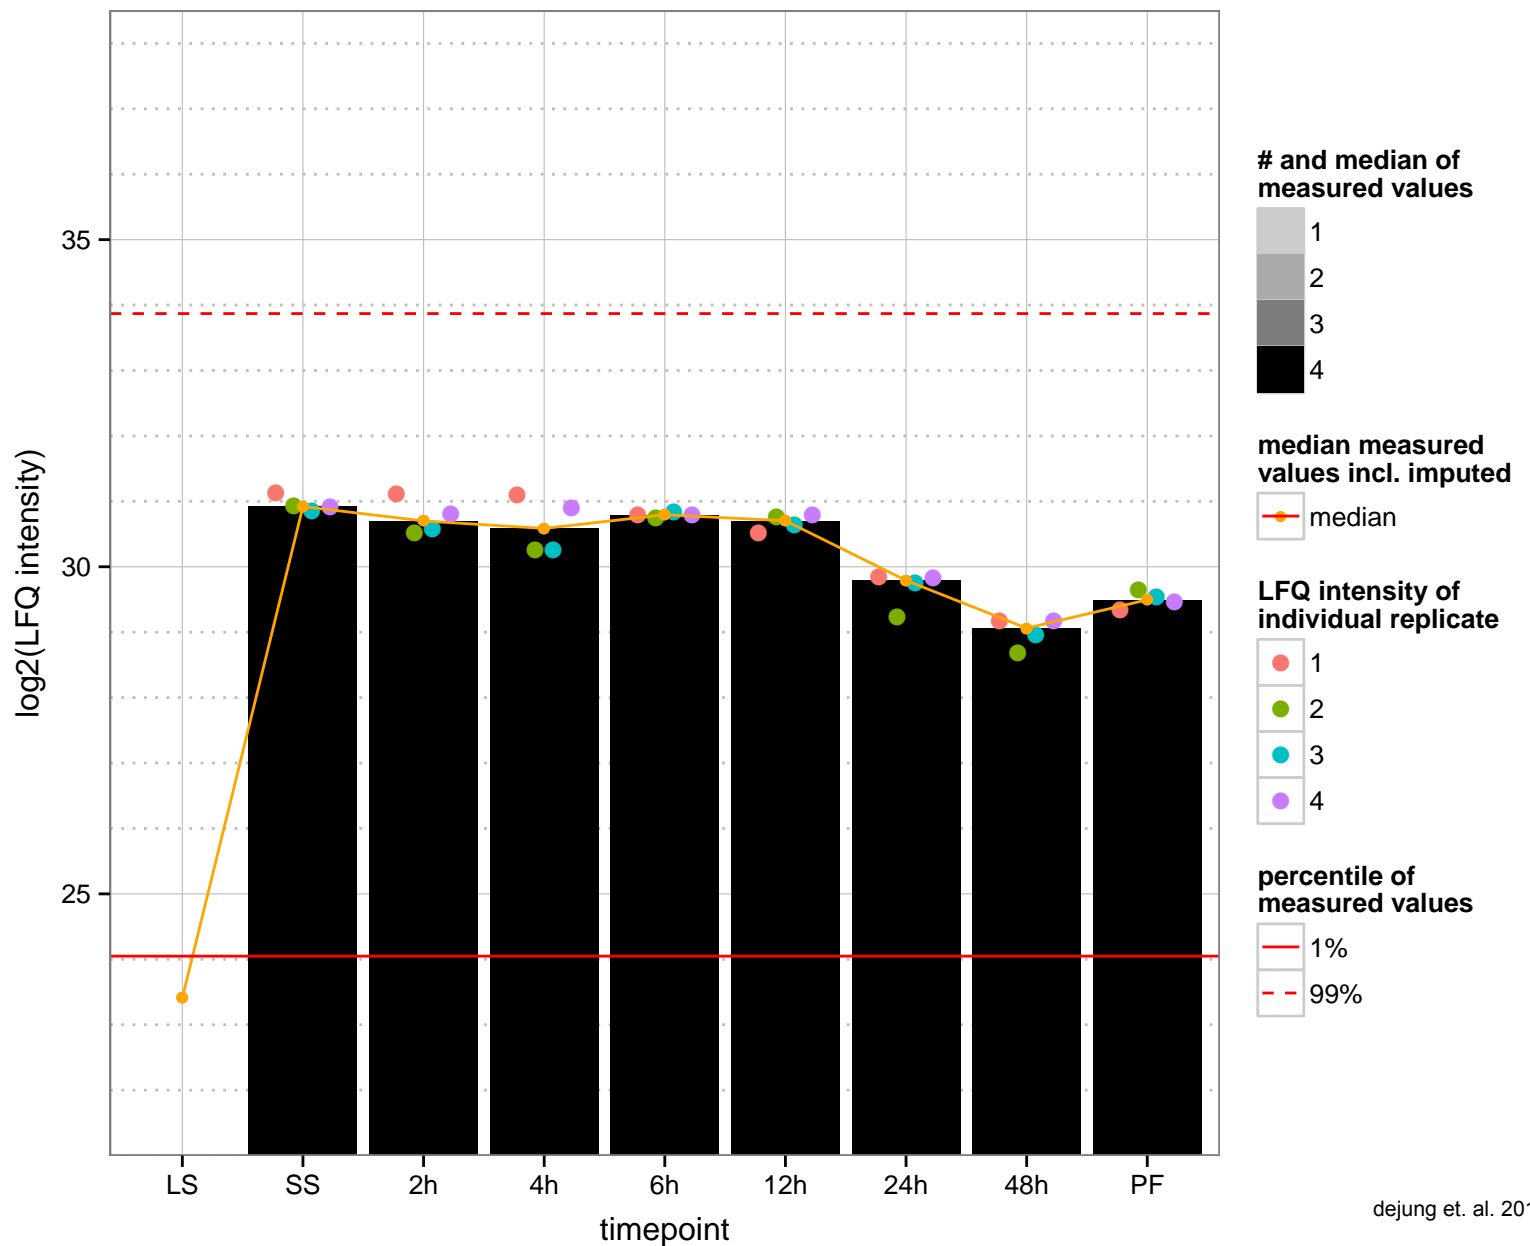



hypothetical protein, conserved  
 Tb927.4.2370  
 AGOF: null  
 AGOC: null  
 AGOP: null  
 PGO: null  
 PGOC: null  
 PGOP: null

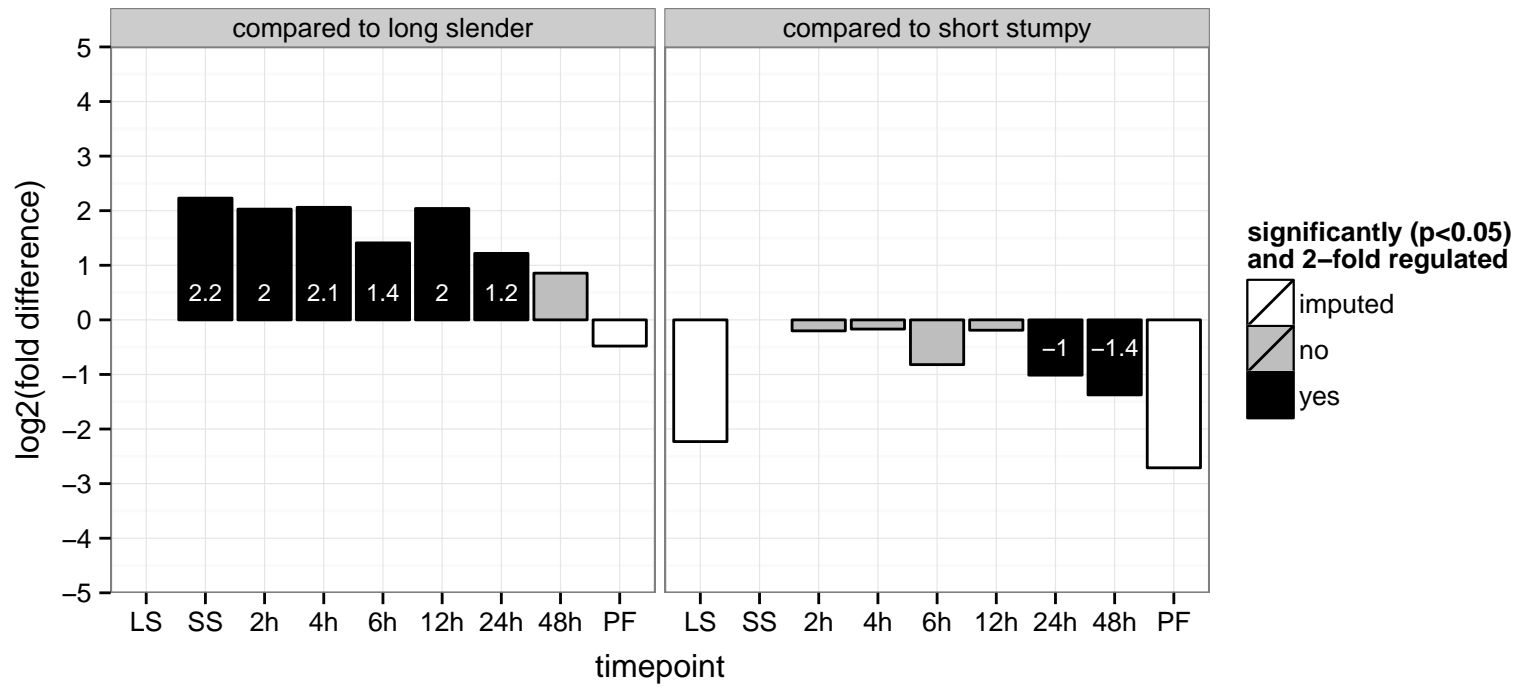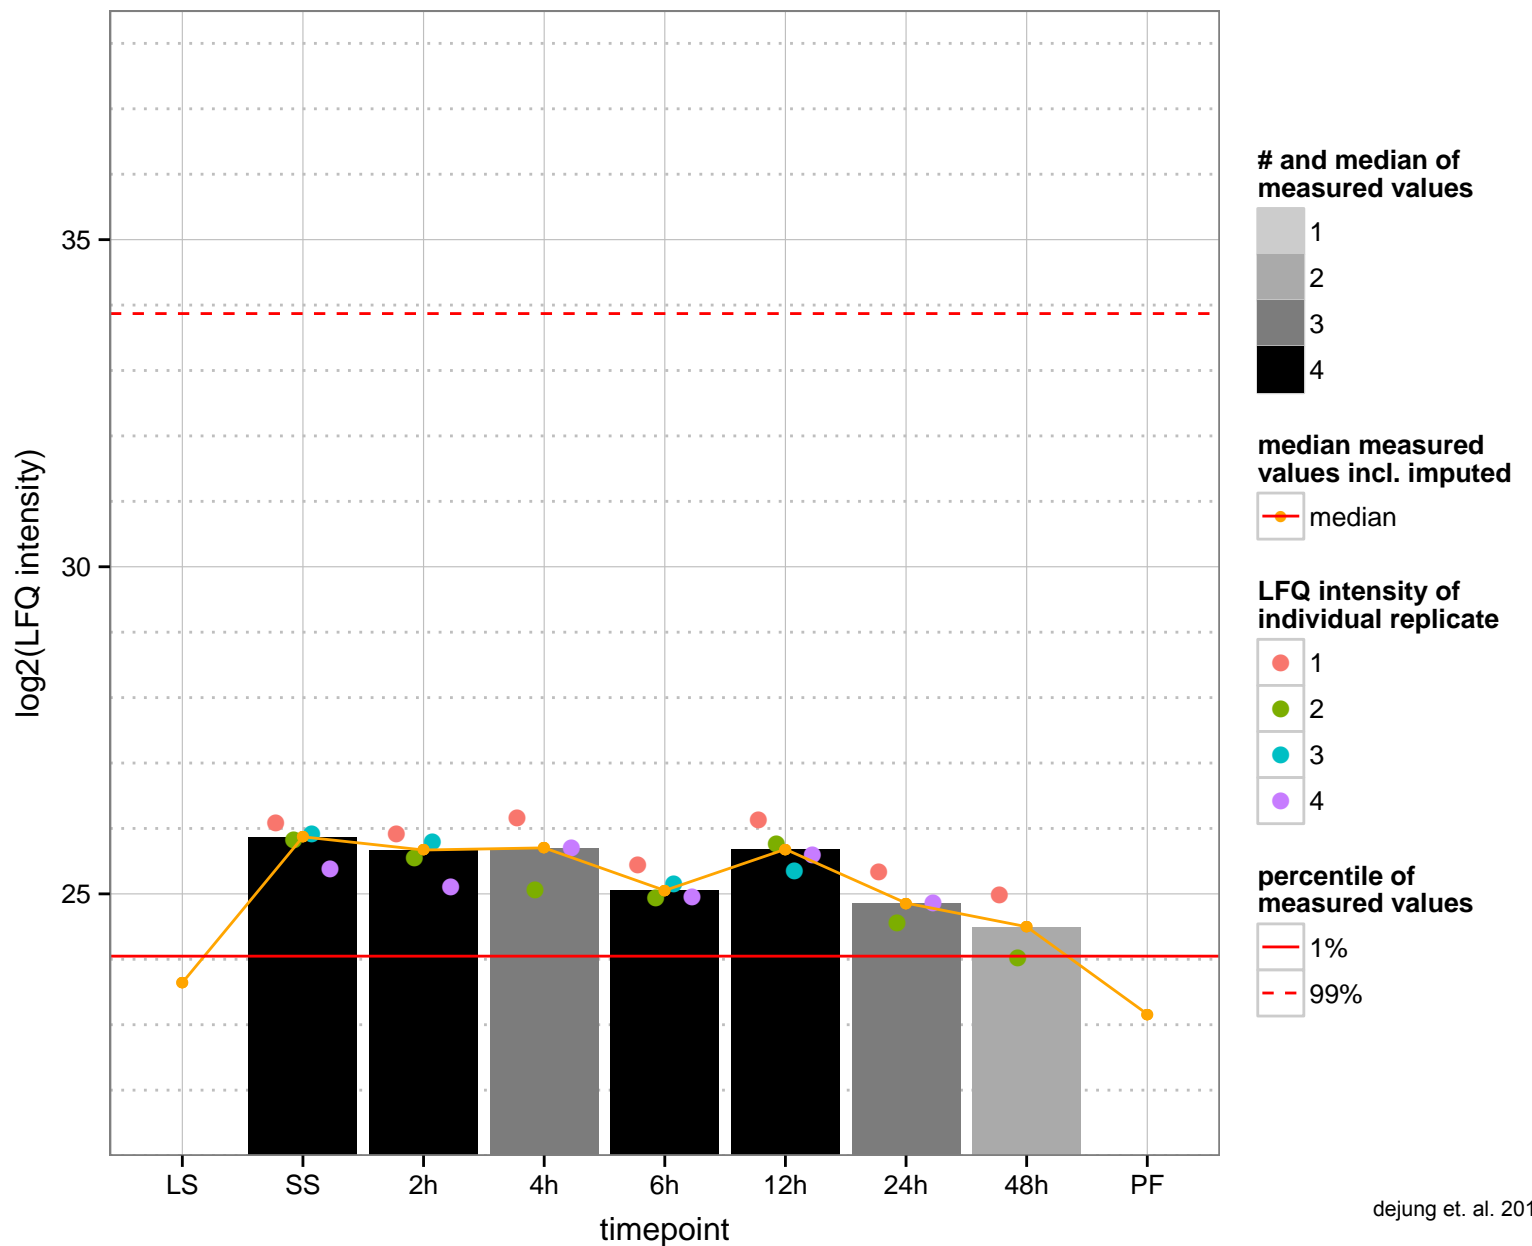

sarcoplasmic reticulum glycoprotein, putative  
 Tb927.4.2380  
 AGOF: GTP binding, calcium ion binding  
 AGOC: intracellular, sarcoplasmic reticulum  
 AGOP: calcium ion transport  
 PGOF: GTP binding, GTPase activity  
 PGO: null  
 PGOP: null

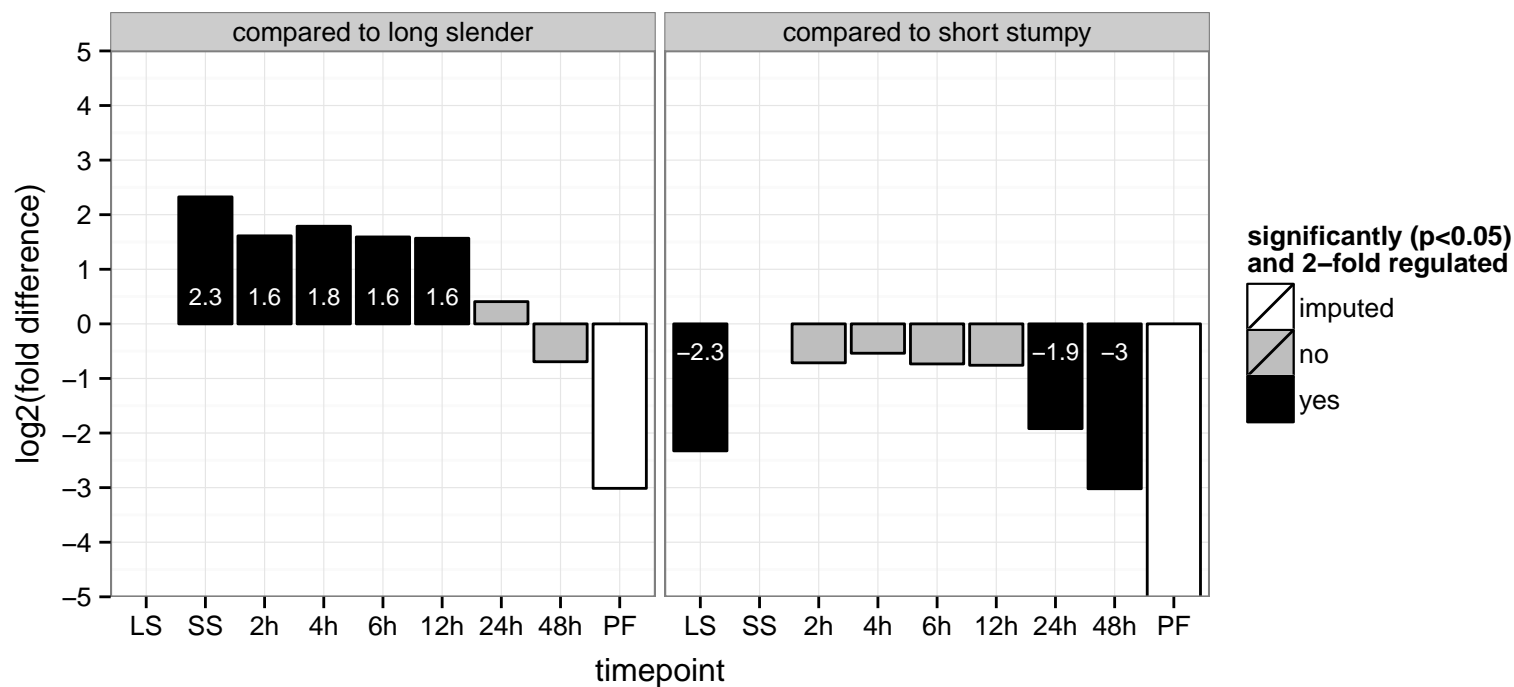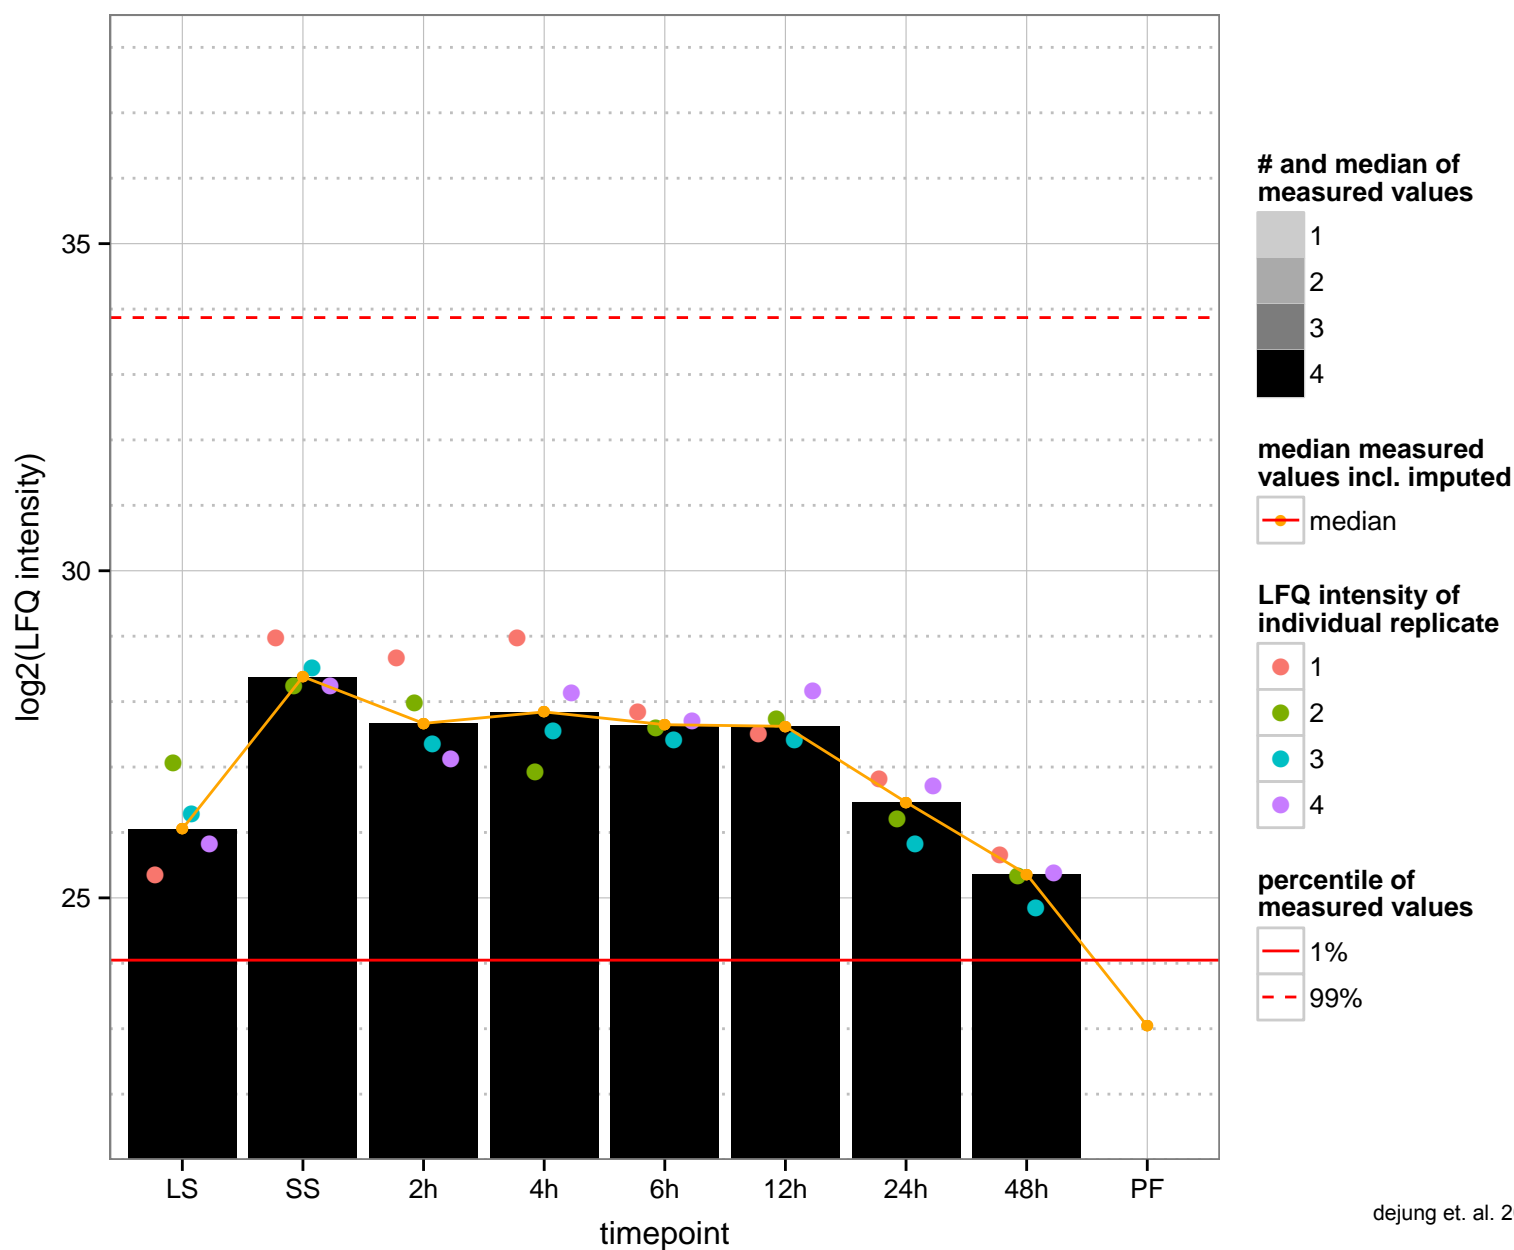

myosin IB heavy chain, putative  
 Tb927.4.3380  
 AGOF: ATP binding, motor activity, zinc ion binding  
 AGOC: myosin complex  
 AGOP: null  
 PGOF: ATP binding, motor activity, protein binding  
 PGOC: myosin complex  
 PGOP: null

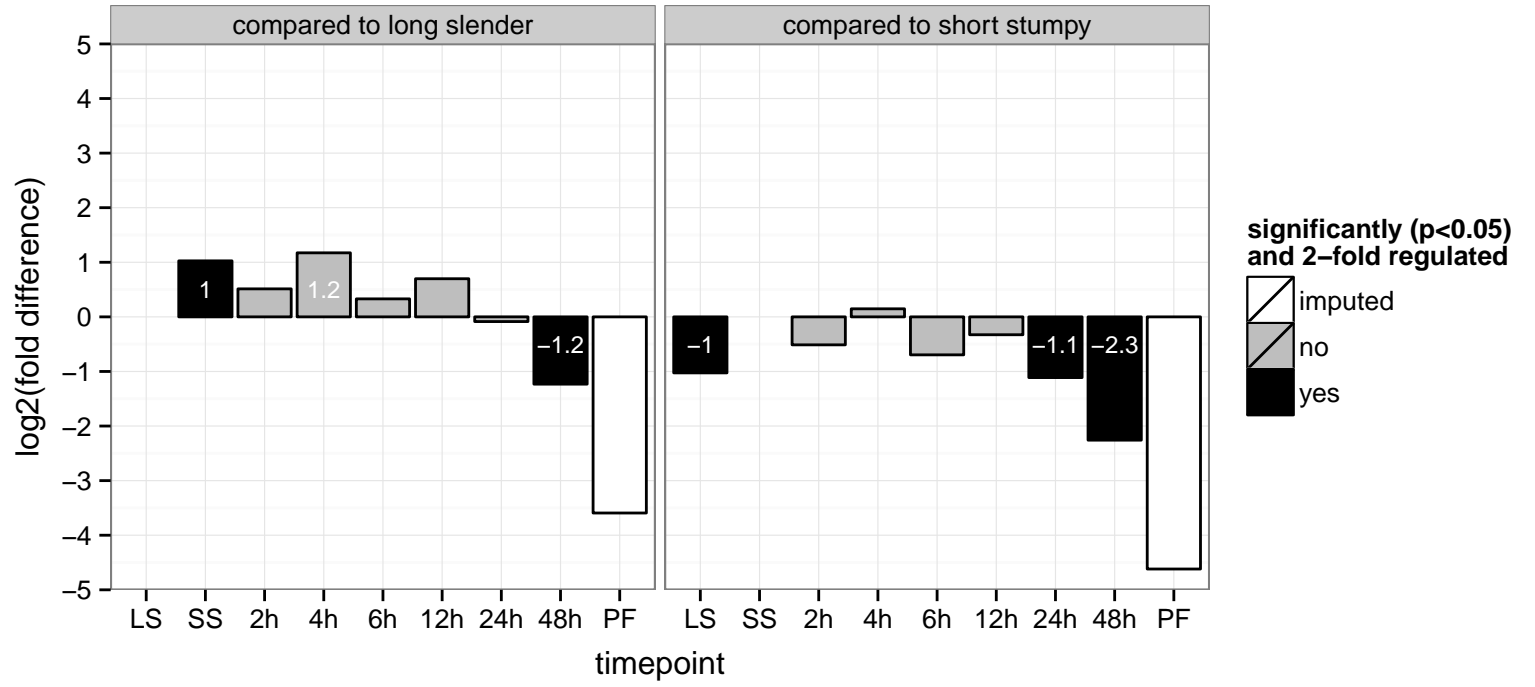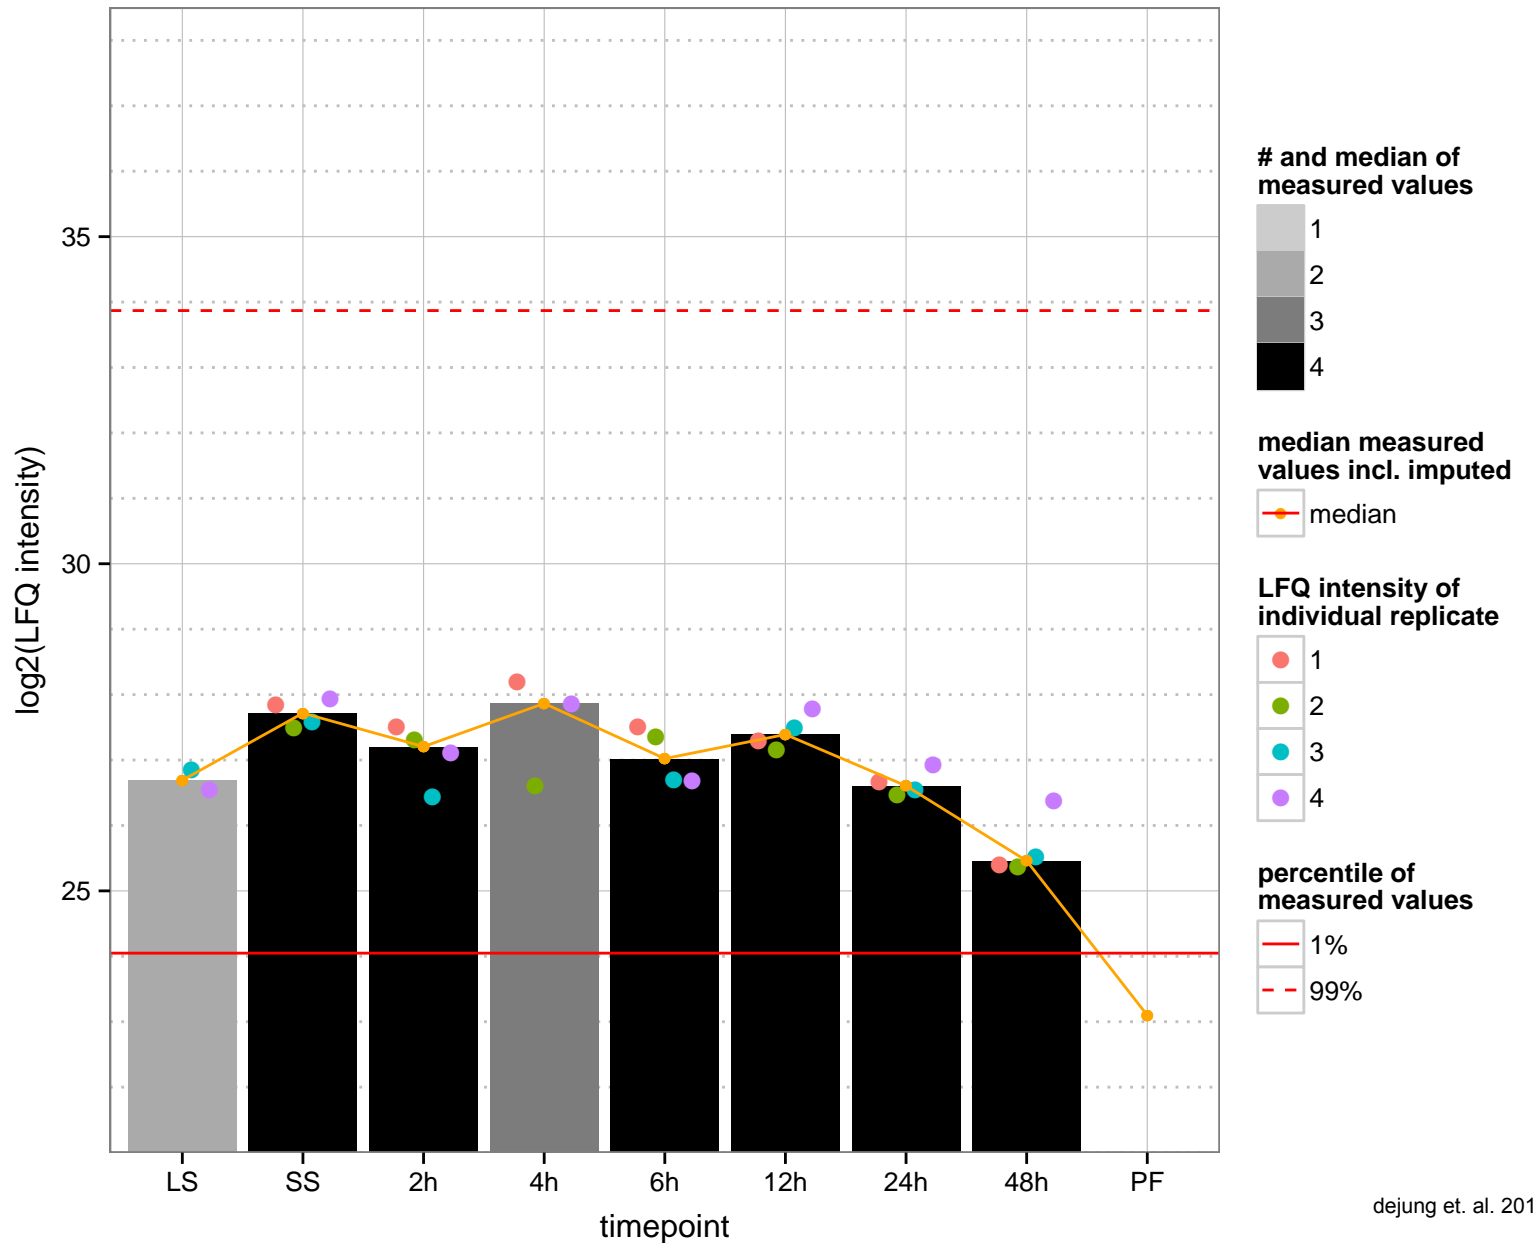

hypothetical protein  
 Tb927.4.3480  
 AGOF: null  
 AGOC: null  
 AGOP: null  
 PGOF: null  
 PGO C: null  
 PGOP: null

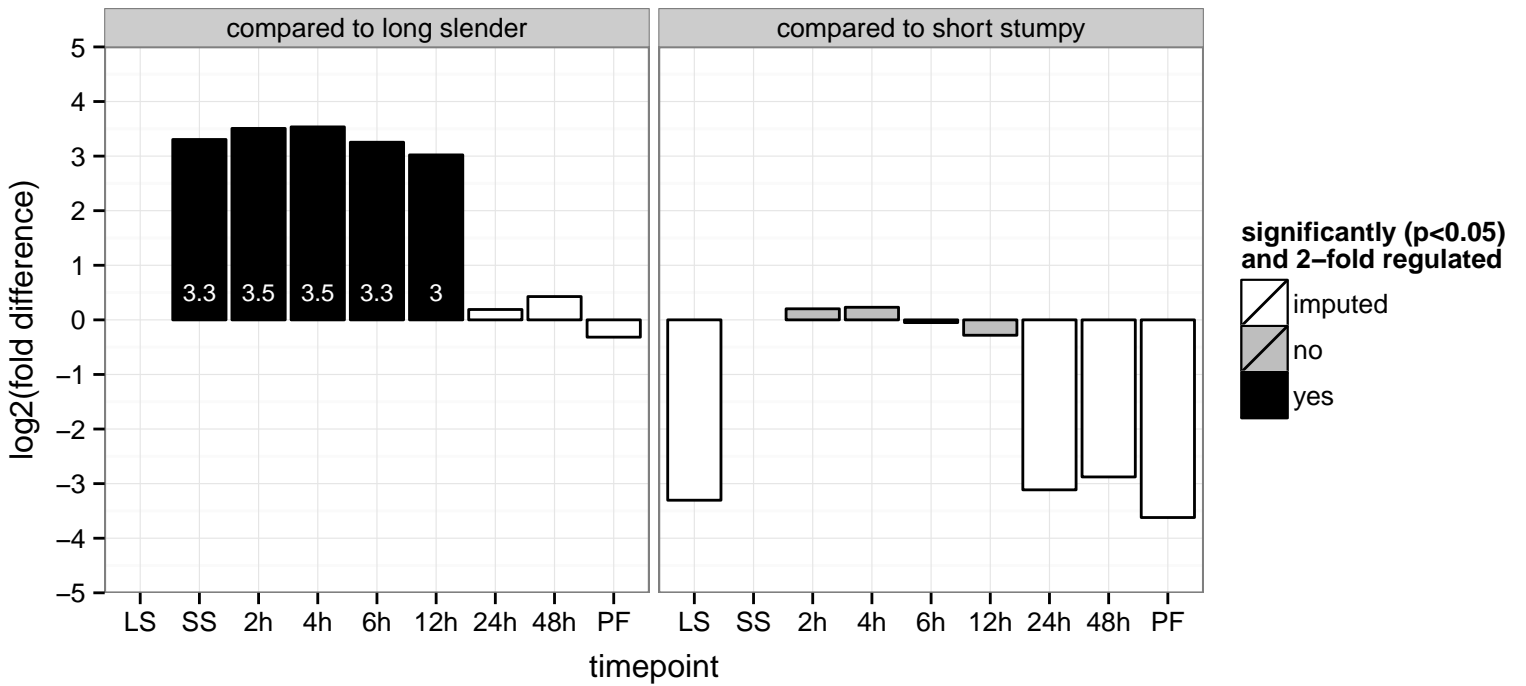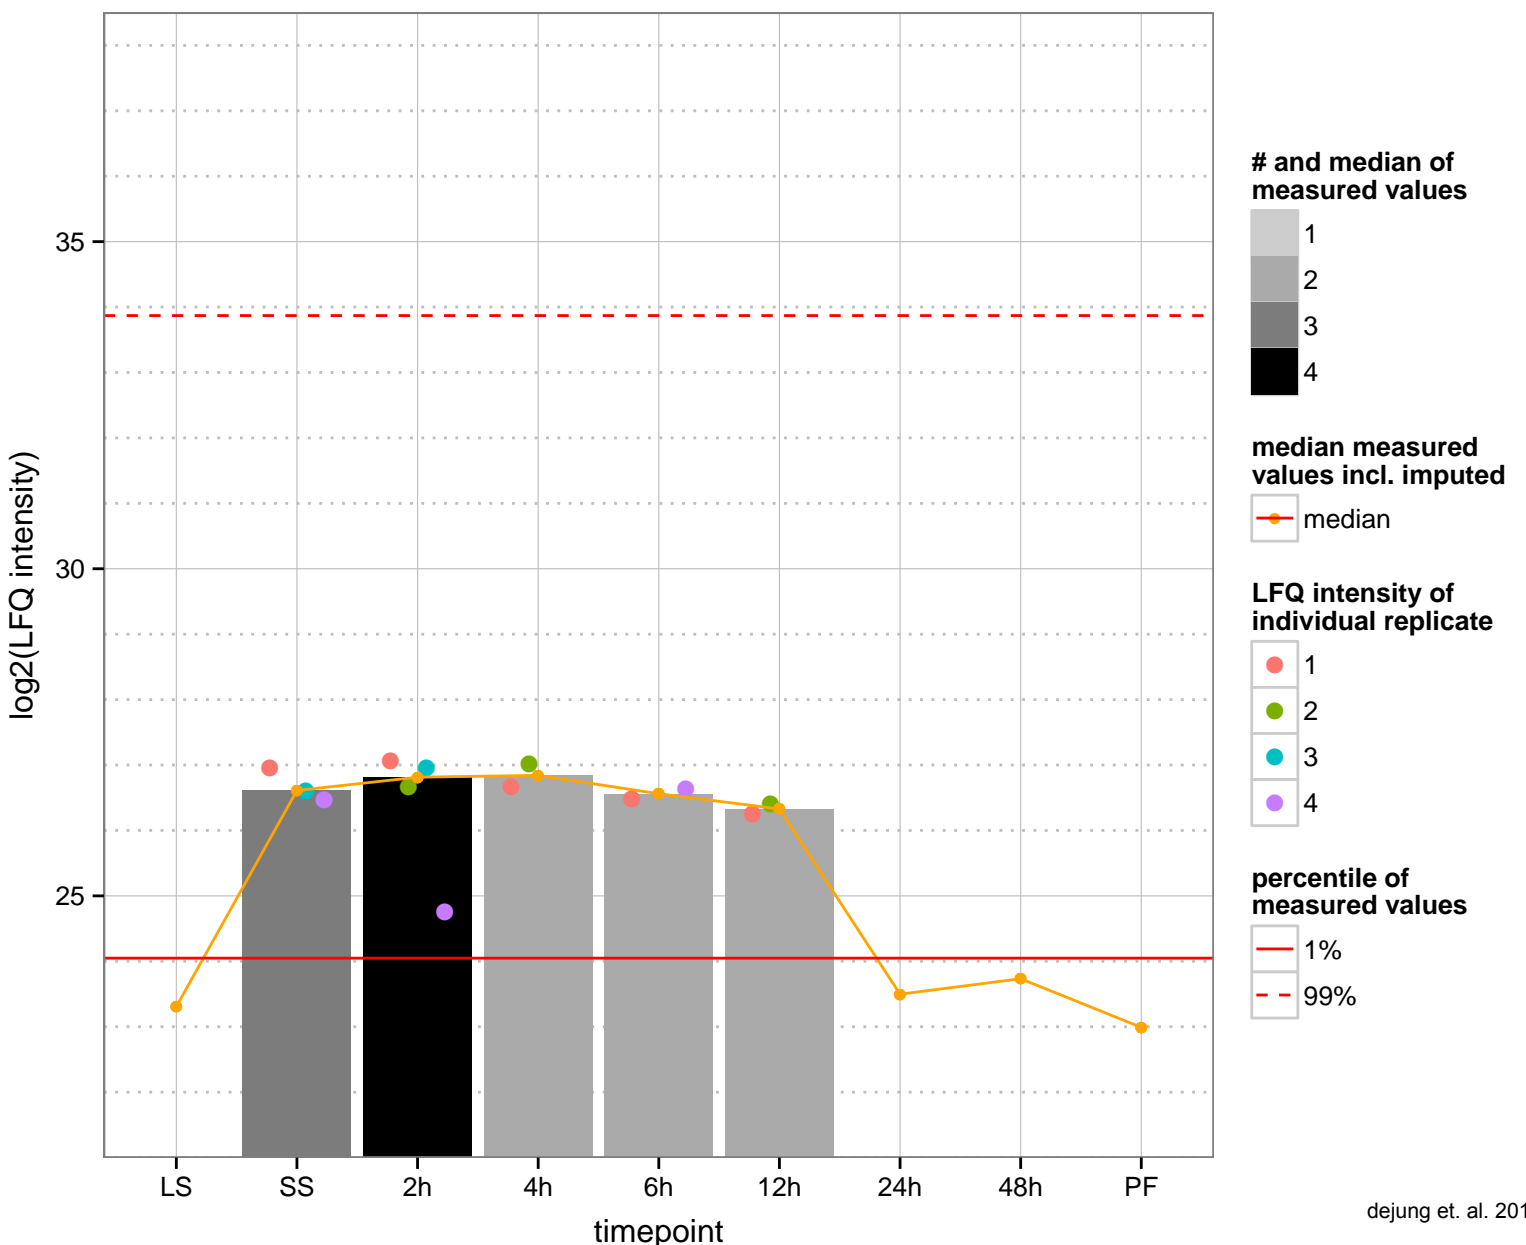

Repressor of differentiation kinase 2 (RDK2), serine/threonine-protein kinase a, putative, protein kinase

Tb927.4.5310

AGOF: ATP binding, protein kinase activity, protein serine/threonine kinase activity, protein tyrosine kinase activity

AGOC: null

AGOP: modulation of development of symbiont involved in interaction with host, protein phosphorylation, protein phosphorylat

PGOF: ATP binding, phospholipid binding, protein binding, protein kinase activity, transferase activity, transferring phosphorus

PGOC: null

PGOP: protein phosphorylation

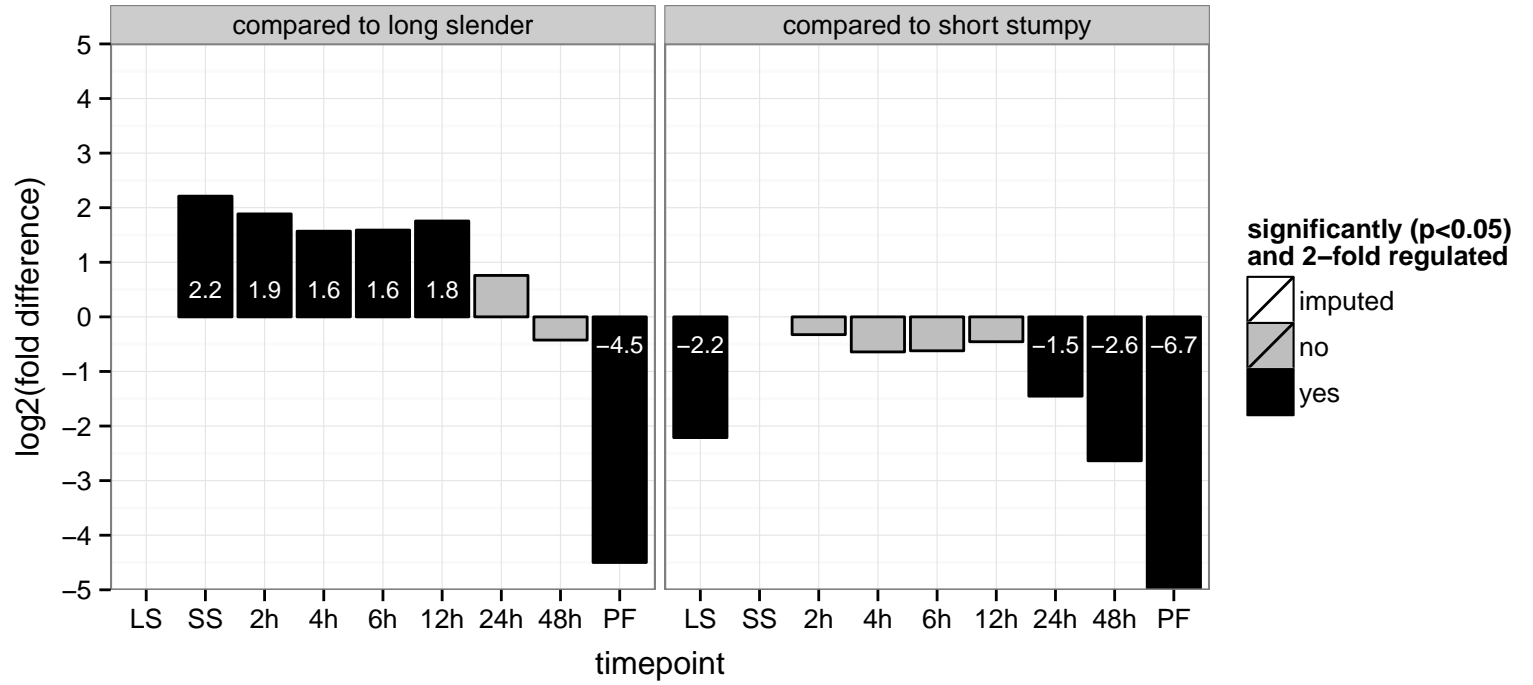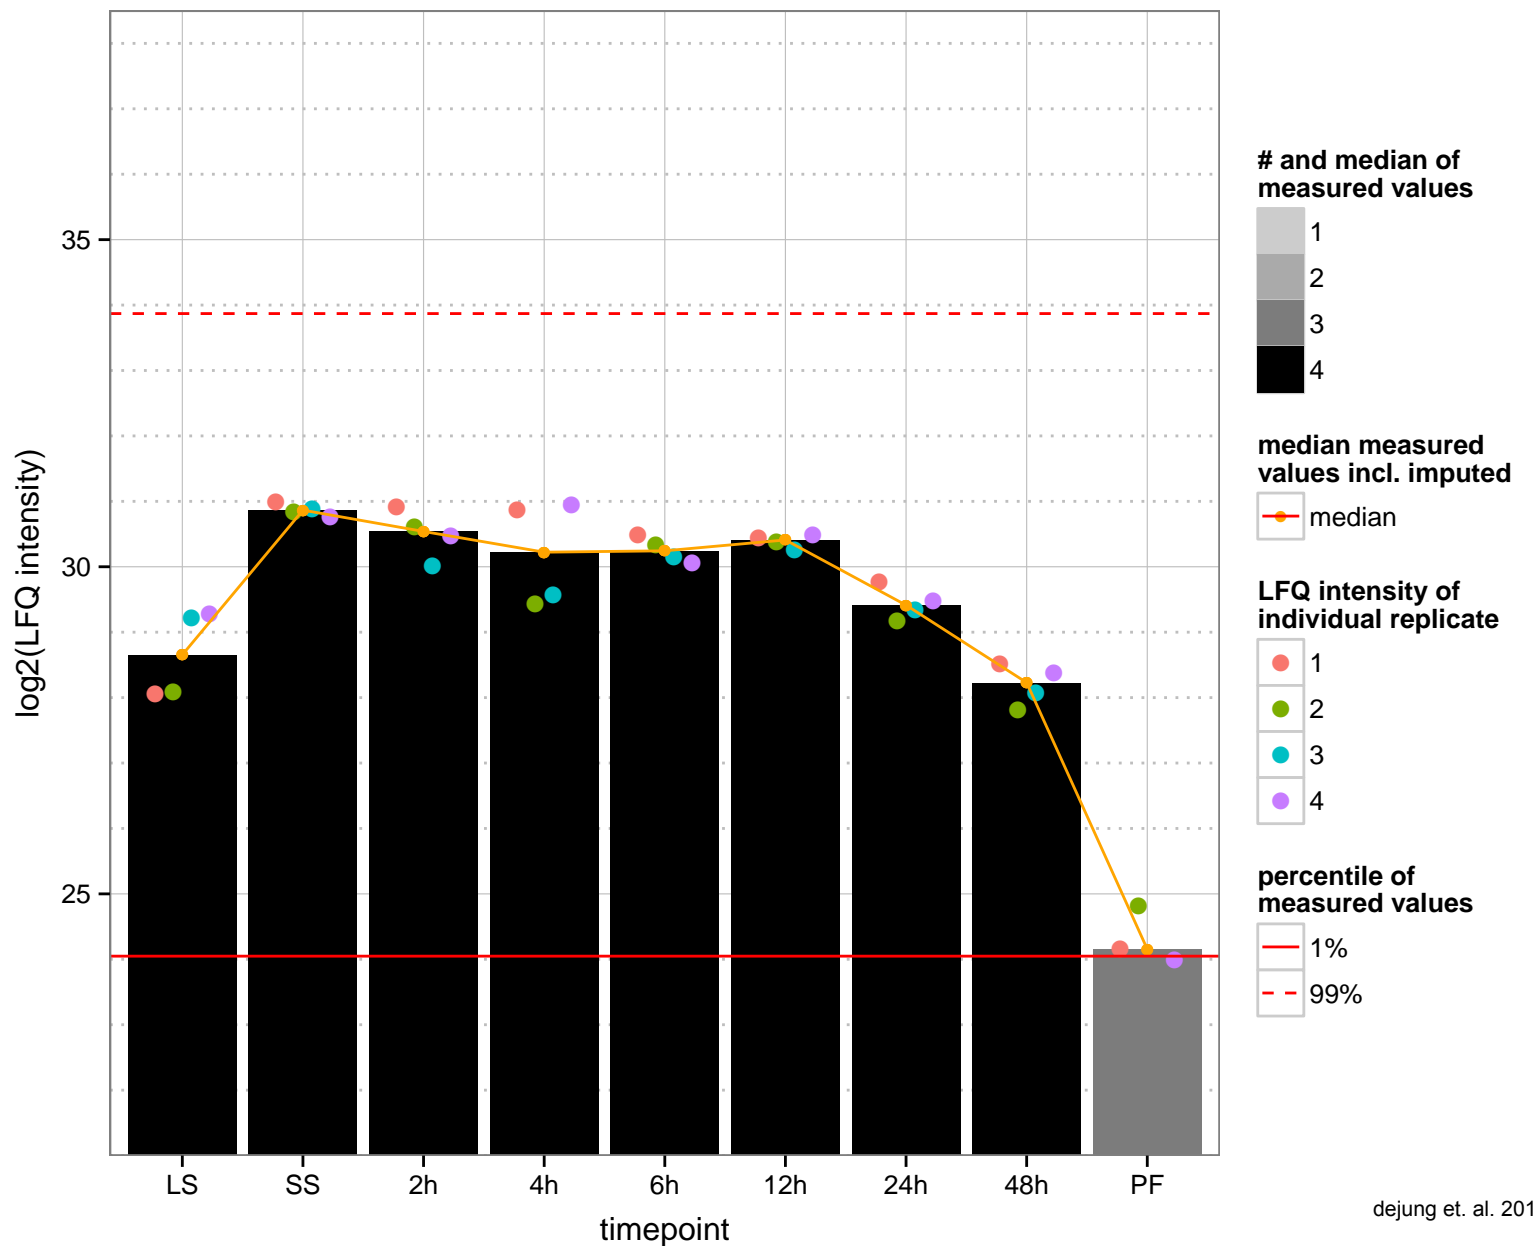

Cytoplasmic dynein 2 heavy chain (DYNC2H1), putative

Tb927.4.560

AGOF: ATP binding, ATPase activity, microtubule motor activity

AGOC: dynein complex

AGOP: chromosome segregation, microtubule-based movement, minus-end-directed vesicle transport along microtubule, m

PGOF: ATP binding, ATPase activity, microtubule motor activity, nucleoside-triphosphatase activity, nucleotide binding

PGOC: dynein complex

PGOP: microtubule-based movement

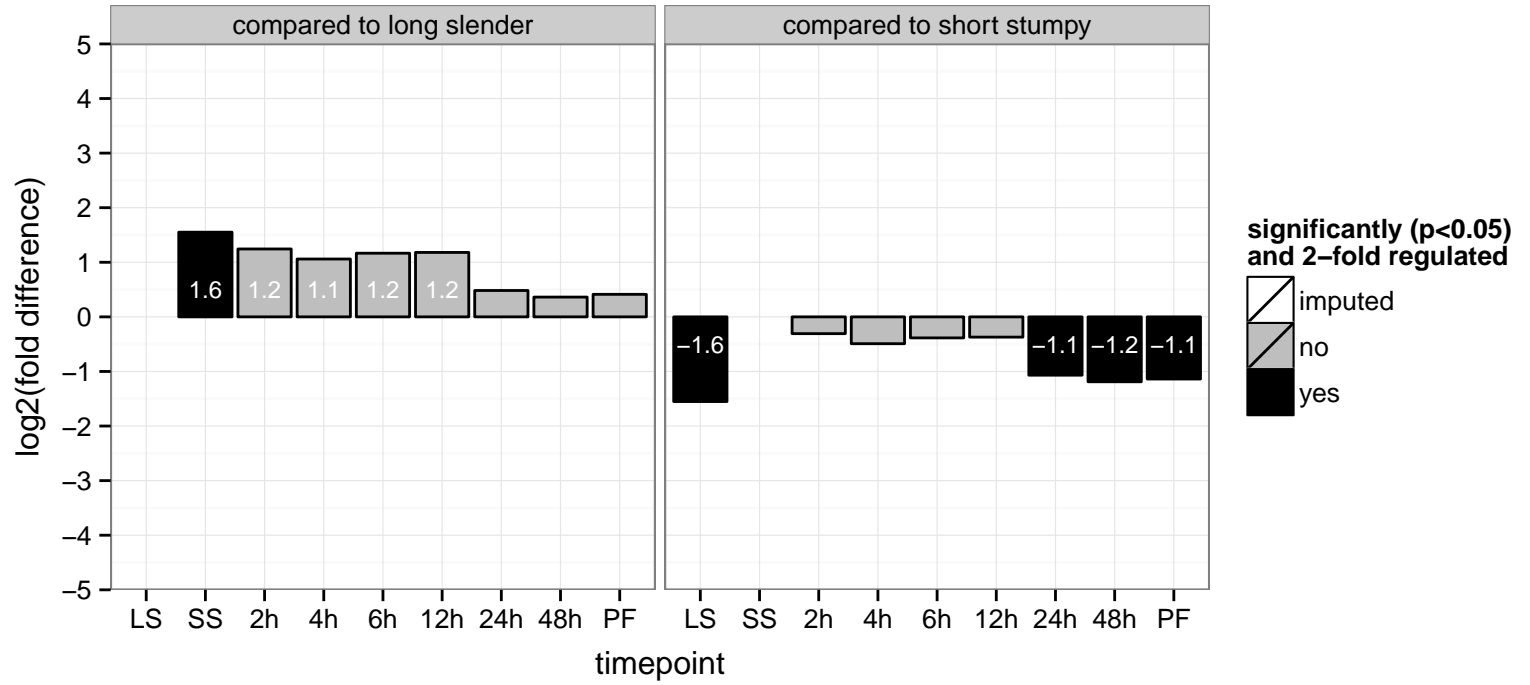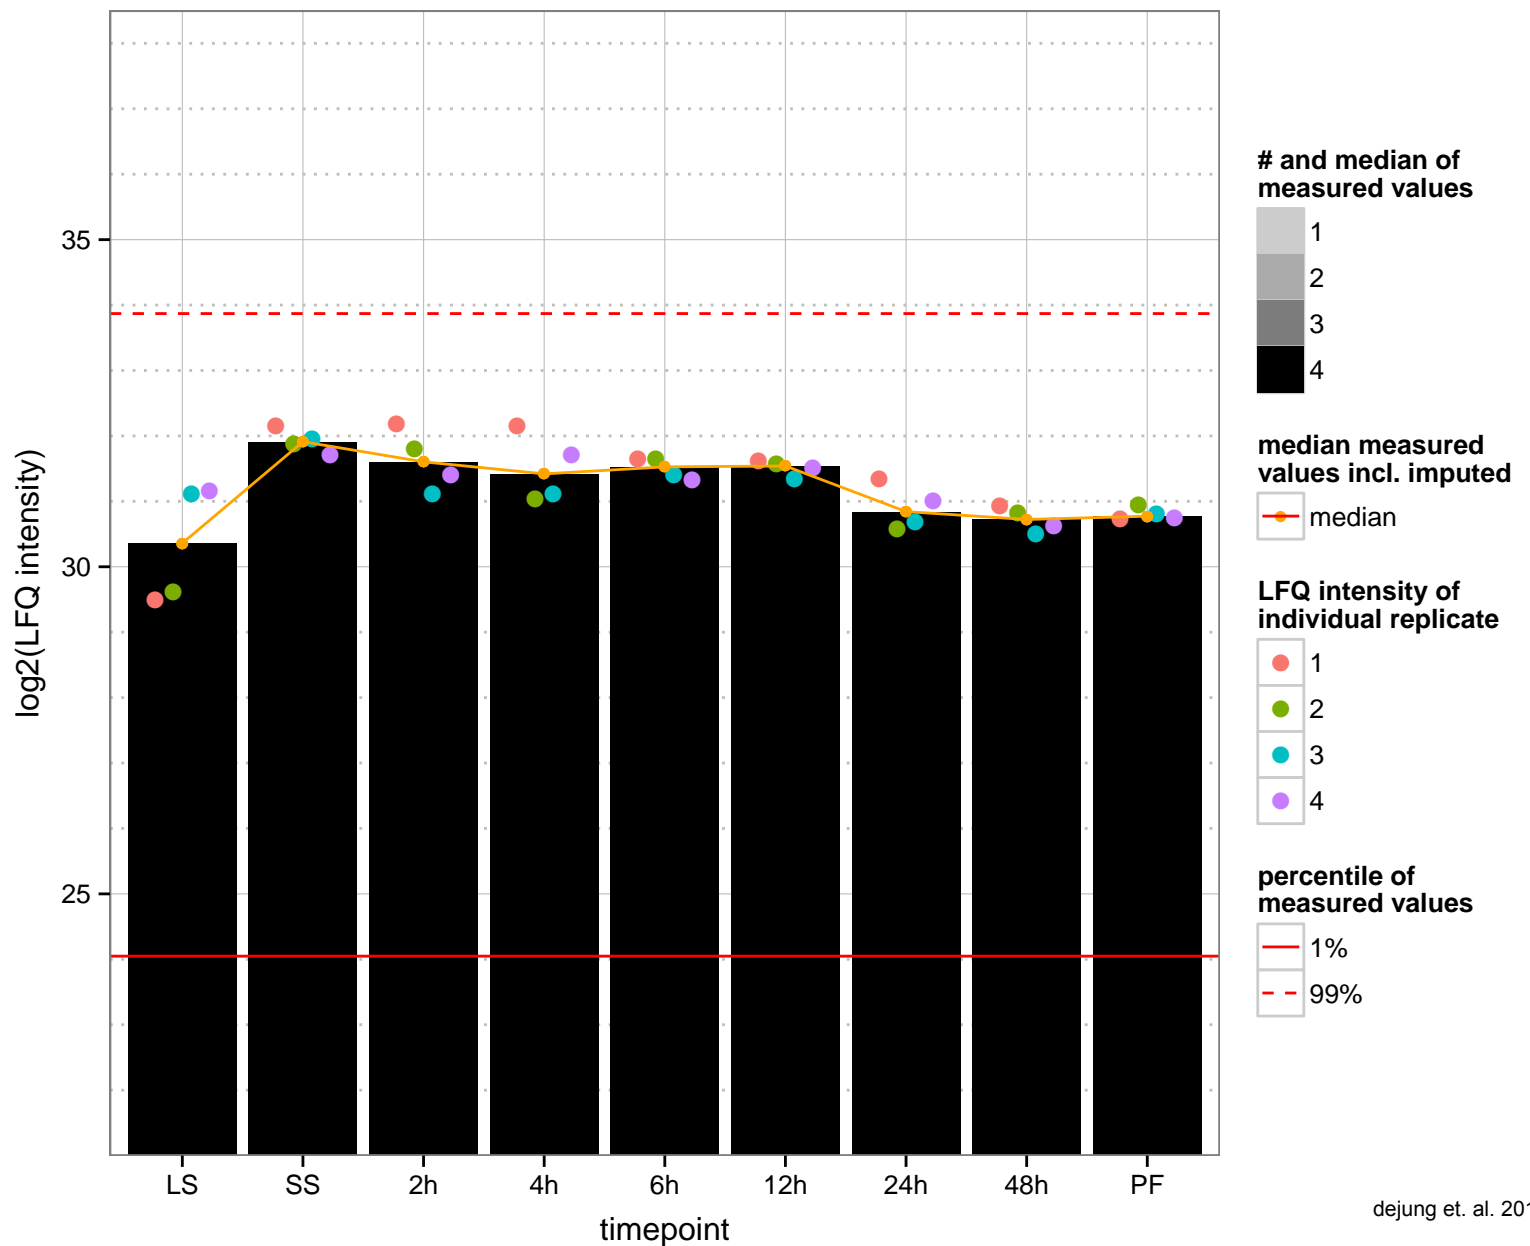

gamma-adaptin 1, putative, AP-1 adapter complex gamma subunit

Tb927.4.760

AGOF: protein transporter activity

AGOC: Golgi apparatus, Golgi apparatus part, clathrin adaptor complex, membrane coat

AGOP: intracellular protein transport, vesicle-mediated transport

PGOF: binding, protein transporter activity

PGOC: Golgi apparatus, Golgi apparatus part, clathrin adaptor complex, membrane coat

PGOP: intracellular protein transport, protein transport, vesicle-mediated transport

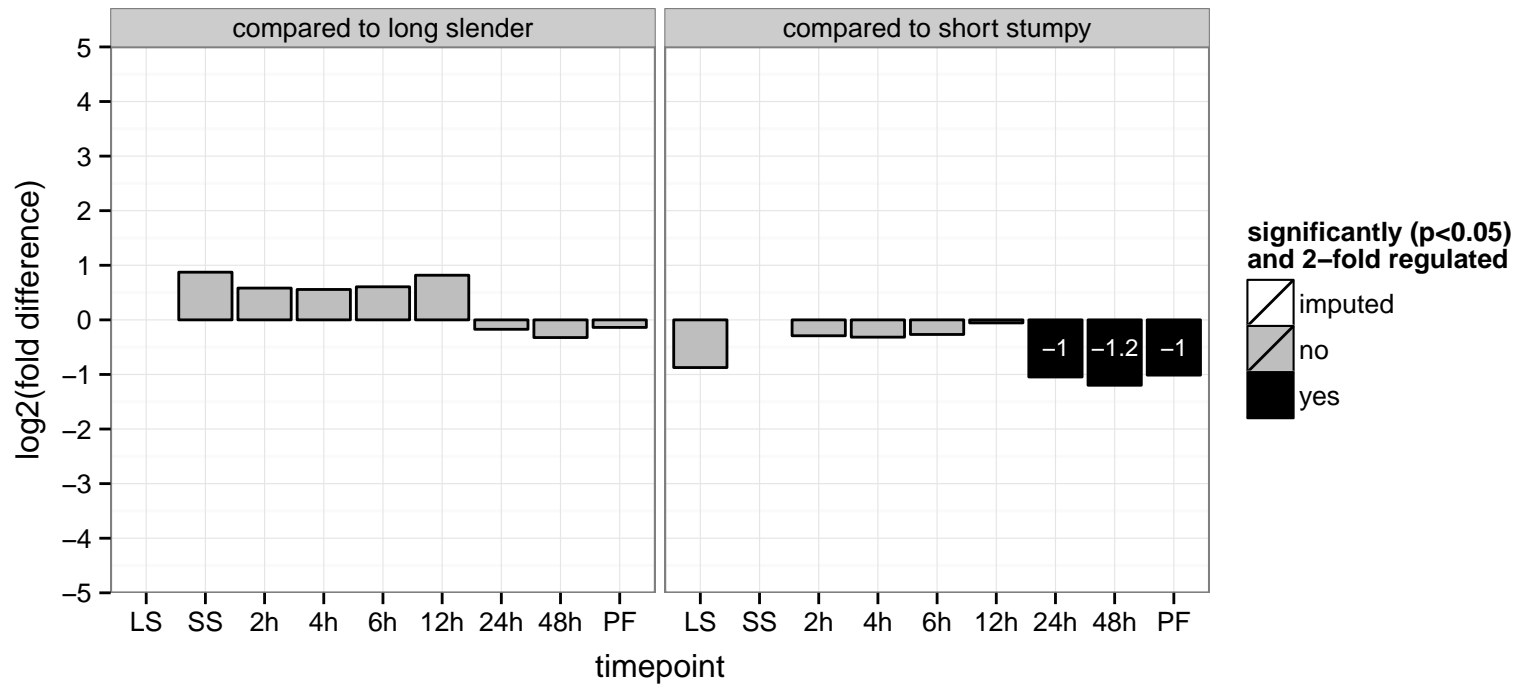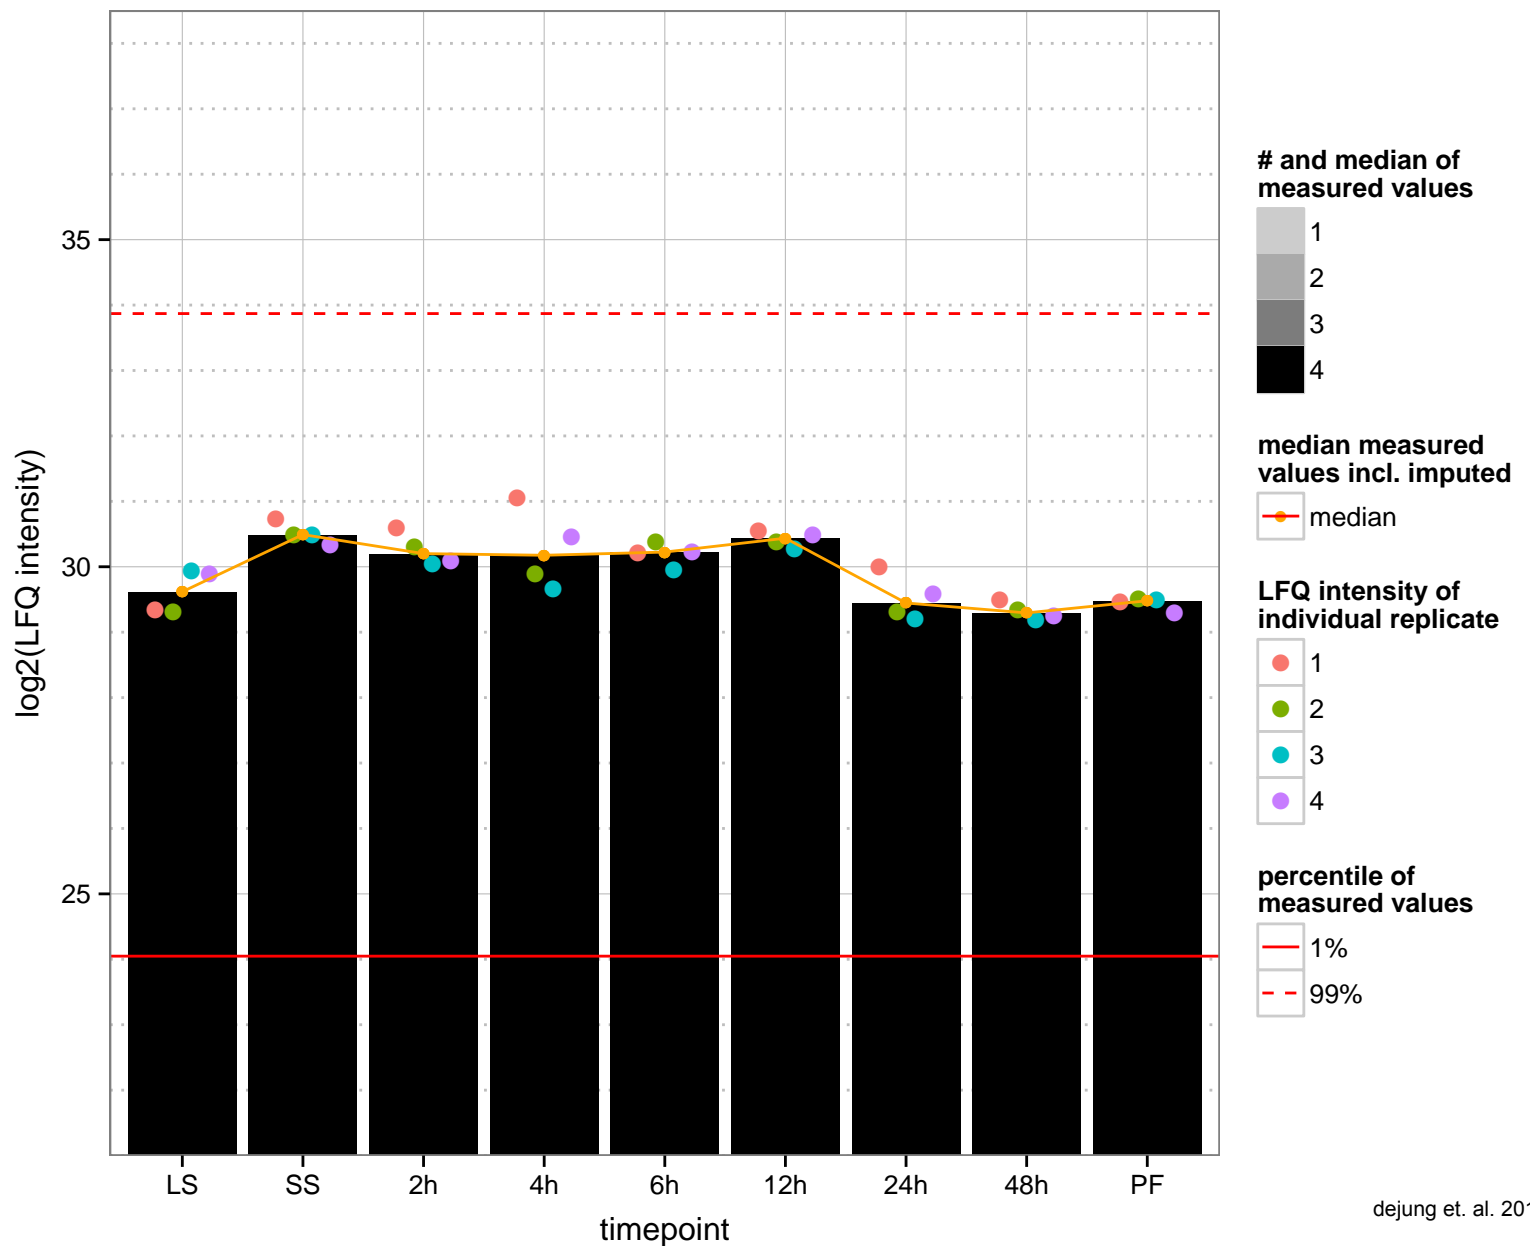

expression site-associated gene (ESAG) protein, putative, expression site-associated gene 5 (ESAG5) protein  
 Tb927.4.810  
 AGOF: lipid binding  
 AGOC: null  
 AGOP: null  
 PGO: lipid binding  
 PGOC: null  
 PGOP: null

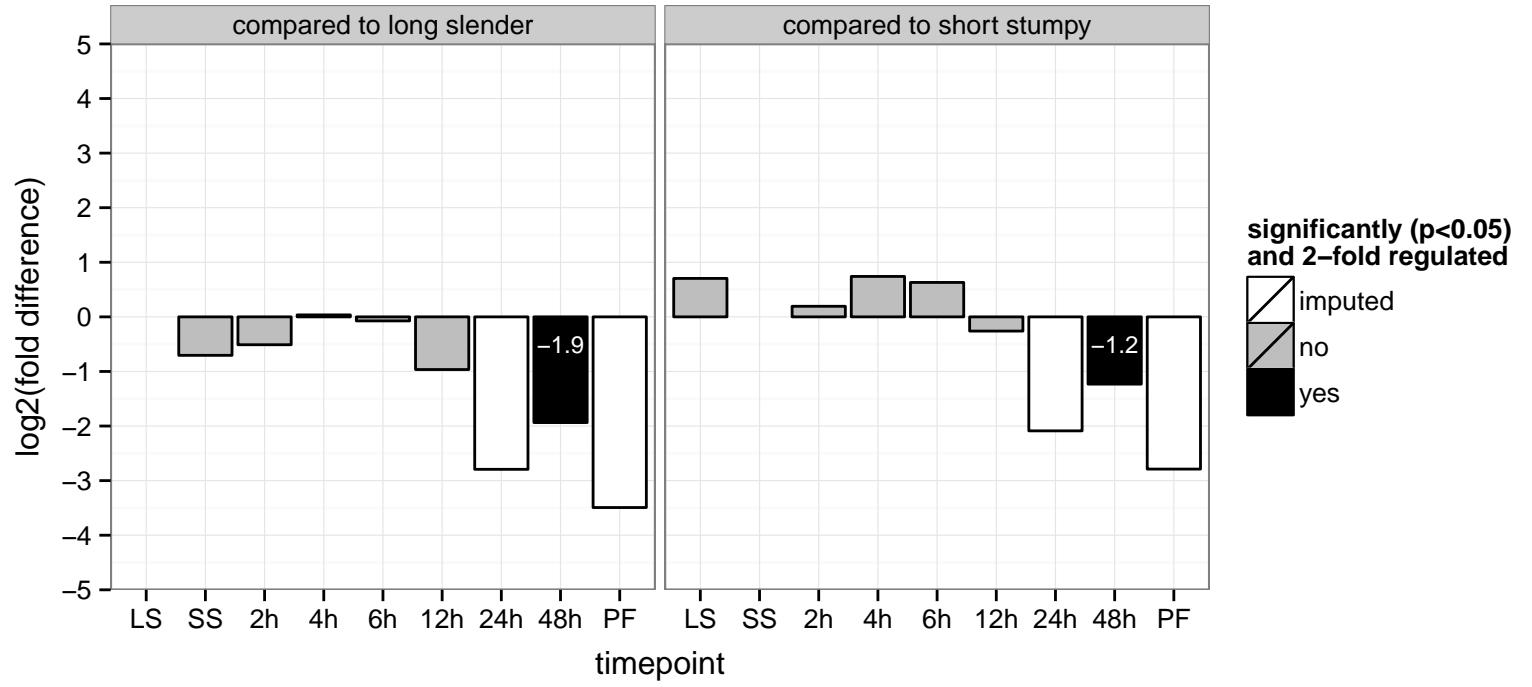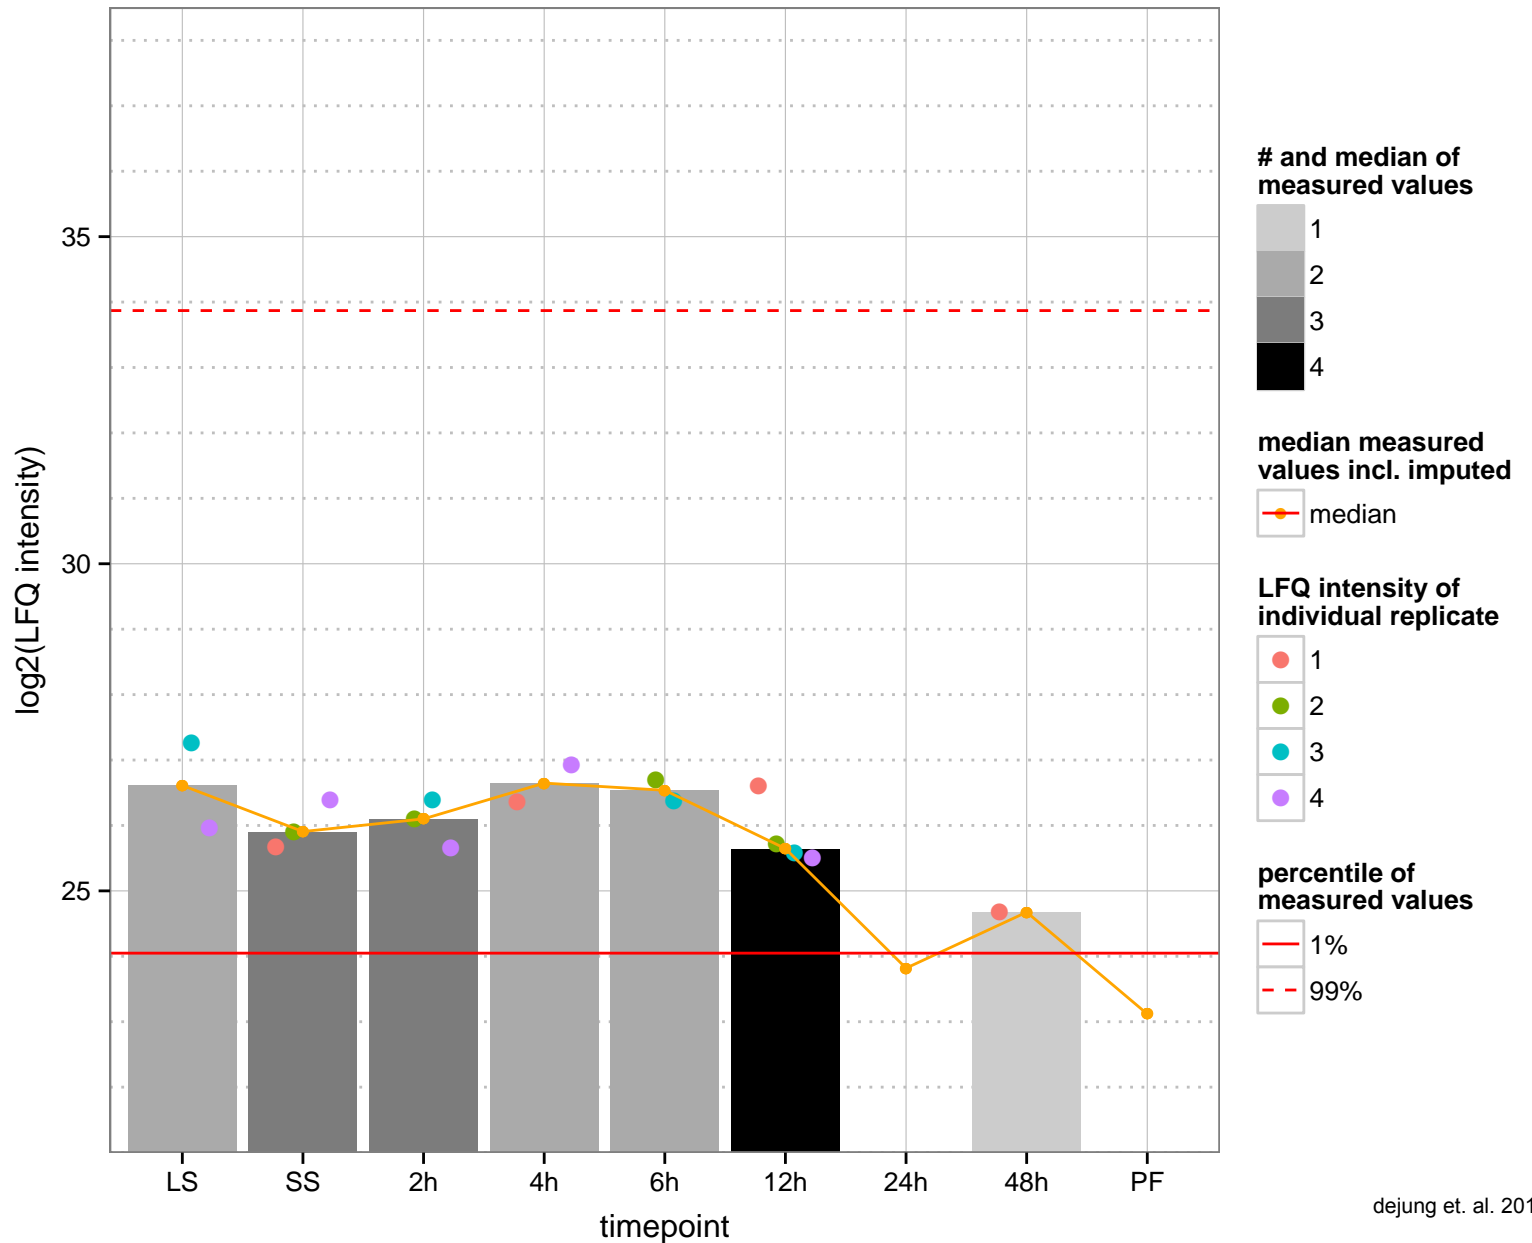



64 kDa invariant surface glycoprotein (ISG64)  
 Tb927.5.1410  
 AGOF: null  
 AGOC: null  
 AGOP: null  
 PGO: null  
 PGOC: null  
 PGOP: null

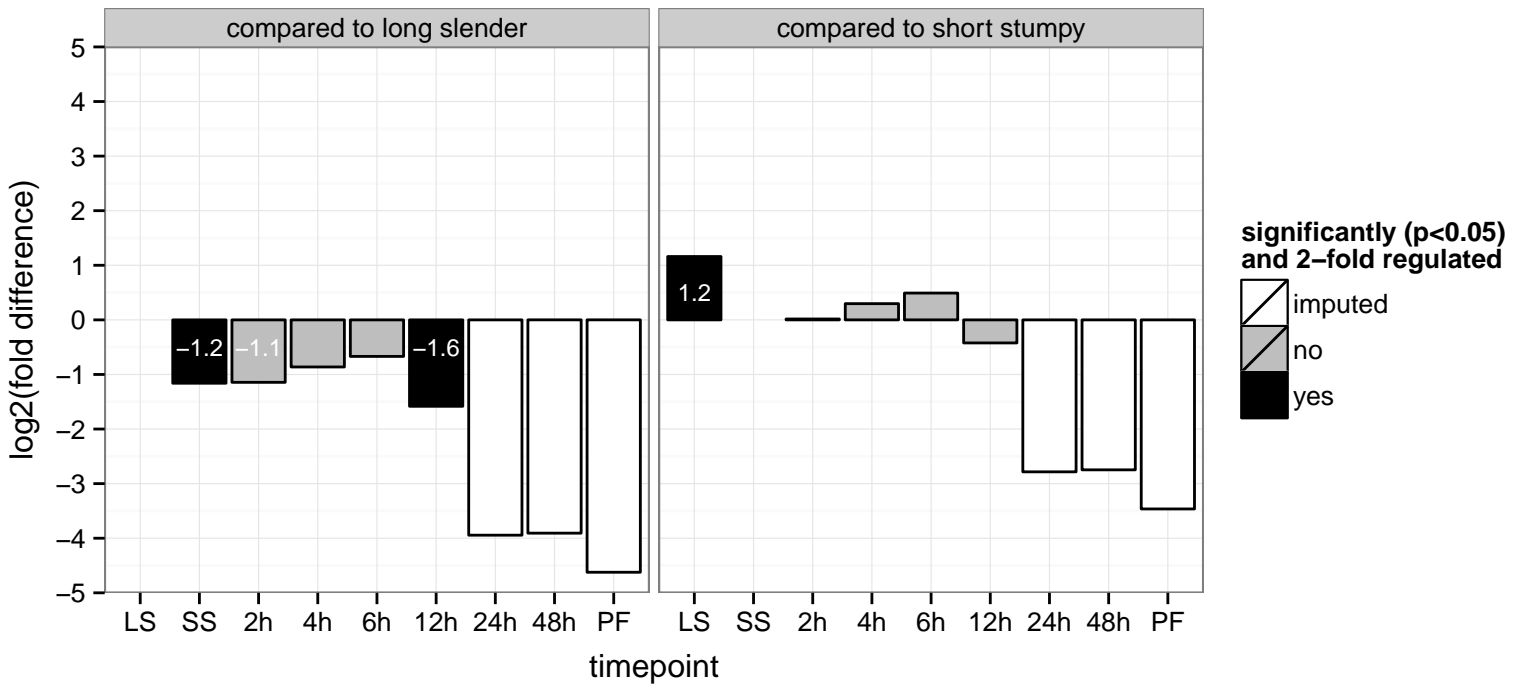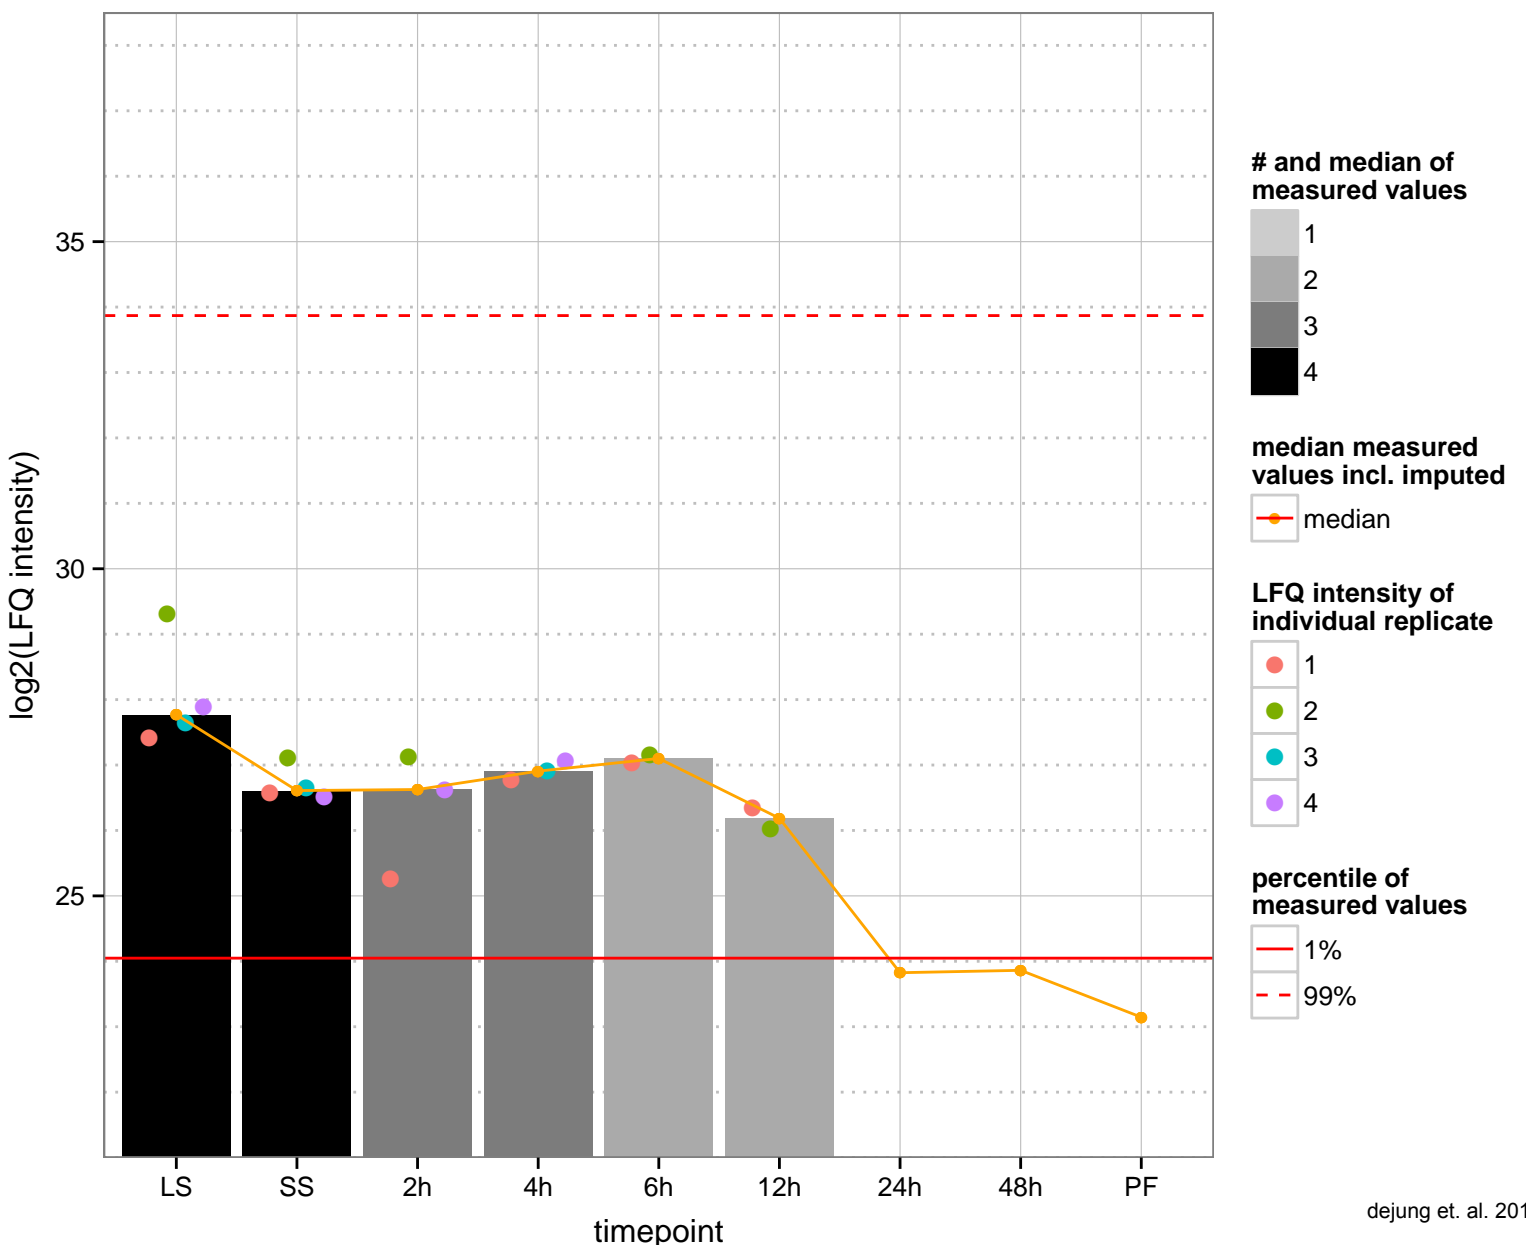

kinesin, putative  
 Tb927.5.2090  
 AGOF: ATP binding, microtubule motor activity, motor activity  
 AGOC: microtubule associated complex, kinesin complex, microtubule associated complex  
 AGOP: microtubule-based movement  
 PGO: ATP binding, microtubule motor activity  
 PGOC: null  
 PGOP: microtubule-based movement

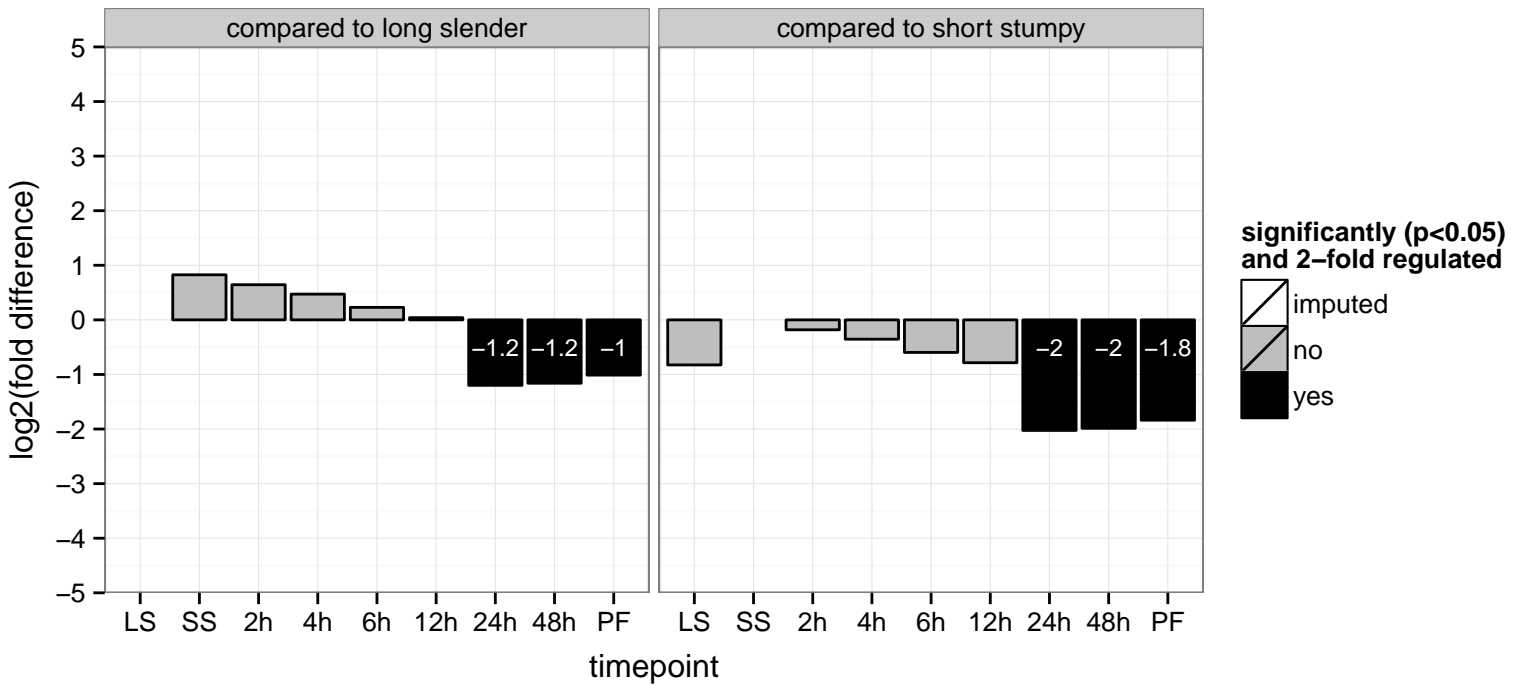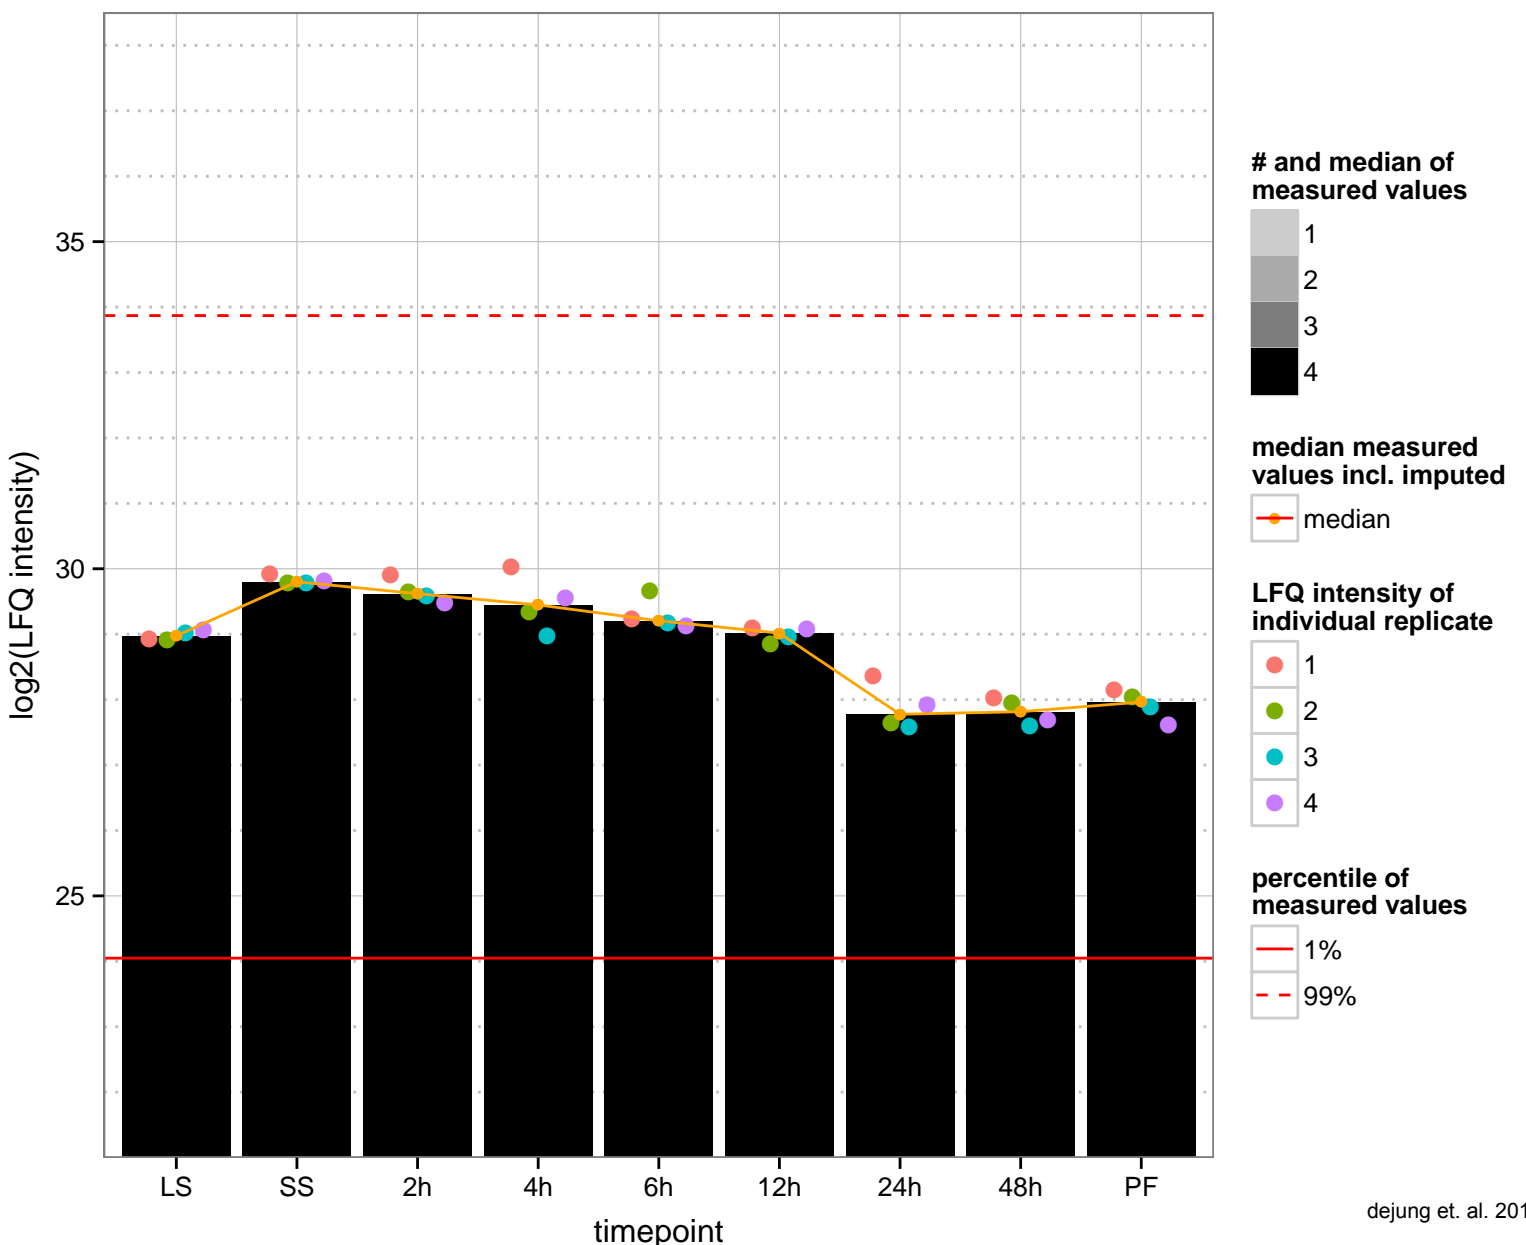

hypothetical protein, conserved  
 Tb927.5.310;Tb11.v5.0208  
 AGOF: null  
 AGOC: null  
 AGOP: null  
 PGO: null  
 PGOC: null  
 PGOP: null

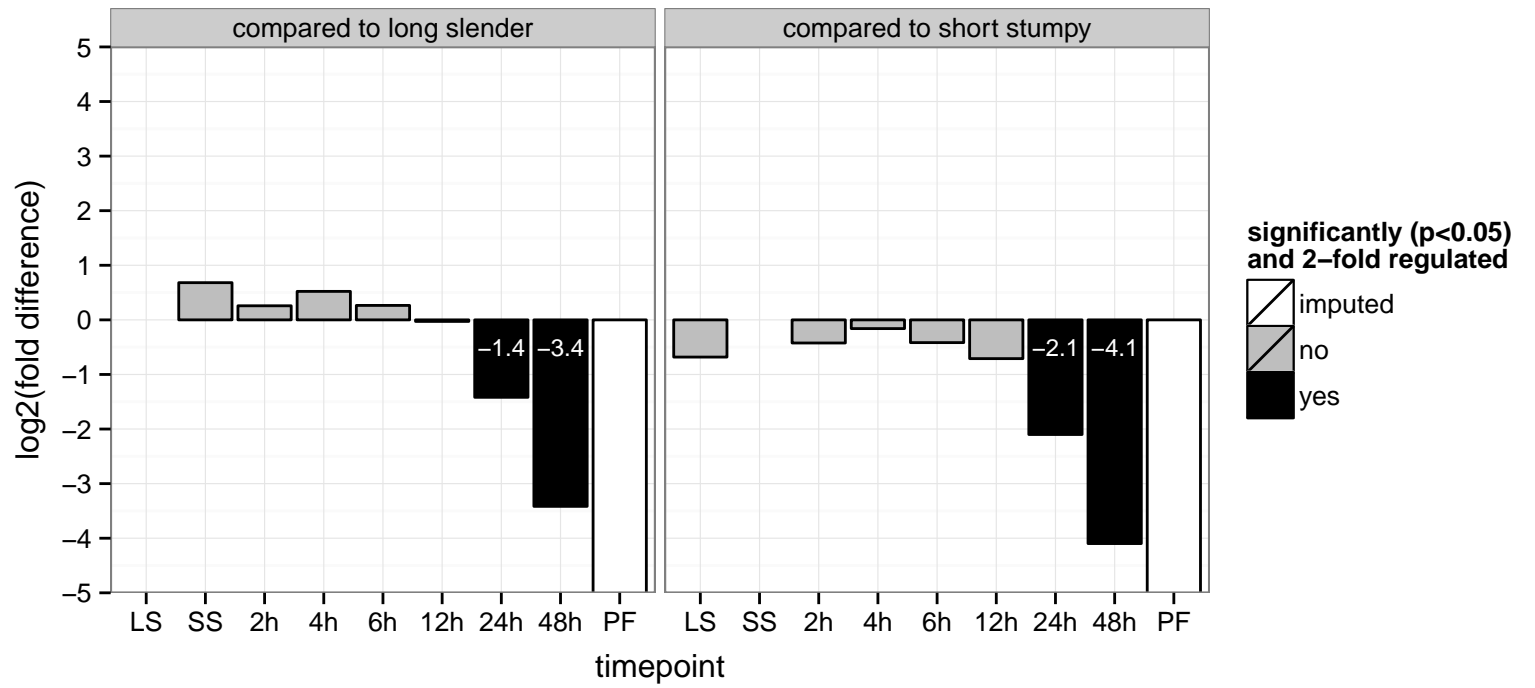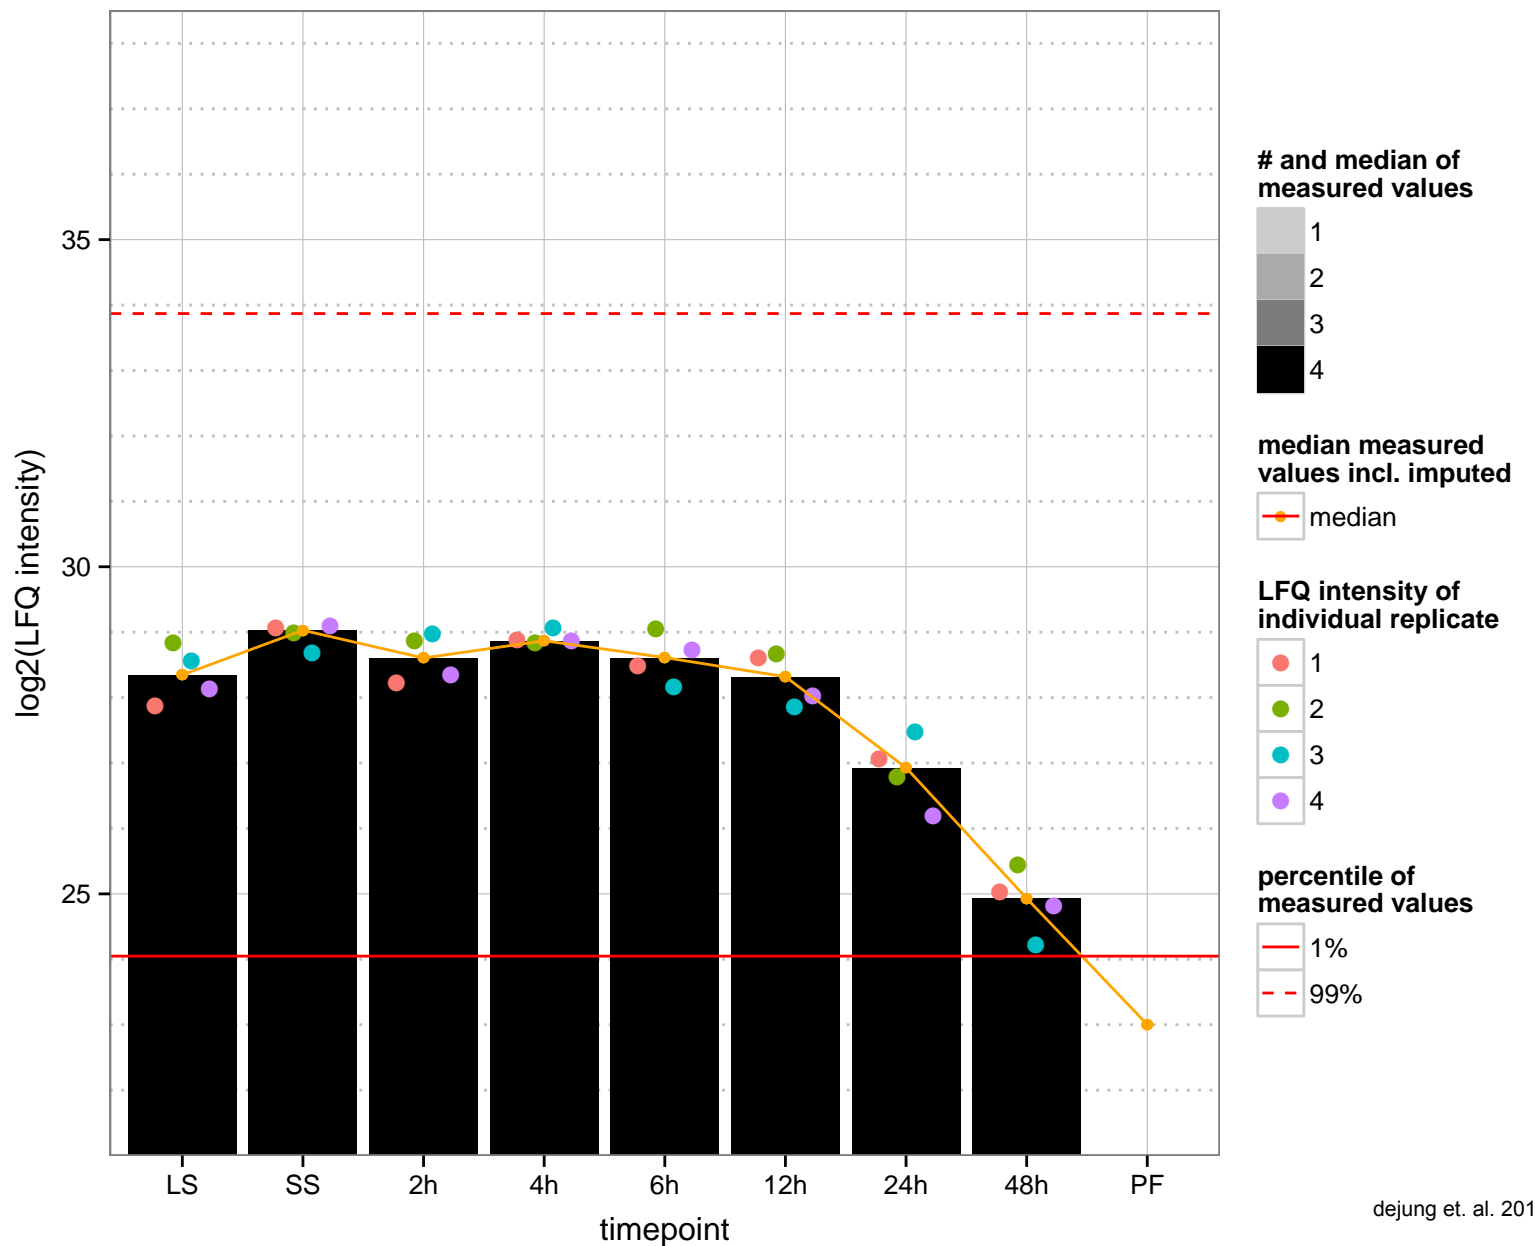

hypothetical protein, conserved, acidic phosphatase, putative  
 Tb927.5.630  
 AGOF: null  
 AGOC: null  
 AGOP: null  
 PGOF: nucleic acid binding, null  
 PGO: null  
 PGOP: null

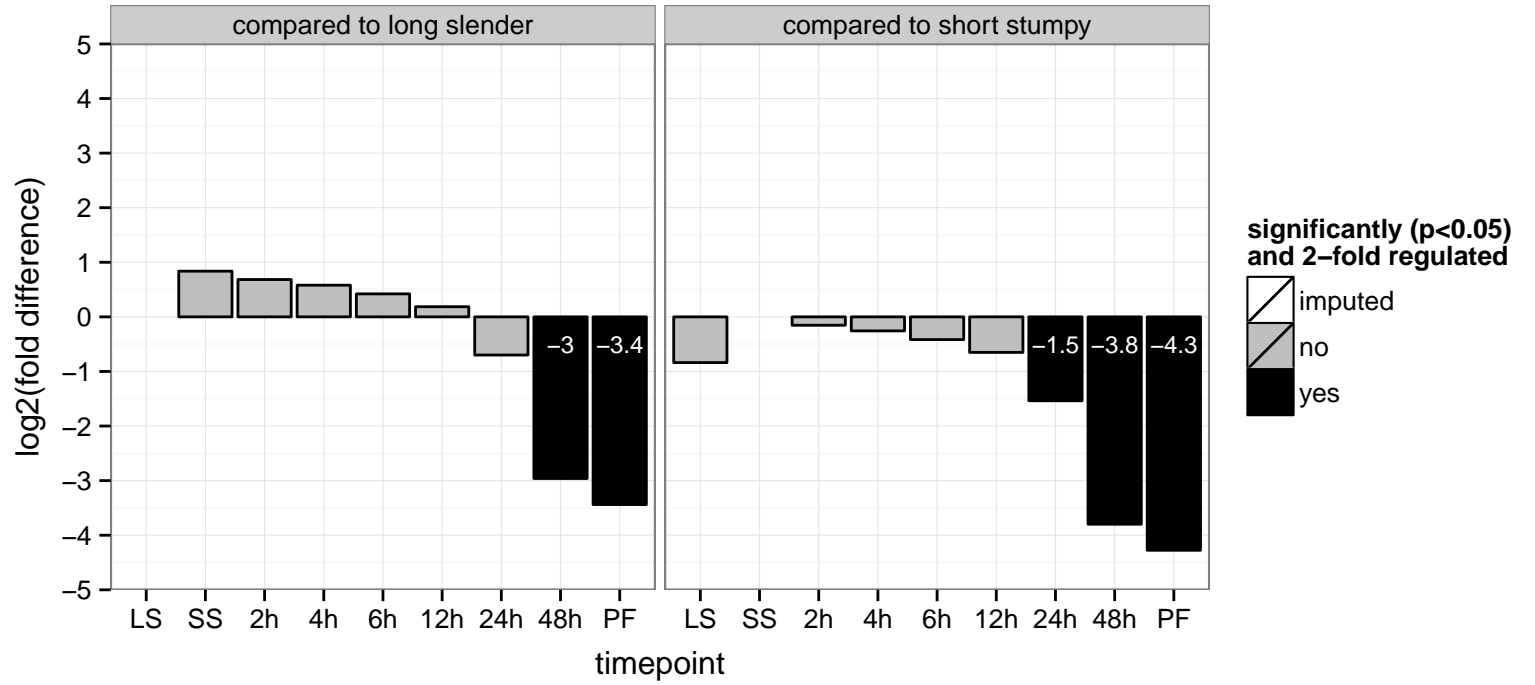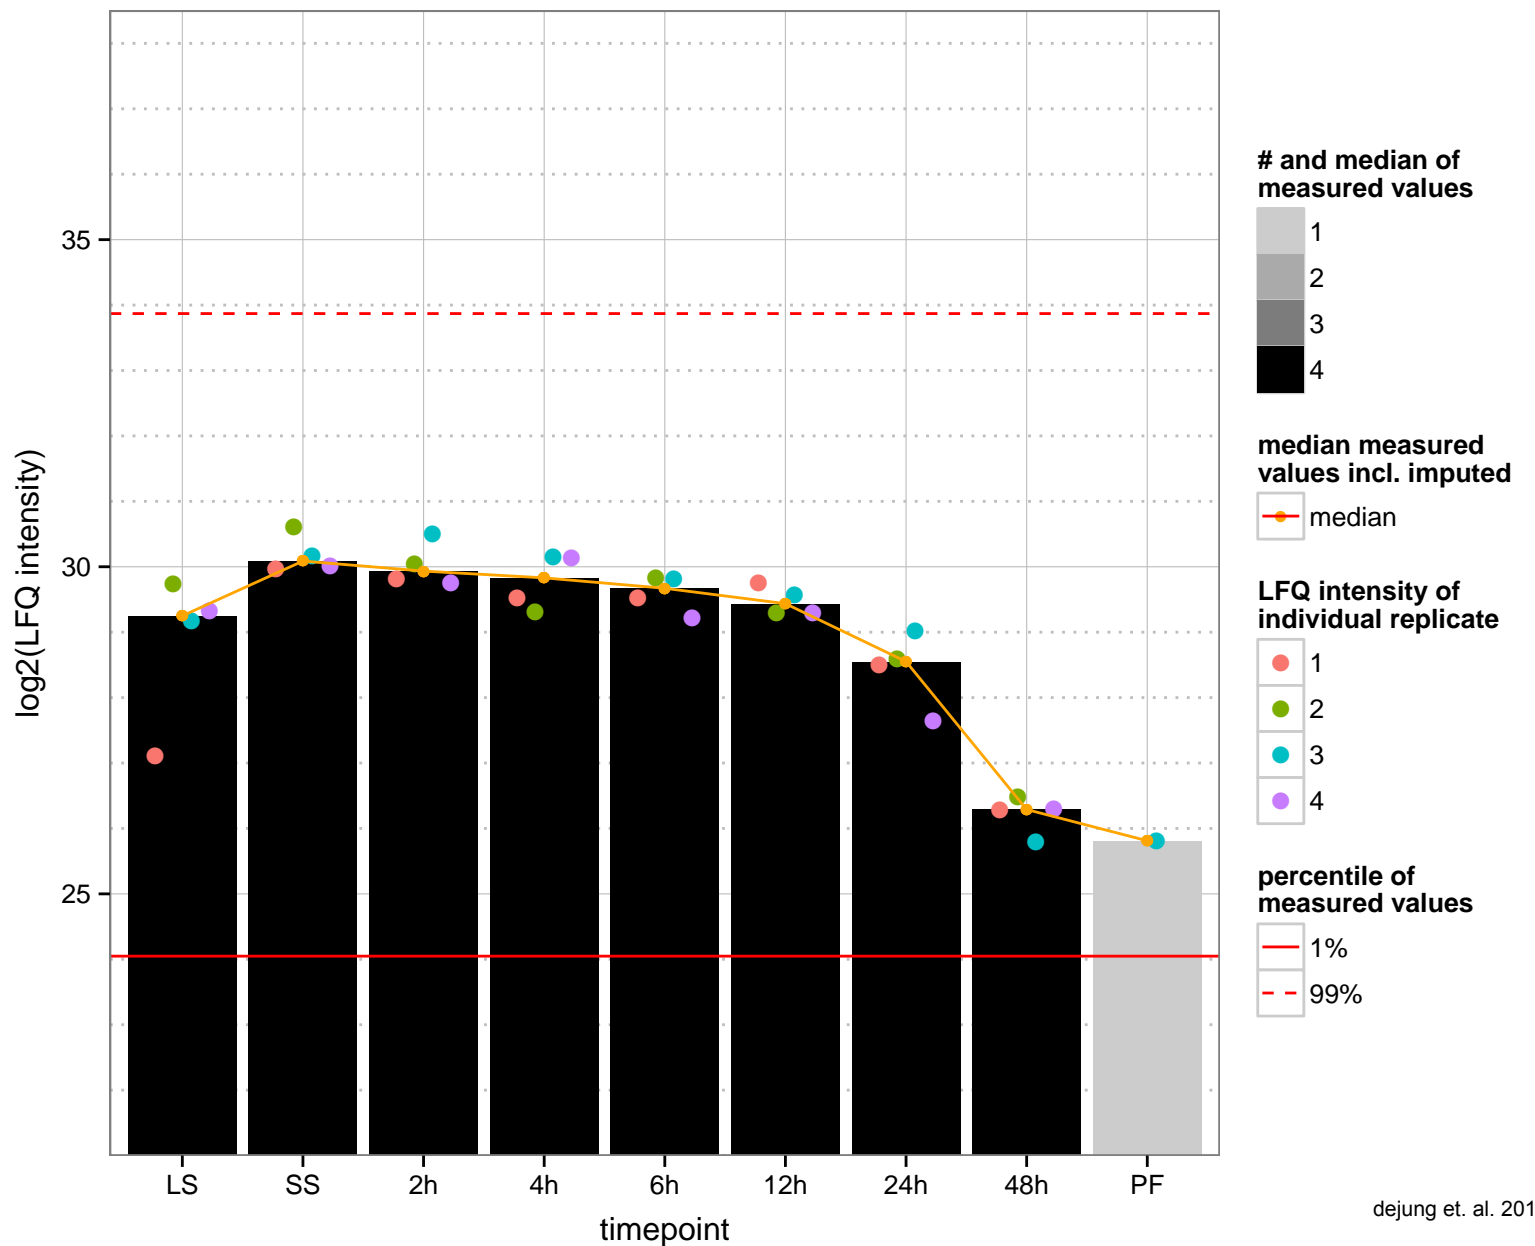

hypothetical protein, conserved, oligosaccharyl transferase subunit, putative  
 Tb927.5.890  
 AGOF: oligosaccharyl transferase activity  
 AGOC: membrane  
 AGOP: protein glycosylation, protein mannosylation  
 PGO: oligosaccharyl transferase activity  
 PGOC: membrane  
 PGOP: protein glycosylation

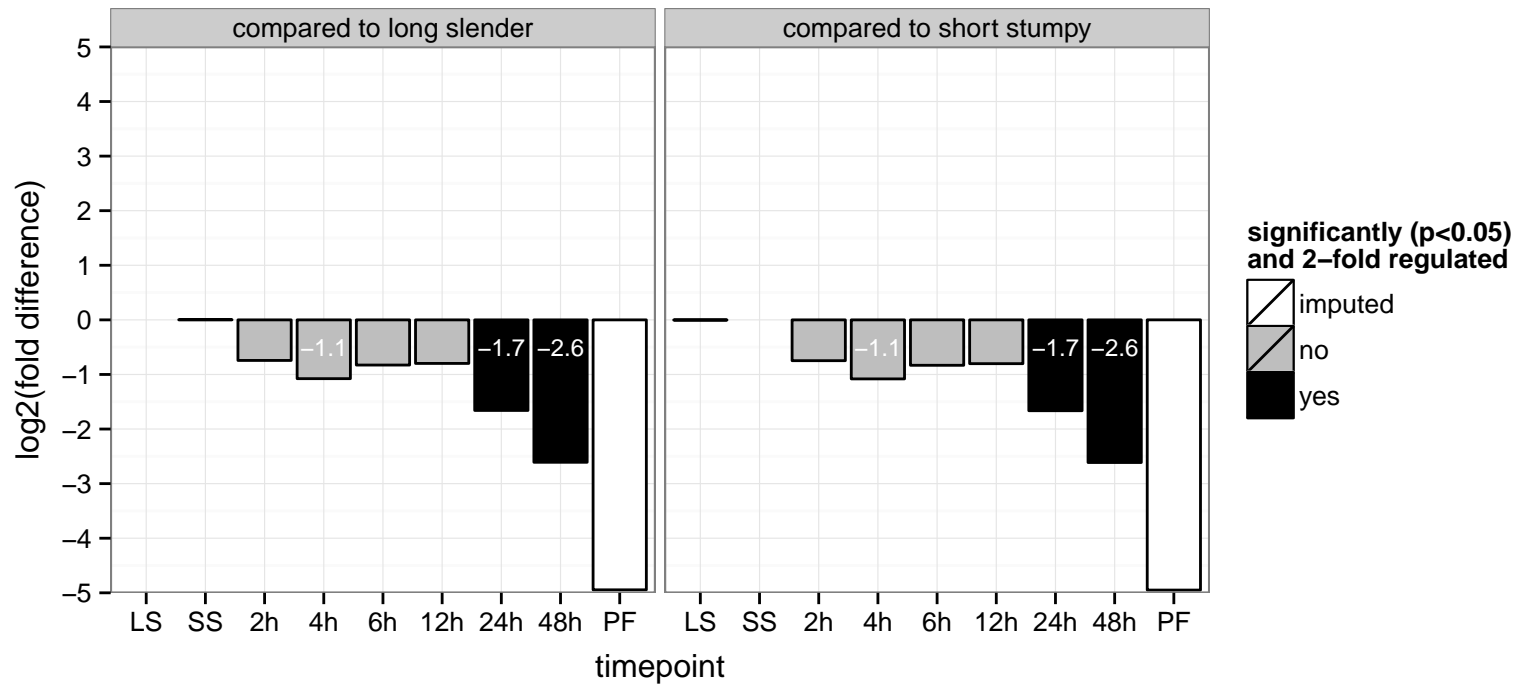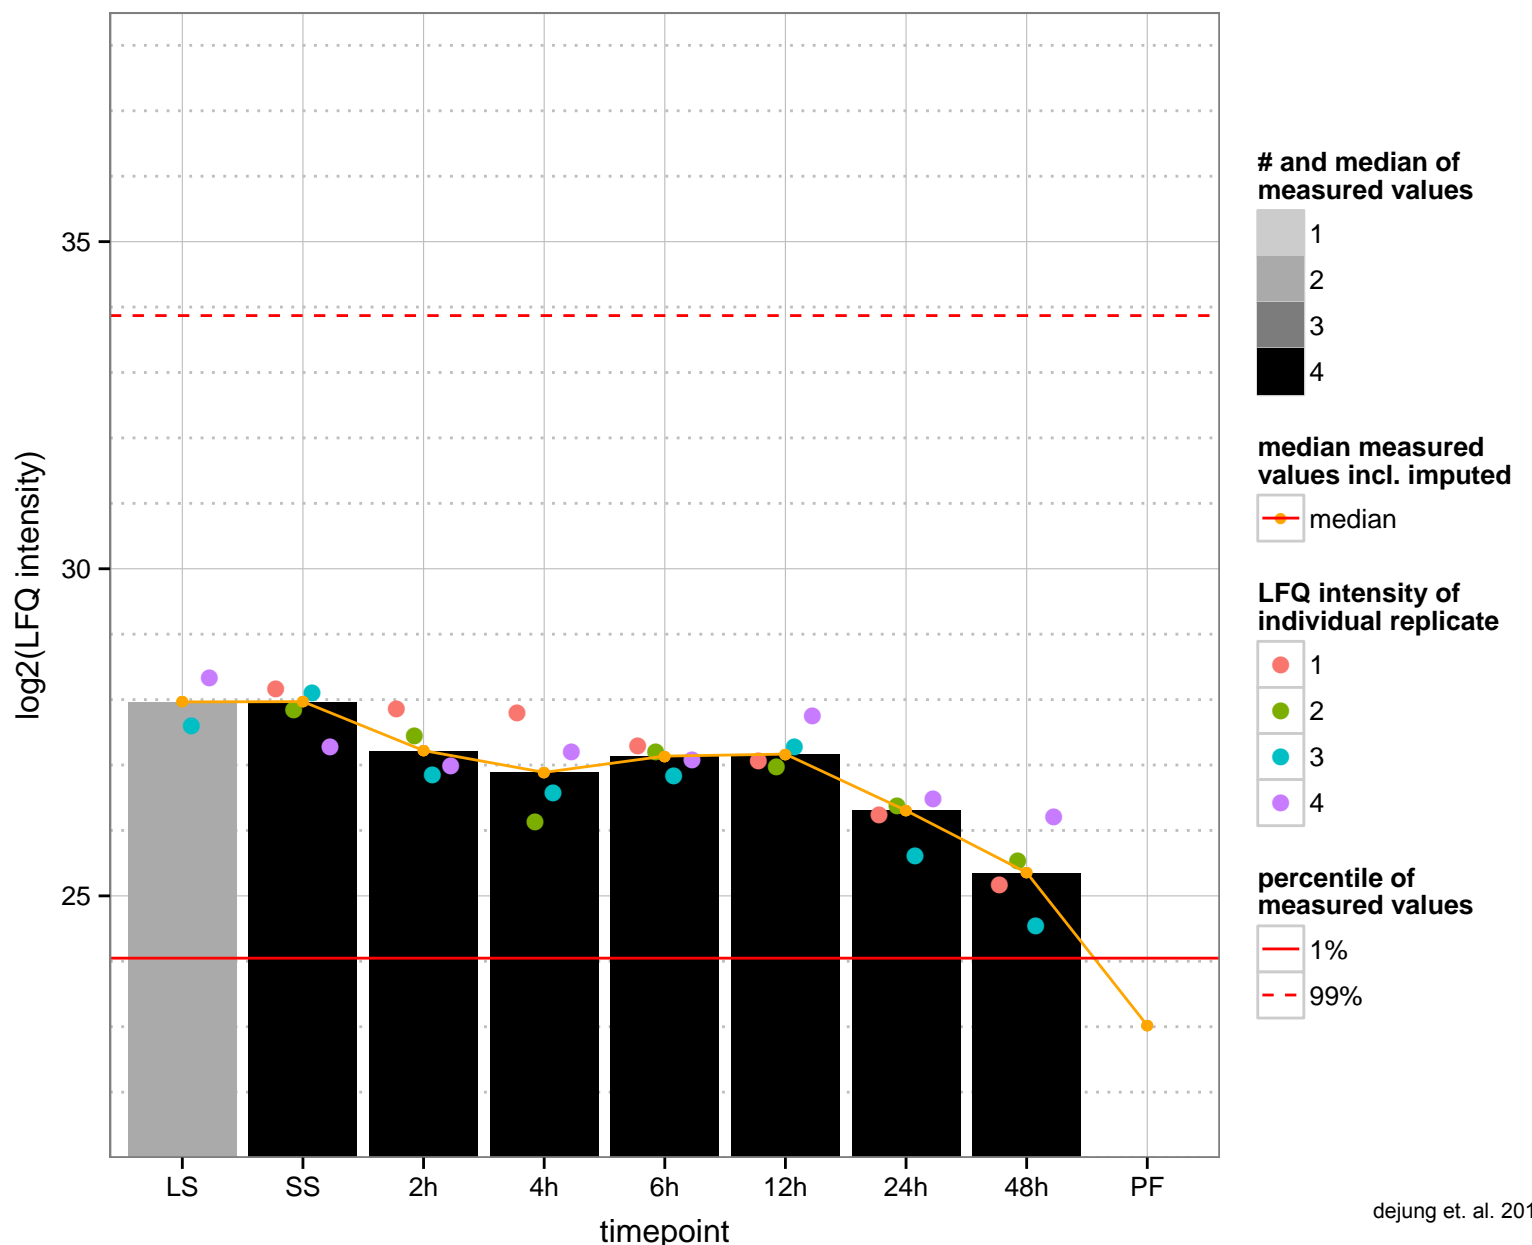

hypothetical protein, conserved  
 Tb927.6.1730  
 AGOF: null  
 AGOC: null  
 AGOP: null  
 PGO: null  
 PGOC: null  
 PGOP: null

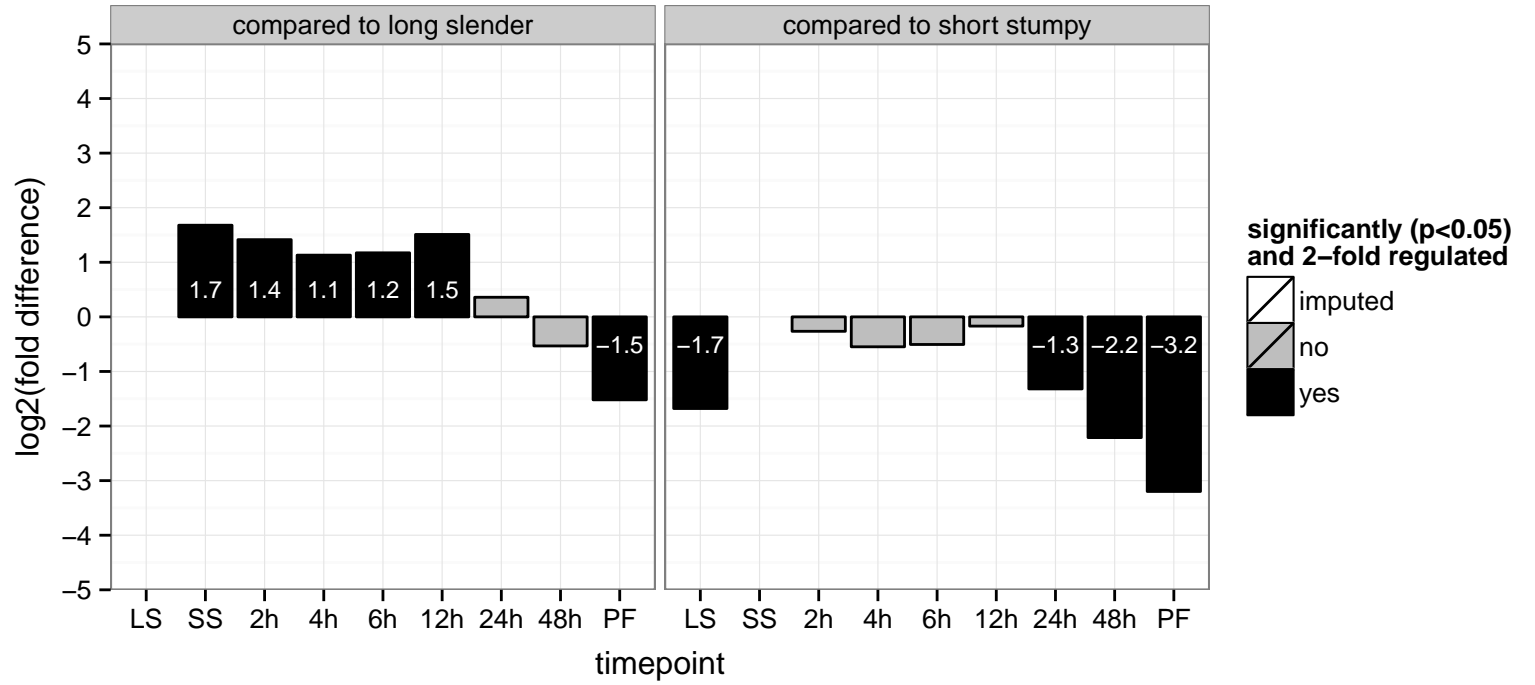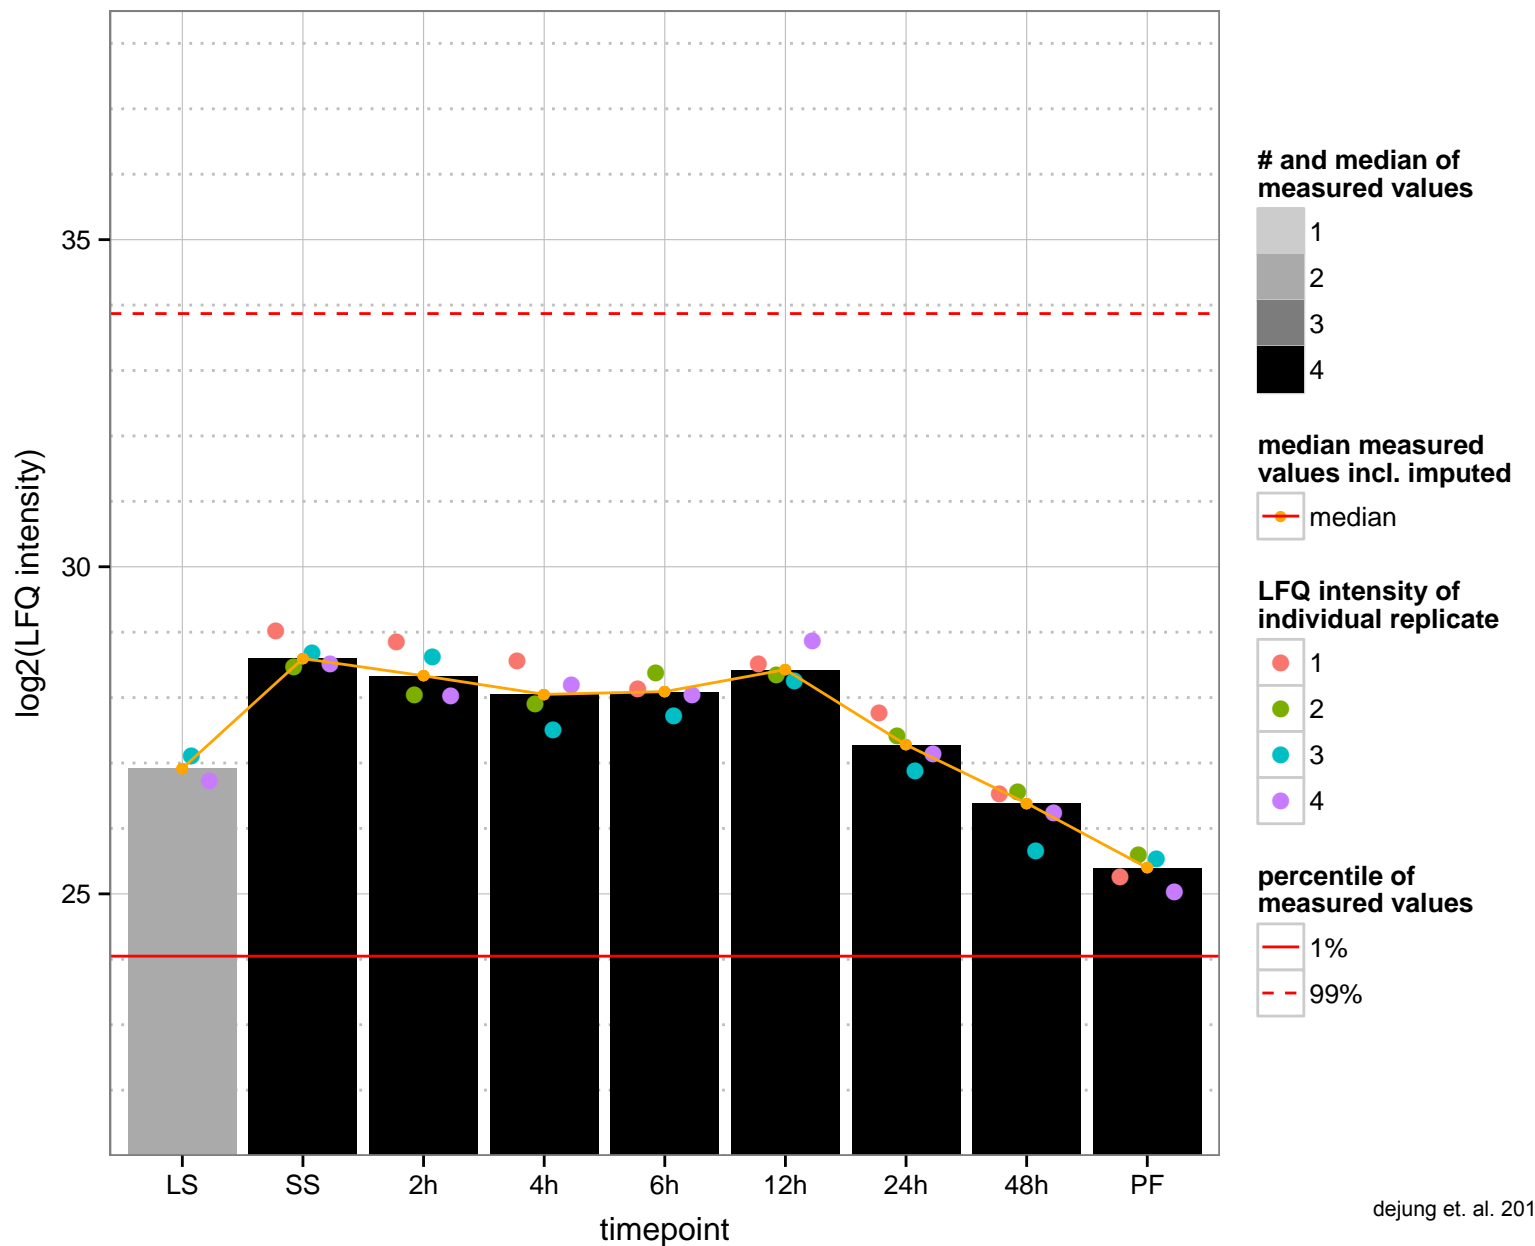

rac serine–threonine kinase, putative, protein kinase

Tb927.6.2250

AGOF: ATP binding, protein serine/threonine kinase activity, protein tyrosine kinase activity

AGOC: null

AGOP: protein phosphorylation

PGOF: ATP binding, phospholipid binding, protein binding, protein kinase activity, protein serine/threonine kinase activity, transmembrane protein activity

PGOC: null

PGOP: protein phosphorylation

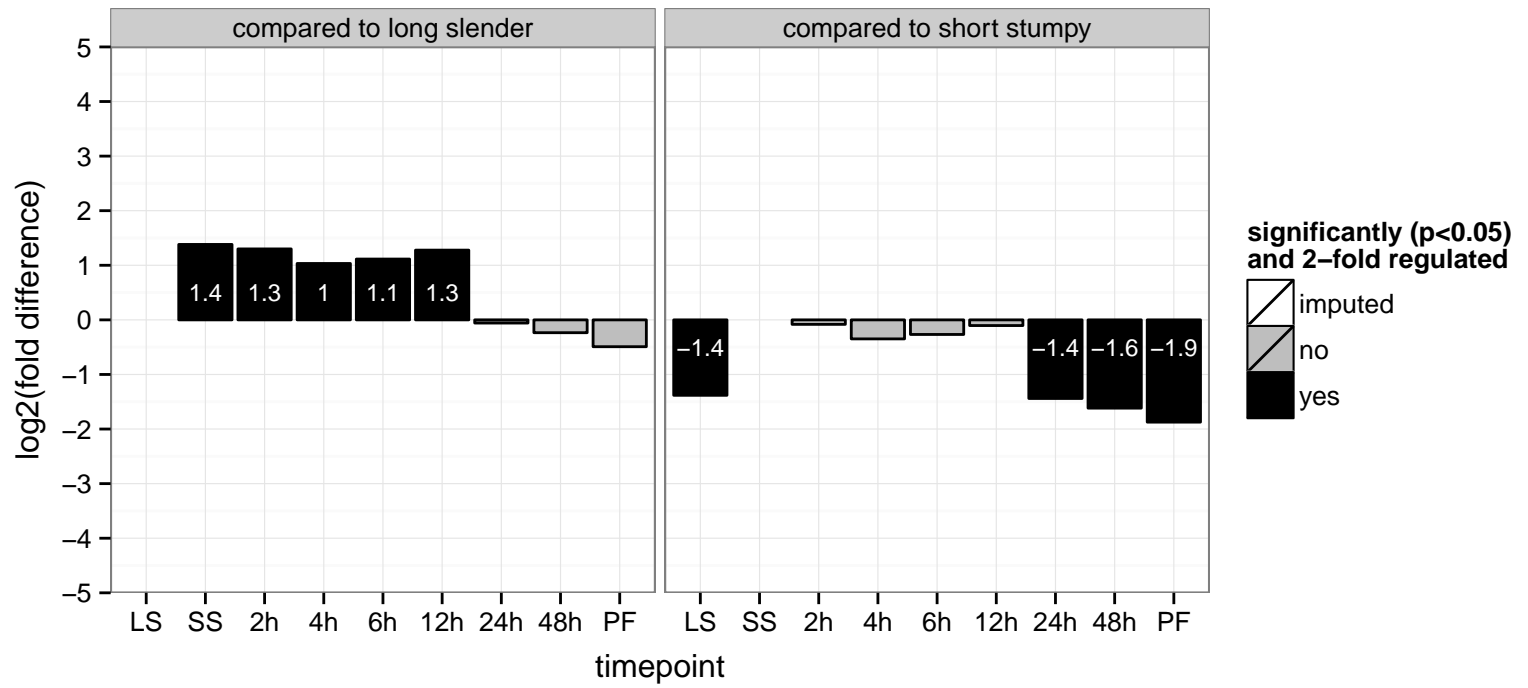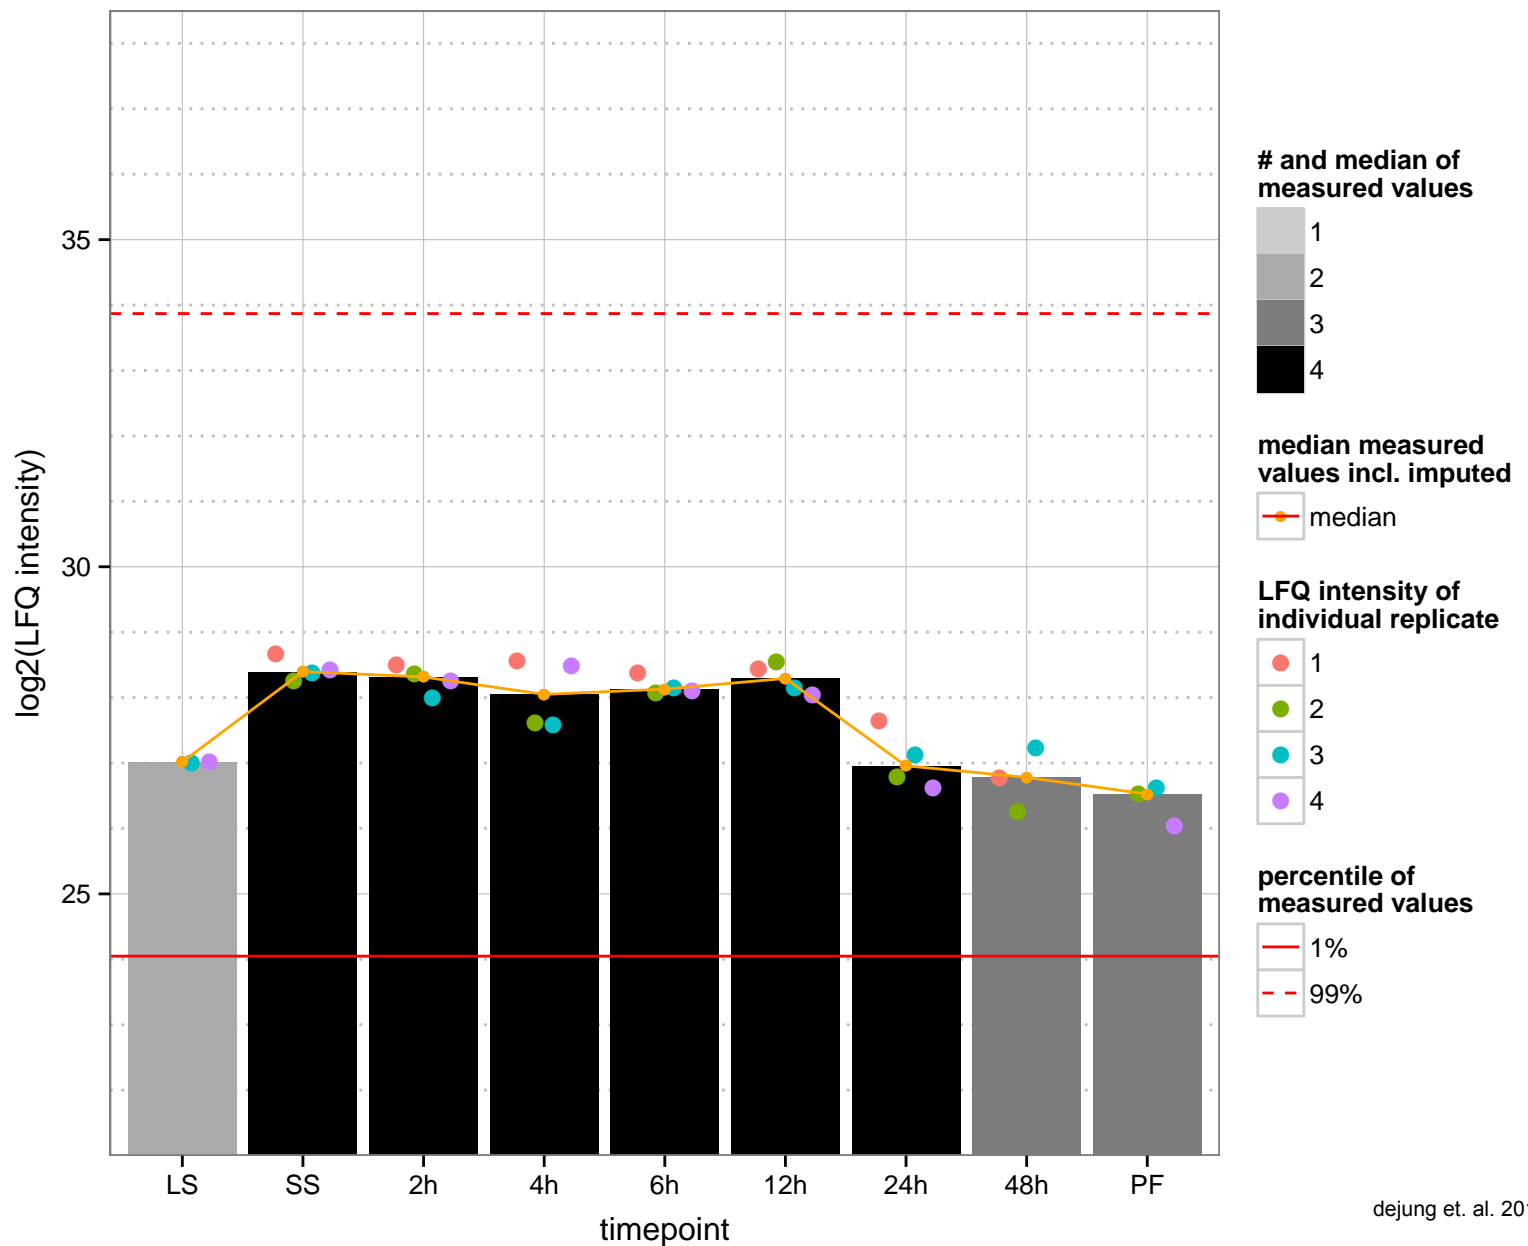

hypothetical protein, conserved  
 Tb927.6.3640  
 AGOF: zinc ion binding  
 AGOC: intracellular  
 AGOP: null  
 PGOF: protein binding, zinc ion binding  
 PGO: intracellular  
 PGOP: null

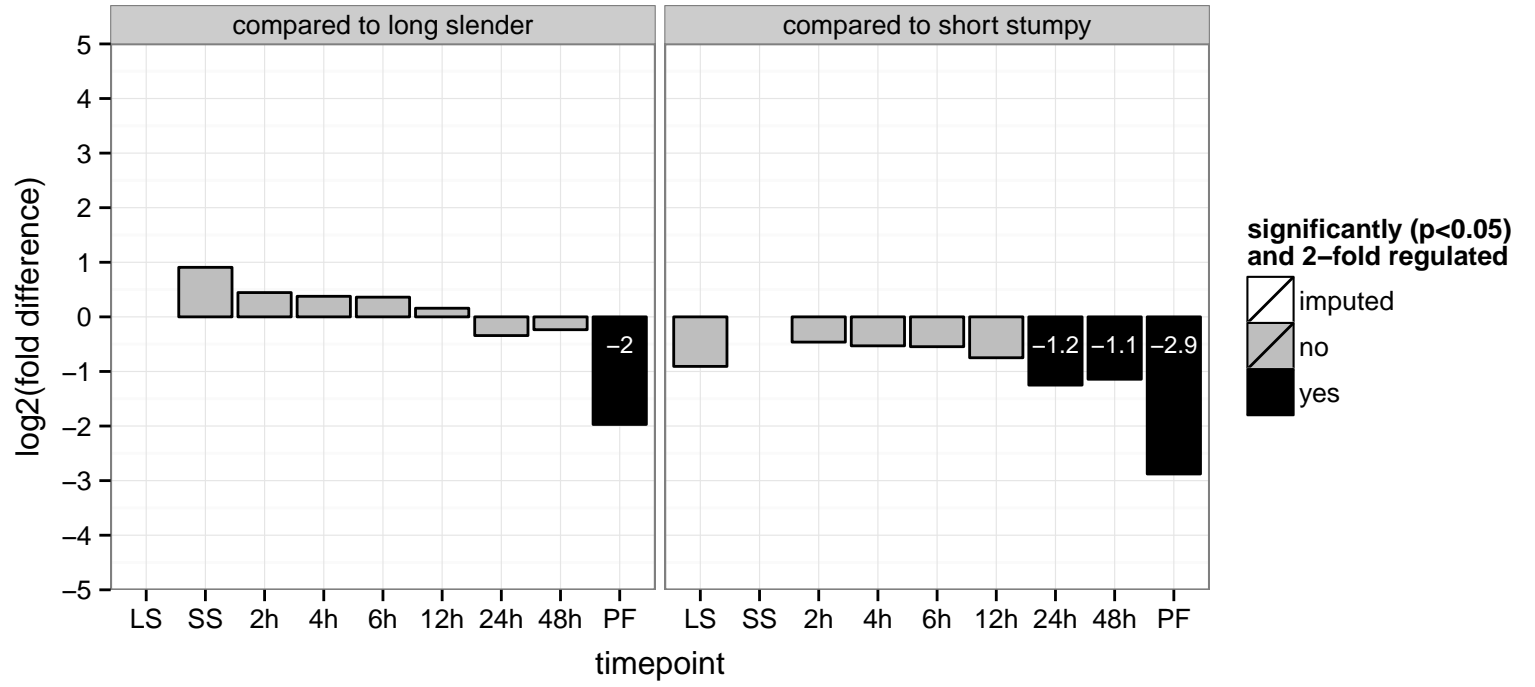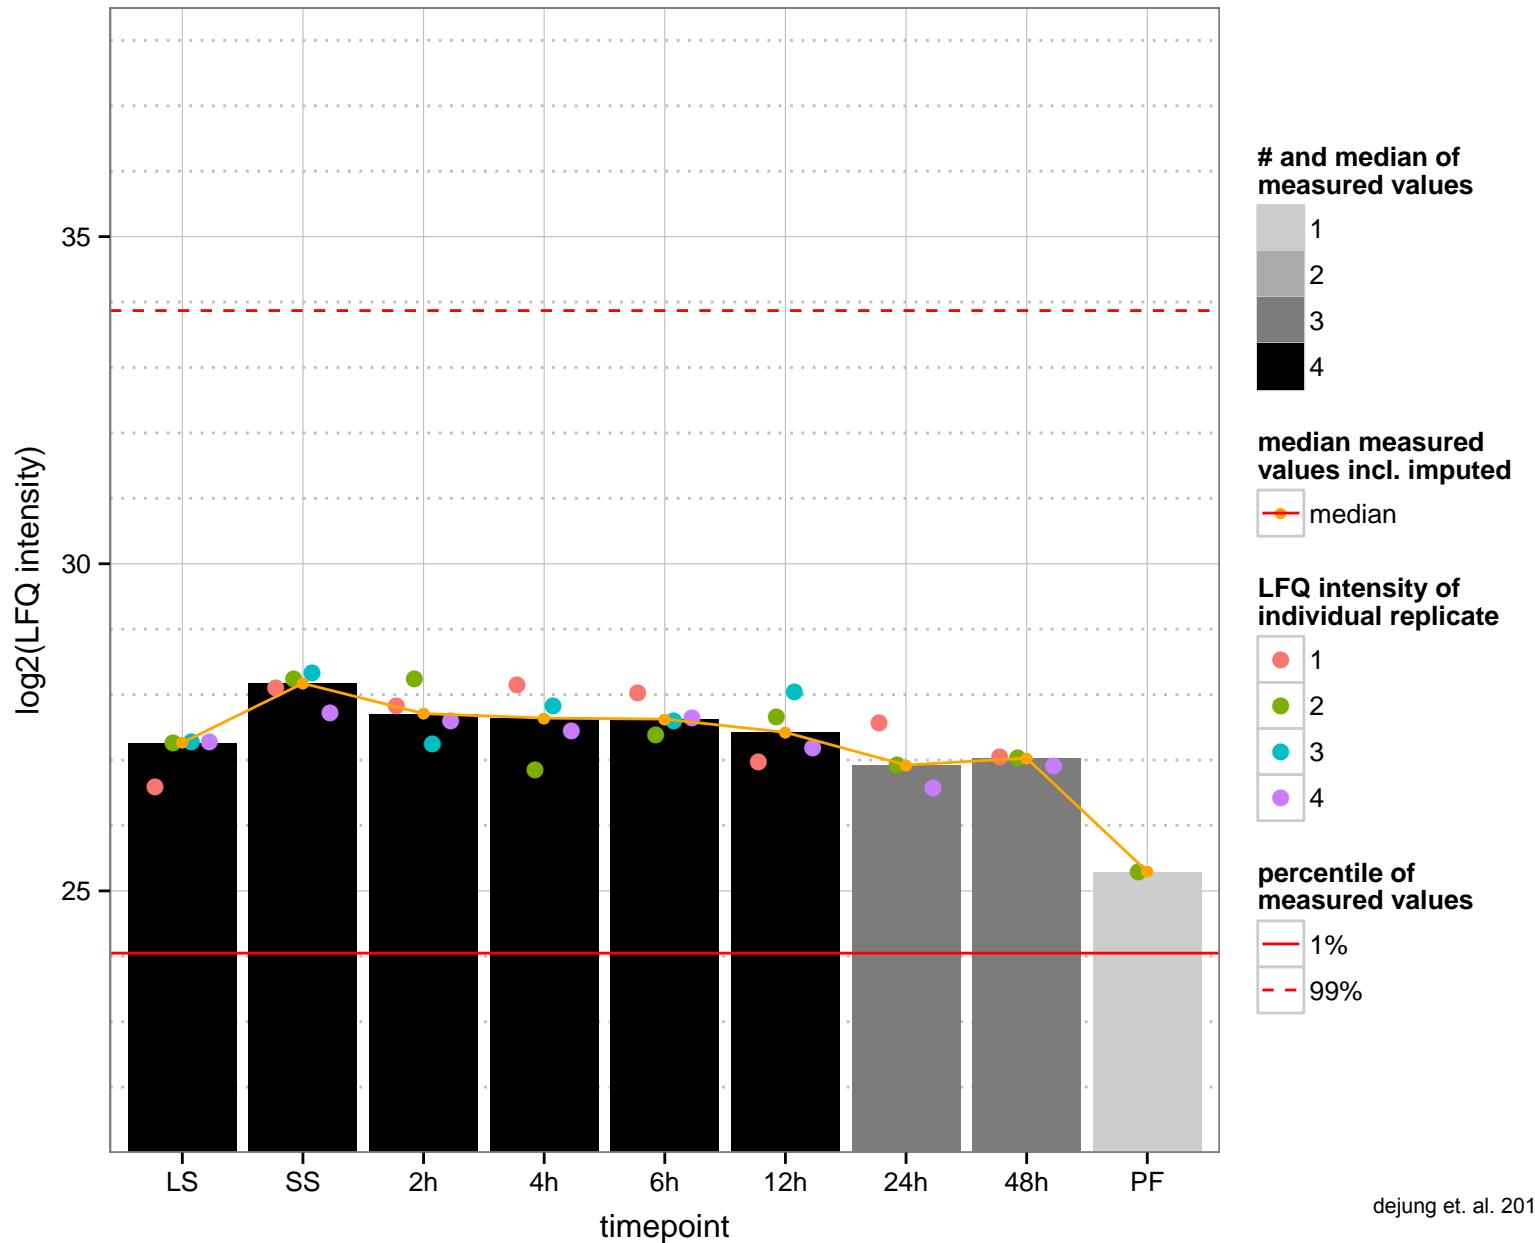



kinesin, putative  
 Tb927.6.4390  
 AGOF: ATP binding, microtubule motor activity, motor activity  
 AGOC: microtubule associated complex  
 AGOP: microtubule-based movement  
 PGOF: ATP binding, microtubule motor activity  
 PGO: null  
 PGOP: microtubule-based movement

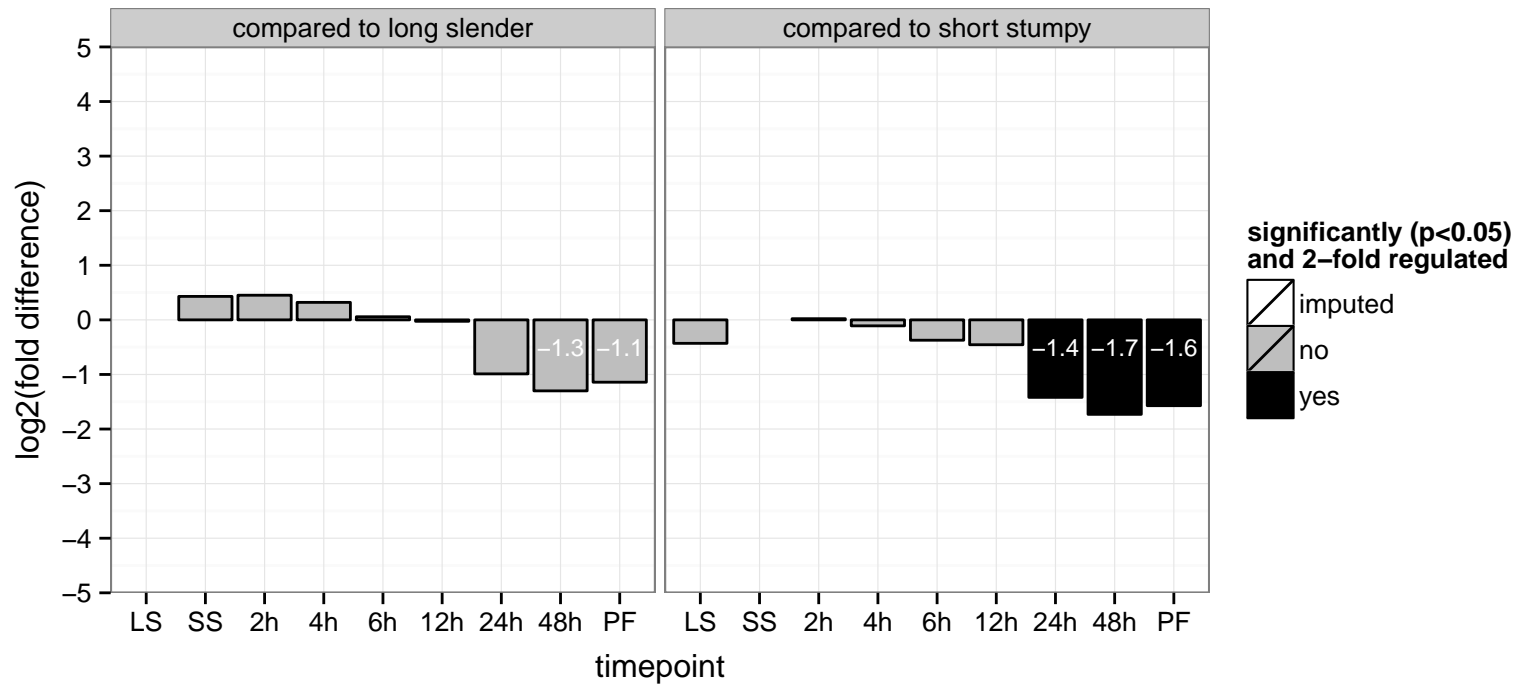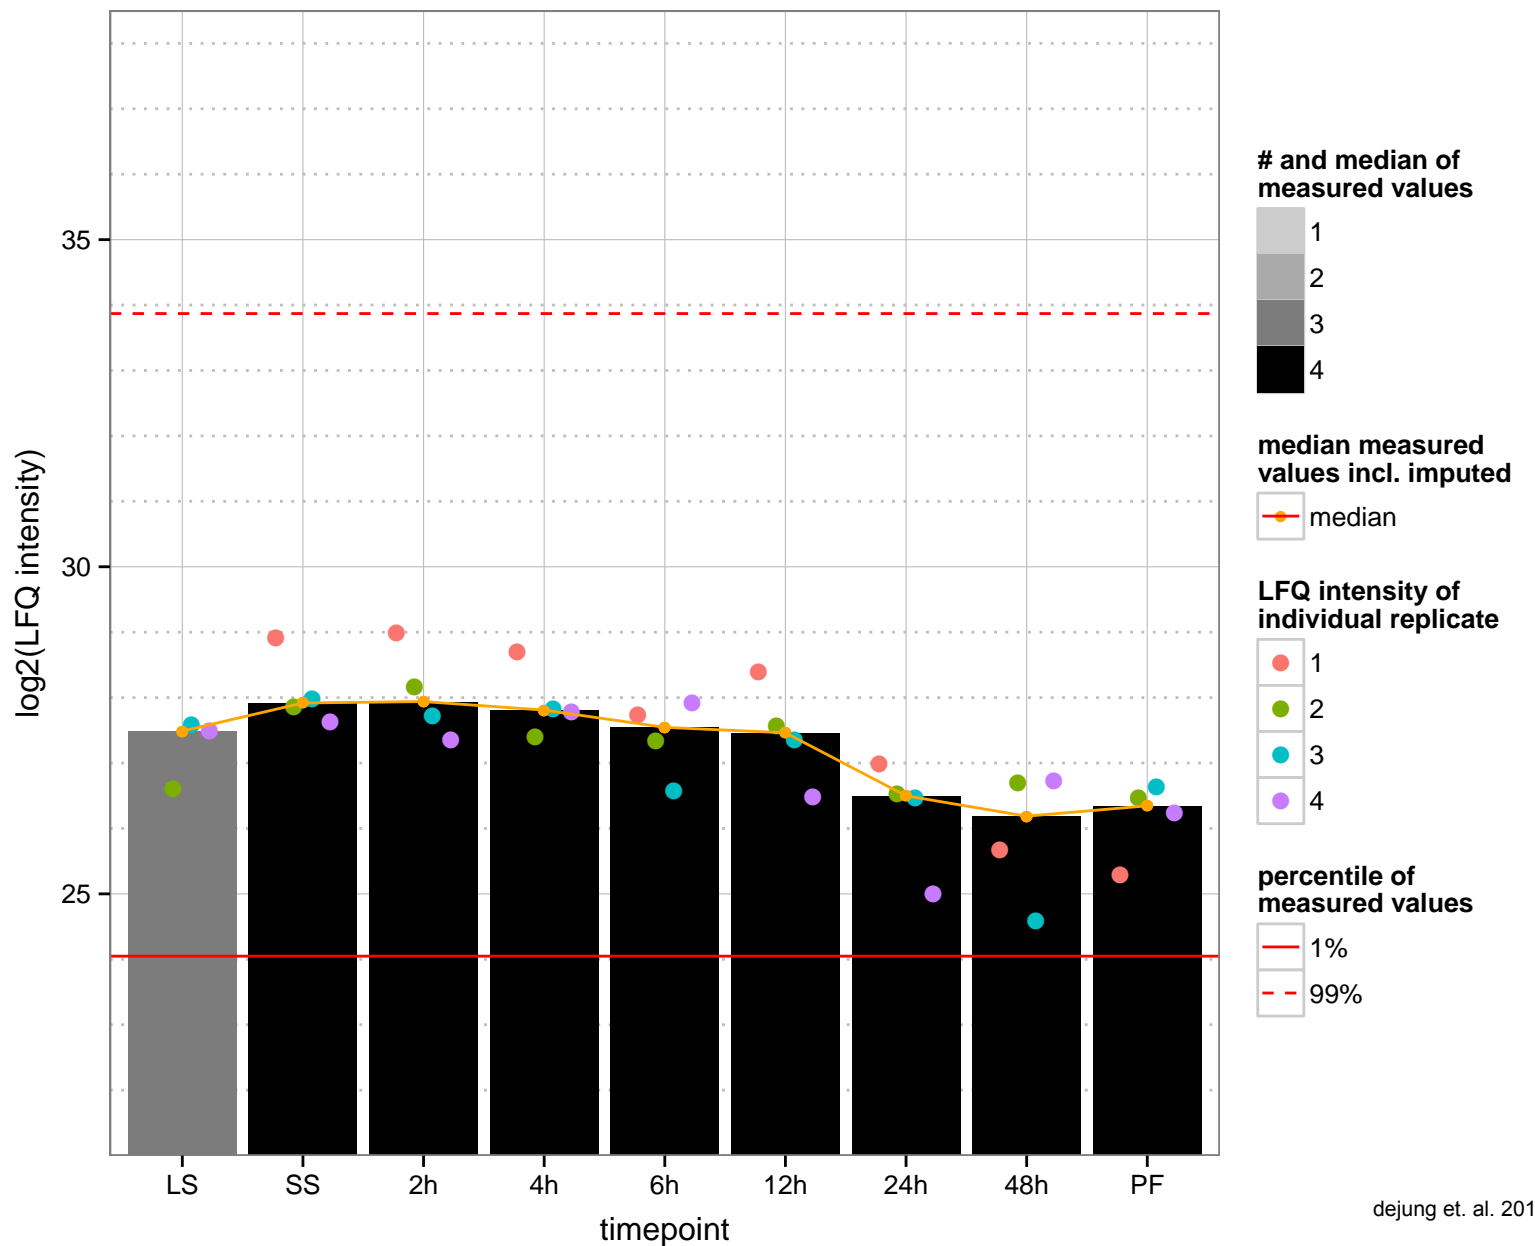

metacaspase MCA3, cysteine peptidase, Clan CD, family C13, putative (TbMCA4), metacaspase MCA2 (MCA2)  
 Tb927.6.940;Tb927.6.930  
 AGOF: cysteine-type endopeptidase activity, peptidase activity, cysteine-type peptidase activity  
 AGOC: nucleus  
 AGOP: aerobic respiration, proteolysis, proteolysis  
 PGO: cysteine-type endopeptidase activity  
 PGOC: null  
 PGOP: proteolysis

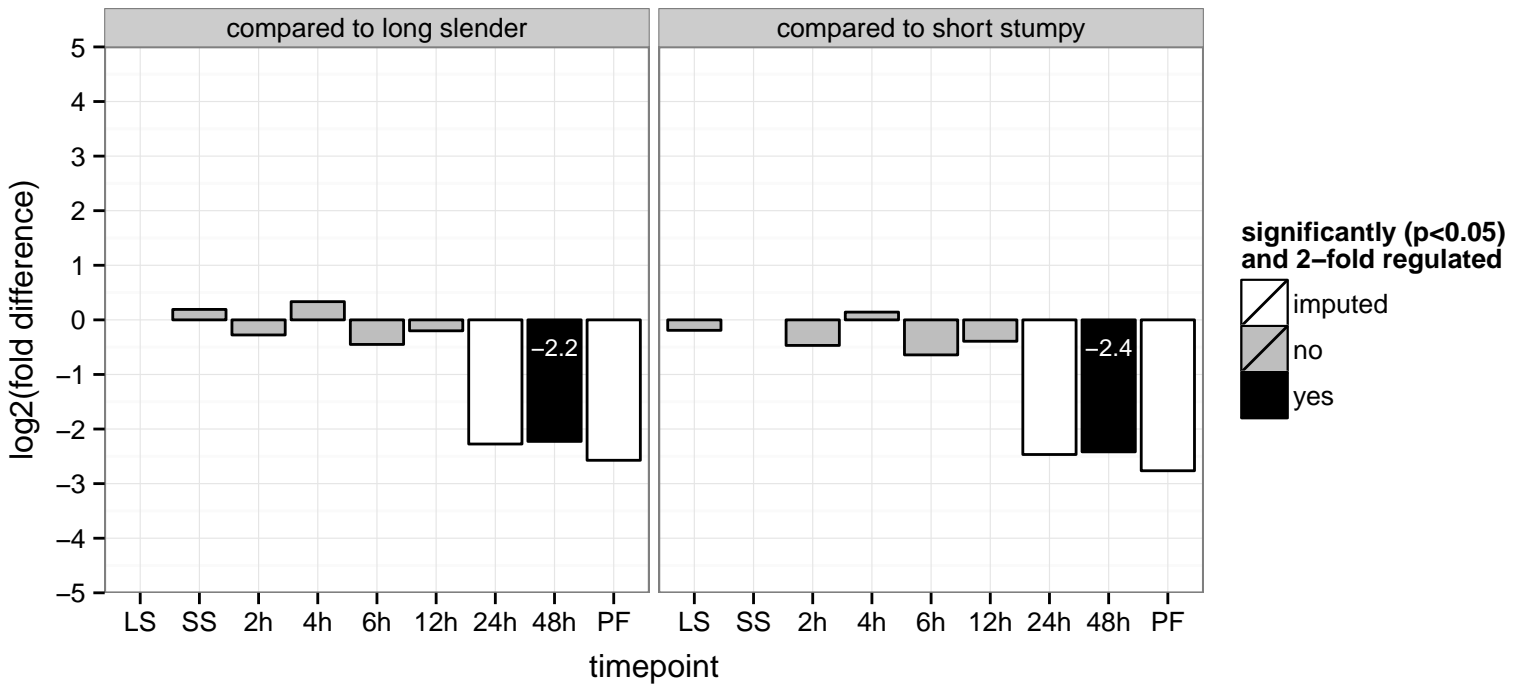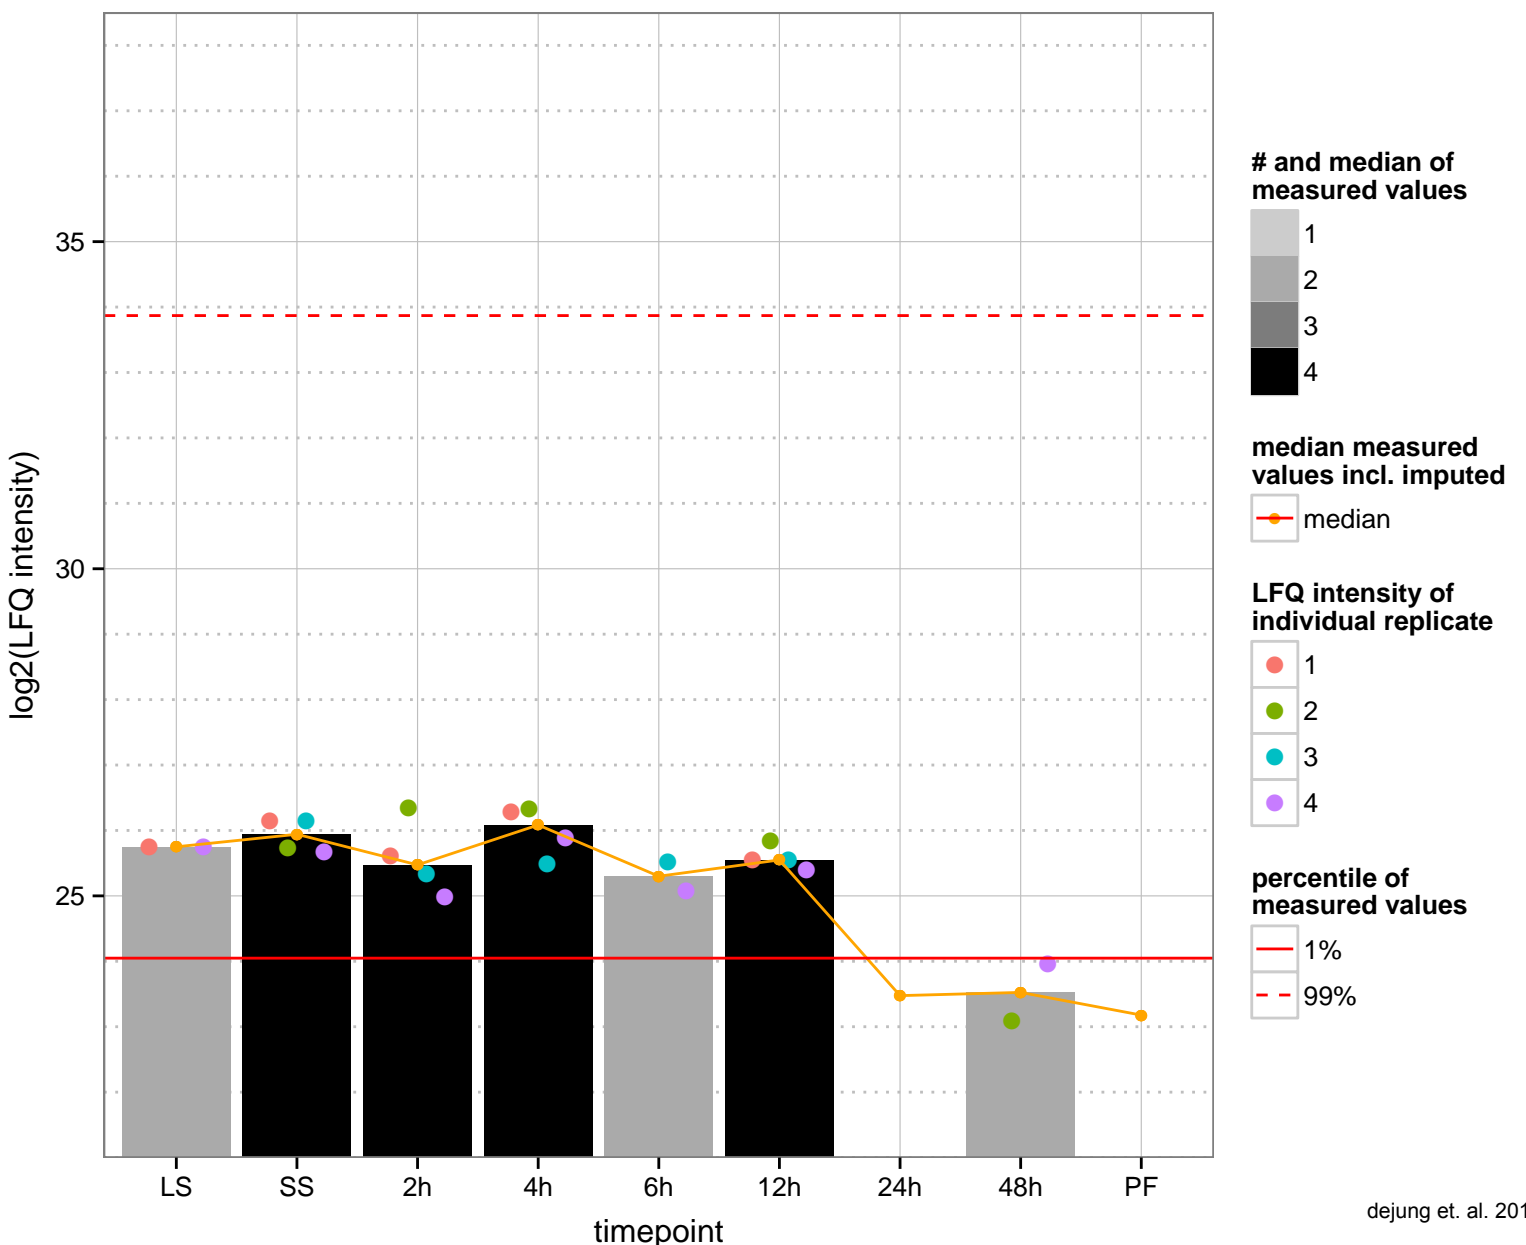

synaptojanin (N-terminal domain), putative  
 Tb927.7.3490  
 AGOF: inositol-polyphosphate 5-phosphatase activity  
 AGOC: null  
 AGOP: endocytosis  
 PGOF: phosphoric ester hydrolase activity  
 PGOC: null  
 PGOP: null

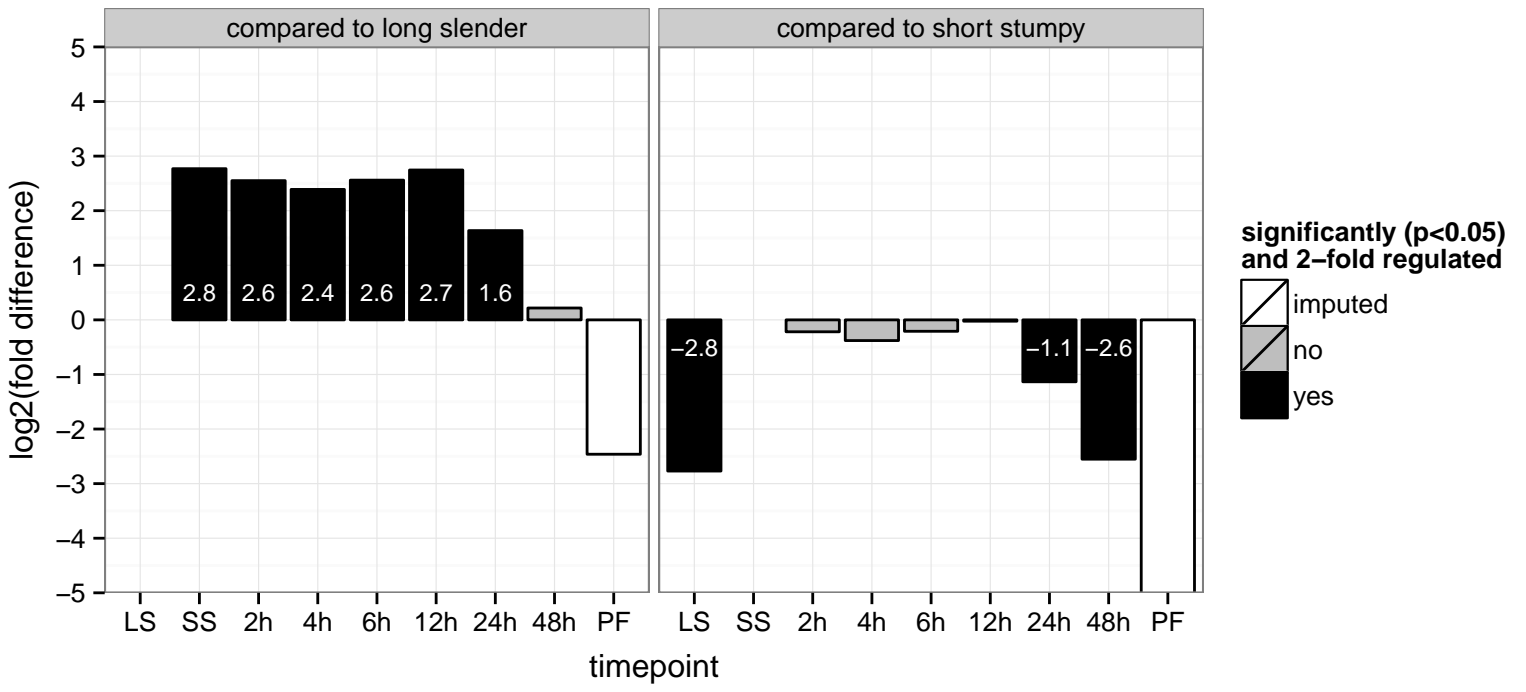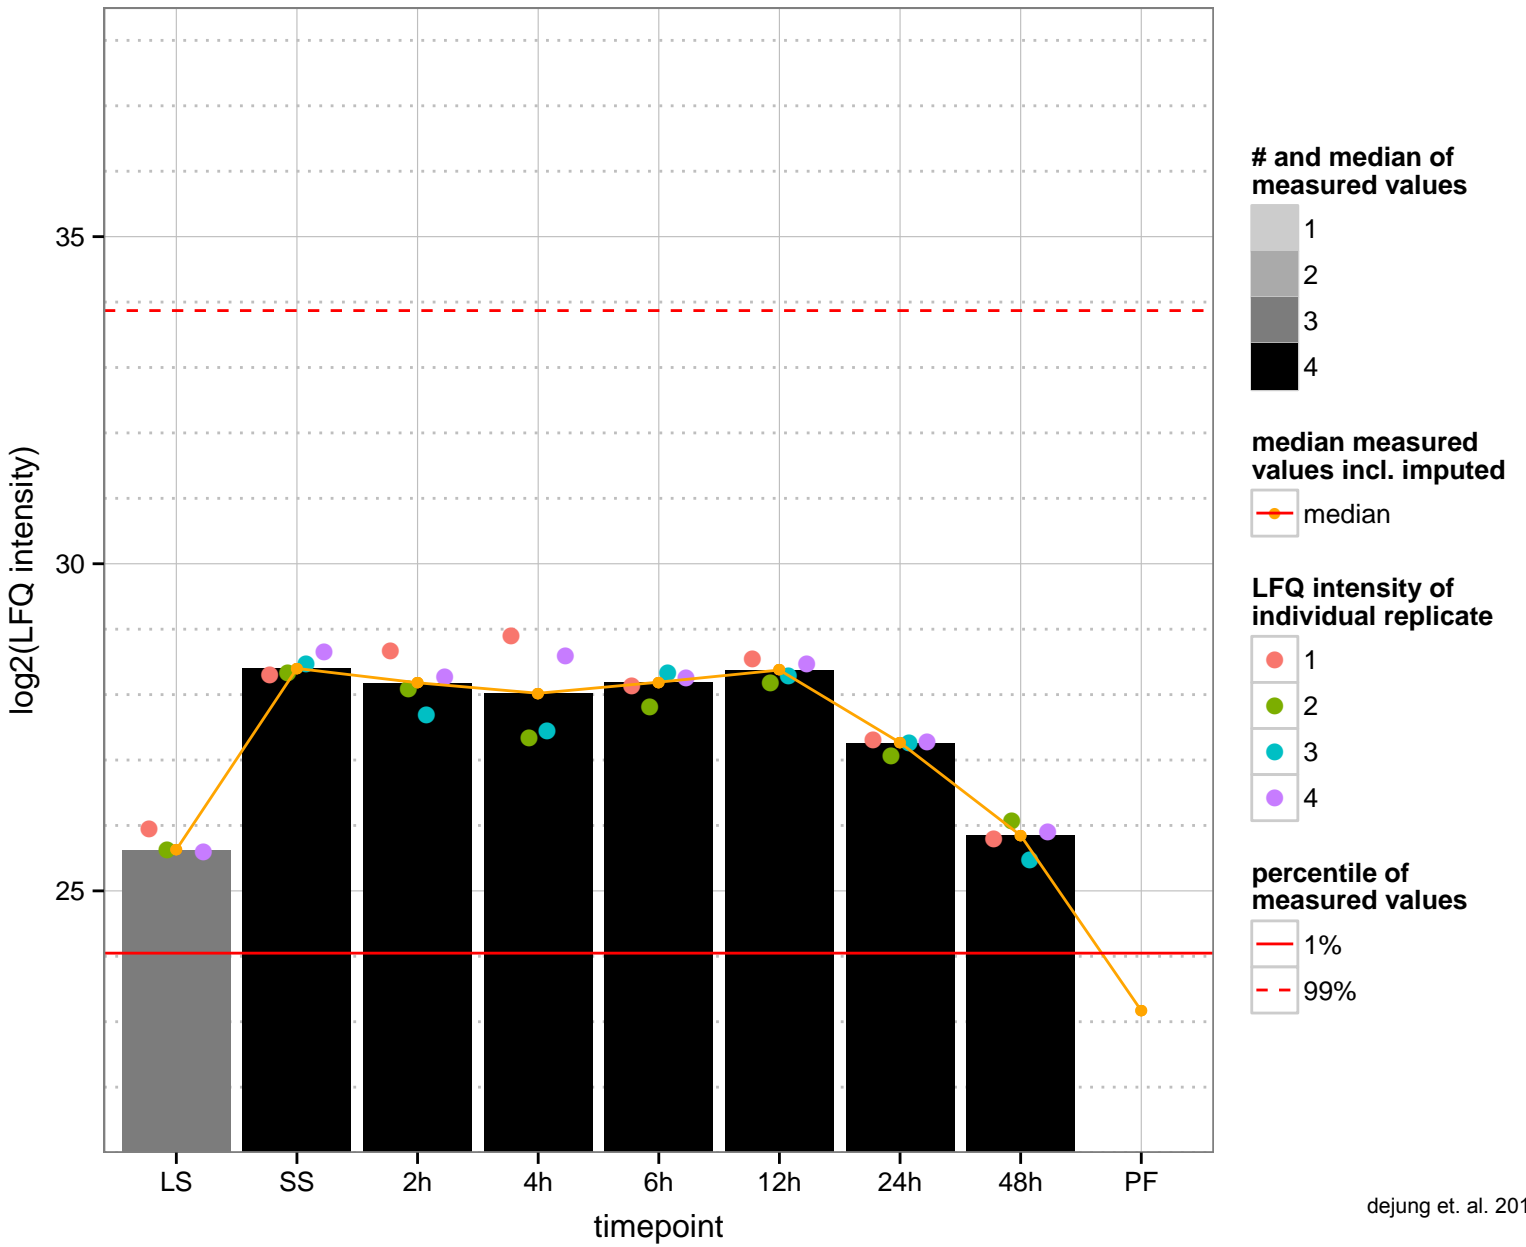

Protein Associated with Differentiation (PAD1)

Tb927.7.5930

AGOF: null

AGOC: cell surface, plasma membrane

AGOP: citrate transport, regulation of developmental process, response to temperature stimulus

PGOF: null

PGOC: integral to membrane

PGOP: transmembrane transport

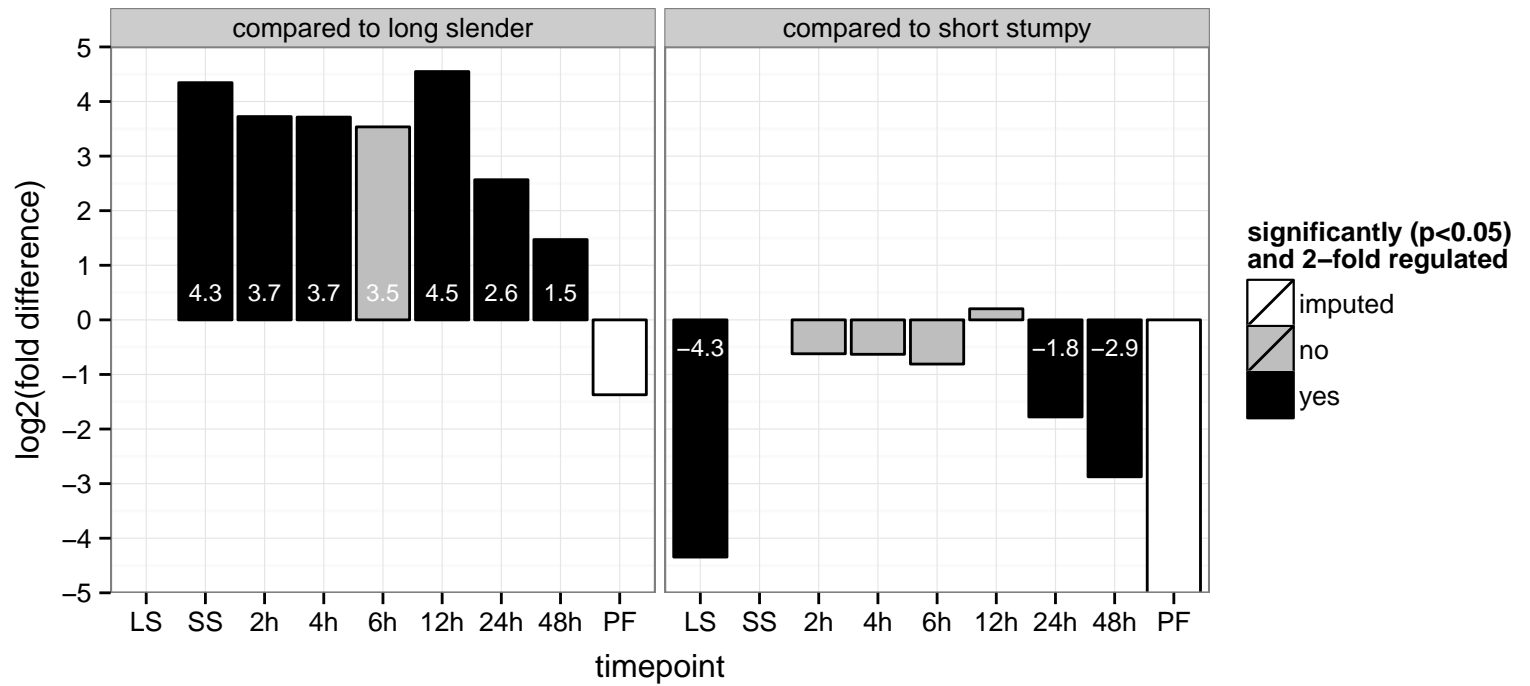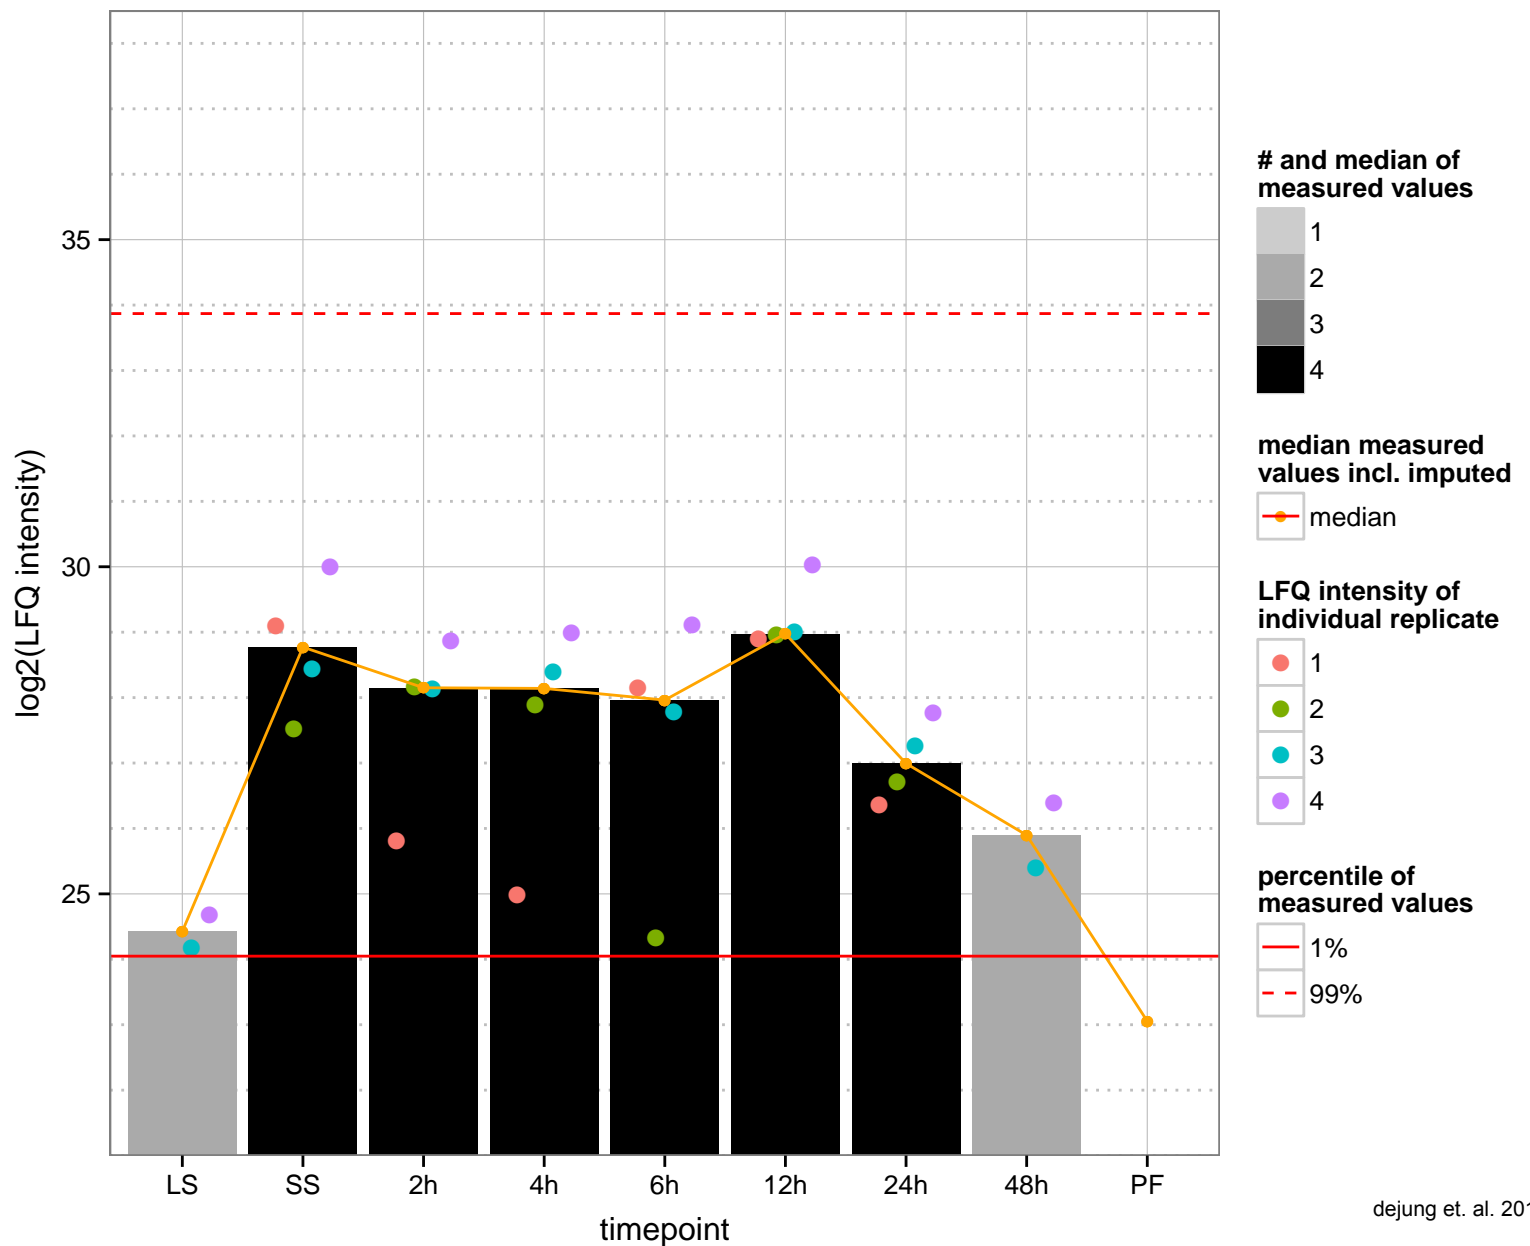

vesicle transport v-SNARE protein, putative  
 Tb927.7.6440  
 AGOF: SNAP receptor activity  
 AGOC: SNARE complex  
 AGOP: intracellular protein transport  
 PGO: null  
 PGO: null  
 PGO: null

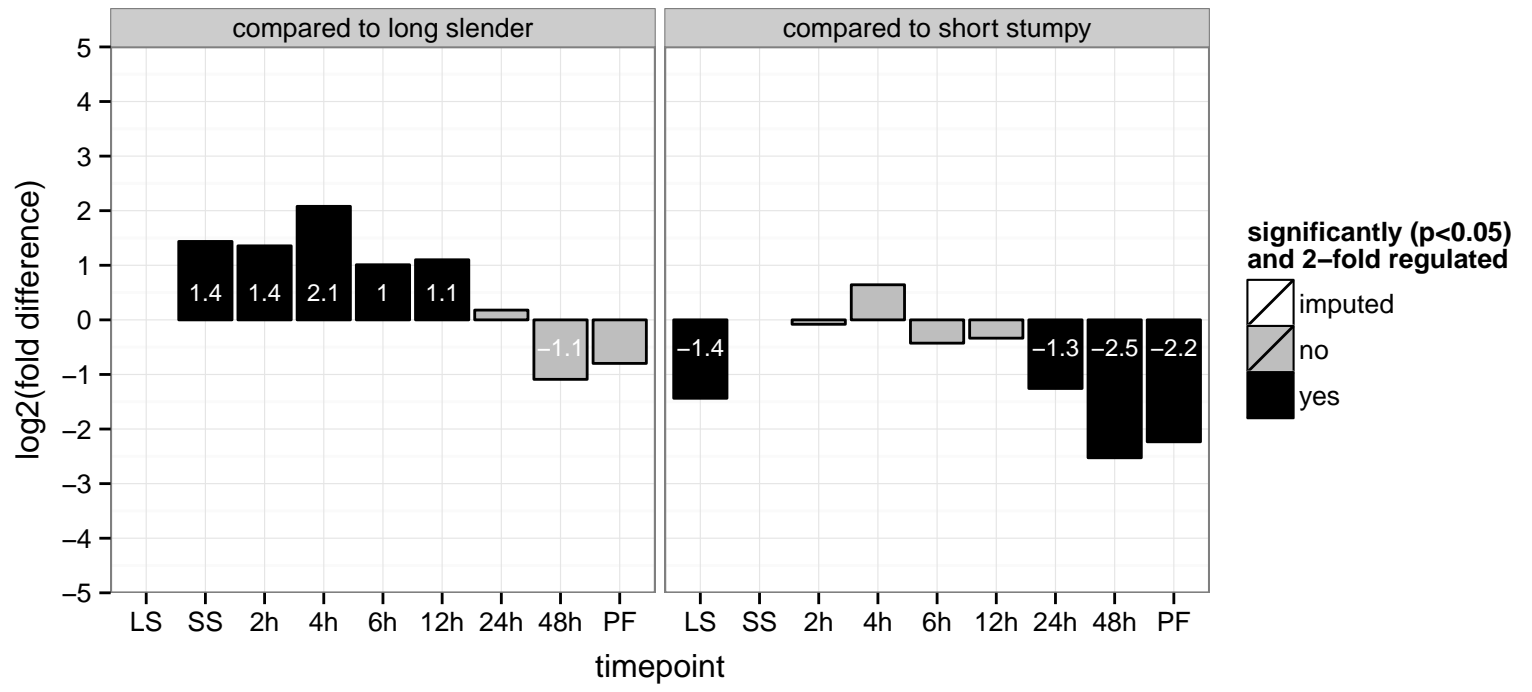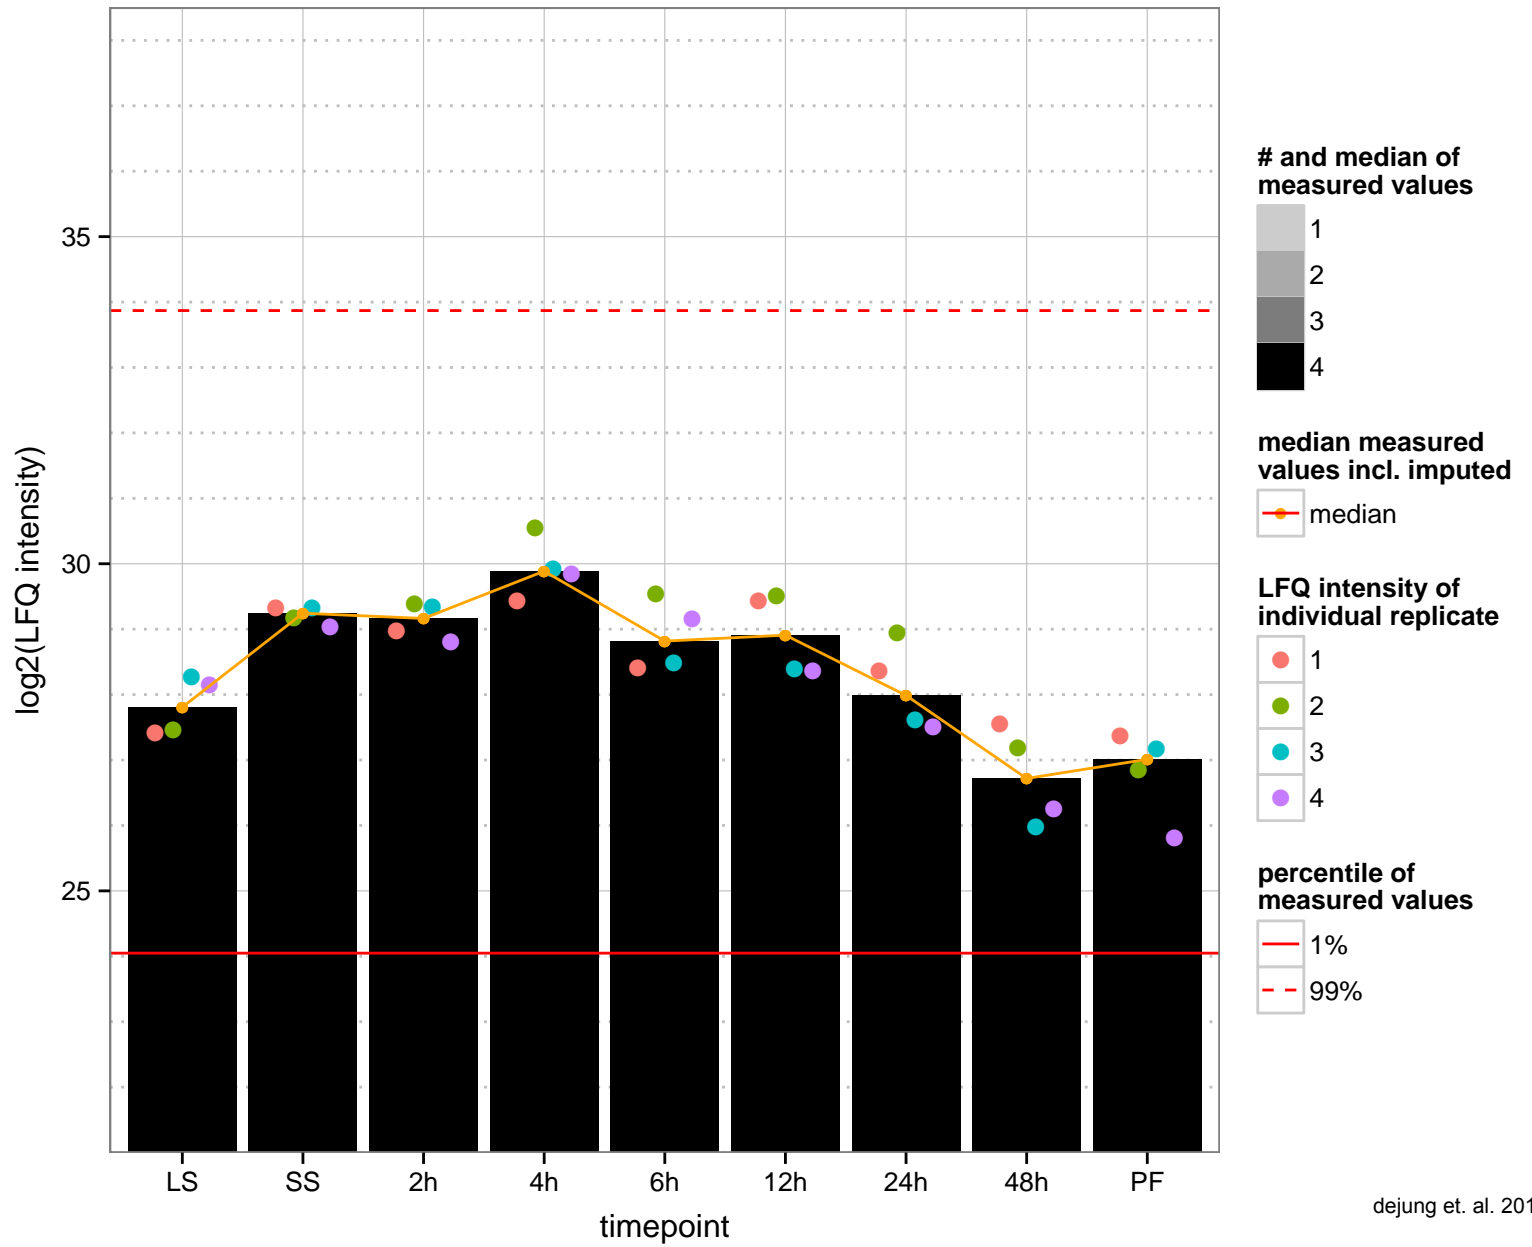

receptor-type adenylyate cyclase GRESAG 4, putative  
 Tb927.7.7530;Tb927.7.7520  
 AGOF: phosphorus-oxygen lyase activity, adenylyate cyclase activity  
 AGOC: integral to membrane  
 AGOP: cyclic nucleotide biosynthetic process, intracellular signal transduction  
 PGO: phosphorus-oxygen lyase activity  
 PGOC: null  
 PGOP: cyclic nucleotide biosynthetic process, intracellular signal transduction

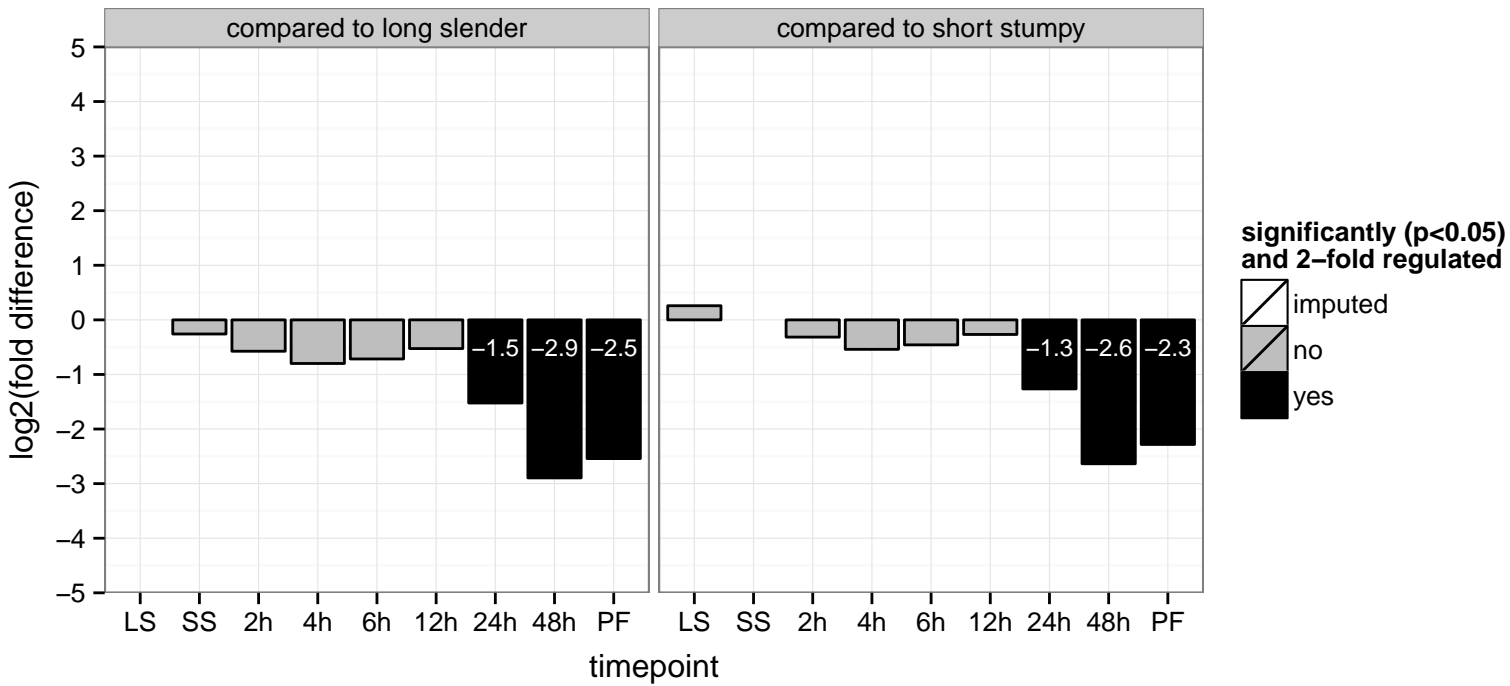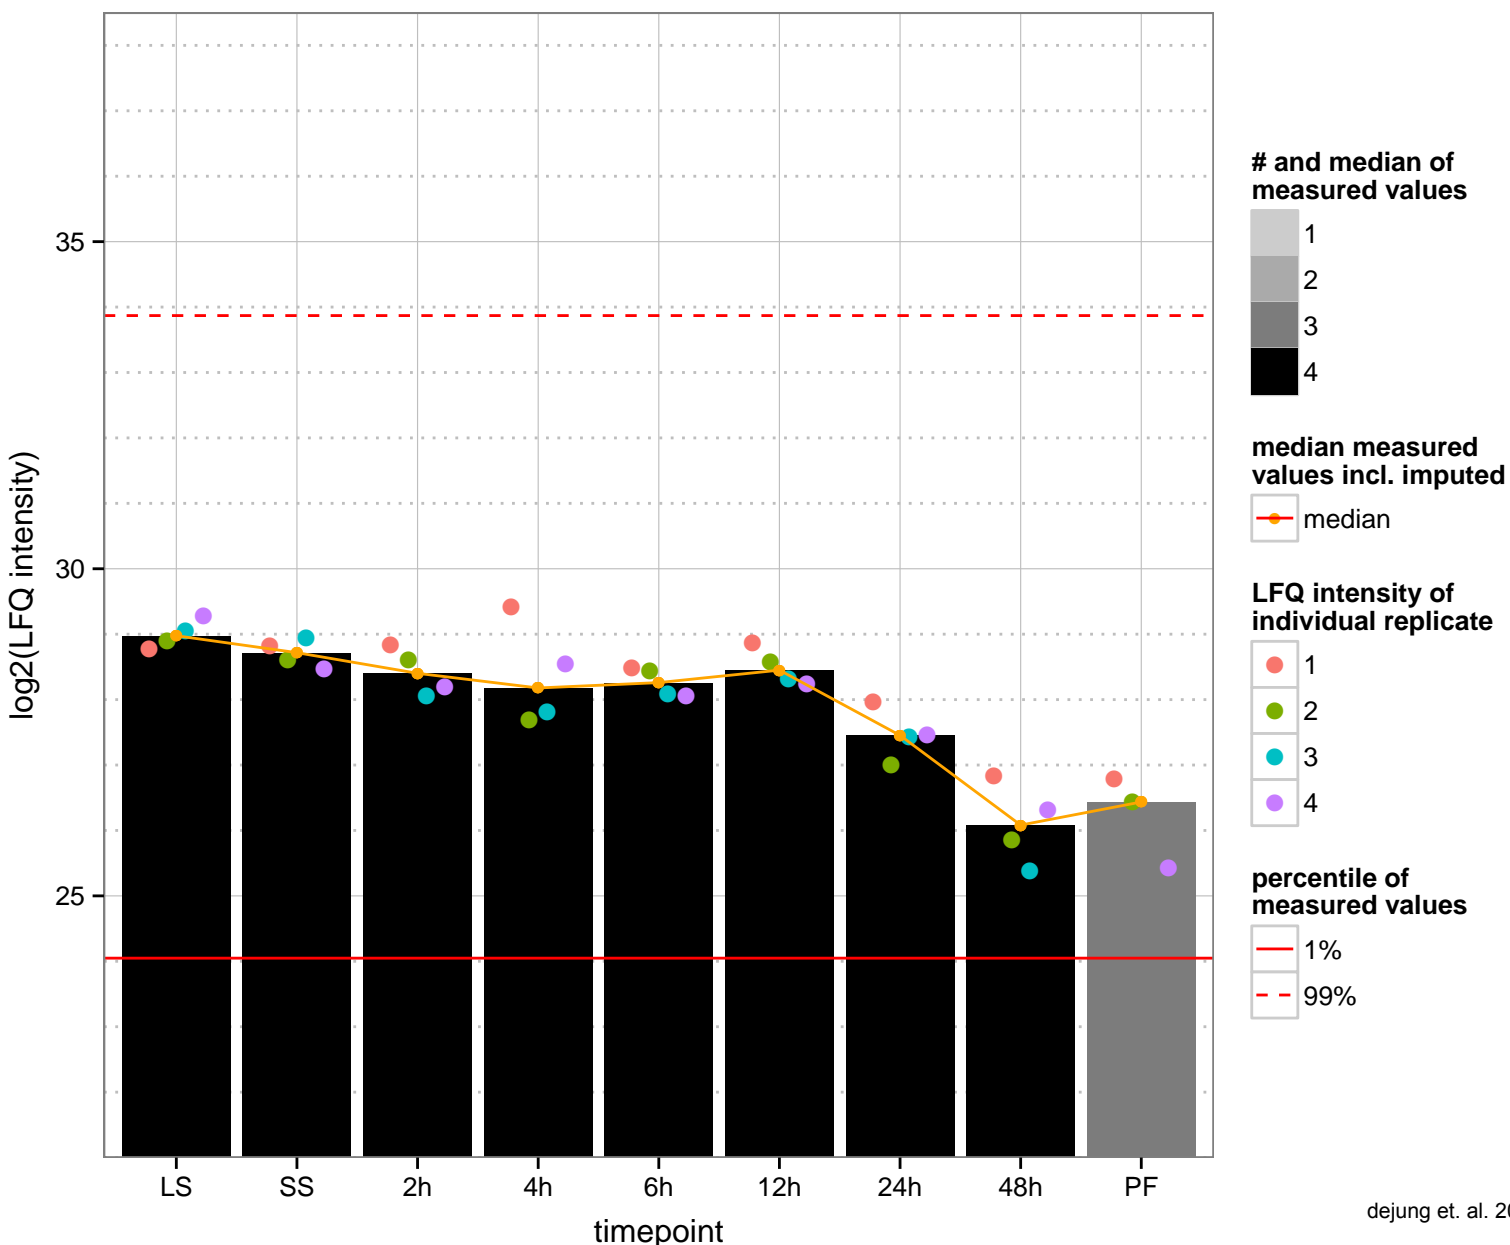

hypothetical protein, conserved  
 Tb927.8.2070;Tb927.8.2270  
 AGOF: null  
 AGOC: null  
 AGOP: null  
 PGO: null  
 PGOC: null  
 PGOP: null

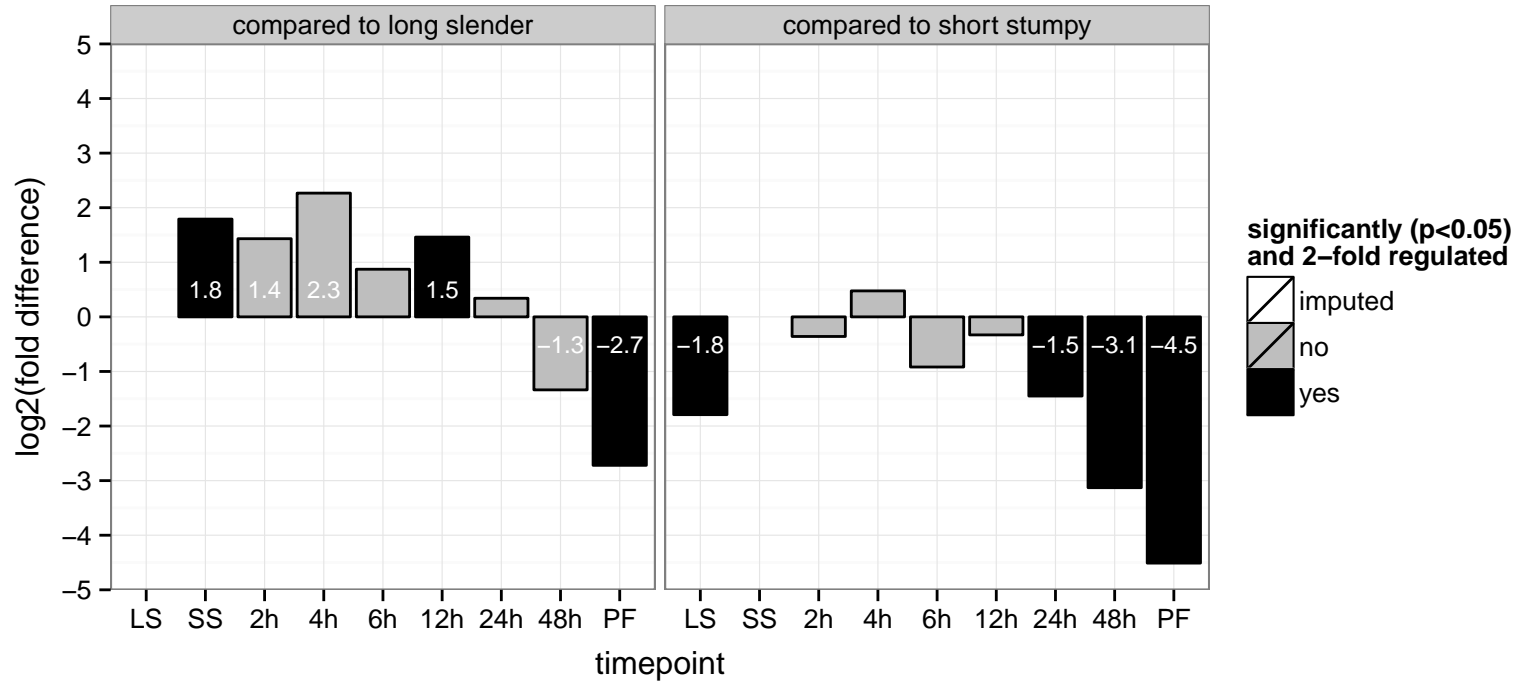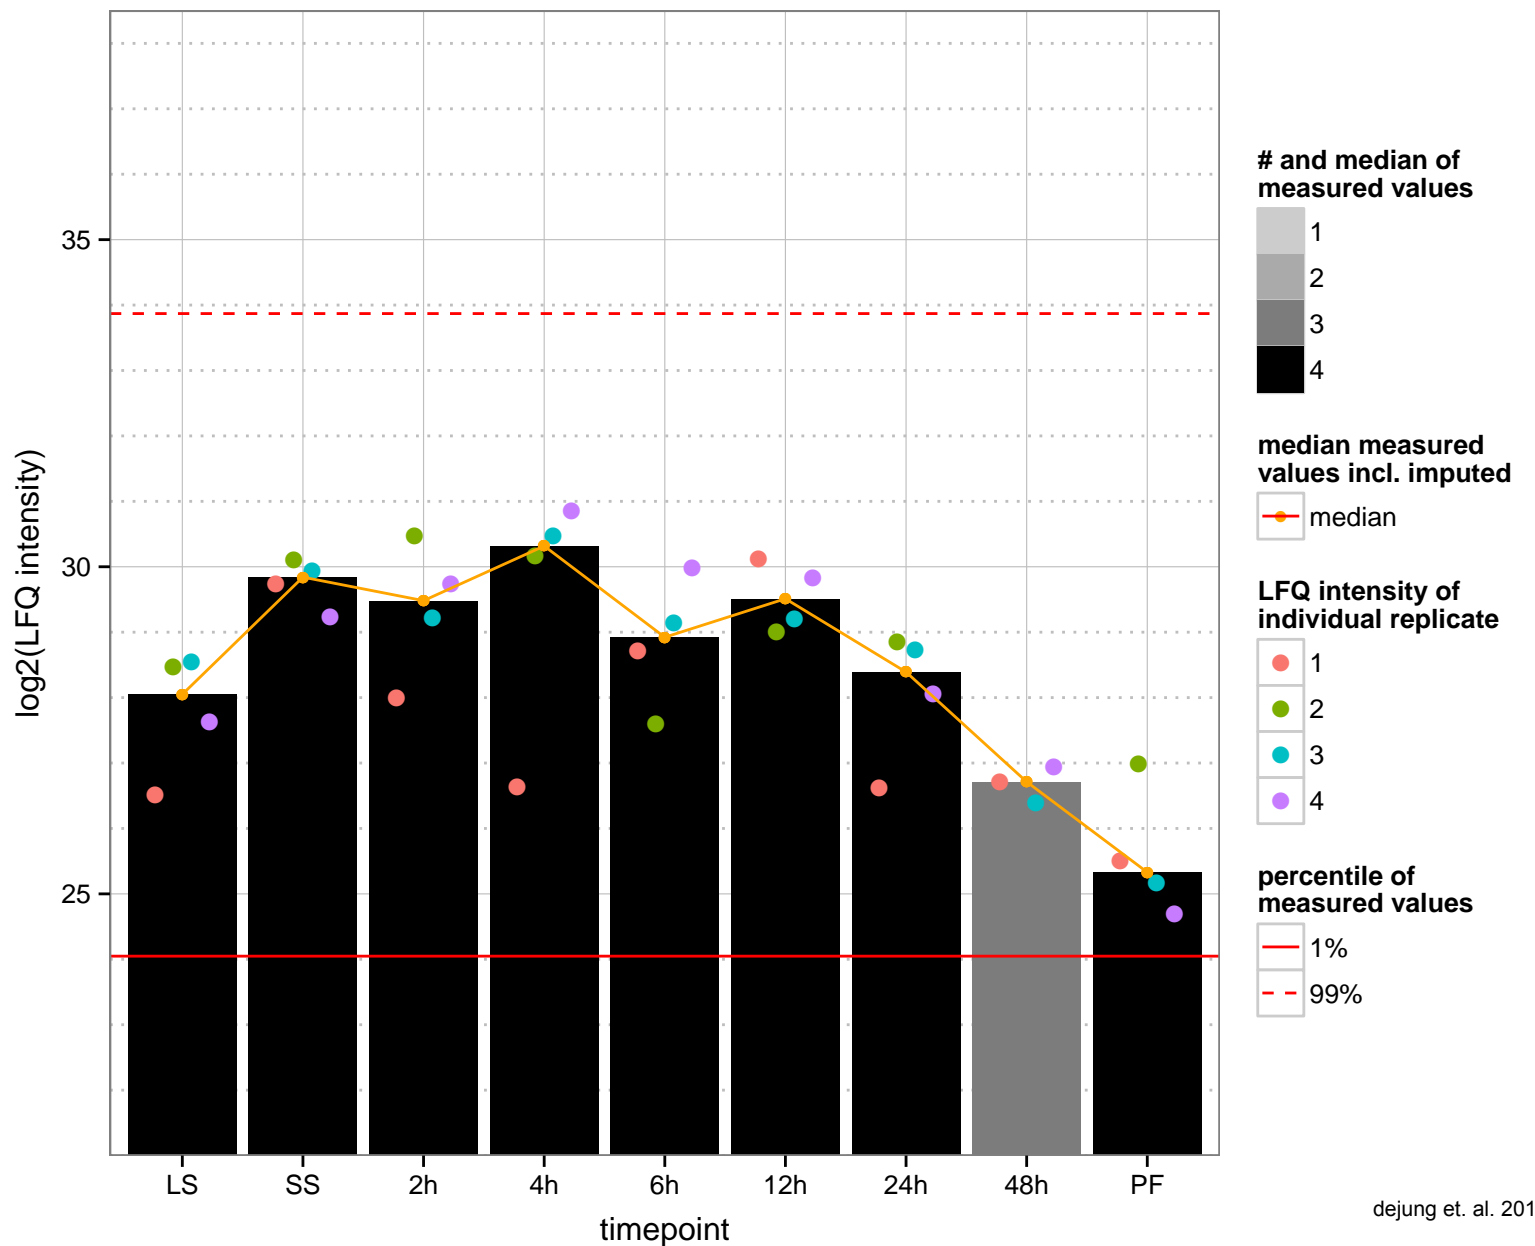

hypothetical protein, conserved  
 Tb927.8.2280;Tb927.8.2260  
 AGOF: null  
 AGOC: null  
 AGOP: null  
 PGO: null  
 PGOC: null  
 PGOP: null

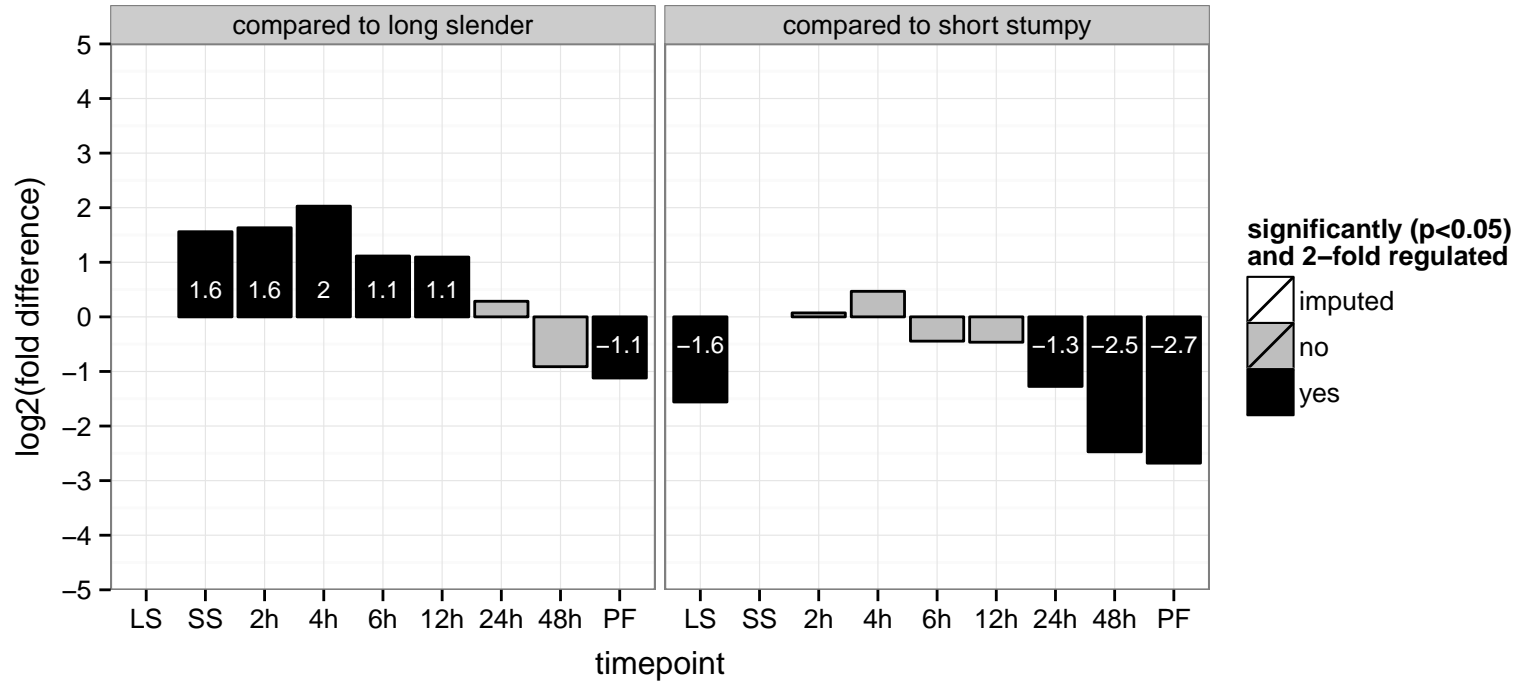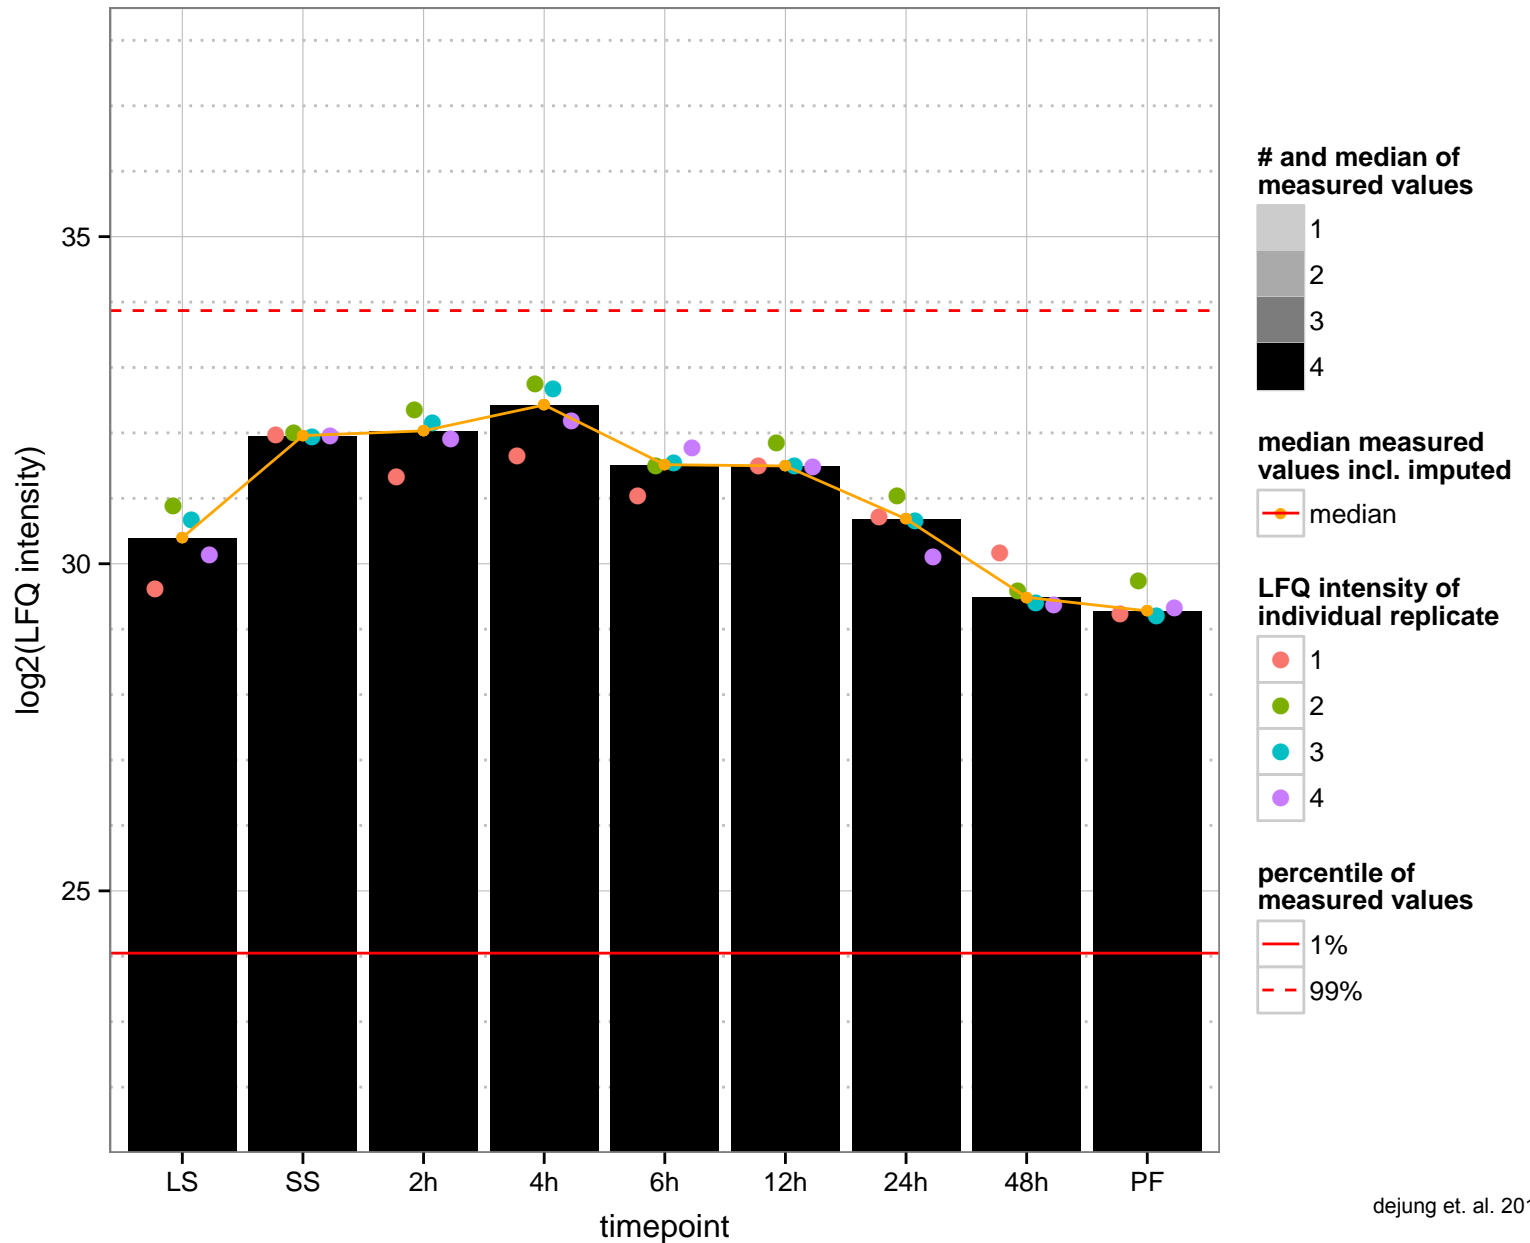



hypothetical protein, conserved  
 Tb927.8.2720  
 AGOF: null  
 AGOC: null  
 AGOP: null  
 PGOF: null  
 PGO: null  
 PGOP: null

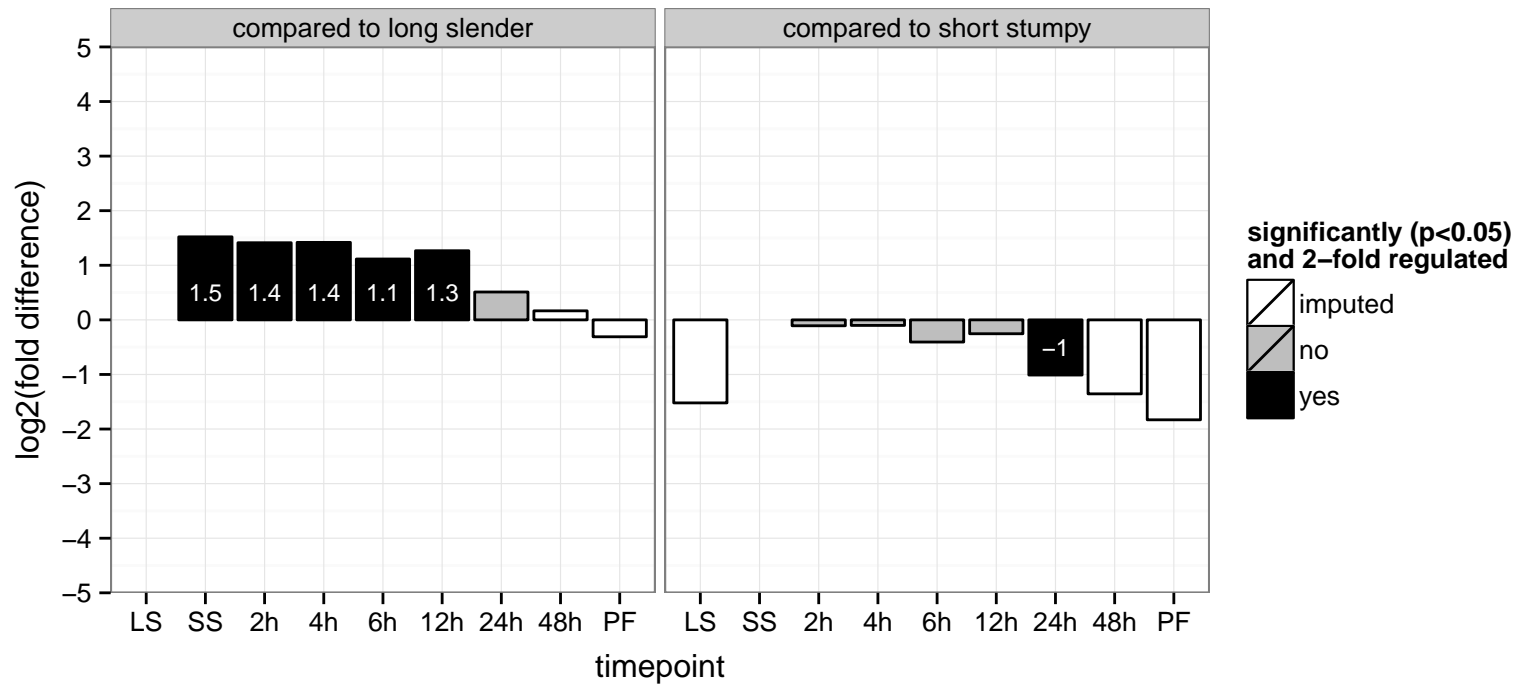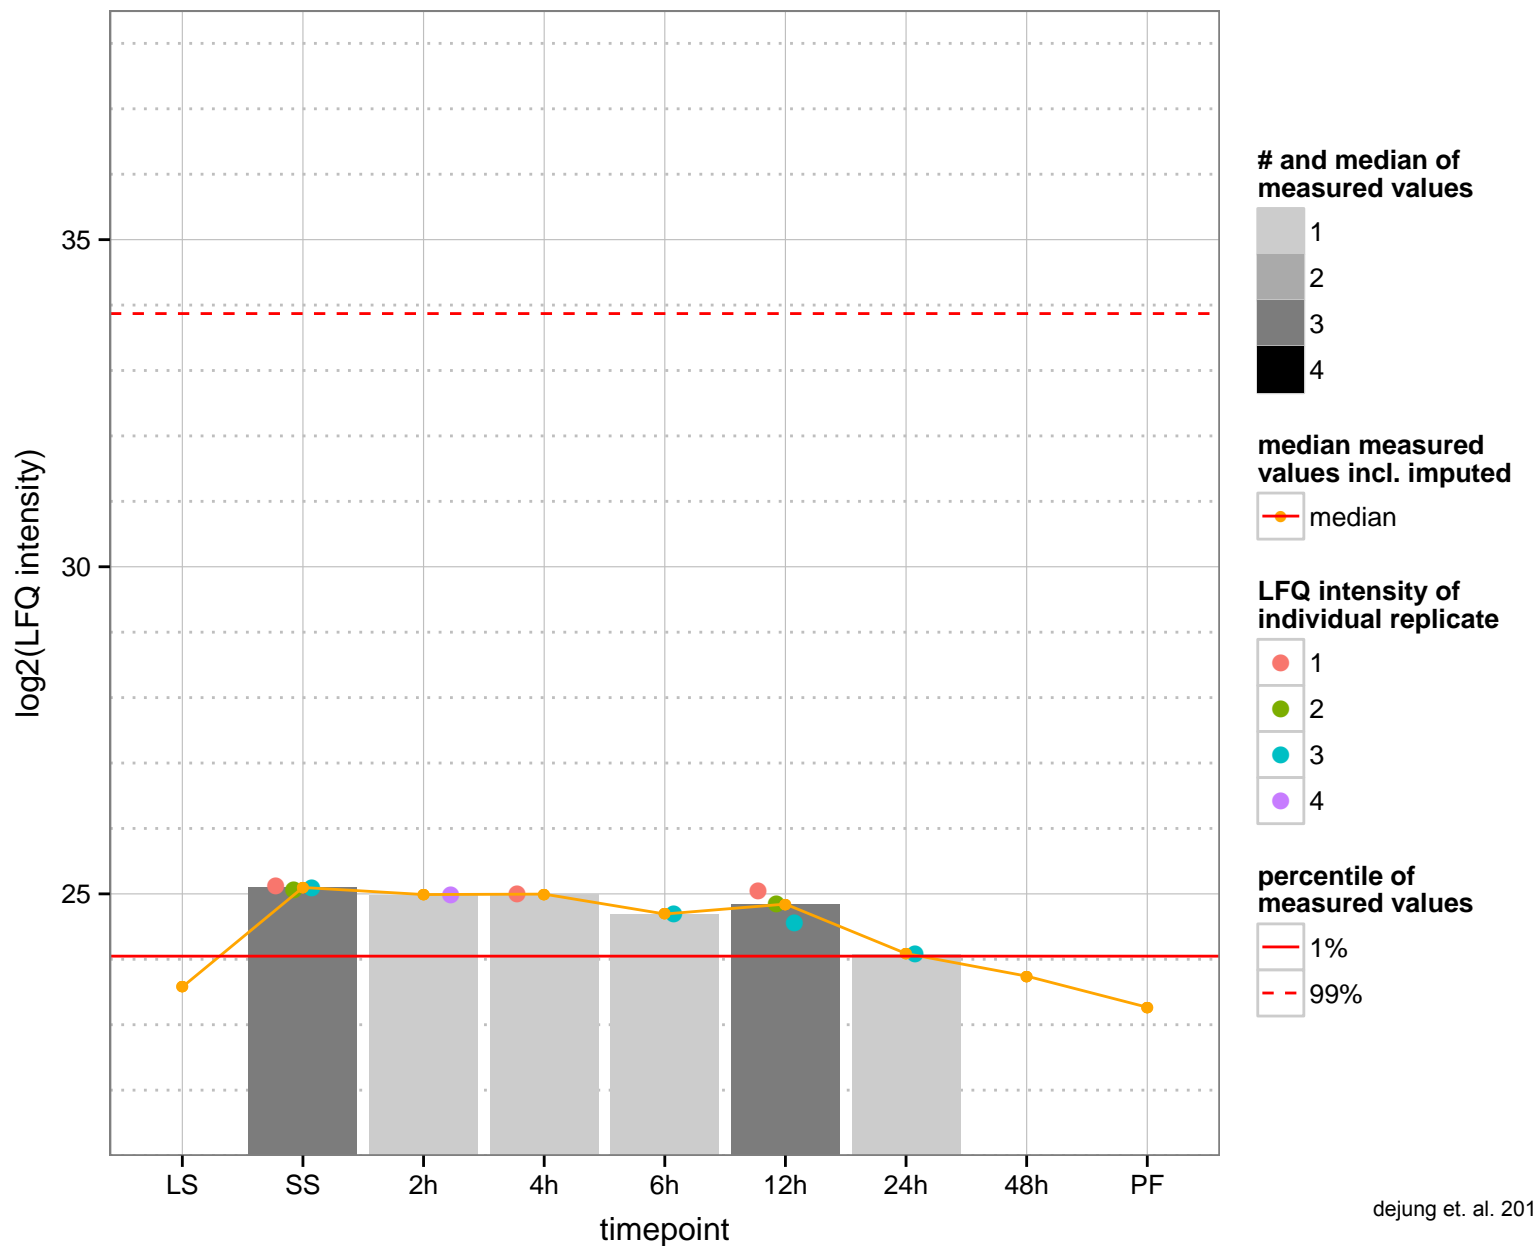

hypothetical protein, conserved

Tb927.8.2860

AGOF: null

AGOC: null

AGOP: modulation of development of symbiont involved in interaction with host, quorum sensing involved in interaction with host

PGOF: null

PGOC: null

PGOP: null

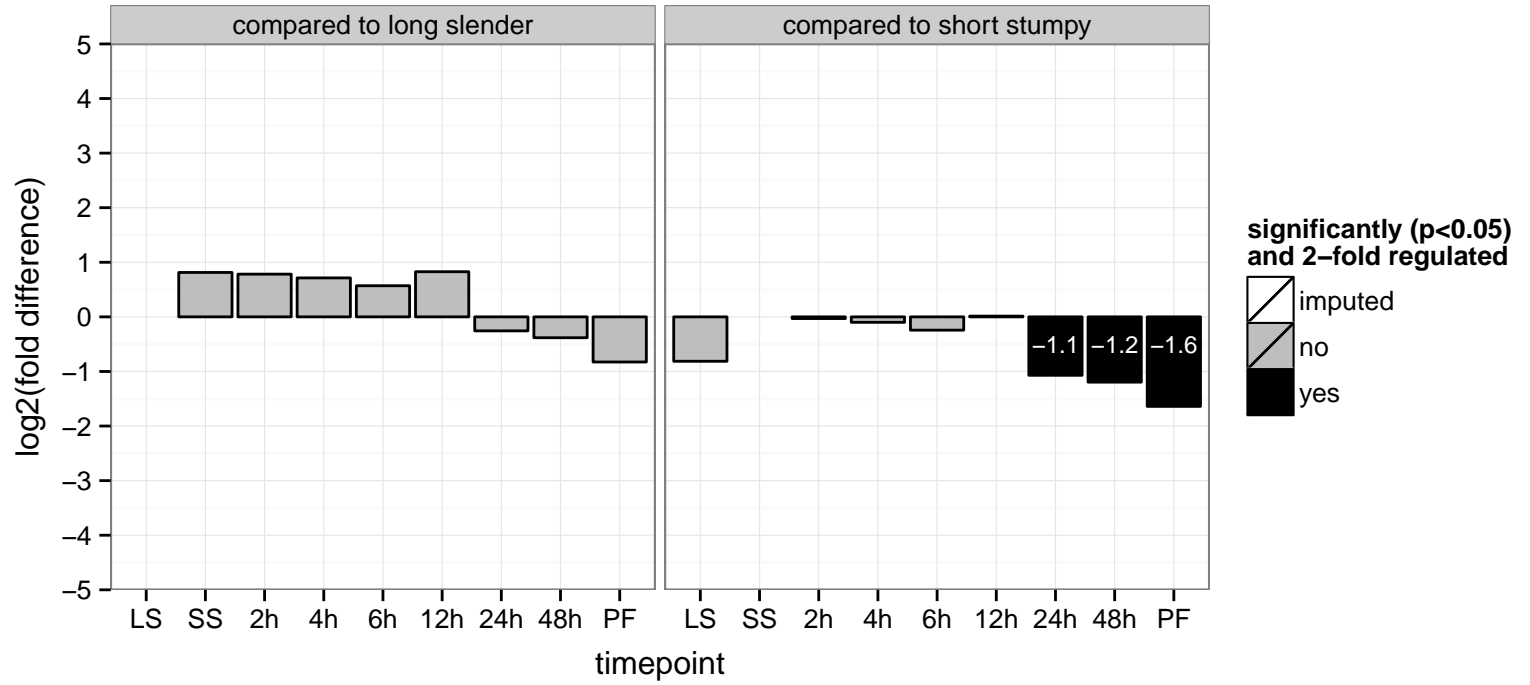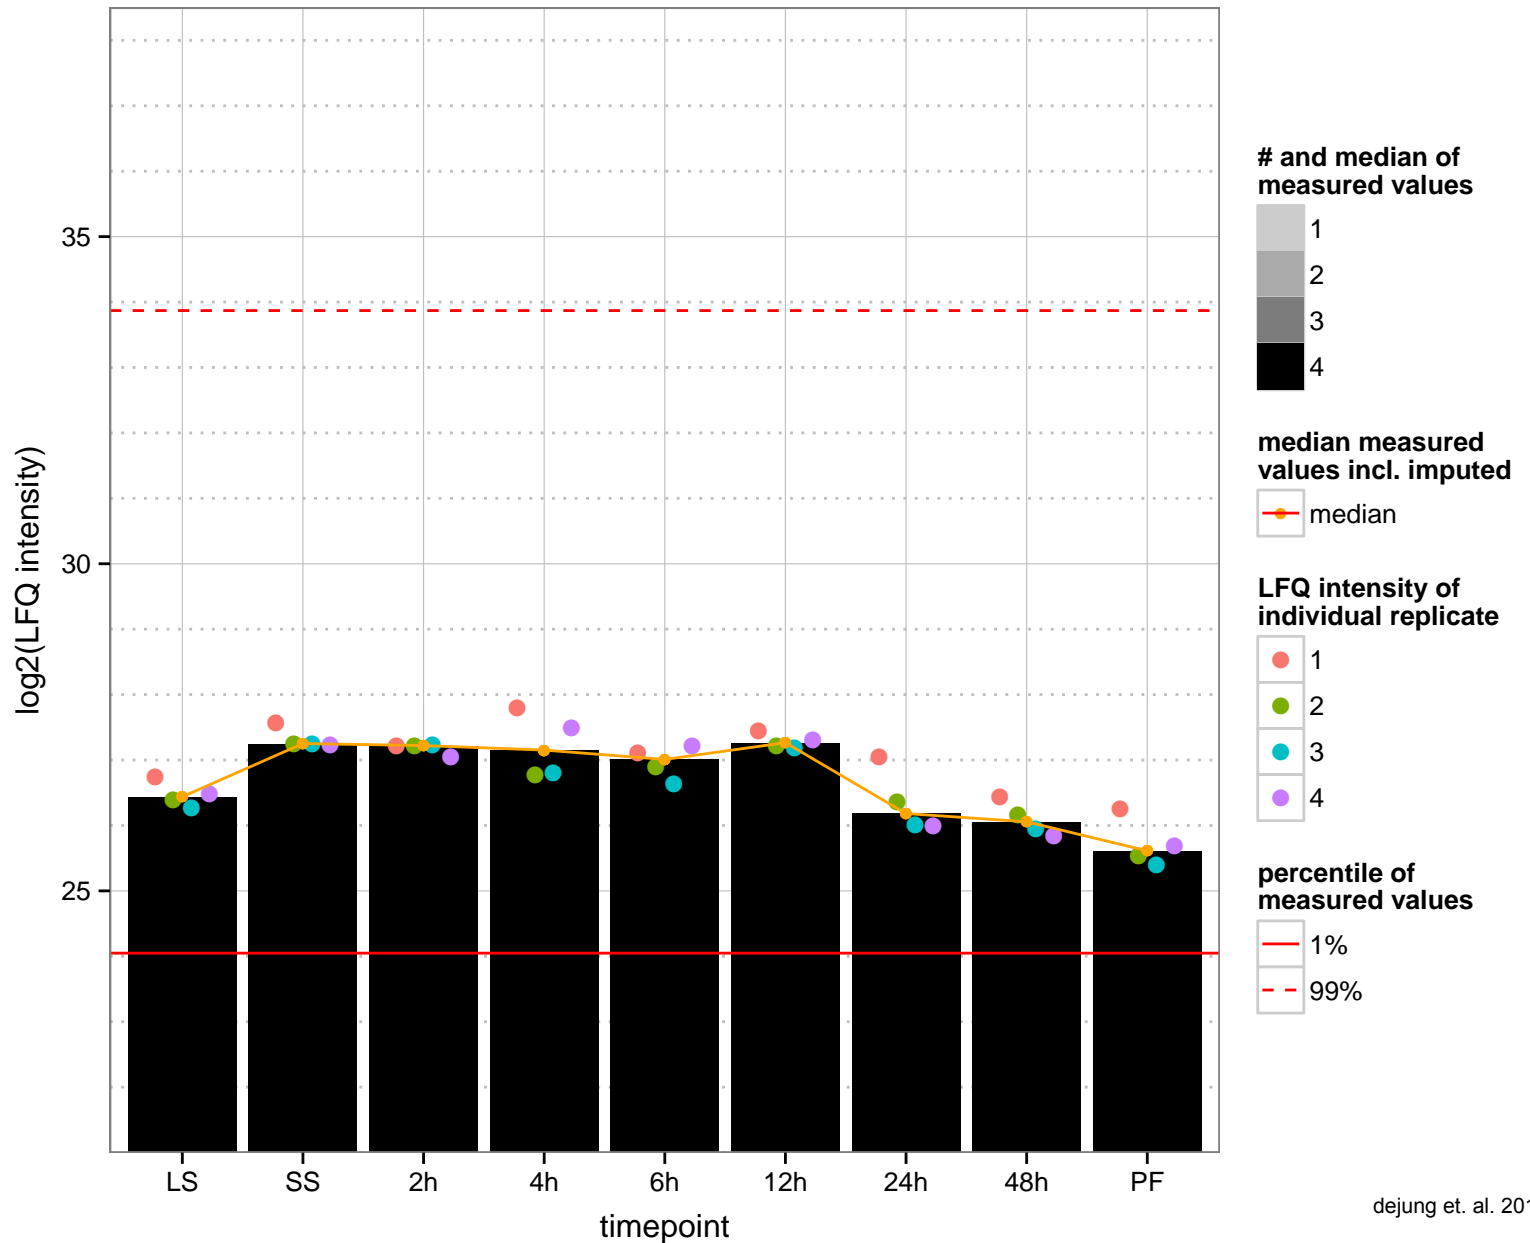

mitogen-activated protein kinase 3, putative

Tb927.8.3550

AGOF: ATP binding, protein serine/threonine kinase activity, protein tyrosine kinase activity

AGOC: null

AGOP: null

PGOF: ATP binding, protein kinase activity, transferase activity, transferring phosphorus-containing groups

PGOC: null

PGOP: protein phosphorylation

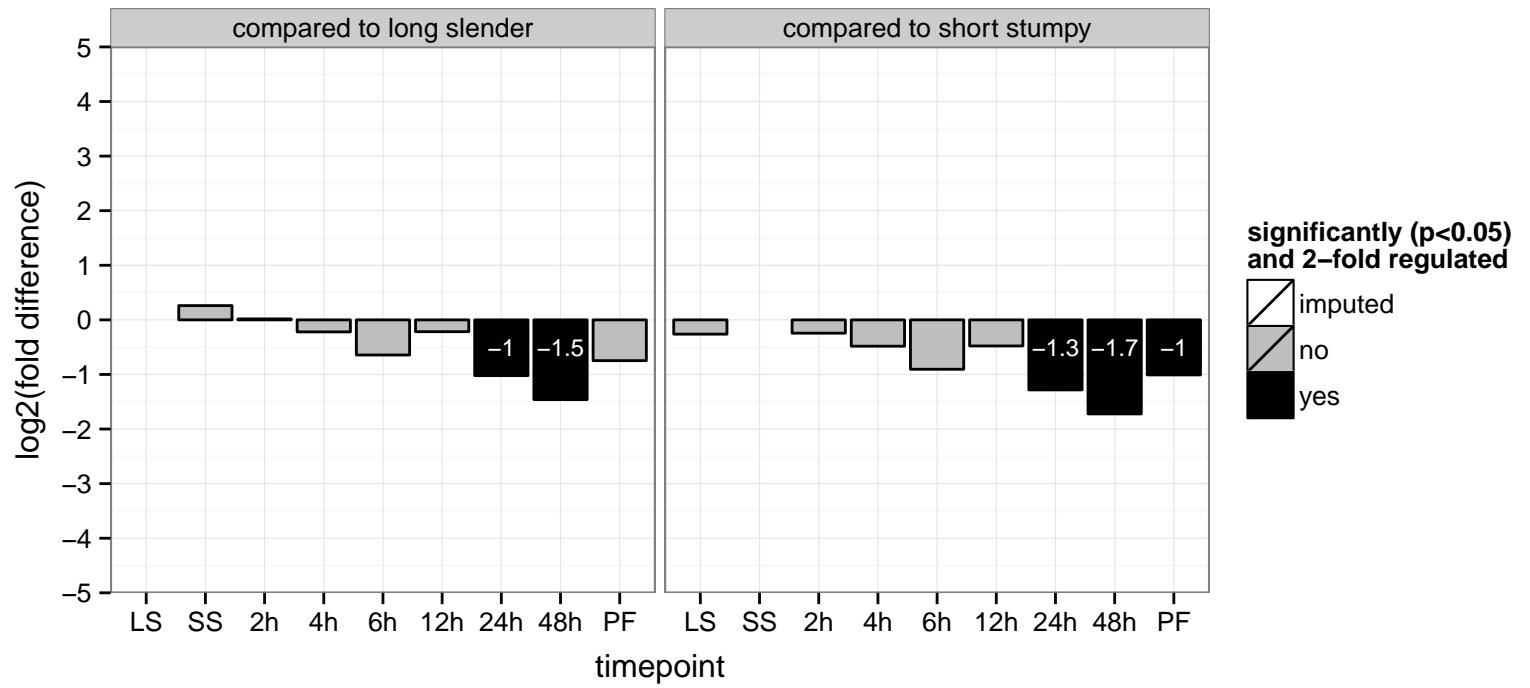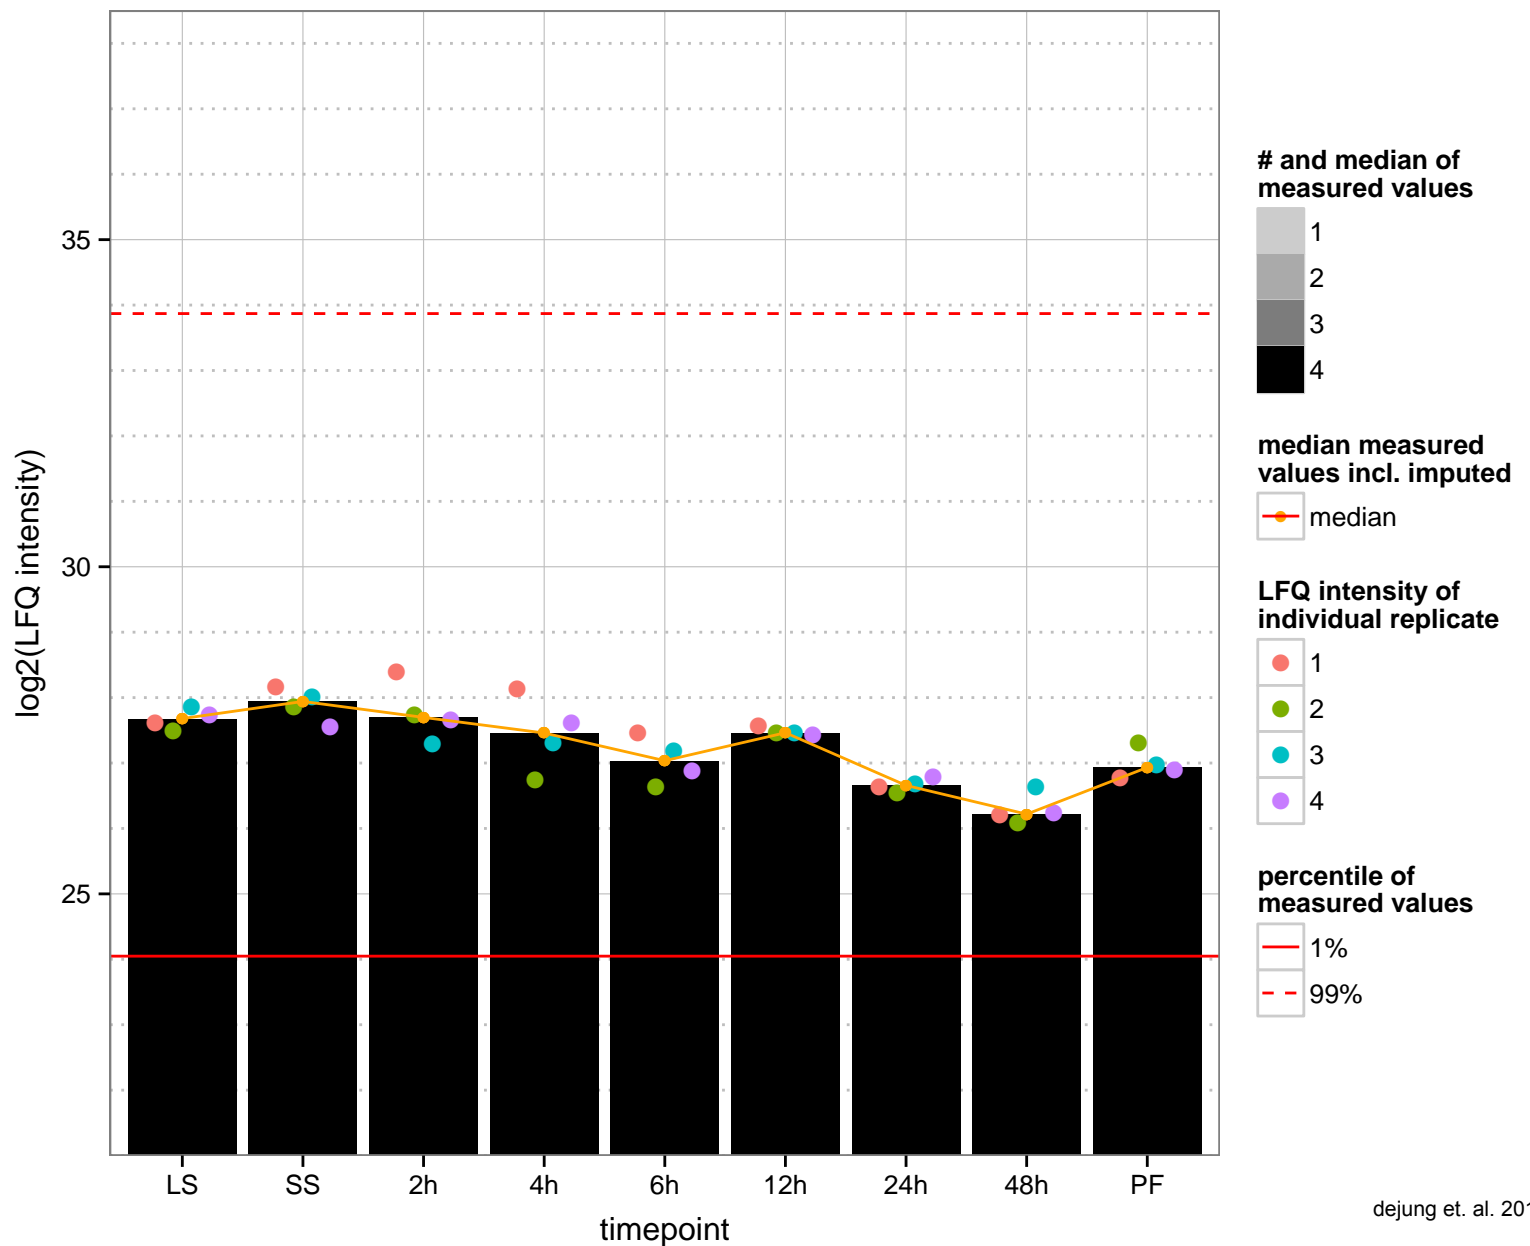

mitogen-activated protein kinase, putative (MPK10)

Tb927.8.3770

AGOF: ATP binding, protein kinase activity, protein serine/threonine kinase activity, protein tyrosine kinase activity

AGOC: null

AGOP: null

PGOF: ATP binding, protein kinase activity, transferase activity, transferring phosphorus-containing groups

PGOC: null

PGOP: protein phosphorylation

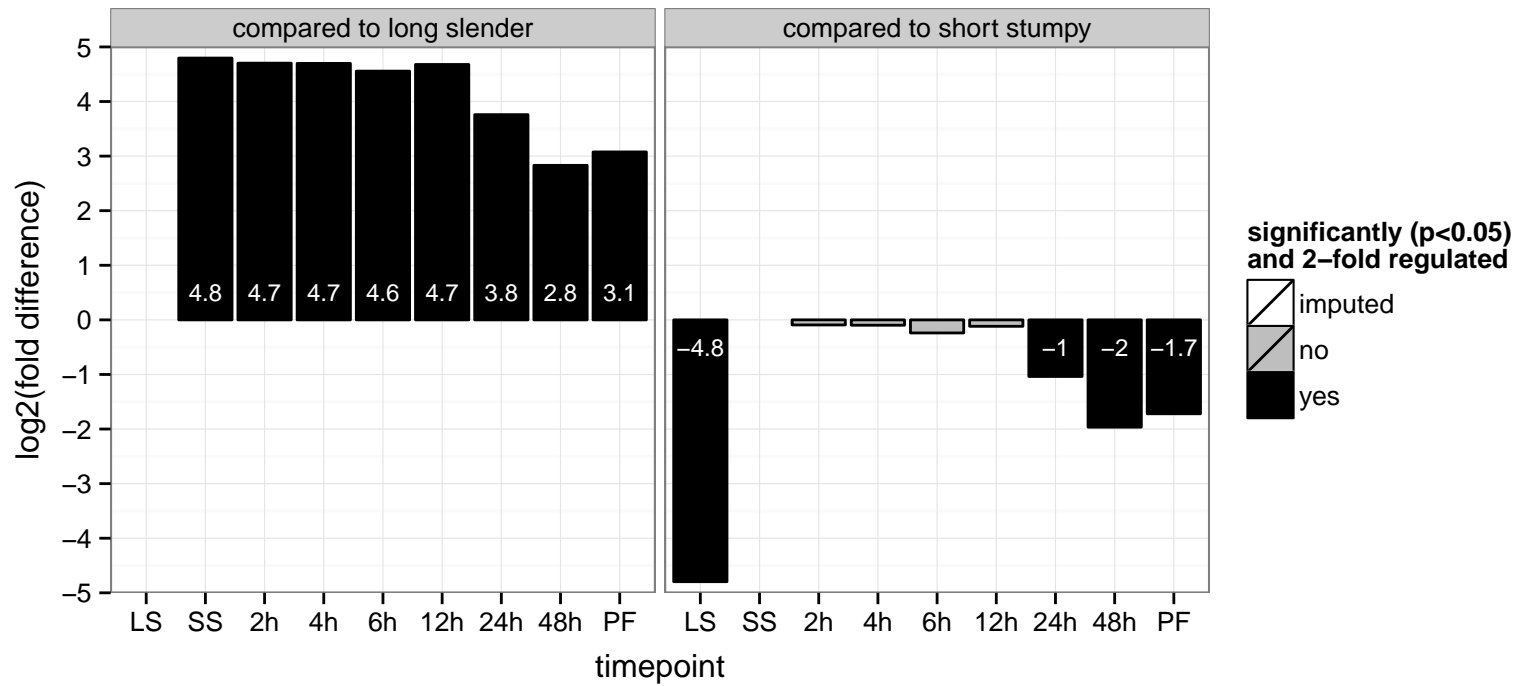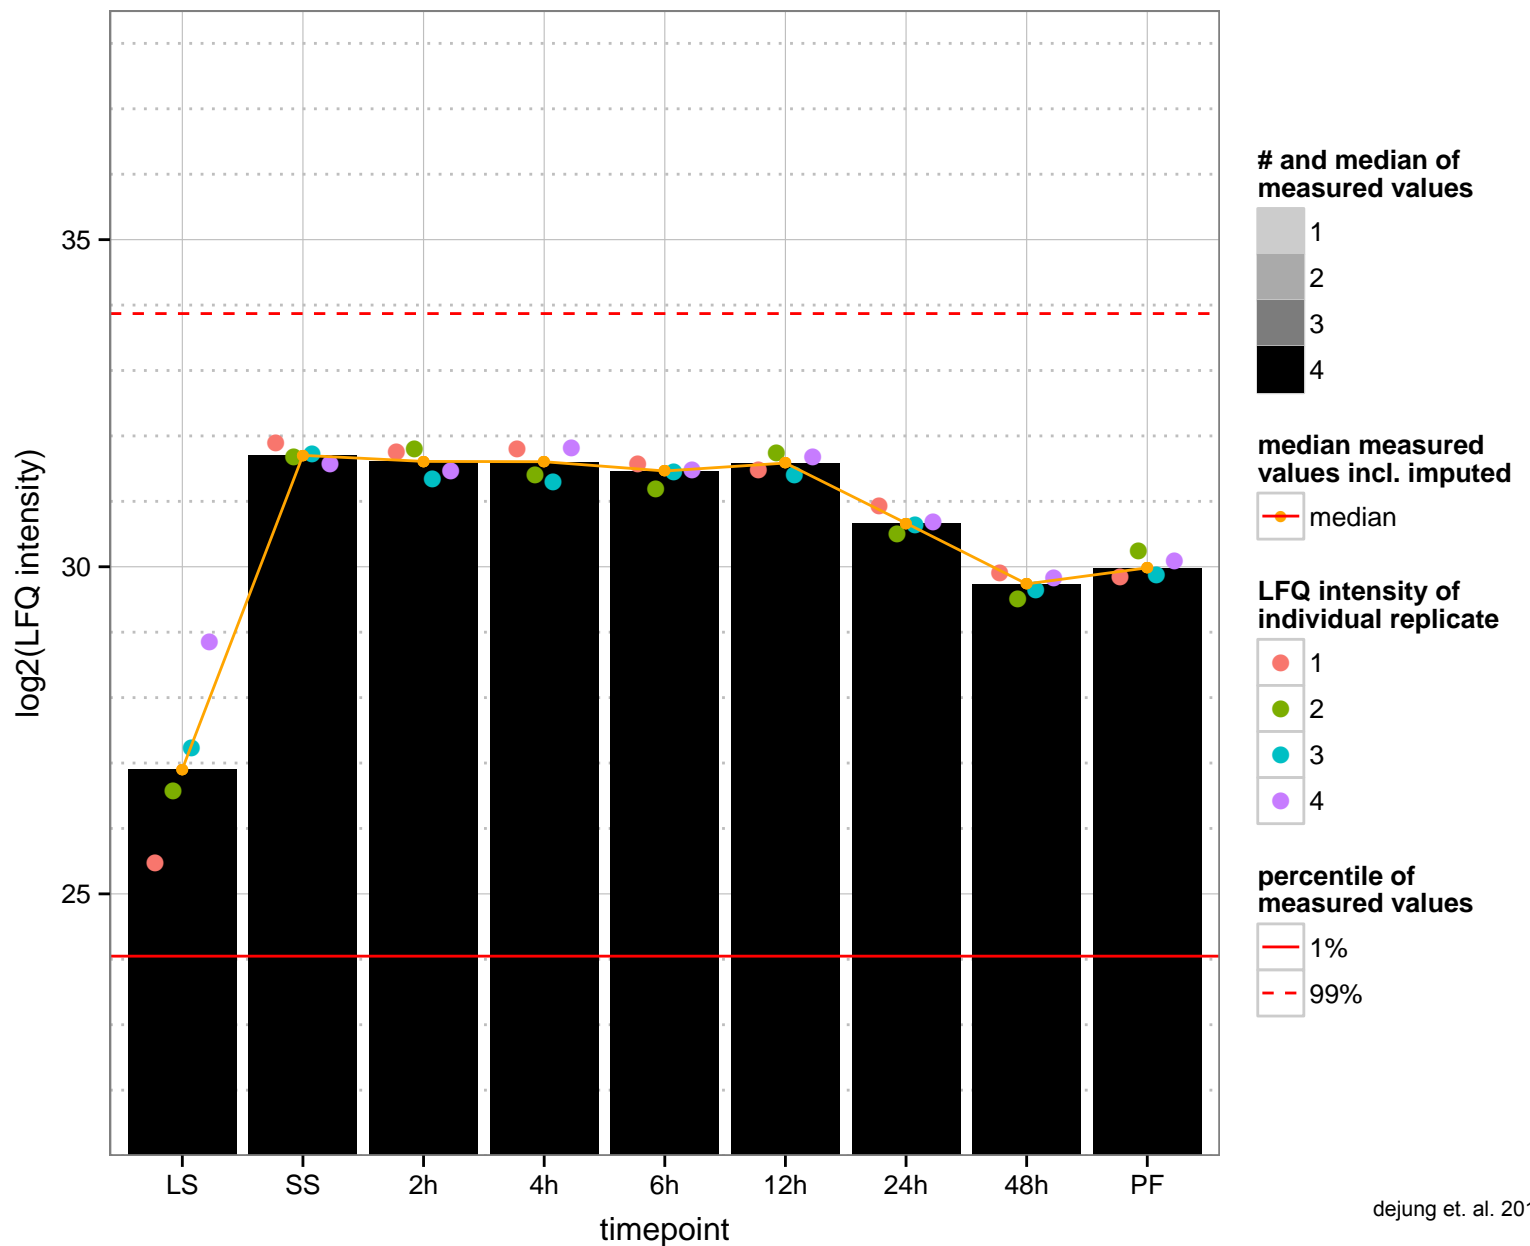

endoplasmic reticulum oxidoreductin, putative, pol-associated gene 1

Tb927.8.4890

AGOF: disulfide oxidoreductase activity, electron carrier activity, flavin adenine dinucleotide binding, oxidoreductase activity, a

AGOC: endoplasmic reticulum membrane, integral to membrane

AGOP: oxidation-reduction process, protein thiol-disulfide exchange

PGOF: flavin adenine dinucleotide binding, oxidoreductase activity, acting on a sulfur group of donors, disulfide as acceptor

PGOC: endoplasmic reticulum membrane

PGOP: oxidation-reduction process, protein thiol-disulfide exchange

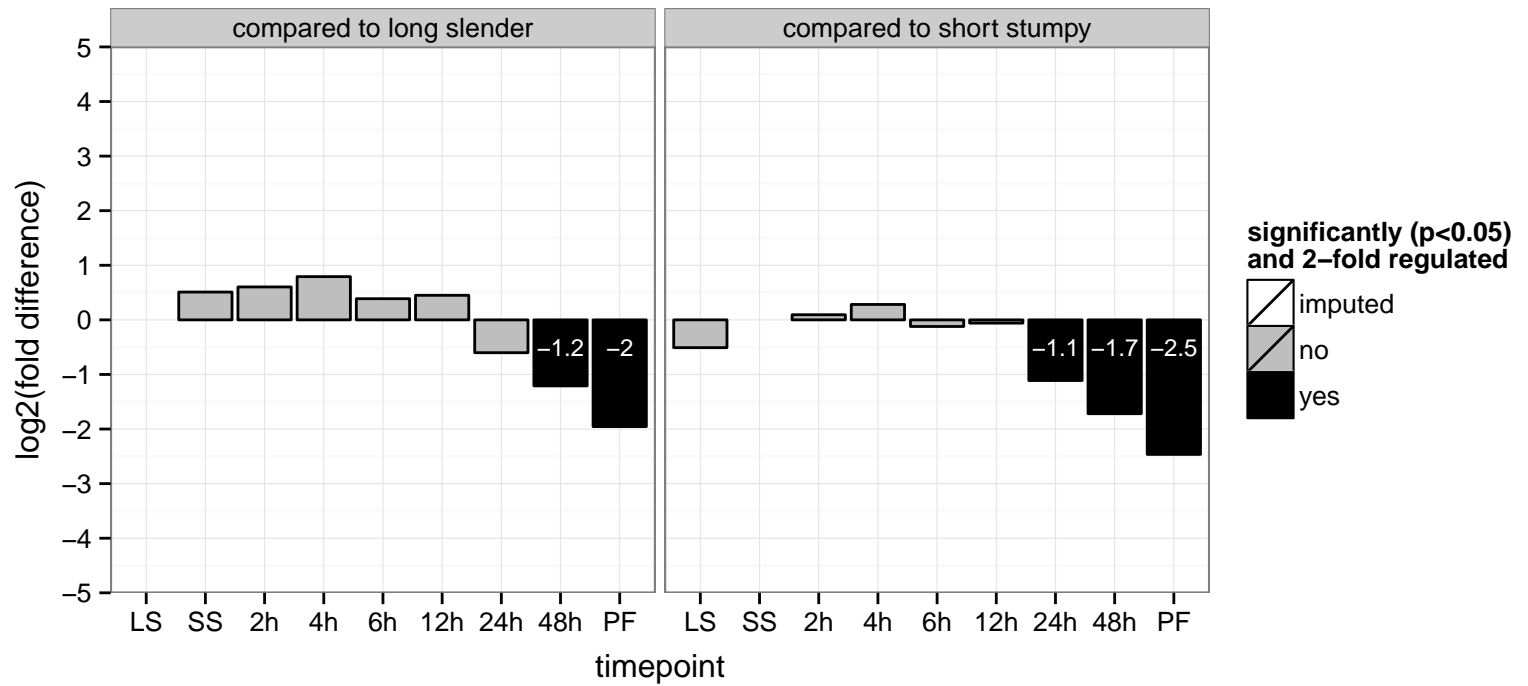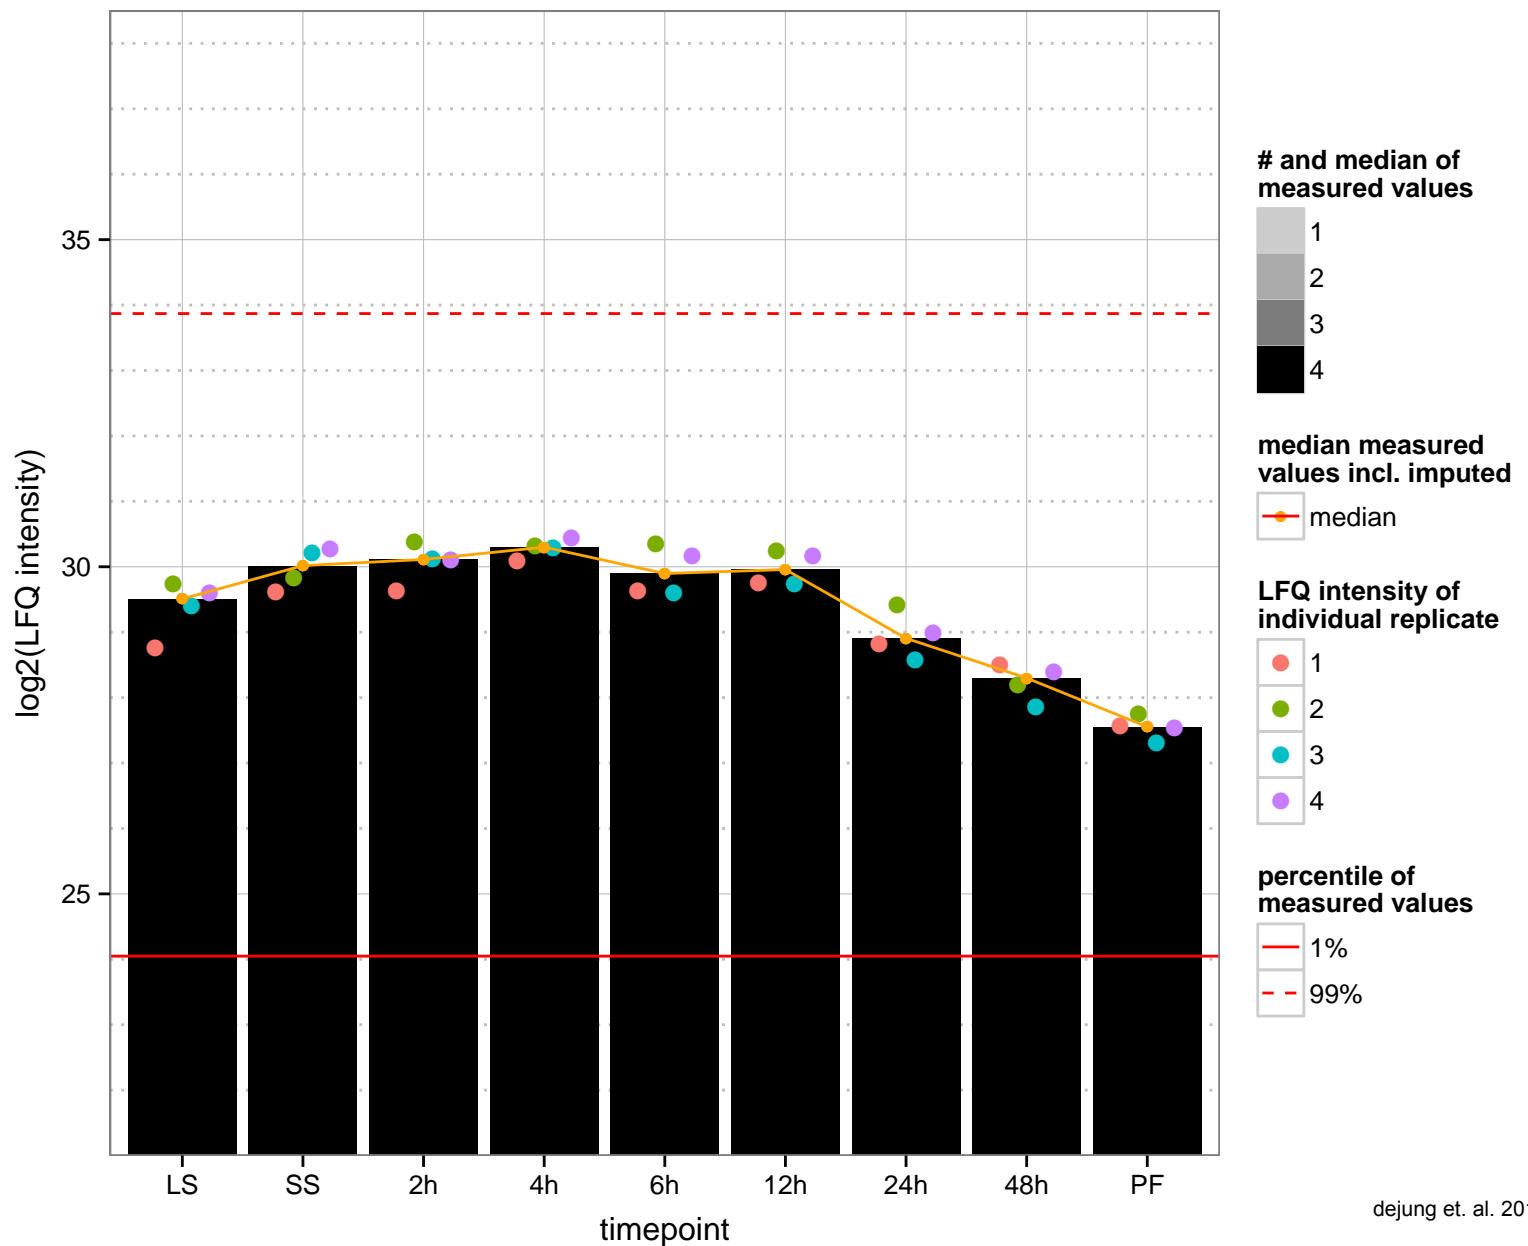

hypothetical protein, conserved  
 Tb927.8.5050  
 AGOF: null  
 AGOC: null  
 AGOP: null  
 PGOF: null  
 PGO: null  
 PGOP: null

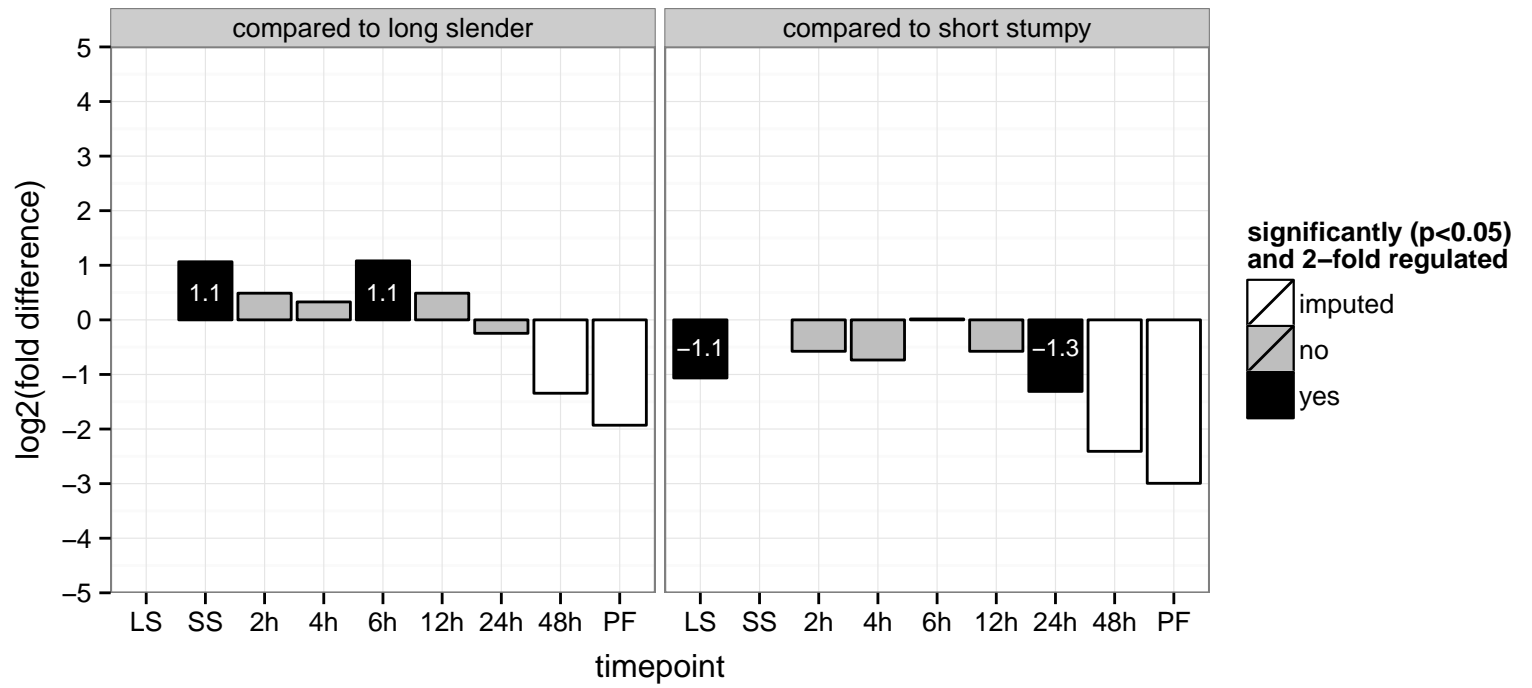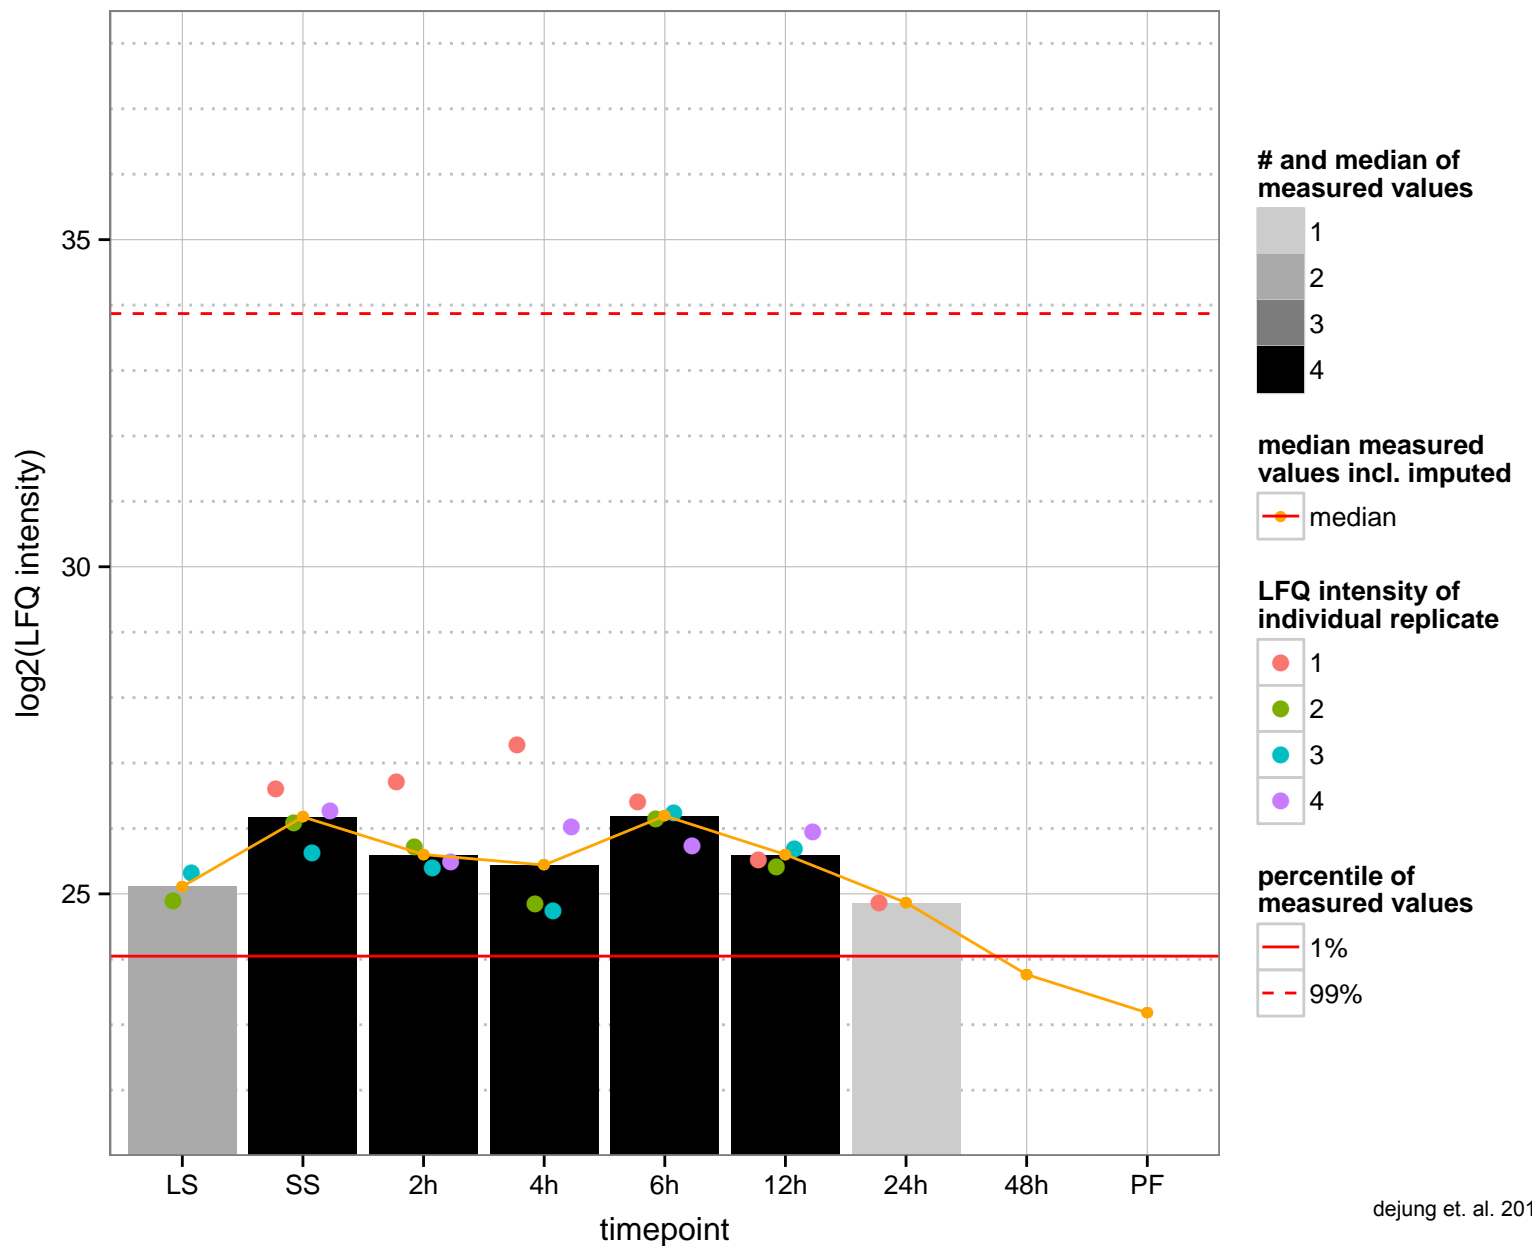

hypothetical protein, conserved

Tb927.8.5080

AGOF: carbon-nitrogen ligase activity, with glutamine as amido-N-donor

AGOC: null

AGOP: null

PGOF: carbon-nitrogen ligase activity, with glutamine as amido-N-donor

PGOC: null

PGOP: null

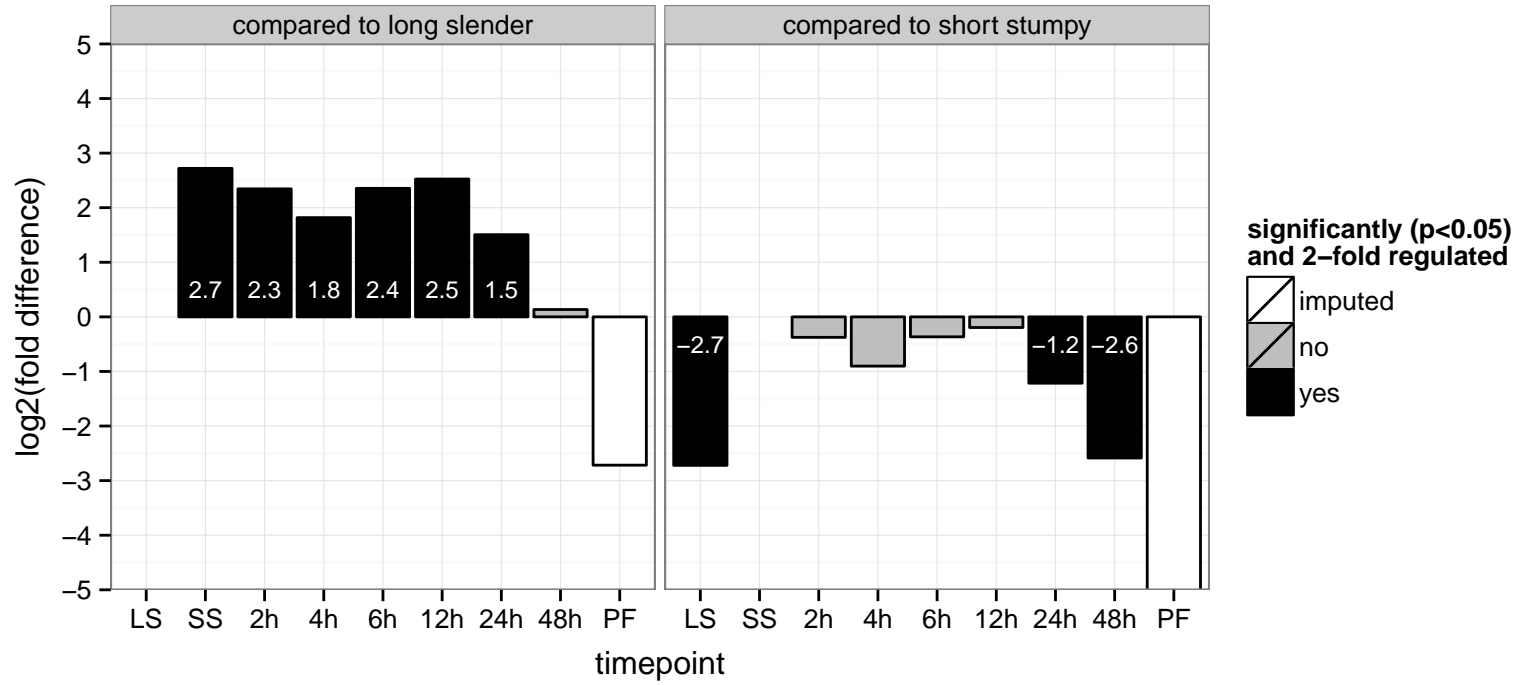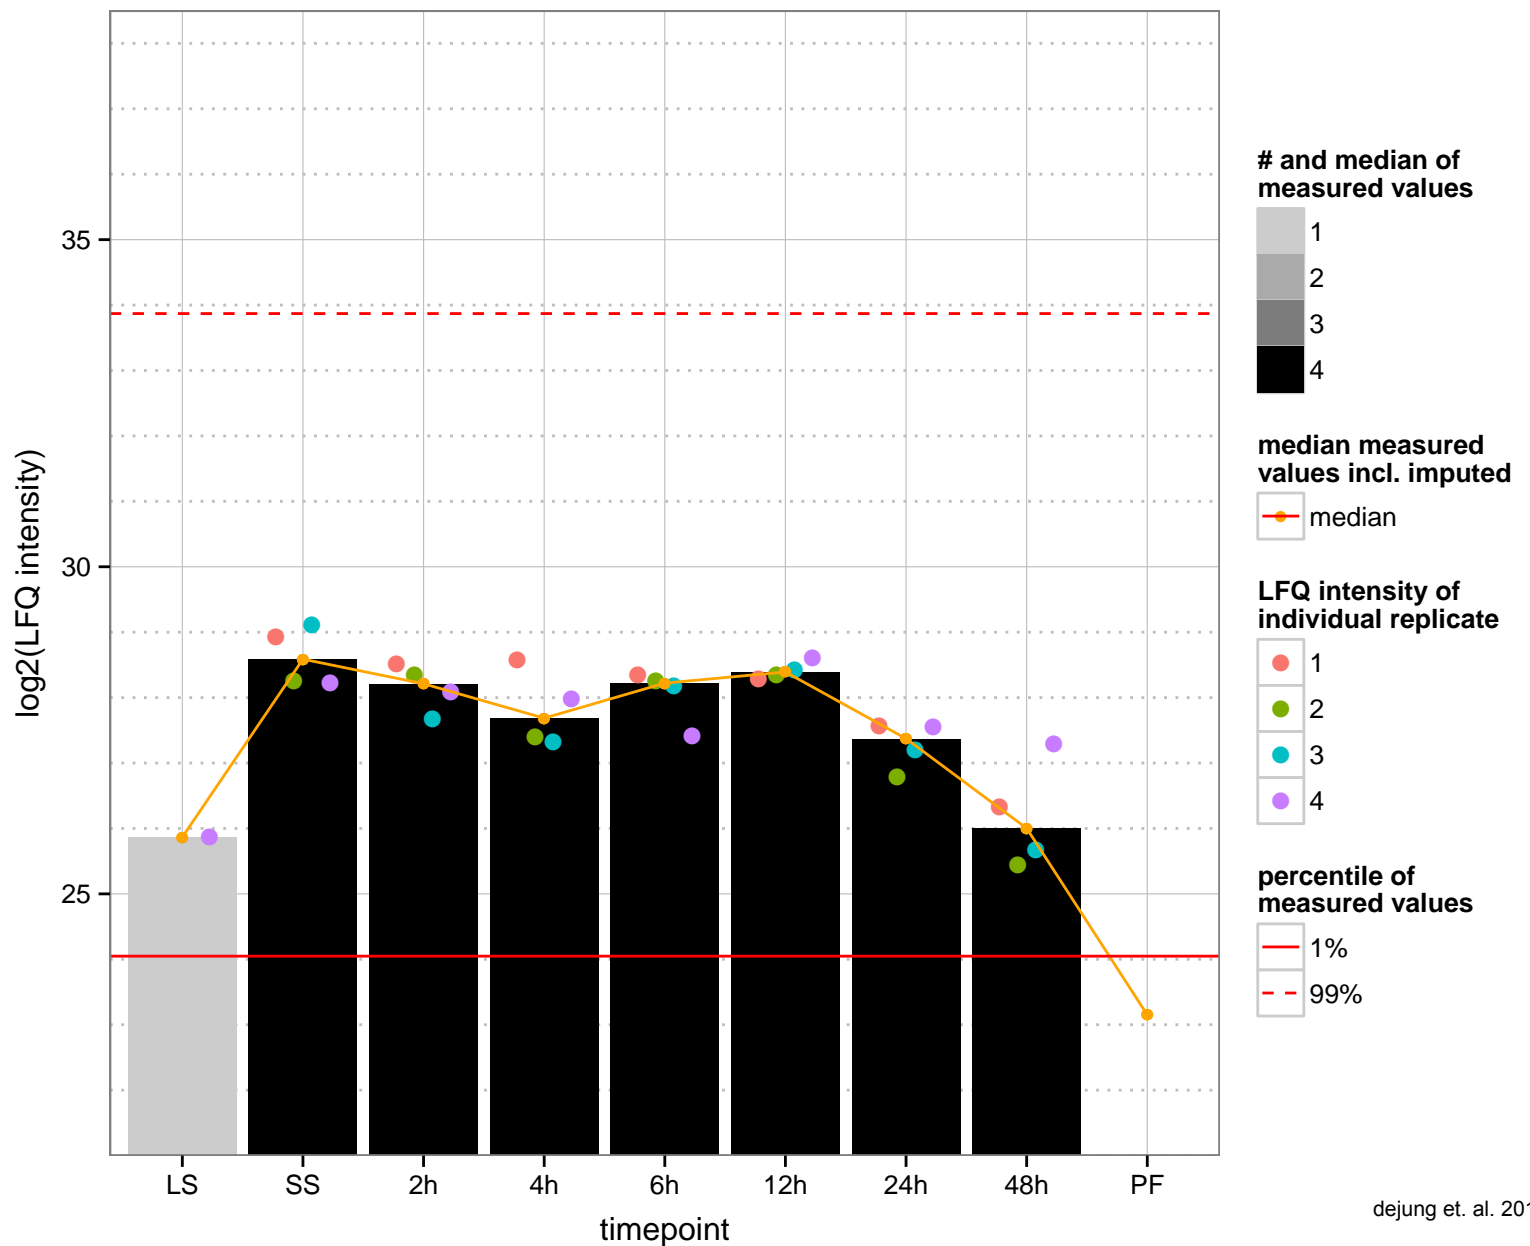

serine/threonine-protein kinase NrkA (NRKB)

Tb927.8.6930

AGOF: ATP binding, protein serine/threonine kinase activity, protein tyrosine kinase activity

AGOC: null

AGOP: protein phosphorylation

PGOF: ATP binding, phospholipid binding, protein binding, protein kinase activity, transferase activity, transferring phosphorus

PGOC: null

PGOP: protein phosphorylation

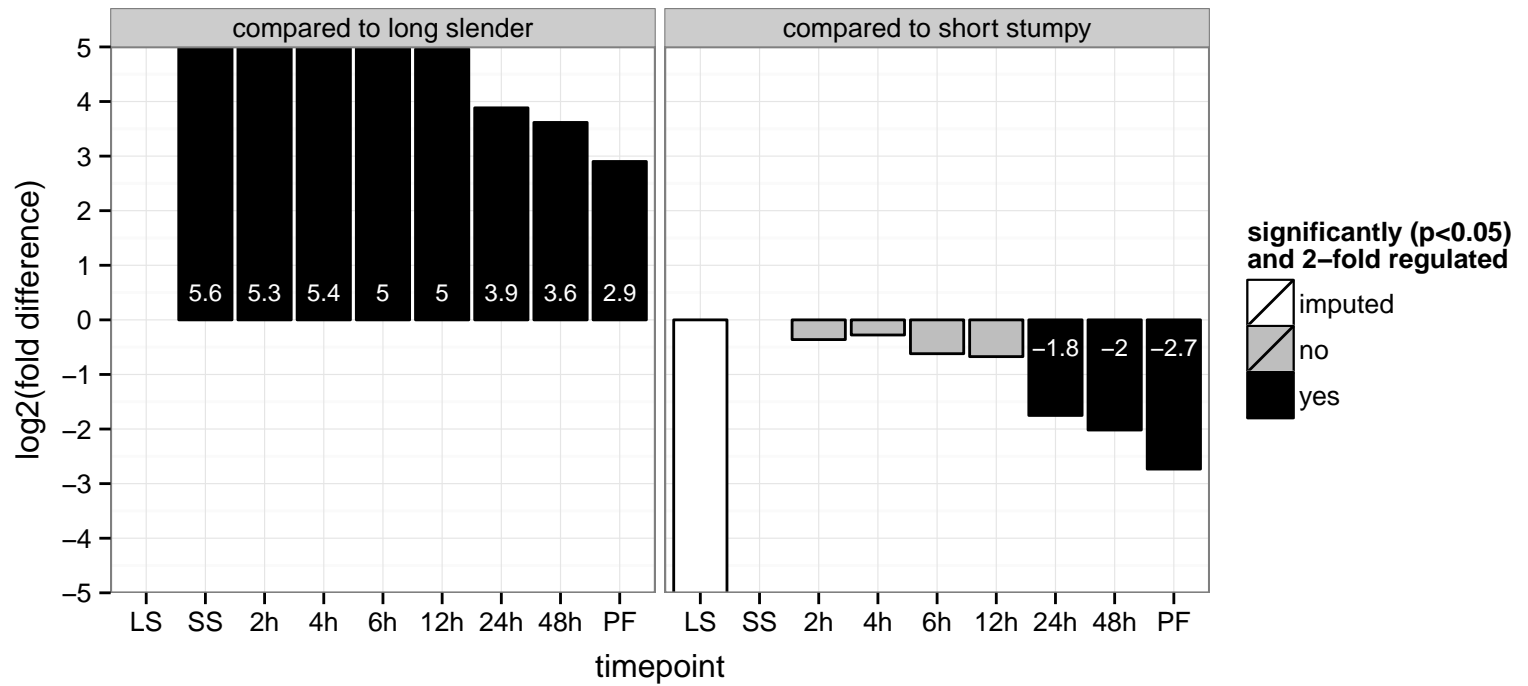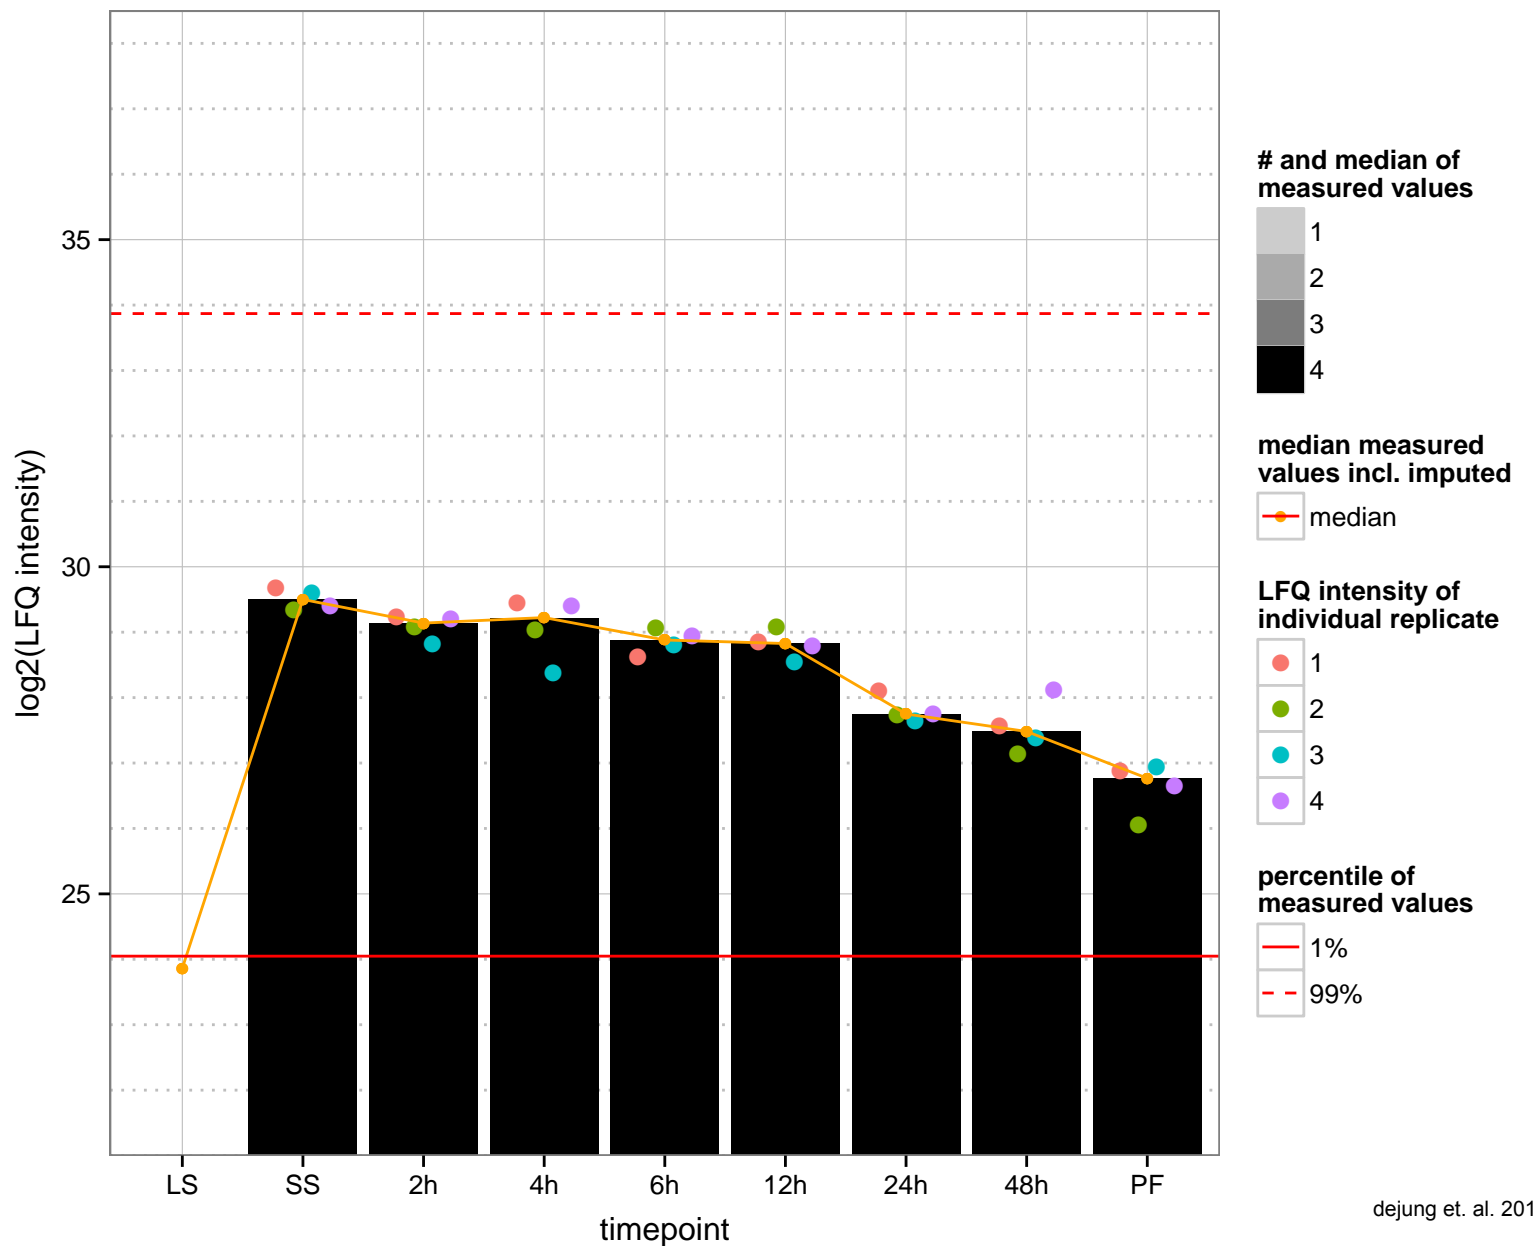



hypothetical protein  
 Tb927.8.7970  
 AGOF: null  
 AGOC: null  
 AGOP: null  
 PGO: null  
 PGOC: null  
 PGOP: null

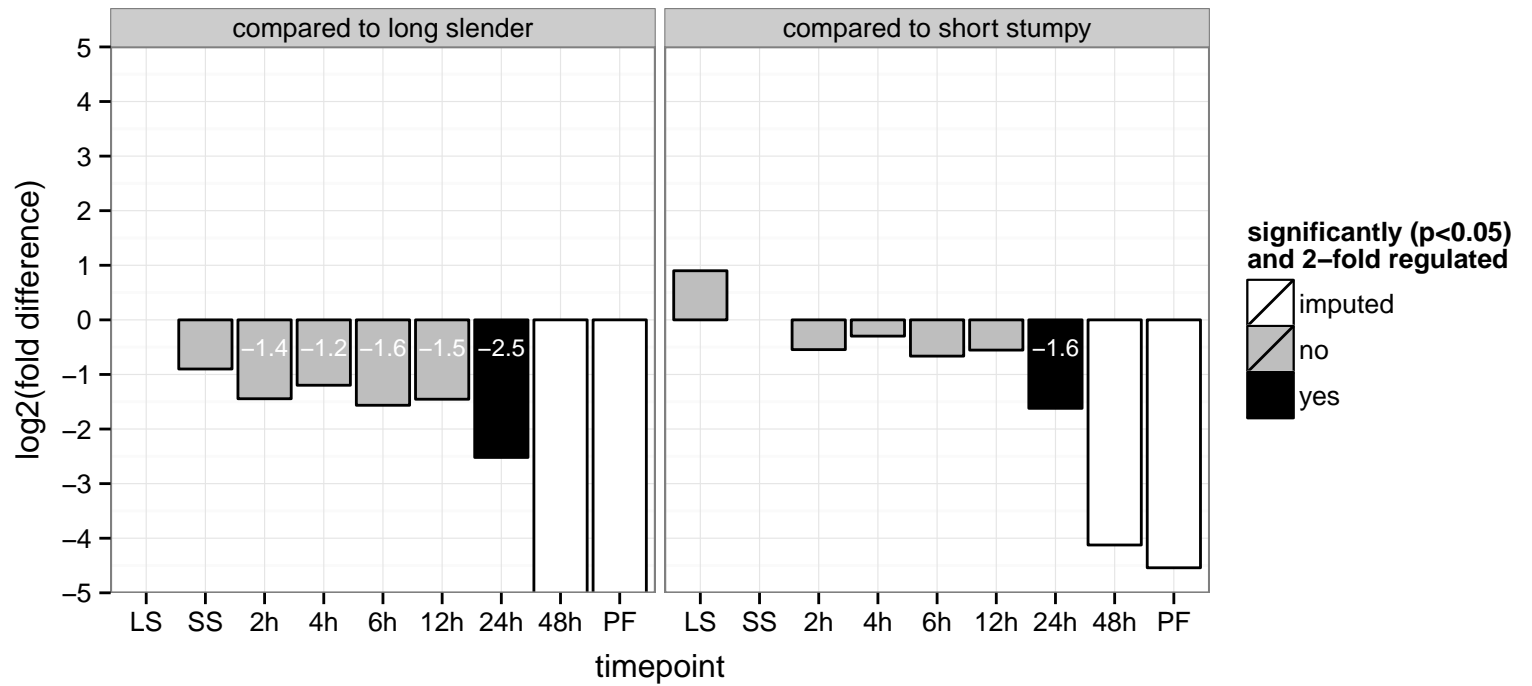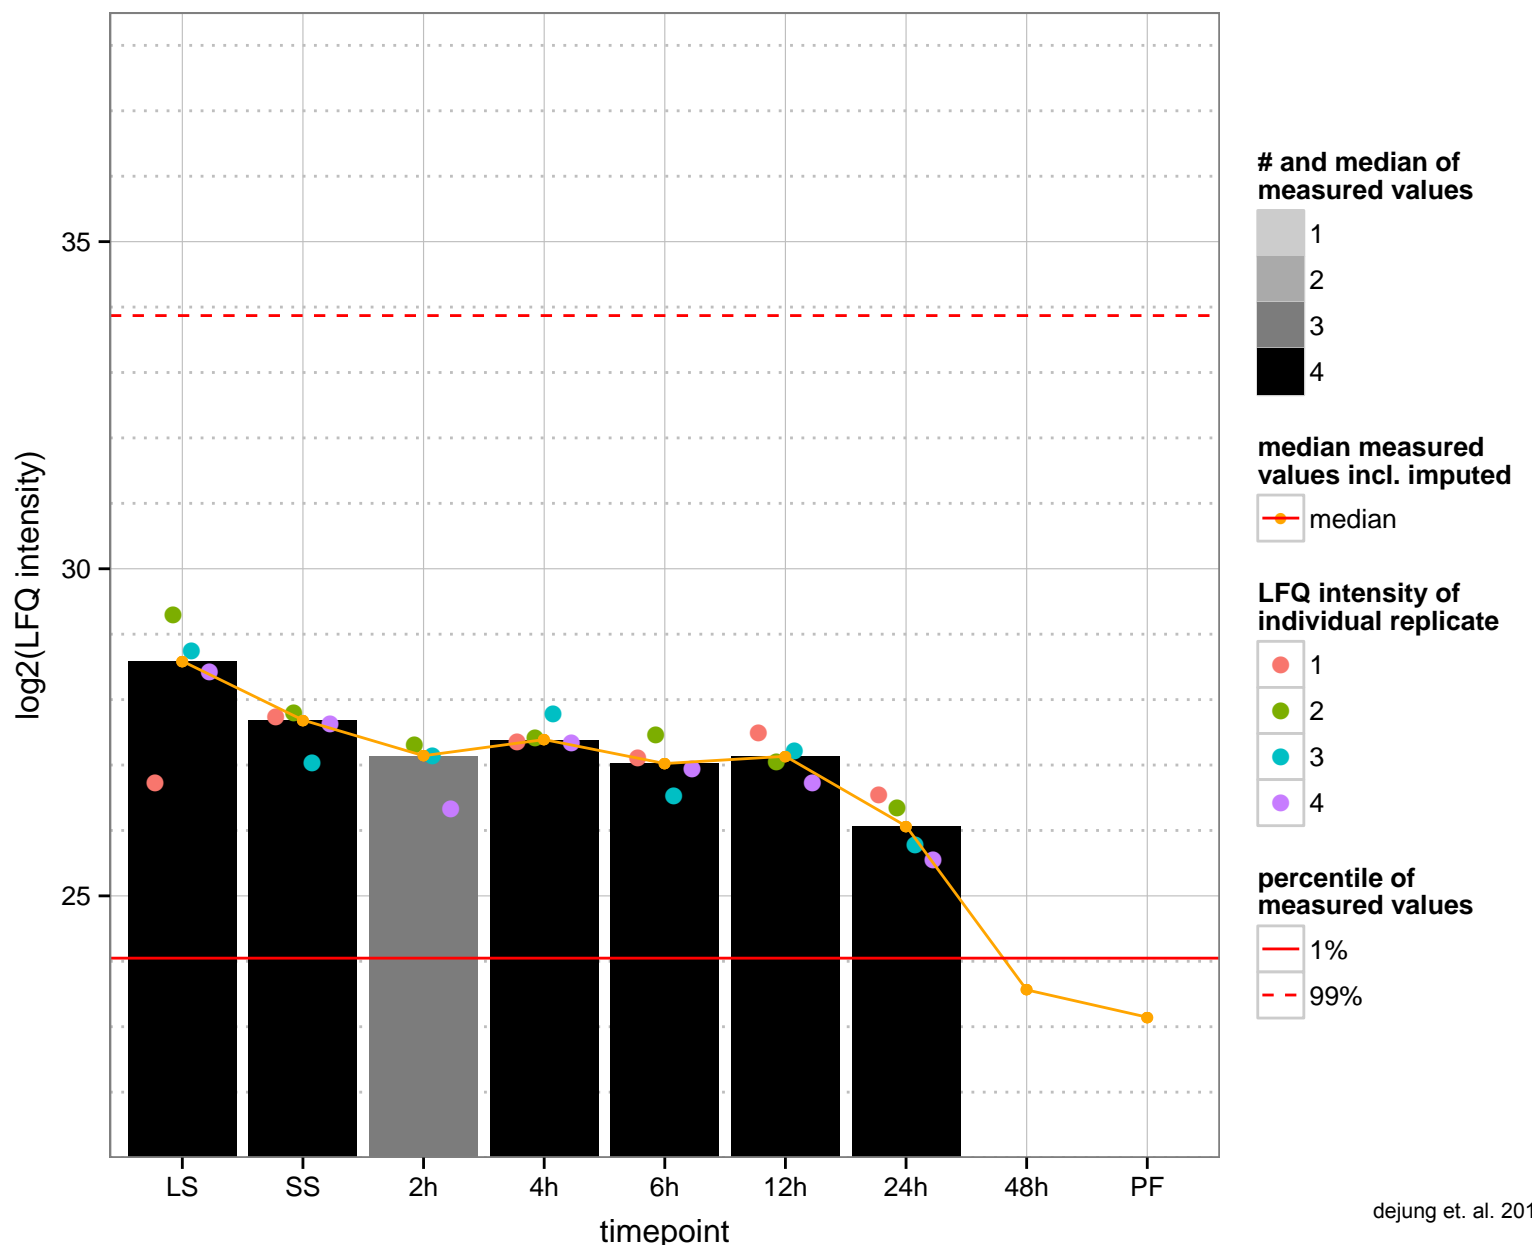

small GTP-binding rab protein, putative

Tb927.8.8140

AGOF: GTP binding

AGOC: intracellular

AGOP: protein transport, small GTPase mediated signal transduction

PGOF: GTP binding, GTPase activity

PGOC: intracellular, membrane

PGOP: GTP catabolic process, protein transport, signal transduction, small GTPase mediated signal transduction

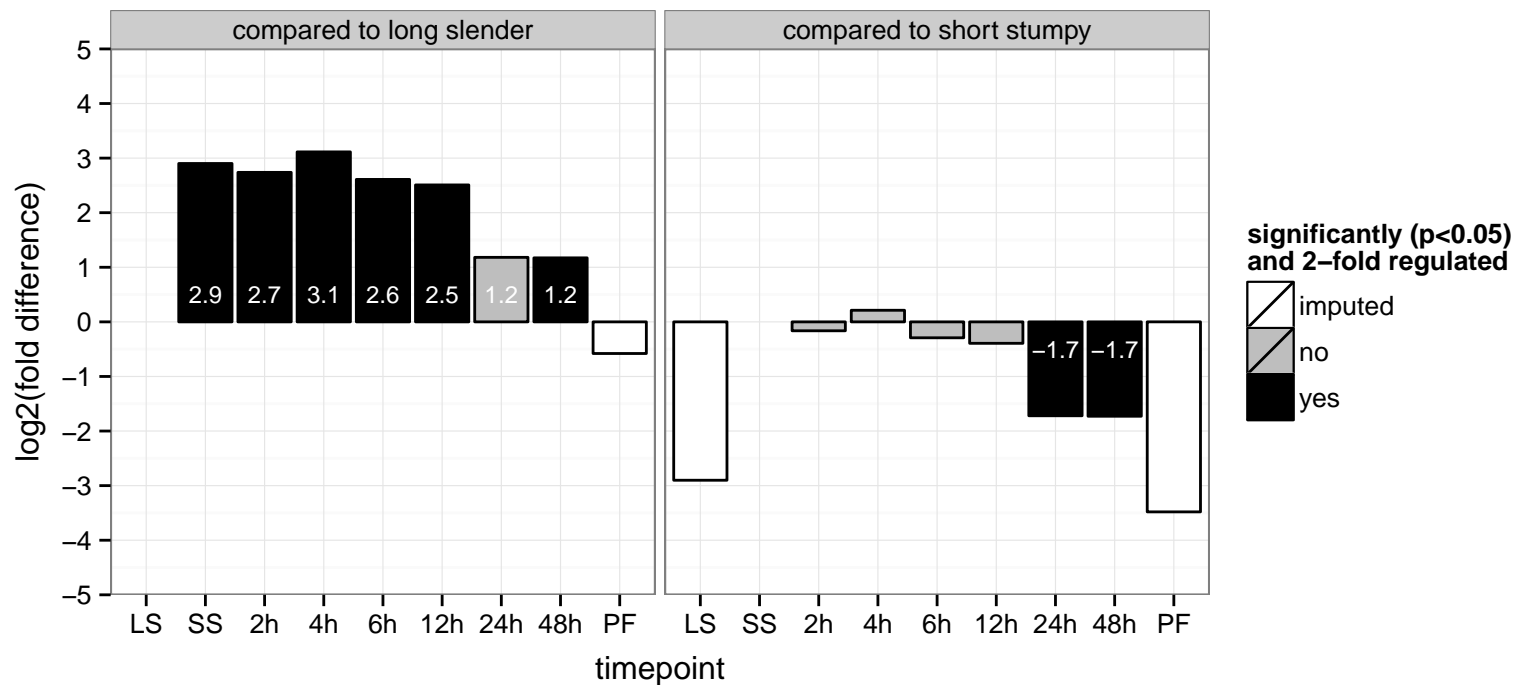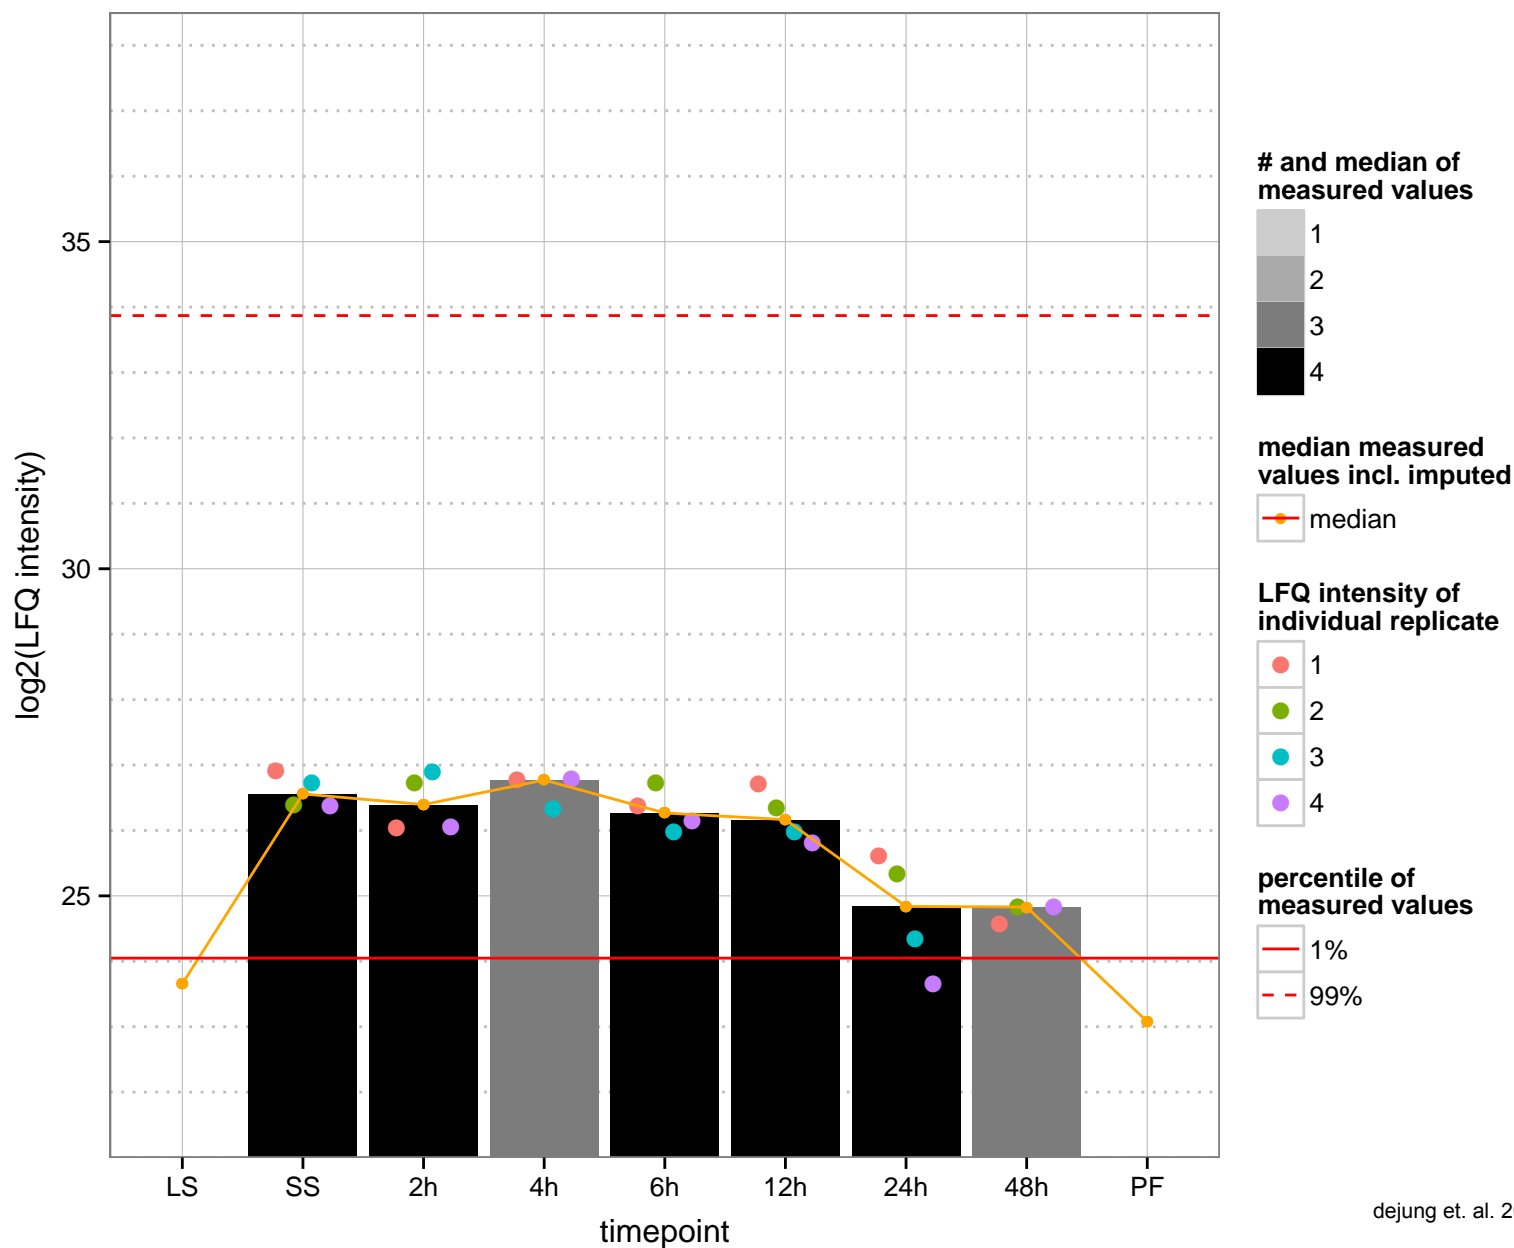

hypothetical protein, conserved  
 Tb927.8.8150  
 AGOF: null  
 AGOC: null  
 AGOP: null  
 PGO: protein binding  
 PGO: null  
 PGO: null

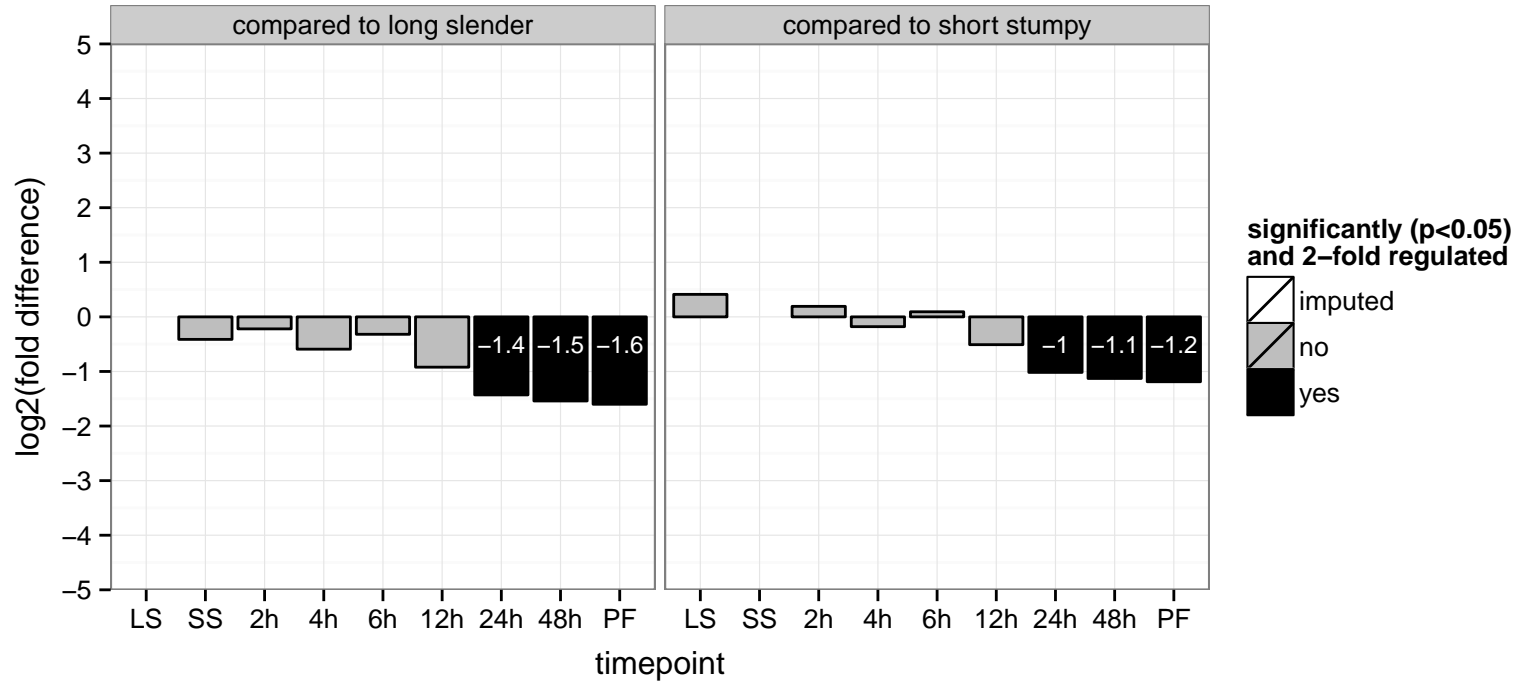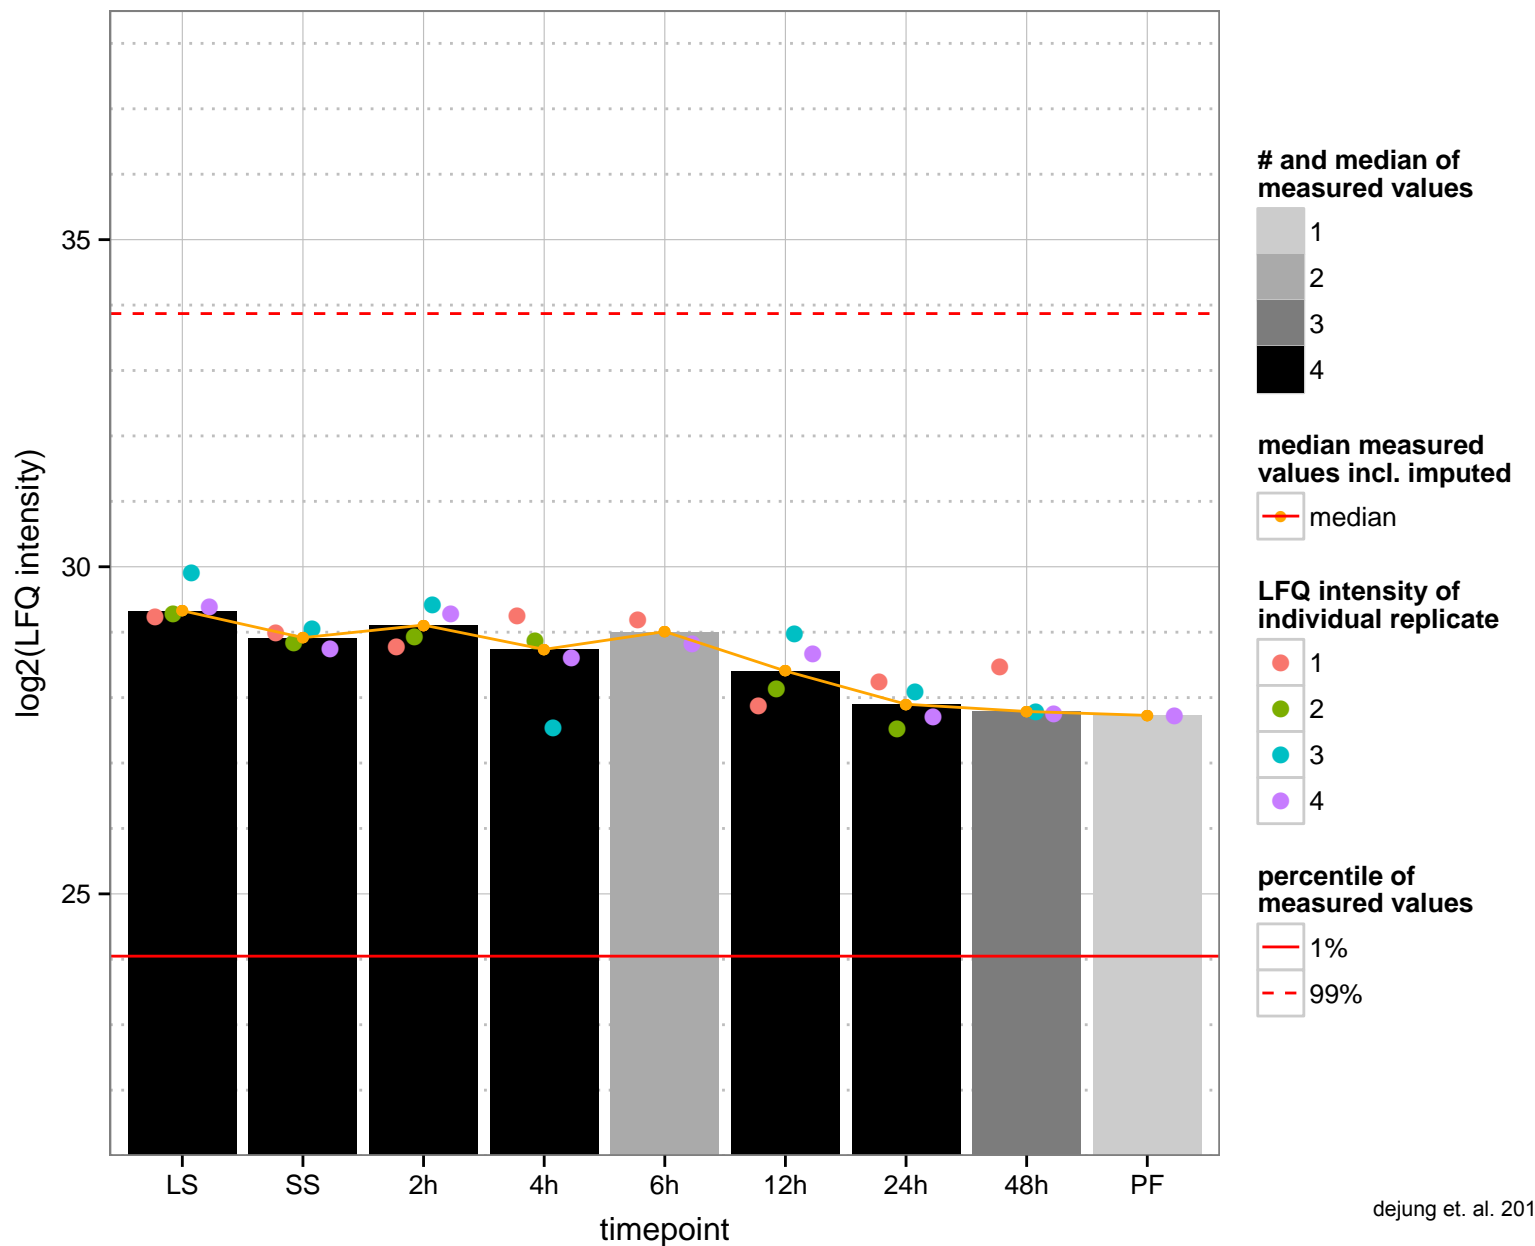

amino acid transporter, putative  
 Tb927.8.8230  
 AGOF: amine transmembrane transporter activity  
 AGOC: integral to membrane  
 AGOP: amino acid transport  
 PGO: null  
 PGO: null  
 PGO: null

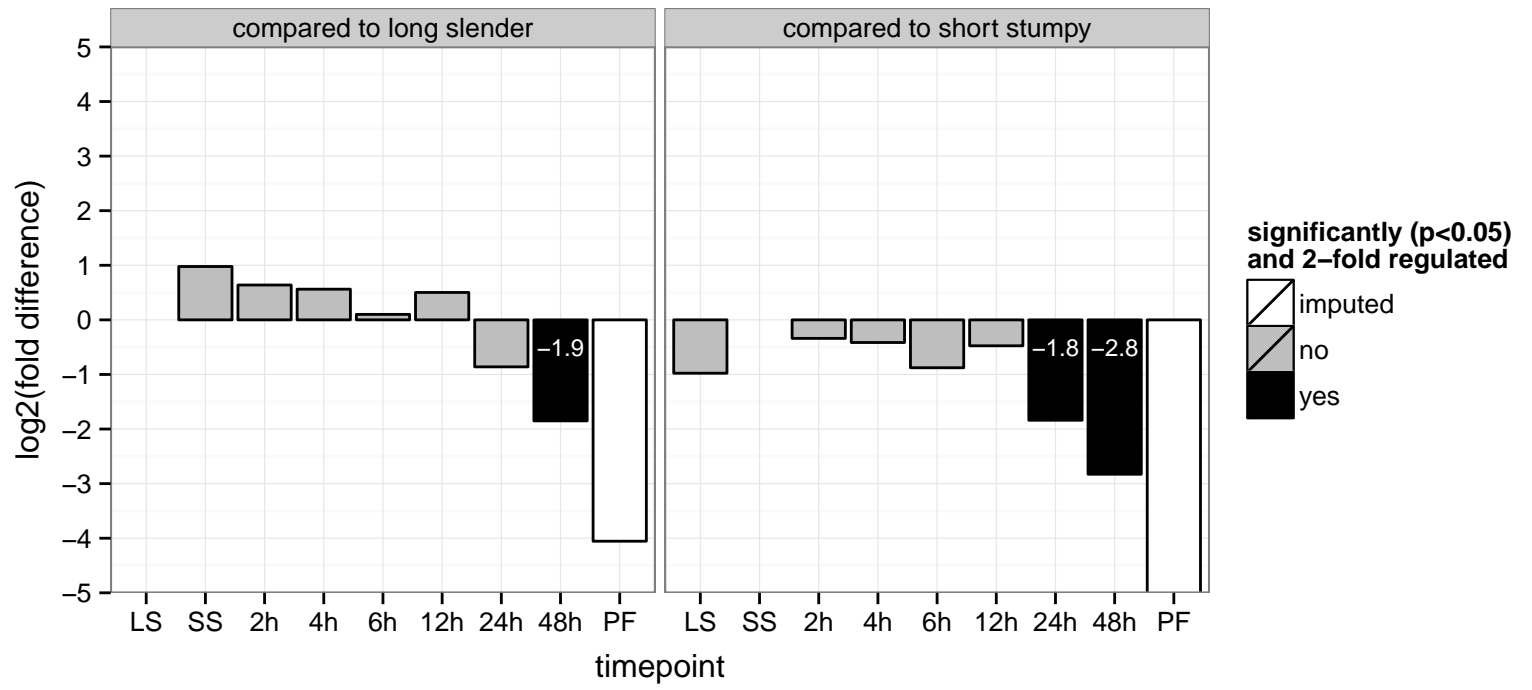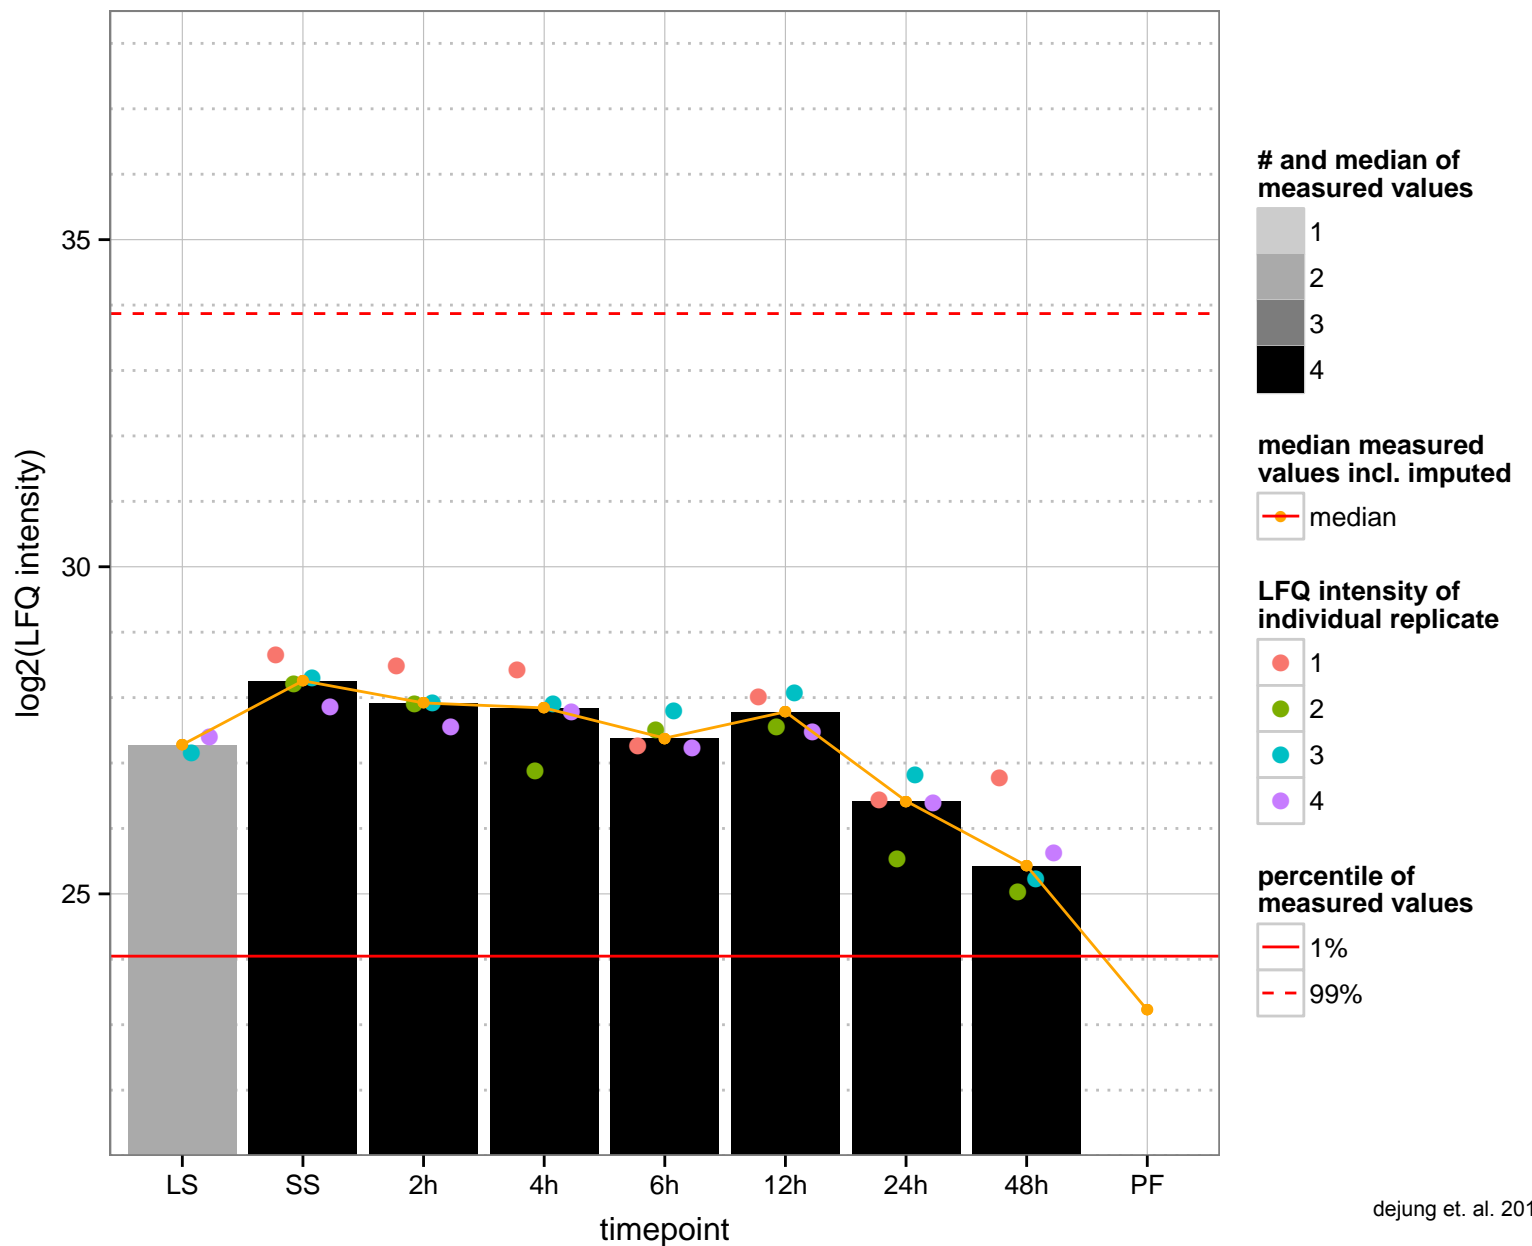

hypothetical protein, conserved  
 Tb927.8.8280  
 AGOF: null  
 AGOC: null  
 AGOP: null  
 PGO: null  
 PGOC: null  
 PGOP: null

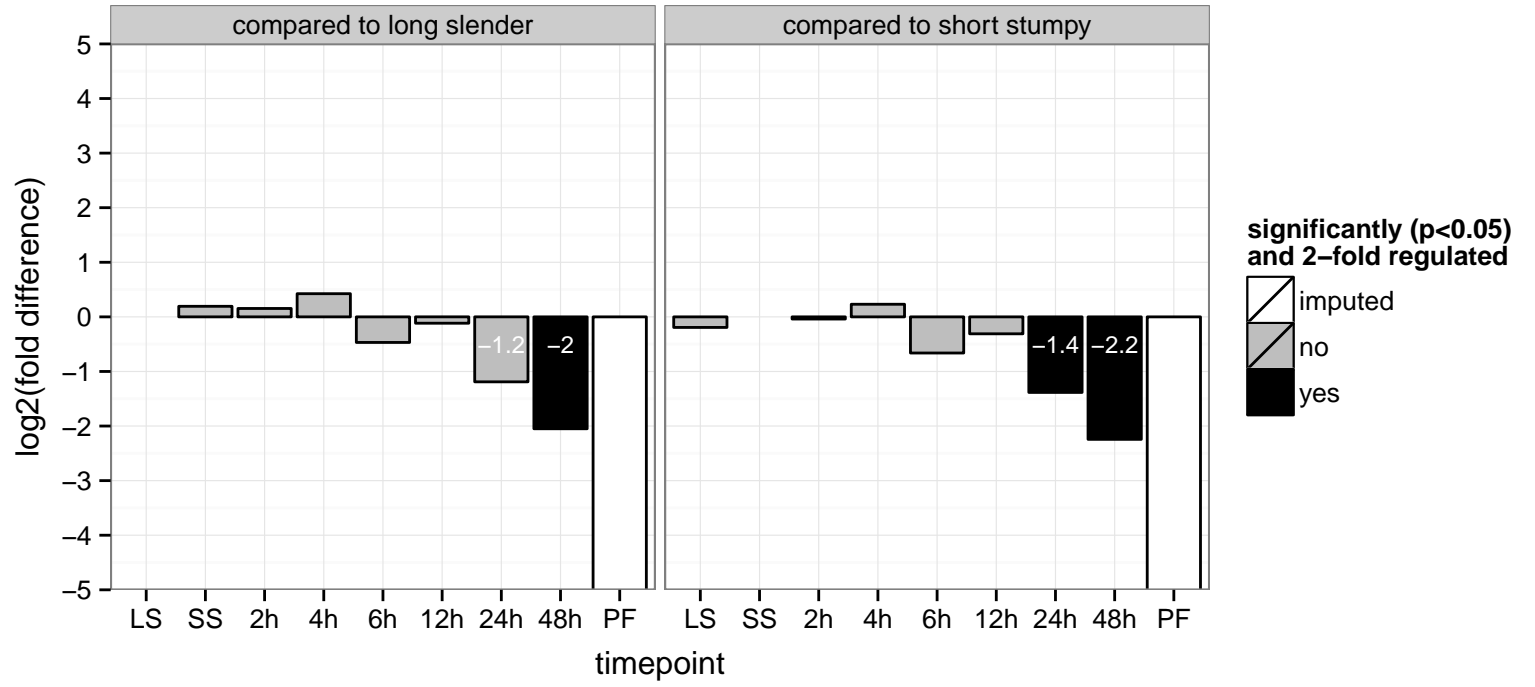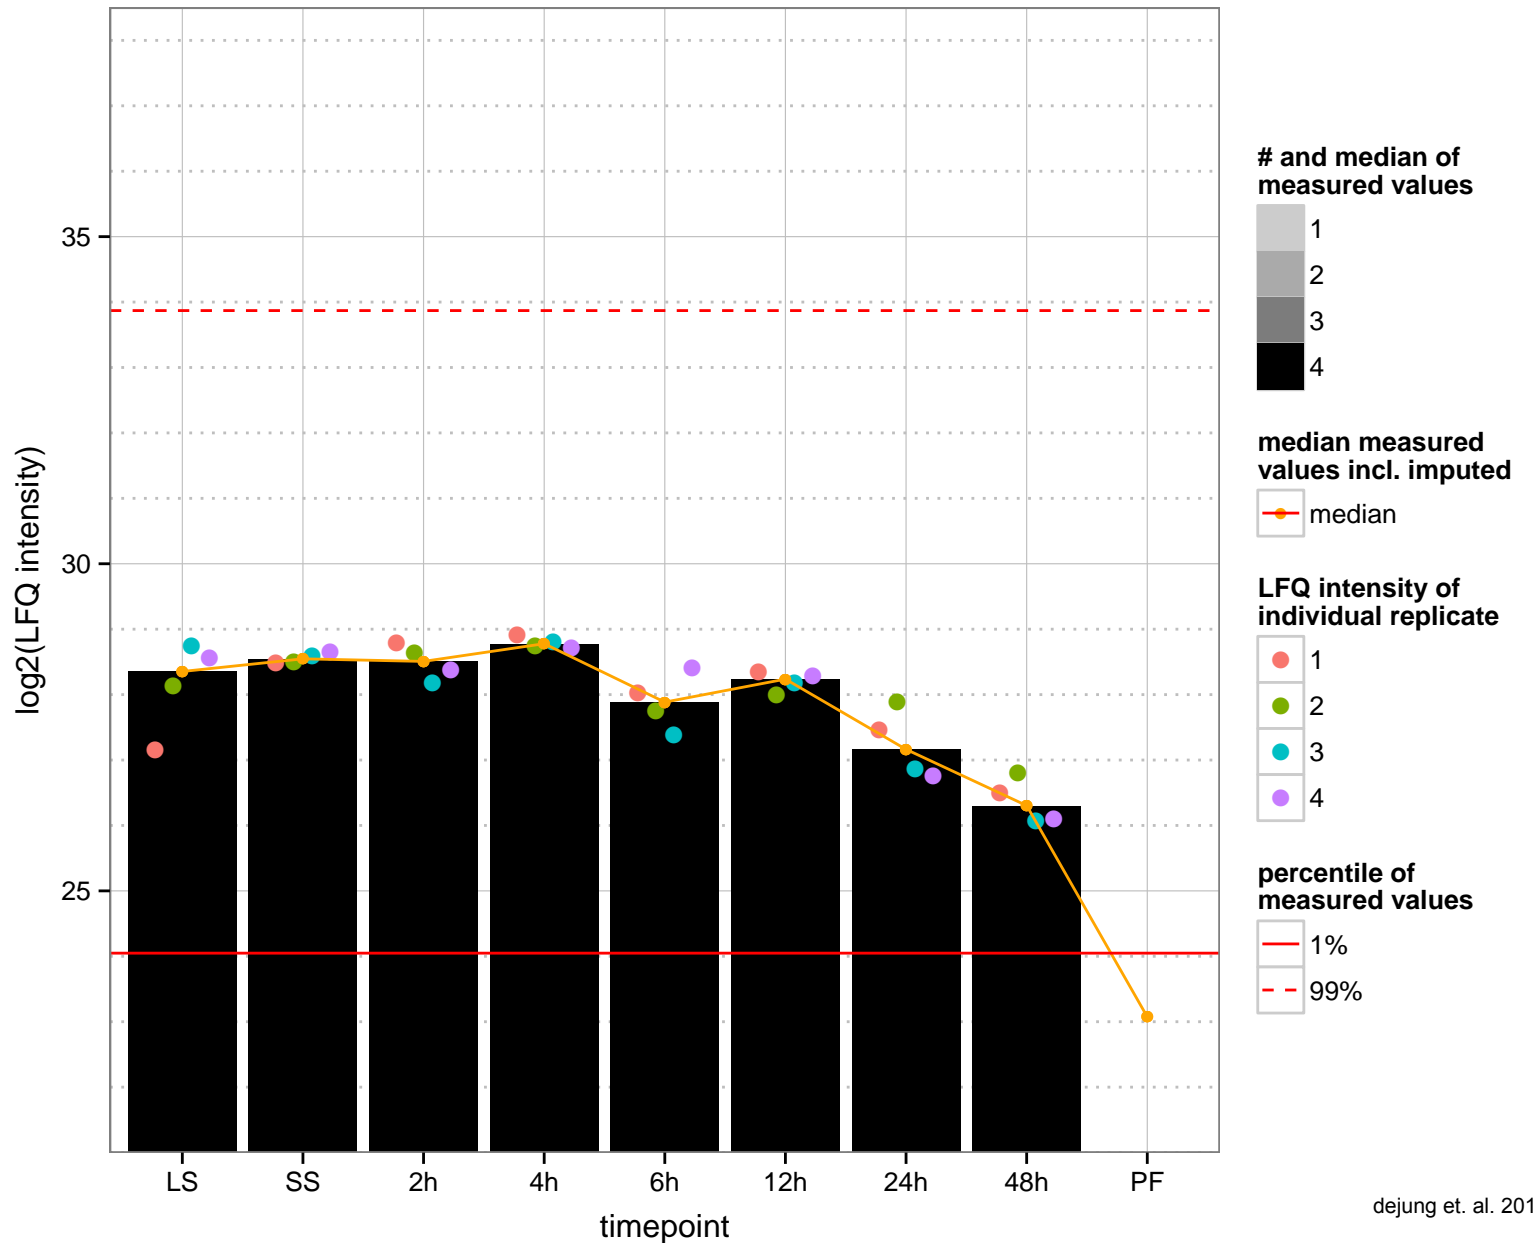

glycerol kinase, glycosomal (glk1)  
 Tb927.9.12630;Tb927.9.12590;Tb927.9.12570;Tb927.9.12550;Tb927.9.12610  
 AGOF: ATP binding, glycerol kinase activity  
 AGOC: glycosome  
 AGOP: carbohydrate metabolic process, glycerol-3-phosphate metabolic process  
 PGO: glycerol kinase activity, phosphotransferase activity, alcohol group as acceptor  
 PGO: null  
 PGO: carbohydrate metabolic process, glycerol-3-phosphate metabolic process

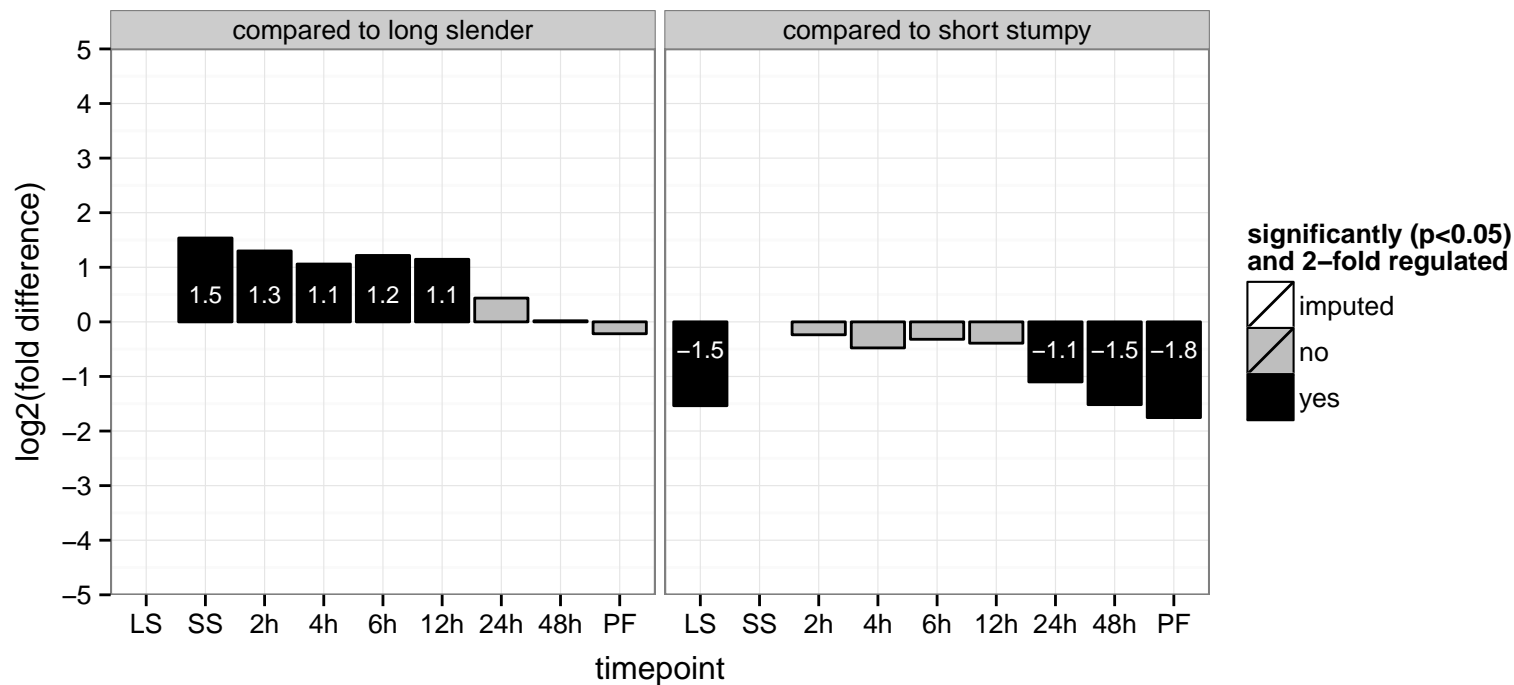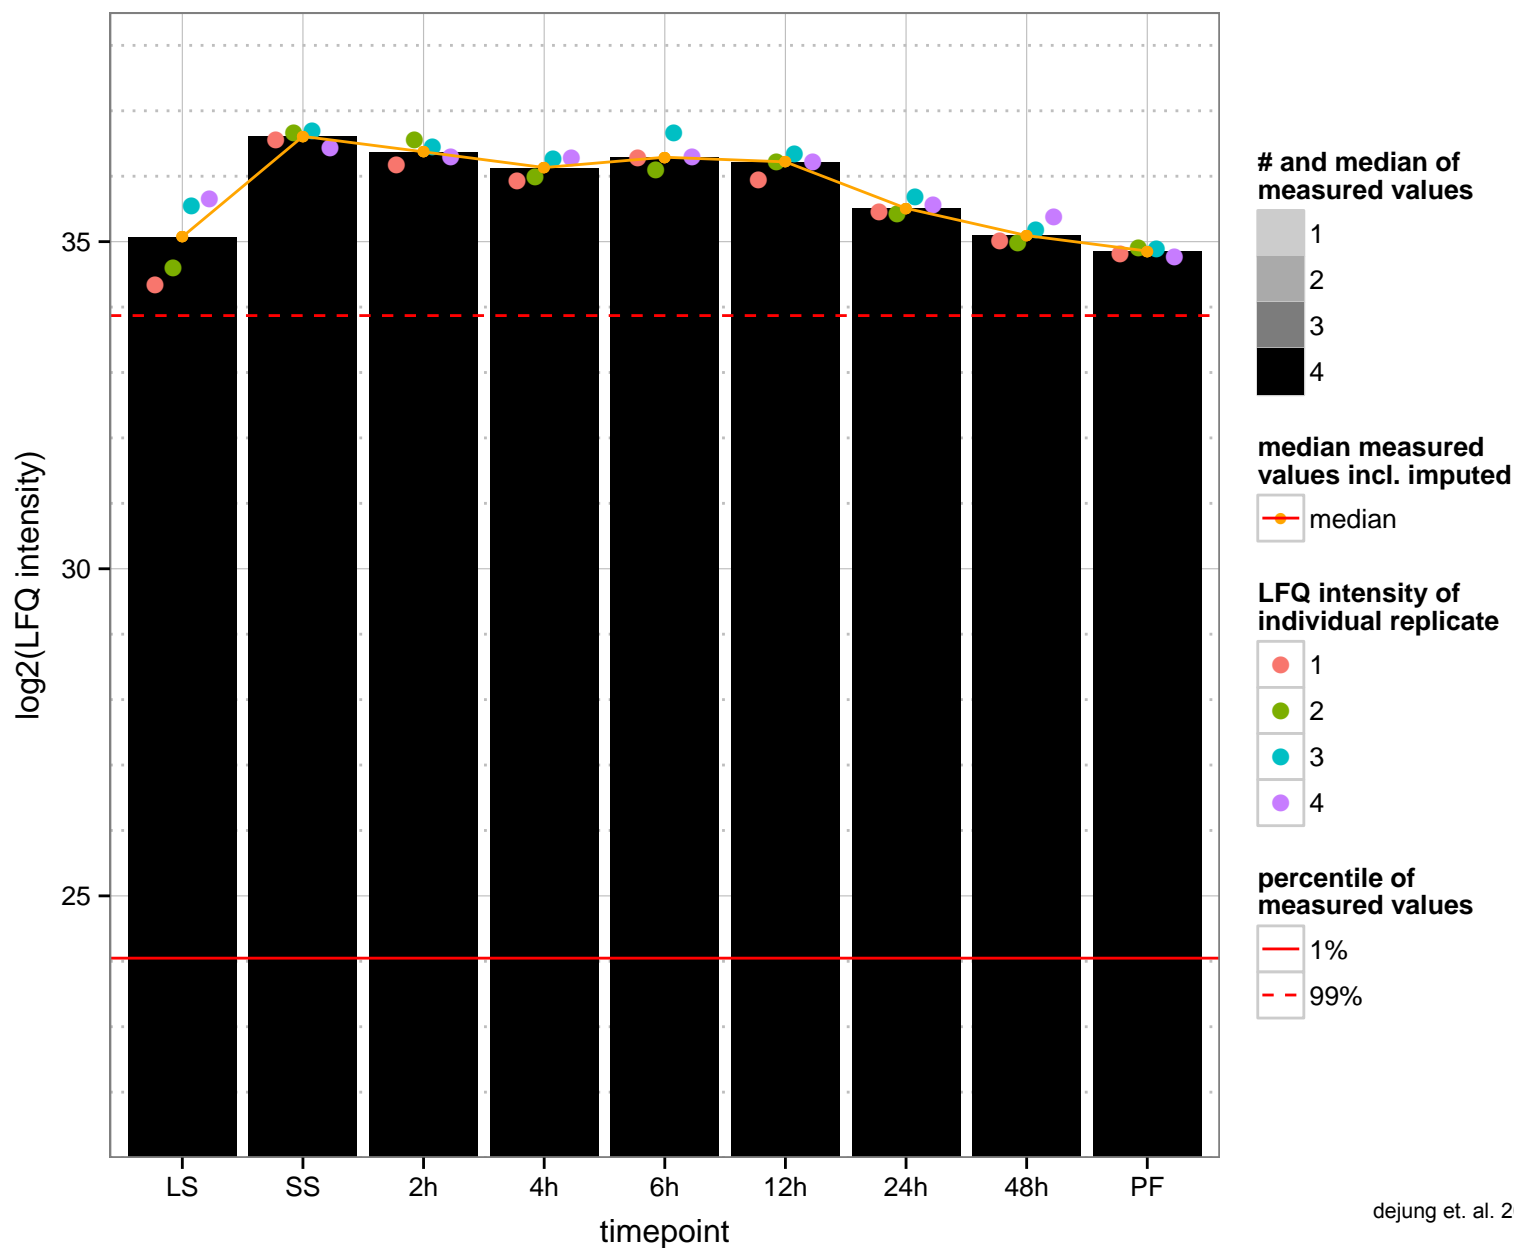

hypothetical protein, conserved  
 Tb927.9.13620  
 AGOF: null  
 AGOC: null  
 AGOP: null  
 PGO: null  
 PGOC: null  
 PGOP: null

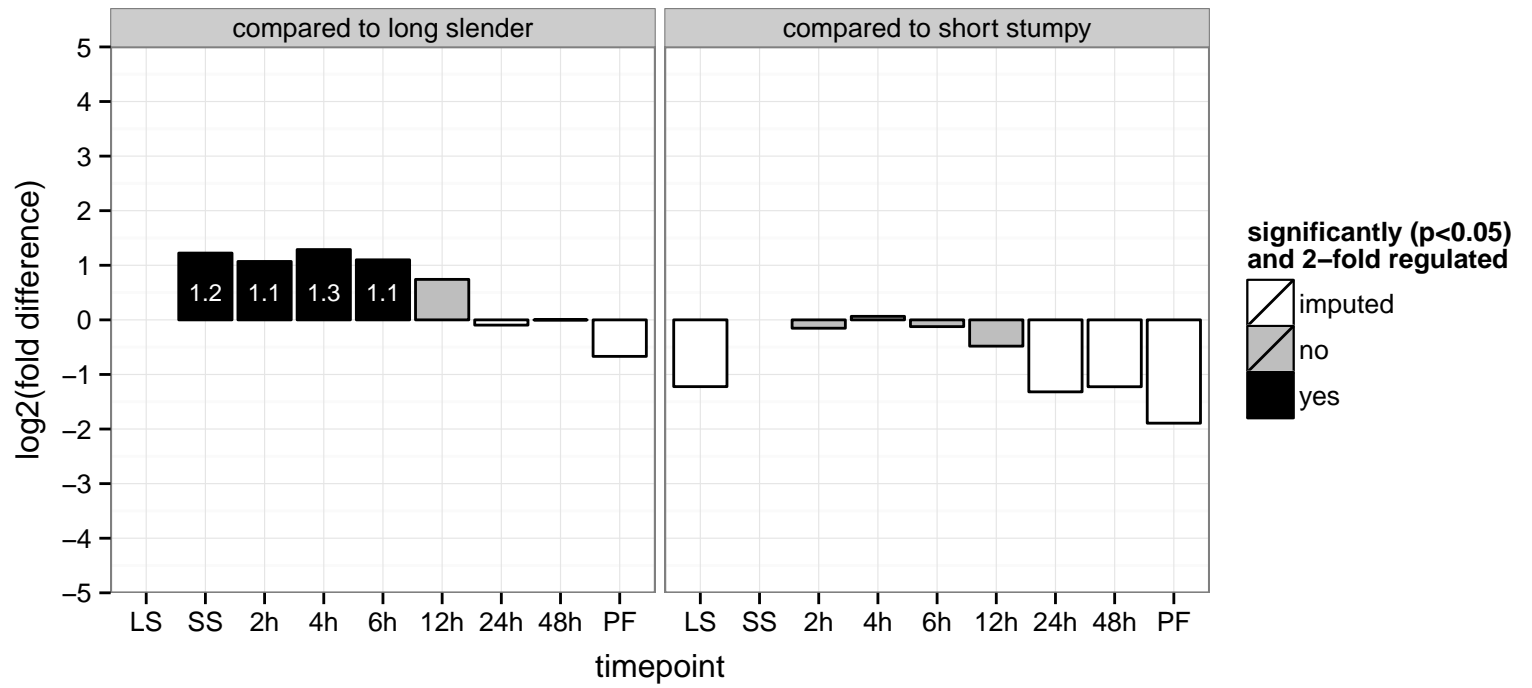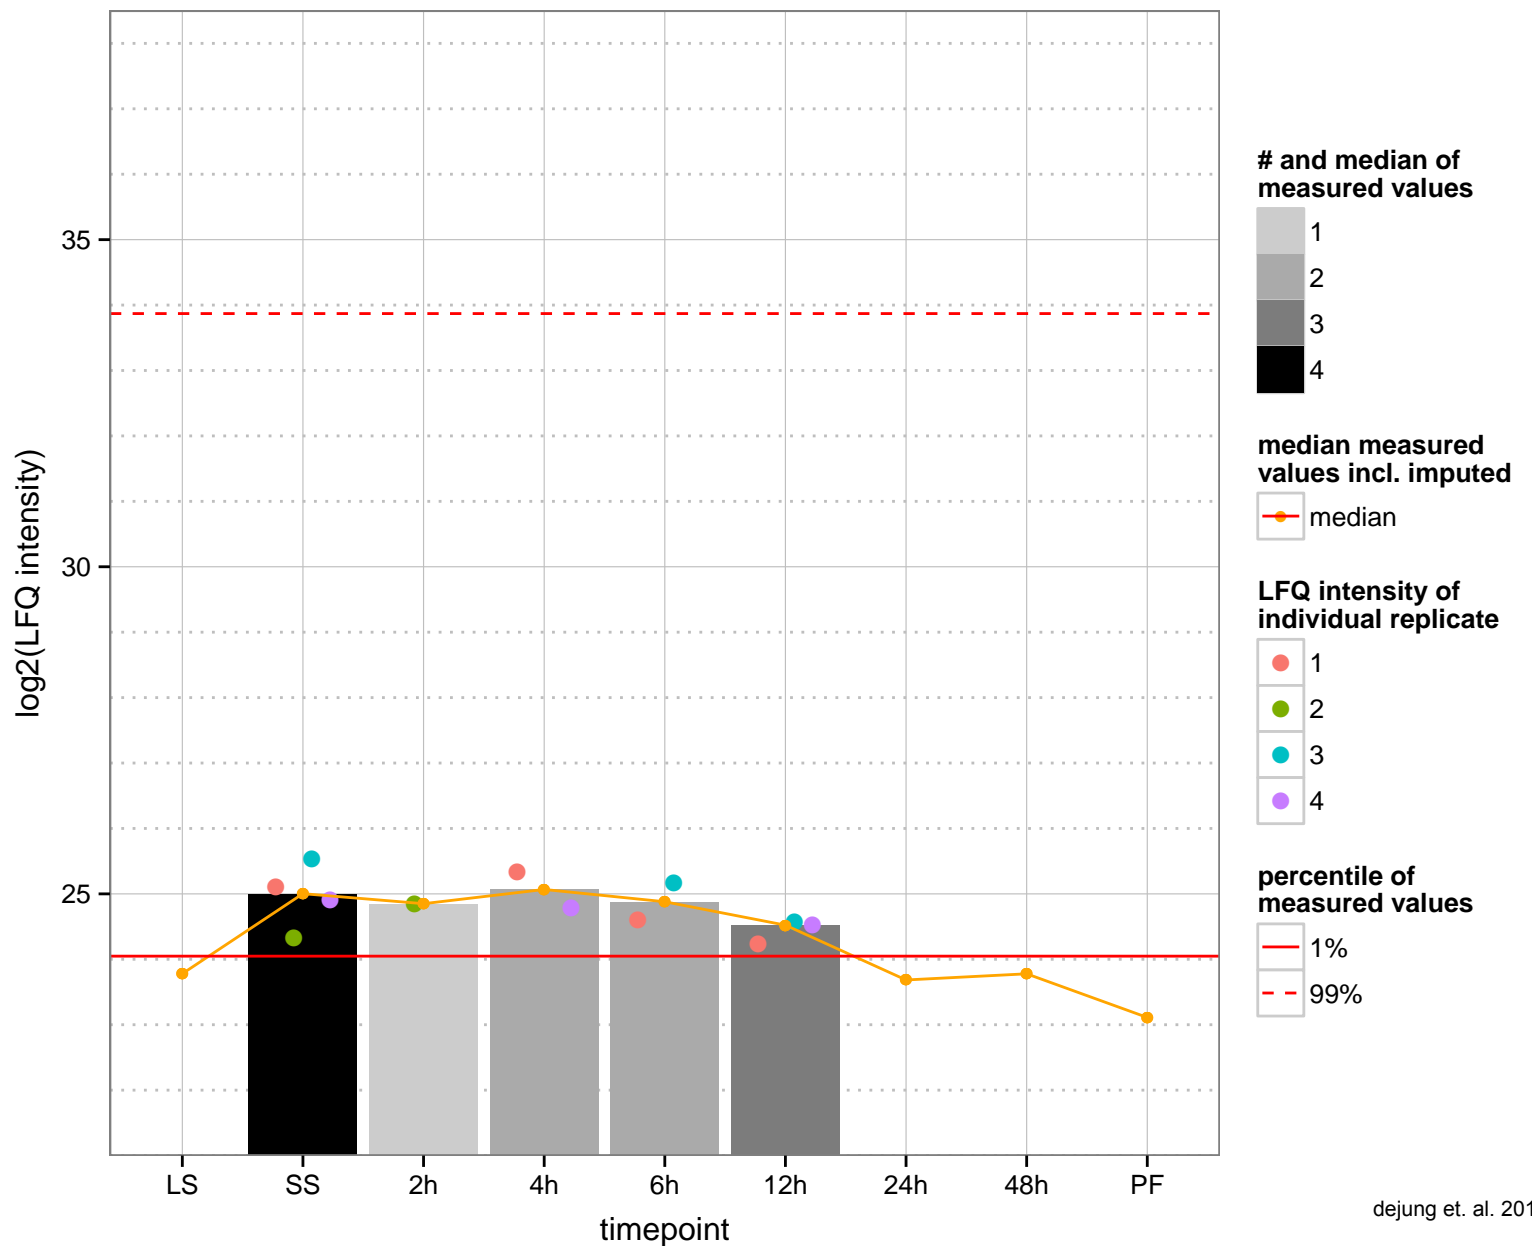

ubiquitin carboxyl-terminal hydrolase, putative, cysteine peptidase, Clan CA, family C19  
 Tb927.9.14470  
 AGOF: cysteine-type endopeptidase activity, ubiquitin thiolesterase activity  
 AGOC: null  
 AGOP: ubiquitin-dependent protein catabolic process  
 PGO: ubiquitin thiolesterase activity  
 PGO: null  
 PGO: ubiquitin-dependent protein catabolic process

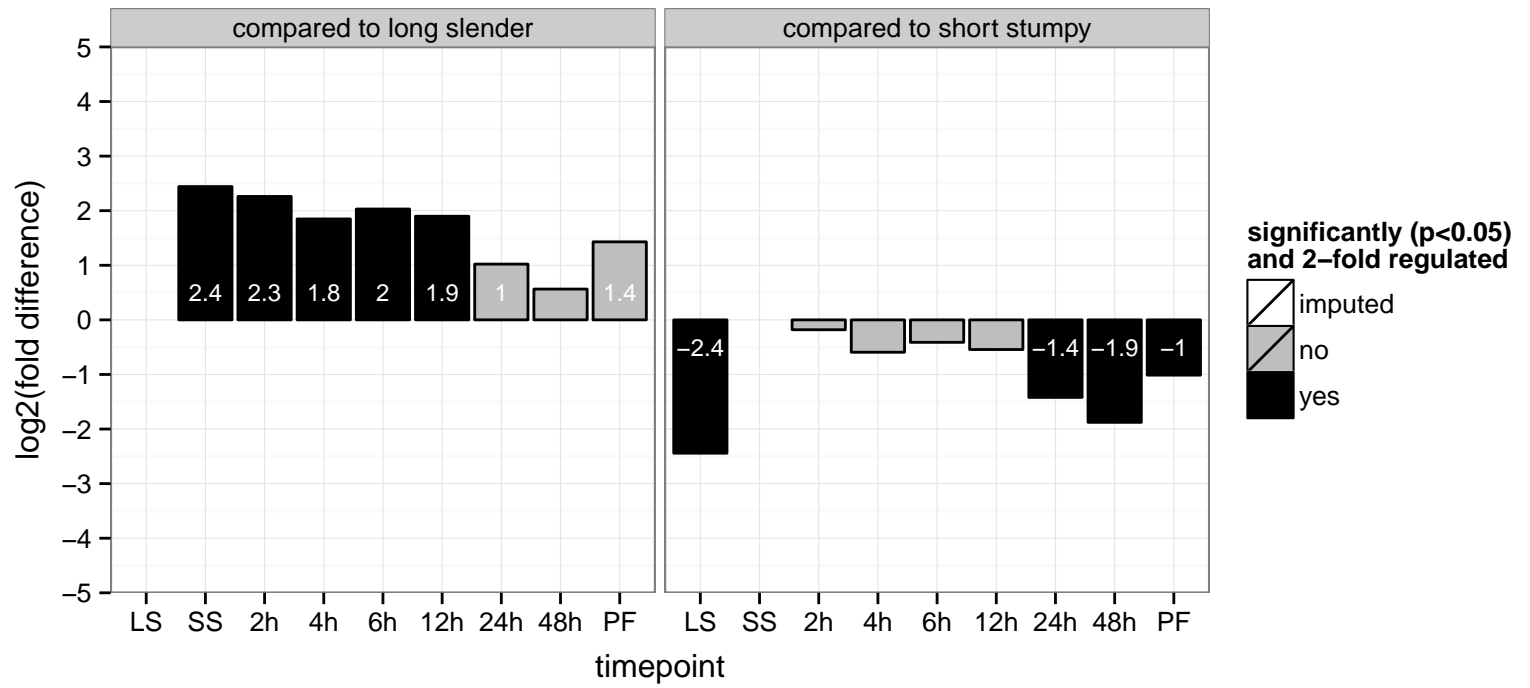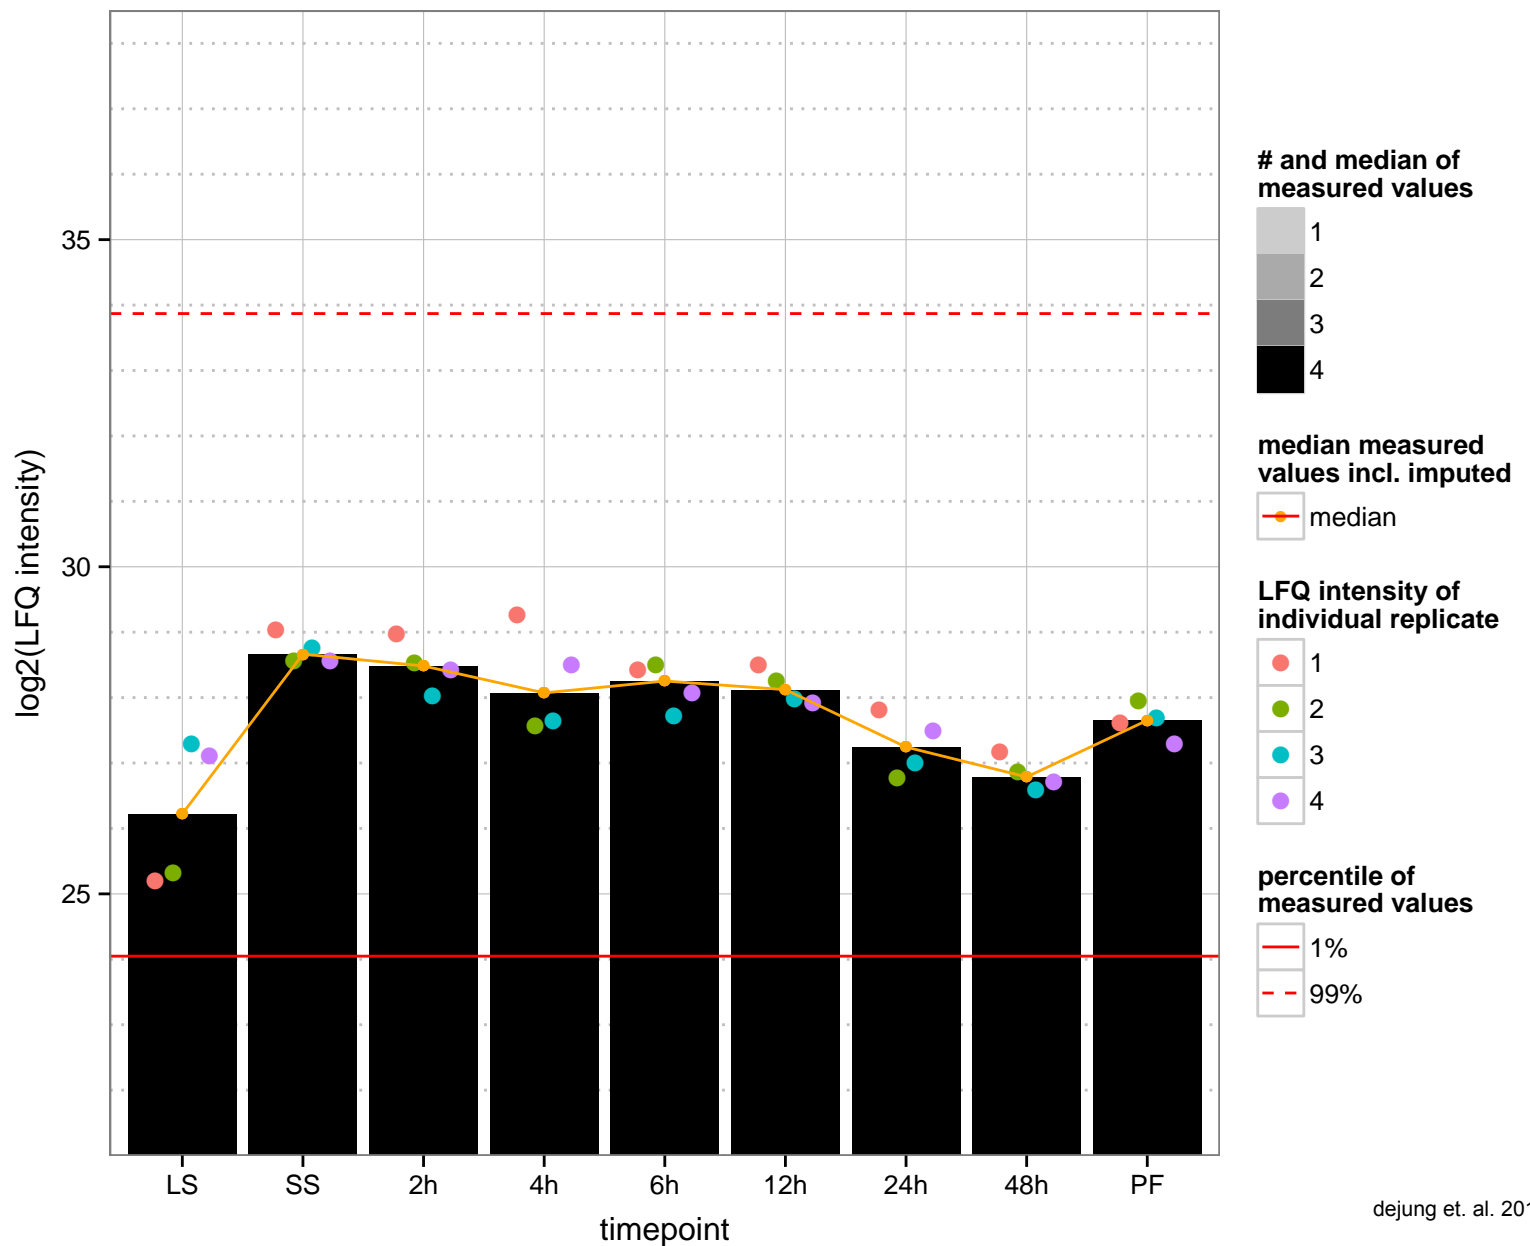



hypothetical protein, conserved  
 Tb927.9.1600  
 AGOF: null  
 AGOC: null  
 AGOP: null  
 PGO: null  
 PGOC: null  
 PGOP: null

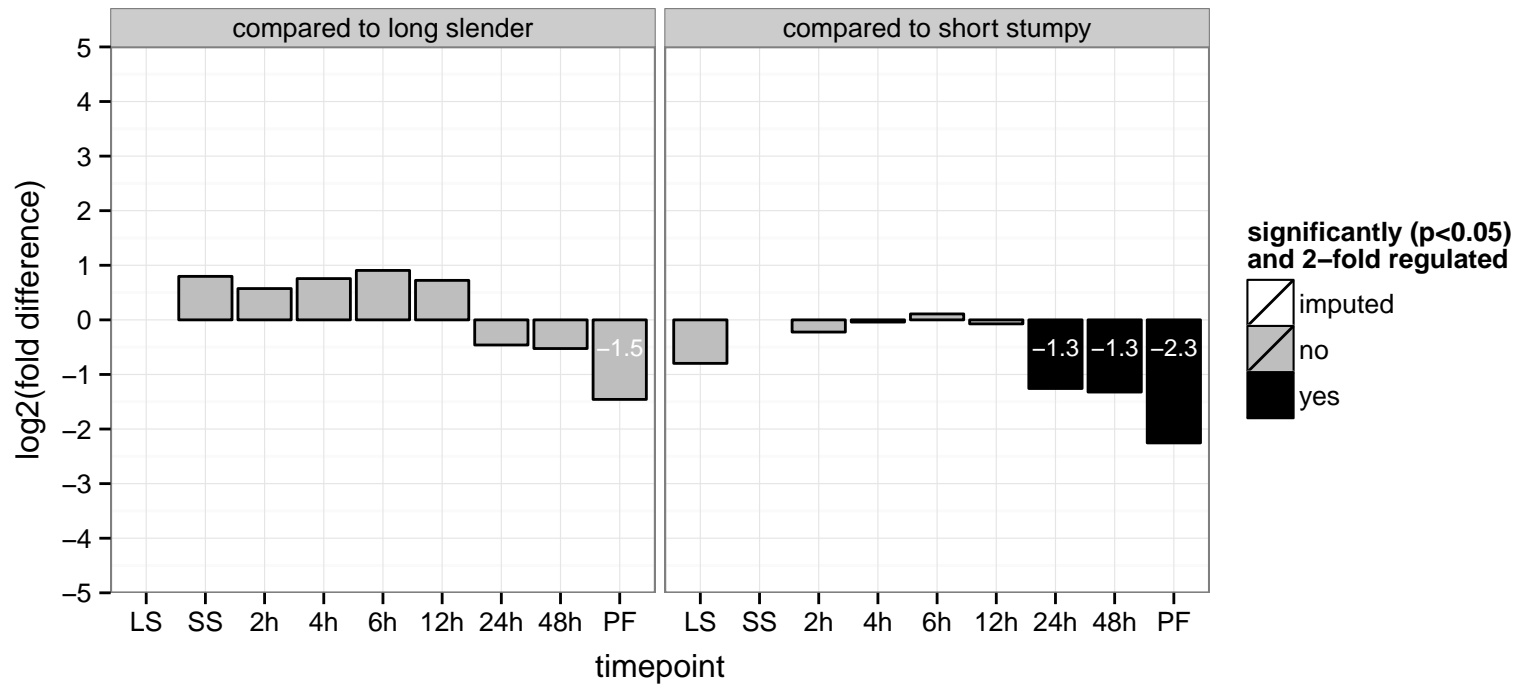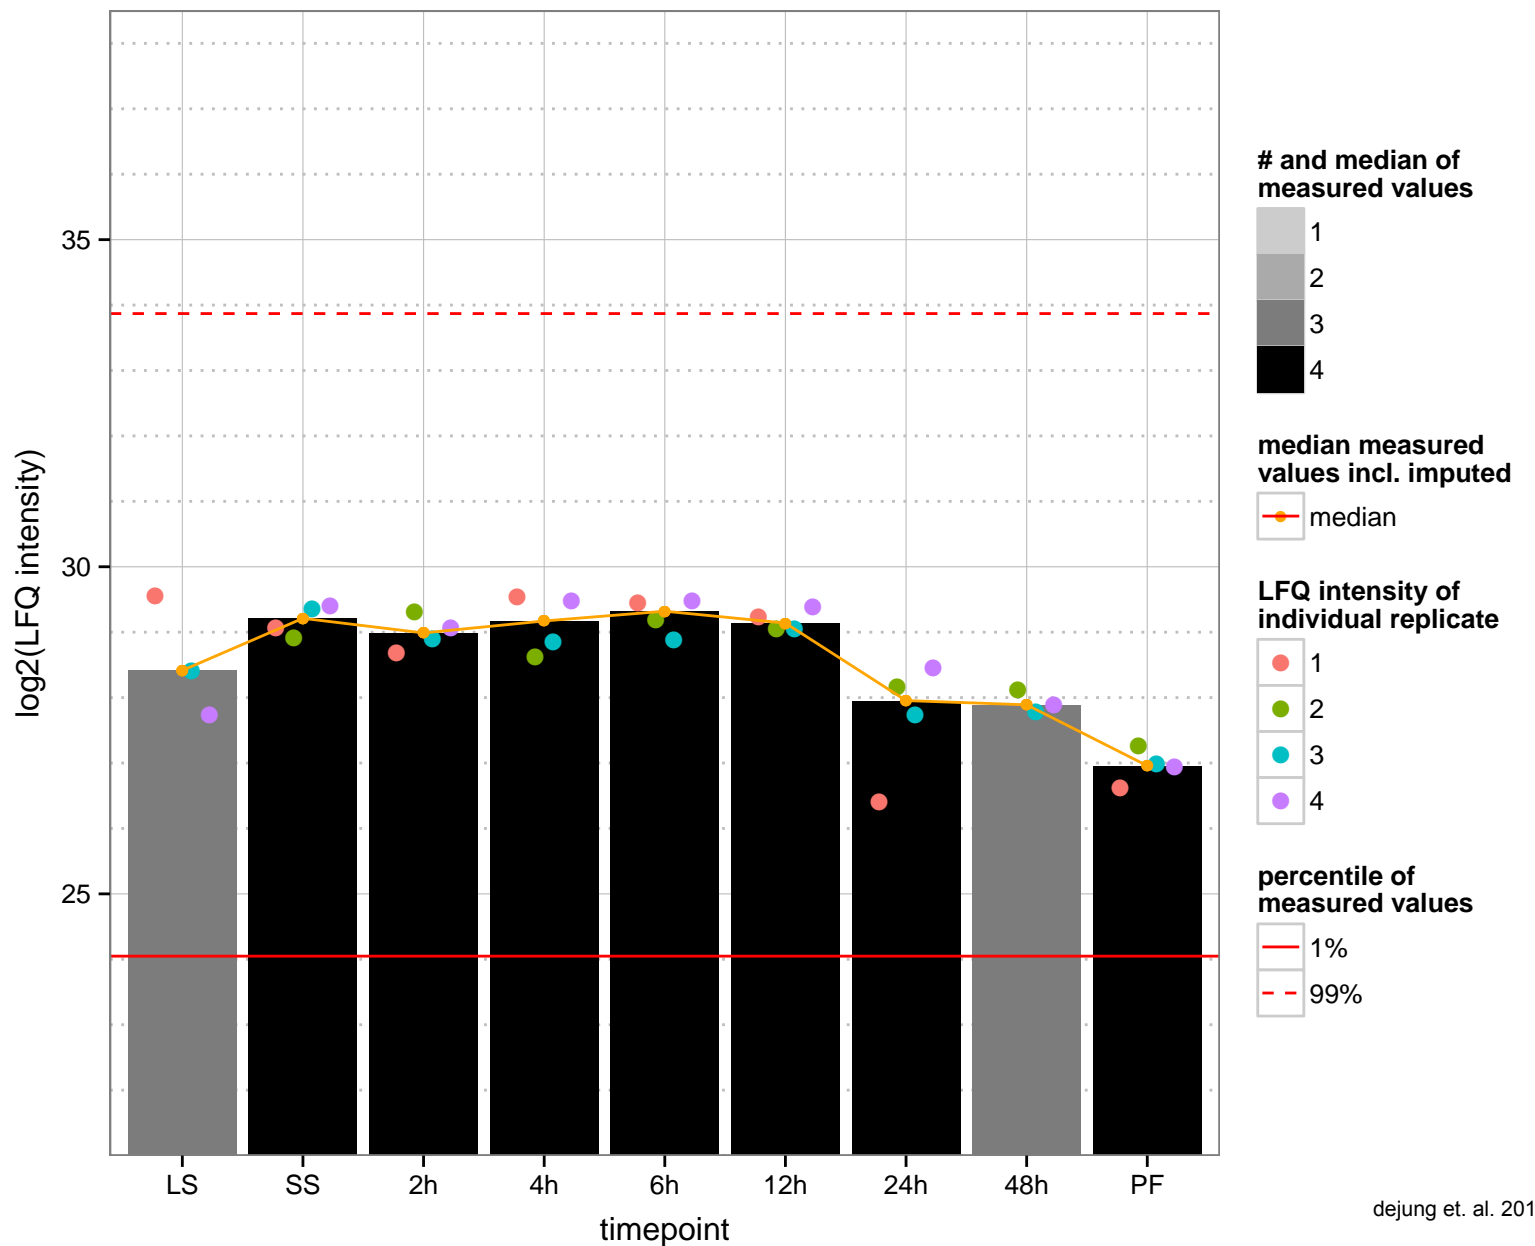

syntaxin binding protein 1, putative  
 Tb927.9.1970  
 AGOF: SNARE binding, protein transporter activity  
 AGOC: null  
 AGOP: vesicle docking involved in exocytosis, vesicle-mediated transport  
 PGO: null  
 PGO: null  
 PGO: vesicle docking involved in exocytosis, vesicle-mediated transport

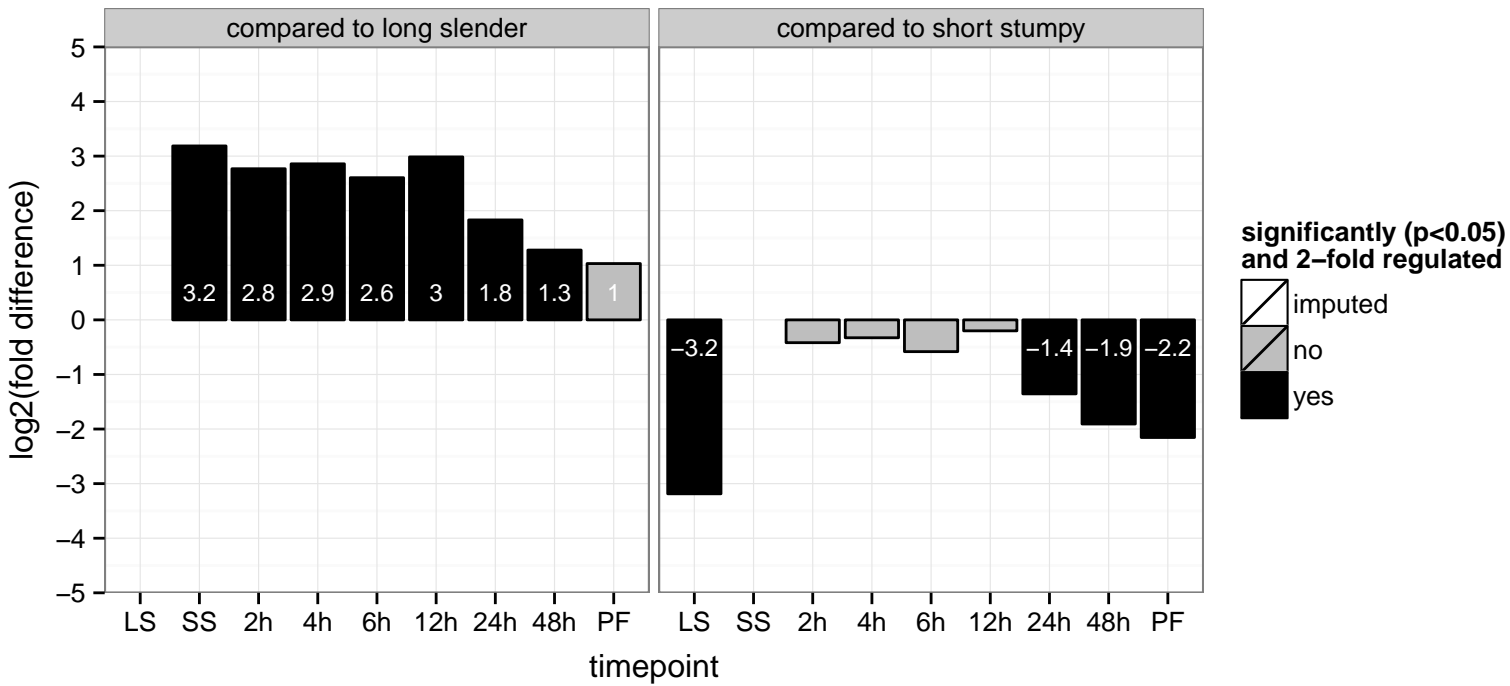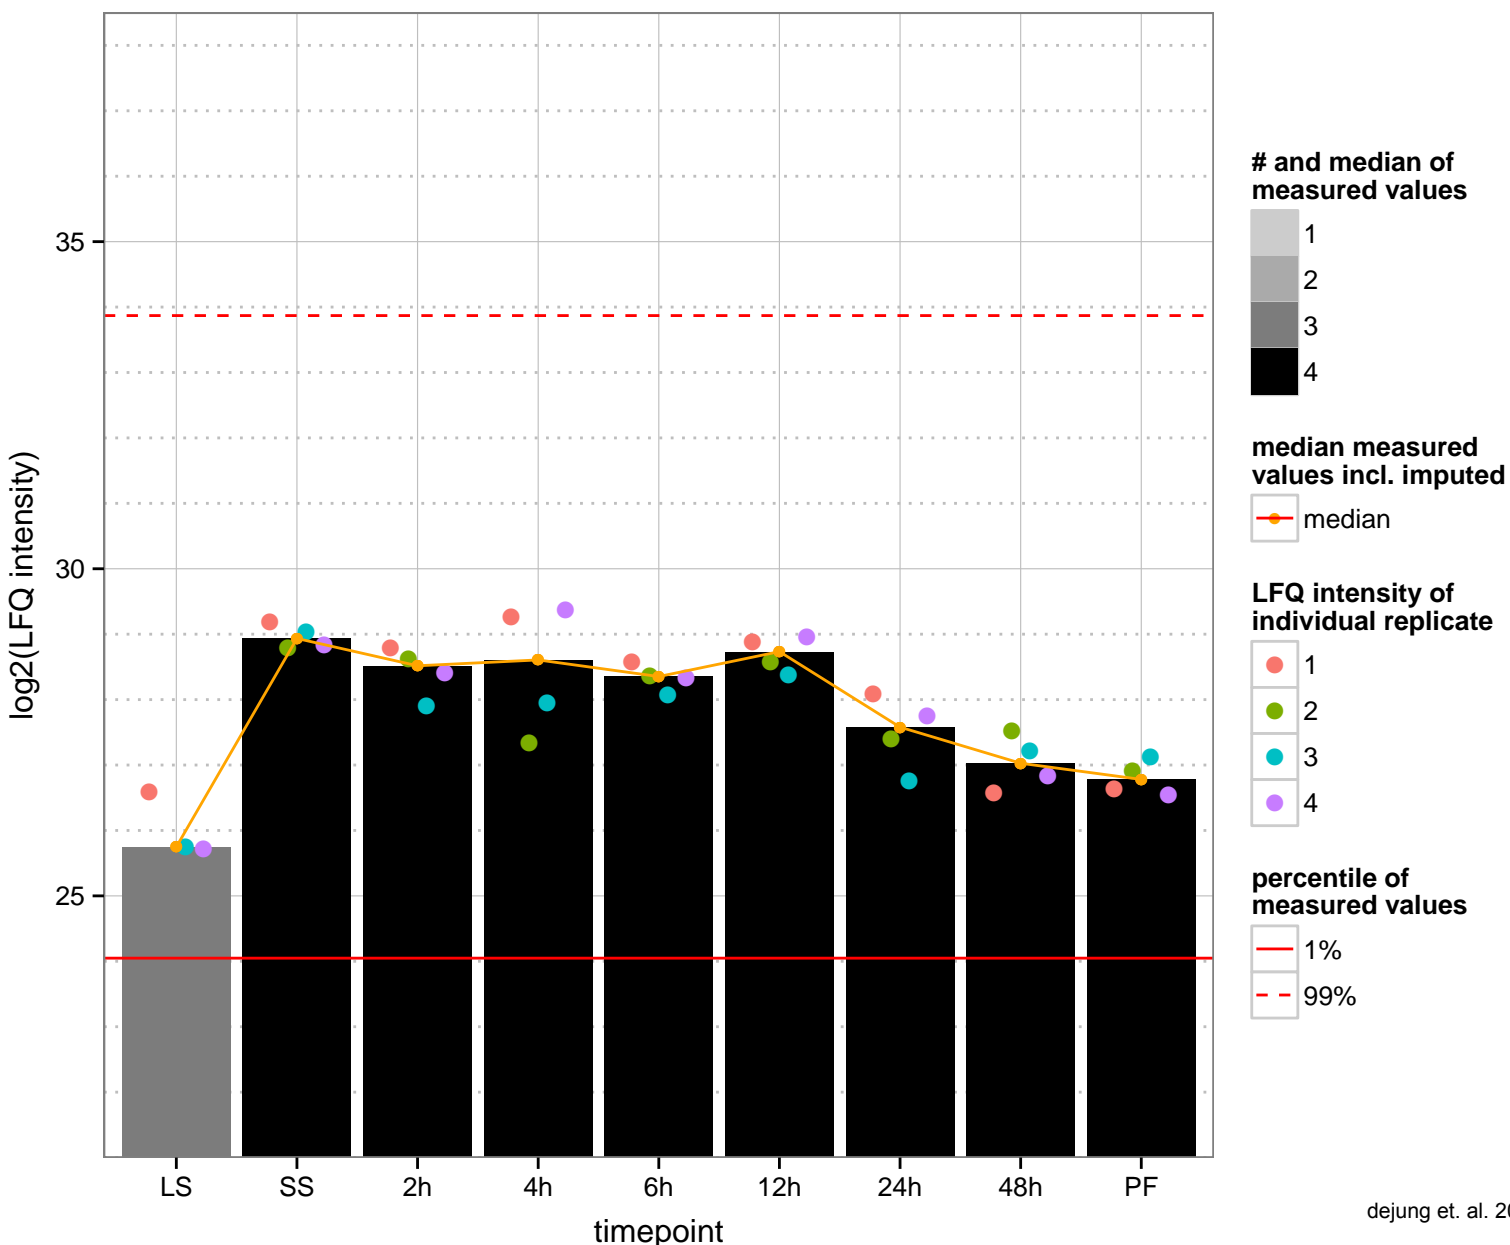

hypothetical protein, conserved  
 Tb927.9.2290  
 AGOF: null  
 AGOC: null  
 AGOP: null  
 PGO: null  
 PGOC: null  
 PGOP: null

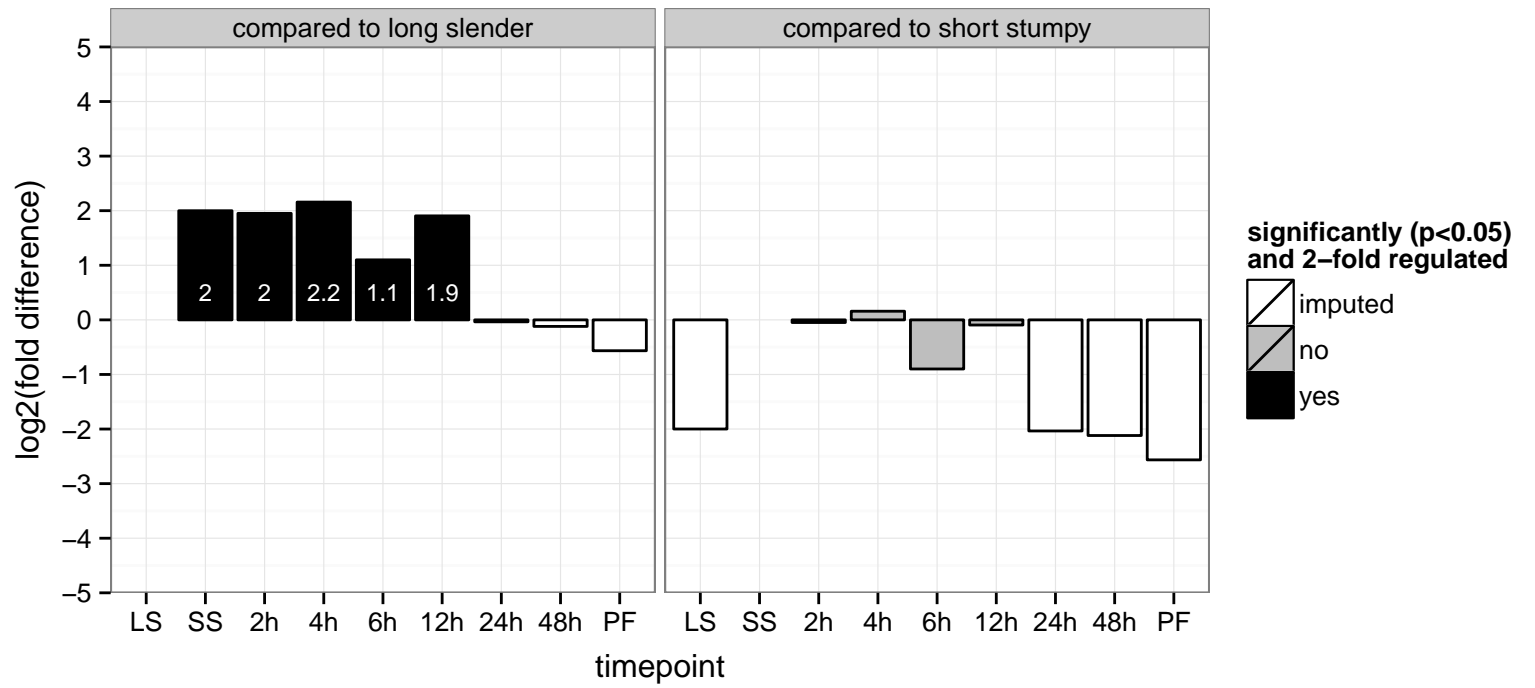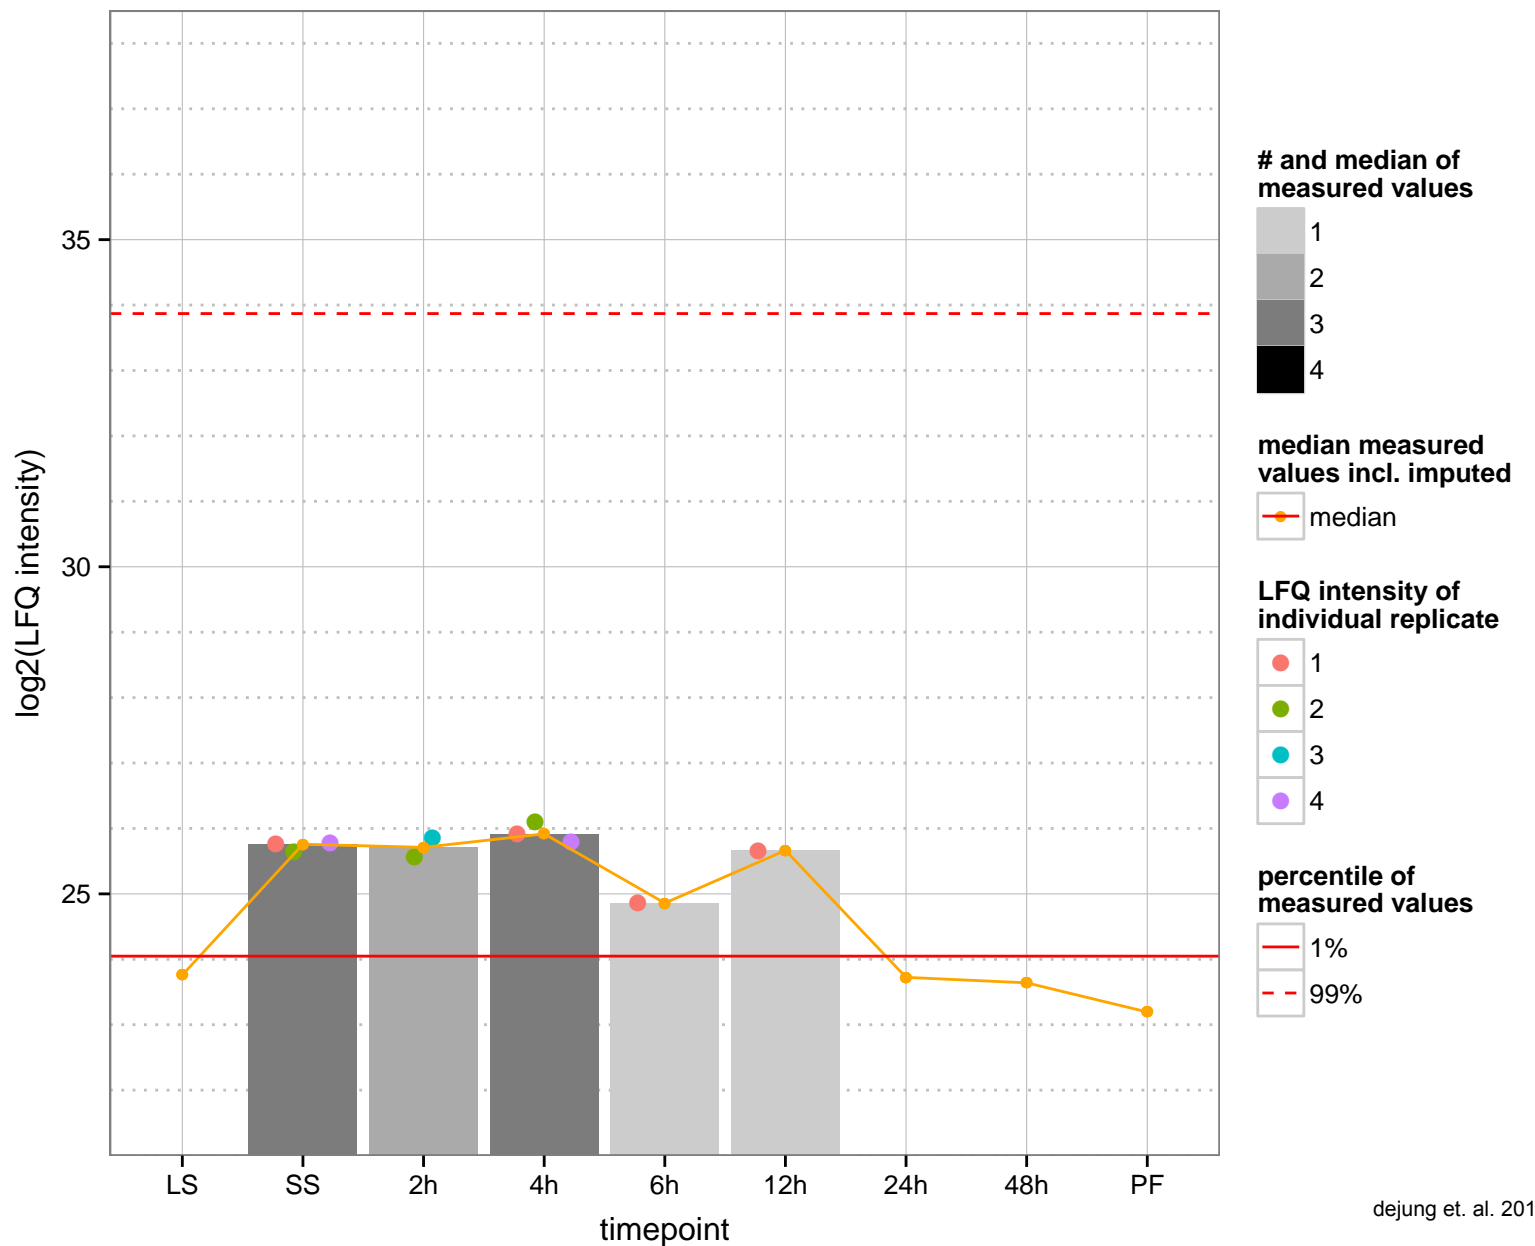

syntaxin, putative  
 Tb927.9.3820  
 AGOF: transporter activity  
 AGOC: membrane  
 AGOP: vesicle-mediated transport  
 PGO: protein binding  
 PGO: null  
 PGO: null

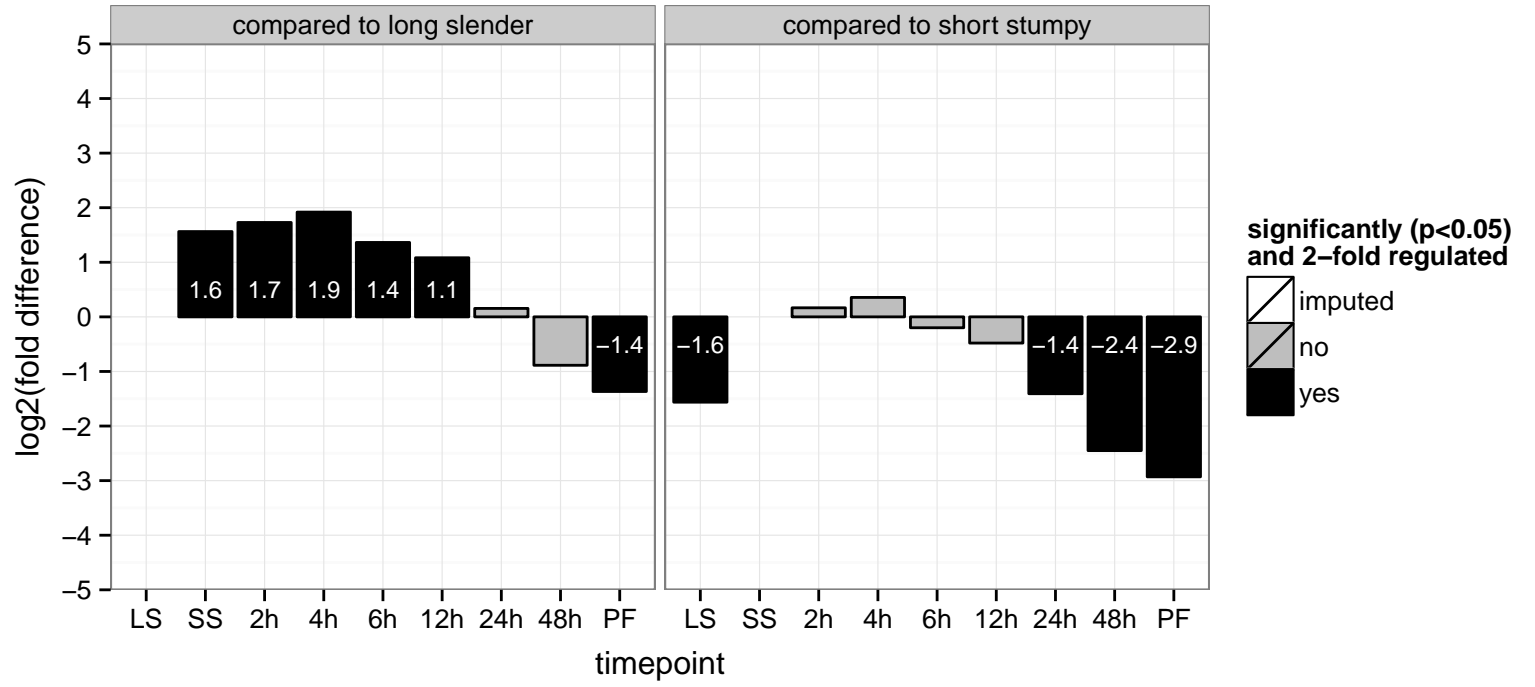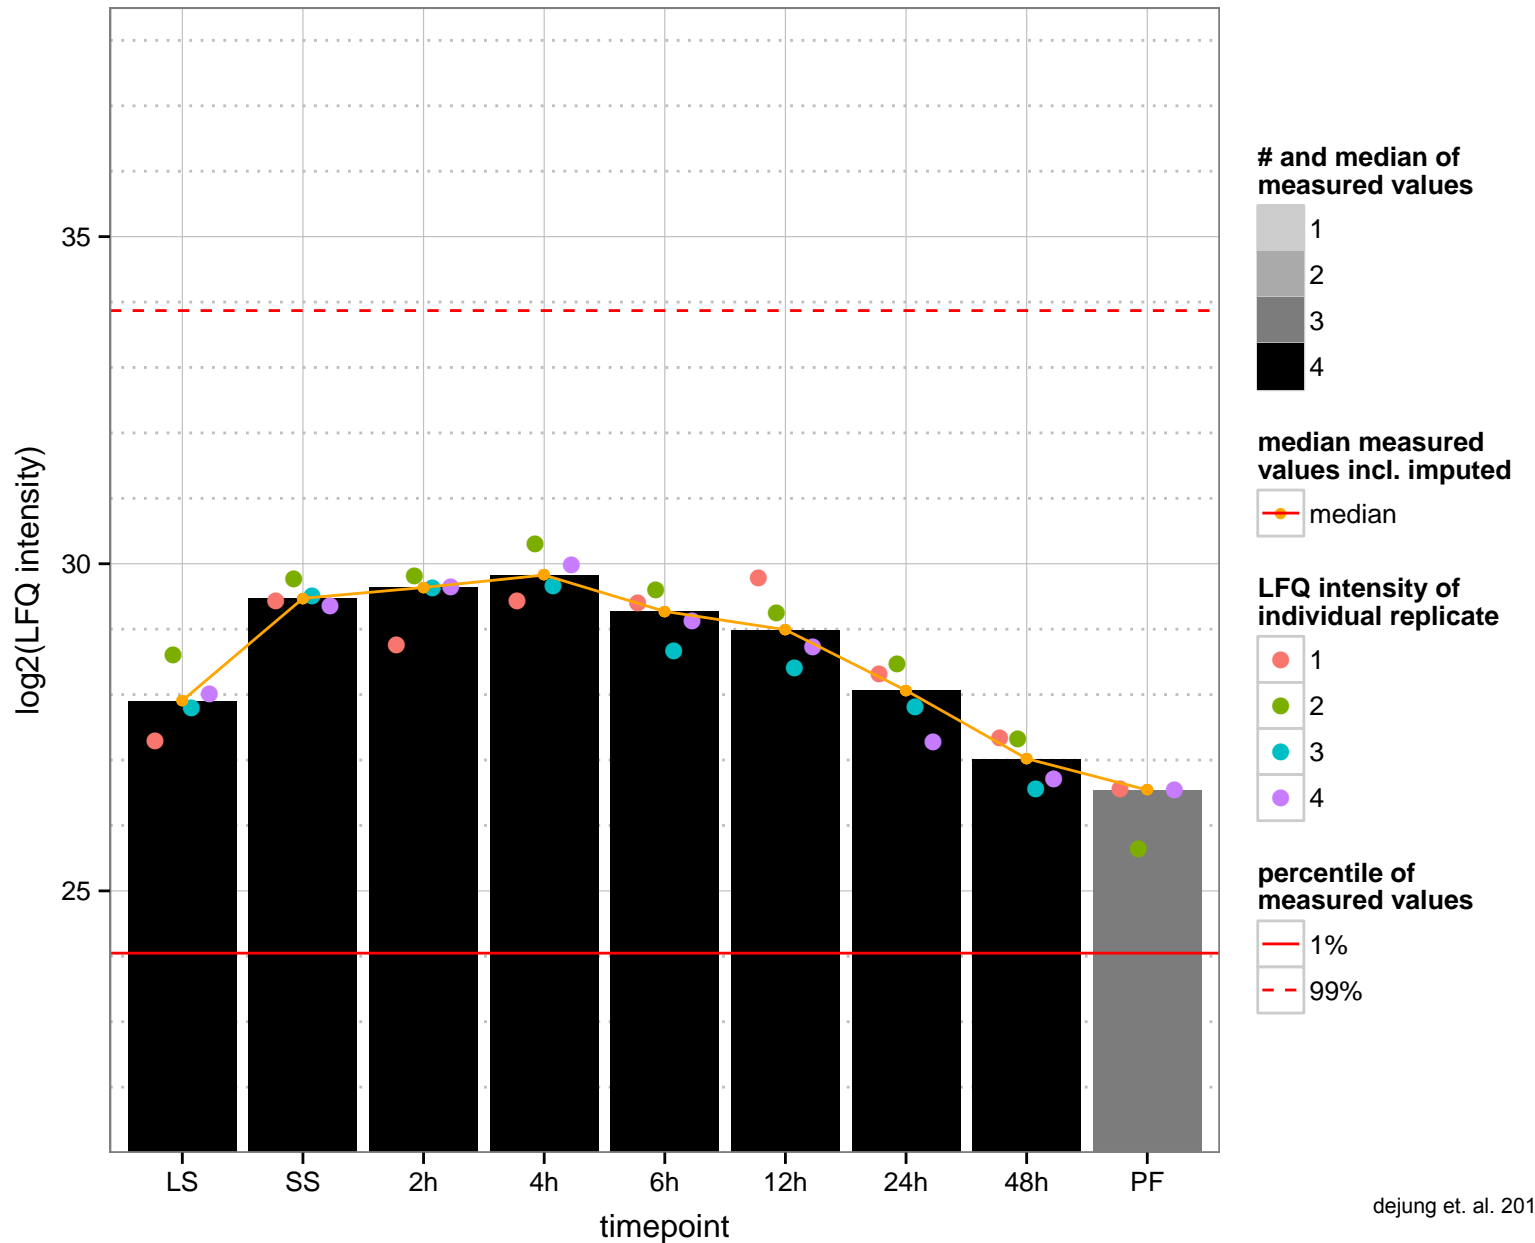

hypothetical protein, conserved  
 Tb927.9.7760  
 AGOF: null  
 AGOC: null  
 AGOP: null  
 PGO: null  
 PGO: null  
 PGO: null

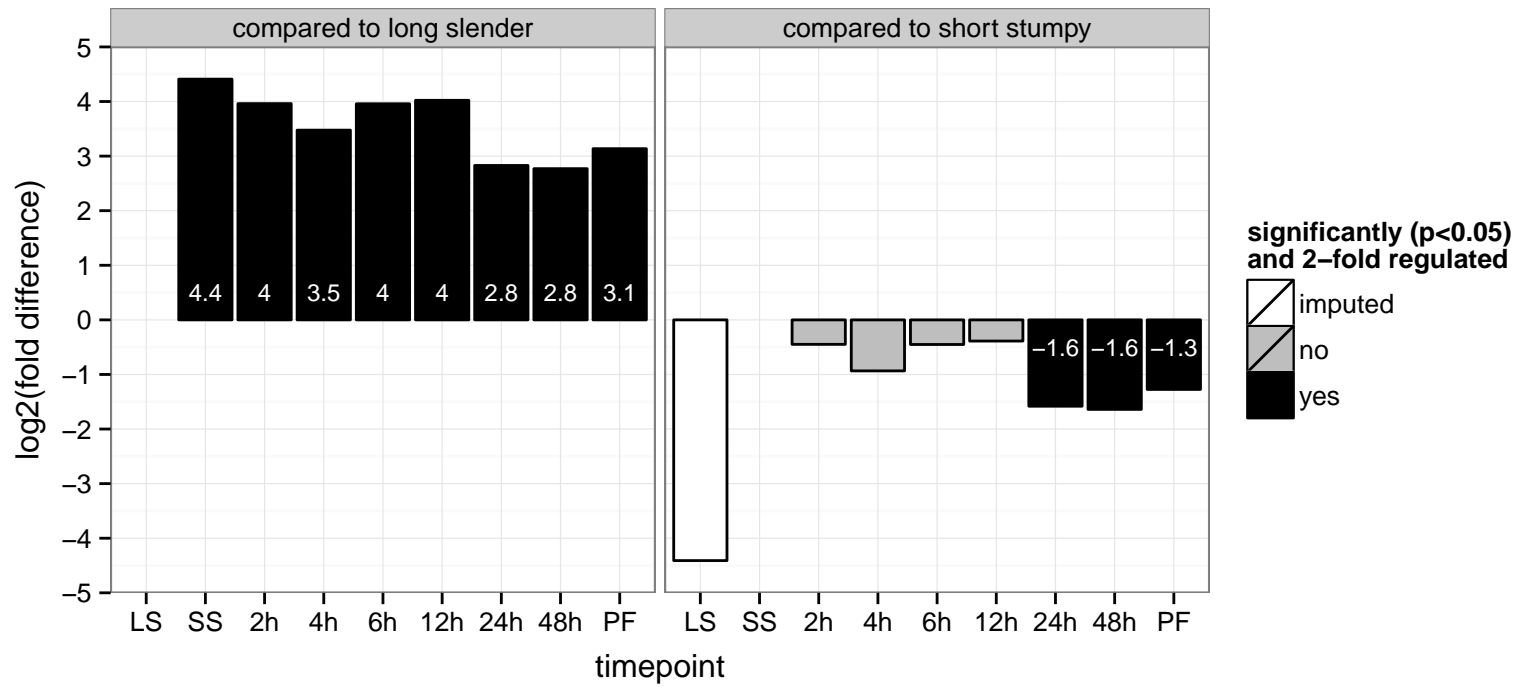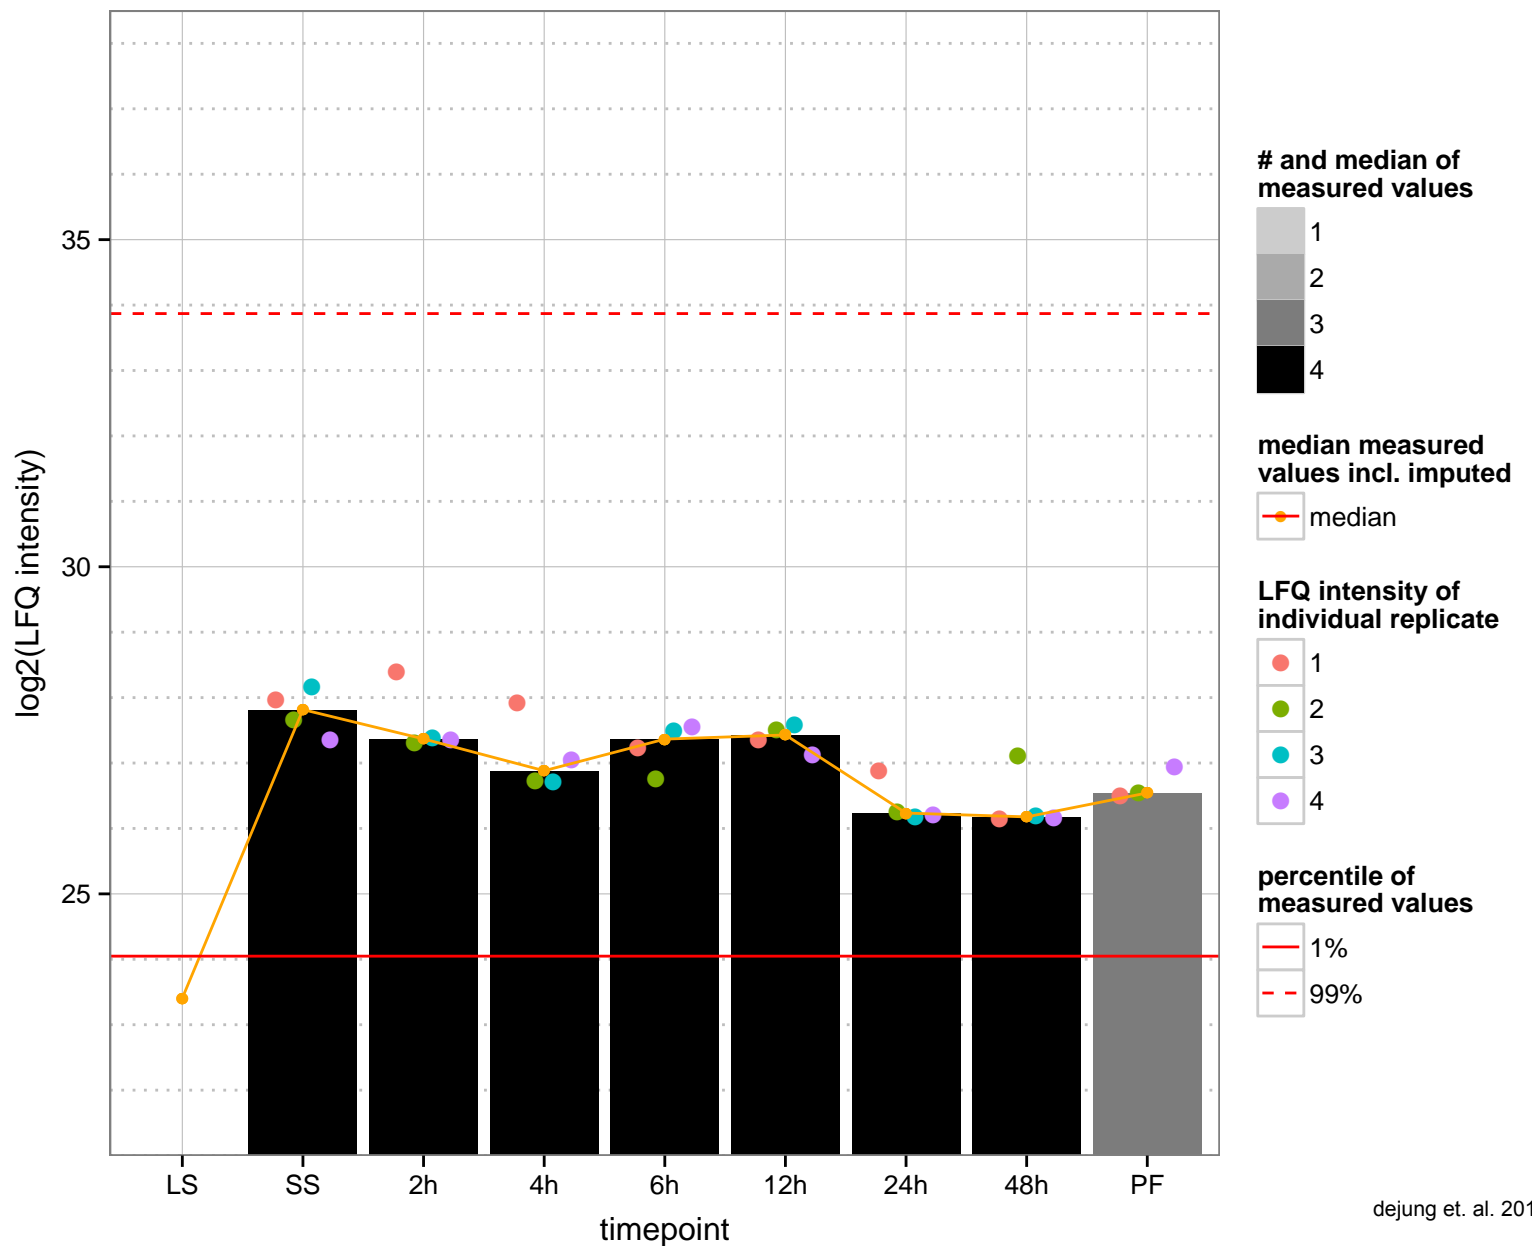

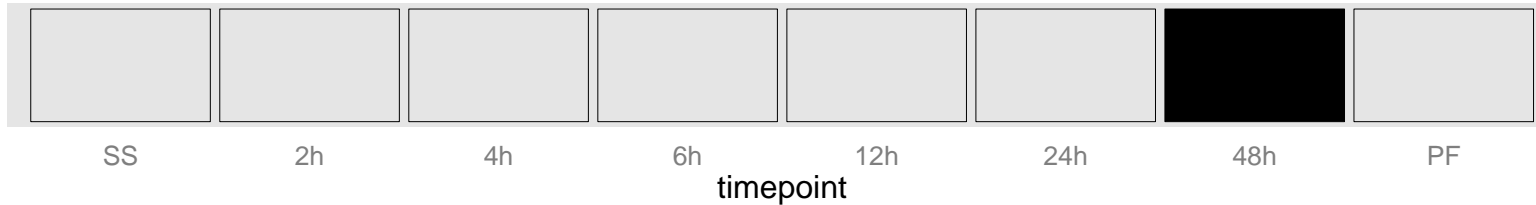

**regulated**  **not regulated**  **significant down**  **significant up**

hypothetical protein, conserved  
 Tb11.02.5430b;Tb11.02.5430  
 AGOF: null  
 AGOC: null  
 AGOP: null  
 PGO: null  
 PGOC: null  
 PGOP: null

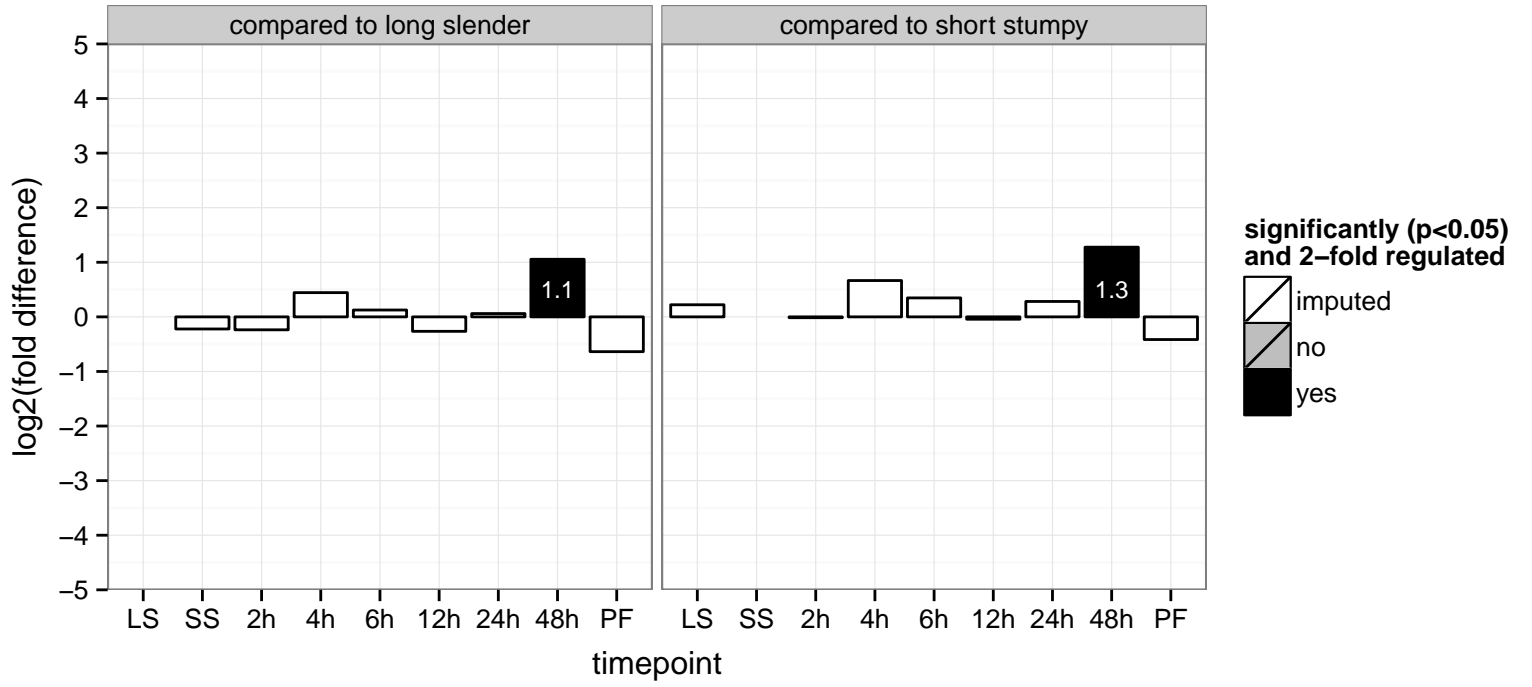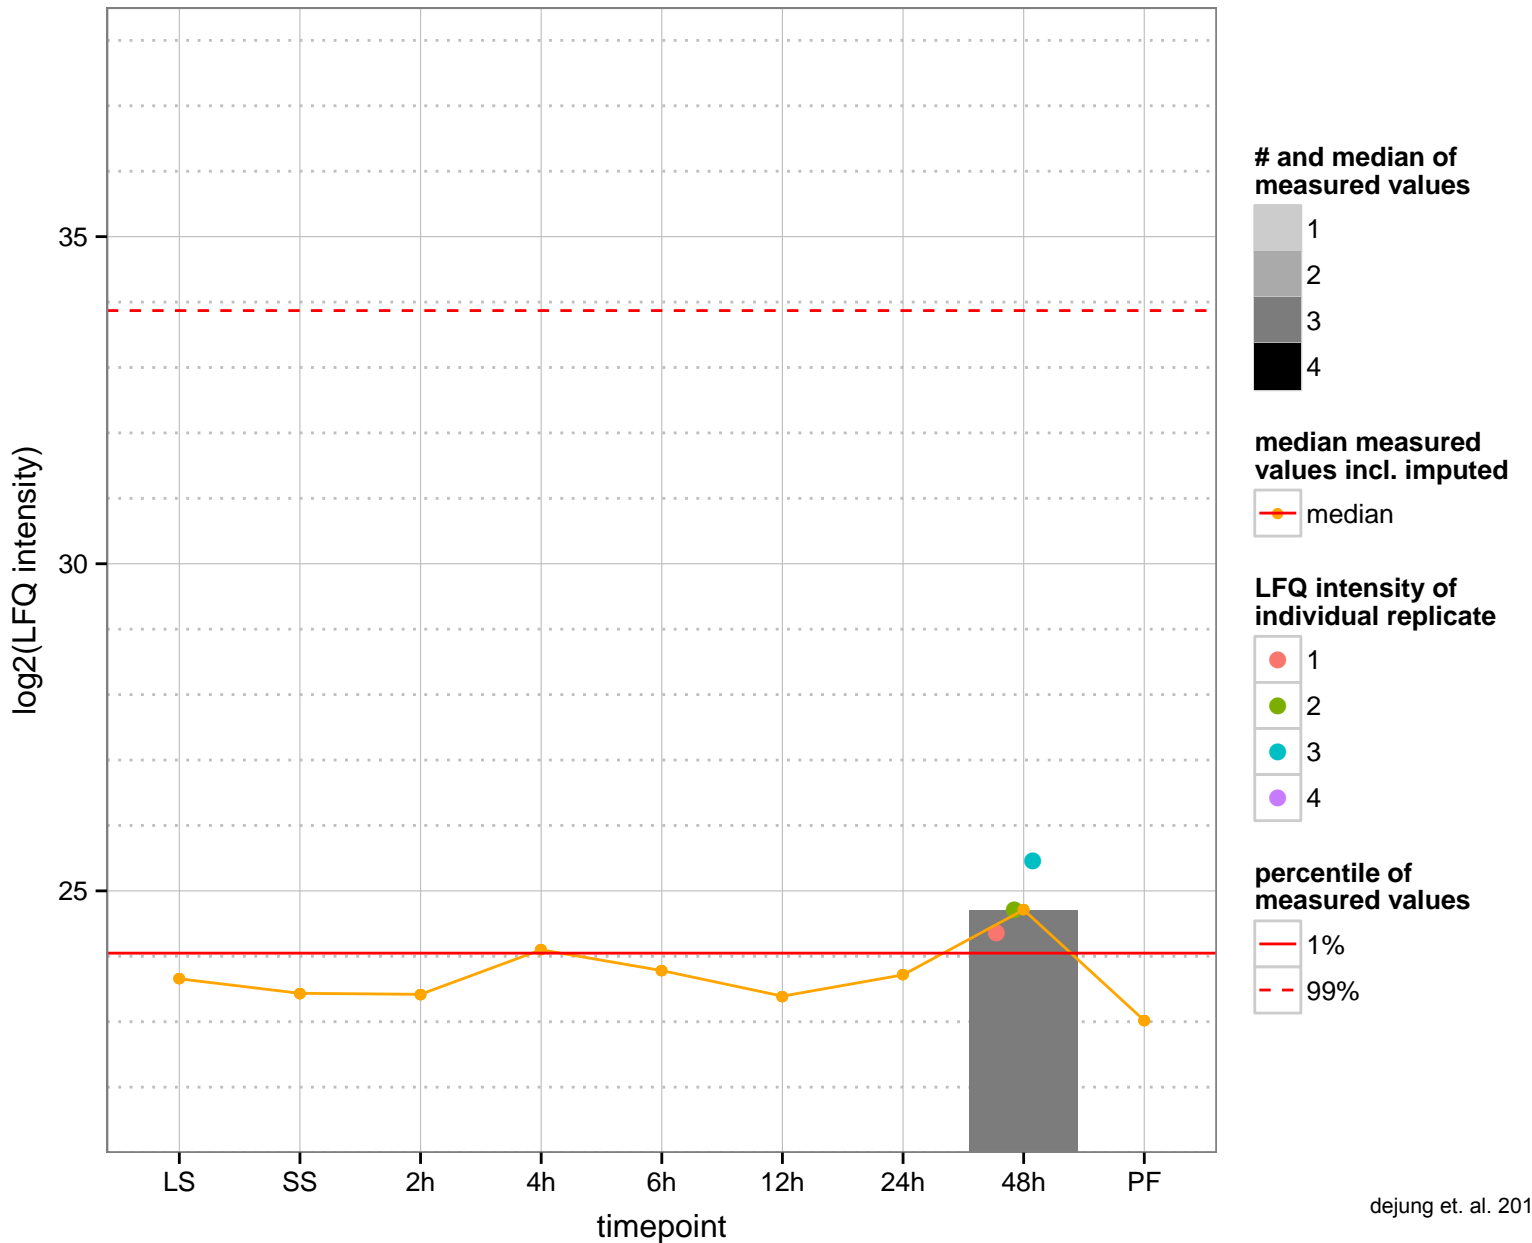

60S ribosomal protein L19, putative  
 Tb927.7.5020;Tb927.7.5000;Tb11.v5.0182;Tb11.v5.0181  
 AGOF: null, structural constituent of ribosome  
 AGOC: null, intracellular, ribosome  
 AGOP: null, ribosome biogenesis, translation  
 PGO: null, structural constituent of ribosome  
 PGOC: null, intracellular, ribosome  
 PGOP: null, translation

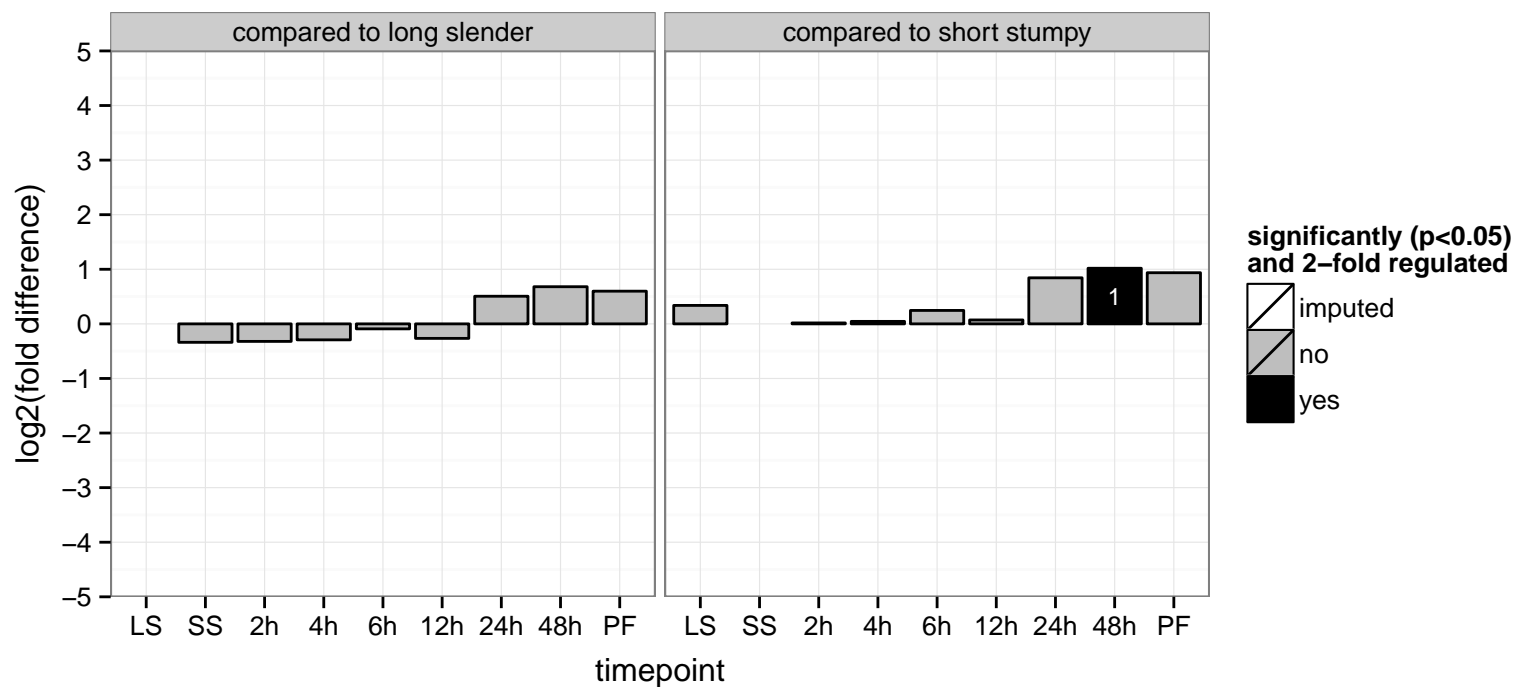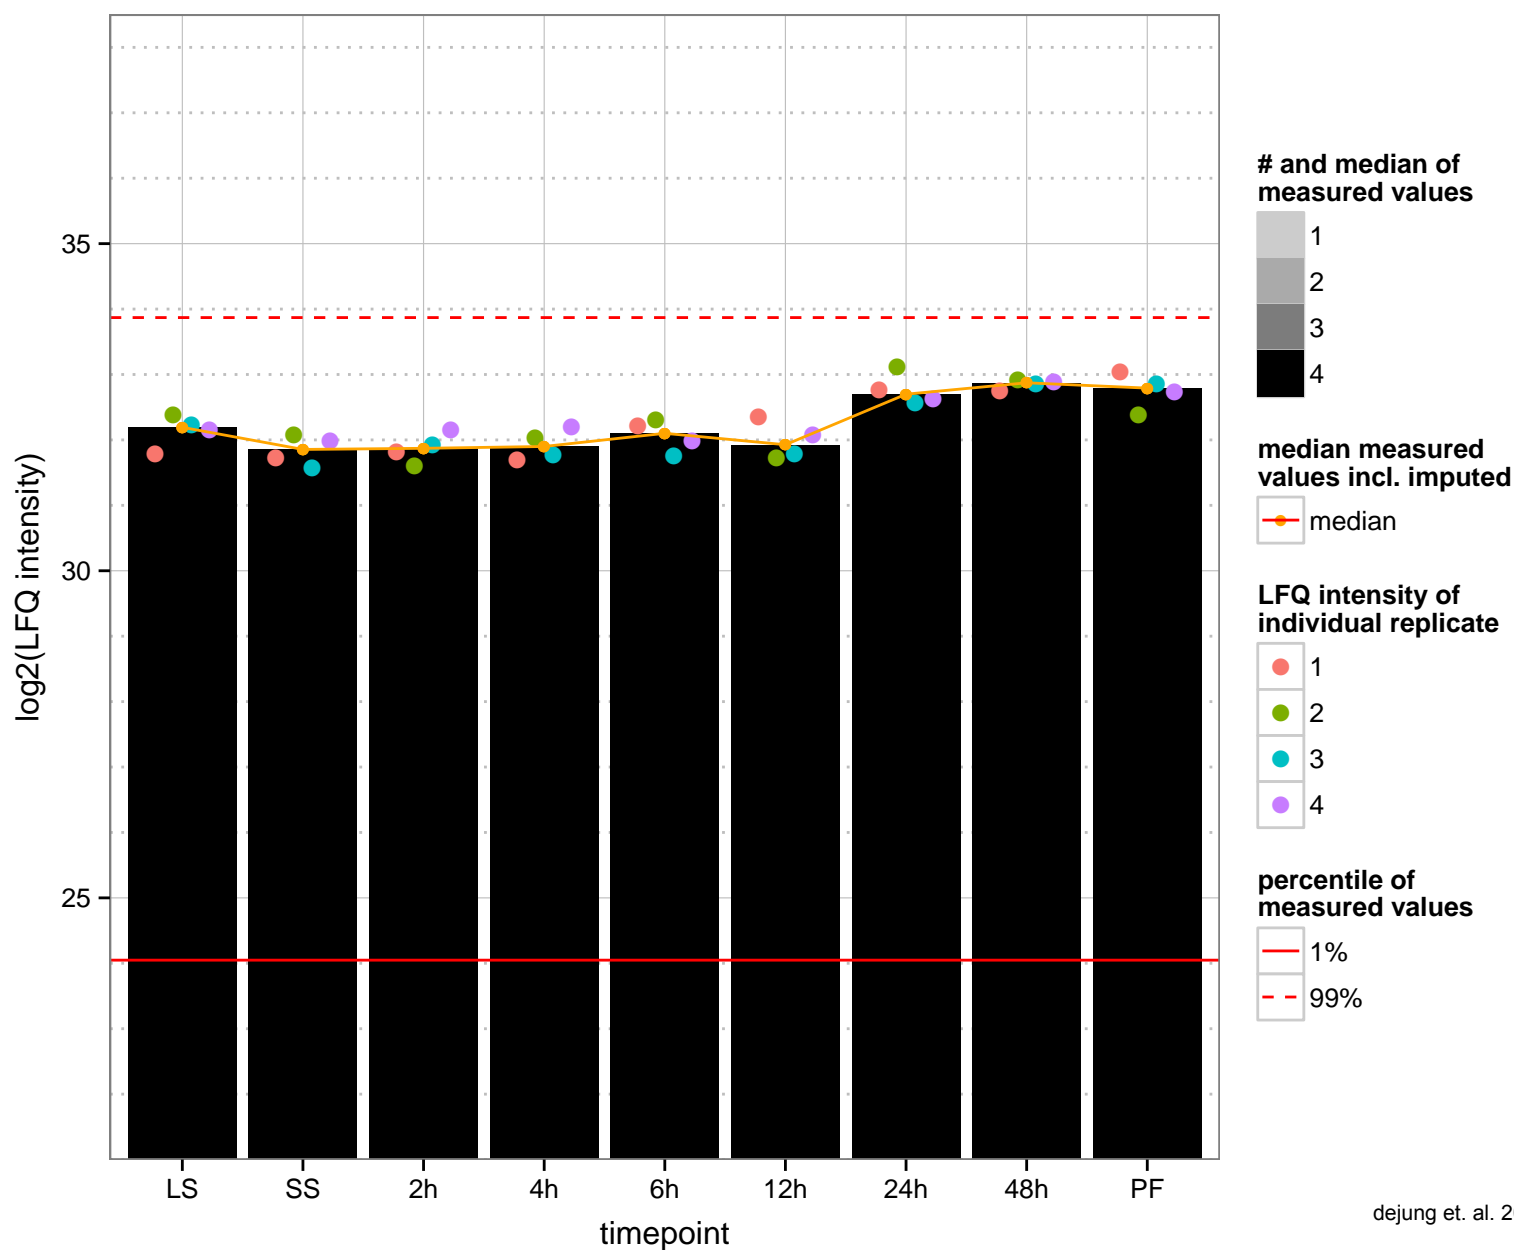



40S ribosomal protein S18, putative, variant surface glycoprotein (VSG), putative (RPS18)  
 Tb927.10.5340;Tb927.10.5330;Tb11.v5.1060;Tb11.v5.0243  
 AGOF: null, RNA binding, structural constituent of ribosome  
 AGOC: null, intracellular, organellar small ribosomal subunit, ribosome  
 AGOP: null, translation  
 PGOF: null, RNA binding, nucleic acid binding, structural constituent of ribosome  
 PGO: null, intracellular, ribosome  
 PGOP: null, translation

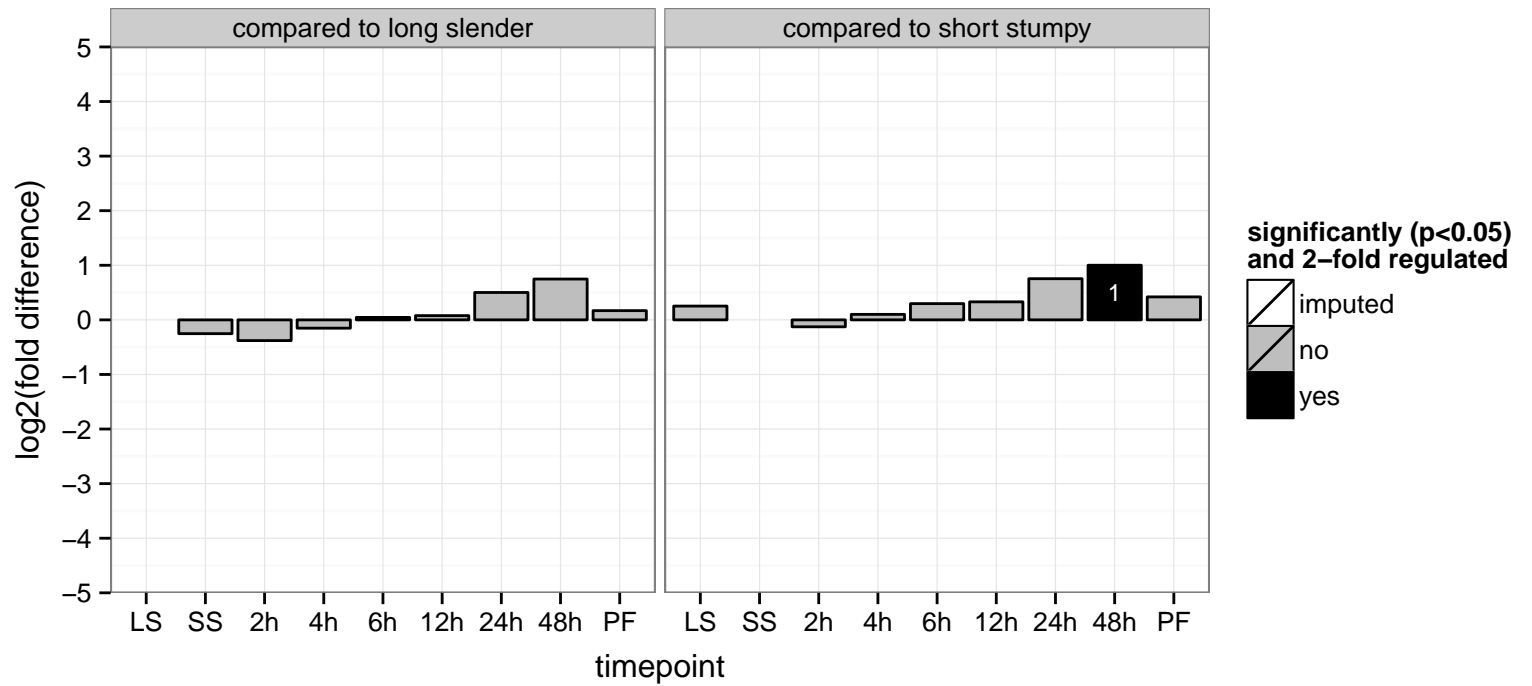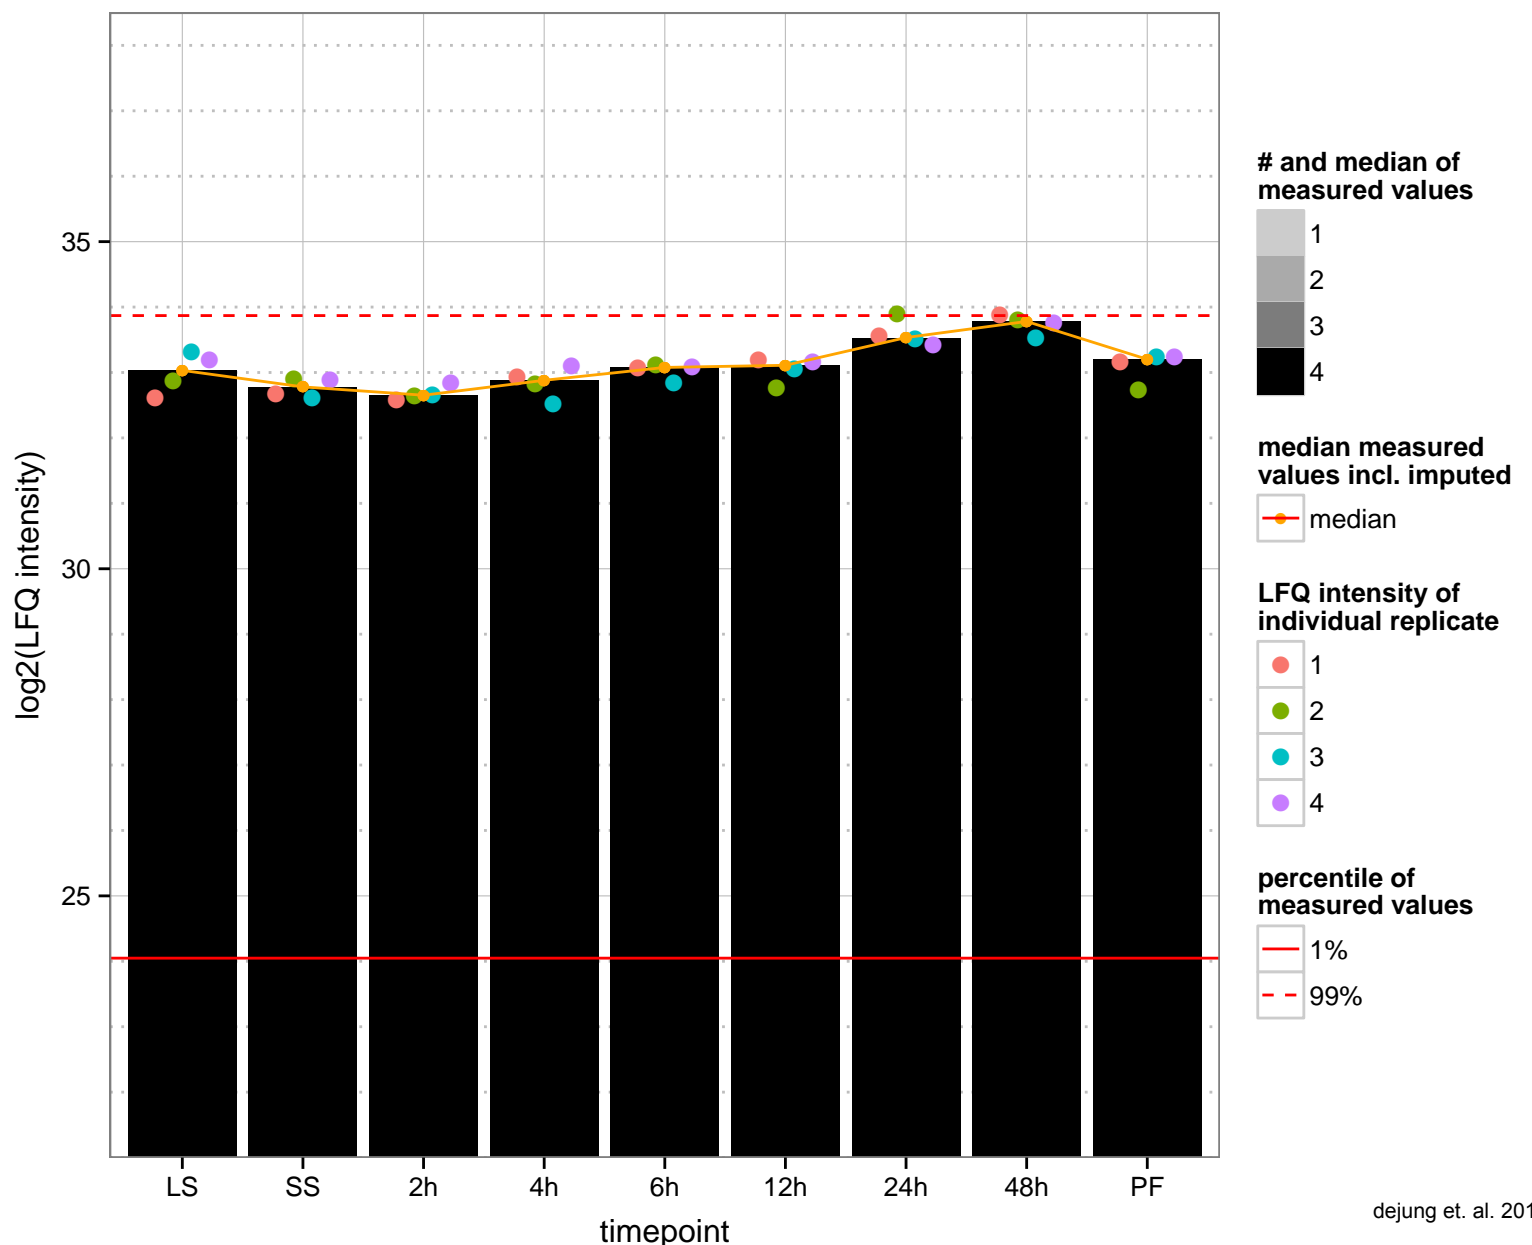

periodic tryptophan protein 2, putative, Periodic tryptophan protein 2 homolog  
 Tb927.10.13270;Tb11.v5.0563  
 AGOF: null, snoRNA binding  
 AGOC: null, Pwp2p-containing subcomplex of 90S preribosome, small-subunit processome  
 AGOP: null, cytokinesis, completion of separation  
 PGO: protein binding  
 PGO: null  
 PGO: null

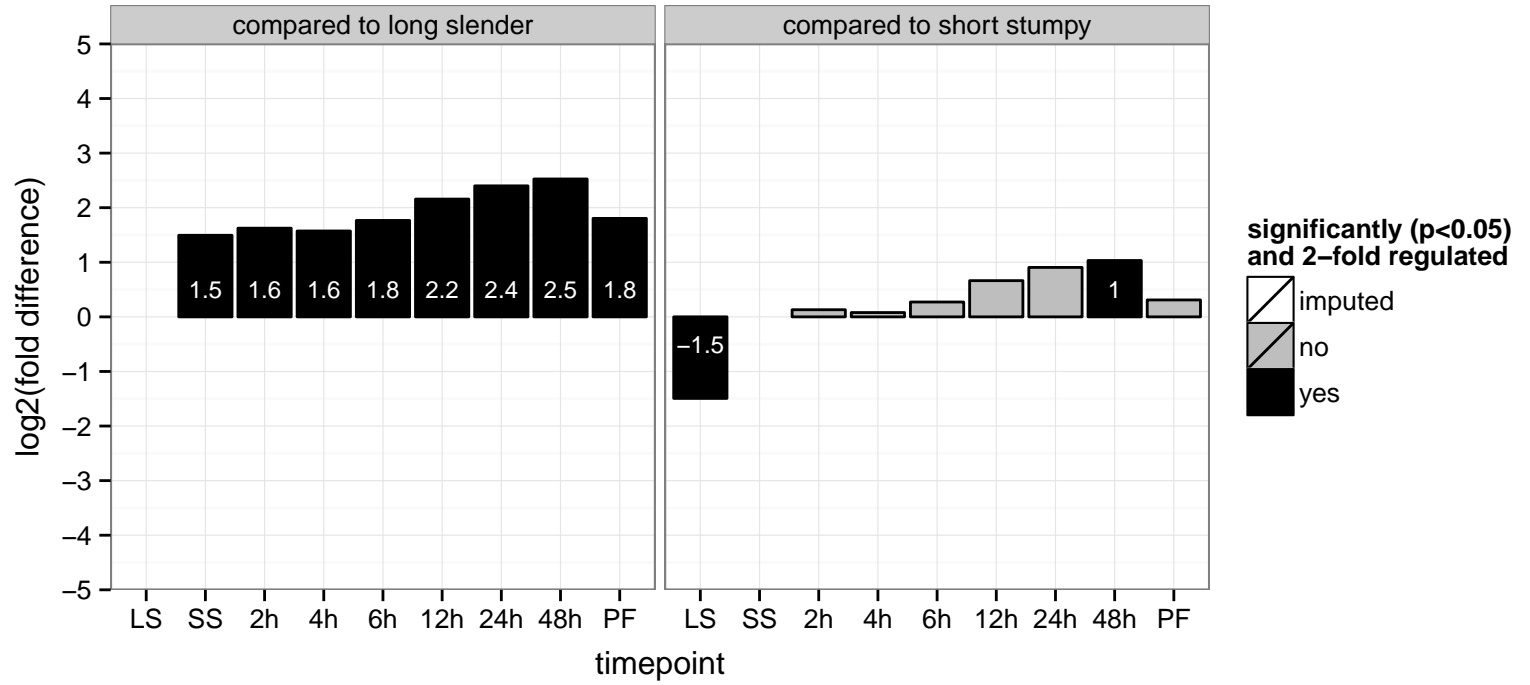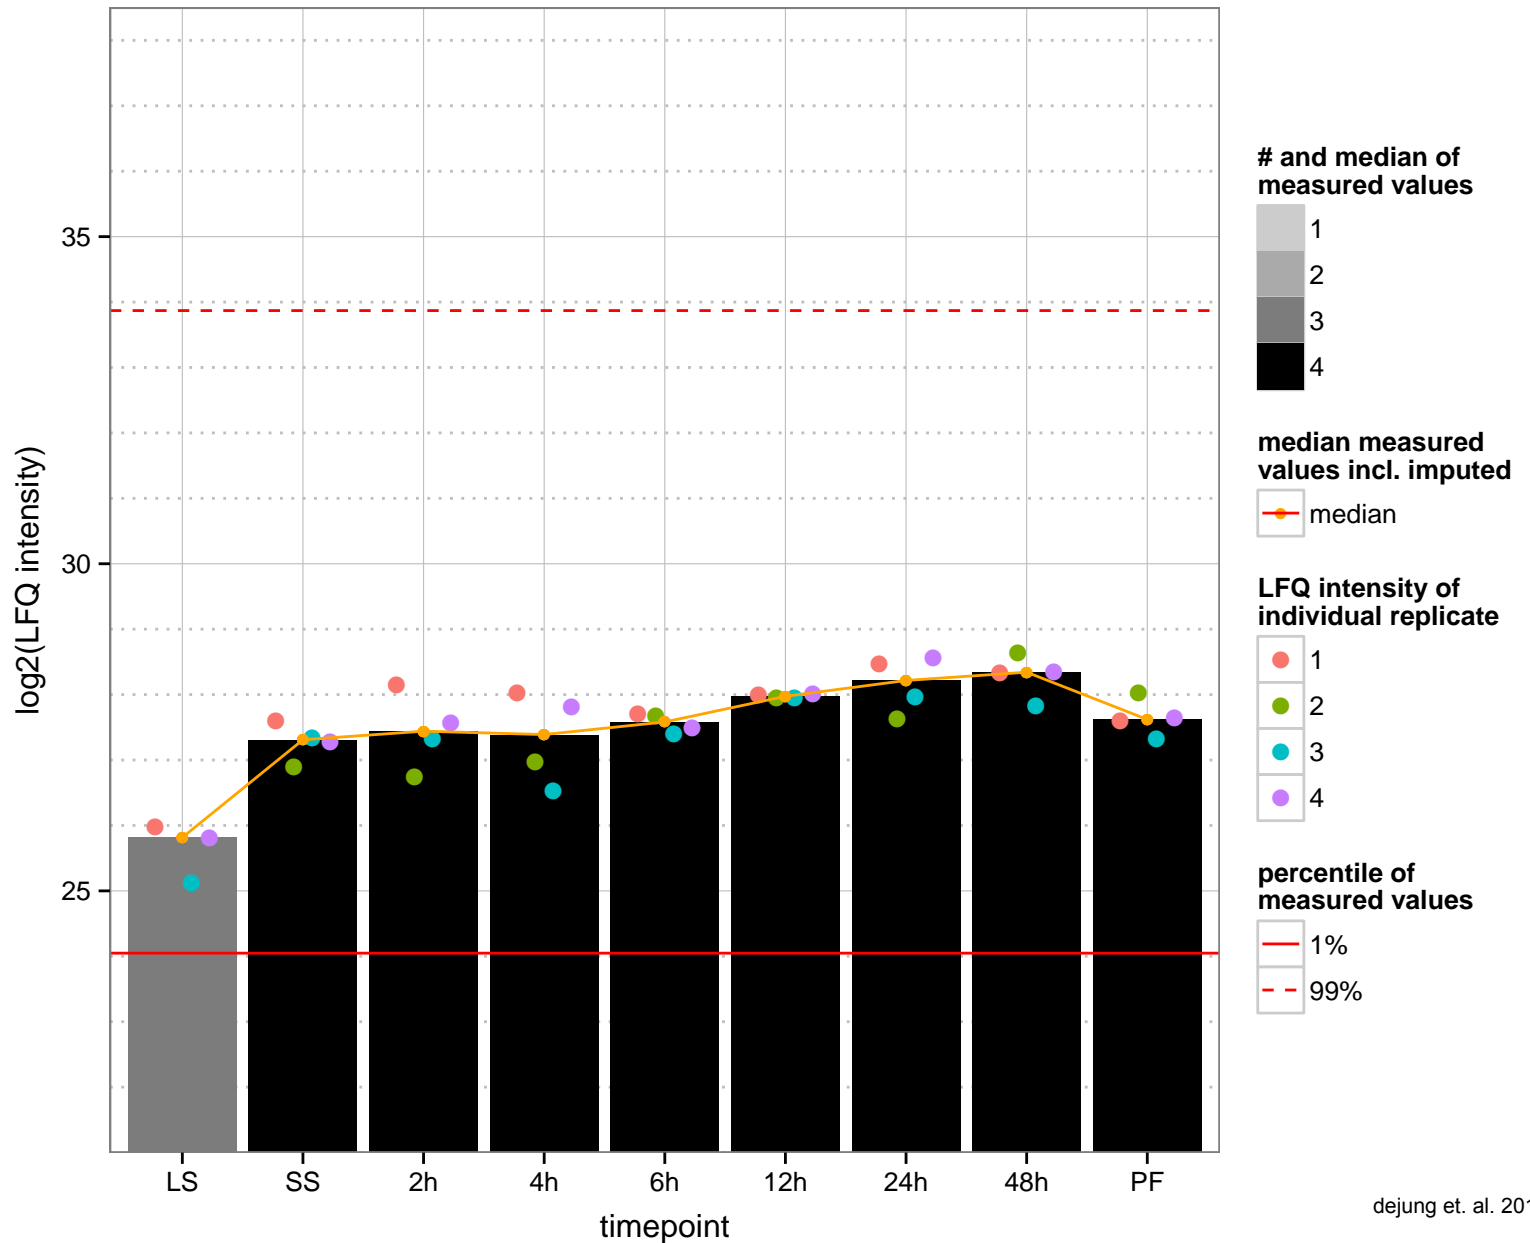

hypothetical protein, conserved, NADH-ubiquinone oxidoreductase complex I subunit, putative, NDUFA9 subunit  
 Tb927.9.15380;Tb11.v5.0686  
 AGOF: null, catalytic activity  
 AGOC: null, mitochondrion, respiratory chain complex I  
 AGOP: null, metabolic process  
 PGO: null  
 PGOC: null  
 PGOP: null

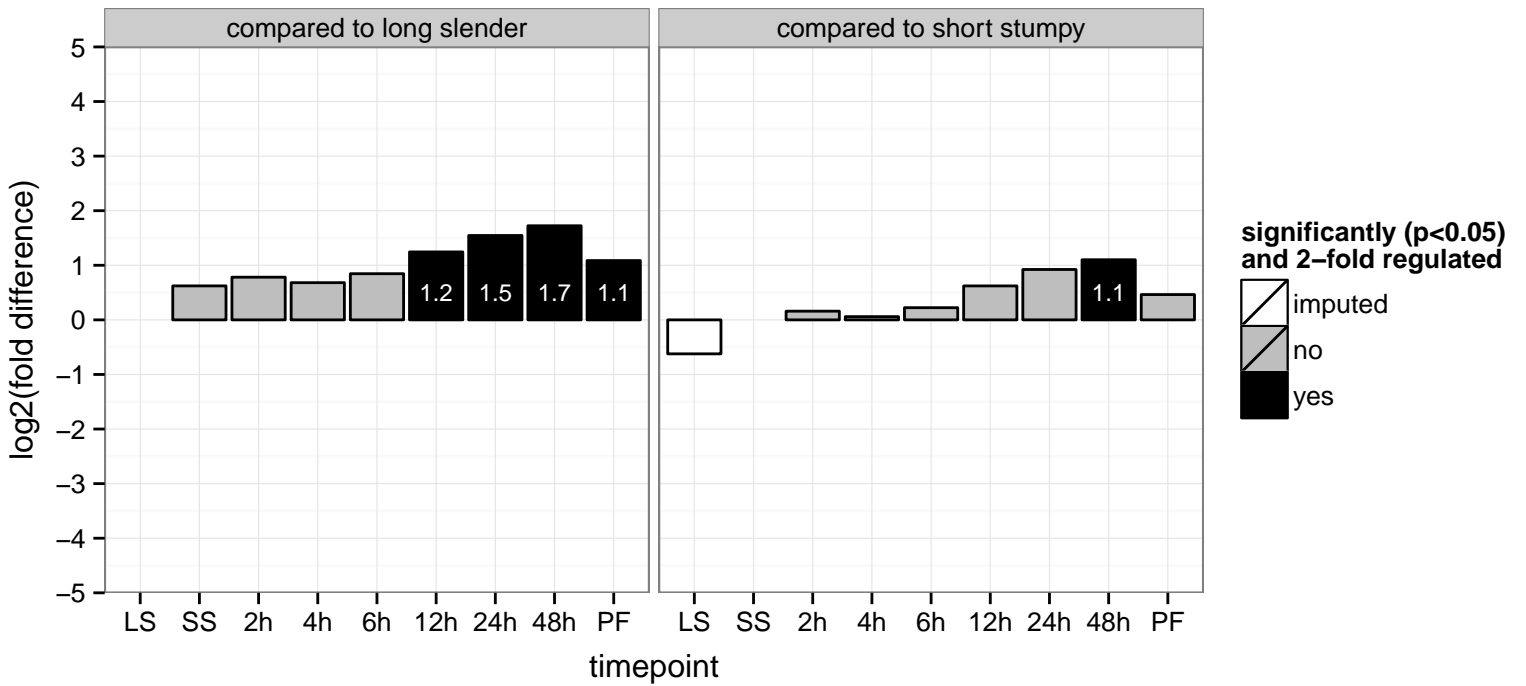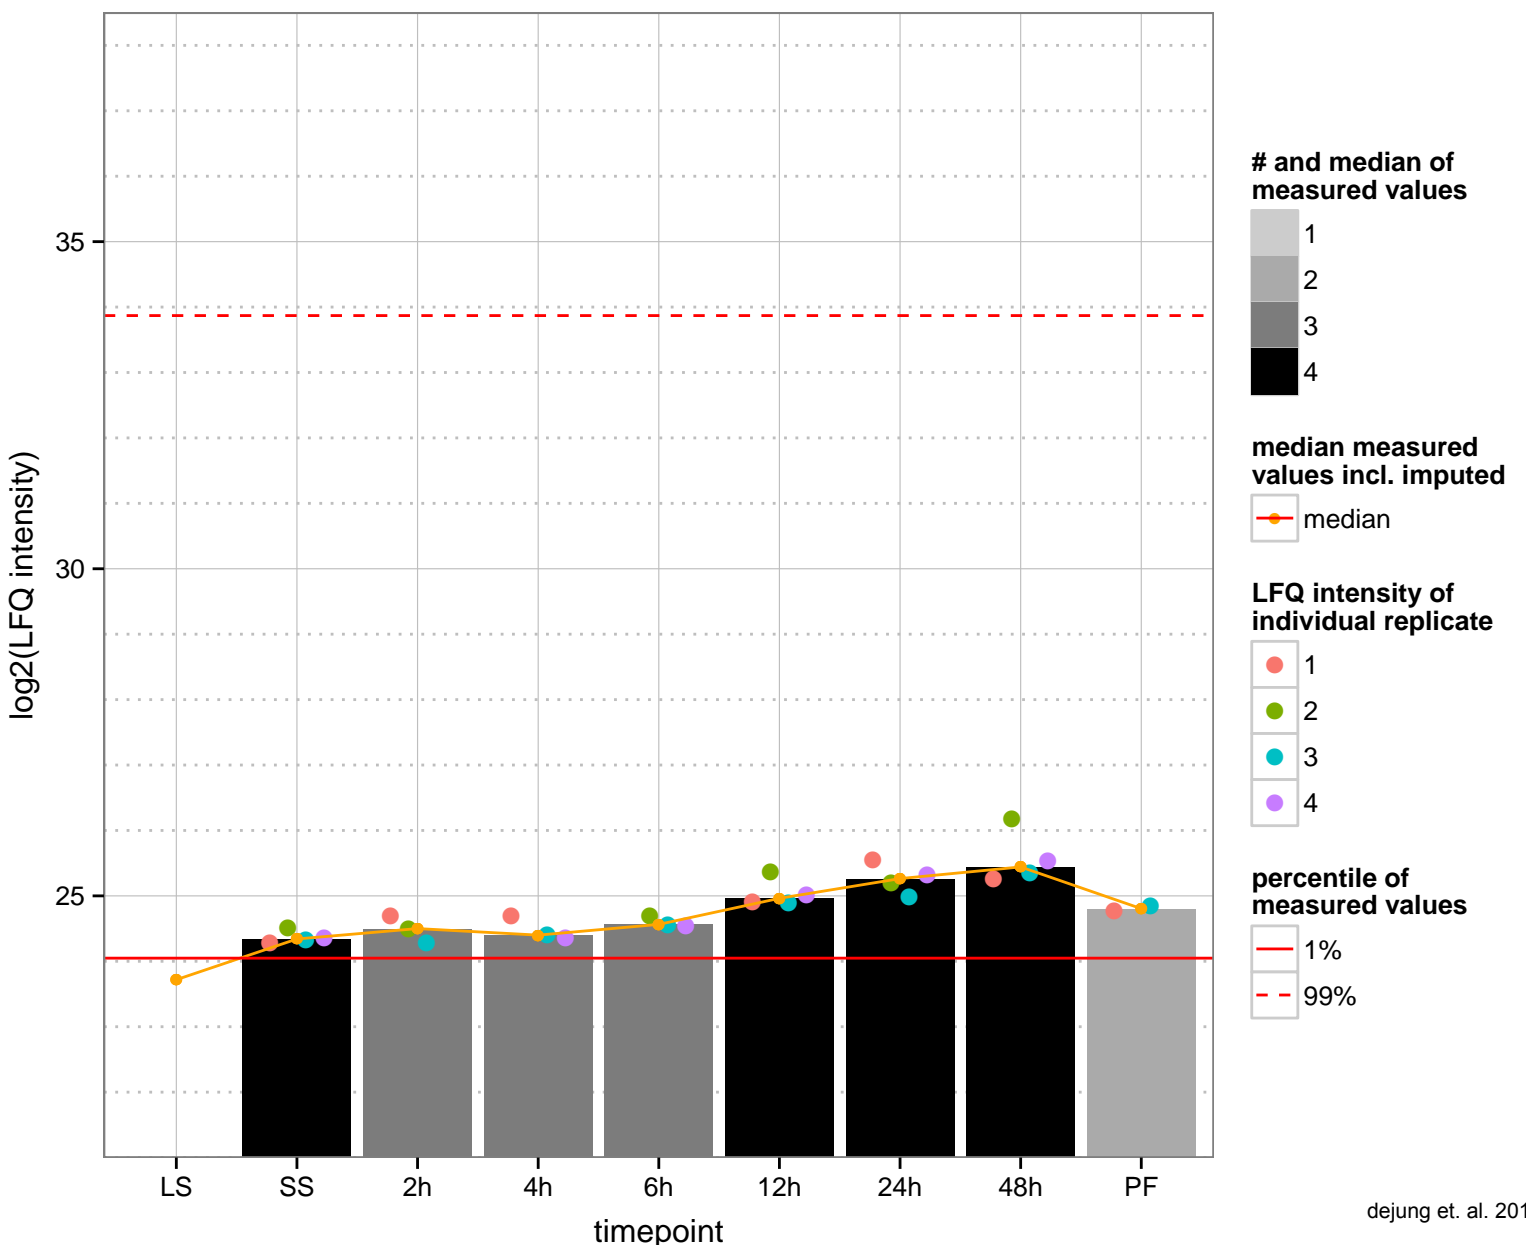

retrotransposon hot spot (RHS) protein, putative  
 Tb11.v5.0713  
 AGOF: null  
 AGOC: null  
 AGOP: null  
 PGO: null  
 PGOC: null  
 PGOP: null

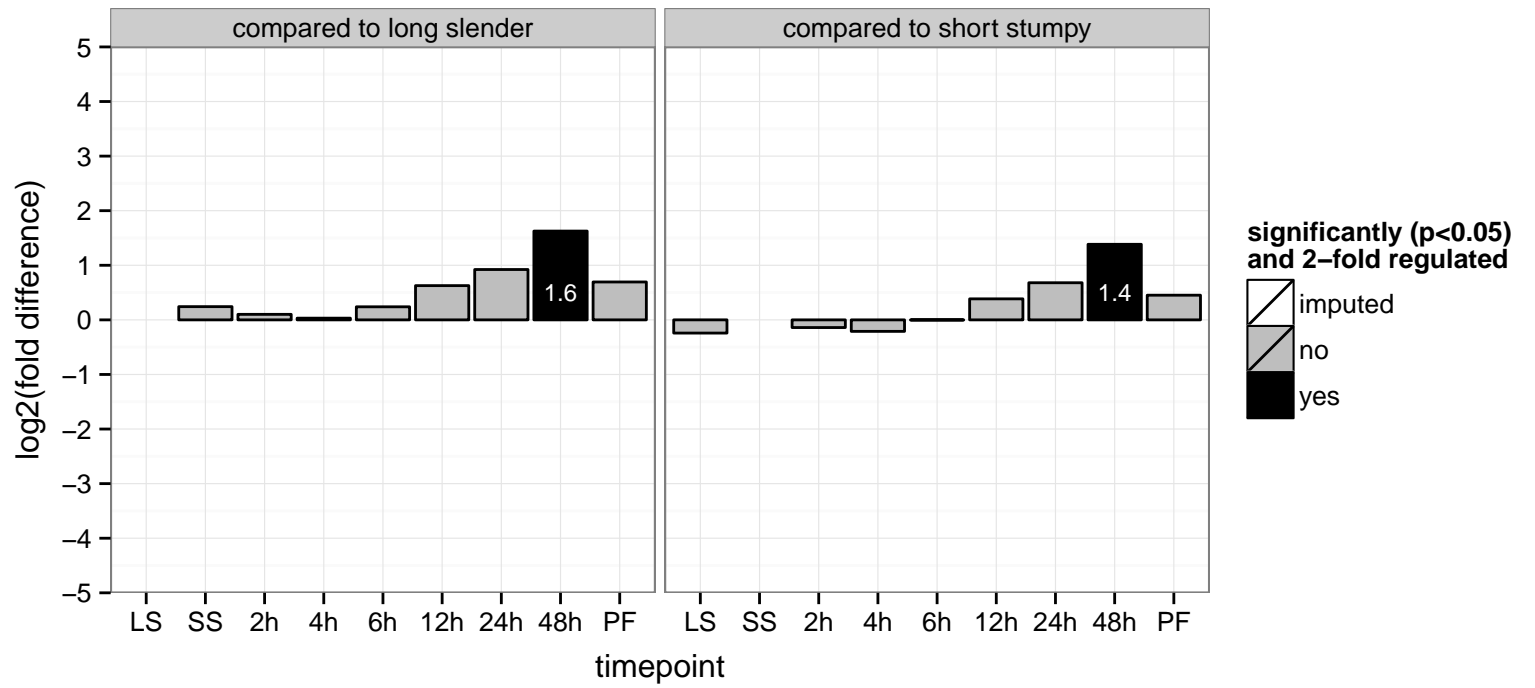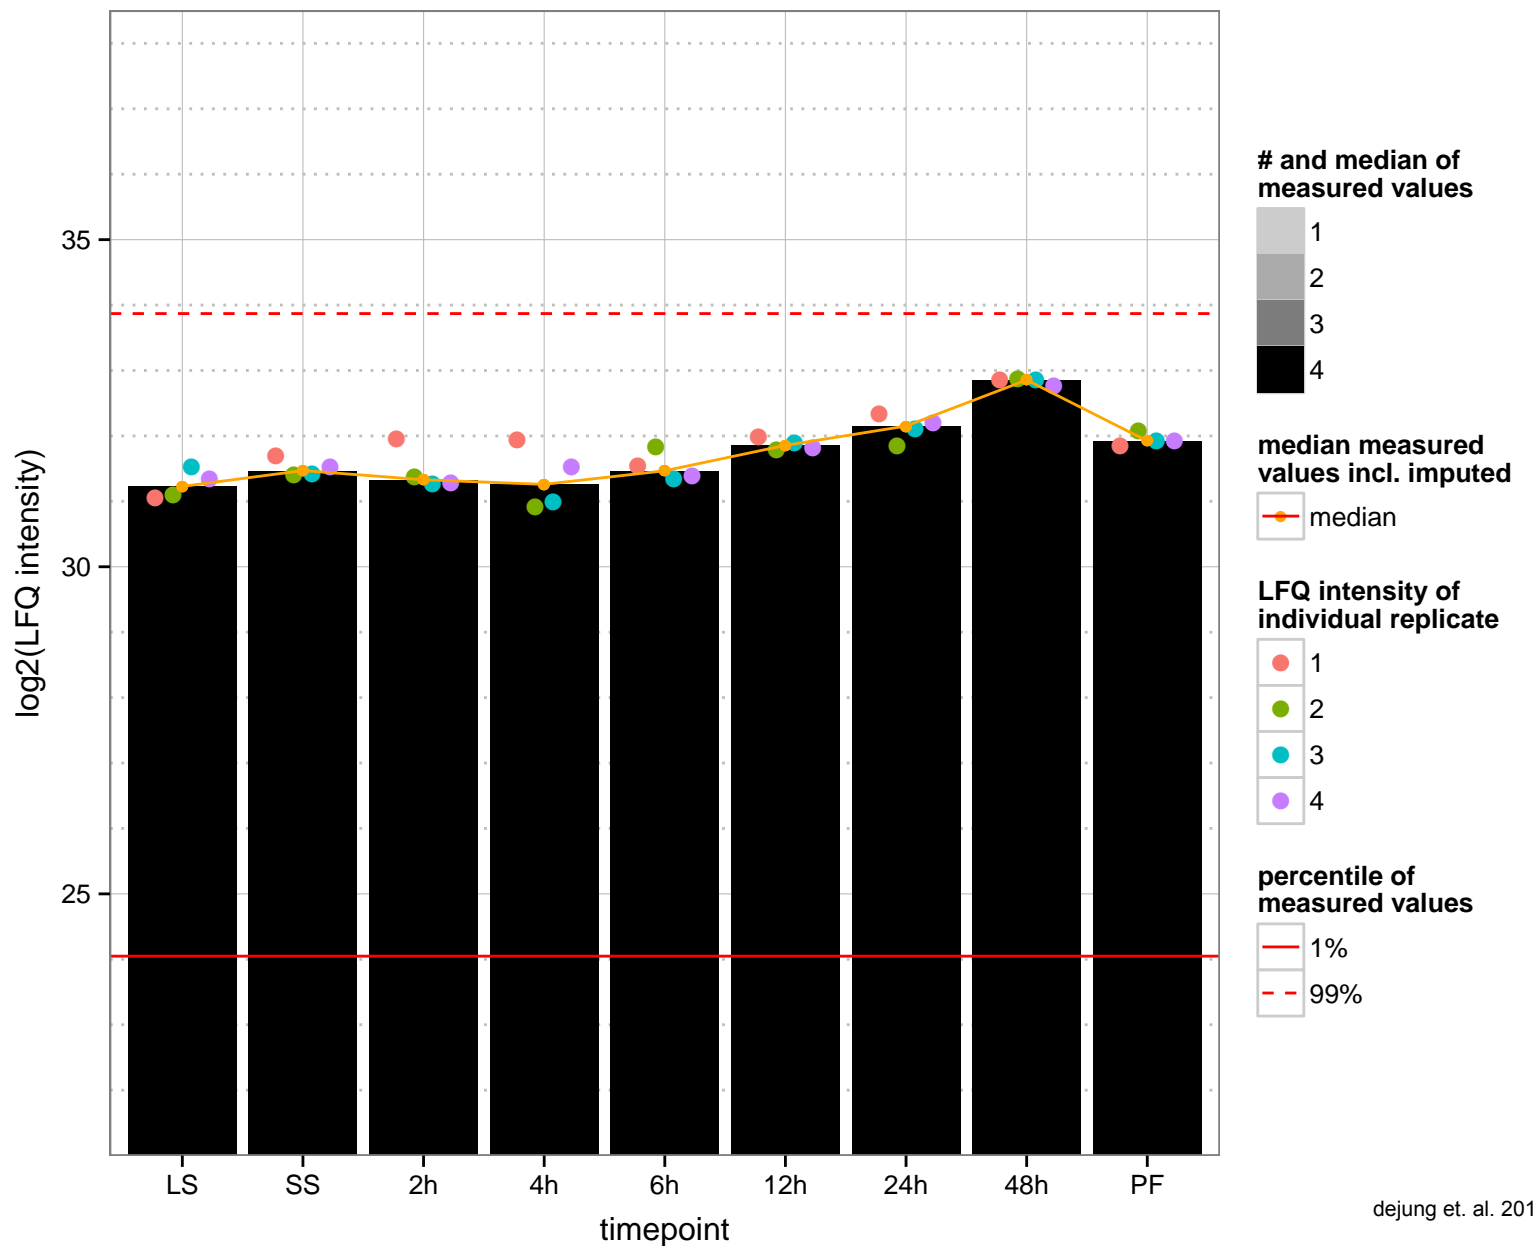

hypothetical protein, conserved, ATP dependent DEAD-box helicase (RH)

Tb11.v5.0842;Tb927.4.2720

AGOF: null, ATP binding, helicase activity, nucleic acid binding, ribosome binding

AGOC: null, mitochondrial ribosome, mitochondrion

AGOP: null

PGOF: ATP binding, ATP-dependent helicase activity, helicase activity, nucleic acid binding

PGOC: null

PGOP: null

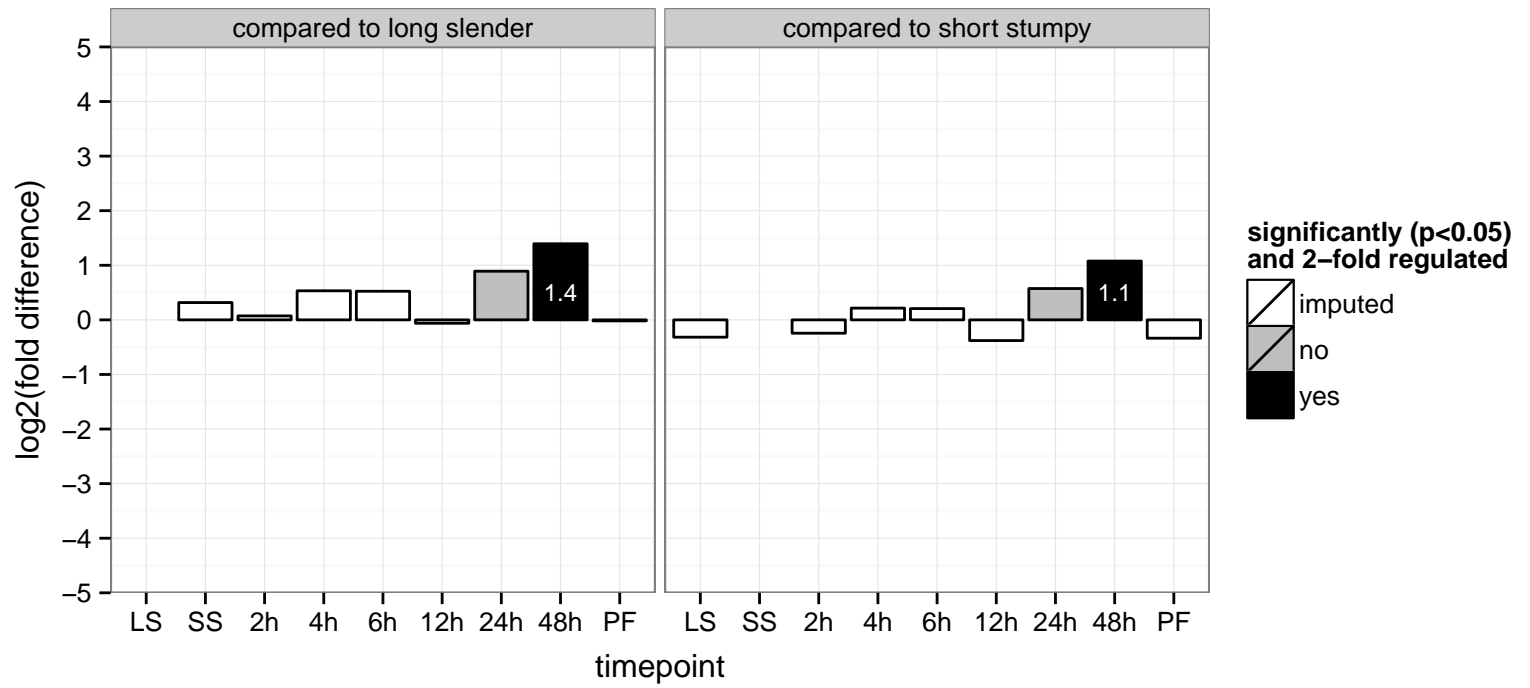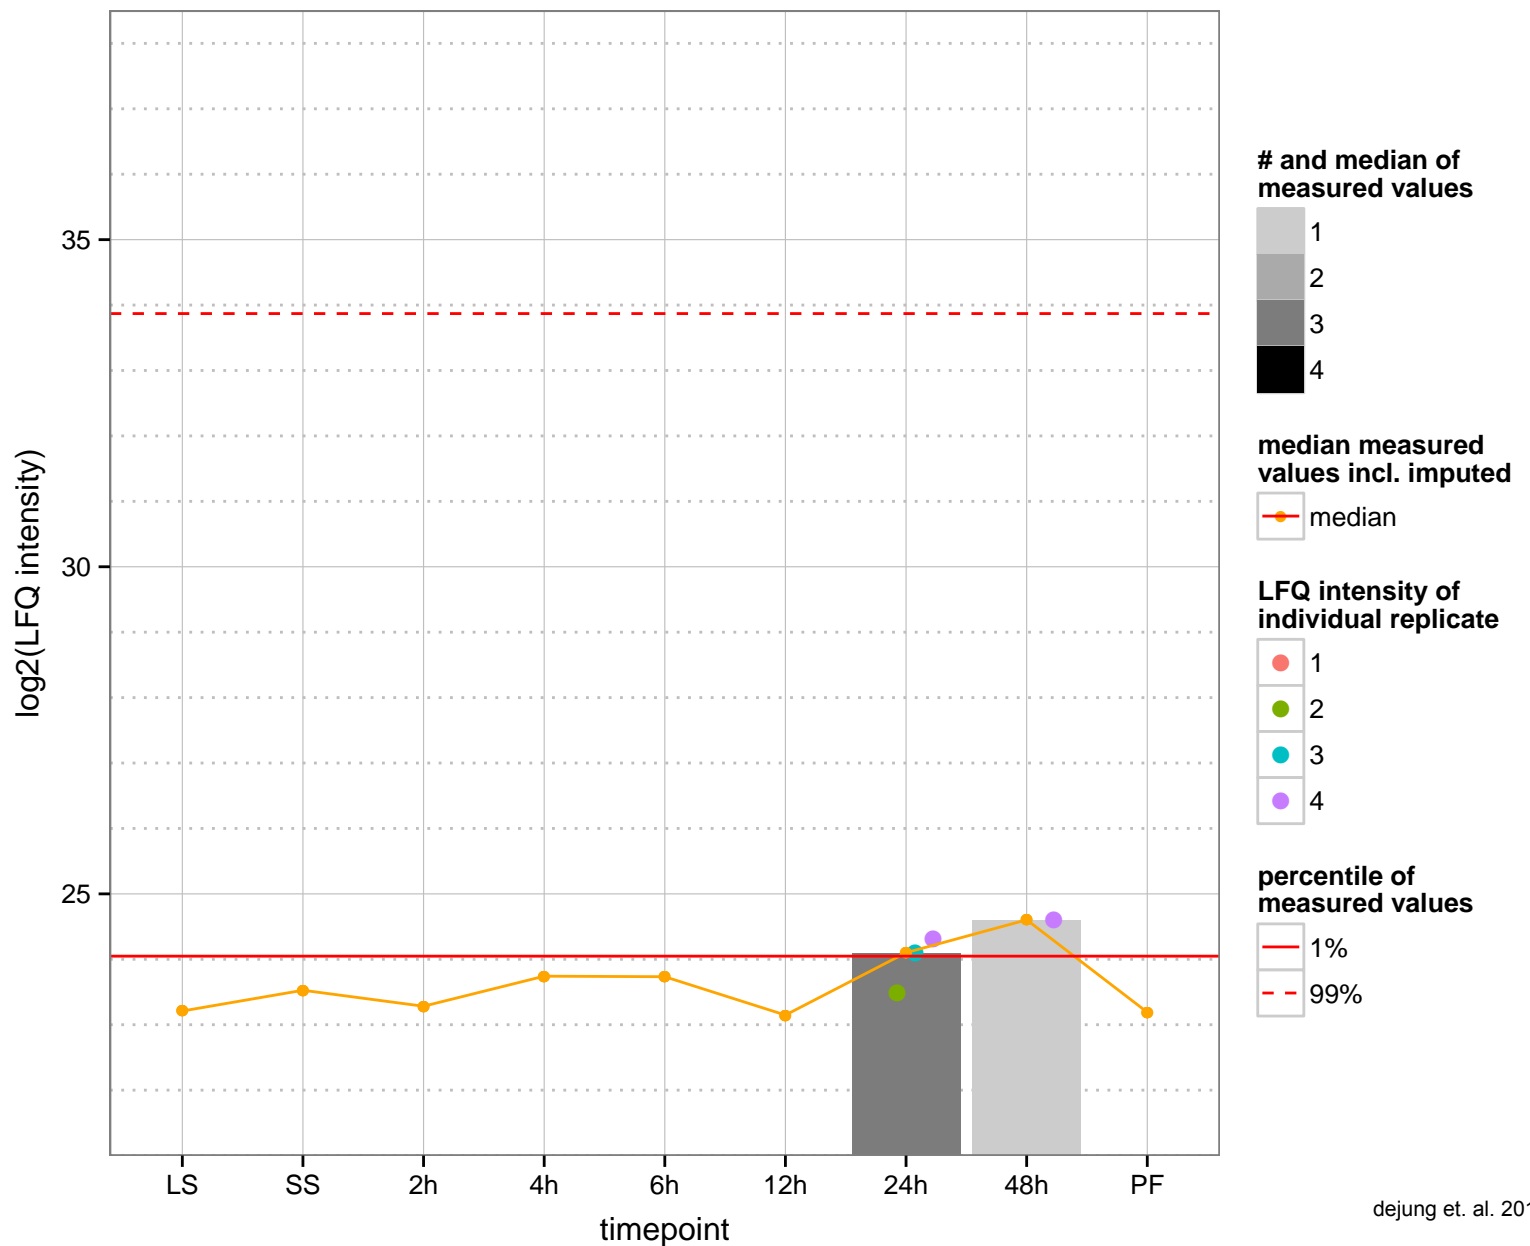

40S ribosomal protein S11, putative  
 Tb927.1.3180  
 AGOF: null  
 AGOC: intracellular, ribosome  
 AGOP: translation  
 PGO: structural constituent of ribosome  
 PGO: intracellular, ribosome  
 PGO: translation

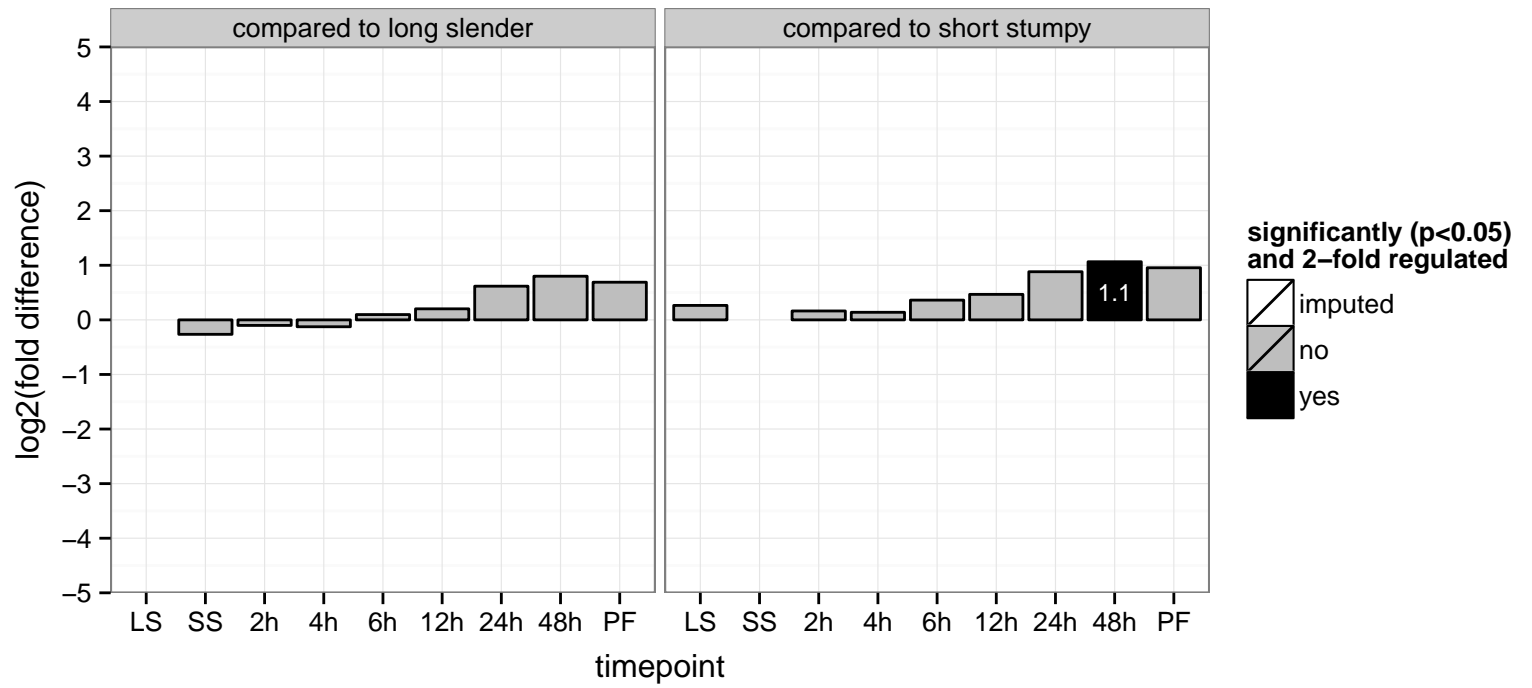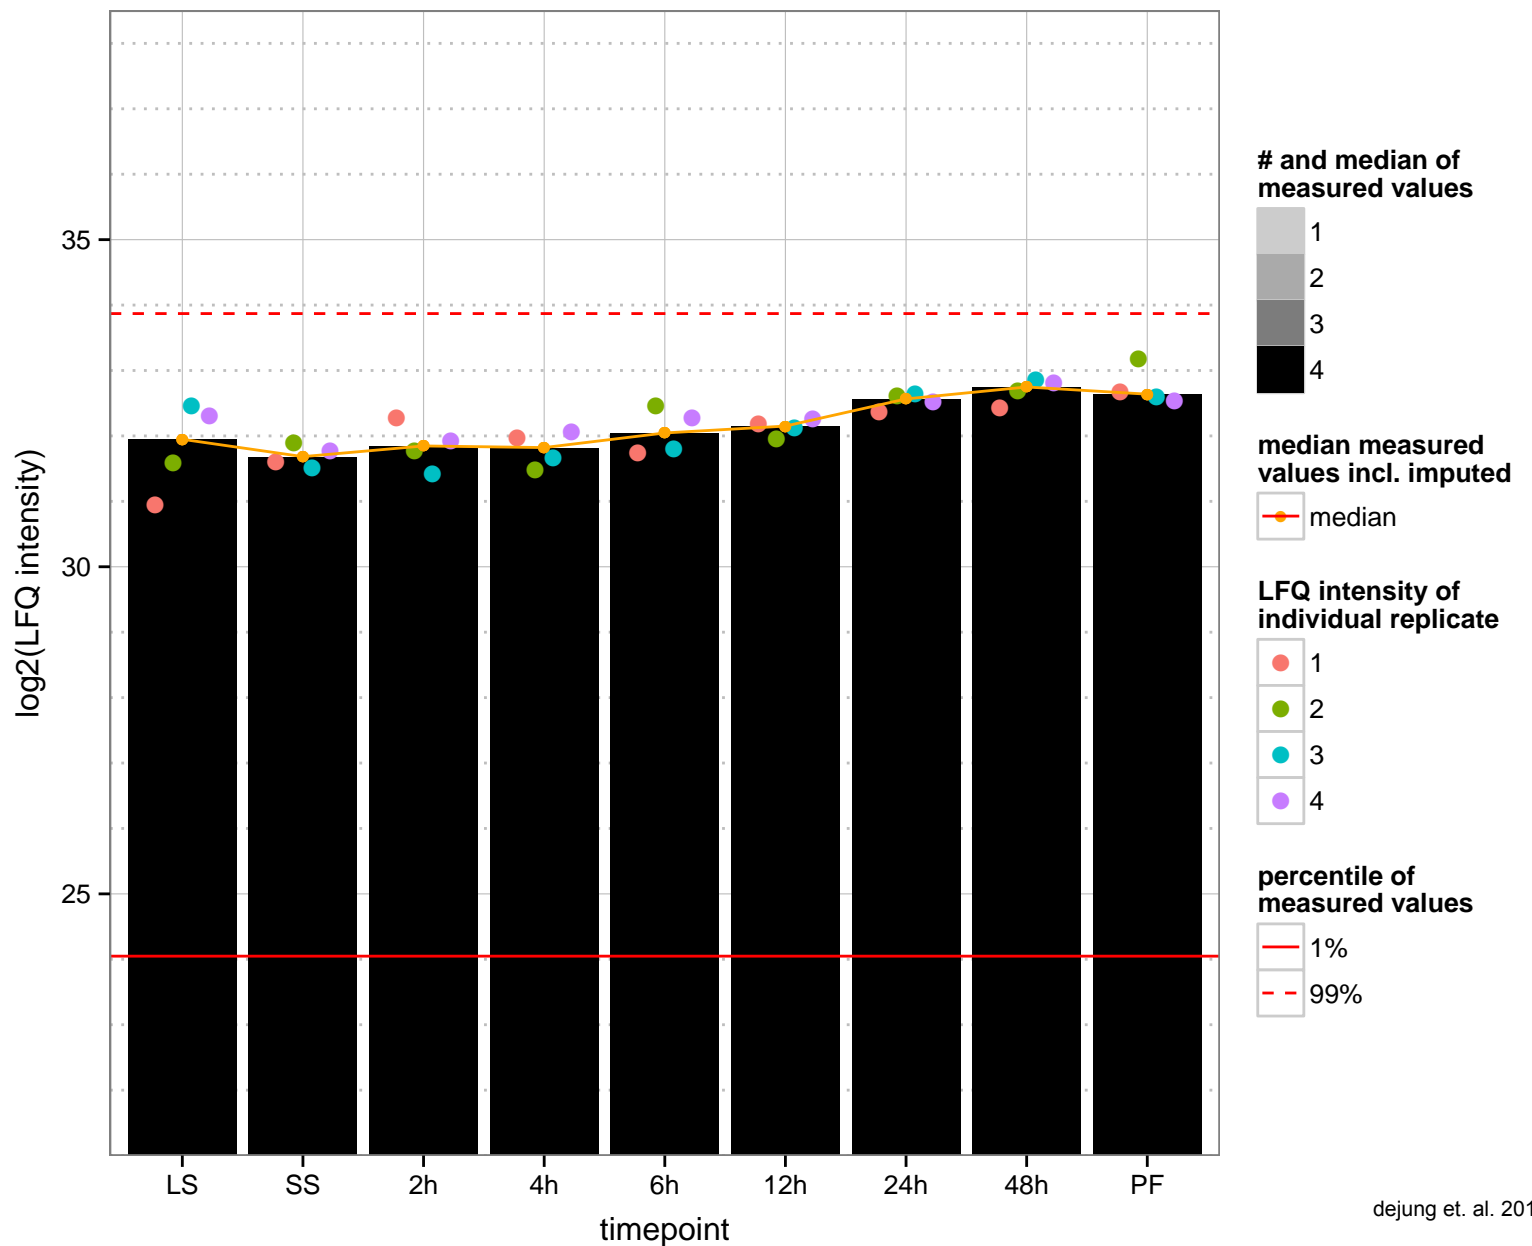

hypothetical protein, conserved  
 Tb927.1.3910  
 AGOF: null  
 AGOC: null  
 AGOP: null  
 PGO: protein binding  
 PGOC: null  
 PGOP: null

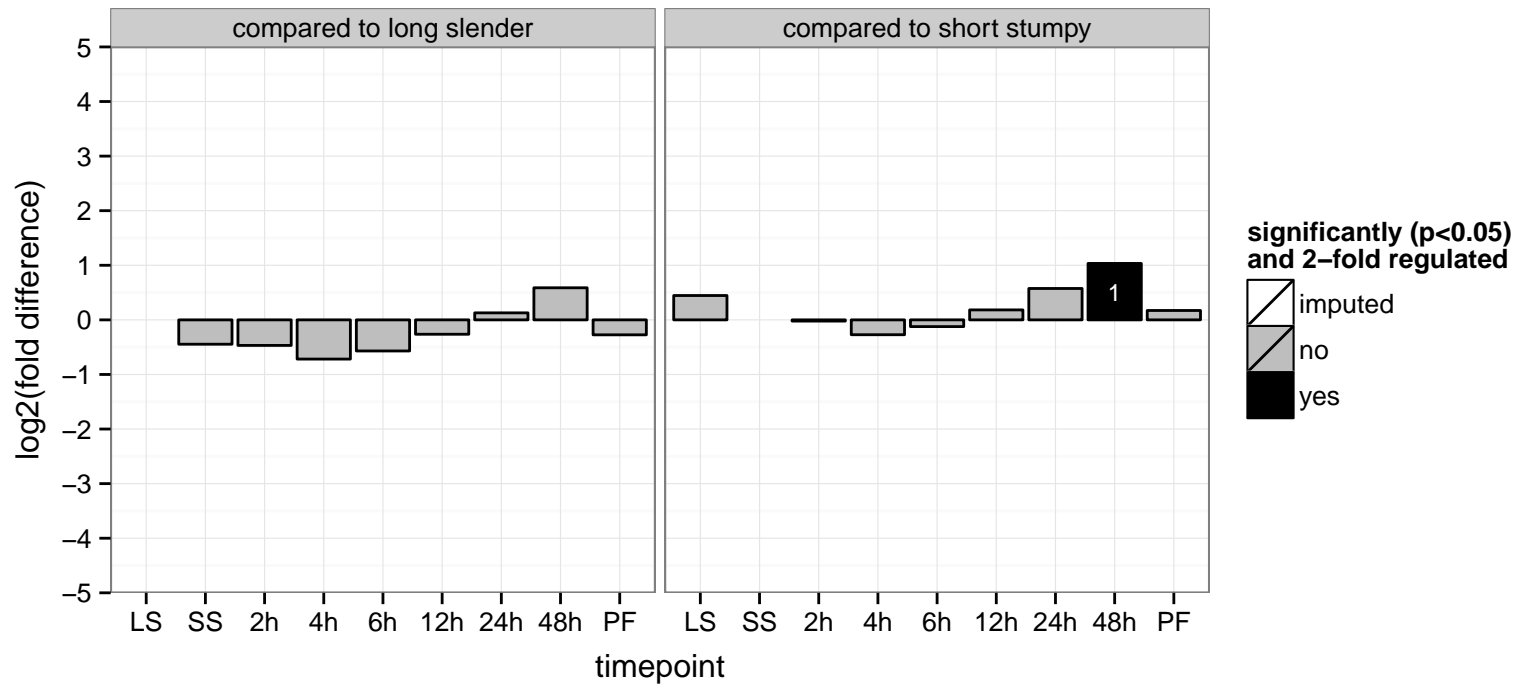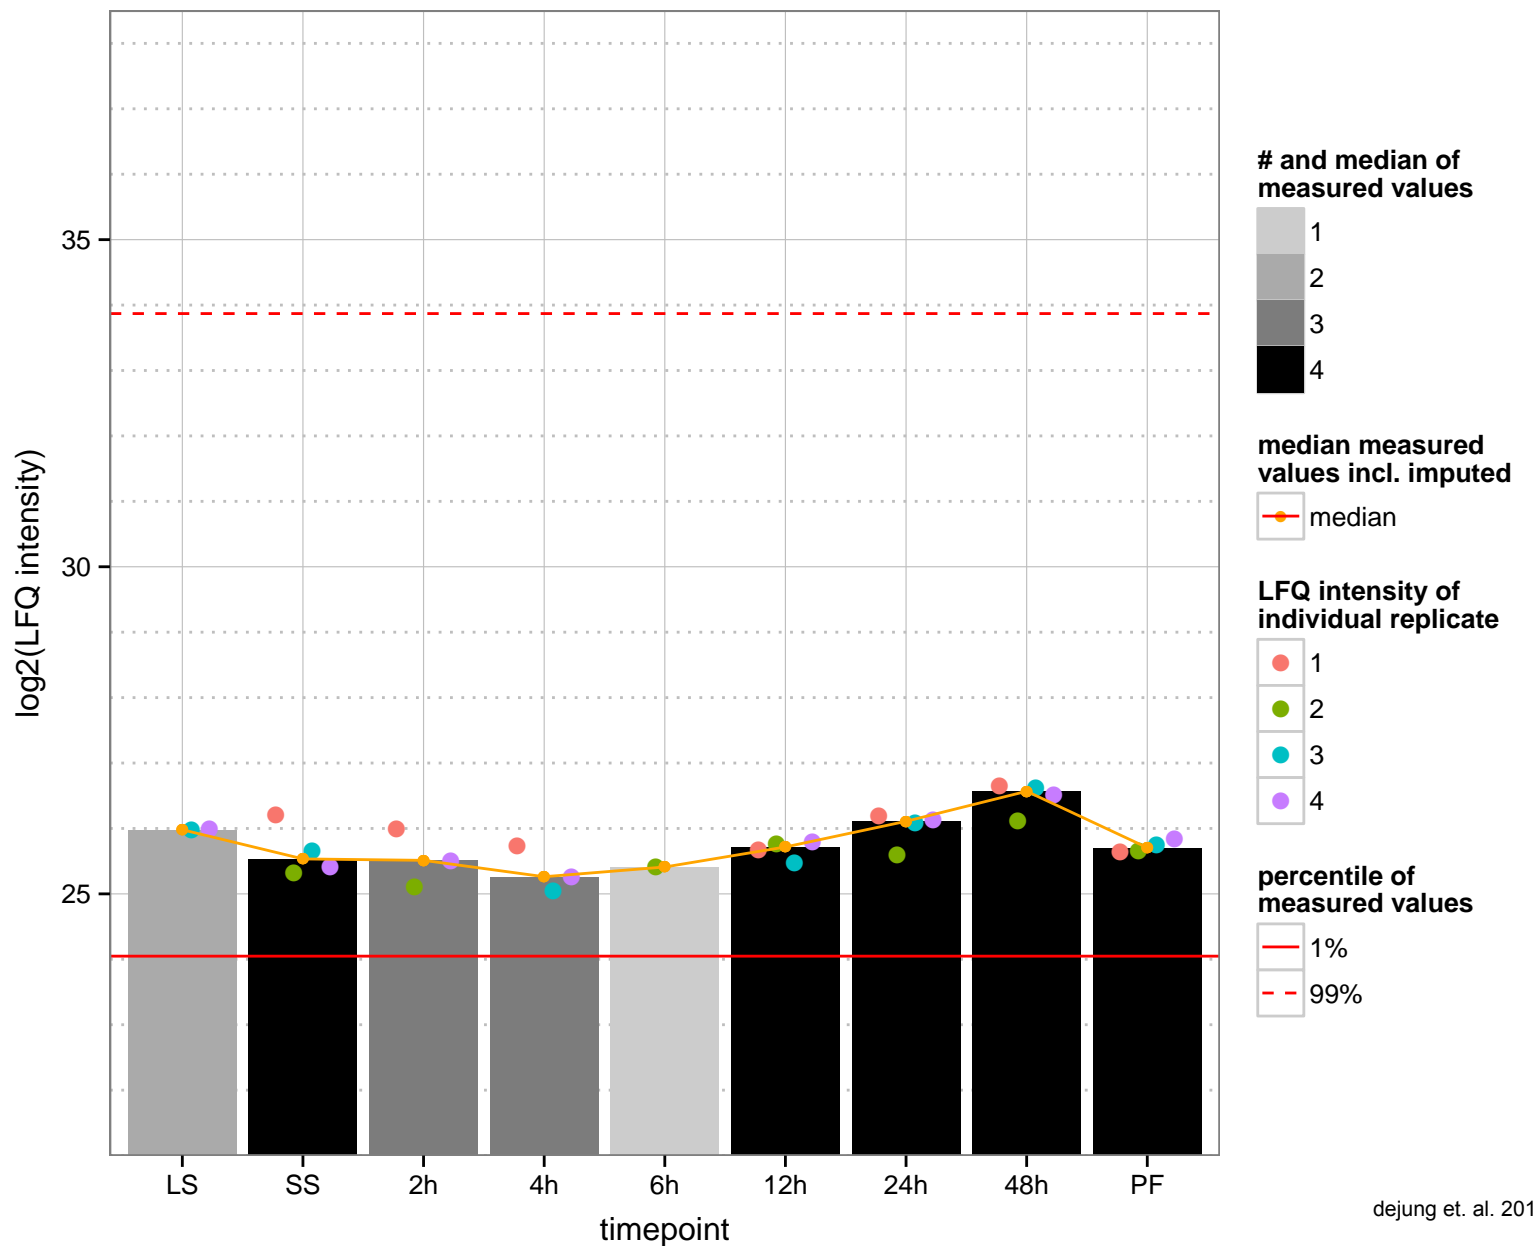

ABC transporter, putative

Tb927.1.4420

AGOF: ATP binding, ATPase activity, coupled to transmembrane movement of substances

AGOC: ATP-binding cassette (ABC) transporter complex

AGOP: transport

PGOF: ATP binding, ATPase activity, nucleoside-triphosphatase activity, nucleotide binding

PGOC: null

PGOP: null

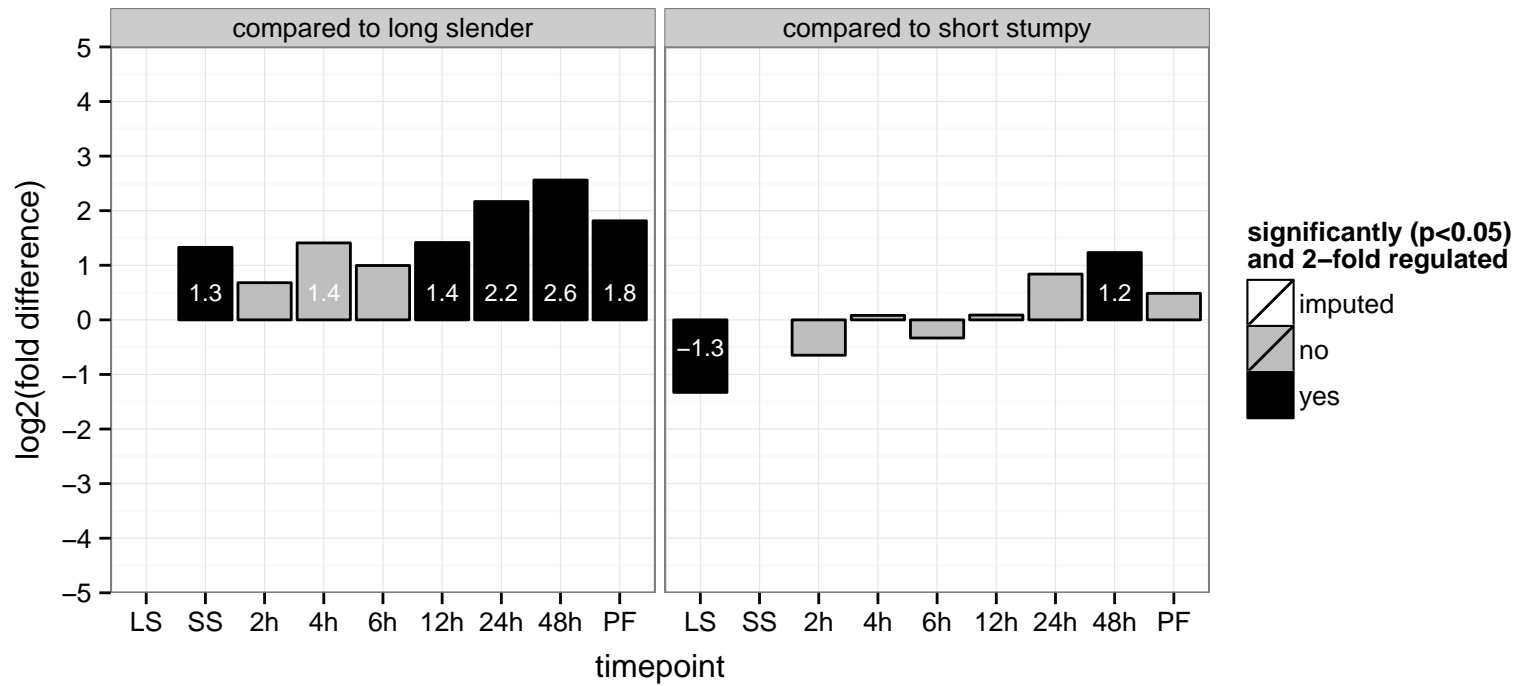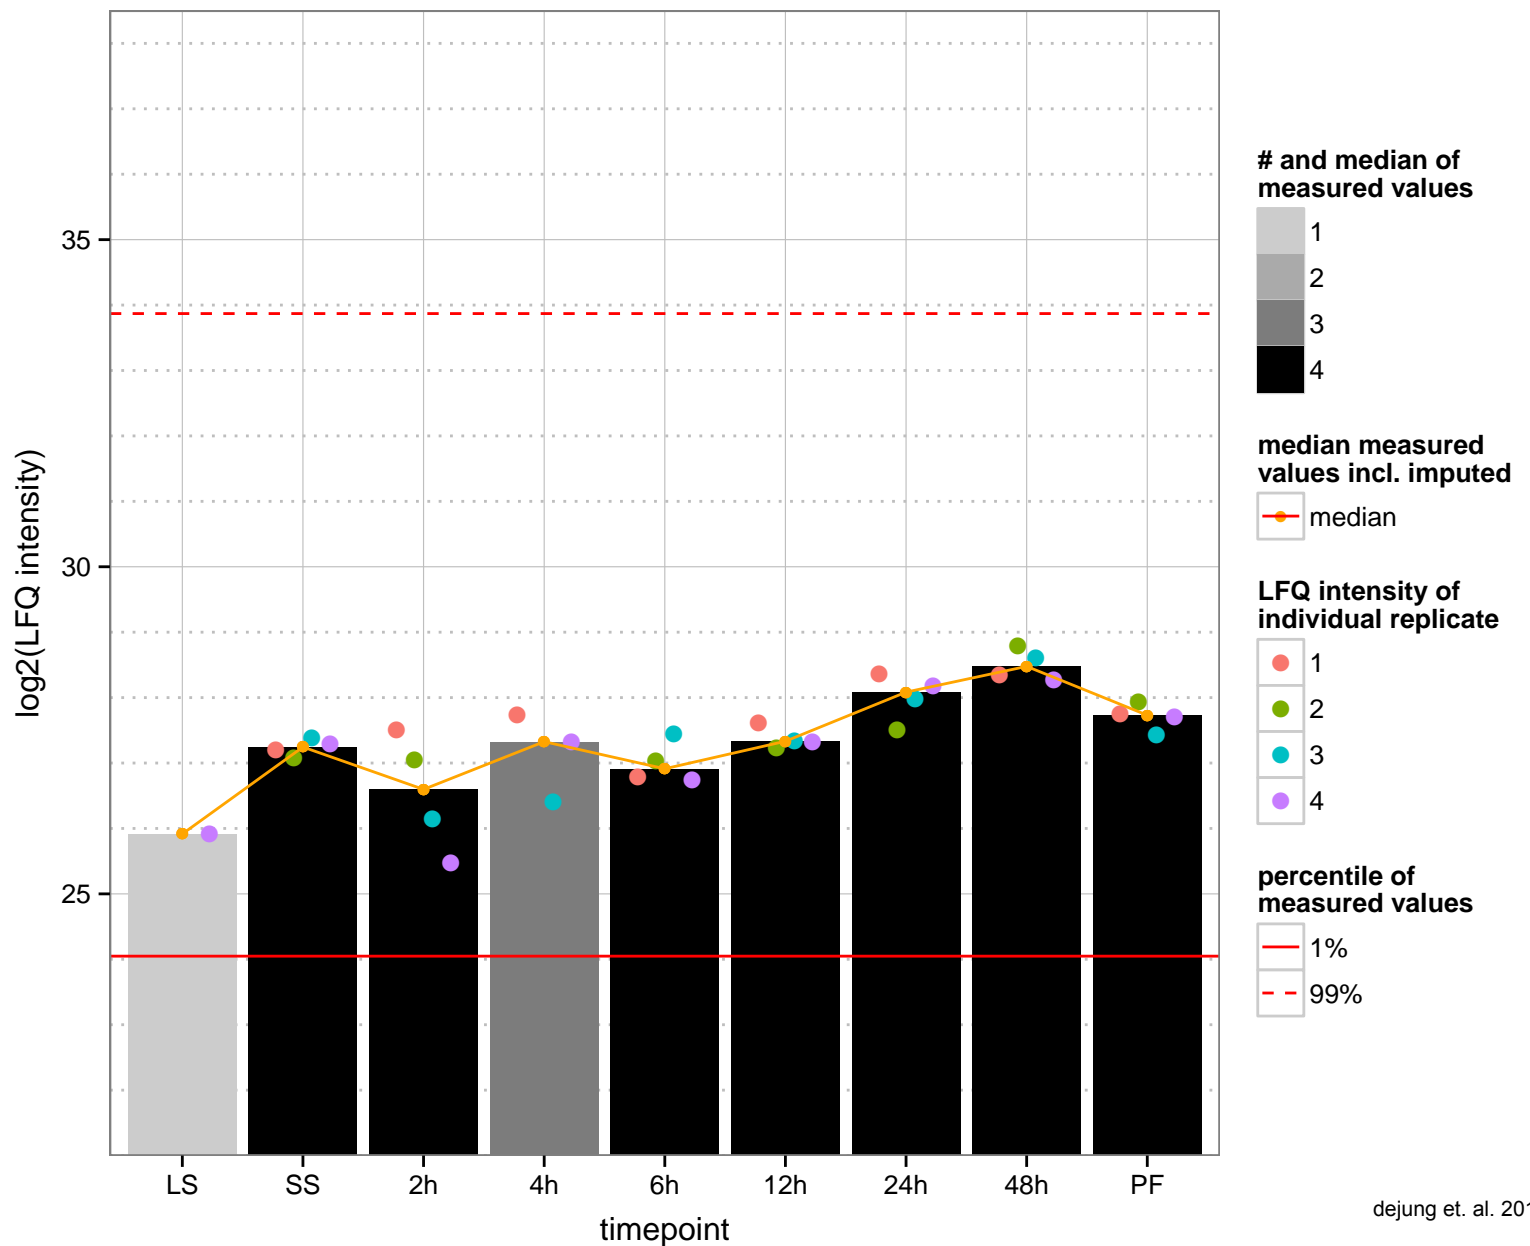



hypothetical protein, conserved  
 Tb927.1.4480  
 AGOF: null  
 AGOC: null  
 AGOP: null  
 PGOF: protein binding  
 PGO: null  
 PGOP: null

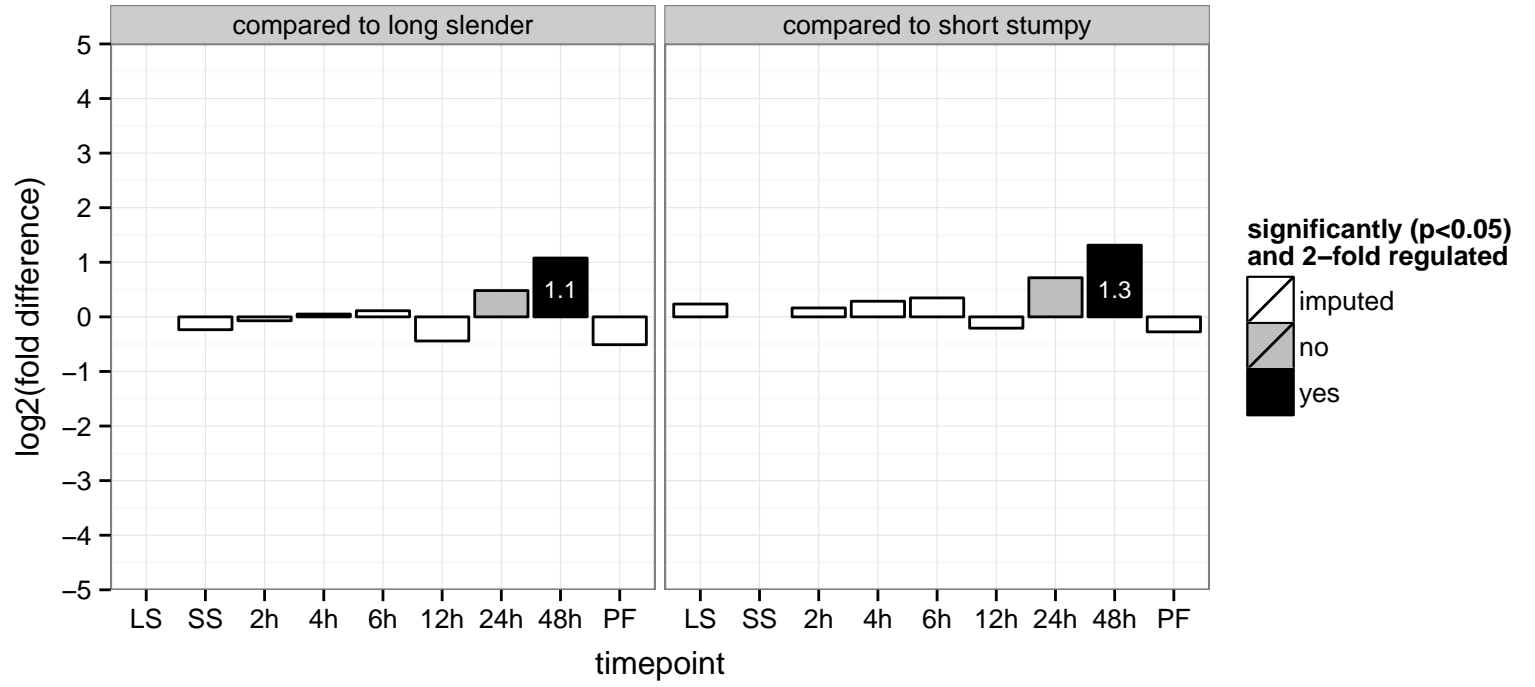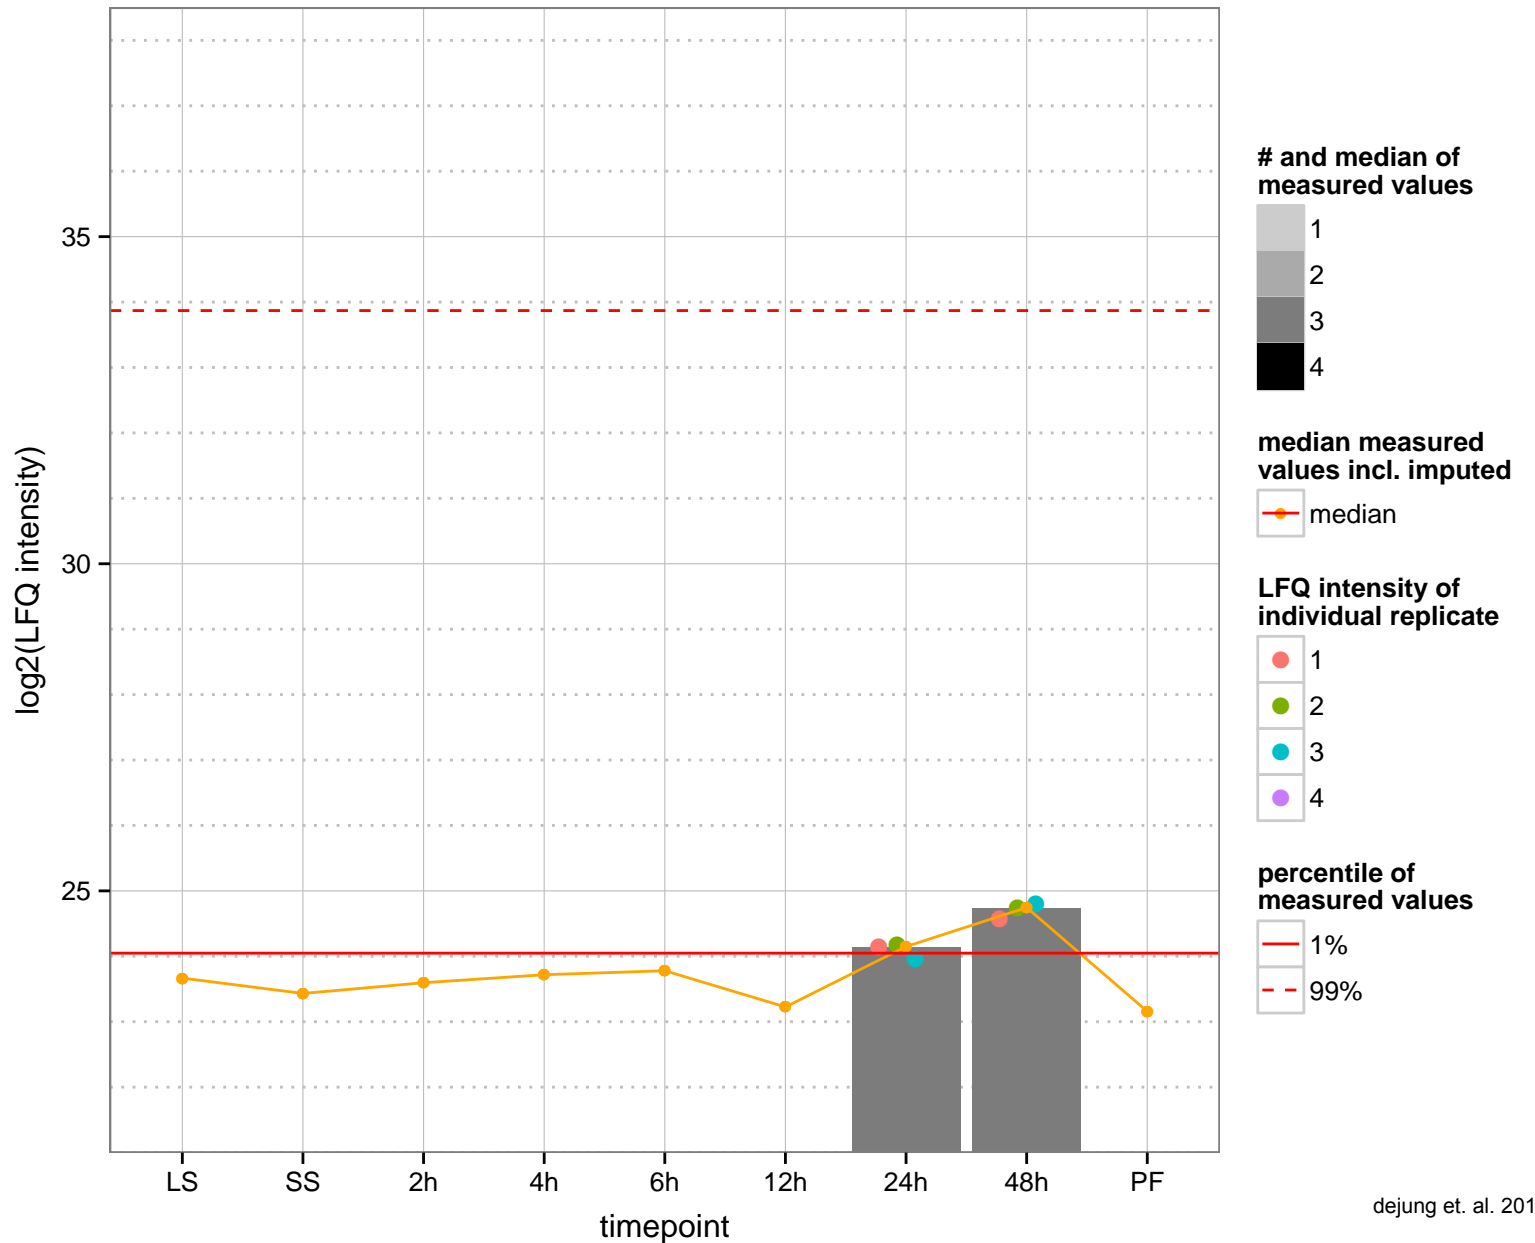

arginine N-methyltransferase (PRMT1)

Tb927.1.4690

AGOF: arginine N-methyltransferase activity, protein-arginine N-methyltransferase activity

AGOC: null

AGOP: peptidyl-arginine methylation, to asymmetrical-dimethyl arginine, protein methylation

PGOF: null

PGOC: null

PGOP: null

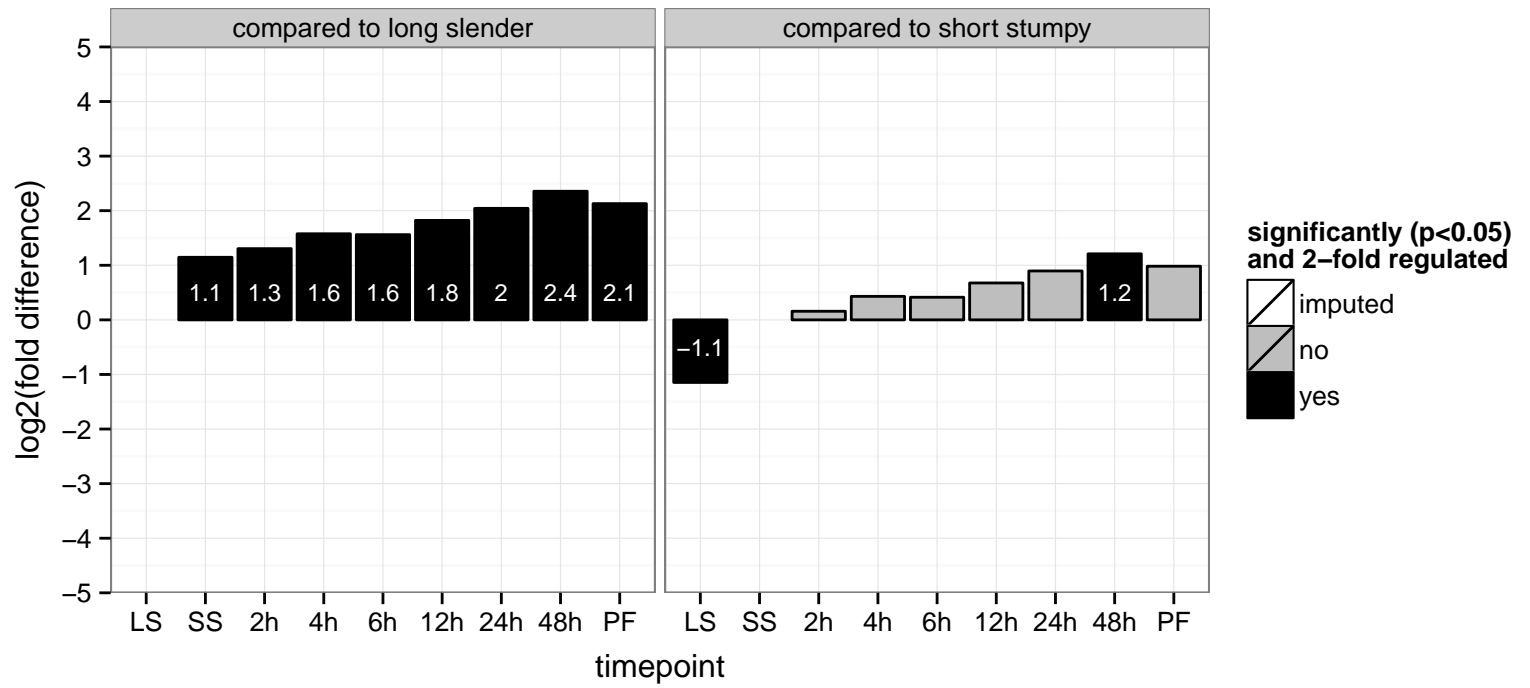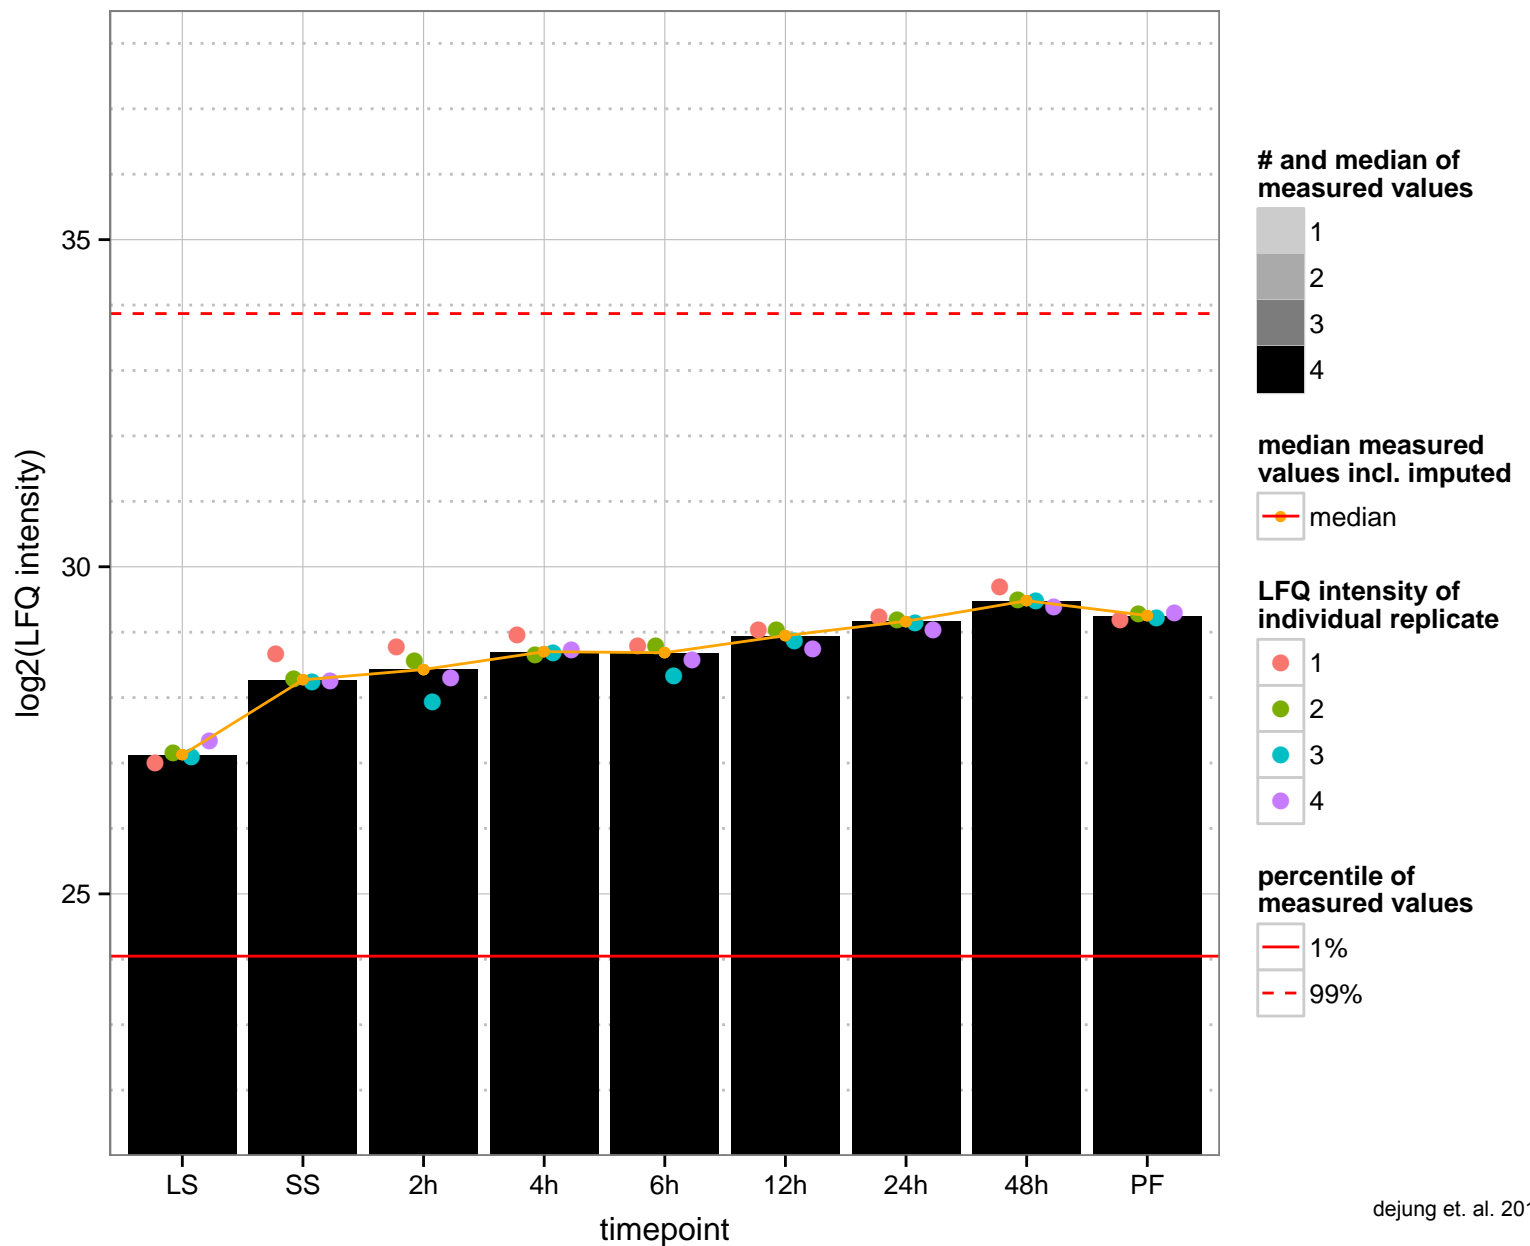

hypothetical protein, conserved  
 Tb927.1.5000  
 AGOF: null  
 AGOC: mitochondrion  
 AGOP: null  
 PGO: null  
 PGOC: null  
 PGOP: null

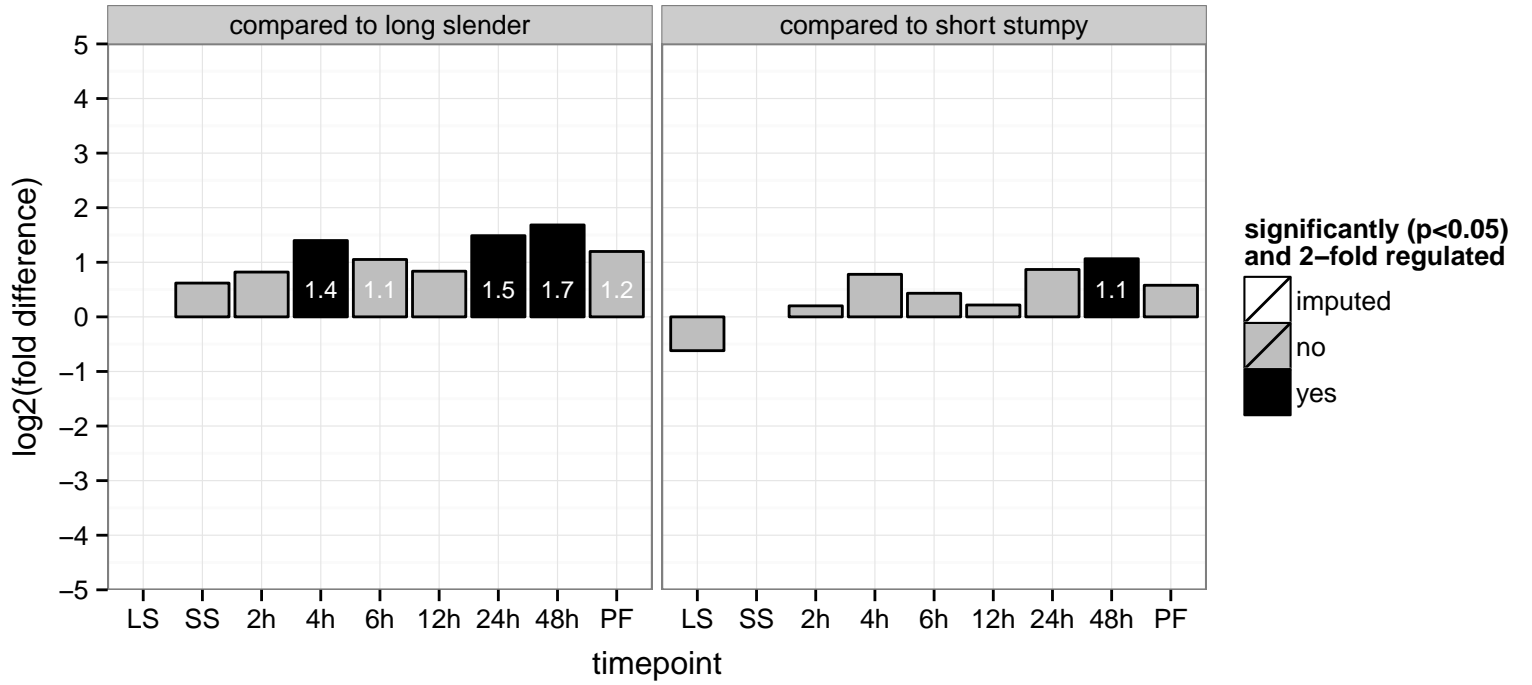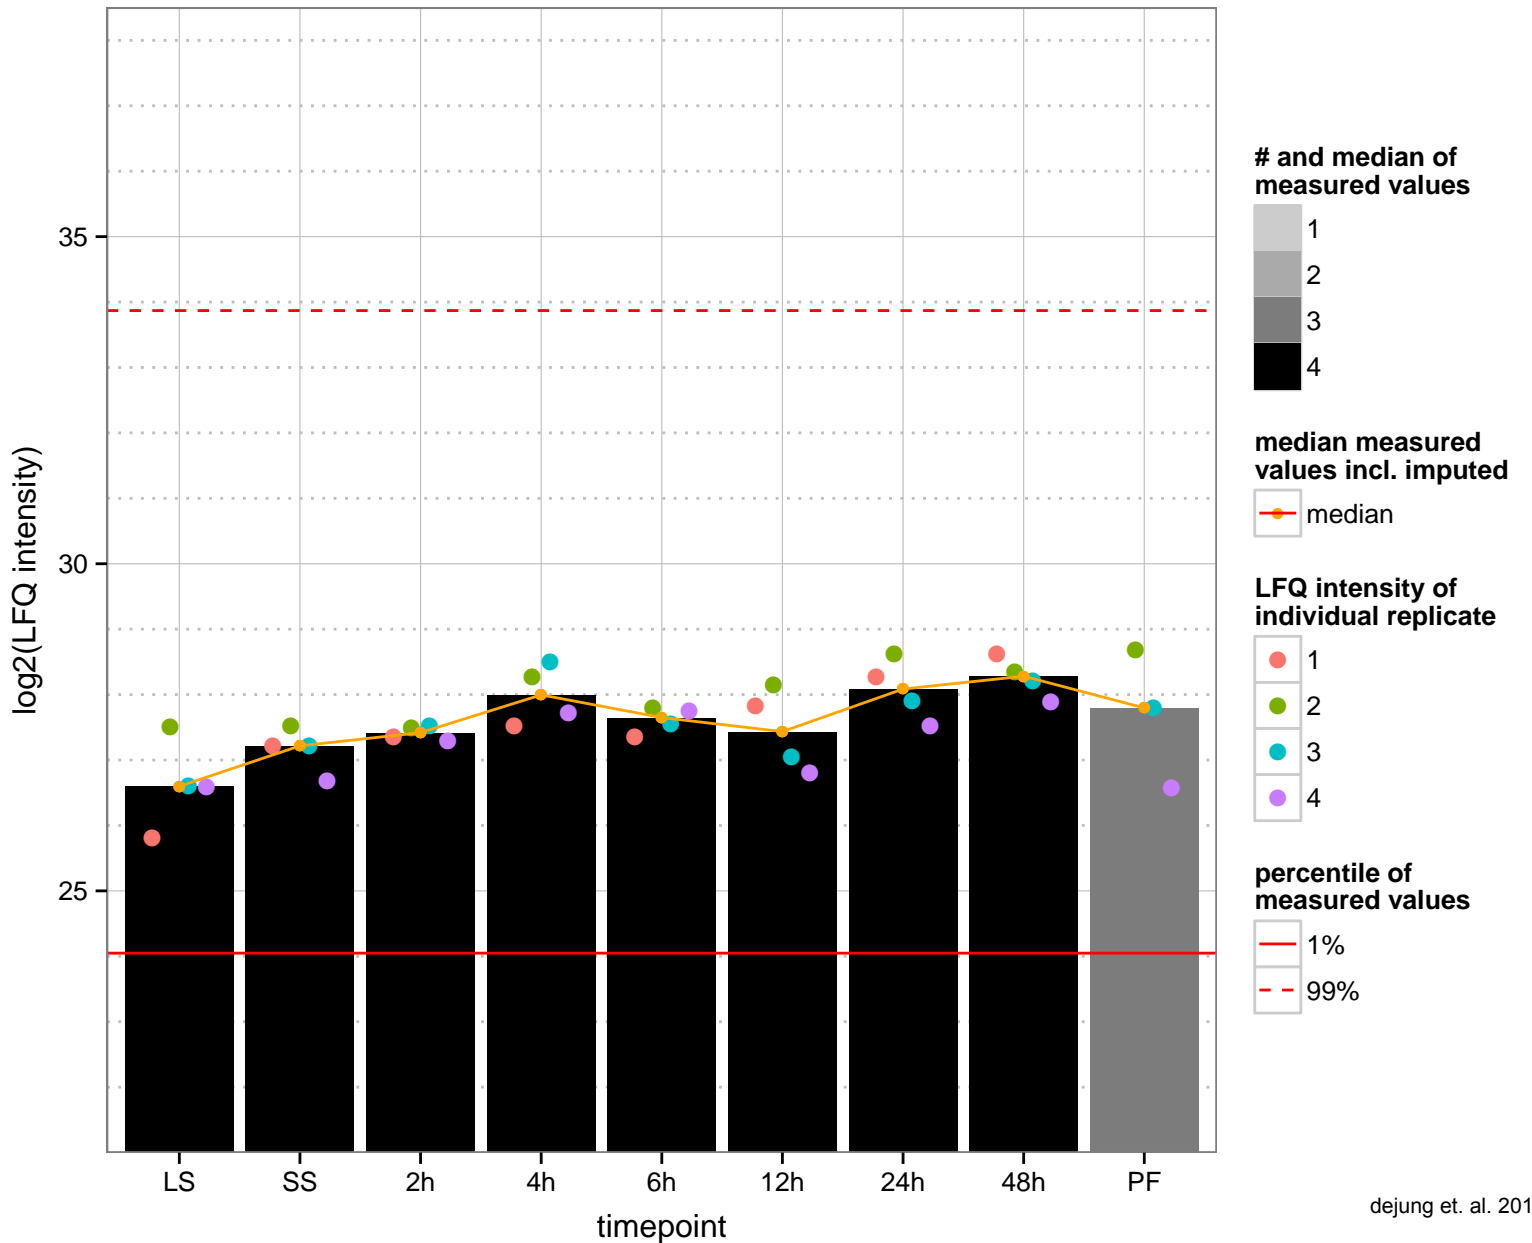

phosphate-repressible phosphate permease, putative

Tb927.1.600

AGOF: inorganic phosphate transmembrane transporter activity, phosphate ion transmembrane transporter activity

AGOC: membrane

AGOP: null

PGOF: inorganic phosphate transmembrane transporter activity

PGOC: membrane

PGOP: phosphate ion transport

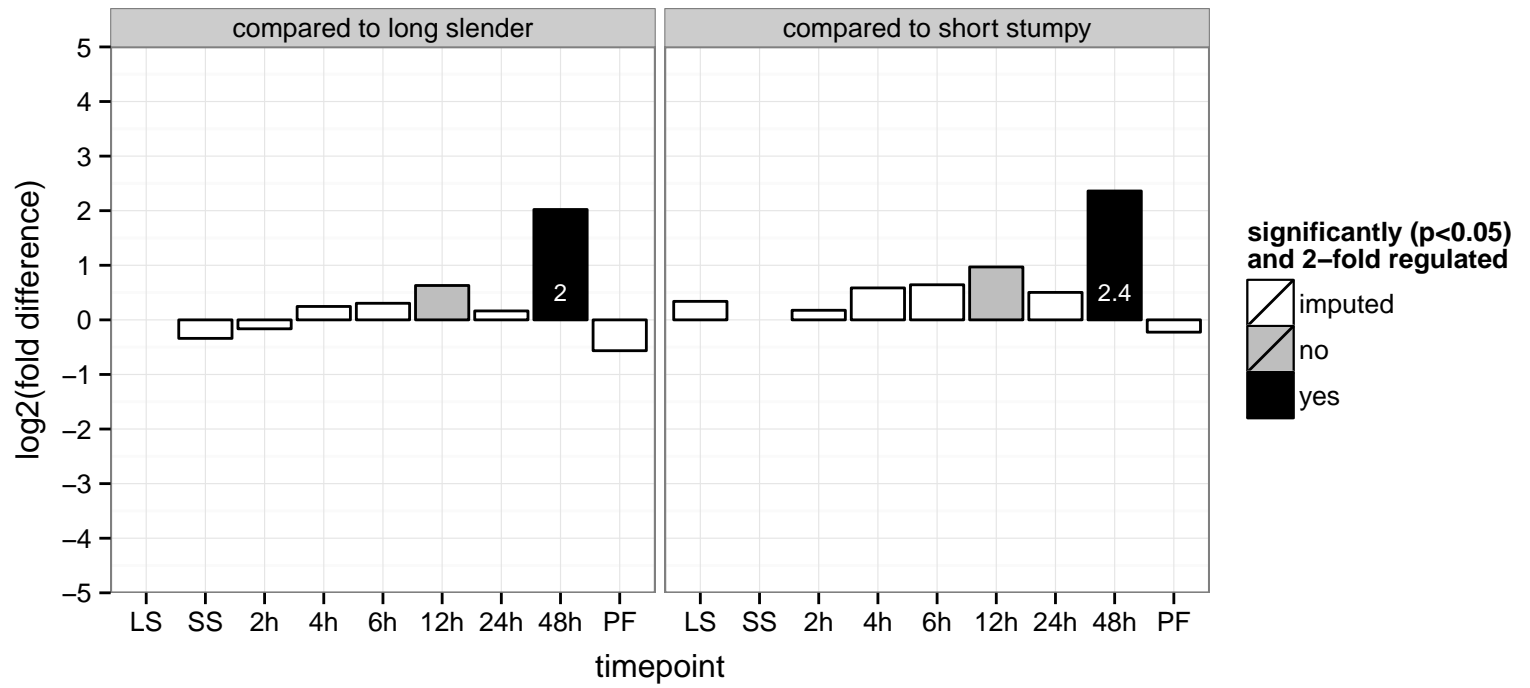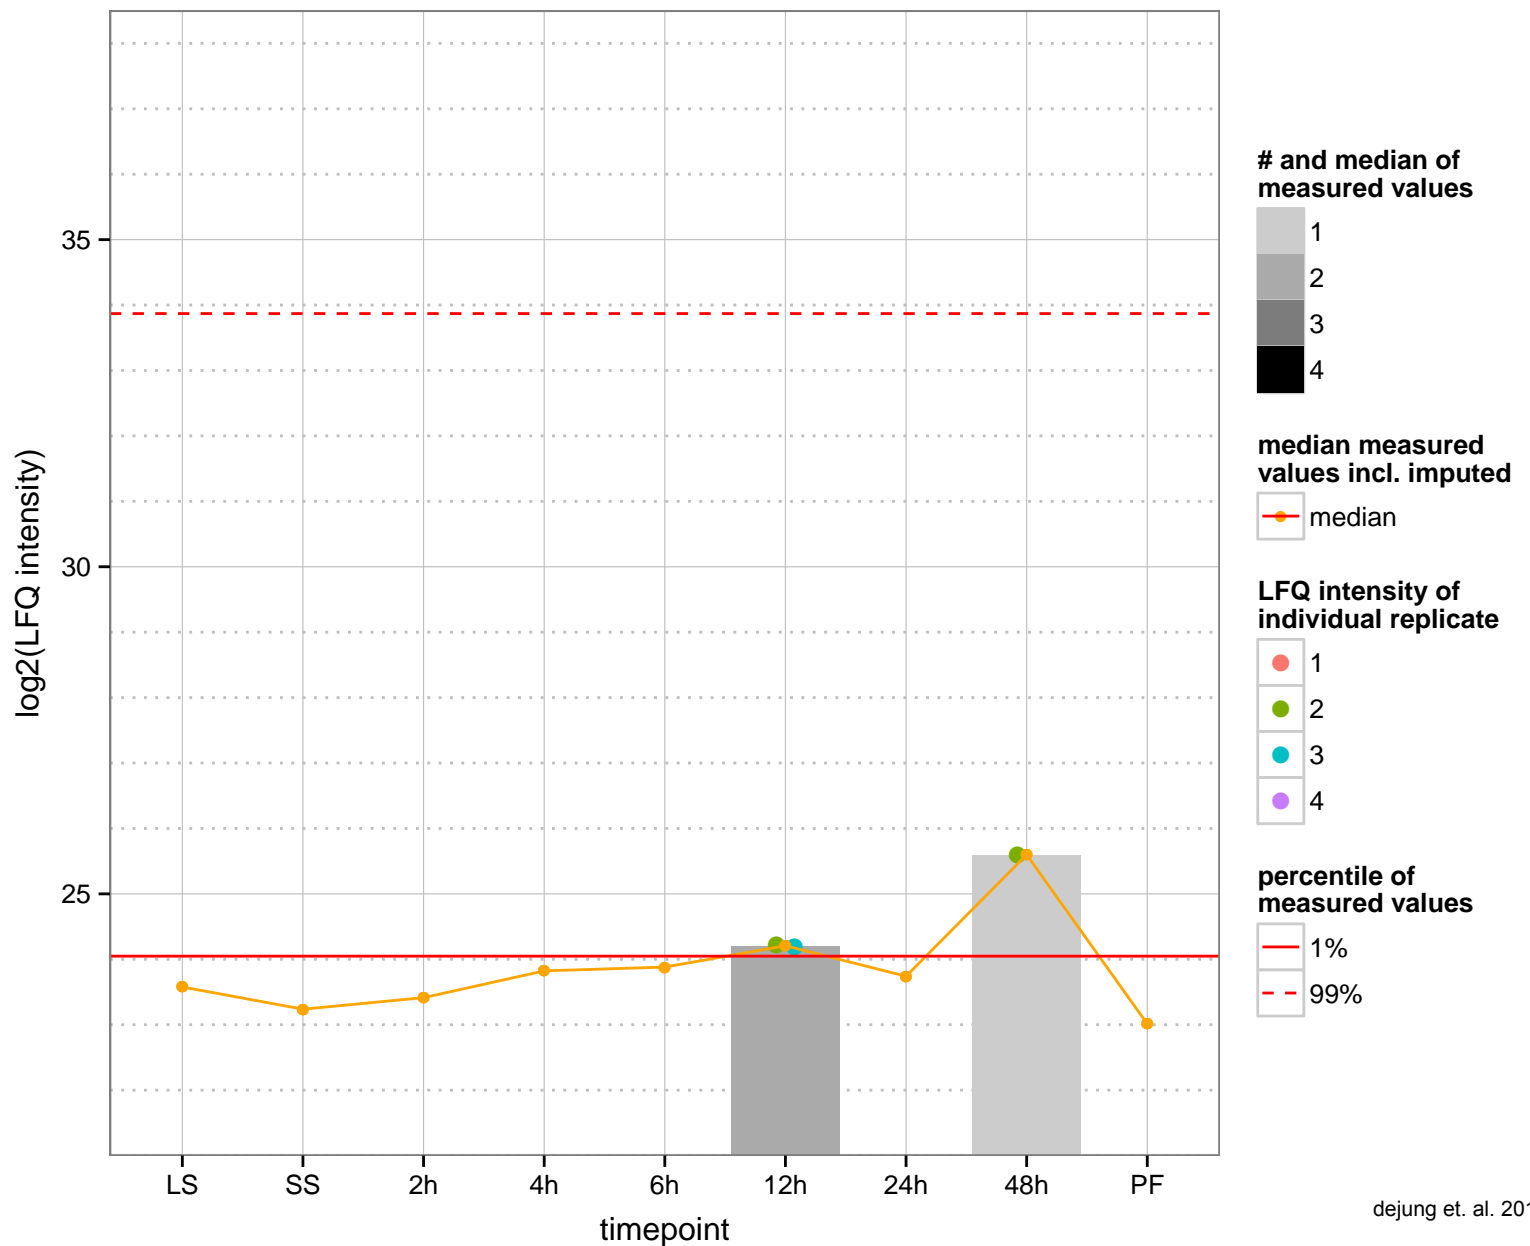

Metal-binding domain-containing protein  
 Tb927.1.750  
 AGOF: null  
 AGOC: null  
 AGOP: null  
 PGOF: null  
 PGOC: null  
 PGOP: null

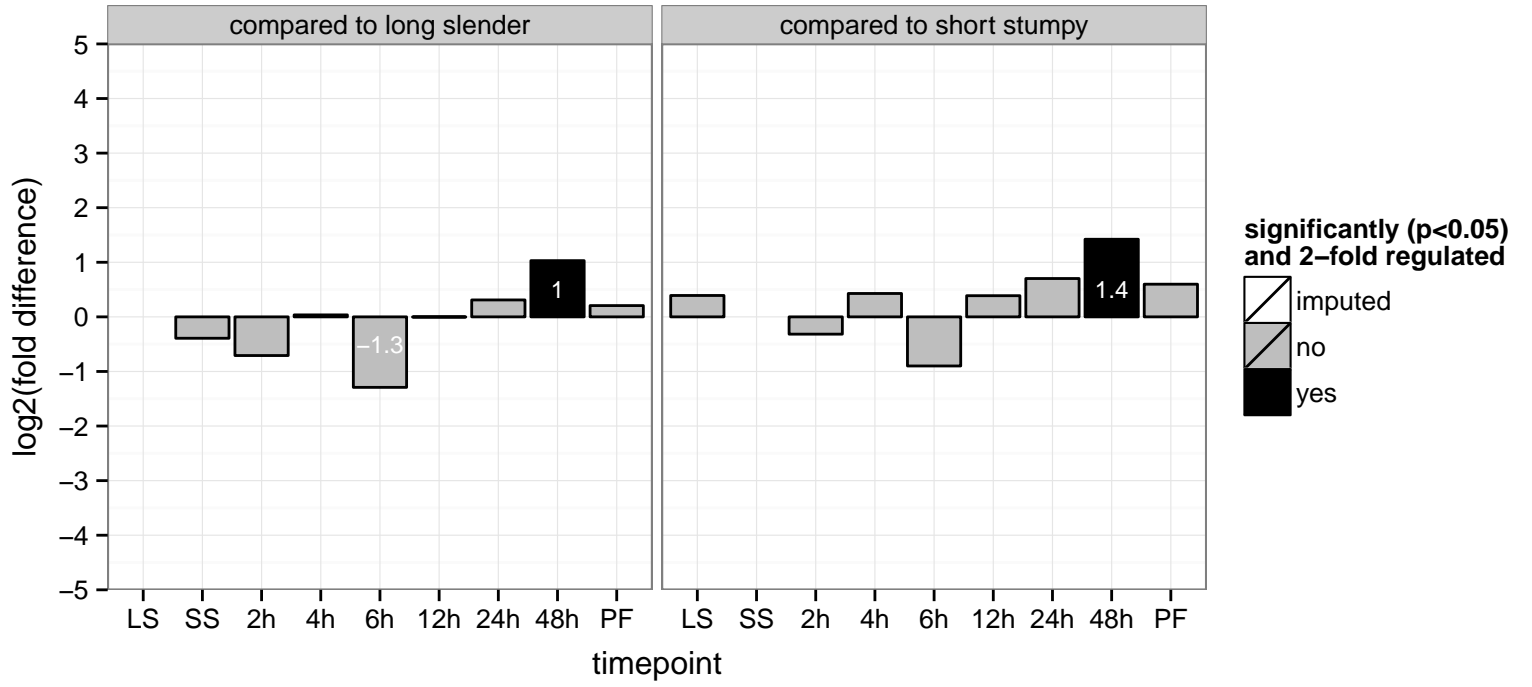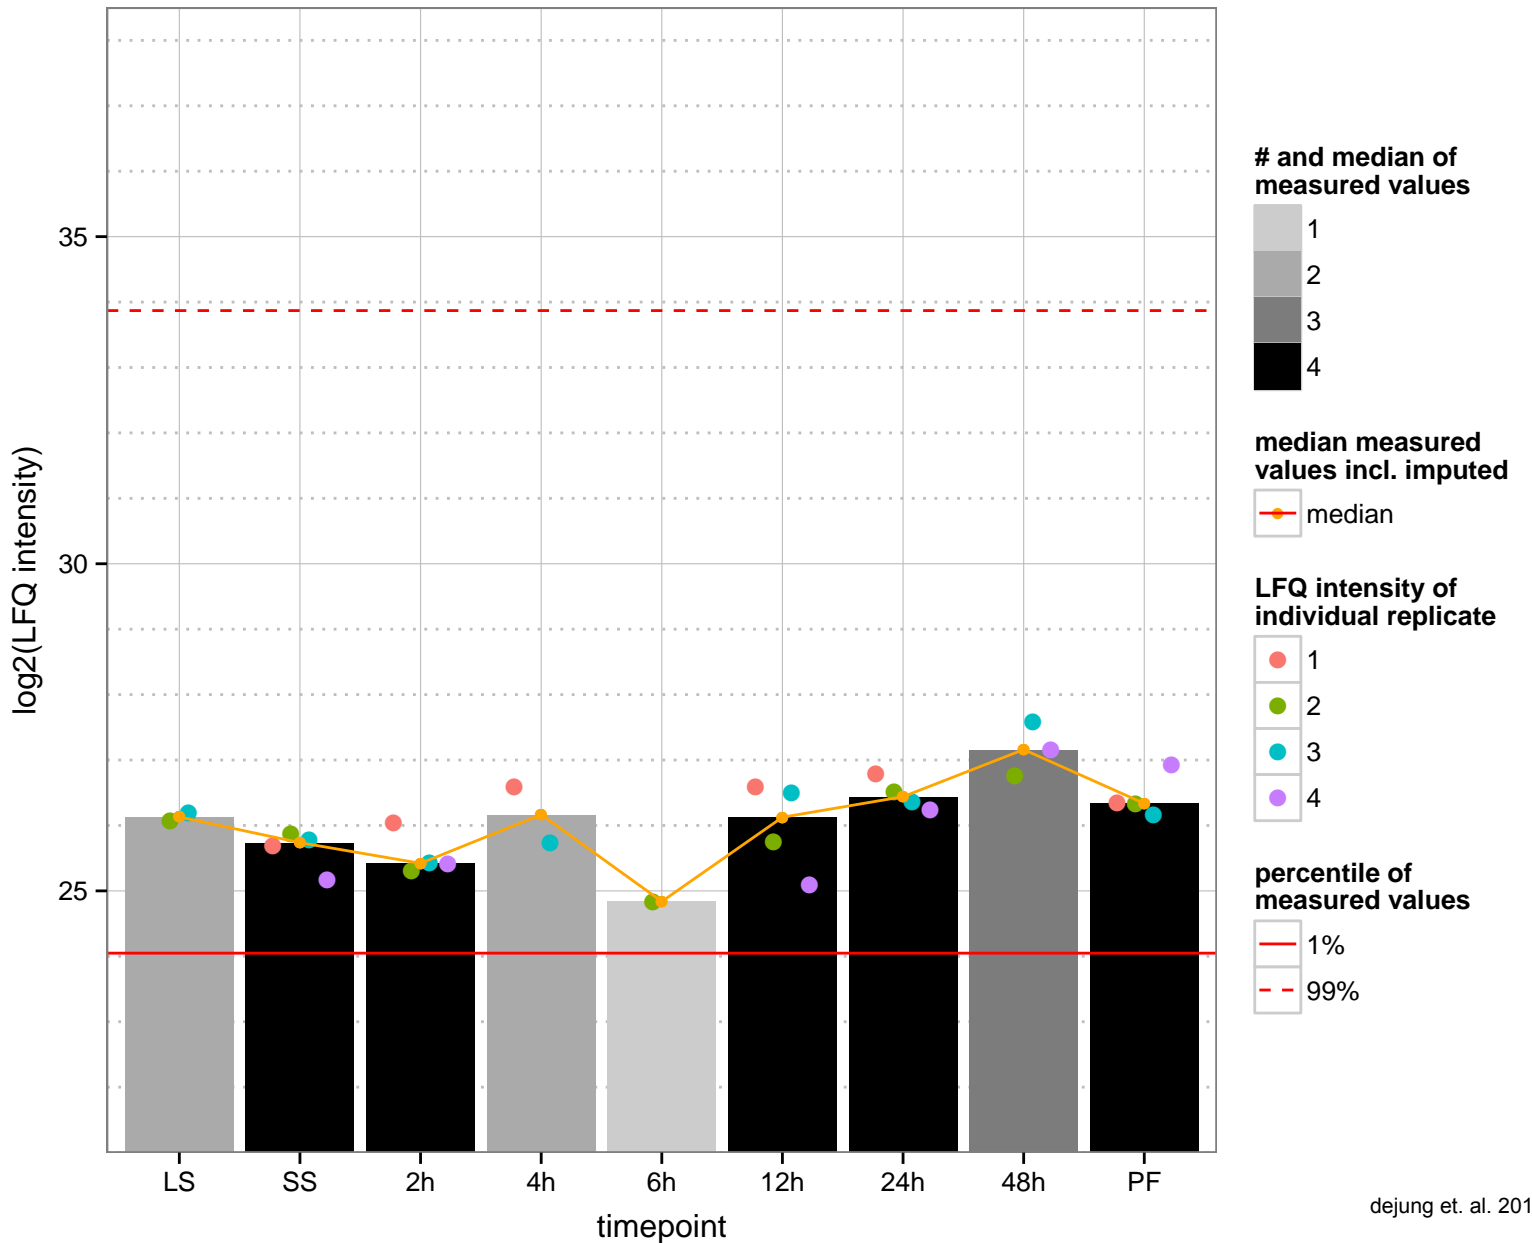

T-complex protein 1, delta subunit, putative (TCP-1-delta)  
 Tb927.10.1060  
 AGOF: ATP binding, unfolded protein binding  
 AGOC: chaperonin-containing T-complex  
 AGOP: protein folding, regulation of cell cycle  
 PGO: ATP binding, unfolded protein binding  
 PGO: null  
 PGO: cellular protein metabolic process, protein folding

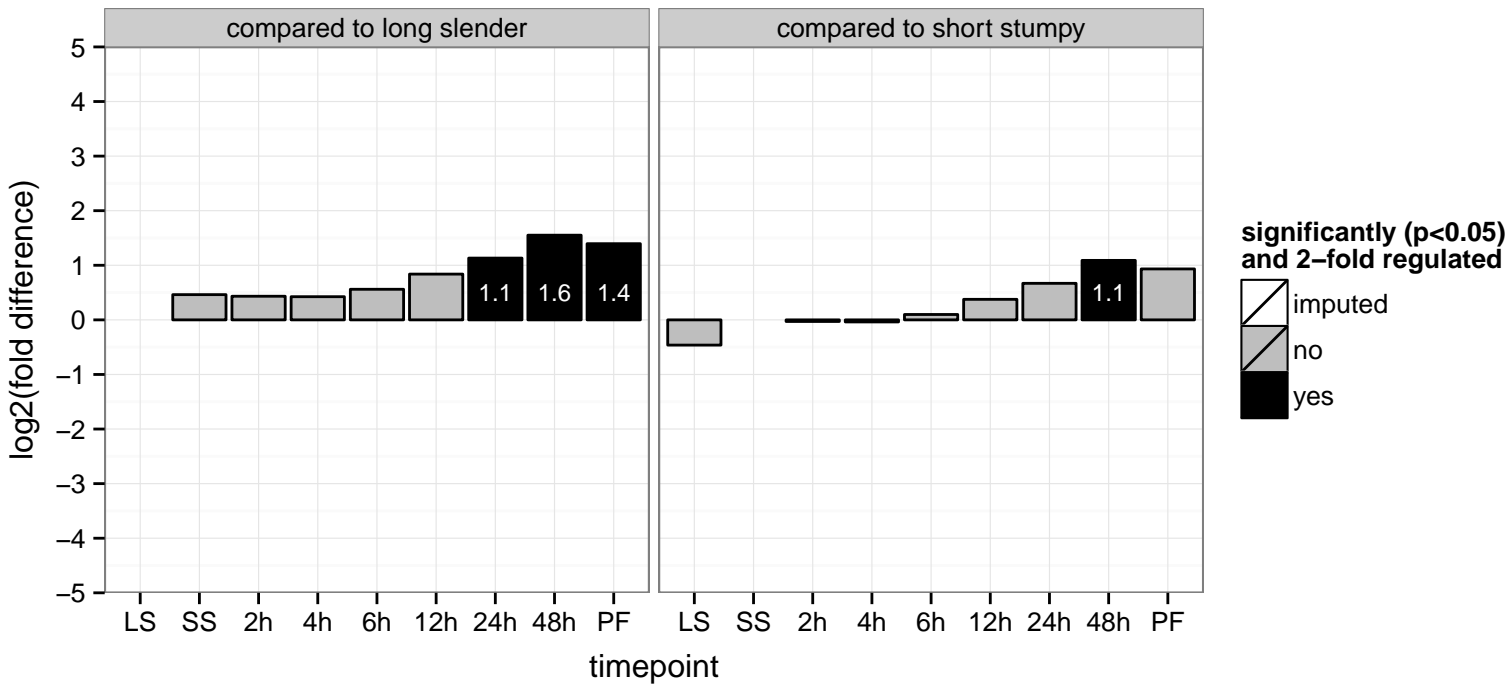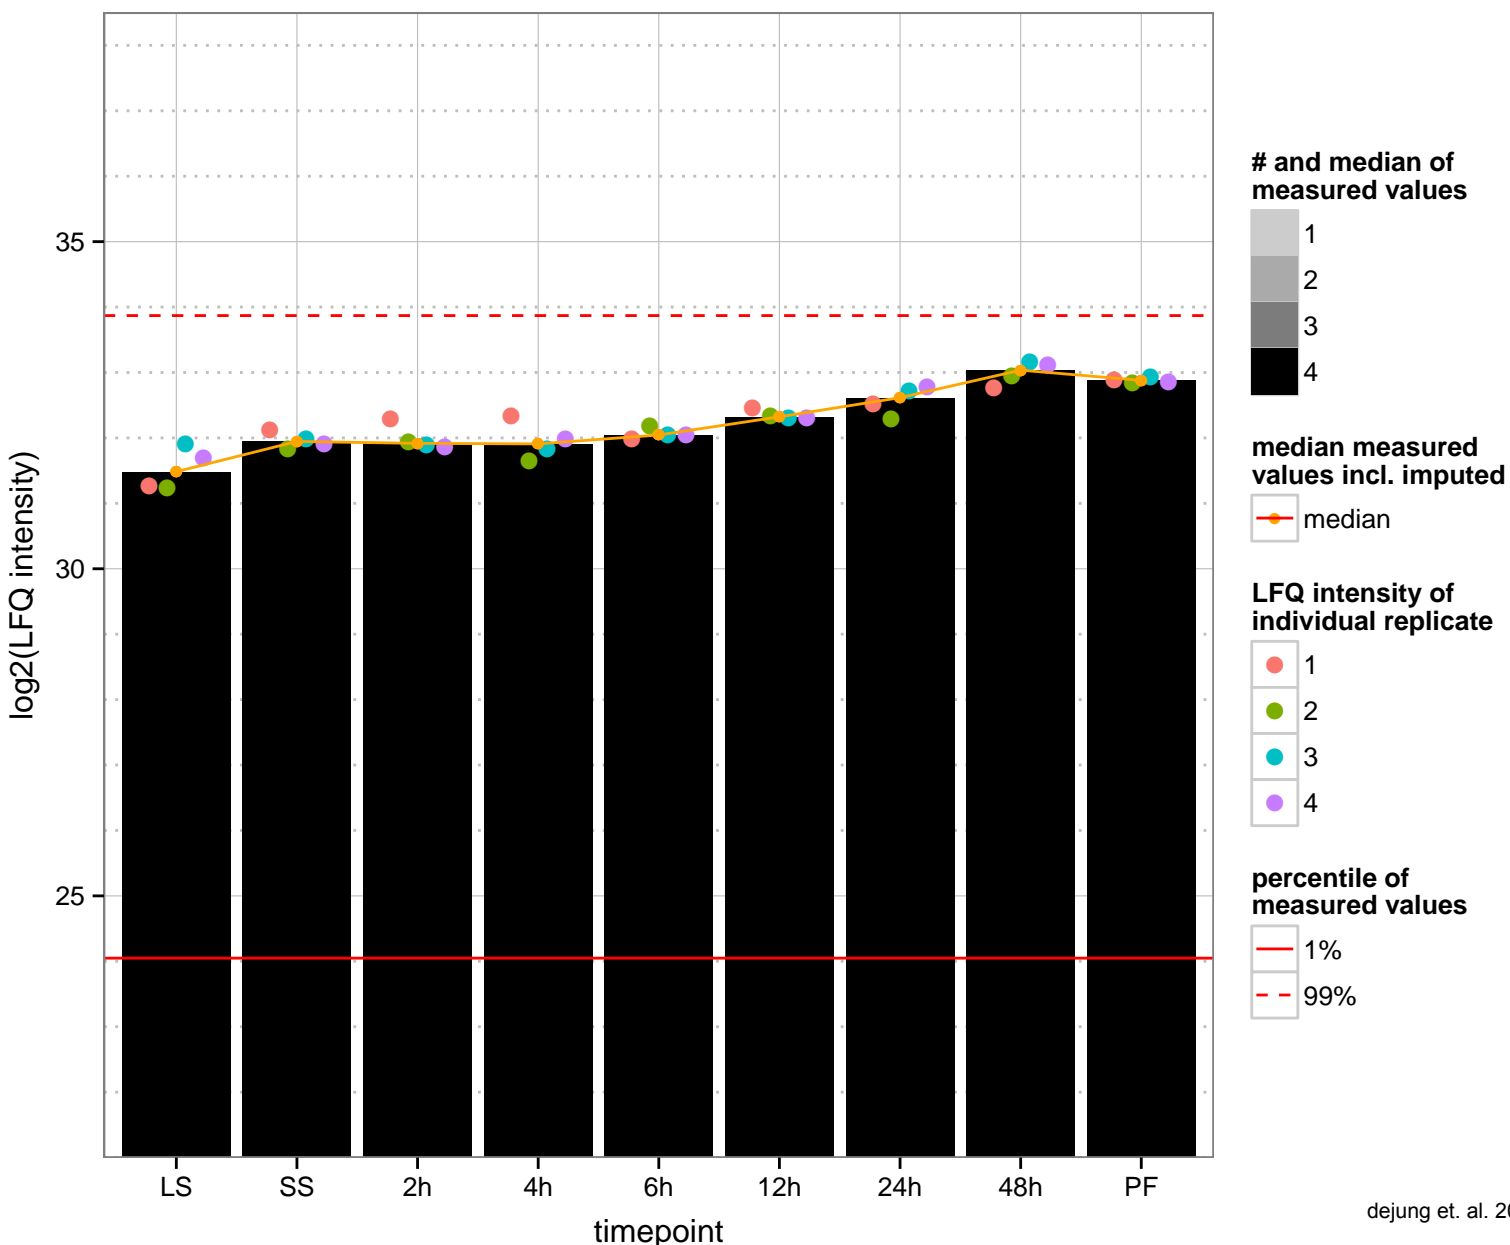

hypothetical protein, conserved  
 Tb927.10.11050  
 AGOF: null  
 AGOC: mitochondrion  
 AGOP: null  
 PGO: null  
 PGOC: null  
 PGOP: null

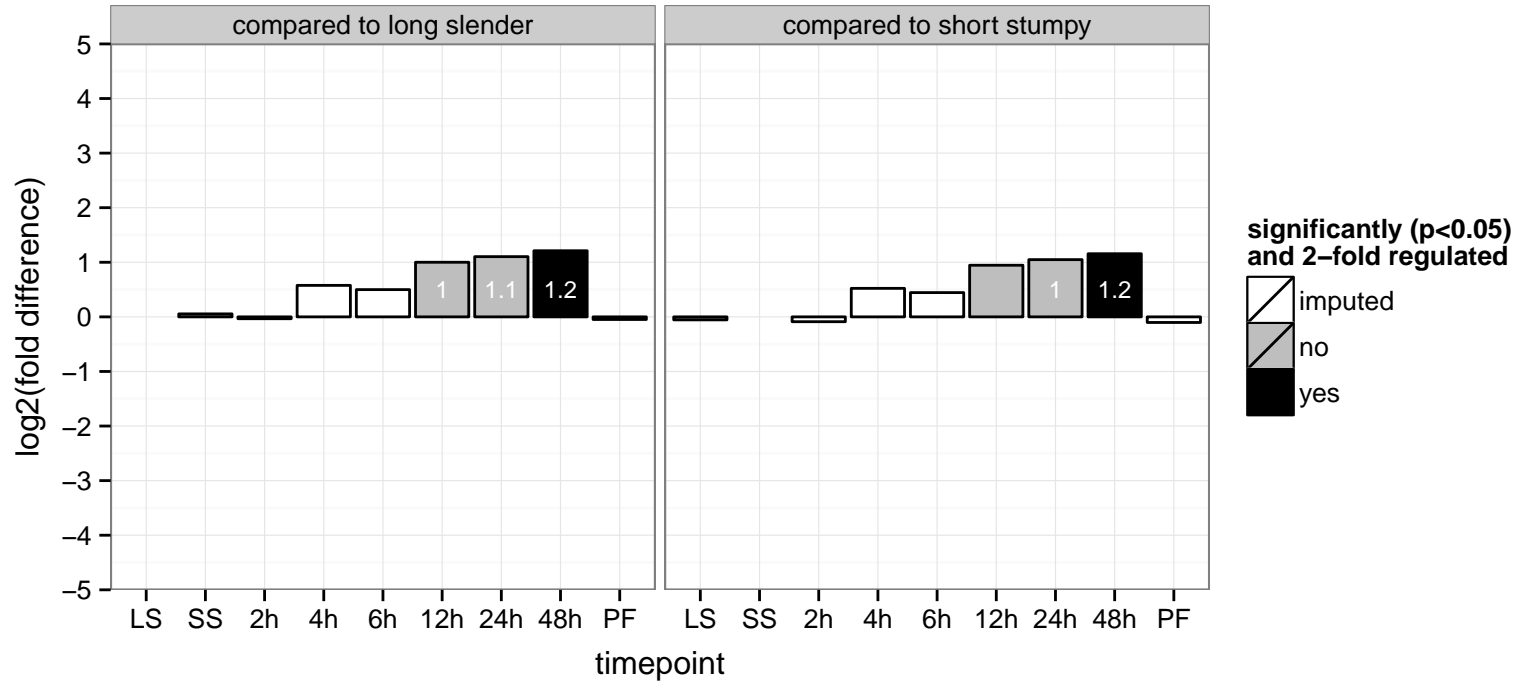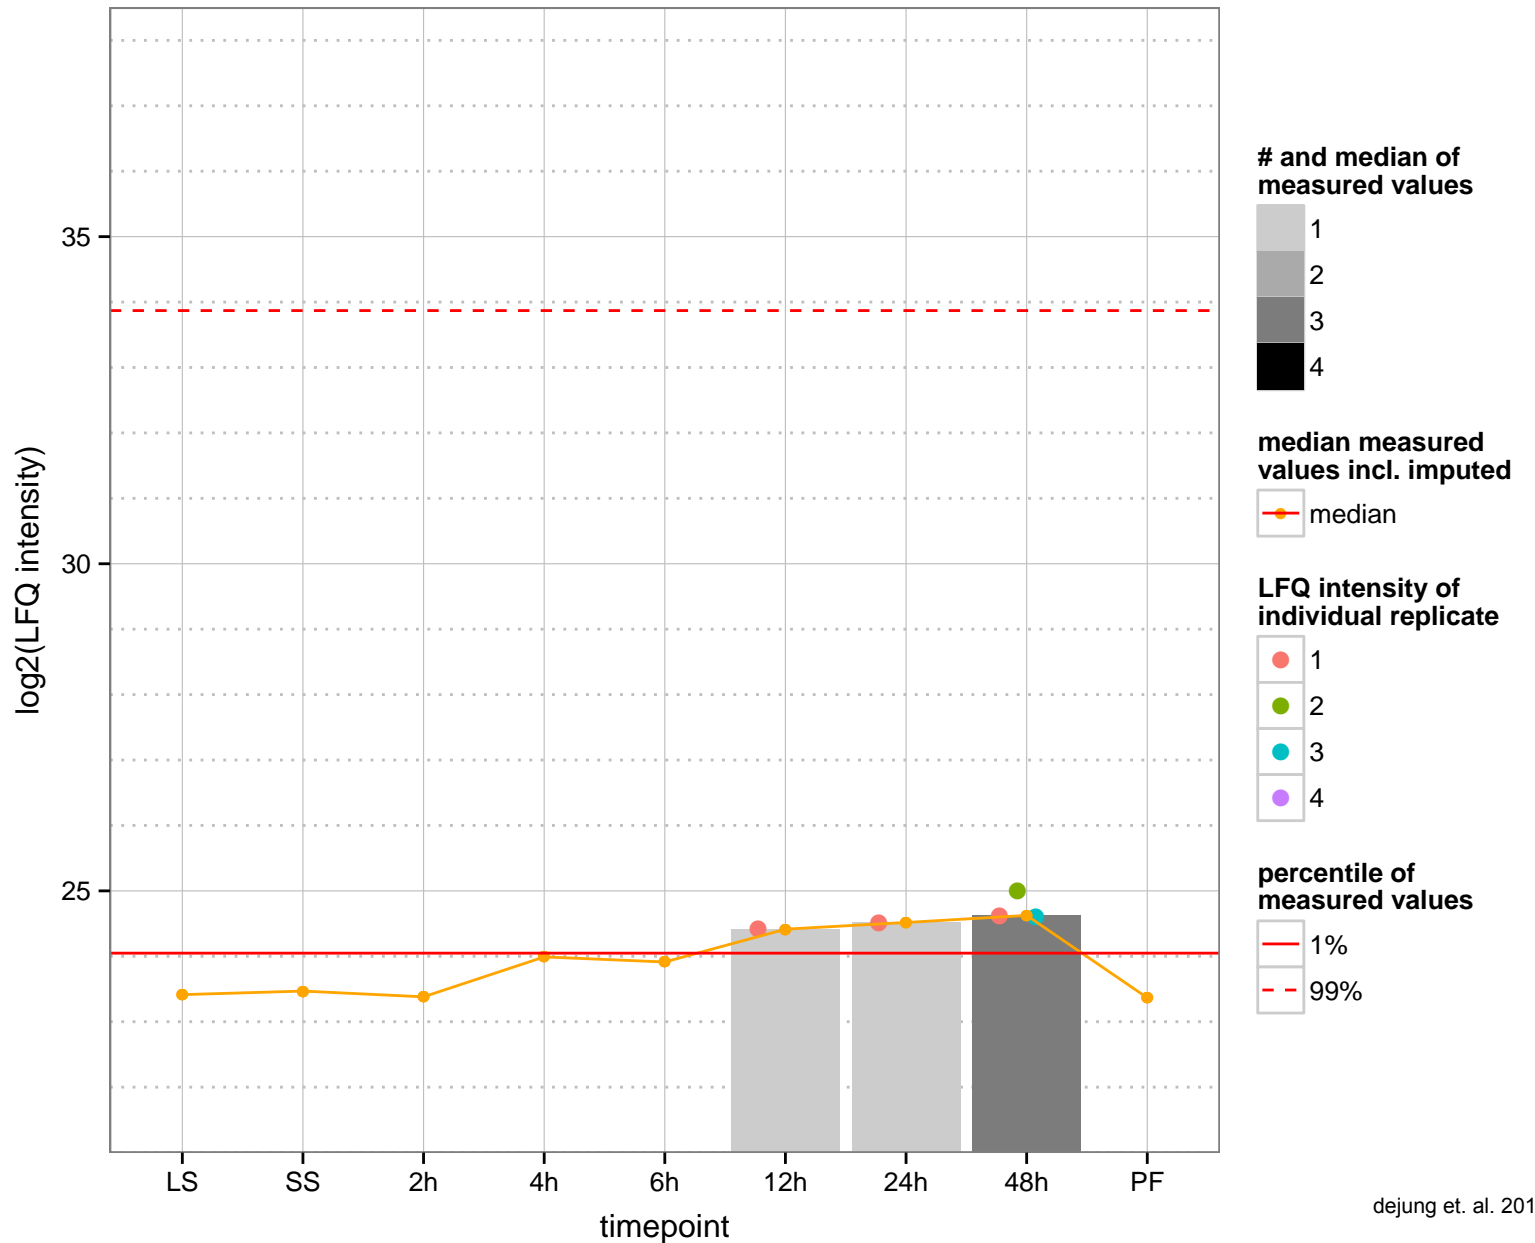

hypothetical protein, conserved  
 Tb927.10.11120  
 AGOF: null  
 AGOC: null  
 AGOP: null  
 PGO: null  
 PGOC: null  
 PGOP: null

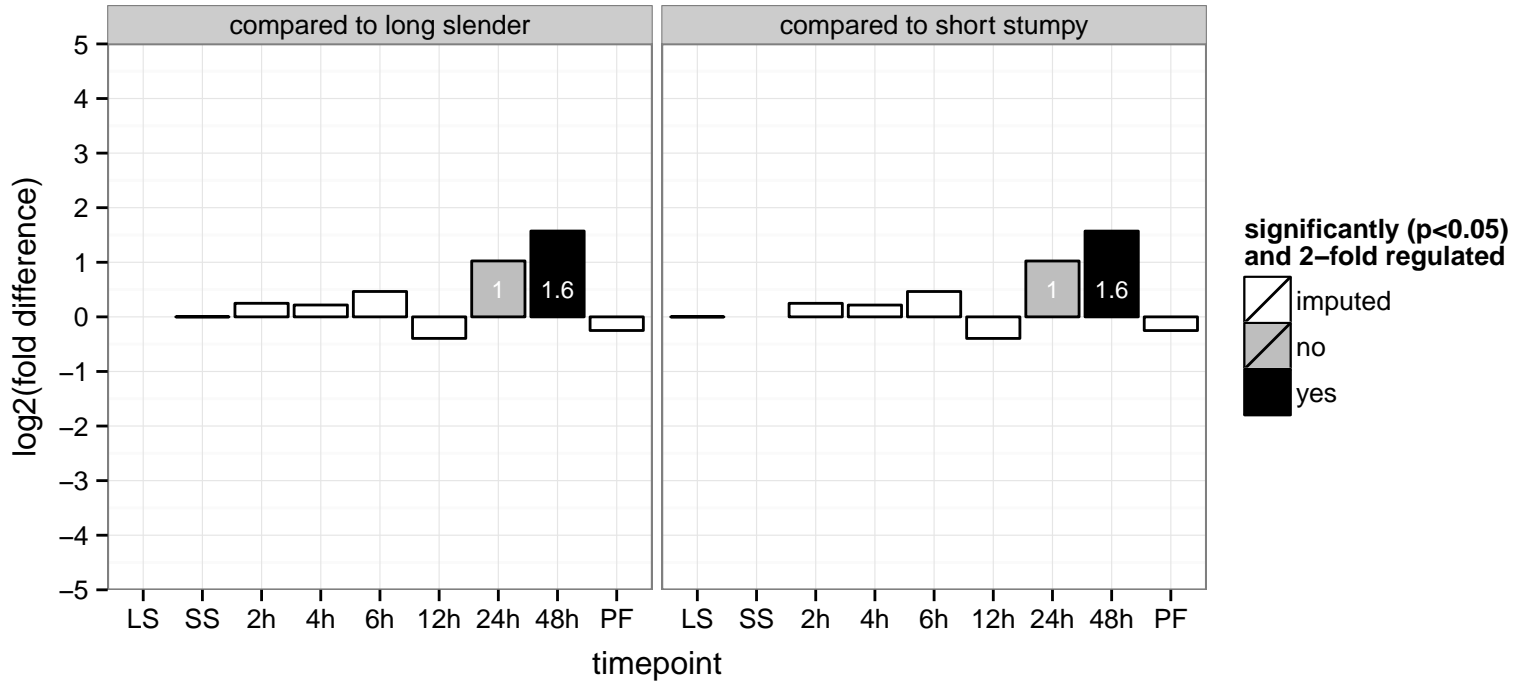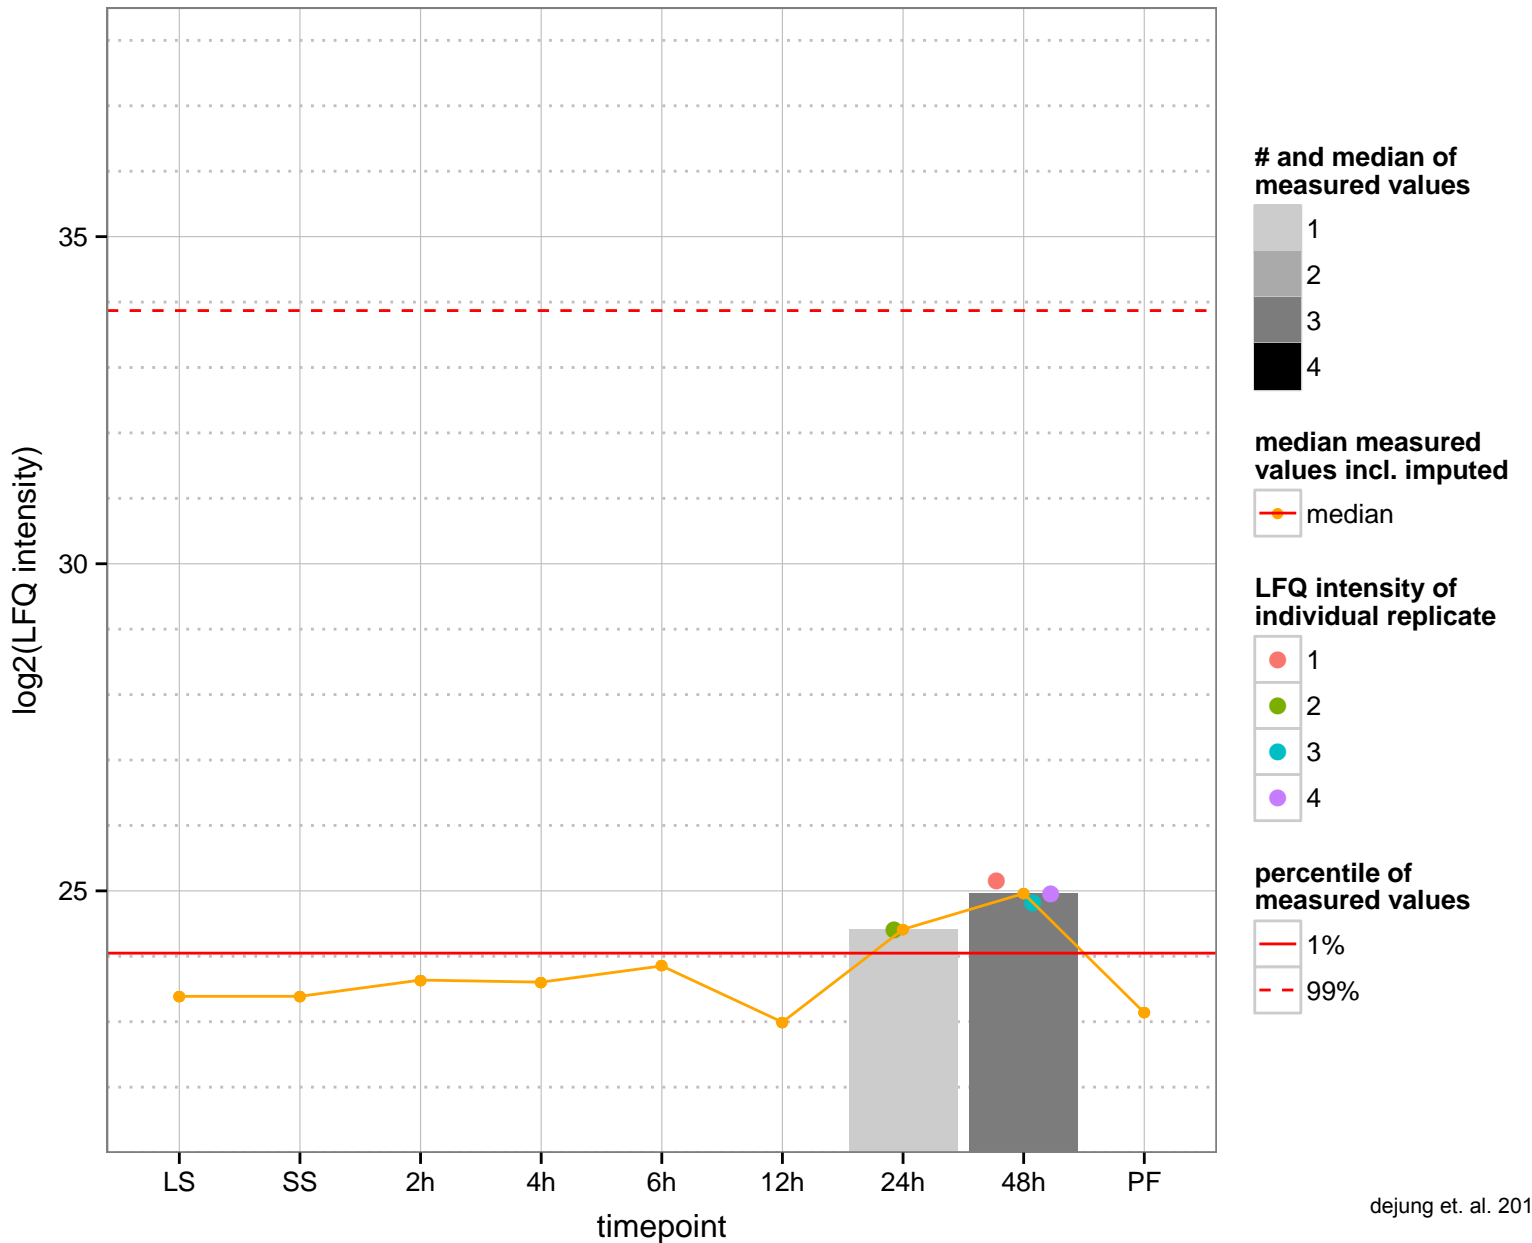



hypothetical protein, conserved  
 Tb927.10.14130  
 AGOF: 7S RNA binding  
 AGOC: signal recognition particle  
 AGOP: SRP-dependent cotranslational protein targeting to membrane  
 PGO: 7S RNA binding  
 PGO: signal recognition particle  
 PGO: SRP-dependent cotranslational protein targeting to membrane

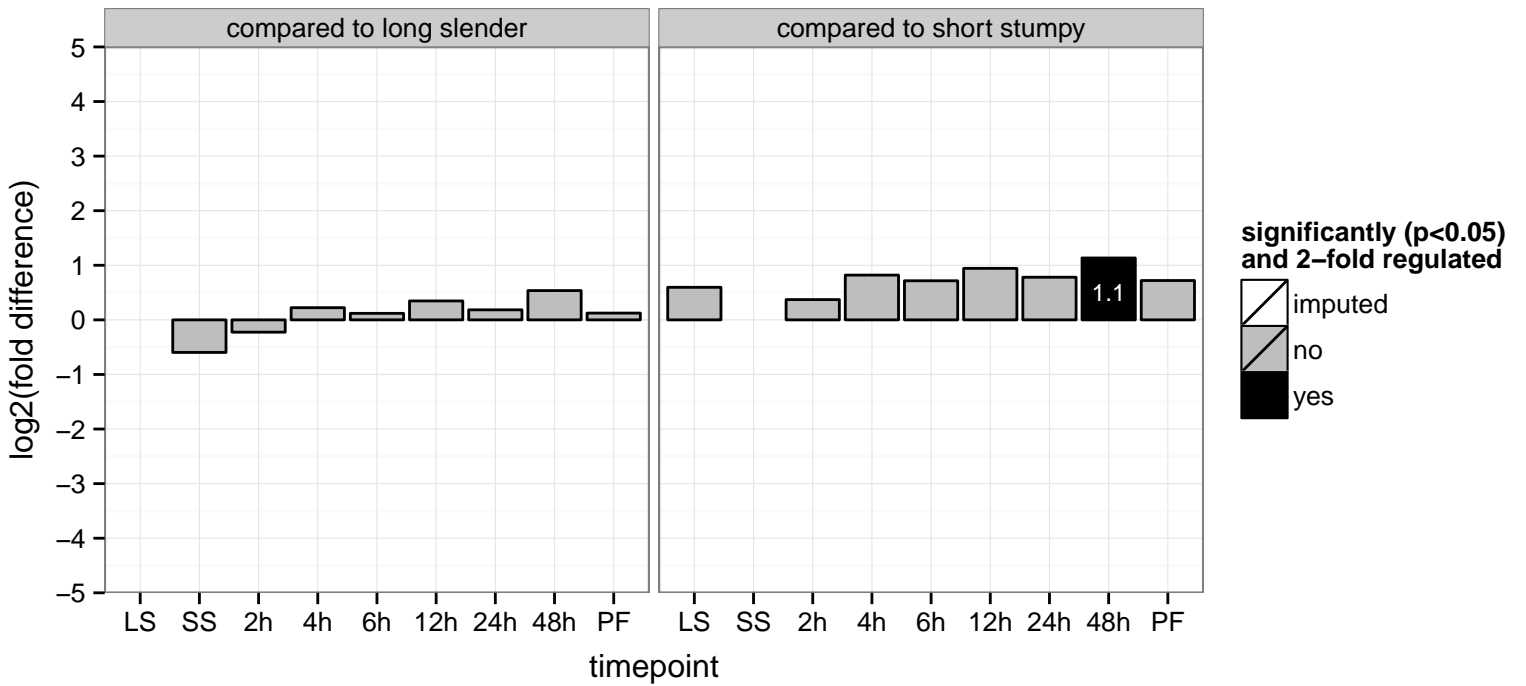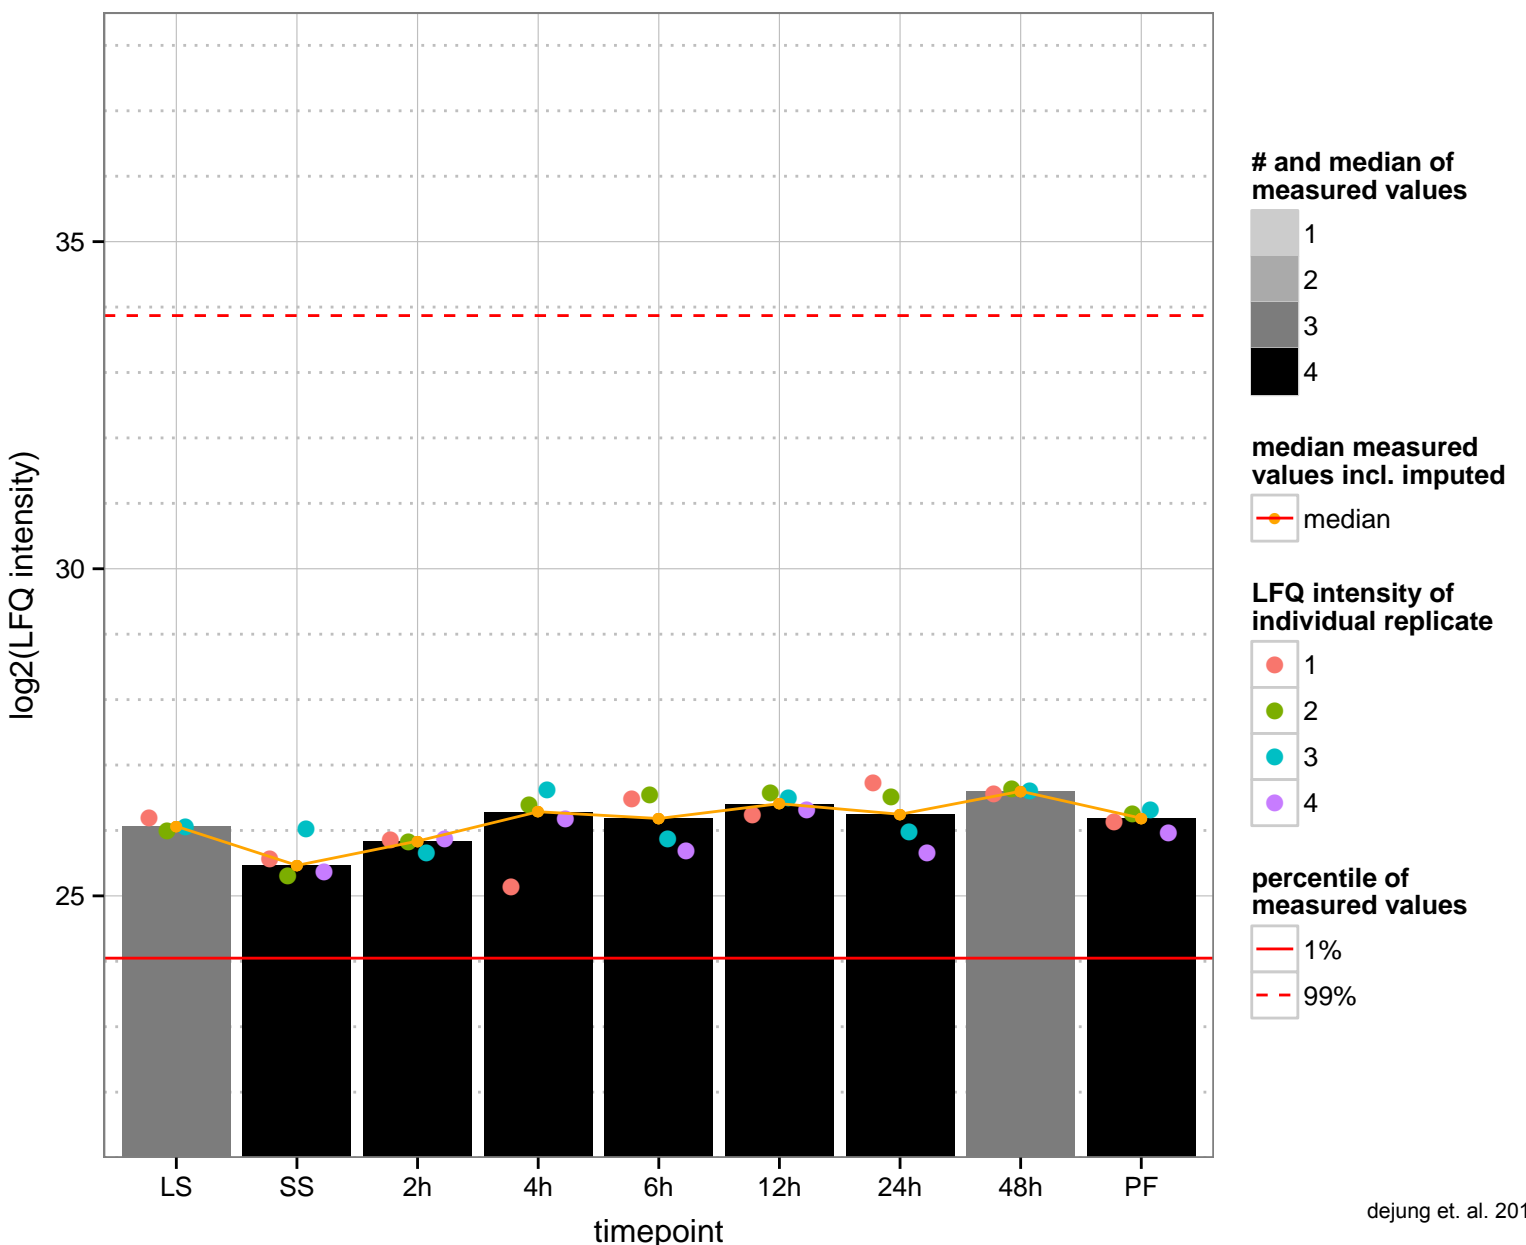

NA, ATP-dependent DEAD/H RNA helicase, putative

Tb927.10.14550

AGOF: NA, ATP binding, ATP-dependent helicase activity, helicase activity, nucleic acid binding

AGOC: NA, null

AGOP: NA, nucleobase-containing compound metabolic process

PGOF: NA, ATP binding, ATP-dependent helicase activity, helicase activity, nucleic acid binding

PGOC: NA, null

PGOP: NA, null

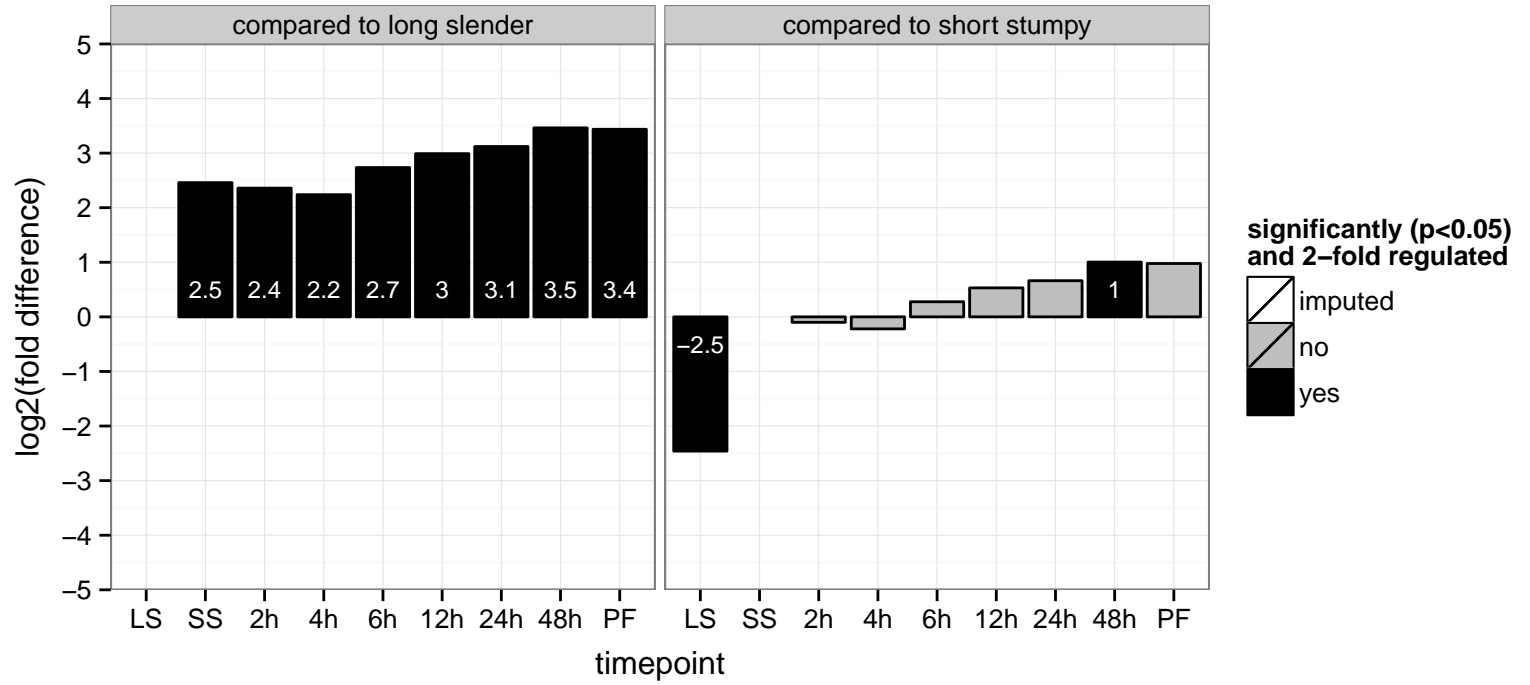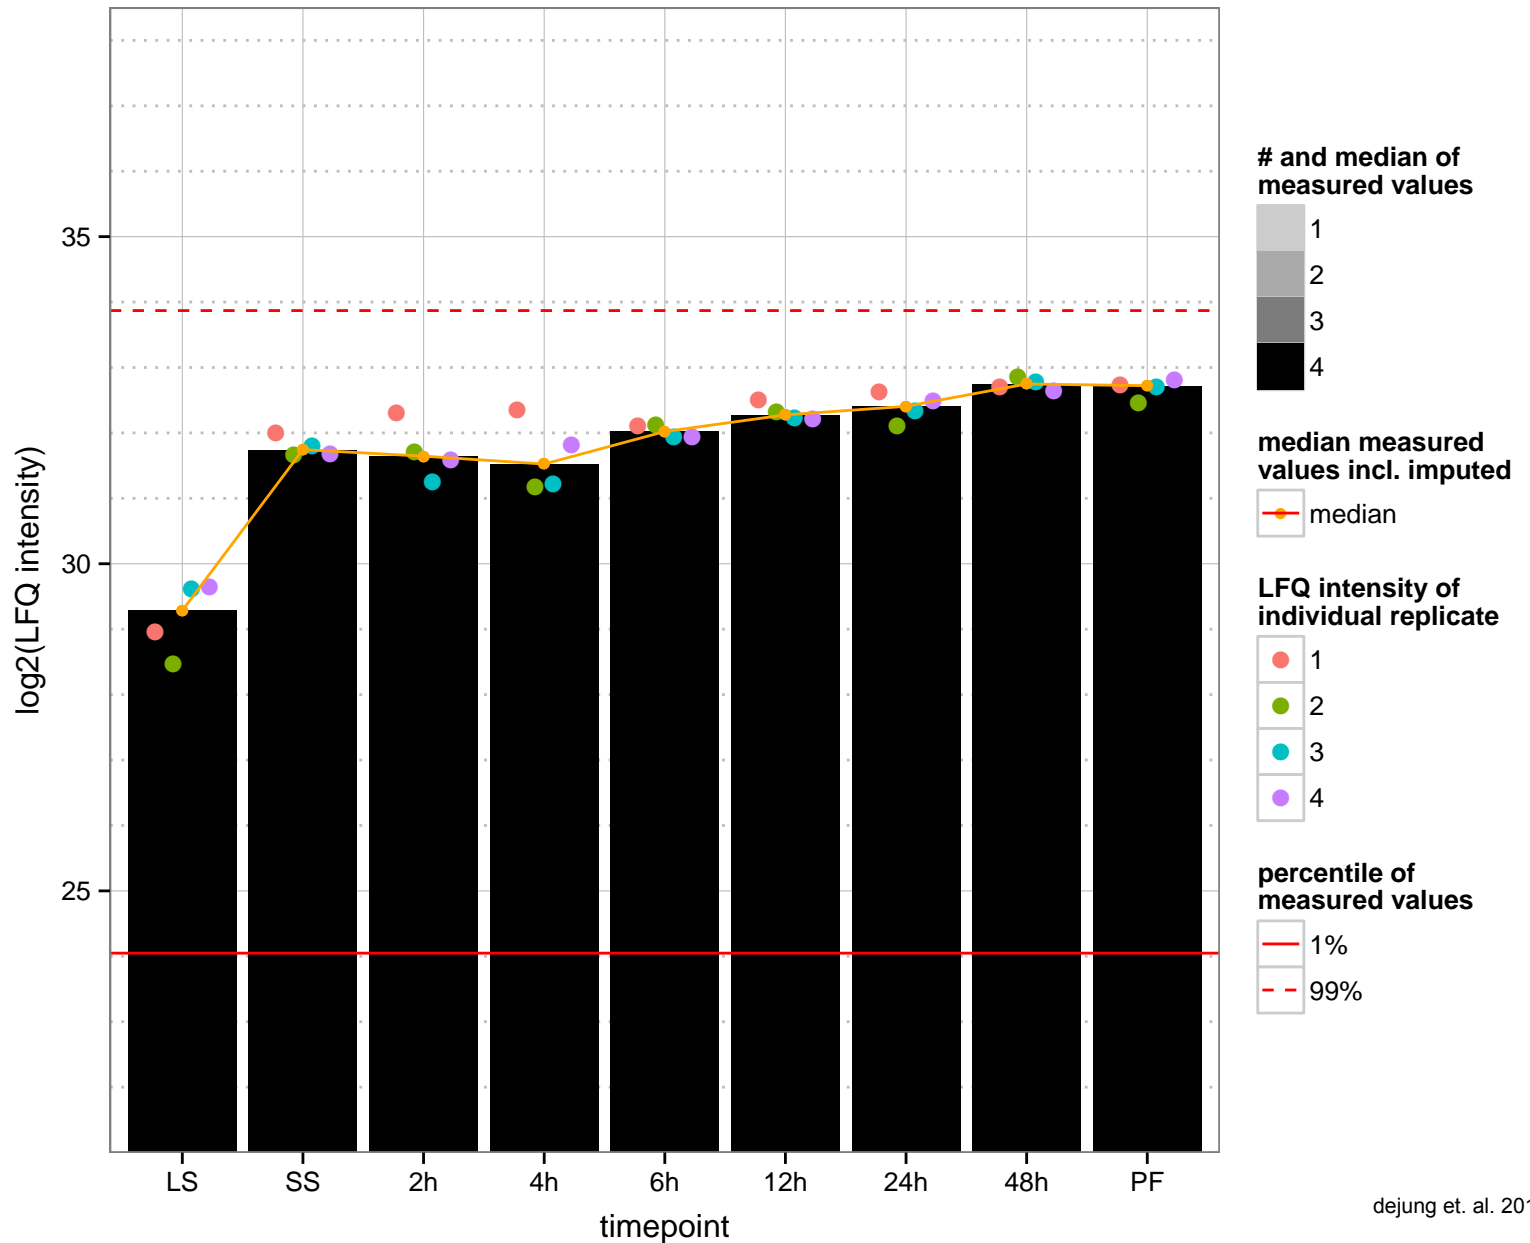

hypothetical protein, conserved  
 Tb927.10.14560;Tb11.v5.0477  
 AGOF: null  
 AGOC: null  
 AGOP: null  
 PGO: protein binding  
 PGOC: null  
 PGOP: null

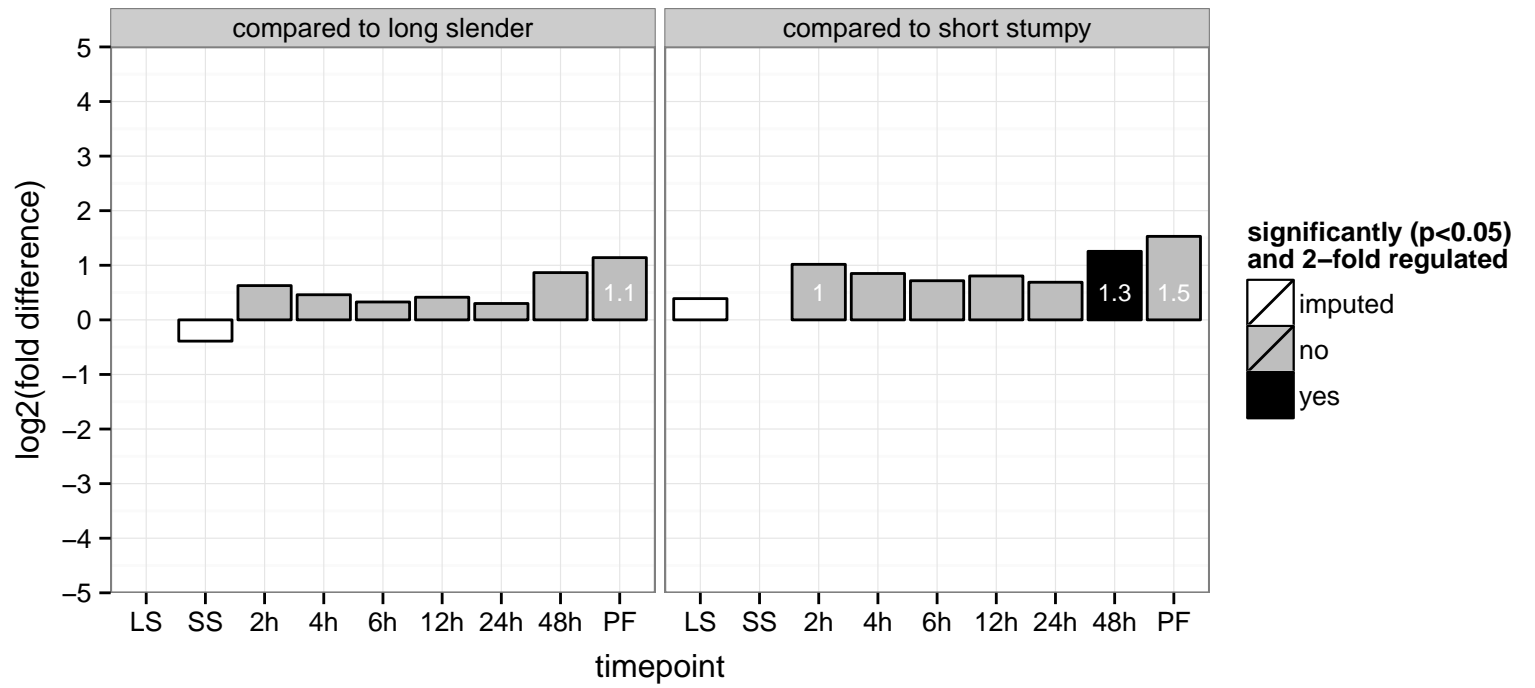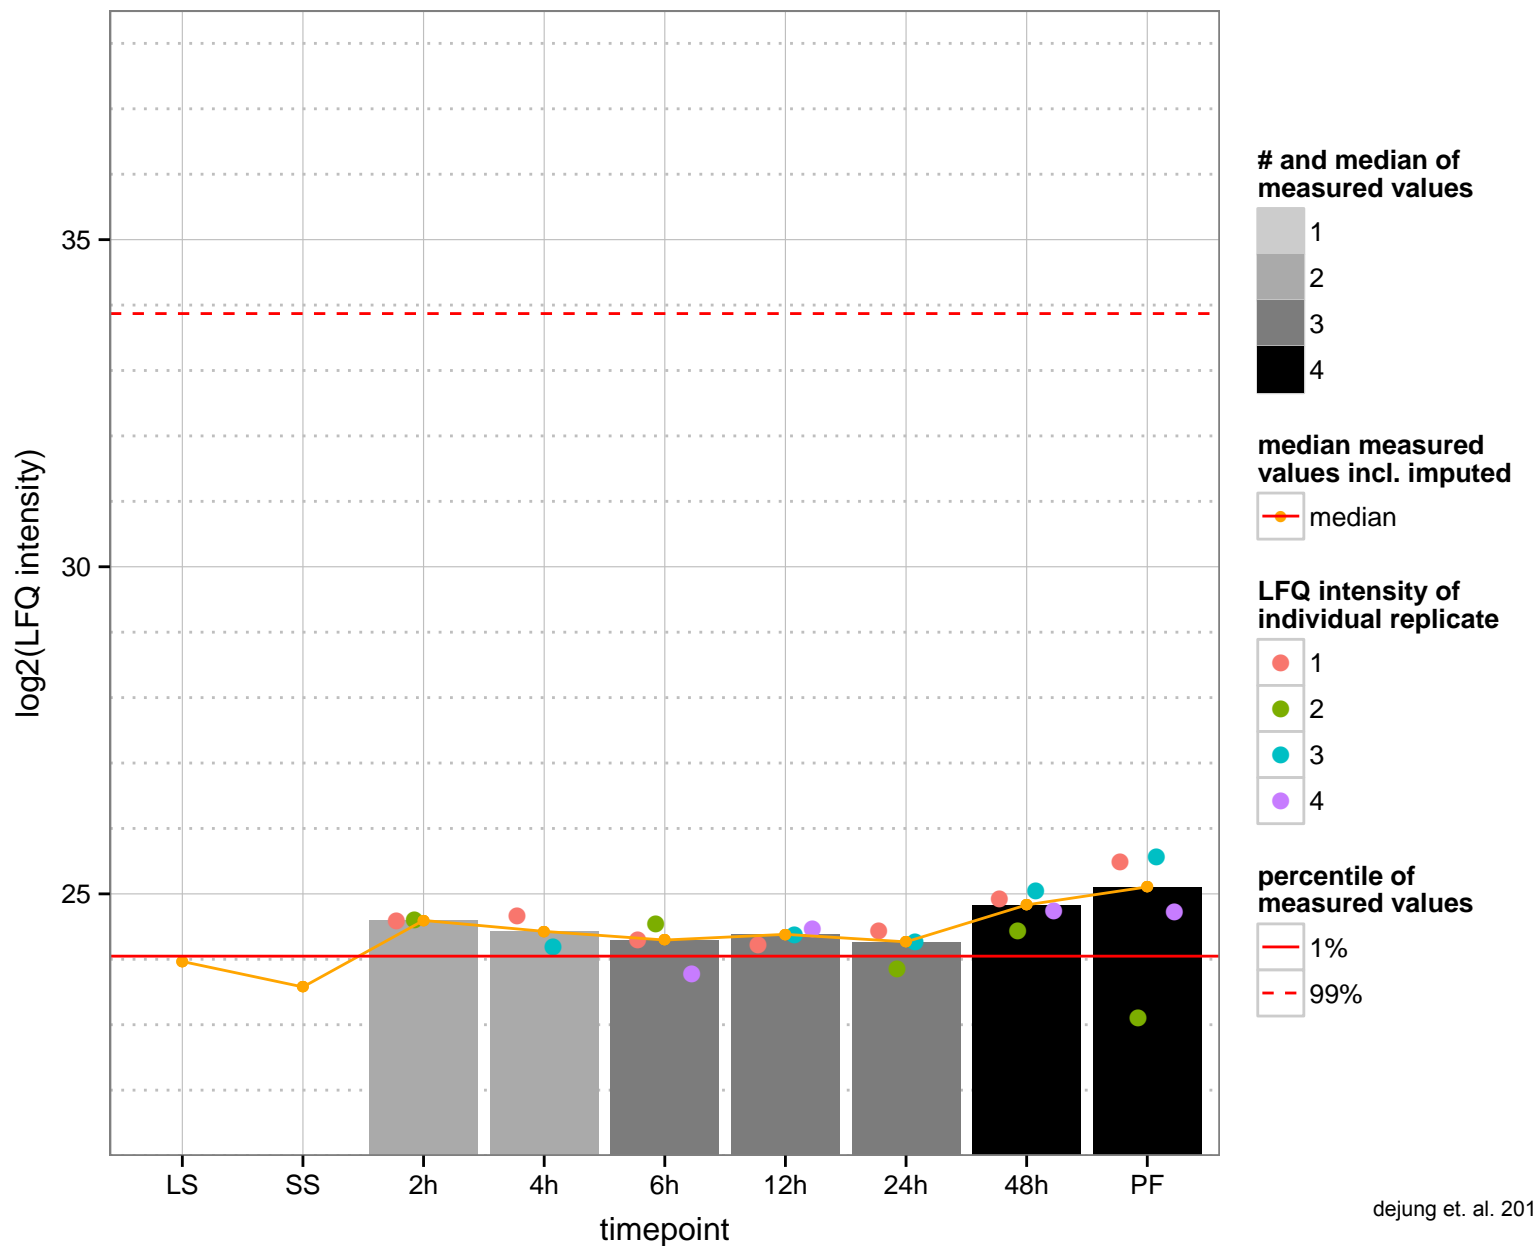

metallo-peptidase, Clan MG, Family M24, aminopeptidase, putative  
 Tb927.10.14790  
 AGOF: null  
 AGOC: null  
 AGOP: cellular process  
 PGO: null  
 PGO: null  
 PGO: null  
 PGO: cellular process

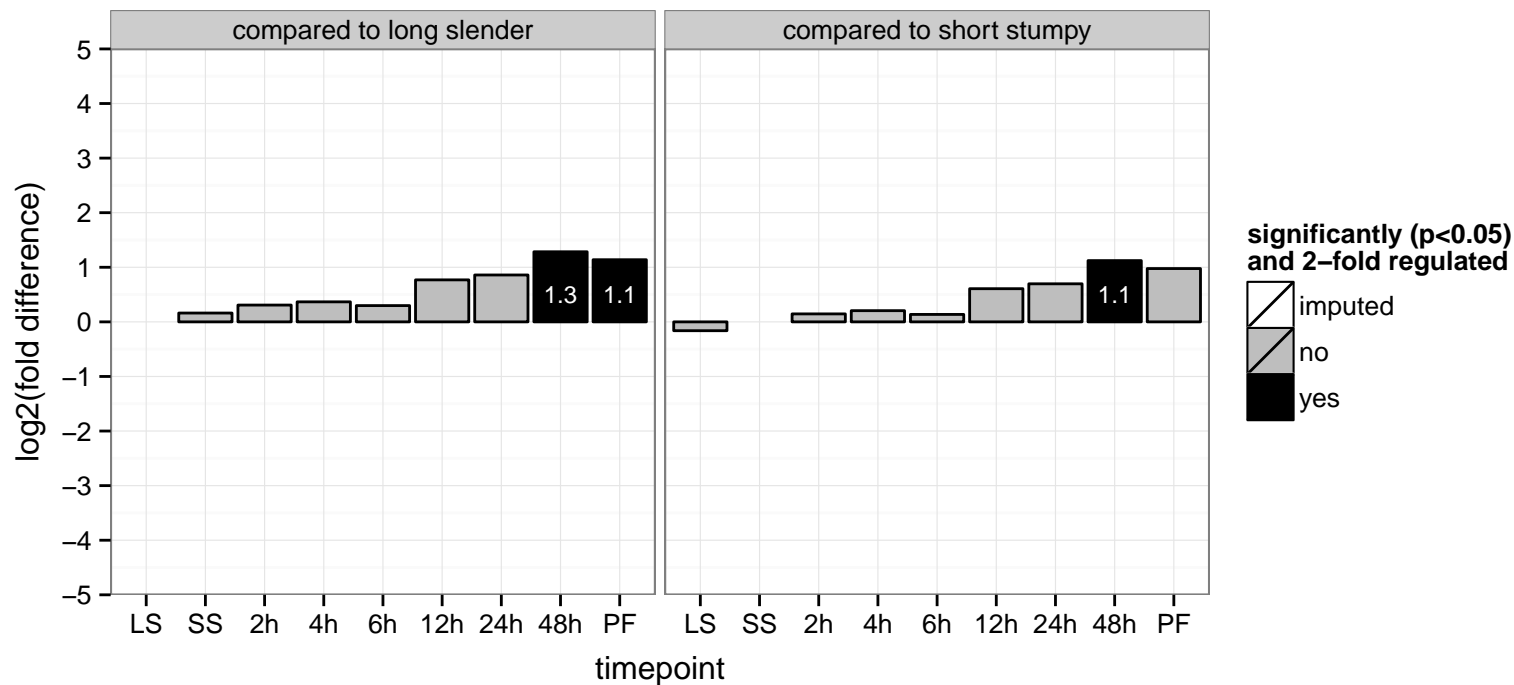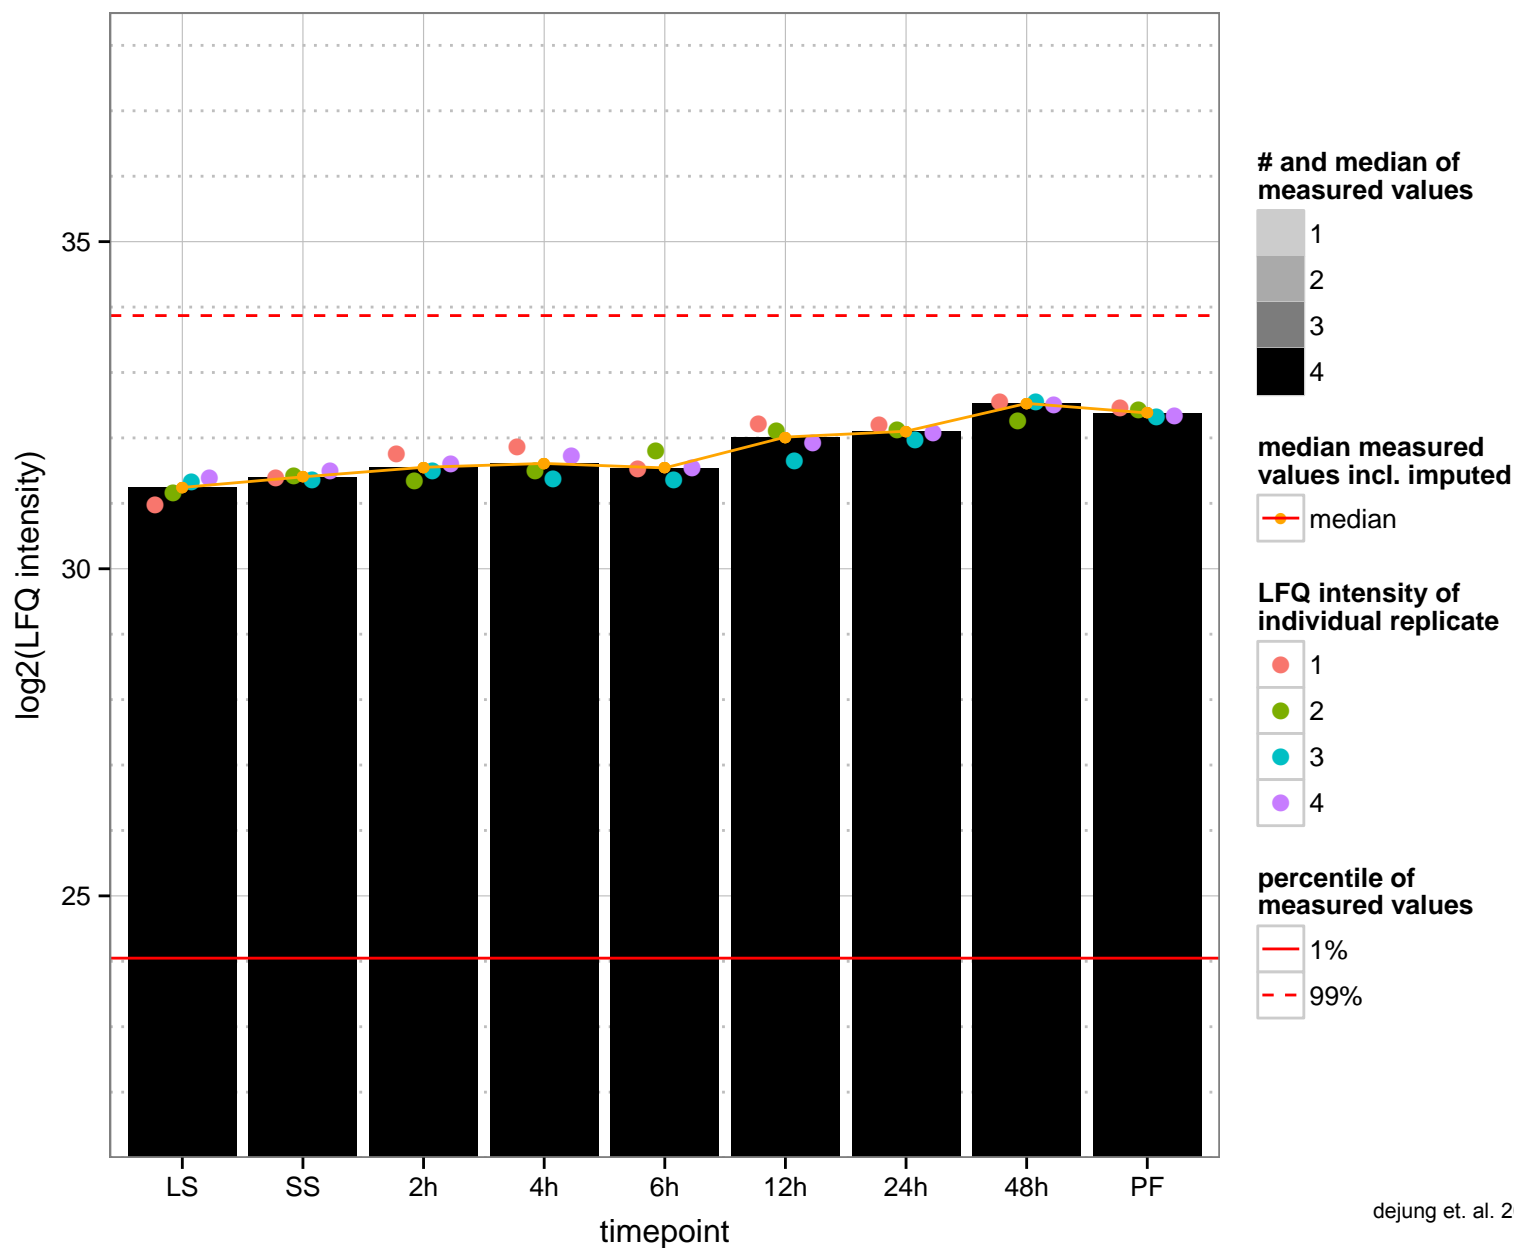

hypothetical protein, conserved  
 Tb927.10.1730  
 AGOF: null  
 AGOC: null  
 AGOP: null  
 PGOF: null  
 PGO: null  
 PGOP: null

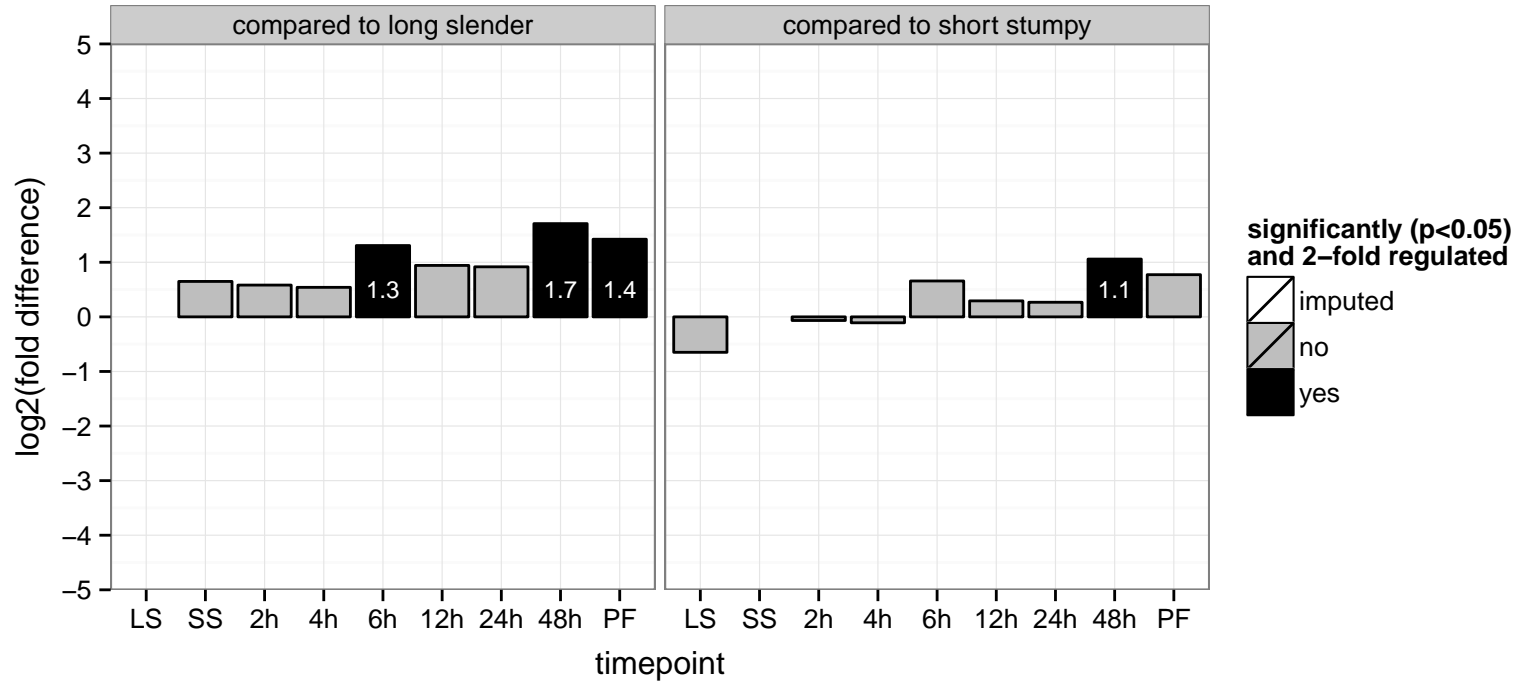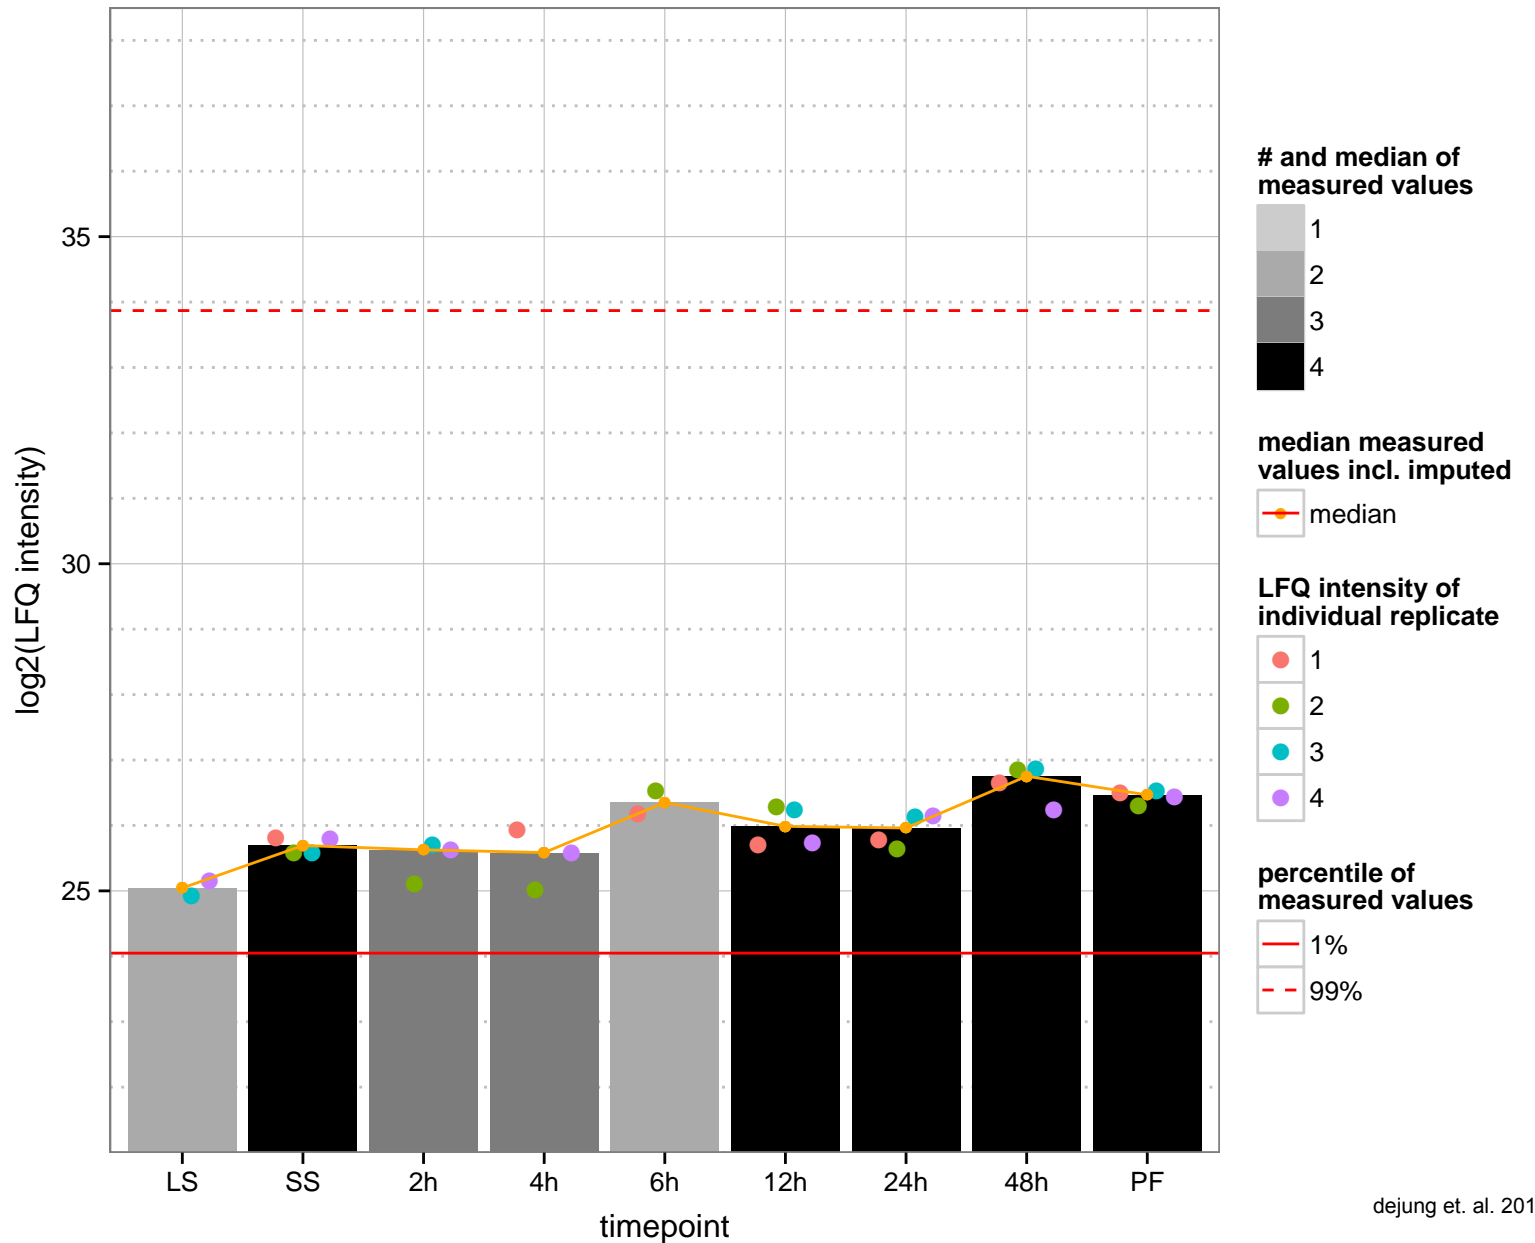

40S ribosomal protein S9, putative  
 Tb927.8.1110;Tb927.10.5610  
 AGOF: RNA binding, rRNA binding, structural constituent of ribosome, rRNA binding  
 AGOC: intracellular, ribosome, small ribosomal subunit  
 AGOP: translation  
 PGOF: RNA binding, rRNA binding, structural constituent of ribosome  
 PGO: intracellular, small ribosomal subunit  
 PGOP: translation

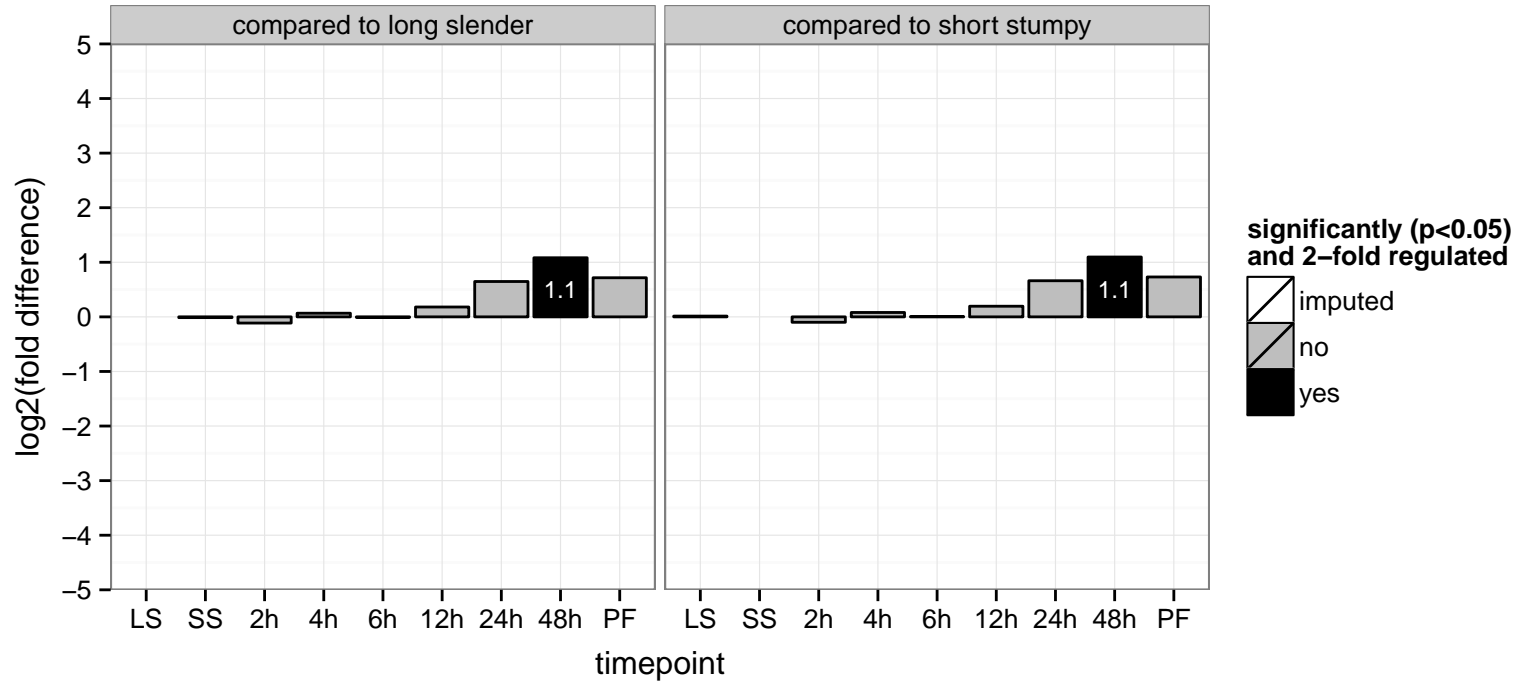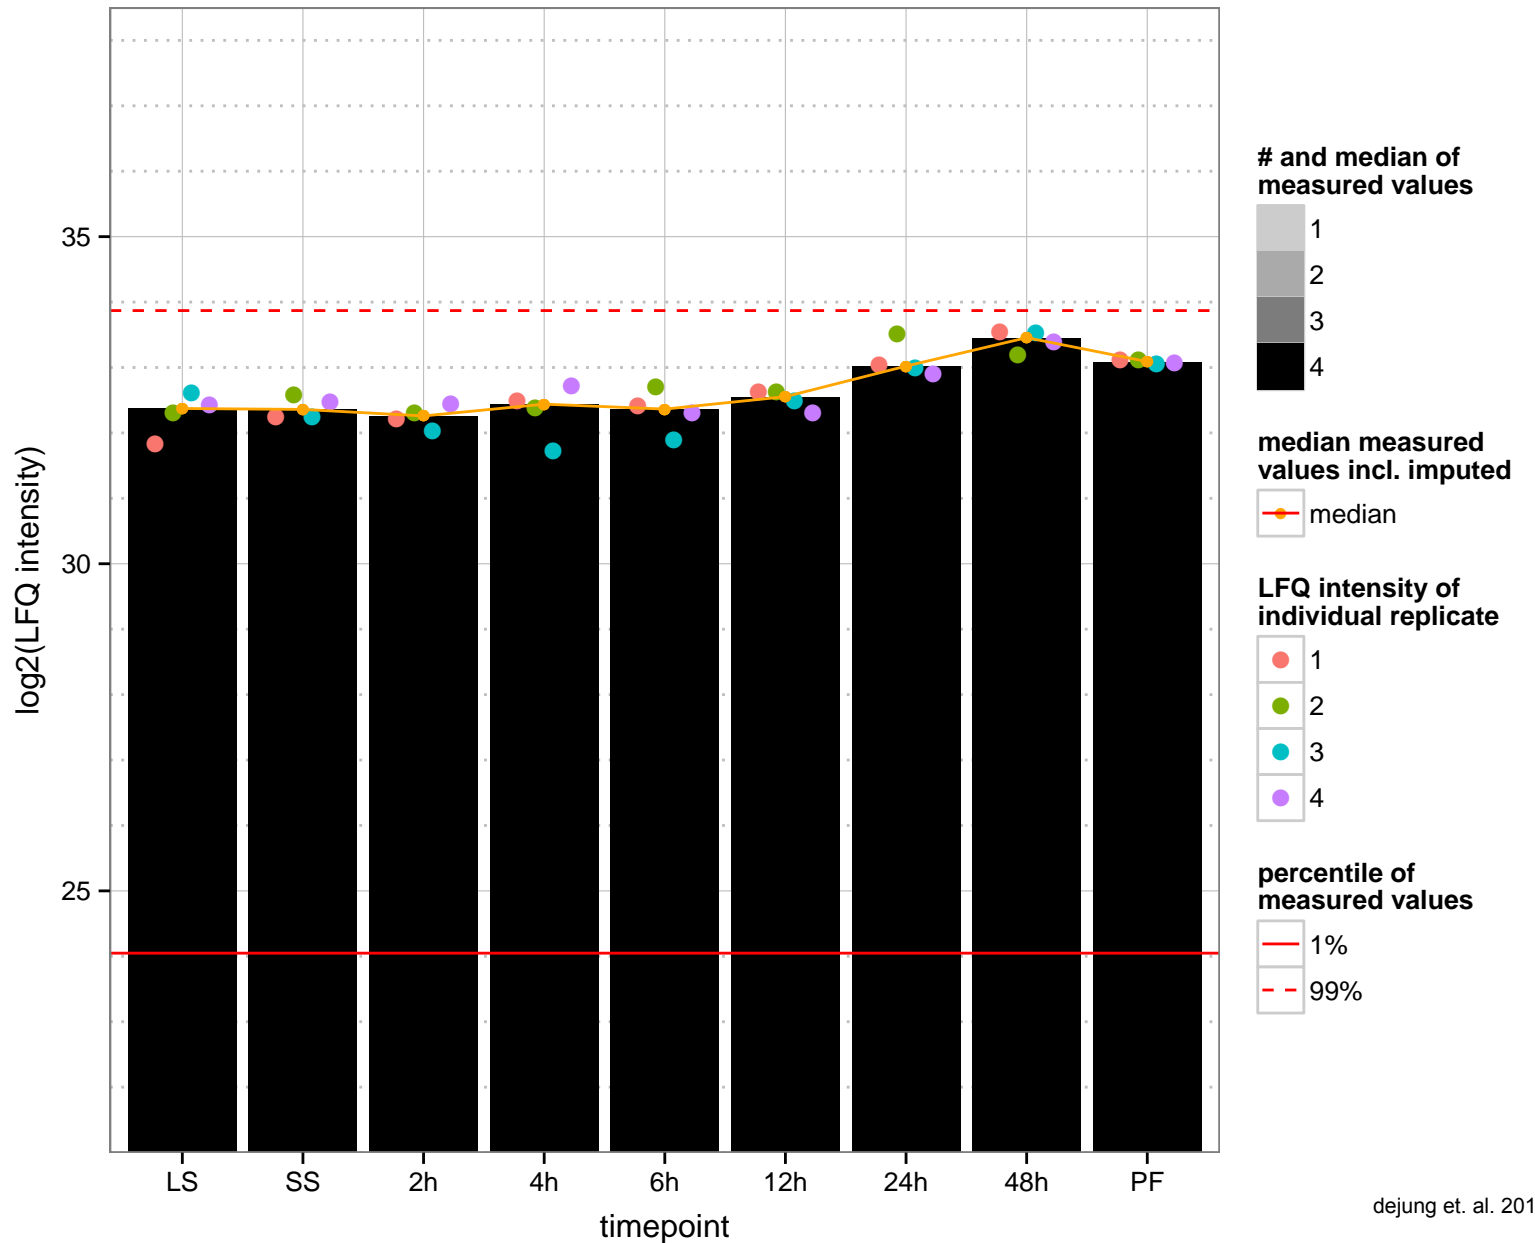

Proteophosphoglycan, putative  
 Tb927.10.5880  
 AGOF: null  
 AGOC: null  
 AGOP: null  
 PGO: null  
 PGO: null  
 PGO: null

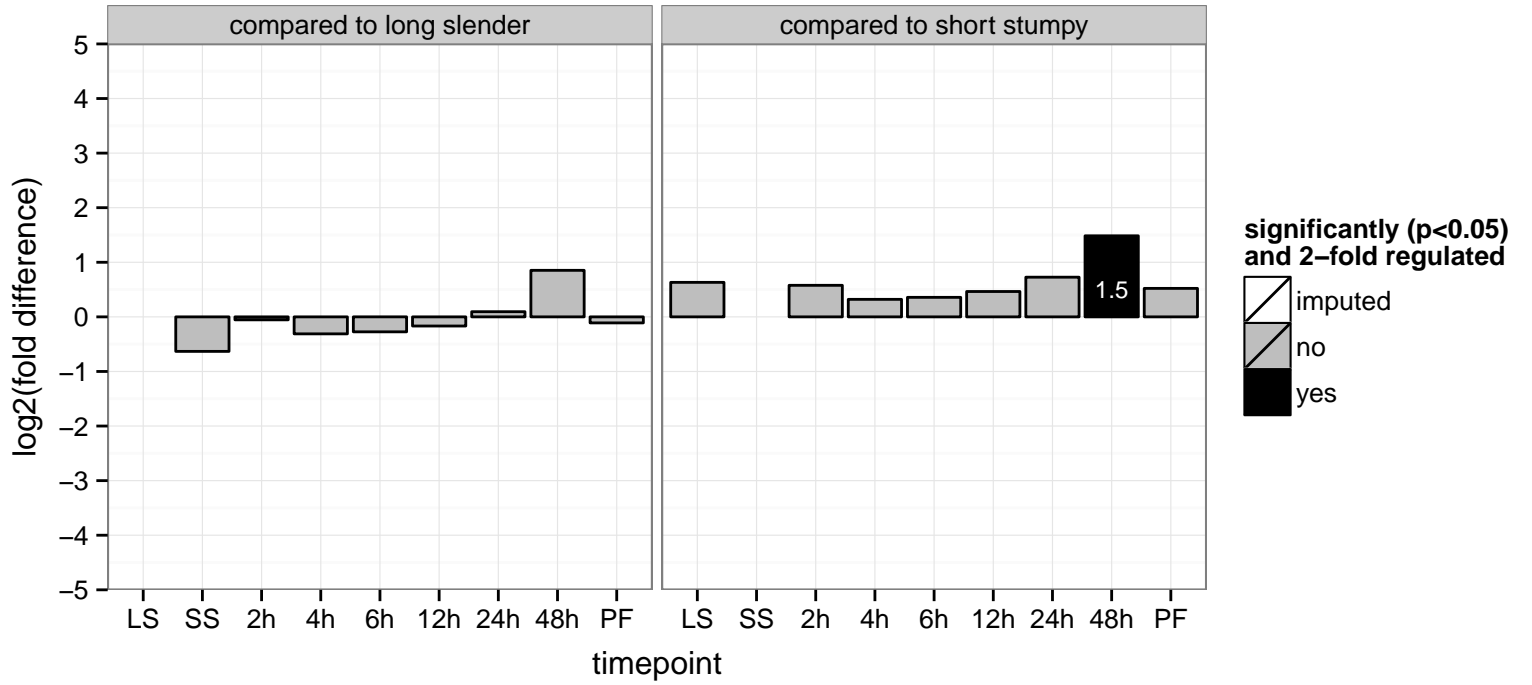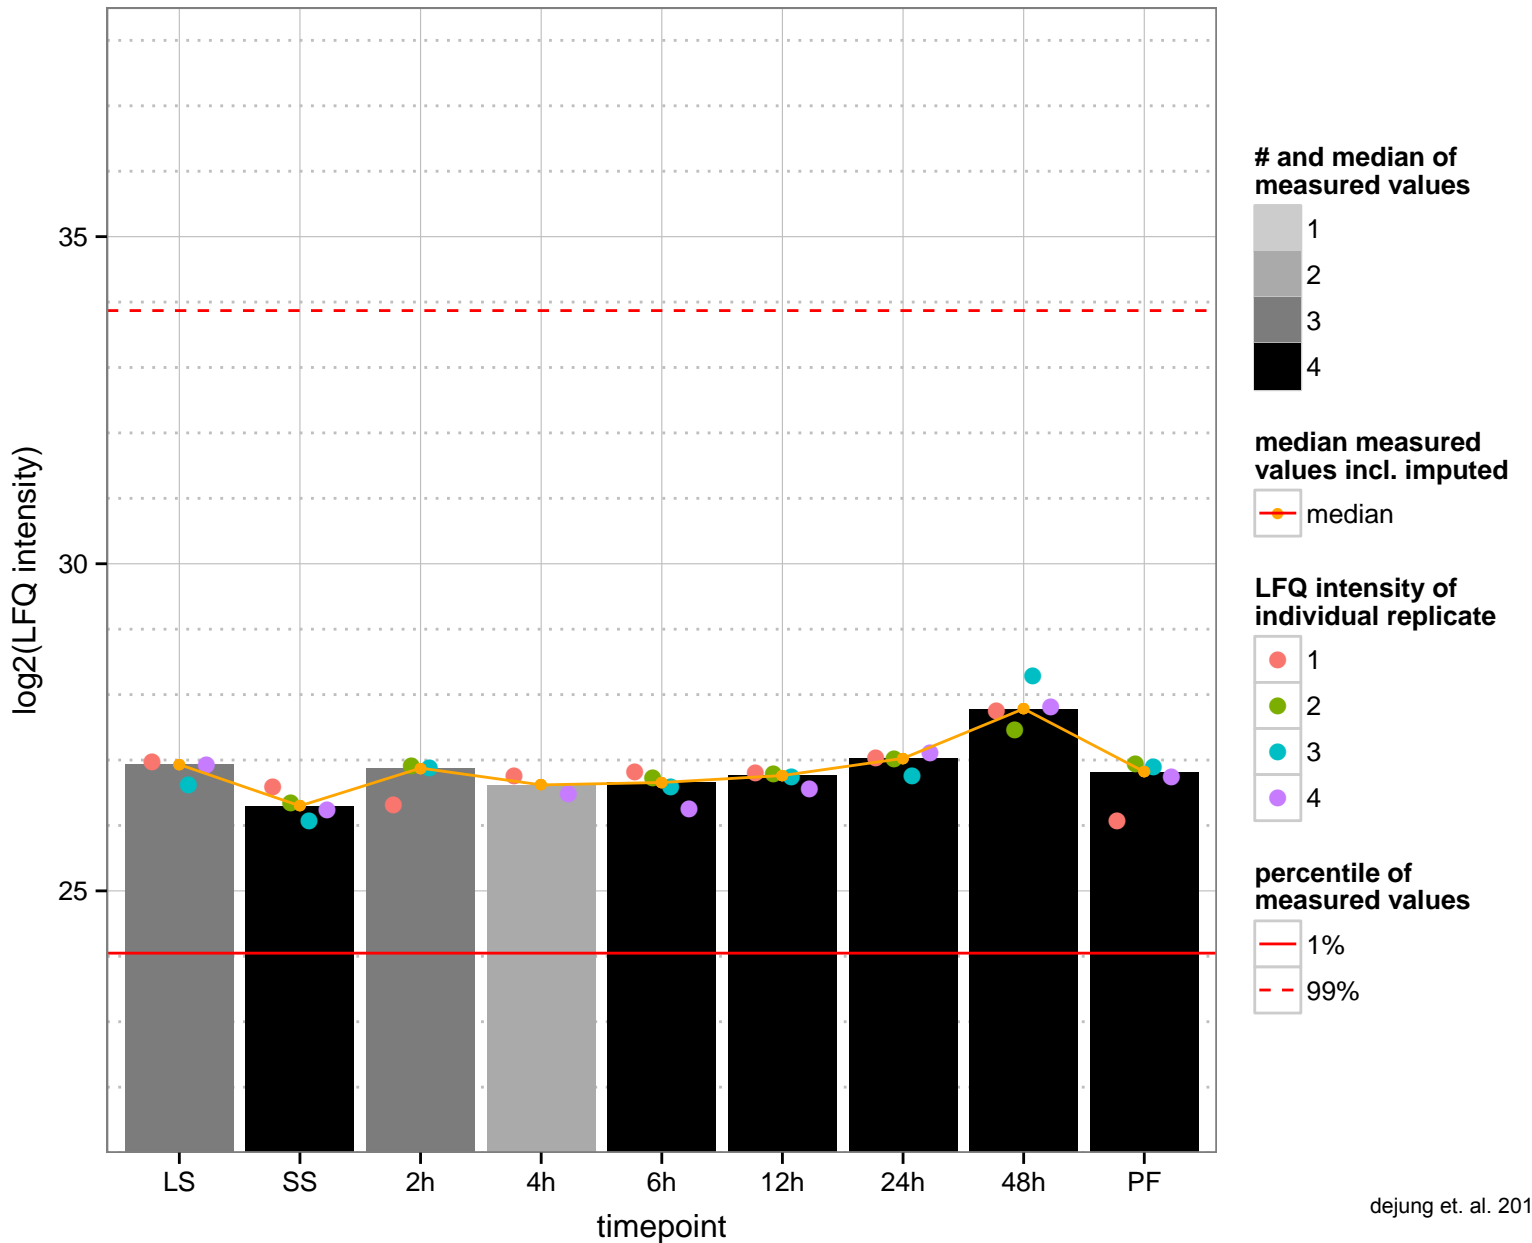

T-complex protein 1, theta subunit, putative, CCT-theta, putative (TCP-1-theta)

Tb927.10.8190

AGOF: ATP binding, unfolded protein binding

AGOC: chaperonin-containing T-complex

AGOP: protein folding, regulation of cell cycle

PGOF: ATP binding, unfolded protein binding

PGOC: null

PGOP: cellular protein metabolic process, protein folding

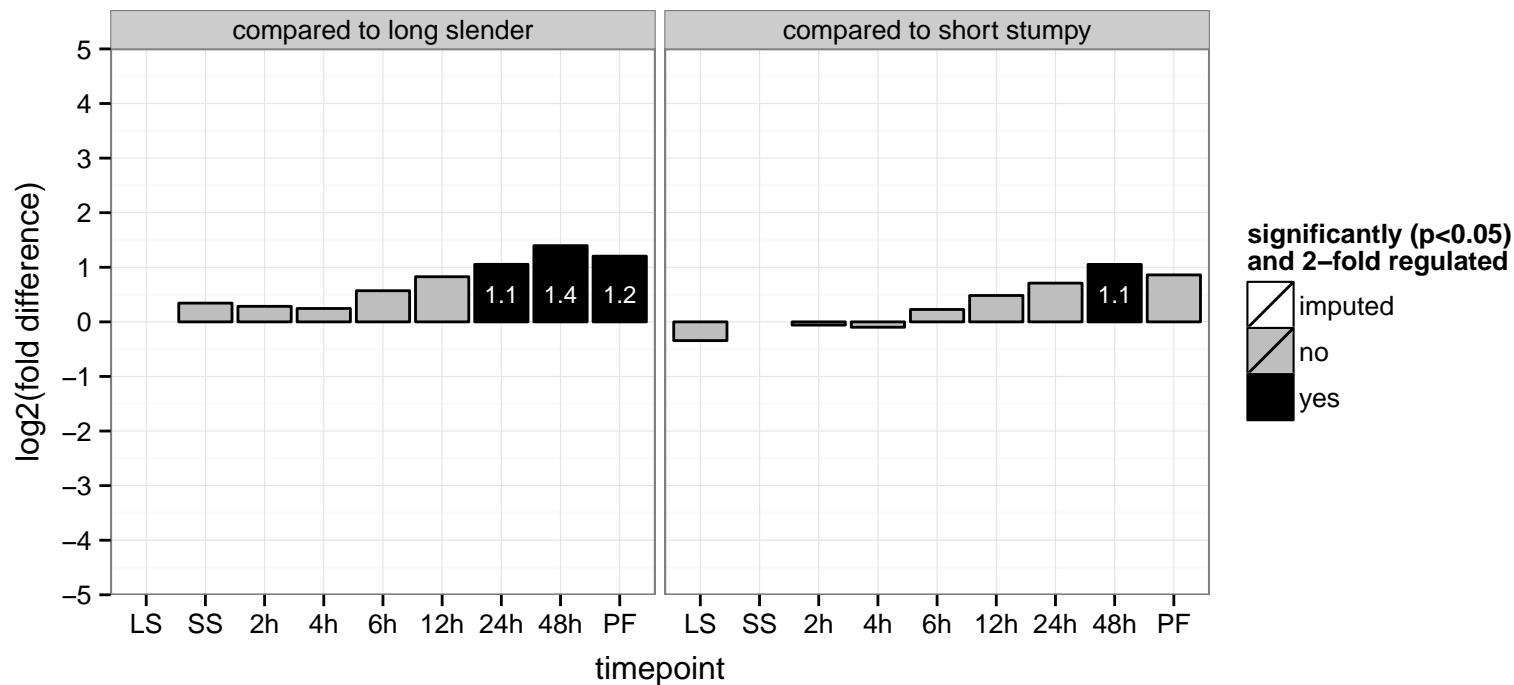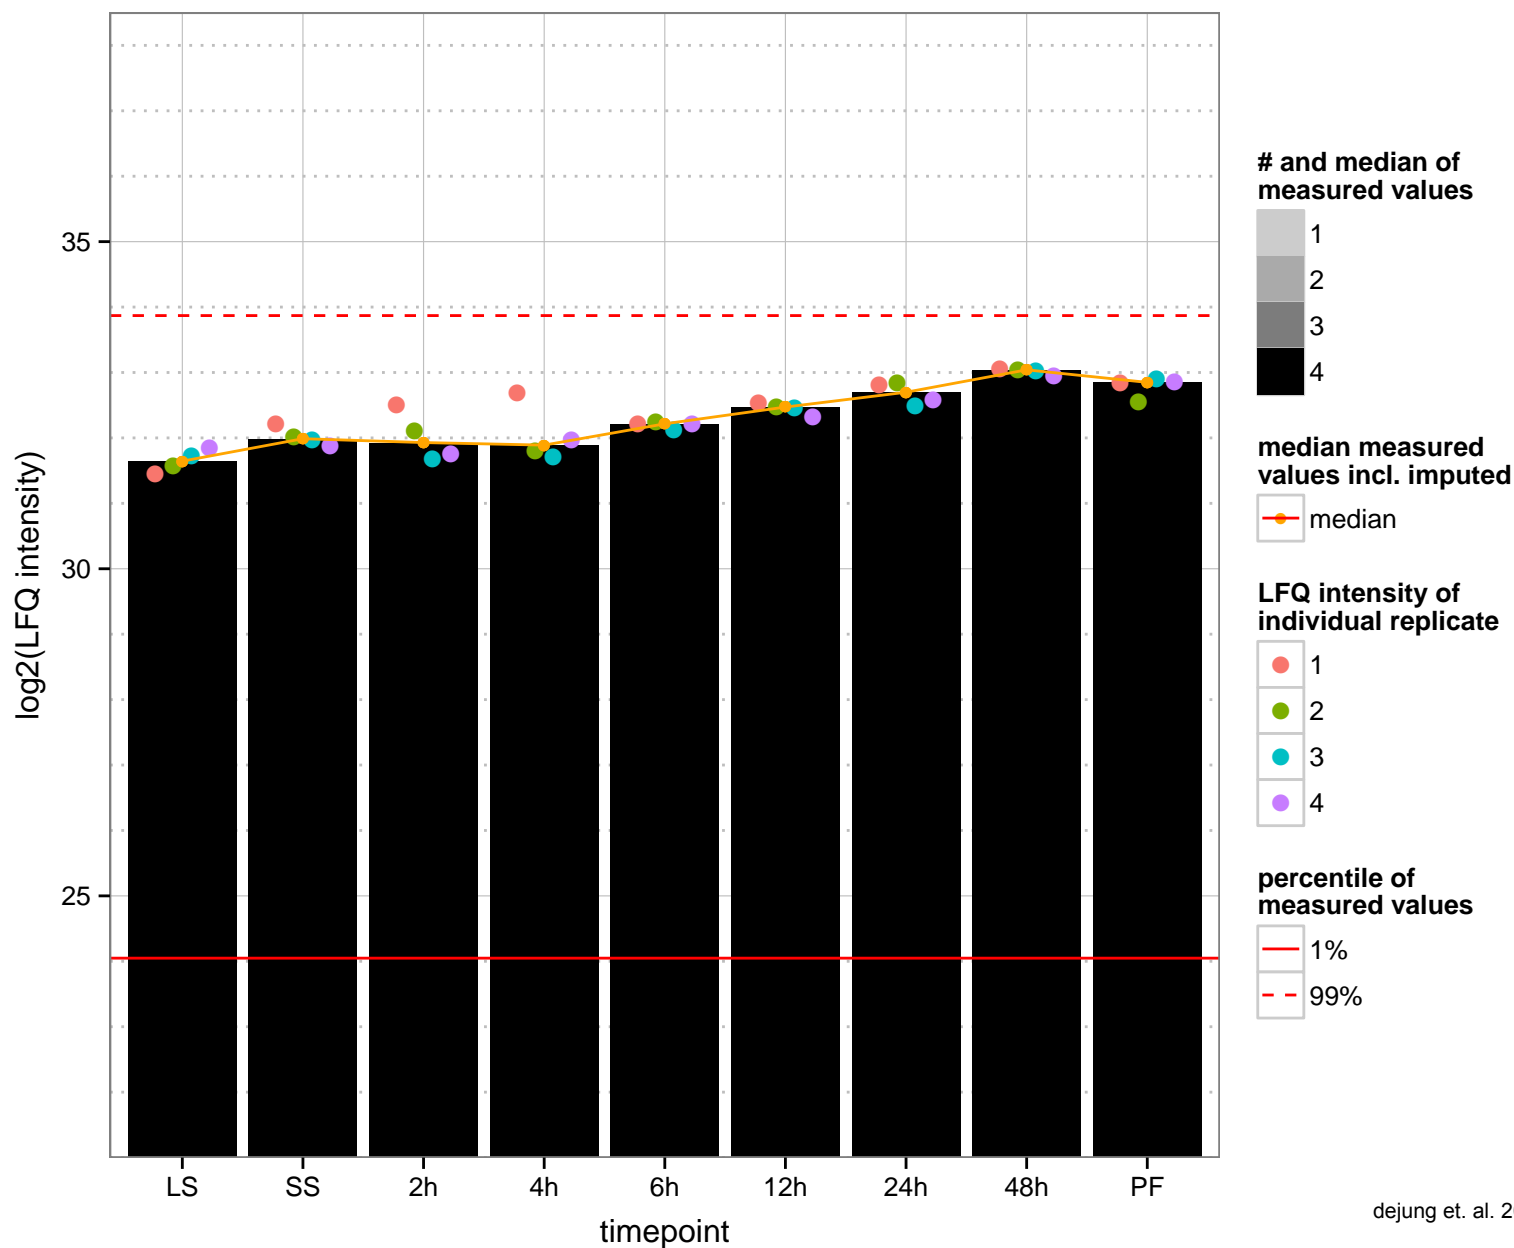



hypothetical protein, conserved  
 Tb927.10.820  
 AGOF: null  
 AGOC: null  
 AGOP: null  
 PGOF: null  
 PGO: null  
 PGOP: null

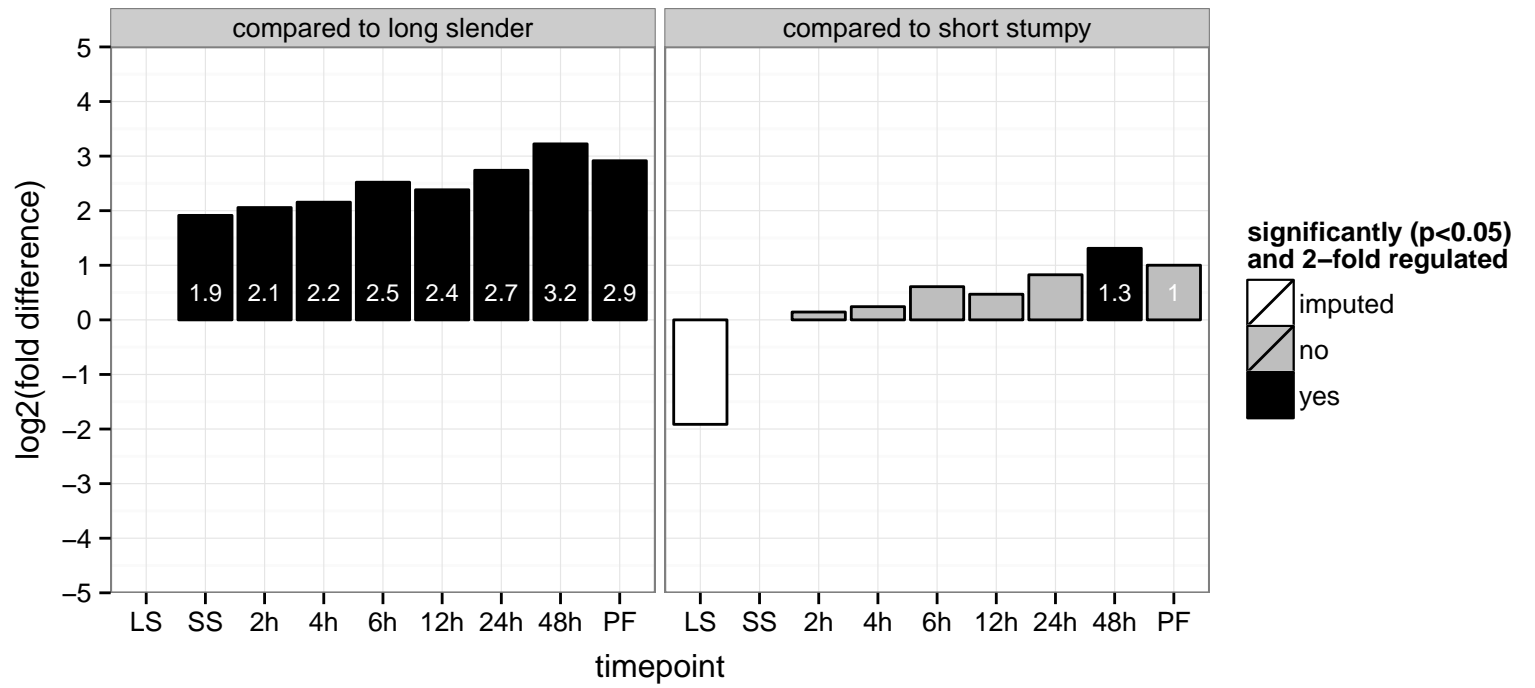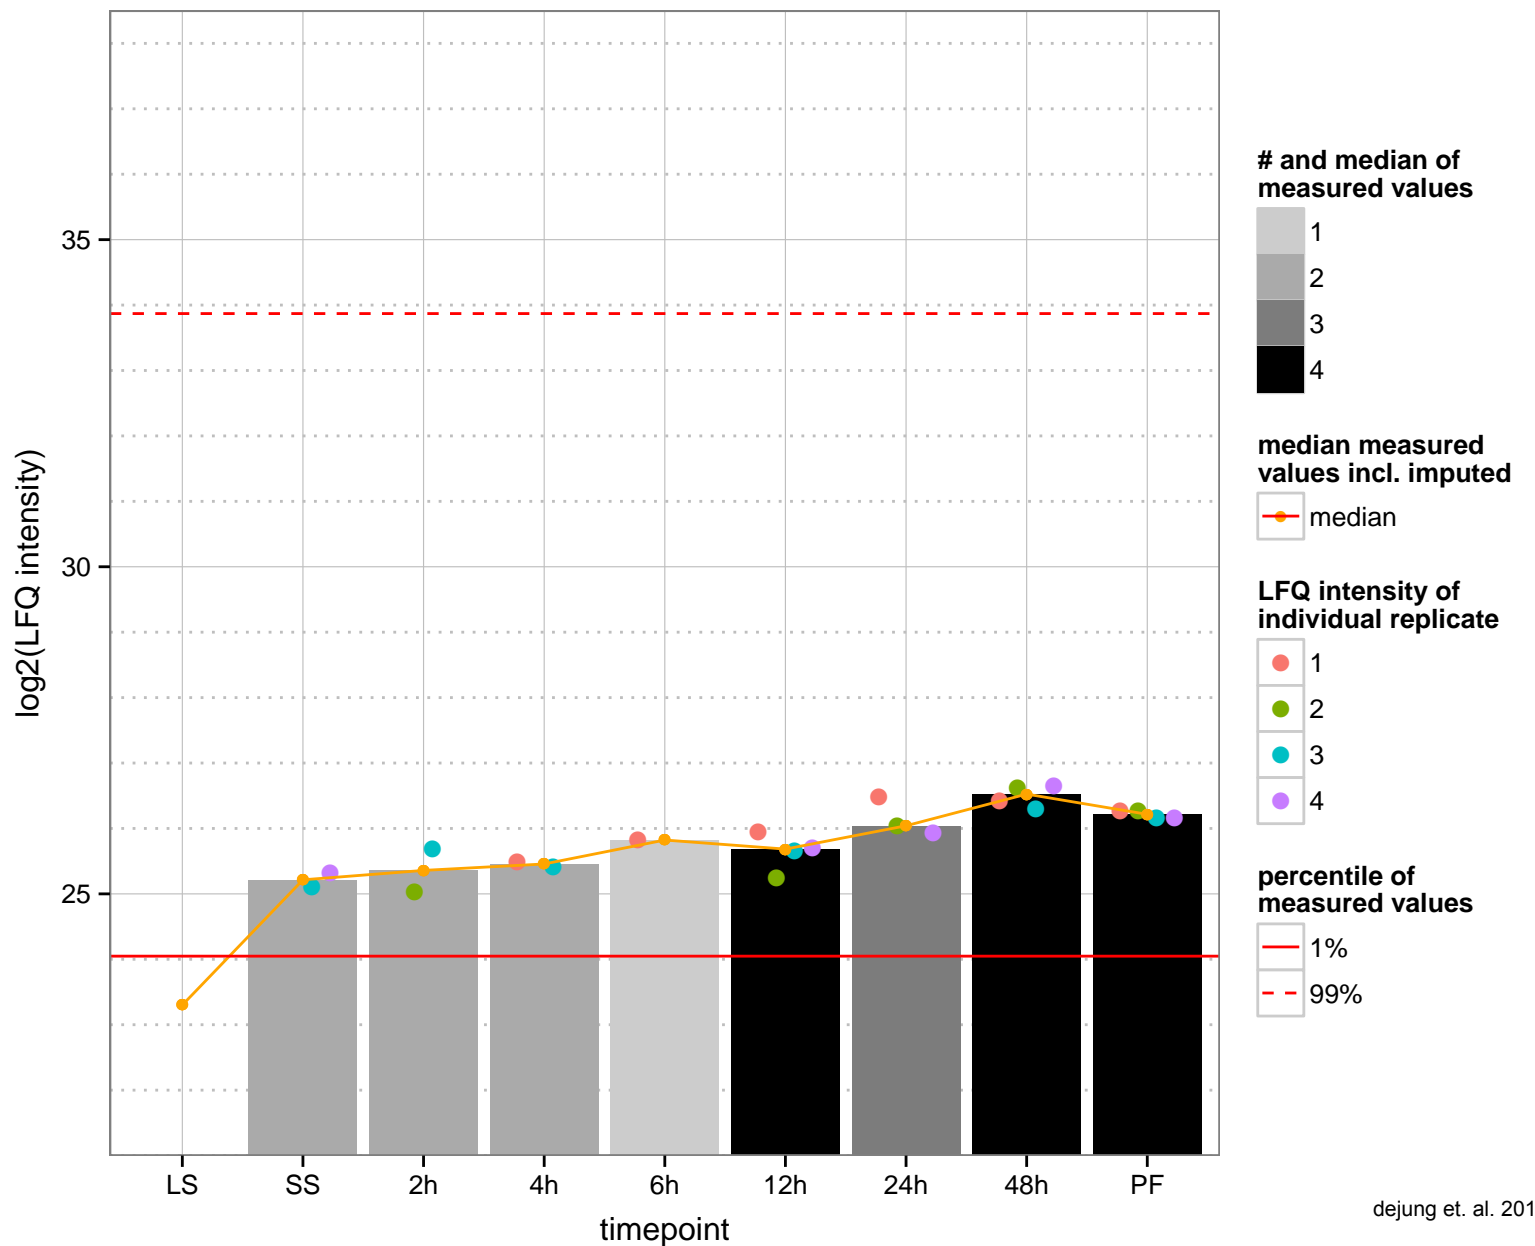

40S ribosomal protein S12, putative  
 Tb927.10.8430  
 AGOF: structural constituent of ribosome  
 AGOC: intracellular, ribosome  
 AGOP: translation  
 PGO: null  
 PGO: null  
 PGO: null

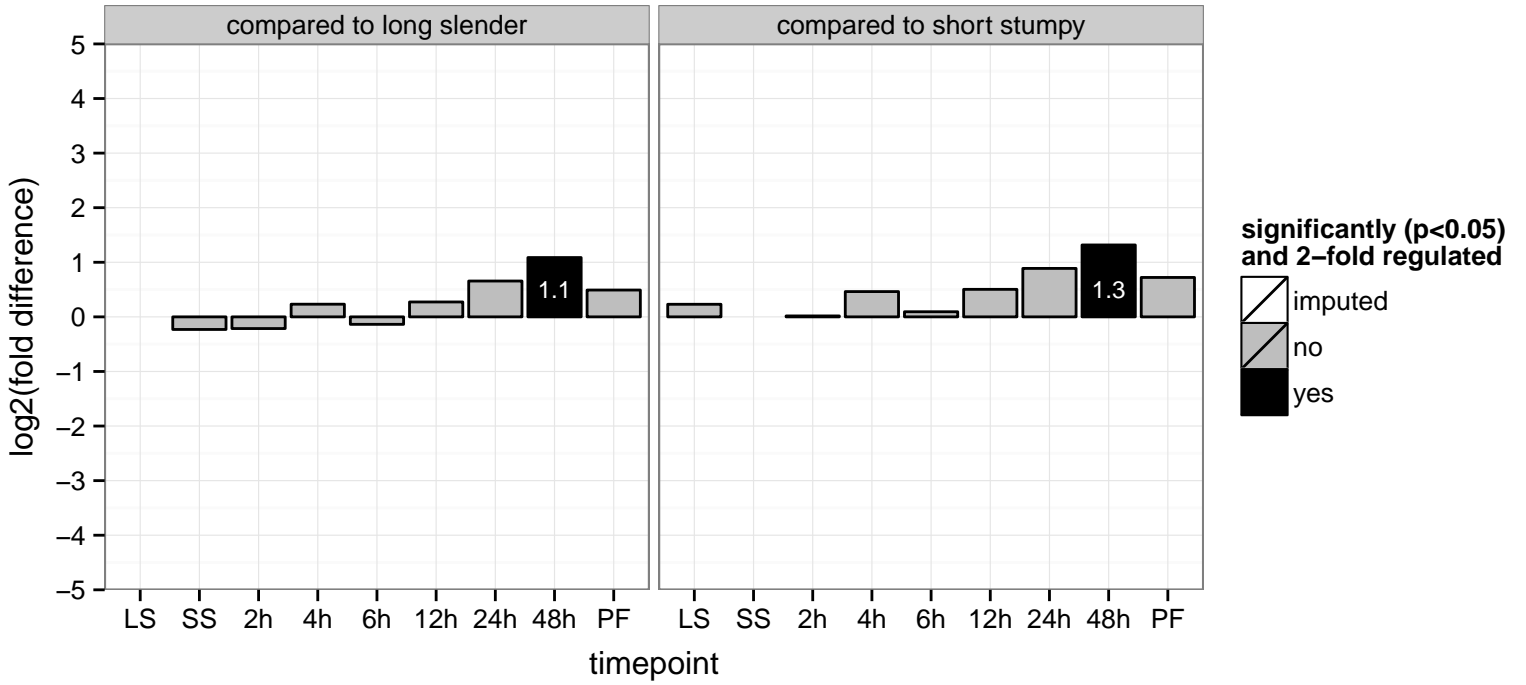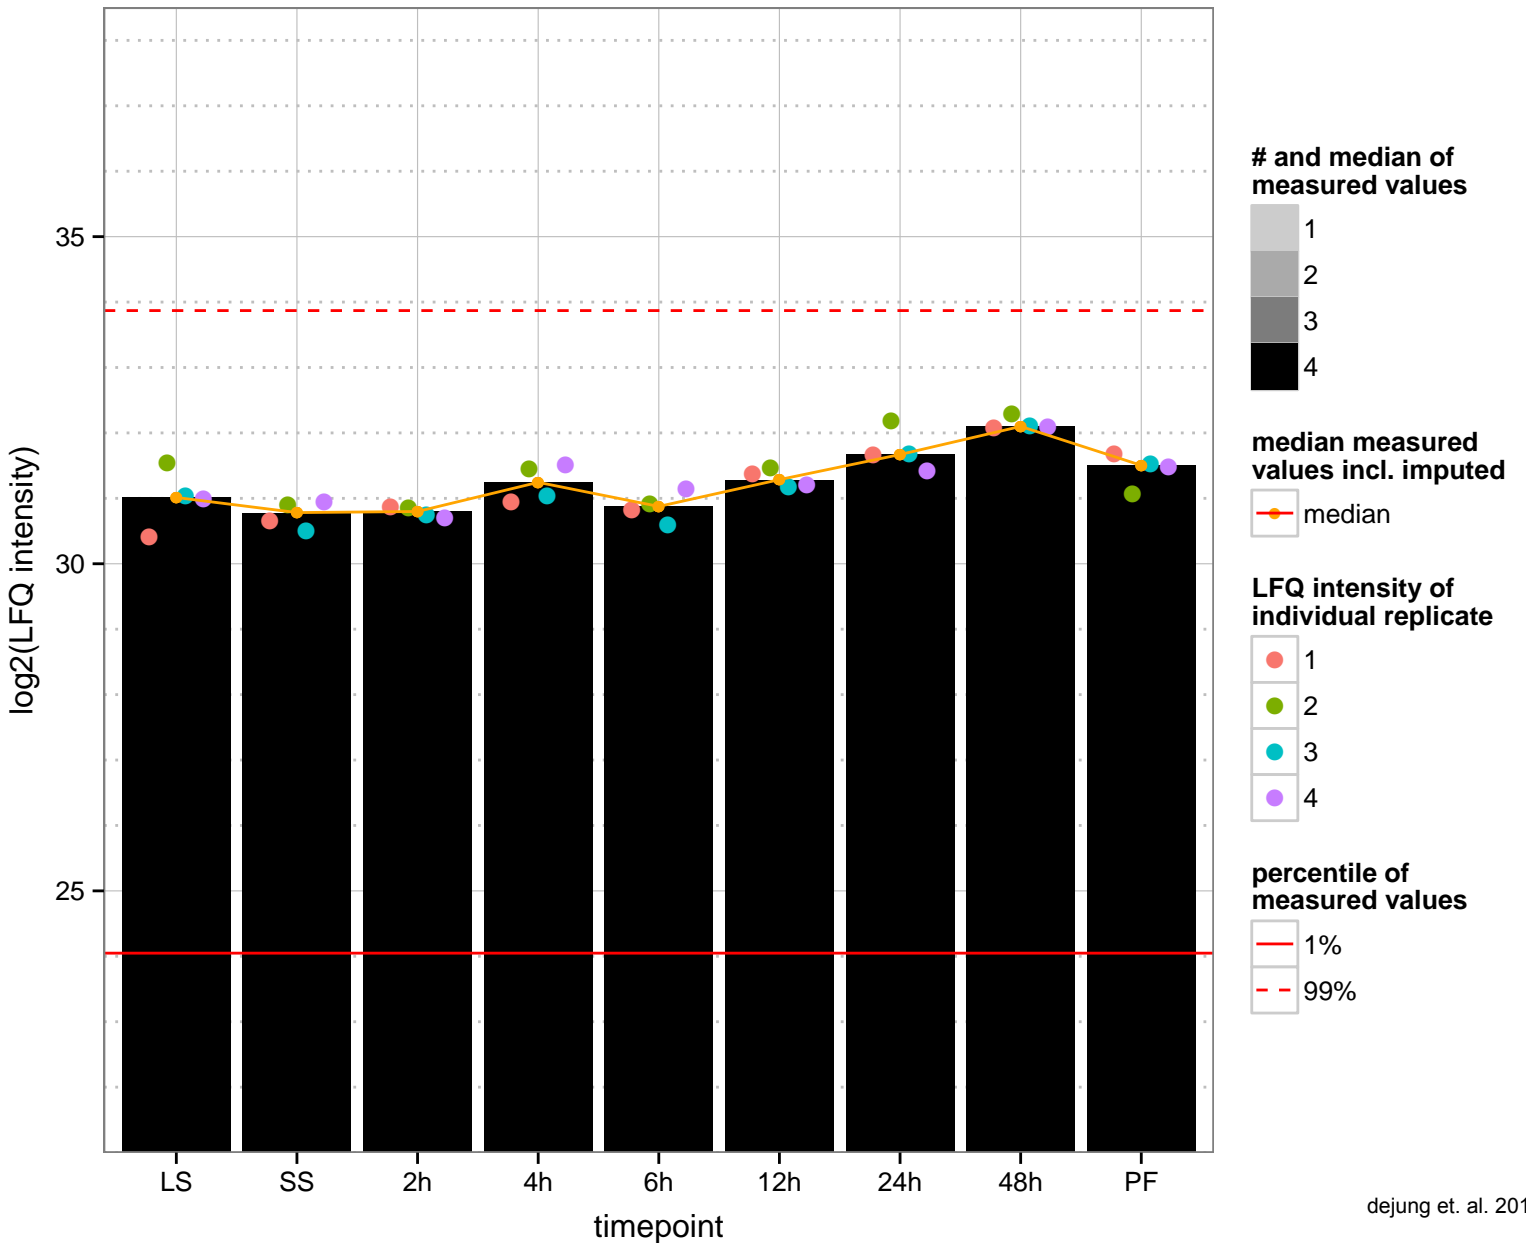

hypothetical protein, conserved  
 Tb927.10.9200  
 AGOF: null  
 AGOC: null  
 AGOP: null  
 PGOF: null  
 PGO: null  
 PGOP: null

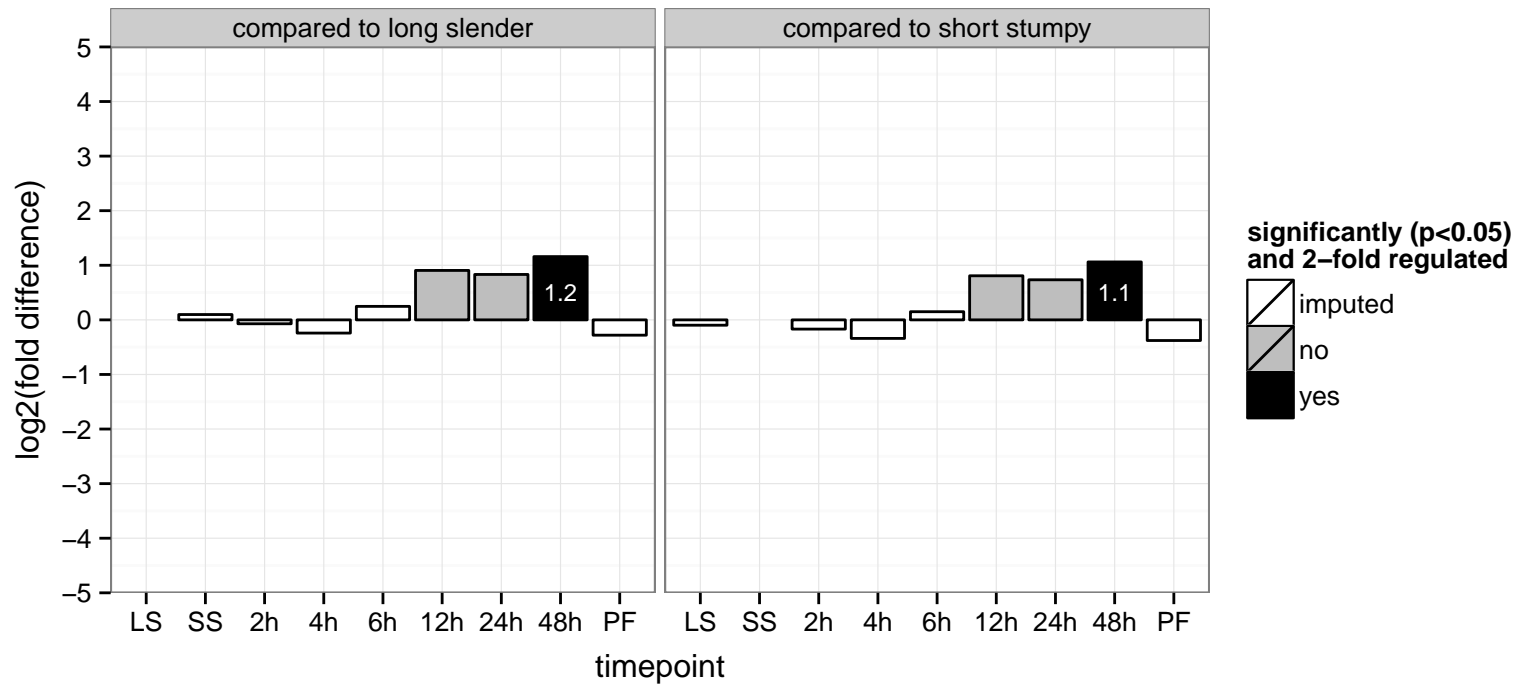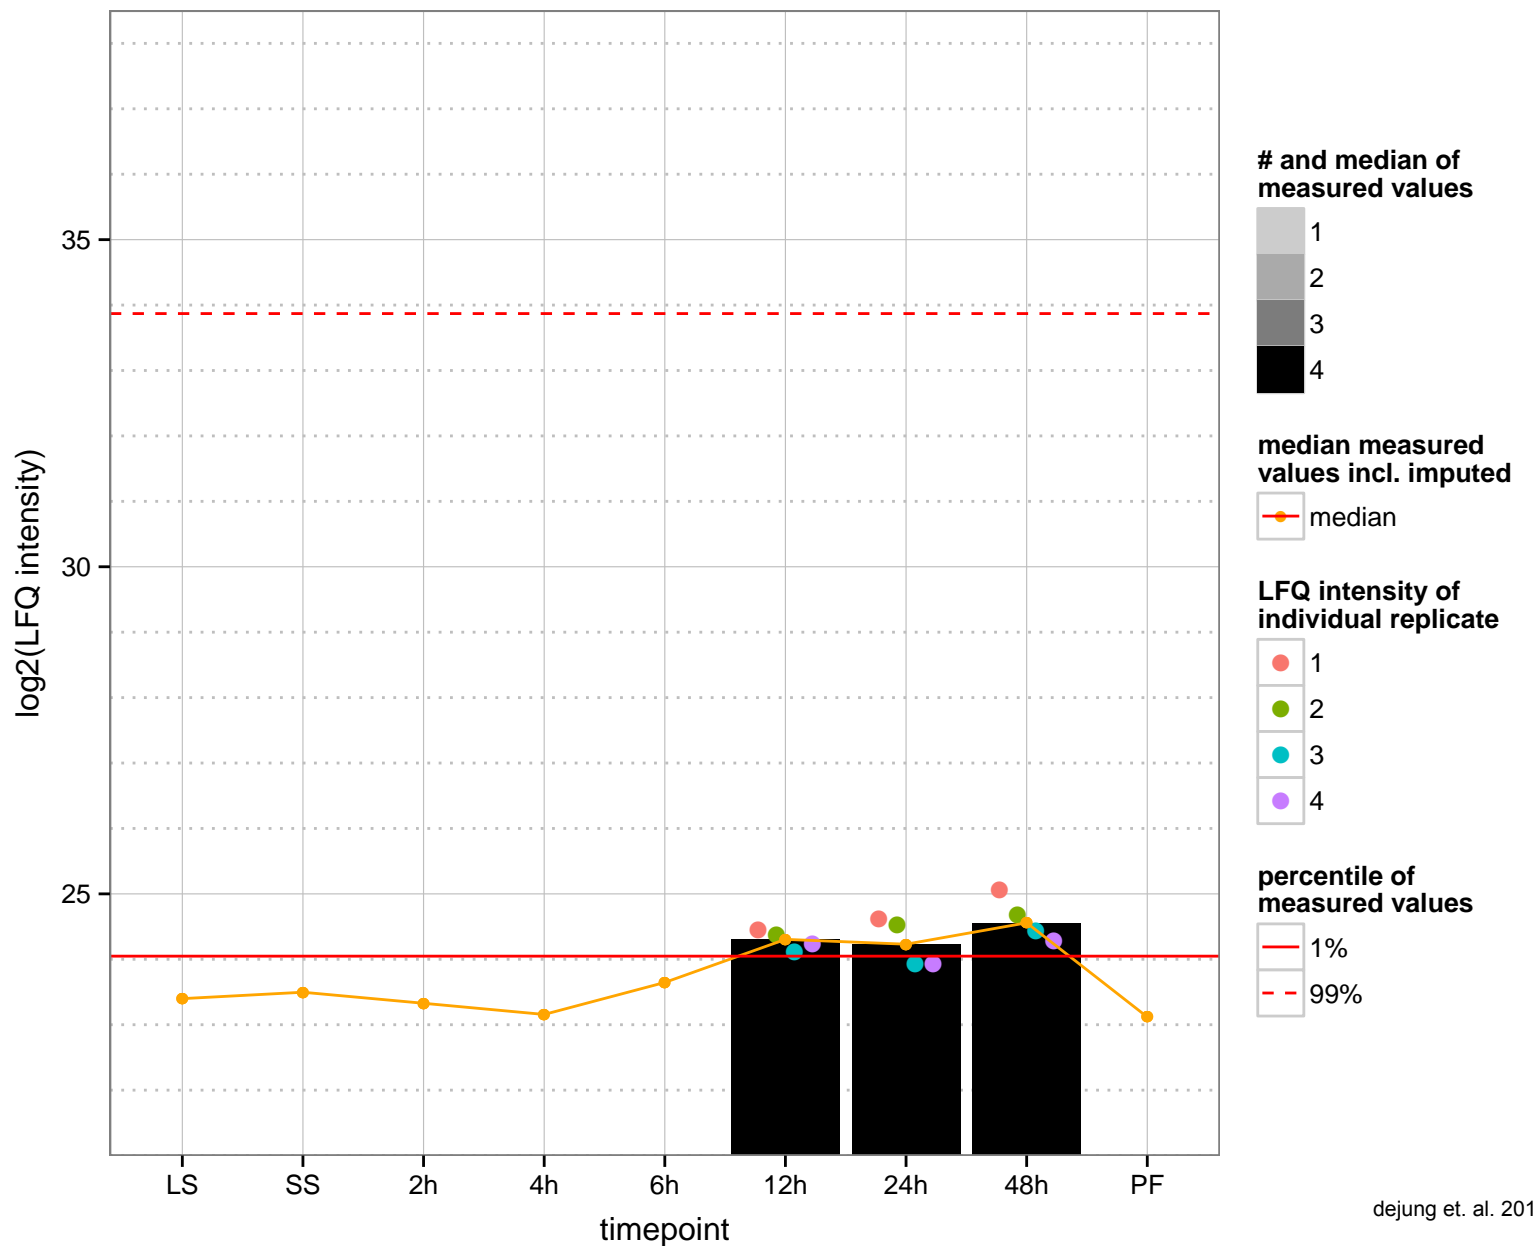

RNA-editing-associated protein 1, RNA-binding protein, oligo (U) binding protein, RNA editing complex protein (REAP-1)  
 Tb927.10.9720  
 AGOF: null  
 AGOC: mitochondrial mRNA editing complex  
 AGOP: RNA modification  
 PGO: null  
 PGOC: null  
 PGOP: null

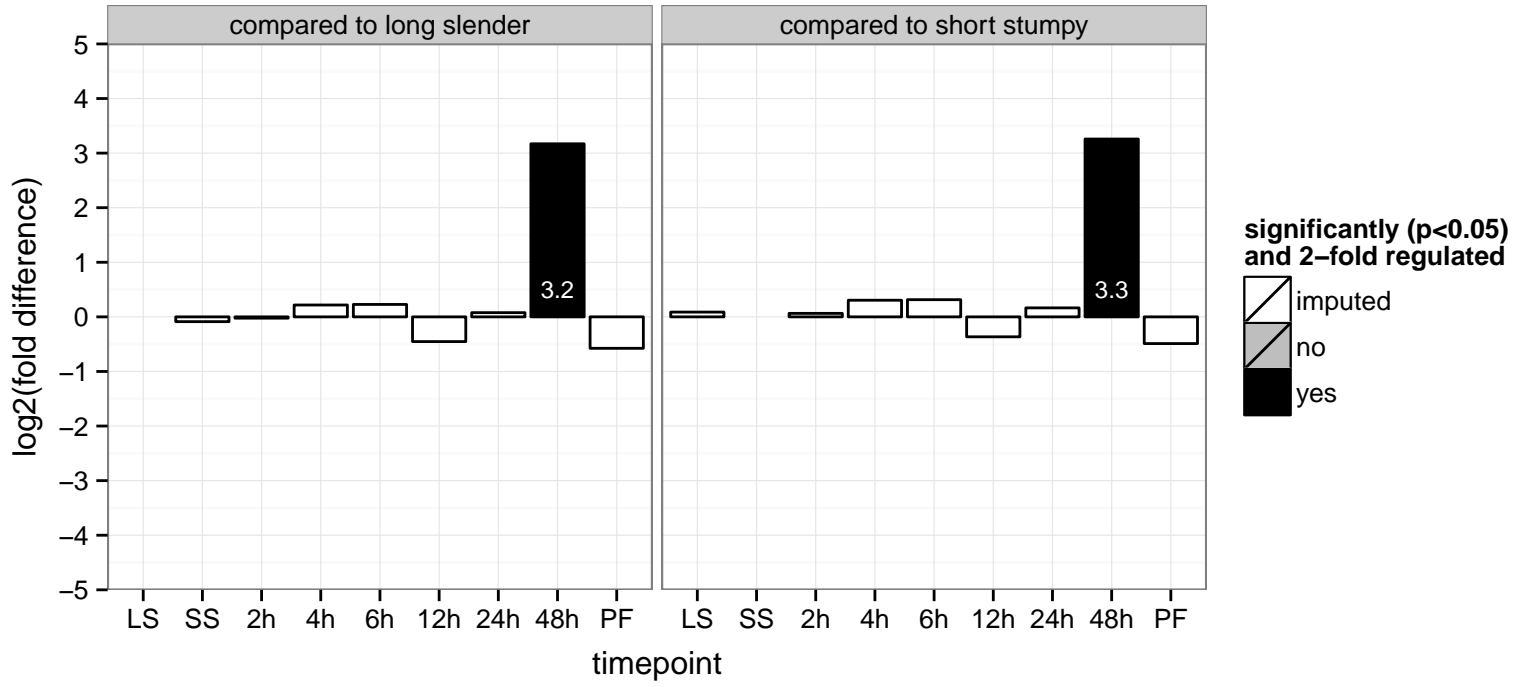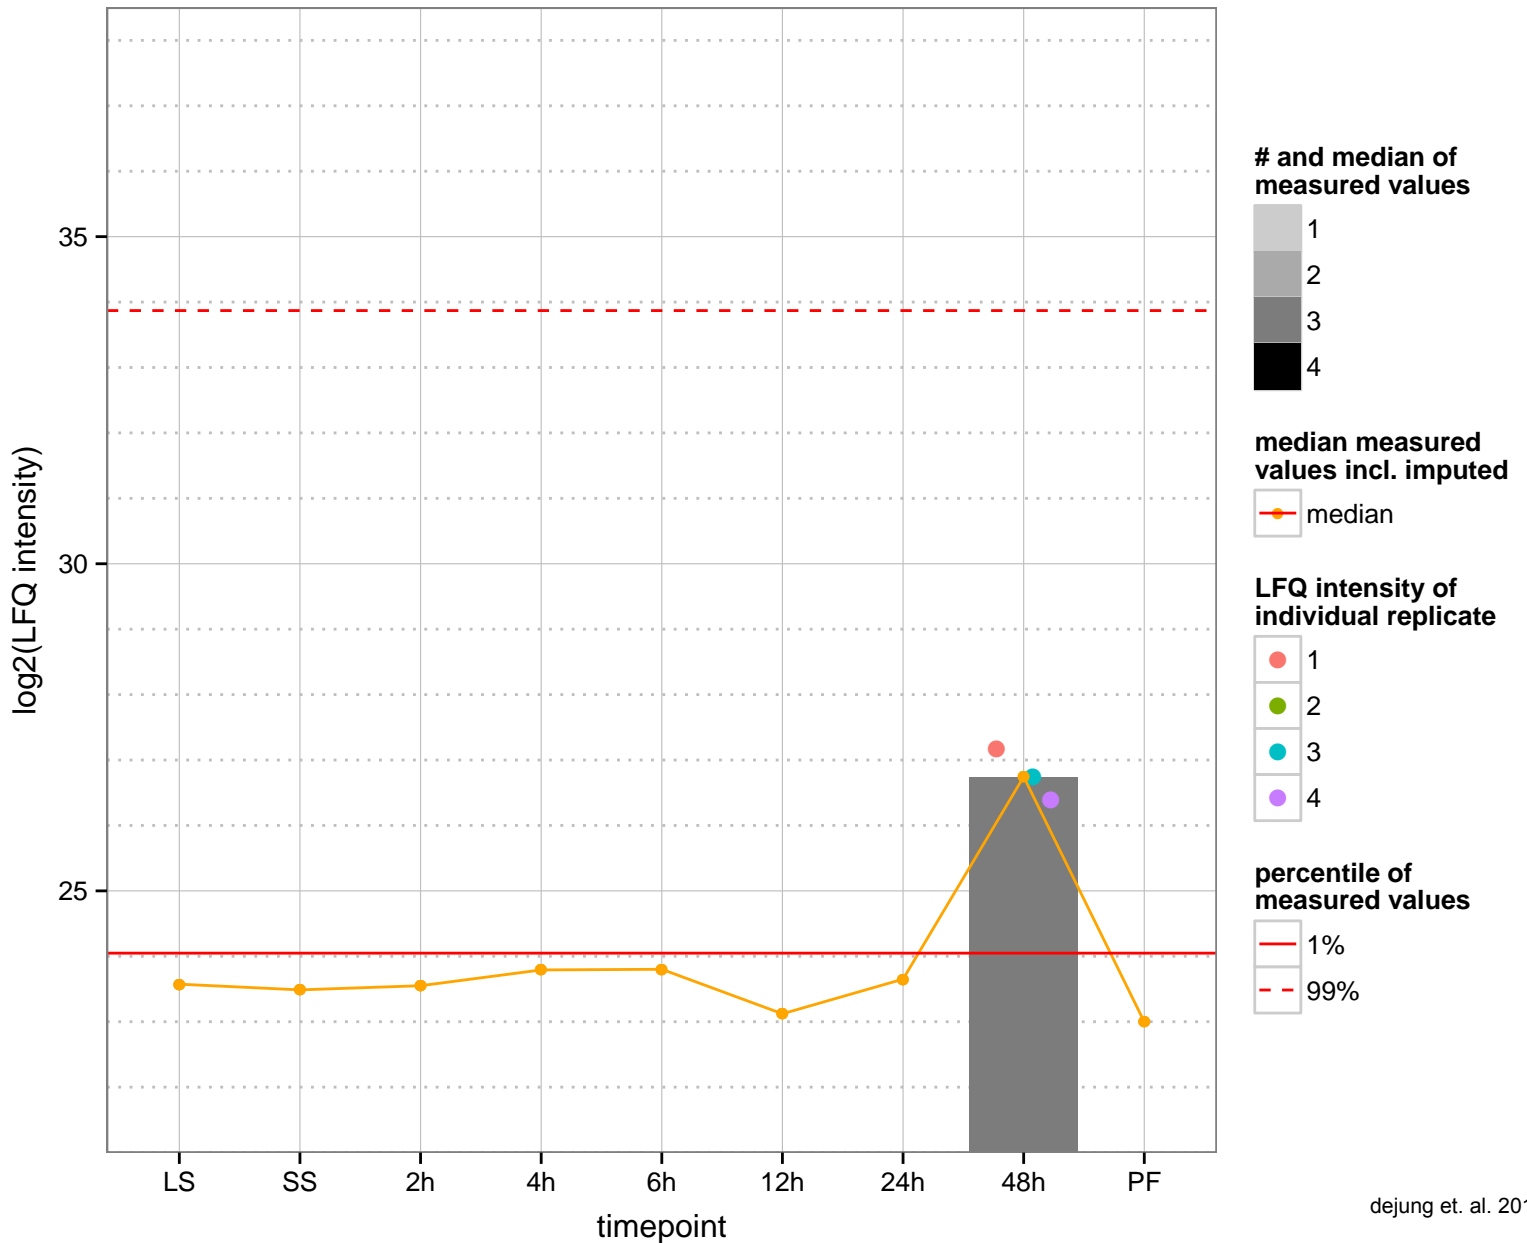

hypothetical protein, conserved  
 Tb927.11.10220  
 AGOF: null  
 AGOC: null  
 AGOP: null  
 PGO: null  
 PGOC: null  
 PGOP: null

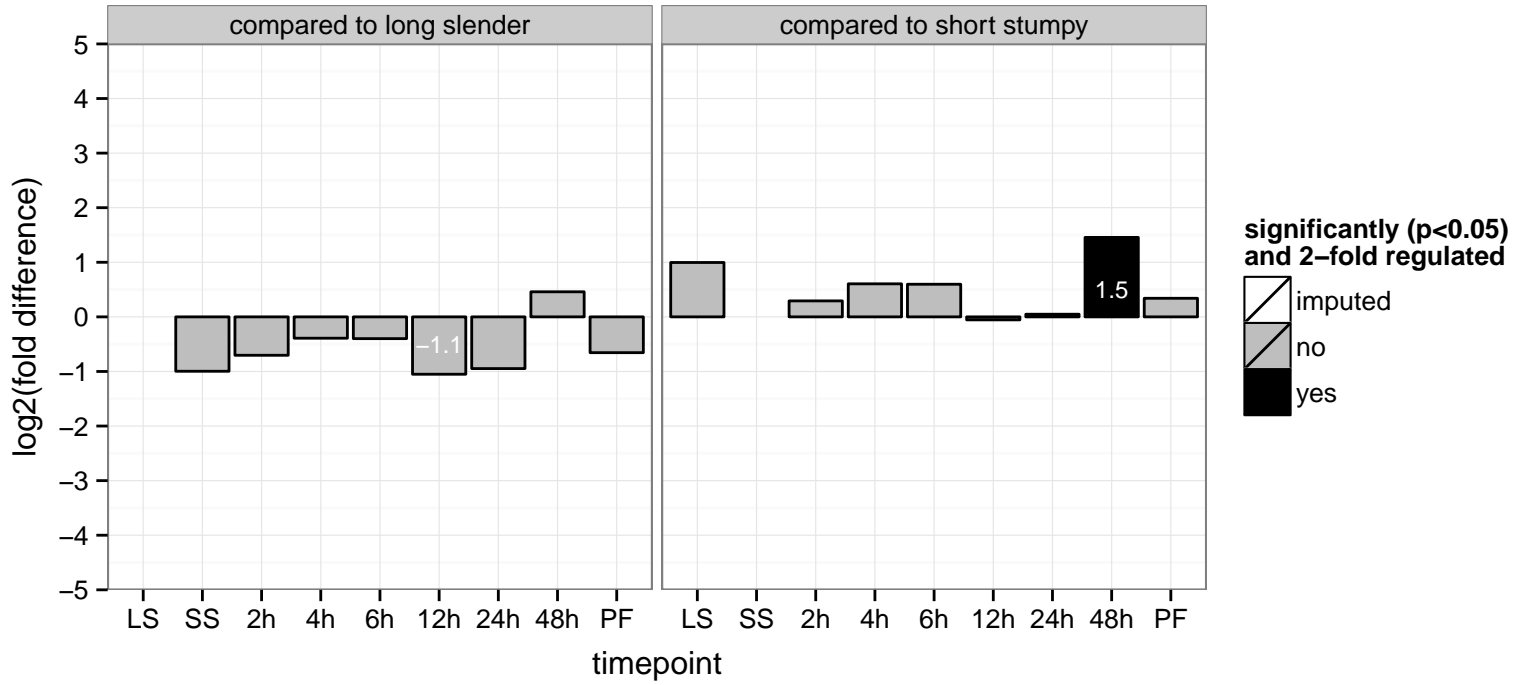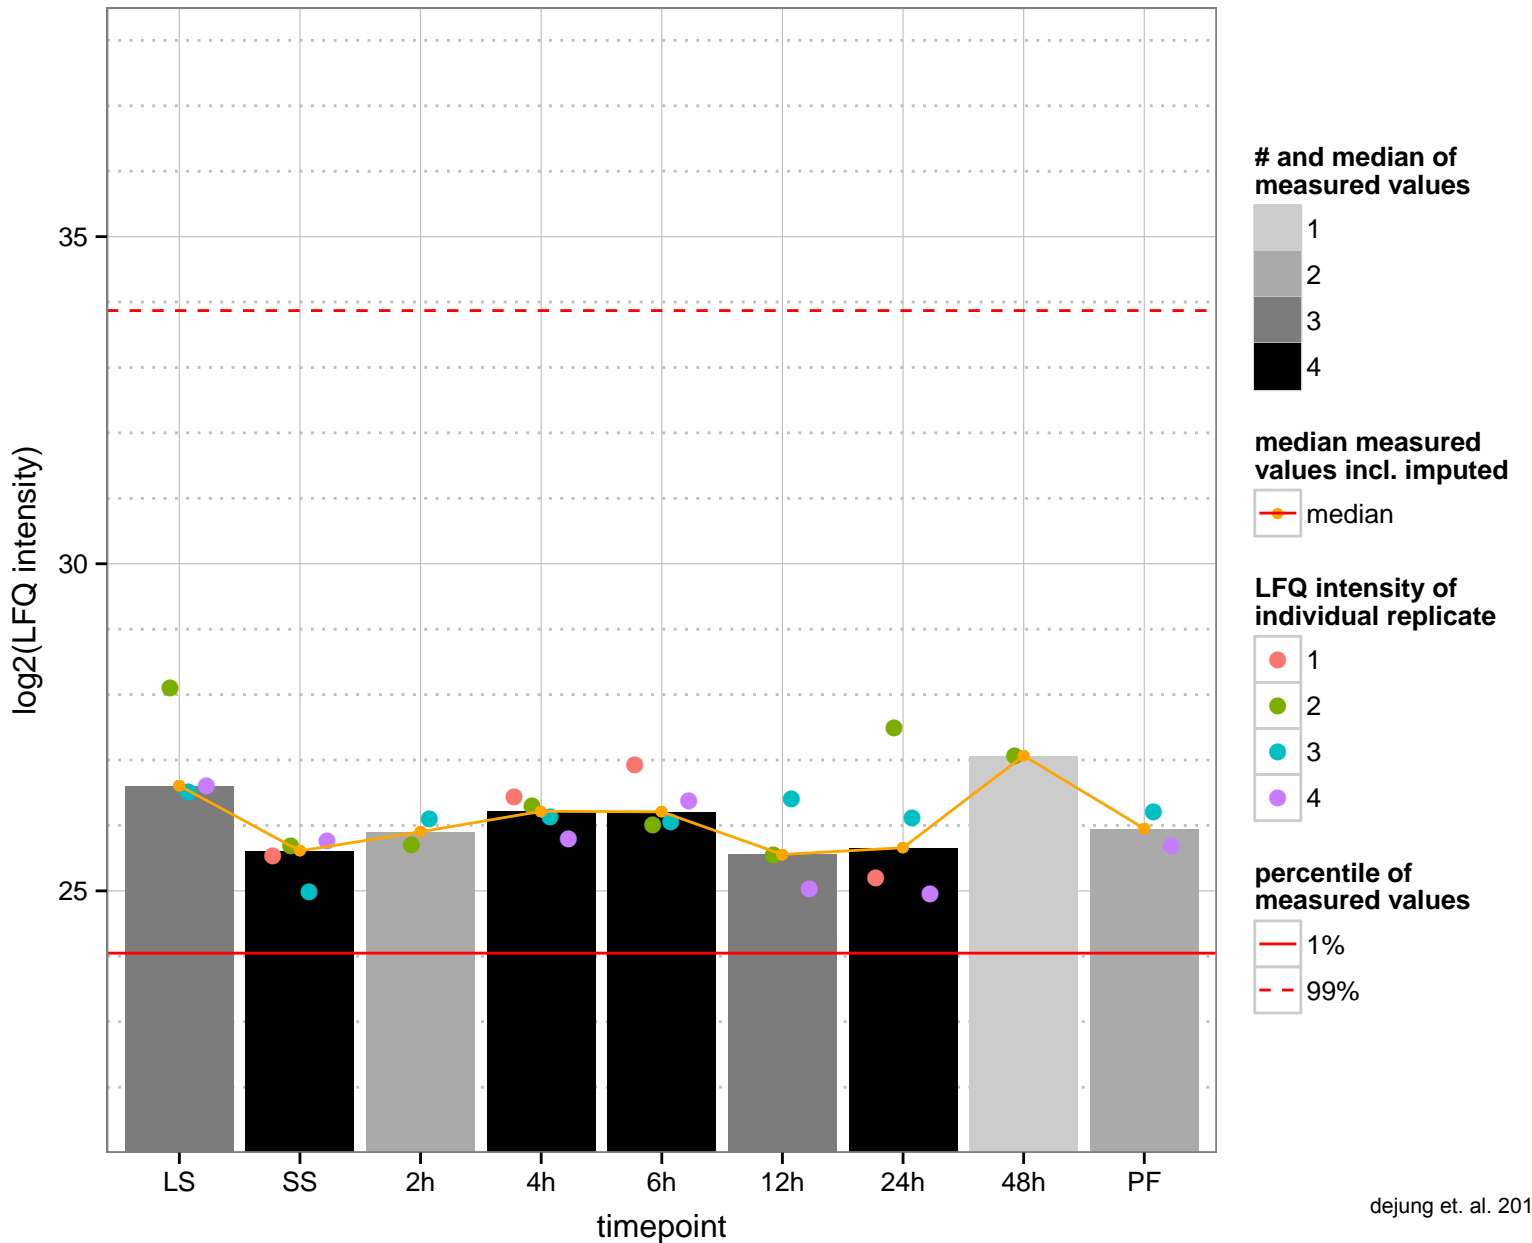

hypothetical protein, conserved  
 Tb927.11.10300  
 AGOF: null  
 AGOC: null  
 AGOP: null  
 PGOF: protein binding  
 PGO: null  
 PGOP: null

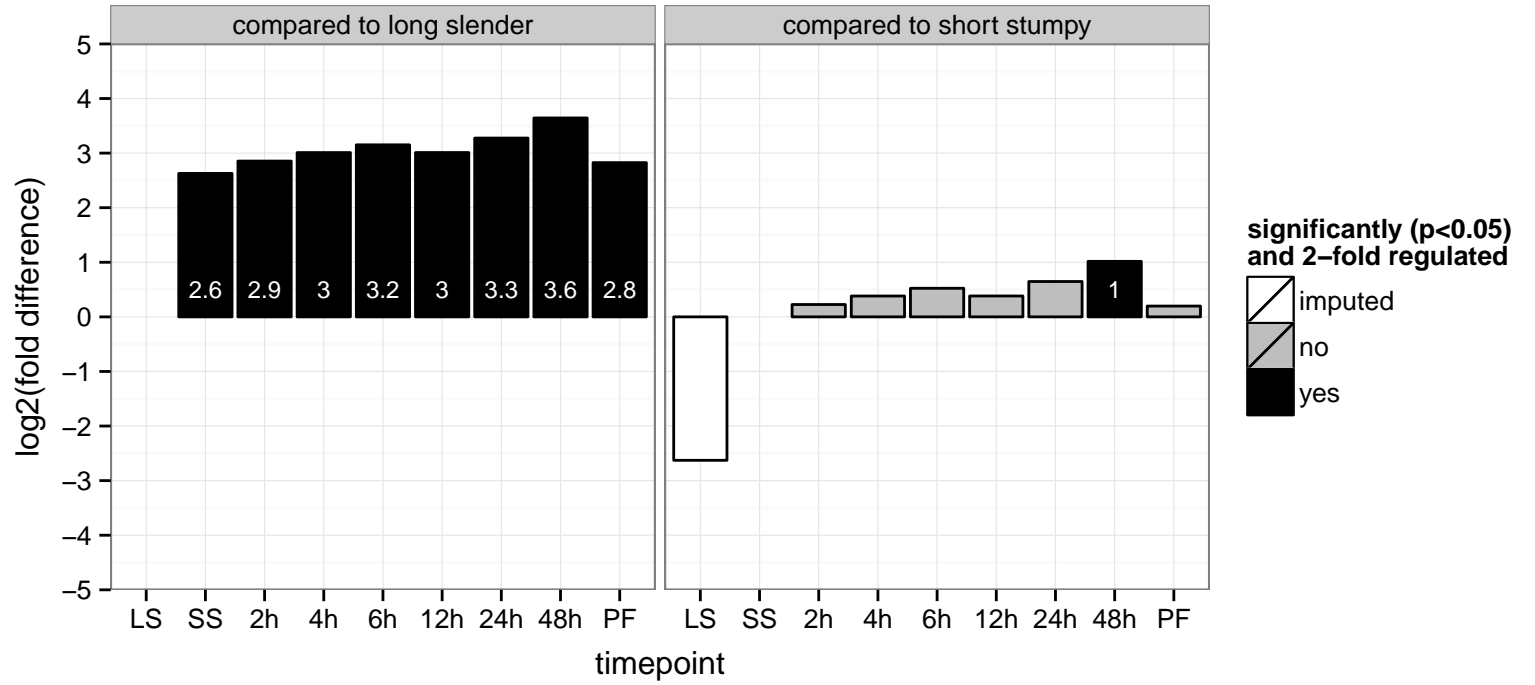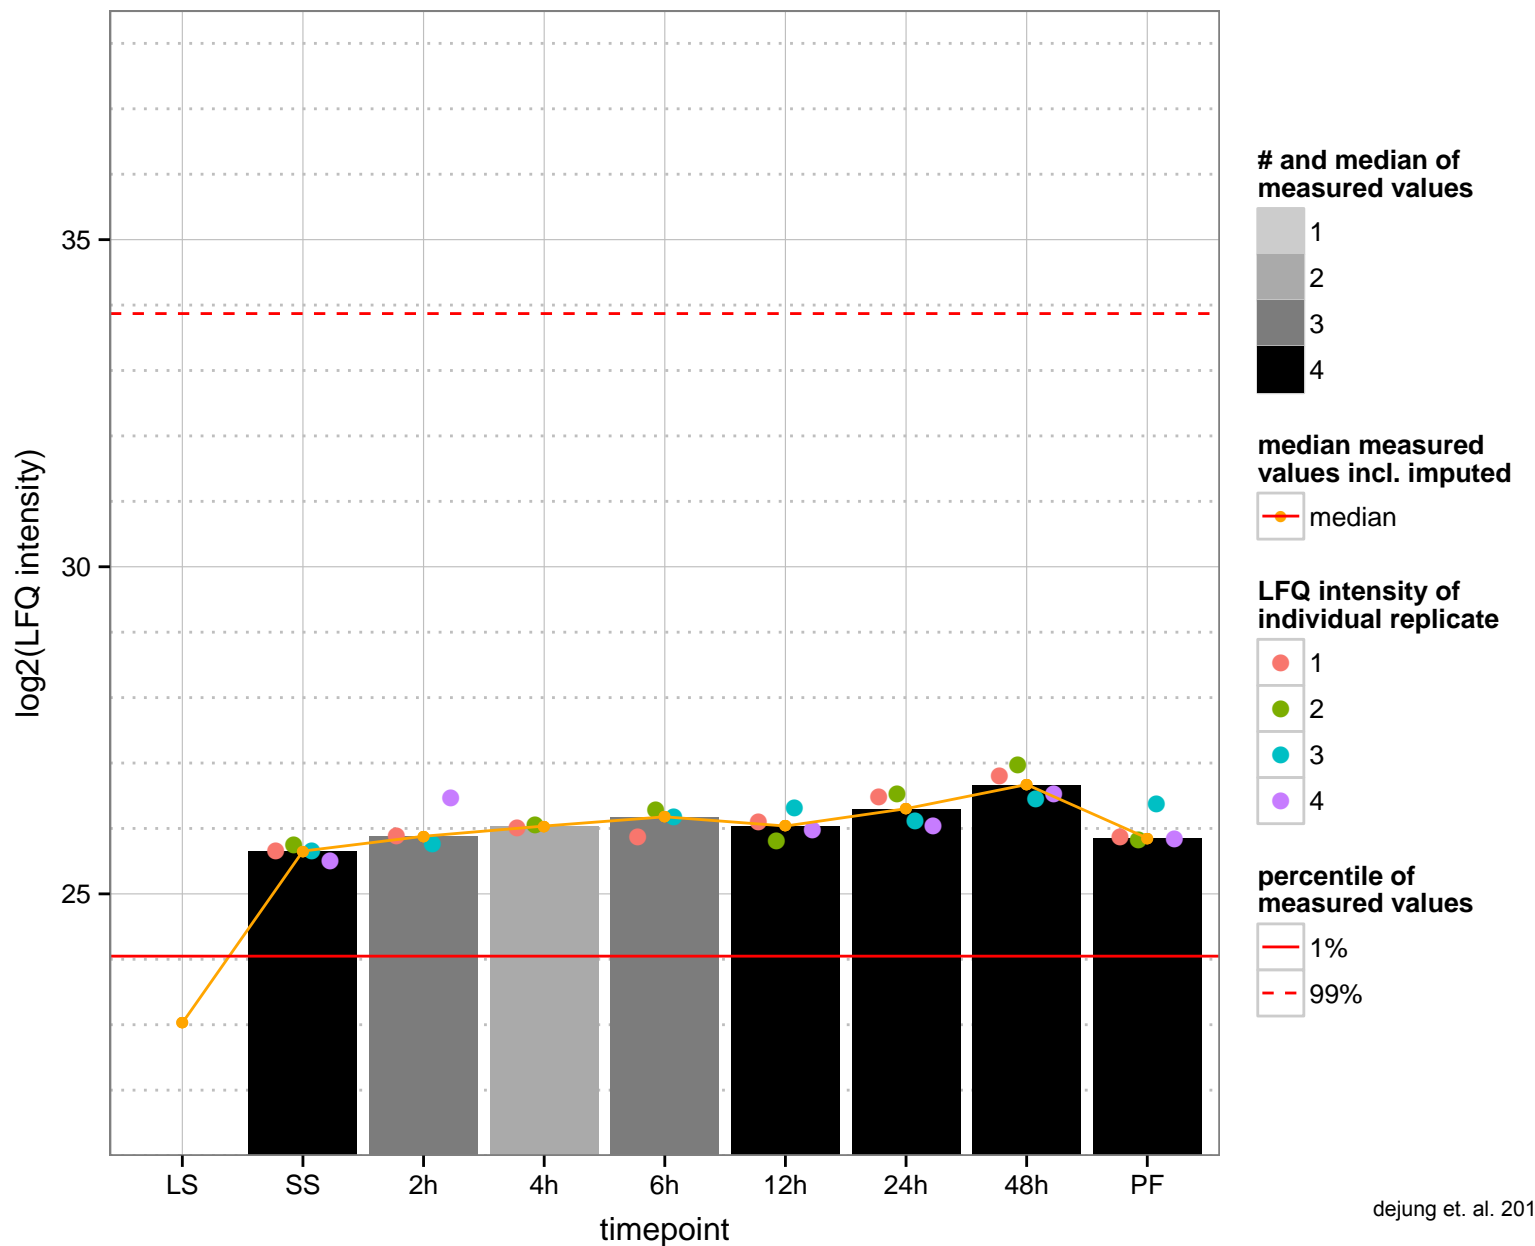

heat shock protein HslVU, ATPase subunit HslU, putative, ATP-dependent hsl protease ATP-binding subunit hslU  
 Tb927.11.12230  
 AGOF: ATP binding, ATP-dependent peptidase activity, ATPase activity, peptidase activity, acting on L-amino acid peptides  
 AGOC: HslUV protease complex  
 AGOP: null  
 PGOF: ATP binding, ATPase activity, nucleoside-triphosphatase activity, nucleotide binding, peptidase activity, acting on L-amino acid peptides  
 PGO: HslUV protease complex, cytoplasm  
 PGOP: null

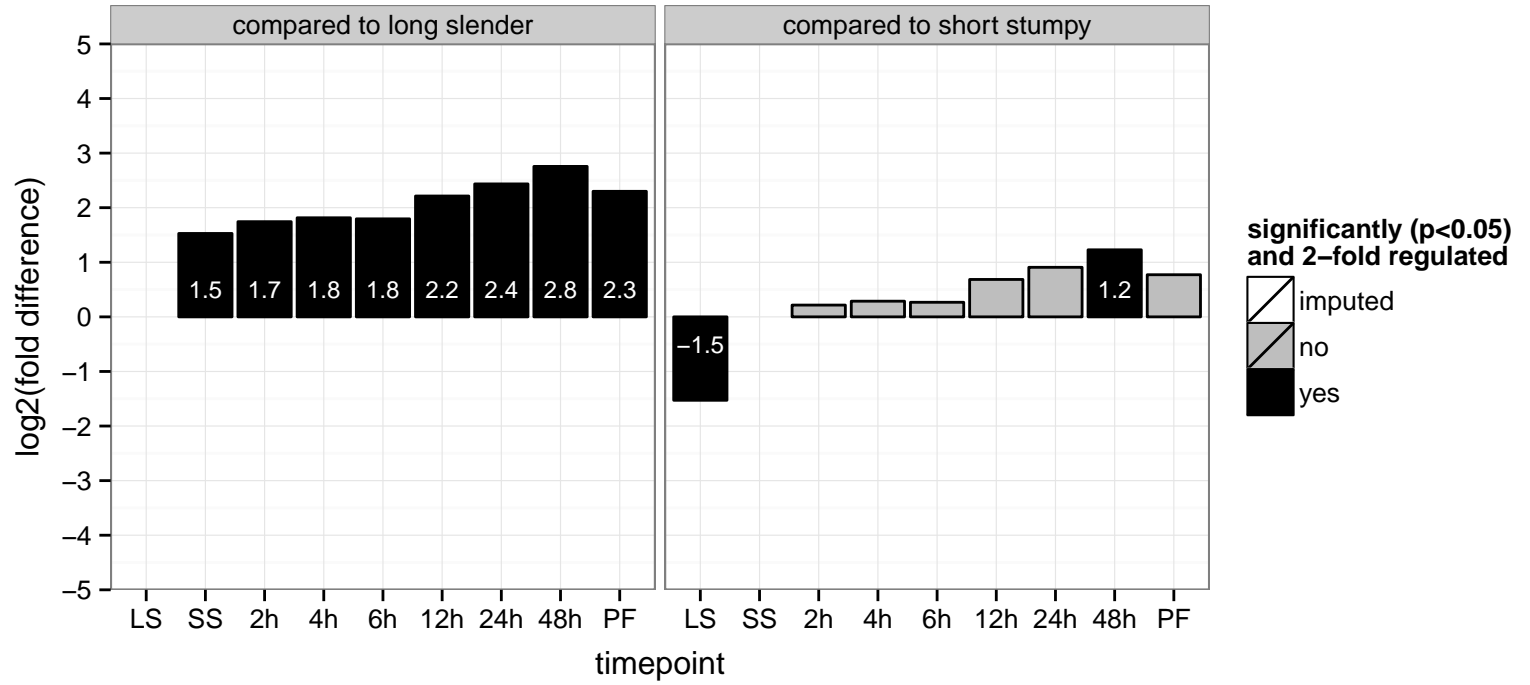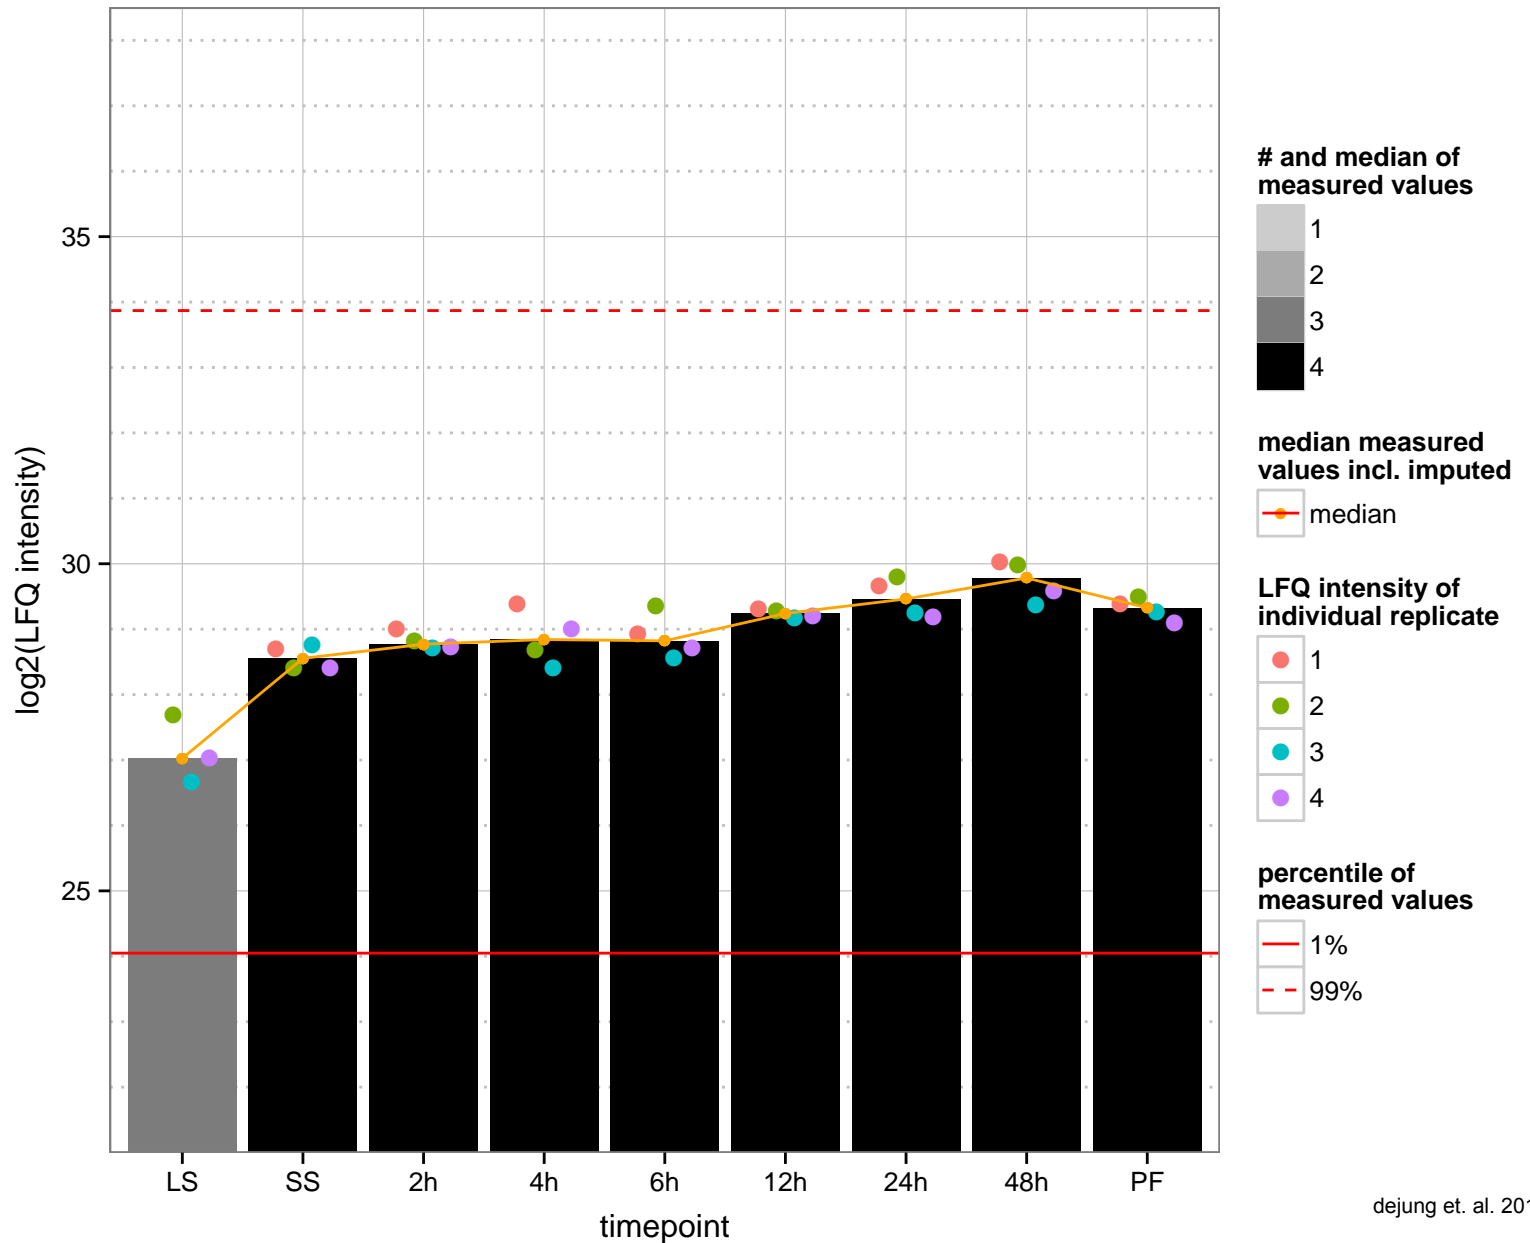

hypothetical protein, conserved  
 Tb927.11.13340  
 AGOF: null  
 AGOC: null  
 AGOP: null  
 PGO: null  
 PGOC: null  
 PGOP: null

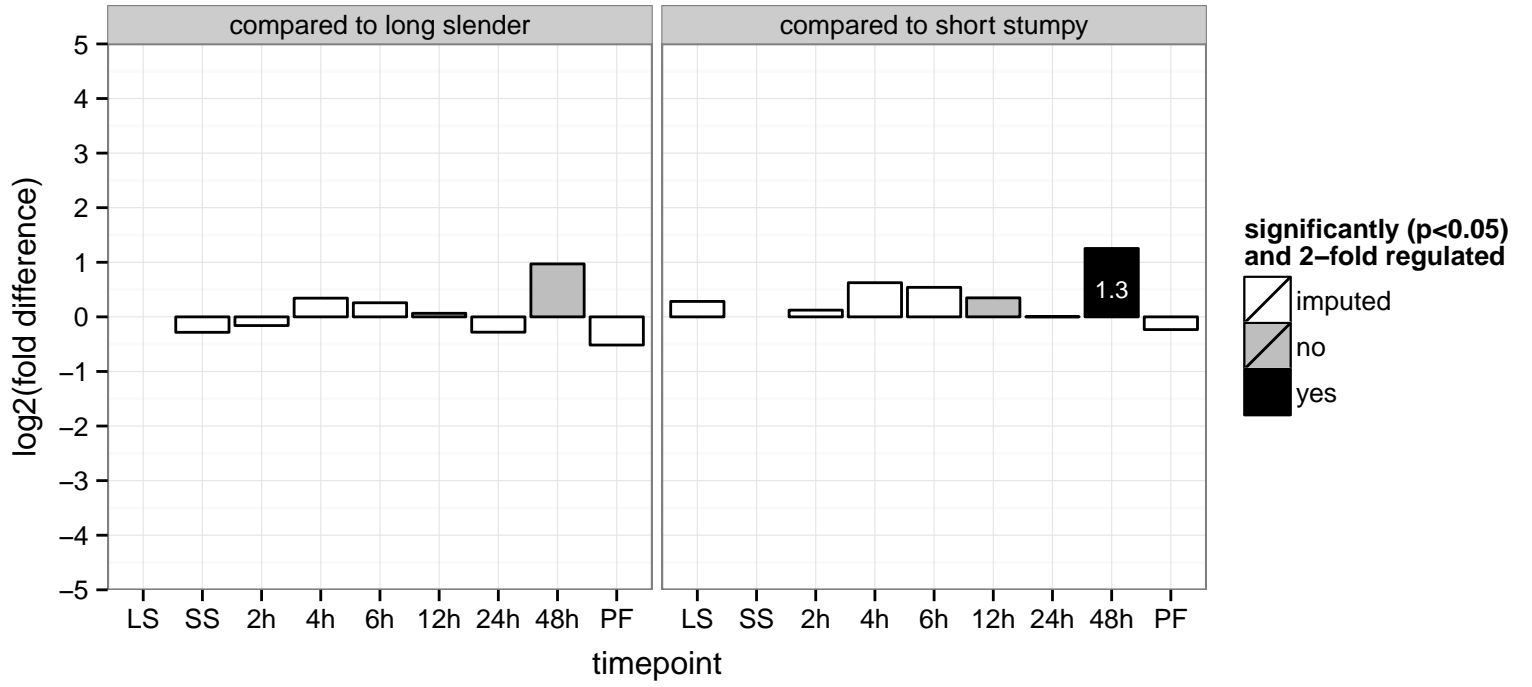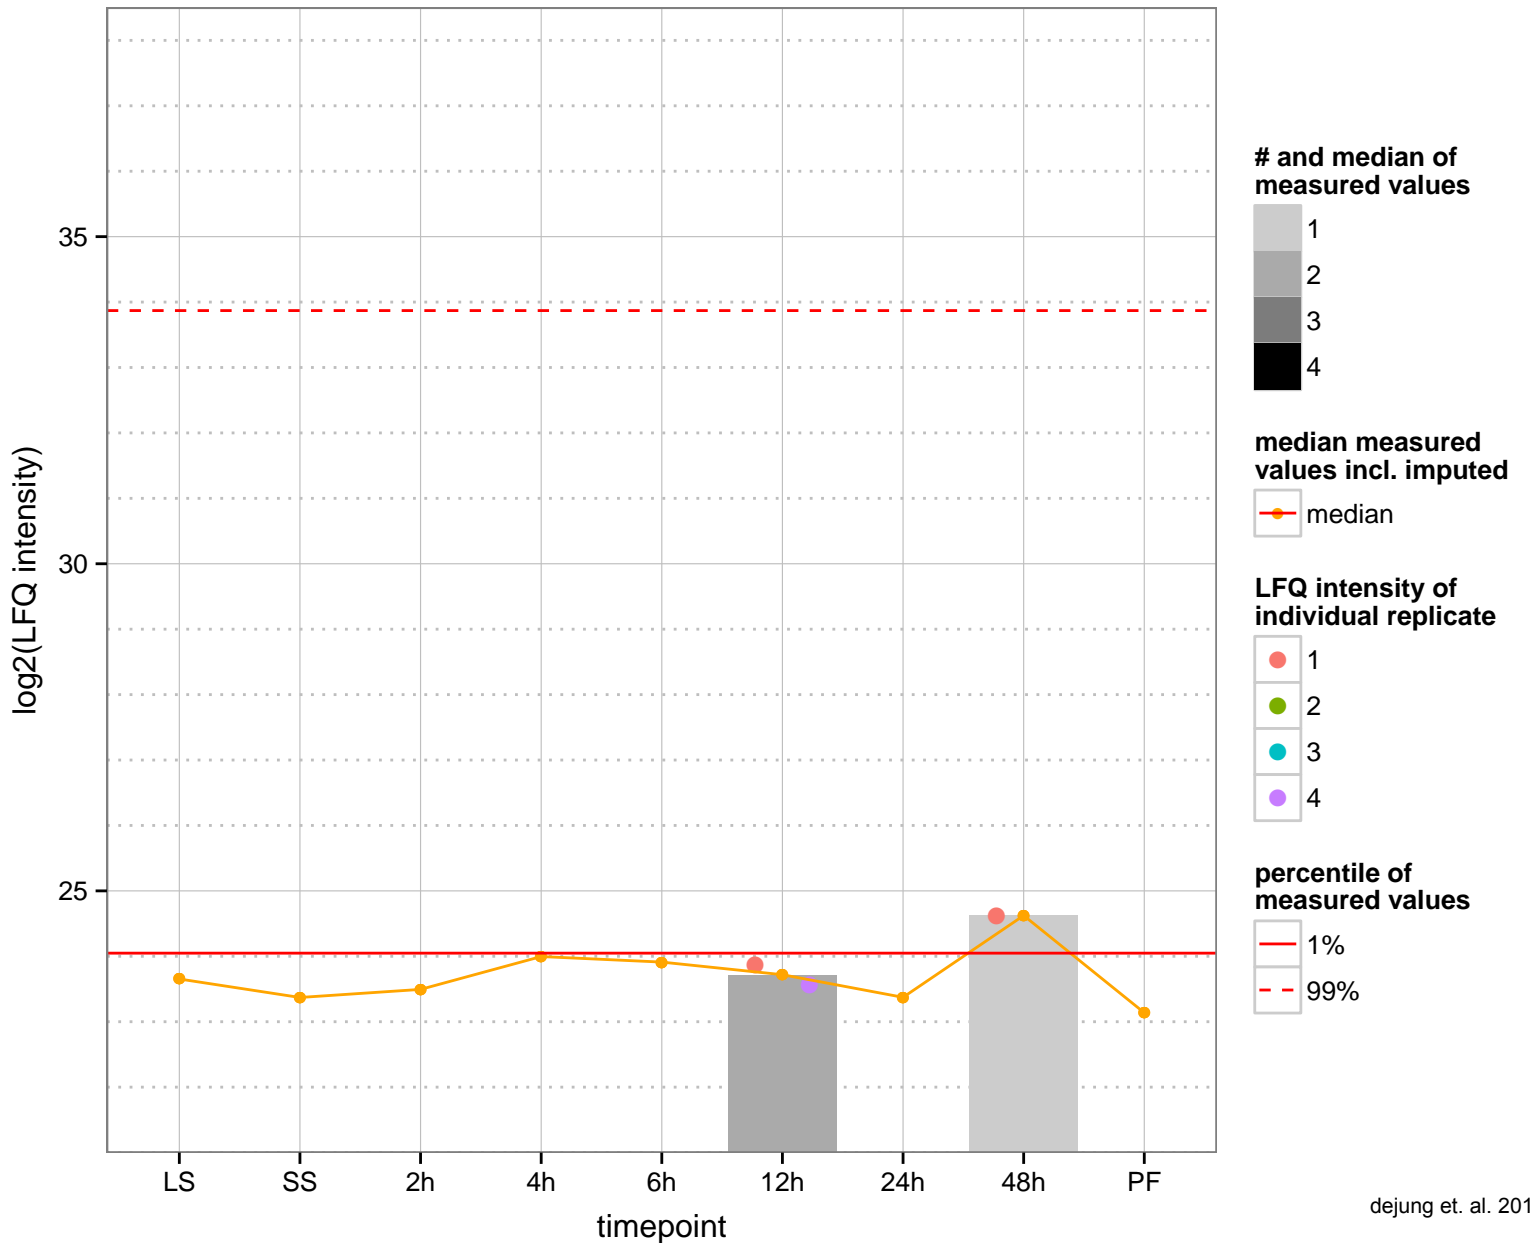



phosphatidylinositol 3-related kinase, putative (ATR)

Tb927.11.14680

AGOF: 1-phosphatidylinositol-3-kinase activity, phosphotransferase activity, alcohol group as acceptor

AGOC: null

AGOP: cytokinesis checkpoint, growth

PGOF: phosphotransferase activity, alcohol group as acceptor, protein binding, transferase activity, transferring phosphorus-

PGOC: null

PGOP: null

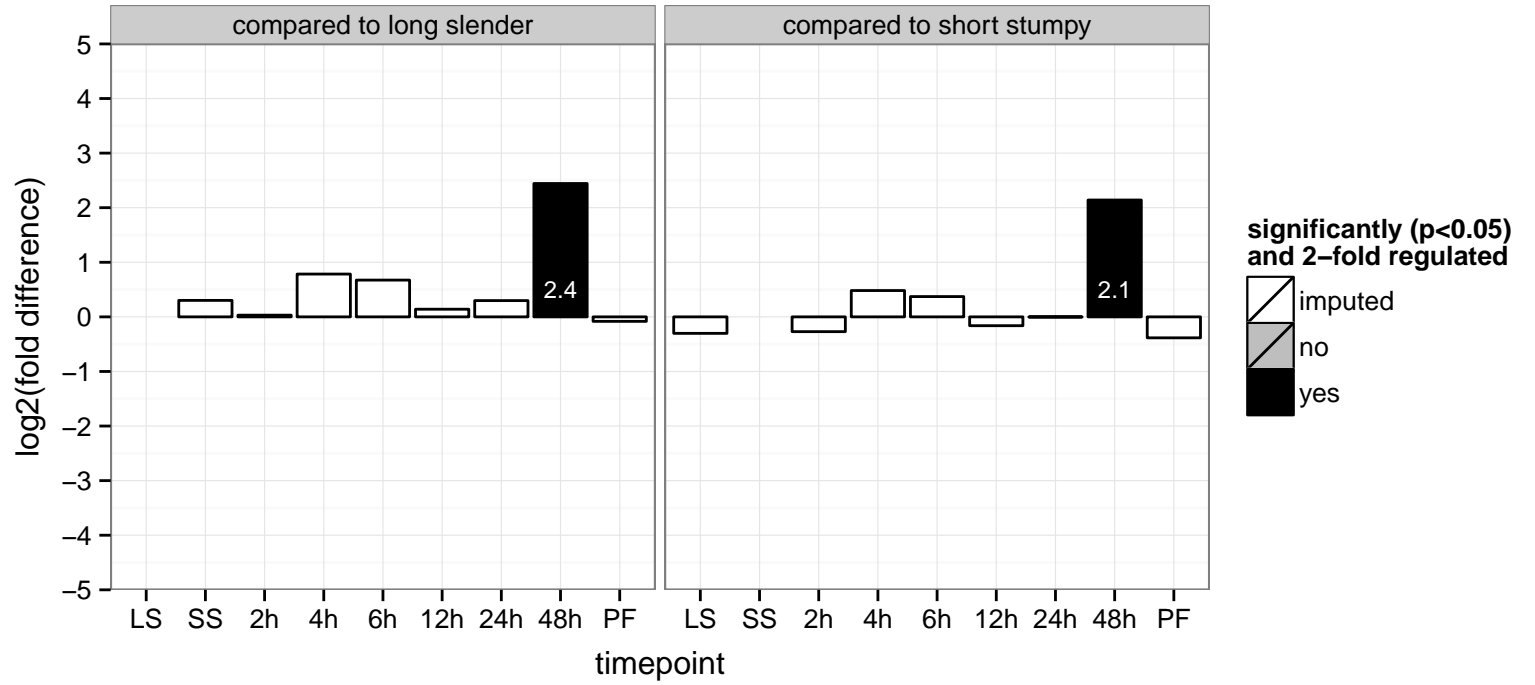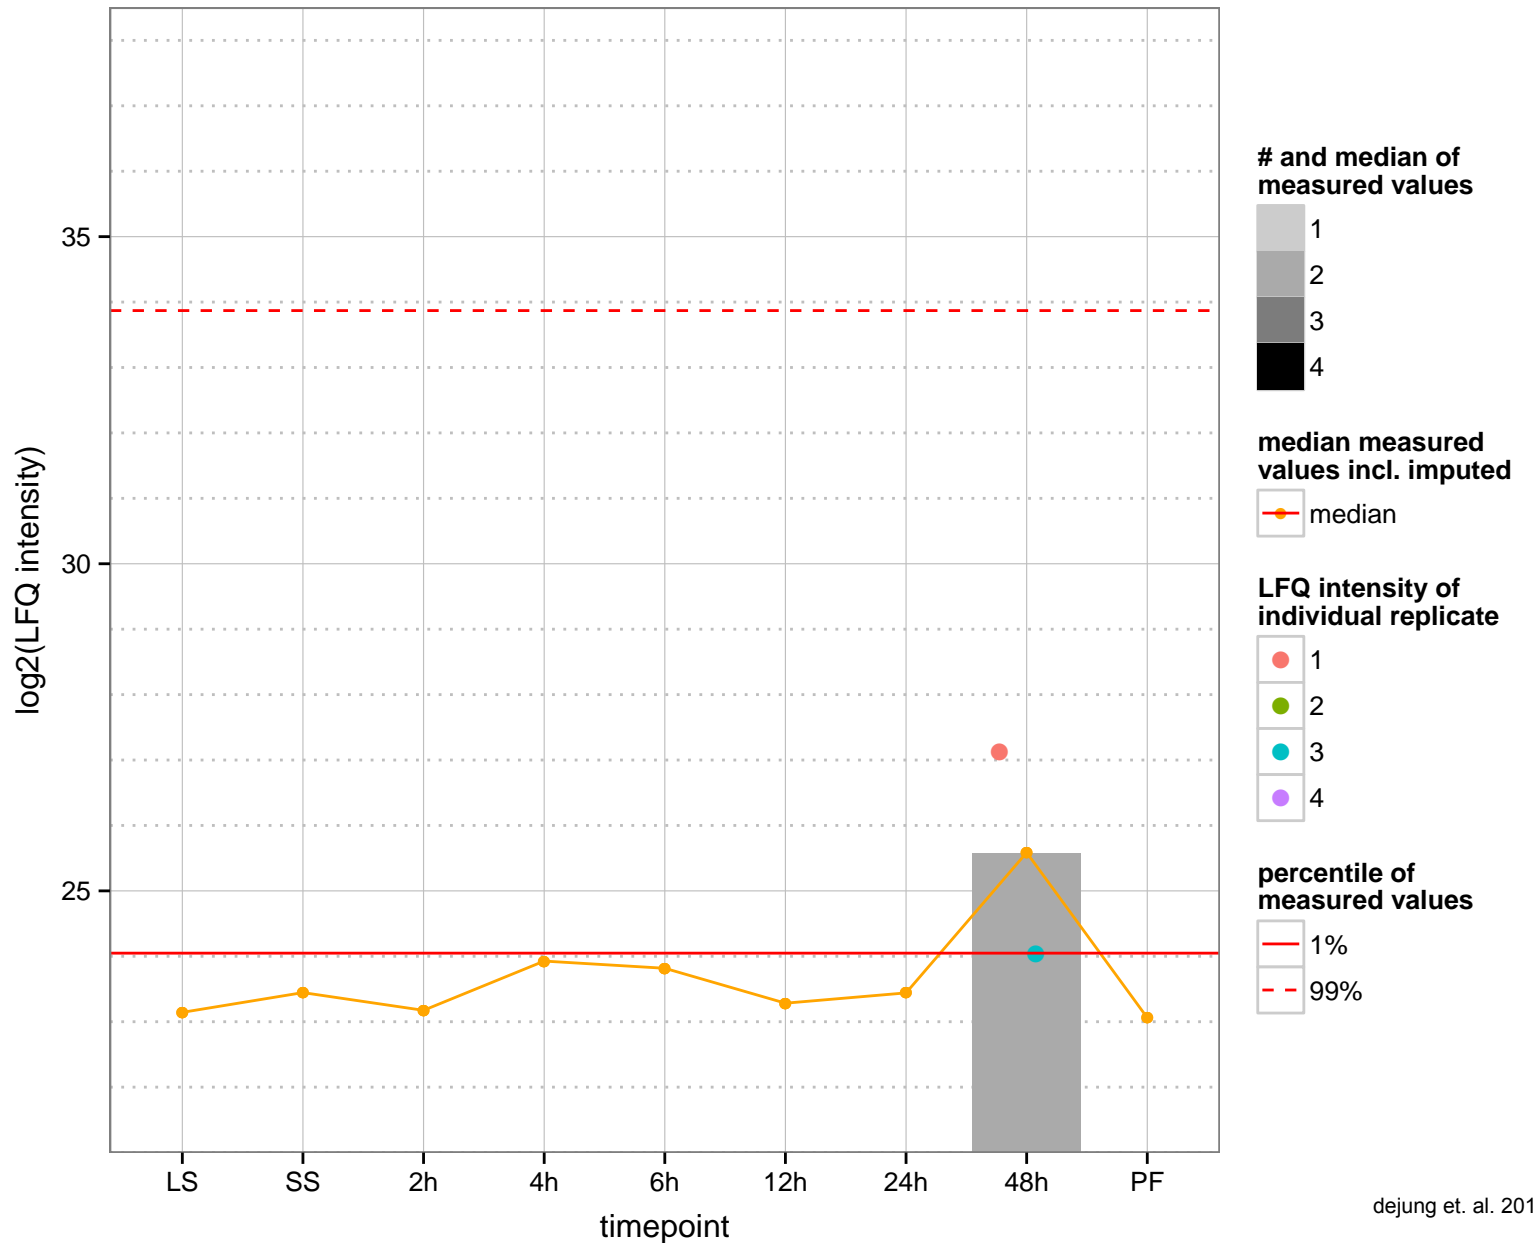

metalloprotease, putative, cell division protein FtsH homologue

Tb927.11.14730

AGOF: ATP binding, ATPase activity, metalloendopeptidase activity, zinc ion binding

AGOC: integral to membrane, mitochondrial inner membrane

AGOP: proteolysis

PGOF: ATP binding, metalloendopeptidase activity, nucleoside-triphosphatase activity, nucleotide binding

PGOC: null

PGOP: proteolysis

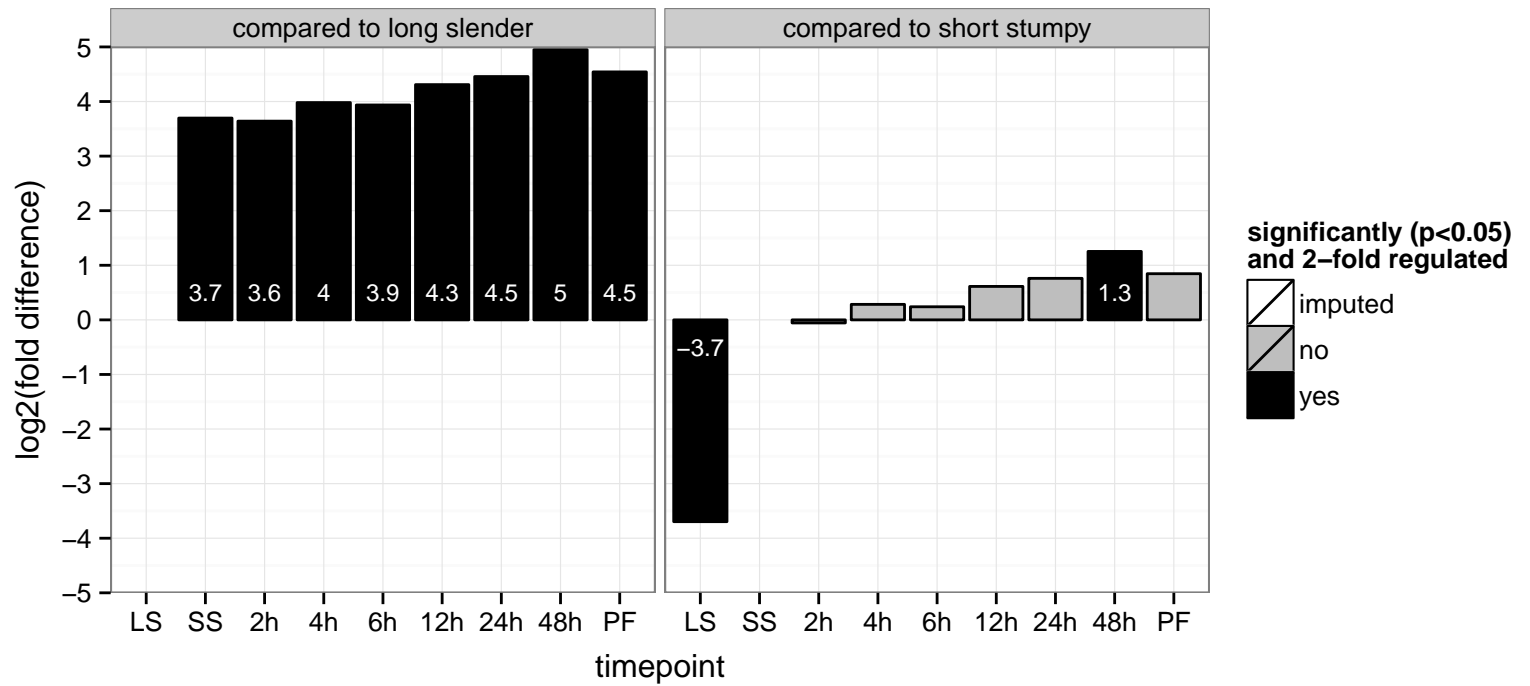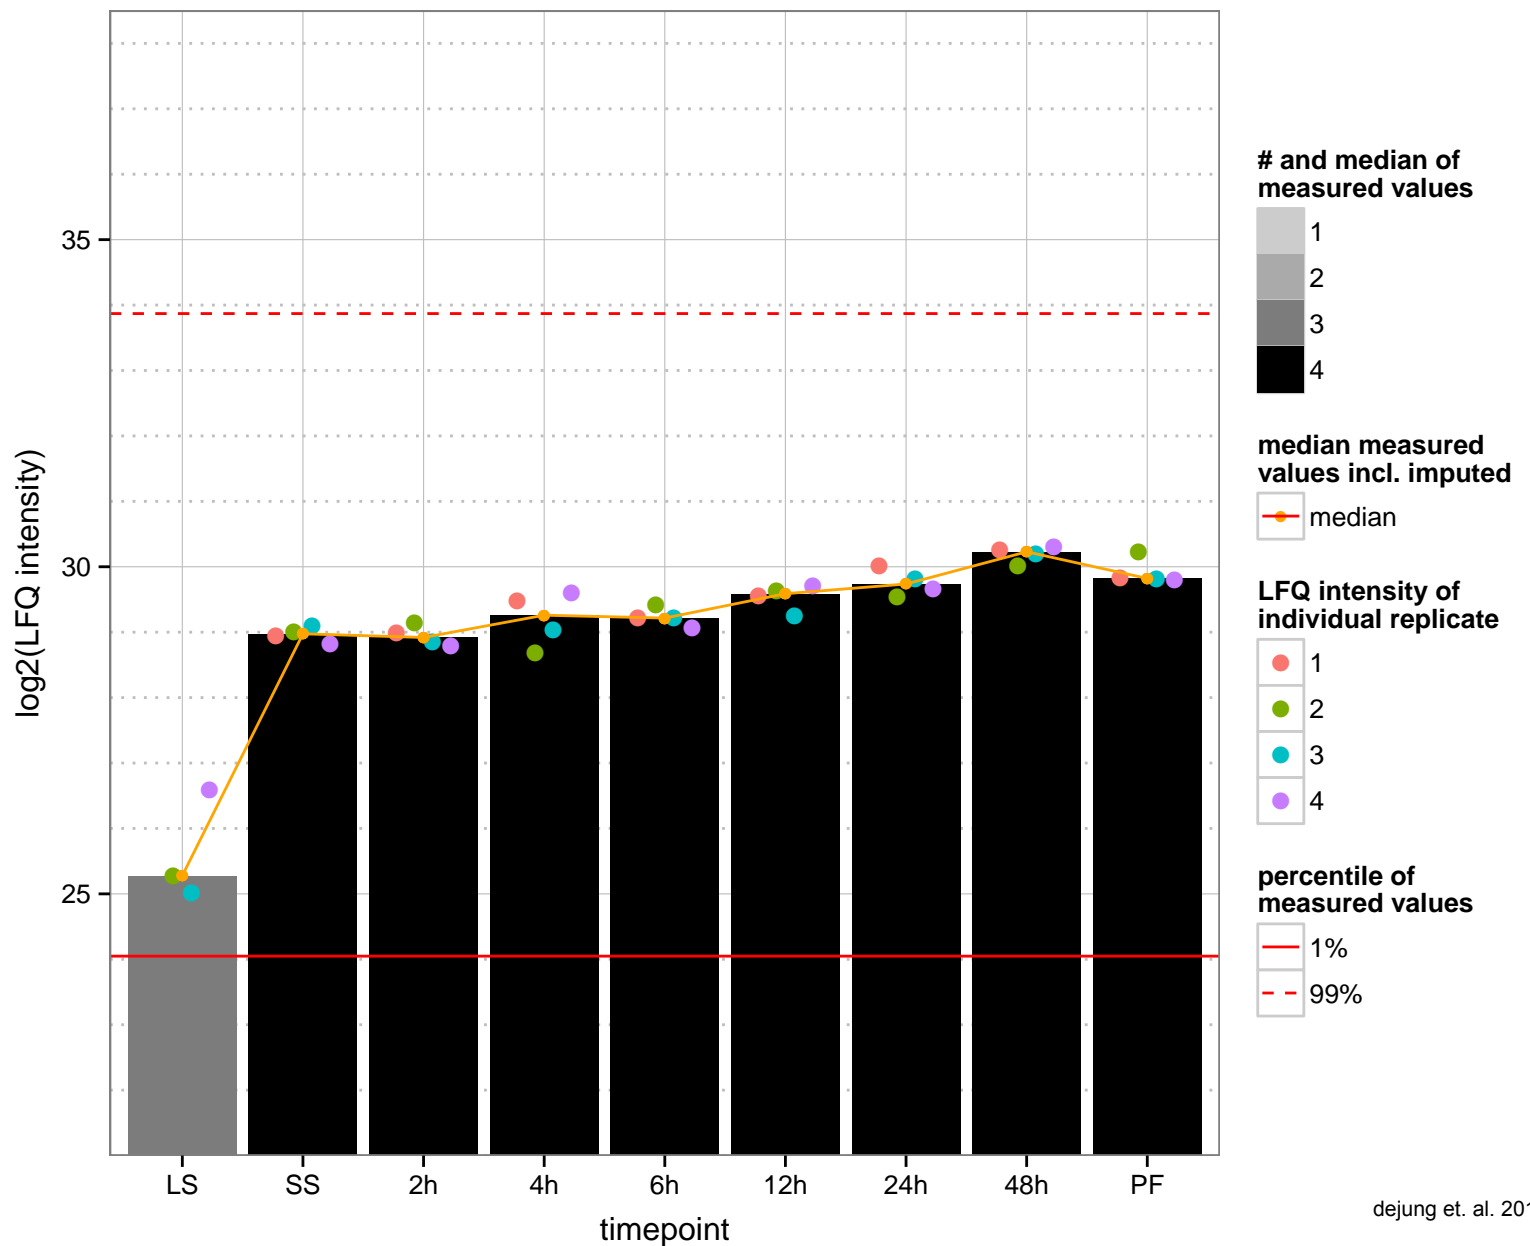

iron superoxide dismutase  
 Tb927.11.15910  
 AGOF: metal ion binding, superoxide dismutase activity  
 AGOC: null  
 AGOP: oxidation–reduction process, superoxide metabolic process  
 PGOF: metal ion binding, superoxide dismutase activity  
 PGO: null  
 PGOP: oxidation–reduction process, superoxide metabolic process

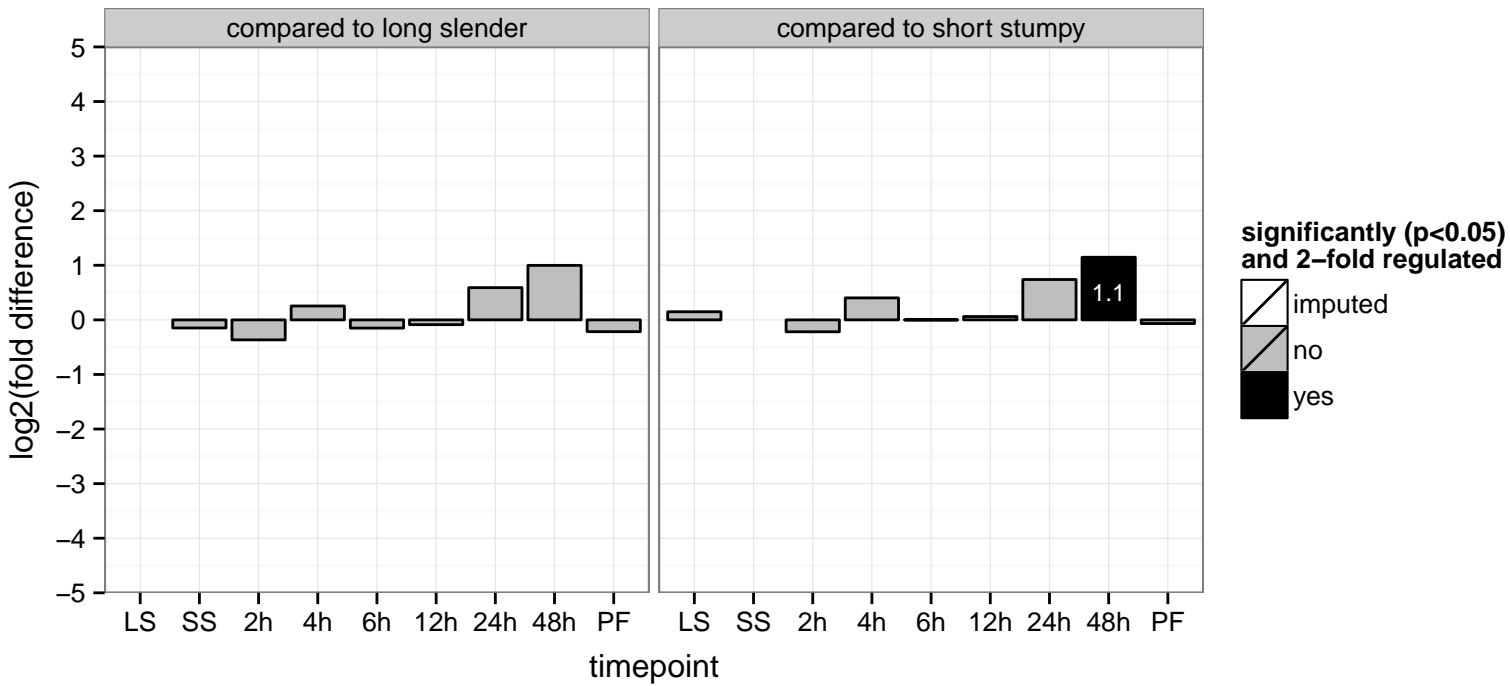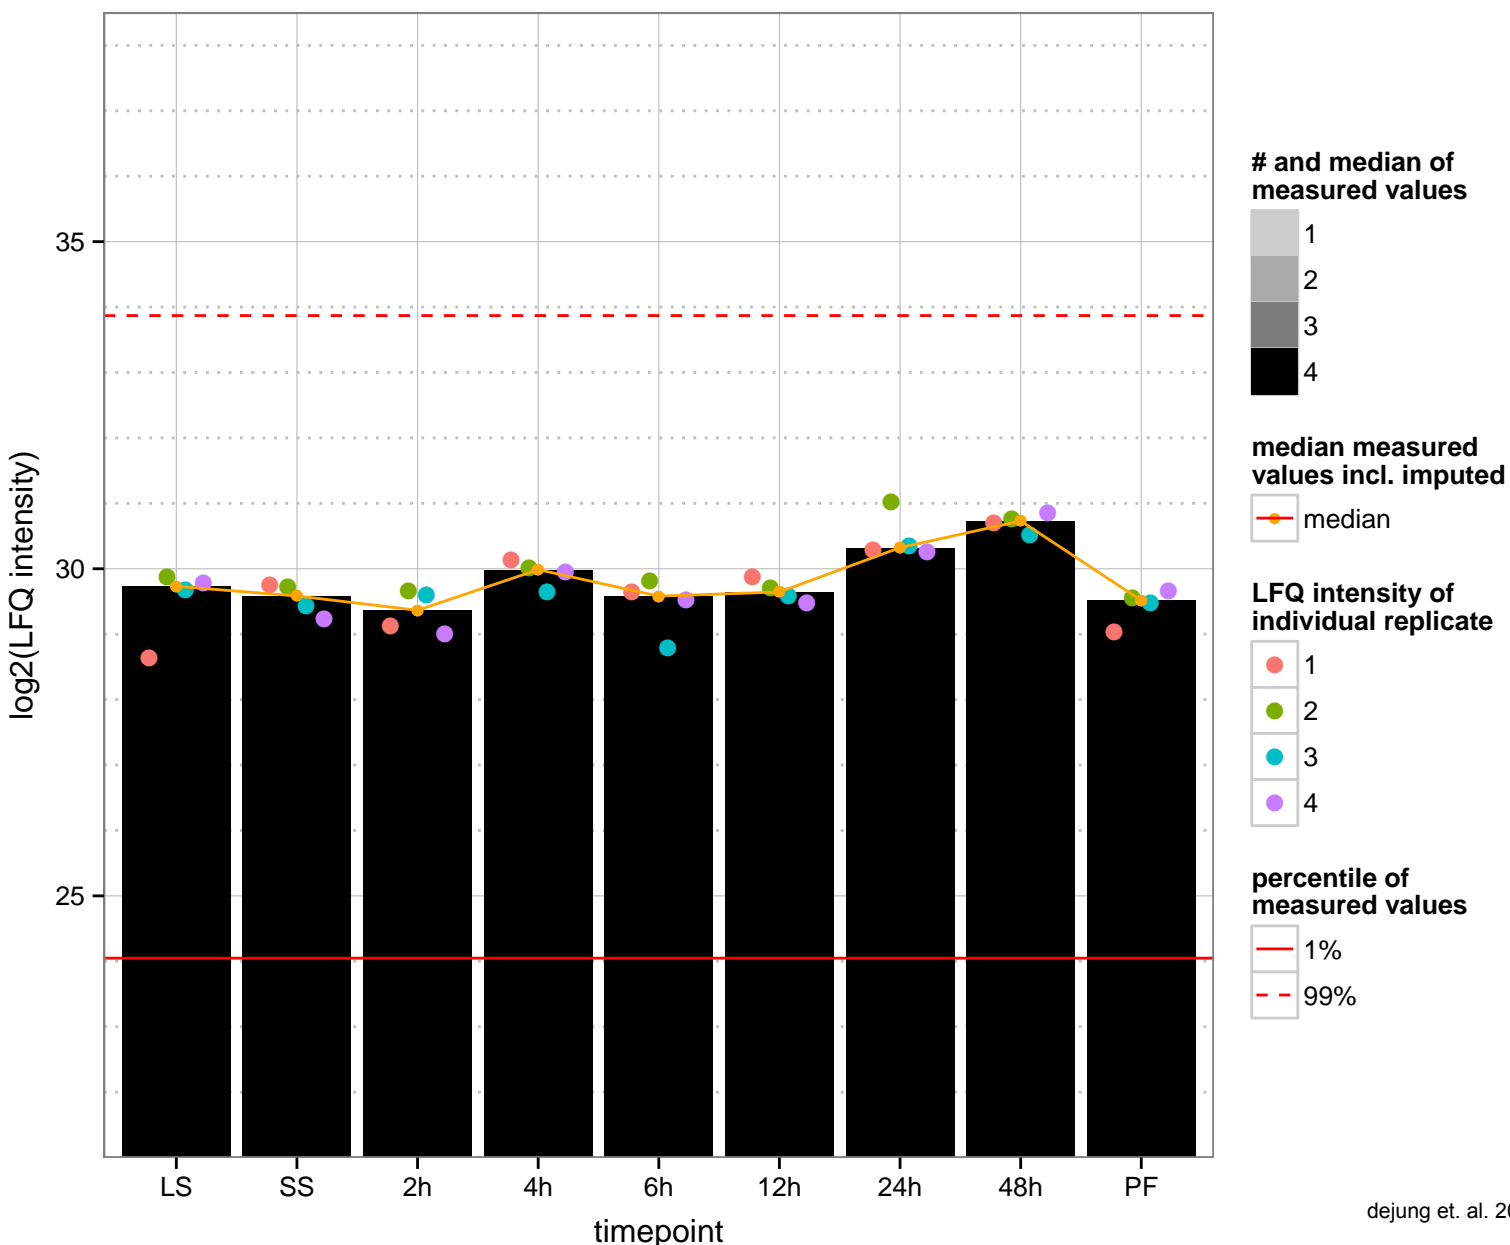

hypothetical protein, conserved  
 Tb927.11.1950  
 AGOF: RNA binding, ribonuclease III activity  
 AGOC: mitochondrion  
 AGOP: RNA processing  
 PGOF: RNA binding, ribonuclease III activity  
 PGO: null  
 PGOP: RNA processing

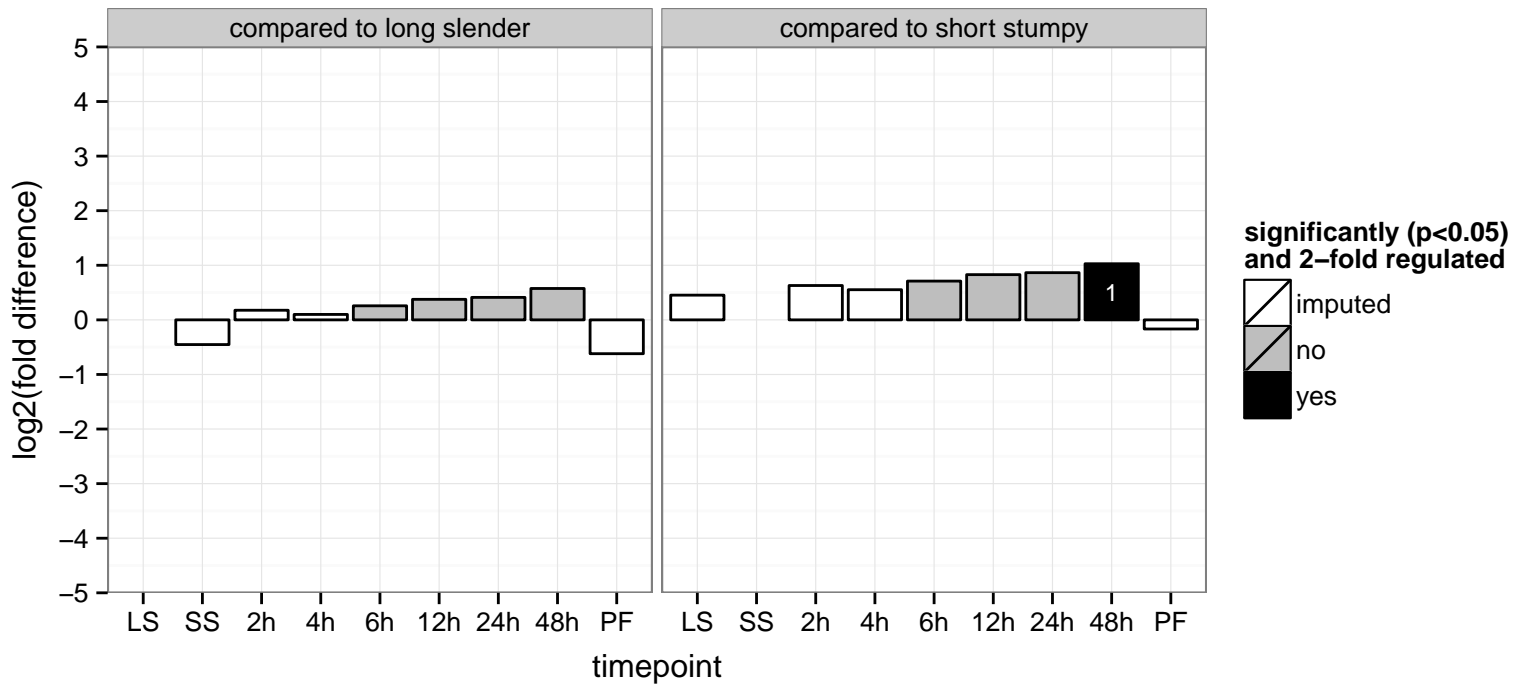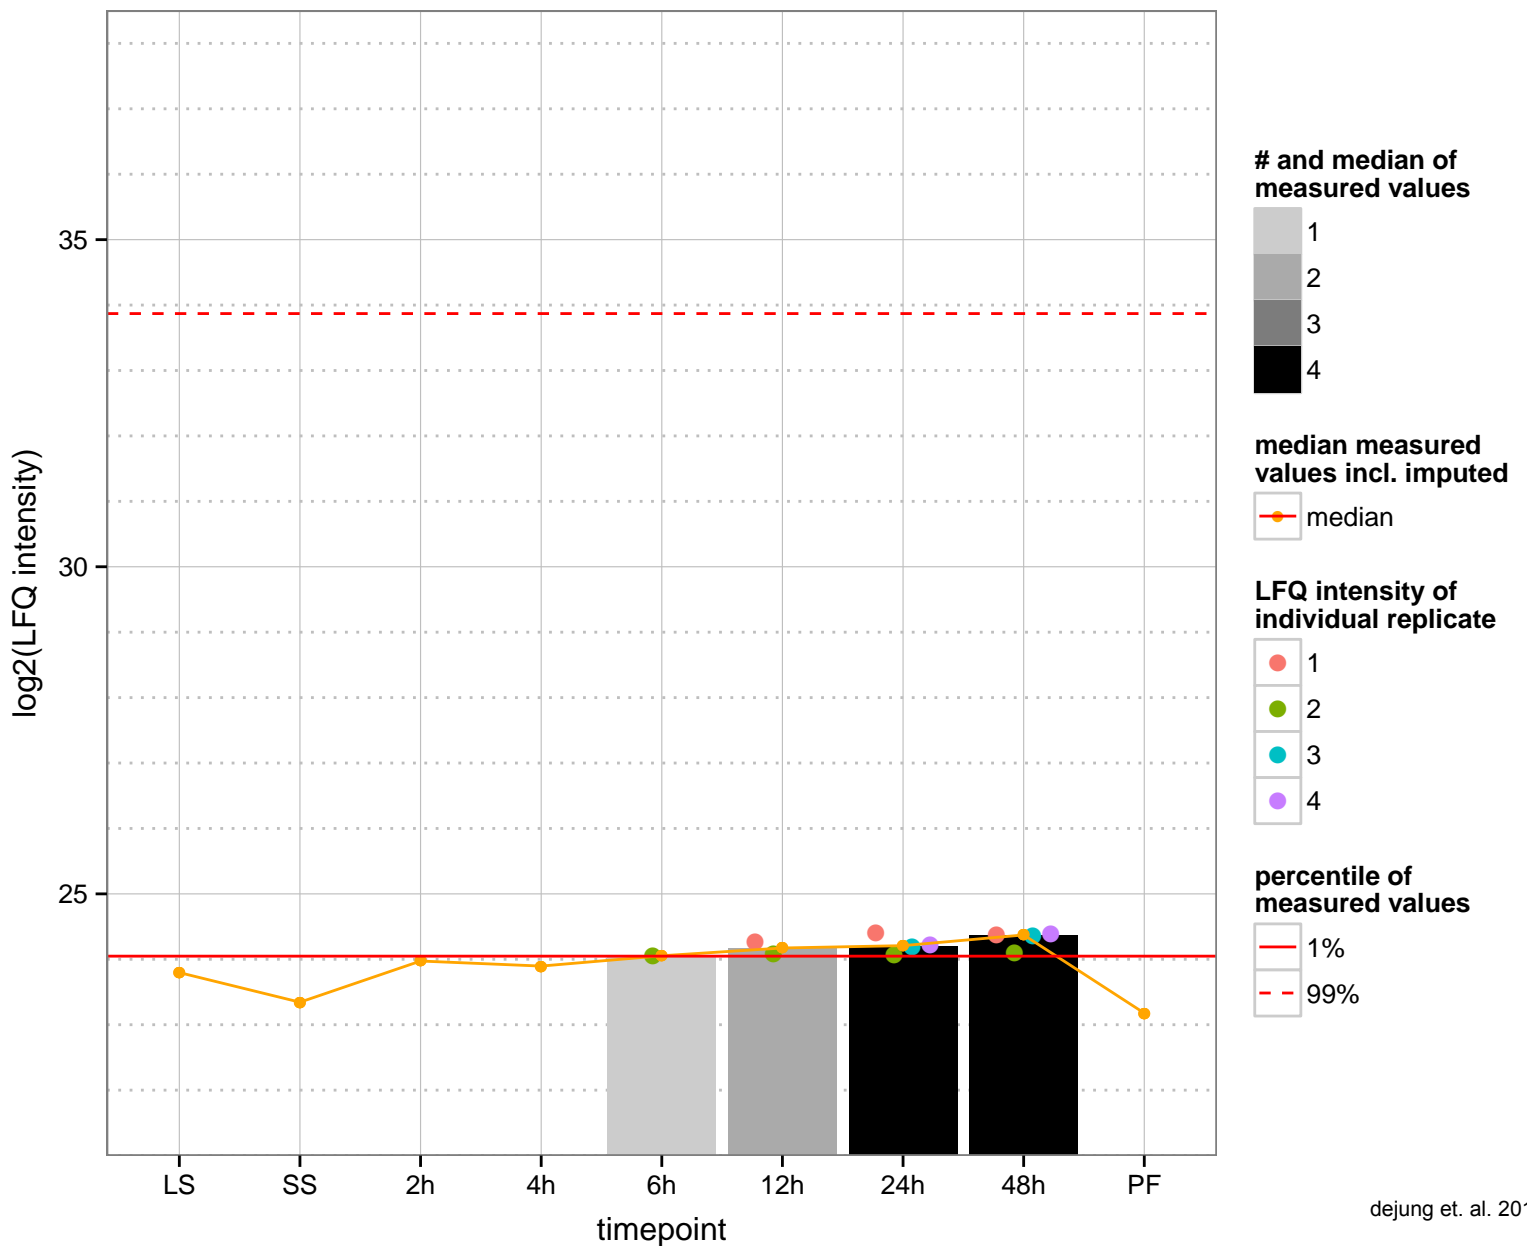

arginyl-tRNA synthetase, putative

Tb927.11.1990

AGOF: ATP binding, arginine-tRNA ligase activity

AGOC: cytoplasm

AGOP: arginyl-tRNA aminoacylation, translation

PGOF: ATP binding, aminoacyl-tRNA ligase activity, arginine-tRNA ligase activity, nucleotide binding

PGOC: cytoplasm

PGOP: arginyl-tRNA aminoacylation, tRNA aminoacylation for protein translation

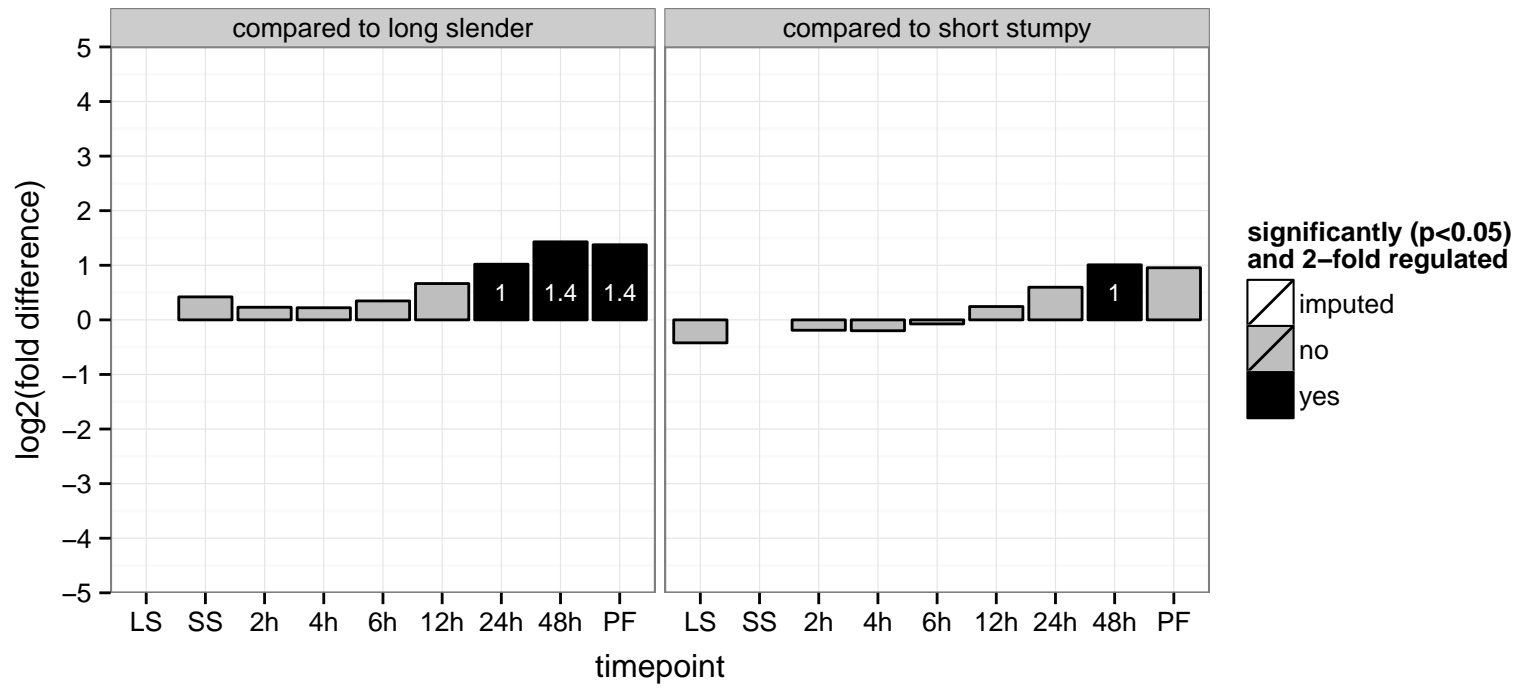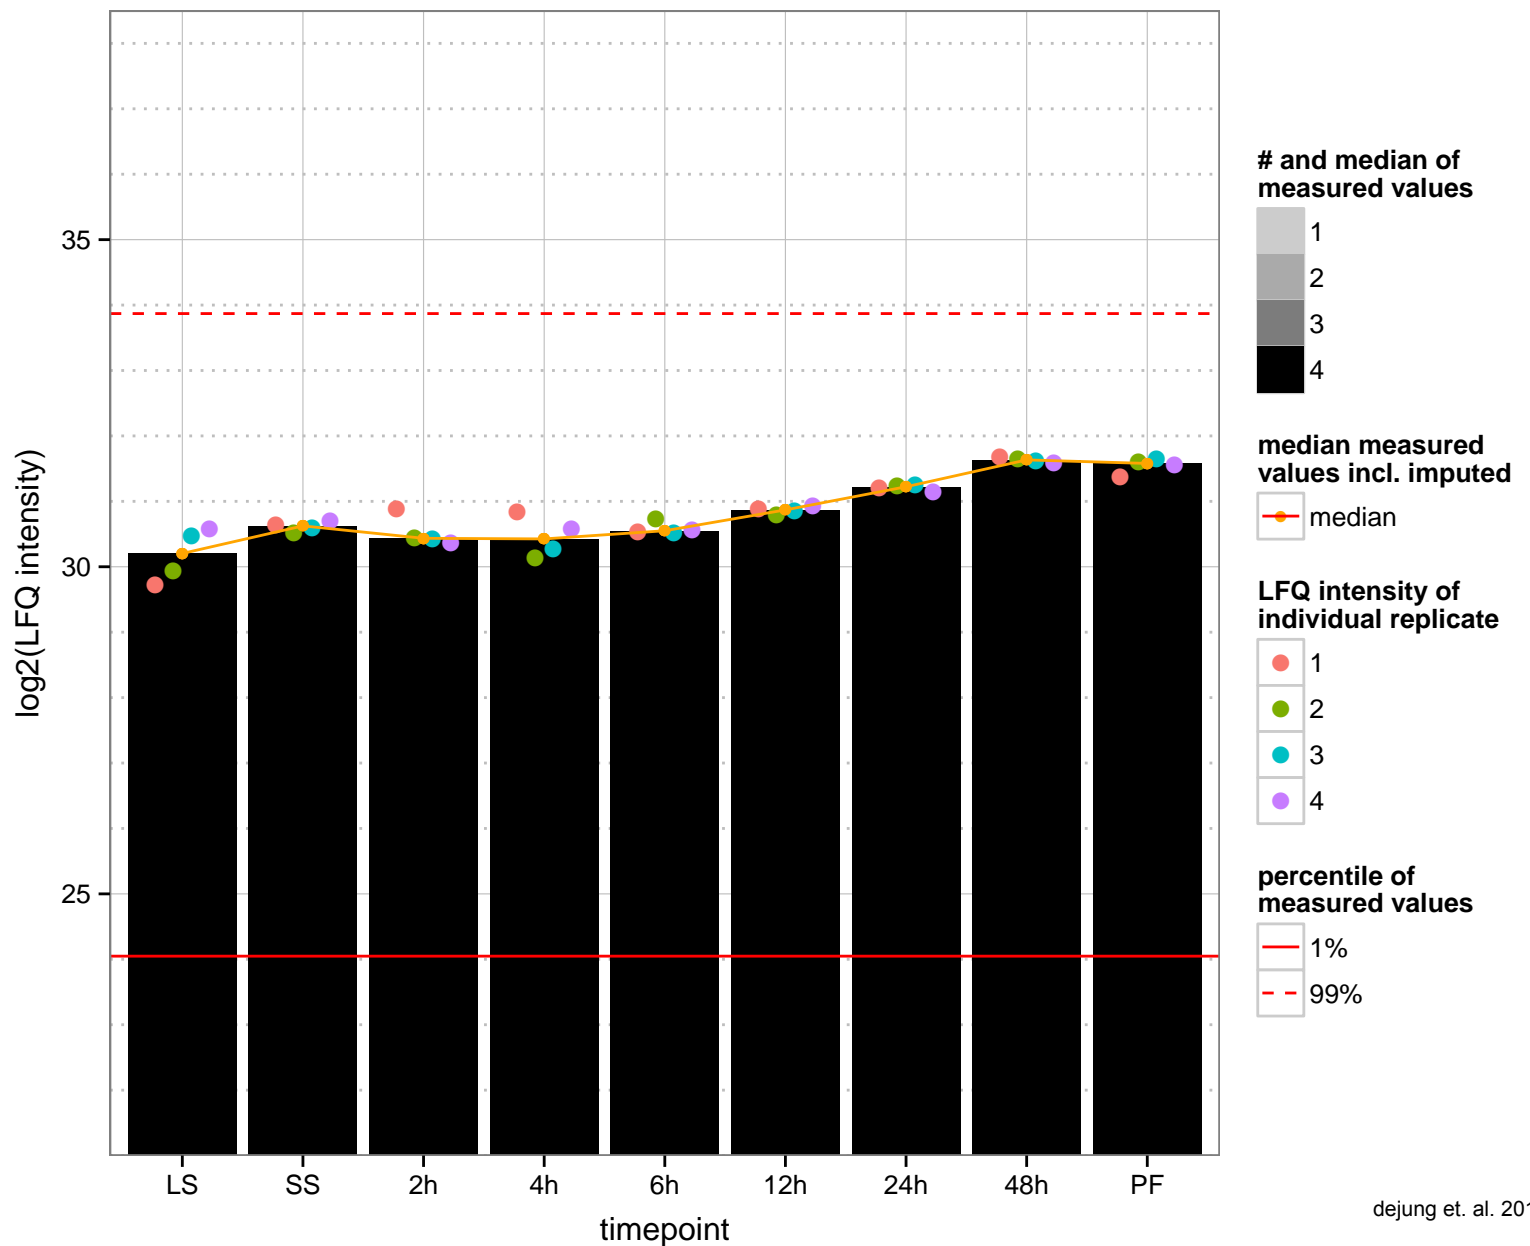

hypothetical protein, conserved  
 Tb927.11.4330  
 AGOF: null  
 AGOC: mitochondrion  
 AGOP: null  
 PGO: null  
 PGOC: null  
 PGOP: null

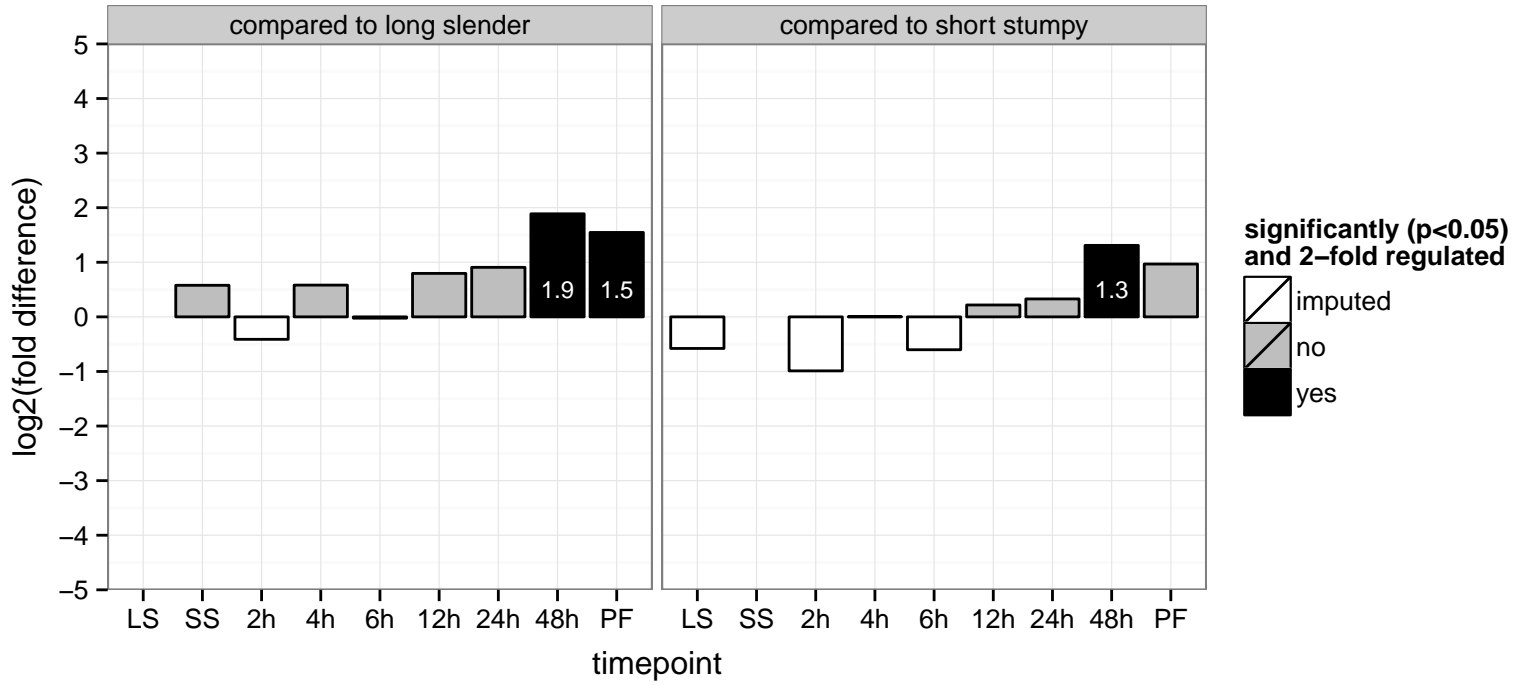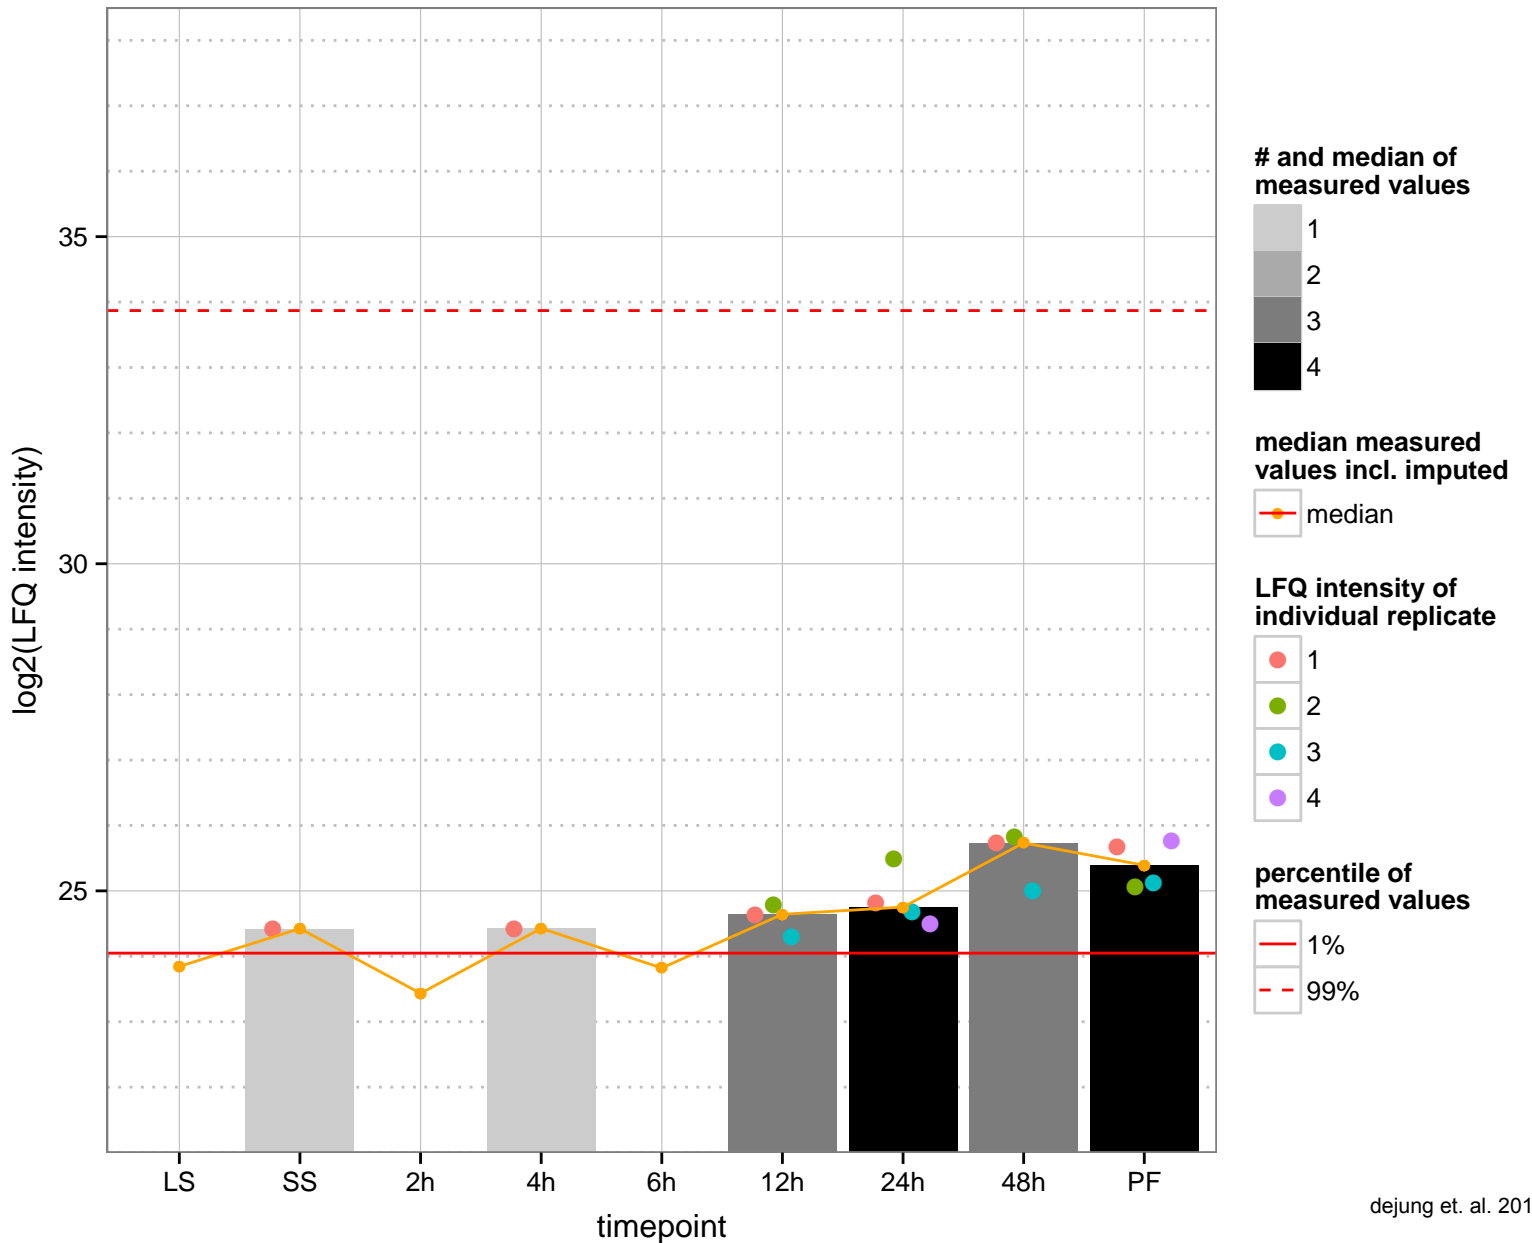

aspartate aminotransferase, mitochondrial

Tb927.11.5090

AGOF: L-alanine:2-oxoglutarate aminotransferase activity, pyridoxal phosphate binding, transaminase activity

AGOC: mitochondrion

AGOP: L-methionine salvage from methylthioadenosine, biosynthetic process

PGOF: pyridoxal phosphate binding, transferase activity

PGOC: null

PGOP: biosynthetic process

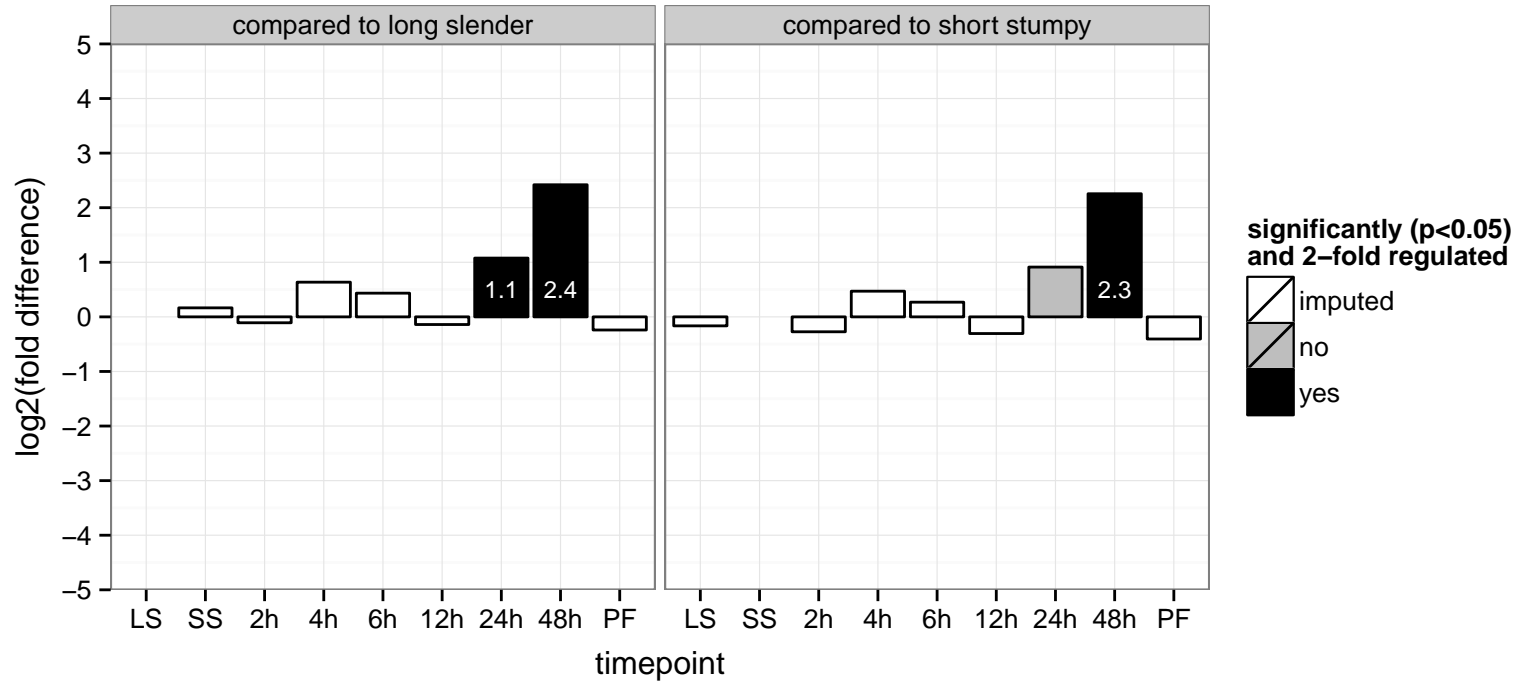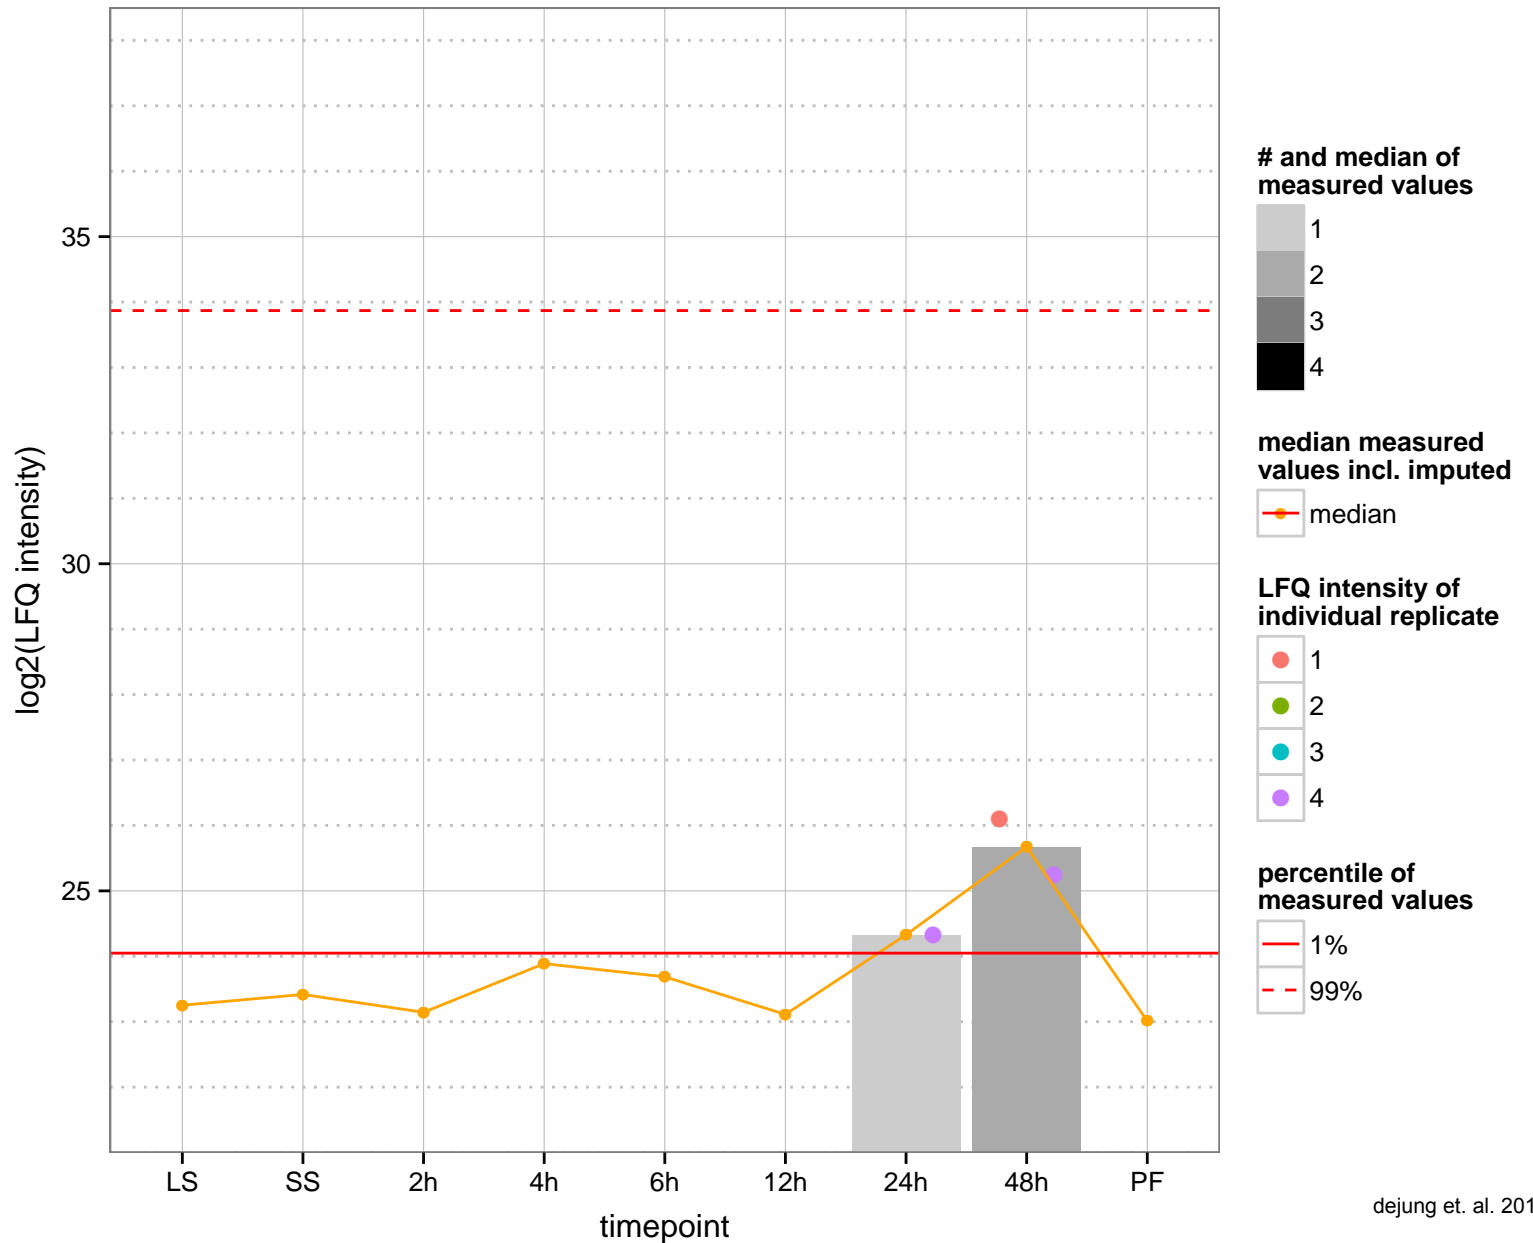

malic enzyme  
 Tb927.11.5440  
 AGOF: NAD binding, malic enzyme activity, oxidoreductase activity, acting on the CH-OH group of donors, NAD or NADP as  
 AGOC: cytosol  
 AGOP: malate metabolic process  
 PGOF: NAD binding, malate dehydrogenase (oxaloacetate-decarboxylating) activity, malic enzyme activity, oxidoreductase ac  
 PGO: null  
 PGOP: malate metabolic process, oxidation-reduction process

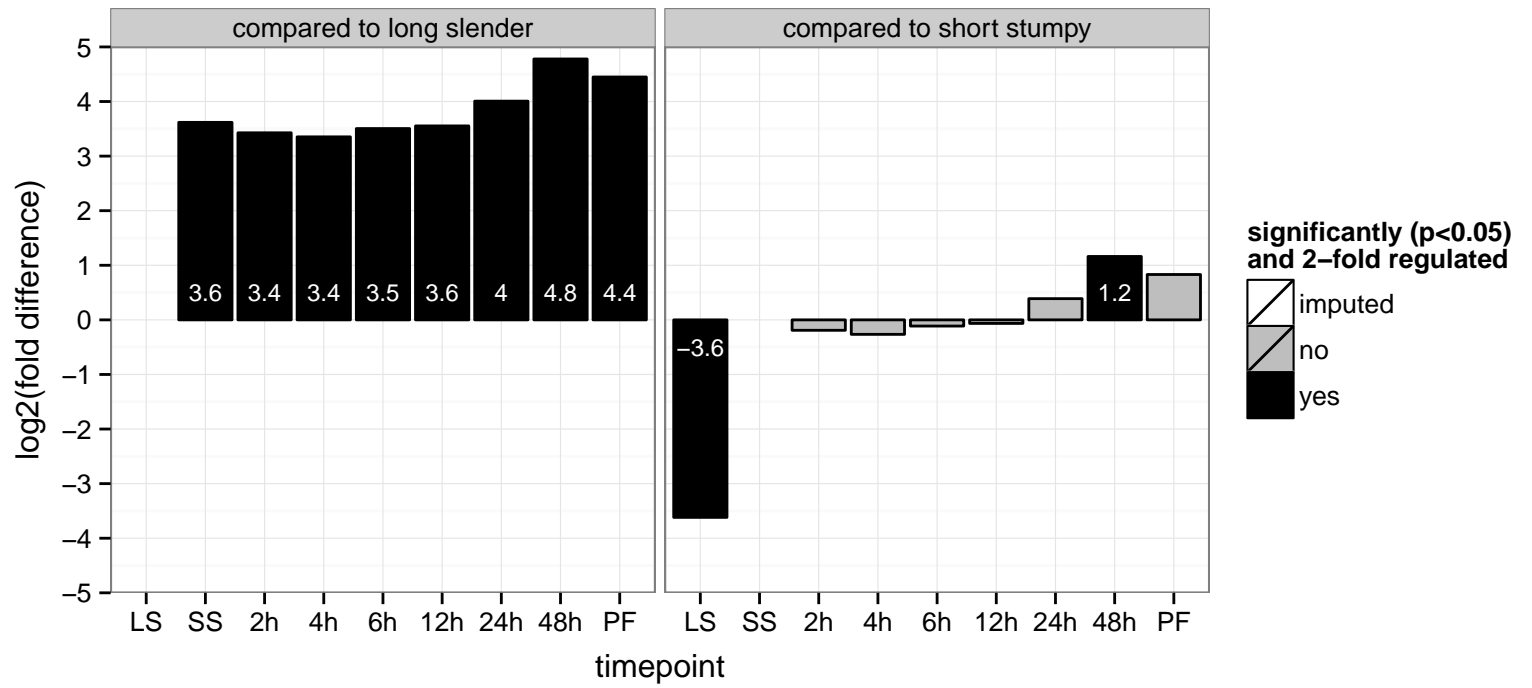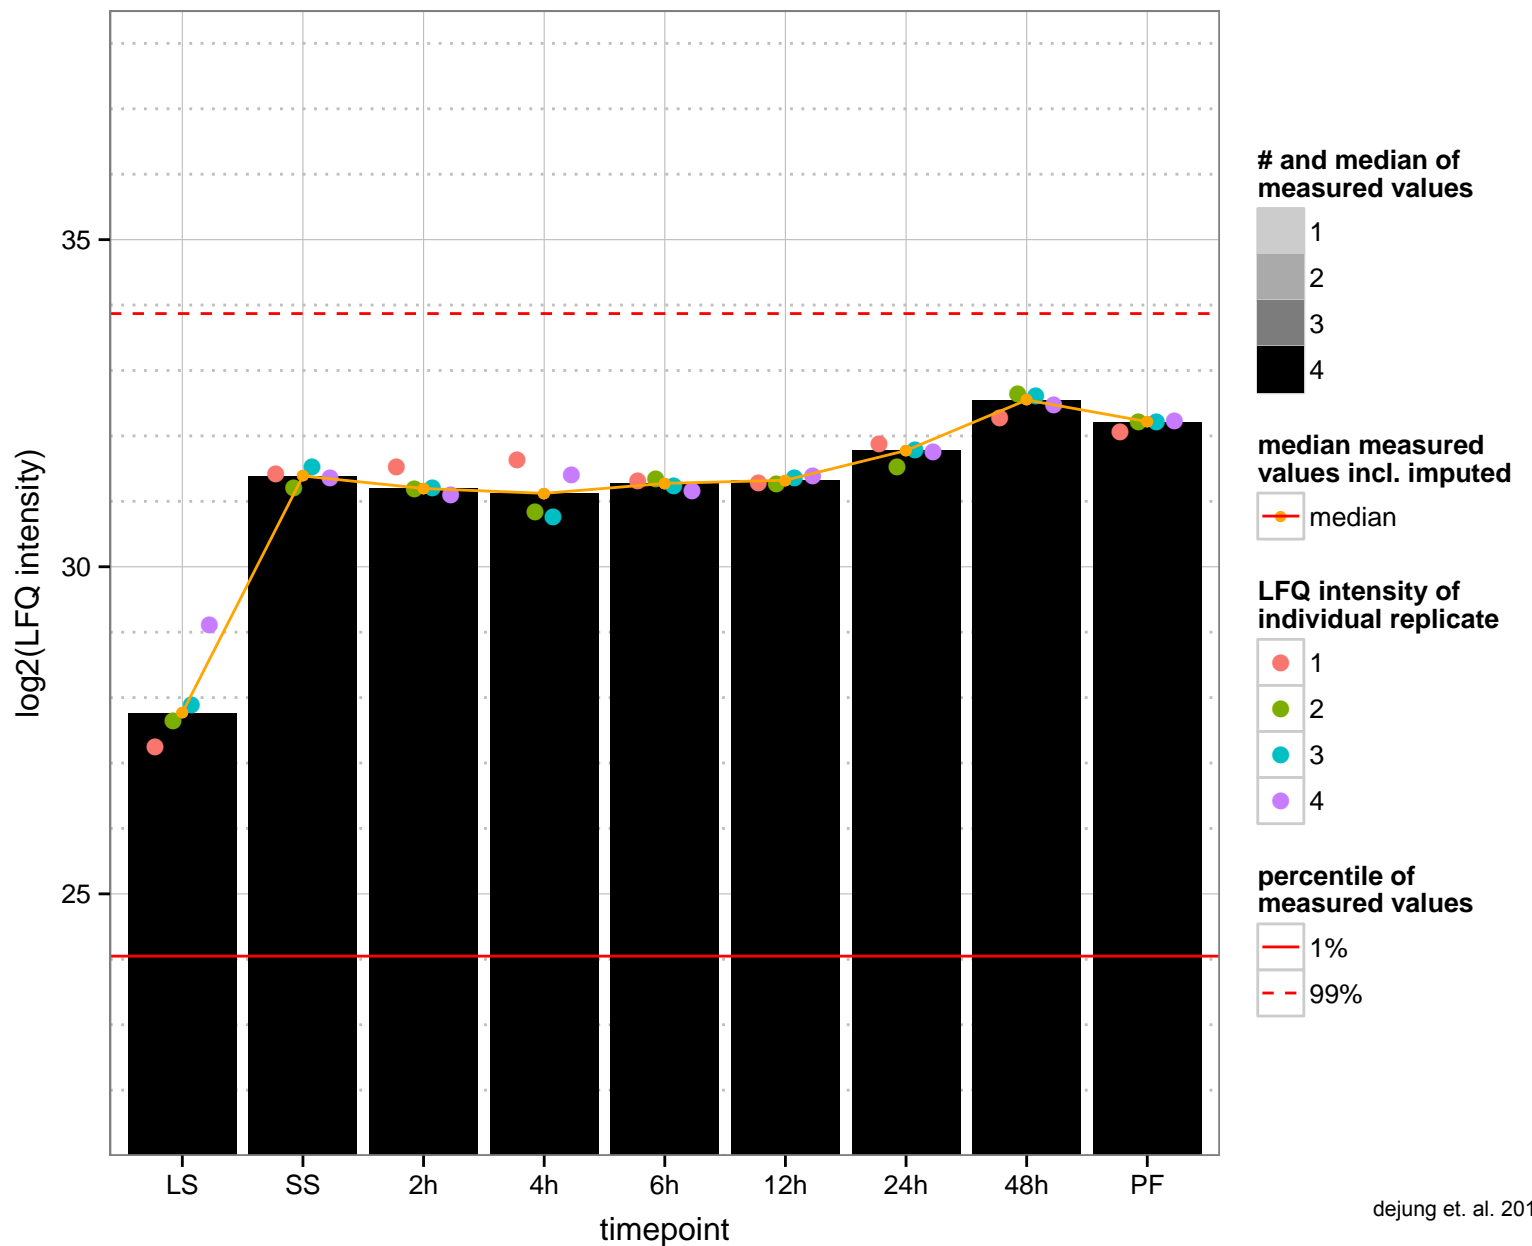



hypothetical protein, conserved  
 Tb927.11.6040  
 AGOF: null  
 AGOC: integral to membrane  
 AGOP: null  
 PGO: null  
 PGO: null  
 PGO: null

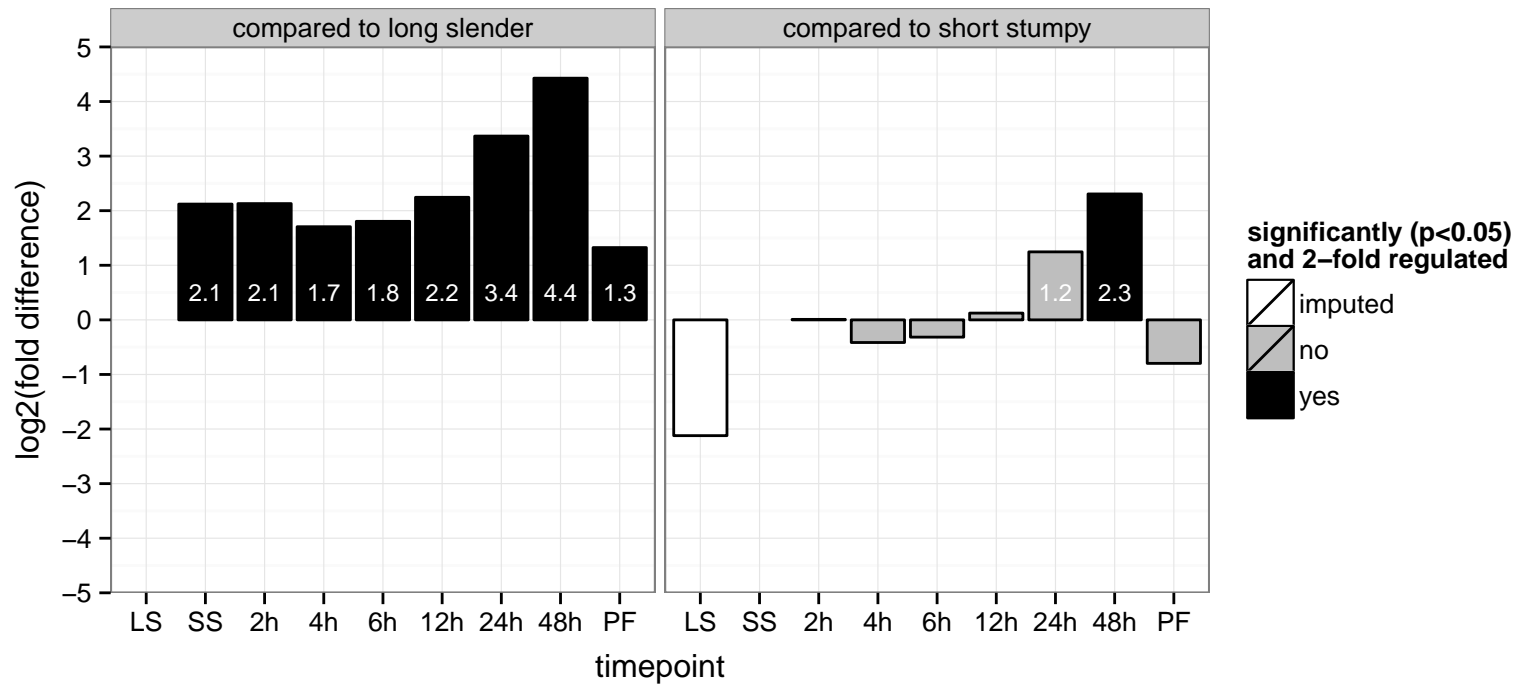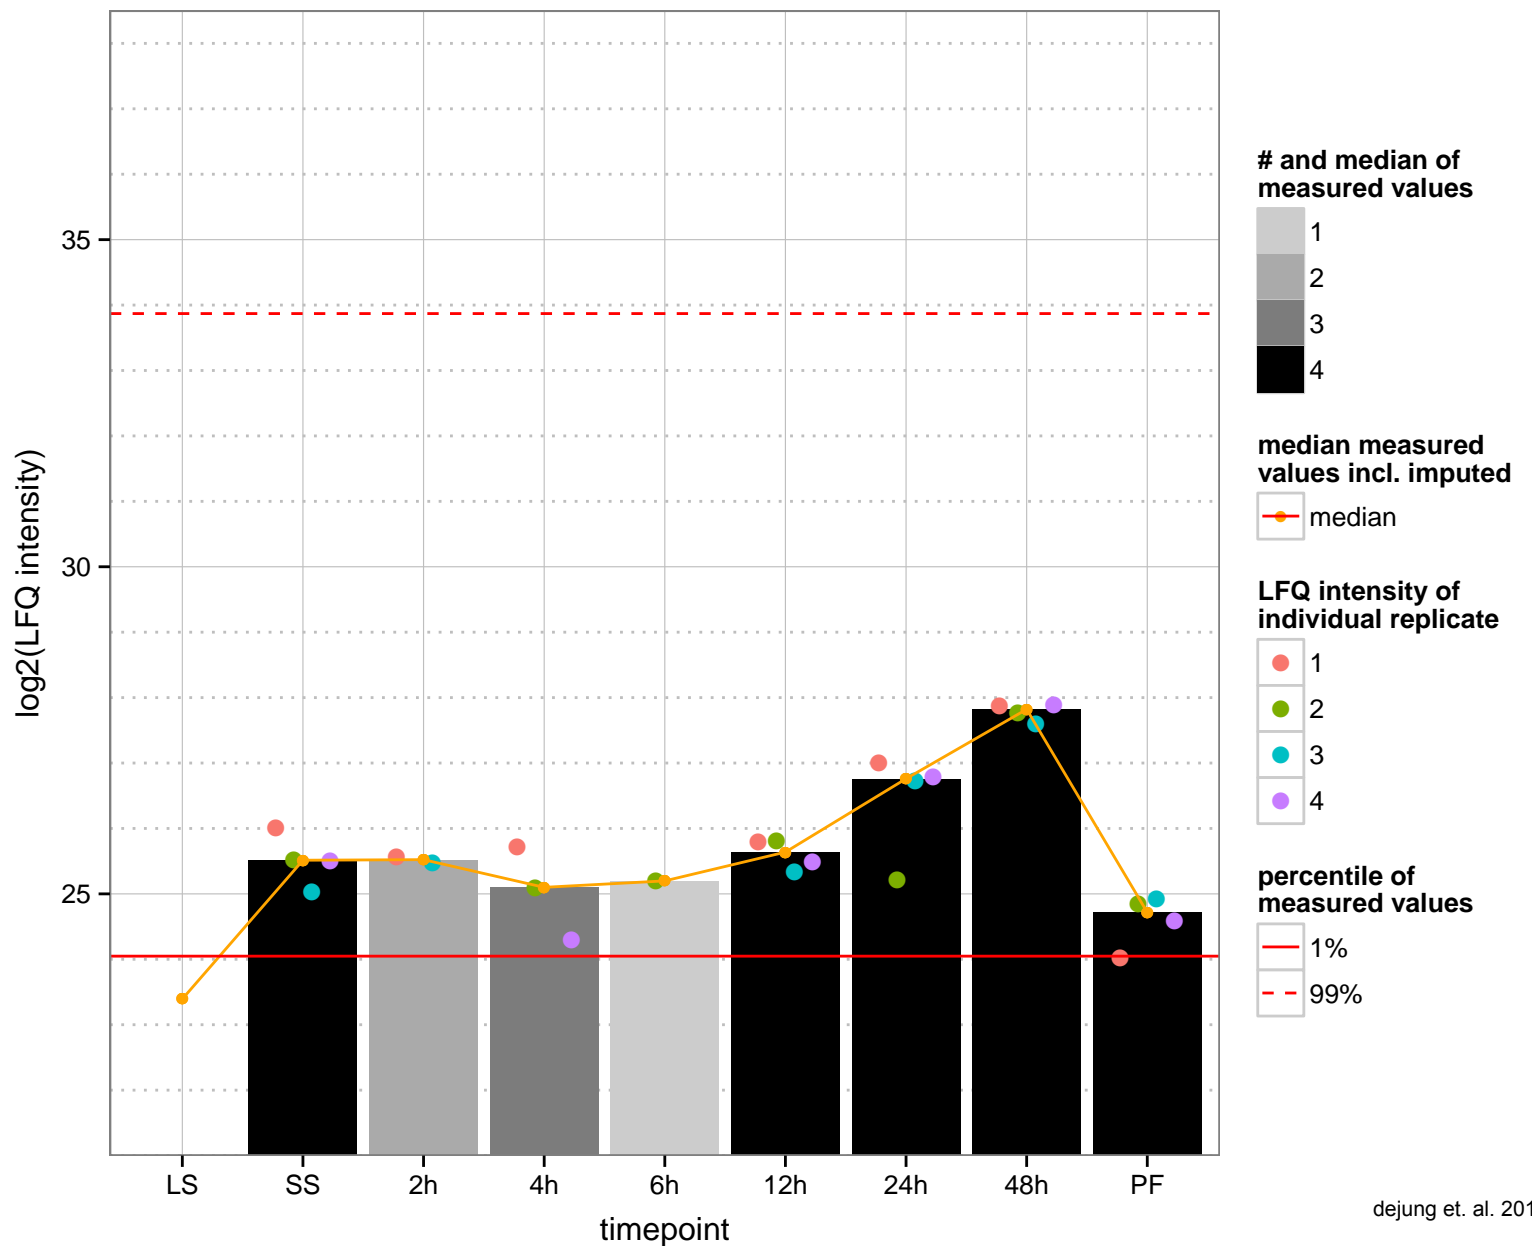

hypothetical protein, conserved  
 Tb927.11.6570  
 AGOF: calcium ion binding  
 AGOC: integral to membrane  
 AGOP: null  
 PGO: null  
 PGO: null  
 PGO: null

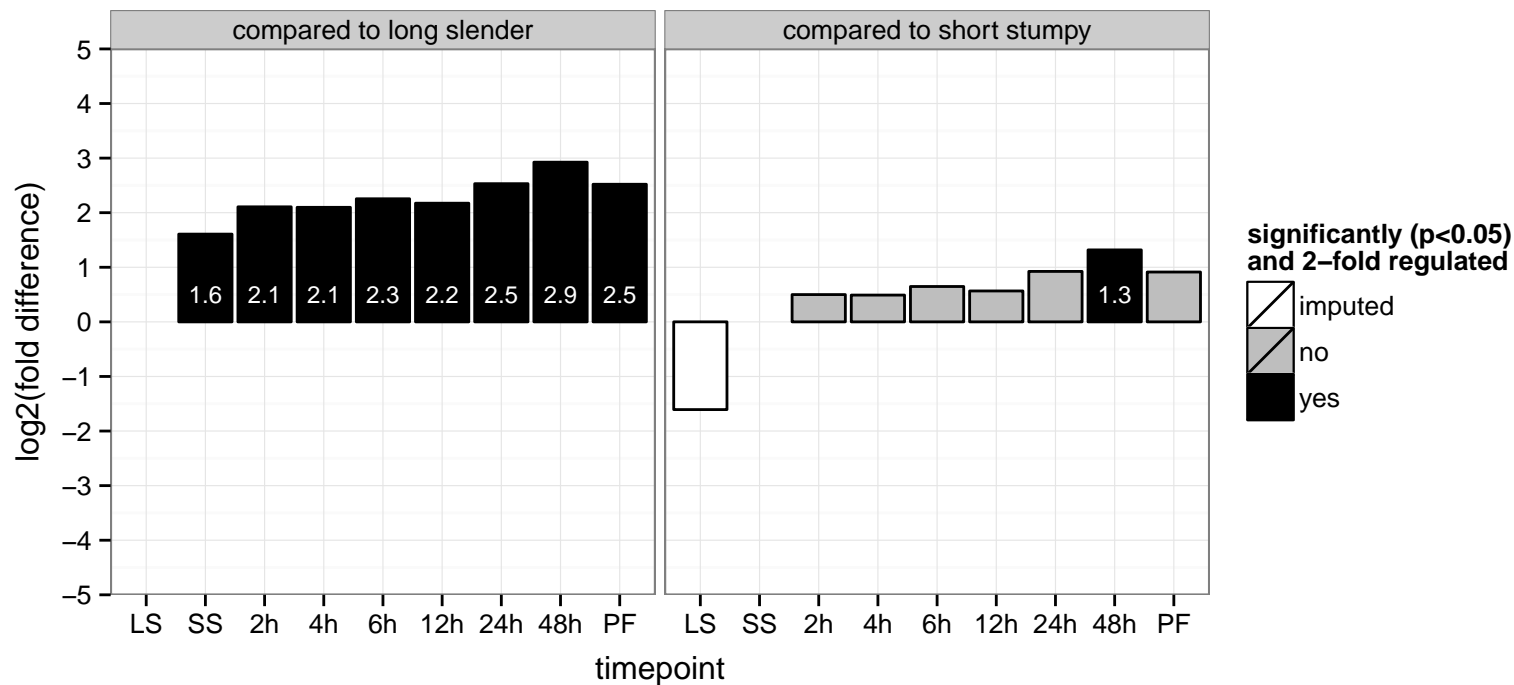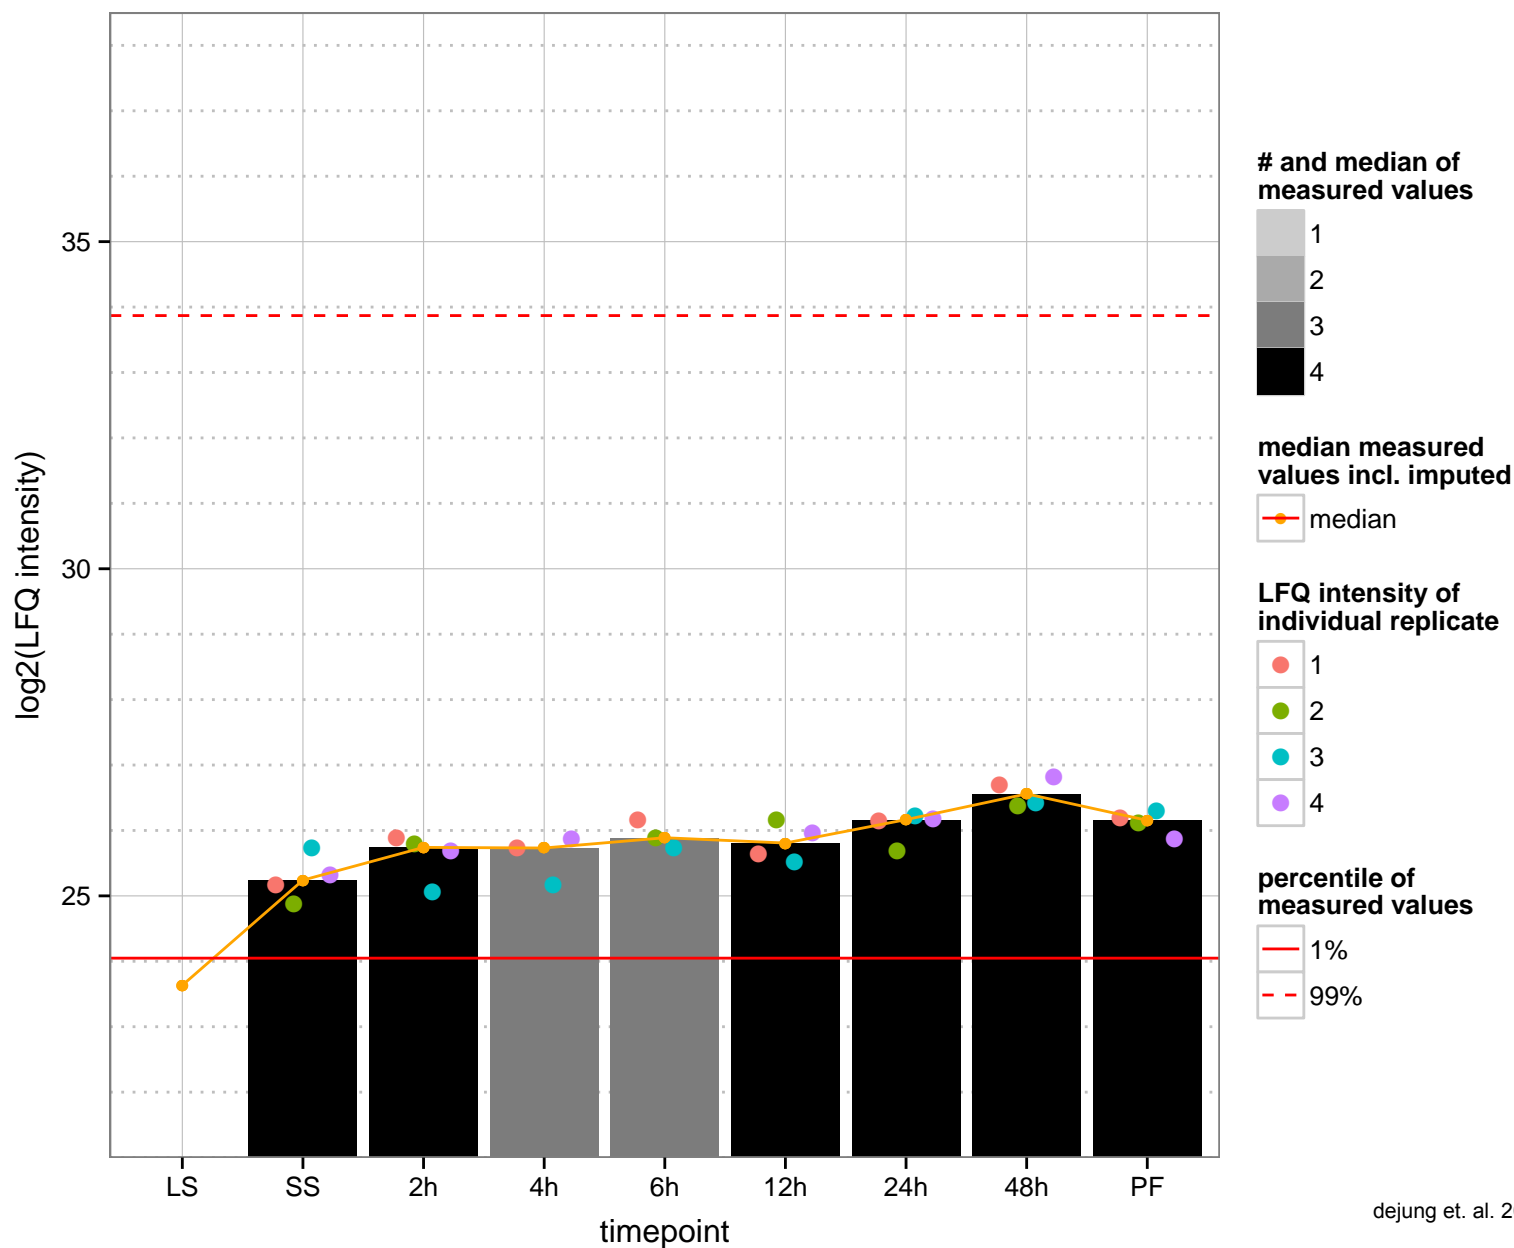

replication factor A, 51kDa subunit, putative  
 Tb927.11.9130  
 AGOF: DNA binding  
 AGOC: nucleus  
 AGOP: DNA replication  
 PGOF: DNA binding, nucleic acid binding  
 PGO: nucleus  
 PGOP: DNA replication

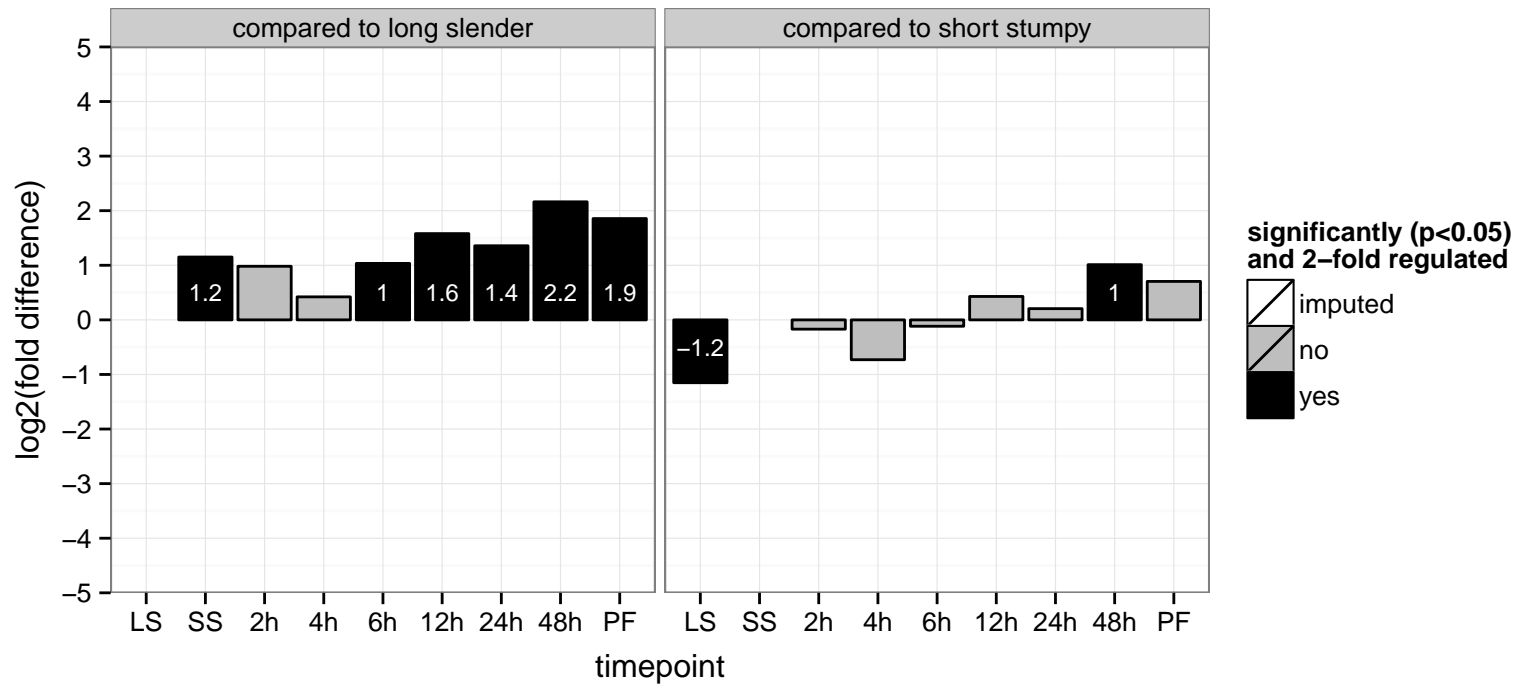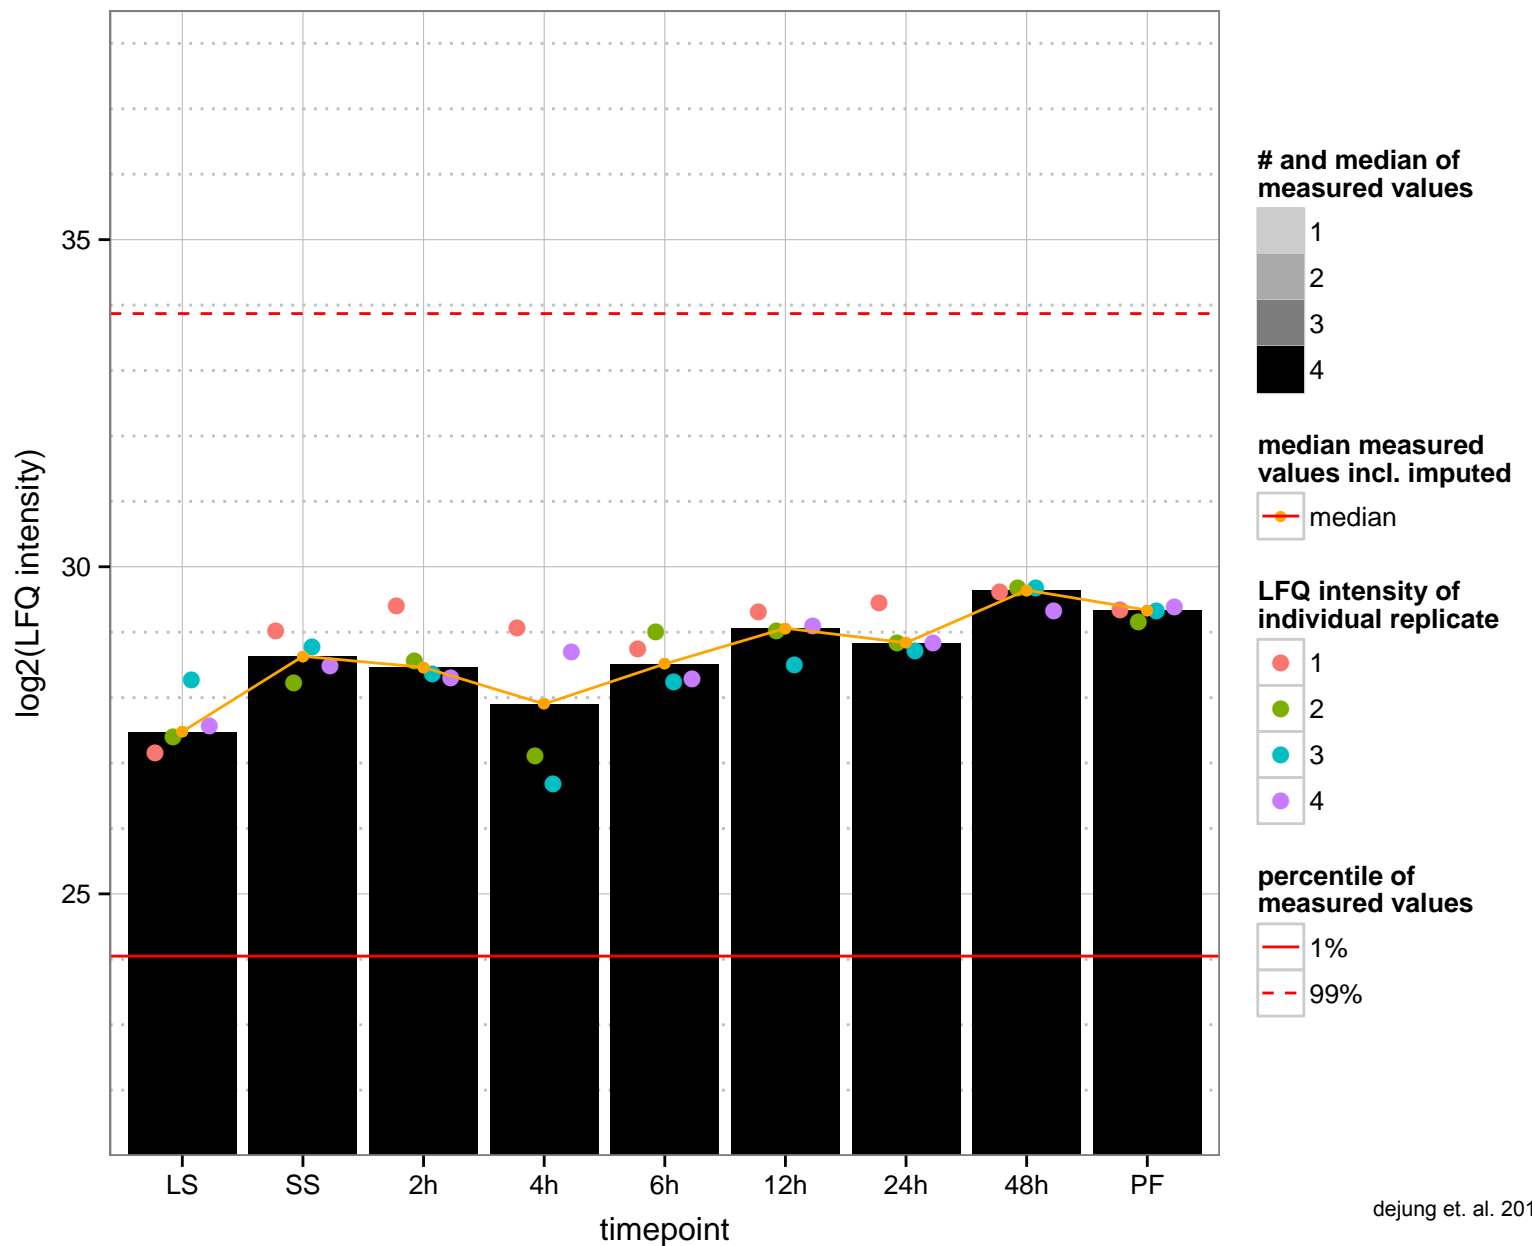

hypothetical protein, conserved  
 Tb927.11.9210  
 AGOF: null  
 AGOC: null  
 AGOP: null  
 PGOF: null  
 PGO: null  
 PGOP: null

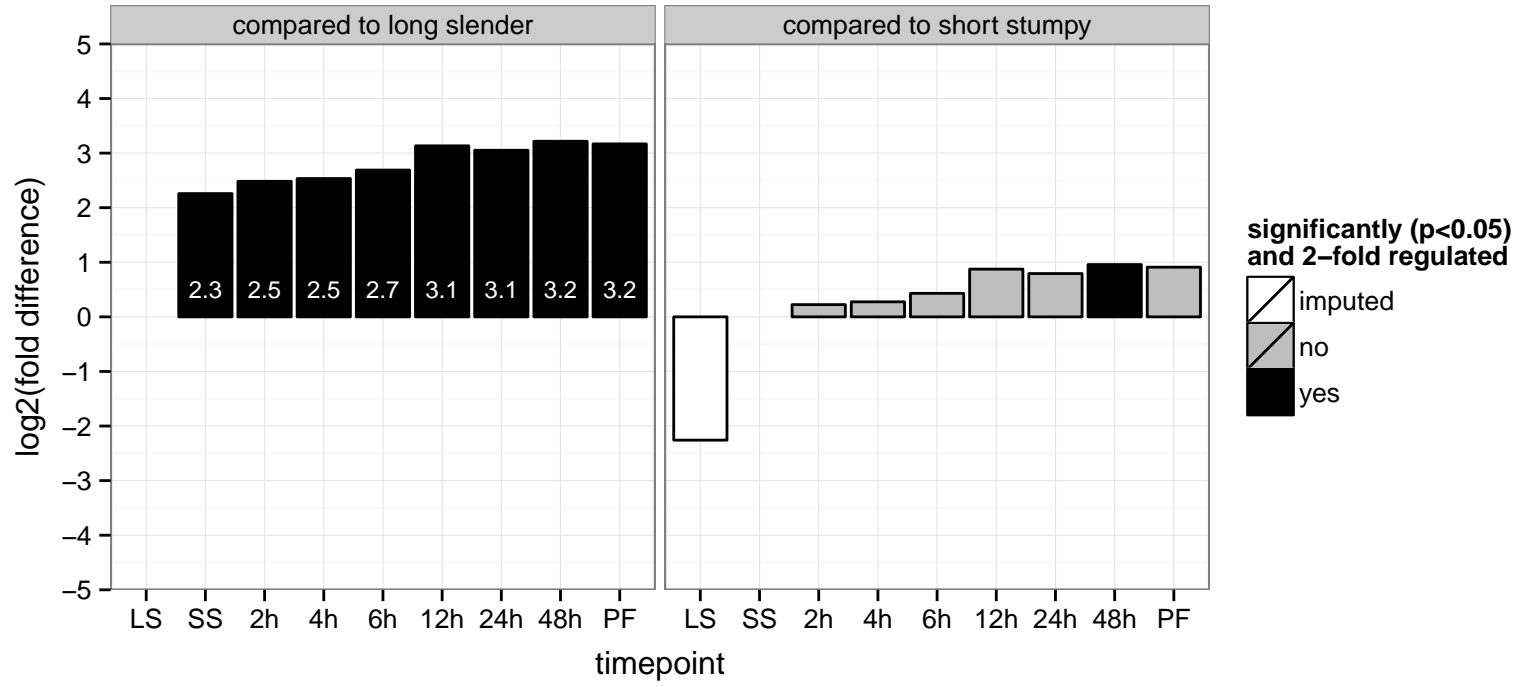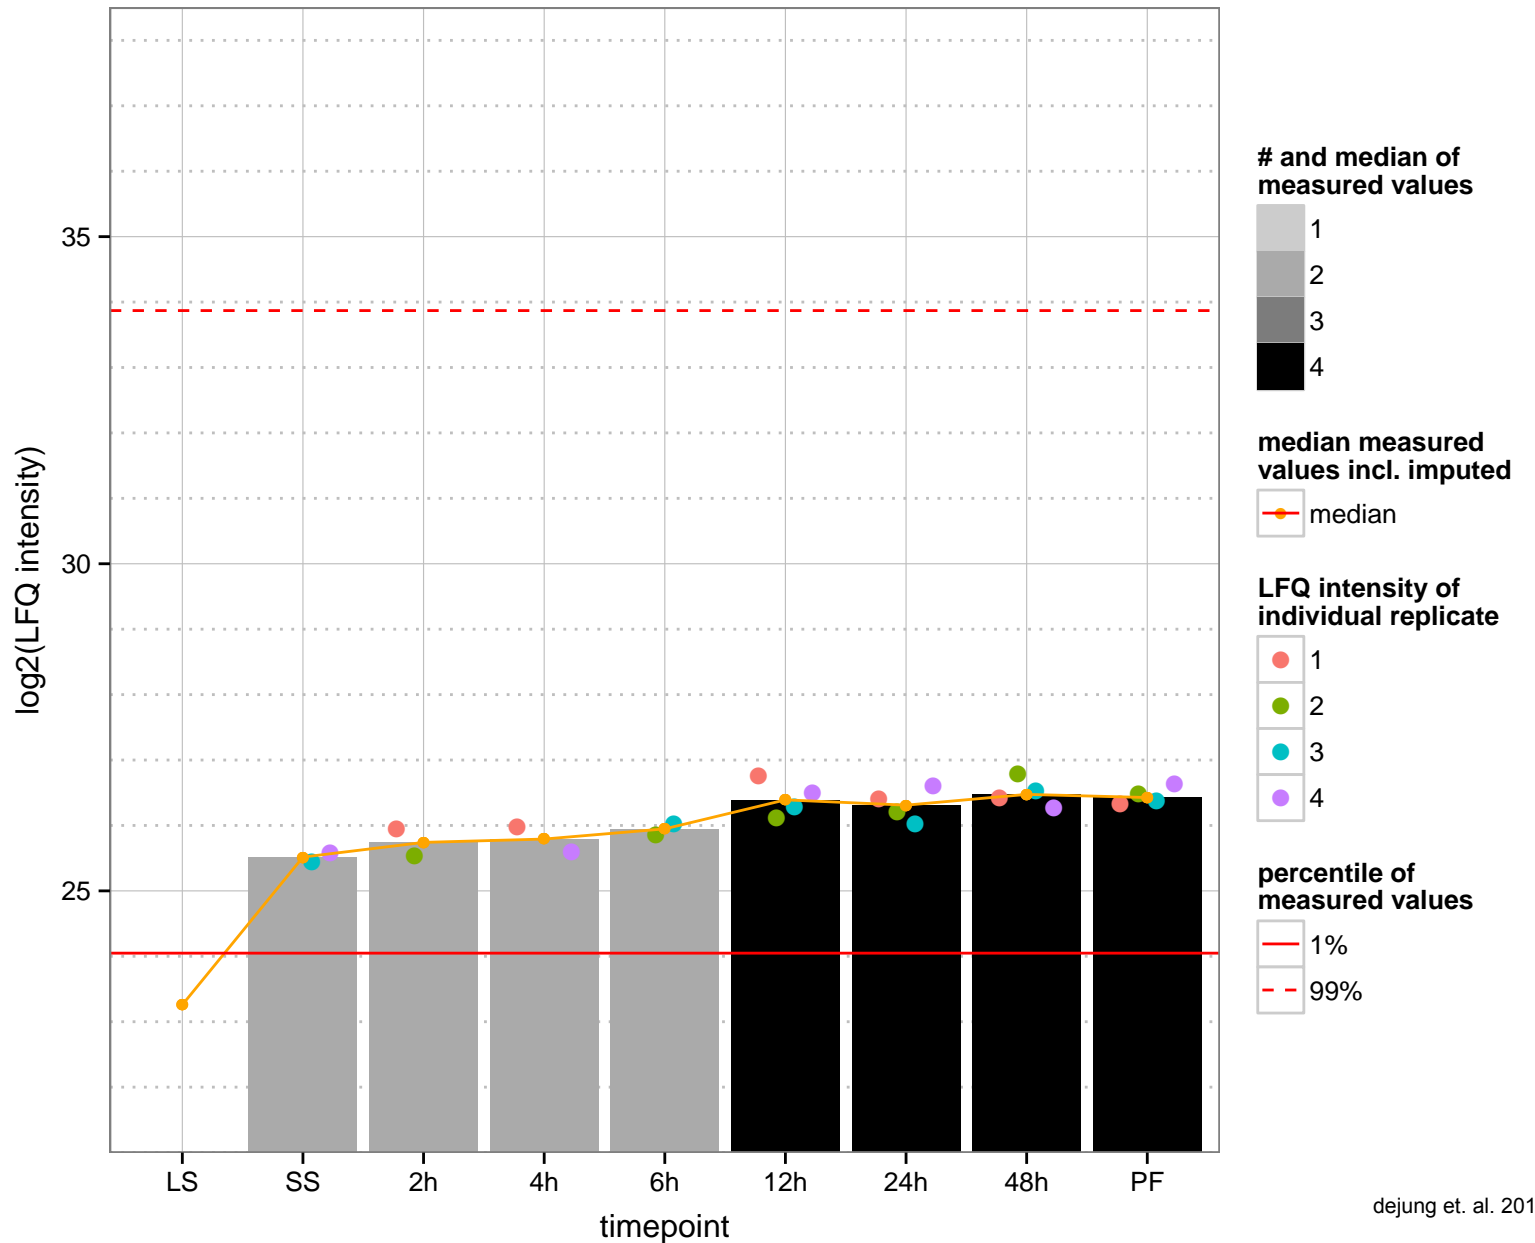

hypothetical protein, conserved  
 Tb927.11.9230  
 AGOF: null  
 AGOC: null  
 AGOP: null  
 PGO: null  
 PGOC: null  
 PGOP: null

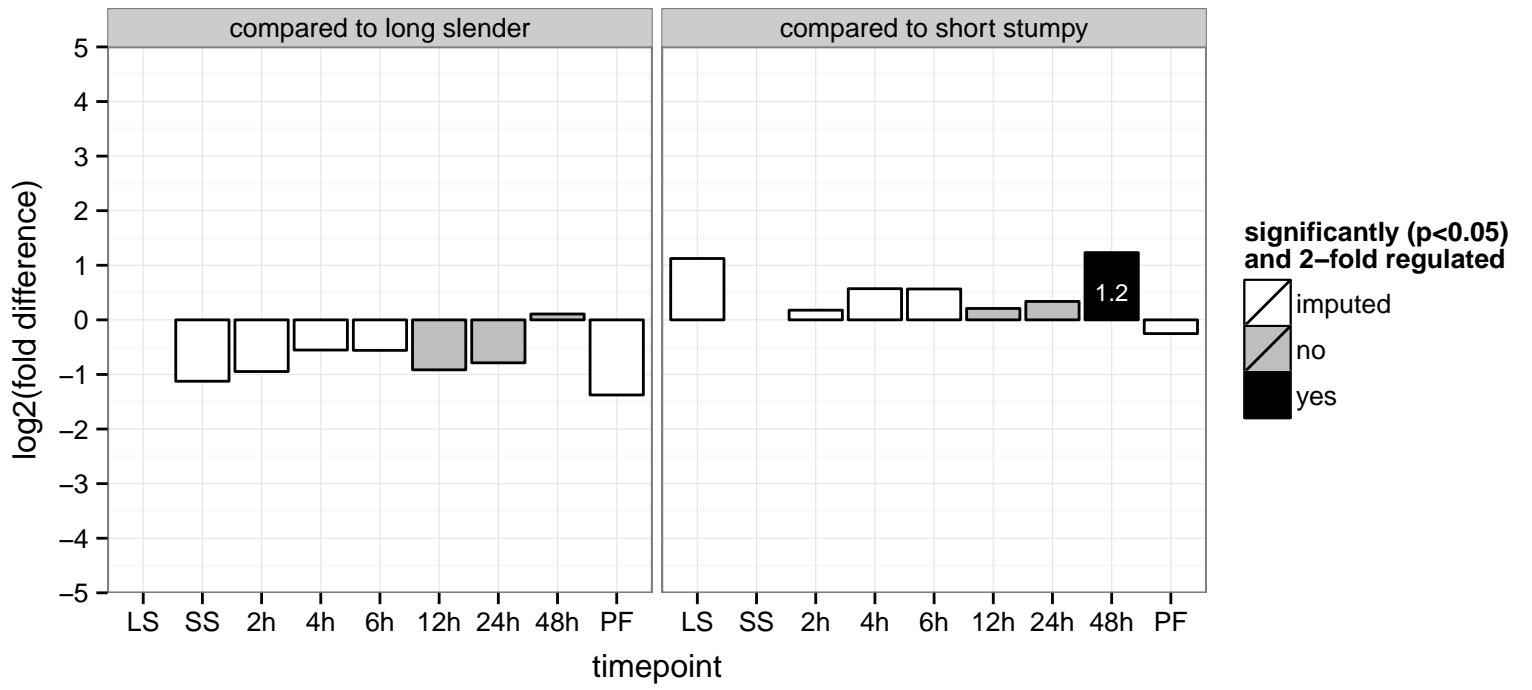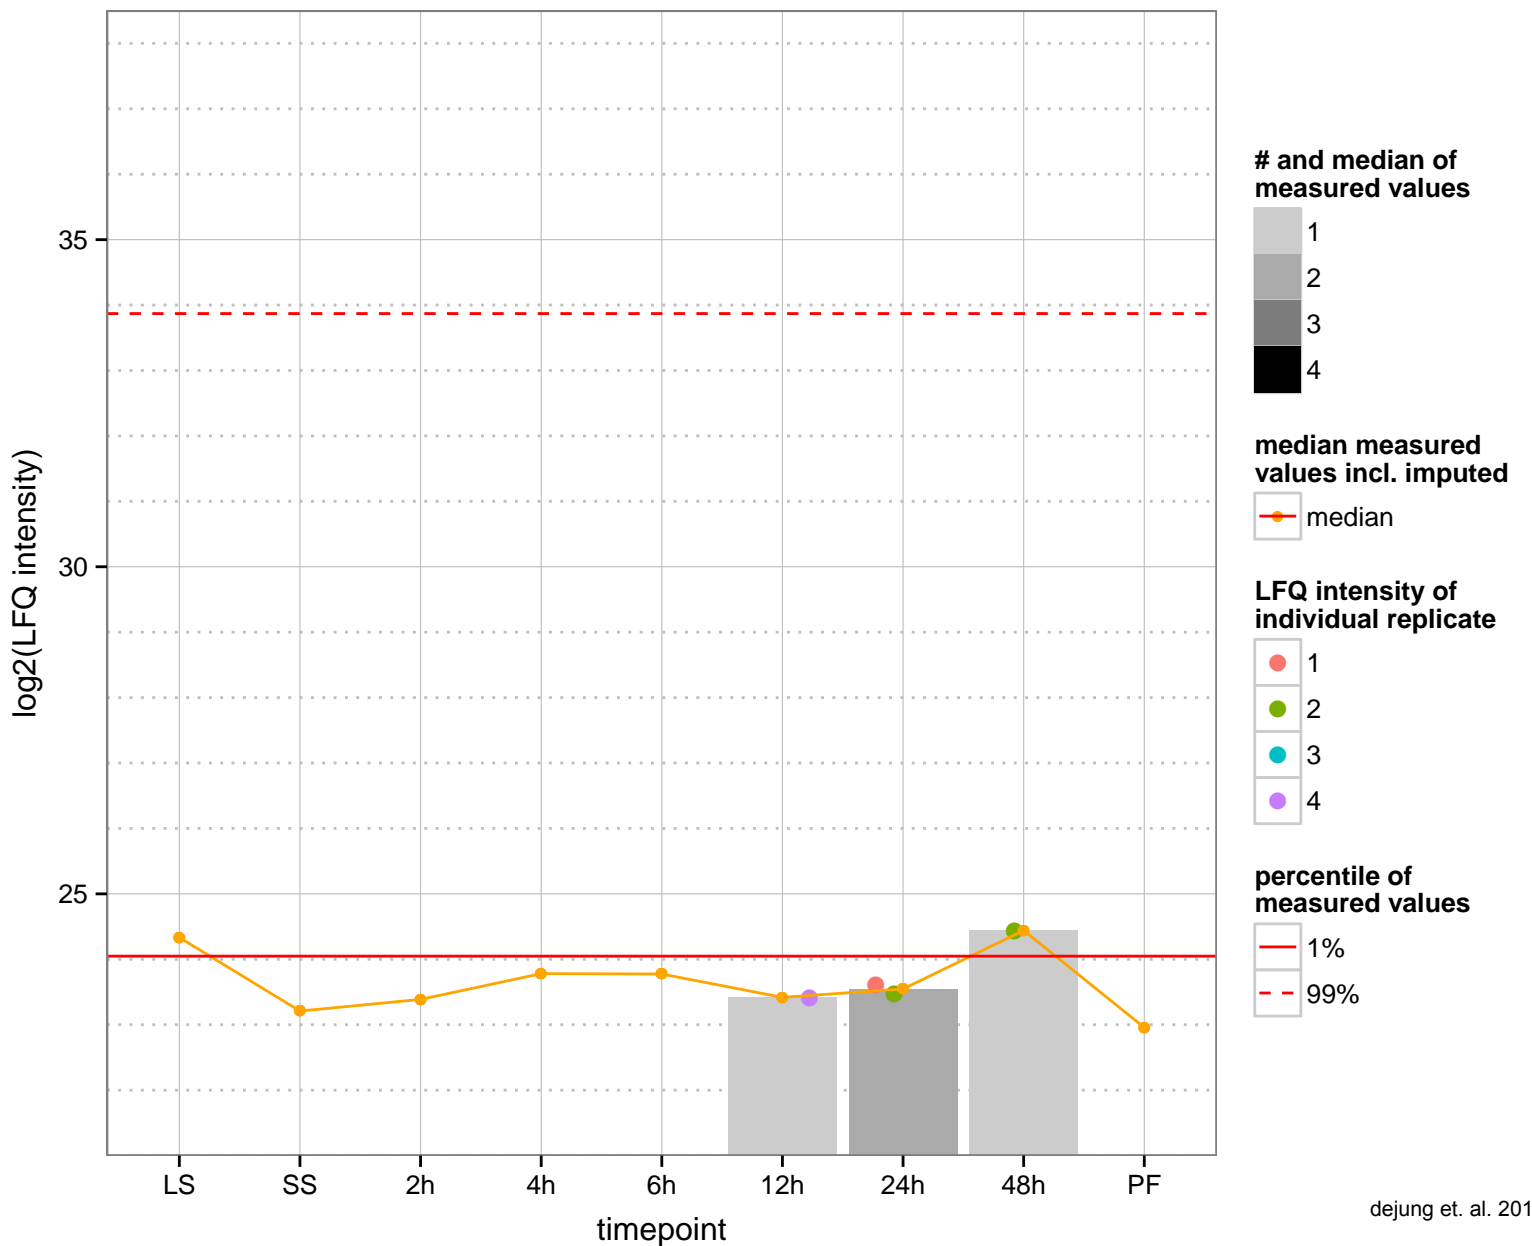

calmodulin, putative  
 Tb927.11.9790  
 AGOF: calcium ion binding  
 AGOC: null  
 AGOP: null  
 PGOF: calcium ion binding  
 PGOC: null  
 PGOP: null

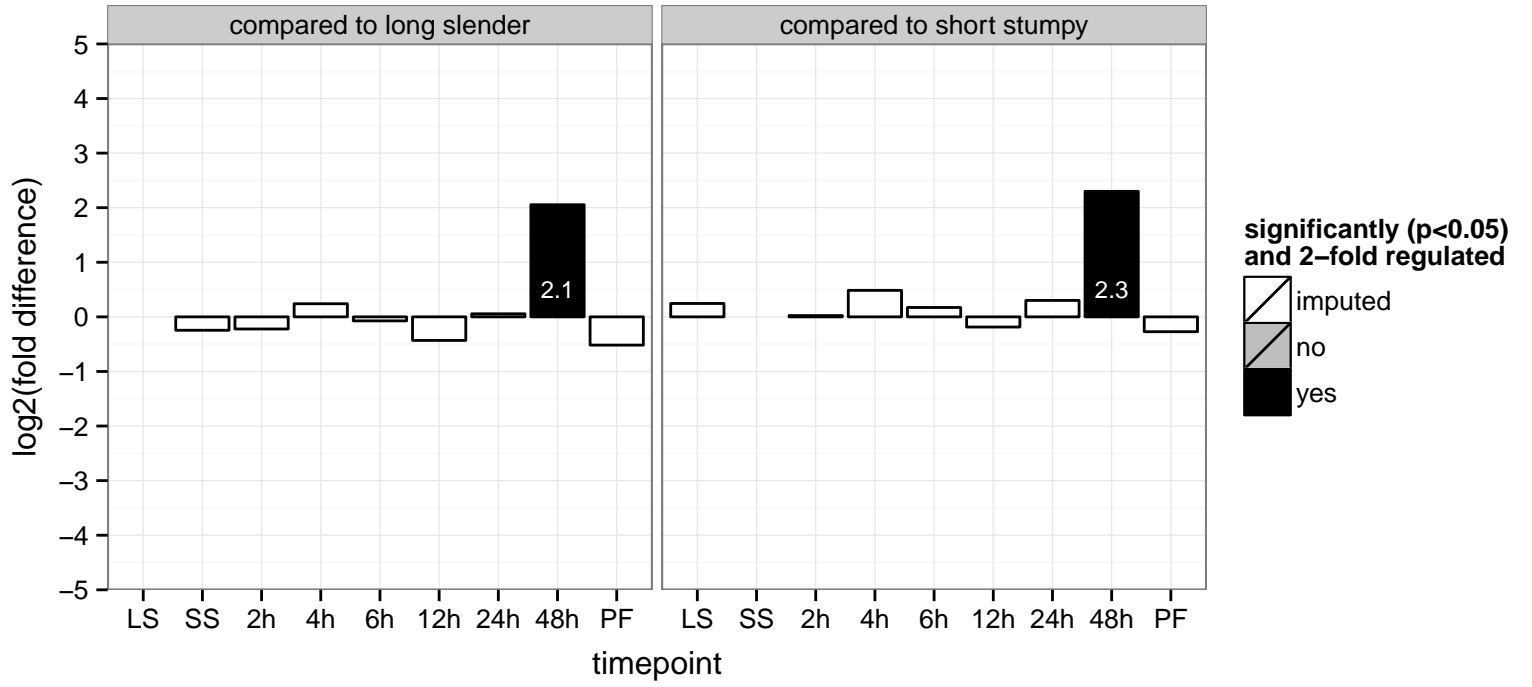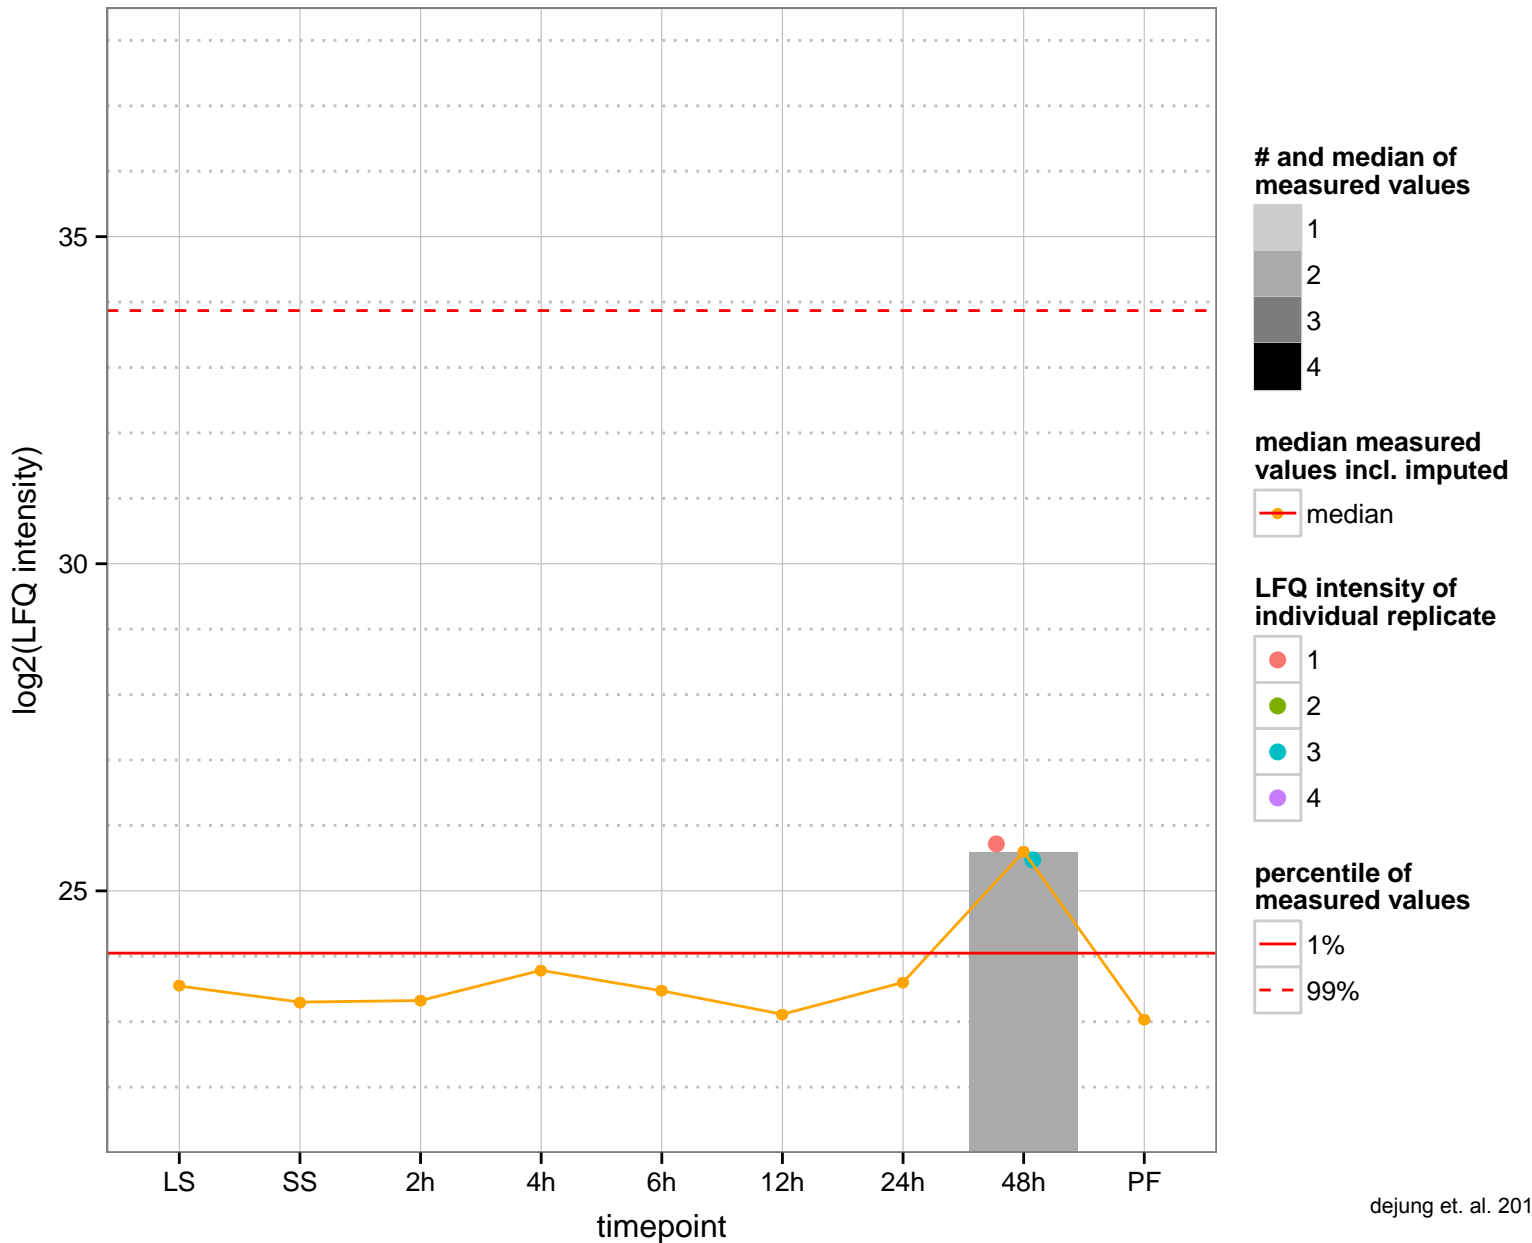

protein kinase, putative

Tb927.2.1820

AGOF: ATP binding, calcium ion binding, protein kinase activity, protein serine/threonine kinase activity, protein tyrosine kinase activity

AGOC: null

AGOP: protein phosphorylation

PGOF: ATP binding, calcium ion binding, protein kinase activity, transferase activity, transferring phosphorus-containing group

PGOC: null

PGOP: protein phosphorylation

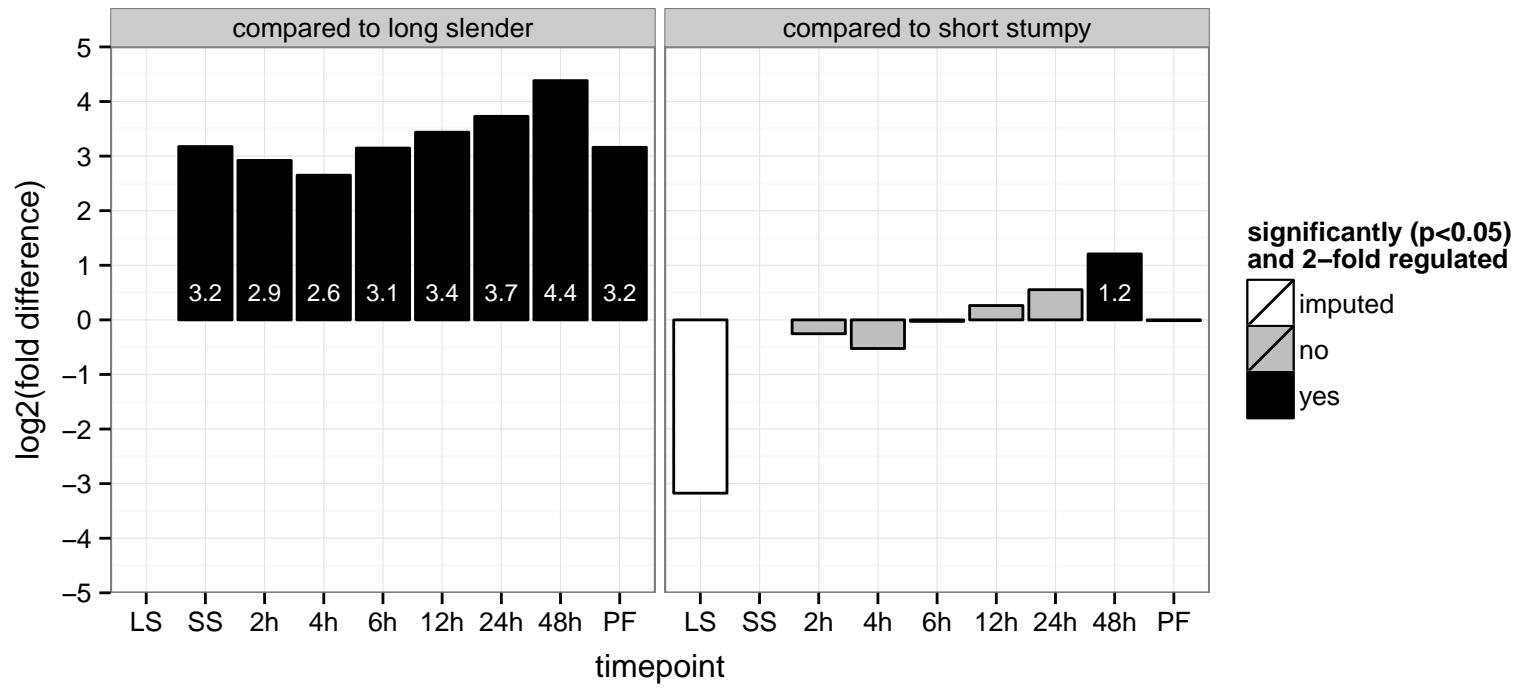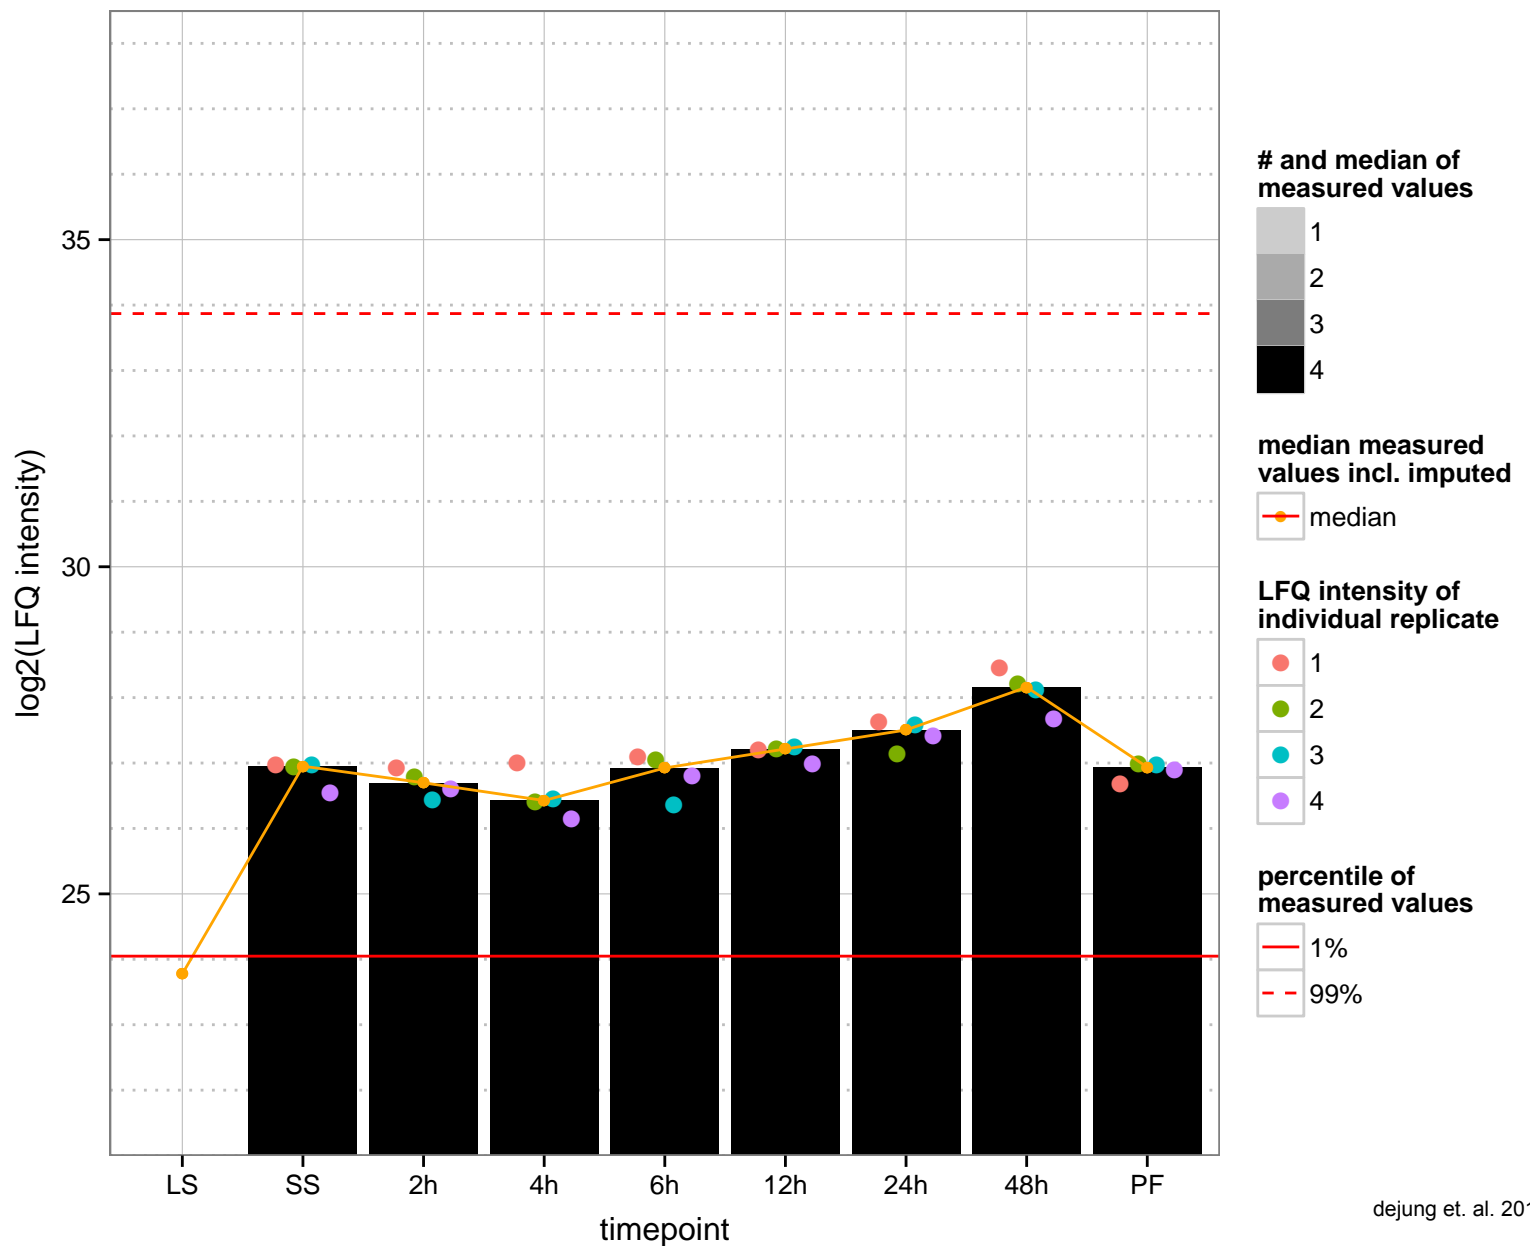

retrotransposon hot spot protein 5 (RHS5), putative, retrotransposon hot spot protein (RHS, pseudogene), degenerate  
 Tb927.2.240  
 AGOF: null  
 AGOC: nucleus, null  
 AGOP: null  
 PGO: null  
 PGO: null  
 PGO: null  
 PGO: null

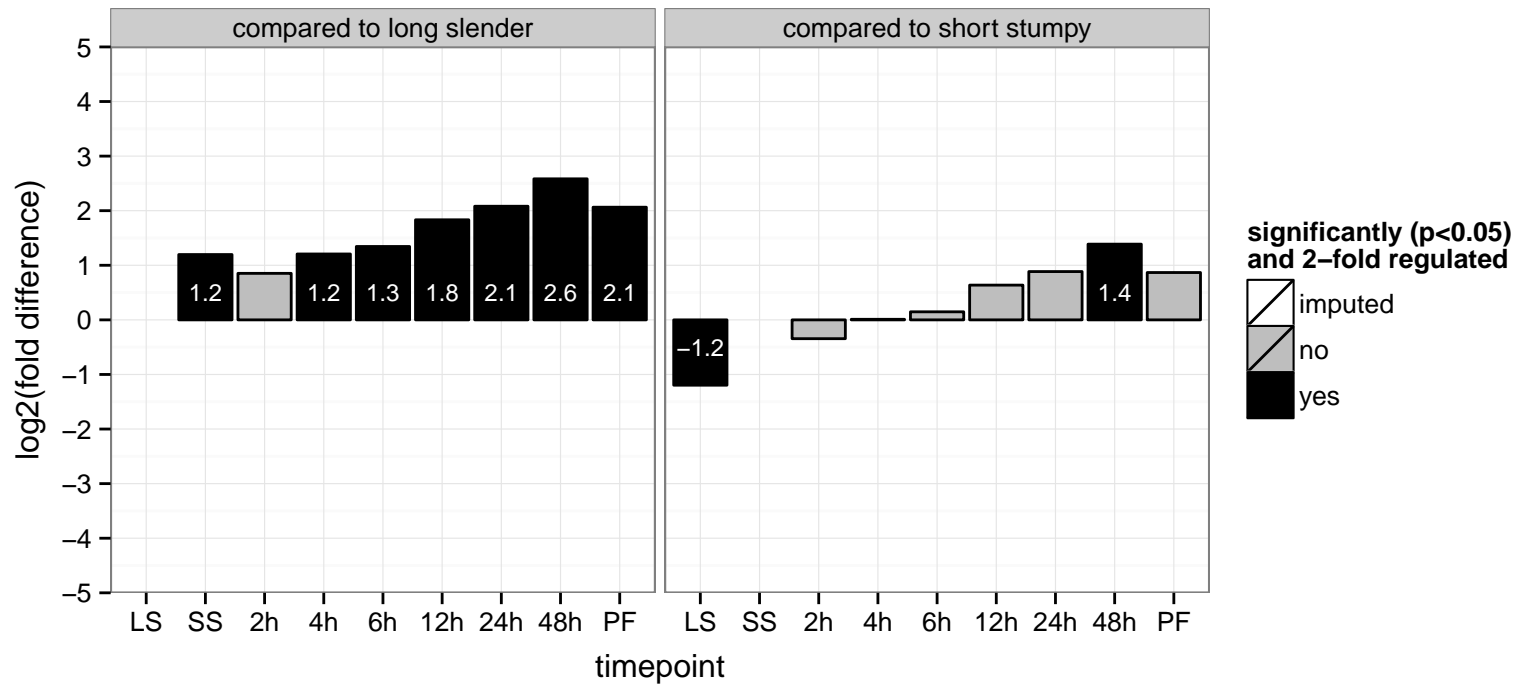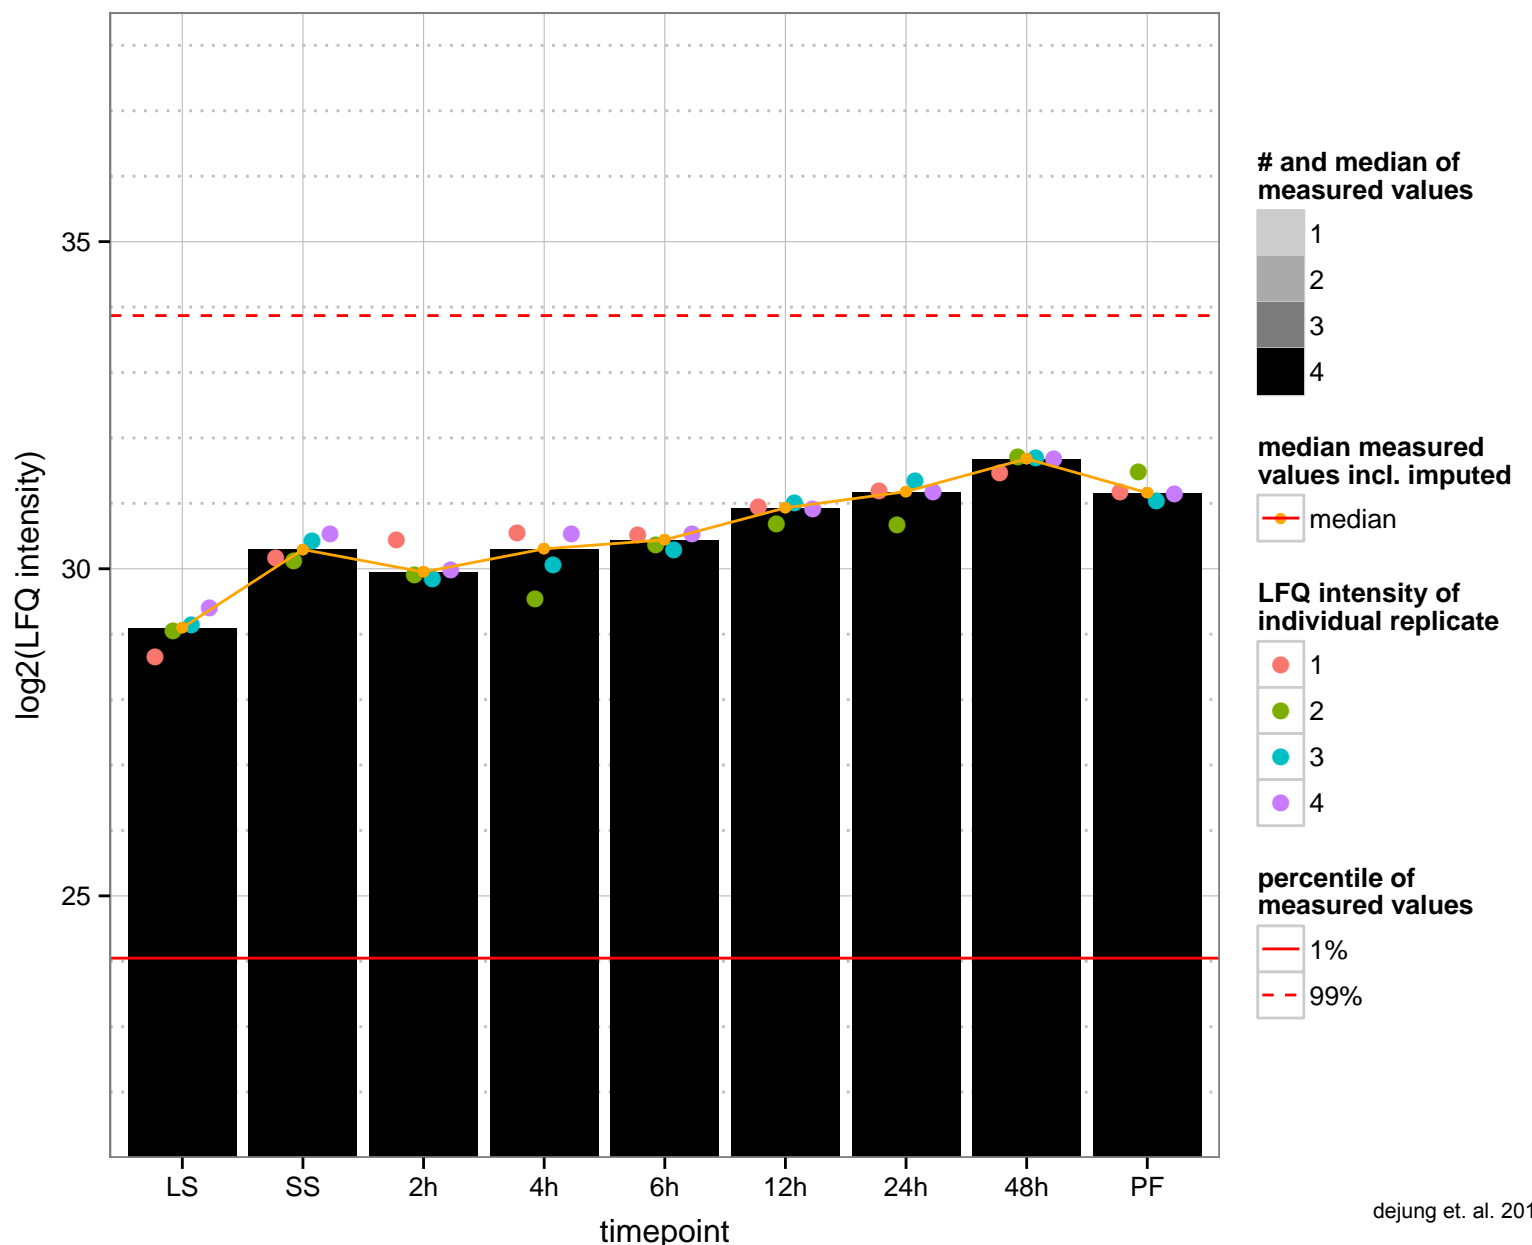



RNA-editing complex protein, KREPA1, RNA-editing complex protein (KREPA1)  
 Tb927.2.2470  
 AGOF: alpha-catenin binding, zinc ion binding  
 AGOC: intracellular, mitochondrial mRNA editing complex, mitochondrion  
 AGOP: RNA nucleotide deletion, RNA nucleotide insertion  
 PGO: zinc ion binding  
 PGOC: intracellular  
 PGOP: null

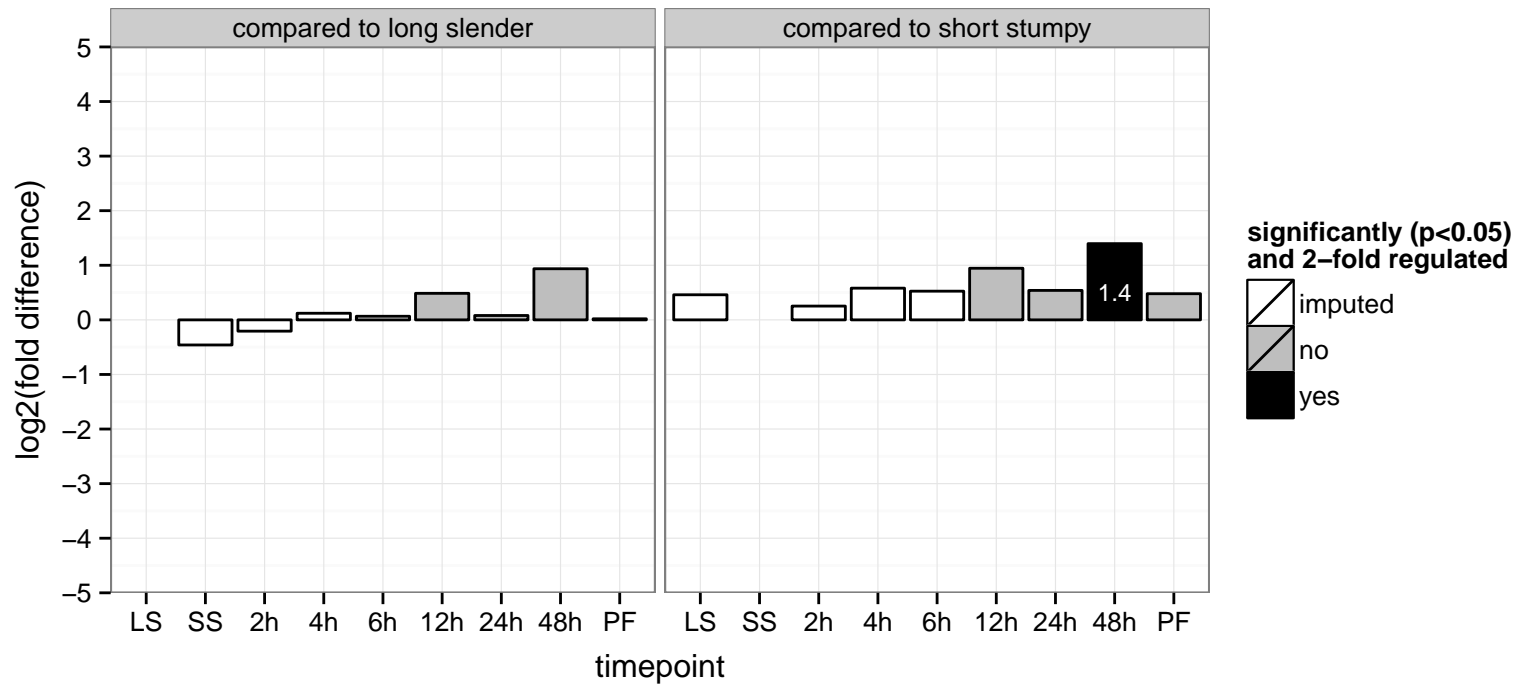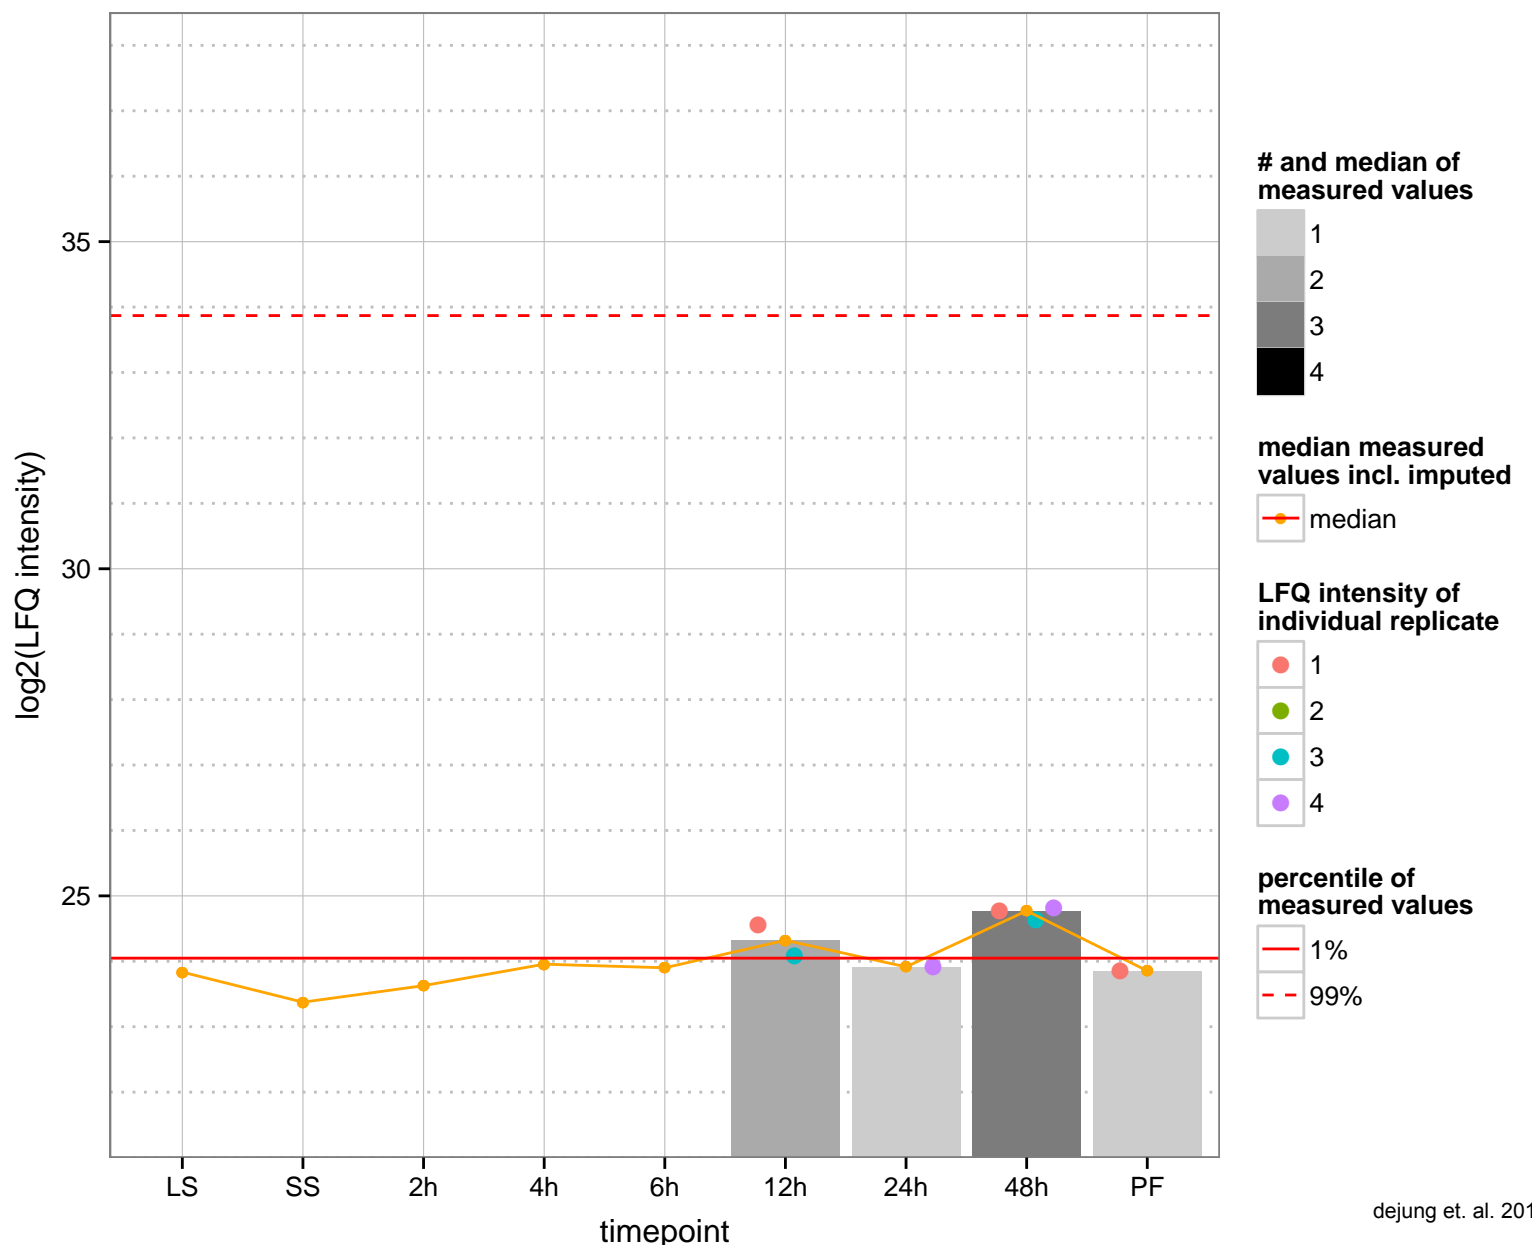

NUP-1 protein, putative  
 Tb927.2.4230  
 AGOF: null  
 AGOC: null, nuclear lamina  
 AGOP: null  
 PGO: null  
 PGO: null  
 PGO: null

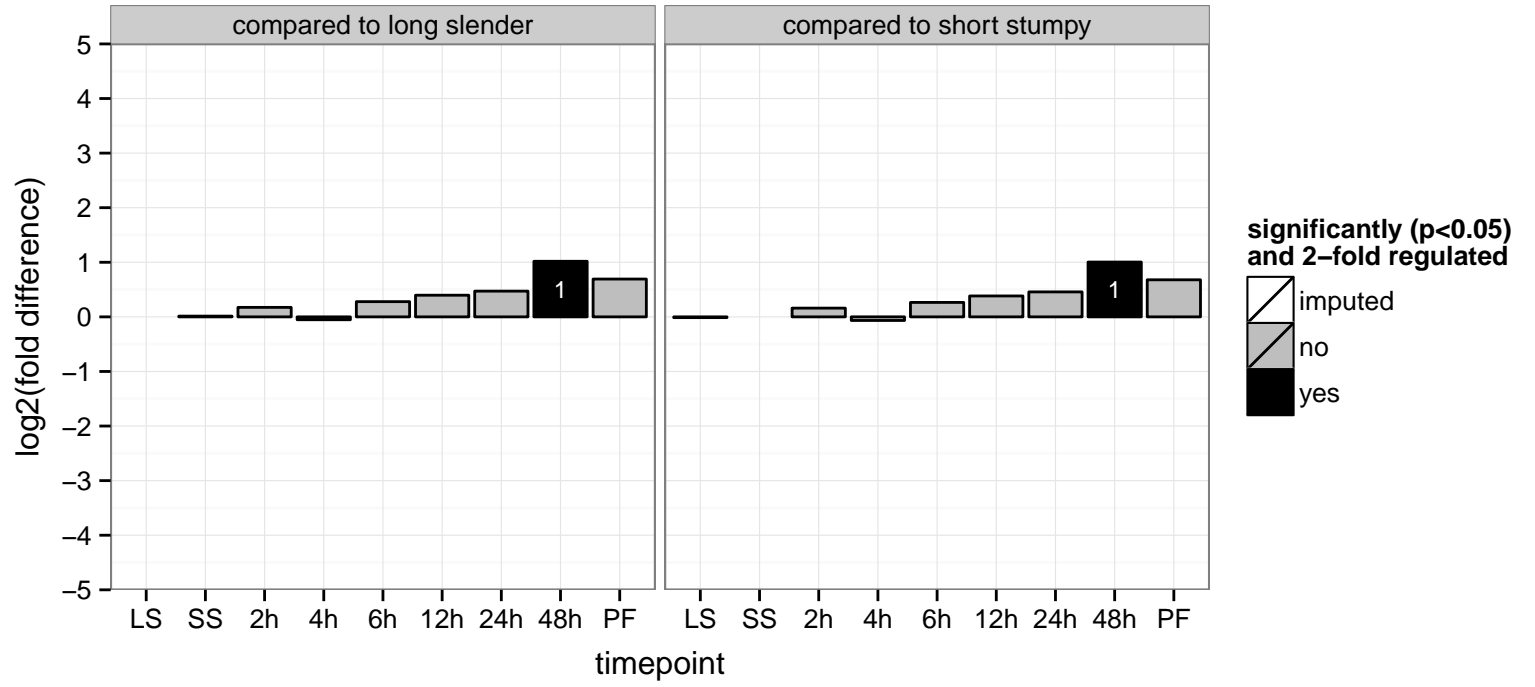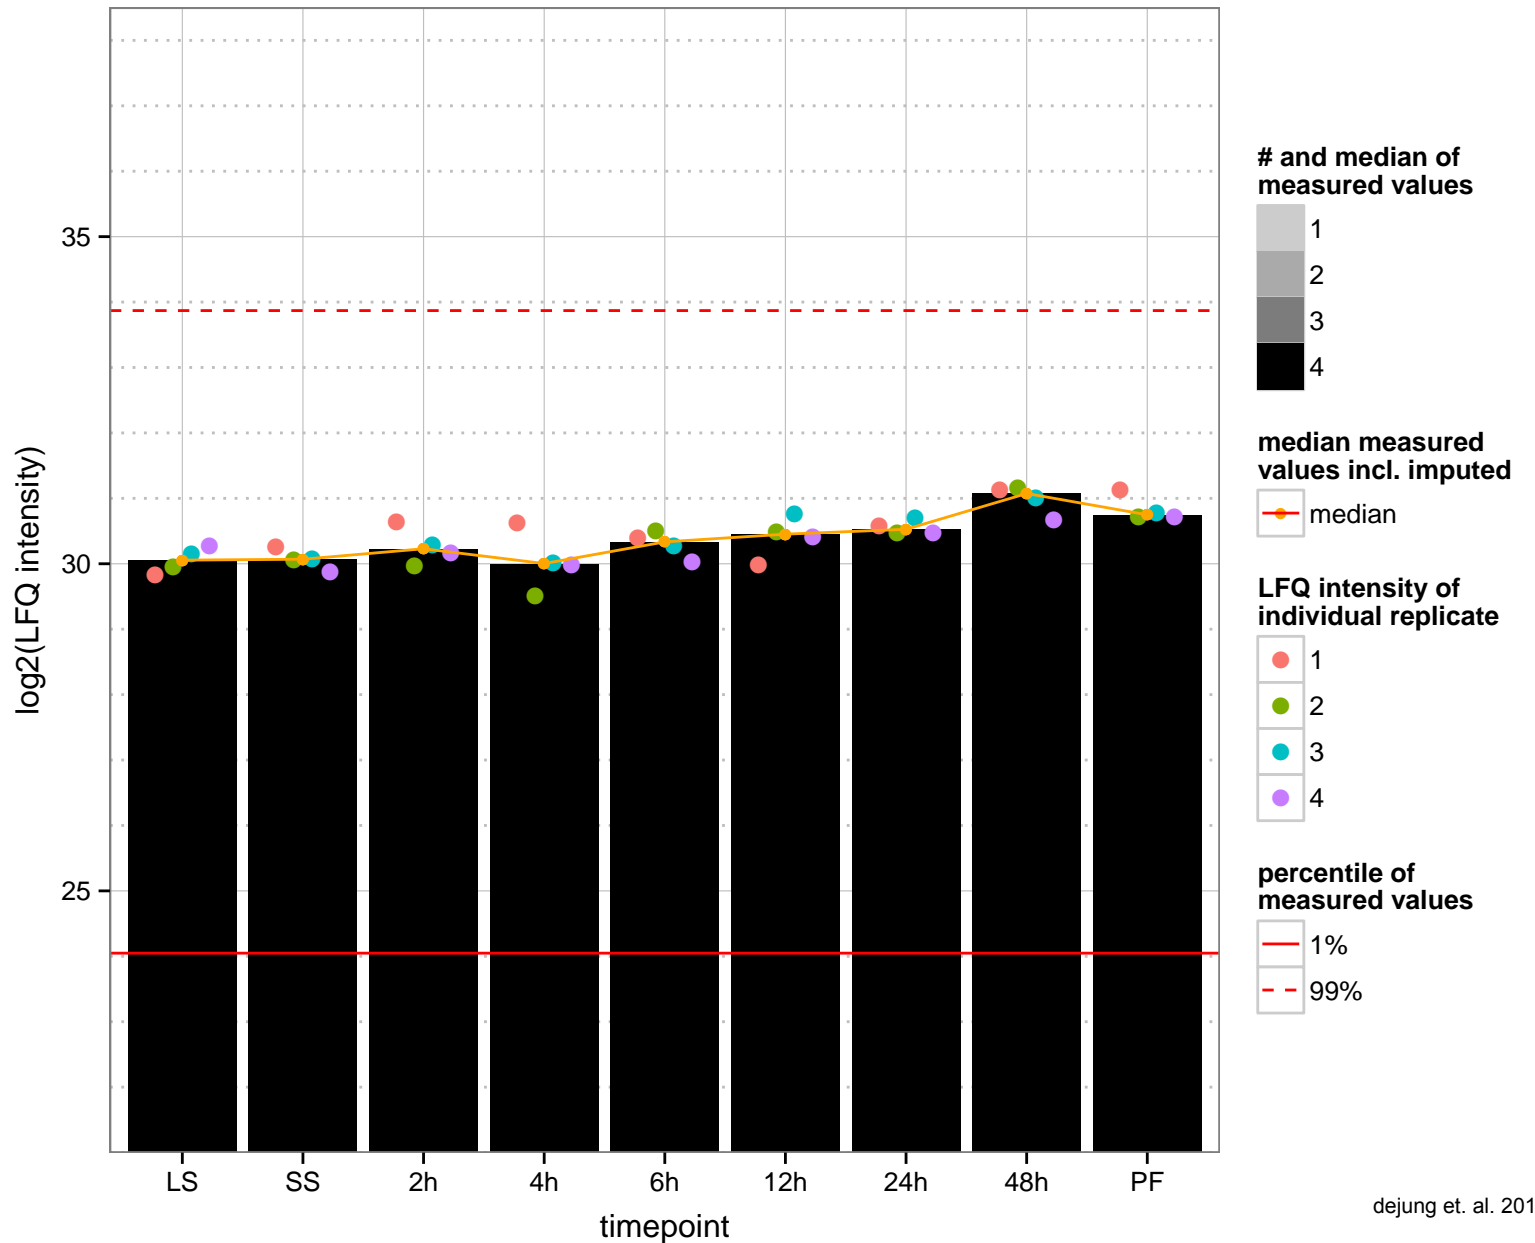

FtsJ cell division protein, putative  
 Tb927.2.4550  
 AGOF: methyltransferase activity, nucleic acid binding  
 AGOC: nucleus  
 AGOP: rRNA methylation  
 PGO: methyltransferase activity, nucleic acid binding  
 PGO: nucleus  
 PGO: methylation, rRNA processing

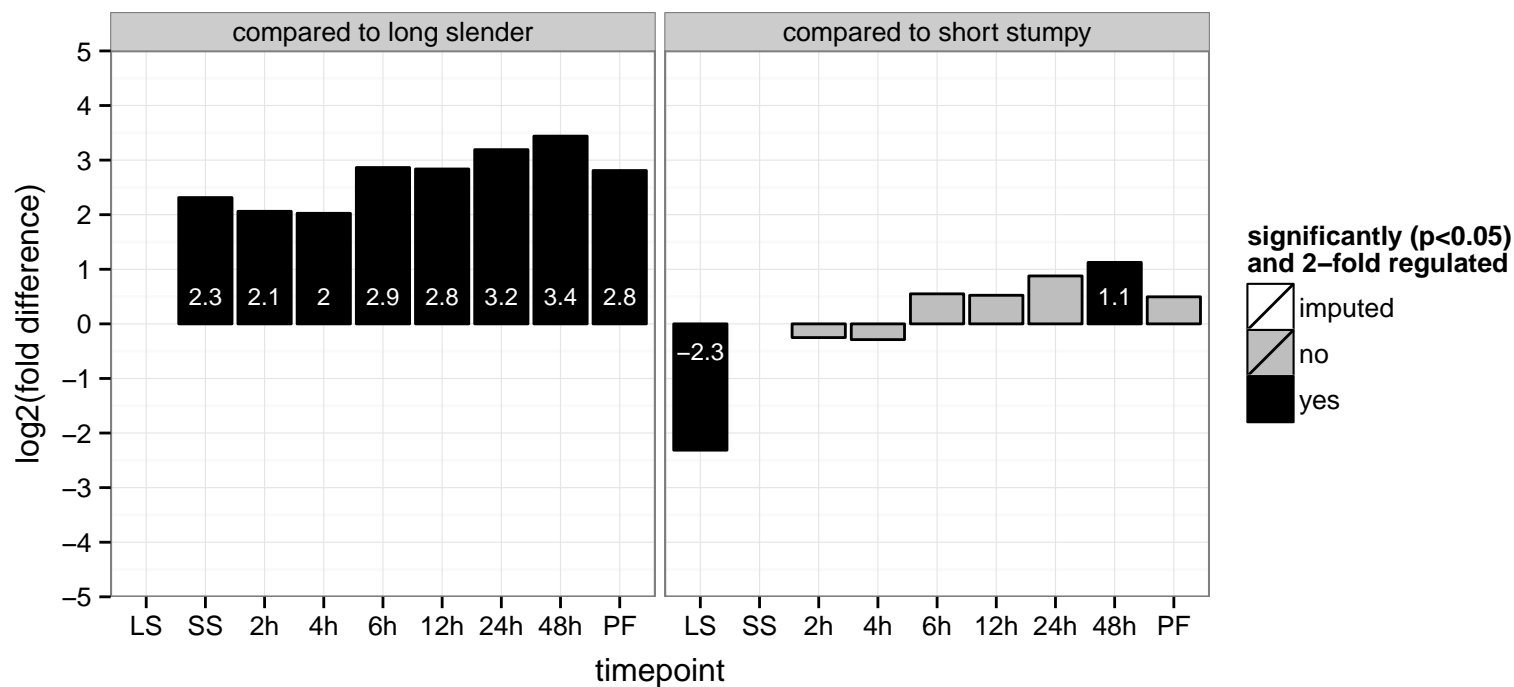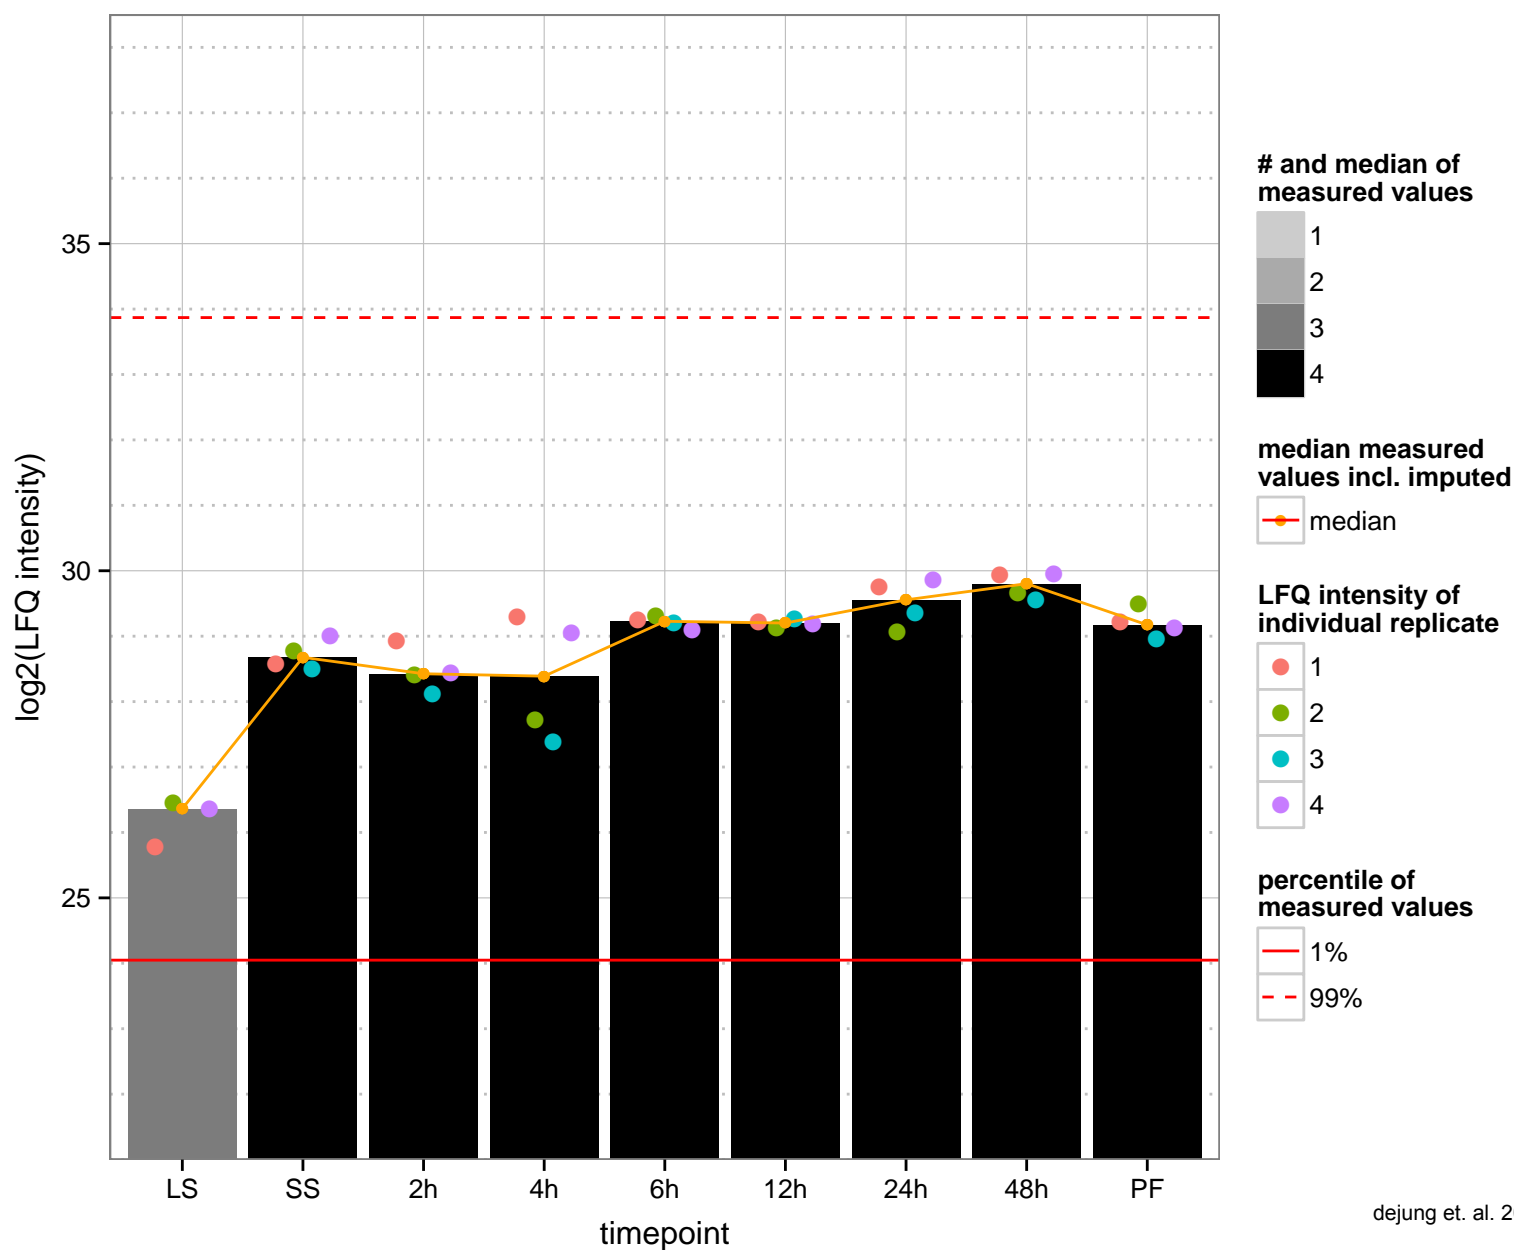

U6 snRNA-associated Sm-like protein LSm8p (TbLSm8)  
 Tb927.3.1780  
 AGOF: U6 snRNA 3'-end binding  
 AGOC: U4/U6 x U5 tri-snRNP complex, nucleus  
 AGOP: assembly of spliceosomal tri-snRNP, nuclear mRNA splicing, via spliceosome  
 PGO: null  
 PGOC: null  
 PGOP: null

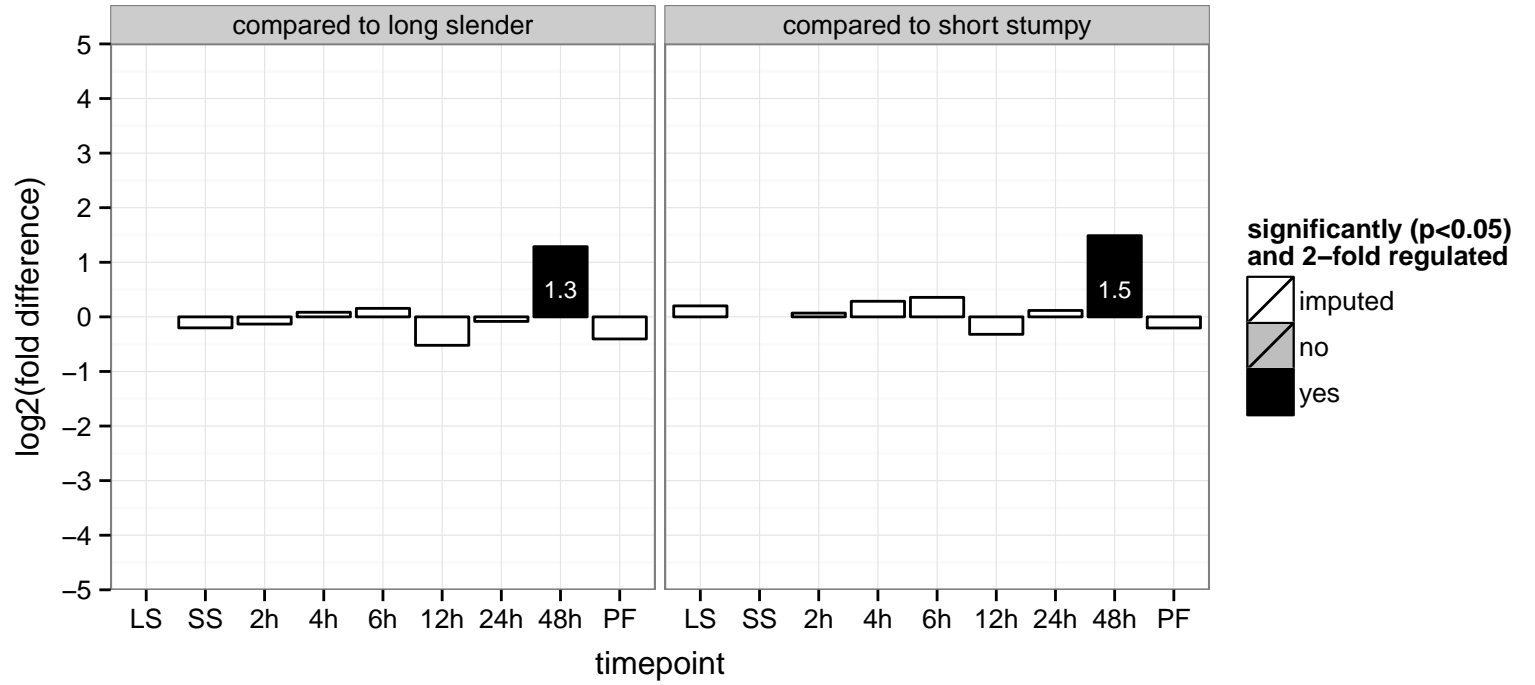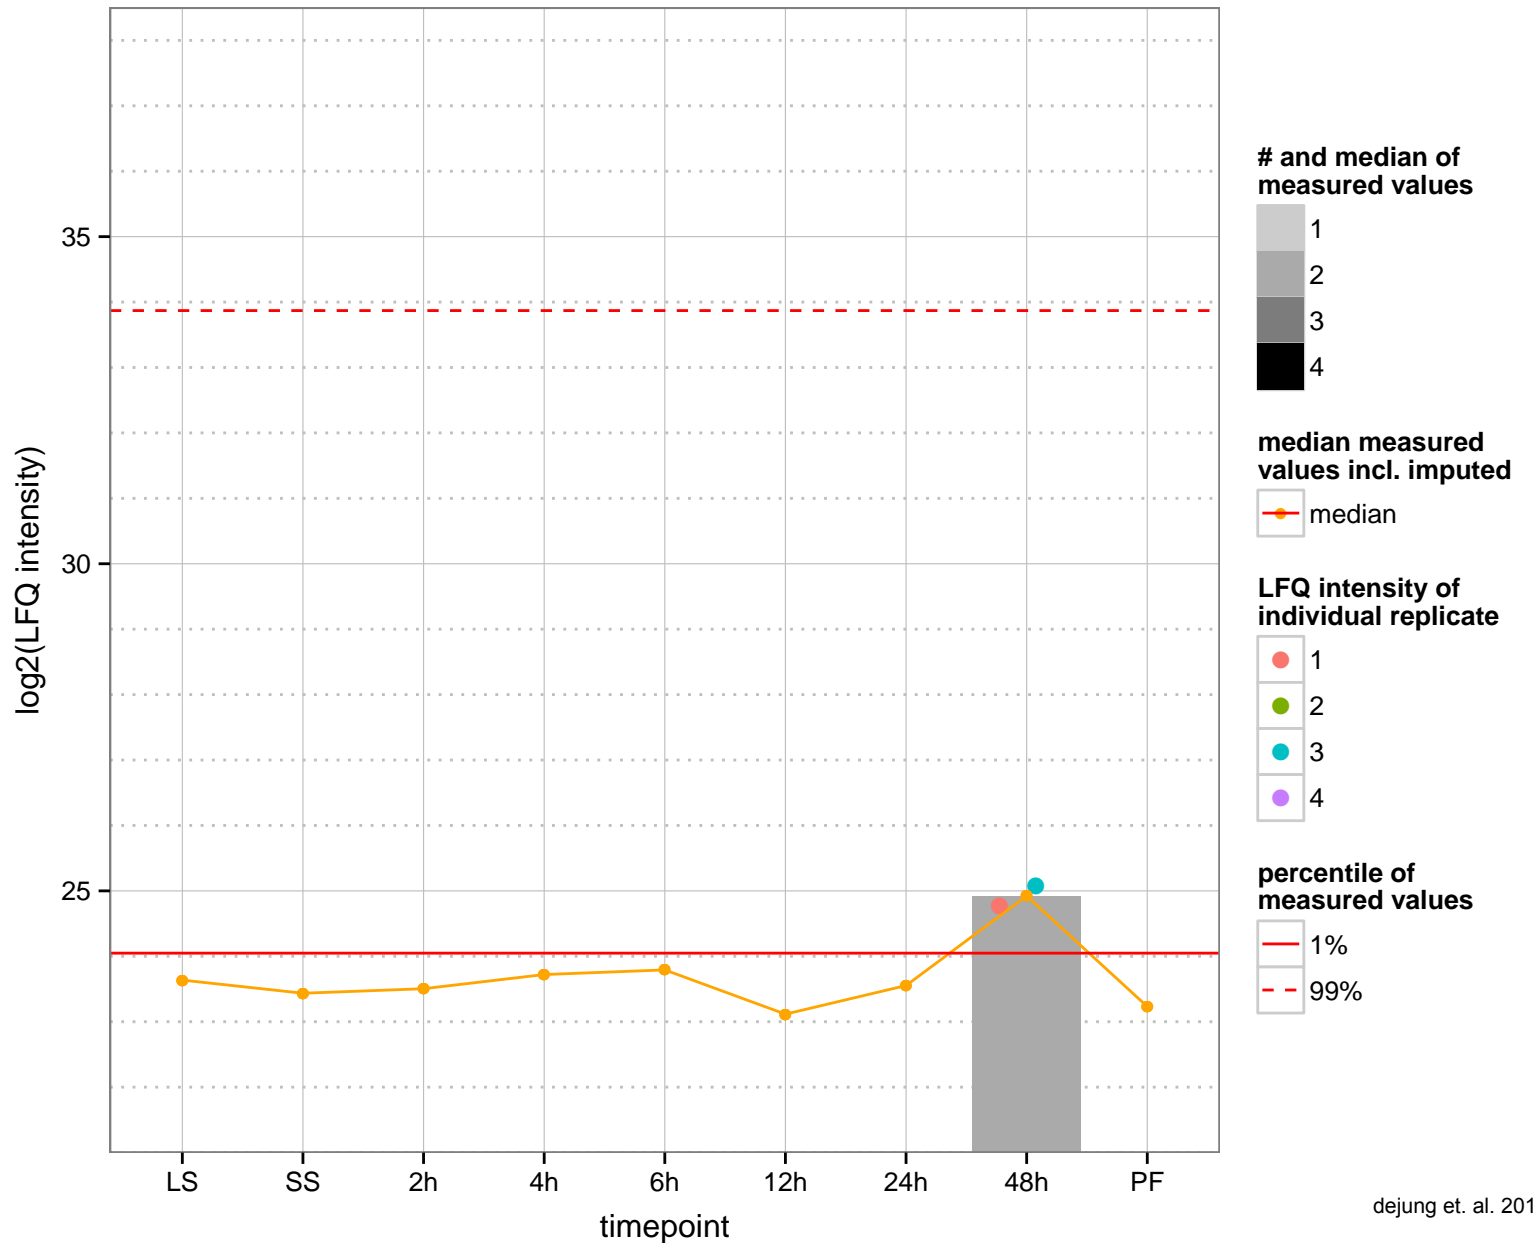

hypothetical protein, conserved  
 Tb927.3.2100  
 AGOF: null  
 AGOC: null  
 AGOP: null  
 PGOF: null  
 PGO: null  
 PGOP: null

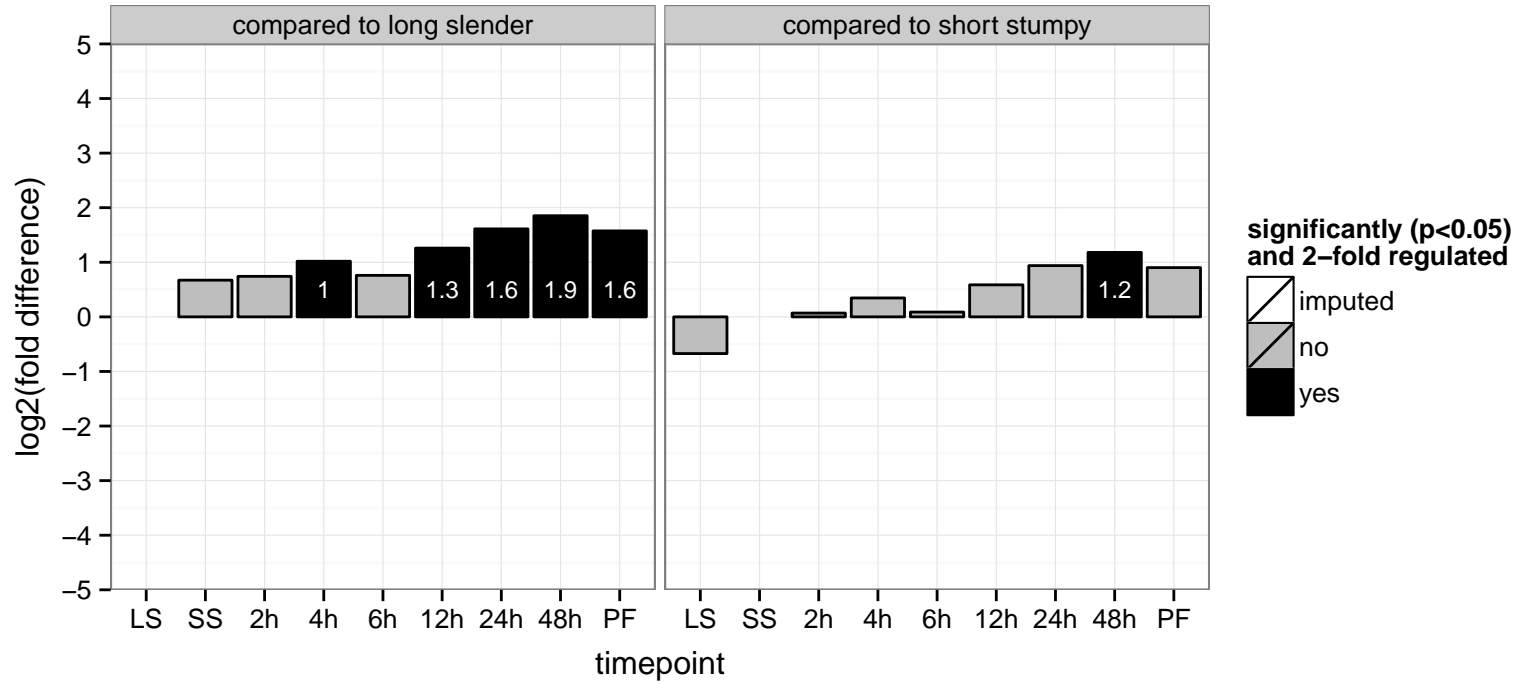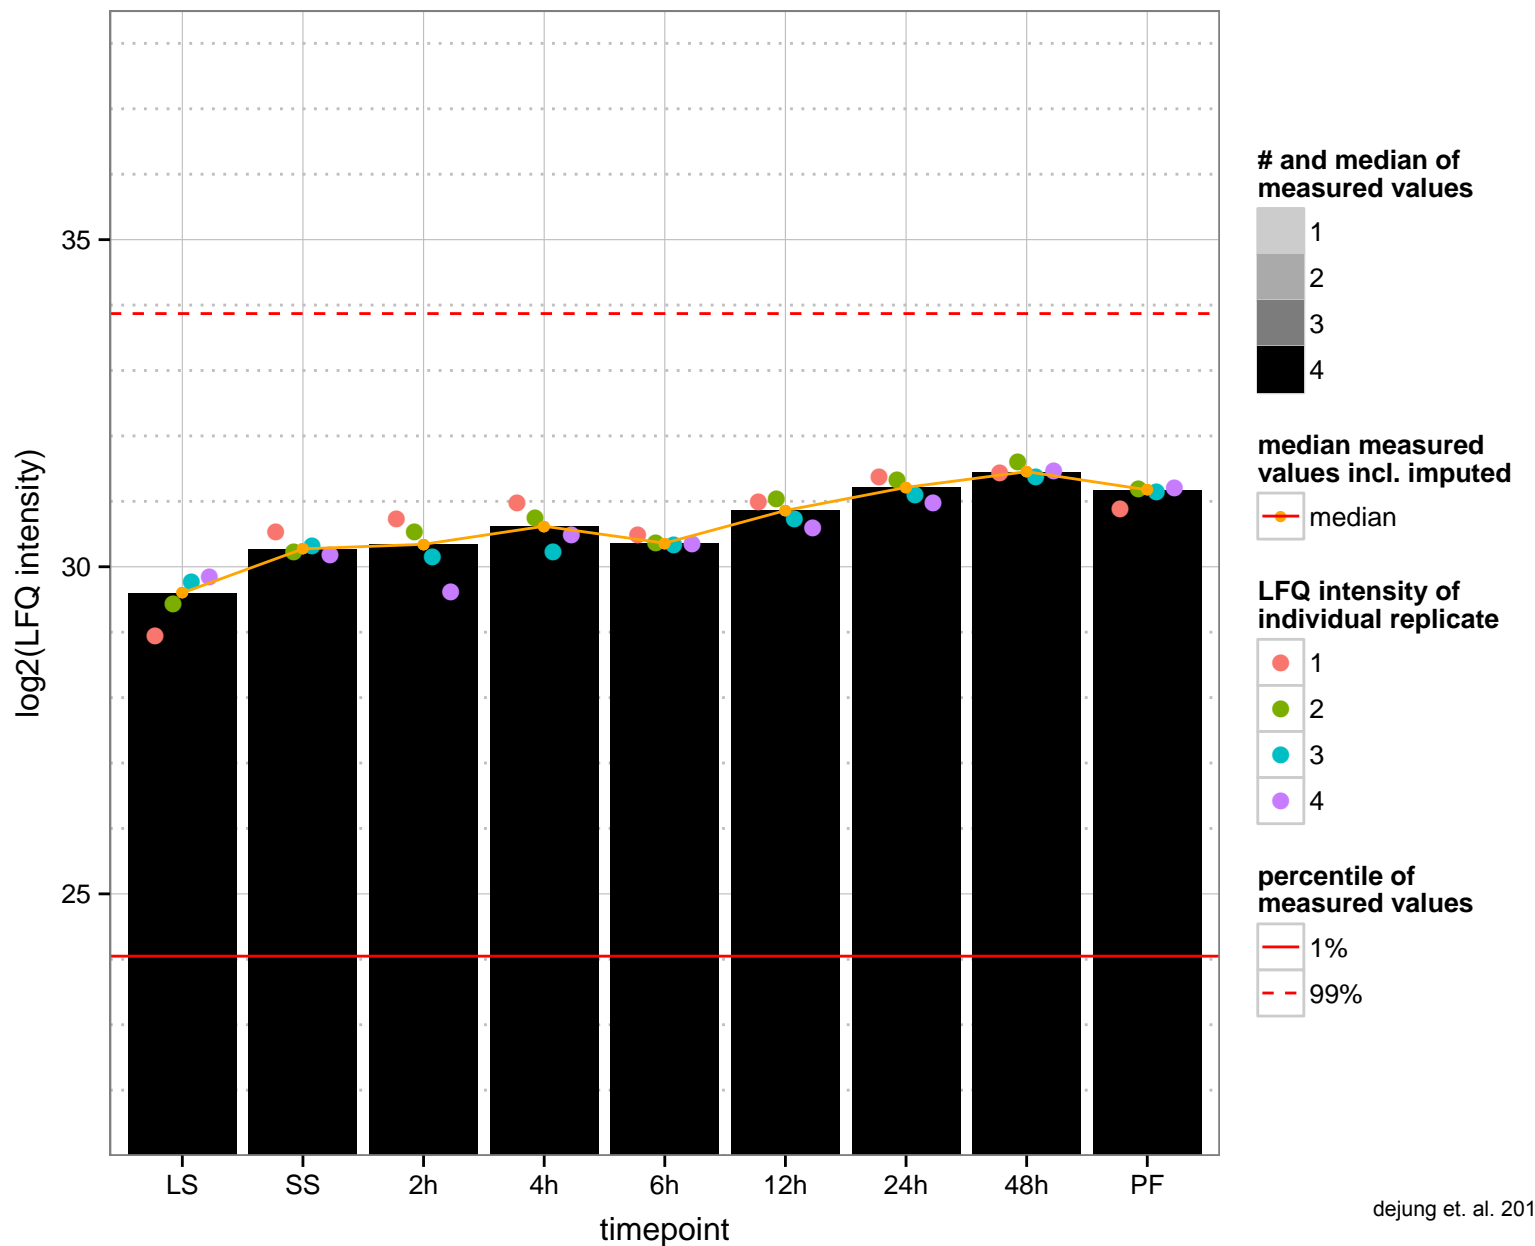

hypothetical protein, conserved

Tb927.3.2660

AGOF: endodeoxyribonuclease activity, producing 5'-phosphomonoesters

AGOC: null

AGOP: null

PGOF: endodeoxyribonuclease activity, producing 5'-phosphomonoesters

PGOC: null

PGOP: null

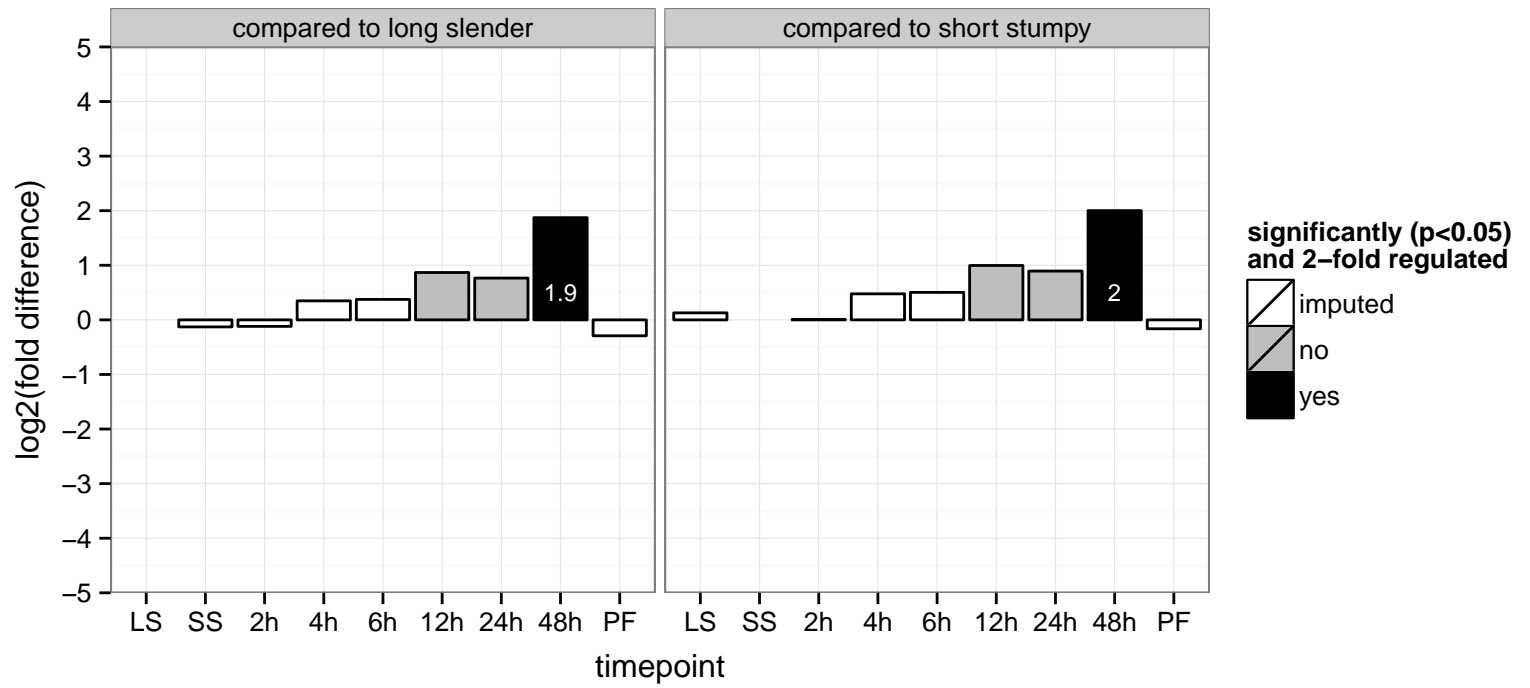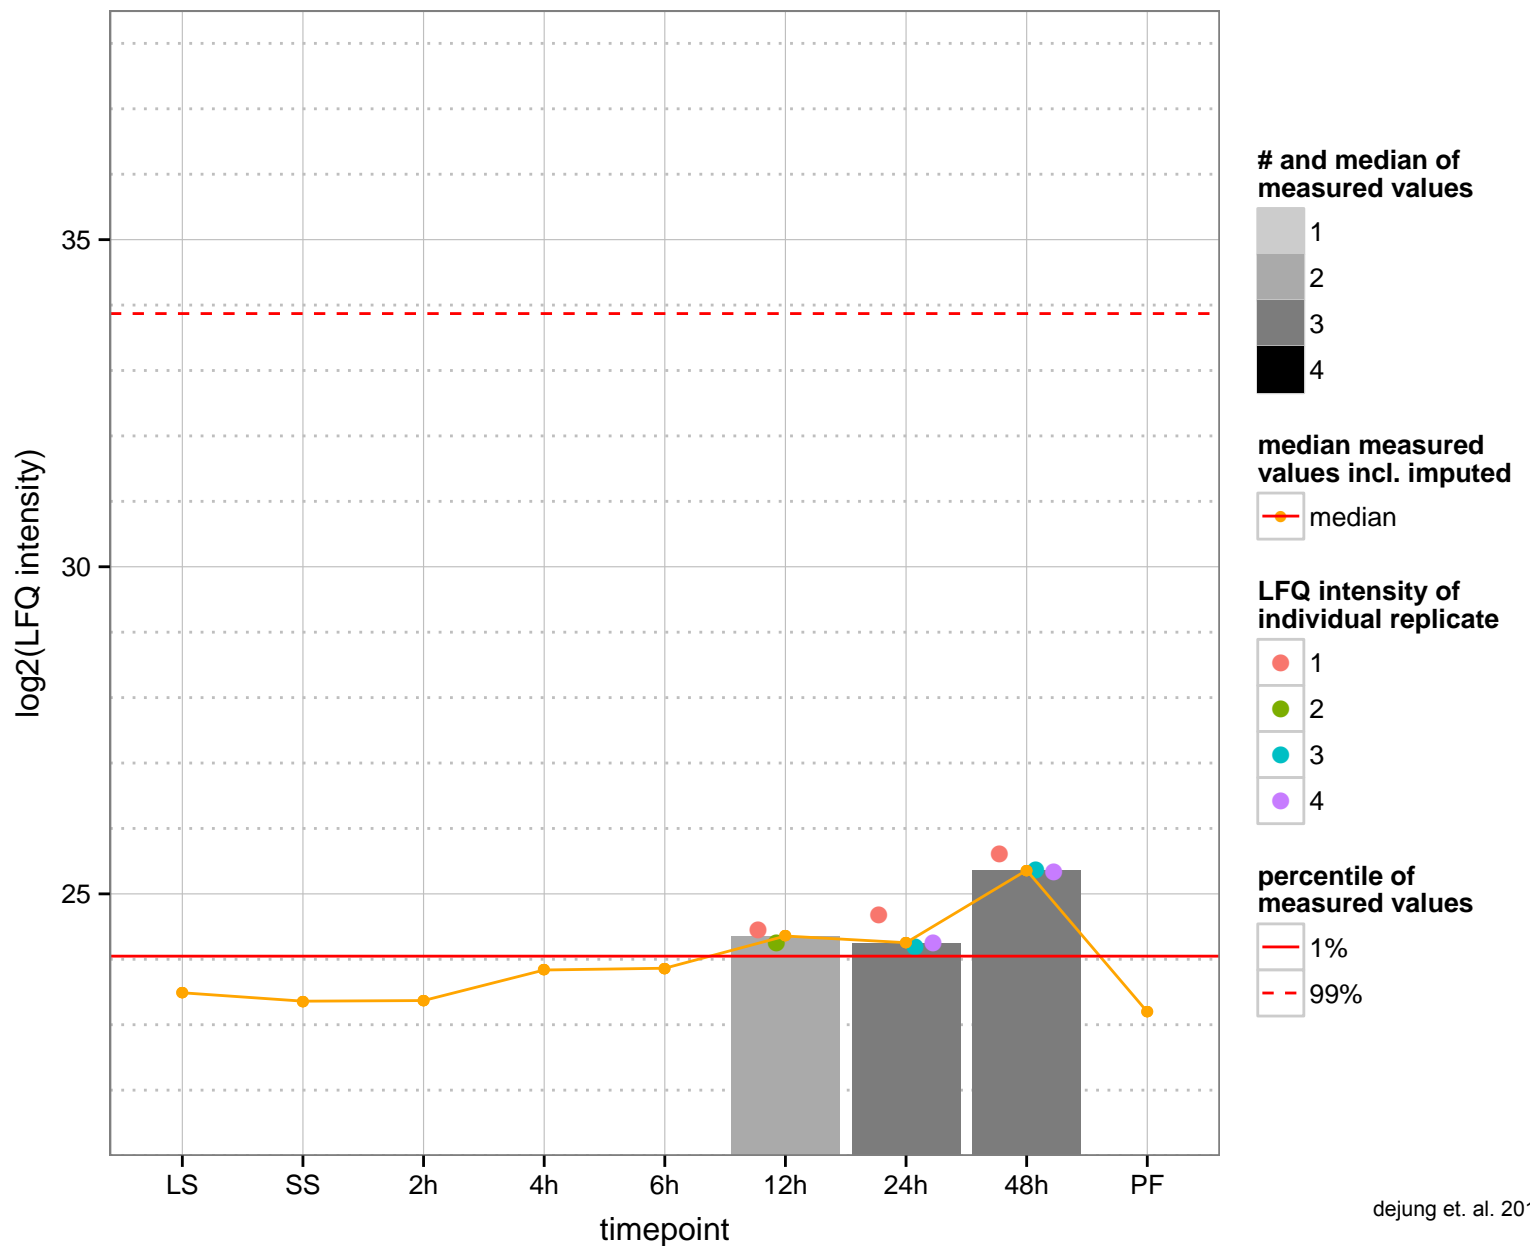

hypothetical protein, conserved  
 Tb927.3.3150;Tb11.v5.0796  
 AGOF: null  
 AGOC: null  
 AGOP: null  
 PGOF: null  
 PGO: null  
 PGOP: null

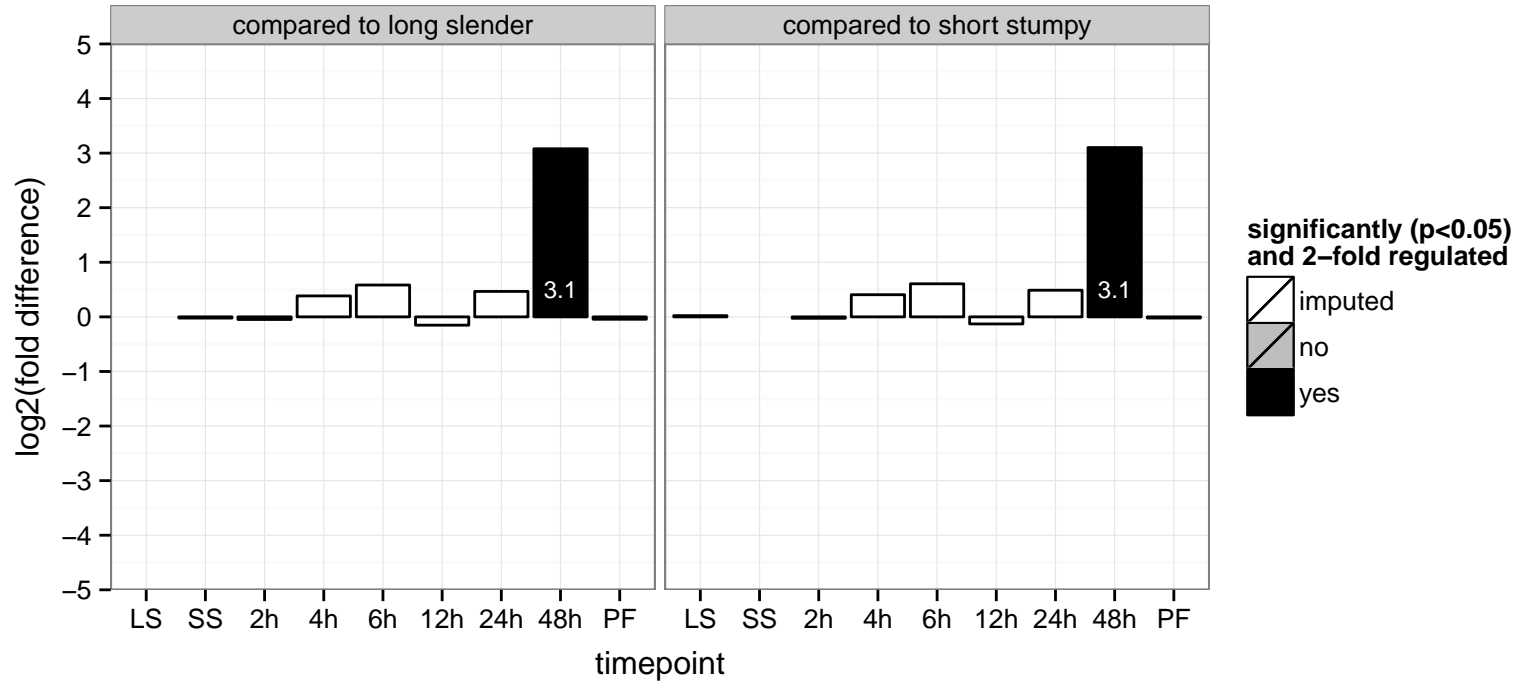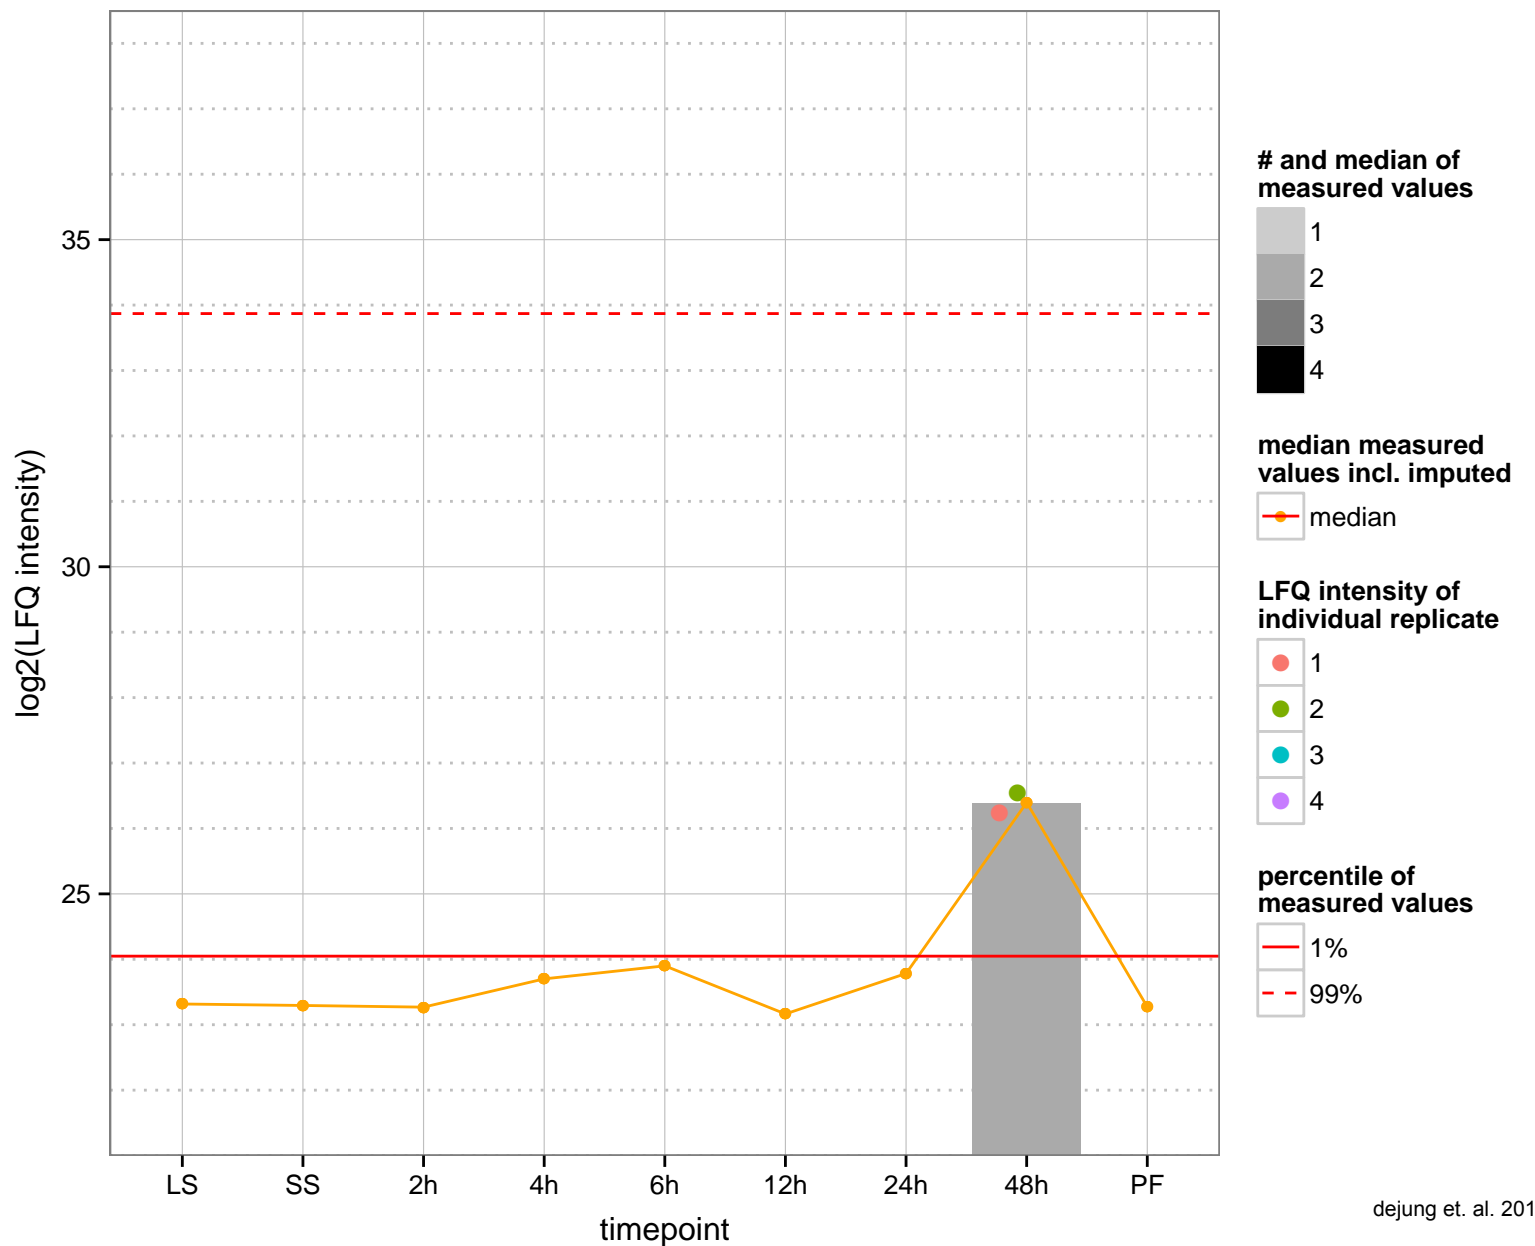

60S ribosomal protein L13, putative  
 Tb927.3.3320;Tb927.3.3310  
 AGOF: structural constituent of ribosome  
 AGOC: intracellular, ribosome  
 AGOP: null  
 PGOF: structural constituent of ribosome, null  
 PGOC: intracellular, ribosome, null  
 PGOP: translation, null

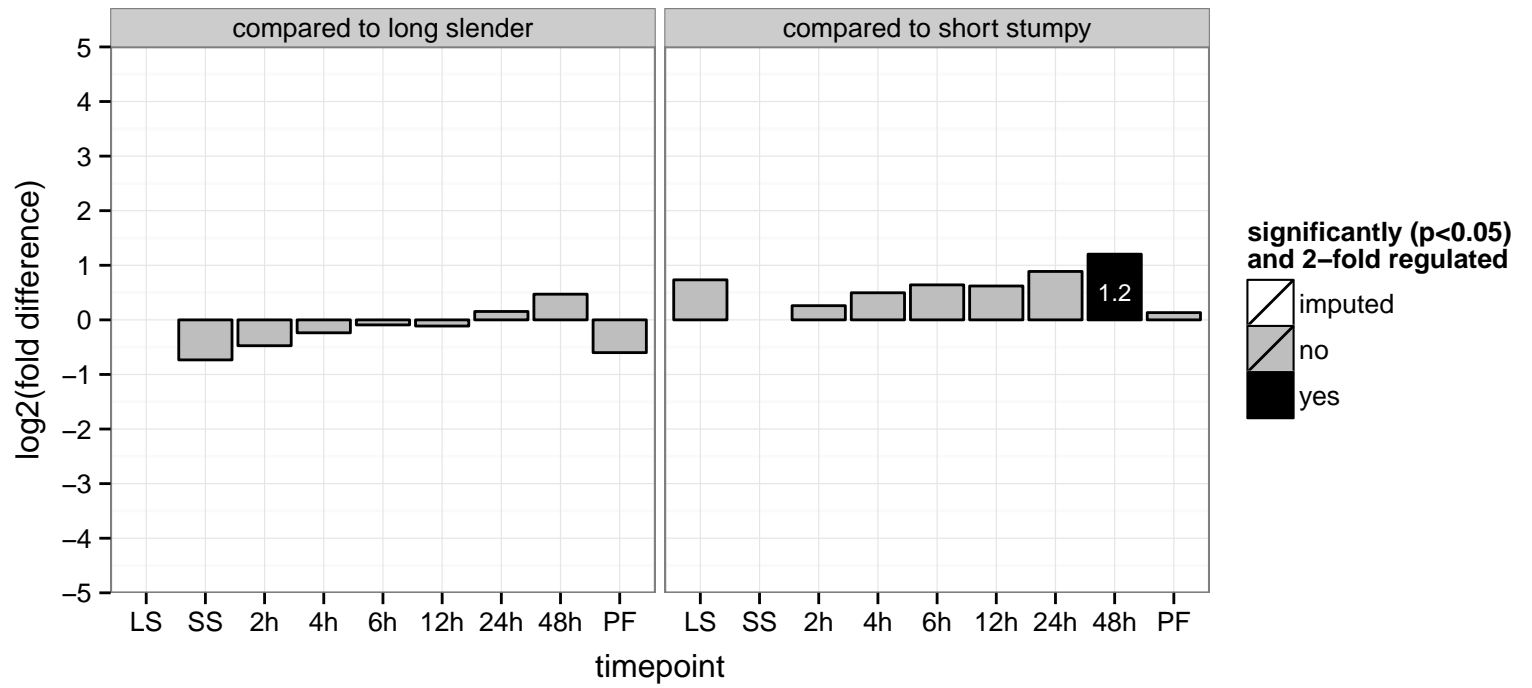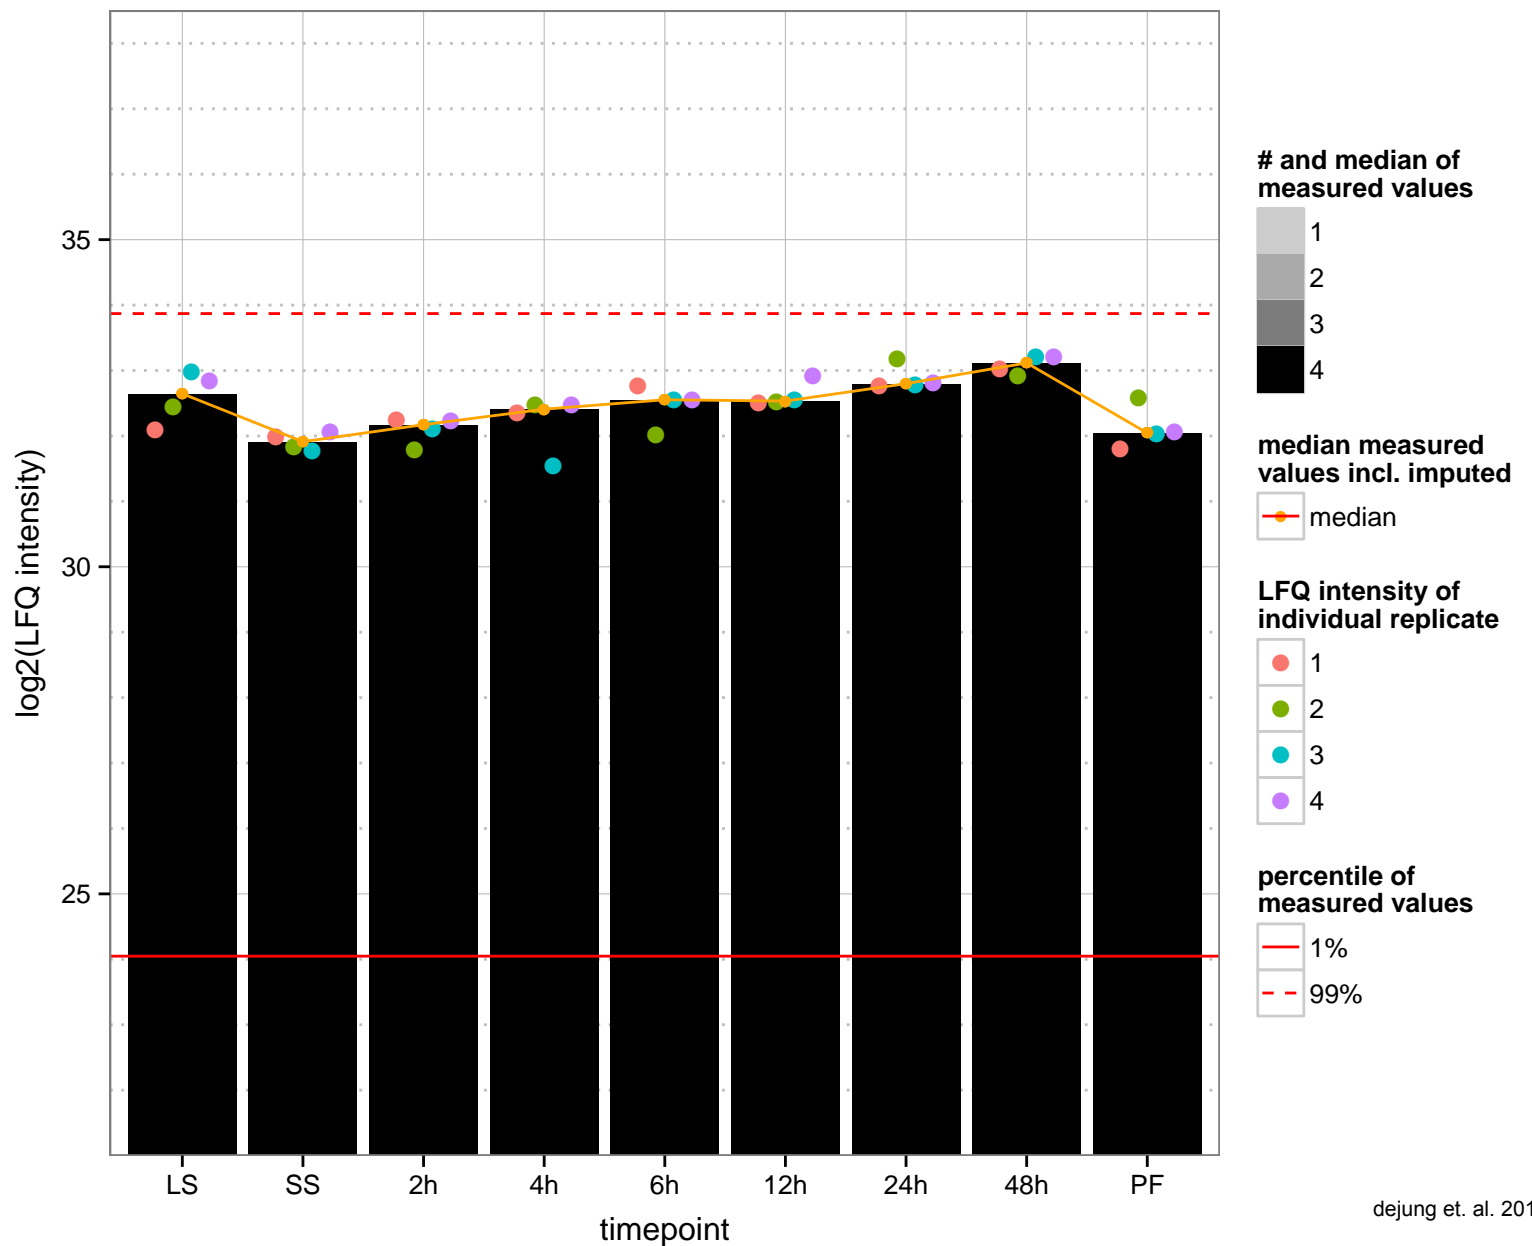



RNA-binding protein, putative (TRRM3)  
 Tb927.3.3670  
 AGOF: RNA binding  
 AGOC: nucleus  
 AGOP: RNA processing  
 PGO: nucleic acid binding  
 PGO: null  
 PGO: null

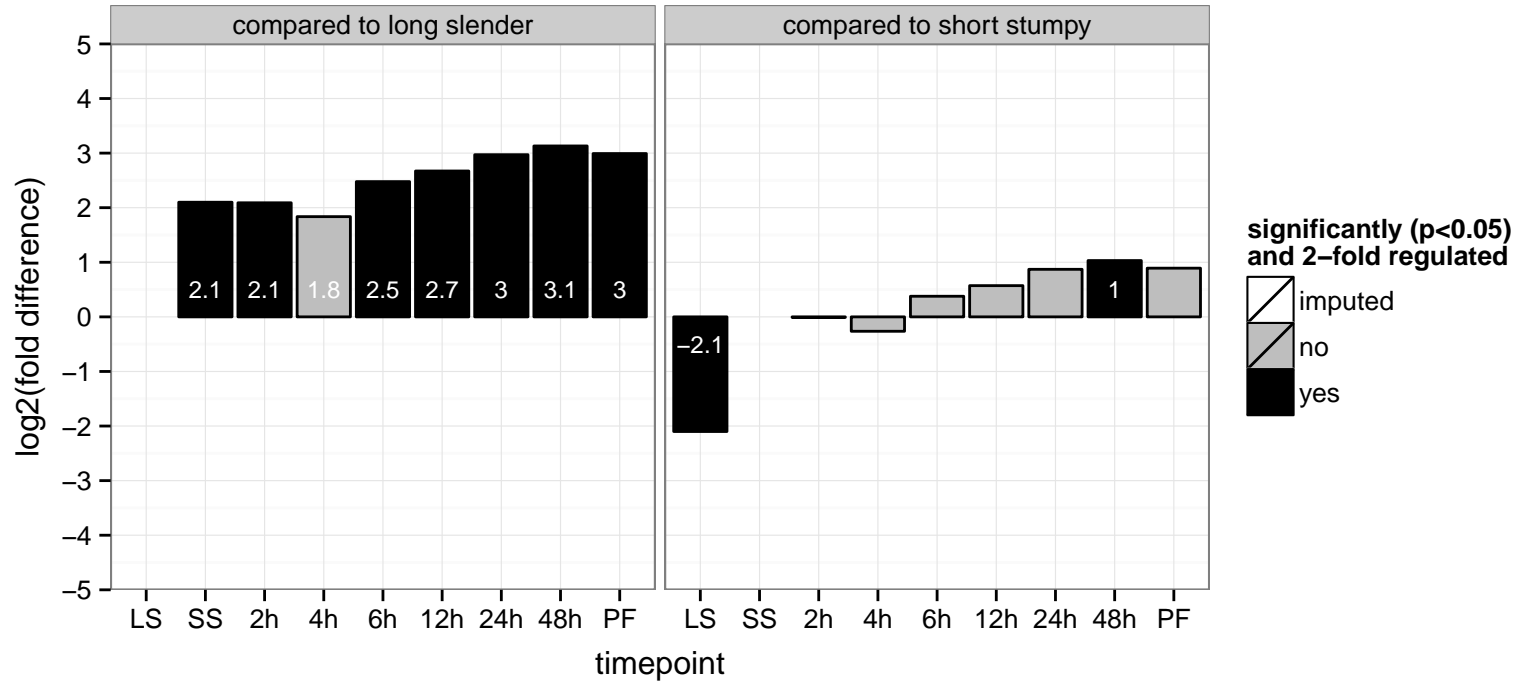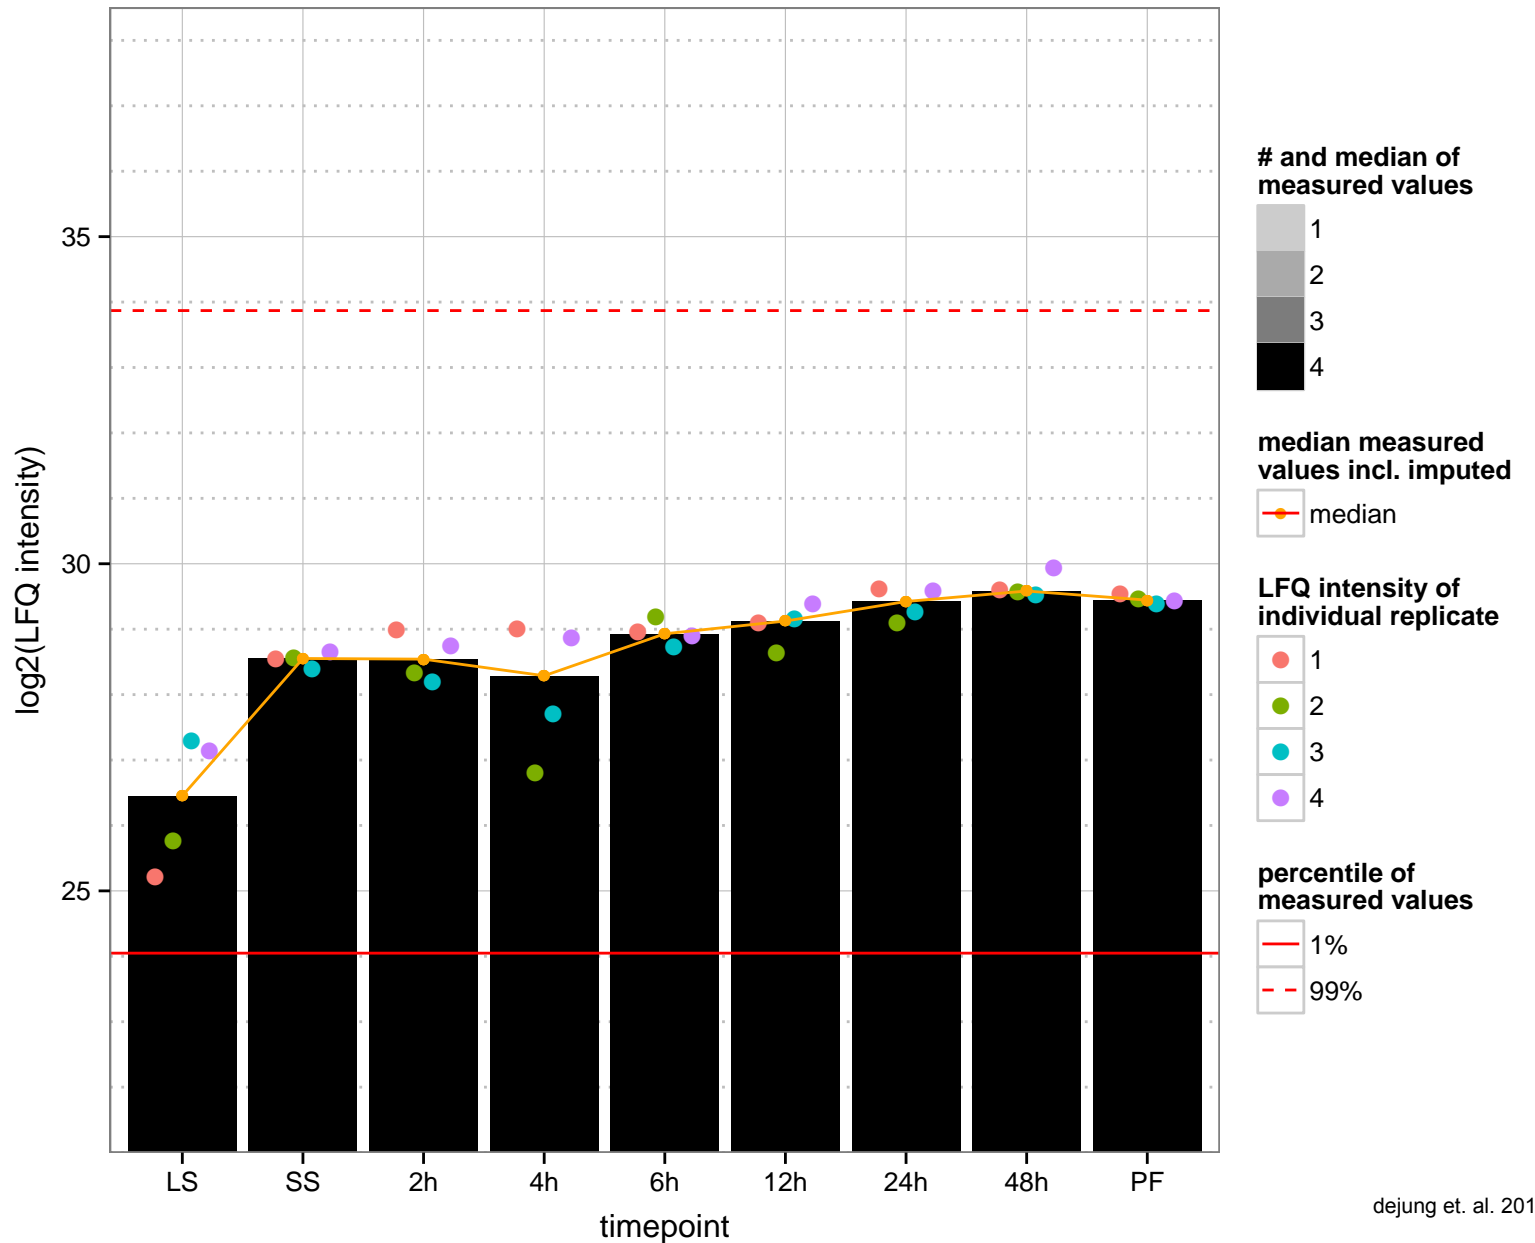

hypothetical protein, conserved  
 Tb927.3.3740  
 AGOF: zinc ion binding  
 AGOC: intracellular  
 AGOP: null  
 PGOF: zinc ion binding  
 PGOC: intracellular  
 PGOP: null

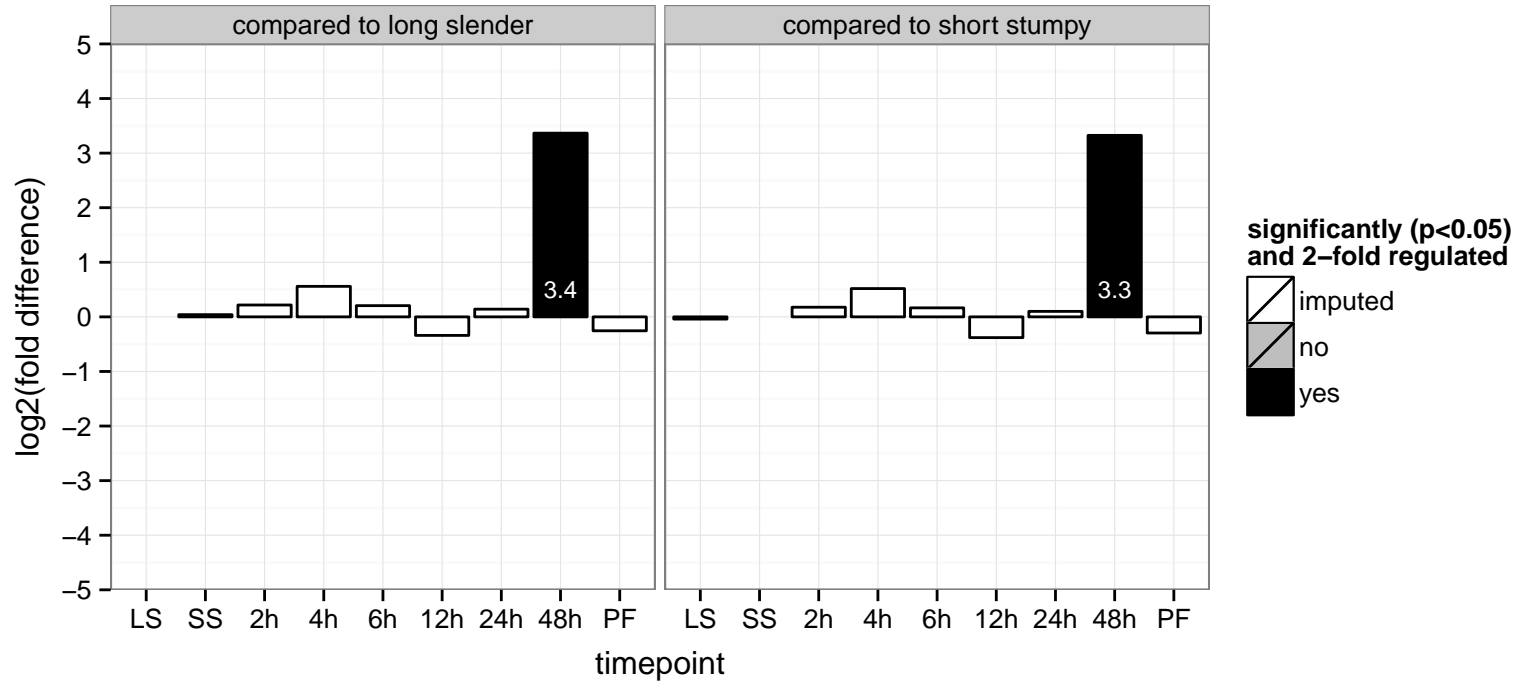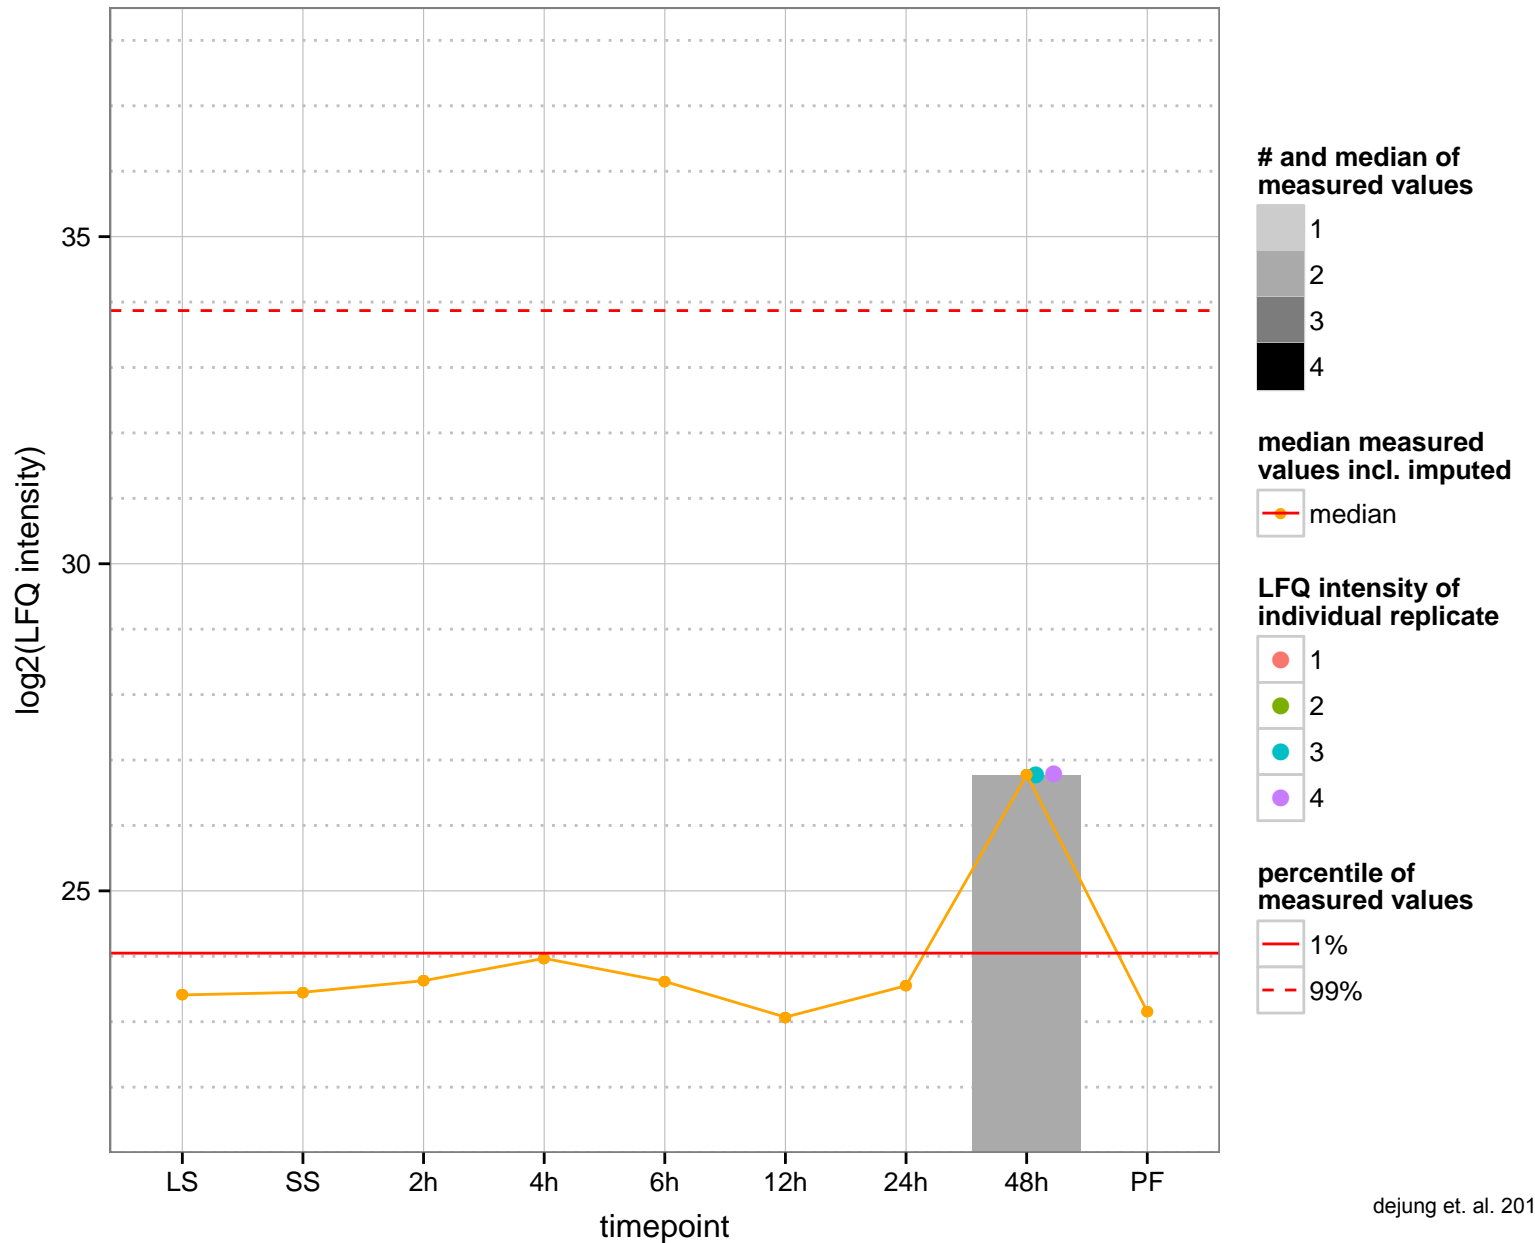

hypothetical protein, conserved  
 Tb927.3.4620  
 AGOF: nucleic acid binding, zinc ion binding  
 AGOC: null  
 AGOP: null  
 PGOF: nucleic acid binding, zinc ion binding  
 PGOC: null  
 PGOP: null

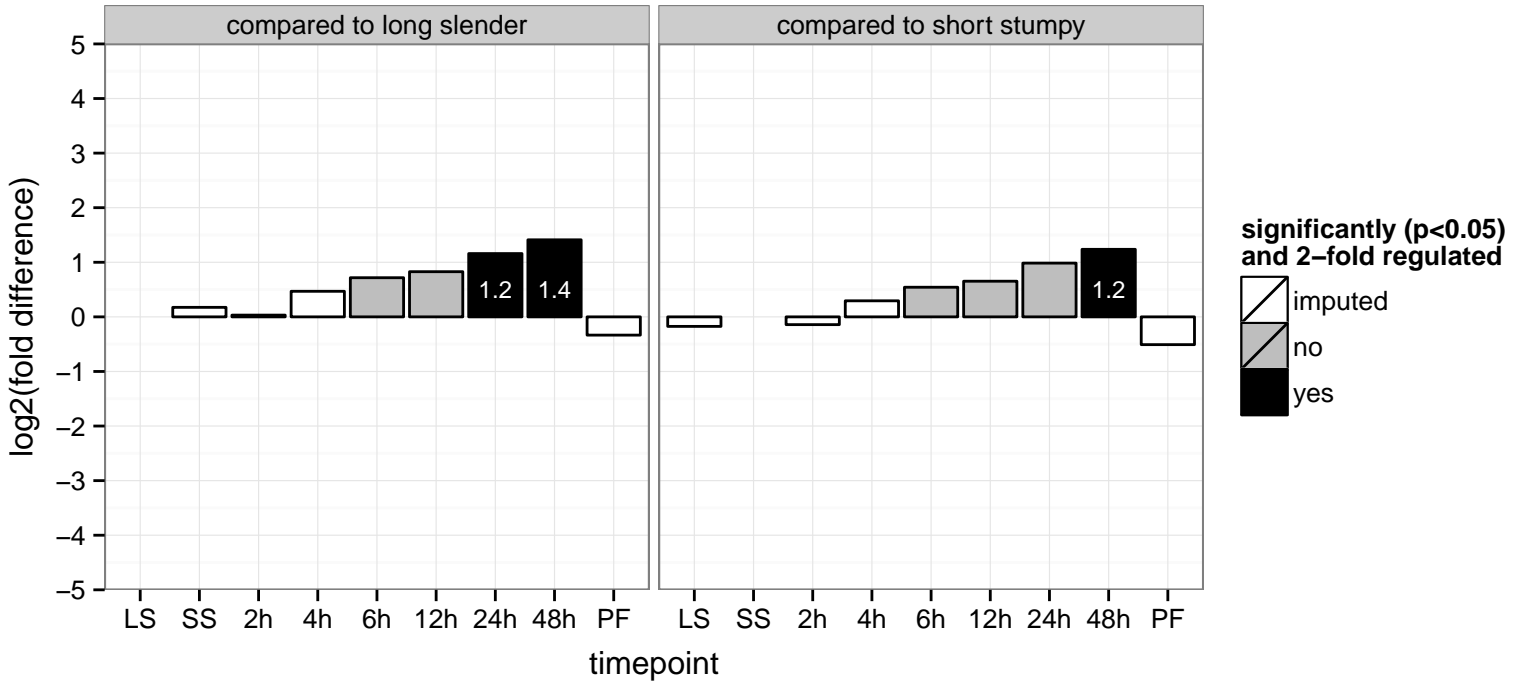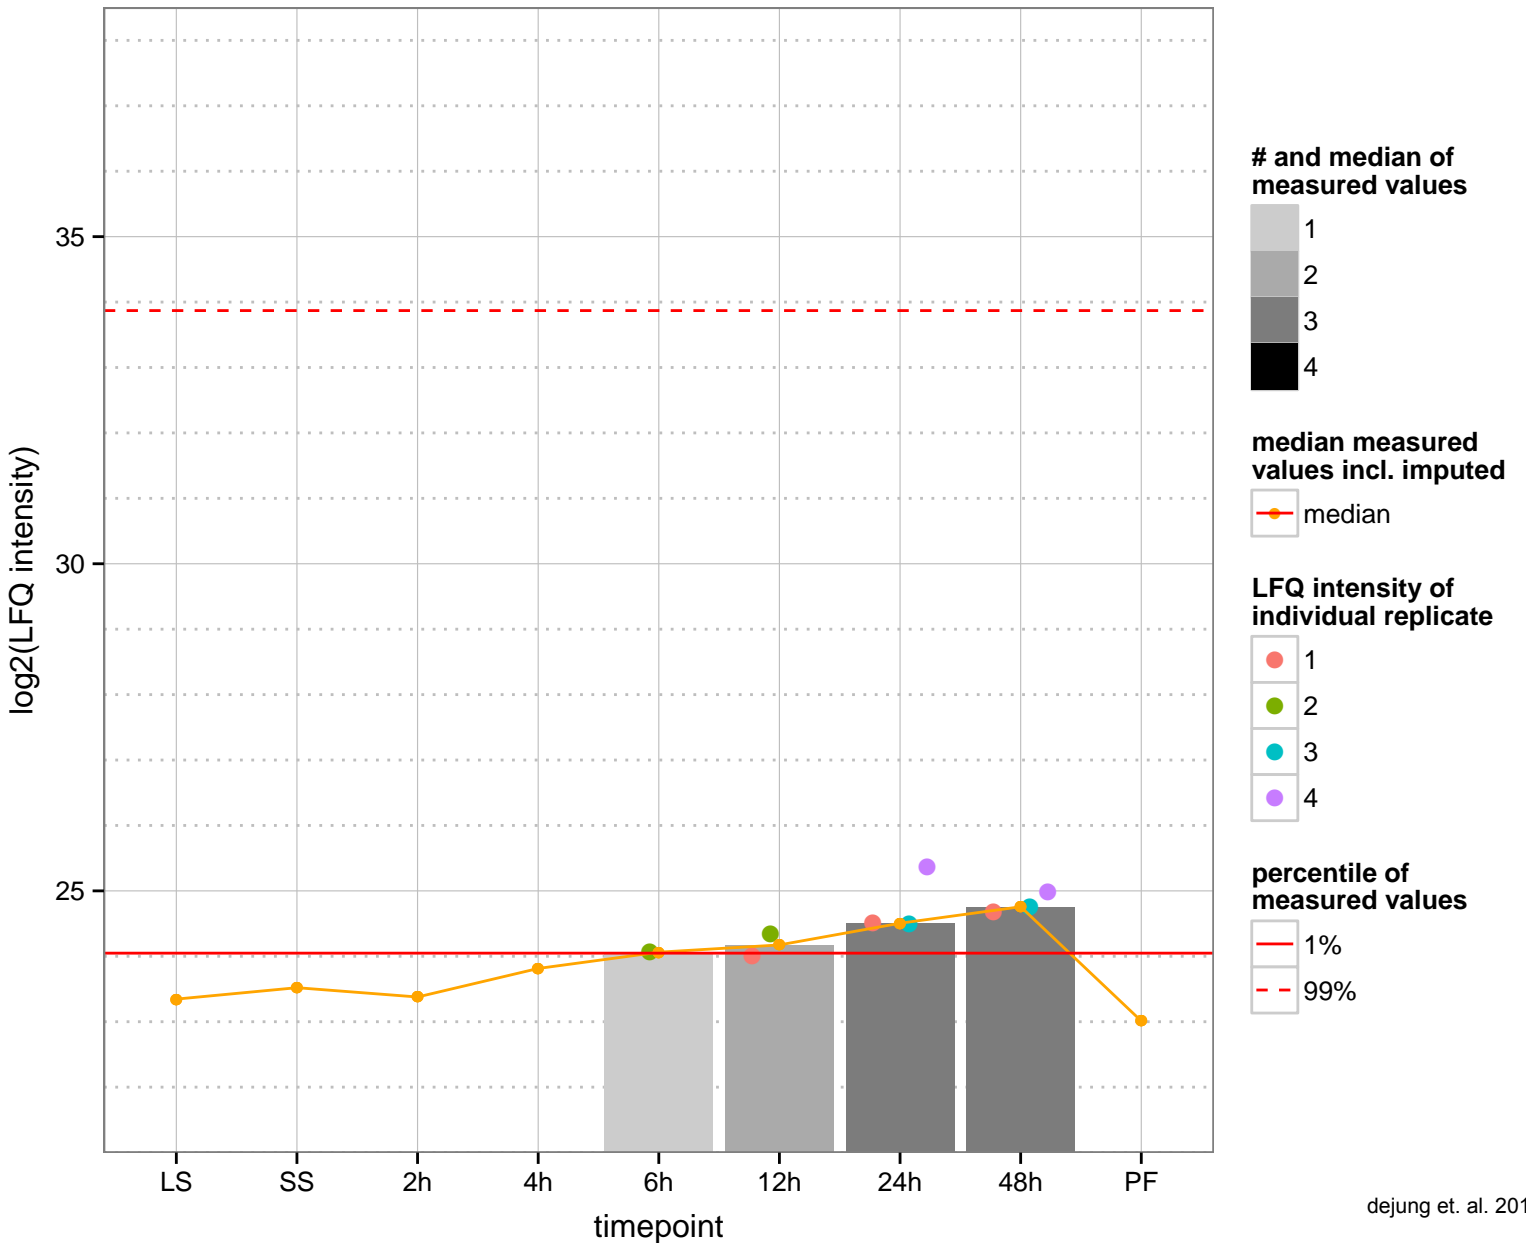

paraflagellar rod protein, I2 antigen  
 Tb927.3.5310  
 AGOF: null  
 AGOC: null  
 AGOP: null  
 PGO: null  
 PGOC: null  
 PGOP: null

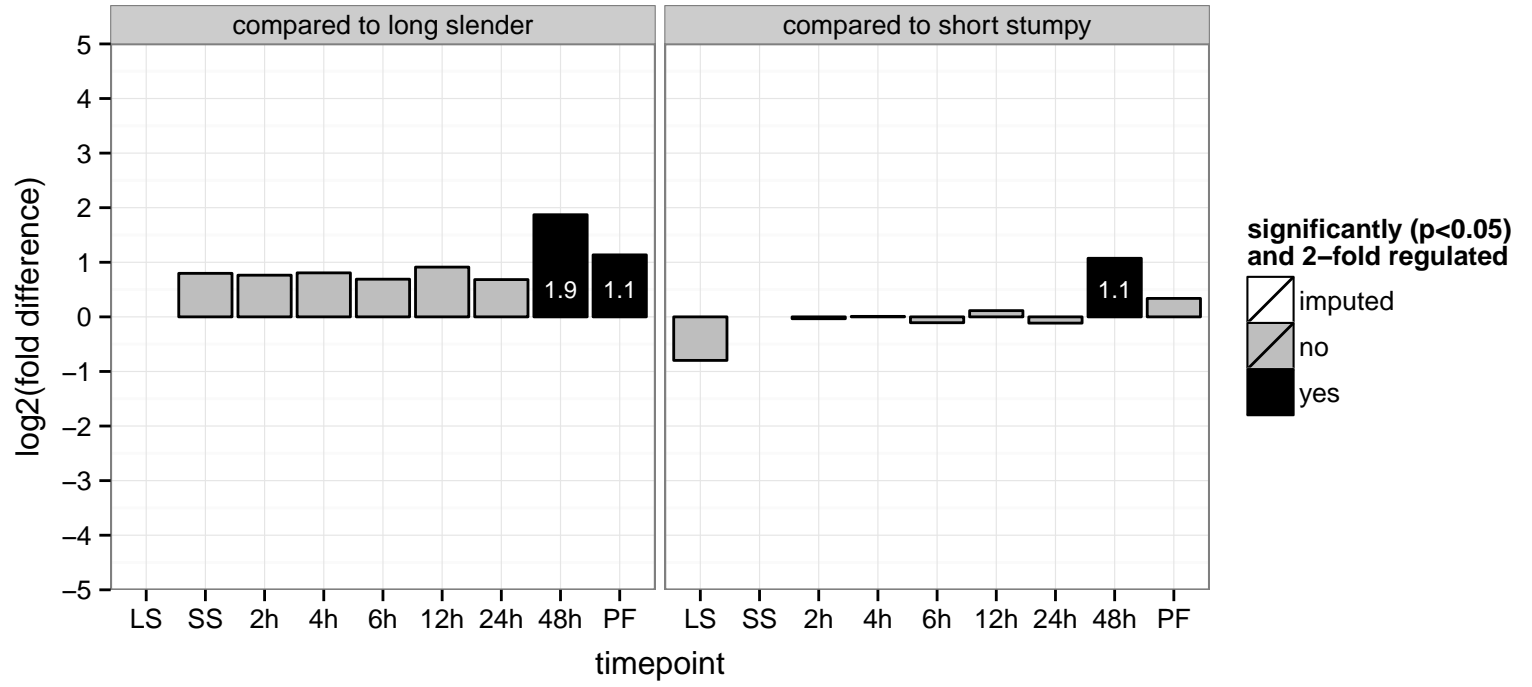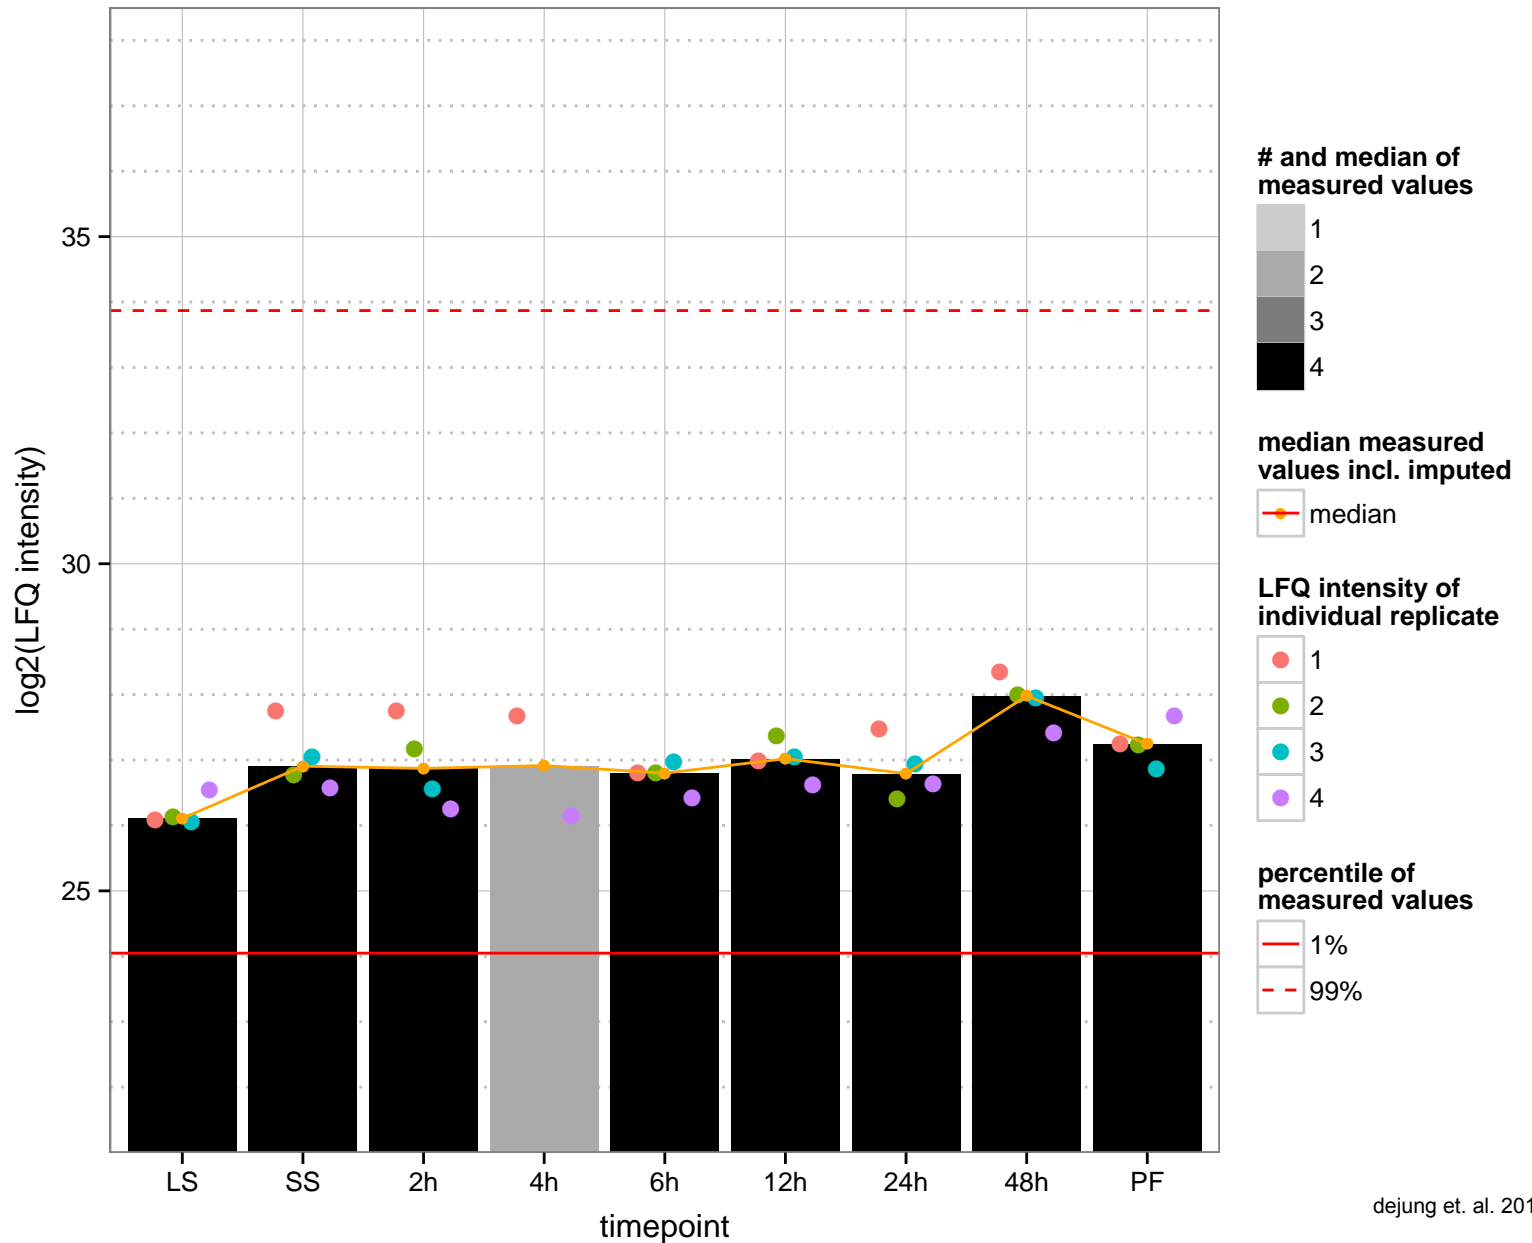

hypothetical protein, conserved

Tb927.3.5400

AGOF: ATP binding, protein serine/threonine kinase activity

AGOC: null

AGOP: growth

PGOF: ATP binding, catalytic activity, protein serine/threonine kinase activity, transferase activity, transferring phosphorus-con

PGOC: null

PGOP: null

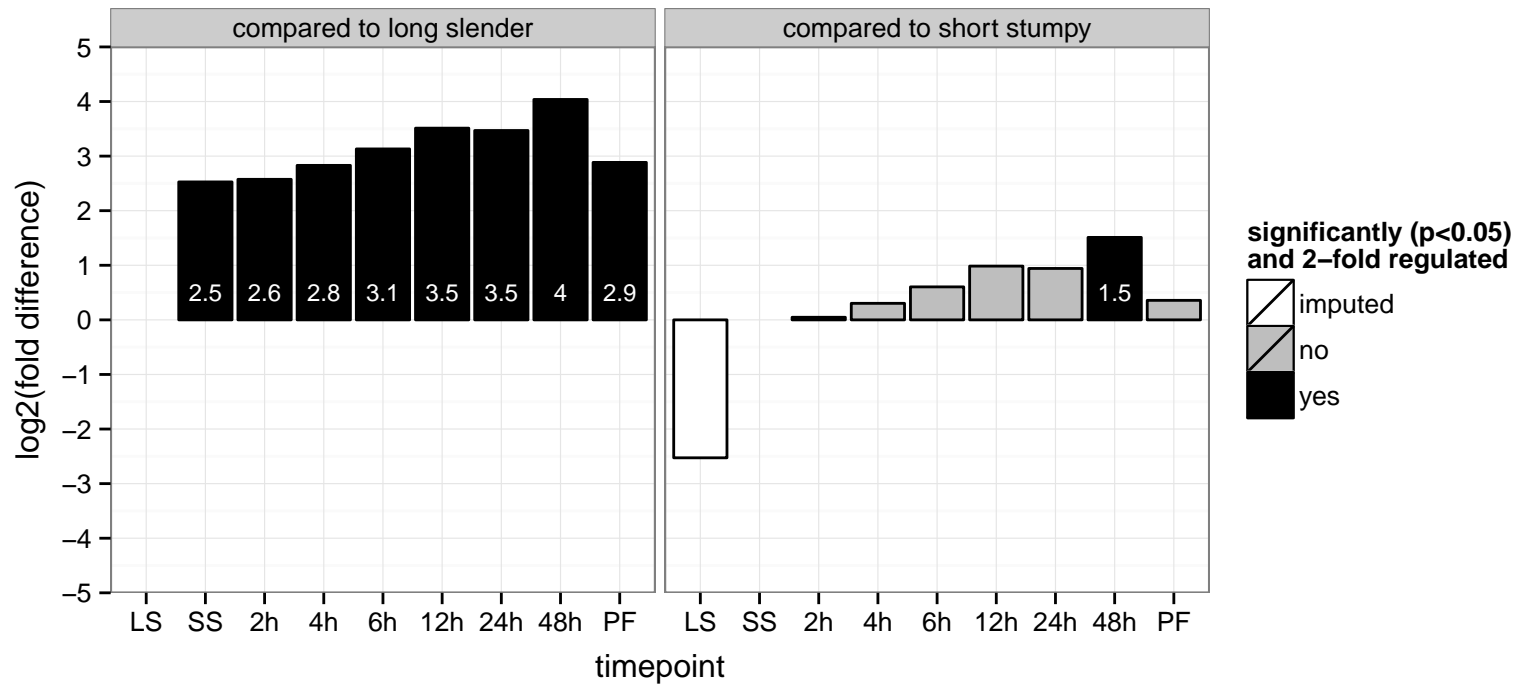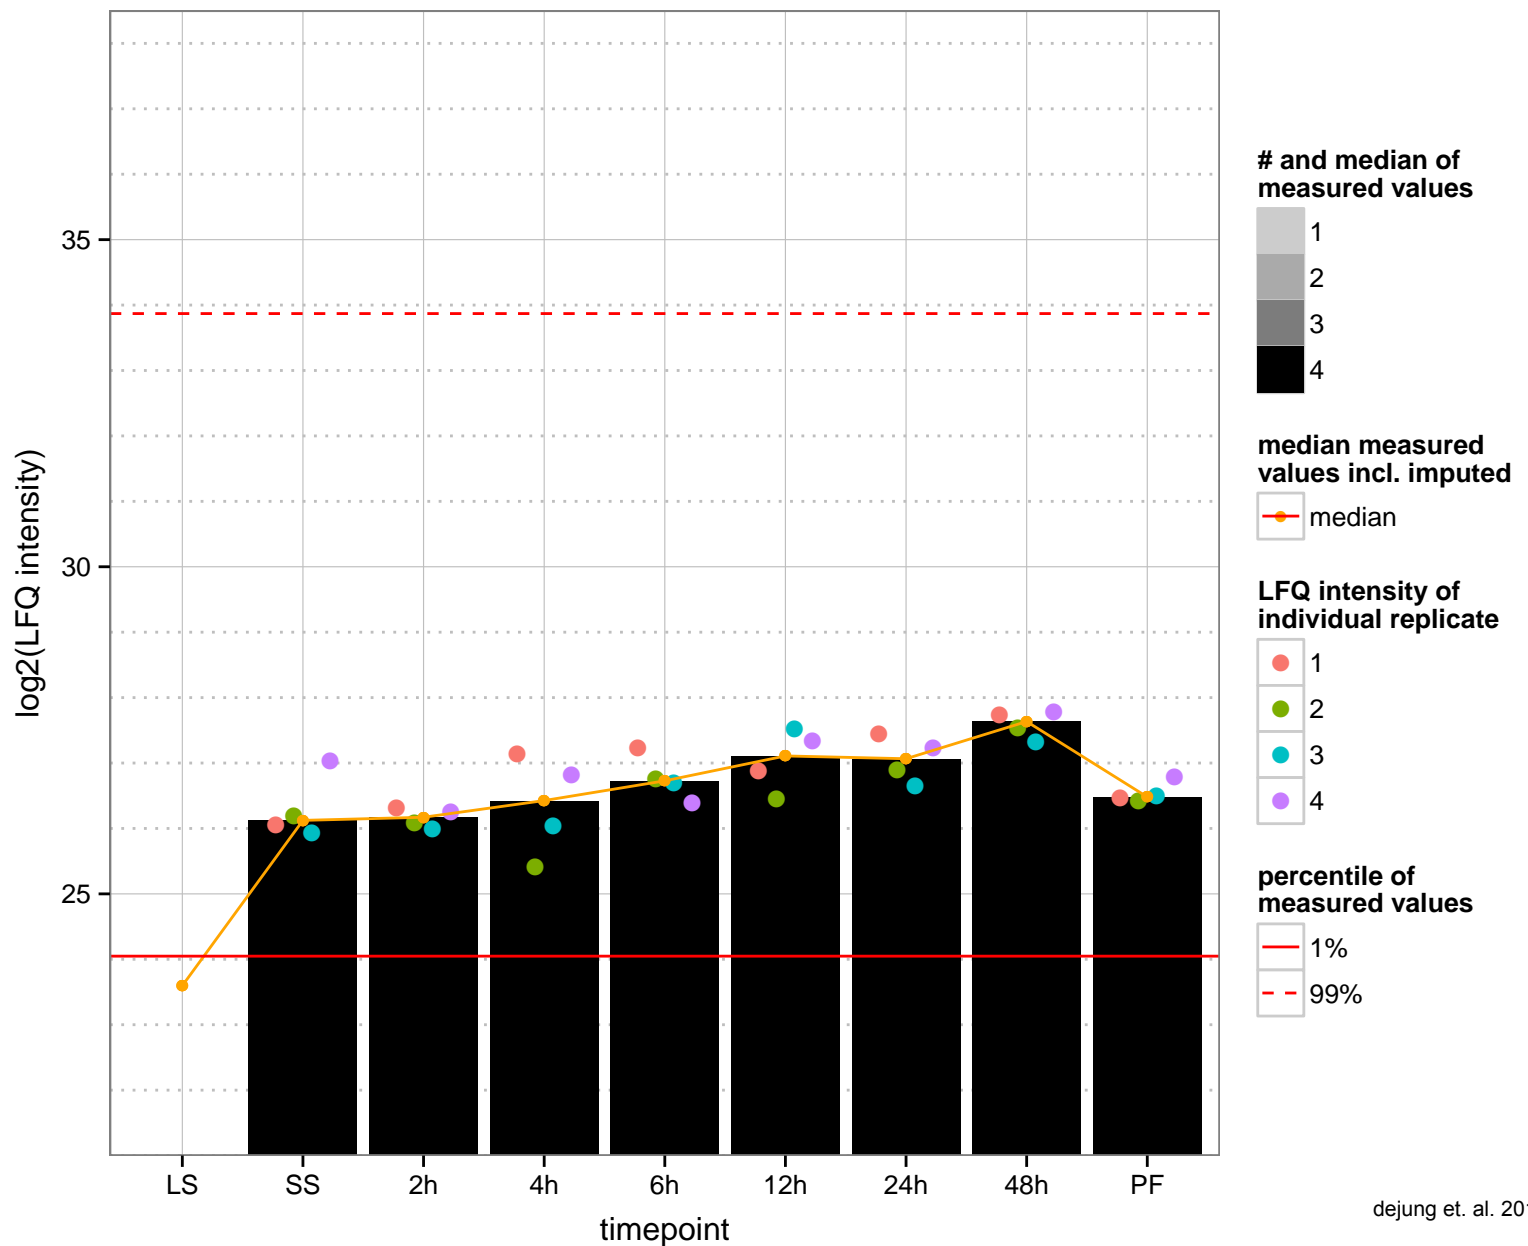

hypothetical protein, conserved  
 Tb927.4.1520  
 AGOF: null  
 AGOC: null  
 AGOP: viral protein processing, viral reproduction  
 PGO: null  
 PGO: null  
 PGO: null  
 PGO: viral protein processing, viral reproduction

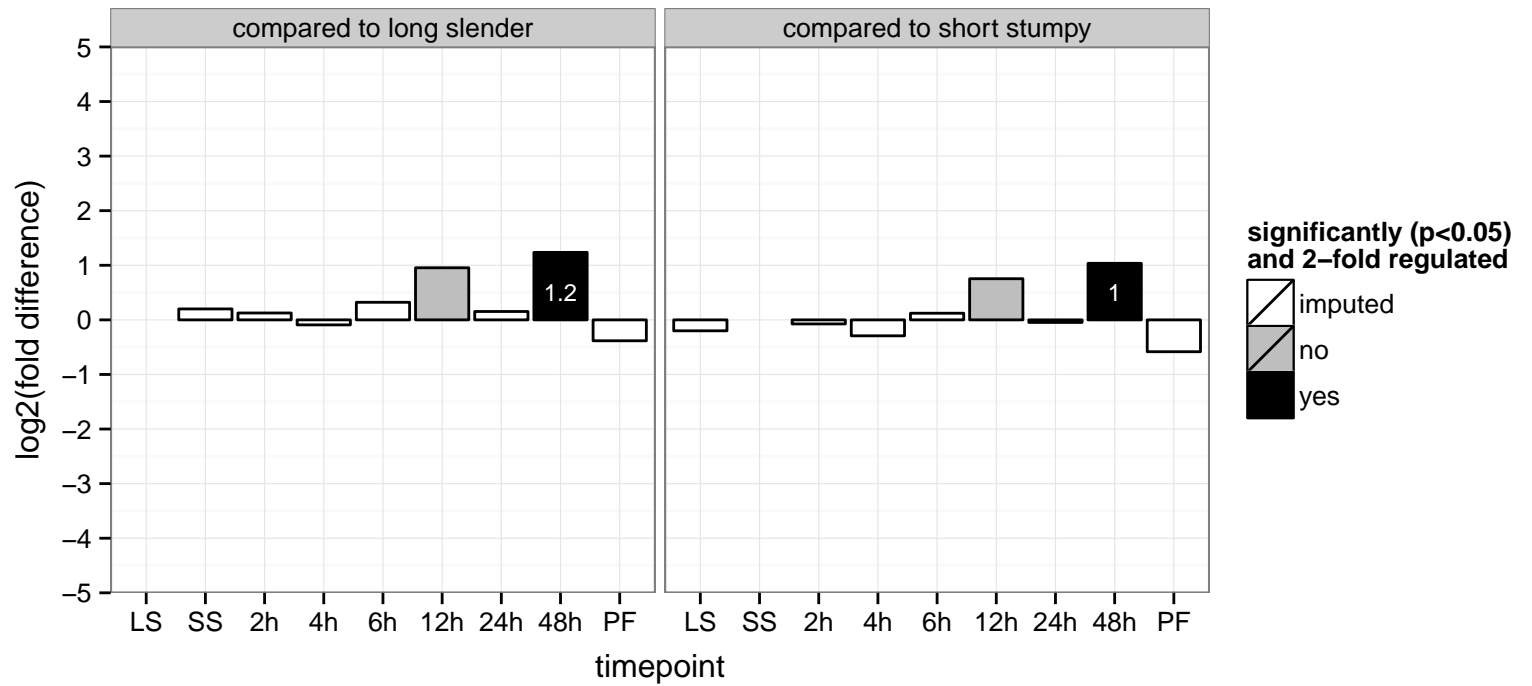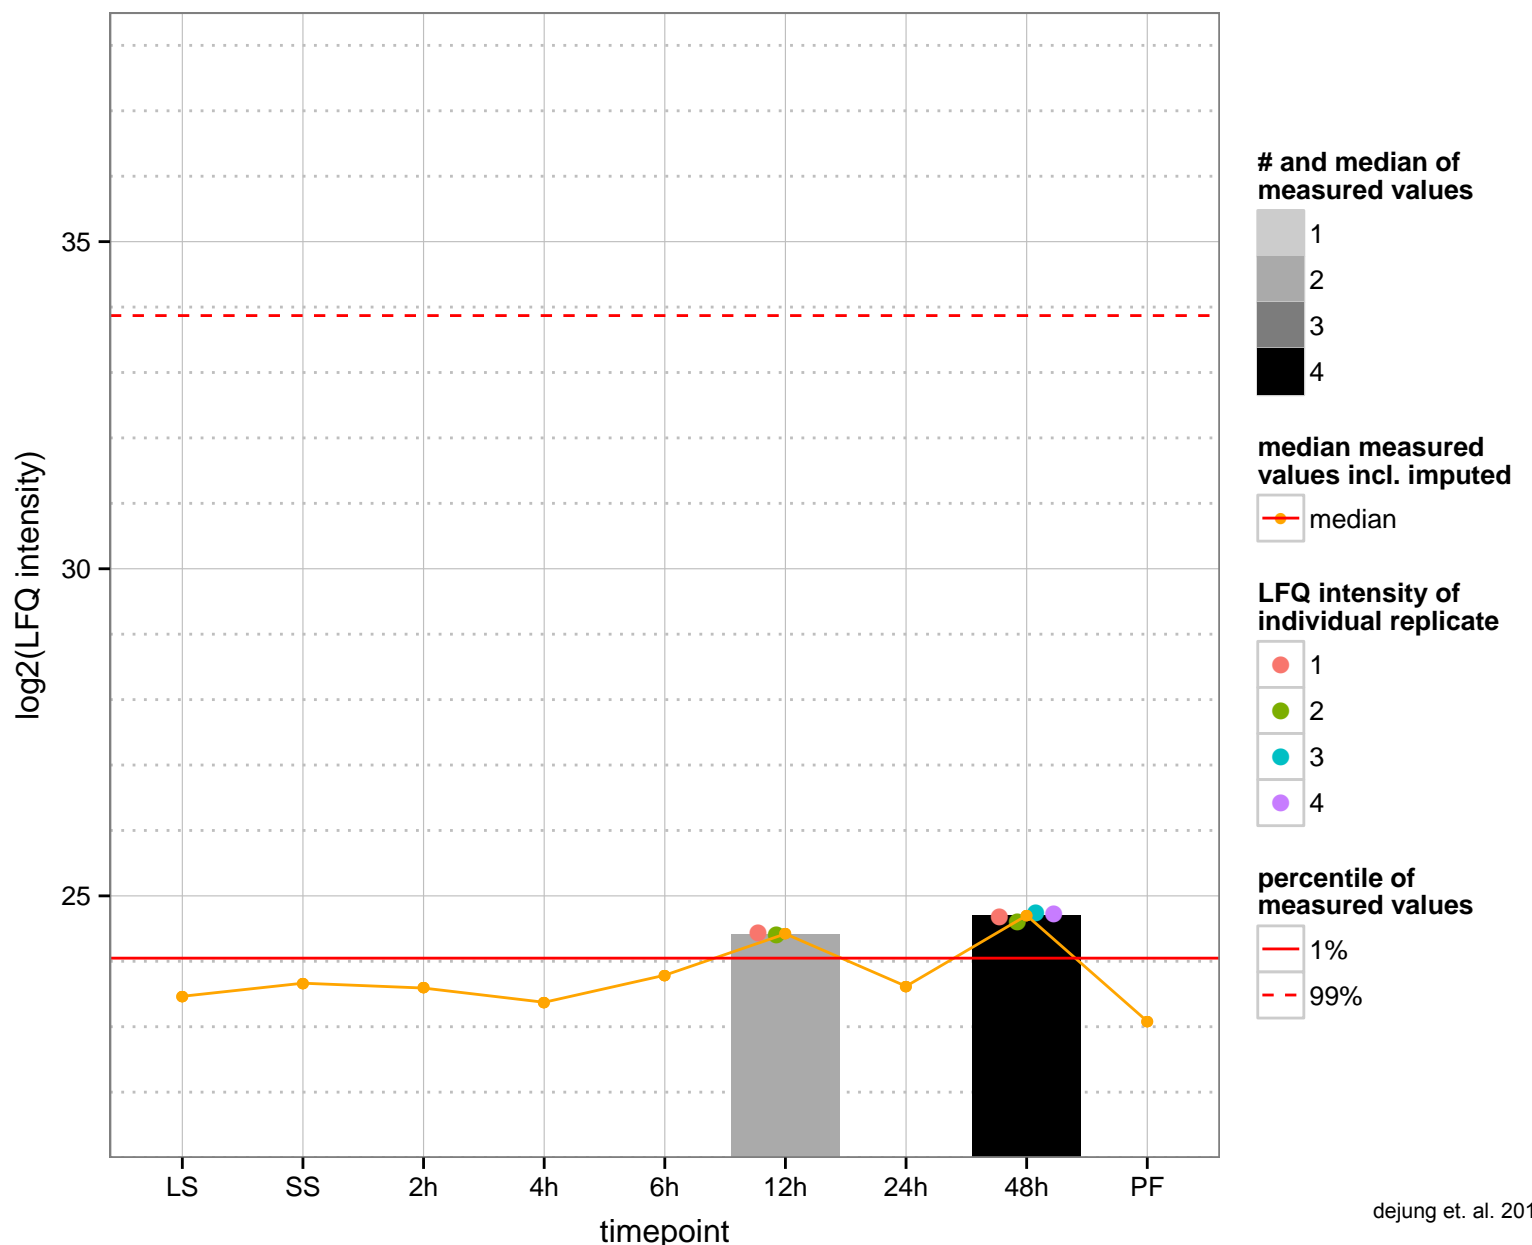

hypothetical protein, conserved  
 Tb927.4.720  
 AGOF: null  
 AGOC: mitochondrion  
 AGOP: null  
 PGO: null  
 PGO: null  
 PGO: null

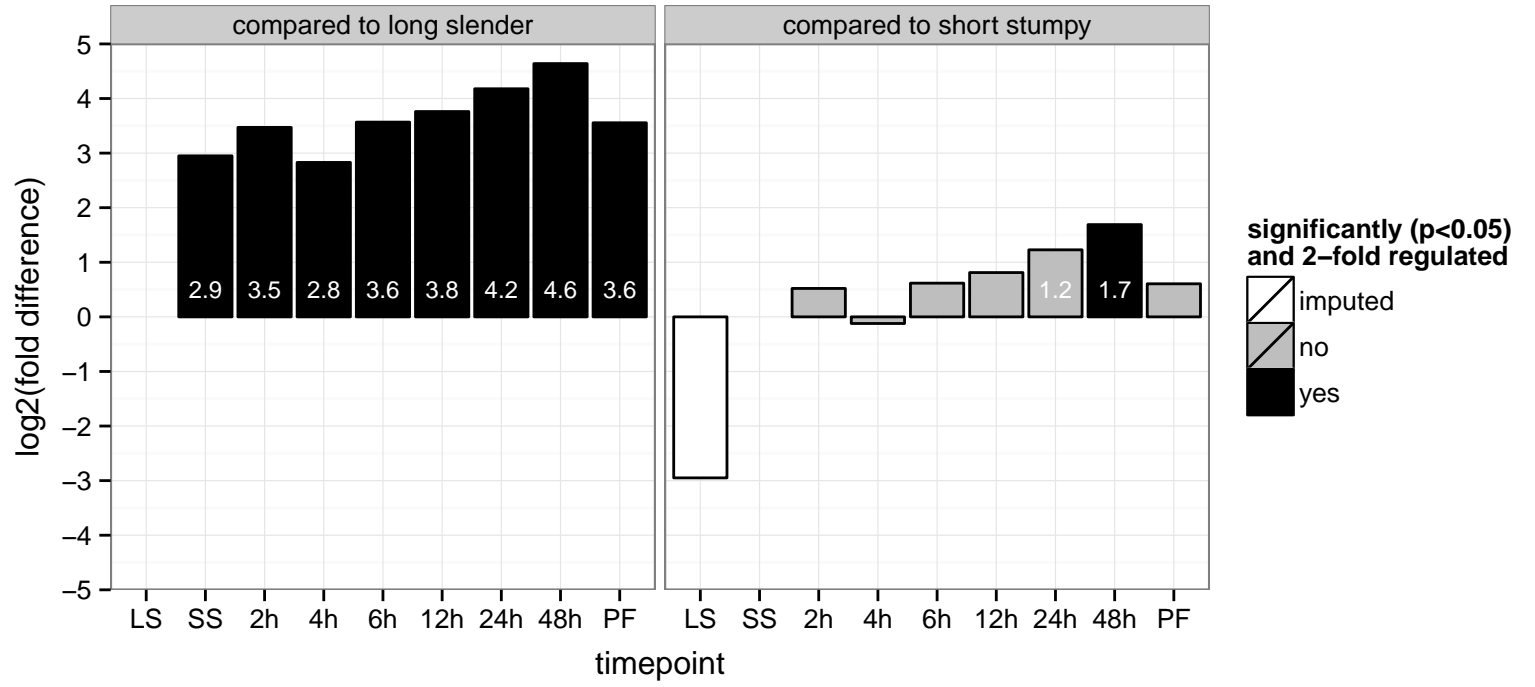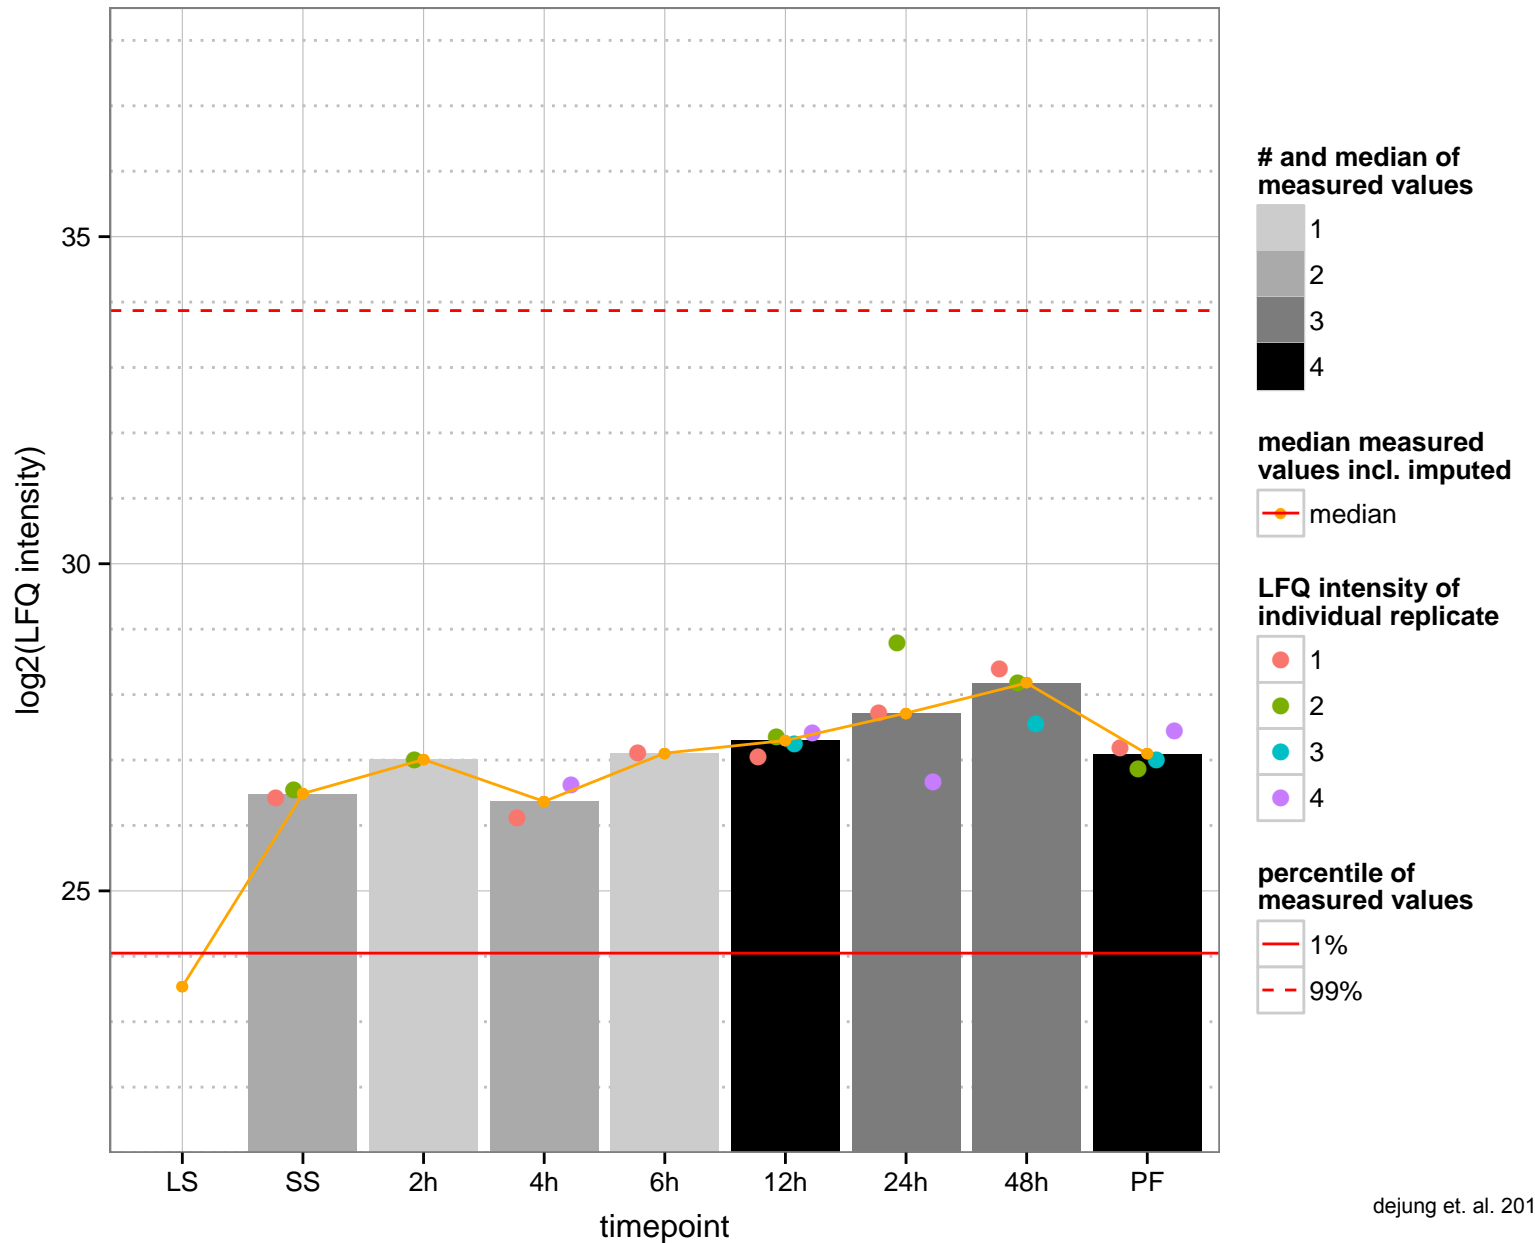

ubiquitin–protein ligase, putative (upl3)  
 Tb927.4.770  
 AGOF: acid–amino acid ligase activity  
 AGOC: intracellular  
 AGOP: cellular protein modification process  
 PGO: acid–amino acid ligase activity  
 PGOC: intracellular  
 PGOP: cellular protein modification process

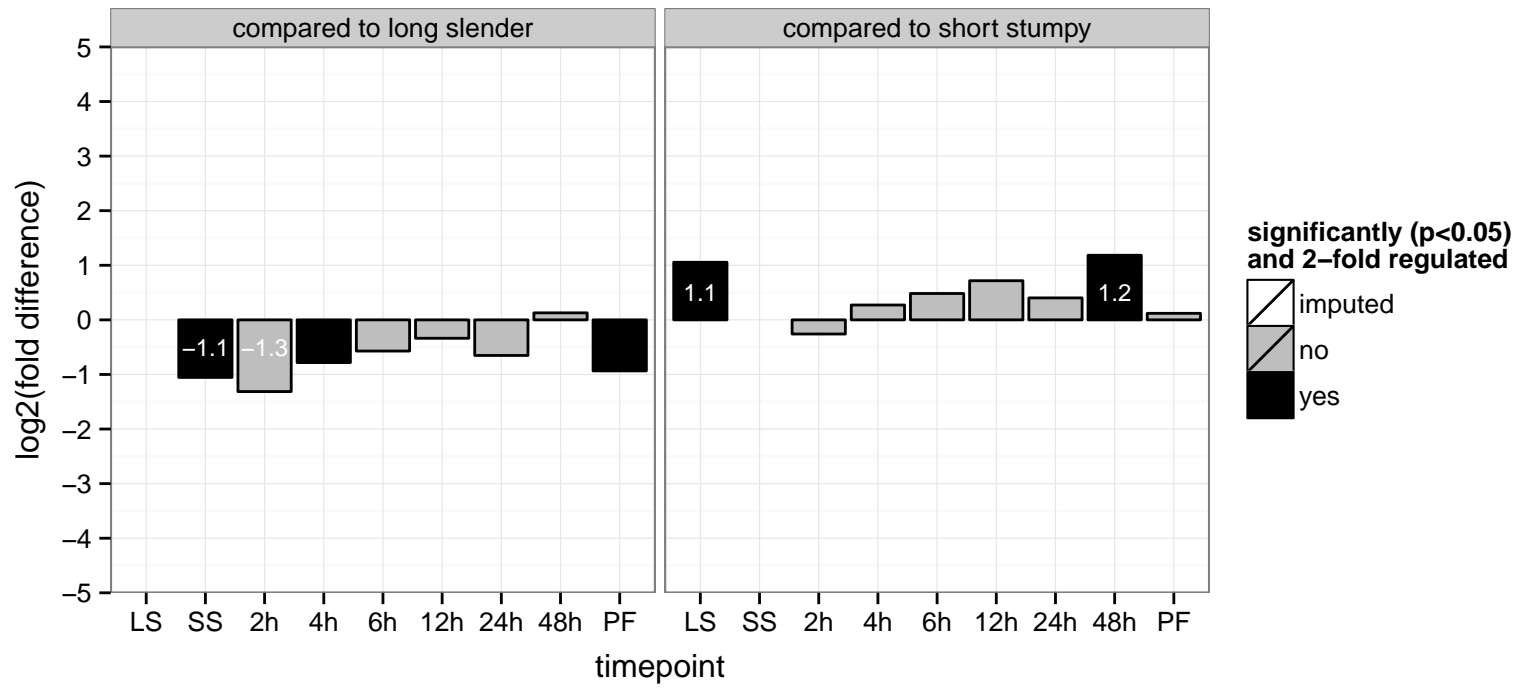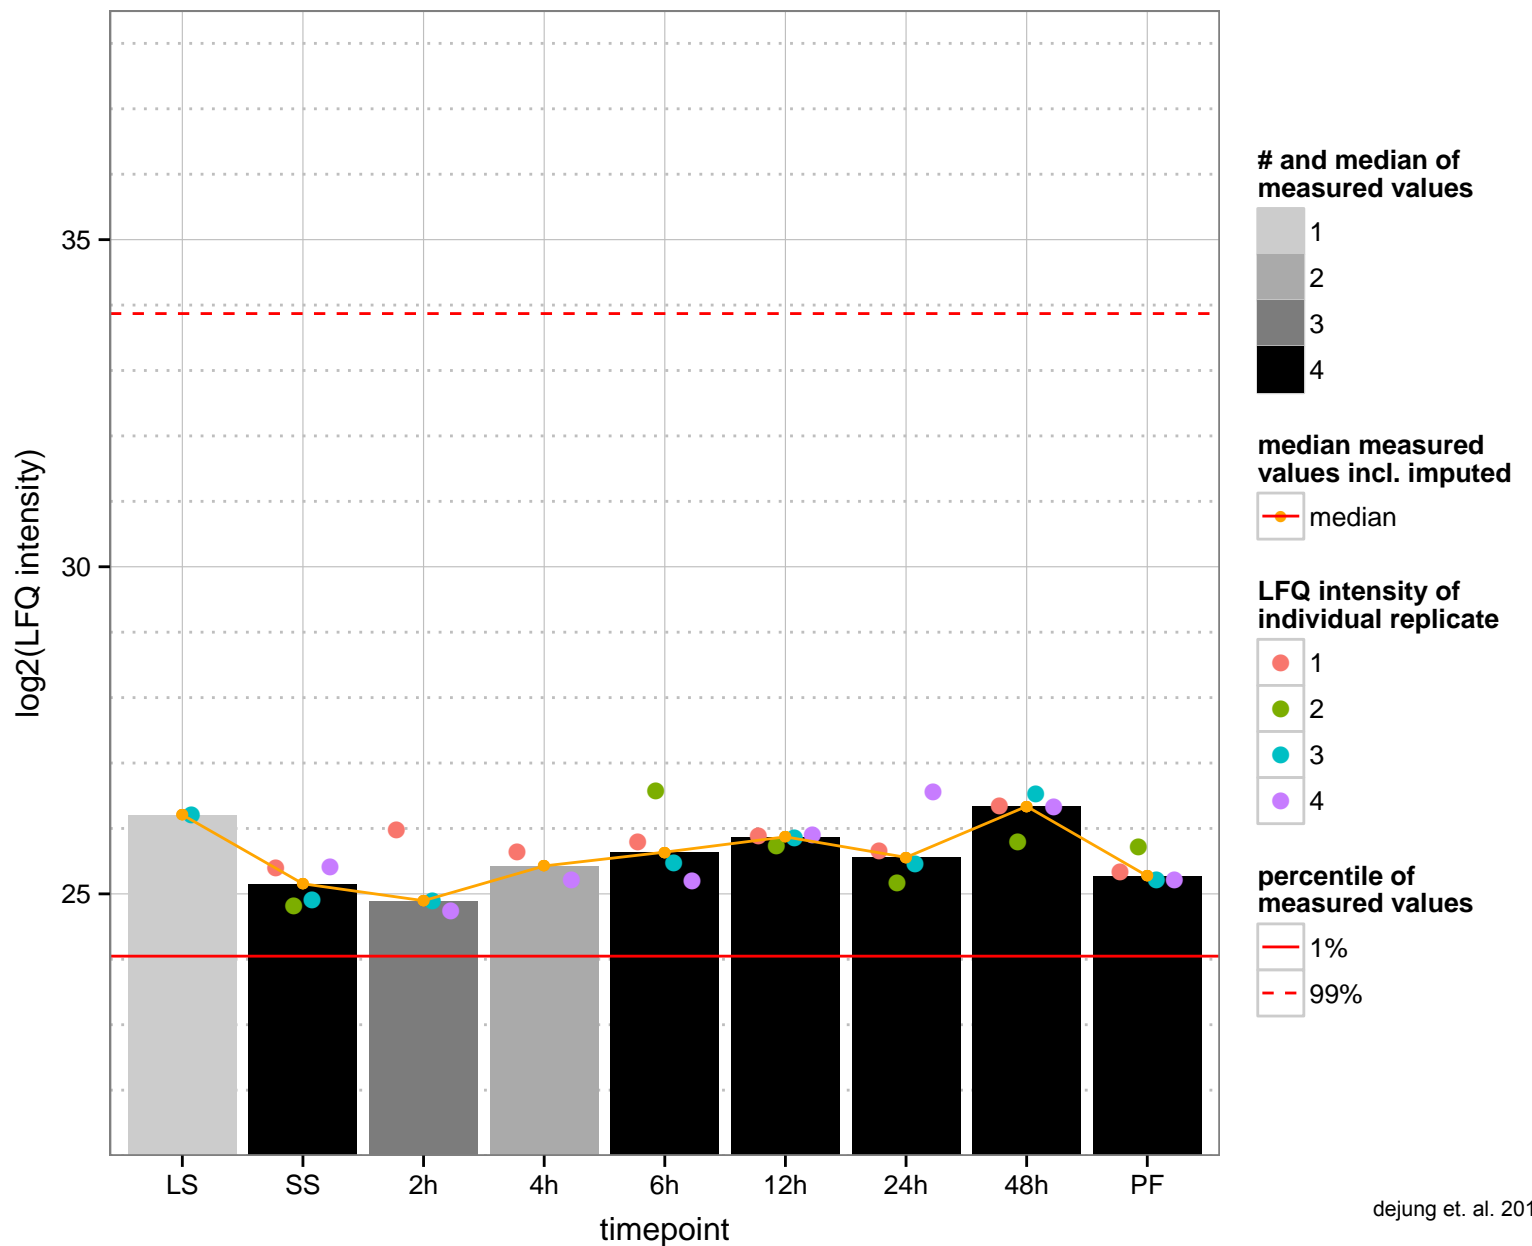



ADG1, pseudogene  
 Tb927.5.3390  
 AGOF: null  
 AGOC: null  
 AGOP: null  
 PGO: null  
 PGOC: null  
 PGOP: null

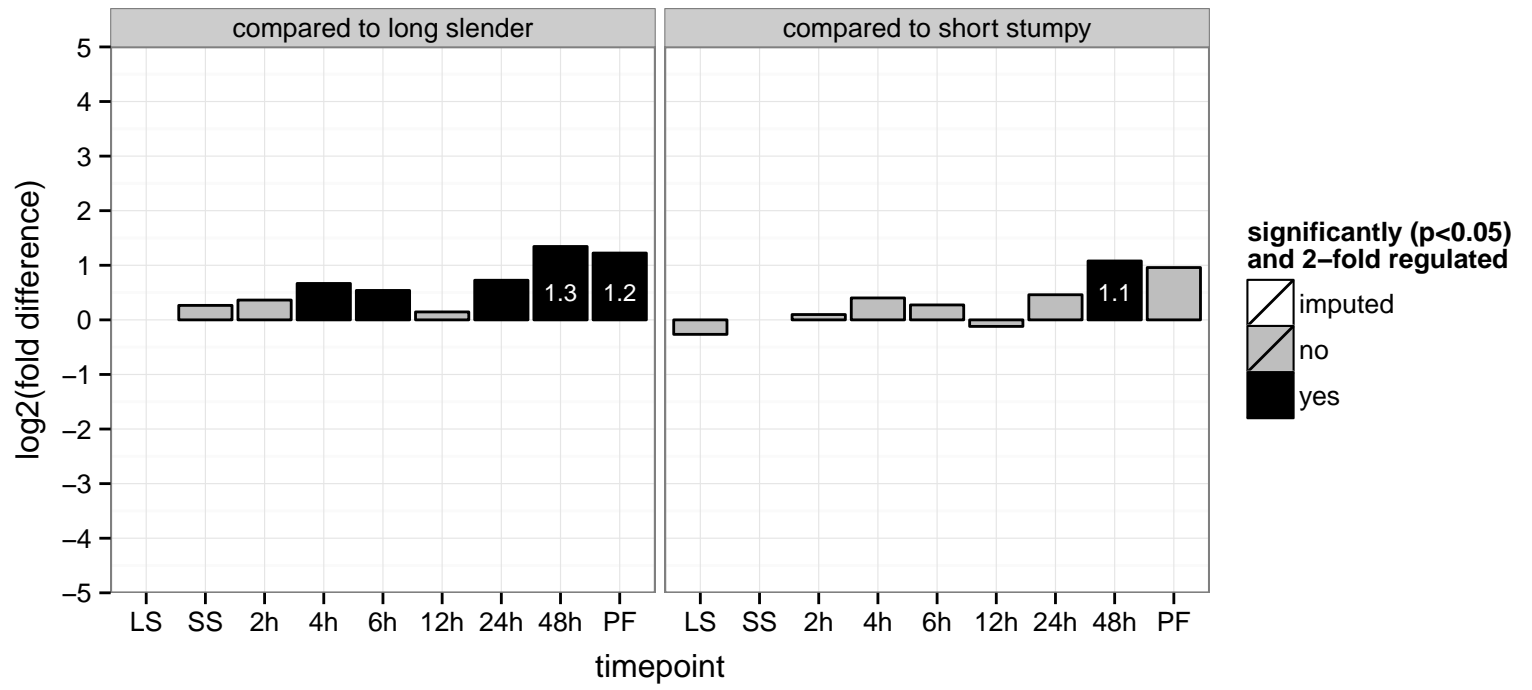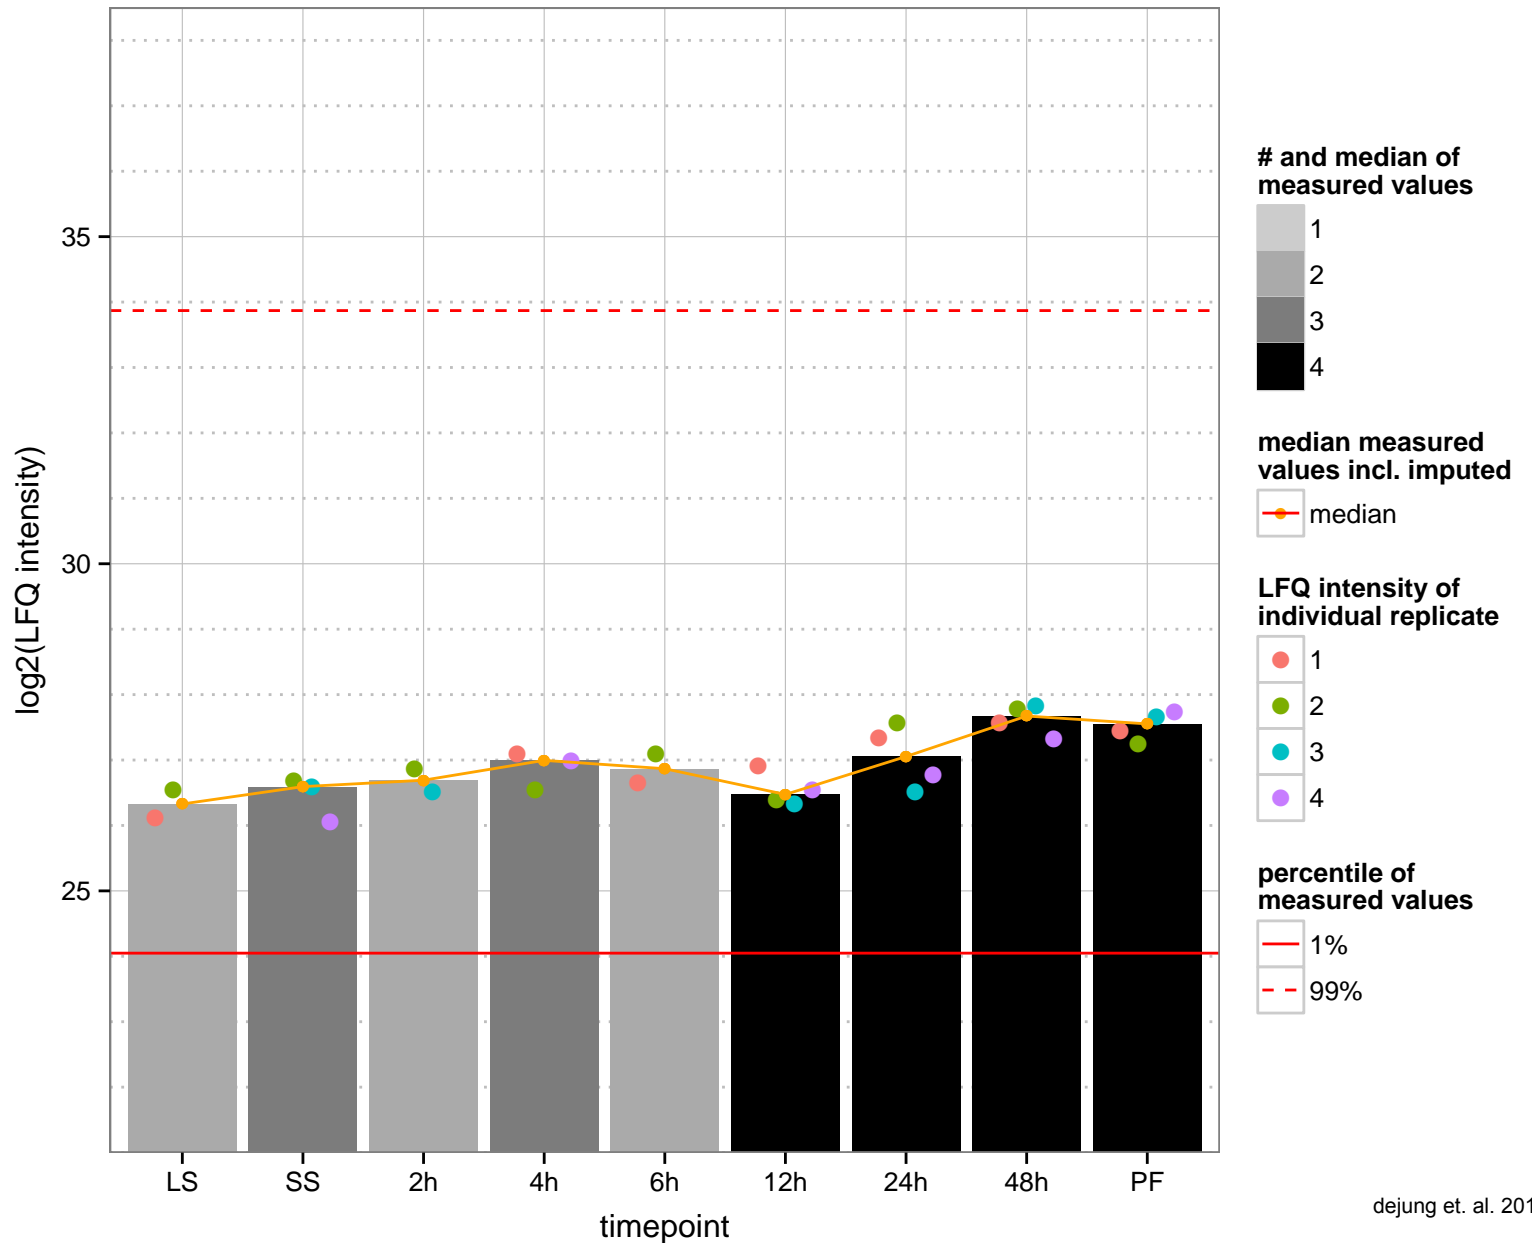

hypothetical protein, conserved  
 Tb927.5.770  
 AGOF: null  
 AGOC: null  
 AGOP: null  
 PGO: null  
 PGOC: null  
 PGOP: null

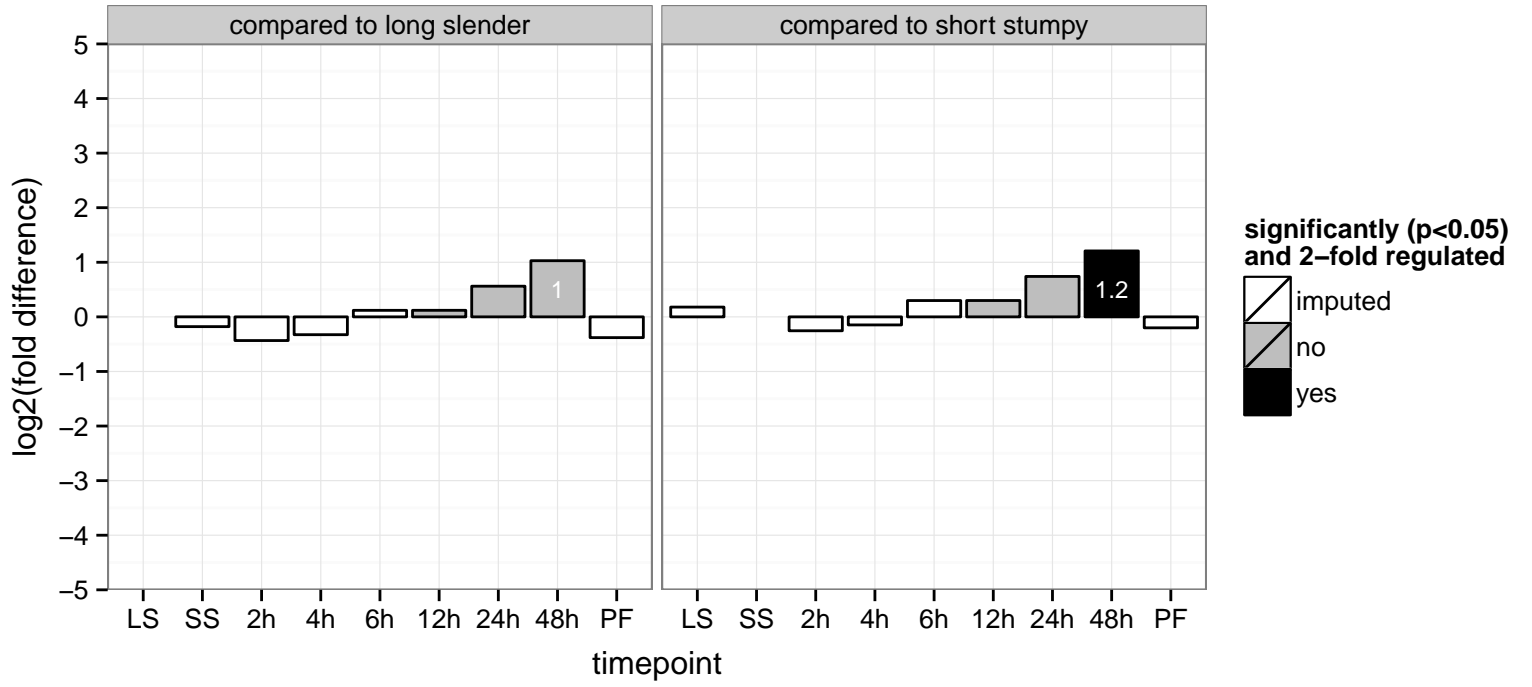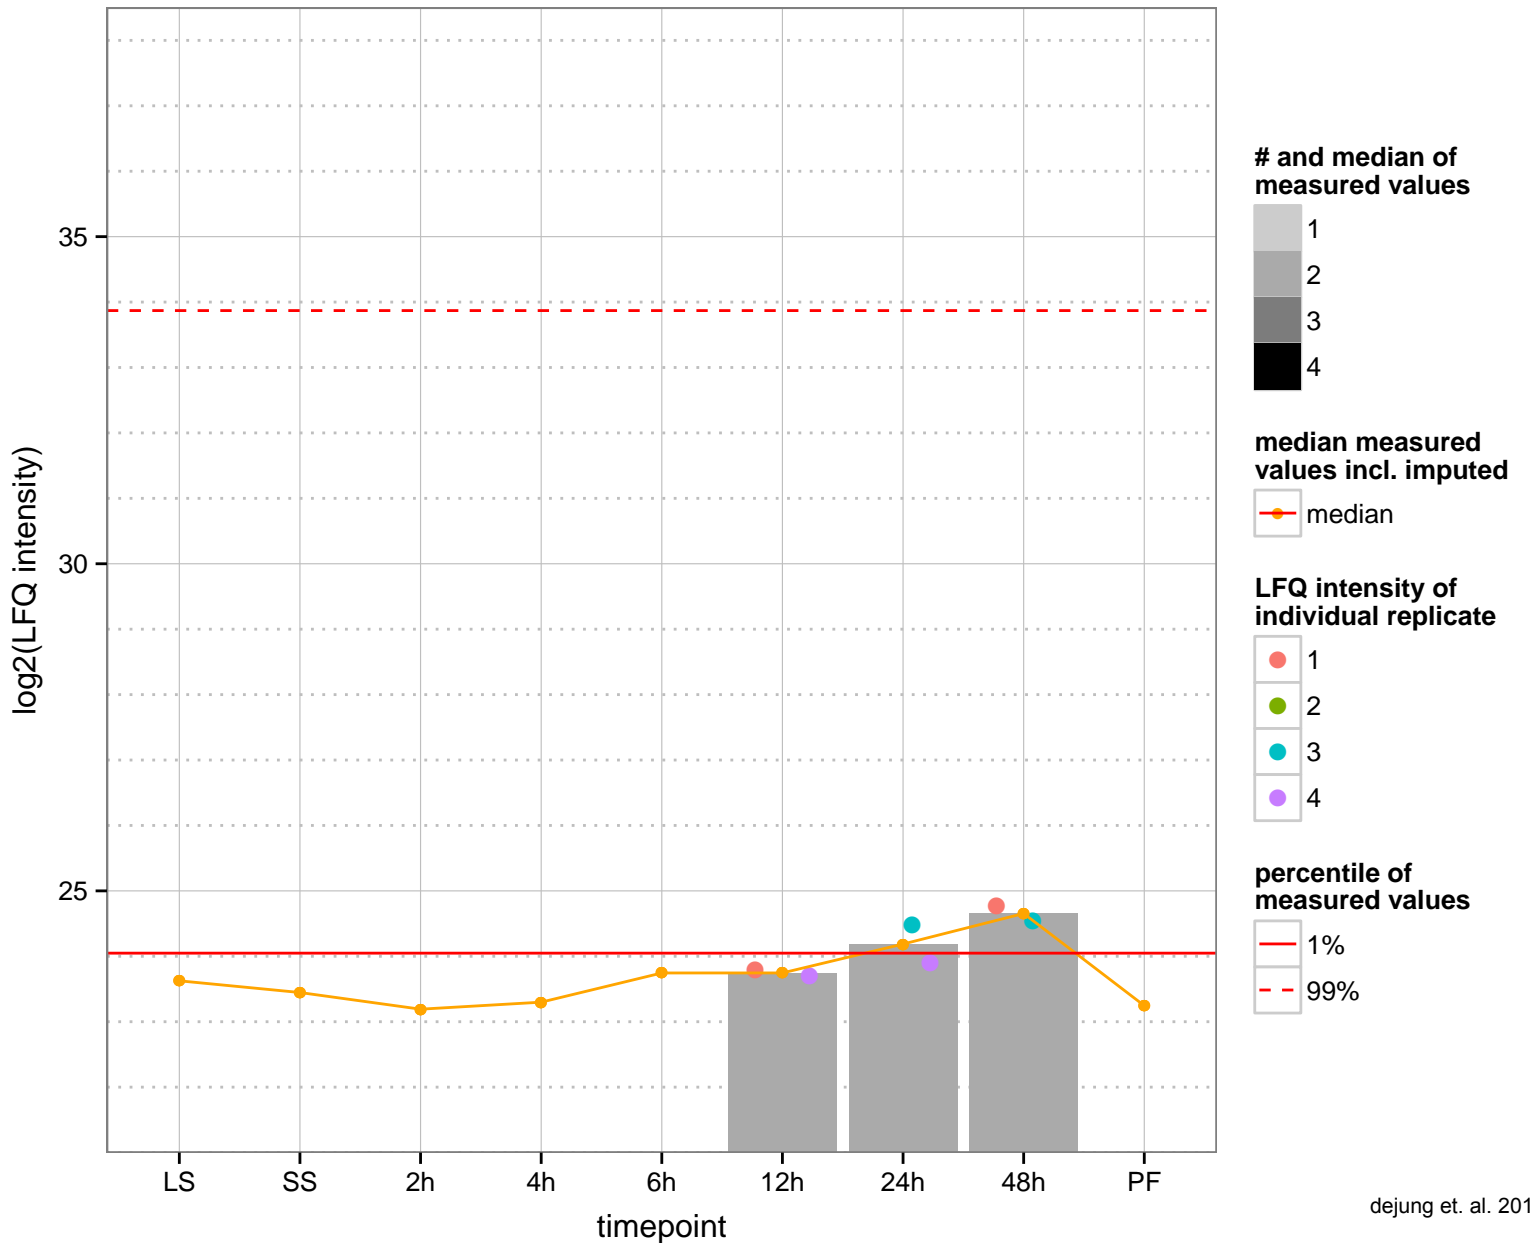

ubiquitin carboxyl-terminal hydrolase, putative, cysteine peptidase, Clan CA, family C19  
 Tb927.6.1110  
 AGOF: ubiquitin thiolesterase activity  
 AGOC: null  
 AGOP: ubiquitin-dependent protein catabolic process  
 PGO: ubiquitin thiolesterase activity  
 PGO: null  
 PGO: ubiquitin-dependent protein catabolic process

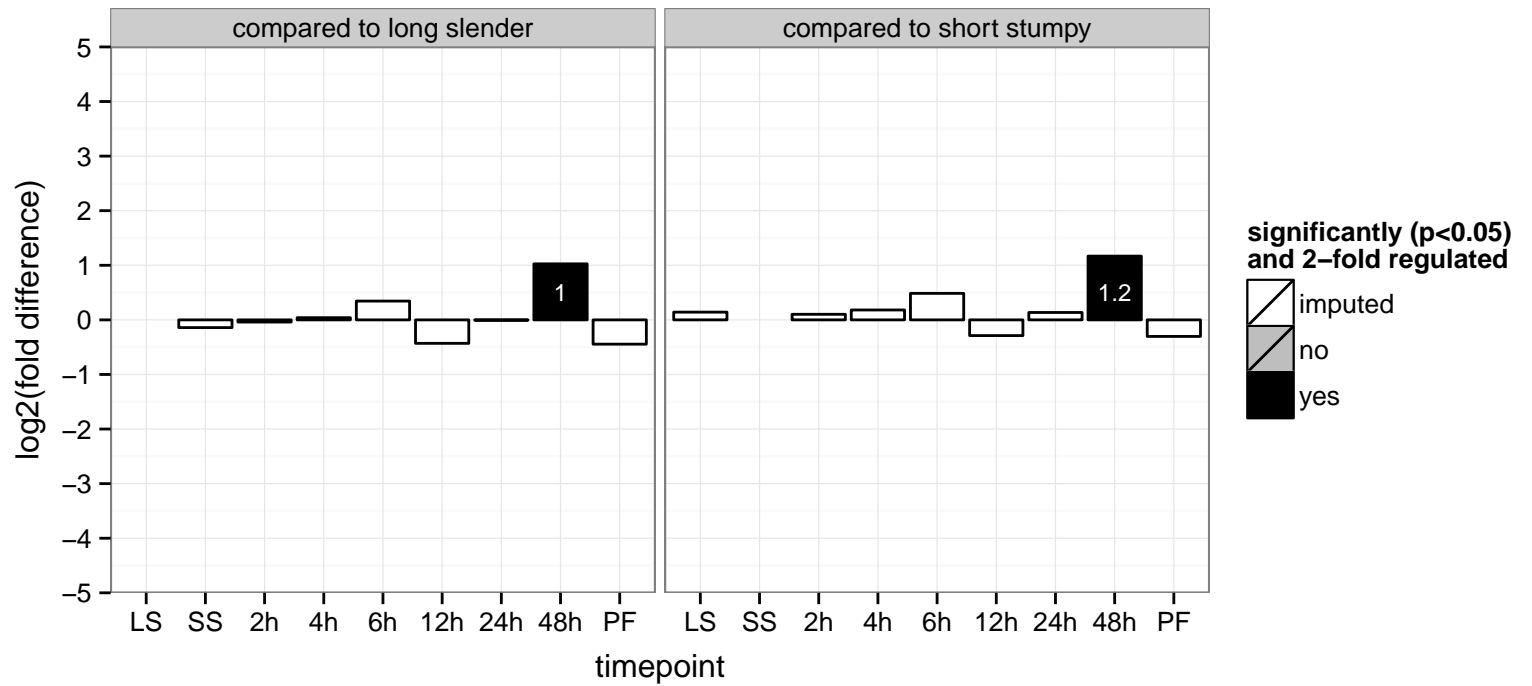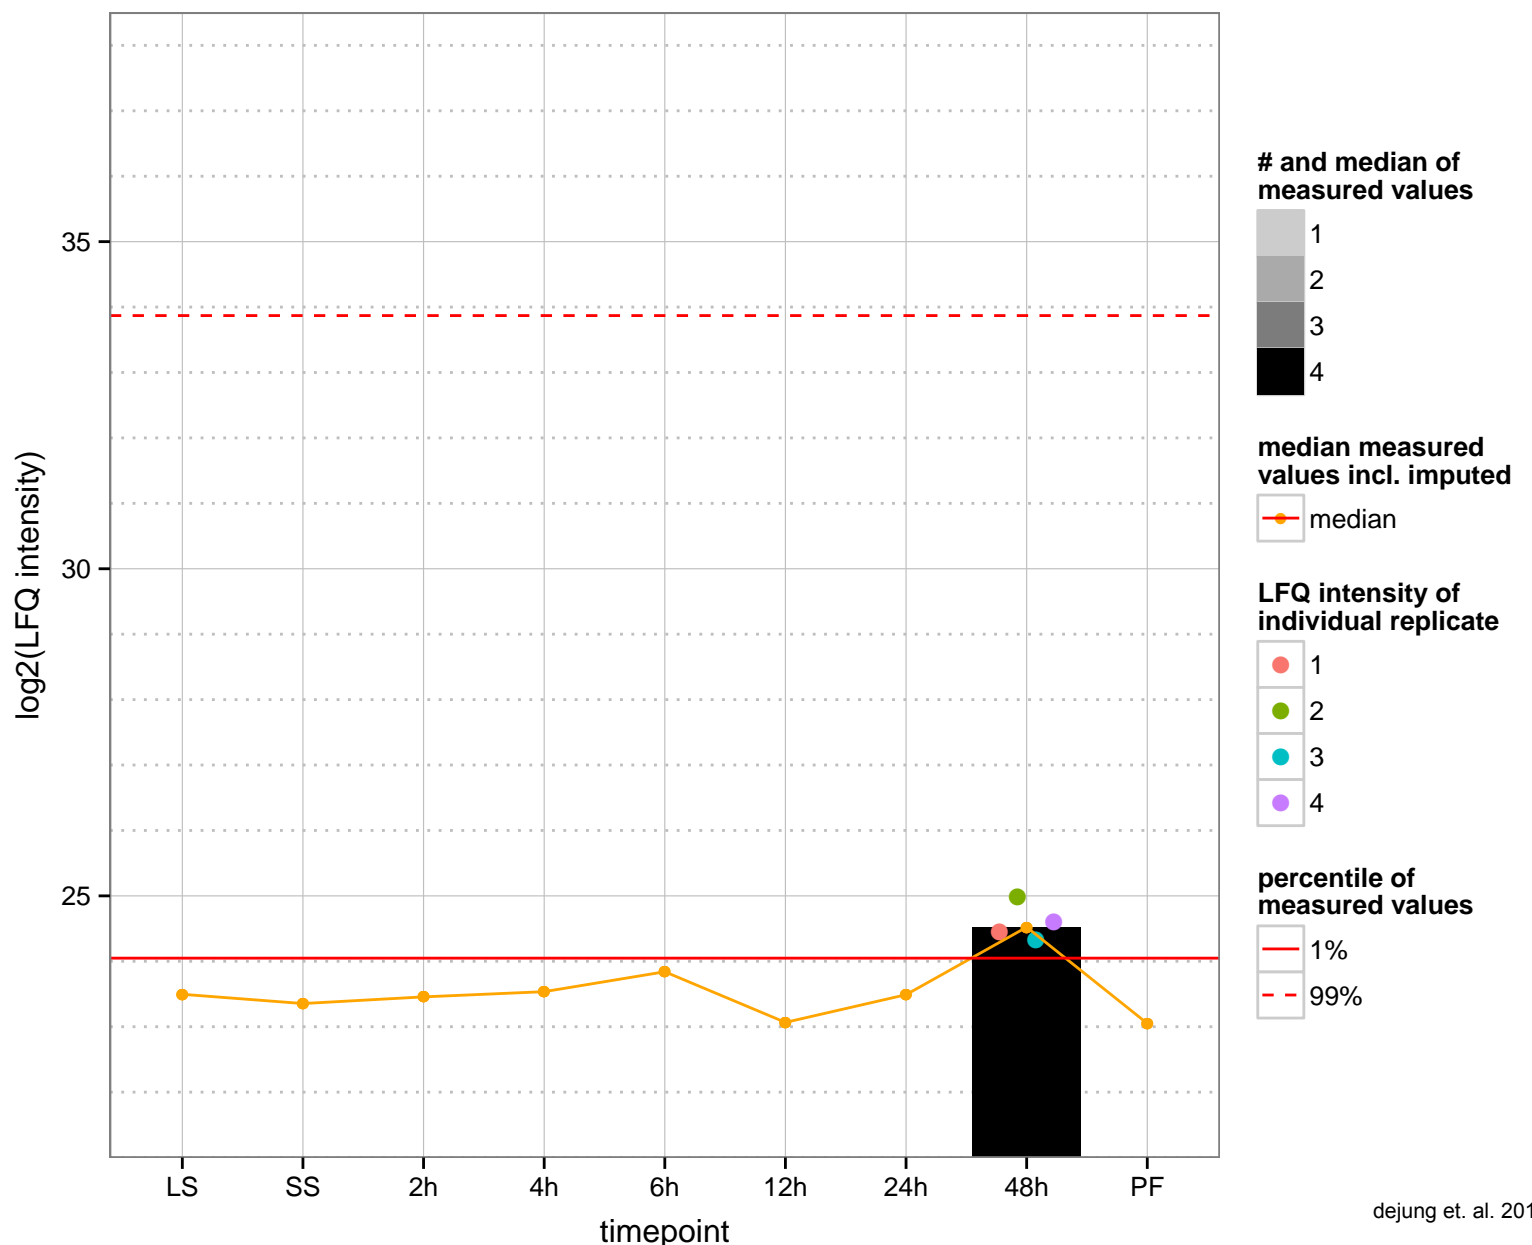

cell division cycle protein 16 homolog, putative  
 Tb927.6.2150  
 AGOF: null  
 AGOC: null  
 AGOP: null  
 PGO: protein binding  
 PGOC: null  
 PGOP: null

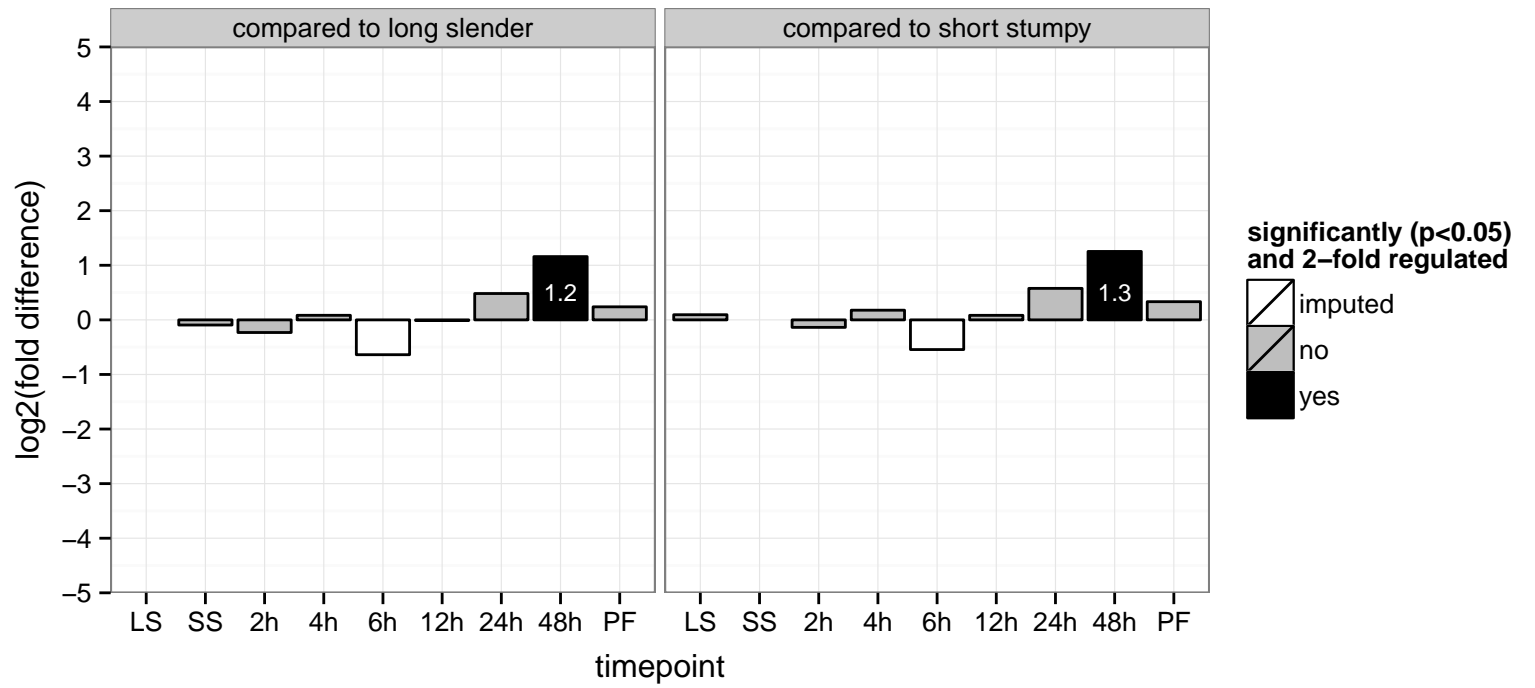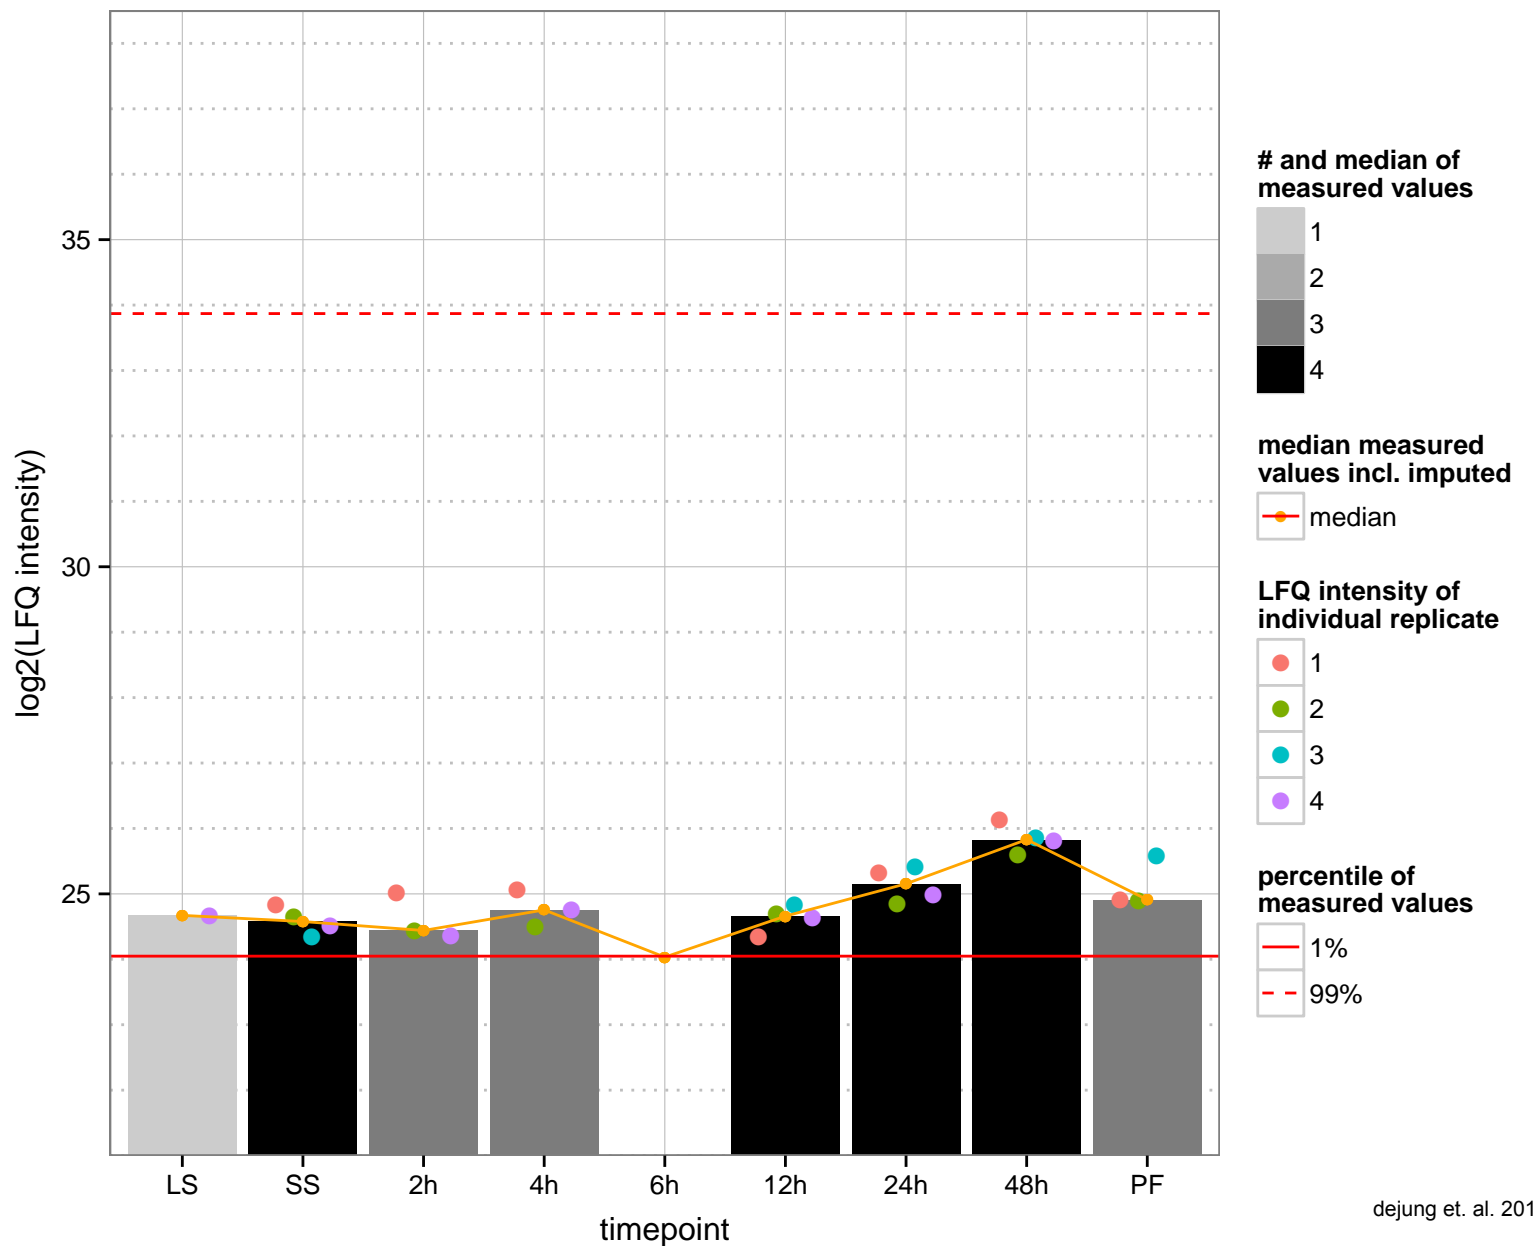

hypothetical protein, conserved  
 Tb927.6.2710  
 AGOF: zinc ion binding  
 AGOC: integral to membrane, intracellular  
 AGOP: null  
 PGOF: protein binding, zinc ion binding  
 PGO: intracellular  
 PGOP: null

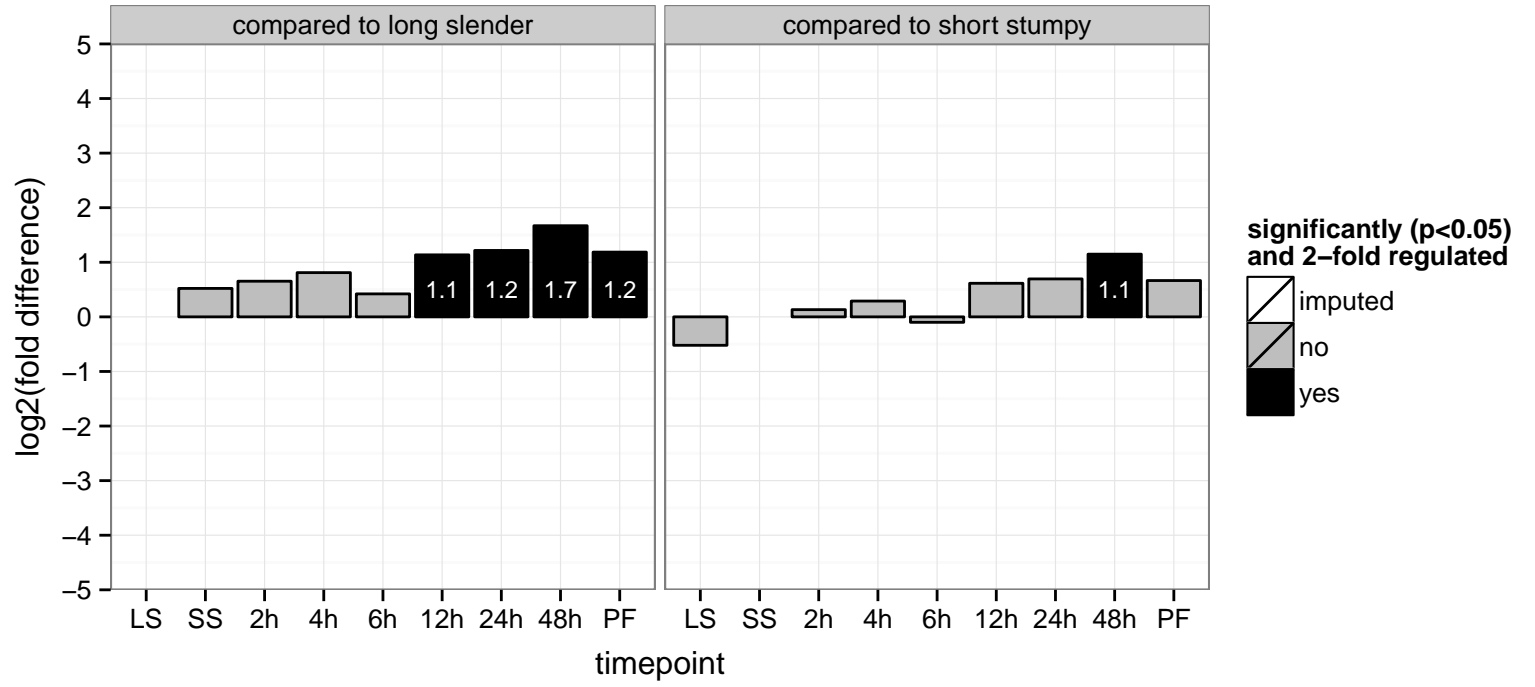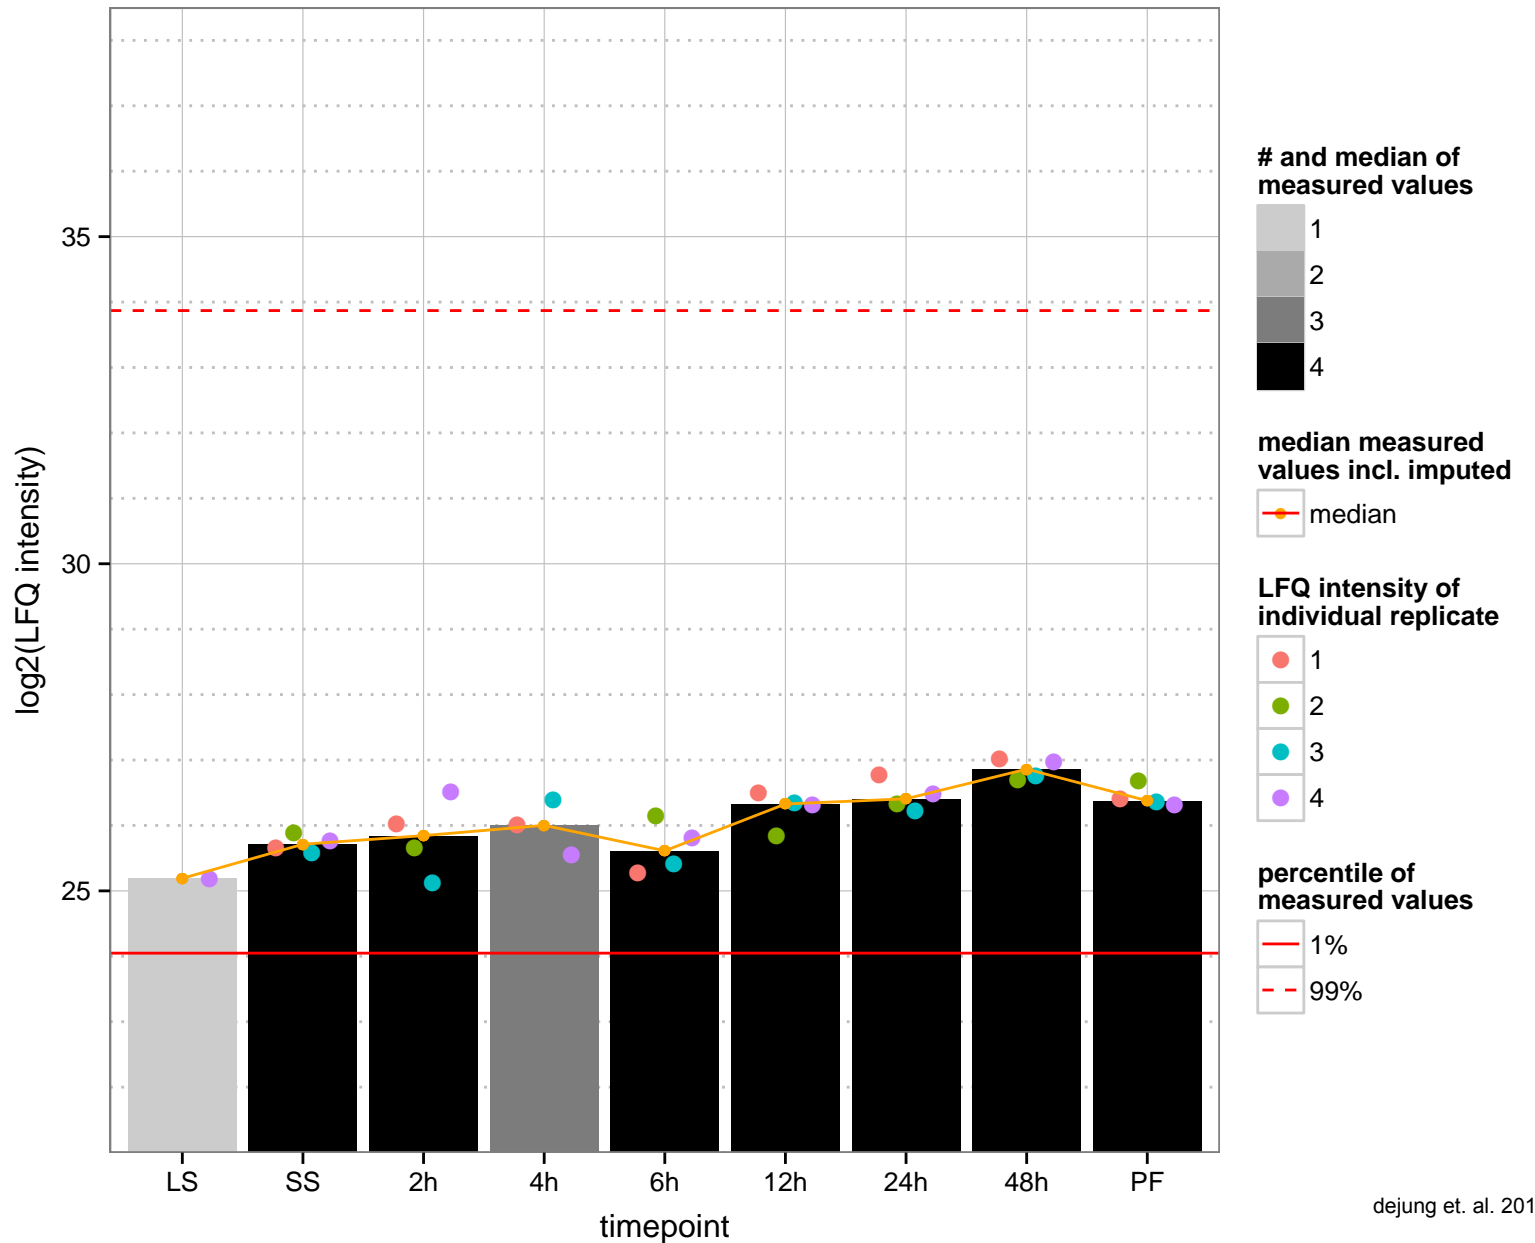

serine/arginine-rich protein specific kinase SRPK, putative, protein kinase

Tb927.6.4970

AGOF: ATP binding, protein serine/threonine kinase activity, protein tyrosine kinase activity

AGOC: null

AGOP: growth, protein phosphorylation

PGOF: ATP binding, protein kinase activity, transferase activity, transferring phosphorus-containing groups

PGOC: null

PGOP: protein phosphorylation

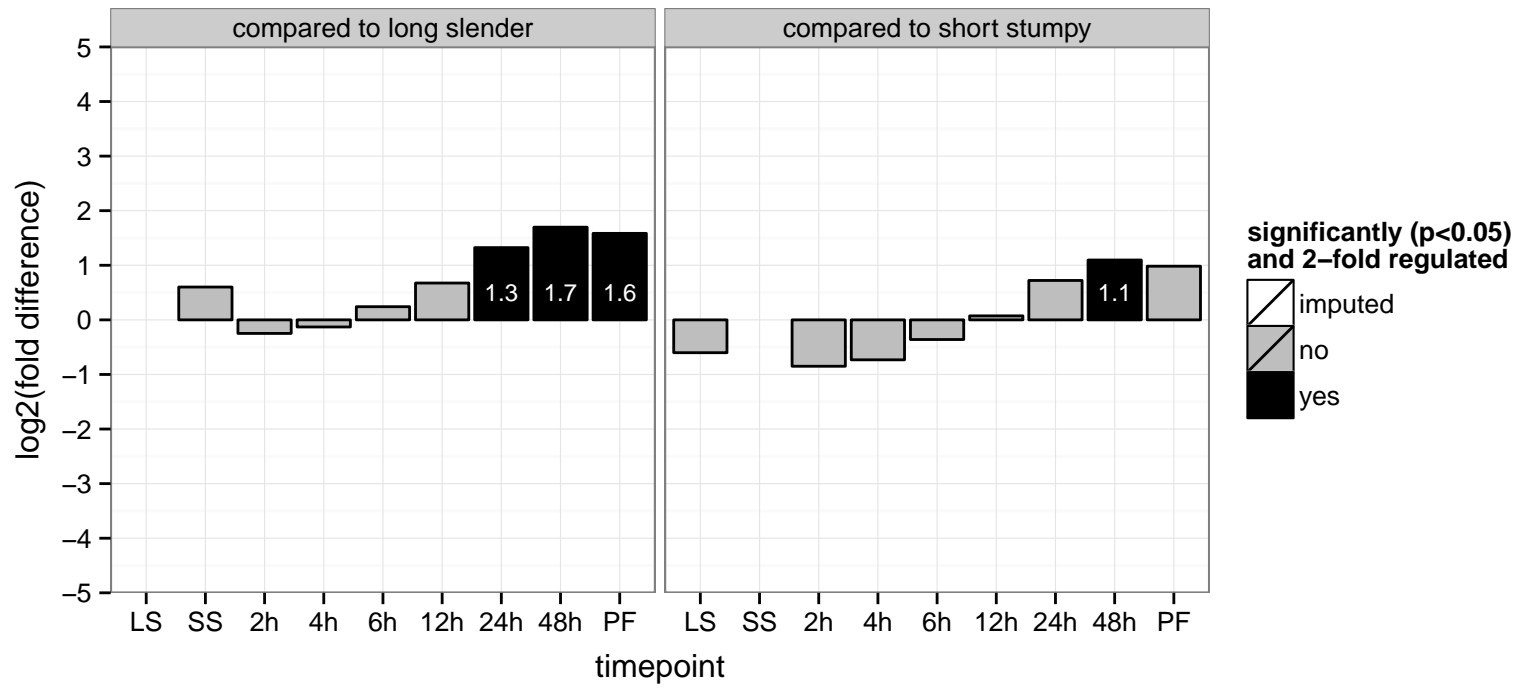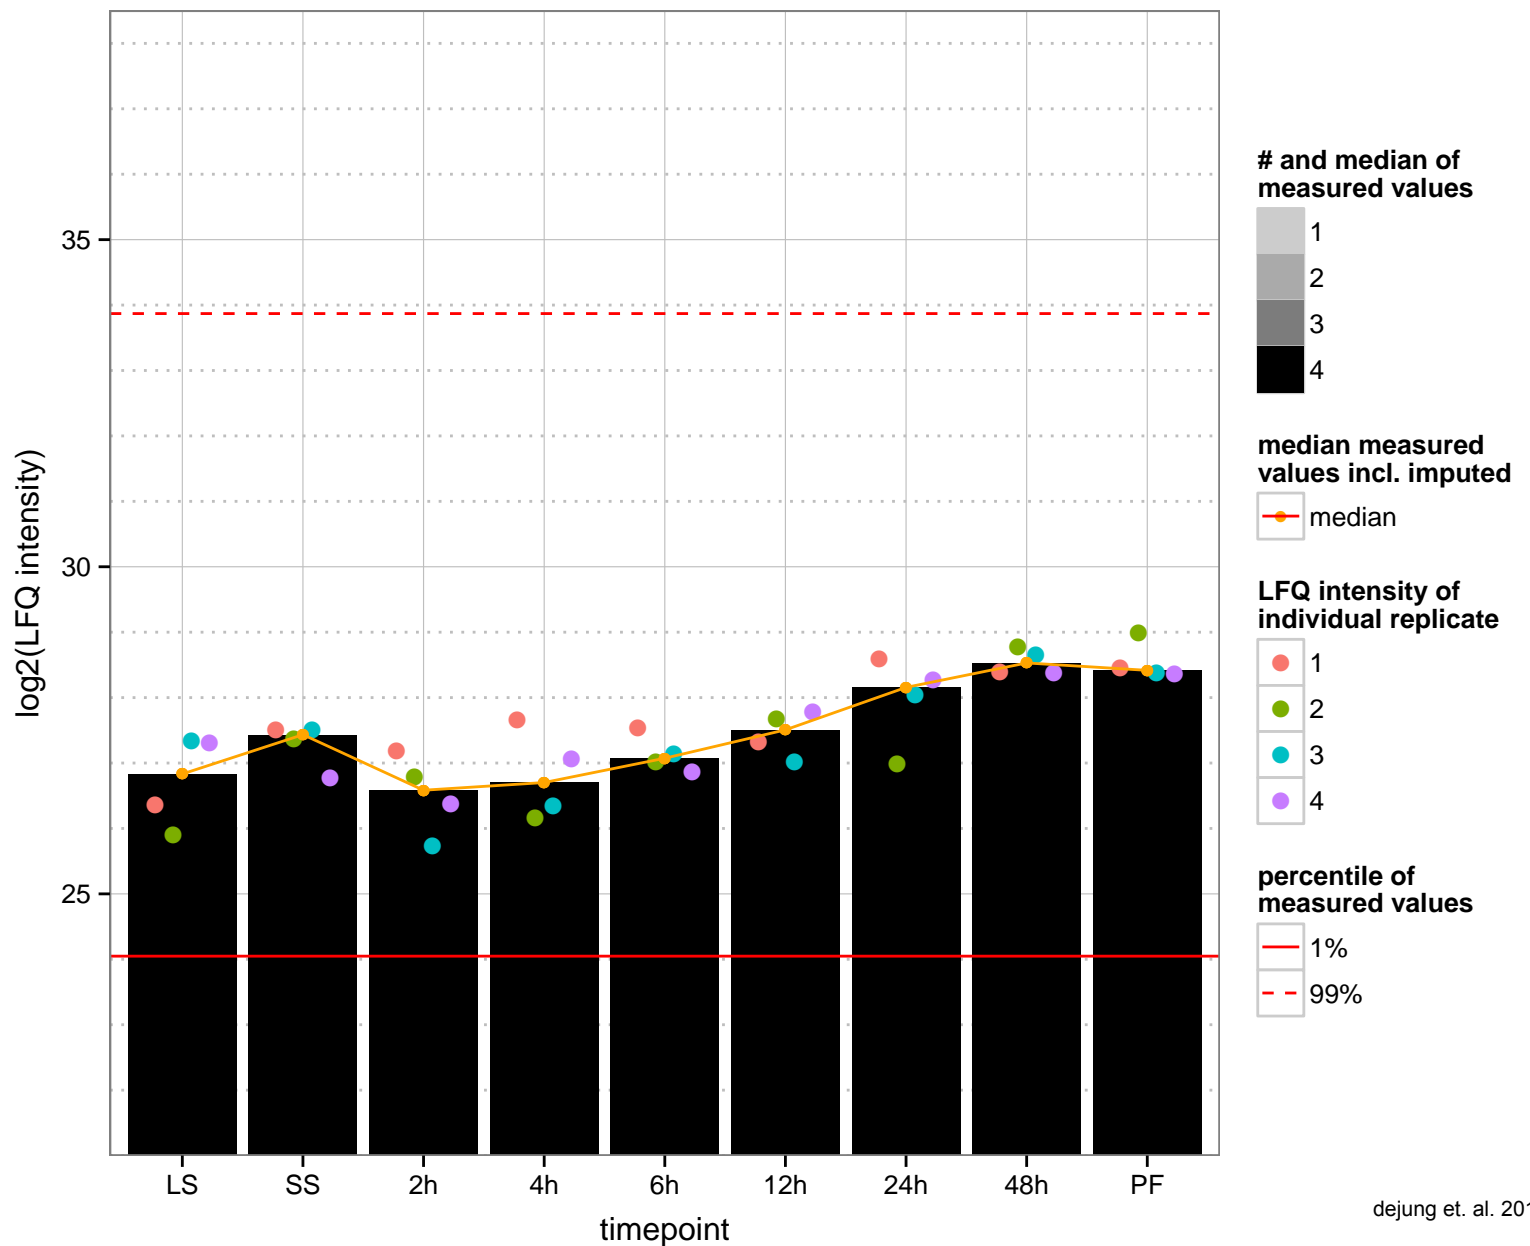

hypothetical protein, conserved  
 Tb927.7.2390  
 AGOF: null  
 AGOC: mitochondrion  
 AGOP: null  
 PGO: null  
 PGO: null  
 PGO: null

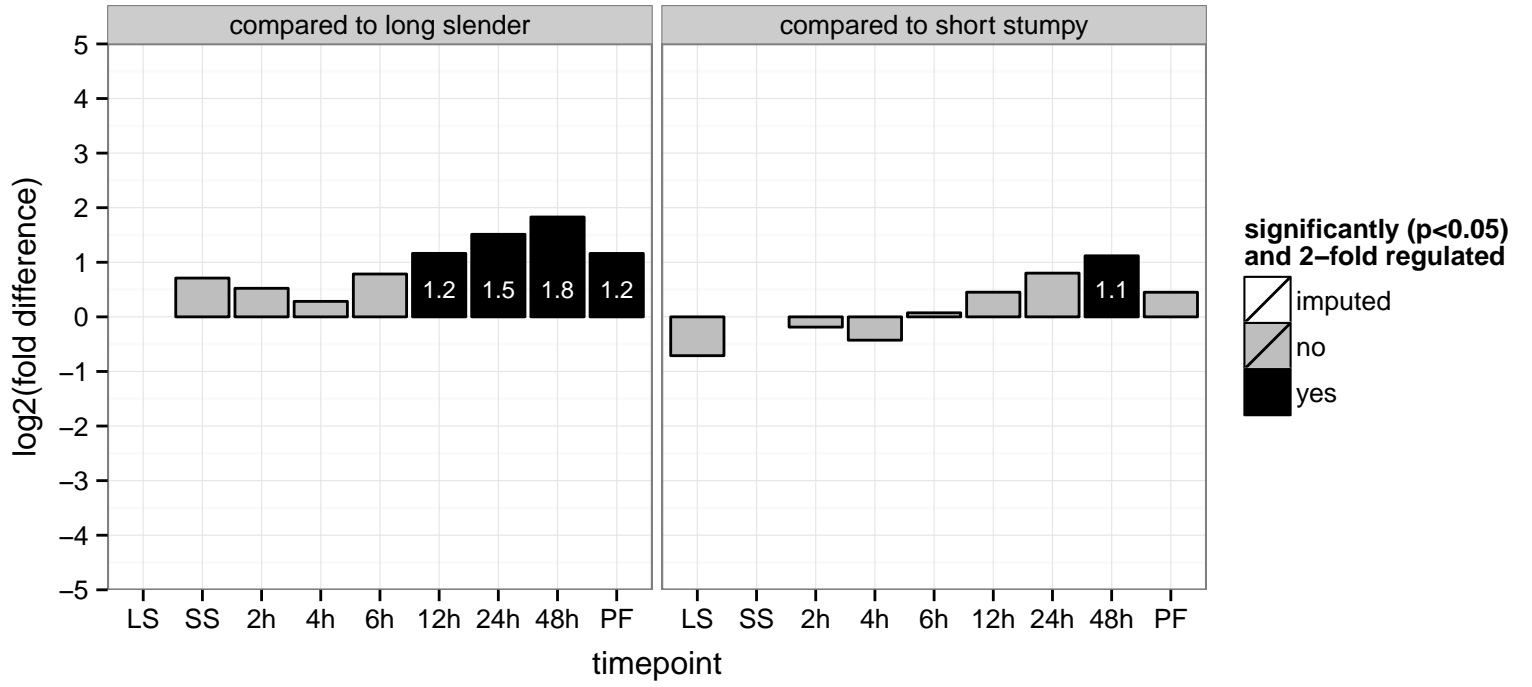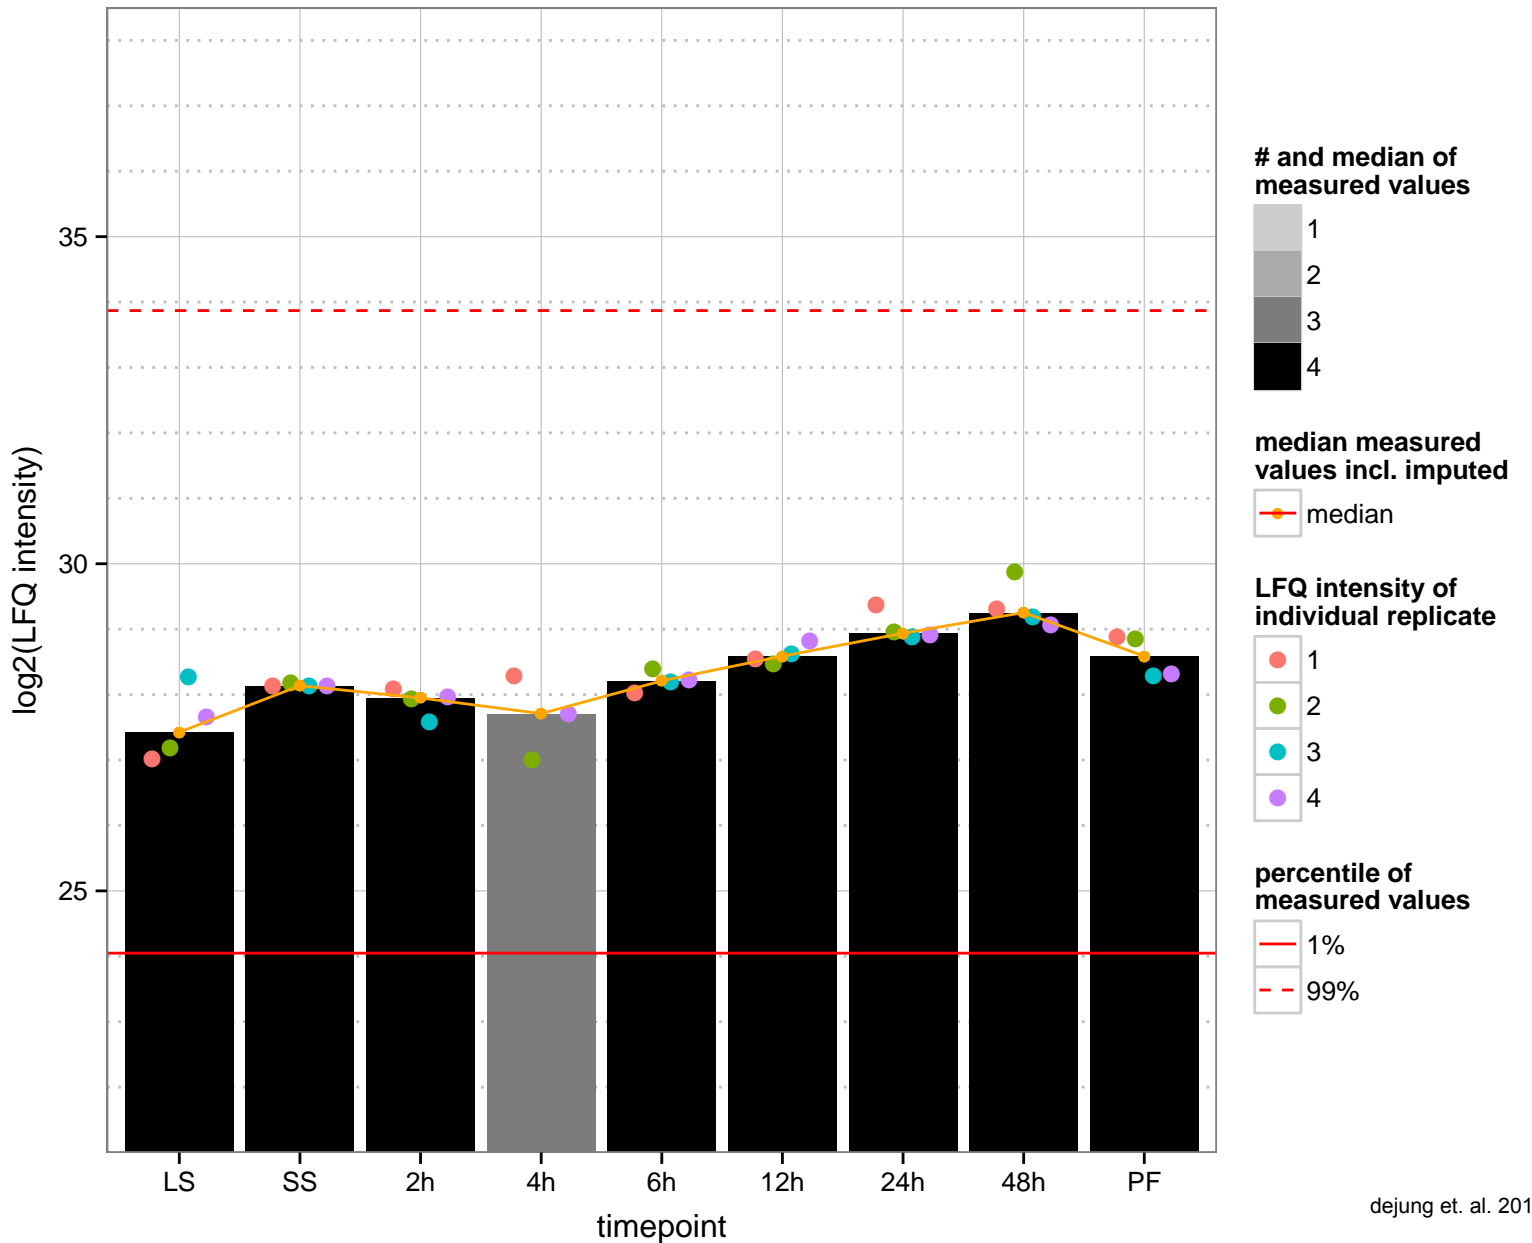

peptidyl-prolyl cis-trans isomerase, putative, parvulin (PAR45)  
 Tb927.7.2480  
 AGOF: peptidyl-prolyl cis-trans isomerase activity  
 AGOC: nucleus  
 AGOP: null  
 PGOF: isomerase activity, protein binding  
 PGOC: null  
 PGOP: null

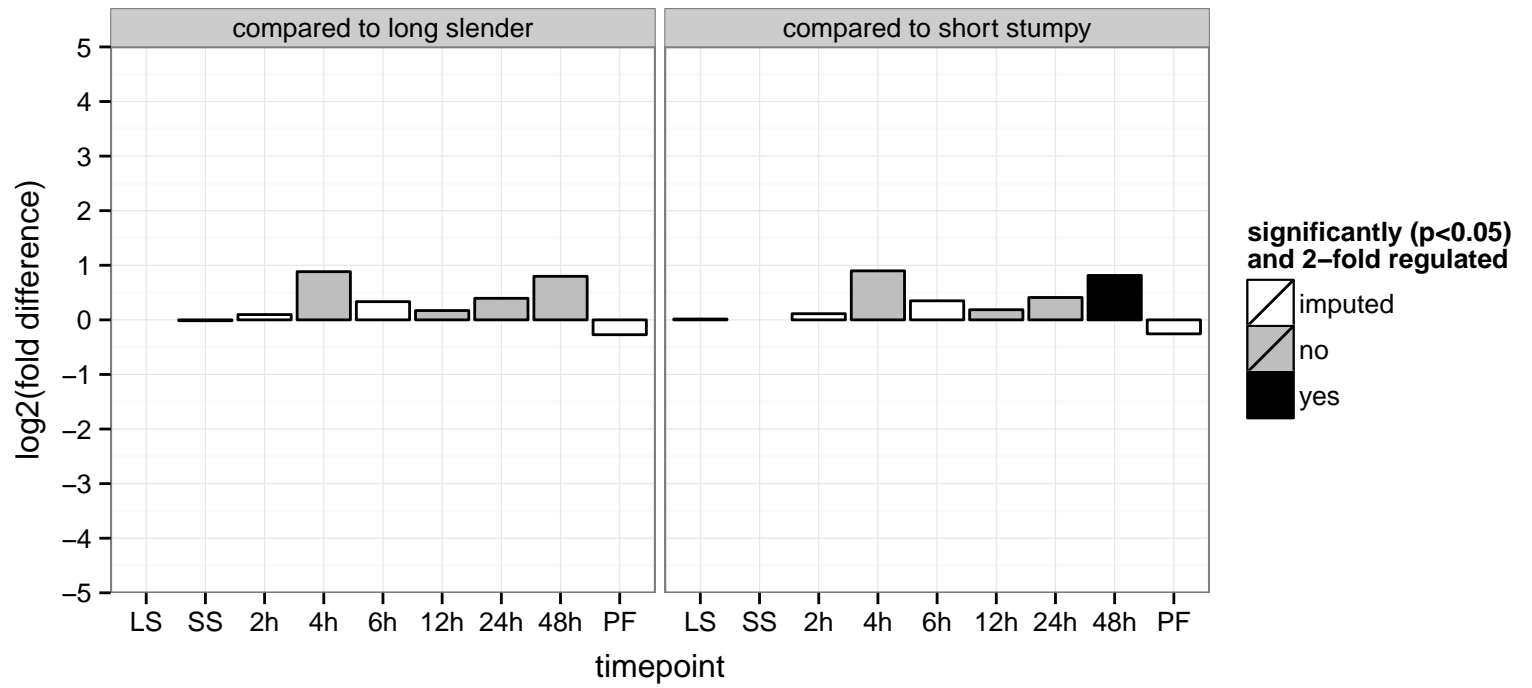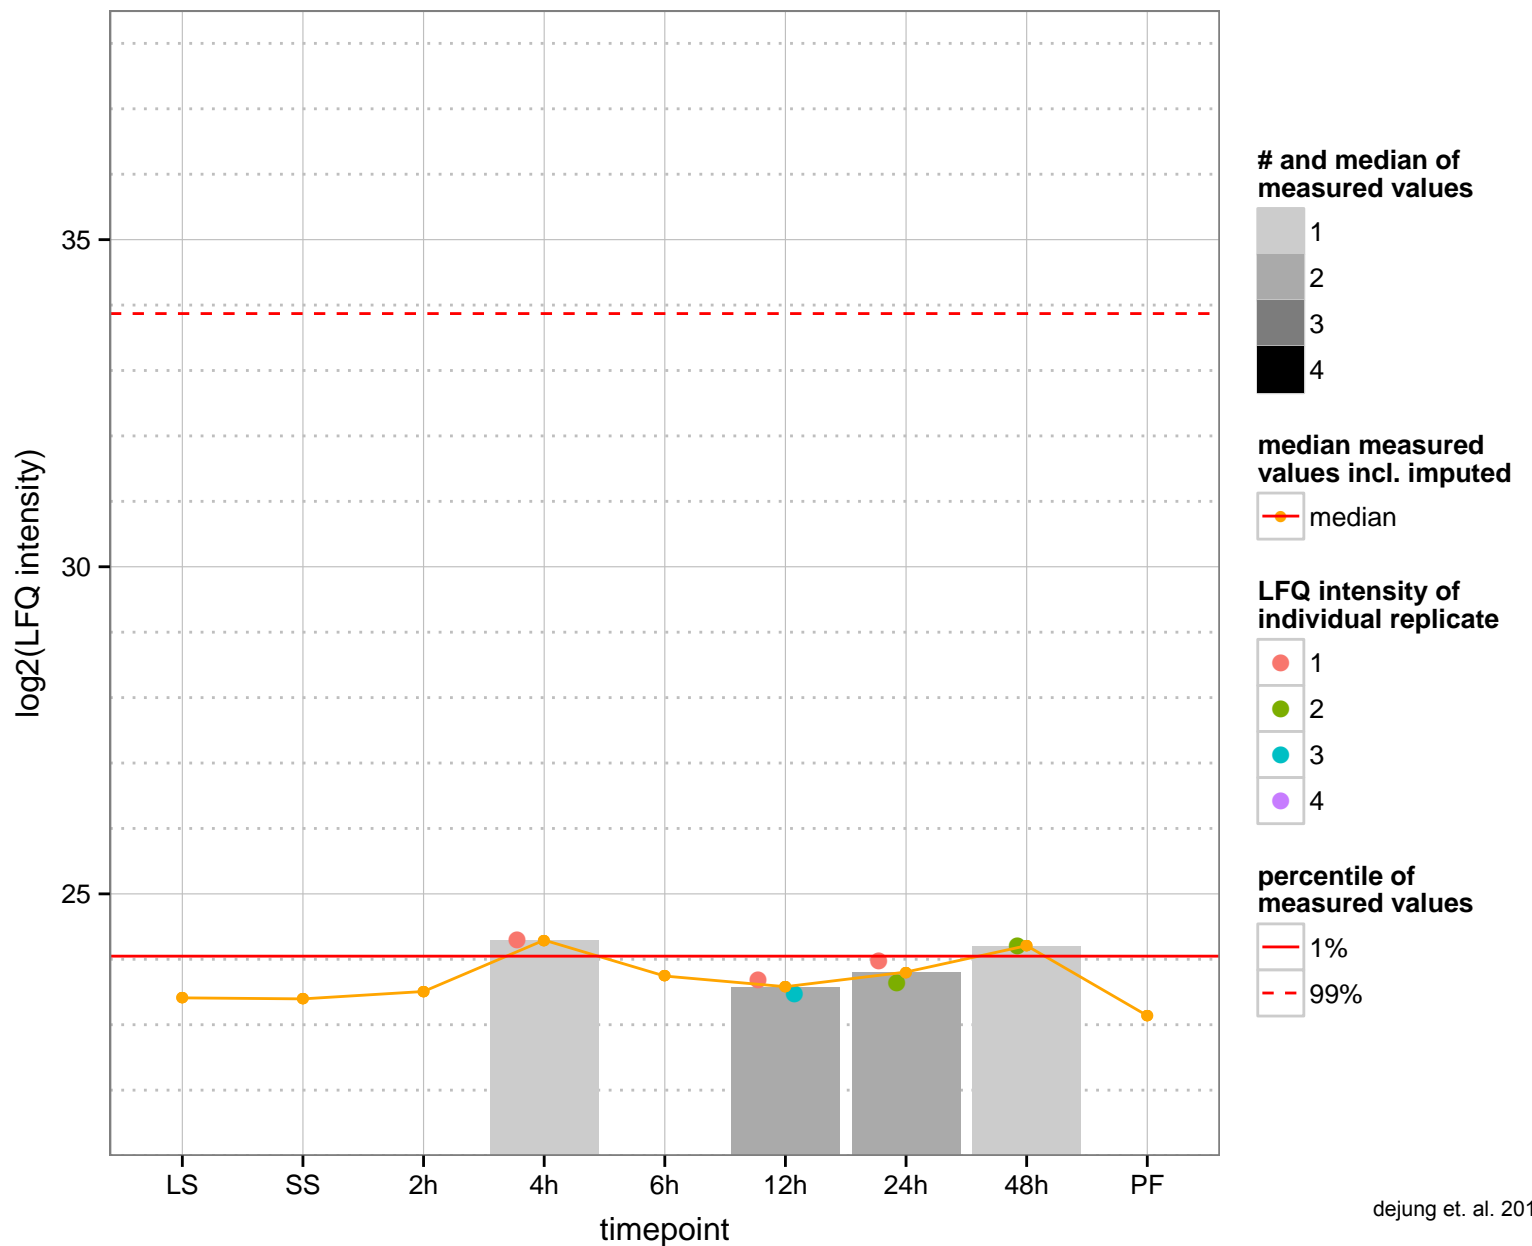



hypothetical protein, conserved  
 Tb927.7.3040  
 AGOF: null  
 AGOC: null  
 AGOP: null  
 PGO: protein binding  
 PGOC: null  
 PGOP: null

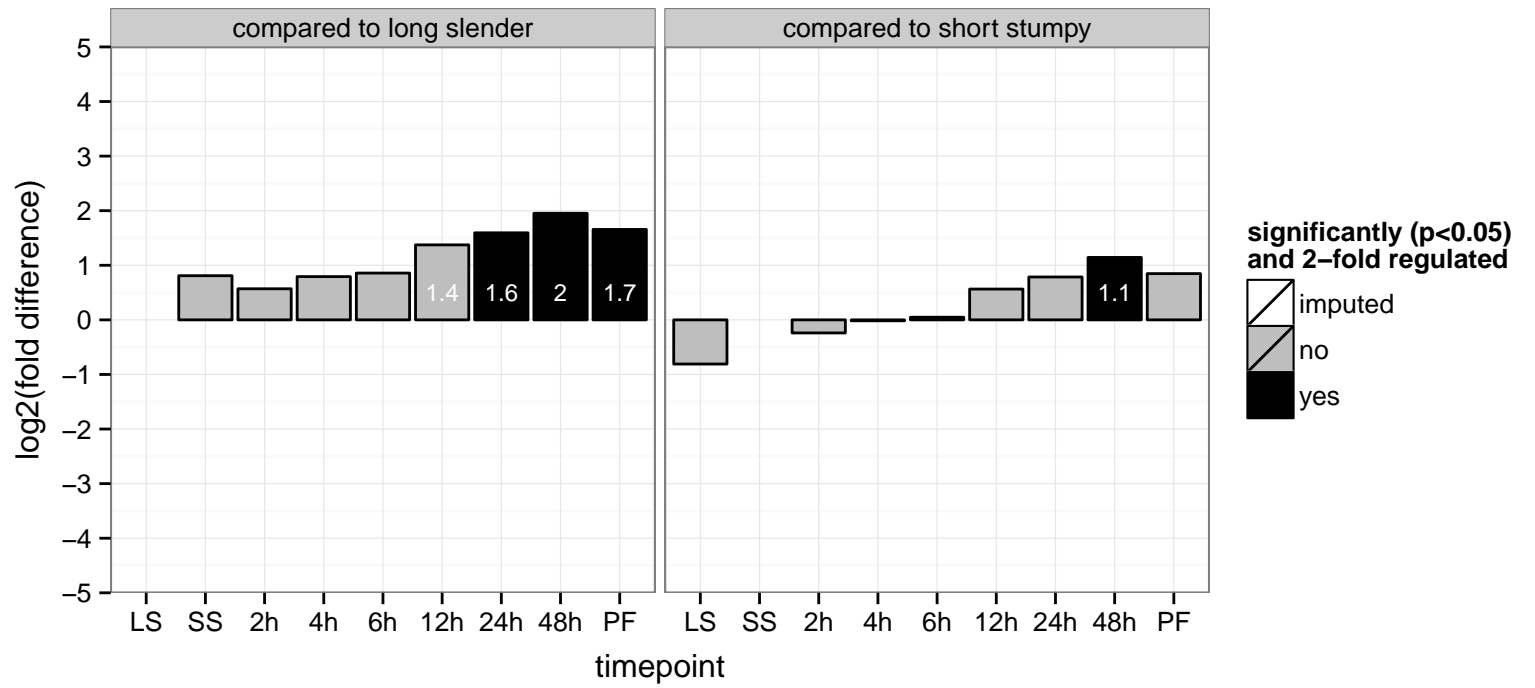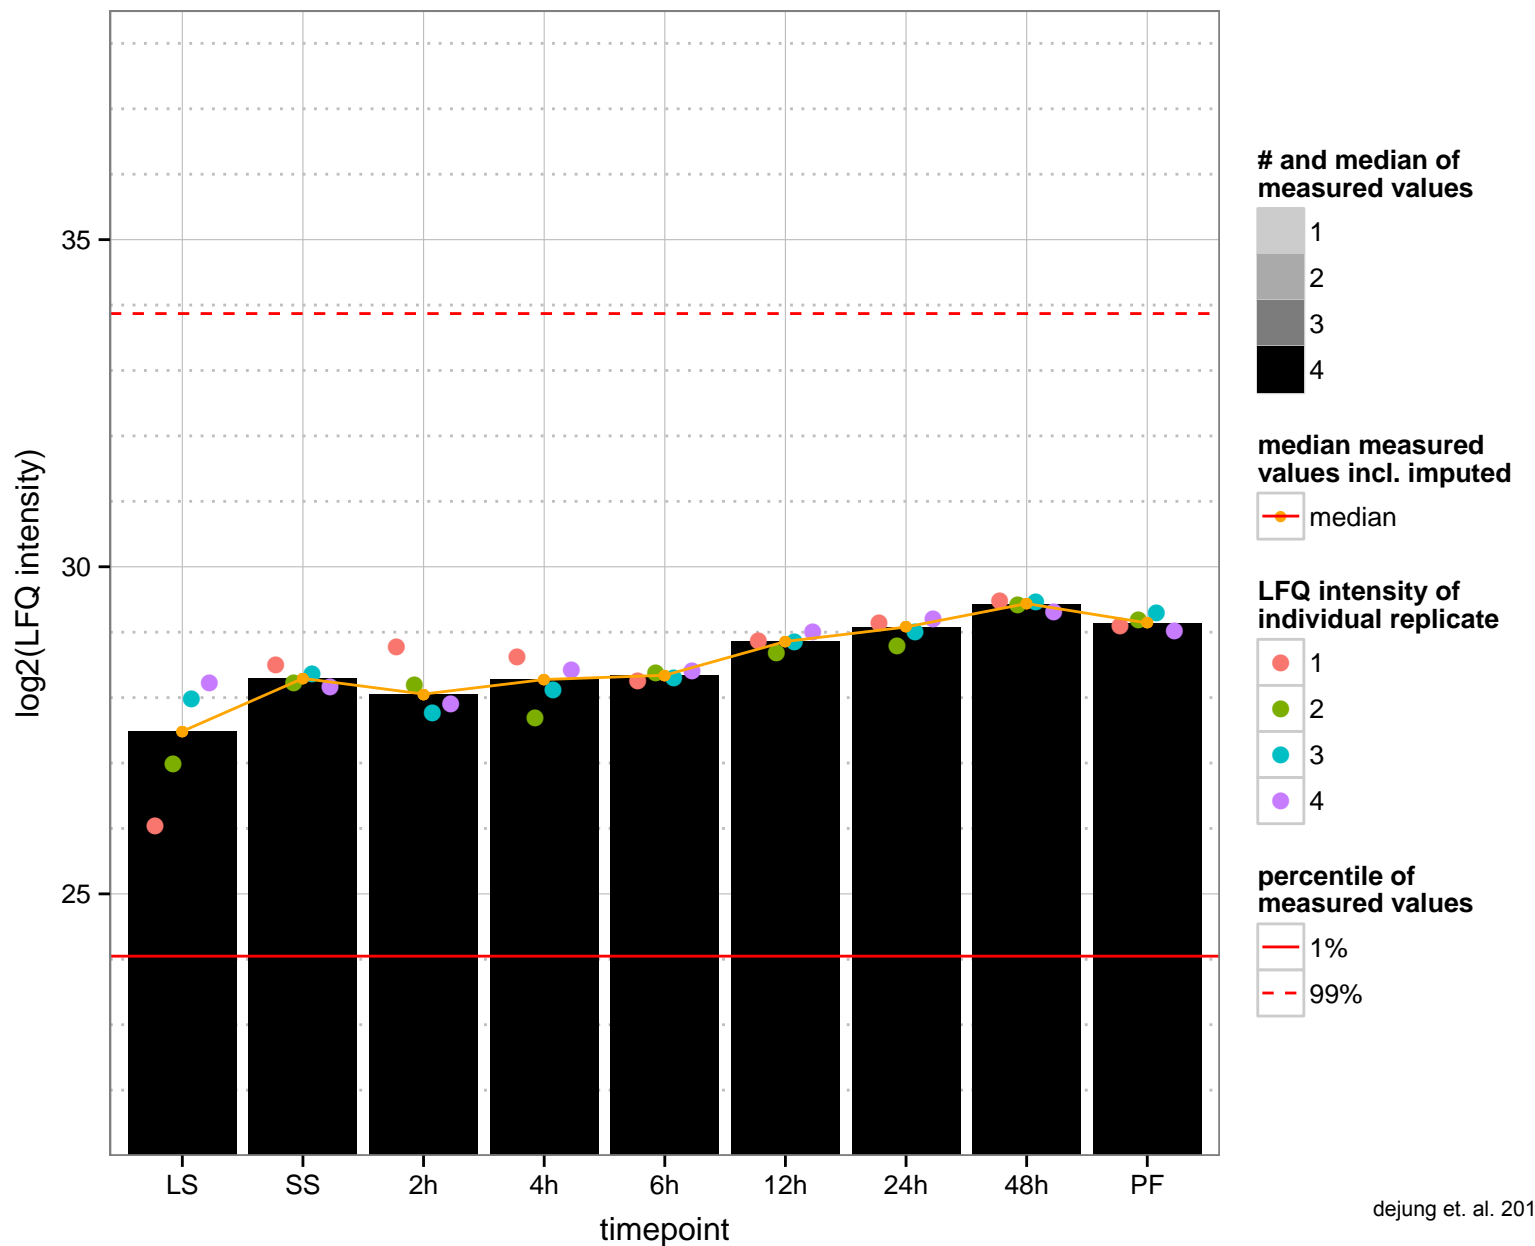

farnesyl pyrophosphate synthase (FPPS)

Tb927.7.3360

AGOF: dimethylallyltranstransferase activity, geranyltranstransferase activity

AGOC: cytosol, endoplasmic reticulum

AGOP: cholesterol biosynthetic process, farnesyl diphosphate biosynthetic process

PGOF: null

PGOC: null

PGOP: isoprenoid biosynthetic process

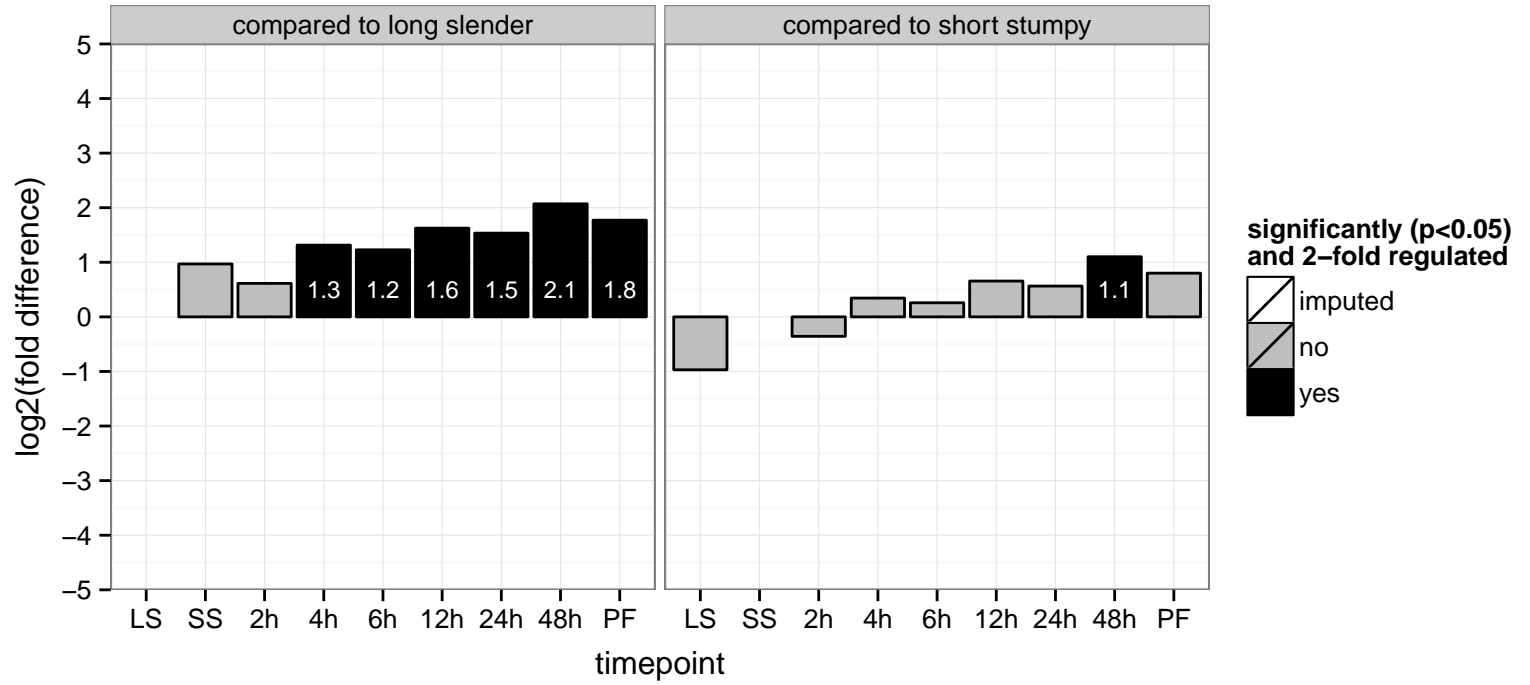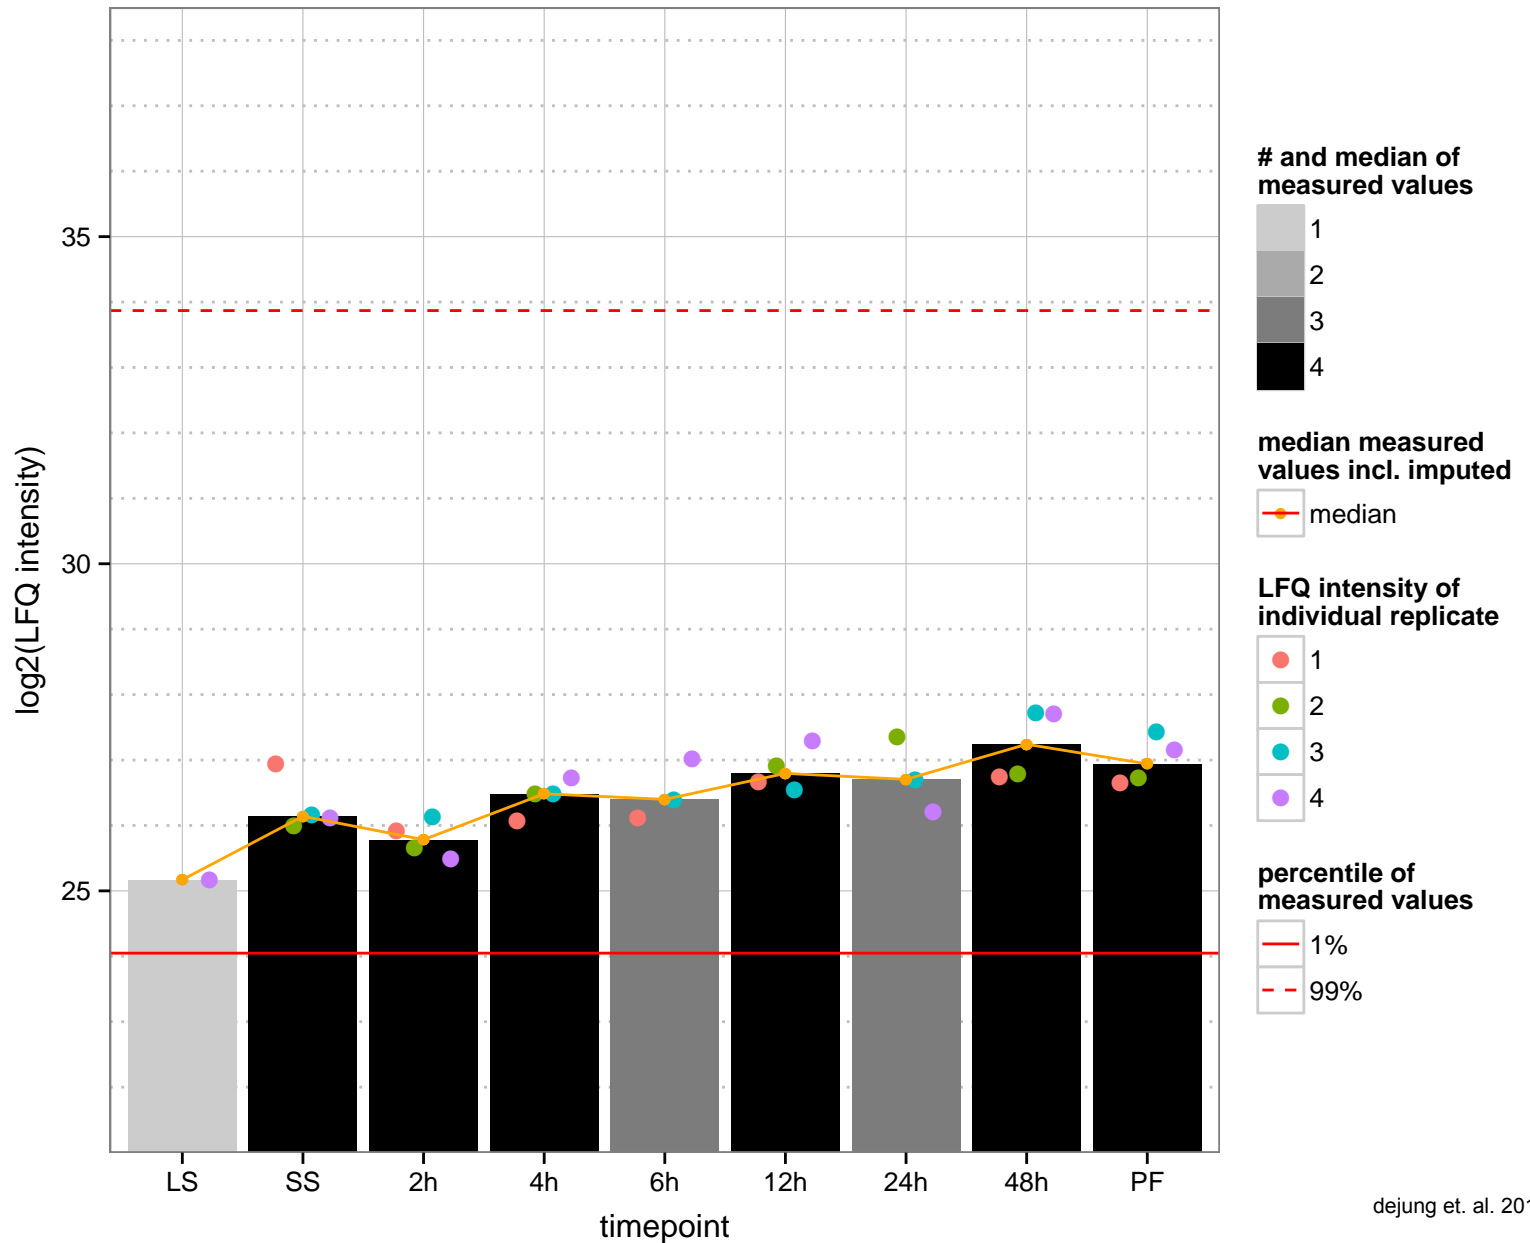

calpain-like cysteine peptidase, putative, cysteine peptidase, Clan CA, family C2  
 Tb927.7.4060  
 AGOF: null  
 AGOC: null  
 AGOP: null  
 PGOF: null  
 PGO: null  
 PGOP: null

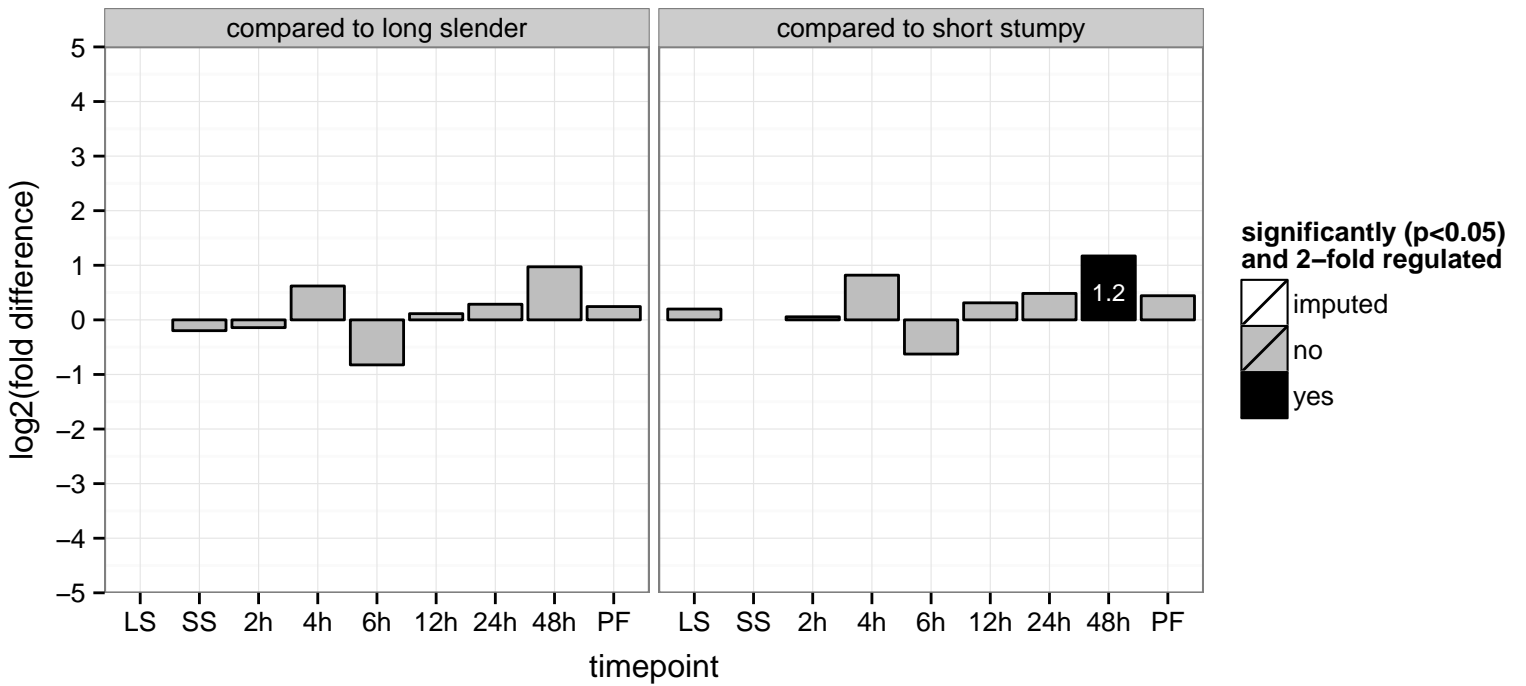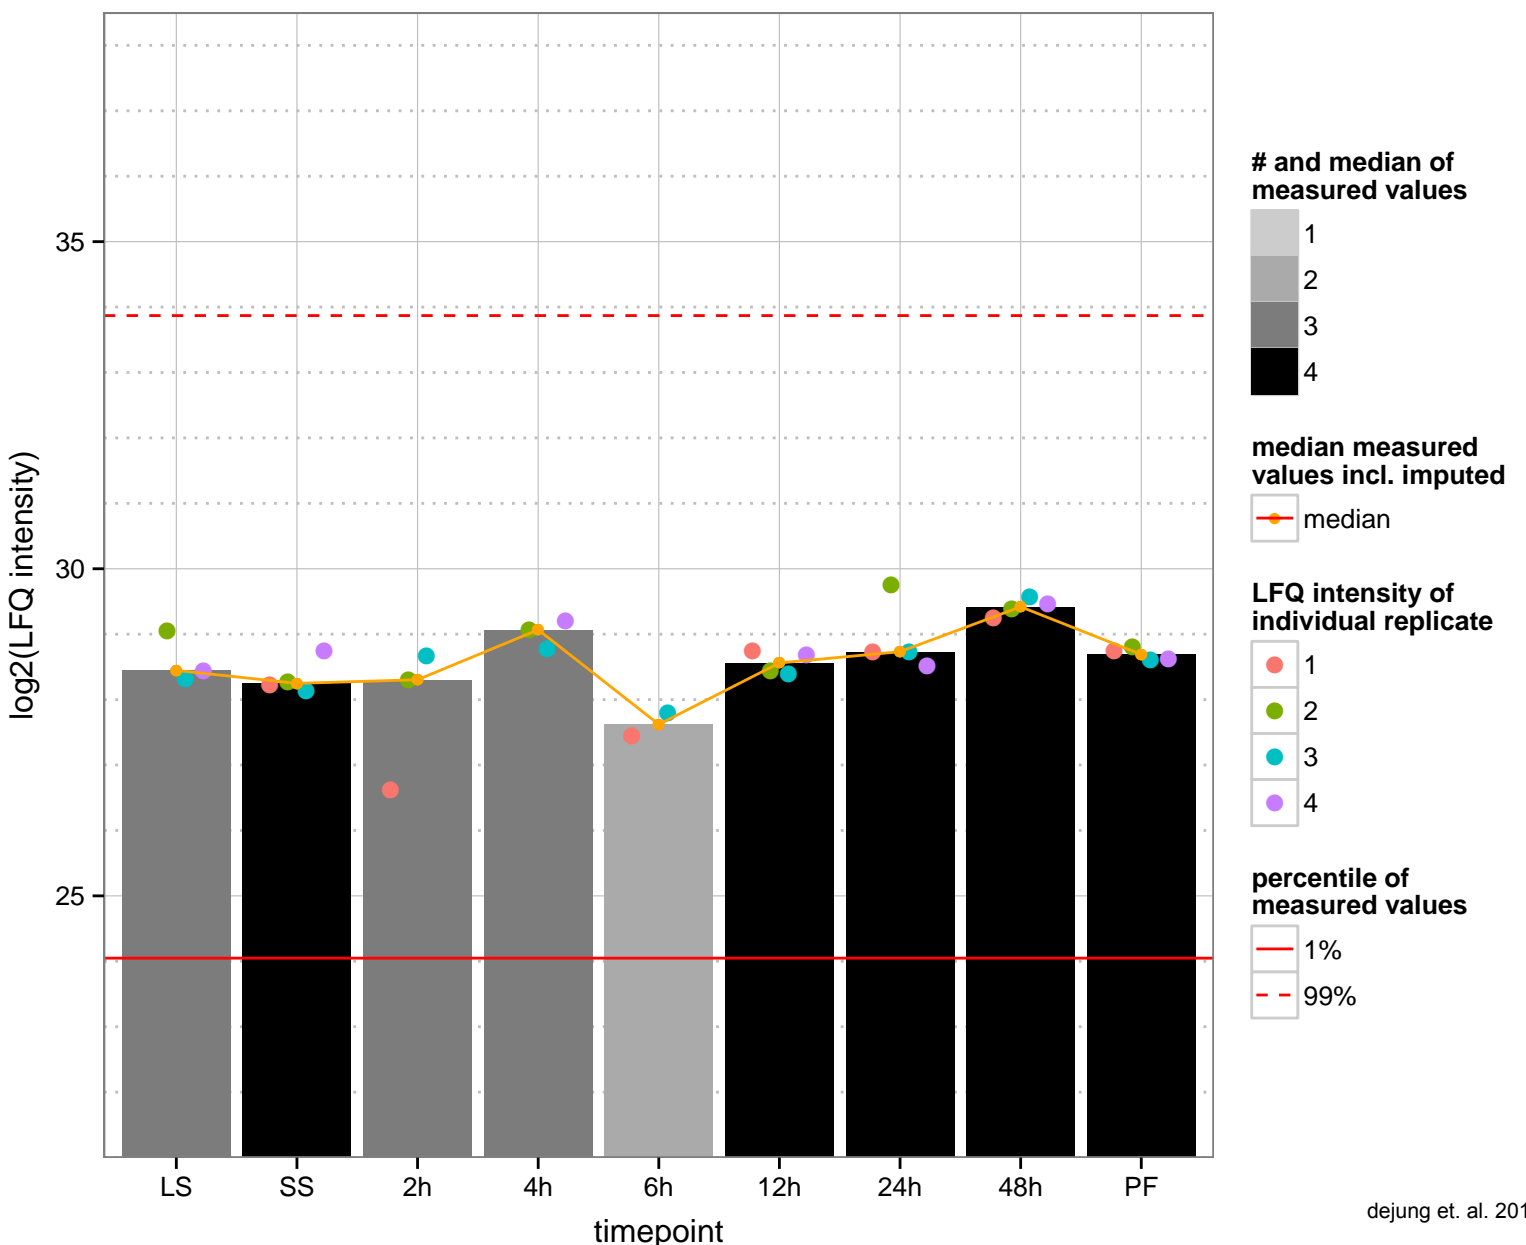

leucine-rich repeat protein (LRRP), putative  
 Tb927.7.5600  
 AGOF: null  
 AGOC: null  
 AGOP: null  
 PGO: null  
 PGOC: null  
 PGOP: null

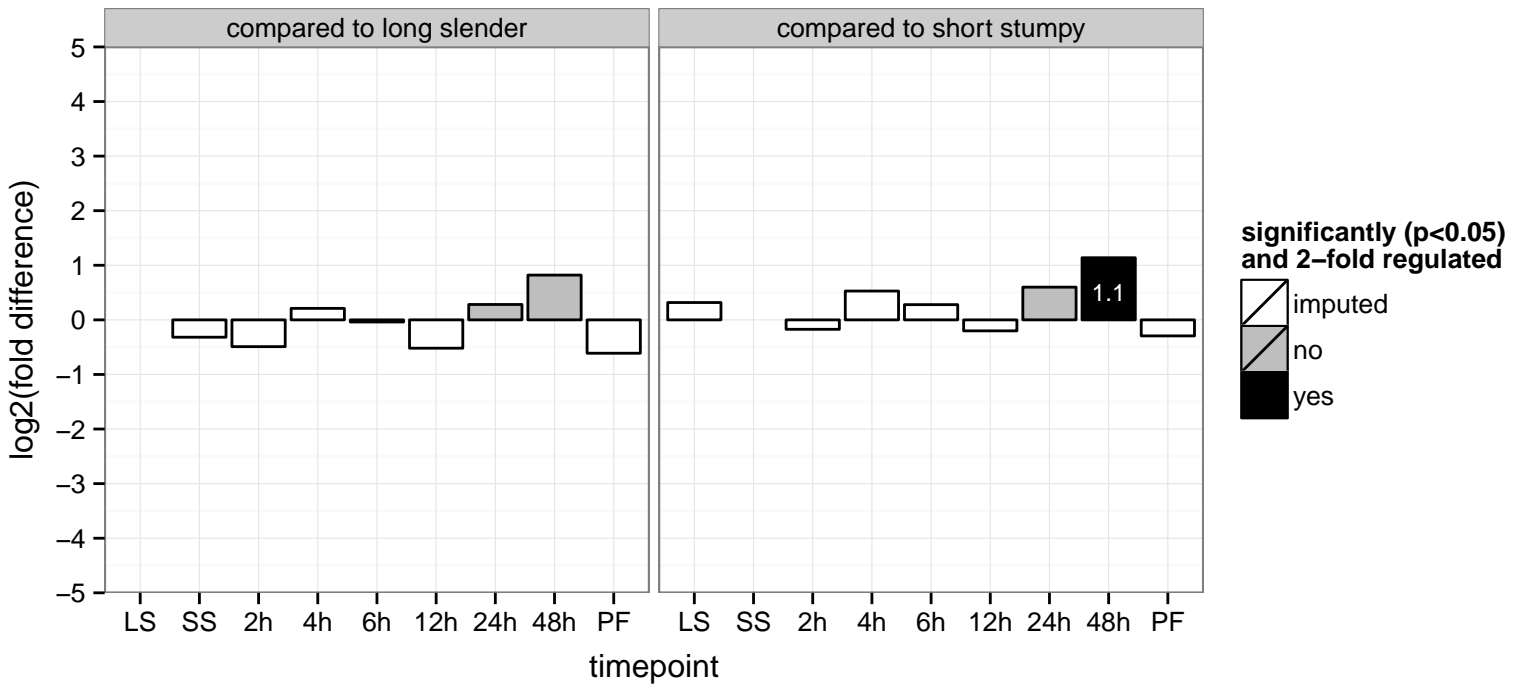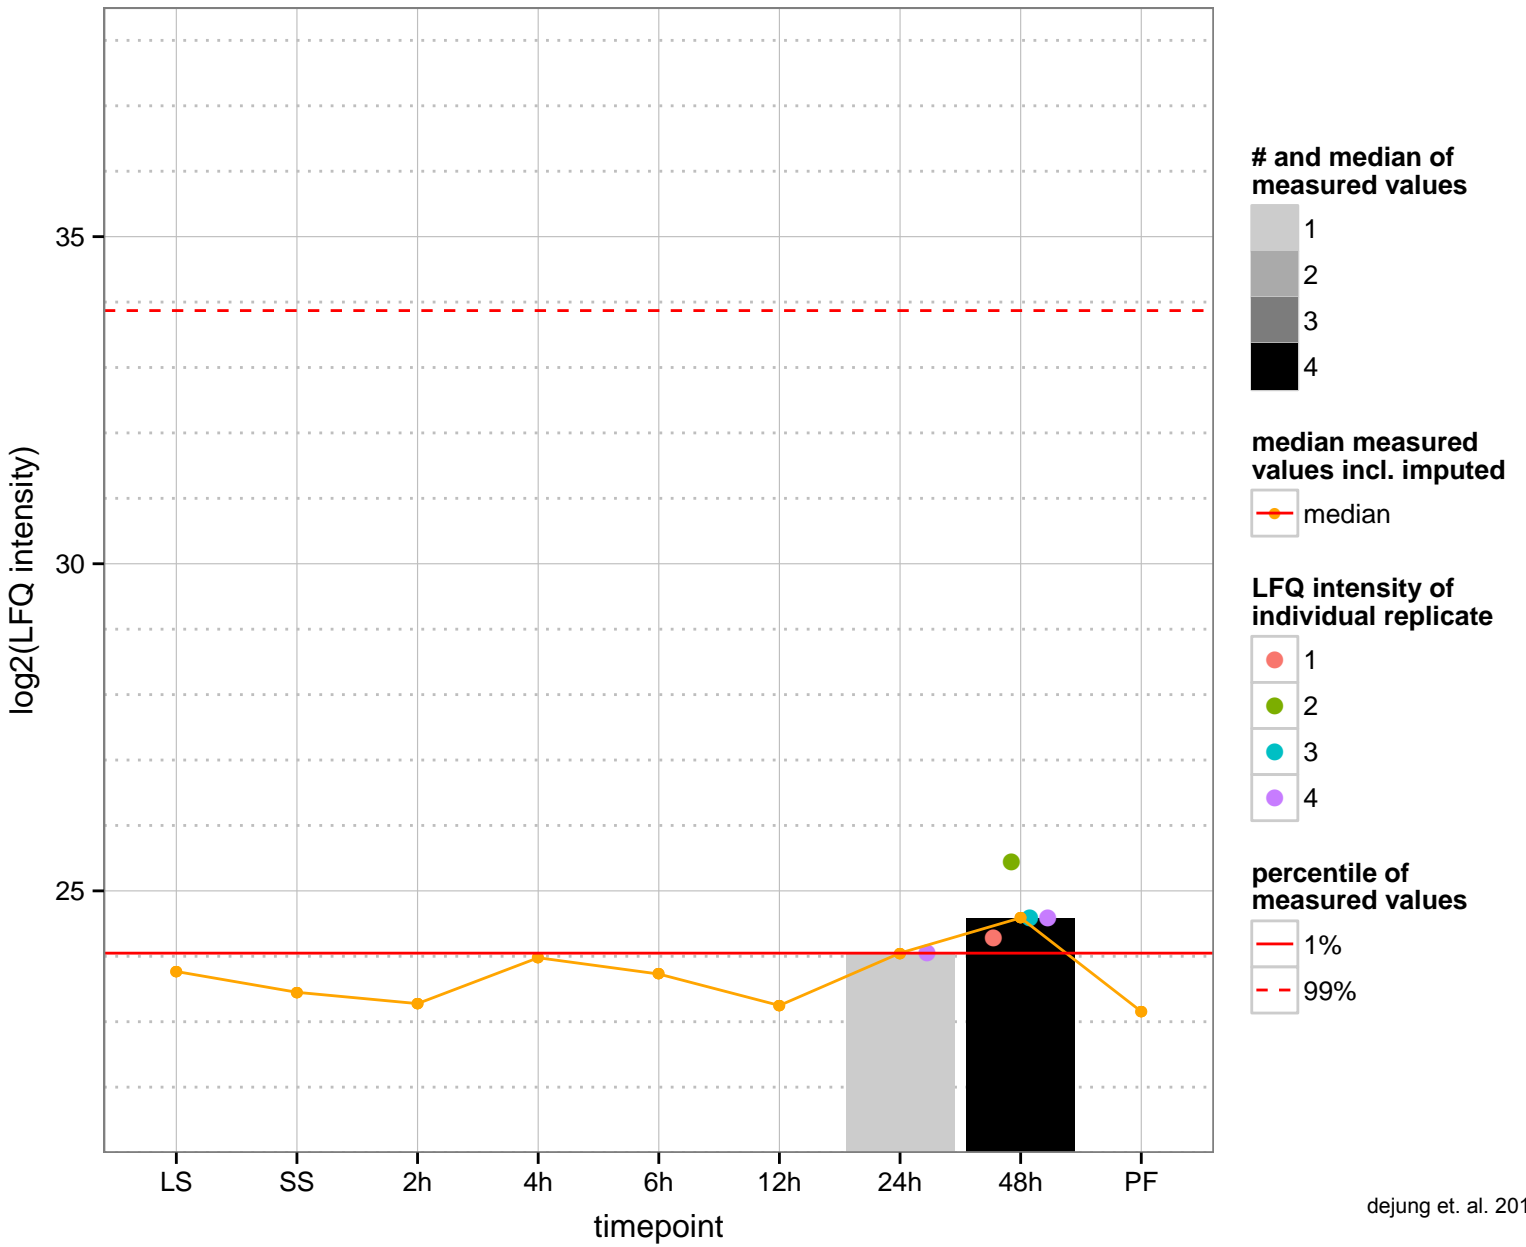

hypothetical protein, conserved  
 Tb927.7.6770  
 AGOF: fatty-acyl-CoA binding  
 AGOC: null  
 AGOP: null  
 PGOF: fatty-acyl-CoA binding  
 PGOC: null  
 PGOP: null

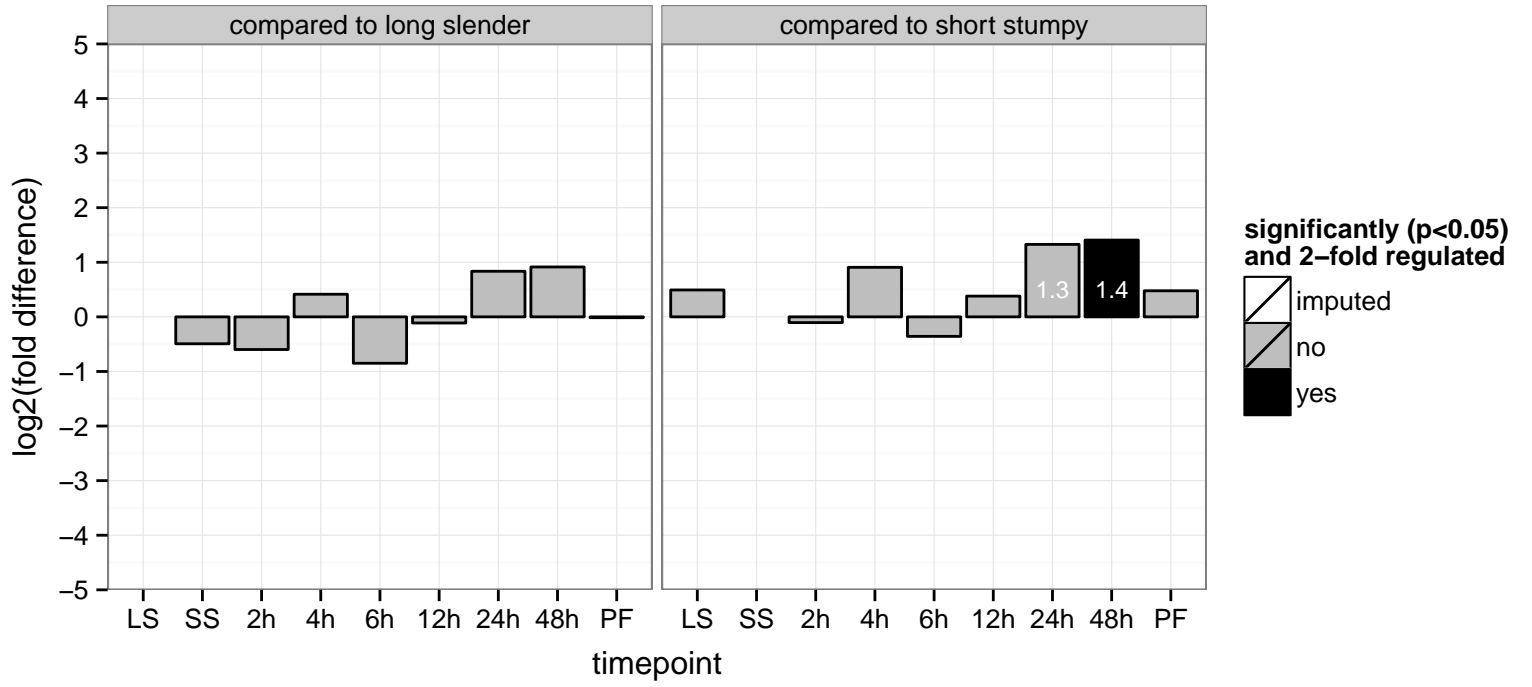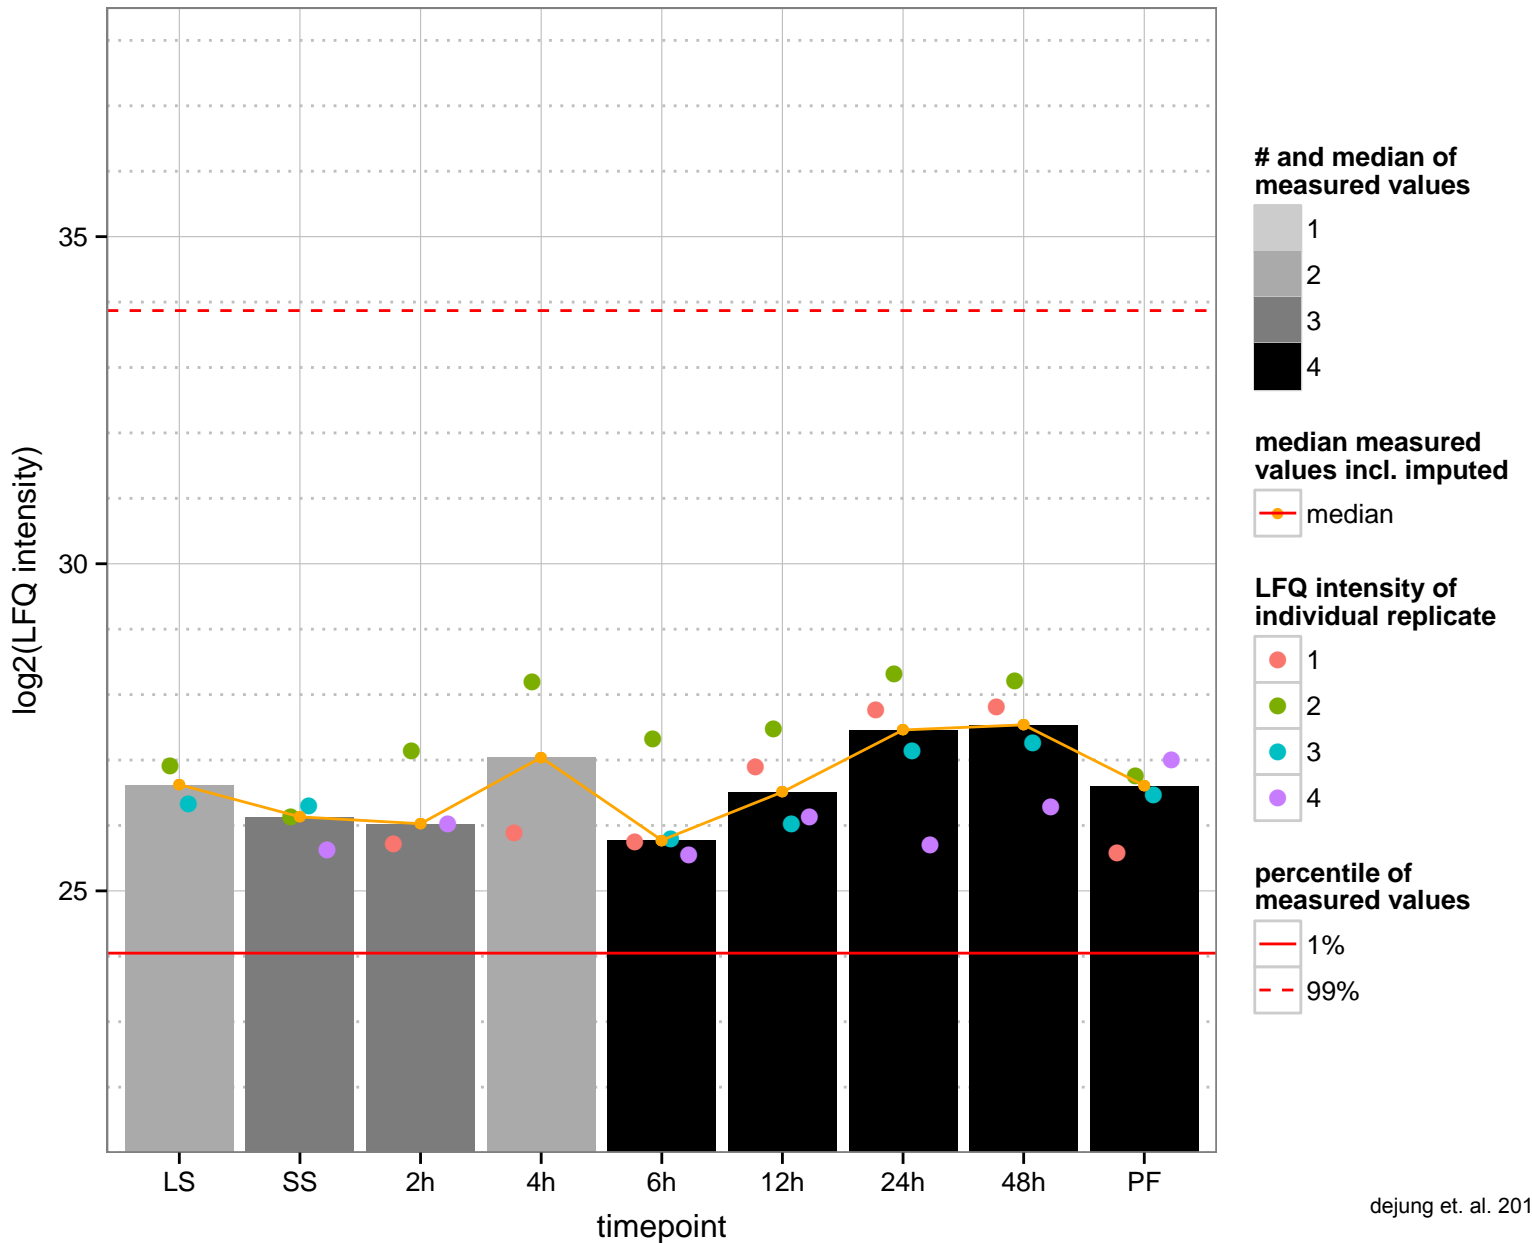

hypothetical protein, conserved  
 Tb927.7.7210  
 AGOF: null  
 AGOC: null  
 AGOP: null  
 PGO: null  
 PGOC: null  
 PGOP: null

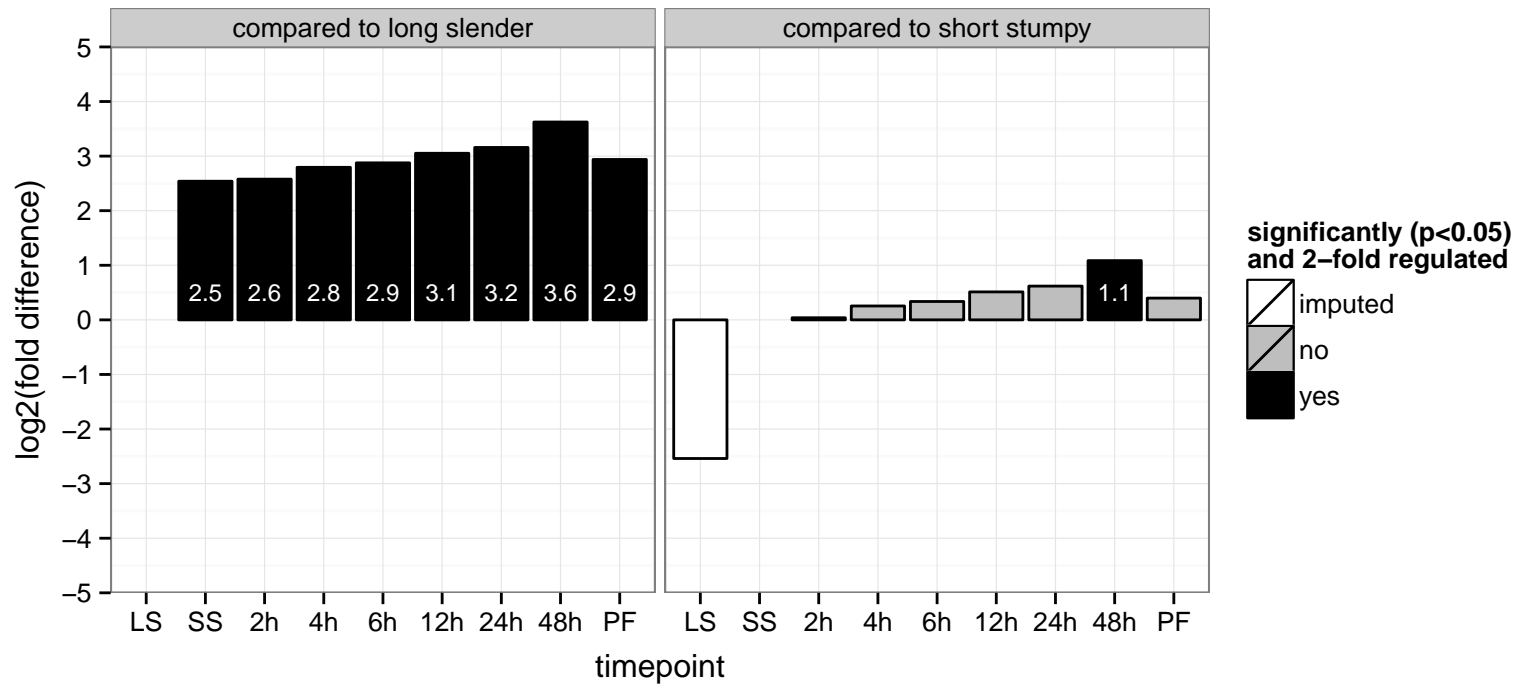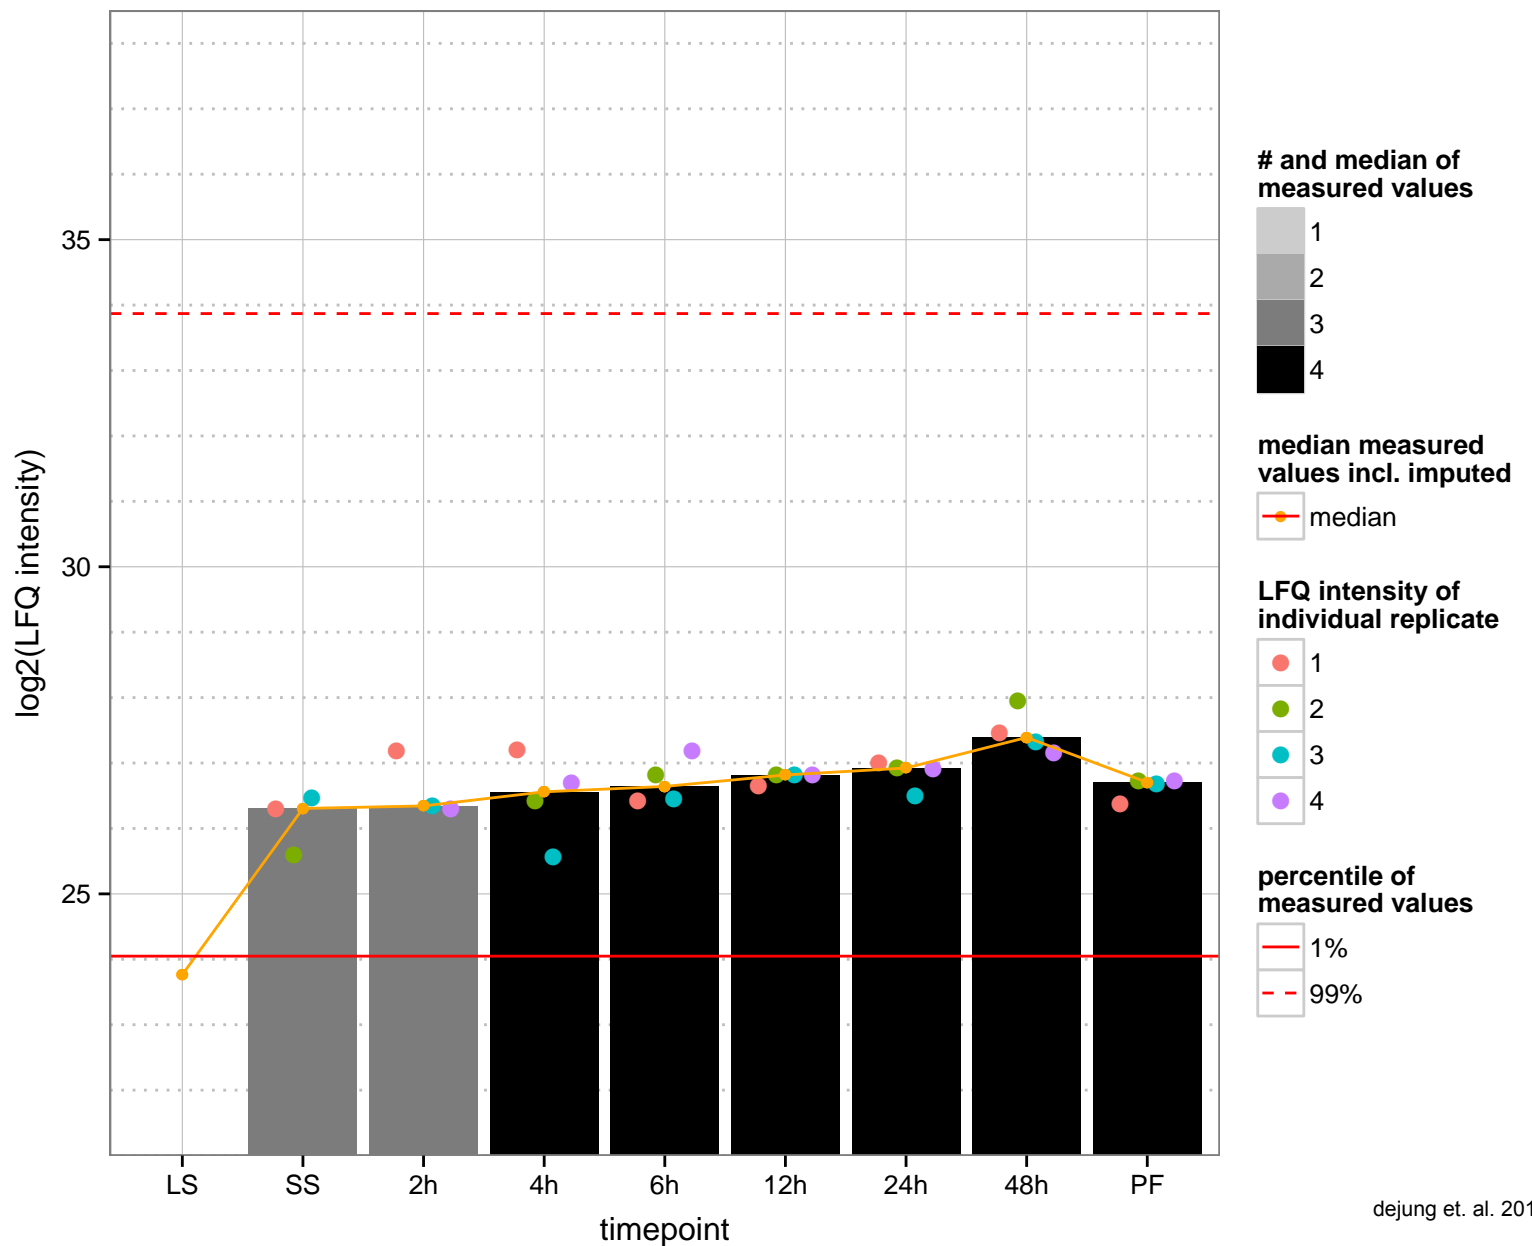

mitochondrial RNA binding protein (TbRBP38)  
 Tb927.8.2740  
 AGOF: RNA binding  
 AGOC: mitochondrion  
 AGOP: mRNA stabilization  
 PGO: null  
 PGOC: null  
 PGOP: null

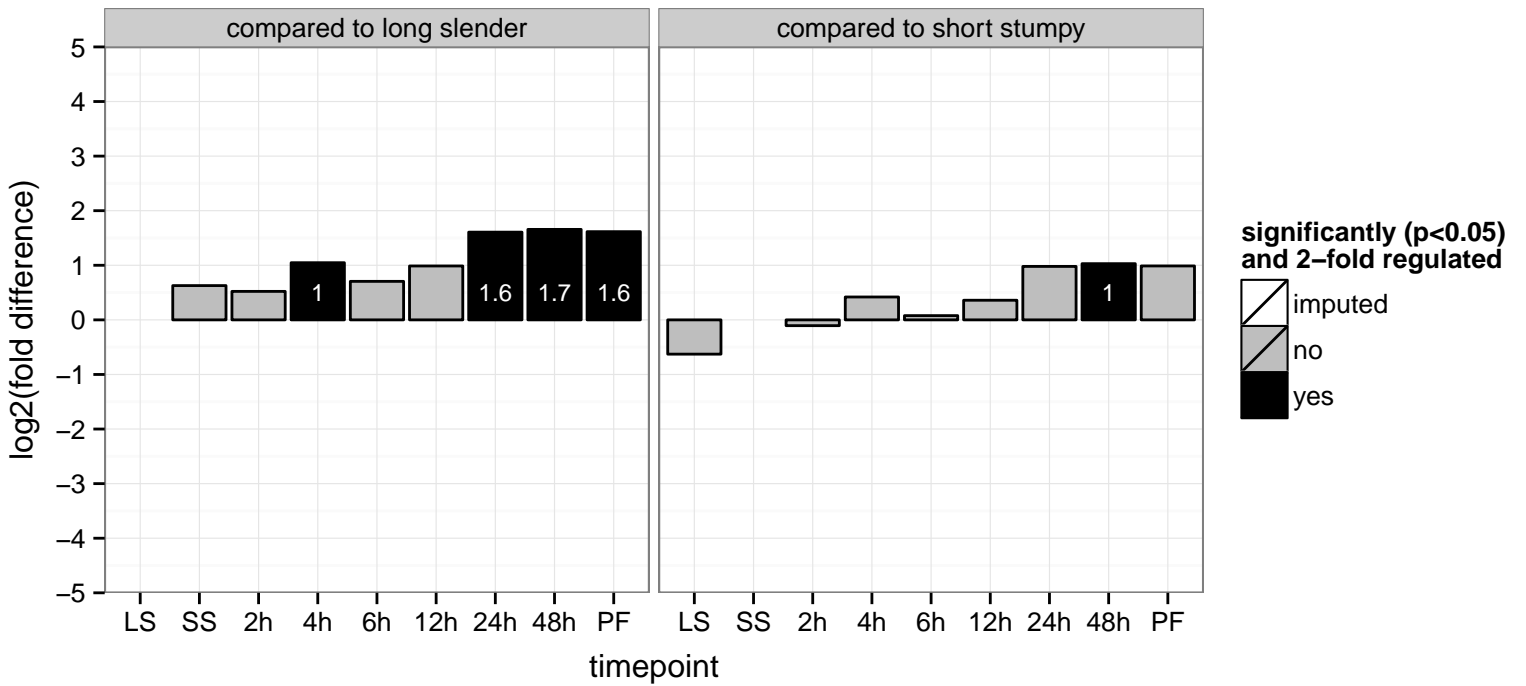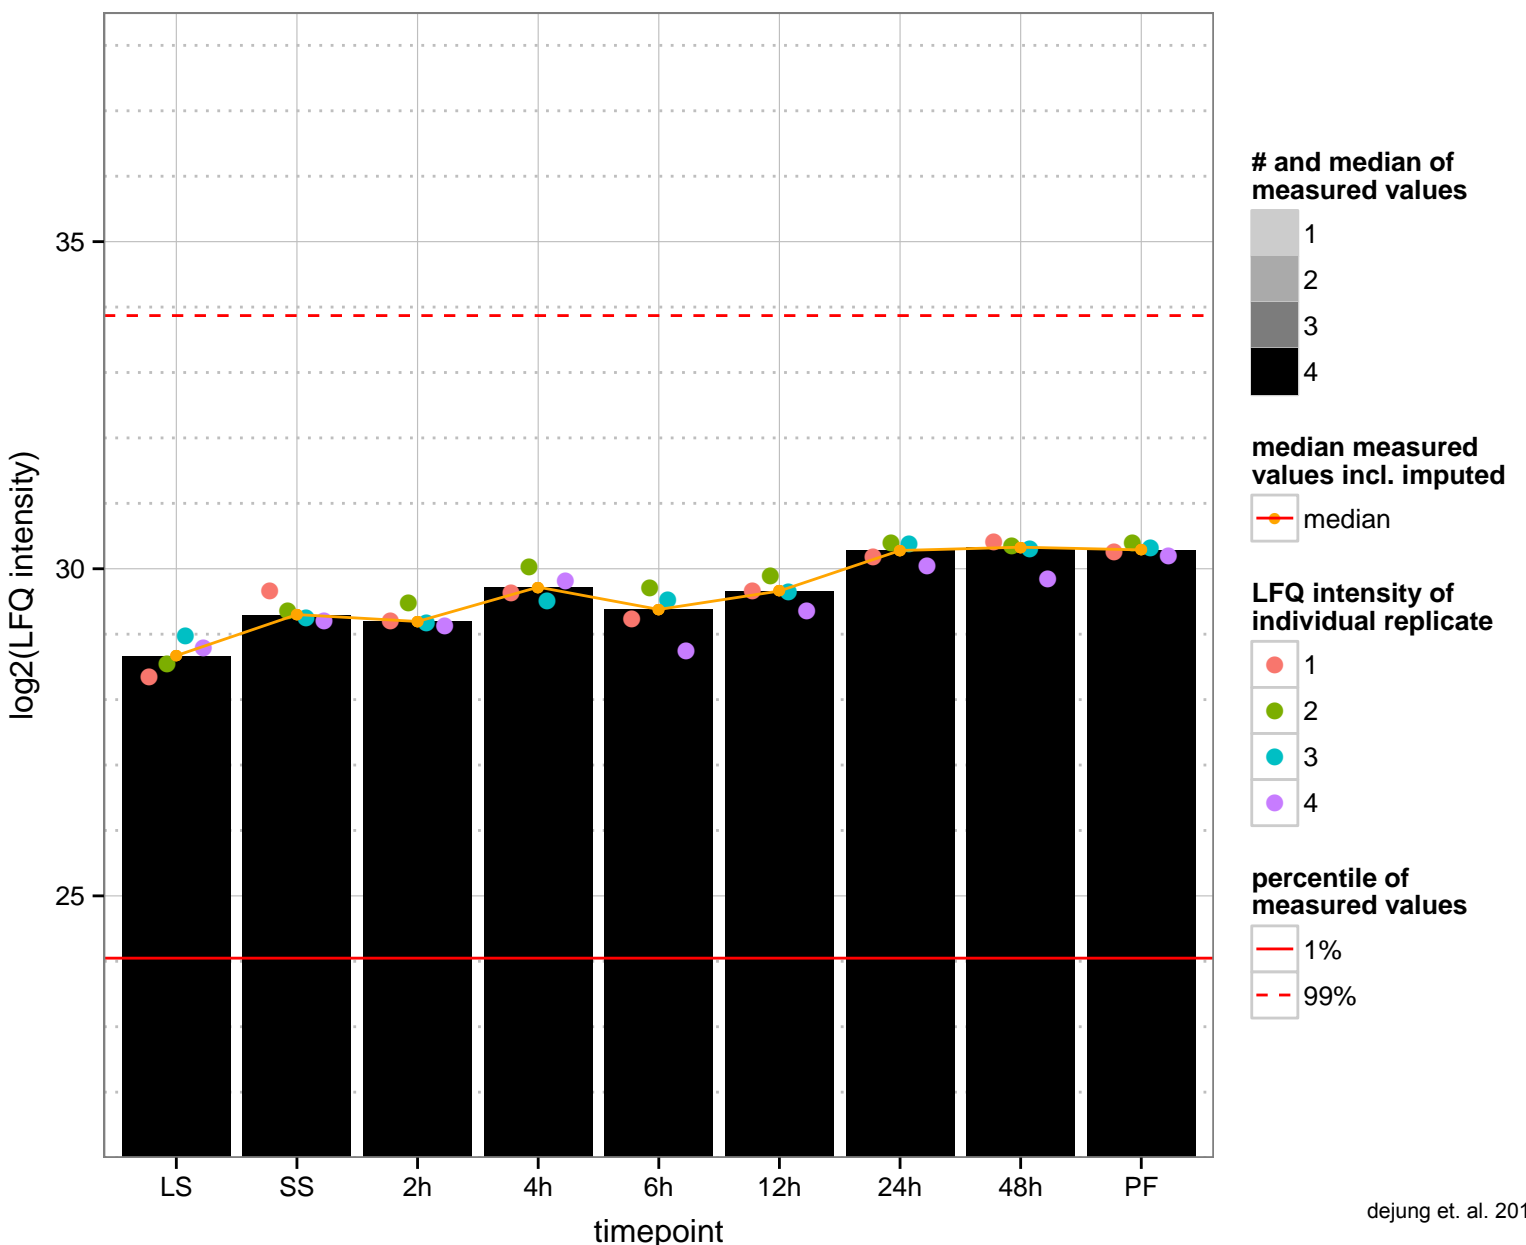

hypothetical protein, conserved  
 Tb927.8.3260  
 AGOF: null  
 AGOC: null  
 AGOP: null  
 PGOF: null  
 PGOC: null  
 PGOP: null

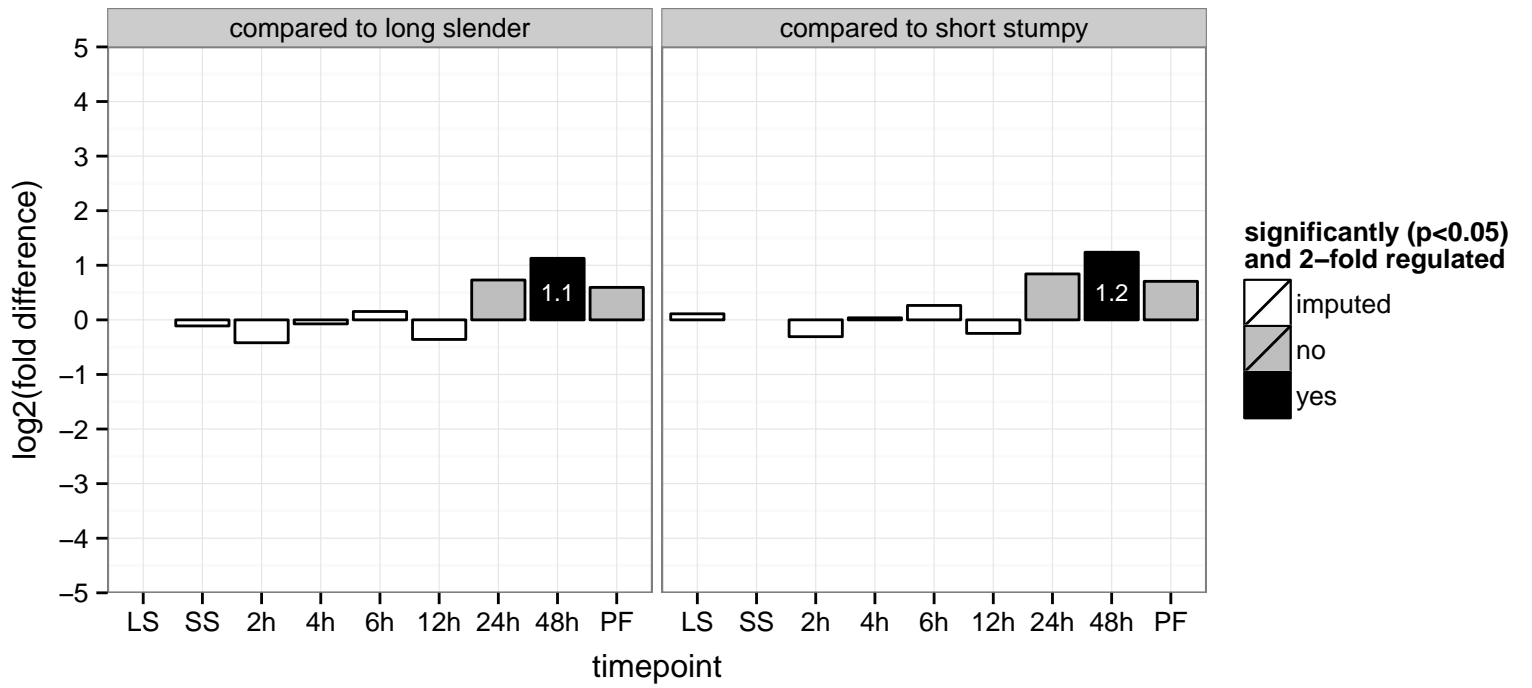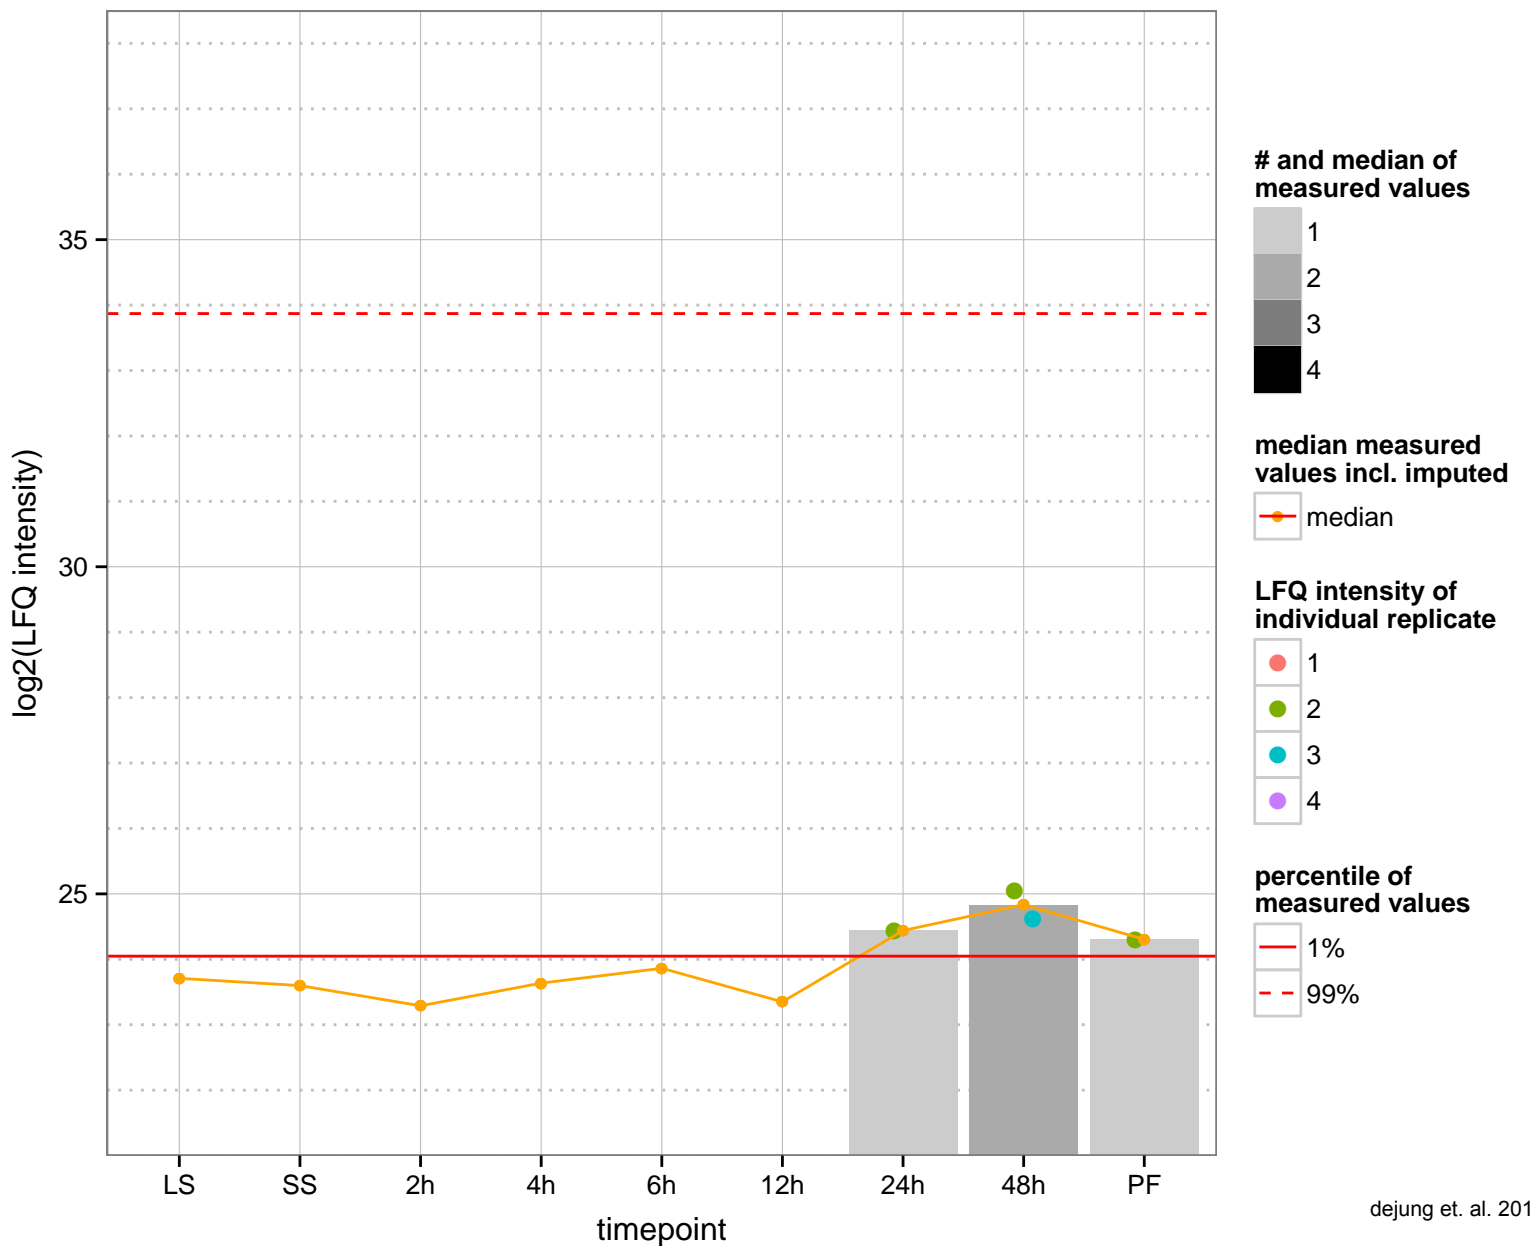



hypothetical protein, conserved  
 Tb927.8.5610  
 AGOF: null  
 AGOC: null  
 AGOP: null  
 PGO: null  
 PGOC: null  
 PGOP: null

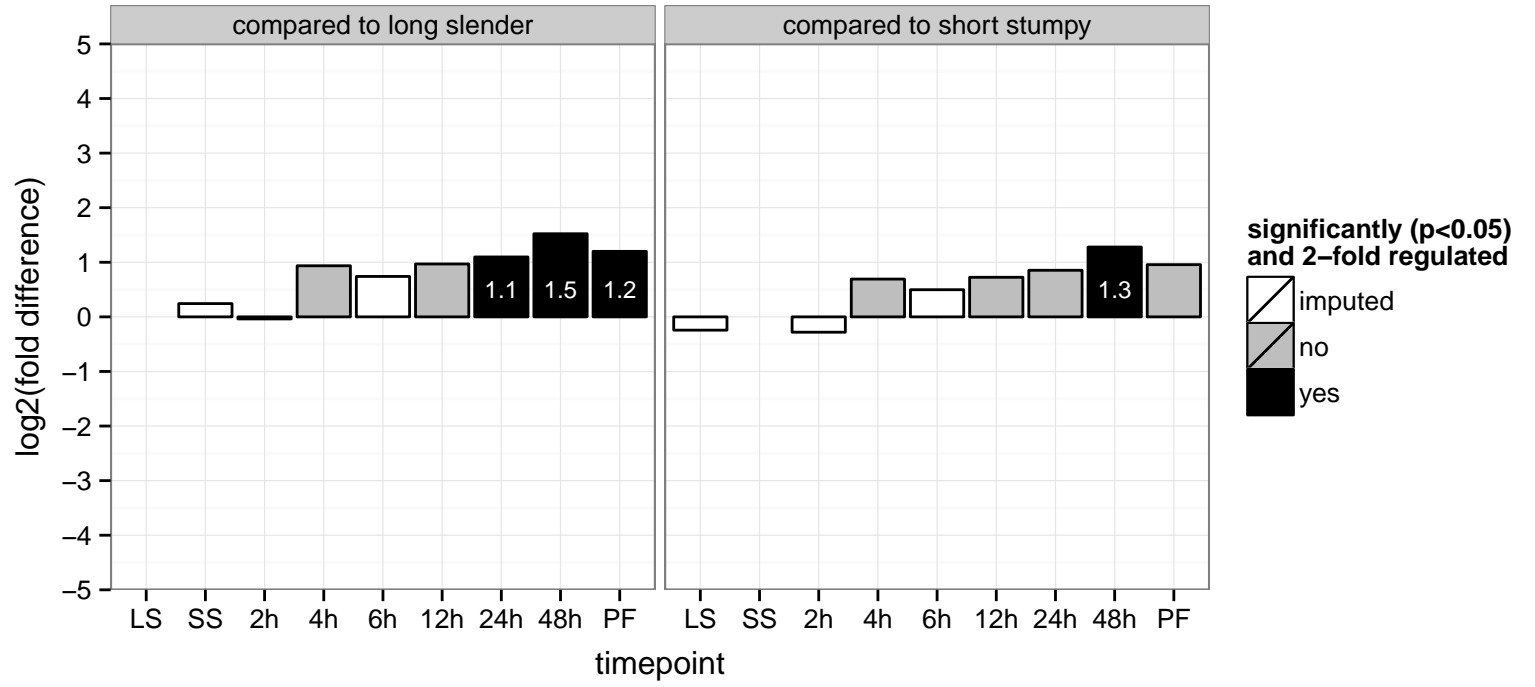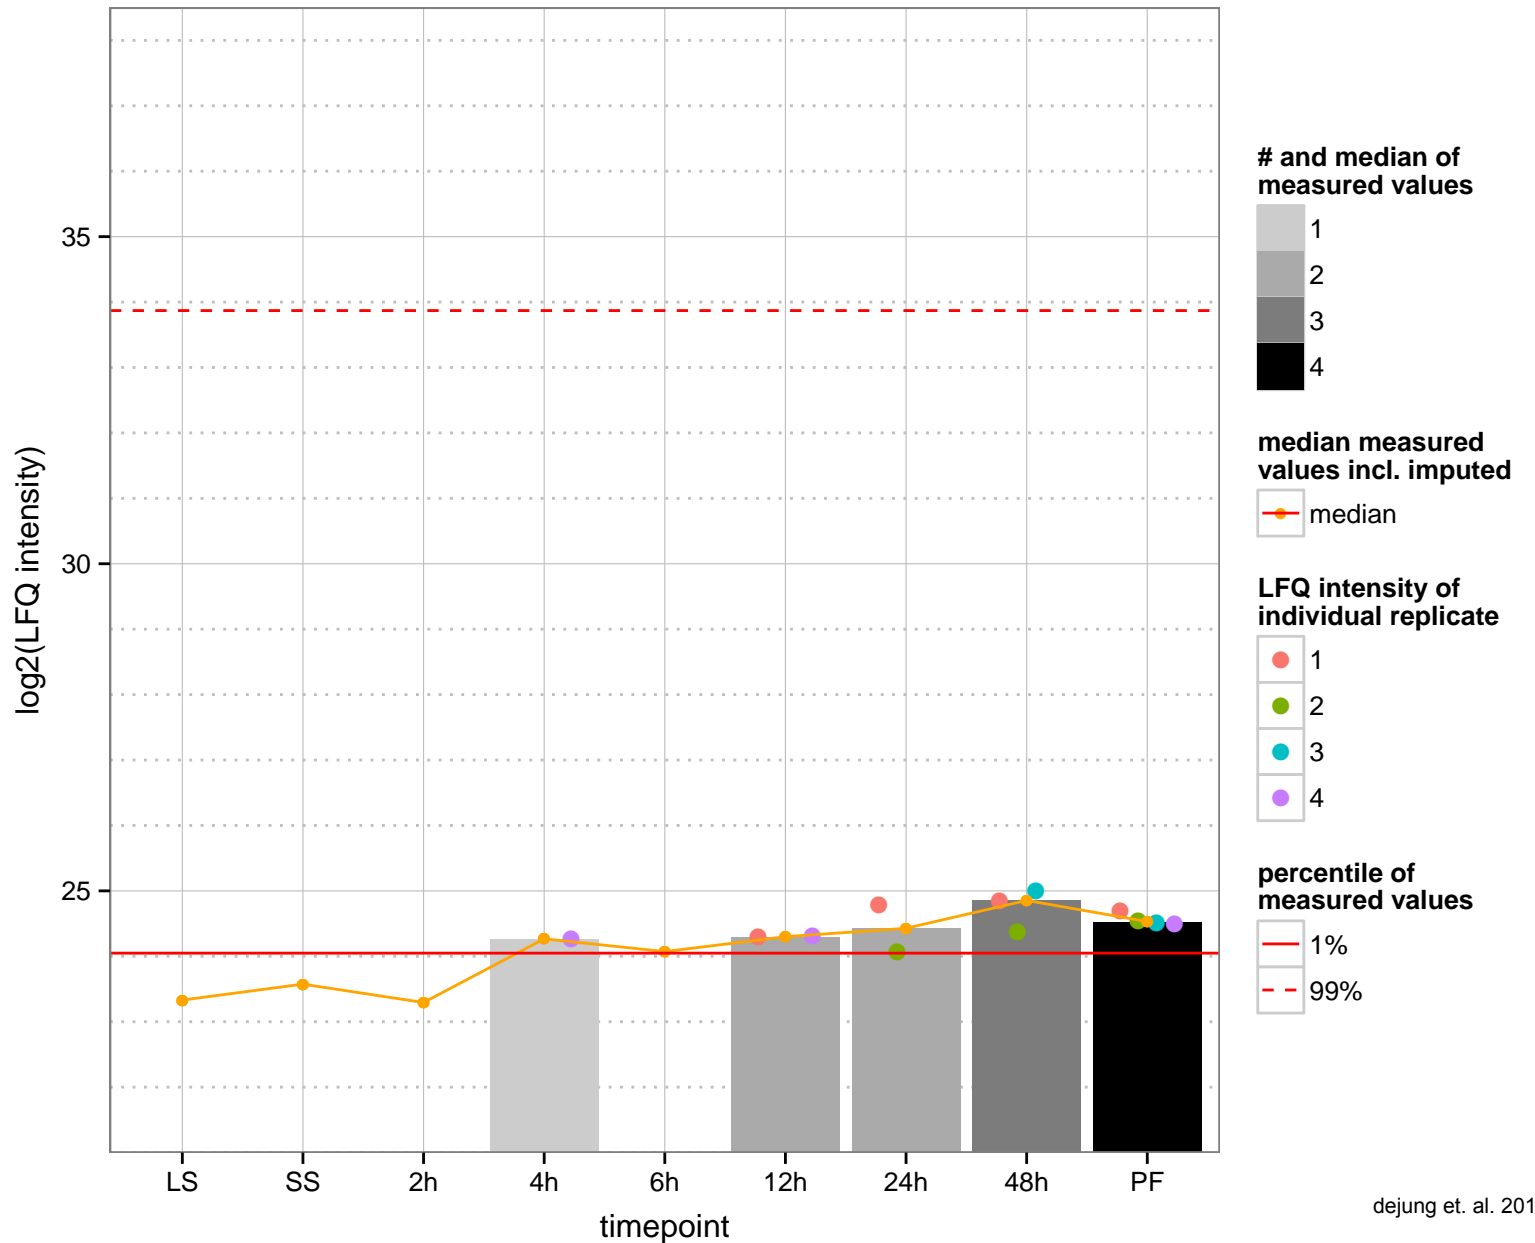

hypothetical protein, conserved  
 Tb927.8.6280  
 AGOF: peptidyl-prolyl cis-trans isomerase activity  
 AGOC: null  
 AGOP: null  
 PGOF: peptidyl-prolyl cis-trans isomerase activity  
 PGOC: null  
 PGOP: protein folding

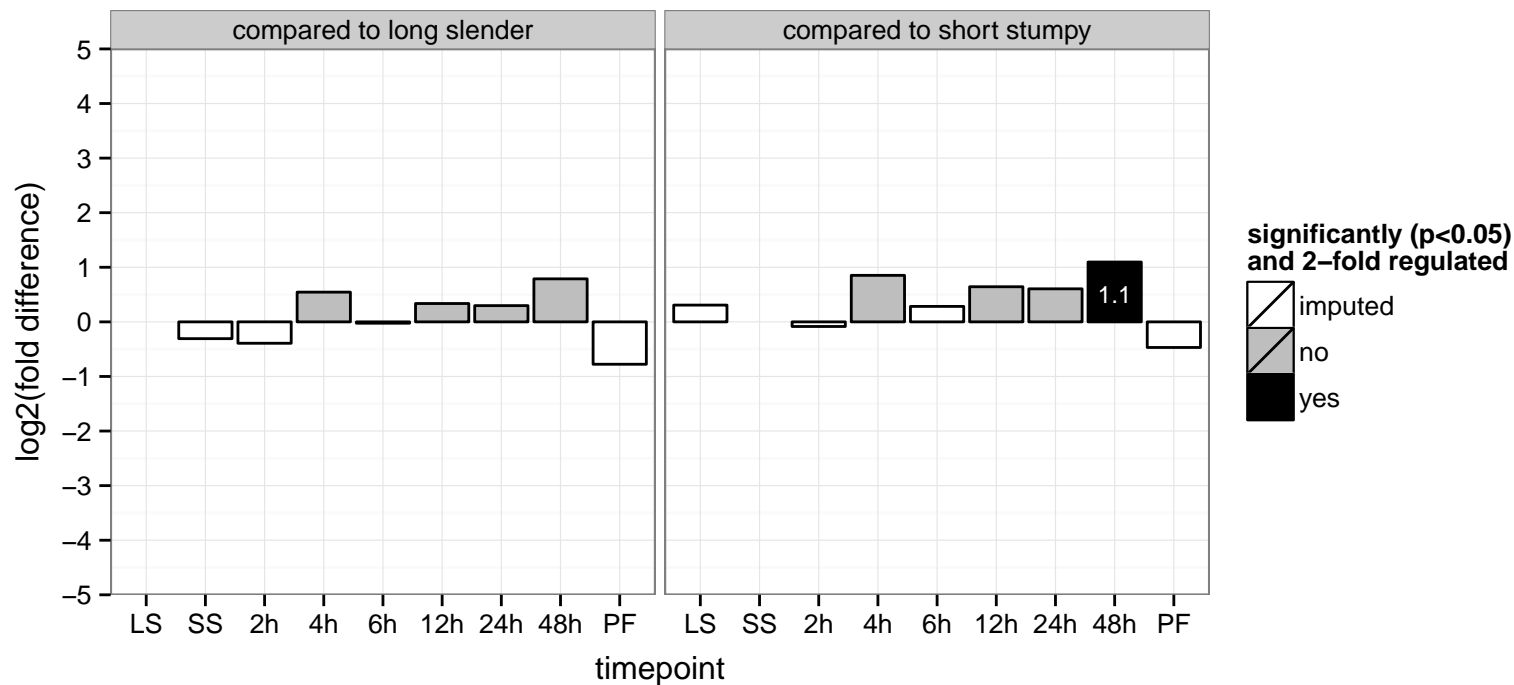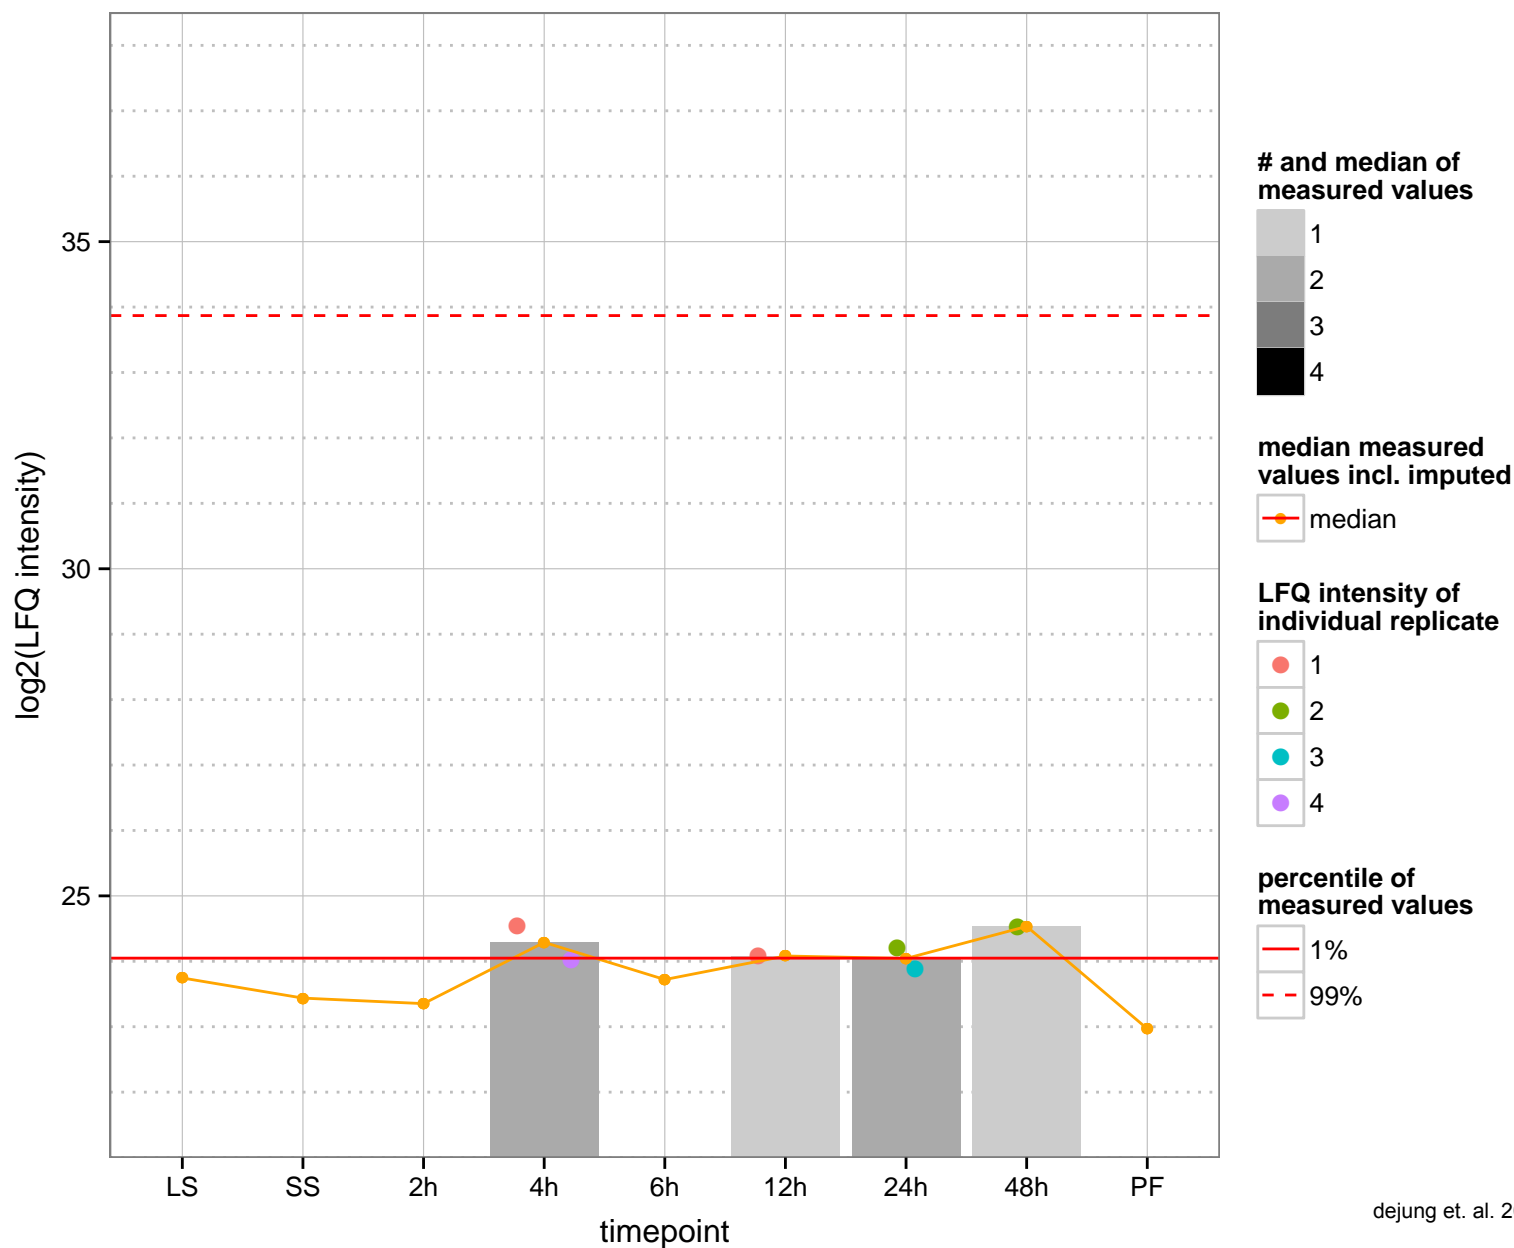

mitochondrial RNA binding complex 1 subunit (MRB8180)  
 Tb927.8.8180  
 AGOF: RNA binding  
 AGOC: mitochondrion  
 AGOP: cytidine to uridine editing, mRNA stabilization  
 PGO: null  
 PGOC: null  
 PGOP: null

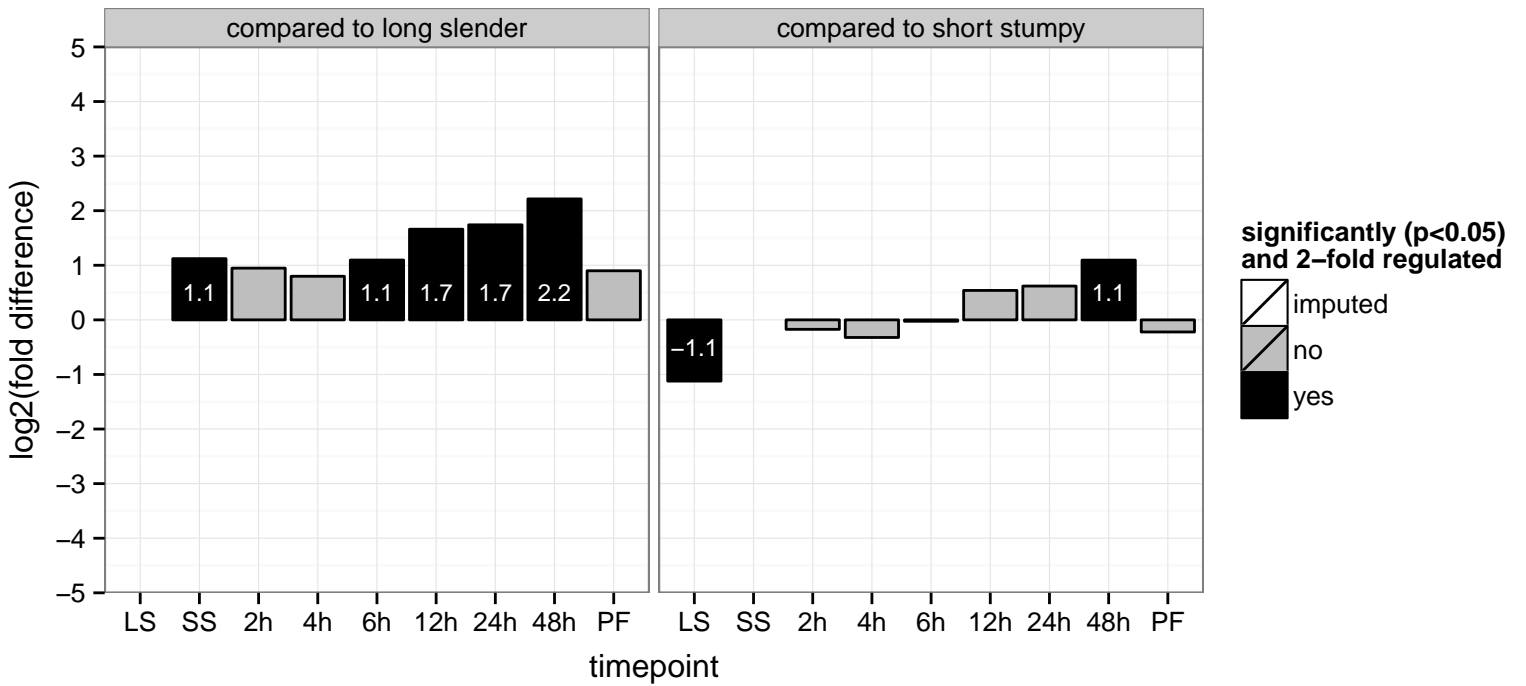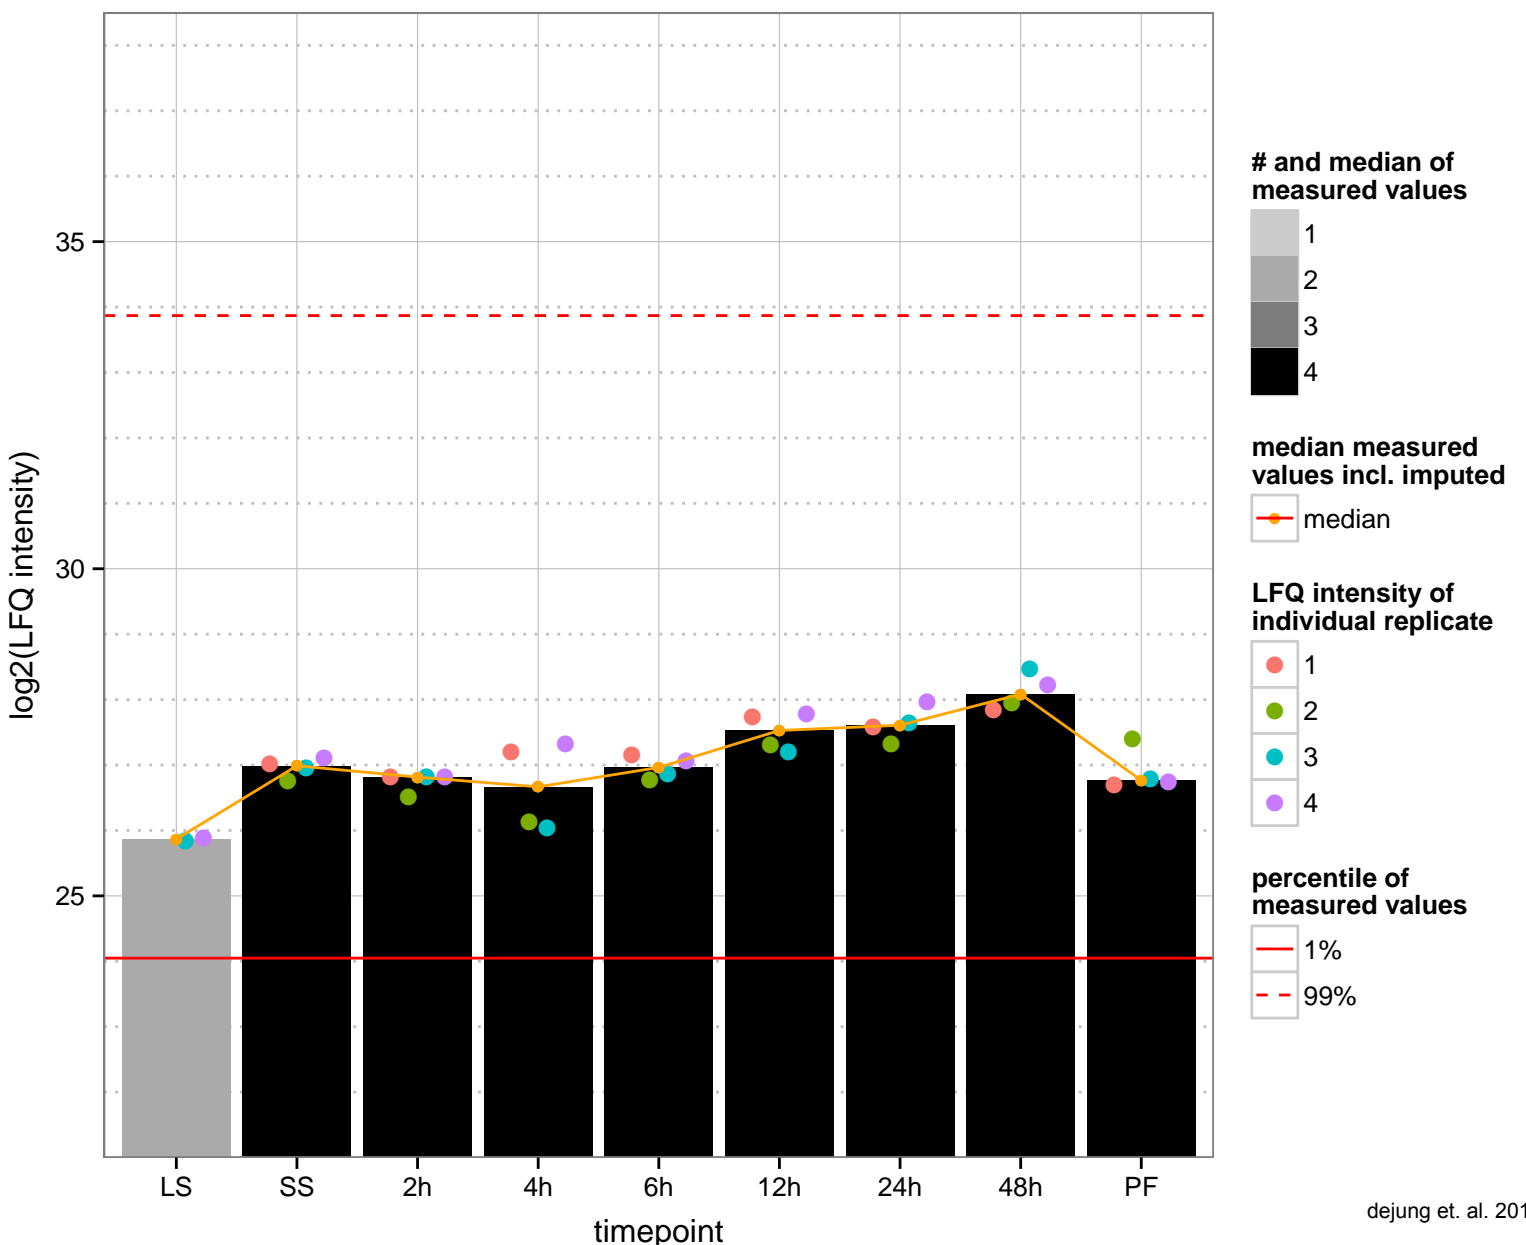

mitochondrial carrier protein, mitochondrial carrier protein (MCP11)  
 Tb927.9.10310  
 AGOF: null  
 AGOC: mitochondrial inner membrane, mitochondrial part  
 AGOP: transport  
 PGO: null  
 PGOC: null  
 PGOP: null

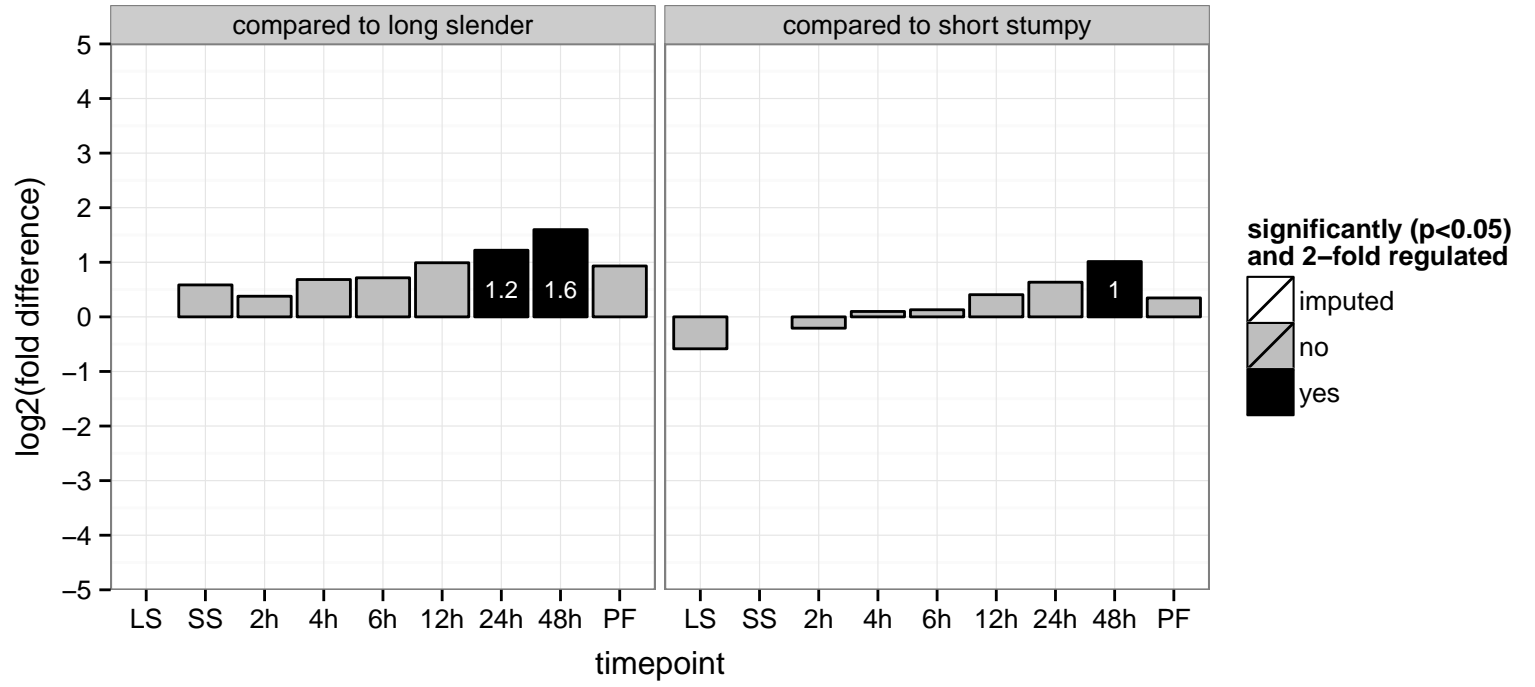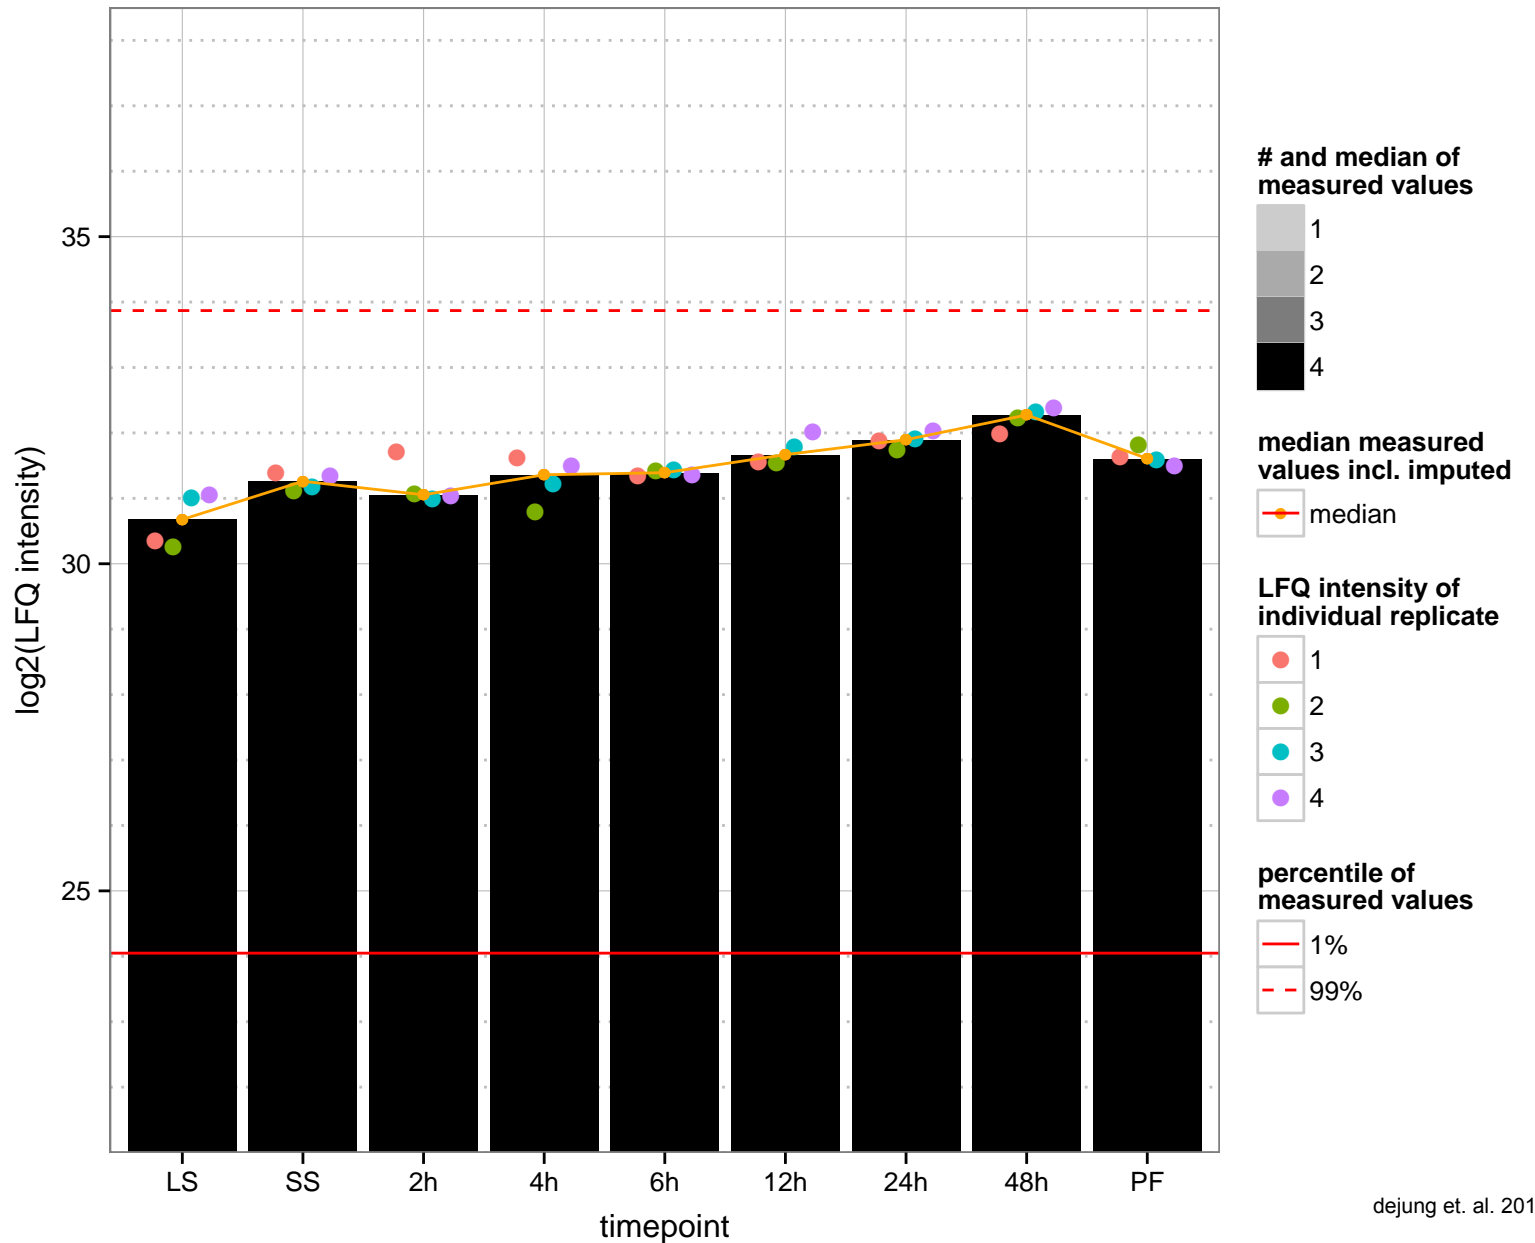

elongation factor 1-alpha, putative, hsp70 subfamily B suppressor 1

Tb927.9.10710

AGOF: GTP binding, GTPase activity, translation elongation factor activity

AGOC: eukaryotic translation elongation factor 1 complex

AGOP: translational elongation

PGOF: GTP binding, GTPase activity

PGOC: null

PGOP: null

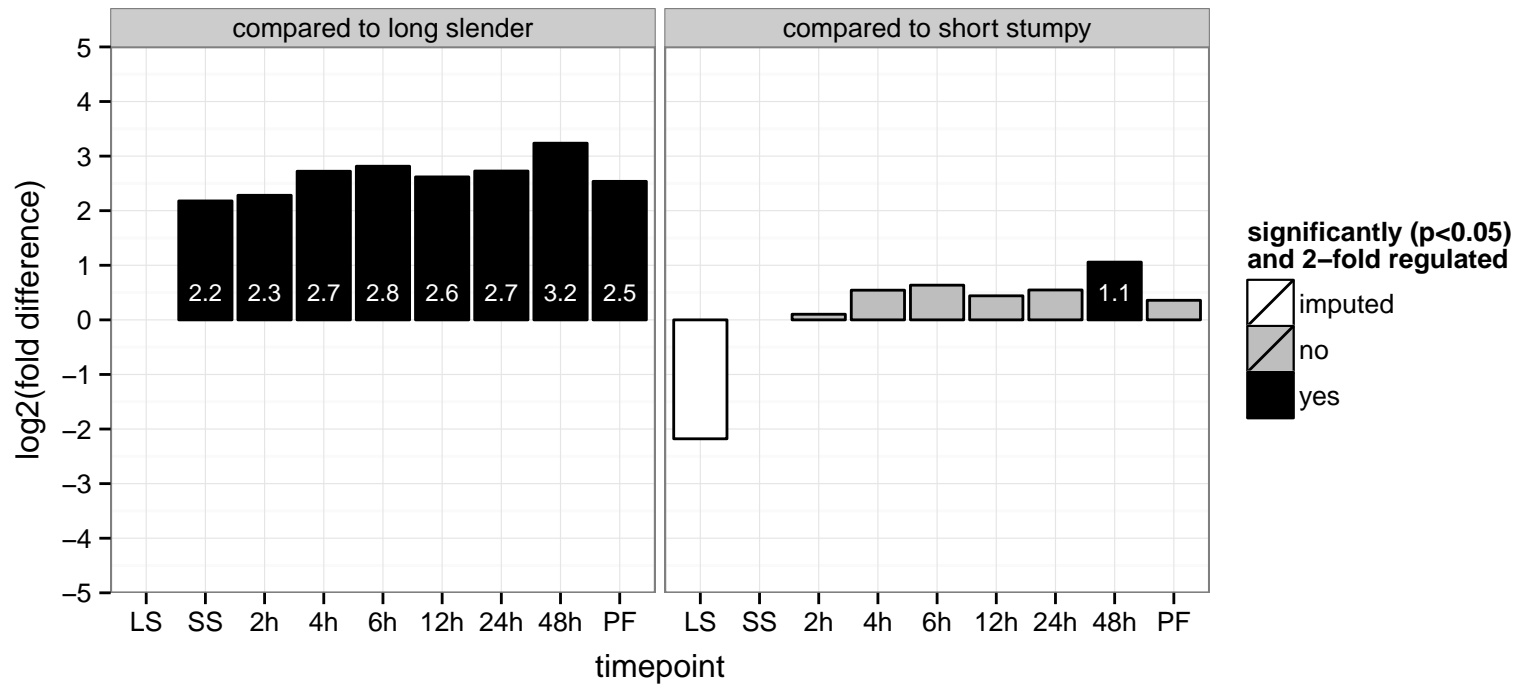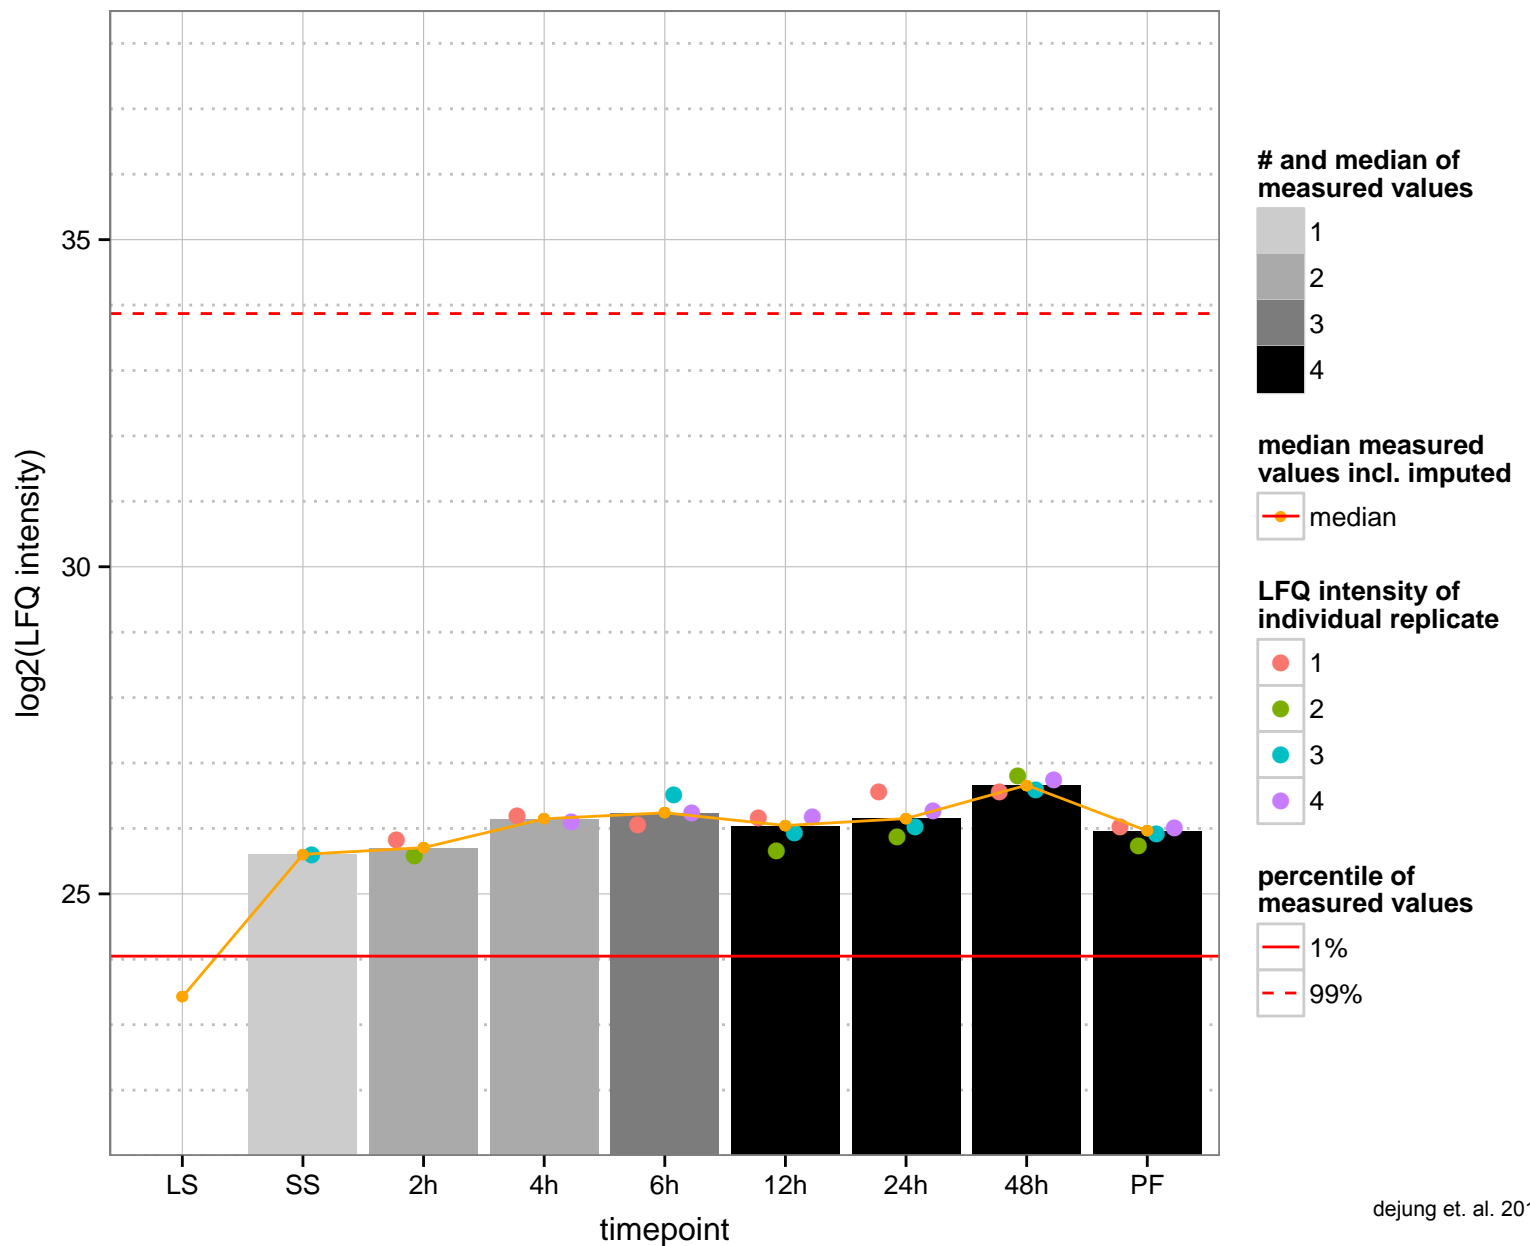

hypothetical protein  
 Tb927.9.10790  
 AGOF: null  
 AGOC: null  
 AGOP: null  
 PGO: null  
 PGOC: null  
 PGOP: null

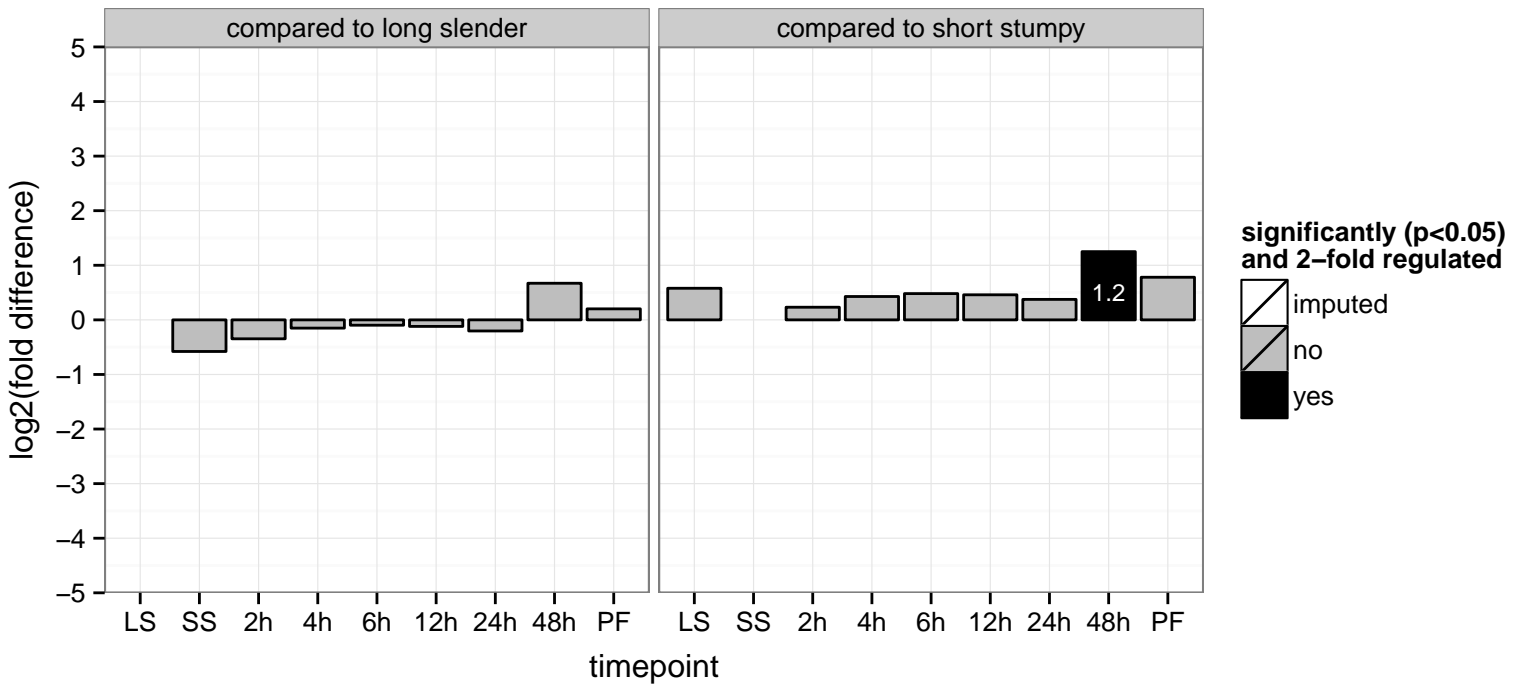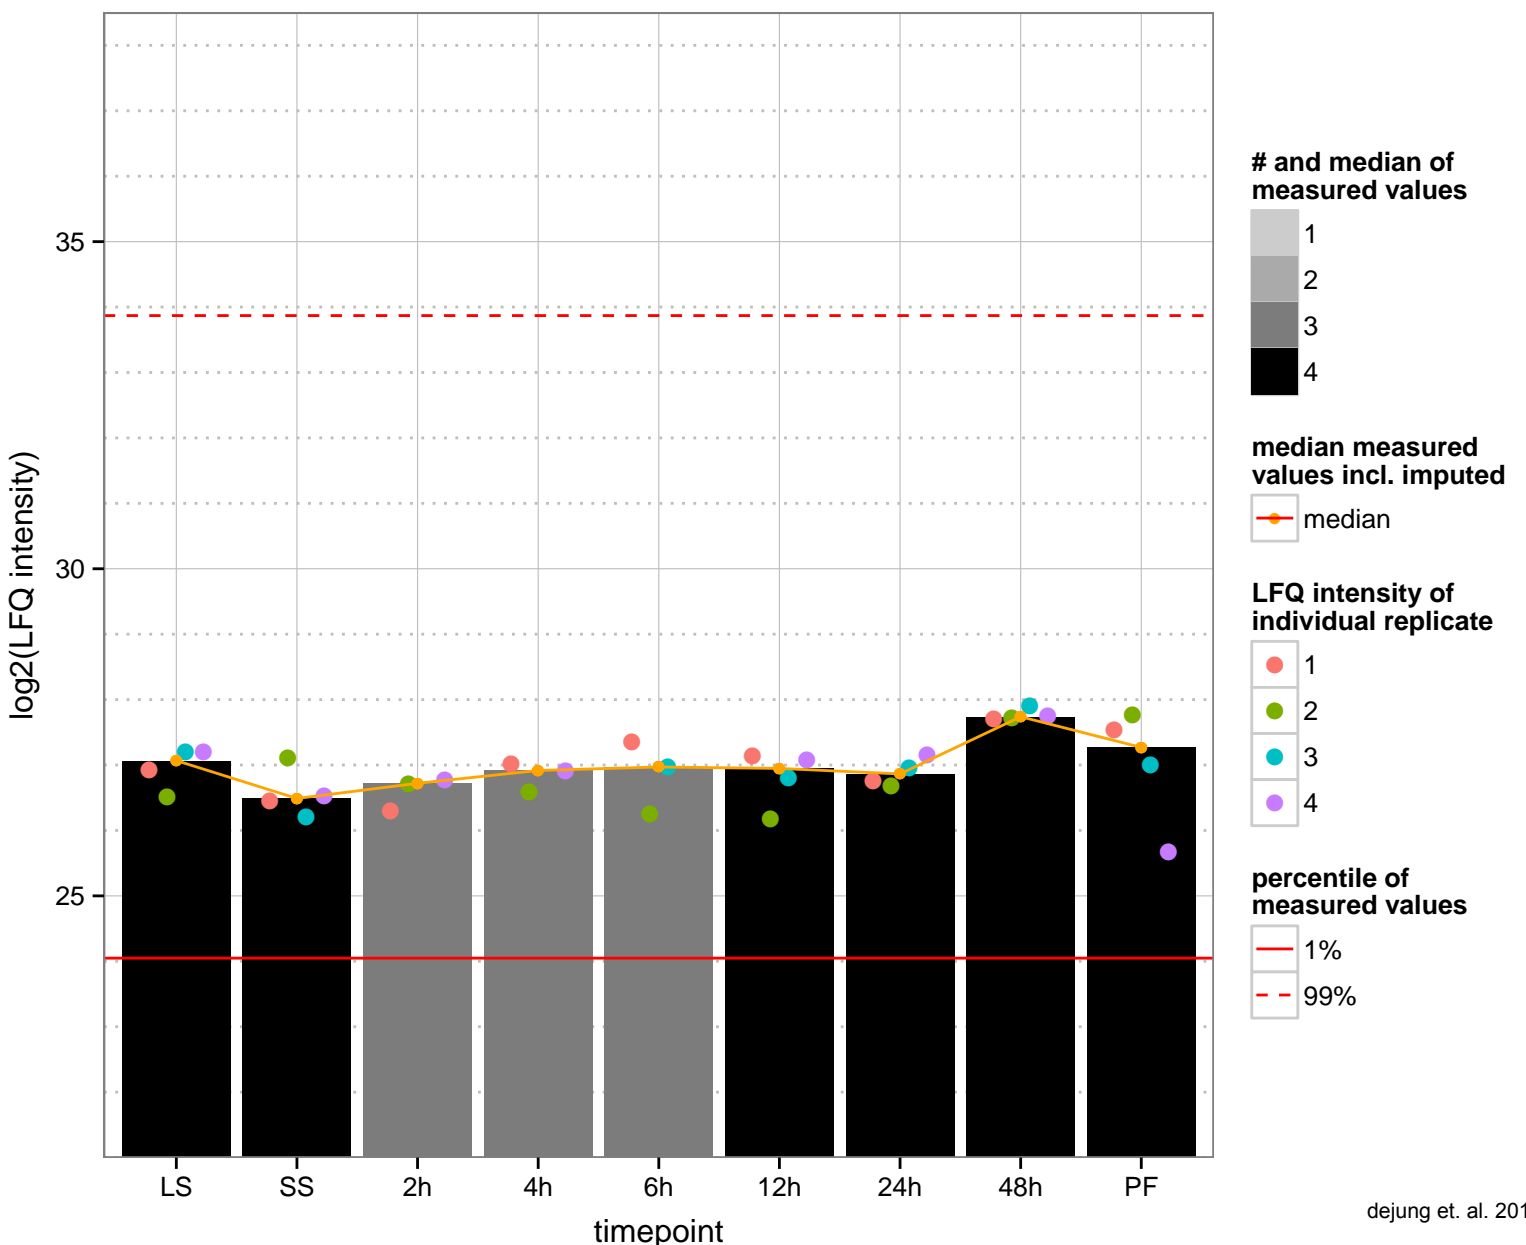

hypothetical protein, conserved  
 Tb927.9.11540  
 AGOF: null  
 AGOC: null  
 AGOP: null  
 PGO: null  
 PGOC: null  
 PGOP: null

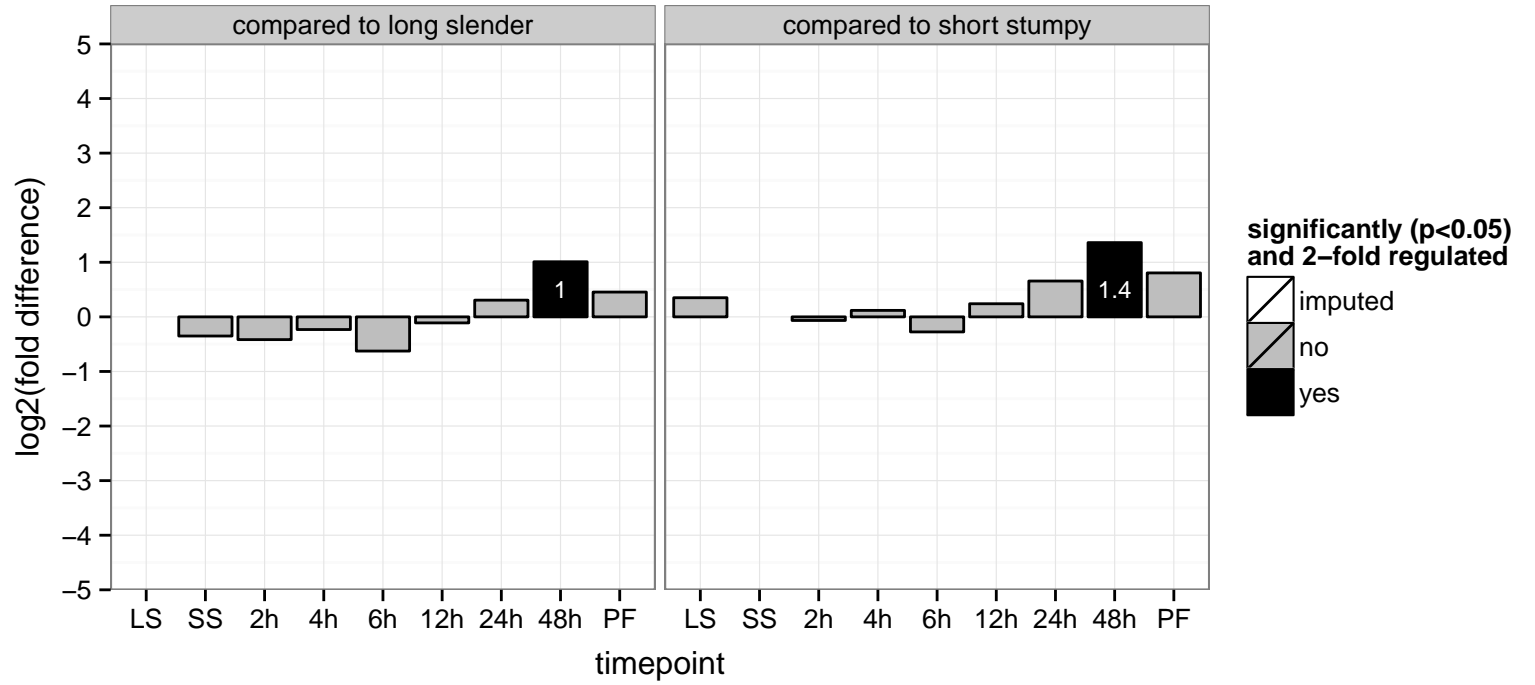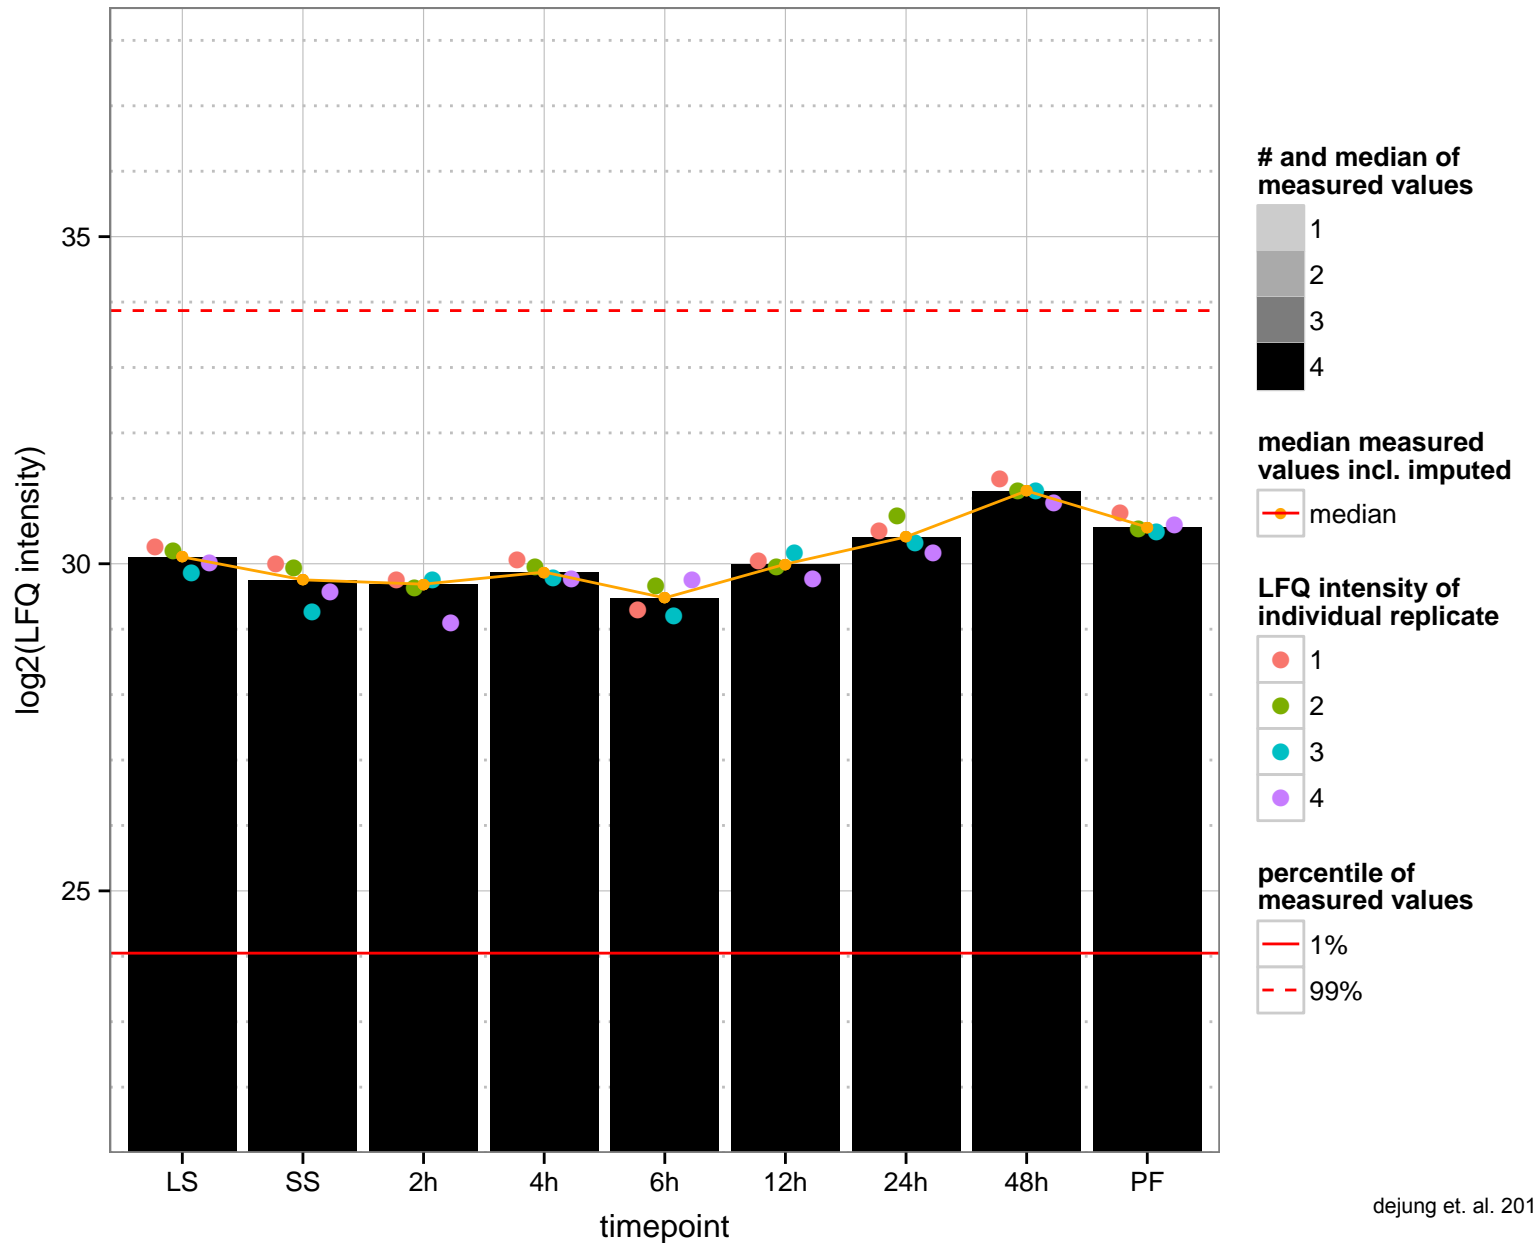

leucine-rich repeat protein (LRRP), putative  
 Tb927.9.12170  
 AGOF: null  
 AGOC: null  
 AGOP: null  
 PGO: protein binding  
 PGOC: null  
 PGOP: null

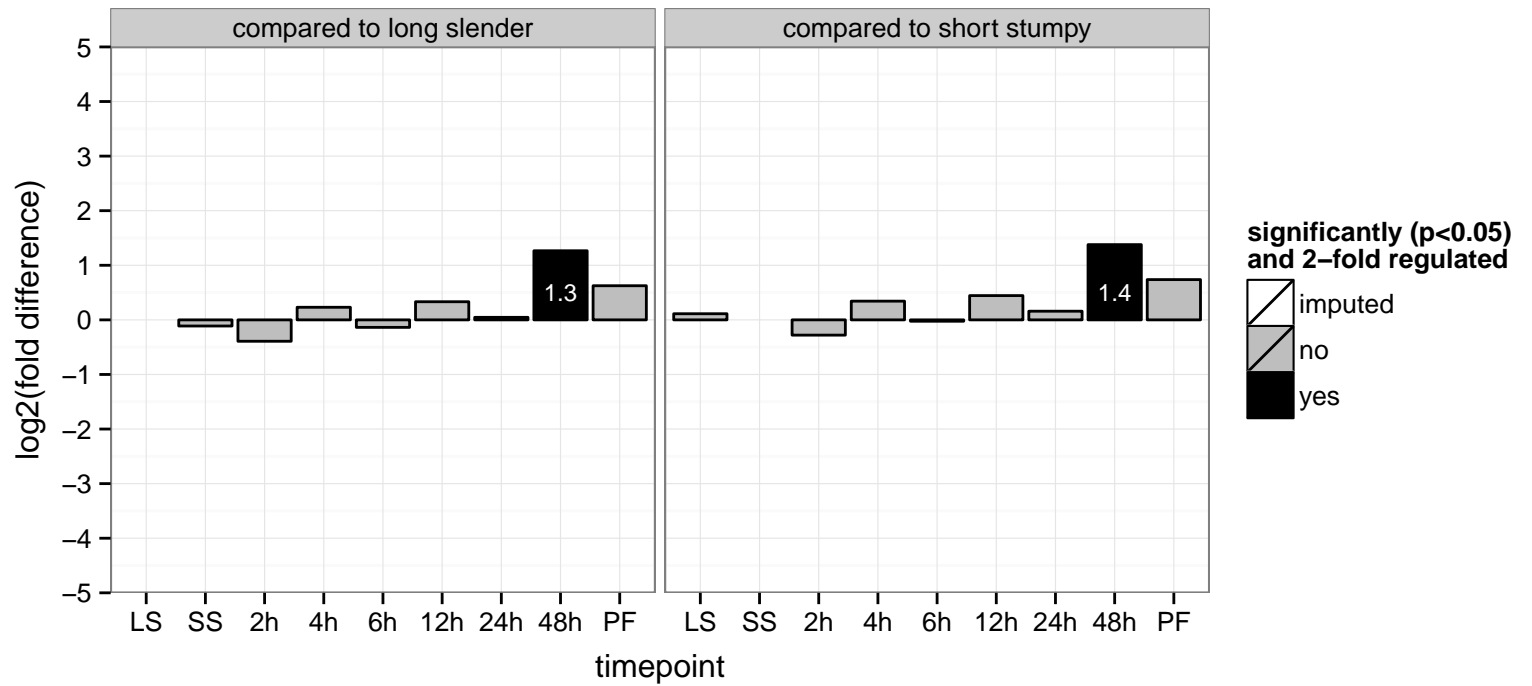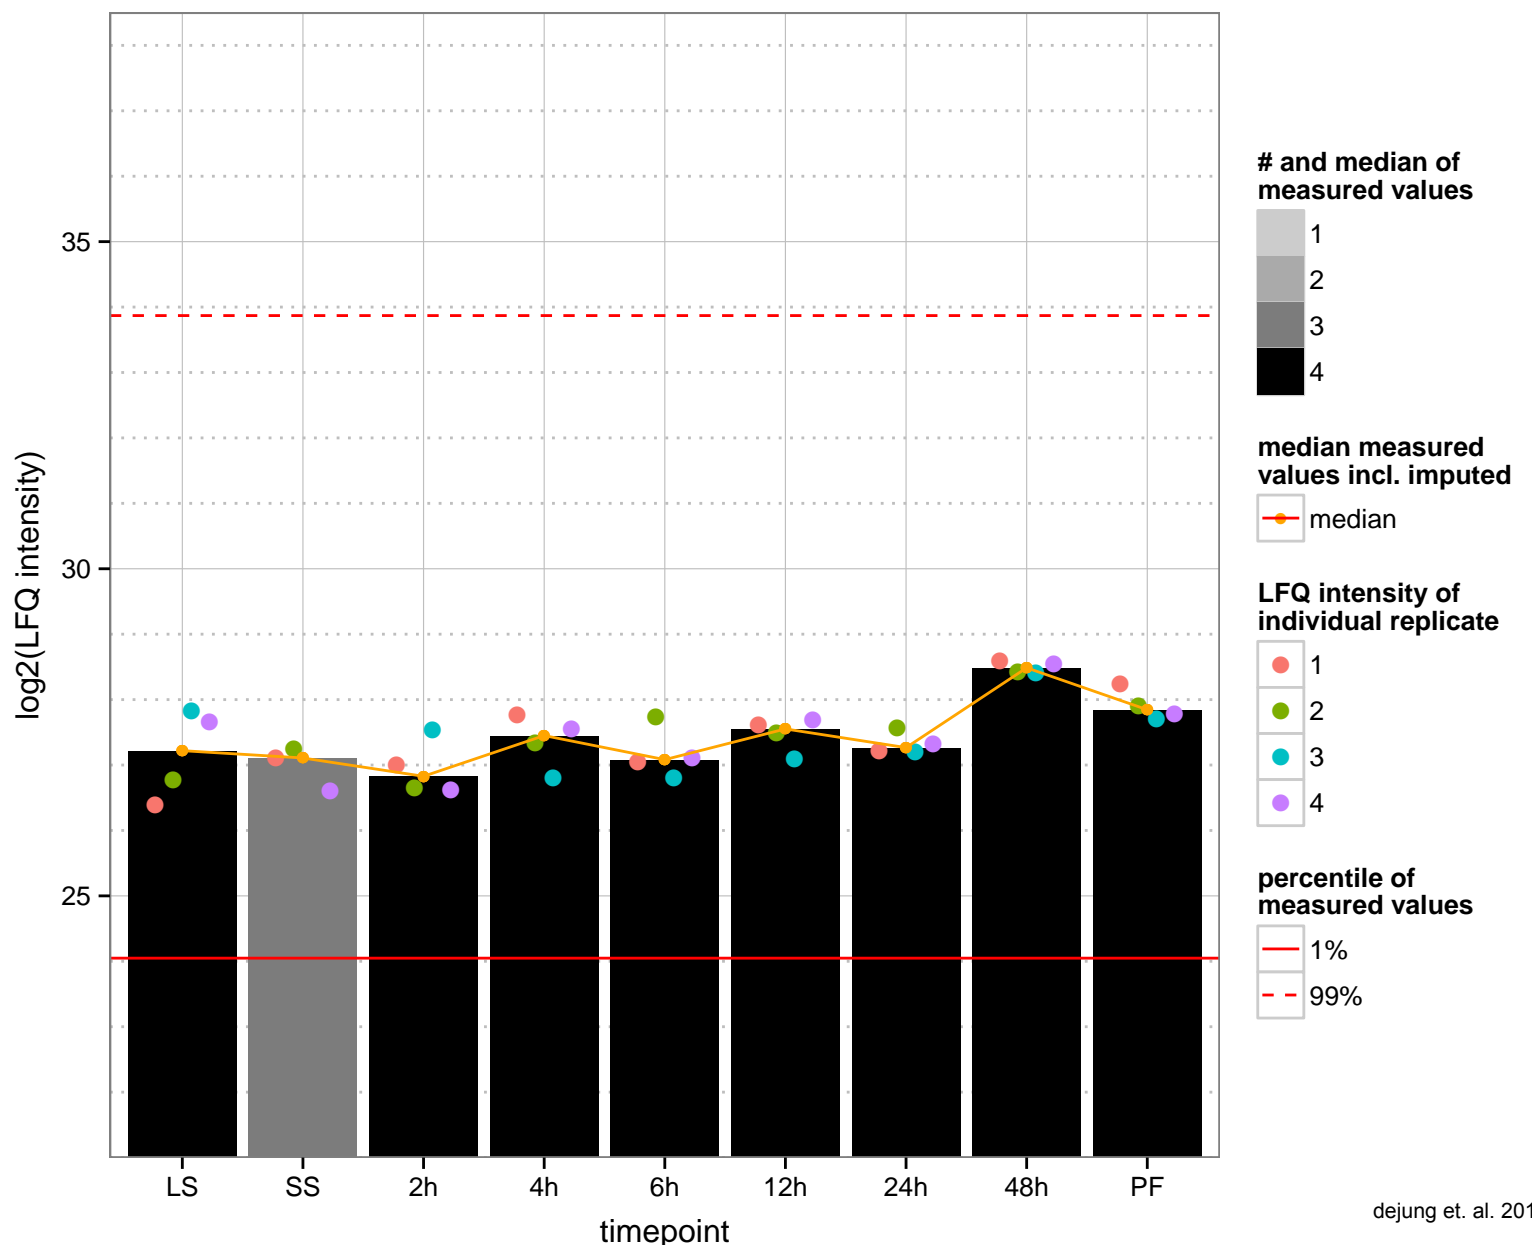



ATP-dependent DEAD/H RNA helicase, putative (DED1)

Tb927.9.12510

AGOF: ATP binding, ATP-dependent helicase activity, helicase activity, nucleic acid binding

AGOC: null

AGOP: nucleobase-containing compound metabolic process

PGOF: ATP binding, ATP-dependent helicase activity, helicase activity, nucleic acid binding

PGOC: null

PGOP: null

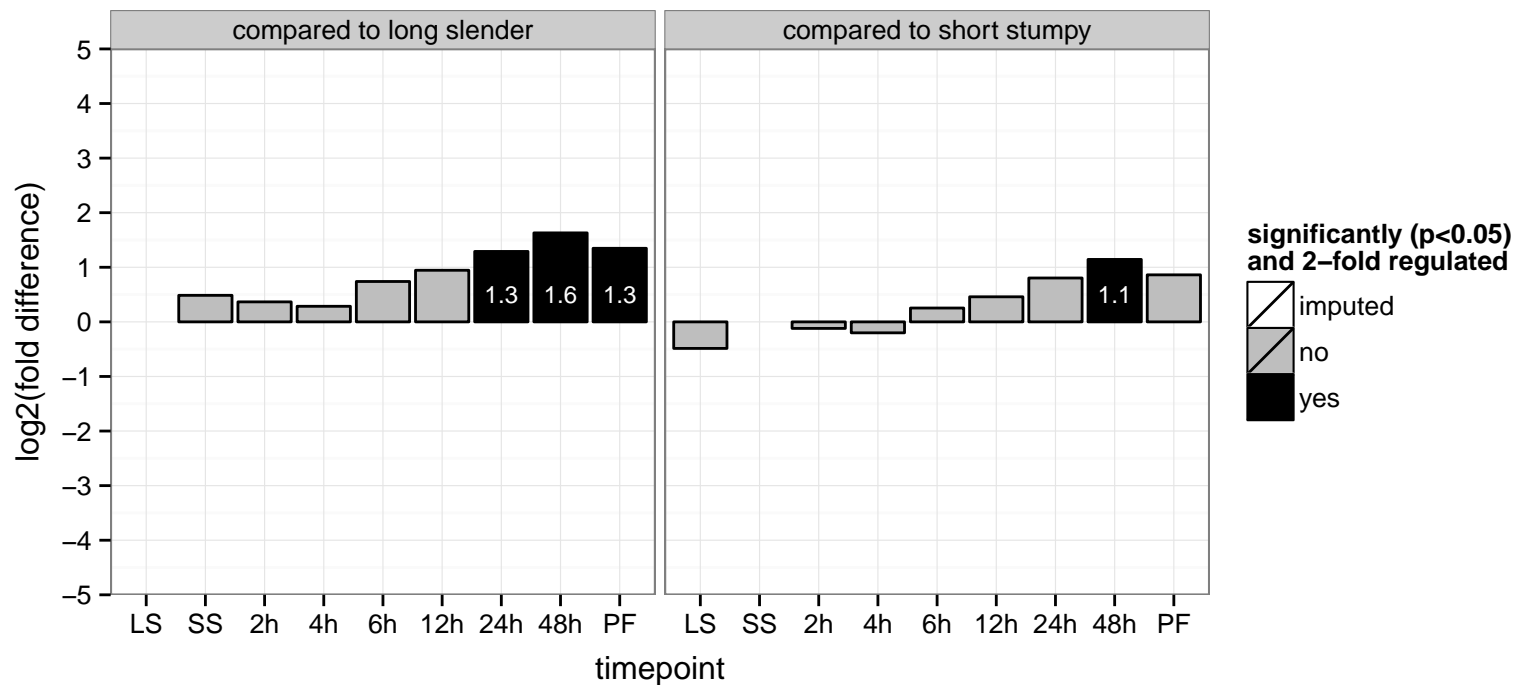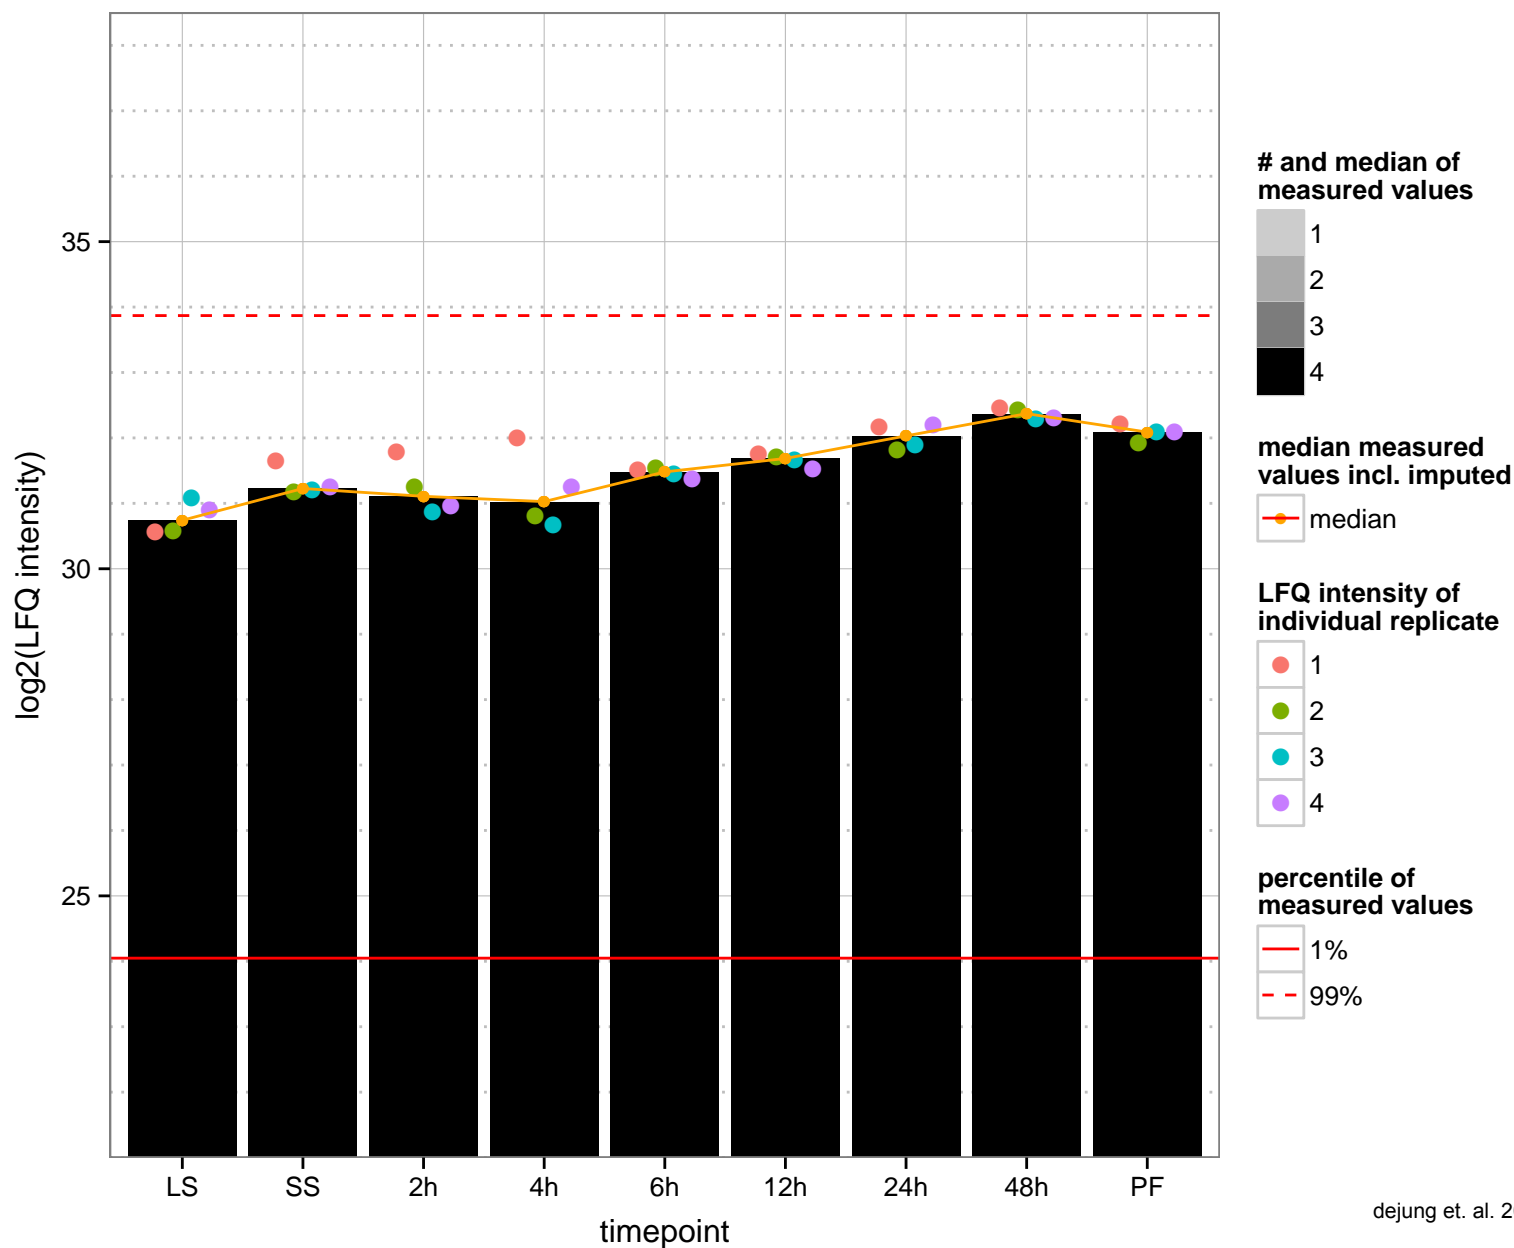

hypothetical protein, conserved  
 Tb927.9.13520  
 AGOF: null  
 AGOC: null  
 AGOP: null  
 PGOF: binding  
 PGO: null  
 PGOP: null

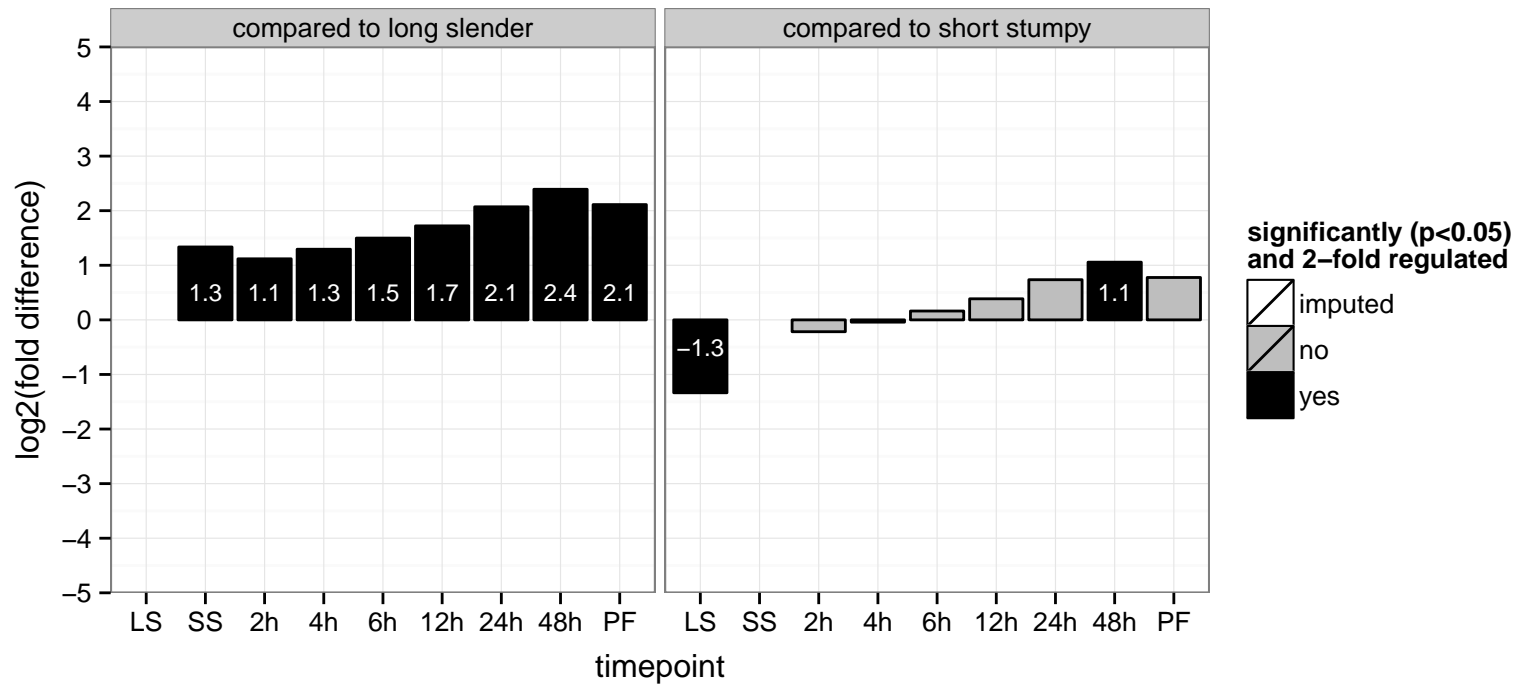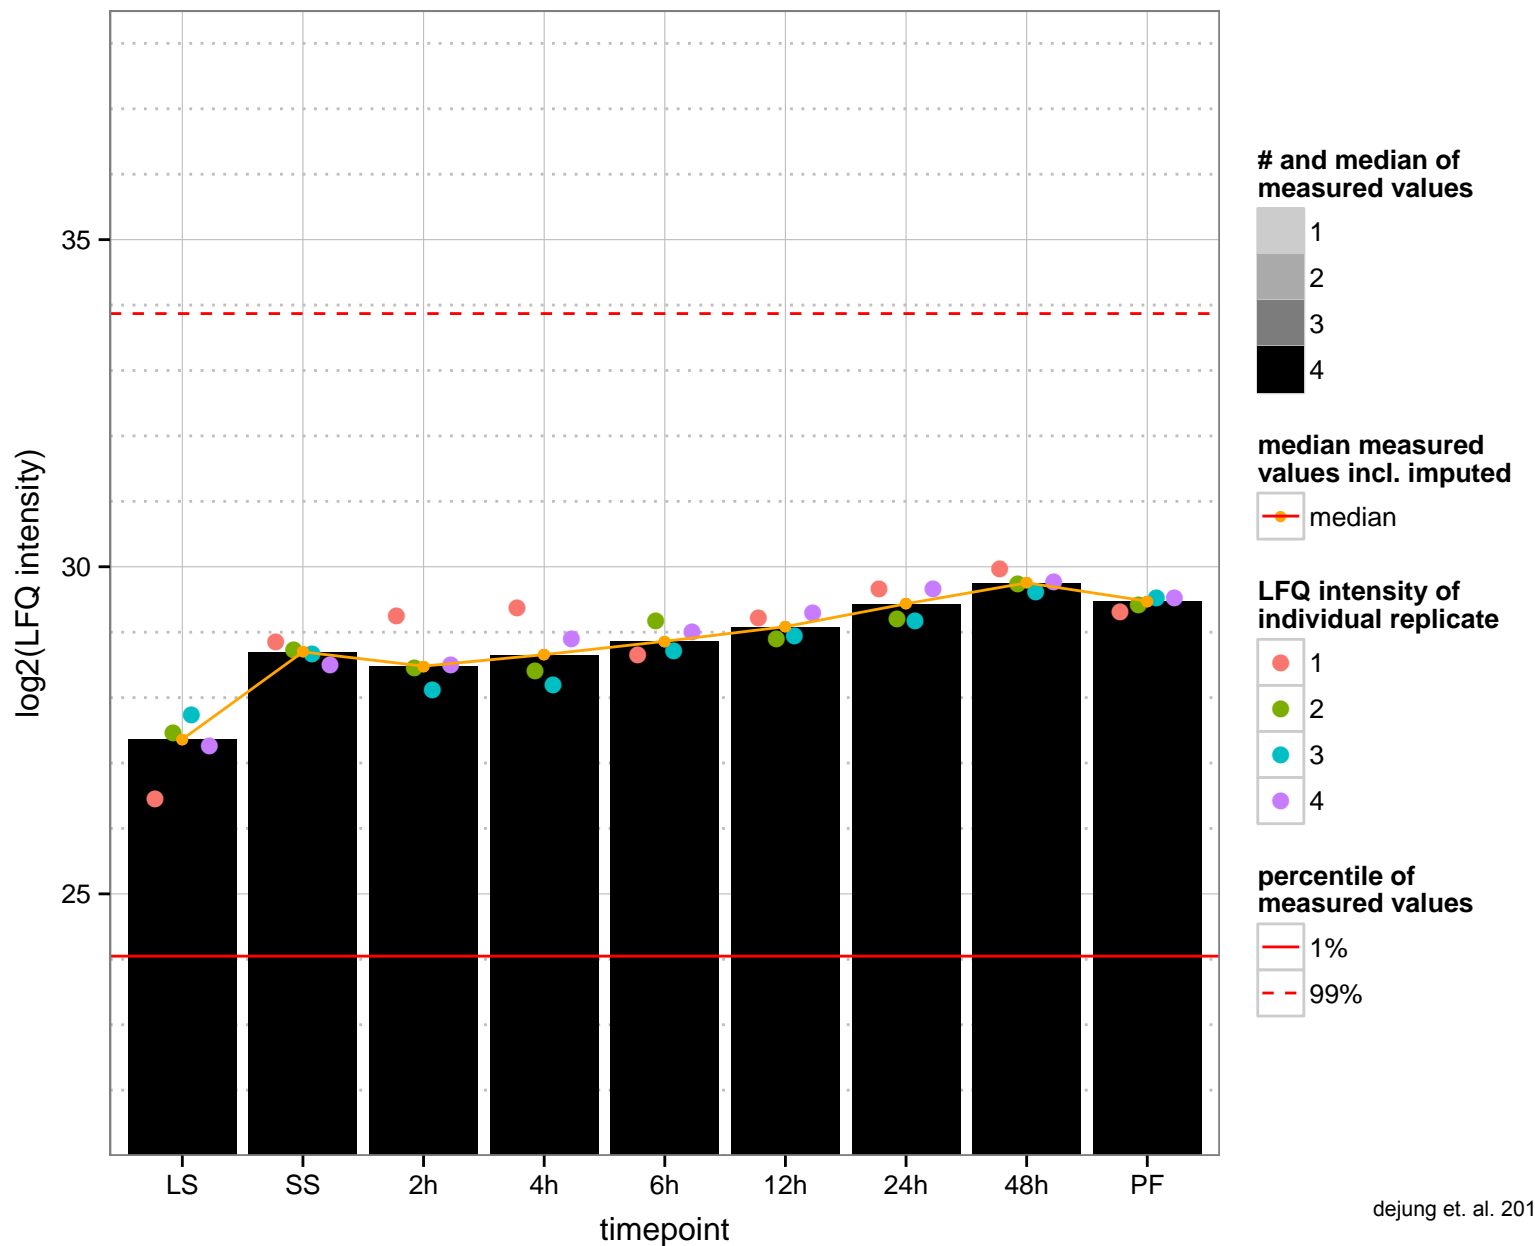

ribosomal protein L15, putative  
 Tb927.9.15190  
 AGOF: structural constituent of ribosome  
 AGOC: intracellular, ribosome  
 AGOP: translation  
 PGOF: structural constituent of ribosome  
 PGO: intracellular, ribosome  
 PGOP: translation

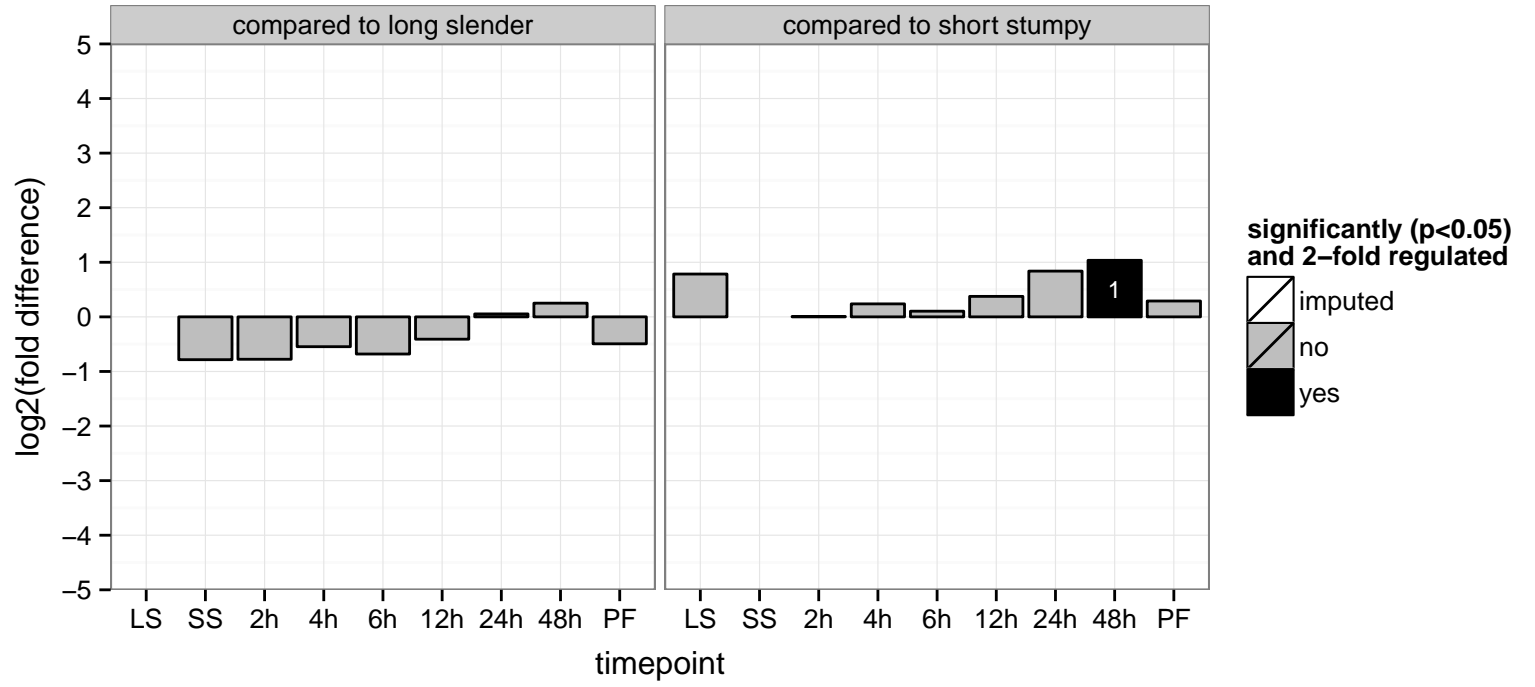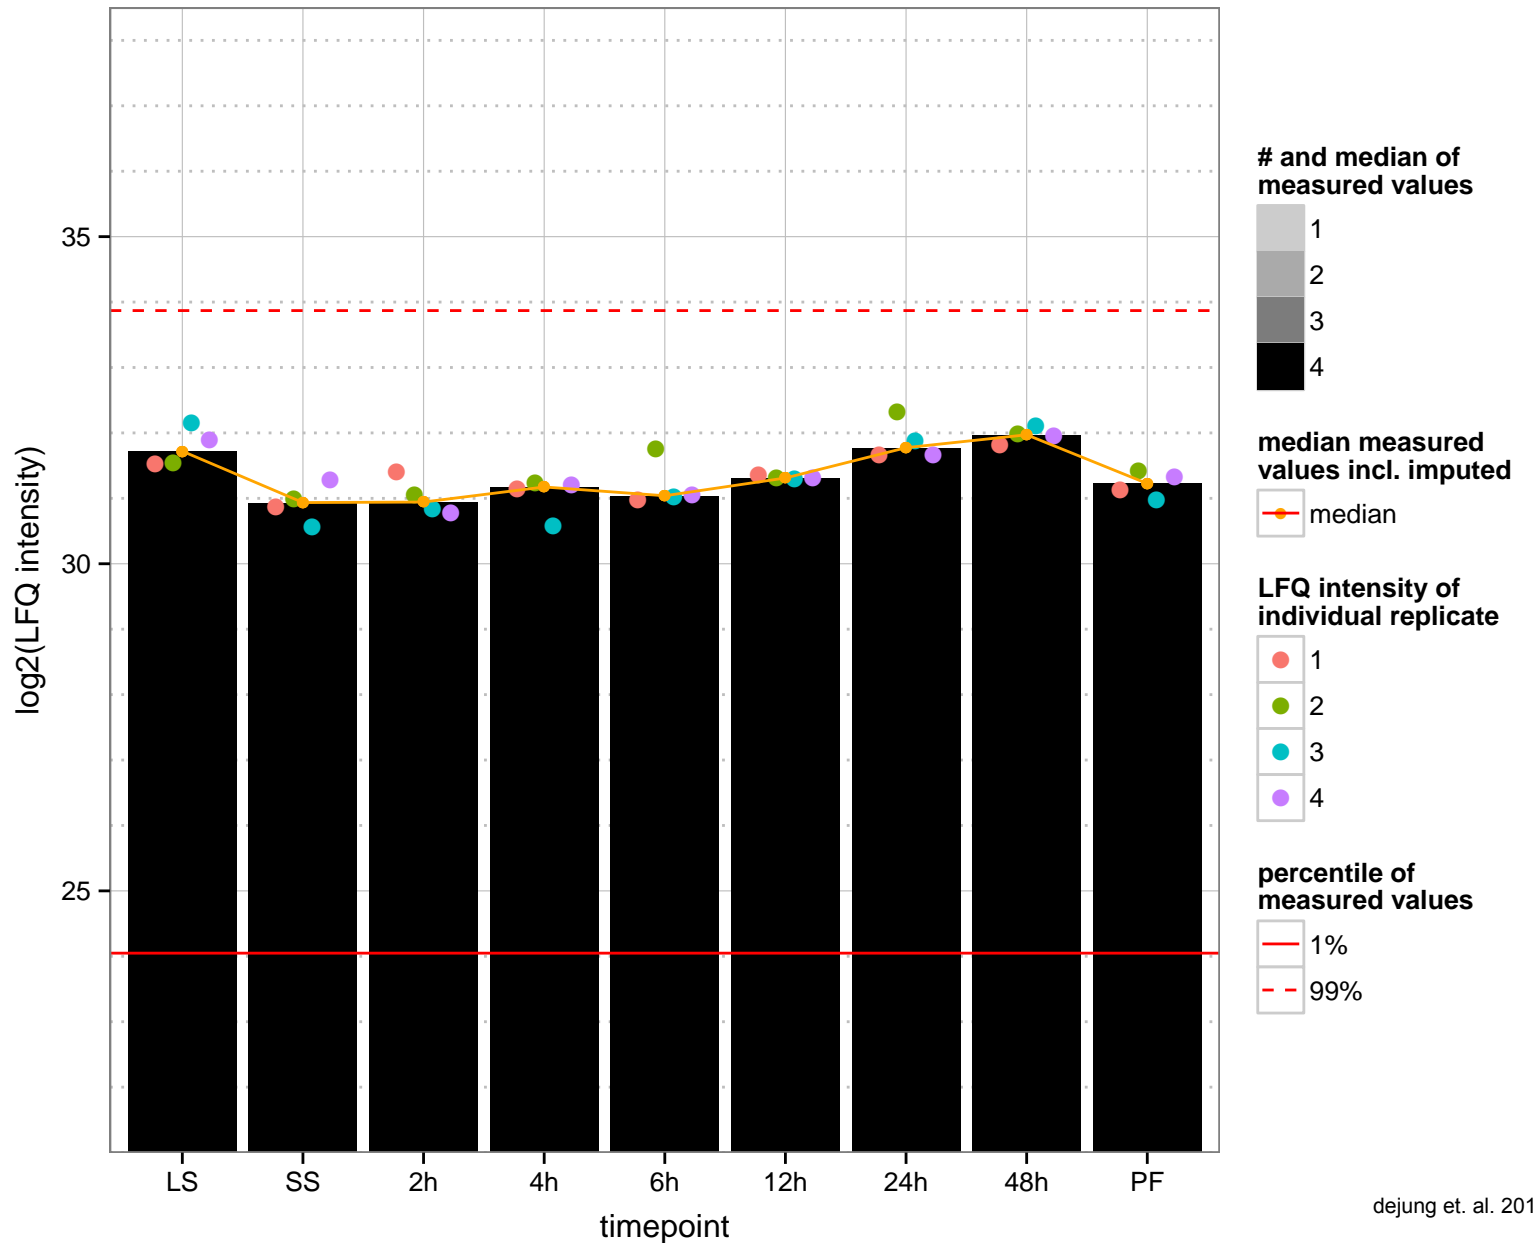

hypothetical protein, conserved  
 Tb927.9.1590  
 AGOF: null  
 AGOC: null  
 AGOP: null  
 PGOF: null  
 PGO C: null  
 PGOP: null

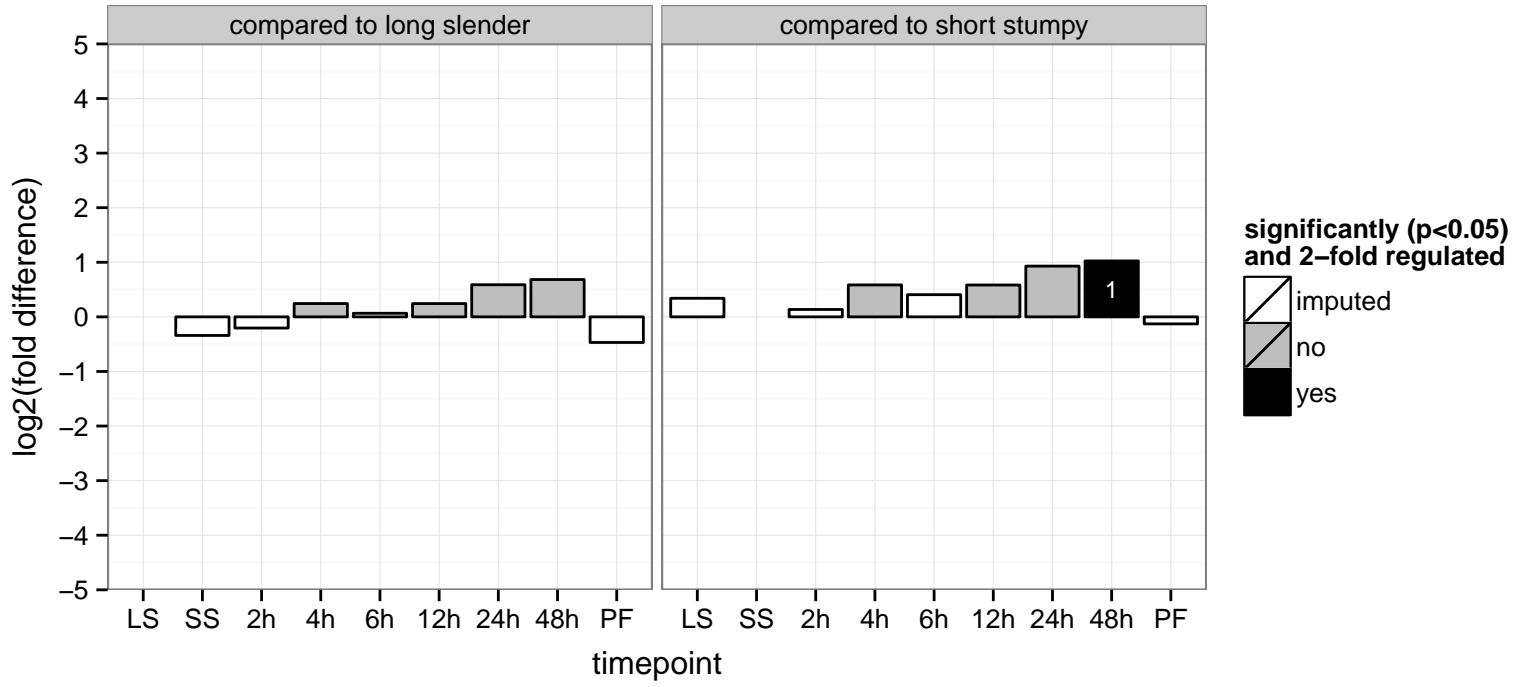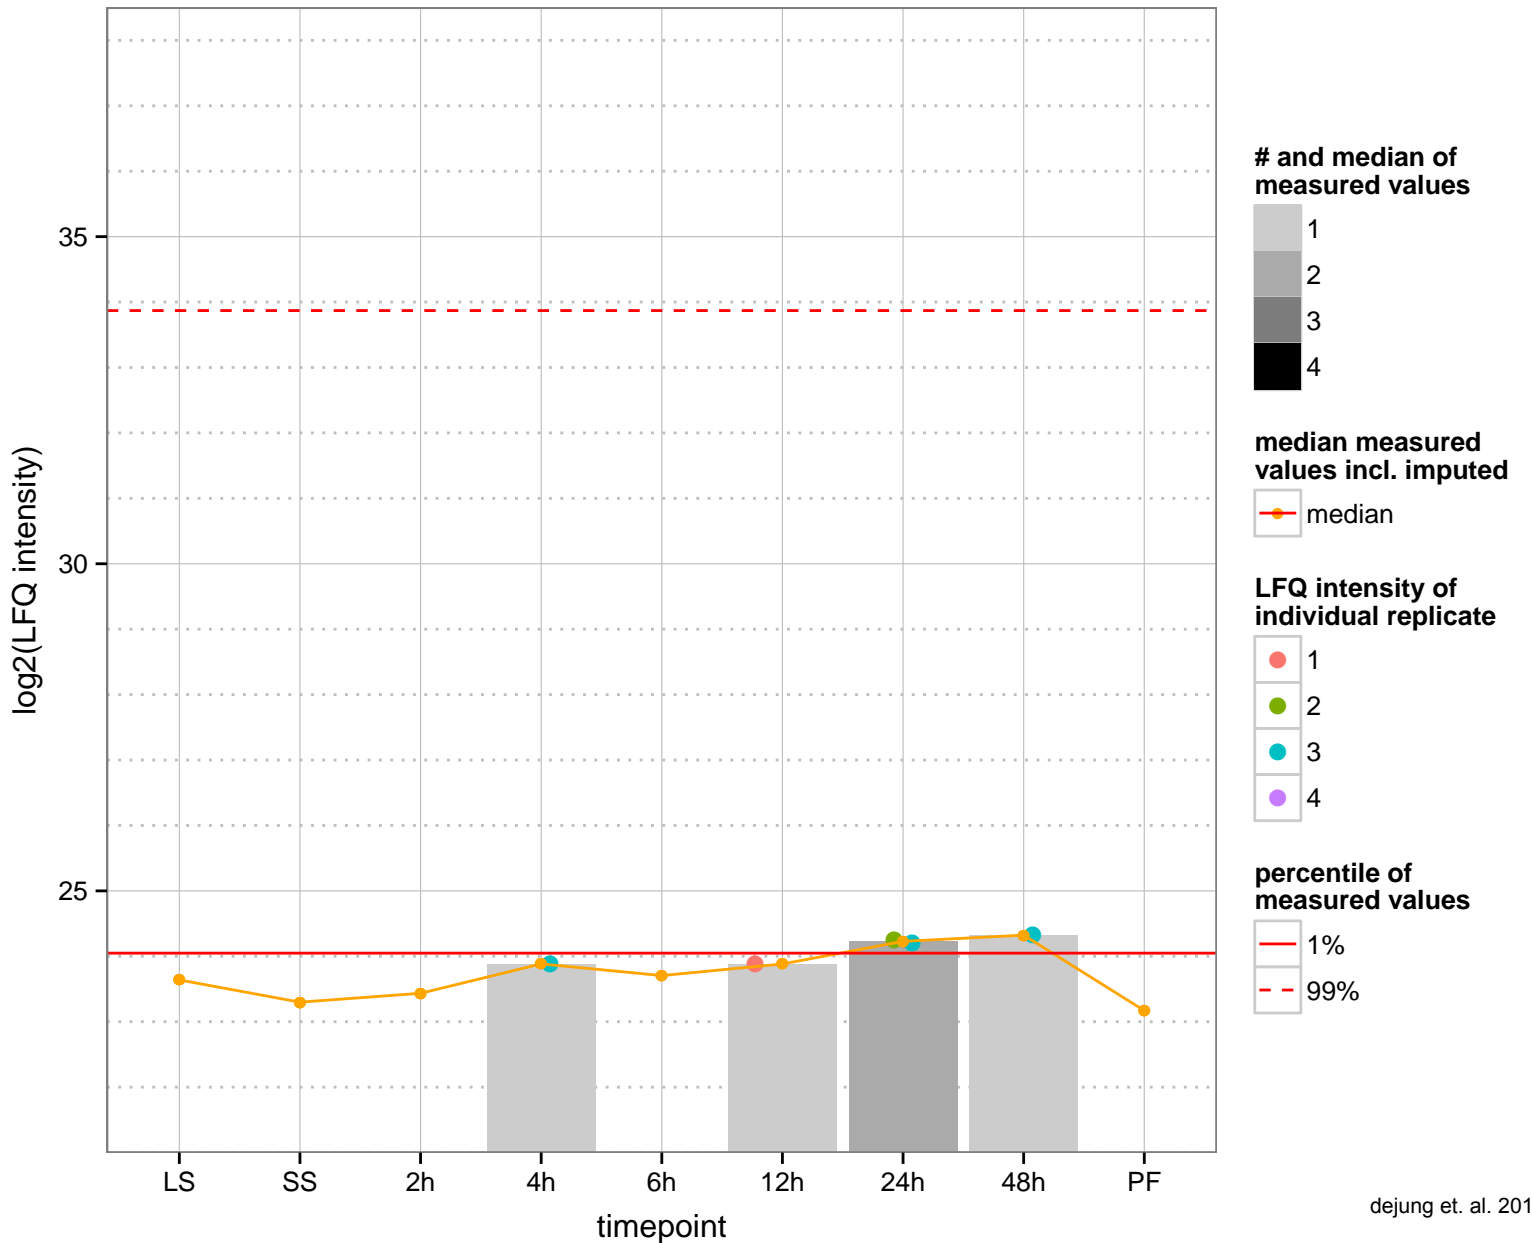

hypothetical protein, conserved  
 Tb927.9.2620  
 AGOF: null  
 AGOC: mitochondrion  
 AGOP: null  
 PGO: null  
 PGOC: null  
 PGOP: null

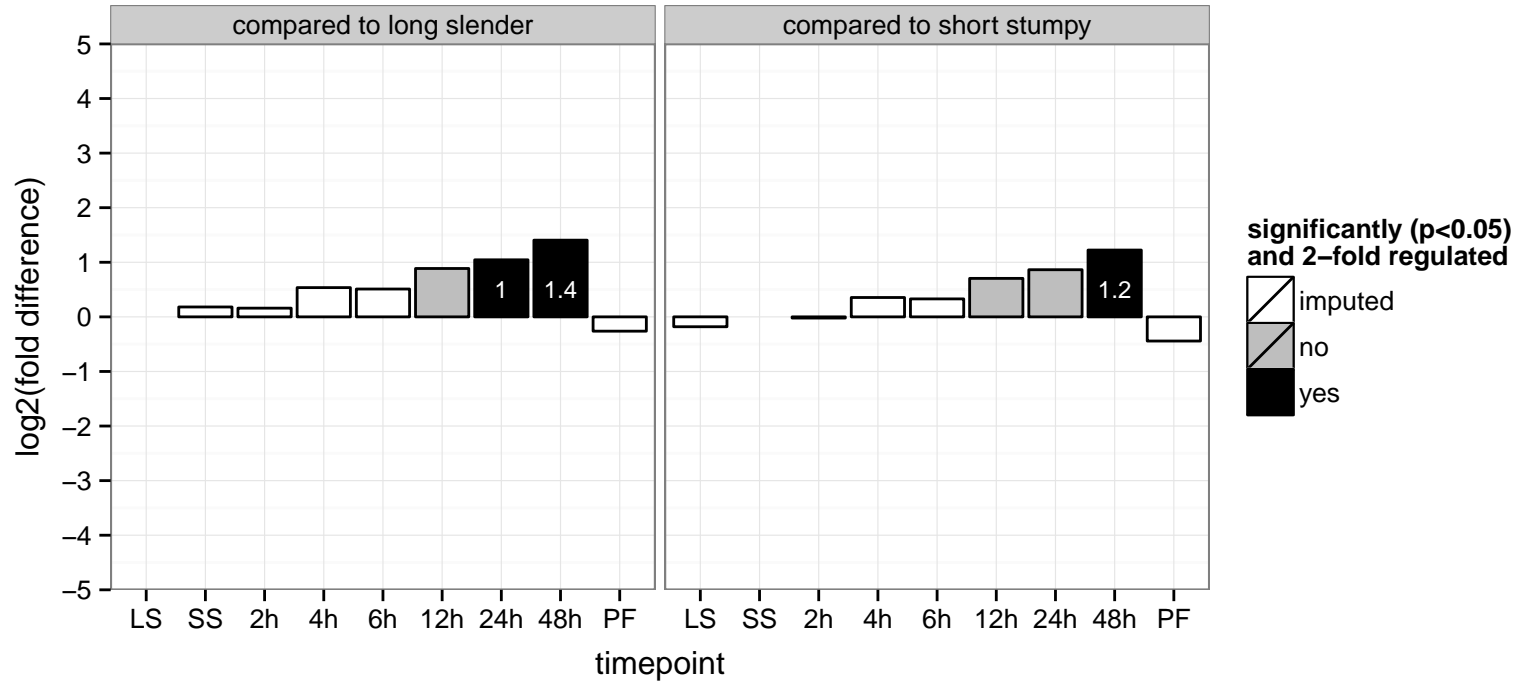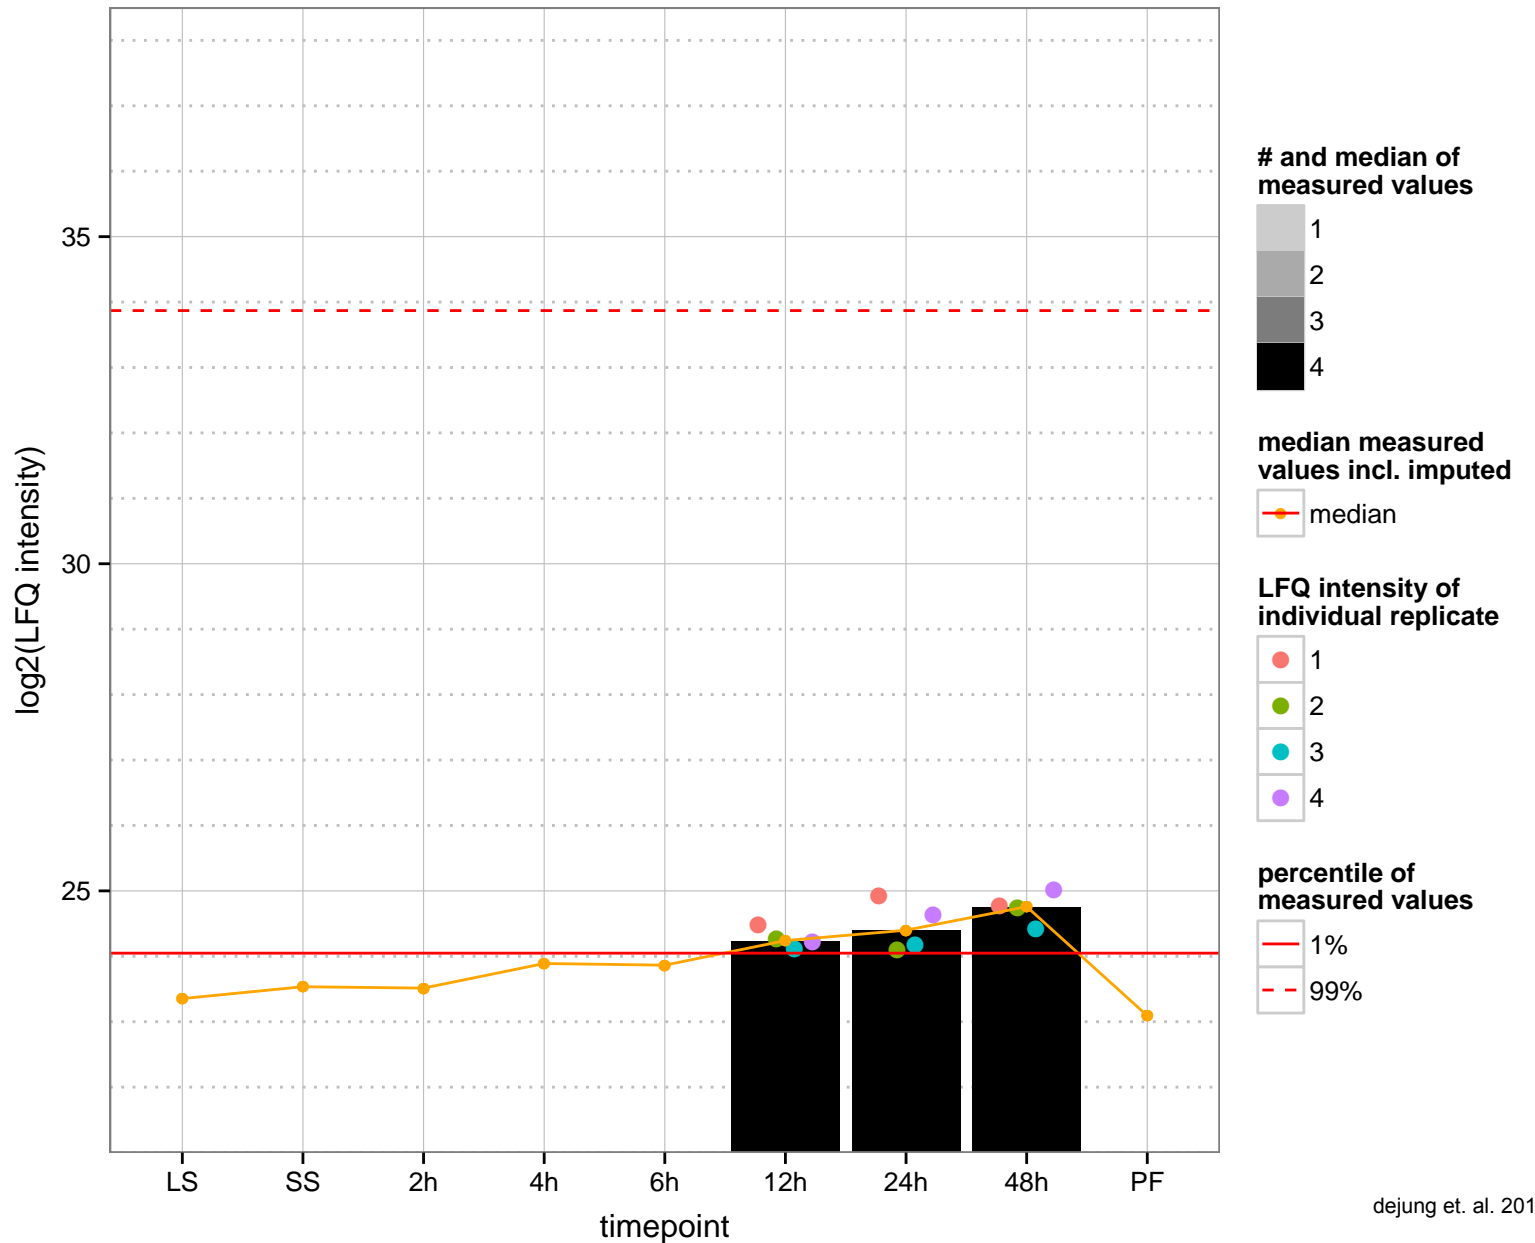

cAMP-specific phosphodiesterase (PDEB1)  
 Tb927.9.5040  
 AGOF: 3', 5'-cyclic-nucleotide phosphodiesterase activity  
 AGOC: cytoplasm  
 AGOP: cell proliferation, signal transduction  
 PGOF: 3', 5'-cyclic-nucleotide phosphodiesterase activity, catalytic activity, protein binding  
 PGOC: null  
 PGOP: signal transduction

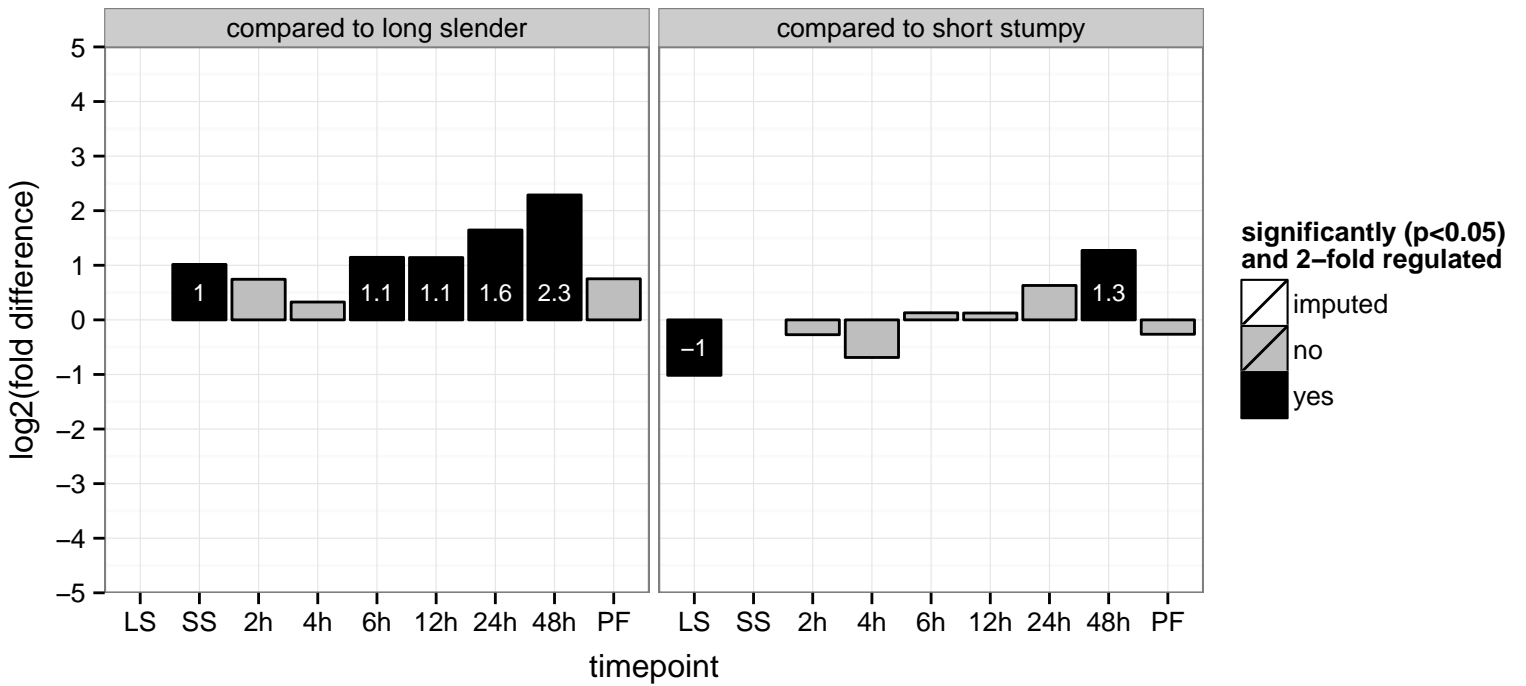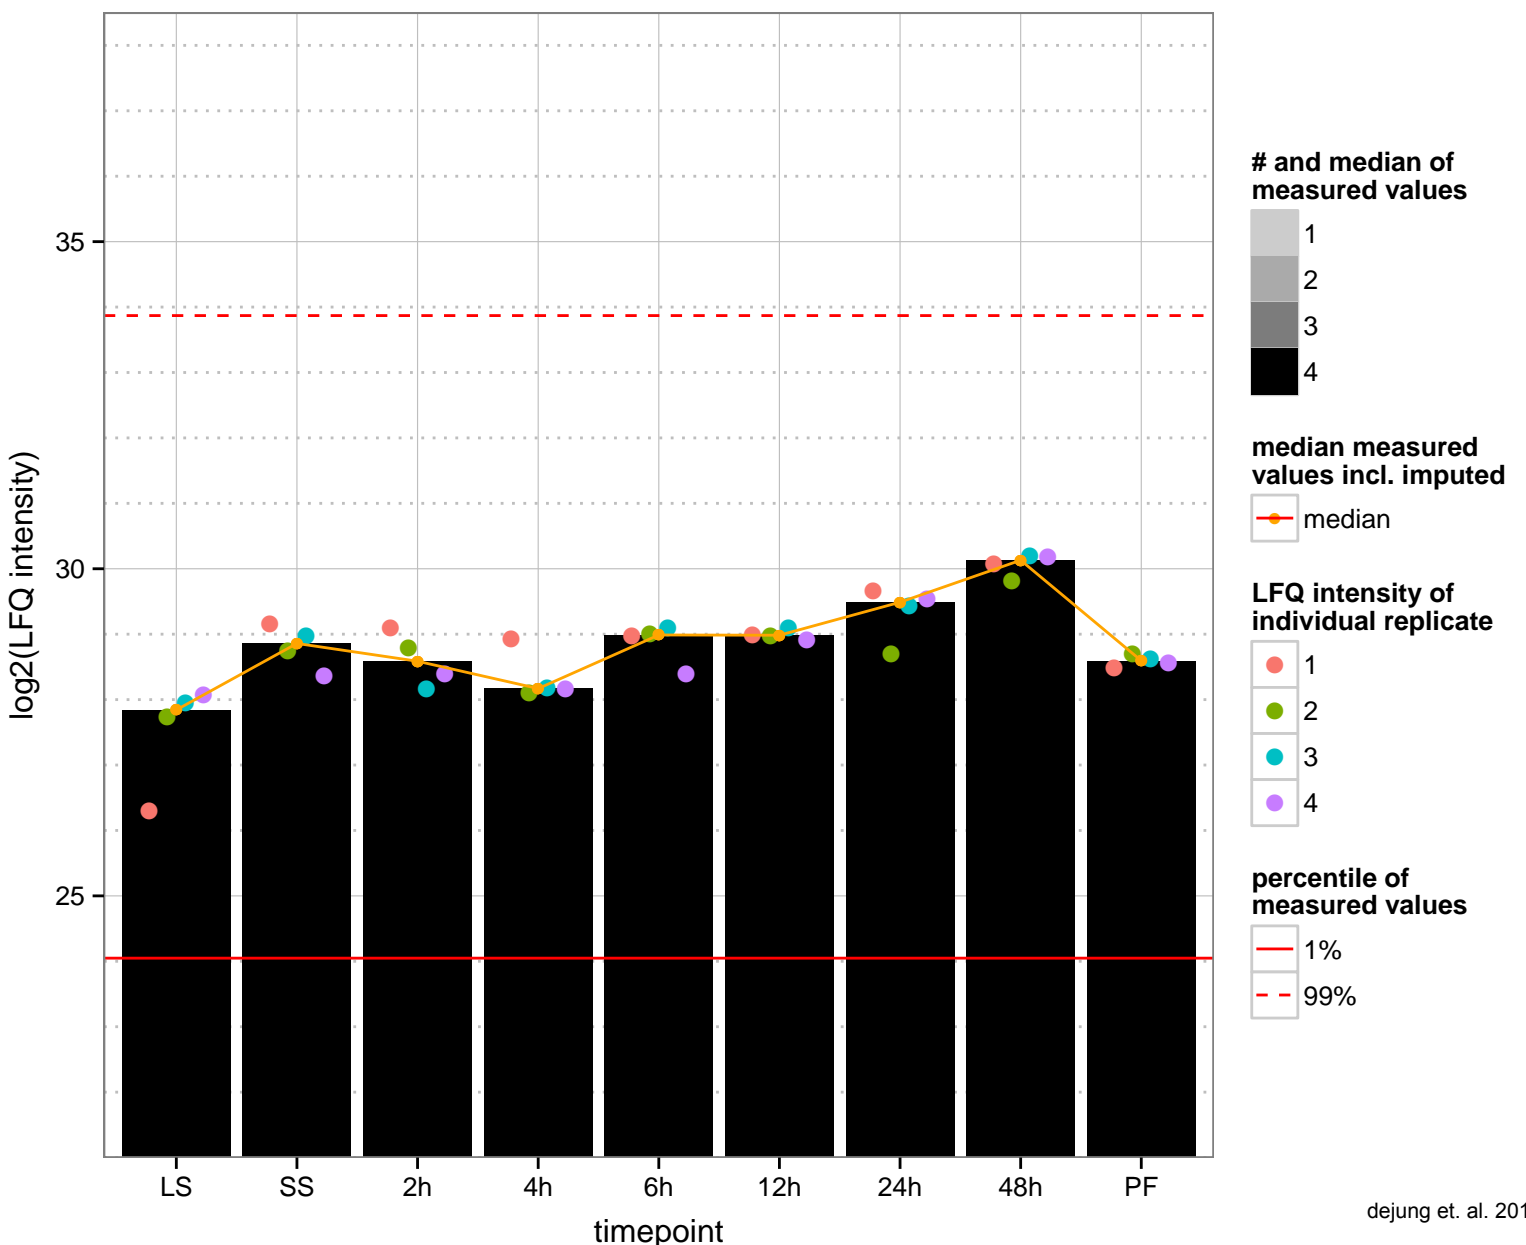

adenylosuccinate lyase, putative (ADSL)

Tb927.9.7550

AGOF: N6-(1, 2-dicarboxyethyl)AMP AMP-lyase (fumarate-forming) activity

AGOC: null

AGOP: IMP biosynthetic process, purine nucleobase metabolic process, purine ribonucleotide biosynthetic process

PGOF: N6-(1, 2-dicarboxyethyl)AMP AMP-lyase (fumarate-forming) activity, catalytic activity

PGOC: null

PGOP: IMP biosynthetic process, purine ribonucleotide biosynthetic process

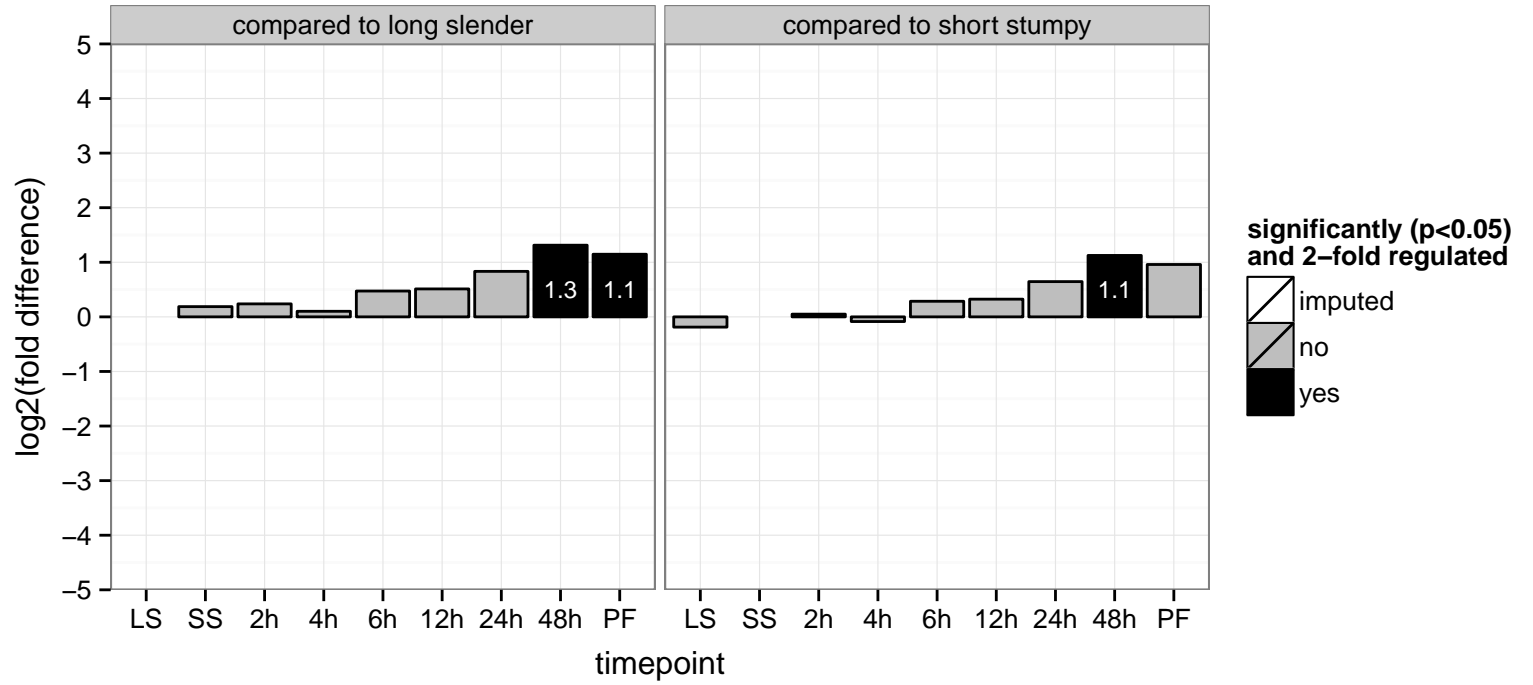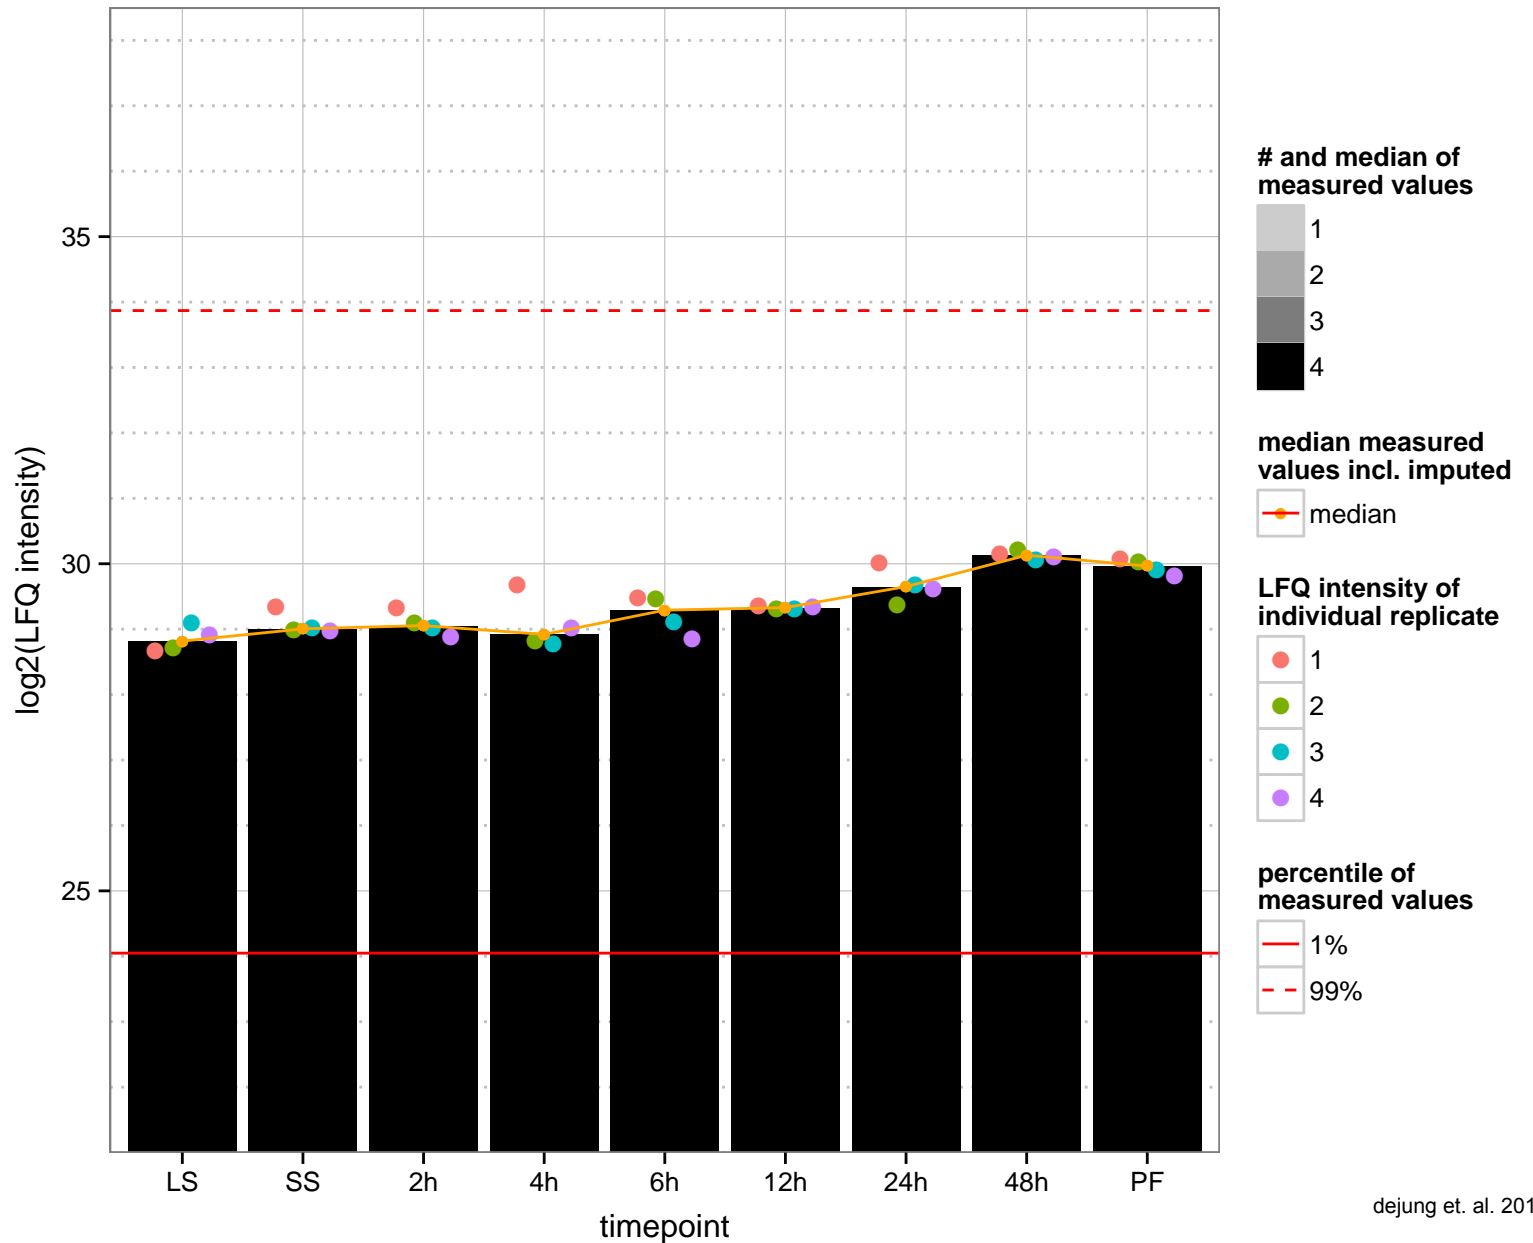

hypothetical protein, conserved  
 Tb927.9.9660  
 AGOF: null  
 AGOC: mitochondrion  
 AGOP: null  
 PGO: null  
 PGO: null  
 PGO: null

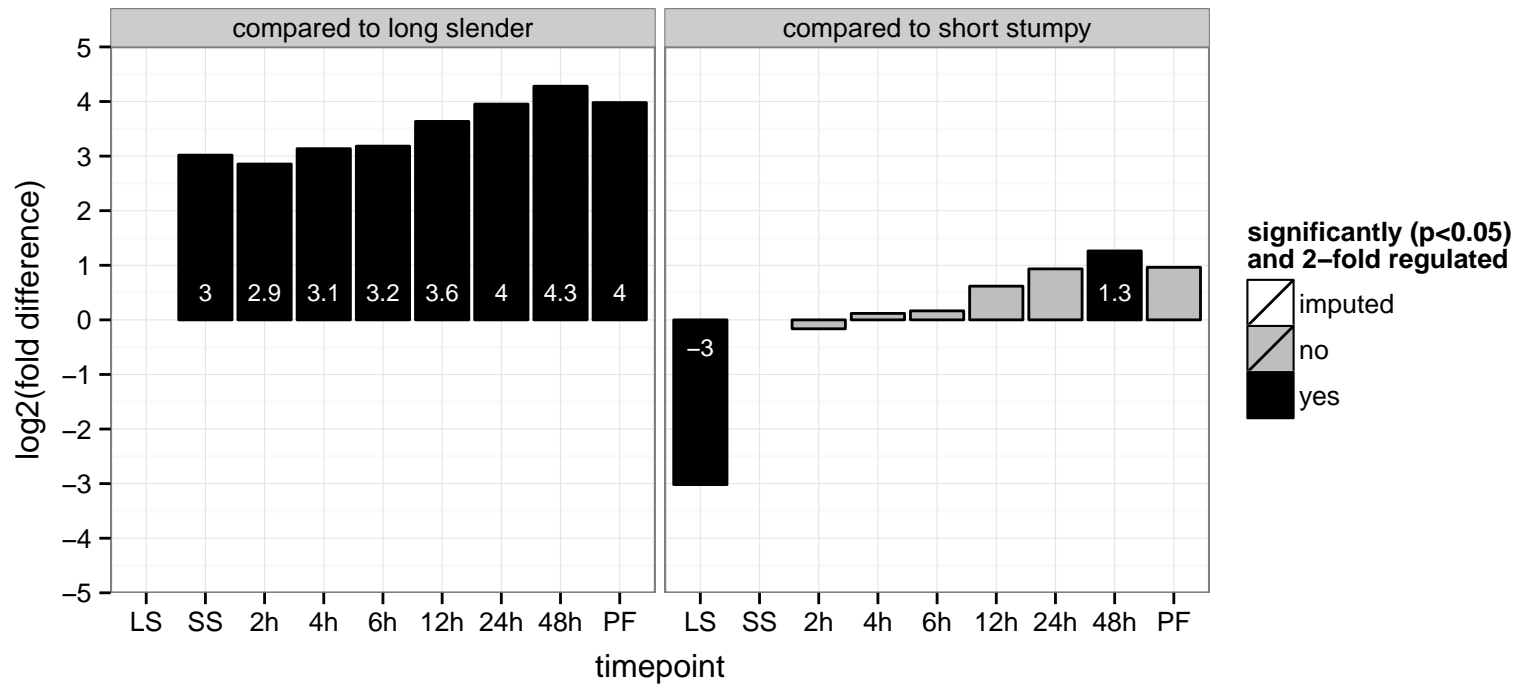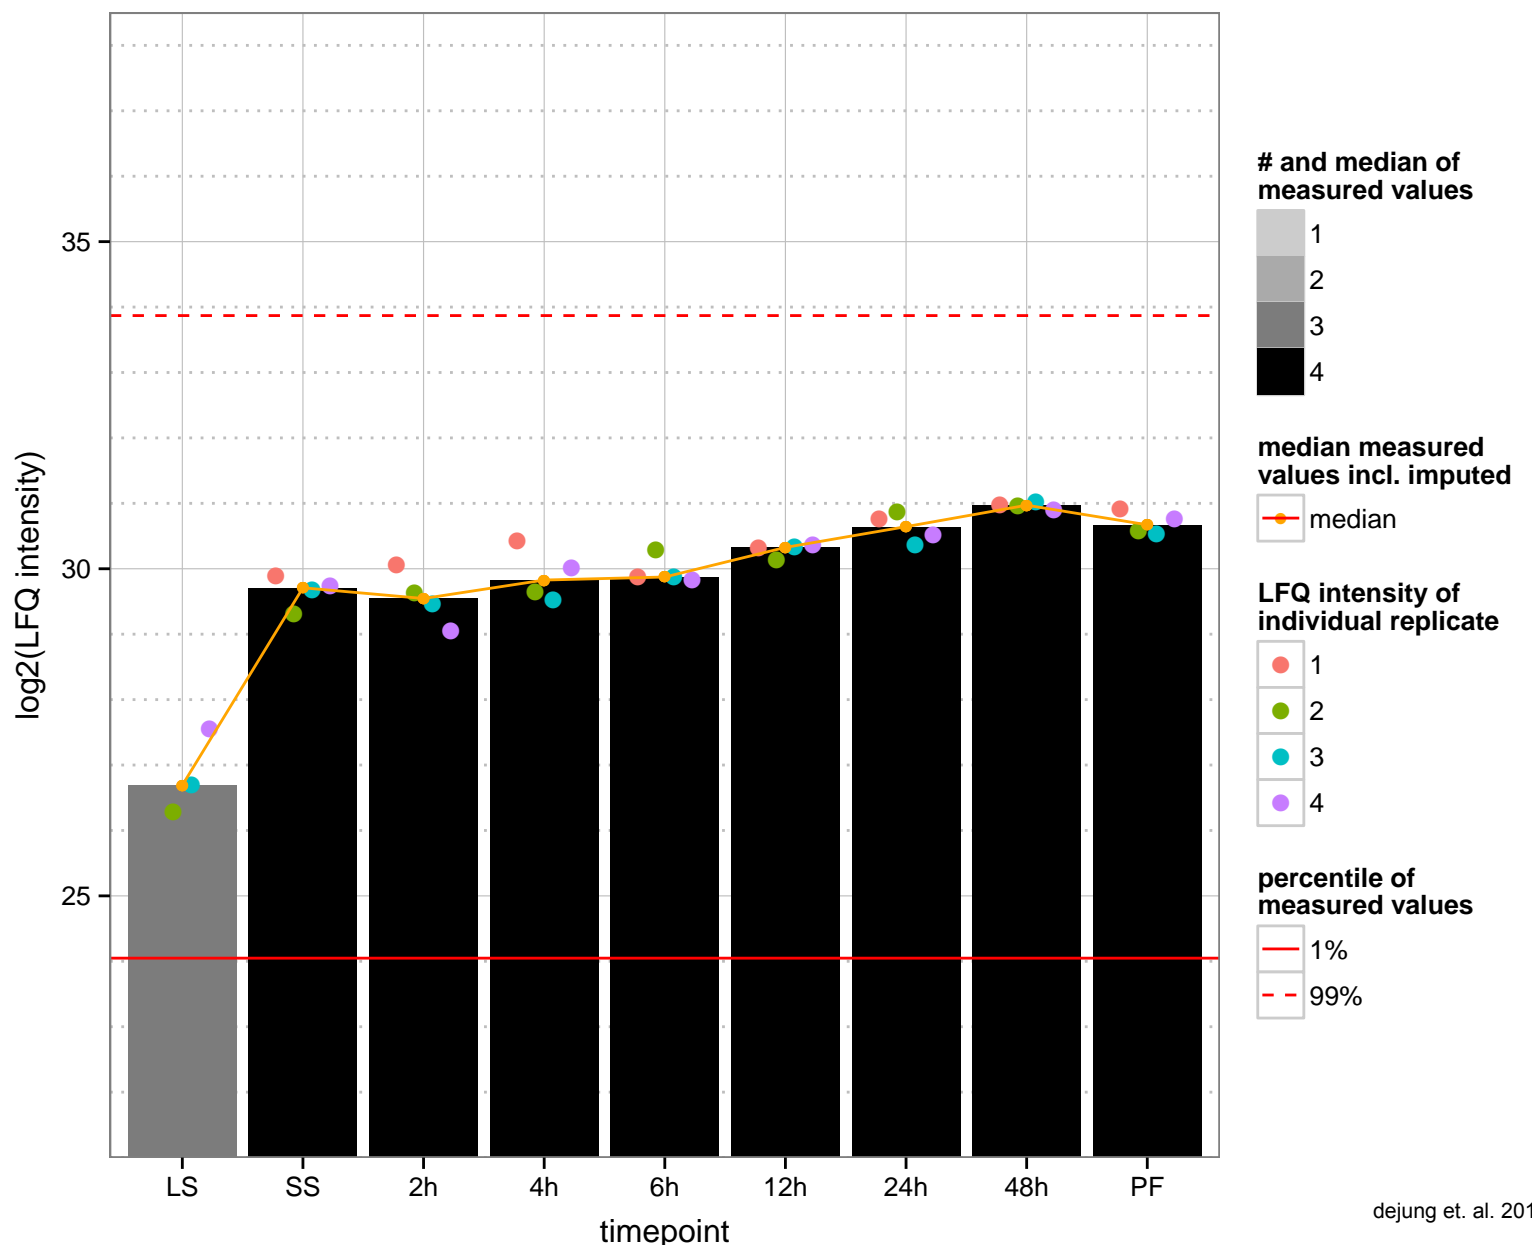



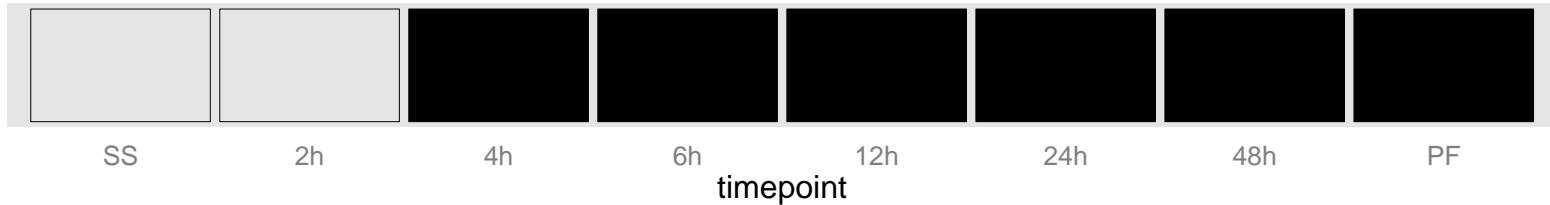

**regulated**  **not regulated**  **significant down**  **significant up**

hypothetical protein, conserved, trans-sialidase, putative  
 Tb927.5.440;Tb11.v5.0223  
 AGOF: null, exo-alpha-sialidase activity  
 AGOC: null  
 AGOP: null, pathogenesis  
 PGO: null  
 PGO: null  
 PGO: null

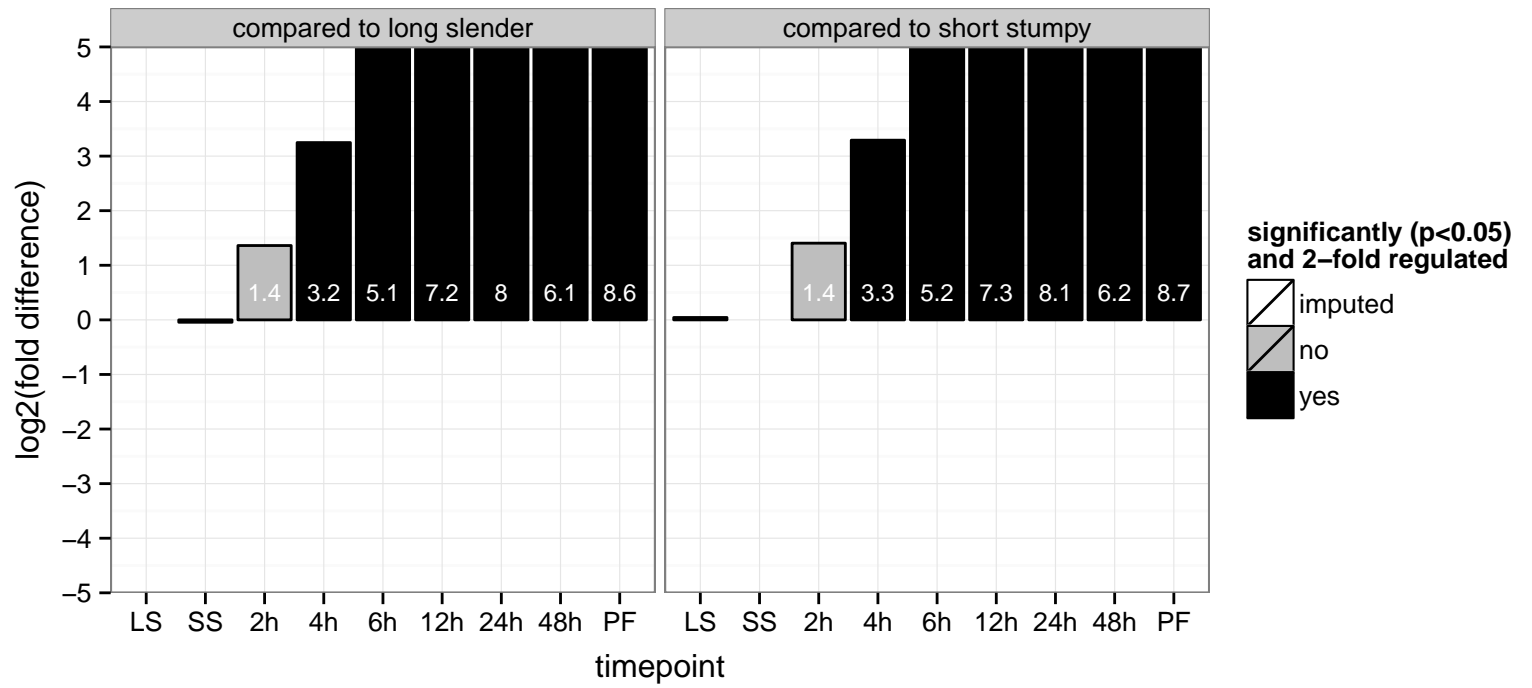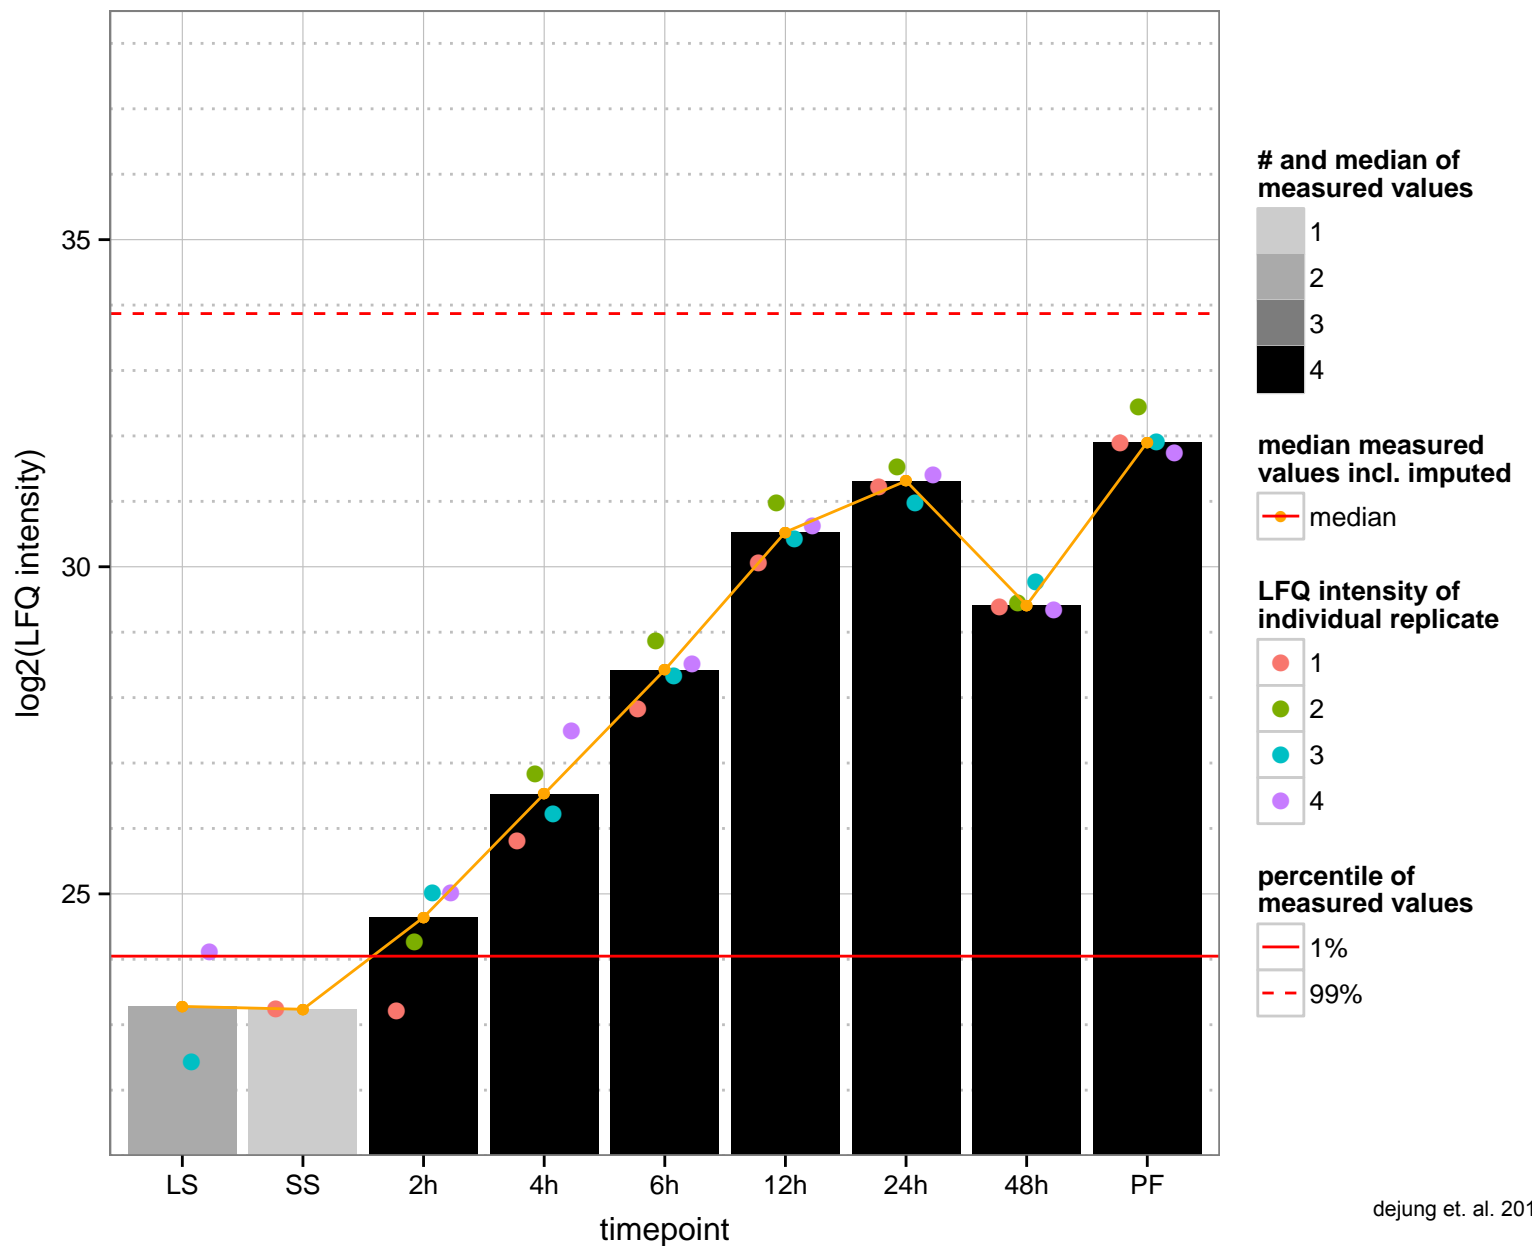

hypothetical protein, conserved, mitochondrial RNA binding complex 1 subunit (PPR5)  
 Tb927.10.380;Tb11.v5.0637  
 AGOF: null, RNA binding  
 AGOC: null, mitochondrion  
 AGOP: null, RNA polyadenylation  
 PGO: null  
 PGOC: null  
 PGO: null

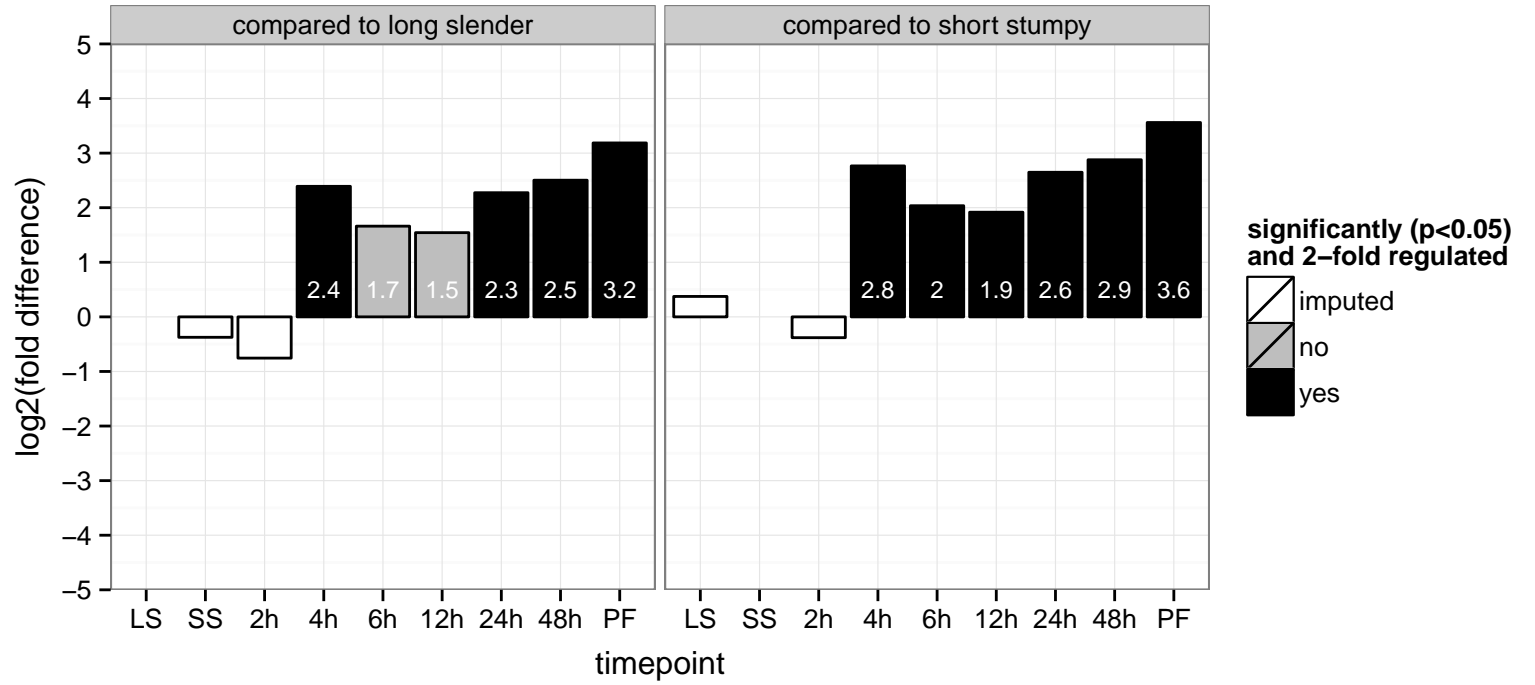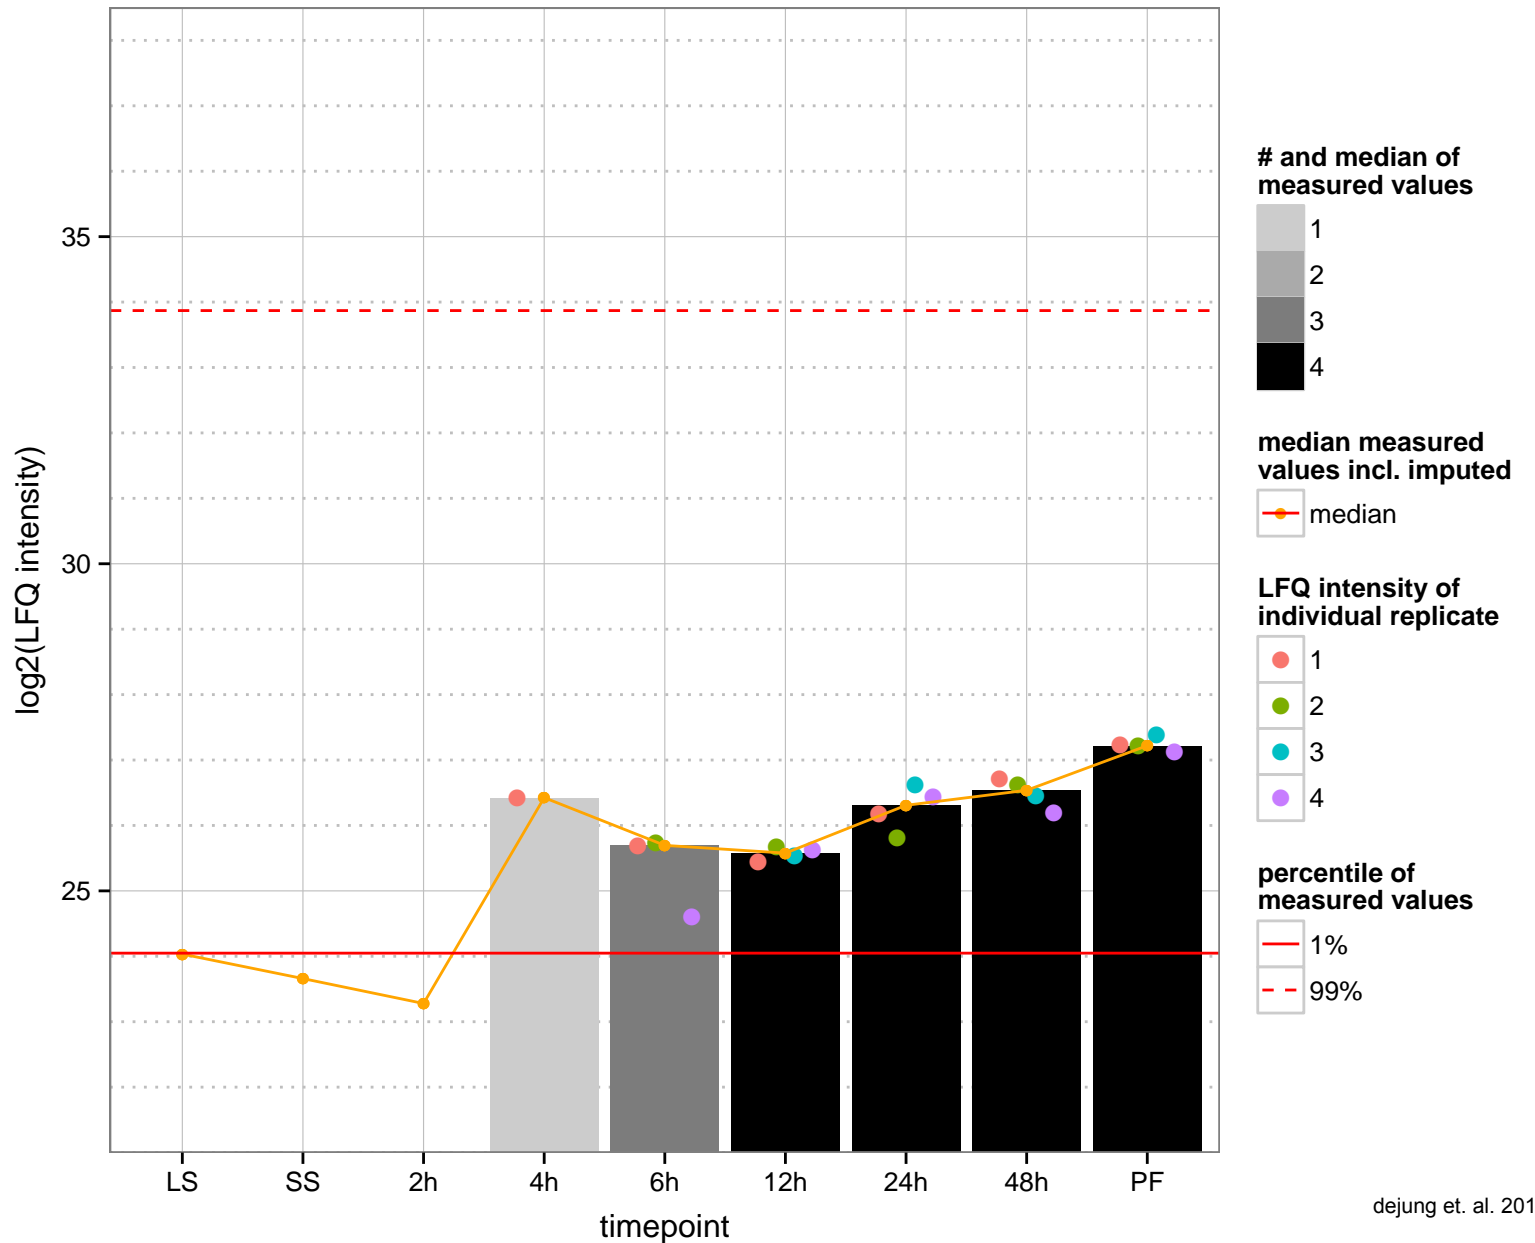

hypothetical protein, conserved  
 Tb11.v5.0775;Tb927.10.7560  
 AGOF: null, methyltransferase activity  
 AGOC: null  
 AGOP: null, metabolic process  
 PGO: methyltransferase activity  
 PGOC: null  
 PGOP: metabolic process

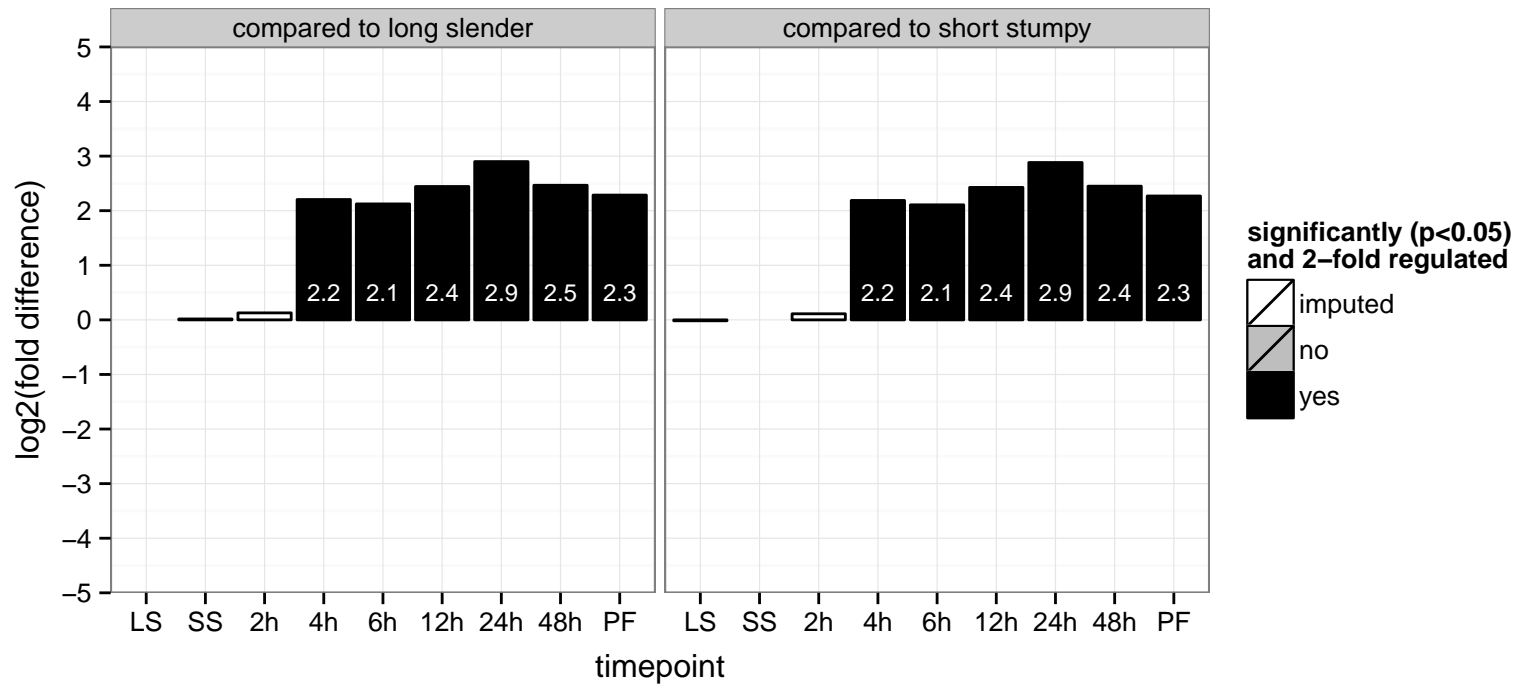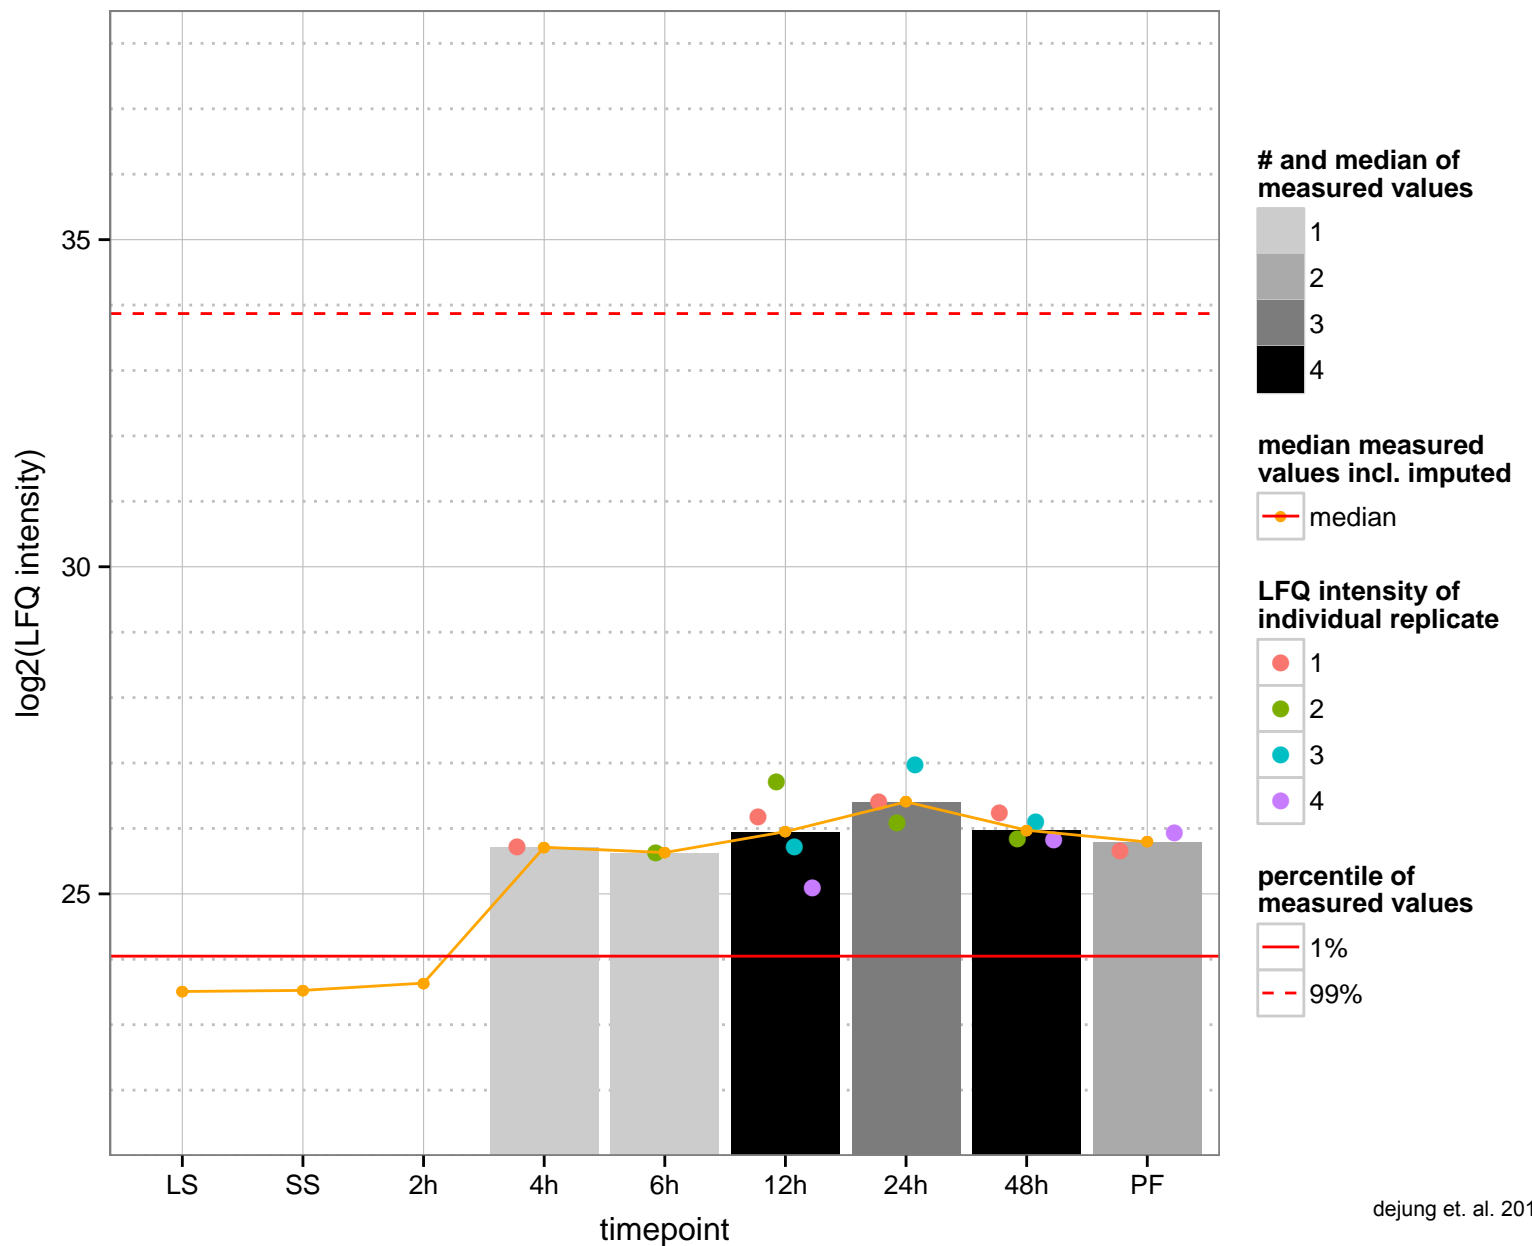

hypothetical protein, conserved  
 Tb927.1.2210  
 AGOF: null  
 AGOC: null  
 AGOP: null  
 PGO: null  
 PGOC: nucleus  
 PGOP: nucleosome assembly

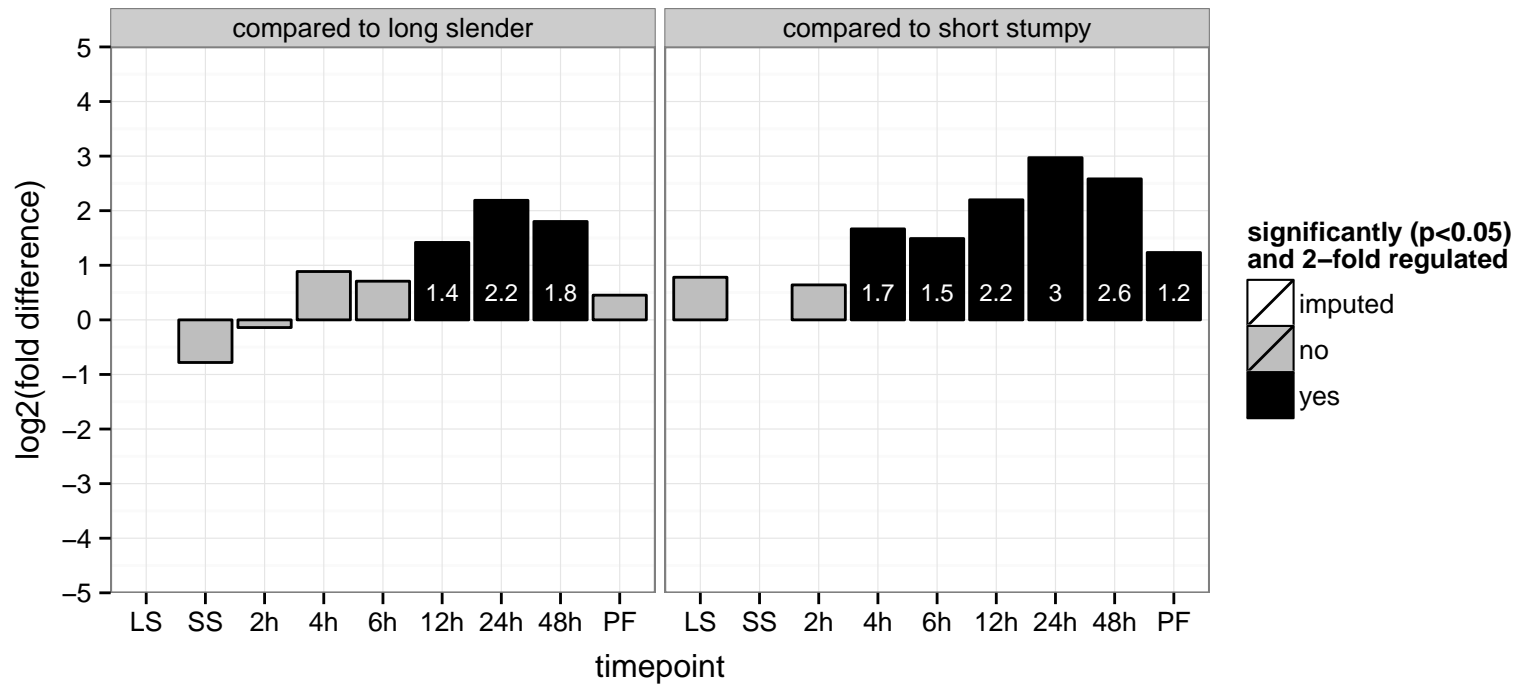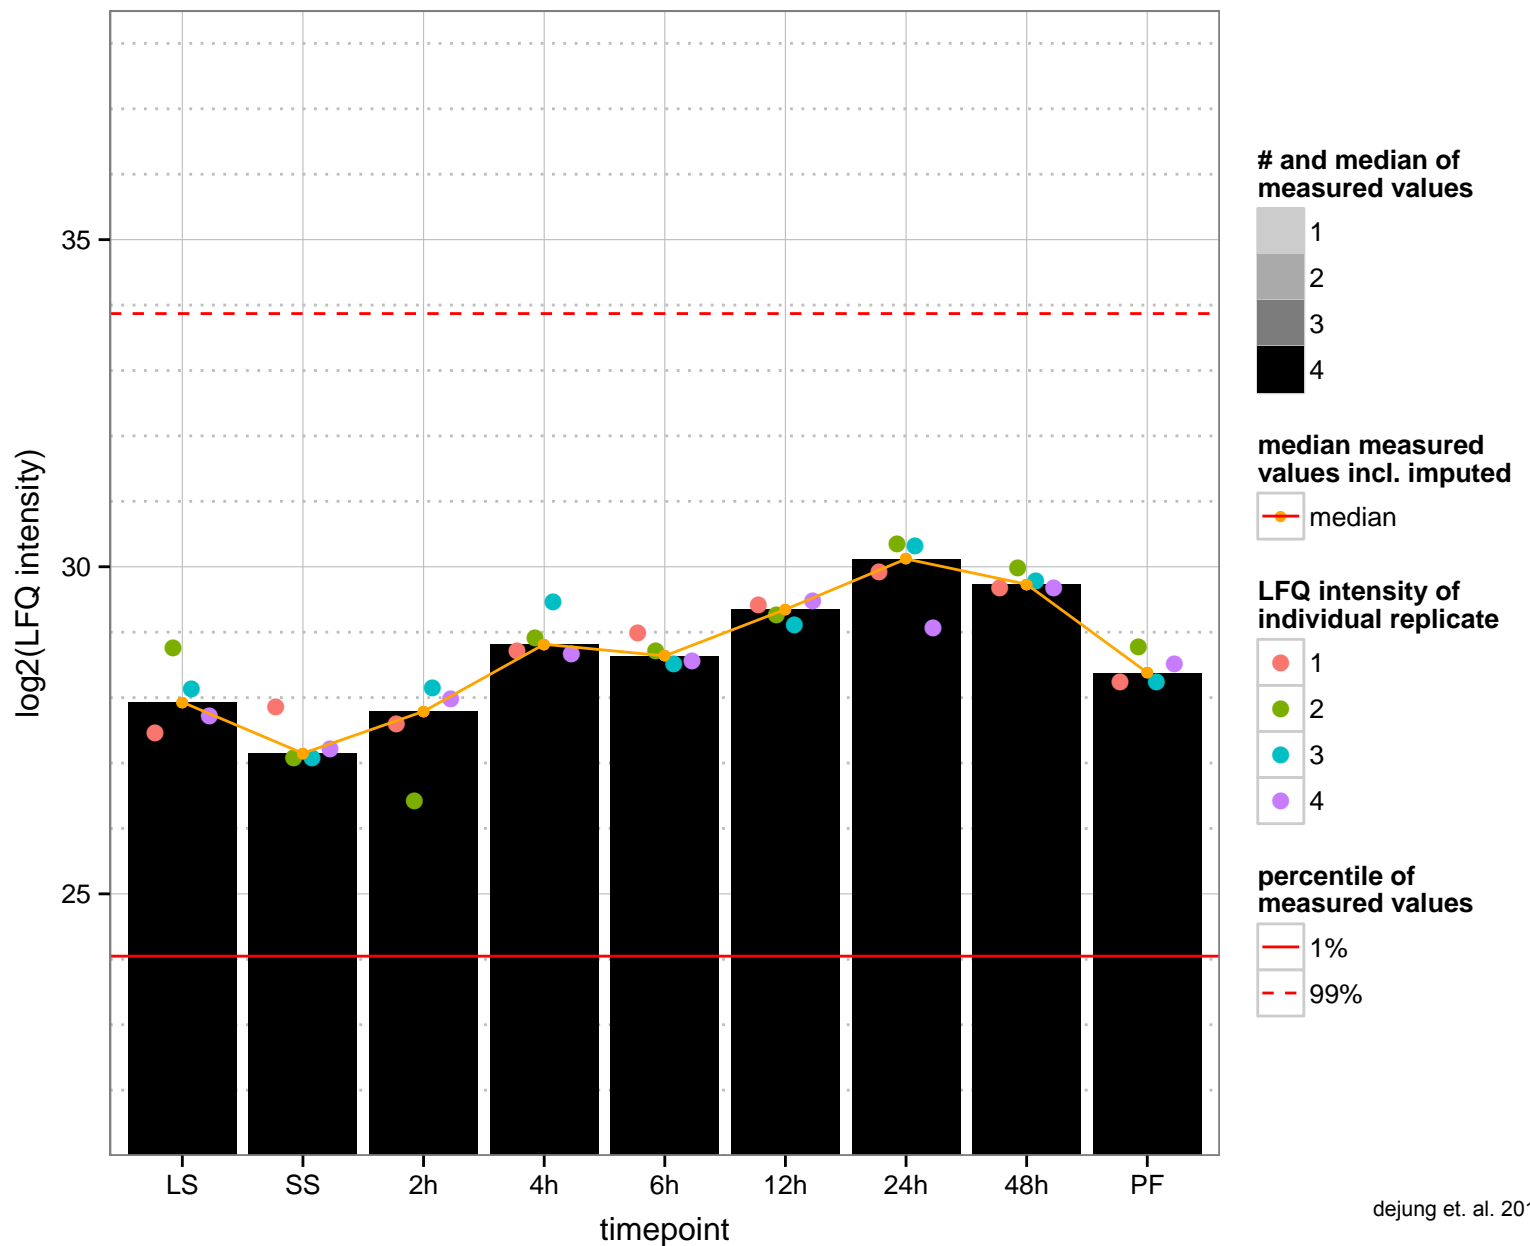

hypothetical protein, conserved  
 Tb927.1.3070  
 AGOF: null  
 AGOC: null  
 AGOP: null  
 PGO: null  
 PGOC: null  
 PGOP: null

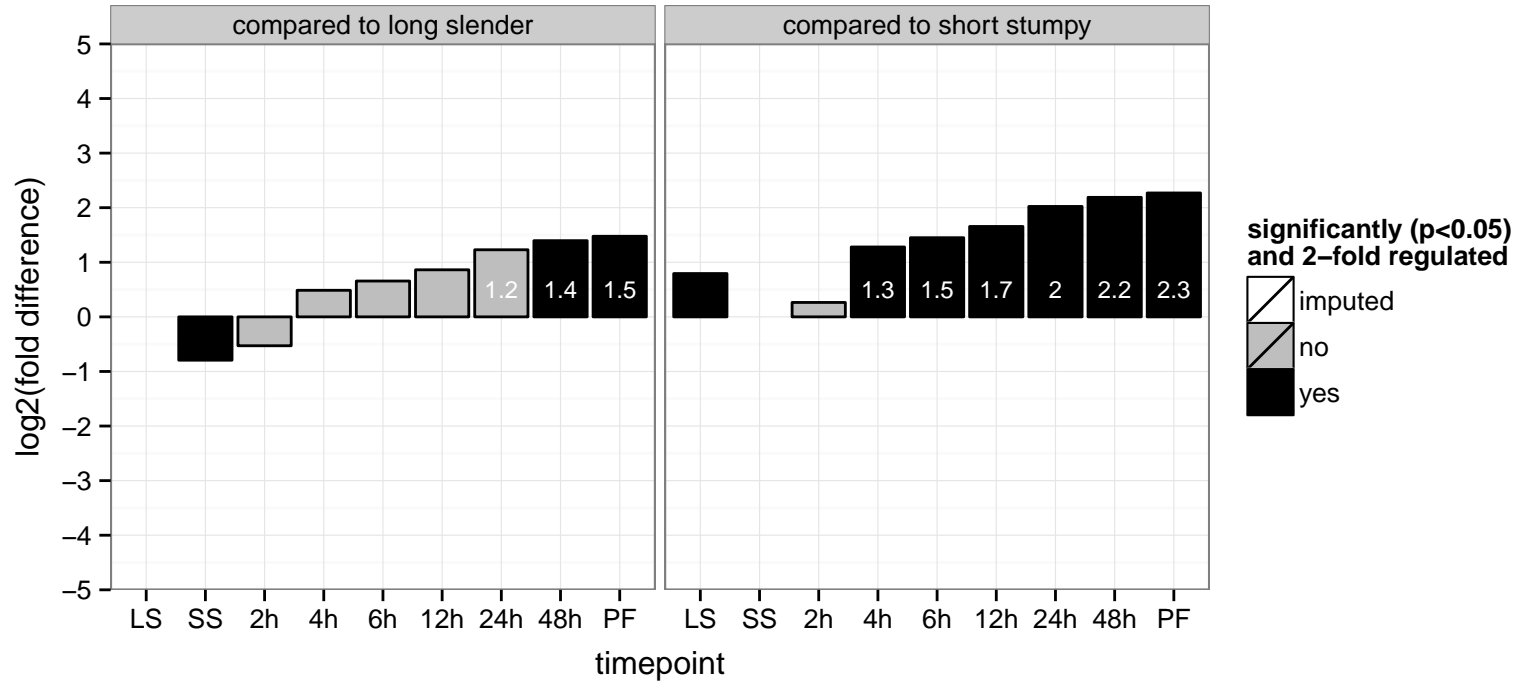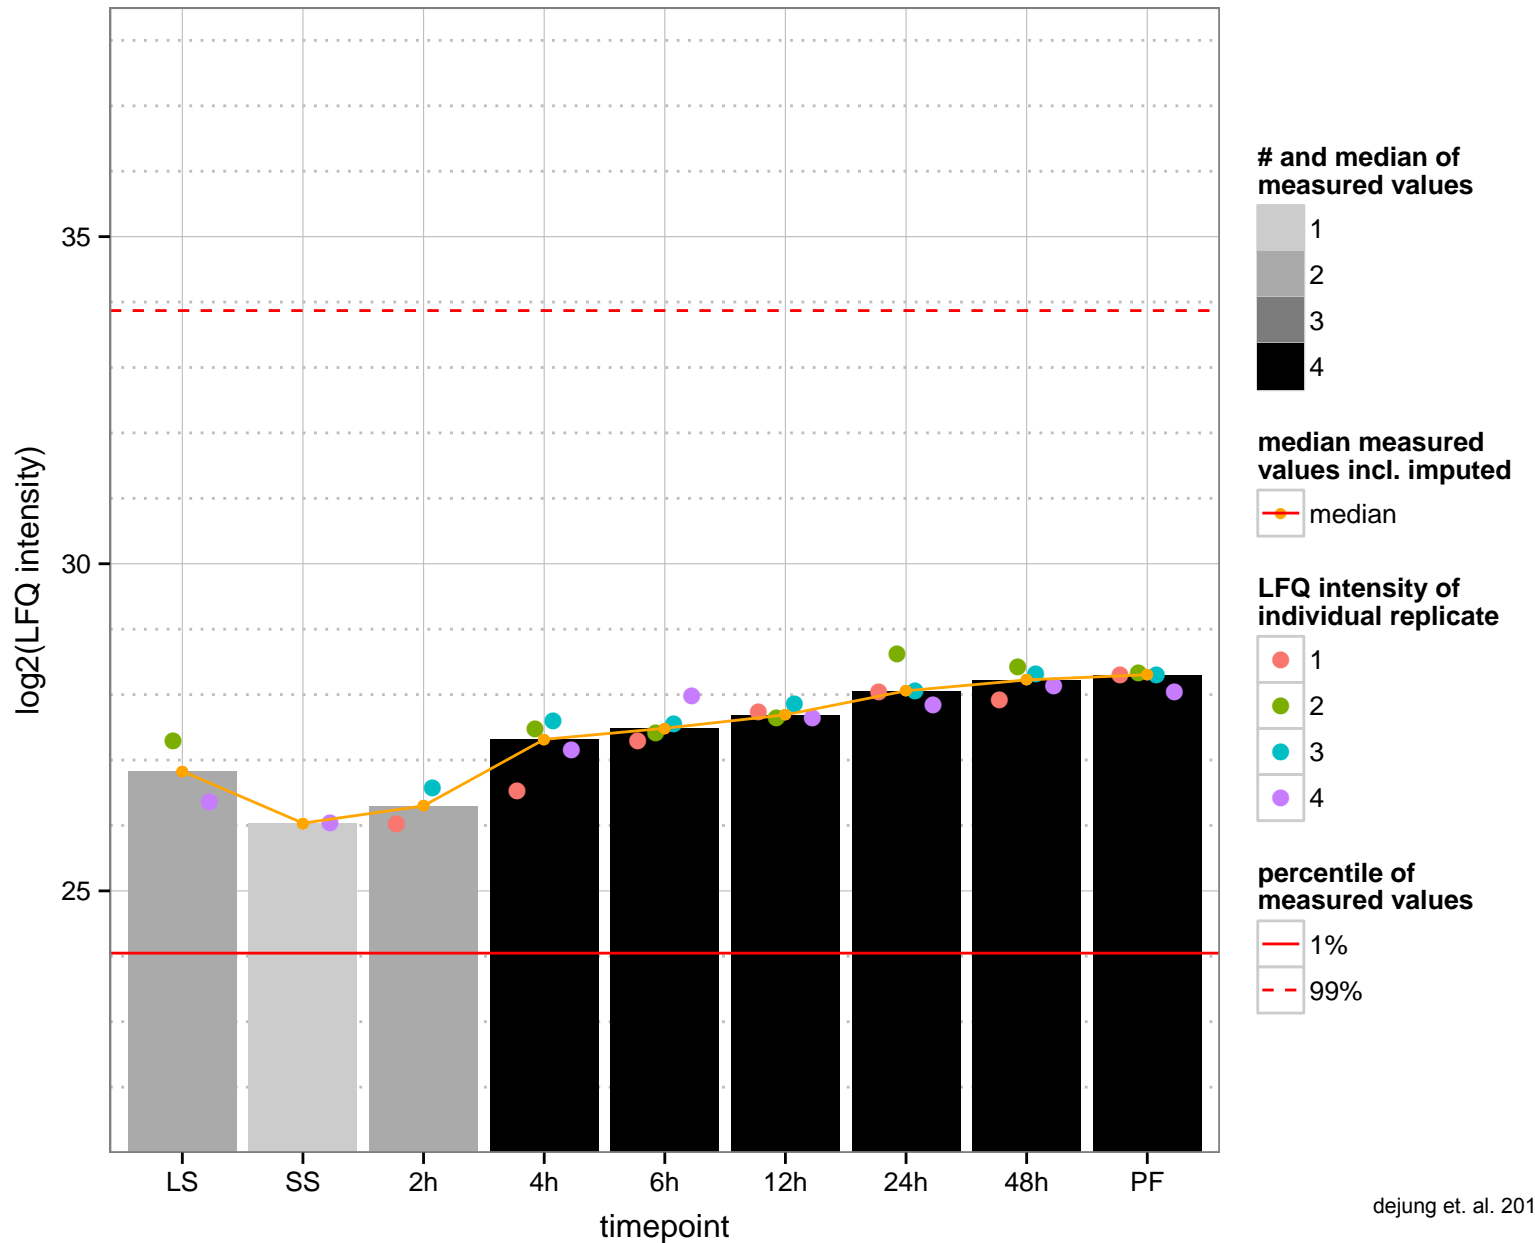

cytochrome oxidase subunit IV (COXIV)  
 Tb927.1.4100  
 AGOF: cytochrome-c oxidase activity  
 AGOC: mitochondrial respiratory chain complex IV, mitochondrion  
 AGOP: oxidation-reduction process  
 PGO: null  
 PGOC: null  
 PGOP: null

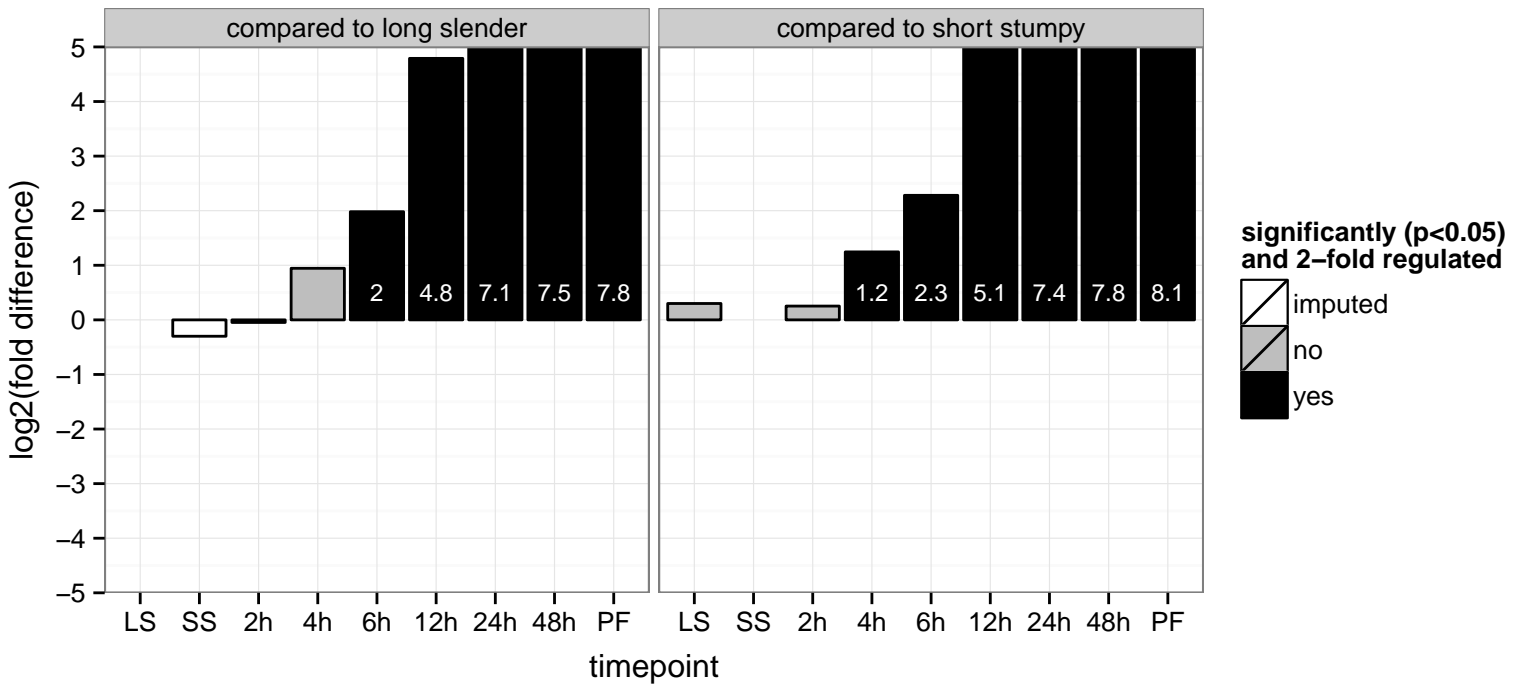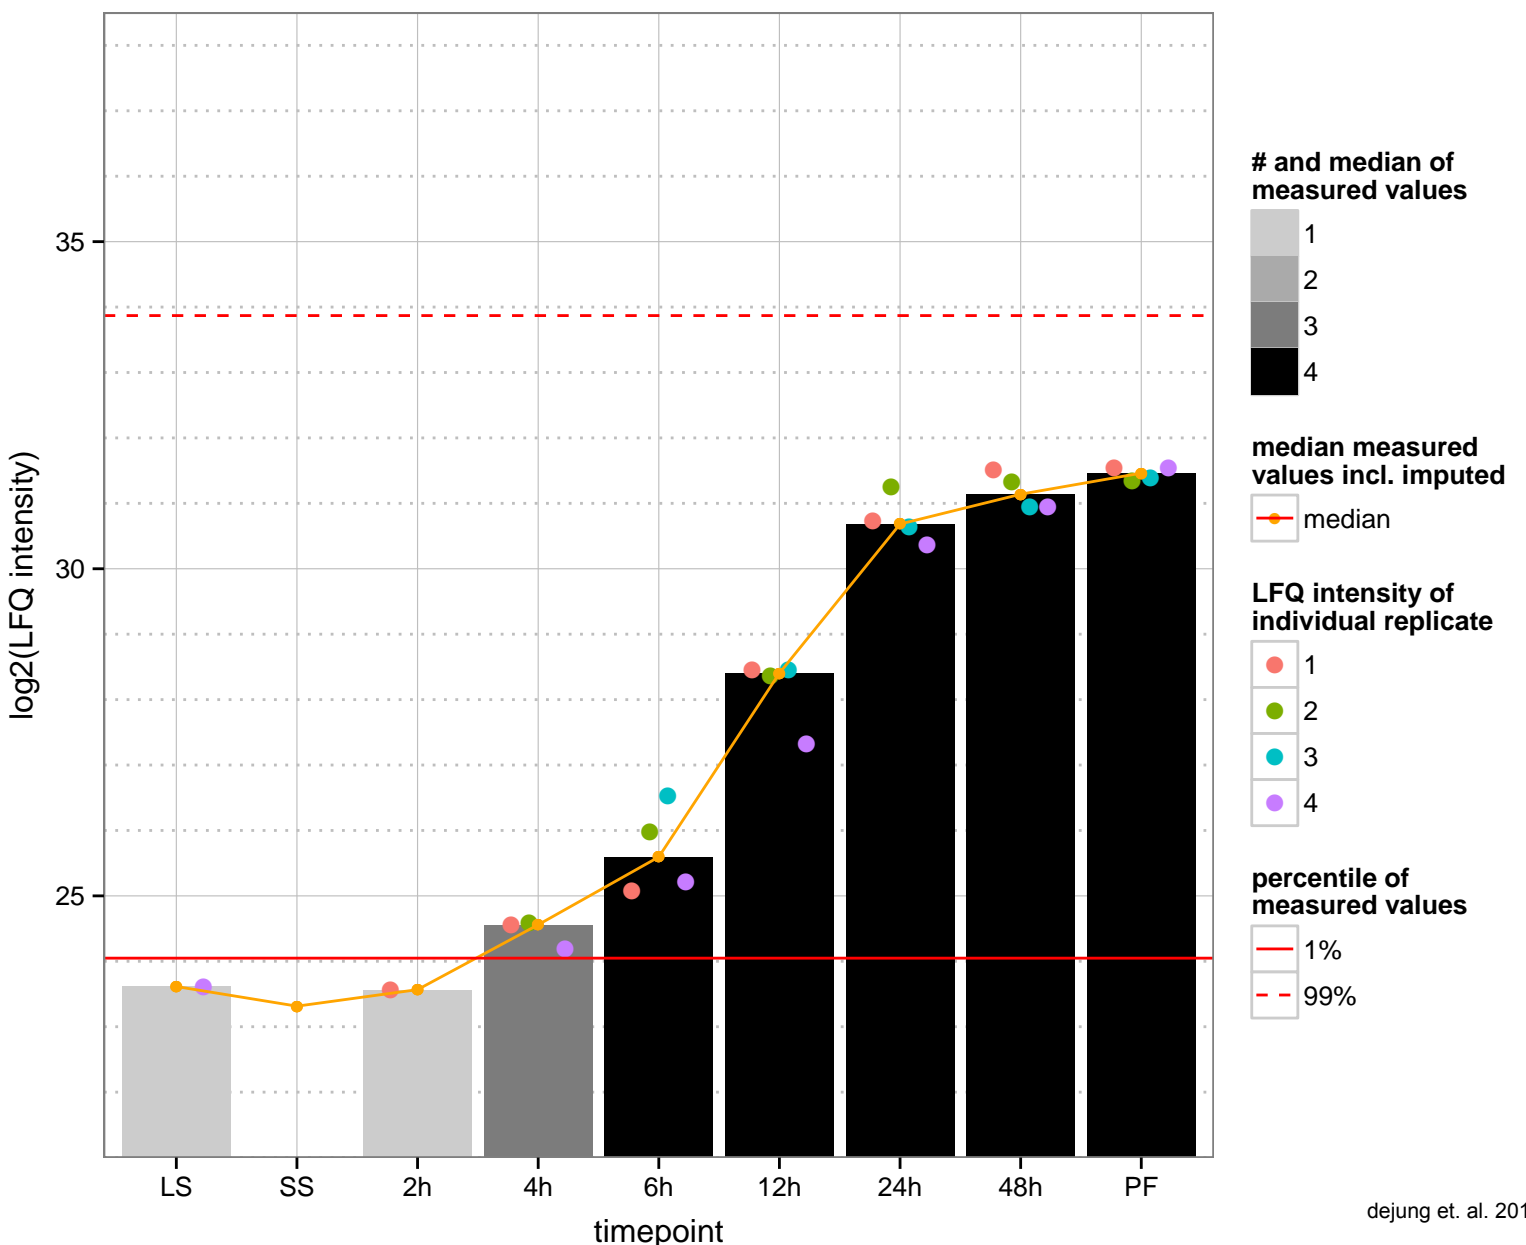

hypothetical protein, conserved  
 Tb927.1.560  
 AGOF: null  
 AGOC: null  
 AGOP: null  
 PGO: protein binding  
 PGOC: null  
 PGOP: null

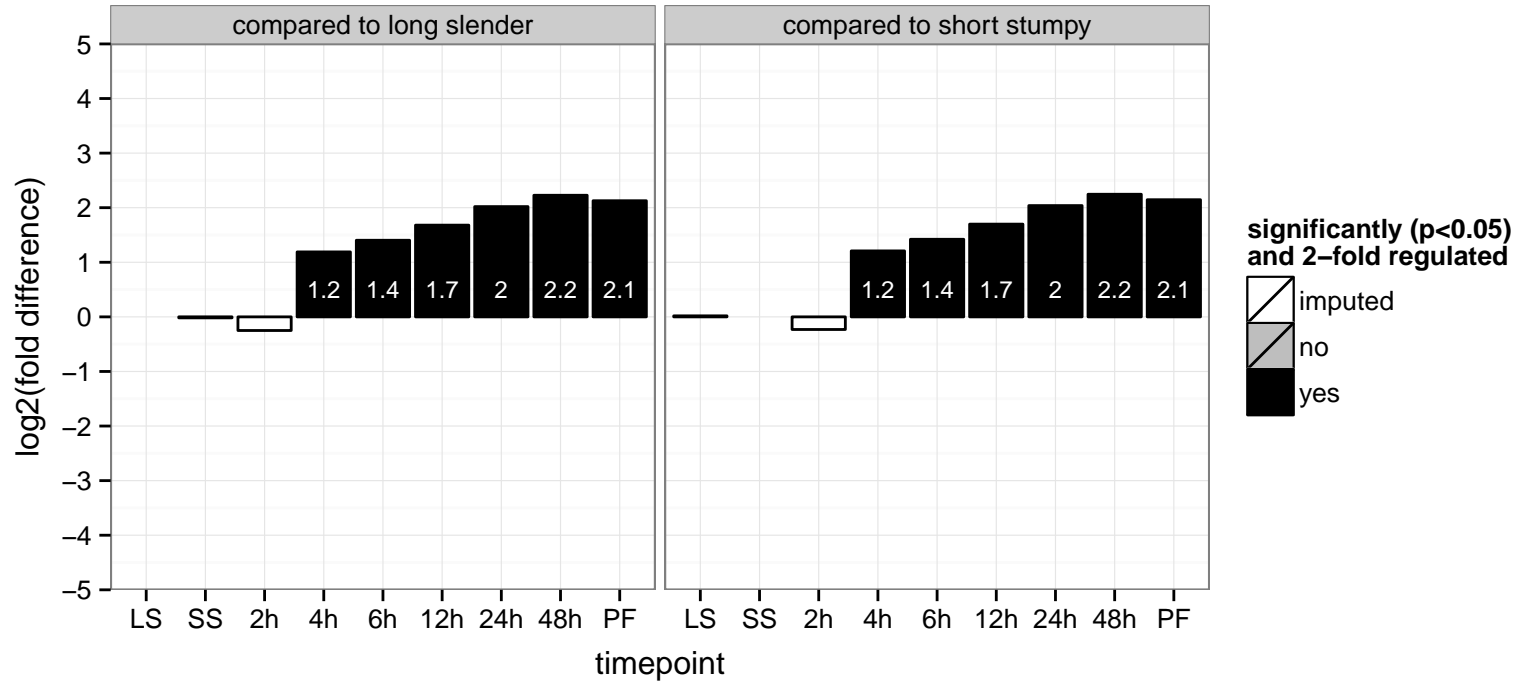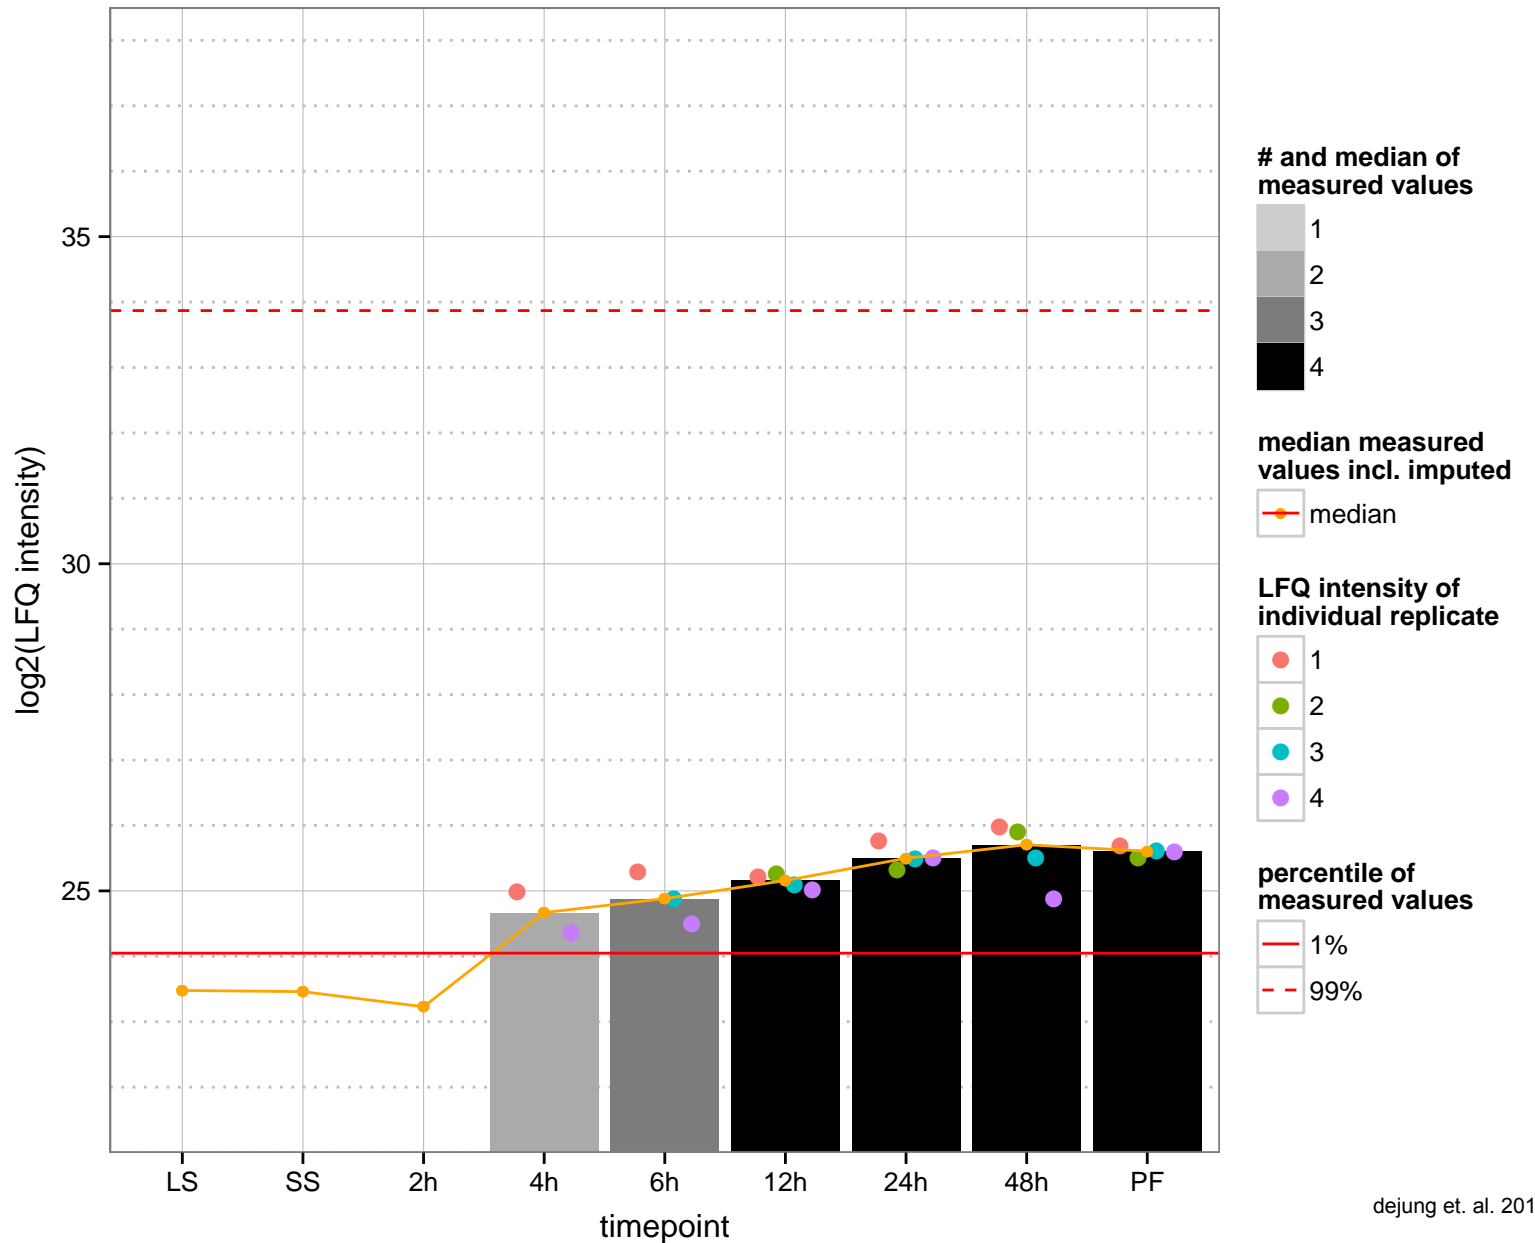



splicing factor Prp31  
 Tb927.10.10700  
 AGOF: RNA binding  
 AGOC: nucleus  
 AGOP: RNA splicing  
 PGO: null  
 PGO: null  
 PGO: null

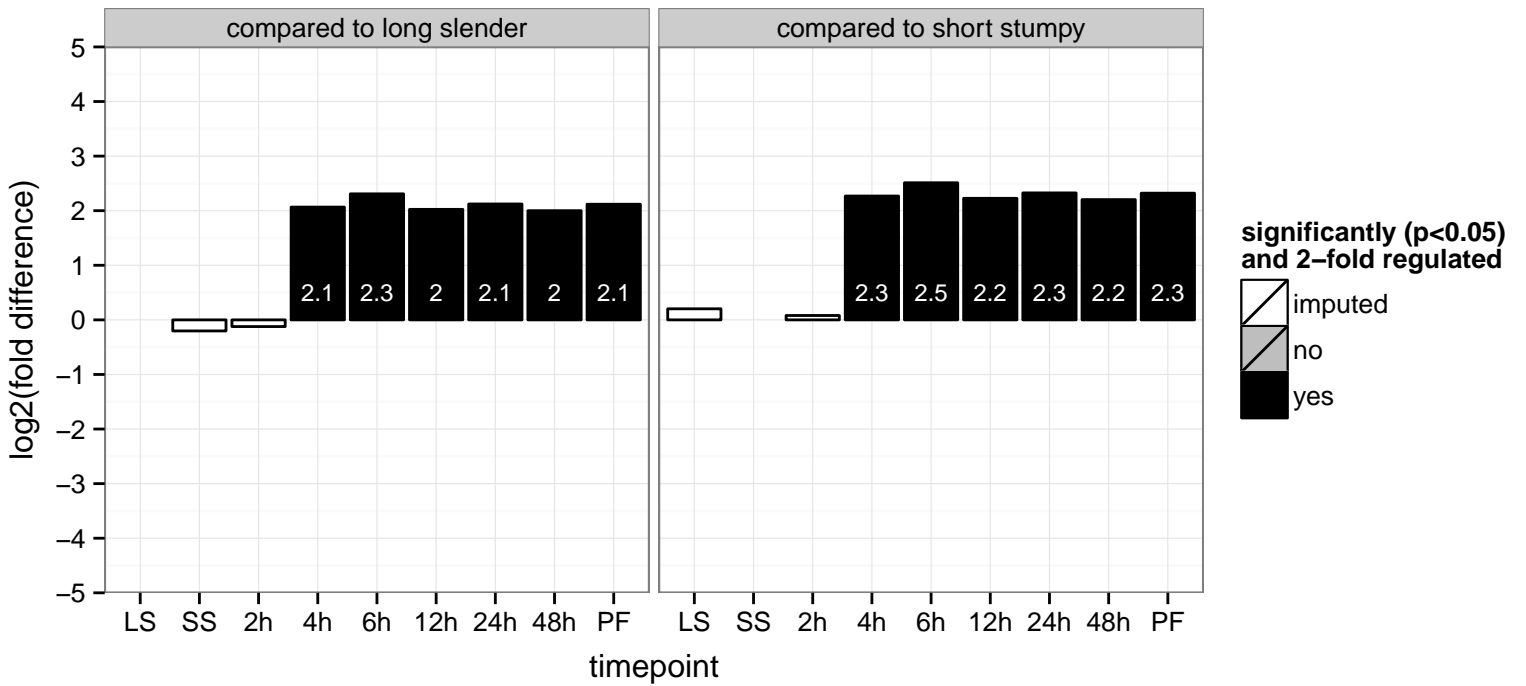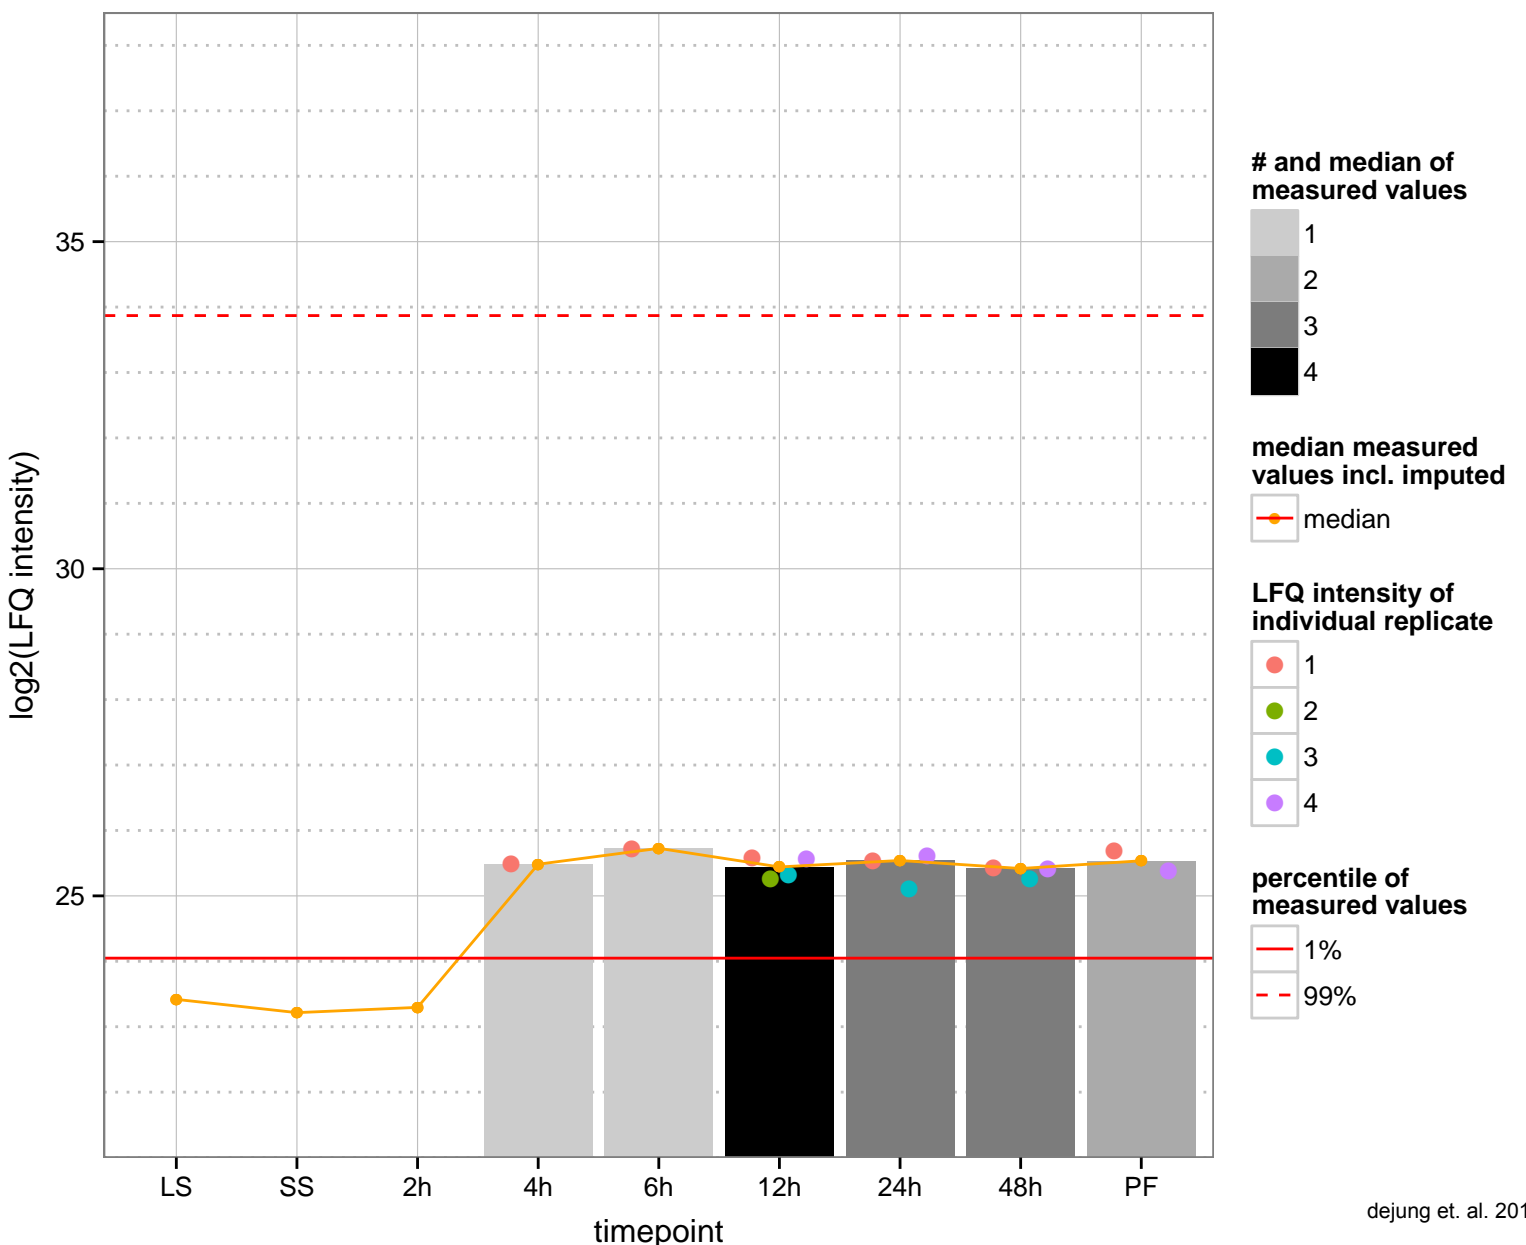

Ubiquitin-like modifier-activating enzyme ATG7, putative, Autophagy-related protein 7 (ATG7)  
 Tb927.10.11180  
 AGOF: catalytic activity  
 AGOC: null  
 AGOP: autophagy, protein targeting to vacuole  
 PGO: catalytic activity  
 PGOC: null  
 PGOP: null

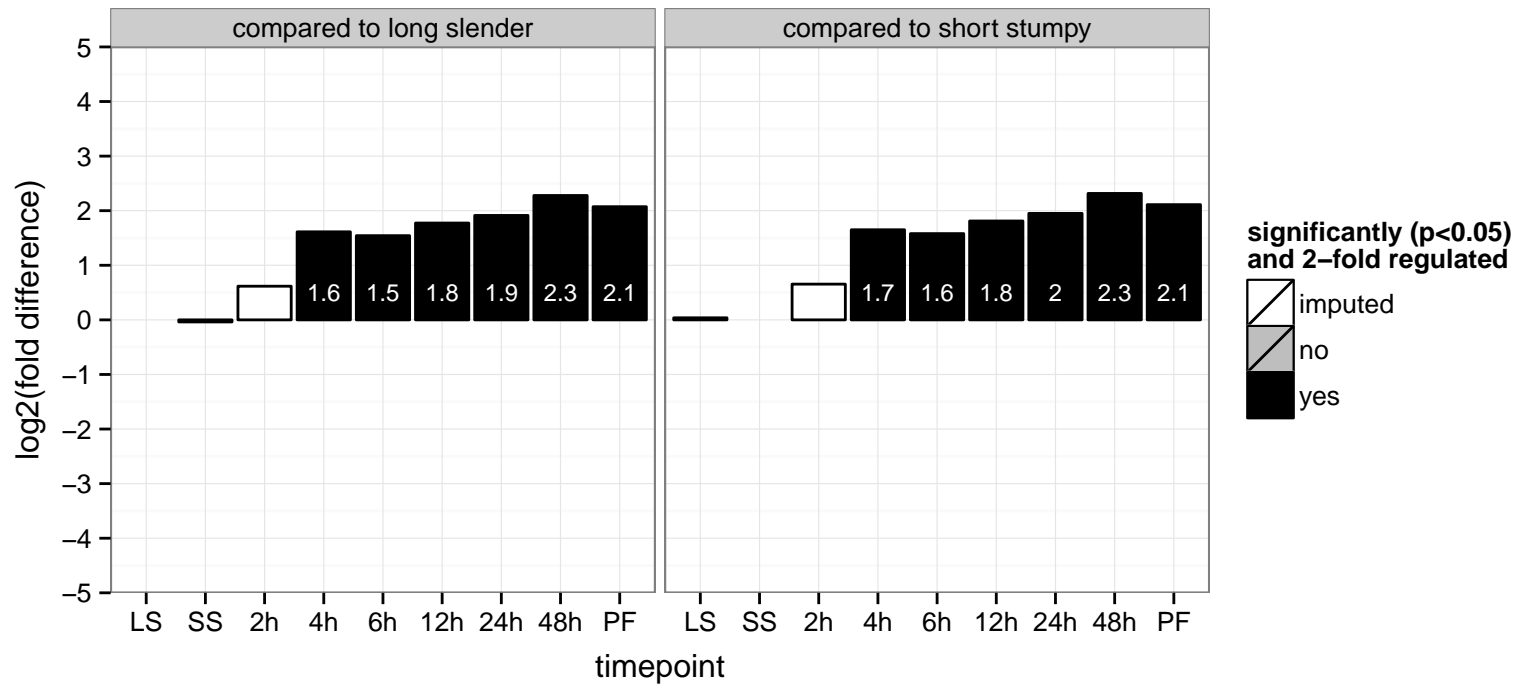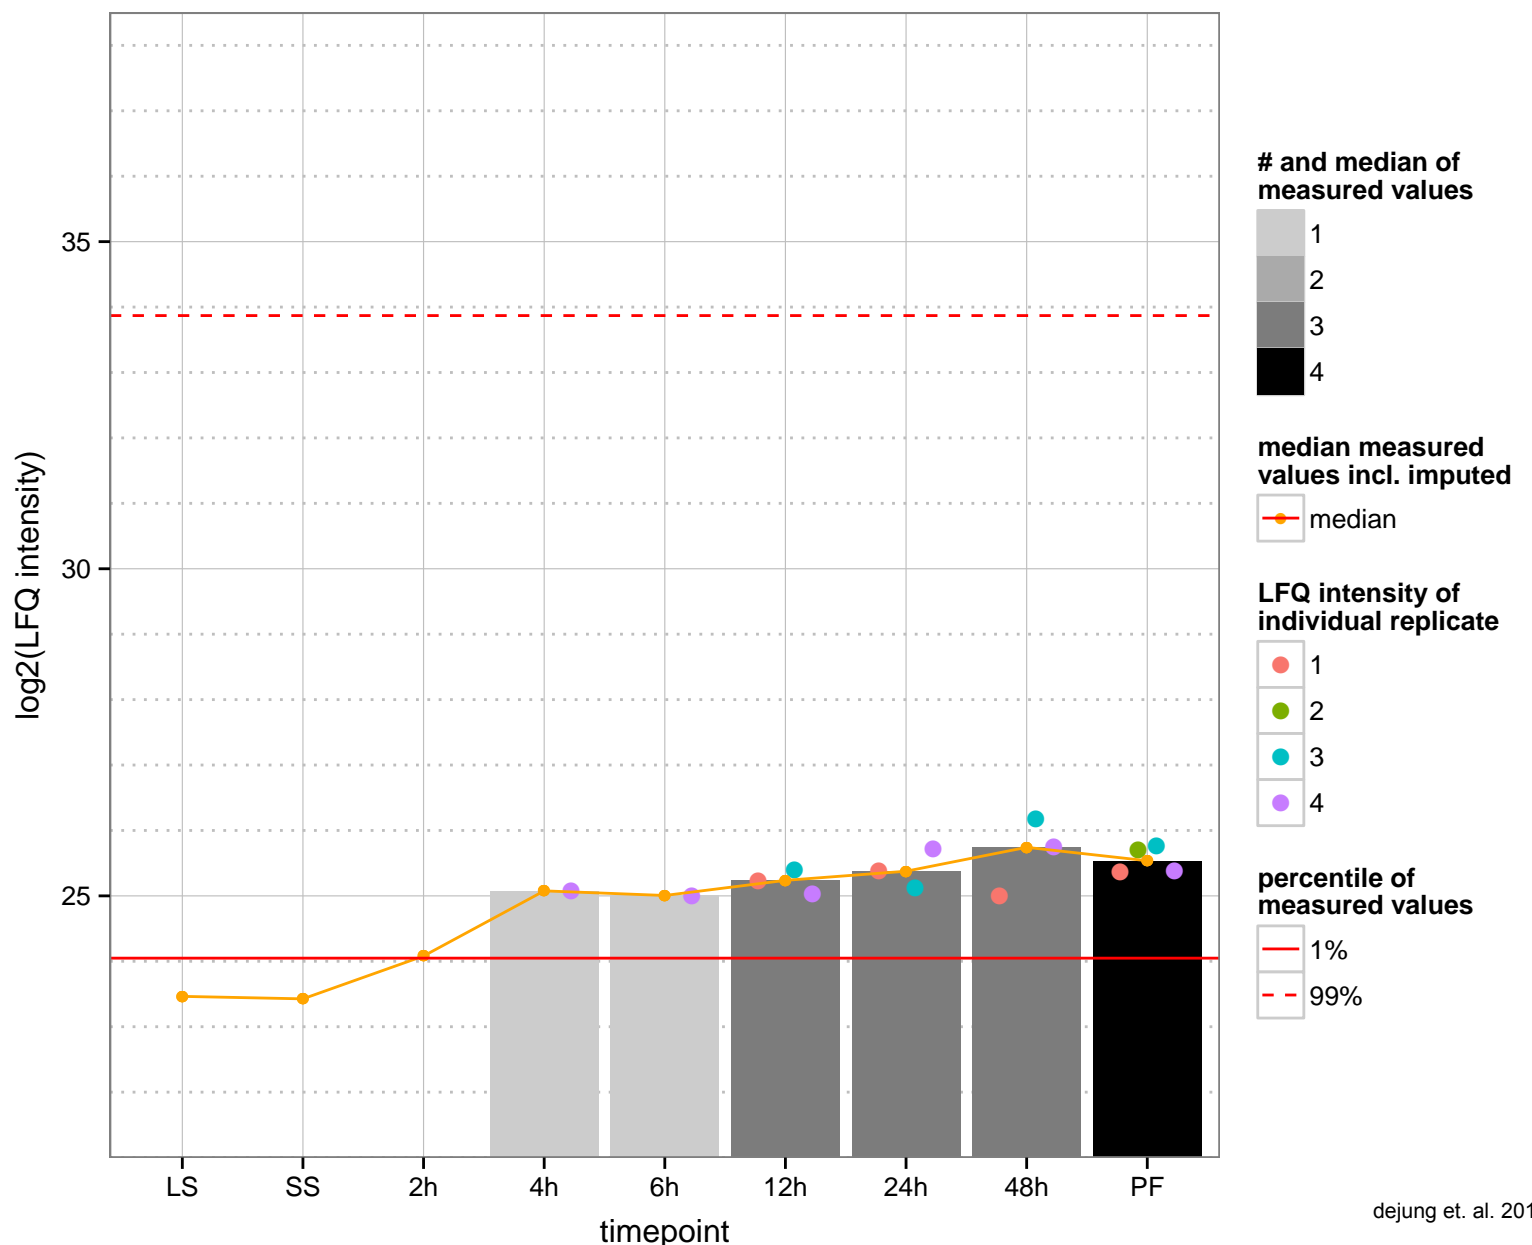

hypothetical protein, conserved  
 Tb927.10.11370  
 AGOF: null  
 AGOC: mitochondrion  
 AGOP: null  
 PGO: null  
 PGOC: null  
 PGOP: null

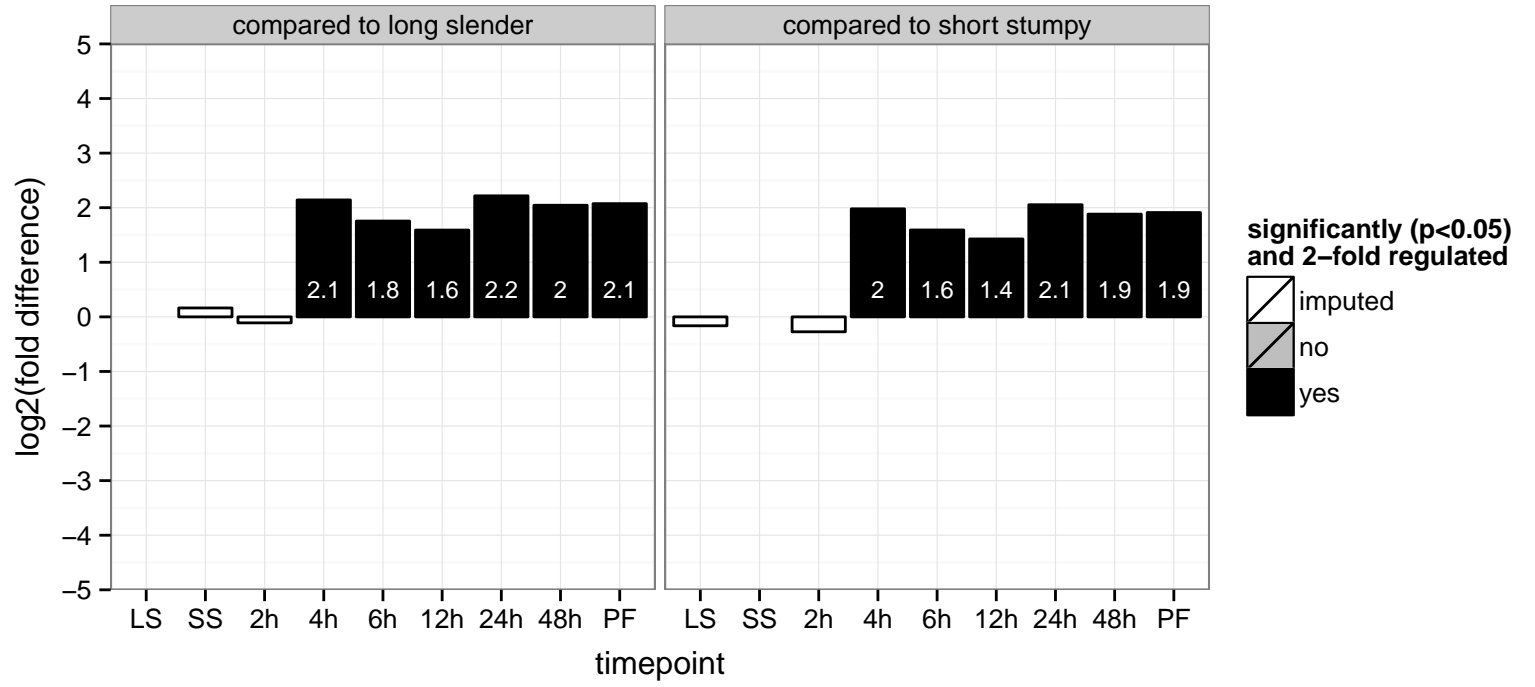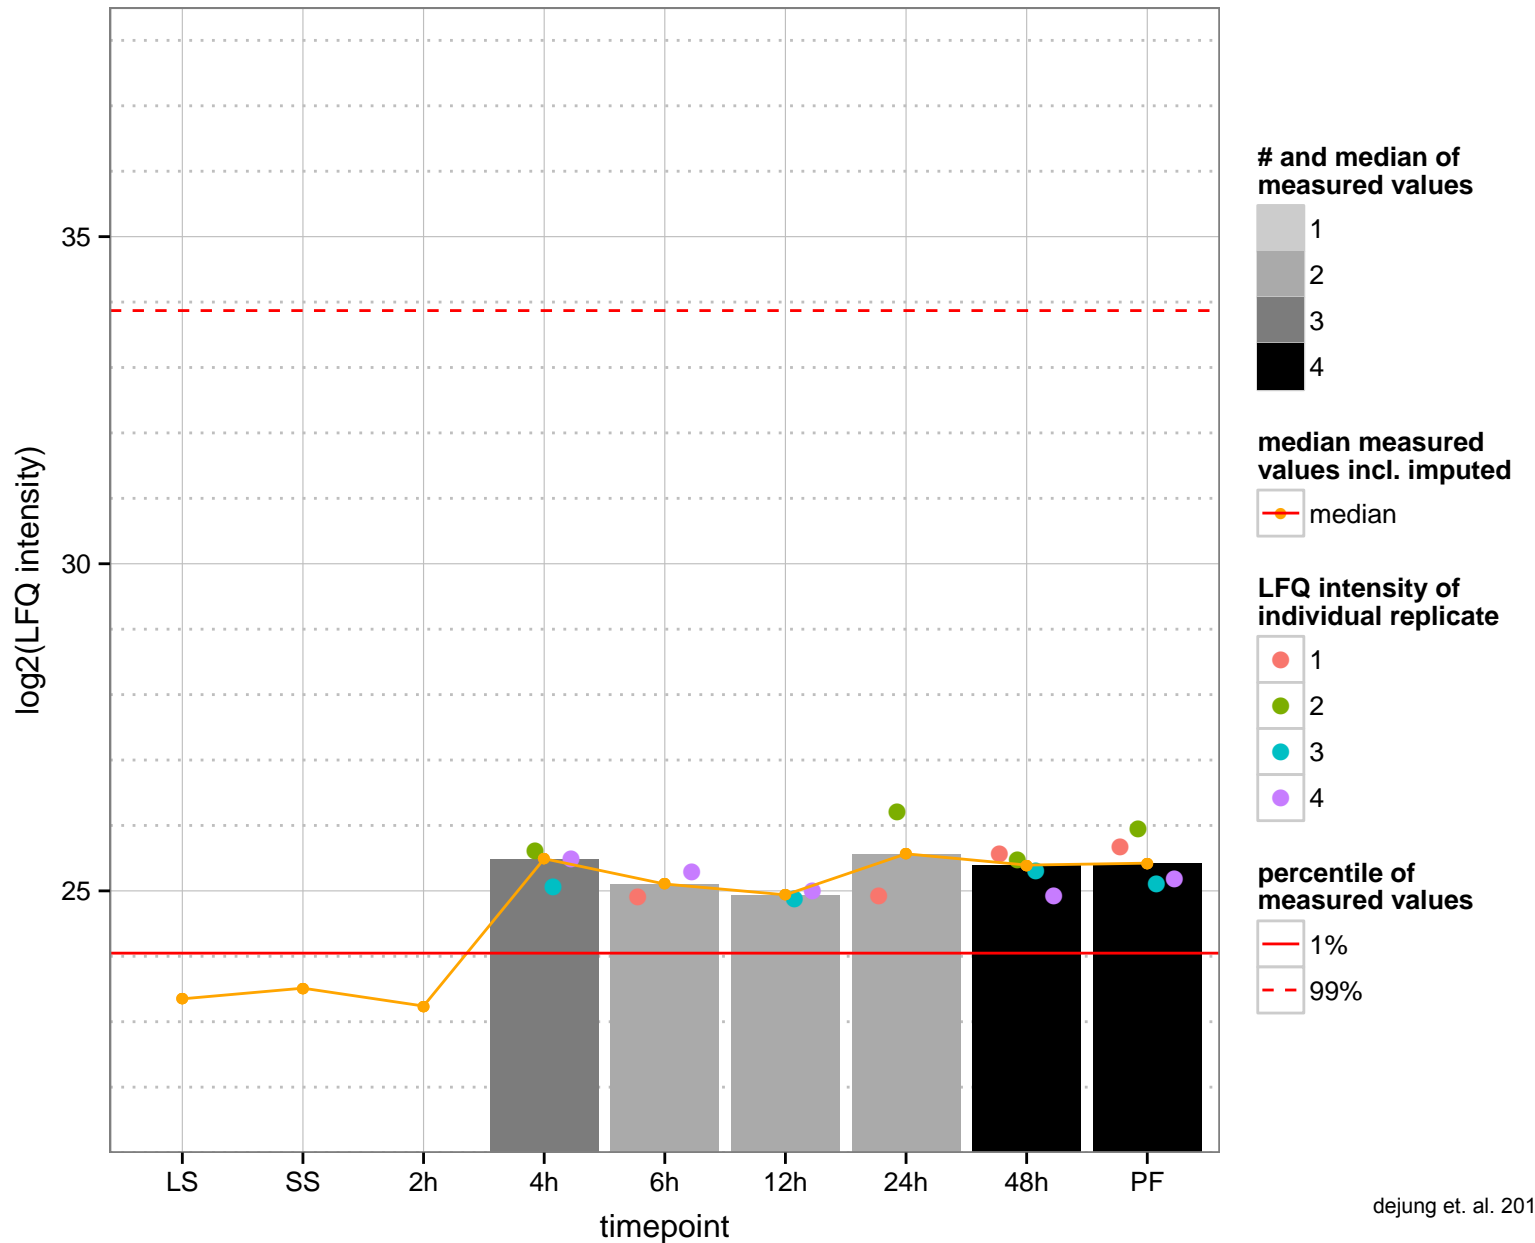

hypothetical protein, conserved  
 Tb927.10.1310  
 AGOF: null  
 AGOC: null  
 AGOP: null  
 PGO: binding  
 PGOC: null  
 PGOP: null

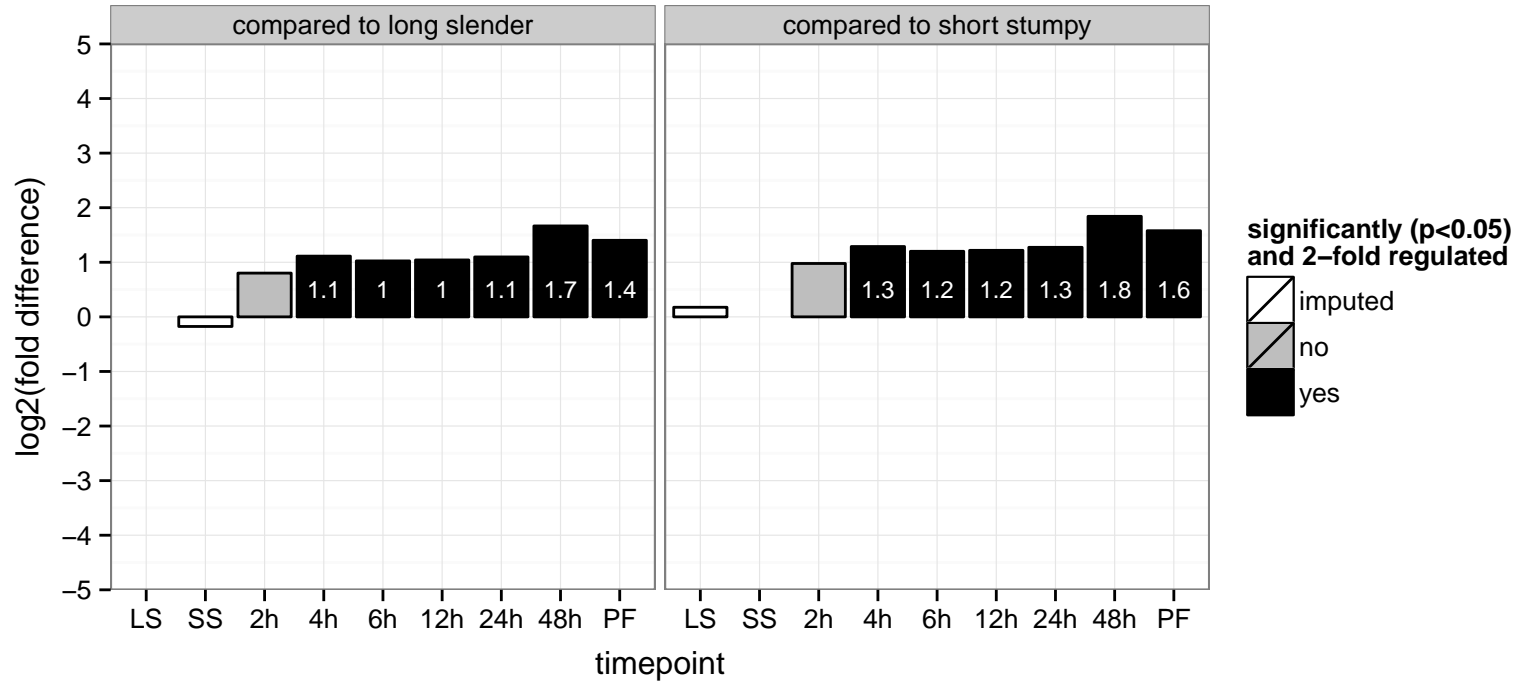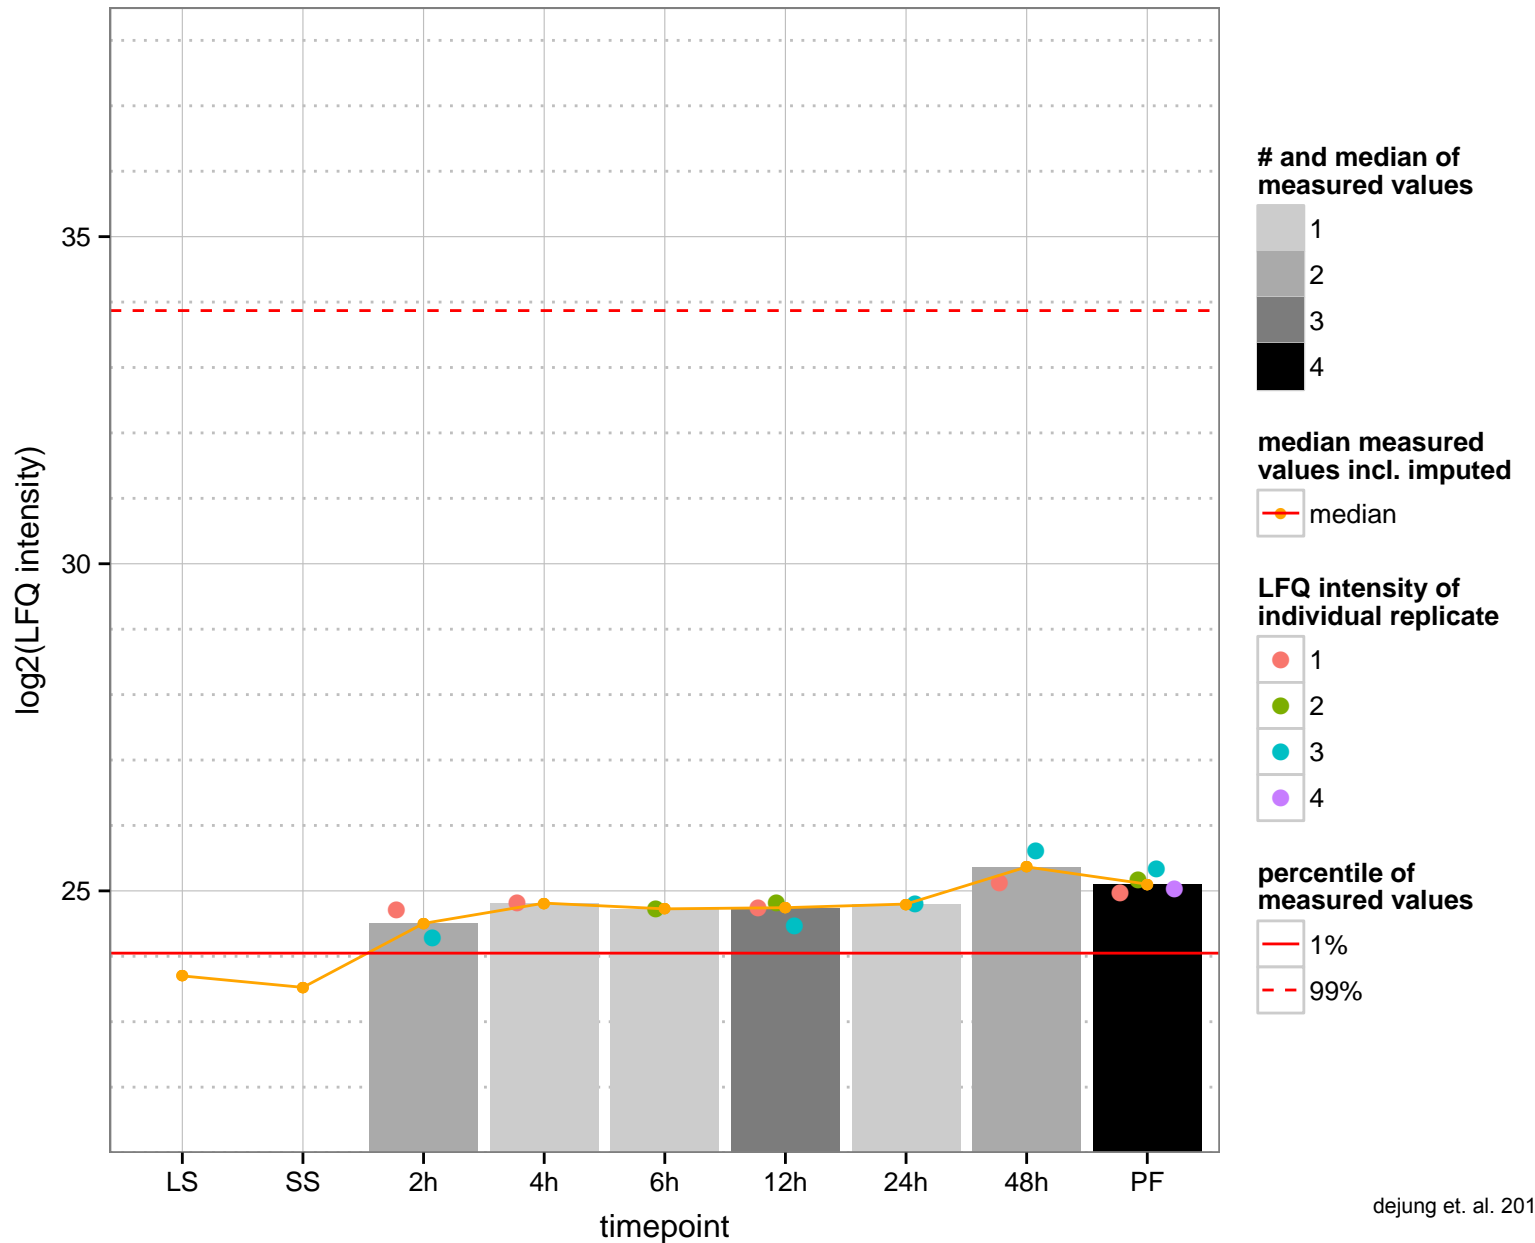

hypothetical protein, conserved  
 Tb927.10.14330  
 AGOF: null  
 AGOC: small-subunit processome  
 AGOP: rRNA processing  
 PGO: null  
 PGOC: small-subunit processome  
 PGOP: rRNA processing

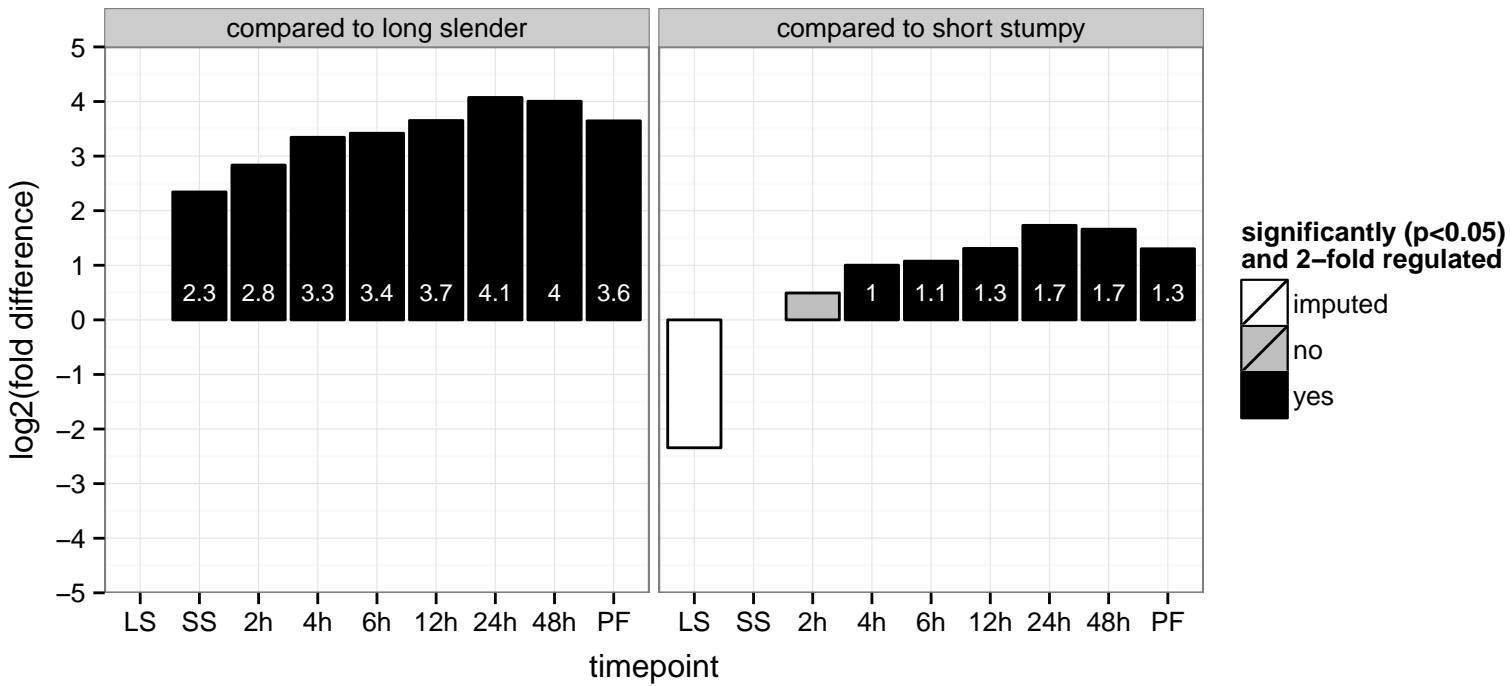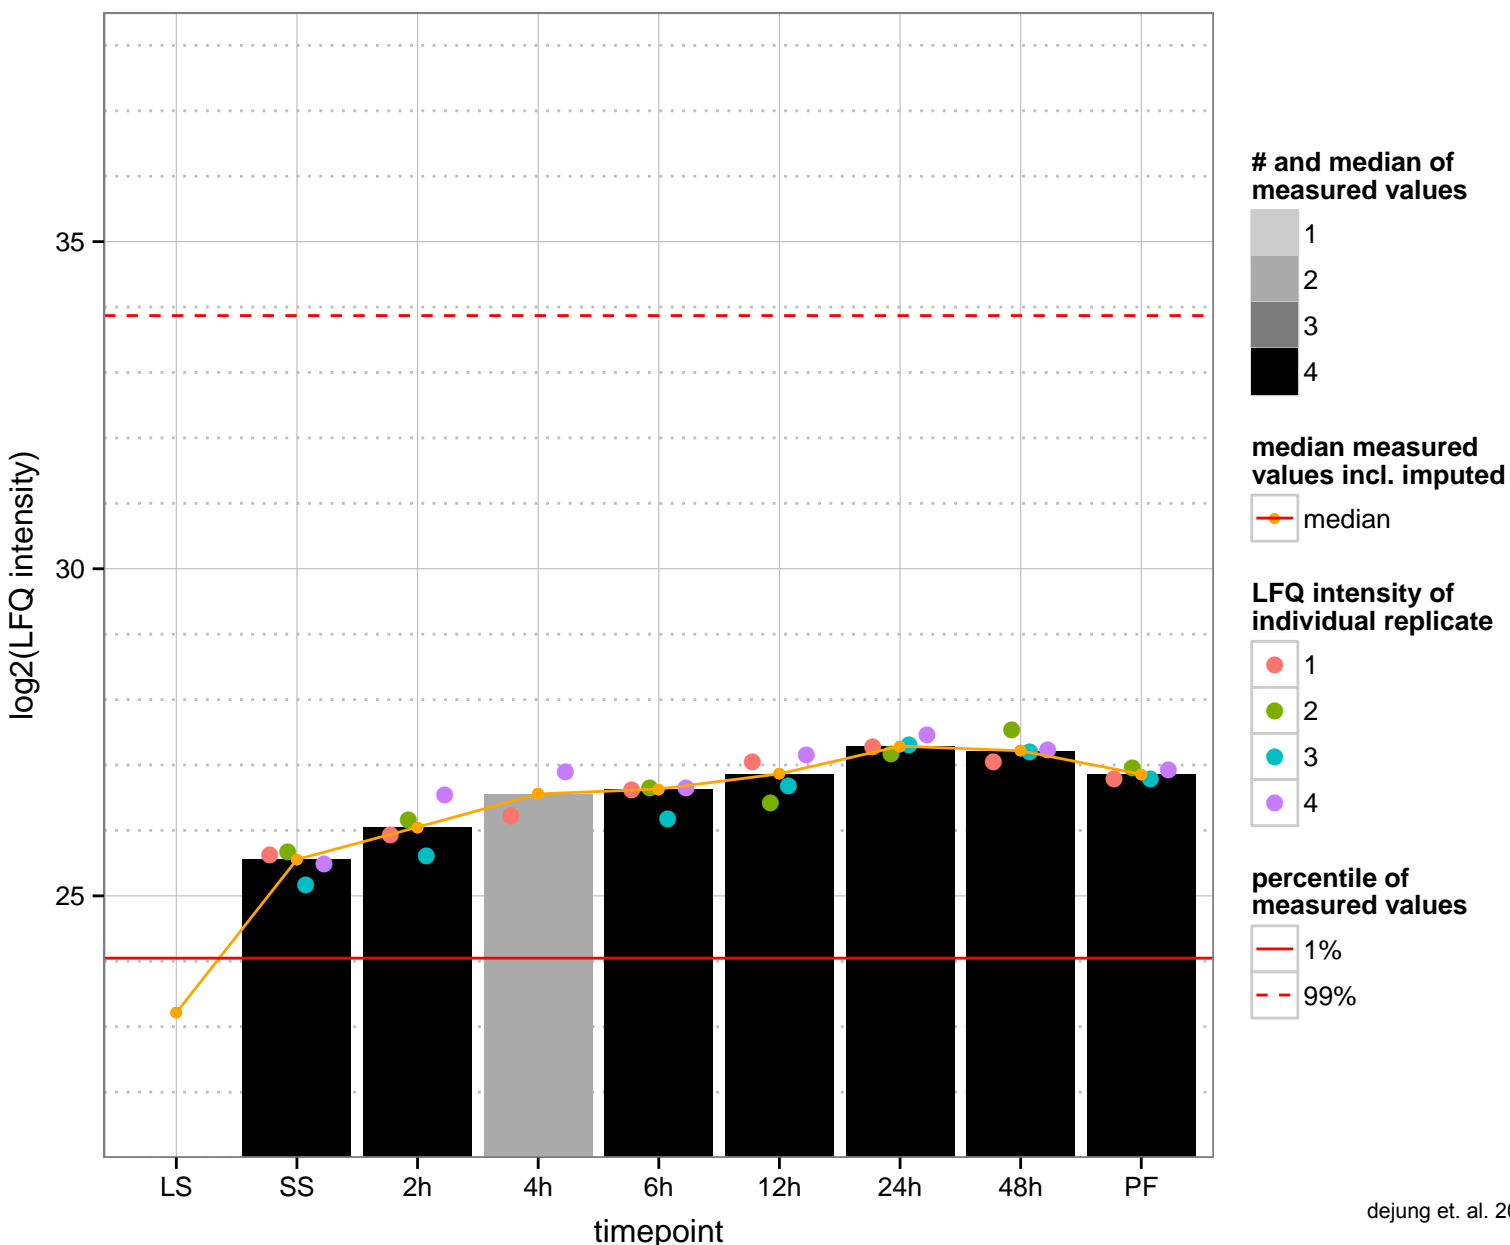

chaperone protein DNAj, putative, variant surface glycoprotein (VSG)  
 Tb927.10.14730;Tb11.v5.1062  
 AGOF: null, heat shock protein binding, unfolded protein binding  
 AGOC: null  
 AGOP: null, protein folding  
 PGOF: heat shock protein binding, null  
 PGO: null  
 PGOP: null

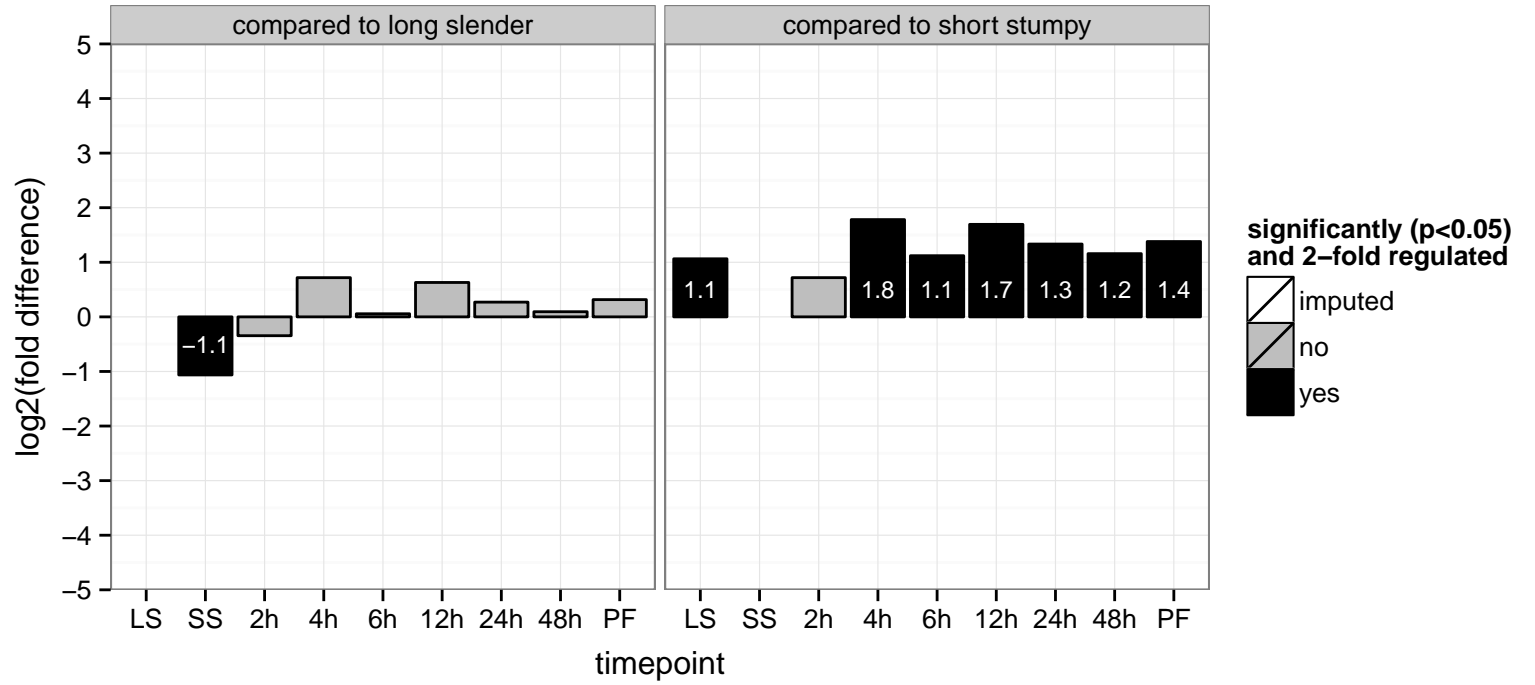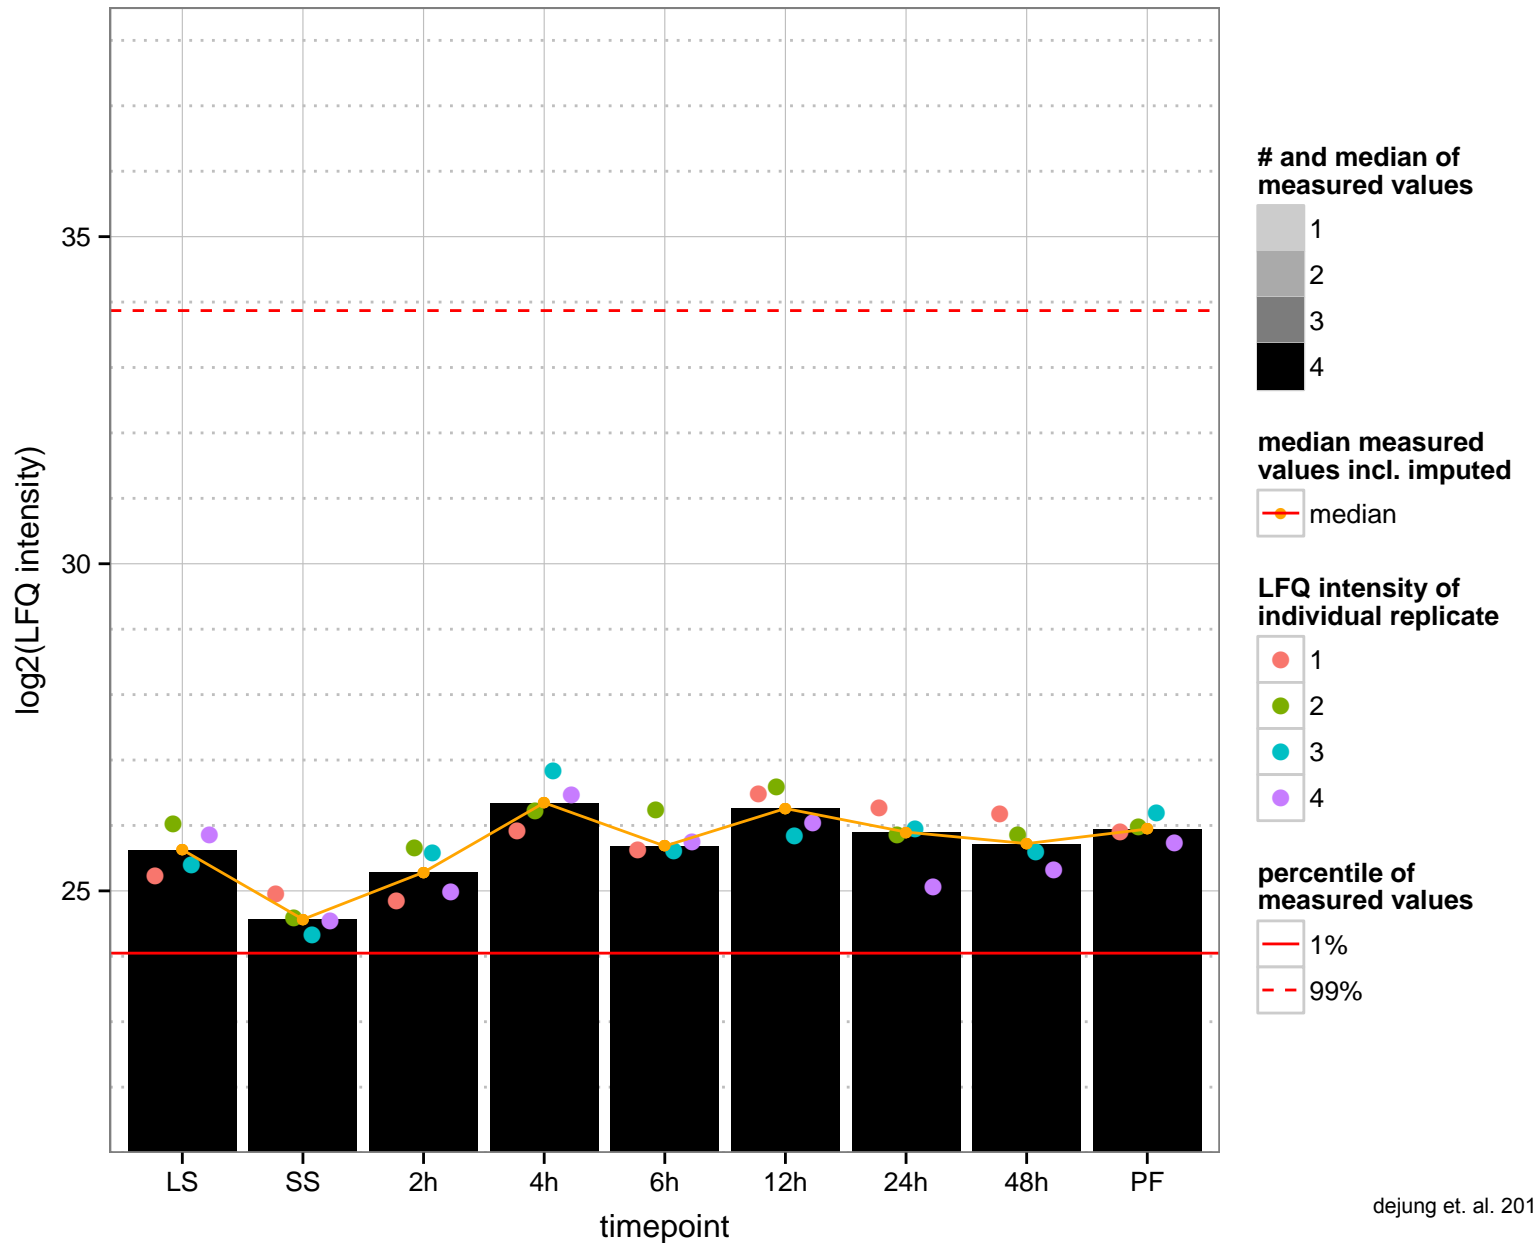

dual specificity protein phosphatase, putative, phosphoserine/threonine/tyrosine-binding protein  
 Tb927.10.1620;Tb11.v5.0643  
 AGOF: null, protein tyrosine/serine/threonine phosphatase activity  
 AGOC: null  
 AGOP: null, protein dephosphorylation  
 PGO: phosphatase activity, protein tyrosine/serine/threonine phosphatase activity  
 PGOC: null  
 PGO: dephosphorylation, protein dephosphorylation

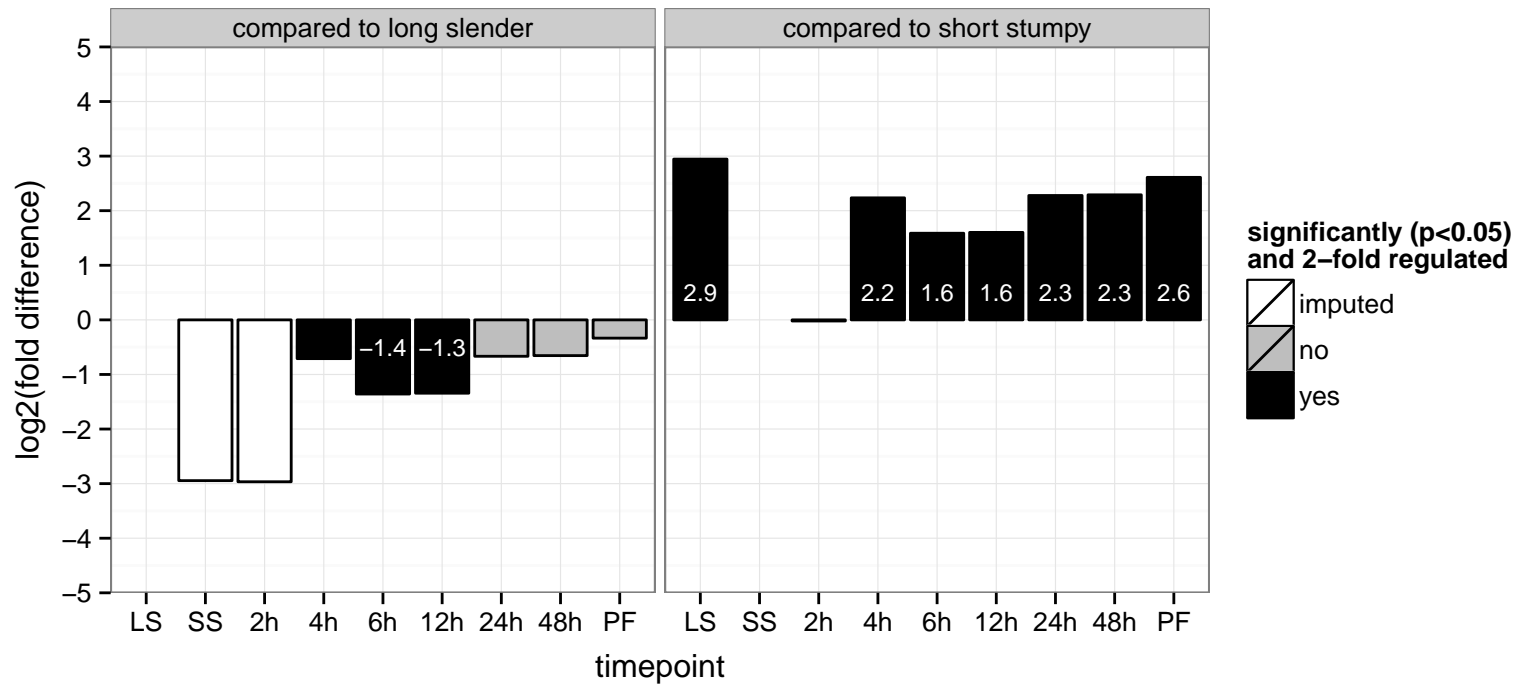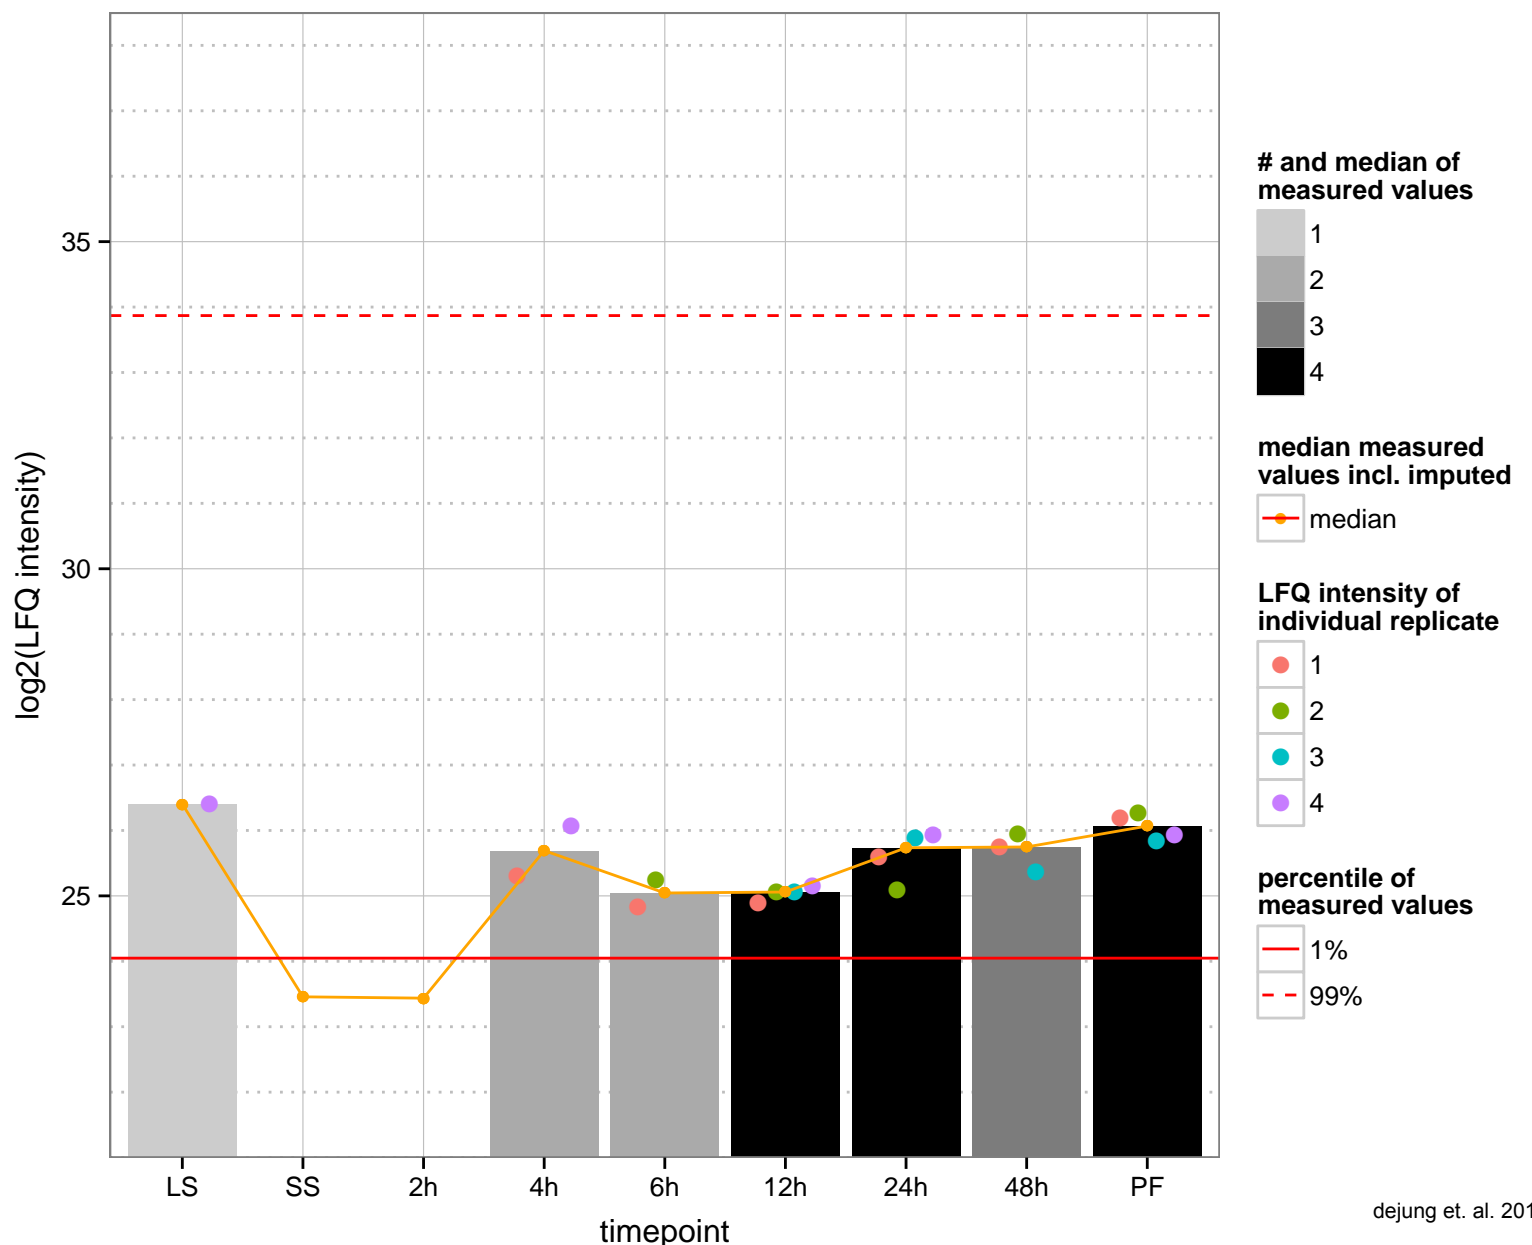

malate dehydrogenase-related

Tb927.10.2550

AGOF: L-malate dehydrogenase activity

AGOC: mitochondrion

AGOP: glycolysis, malate metabolic process, oxidation-reduction process

PGOF: catalytic activity, oxidoreductase activity, acting on the CH-OH group of donors, NAD or NADP as acceptor

PGOC: null

PGOP: carbohydrate metabolic process, cellular carbohydrate metabolic process, oxidation-reduction process

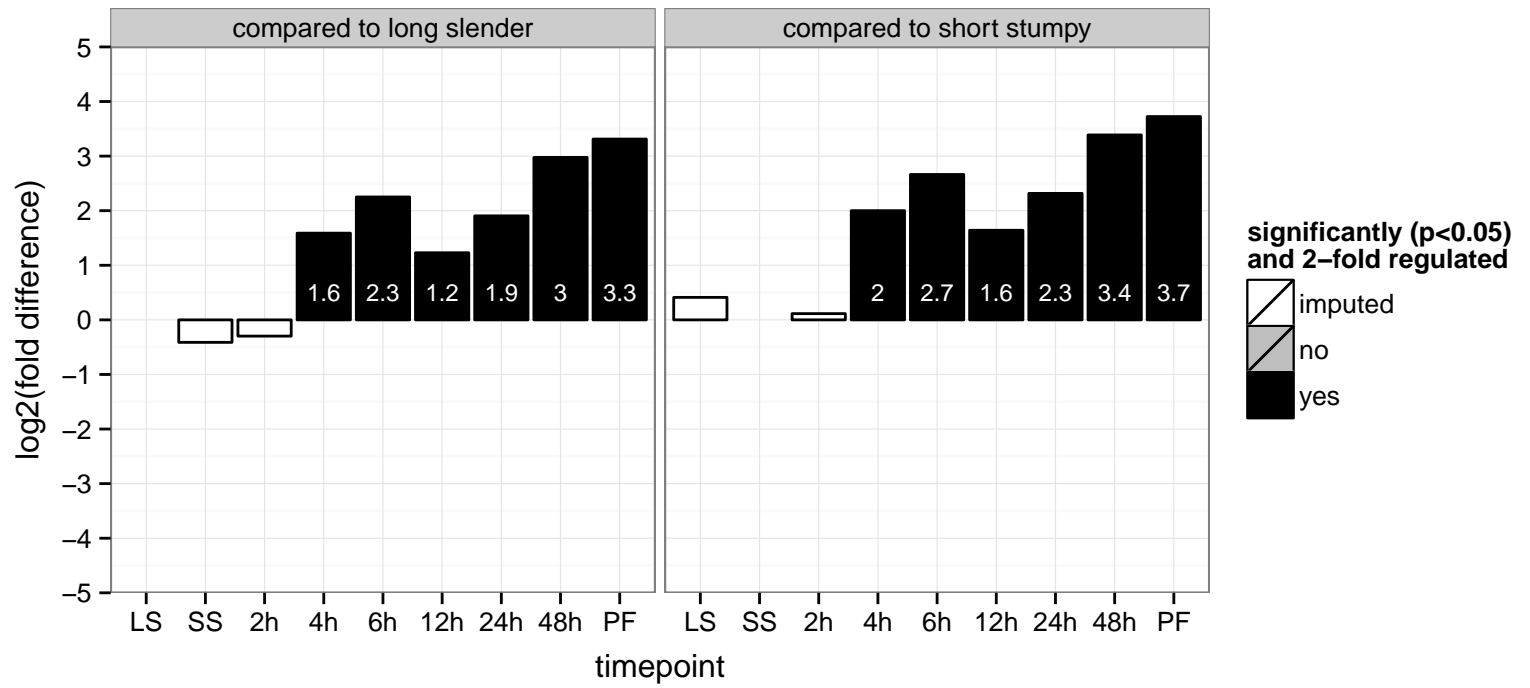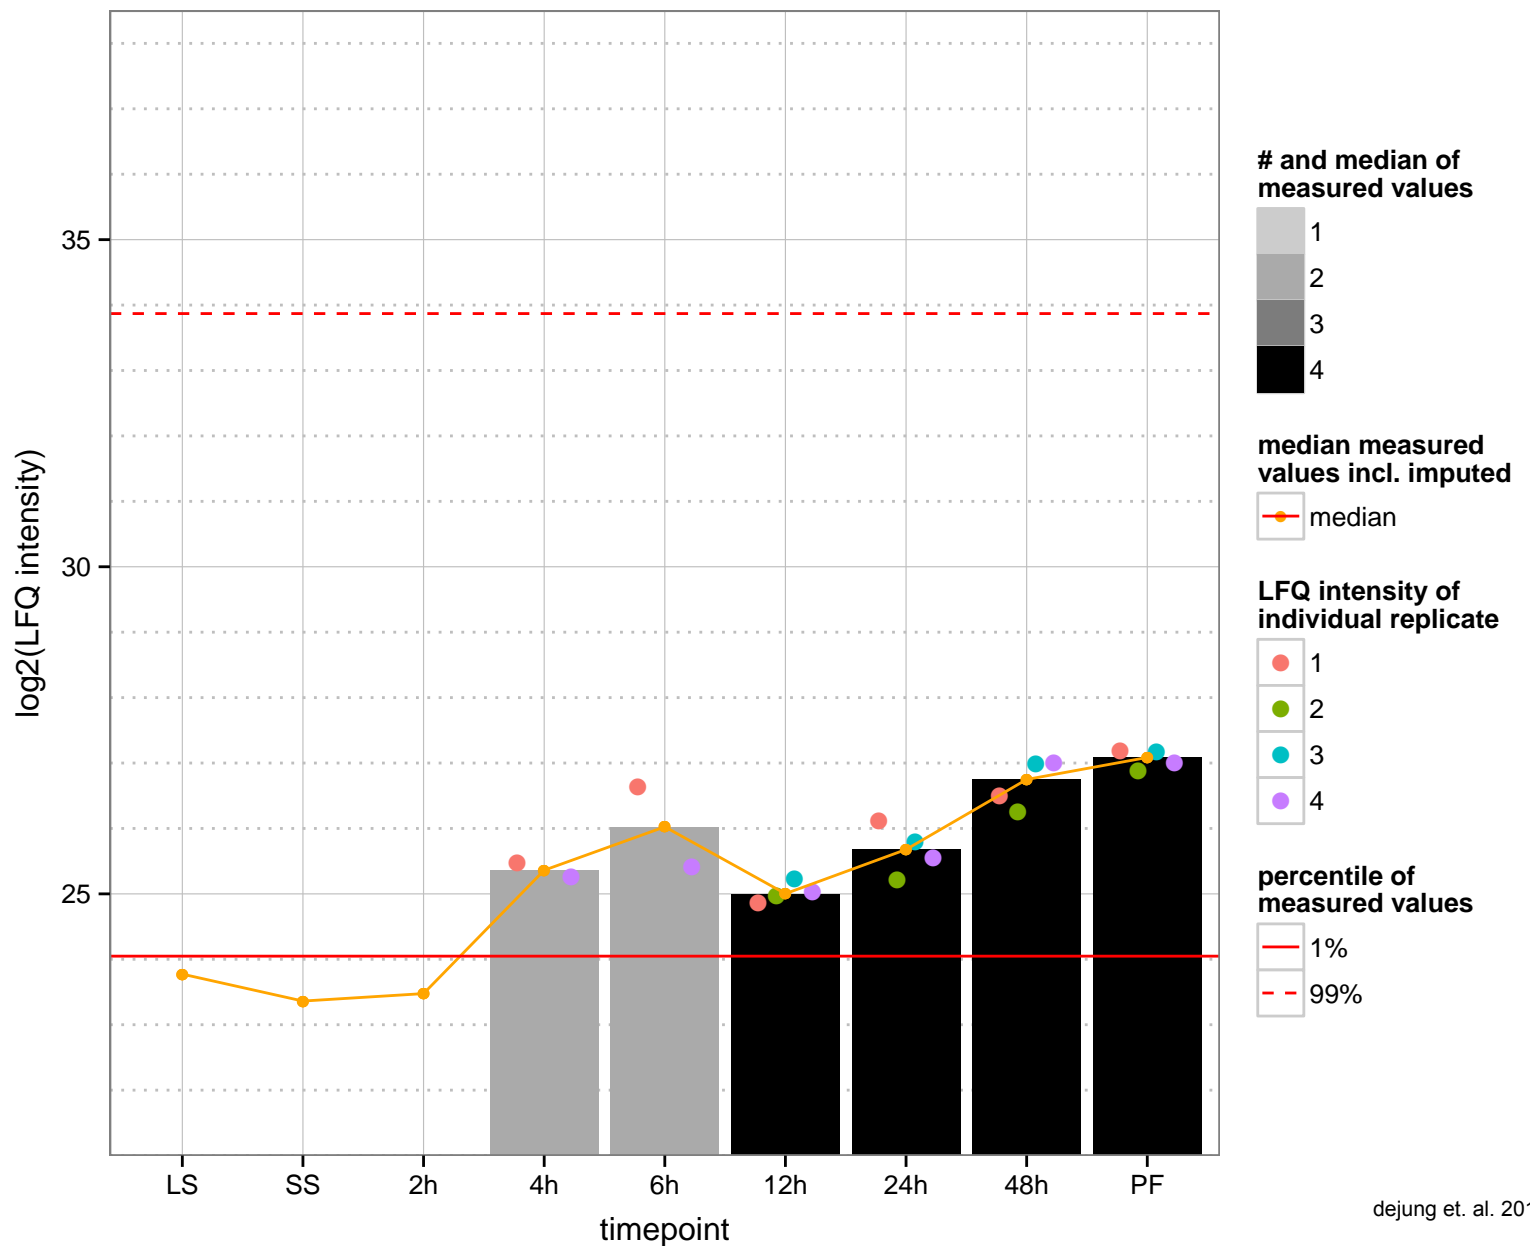



NDUFA5/B13 subunit, putative  
 Tb927.10.4130  
 AGOF: null  
 AGOC: mitochondrion  
 AGOP: null  
 PGO: null  
 PGOC: null  
 PGOP: null

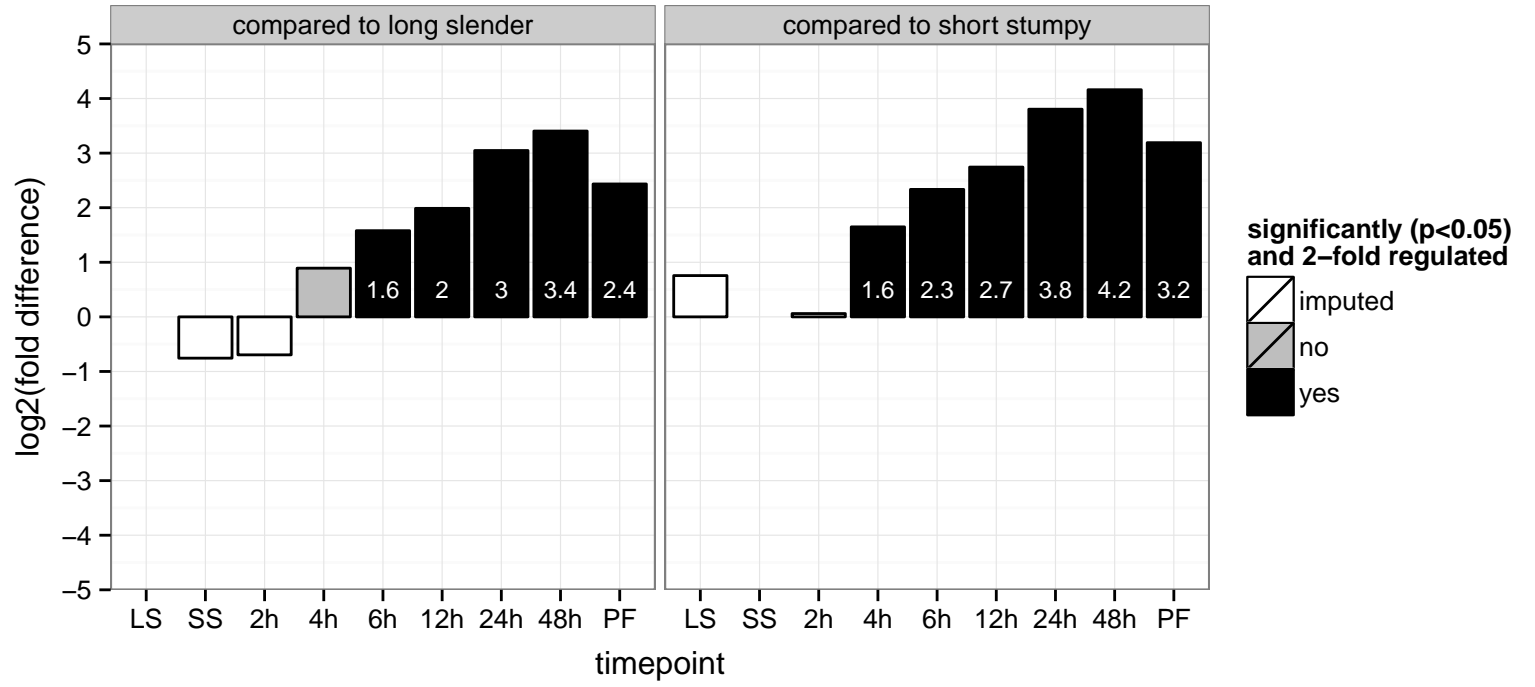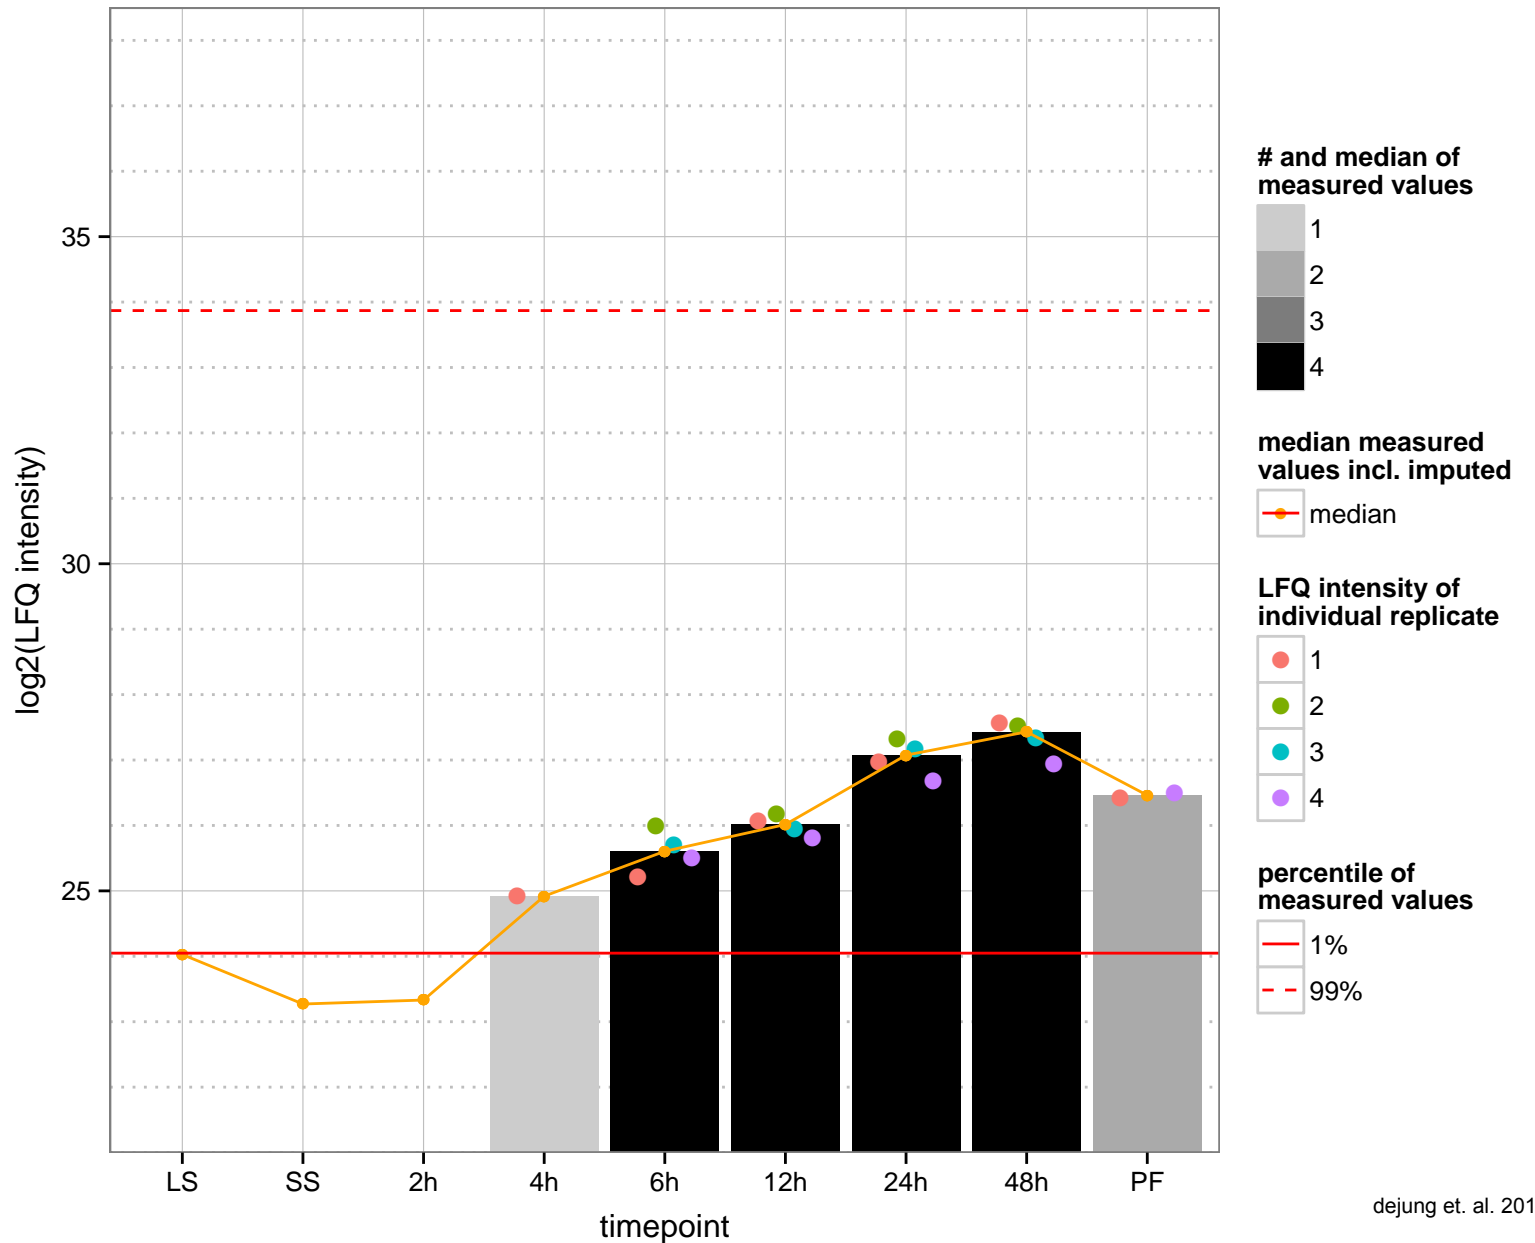

protein phosphatase 2C, putative  
 Tb927.10.5590  
 AGOF: catalytic activity, phosphatase activity  
 AGOC: mitochondrion  
 AGOP: dephosphorylation  
 PGO: catalytic activity  
 PGOC: null  
 PGOP: null

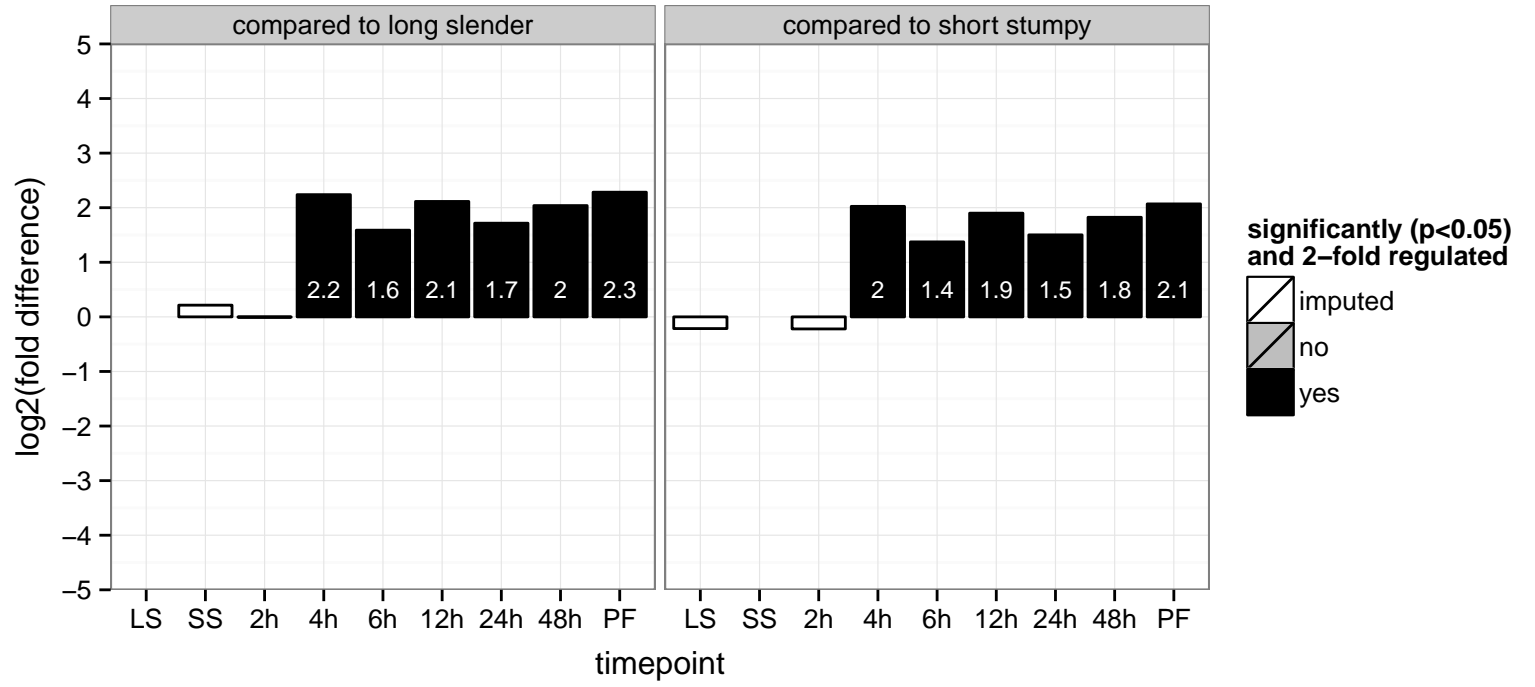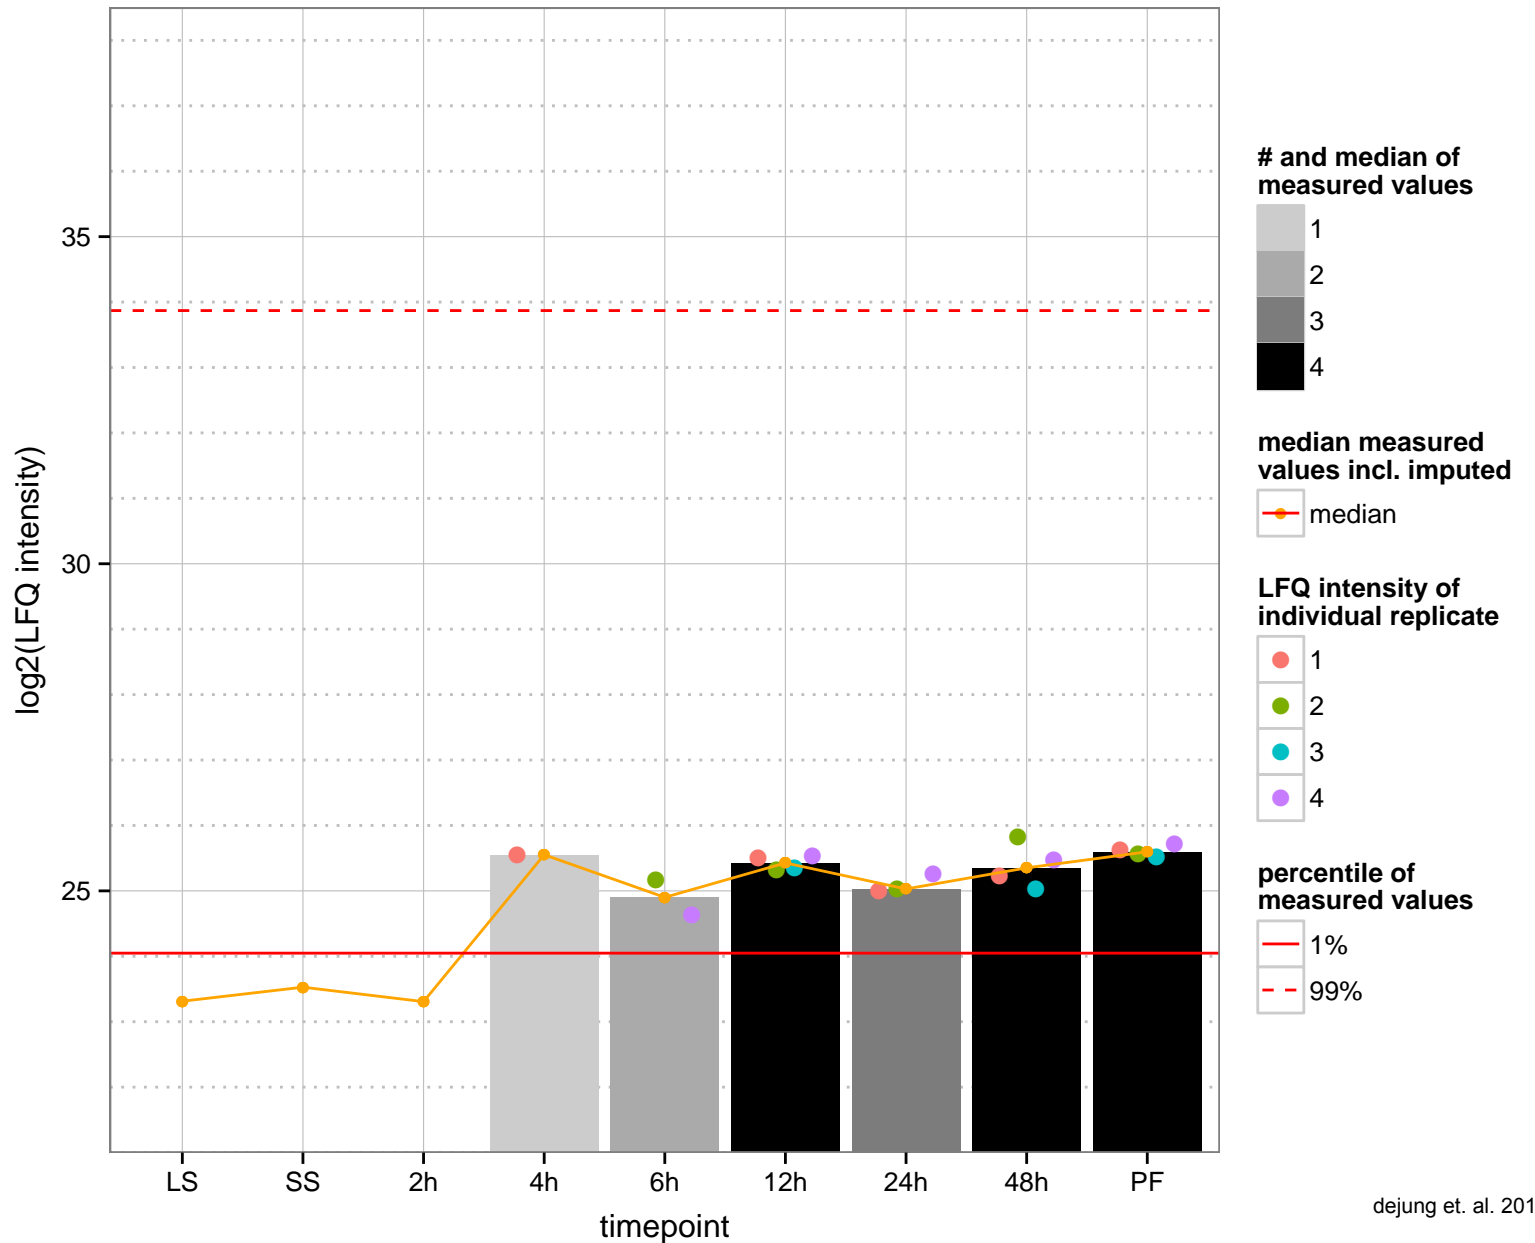

mitochondrial RNA binding complex 1 subunit, mitochondrial edited mRNA stability factor 1 subunit, kinteoplast poly(A) polym  
Tb927.10.6850  
AGOF: RNA binding, structural constituent of ribosome  
AGOC: intracellular, mitochondrion, ribosome  
AGOP: RNA polyadenylation, mRNA stabilization, translation  
PGOF: structural constituent of ribosome  
PGOC: intracellular, ribosome  
PGOP: translation

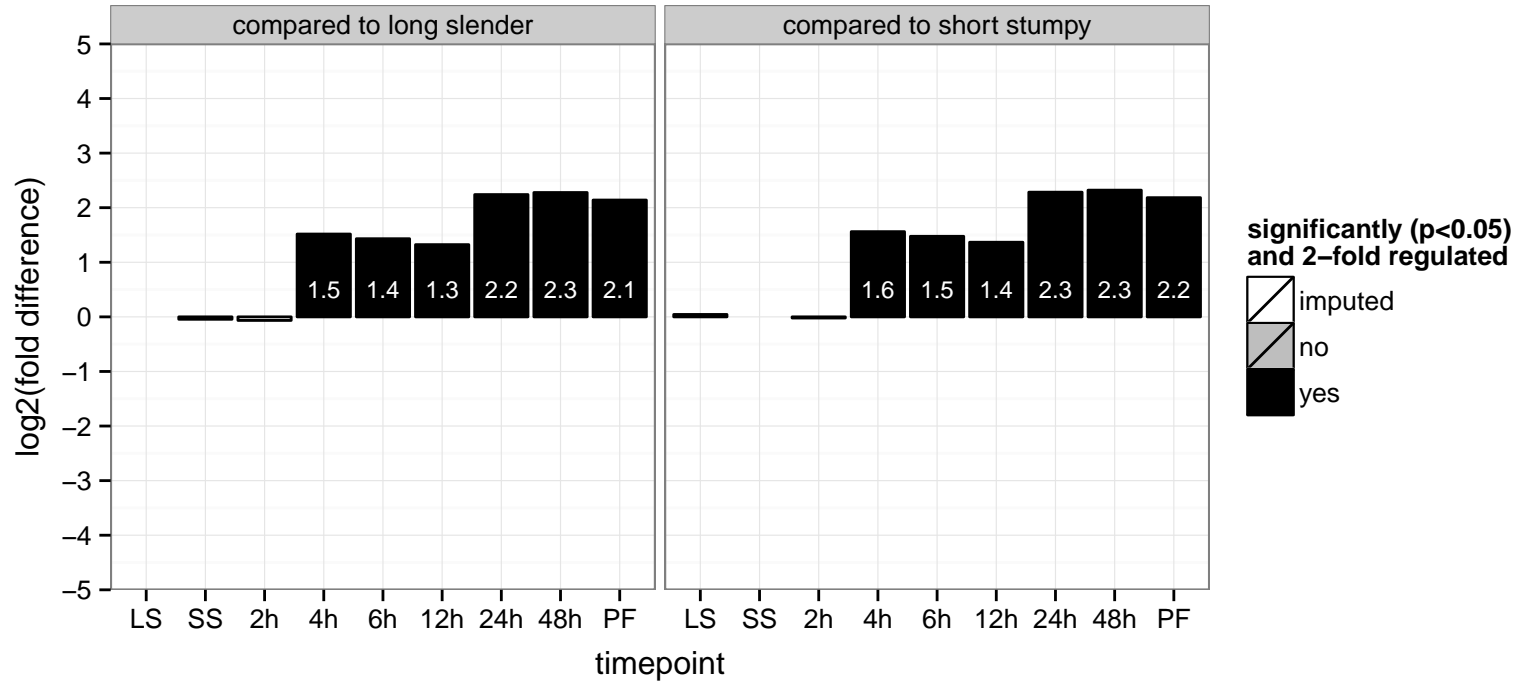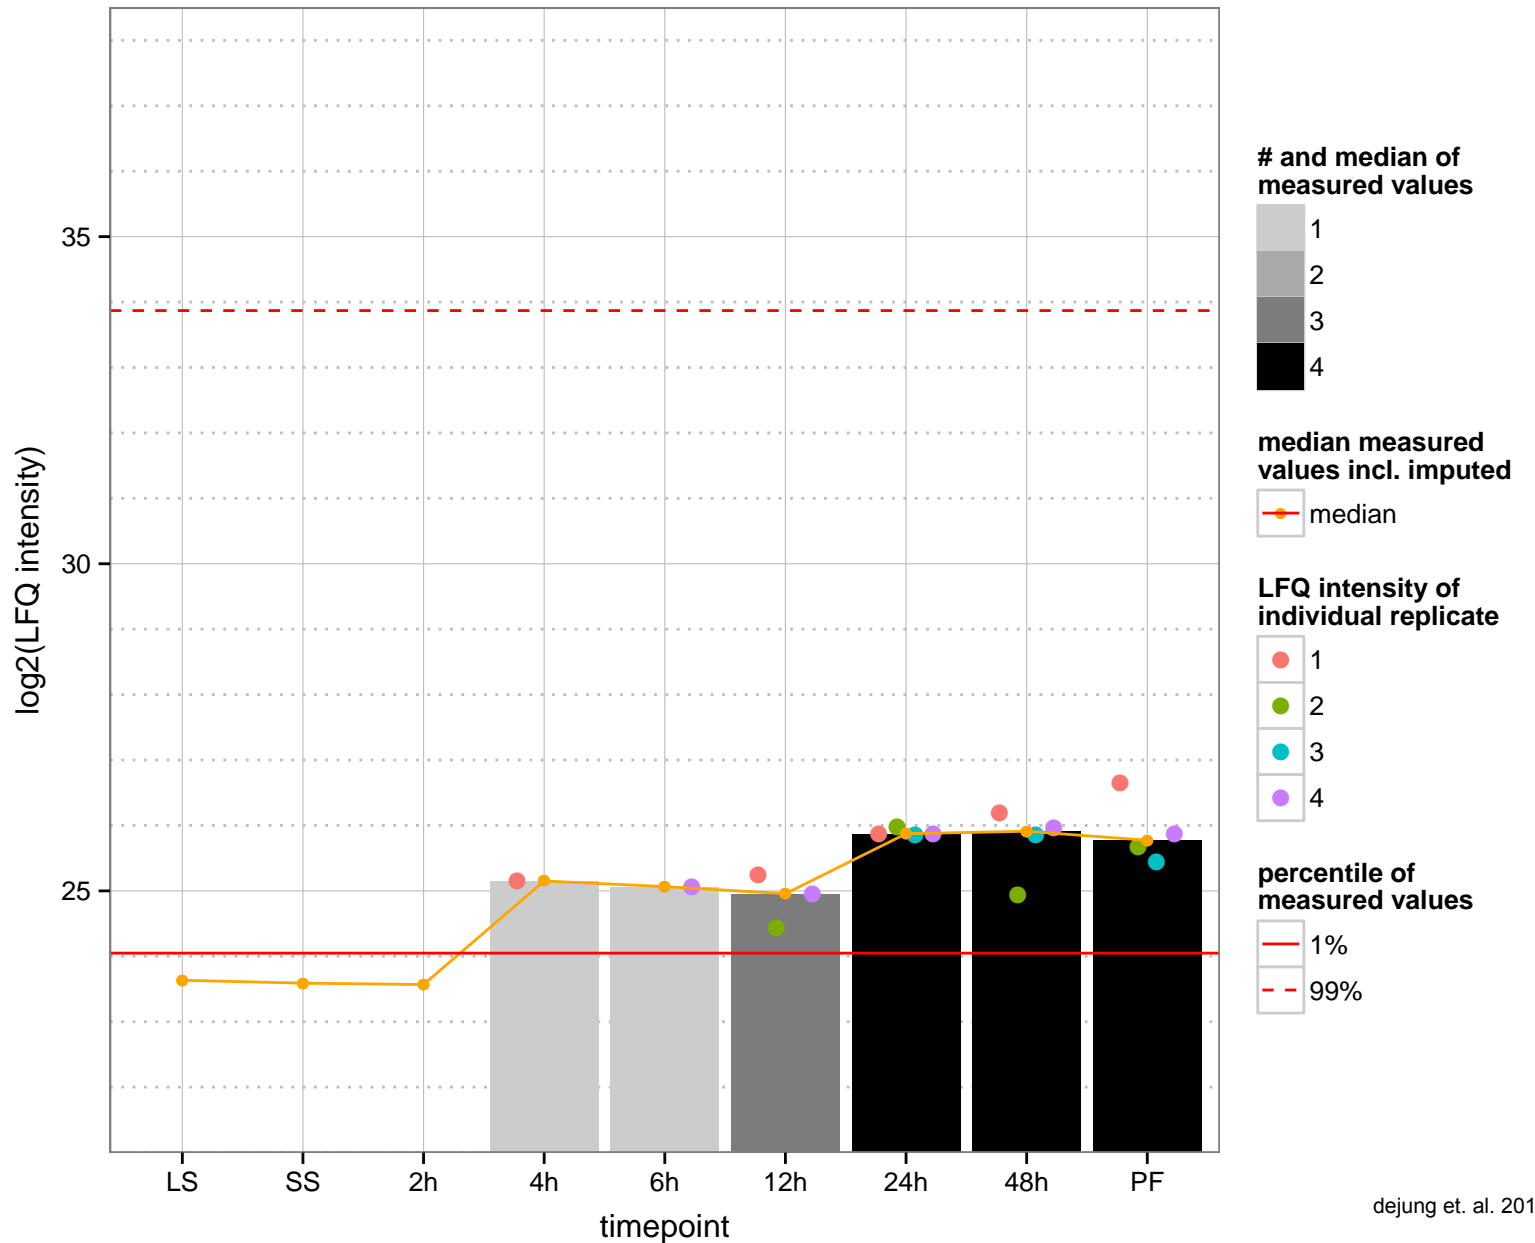

mitochondrial ATP-dependent zinc metallopeptidase, putative, metallo-peptidase, Clan MA(E) Family M41  
Tb927.10.7620

AGOF: ATP binding, metalloendopeptidase activity, nucleoside-triphosphatase activity, unfolded protein binding

AGOC: membrane, mitochondrion

AGOP: cell cycle, protein catabolic process, proteolysis

PGOF: ATP binding, metalloendopeptidase activity, nucleoside-triphosphatase activity, nucleotide binding

PGOC: membrane

PGOP: protein catabolic process, proteolysis

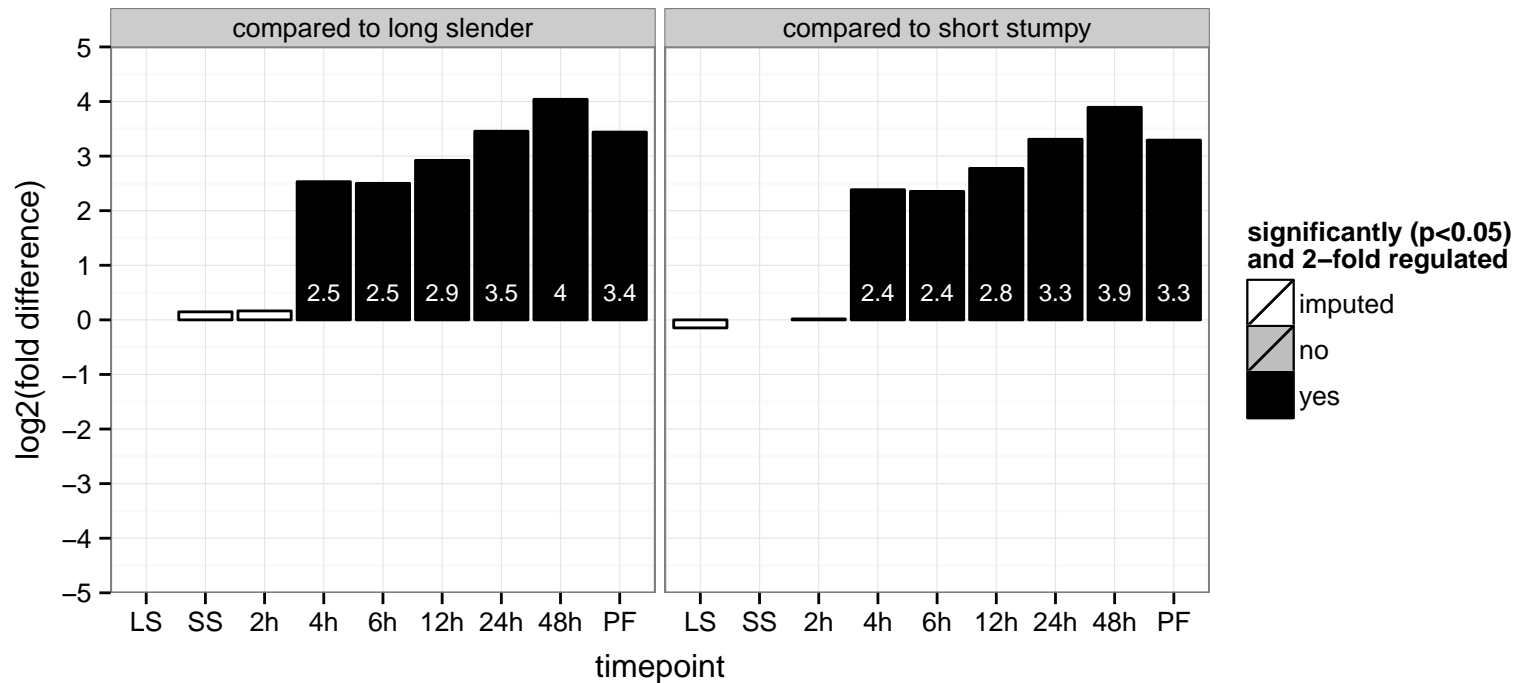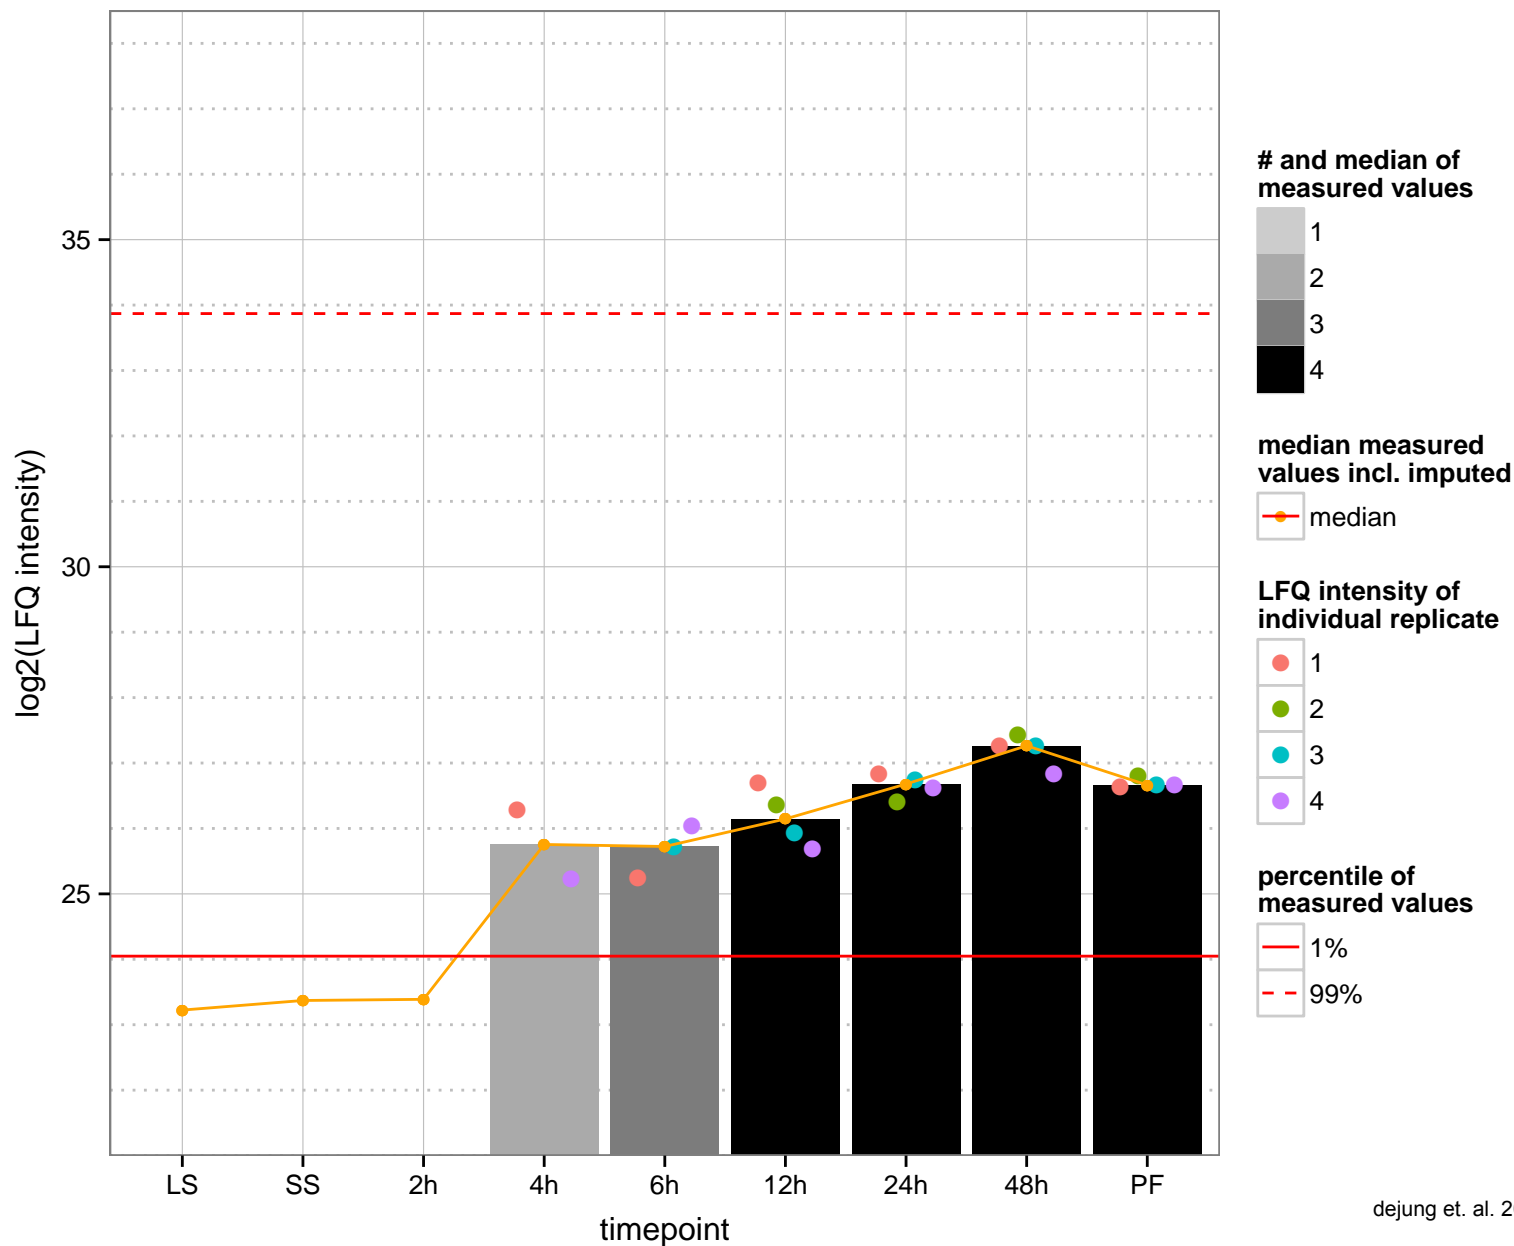

40S ribosomal protein S8, putative  
 Tb927.10.7710  
 AGOF: structural constituent of ribosome  
 AGOC: intracellular, ribosome  
 AGOP: translation  
 PGO: null  
 PGOC: null  
 PGOP: null

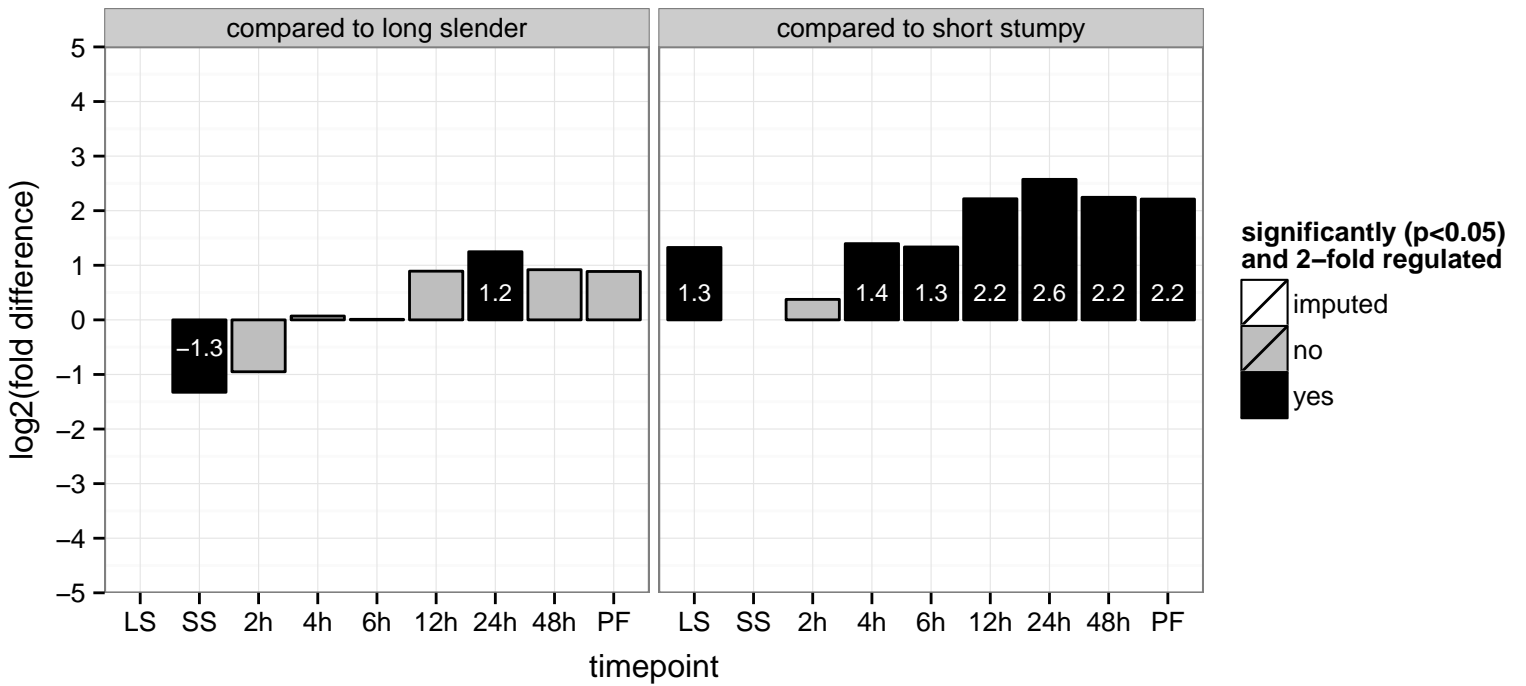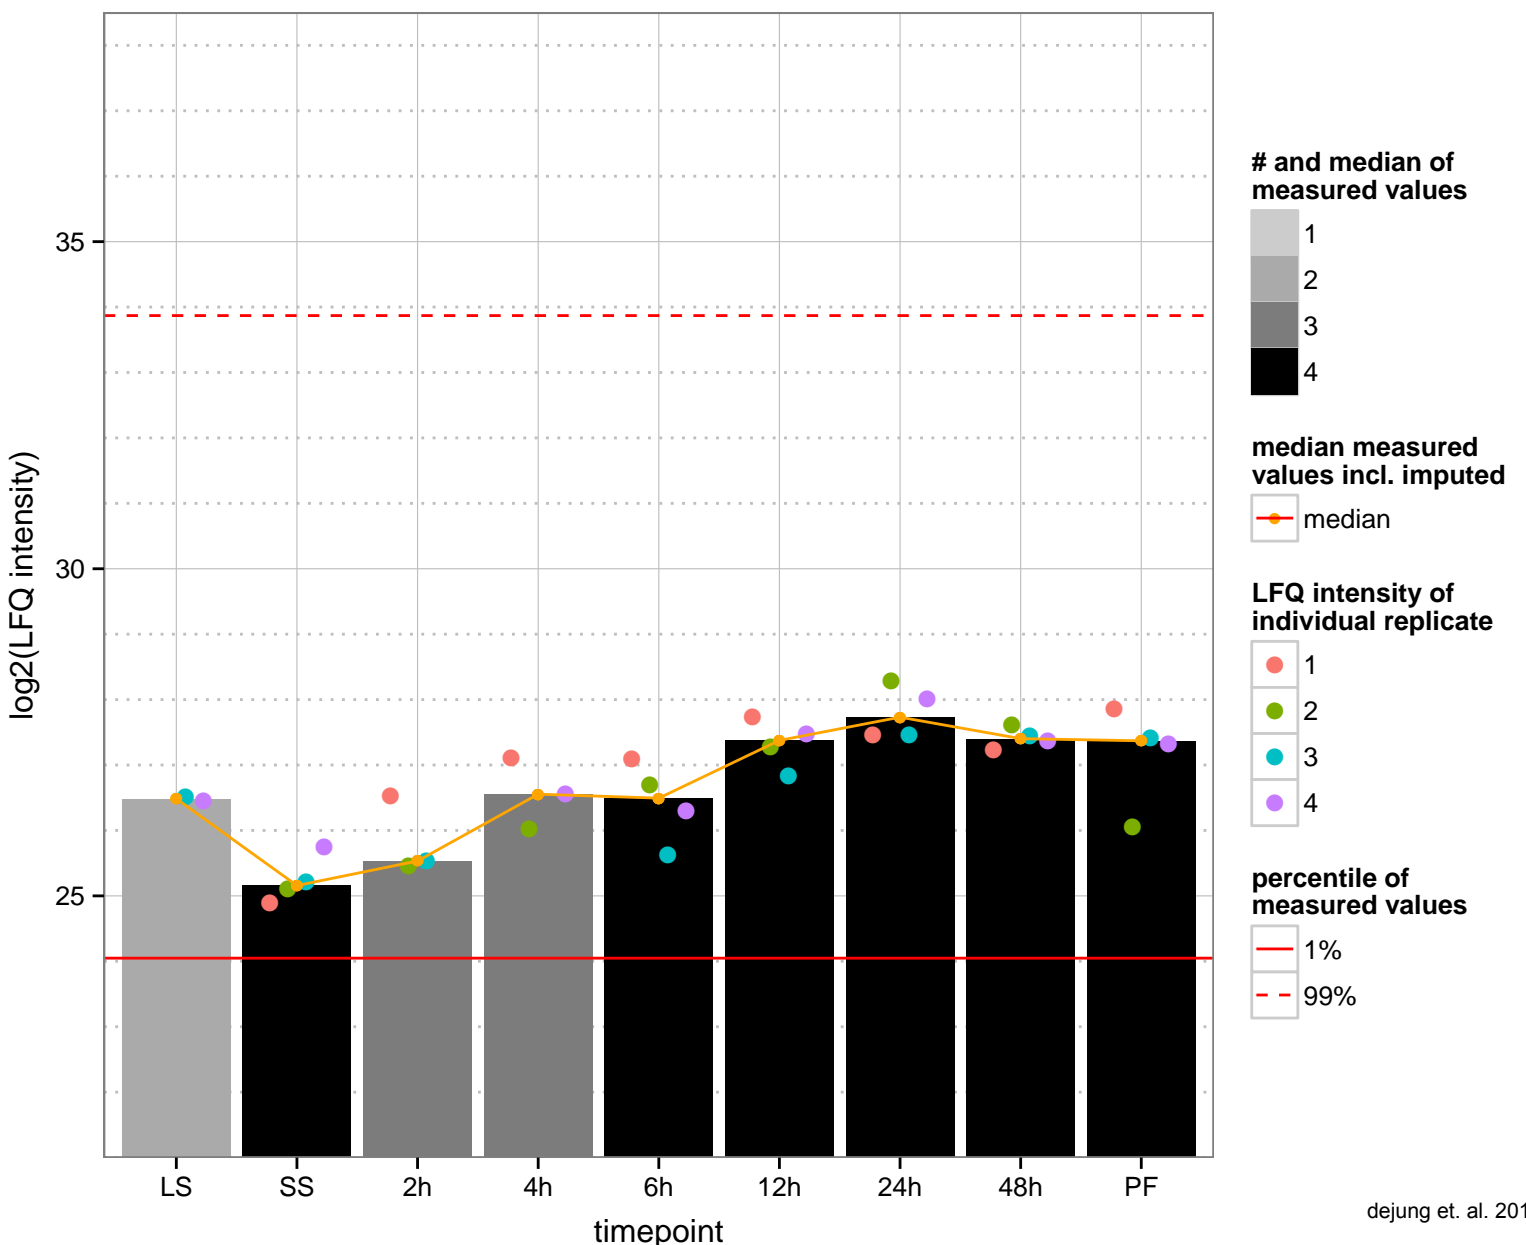

hypothetical protein, conserved  
 Tb927.11.13710  
 AGOF: null  
 AGOC: mitochondrion  
 AGOP: null  
 PGO: null  
 PGO: null  
 PGO: null

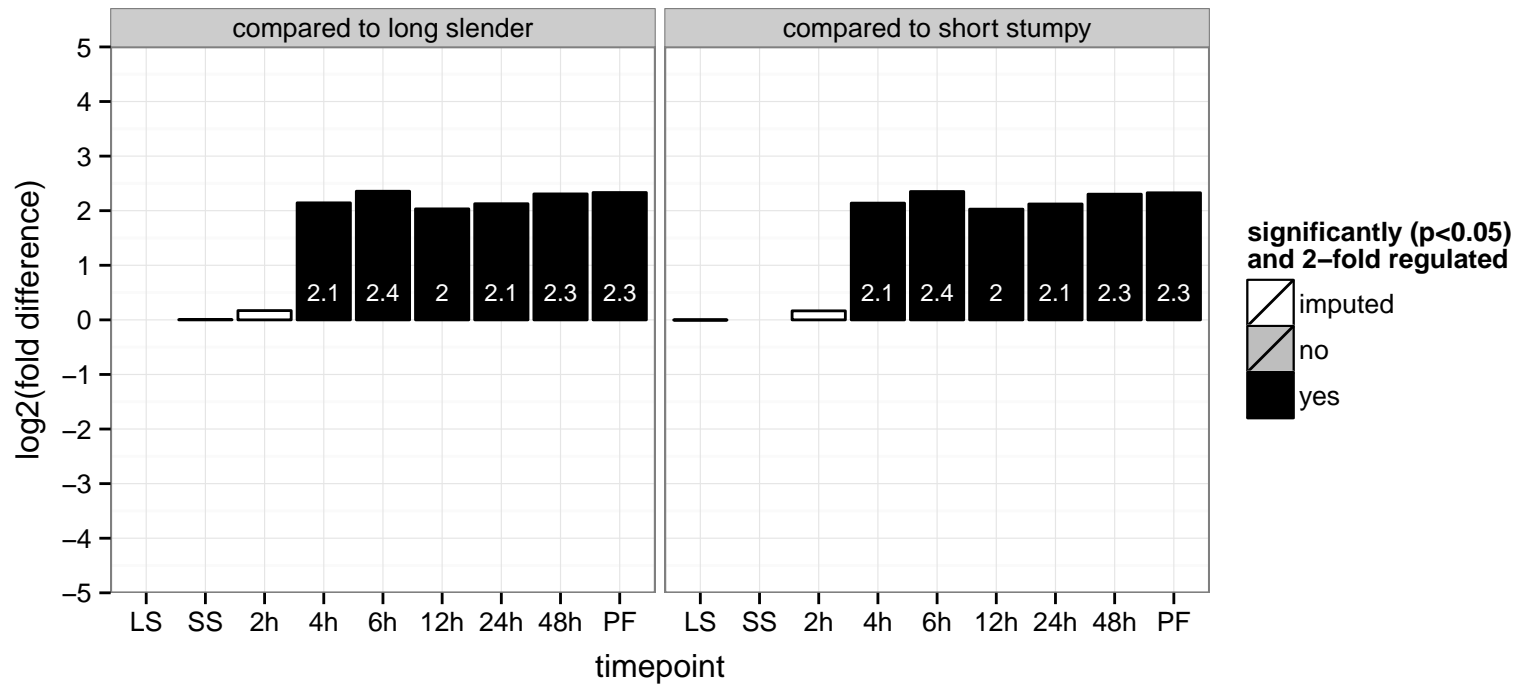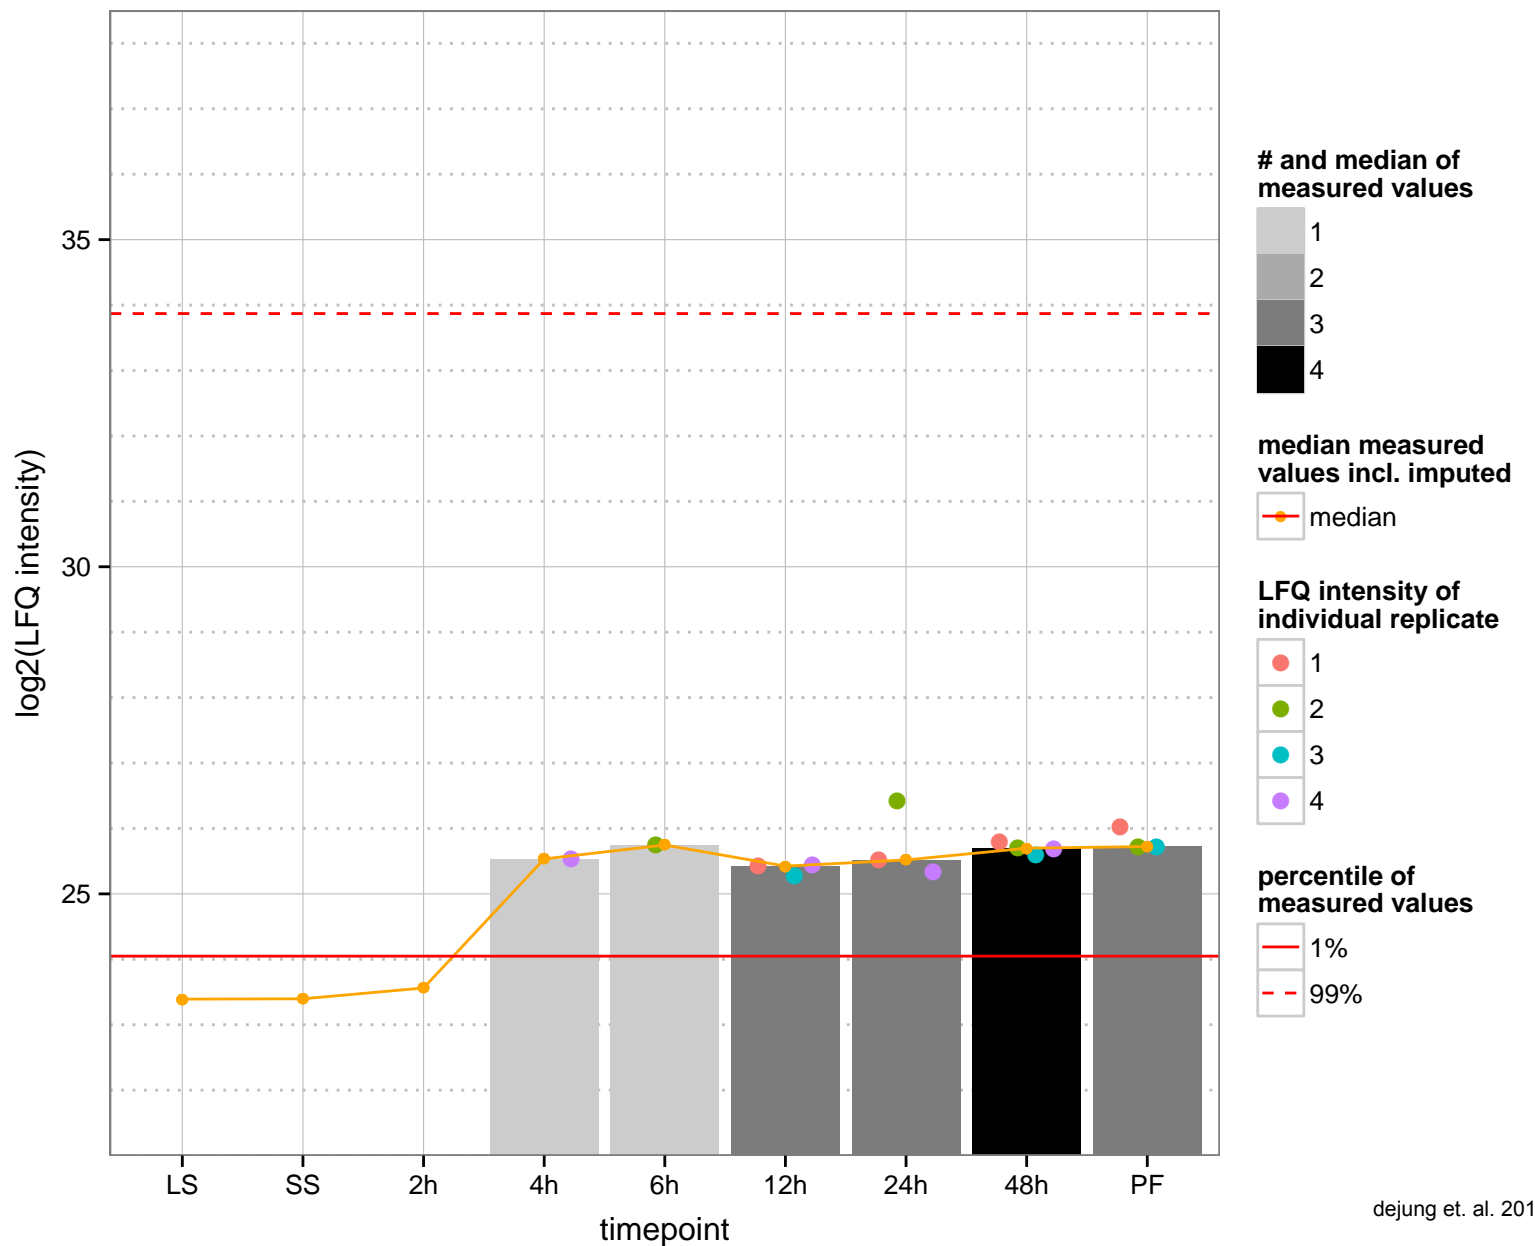

hypothetical protein, conserved  
 Tb927.11.14390  
 AGOF: null  
 AGOC: null  
 AGOP: null  
 PGO: null  
 PGOC: null  
 PGOP: null

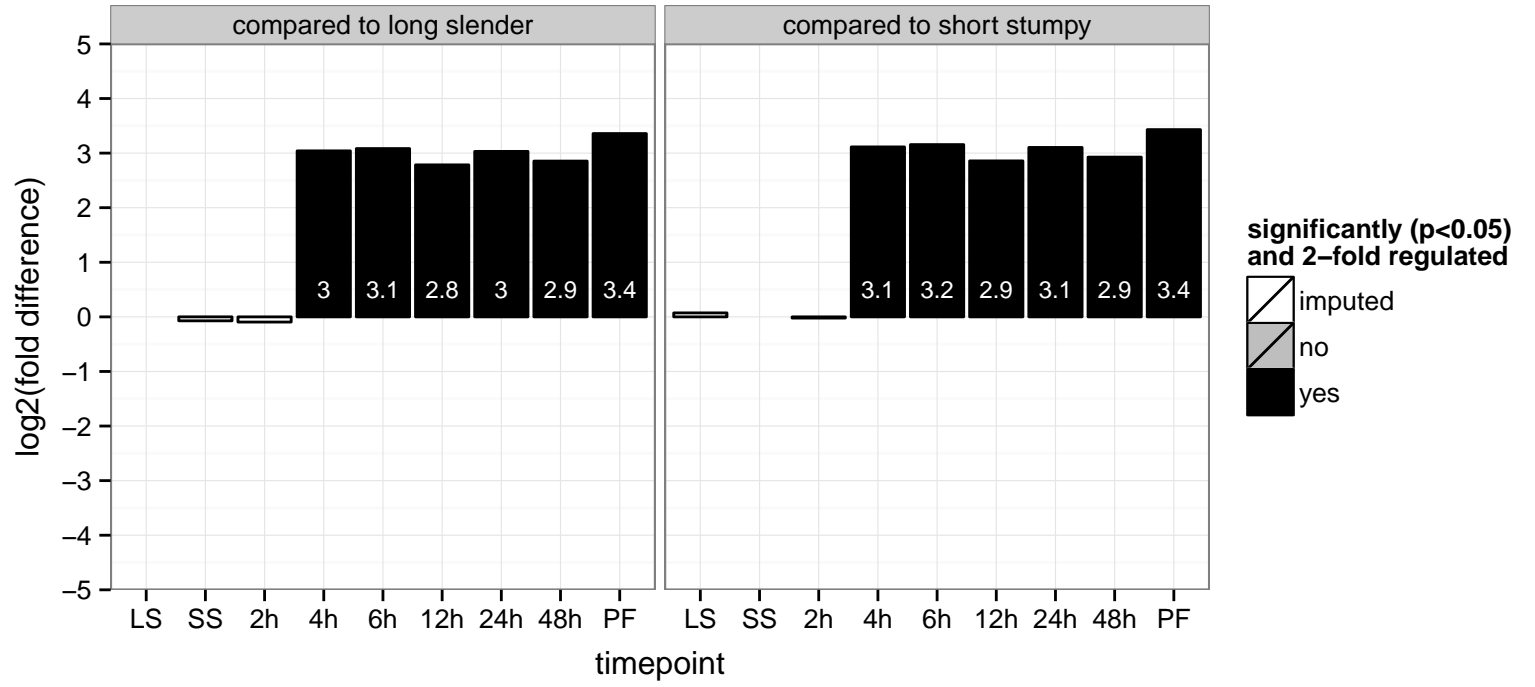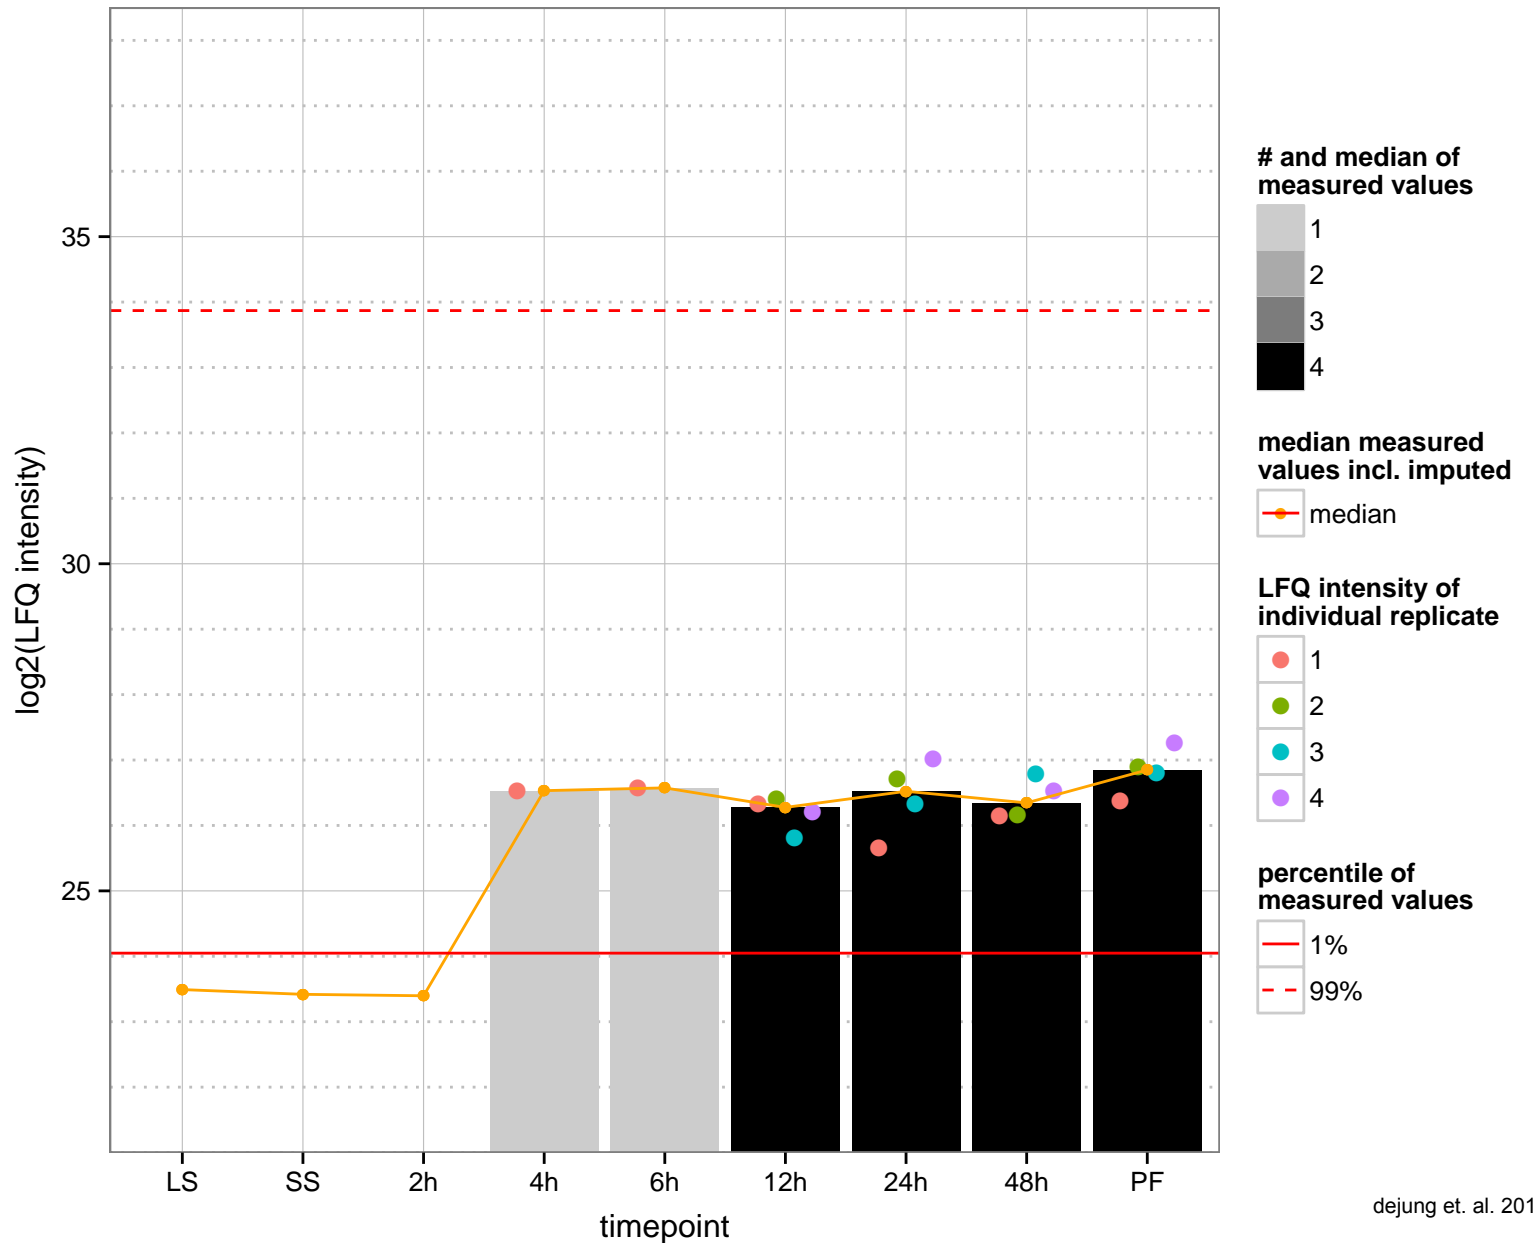

hypothetical protein, conserved  
 Tb927.11.15590  
 AGOF: catalytic activity  
 AGOC: null  
 AGOP: metabolic process  
 PGO: null  
 PGOC: null  
 PGOP: null

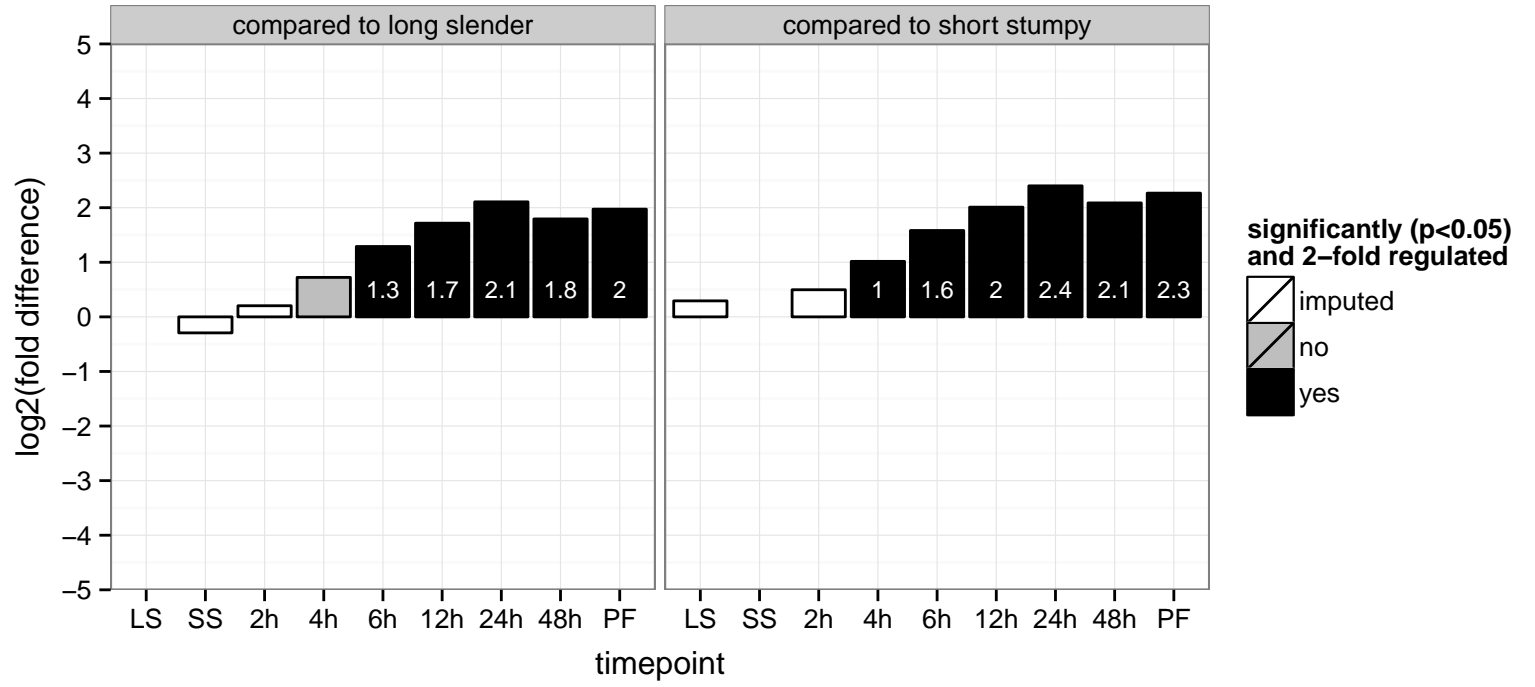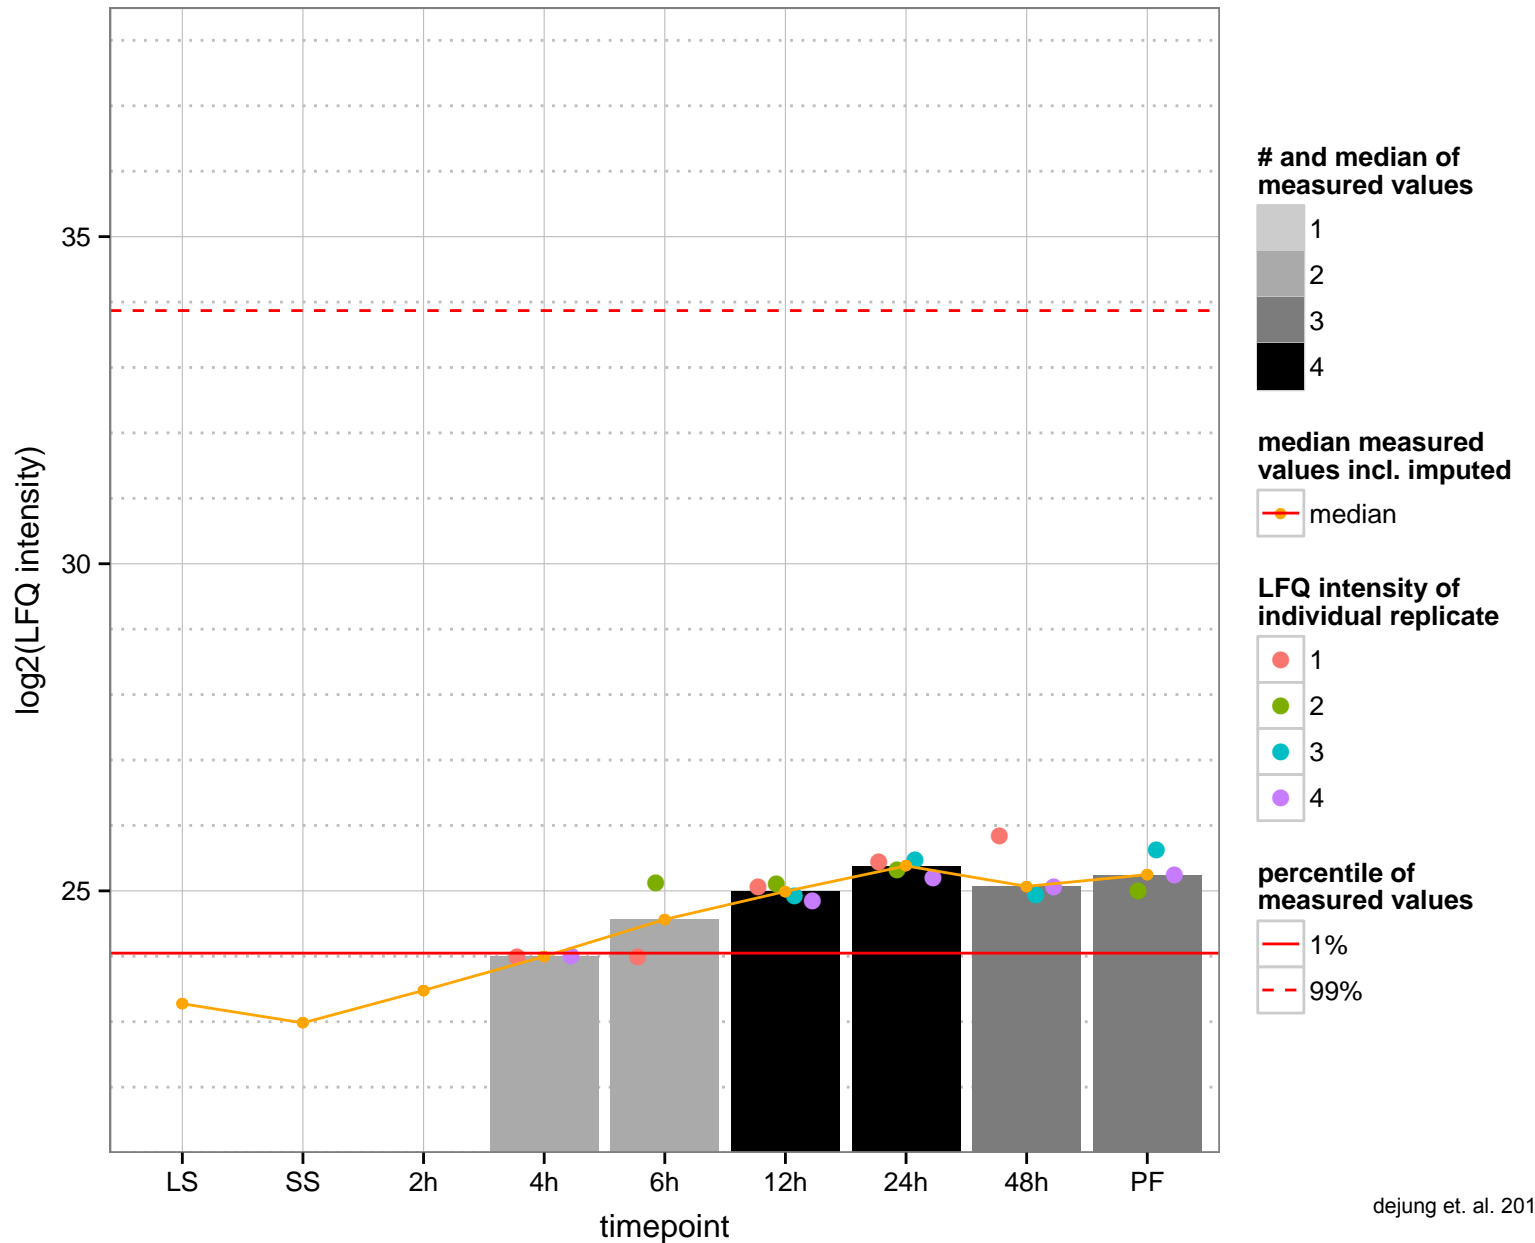



hypothetical protein, conserved  
 Tb927.11.16750  
 AGOF: null  
 AGOC: mitochondrion  
 AGOP: null  
 PGO: null  
 PGO: null  
 PGO: null

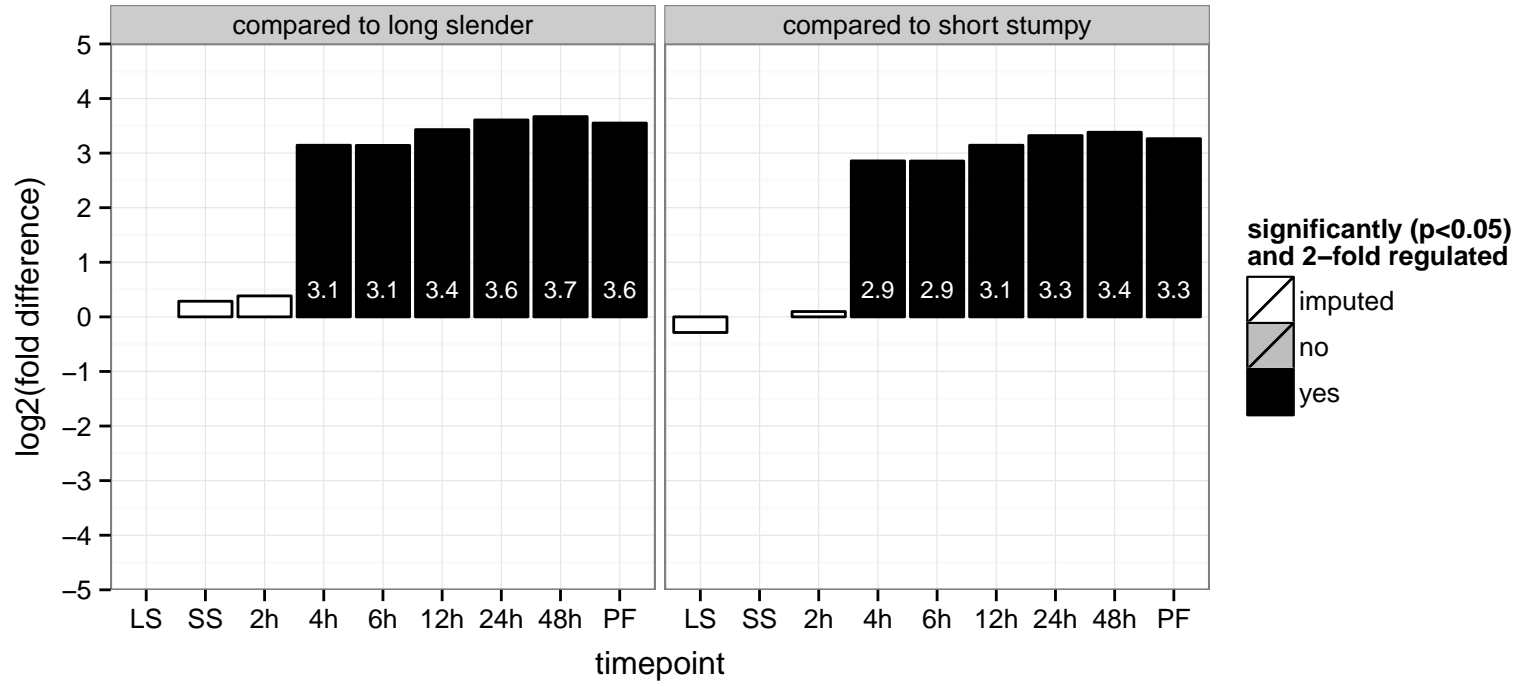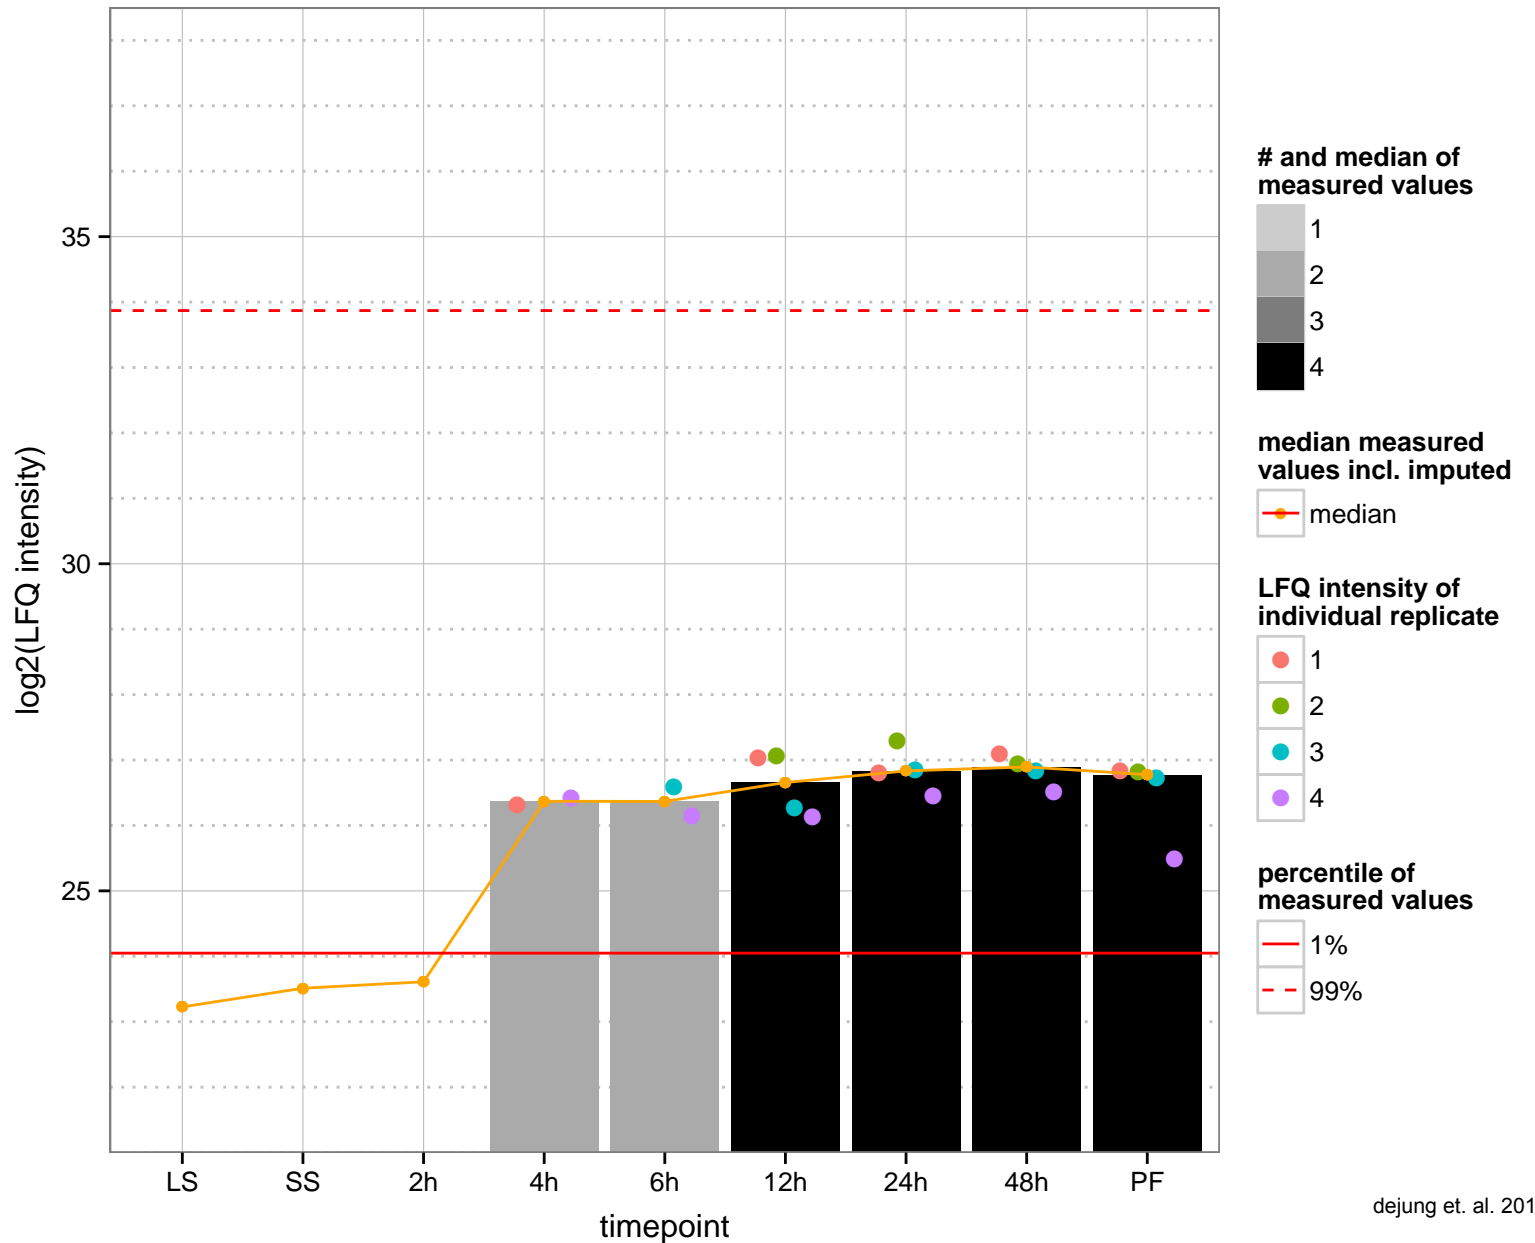

hypothetical protein, conserved  
 Tb927.11.1720  
 AGOF: null  
 AGOC: null  
 AGOP: null  
 PGOF: null  
 PGOE: null  
 PGOP: null

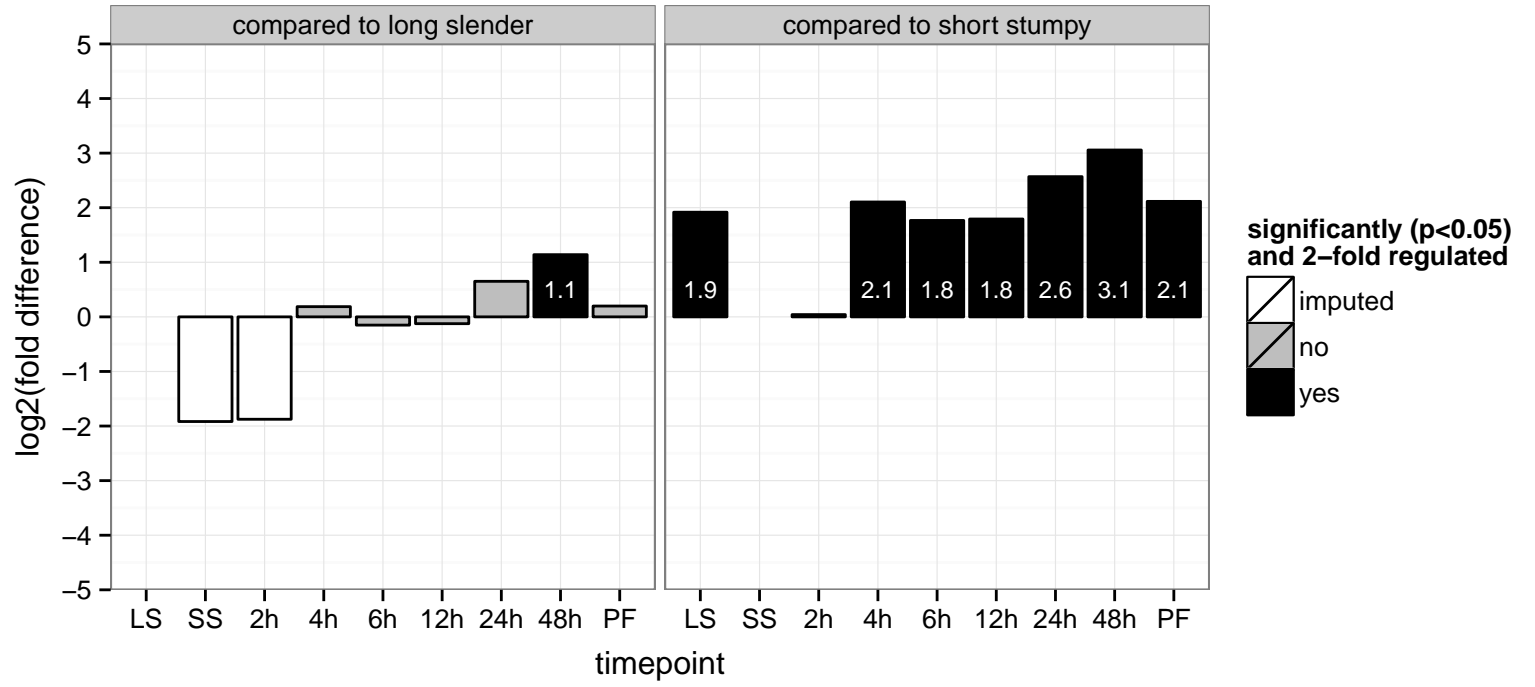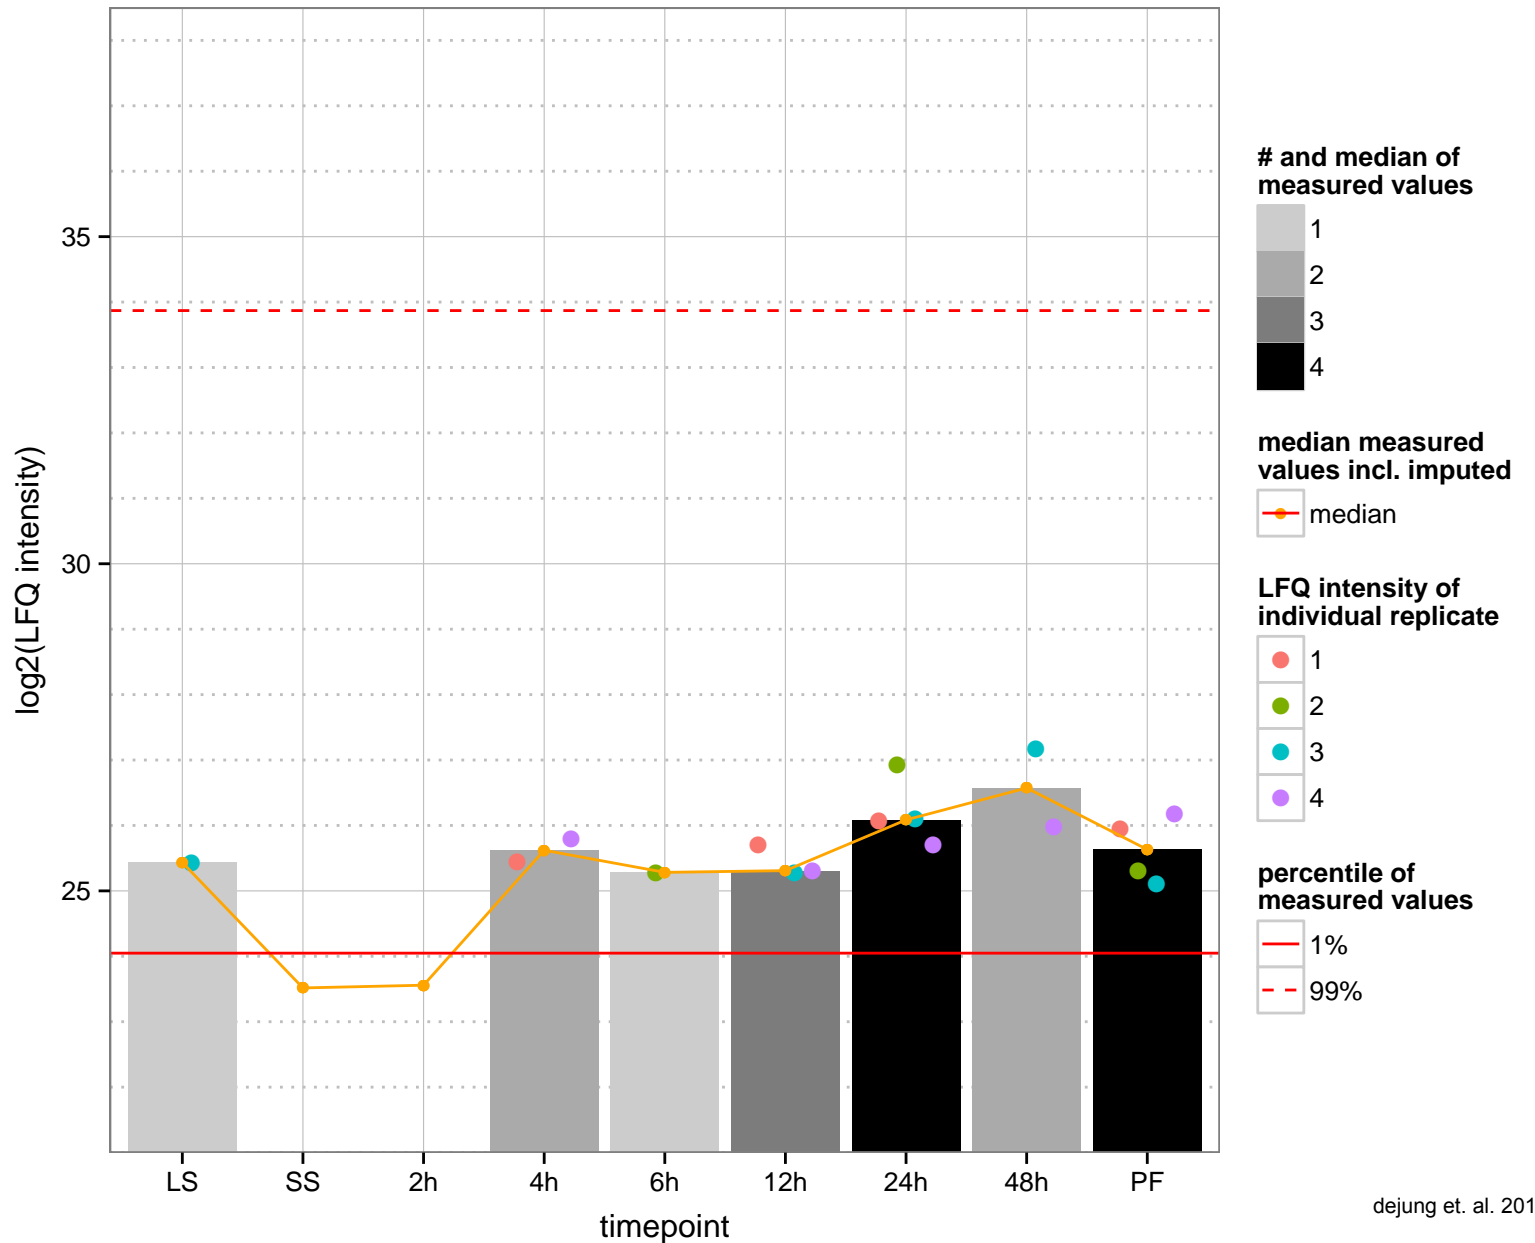

hypothetical protein, conserved  
 Tb927.11.2420  
 AGOF: tubulin-tyrosine ligase activity  
 AGOC: null  
 AGOP: cellular protein modification process  
 PGO: tubulin-tyrosine ligase activity  
 PGOC: null  
 PGOP: cellular protein modification process

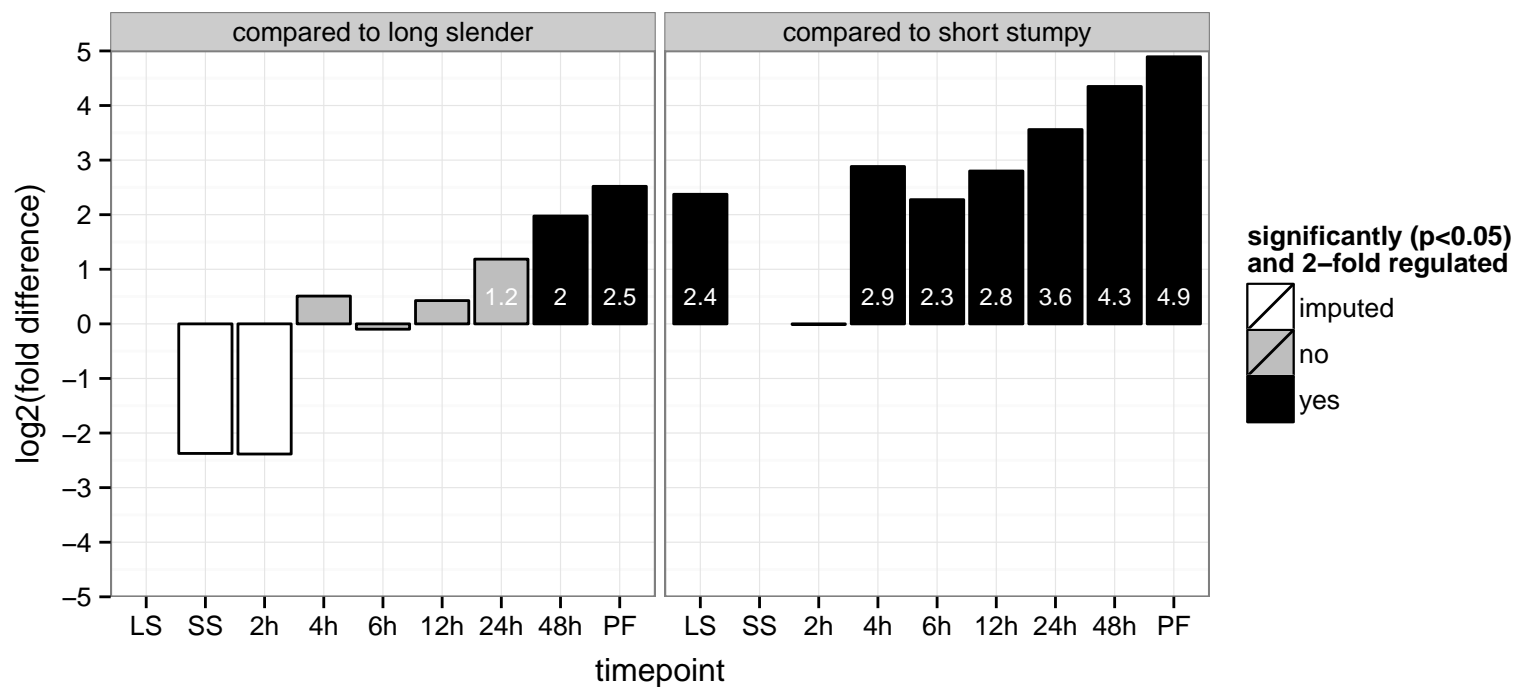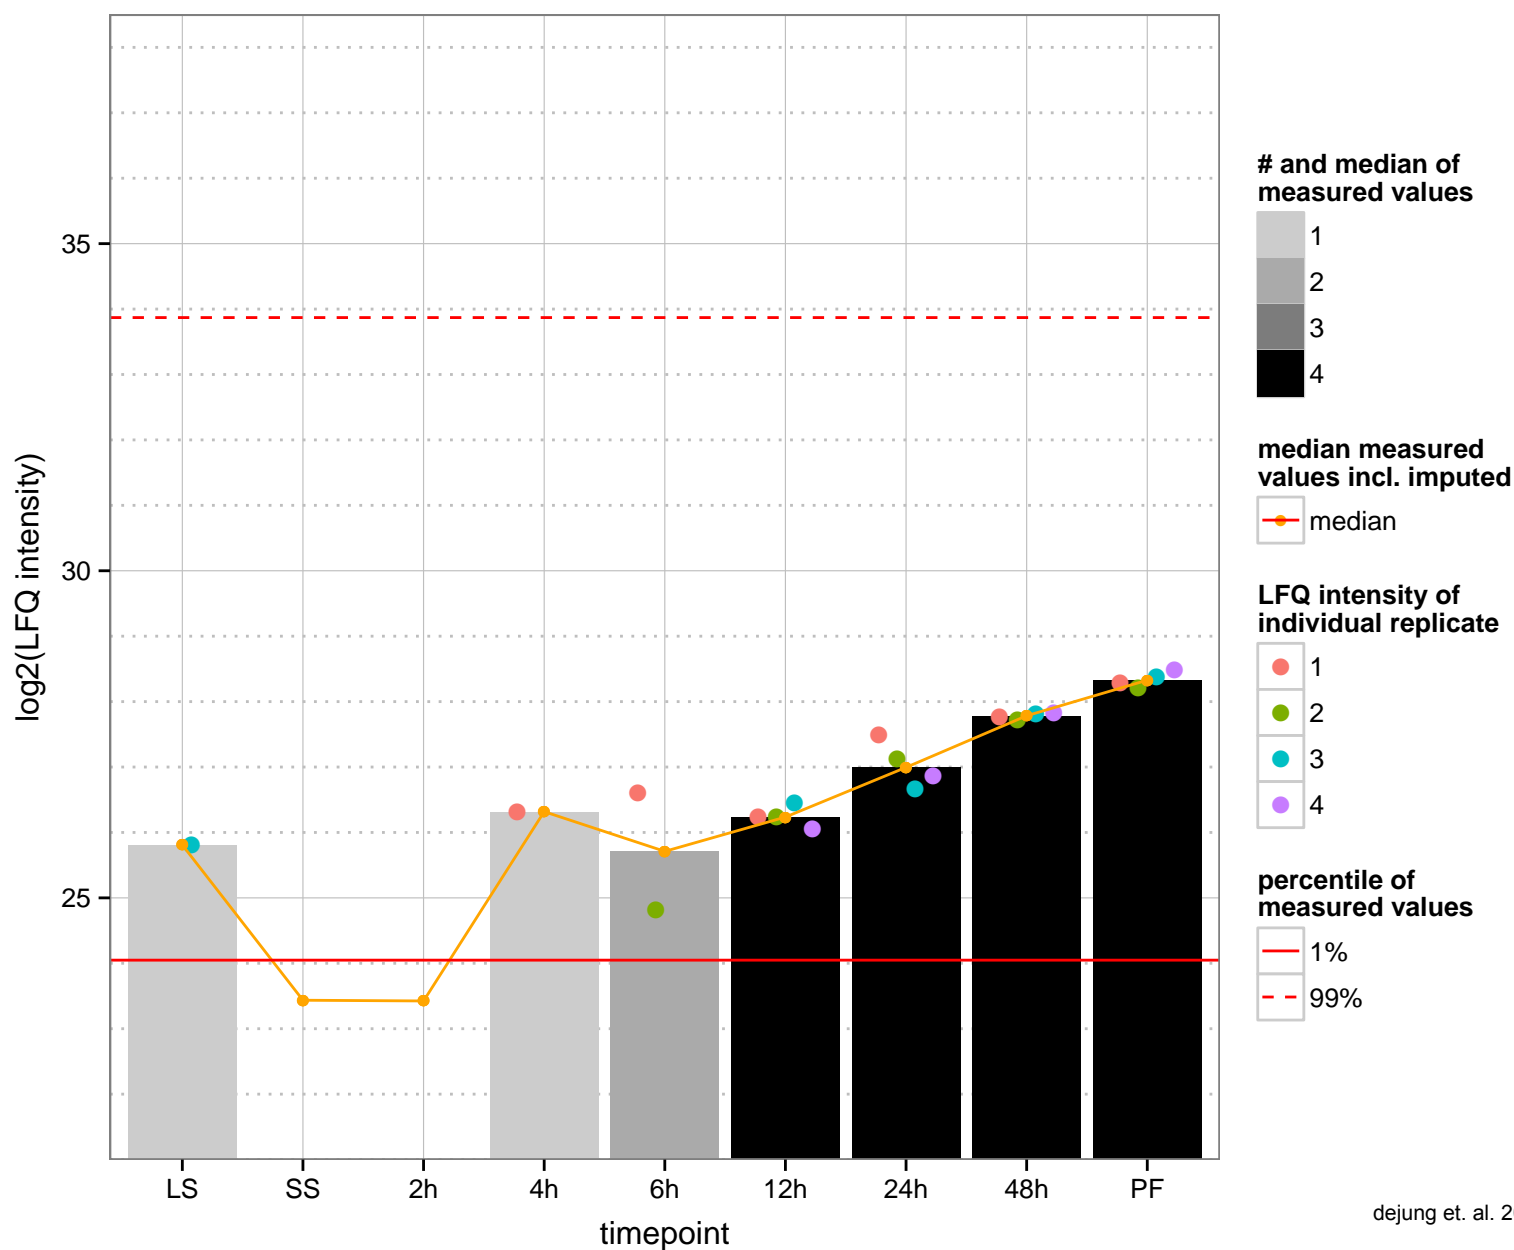

hypothetical protein, conserved  
 Tb927.11.3100  
 AGOF: null  
 AGOC: null  
 AGOP: null  
 PGO: protein binding  
 PGOC: null  
 PGOP: null

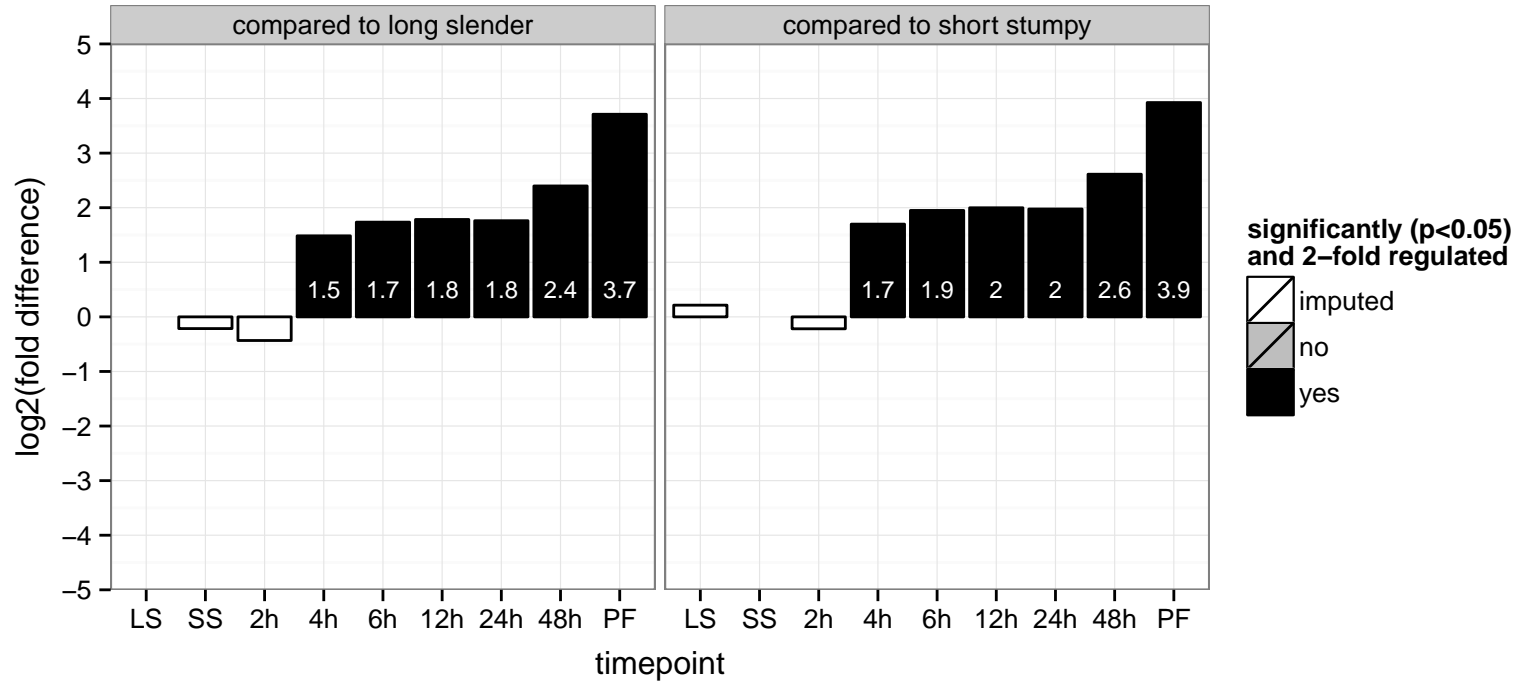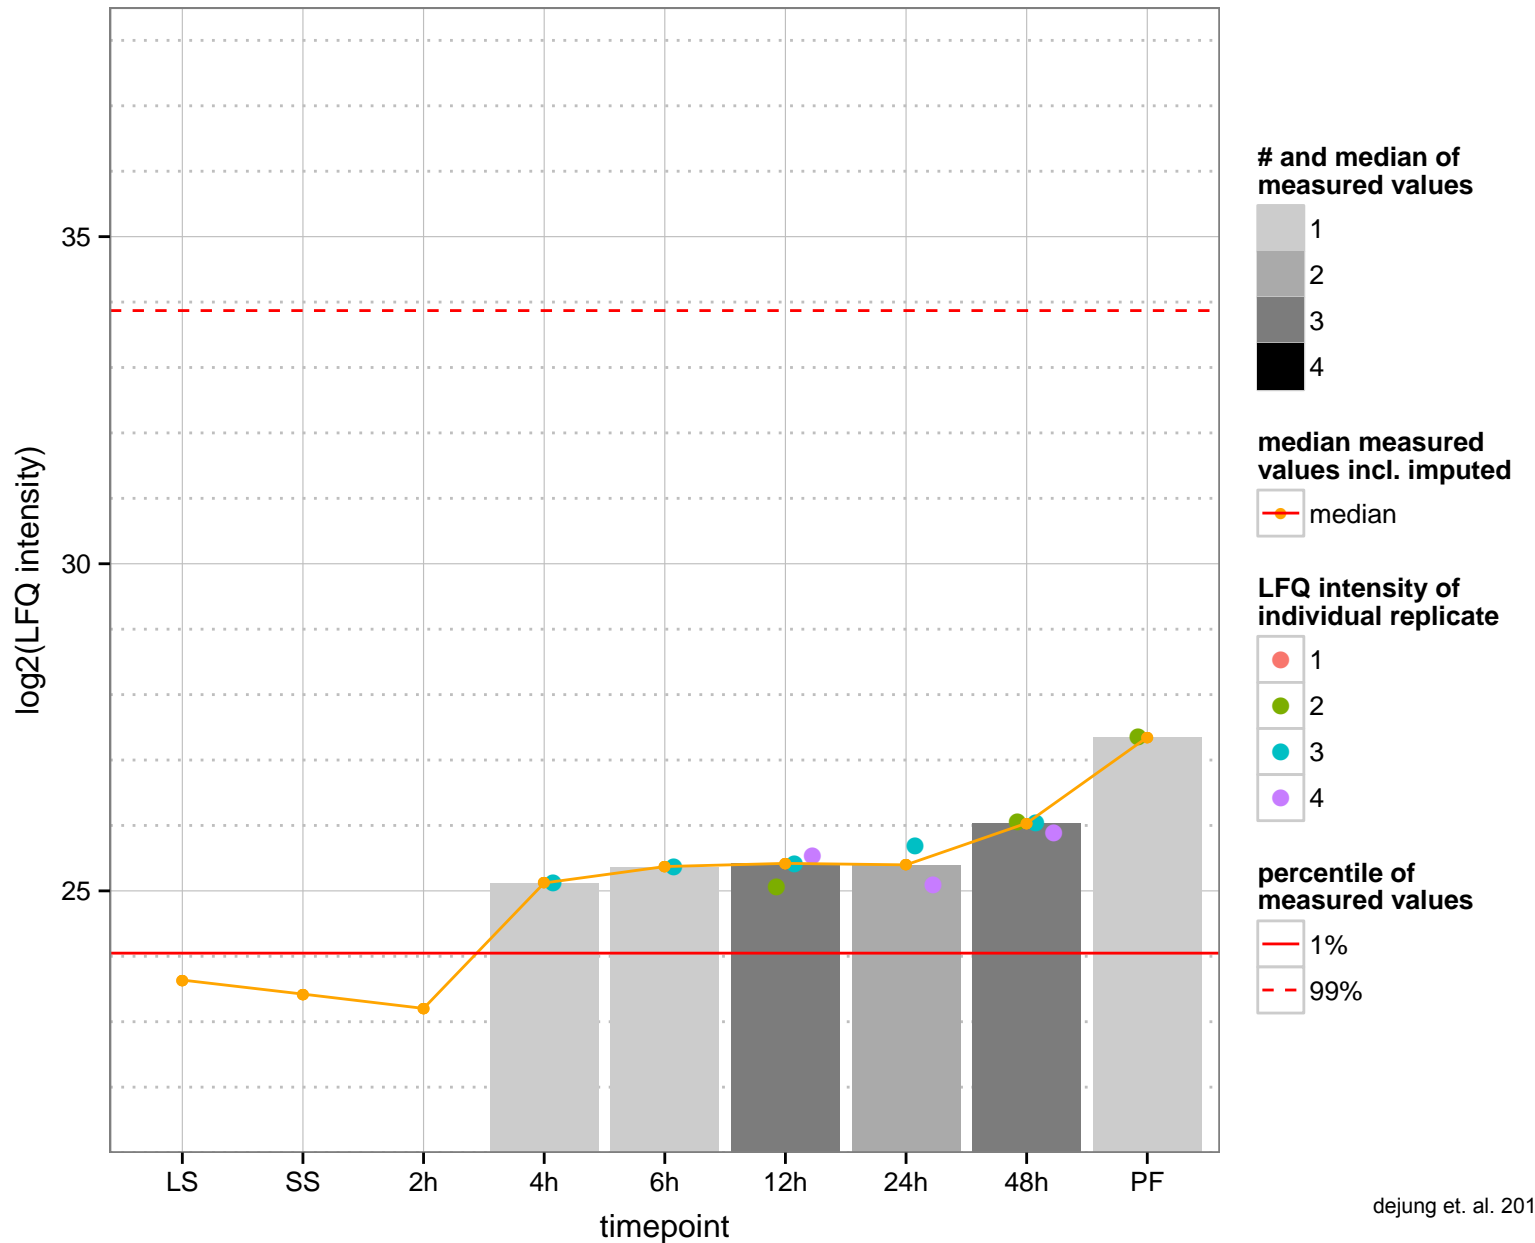

RNA-binding protein, putative (RBP34)  
 Tb927.11.3340  
 AGOF: RNA binding  
 AGOC: null  
 AGOP: RNA processing  
 PGOF: nucleic acid binding  
 PGO: null  
 PGOP: null

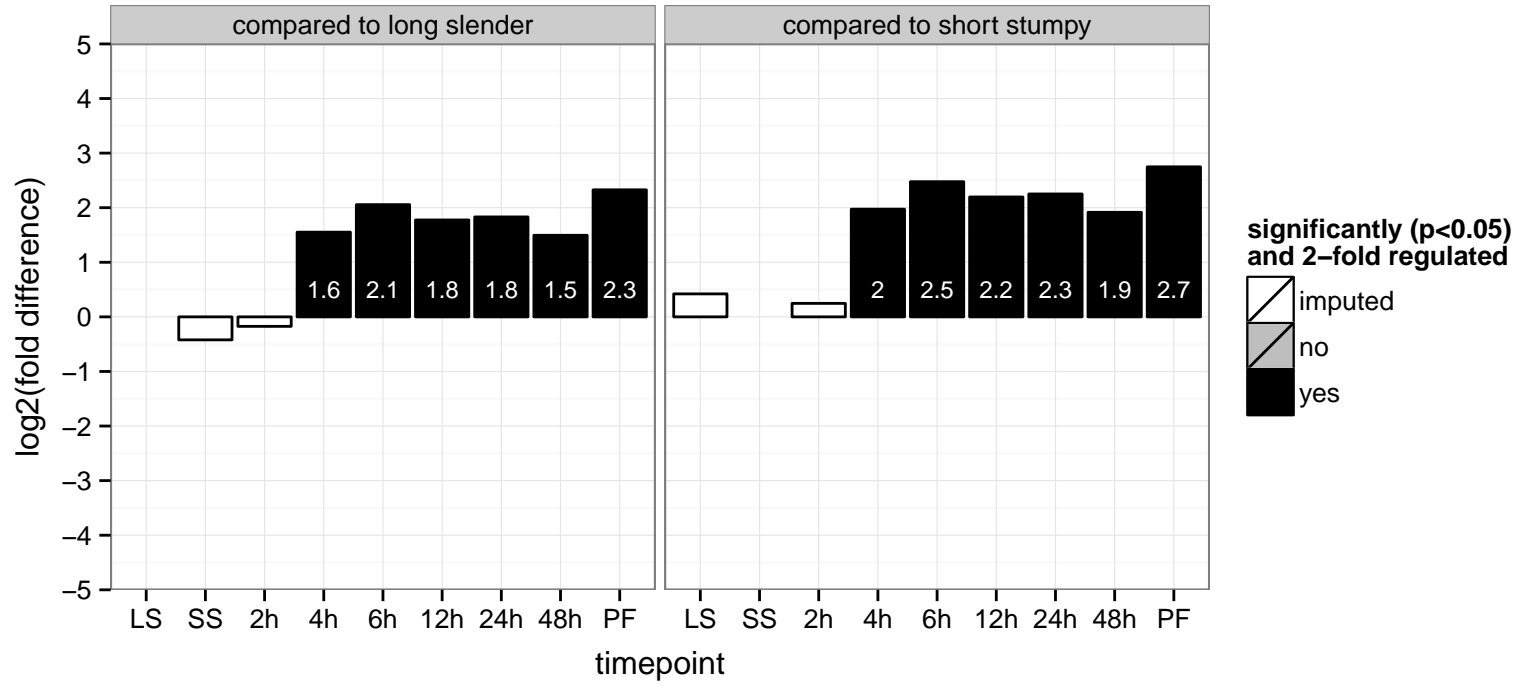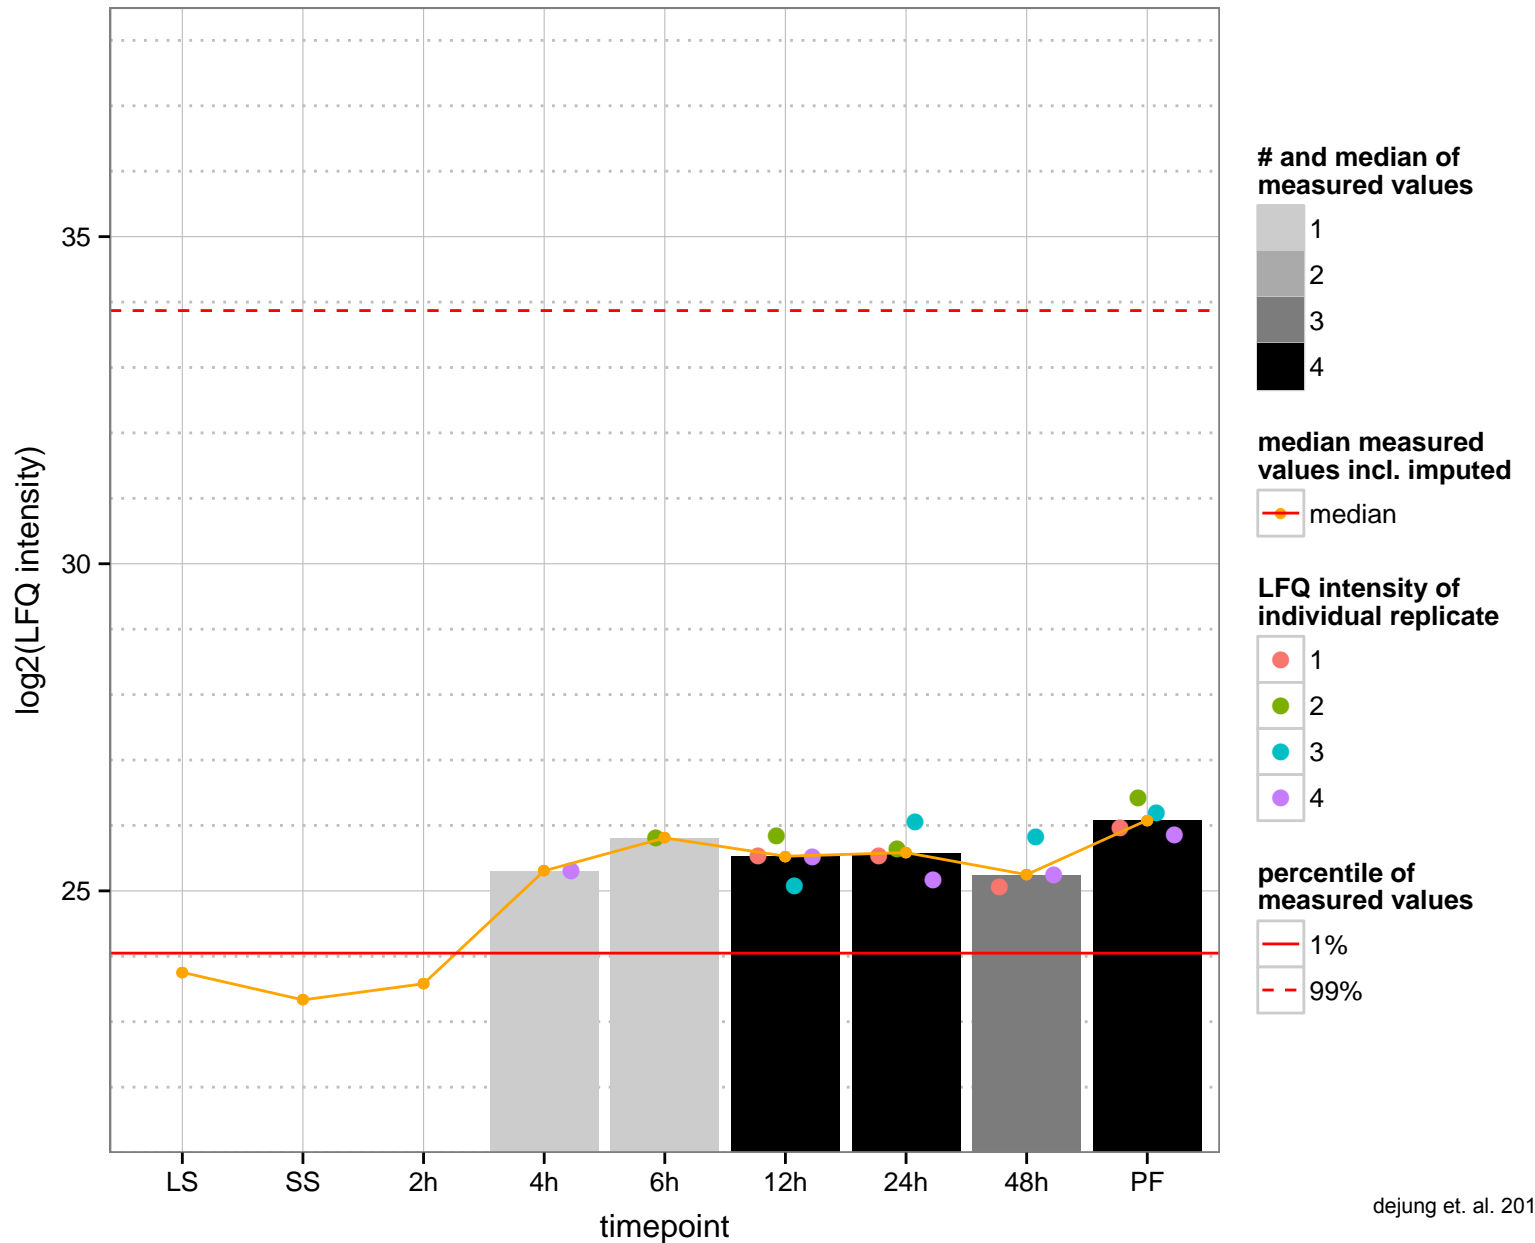

hypothetical protein, conserved  
 Tb927.11.3640  
 AGOF: null  
 AGOC: mitochondrion  
 AGOP: null  
 PGO: null  
 PGO: null  
 PGO: null

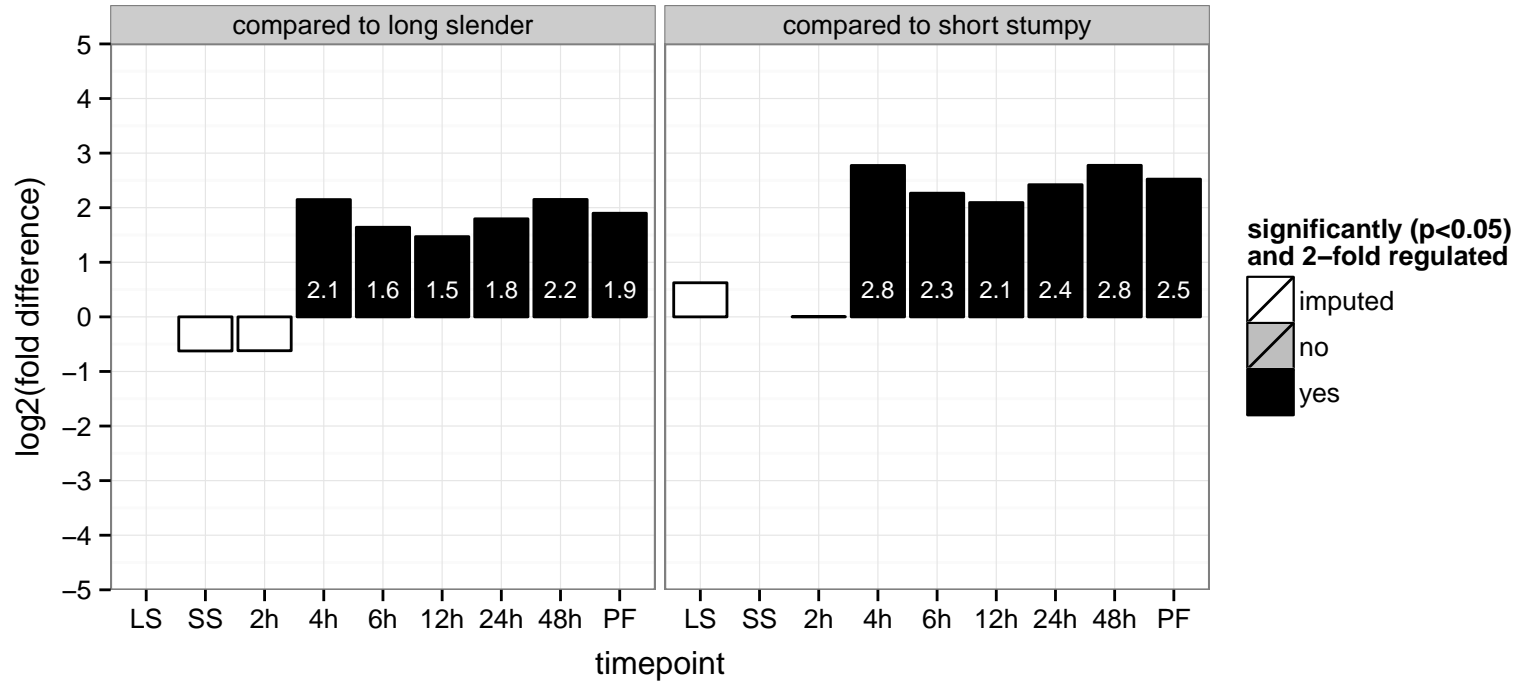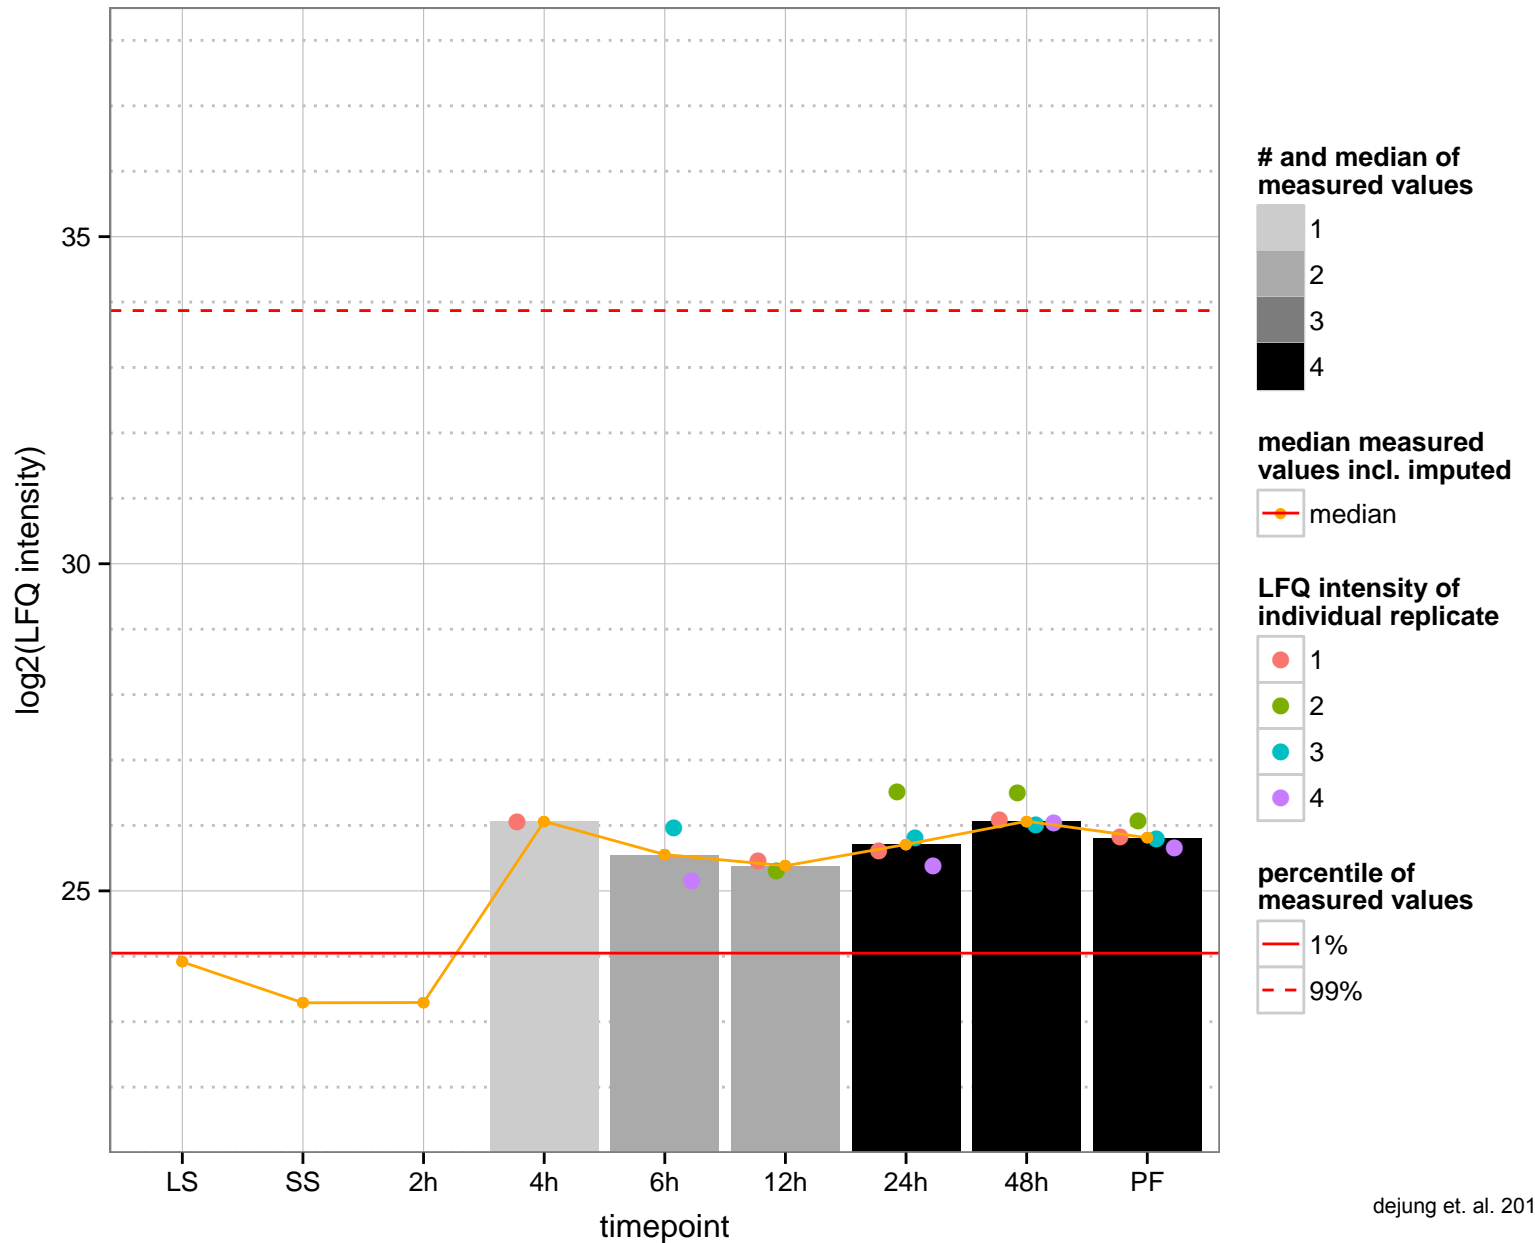

mitochondrial processing peptidase alpha subunit, putative, metallo-peptidase, Clan ME, Family M16

Tb927.11.3980

AGOF: catalytic activity, metalloendopeptidase activity, zinc ion binding

AGOC: mitochondrion

AGOP: proteolysis

PGOF: catalytic activity, metal ion binding, metalloendopeptidase activity, zinc ion binding

PGOC: null

PGOP: proteolysis

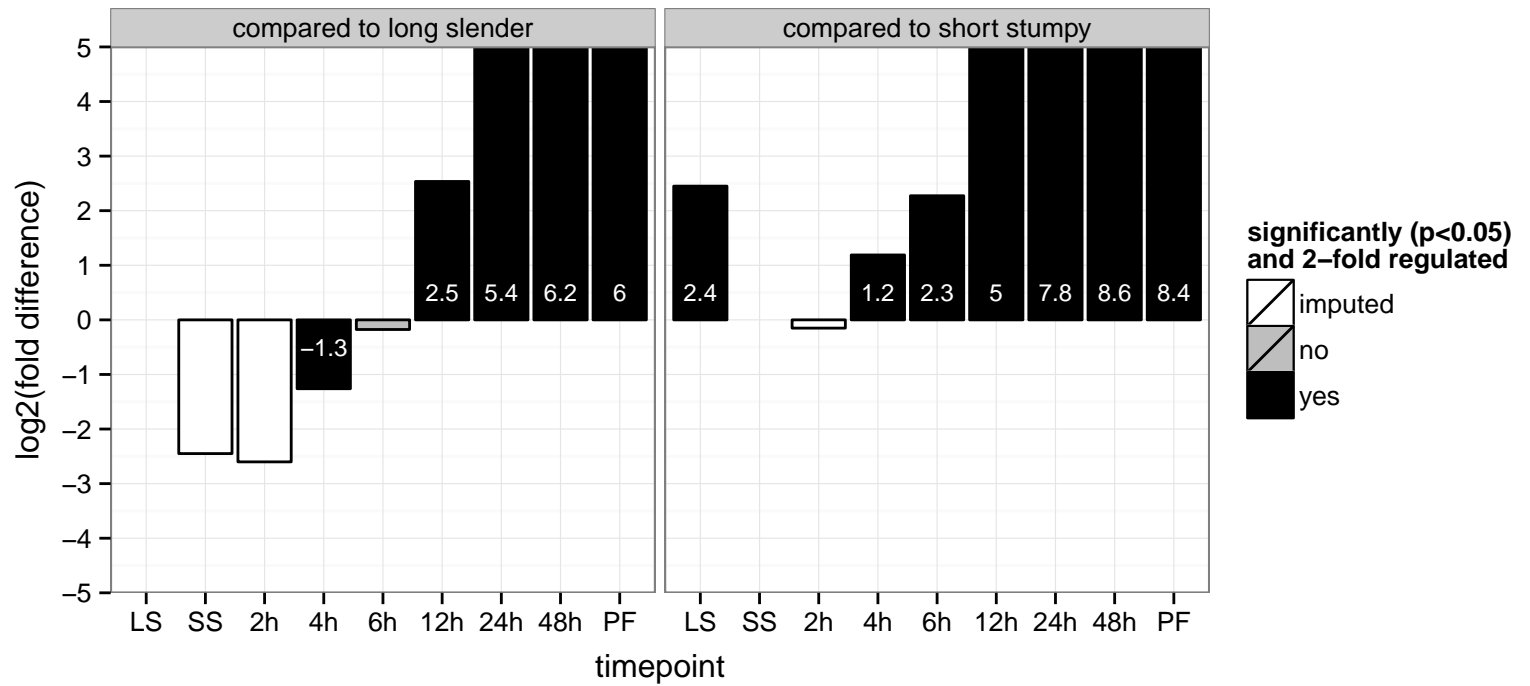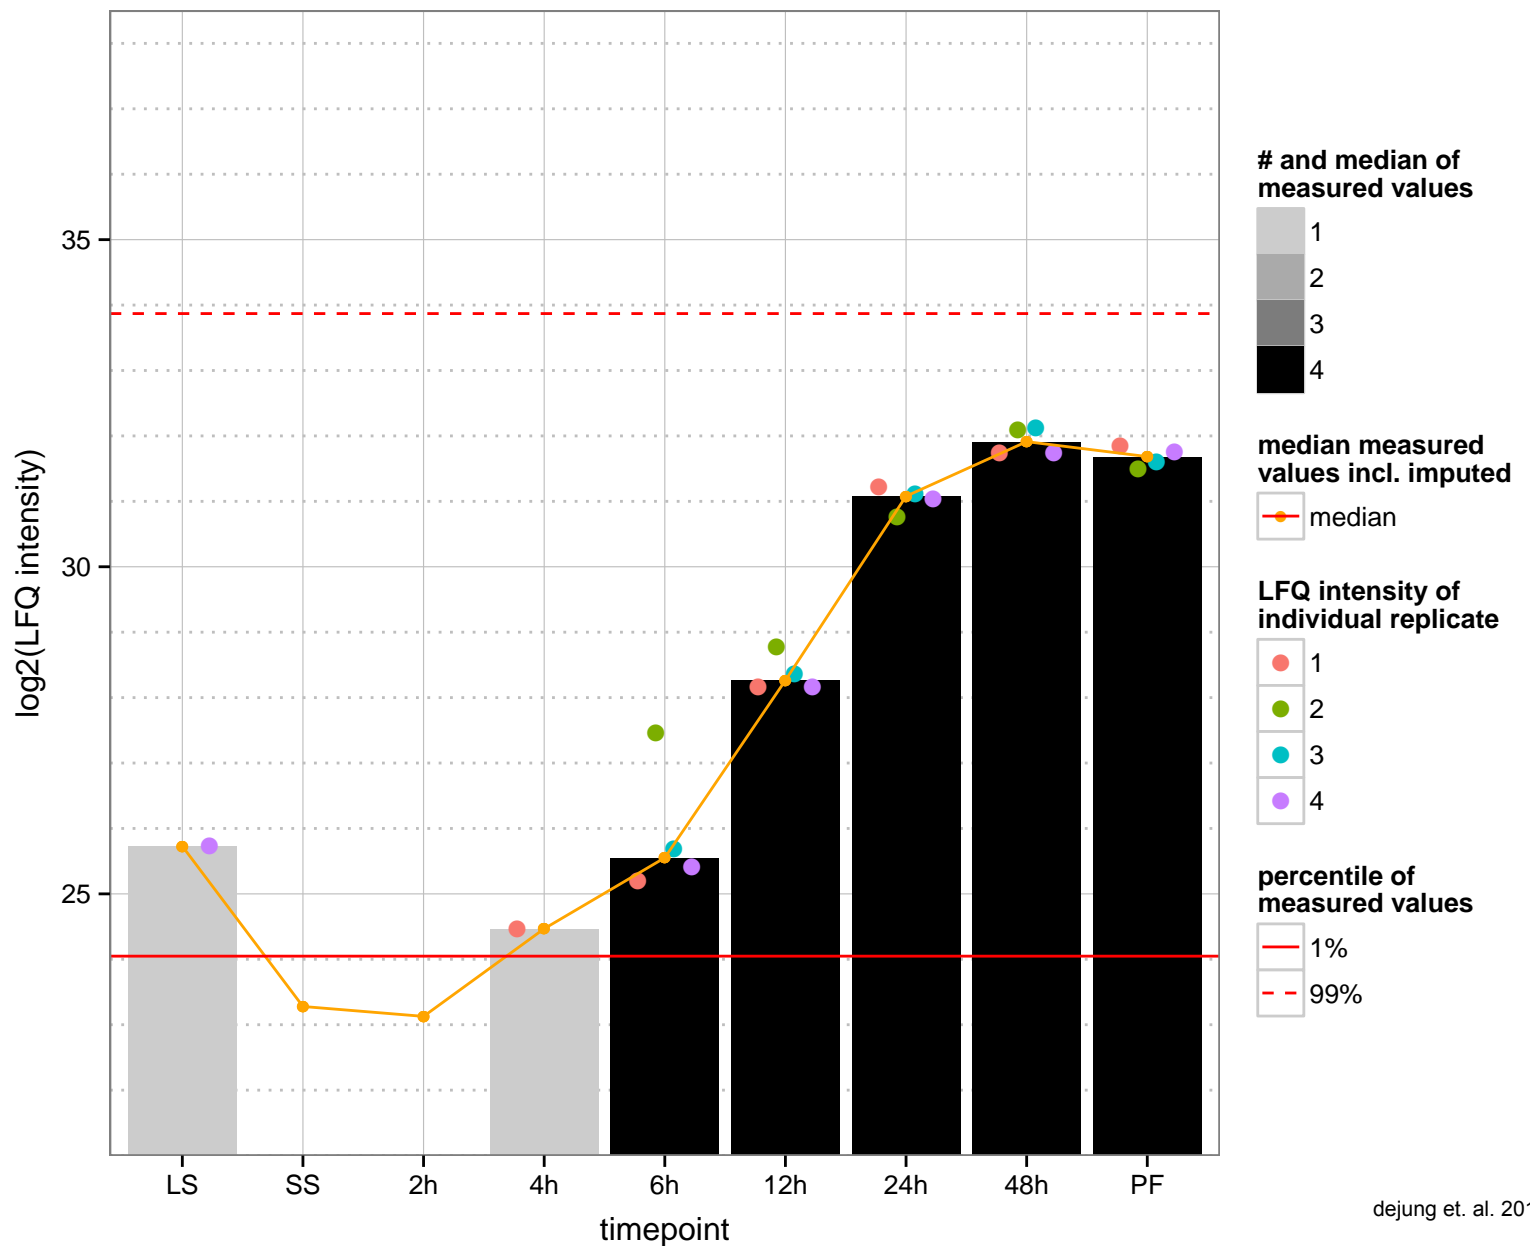

ATP-dependent RNA helicase, putative

Tb927.11.4380

AGOF: ATP binding, ATP-dependent helicase activity, helicase activity, nucleic acid binding

AGOC: null

AGOP: null

PGOF: ATP binding, ATP-dependent helicase activity, helicase activity, nucleic acid binding, nucleoside-triphosphatase activity

PGOC: null

PGOP: null

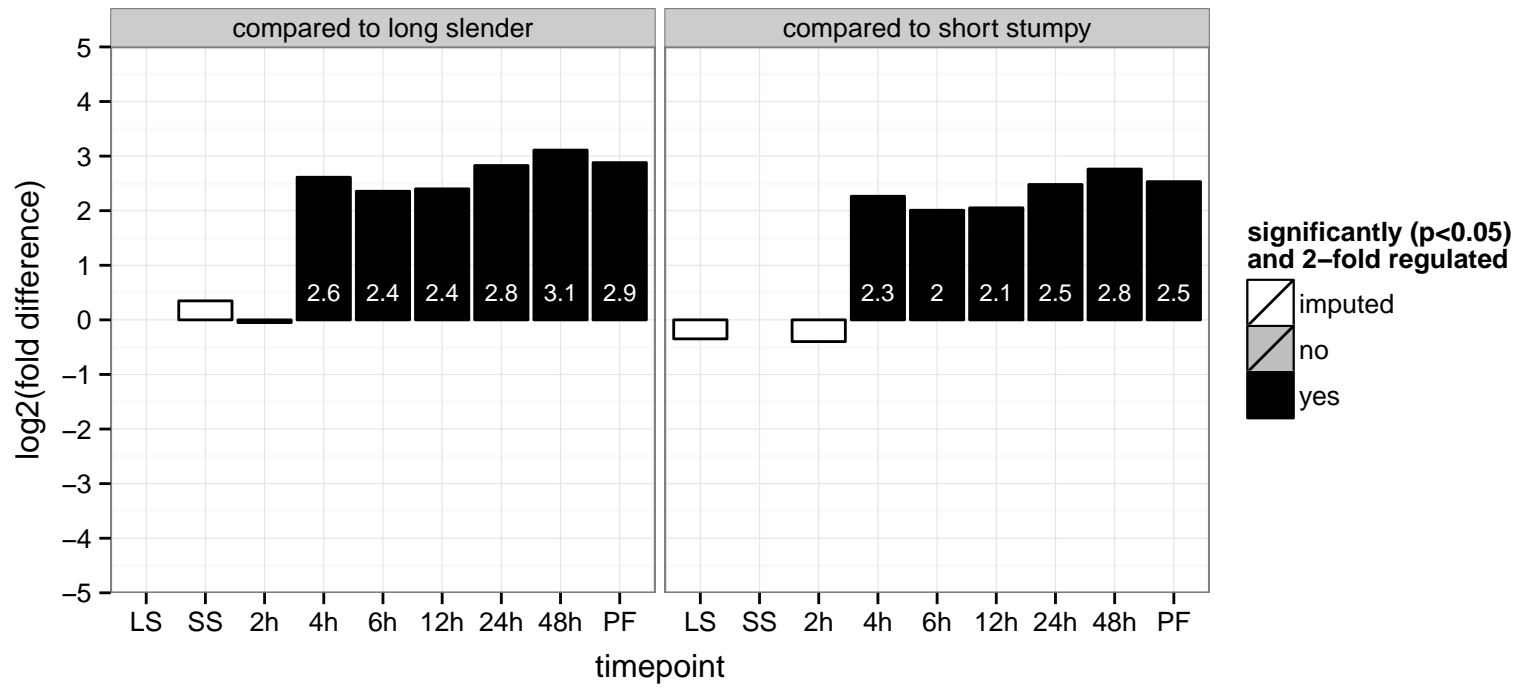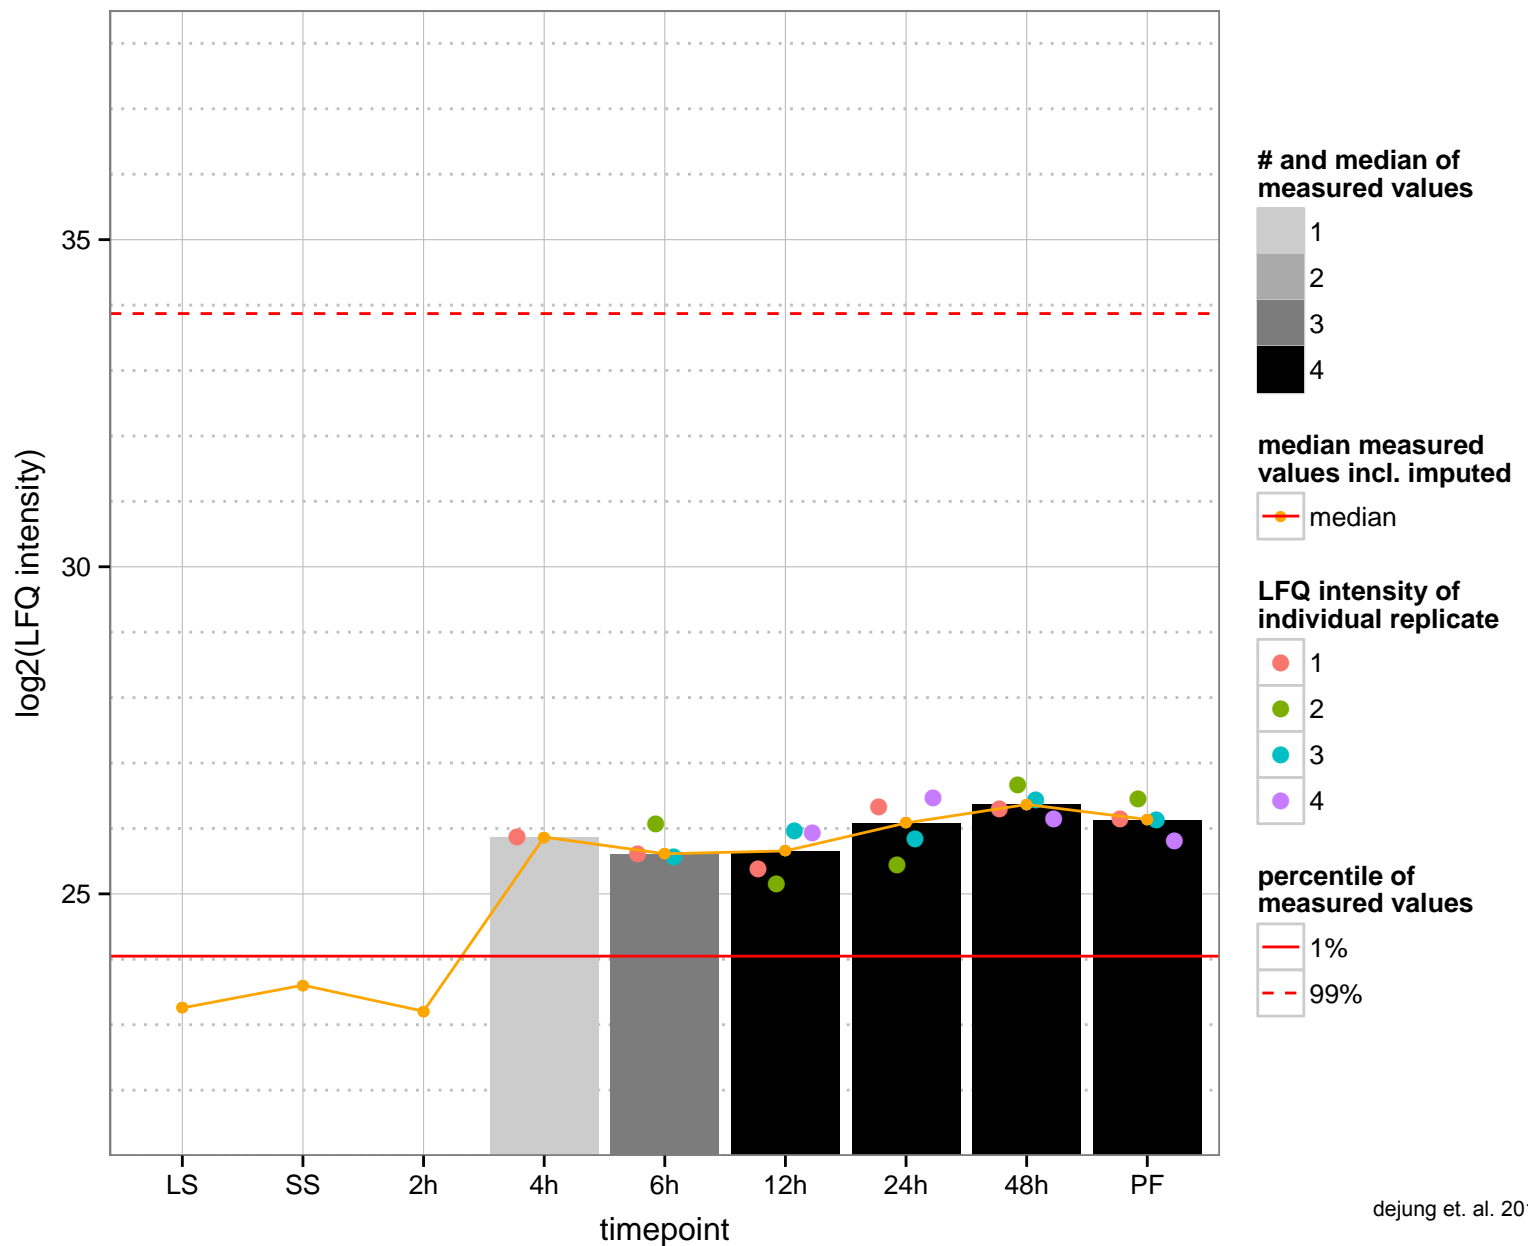



hypothetical protein, conserved  
 Tb927.11.4650  
 AGOF: null  
 AGOC: mitochondrion  
 AGOP: null  
 PGO: null  
 PGO: null  
 PGO: null

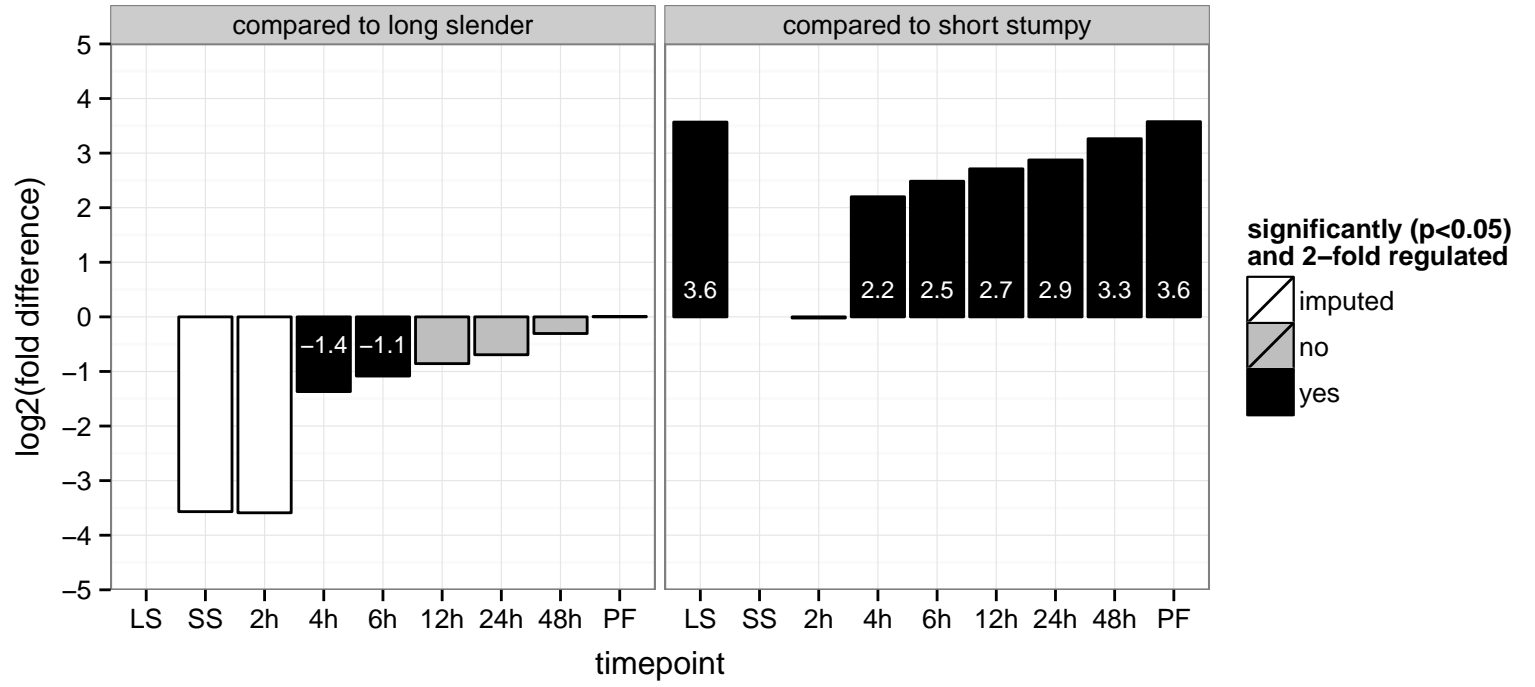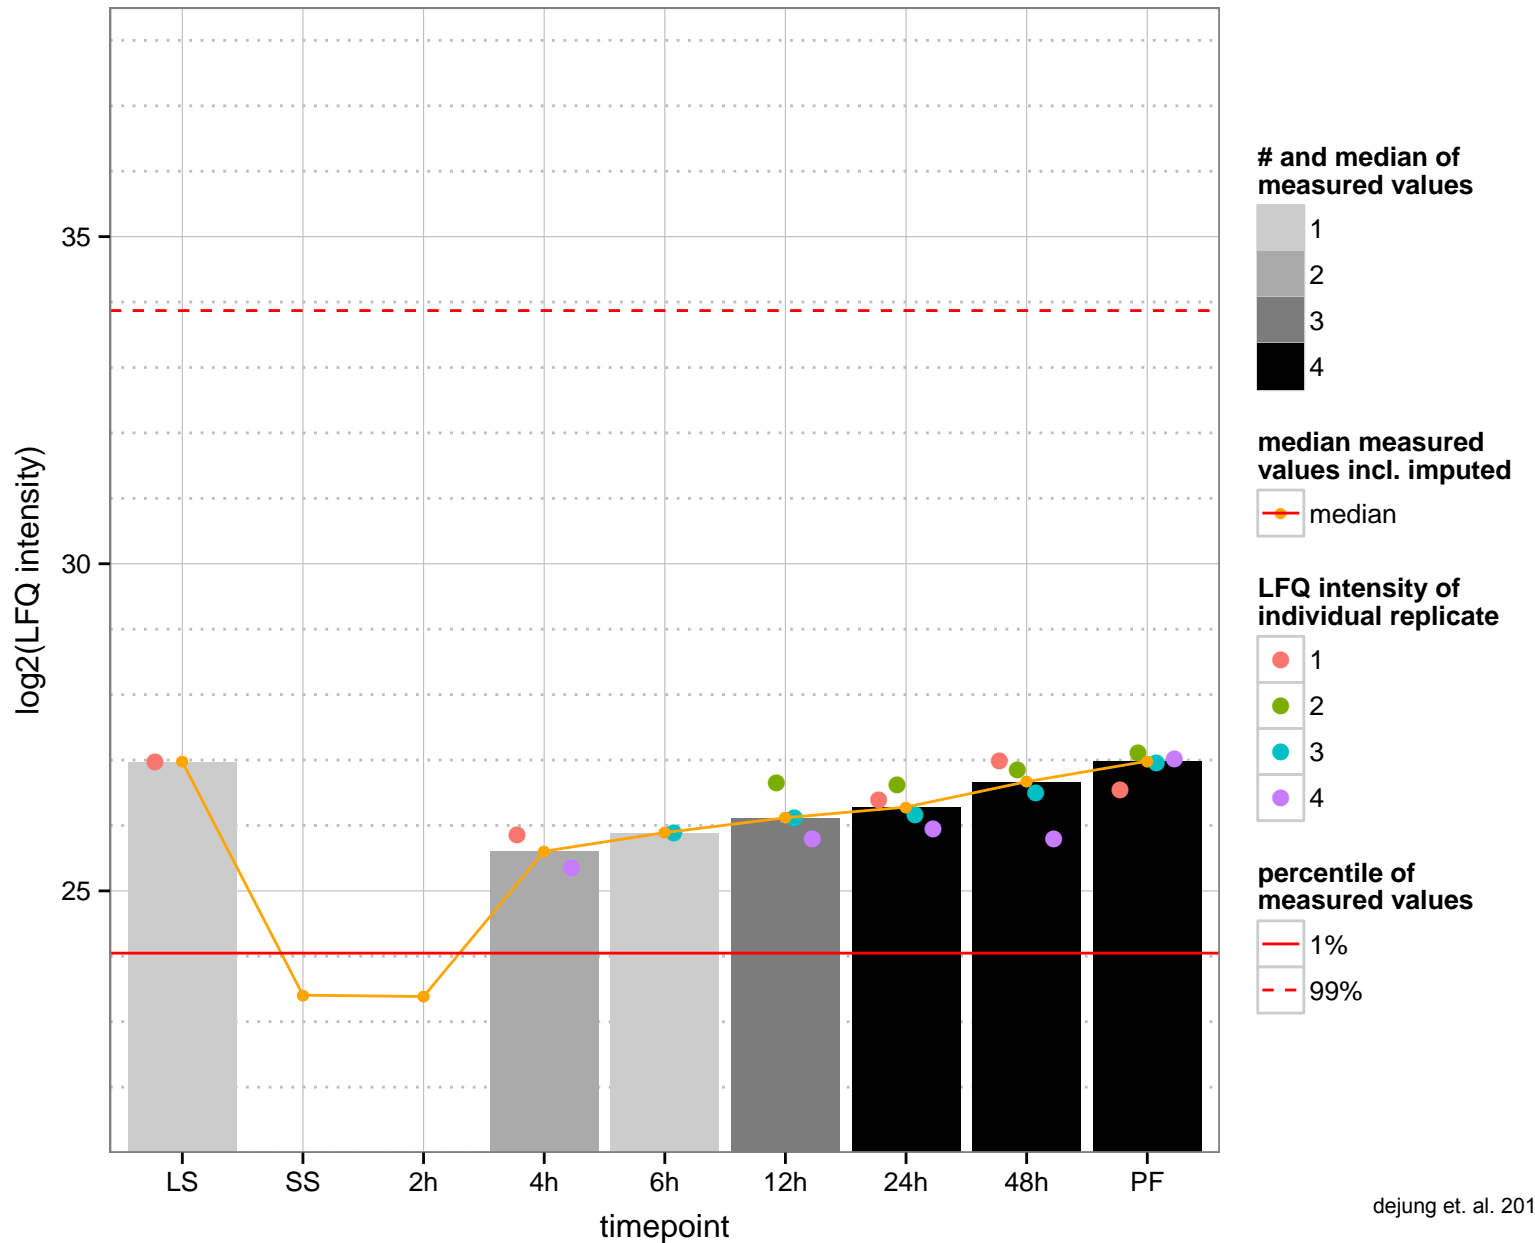

hypothetical protein, conserved  
 Tb927.11.5880  
 AGOF: null  
 AGOC: mitochondrion  
 AGOP: null  
 PGO: null  
 PGOC: null  
 PGOP: null

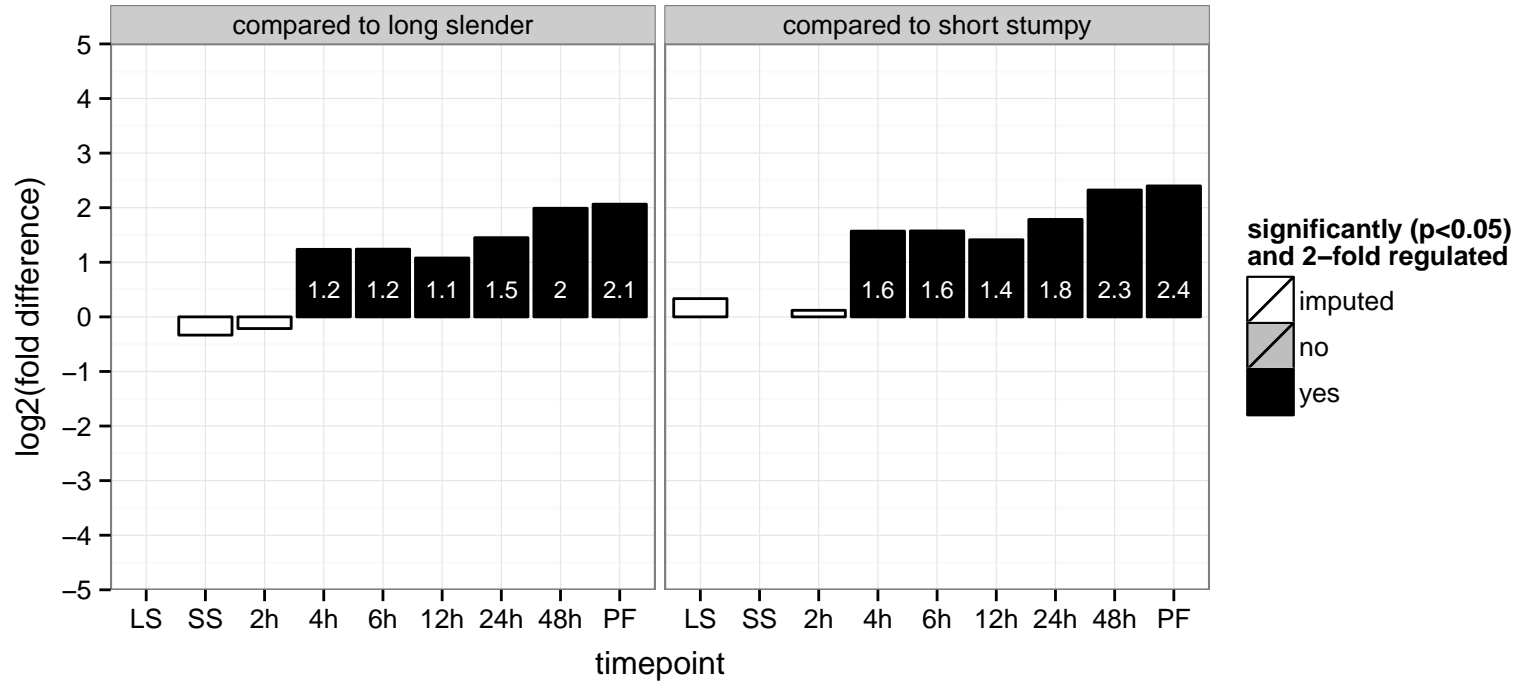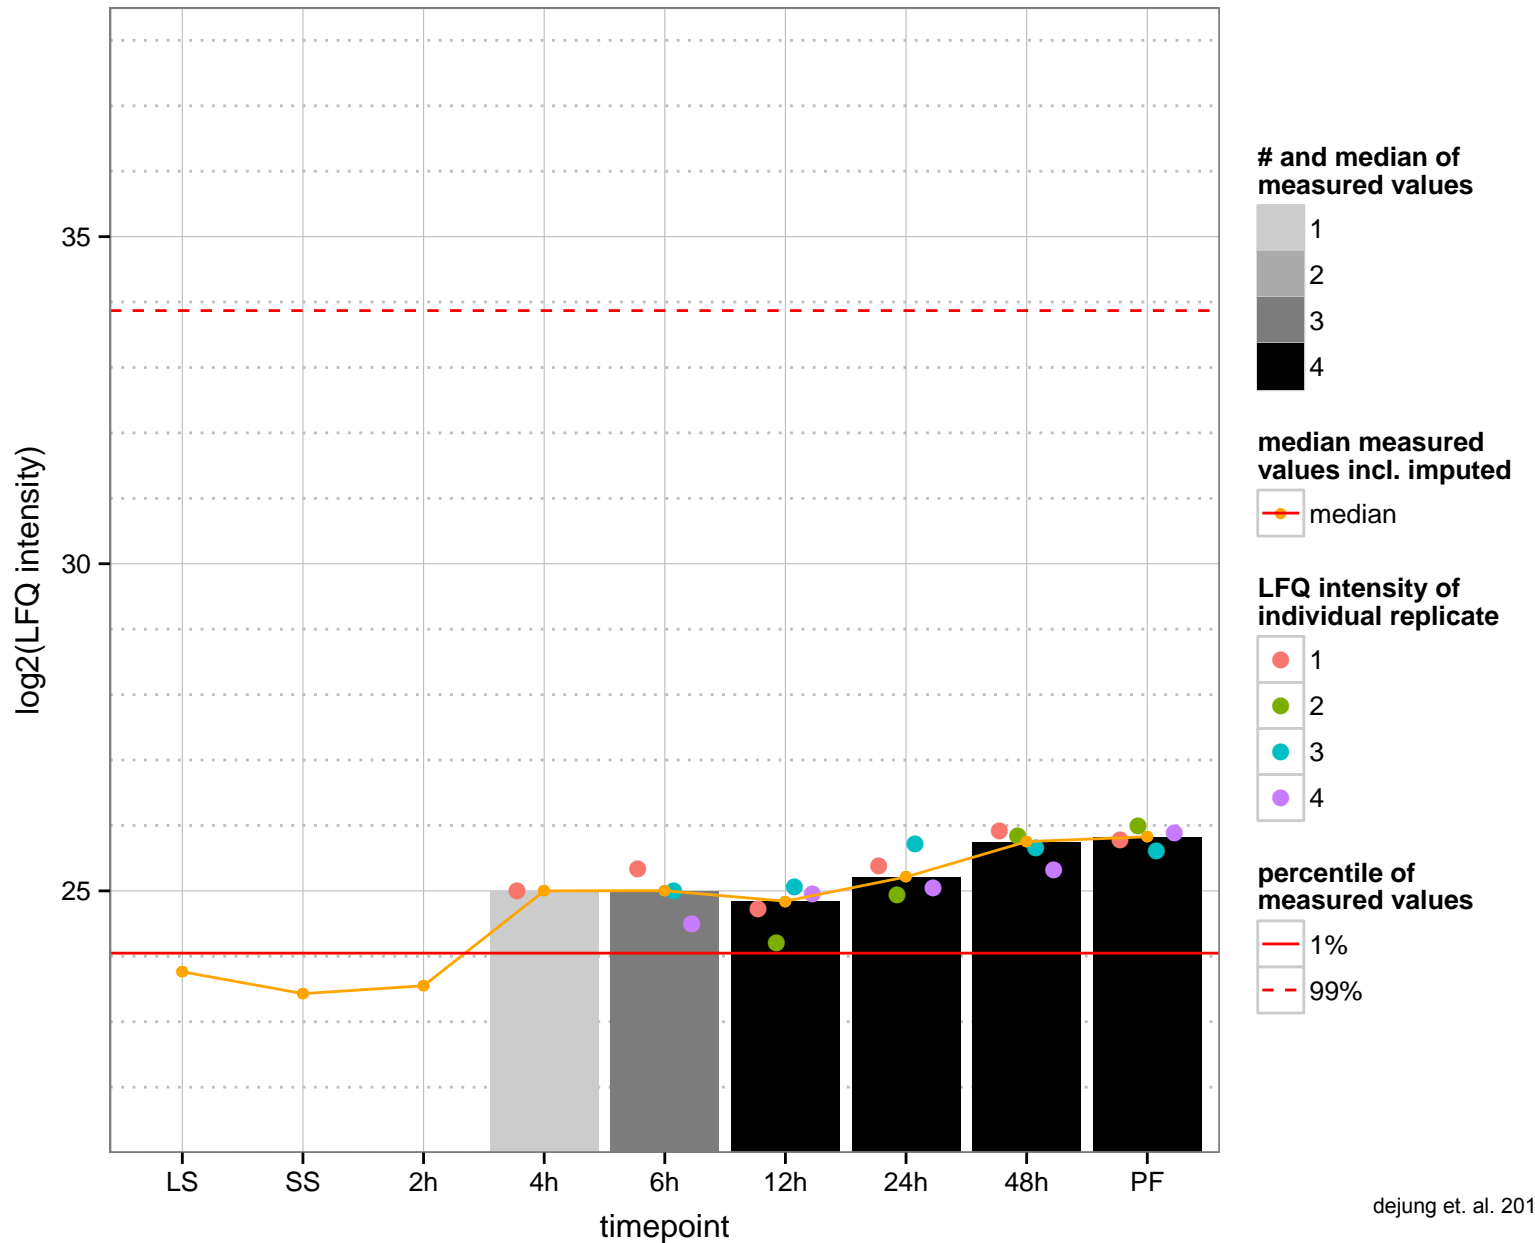

hypothetical protein, conserved  
 Tb927.11.600  
 AGOF: null  
 AGOC: mitochondrion  
 AGOP: null  
 PGO: null  
 PGO: null  
 PGO: null

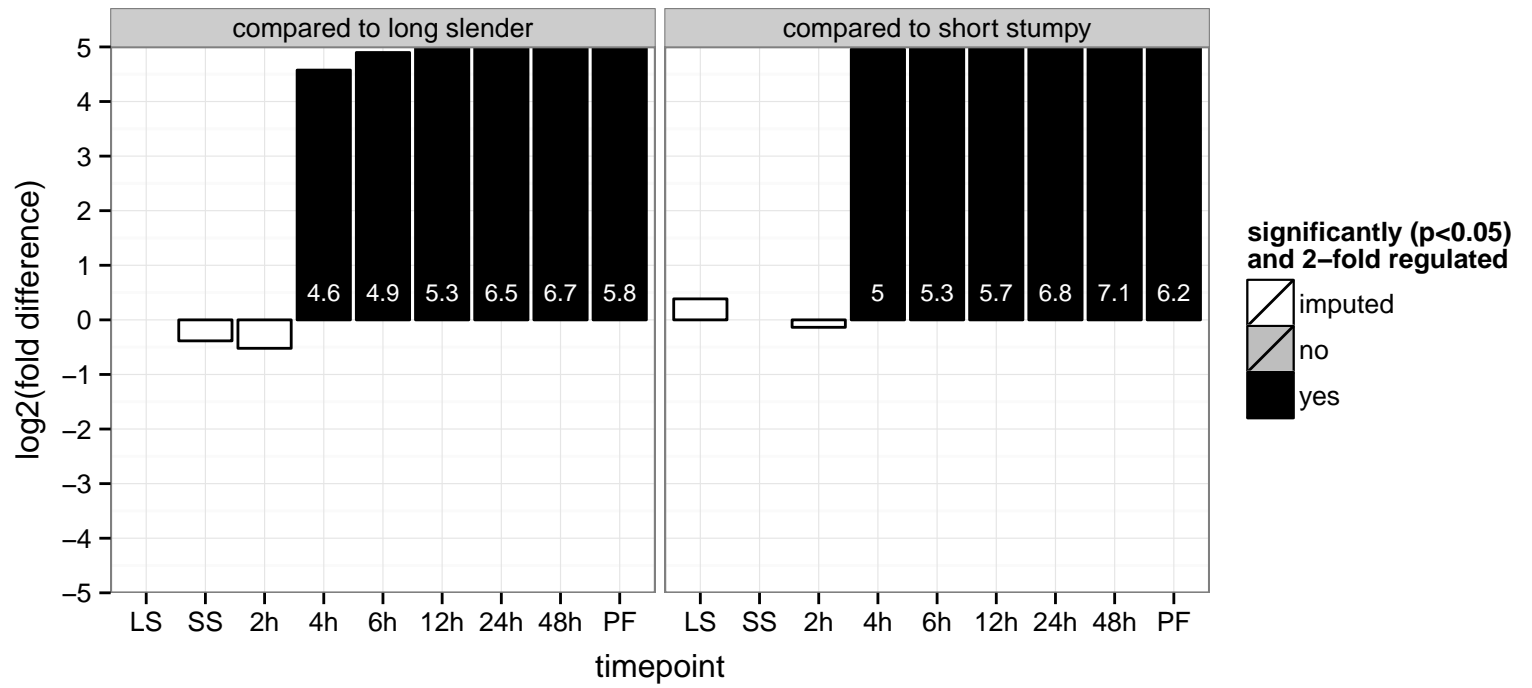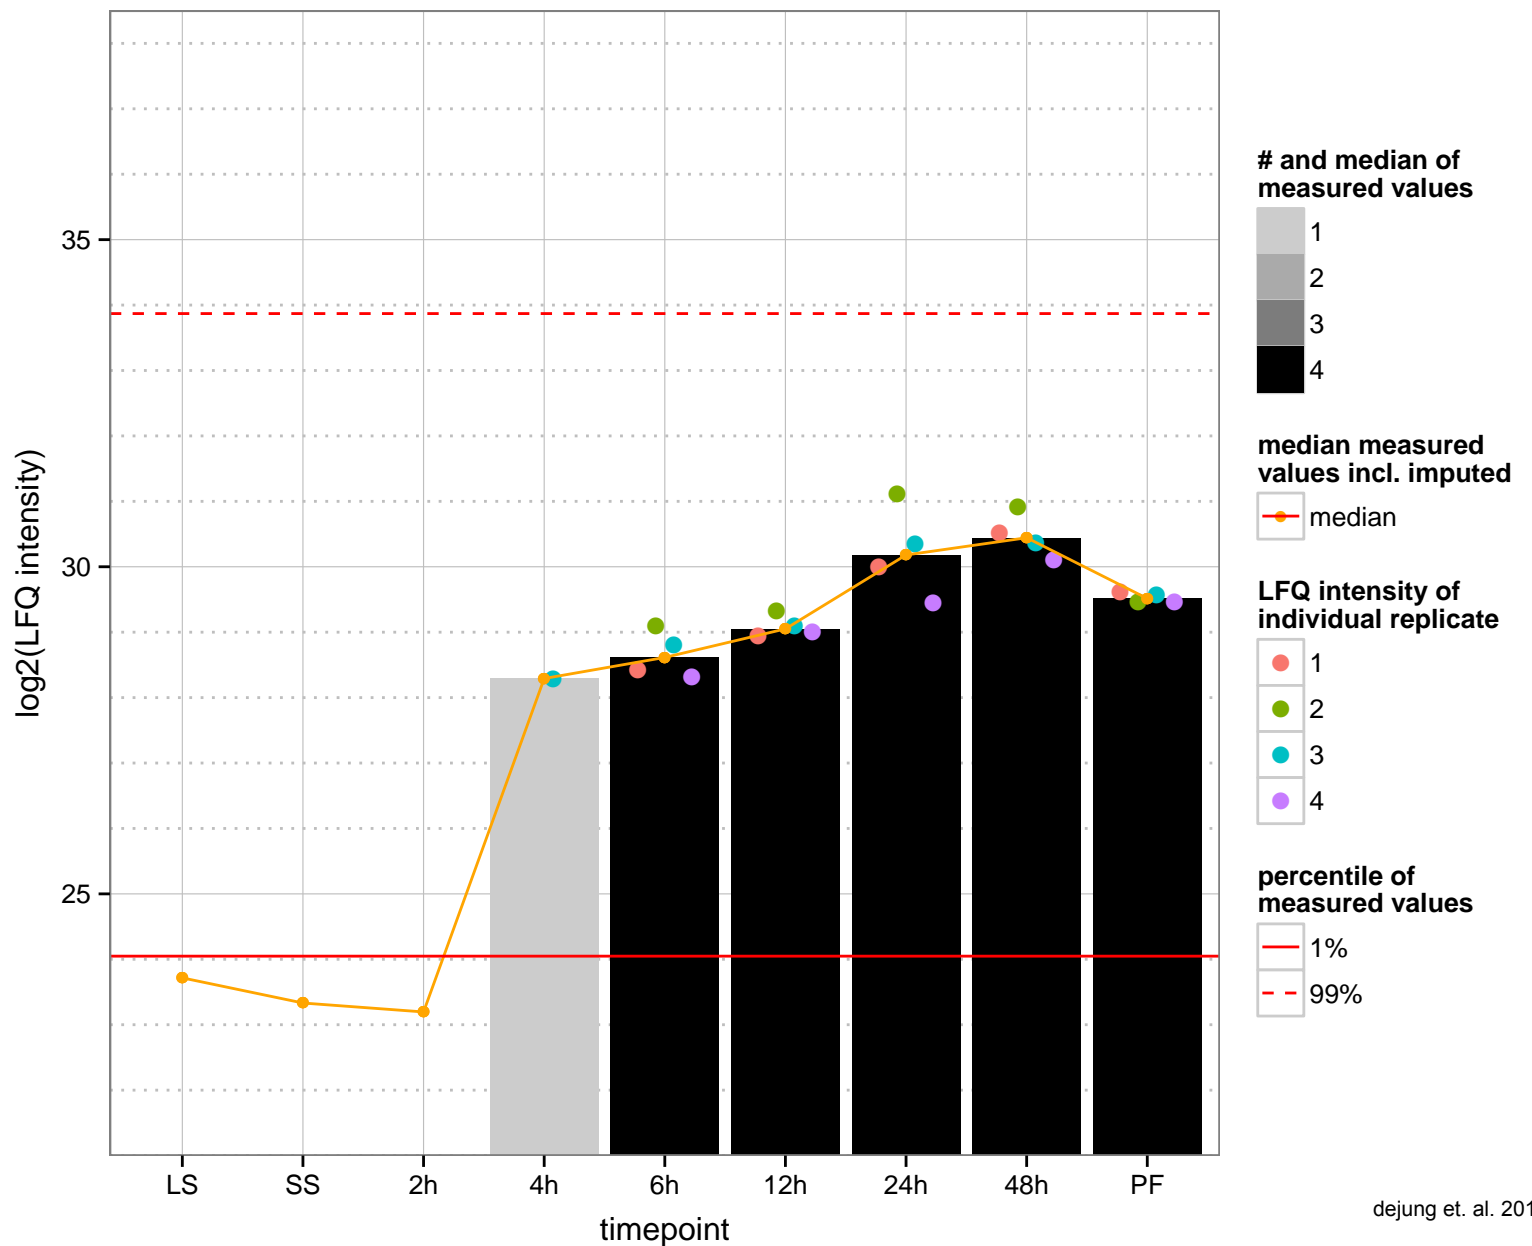

hypothetical protein, conserved  
 Tb927.11.6430  
 AGOF: null  
 AGOC: null  
 AGOP: null  
 PGO: null  
 PGOC: null  
 PGOP: null

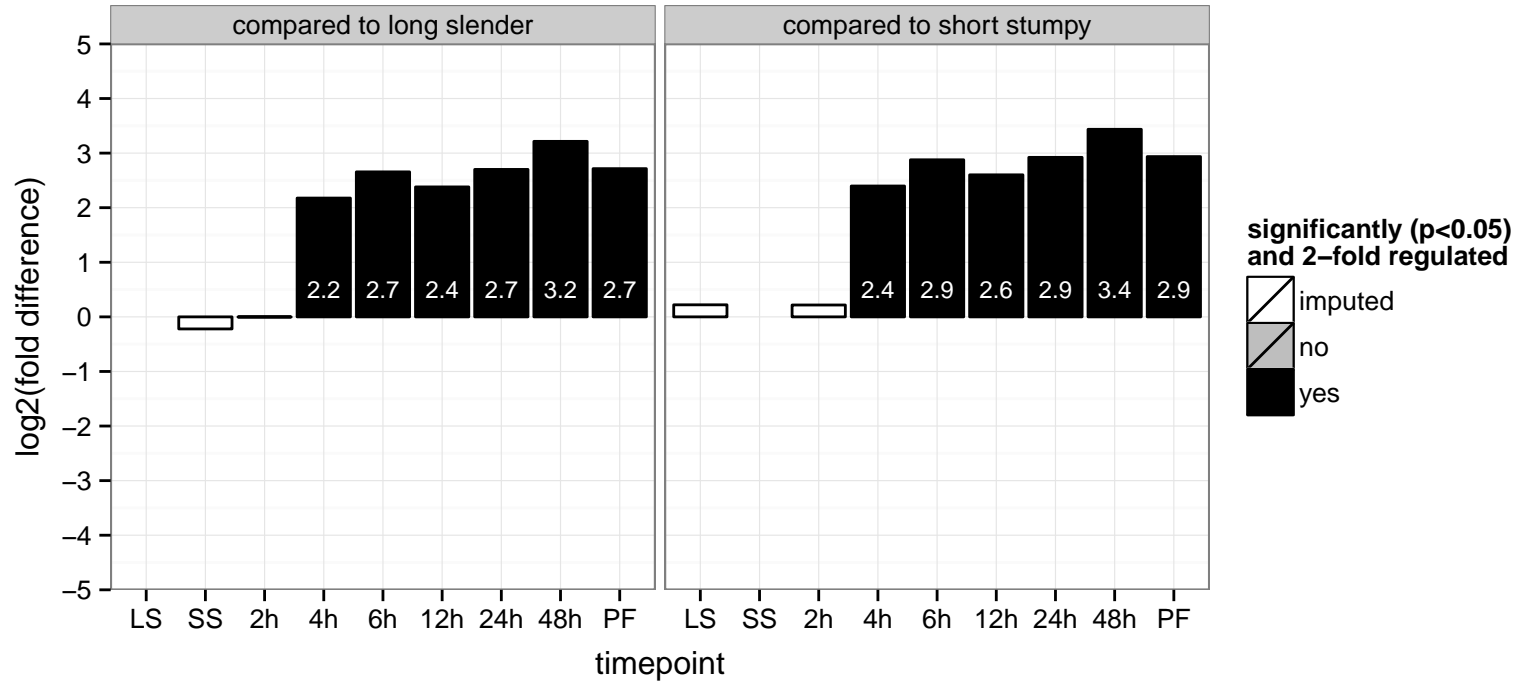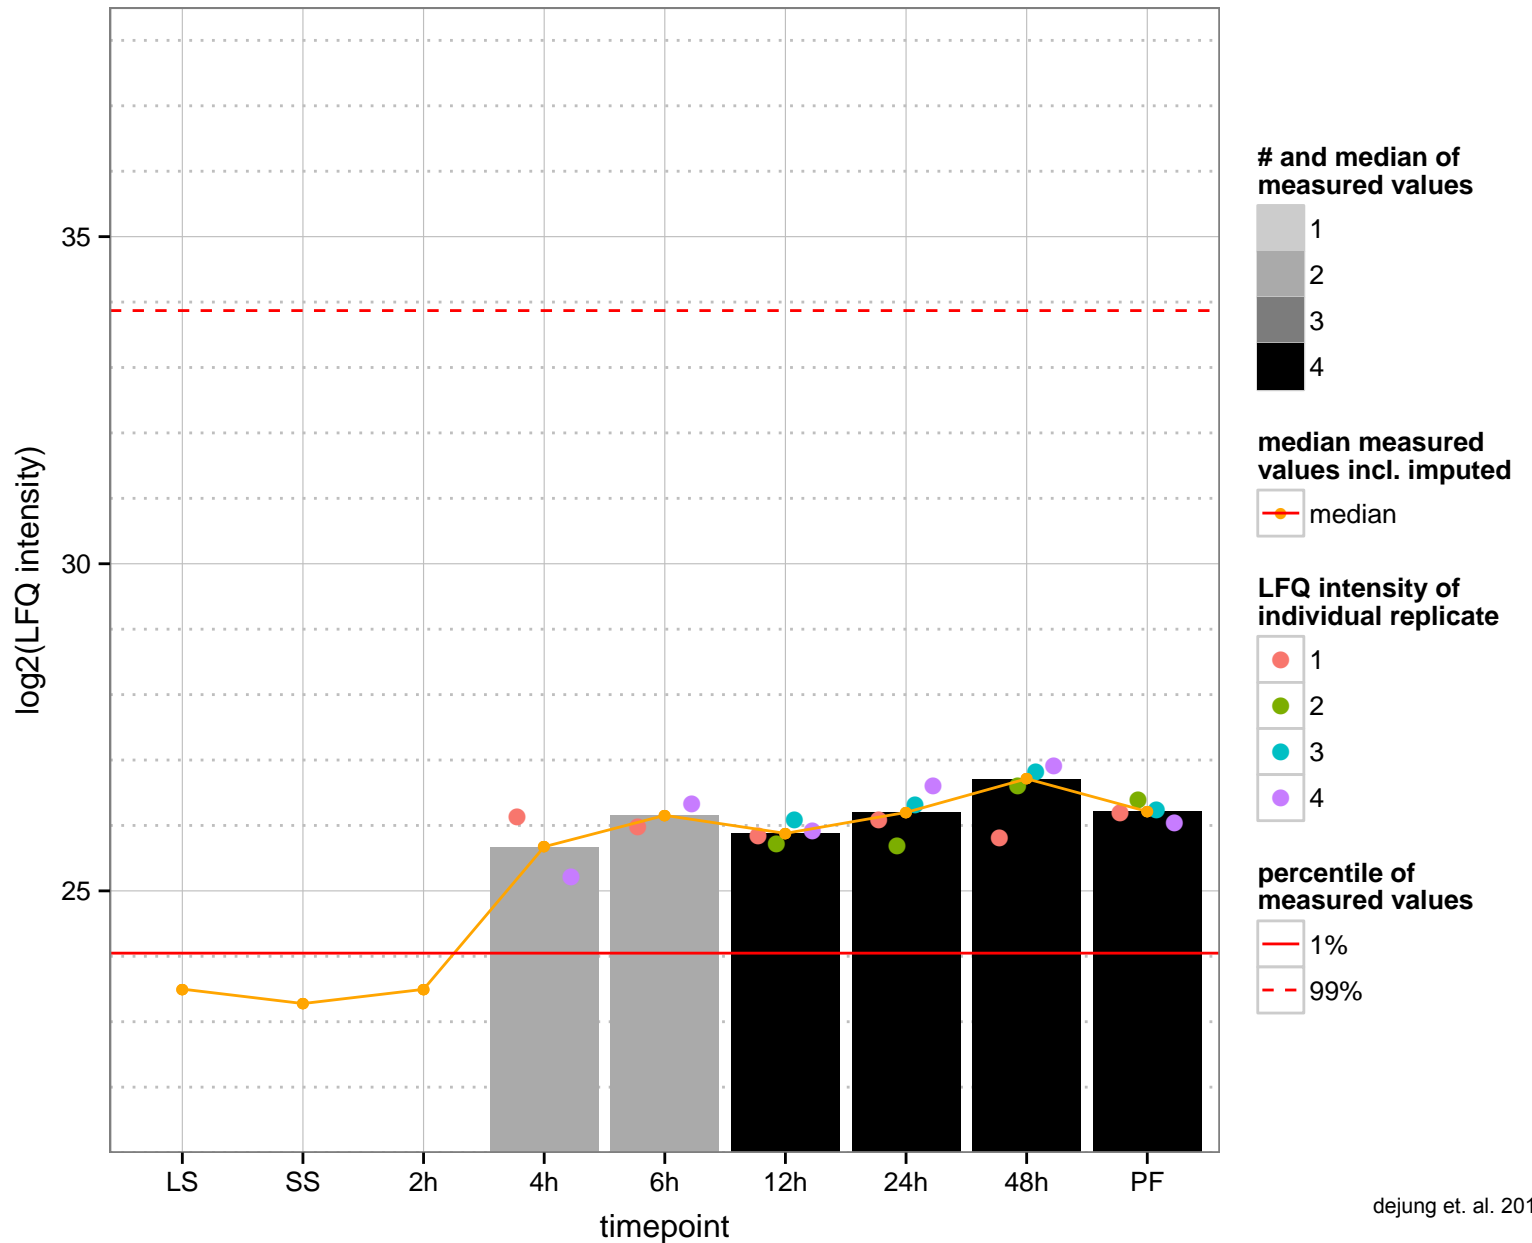

hypothetical protein, conserved  
 Tb927.11.8180  
 AGOF: null  
 AGOC: null  
 AGOP: null  
 PGO: null  
 PGOC: null  
 PGOP: null

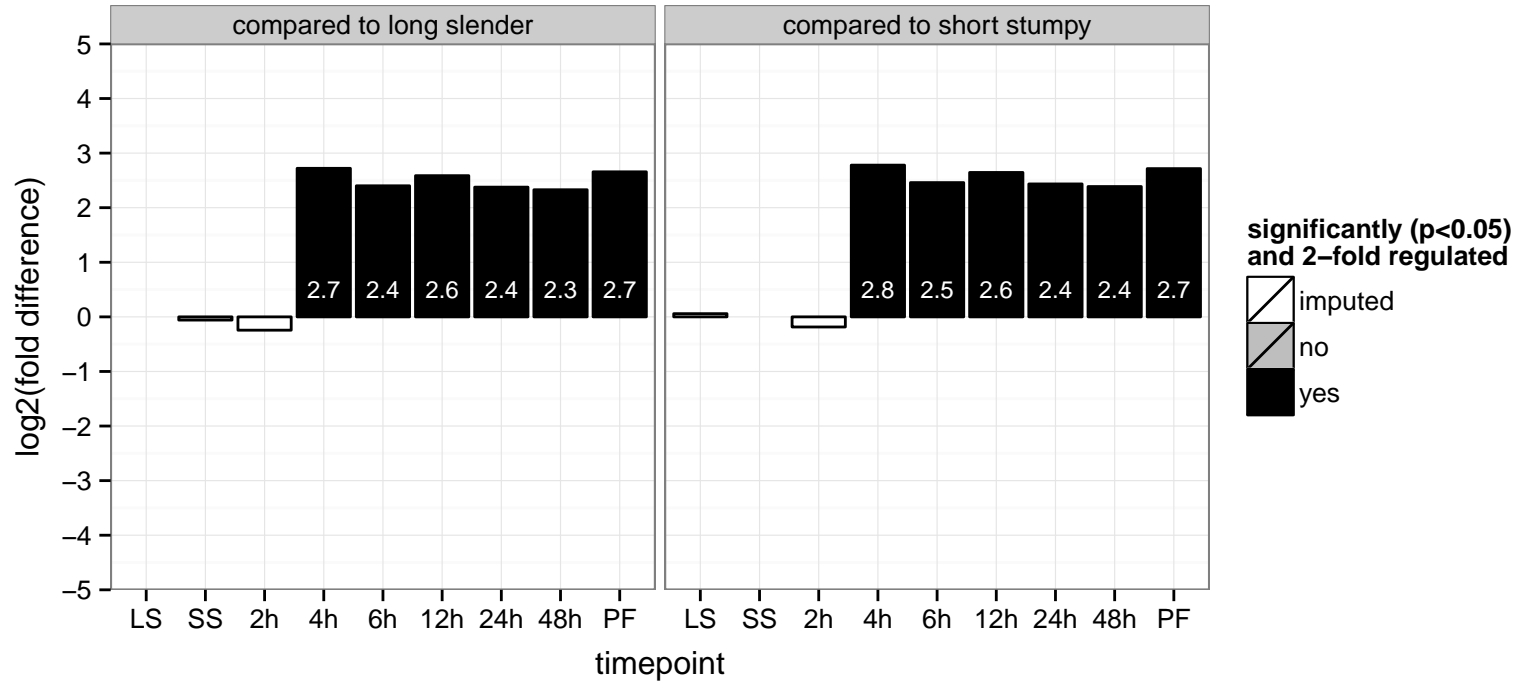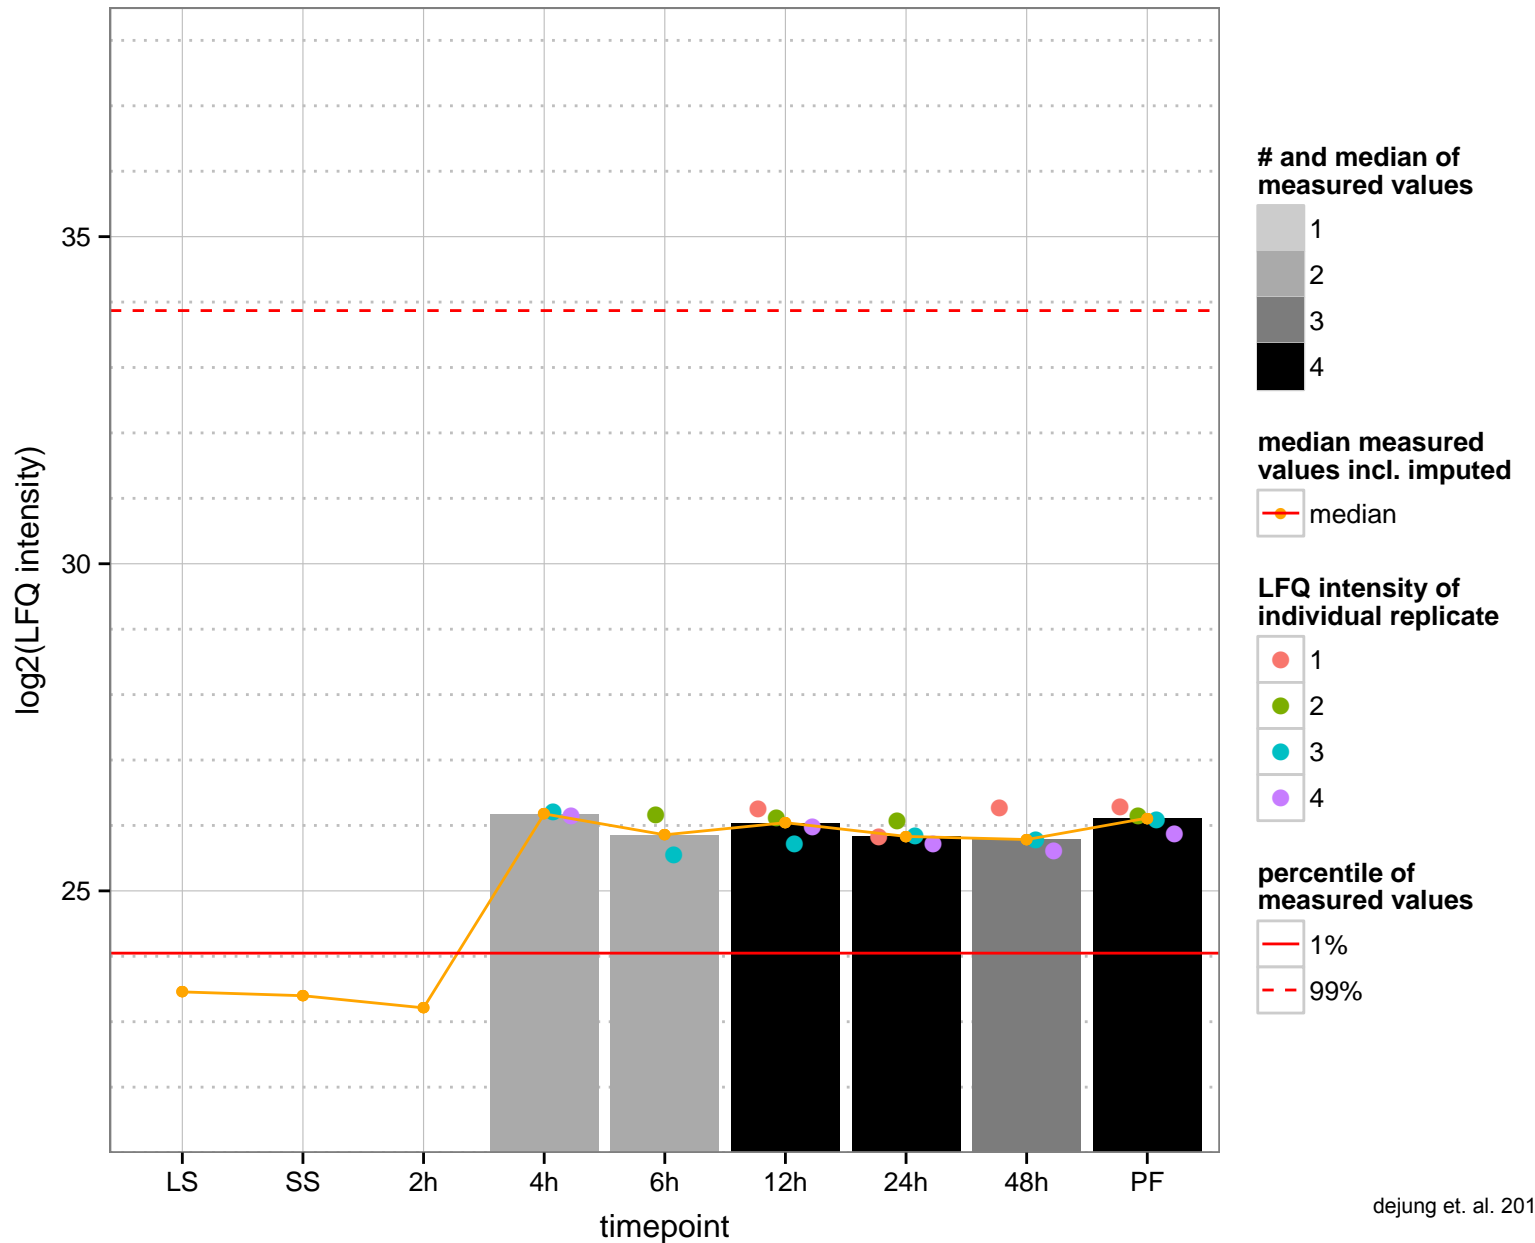

nucleic acid binding protein, putative  
 Tb927.11.9510  
 AGOF: nucleic acid binding, zinc ion binding  
 AGOC: null  
 AGOP: null  
 PGOF: nucleic acid binding, zinc ion binding  
 PGOC: null  
 PGOP: null

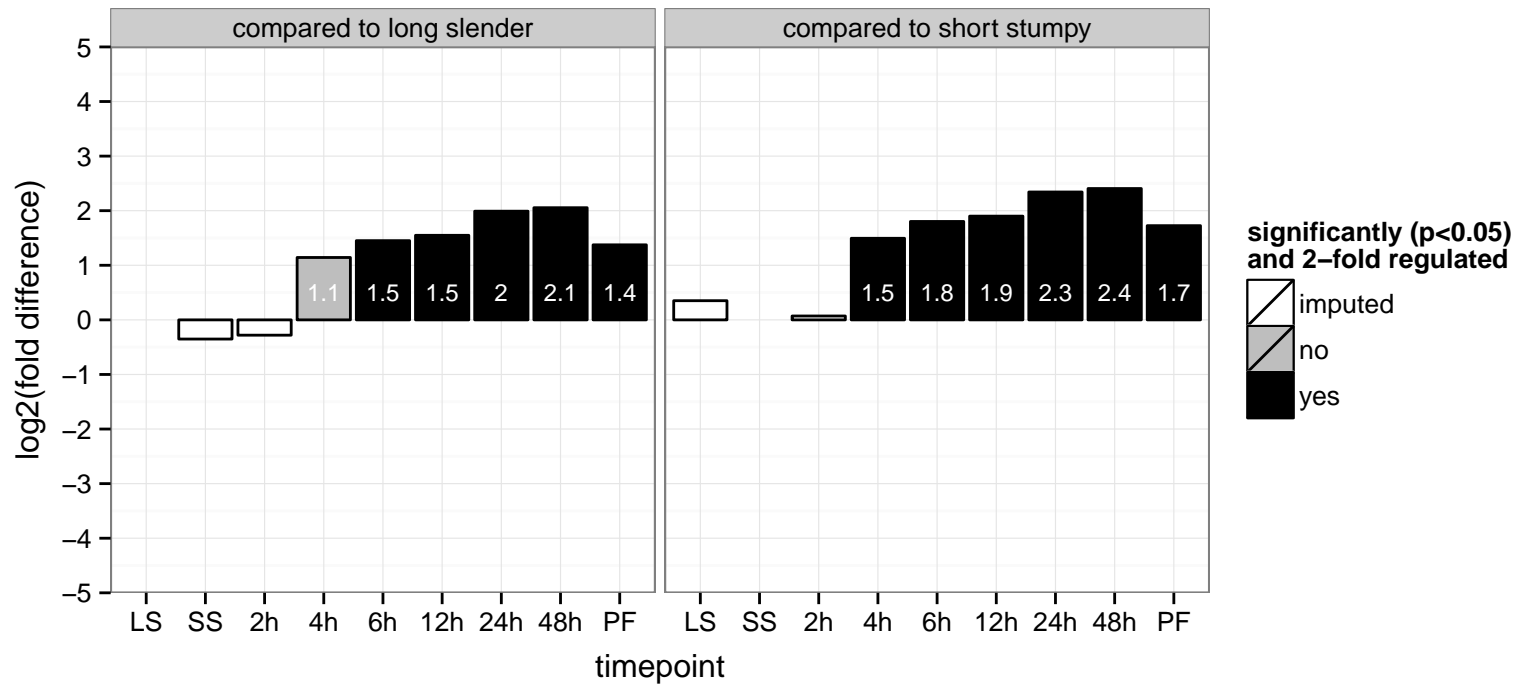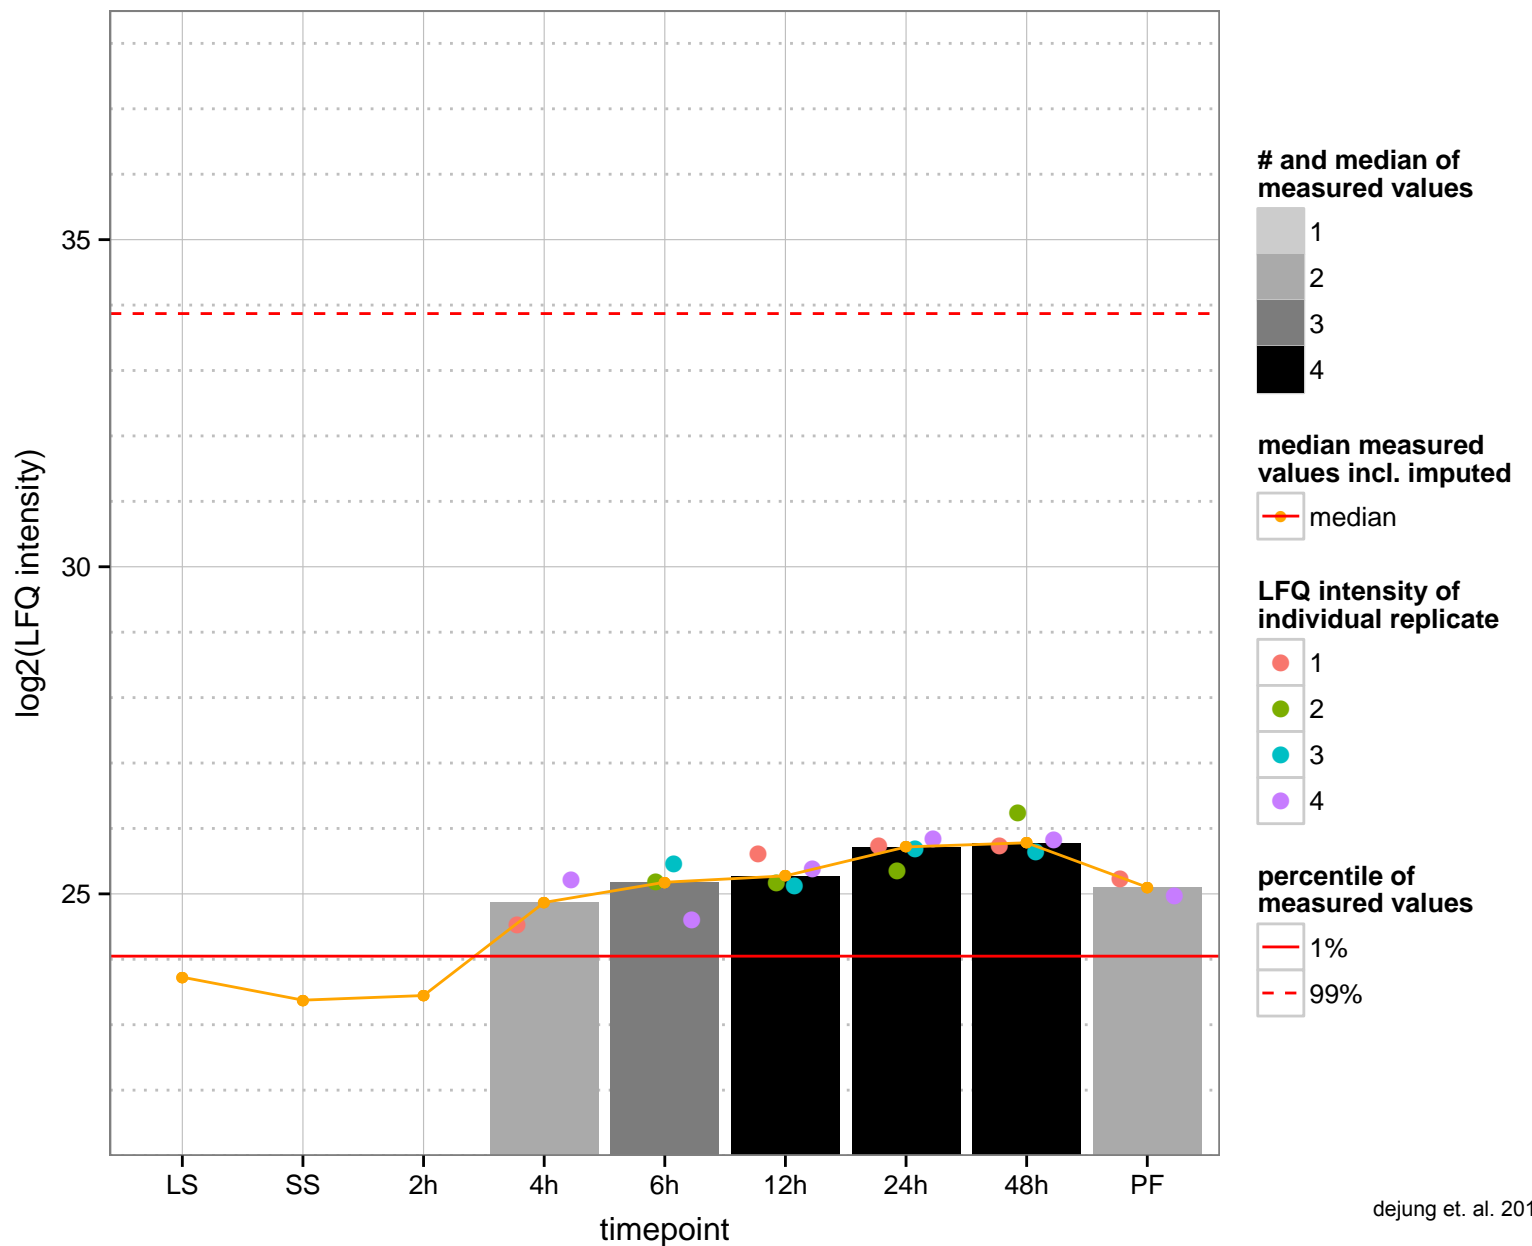

retrotransposon hot spot protein (RHS, pseudogene), putative, retrotransposon hot spot protein 3 (RHS3), interrupted  
 Tb927.2.1140  
 AGOF: null  
 AGOC: null  
 AGOP: null  
 PGO: null  
 PGOC: null  
 PGOP: null

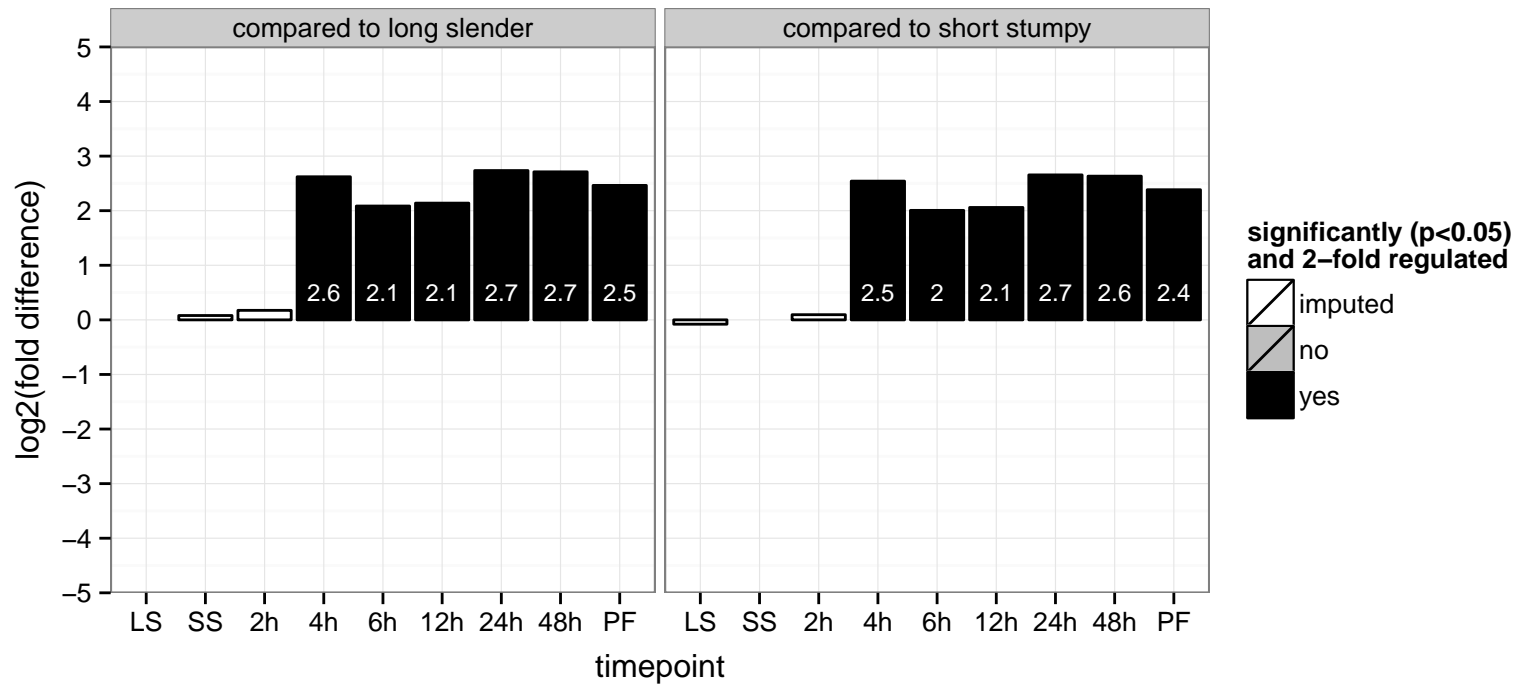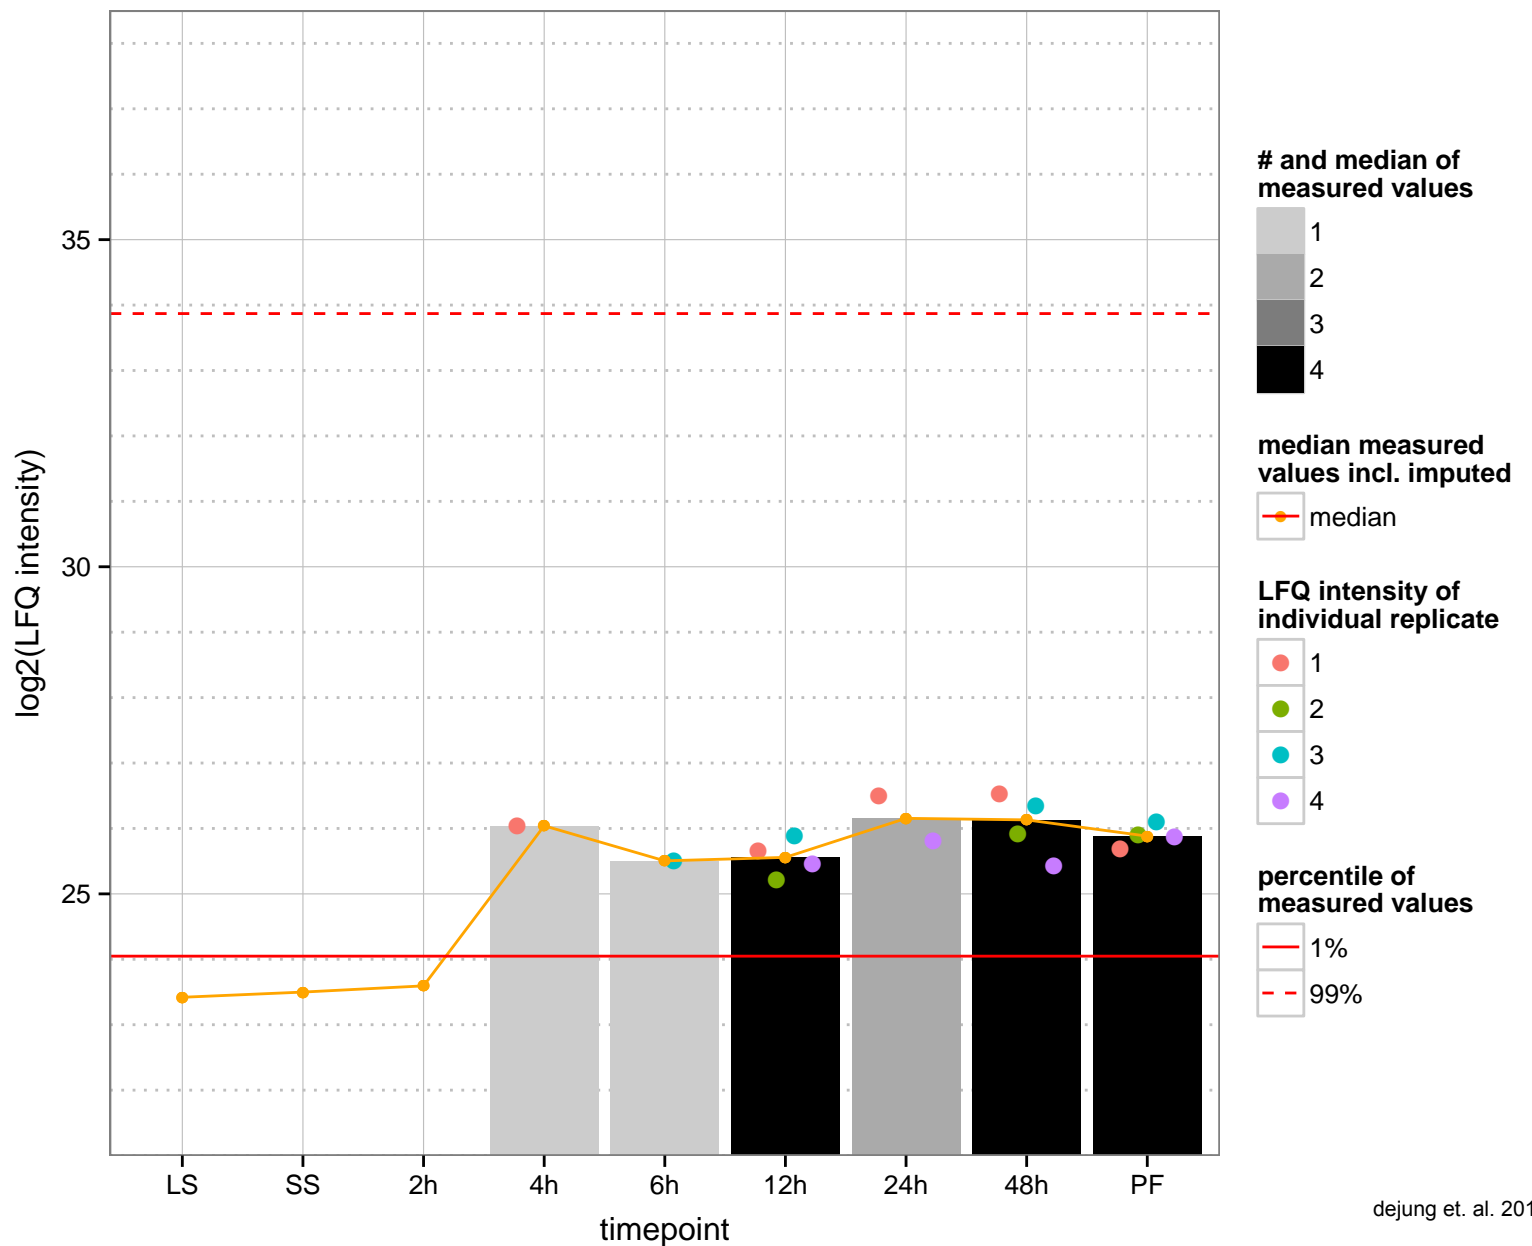

hypothetical protein, conserved

Tb927.3.4160

AGOF: damaged DNA binding

AGOC: null

AGOP: nucleotide–excision repair, proteasomal ubiquitin–dependent protein catabolic process

PGOF: damaged DNA binding, protein binding

PGOC: null

PGOP: nucleotide–excision repair, proteasomal ubiquitin–dependent protein catabolic process

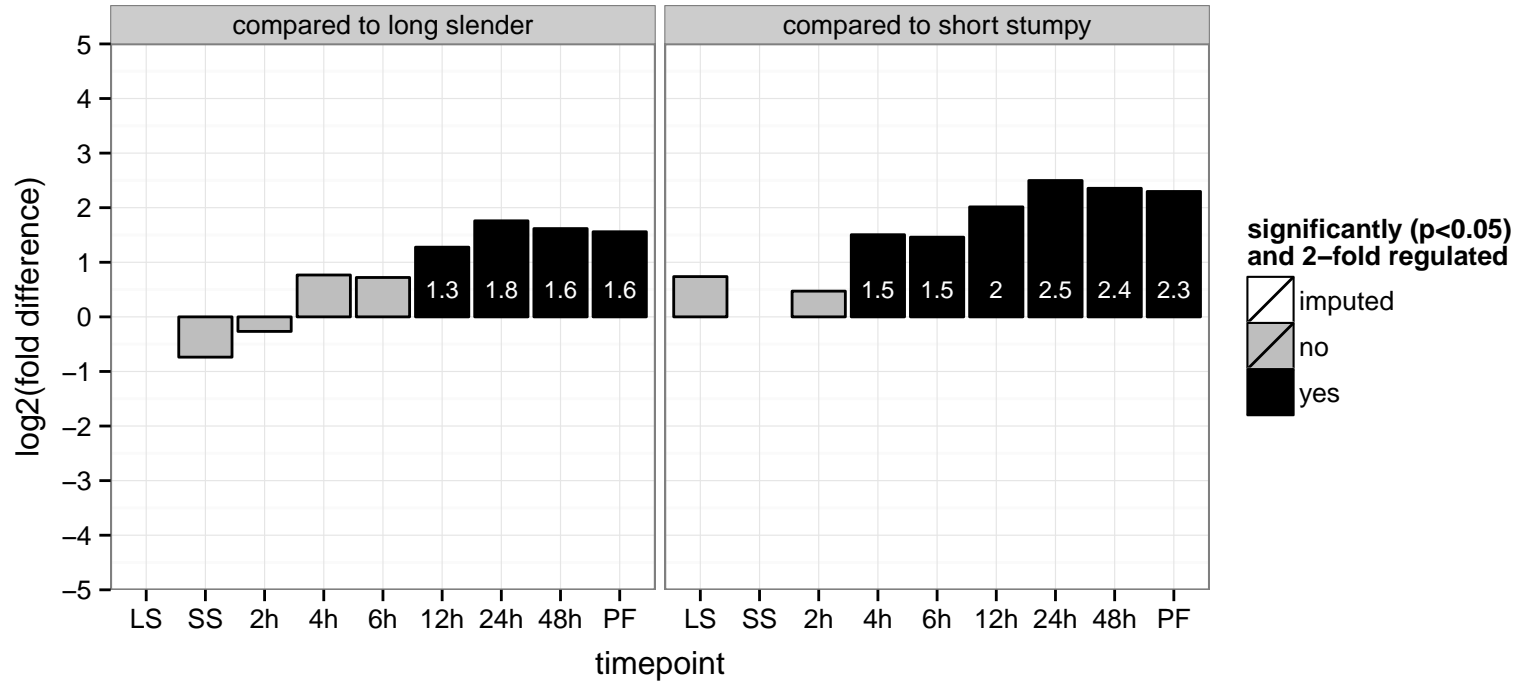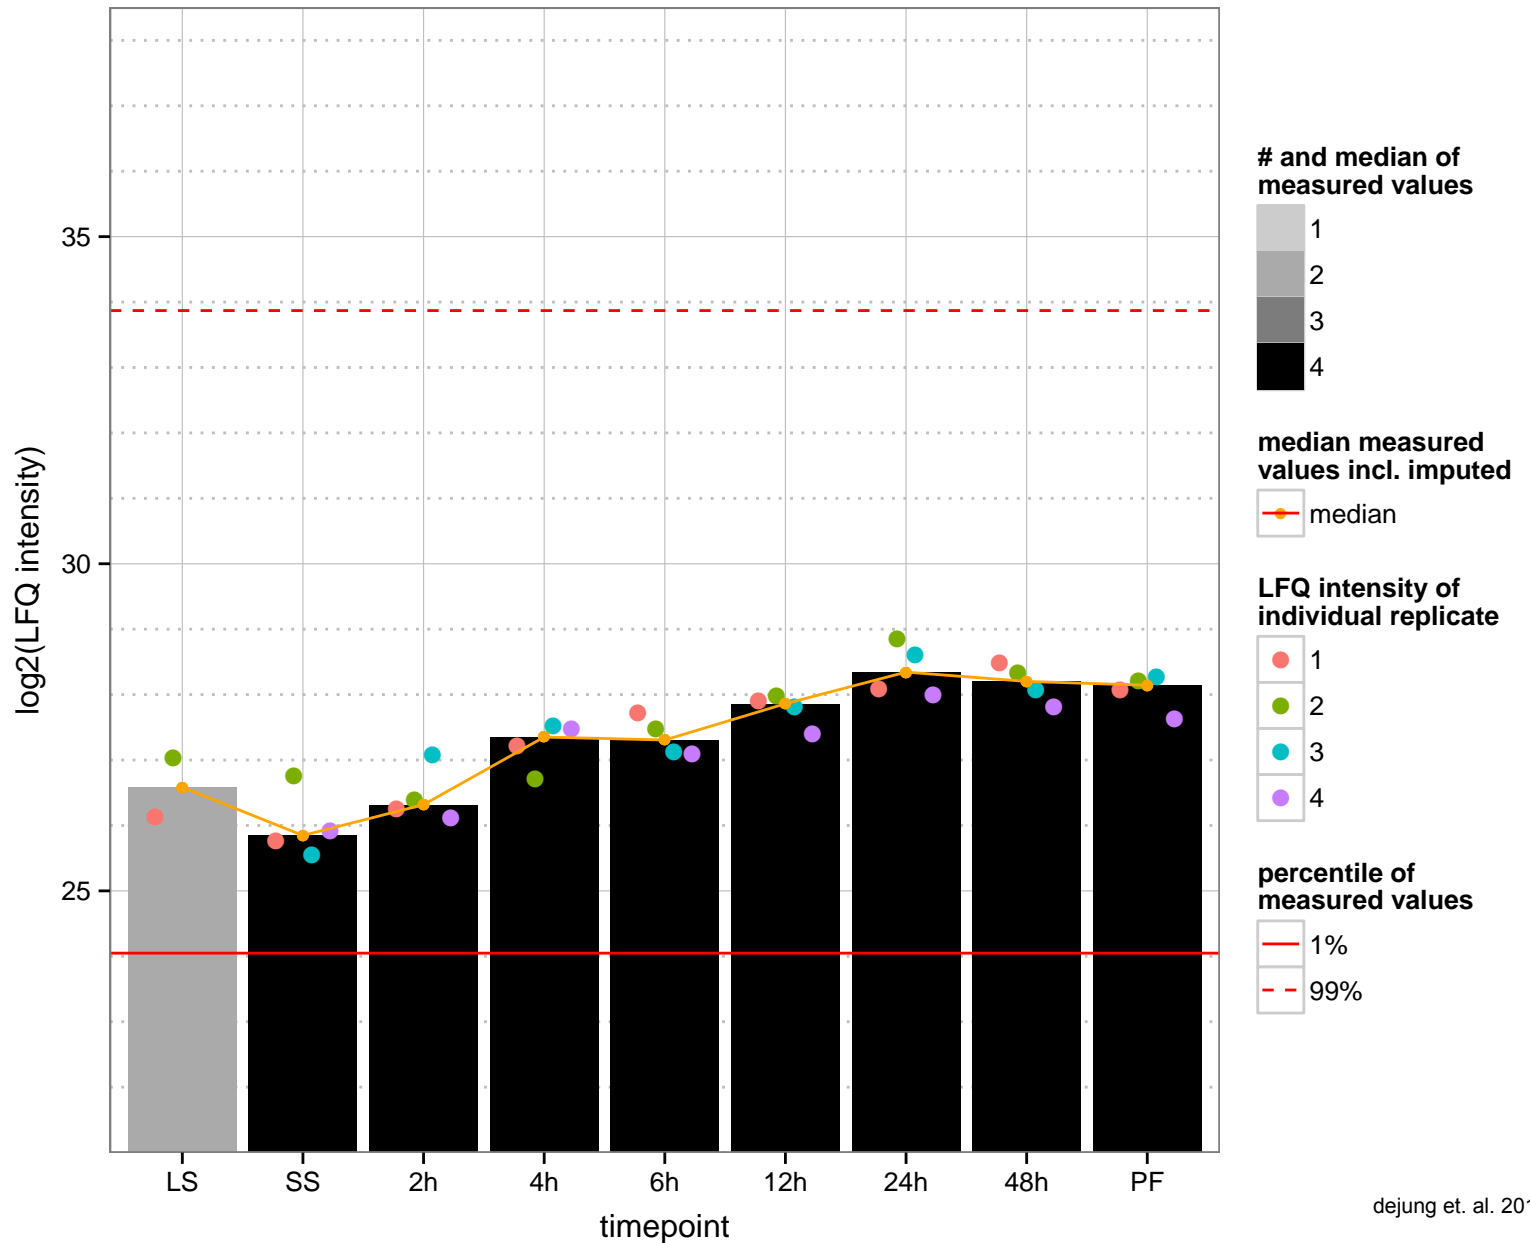



uracil phosphoribosyltransferase, putative  
 Tb927.4.3320  
 AGOF: null  
 AGOC: null  
 AGOP: nucleoside metabolic process  
 PGOF: null  
 PGO: null  
 PGOP: nucleoside metabolic process

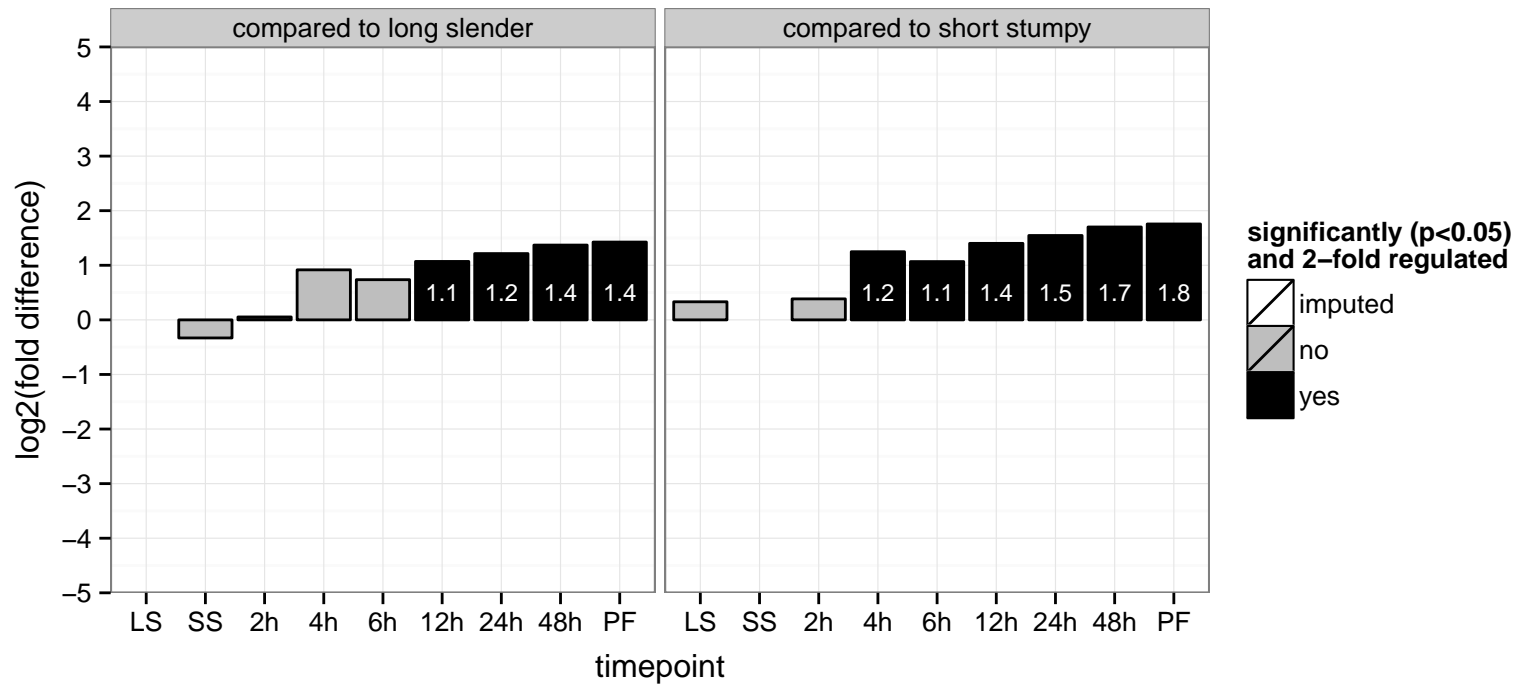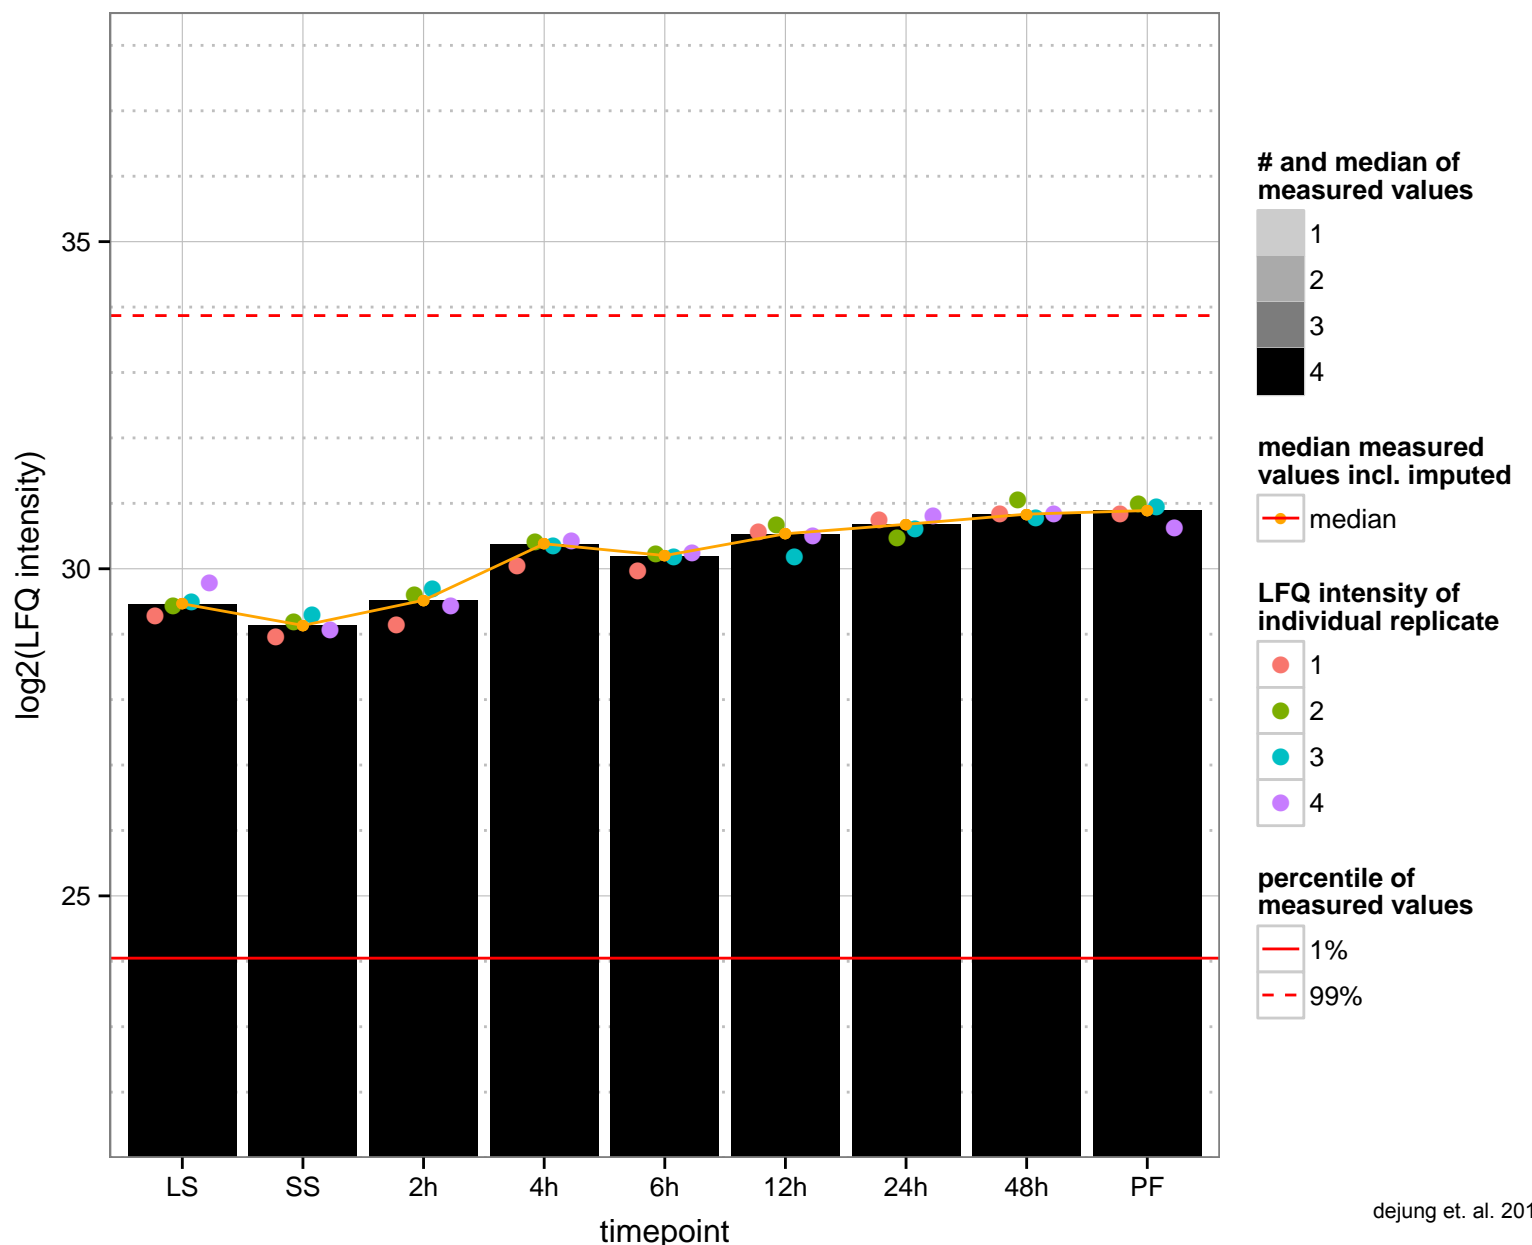

hypothetical protein, conserved  
 Tb927.4.3500  
 AGOF: null  
 AGOC: null  
 AGOP: null  
 PGO: null  
 PGO: null  
 PGO: null

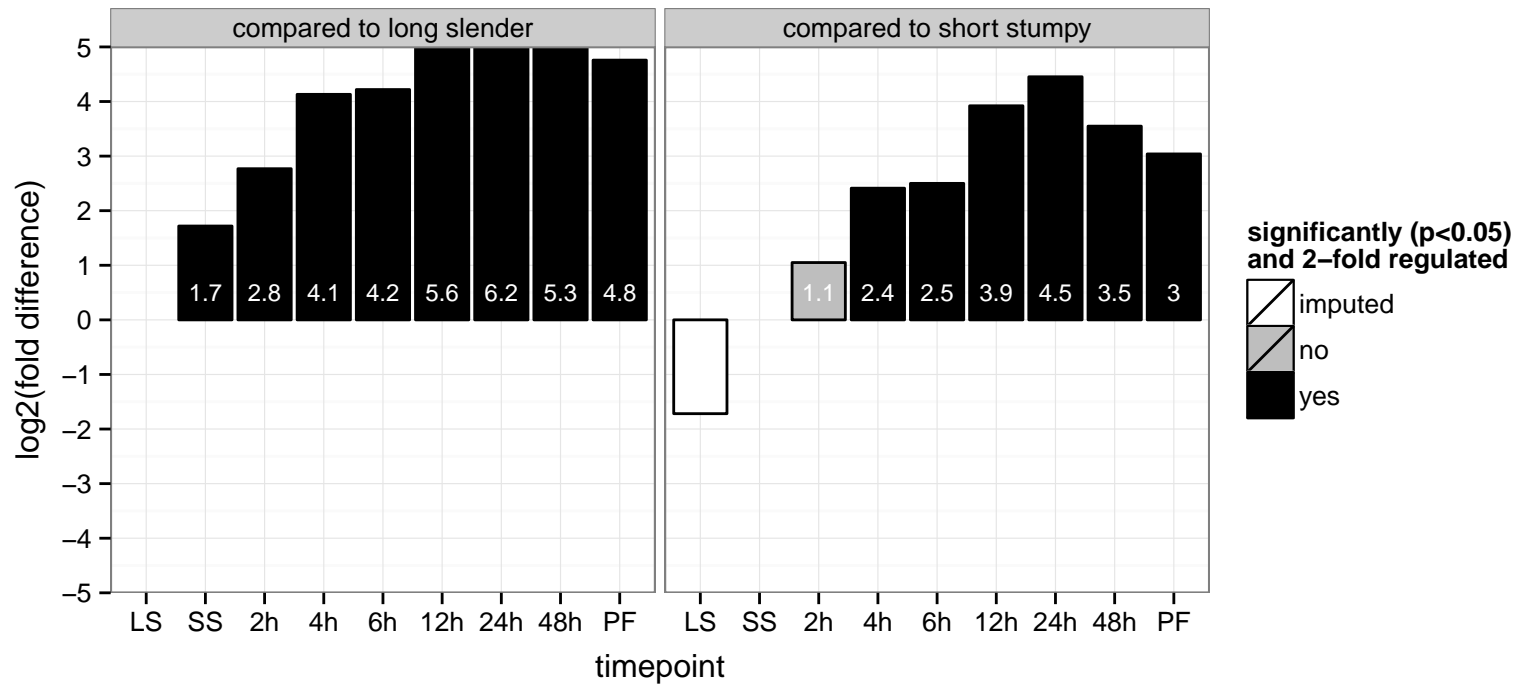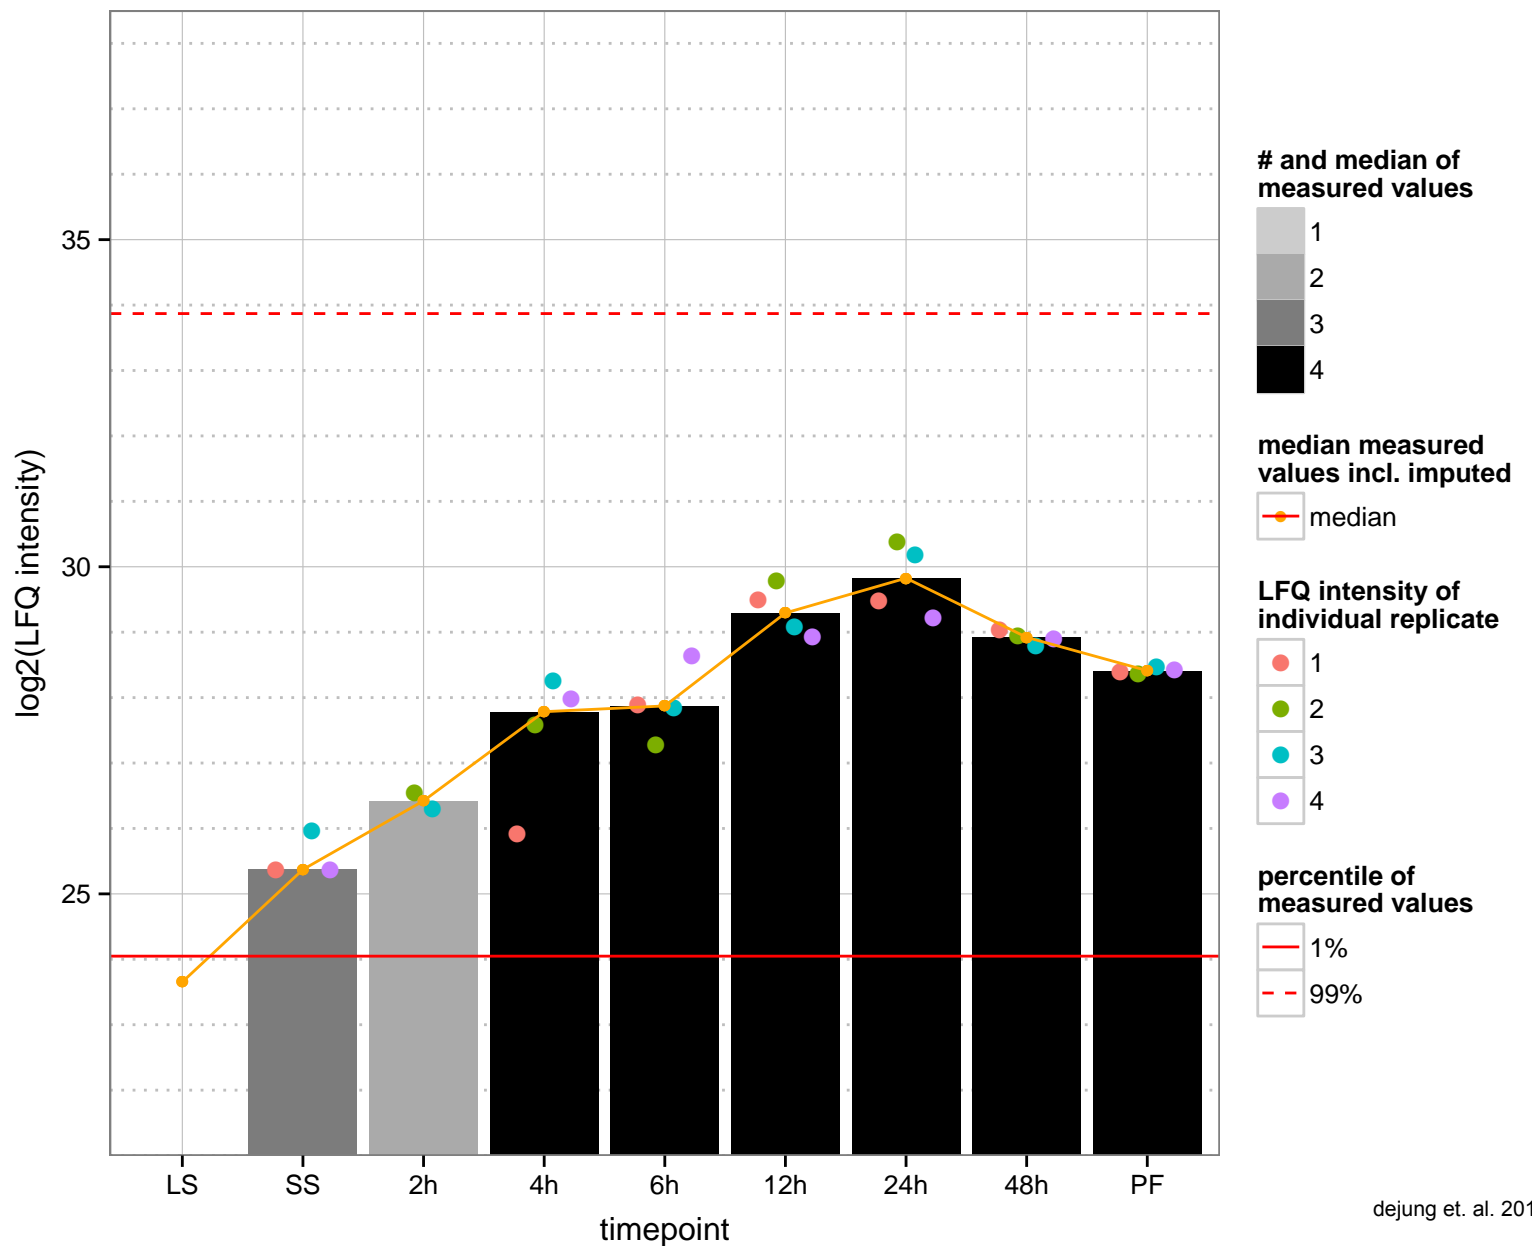

hypothetical protein, conserved  
 Tb927.4.3900  
 AGOF: zinc ion binding  
 AGOC: intracellular  
 AGOP: null  
 PGOF: zinc ion binding  
 PGOC: intracellular  
 PGOP: null

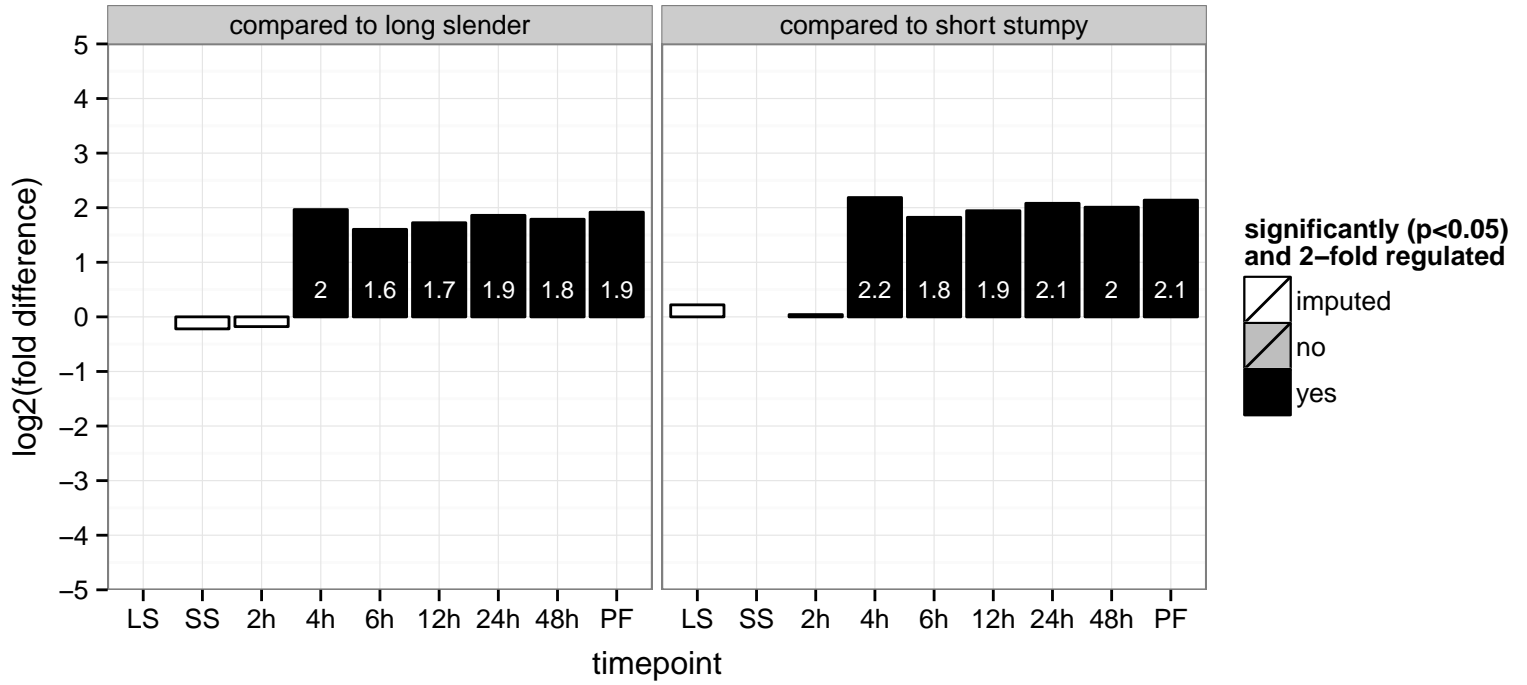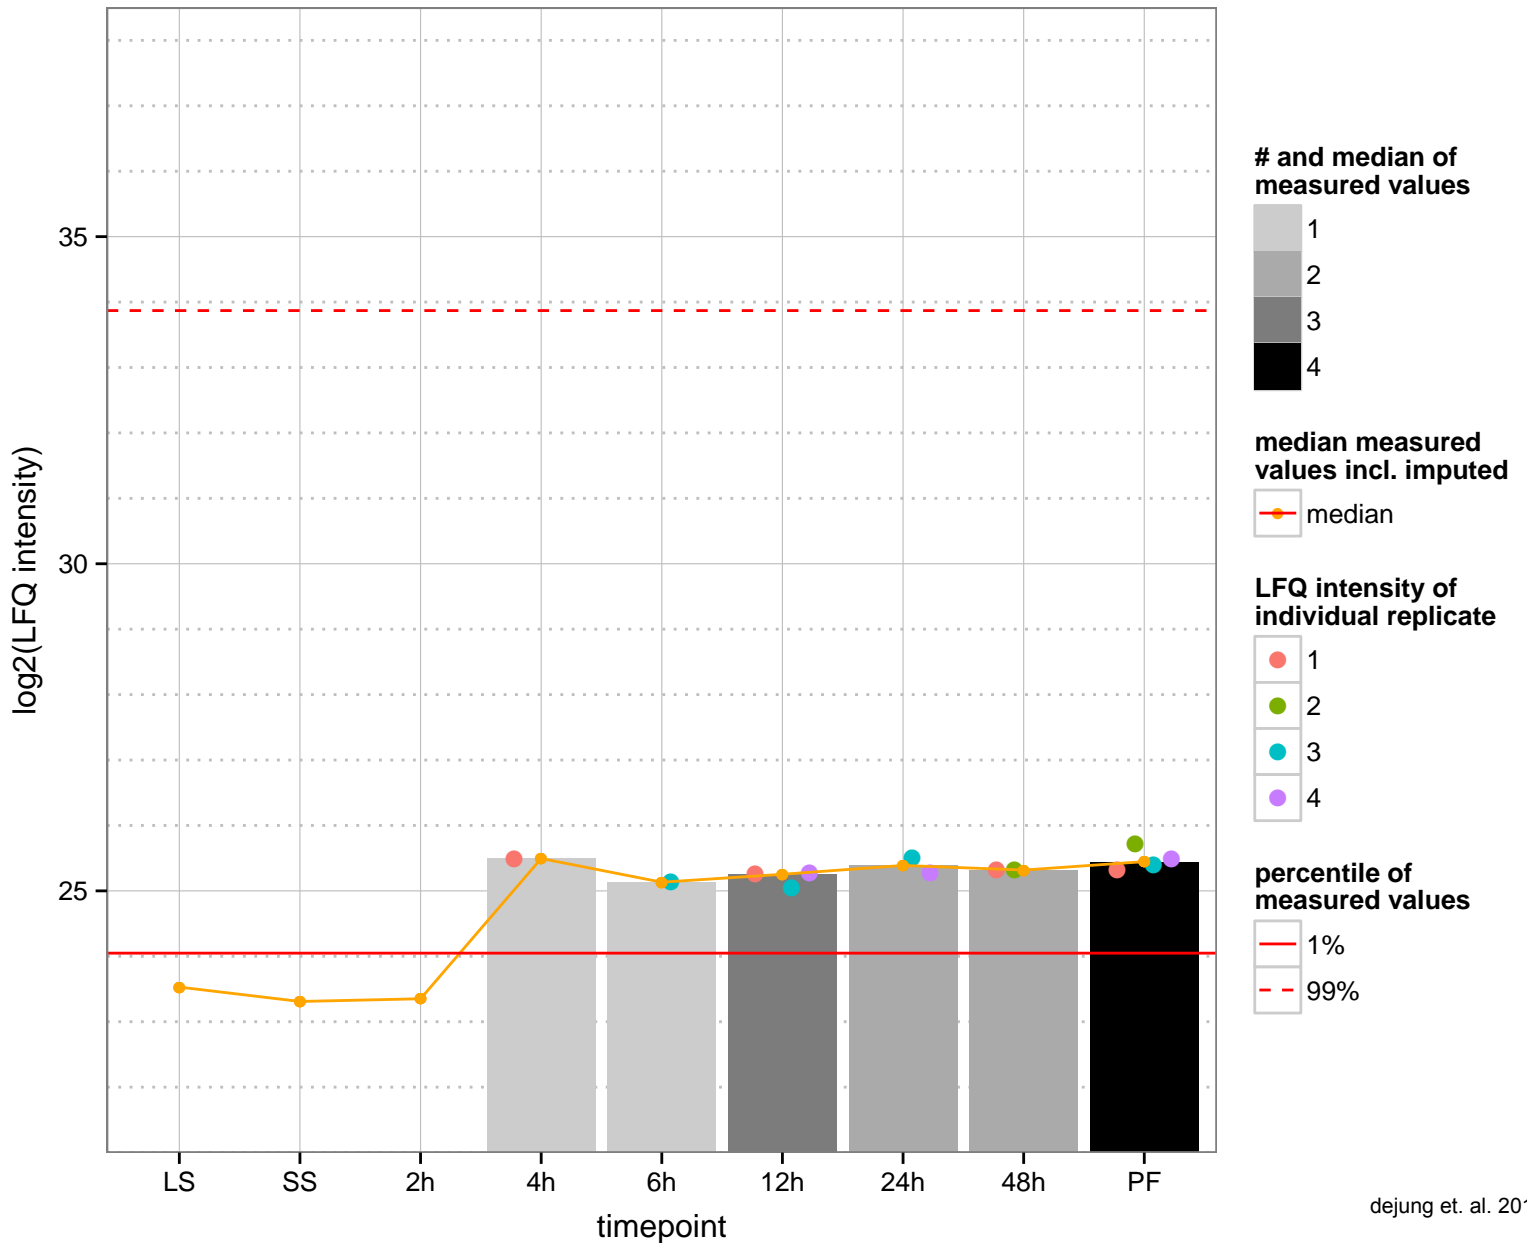

cytoskeleton-associated protein CAP5.5, putative, cysteine peptidase, Clan CA, family C2, putative (CAP5.5)  
 Tb927.4.3950  
 AGOF: calcium-dependent cysteine-type endopeptidase activity  
 AGOC: intracellular  
 AGOP: proteolysis  
 PGOF: calcium-dependent cysteine-type endopeptidase activity  
 PGOC: intracellular  
 PGOP: proteolysis

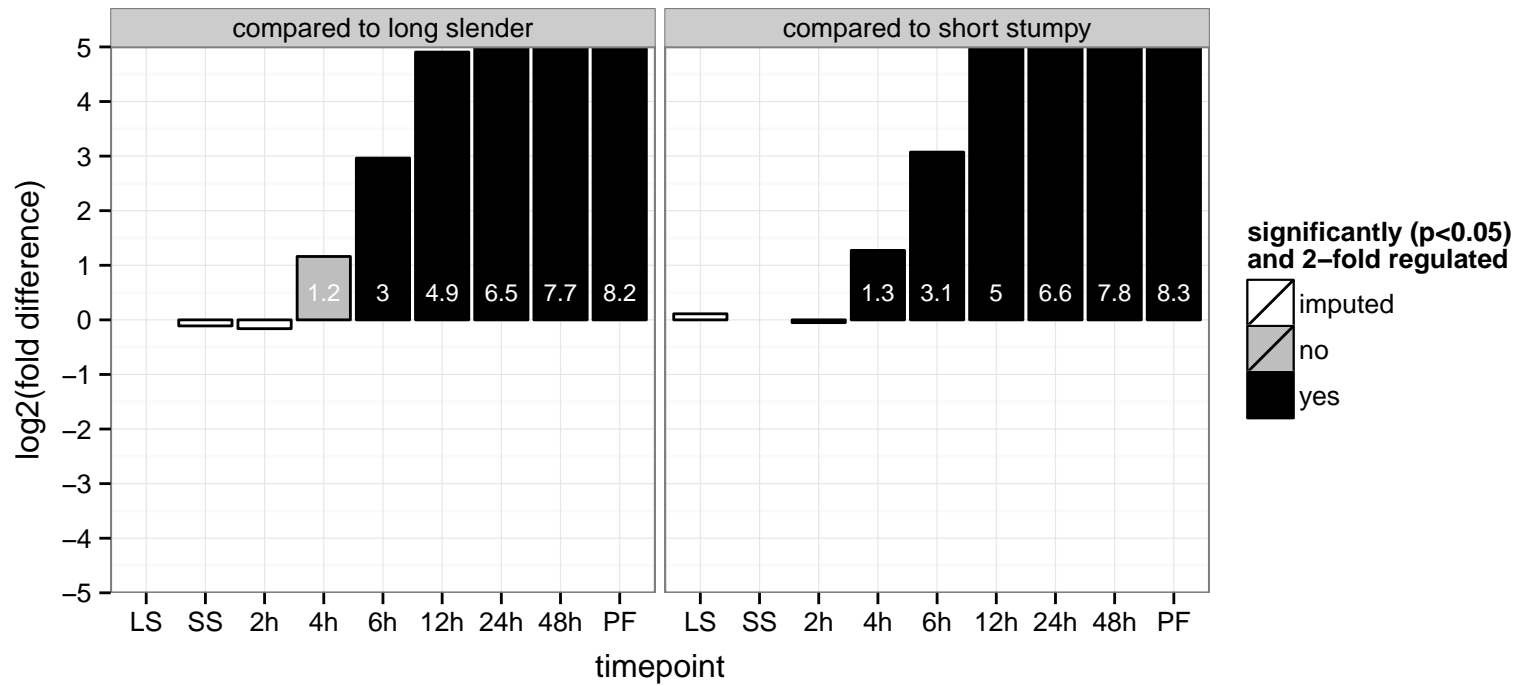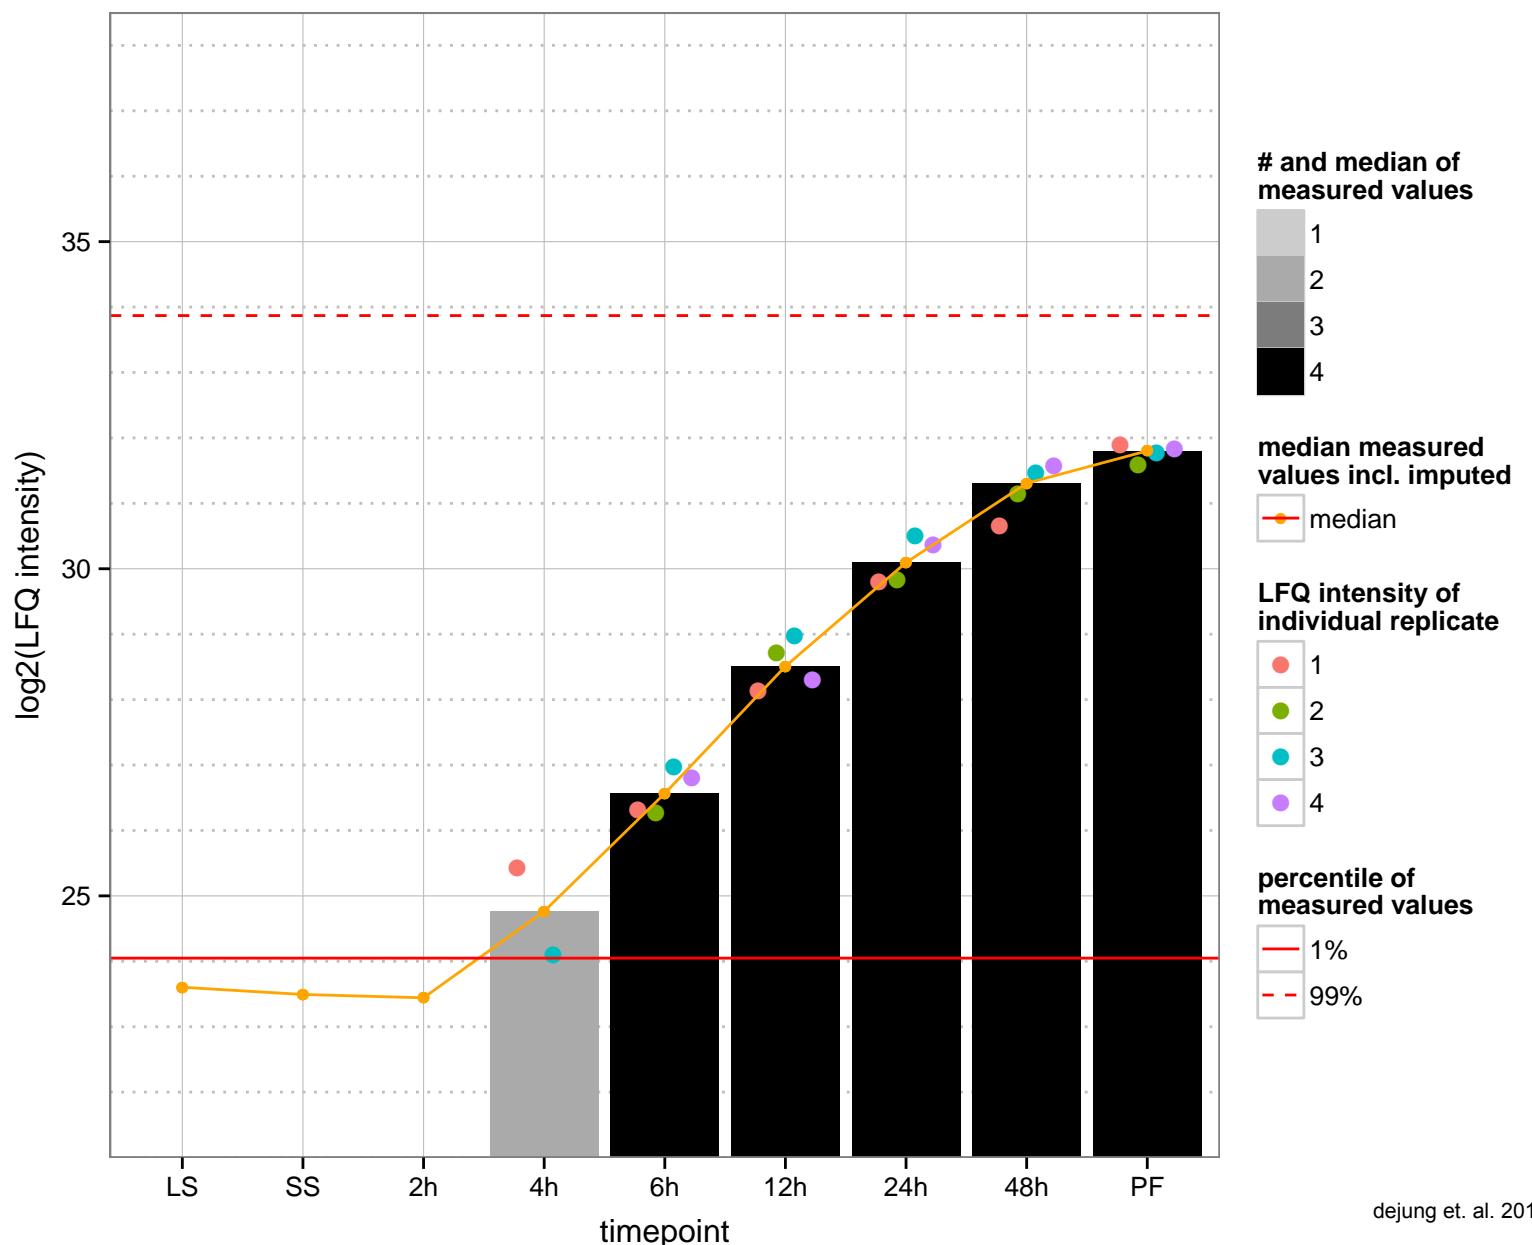

mevalonate kinase, putative  
 Tb927.4.4070  
 AGOF: ATP binding, mevalonate kinase activity  
 AGOC: cytoplasm  
 AGOP: isoprenoid biosynthetic process, phosphorylation  
 PGOF: ATP binding, mevalonate kinase activity  
 PGO: cytoplasm  
 PGOP: isoprenoid biosynthetic process

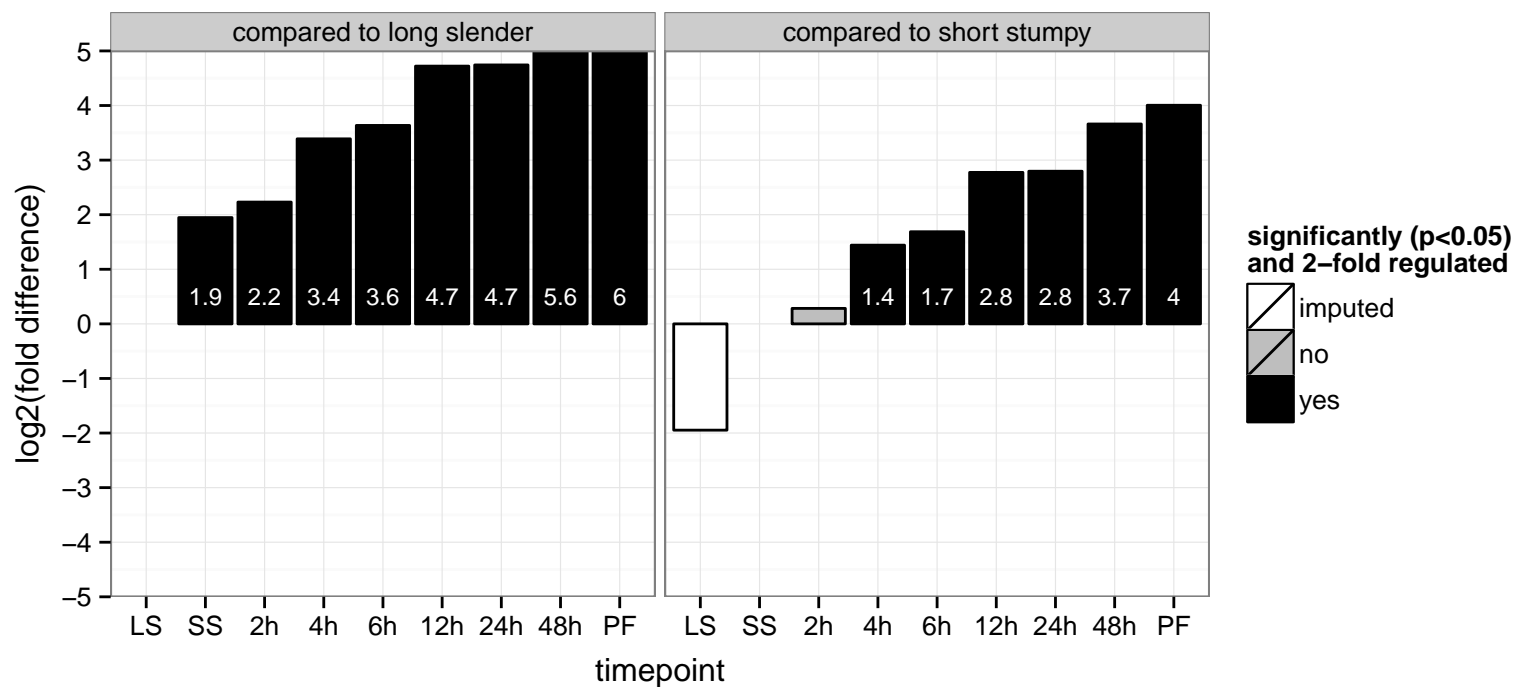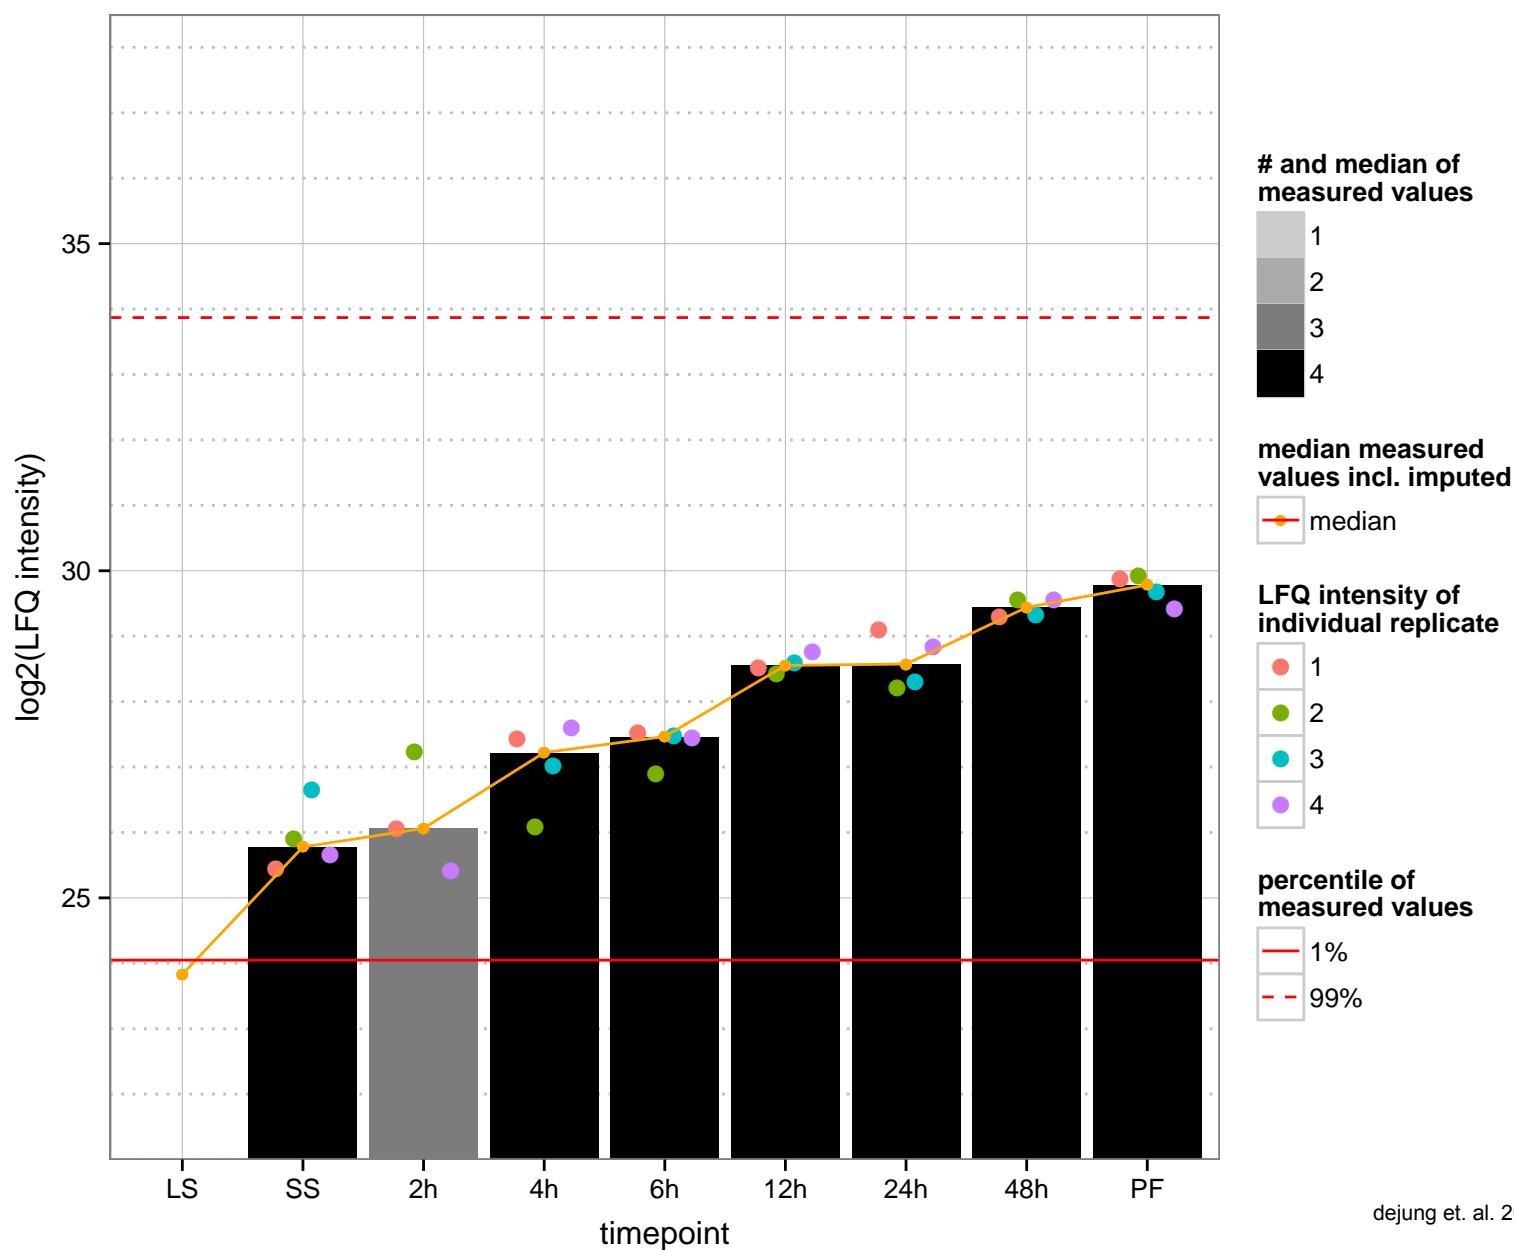

hypothetical protein, conserved  
 Tb927.6.1250  
 AGOF: null  
 AGOC: null, mitochondrion  
 AGOP: null  
 PGO: null  
 PGOC: null  
 PGOP: null

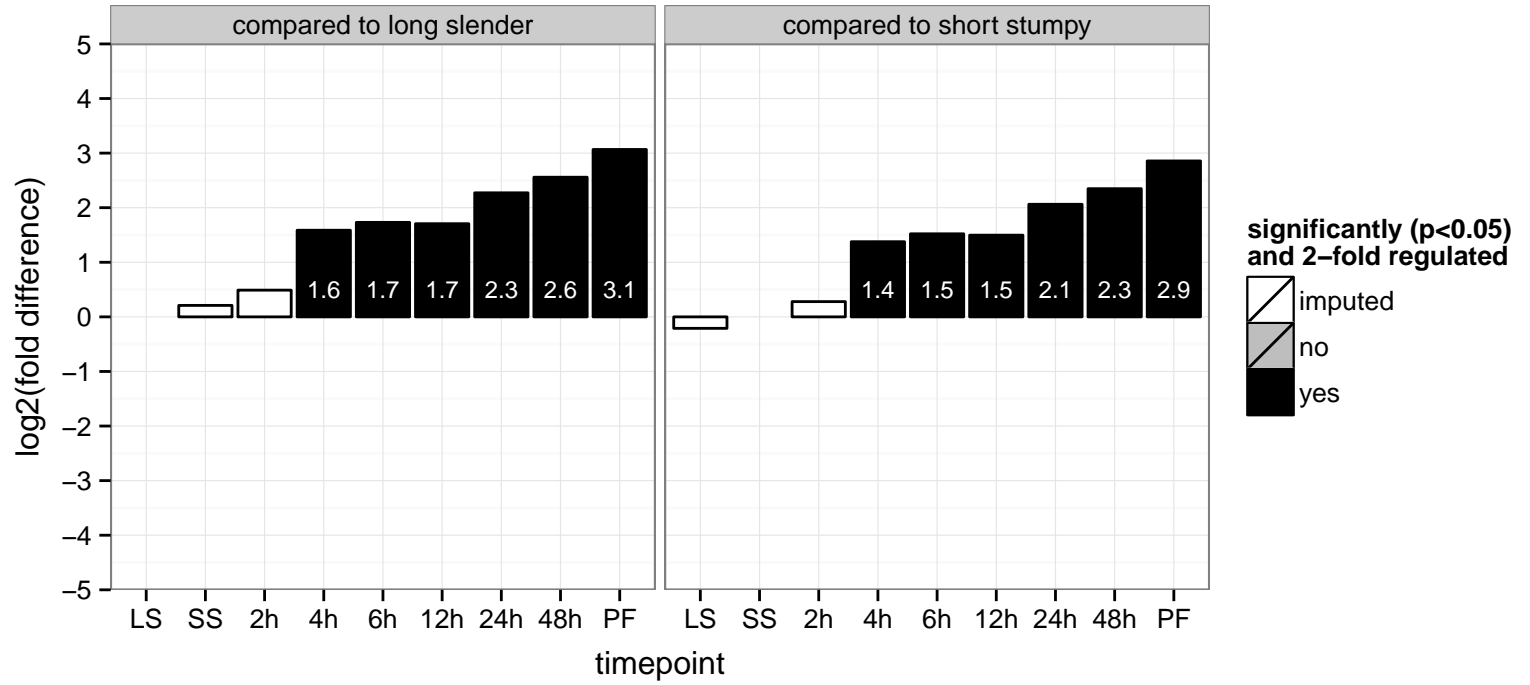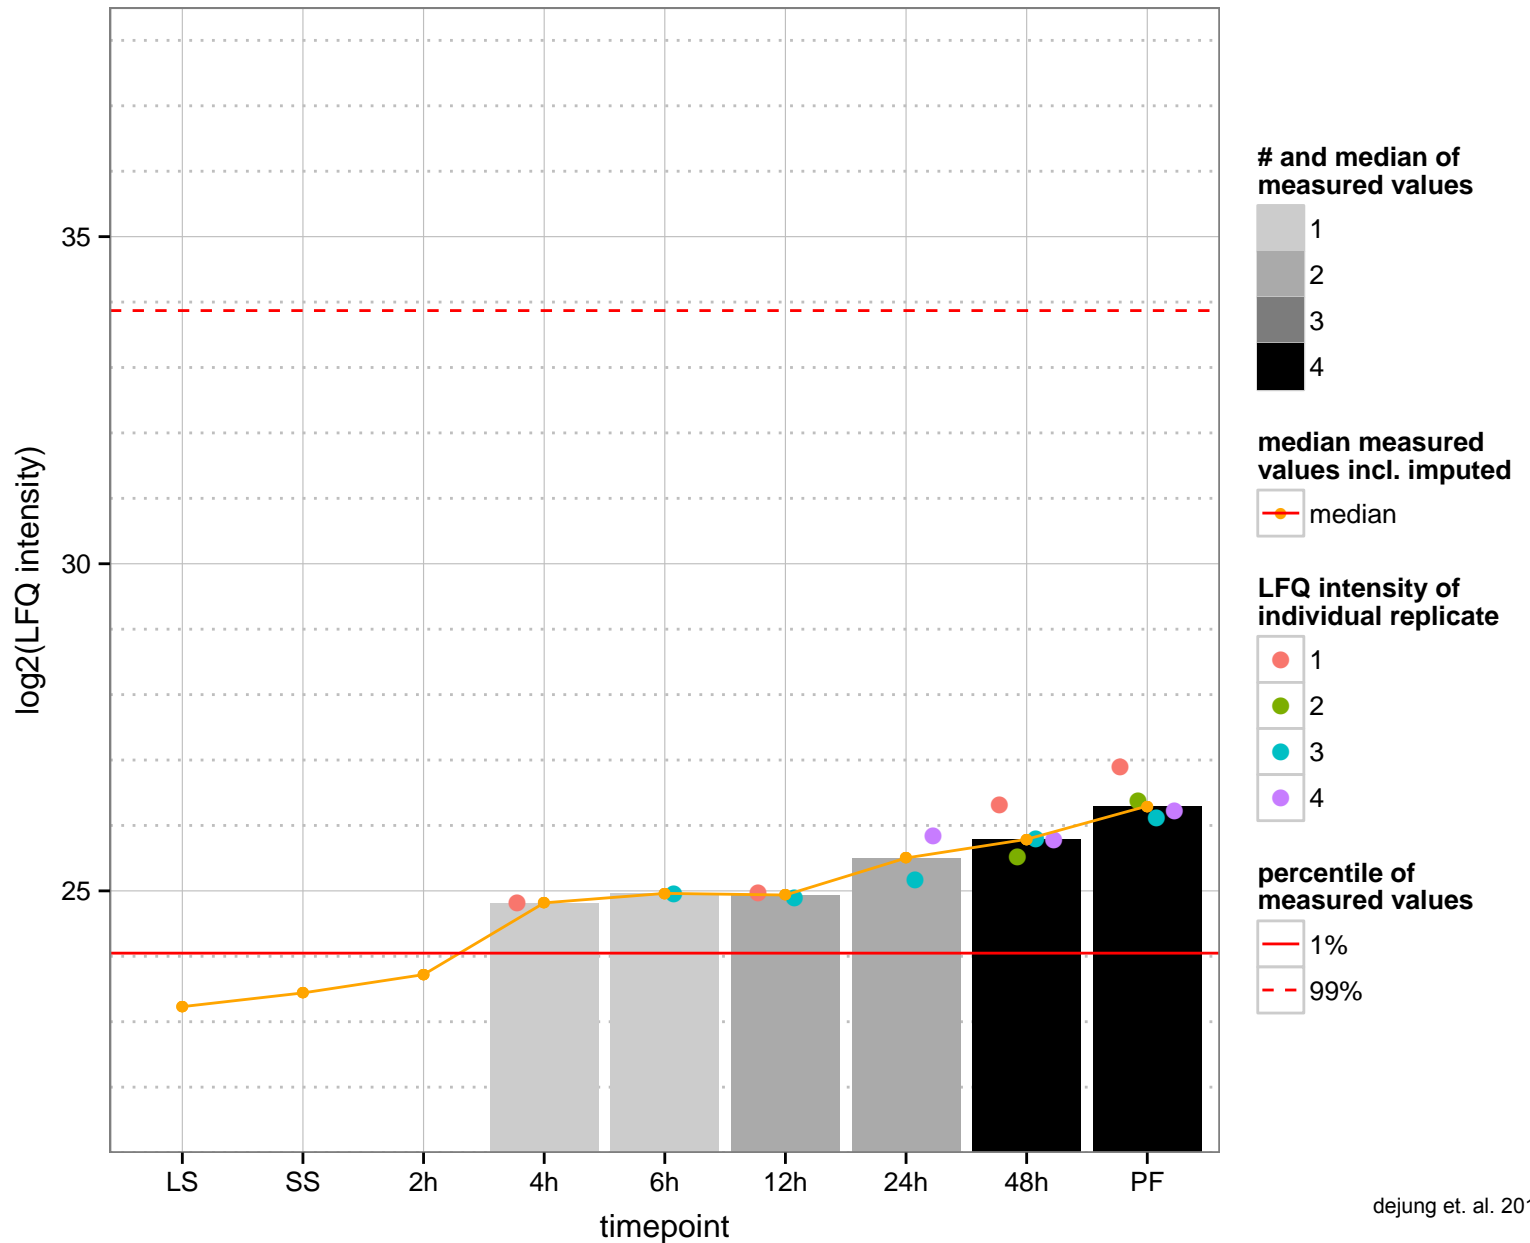

hypothetical protein, conserved  
 Tb927.6.2380  
 AGOF: null  
 AGOC: mitochondrion  
 AGOP: null  
 PGO: null  
 PGOC: null  
 PGOP: null

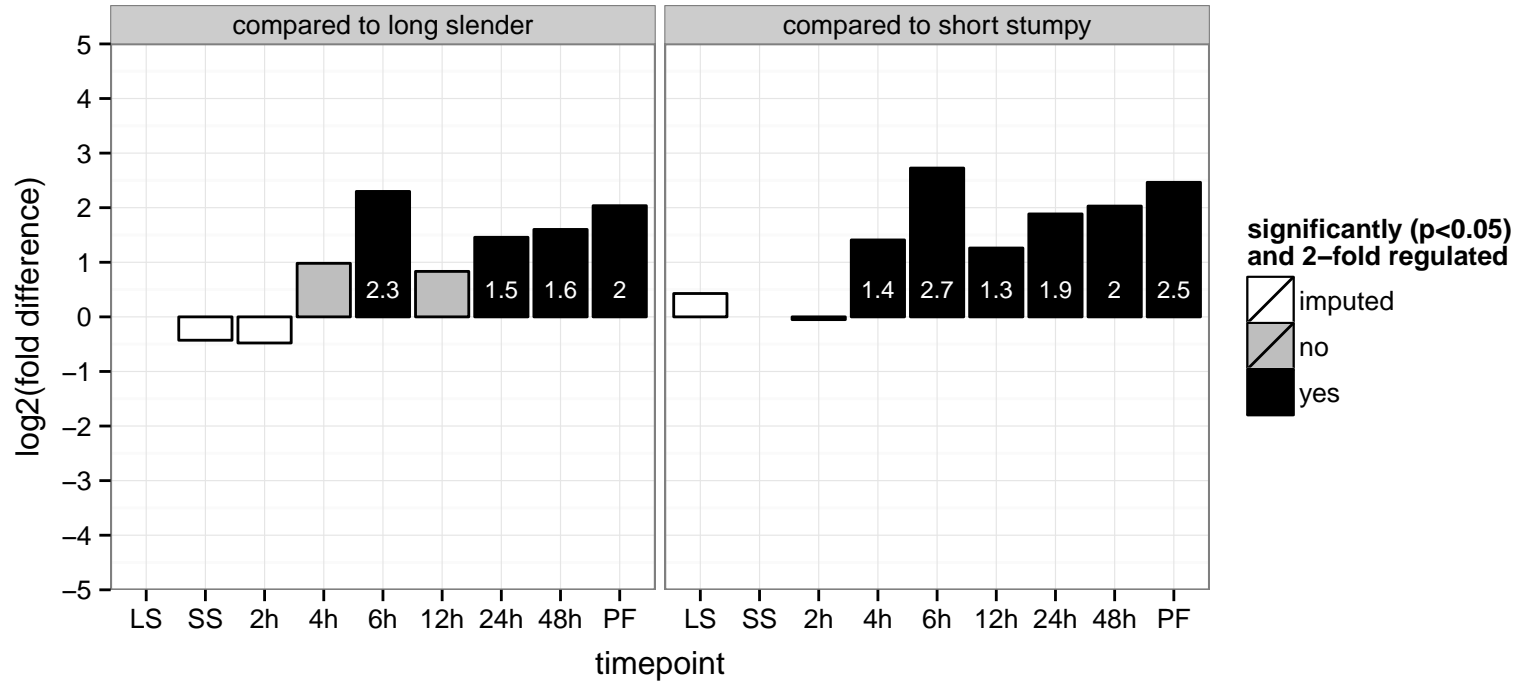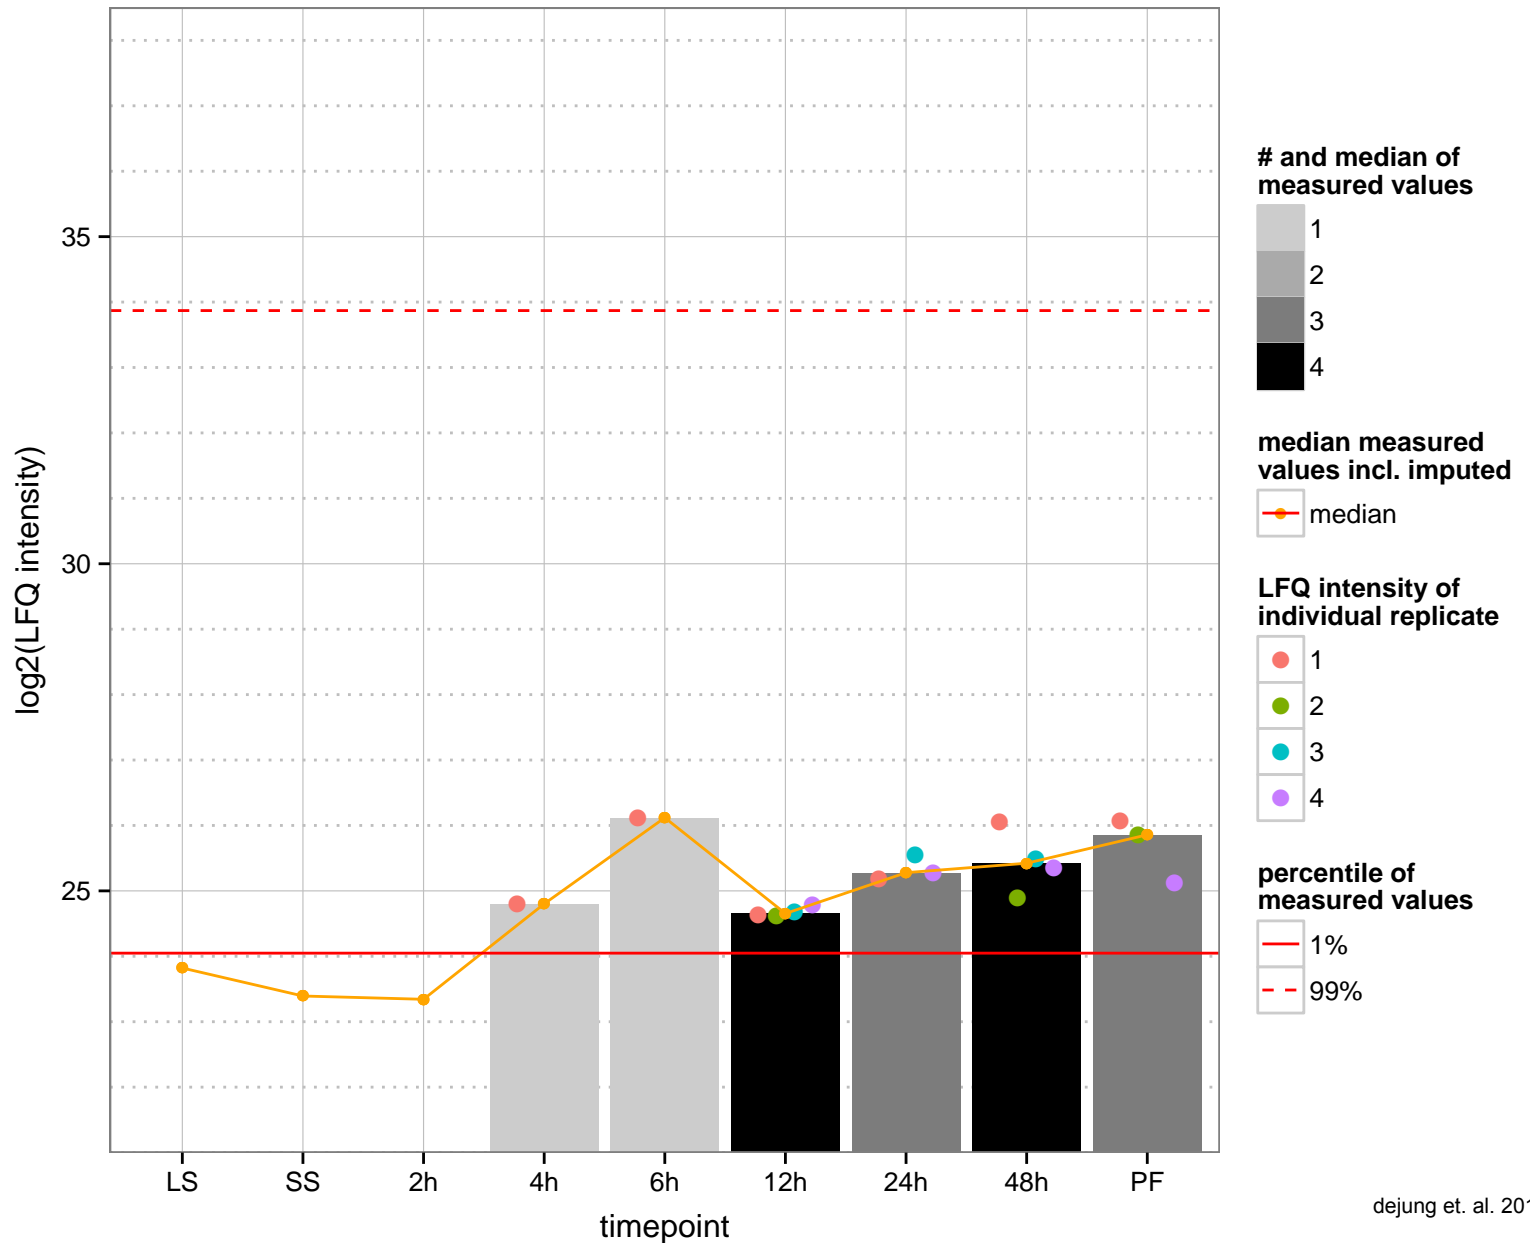

hypothetical protein, conserved  
 Tb927.7.2980;Tb927.7.3020  
 AGOF: oxidoreductase activity  
 AGOC: null  
 AGOP: null  
 PGOF: oxidoreductase activity  
 PGOC: null  
 PGOP: null

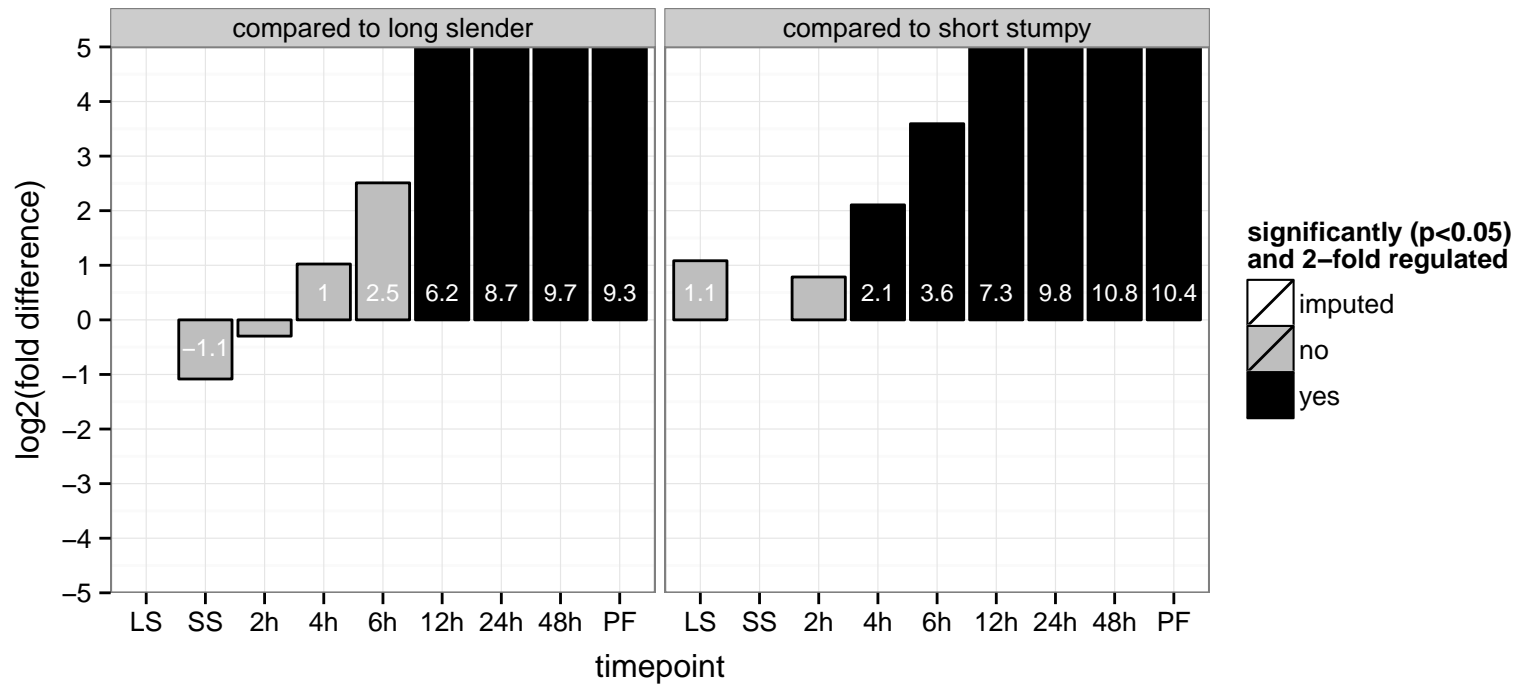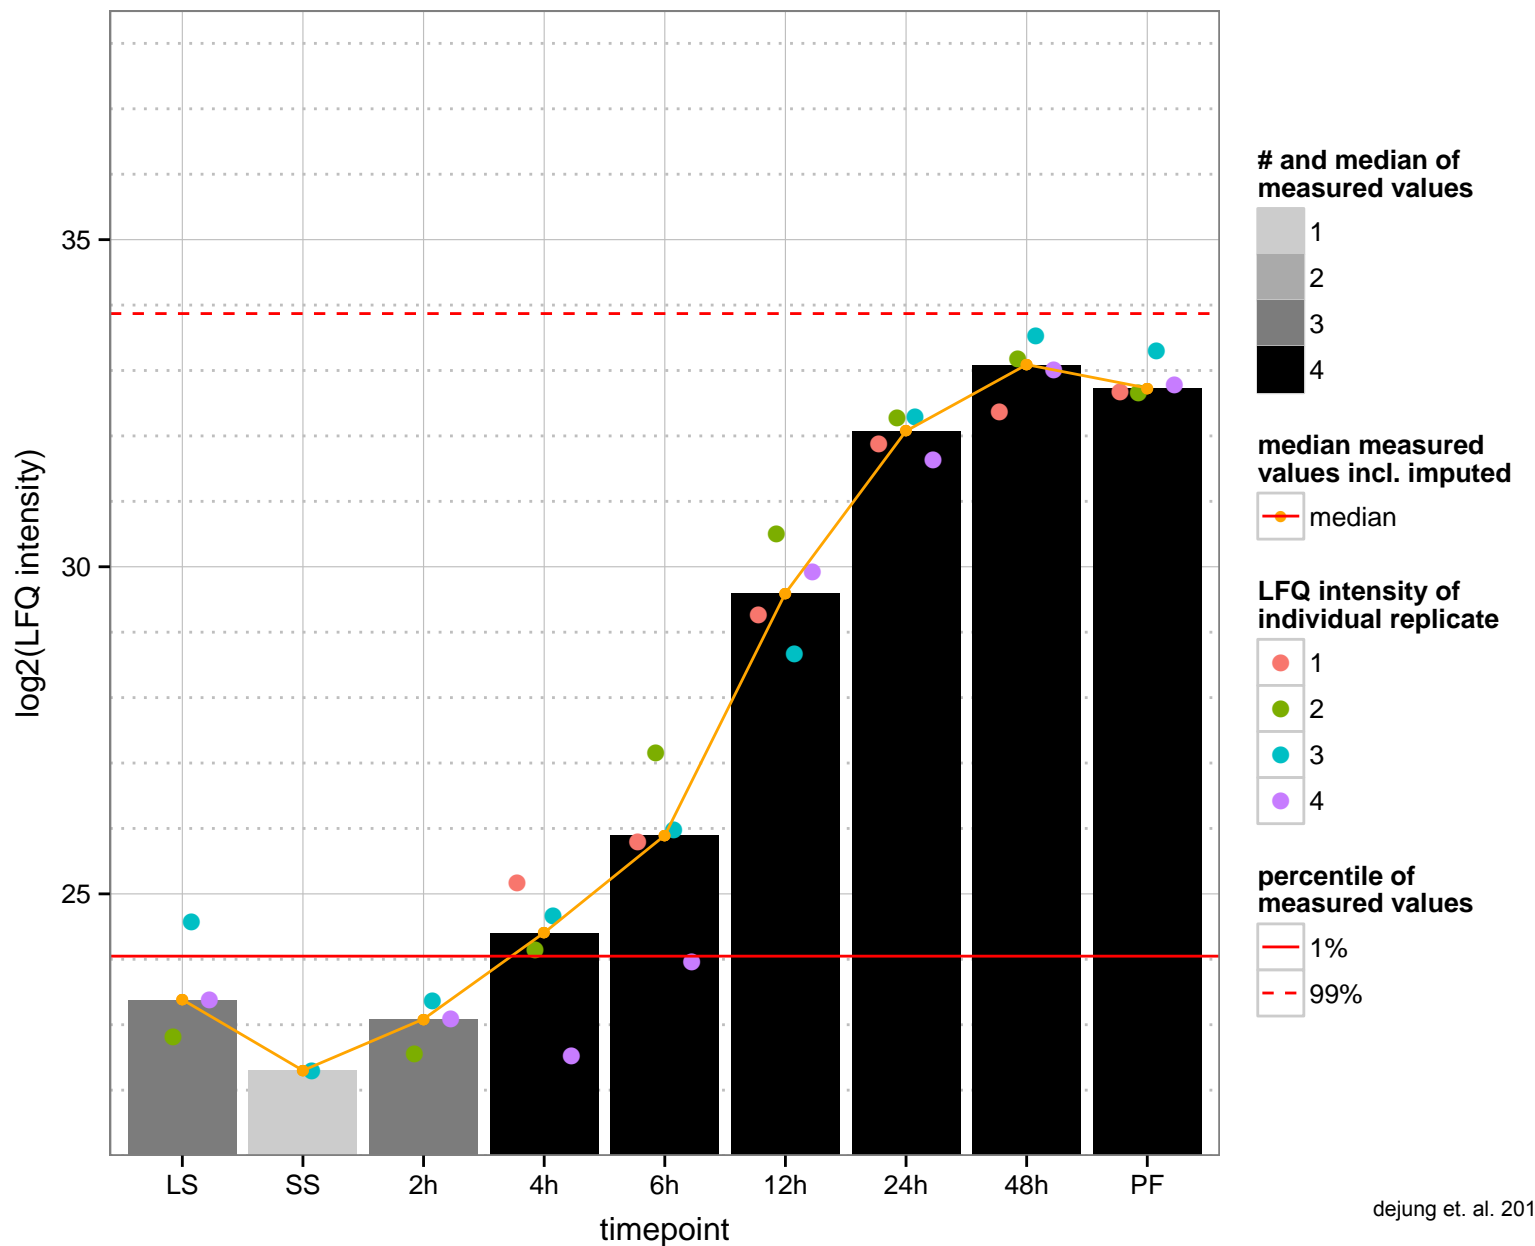



hypothetical protein, conserved  
 Tb927.7.3810  
 AGOF: DNA binding  
 AGOC: mitochondrion  
 AGOP: regulation of transcription, DNA-dependent  
 PGO: DNA binding  
 PGO: null  
 PGO: regulation of transcription, DNA-dependent

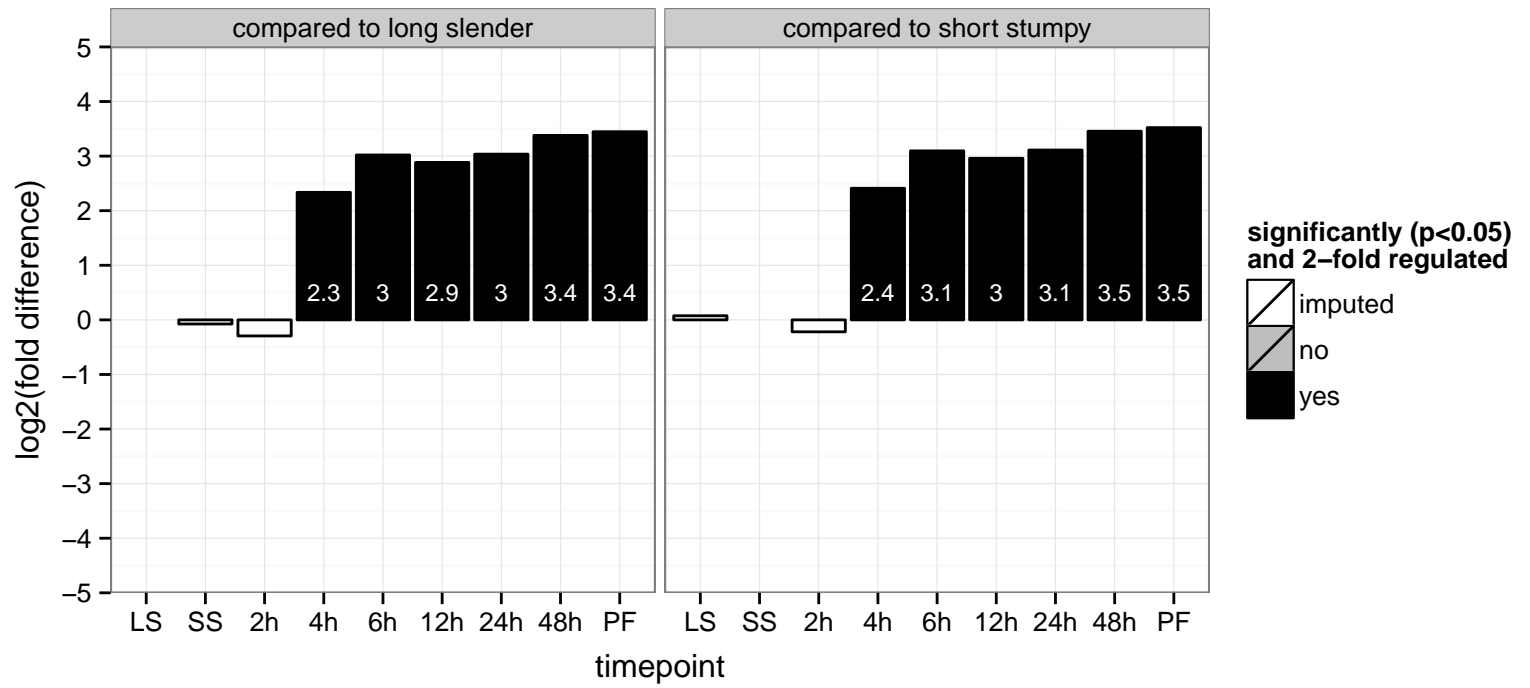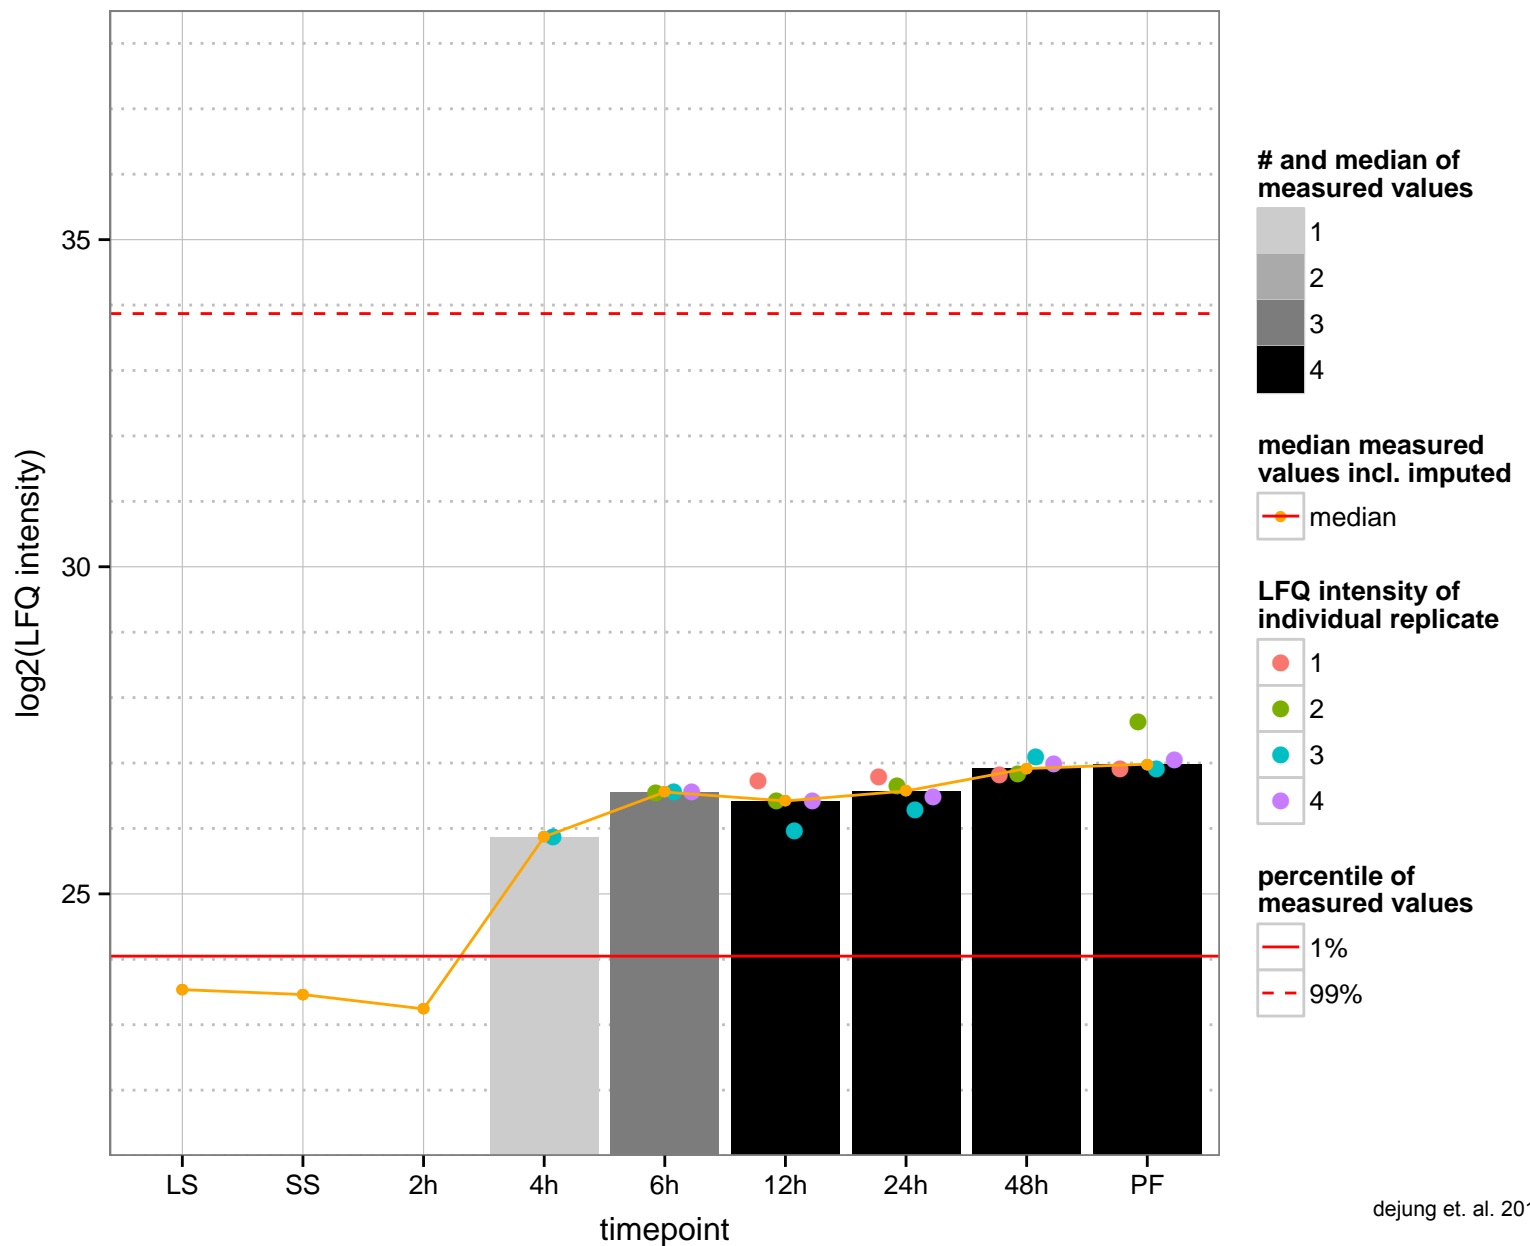

hypothetical protein, conserved  
 Tb927.7.4270  
 AGOF: null  
 AGOC: null  
 AGOP: null  
 PGO: null  
 PGOC: null  
 PGOP: null

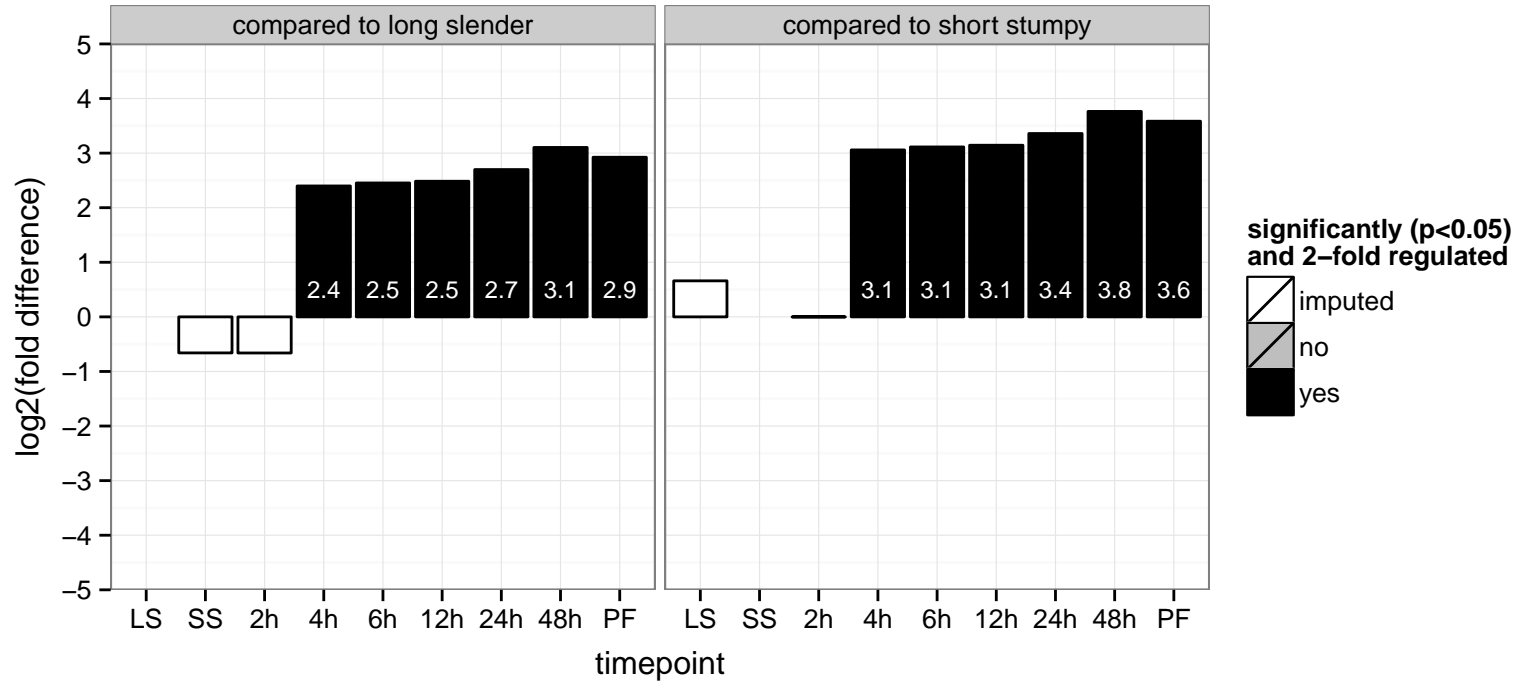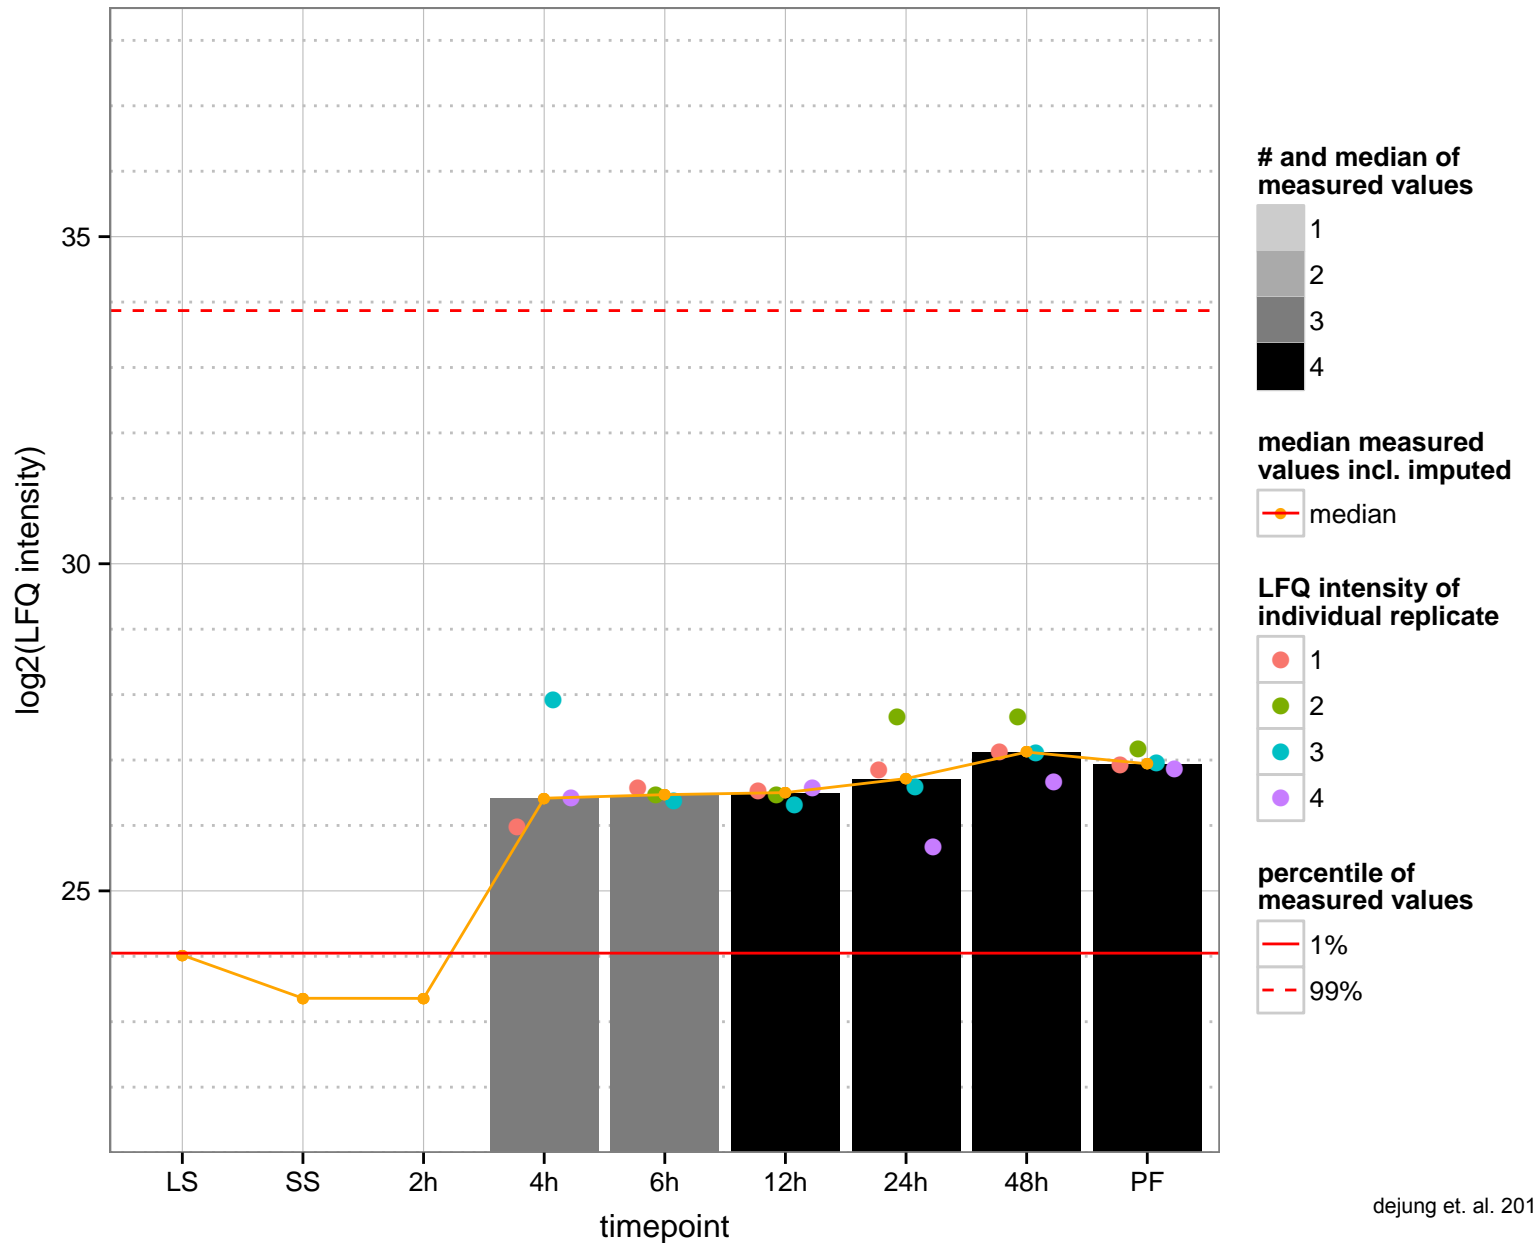

hypothetical protein, conserved  
 Tb927.7.6820  
 AGOF: null  
 AGOC: null  
 AGOP: null  
 PGO: null  
 PGO: null  
 PGO: null

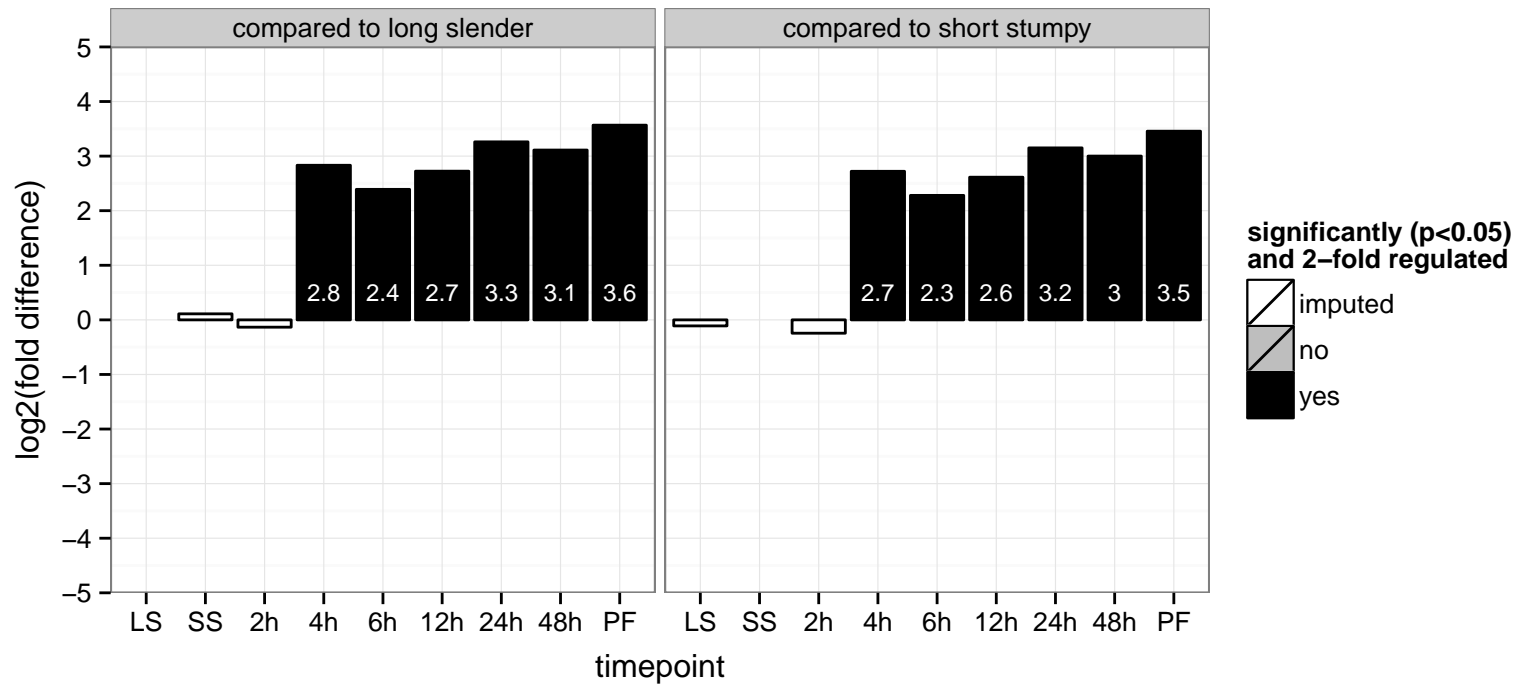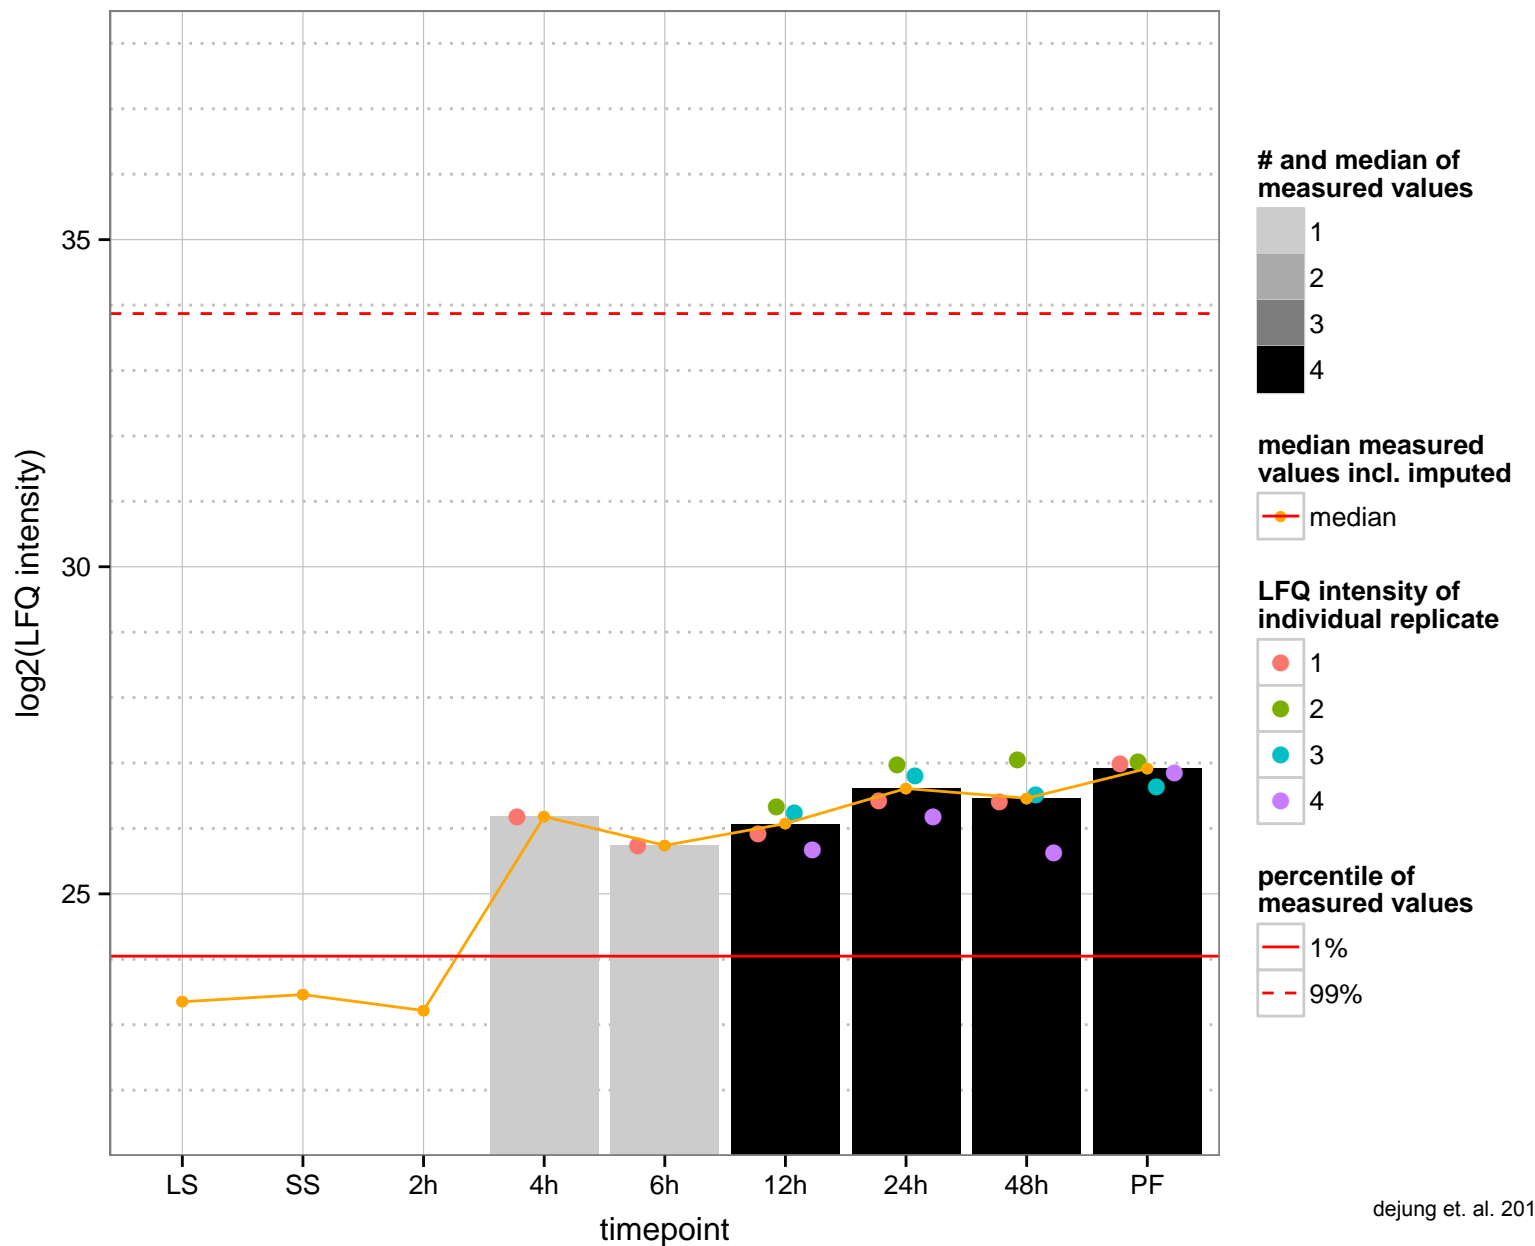

receptor-type adenylyl cyclase GRESAG 4, putative, adenylyl cyclase, ATP pyrophosphate-lyase, BAC from homologous recombination

Tb927.7.7470

AGOF: phosphorus-oxygen lyase activity, null, adenylyl cyclase activity

AGOC: null, integral to membrane

AGOP: cyclic nucleotide biosynthetic process, intracellular signal transduction, null

PGOF: phosphorus-oxygen lyase activity

PGOC: null

PGOP: cyclic nucleotide biosynthetic process, intracellular signal transduction

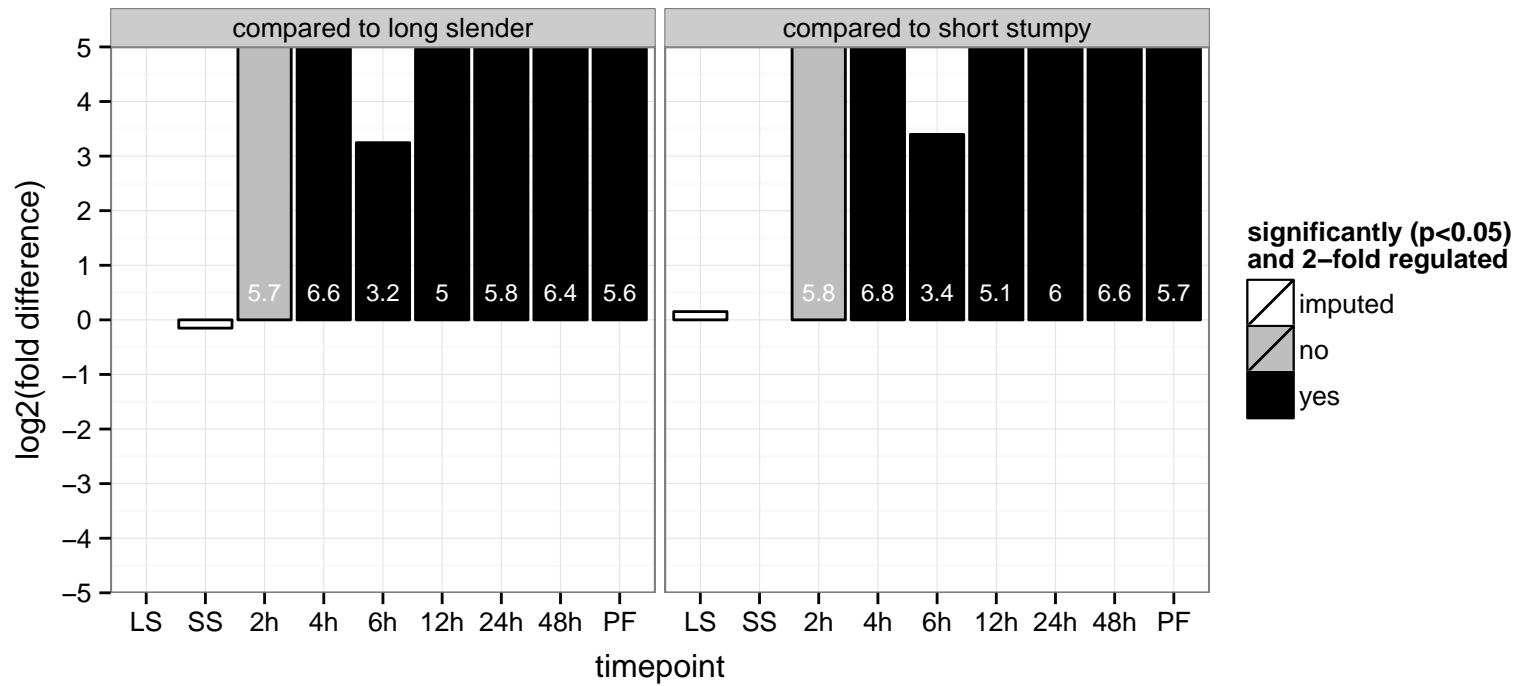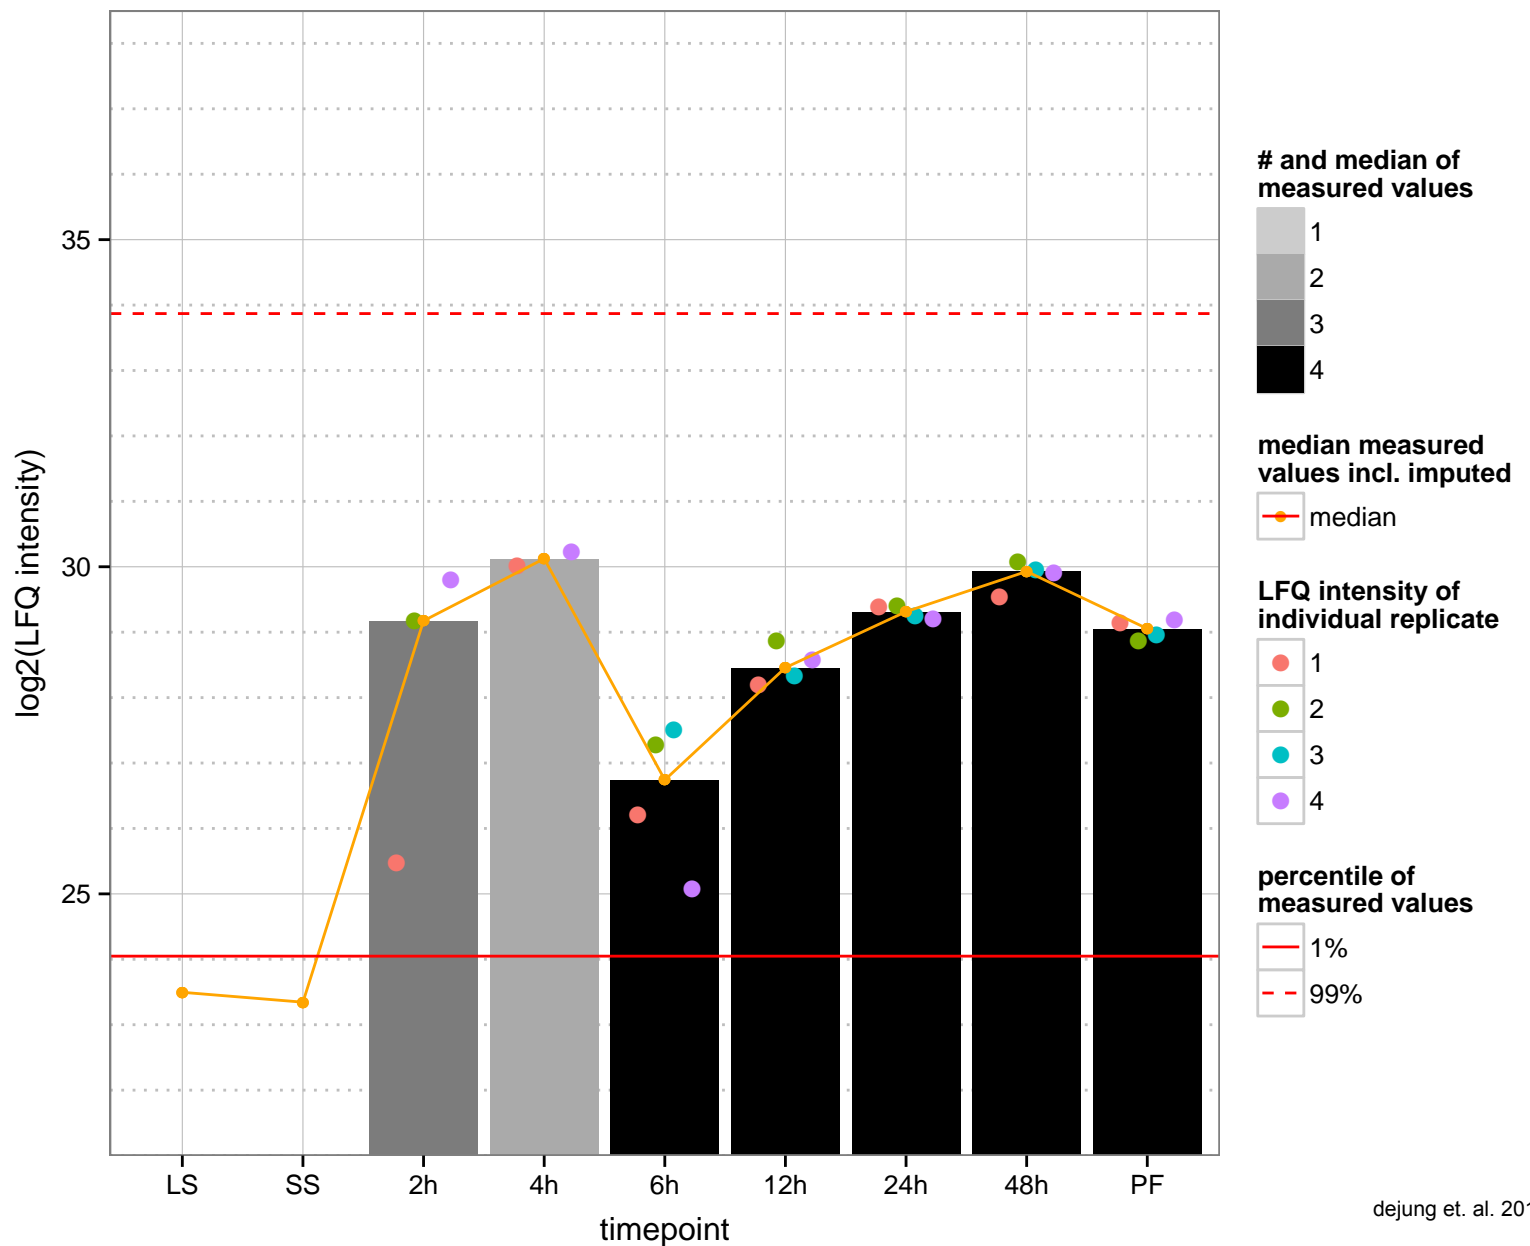

phosphatidylglycerolphosphate synthase, mitochondrial (pgps)

Tb927.8.1720

AGOF: CDP-diacylglycerol-glycerol-3-phosphate 3-phosphatidyltransferase activity

AGOC: membrane, mitochondrion

AGOP: cardiolipin biosynthetic process, glycerophospholipid biosynthetic process, inner mitochondrial membrane organization

PGOF: catalytic activity

PGOC: null

PGOP: metabolic process

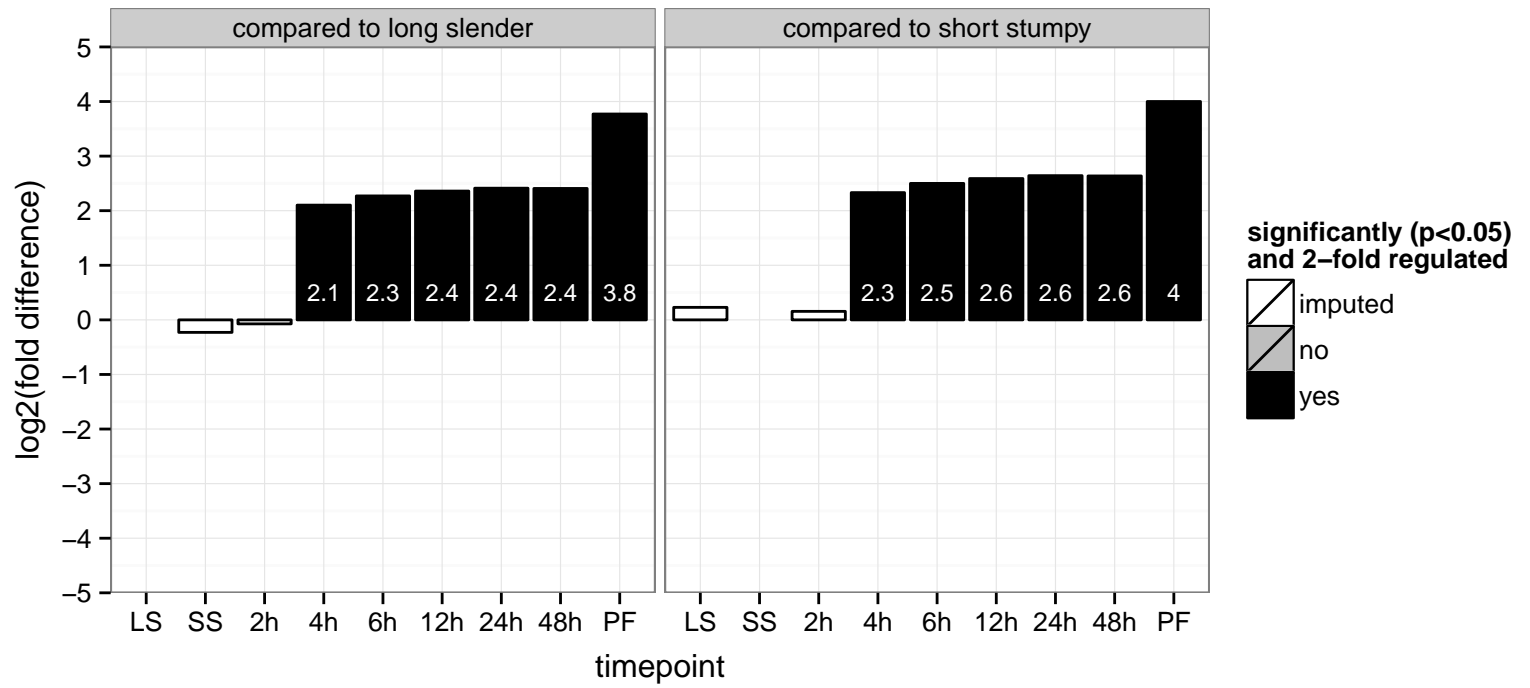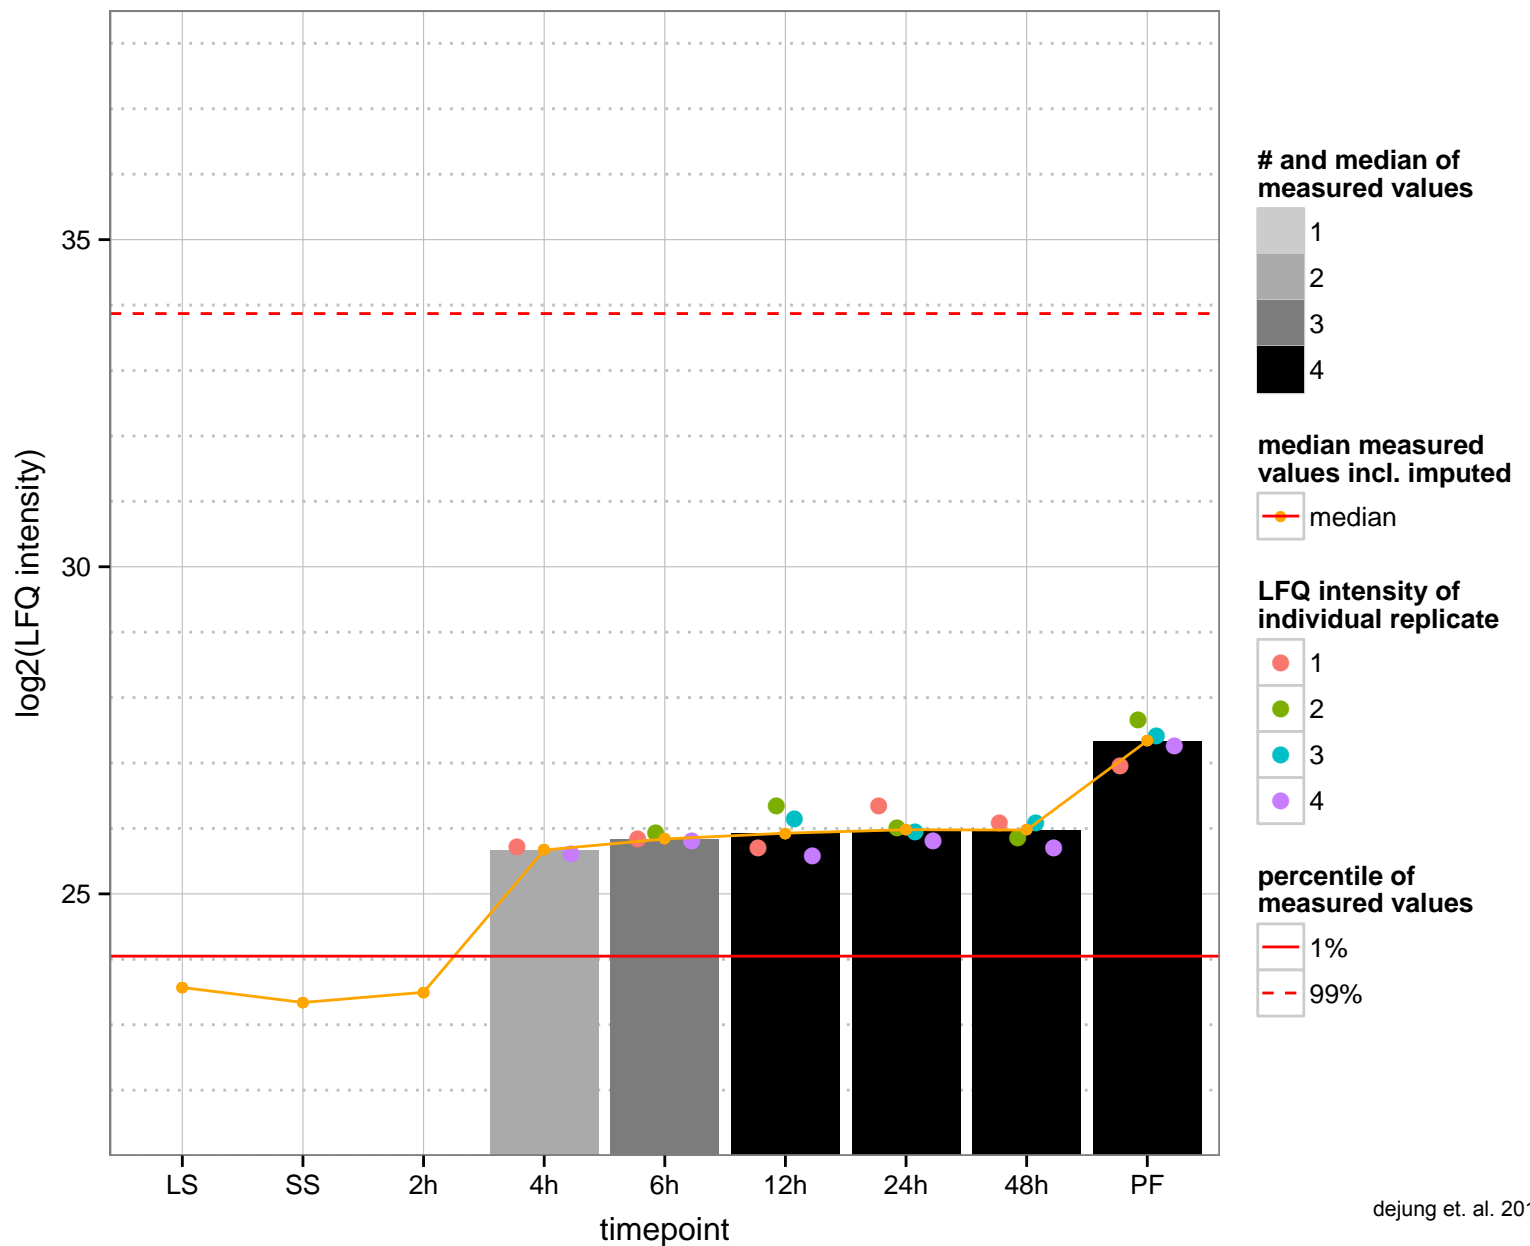

hypothetical protein, conserved  
 Tb927.8.2330  
 AGOF: null  
 AGOC: null  
 AGOP: null  
 PGO: null  
 PGO: null  
 PGO: null

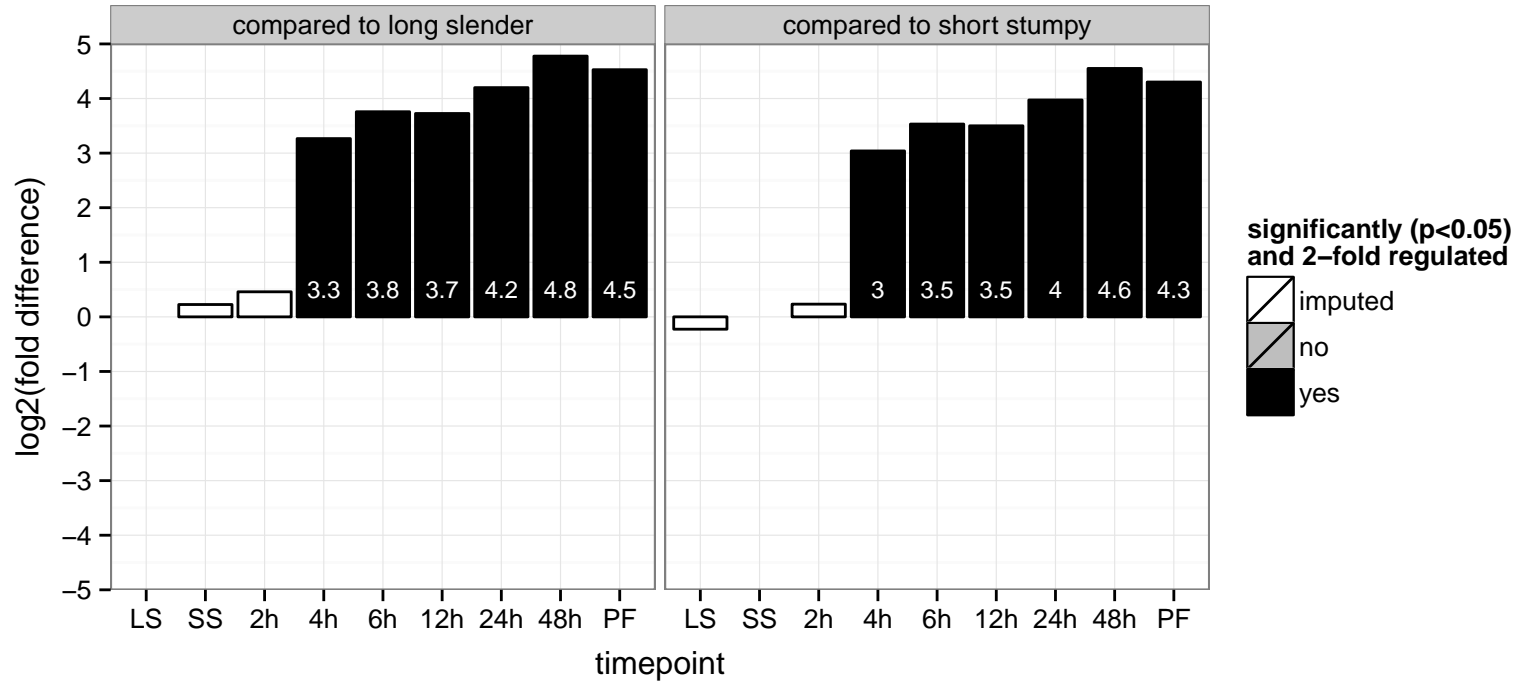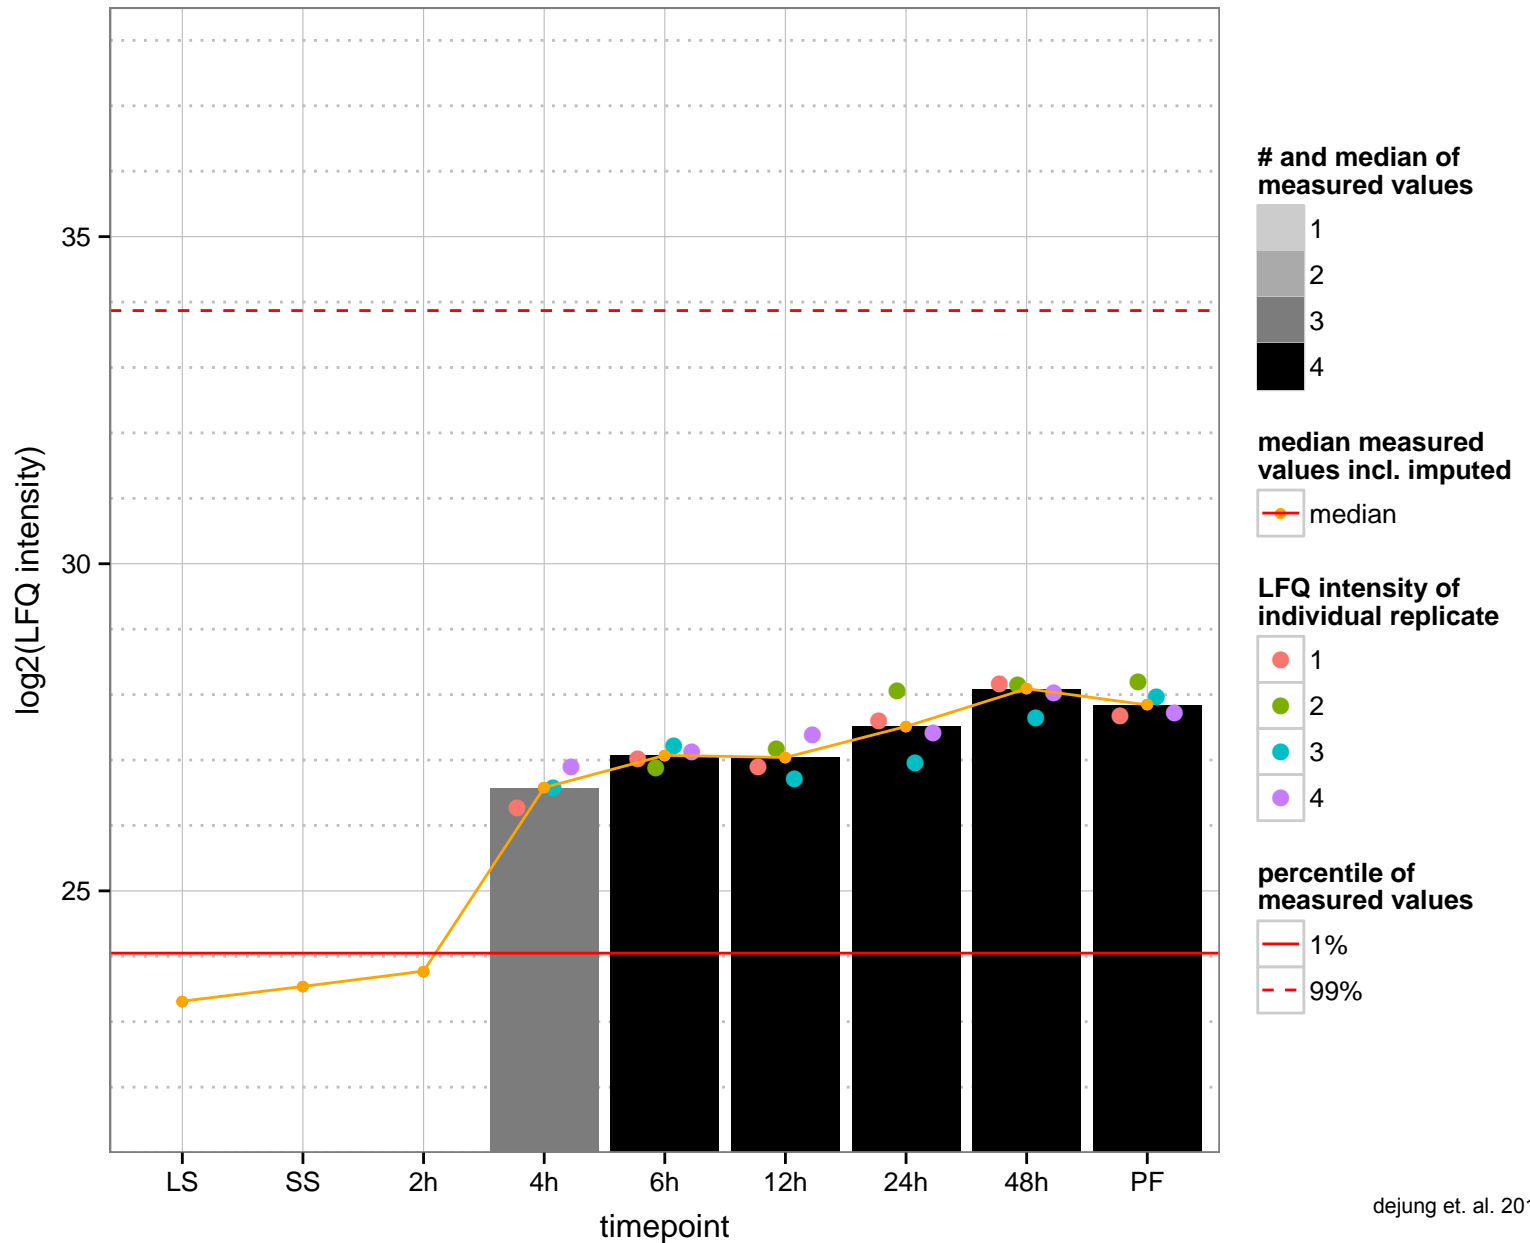

flagellum-adhesion glycoprotein (fla1)  
 Tb927.8.4010  
 AGOF: null  
 AGOC: cilium, flagellar pocket, integral to membrane  
 AGOP: null  
 PGO: null  
 PGO: null  
 PGO: null

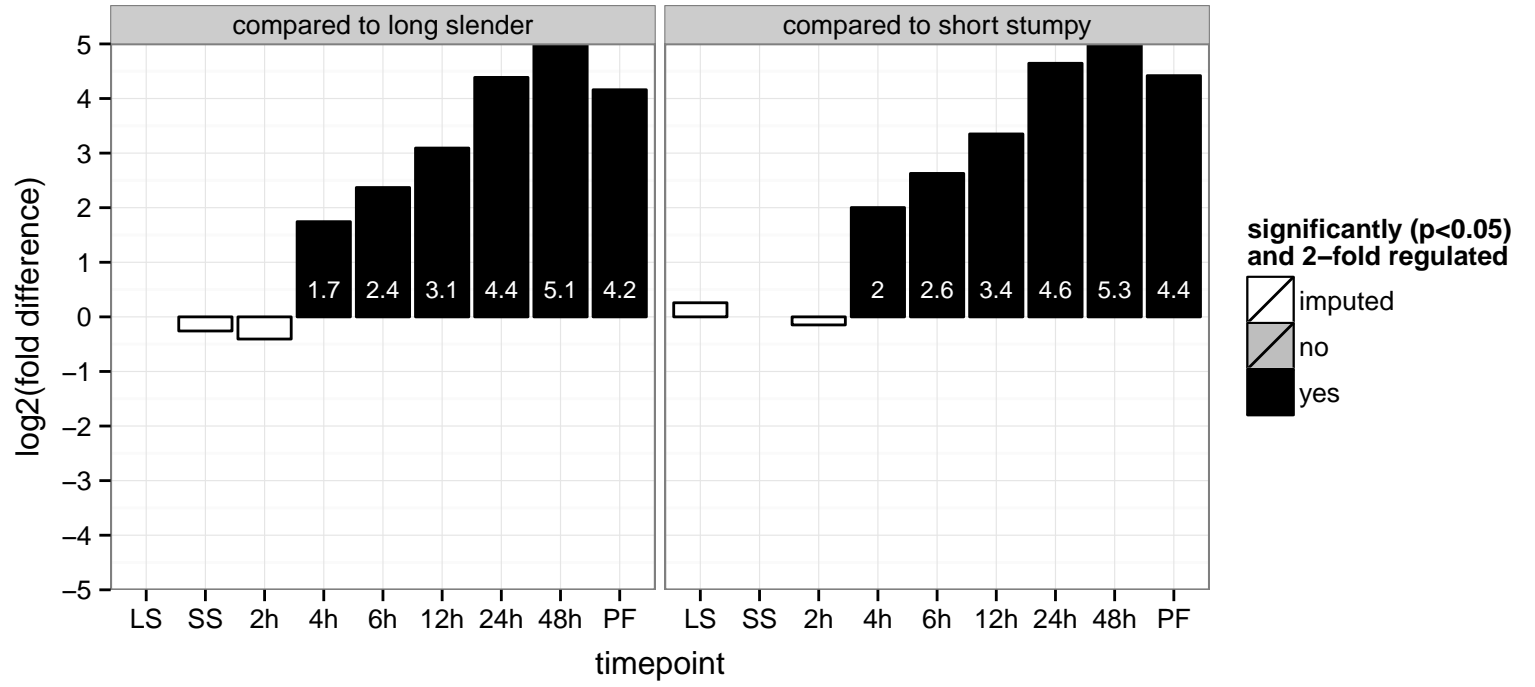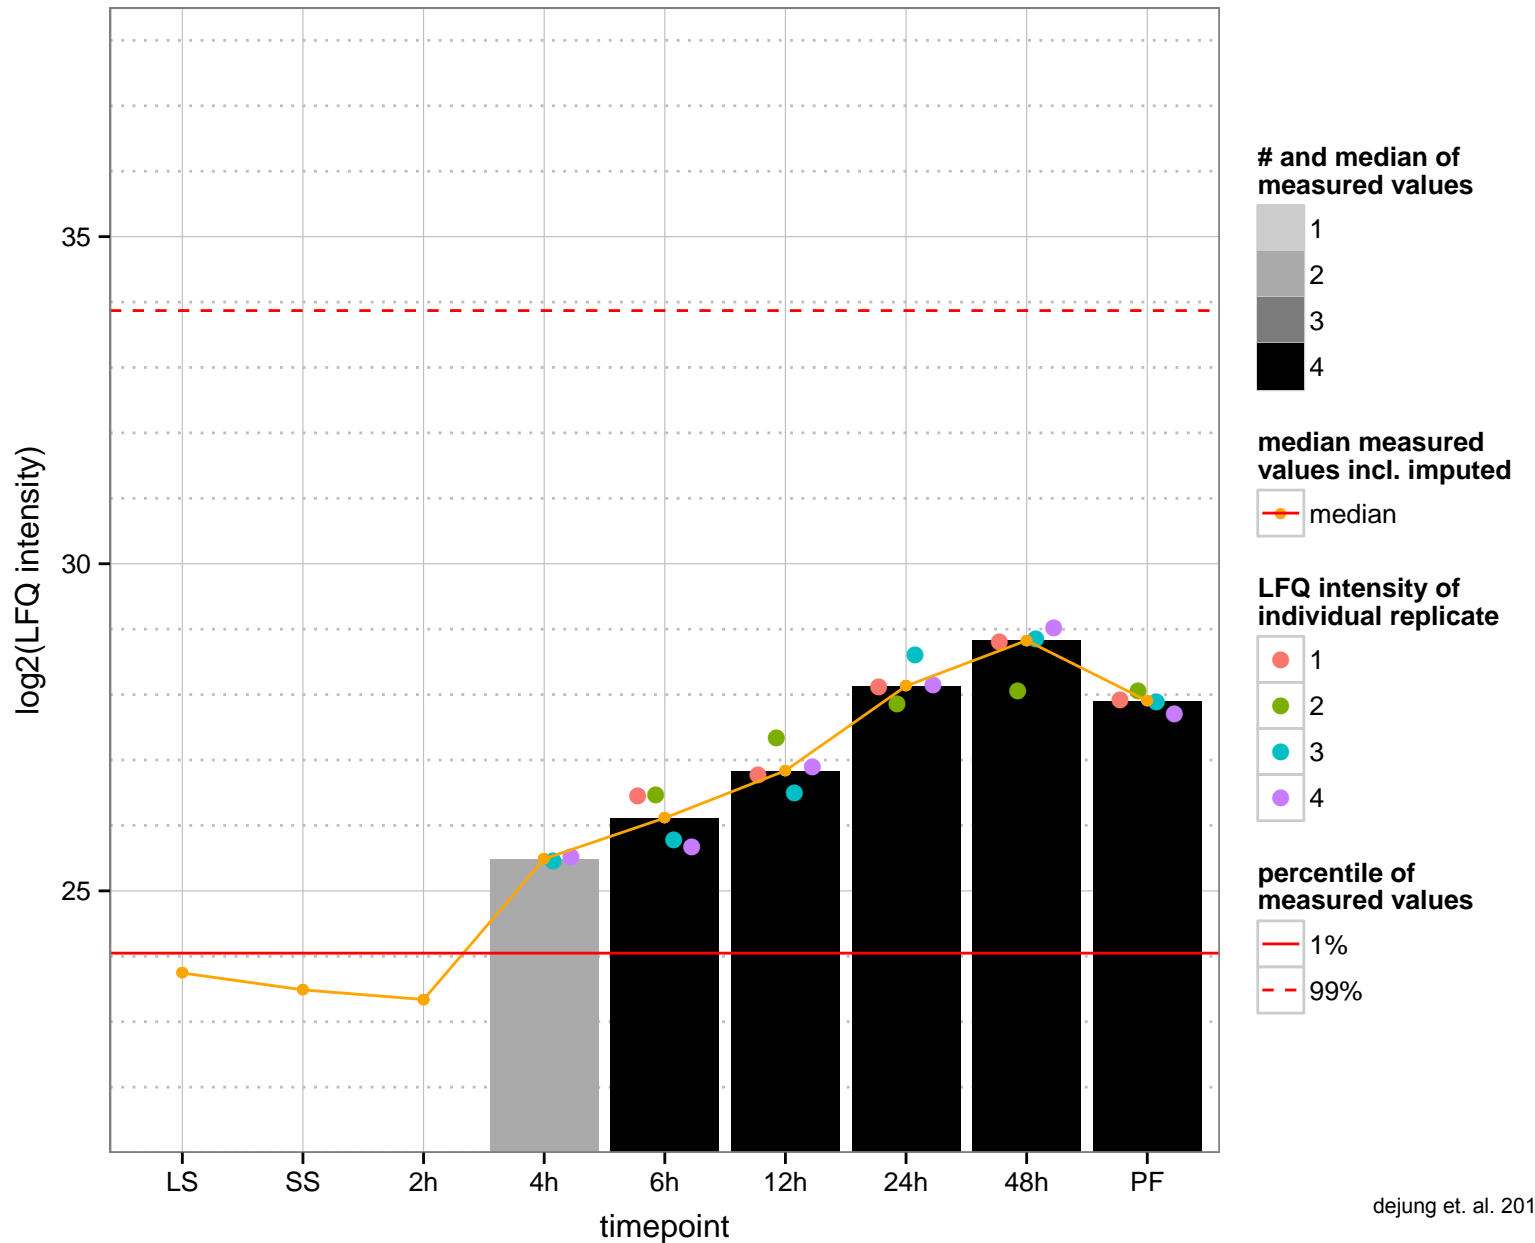

hypothetical protein, conserved  
 Tb927.8.4100;Tb927.8.4050  
 AGOF: null  
 AGOC: integral to membrane  
 AGOP: null  
 PGO: null  
 PGO: null  
 PGO: null

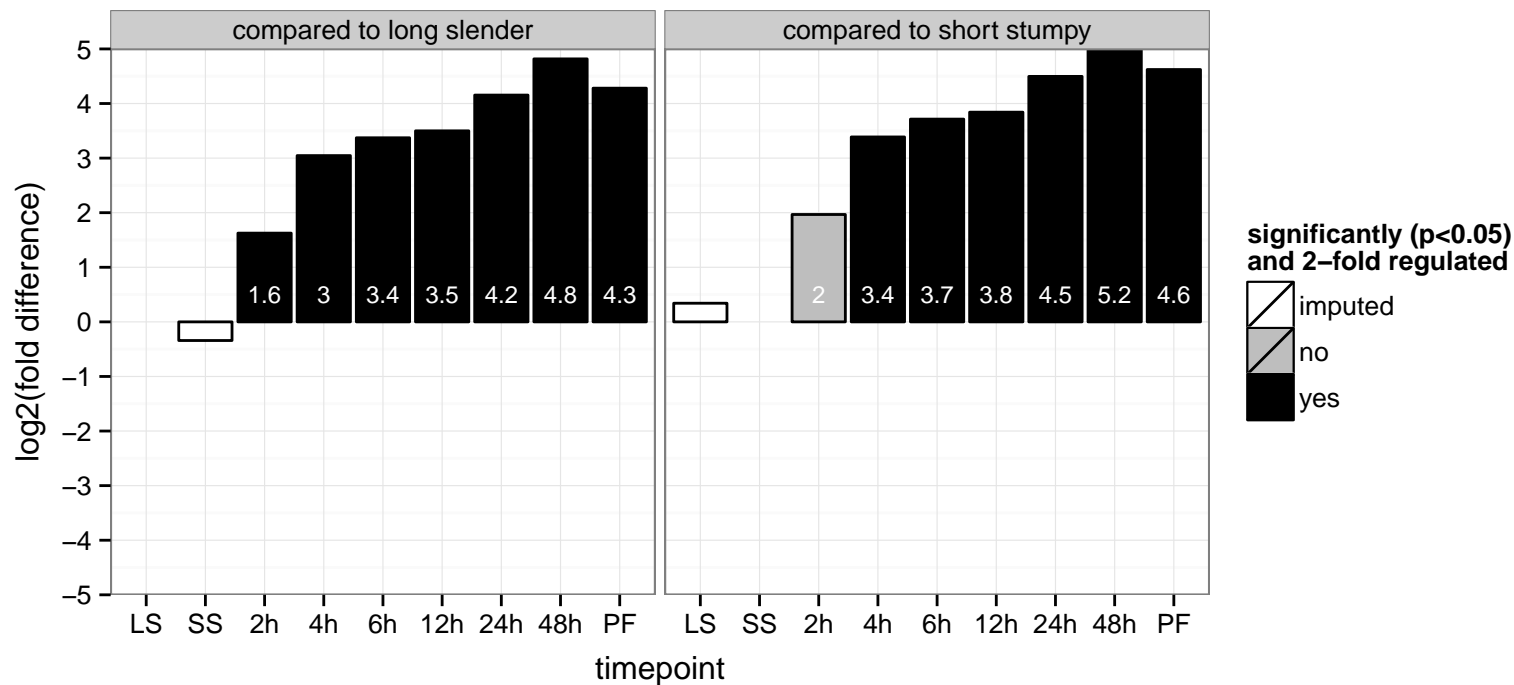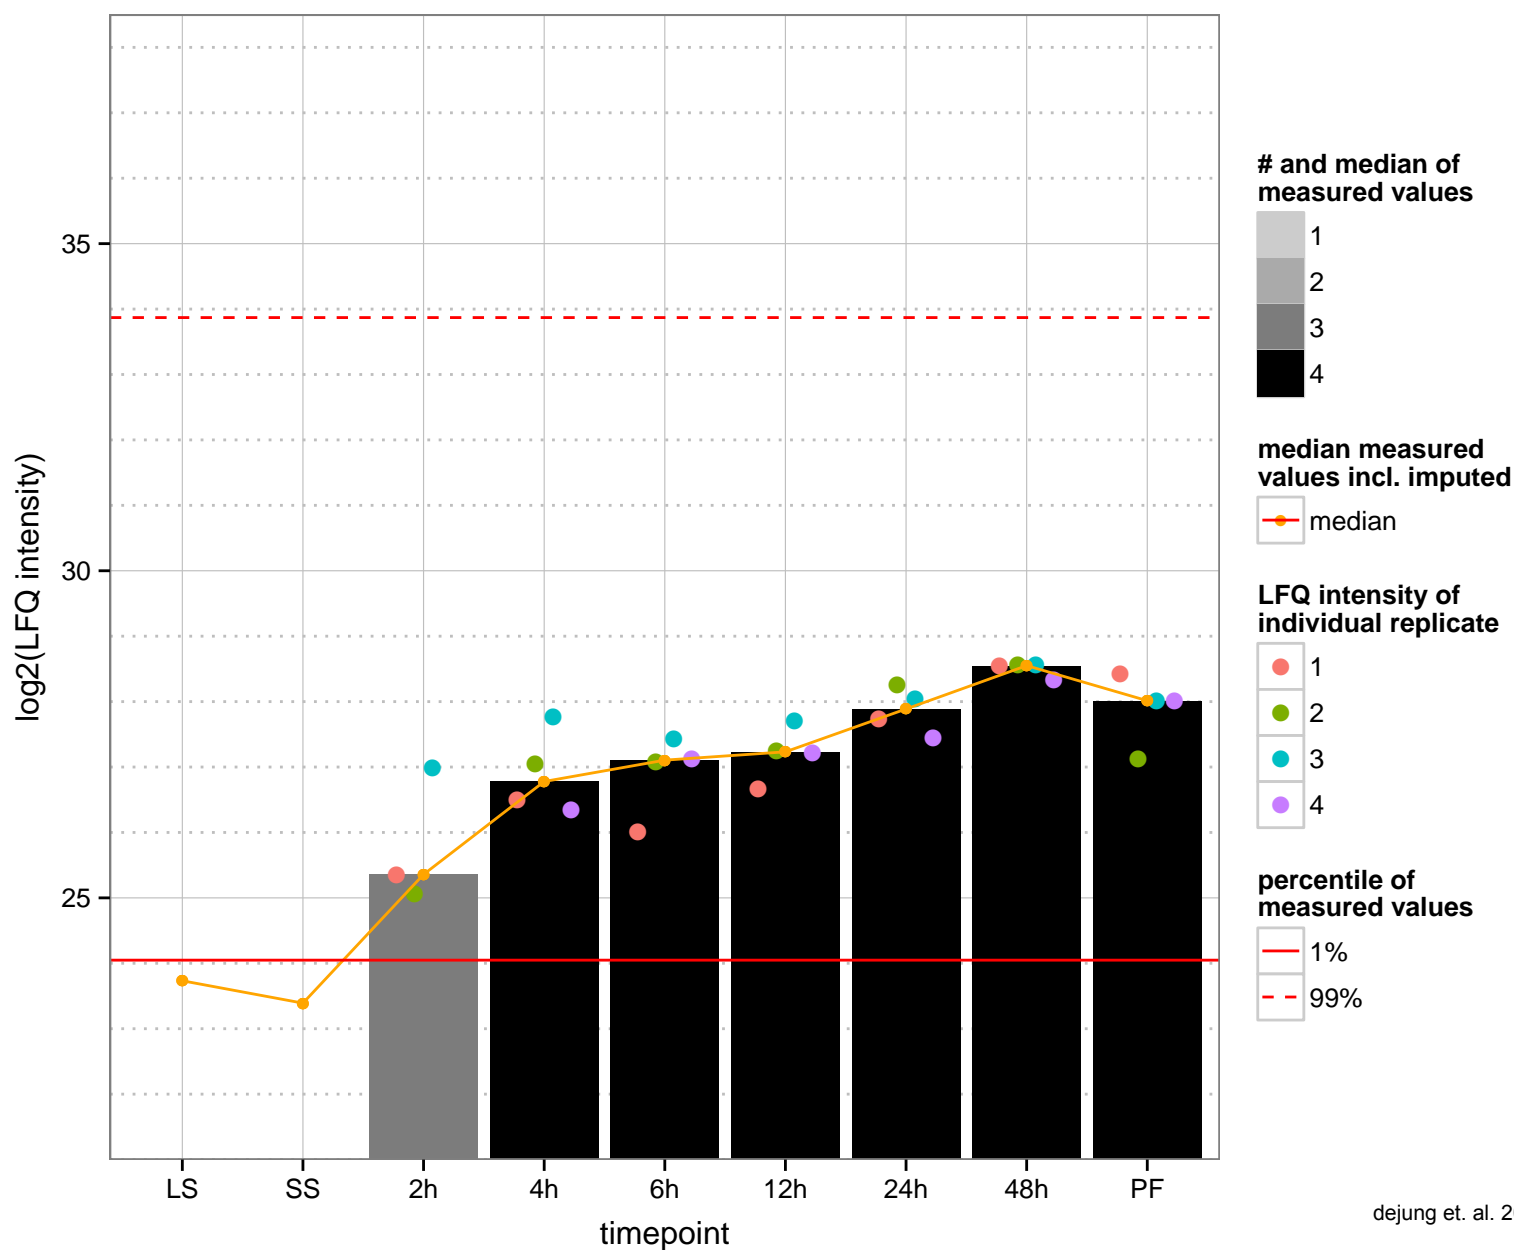



hypothetical protein, conserved  
 Tb927.8.4150  
 AGOF: null  
 AGOC: mitochondrion  
 AGOP: null  
 PGO: null  
 PGO: null  
 PGO: null

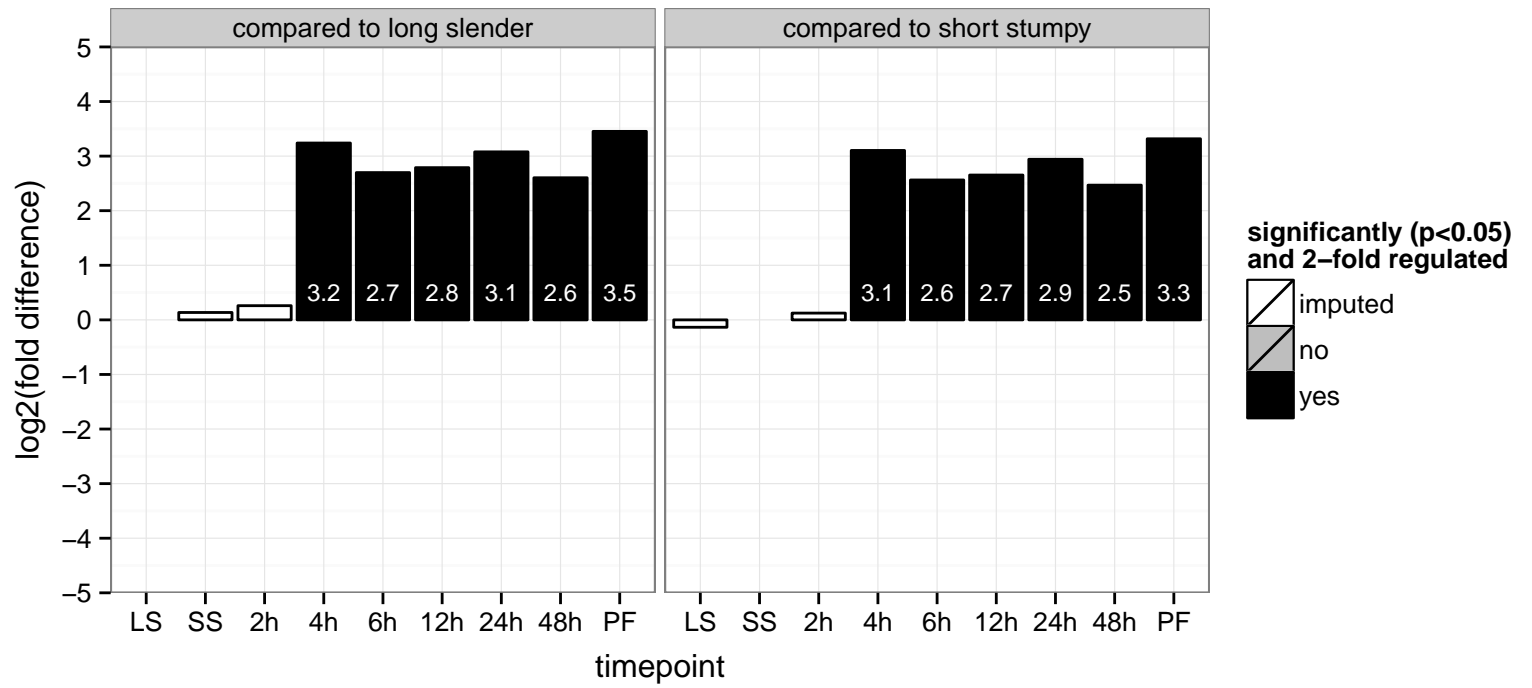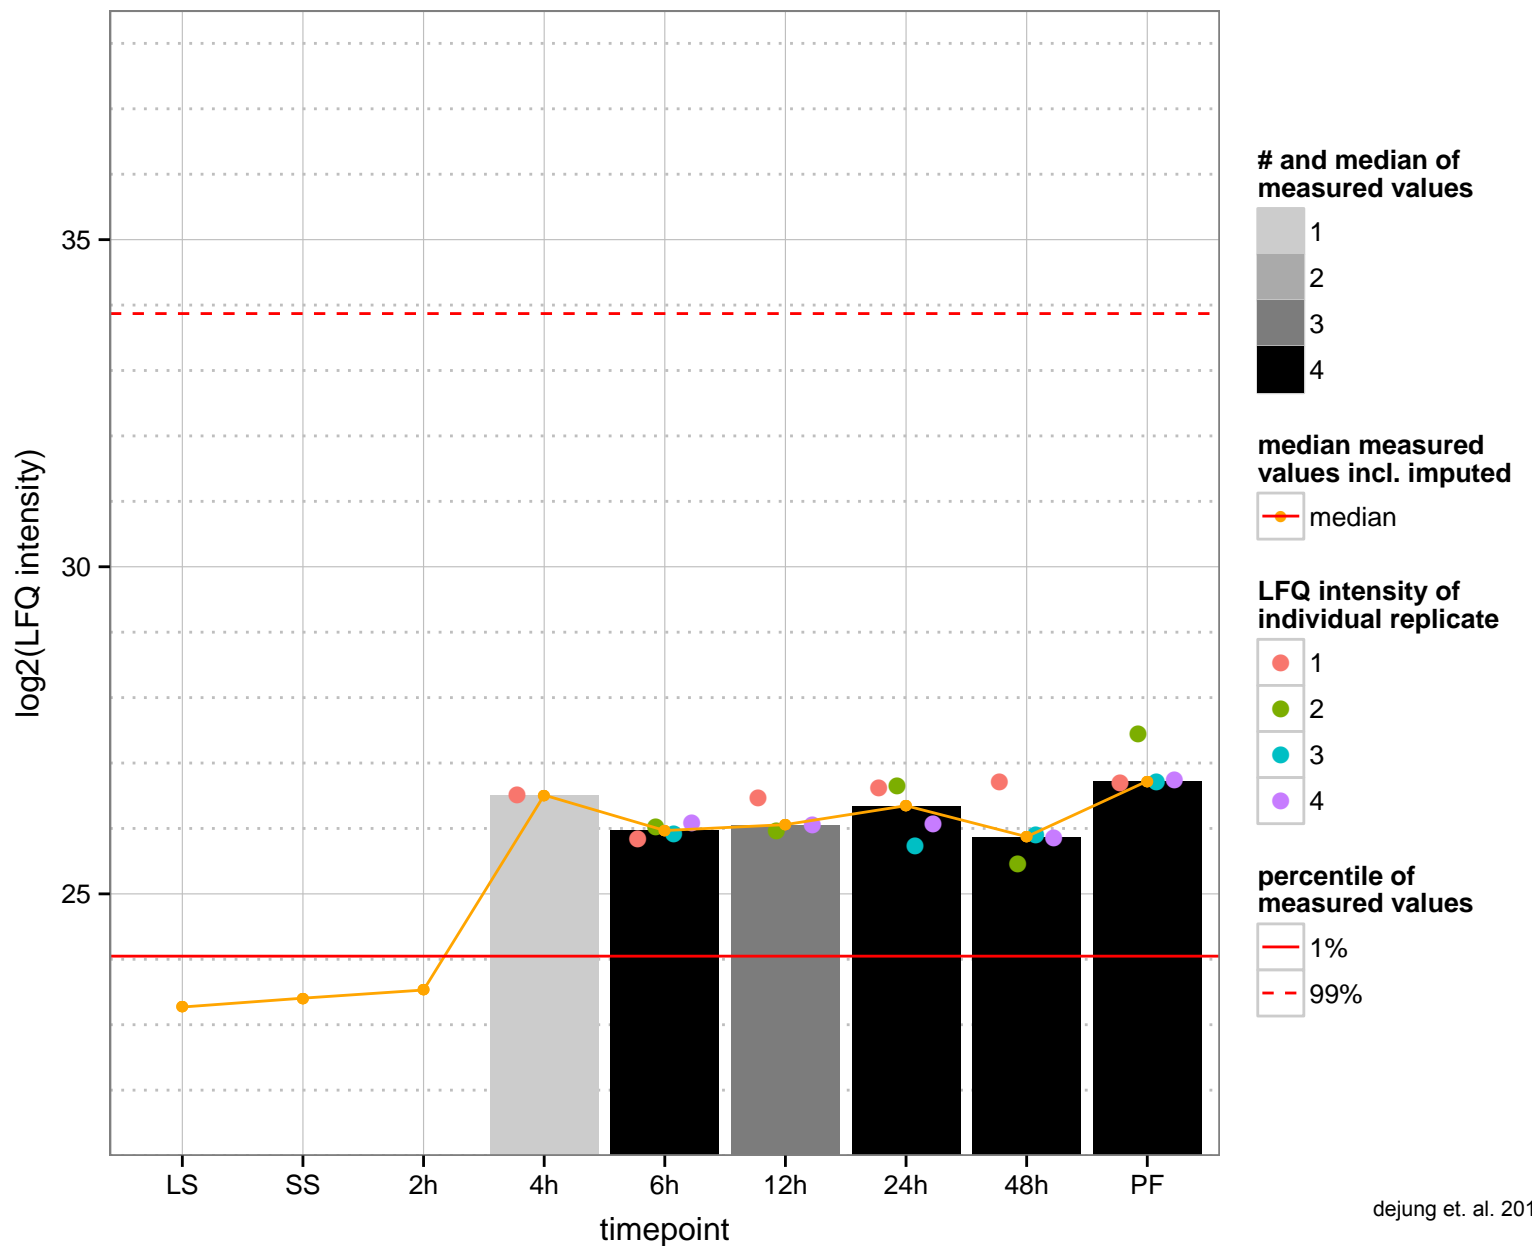

hypothetical protein, conserved  
 Tb927.8.4190  
 AGOF: null  
 AGOC: null  
 AGOP: null  
 PGO: null  
 PGOC: null  
 PGOP: null

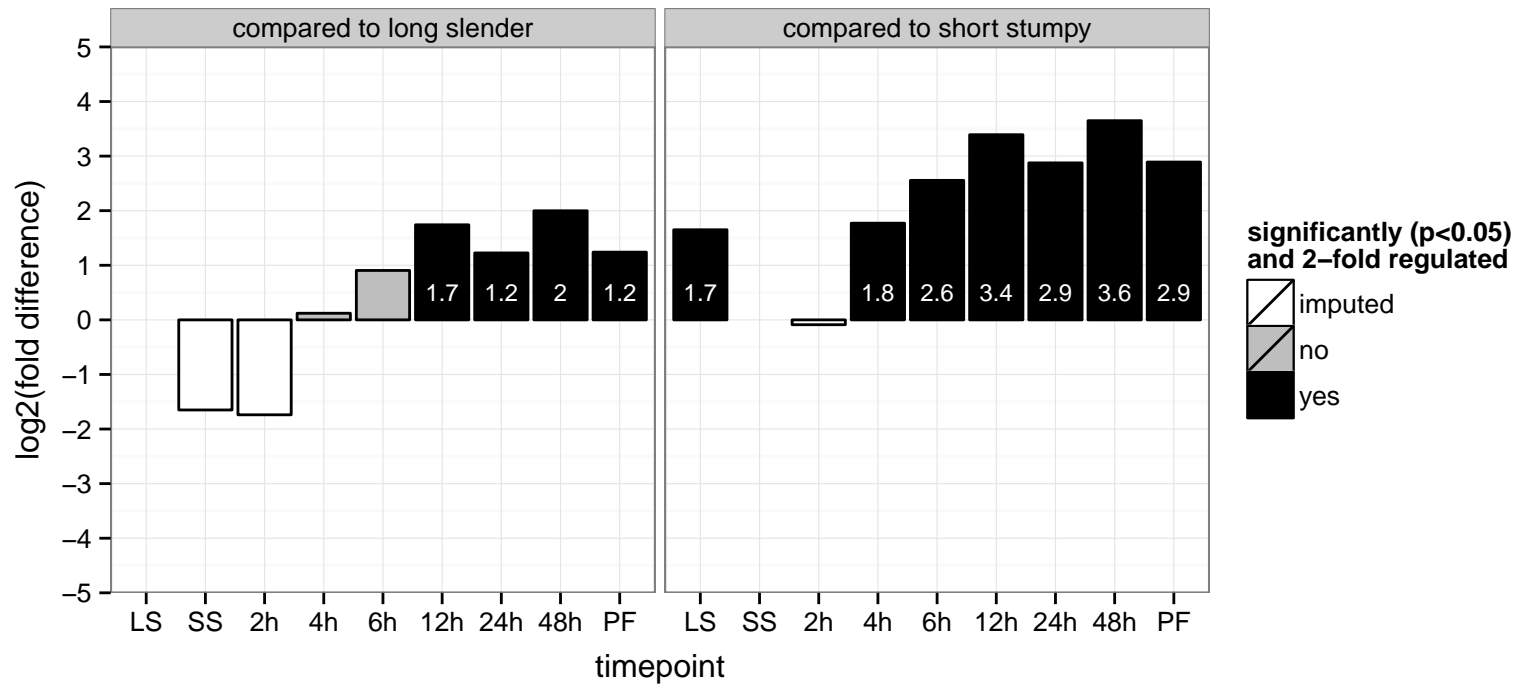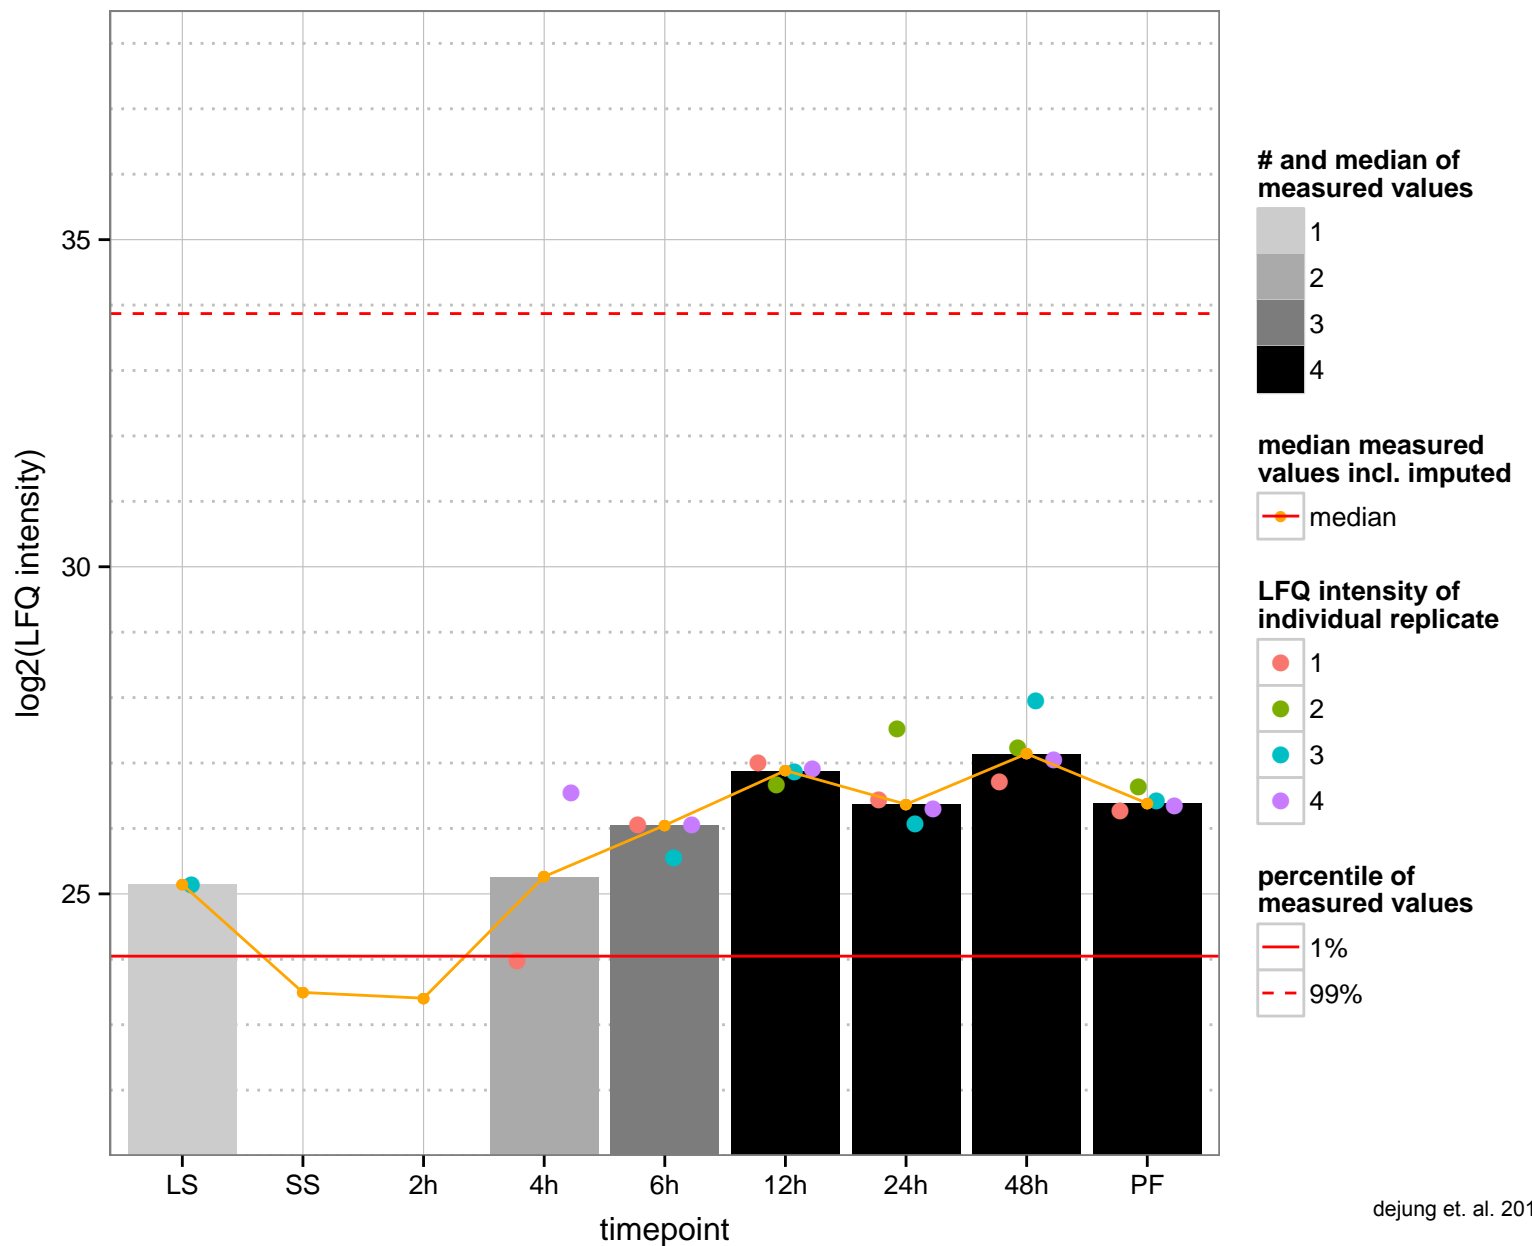

cytochrome c  
 Tb927.8.5120  
 AGOF: electron carrier activity, heme binding, iron ion binding  
 AGOC: mitochondrion  
 AGOP: aerobic respiration  
 PGOF: electron carrier activity, heme binding, iron ion binding  
 PGO: null  
 PGOP: null

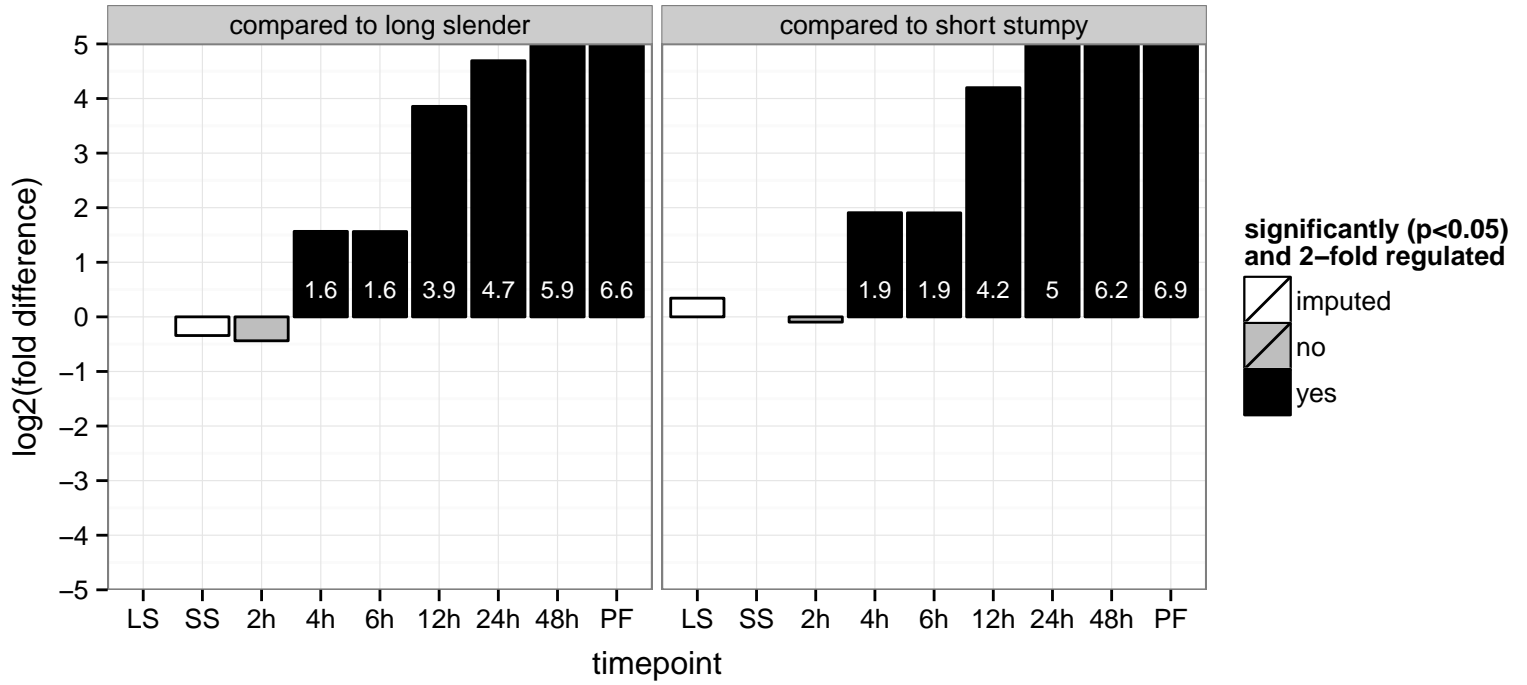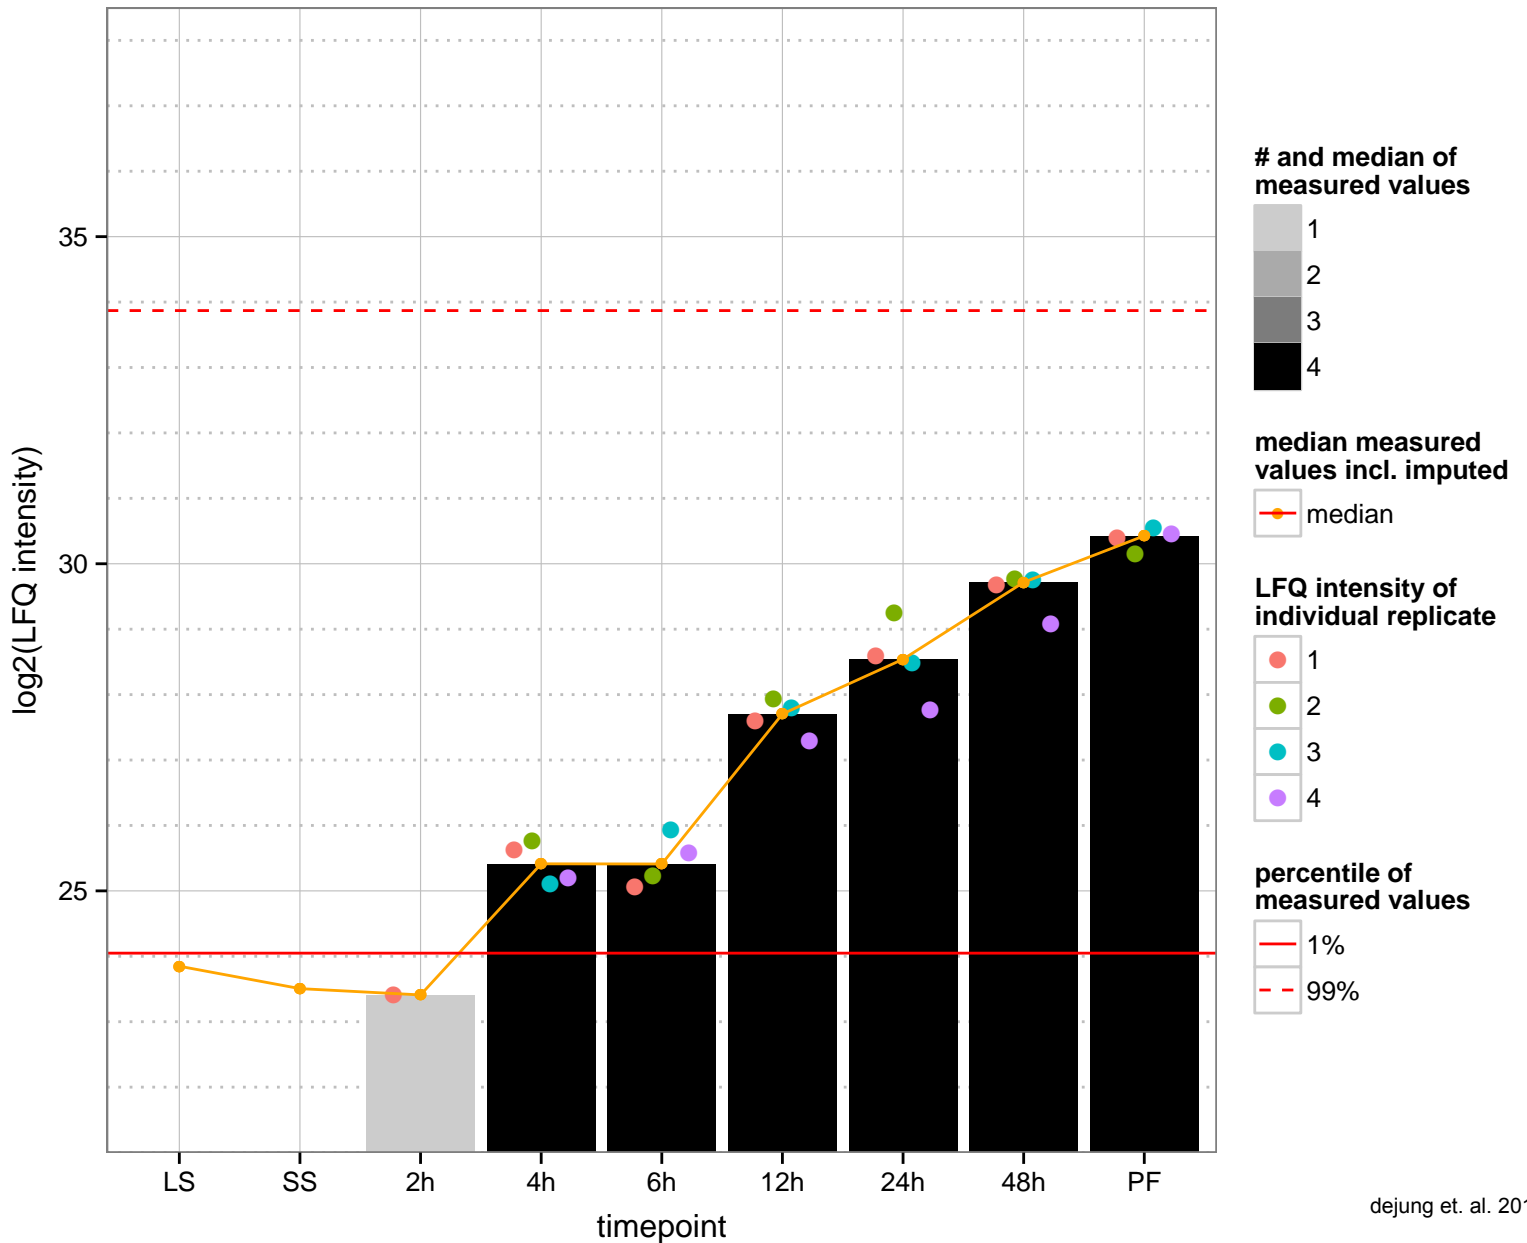

hypothetical protein, conserved  
 Tb927.8.5560  
 AGOF: null  
 AGOC: mitochondrion  
 AGOP: null  
 PGO: null  
 PGOC: null  
 PGOP: null

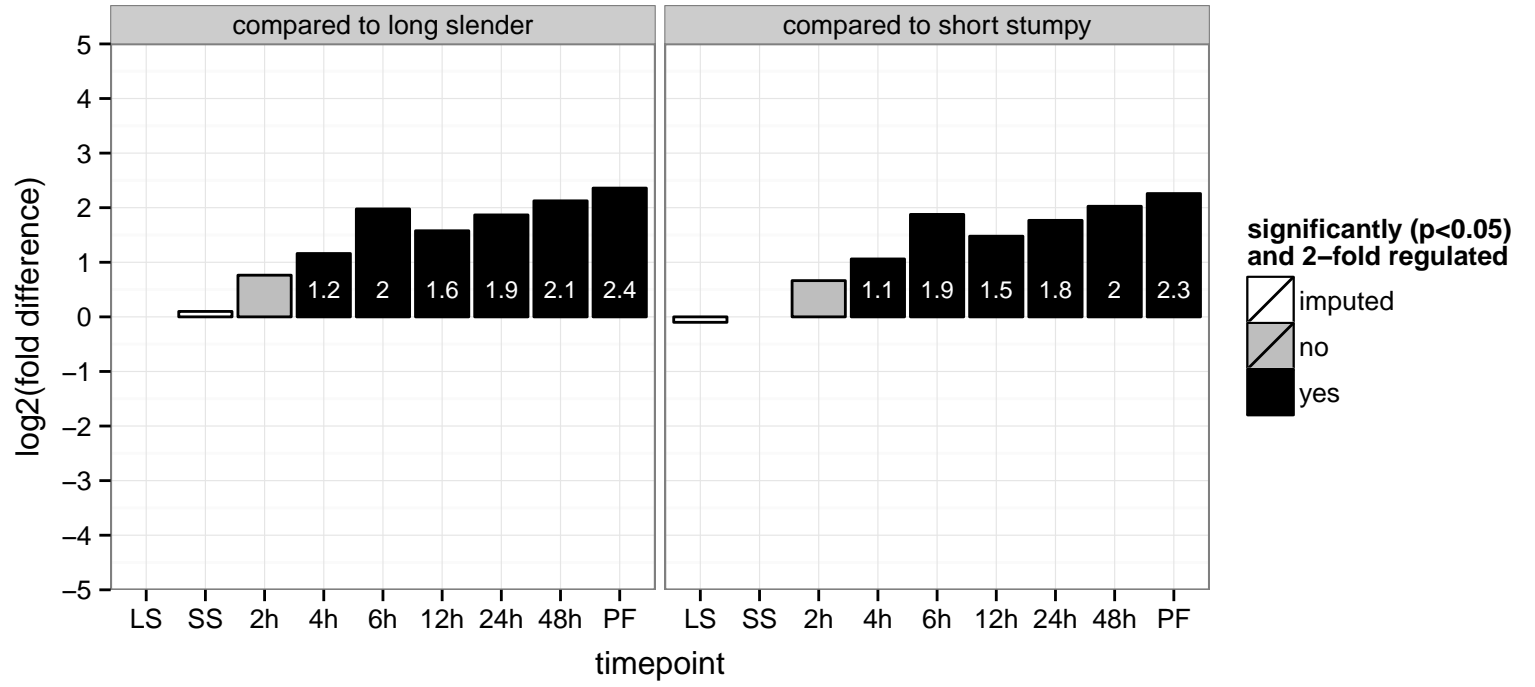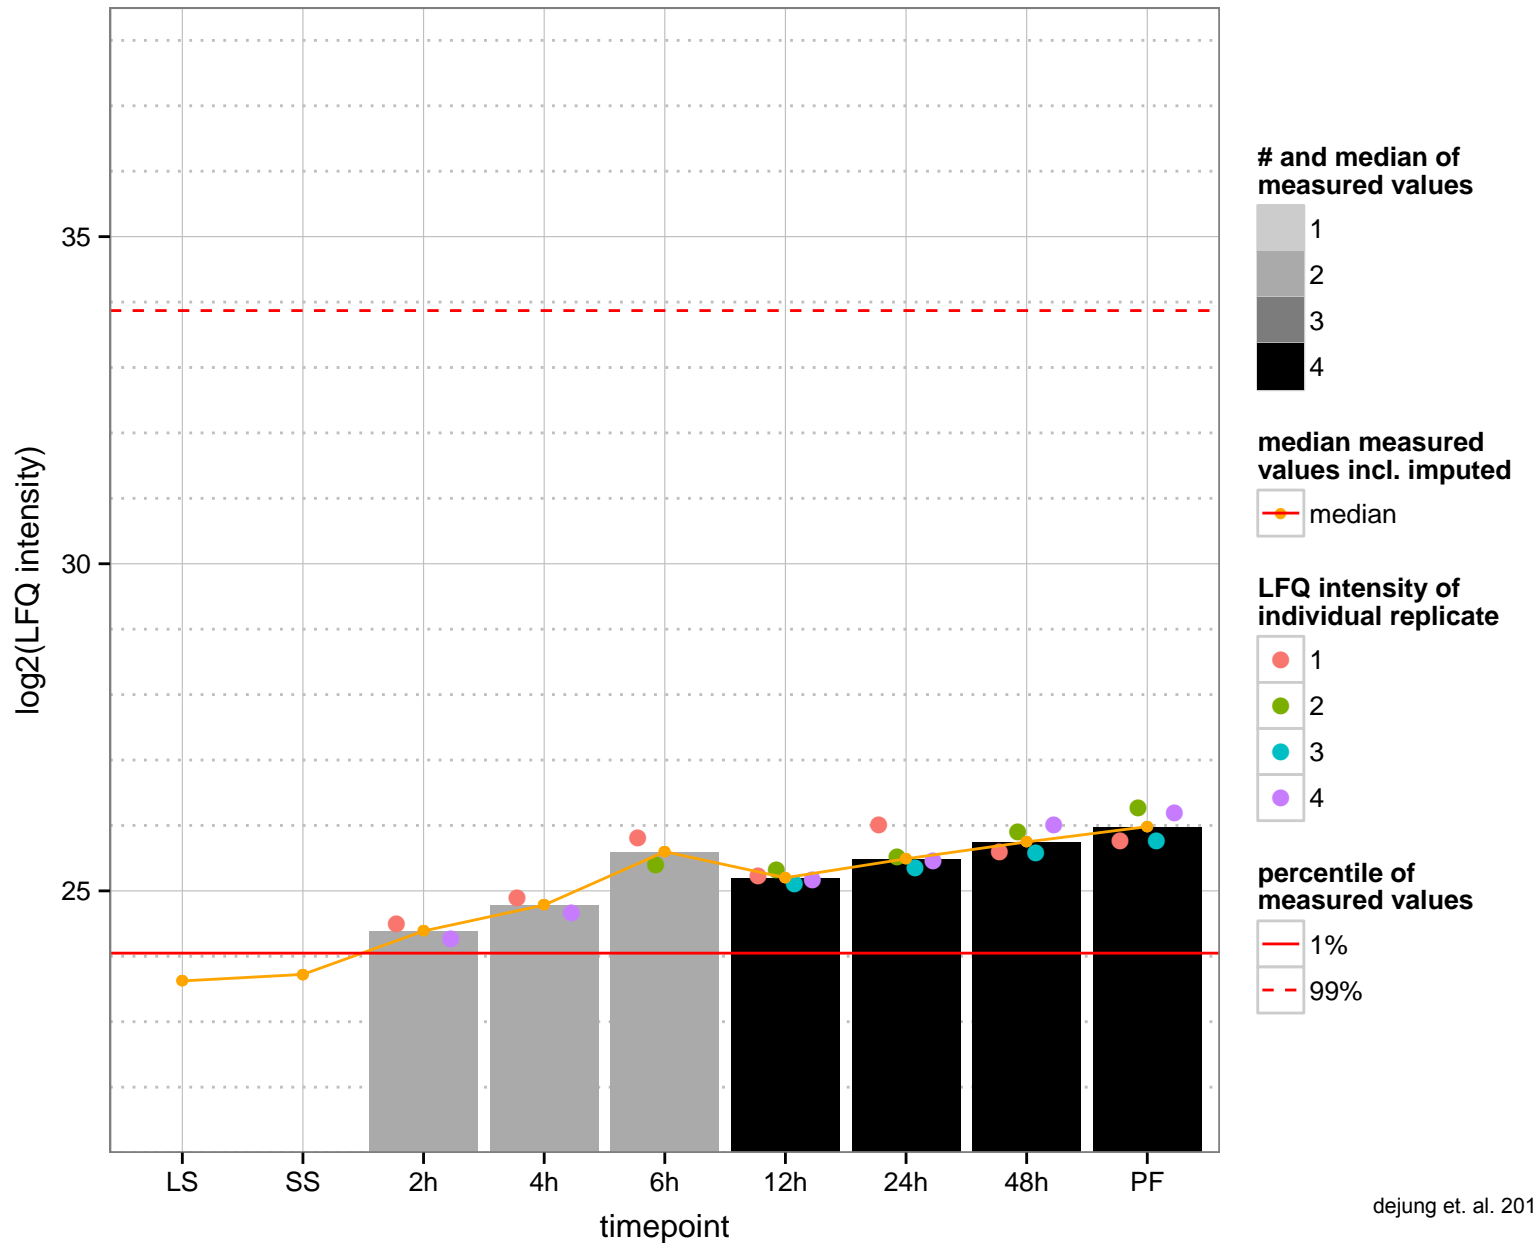

proteasome 26S non-ATPase subunit 9, putative  
 Tb927.8.5740  
 AGOF: endopeptidase activity  
 AGOC: proteasome regulatory particle  
 AGOP: proteasomal ubiquitin-dependent protein catabolic process  
 PGO: protein binding  
 PGOC: null  
 PGOP: null

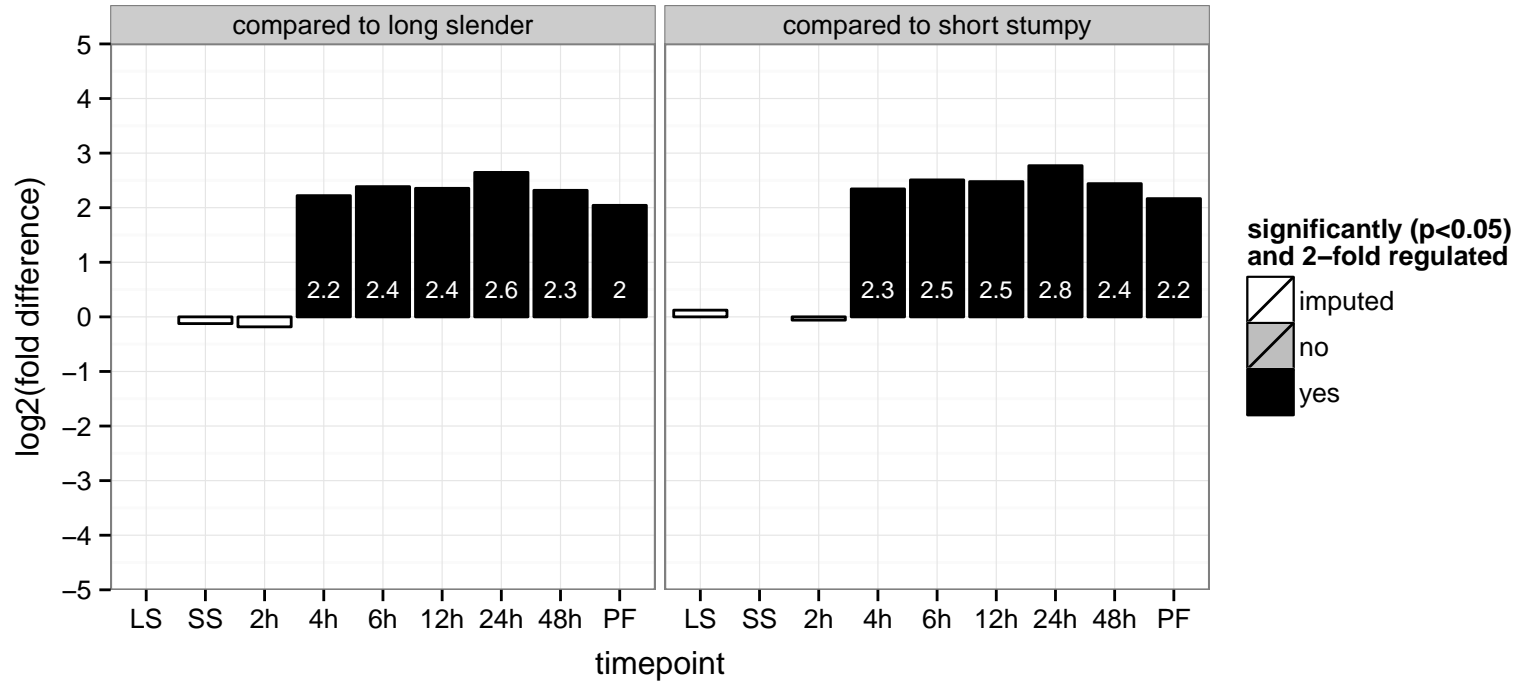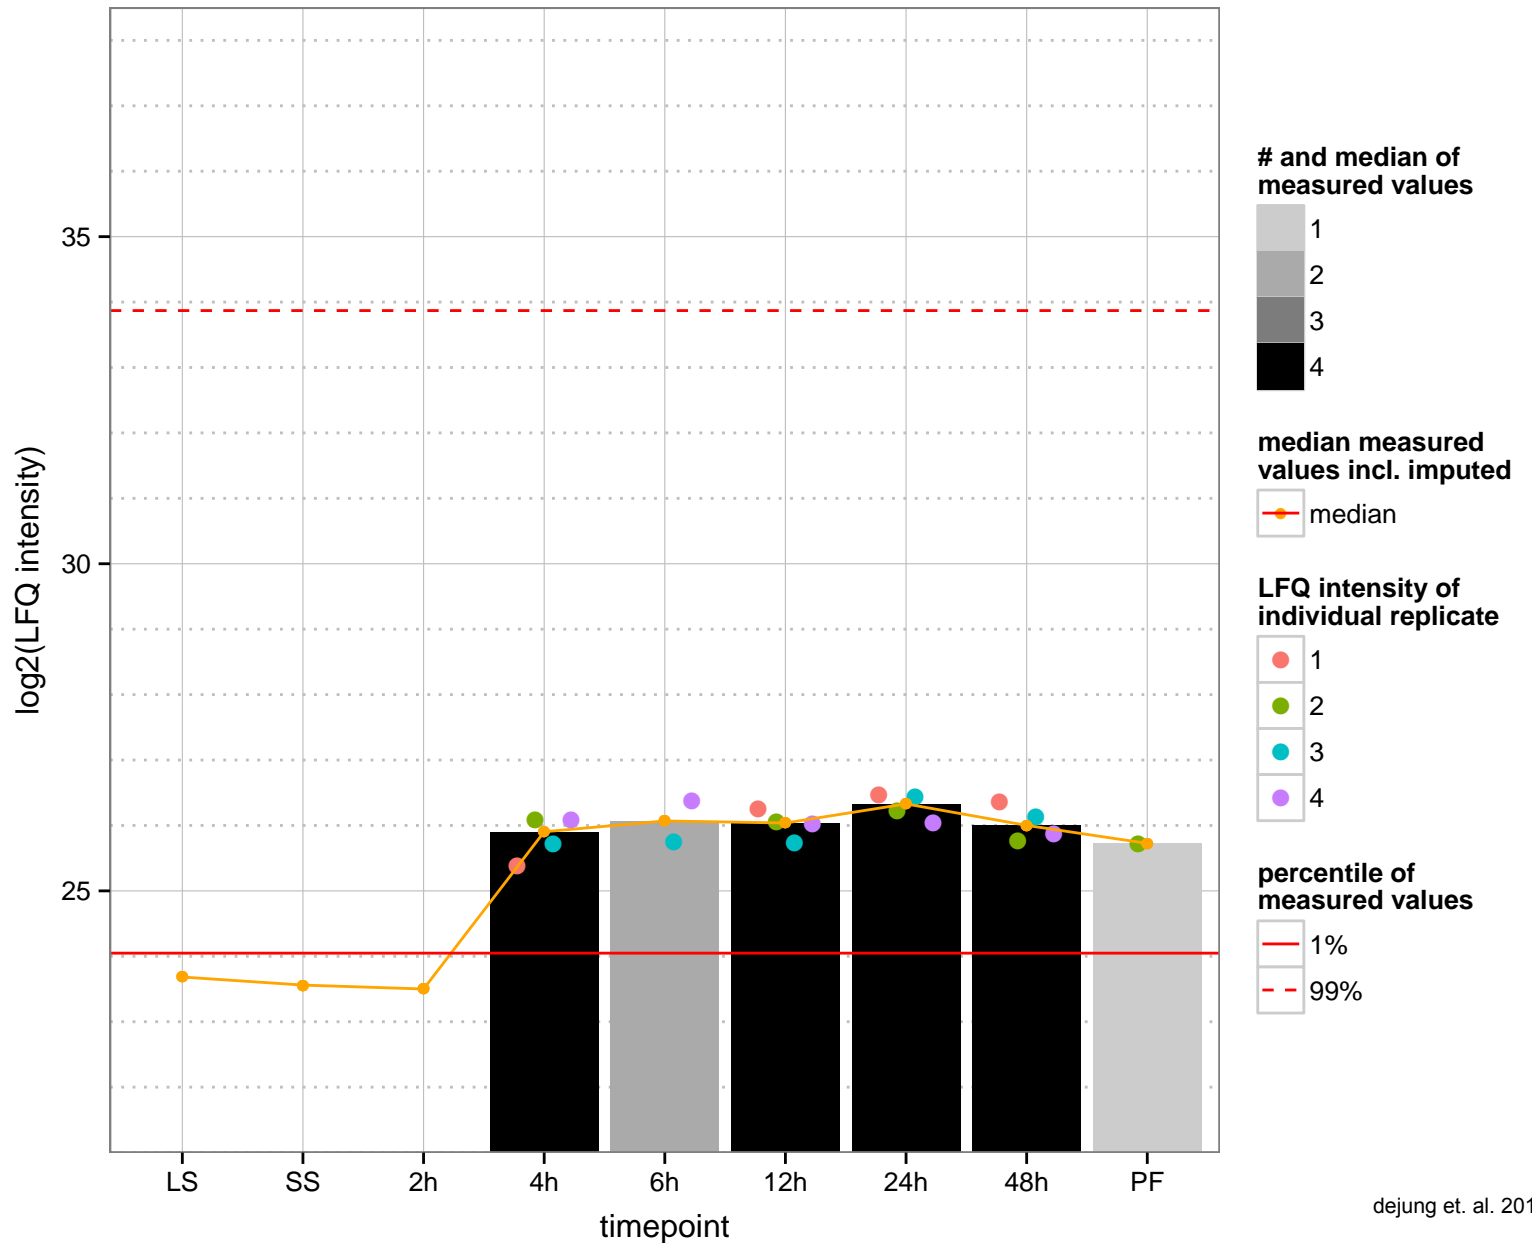

hypothetical protein, conserved

Tb927.8.6640

AGOF: catalytic activity

AGOC: mitochondrion

AGOP: metabolic process

PGOF: oxidoreductase activity, acting on the aldehyde or oxo group of donors, NAD or NADP as acceptor

PGOC: null

PGOP: oxidation-reduction process

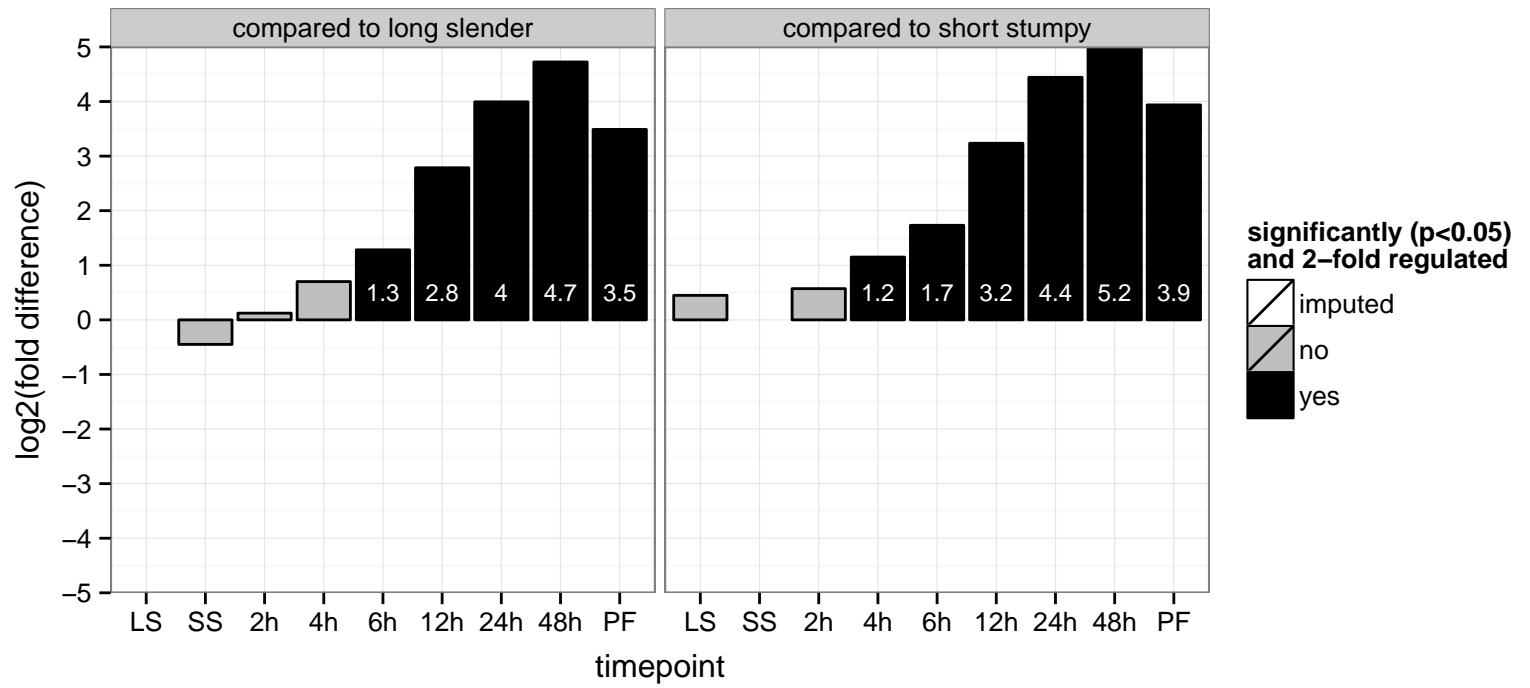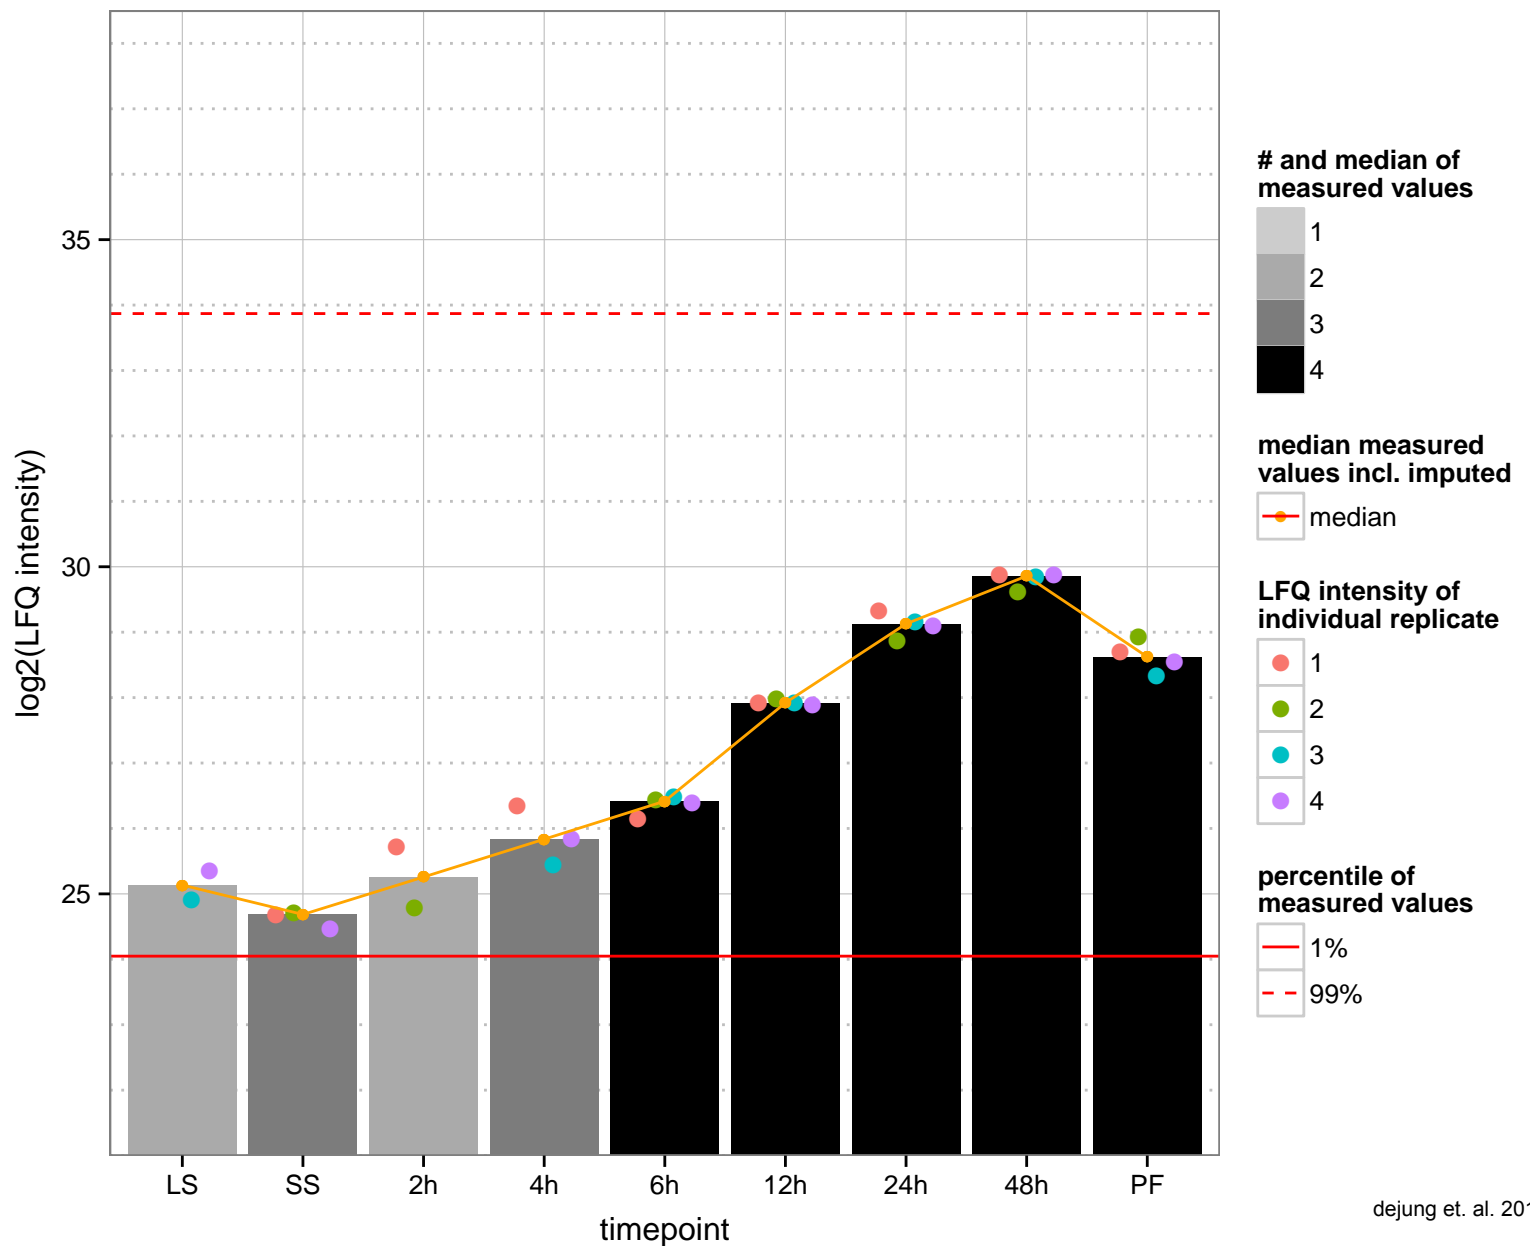

hypothetical protein, conserved  
 Tb927.8.6860  
 AGOF: null  
 AGOC: null  
 AGOP: null  
 PGO: null  
 PGOC: null  
 PGOP: null

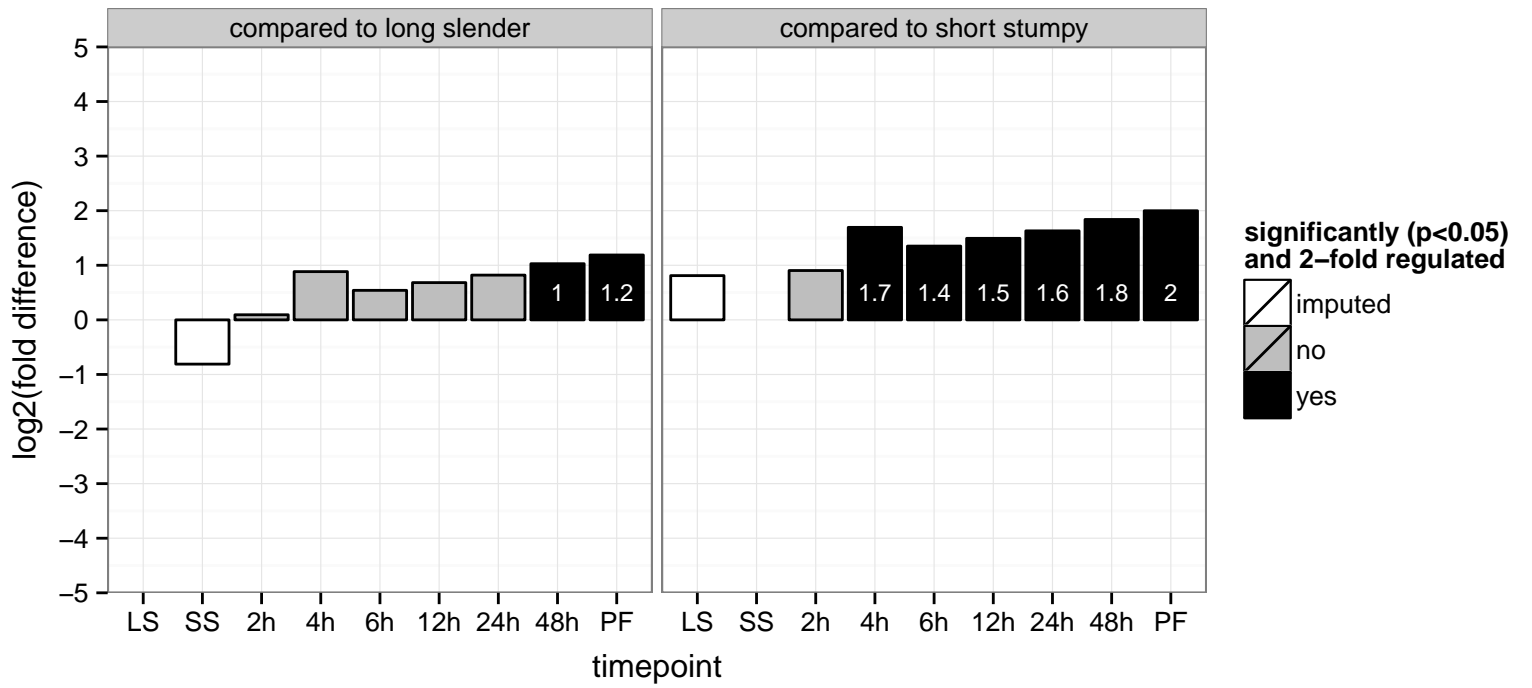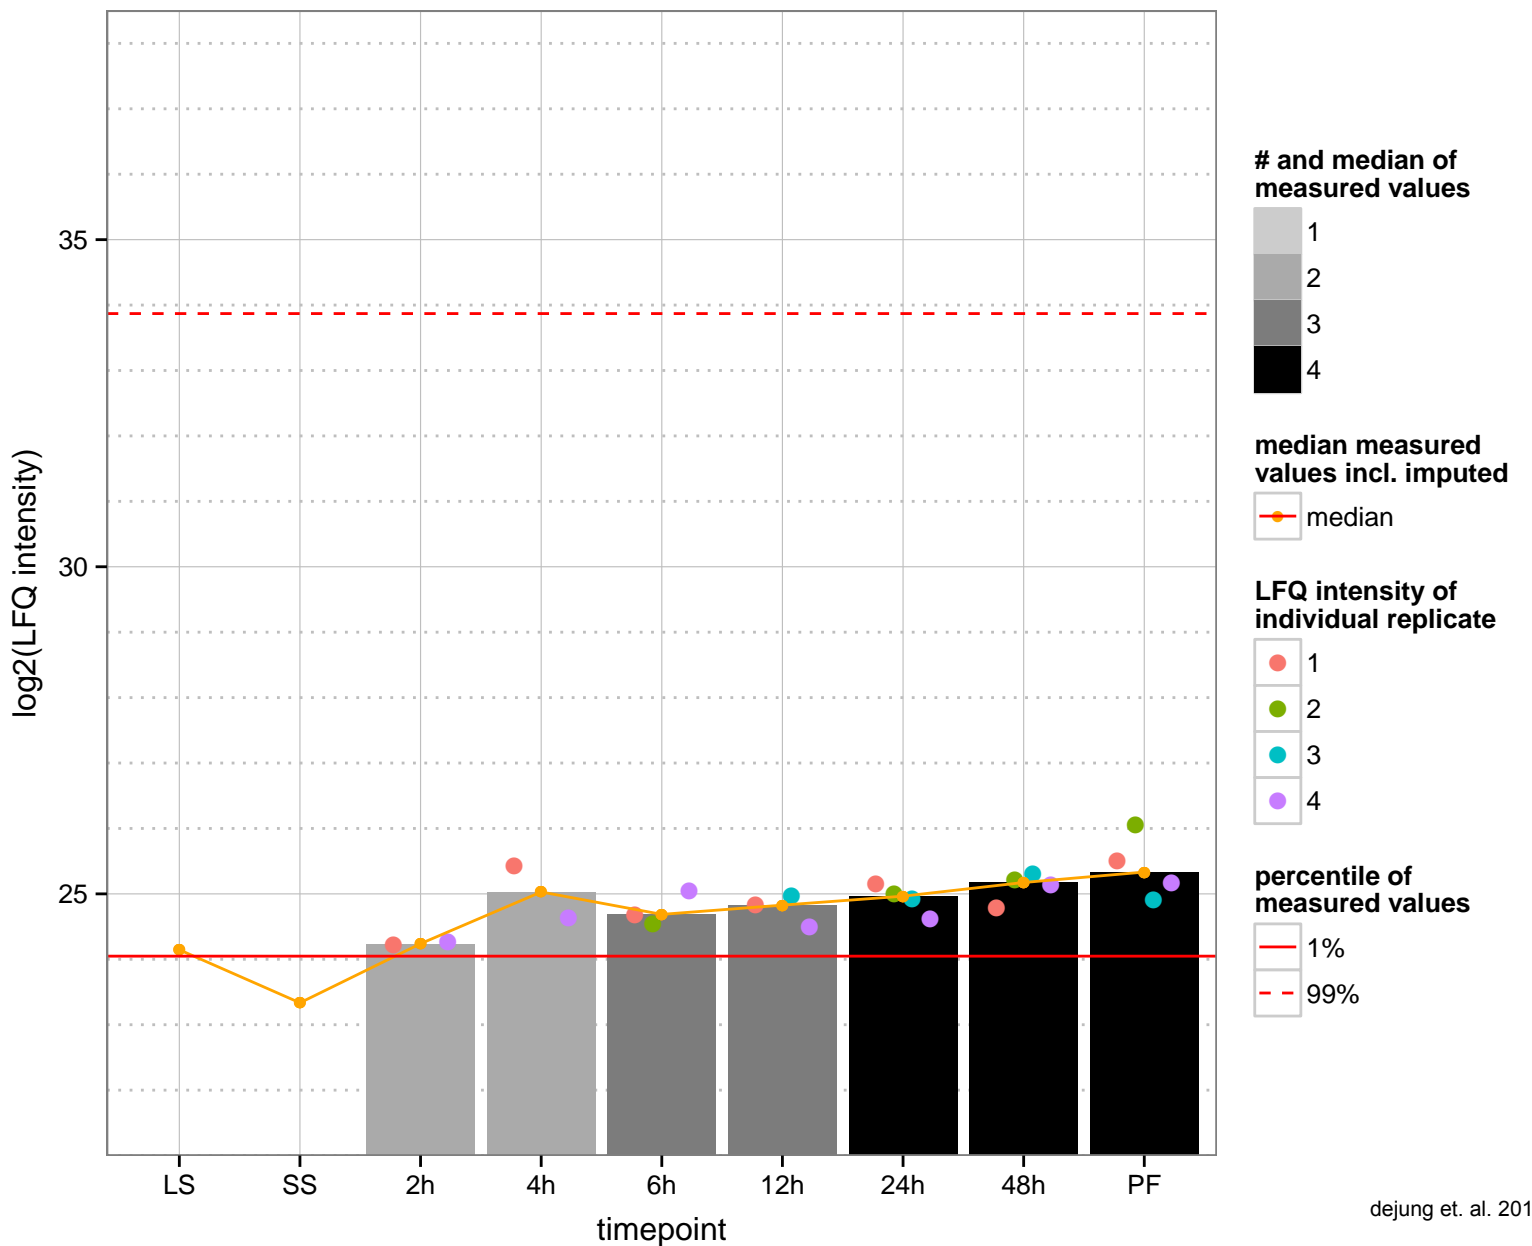

squalene synthase, putative

Tb927.8.7120

AGOF: farnesyl-diphosphate farnesyltransferase activity, oxidoreductase activity

AGOC: endoplasmic reticulum membrane, integral to membrane, mitochondrial outer membrane

AGOP: cholesterol biosynthetic process, ergosterol biosynthetic process, isoprenoid biosynthetic process, oxidation-reduction

PGOF: transferase activity

PGOC: null

PGOP: biosynthetic process

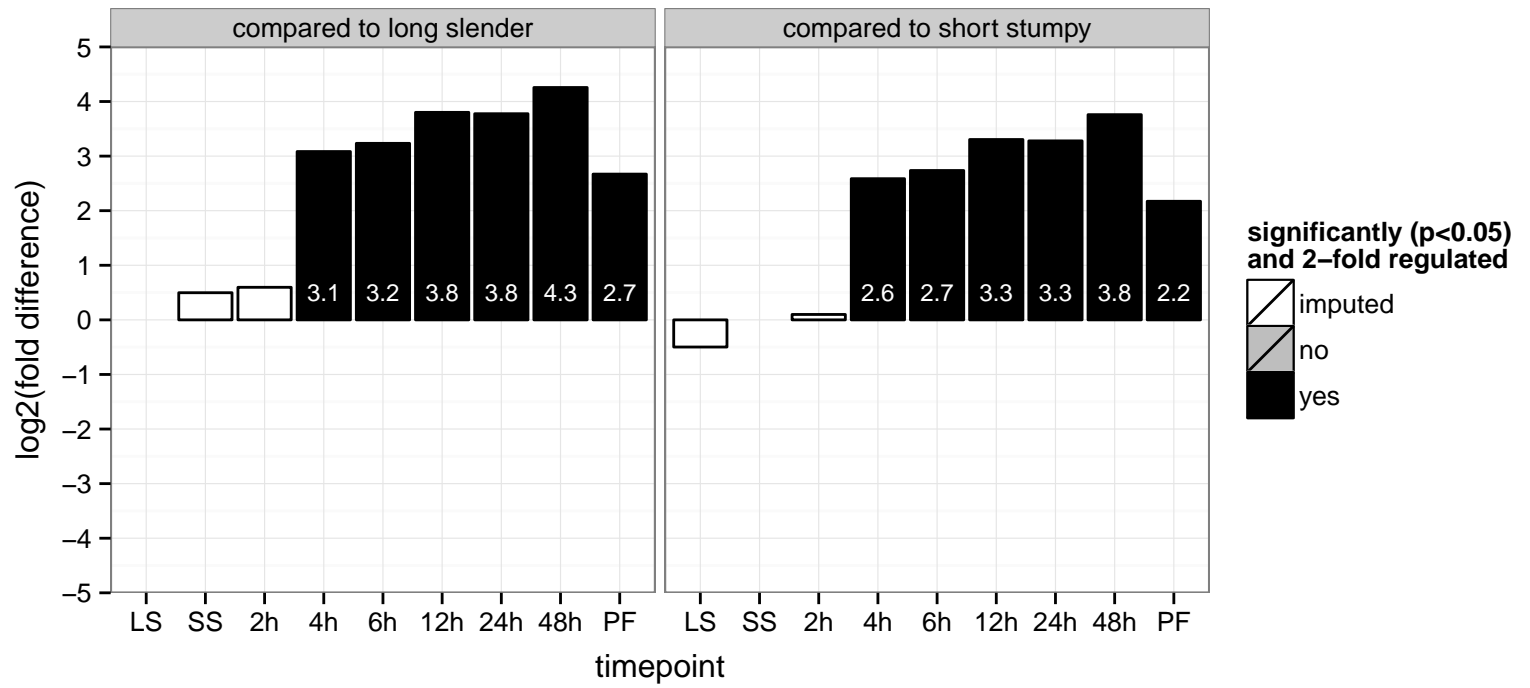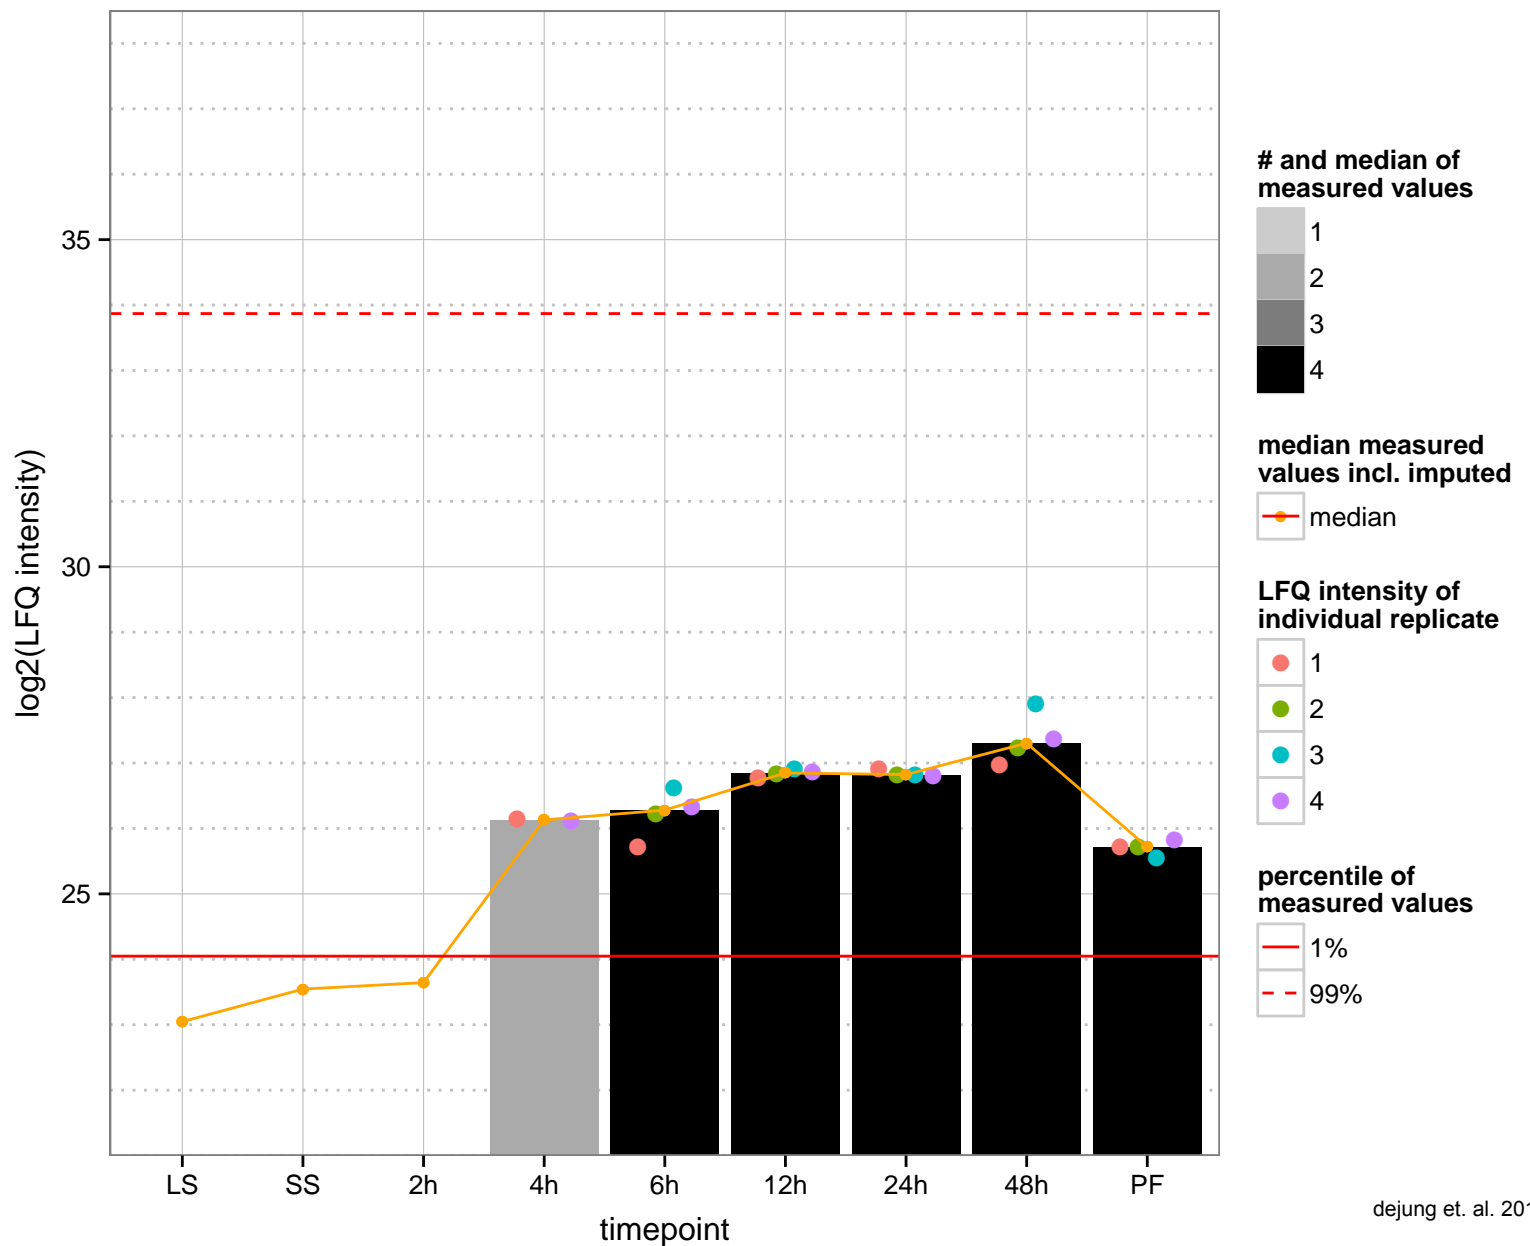



zinc finger protein, putative, predicted zinc finger protein  
 Tb927.9.11870  
 AGOF: zinc ion binding  
 AGOC: null  
 AGOP: null  
 PGOF: metal ion binding  
 PGOC: null  
 PGOP: null

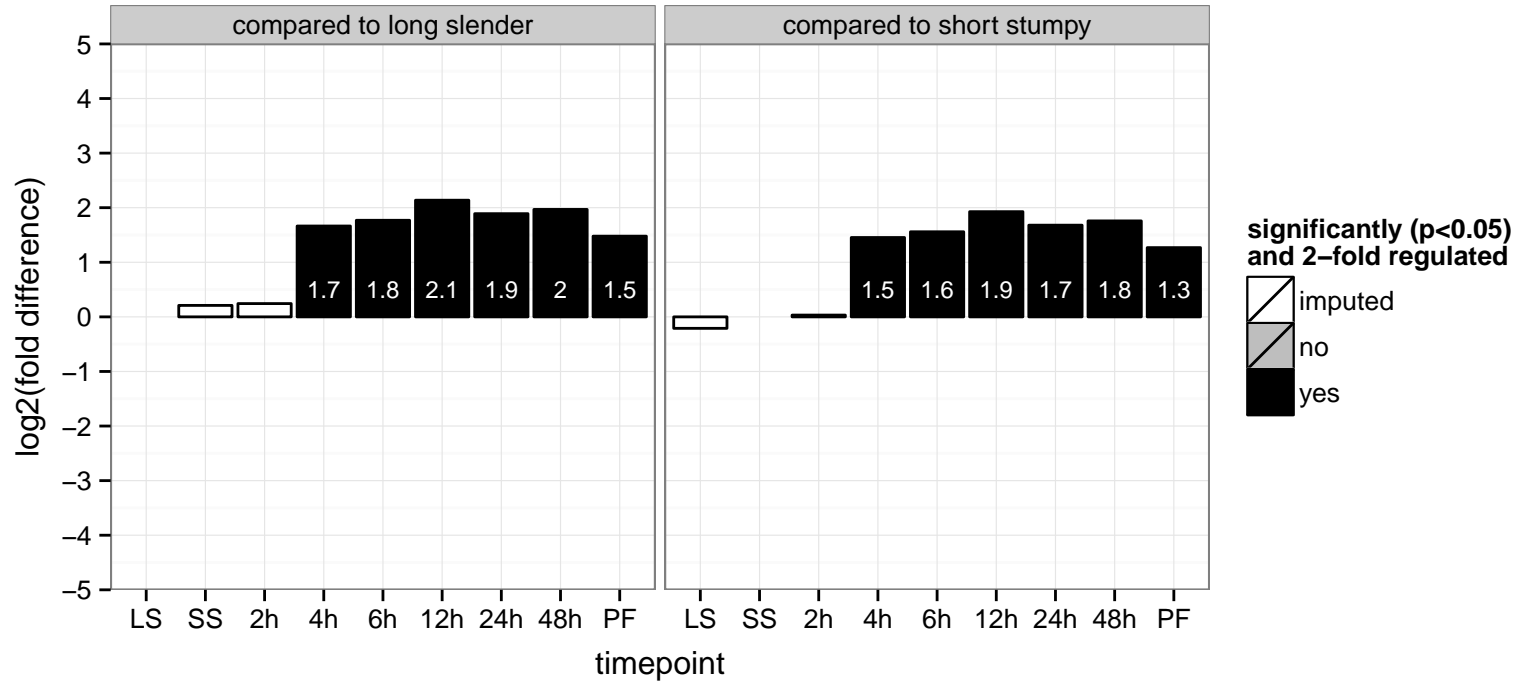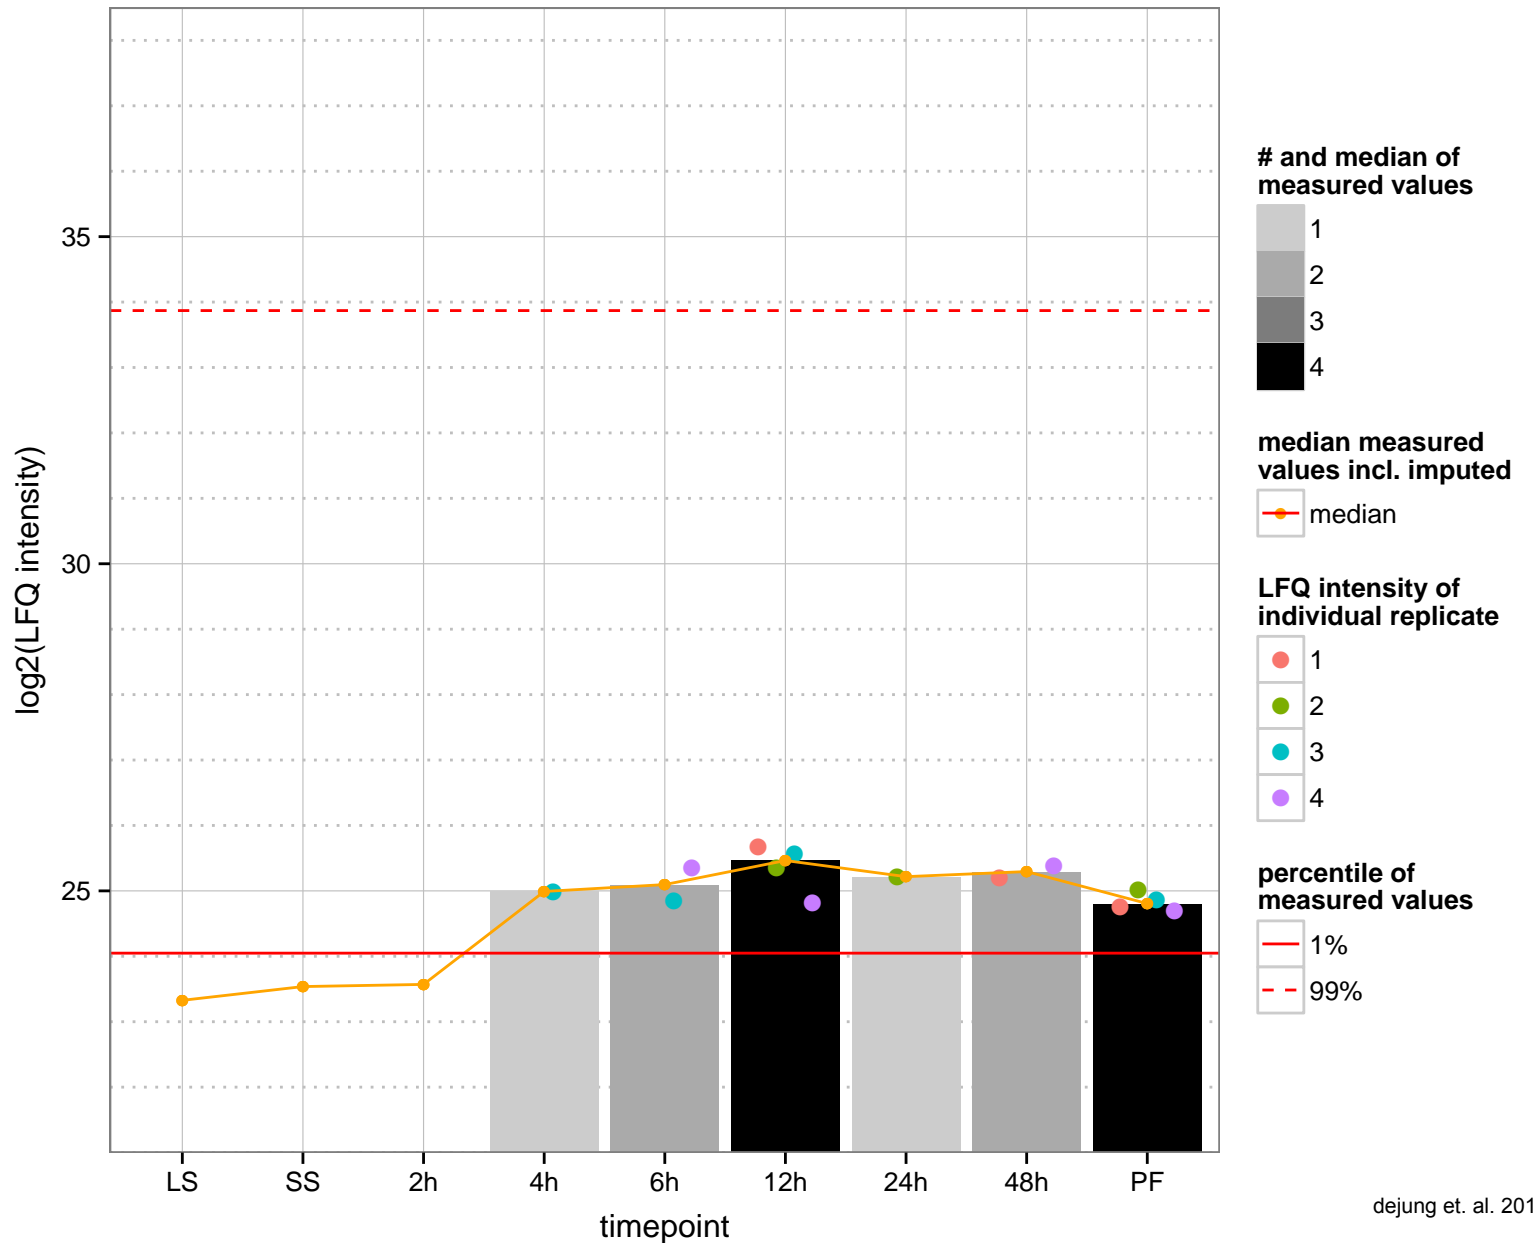

hypothetical protein, conserved  
 Tb927.9.11910  
 AGOF: heme binding, peroxidase activity  
 AGOC: mitochondrion  
 AGOP: oxidation–reduction process, response to oxidative stress  
 PGO: heme binding, peroxidase activity  
 PGO: null  
 PGO: oxidation–reduction process, response to oxidative stress

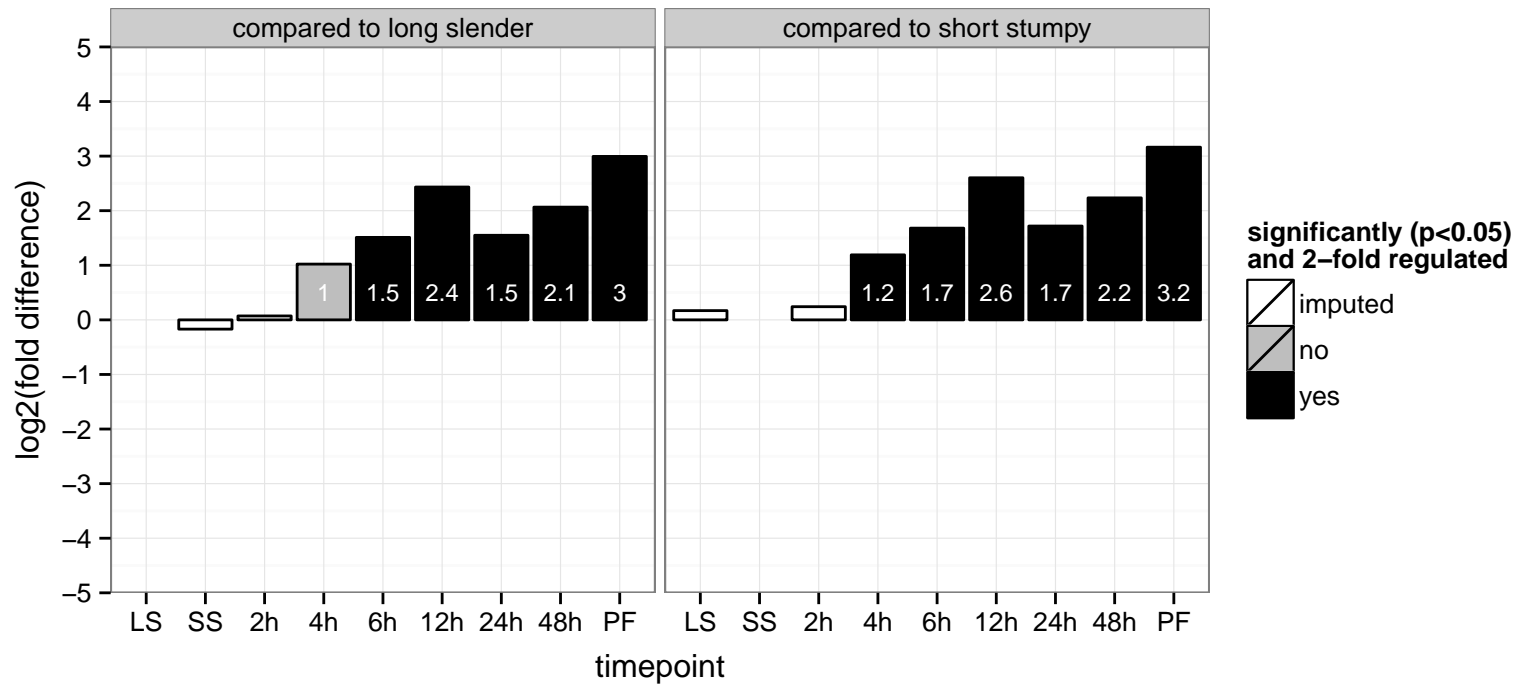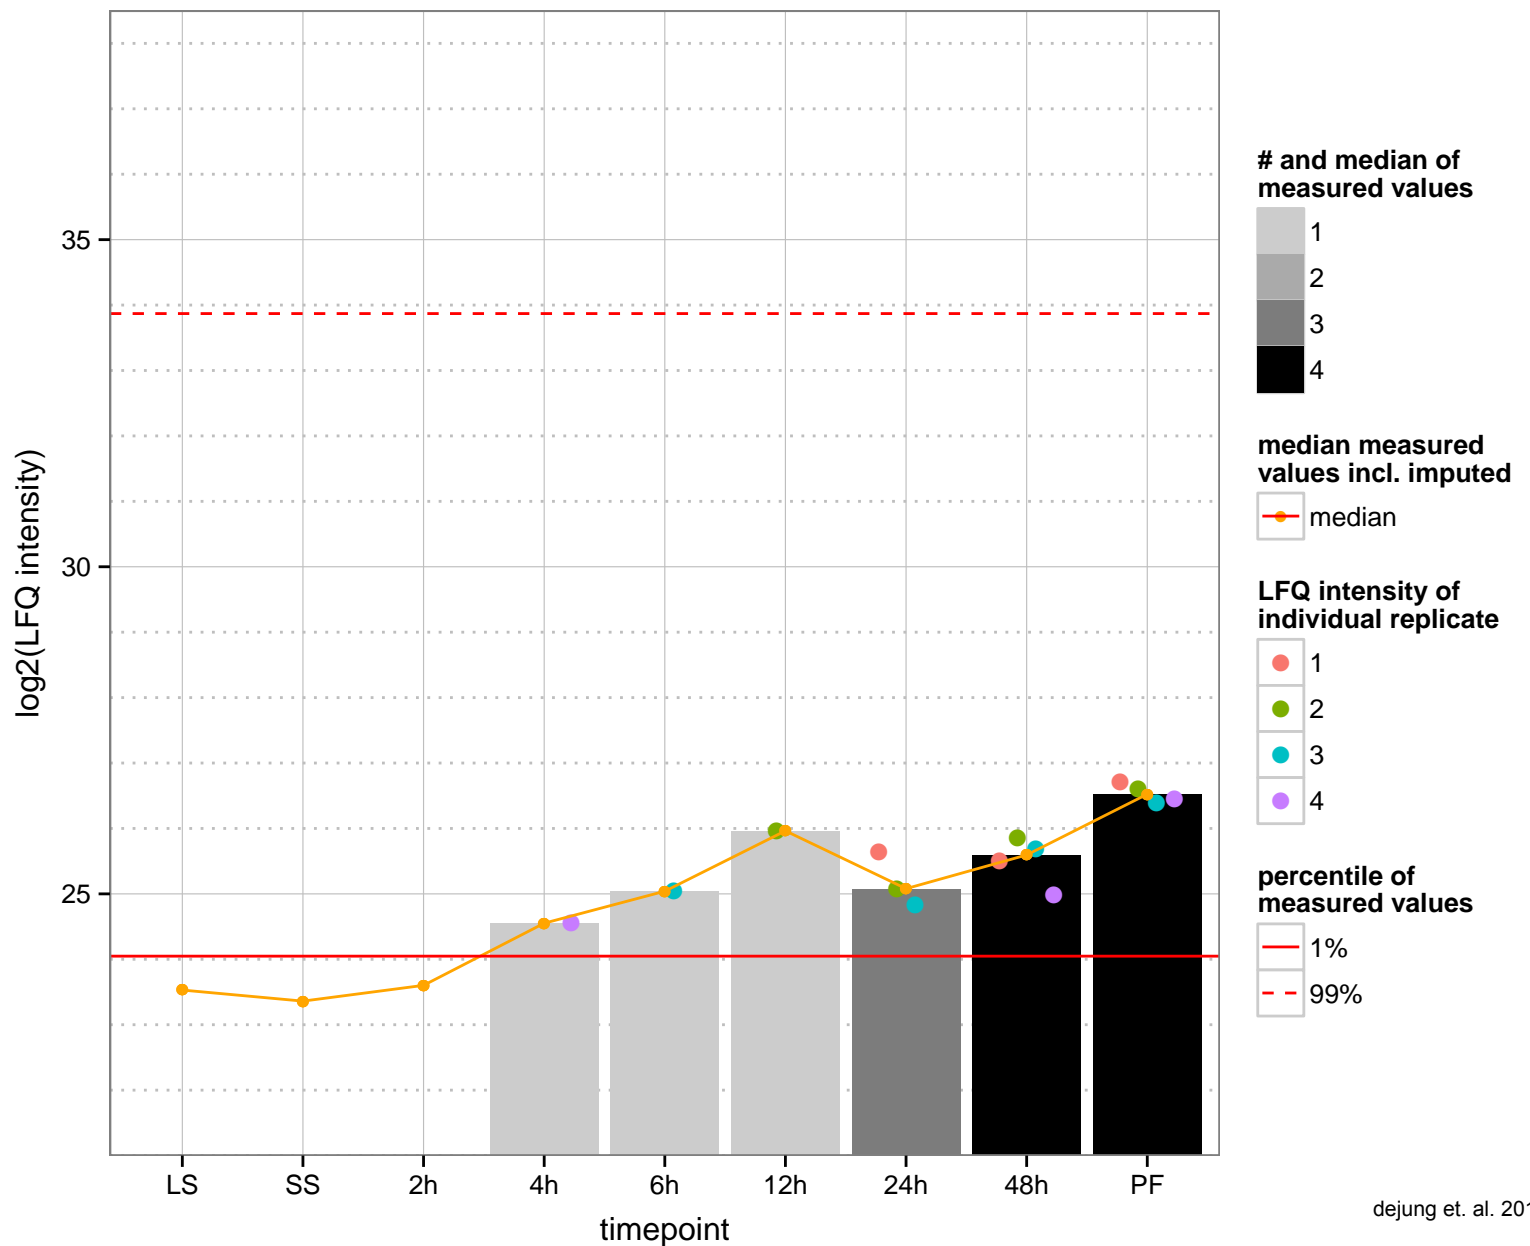

hypothetical protein, conserved  
 Tb927.9.1710  
 AGOF: null  
 AGOC: null  
 AGOP: null  
 PGO: null  
 PGO: null  
 PGO: null

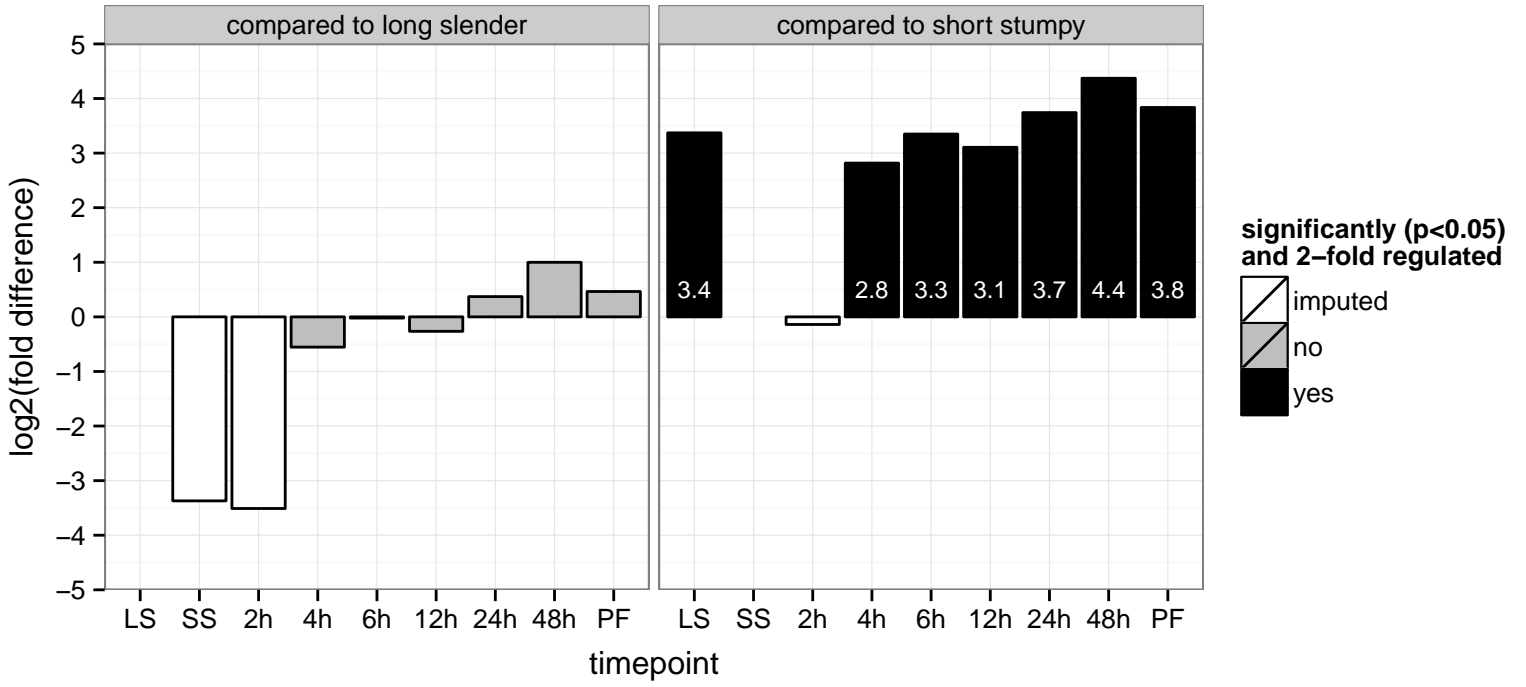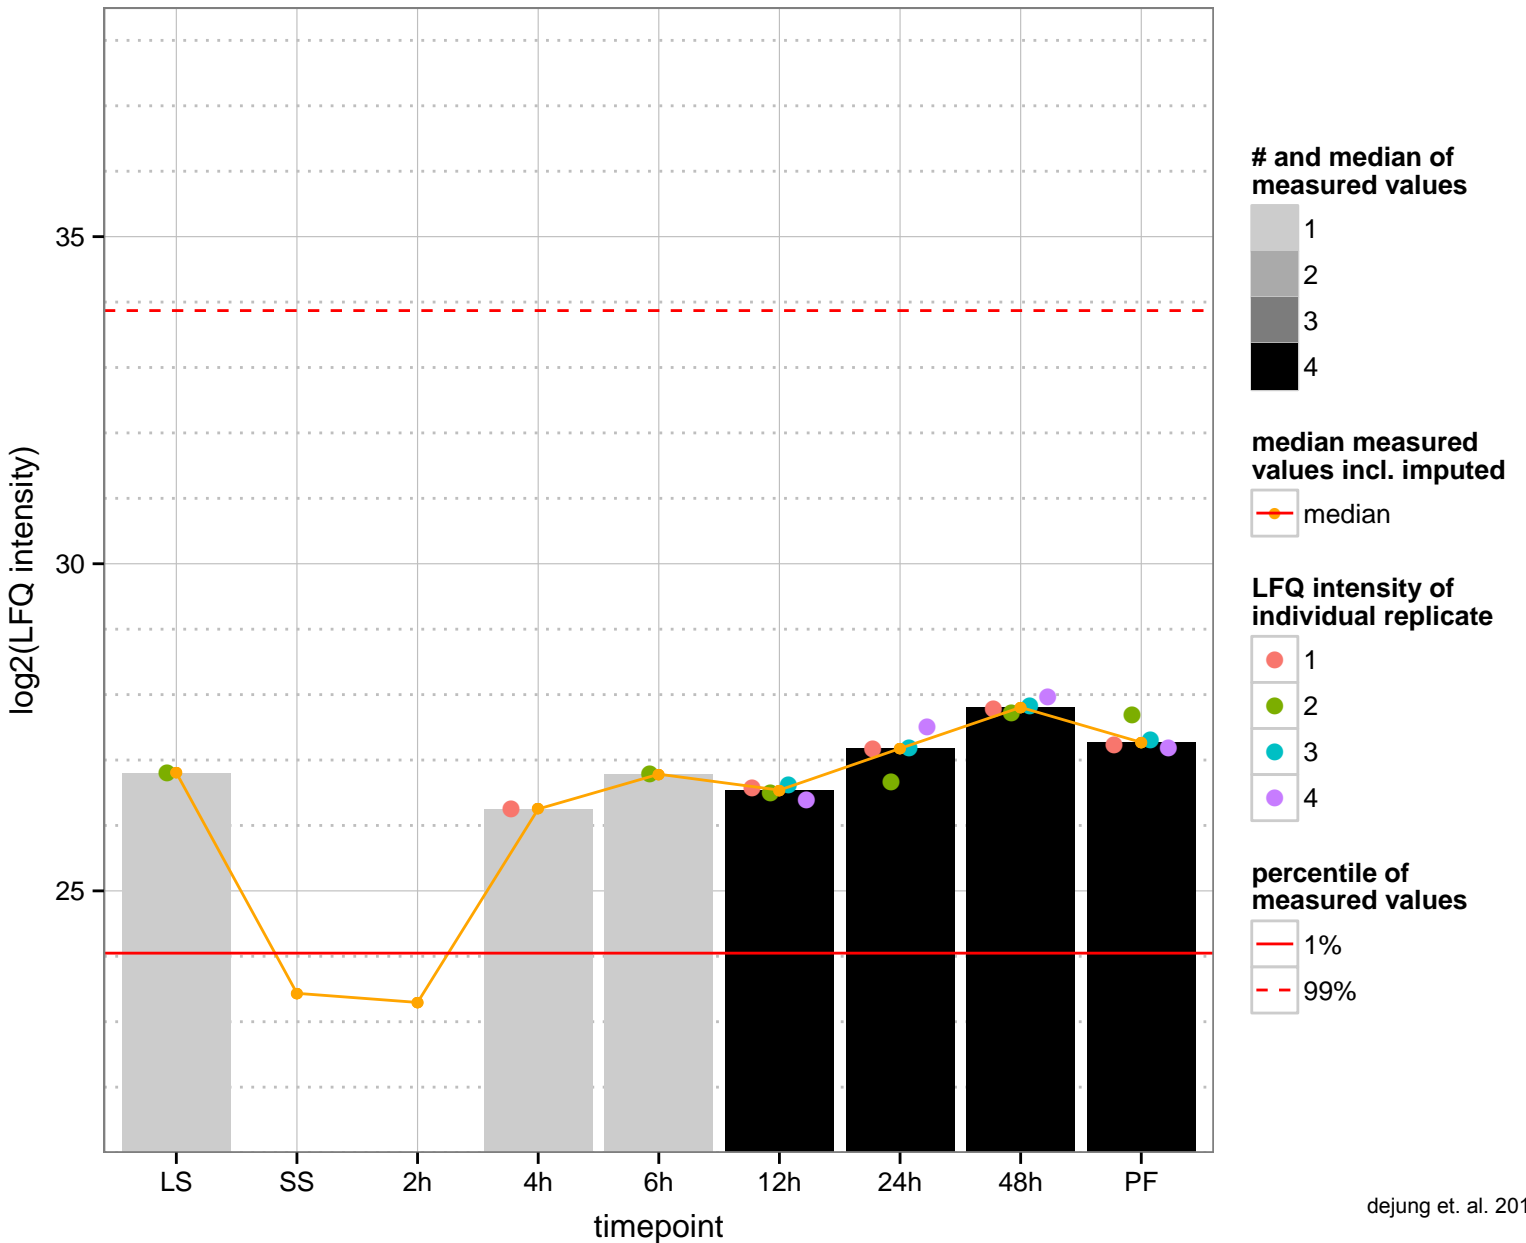

hypothetical protein, conserved  
 Tb927.9.2390  
 AGOF: null  
 AGOC: null  
 AGOP: null  
 PGO: null  
 PGOC: null  
 PGOP: null

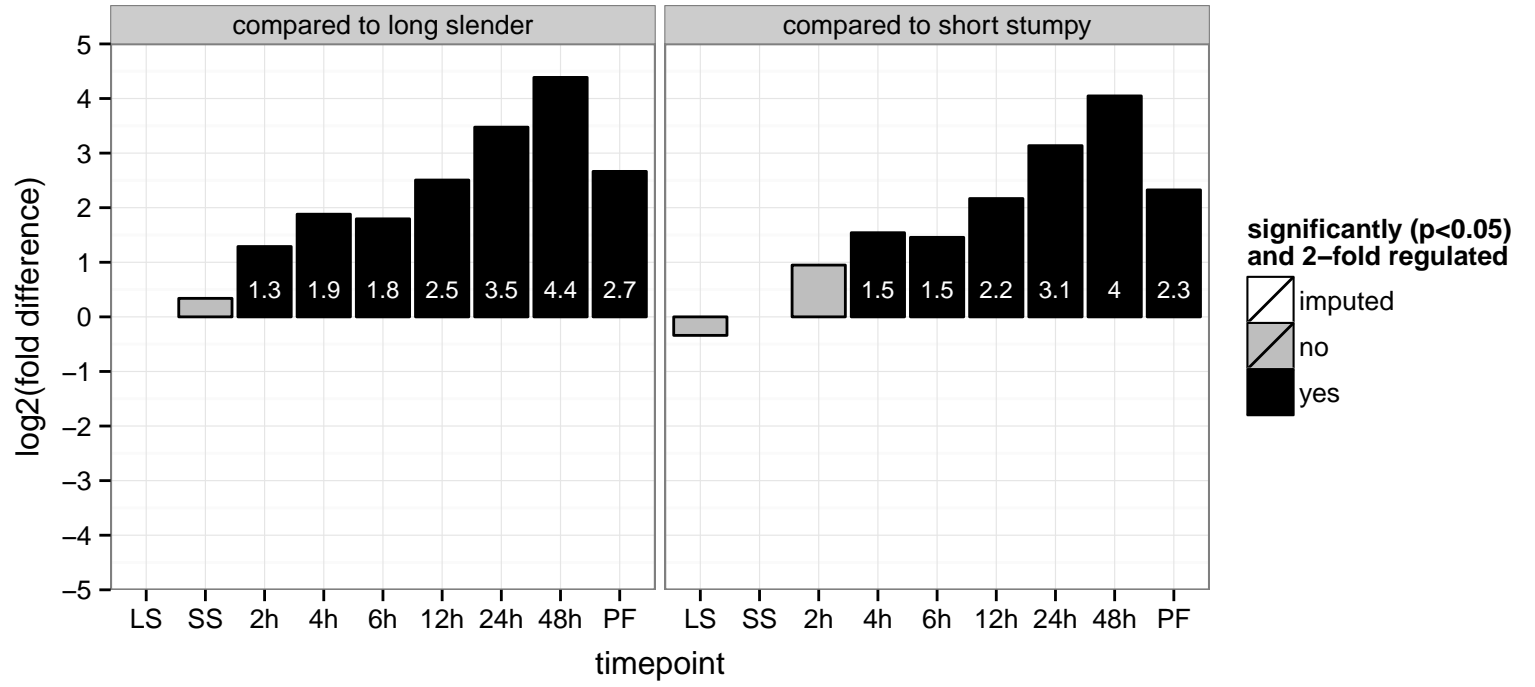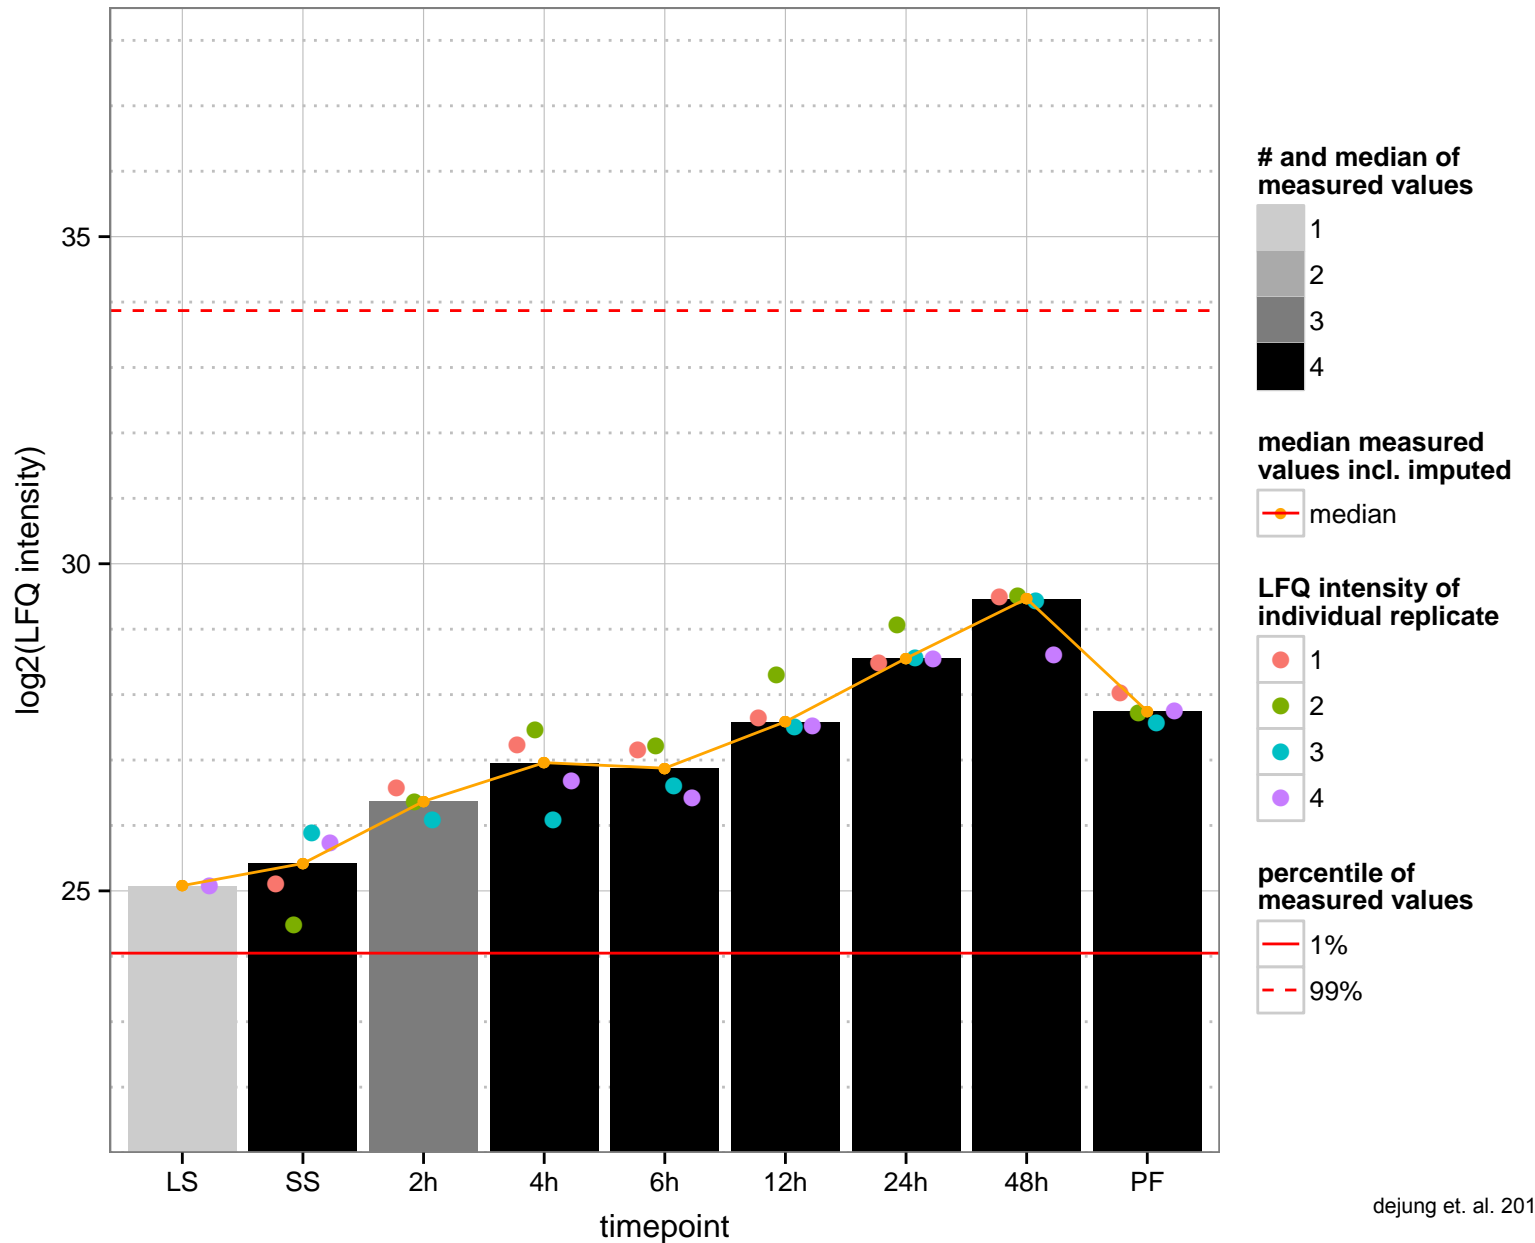

cytochrome oxidase subunit V (COXV)  
 Tb927.9.3170  
 AGOF: null  
 AGOC: mitochondrion  
 AGOP: null  
 PGO: null  
 PGO: null  
 PGO: null

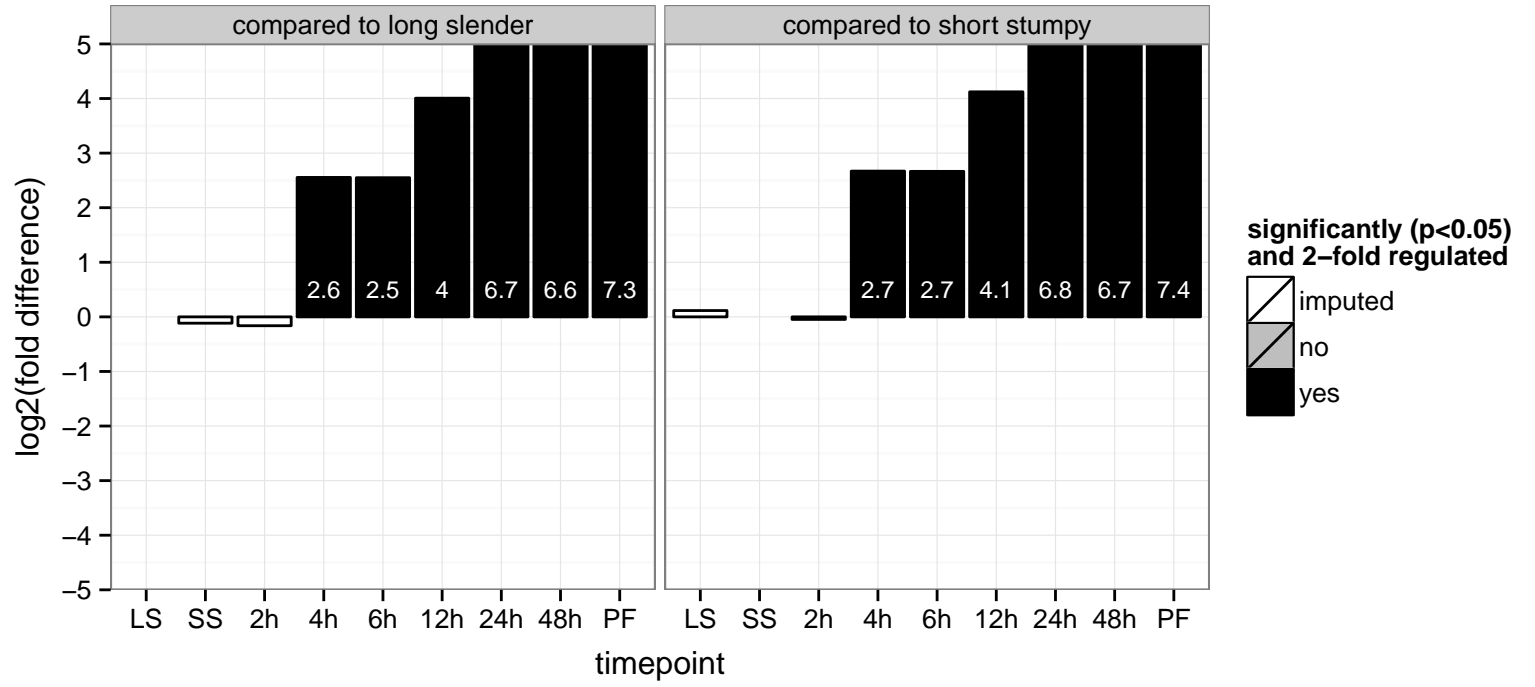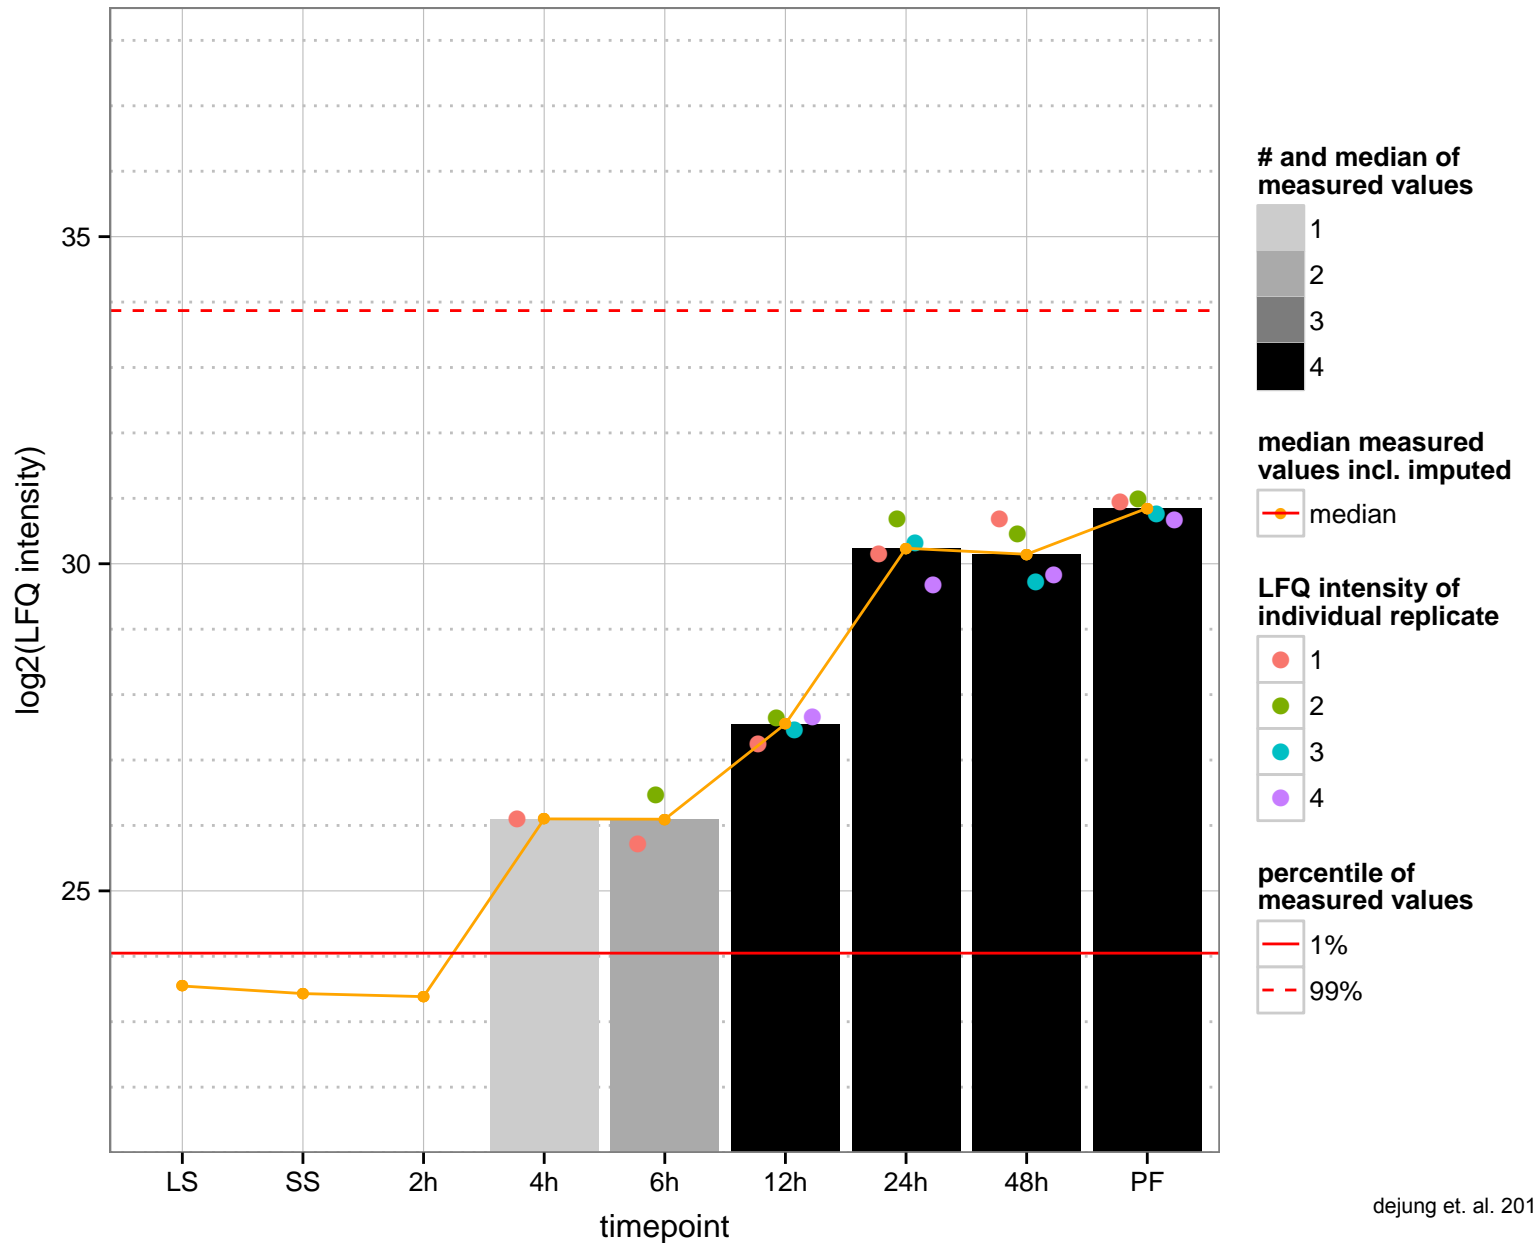

2Fe-2S iron-sulfur cluster binding domain containing protein, putative

Tb927.9.6060

AGOF: thiol oxidase activity

AGOC: mitochondrial intermembrane space, mitochondrion

AGOP: oxidation-reduction process, protein import into mitochondrial intermembrane space

PGOF: thiol oxidase activity

PGOC: null

PGOP: oxidation-reduction process

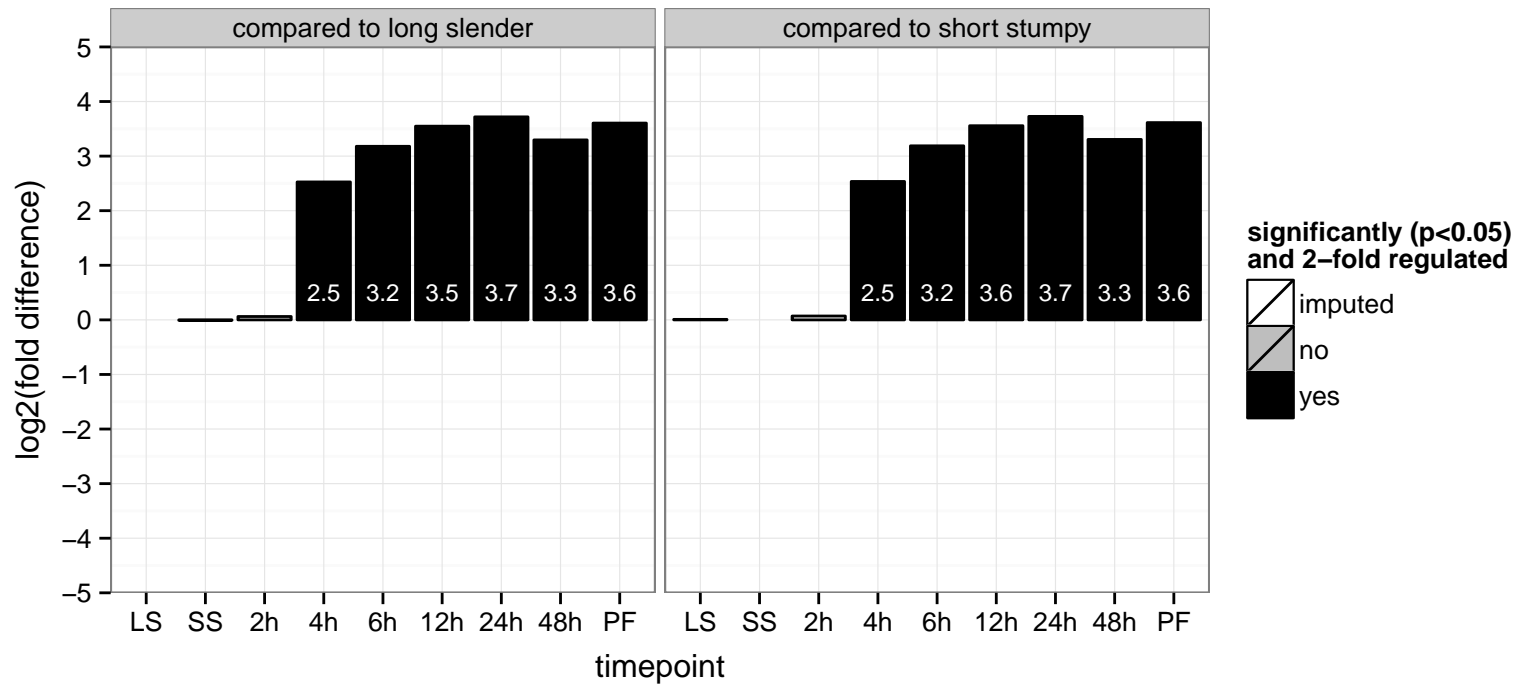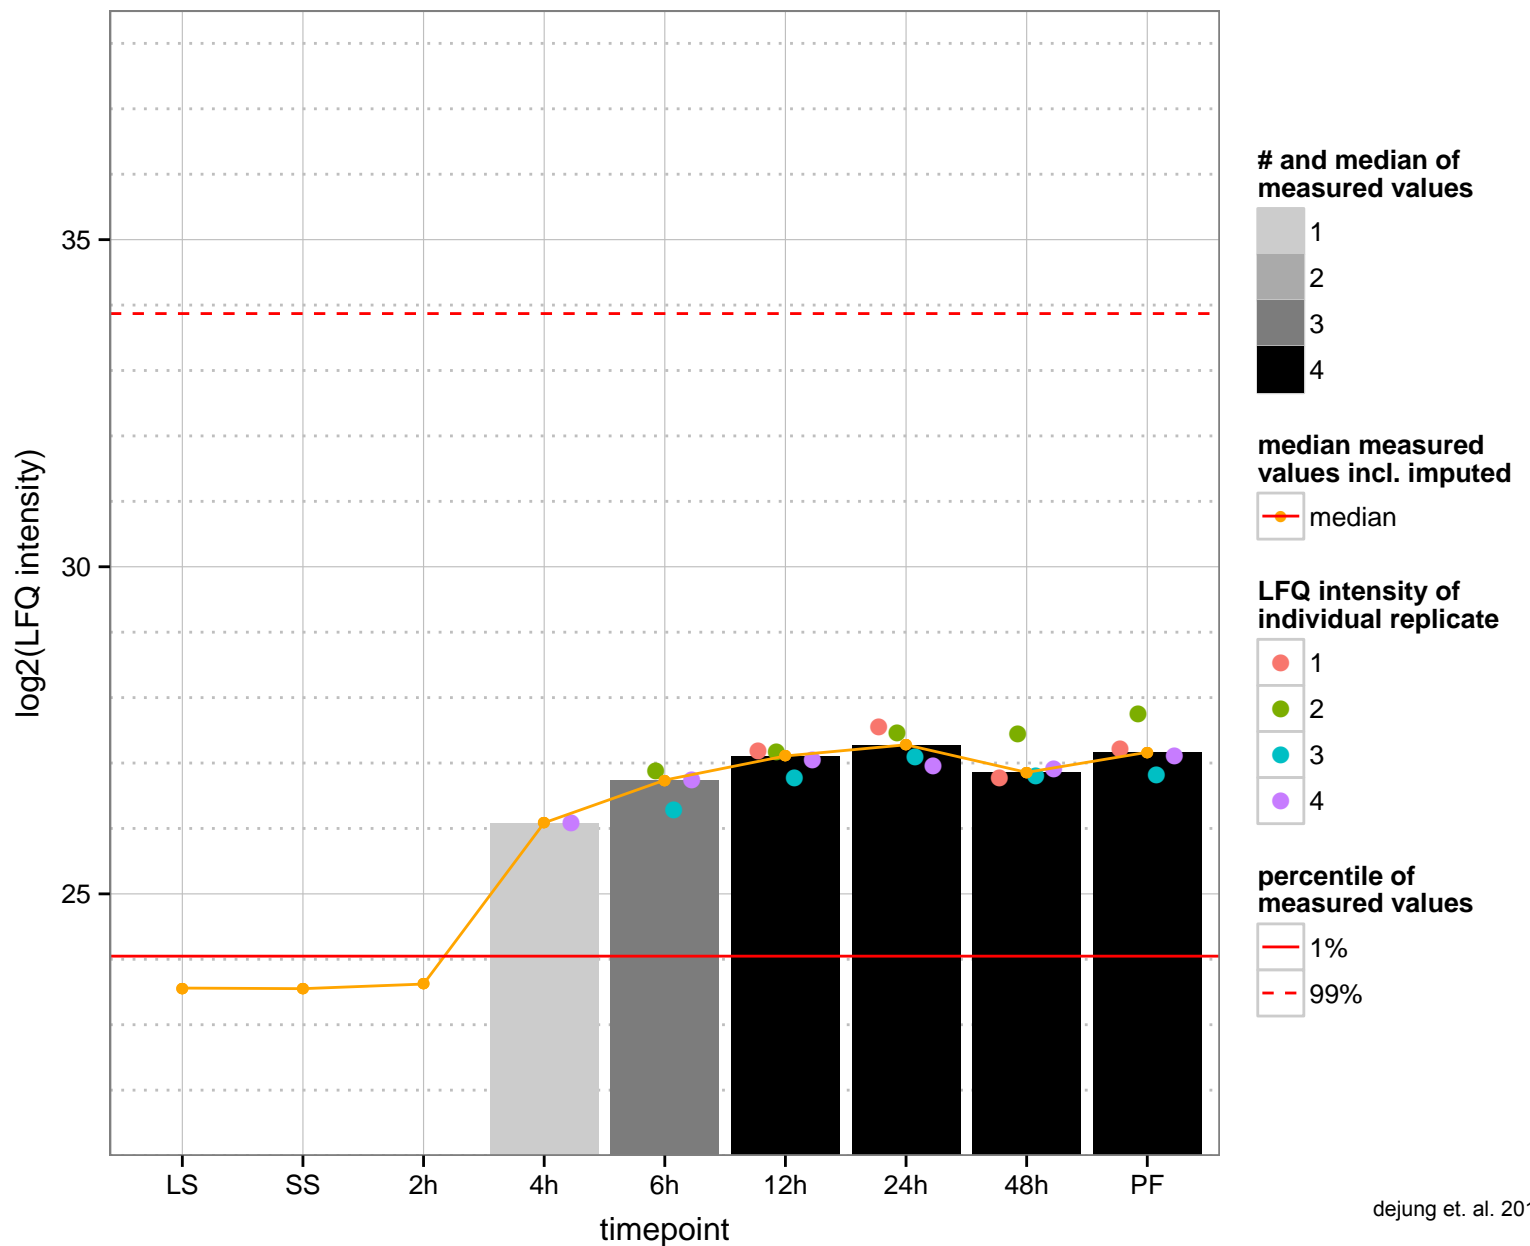

hypothetical protein, conserved  
 Tb927.9.6620  
 AGOF: null  
 AGOC: mitochondrion  
 AGOP: null  
 PGO: null  
 PGOC: null  
 PGOP: null

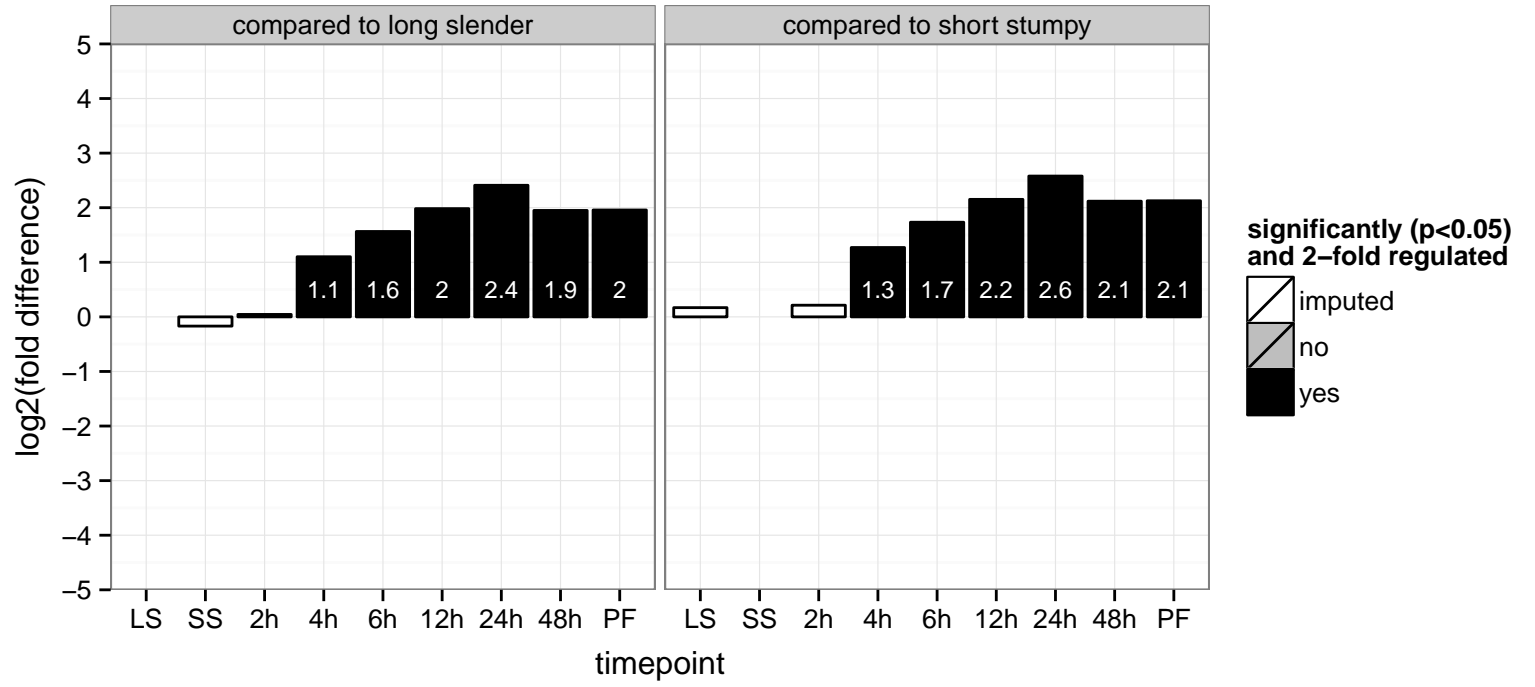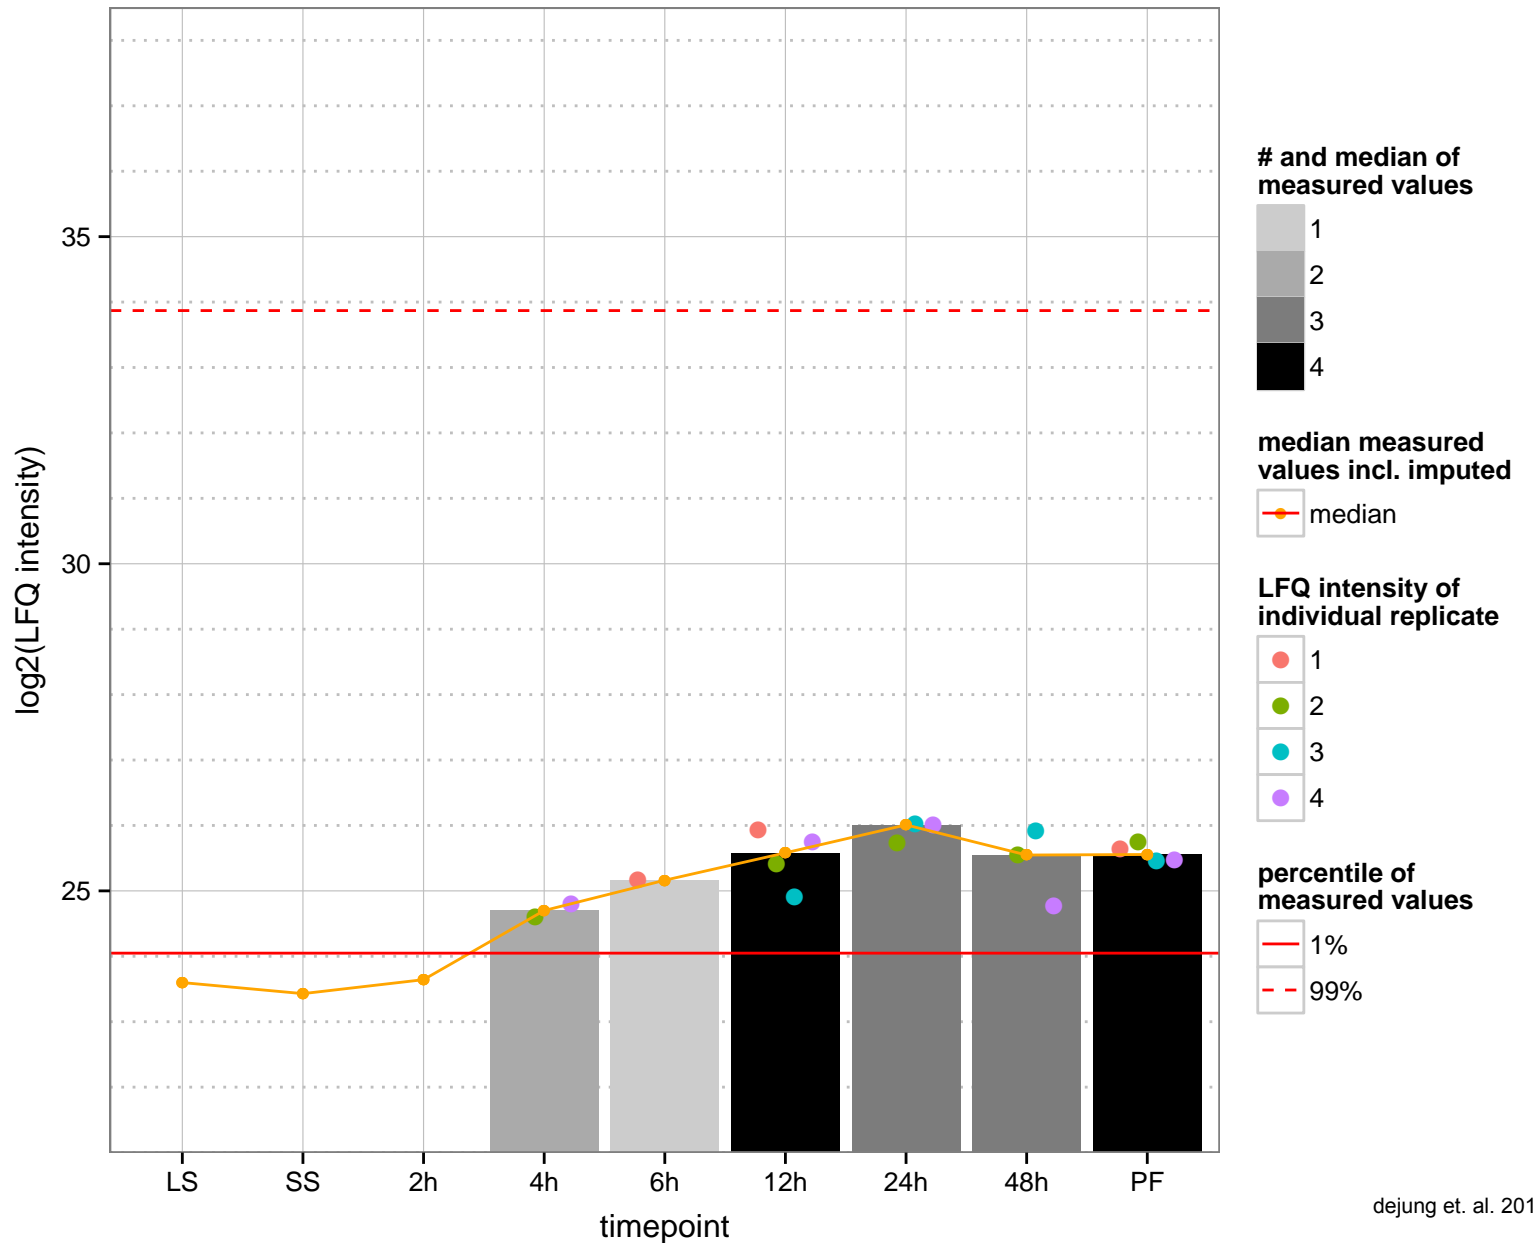

hypothetical protein, conserved  
 Tb927.9.7170  
 AGOF: structural constituent of ribosome  
 AGOC: mitochondrial ribosome, mitochondrion  
 AGOP: translation  
 PGOF: structural constituent of ribosome  
 PGO: mitochondrial ribosome  
 PGOP: translation

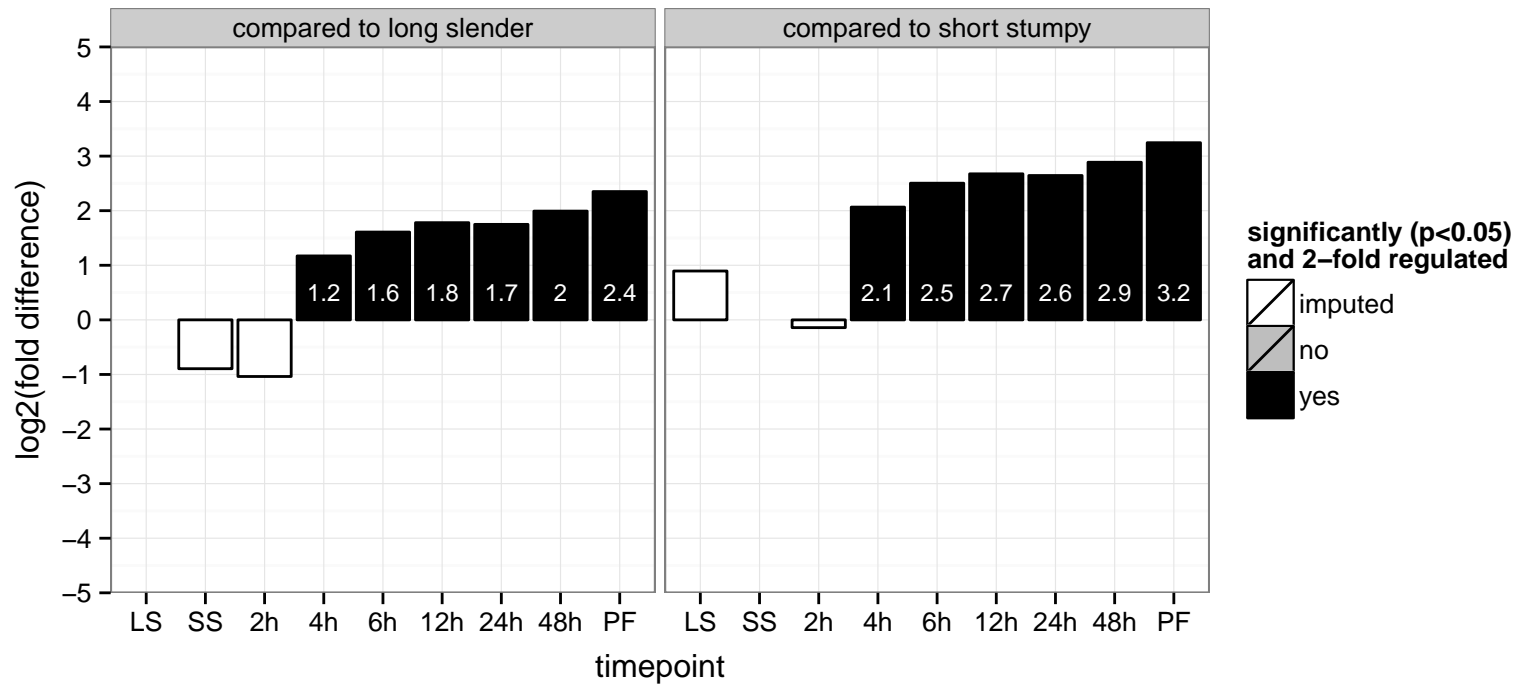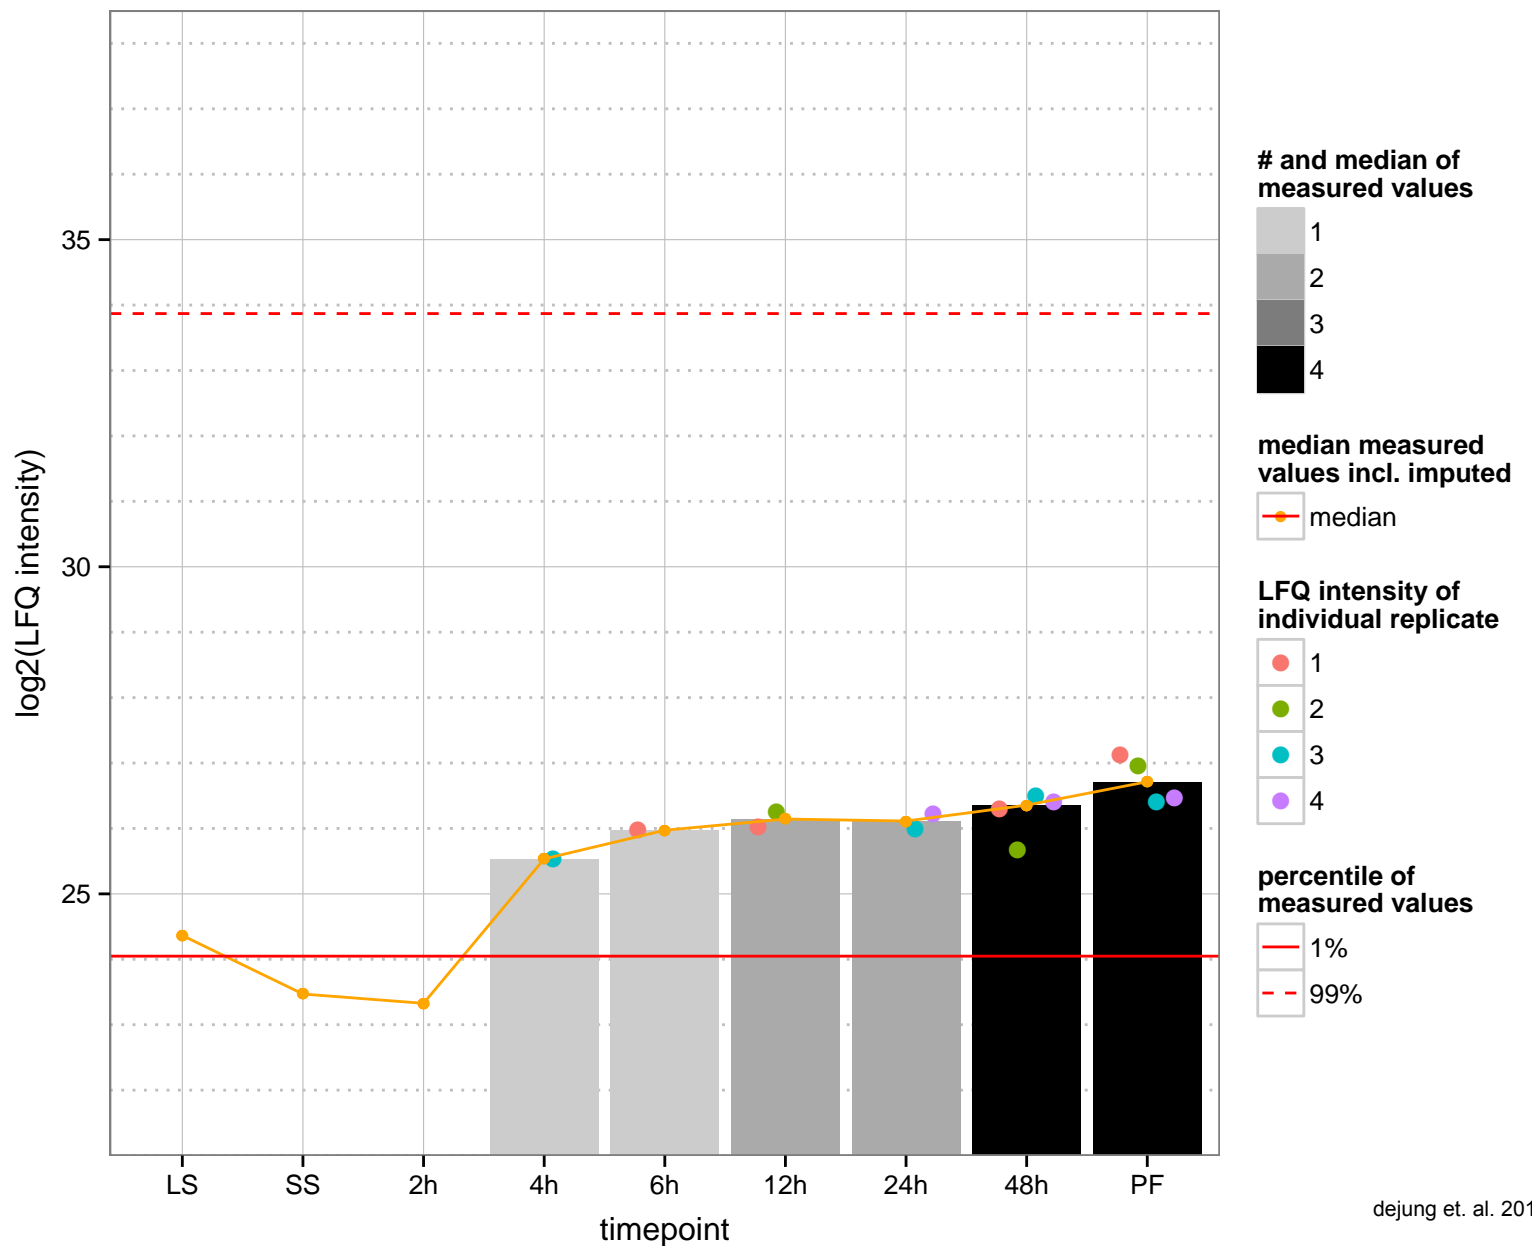



hypothetical protein, conserved  
 Tb927.9.8820  
 AGOF: null  
 AGOC: null  
 AGOP: null  
 PGO: null  
 PGO: null  
 PGO: null

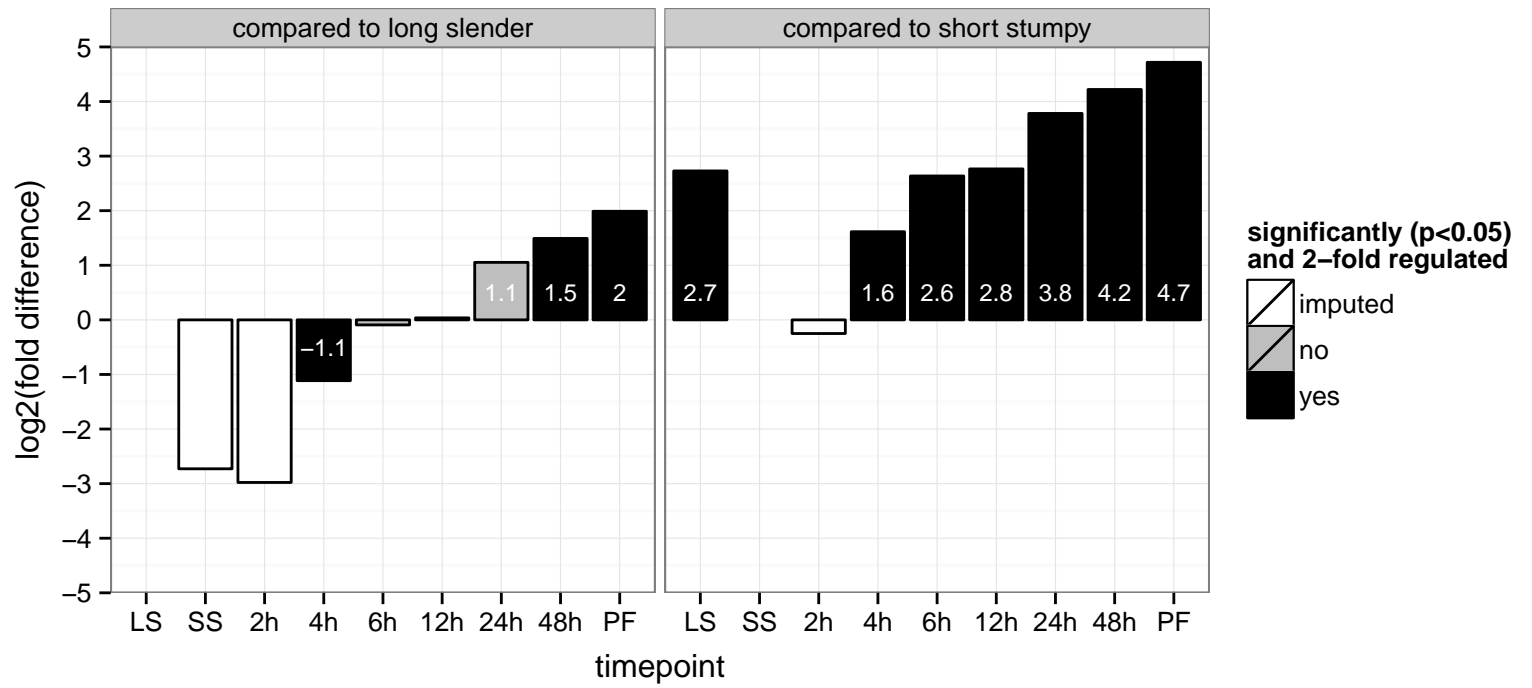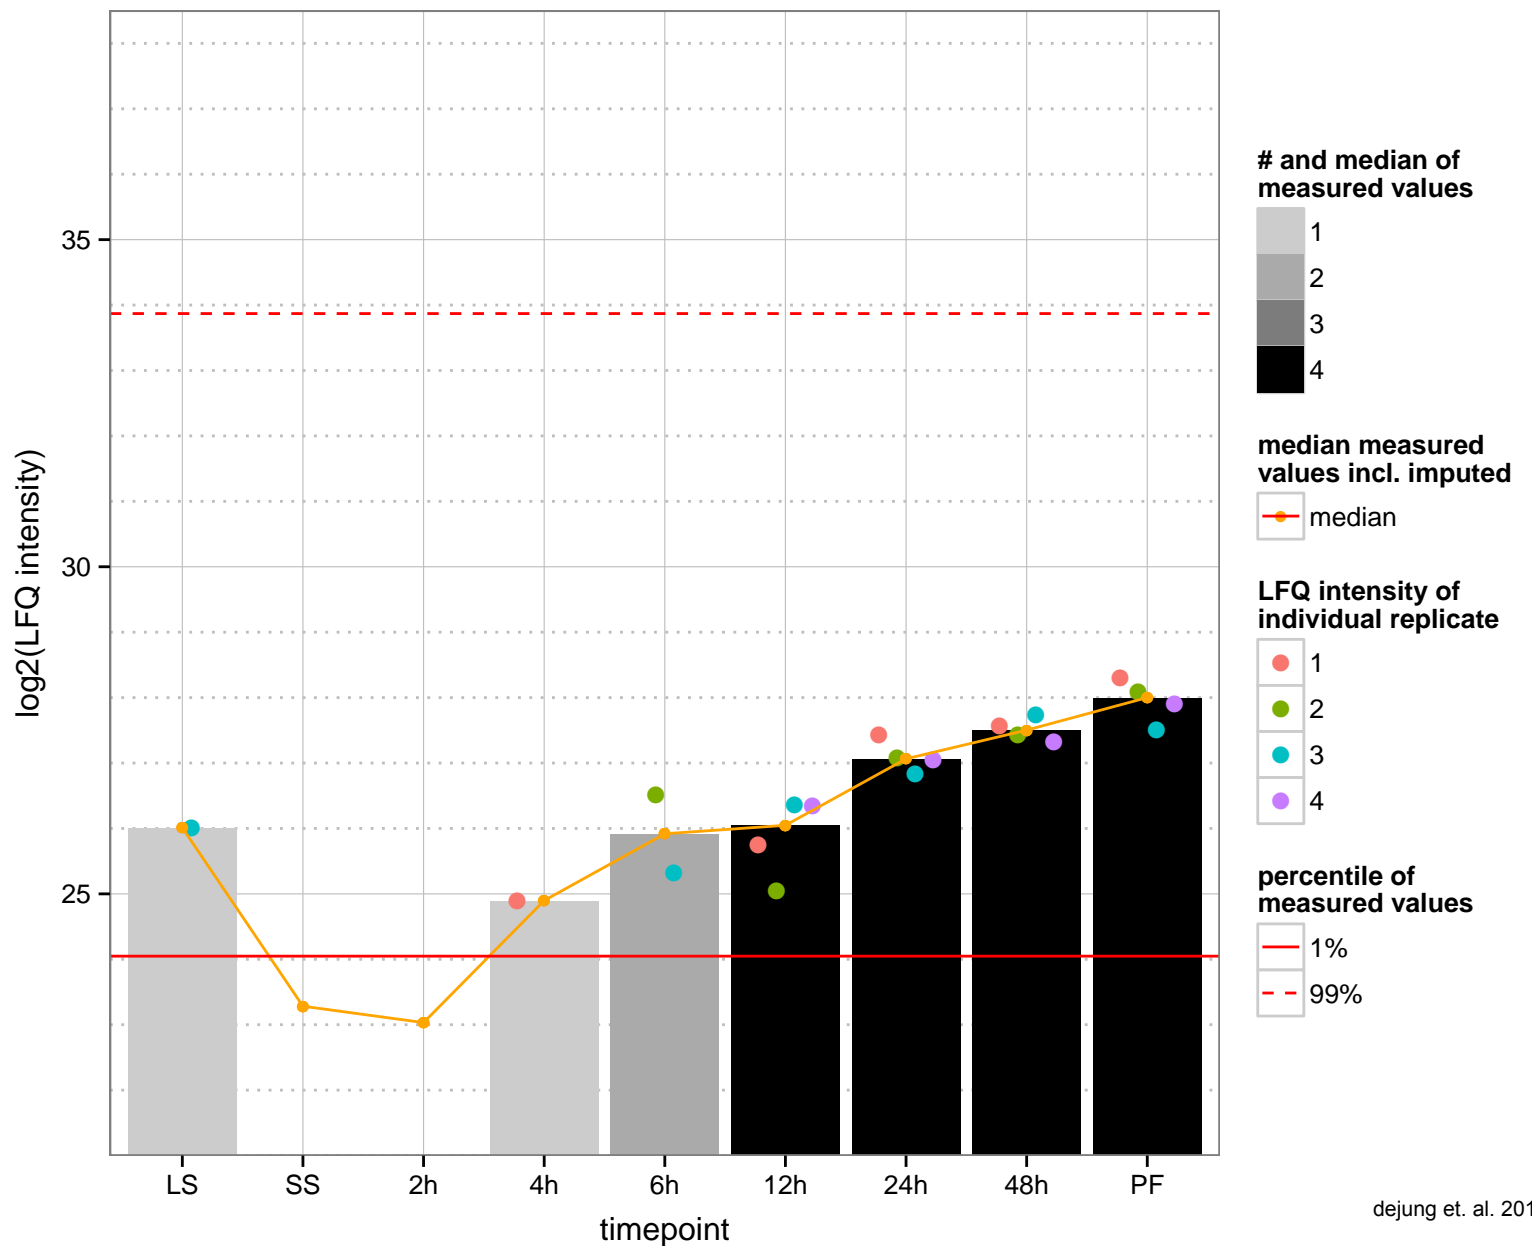

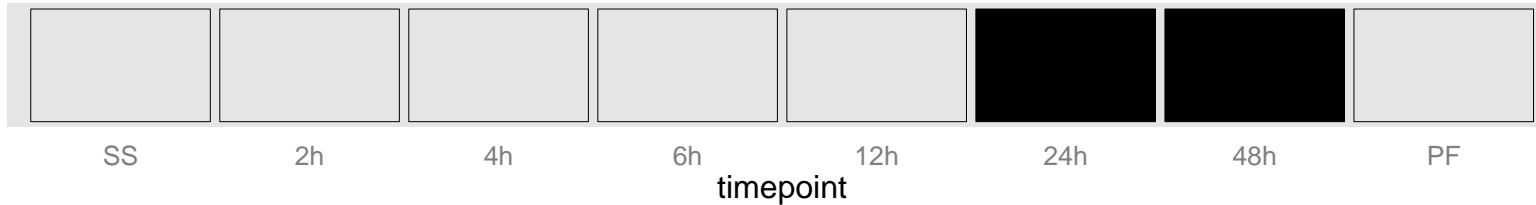

**regulated**  not regulated  significant down  significant up

hypothetical protein, conserved, chrX additional, unordered contigs  
 Tb10.v4.0041;Tb927.10.4510  
 AGOF: null  
 AGOC: null  
 AGOP: null  
 PGO: null  
 PGOC: null  
 PGOP: null

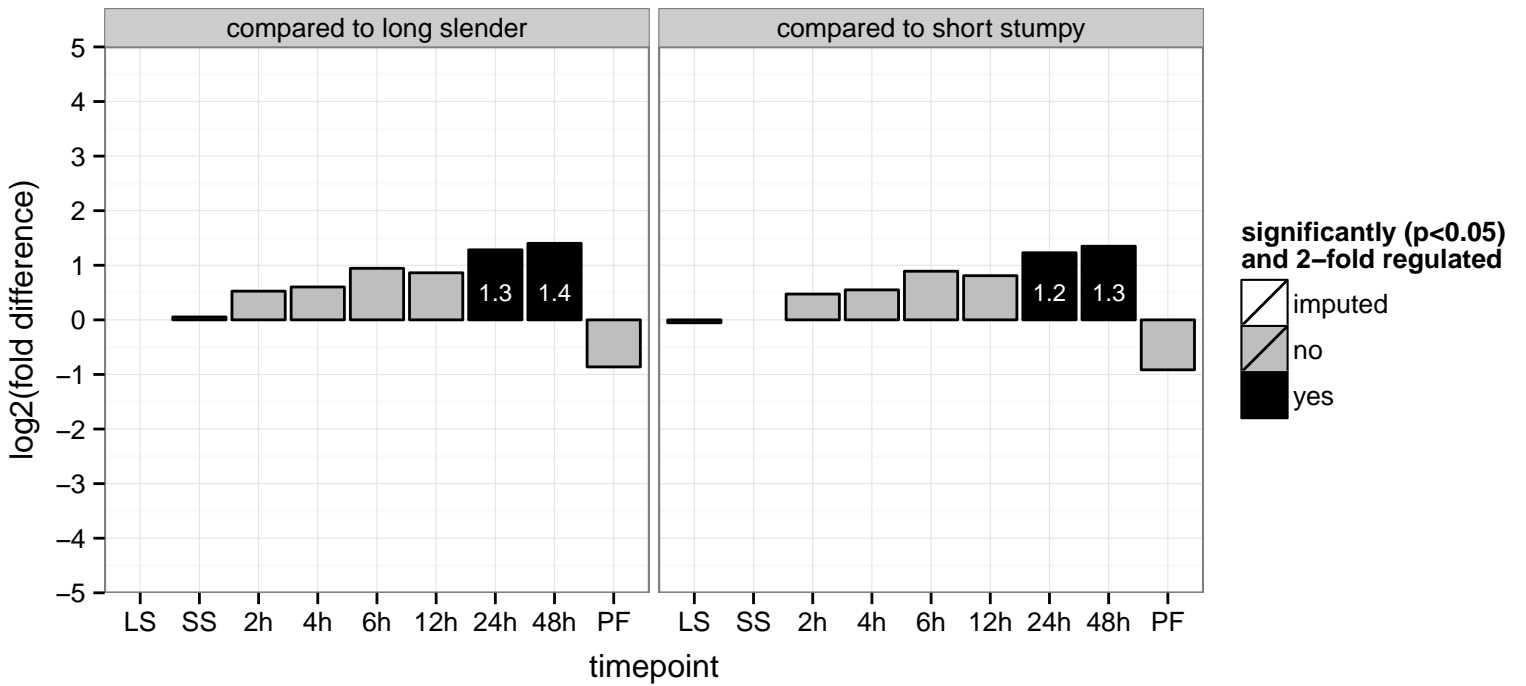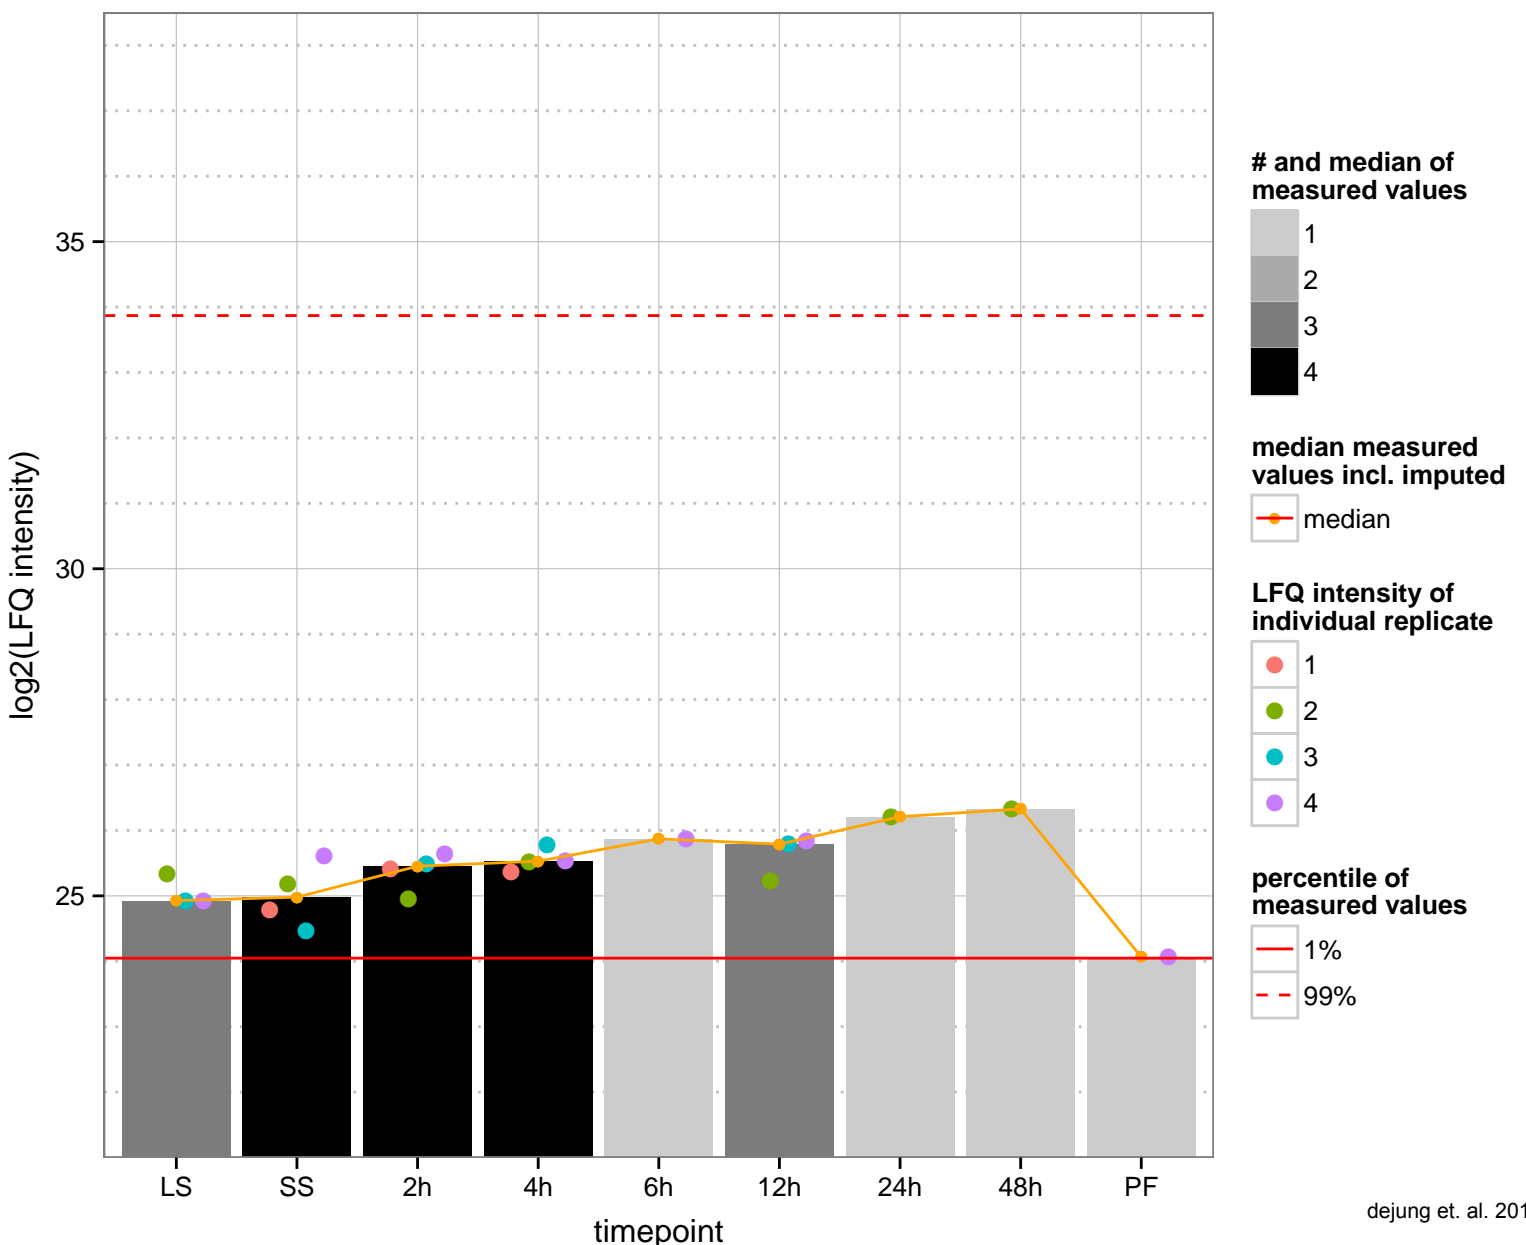

prohibitin, putative, chrX additional, unordered contigs, prohibitin 2, putative (PHB2)  
 Tb927.10.4310;Tb10.v4.0045  
 AGOF: null  
 AGOC: mitochondrial inner membrane, membrane, mitochondrion  
 AGOP: null, proteolysis, regulation of mitochondrial translation, replicative cell aging  
 PGO: null  
 PGOC: null  
 PGOP: null

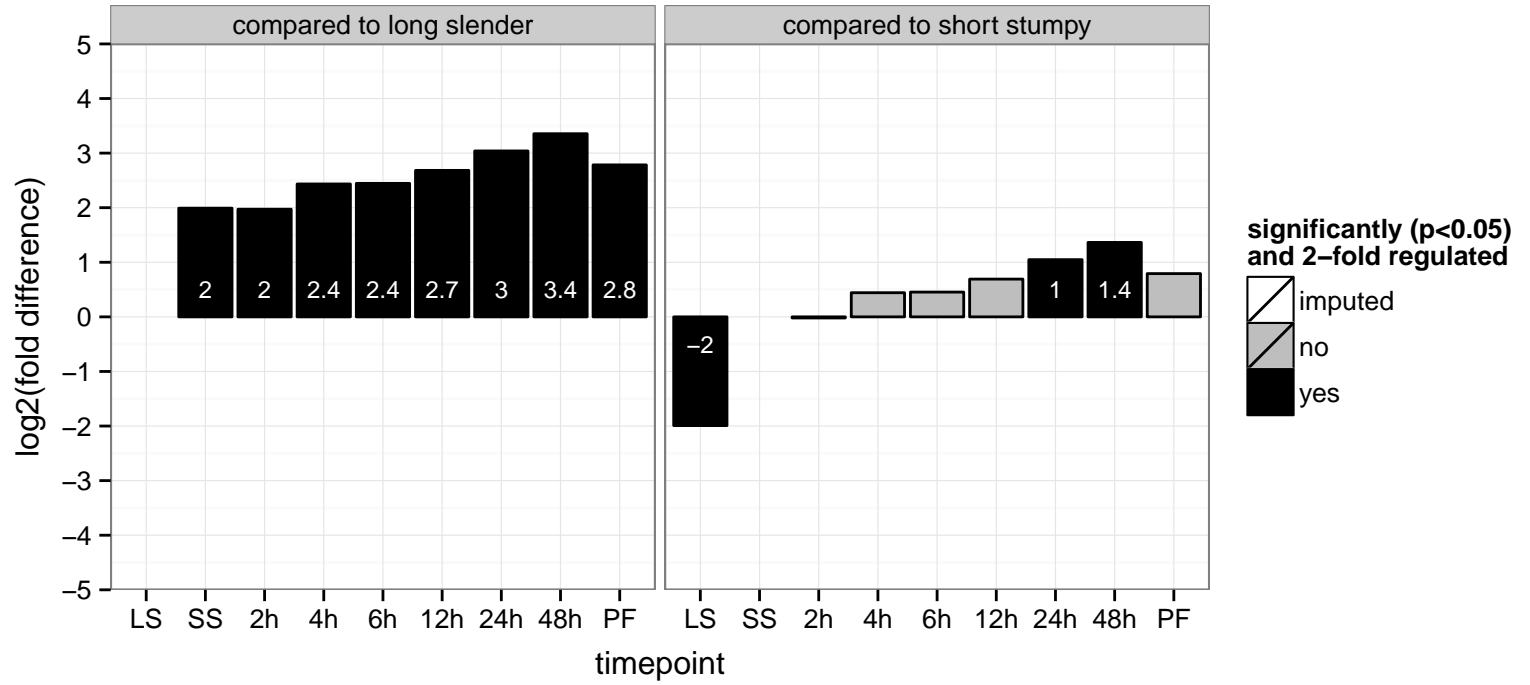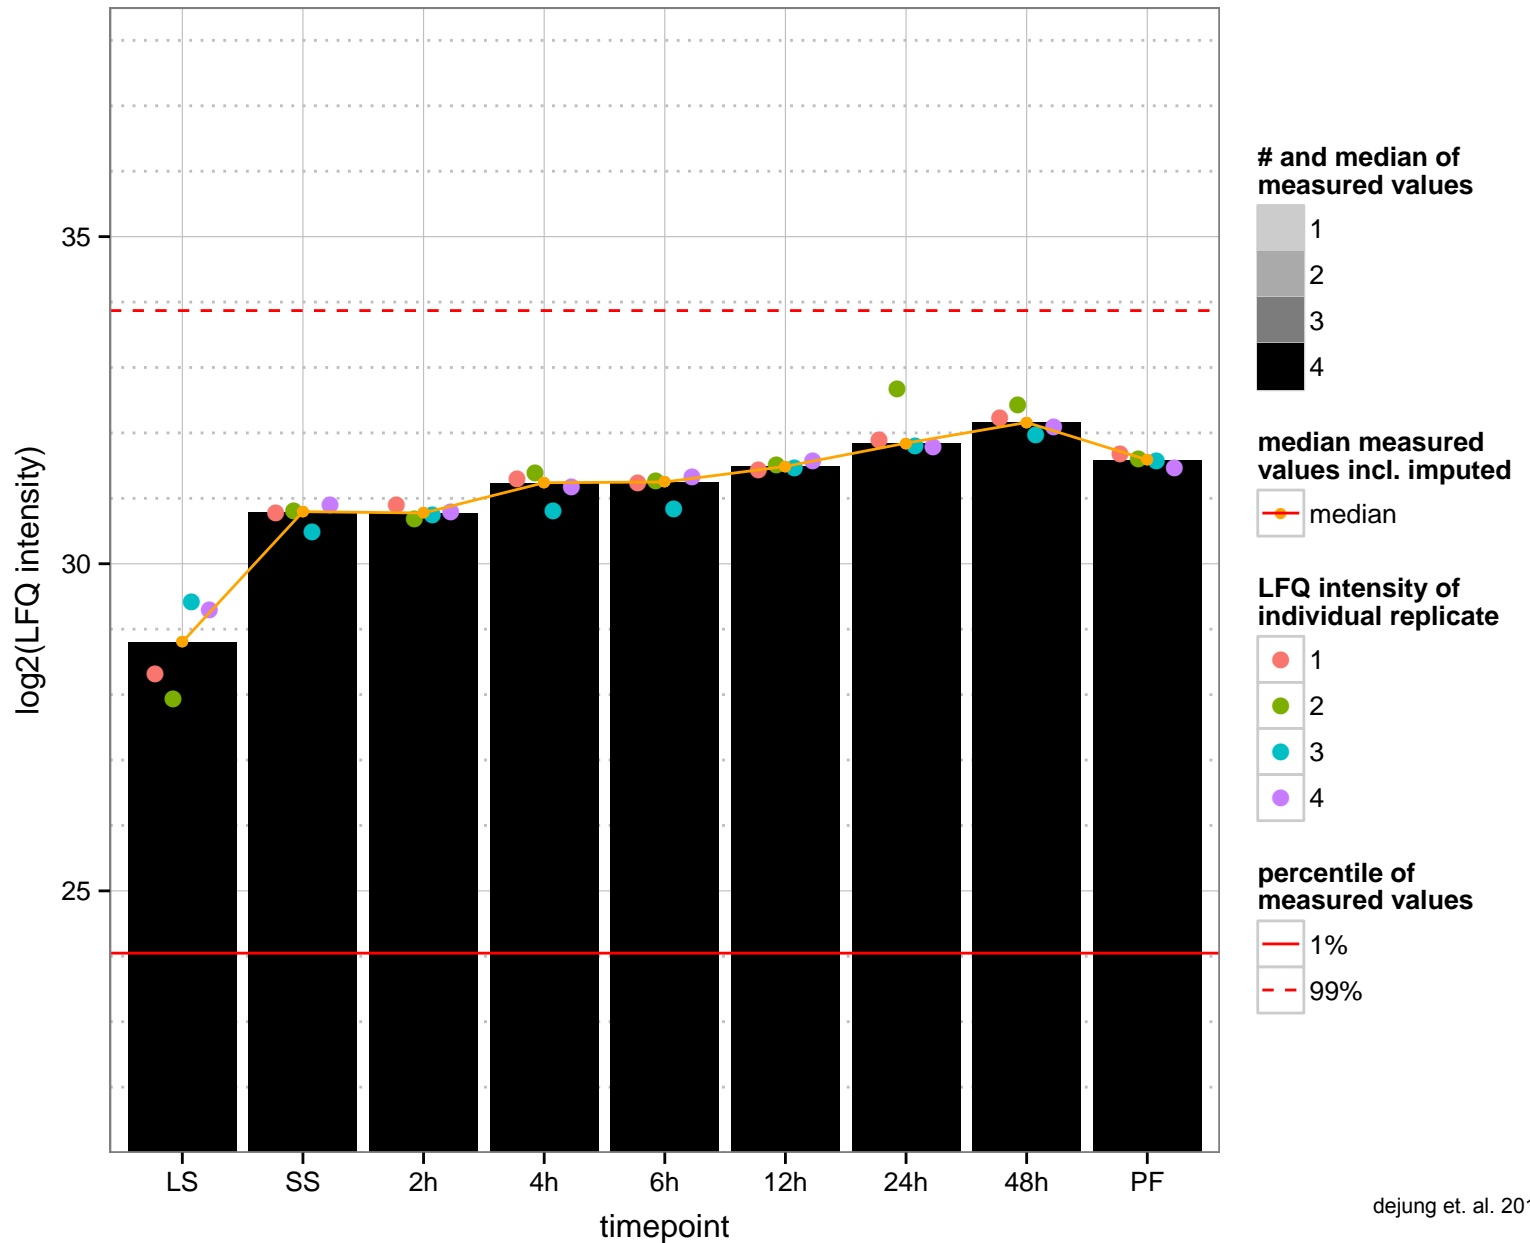

hypothetical protein, conserved  
 Tb11.02.5070b;Tb927.11.7212  
 AGOF: transferase activity  
 AGOC: null  
 AGOP: null  
 PGO: transferase activity  
 PGOC: null  
 PGOP: null

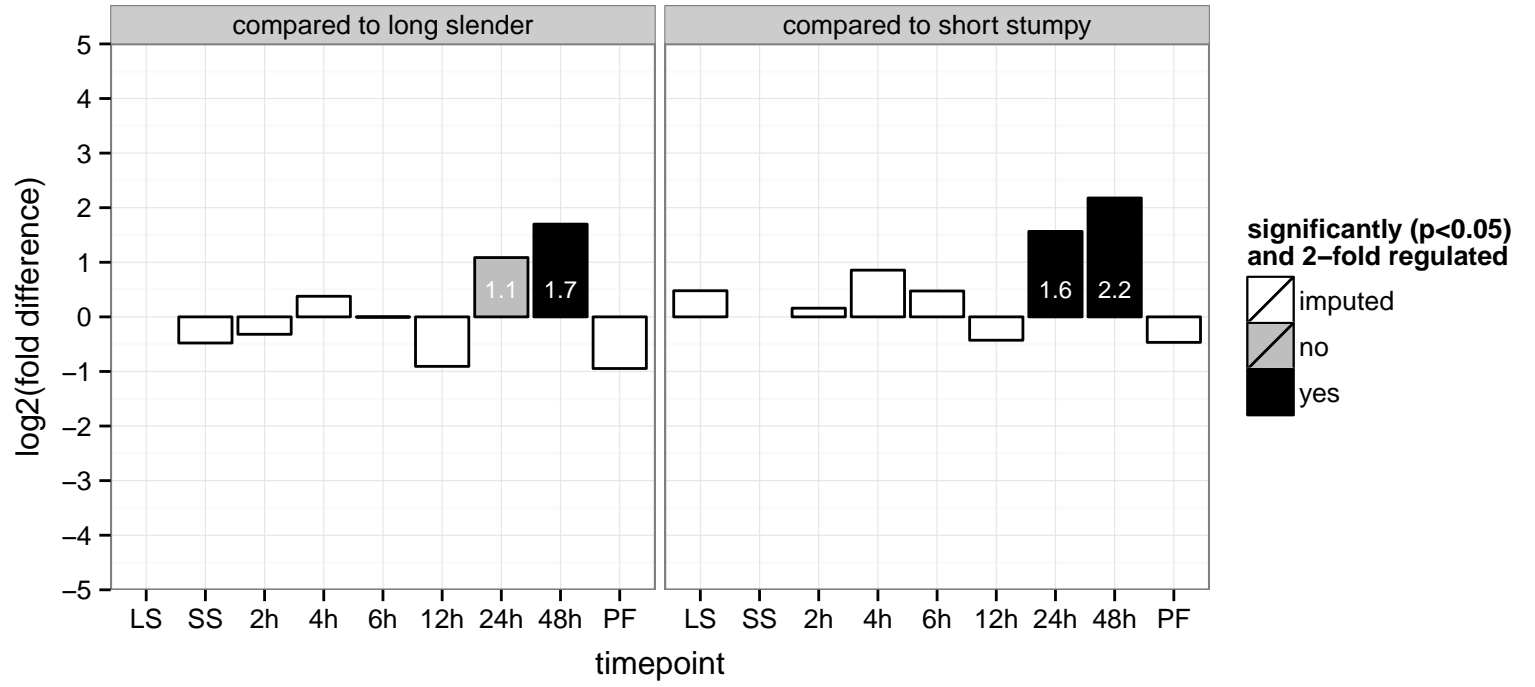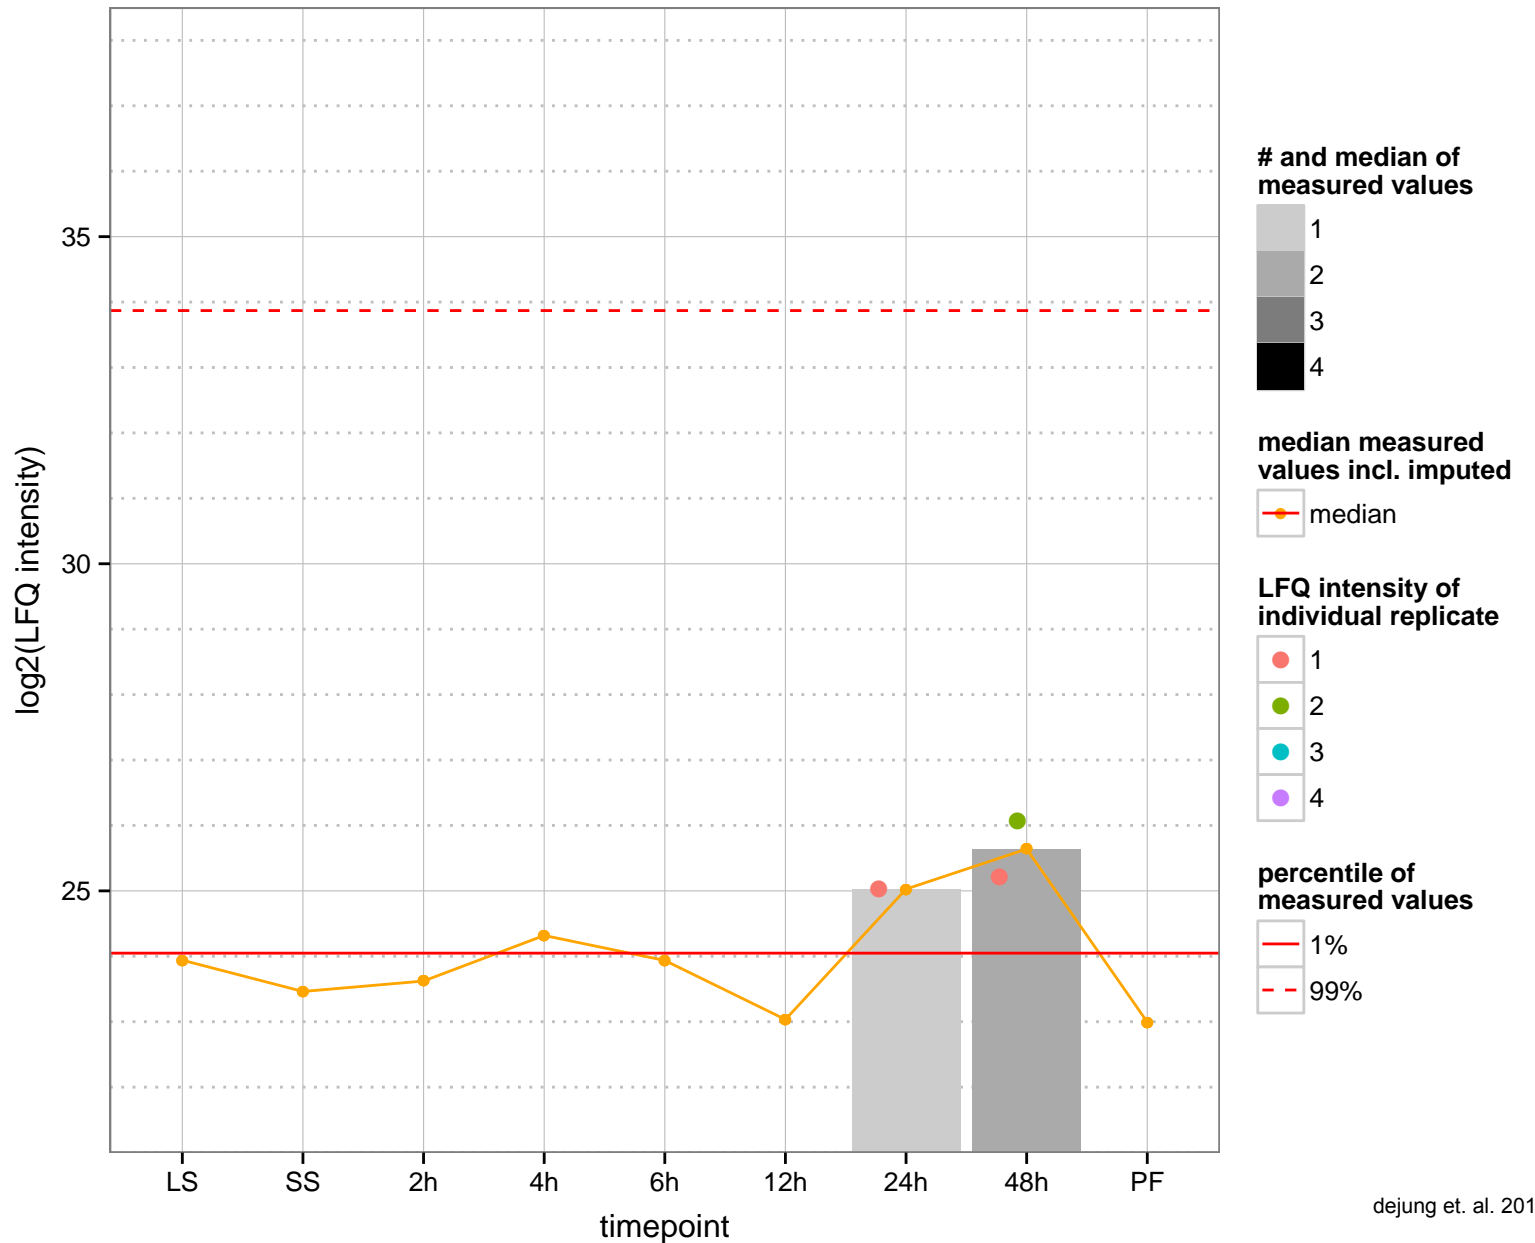

retrotransposon hot spot (RHS) protein, putative, retrotransposon hotspot (RHS) protein 1  
 Tb927.5.295b;Tb11.v5.0214  
 AGOF: null  
 AGOC: null  
 AGOP: null  
 PGO: null  
 PGOC: null  
 PGOP: null

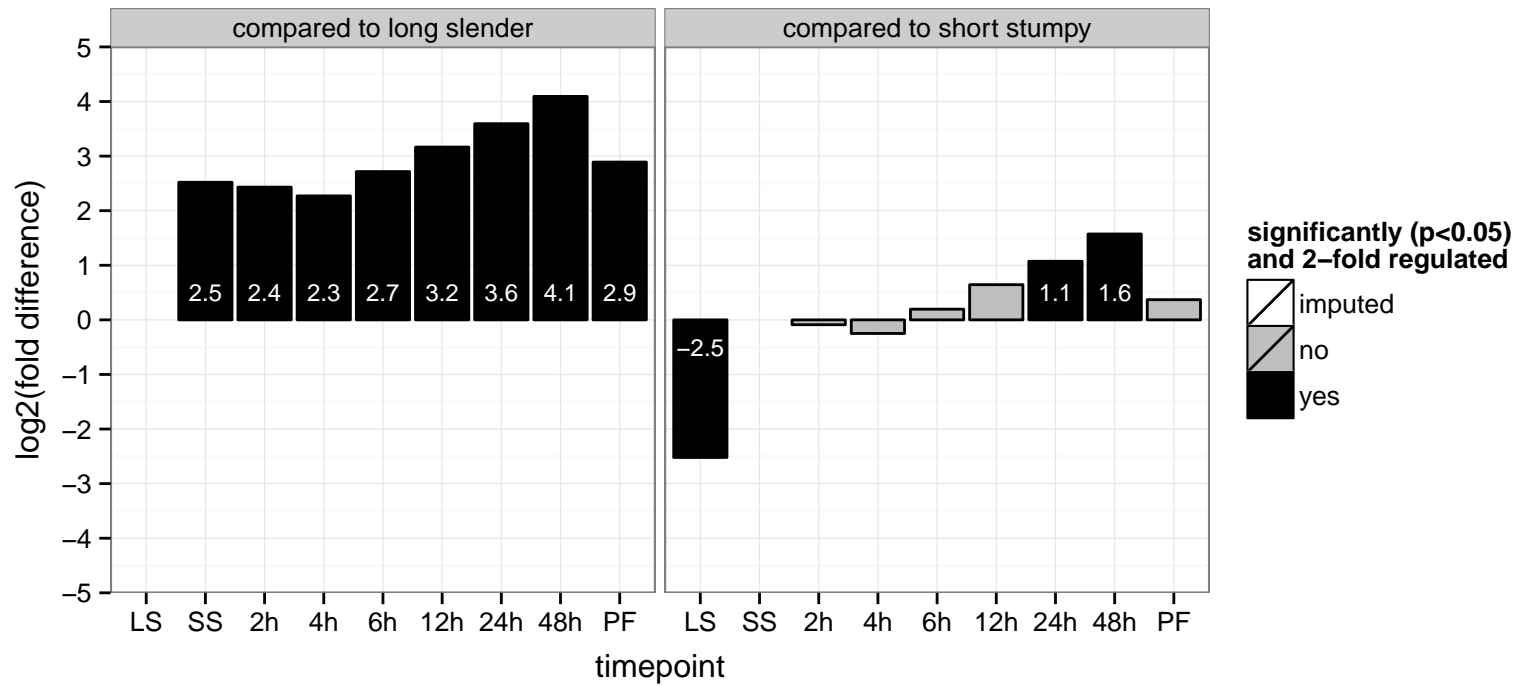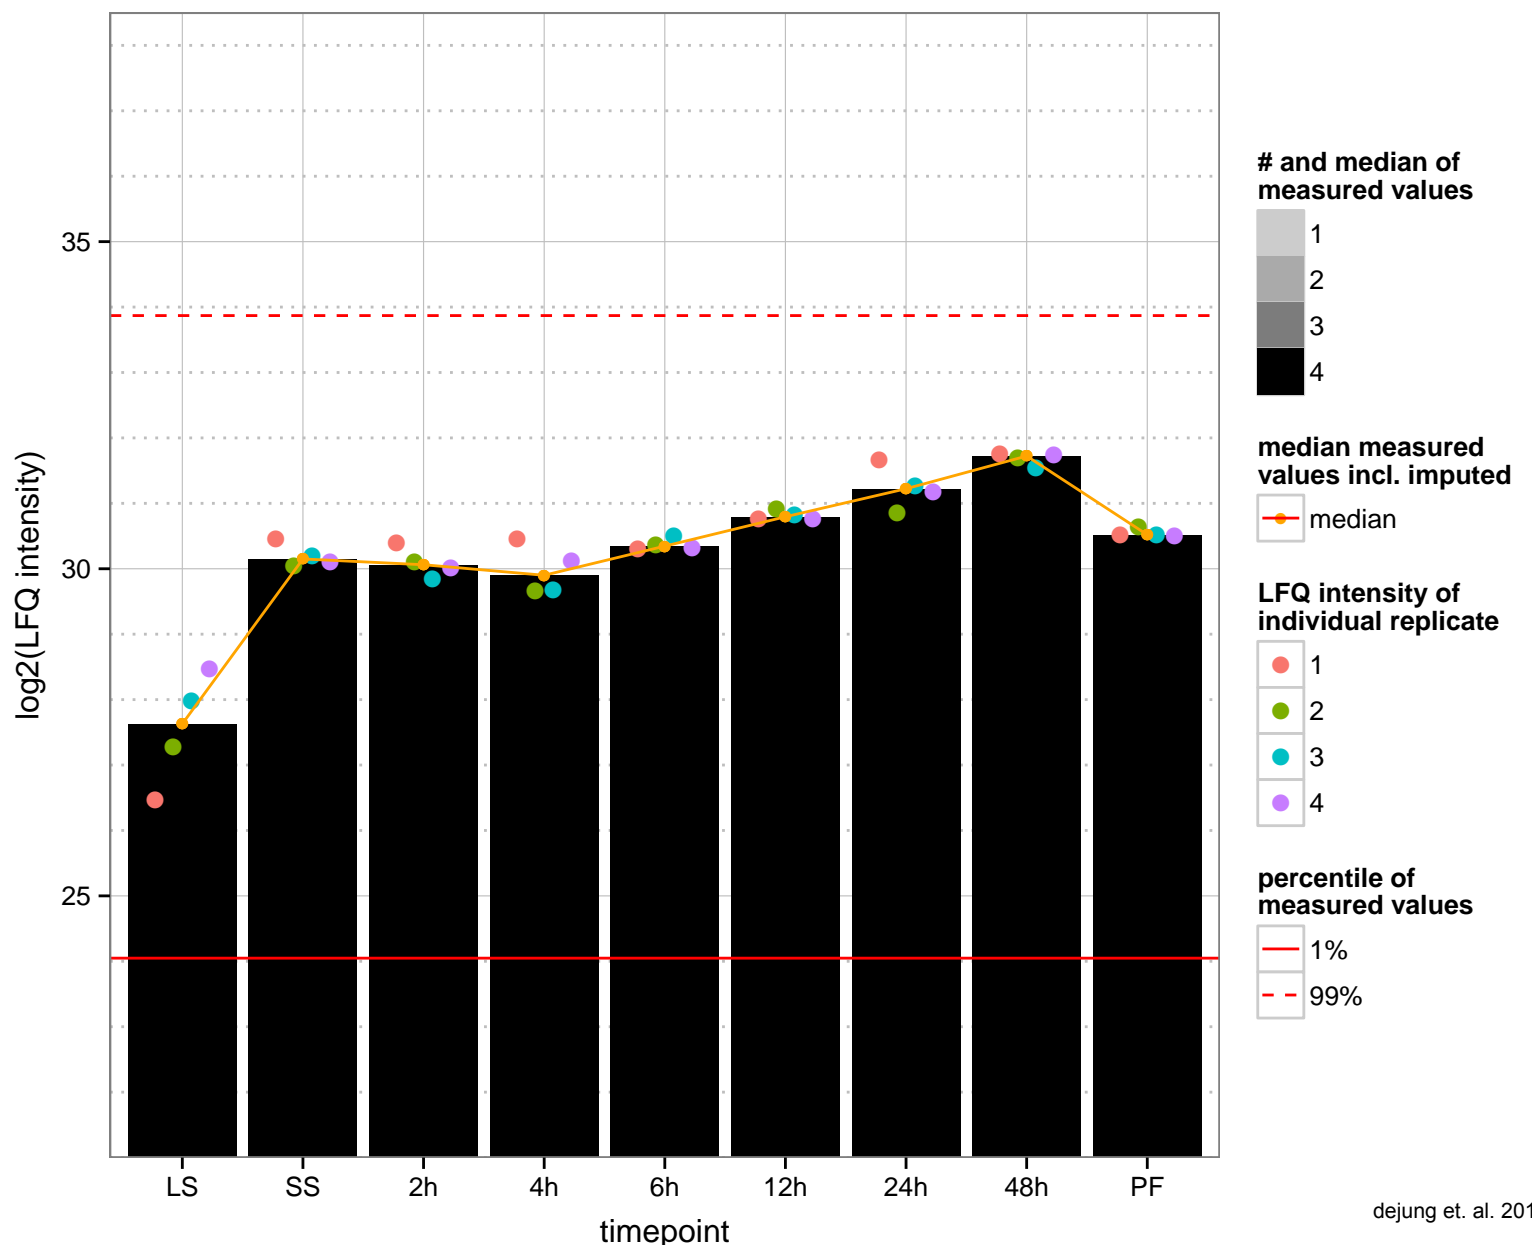

hypothetical protein, conserved  
 Tb927.8.2470;Tb11.v5.0799  
 AGOF: null  
 AGOC: null, mitochondrion  
 AGOP: null  
 PGO: null  
 PGOC: null  
 PGOP: null

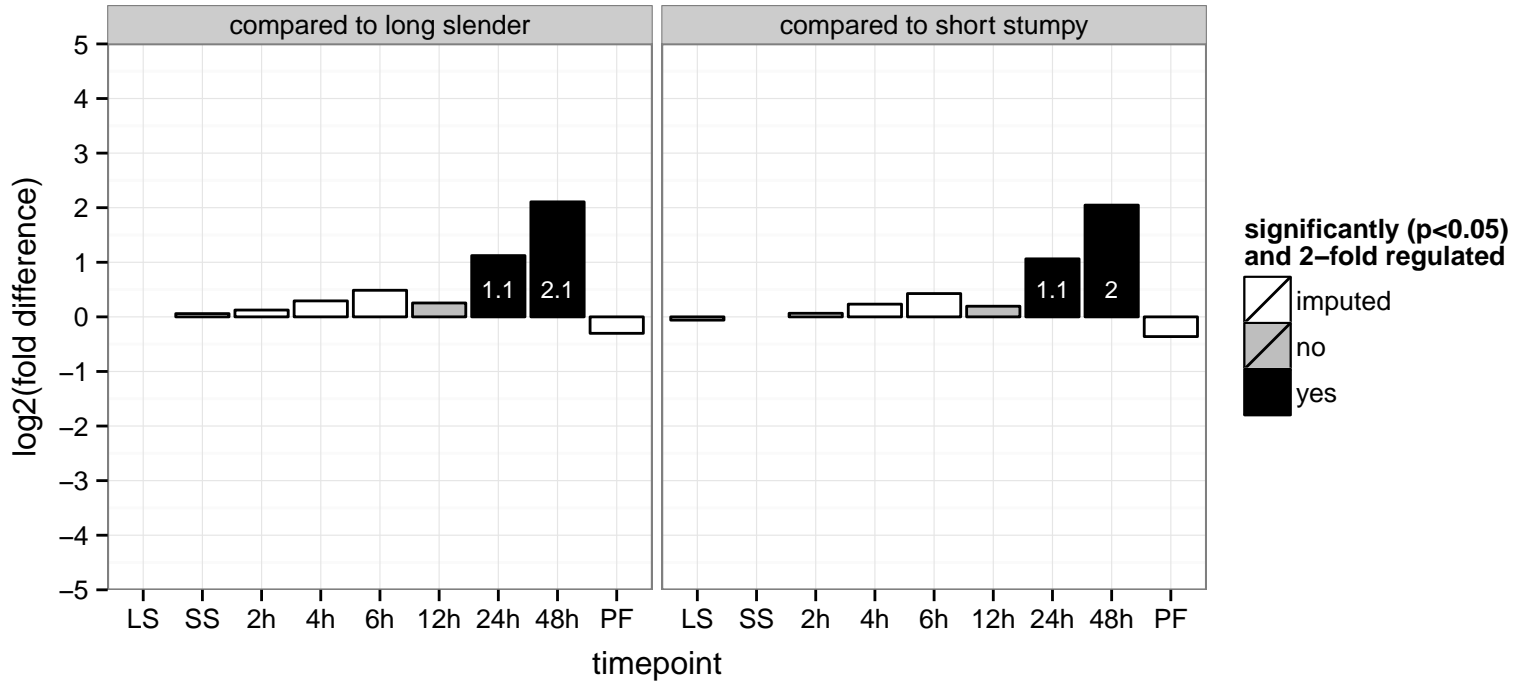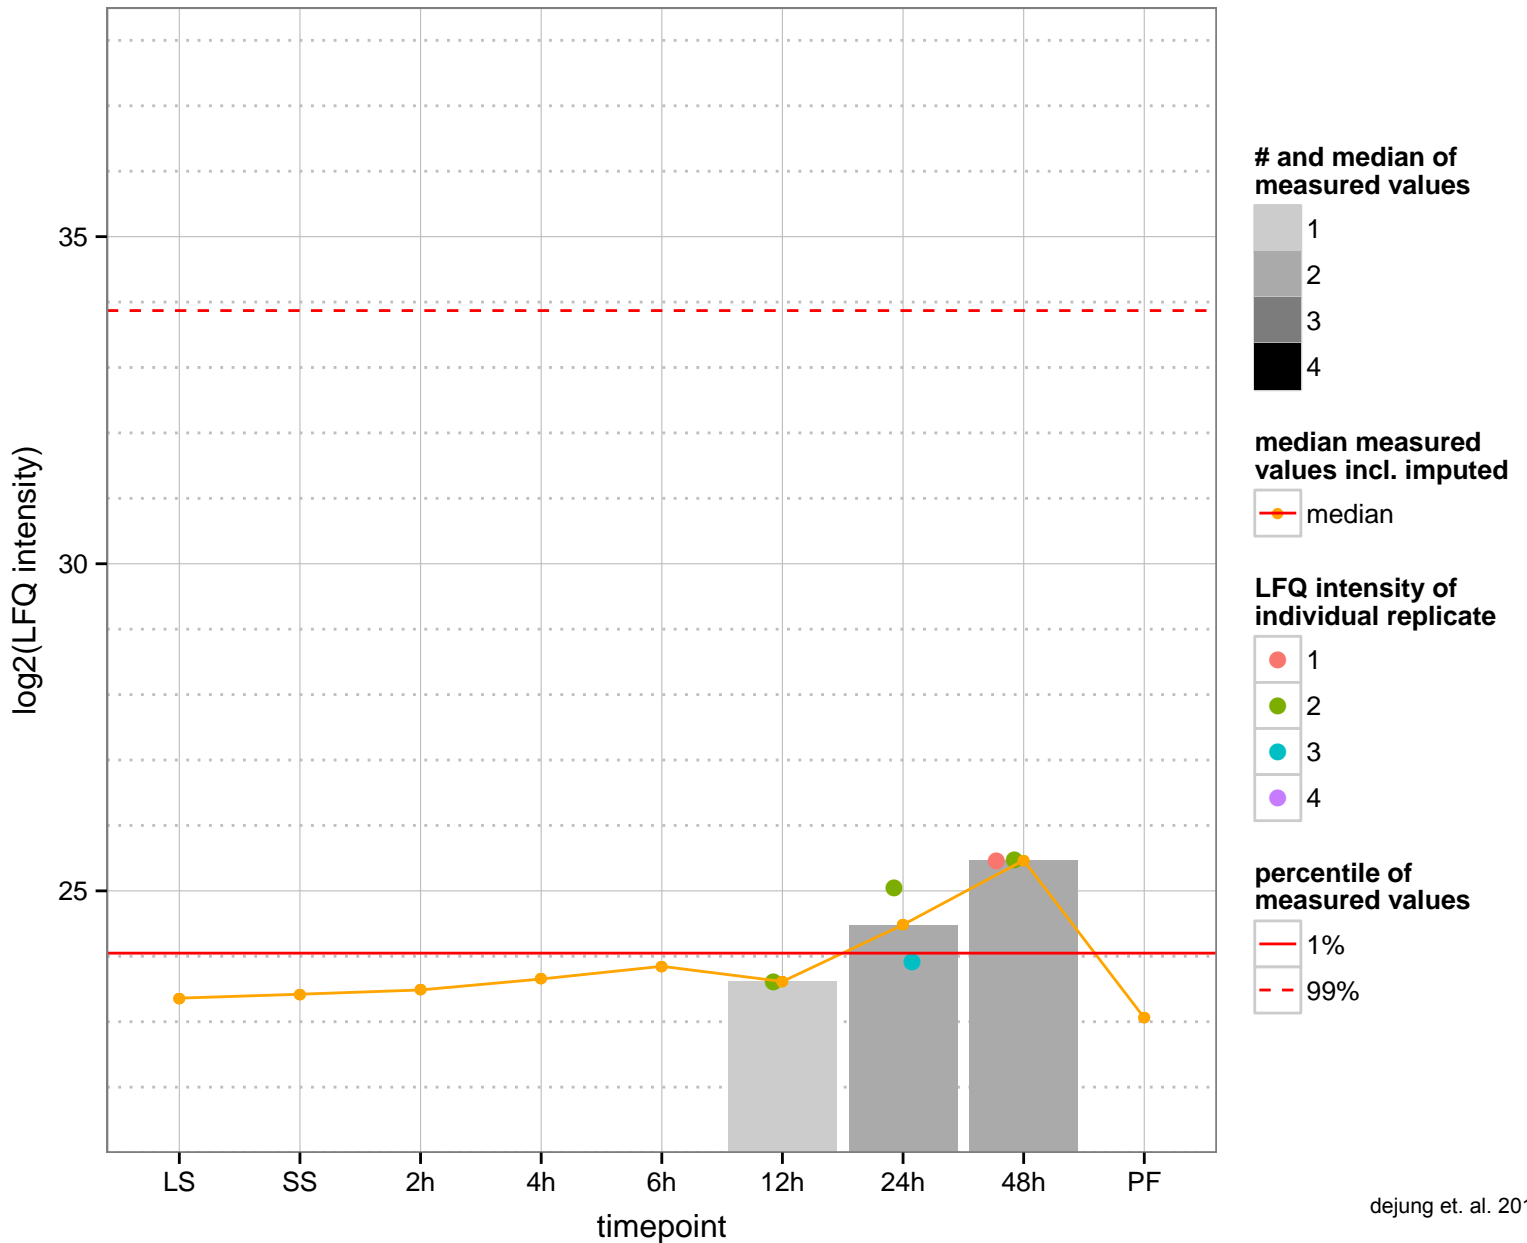

hypothetical protein, conserved  
 Tb927.1.3250  
 AGOF: null  
 AGOC: null  
 AGOP: null  
 PGO: null  
 PGOC: null  
 PGOP: null

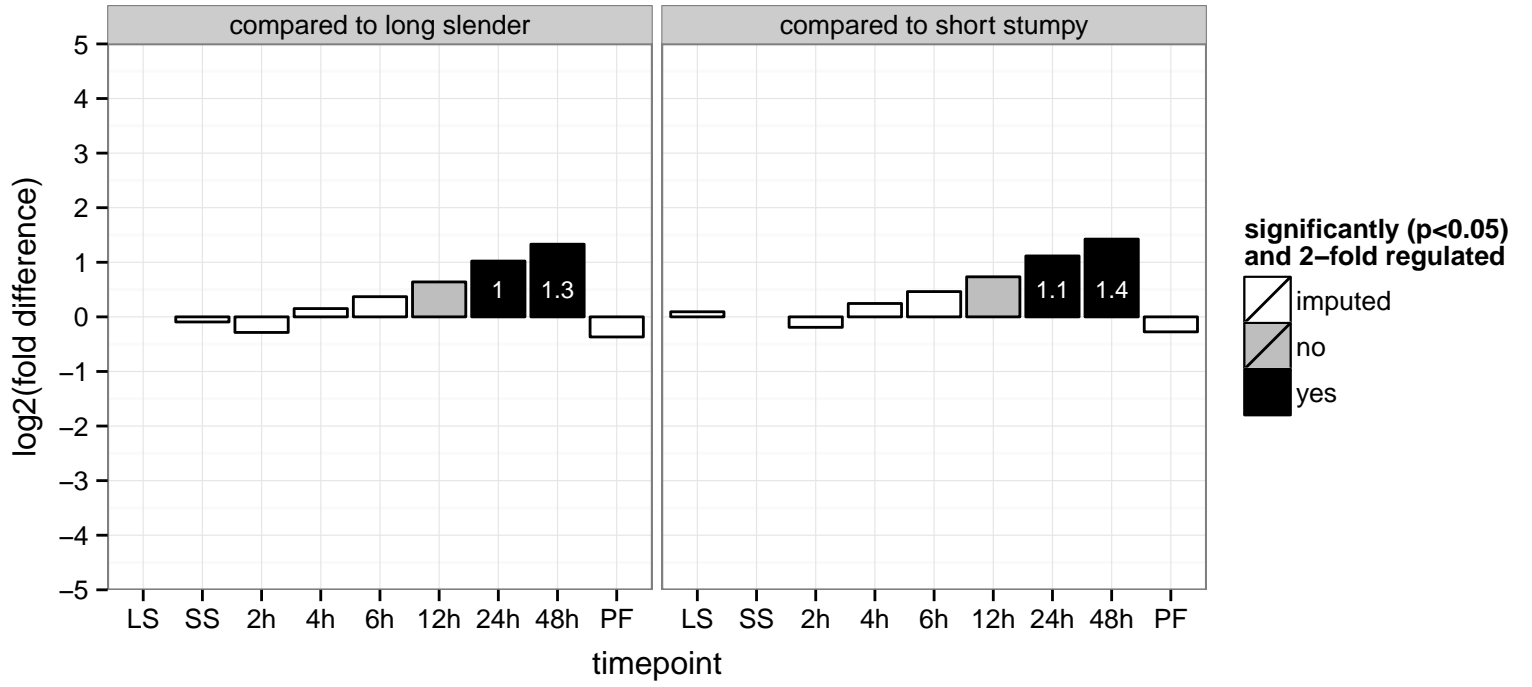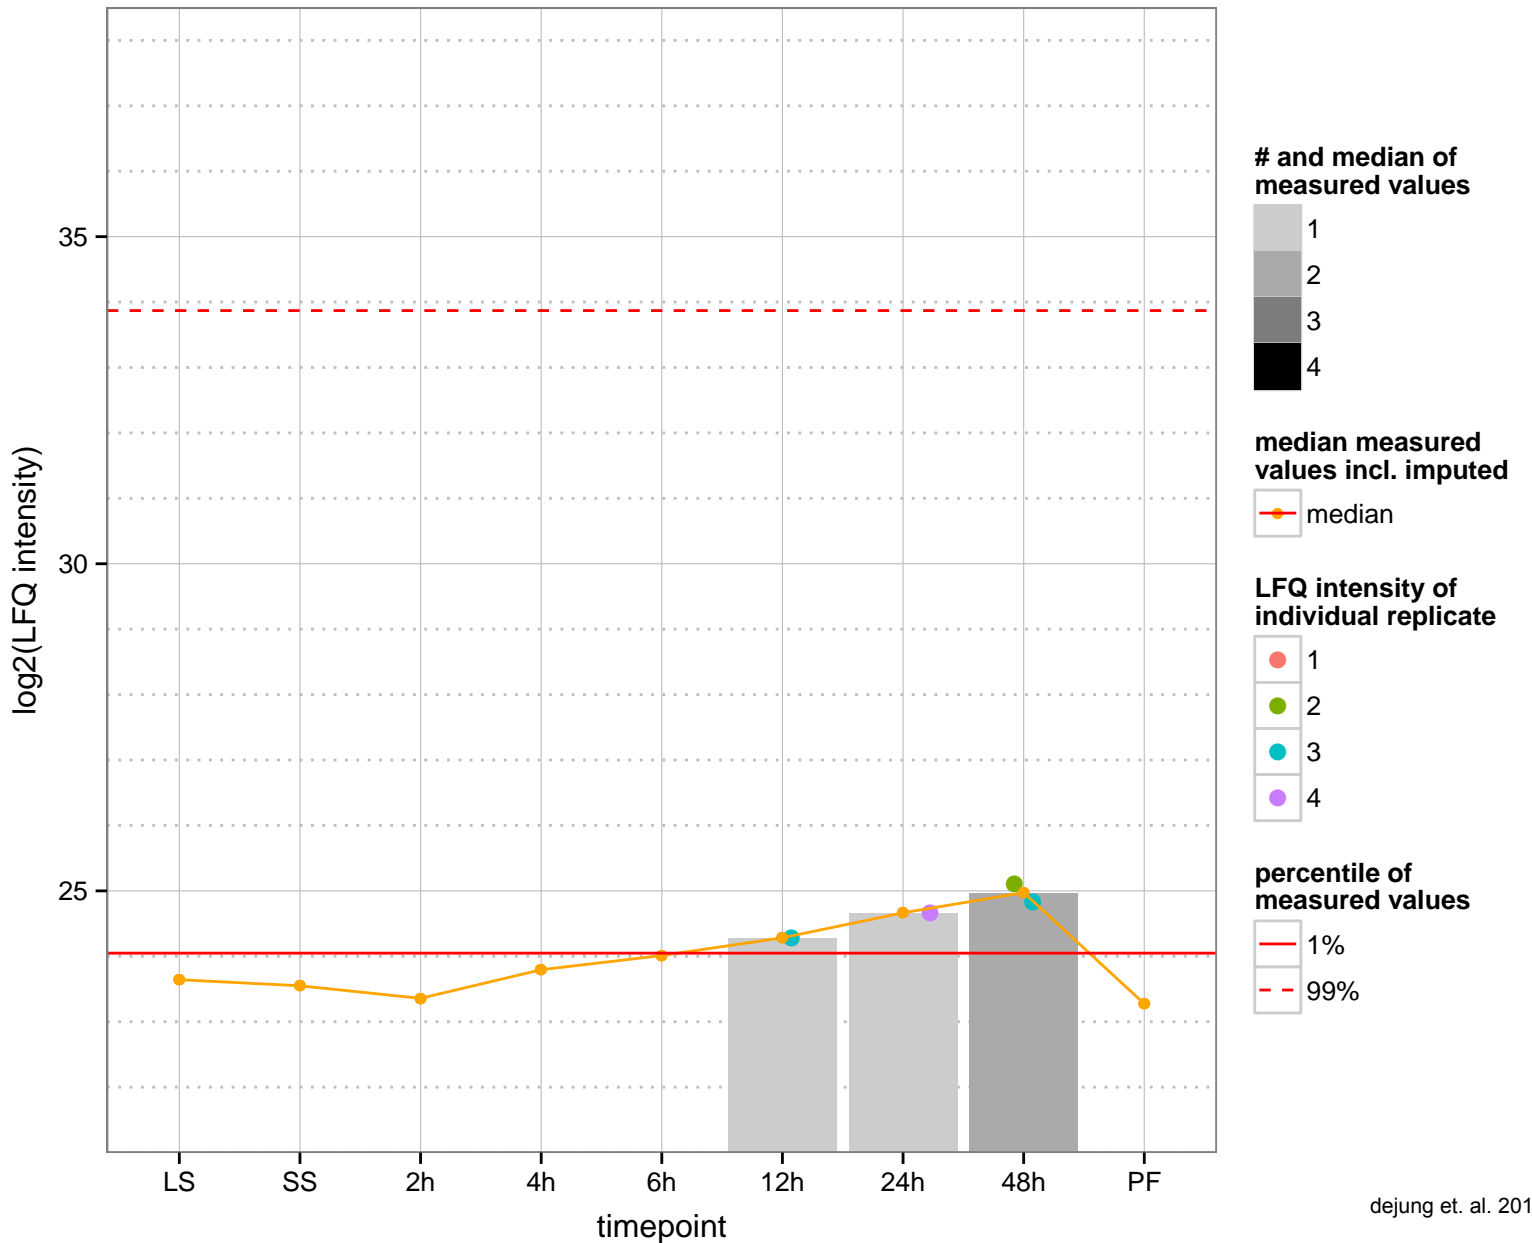



minichromosome maintenance (MCM) complex subunit, putative, DNA replication licensing factor MCM8  
 Tb927.10.10410;Tb11.v5.0535  
 AGOF: null, ATP binding, DNA binding  
 AGOC: null  
 AGOP: null, DNA replication, DNA-dependent DNA replication initiation  
 PGO: ATP binding, DNA binding  
 PGOC: null  
 PGOP: DNA replication

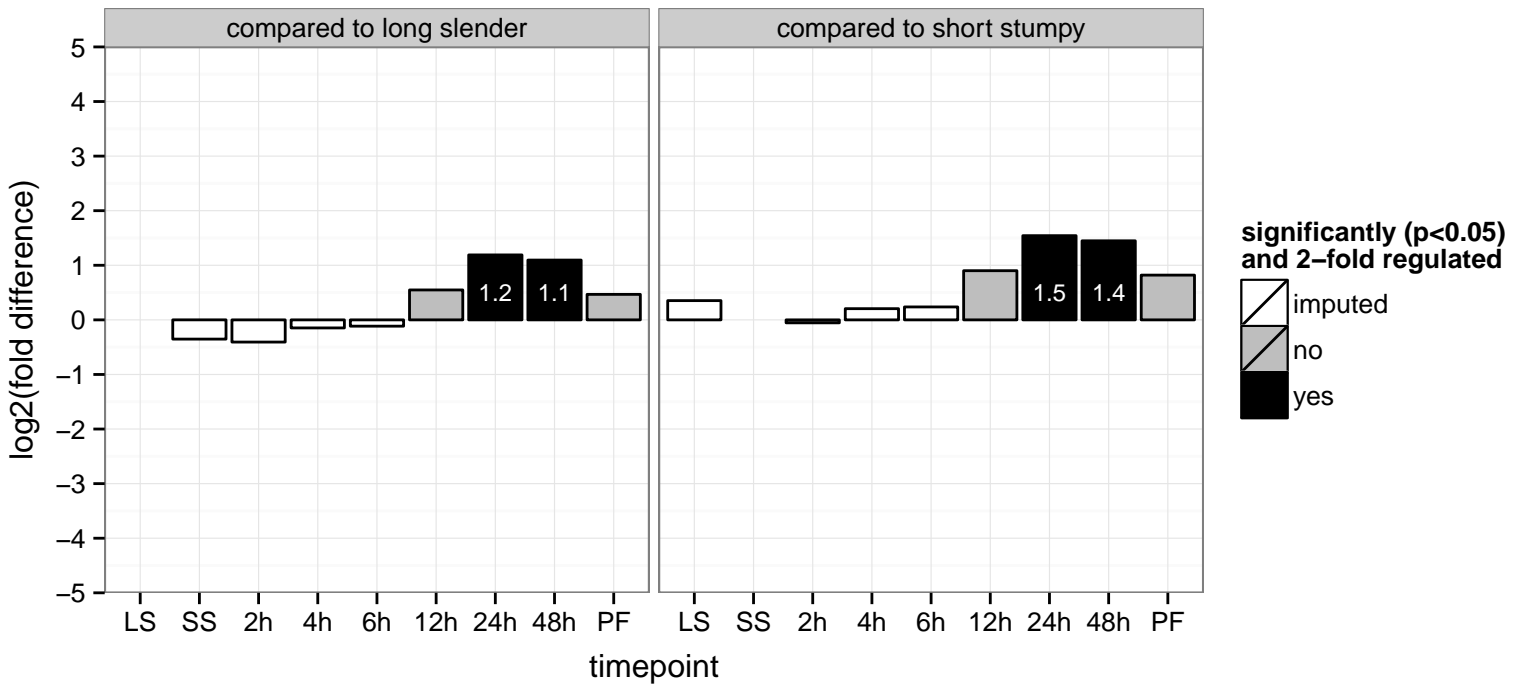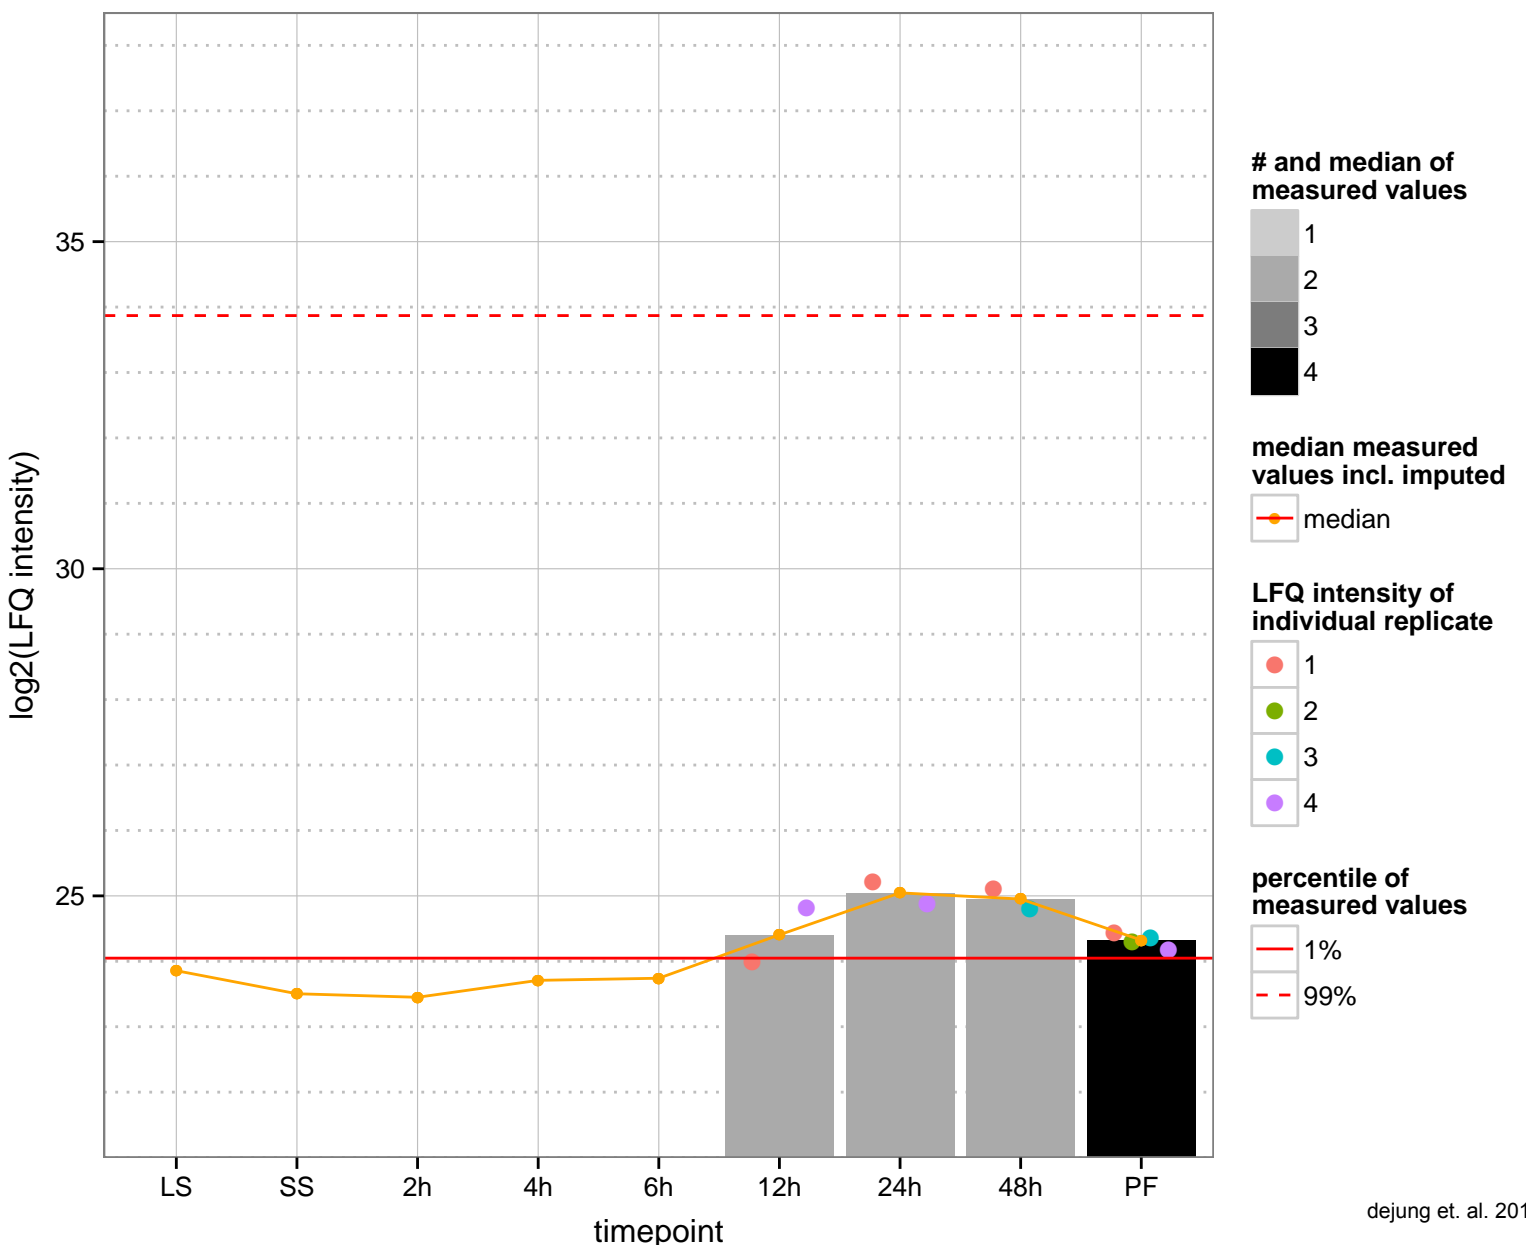

cAMP phosphodiesterase A, putative, 3', 5'-cyclic nucleotide phosphodiesterase, phosphodiesterase, putative (PDEA)  
 Tb927.10.13000  
 AGOF: 3', 5'-cyclic-AMP phosphodiesterase activity, 3', 5'-cyclic-nucleotide phosphodiesterase activity  
 AGOC: cytosol  
 AGOP: negative regulation of reactive oxygen species metabolic process, signal transduction  
 PGO: 3', 5'-cyclic-nucleotide phosphodiesterase activity, catalytic activity  
 PGOC: null  
 PGOP: signal transduction

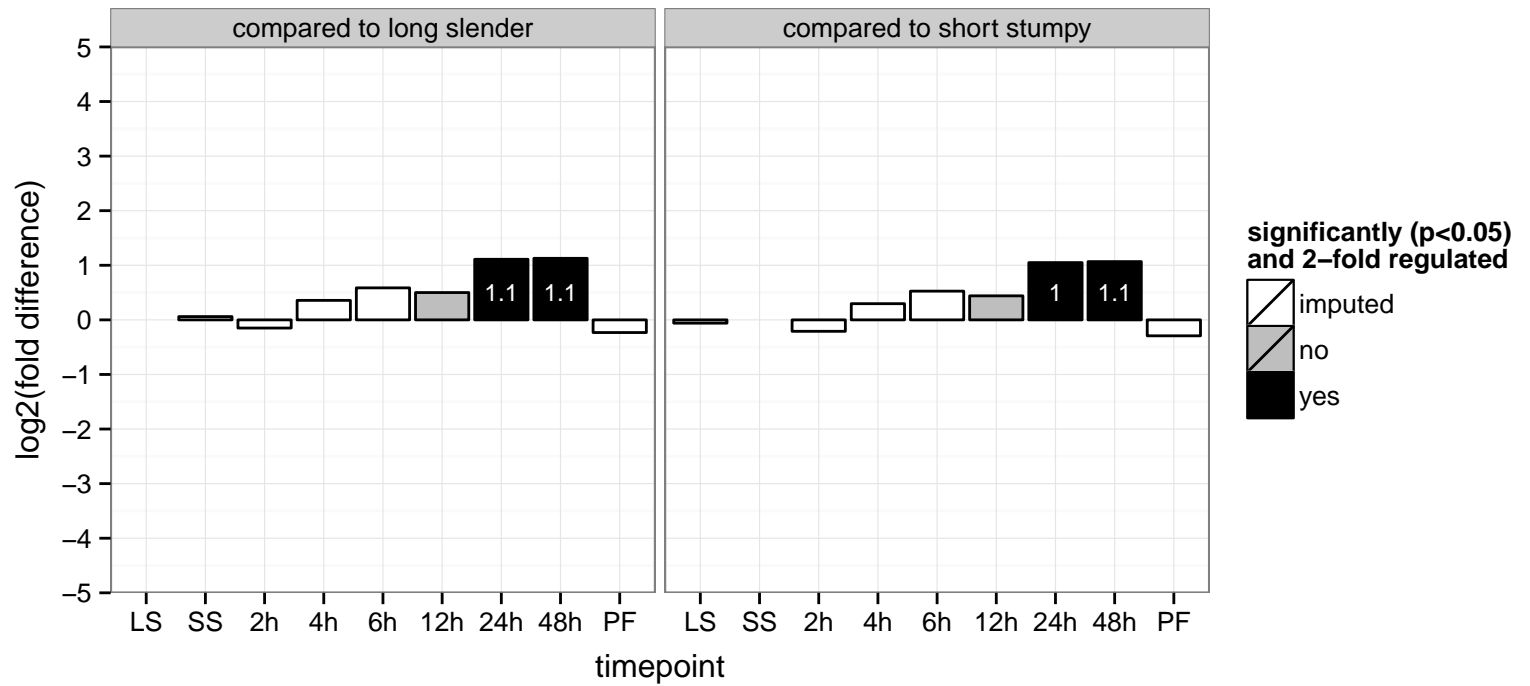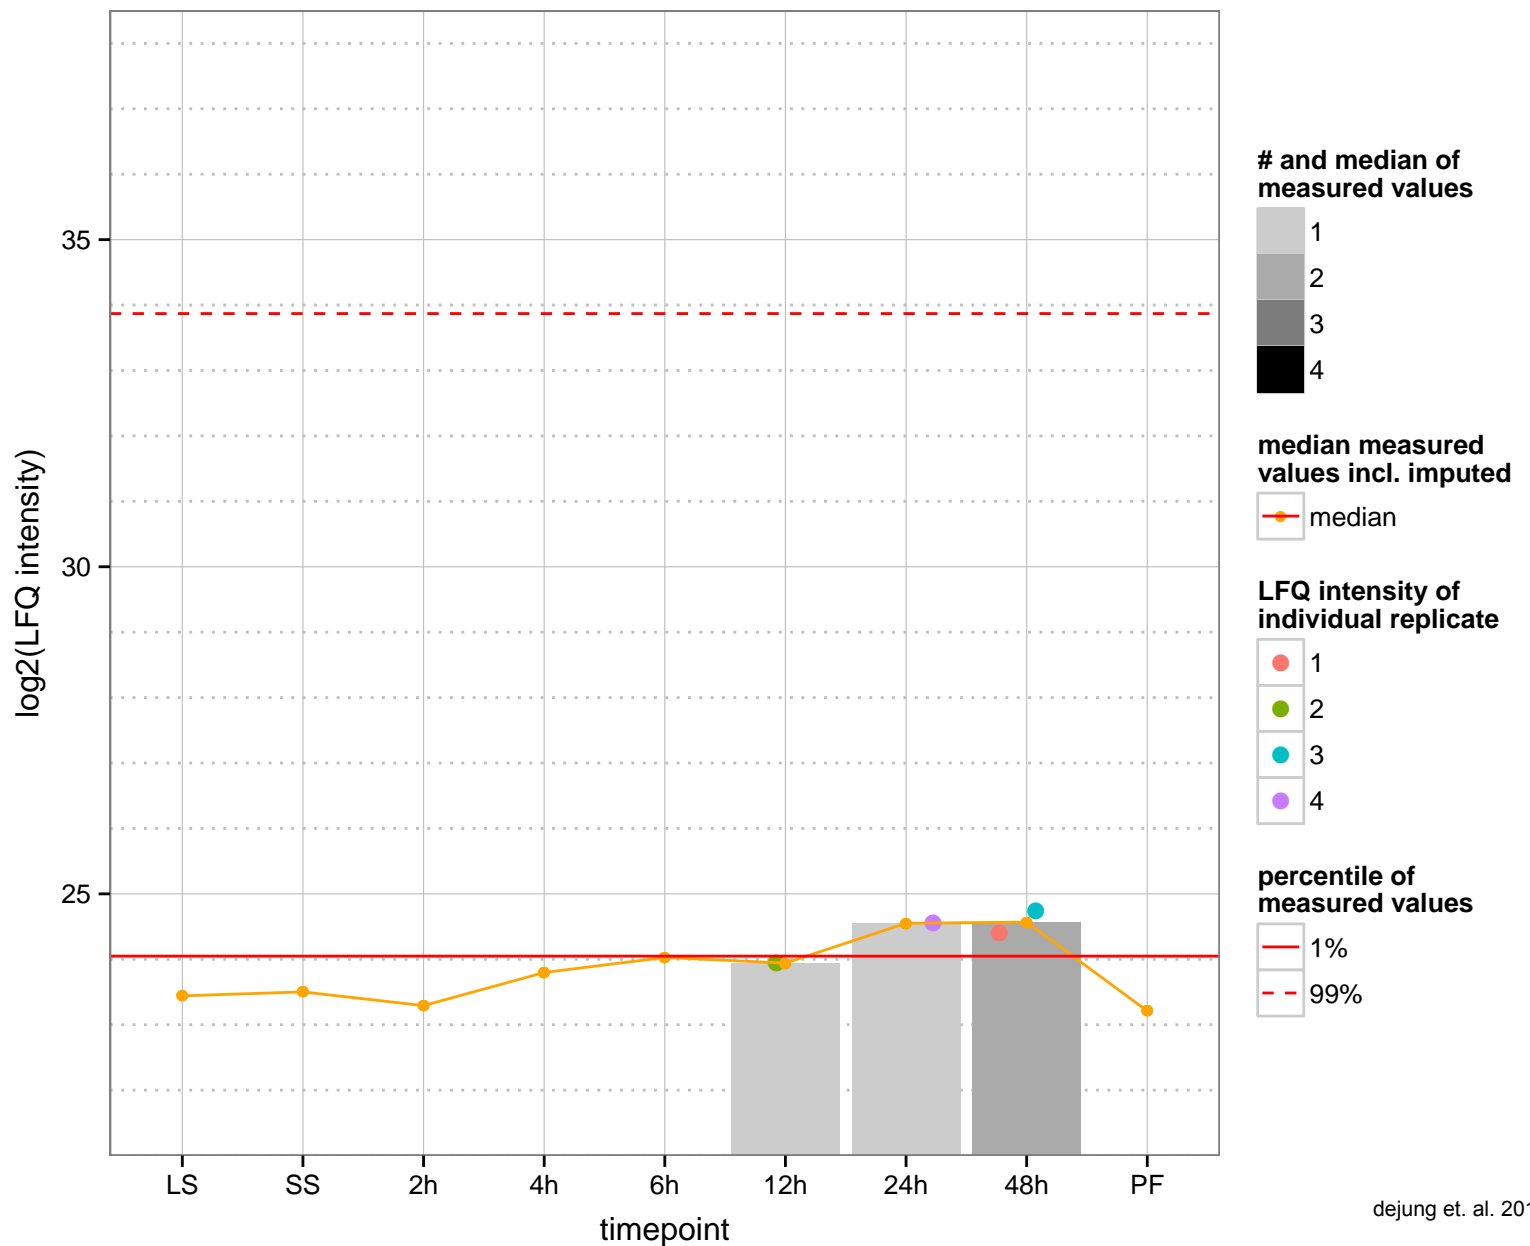

30S ribosomal protein S8, putative  
 Tb927.10.13300  
 AGOF: structural constituent of ribosome  
 AGOC: intracellular, mitochondrion, organellar small ribosomal subunit, ribosome  
 AGOP: translation  
 PGO: structural constituent of ribosome  
 PGO: intracellular, ribosome  
 PGO: translation

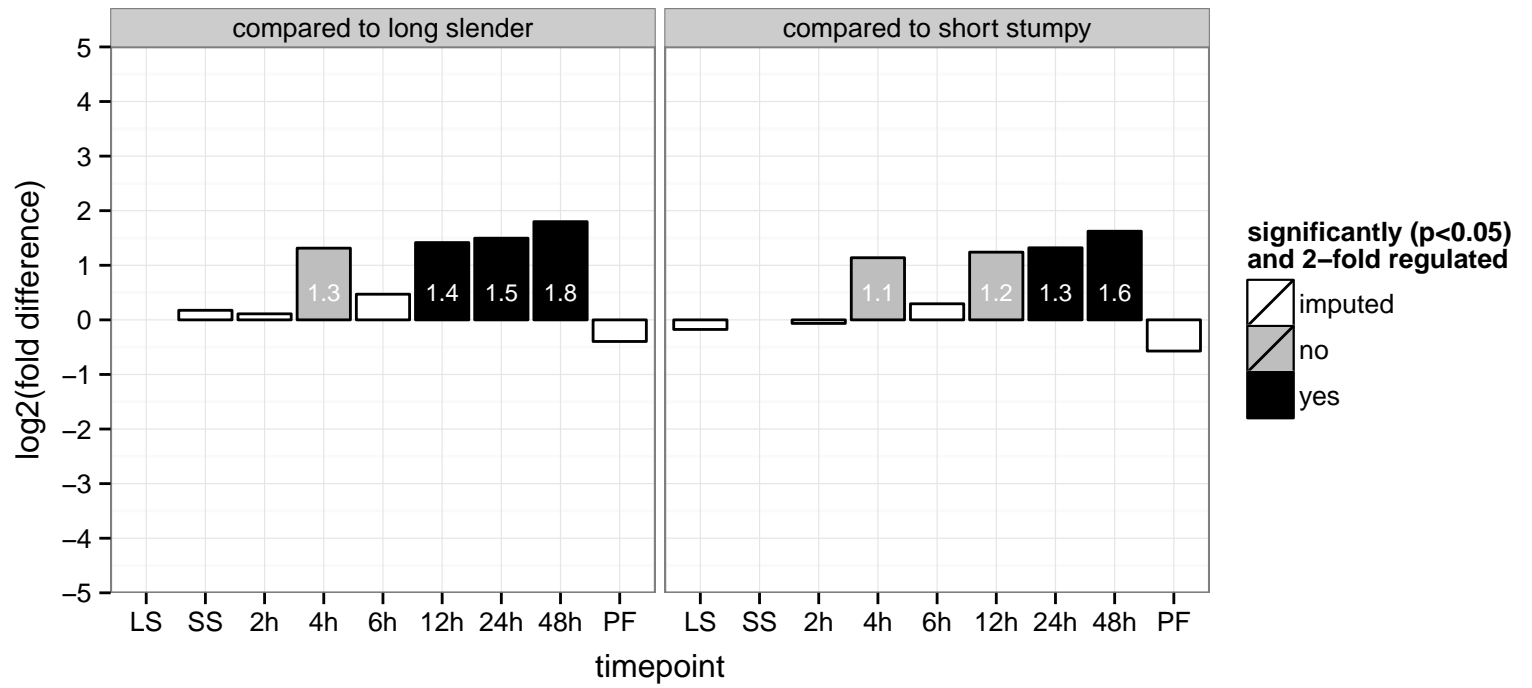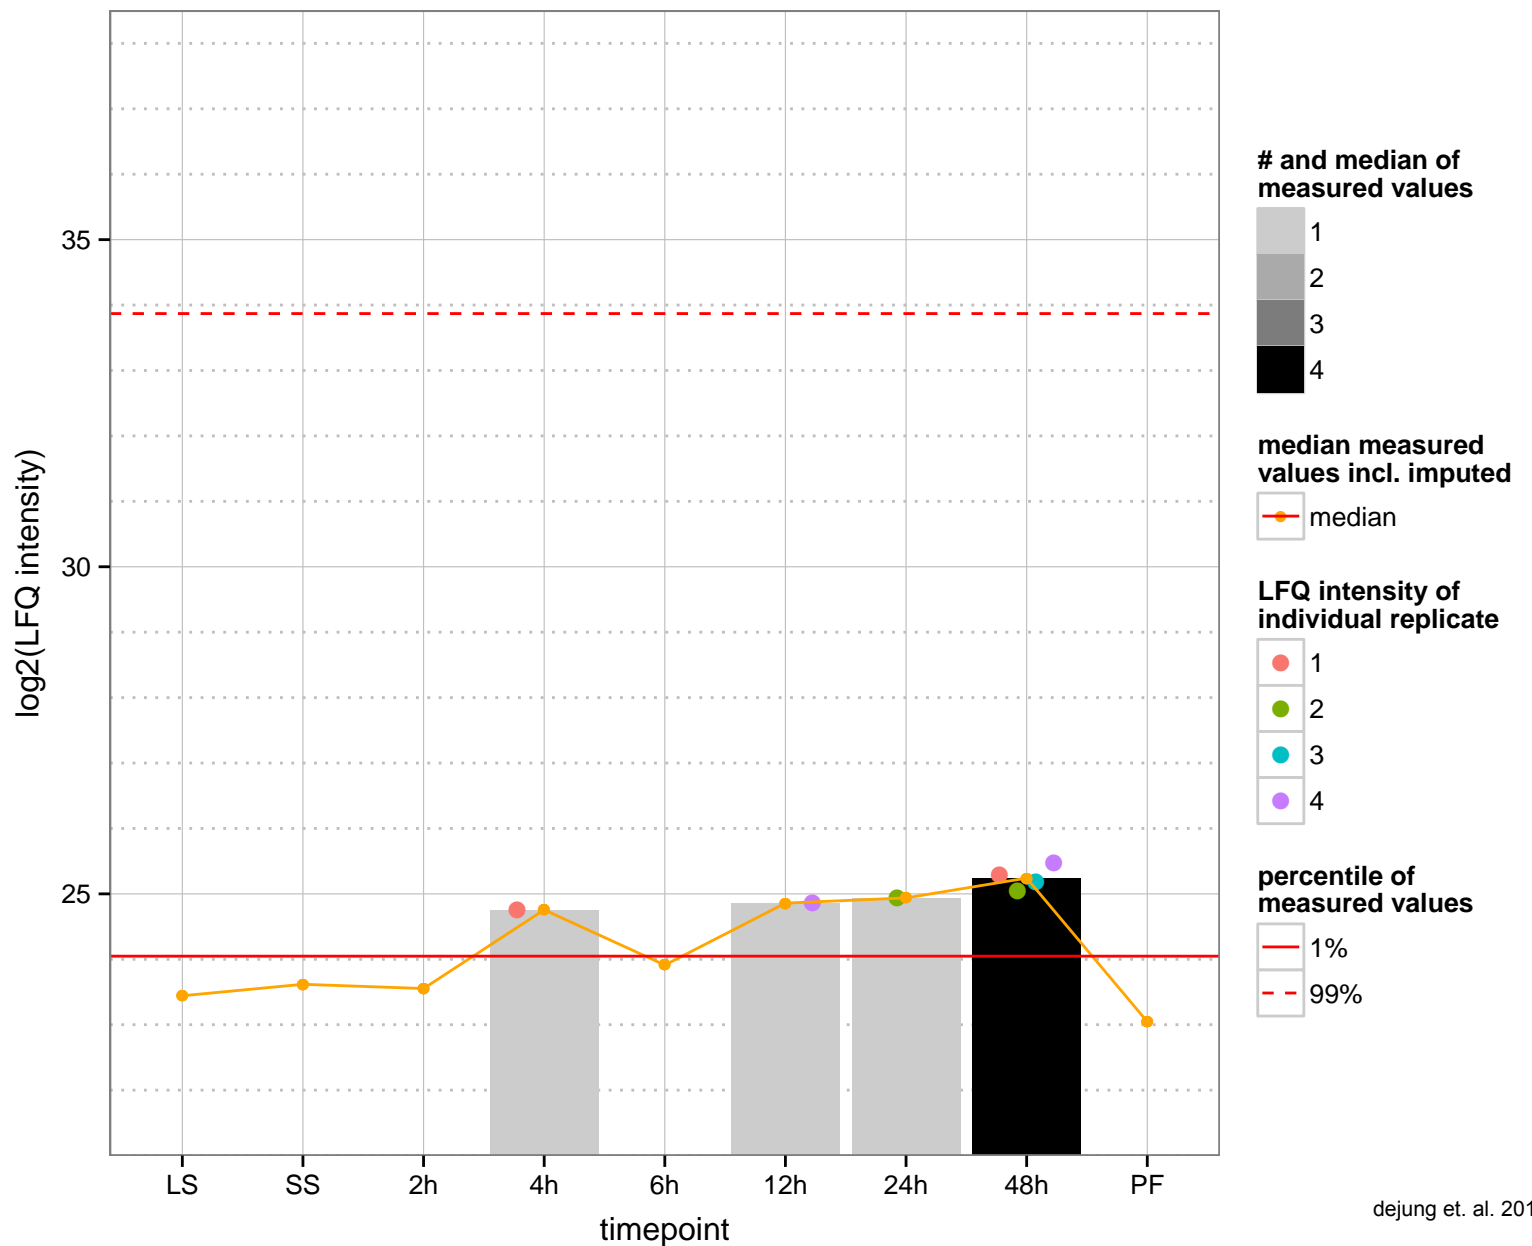

hypothetical protein, conserved  
 Tb927.10.14700  
 AGOF: null  
 AGOC: null  
 AGOP: null  
 PGO: null  
 PGOC: null  
 PGOP: null

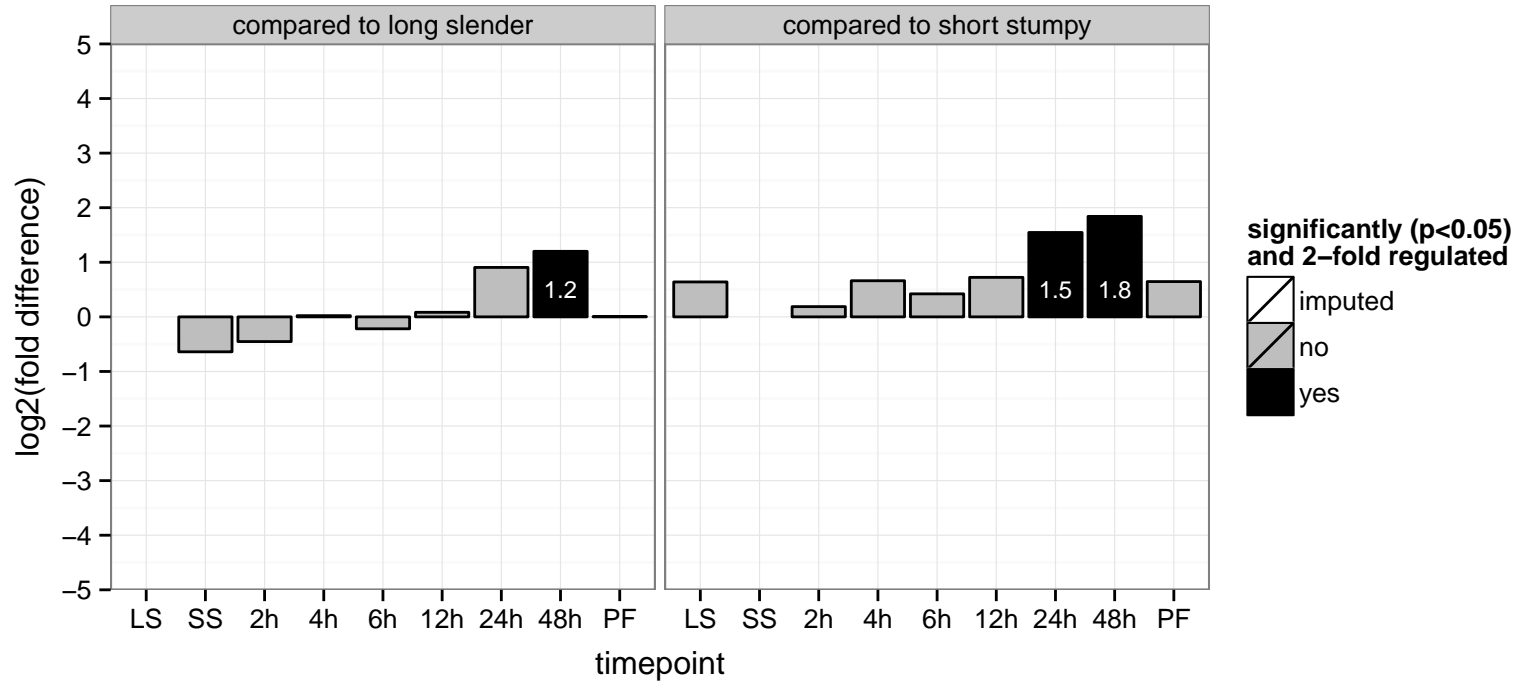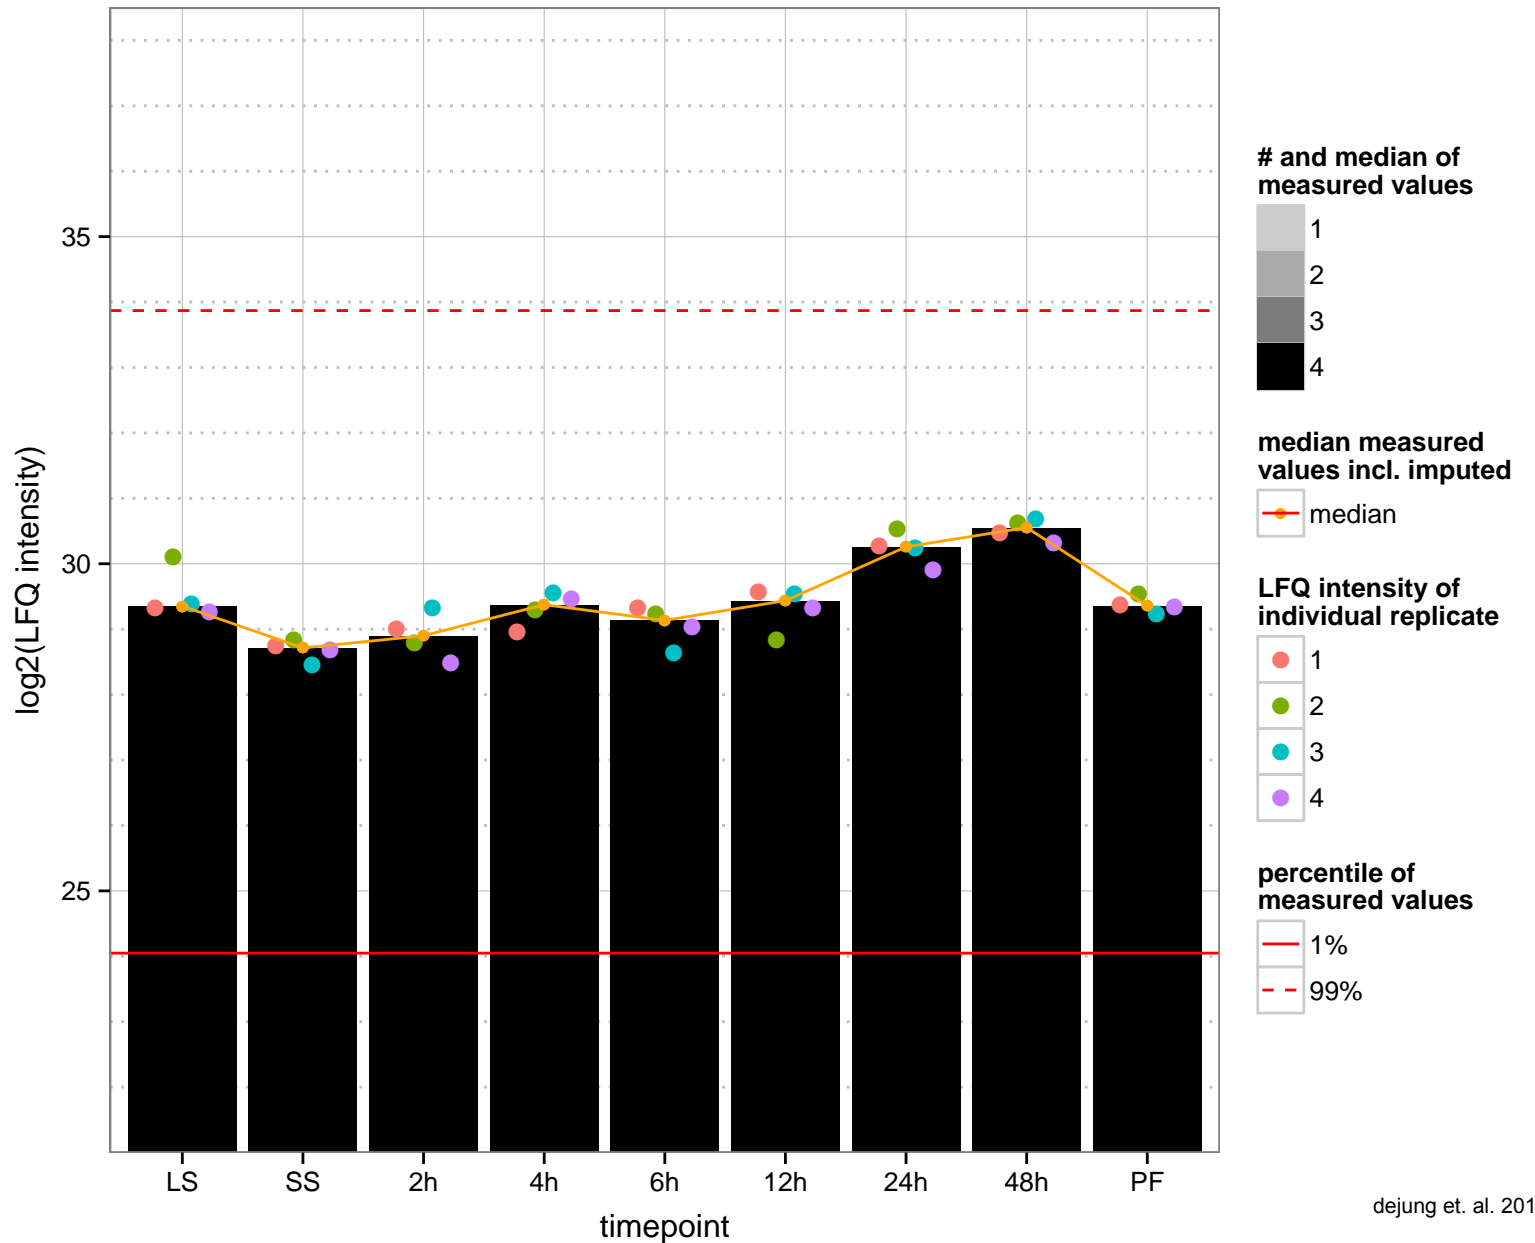

Mitochondrial ADP/ATP carrier protein 5c (MCP5c), Mitochondrial ADP/ATP carrier protein 5b, putative (MCP5b), Mitochondrial  
 Tb927.10.14840;Tb927.10.14830;Tb927.10.14820  
 AGOF: transporter activity  
 AGOC: mitochondrial inner membrane, mitochondrion  
 AGOP: transport  
 PGO: null  
 PGO: null  
 PGO: null

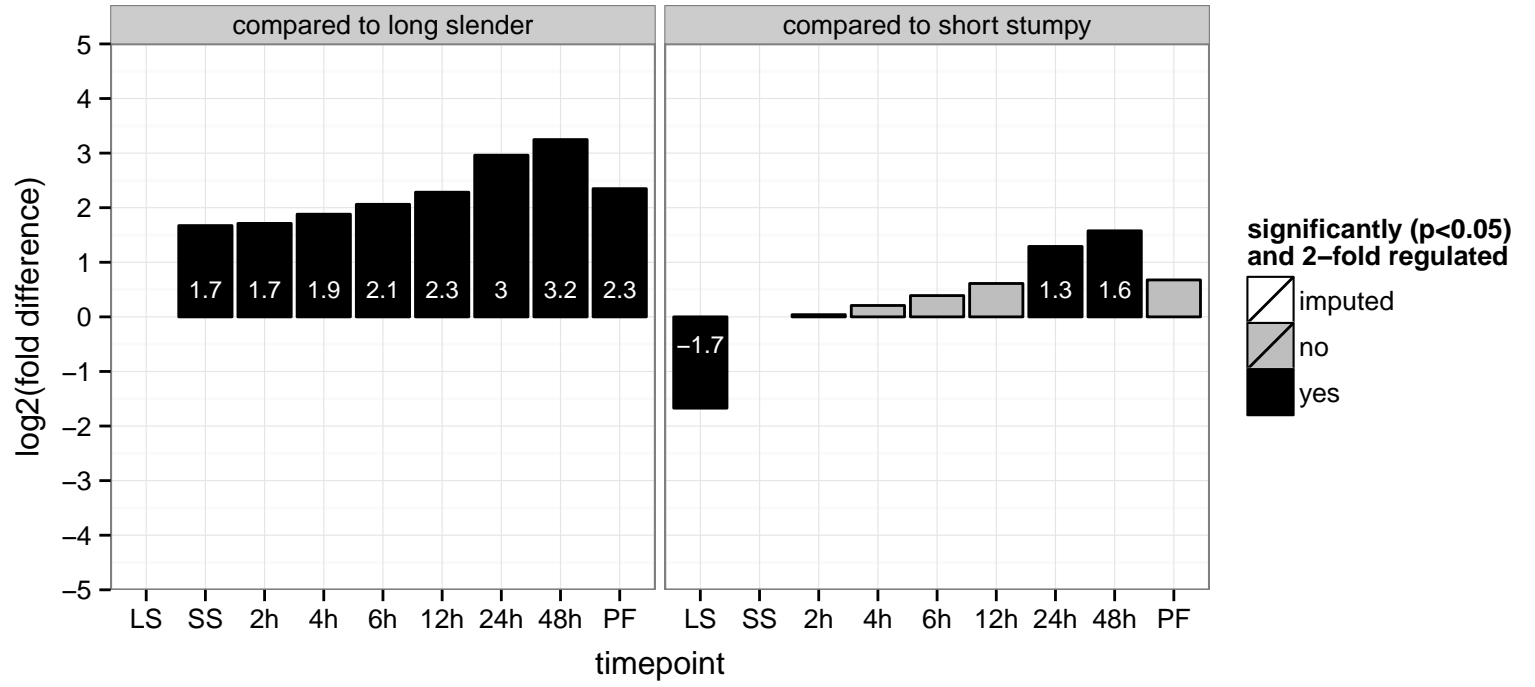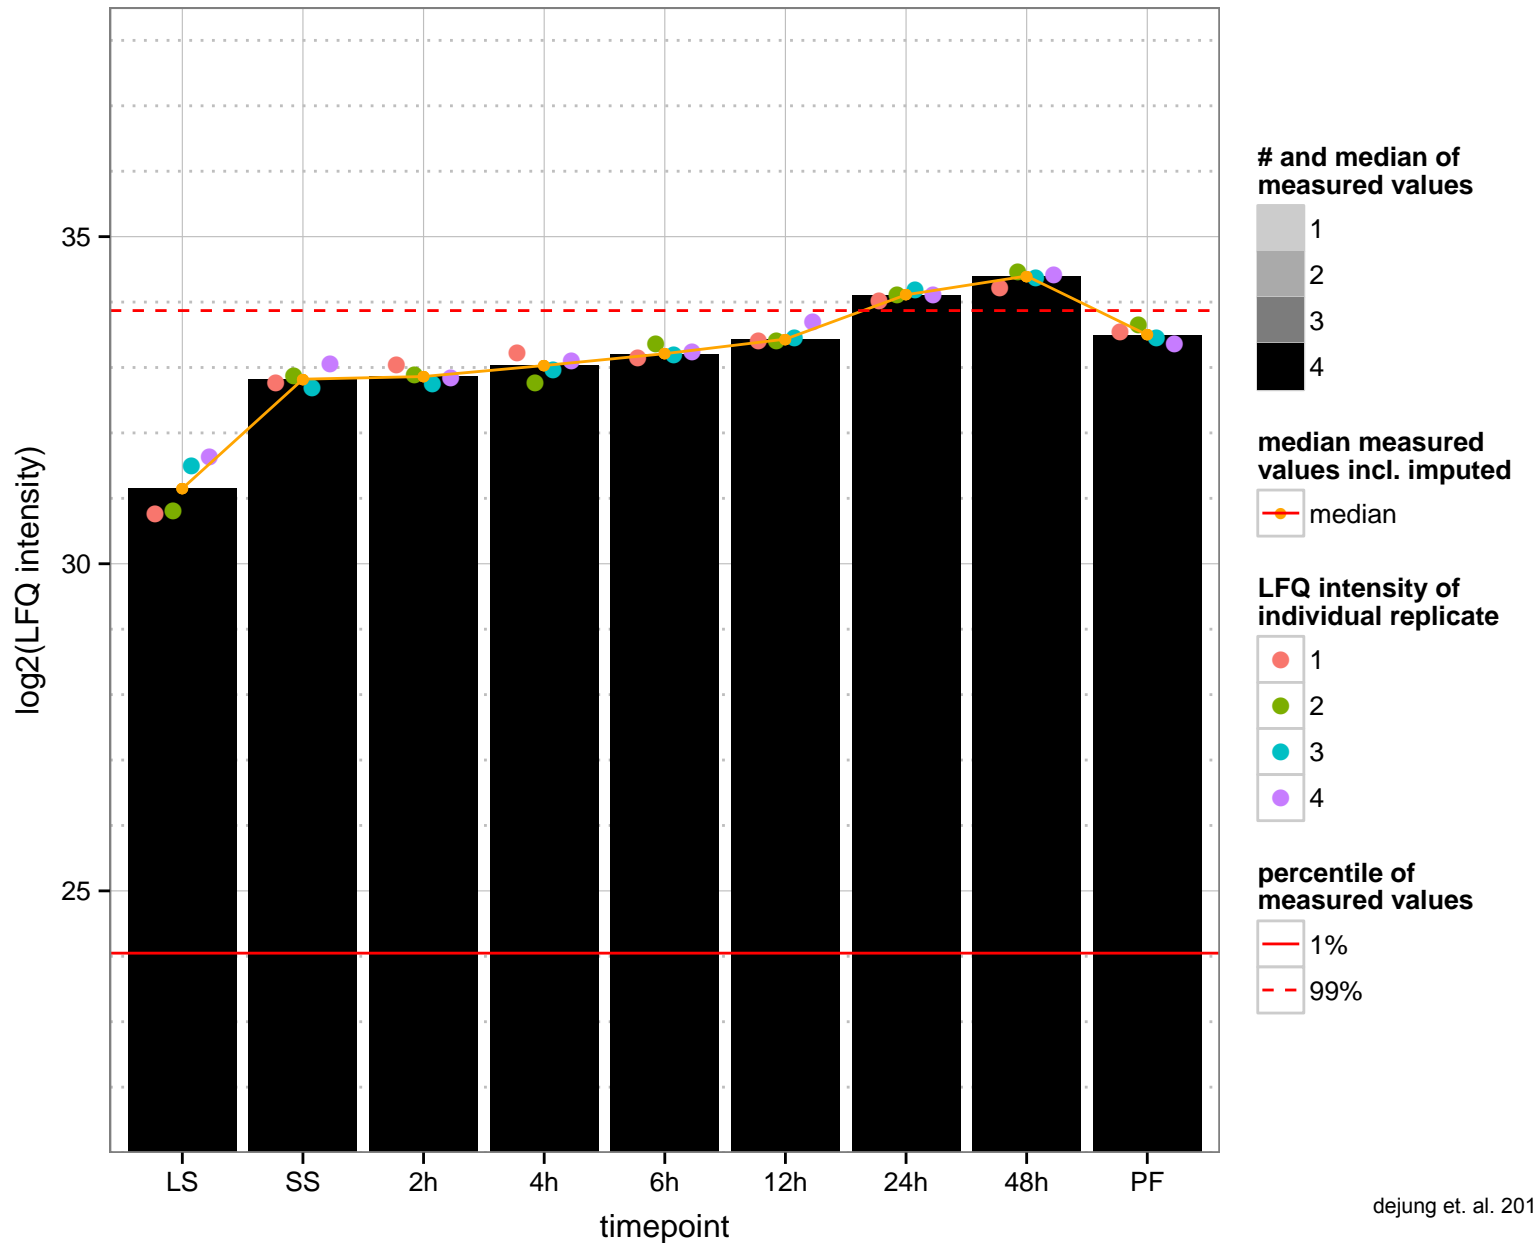

hypothetical protein, conserved  
 Tb927.10.2620  
 AGOF: null  
 AGOC: null  
 AGOP: null  
 PGO: null  
 PGOC: null  
 PGOP: null

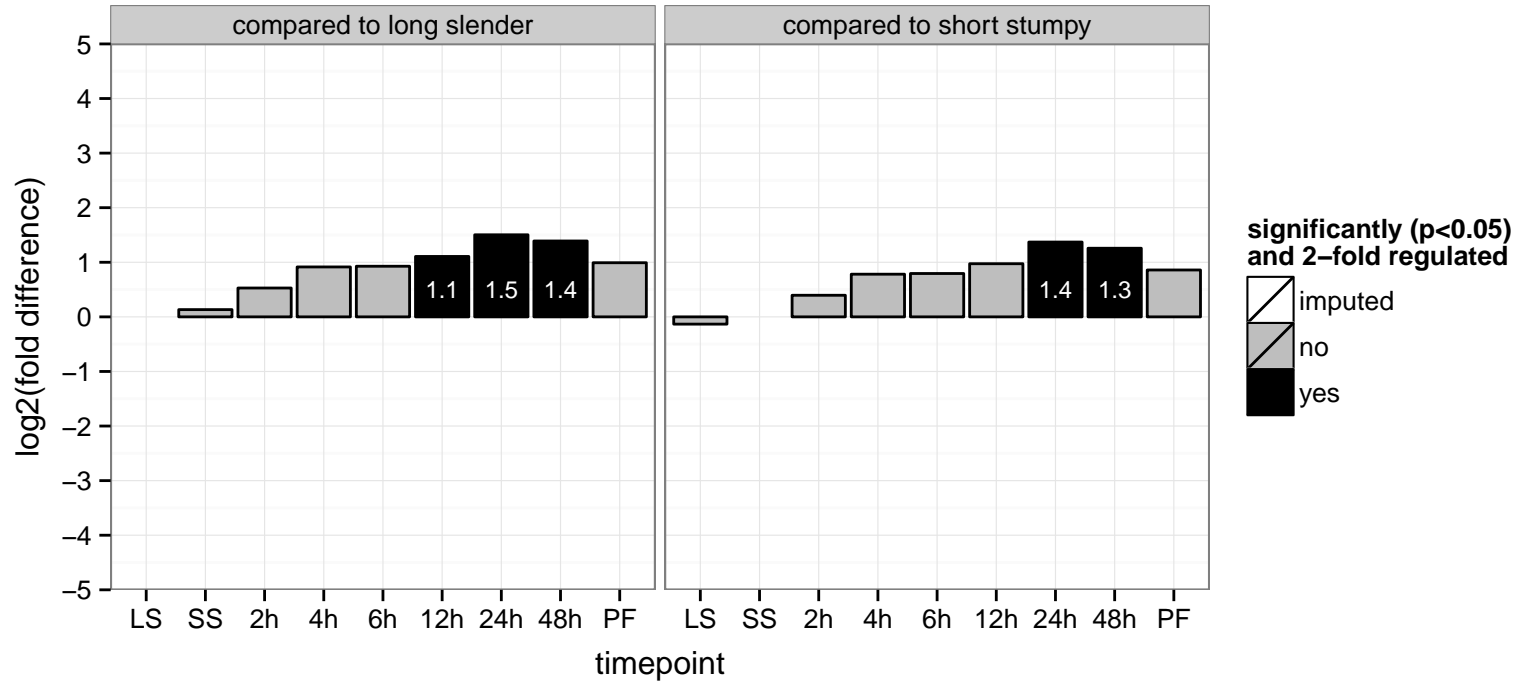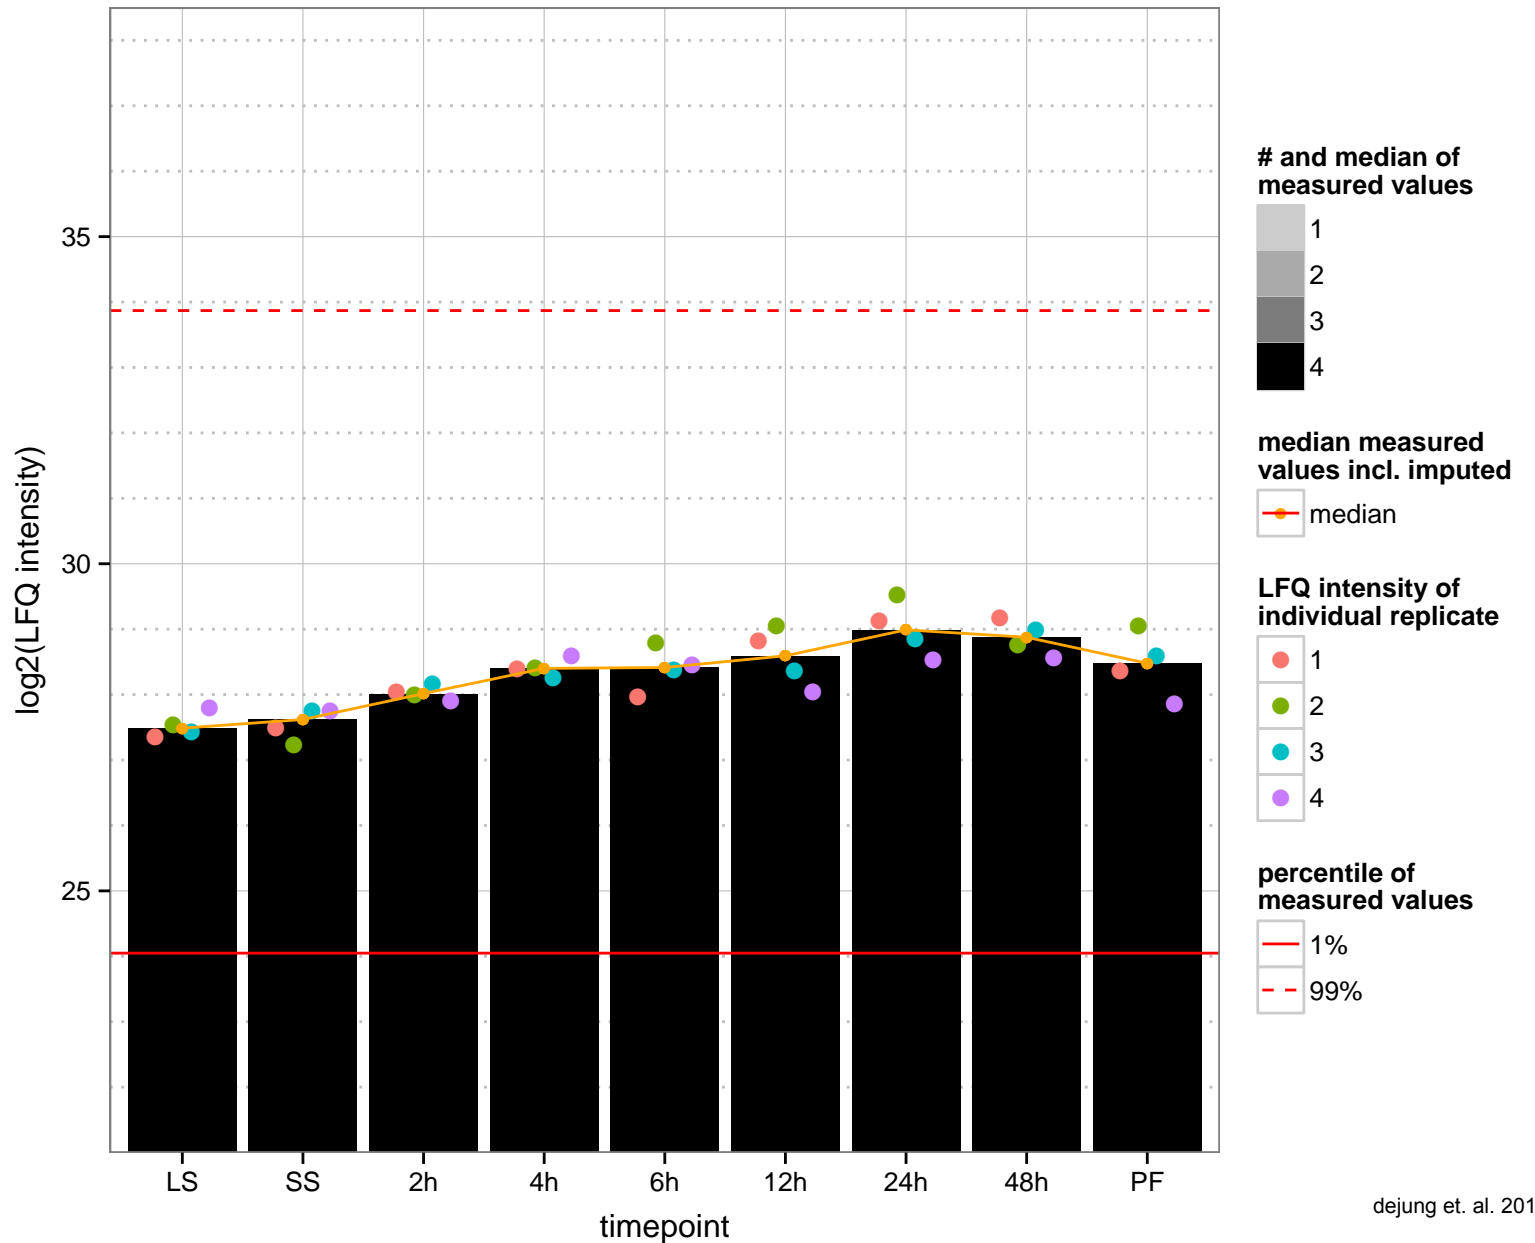

hypothetical protein, conserved  
 Tb927.10.9330  
 AGOF: null  
 AGOC: null  
 AGOP: null  
 PGO: null  
 PGOC: null  
 PGOP: null

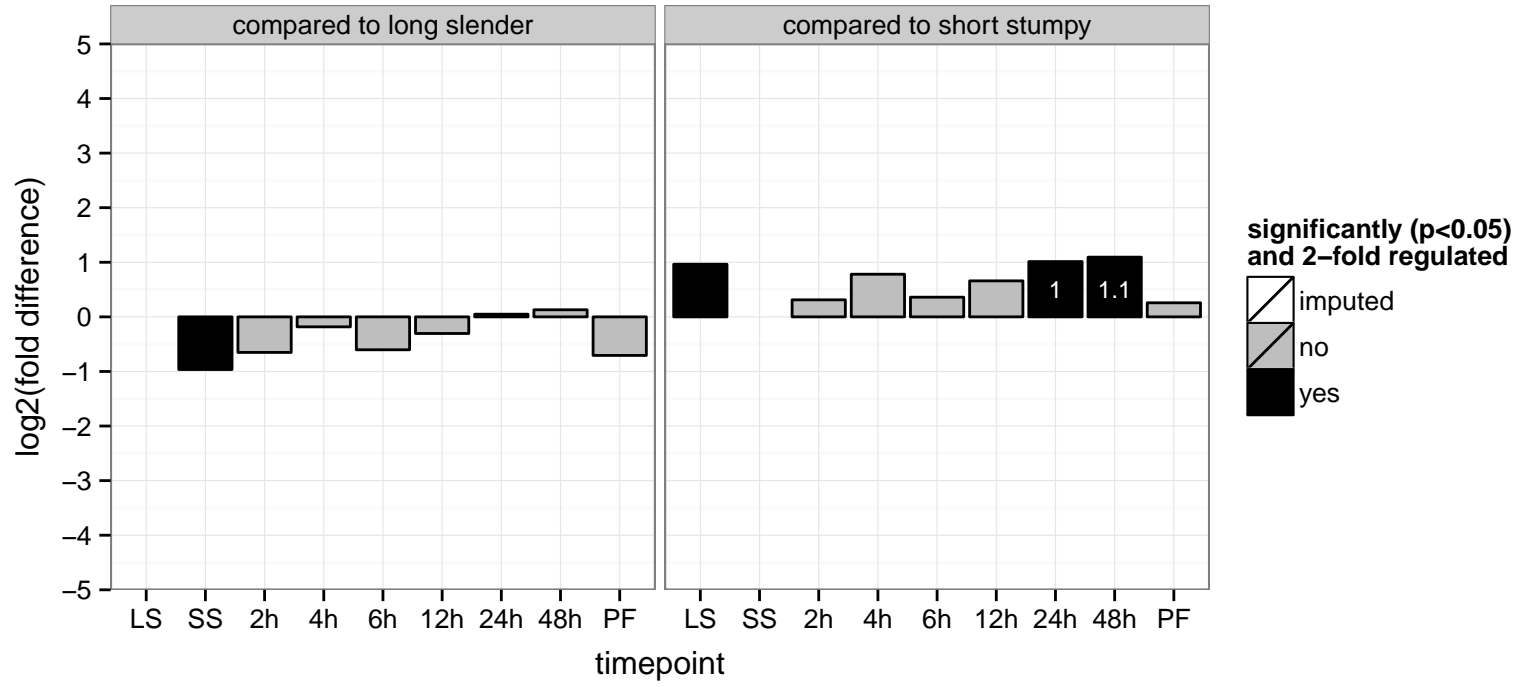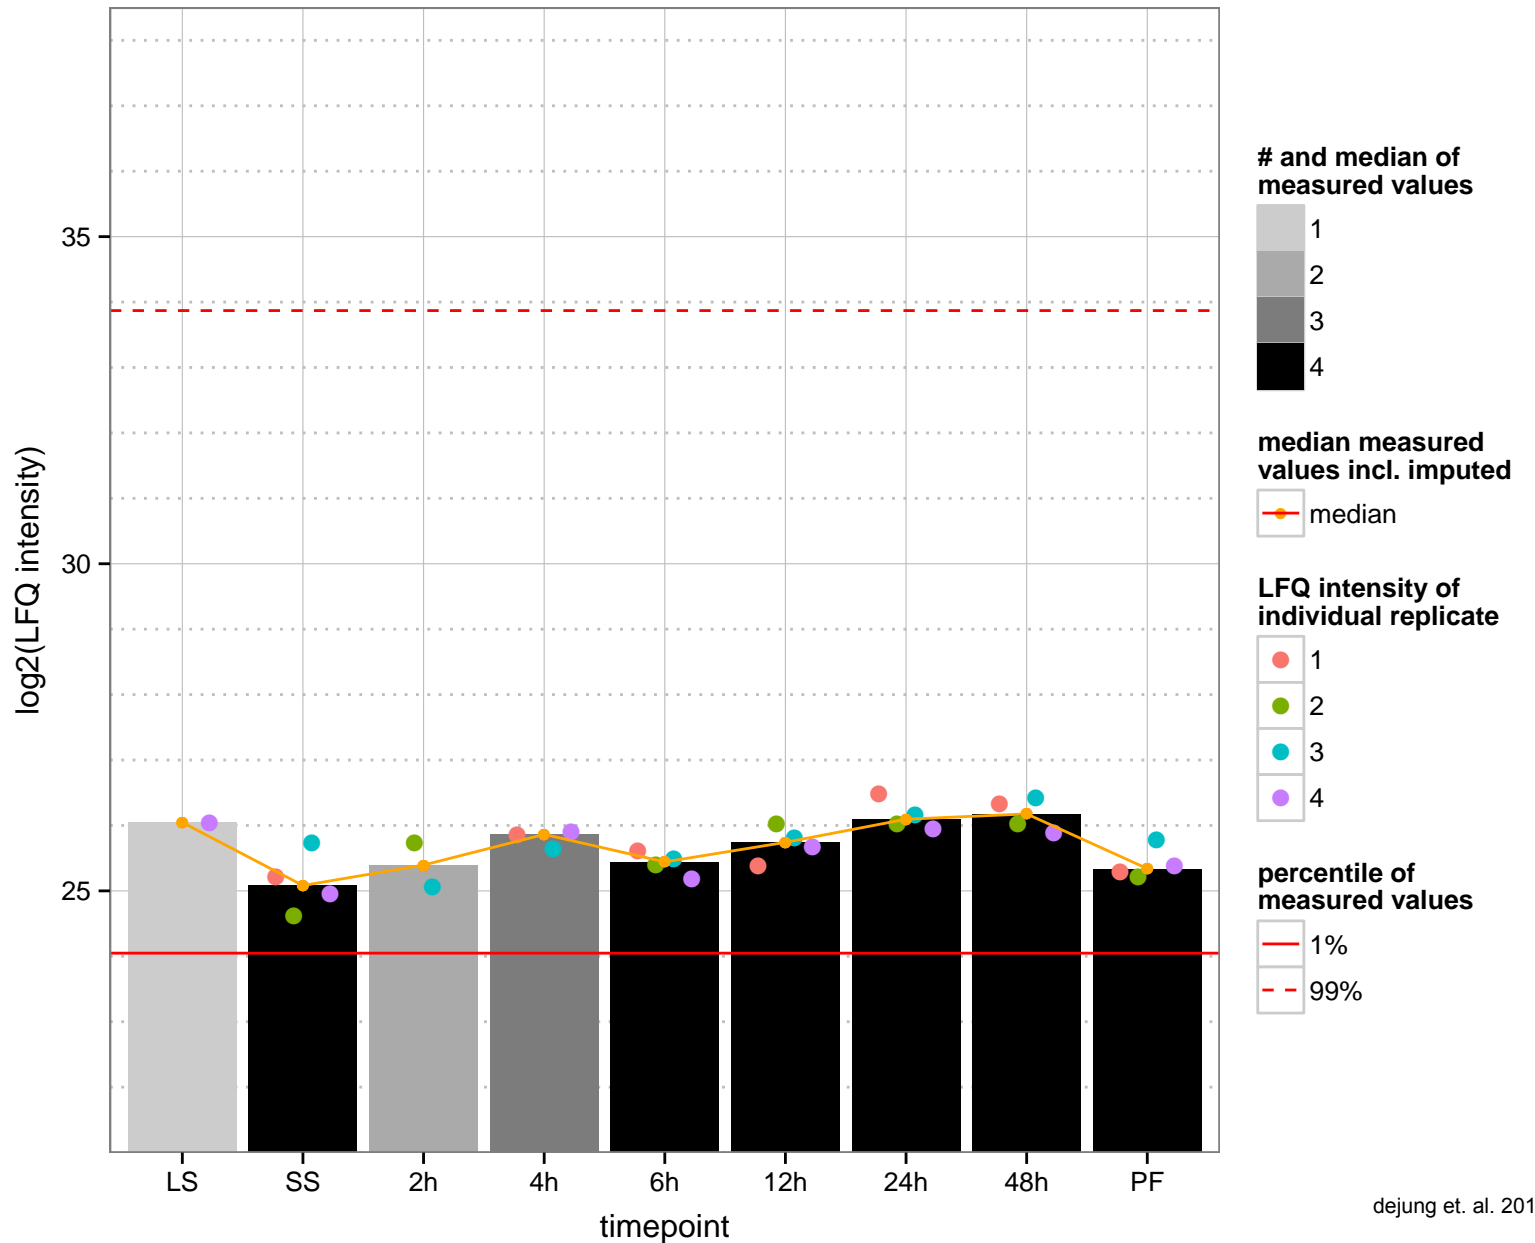

hypothetical protein, conserved  
 Tb927.11.10260  
 AGOF: null  
 AGOC: null  
 AGOP: null  
 PGO: null  
 PGOC: null  
 PGOP: null

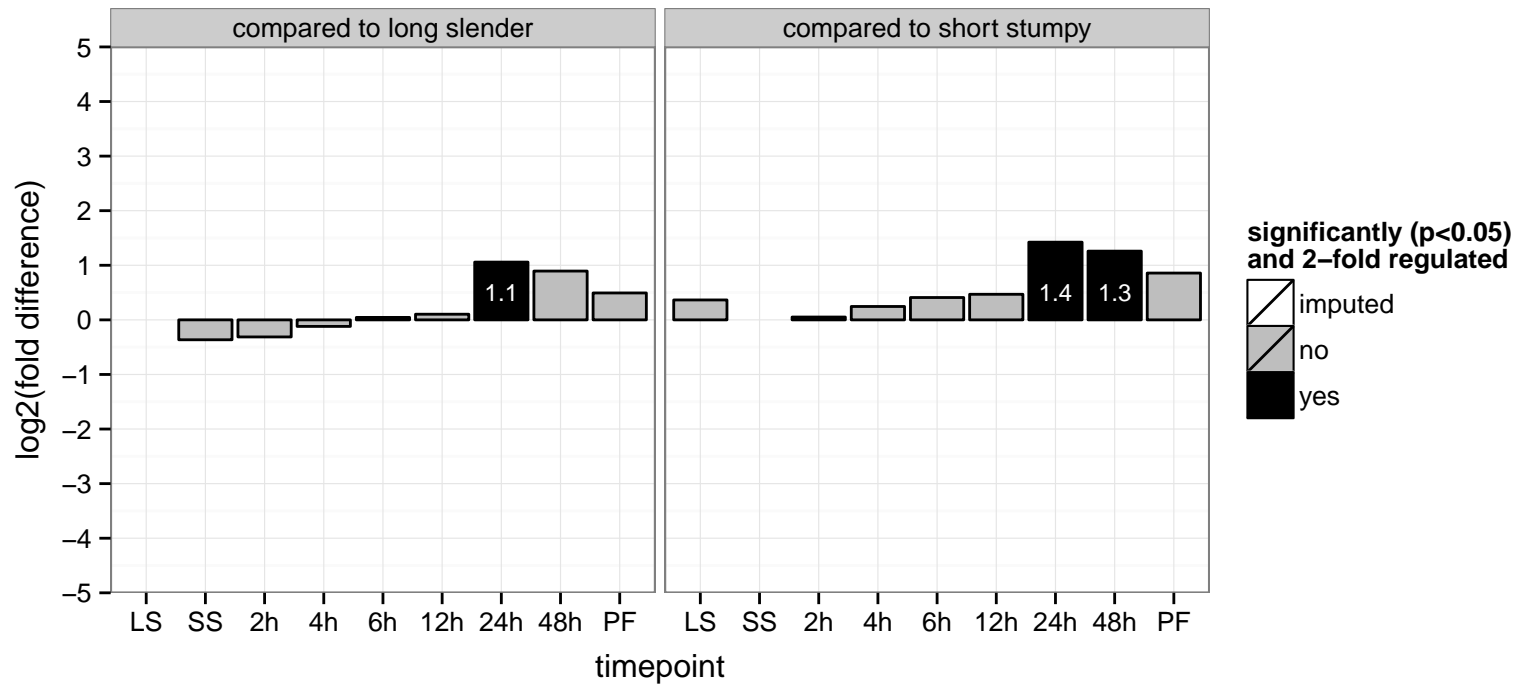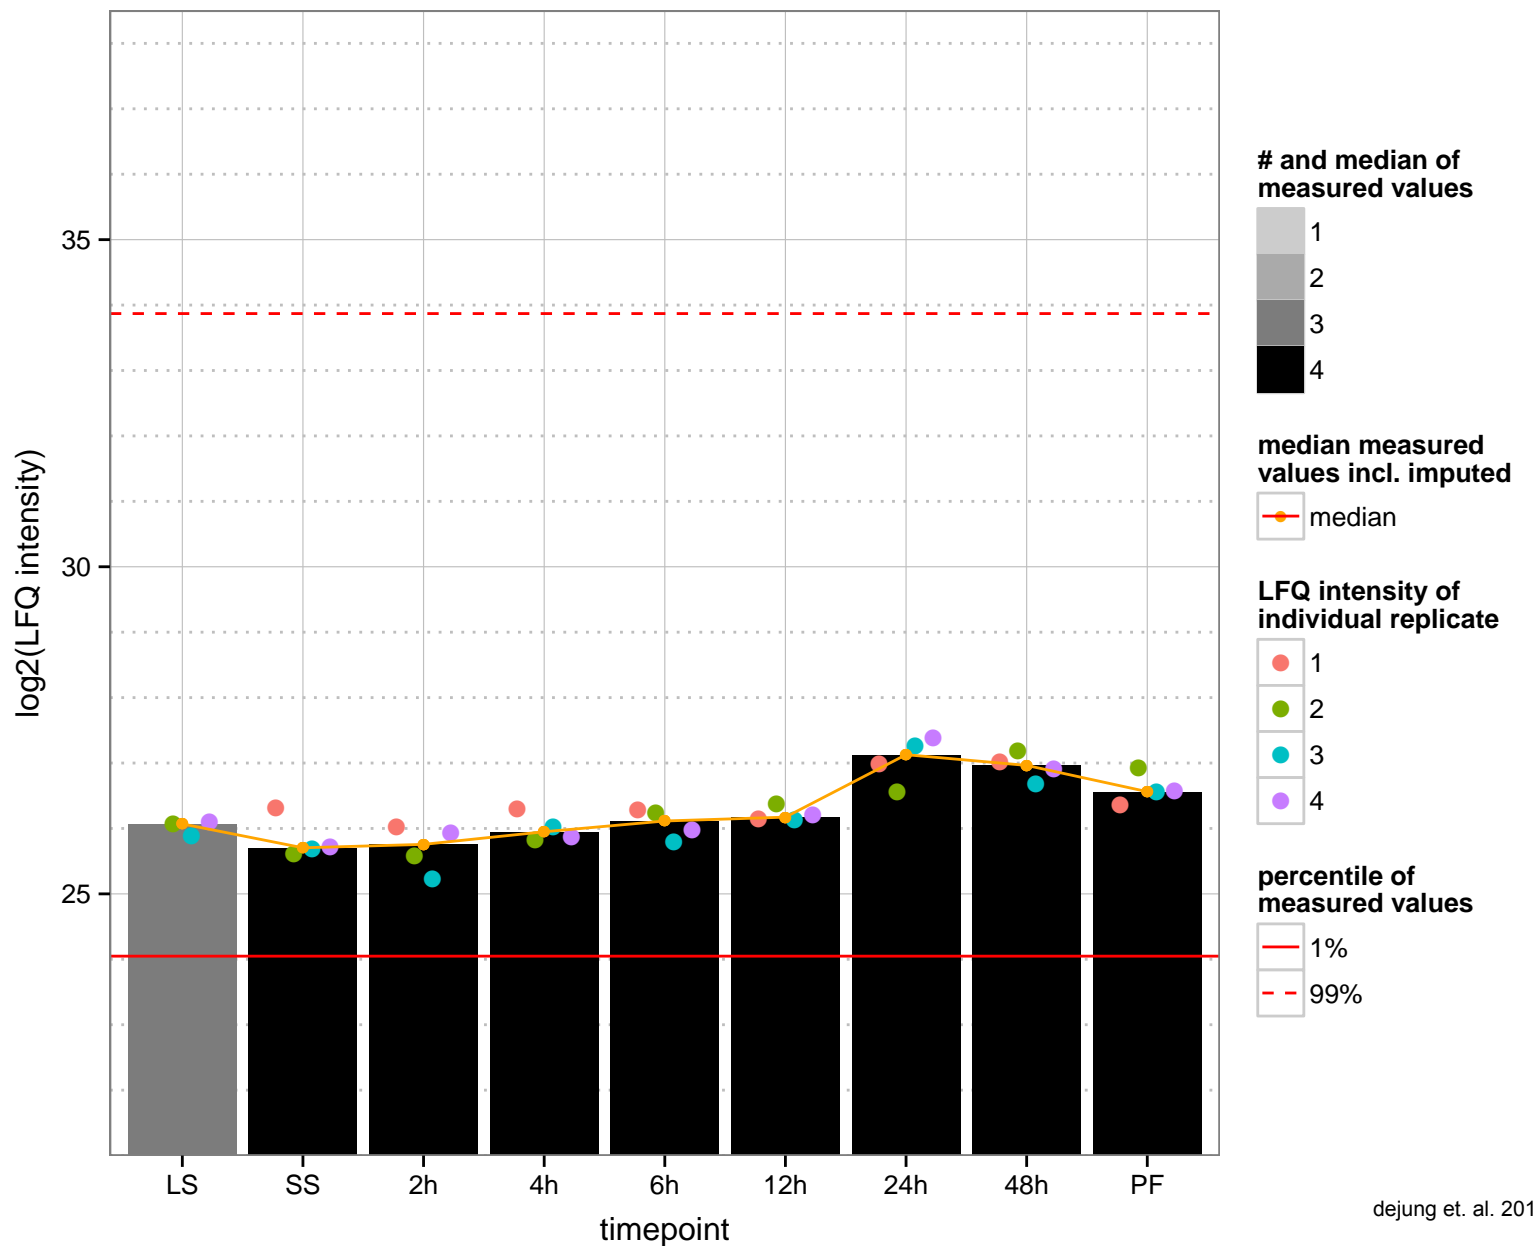



hypothetical protein, conserved

Tb927.11.10960

AGOF: null

AGOC: mitochondrion

AGOP: null

PGOF: oxidoreductase activity, oxidoreductase activity, acting on paired donors, with incorporation or reduction of molecular oxygen

PGOC: null

PGOP: oxidation-reduction process

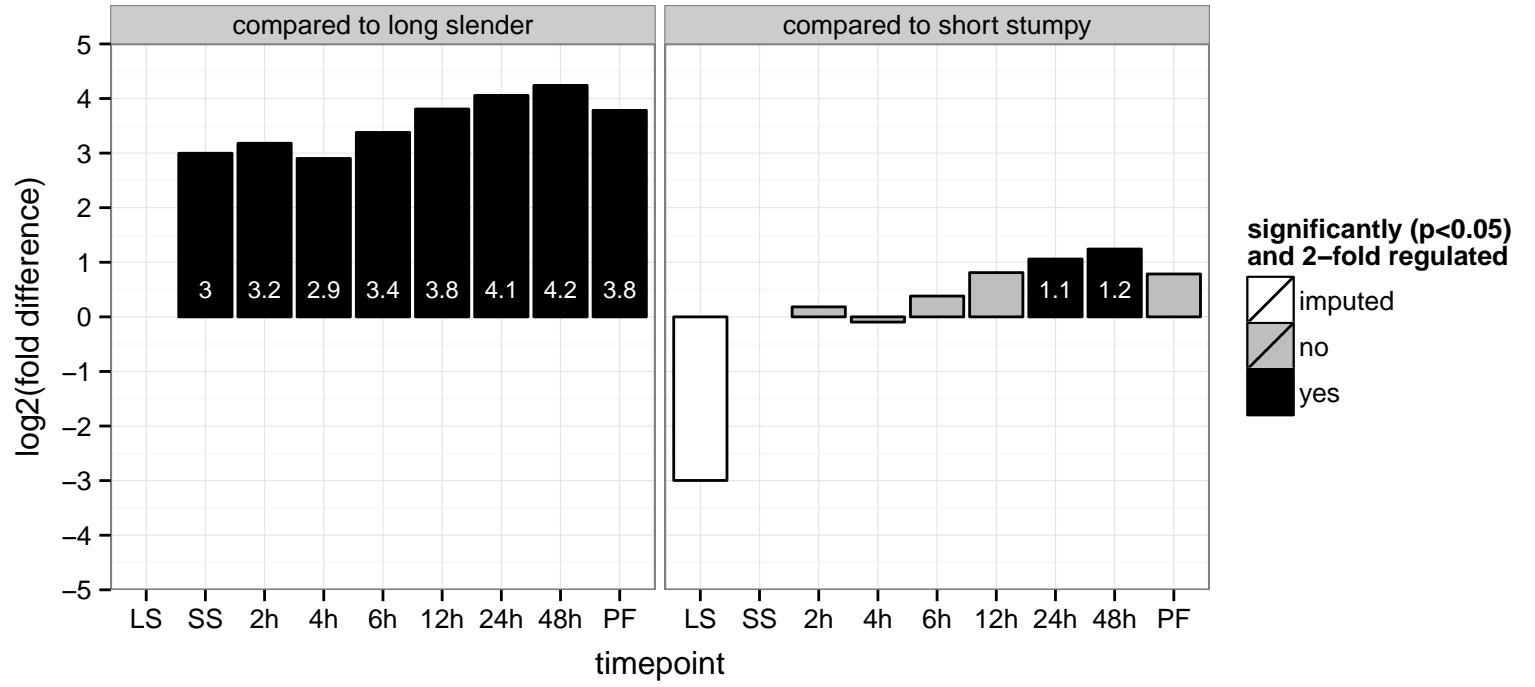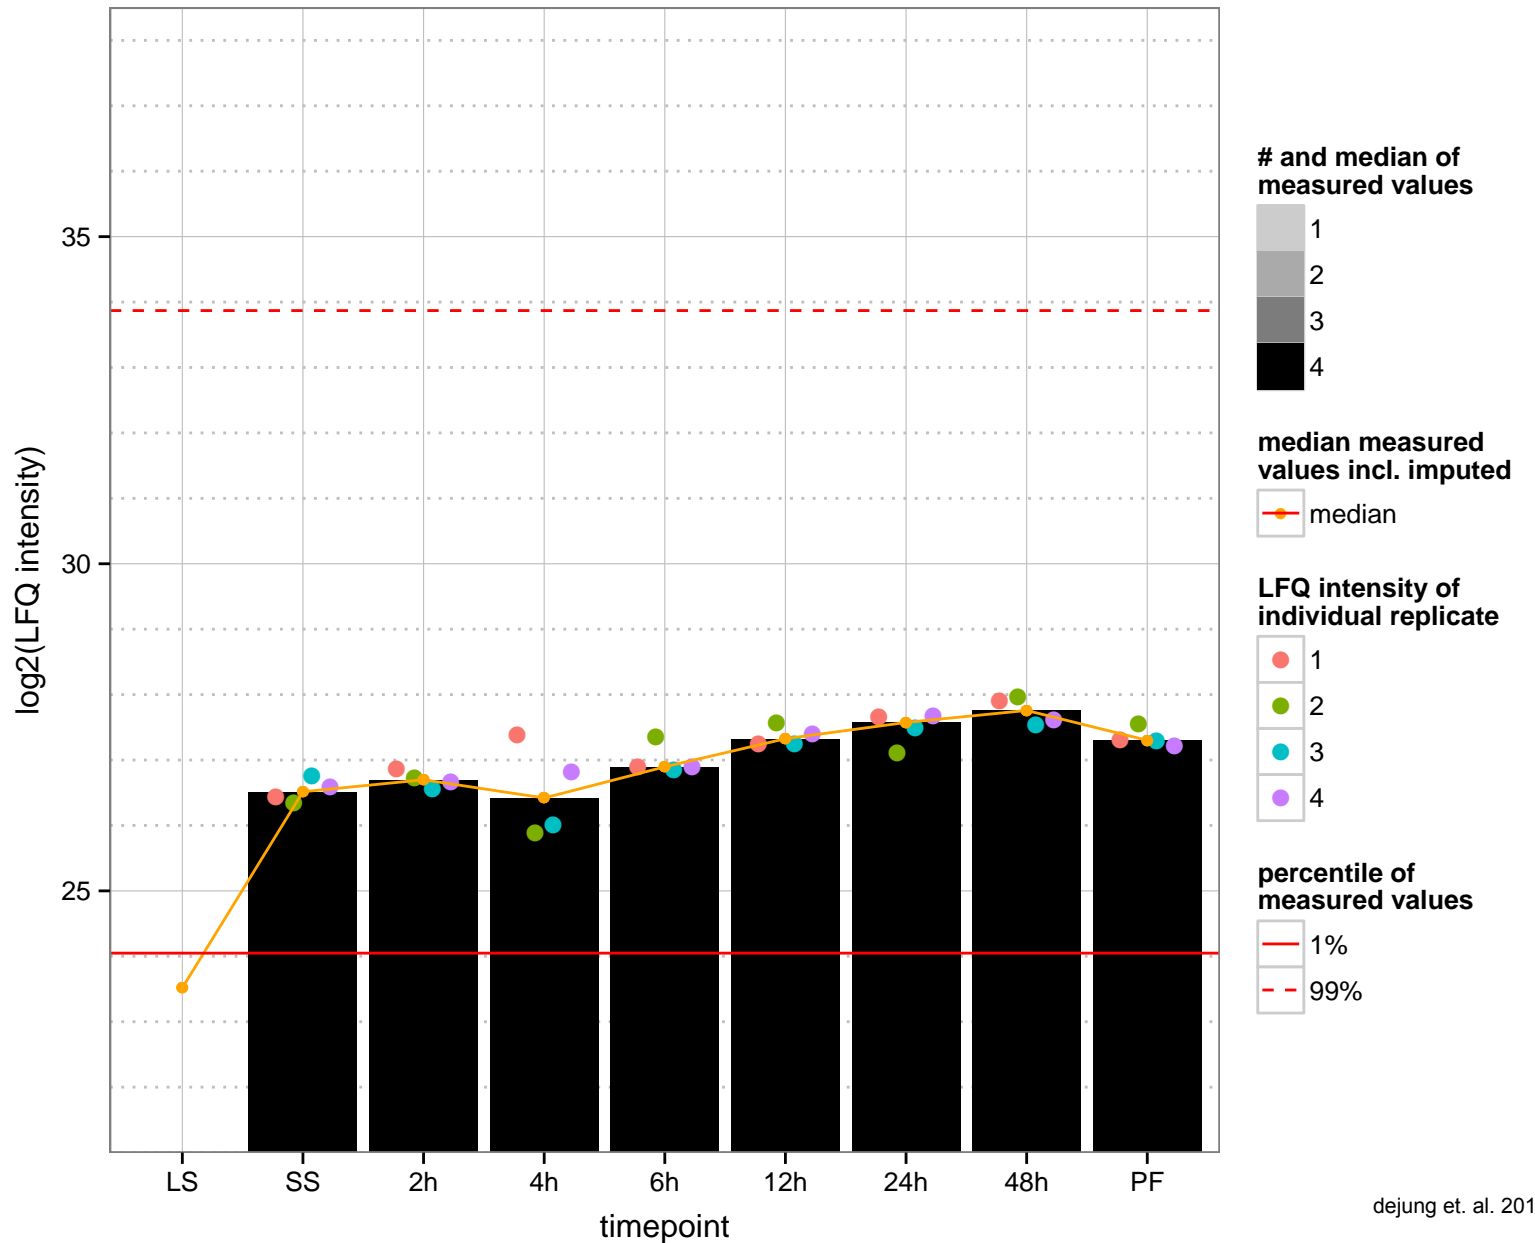

hypothetical protein, conserved  
 Tb927.11.11760  
 AGOF: null  
 AGOC: null  
 AGOP: null  
 PGO: null  
 PGOC: null  
 PGOP: null

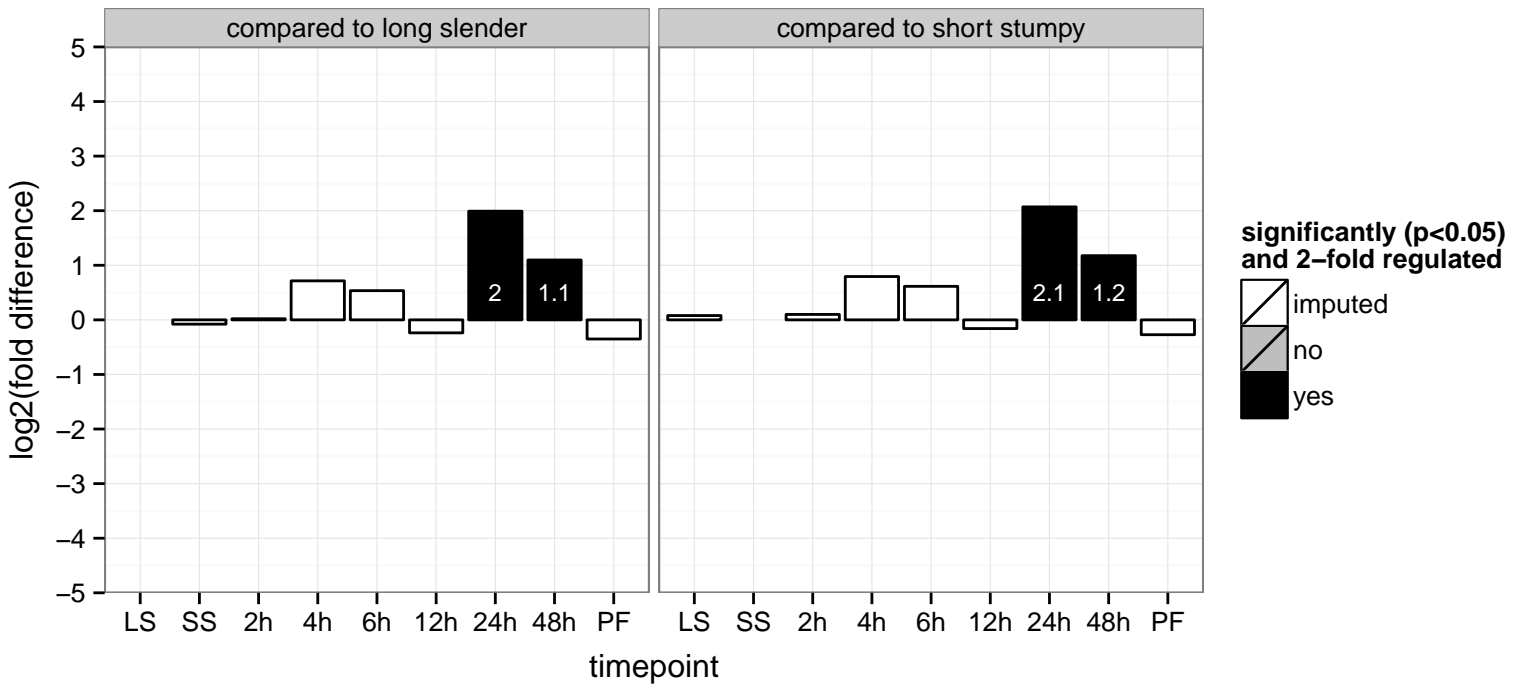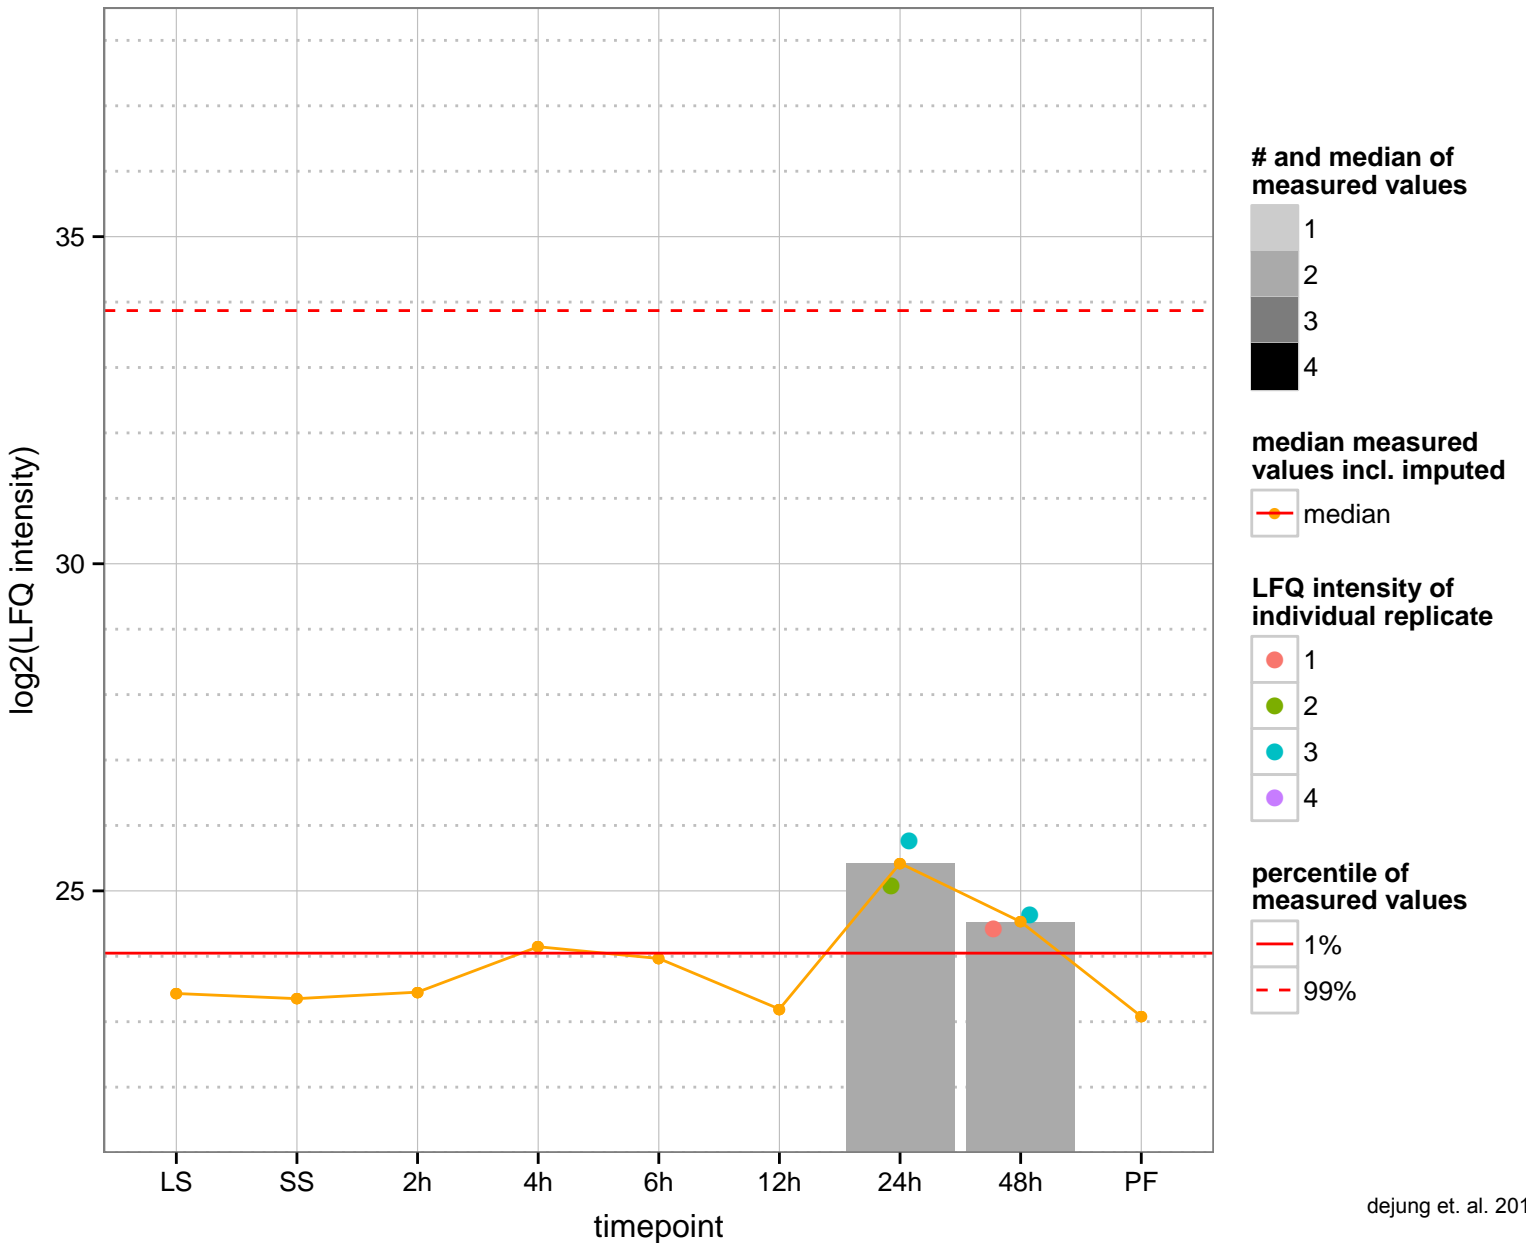

cytochrome oxidase assembly protein, putative  
 Tb927.11.11950  
 AGOF: null  
 AGOC: mitochondrial membrane, mitochondrion  
 AGOP: protein complex assembly  
 PGOF: oxidoreductase activity, acting on the CH-CH group of donors  
 PGOC: membrane  
 PGOP: heme a biosynthetic process, oxidation-reduction process

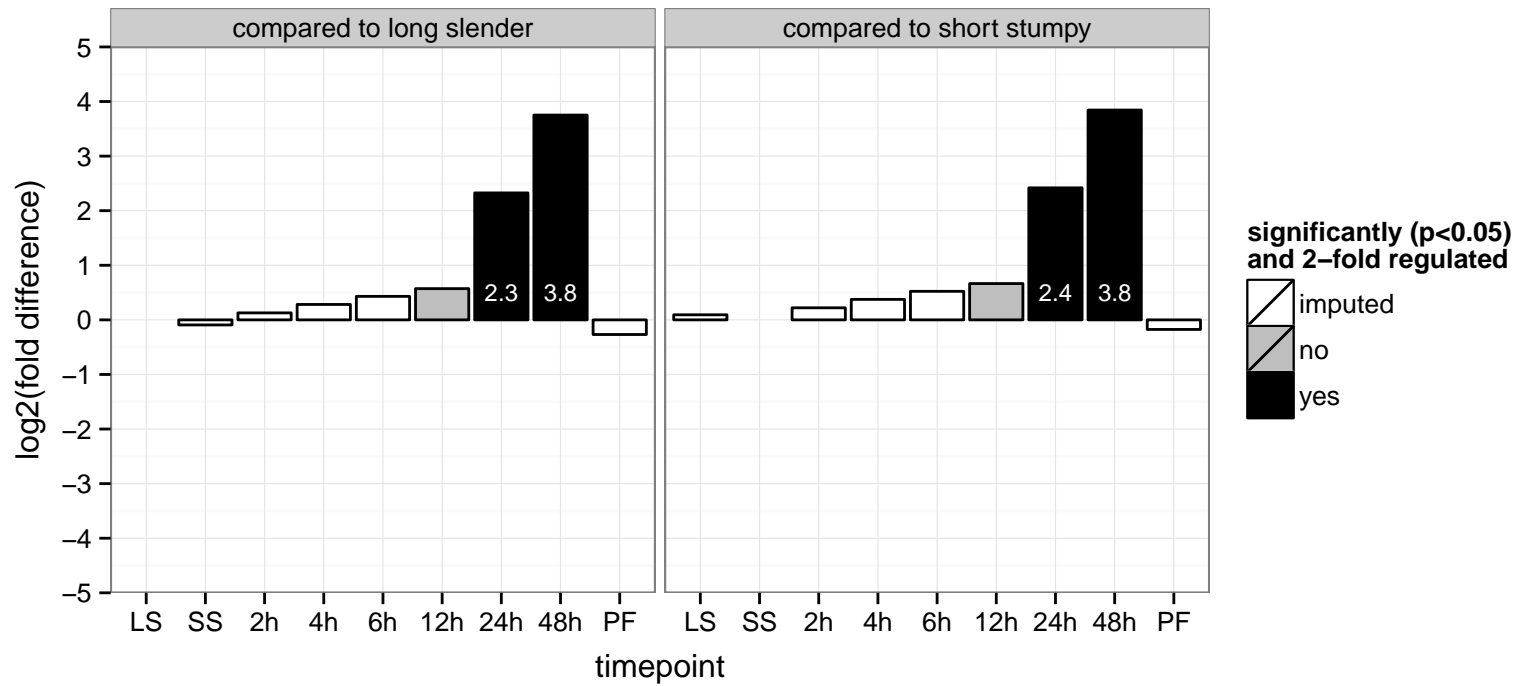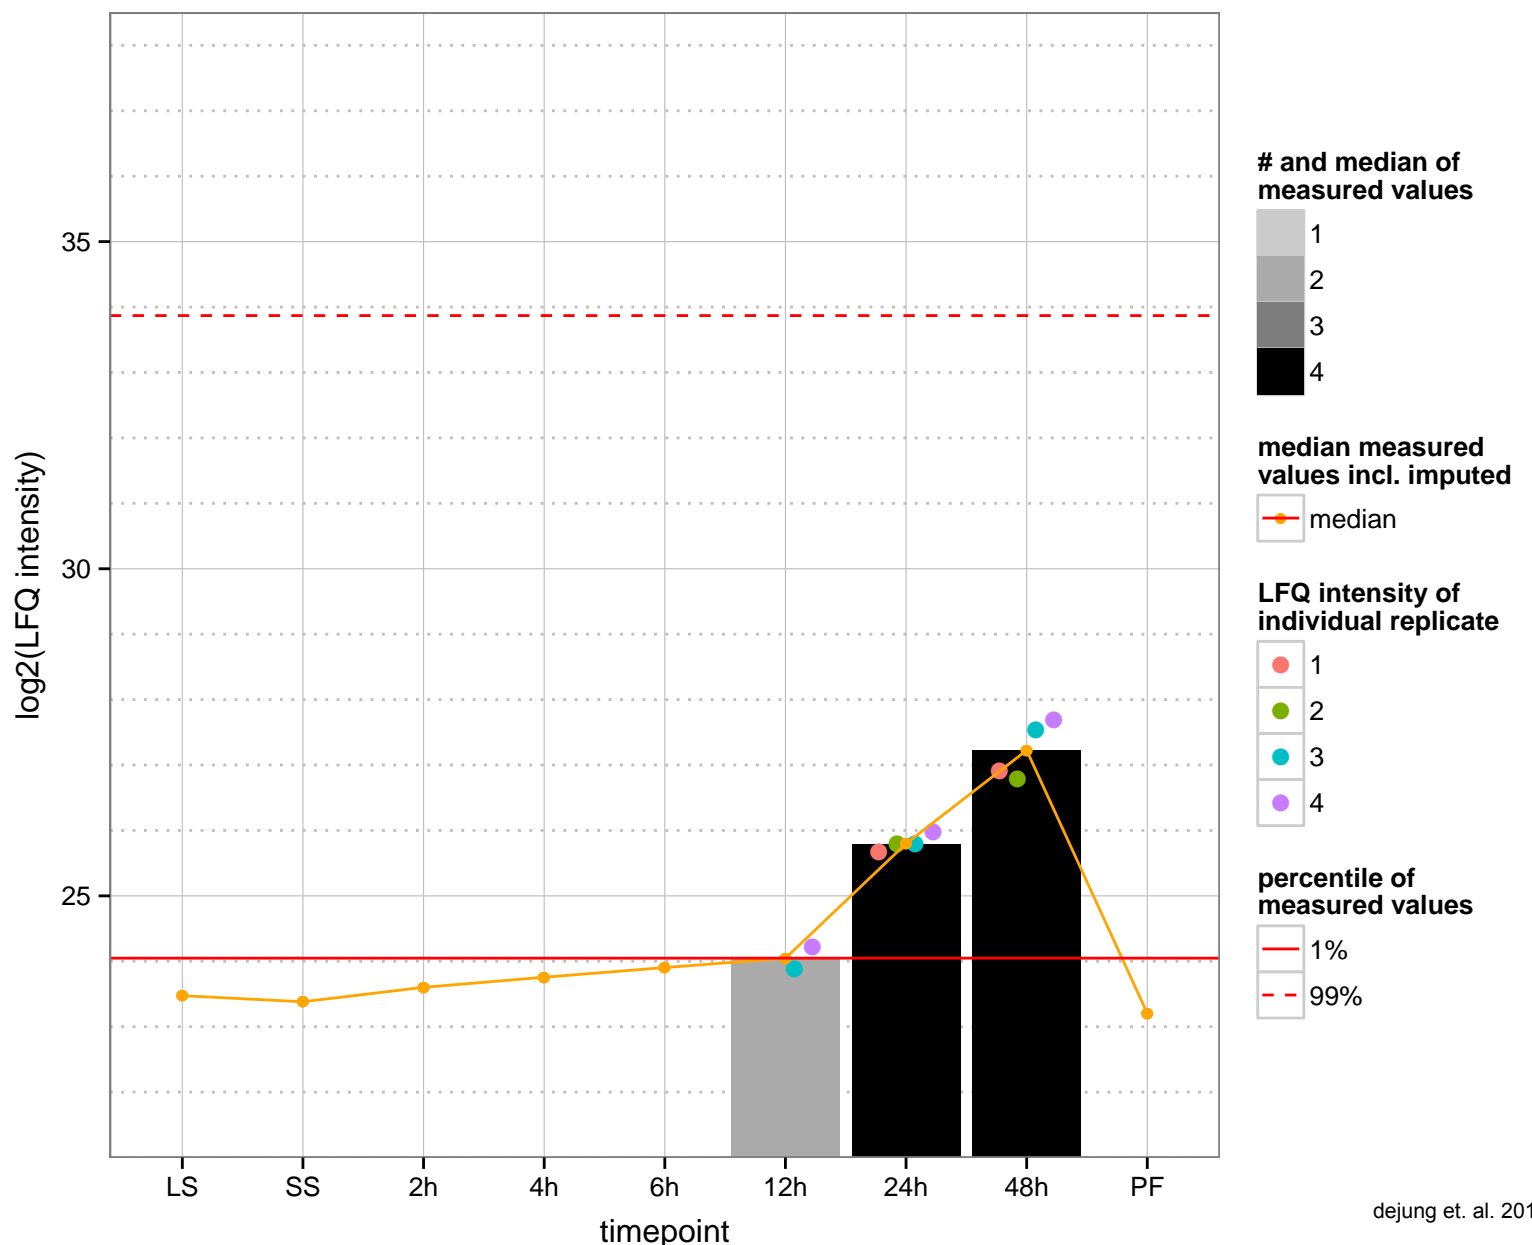

hypothetical protein, conserved  
 Tb927.11.1290  
 AGOF: null  
 AGOC: mitochondrion  
 AGOP: null  
 PGO: null  
 PGO: null  
 PGO: null

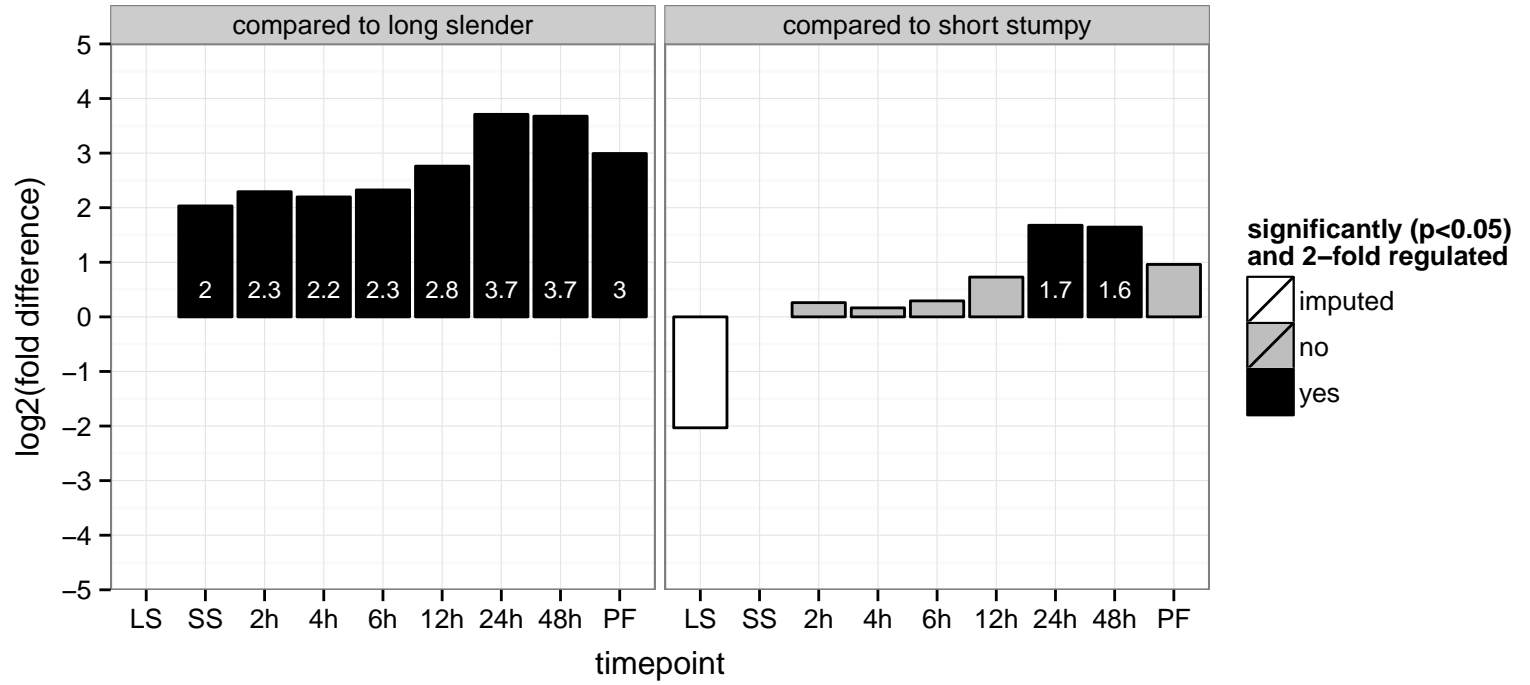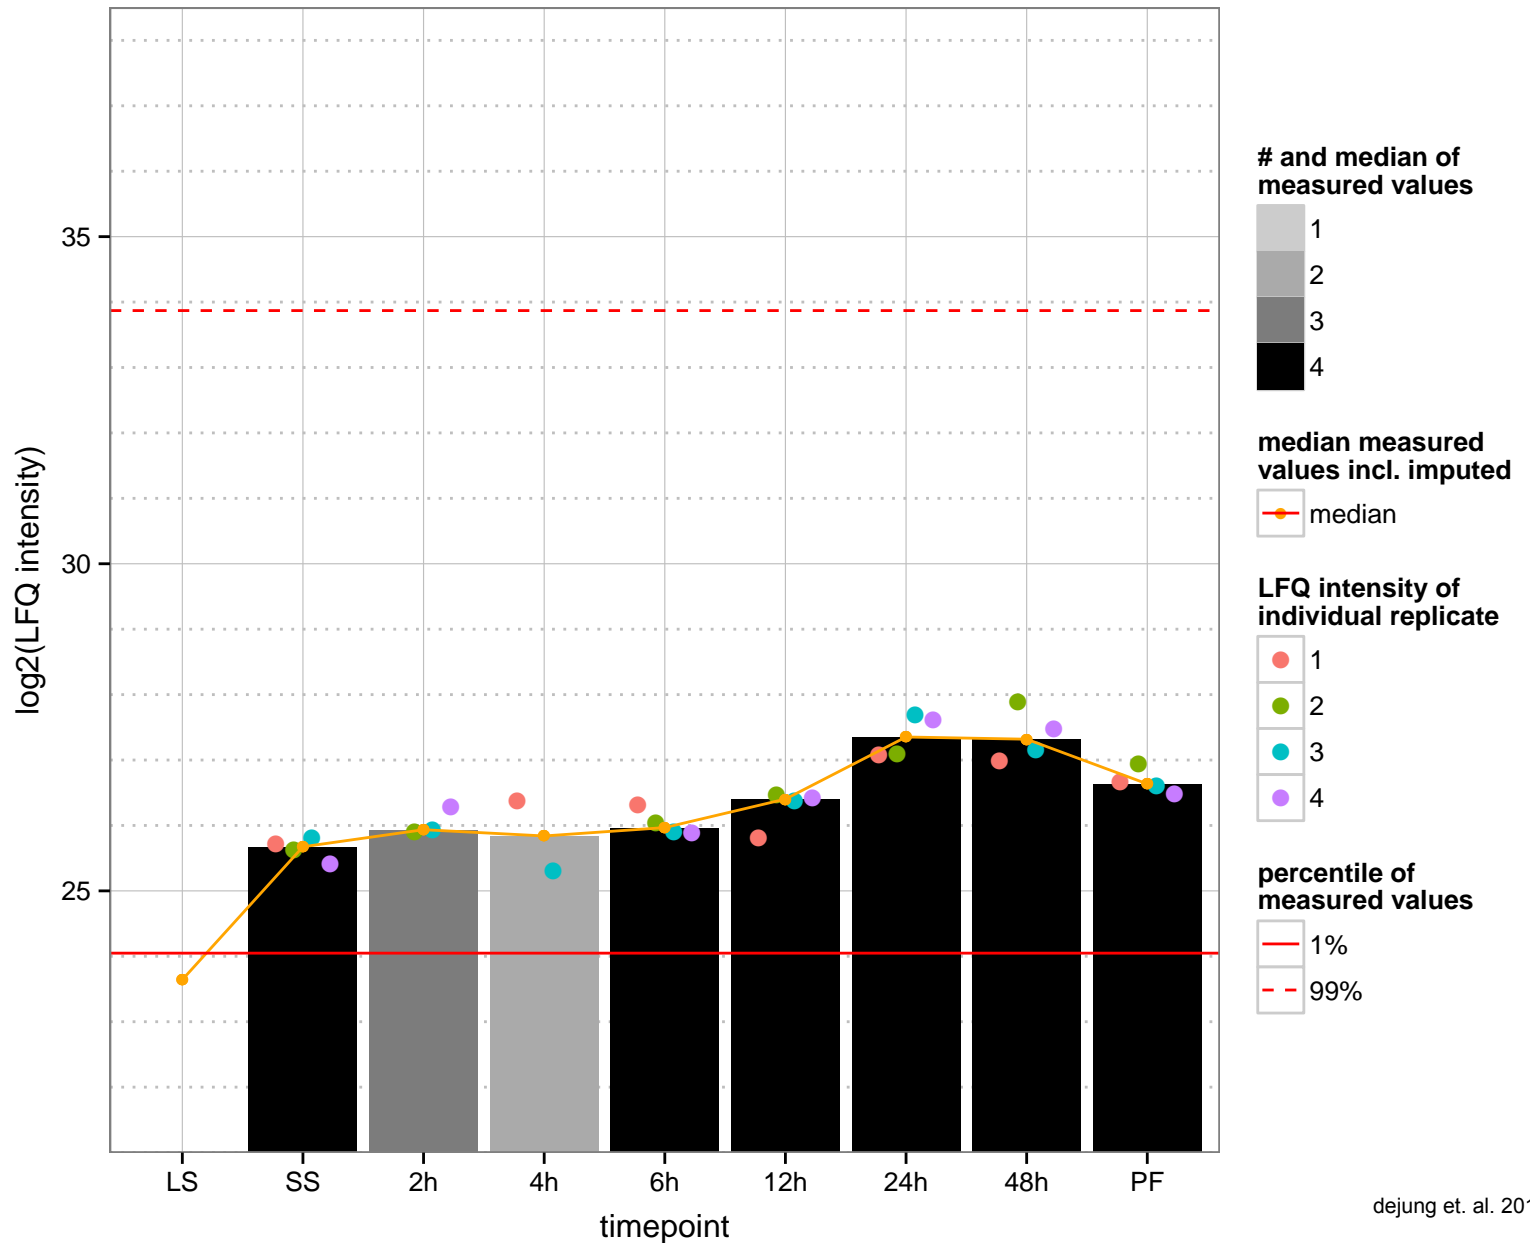

hypothetical protein, conserved  
 Tb927.11.1550  
 AGOF: null  
 AGOC: null  
 AGOP: null  
 PGOF: exonuclease activity, nucleic acid binding  
 PGO: intracellular  
 PGOP: null

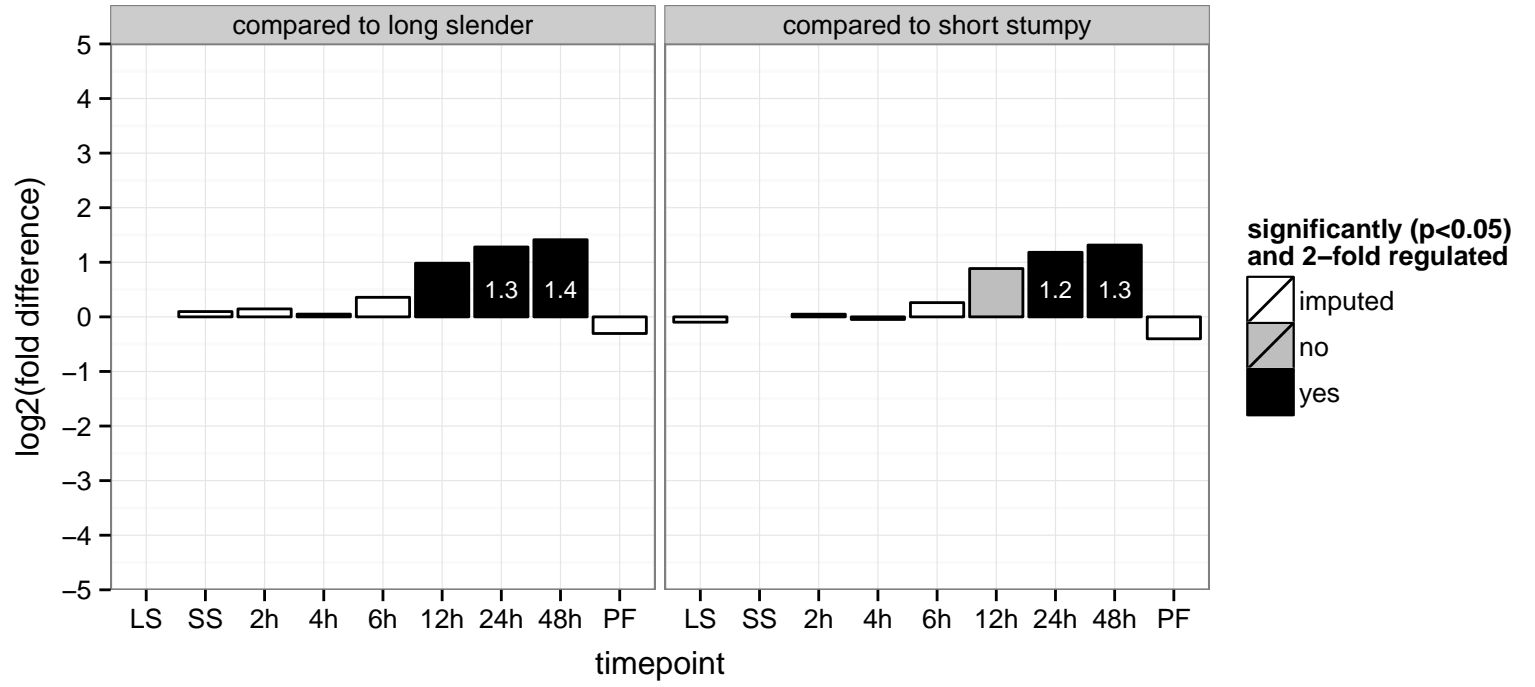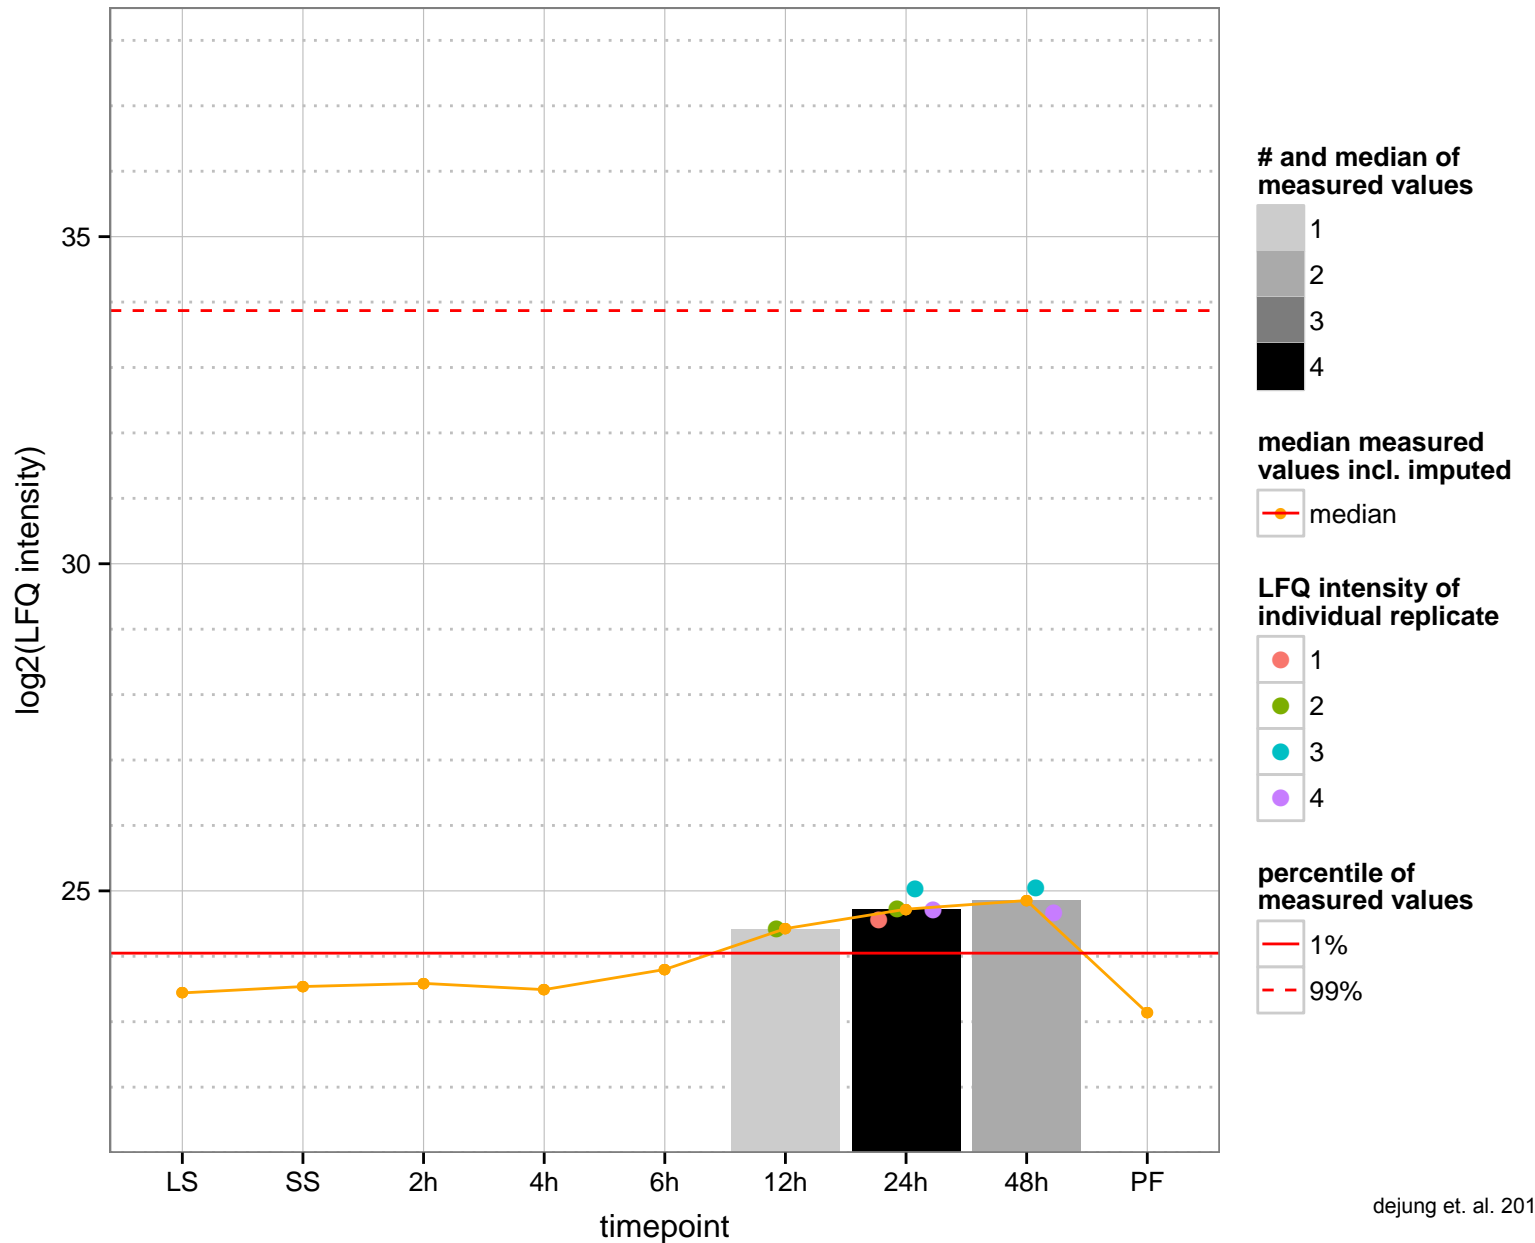

cyclin dependent kinases regulatory subunit, putative (CKS1)

Tb927.11.16390

AGOF: cyclin-dependent protein kinase activity, cyclin-dependent protein kinase regulator activity

AGOC: protein kinase CK2 complex

AGOP: cell cycle

PGOF: cyclin-dependent protein kinase regulator activity

PGOC: null

PGOP: cell cycle

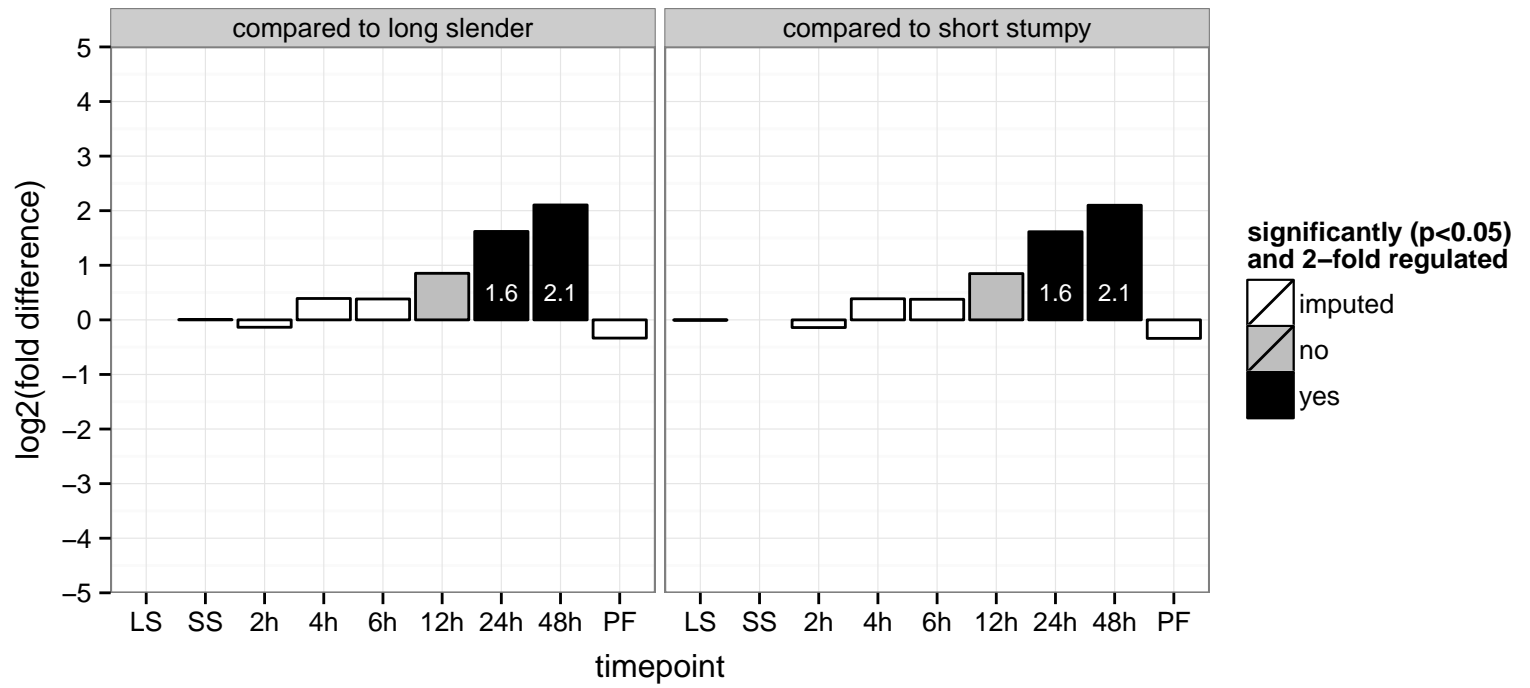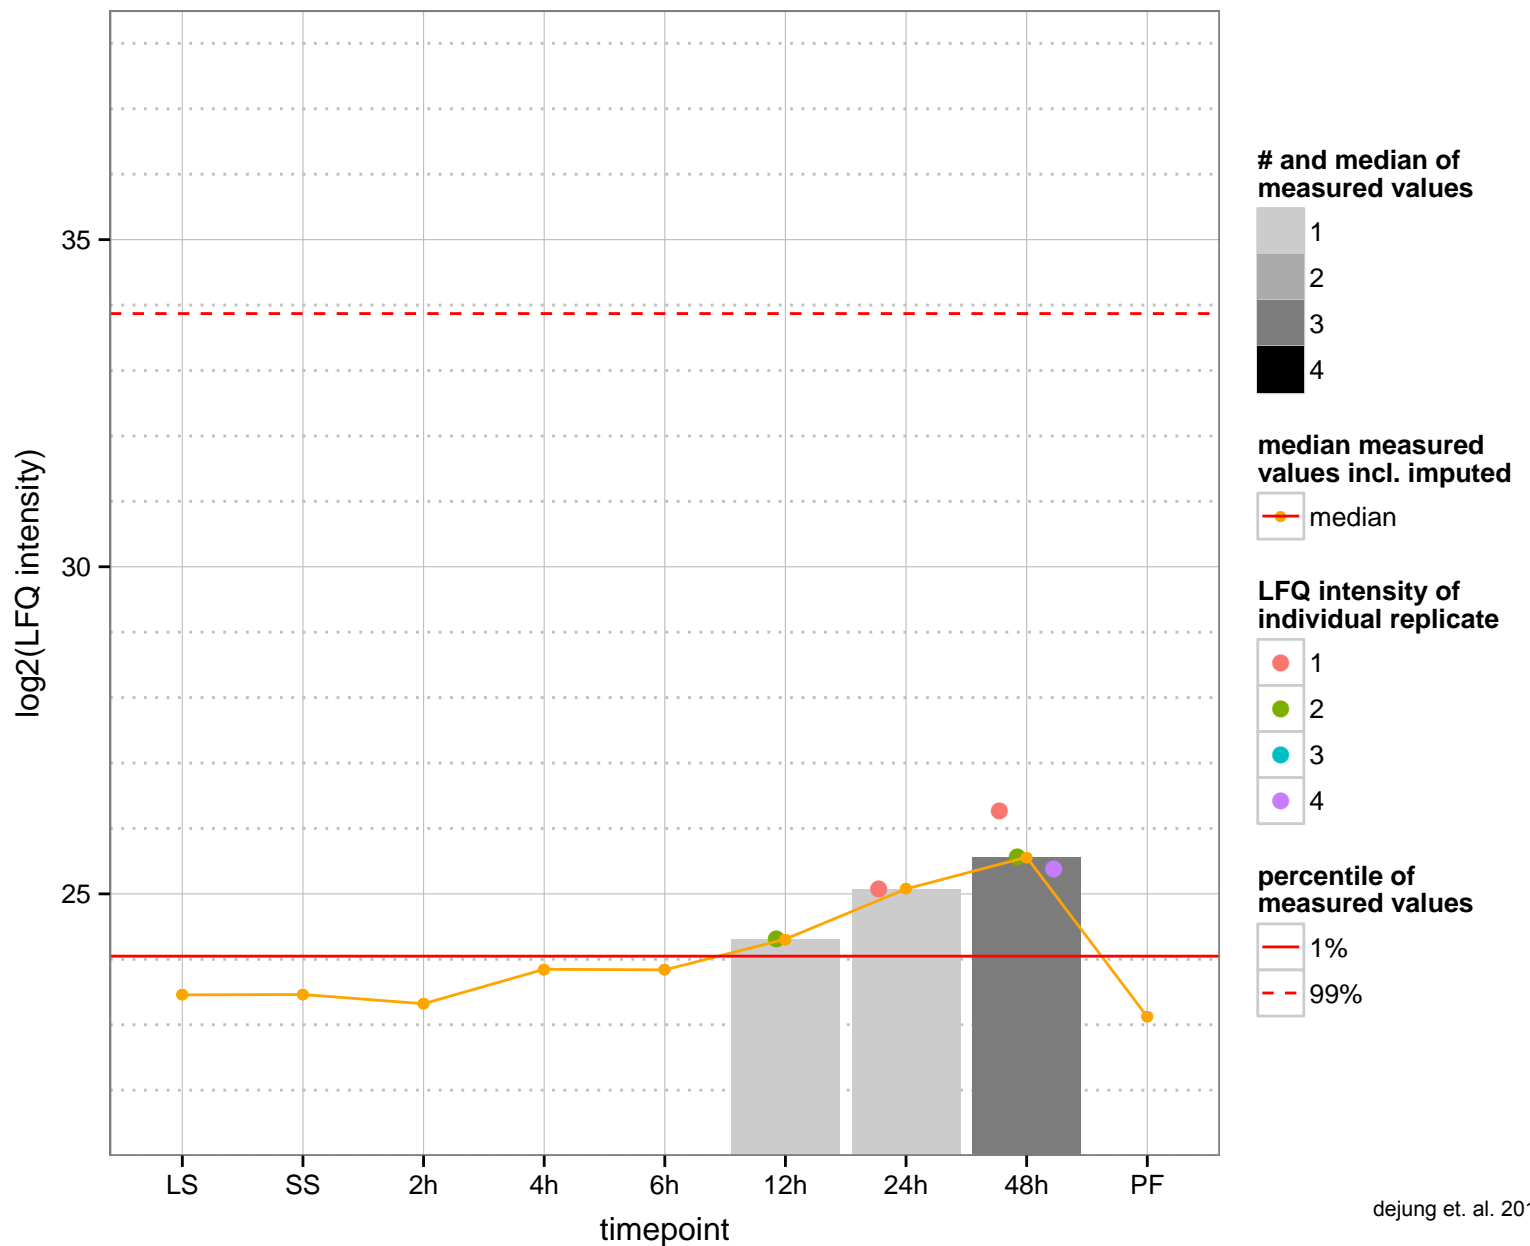

hypothetical protein, conserved  
 Tb927.11.480  
 AGOF: GTP binding, RNA binding  
 AGOC: intracellular, mitochondrion  
 AGOP: null  
 PGOF: GTP binding  
 PGO: null  
 PGOP: null

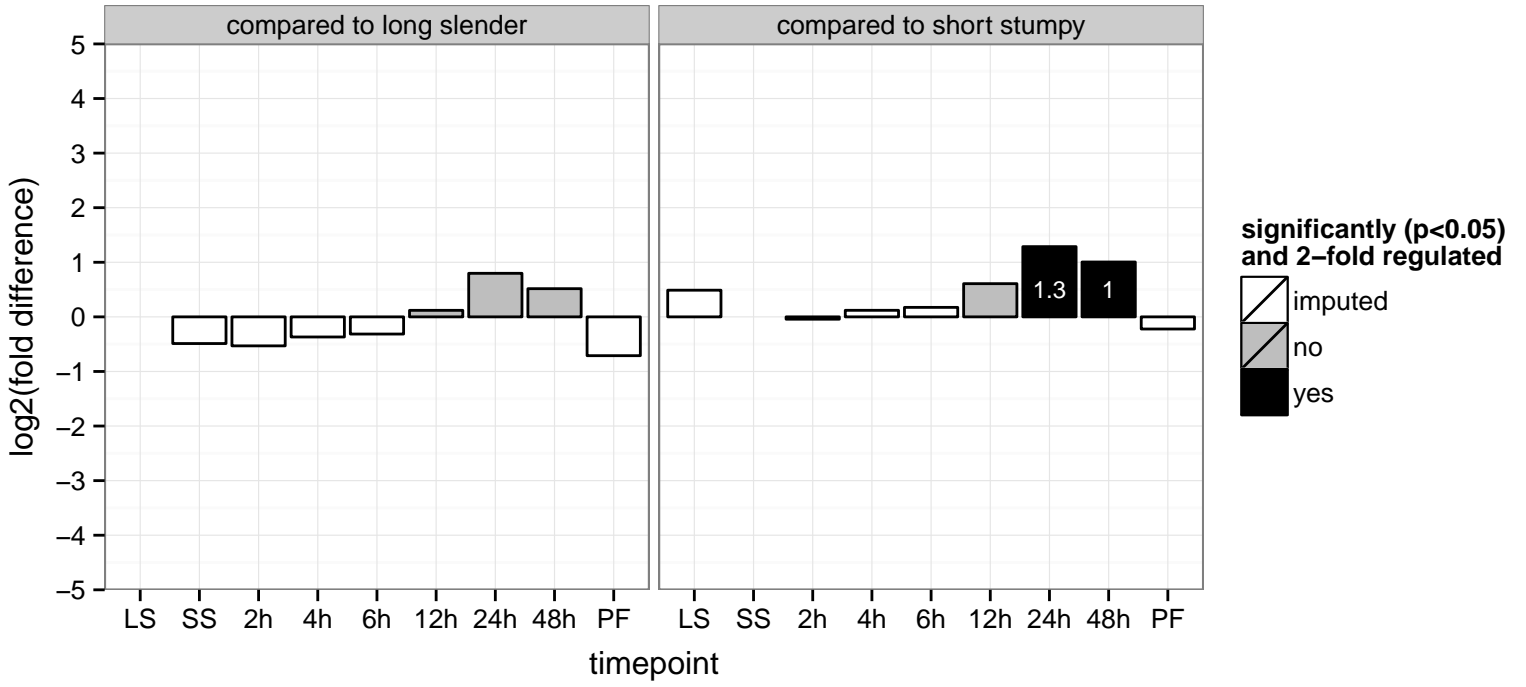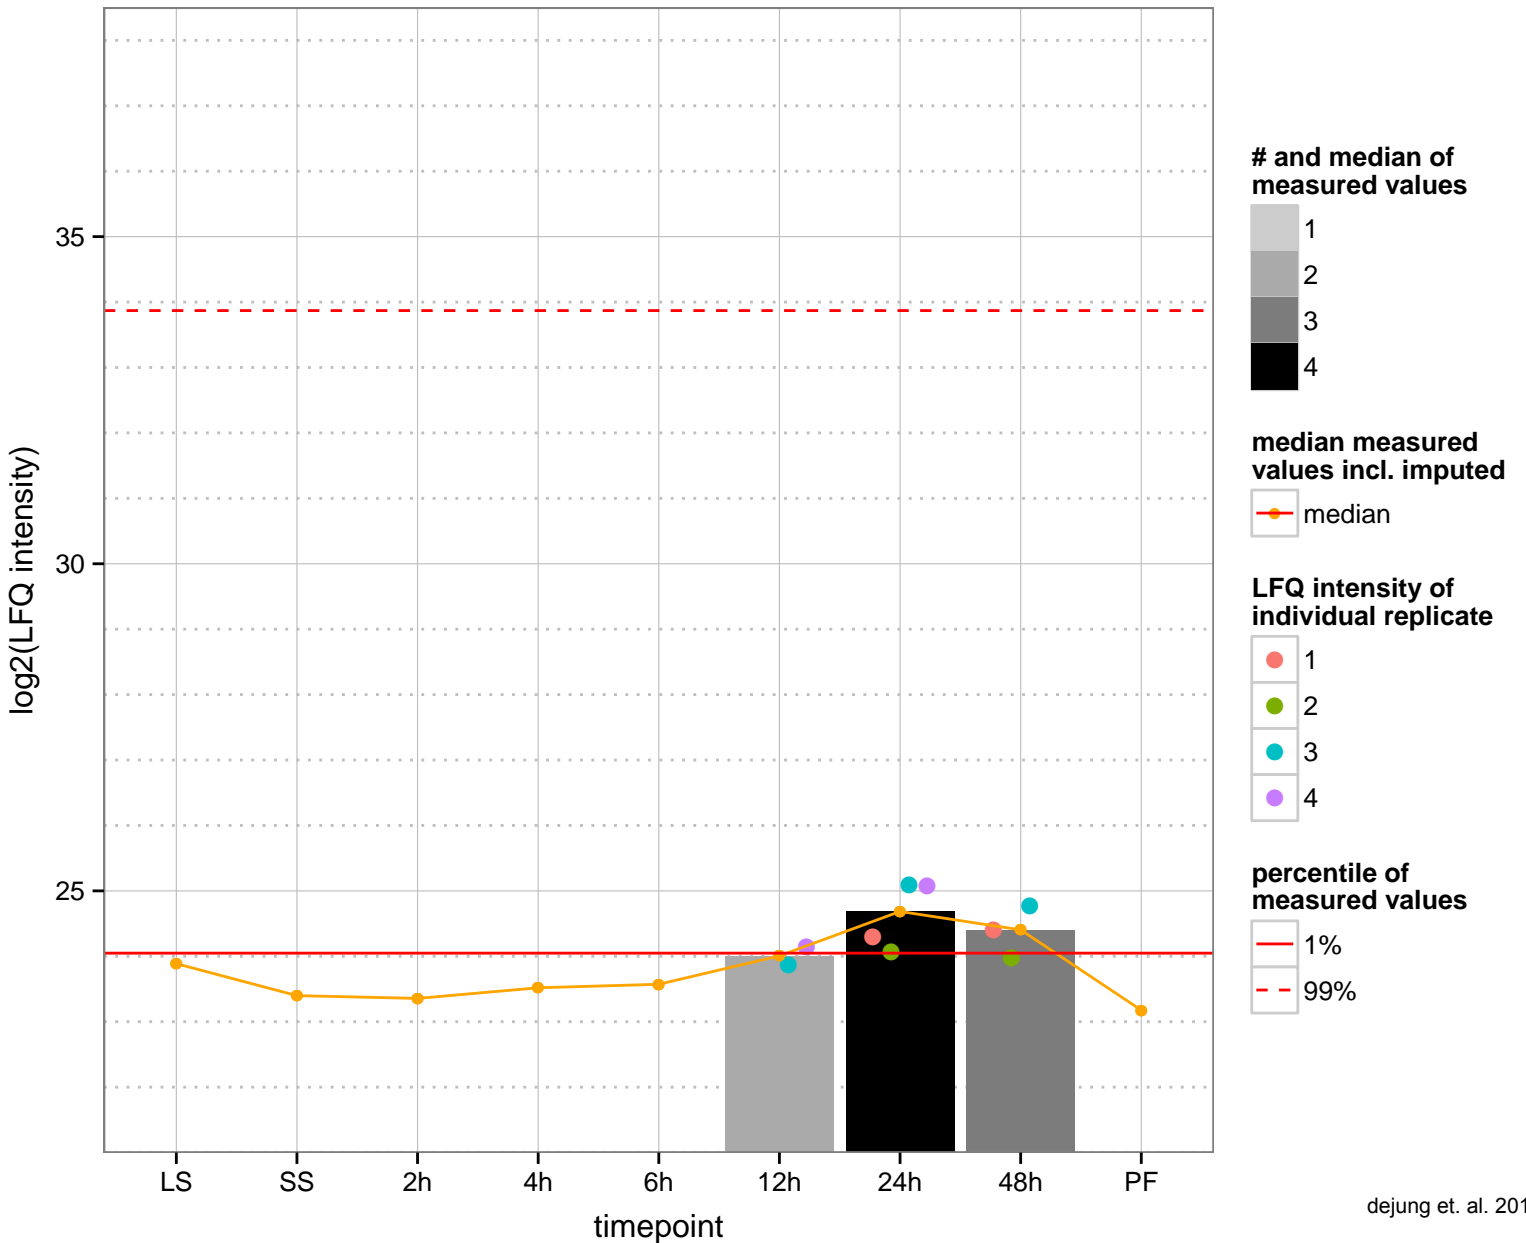

hypothetical protein, conserved  
 Tb927.11.4840  
 AGOF: null  
 AGOC: null  
 AGOP: null  
 PGO: null  
 PGOC: null  
 PGOP: null

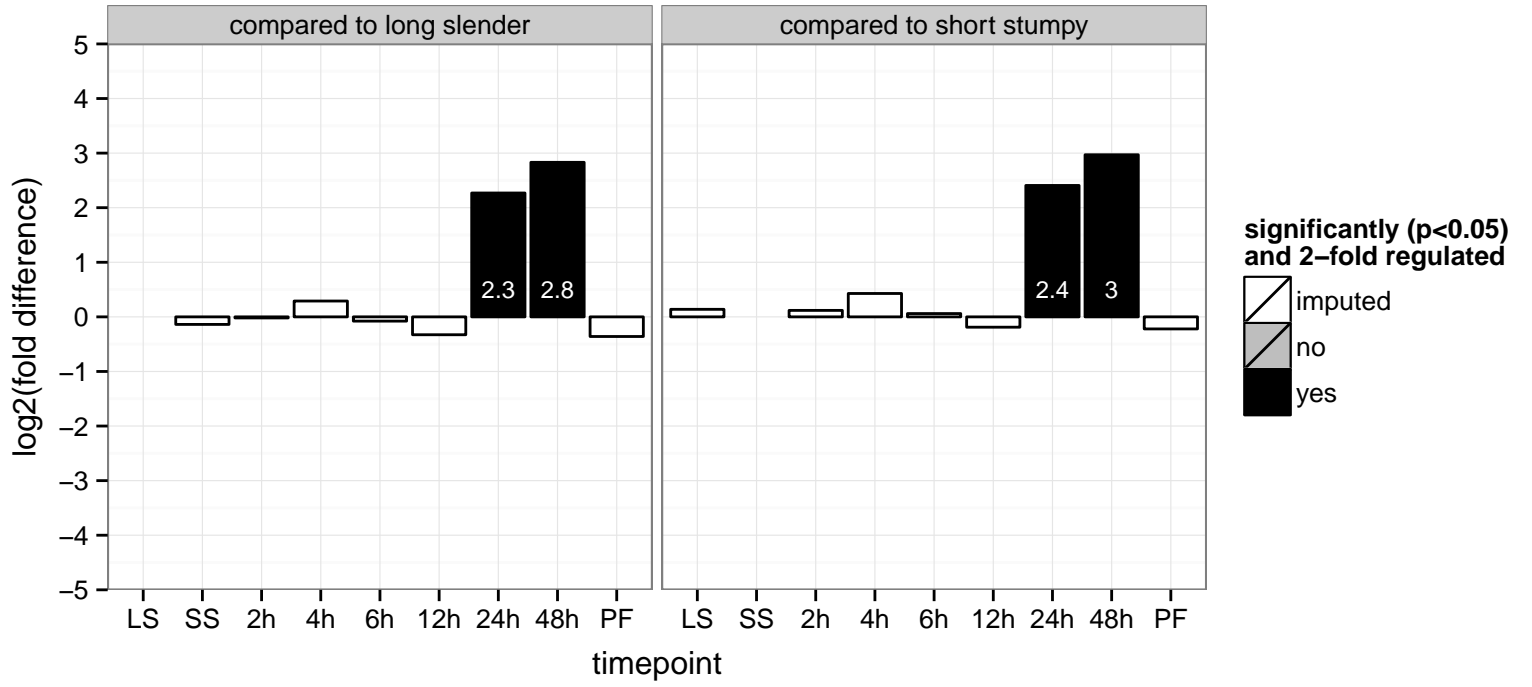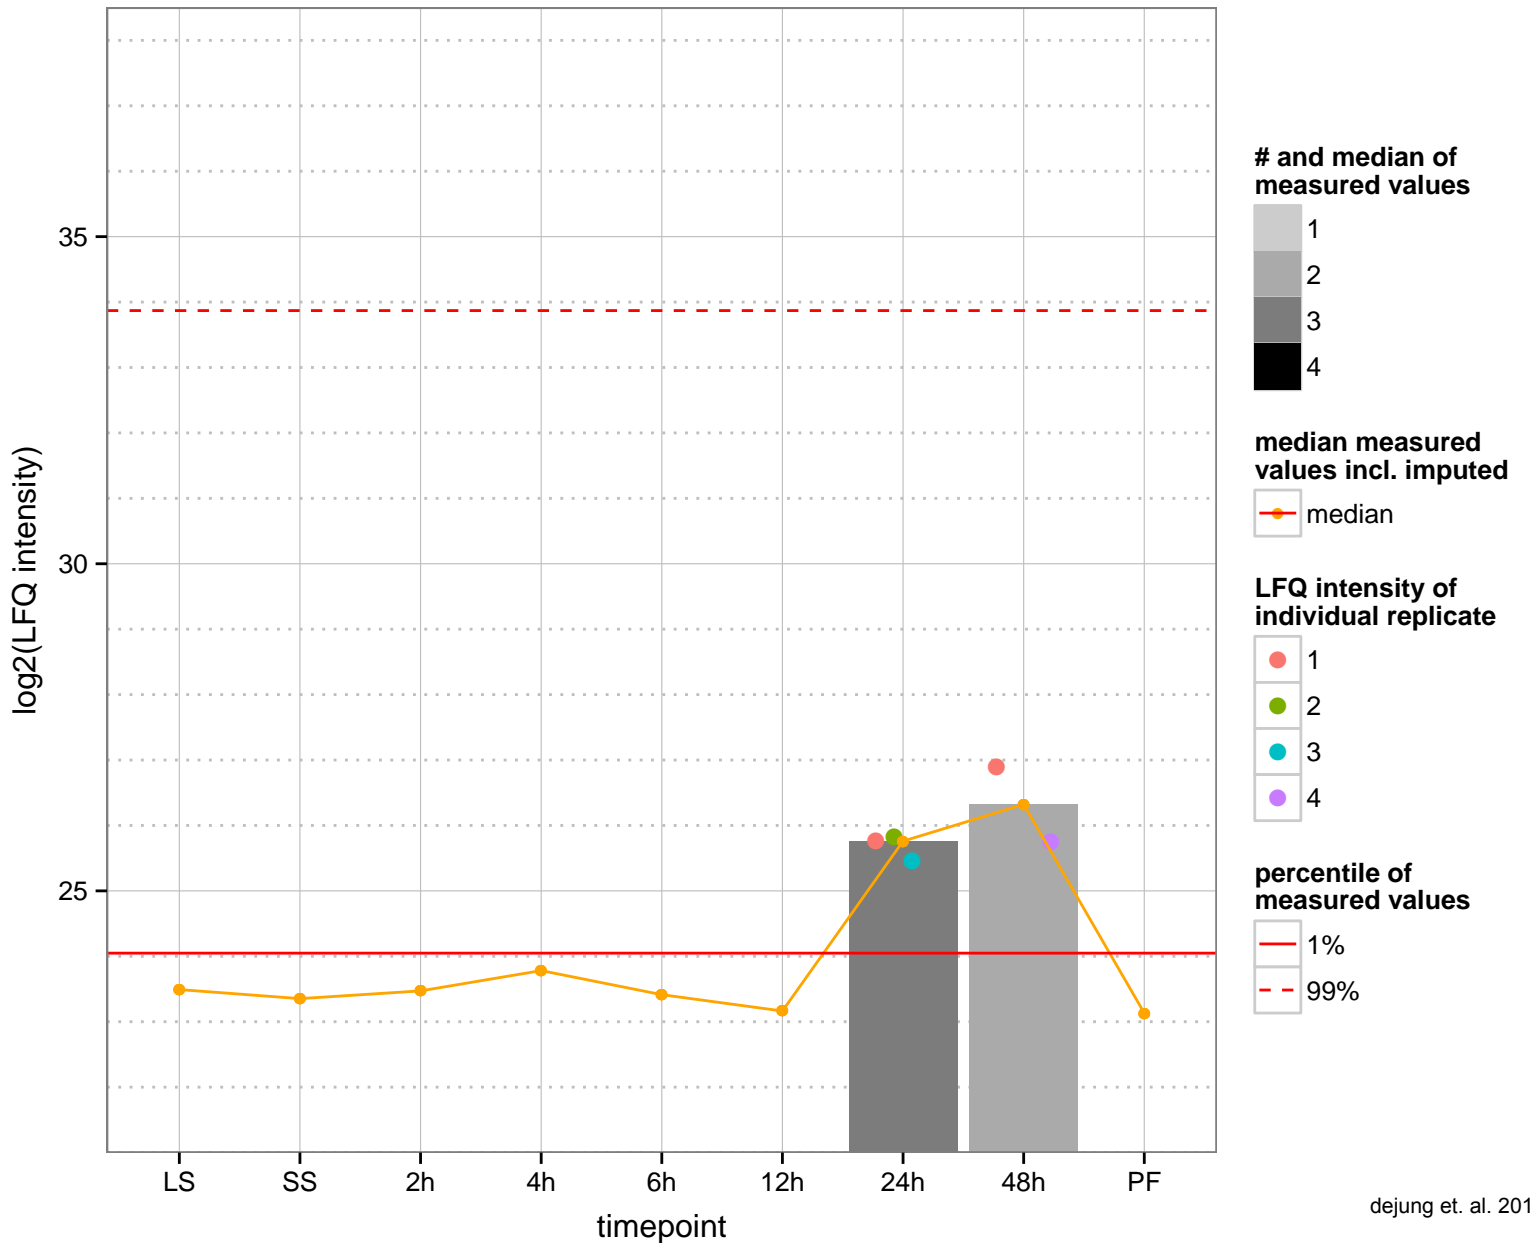



hypothetical protein, conserved  
 Tb927.11.7340  
 AGOF: null  
 AGOC: null  
 AGOP: metabolic process  
 PGO: null  
 PGOC: null  
 PGOP: null

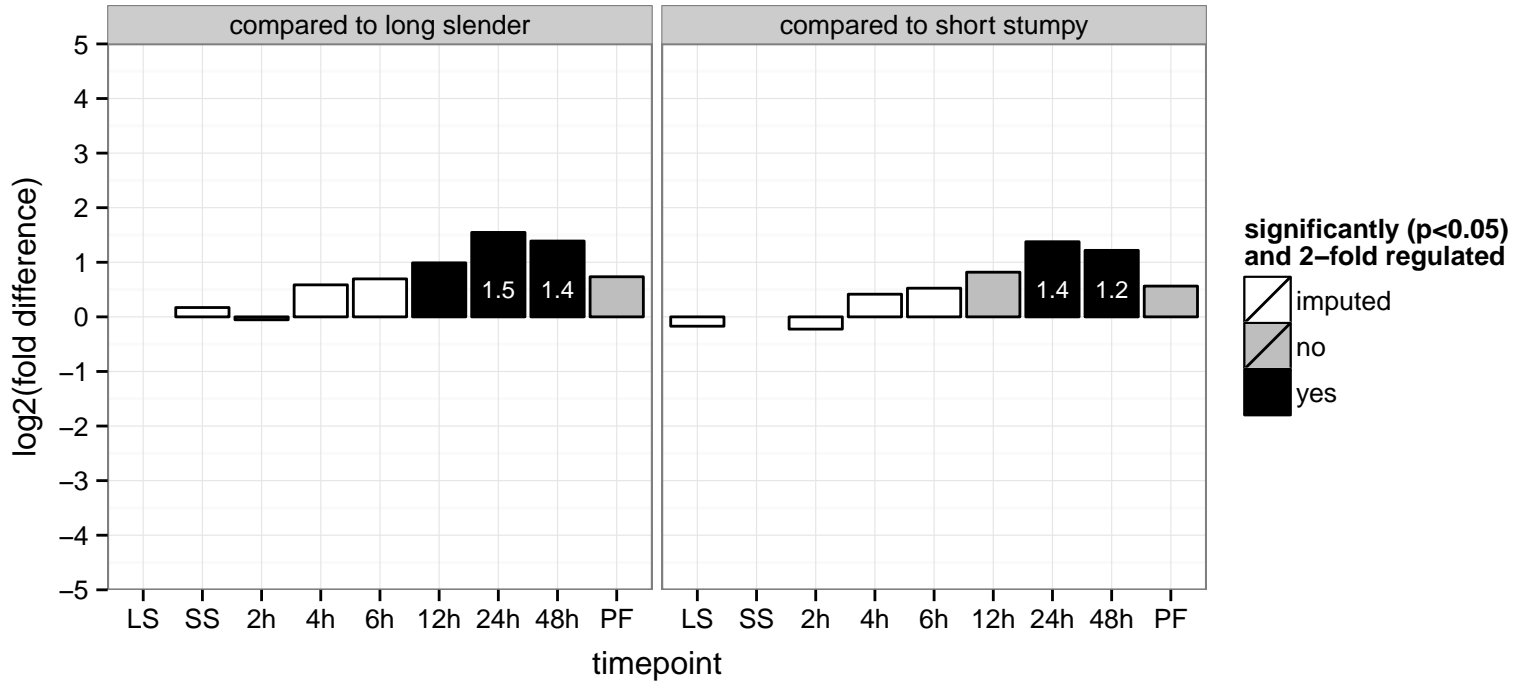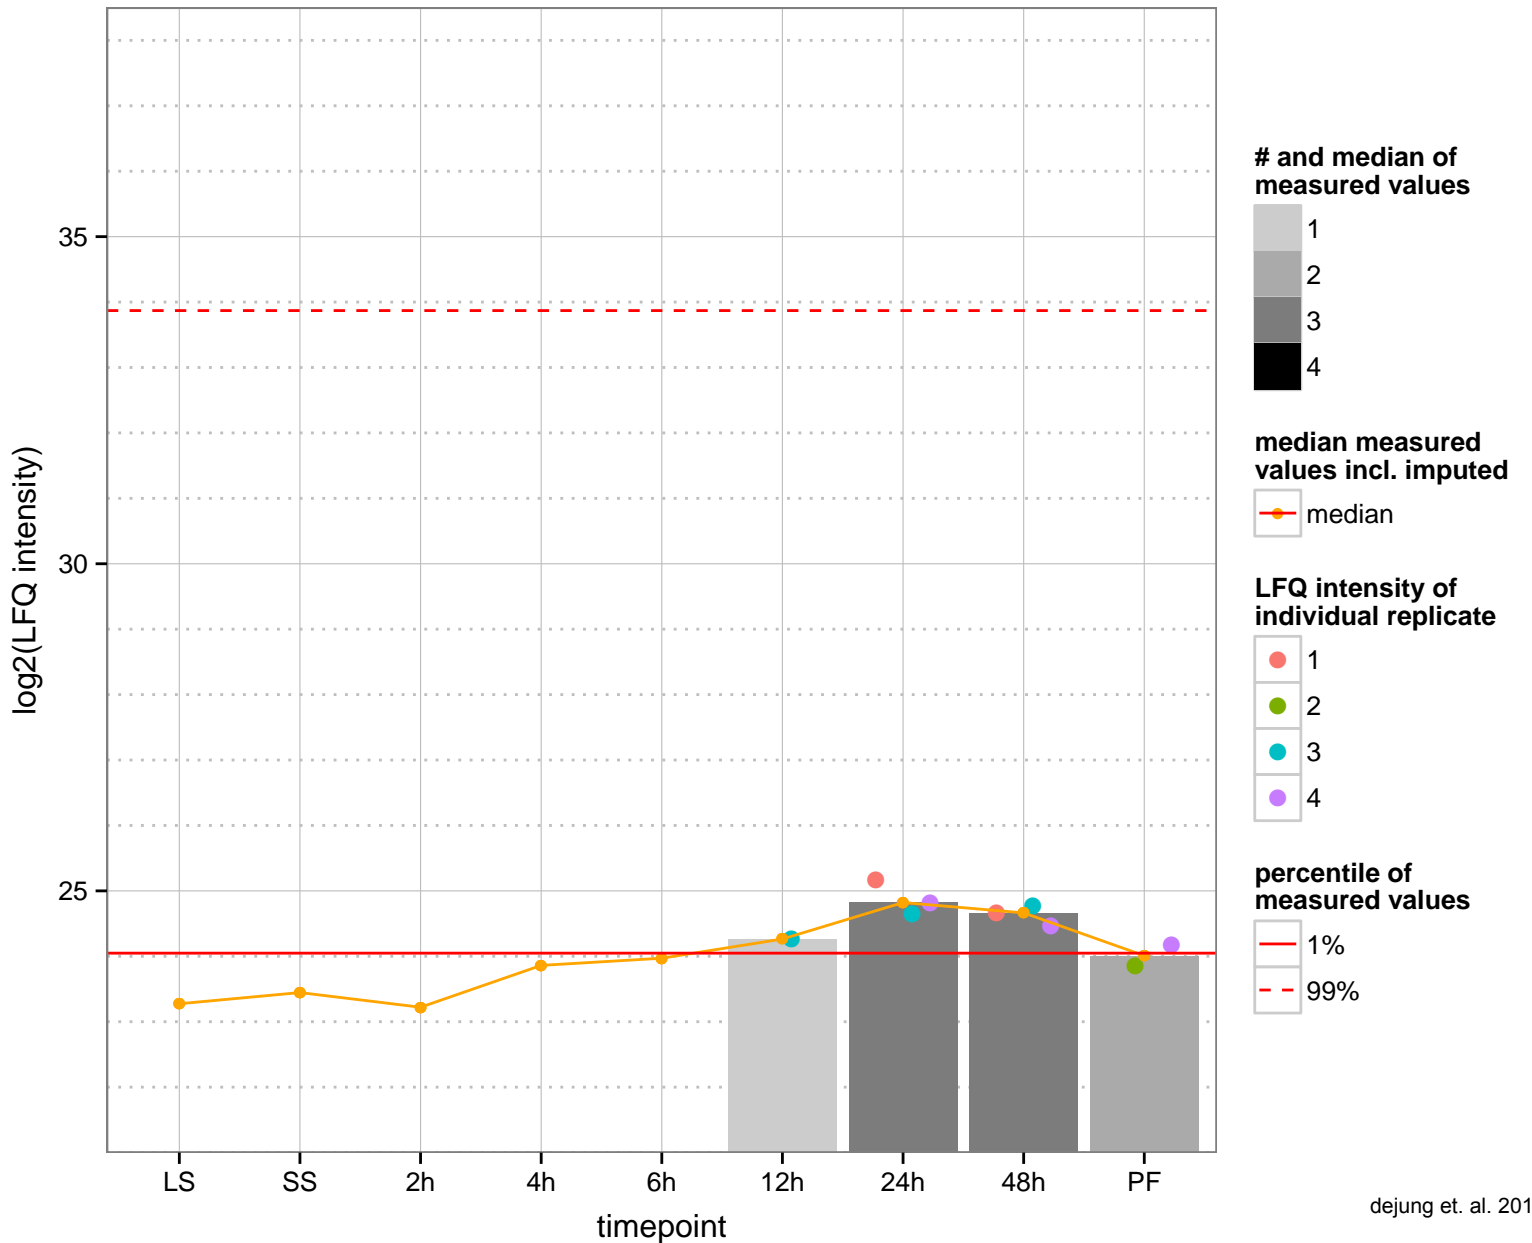

mitochondrial RNA binding protein 16 (RBP16)

Tb927.11.7900

AGOF: DNA binding, RNA binding

AGOC: mitochondrion

AGOP: RNA modification, regulation of transcription, DNA-dependent

PGOF: DNA binding, nucleic acid binding

PGOC: null

PGOP: regulation of transcription, DNA-dependent

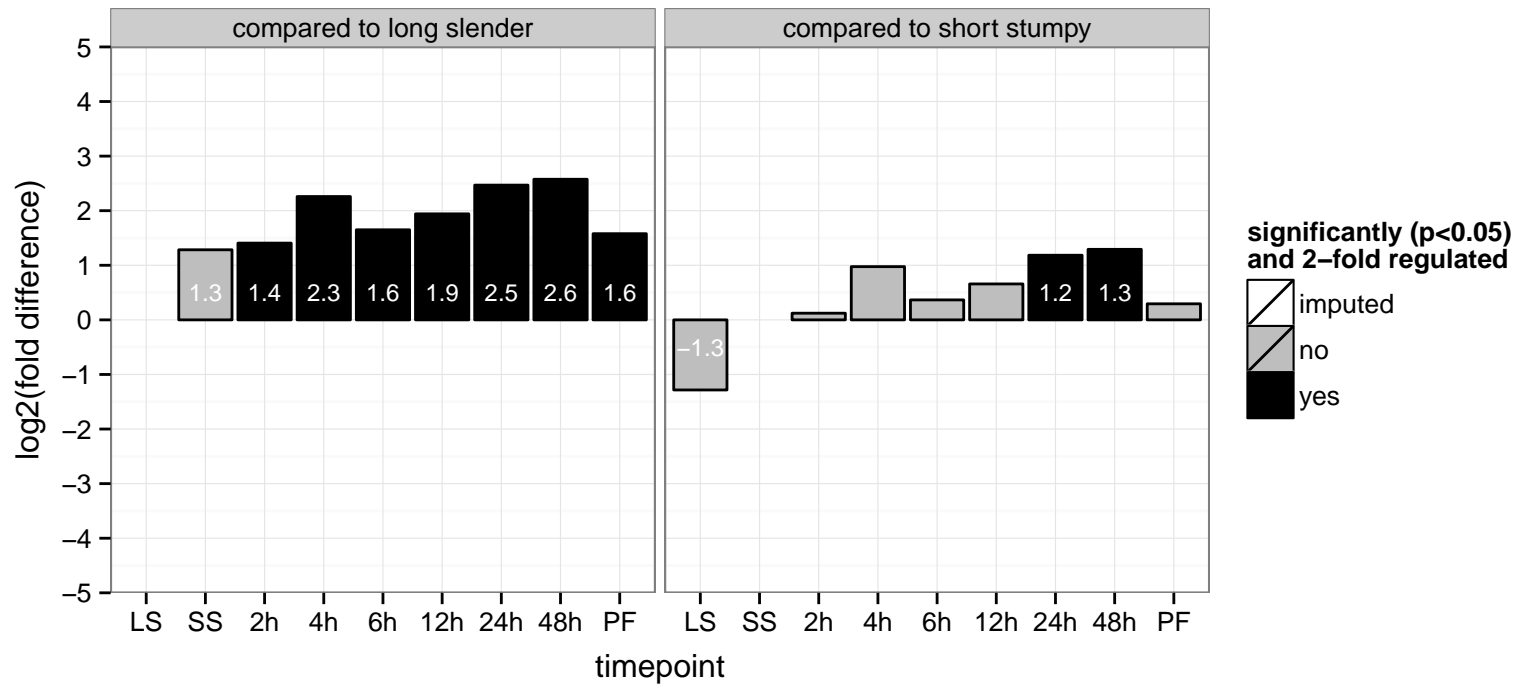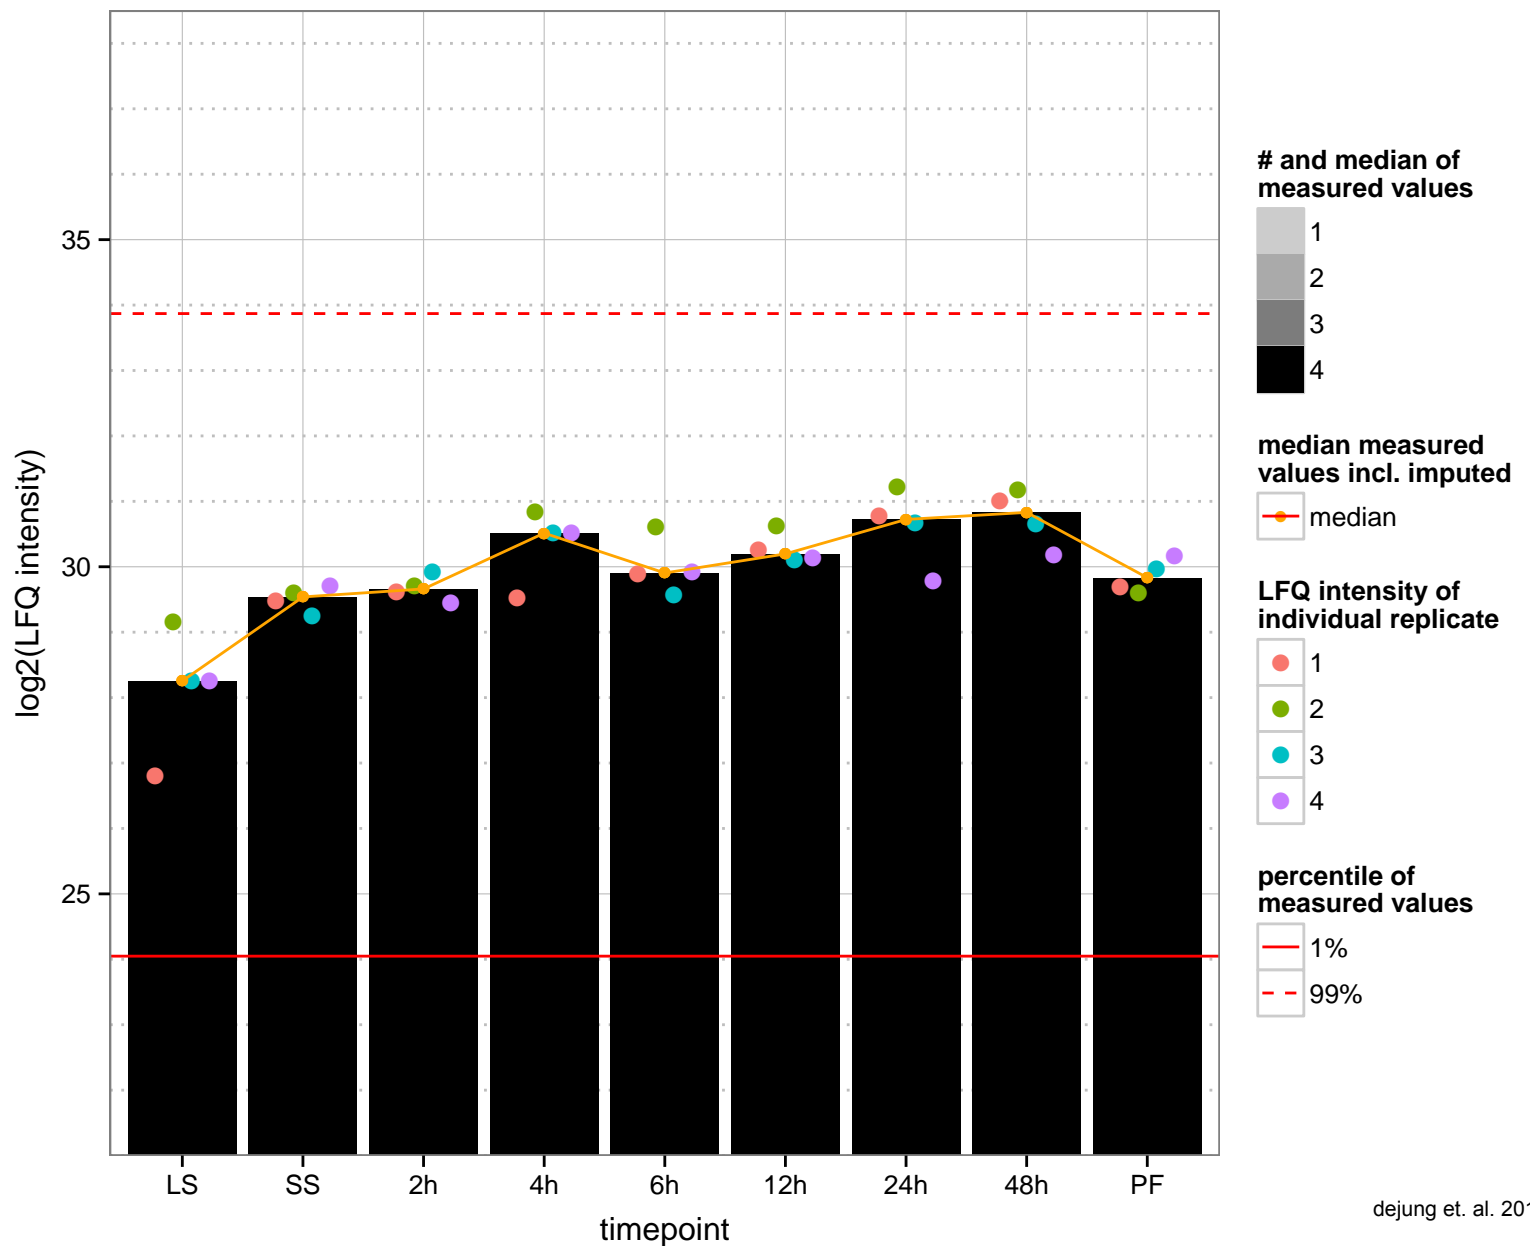

palmitoyl acyltransferase 4, putative  
 Tb927.11.9070  
 AGOF: transferase activity, transferring acyl groups, zinc ion binding  
 AGOC: integral to membrane  
 AGOP: endocytosis, protein palmitoylation, transport  
 PGO: zinc ion binding  
 PGOC: null  
 PGOP: null

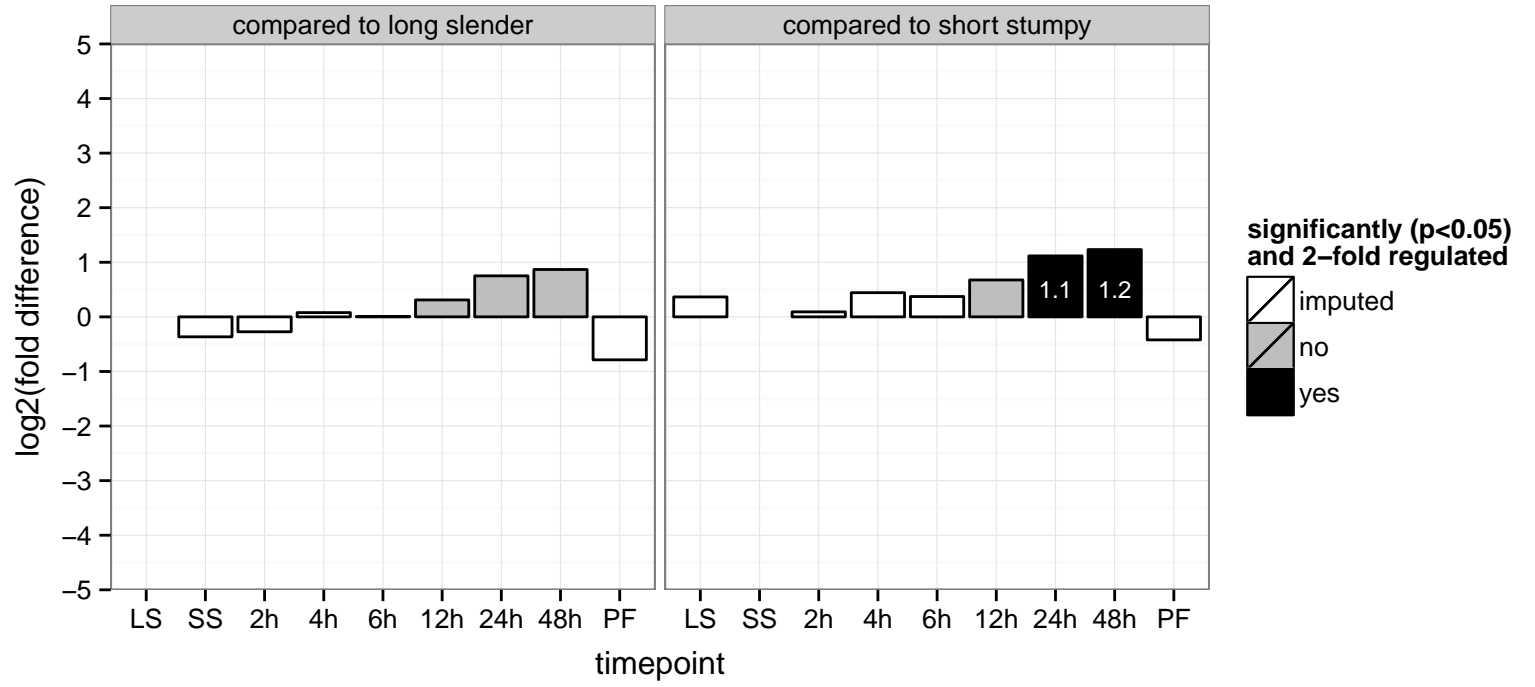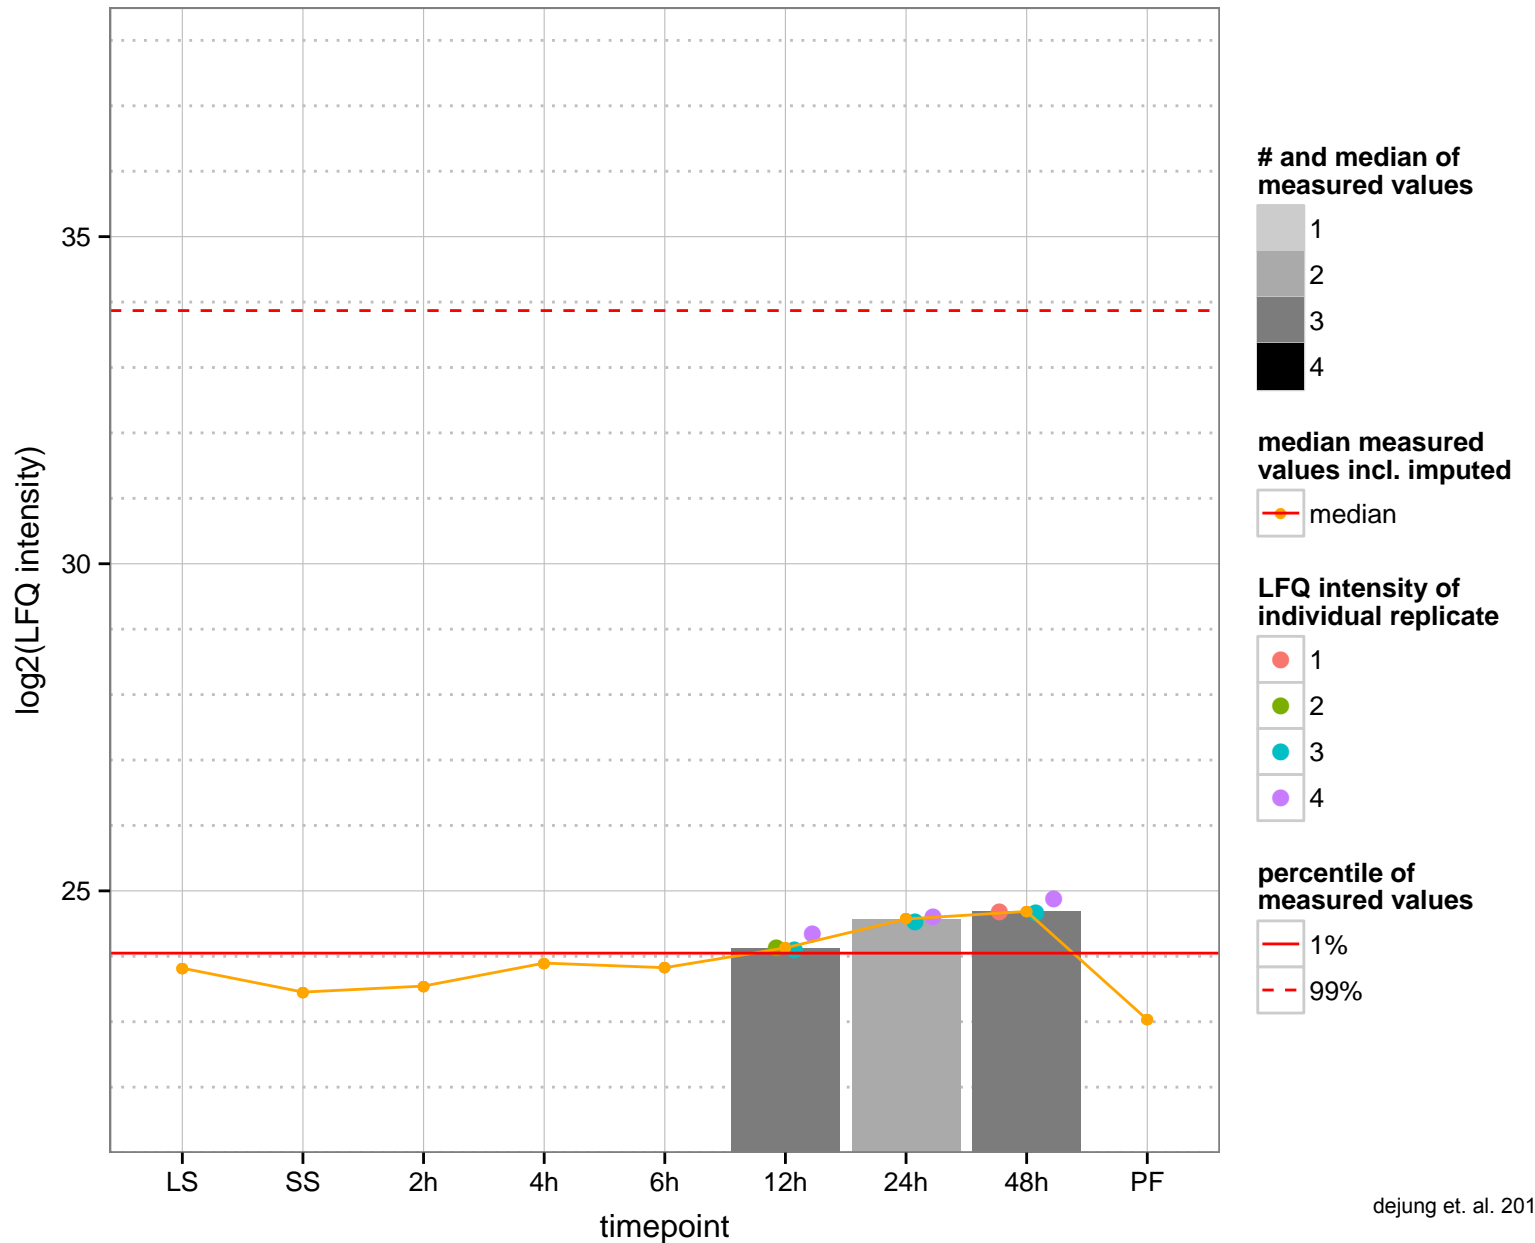

hypothetical protein, conserved  
 Tb927.11.910  
 AGOF: null  
 AGOC: null  
 AGOP: null  
 PGOF: binding  
 PGOC: null  
 PGOP: null

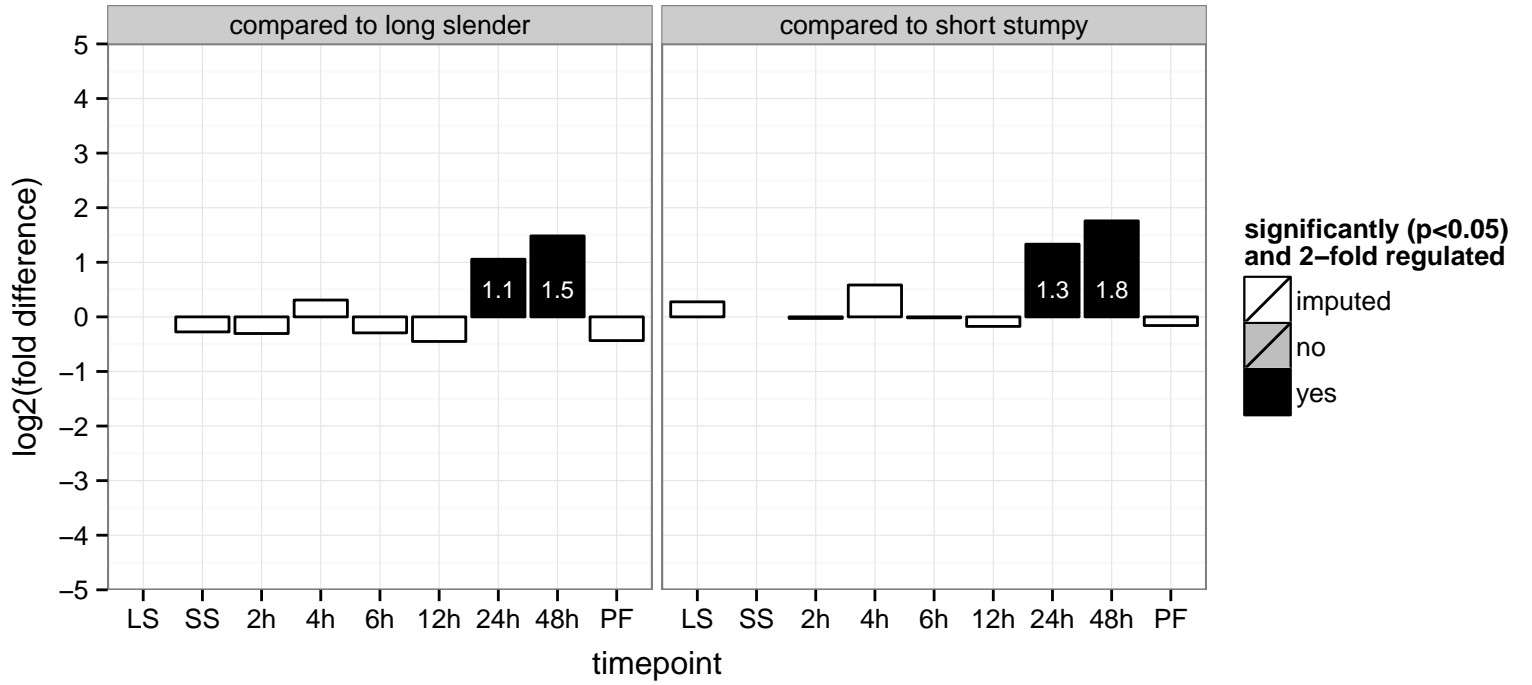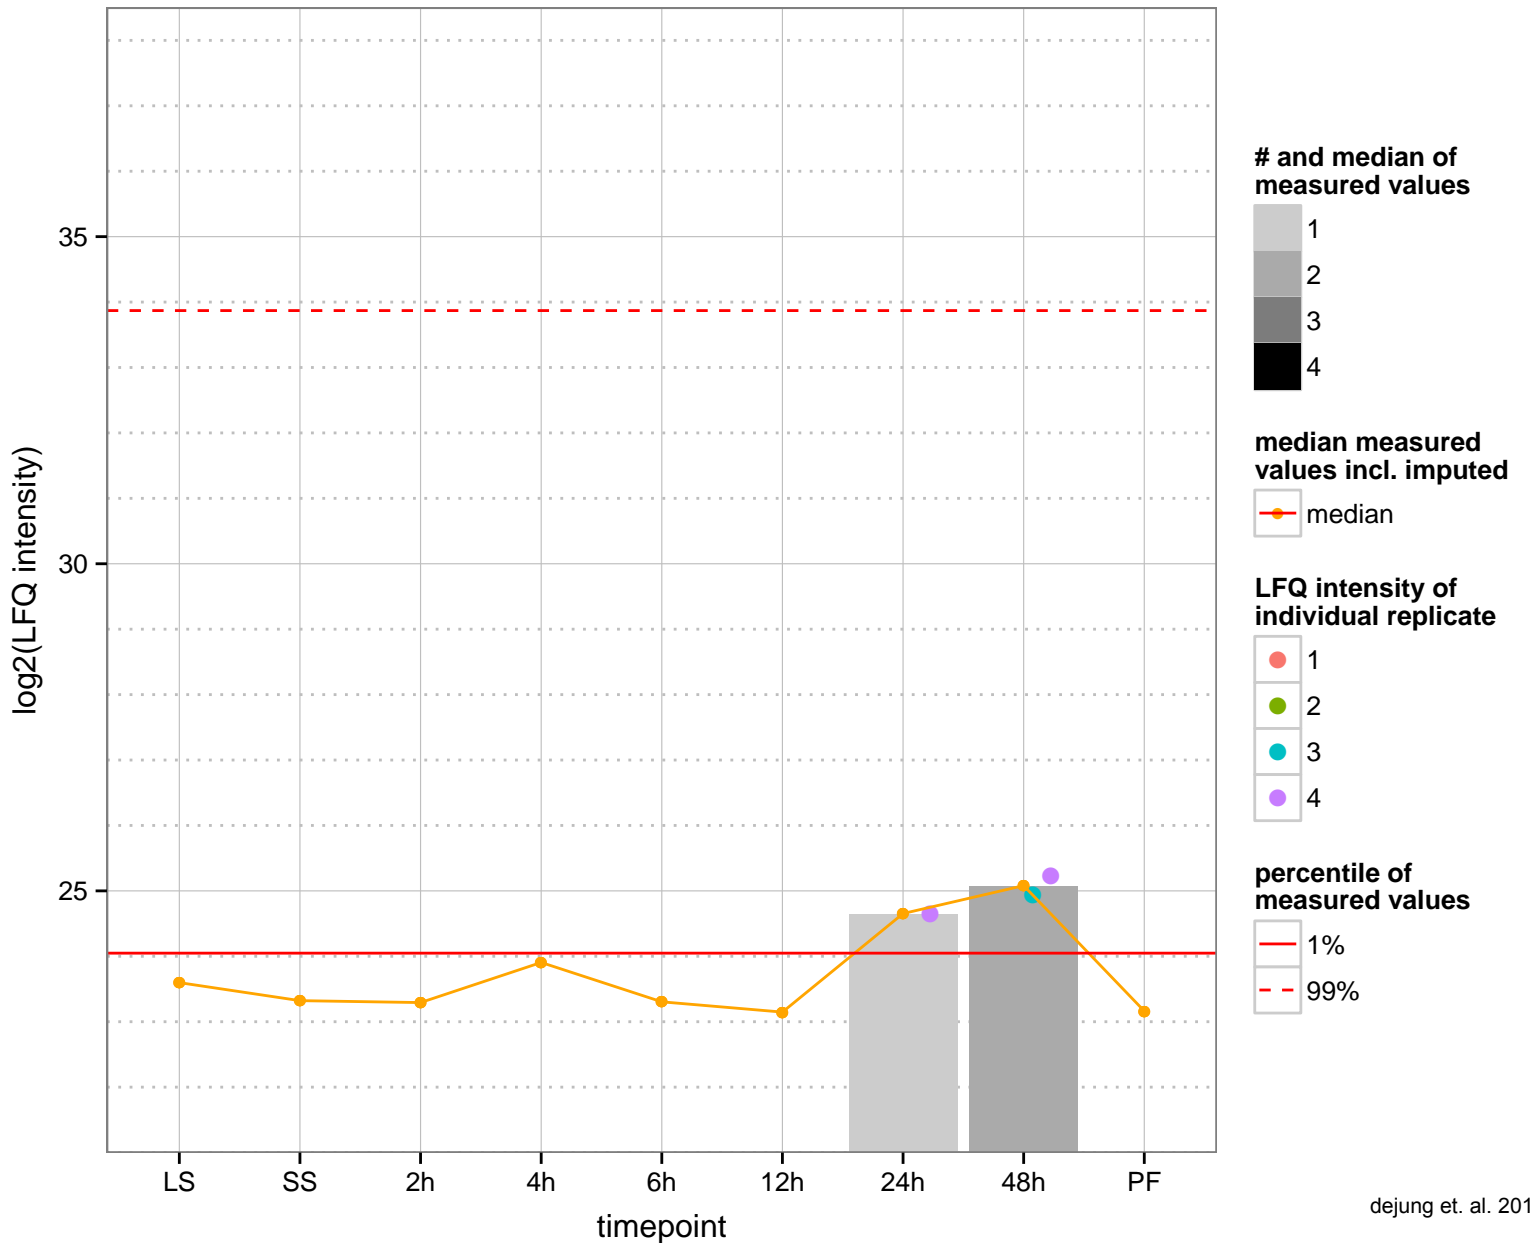

small GTP-binding protein RAB6, putative

Tb927.2.2130

AGOF: GTP binding, GTPase activity

AGOC: intracellular, plasma membrane

AGOP: intracellular protein transport, mitosis, nucleocytoplasmic transport, small GTPase mediated signal transduction, synap

PGOF: GTP binding, GTPase activity

PGOC: intracellular, membrane

PGOP: GTP catabolic process, intracellular protein transport, nucleocytoplasmic transport, protein transport, signal transducti

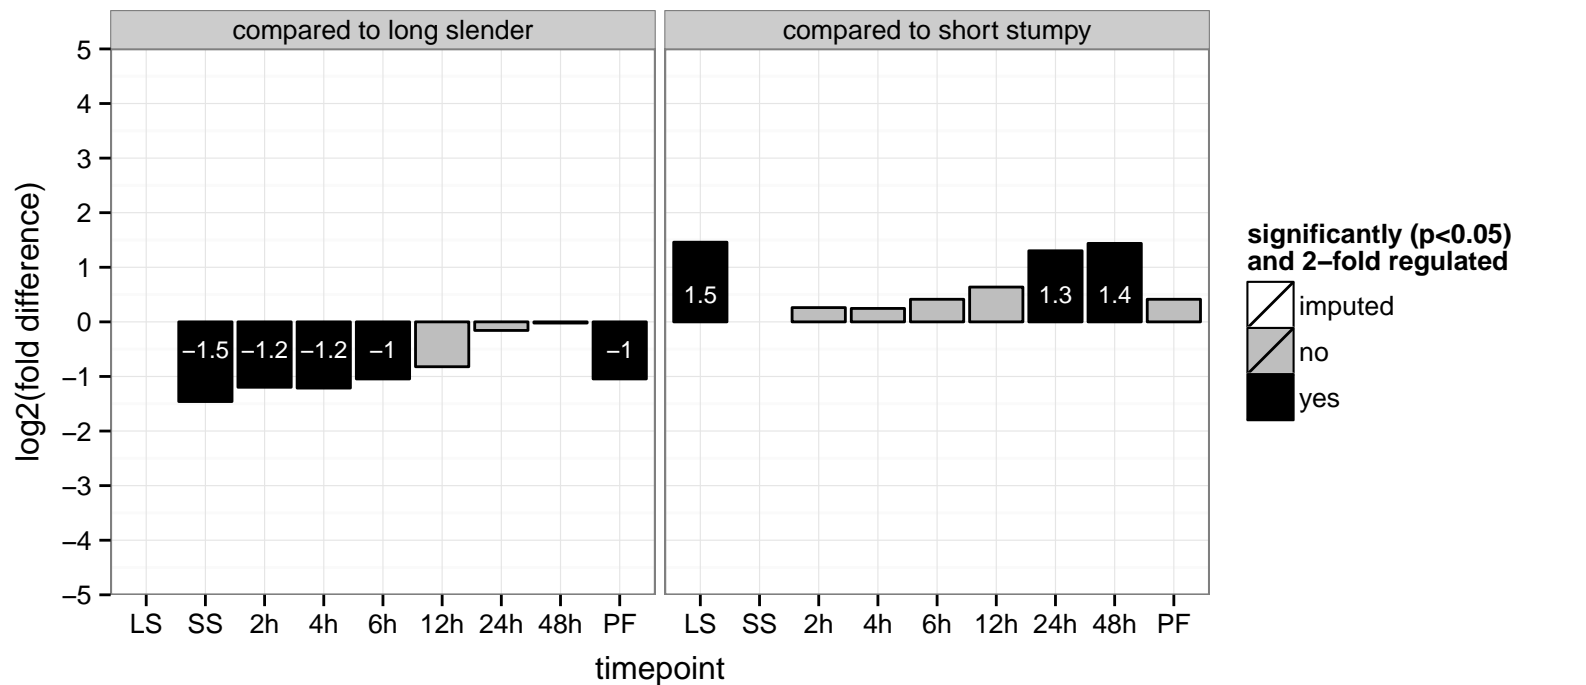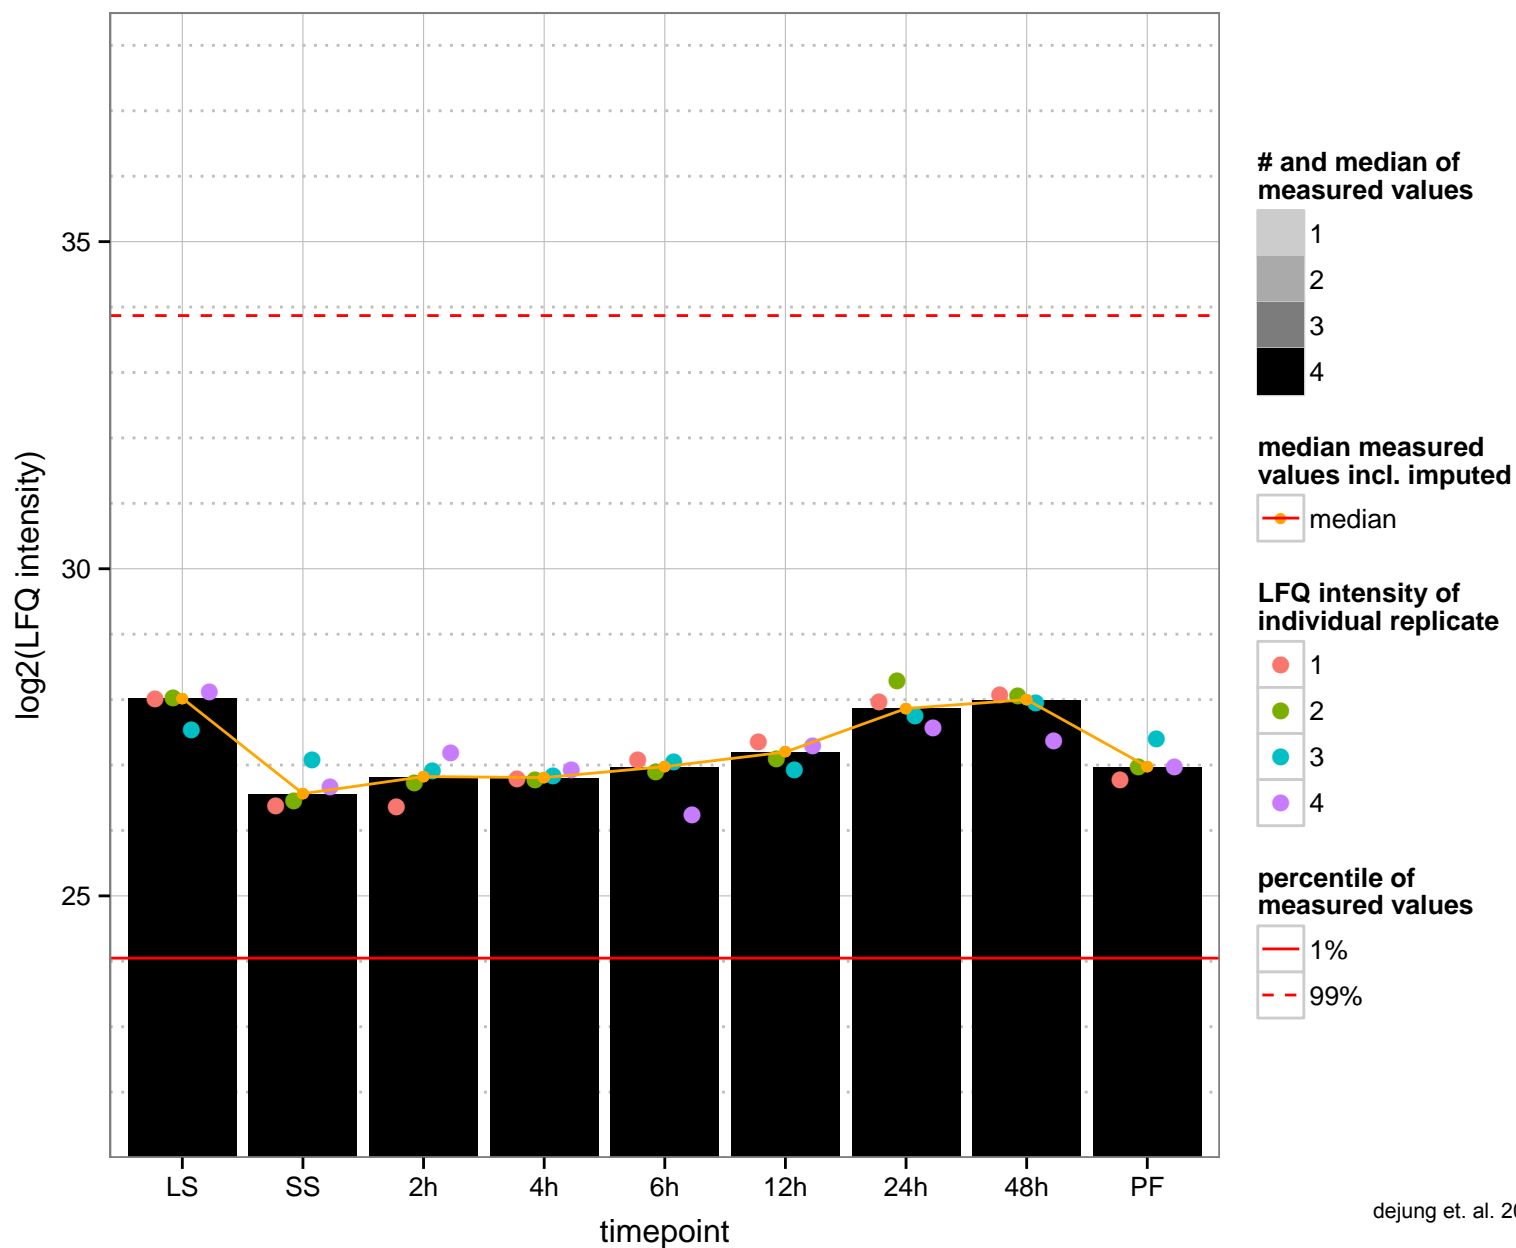

cdc2-related kinase, putative (CRK9)

Tb927.2.4510

AGOF: ATP binding, protein kinase activity, protein serine/threonine kinase activity, protein tyrosine kinase activity

AGOC: null

AGOP: null

PGOF: ATP binding, protein kinase activity, transferase activity, transferring phosphorus-containing groups

PGOC: null

PGOP: protein phosphorylation

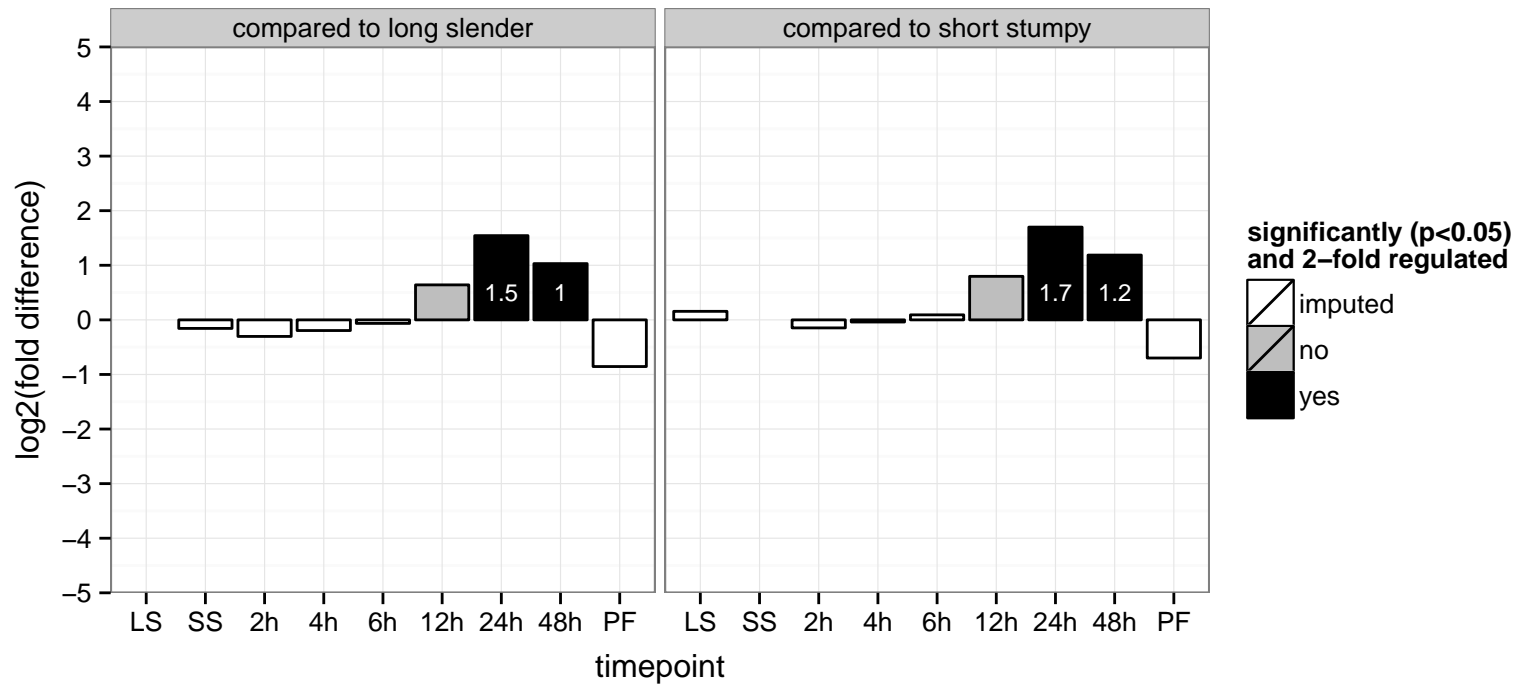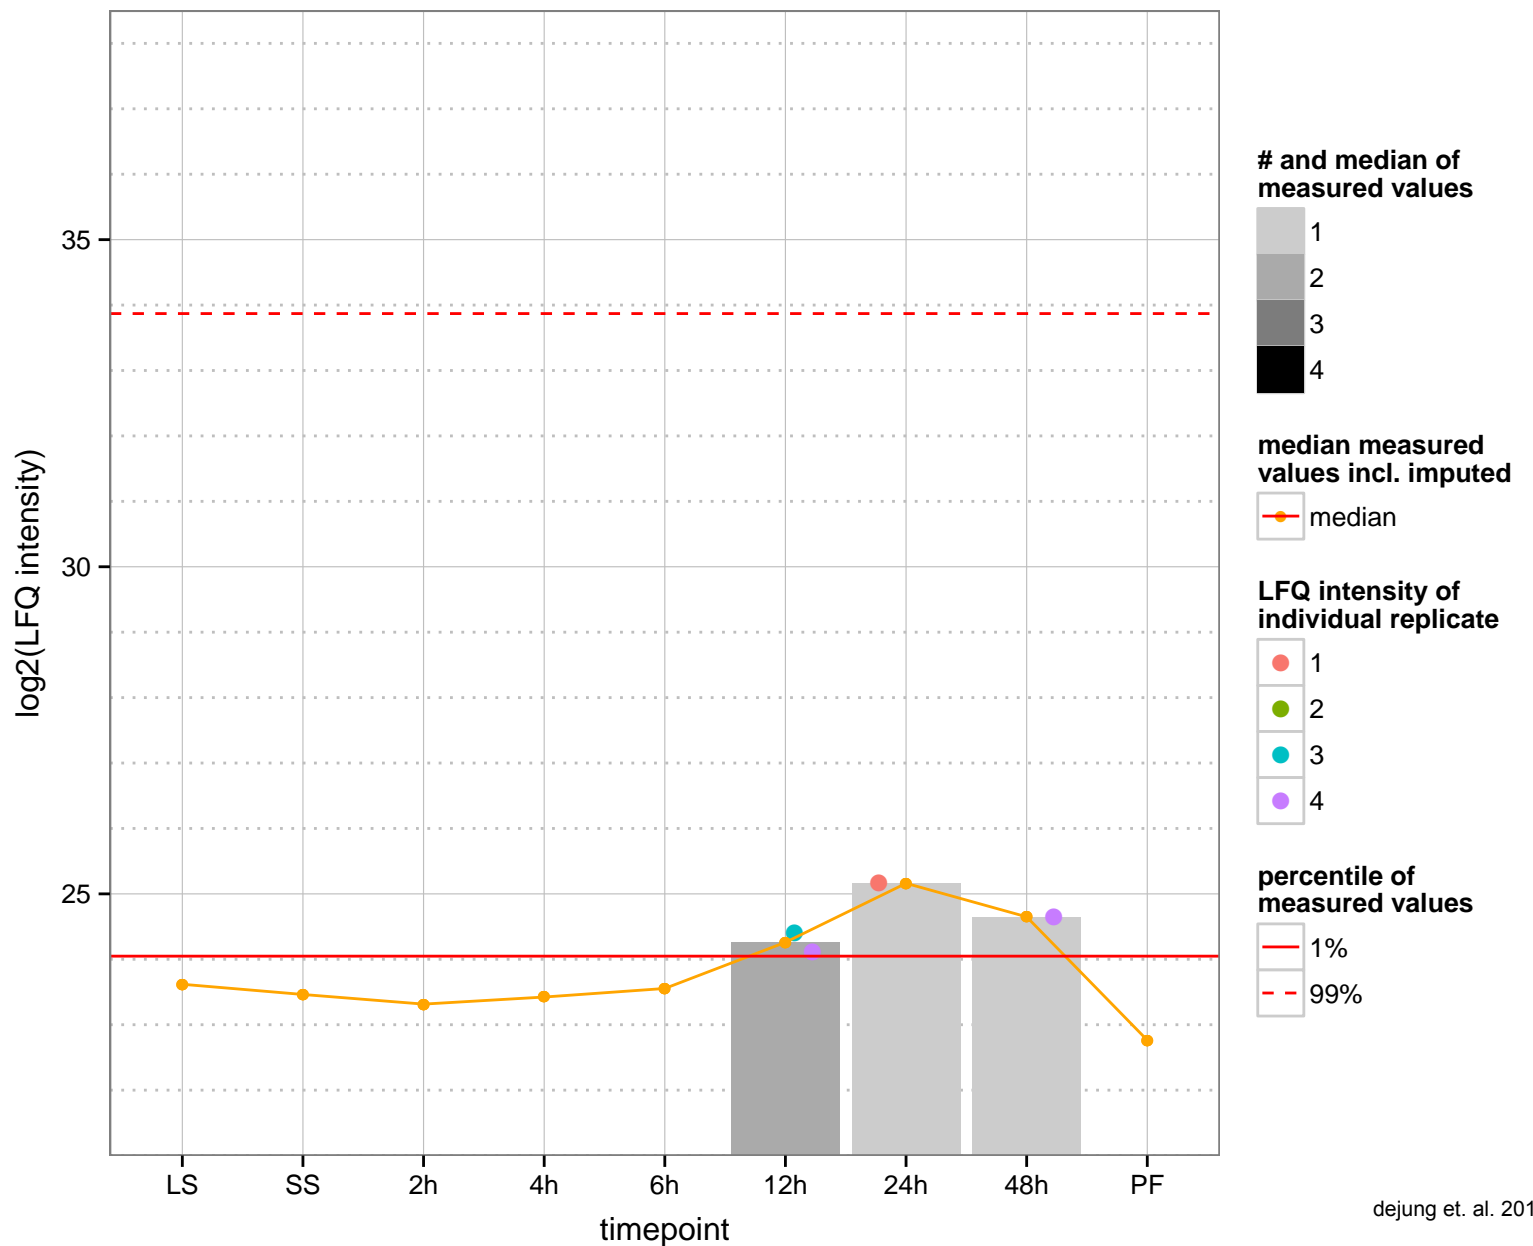

hypothetical protein, conserved  
 Tb927.3.3030  
 AGOF: null  
 AGOC: null  
 AGOP: null  
 PGOF: null  
 PGOC: null  
 PGOP: null

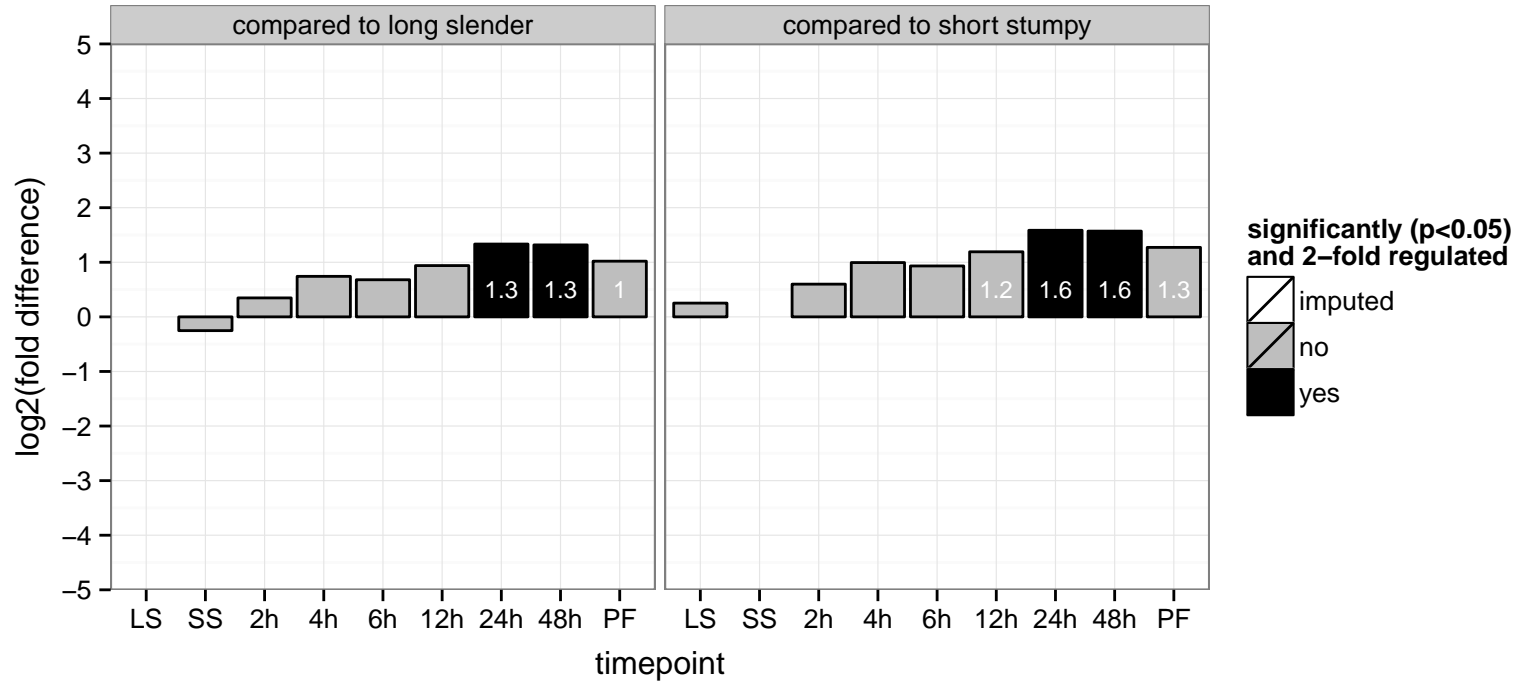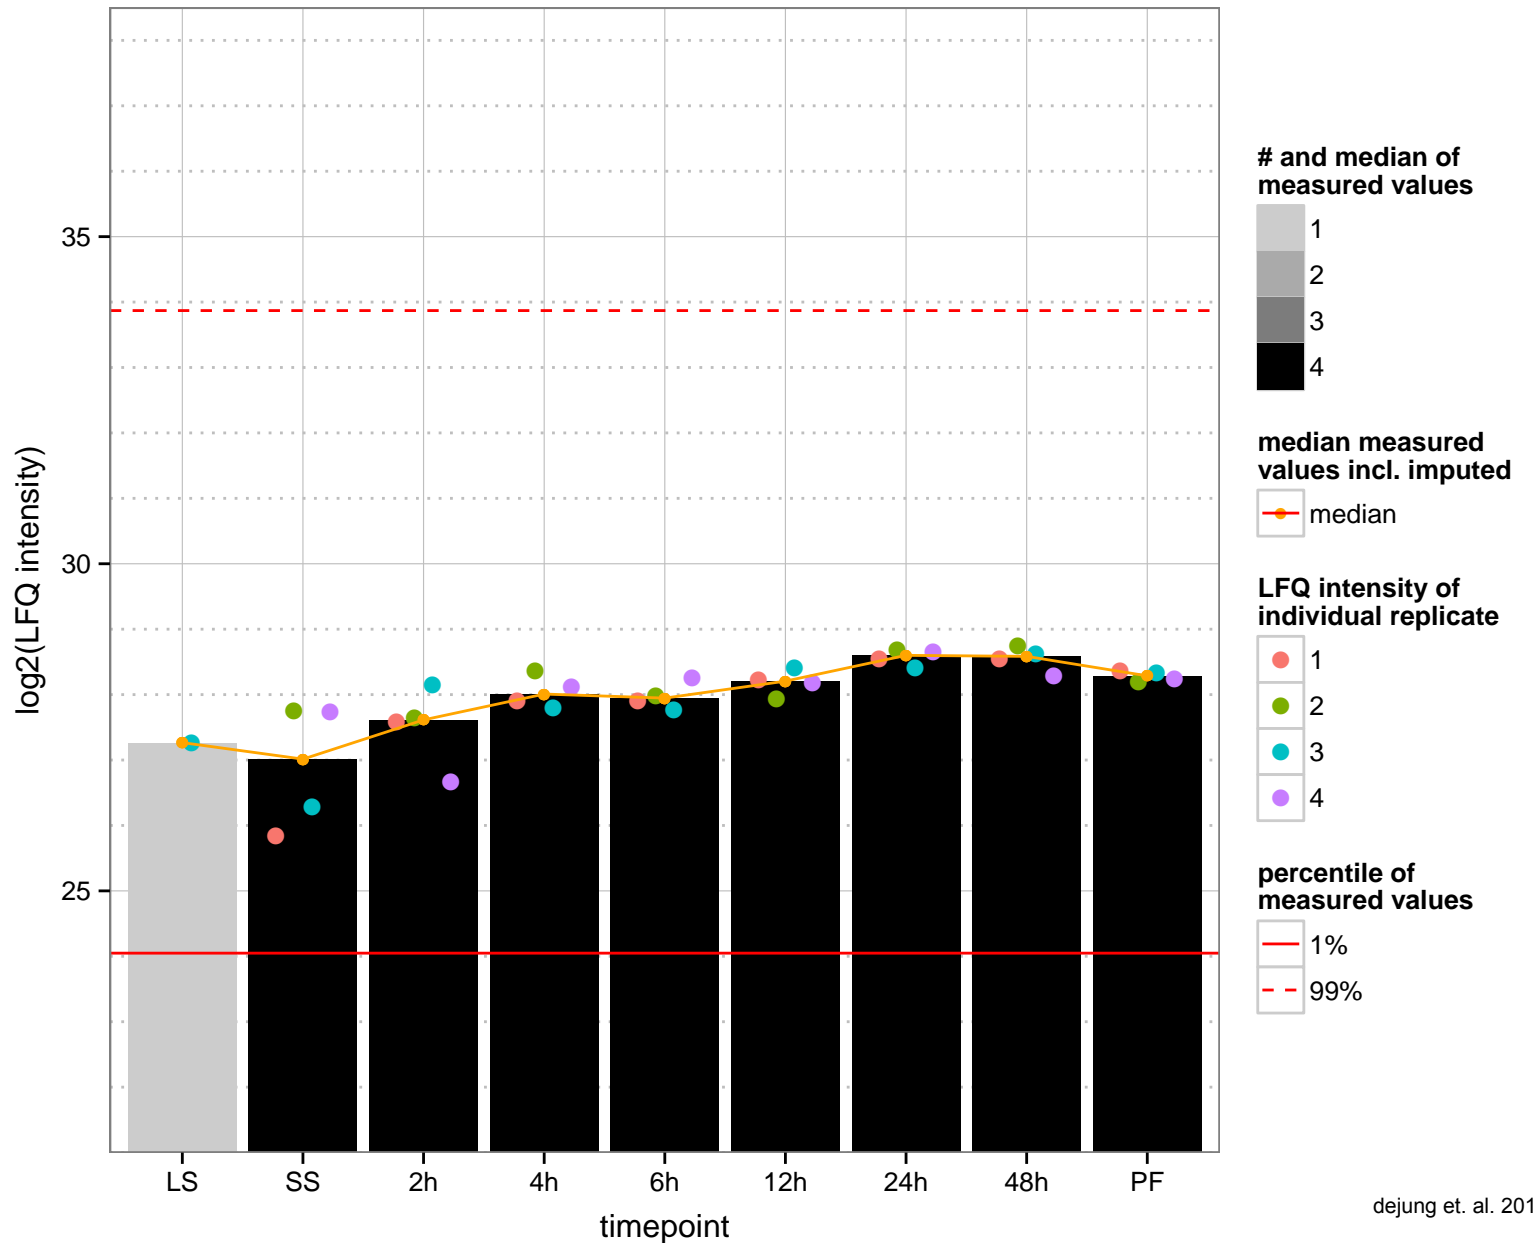

Cell growth–regulating nucleolar protein, putative  
 Tb927.3.3970  
 AGOF: null  
 AGOC: null  
 AGOP: null  
 PGO: null  
 PGOC: null  
 PGOP: null

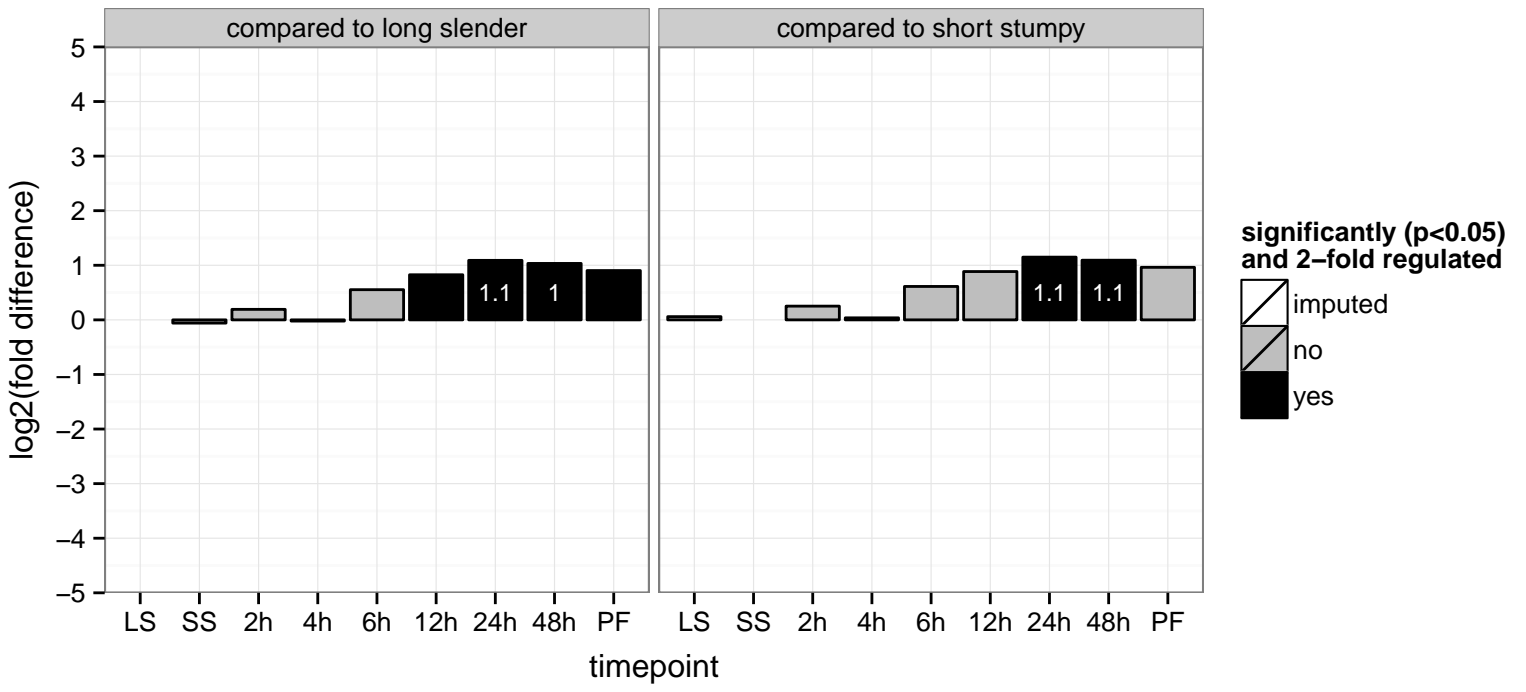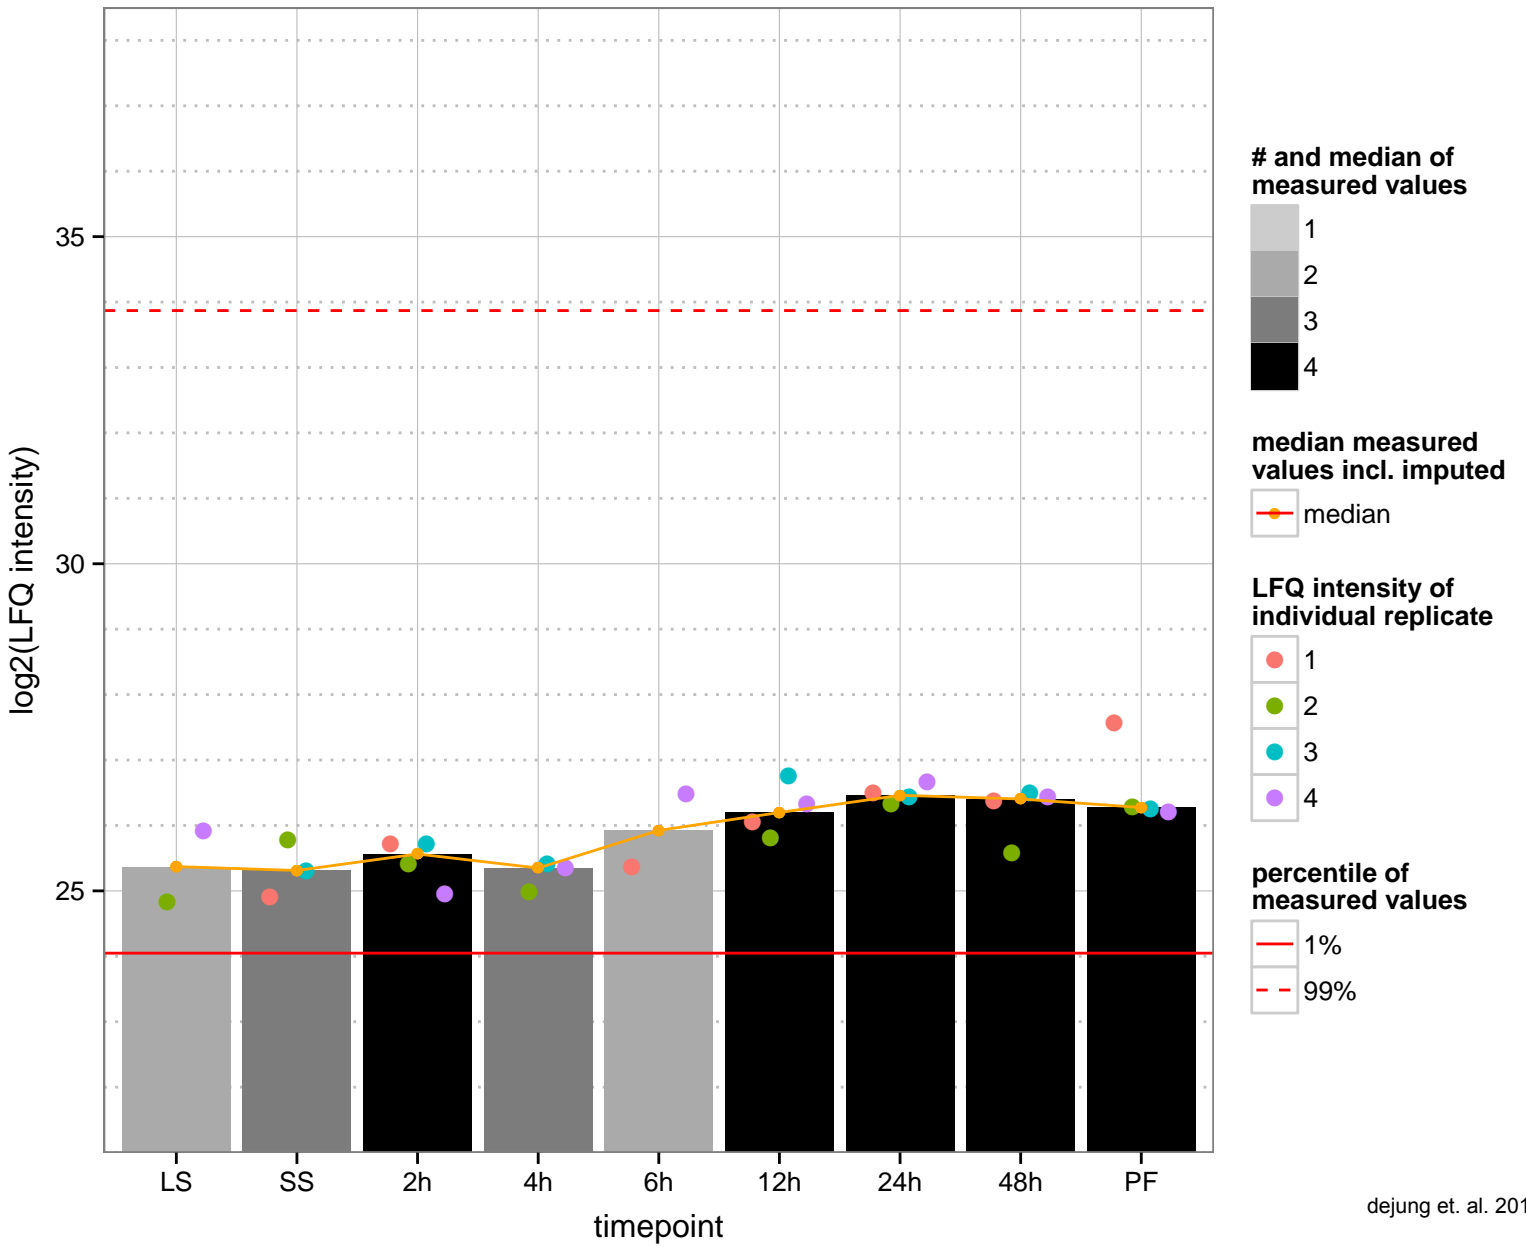



hypothetical protein, conserved  
 Tb927.3.4250  
 AGOF: null  
 AGOC: null  
 AGOP: null  
 PGOF: null  
 PGOC: null  
 PGOP: null

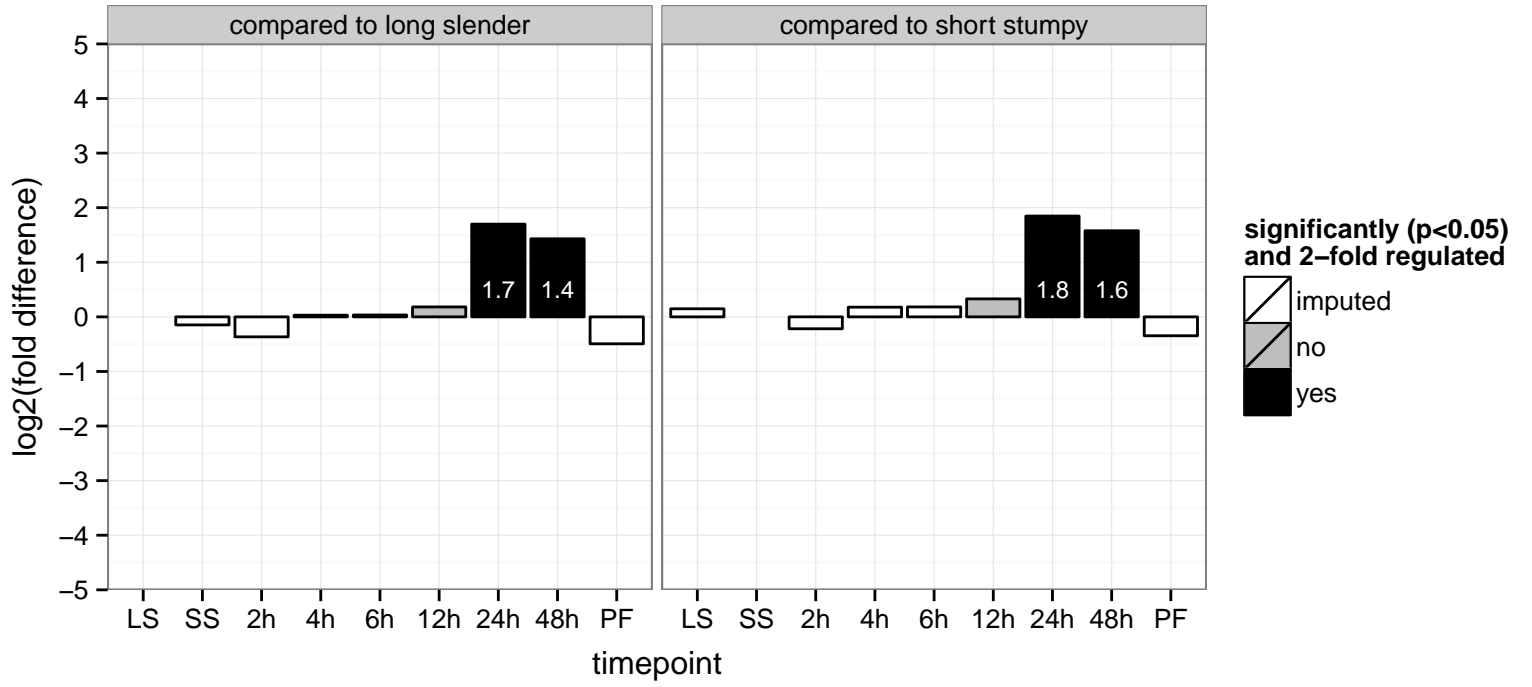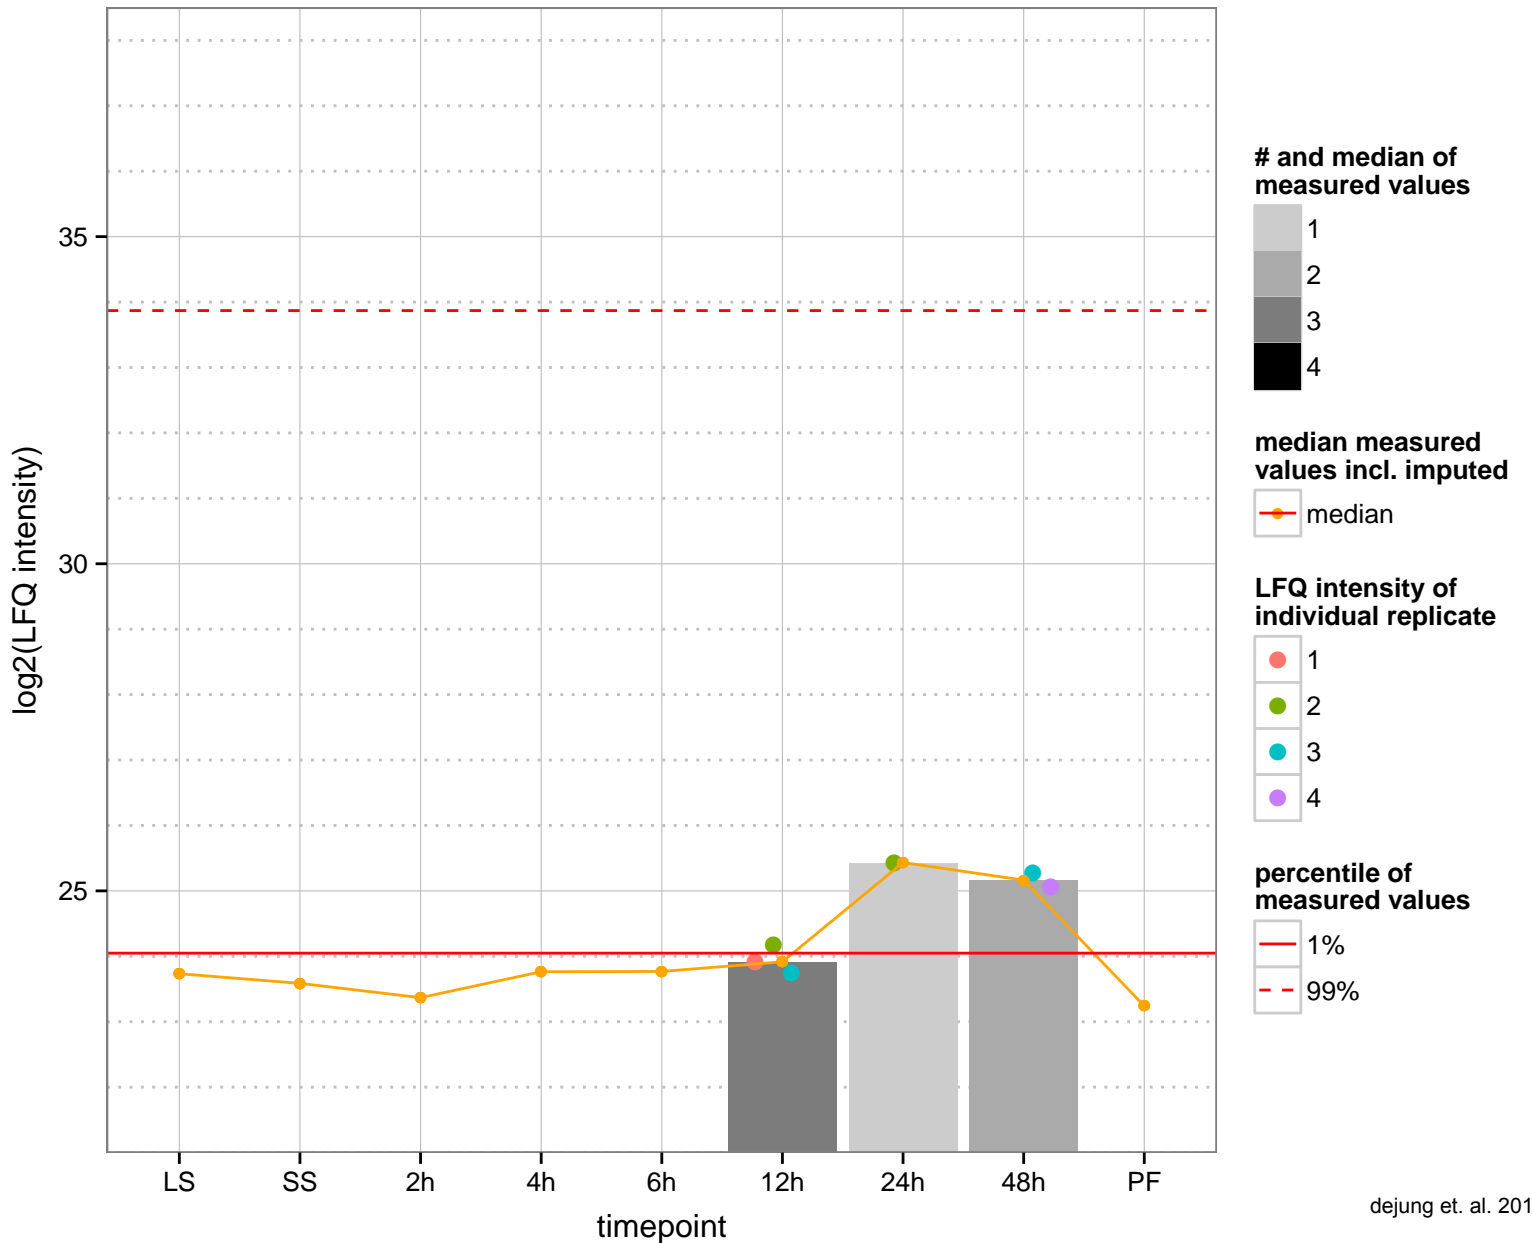

hypothetical protein, conserved

Tb927.3.4780;Tb927.3.4740

AGOF: catalytic activity

AGOC: mitochondrion

AGOP: metabolic process

PGOF: NAD binding, oxidoreductase activity, acting on the CH-OH group of donors, NAD or NADP as acceptor

PGOC: cytoplasm

PGOP: glycerol-3-phosphate catabolic process, oxidation-reduction process

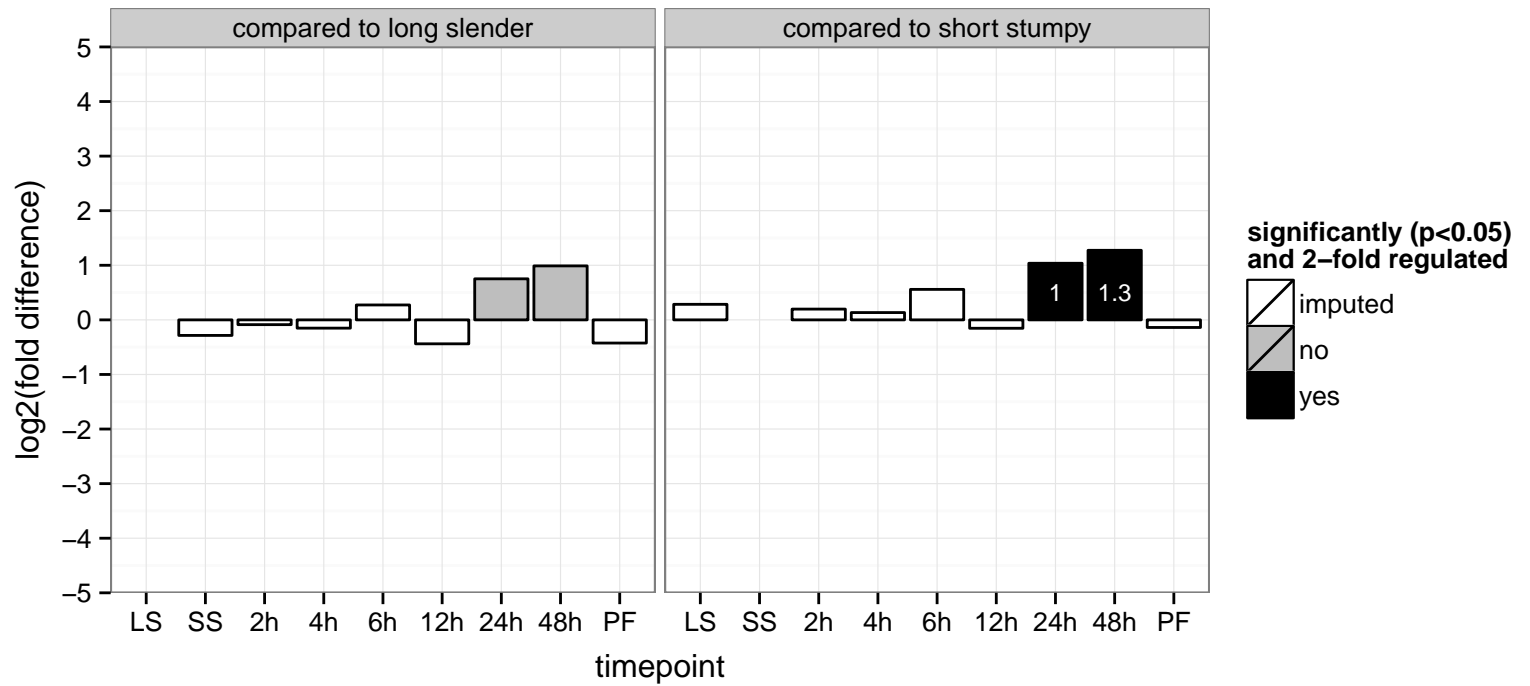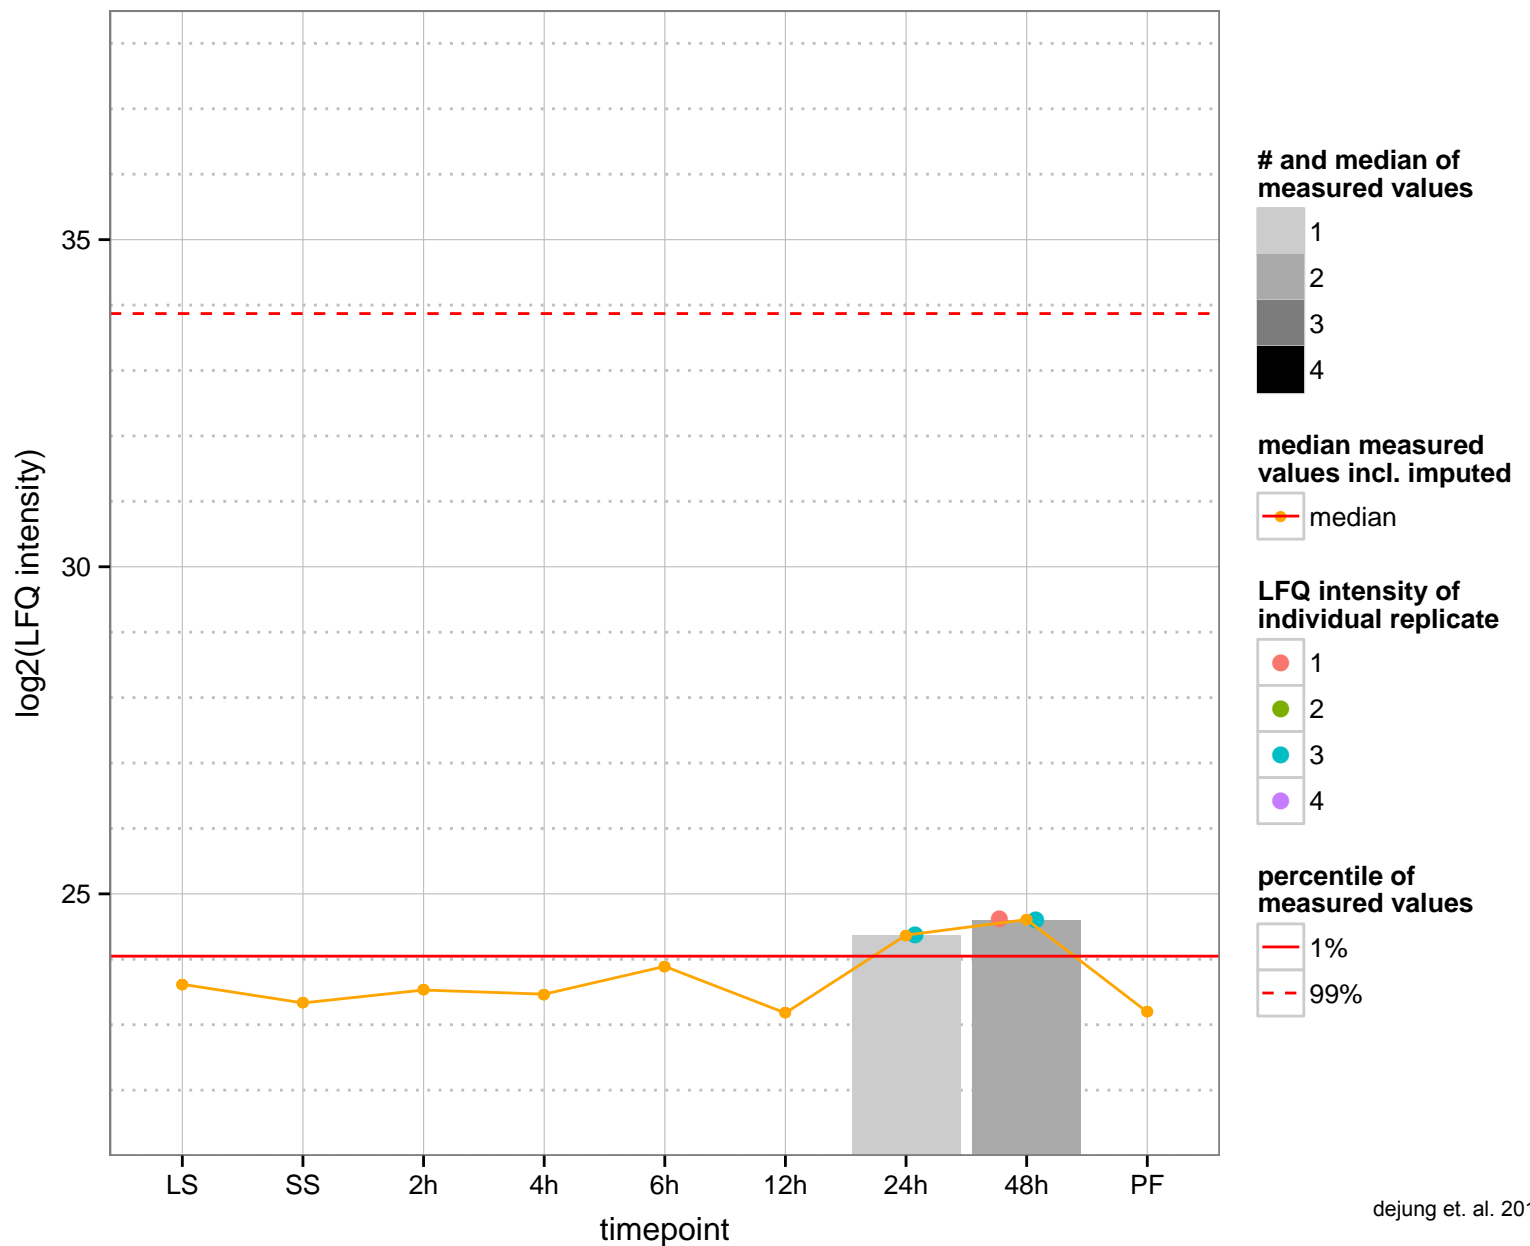

enoyl-CoA hydratase, mitochondrial precursor, putative  
 Tb927.3.4850  
 AGOF: catalytic activity  
 AGOC: null  
 AGOP: metabolic process  
 PGO: catalytic activity  
 PGOC: null  
 PGOP: metabolic process

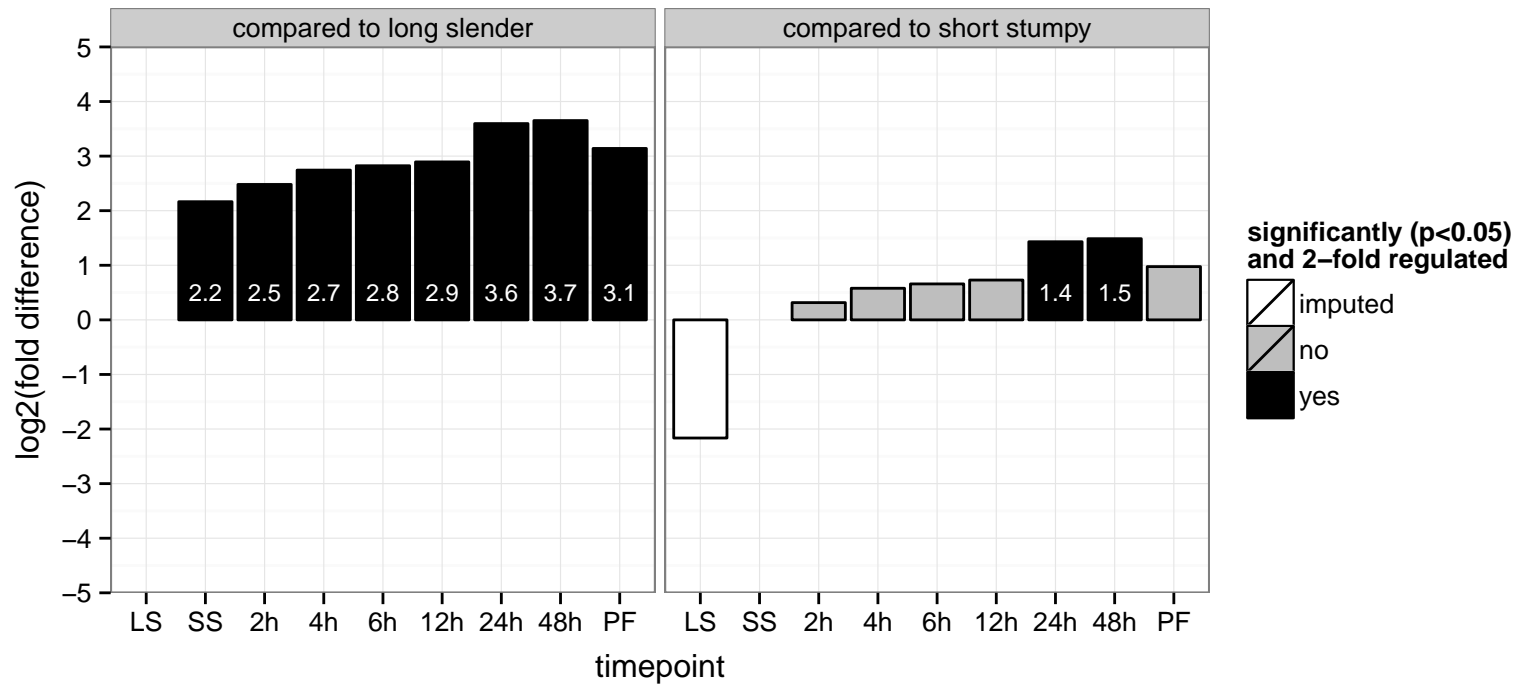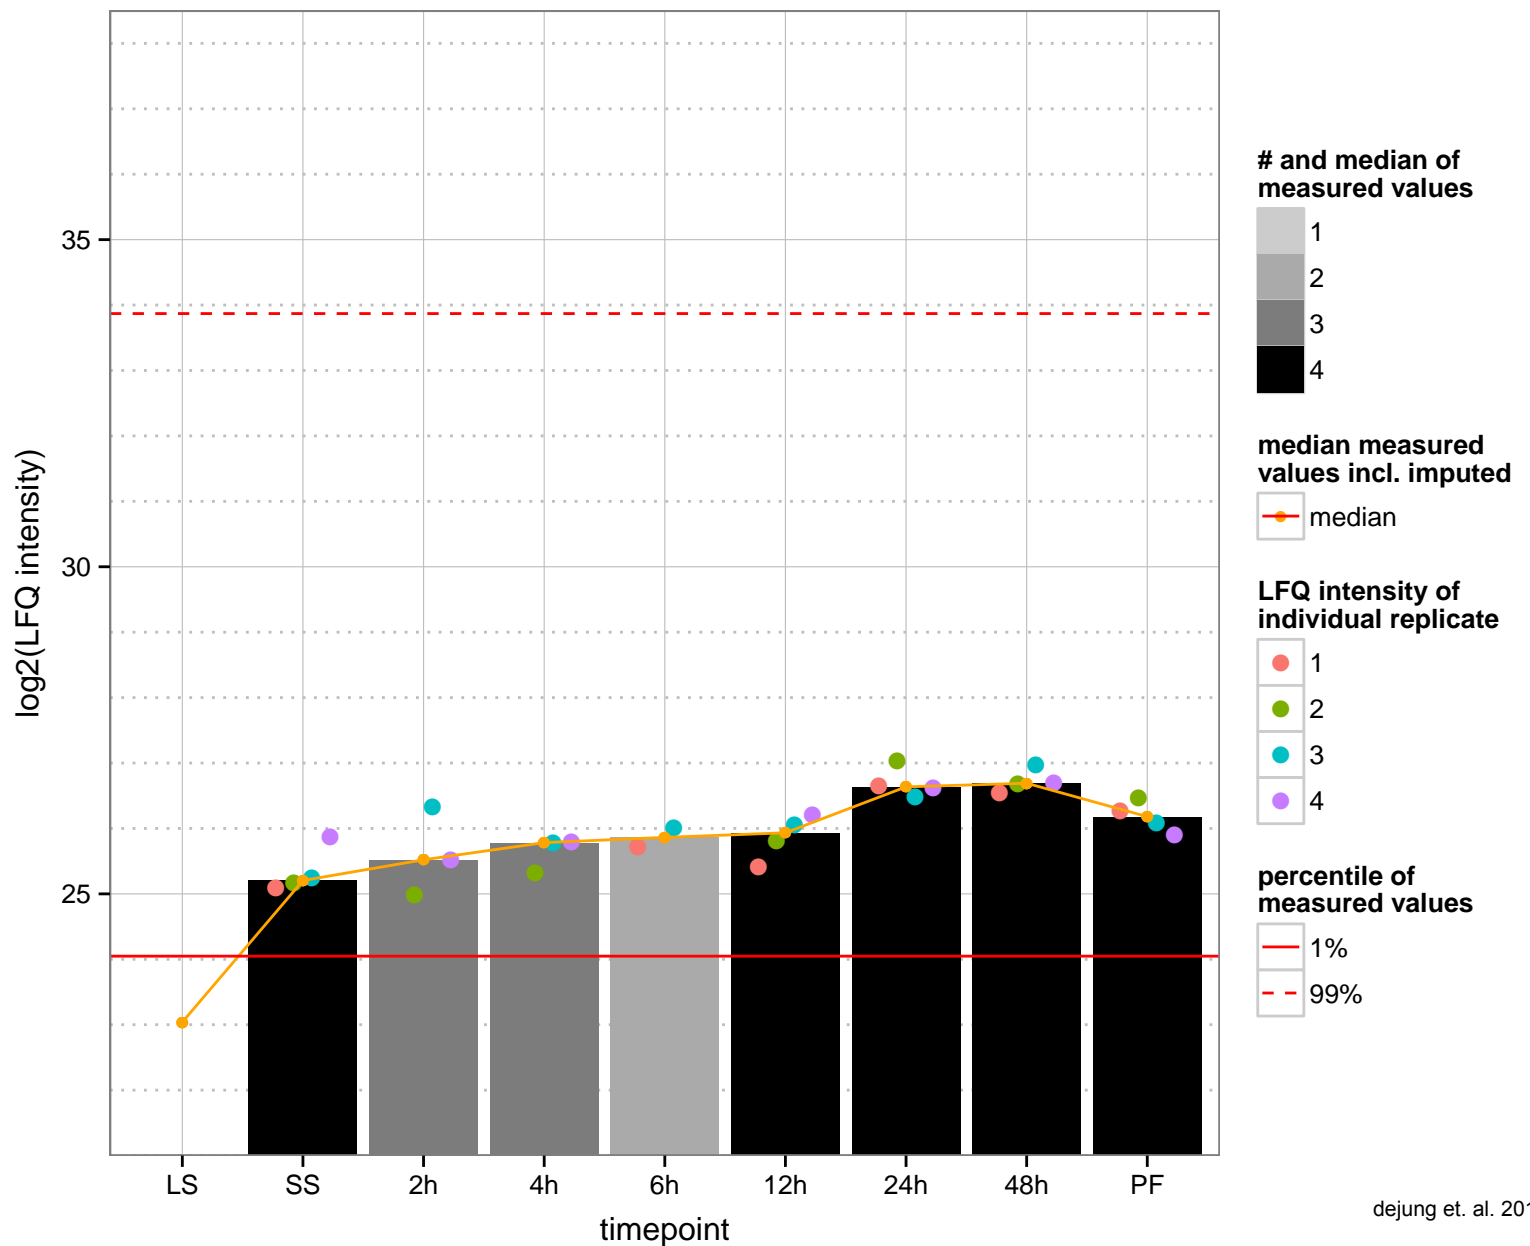

hypothetical protein, conserved  
 Tb927.3.4880  
 AGOF: null  
 AGOC: nucleus  
 AGOP: nucleosome assembly  
 PGO: null  
 PGO: nucleus  
 PGO: nucleosome assembly

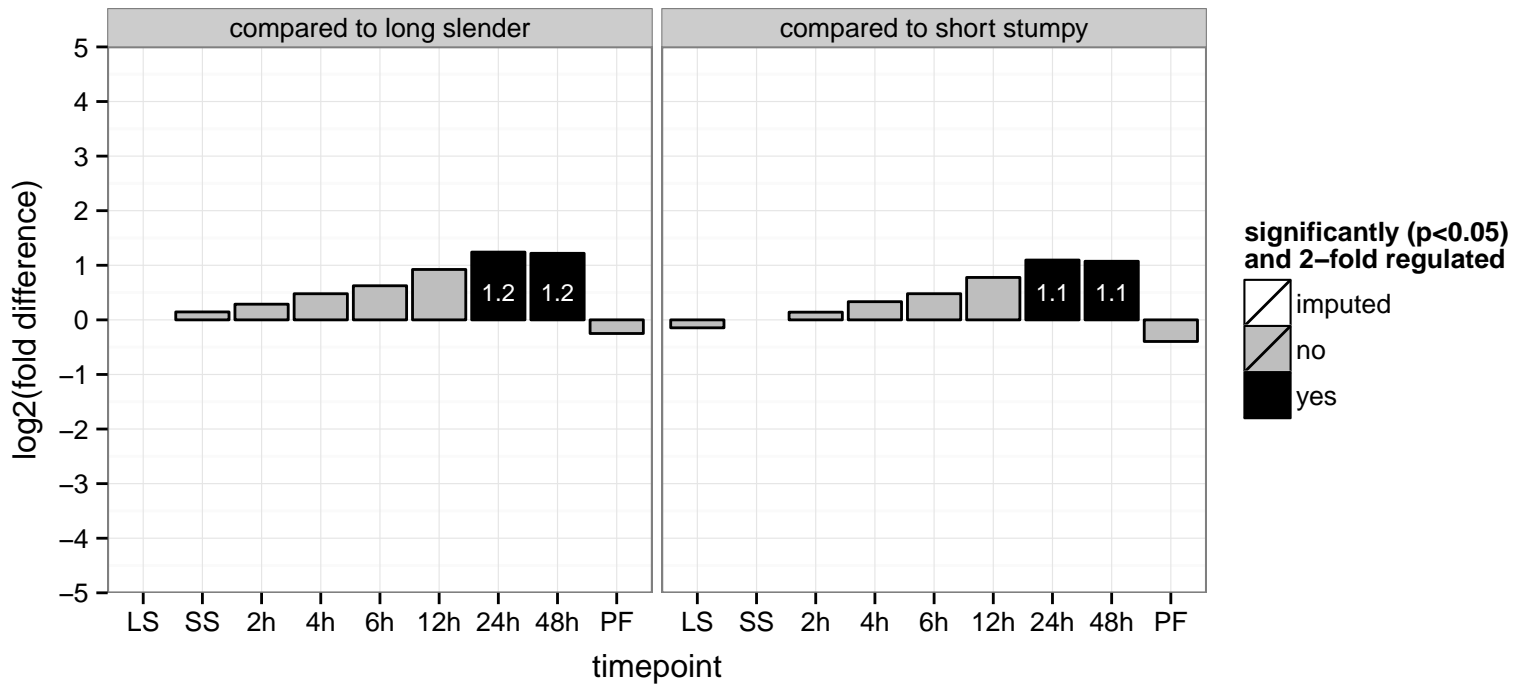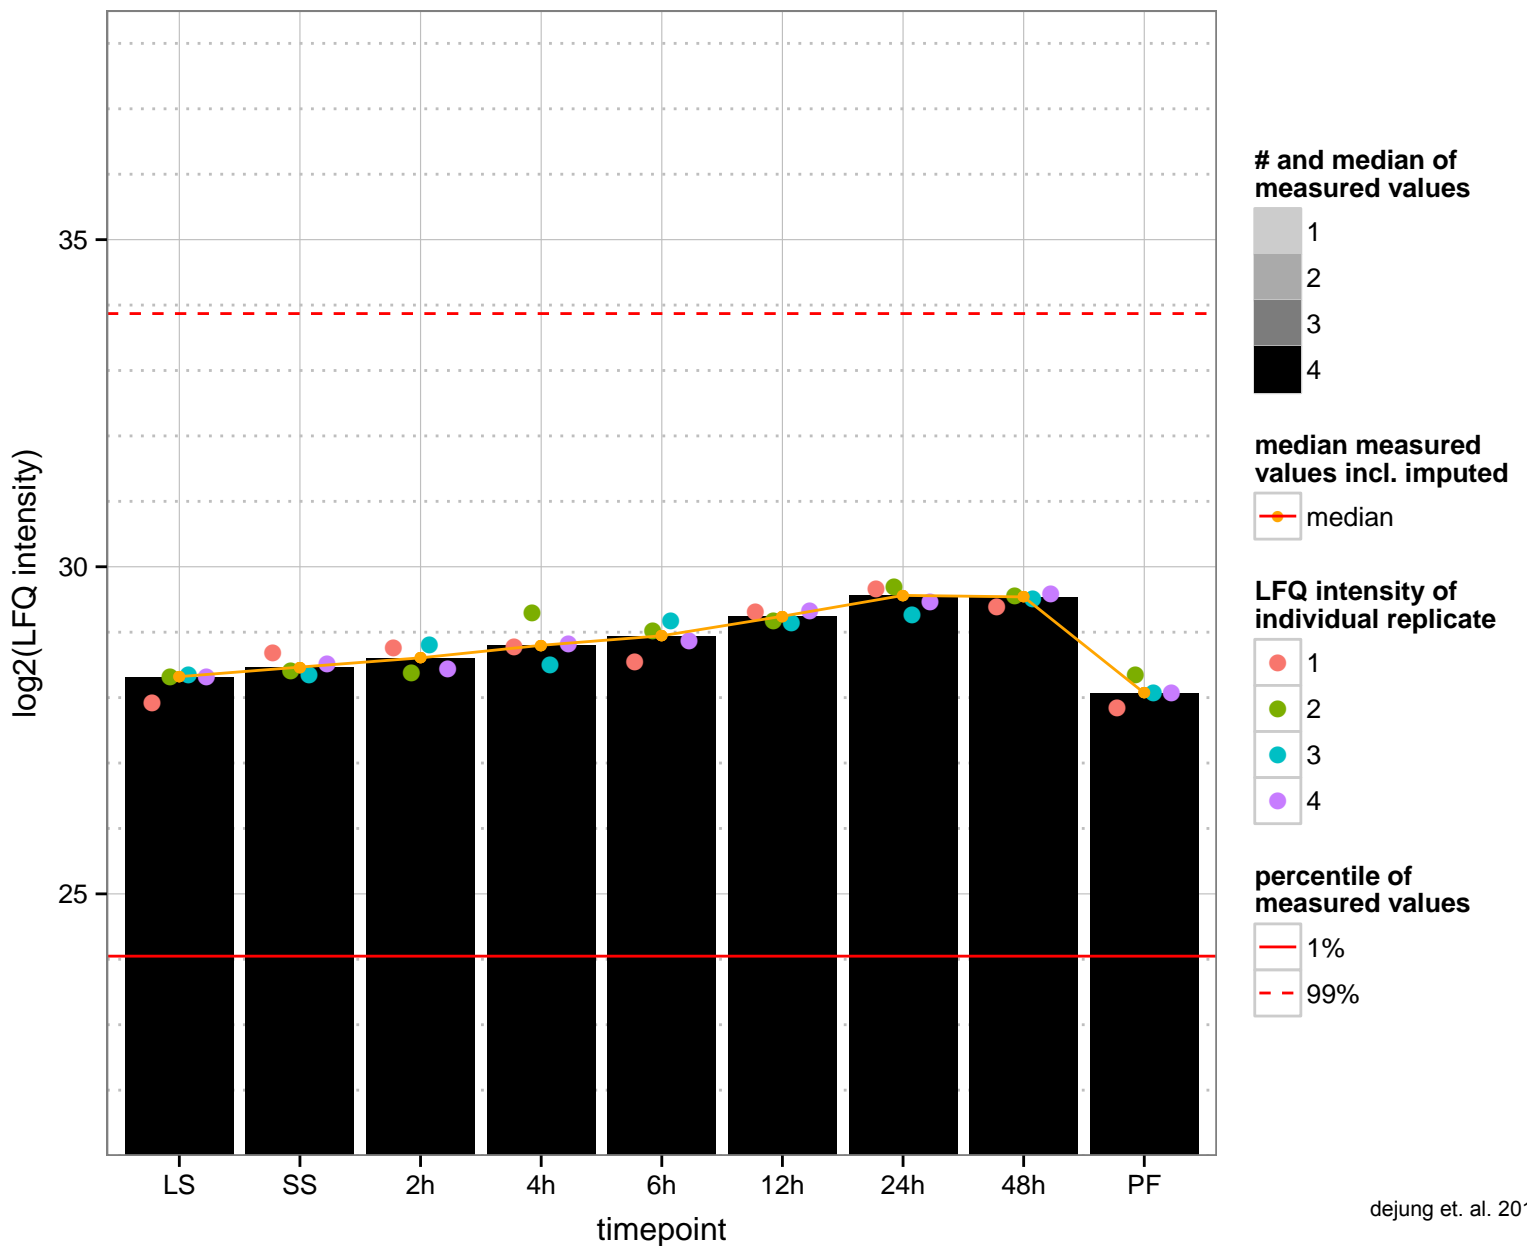

acyl carrier protein, mitochondrial precursor, putative (ACP)

Tb927.3.860

AGOF: ACP phosphopantetheine attachment site binding involved in fatty acid biosynthetic process, cofactor binding

AGOC: mitochondrion

AGOP: fatty acid biosynthetic process

PGOF: null

PGOC: null

PGOP: fatty acid biosynthetic process

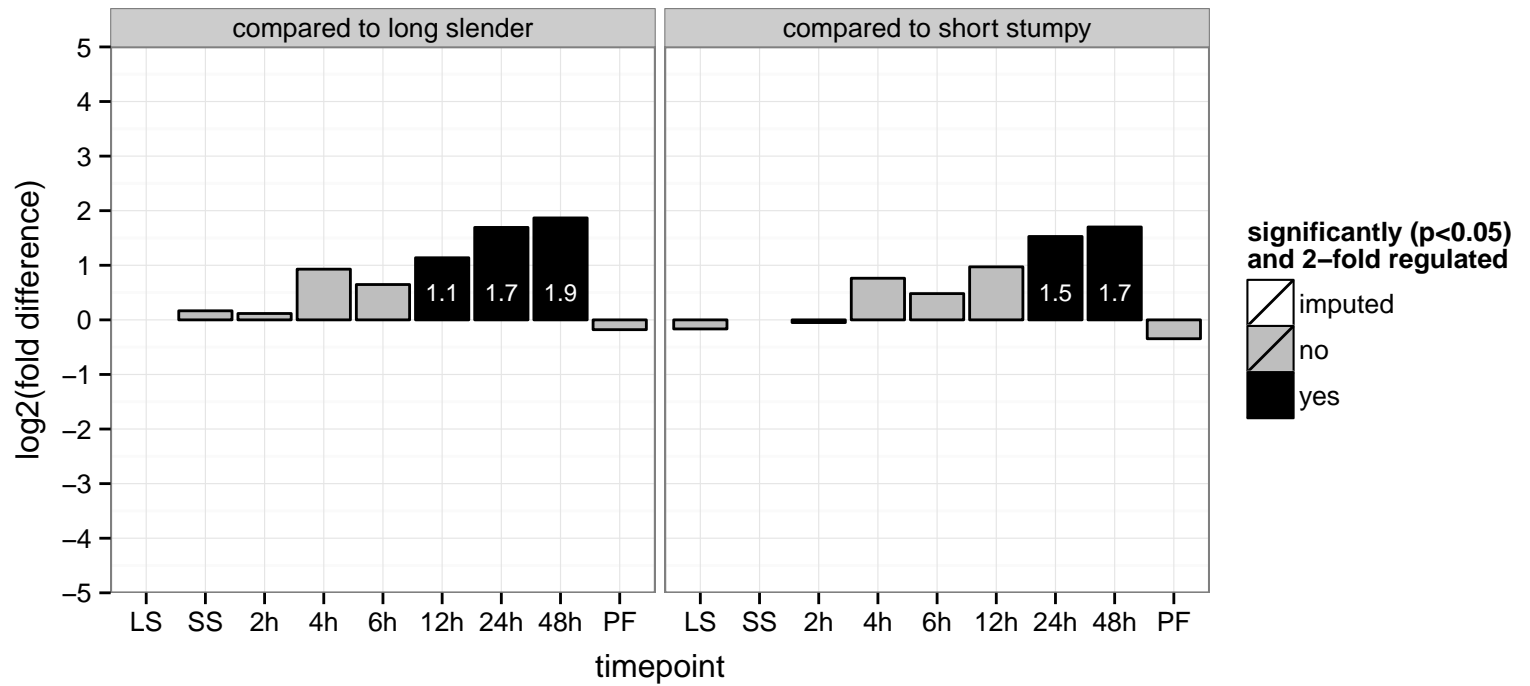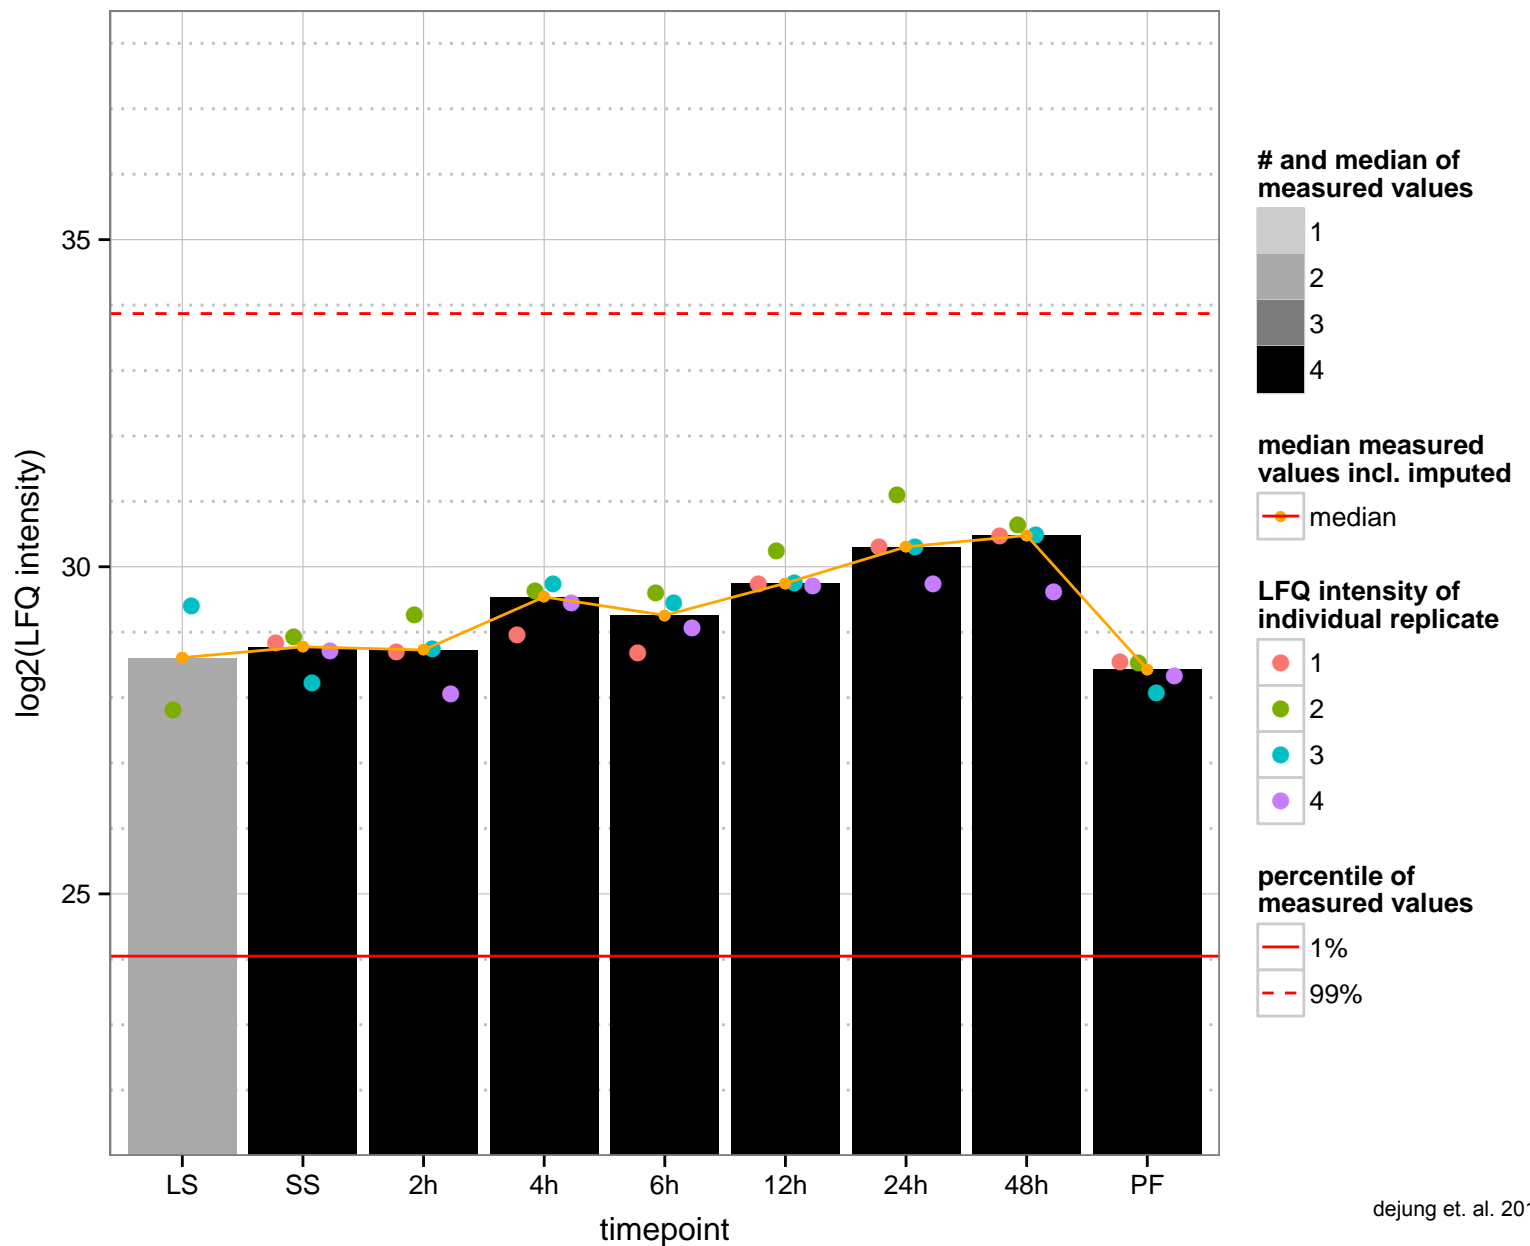

hypothetical protein, conserved  
 Tb927.3.940  
 AGOF: null  
 AGOC: mitochondrion  
 AGOP: null  
 PGO: null  
 PGO: null  
 PGO: null

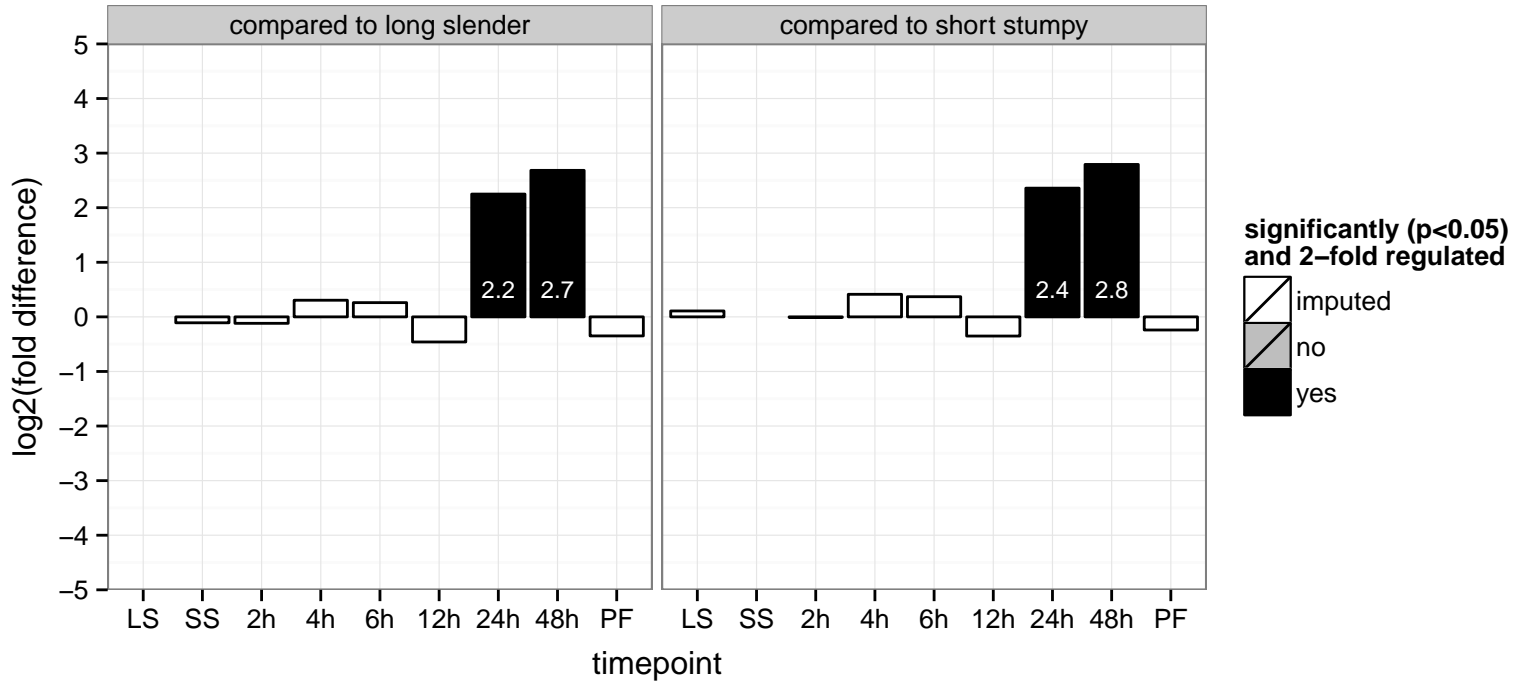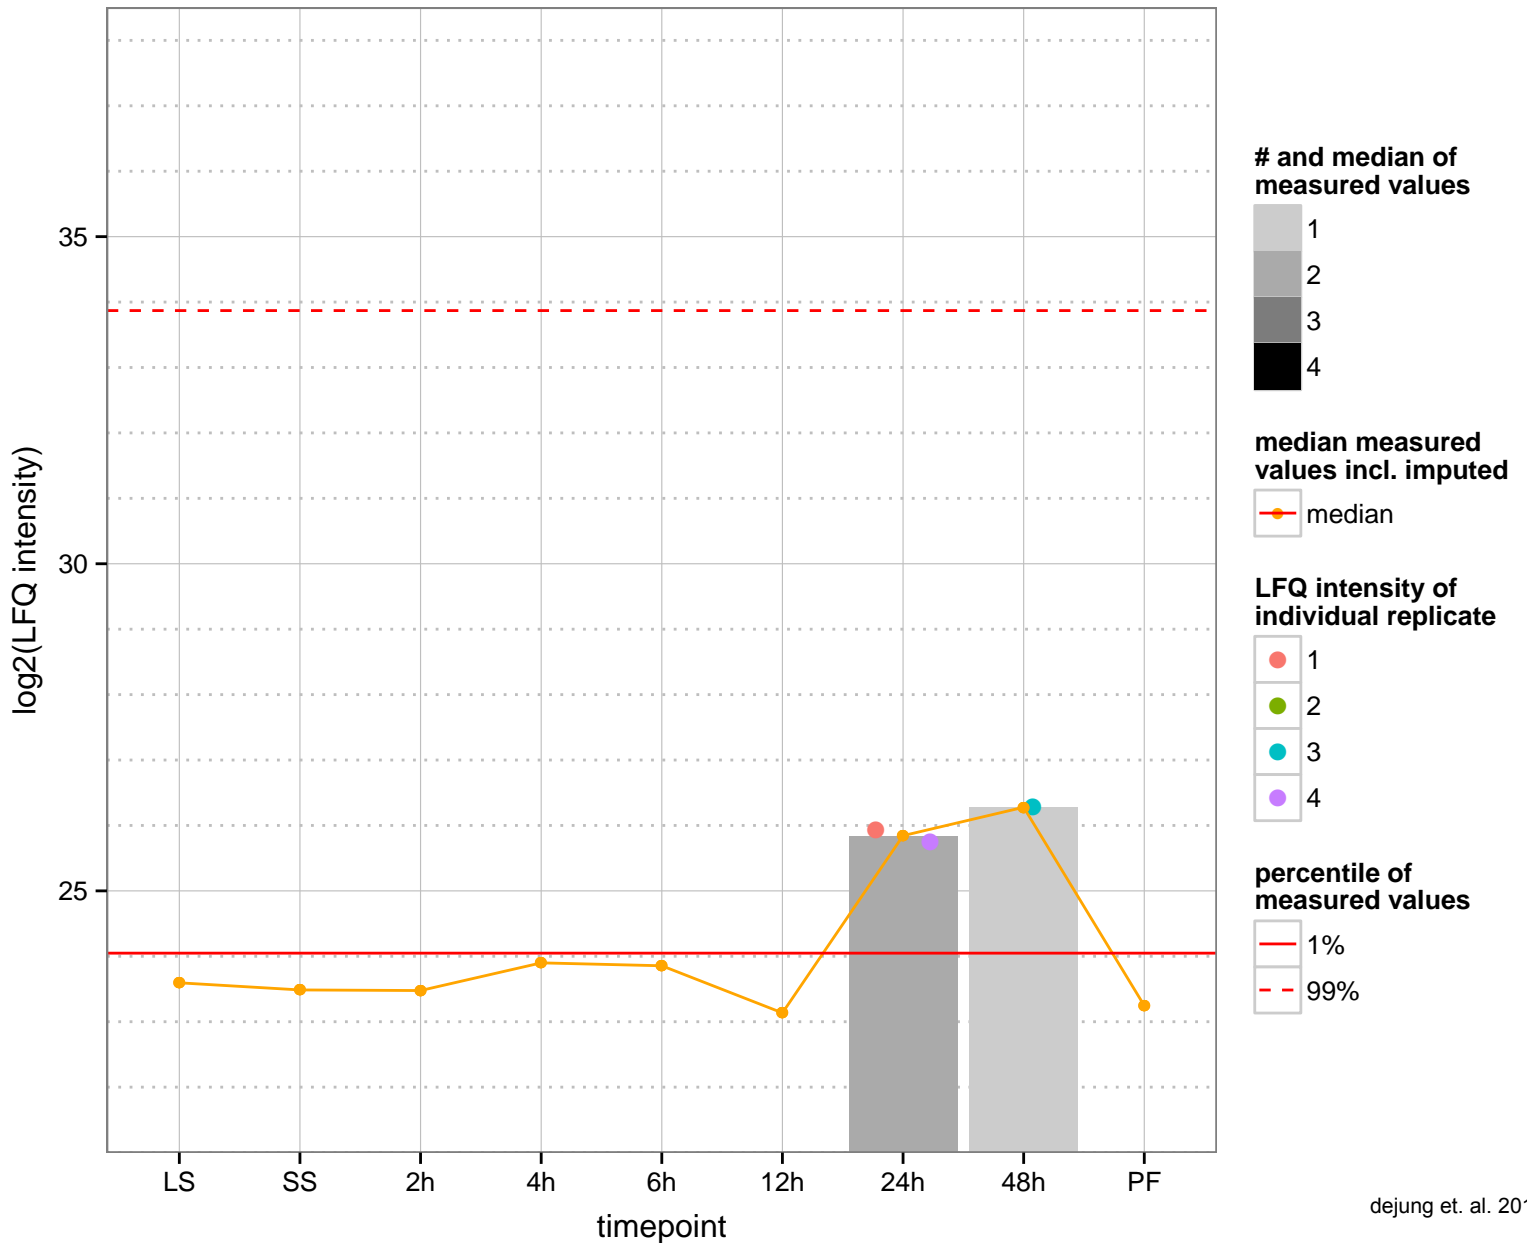

hypothetical protein, conserved  
 Tb927.4.2320  
 AGOF: null  
 AGOC: null  
 AGOP: null  
 PGOF: null  
 PGOC: null  
 PGOP: null

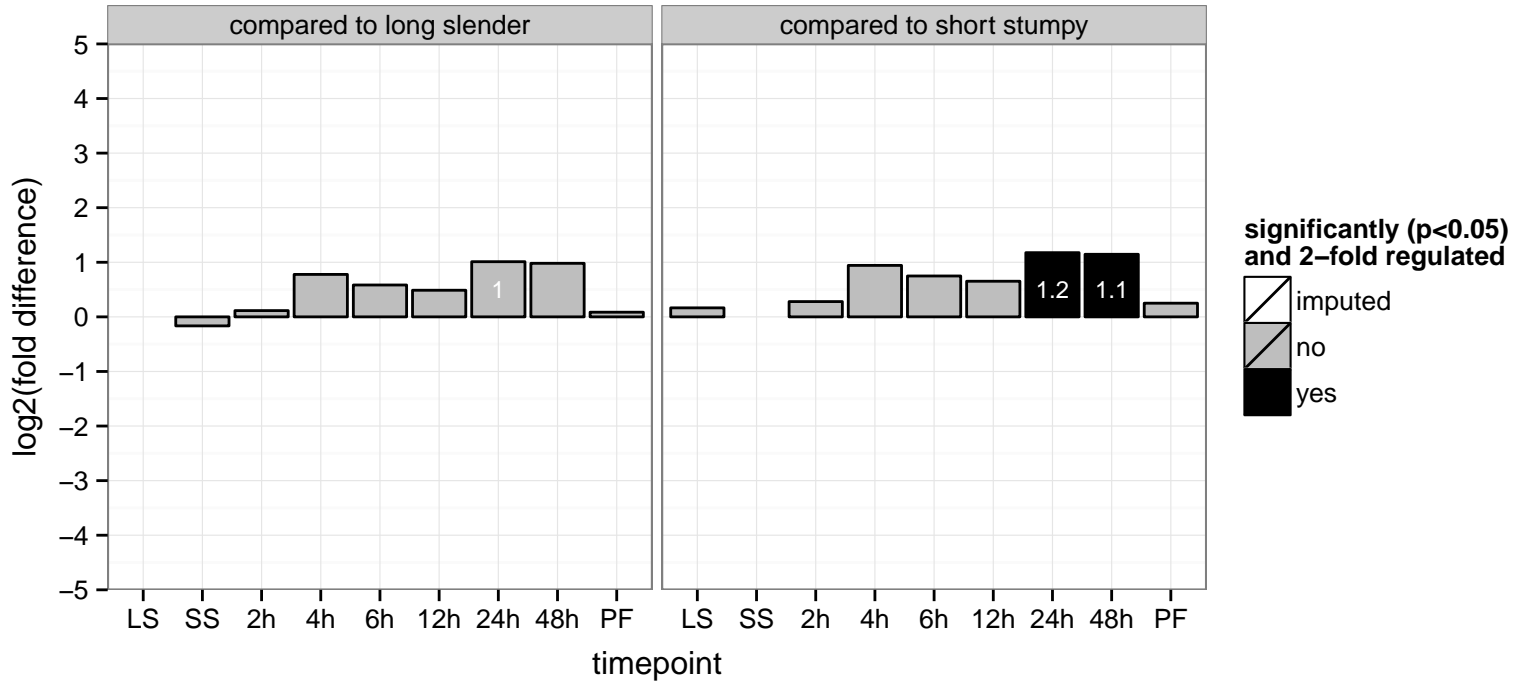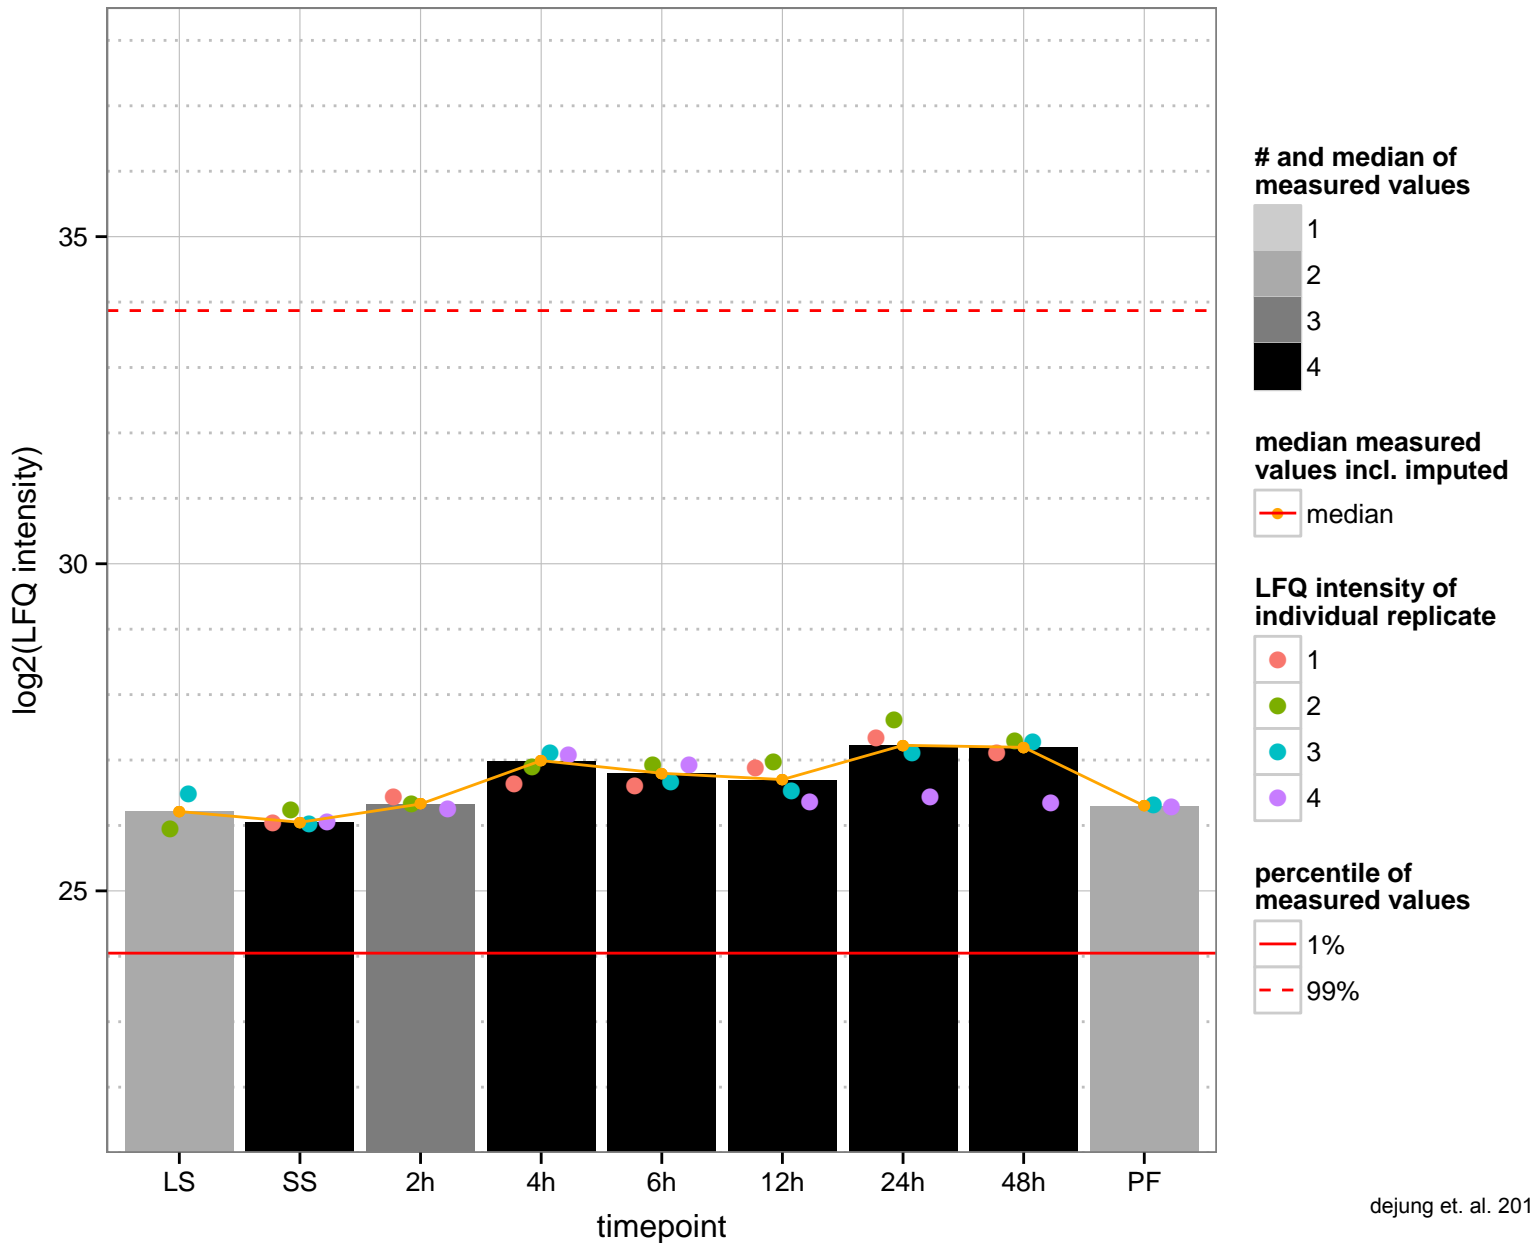

hypothetical protein, conserved  
 Tb927.4.2400  
 AGOF: null  
 AGOC: null  
 AGOP: null  
 PGO: null  
 PGOC: null  
 PGOP: null

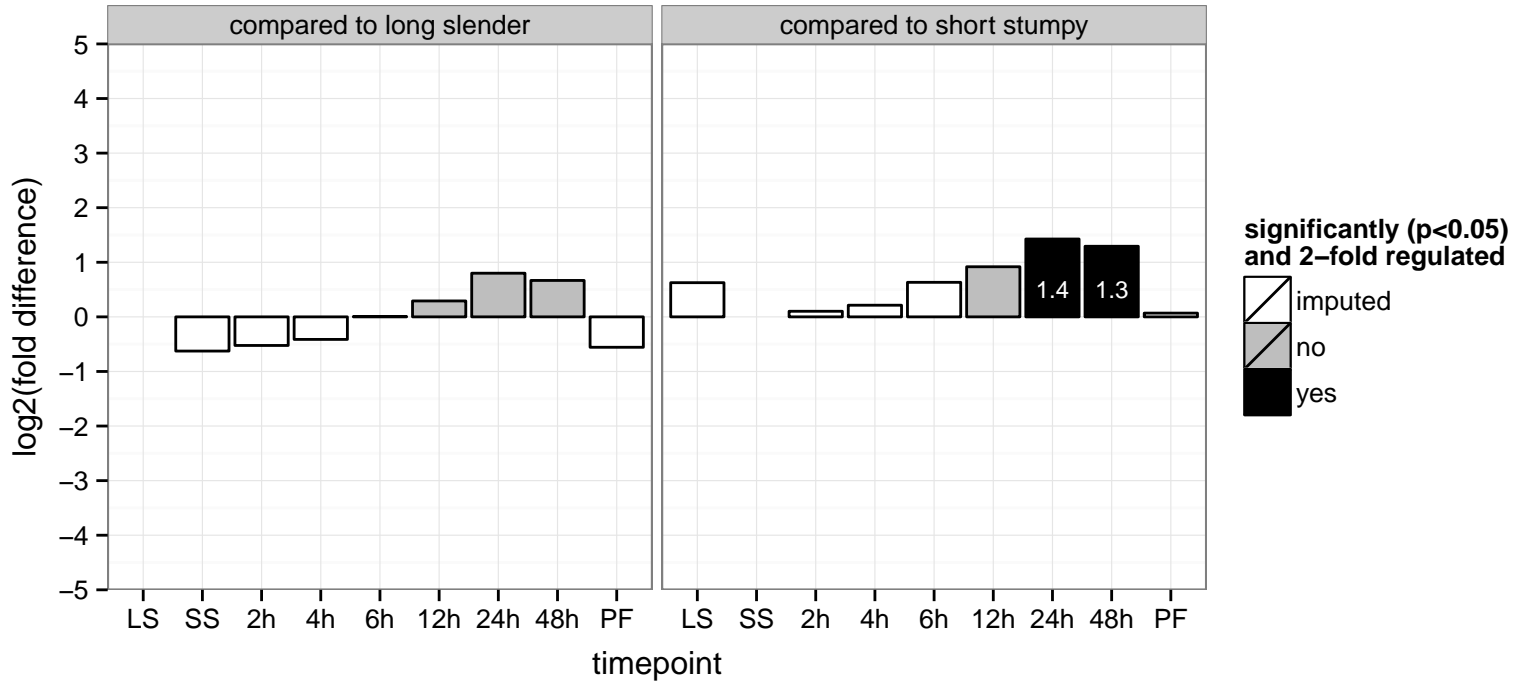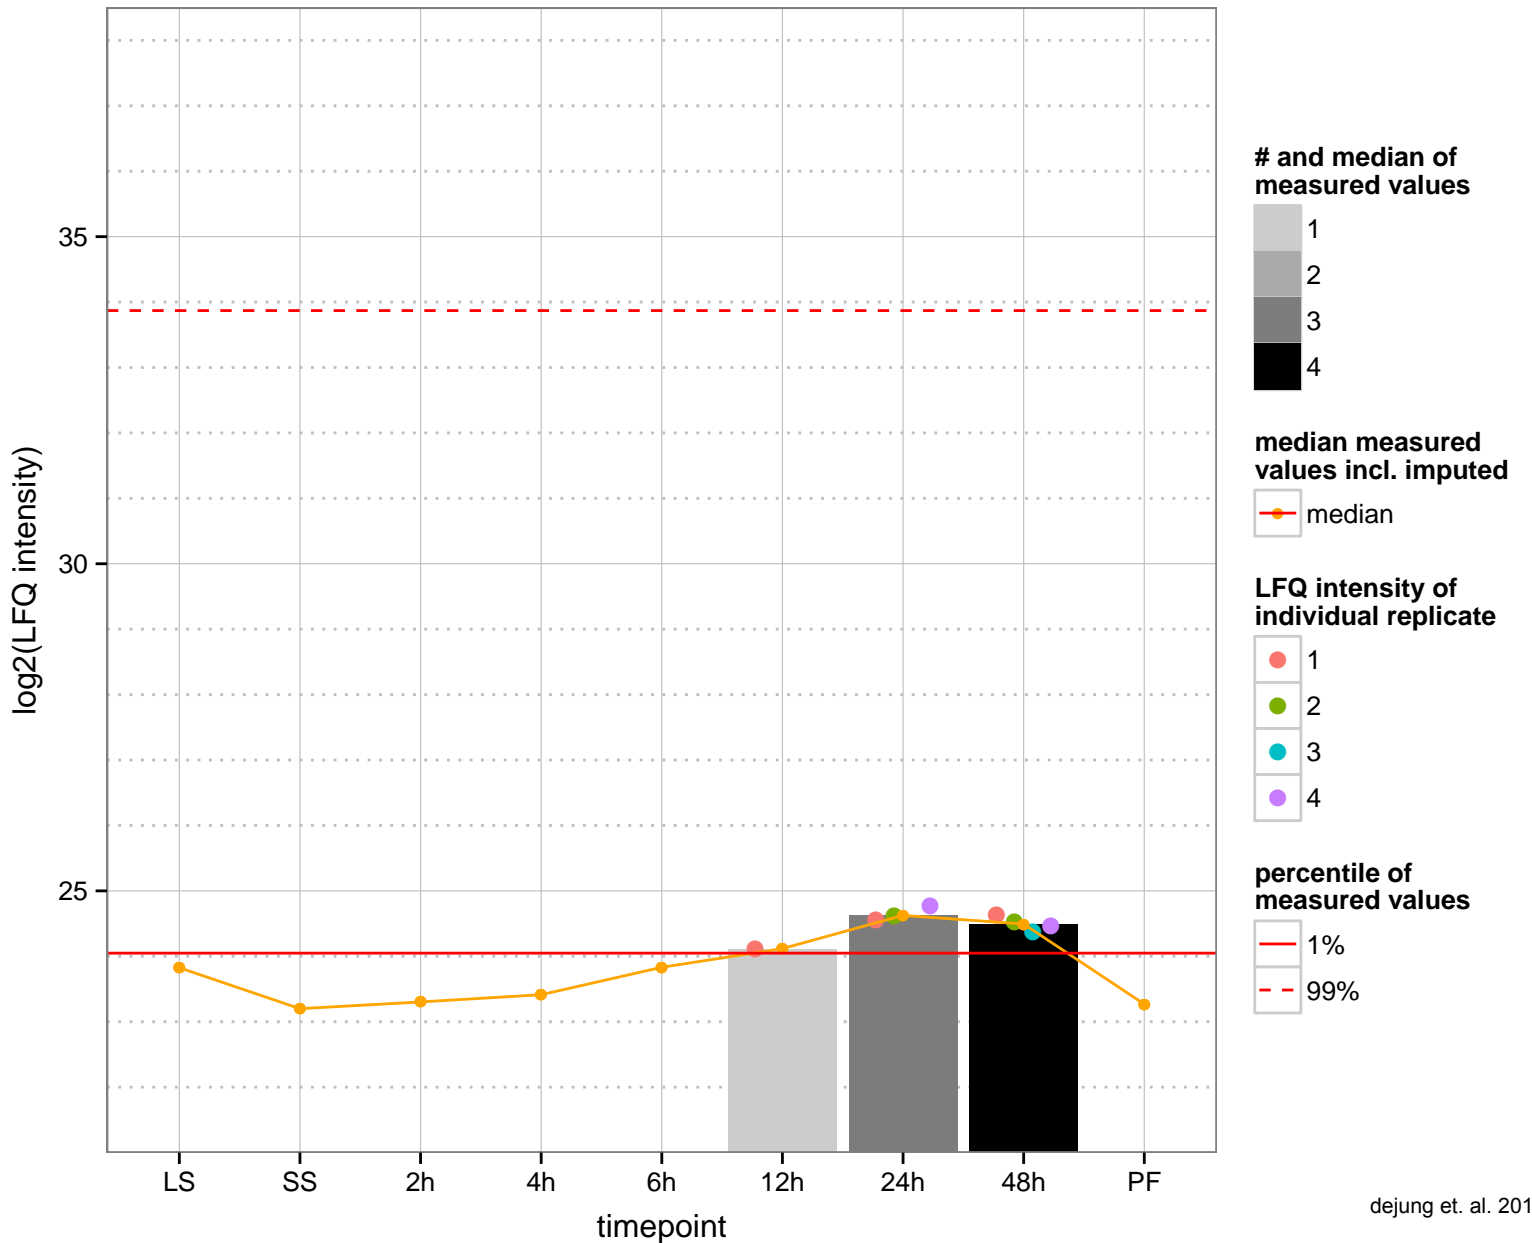



hypothetical protein, conserved  
 Tb927.4.2740  
 AGOF: null  
 AGOC: null  
 AGOP: null  
 PGO: null  
 PGO: null  
 PGO: null

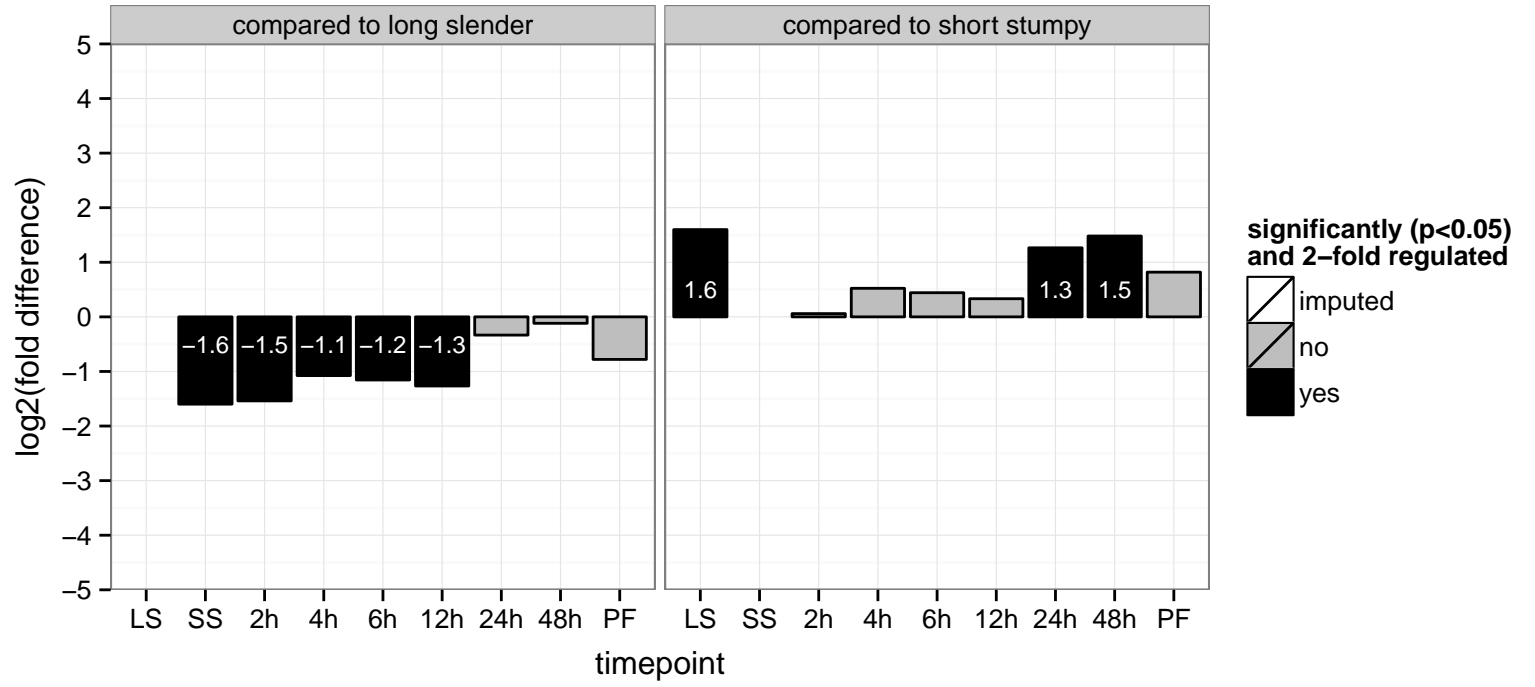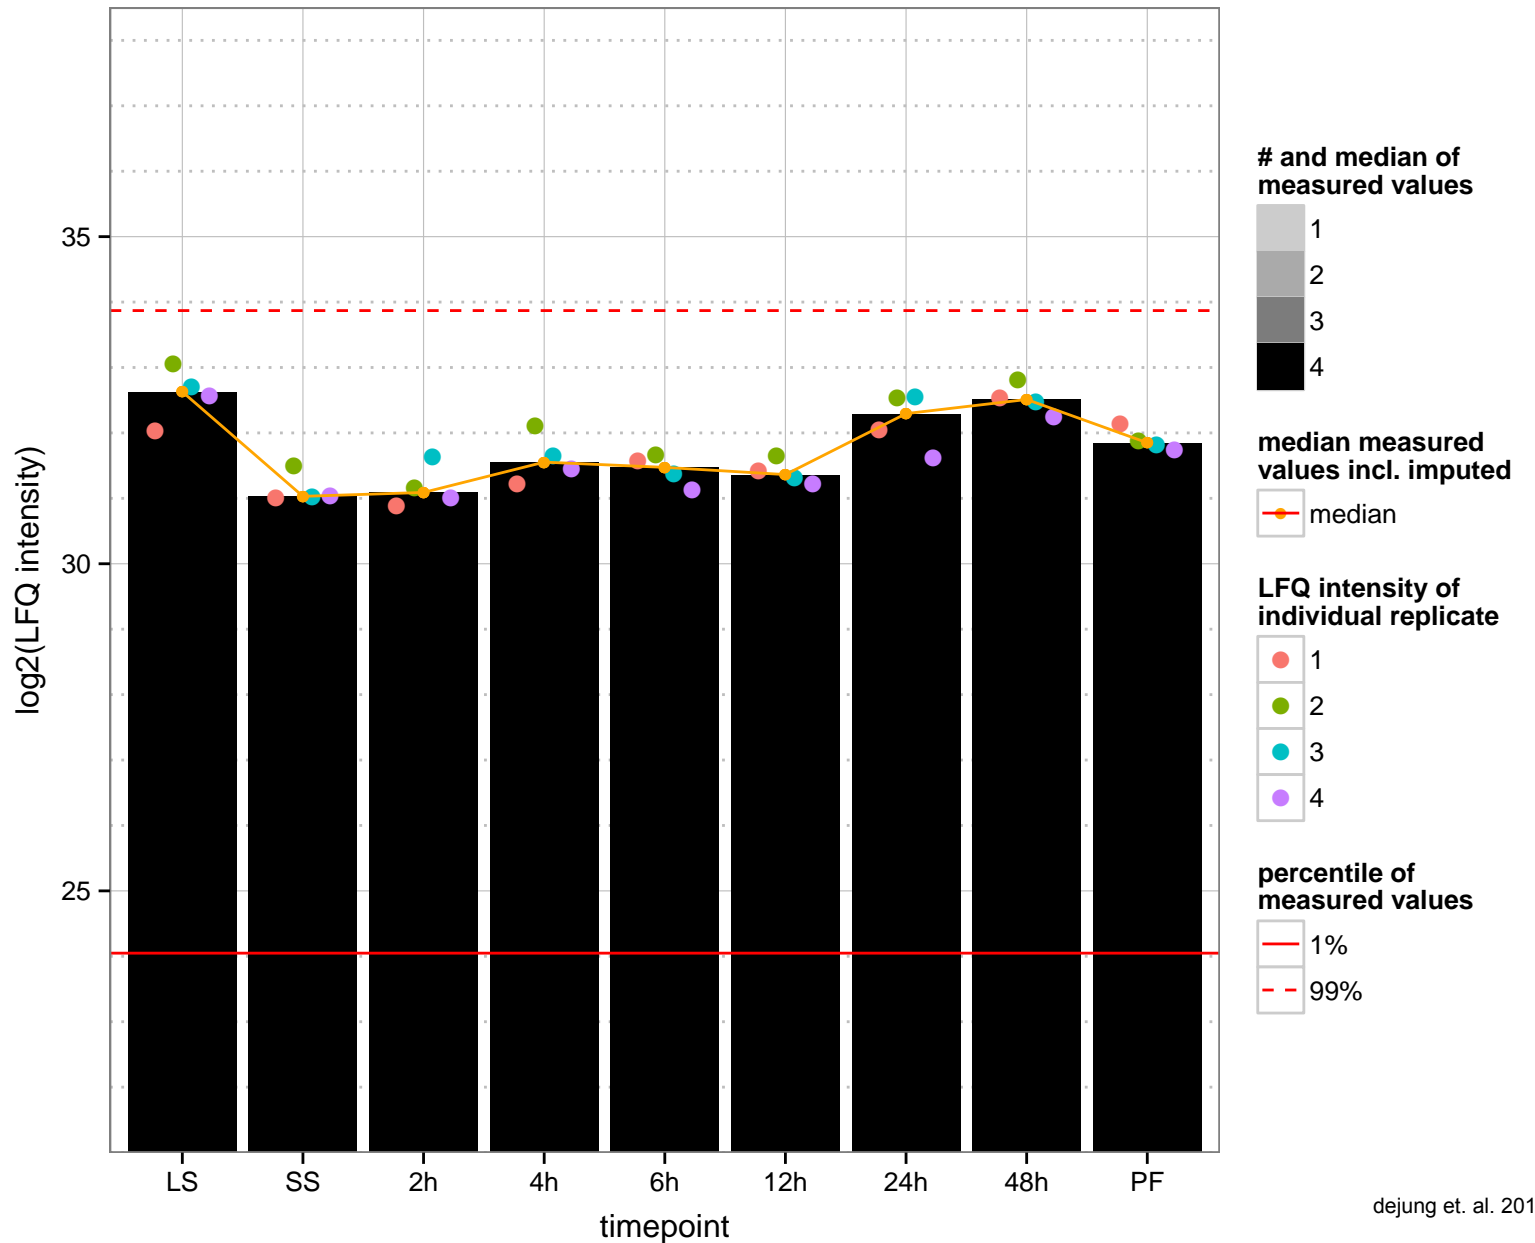

ubiquinol-cytochrome c reductase, putative  
 Tb927.4.4990;Tb927.8.7430  
 AGOF: null, ubiquinol-cytochrome-c reductase activity  
 AGOC: null, mitochondrial respiratory chain complex III  
 AGOP: null, mitochondrial electron transport, ubiquinol to cytochrome c  
 PGO: null  
 PGOC: null  
 PGOP: null

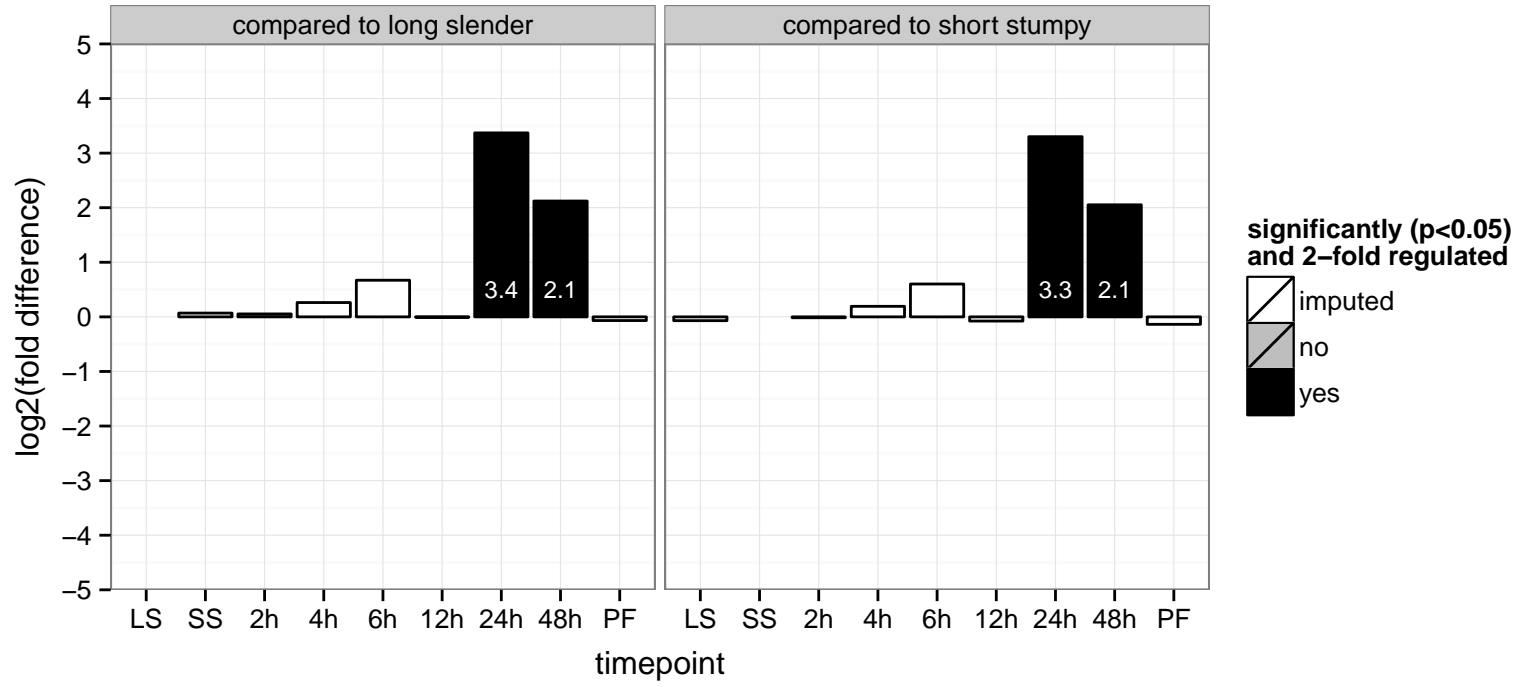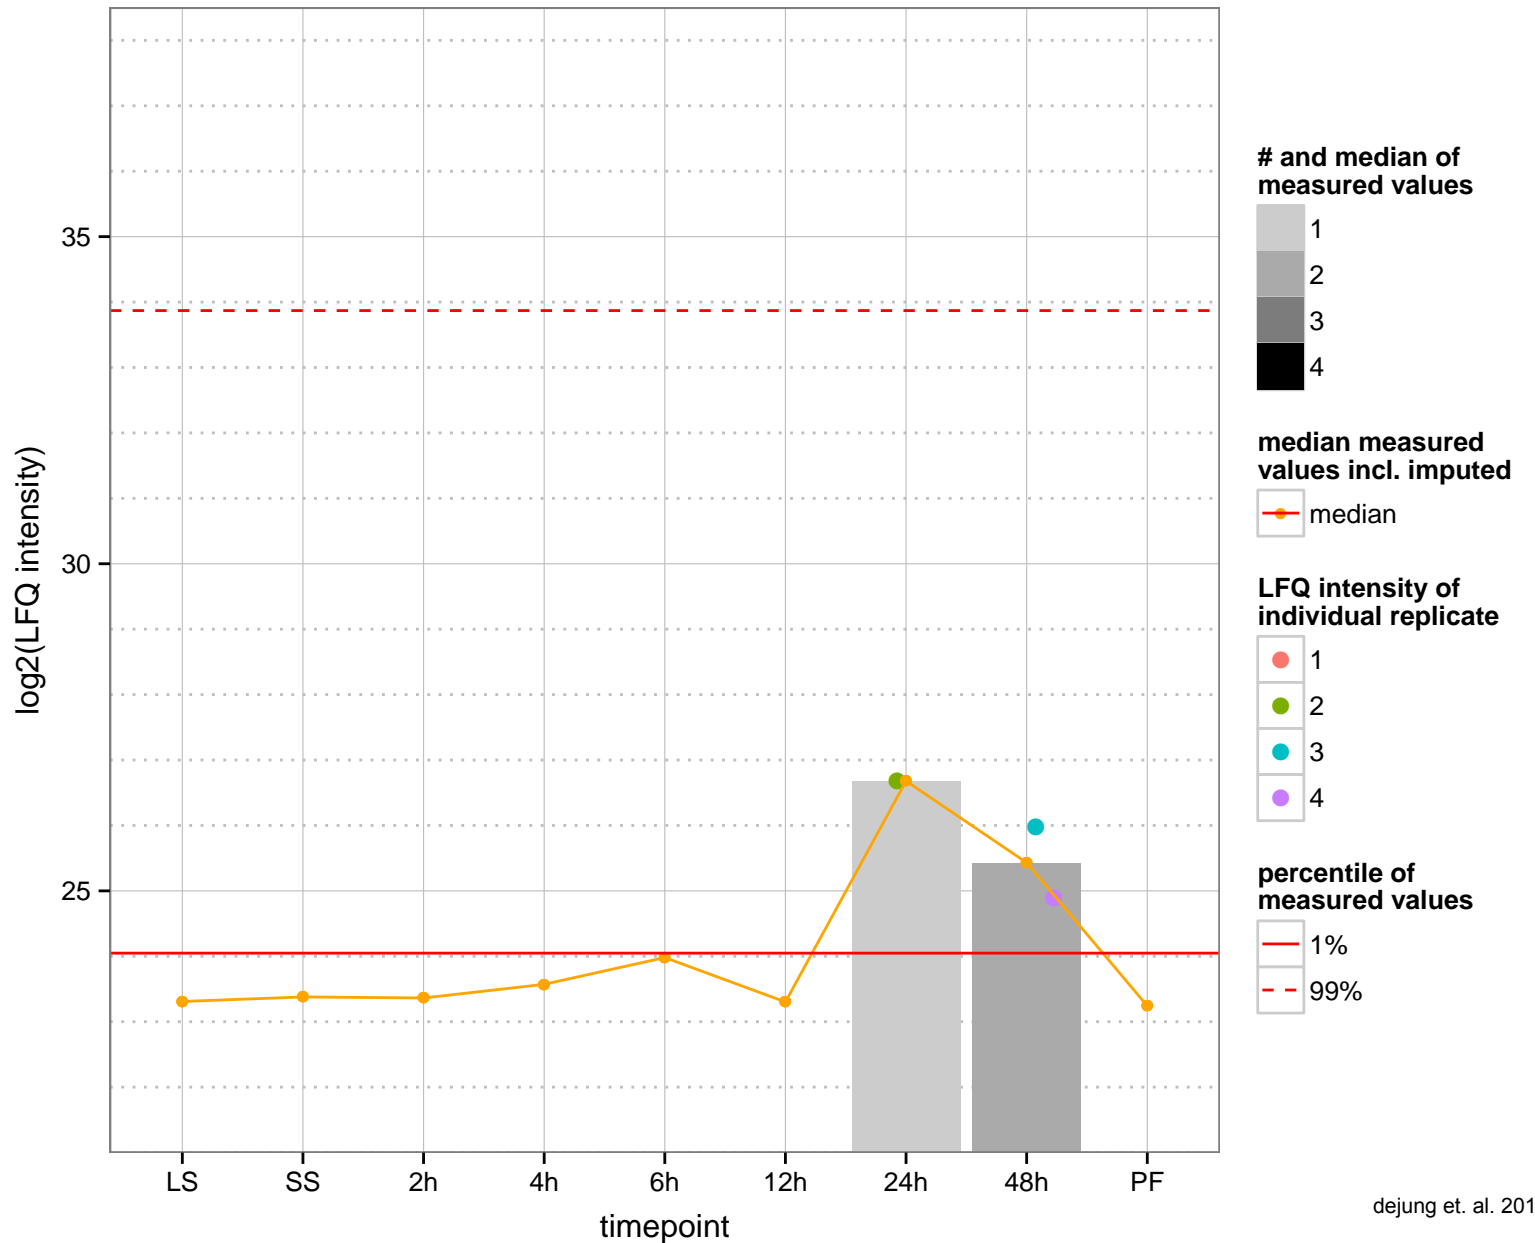

hypothetical protein, conserved  
 Tb927.4.510  
 AGOF: null  
 AGOC: null  
 AGOP: null  
 PGOF: null  
 PGOC: null  
 PGOP: null

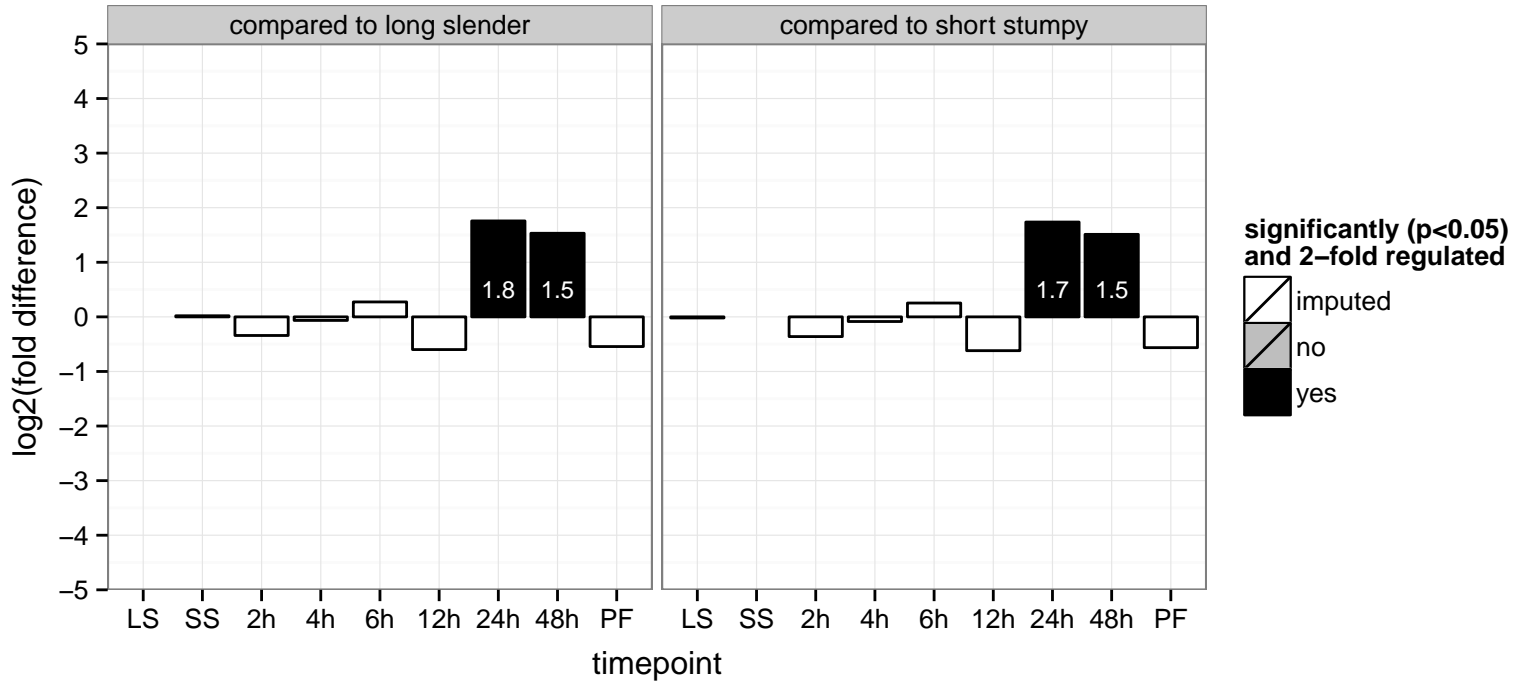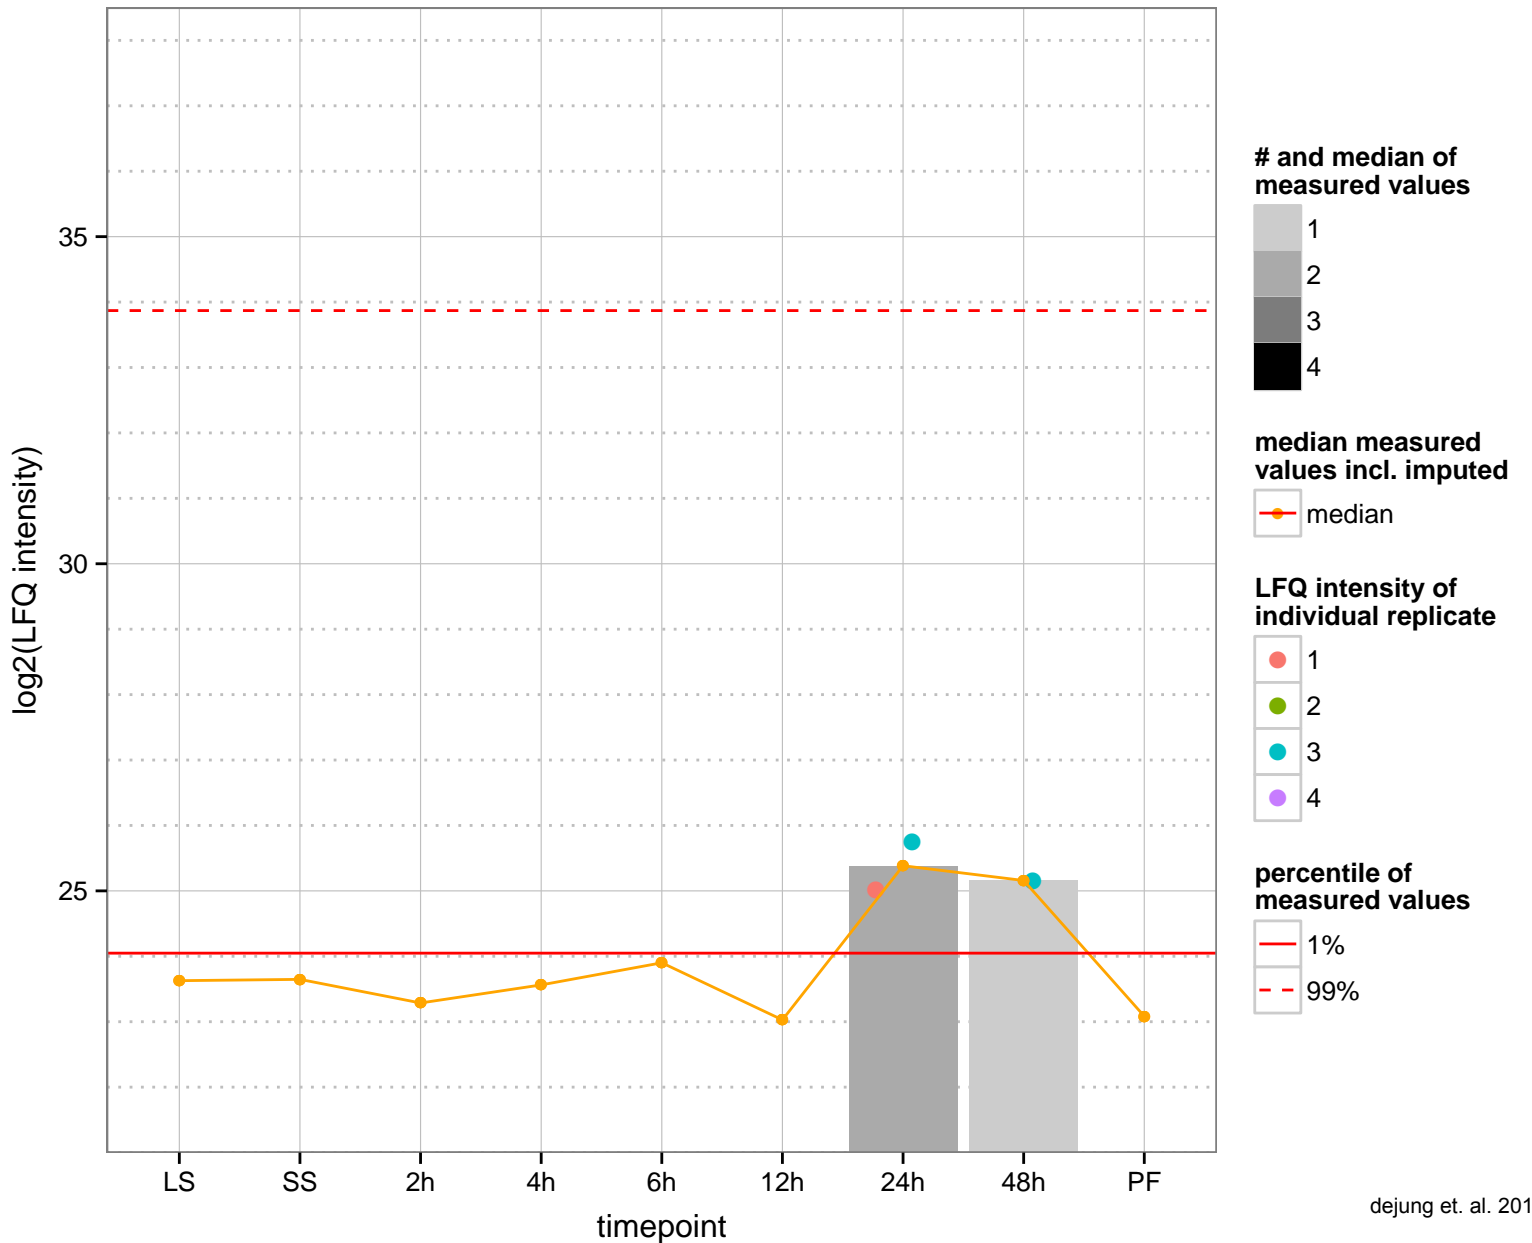

hypothetical protein, conserved  
 Tb927.5.2580  
 AGOF: null  
 AGOC: mitochondrion  
 AGOP: null  
 PGO: null  
 PGOC: null  
 PGOP: null

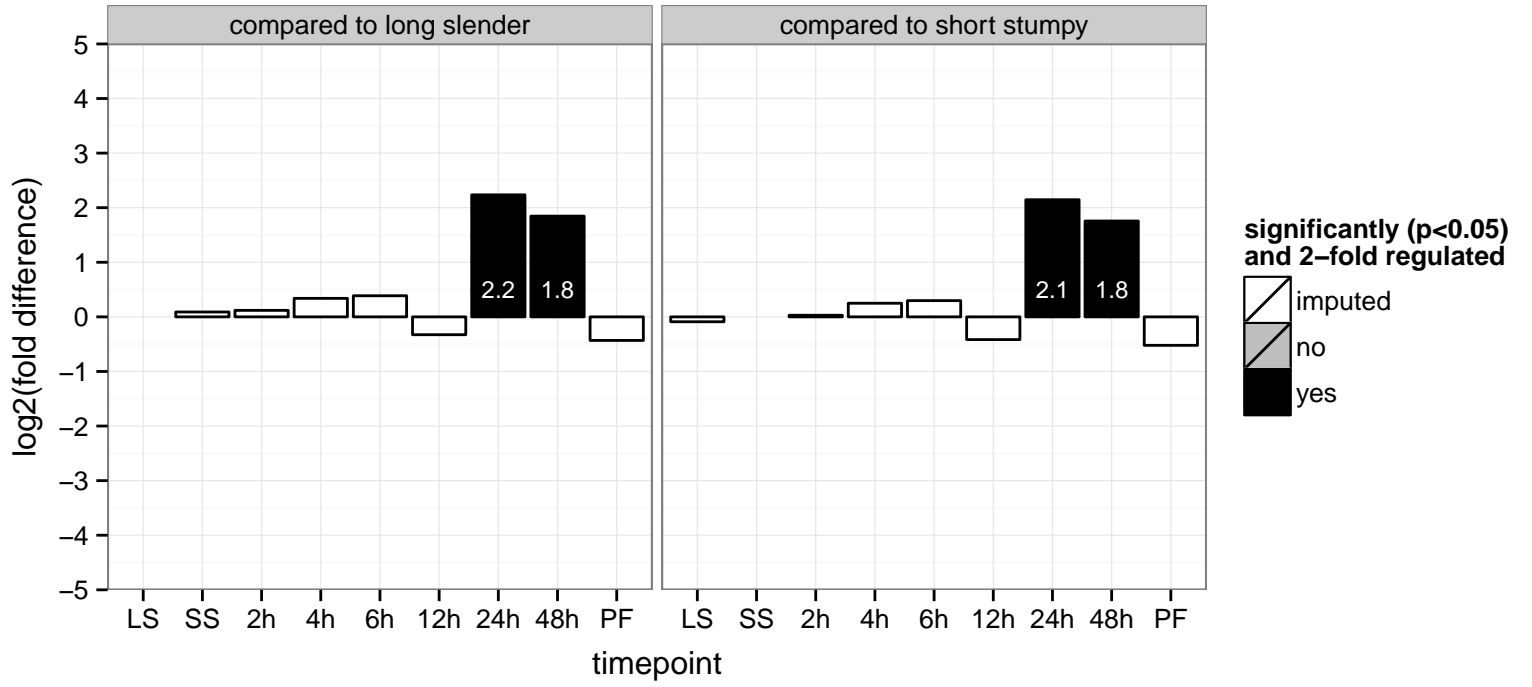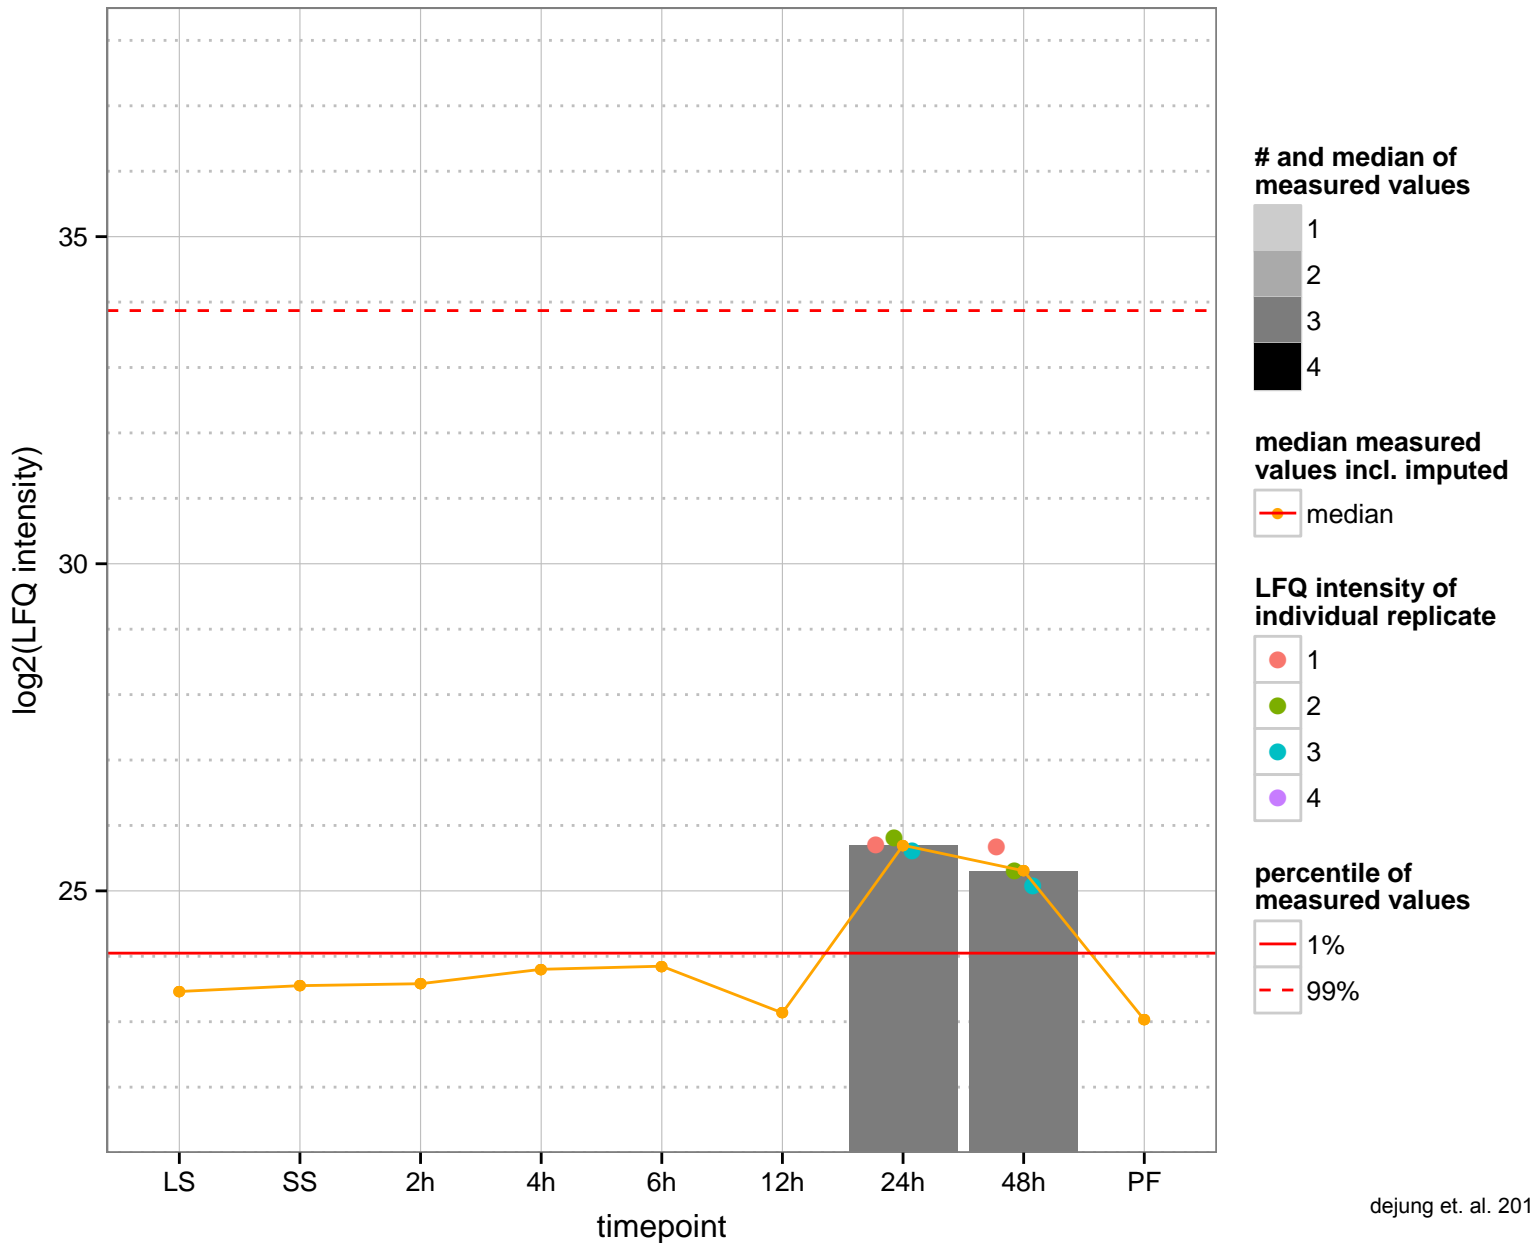

MIX protein  
 Tb927.5.3040  
 AGOF: null  
 AGOC: cytochrome complex, mitochondrial inner membrane, mitochondrion  
 AGOP: electron transport chain, mitochondrial respiratory chain complex IV assembly  
 PGO: null  
 PGOC: null  
 PGOP: null

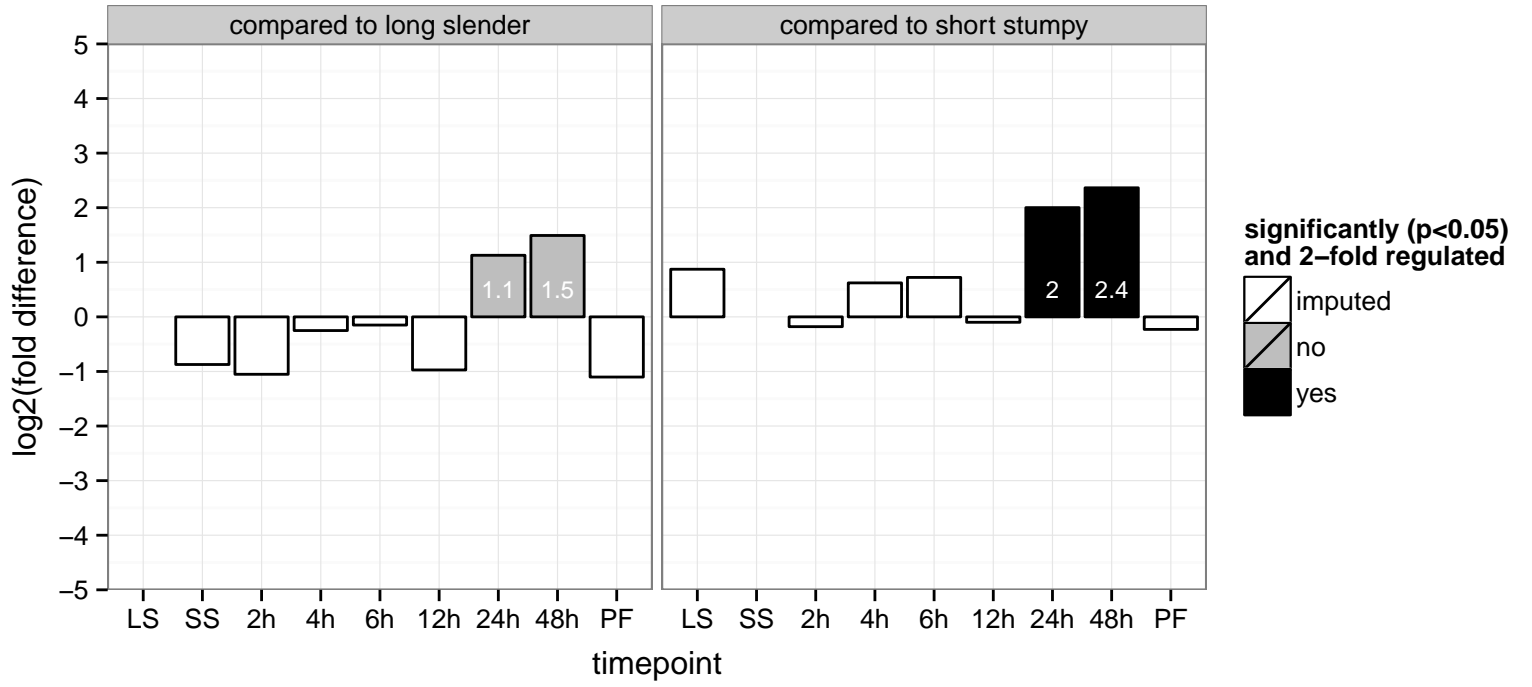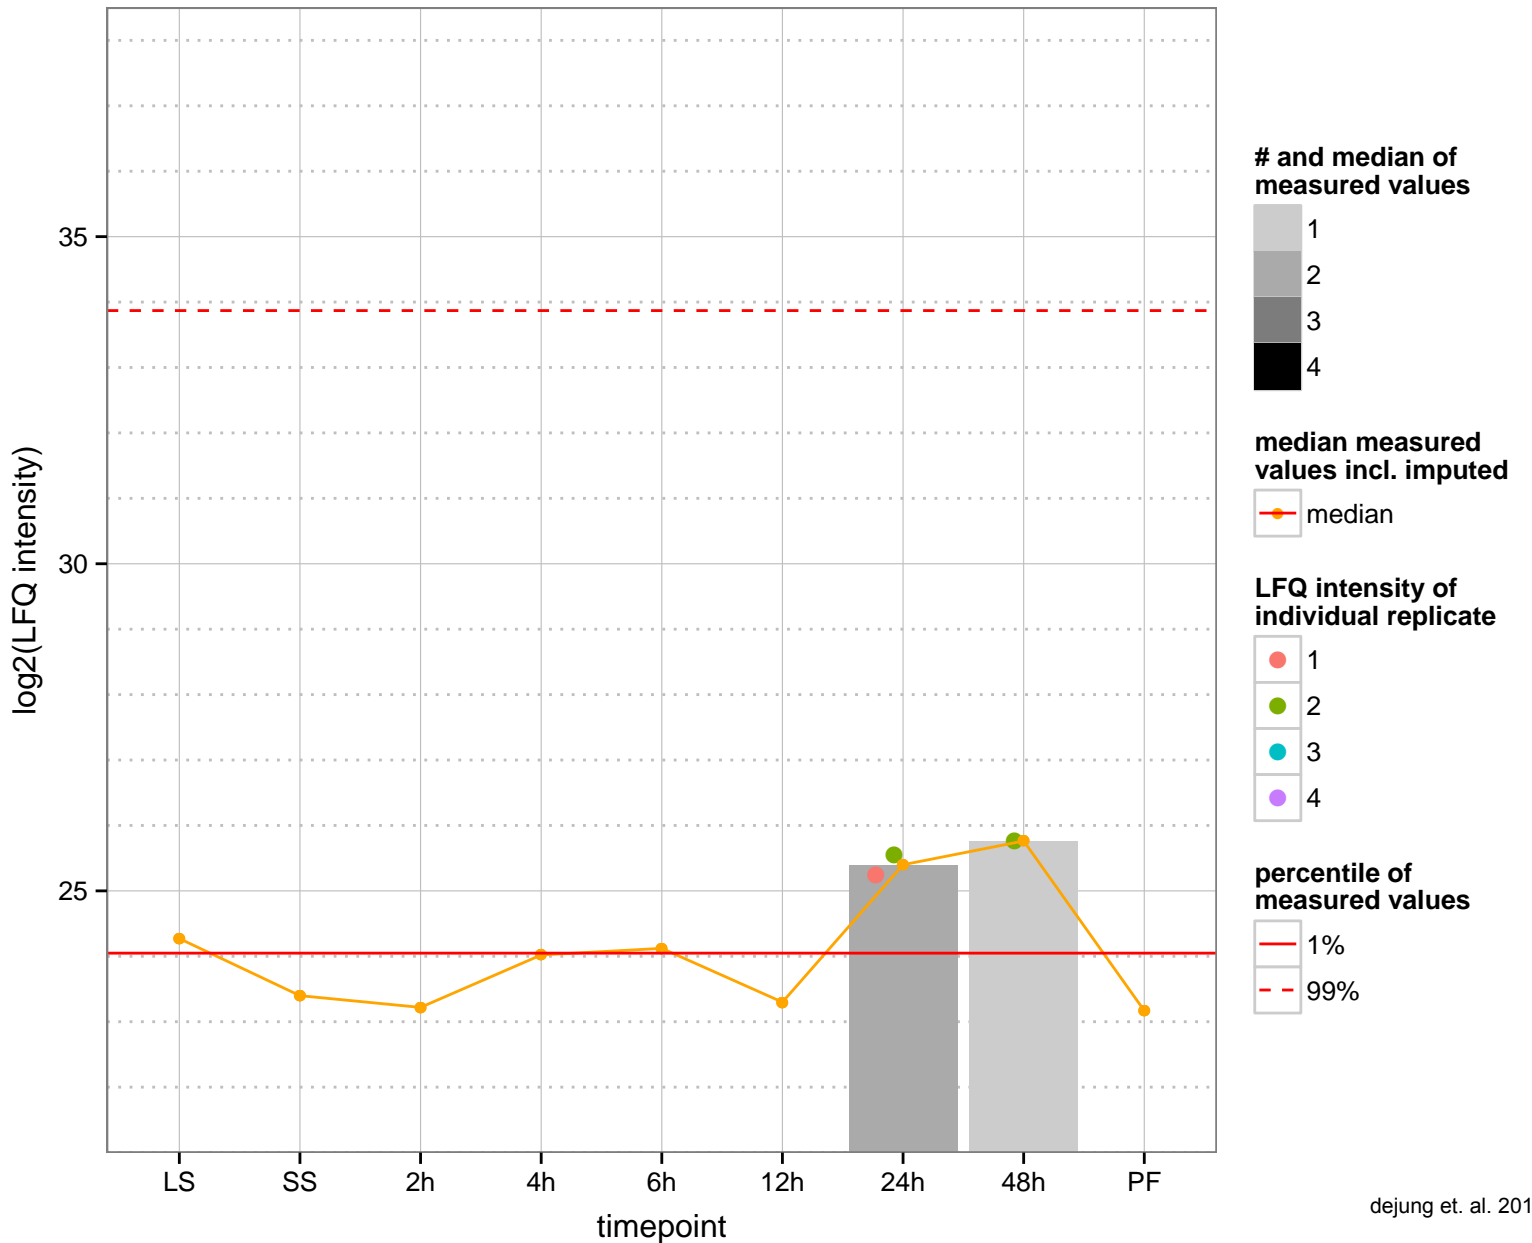

U6 snRNA-associated Sm-like protein LSm7p (TbLSm7)

Tb927.5.4030

AGOF: null

AGOC: U6 snRNP, nucleolus, nucleus

AGOP: maturation of SSU-rRNA, nuclear mRNA splicing, via spliceosome, nuclear-transcribed mRNA catabolic process

PGOF: null

PGOC: null

PGOP: null

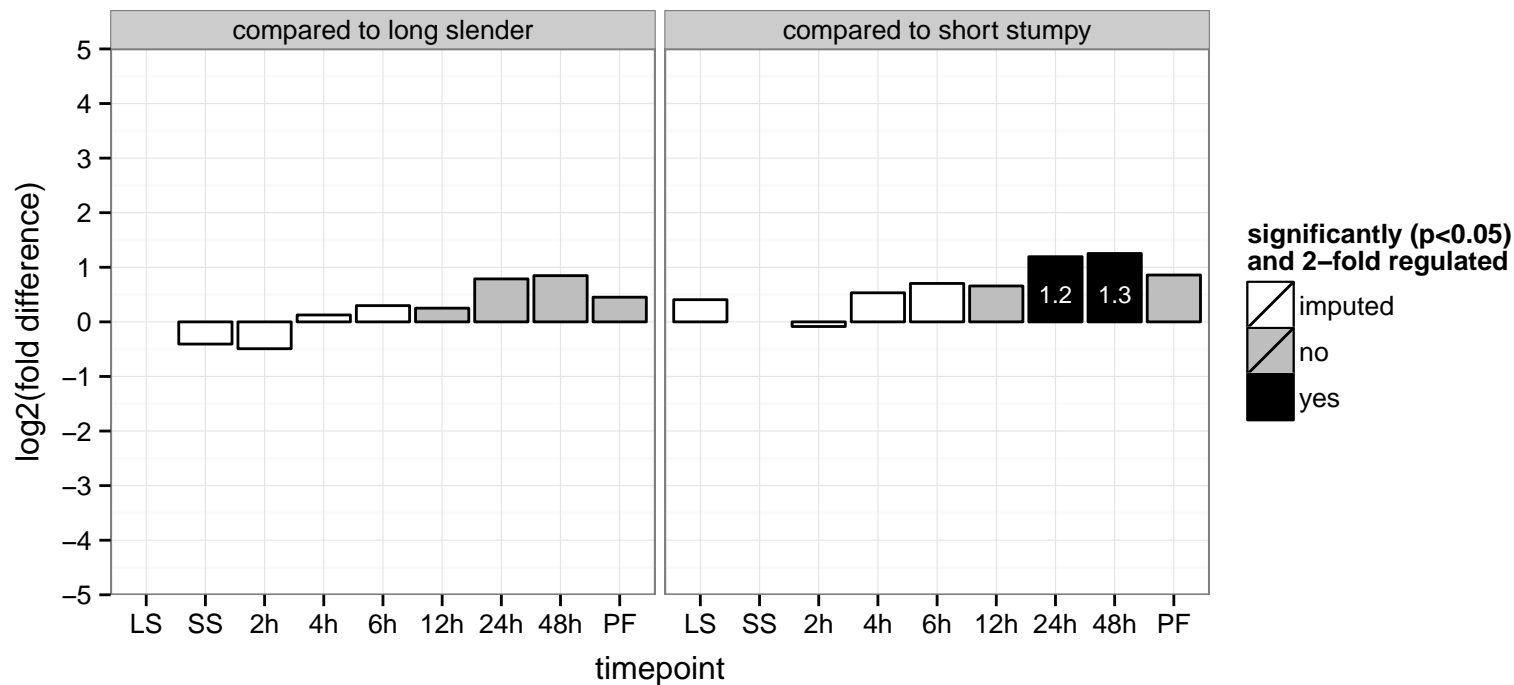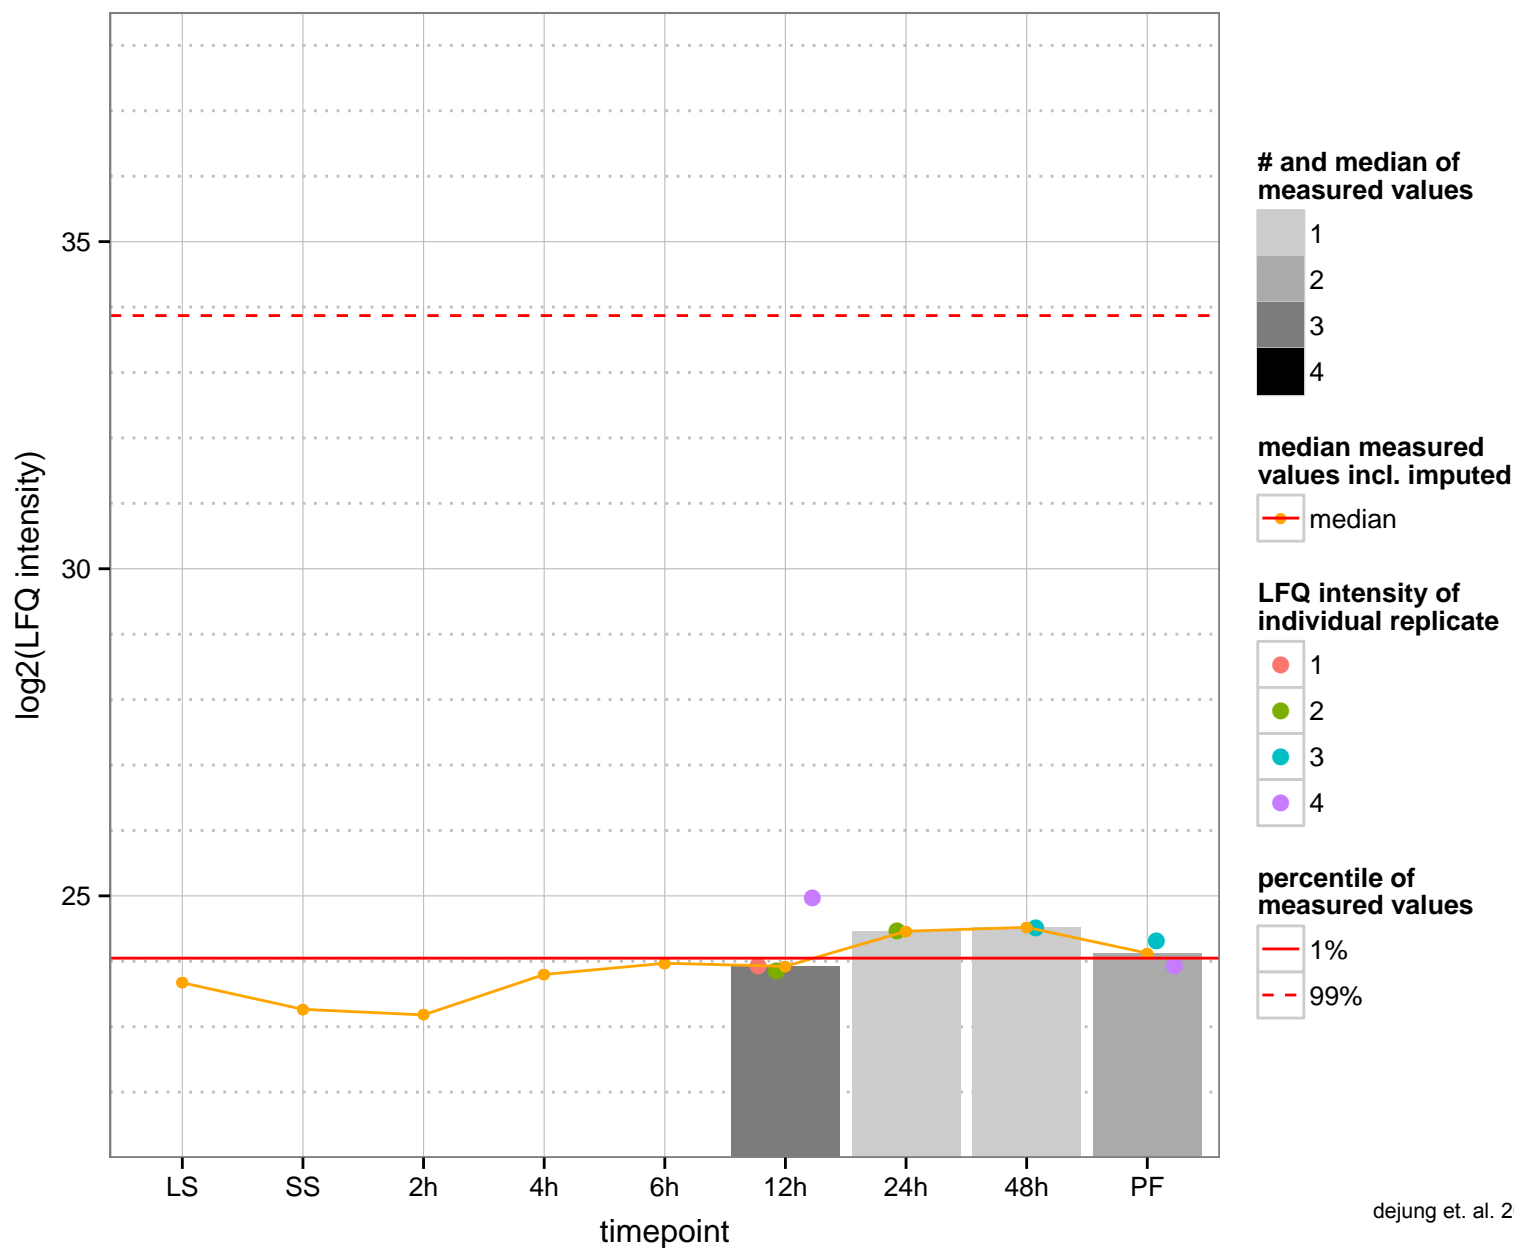

protein phosphatase 1, regulatory subunit, putative  
 Tb927.5.590  
 AGOF: null  
 AGOC: null  
 AGOP: null  
 PGO: protein binding  
 PGOC: null  
 PGOP: null

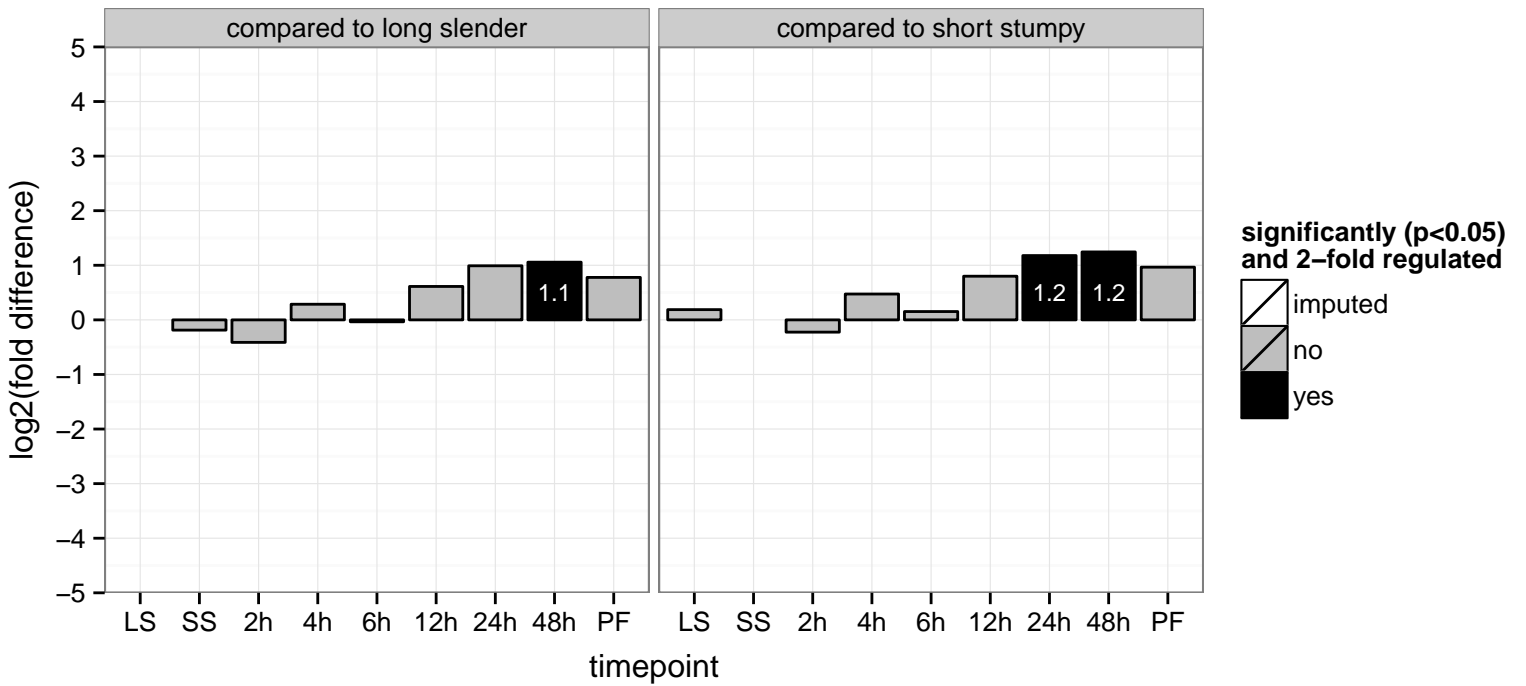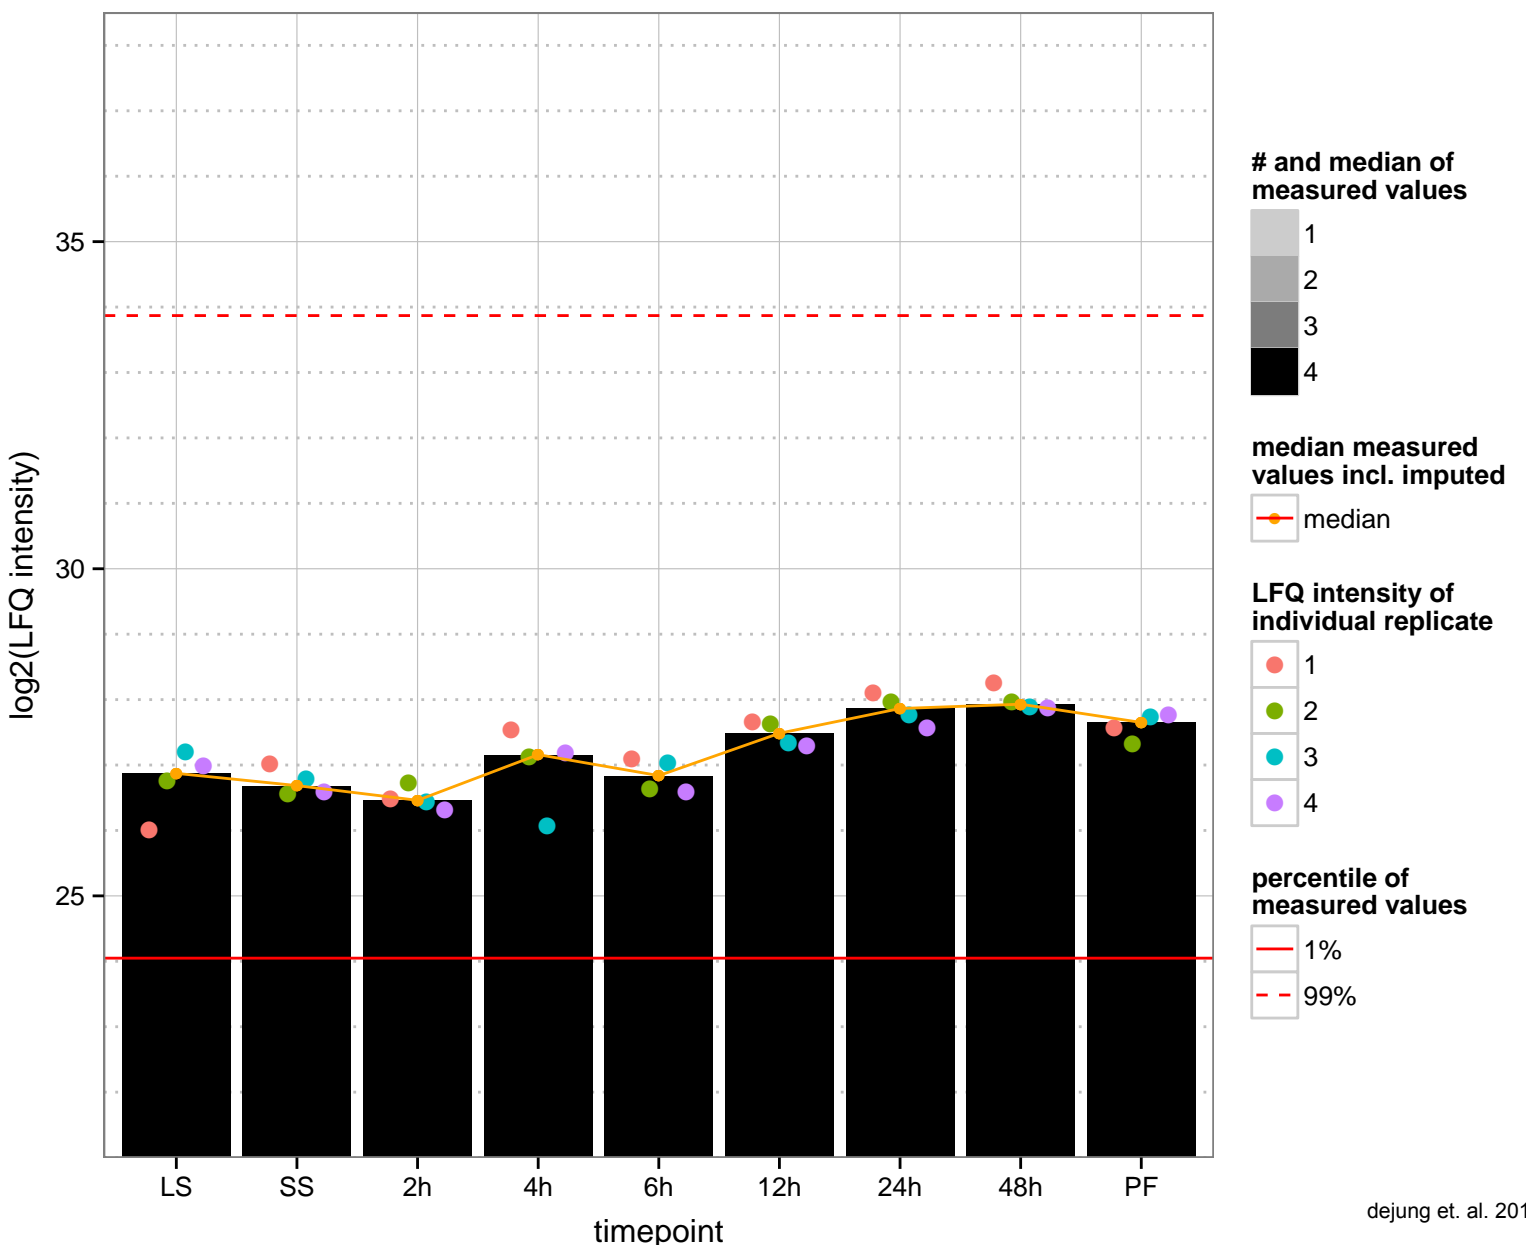

hypothetical protein, conserved

Tb927.5.980

AGOF: oxidoreductase activity

AGOC: null

AGOP: null

PGOF: oxidoreductase activity, oxidoreductase activity, acting on paired donors, with incorporation or reduction of molecular oxygen

PGOC: null

PGOP: oxidation-reduction process

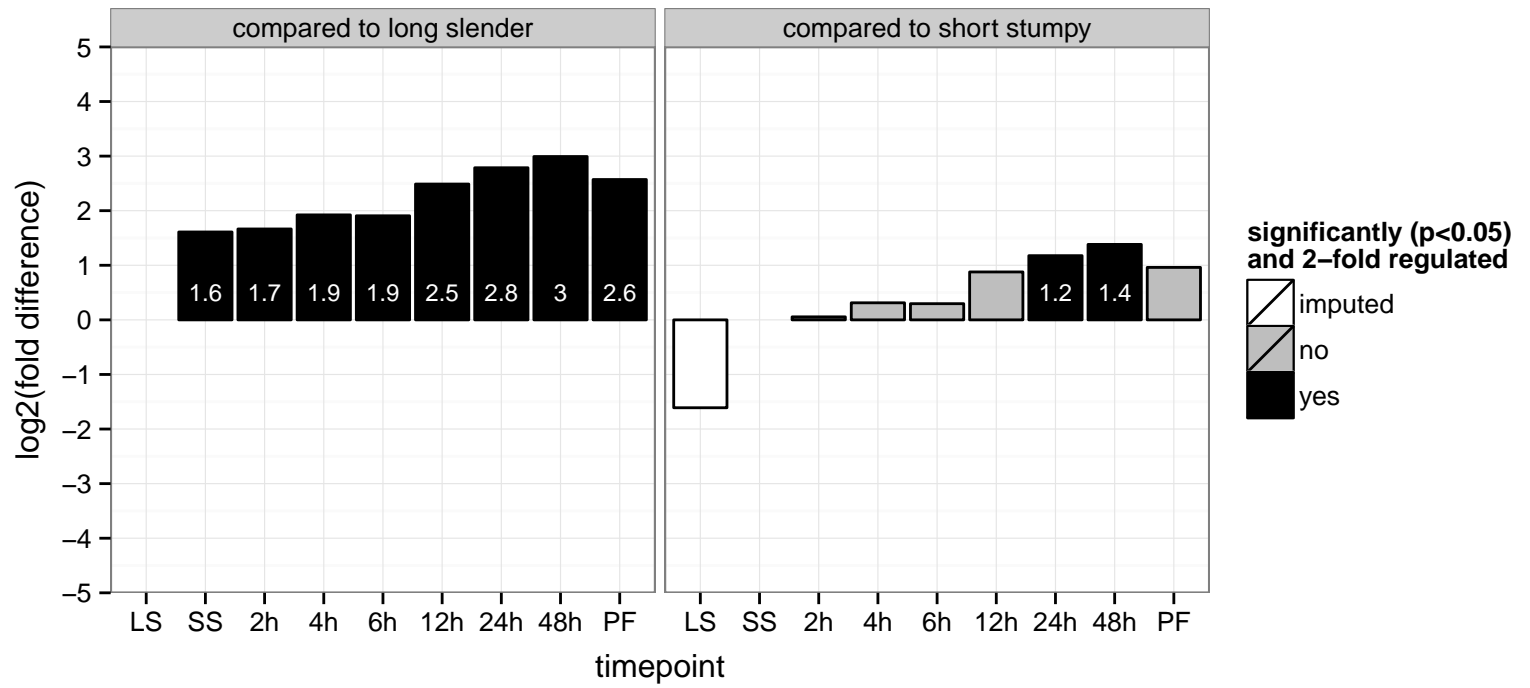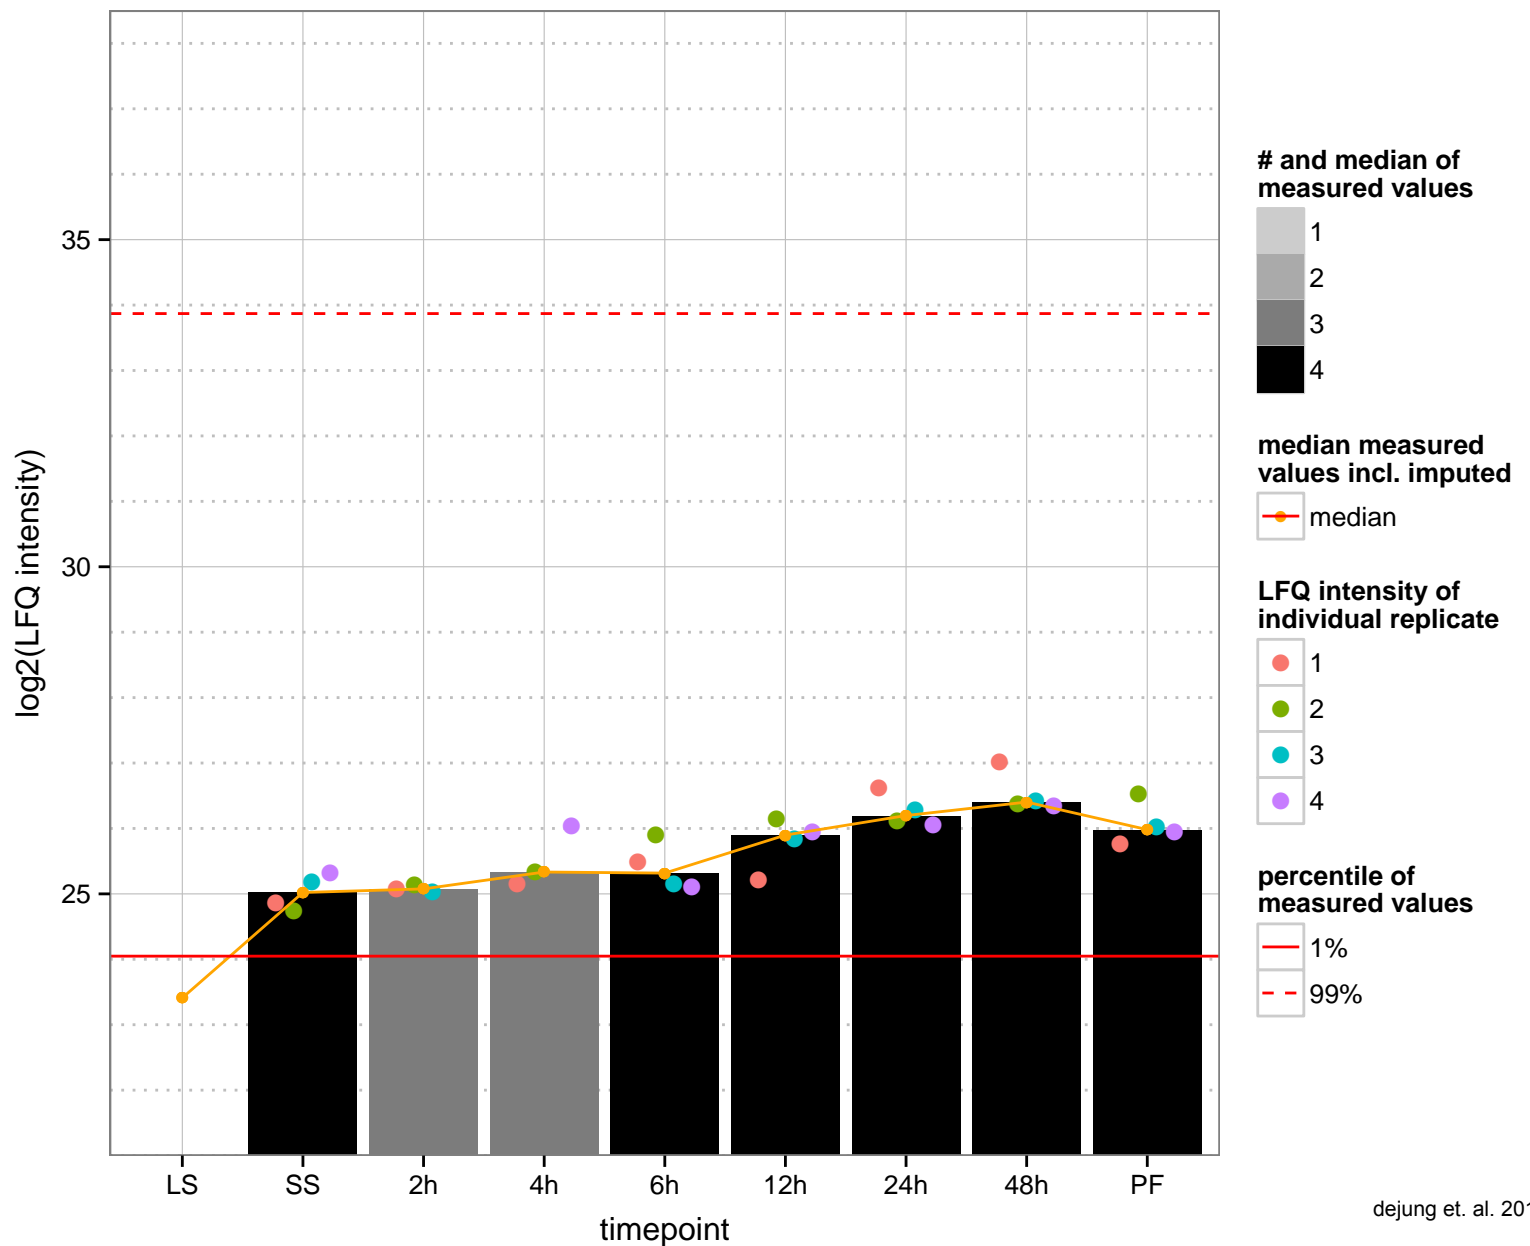



hypothetical protein, conserved  
 Tb927.6.1910  
 AGOF: null  
 AGOC: null  
 AGOP: null  
 PGOF: null  
 PGOC: null  
 PGOP: null

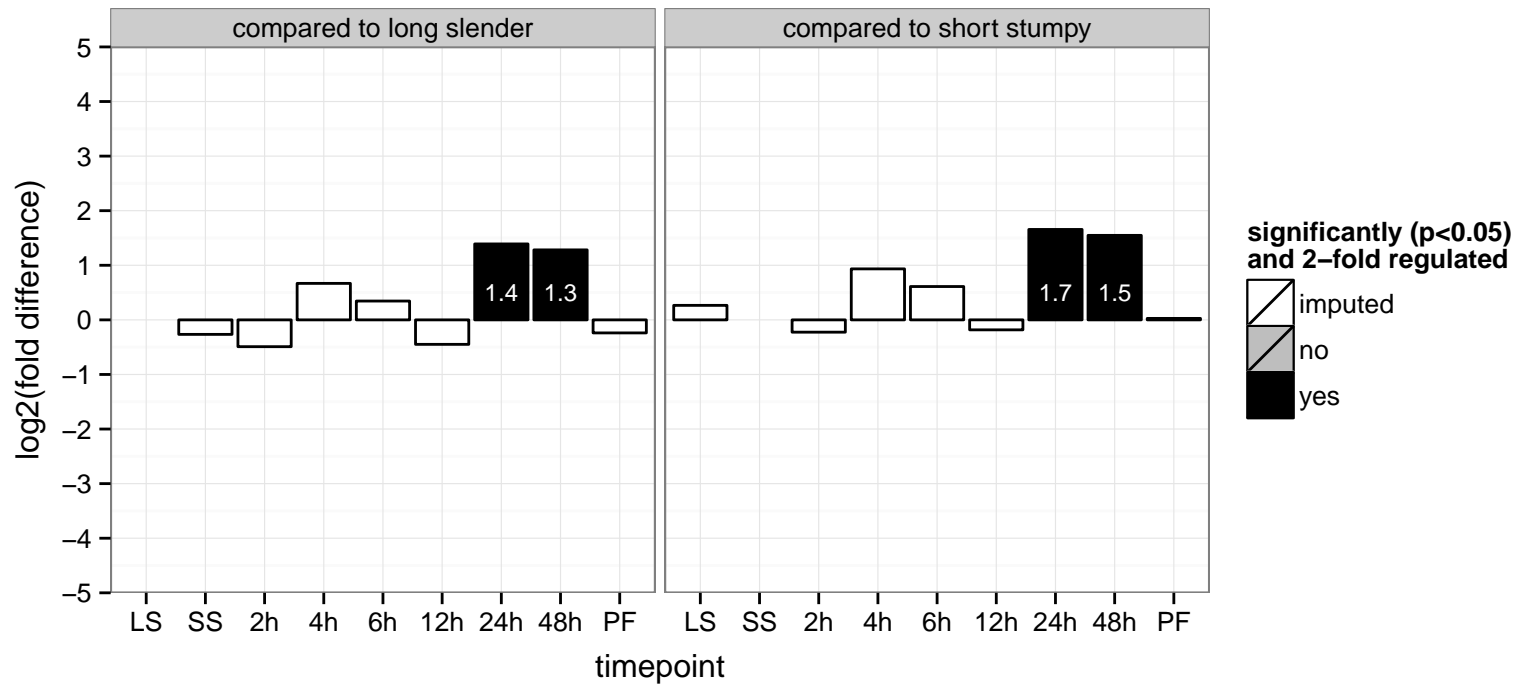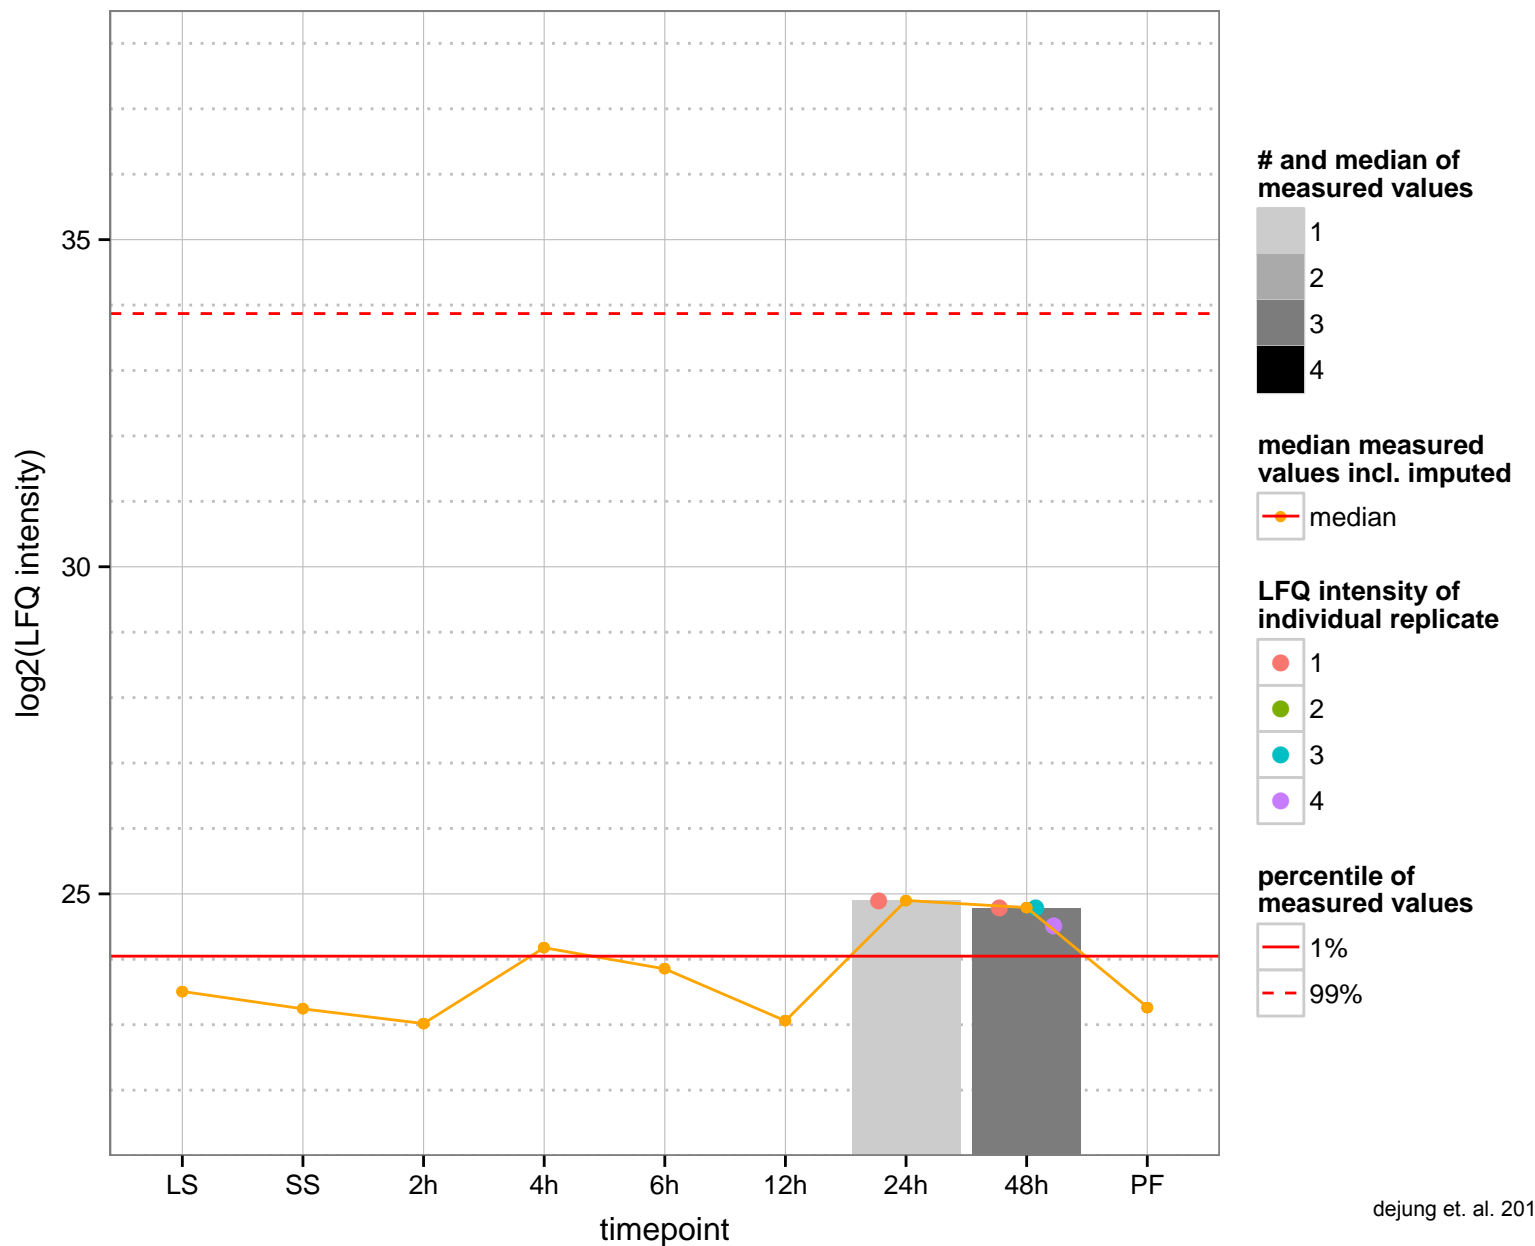

hypothetical protein, conserved  
 Tb927.6.3530  
 AGOF: null  
 AGOC: membrane  
 AGOP: transport  
 PGO: null  
 PGO: null  
 PGO: null

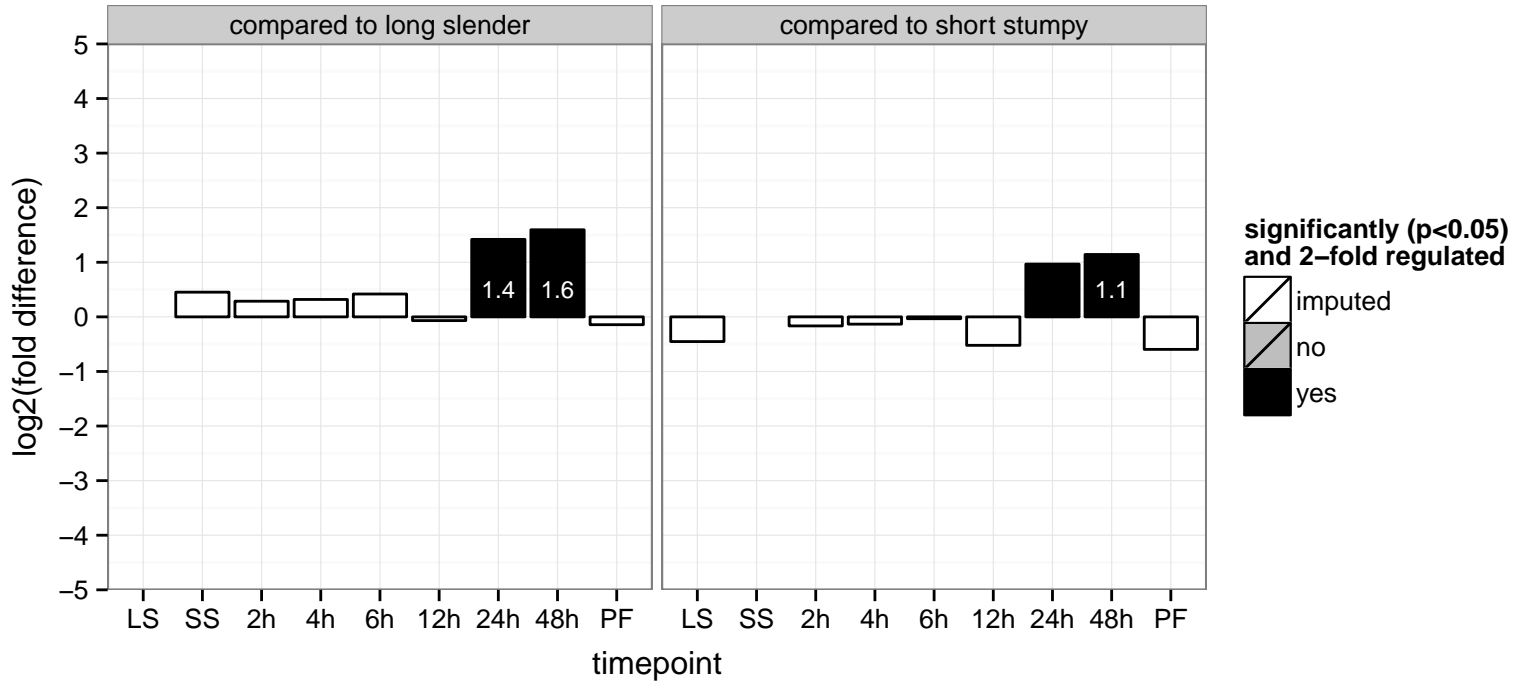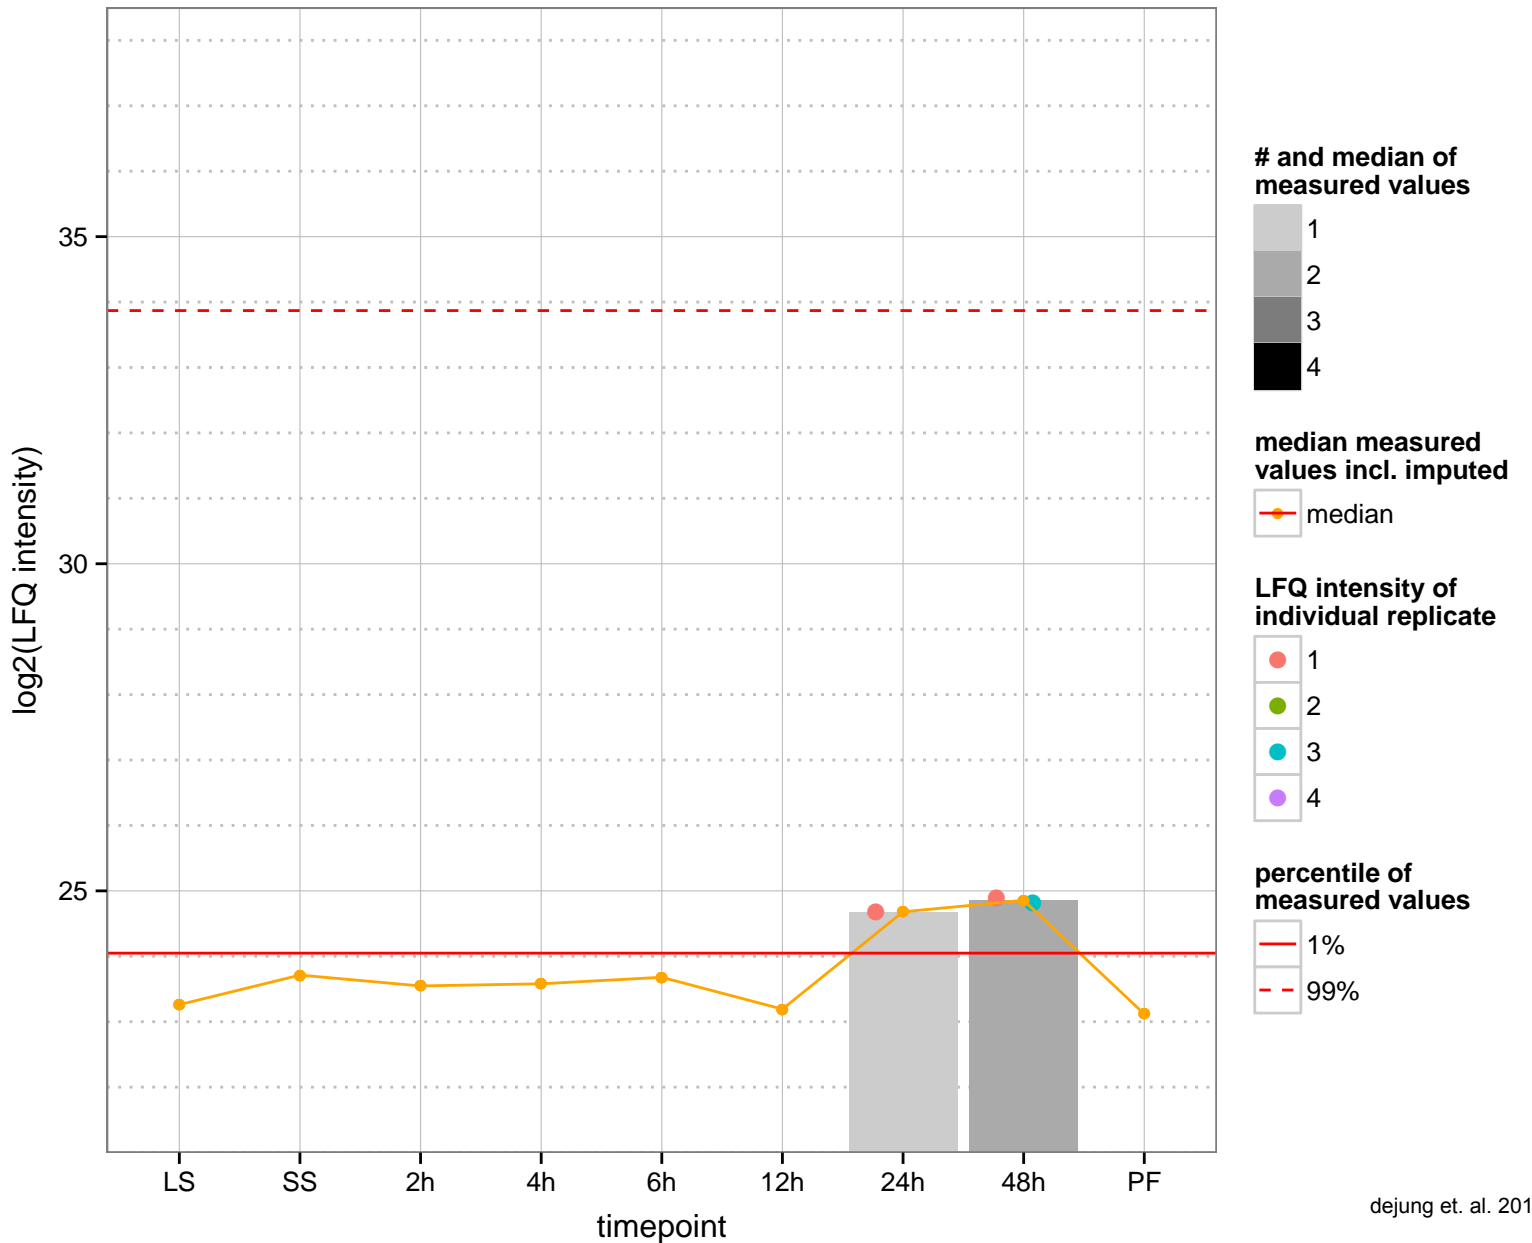

tubulin-tyrosine ligase-like protein, conserved  
 Tb927.6.3570  
 AGOF: tubulin-tyrosine ligase activity  
 AGOC: null  
 AGOP: cellular protein modification process  
 PGO: tubulin-tyrosine ligase activity  
 PGOC: null  
 PGOP: cellular protein modification process

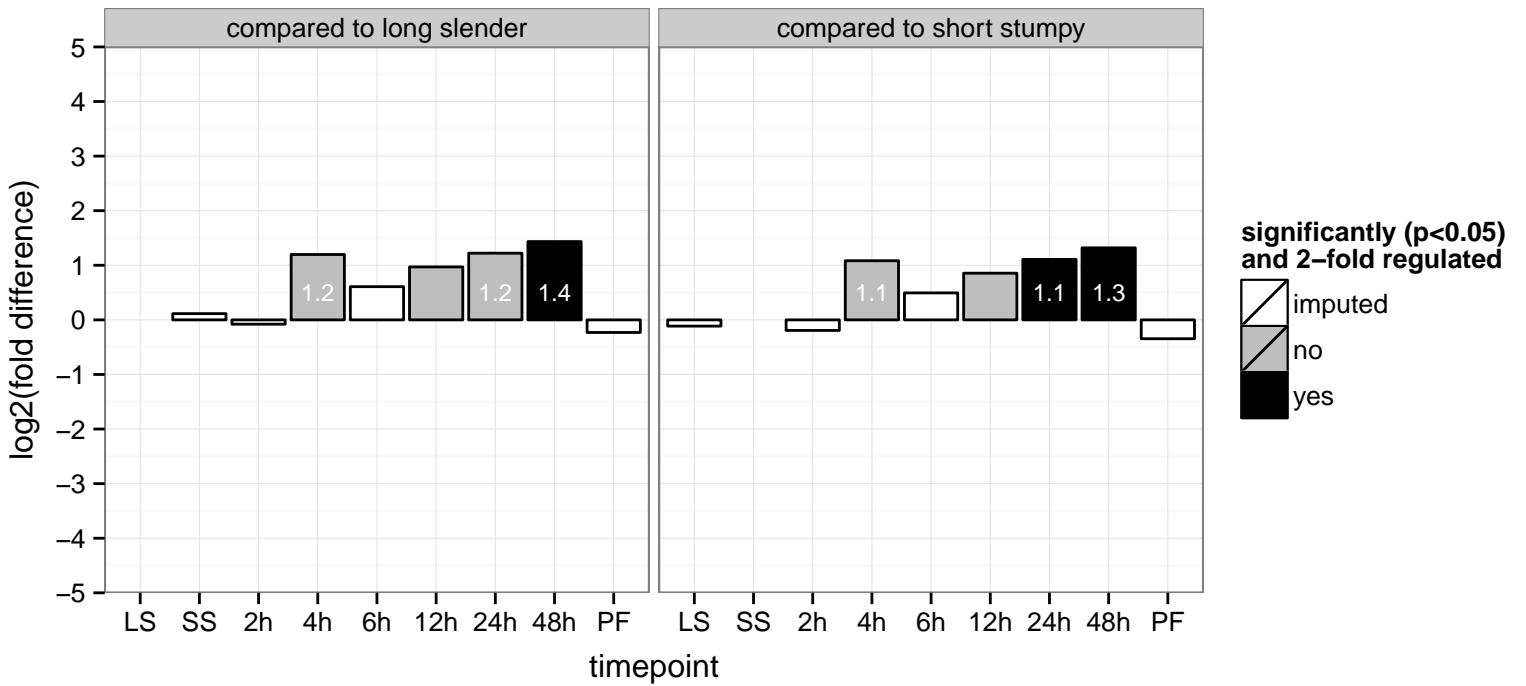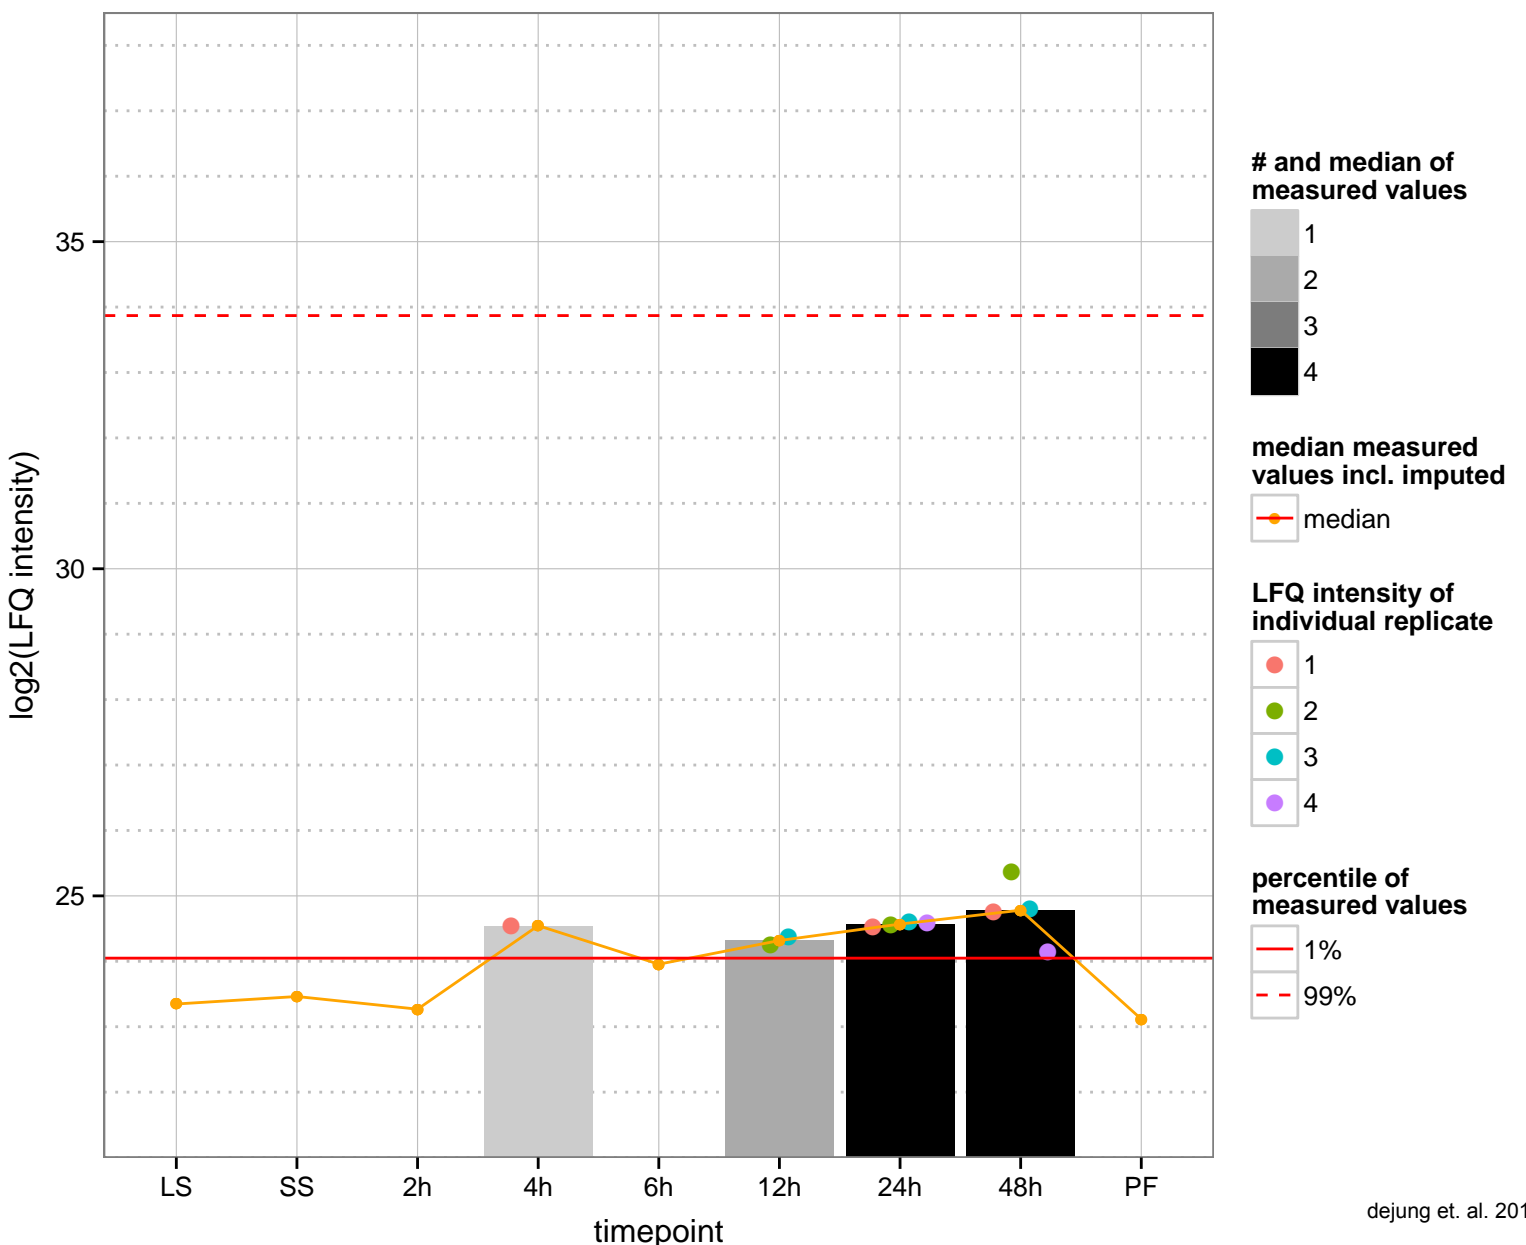

hypothetical protein, conserved  
 Tb927.6.3600  
 AGOF: null  
 AGOC: mitochondrion  
 AGOP: null  
 PGO: null  
 PGOC: null  
 PGOP: null

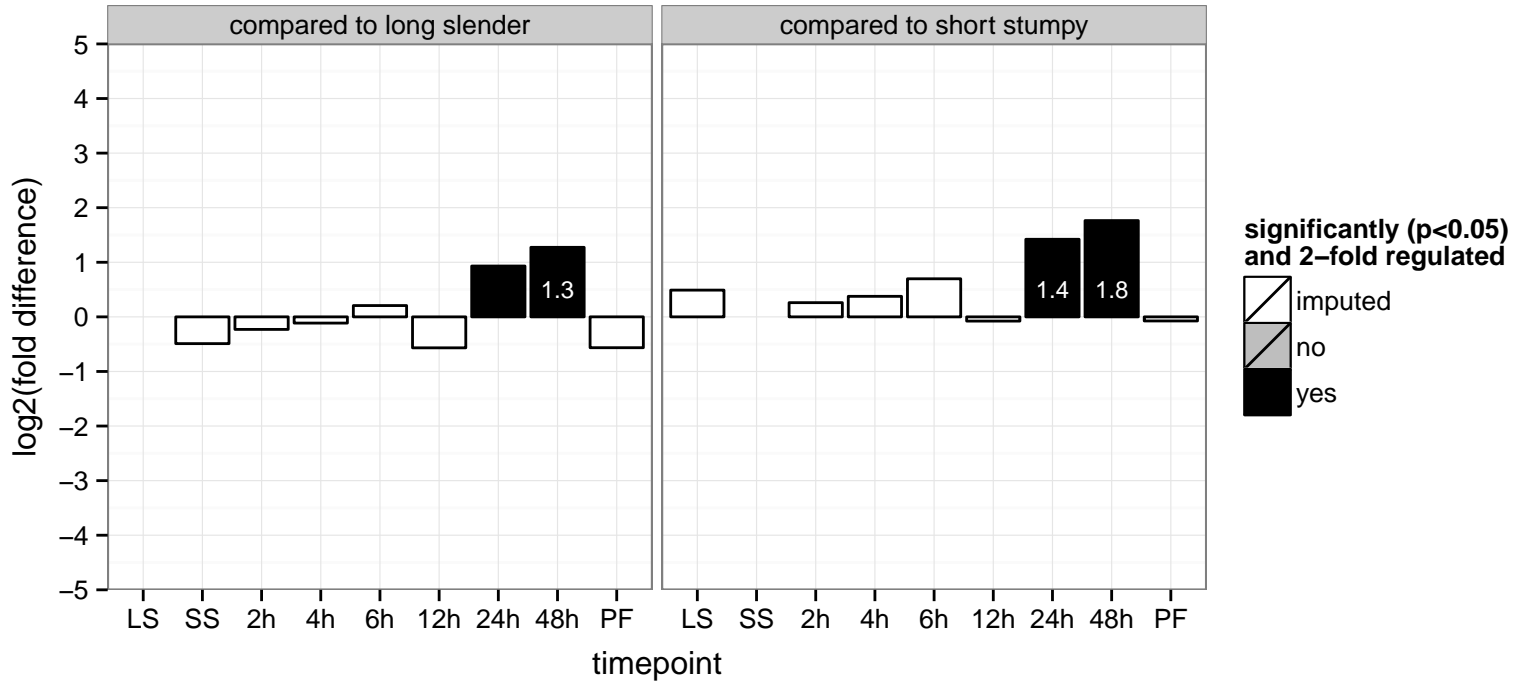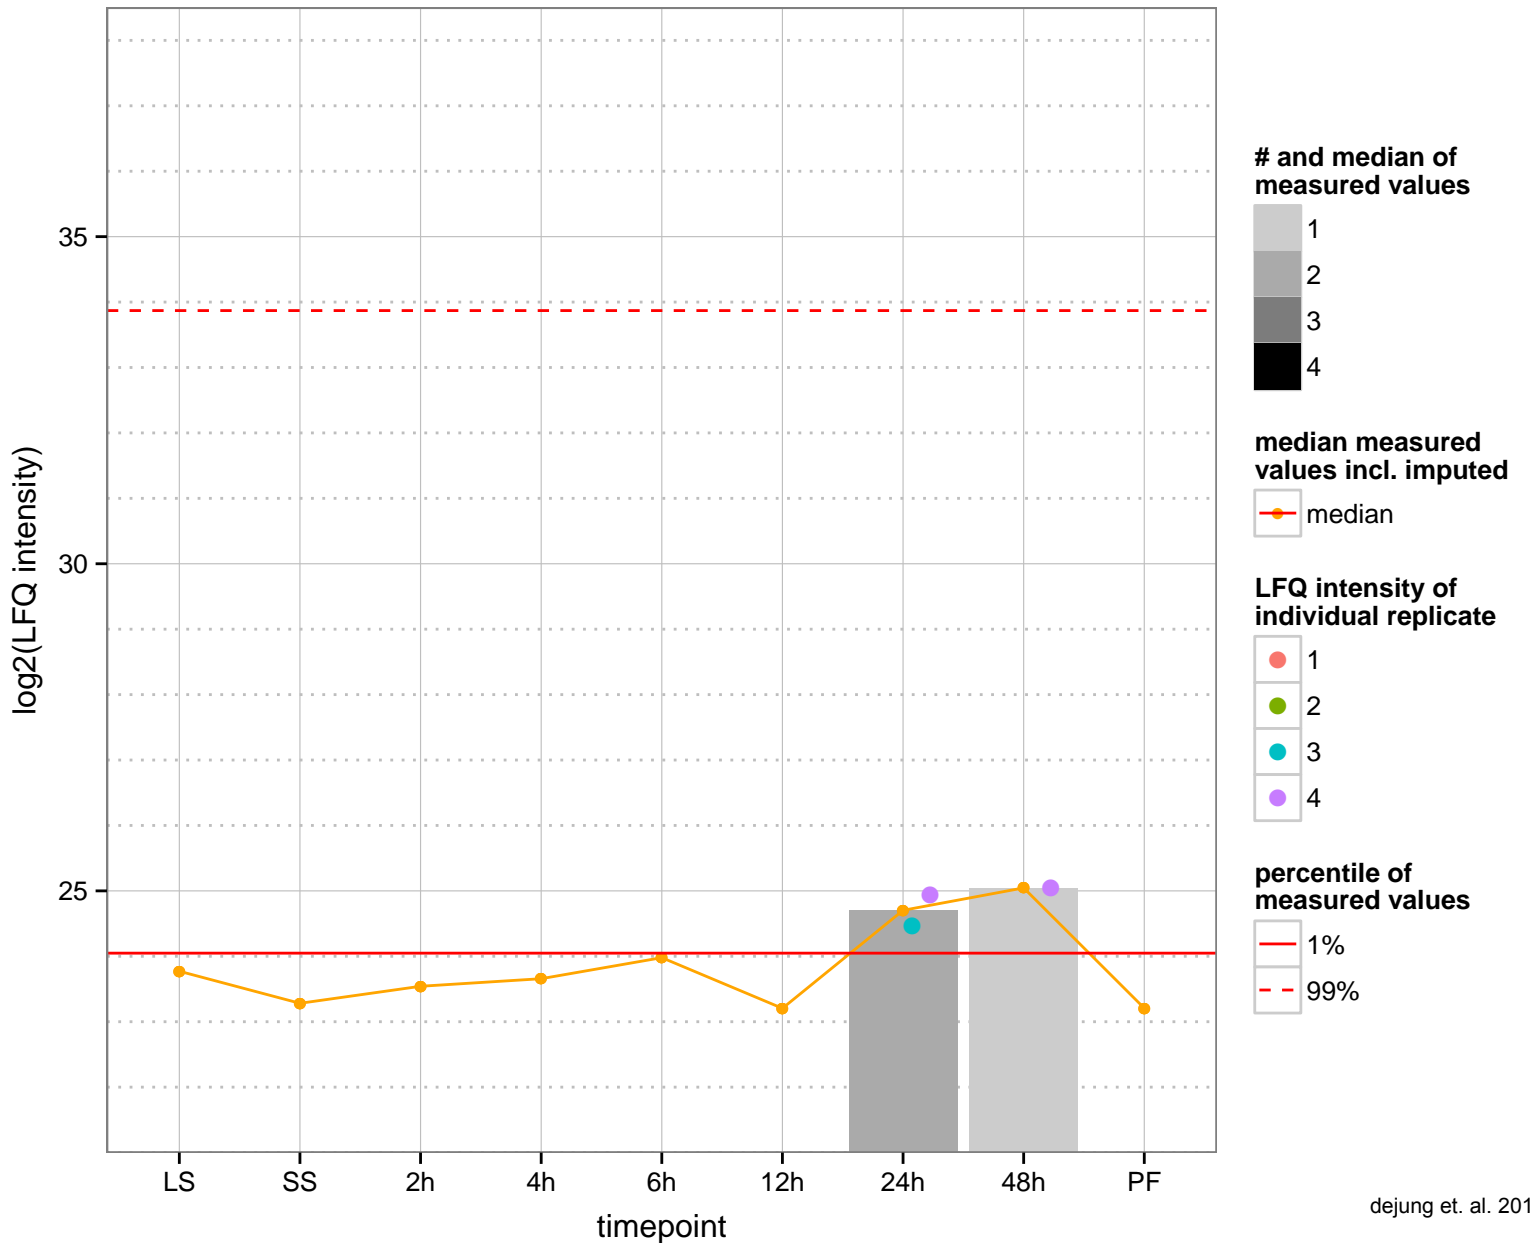

S-adenosylmethionine synthetase, putative (METK1)

Tb927.6.4920;Tb927.6.4910;Tb927.6.4900;Tb927.6.4880;Tb927.6.4860;Tb927.6.4850;Tb927.6.4840;Tb927.6.4890;Tb927.6.4880

AGOF: ATP binding, methionine adenosyltransferase activity

AGOC: null

AGOP: one-carbon metabolic process

PGOF: null, ATP binding, methionine adenosyltransferase activity

PGOC: null

PGOP: null, S-adenosylmethionine biosynthetic process

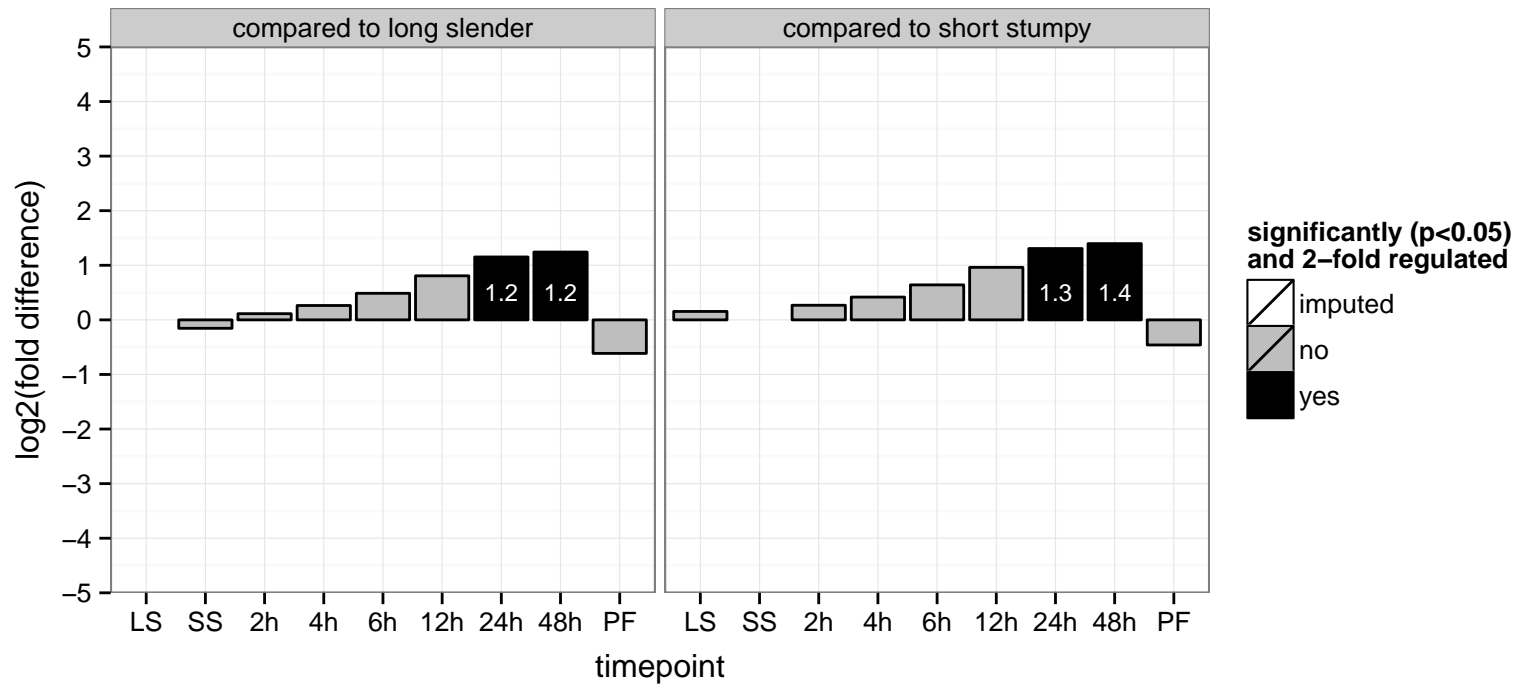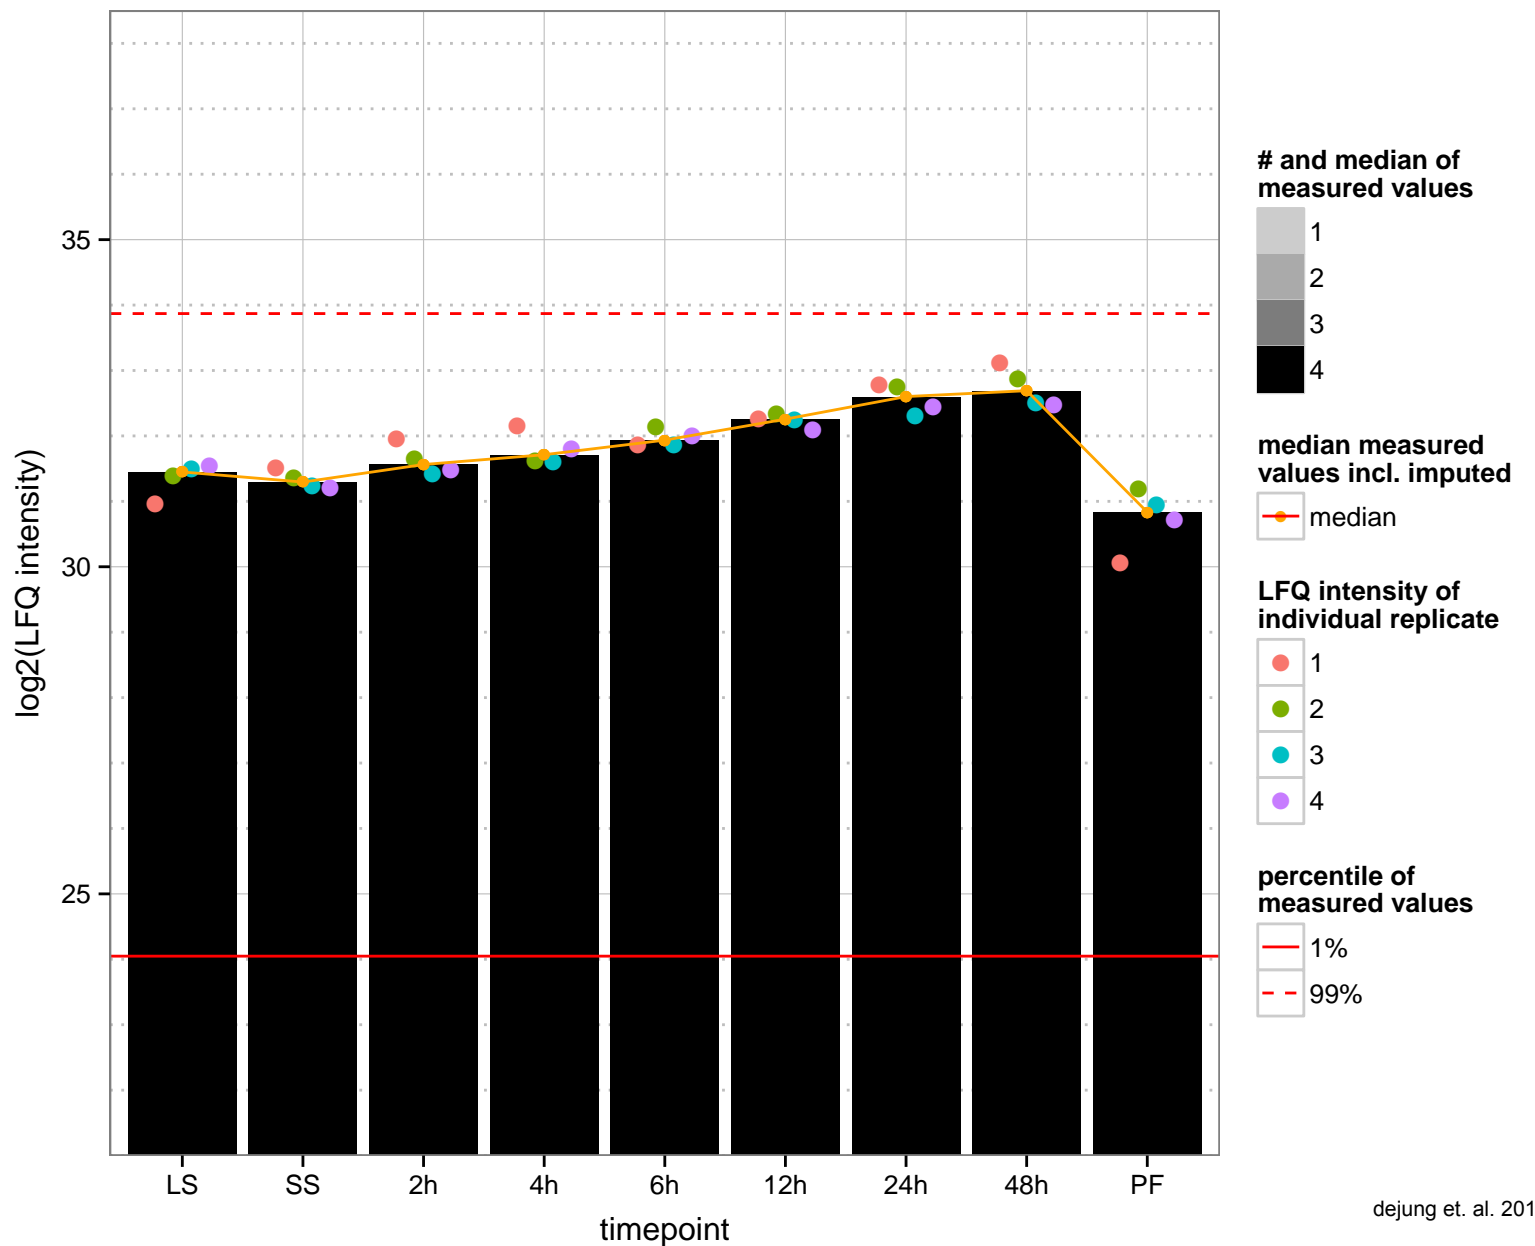

Zinc finger CCCH domain-containing protein 47 (zc3h47)  
 Tb927.6.4960  
 AGOF: RNA binding, nucleic acid binding, zinc ion binding  
 AGOC: null  
 AGOP: null  
 PGOF: nucleic acid binding, zinc ion binding  
 PGO: null  
 PGOP: null

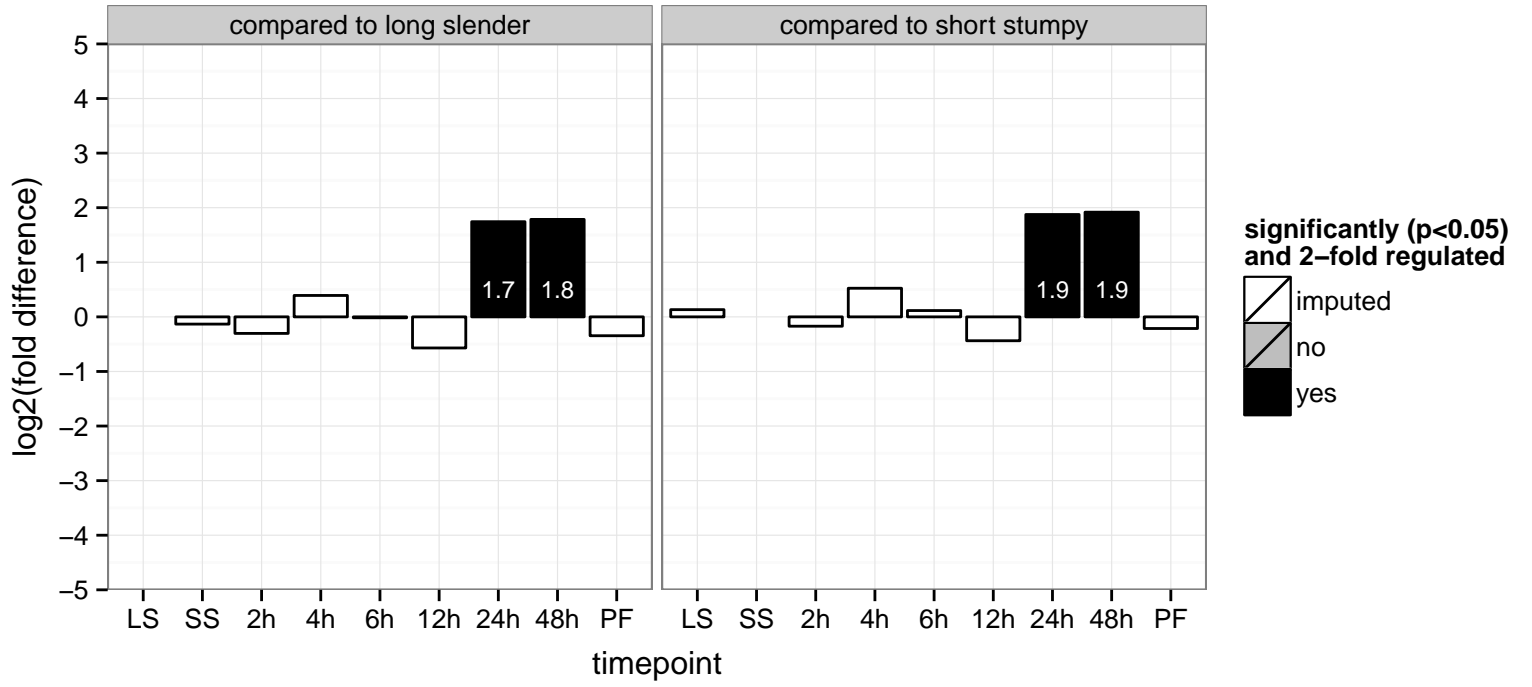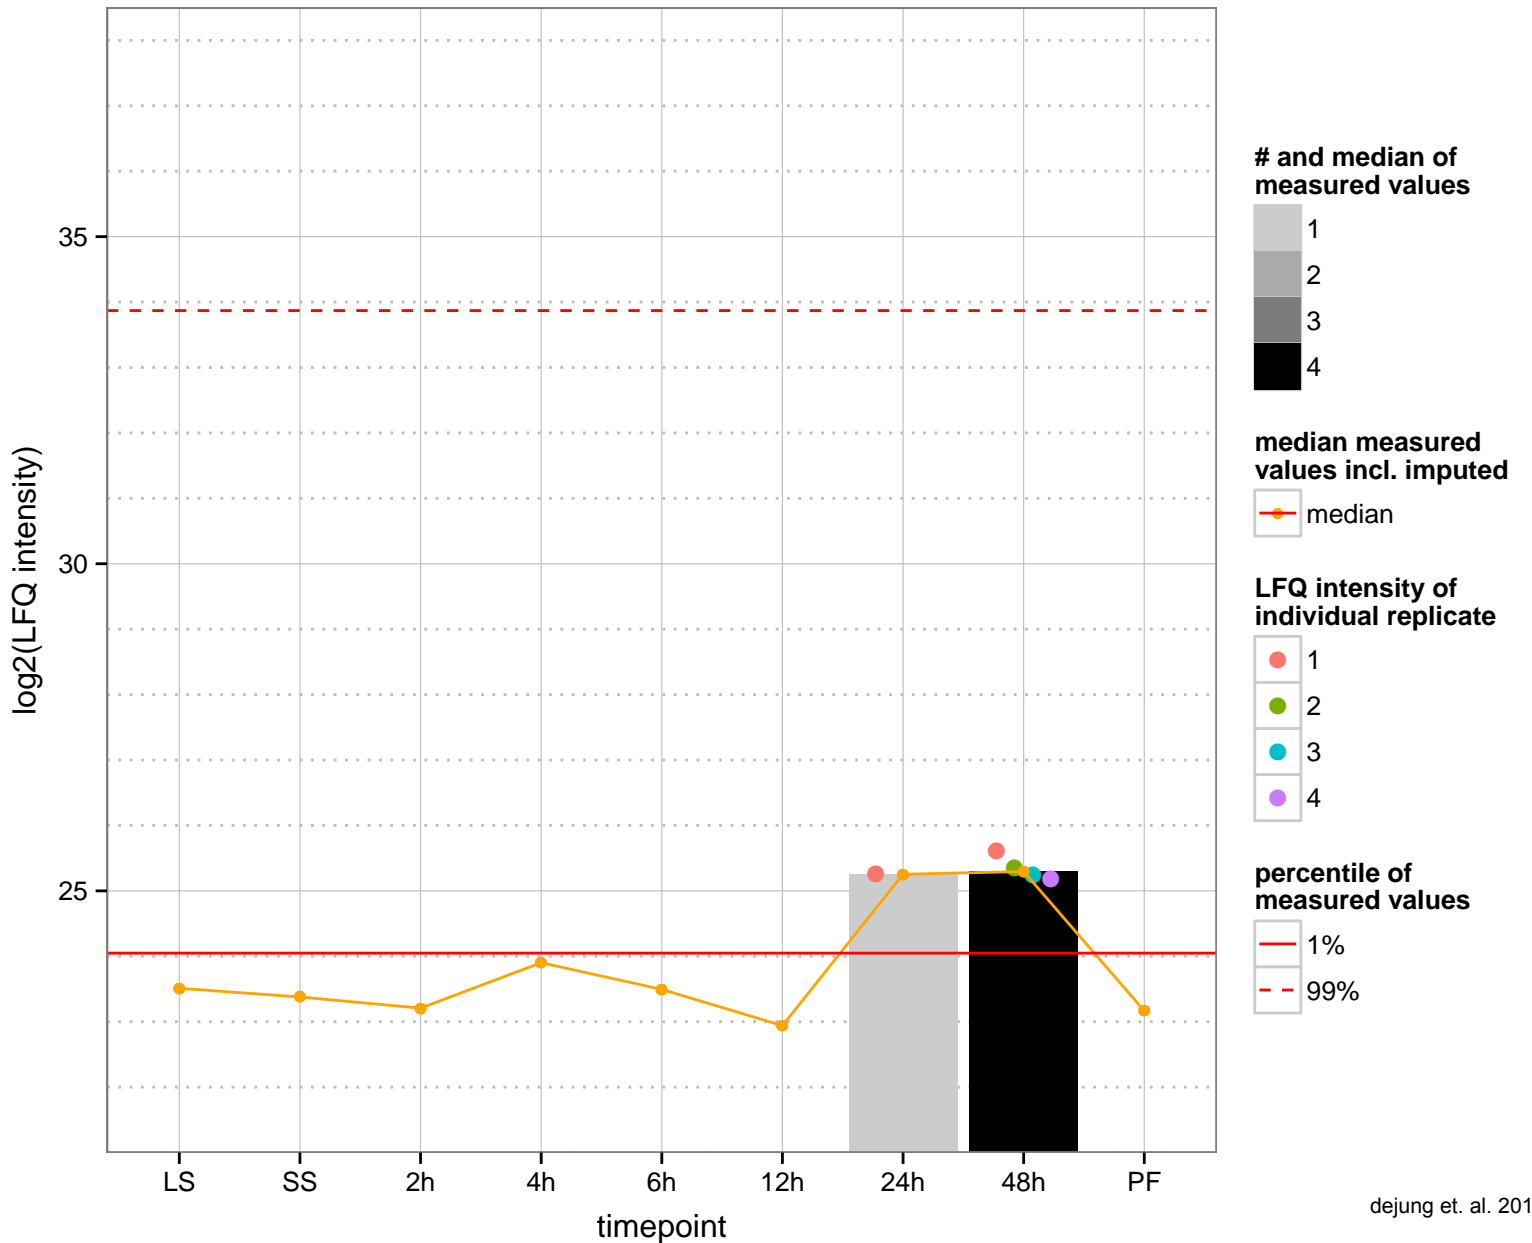

40S ribosomal protein S33, putative  
 Tb927.7.240;Tb927.7.230  
 AGOF: structural constituent of ribosome  
 AGOC: intracellular, ribosome  
 AGOP: translation  
 PGOF: null, structural constituent of ribosome  
 PGO: null, intracellular, ribosome  
 PGOP: null, translation

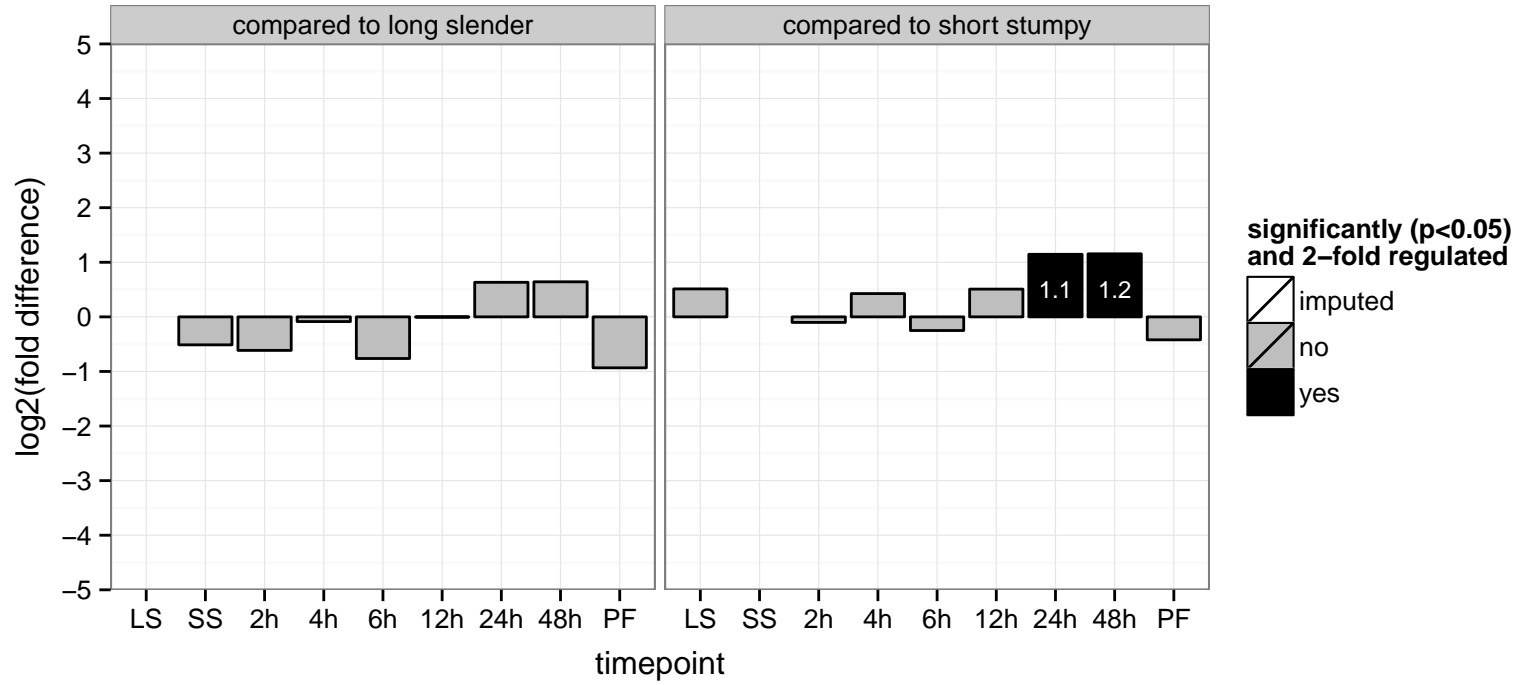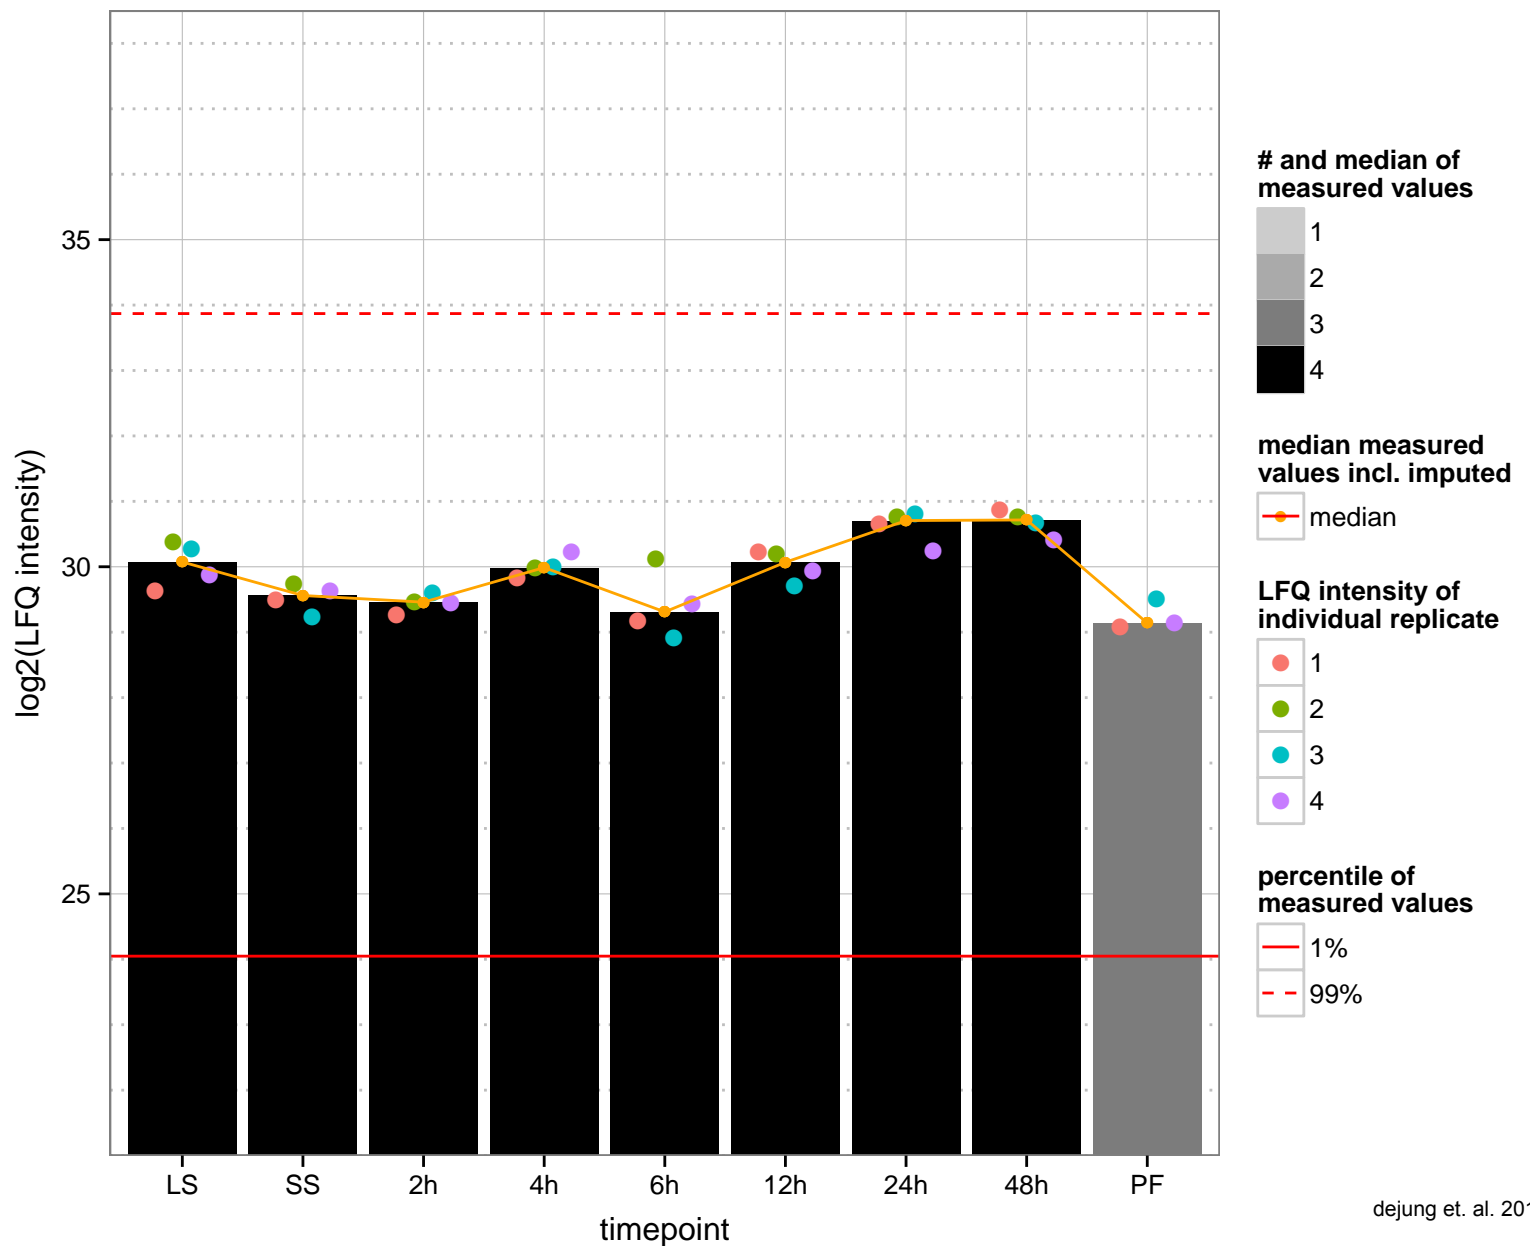

hypothetical protein, conserved

Tb927.7.7130

AGOF: FMN binding, iron-sulfur cluster binding, oxidoreductase activity

AGOC: null

AGOP: null

PGOF: FMN binding, catalytic activity, iron-sulfur cluster binding, oxidoreductase activity

PGOC: null

PGOP: null

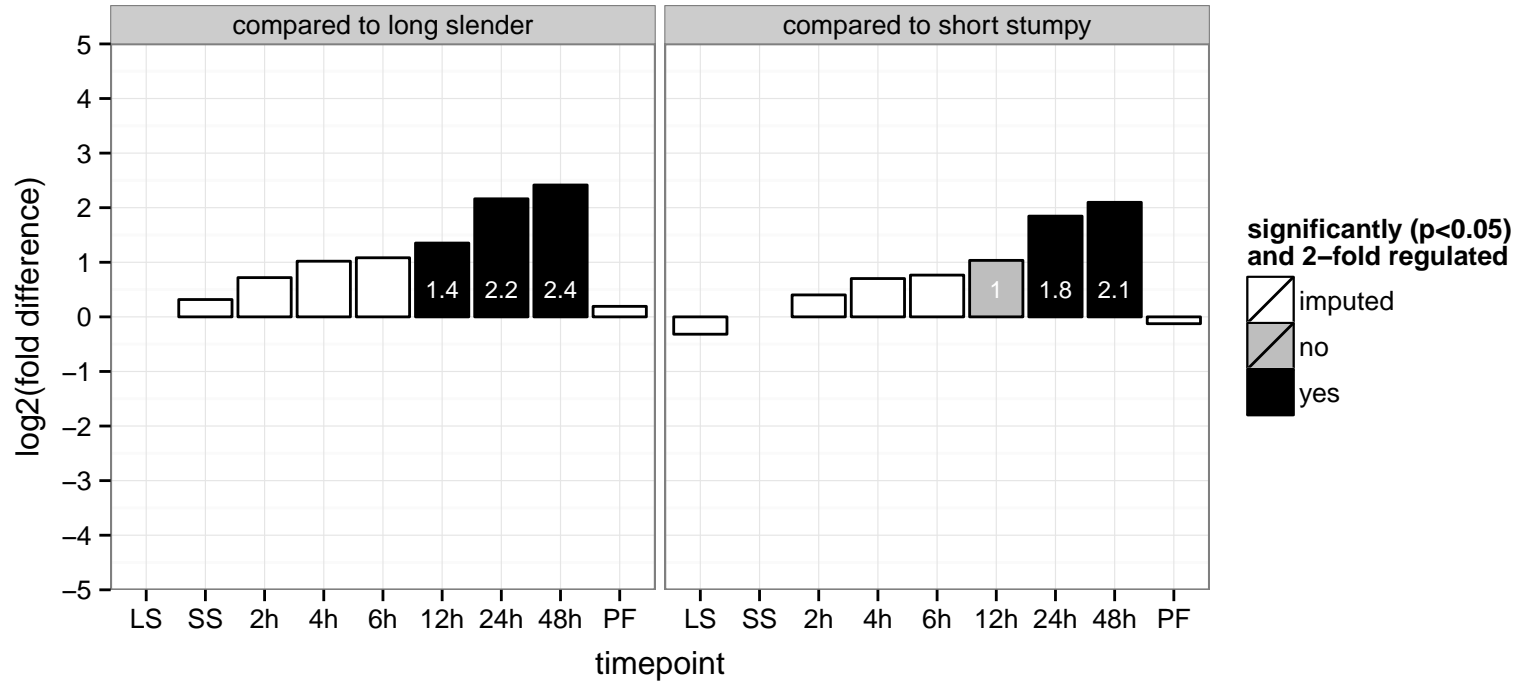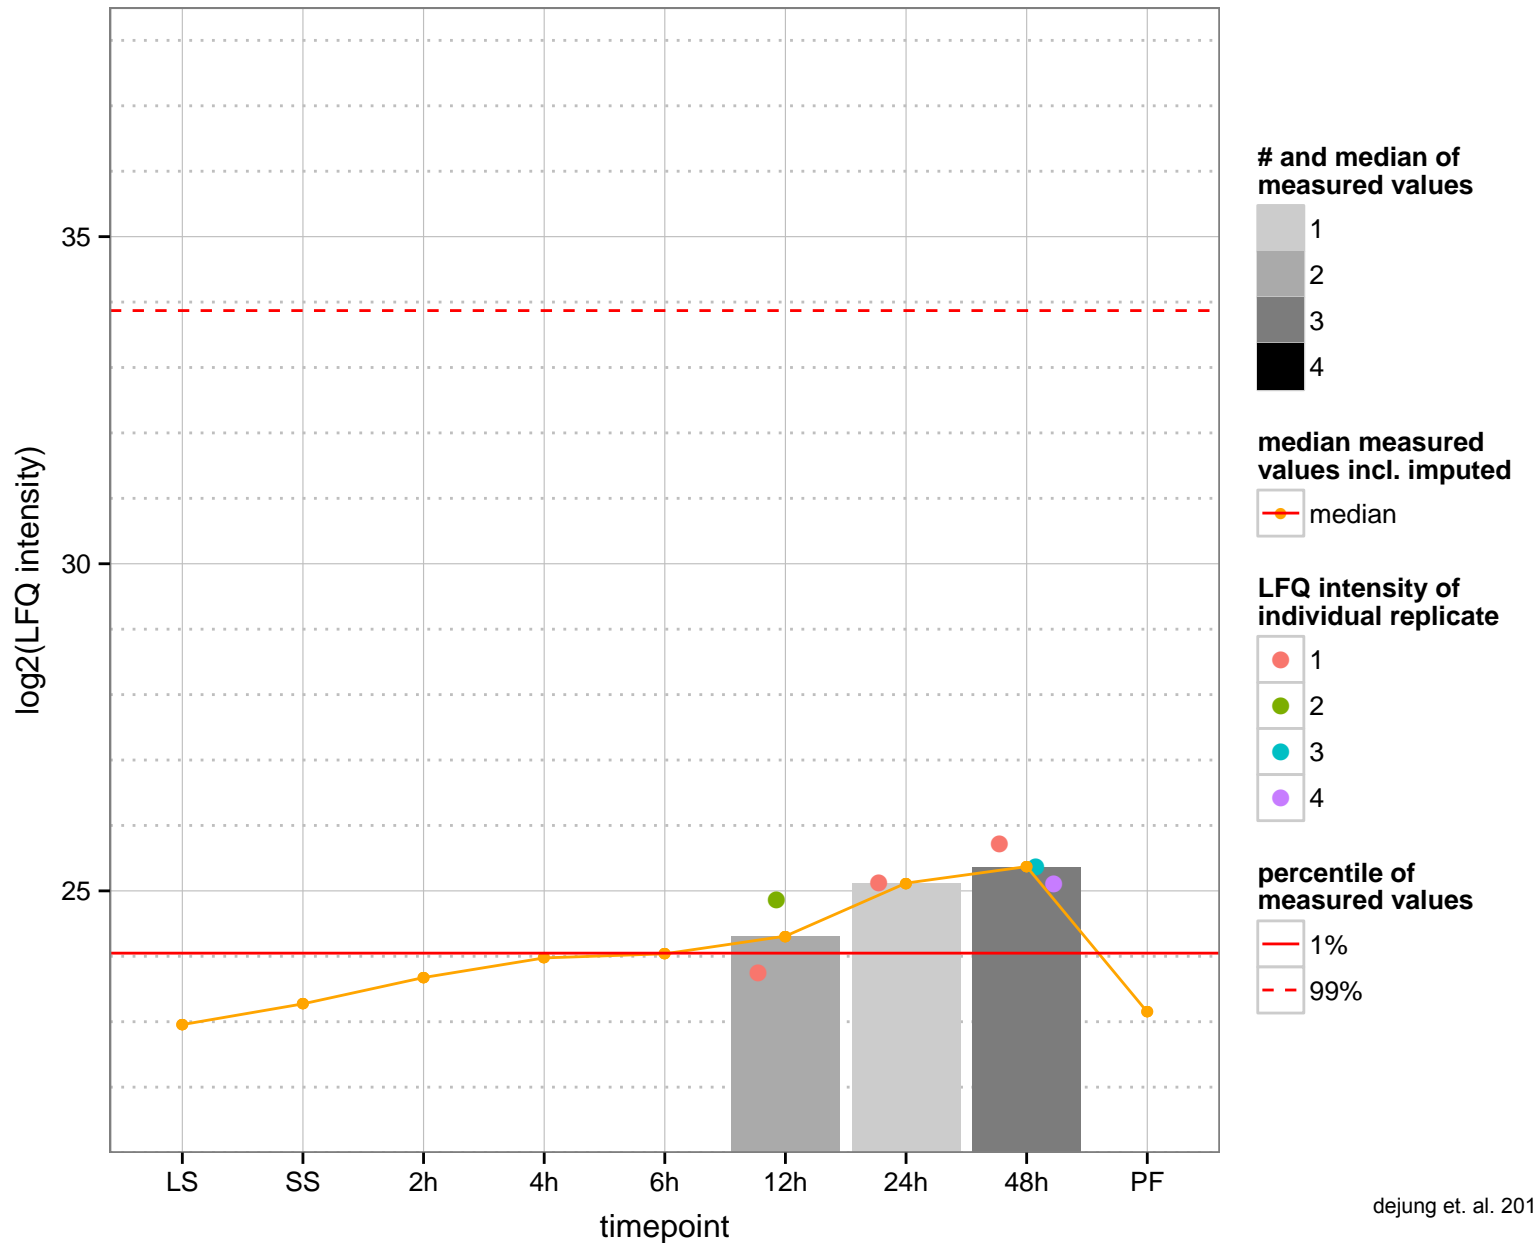



thymine-7-hydroxylase, putative (TLP7)

Tb927.7.7500

AGOF: ferrous iron binding, oxidoreductase activity

AGOC: null

AGOP: metabolic process

PGOF: oxidoreductase activity, oxidoreductase activity, acting on paired donors, with incorporation or reduction of molecular oxygen

PGOC: null

PGOP: oxidation-reduction process

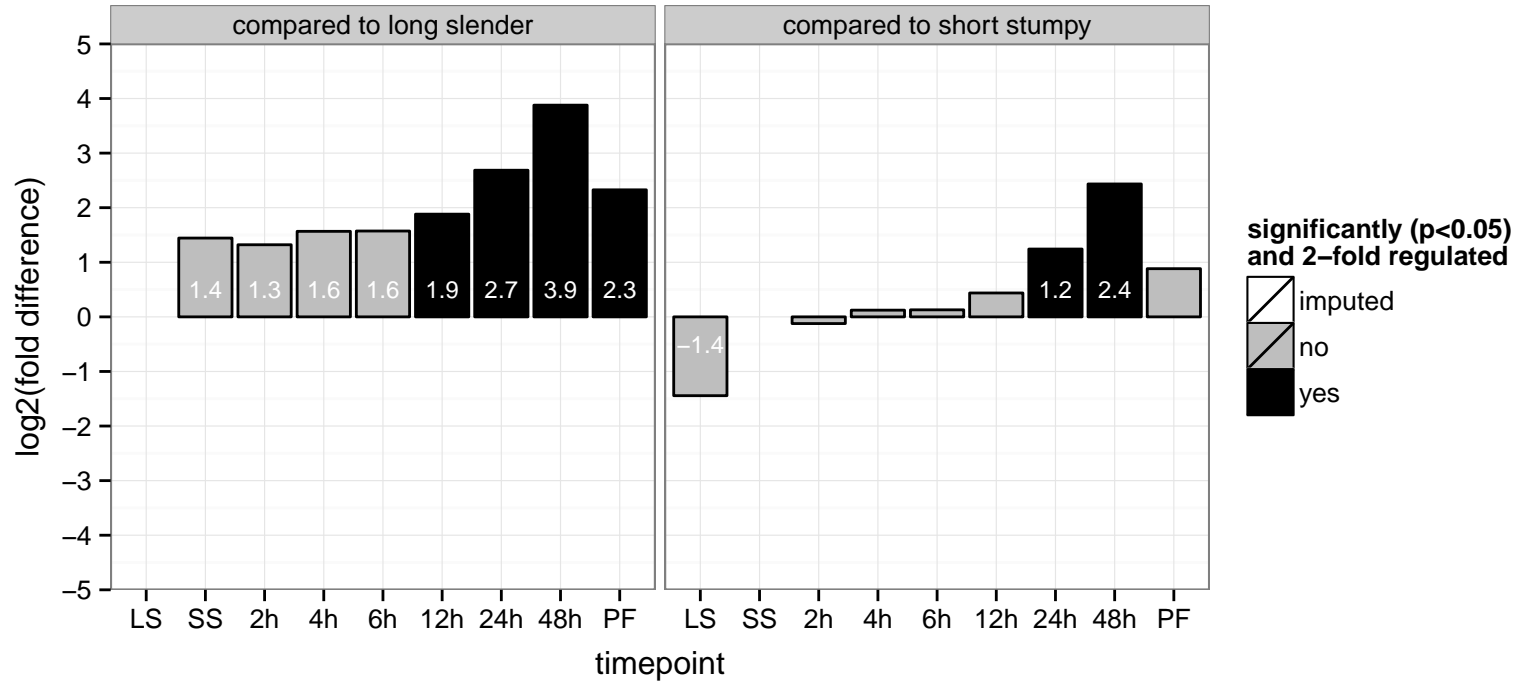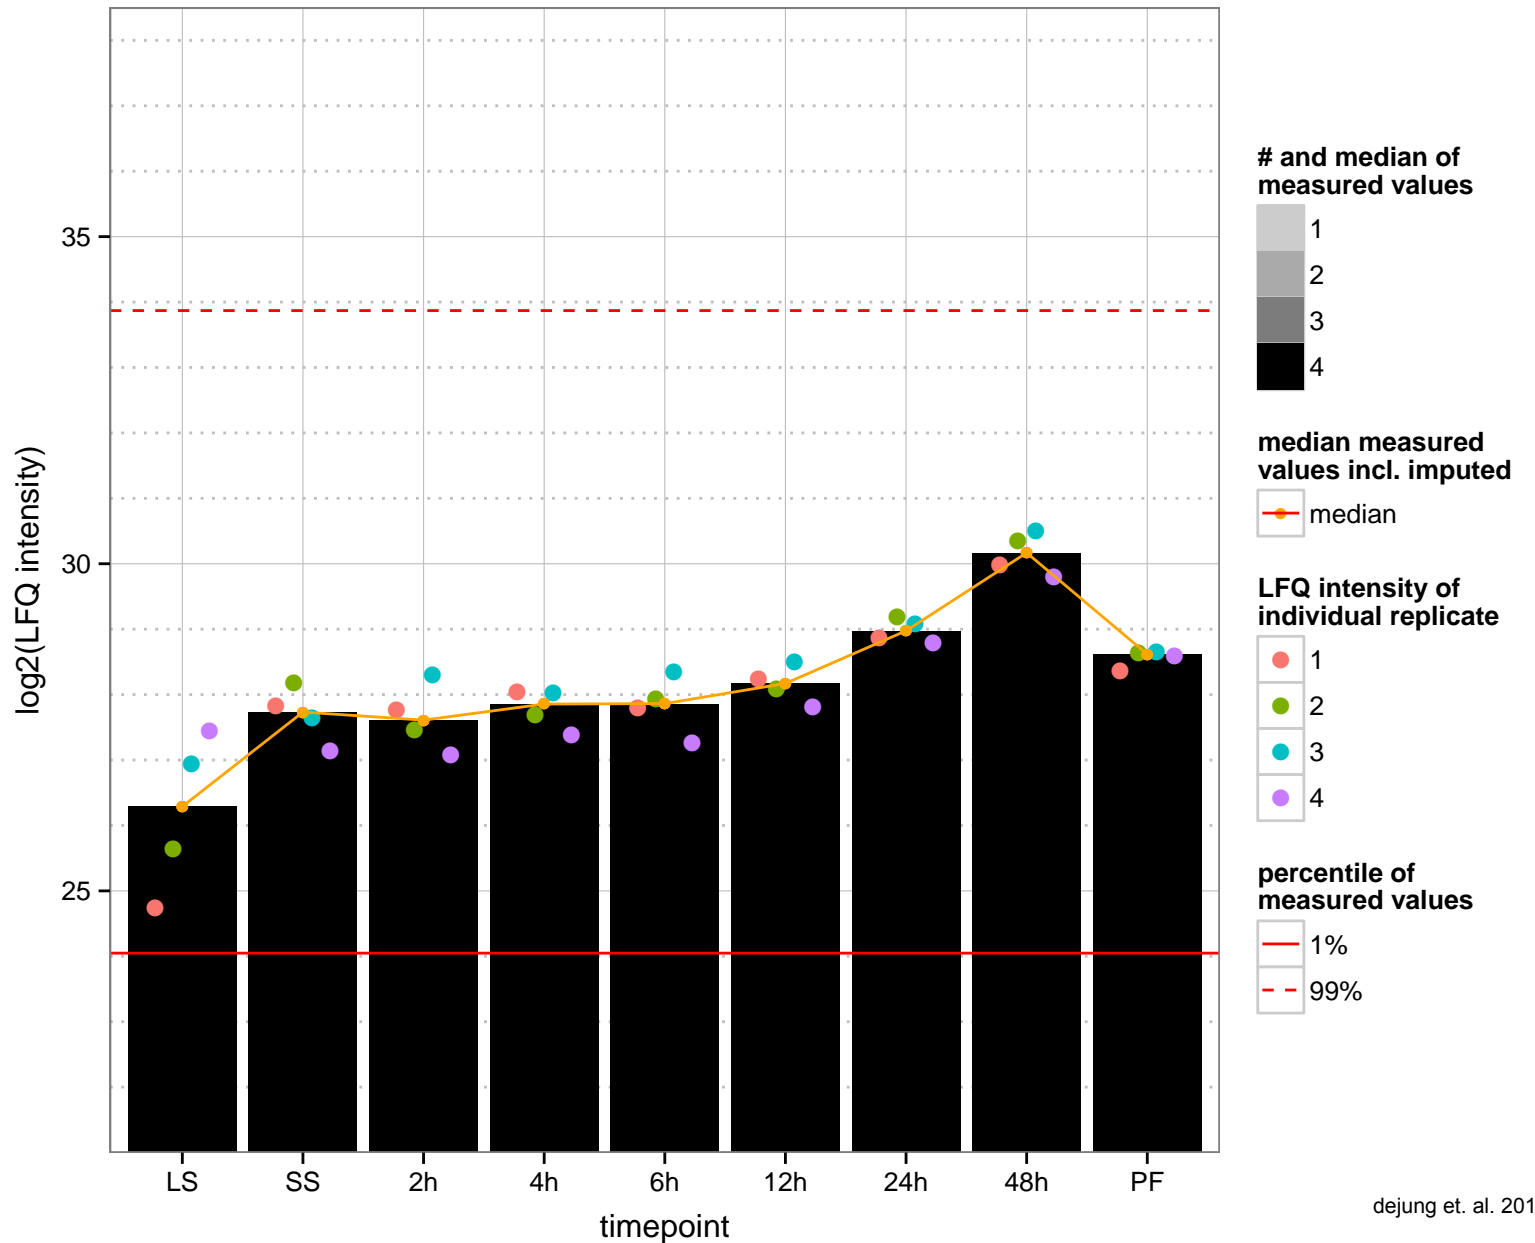

conserved protein  
 Tb927.8.1270  
 AGOF: null  
 AGOC: null  
 AGOP: null  
 PGOF: null  
 PGO: null  
 PGOP: null

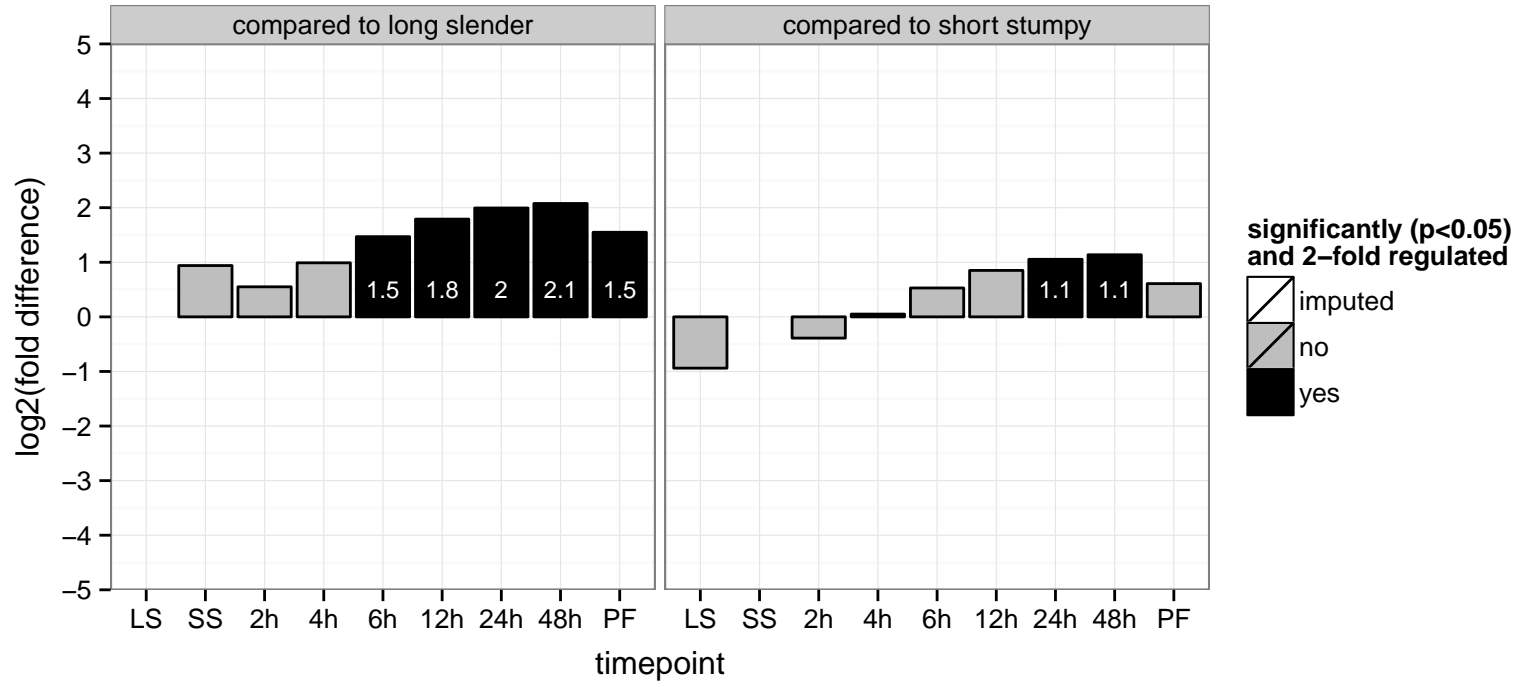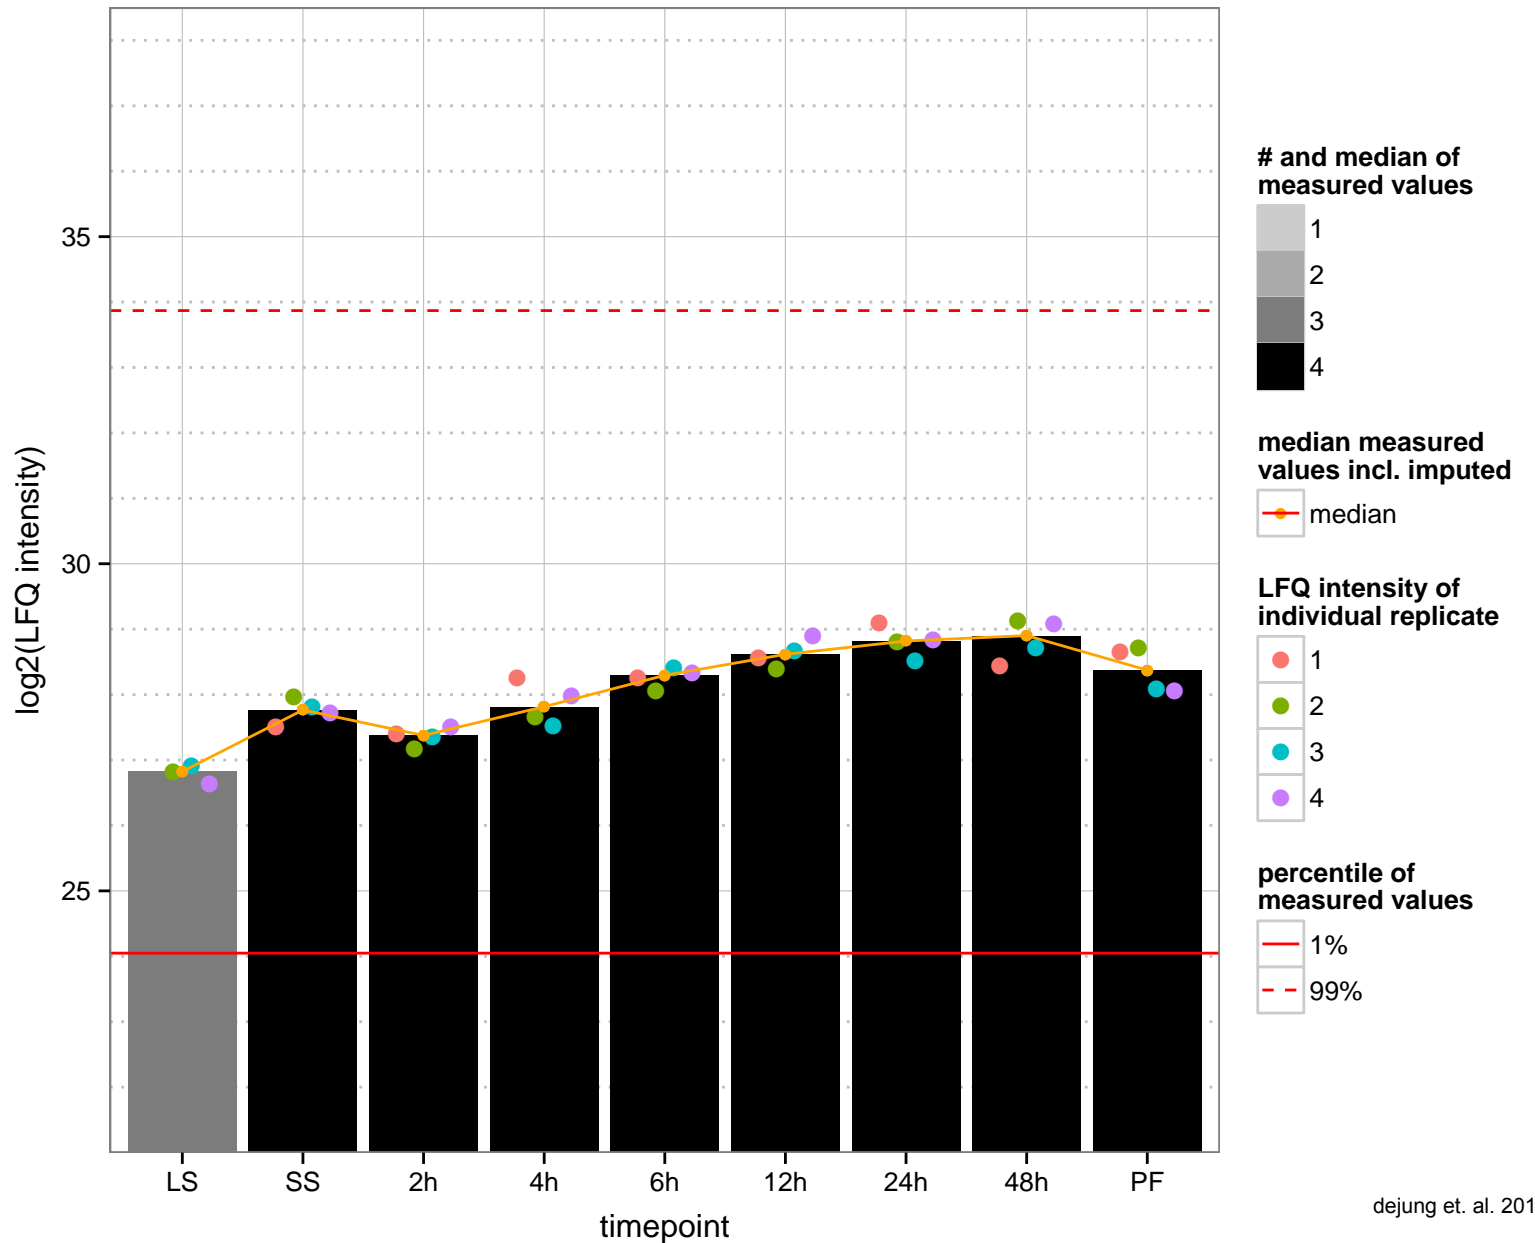

hypothetical protein, conserved  
 Tb927.8.3050  
 AGOF: null  
 AGOC: null  
 AGOP: null  
 PGO: null  
 PGOC: null  
 PGOP: null

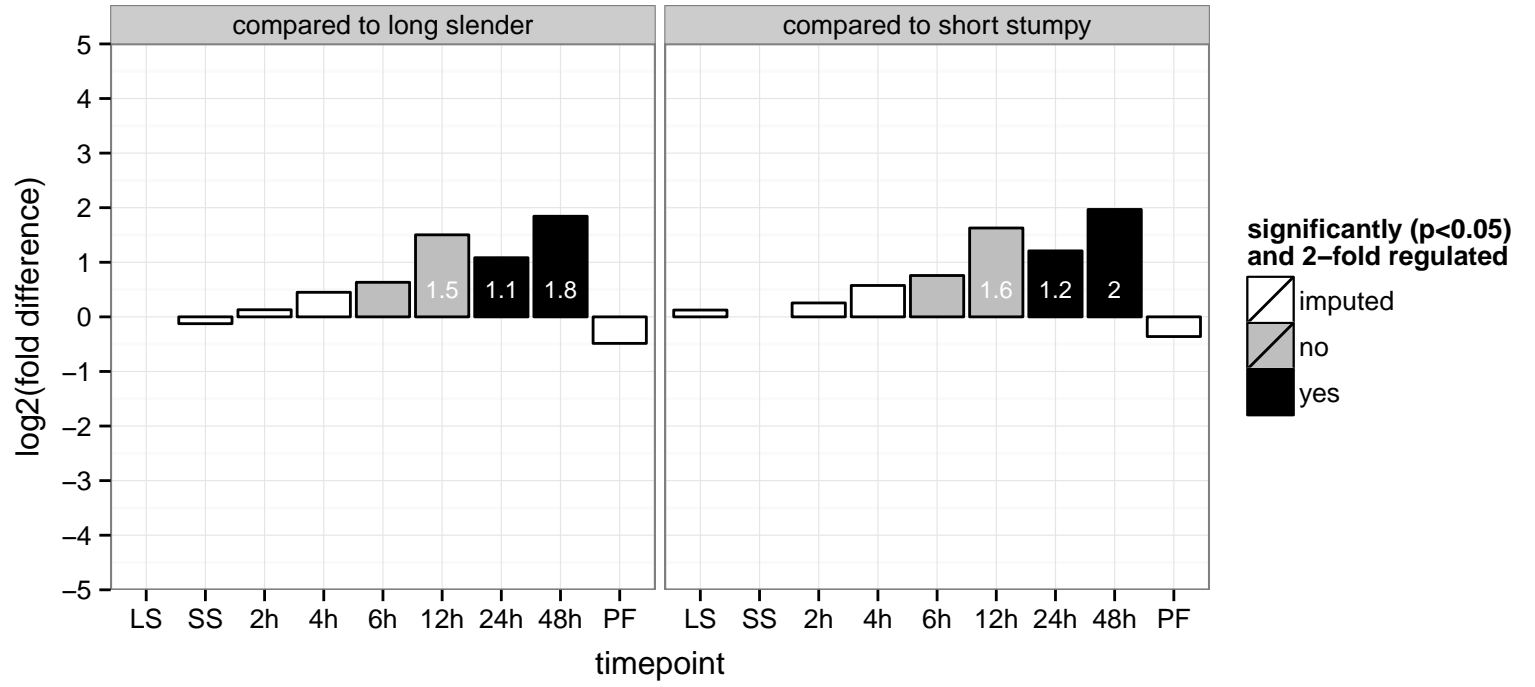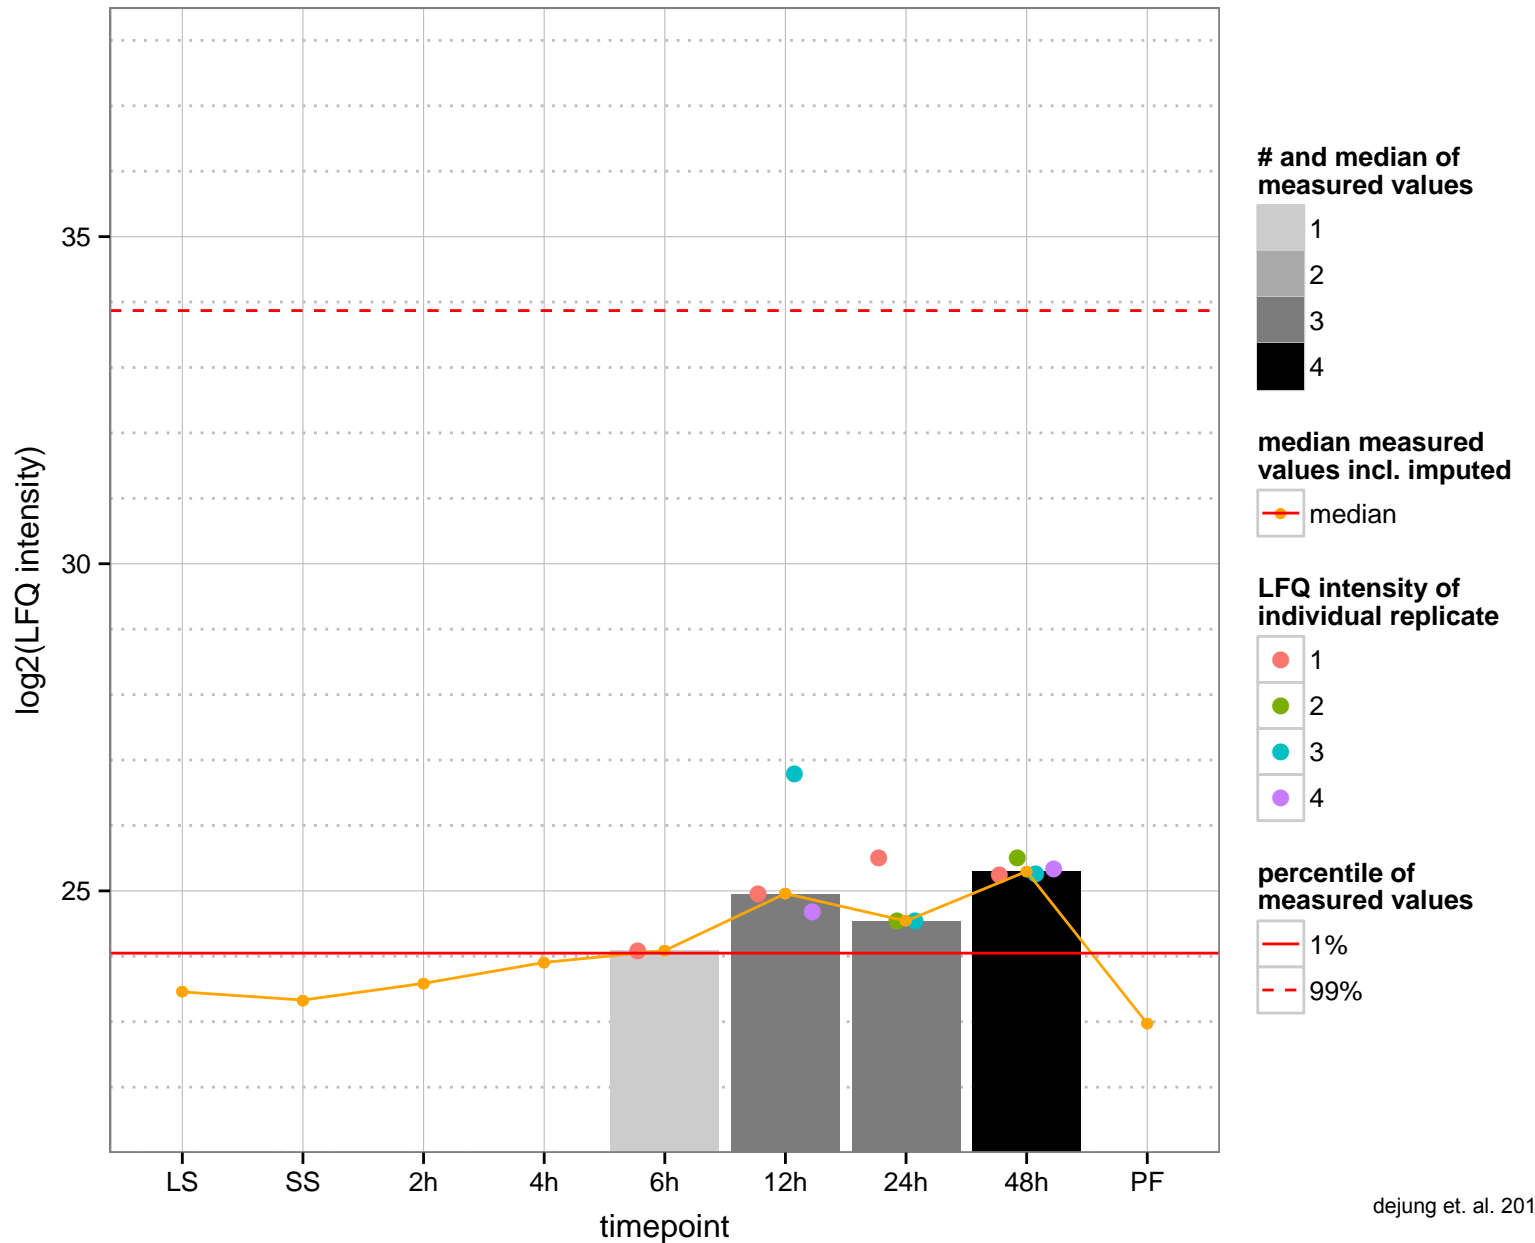

hypothetical protein, conserved  
 Tb927.8.3540  
 AGOF: null  
 AGOC: null  
 AGOP: null  
 PGO: null  
 PGOC: null  
 PGOP: null

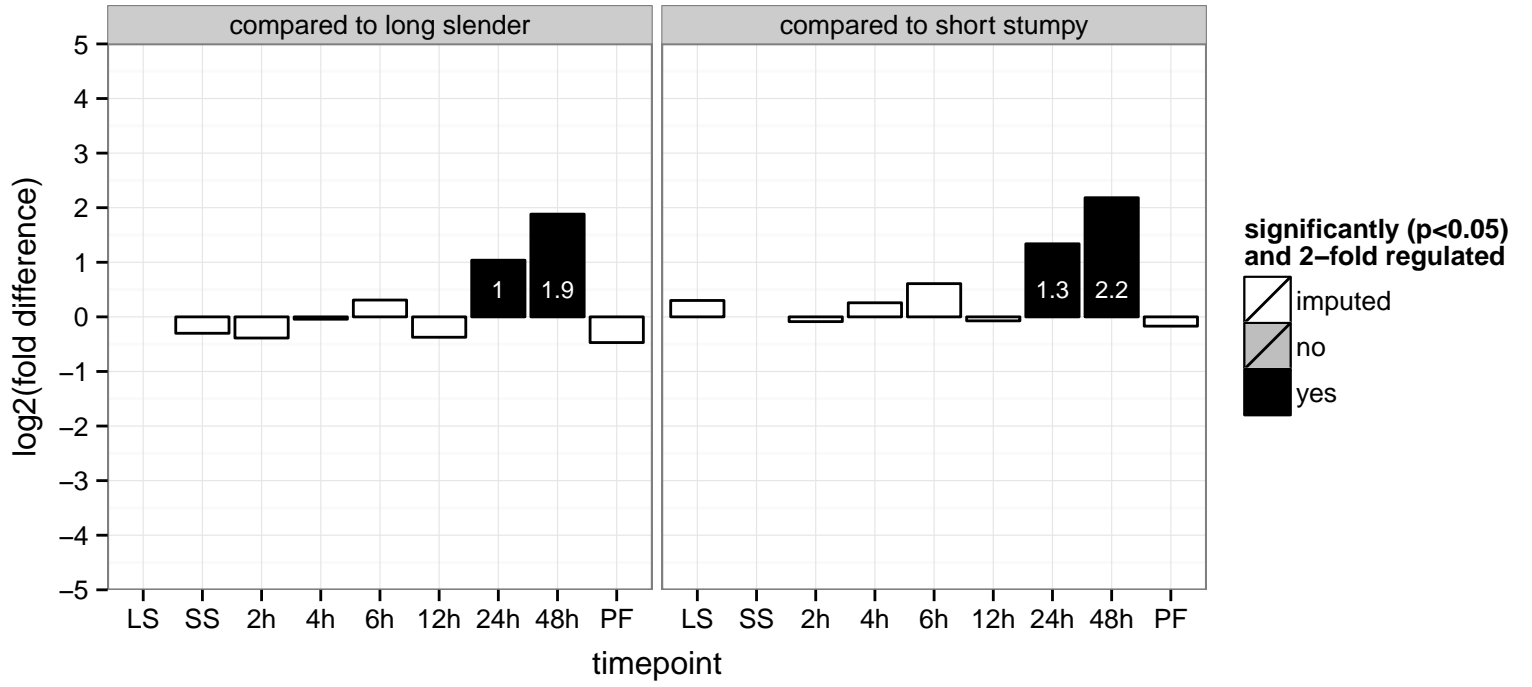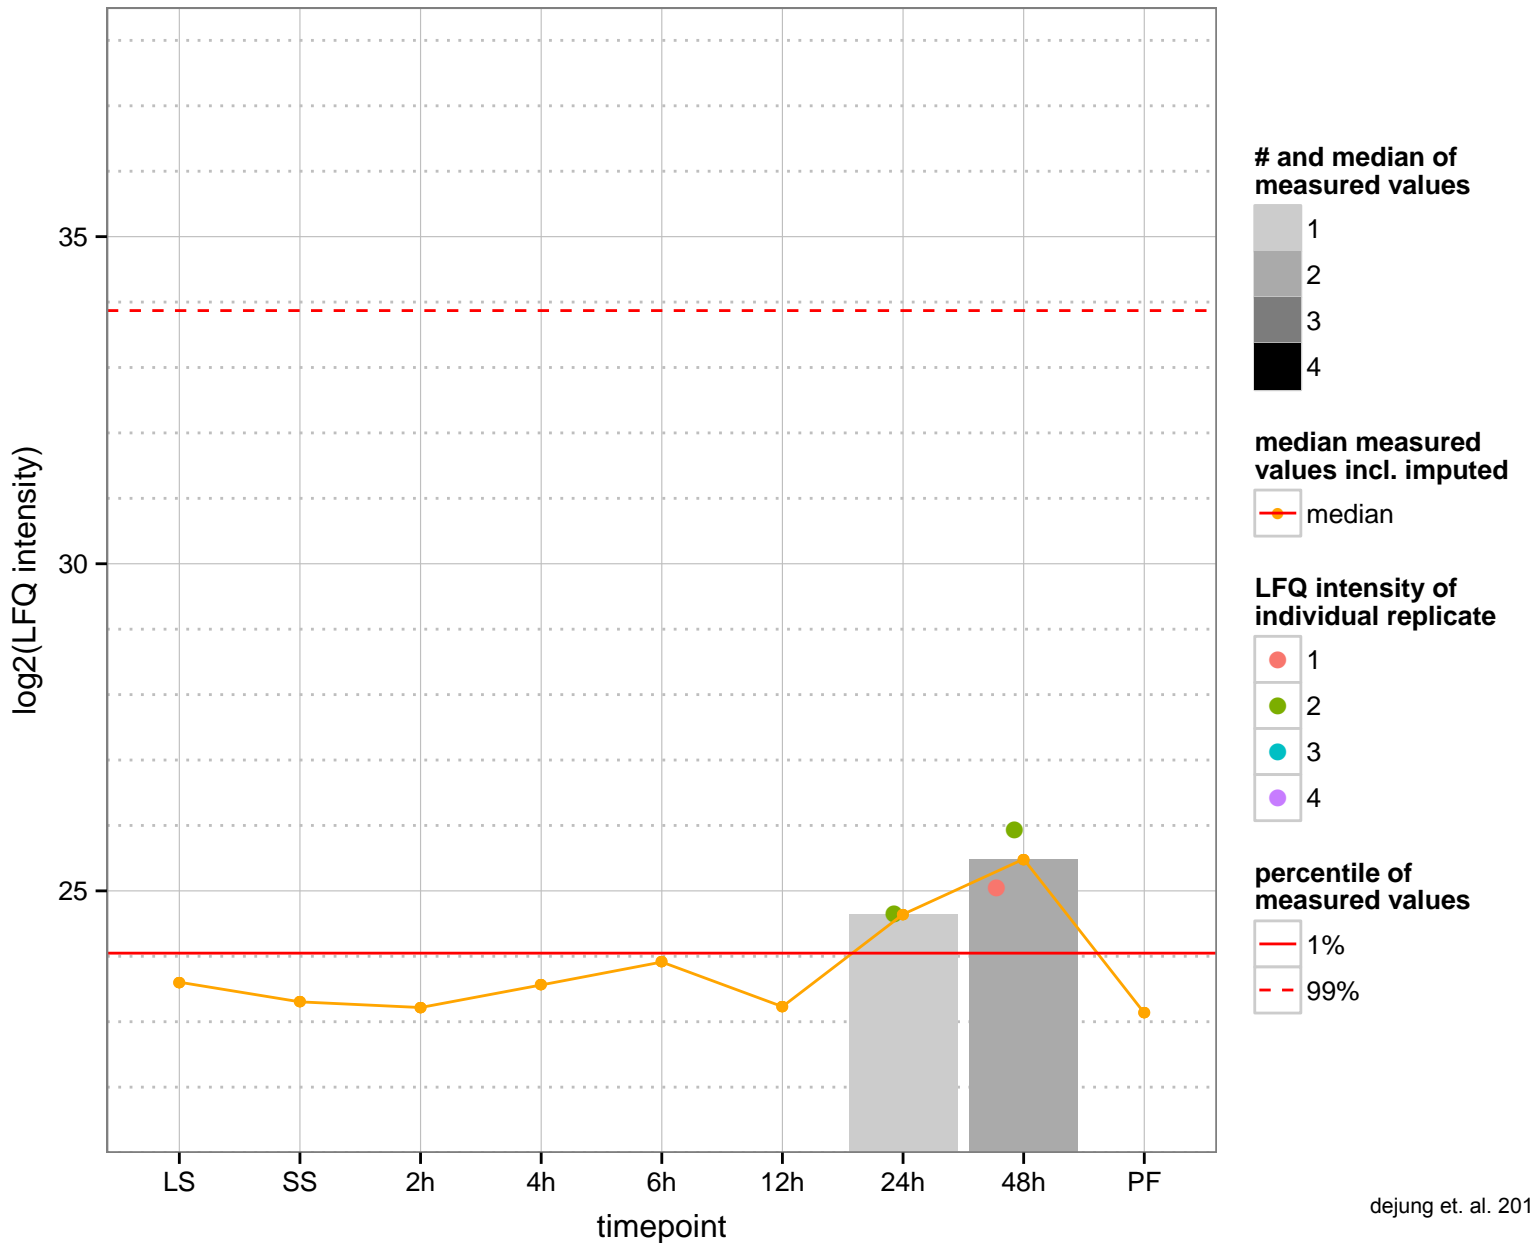

hypothetical protein, conserved  
 Tb927.8.4550  
 AGOF: null  
 AGOC: mitochondrion  
 AGOP: null  
 PGO: null  
 PGO: null  
 PGO: null

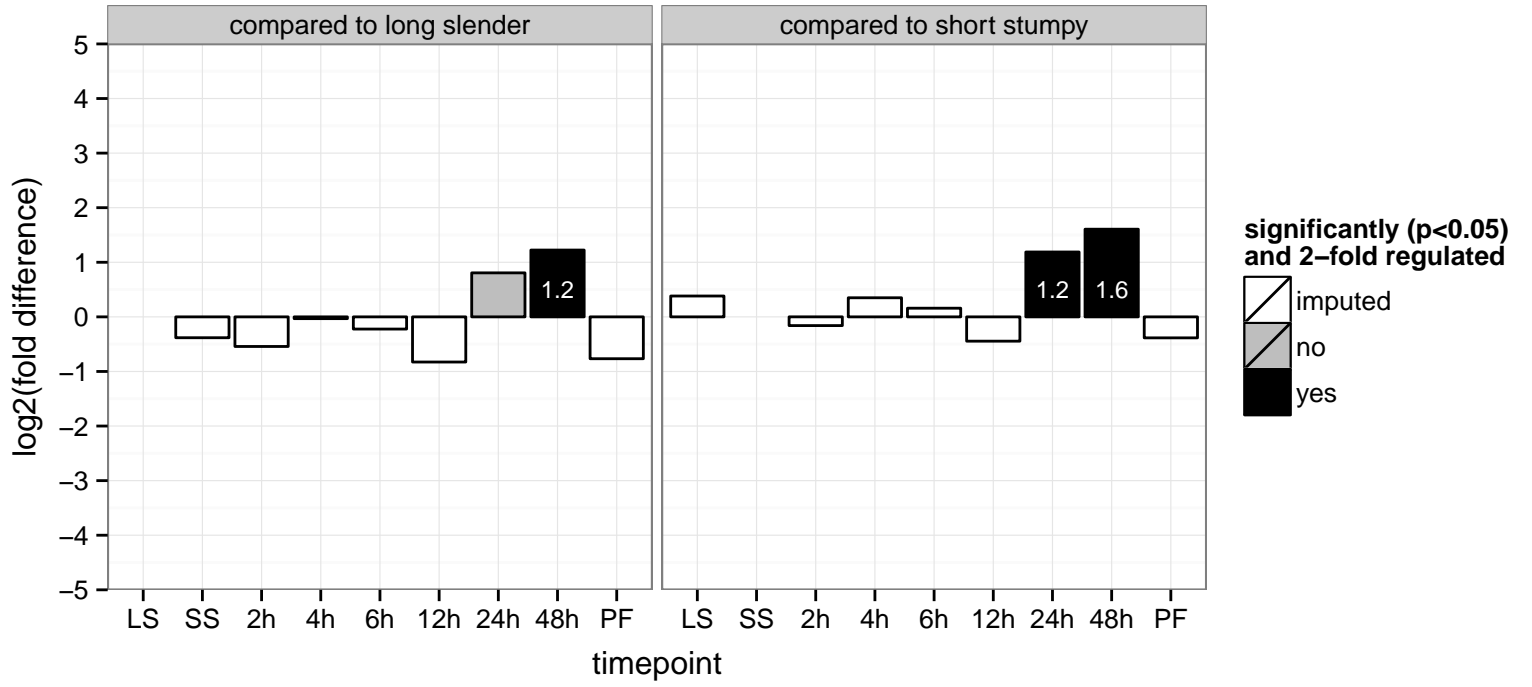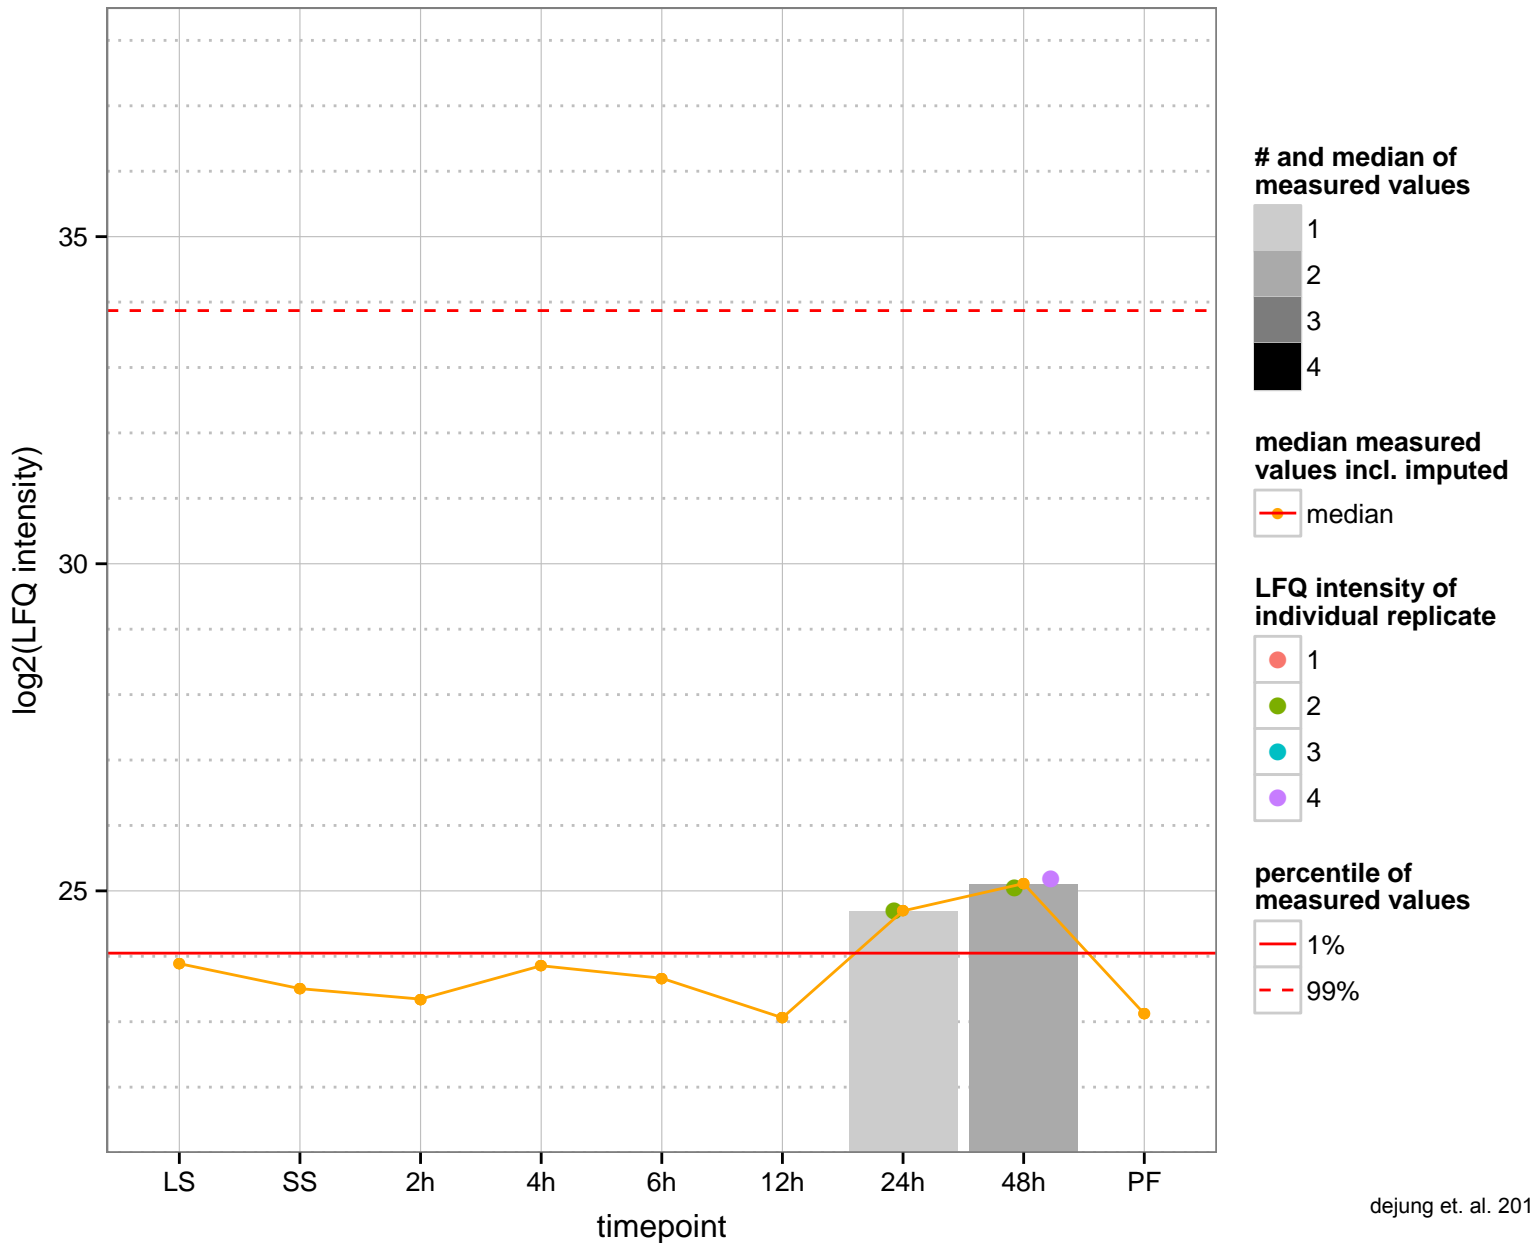

prohibitin 1 (PHB1)

Tb927.8.4810

AGOF: null

AGOC: membrane, mitochondrion

AGOP: mitochondrion organization, regulation of cell cycle, regulation of mitochondrial membrane potential, regulation of mito

PGOF: null

PGOC: null

PGOP: null

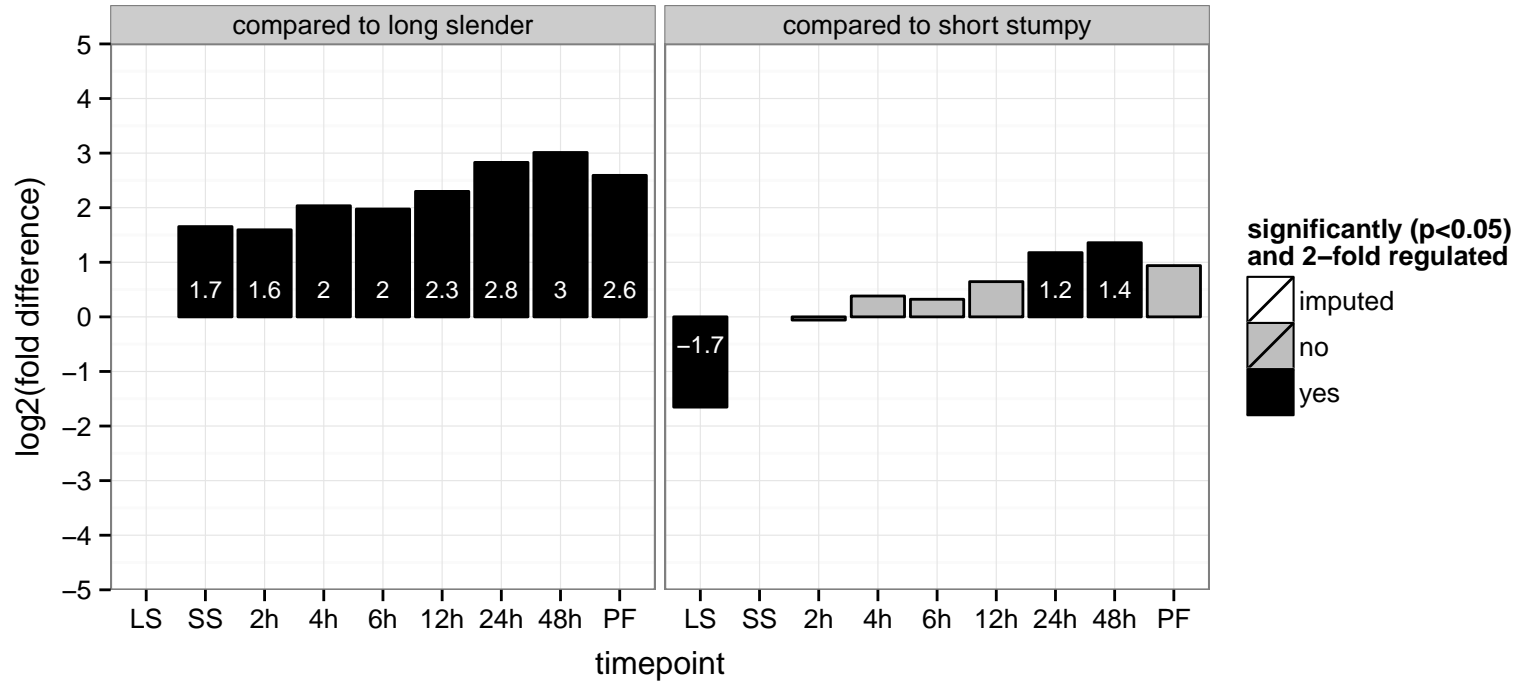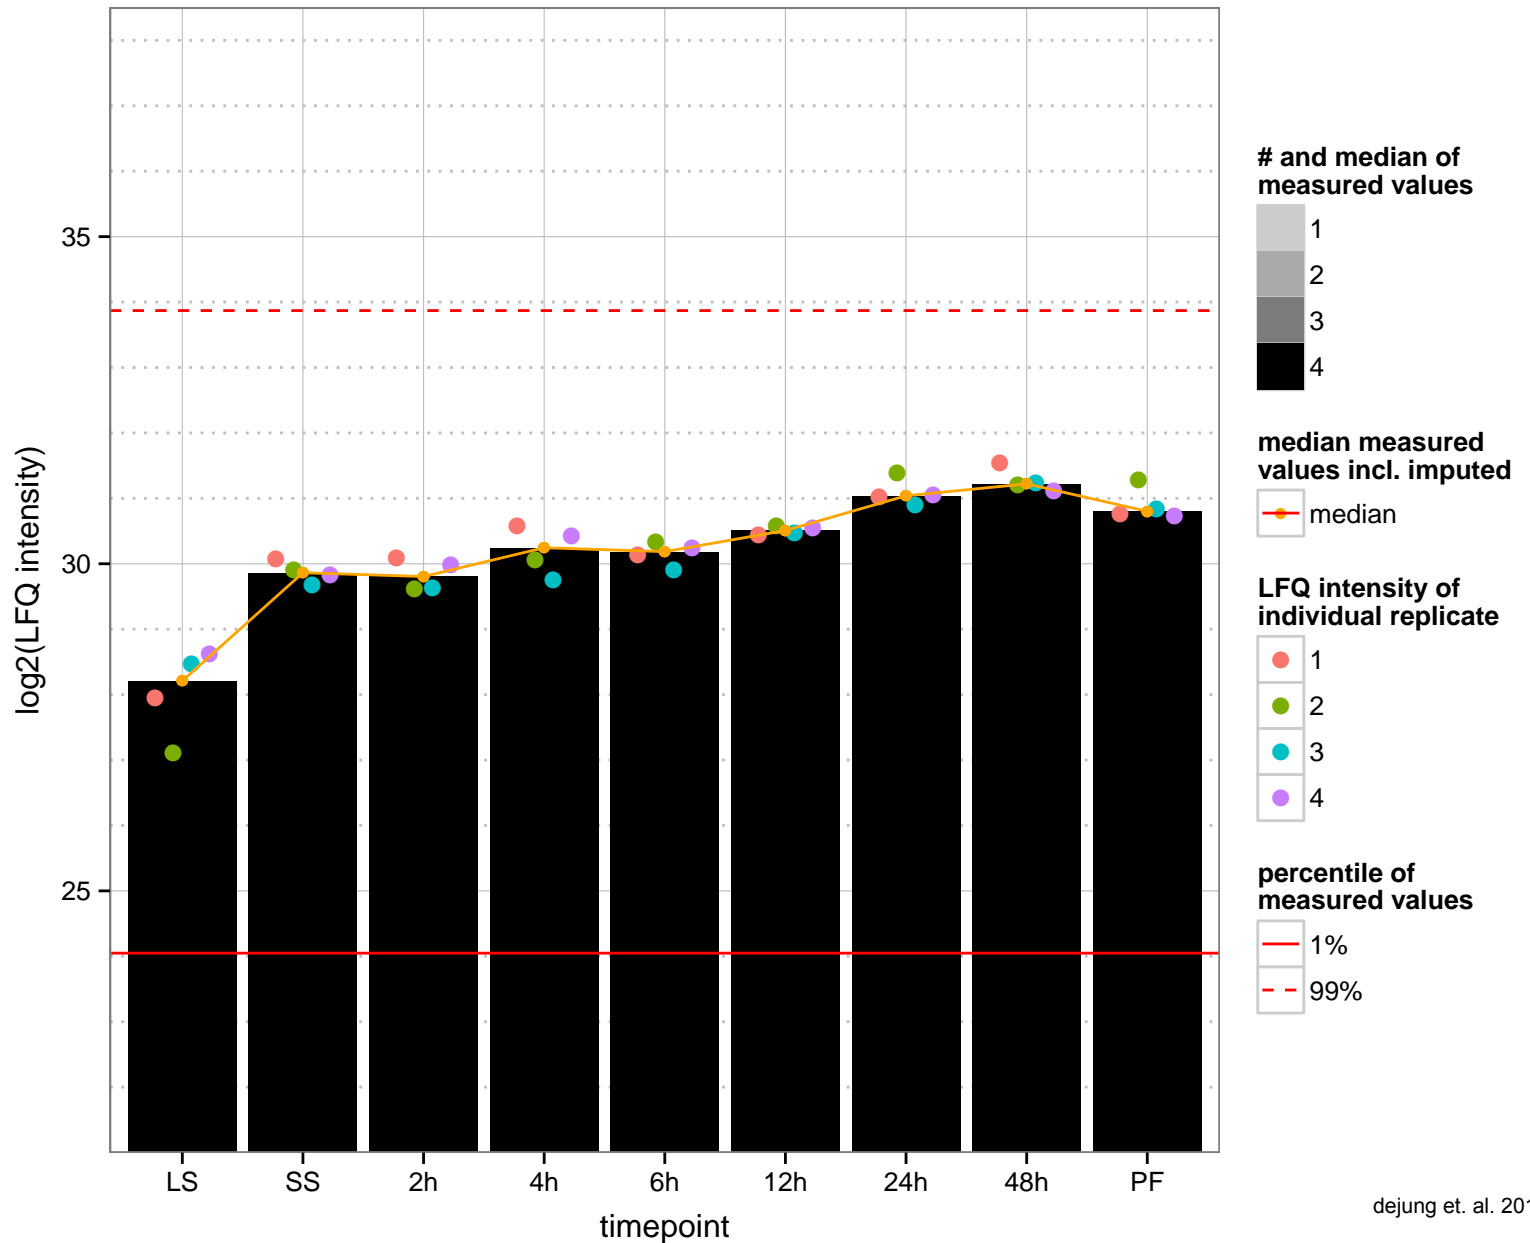

50S ribosomal protein L17, putative

Tb927.8.5860

AGOF: structural constituent of ribosome

AGOC: intracellular, mitochondrion, organellar large ribosomal subunit, ribosome

AGOP: translation

PGOF: structural constituent of ribosome

PGOC: intracellular, ribosome

PGOP: translation

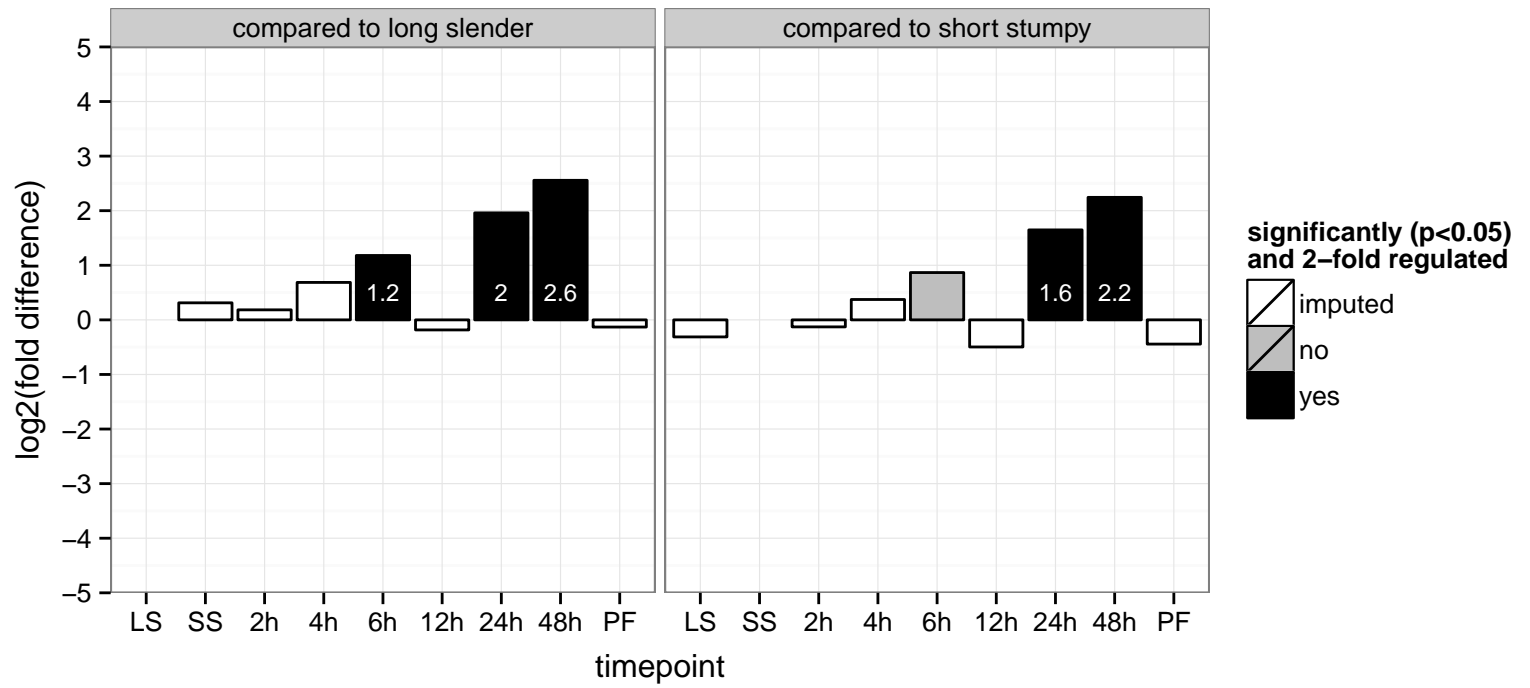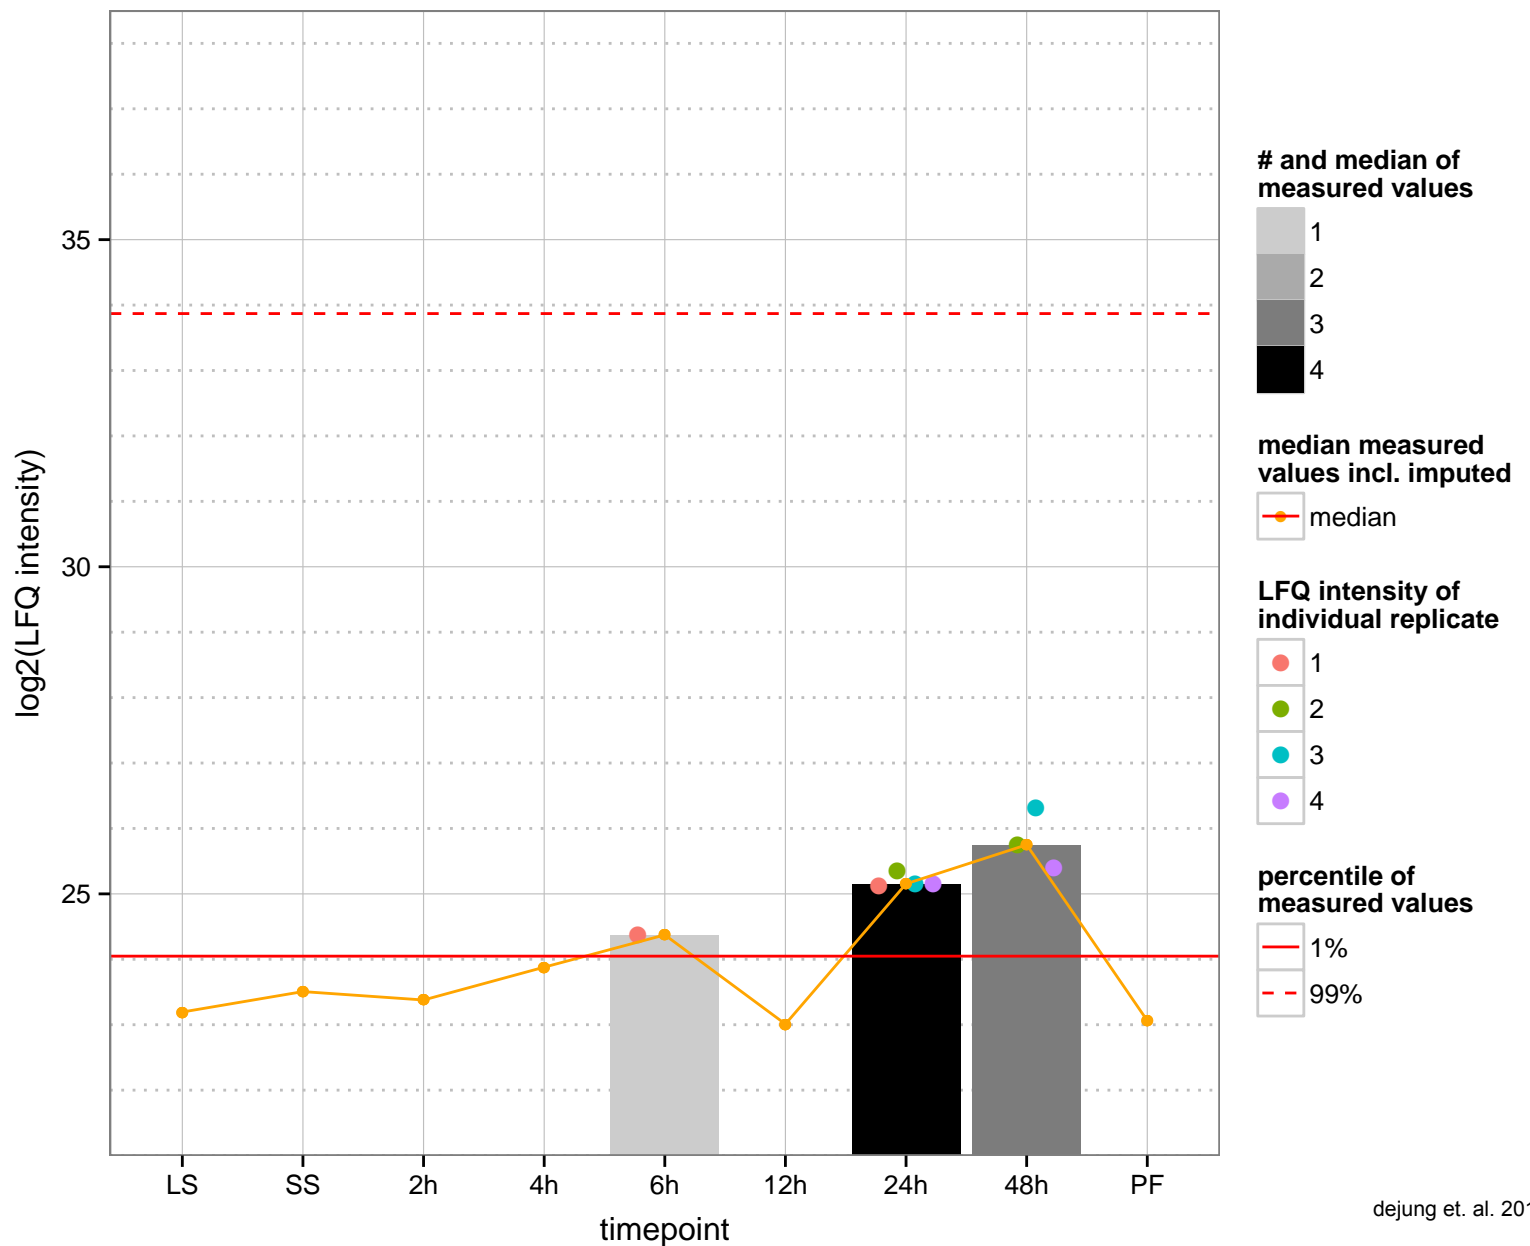

TFIIH basal transcription factor complex helicase subunit, putative, DNA excision repair protein, Transcription factor II H comp  
 Tb927.8.5980  
 AGOF: 5'-3' DNA helicase activity, ATP binding, ATP-dependent DNA helicase activity, sequence-specific DNA binding trans  
 AGOC: holo TFIIH complex  
 AGOP: DNA repair, mRNA transcription from RNA polymerase II promoter, nucleotide-excision repair  
 PGO: ATP binding, ATP-dependent DNA helicase activity, ATP-dependent helicase activity, DNA binding, hydrolase activity,  
 PGO: nucleus  
 PGO: nucleobase-containing compound metabolic process

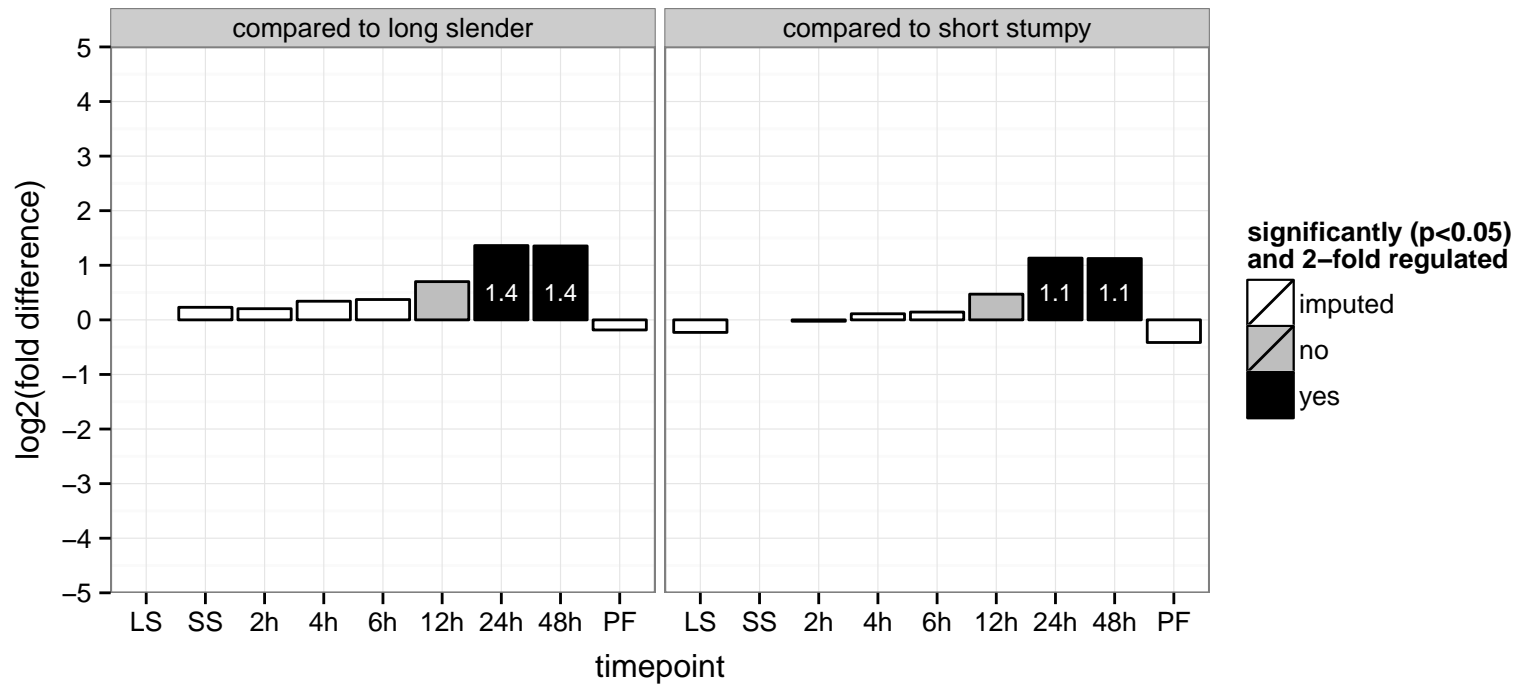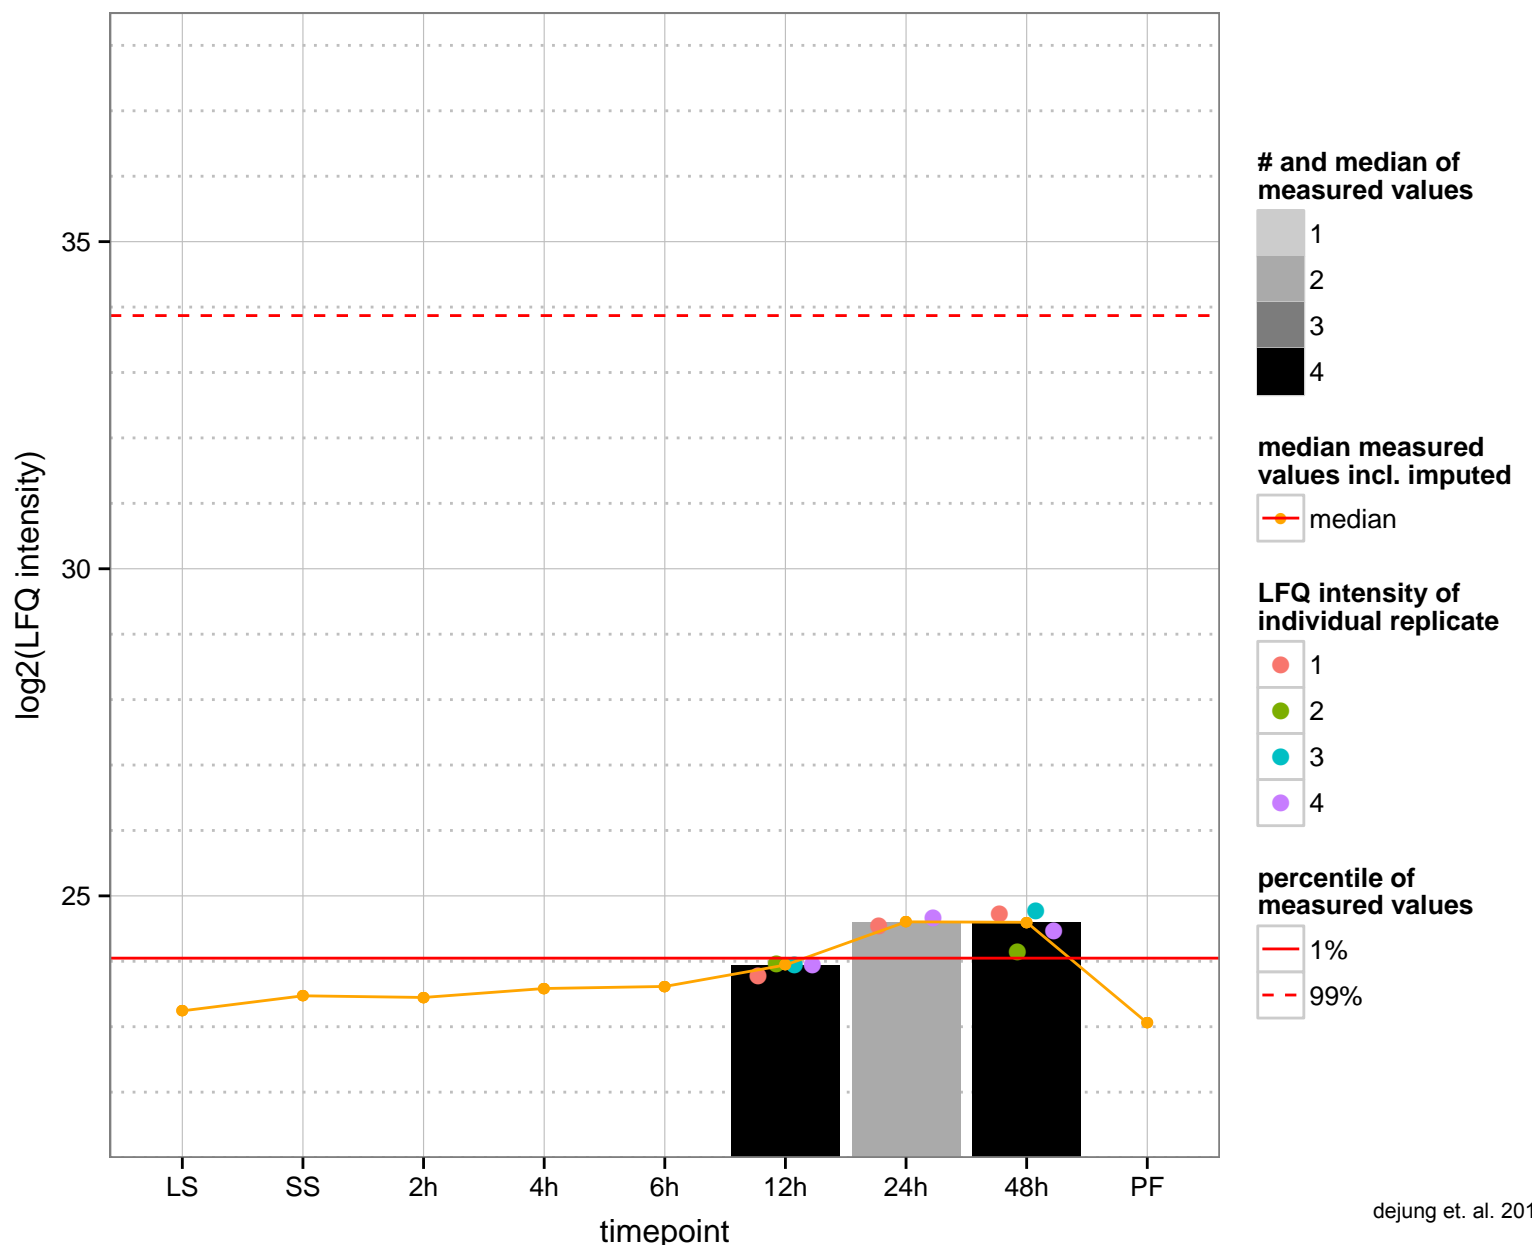



DNA polymerase epsilon catalytic subunit, putative

Tb927.9.10440

AGOF: DNA binding, DNA-directed DNA polymerase activity, nucleotide binding, zinc ion binding

AGOC: nucleus

AGOP: DNA-dependent DNA replication

PGOF: DNA binding, DNA-directed DNA polymerase activity, nucleic acid binding, nucleotide binding, zinc ion binding

PGOC: nucleus

PGOP: DNA replication, nucleobase-containing compound metabolic process

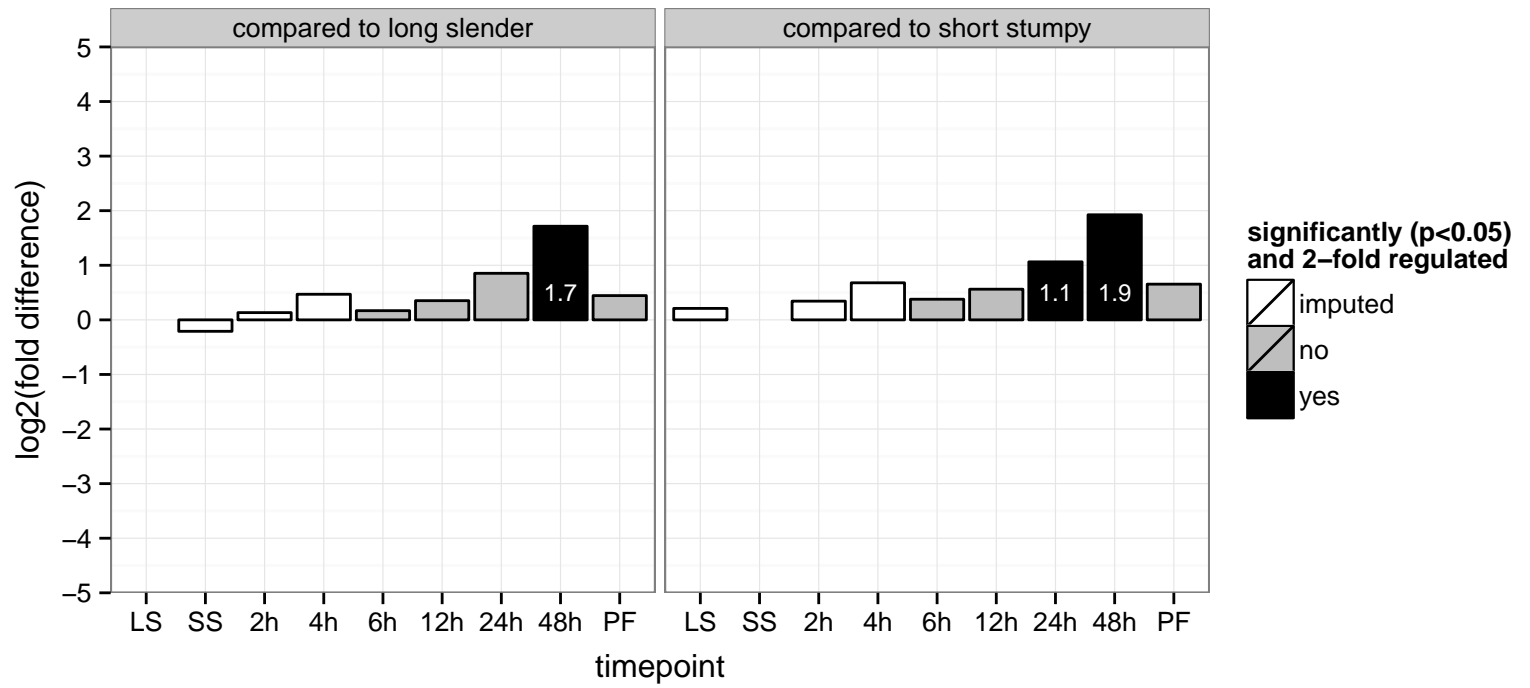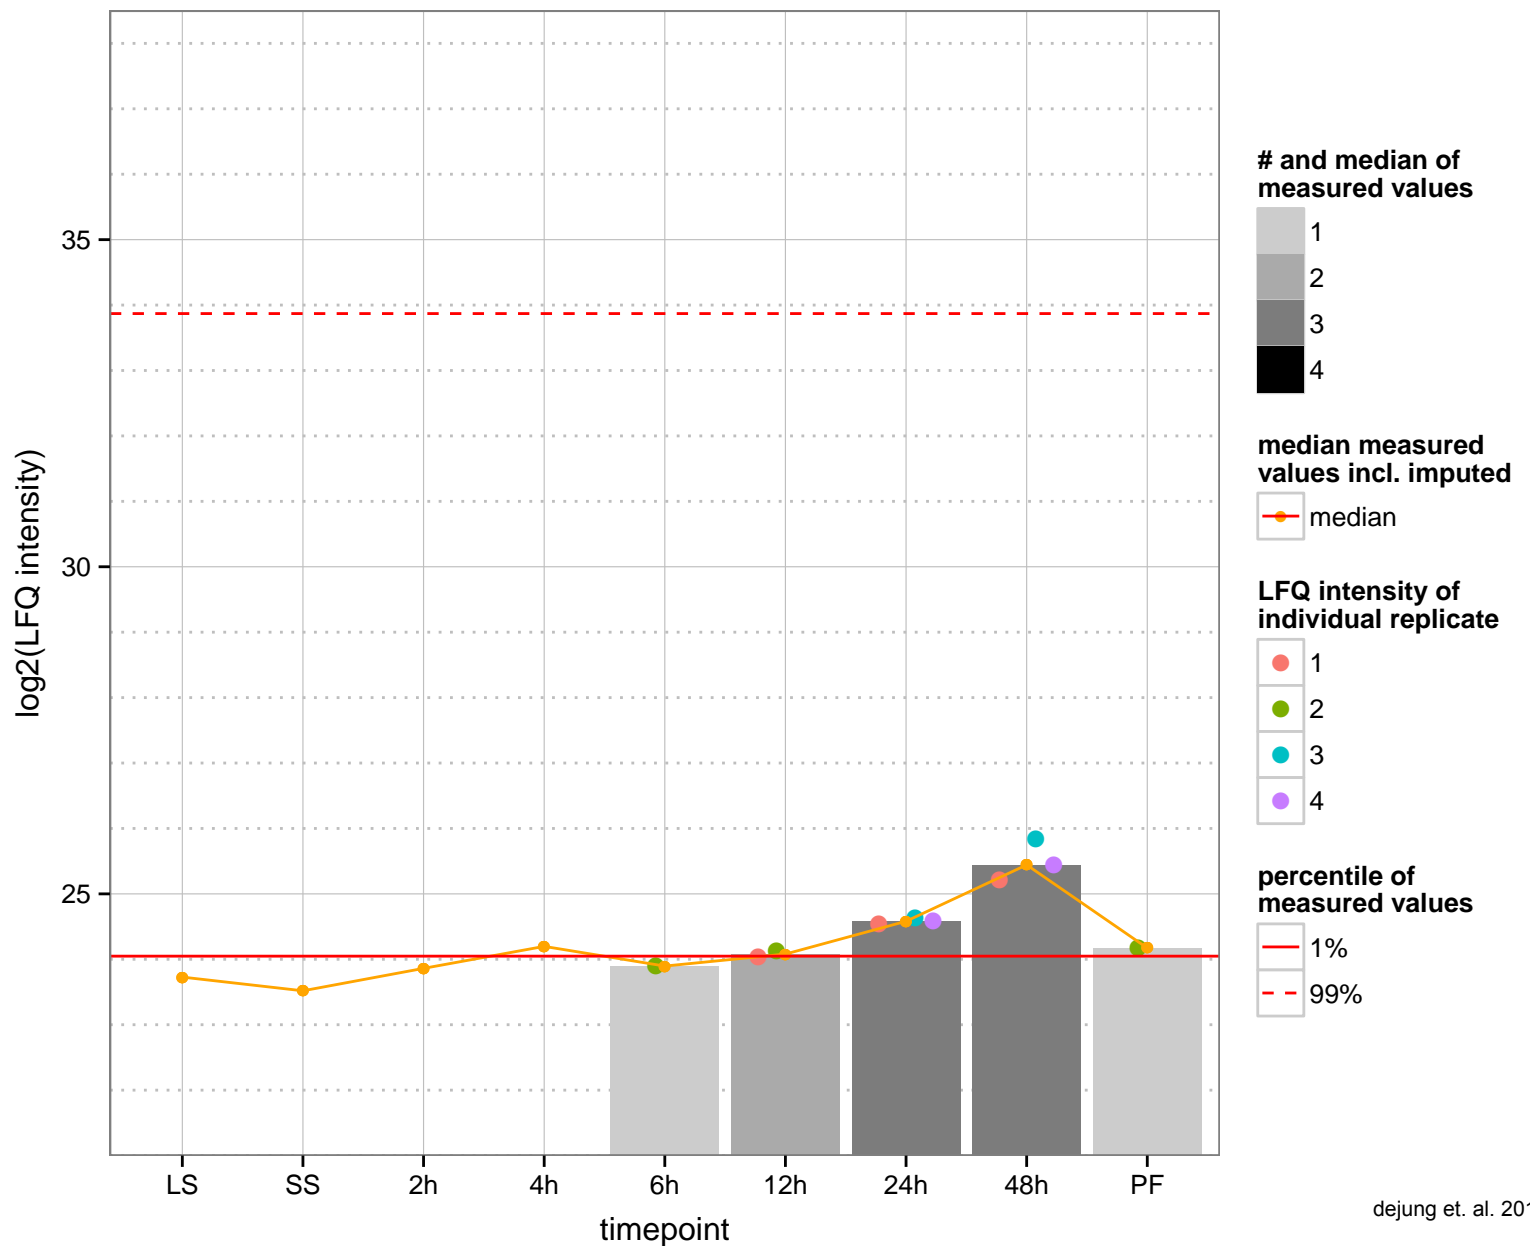

calmodulin-like protein, putative, EF hand containing protein  
 Tb927.9.11230  
 AGOF: calcium ion binding  
 AGOC: null  
 AGOP: null  
 PGOF: calcium ion binding  
 PGO: null  
 PGOP: null

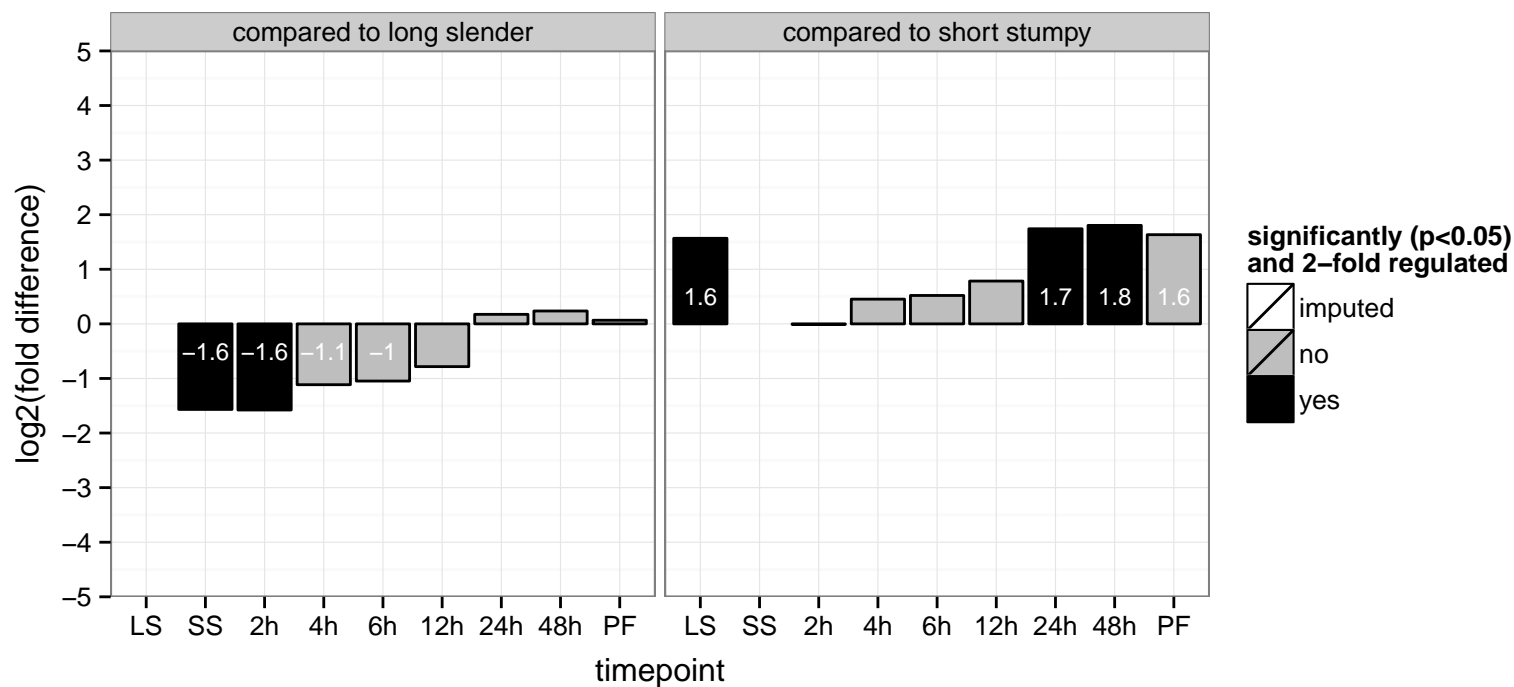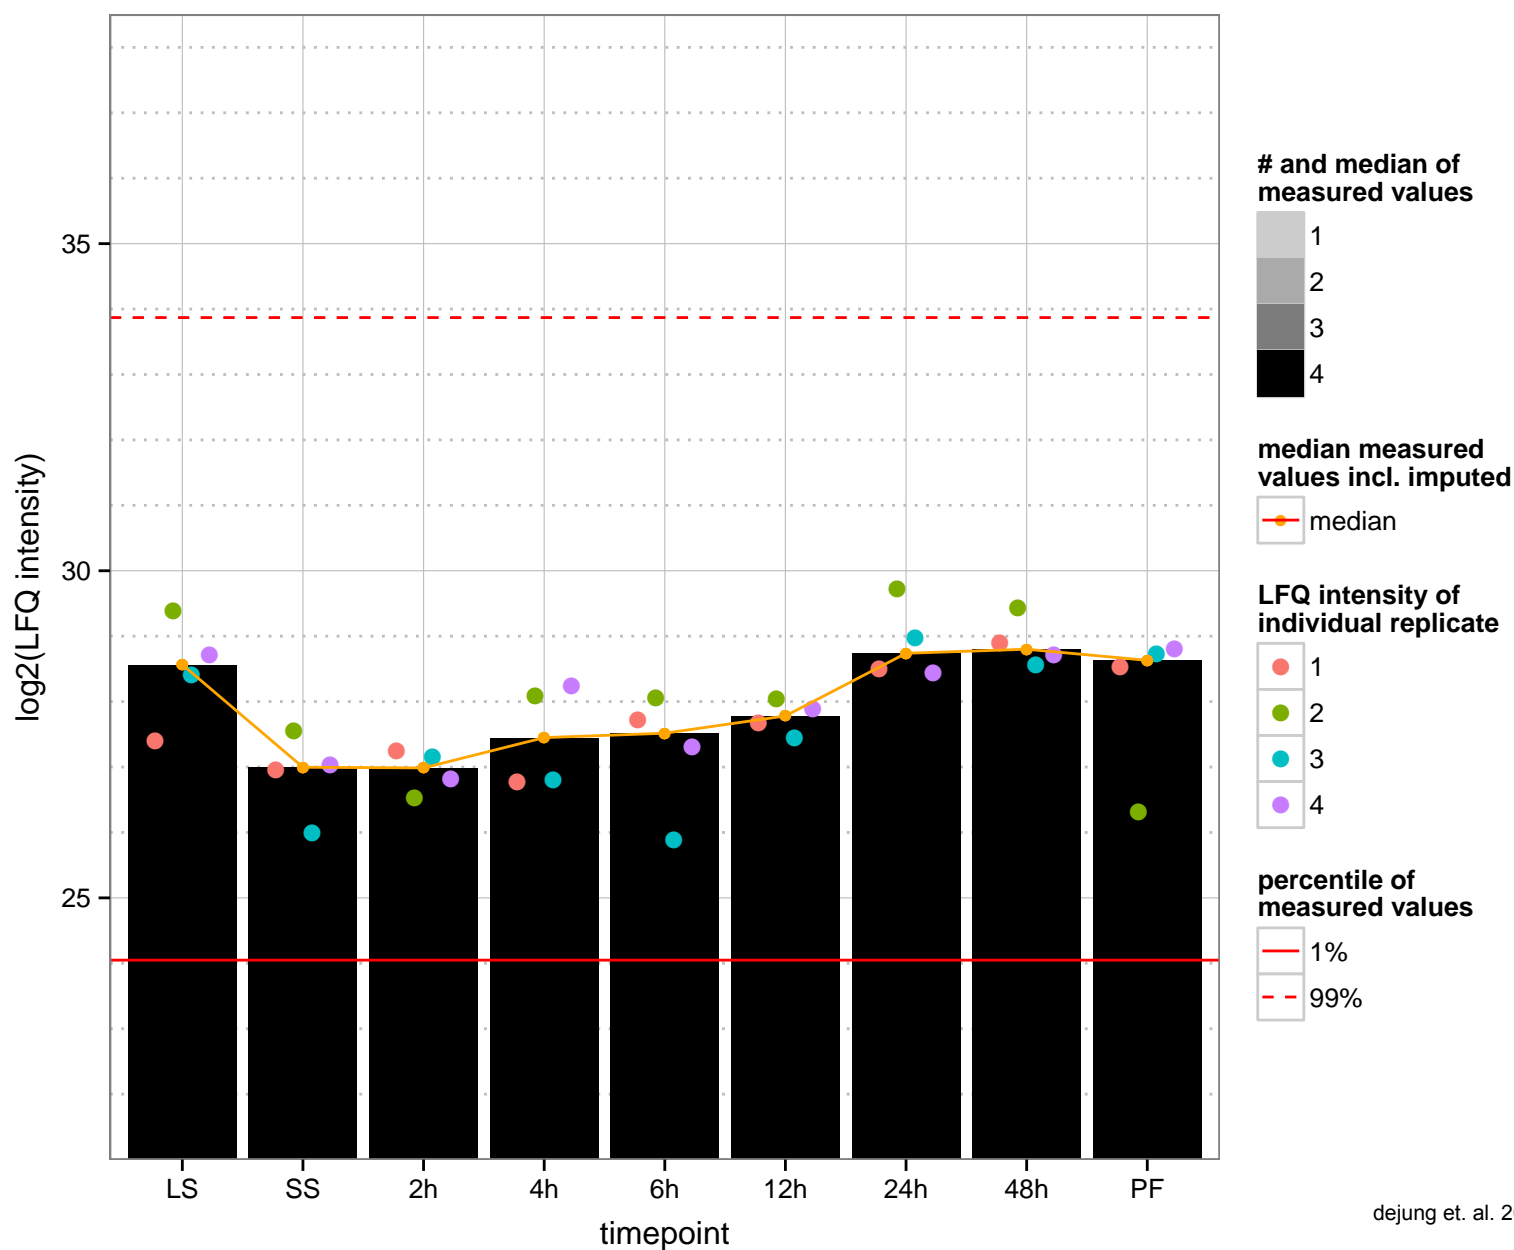

hypothetical protein, conserved  
 Tb927.9.2760  
 AGOF: microtubule binding  
 AGOC: null  
 AGOP: null  
 PGOF: microtubule binding, protein binding  
 PGO: null  
 PGOP: null

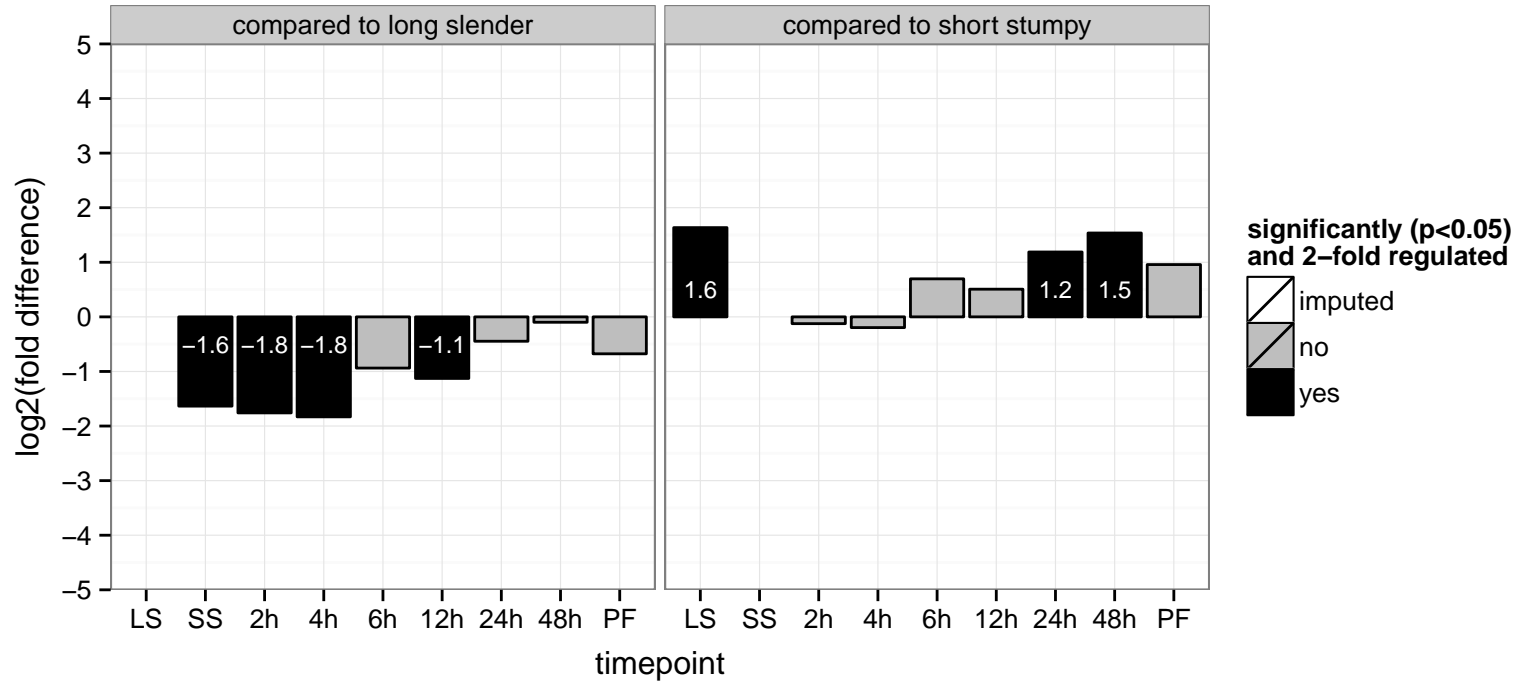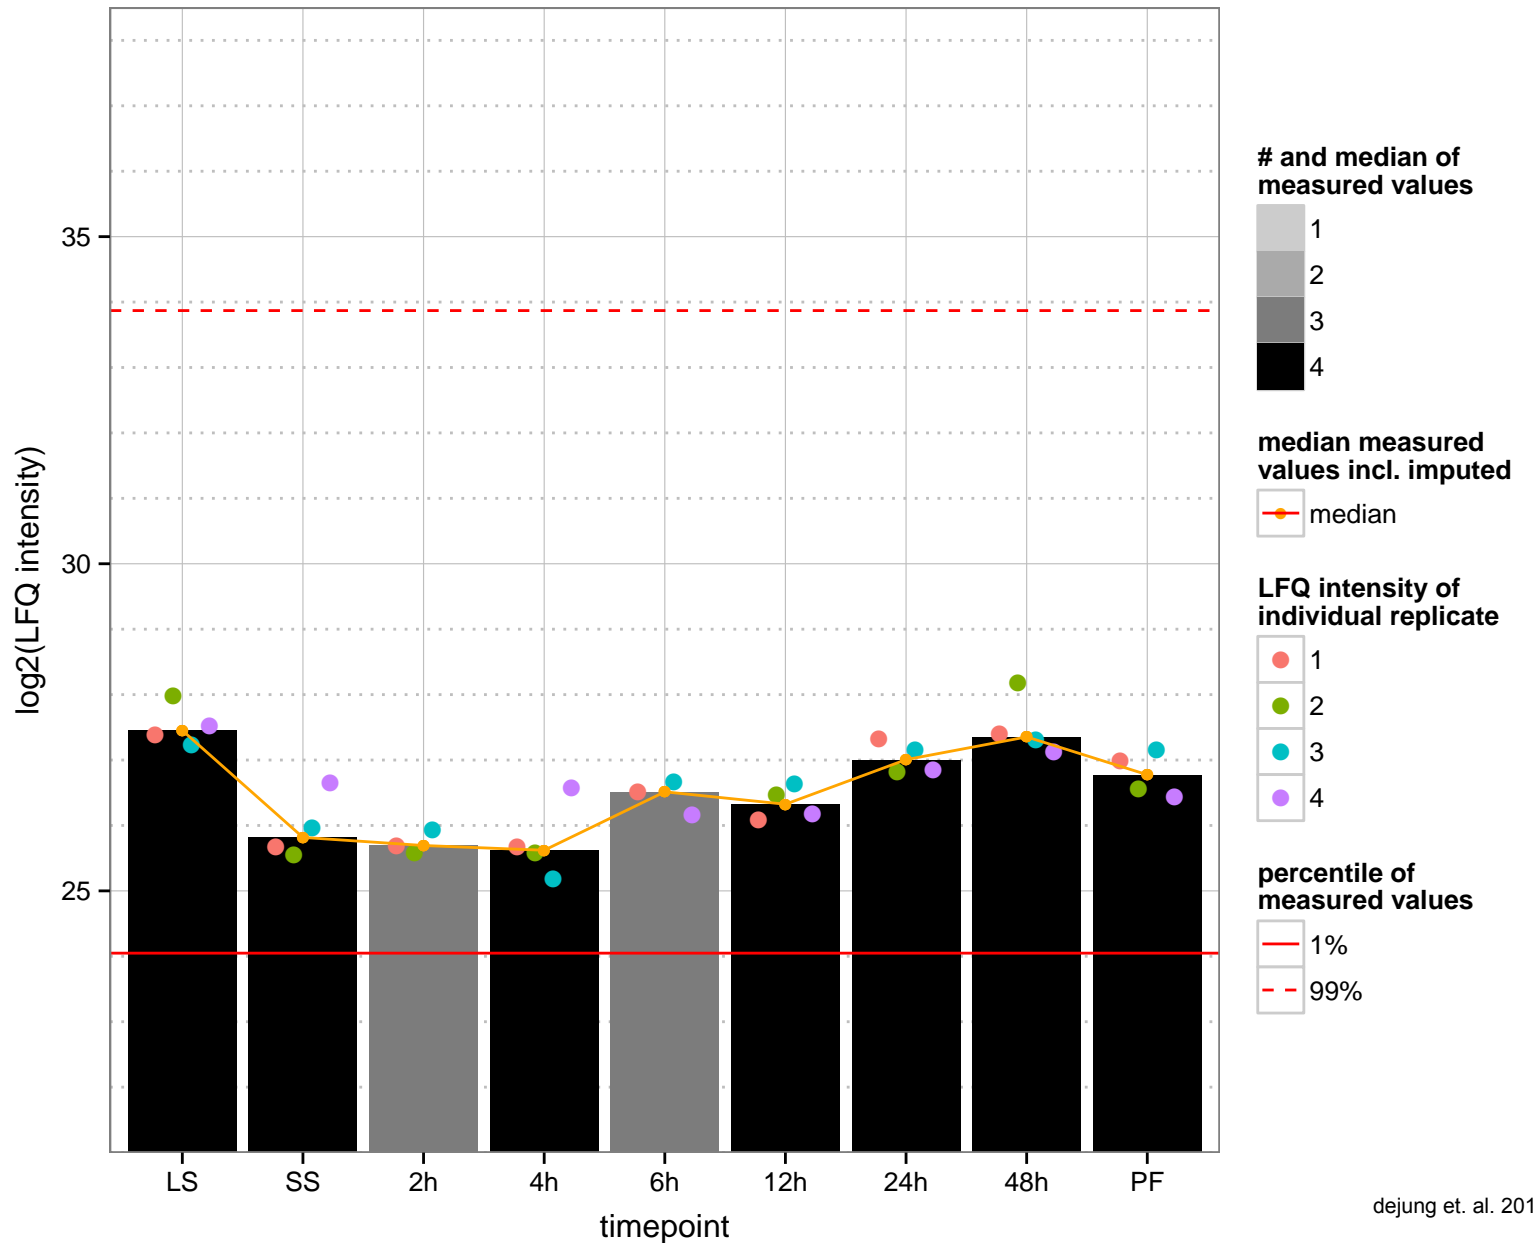

cation transporter, putative  
 Tb927.9.5490  
 AGOF: metal ion transmembrane transporter activity  
 AGOC: membrane  
 AGOP: metal ion transport  
 PGOF: metal ion transmembrane transporter activity  
 PGOC: membrane  
 PGOP: metal ion transport, transmembrane transport

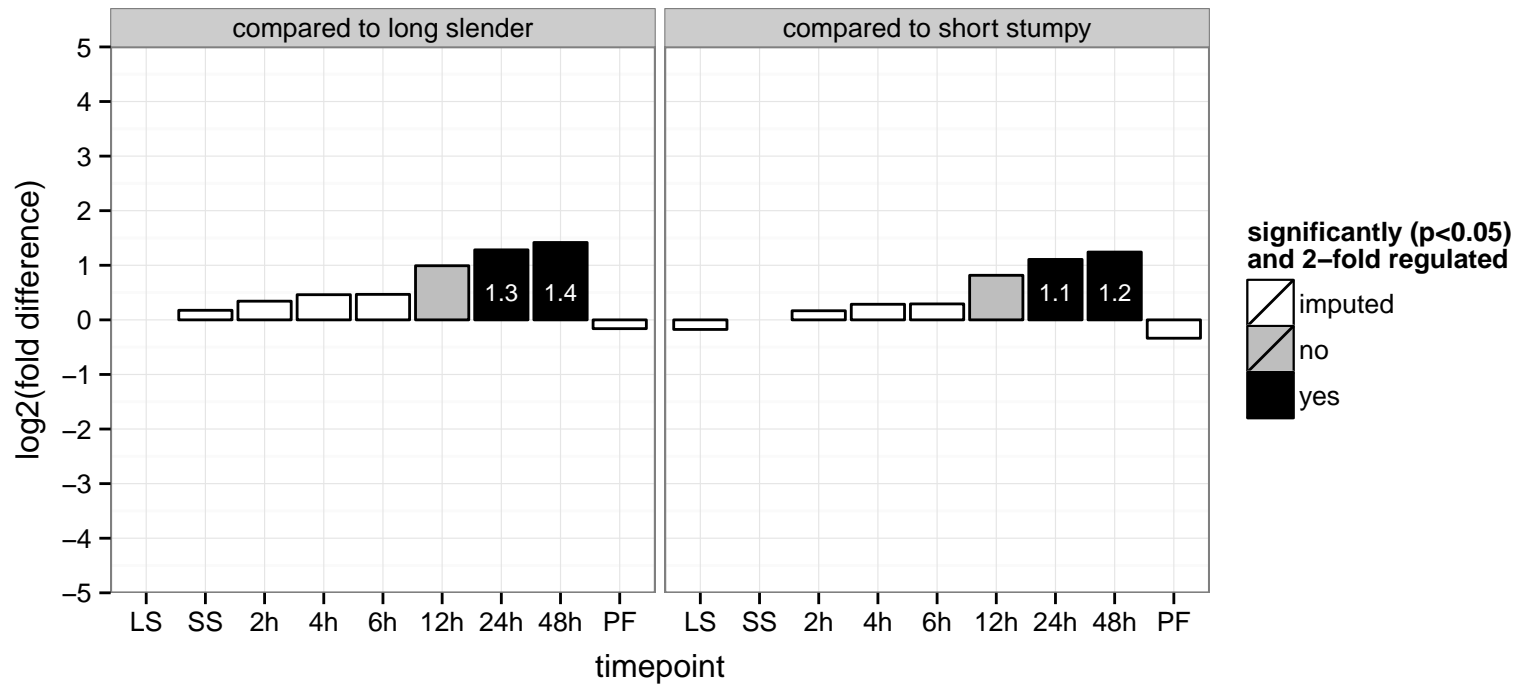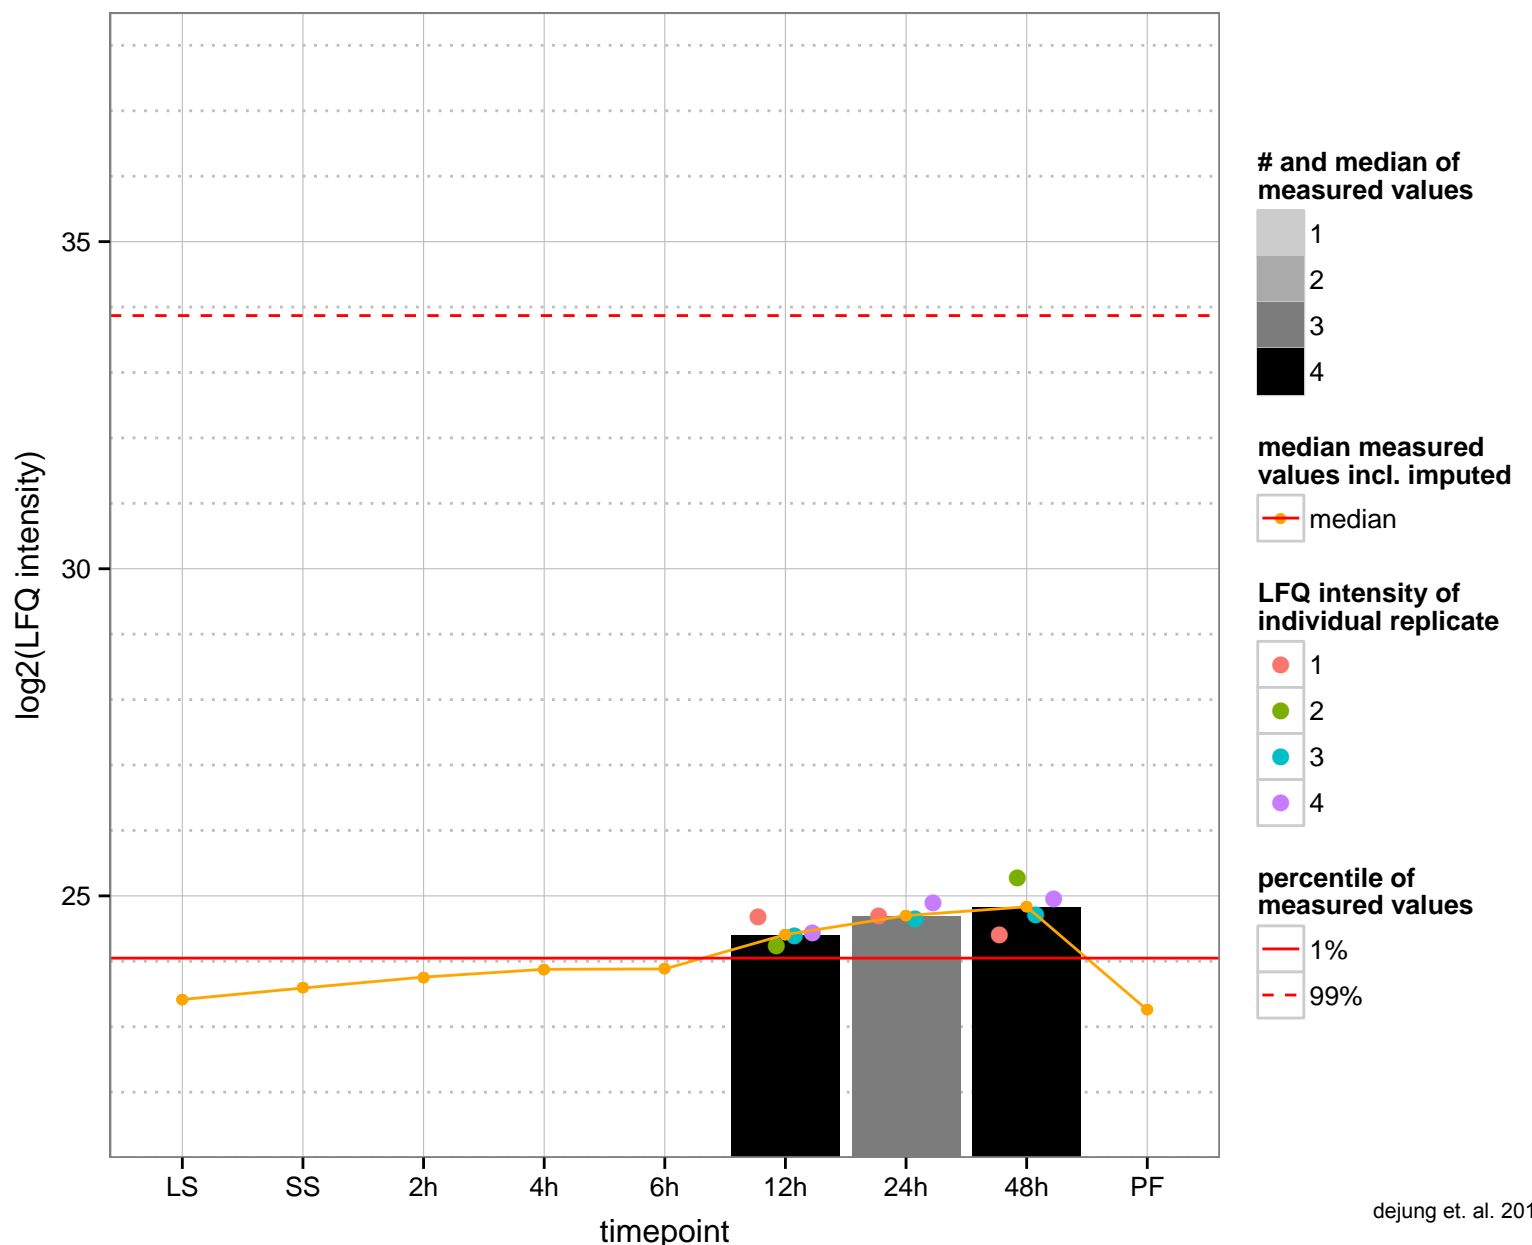

hypothetical protein, conserved  
 Tb927.9.7670  
 AGOF: null  
 AGOC: null  
 AGOP: null  
 PGO: null  
 PGOC: null  
 PGOP: null

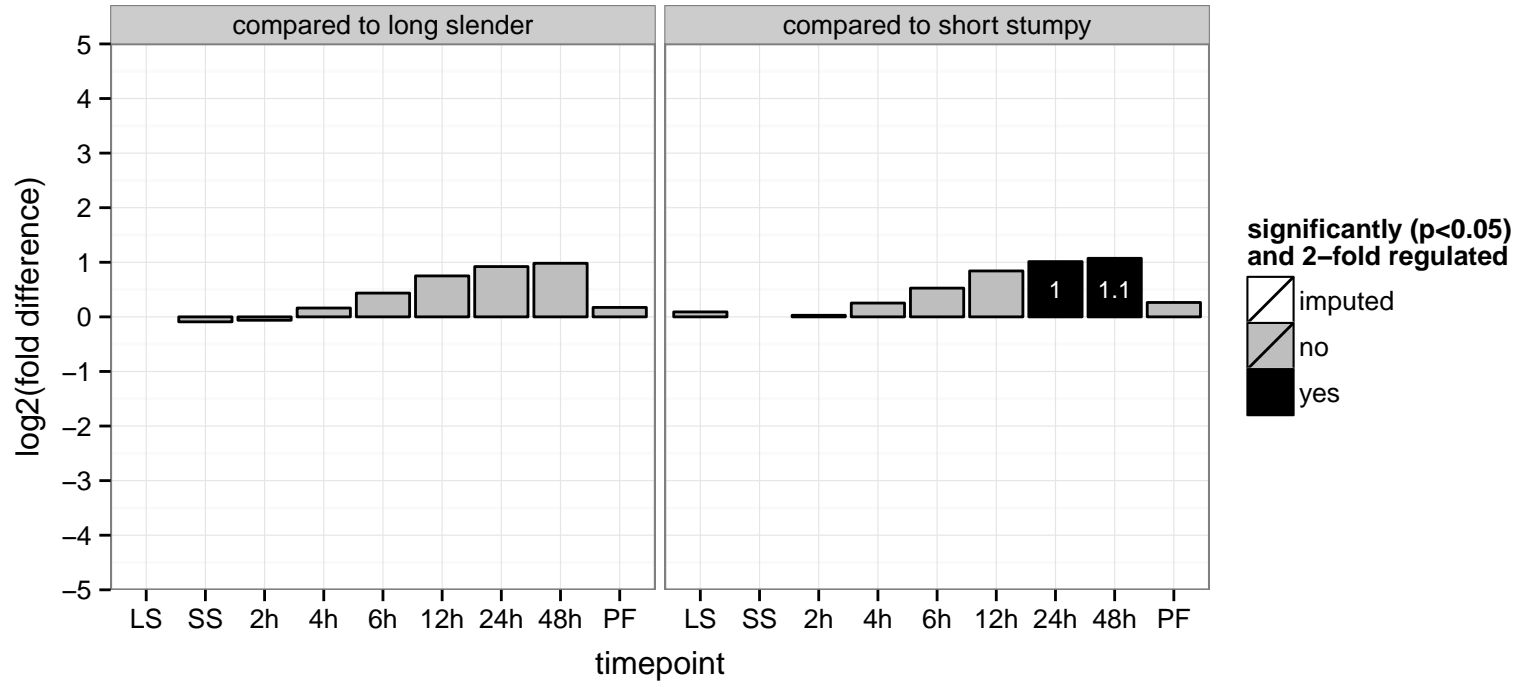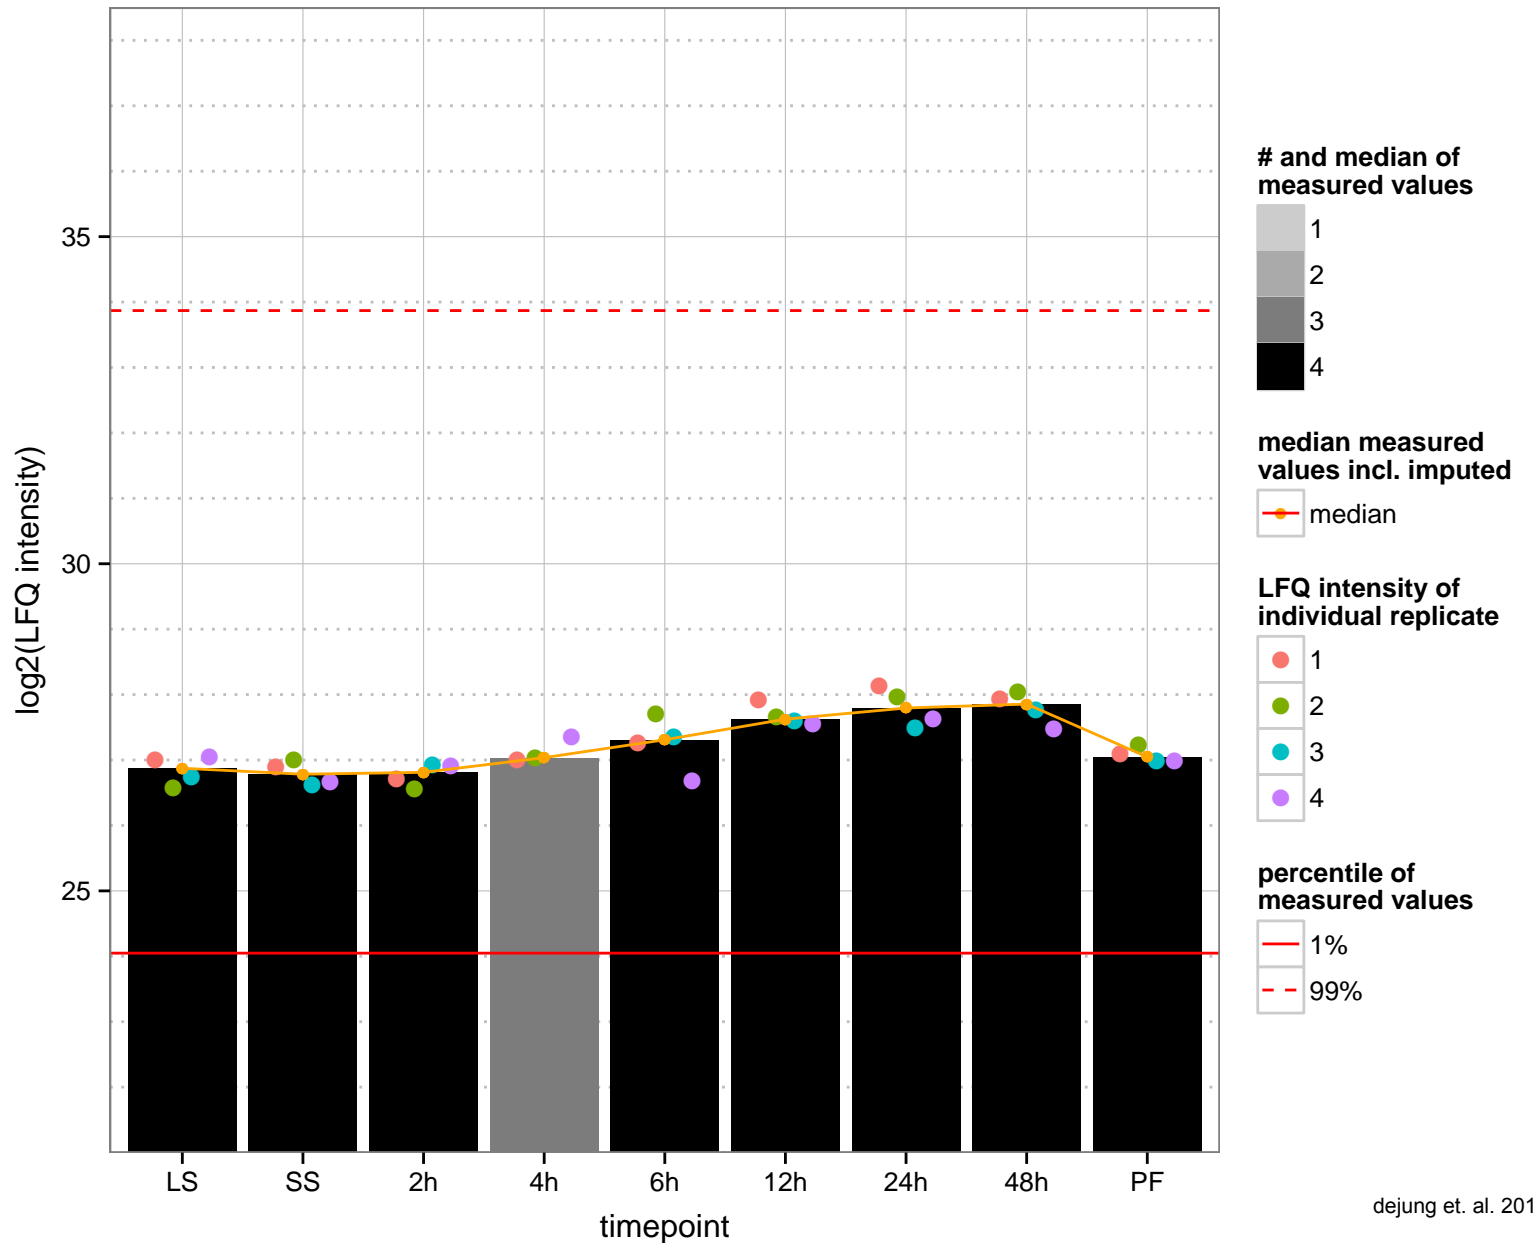

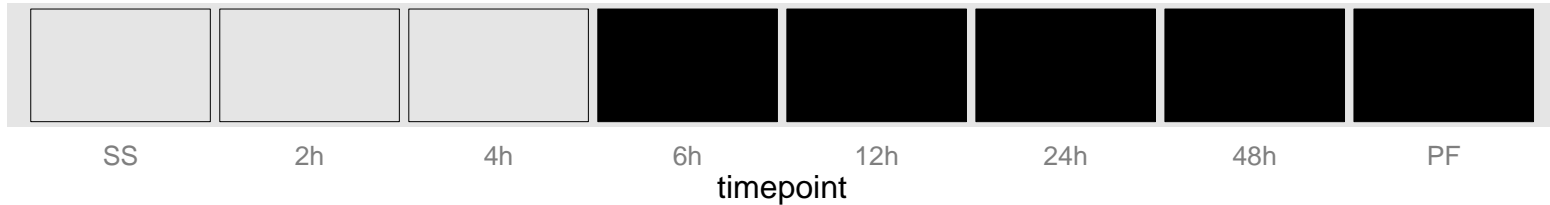

**regulated**  not regulated  significant down  significant up

zinc finger protein family member, putative (ZC3H18), hypothetical protein  
 Tb927.7.2140;Tb07.11L3.90  
 AGOF: nucleic acid binding, zinc ion binding, RNA binding  
 AGOC: null  
 AGOP: null  
 PGO: nucleic acid binding, zinc ion binding  
 PGOC: null  
 PGOP: null

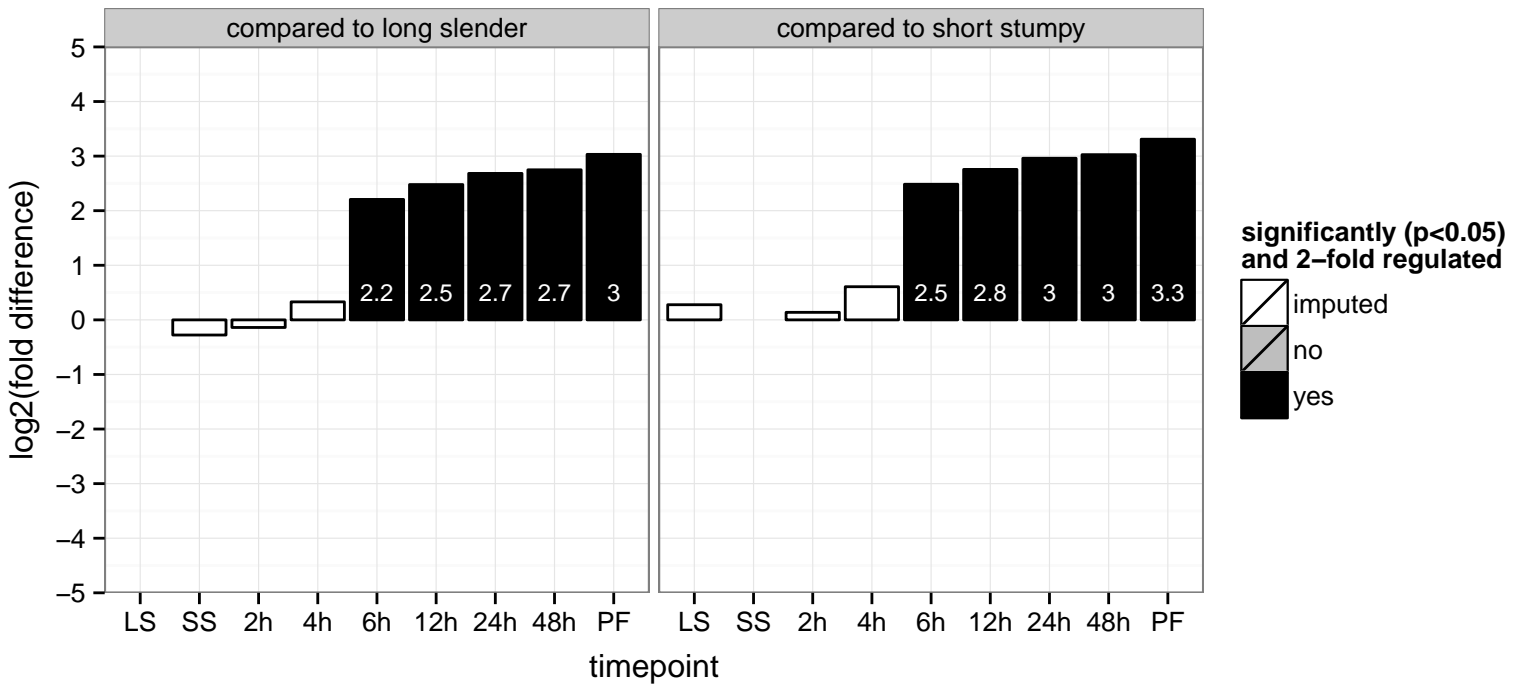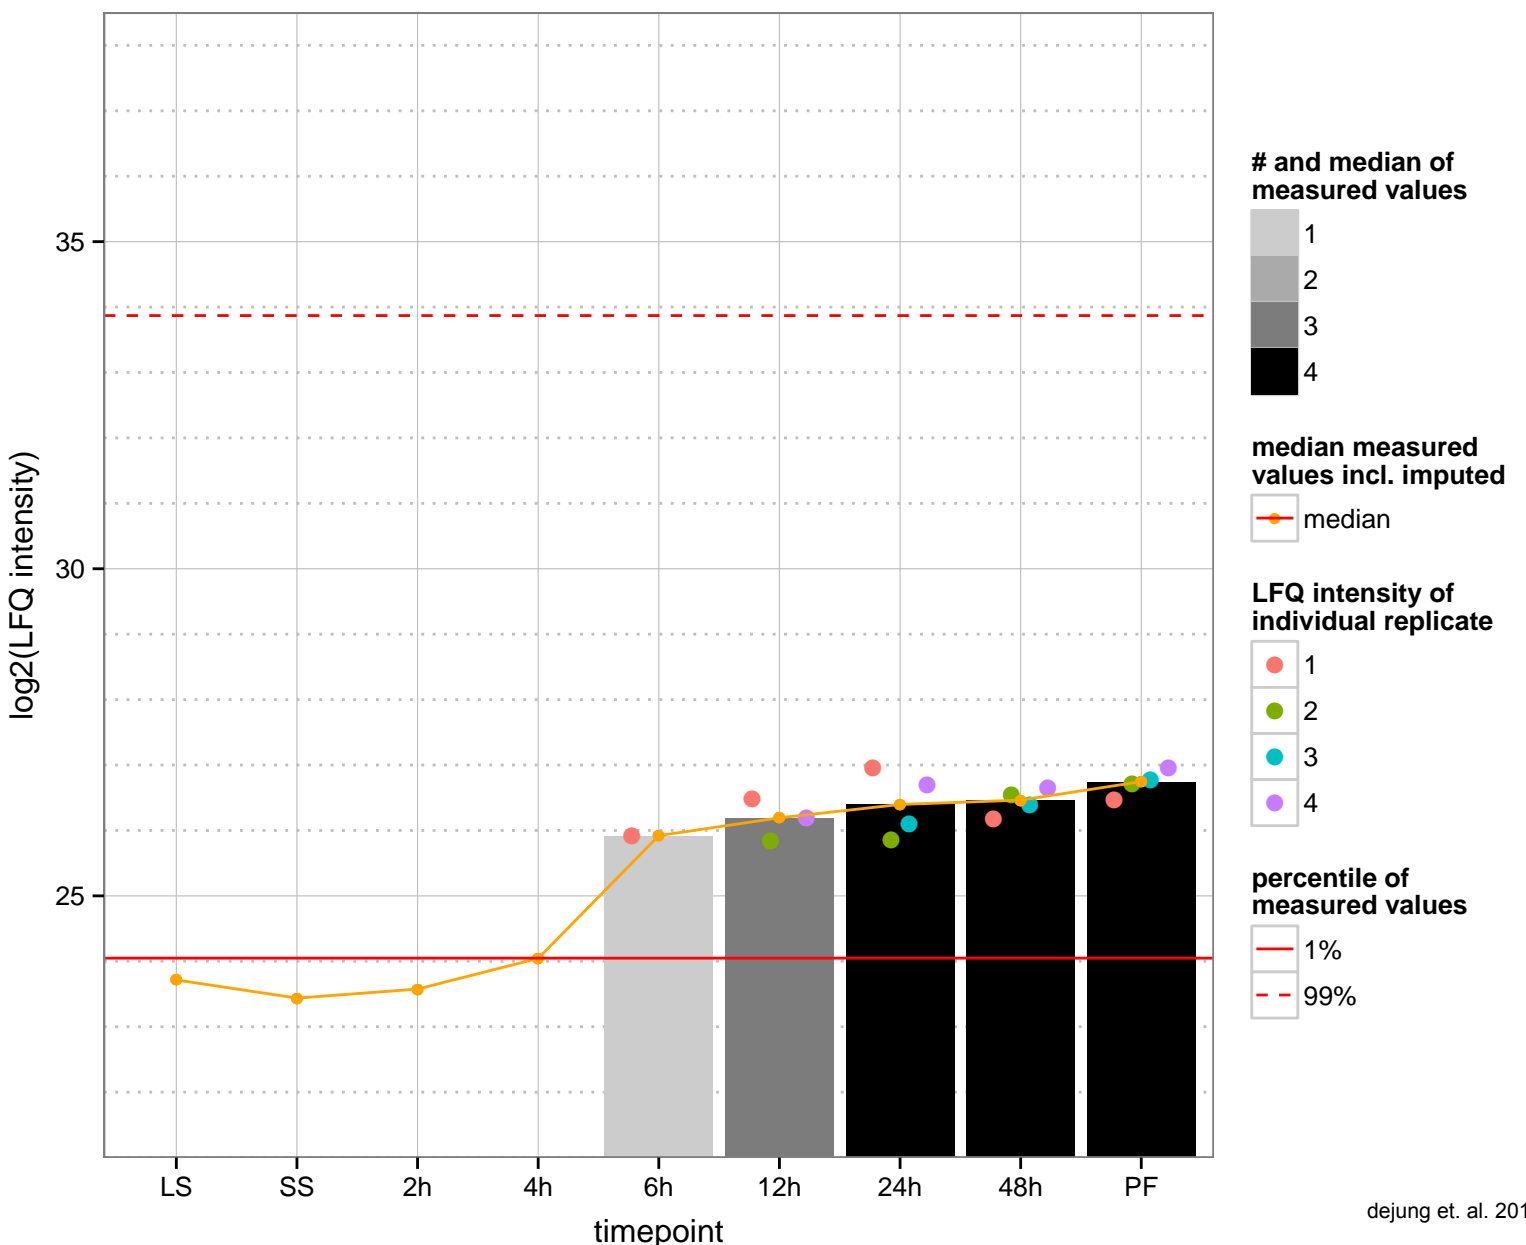

s-adenosyl-L-methionine-c-24-delta-sterol-methyl transferase a, putative, sterol 24-c-methyltransferase, Sterol methyltransferase  
 Tb927.10.6950;Tb927.10.6910;Tb11.v5.0496;Tb10.v4.0247  
 AGOF: methyltransferase activity, null  
 AGOC: null  
 AGOP: steroid biosynthetic process, null  
 PGO: methyltransferase activity, sterol 24-C-methyltransferase activity  
 PGOC: null  
 PGO: metabolic process, steroid biosynthetic process

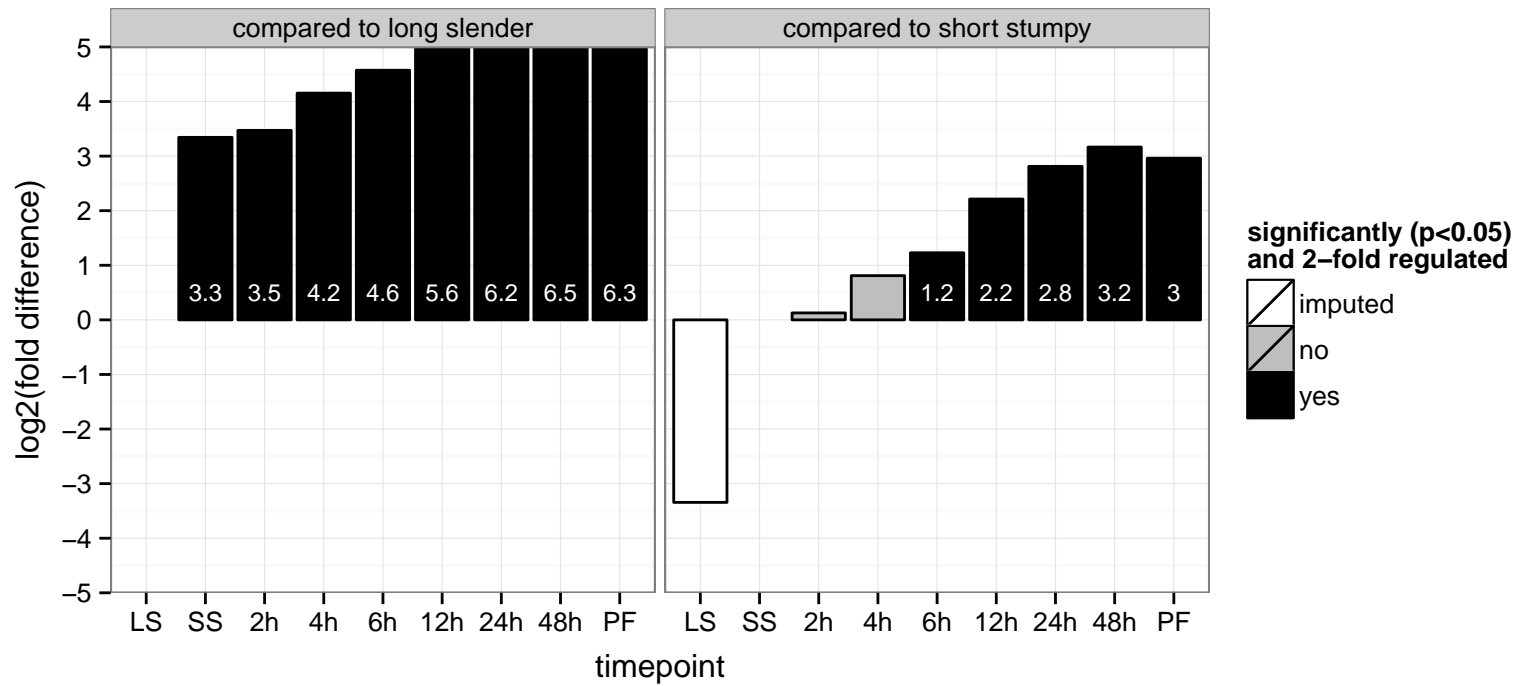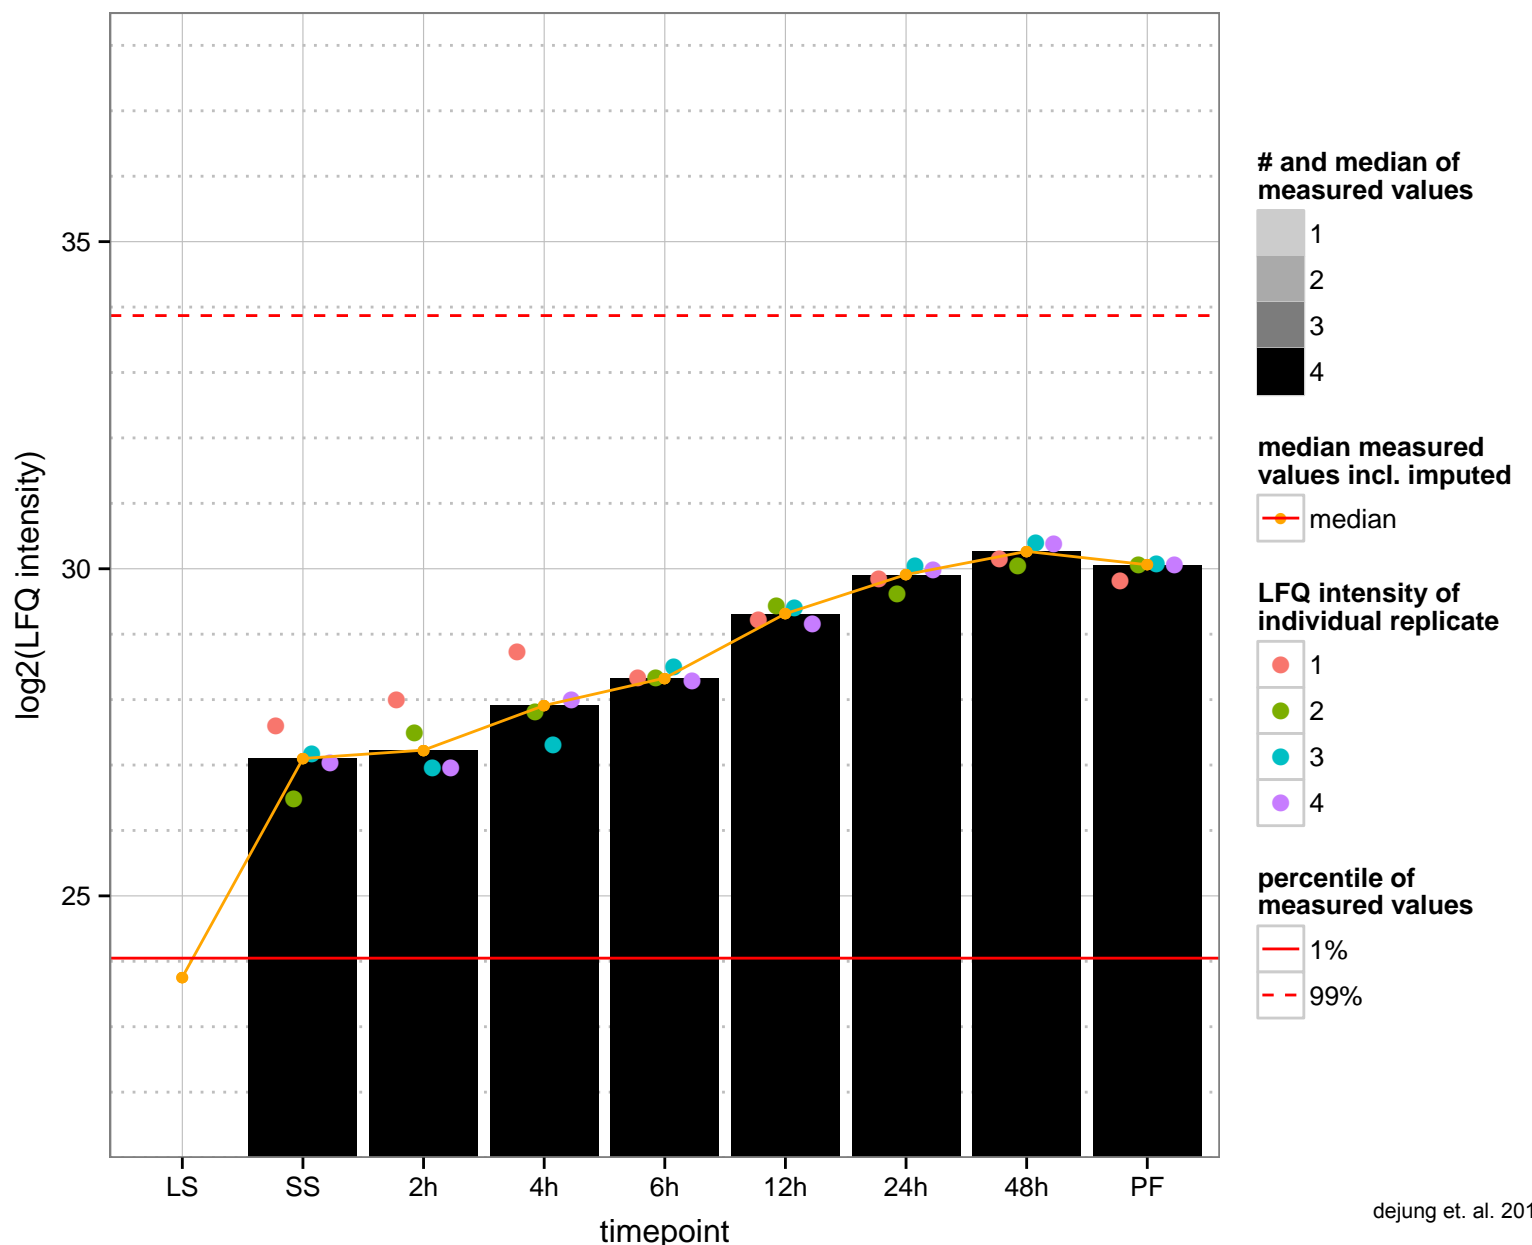



hypothetical protein, conserved  
 Tb927.10.5220;Tb11.v5.0235  
 AGOF: null  
 AGOC: null, mitochondrion  
 AGOP: null  
 PGO: binding  
 PGOC: null  
 PGOP: null

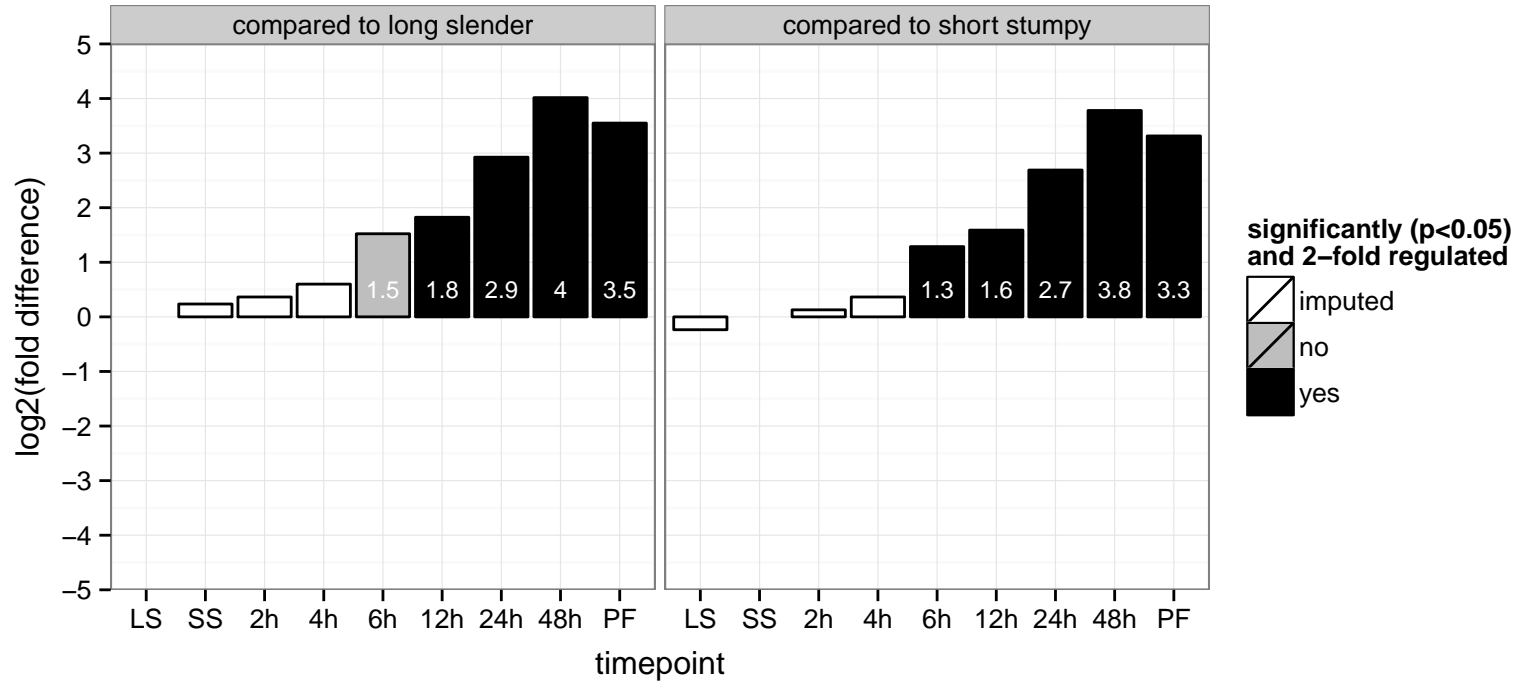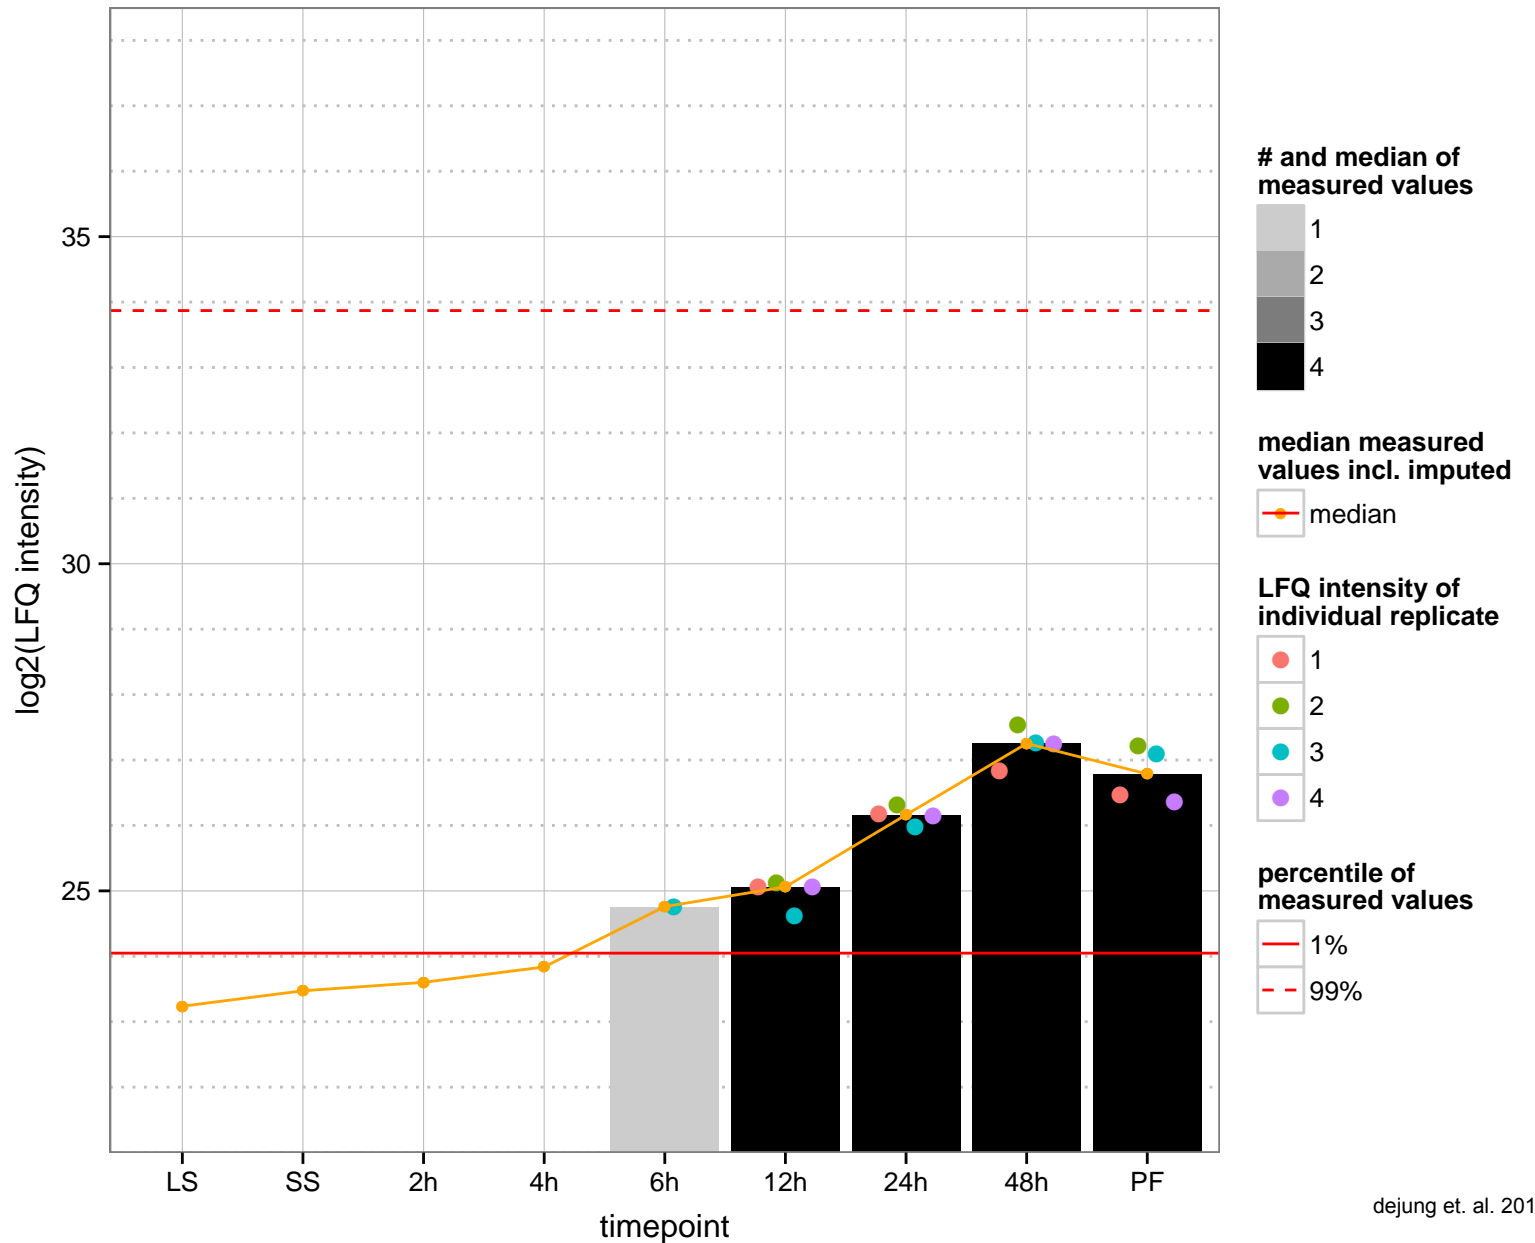

receptor-type adenylate cyclase GRESAG 4, putative, adenyl cyclase, ATP pyrophosphate-lyase  
 Tb927.5.330;Tb11.v5.0281  
 AGOF: null, adenylate cyclase activity  
 AGOC: null, integral to membrane  
 AGOP: null, cyclic nucleotide biosynthetic process, intracellular signal transduction  
 PGO: phosphorus-oxygen lyase activity  
 PGO: null  
 PGO: cyclic nucleotide biosynthetic process, intracellular signal transduction

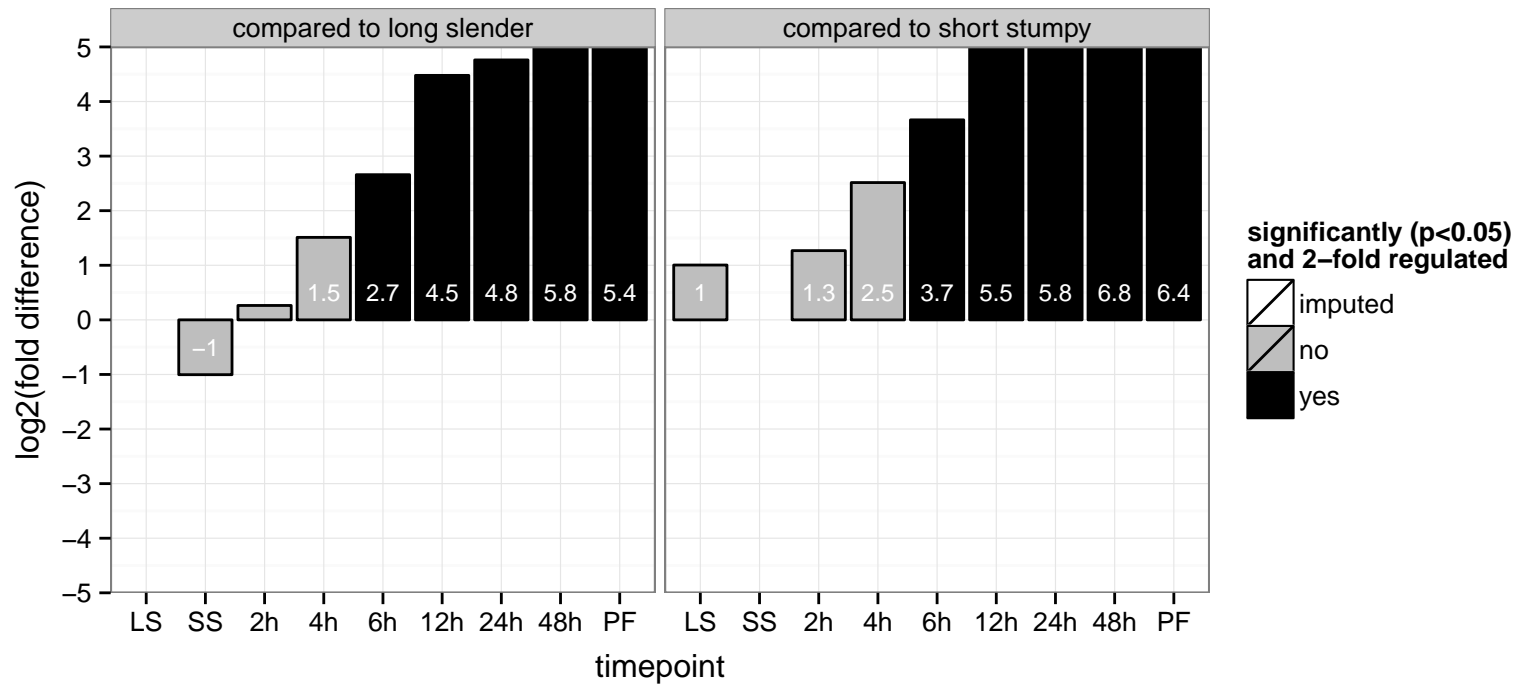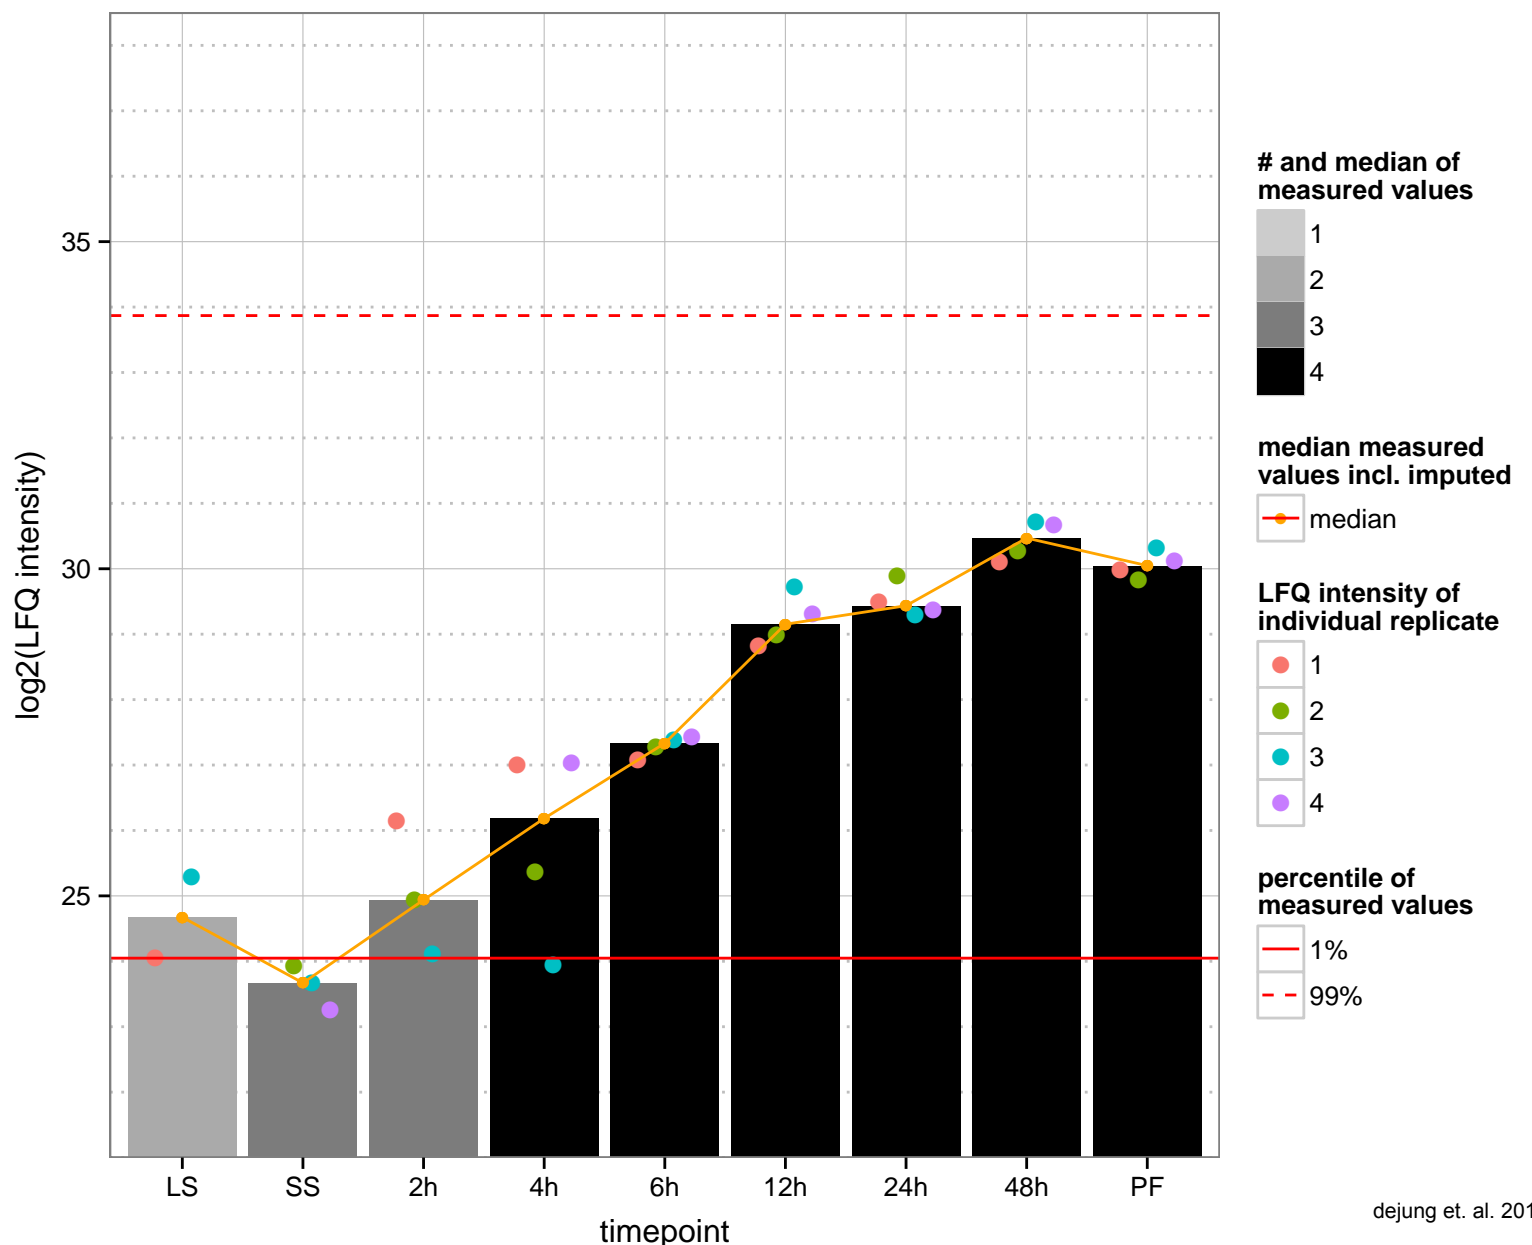

hypothetical protein, conserved, predicted SET domain protein  
 Tb927.10.4600;Tb11.v5.0422  
 AGOF: null  
 AGOC: null  
 AGOP: null  
 PGO: protein binding  
 PGOC: null  
 PGOP: null

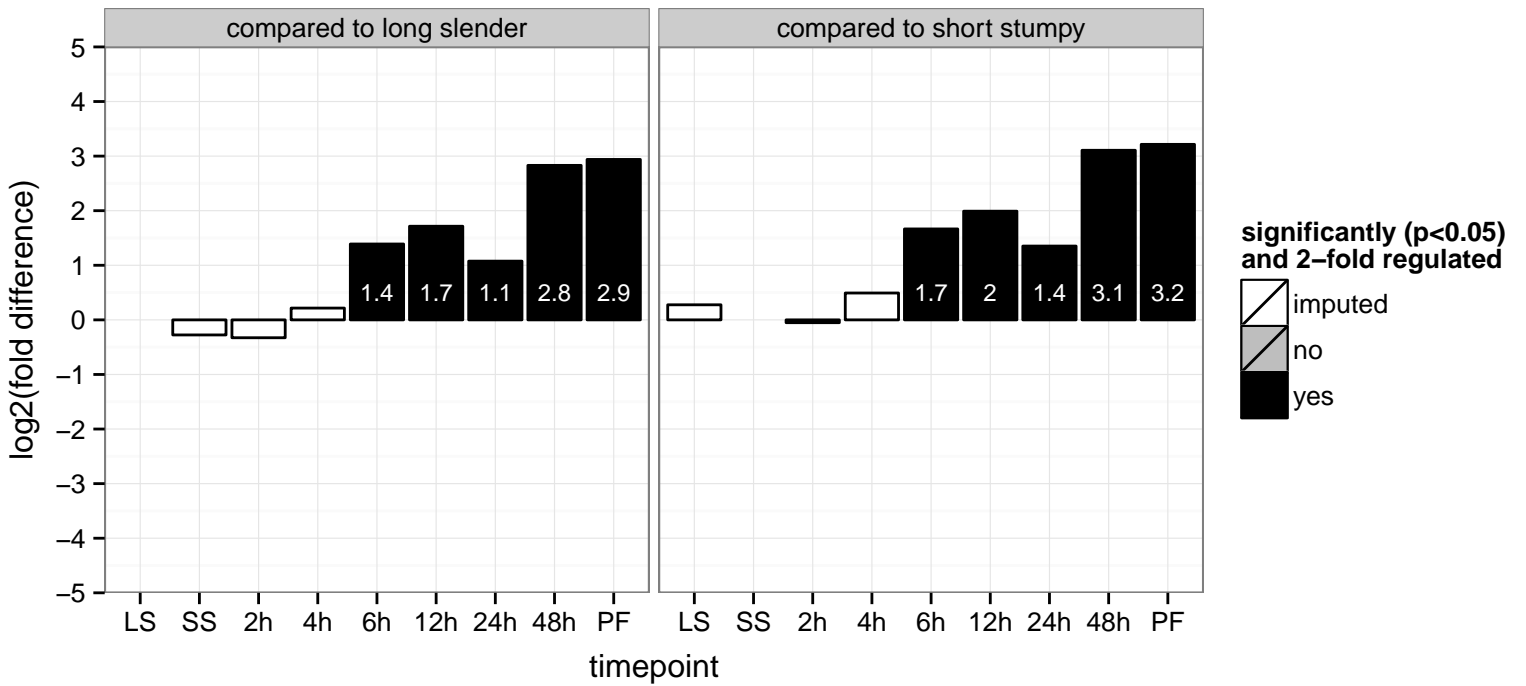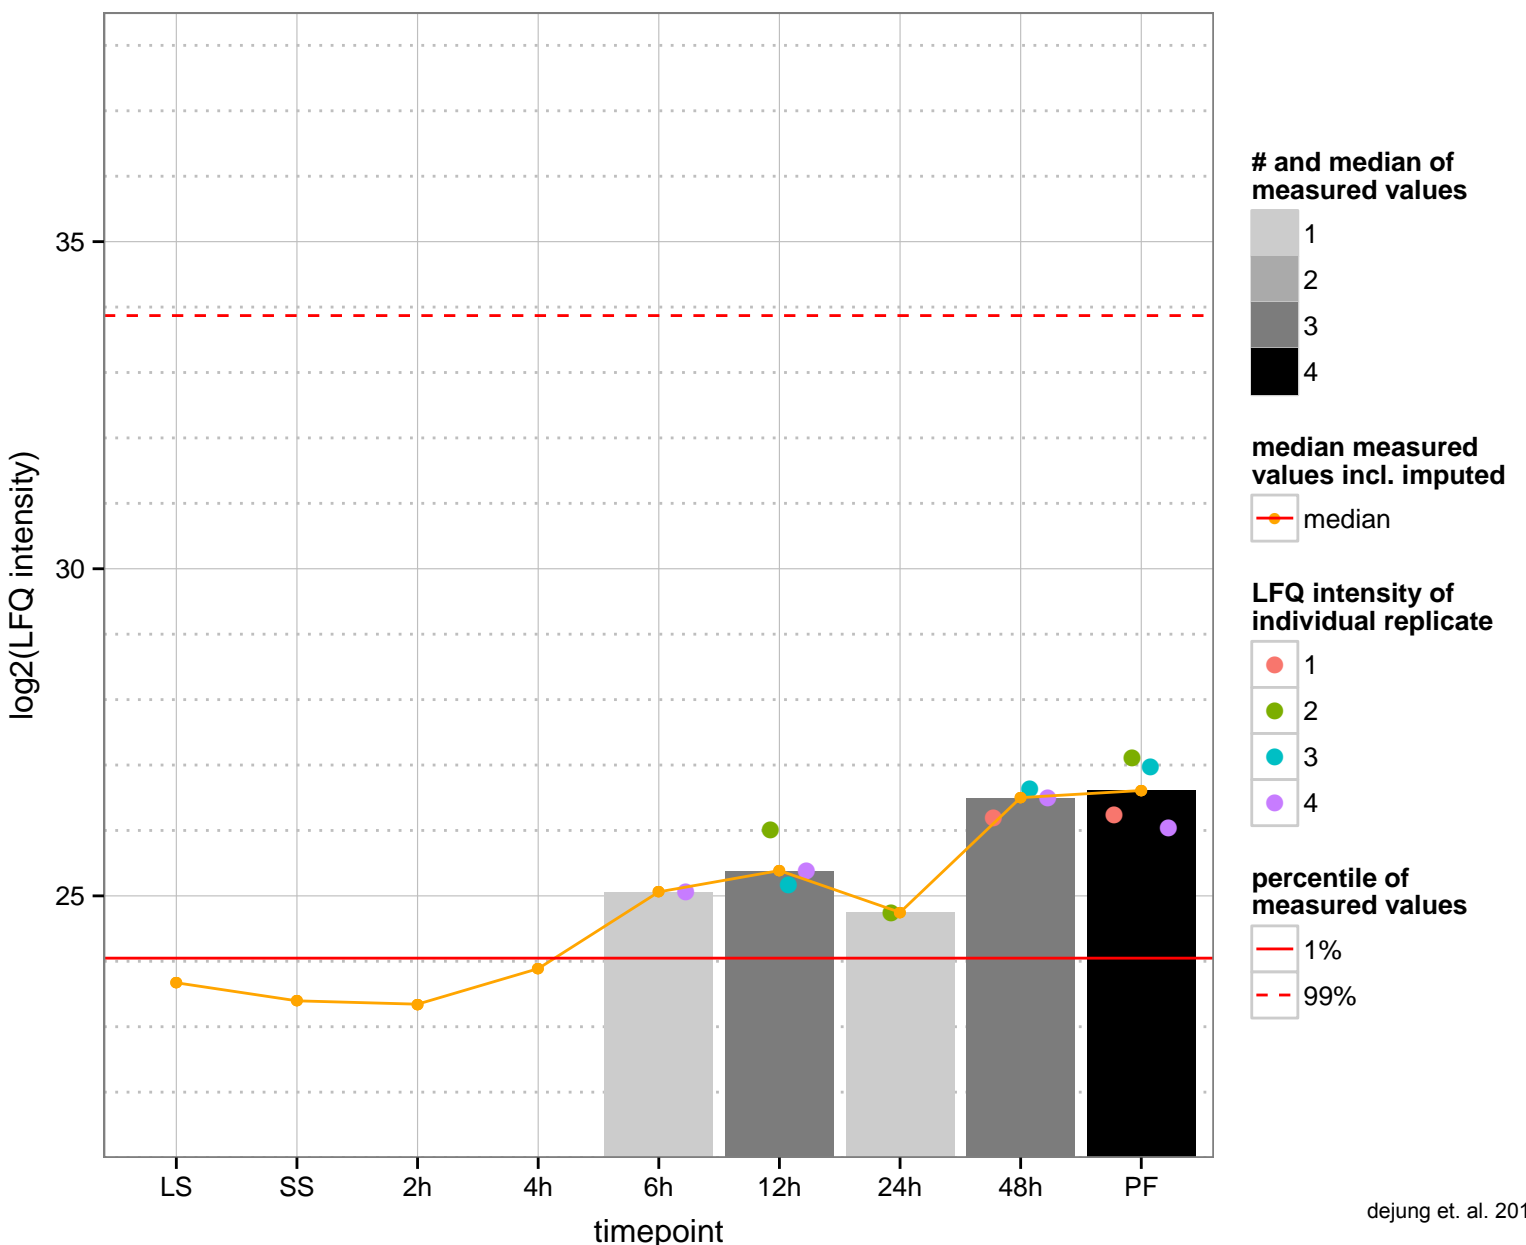

delta-6 fatty acid desaturase, putative, delta-4 fatty acid desaturase  
 Tb927.10.7100;Tb11.v5.0580  
 AGOF: null, heme binding, oxidoreductase activity, stearoyl-CoA 9-desaturase activity  
 AGOC: null  
 AGOP: null, fatty acid biosynthetic process  
 PGO: heme binding  
 PGOC: null  
 PGO: lipid metabolic process

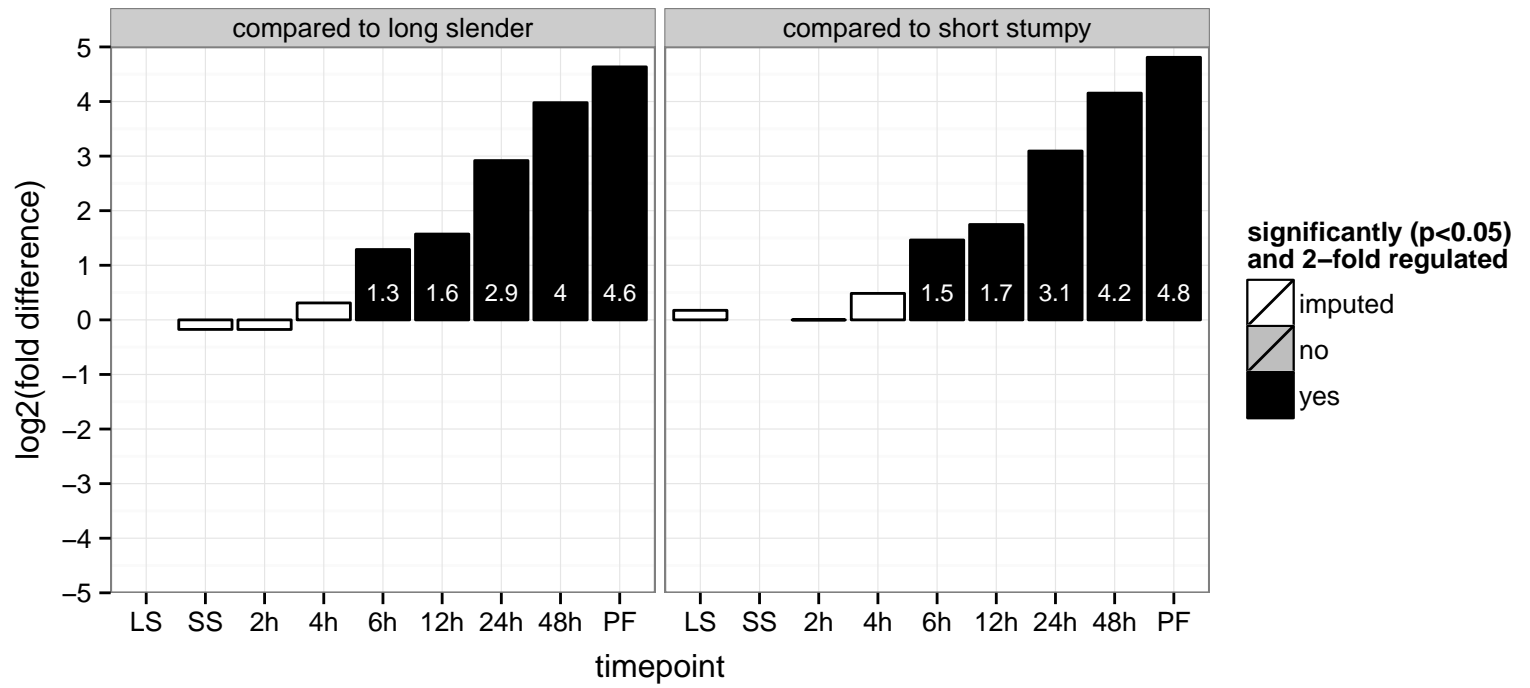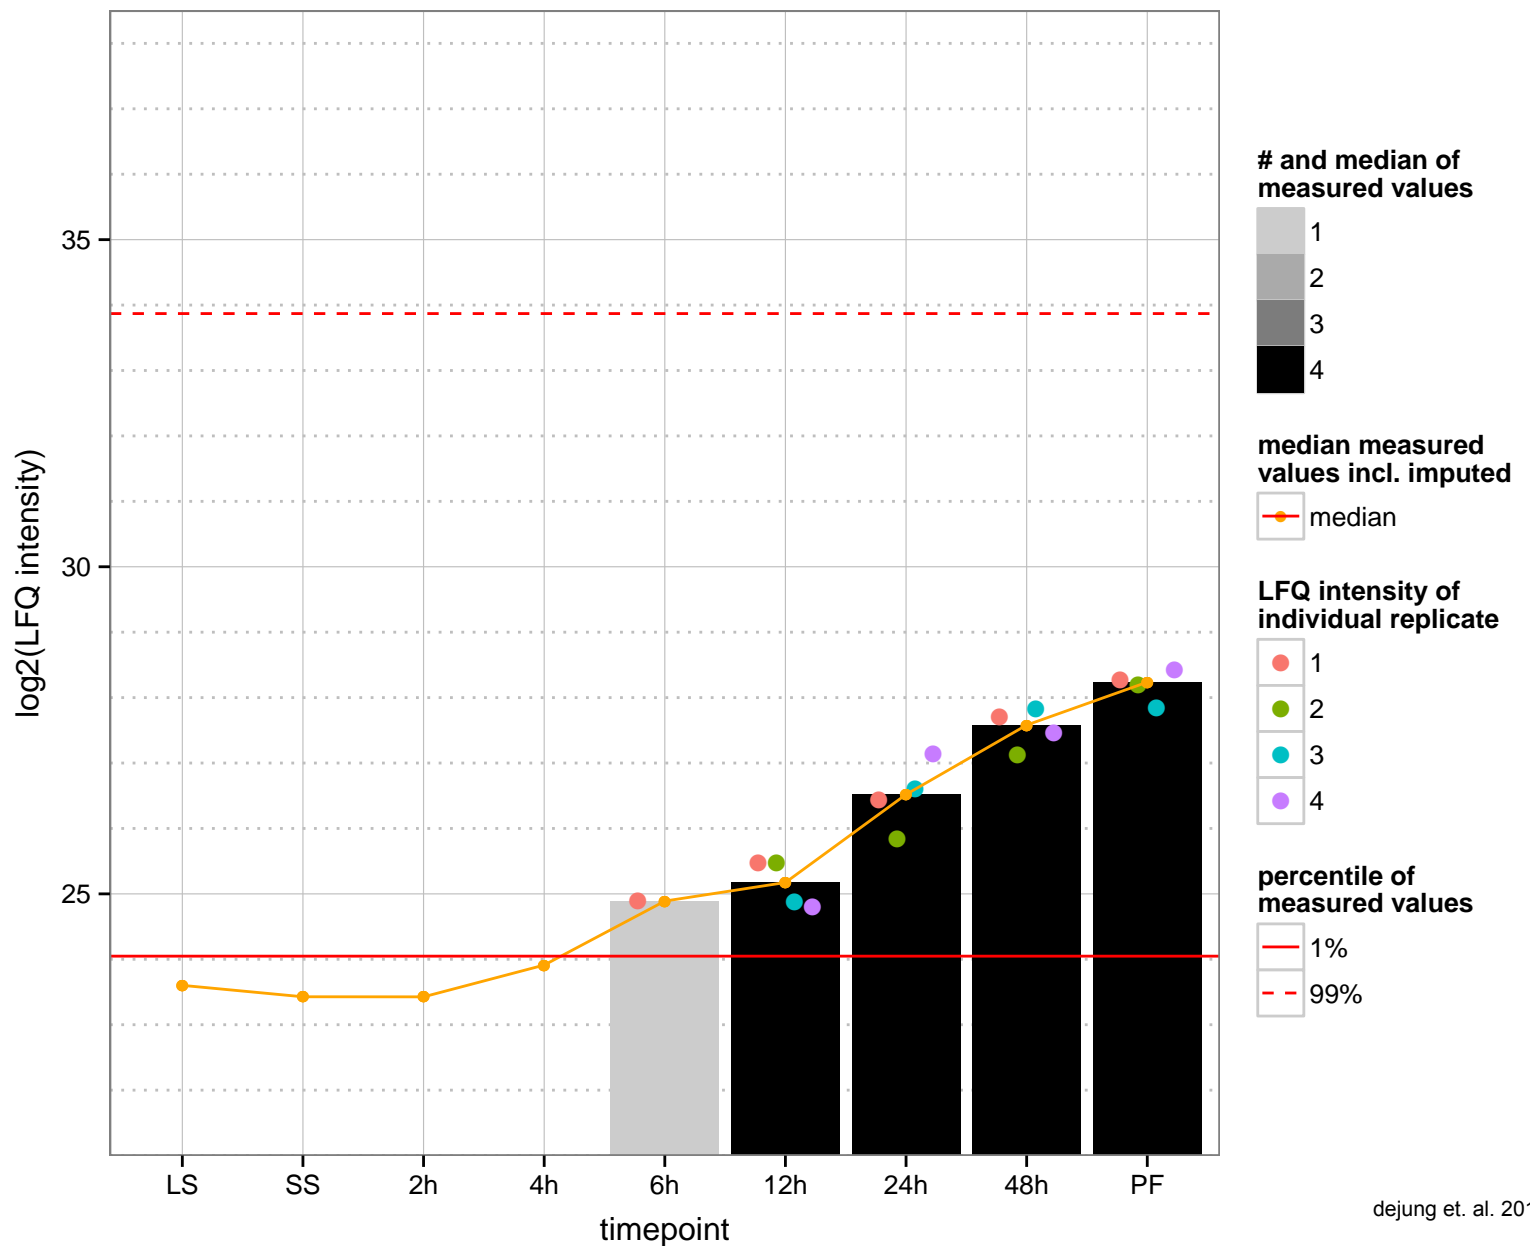

transcription elongation factor 1 homolog (ELOF1)

Tb927.1.1630

AGOF: null

AGOC: null

AGOP: null

PGOF: null

PGOC: null

PGOP: null

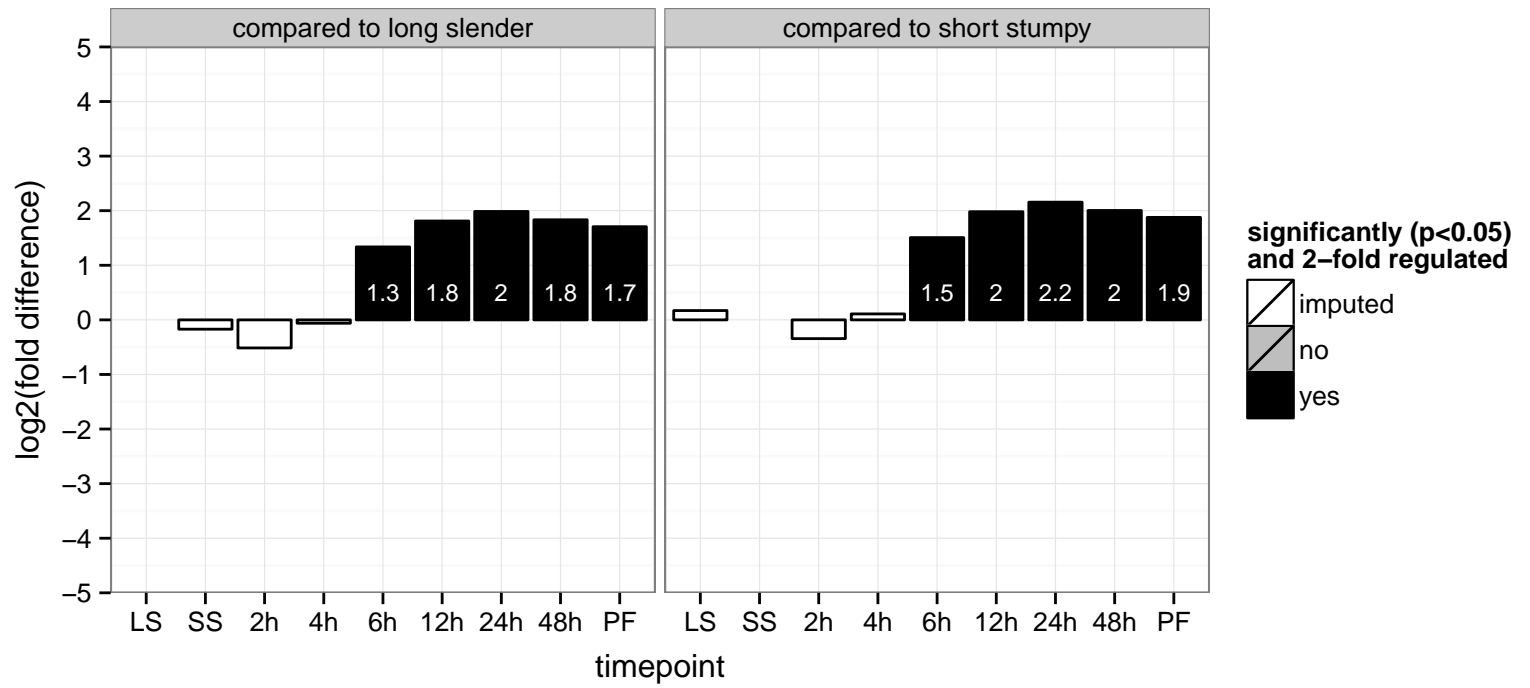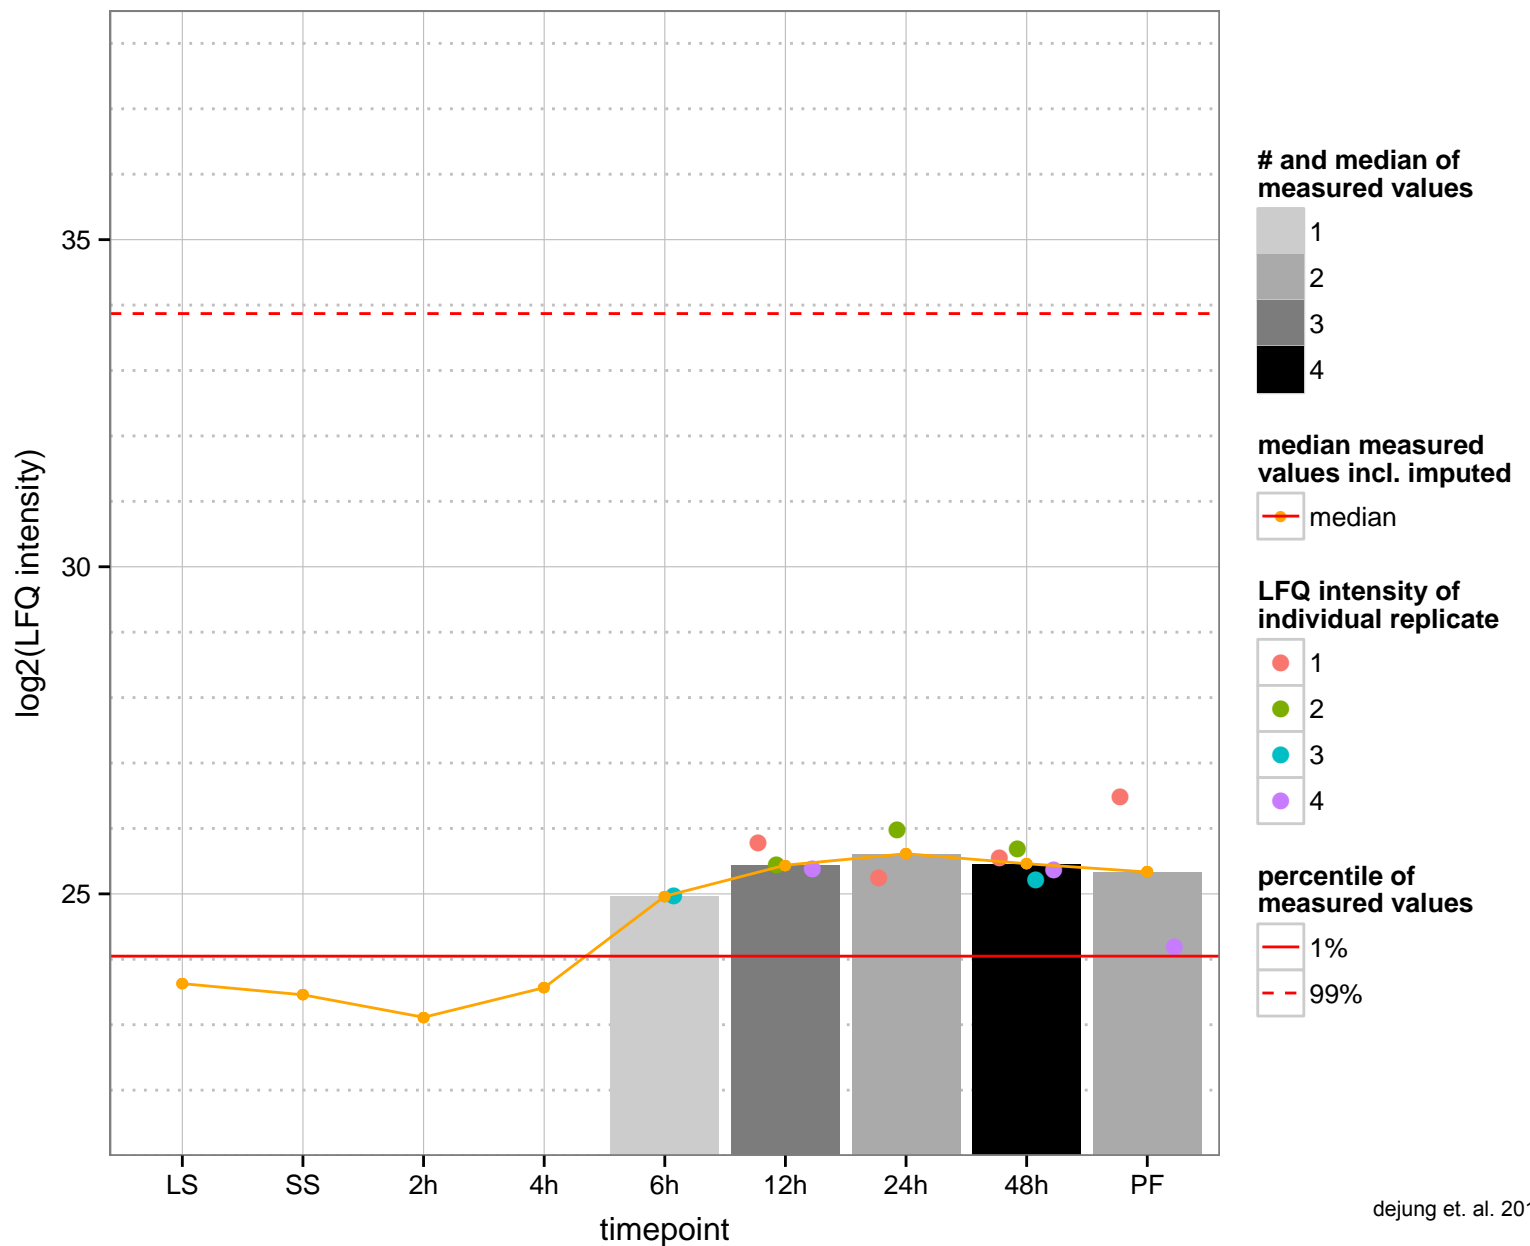

transmembrane protein, putative  
 Tb927.1.840  
 AGOF: null  
 AGOC: mitochondrion  
 AGOP: null  
 PGO: null  
 PGOC: null  
 PGOP: null

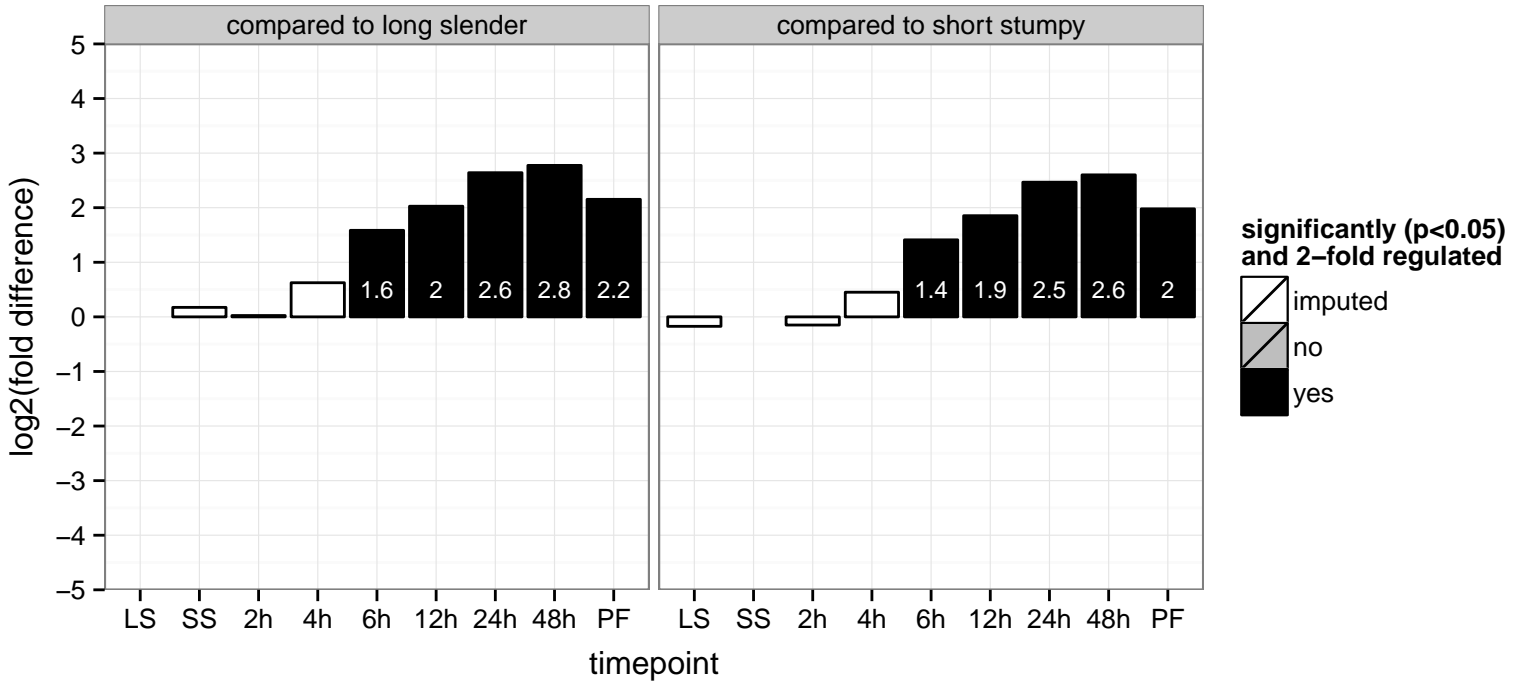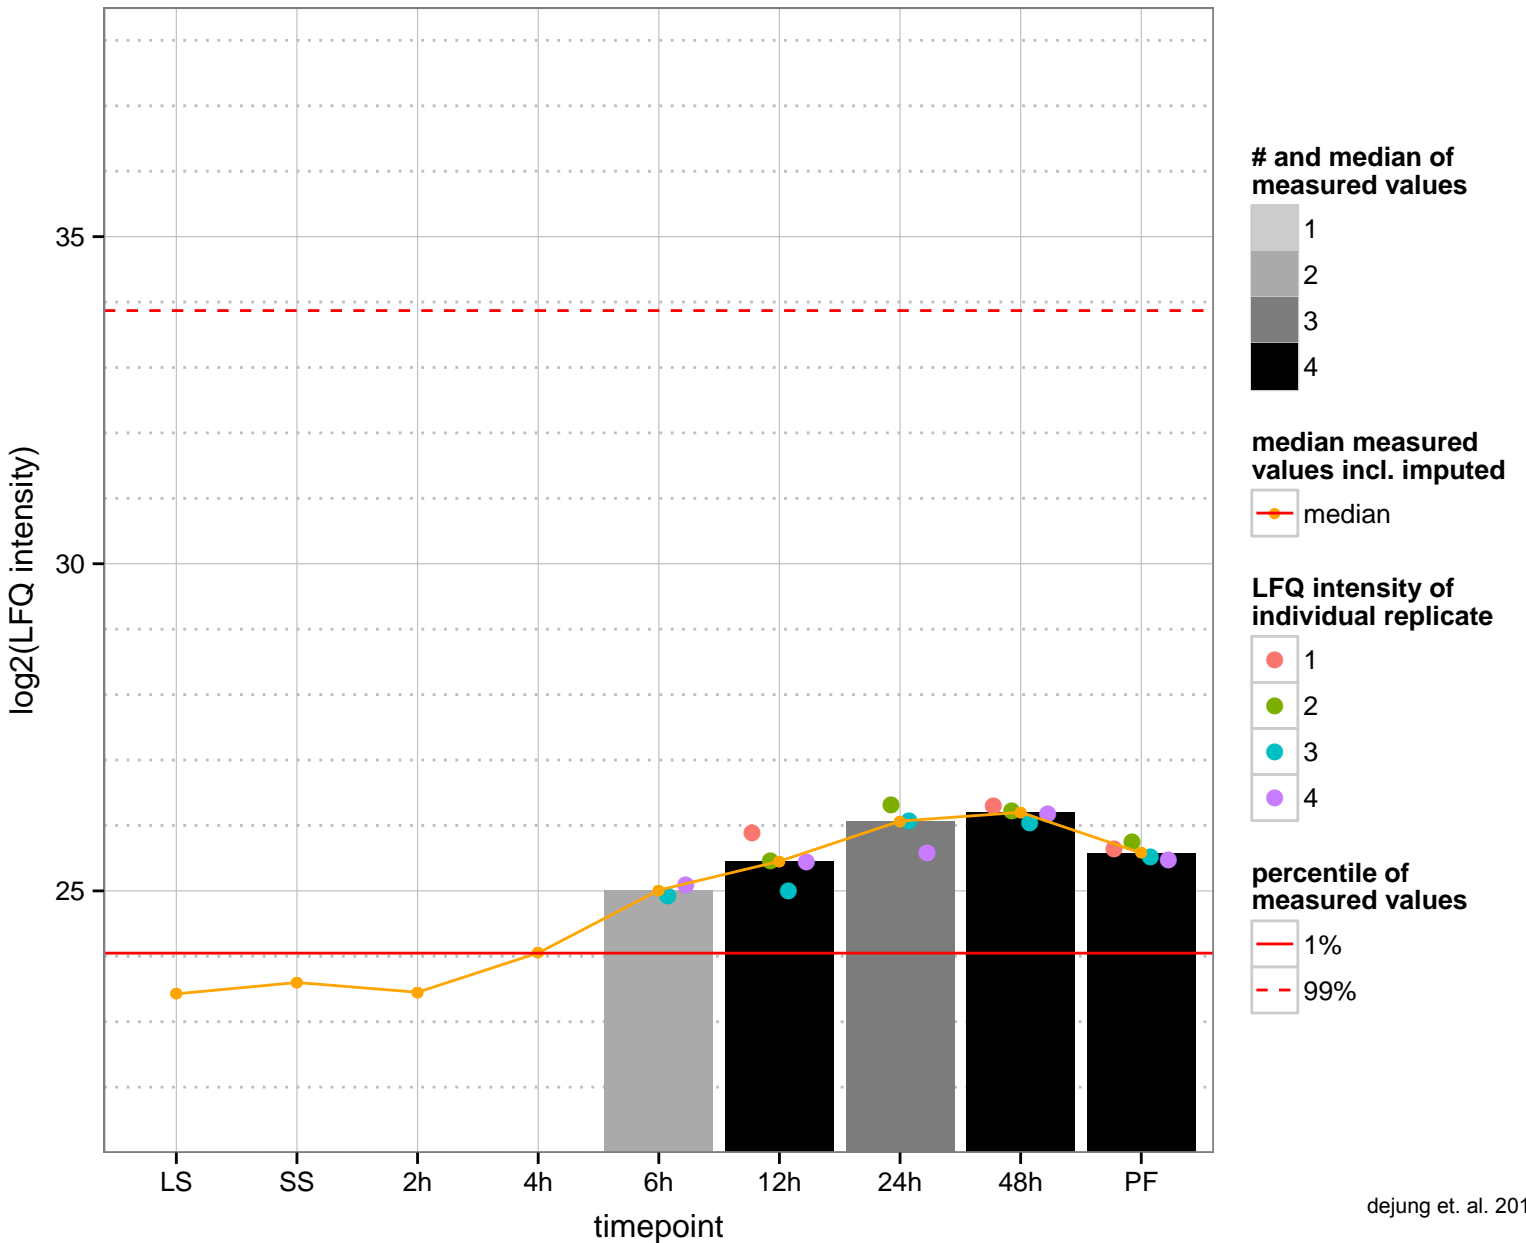

hypothetical protein, conserved  
 Tb927.10.10120  
 AGOF: null  
 AGOC: mitochondrion  
 AGOP: null  
 PGO: null  
 PGOC: null  
 PGO: null

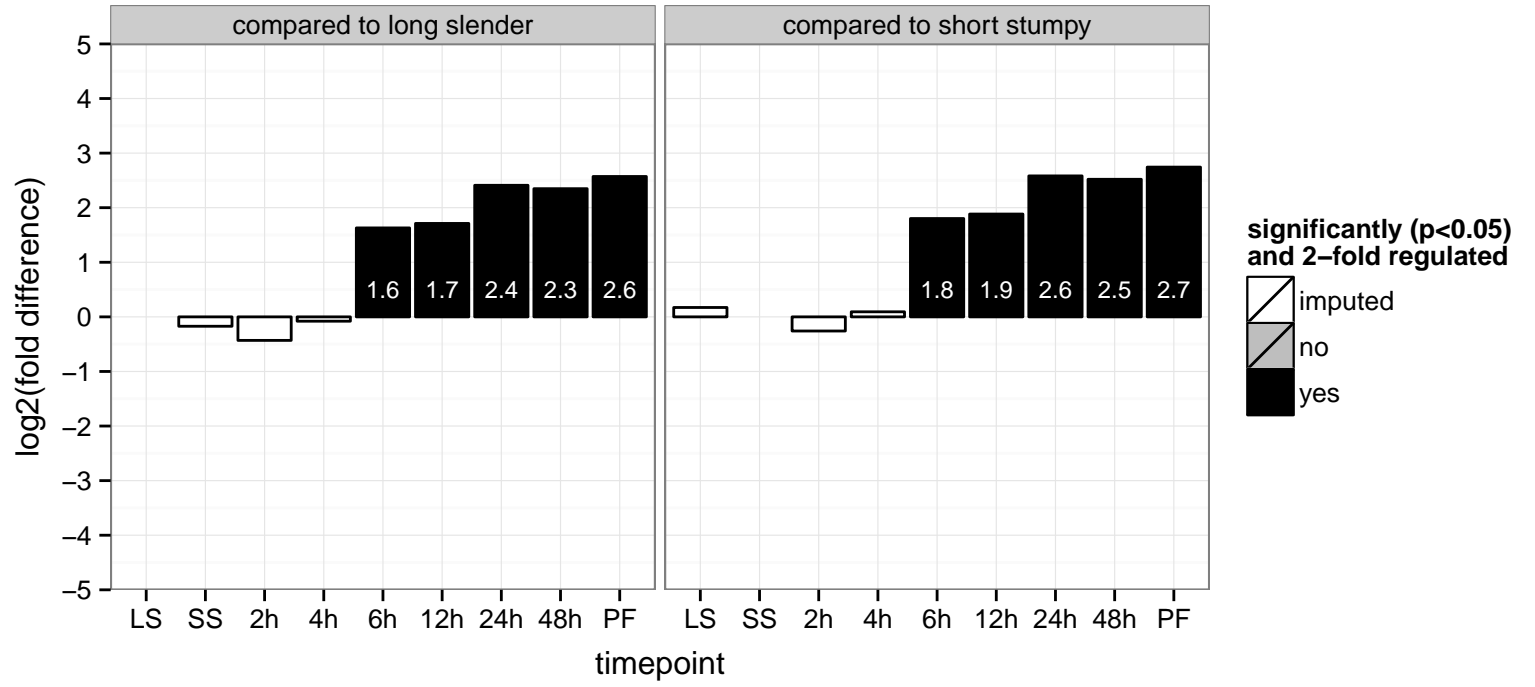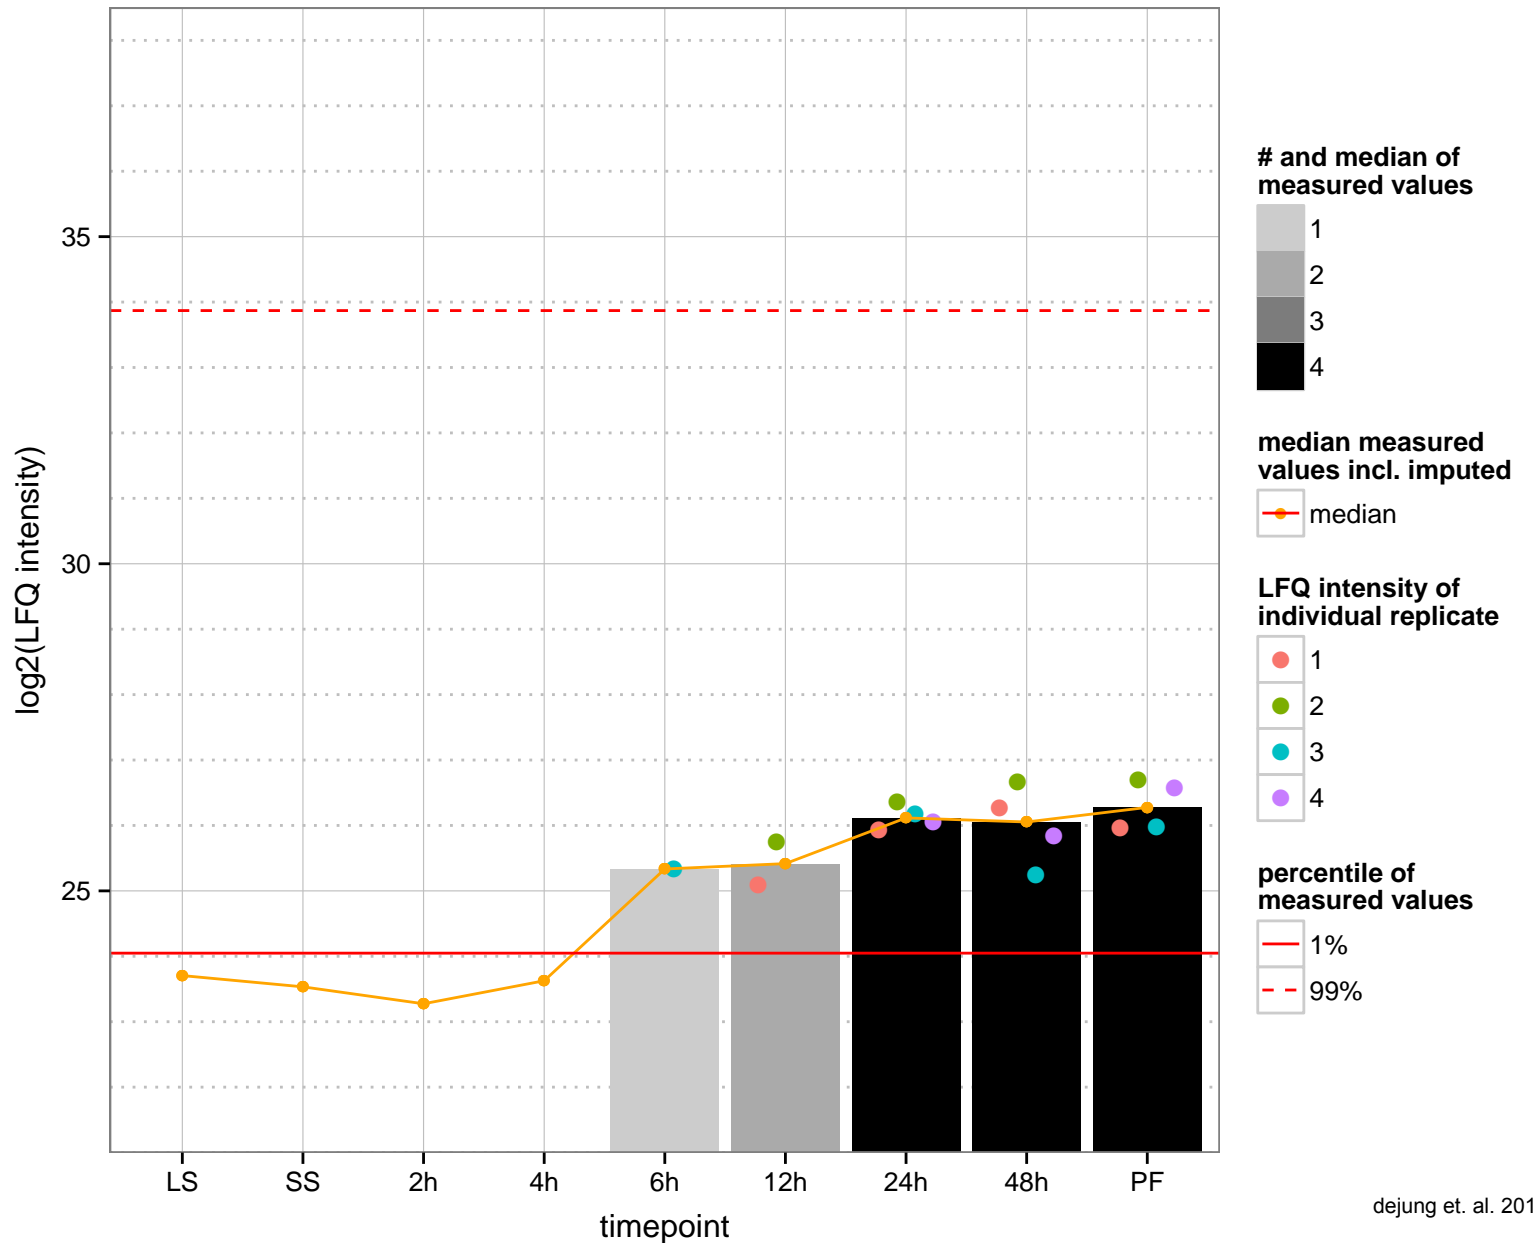

mitochondrial malate dehydrogenase (mMDH)

Tb927.10.2560

AGOF: L-malate dehydrogenase activity, malate dehydrogenase activity, oxidoreductase activity

AGOC: mitochondrial inner membrane, mitochondrion

AGOP: glycolysis, malate metabolic process, oxidation-reduction process, tricarboxylic acid cycle

PGOF: L-malate dehydrogenase activity, catalytic activity, oxidoreductase activity, acting on the CH-OH group of donors, NAD

PGOC: null

PGOP: carbohydrate metabolic process, cellular carbohydrate metabolic process, malate metabolic process, oxidation-reduct

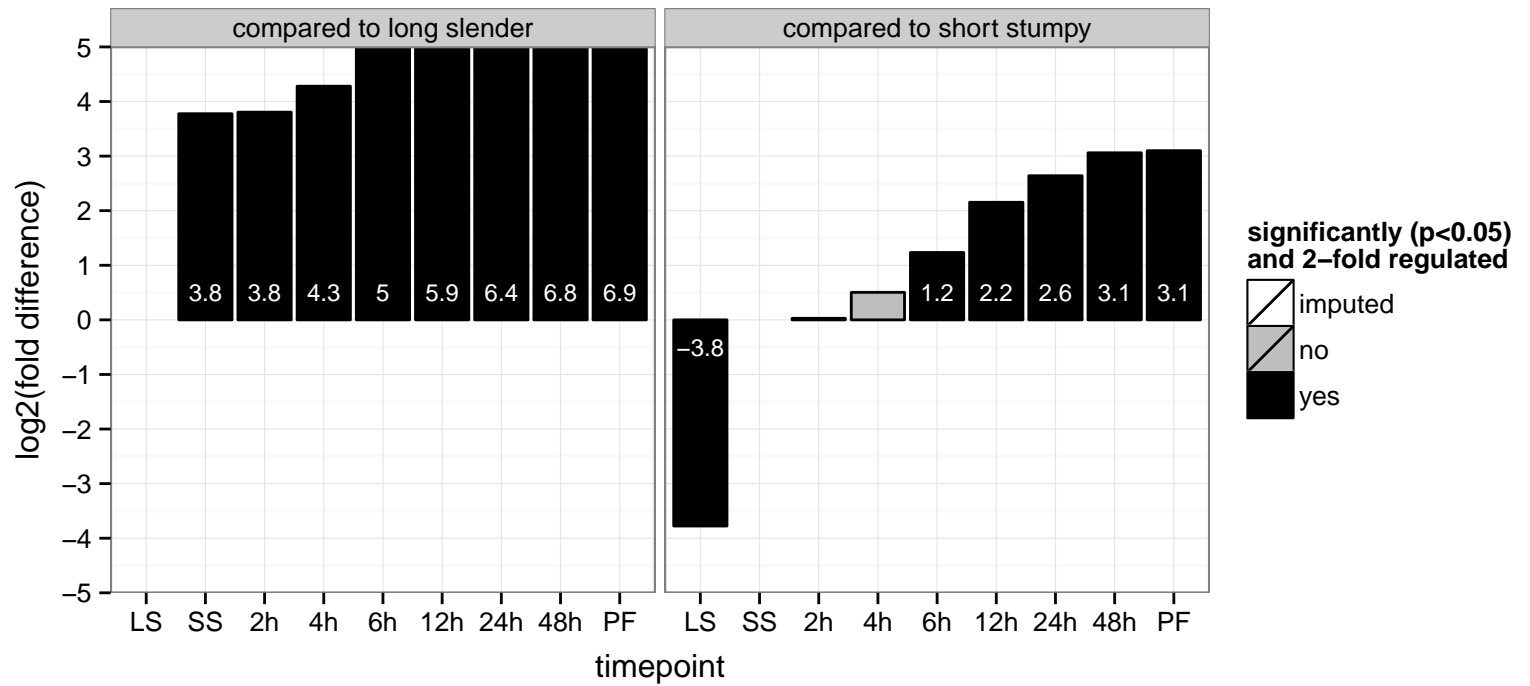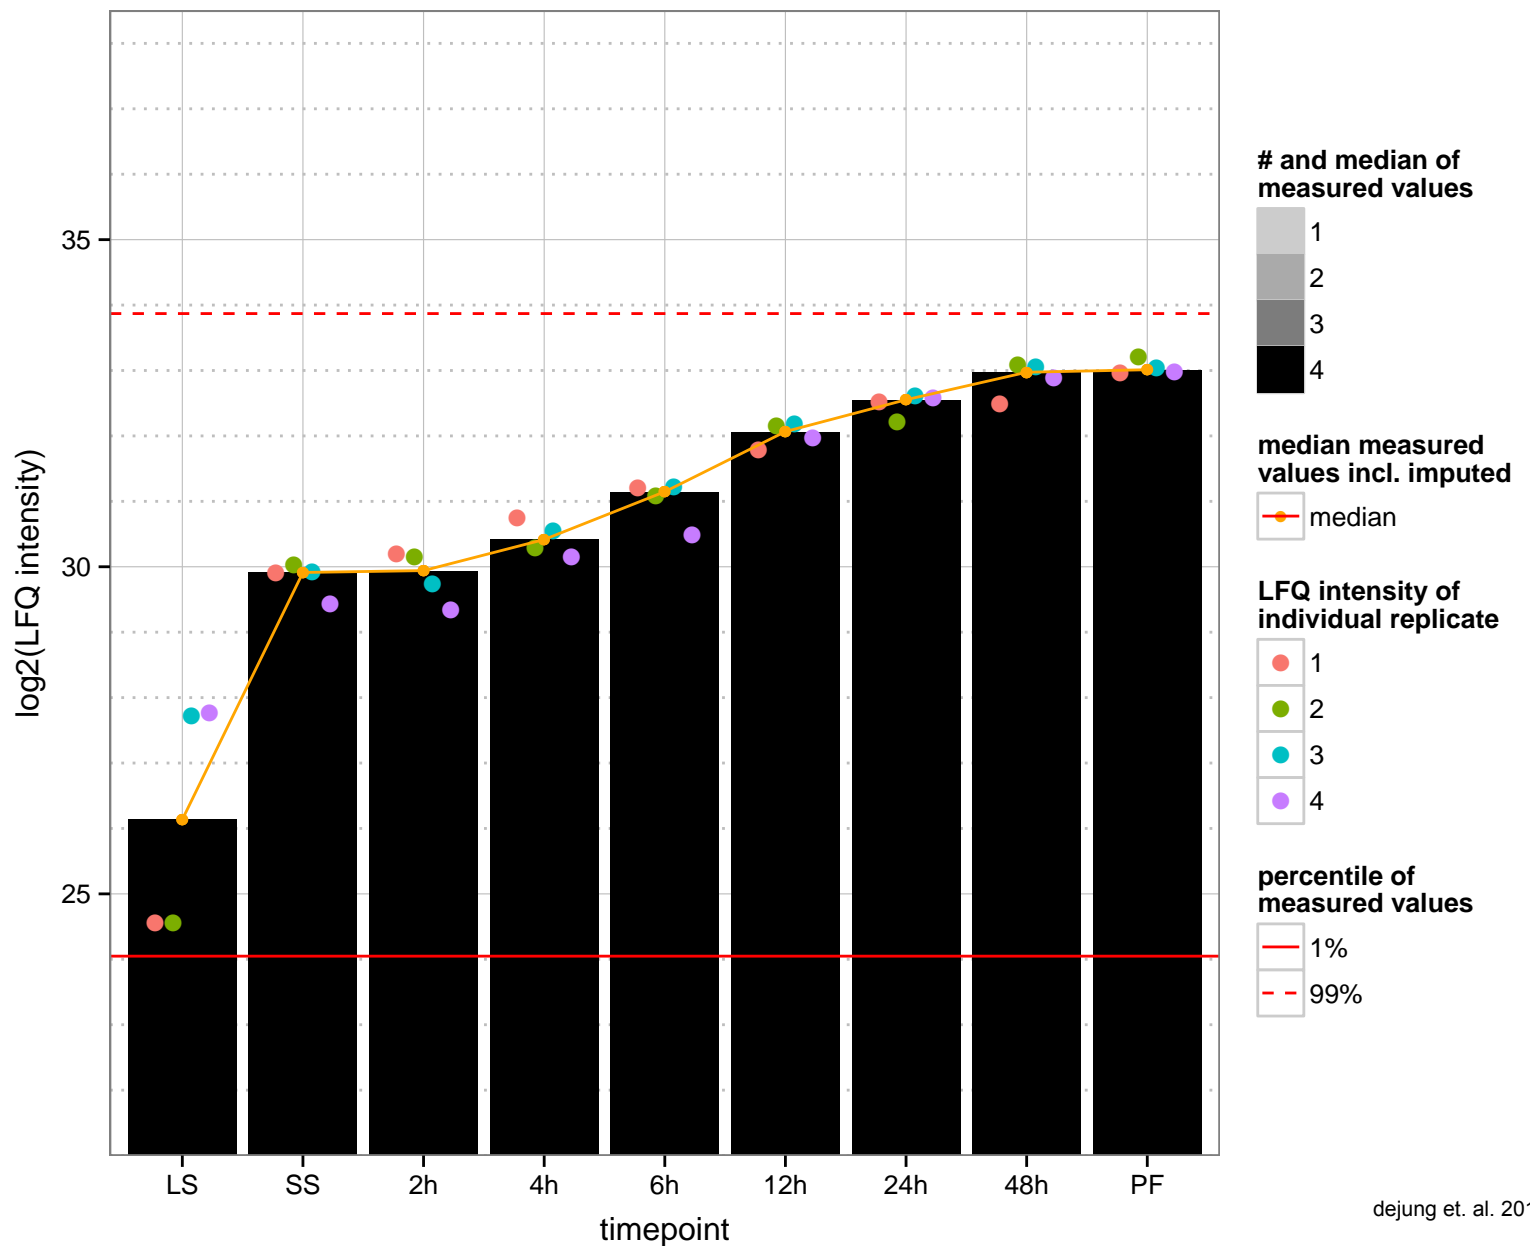



choline dehydrogenase, putative

Tb927.10.470

AGOF: choline dehydrogenase activity, oxidoreductase activity, acting on paired donors, with incorporation or reduction of mol

AGOC: mitochondrion

AGOP: carotenoid biosynthetic process, glycine betaine biosynthetic process from choline

PGOF: flavin adenine dinucleotide binding, oxidoreductase activity, acting on CH-OH group of donors

PGOC: null

PGOP: oxidation-reduction process

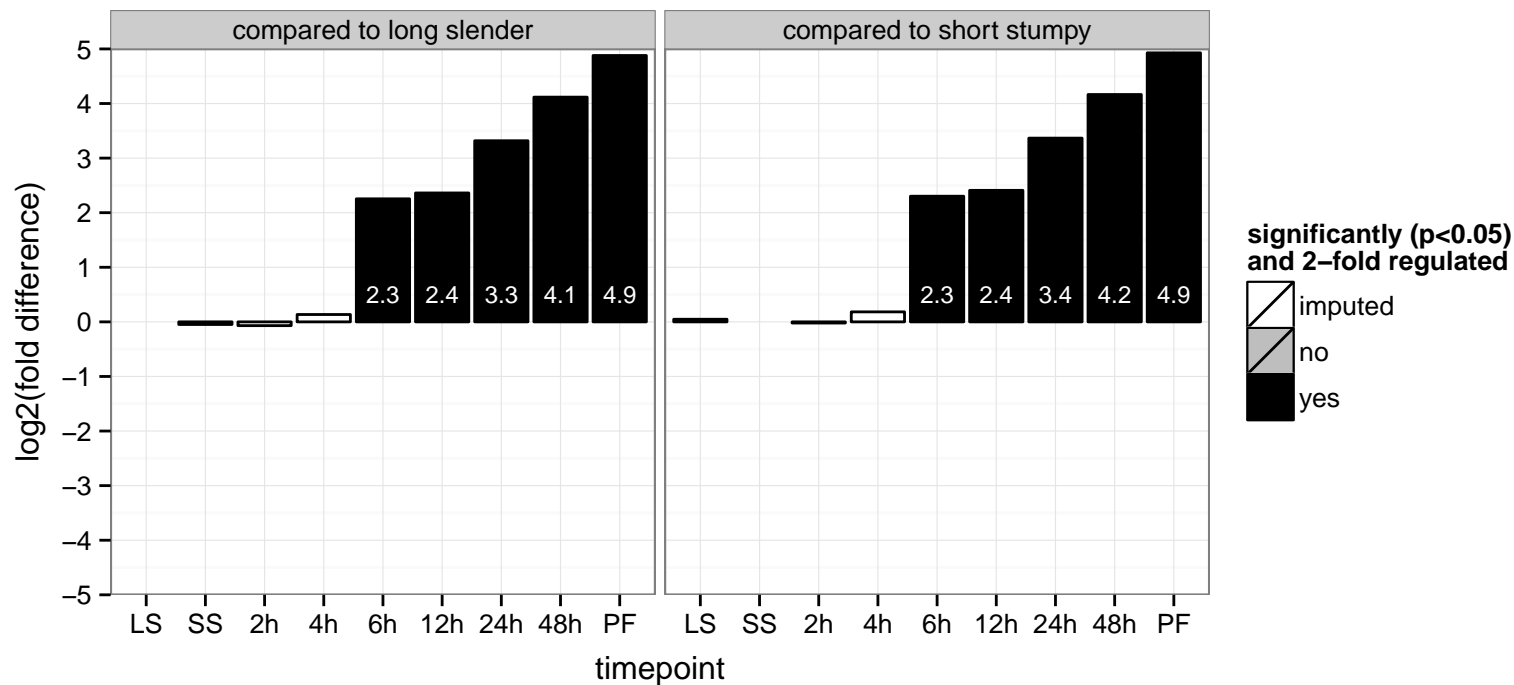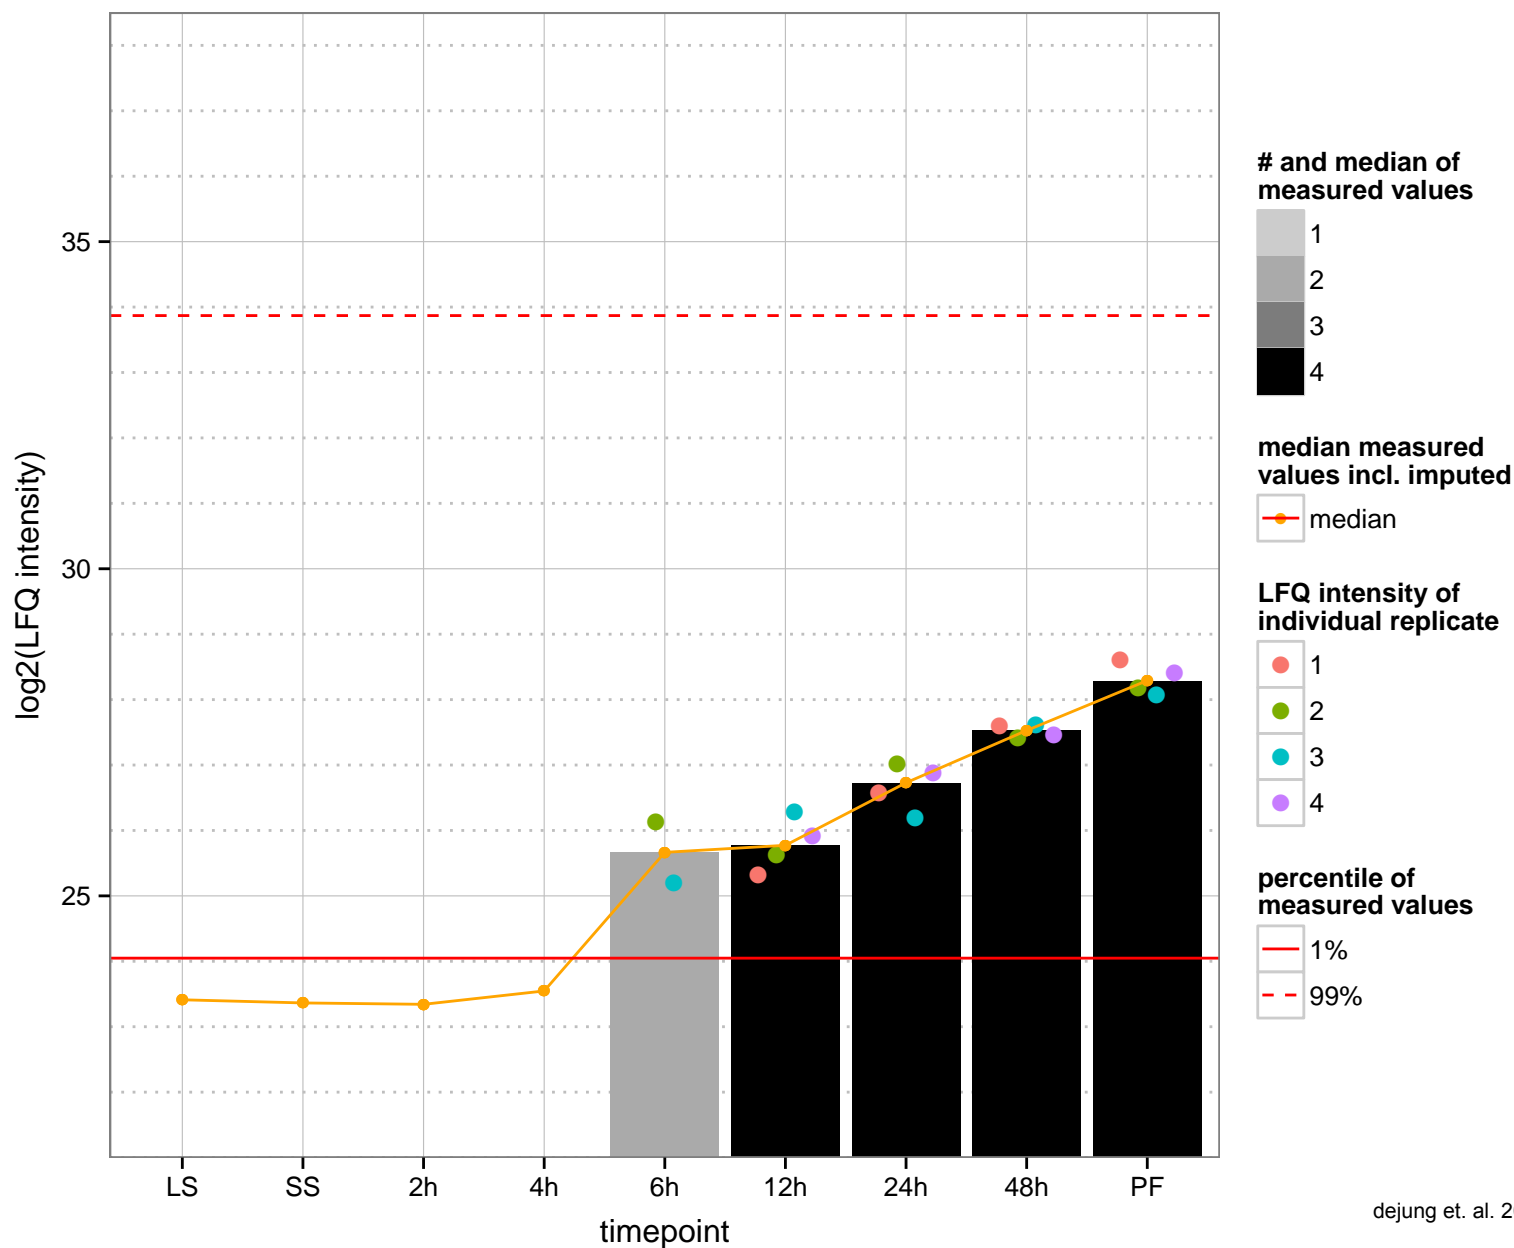

protein kinase, putative, (OTHER) NEK family, HsNEK1-like

Tb927.10.5940;Tb927.10.5930

AGOF: ATP binding, protein serine/threonine kinase activity, protein tyrosine kinase activity

AGOC: null

AGOP: modulation of development of symbiont involved in interaction with host, protein phosphorylation, quorum sensing involved

PGOF: ATP binding, phospholipid binding, protein binding, protein kinase activity, transferase activity, transferring phosphorus

PGOC: null

PGOP: protein phosphorylation

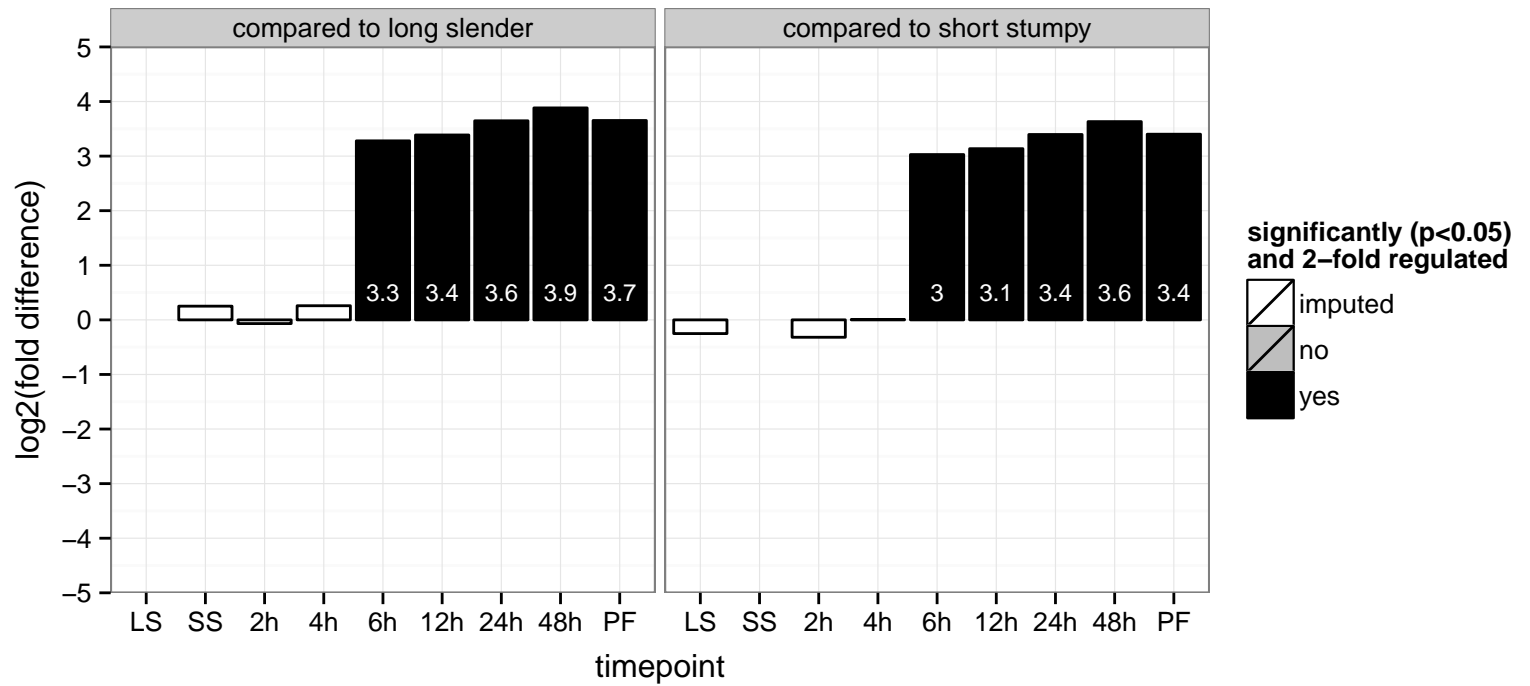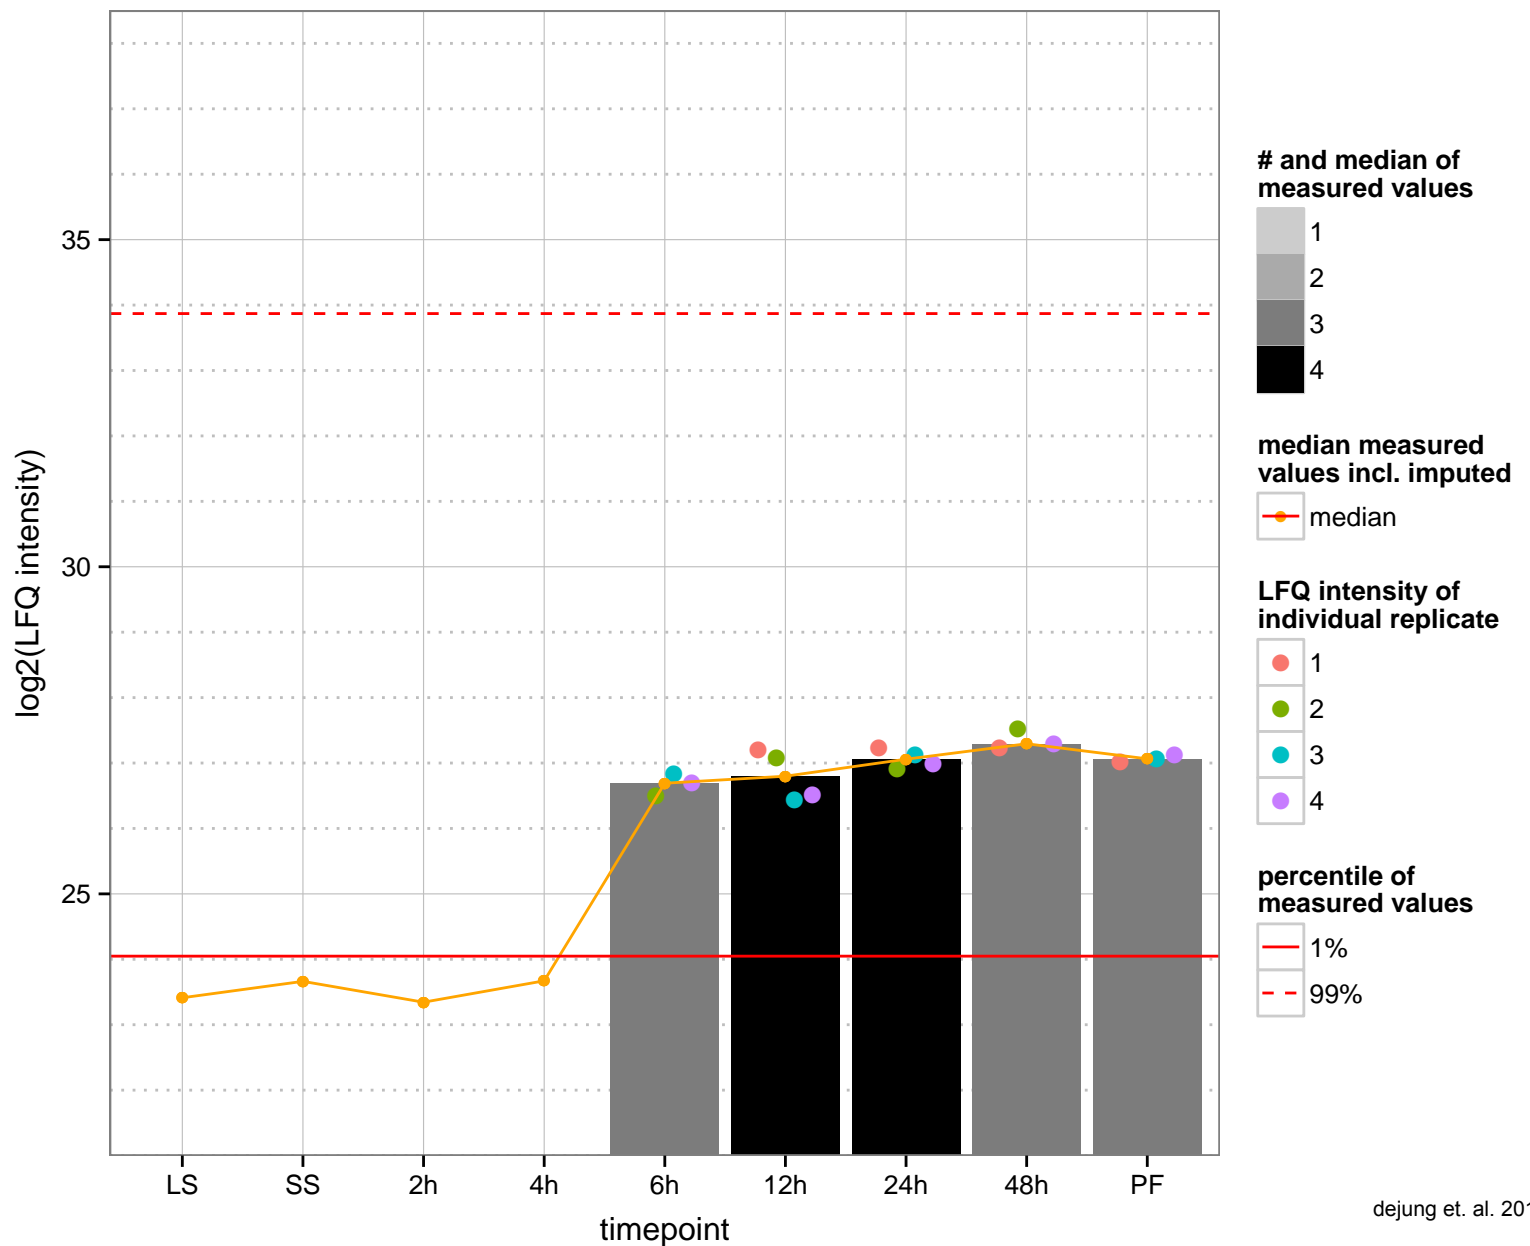

ATP-dependent DEAD/H RNA helicase HEL64, putative (HEL64)

Tb927.10.6630

AGOF: ATP binding, ATP-dependent helicase activity, helicase activity, nucleic acid binding

AGOC: cytosol

AGOP: nucleobase-containing compound metabolic process

PGOF: ATP binding, ATP-dependent helicase activity, helicase activity, nucleic acid binding

PGOC: null

PGOP: null

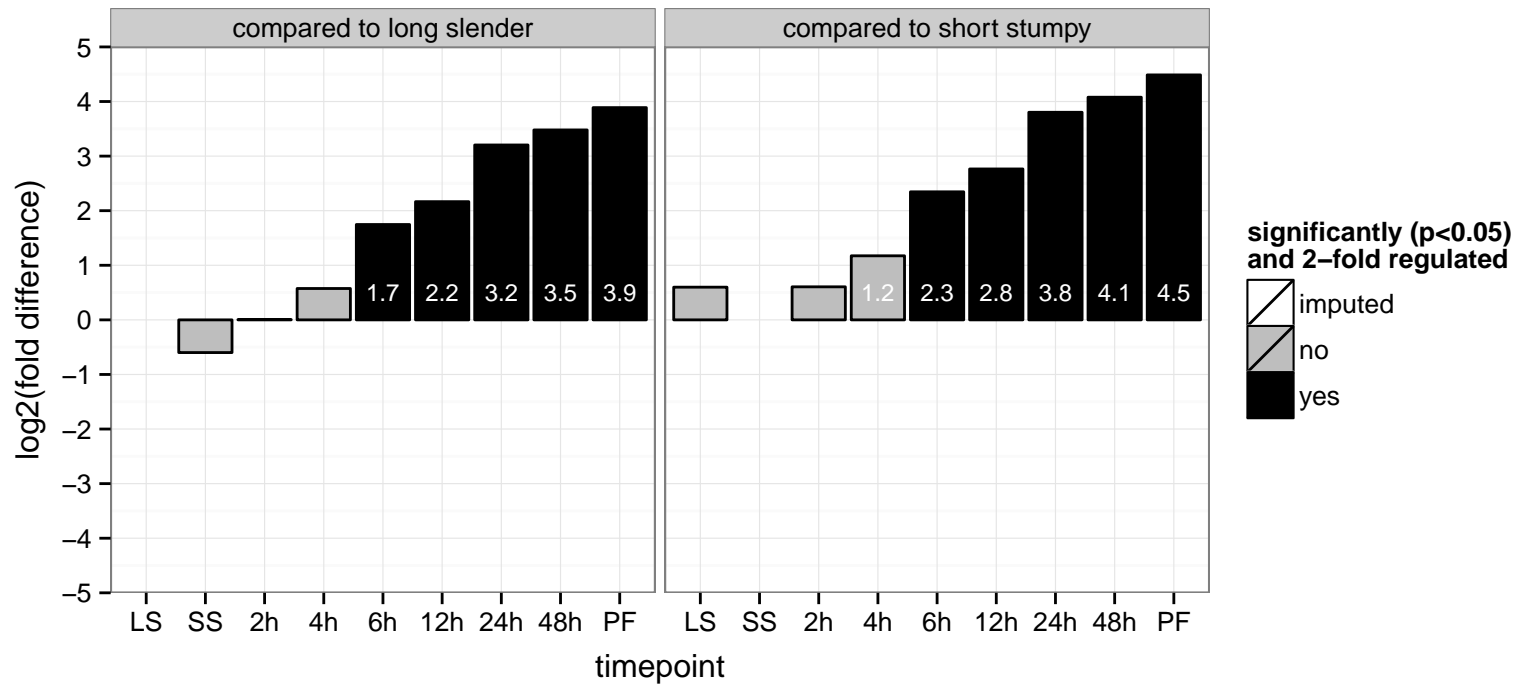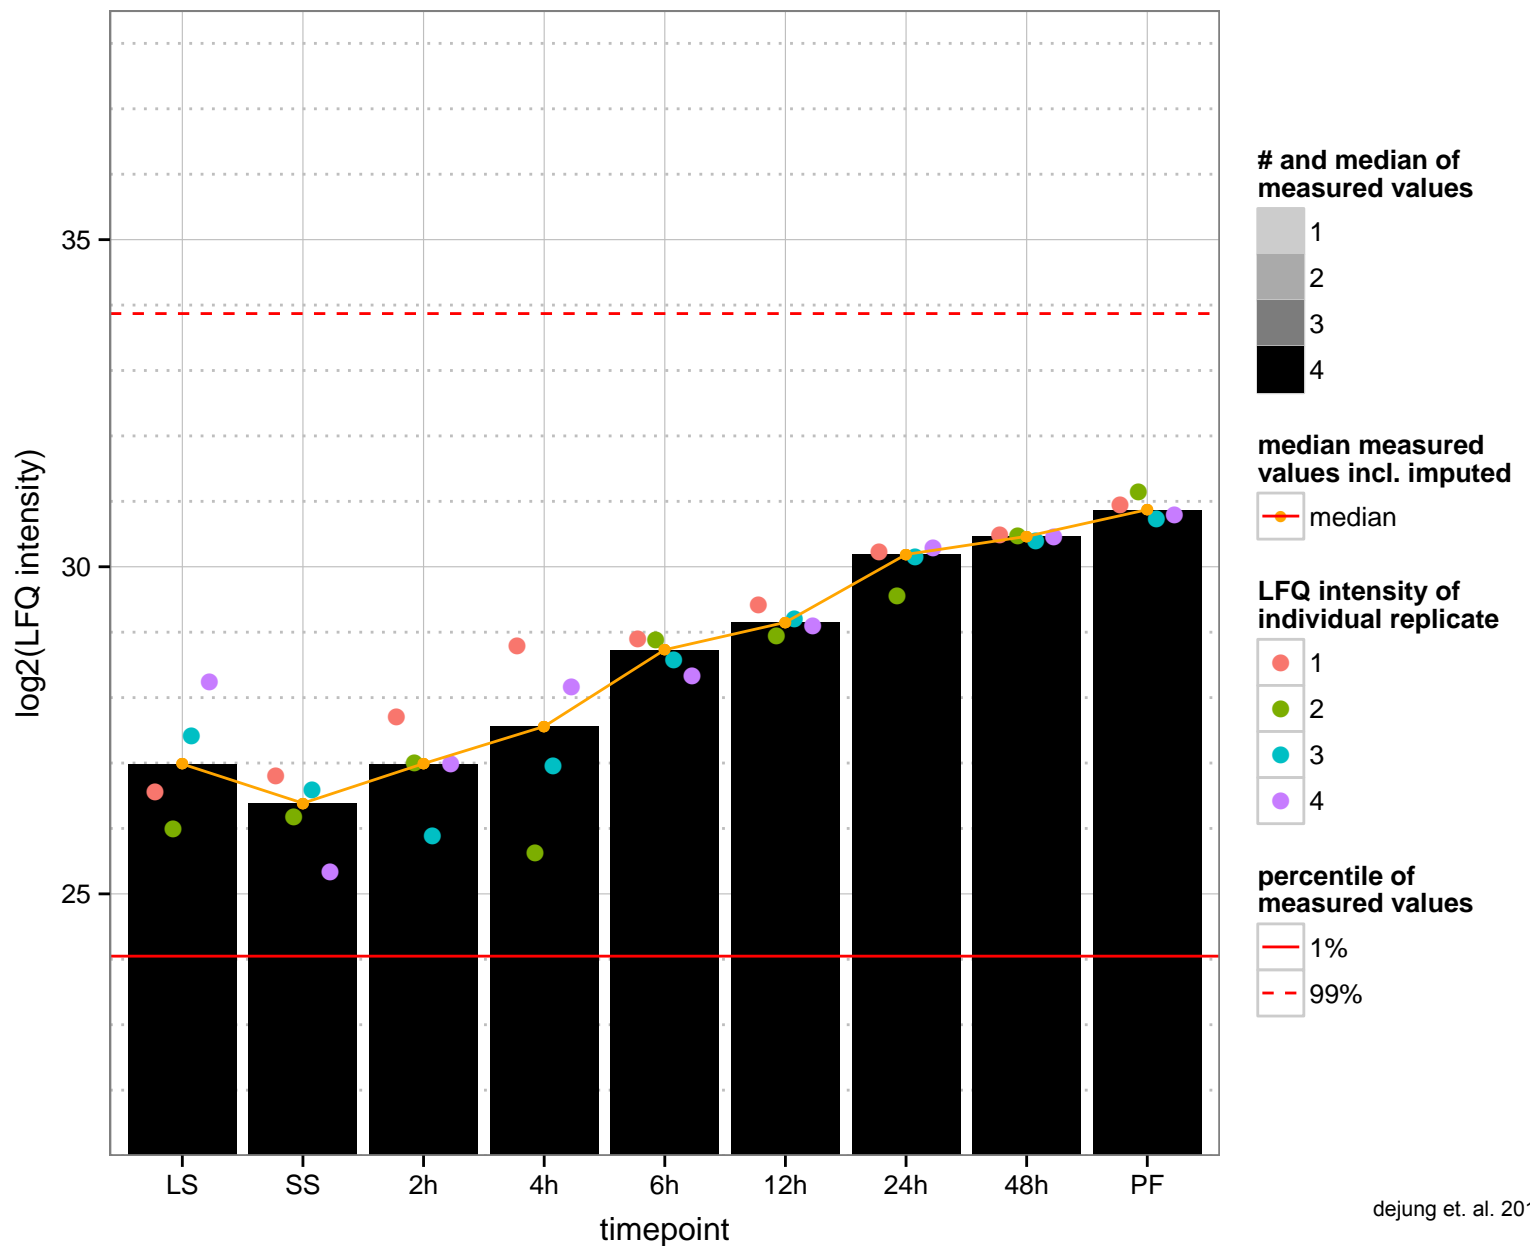

hypothetical protein, conserved  
 Tb927.10.9000  
 AGOF: null  
 AGOC: mitochondrion  
 AGOP: null  
 PGO: null  
 PGOC: null  
 PGOP: null

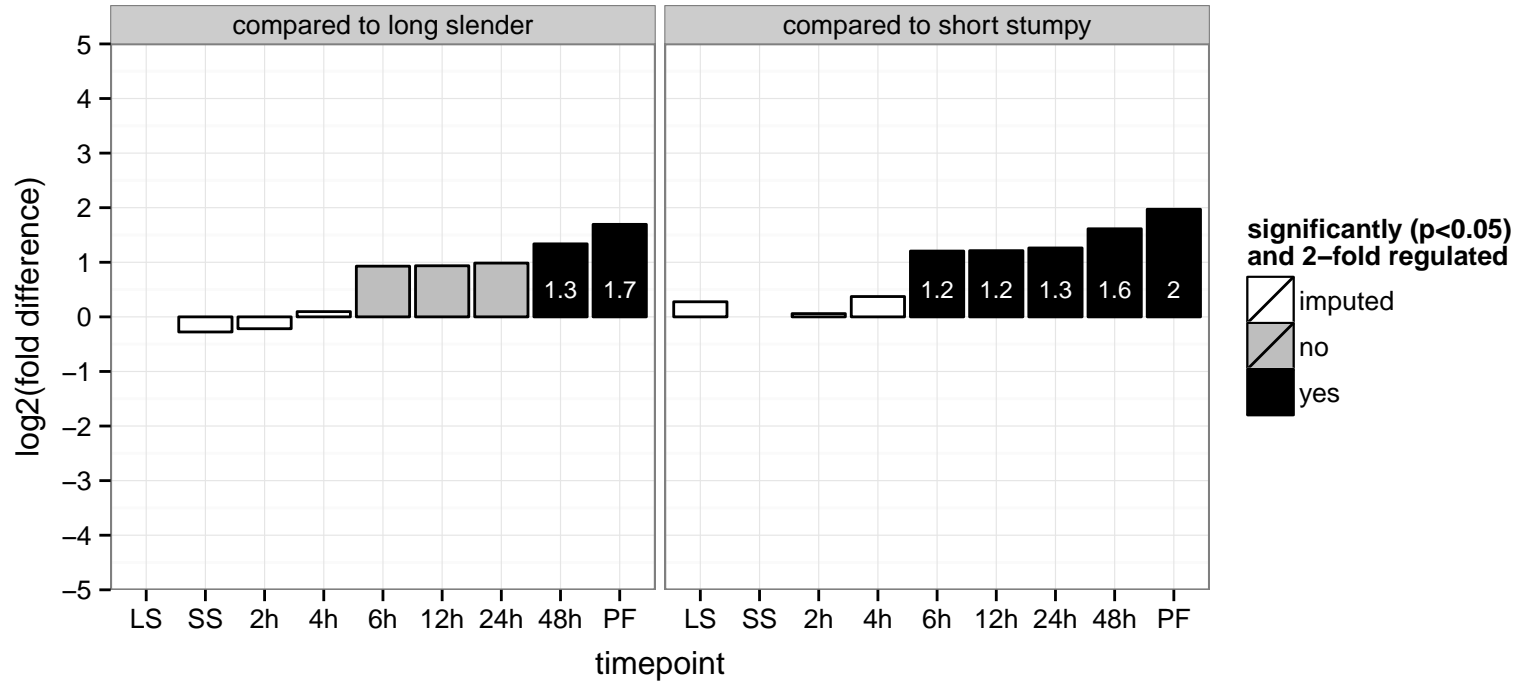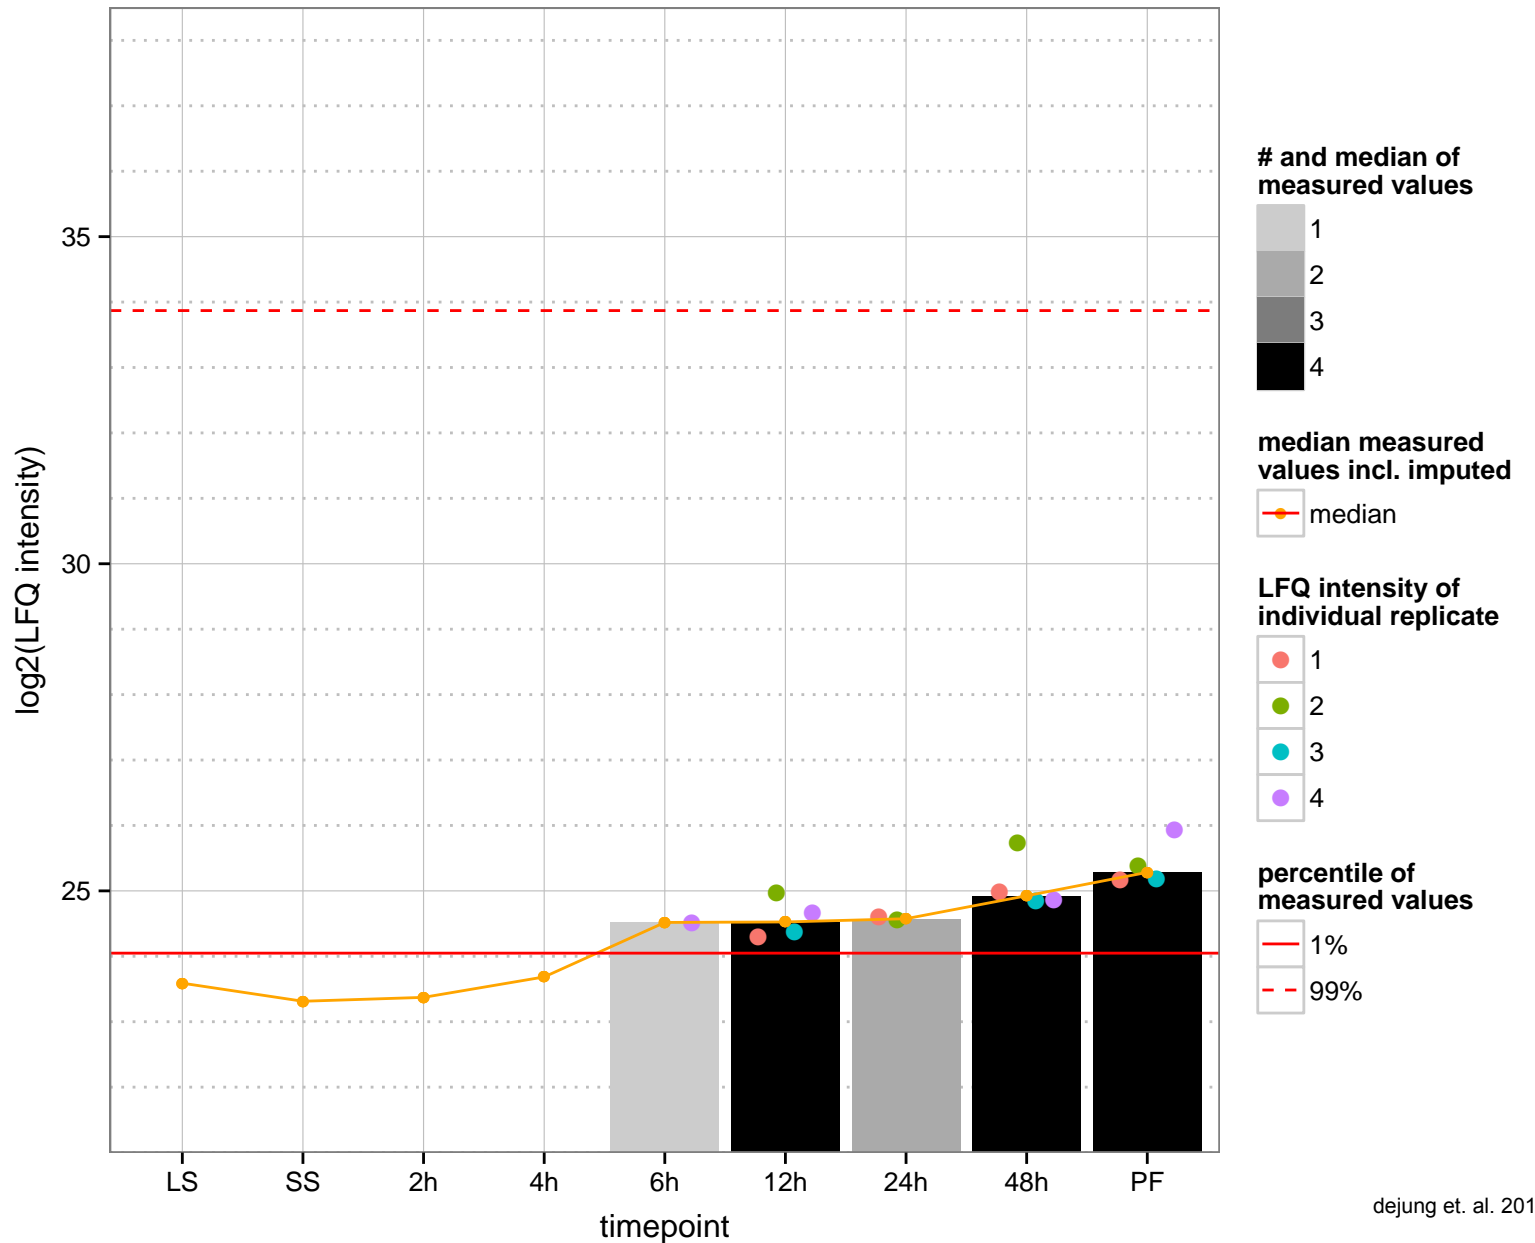

hypothetical protein, conserved  
 Tb927.11.10150  
 AGOF: catalytic activity  
 AGOC: mitochondrion  
 AGOP: metabolic process  
 PGO: catalytic activity  
 PGOC: null  
 PGOP: metabolic process

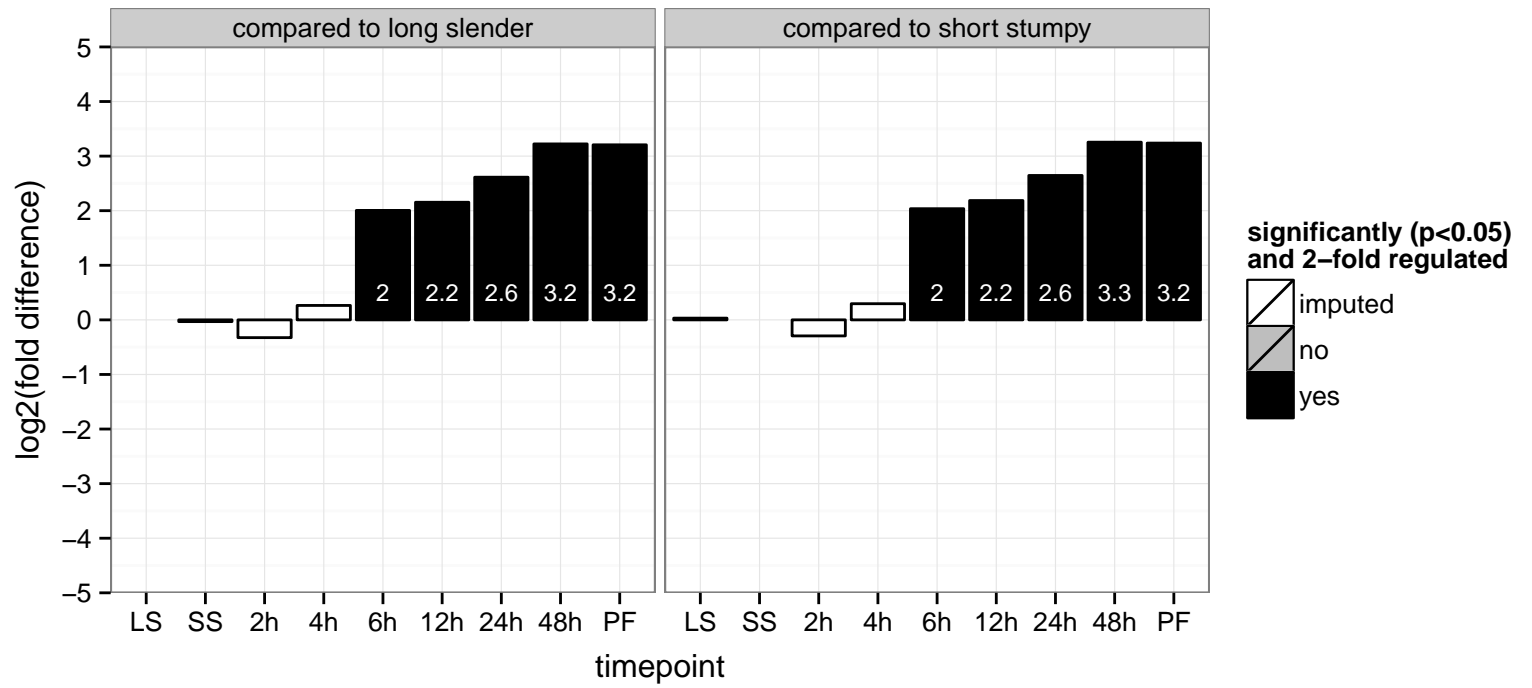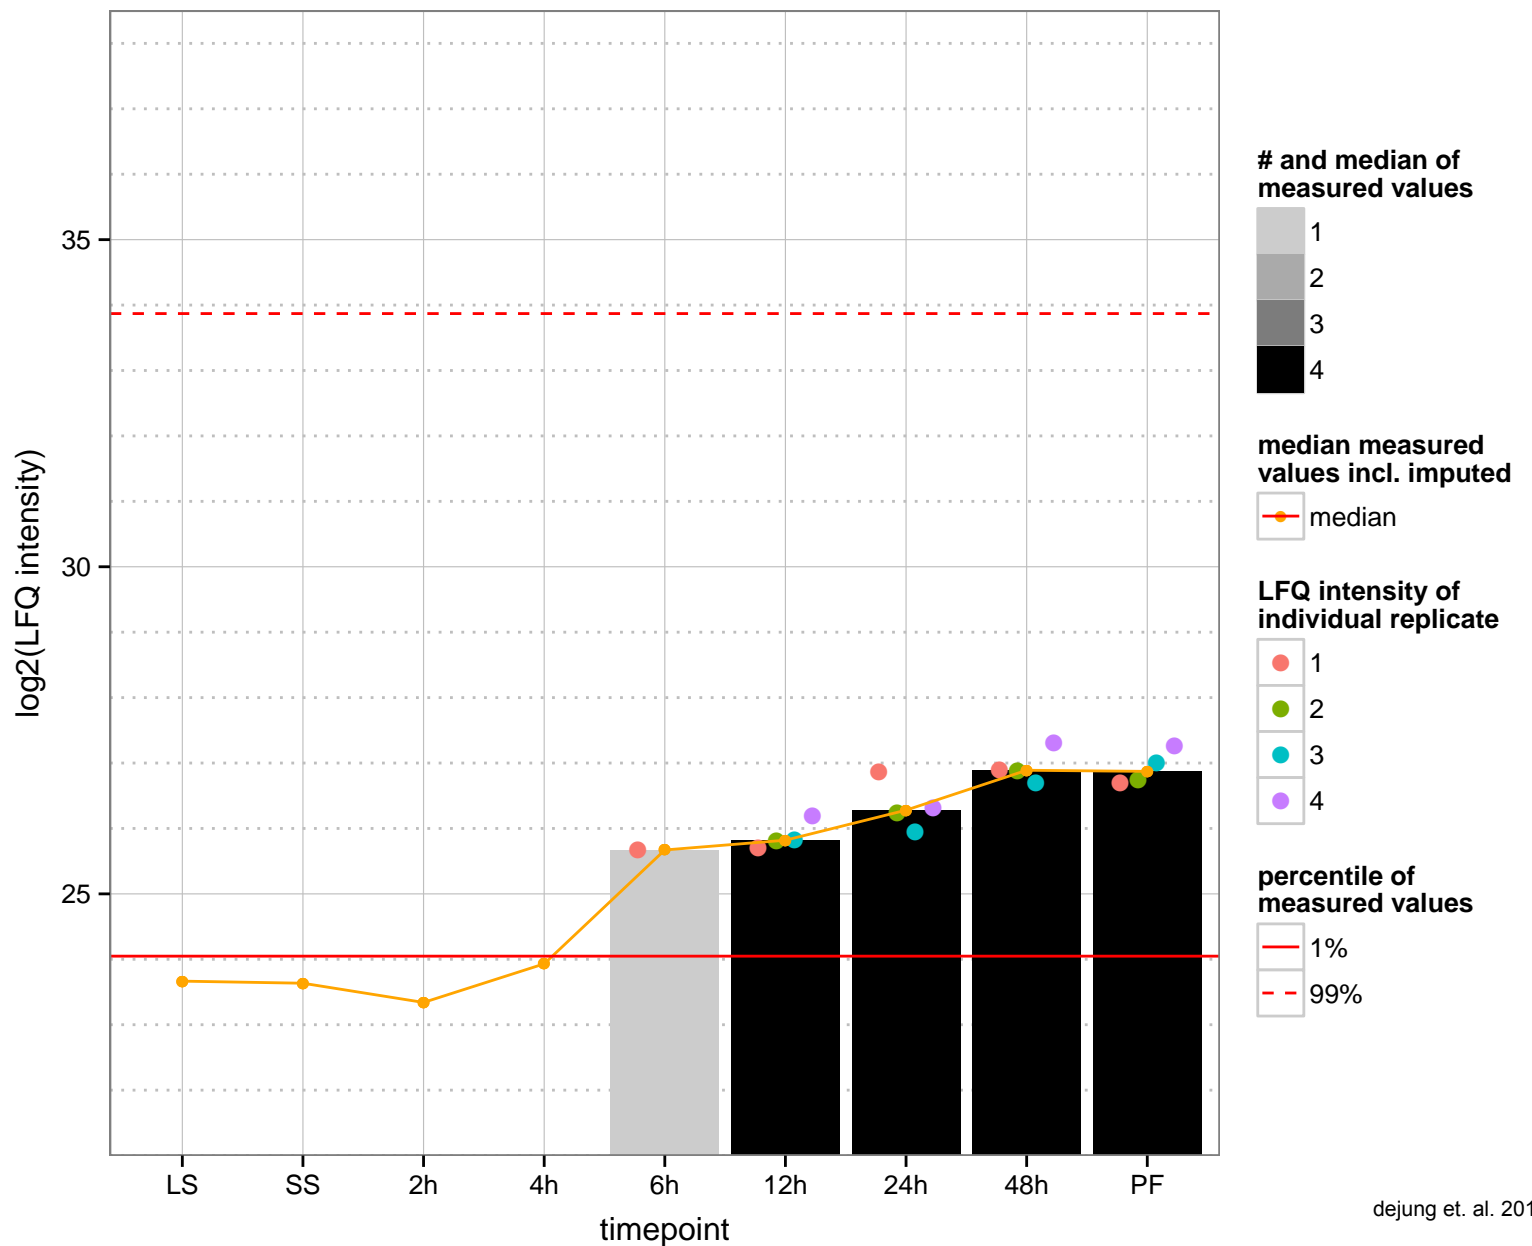

glycosyl hydrolase-like protein  
 Tb927.11.10370  
 AGOF: hydrolase activity, hydrolyzing O-glycosyl compounds  
 AGOC: null  
 AGOP: carbohydrate metabolic process  
 PGOF: hydrolase activity, hydrolyzing O-glycosyl compounds  
 PGOC: null  
 PGOP: carbohydrate metabolic process

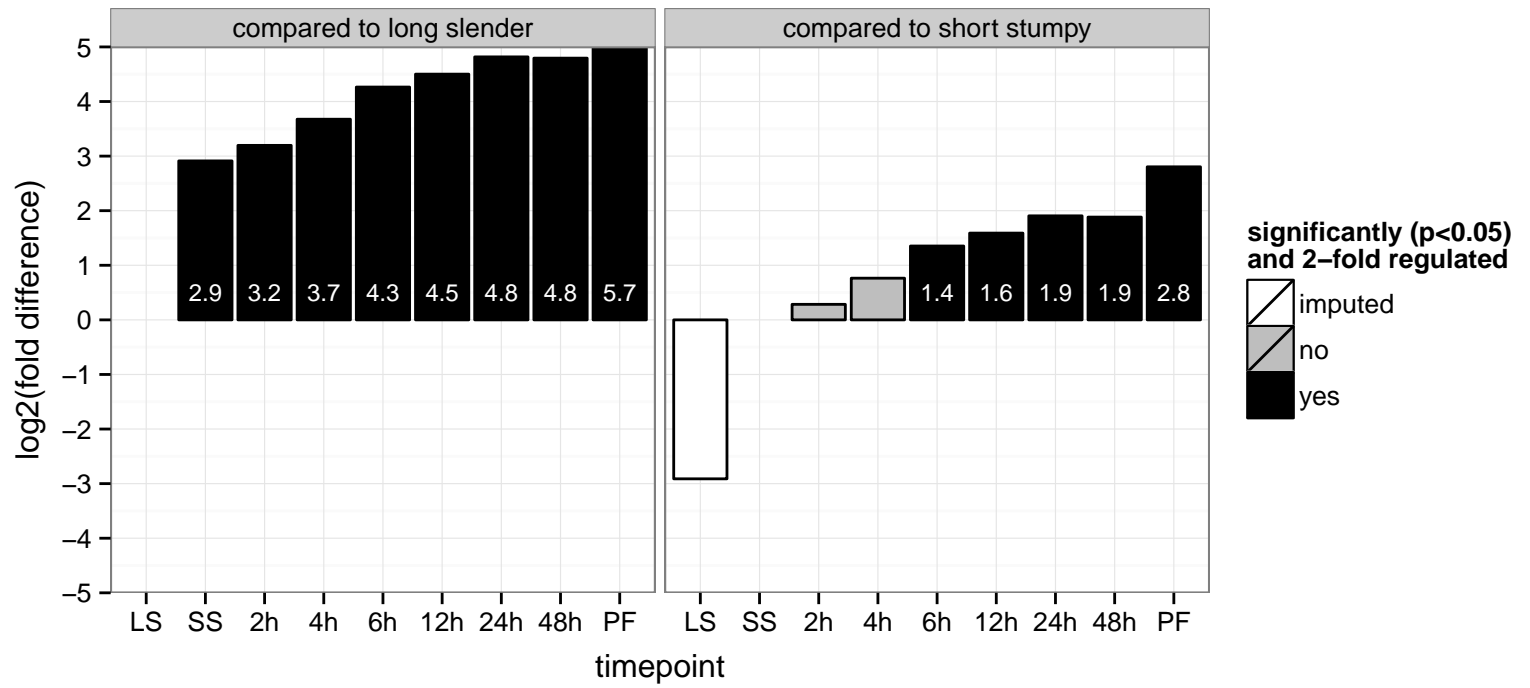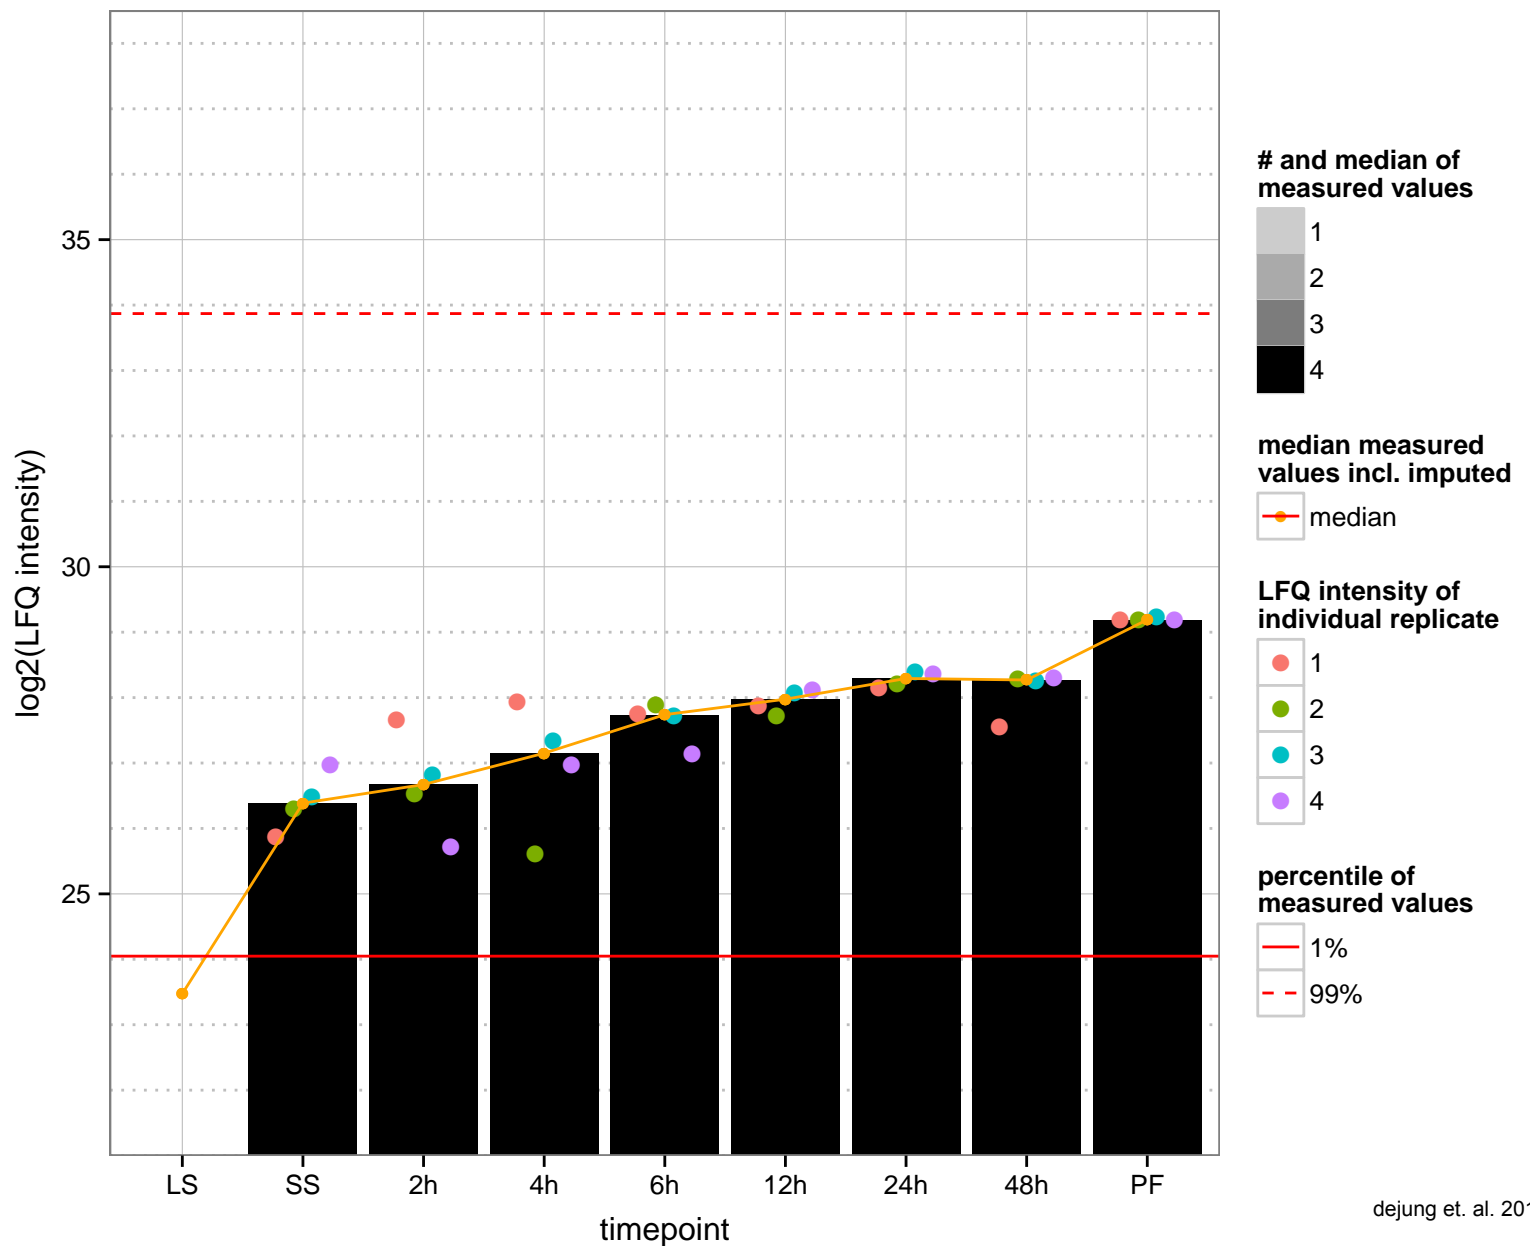

hypothetical protein, conserved  
 Tb927.11.10770  
 AGOF: null  
 AGOC: null  
 AGOP: intracellular protein transport  
 PGO: null  
 PGO: null  
 PGO: null  
 PGO: intracellular protein transport

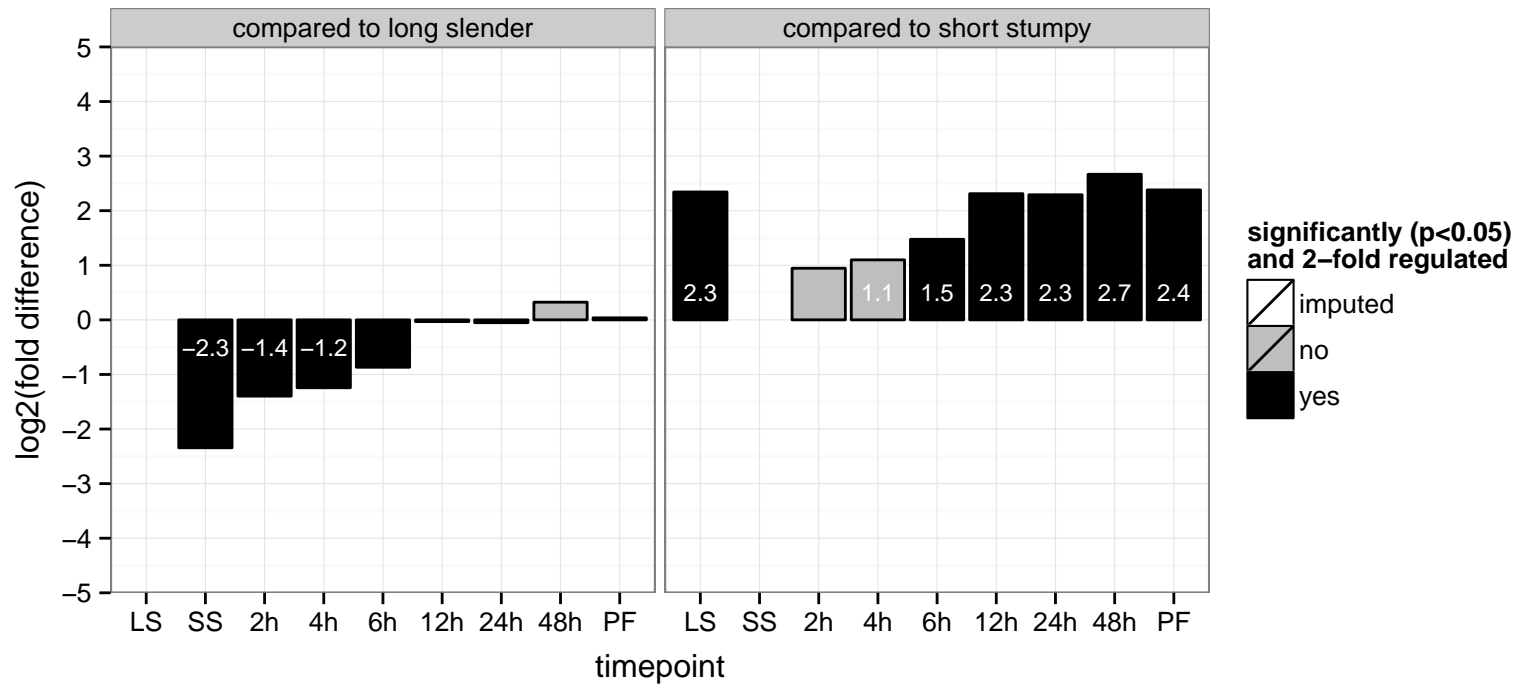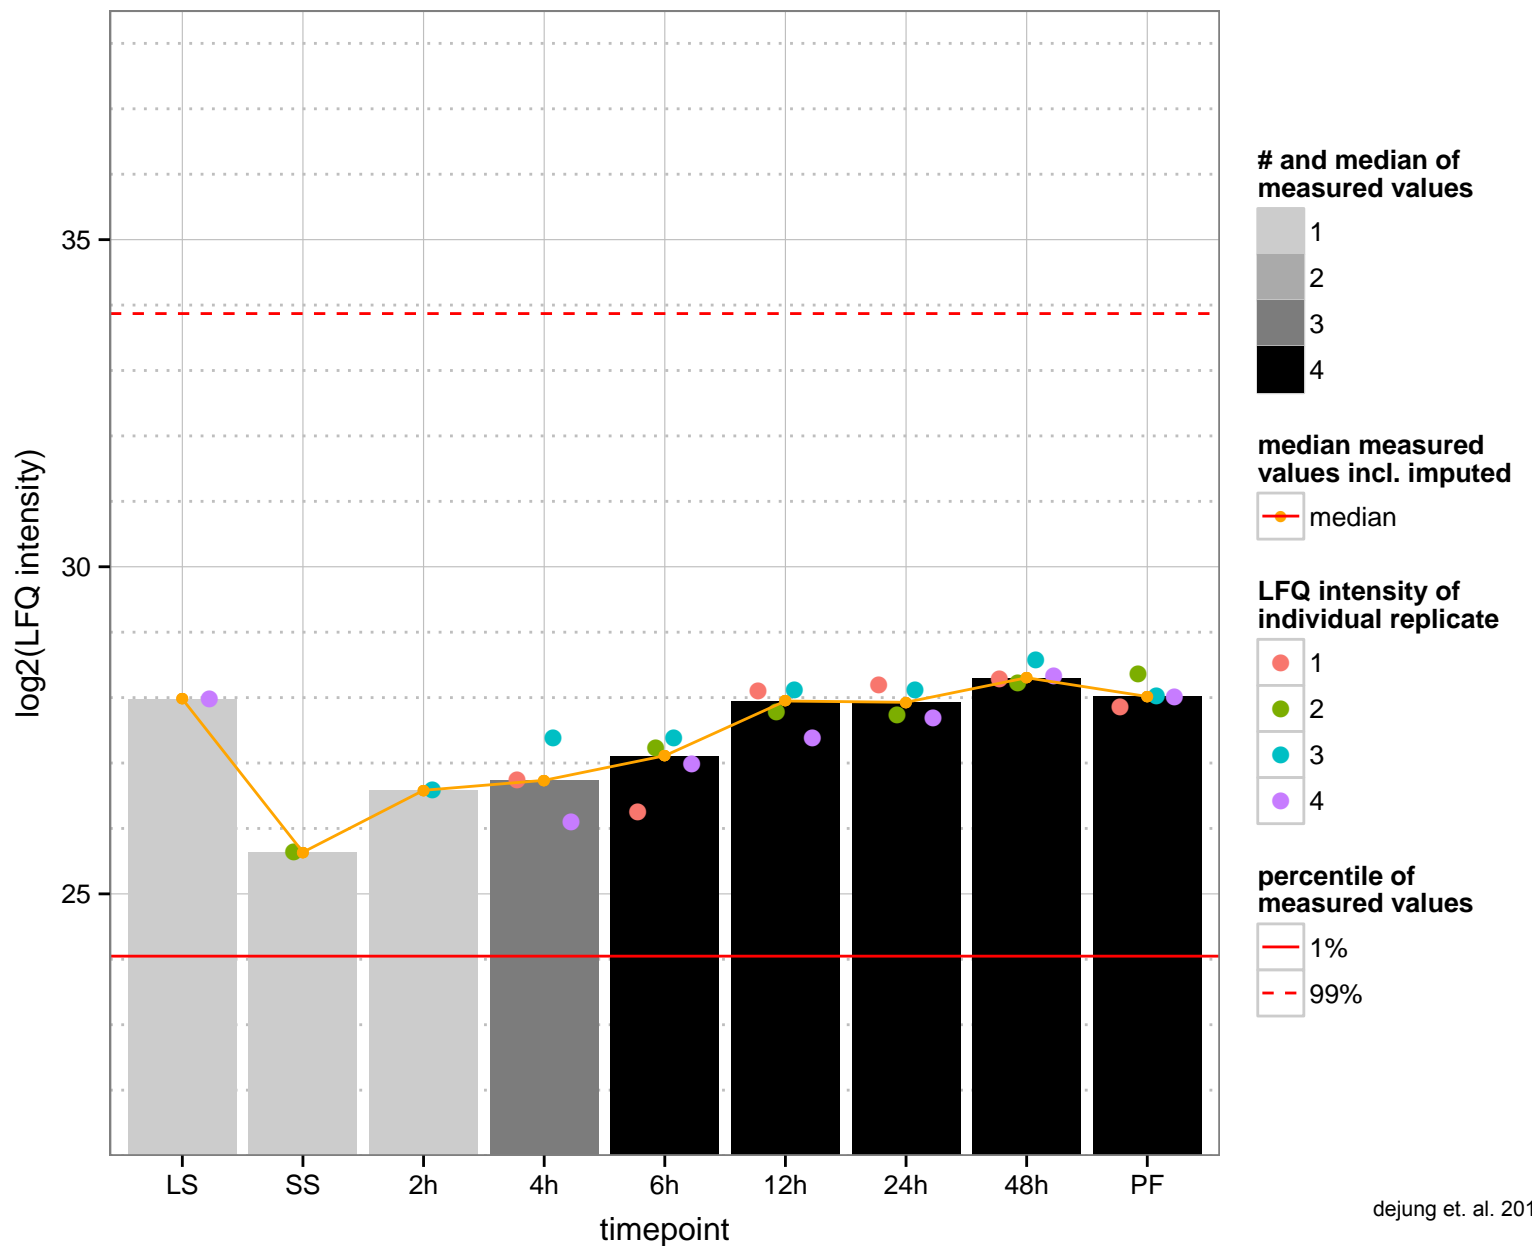

hypothetical protein, conserved  
 Tb927.11.12440  
 AGOF: DNA binding, zinc ion binding  
 AGOC: nucleus  
 AGOP: DNA-dependent transcription, initiation, histone modification  
 PGO: DNA binding, protein binding, zinc ion binding  
 PGO: nucleus  
 PGO: DNA-dependent transcription, initiation, histone modification

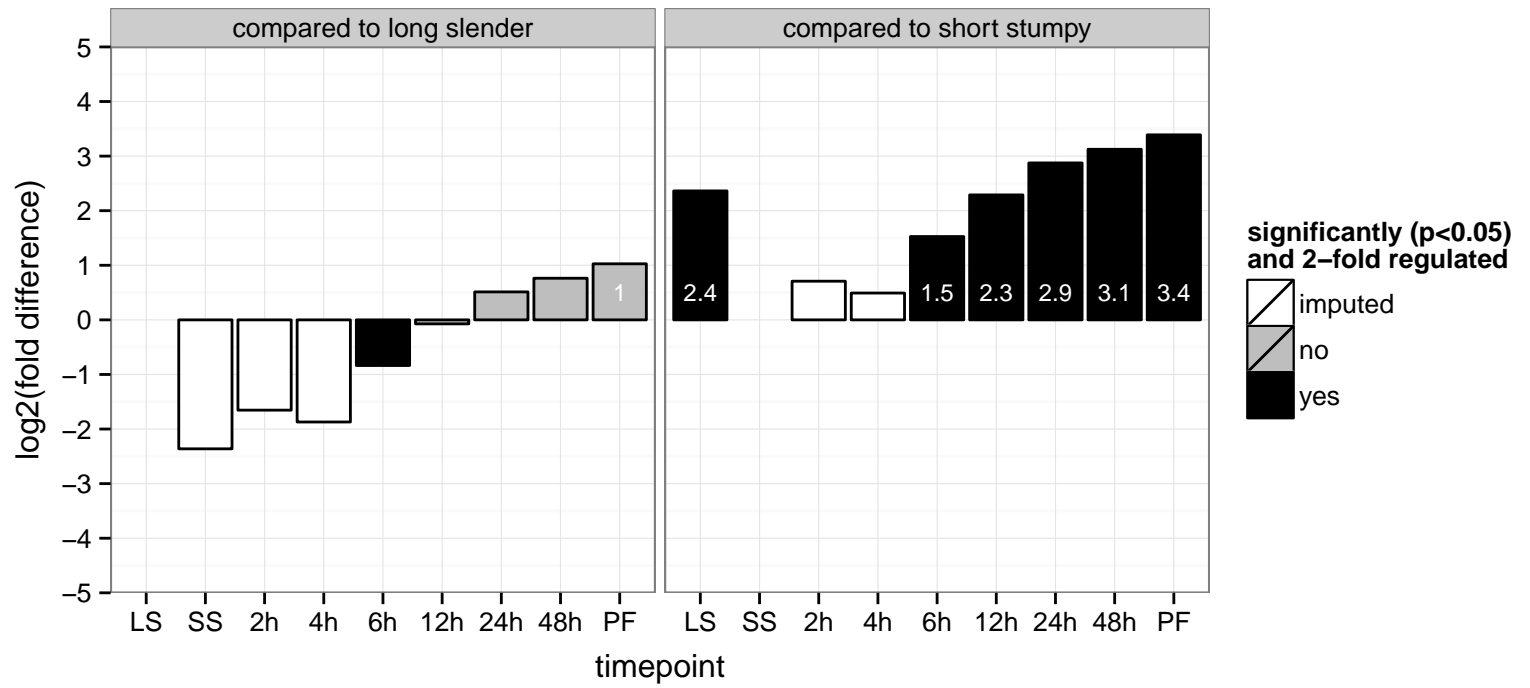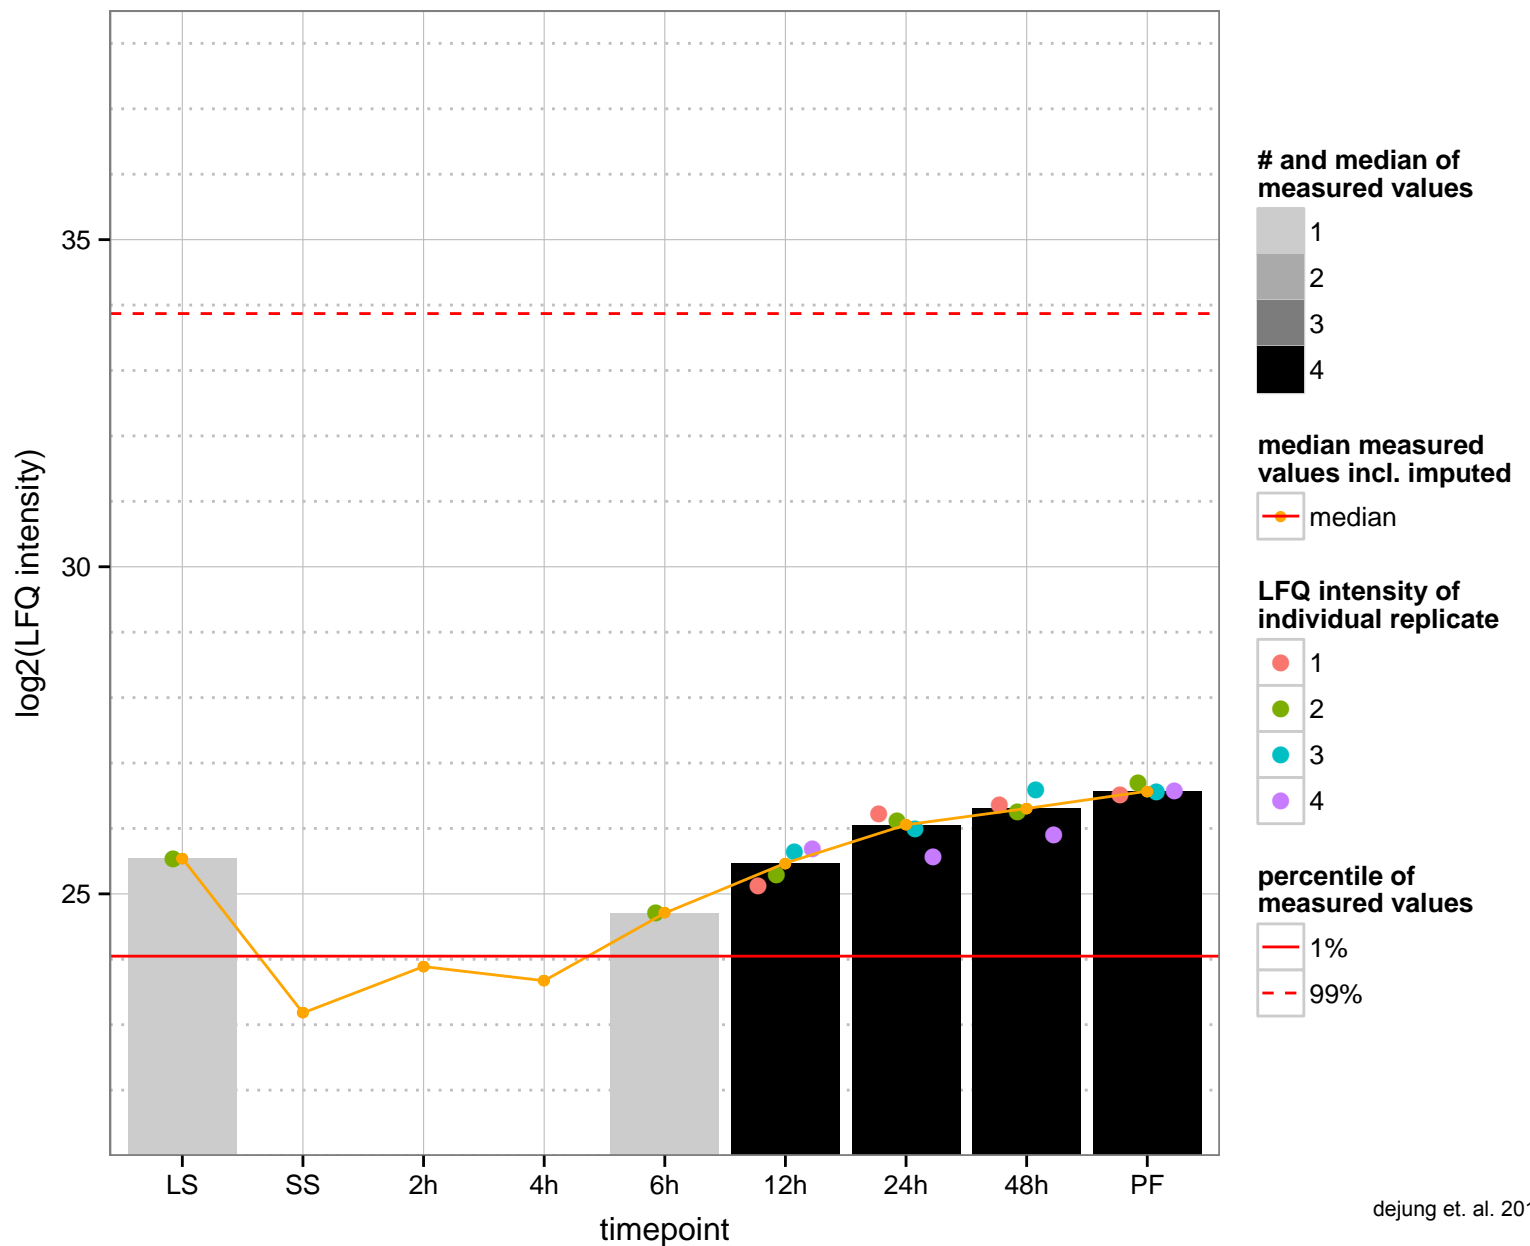



cytochrome b5, putative (CYB5)  
 Tb927.11.13650  
 AGOF: glutathione–disulfide reductase activity, heme binding  
 AGOC: integral to membrane  
 AGOP: oxidation–reduction process  
 PGOF: heme binding  
 PGO: null  
 PGOP: null

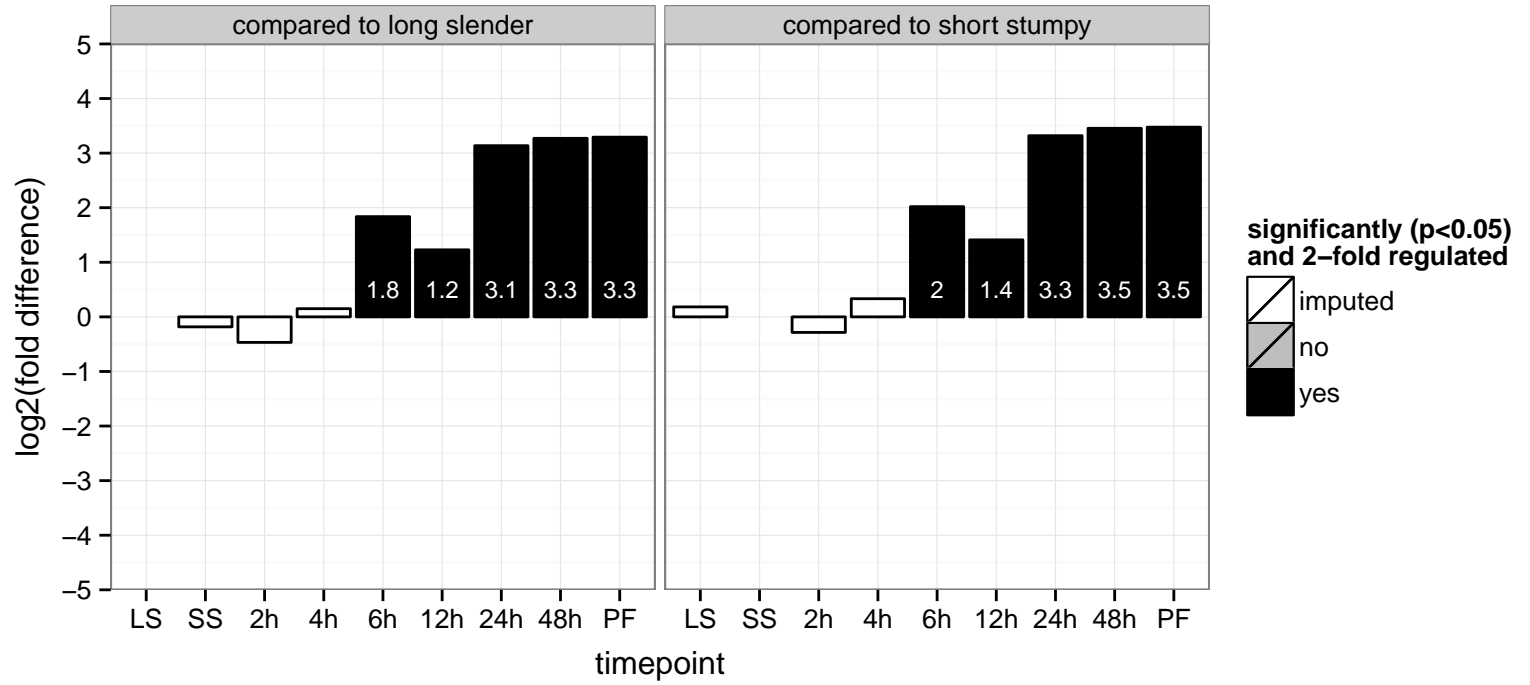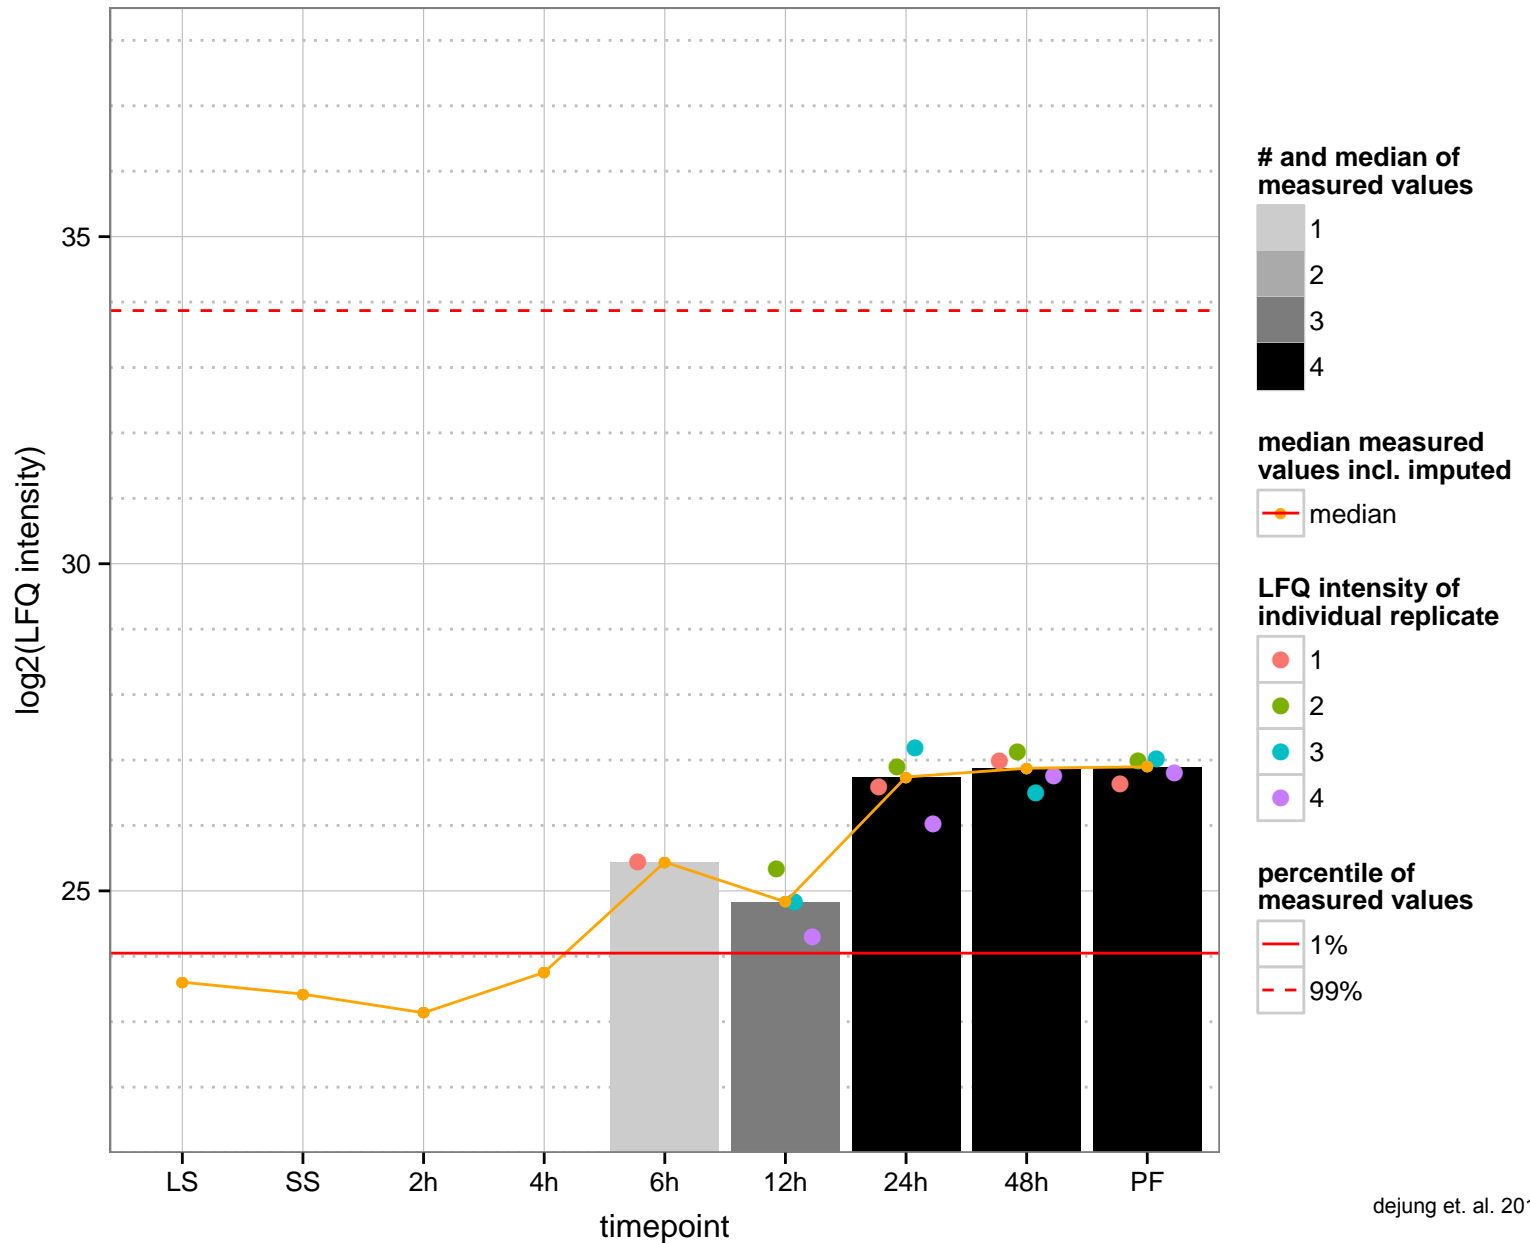

hypothetical protein, conserved  
 Tb927.11.14160  
 AGOF: null  
 AGOC: null  
 AGOP: null  
 PGO: carboxylesterase activity  
 PGOC: null  
 PGOP: null

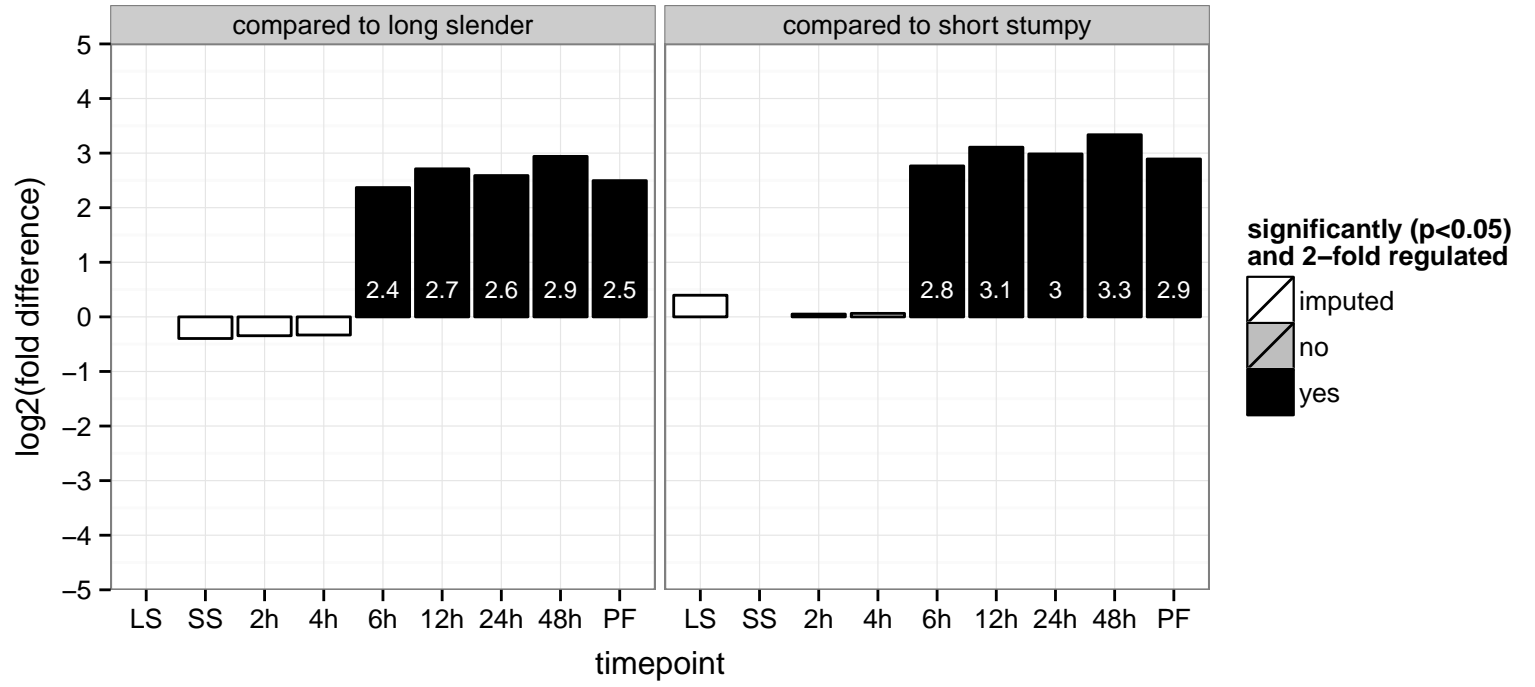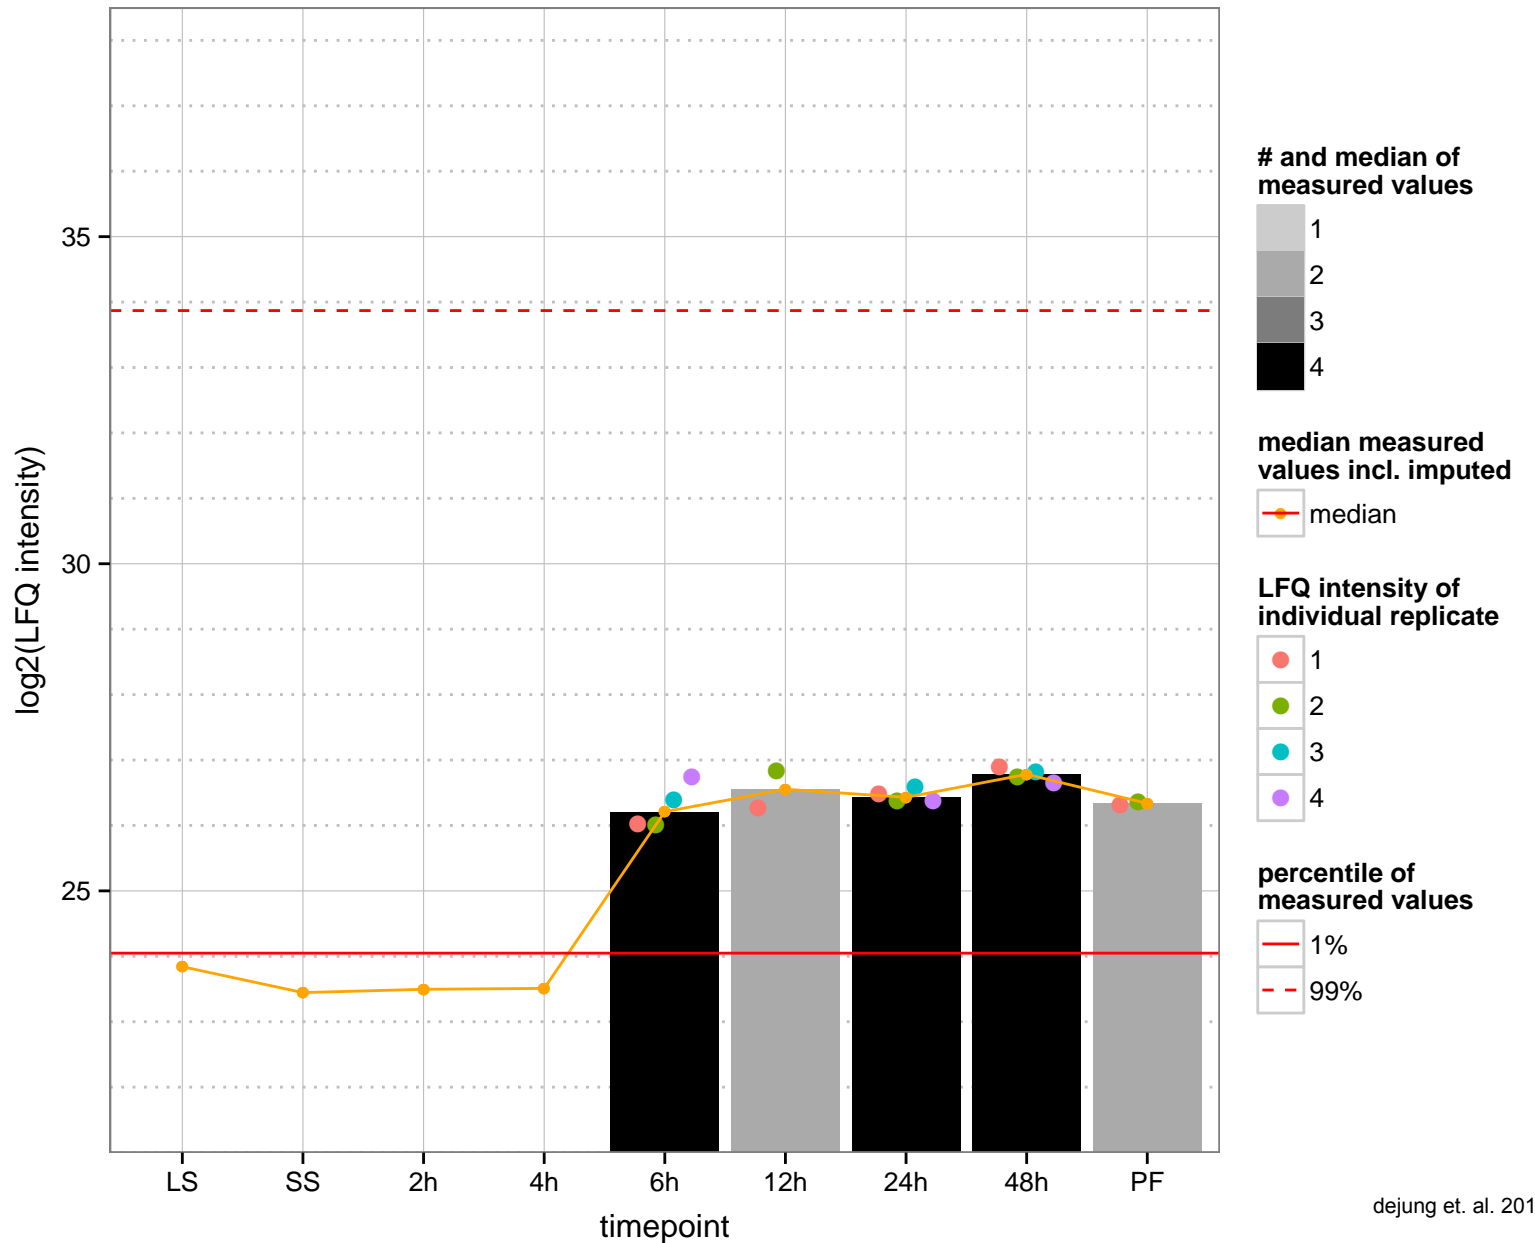

hypothetical protein, conserved  
 Tb927.11.15630  
 AGOF: null  
 AGOC: null  
 AGOP: null  
 PGOF: null  
 PGO: null  
 PGOP: null

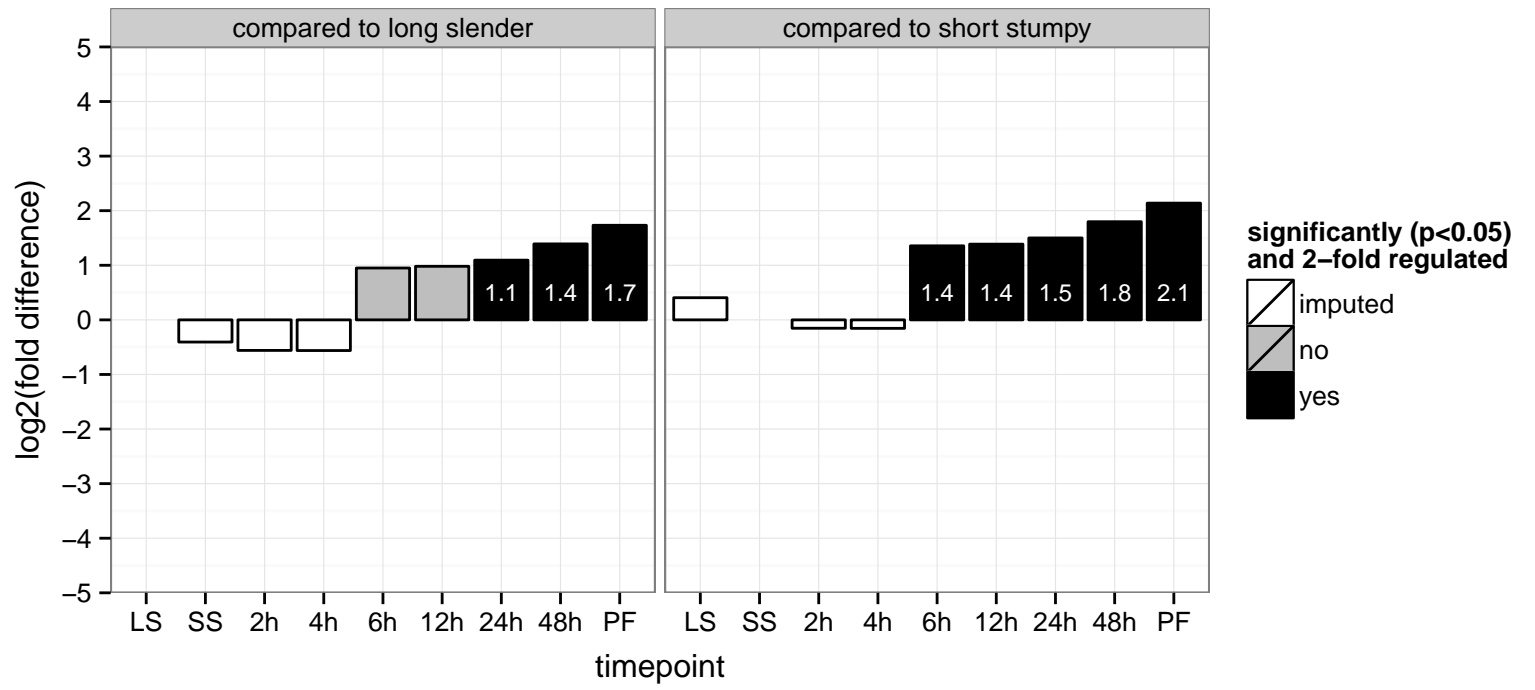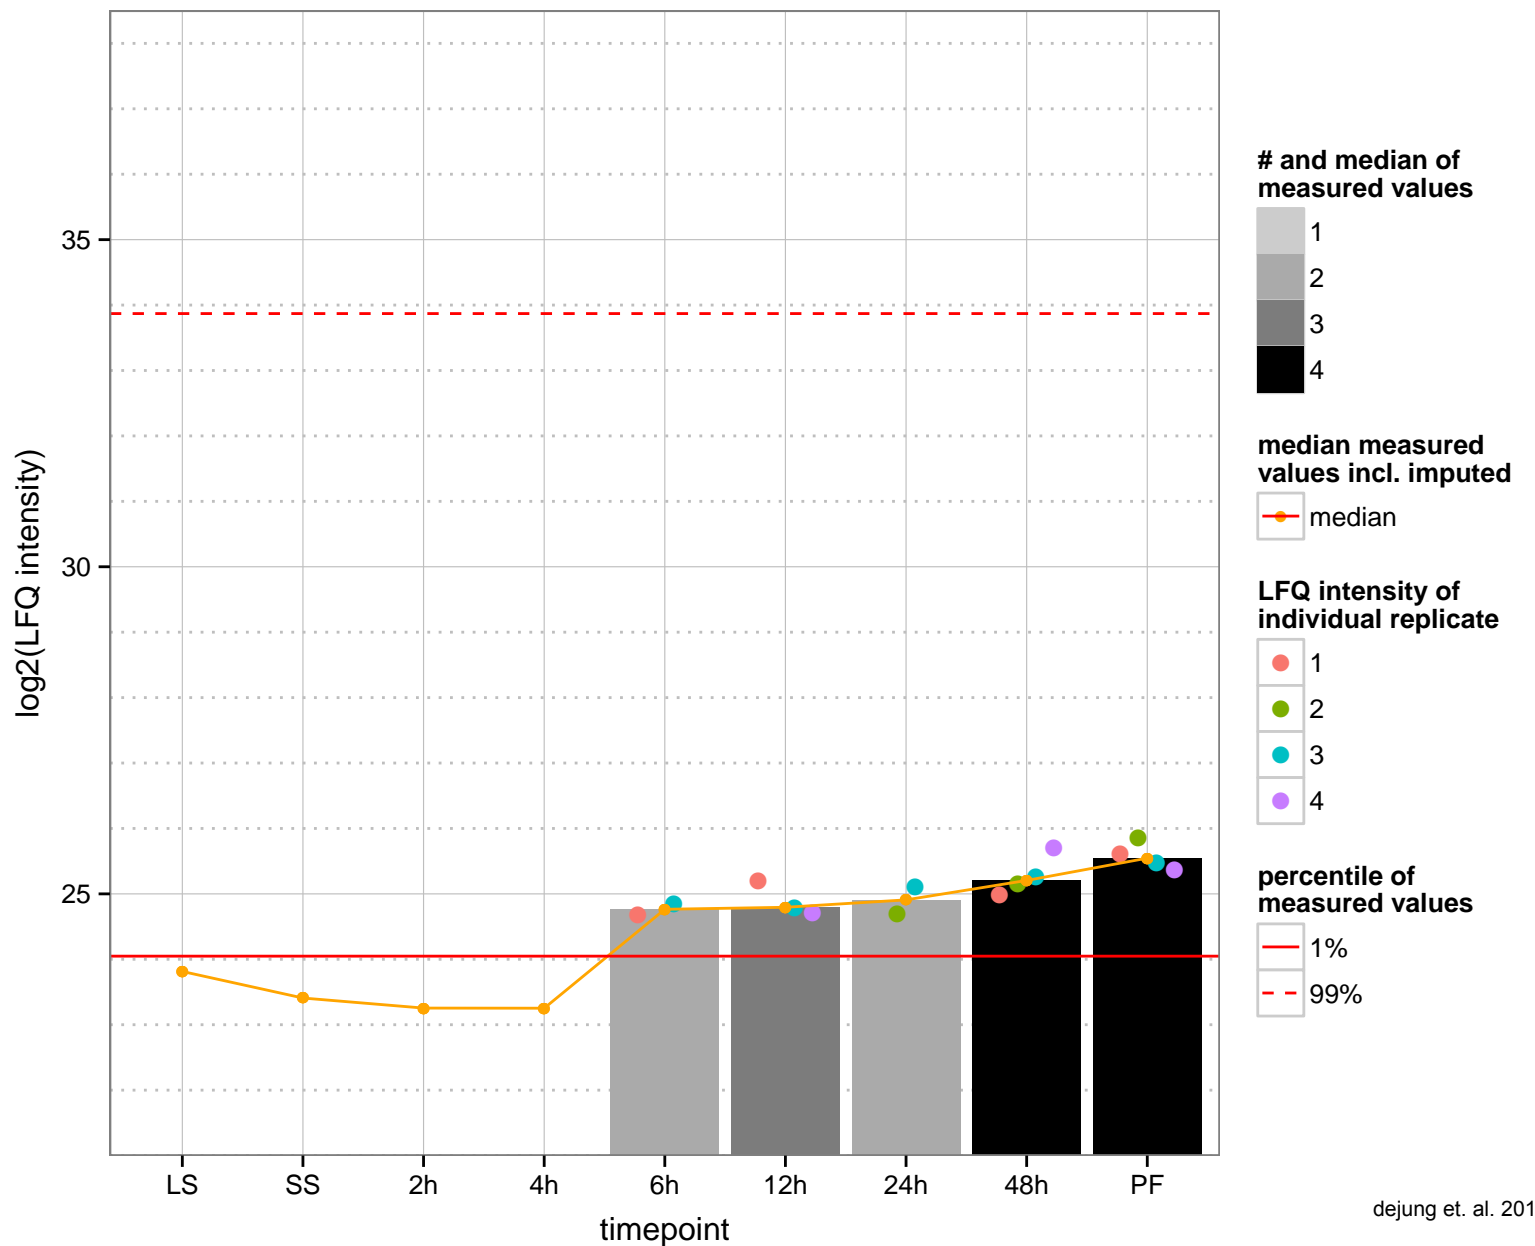

nucleolar GTP-binding protein 1 (NOG1)  
 Tb927.11.3120  
 AGOF: GTP binding  
 AGOC: nucleolus  
 AGOP: ribosome biogenesis  
 PGO: GTP binding  
 PGO: nucleolus  
 PGO: null

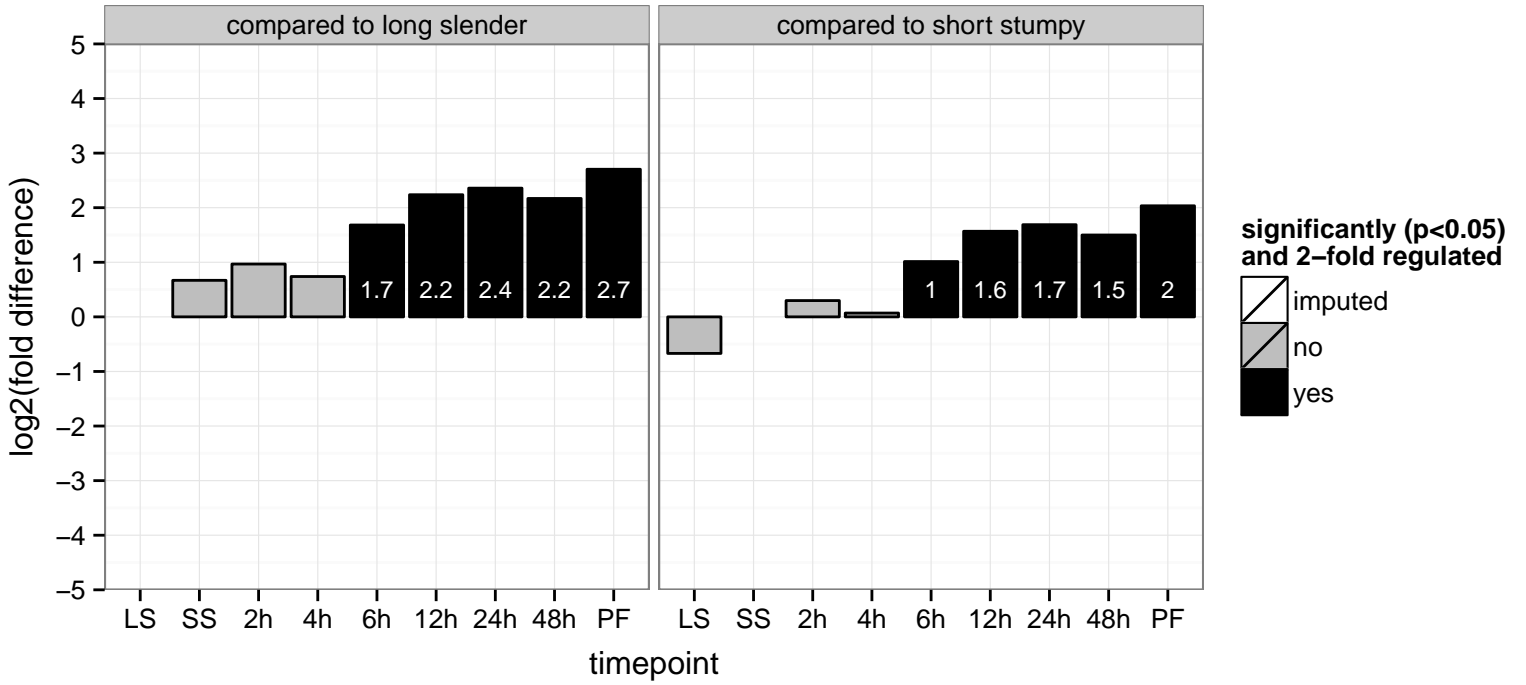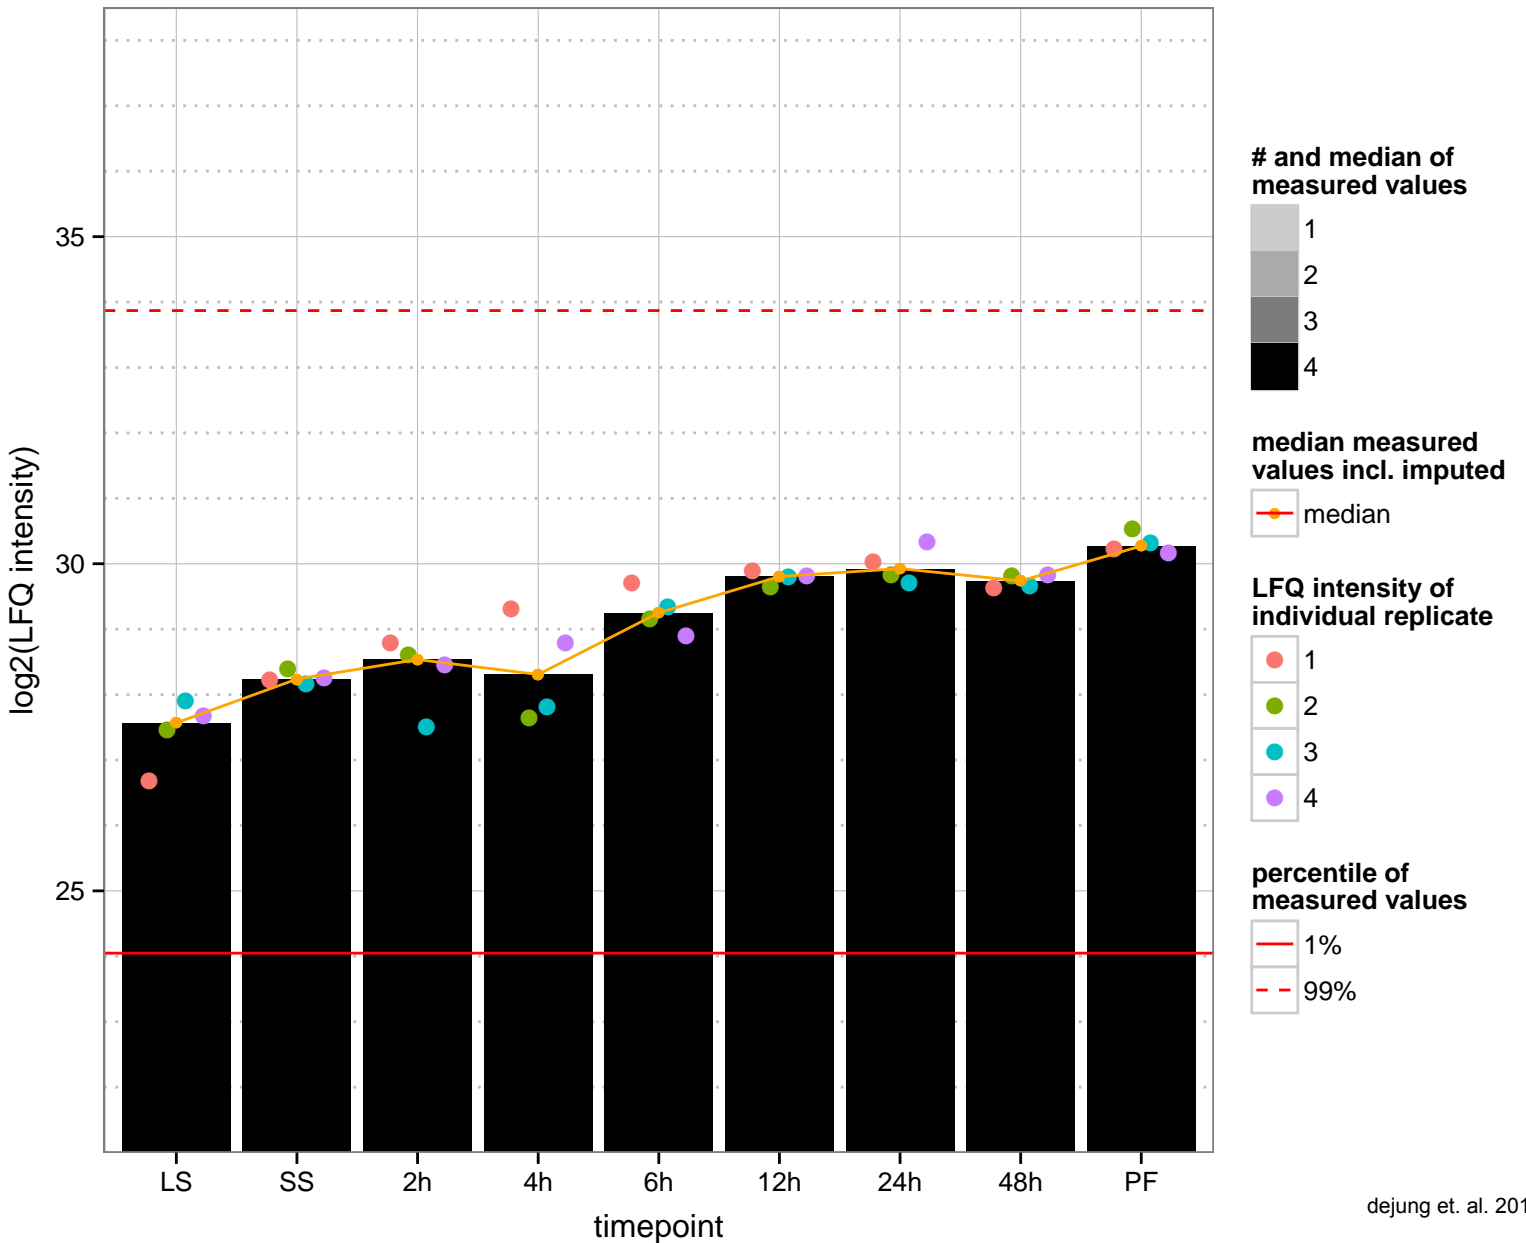

nucleoporin 48 (TbNup48)  
 Tb927.11.4540  
 AGOF: null  
 AGOC: nuclear pore  
 AGOP: null  
 PGOF: protein binding  
 PGOC: null  
 PGOP: null

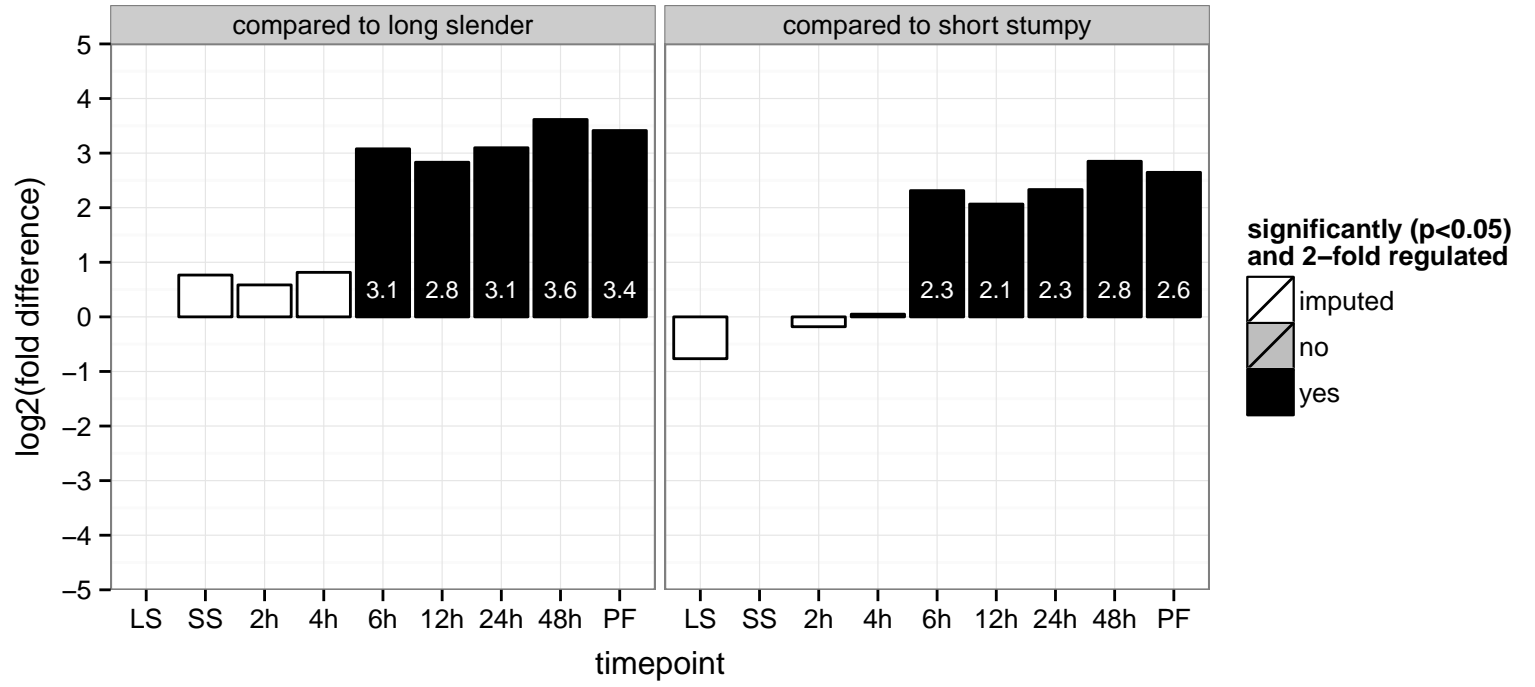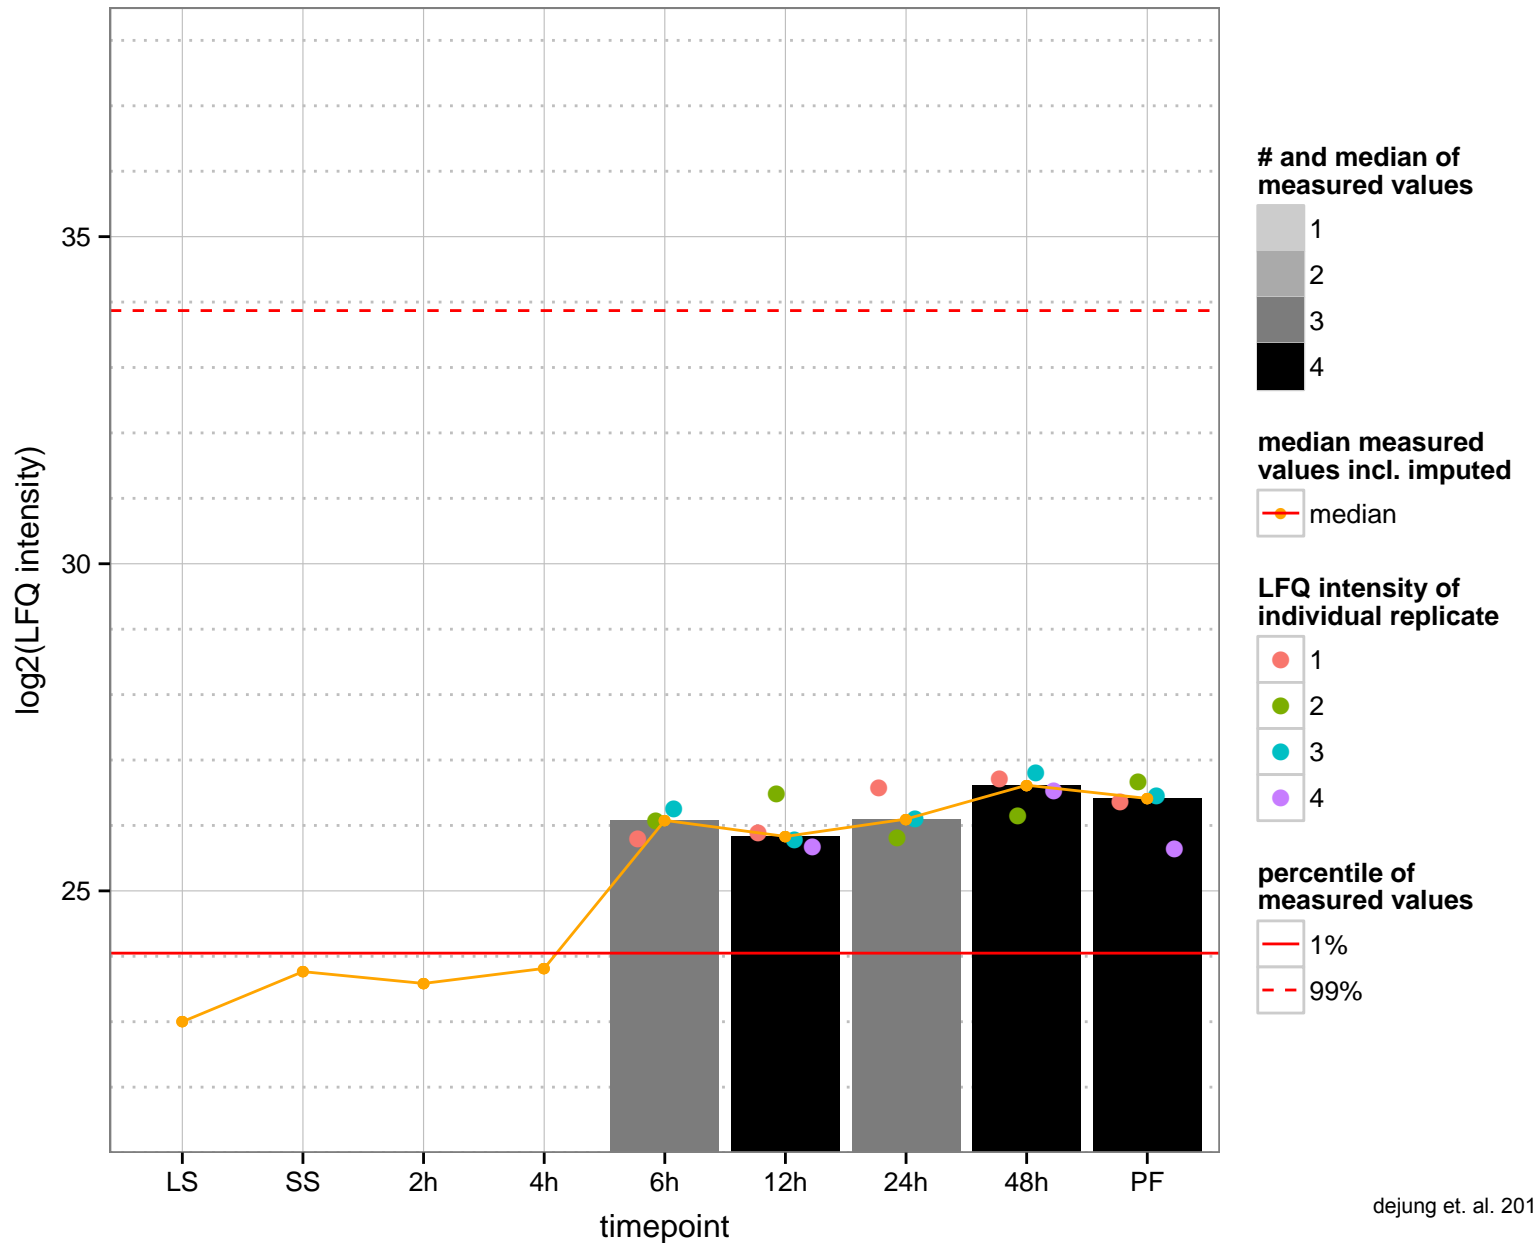

sterol 14- $\alpha$ -demethylase, cytochrome P450 51A1, lanosterol 14- $\alpha$ -demethylase (CYP51)

Tb927.11.6210

AGOF: electron carrier activity, heme binding, iron ion binding, monooxygenase activity, oxidoreductase activity

AGOC: null

AGOP: metabolic process

PGOF: electron carrier activity, heme binding, iron ion binding, oxidoreductase activity, acting on paired donors, with incorporation

PGOC: null

PGOP: oxidation-reduction process

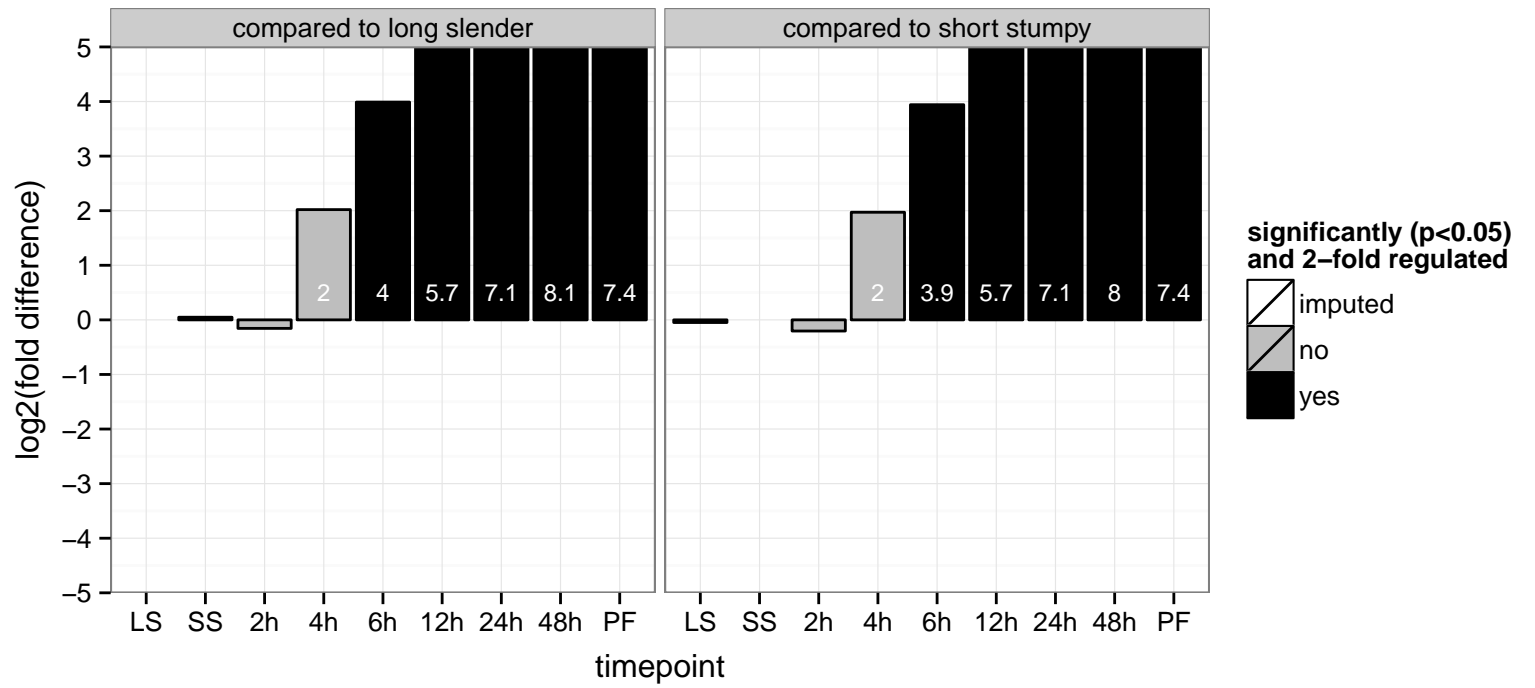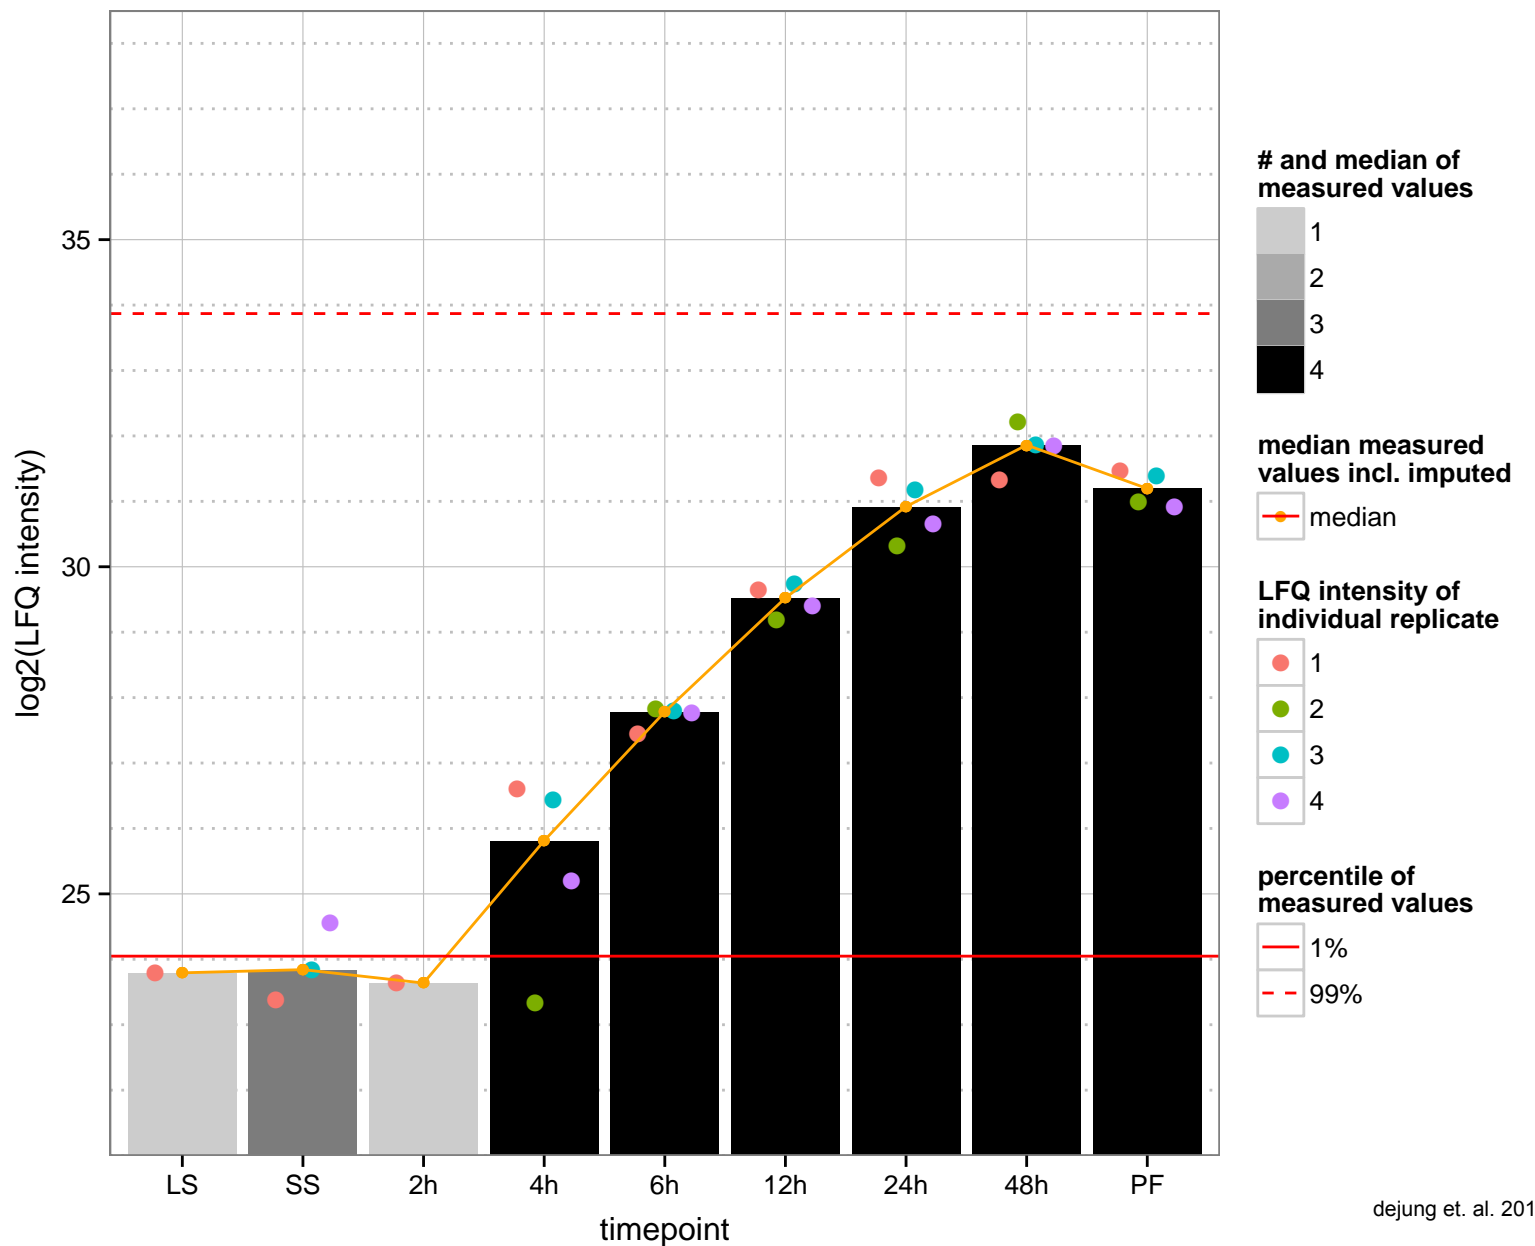

hypothetical protein, conserved  
 Tb927.11.6670  
 AGOF: RNA binding, pseudouridine synthase activity  
 AGOC: null  
 AGOP: pseudouridine synthesis  
 PGOF: RNA binding, pseudouridine synthase activity  
 PGOC: null  
 PGOP: RNA modification, pseudouridine synthesis

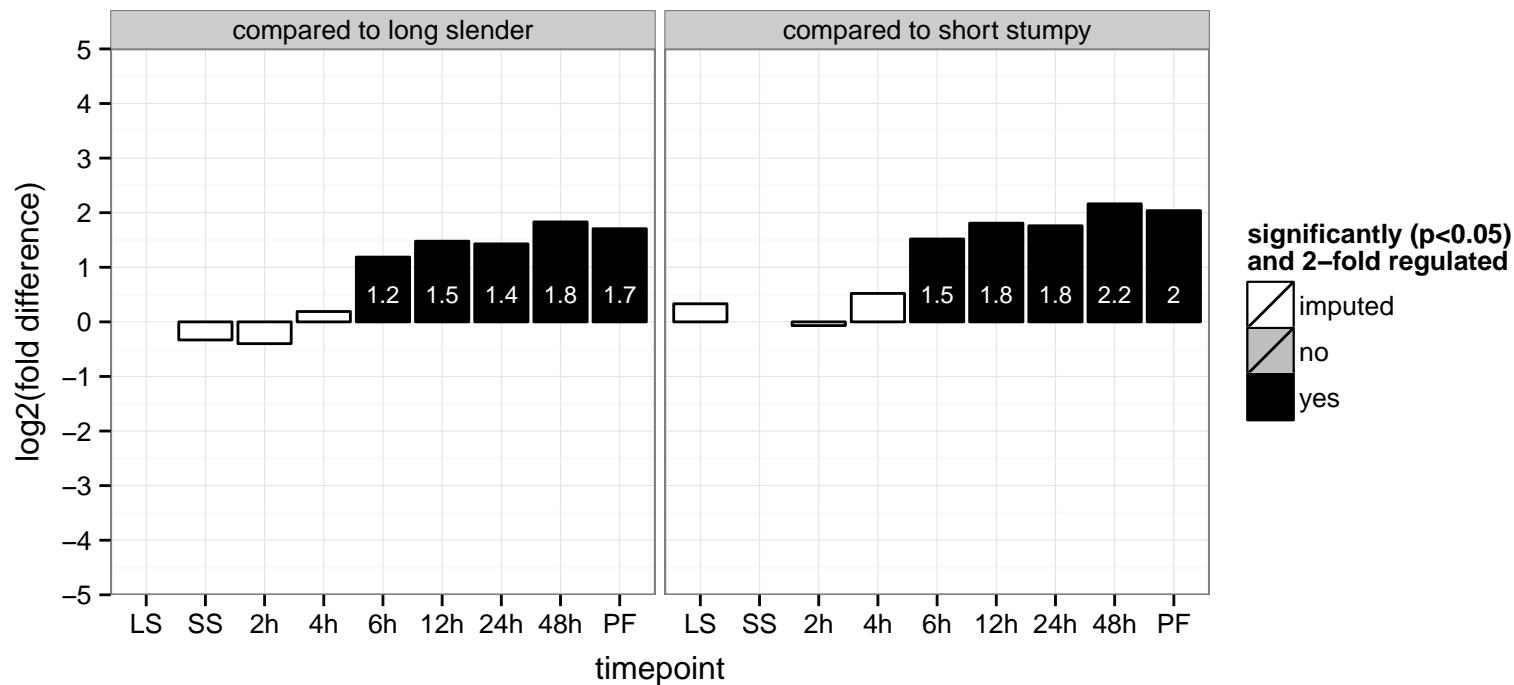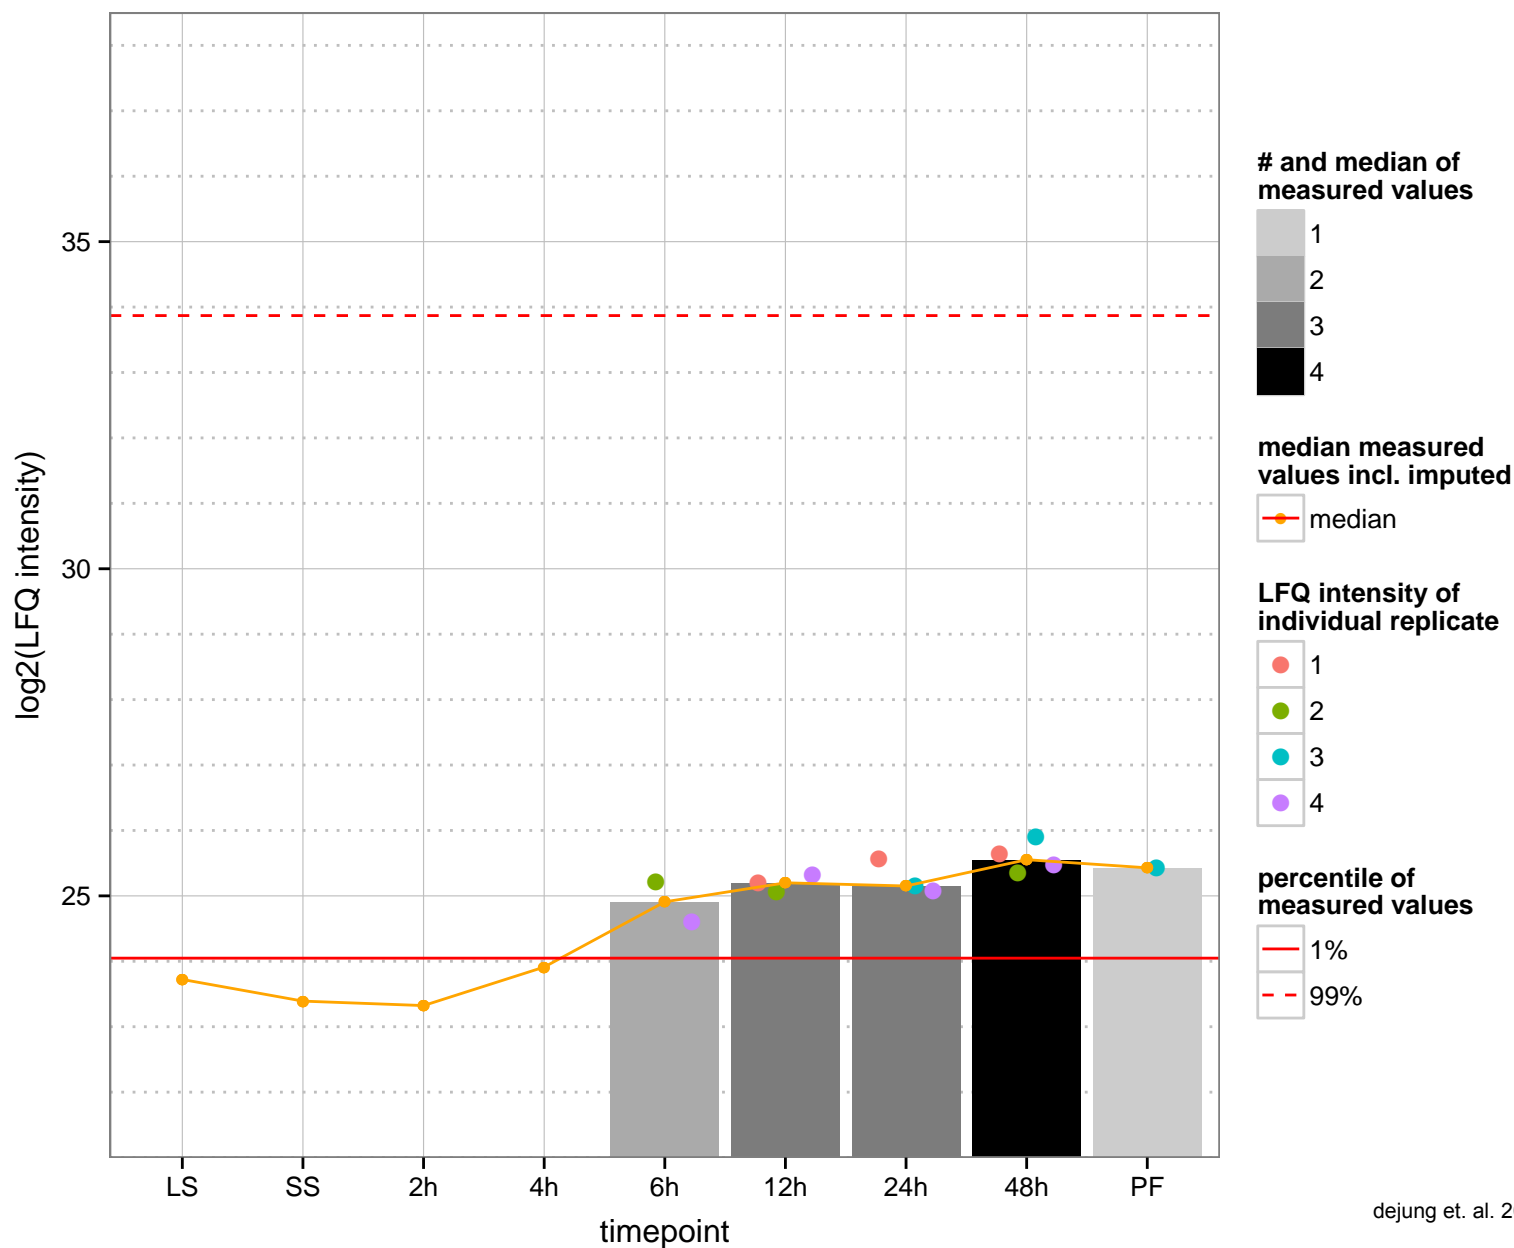

phosphoadenosine phosphosulfate reductase-like protein  
 Tb927.11.7420  
 AGOF: transferase activity  
 AGOC: null  
 AGOP: metabolic process  
 PGO: catalytic activity  
 PGOC: null  
 PGOP: metabolic process

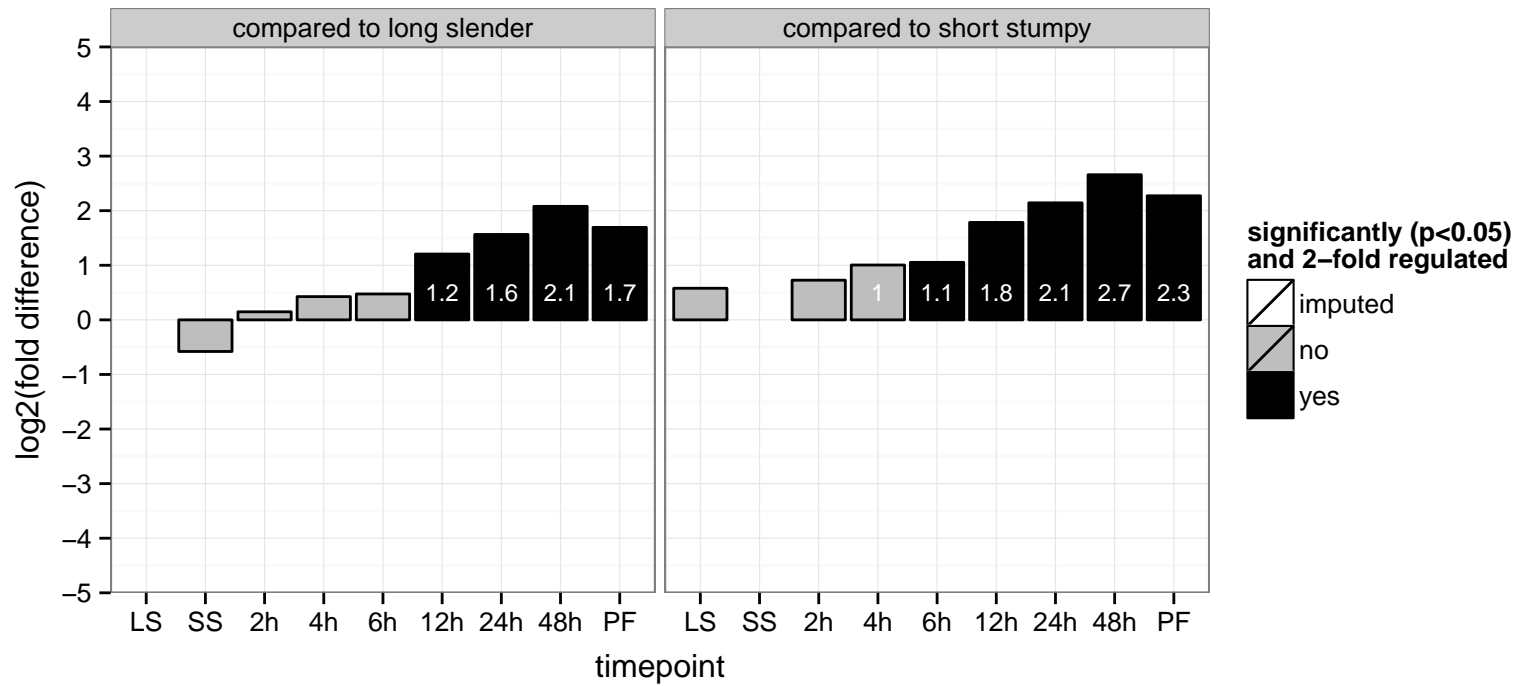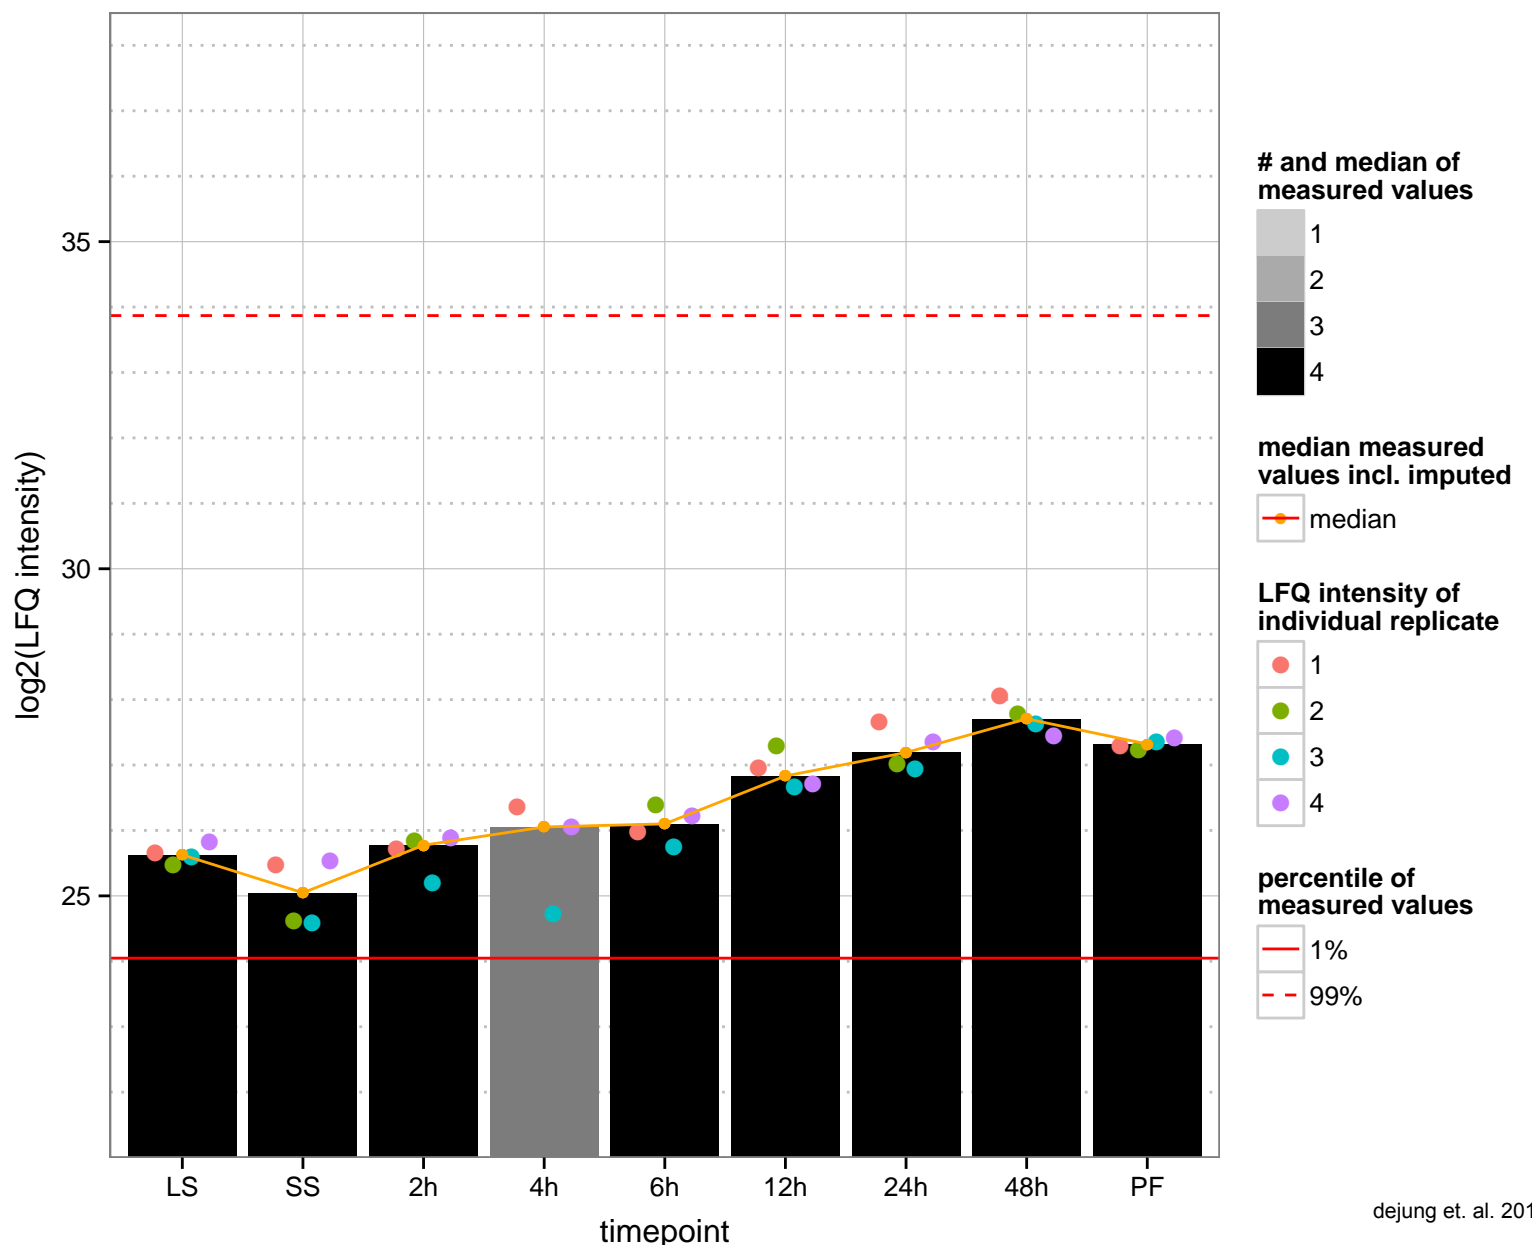



oxidoreductase-like protein  
 Tb927.11.7770  
 AGOF: oxidoreductase activity  
 AGOC: null  
 AGOP: metabolic process  
 PGO: null  
 PGOC: null  
 PGOP: null

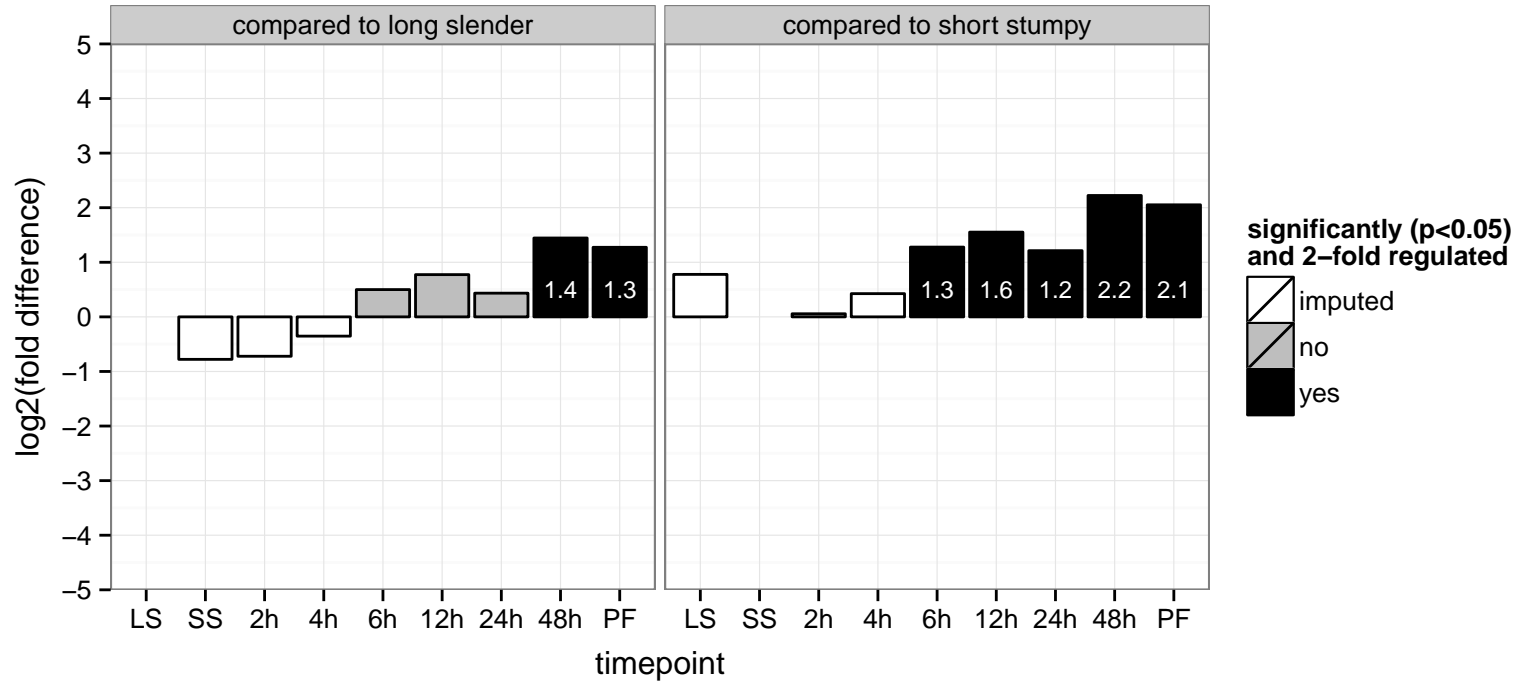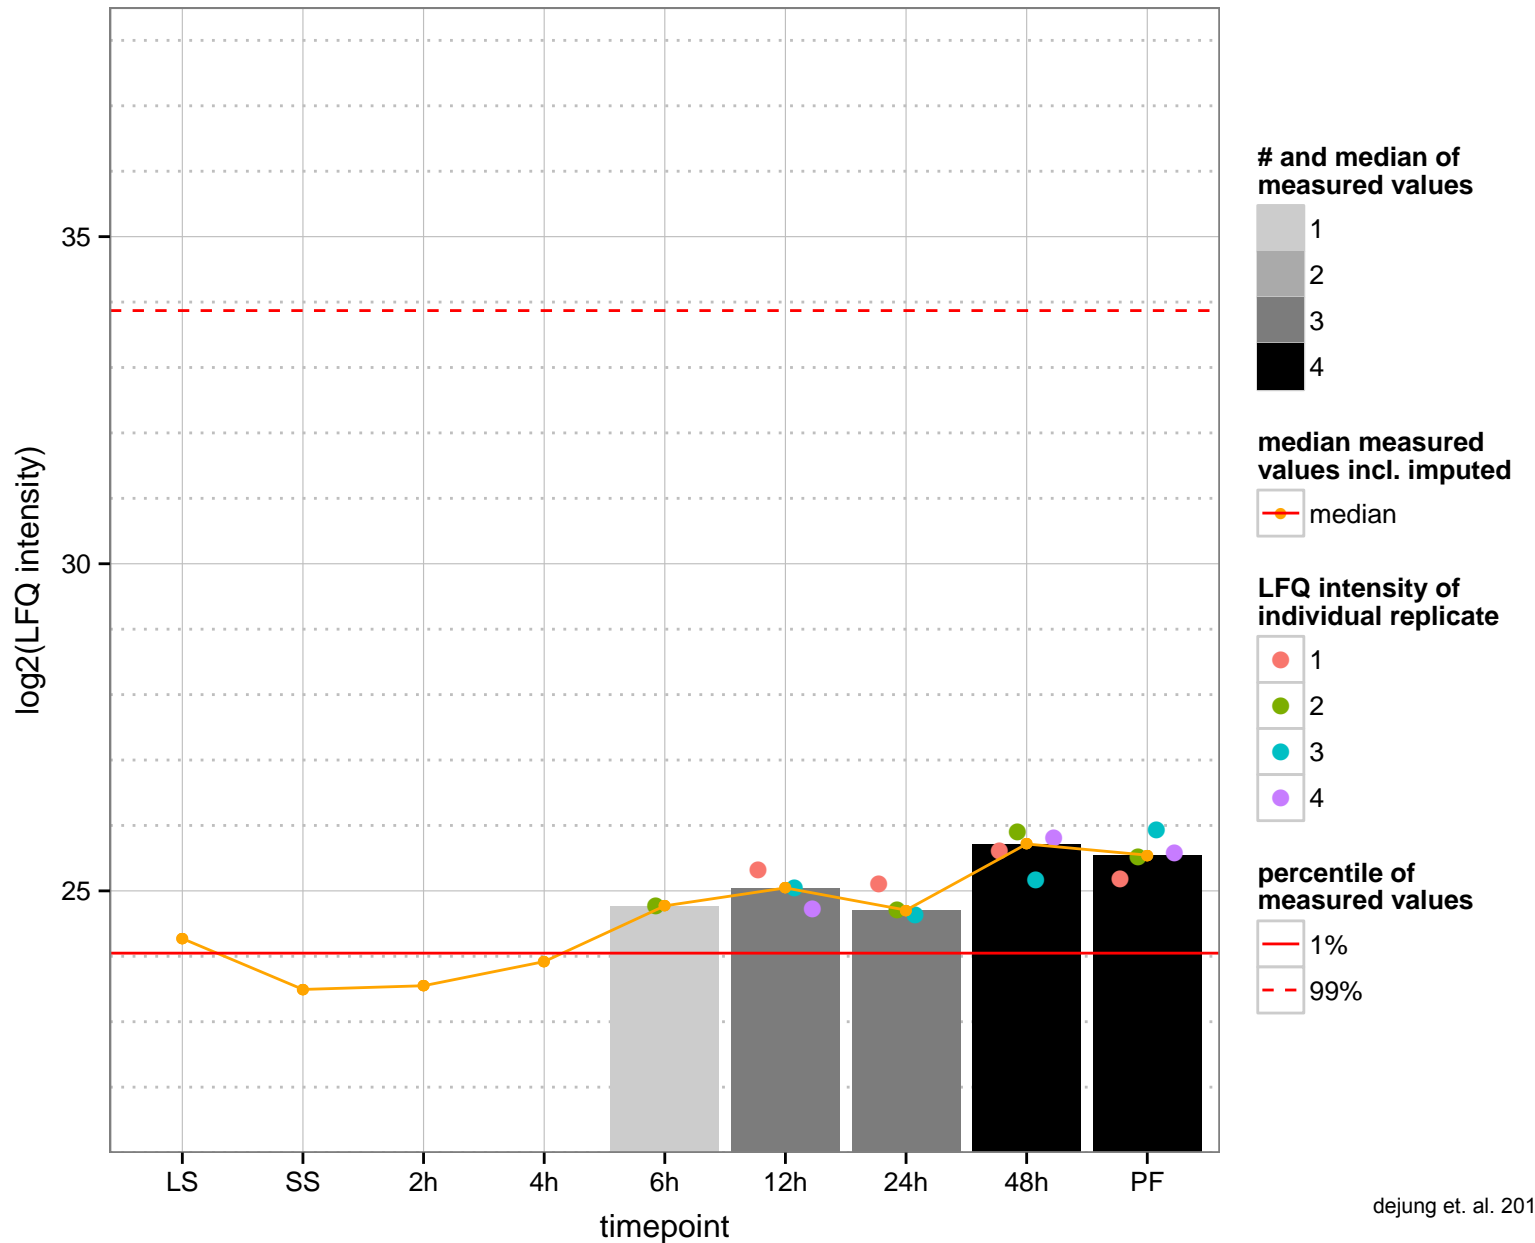

RAD50 DNA repair-like protein, putative

Tb927.11.8210

AGOF: null, ATP binding, double-stranded DNA binding

AGOC: null, chromosome, nucleus

AGOP: null, double-strand break repair via nonhomologous end joining

PGOF: null, ATP binding

PGOC: null, Mre11 complex

PGOP: null, DNA repair

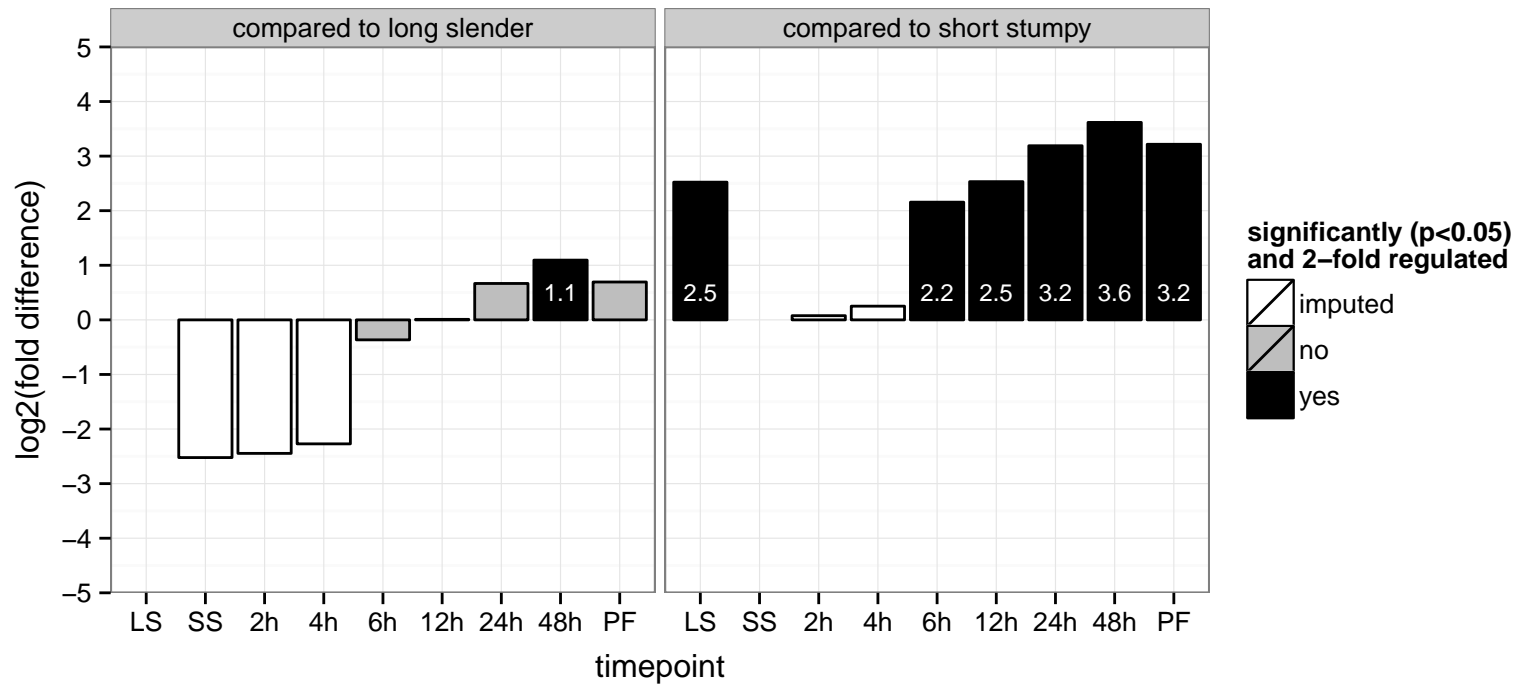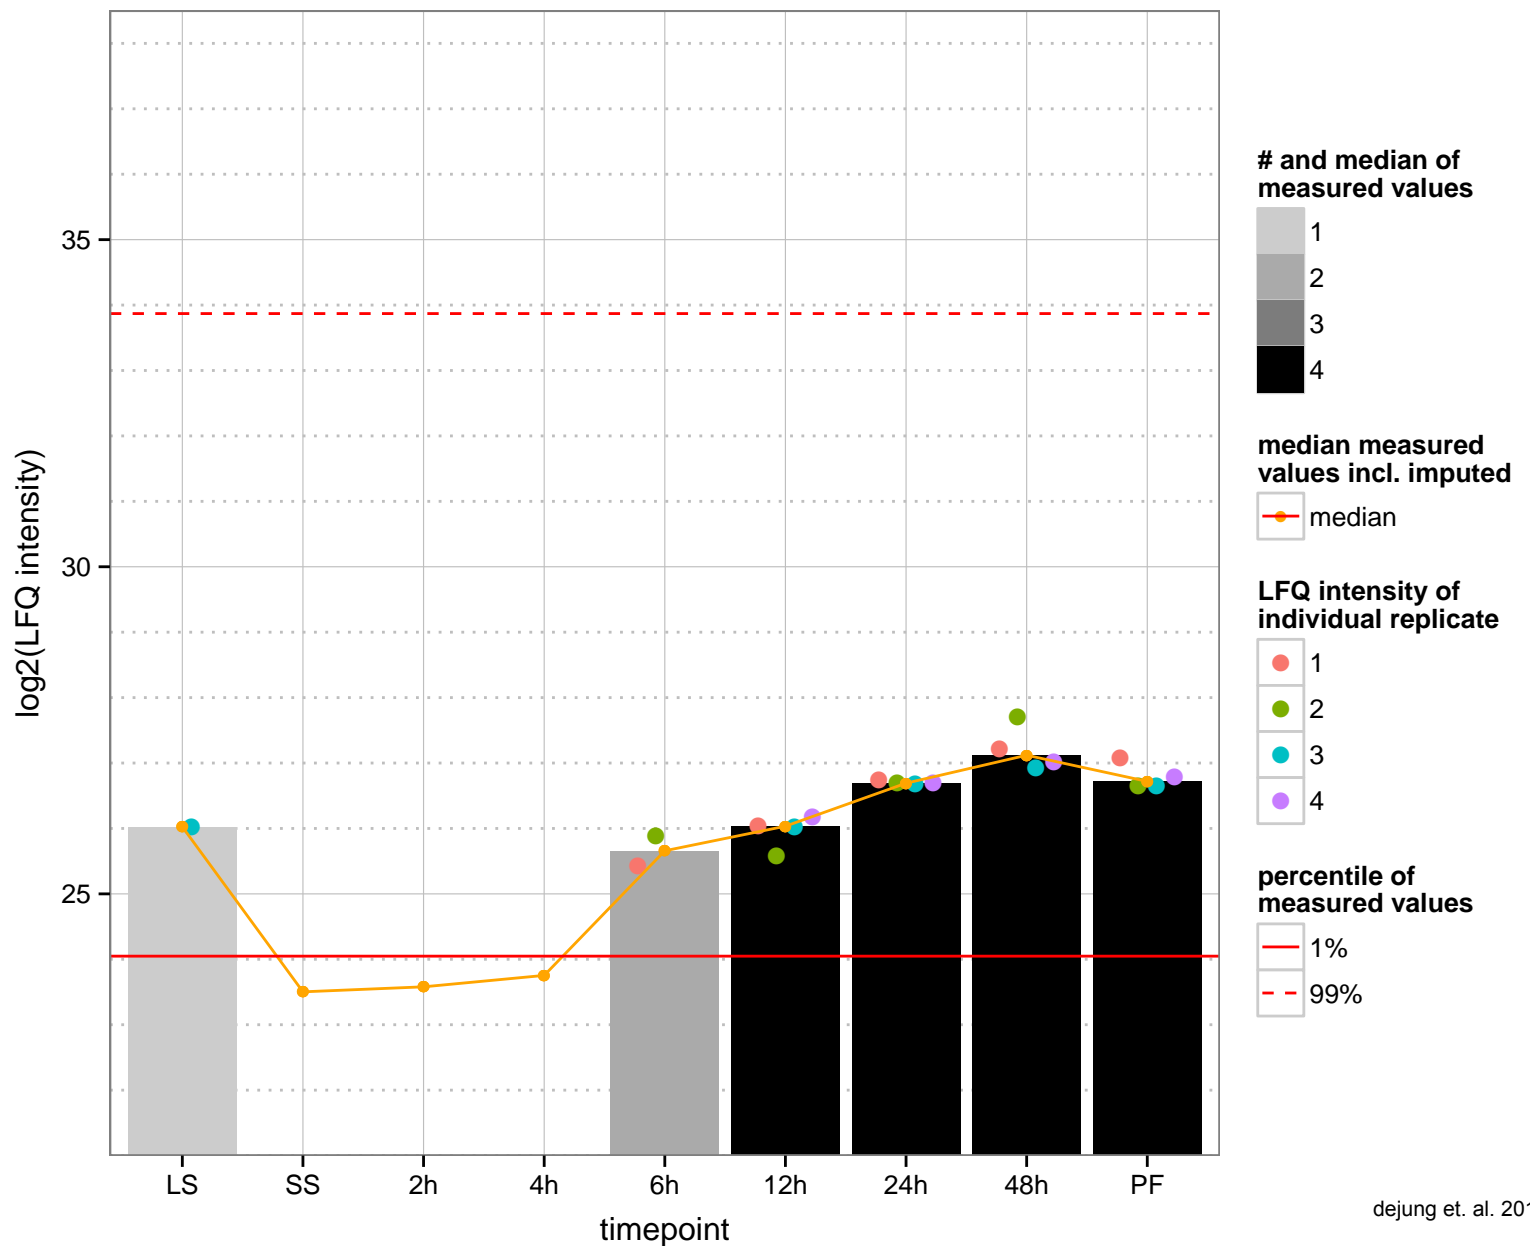

cation transporter, putative  
 Tb927.11.8990  
 AGOF: metal ion transmembrane transporter activity  
 AGOC: mitochondrial membrane  
 AGOP: metal ion transport  
 PGOF: metal ion transmembrane transporter activity  
 PGO: membrane  
 PGOP: metal ion transport, transmembrane transport

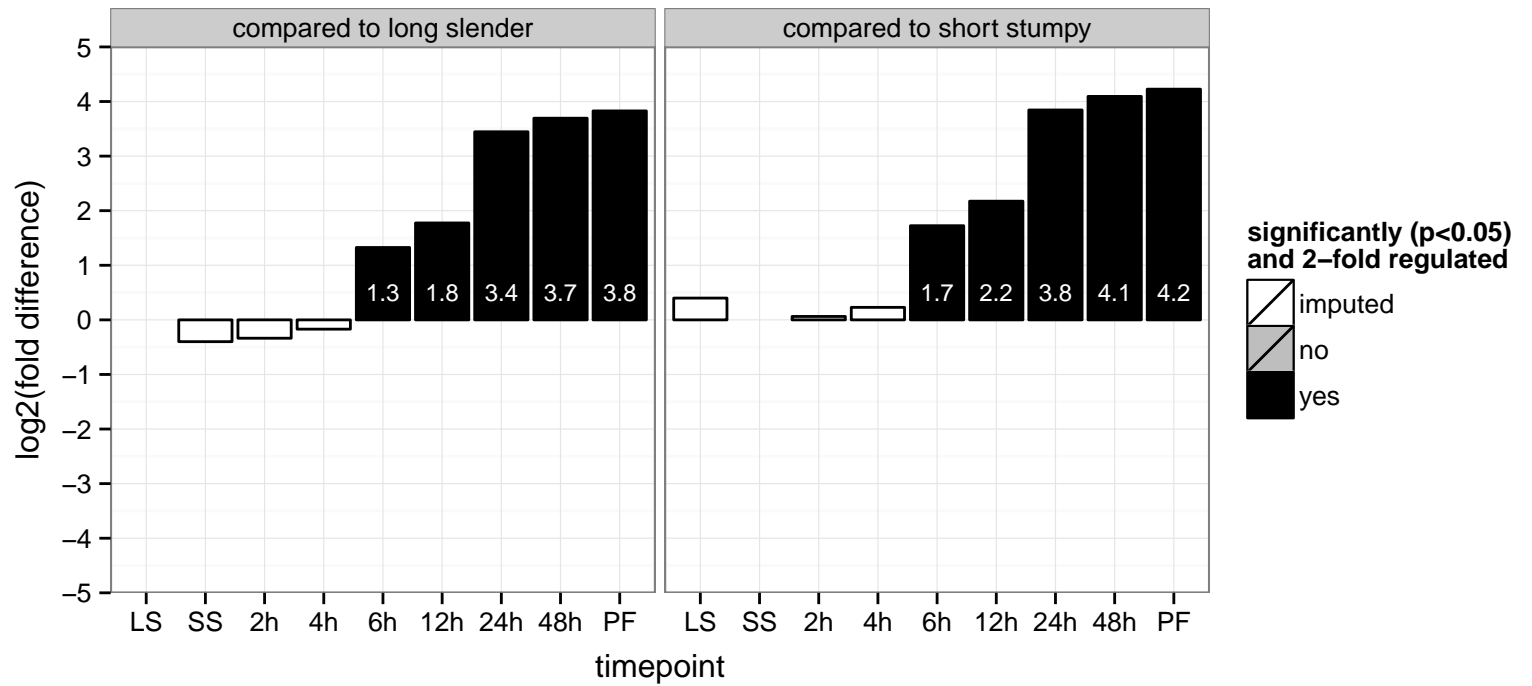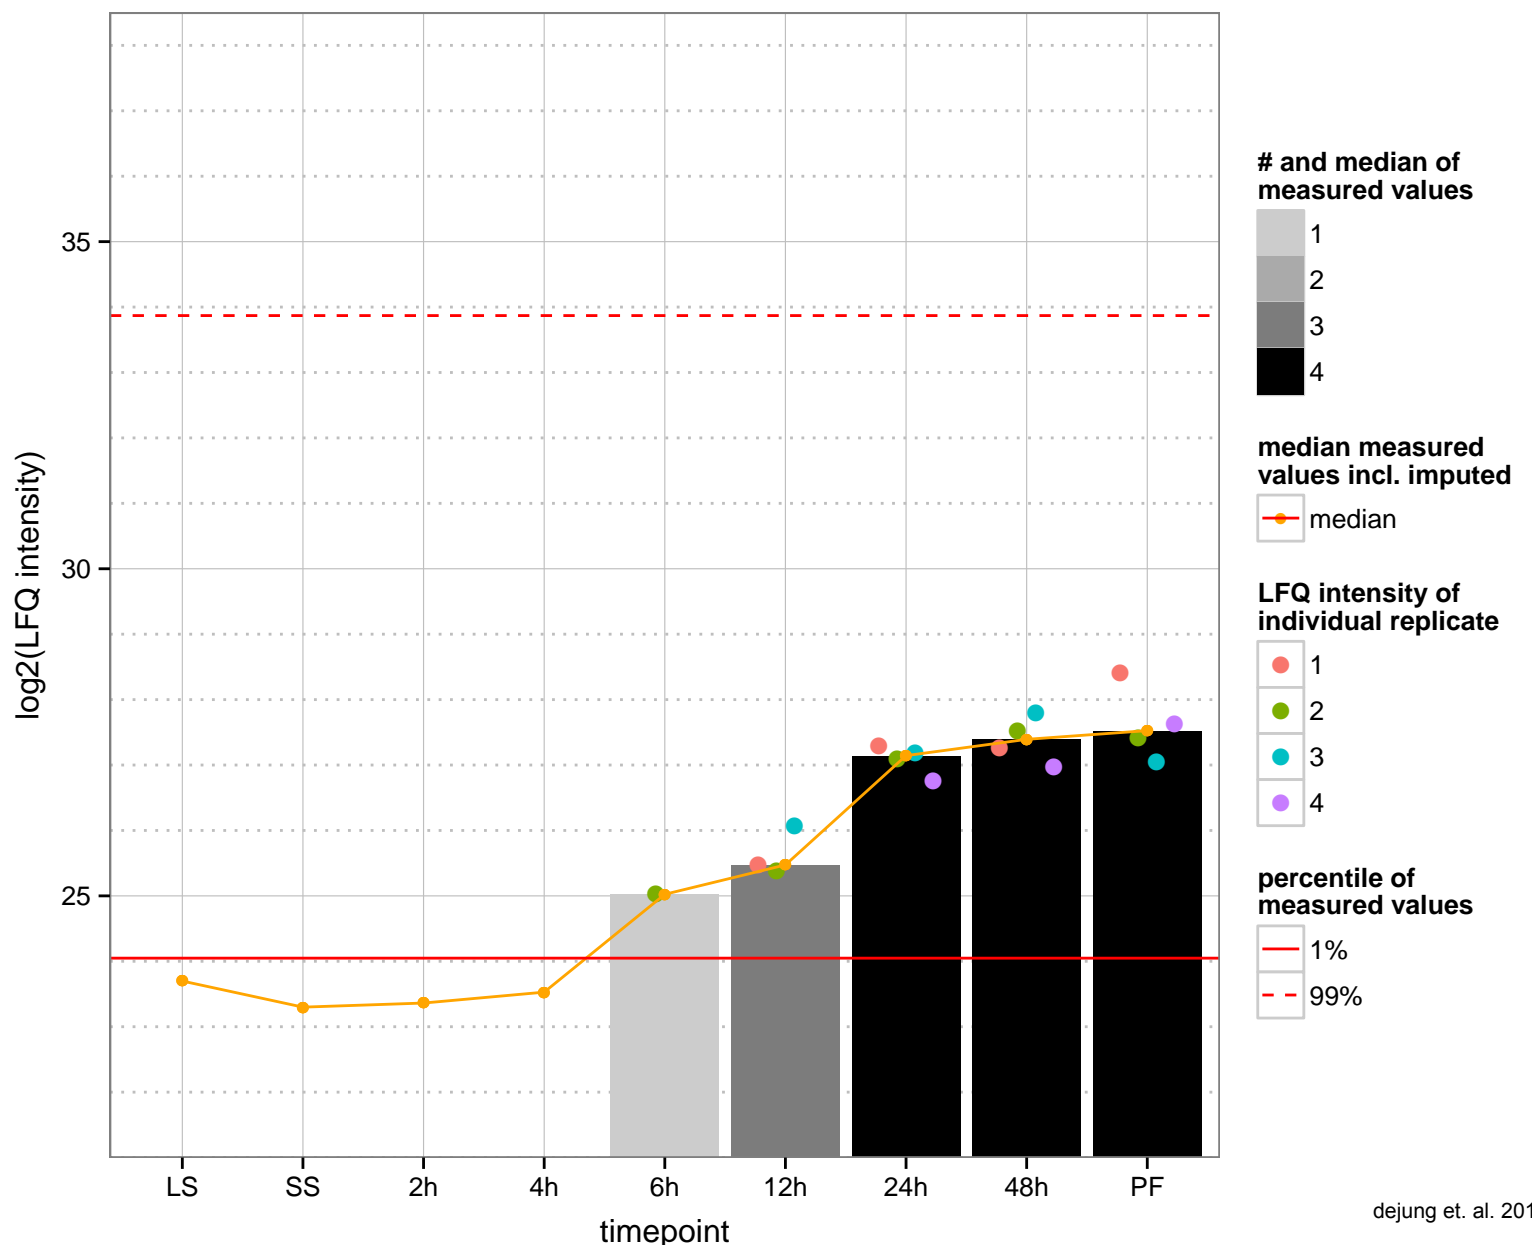

hypothetical protein, conserved  
 Tb927.3.2680  
 AGOF: null  
 AGOC: null  
 AGOP: null  
 PGO: null  
 PGOC: null  
 PGOP: null

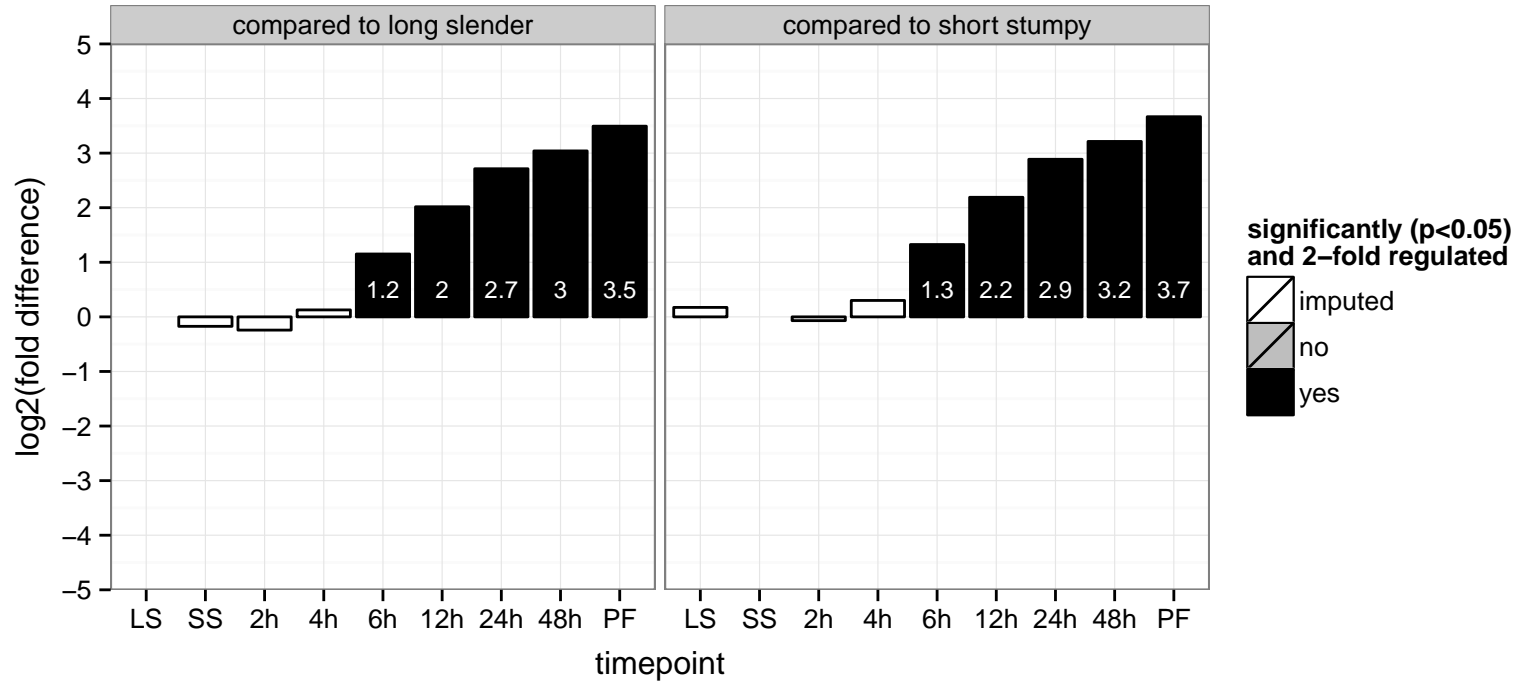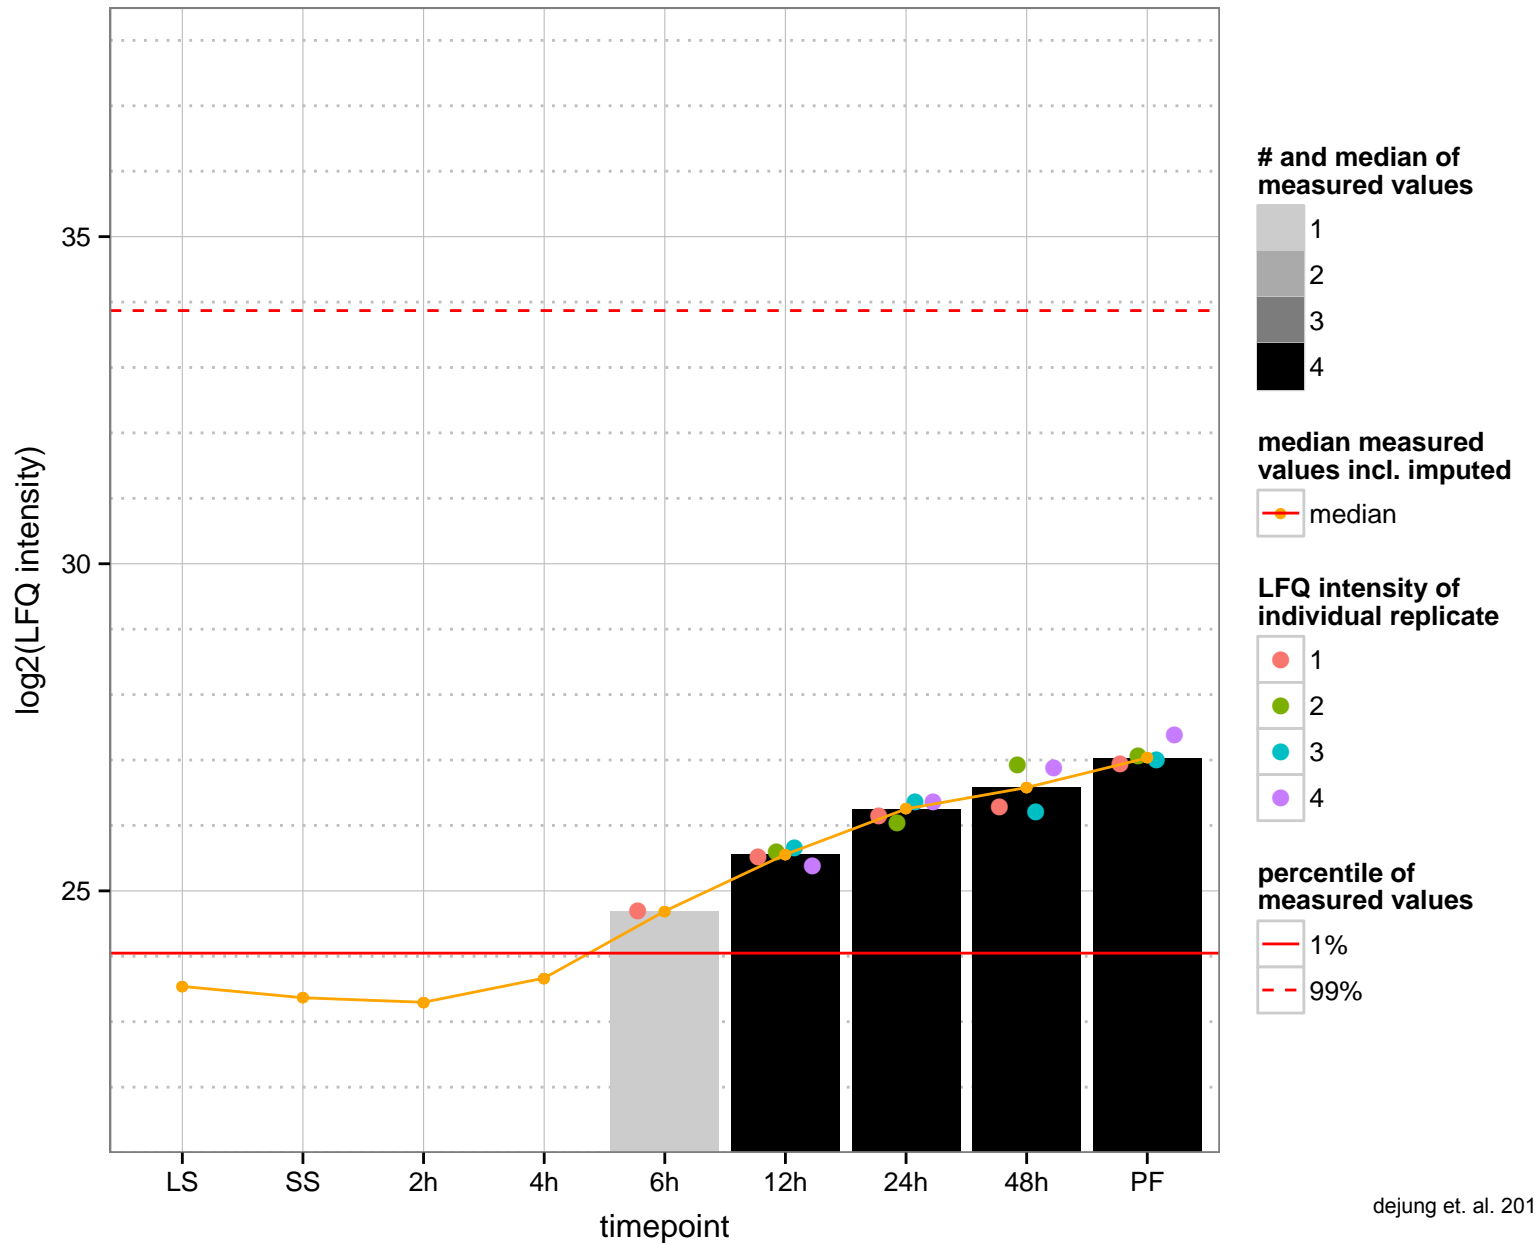

Elongation factor Ts, mitochondrial, putative (EF-Ts)  
 Tb927.3.3630  
 AGOF: protein binding, translation elongation factor activity  
 AGOC: intracellular, mitochondrion  
 AGOP: growth, oxidative phosphorylation, translational elongation  
 PGO: protein binding, translation elongation factor activity  
 PGO: intracellular  
 PGO: translational elongation

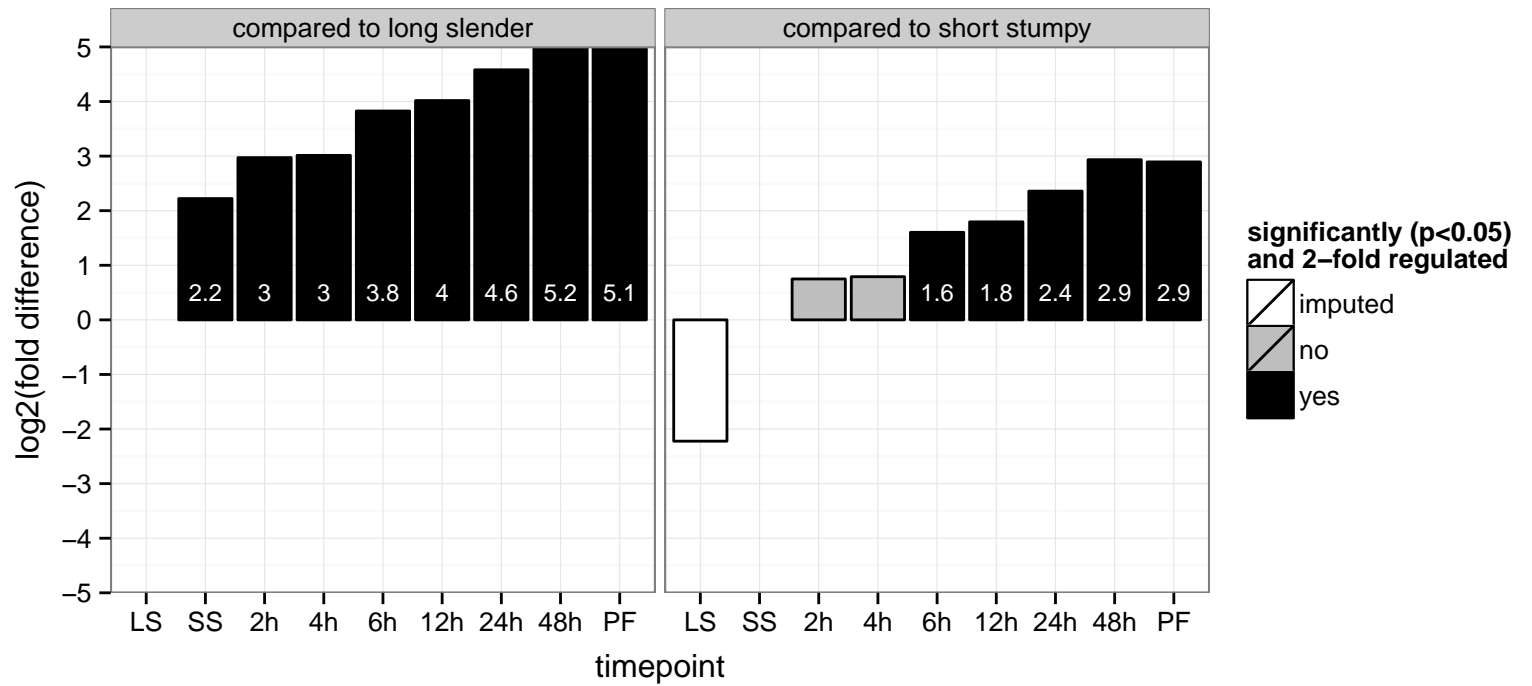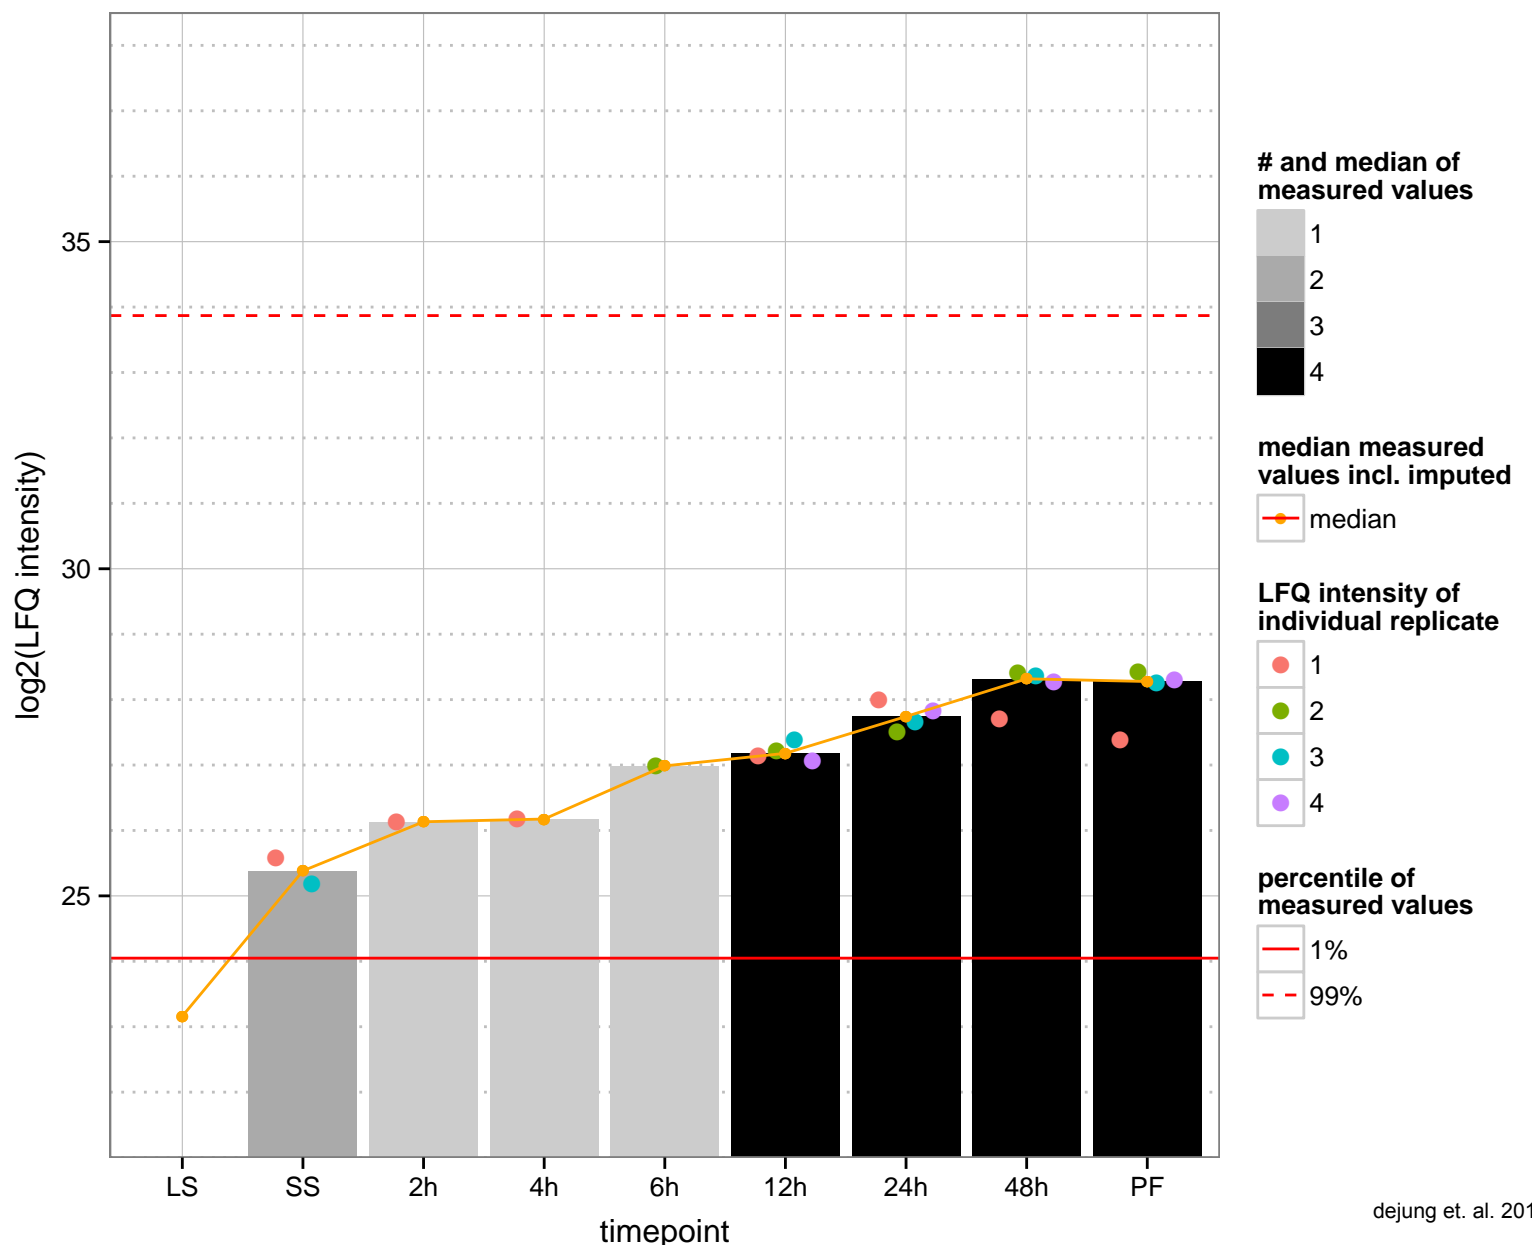

fumarate hydratase, putative, class I (FHc)  
 Tb927.3.4500;Tb11.v5.0629  
 AGOF: null, fumarate hydratase activity  
 AGOC: null, cytosol  
 AGOP: null, generation of precursor metabolites and energy  
 PGO: hydro-lyase activity, lyase activity, fumarate hydratase activity, hydro-lyase activity  
 PGOC: null  
 PGOP: null, generation of precursor metabolites and energy

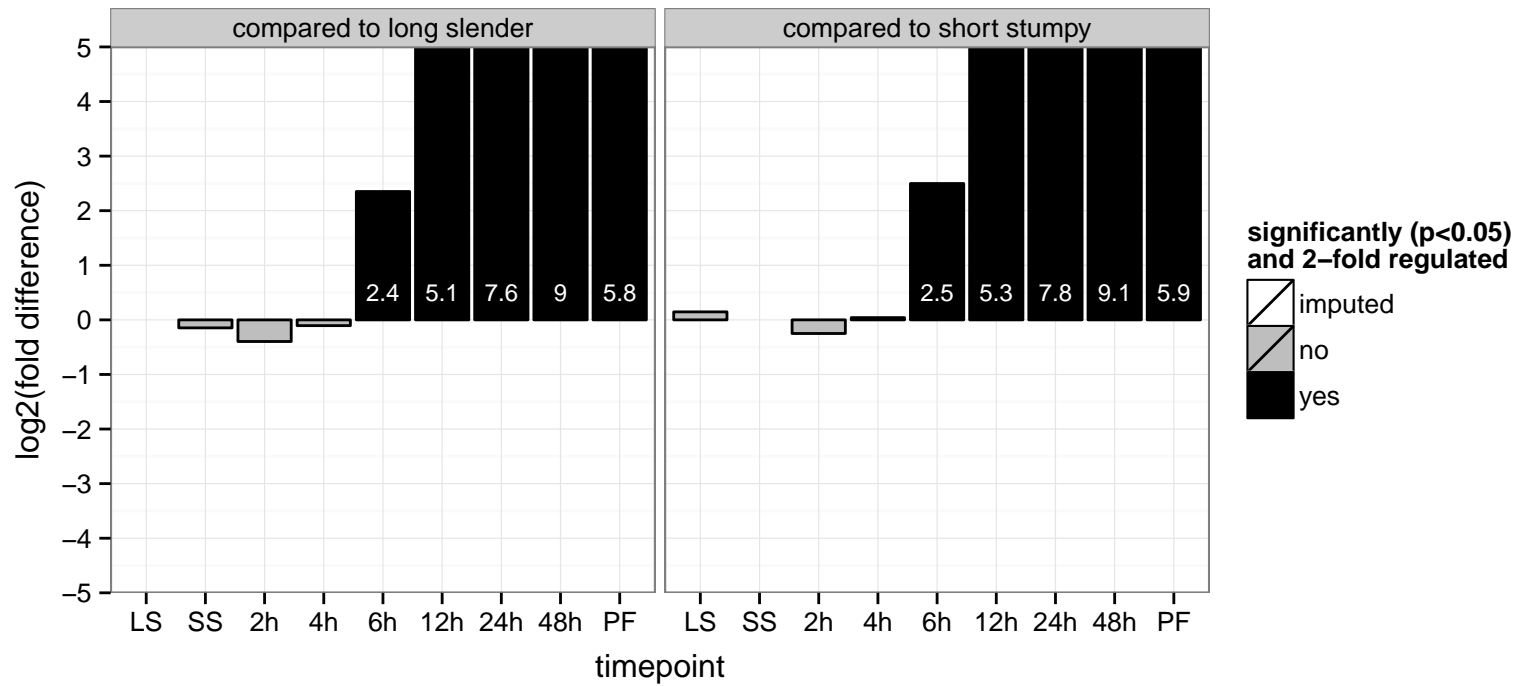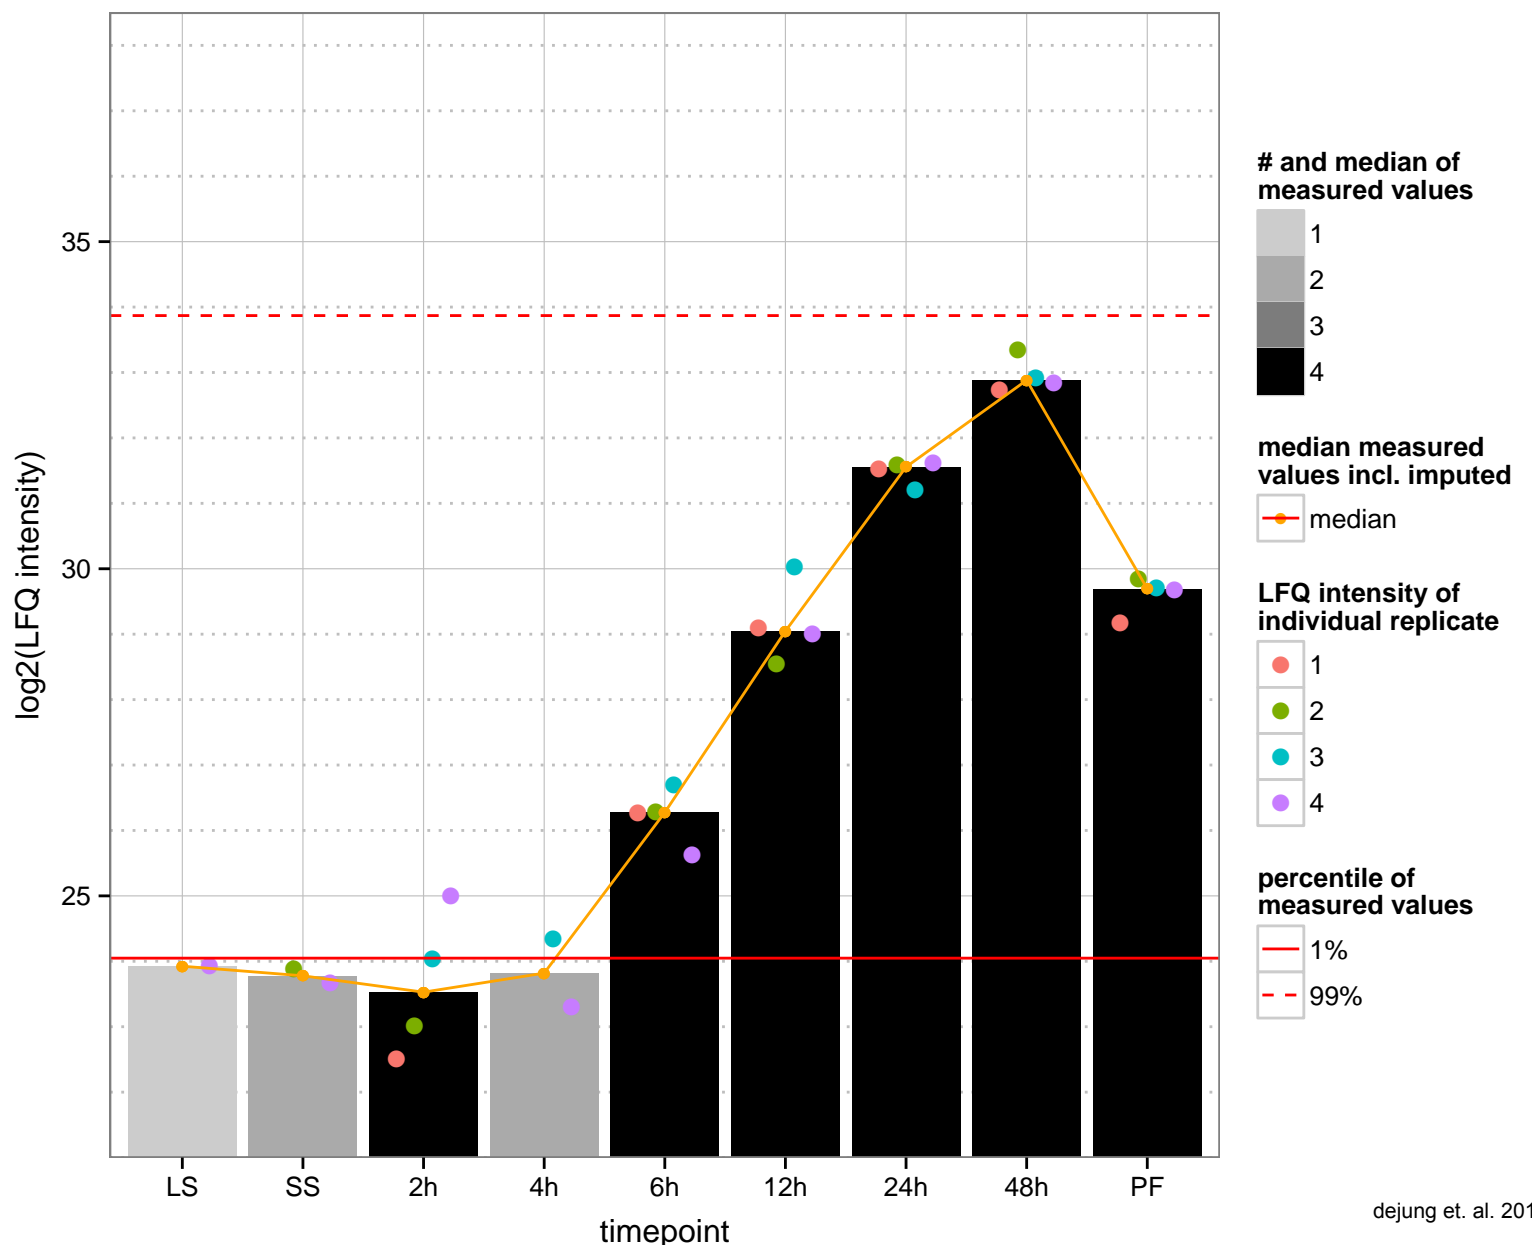

hypothetical protein, conserved  
 Tb927.3.640  
 AGOF: null  
 AGOC: null  
 AGOP: null  
 PGO: null  
 PGOC: null  
 PGOP: null

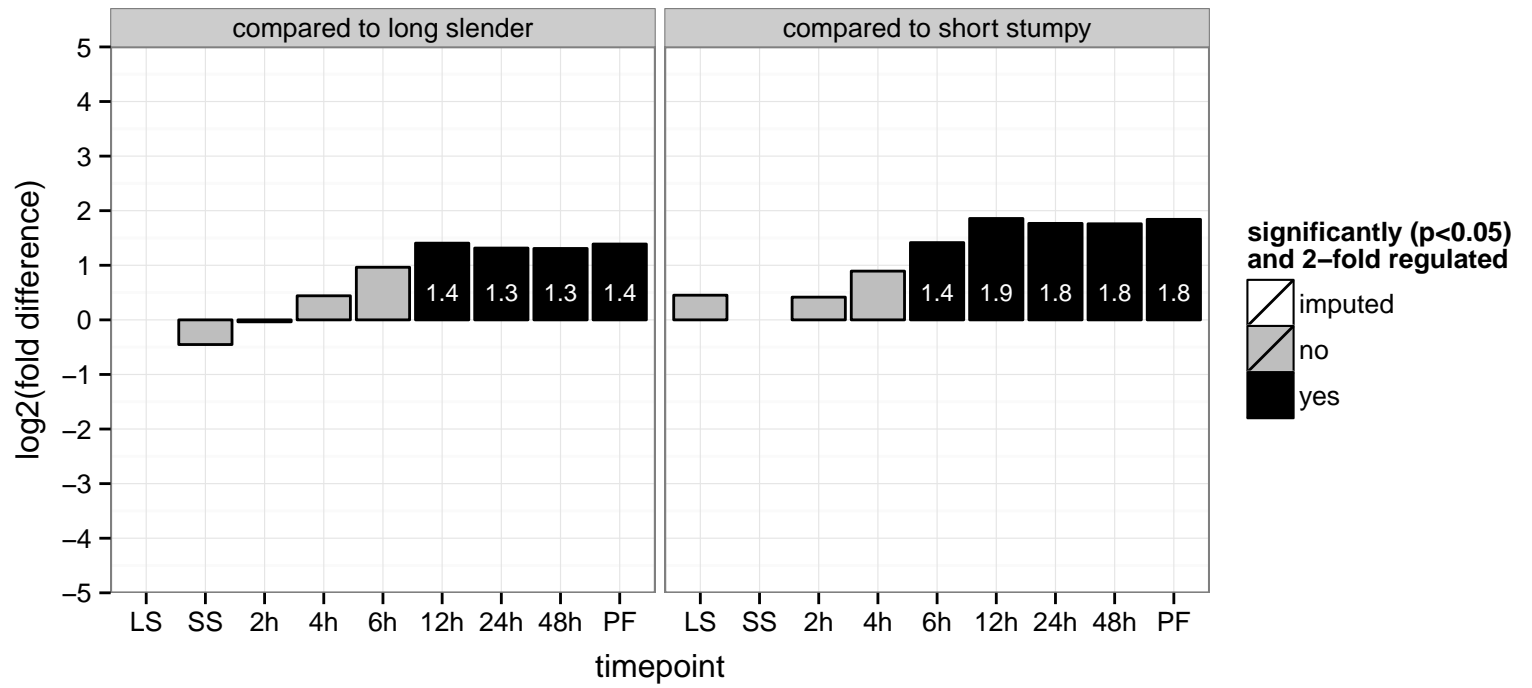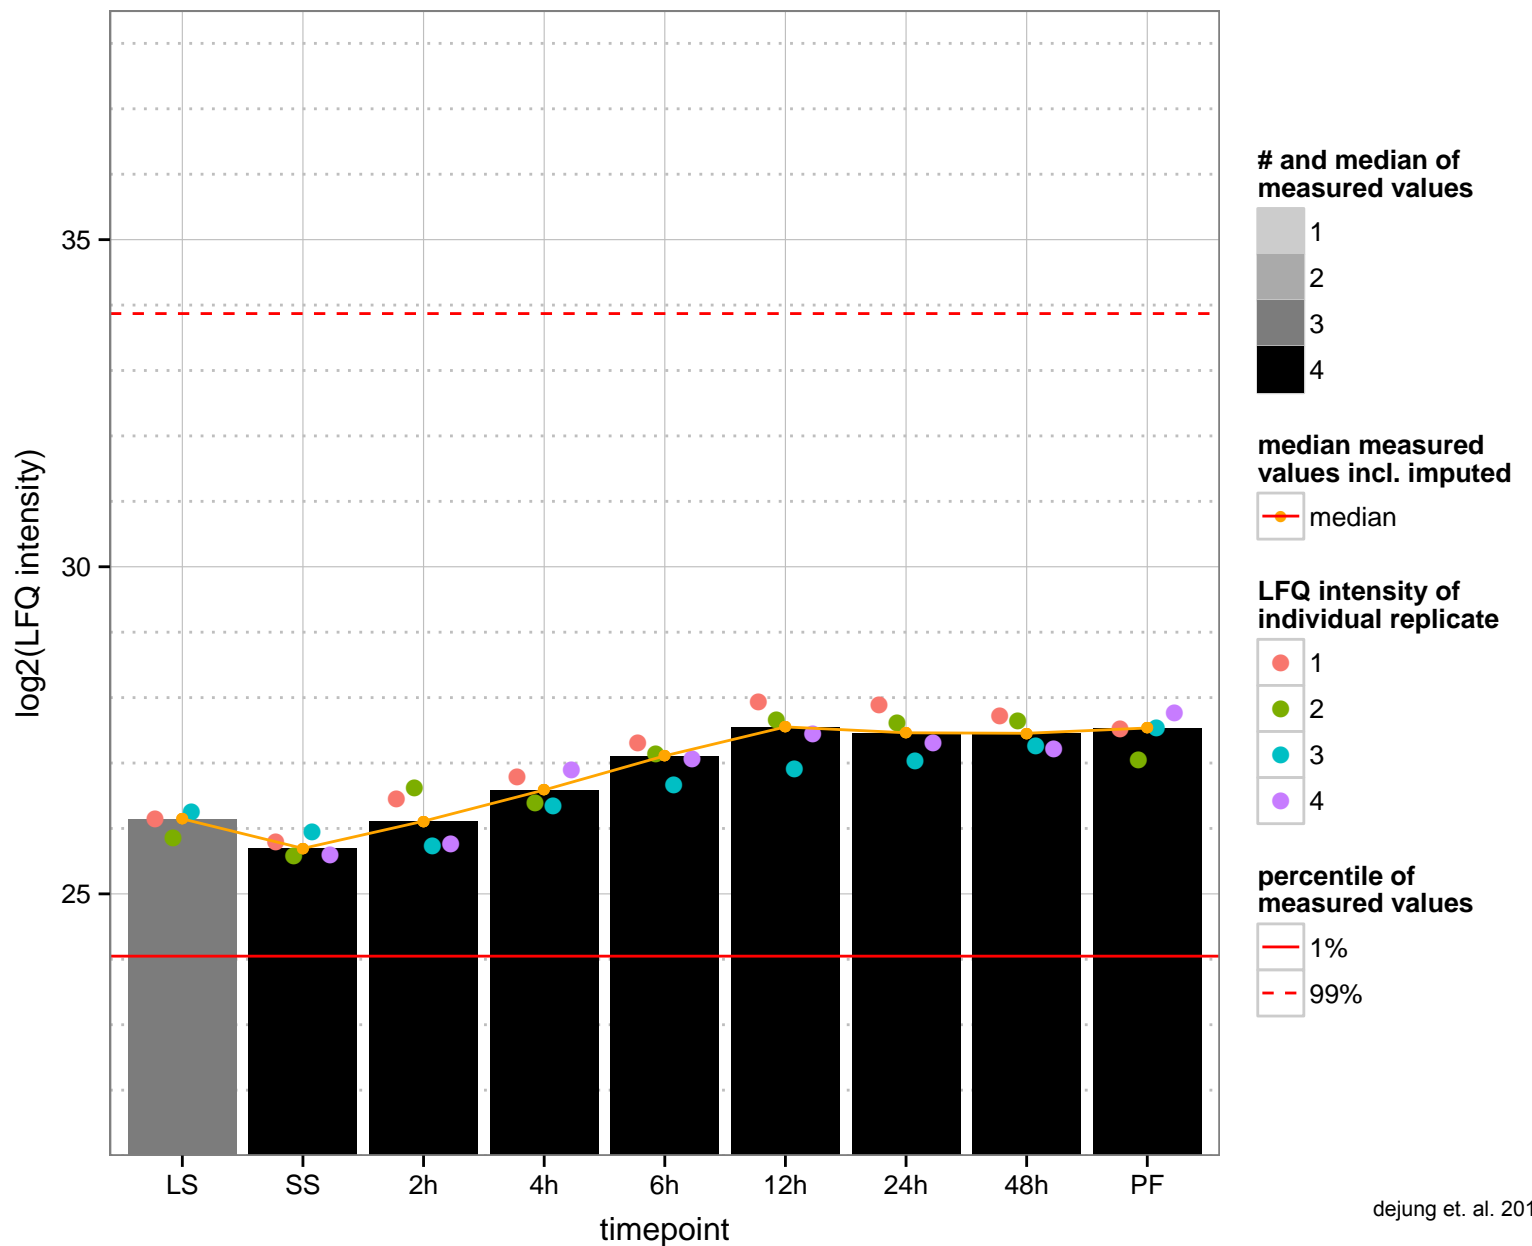

hypothetical protein, conserved  
 Tb927.4.3670  
 AGOF: null  
 AGOC: null  
 AGOP: null  
 PGO: null  
 PGOC: null  
 PGOP: null

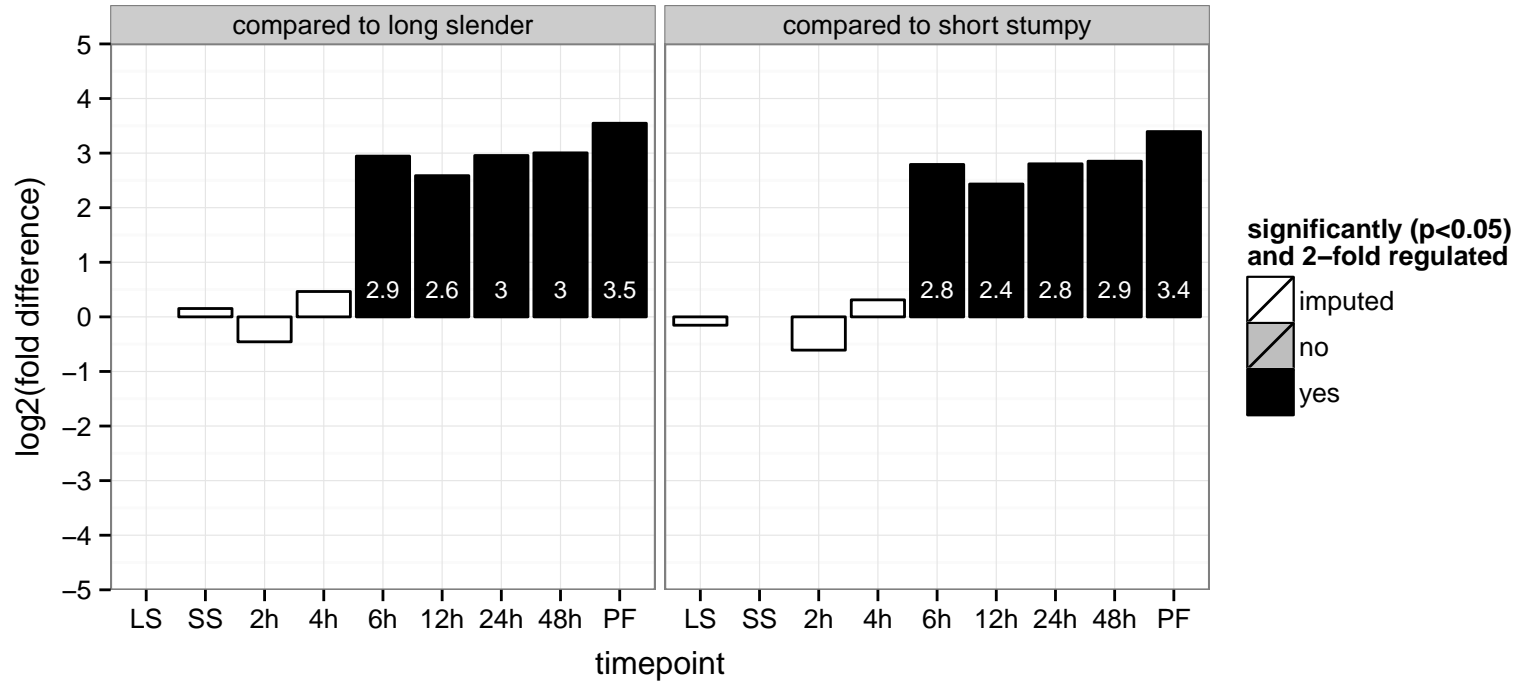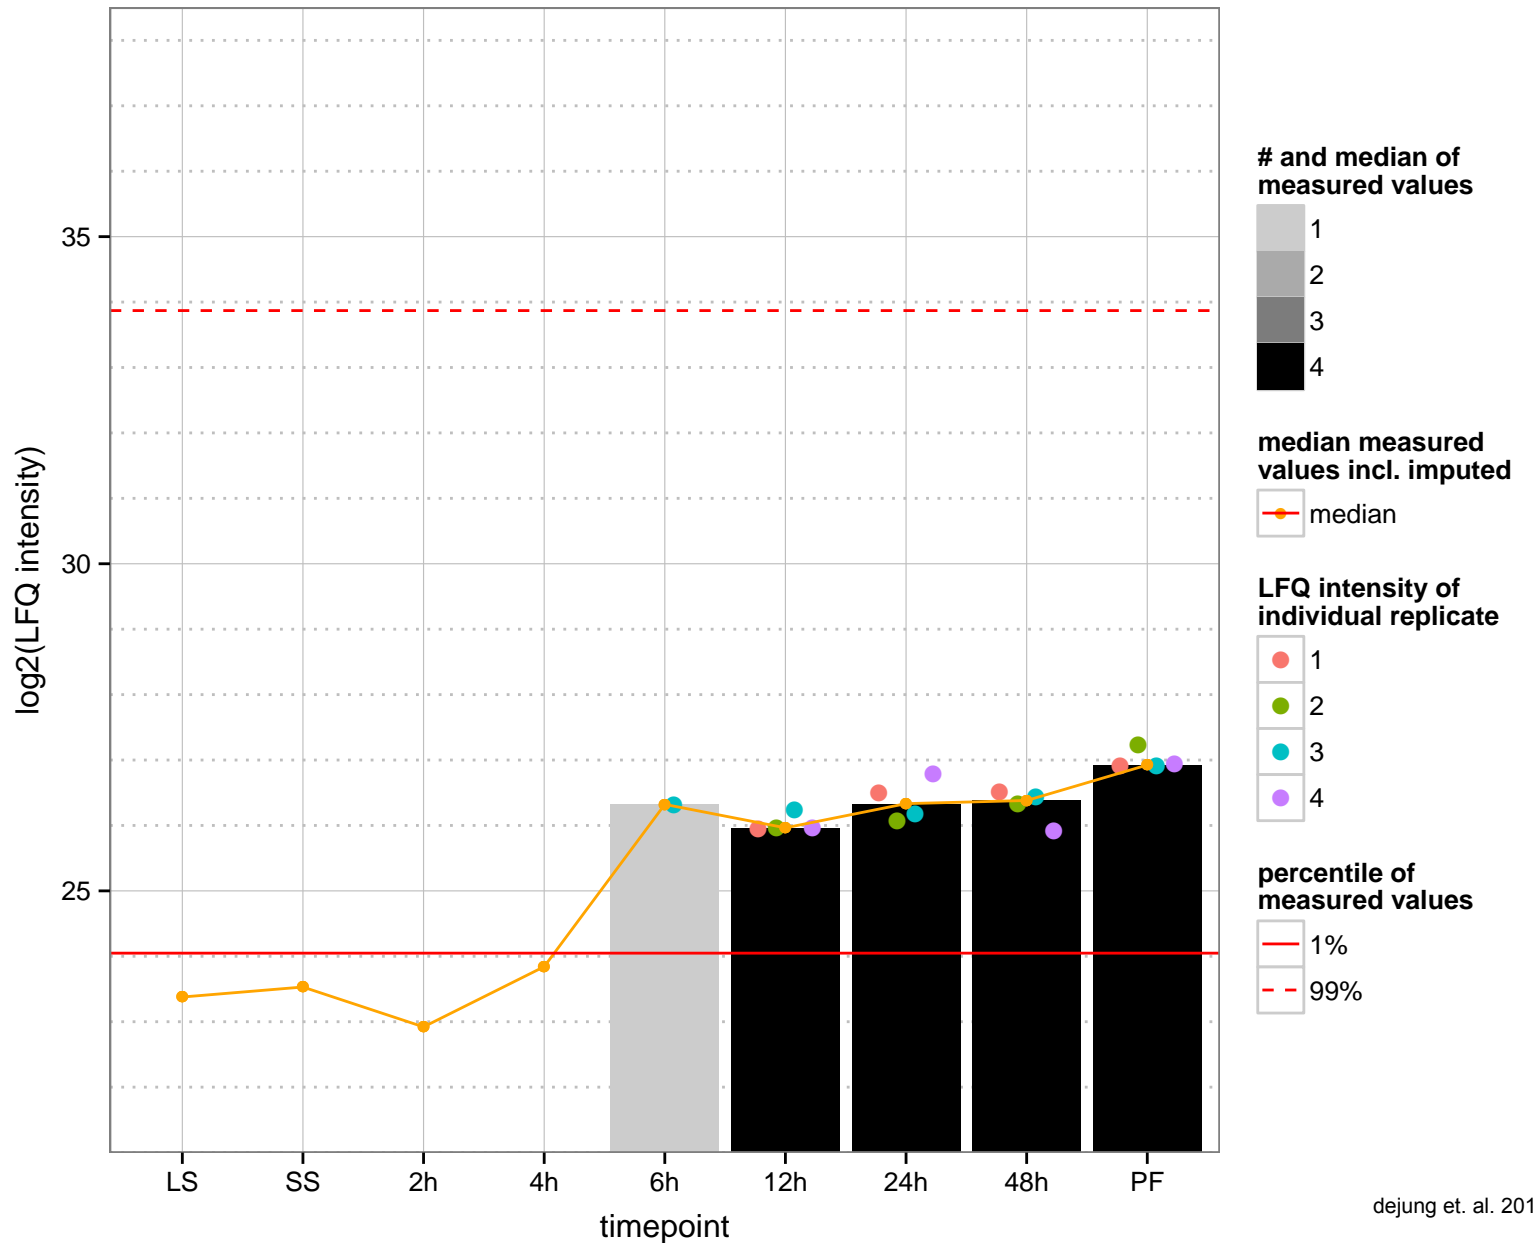



glycosomal transporter (GAT1), ABC transporter, putative (GAT1)

Tb927.4.4050

AGOF: ATP binding, ATPase activity, coupled to transmembrane movement of substances, transporter activity

AGOC: glycosome membrane, integral to membrane

AGOP: fatty acid transport

PGOF: ATP binding, ATPase activity, coupled to transmembrane movement of substances, nucleoside-triphosphatase activity

PGOC: integral to membrane, membrane

PGOP: transmembrane transport, transport

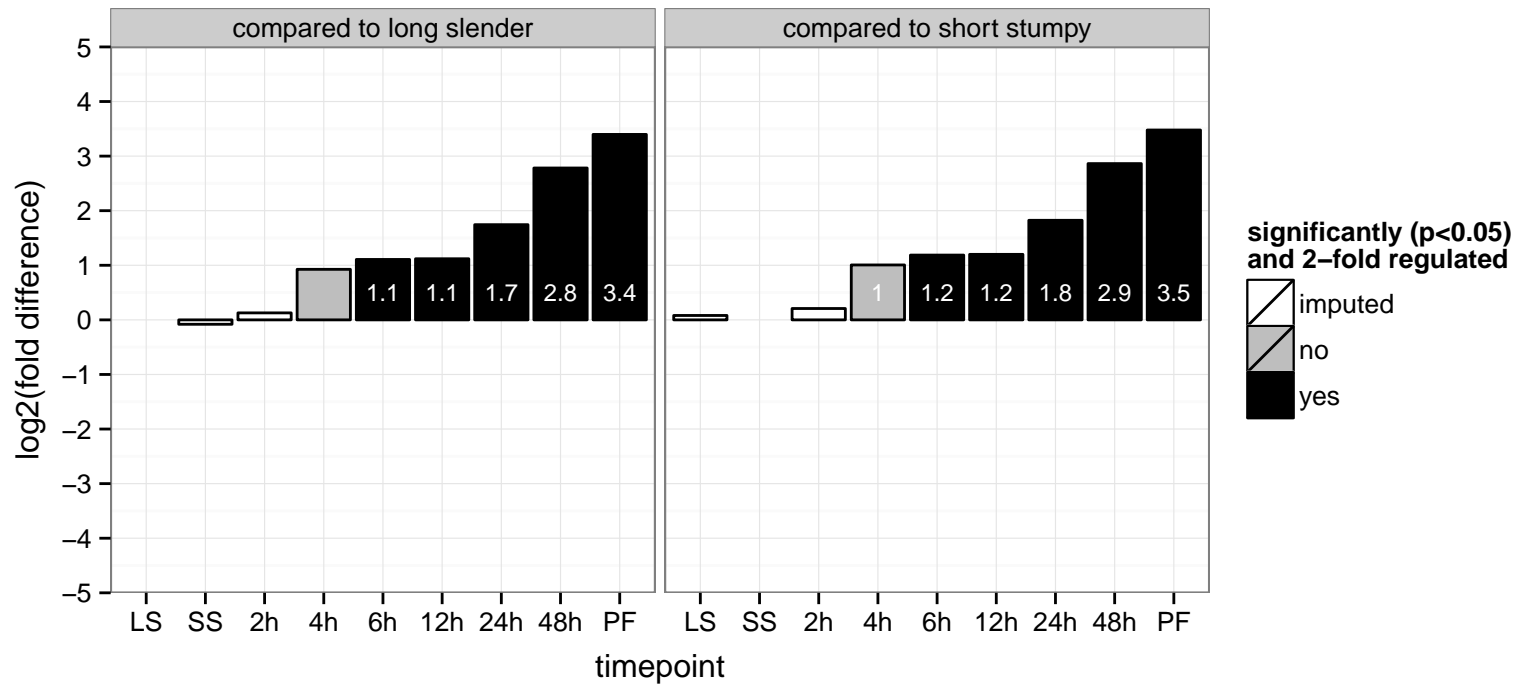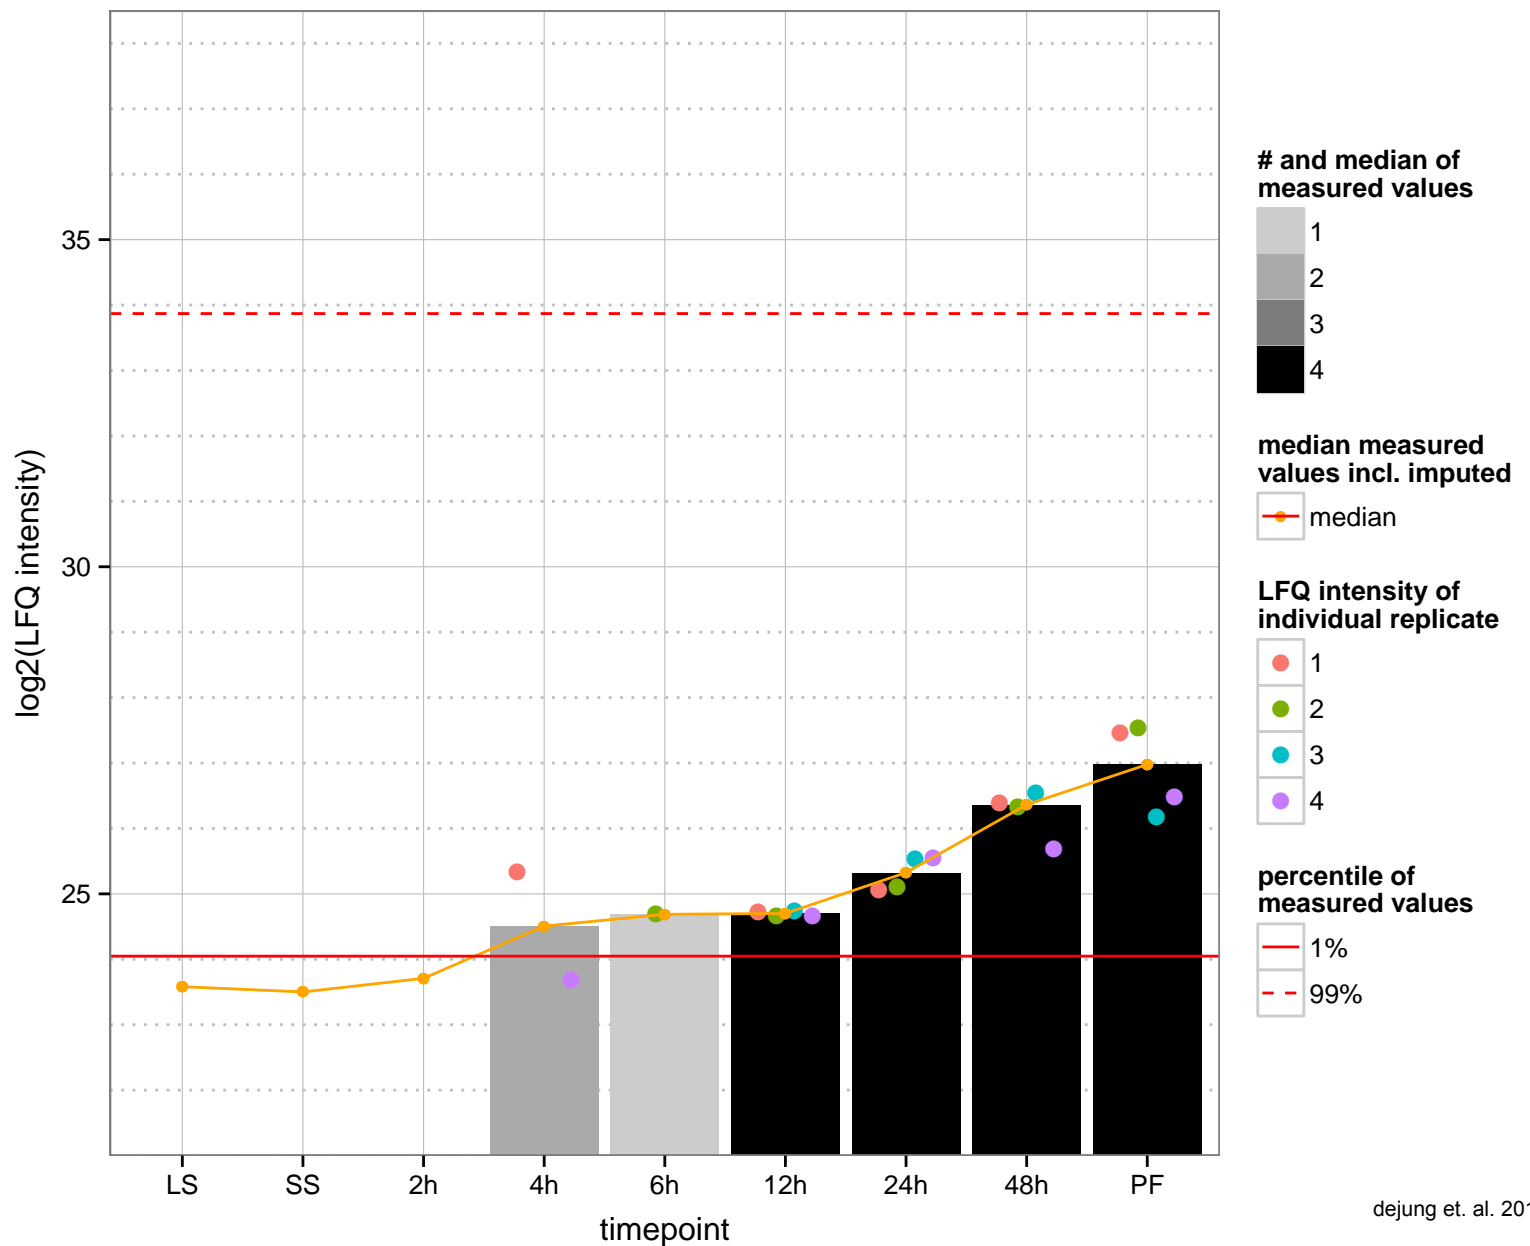

Eukaryotic translation initiation factor 4 gamma type 1 (eif4g1)  
 Tb927.5.1490  
 AGOF: protein binding  
 AGOC: eukaryotic translation initiation factor 4F complex  
 AGOP: RNA metabolic process  
 PGO: DNA binding, RNA binding, binding, protein binding  
 PGO: null  
 PGO: null

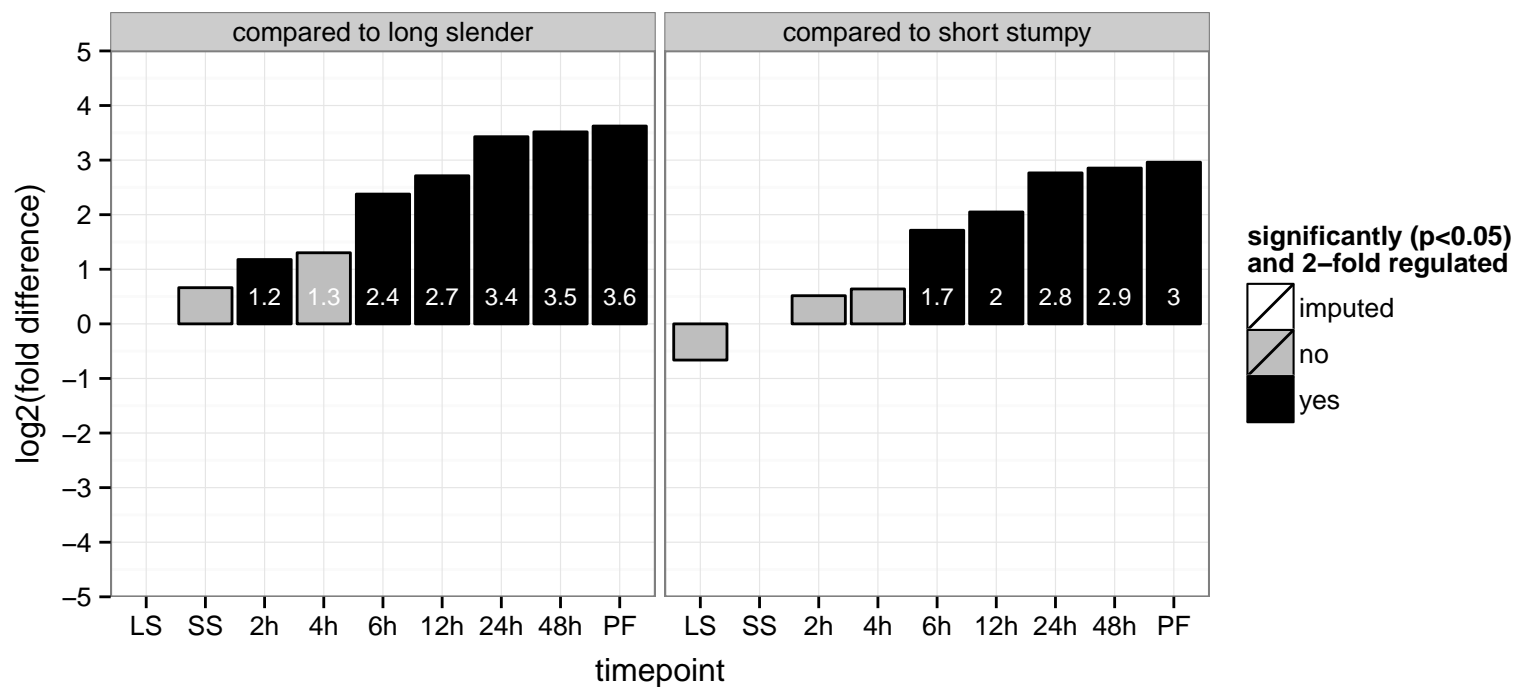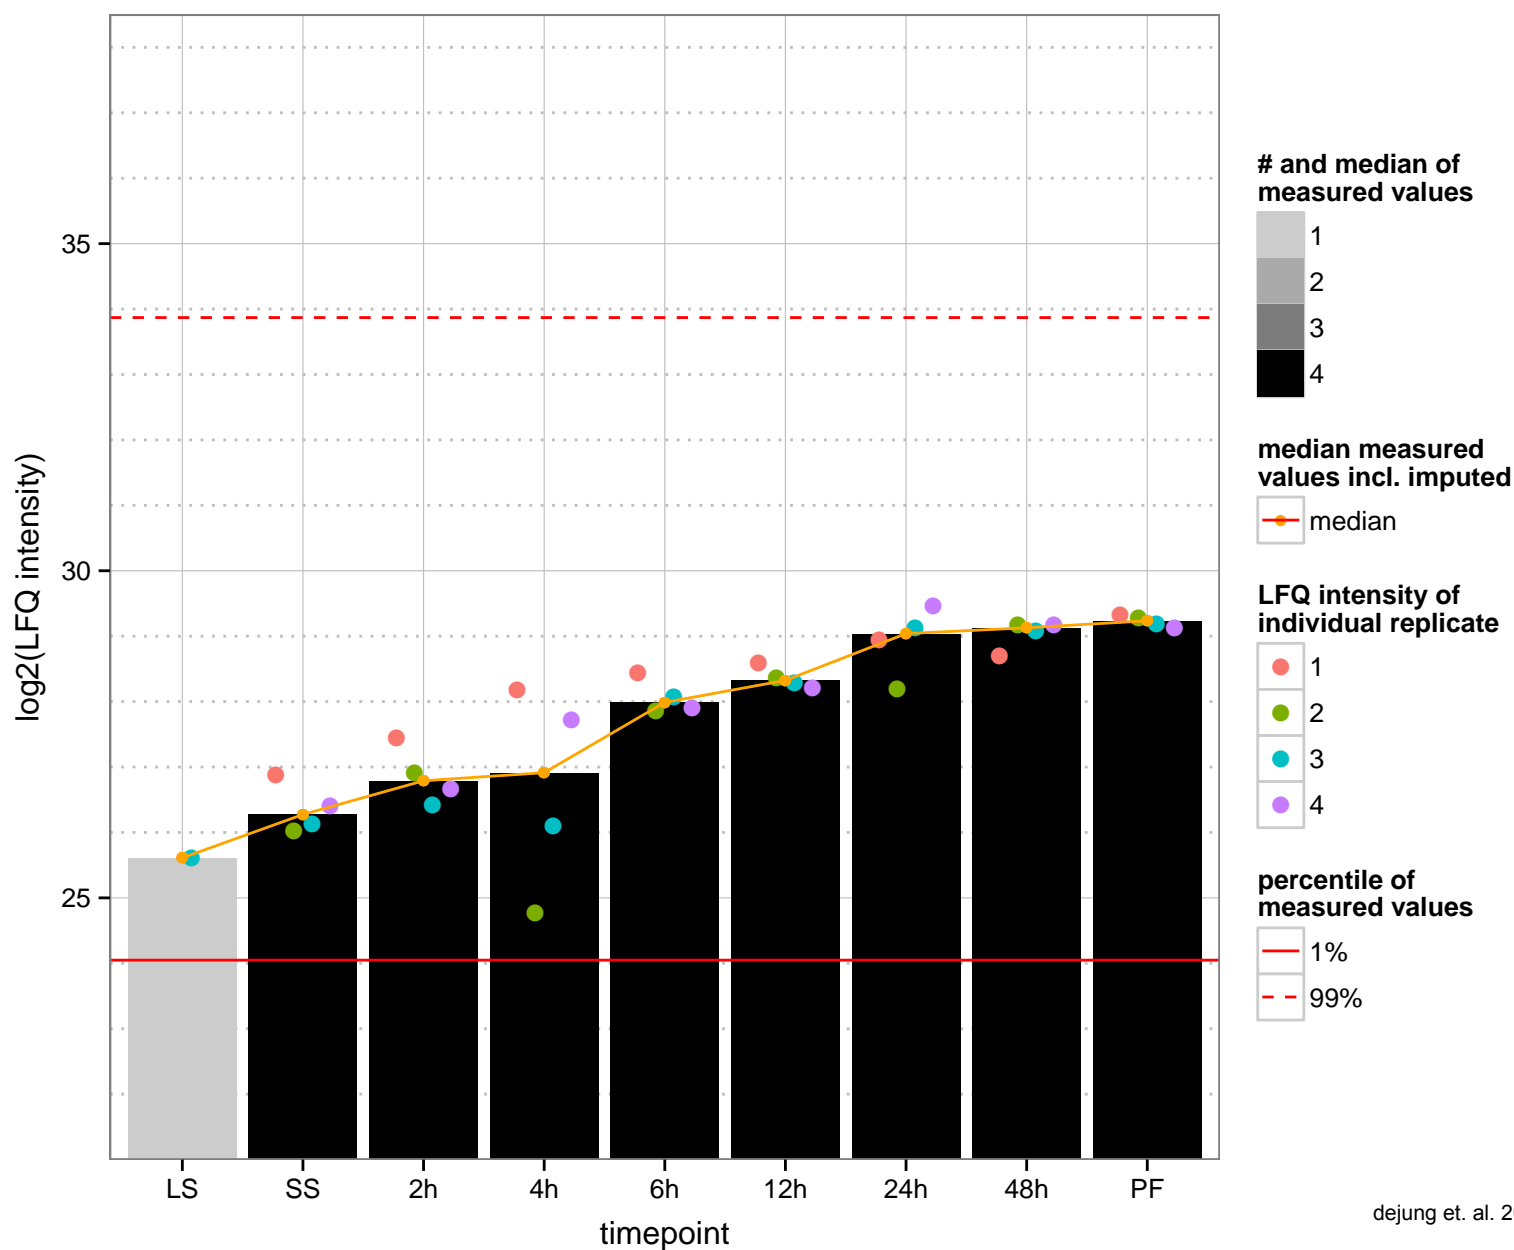

protein phosphatase 2C, putative  
 Tb927.5.1660  
 AGOF: phosphatase activity  
 AGOC: null  
 AGOP: dephosphorylation  
 PGO: catalytic activity  
 PGOC: null  
 PGOP: null

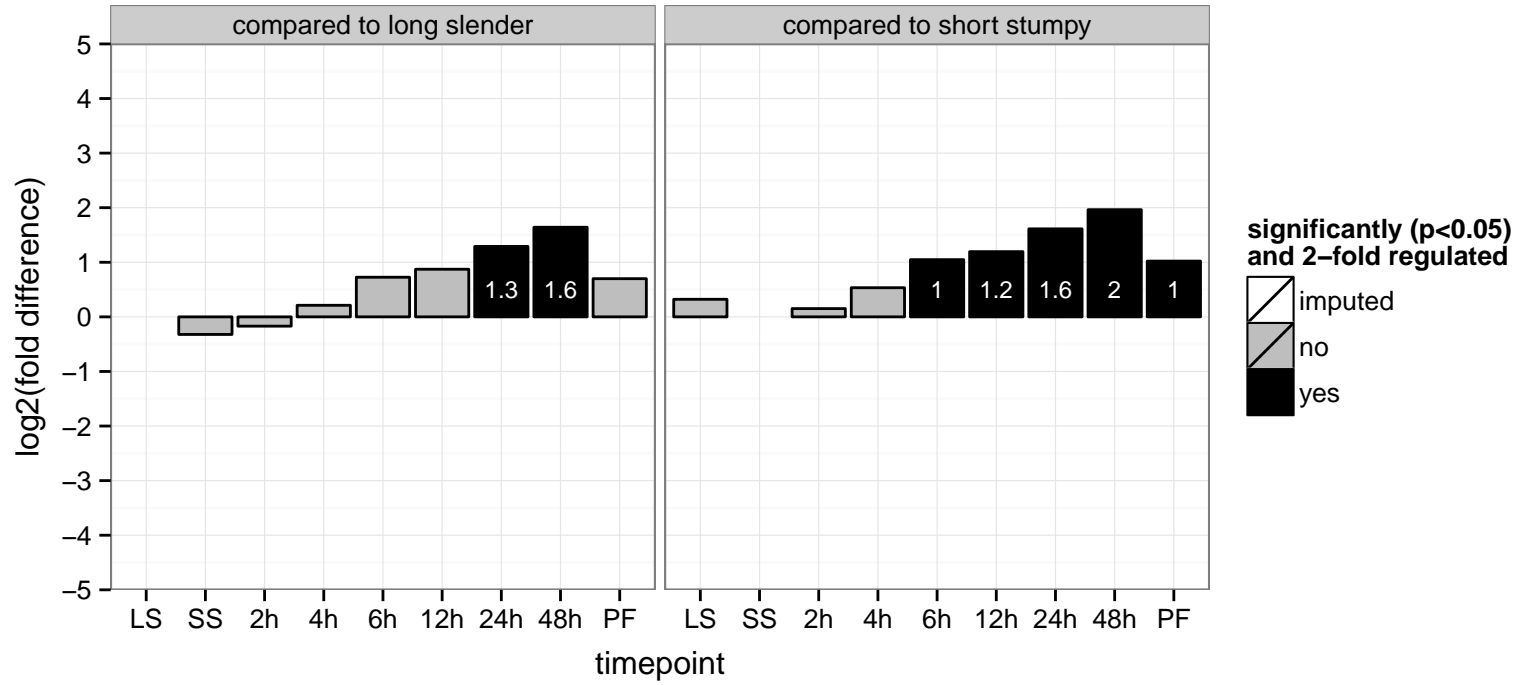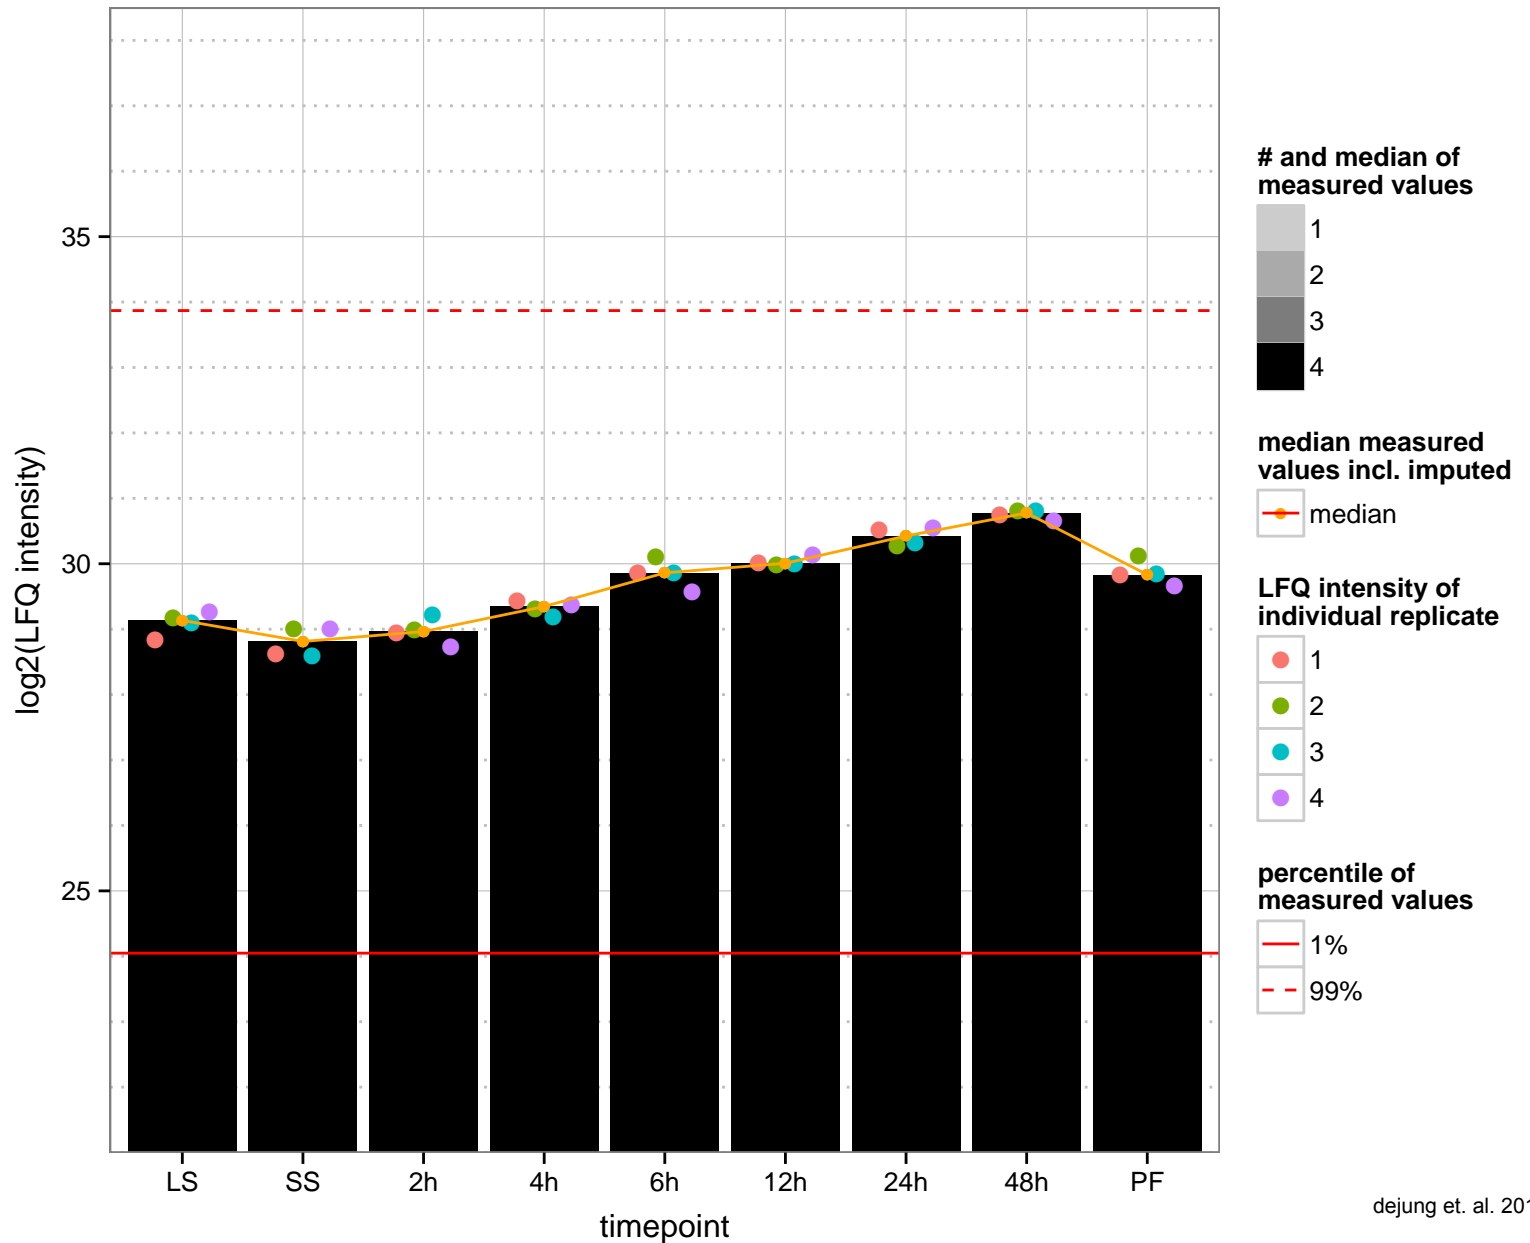

GTP-binding protein, putative  
 Tb927.5.4310  
 AGOF: GTP binding  
 AGOC: intracellular  
 AGOP: null  
 PGO: GTP binding  
 PGOC: null  
 PGOP: null

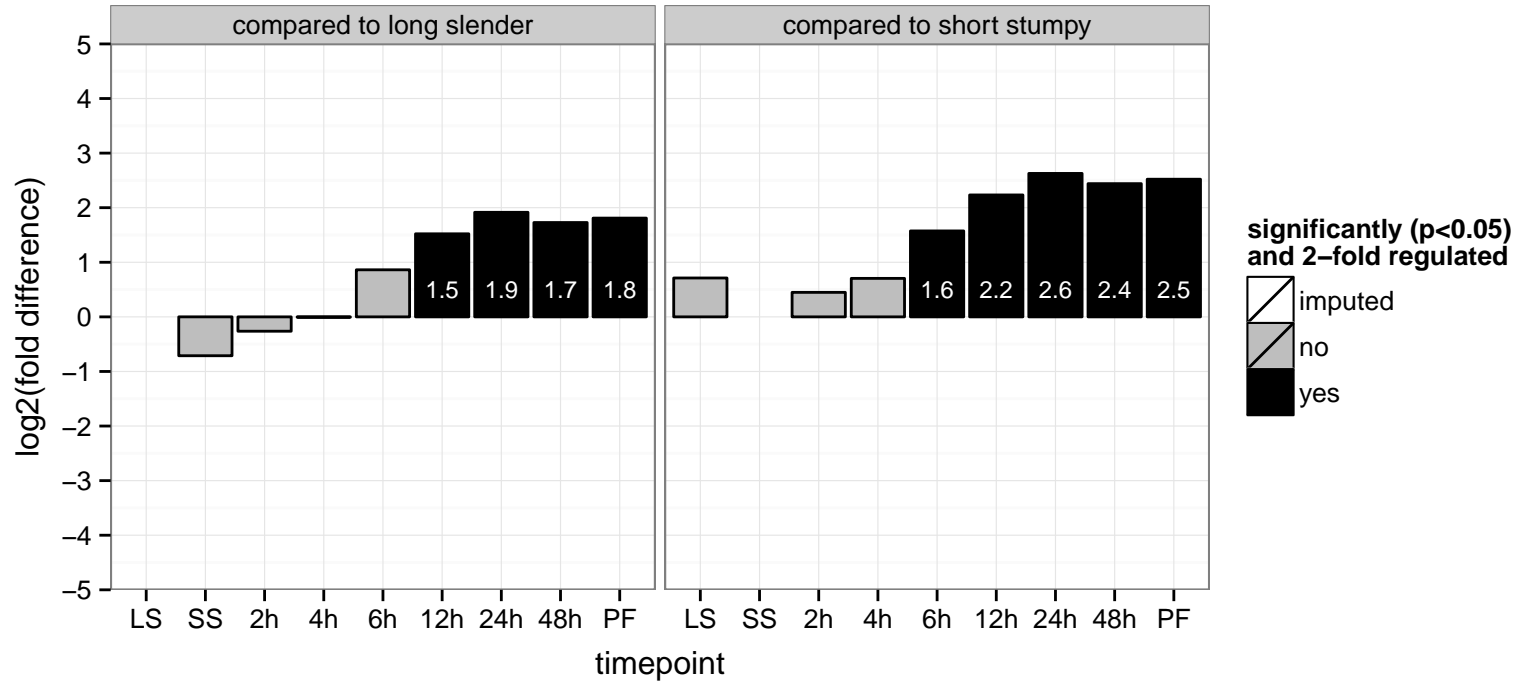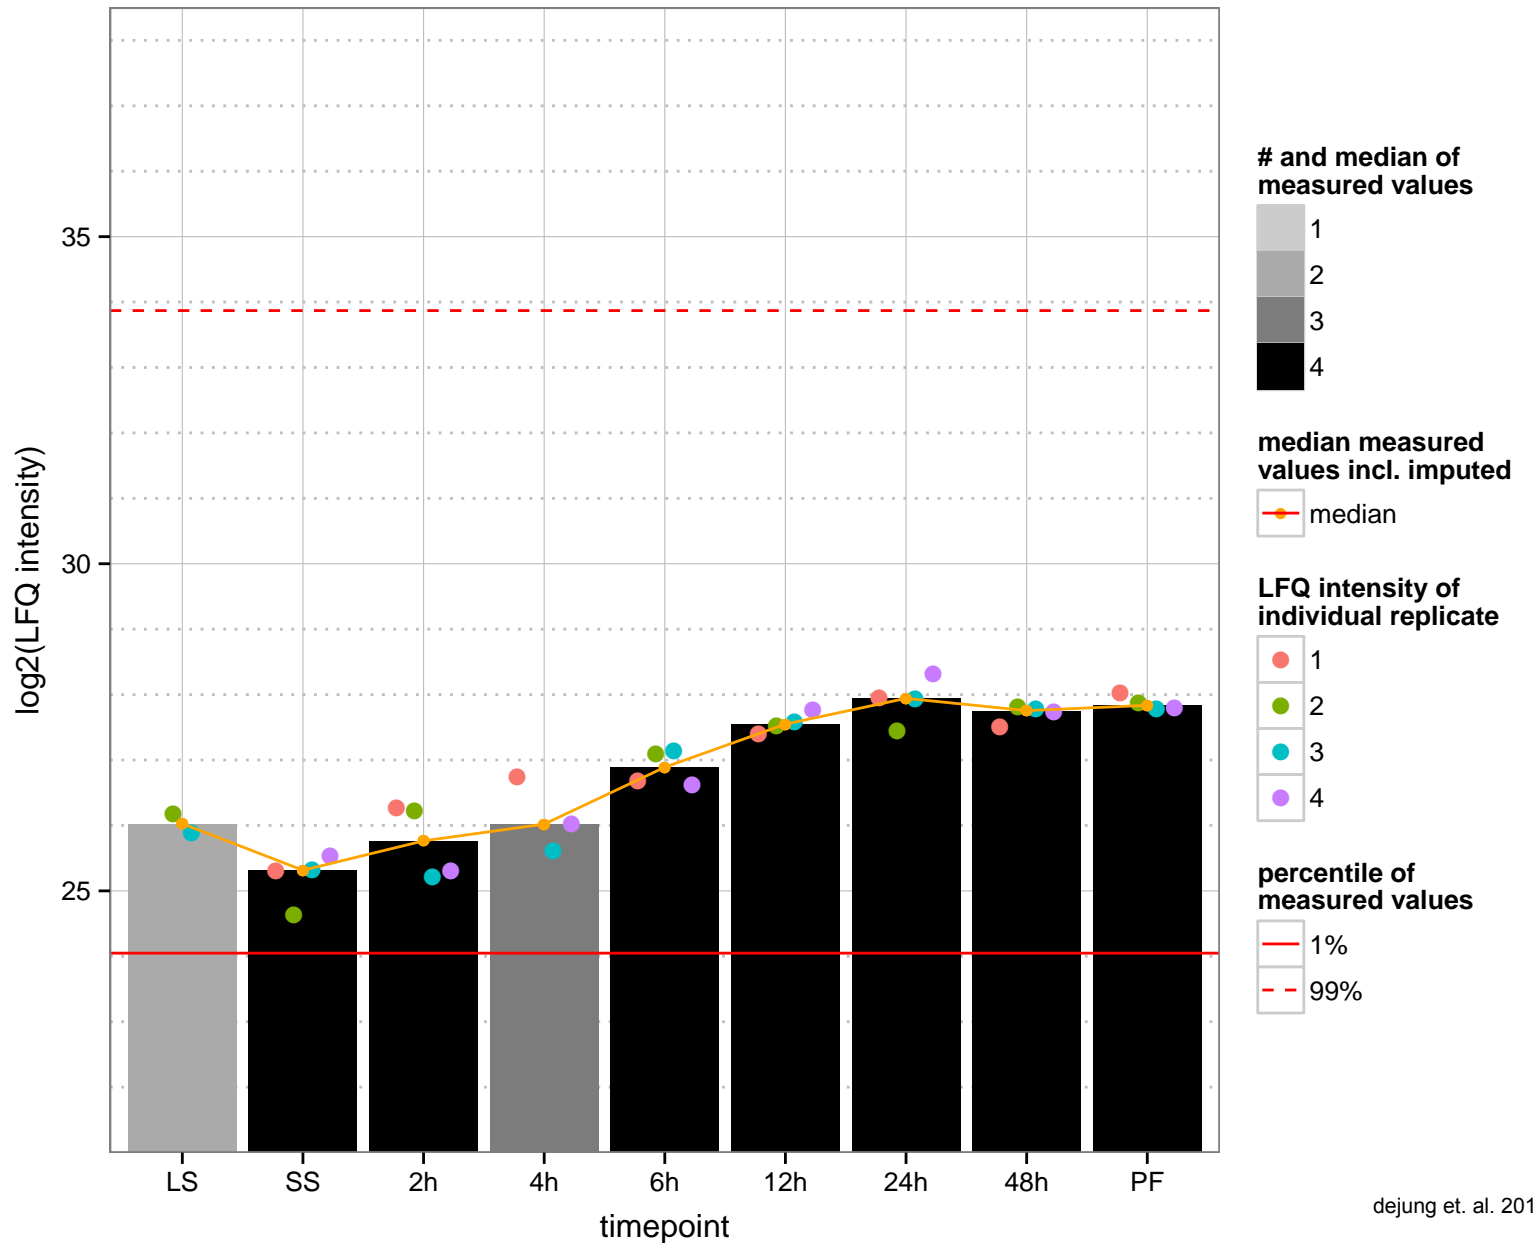

hypothetical protein, conserved  
 Tb927.6.3030  
 AGOF: nucleoside-triphosphatase activity, nucleotide binding  
 AGOC: null  
 AGOP: null  
 PGO: ATP binding, nucleoside-triphosphatase activity, nucleotide binding  
 PGOC: null  
 PGOP: null

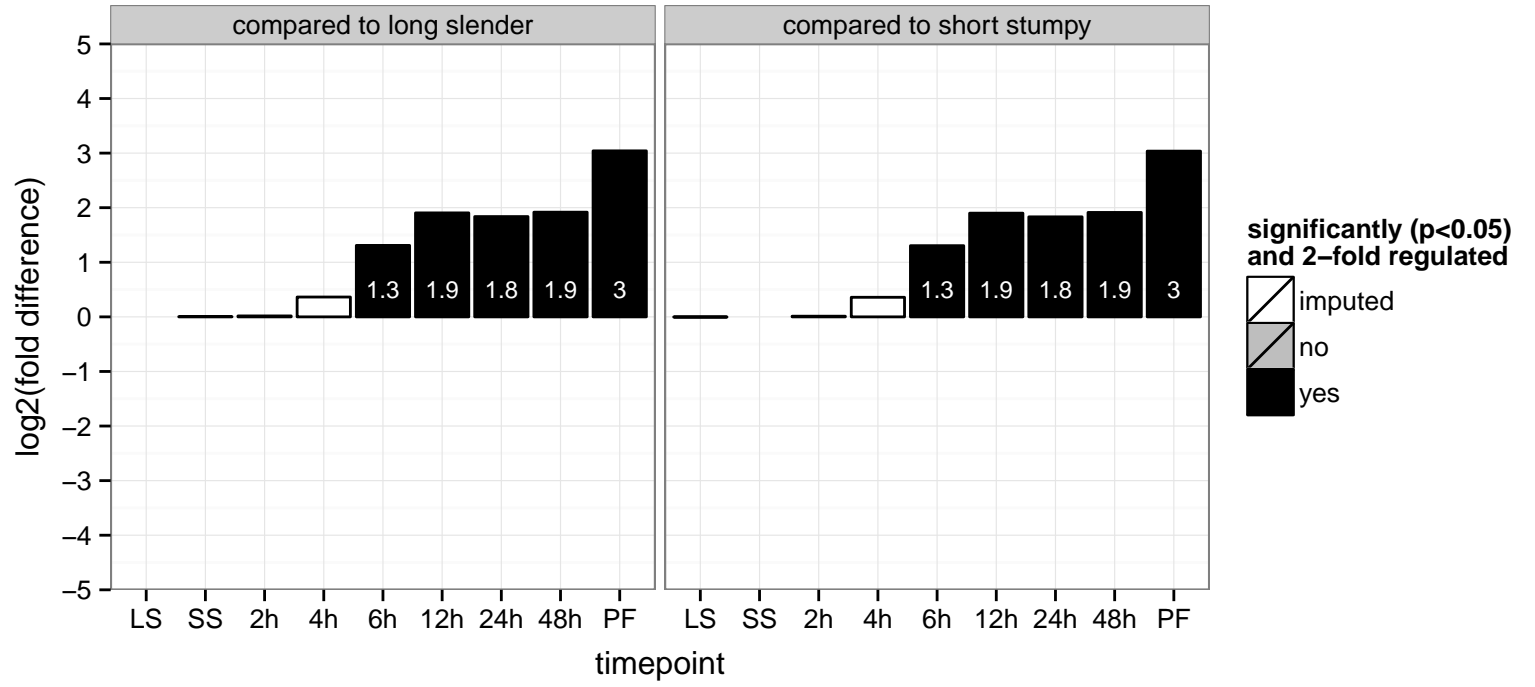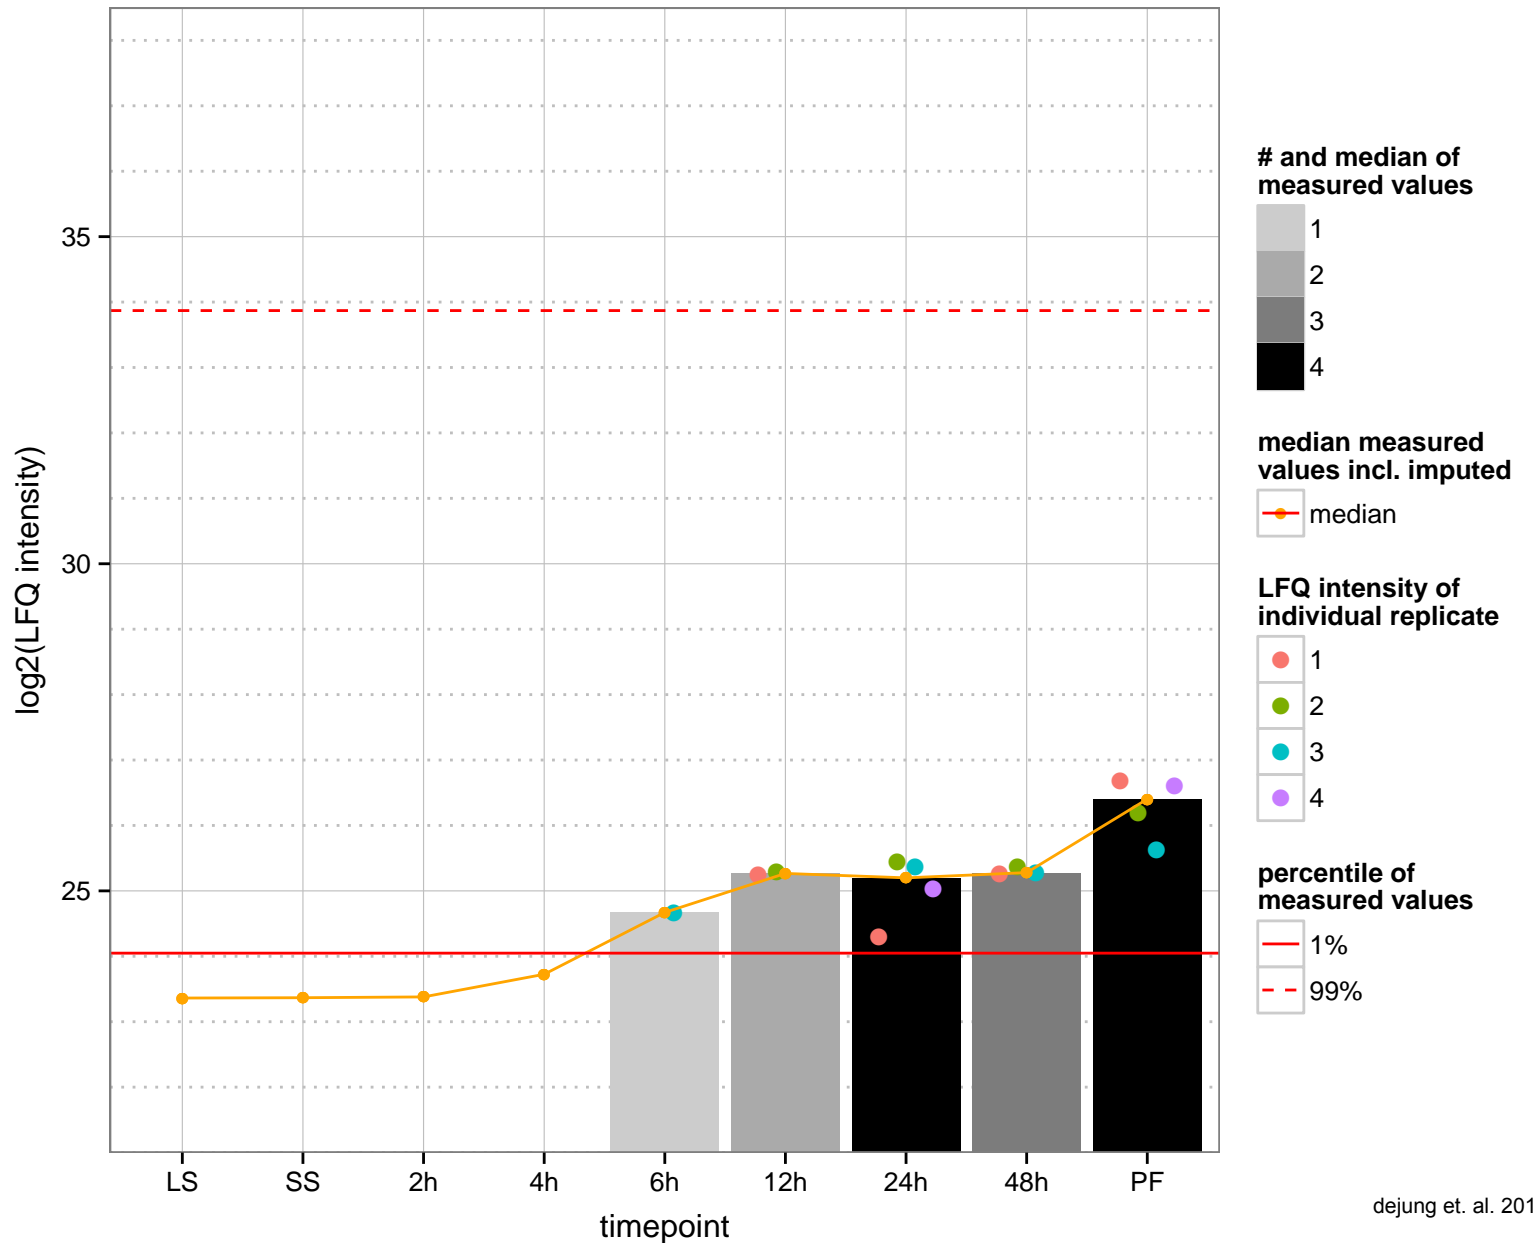

homoserine kinase, putative (HK)  
 Tb927.6.4430  
 AGOF: ATP binding, homoserine kinase activity  
 AGOC: null  
 AGOP: phosphorylation, threonine metabolic process  
 PGO: ATP binding, homoserine kinase activity  
 PGO: null  
 PGO: threonine metabolic process

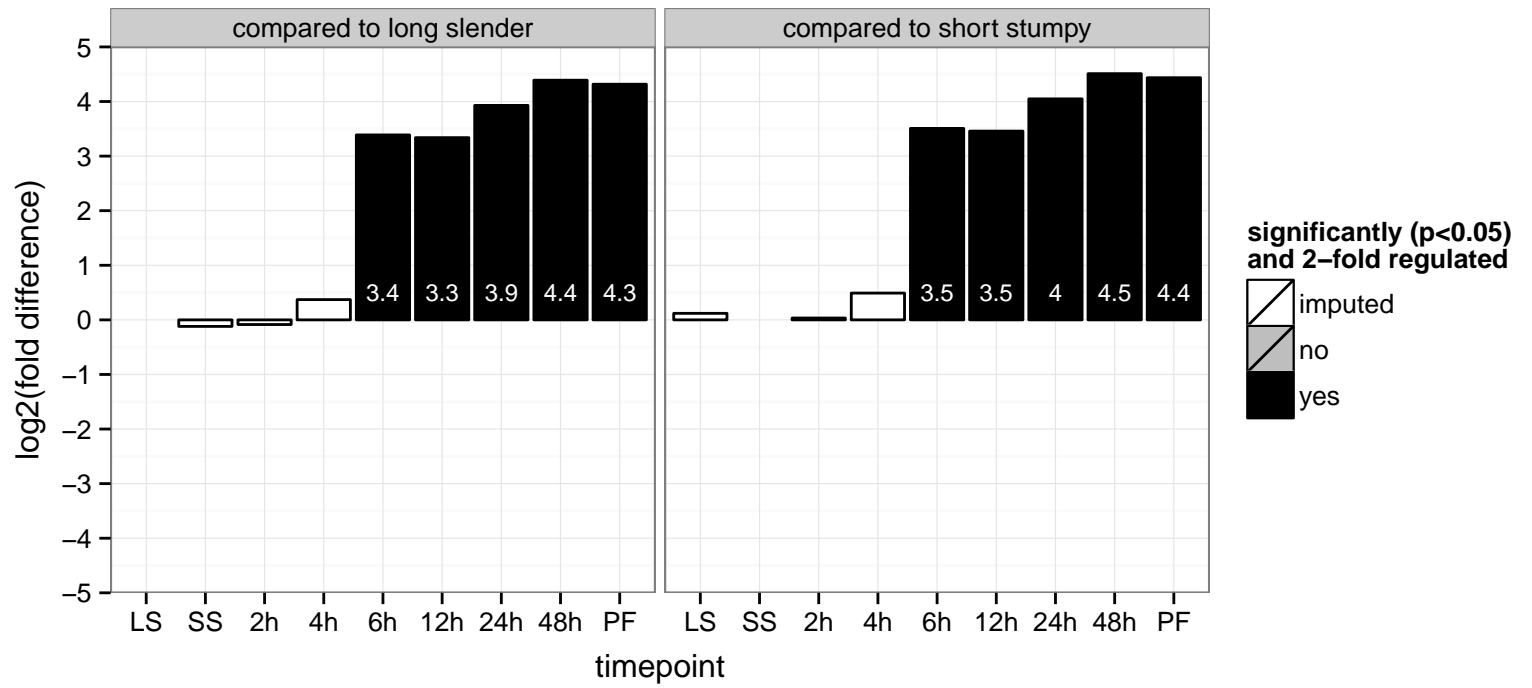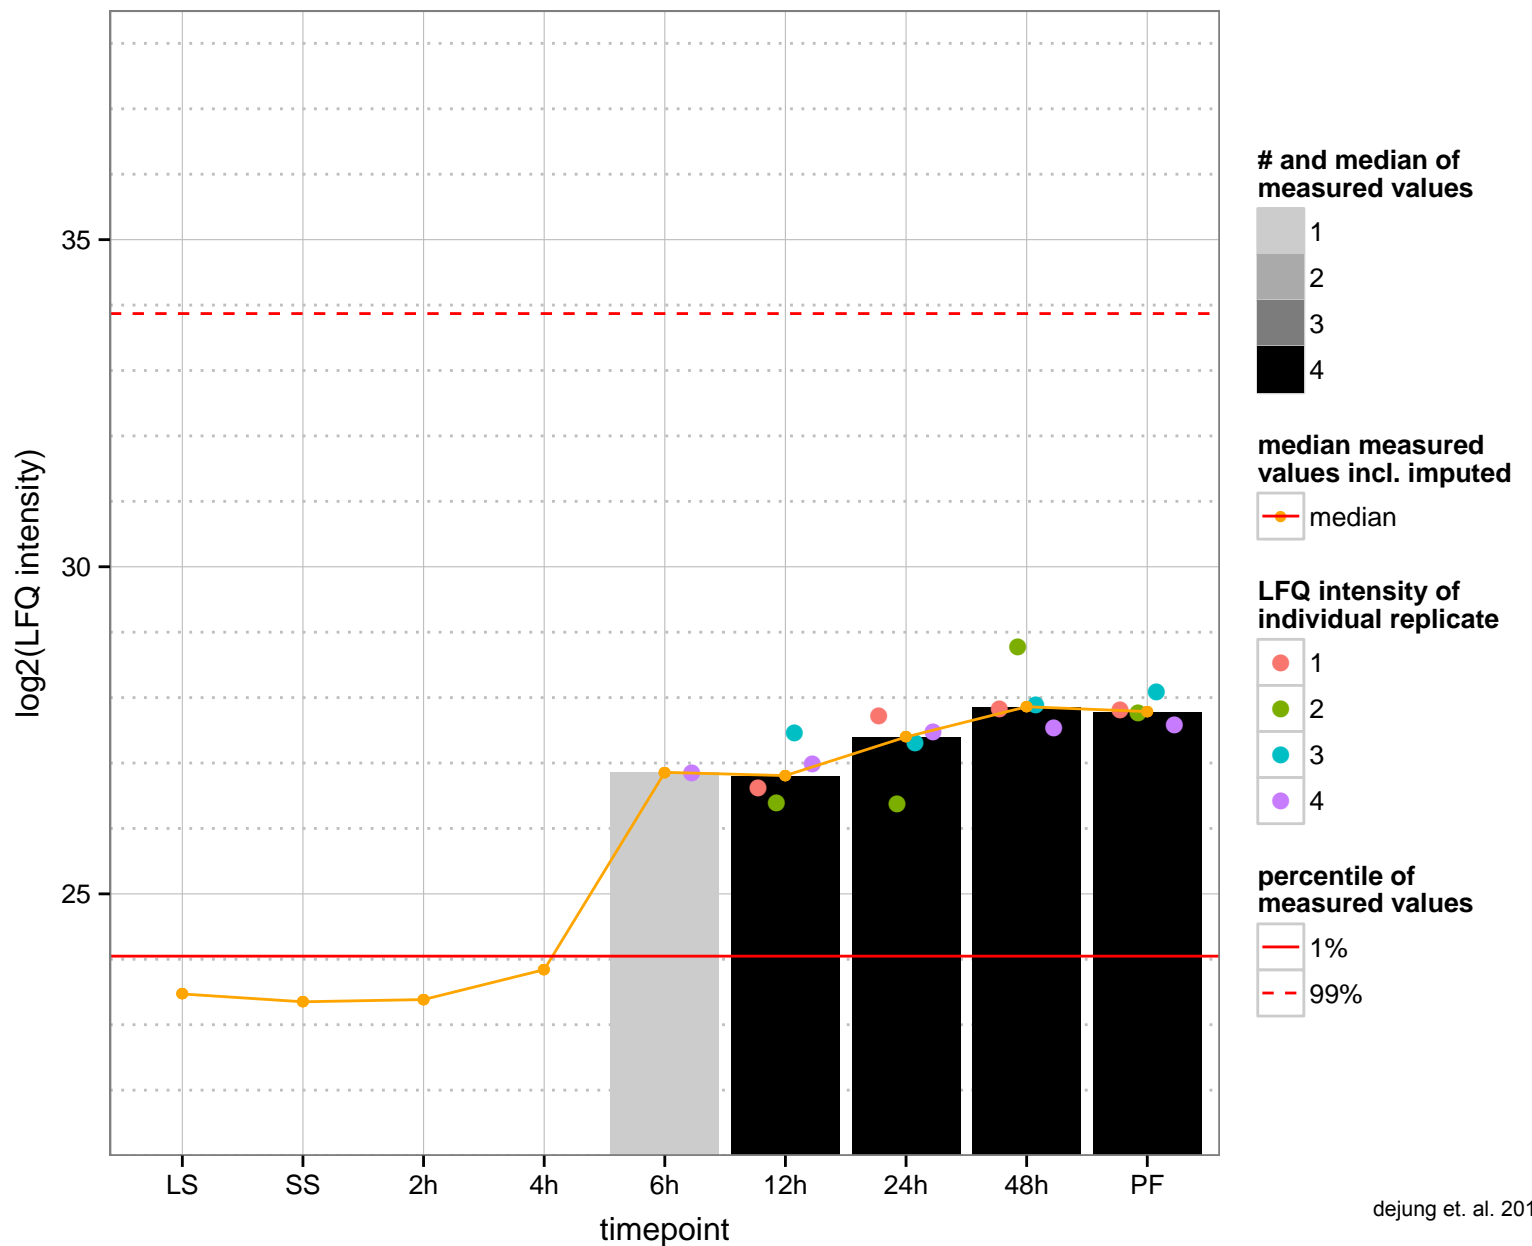

hypothetical protein, conserved  
 Tb927.7.2640  
 AGOF: null  
 AGOC: null  
 AGOP: null  
 PGO: null  
 PGO: null  
 PGO: null

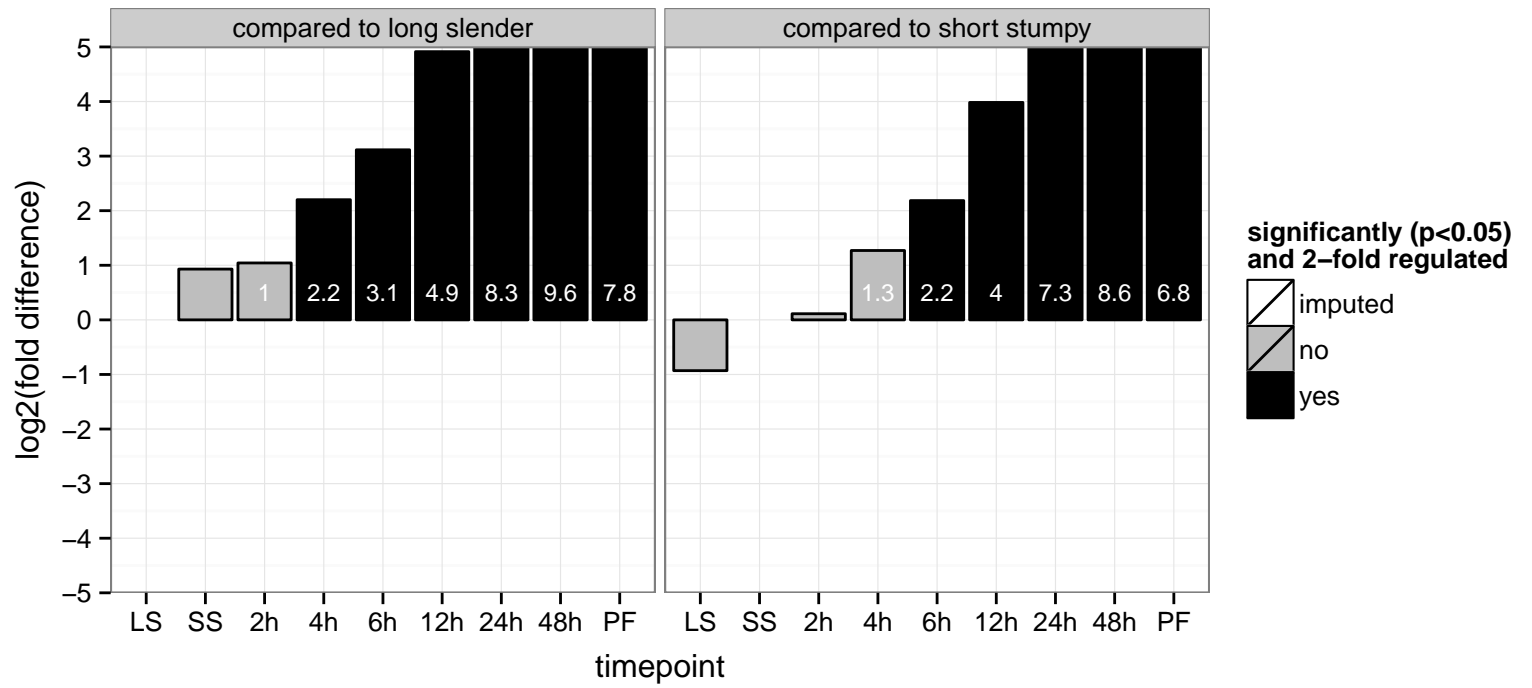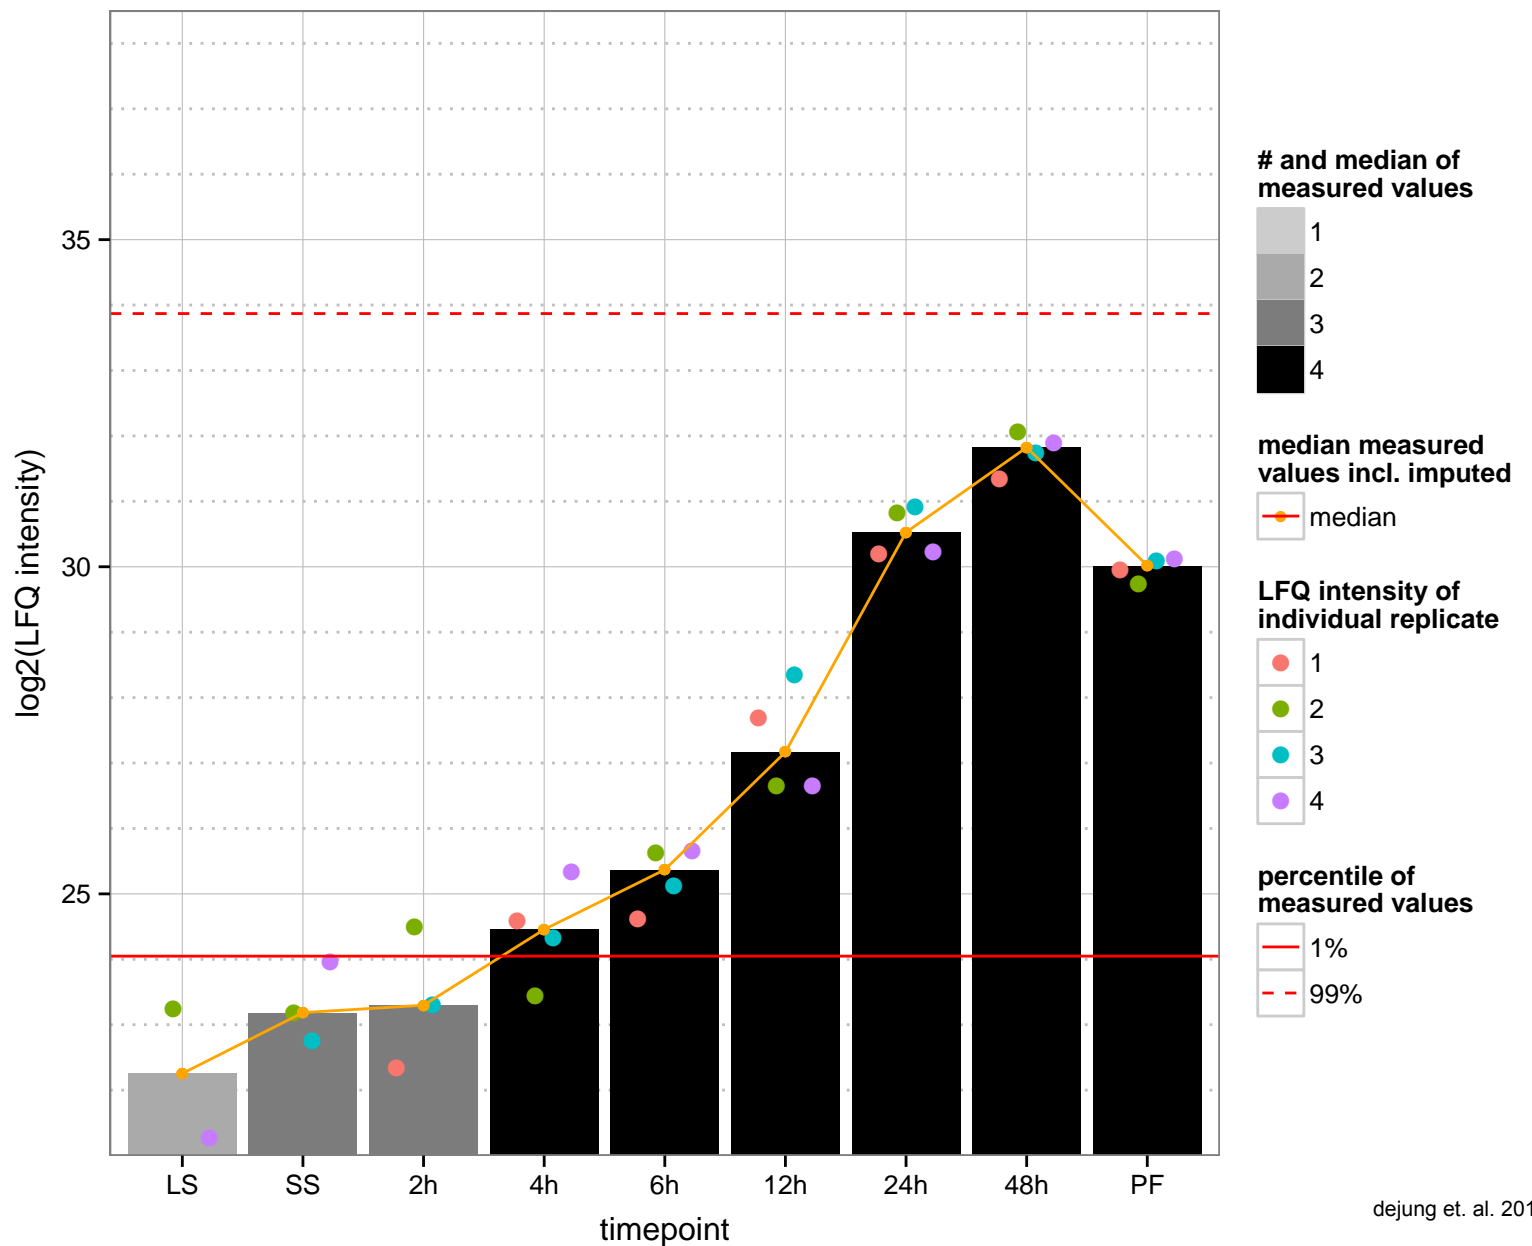

hypothetical protein, conserved  
 Tb927.7.2740  
 AGOF: null  
 AGOC: null  
 AGOP: null  
 PGOF: null  
 PGOC: null  
 PGOP: null

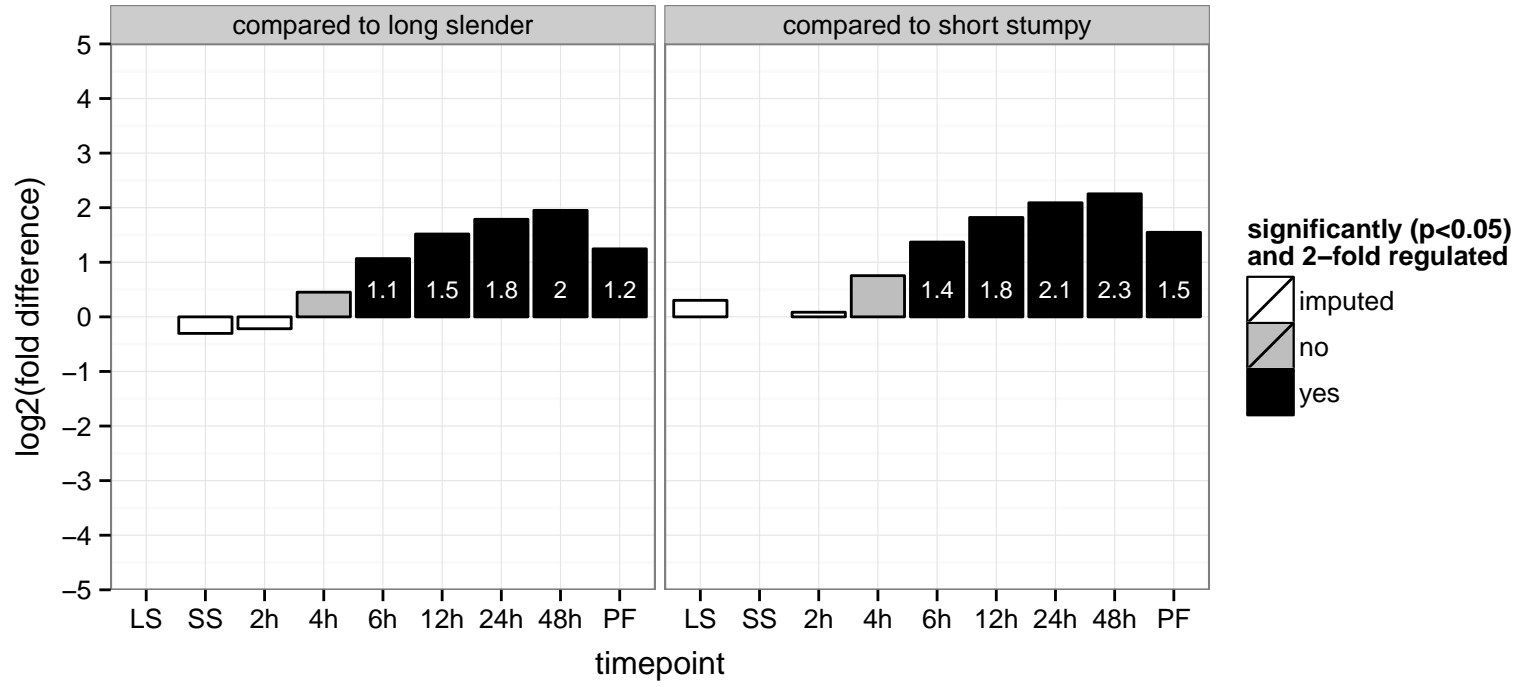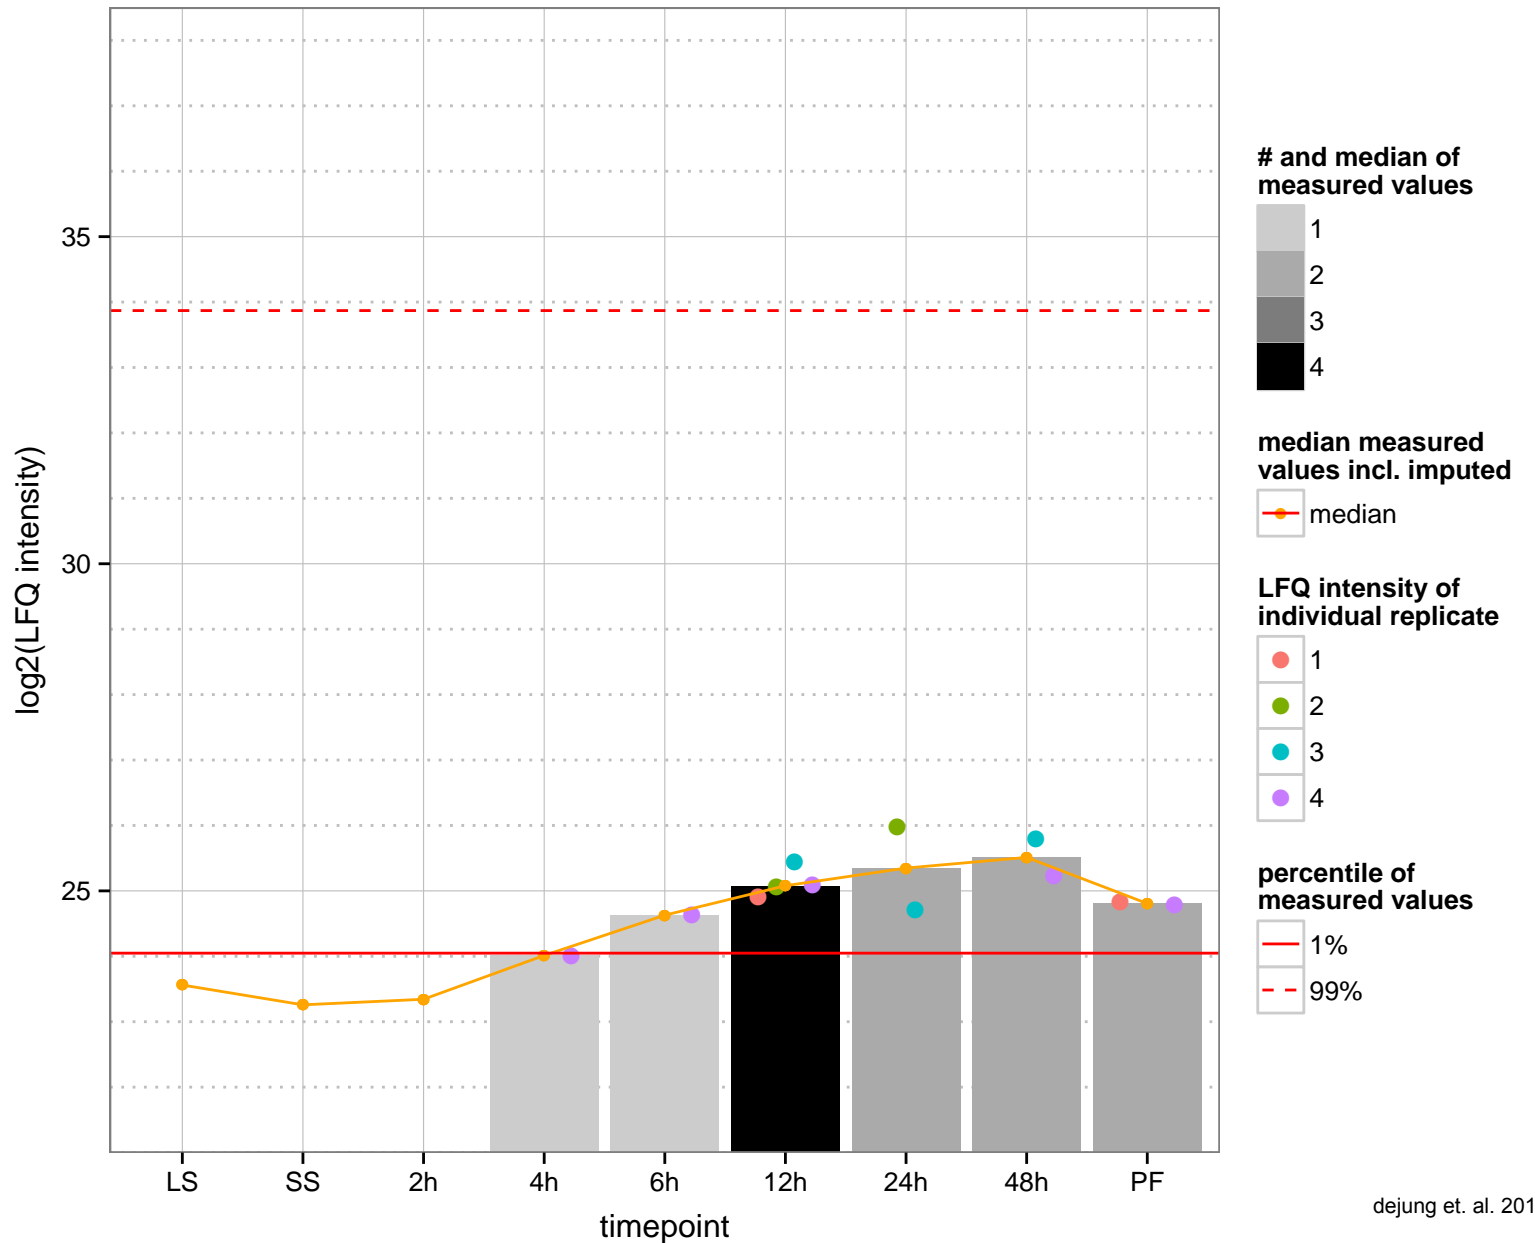



hypothetical protein, conserved (TbRBP8)  
 Tb927.7.320  
 AGOF: RNA binding  
 AGOC: null  
 AGOP: RNA processing  
 PGOF: nucleic acid binding  
 PGO: null  
 PGOP: null

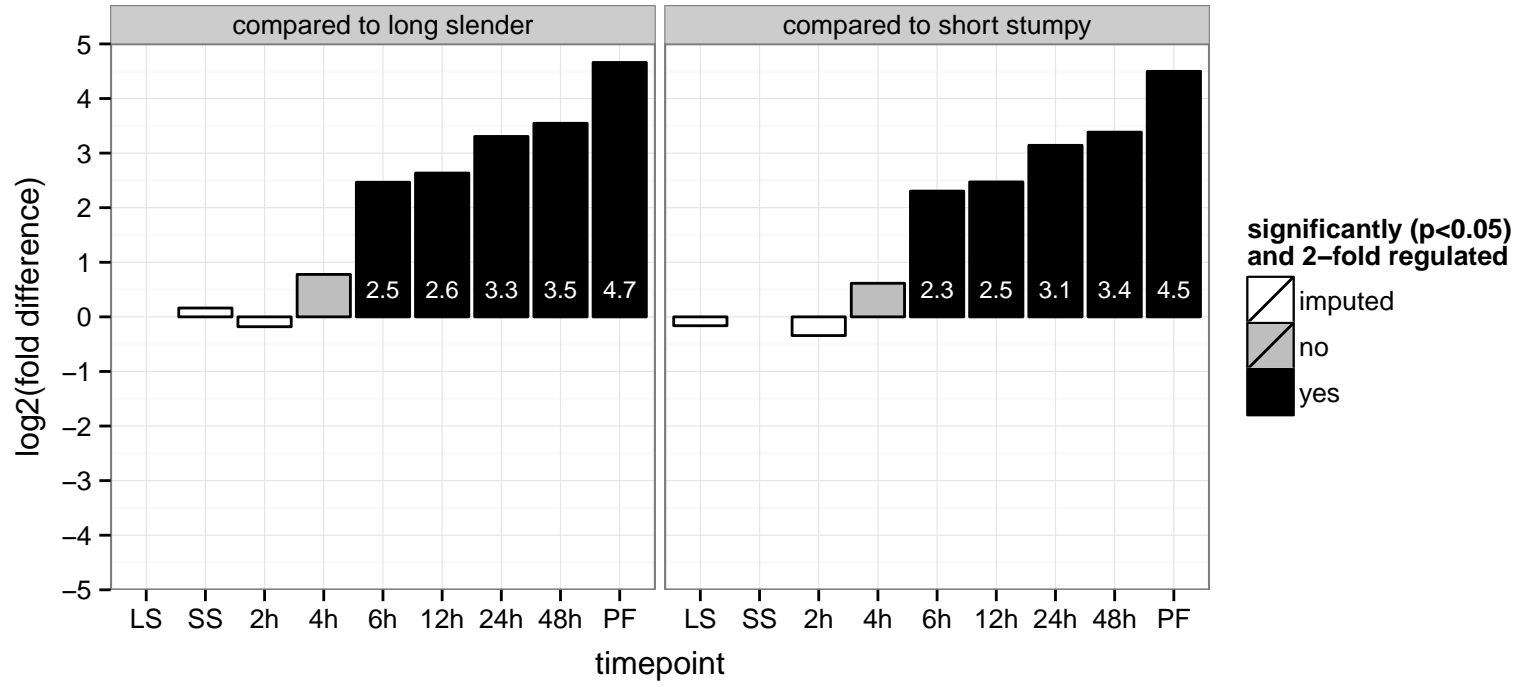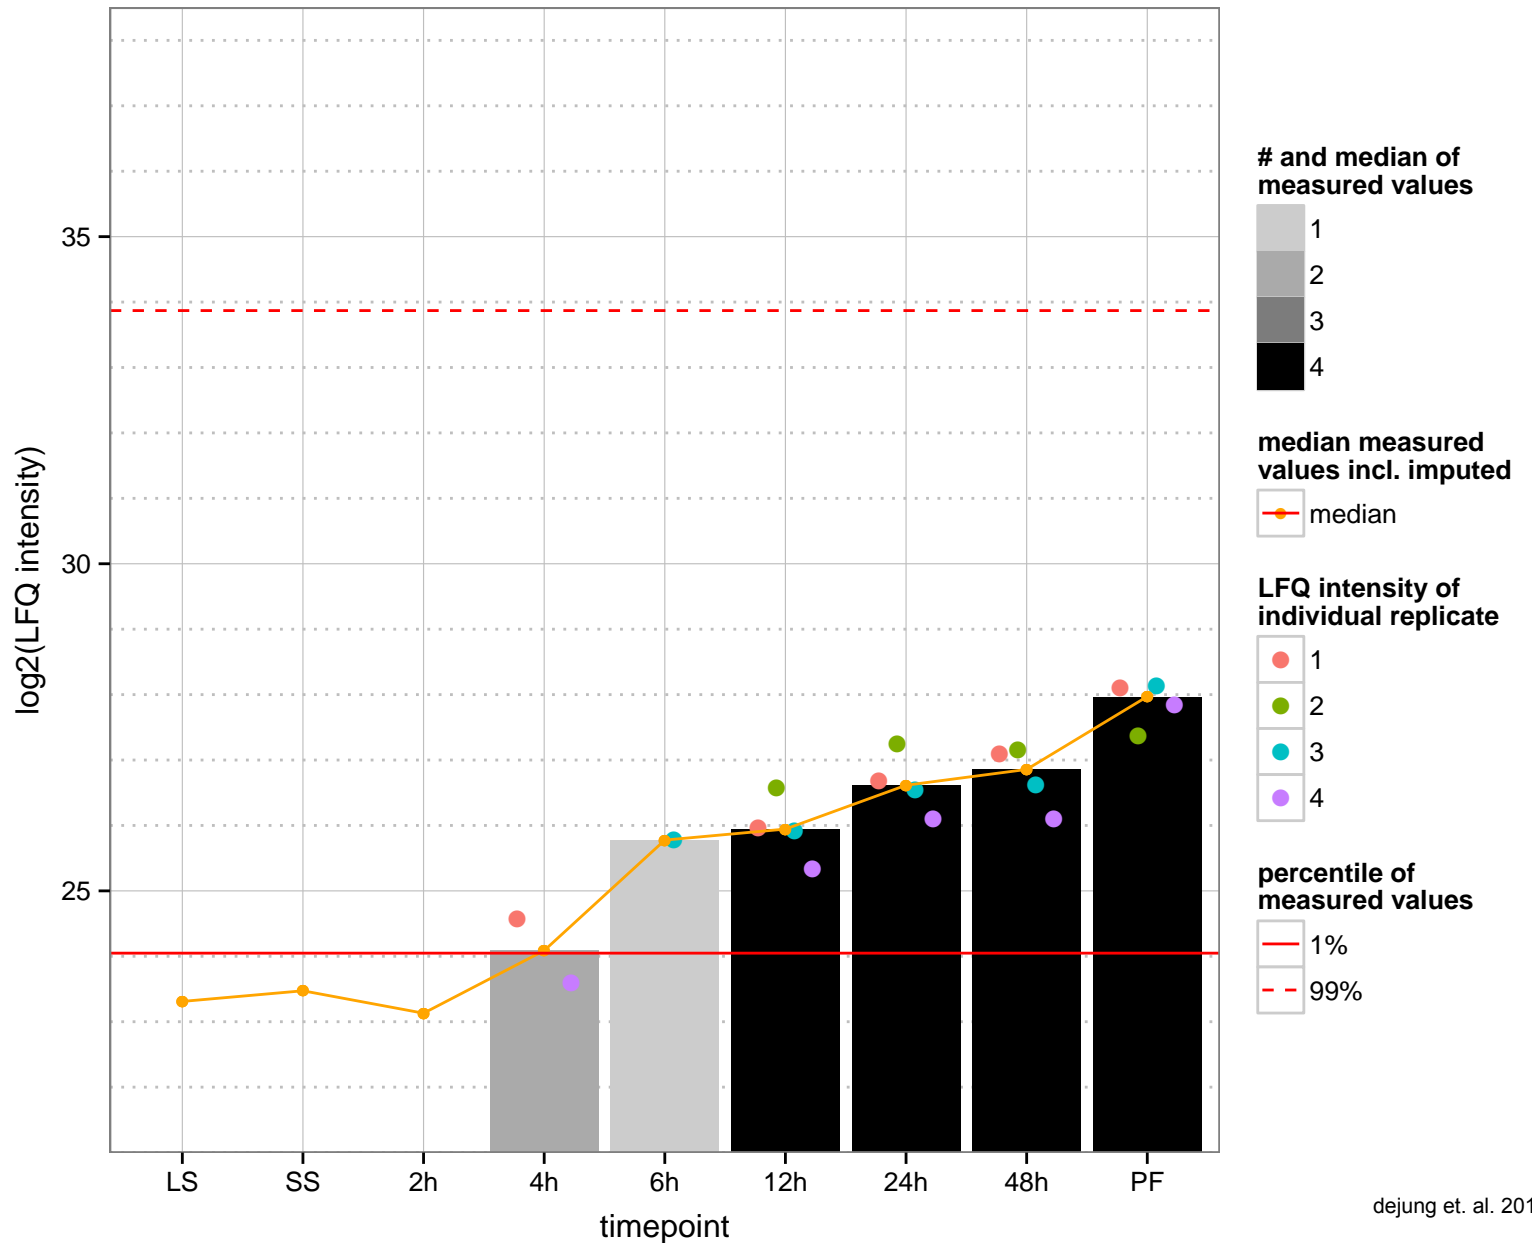

translation initiation factor IF-2, putative

Tb927.7.3280

AGOF: GTP binding, GTPase activity, translation factor activity, nucleic acid binding

AGOC: null

AGOP: translation

PGOF: GTP binding, GTPase activity

PGOC: null

PGOP: null

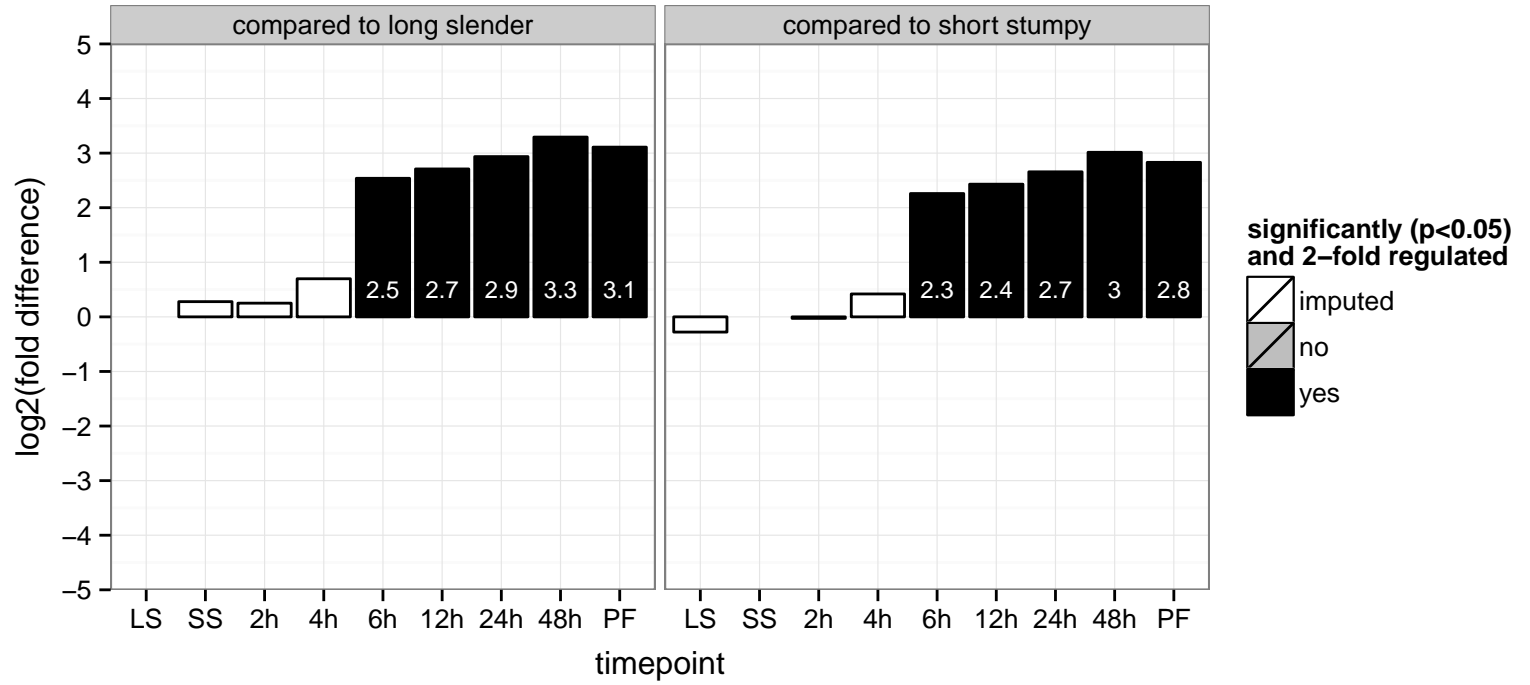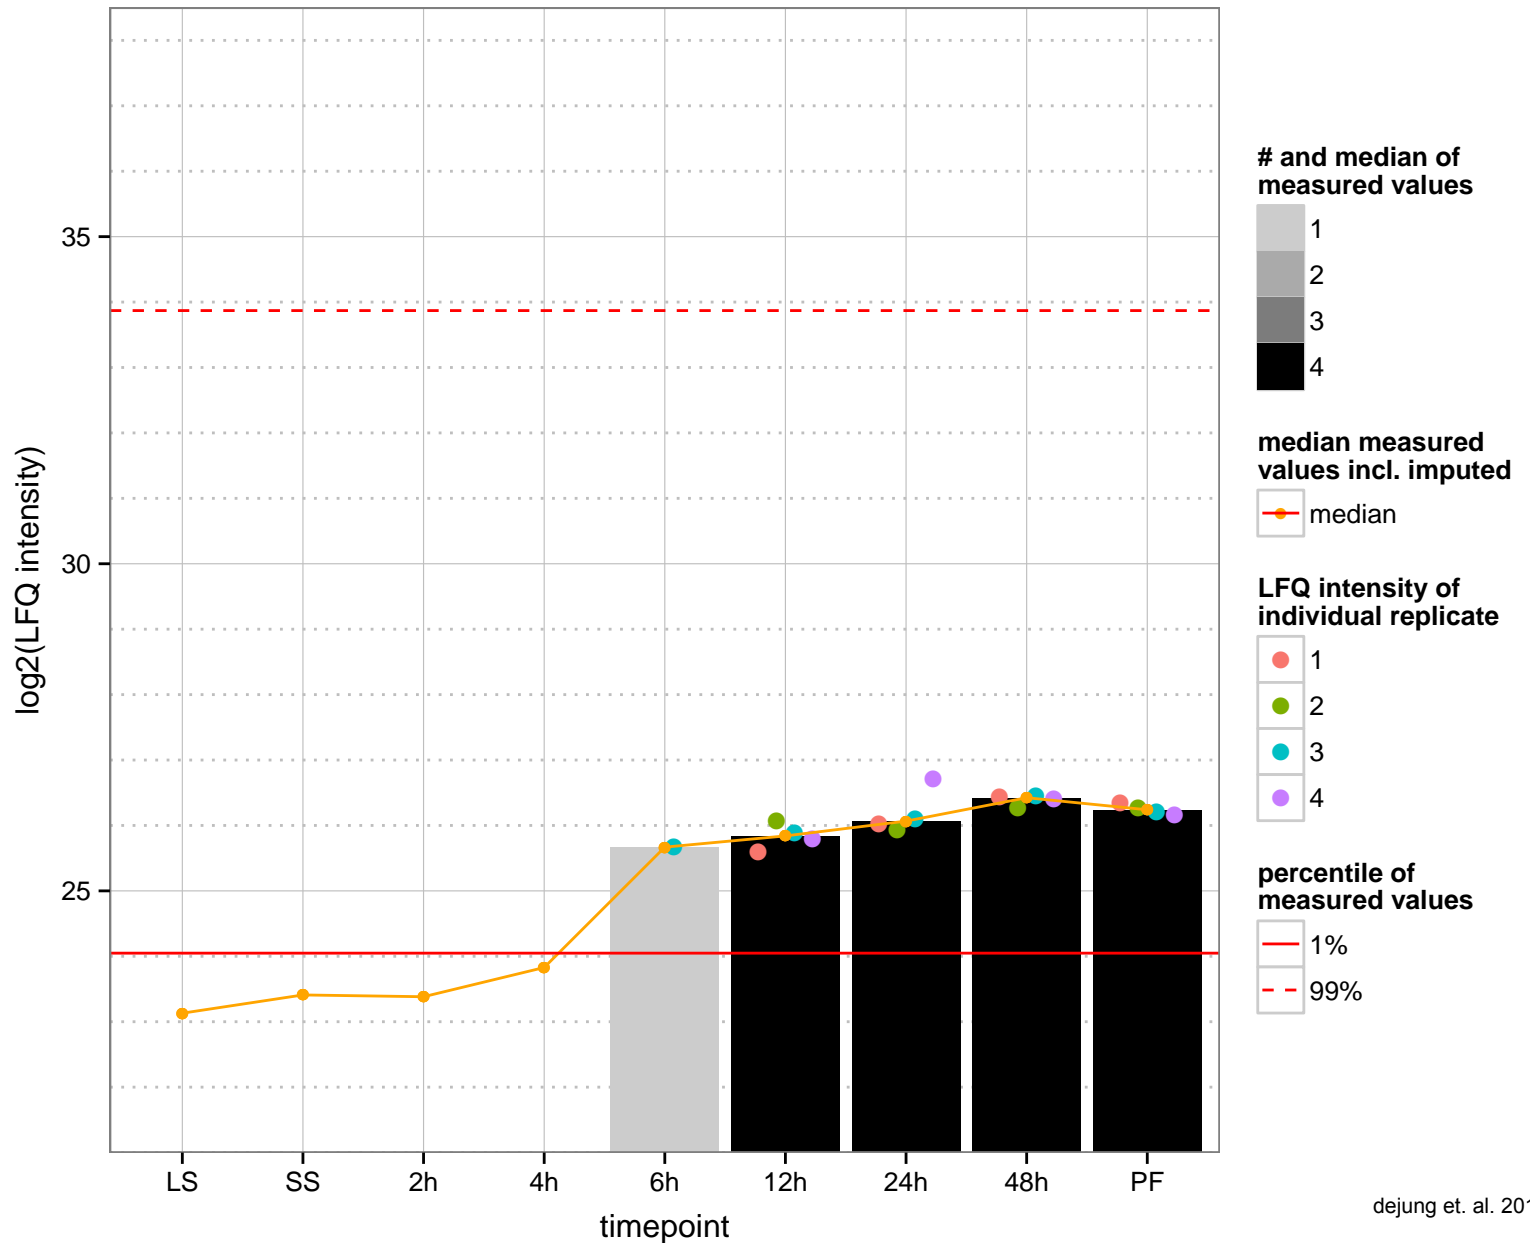

hypothetical protein, conserved  
 Tb927.7.3890  
 AGOF: null  
 AGOC: null  
 AGOP: null  
 PGO: null  
 PGOC: null  
 PGOP: null

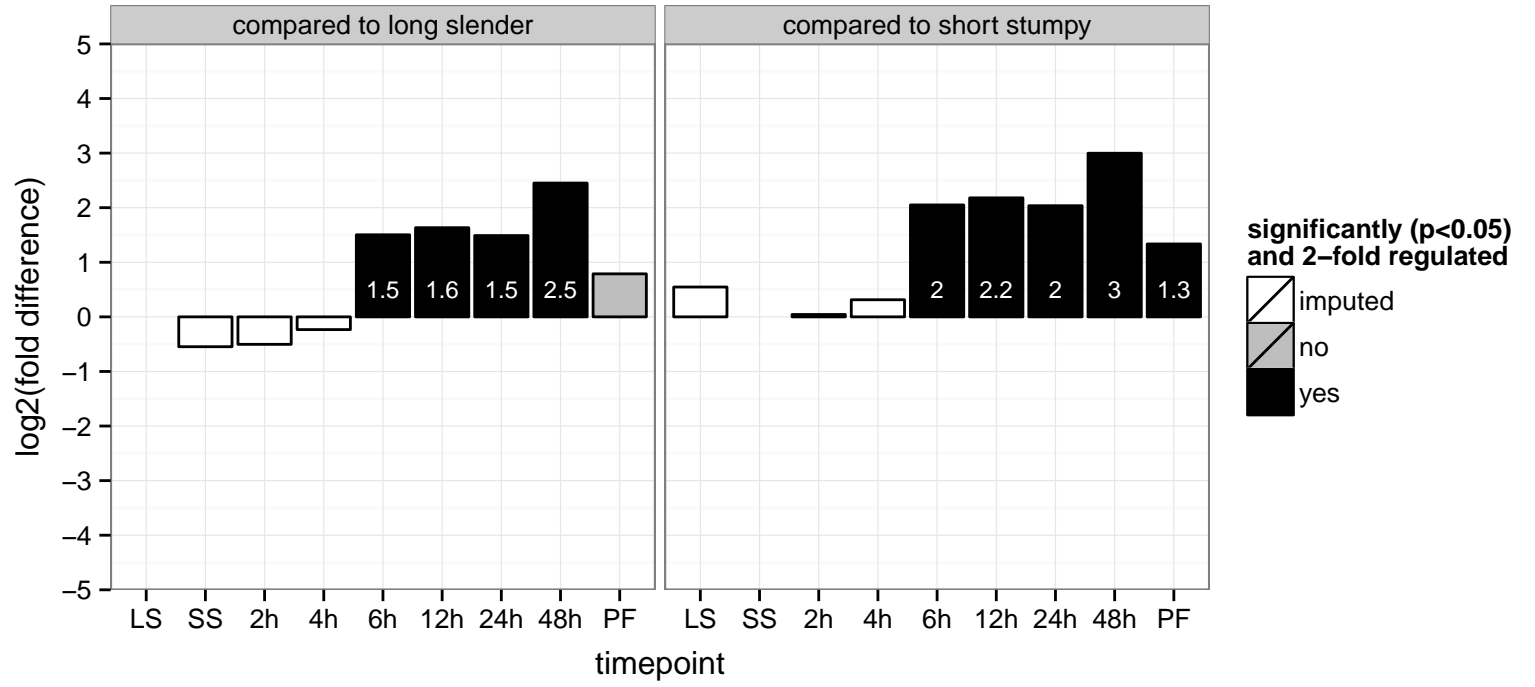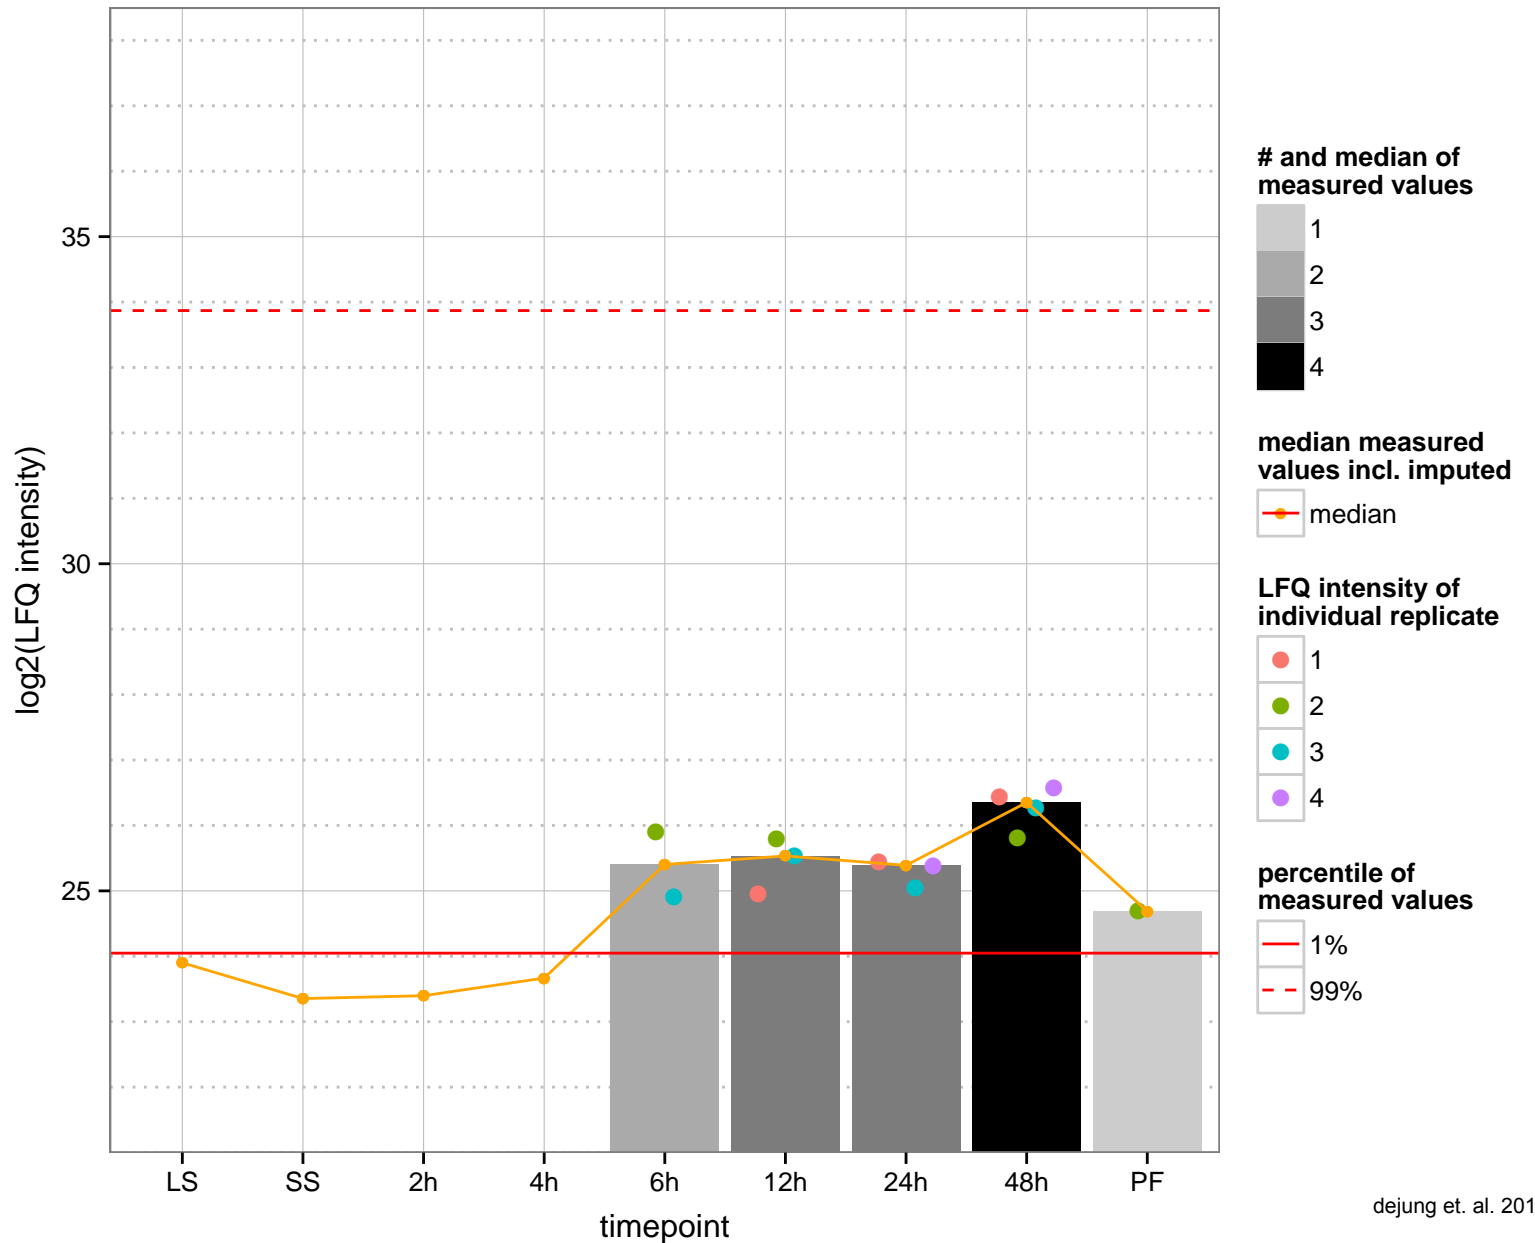

deoxyribose-phosphate aldolase, putative  
 Tb927.7.5680  
 AGOF: deoxyribose-phosphate aldolase activity  
 AGOC: cytoplasm, mitochondrial membrane  
 AGOP: deoxyribonucleotide catabolic process  
 PGO: deoxyribose-phosphate aldolase activity, lyase activity  
 PGO: cytoplasm  
 PGO: deoxyribonucleotide catabolic process

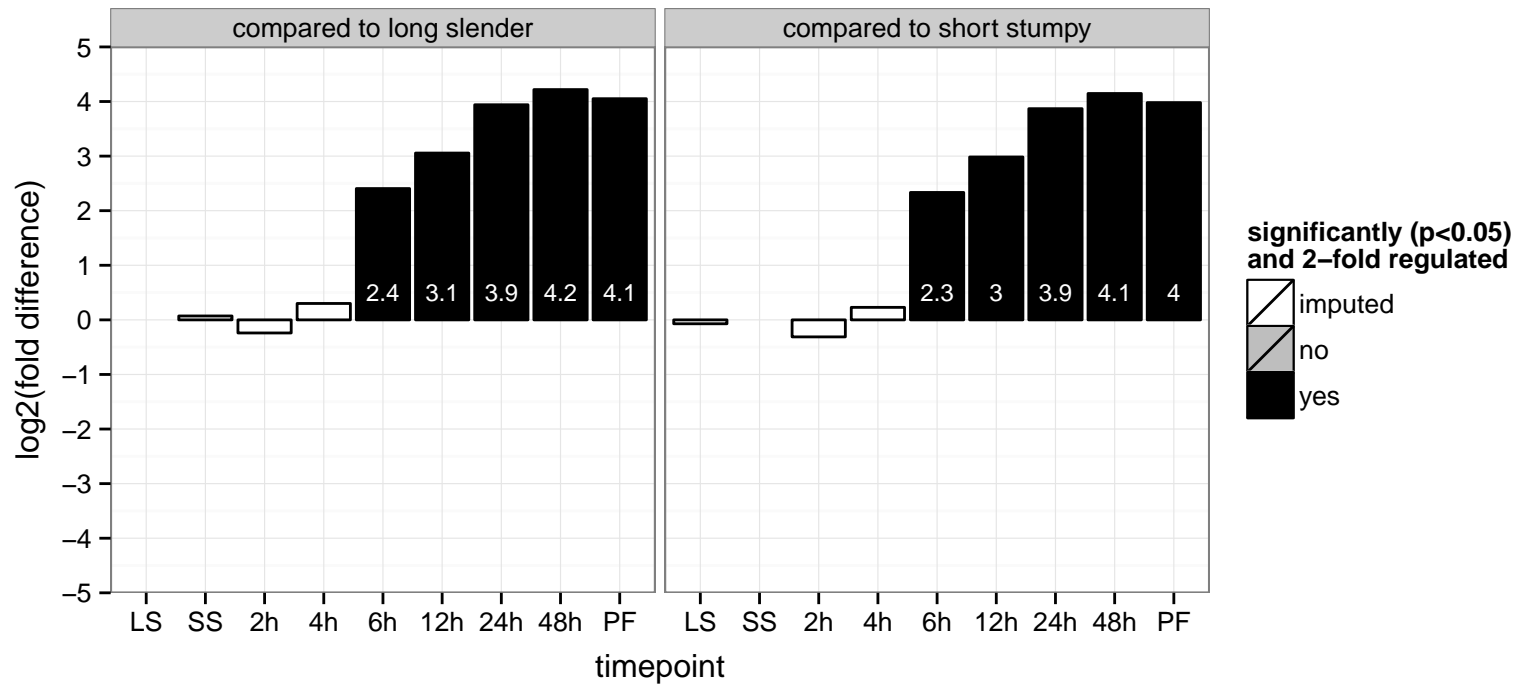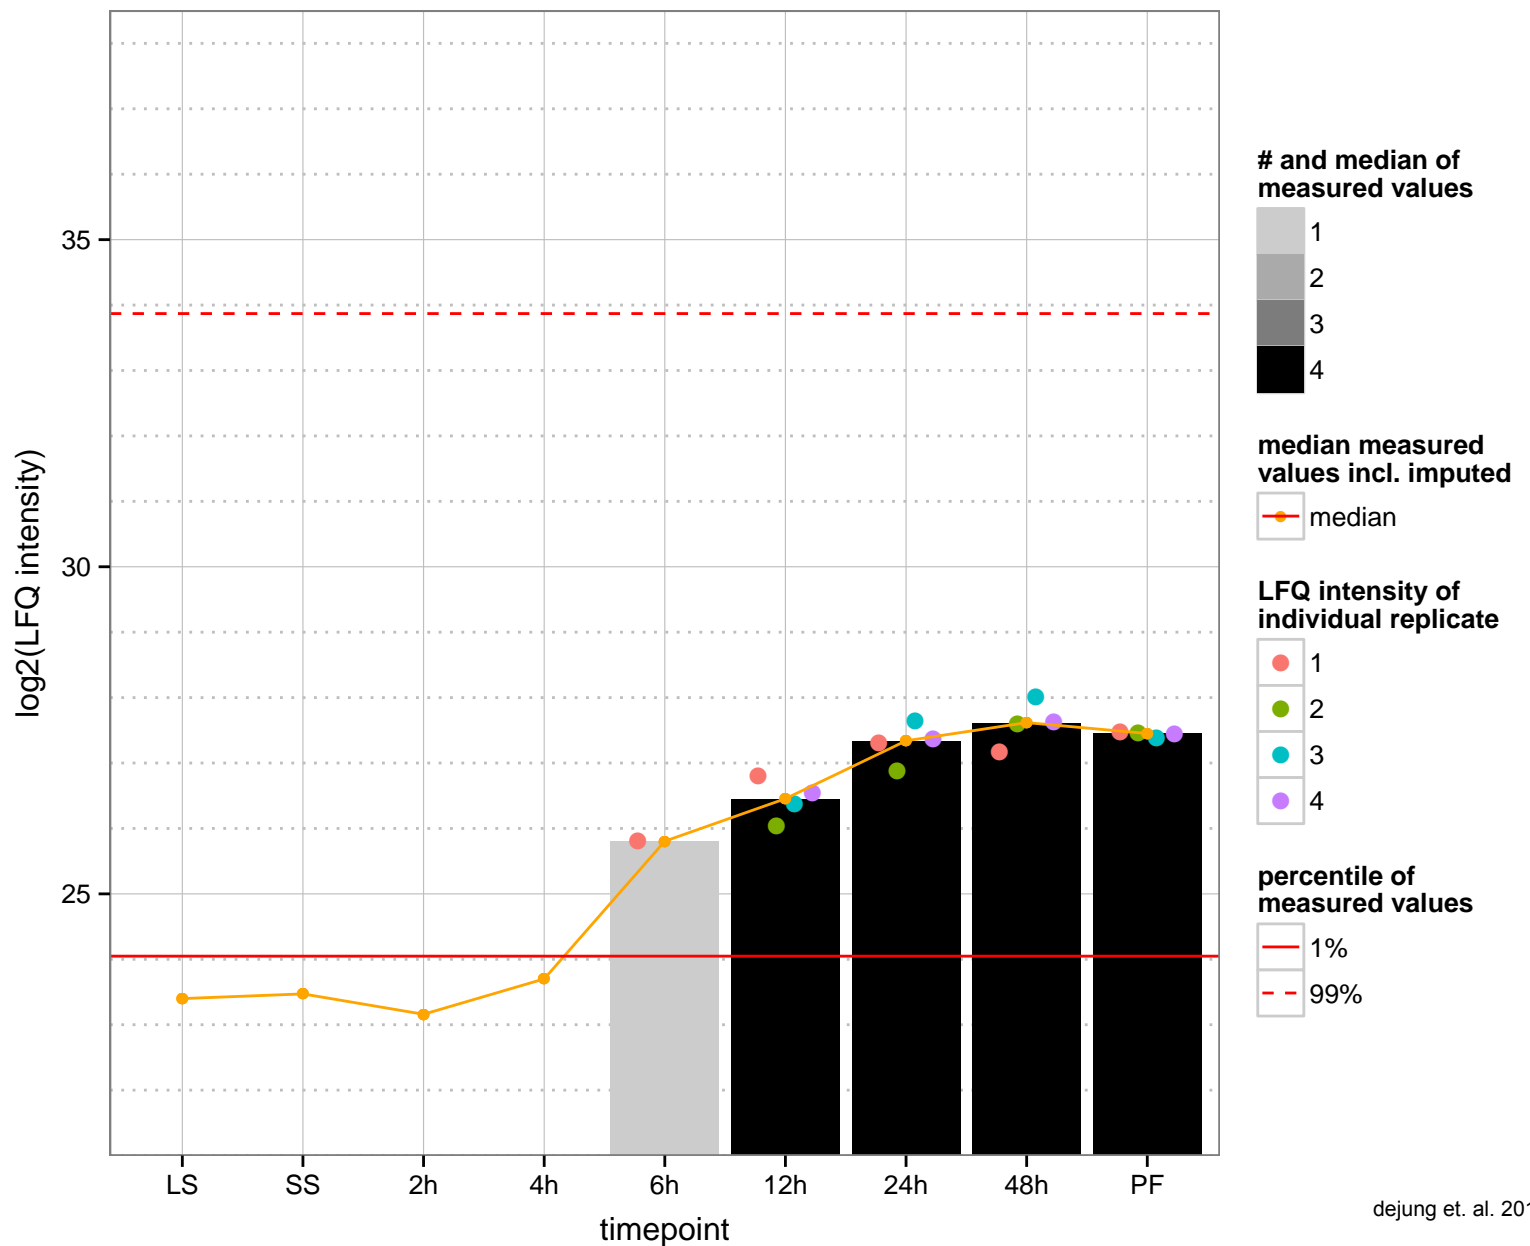

protein associated with differentiation 5, putative (PAD5), protein associated with differentiation 7, putative (PAD7)

Tb927.7.5990;Tb927.7.5970

AGOF: null

AGOC: null

AGOP: null

PGOF: null

PGOC: integral to membrane

PGOP: transmembrane transport

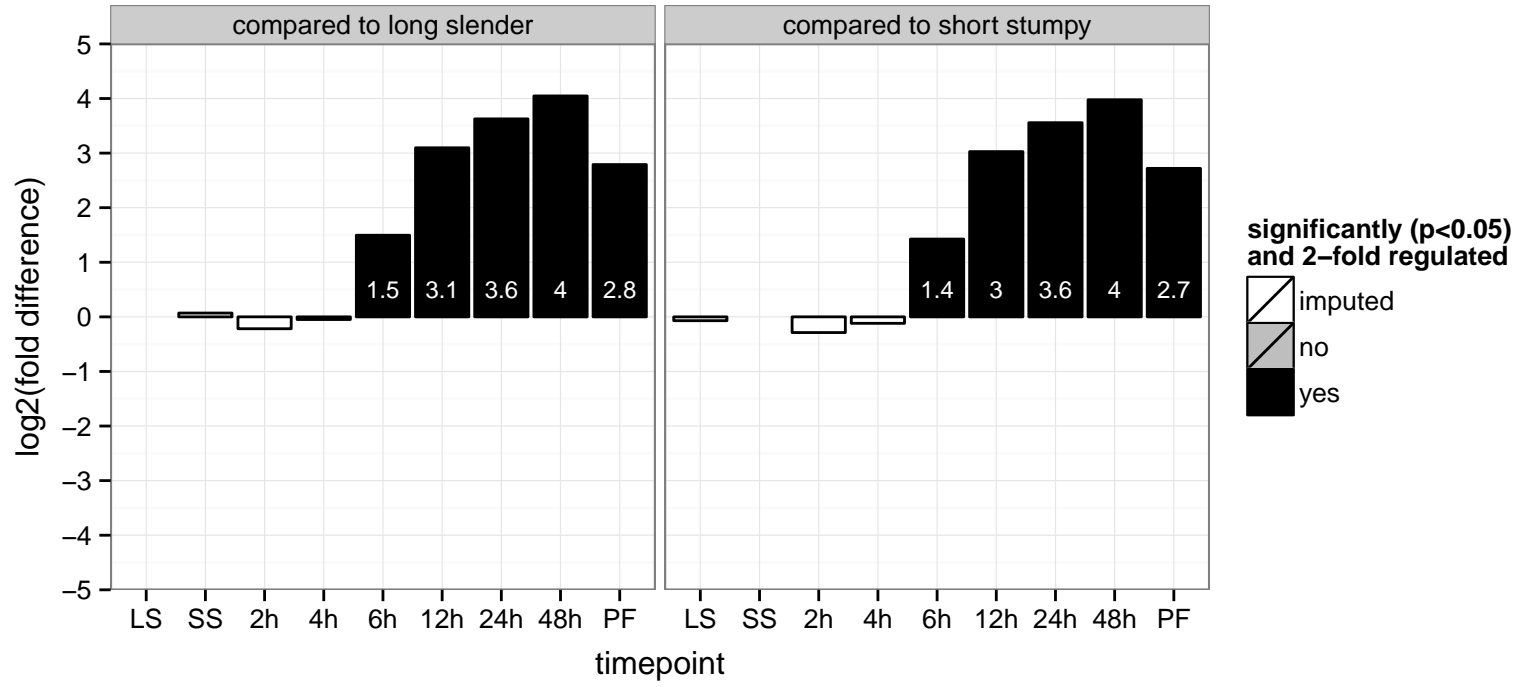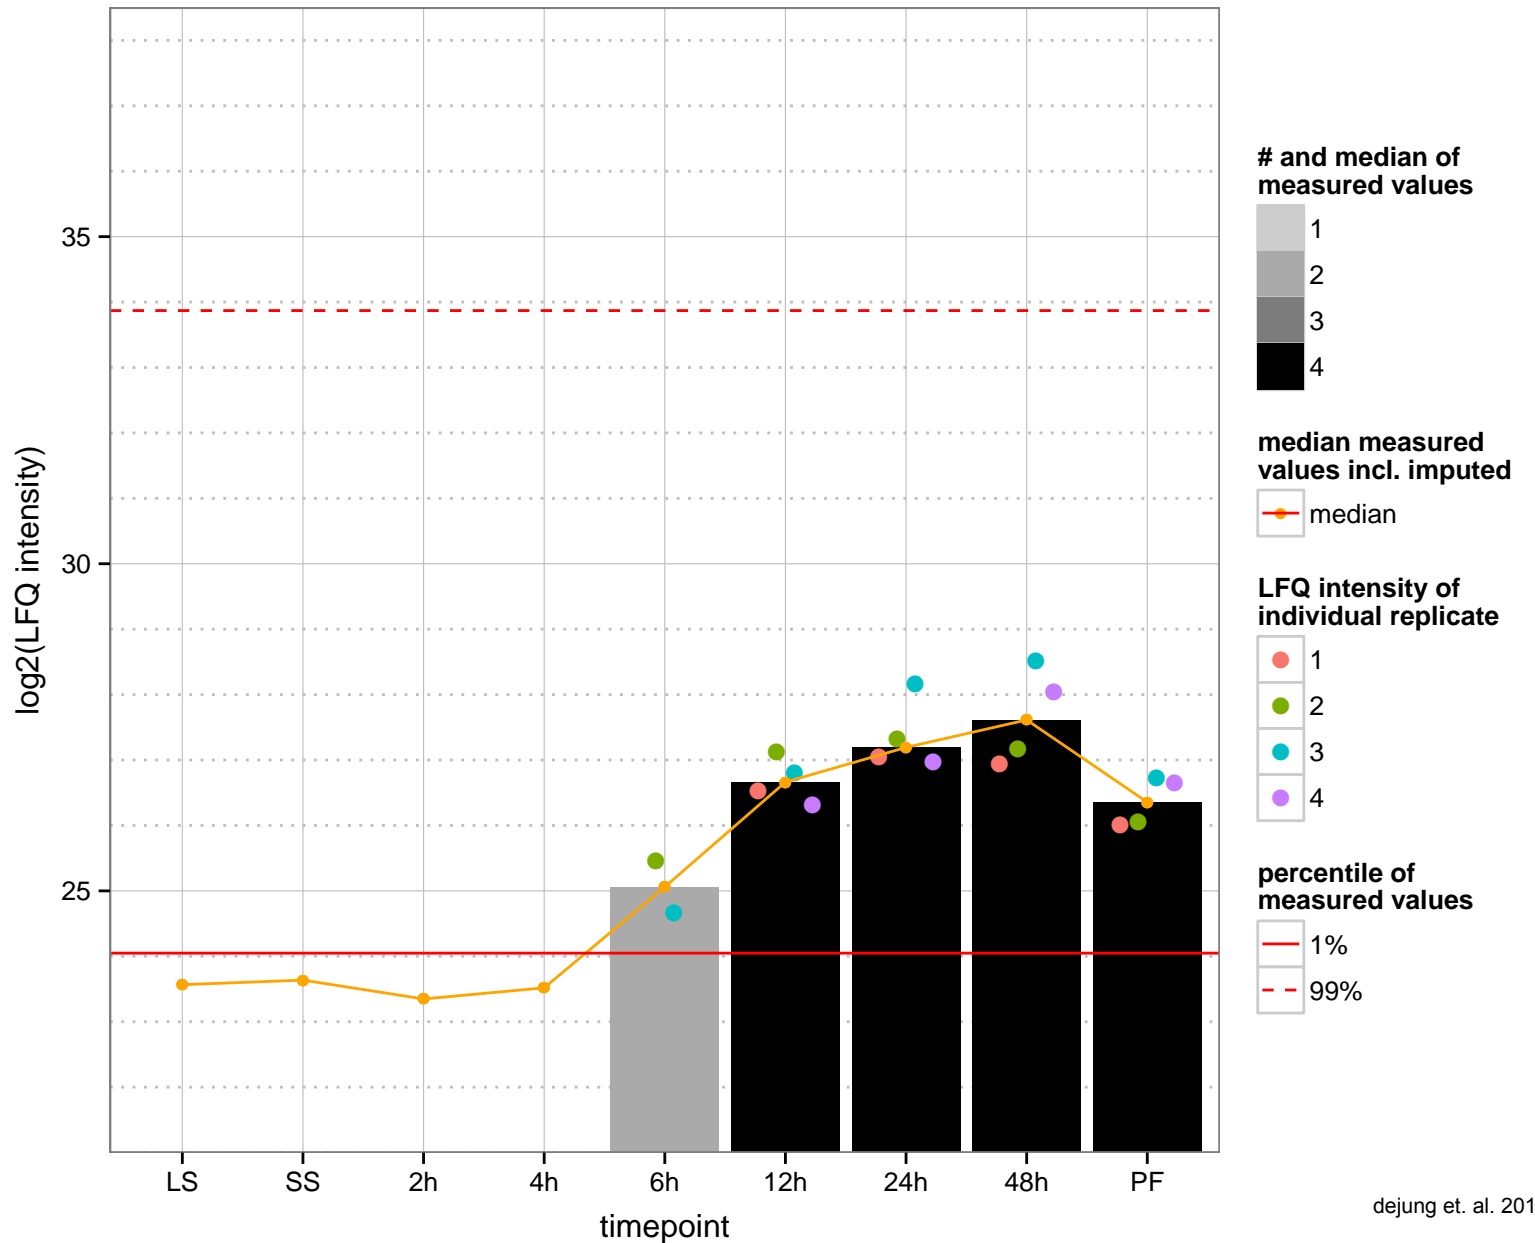

tRNA-dihydrouridine synthase 3, putative

Tb927.7.6450

AGOF: flavin adenine dinucleotide binding, tRNA dihydrouridine synthase activity

AGOC: null

AGOP: oxidation-reduction process, tRNA processing

PGOF: flavin adenine dinucleotide binding, tRNA dihydrouridine synthase activity

PGOC: null

PGOP: oxidation-reduction process, tRNA processing

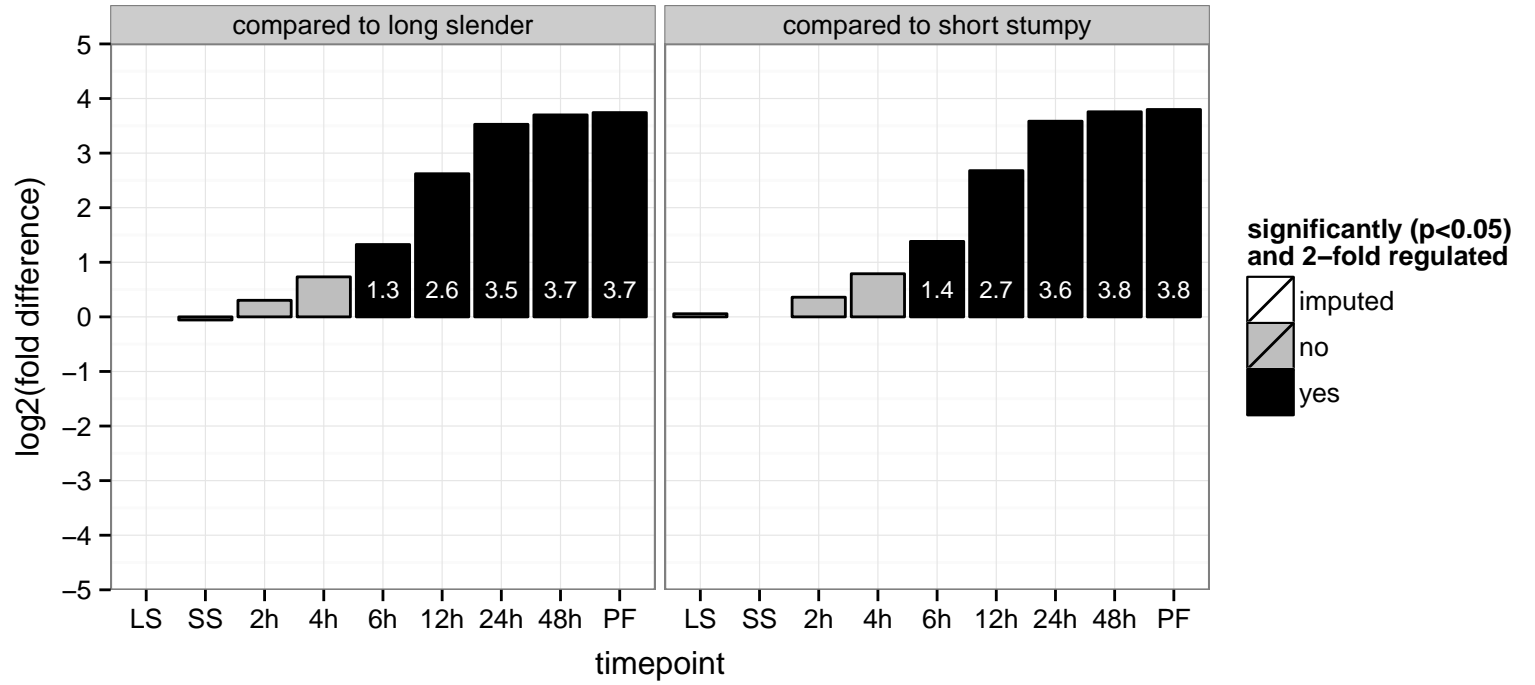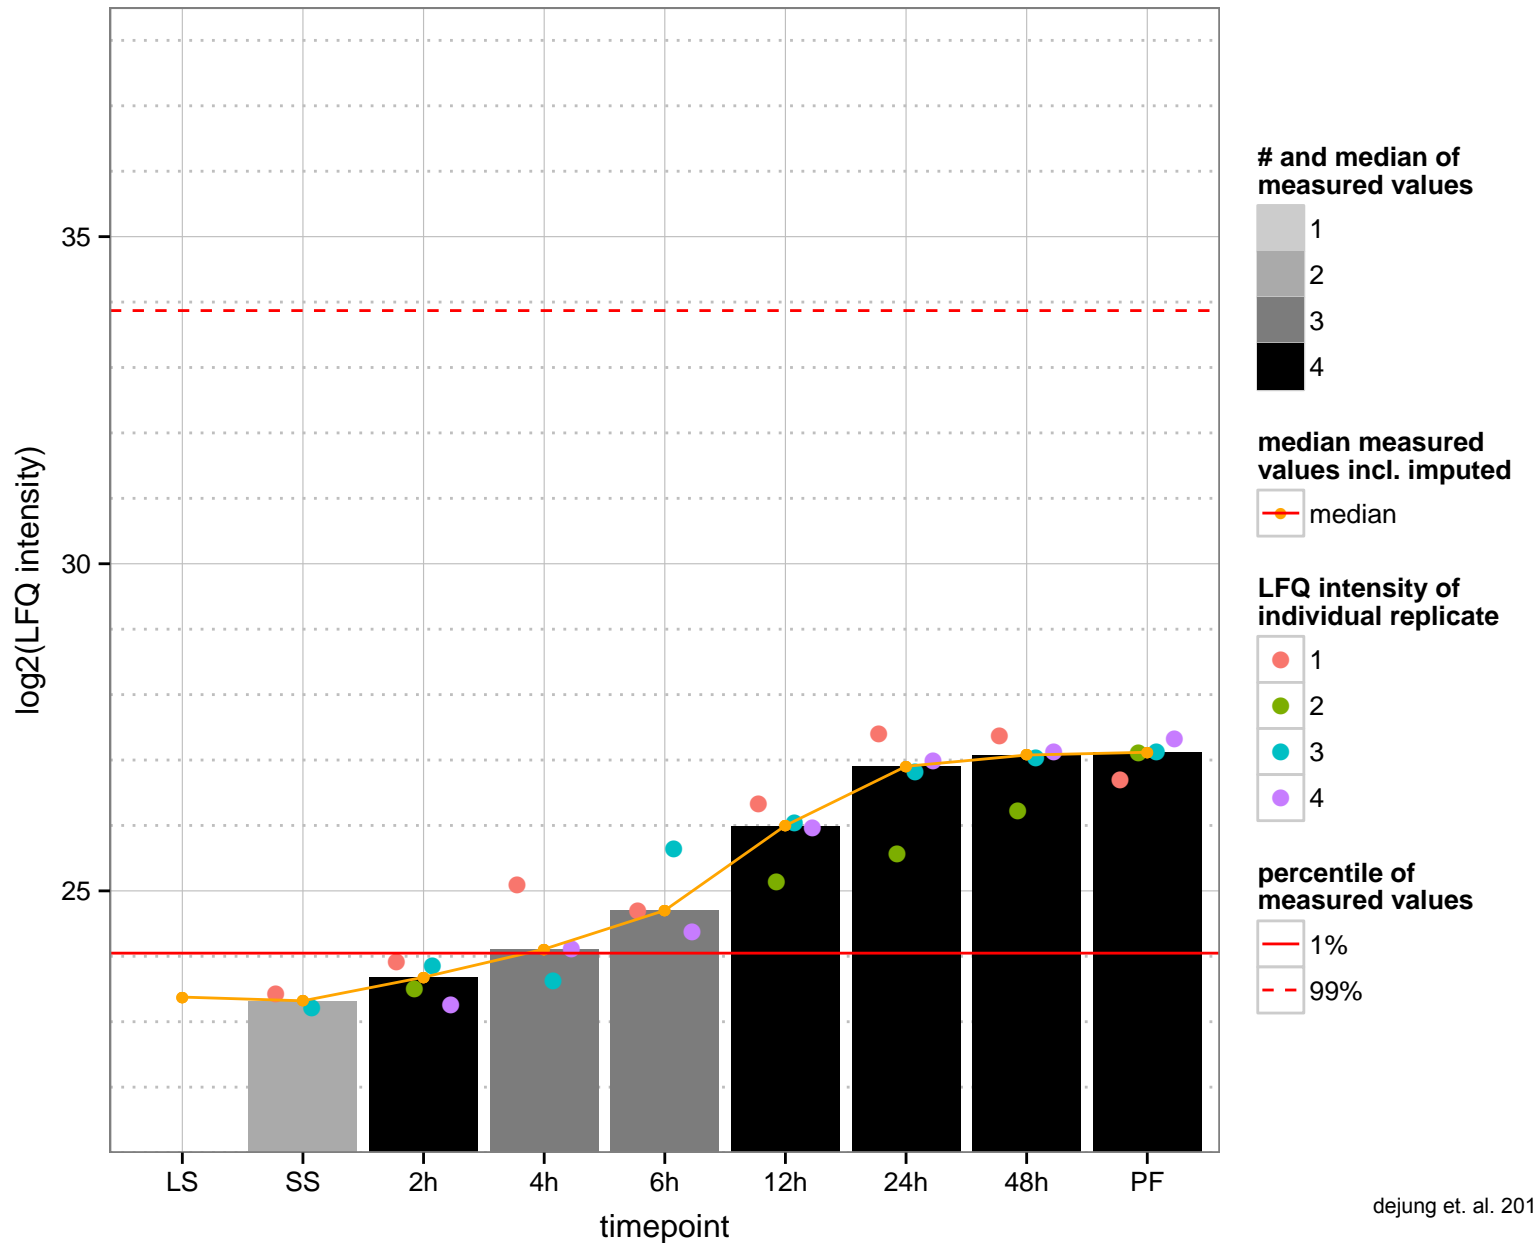

hypothetical protein, conserved  
 Tb927.7.6990  
 AGOF: null  
 AGOC: mitochondrial inner membrane, mitochondrion  
 AGOP: null  
 PGO: null  
 PGO: null  
 PGO: null

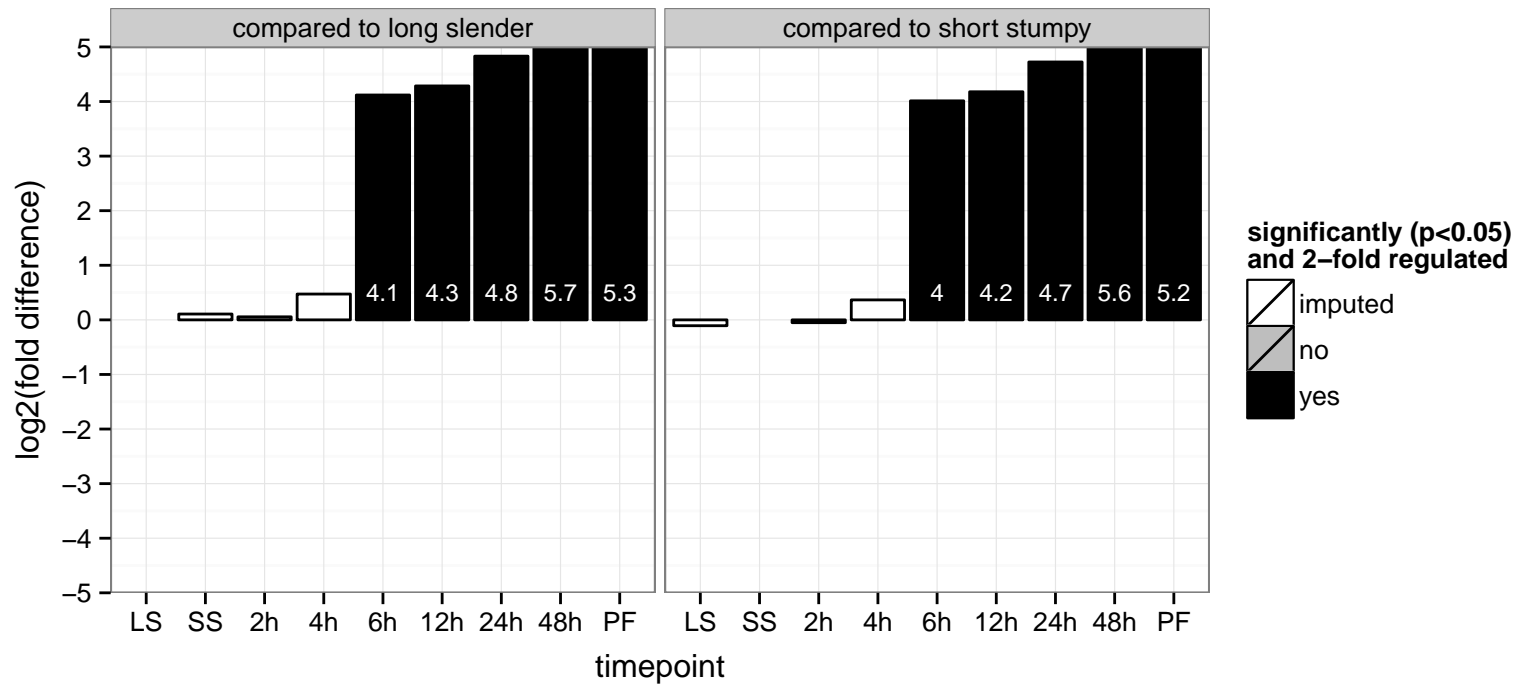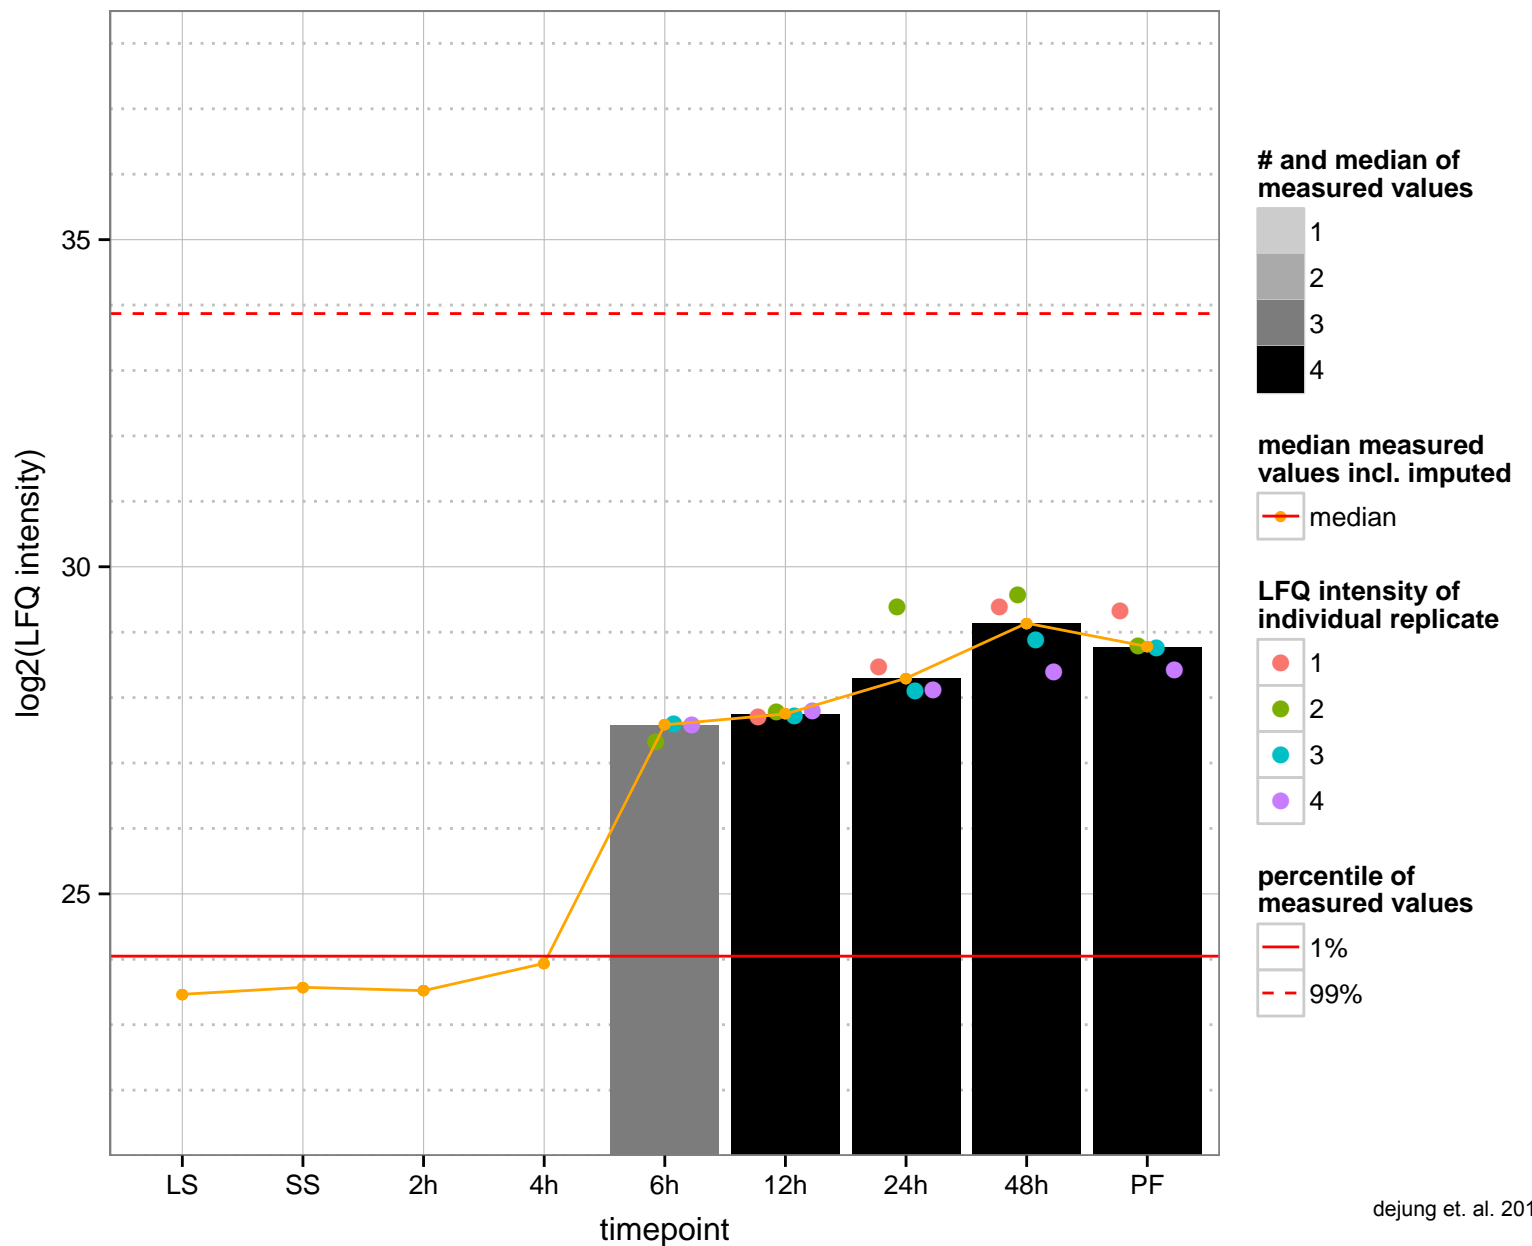

acetylornithine deacetylase, putative, metallo-peptidase, Clan MH, Family M18 (ArgE)

Tb927.8.1910

AGOF: acetylornithine deacetylase activity, cobalt ion binding, metallopeptidase activity, protein dimerization activity, zinc ion binding

AGOC: cytoplasm

AGOP: arginine biosynthetic process, proteolysis

PGOF: acetylornithine deacetylase activity, cobalt ion binding, hydrolase activity, zinc ion binding

PGOC: cytoplasm

PGOP: arginine biosynthetic process, metabolic process

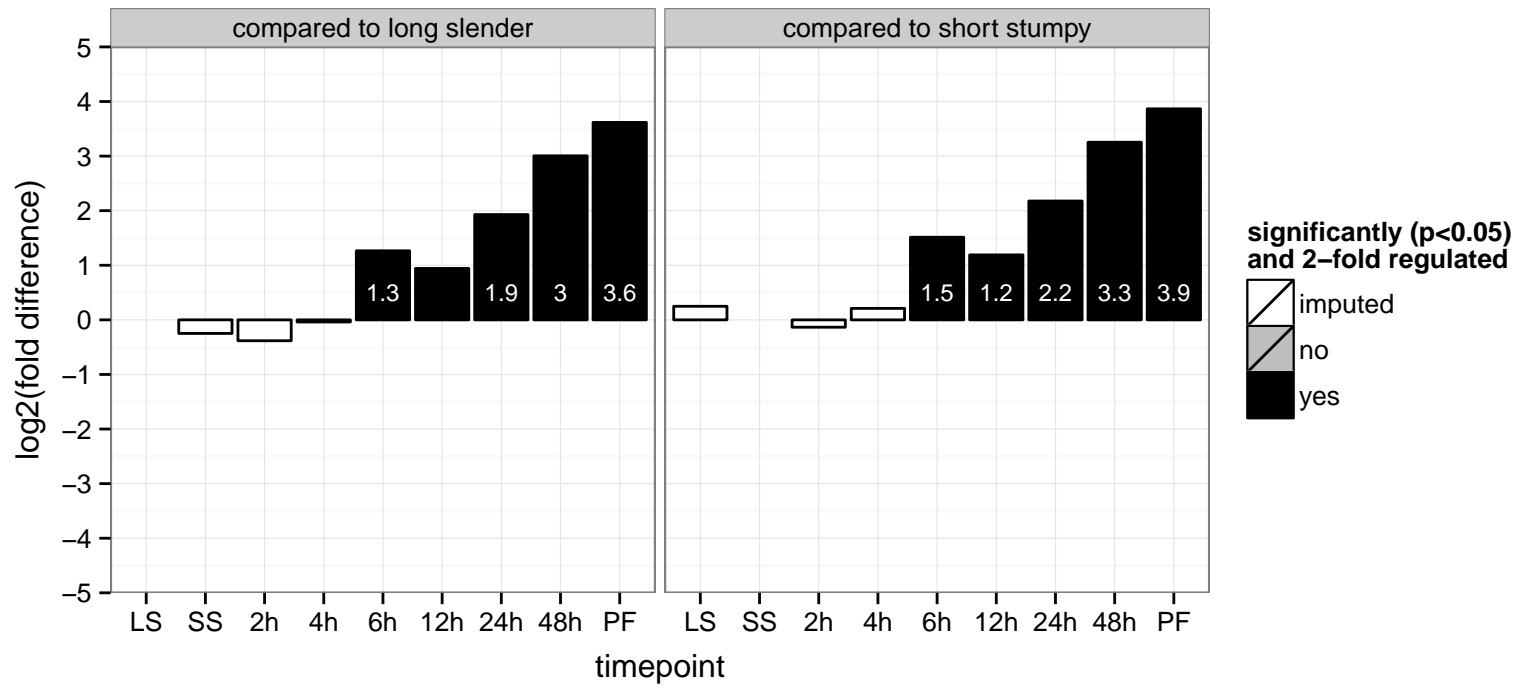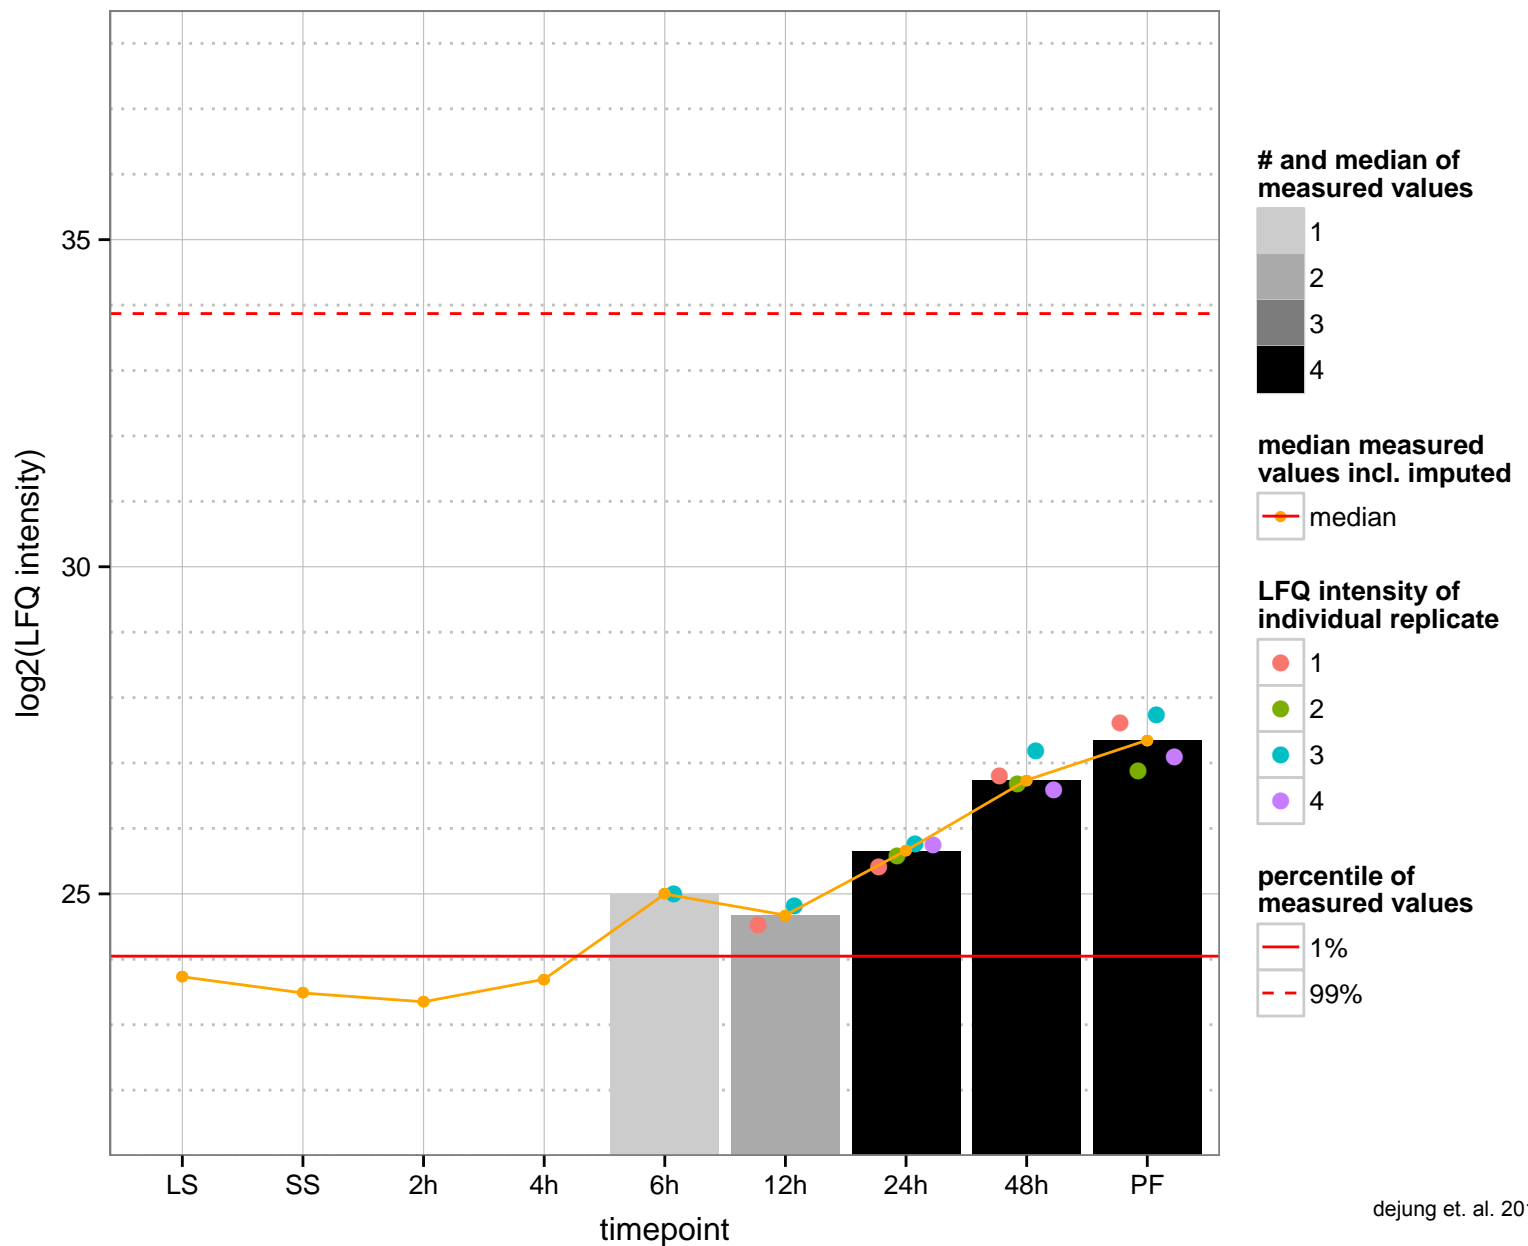



Tryptophanyl-tRNA synthetase 2

Tb927.8.2240

AGOF: ATP binding, aminoacyl-tRNA ligase activity, tryptophan-tRNA ligase activity

AGOC: cytoplasm, mitochondrial part

AGOP: tRNA aminoacylation for protein translation, translation, tryptophanyl-tRNA aminoacylation

PGOF: ATP binding, aminoacyl-tRNA ligase activity, nucleotide binding, tryptophan-tRNA ligase activity

PGOC: cytoplasm

PGOP: tRNA aminoacylation for protein translation, tryptophanyl-tRNA aminoacylation

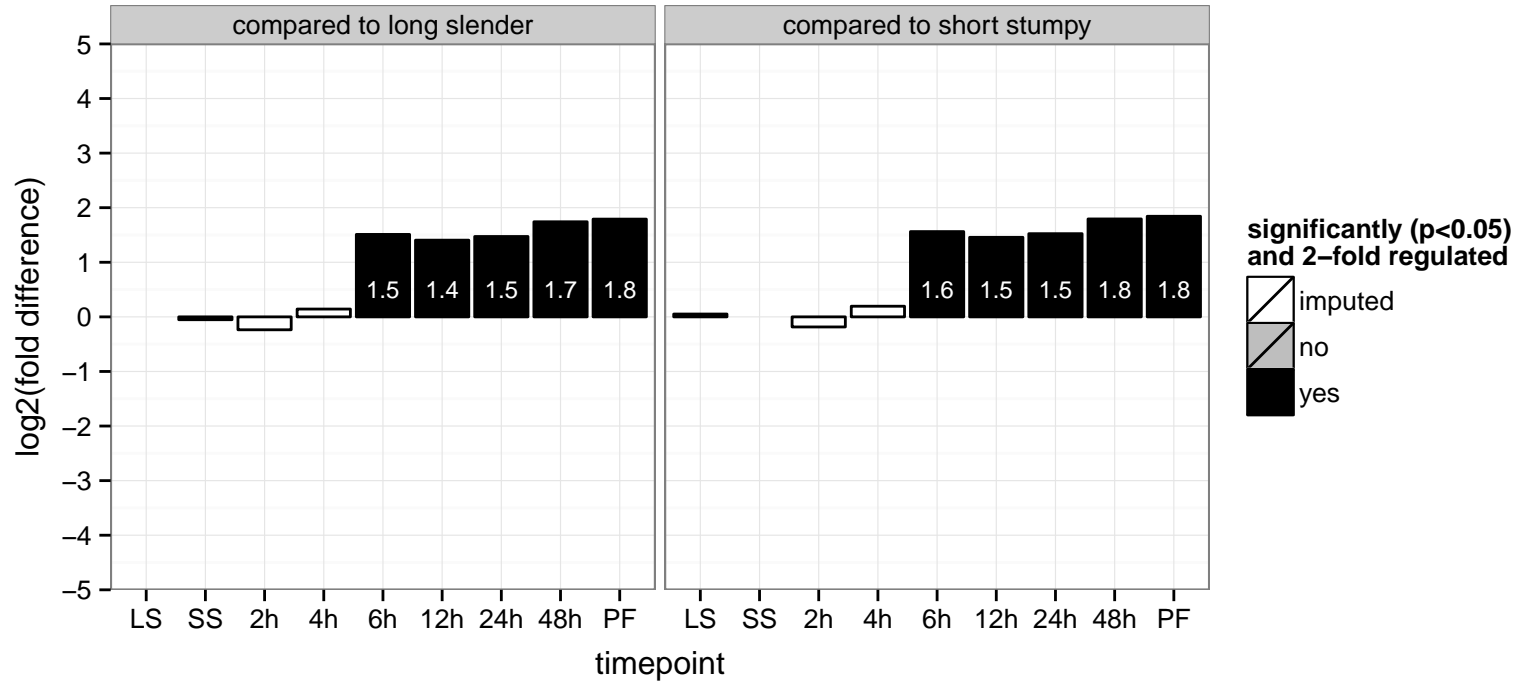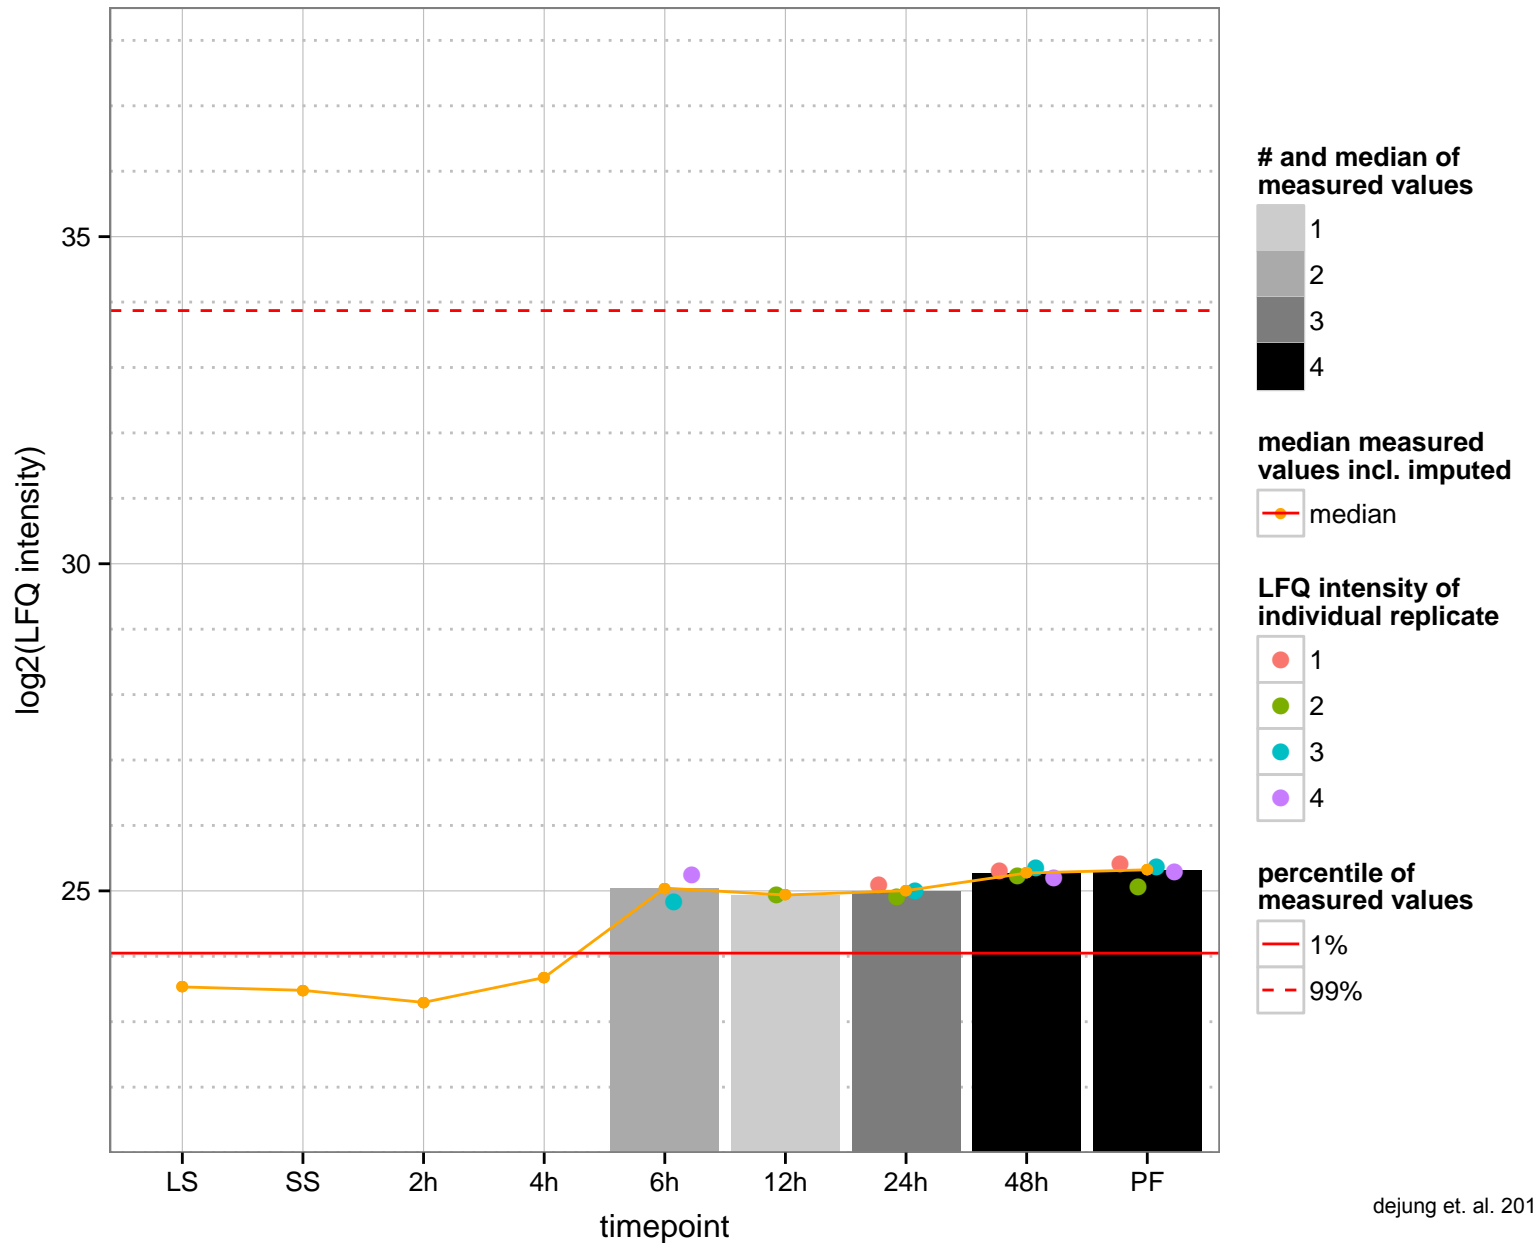

hypothetical protein, conserved  
 Tb927.8.5990  
 AGOF: null  
 AGOC: null  
 AGOP: null  
 PGO: protein binding  
 PGOC: null  
 PGOP: null

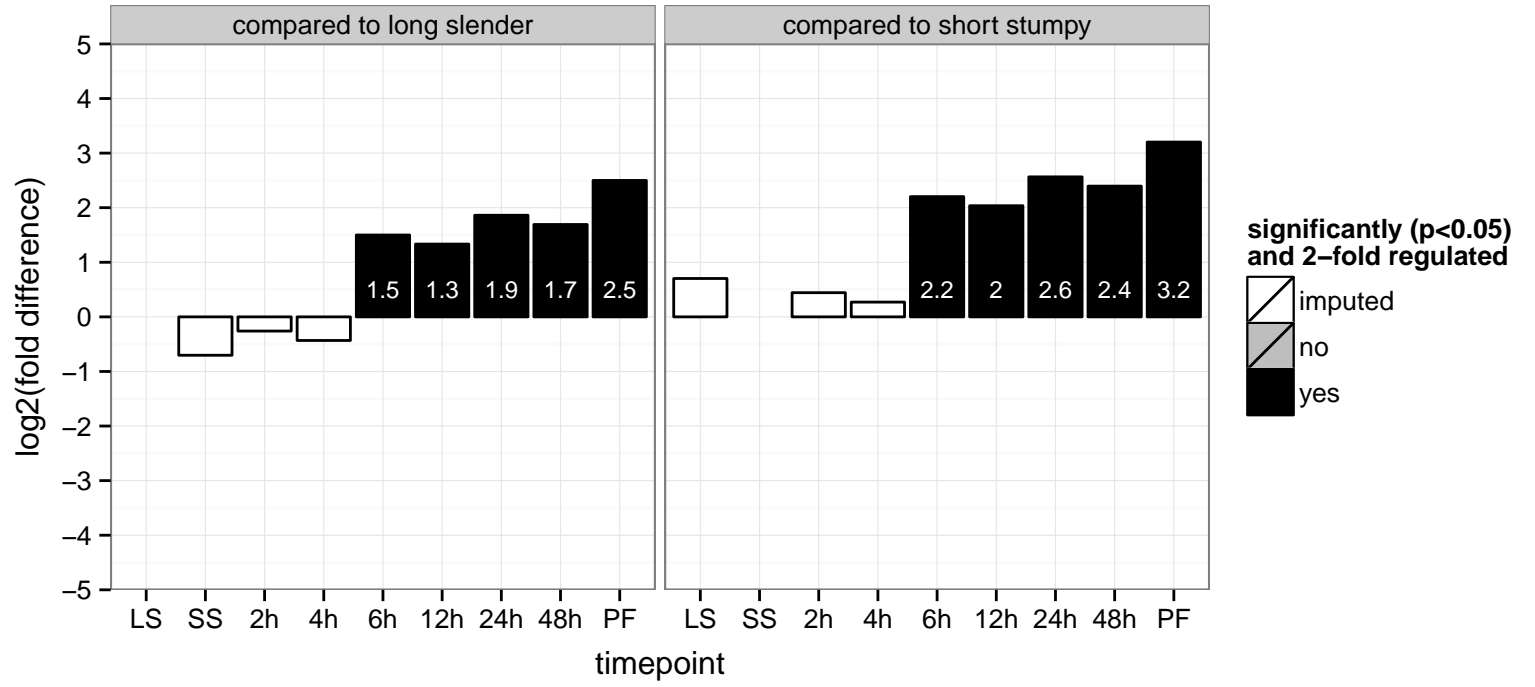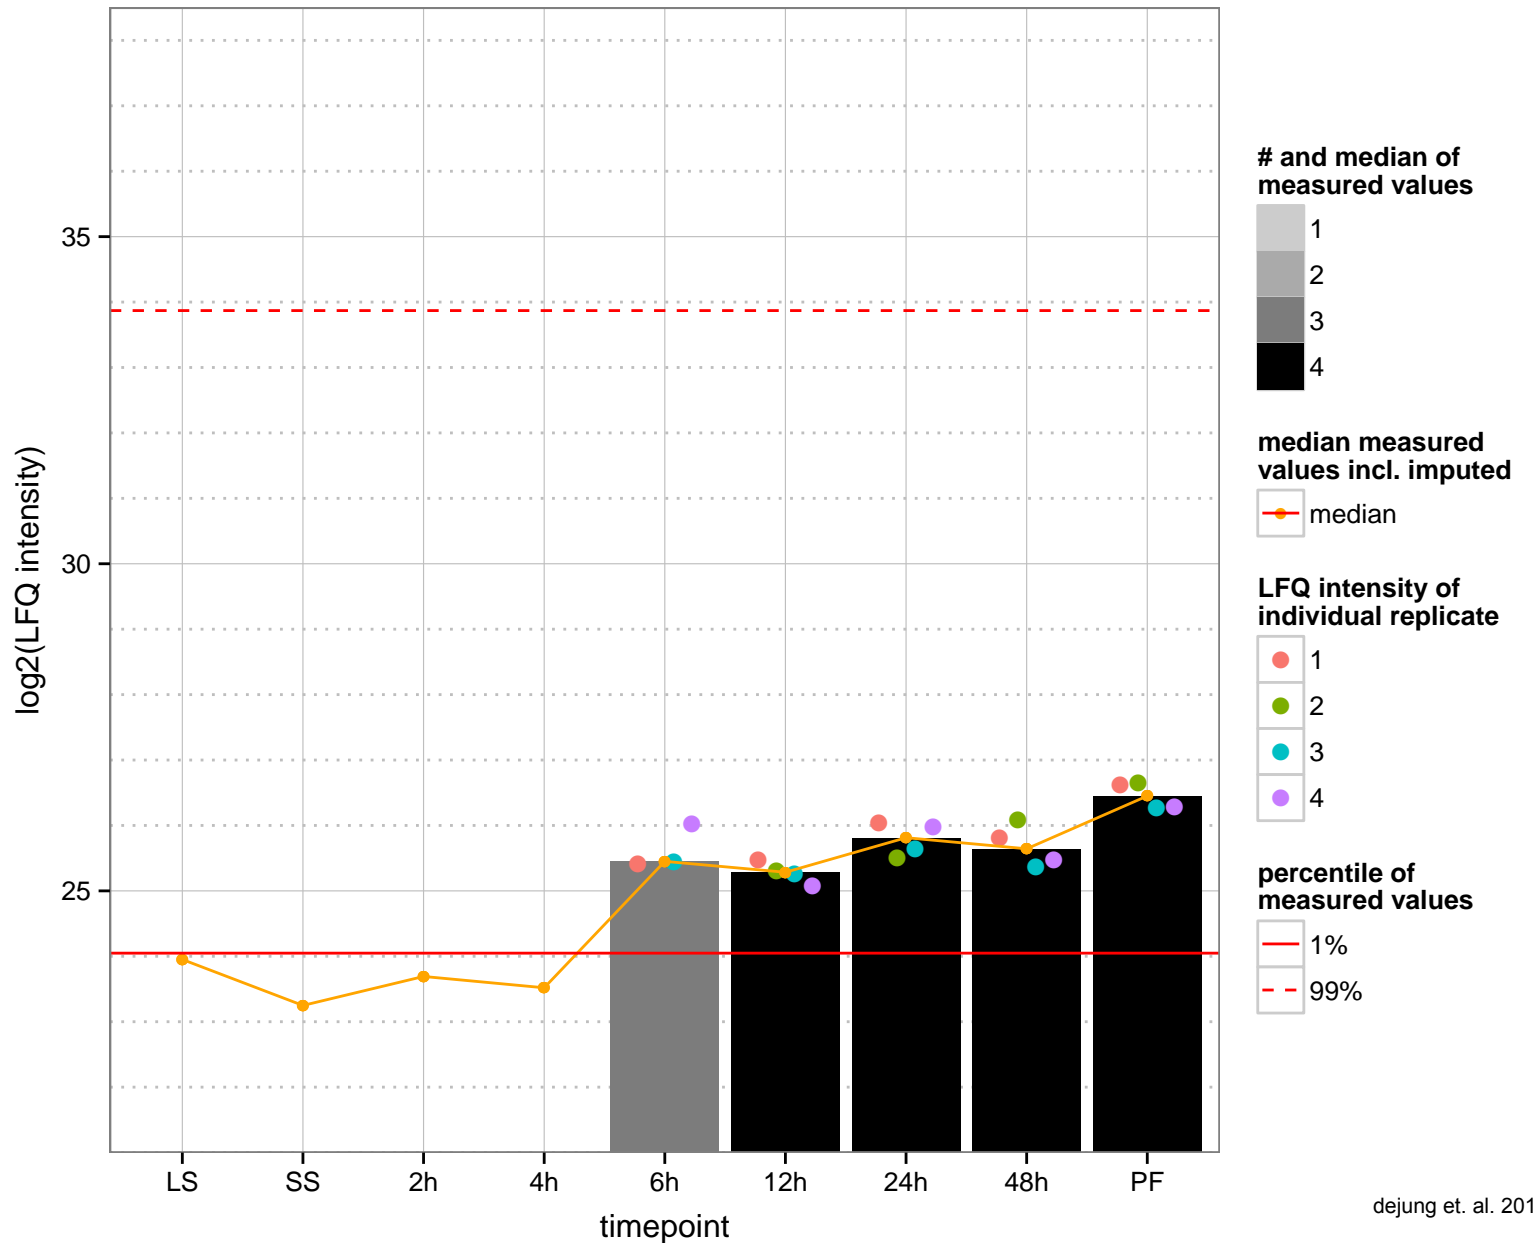

hypothetical protein, conserved  
 Tb927.8.6130  
 AGOF: null  
 AGOC: null  
 AGOP: null  
 PGOF: null  
 PGO: null  
 PGOP: null

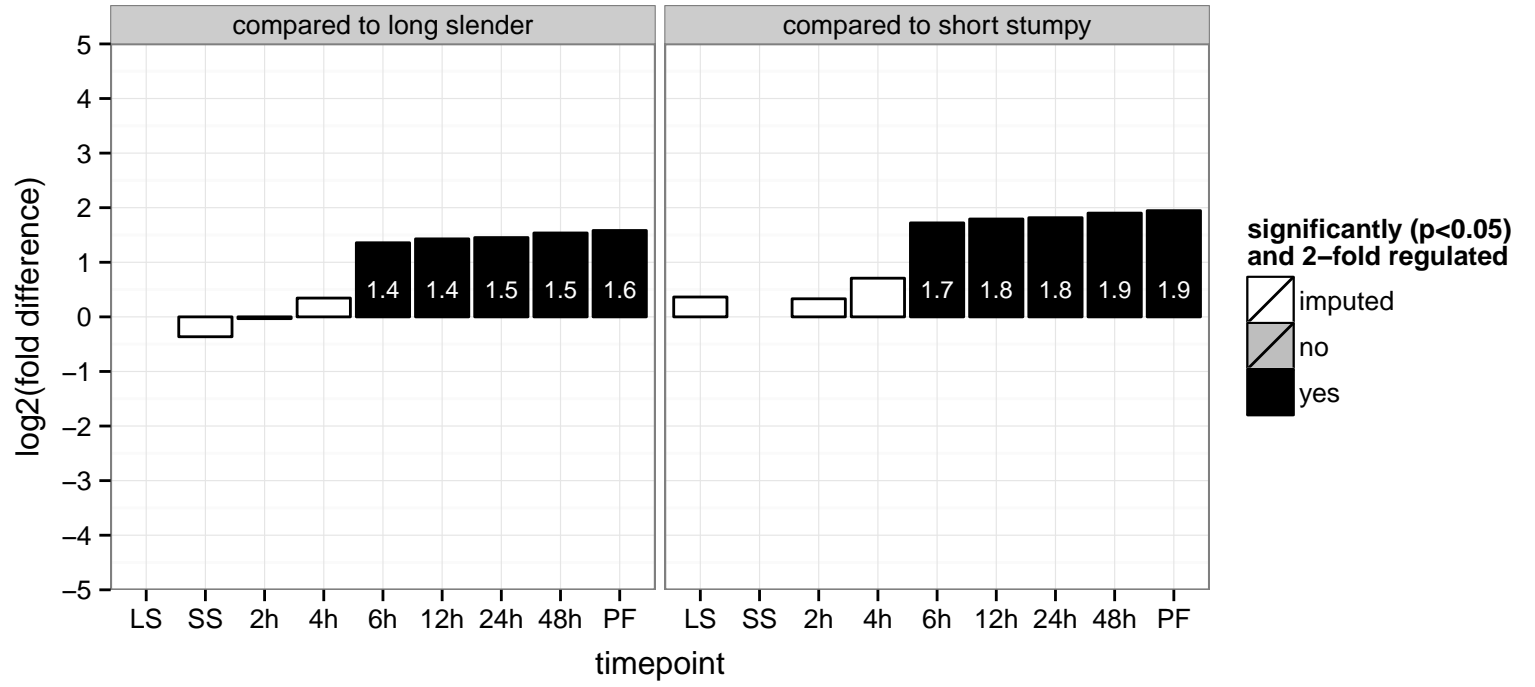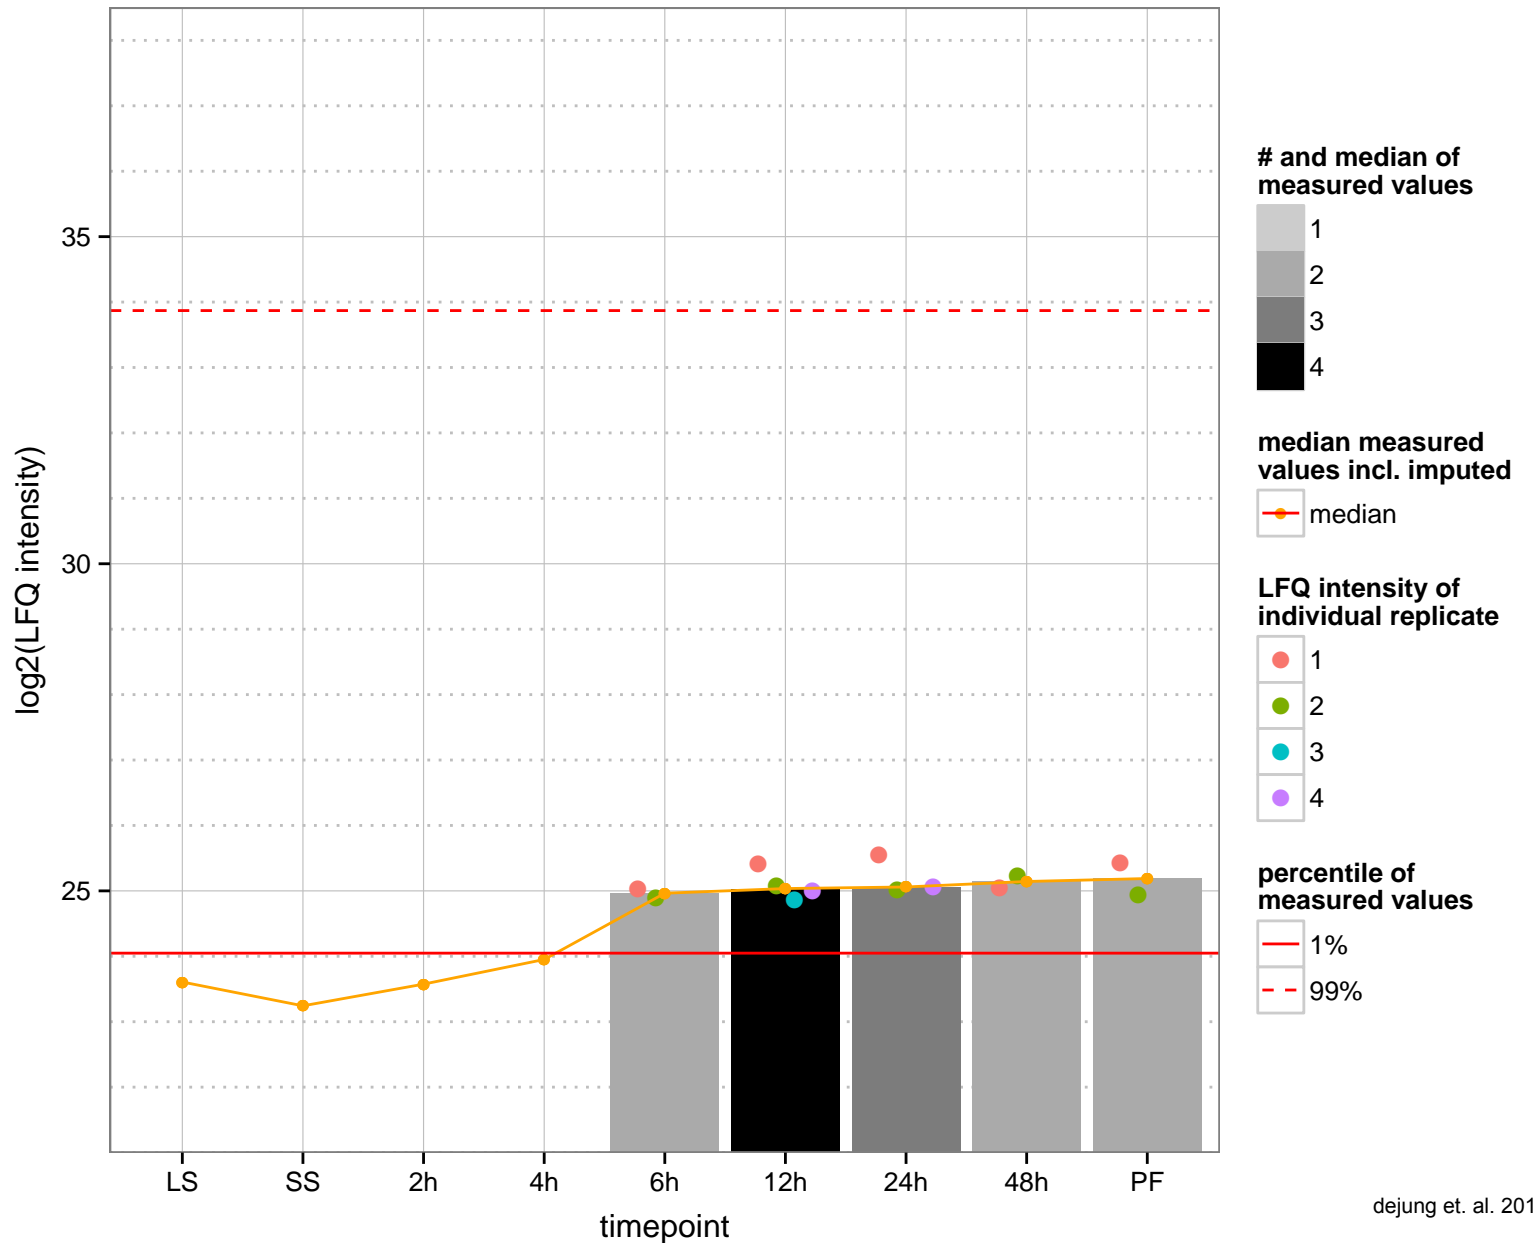

amino acid transporter, putative  
 Tb927.8.7700;Tb927.8.7680  
 AGOF: amine transmembrane transporter activity  
 AGOC: integral to membrane  
 AGOP: amino acid transport  
 PGO: null  
 PGO: null  
 PGO: null

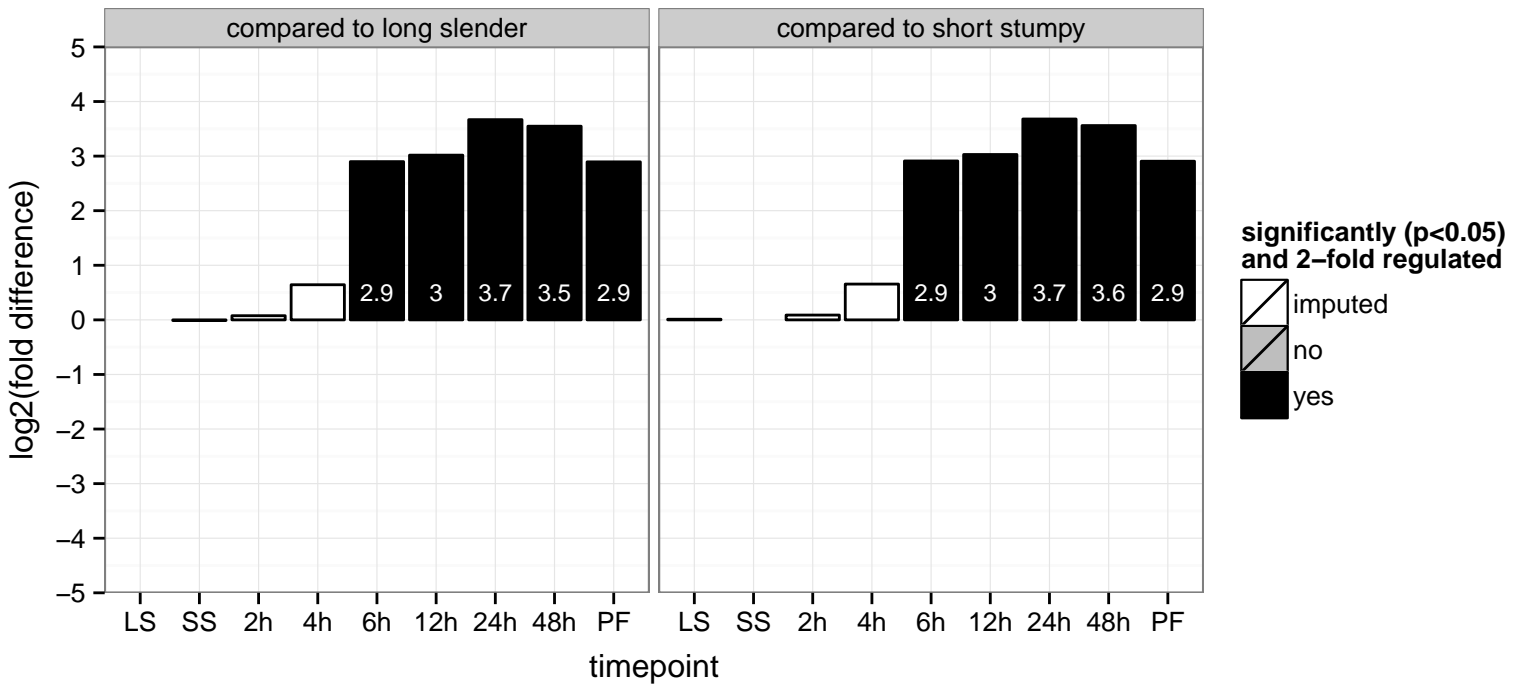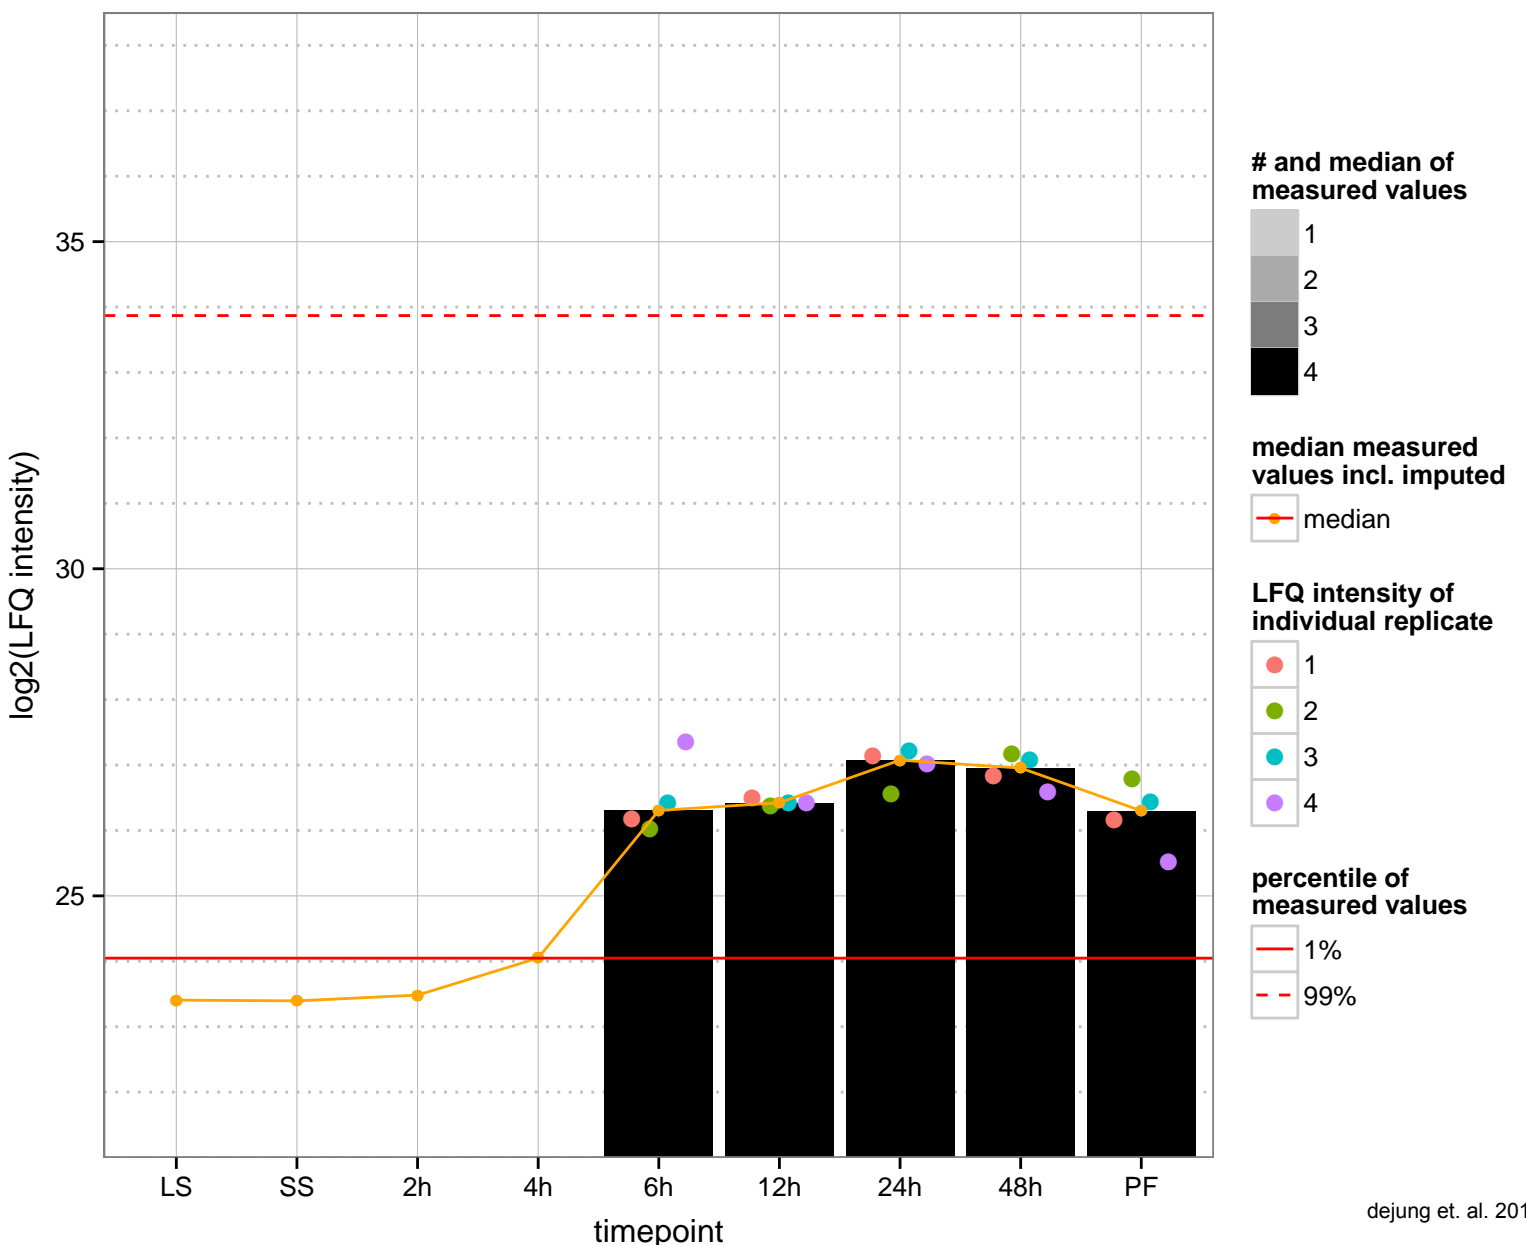

hypothetical protein, conserved  
 Tb927.9.10520  
 AGOF: null  
 AGOC: mitochondrion  
 AGOP: null  
 PGO: null  
 PGO: null  
 PGO: null

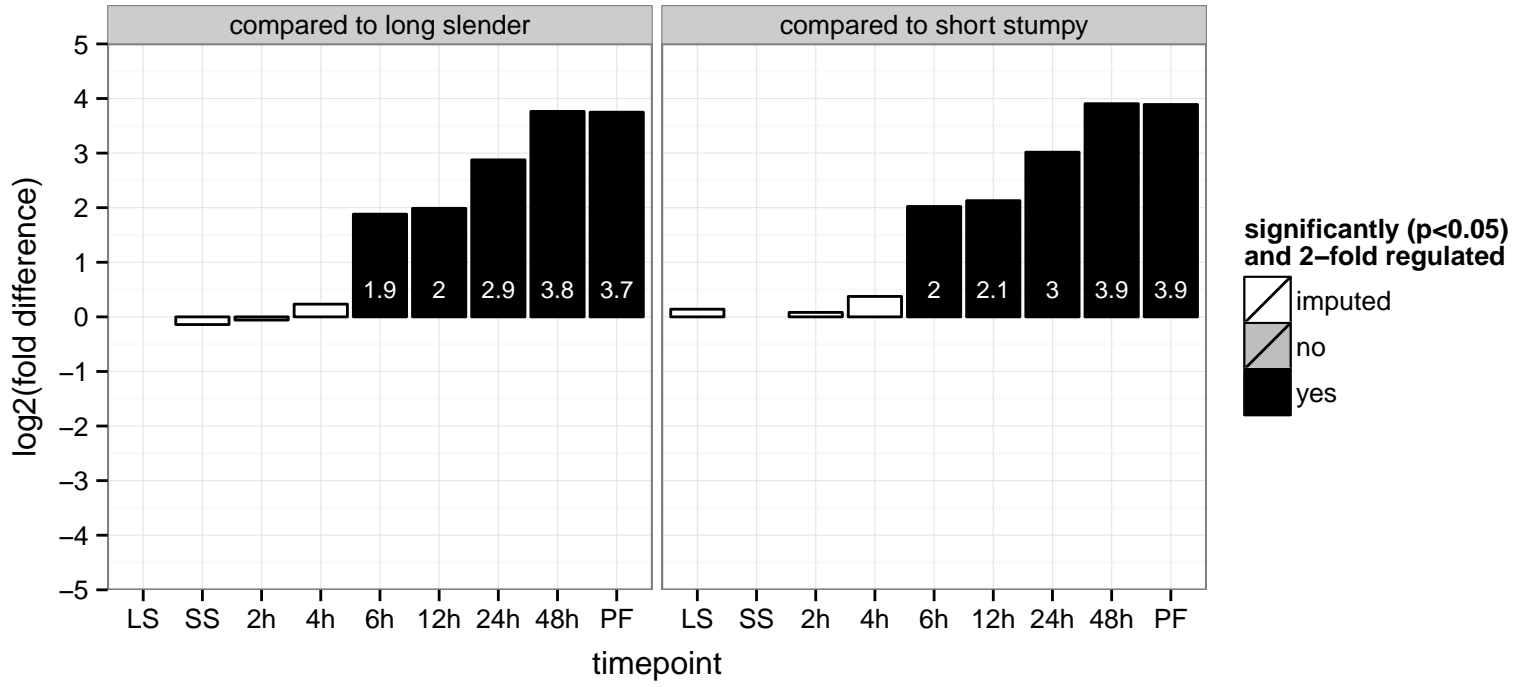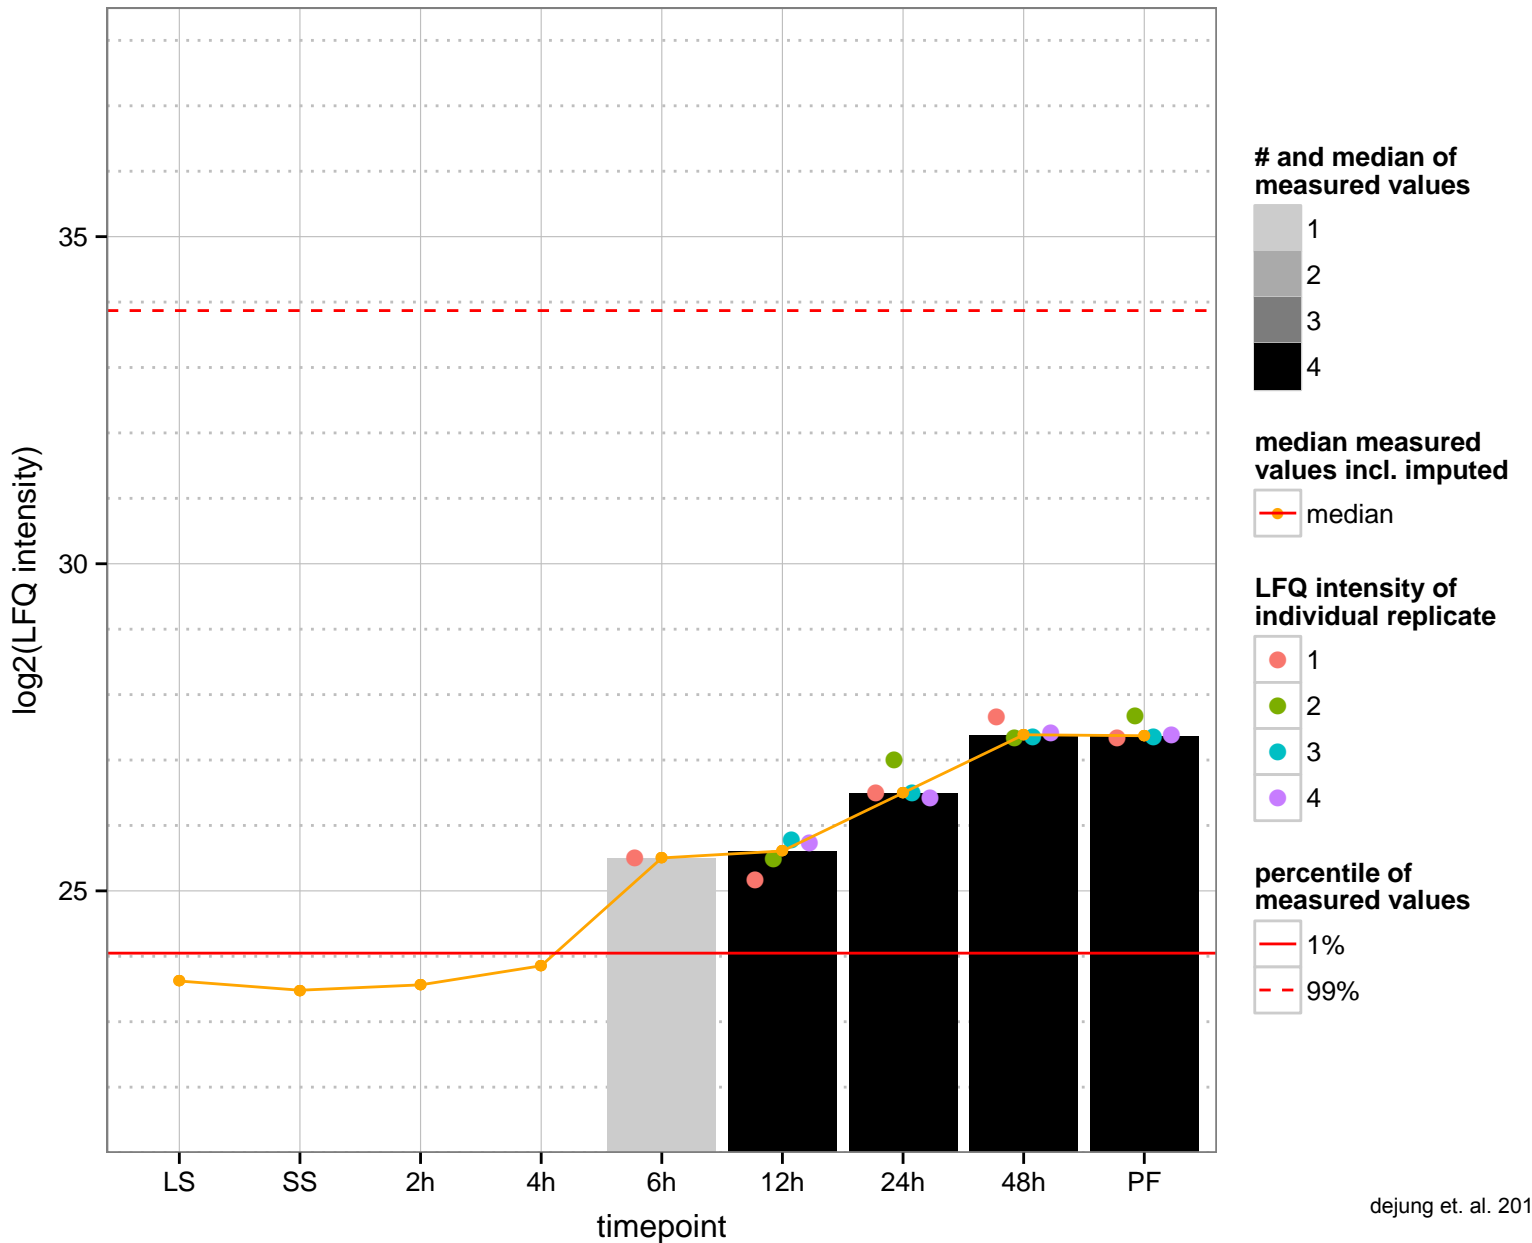

Iron-sulfur cluster assembly protein

Tb927.9.11720

AGOF: iron ion binding, iron-sulfur cluster binding, metallochaperone activity

AGOC: mitochondrion

AGOP: iron-sulfur cluster assembly

PGOF: iron ion binding, iron-sulfur cluster binding

PGOC: null

PGOP: iron-sulfur cluster assembly

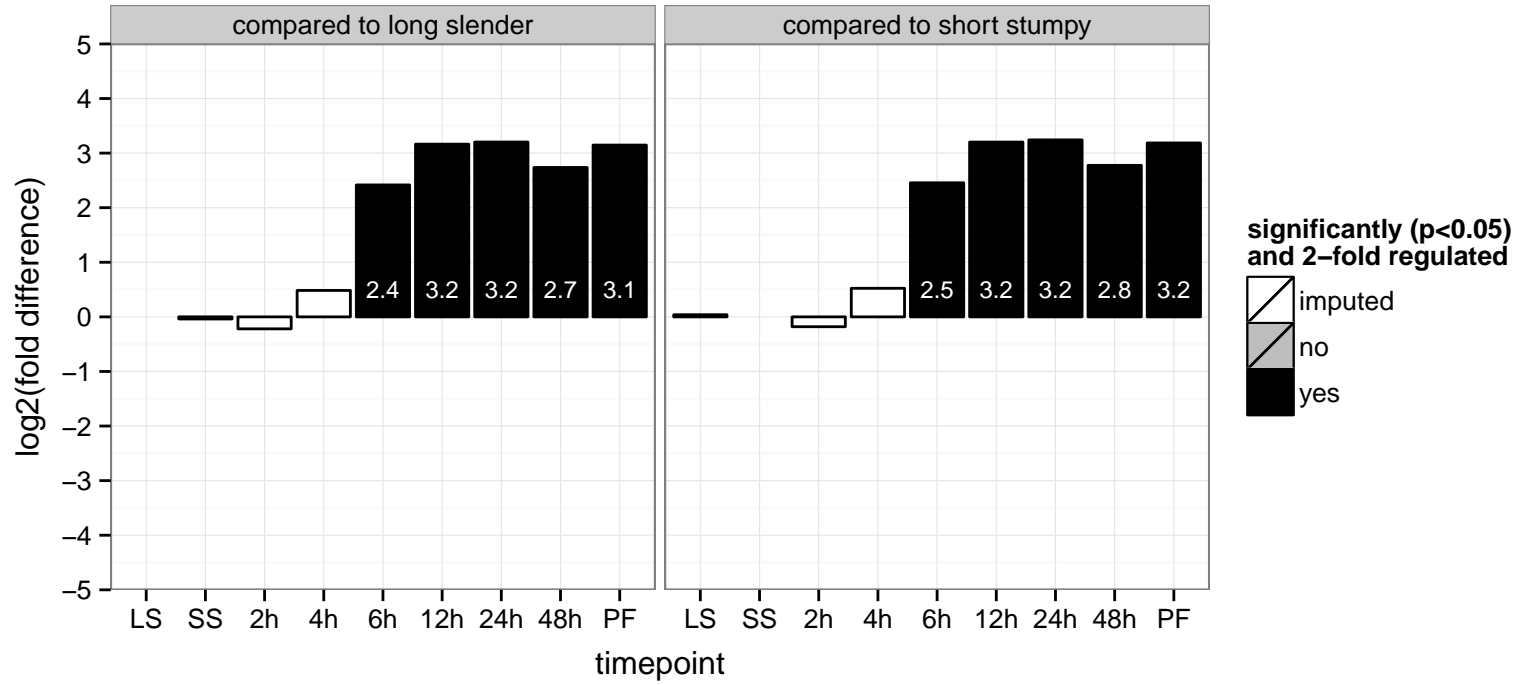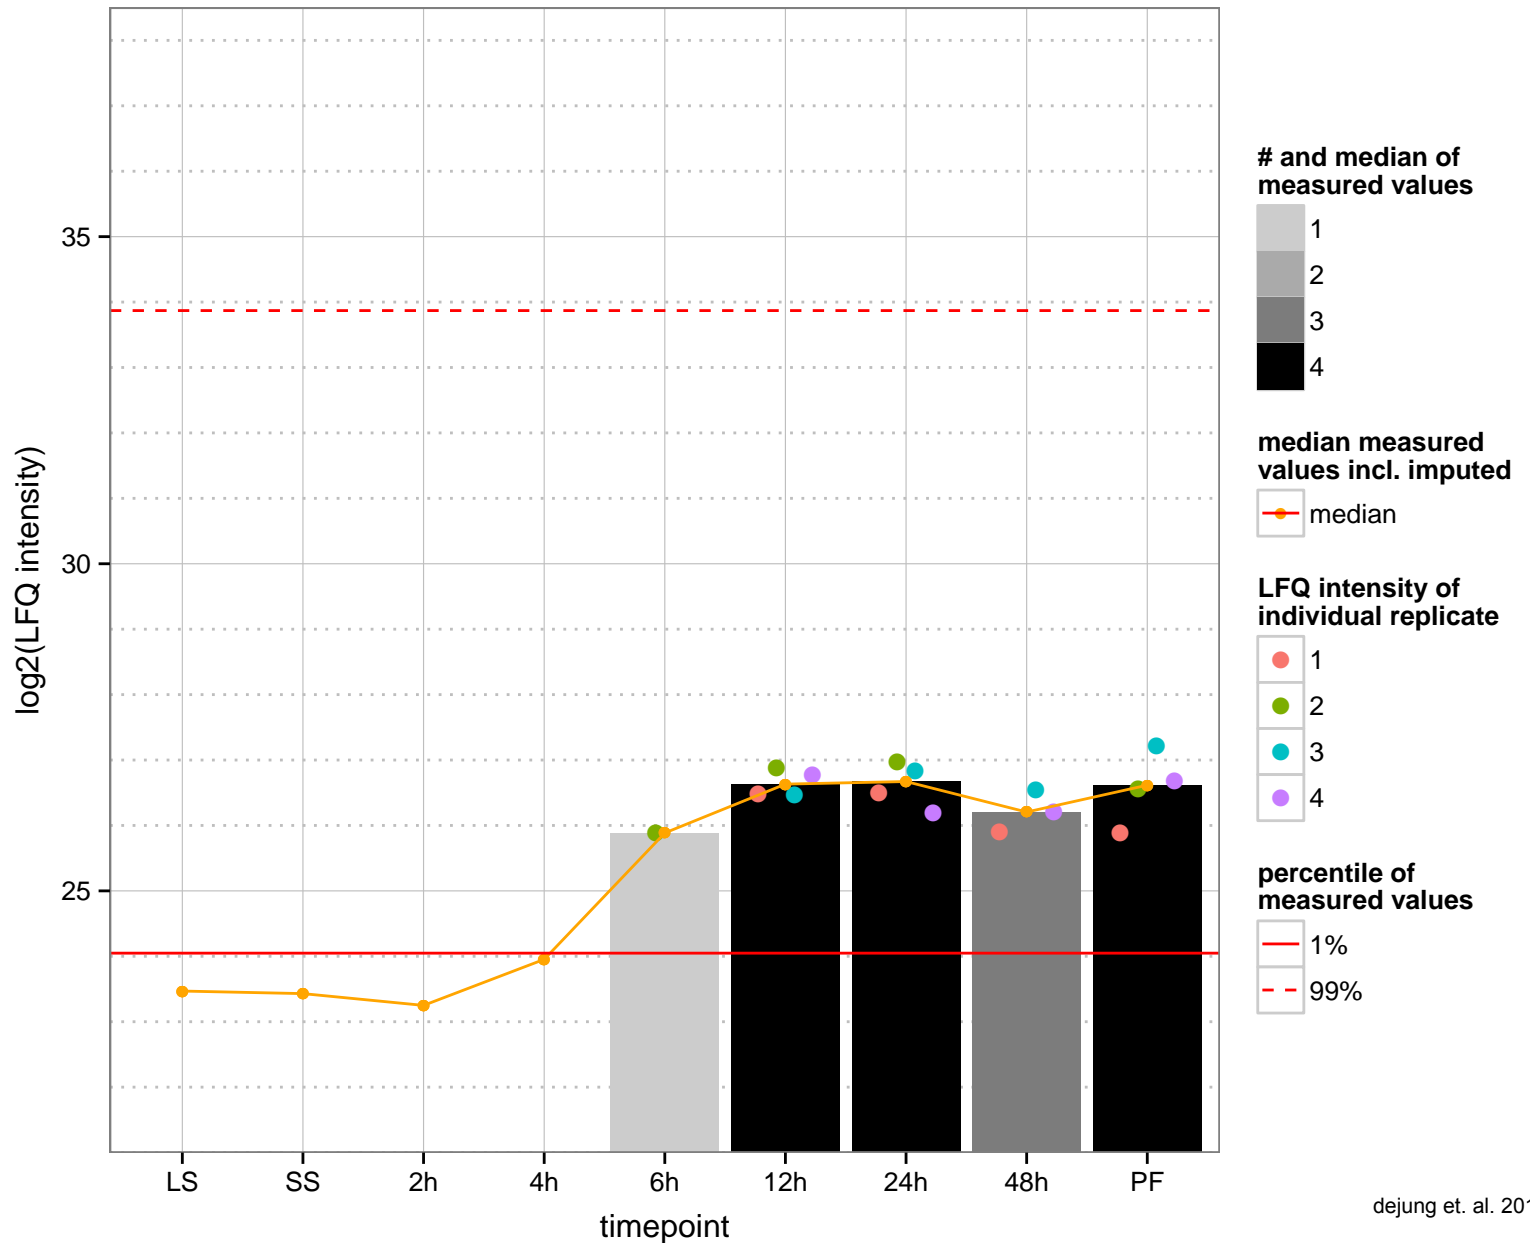

hypothetical protein, conserved  
 Tb927.9.11880  
 AGOF: null  
 AGOC: mitochondrion  
 AGOP: null  
 PGO: null  
 PGO: null  
 PGO: null

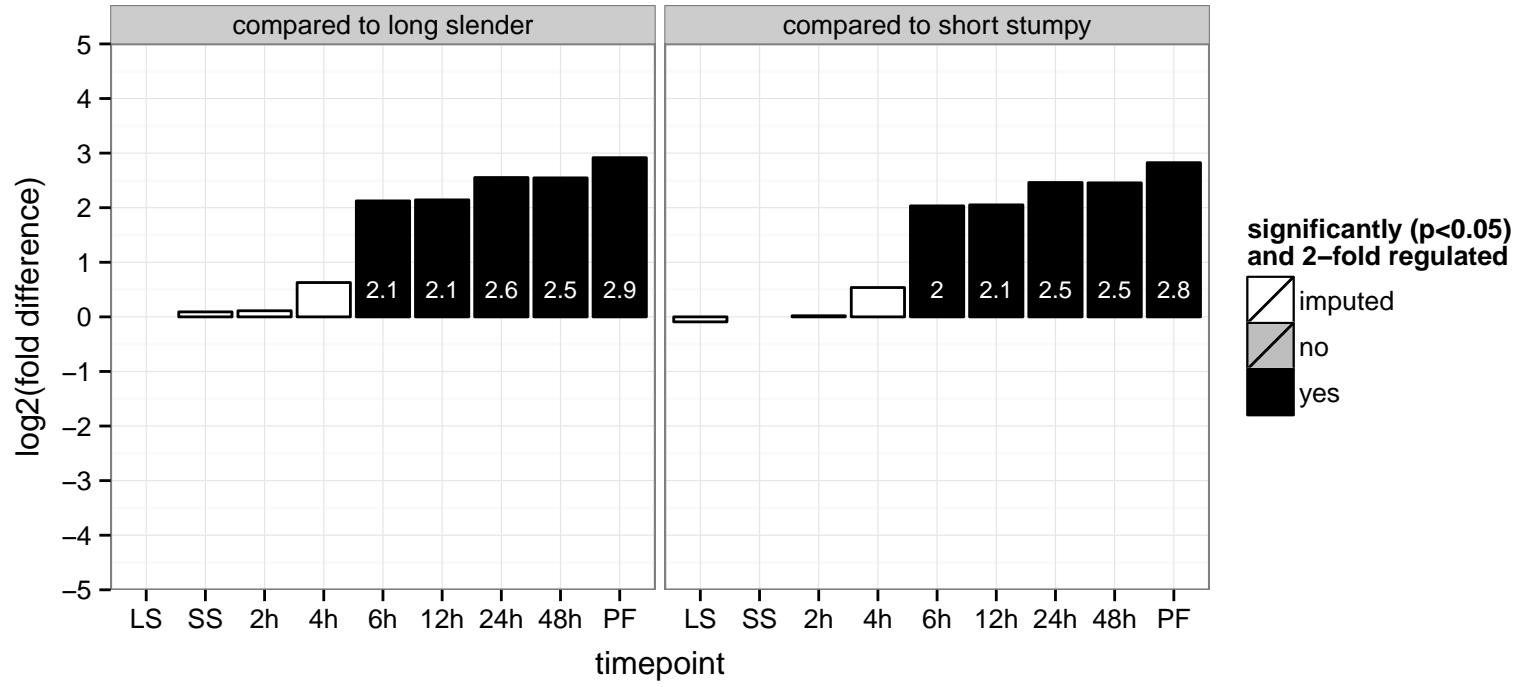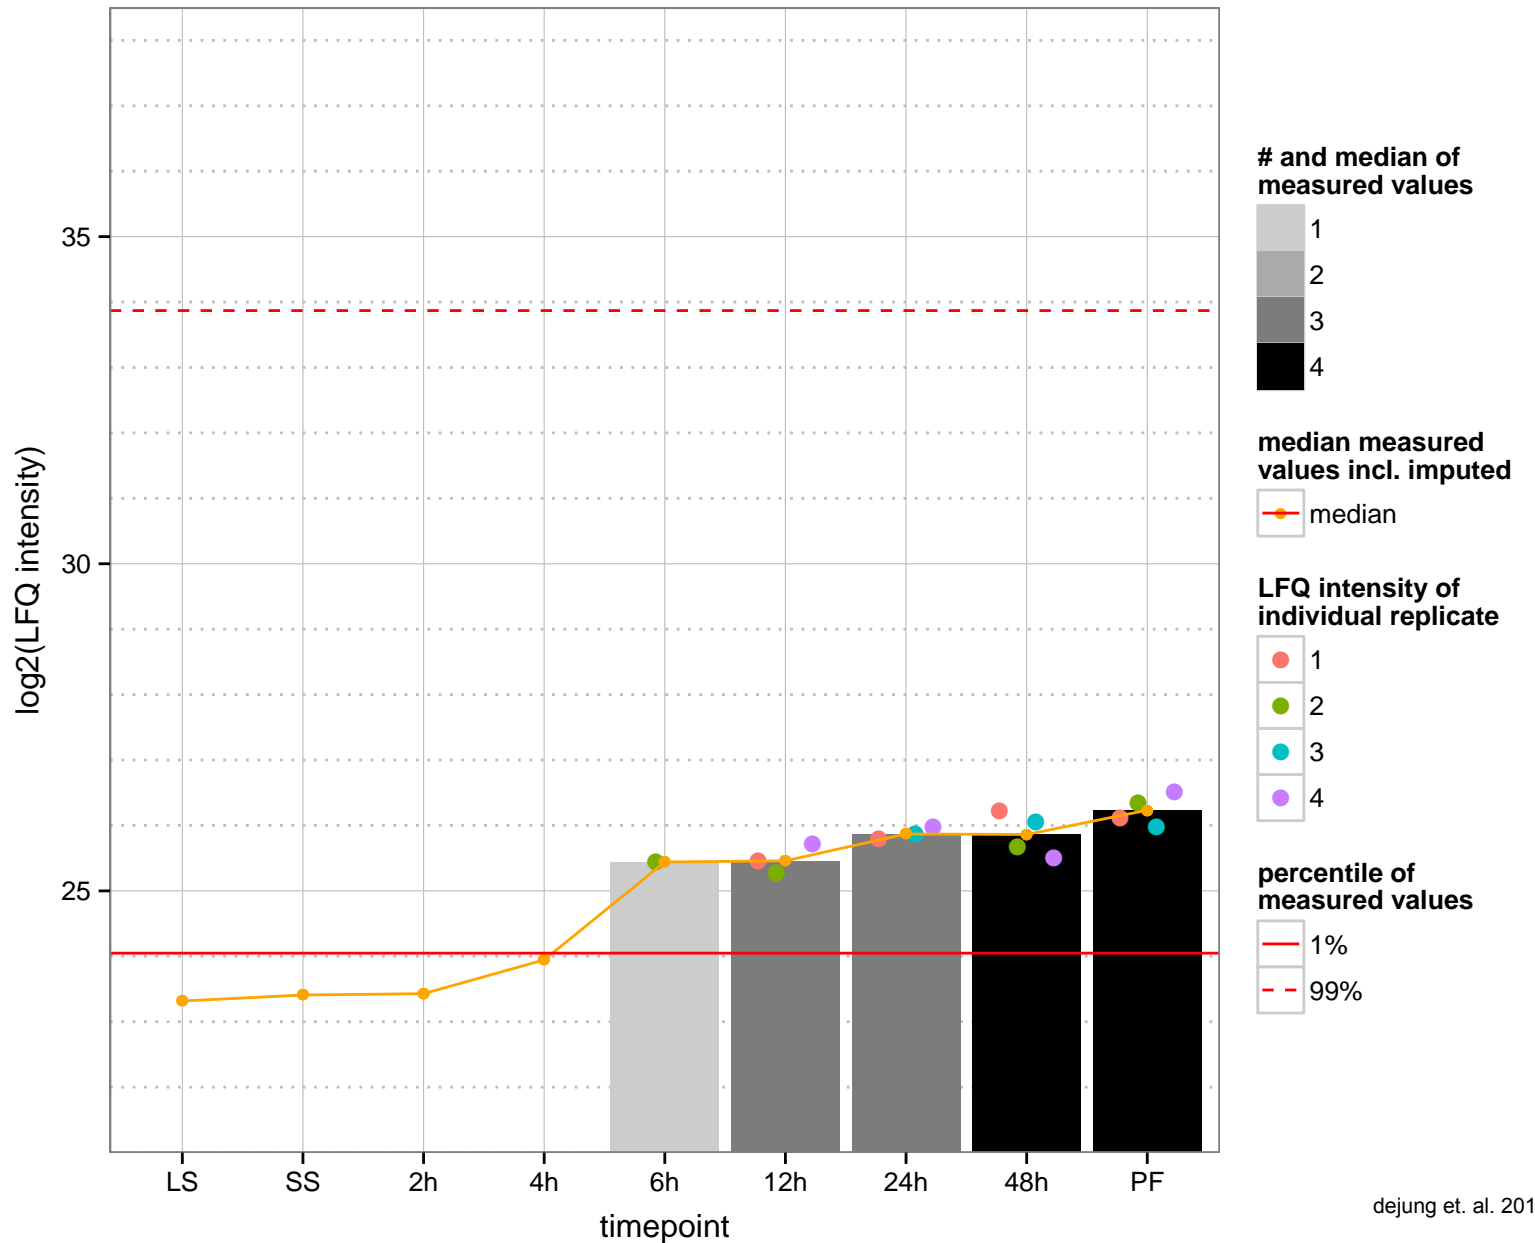

cystathione gamma lyase, putative  
 Tb927.9.12320  
 AGOF: null, cystathionine gamma-lyase activity, pyridoxal phosphate binding  
 AGOC: null  
 AGOP: null, sulfur amino acid metabolic process  
 PGO: pyridoxal phosphate binding  
 PGO: null  
 PGO: cellular amino acid metabolic process

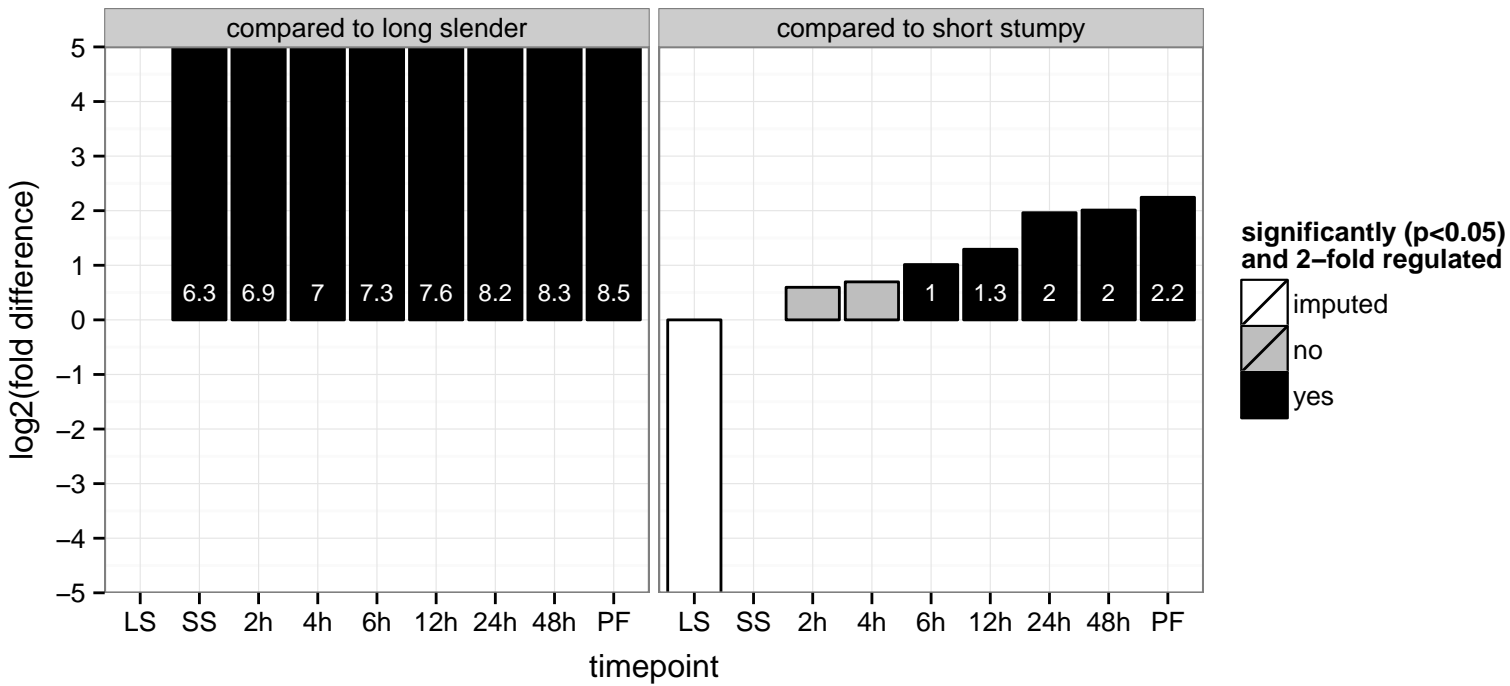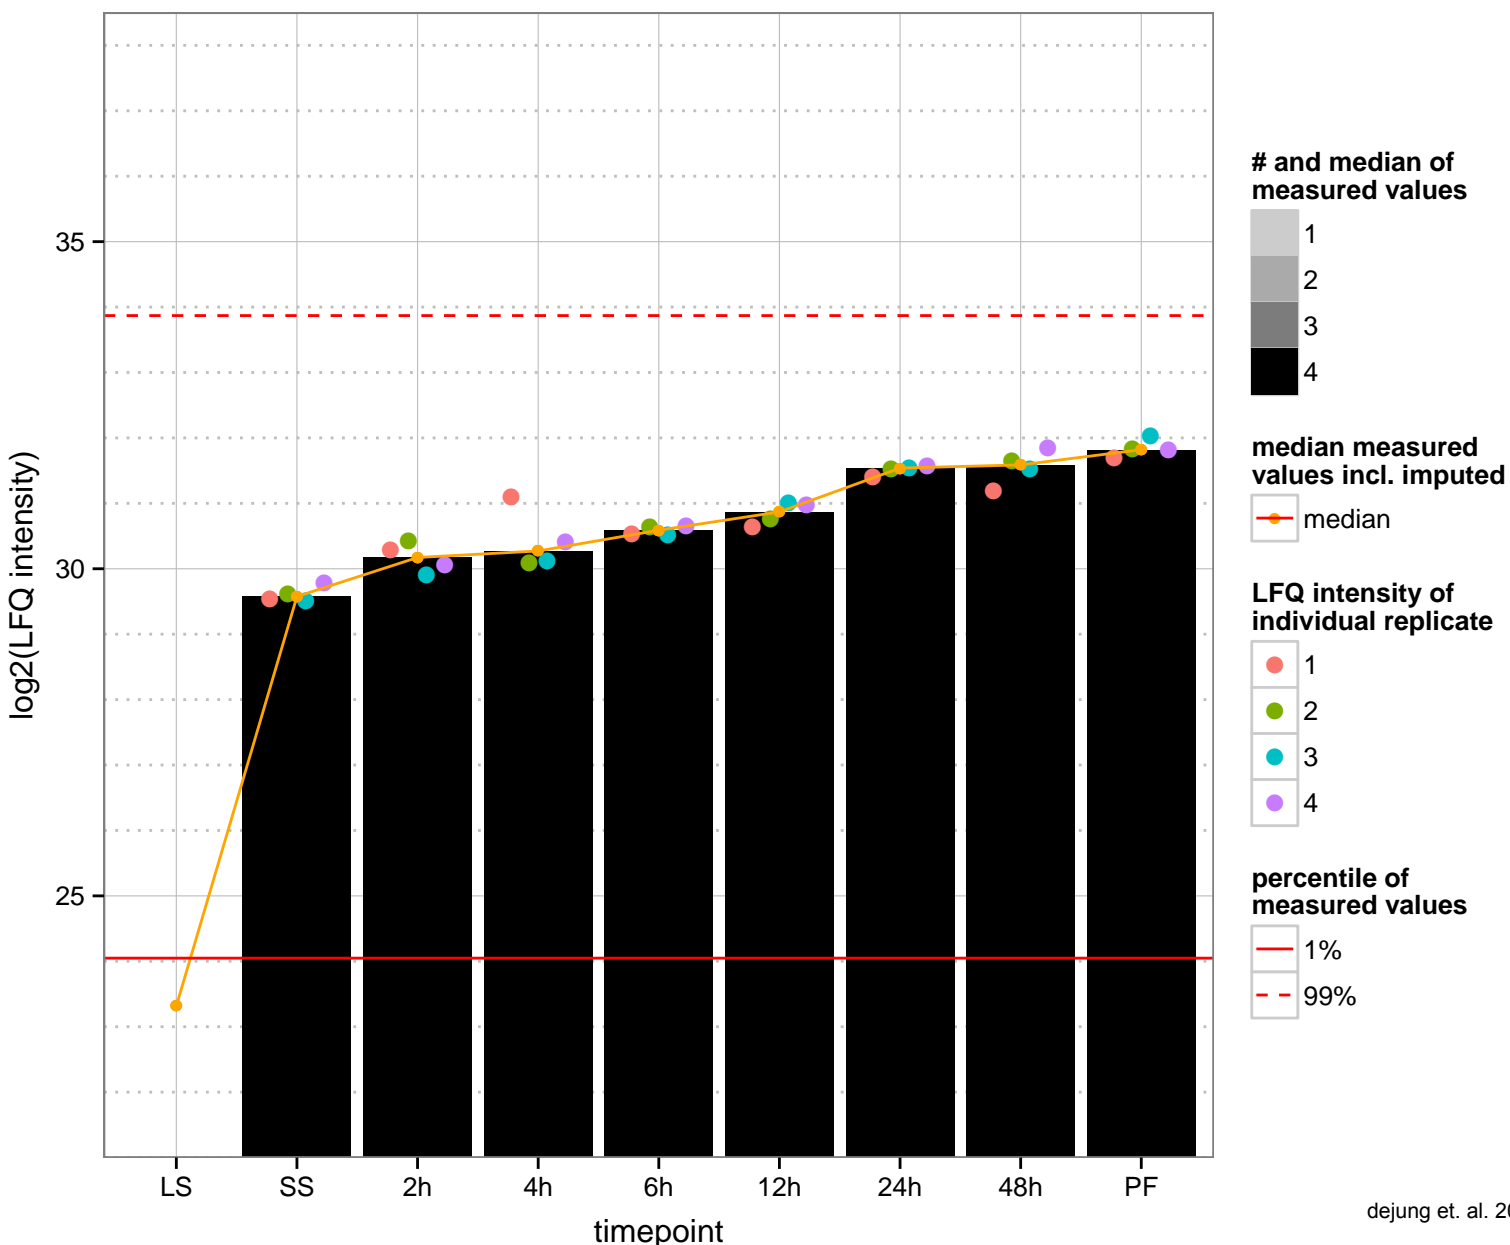



hypothetical protein, conserved  
 Tb927.9.13780  
 AGOF: null  
 AGOC: mitochondrion  
 AGOP: null  
 PGO: null  
 PGO: null  
 PGO: null

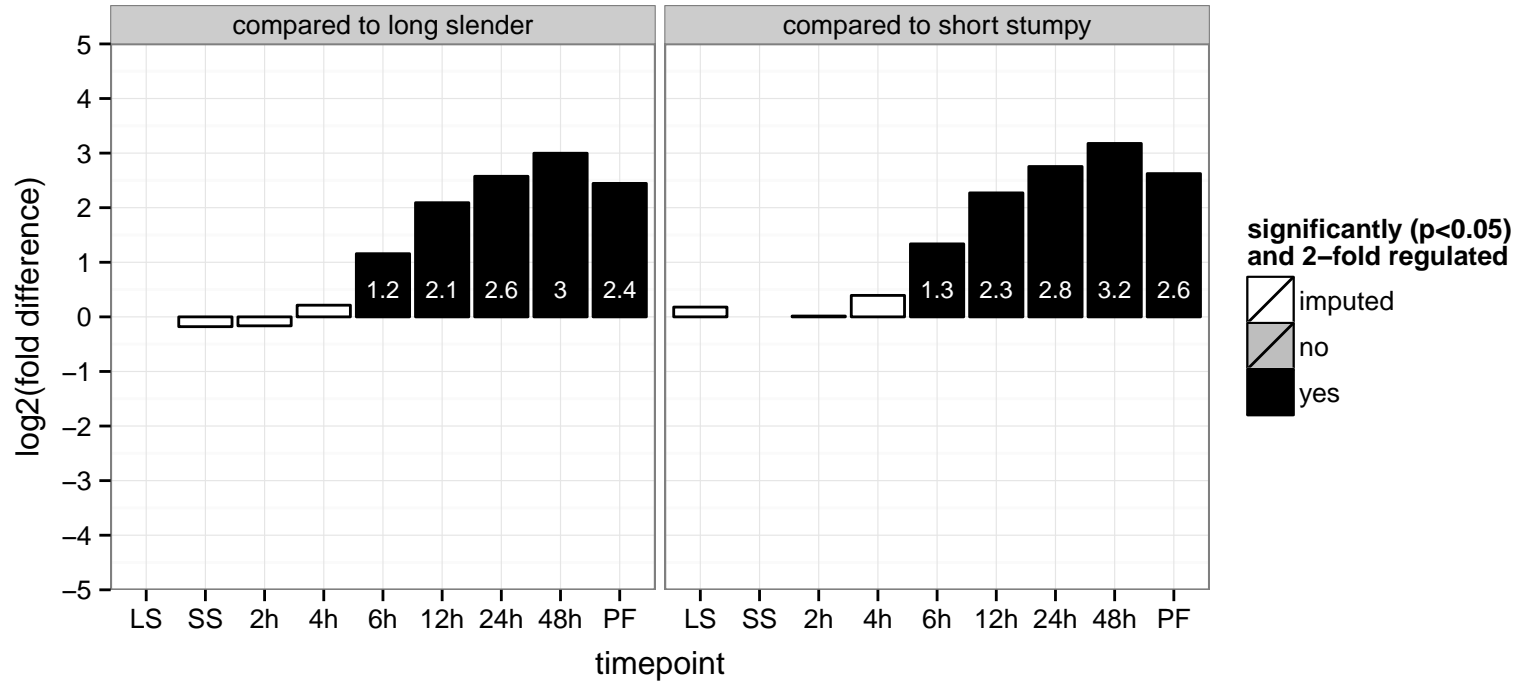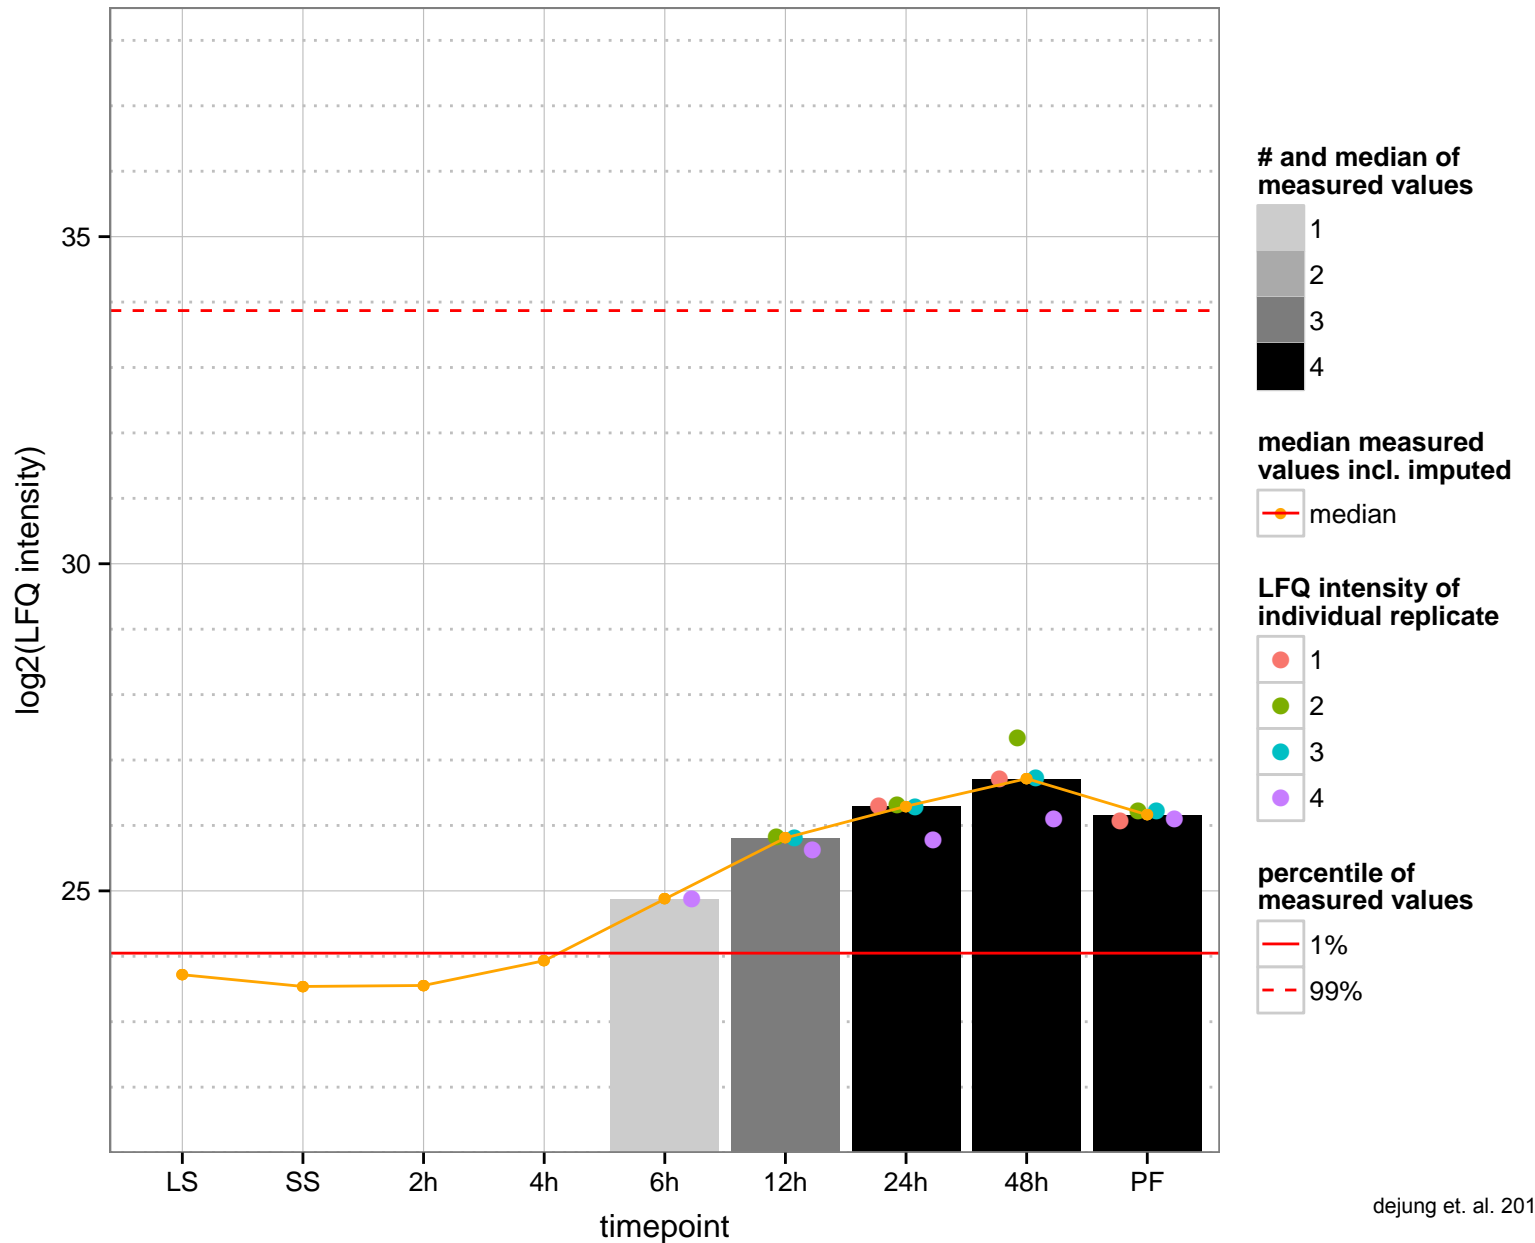

hypothetical protein, conserved  
 Tb927.9.15290  
 AGOF: null  
 AGOC: null  
 AGOP: null  
 PGO: null  
 PGOC: null  
 PGOP: null

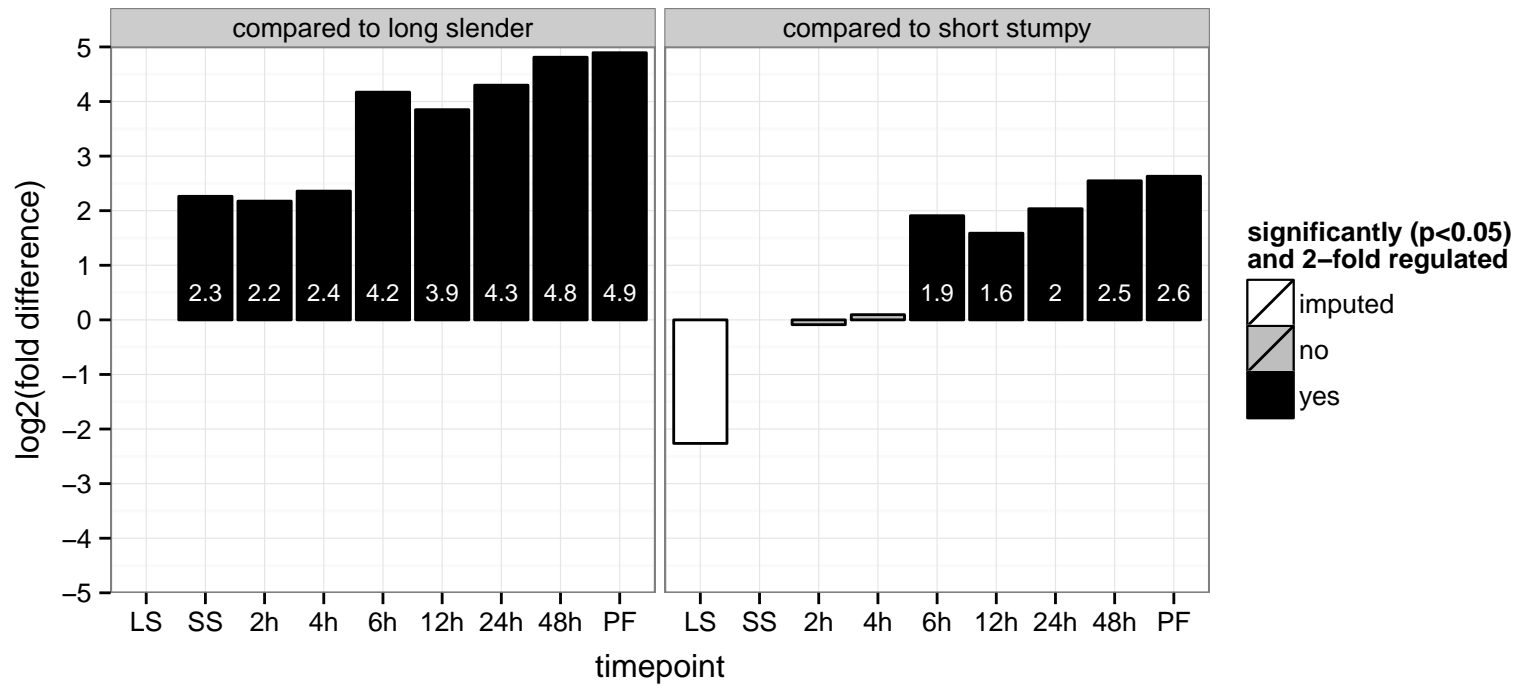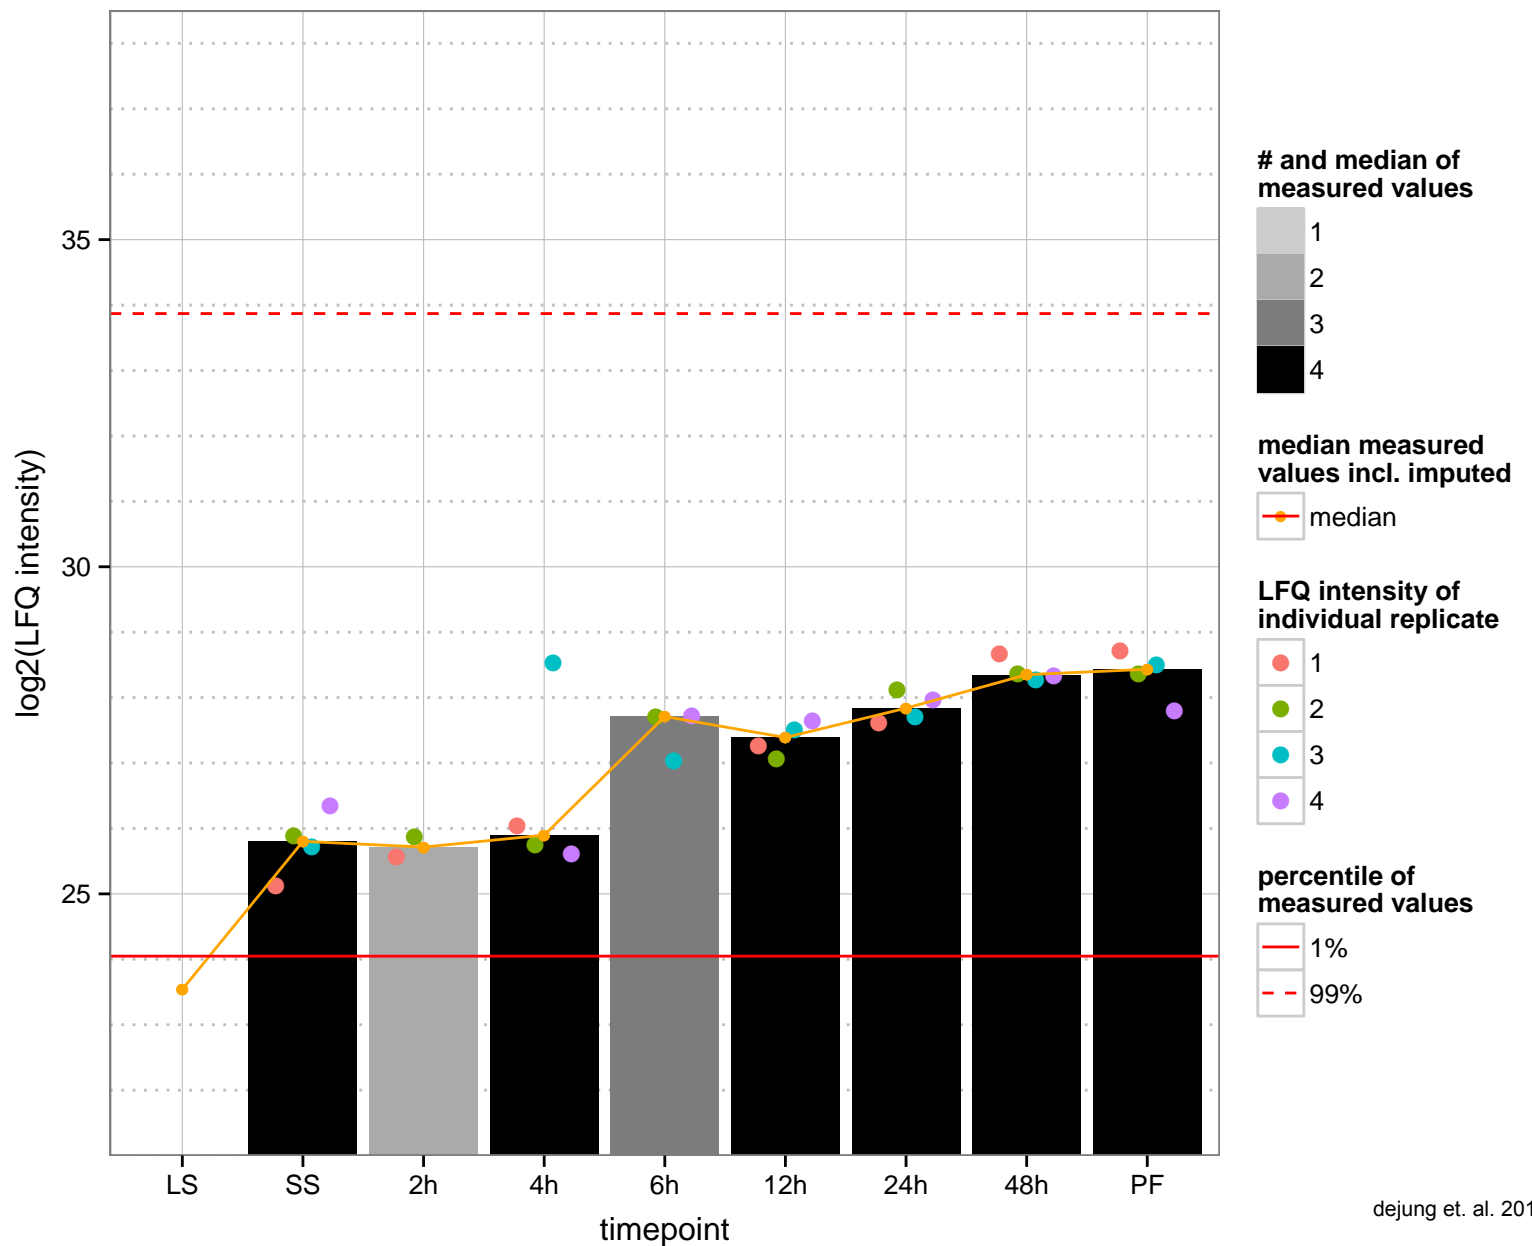

hypothetical protein, conserved  
 Tb927.9.2270  
 AGOF: null  
 AGOC: mitochondrion  
 AGOP: null  
 PGO: null  
 PGOC: null  
 PGOP: null

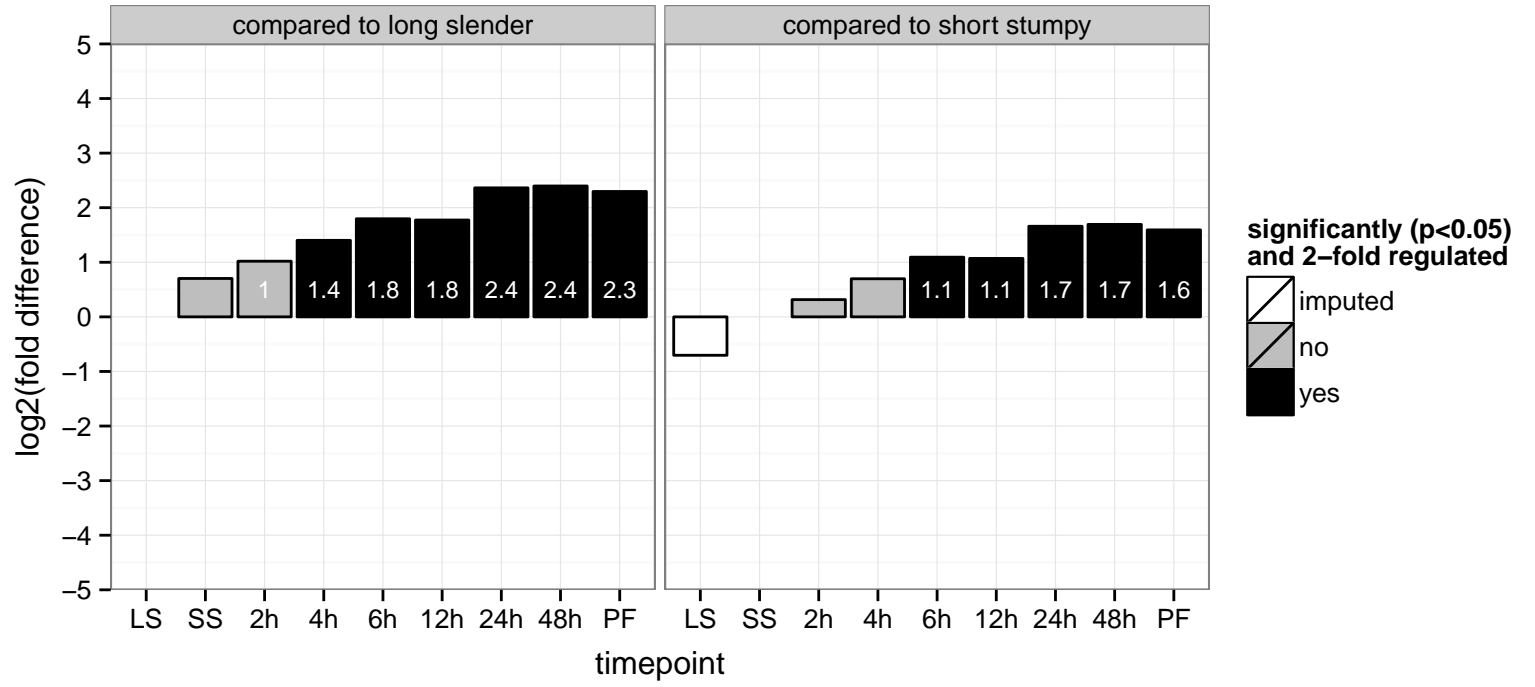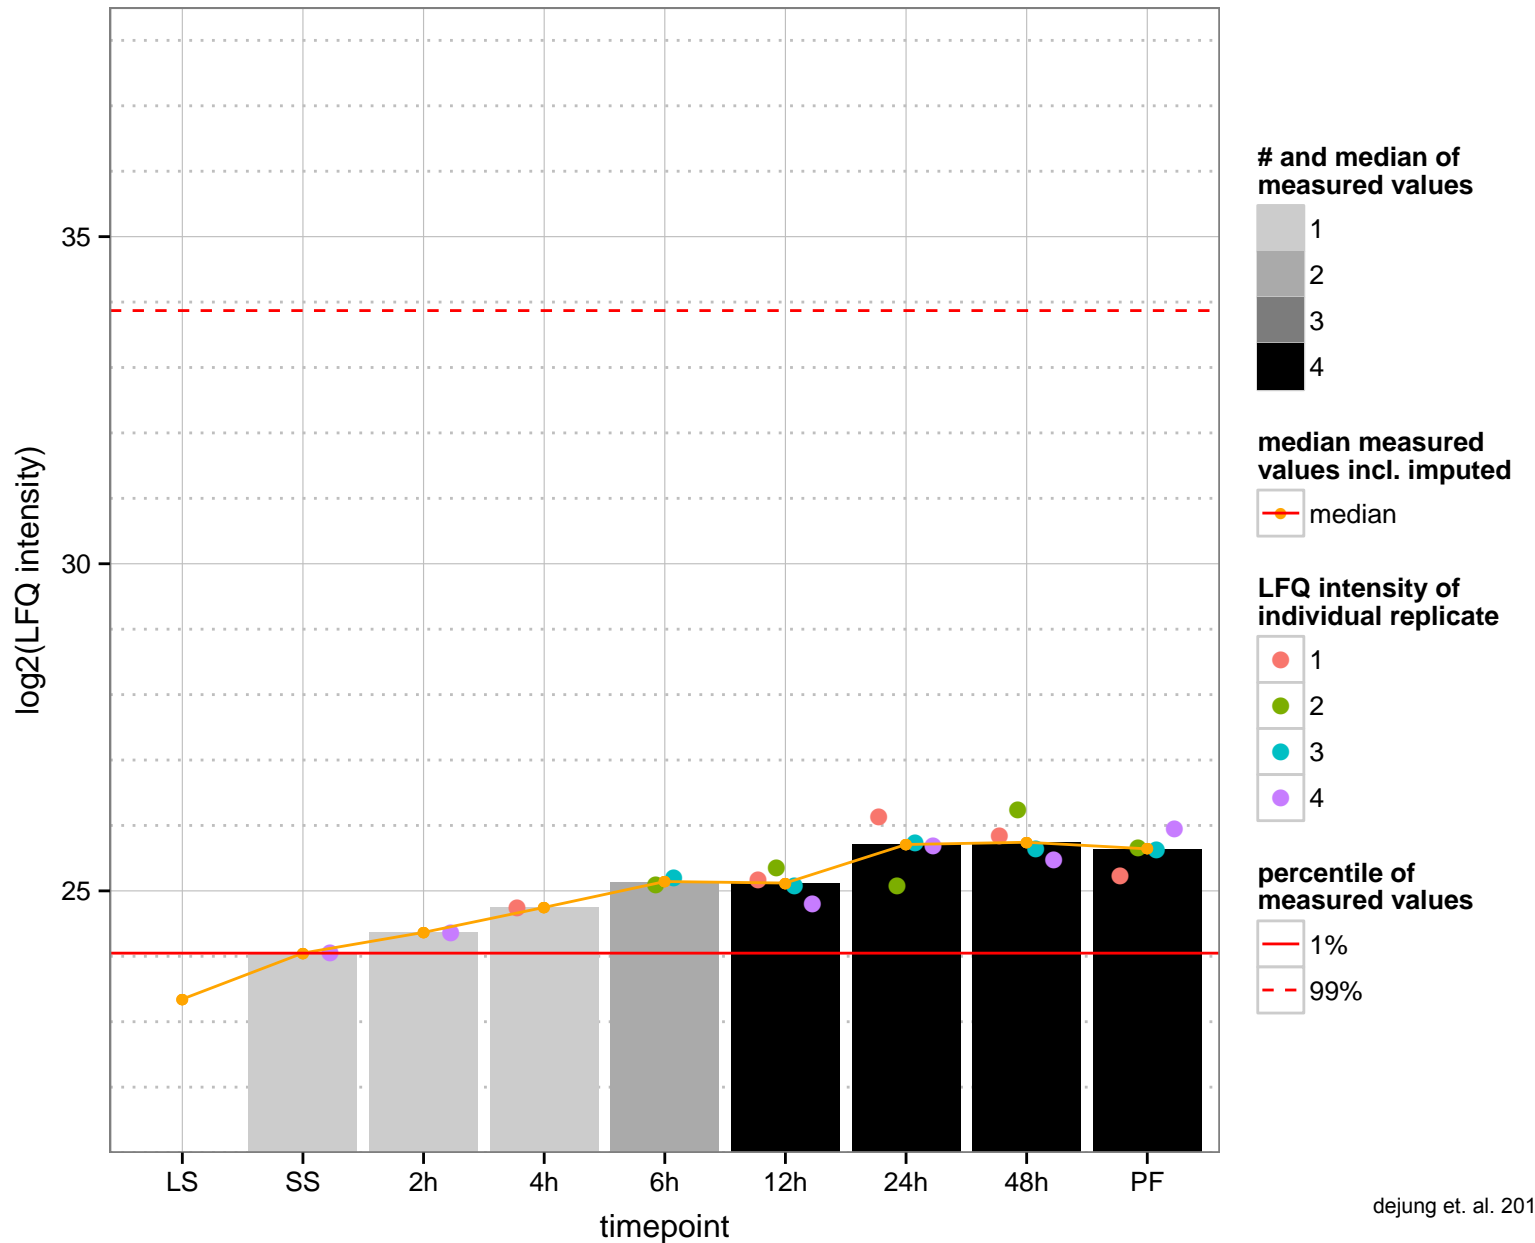

protein kinase, putative

Tb927.9.3120

AGOF: ATP binding, protein serine/threonine kinase activity, protein tyrosine kinase activity

AGOC: integral to membrane

AGOP: protein phosphorylation

PGOF: ATP binding, protein kinase activity, transferase activity, transferring phosphorus-containing groups

PGOC: null

PGOP: protein phosphorylation

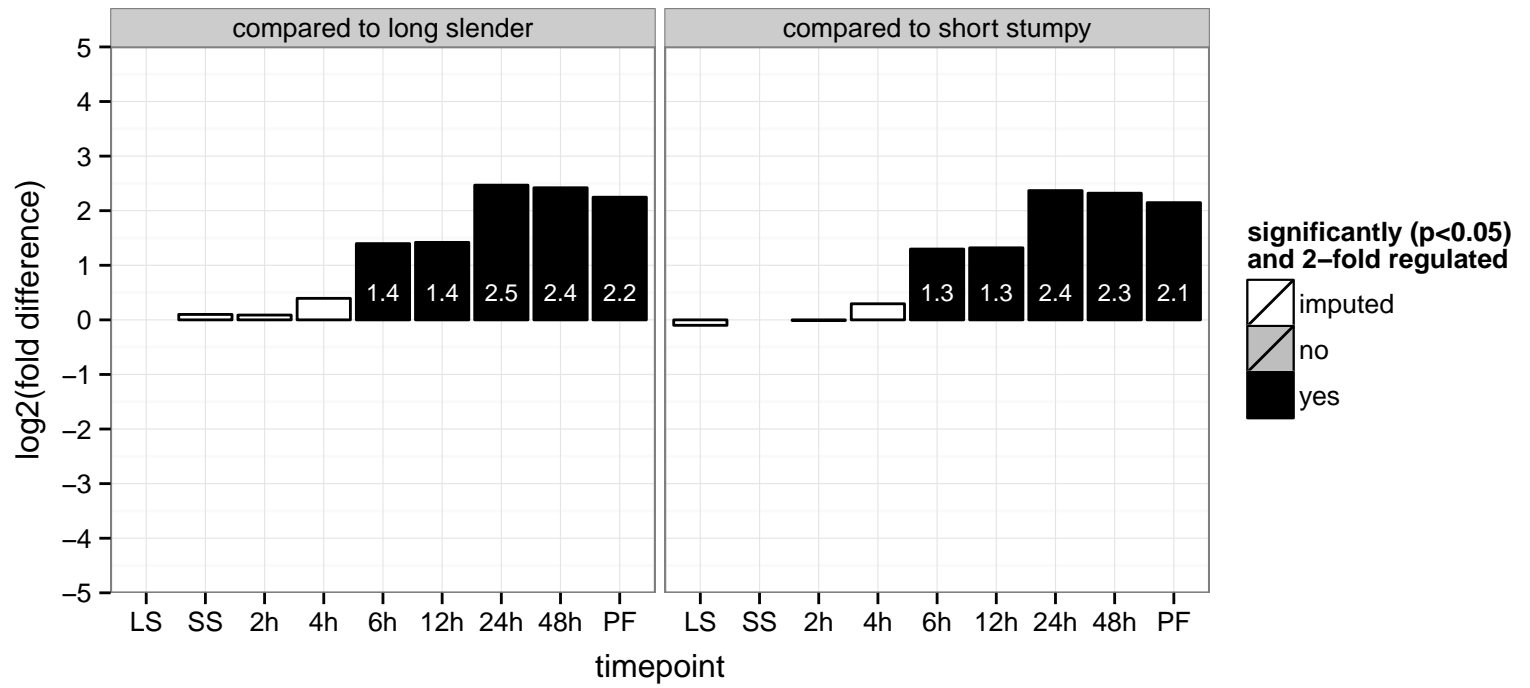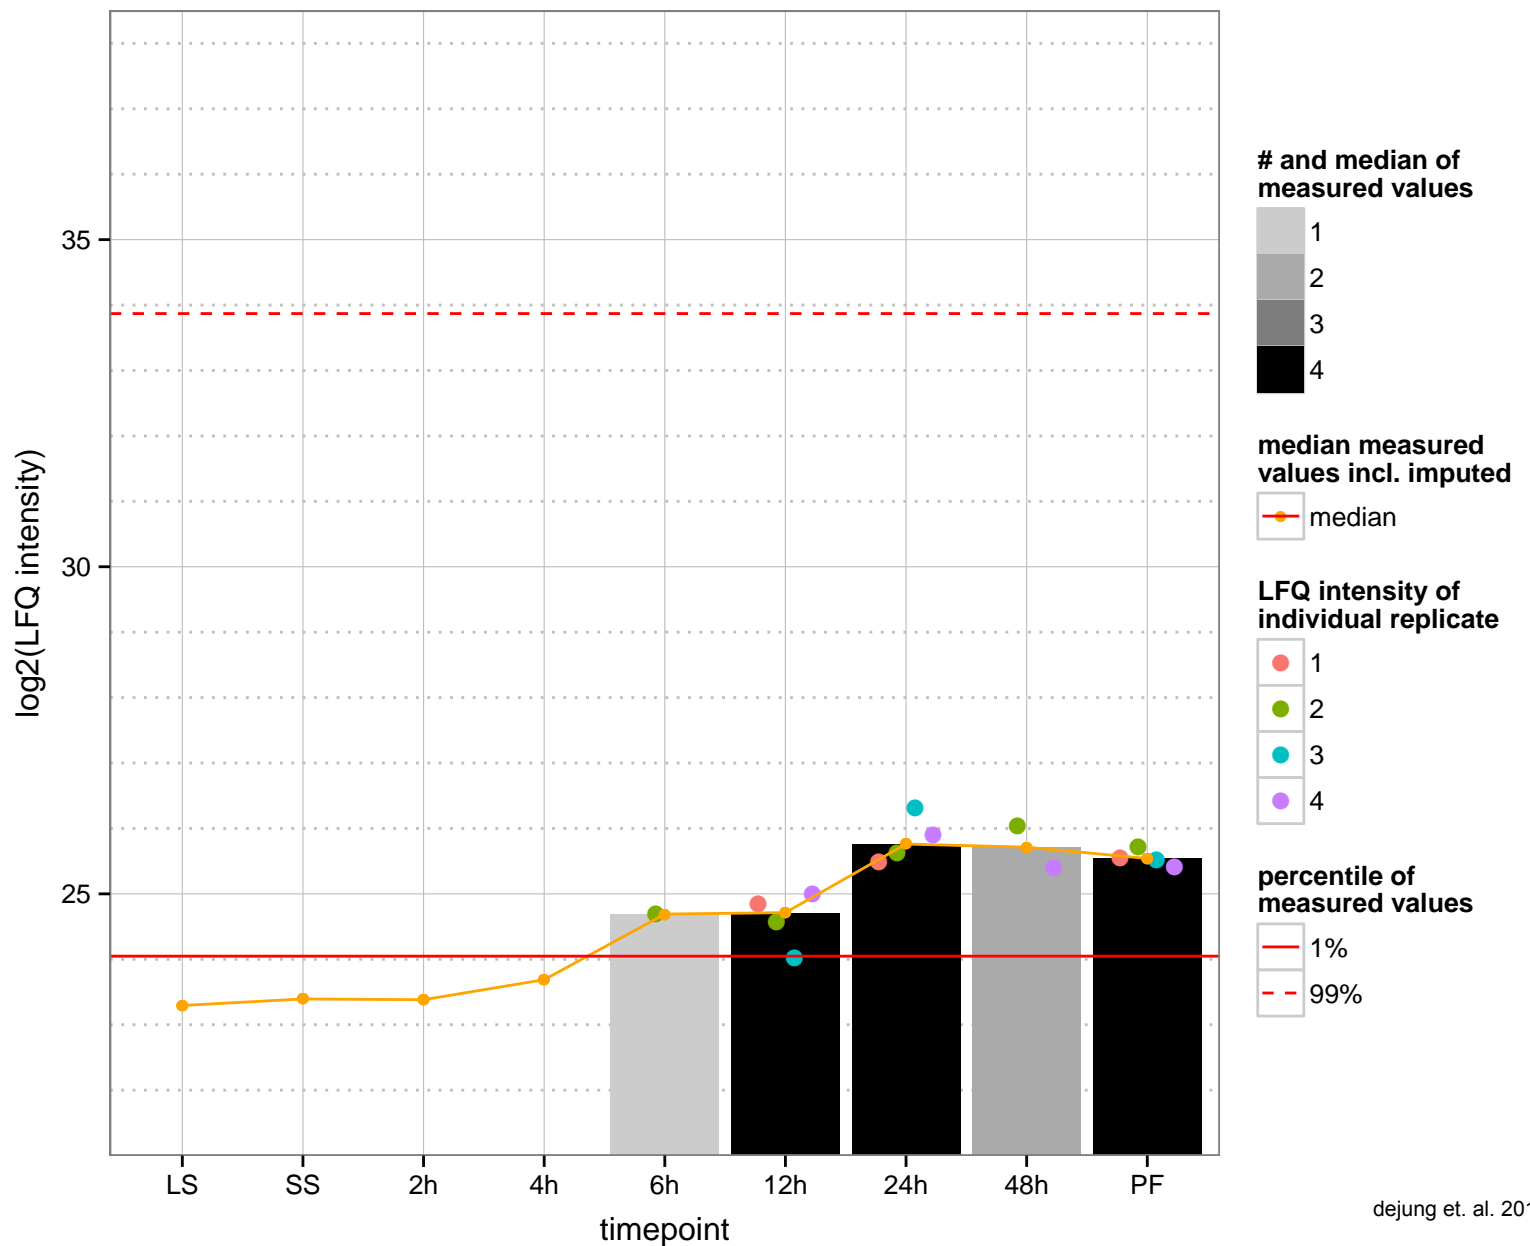

tricarboxylate carrier, putative  
 Tb927.9.4310  
 AGOF: cation transmembrane transporter activity  
 AGOC: mitochondrial inner membrane  
 AGOP: cation transport  
 PGO: cation transmembrane transporter activity  
 PGOC: membrane  
 PGOP: cation transport, transmembrane transport

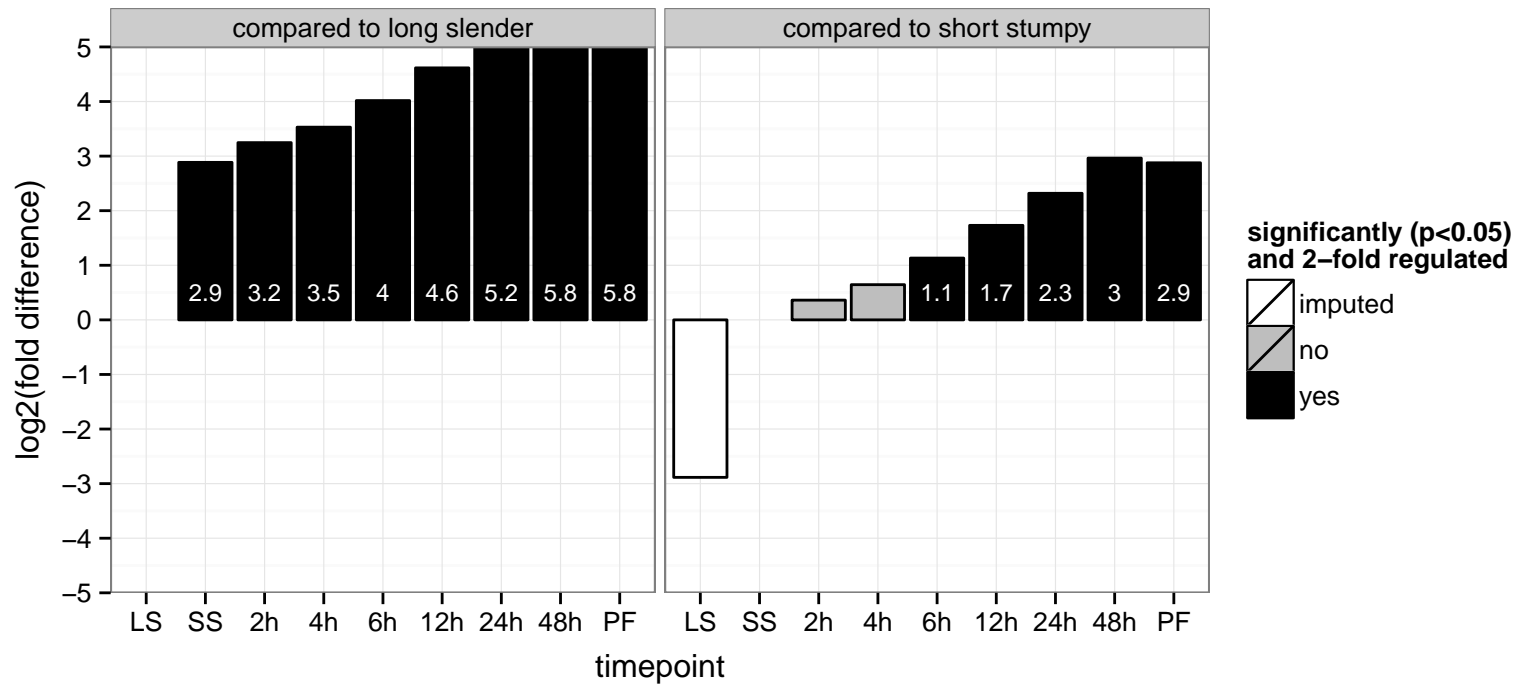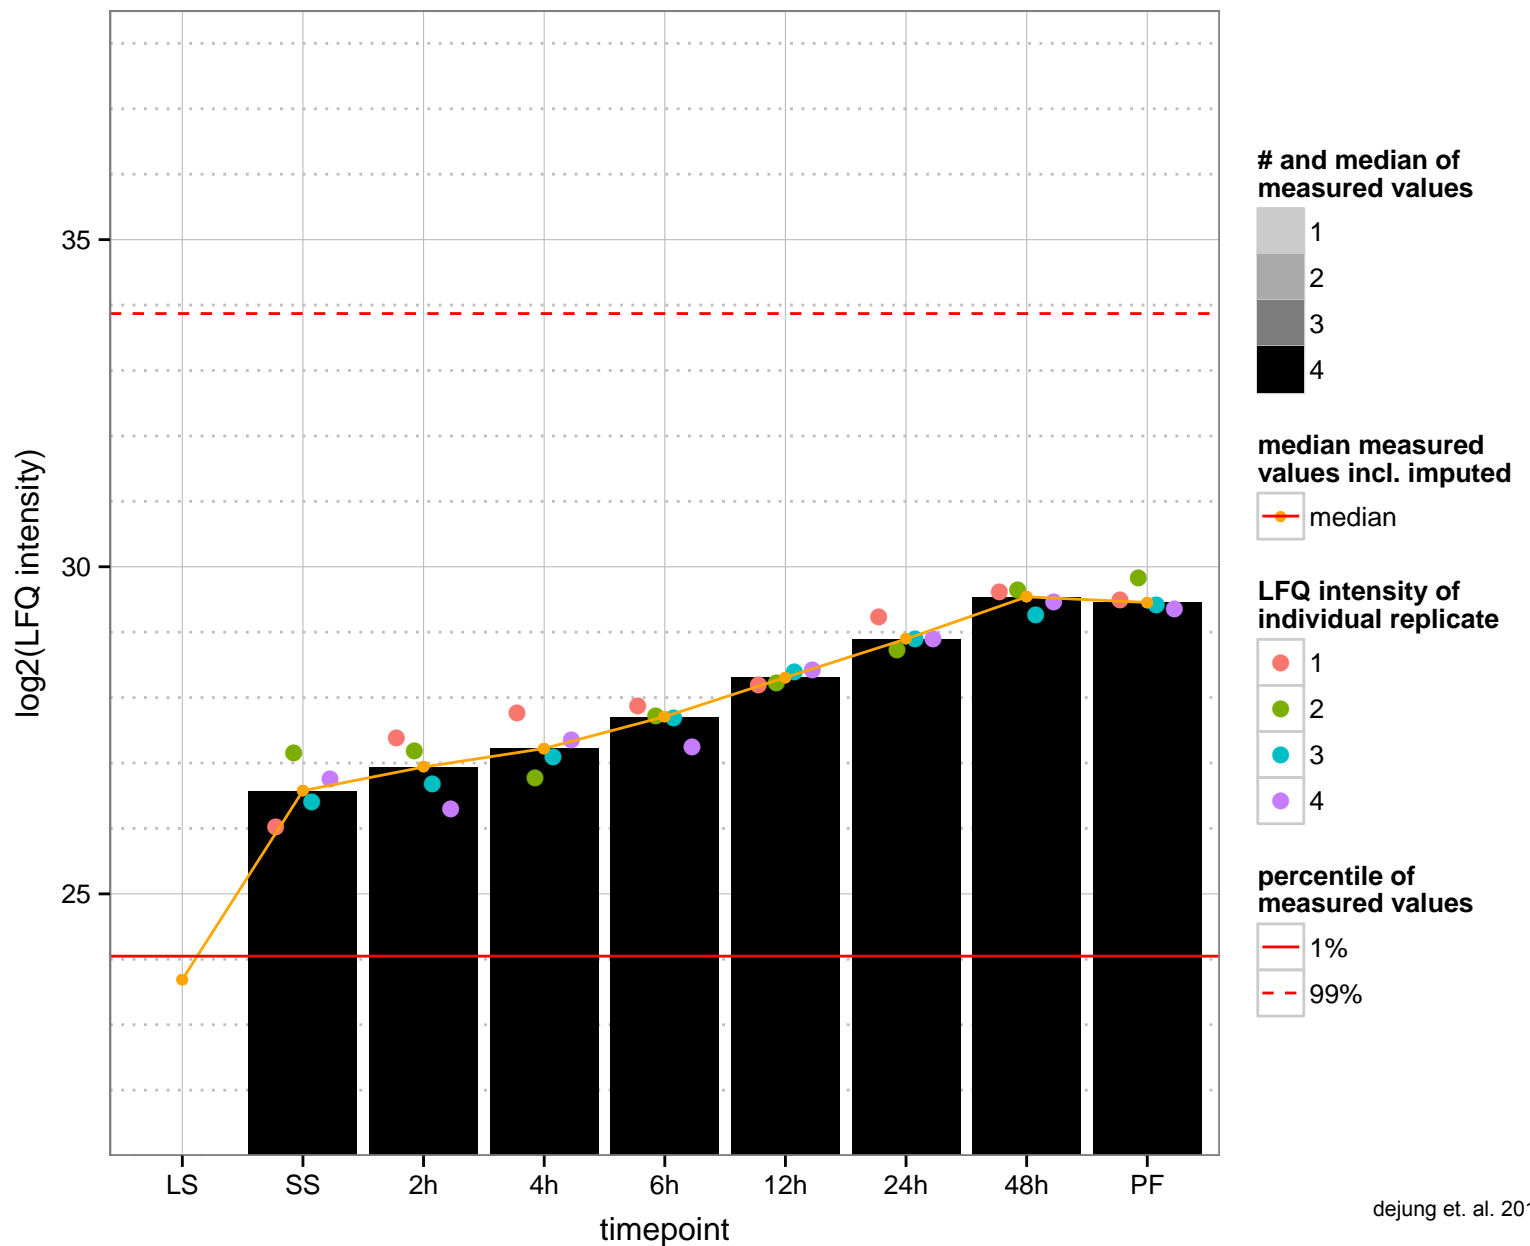

exosome complex exonuclease RRP40 (RRP40)  
 Tb927.9.7070  
 AGOF: 3'-5'-exoribonuclease activity  
 AGOC: null  
 AGOP: rRNA processing  
 PGO: null  
 PGOC: null  
 PGOP: null

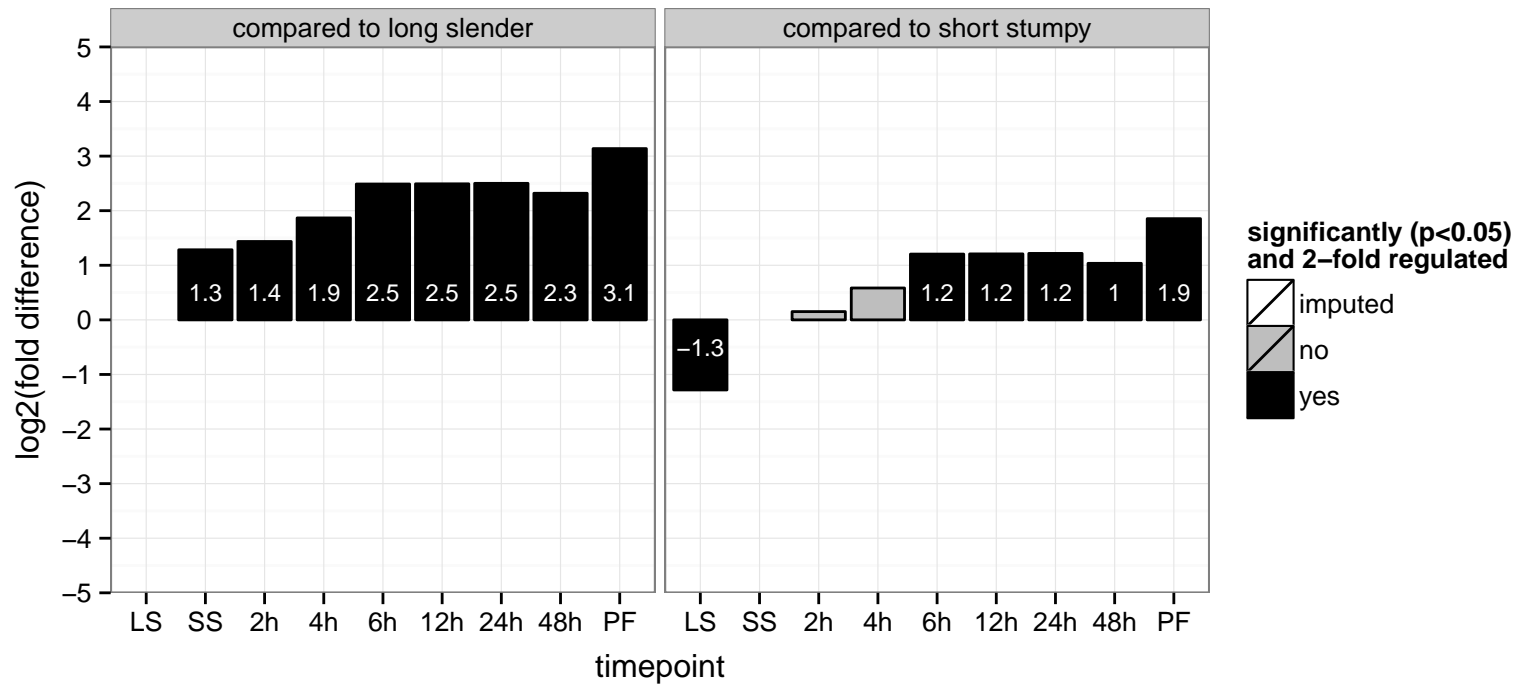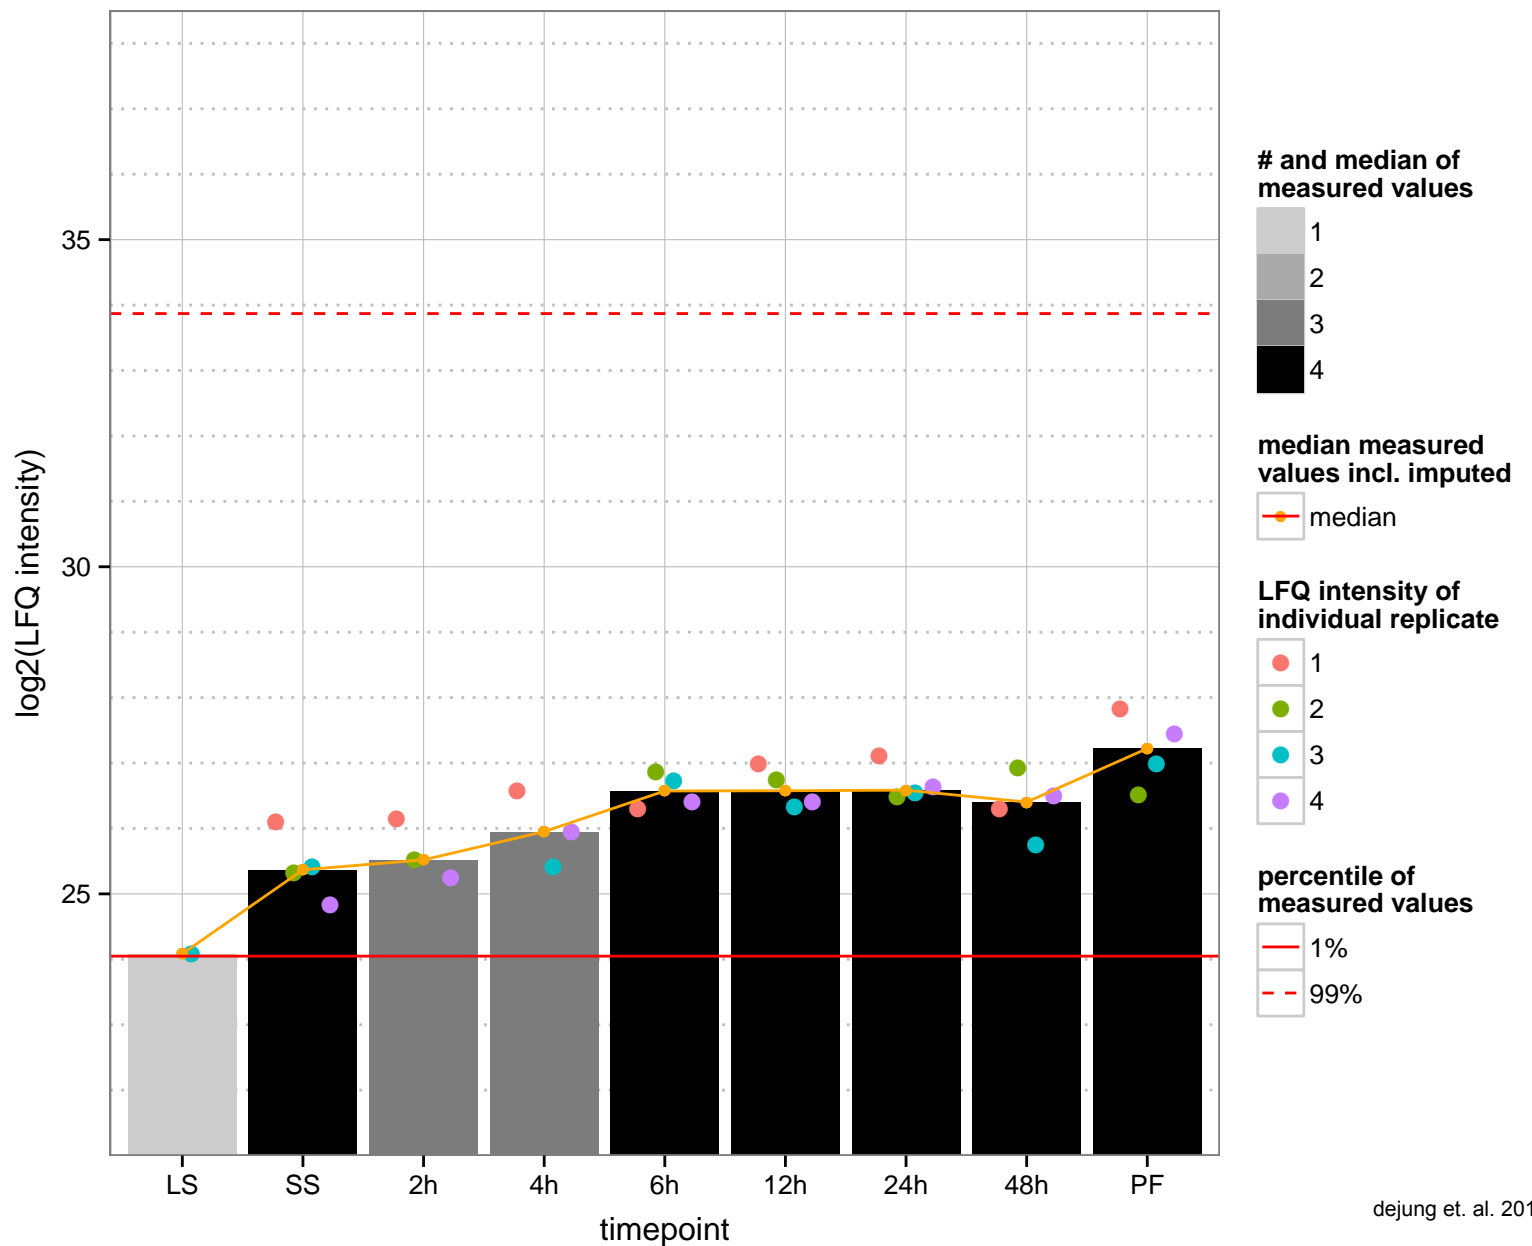

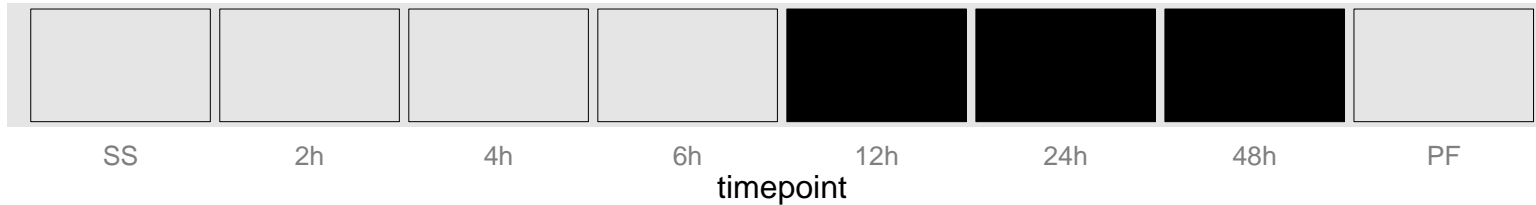

**regulated**  not regulated  significant down  significant up

DNA-directed RNA polymerase II, subunit 9, putative, DNA-directed RNA polymerase II, putative (RPB9)  
 Tb927.11.7280;Tb11.v5.0255  
 AGOF: null, DNA binding, DNA-directed RNA polymerase activity  
 AGOC: null, nucleus  
 AGOP: null, transcription, DNA-dependent  
 PGO: DNA binding, DNA-directed RNA polymerase activity  
 PGOC: null  
 PGOP: transcription, DNA-dependent

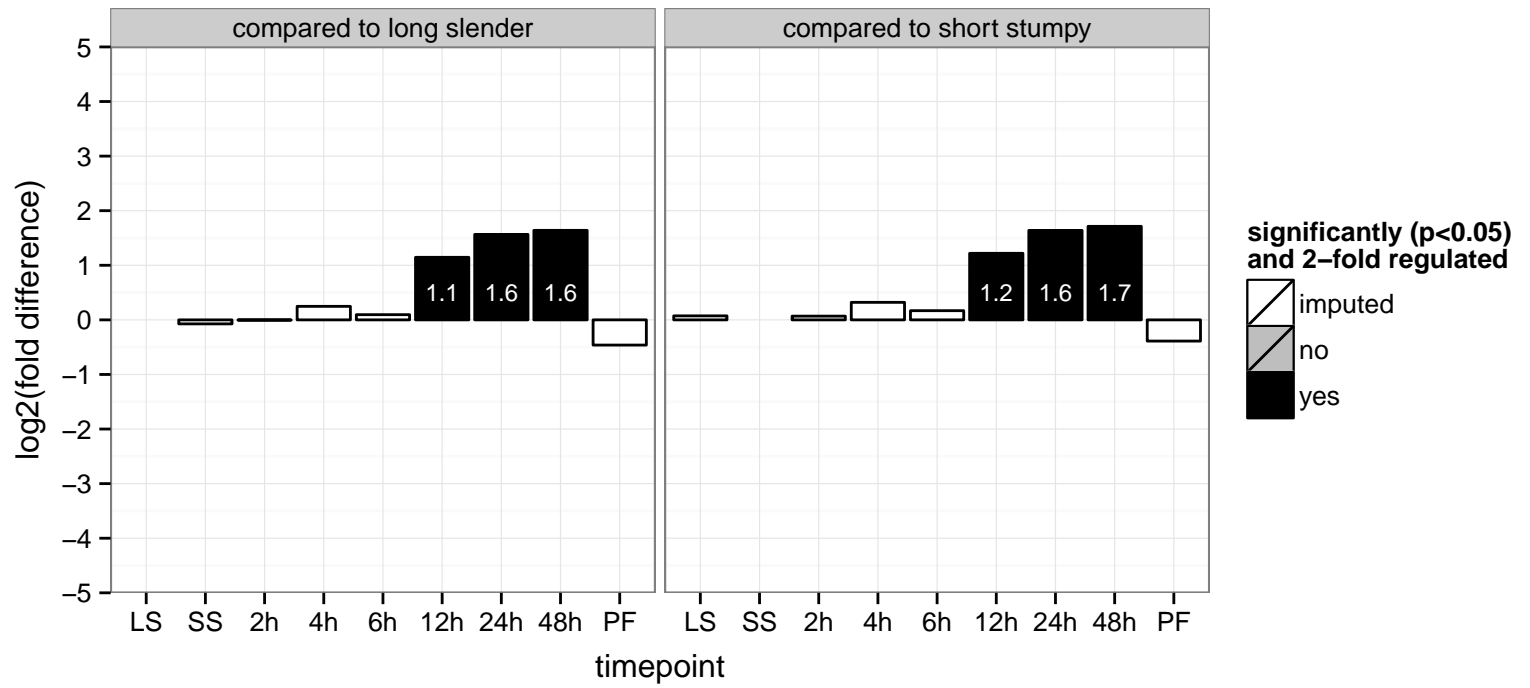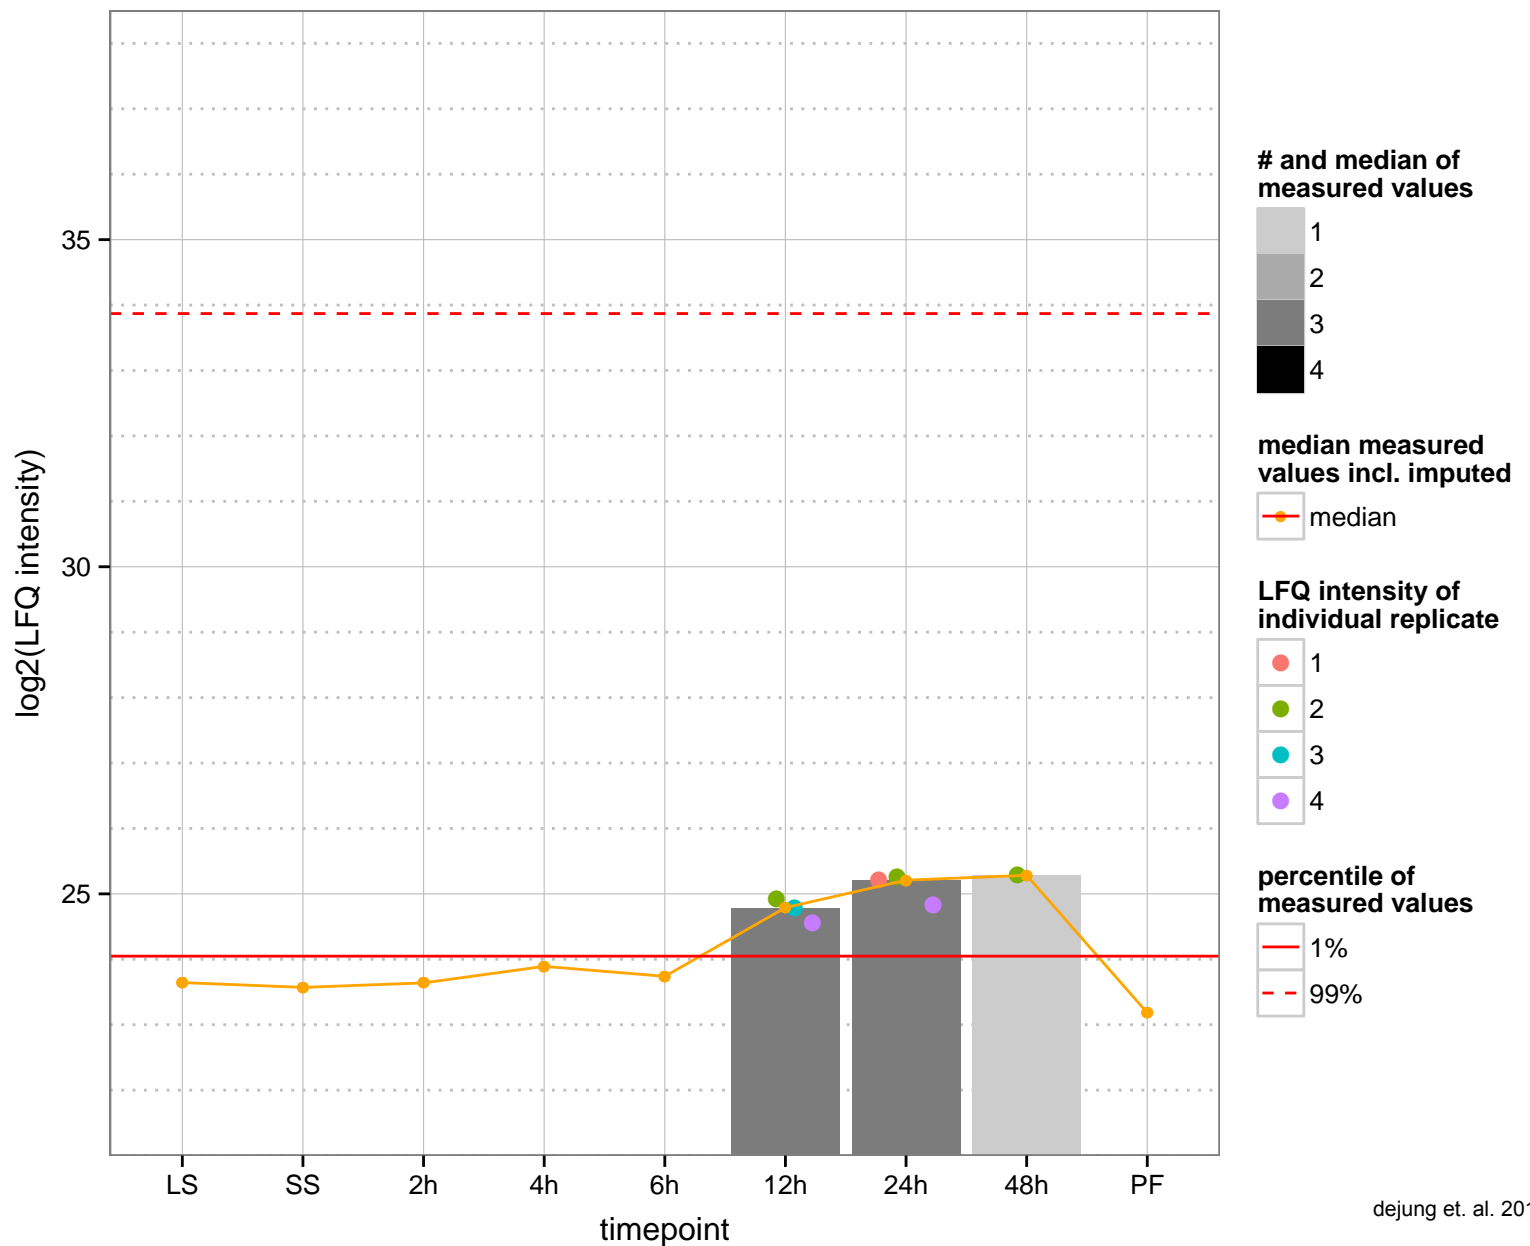



conserved protein, unknown function  
 Tb927.1.1750  
 AGOF: null  
 AGOC: null  
 AGOP: null  
 PGO: null  
 PGOC: null  
 PGOP: null

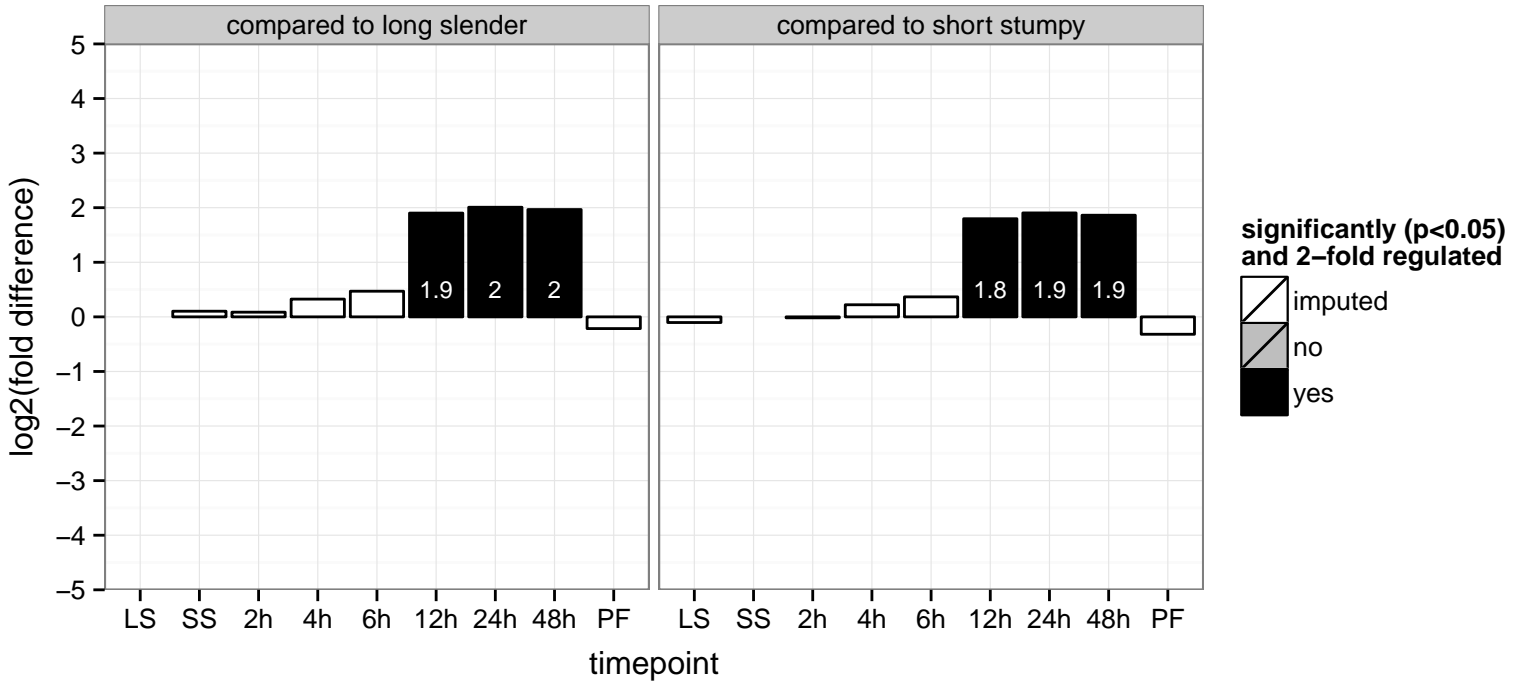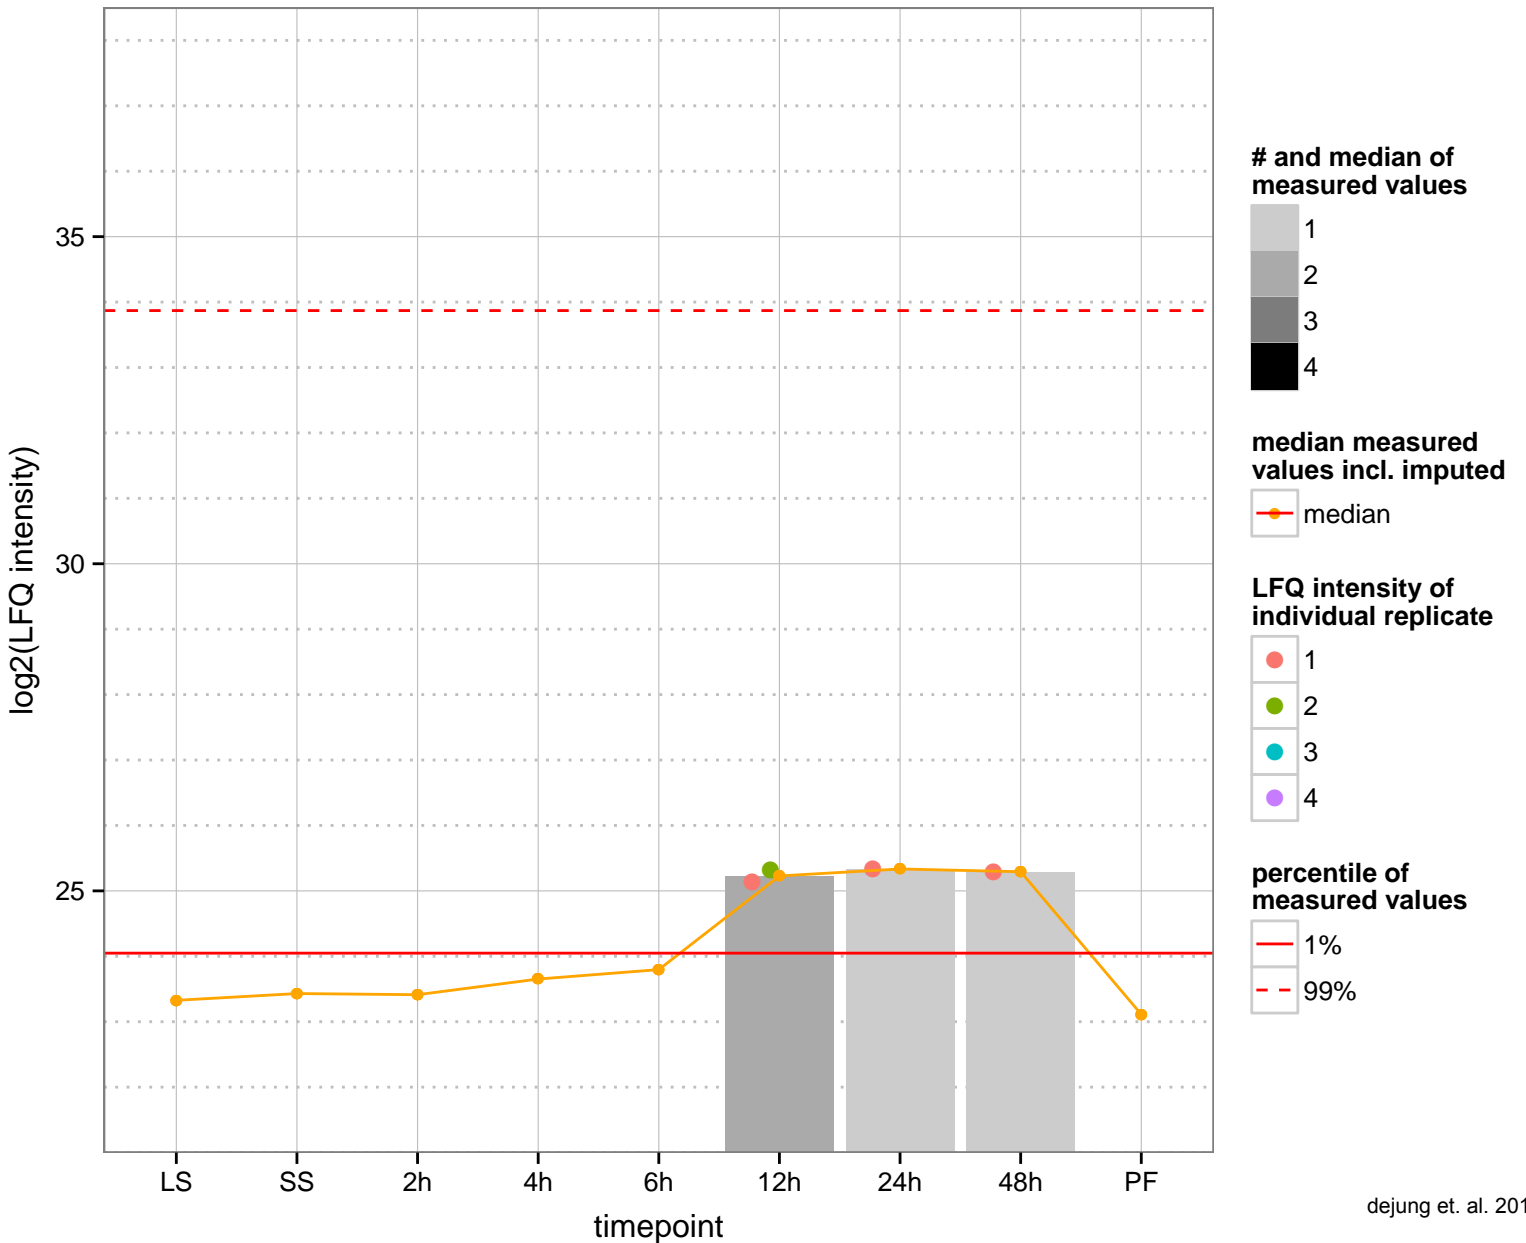

hypothetical protein, conserved  
 Tb927.1.2730  
 AGOF: null  
 AGOC: mitochondrion  
 AGOP: null  
 PGO: null  
 PGOC: null  
 PGOP: null

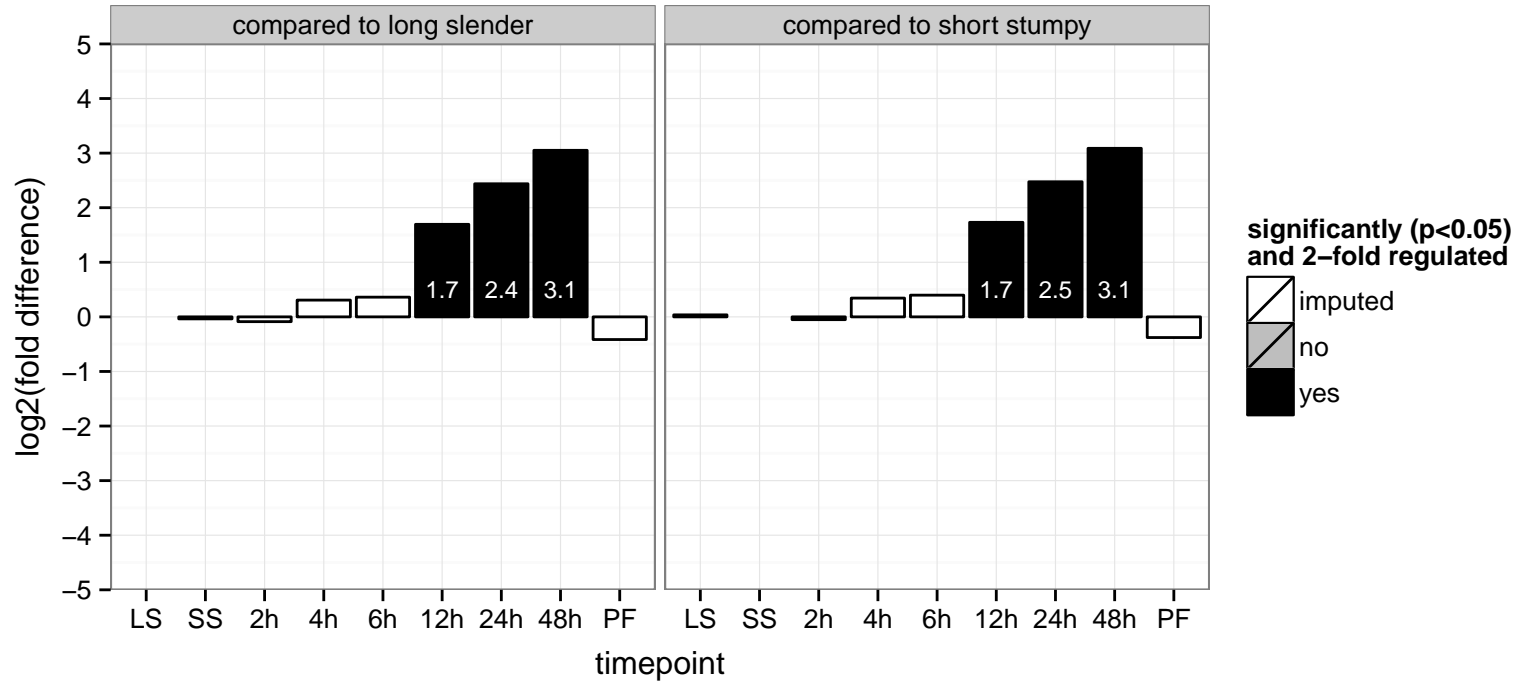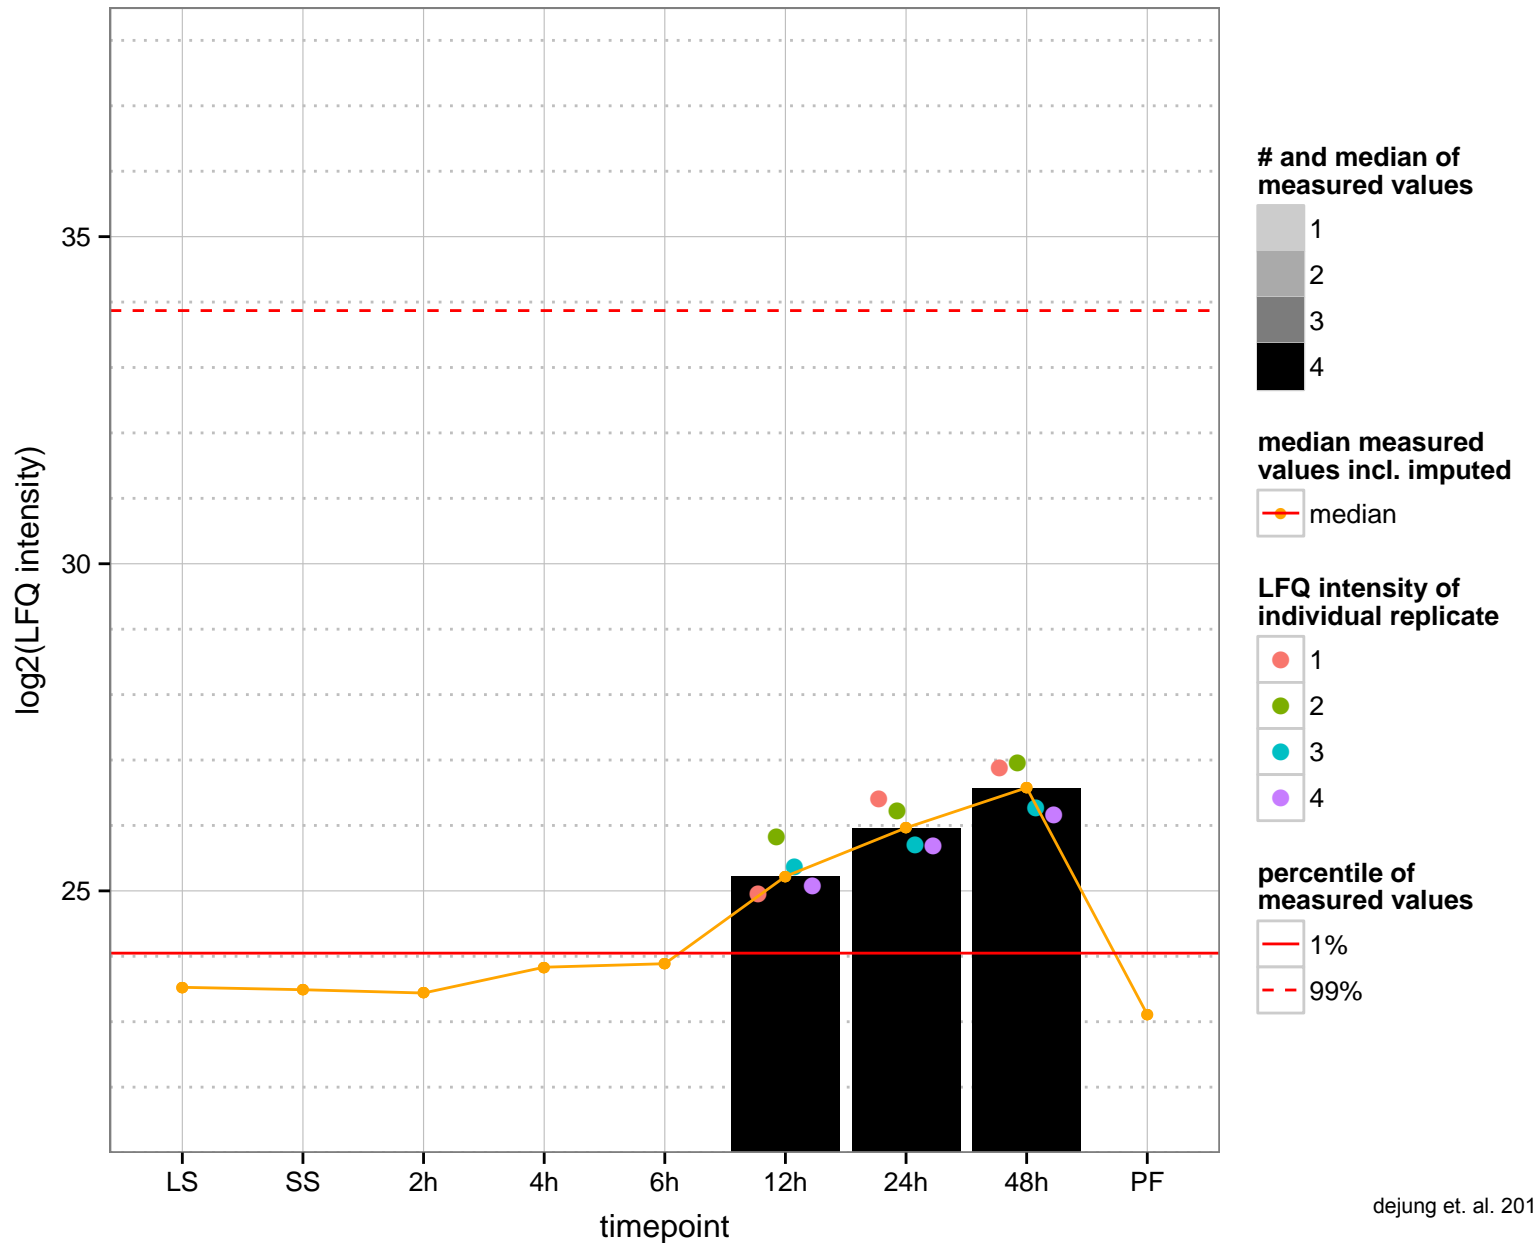

hypothetical protein, conserved  
 Tb927.1.2990  
 AGOF: null  
 AGOC: mitochondrion  
 AGOP: null  
 PGO: null  
 PGOC: null  
 PGOP: null

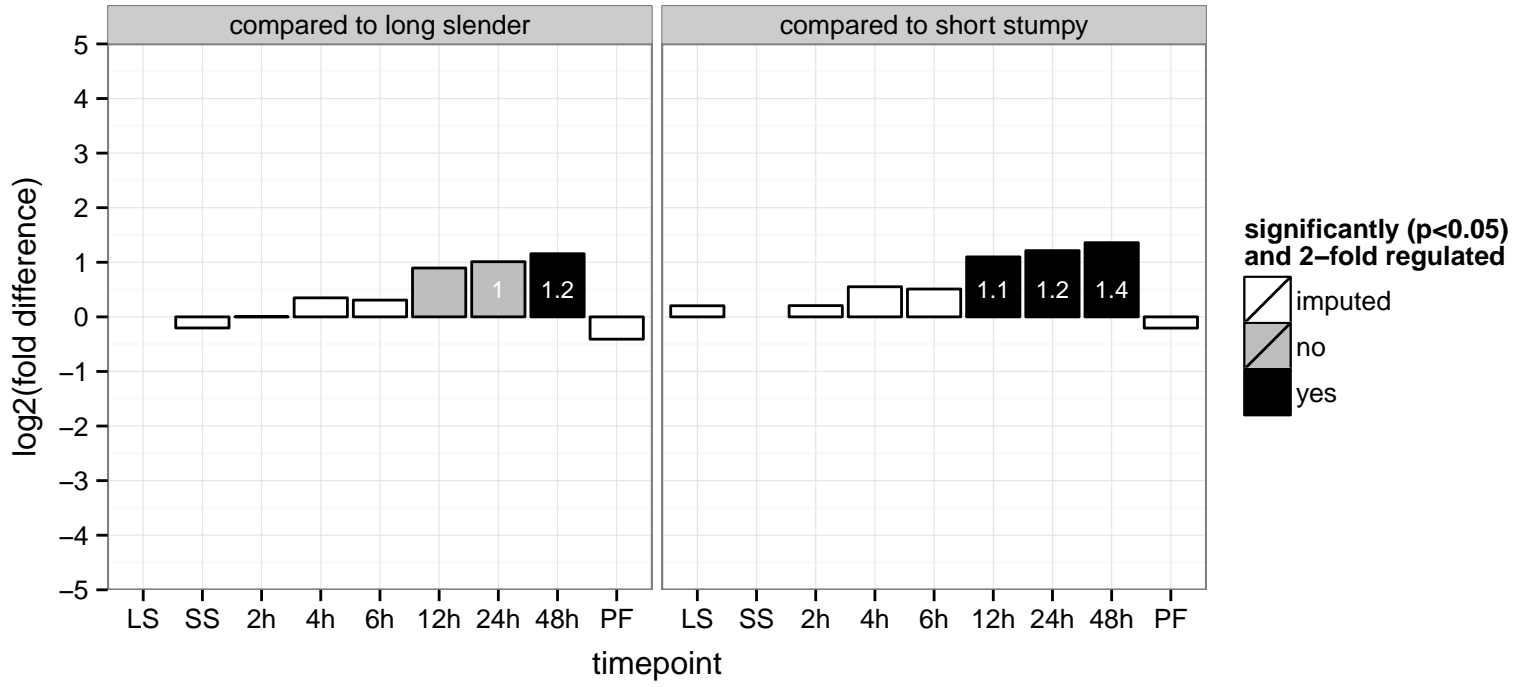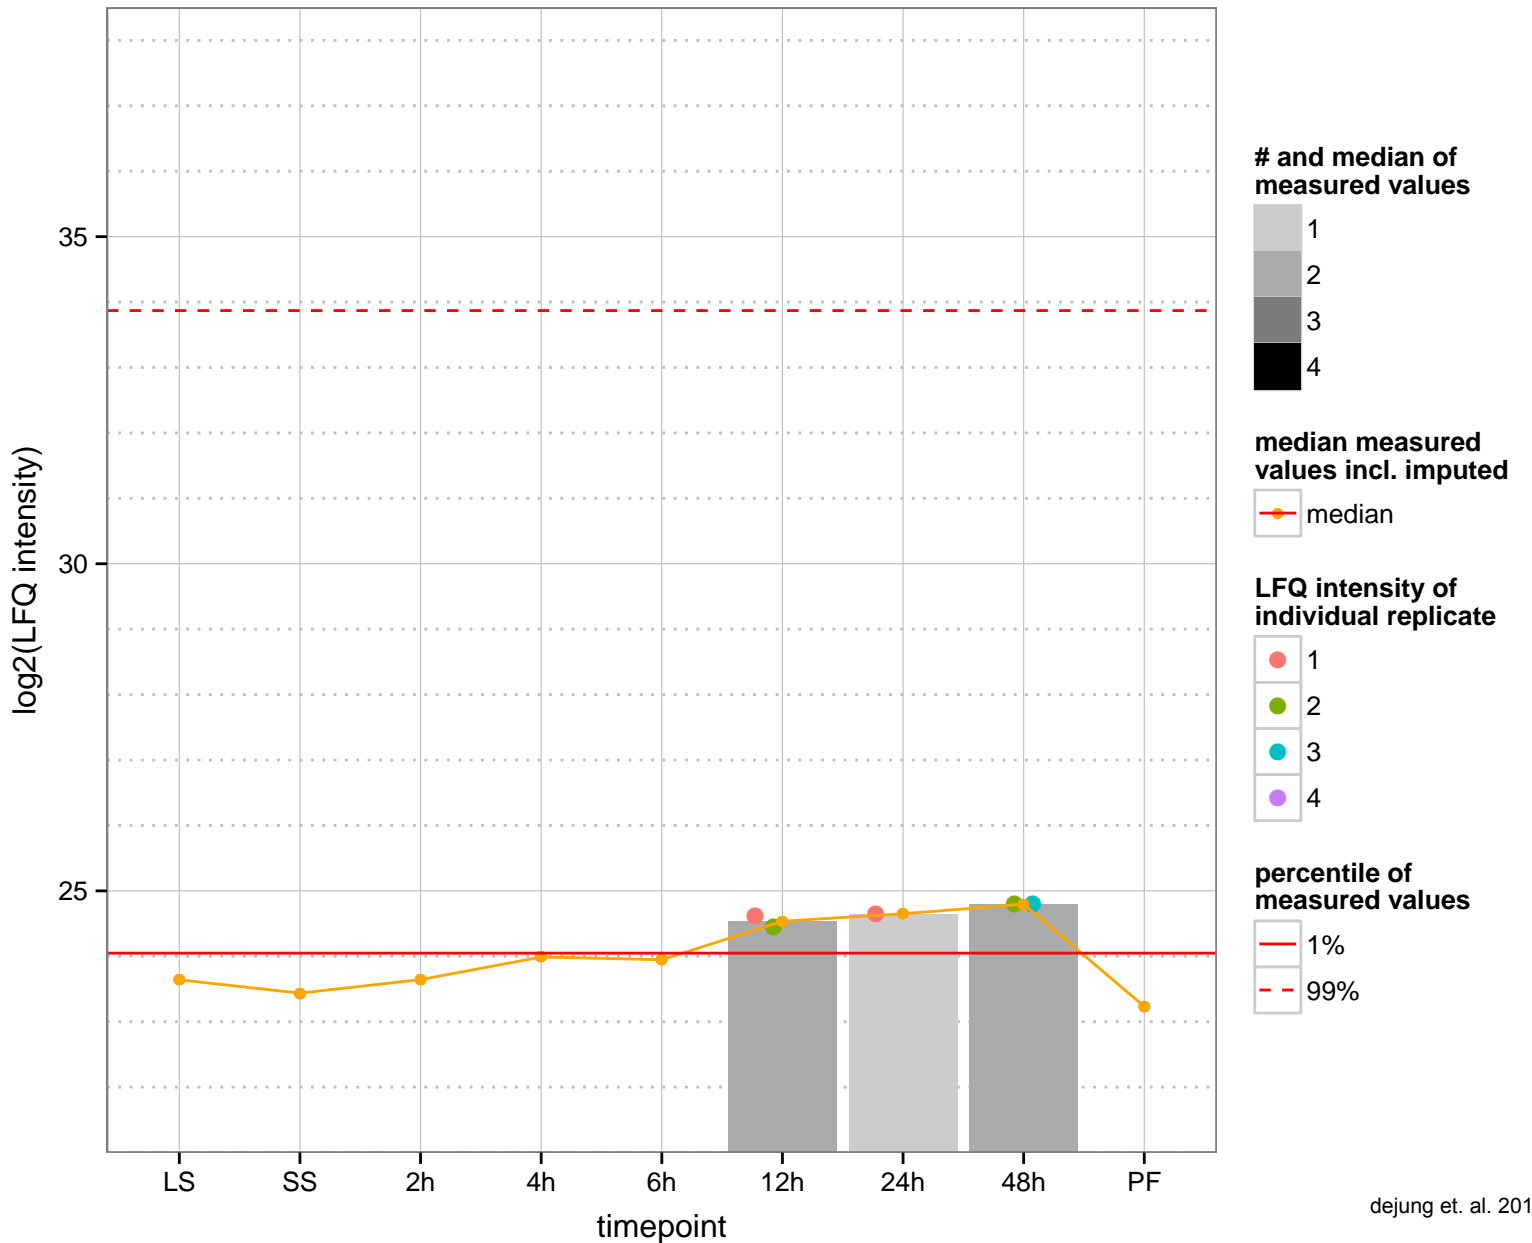

hypothetical protein, conserved  
 Tb927.10.1930  
 AGOF: null  
 AGOC: mitochondrion  
 AGOP: null  
 PGO: null  
 PGOC: null  
 PGOP: null

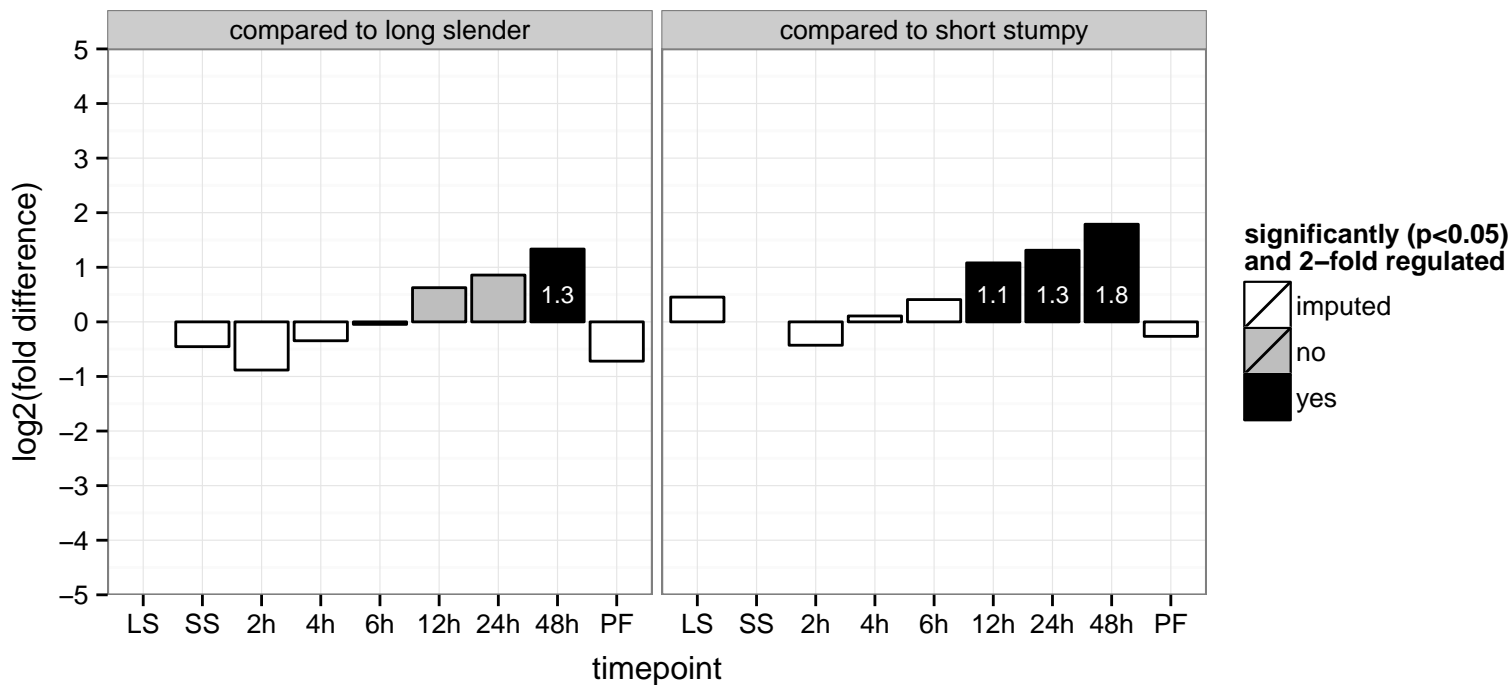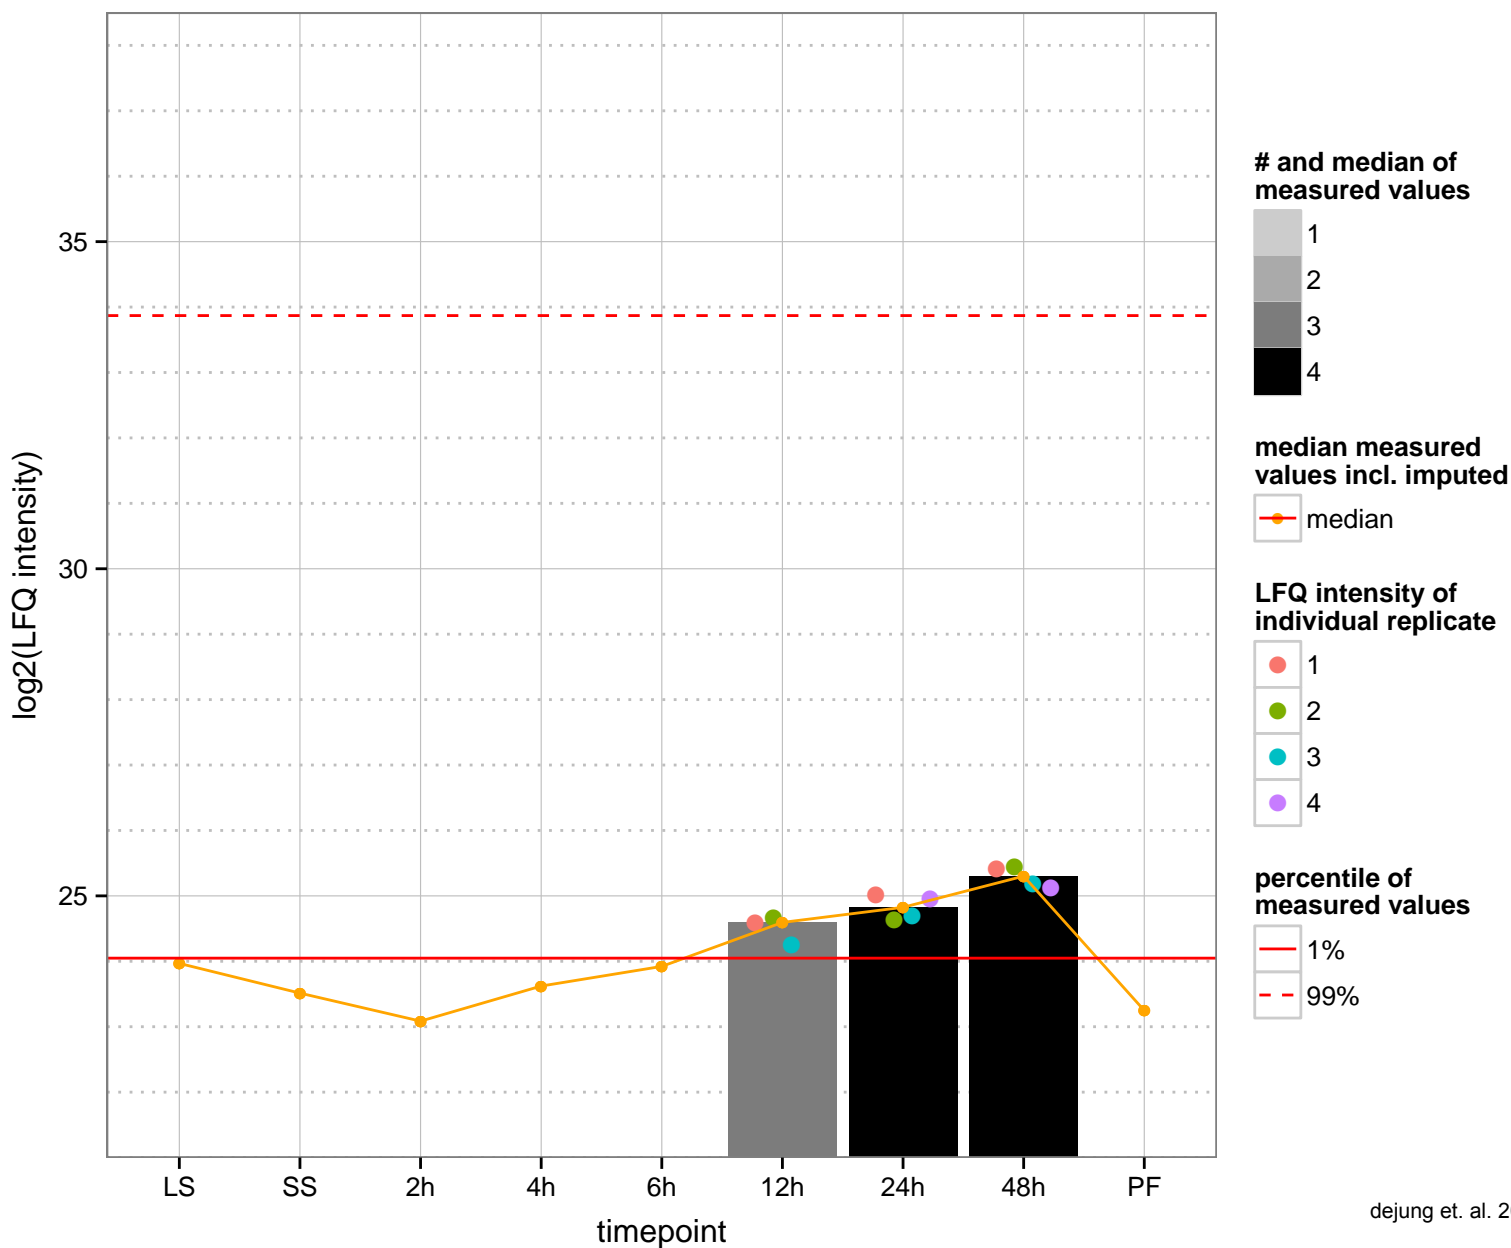

actin-like protein, putative  
 Tb927.10.2000  
 AGOF: structural constituent of cytoskeleton  
 AGOC: mitochondrion  
 AGOP: cytoskeleton organization  
 PGO: null  
 PGO: null  
 PGO: null

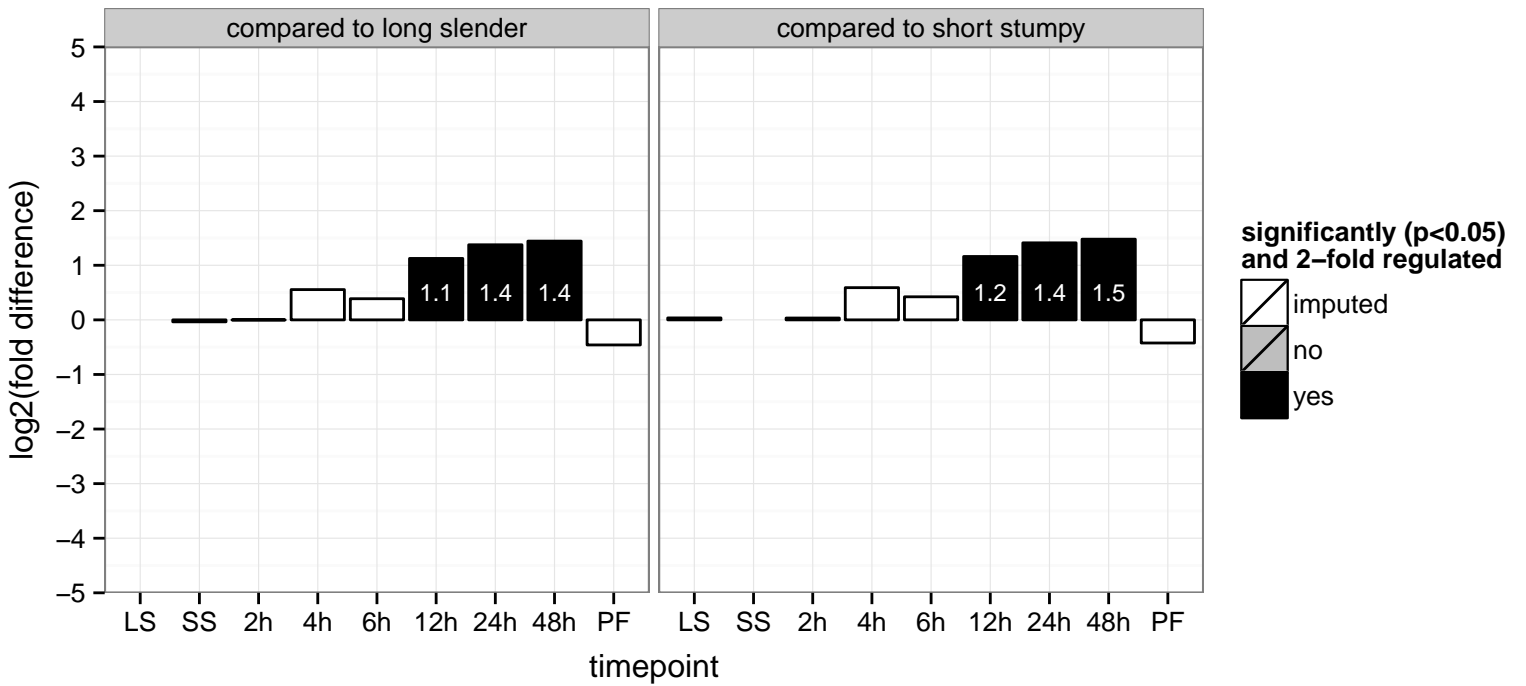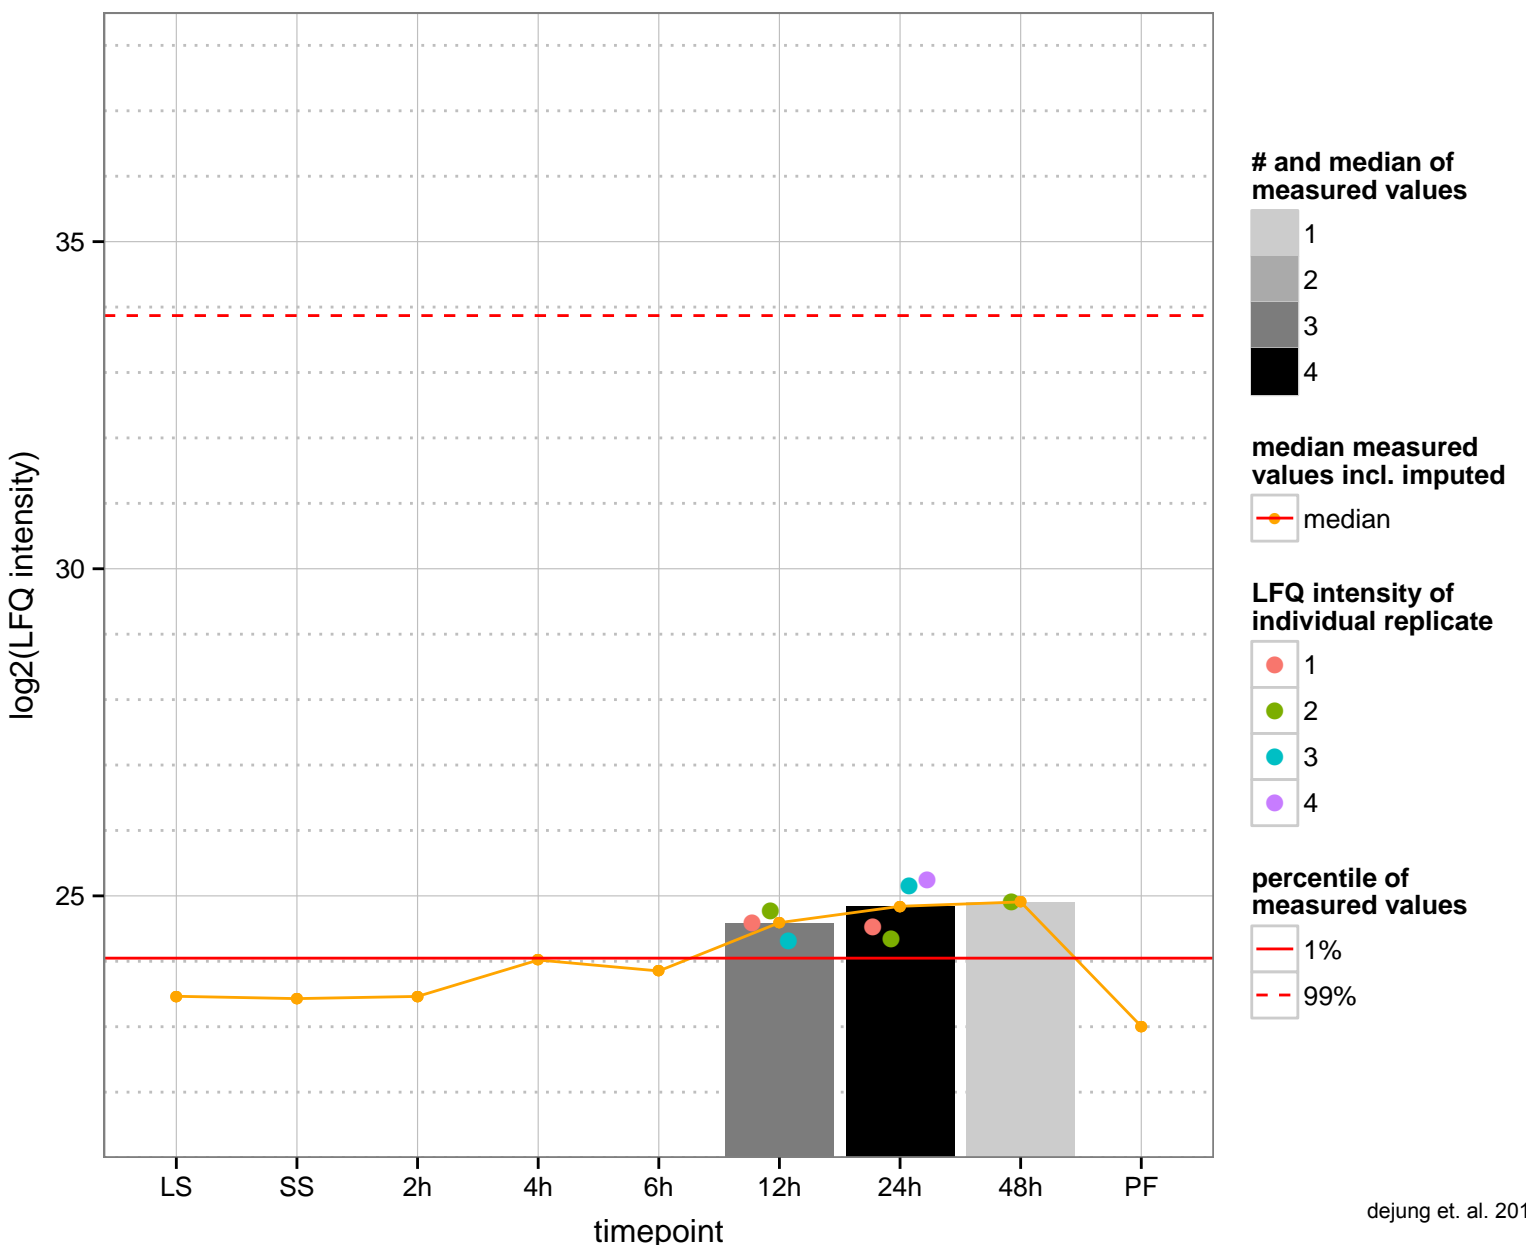

ubiquitin-conjugating enzyme variant Kua homologue, putative  
 Tb927.10.2250  
 AGOF: null  
 AGOC: null  
 AGOP: null  
 PGOF: null  
 PGOC: null  
 PGOP: null

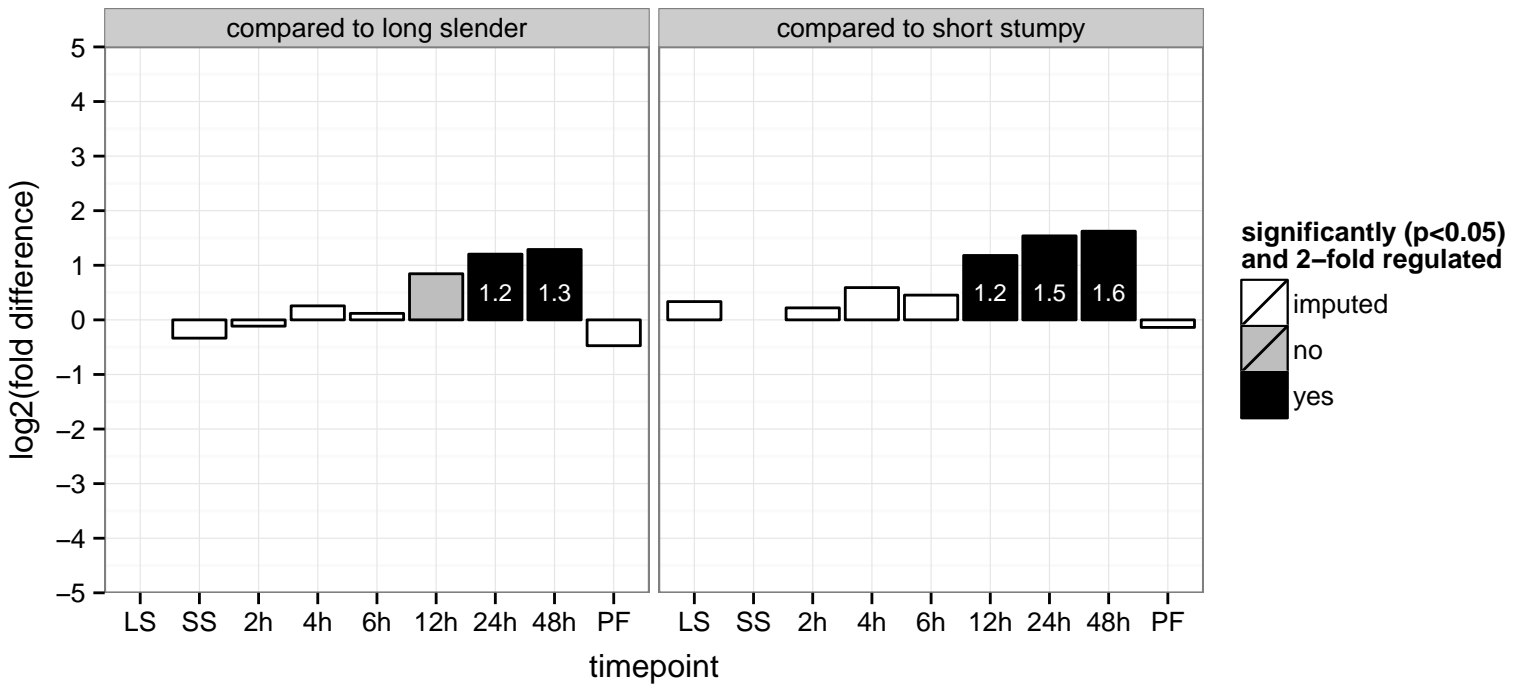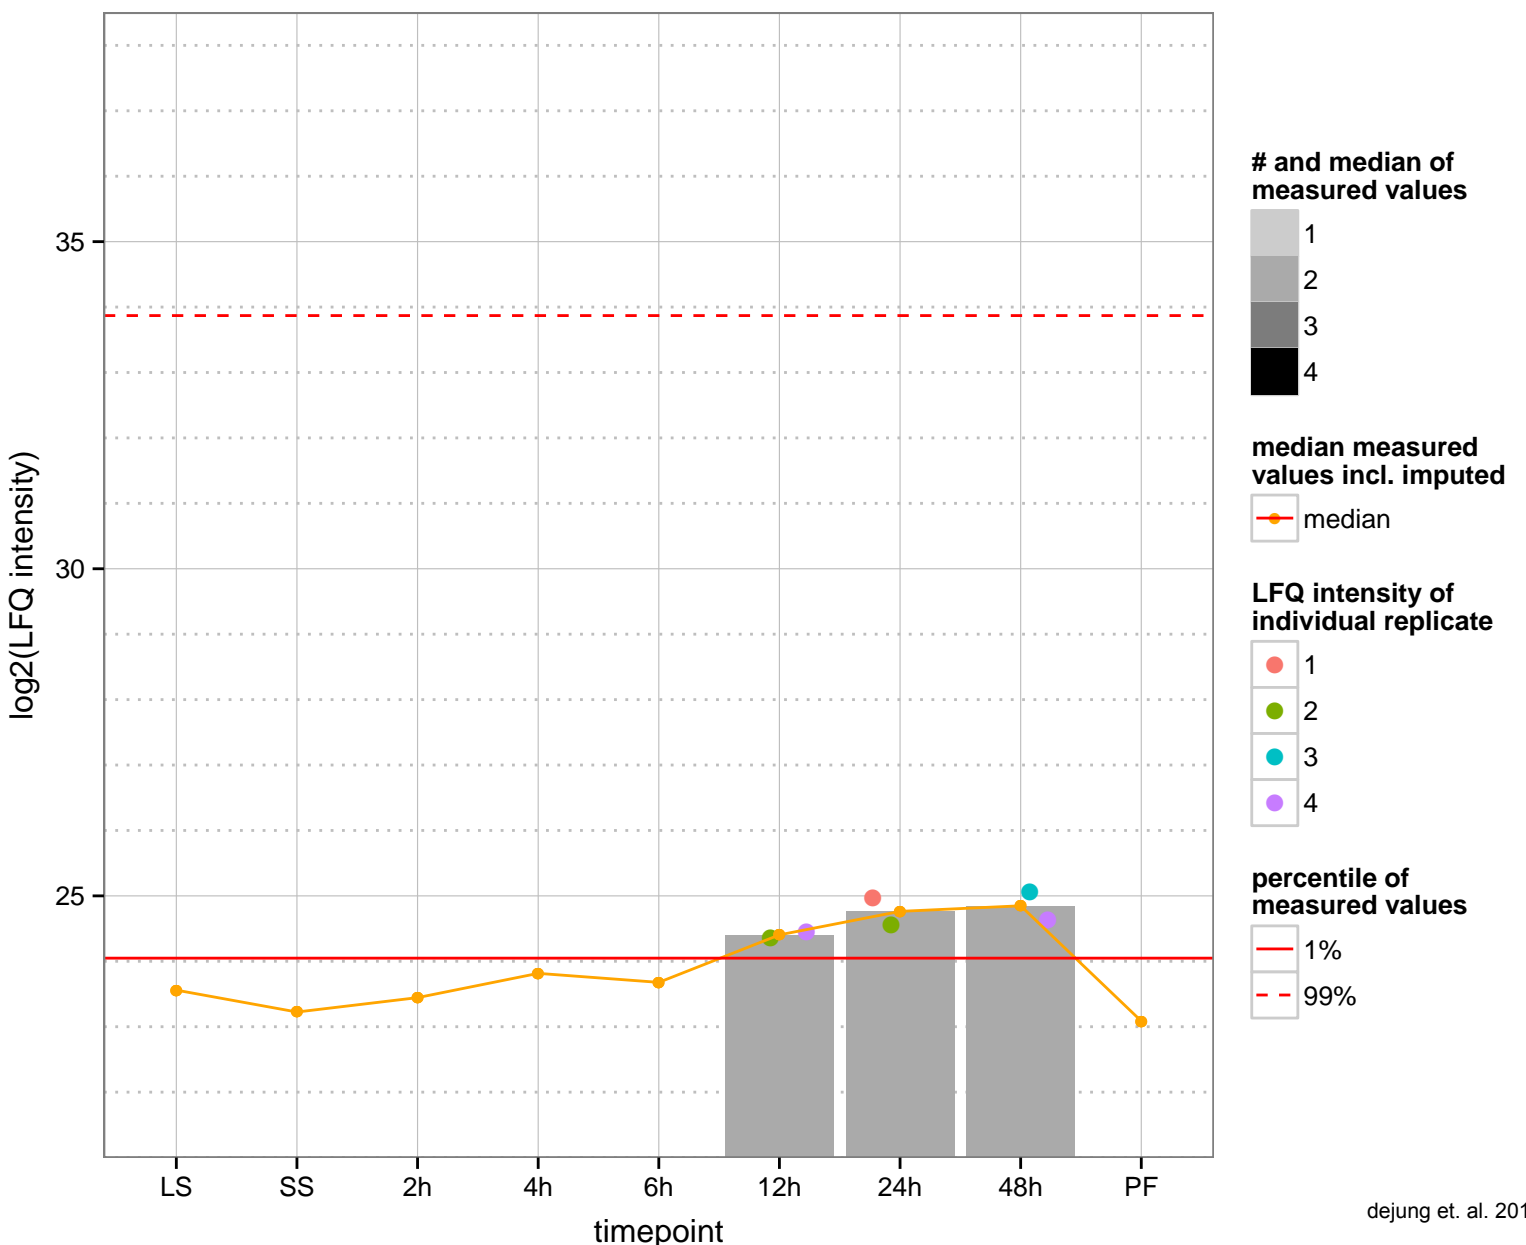

hypothetical protein, conserved  
 Tb927.10.2260  
 AGOF: null  
 AGOC: null  
 AGOP: null  
 PGOF: protein binding  
 PGOC: null  
 PGOP: null

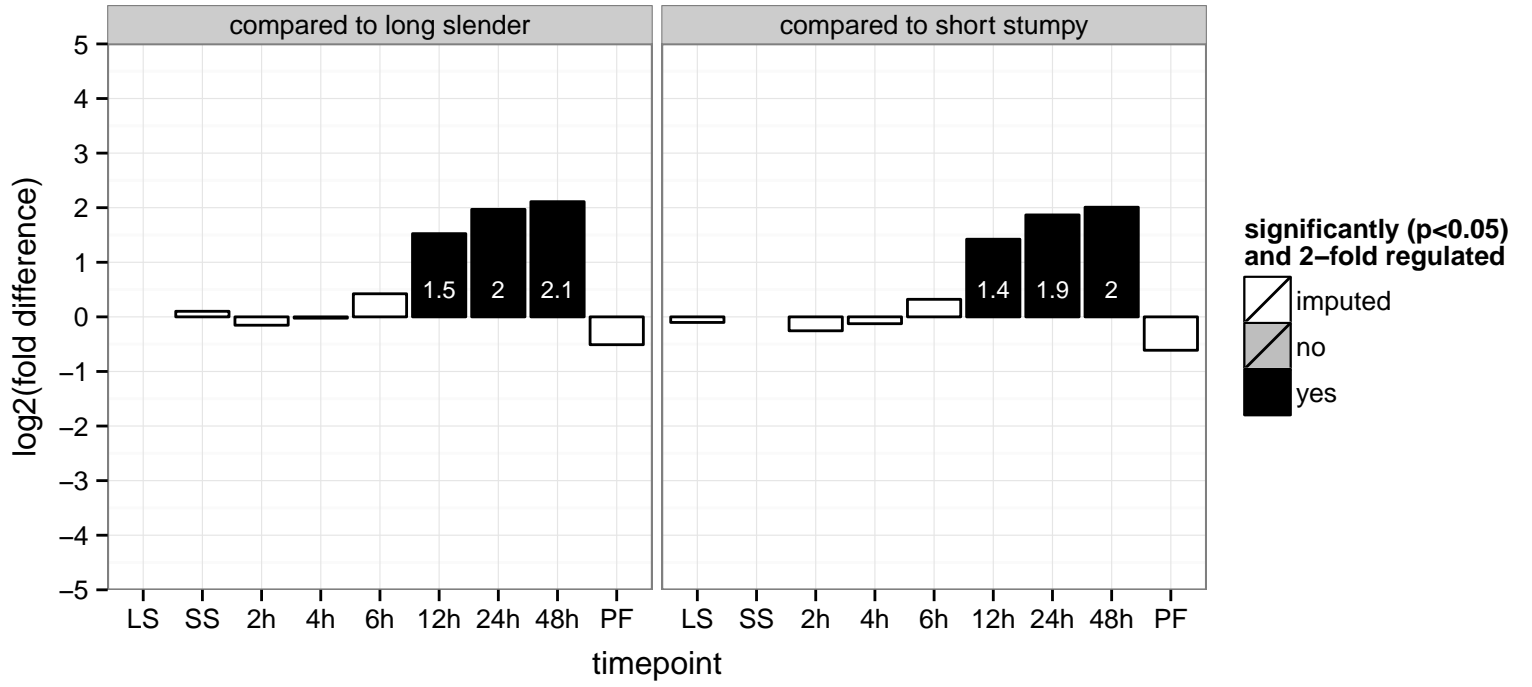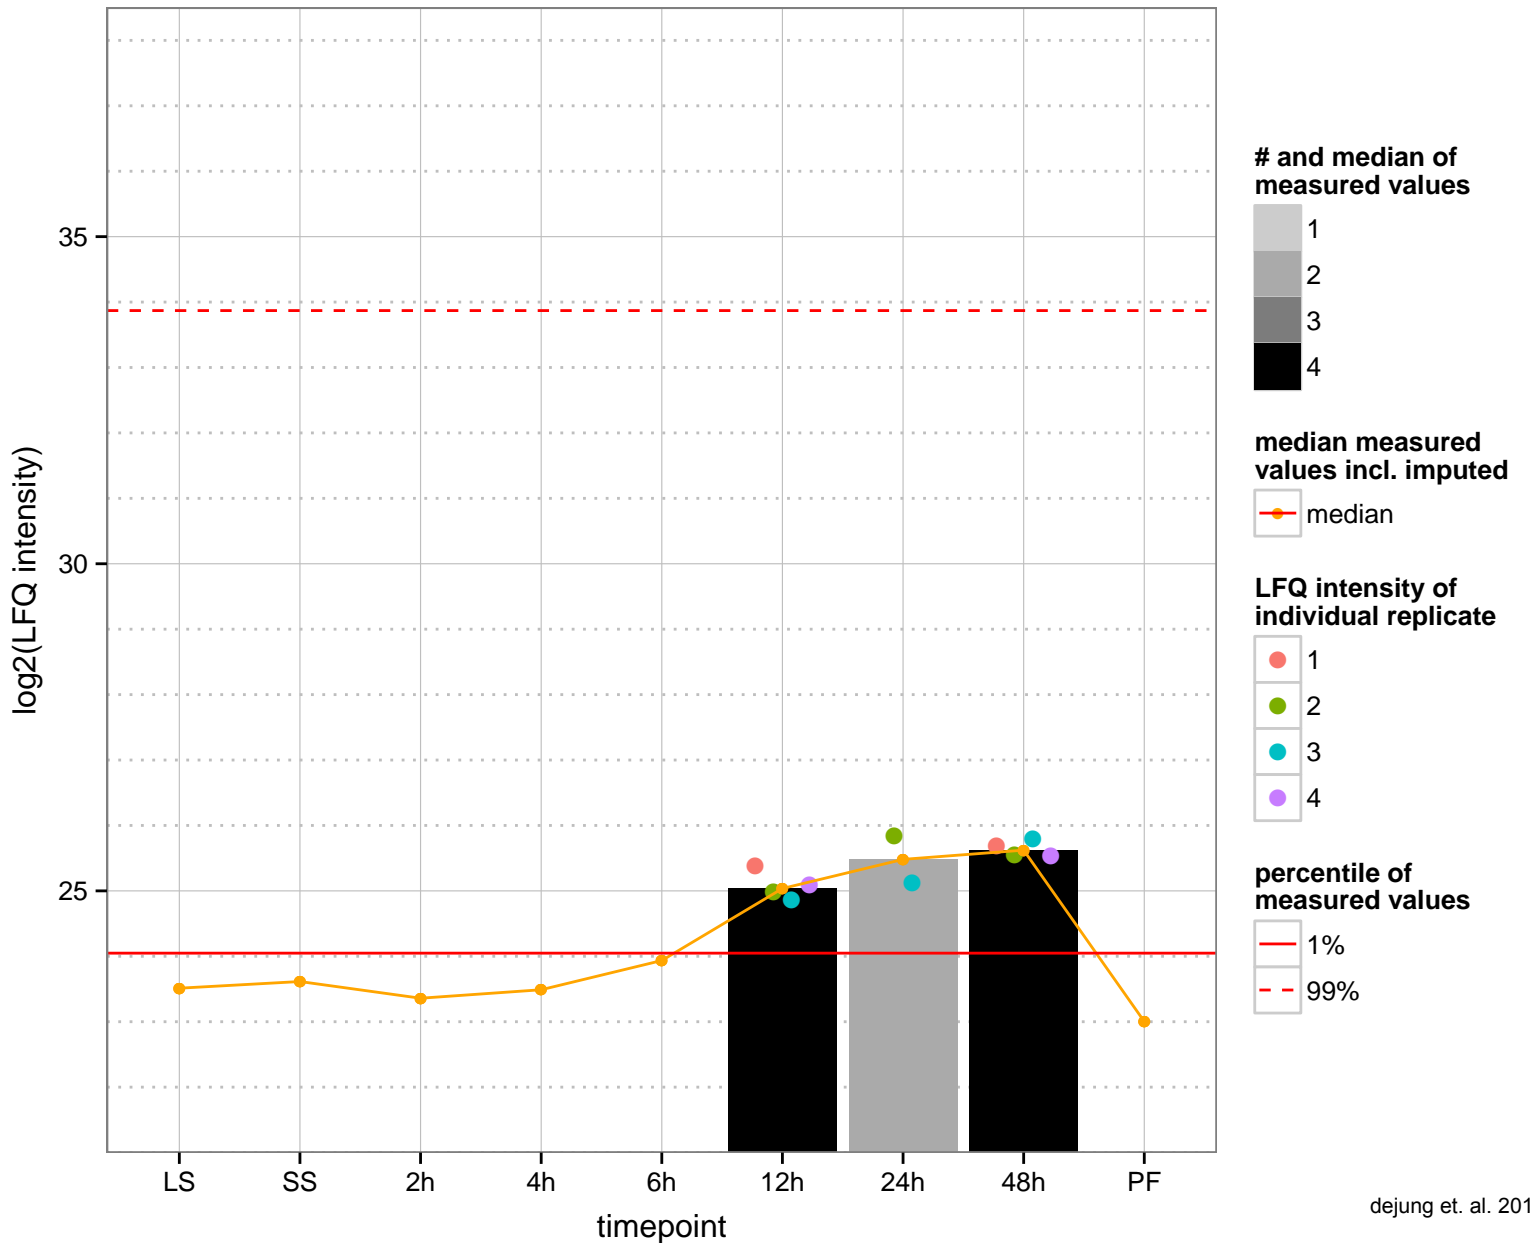

hypothetical protein, conserved  
 Tb927.10.2970  
 AGOF: null  
 AGOC: null  
 AGOP: null  
 PGOF: null  
 PGOC: null  
 PGOP: null

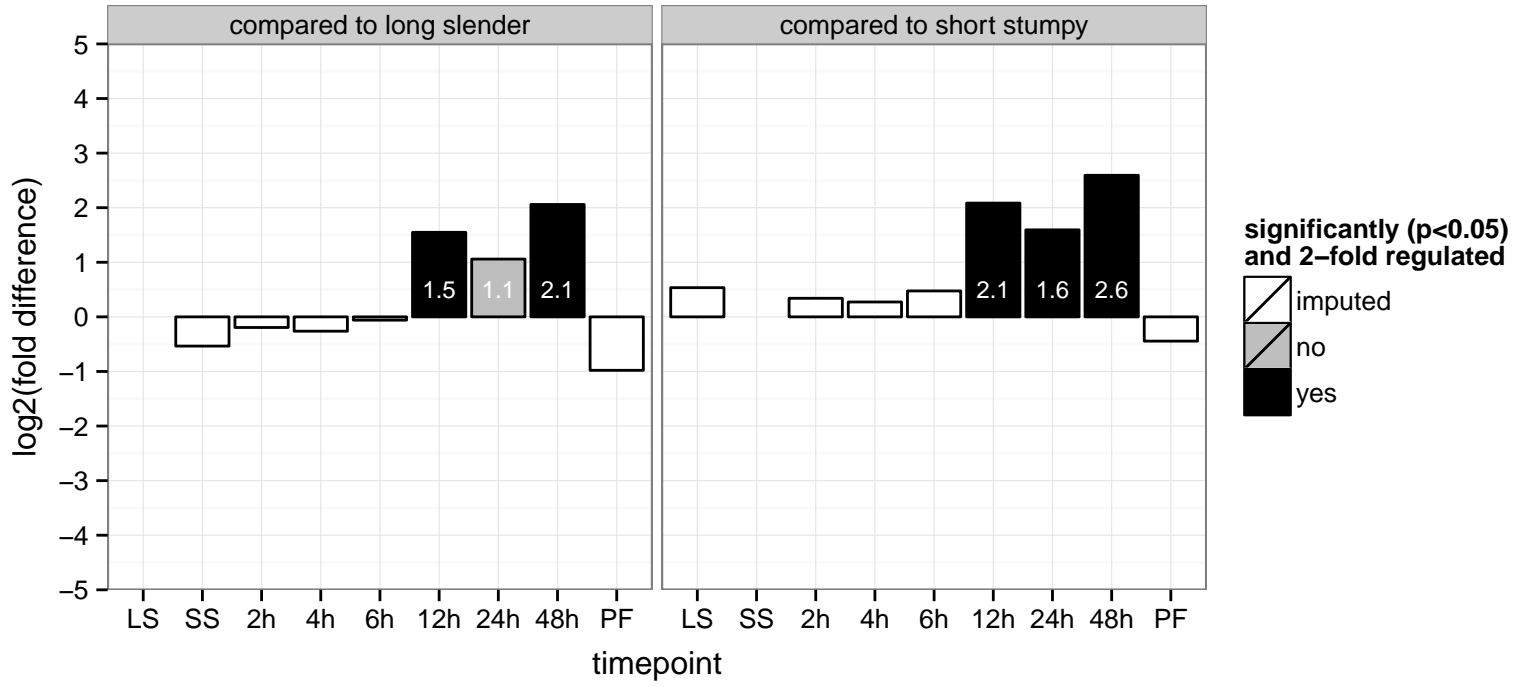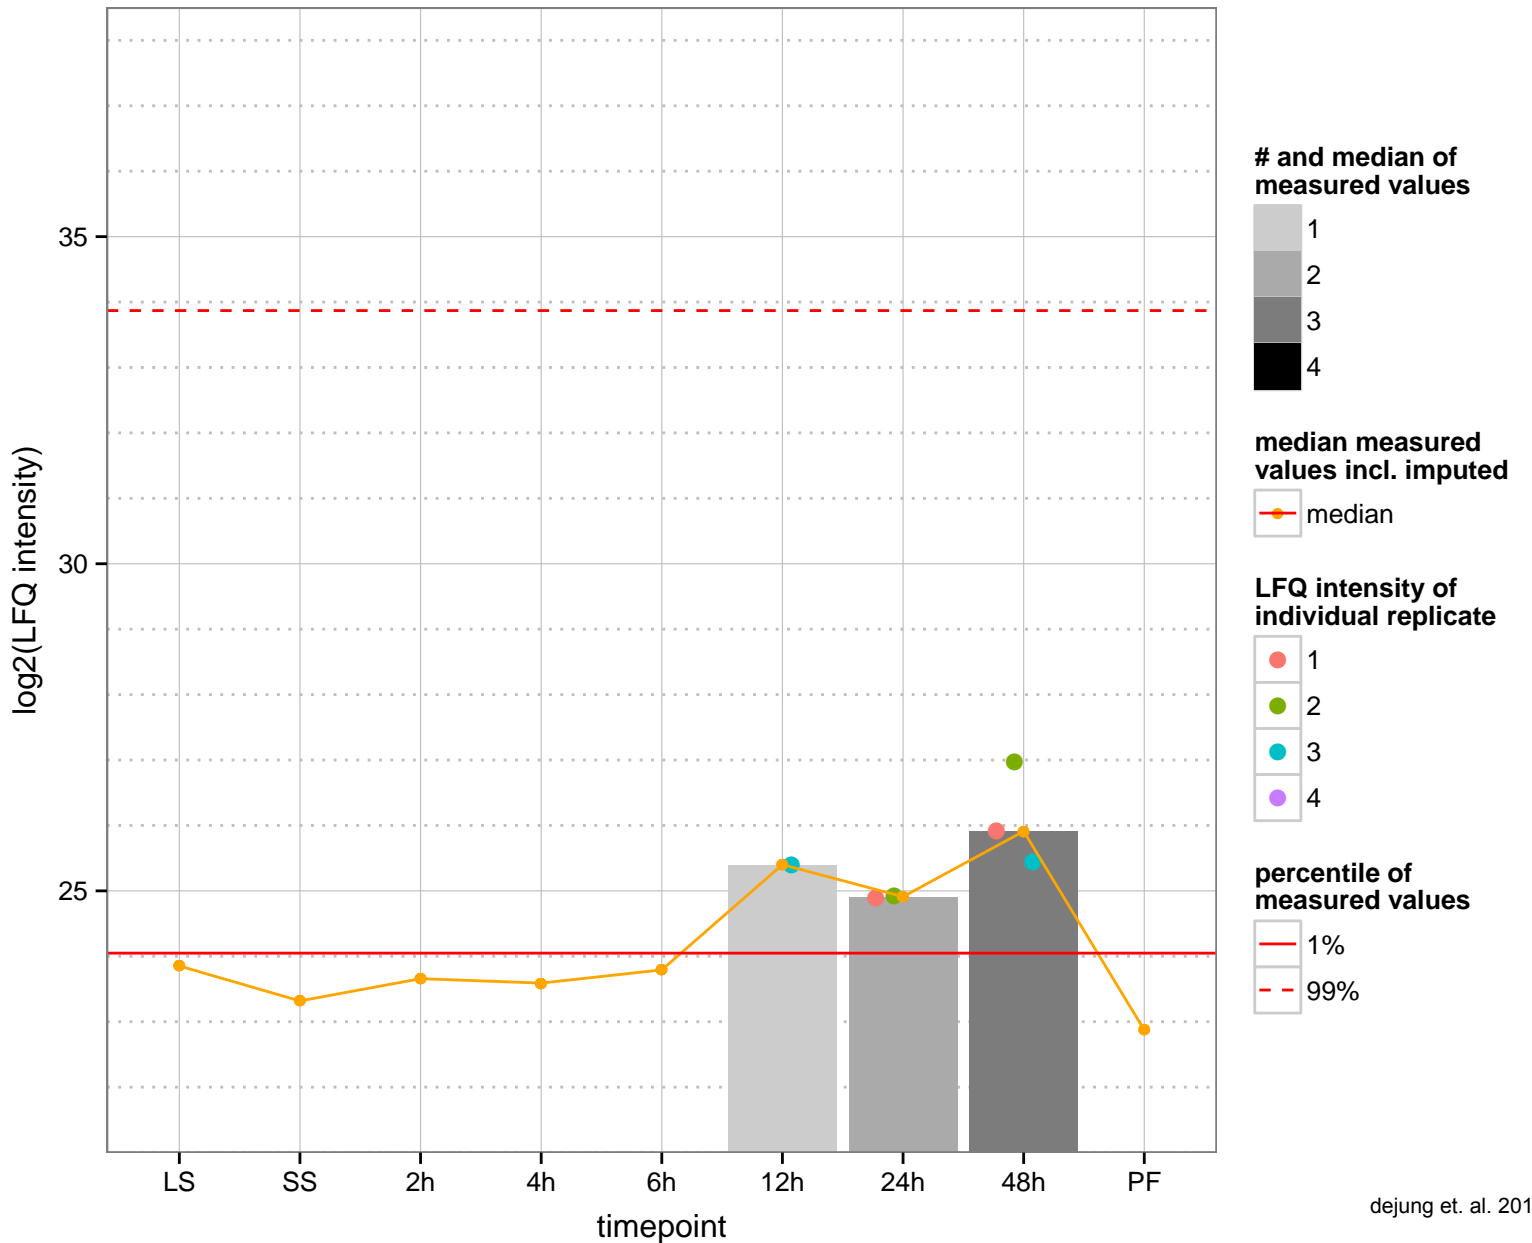



hypothetical protein, conserved  
 Tb927.10.3630  
 AGOF: null  
 AGOC: null  
 AGOP: null  
 PGOF: null  
 PGOC: null  
 PGOP: null

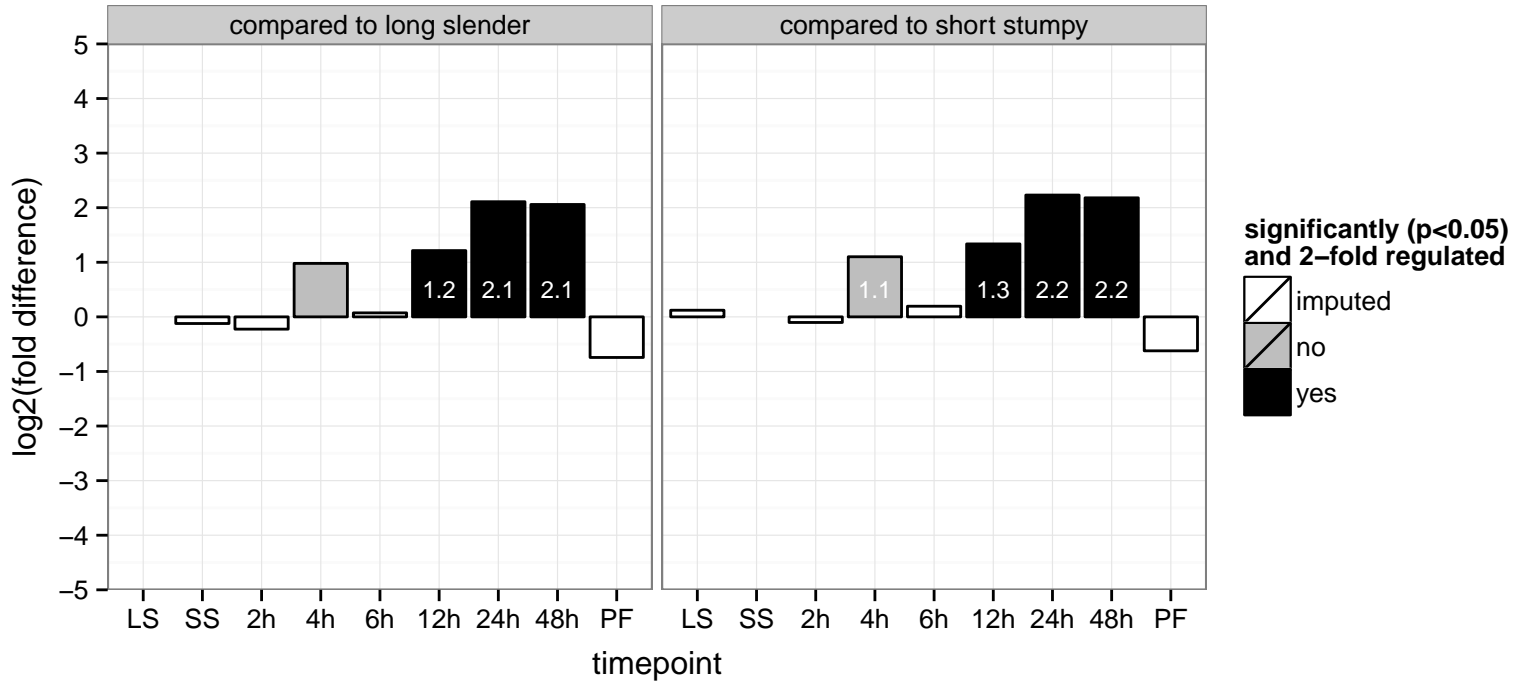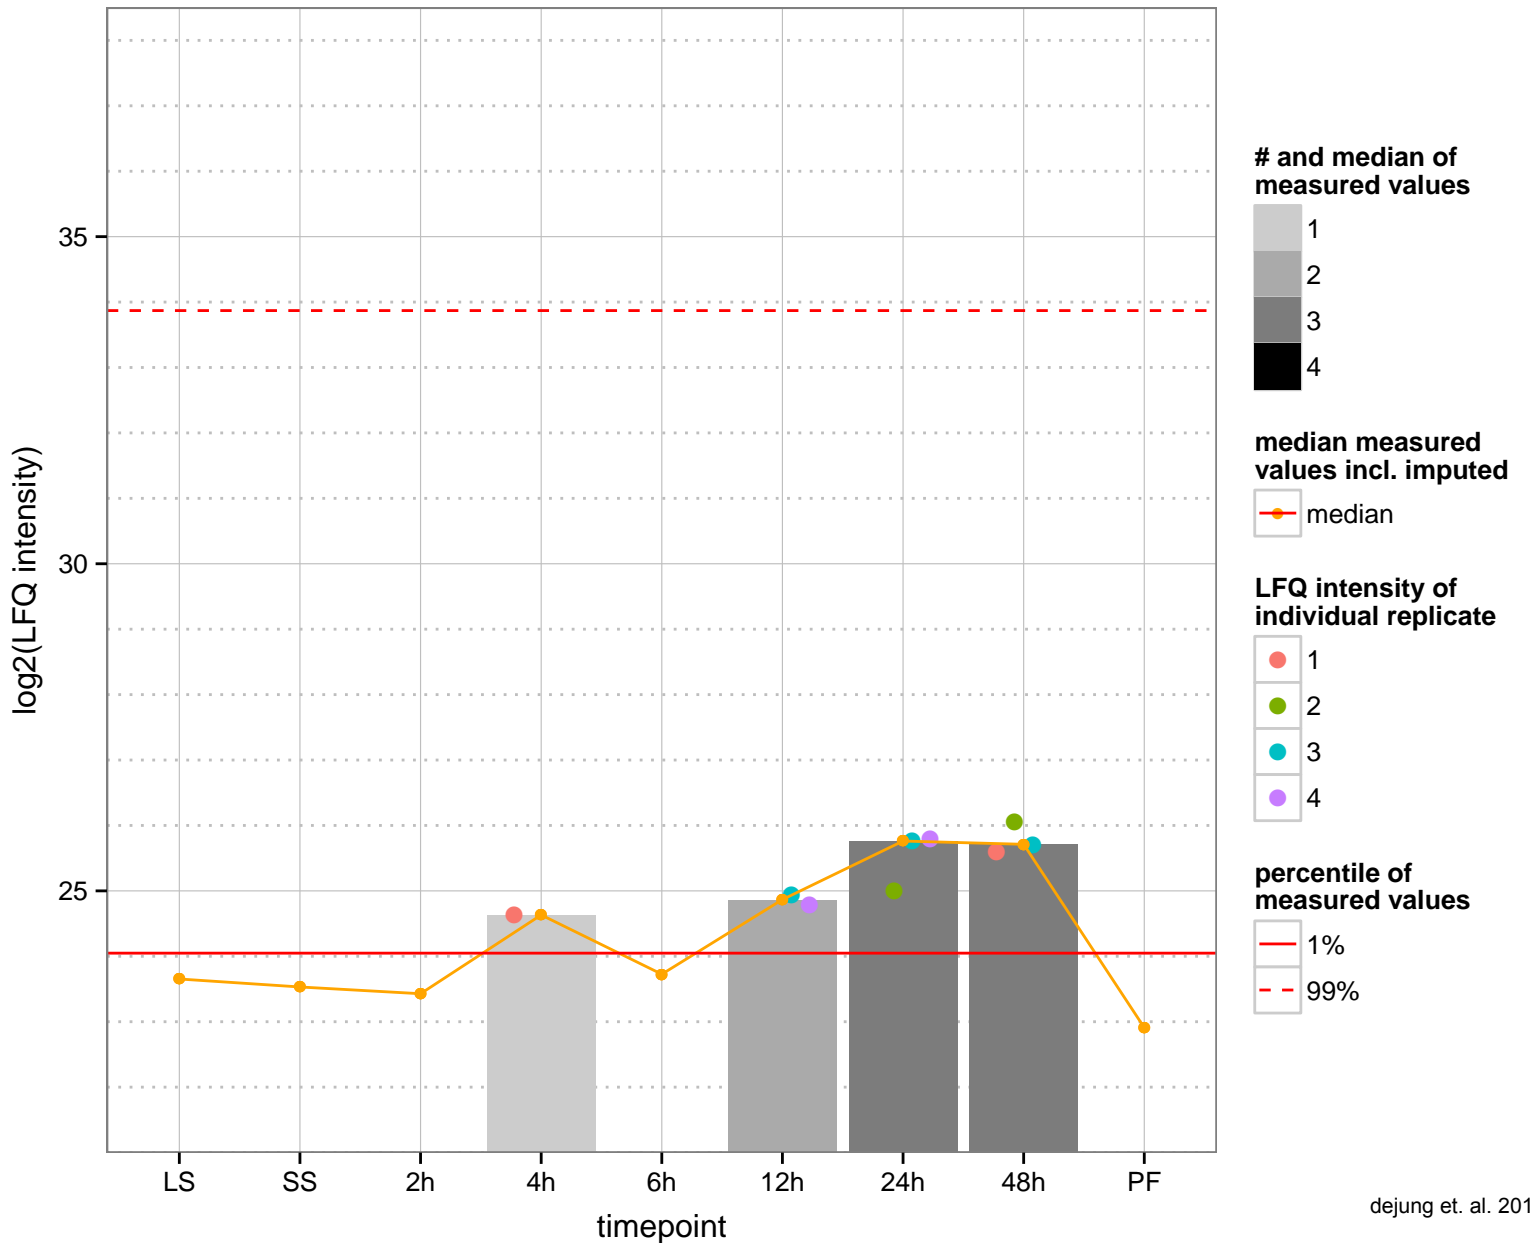

ARP2/3 complex subunit, putative  
 Tb927.10.4540  
 AGOF: actin binding  
 AGOC: Arp2/3 protein complex, cytoskeleton  
 AGOP: cytoskeleton organization, regulation of actin filament polymerization  
 PGO: null  
 PGOC: cytoskeleton  
 PGOP: regulation of actin filament polymerization

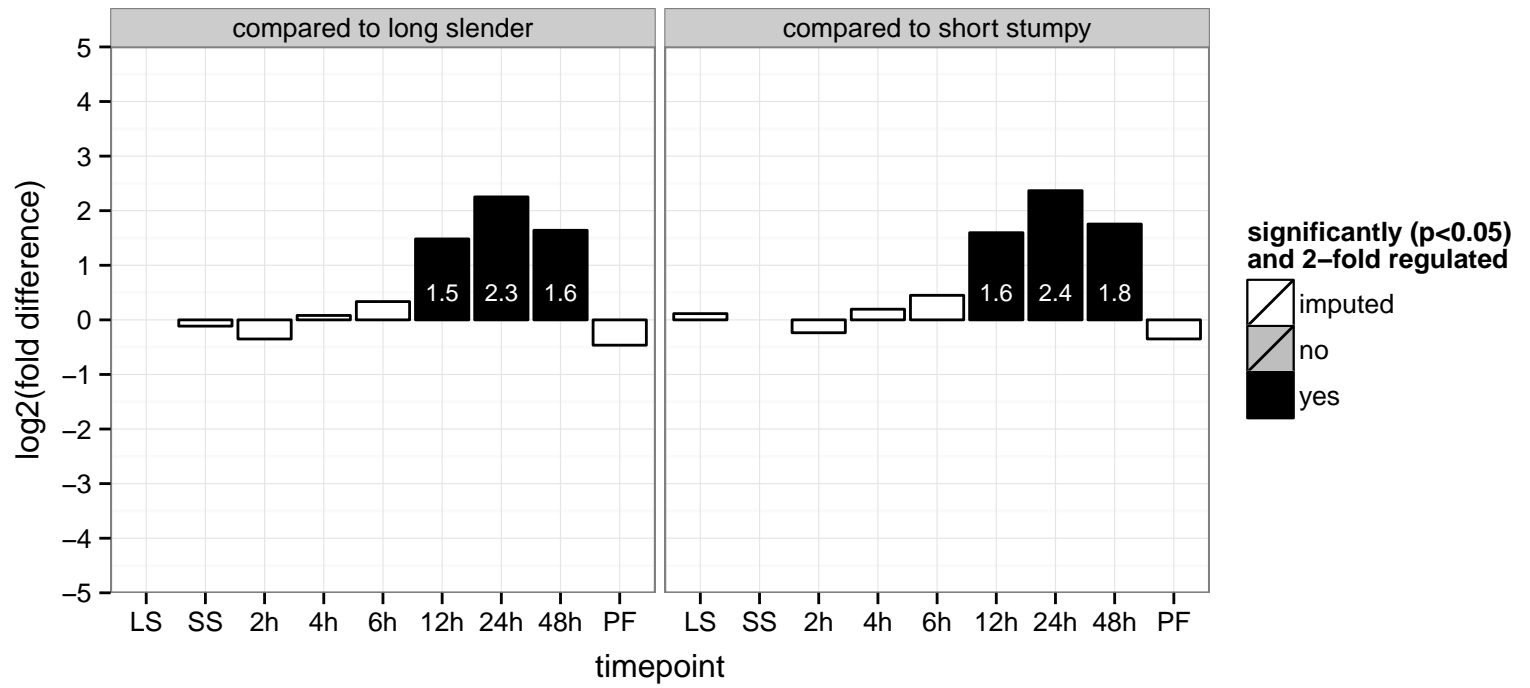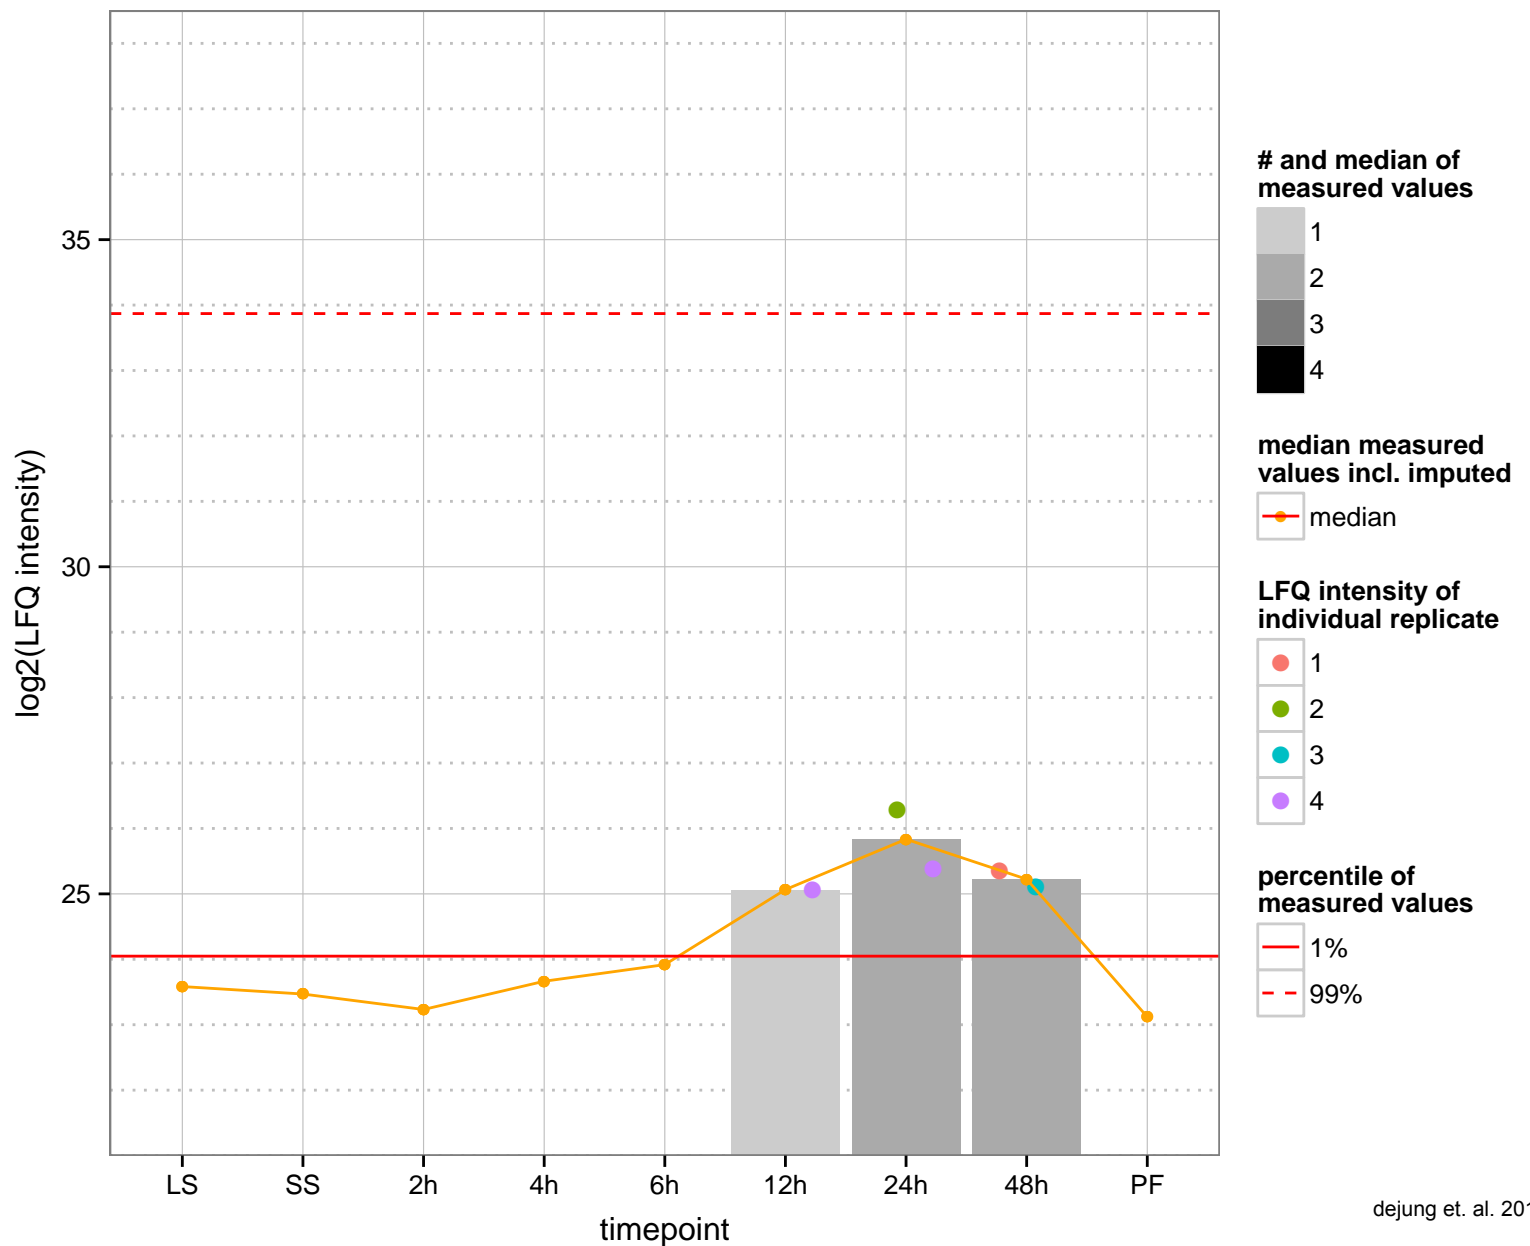

DNA-directed RNA polymerase I subunit, putative (RPA12)

Tb927.11.10420

AGOF: DNA binding, sequence-specific DNA binding transcription factor activity, zinc ion binding

AGOC: null

AGOP: DNA-dependent transcription, elongation, regulation of transcription, DNA-dependent

PGOF: nucleic acid binding, zinc ion binding

PGOC: null

PGOP: transcription, DNA-dependent

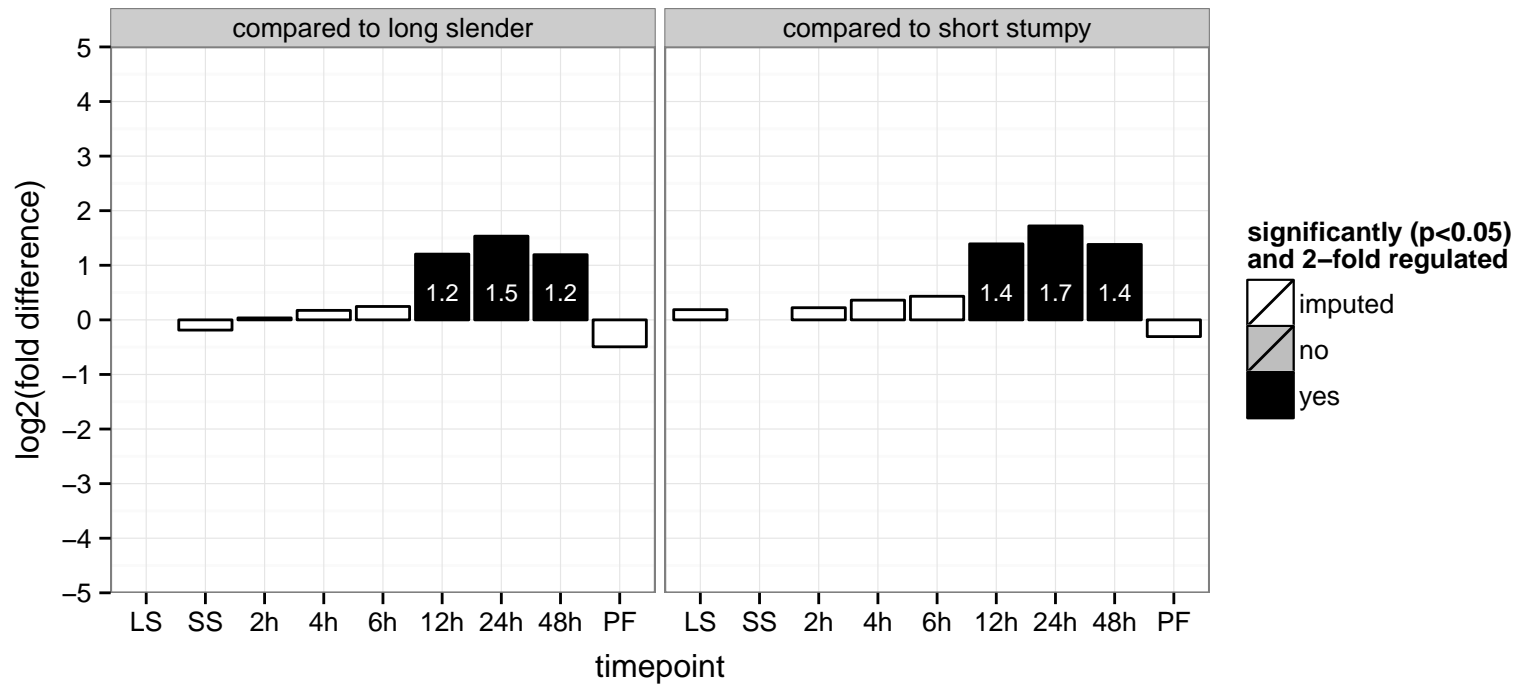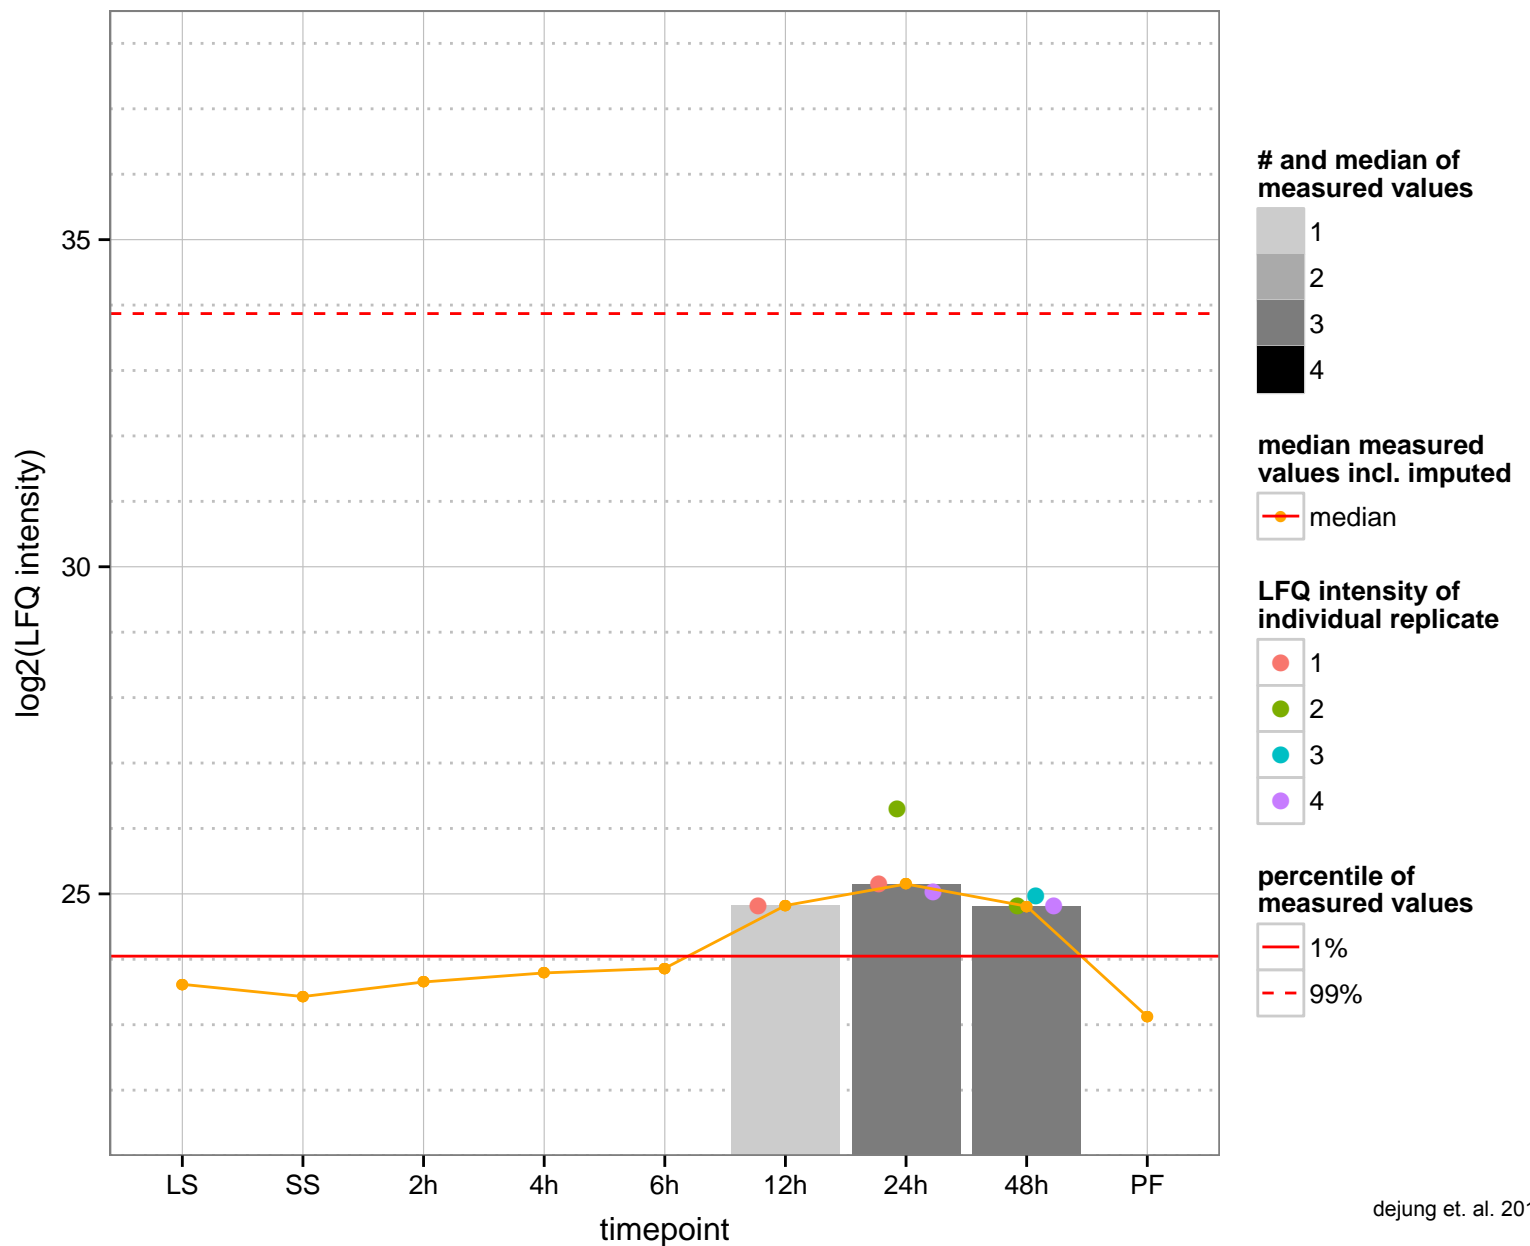

Nucleoporin (TbNup149)  
 Tb927.11.11080  
 AGOF: null  
 AGOC: nuclear pore  
 AGOP: null  
 PGO: null  
 PGO: null  
 PGO: null

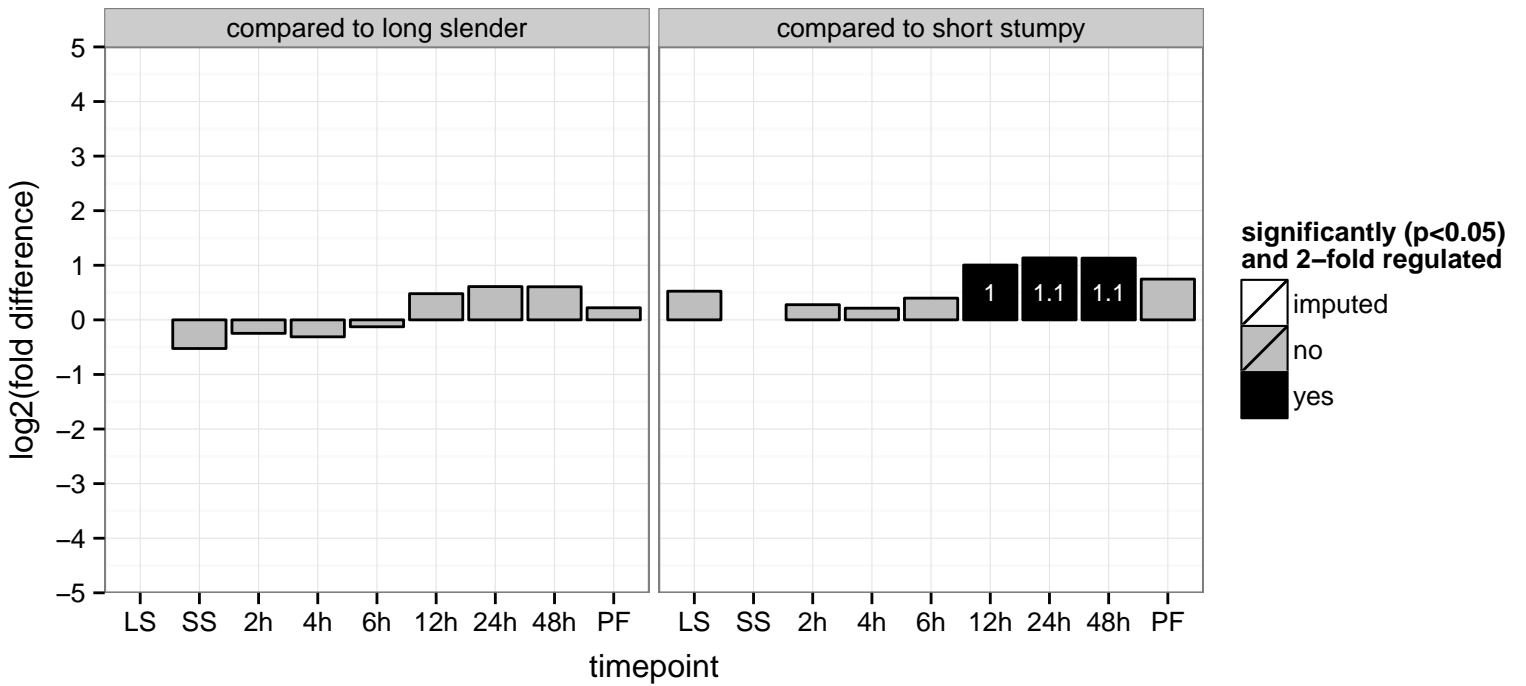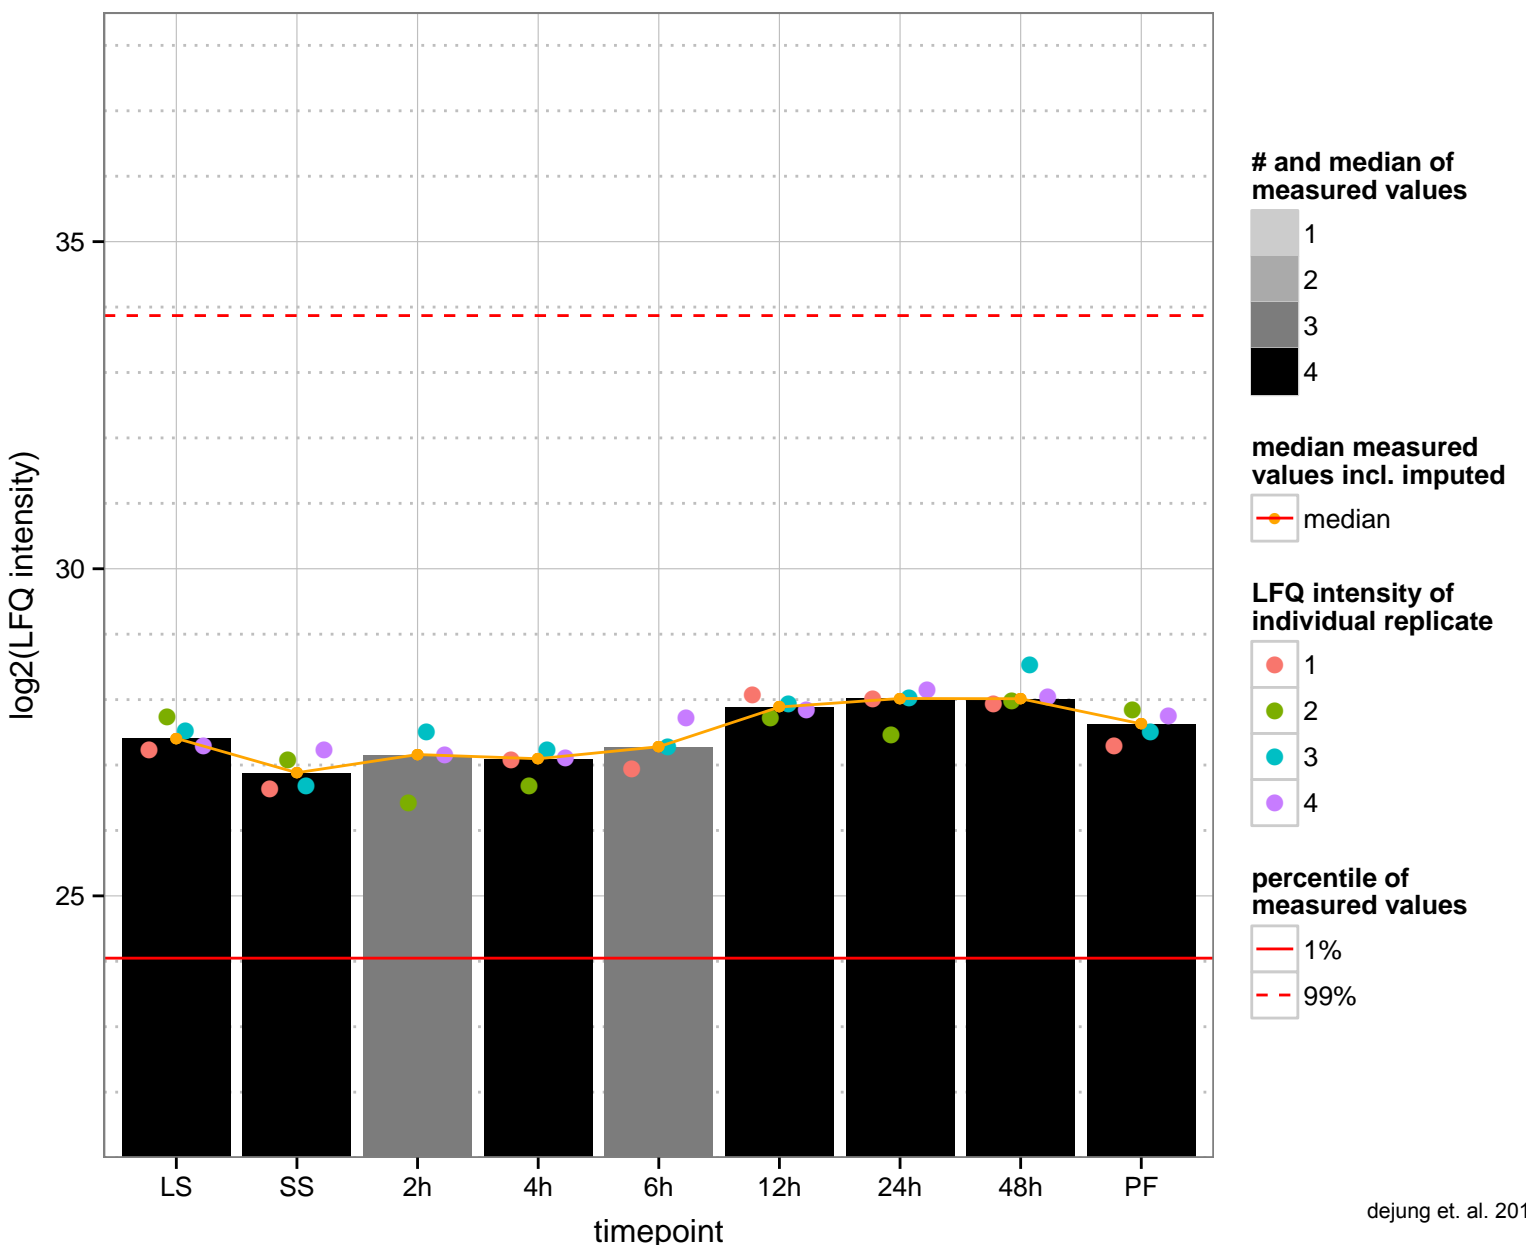

histone acetyltransferase, putative (HAT2)  
 Tb927.11.11530  
 AGOF: histone acetyltransferase activity  
 AGOC: null  
 AGOP: histone acetylation, regulation of transcription, DNA-dependent  
 PGOF: transferase activity, transferring acyl groups other than amino-acyl groups  
 PGOC: nucleus  
 PGOP: regulation of transcription, DNA-dependent

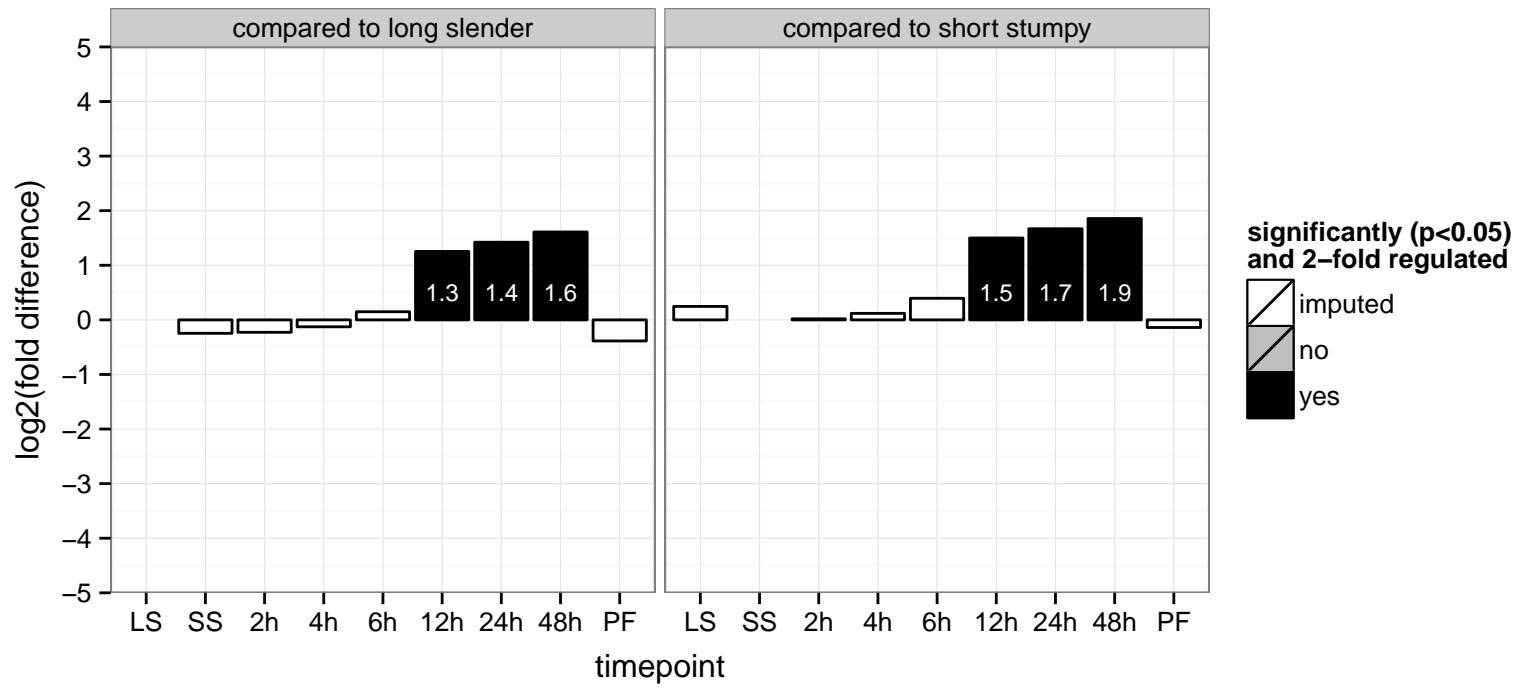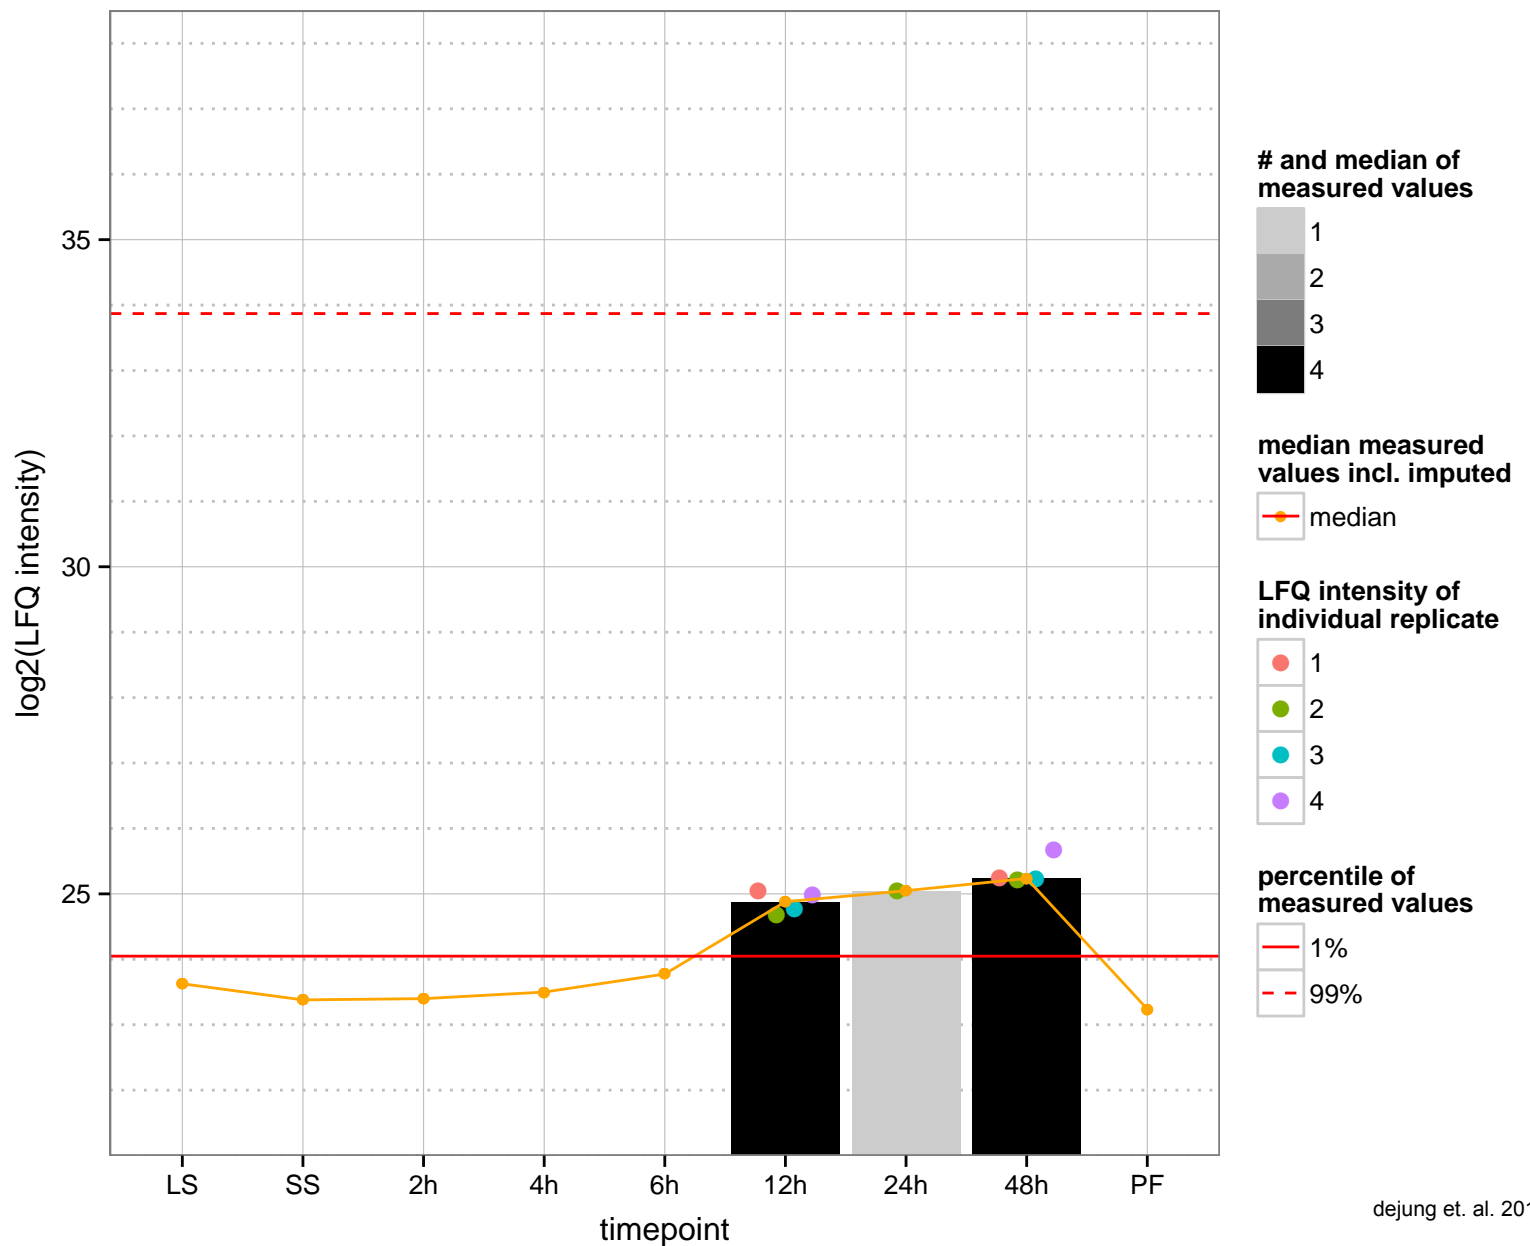

hypothetical protein, conserved  
 Tb927.11.13600  
 AGOF: heat shock protein binding  
 AGOC: integral to membrane  
 AGOP: null  
 PGOF: heat shock protein binding  
 PGOC: null  
 PGOP: null

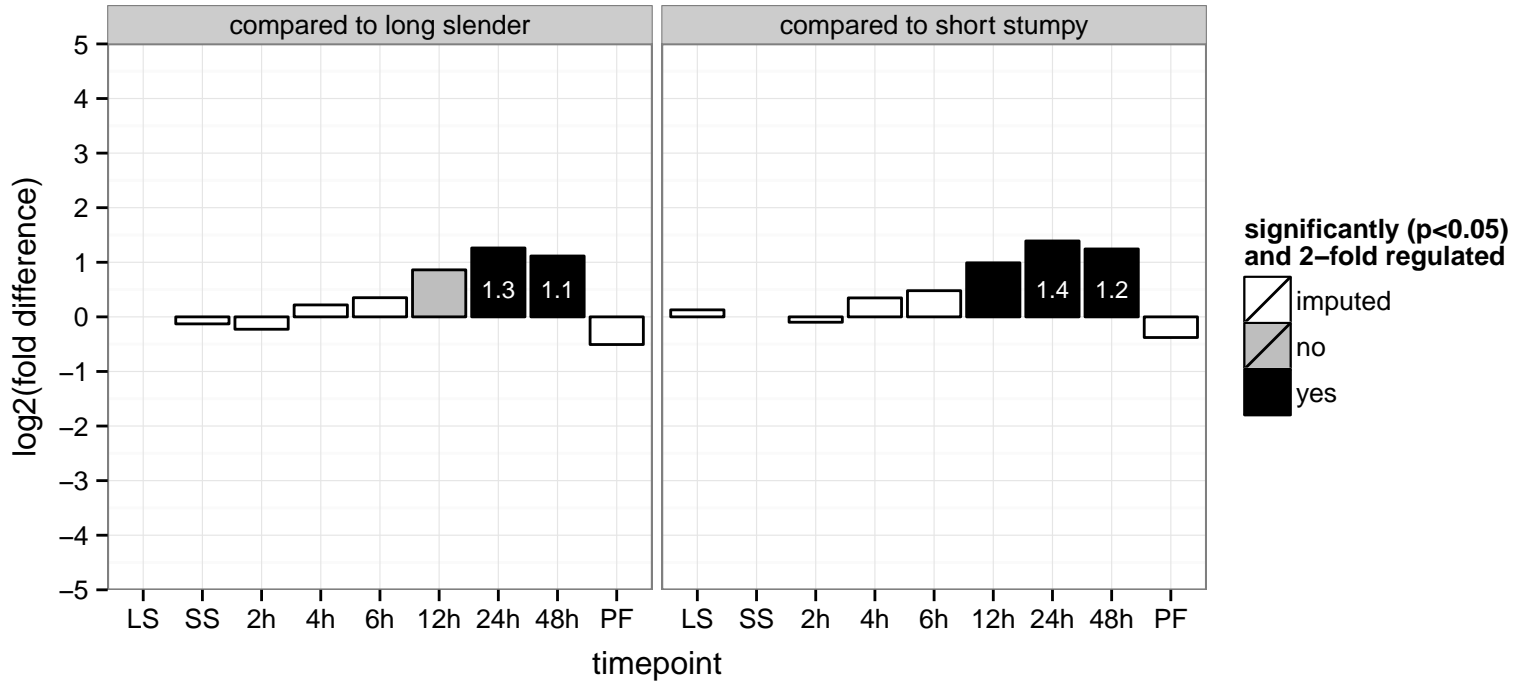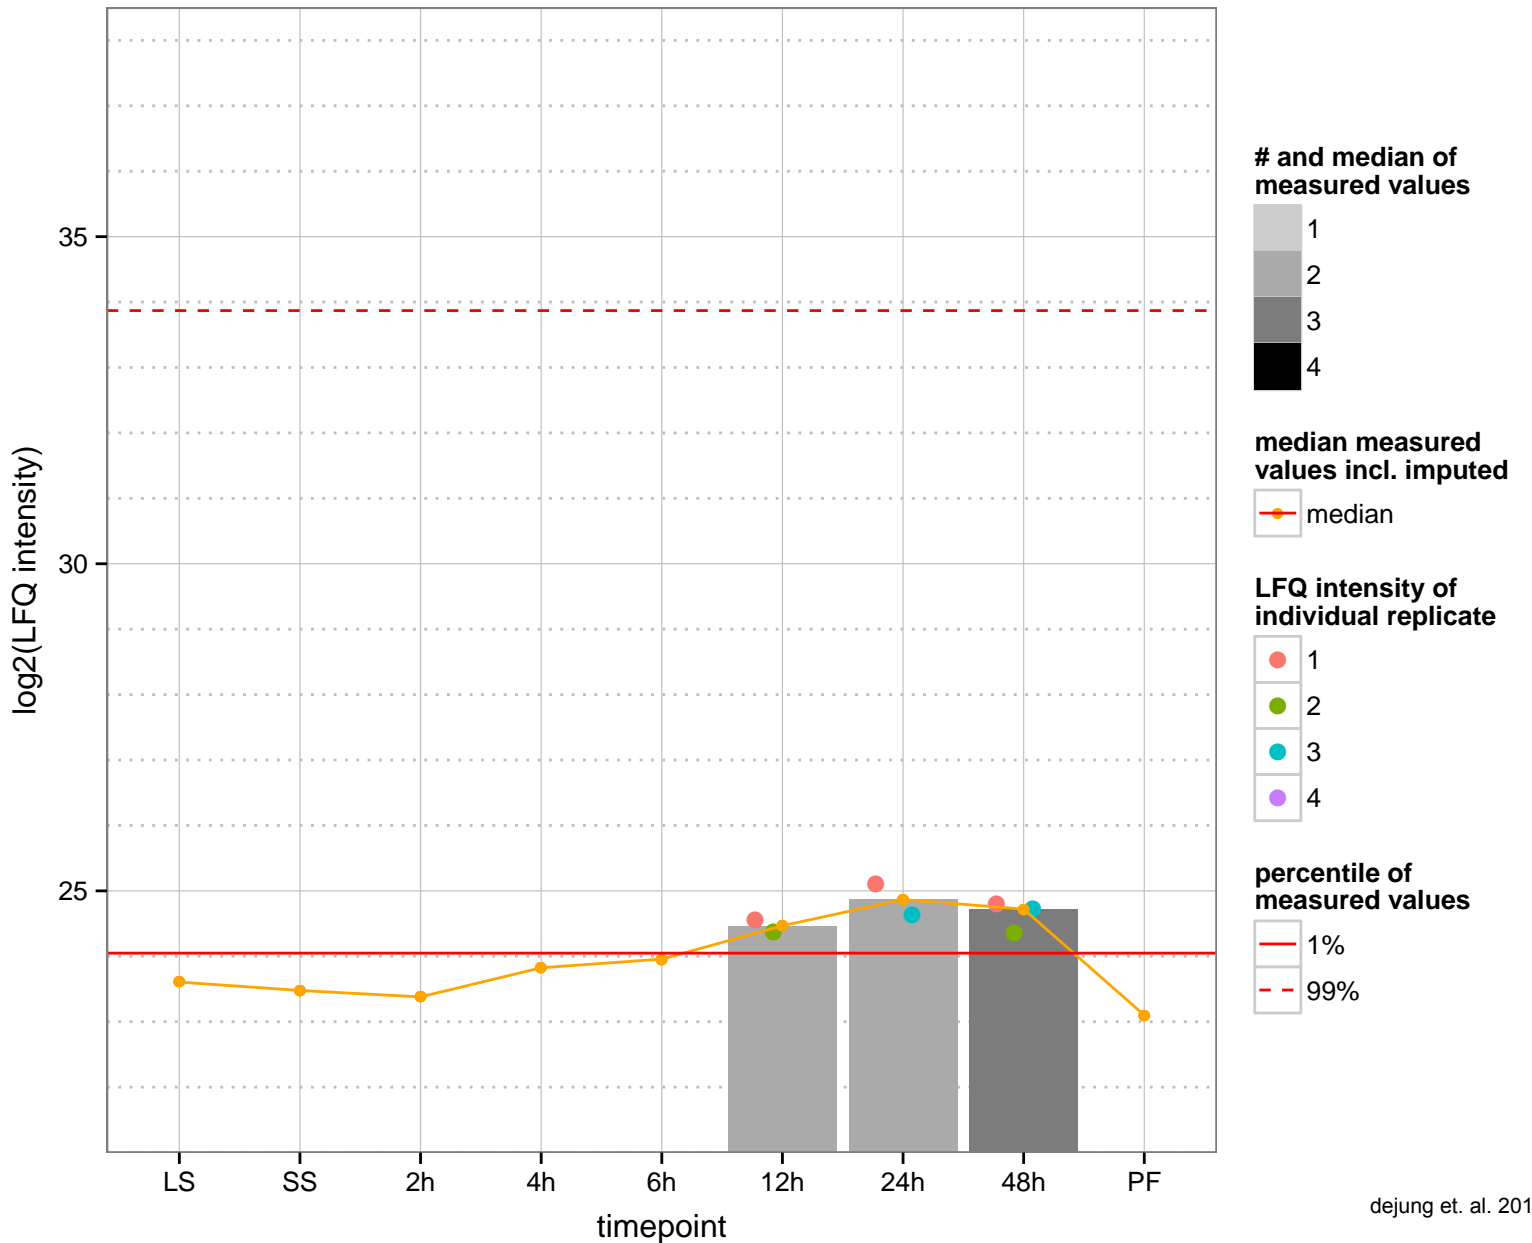

C-14 sterol reductase, putative  
 Tb927.11.15530  
 AGOF: delta14-sterol reductase activity  
 AGOC: integral to membrane, membrane  
 AGOP: ergosterol biosynthetic process  
 PGO: null  
 PGOC: membrane  
 PGOP: null

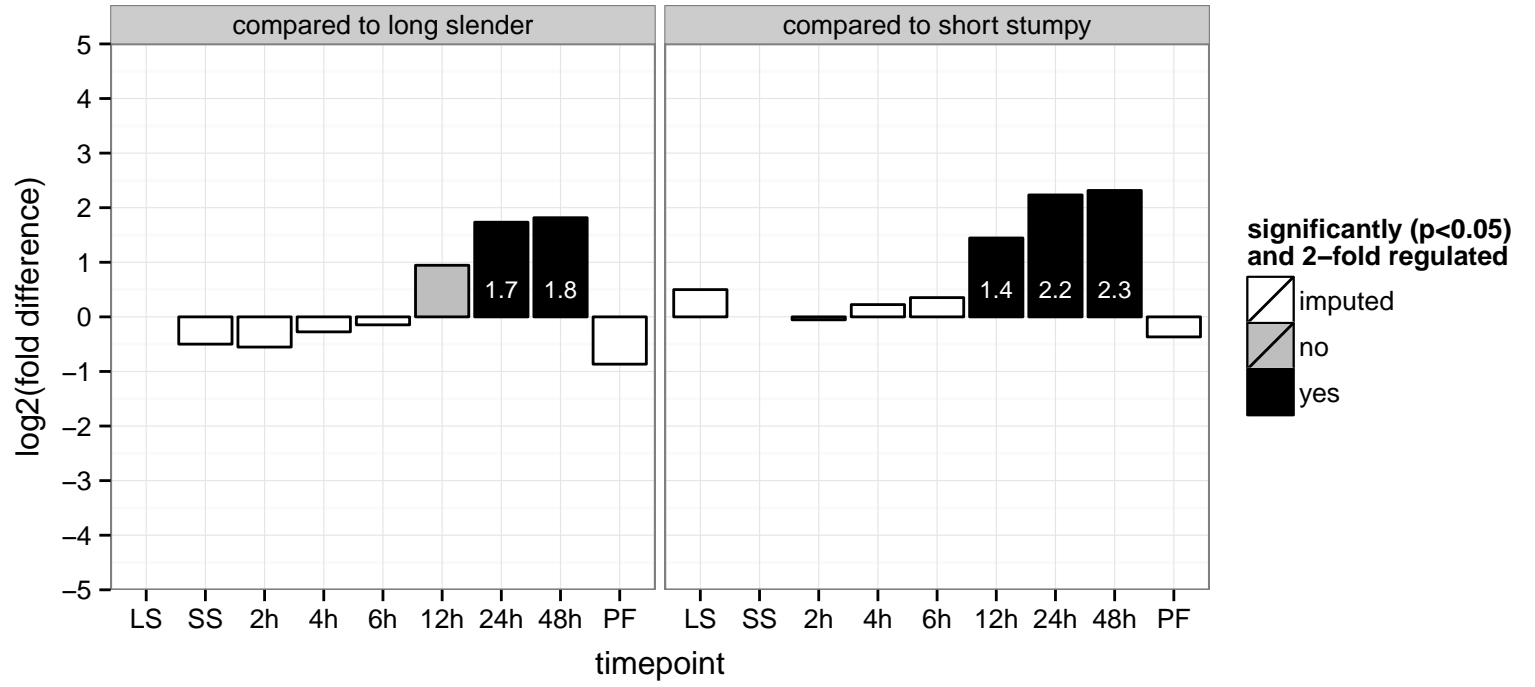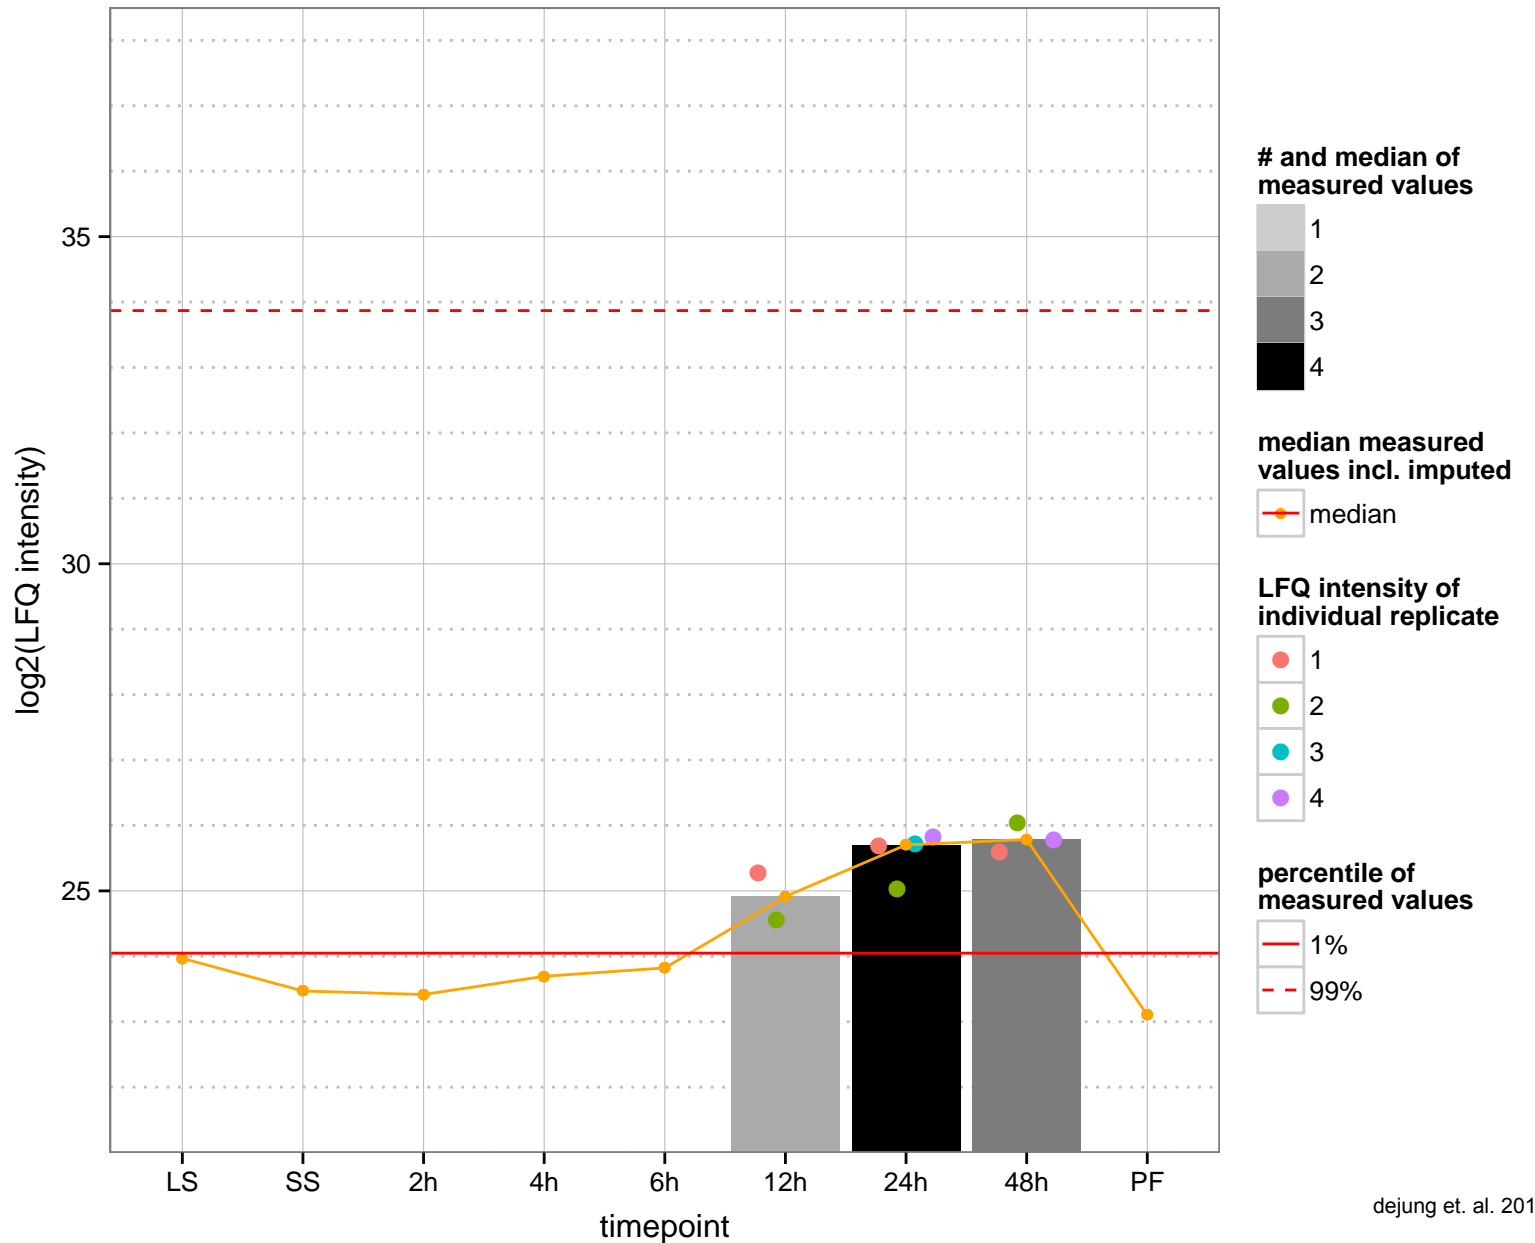

hypothetical protein, conserved  
 Tb927.11.16010  
 AGOF: null  
 AGOC: null  
 AGOP: null  
 PGO: null  
 PGOC: null  
 PGOP: null

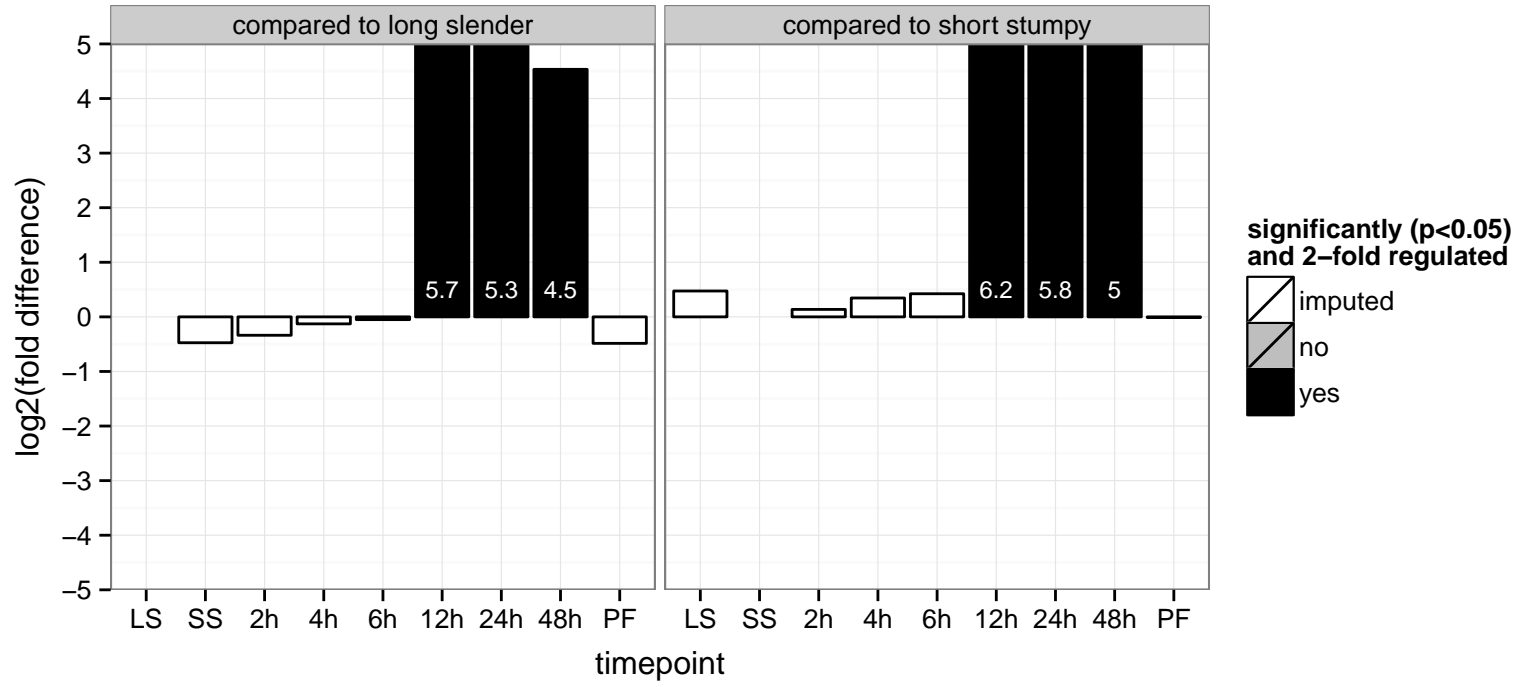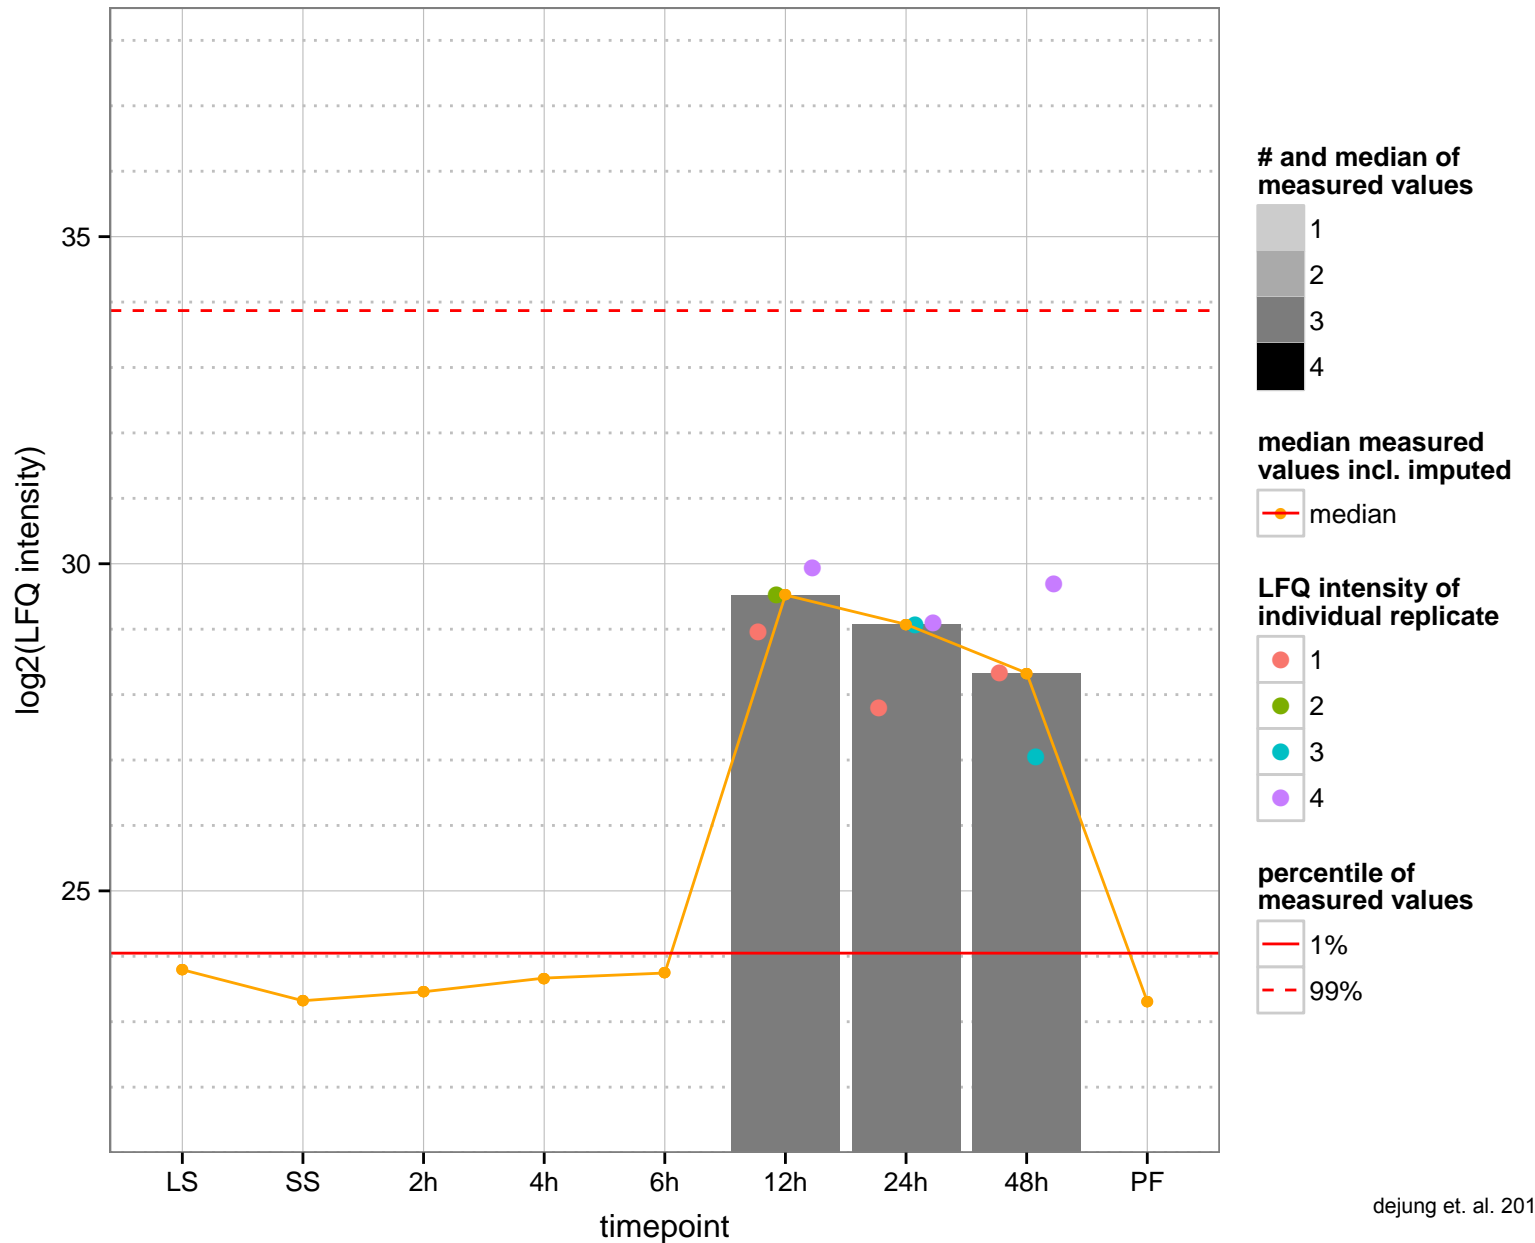



tubulin binding cofactor A, putative  
 Tb927.11.16150  
 AGOF: unfolded protein binding  
 AGOC: microtubule  
 AGOP: protein folding, tubulin complex assembly  
 PGO: unfolded protein binding  
 PGOC: microtubule  
 PGOP: tubulin complex assembly

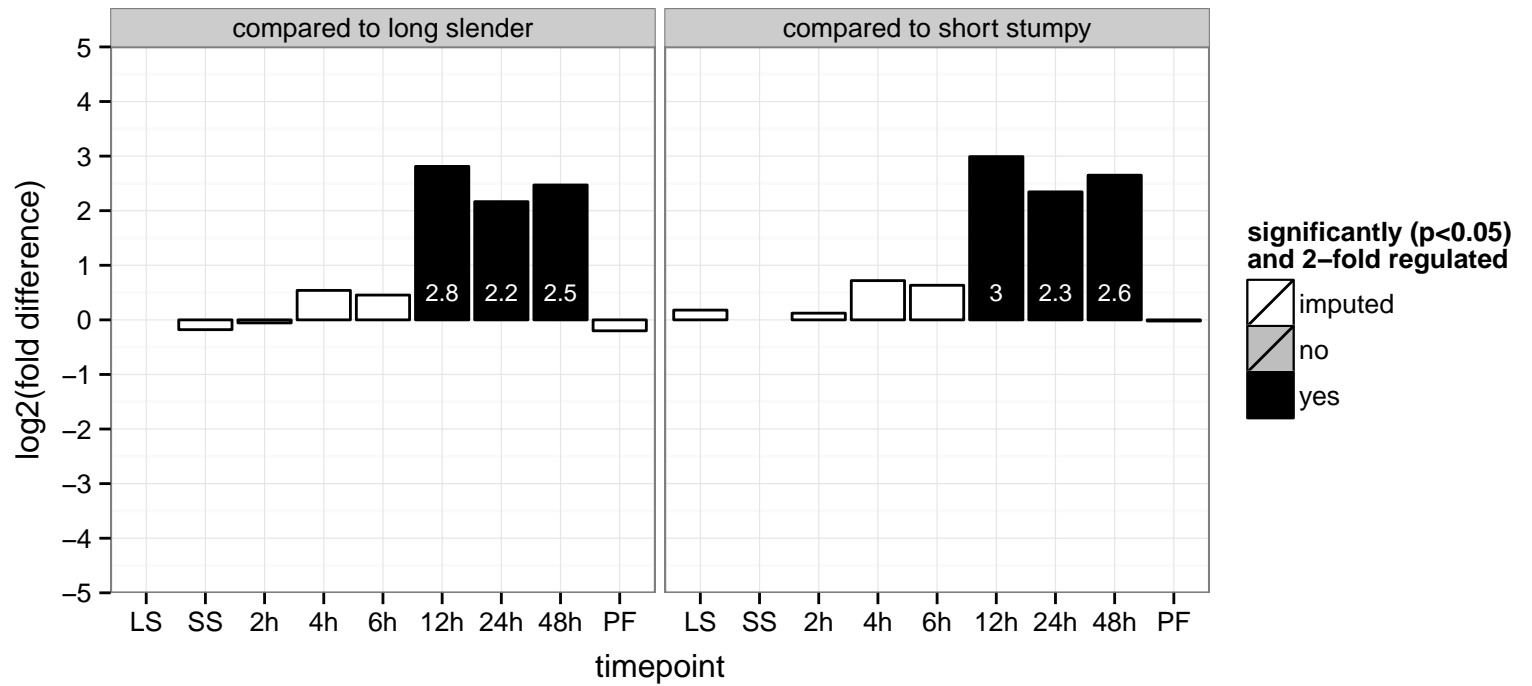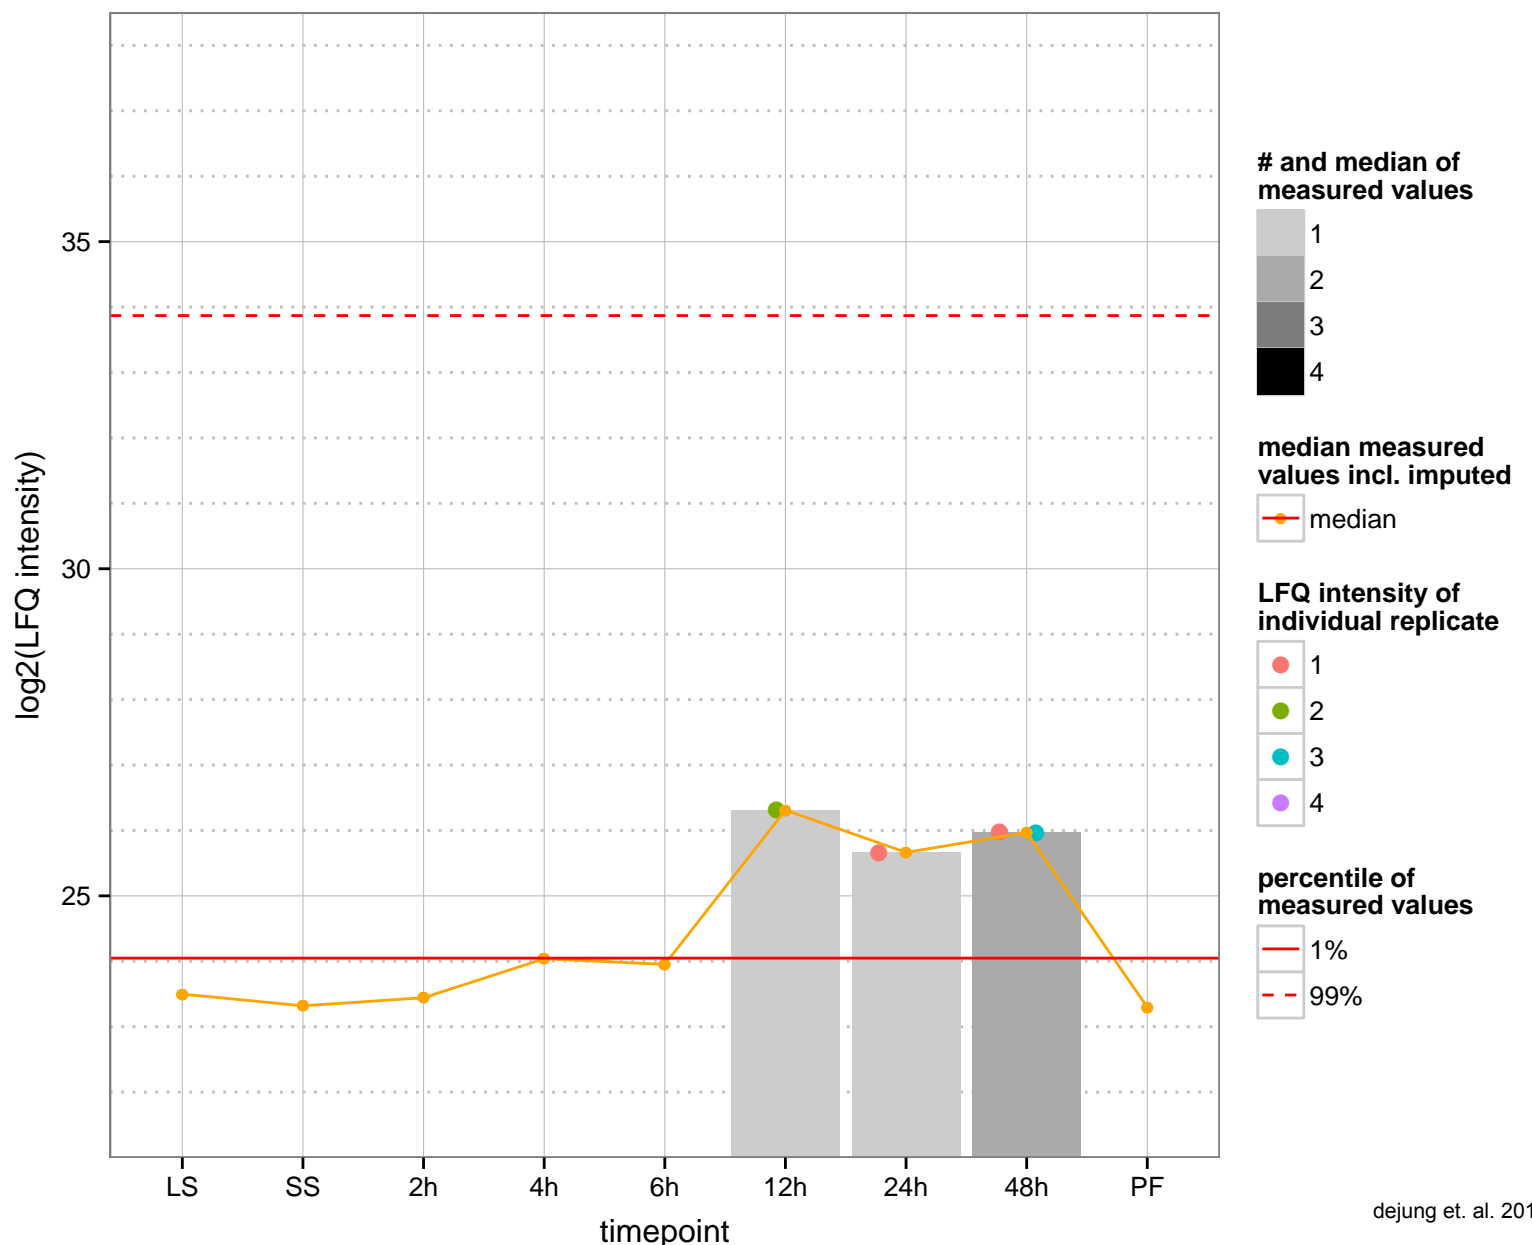

hypothetical protein, conserved  
 Tb927.11.4400  
 AGOF: null  
 AGOC: null  
 AGOP: null  
 PGO: null  
 PGOC: null  
 PGOP: null

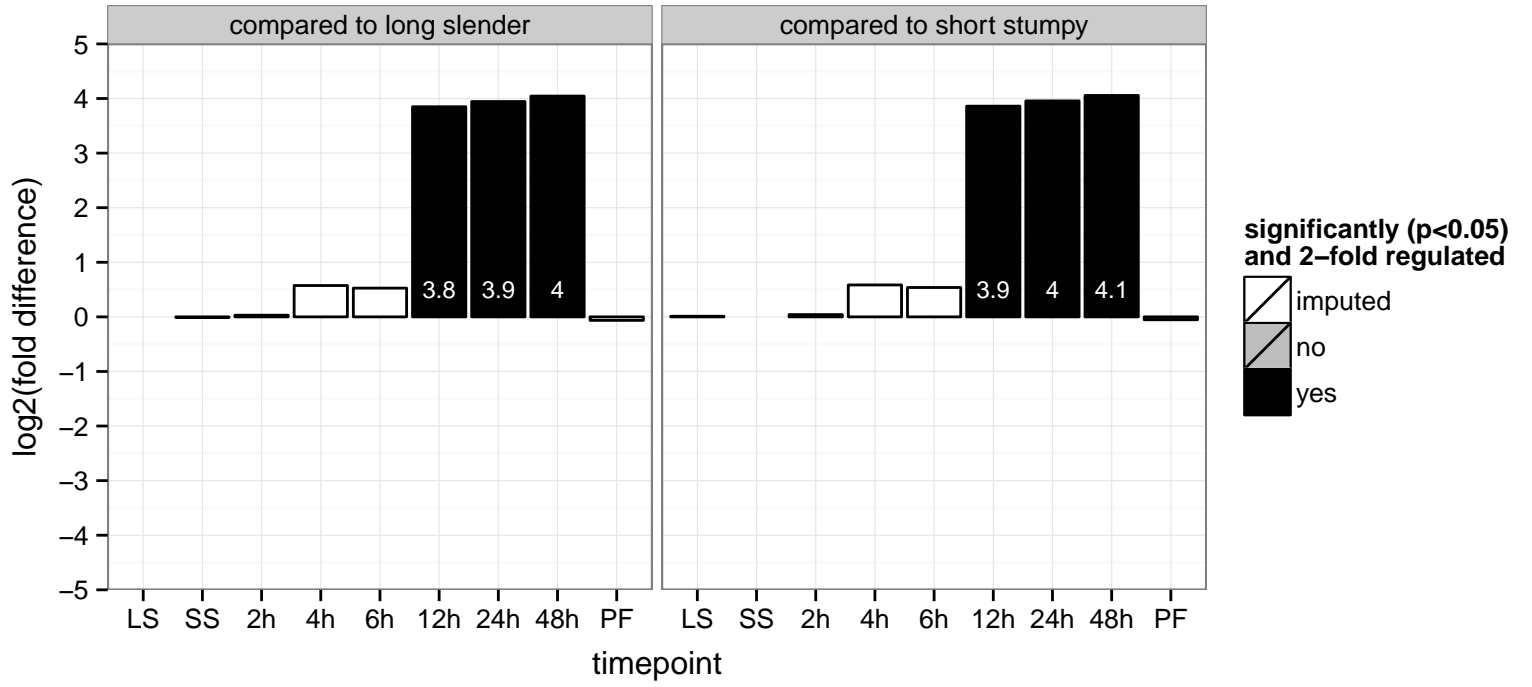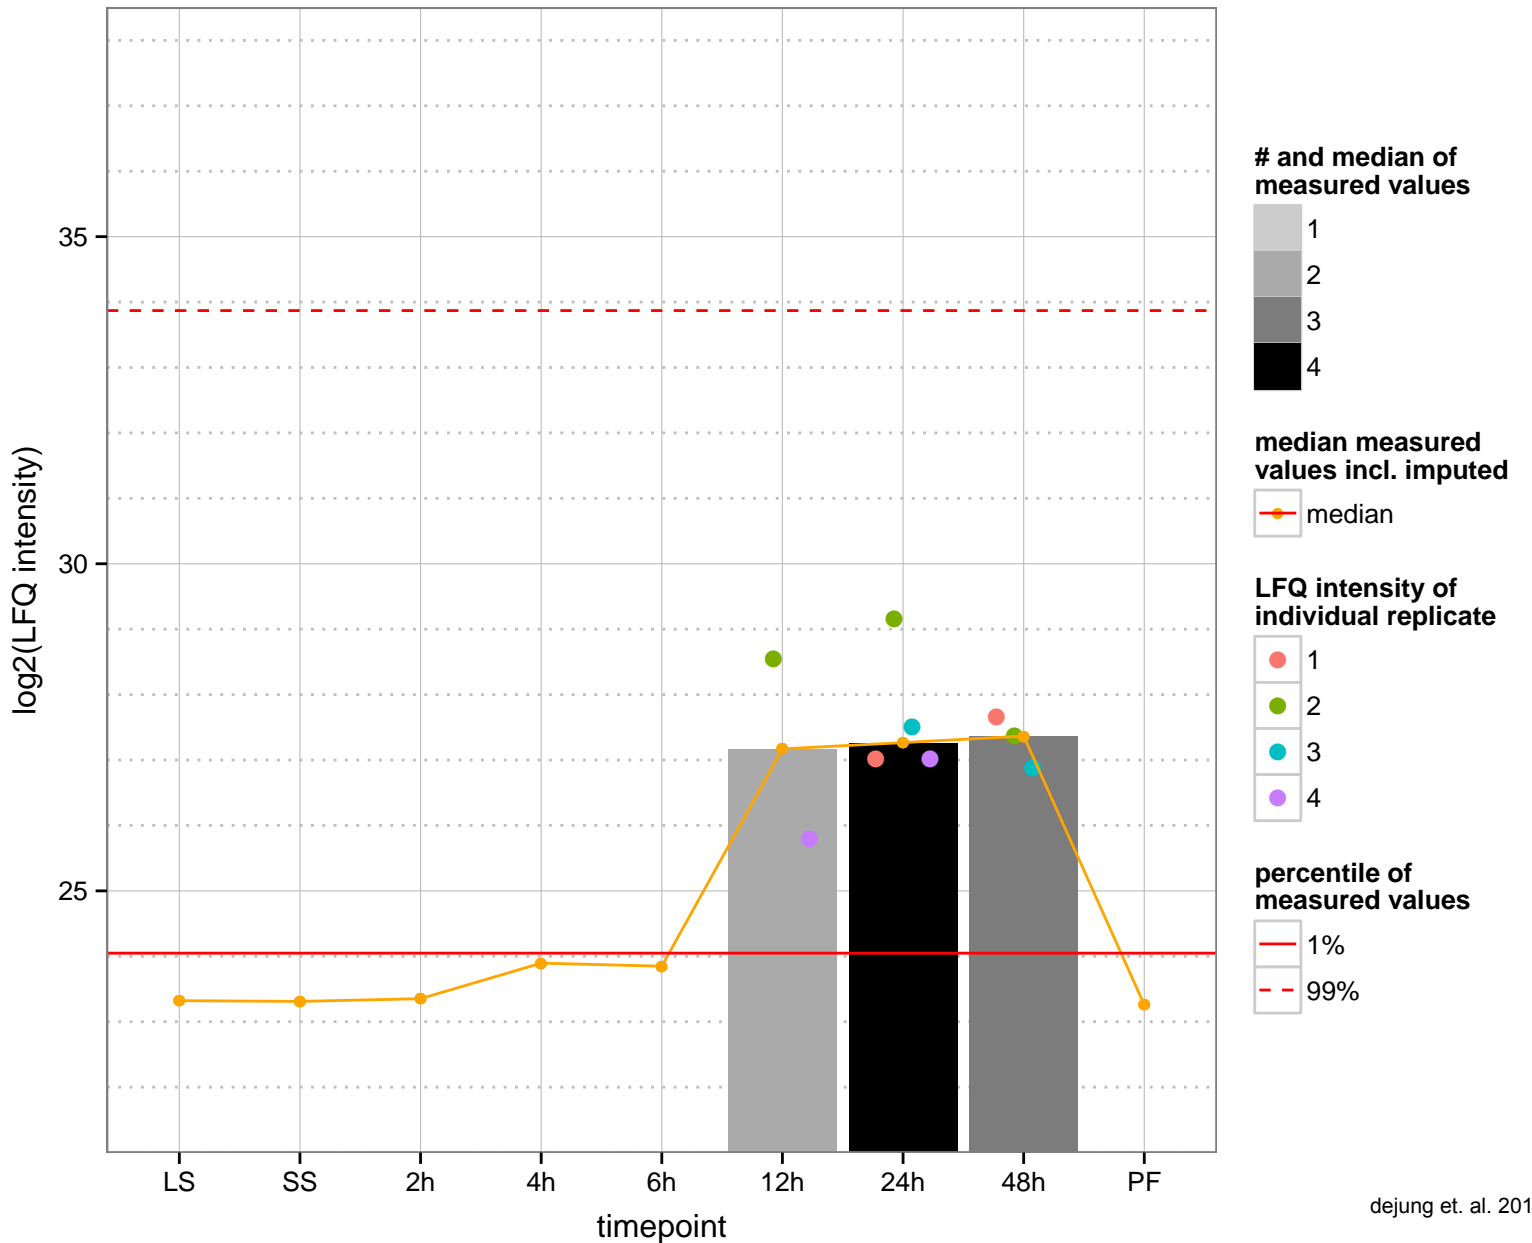

hypothetical protein, conserved  
 Tb927.11.4850  
 AGOF: heat shock protein binding  
 AGOC: integral to membrane, mitochondrion  
 AGOP: null  
 PGO: heat shock protein binding  
 PGOC: null  
 PGOP: null

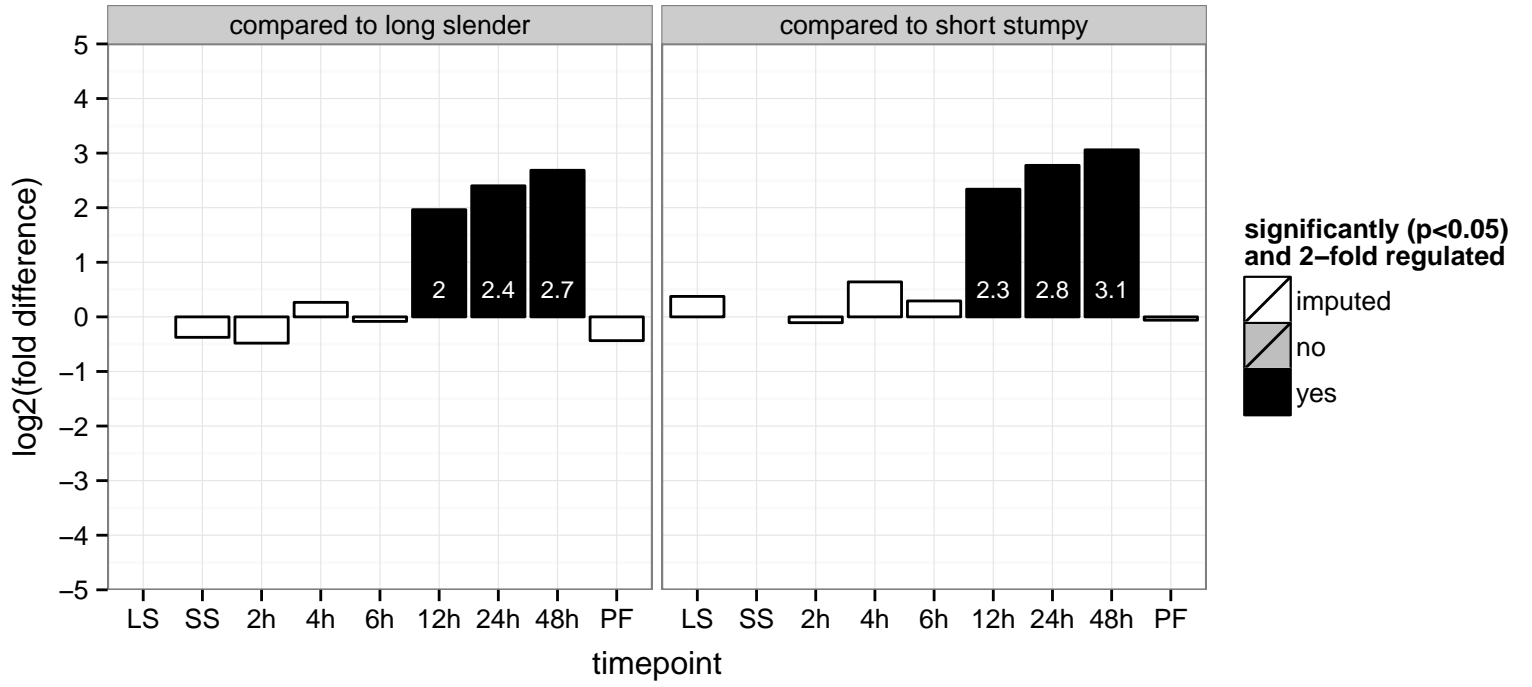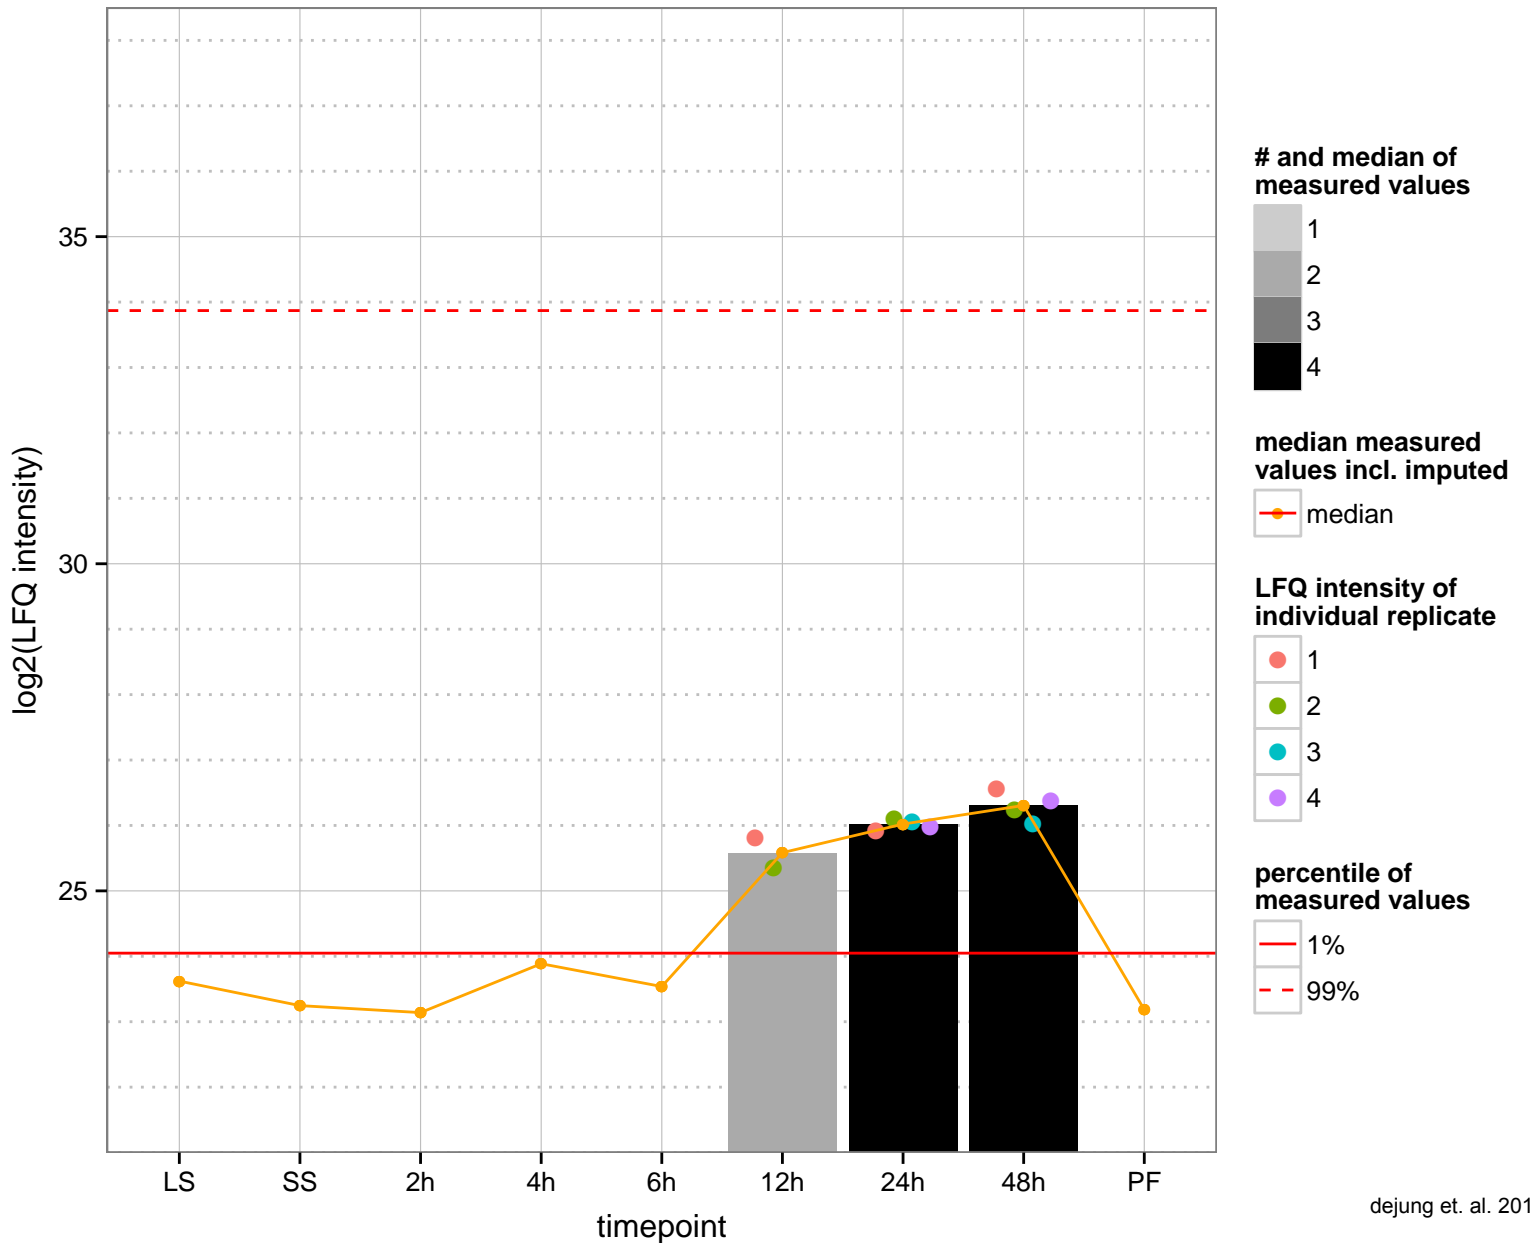

hypothetical protein, conserved  
 Tb927.11.5960;Tb927.11.5950  
 AGOF: null  
 AGOC: null  
 AGOP: null  
 PGO: null  
 PGOC: null  
 PGOP: null

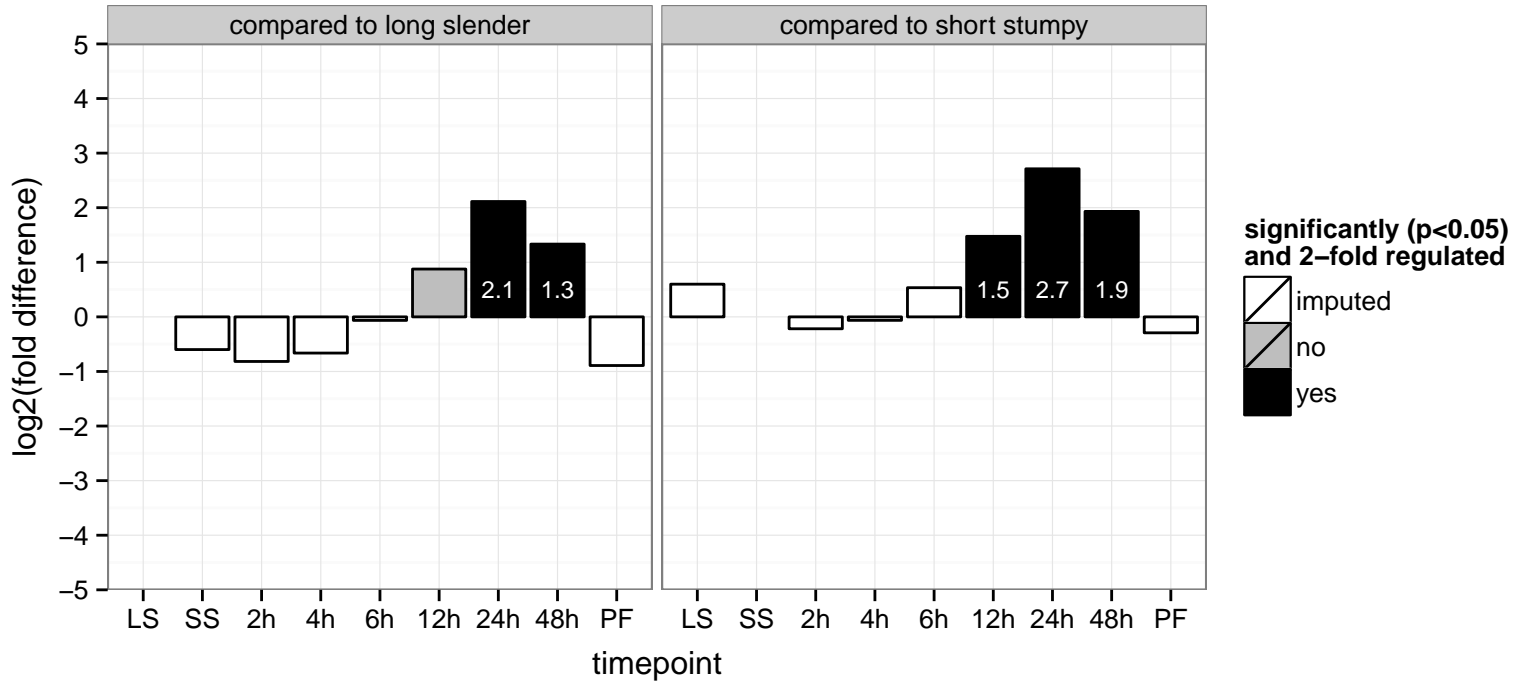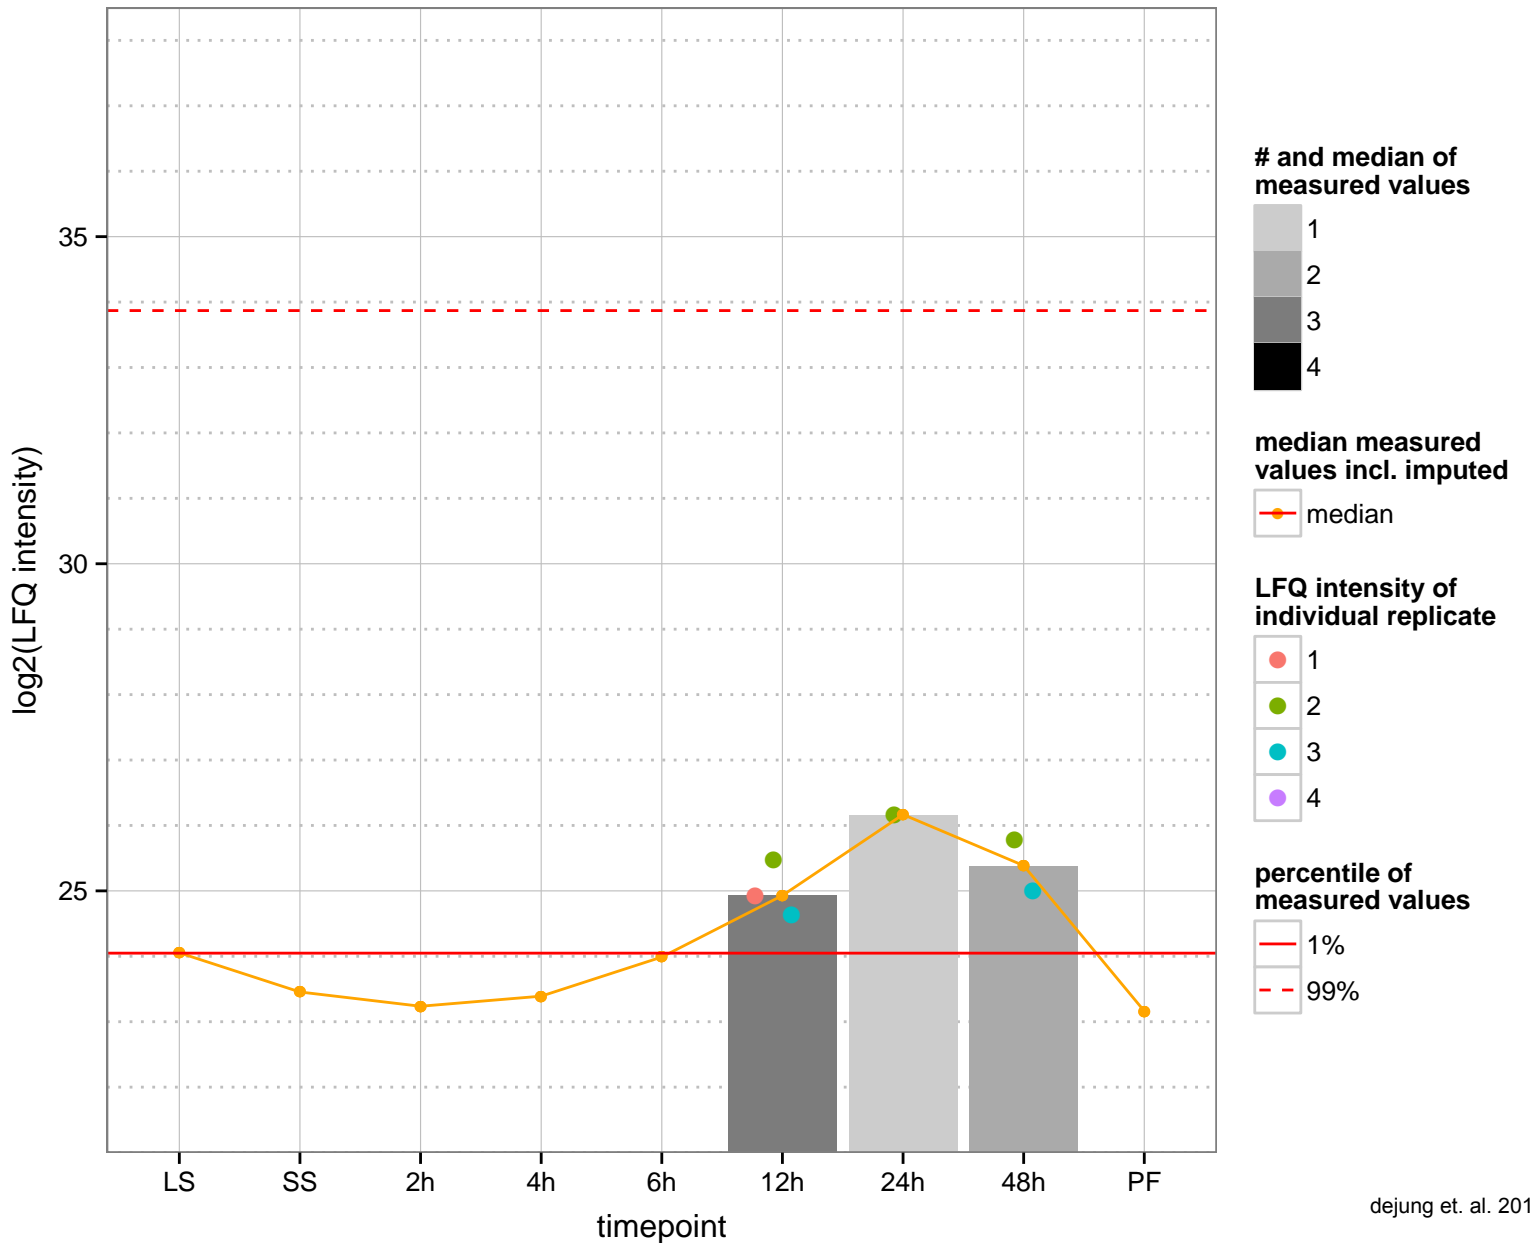

hypothetical protein, conserved  
 Tb927.11.800  
 AGOF: unfolded protein binding  
 AGOC: prefoldin complex  
 AGOP: protein folding  
 PGOF: chaperone binding, unfolded protein binding  
 PGO: prefoldin complex  
 PGOP: protein folding

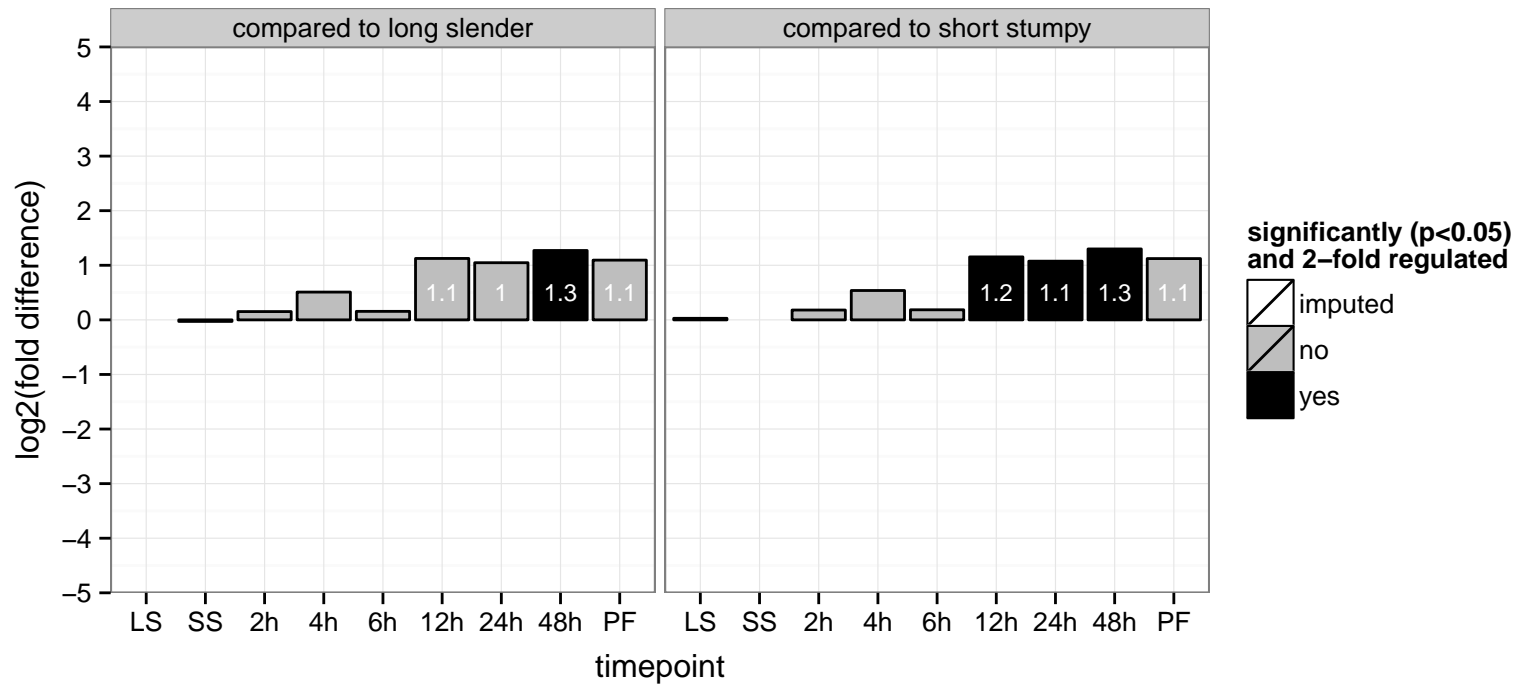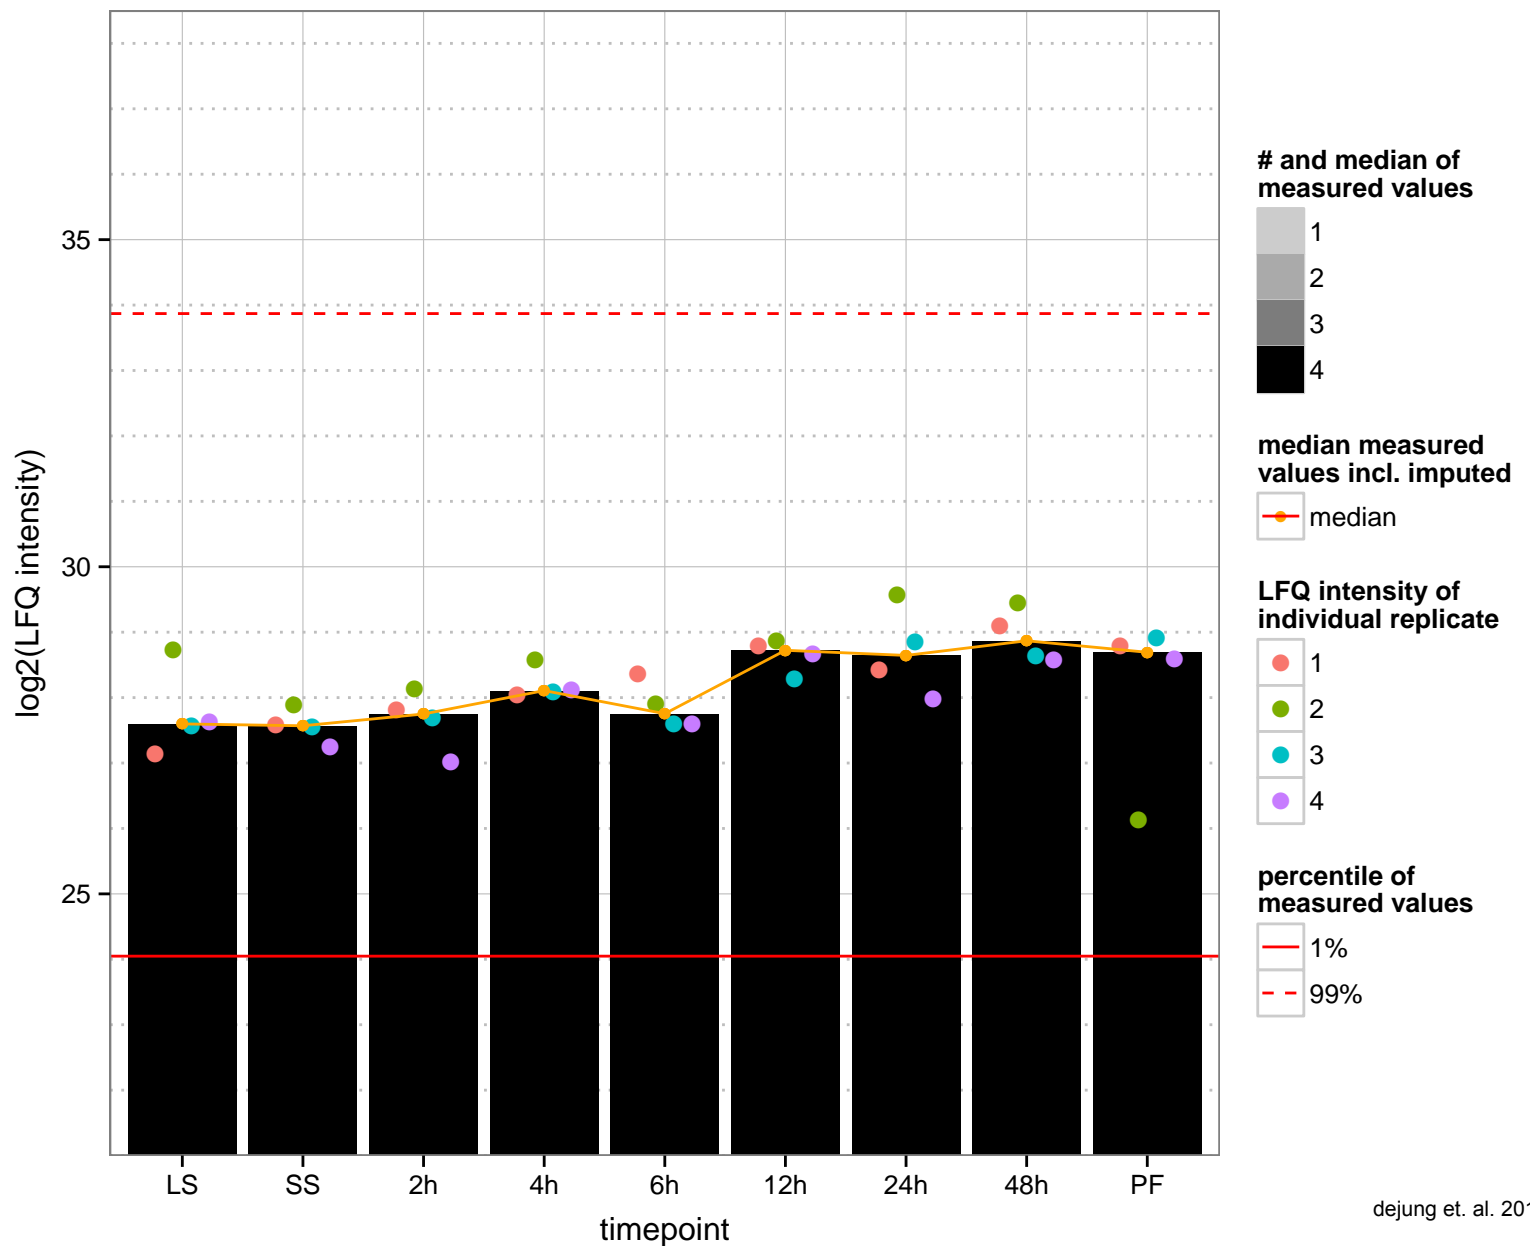

hypothetical protein, conserved  
 Tb927.11.8100  
 AGOF: null  
 AGOC: null  
 AGOP: null  
 PGO: protein binding  
 PGOC: null  
 PGOP: null

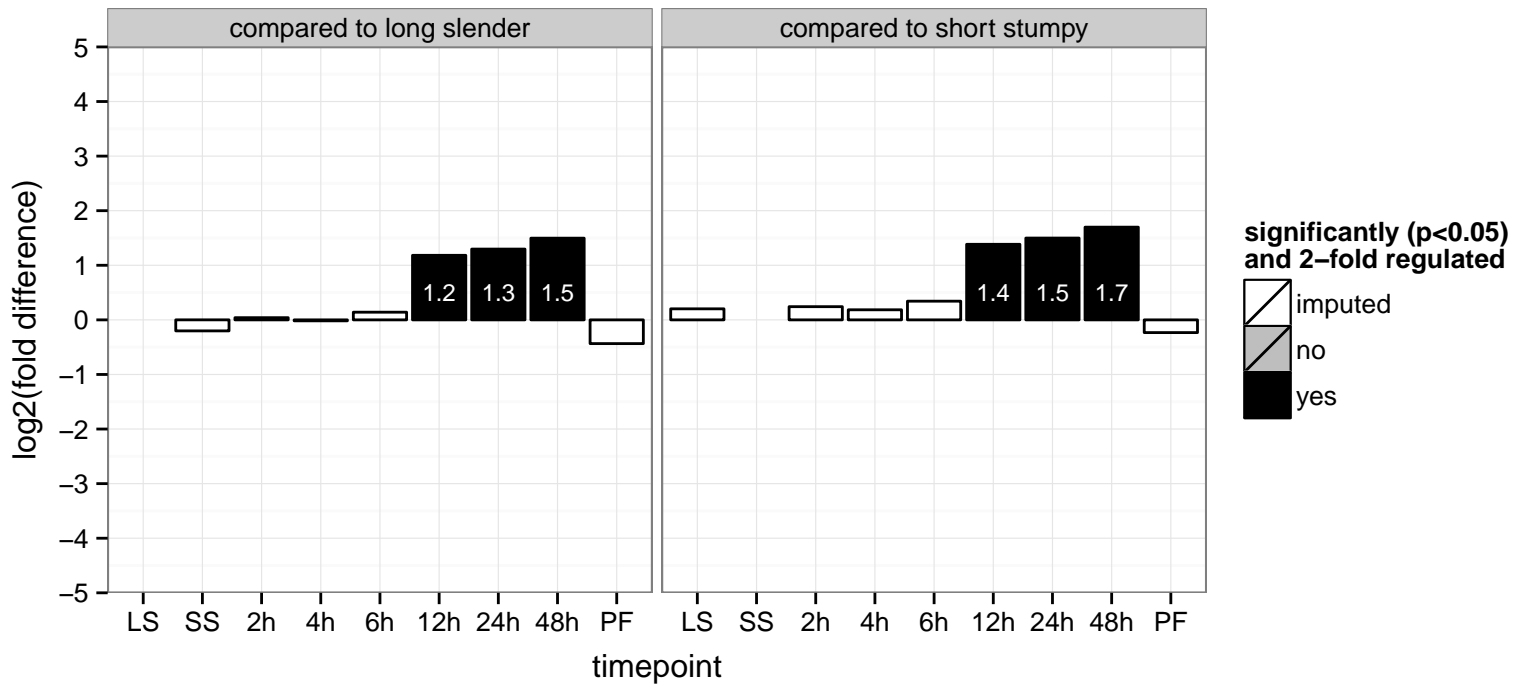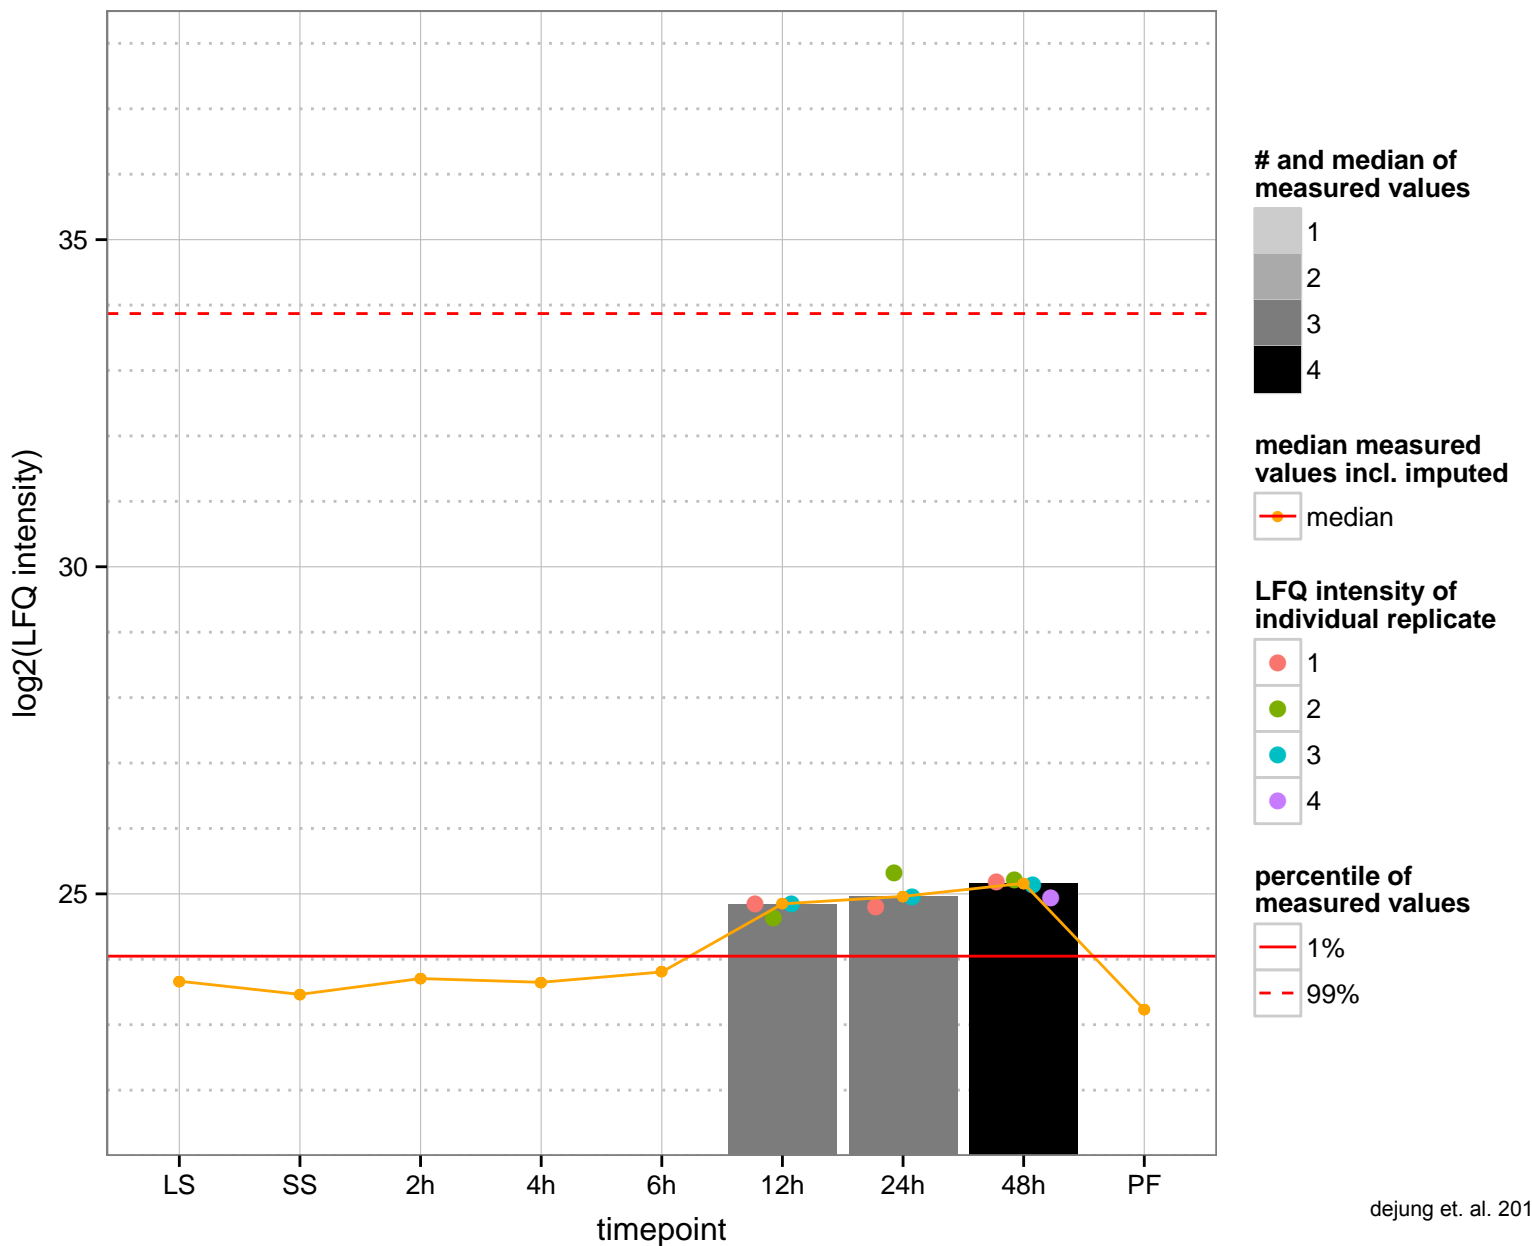

NADH dehydrogenase subunit NB6M, putative, NB6M, Complex 1, NADH-ubiquinone oxidoreductase chain NB6M  
 Tb927.11.8910  
 AGOF: NADH dehydrogenase (ubiquinone) activity, NADH dehydrogenase activity  
 AGOC: NADH dehydrogenase complex, mitochondrial membrane, mitochondrion  
 AGOP: NADH regeneration  
 PGO: null  
 PGOC: null  
 PGOP: null

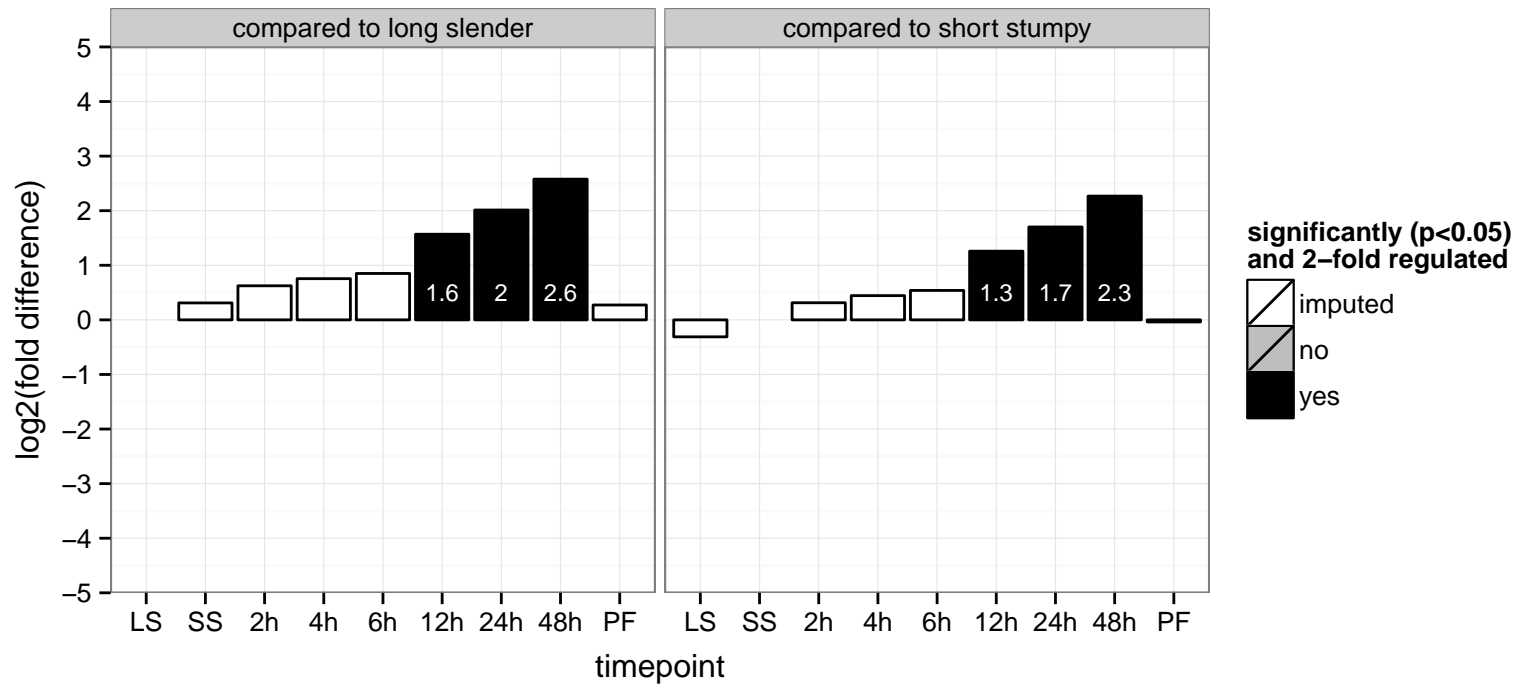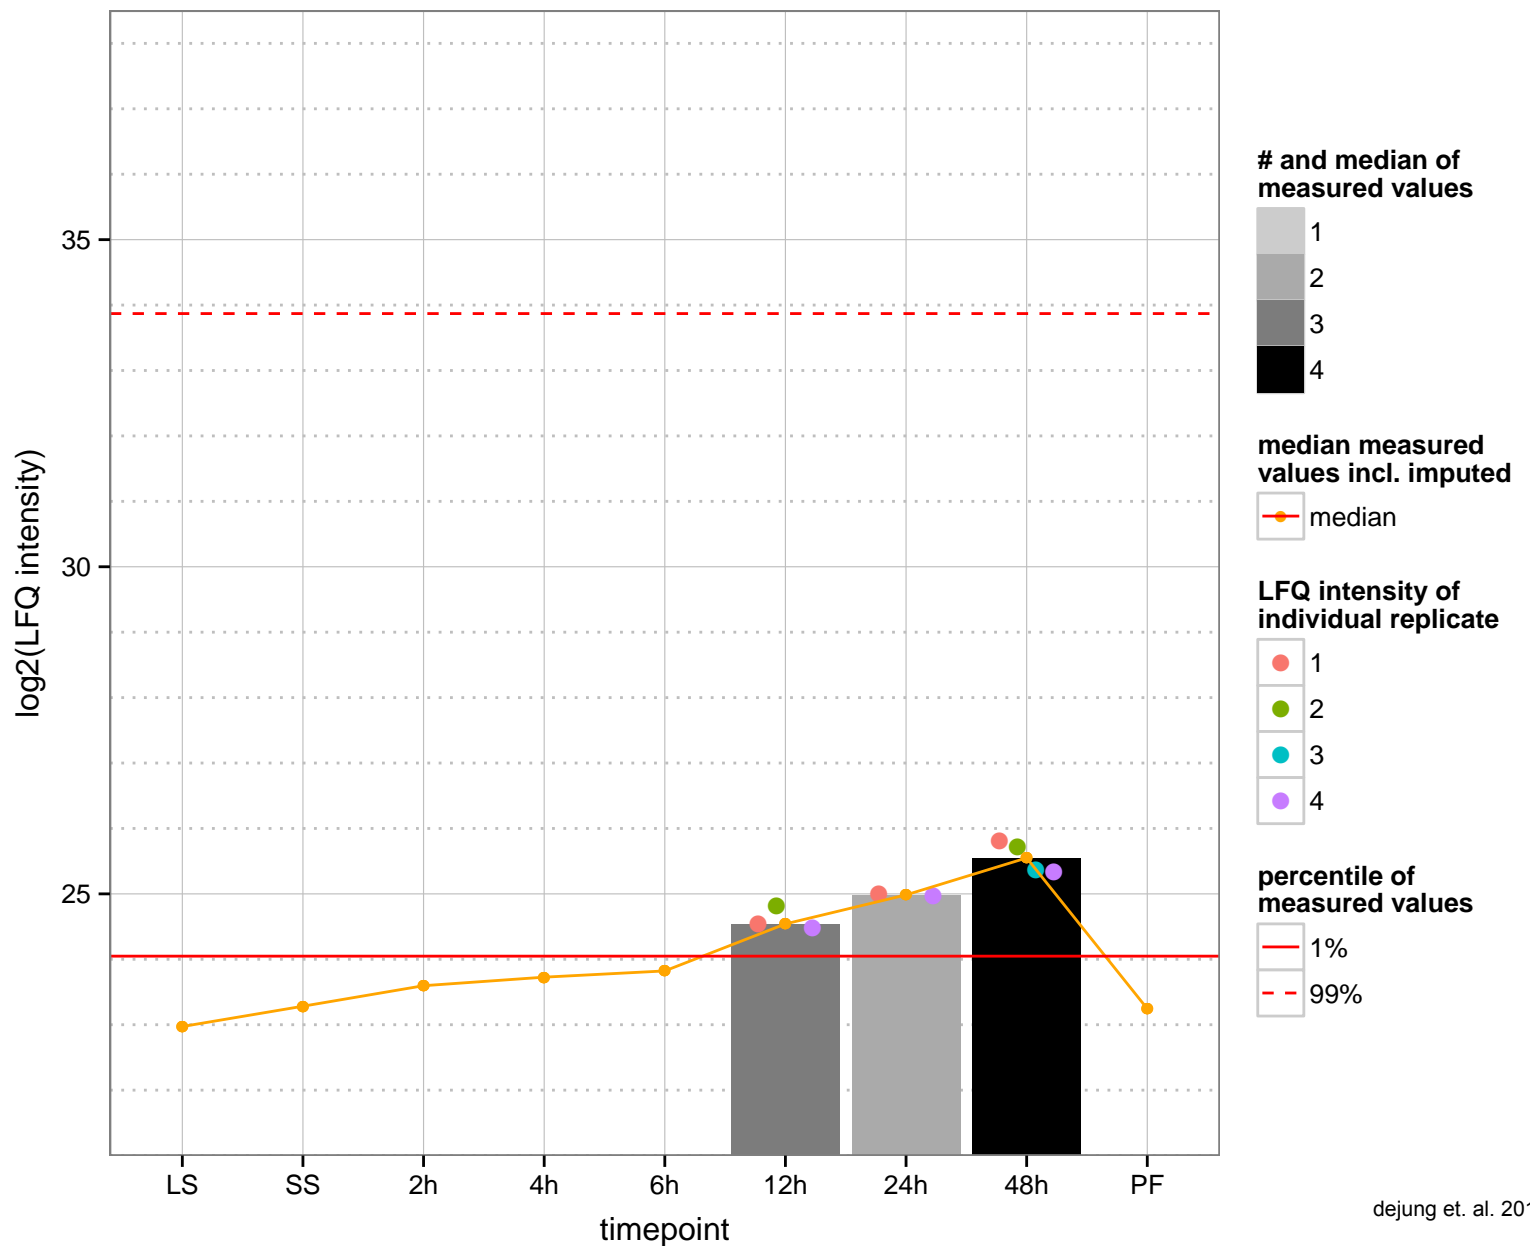

hypothetical protein, conserved  
 Tb927.11.9830  
 AGOF: null  
 AGOC: mitochondrion  
 AGOP: null  
 PGO: null  
 PGOC: null  
 PGOP: null

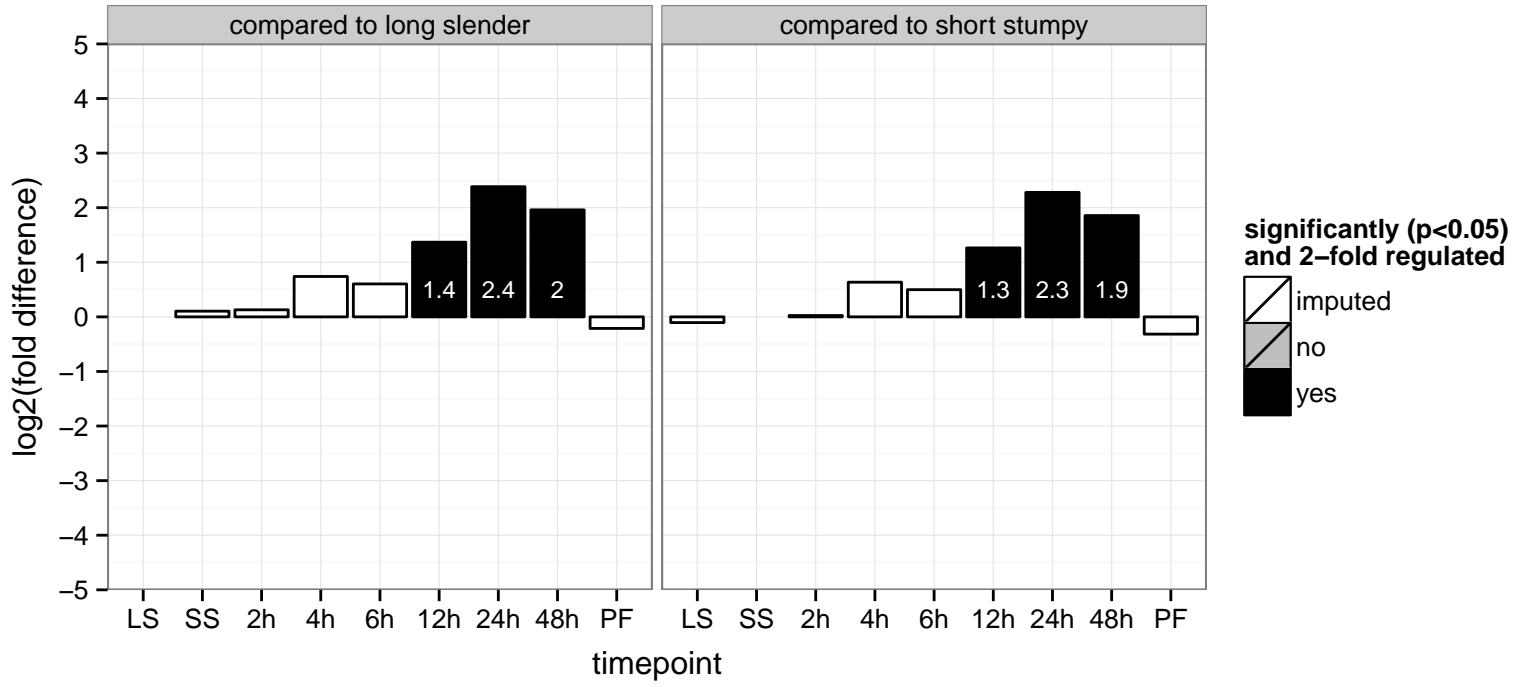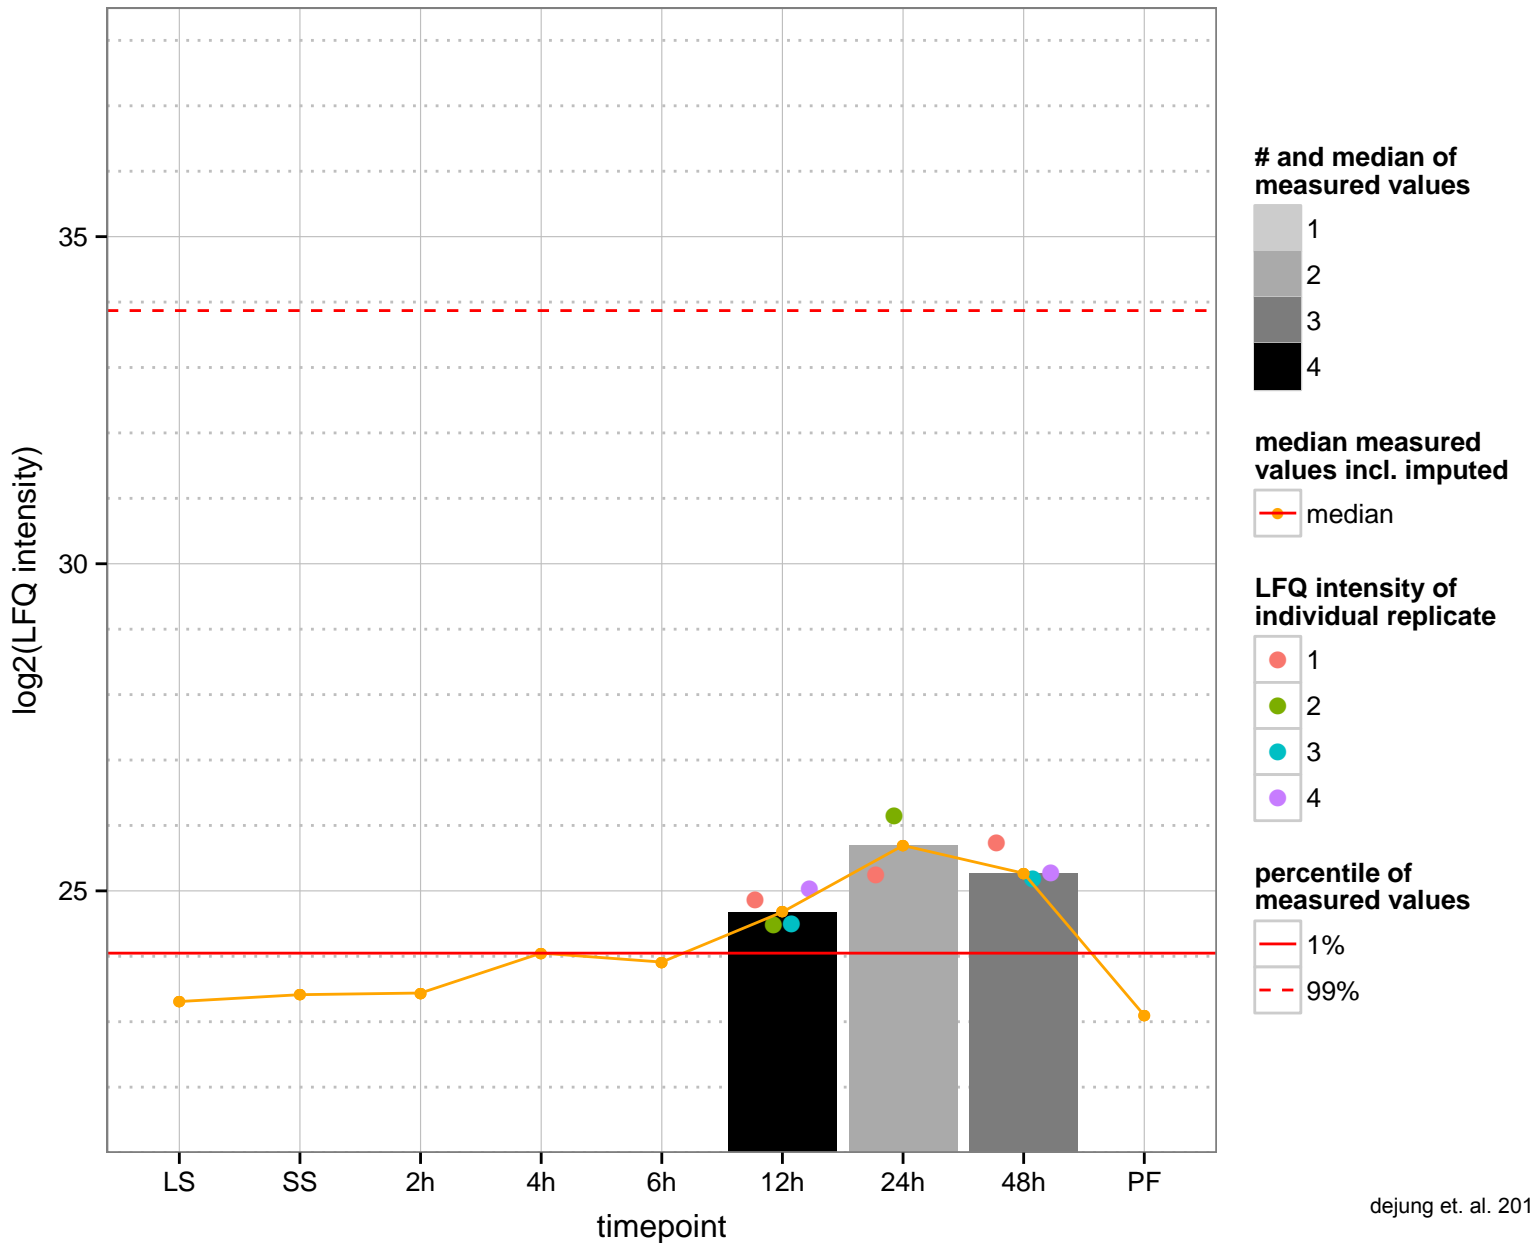



hypothetical protein, conserved  
 Tb927.11.9940  
 AGOF: null  
 AGOC: null  
 AGOP: null  
 PGO: null  
 PGOC: null  
 PGOP: null

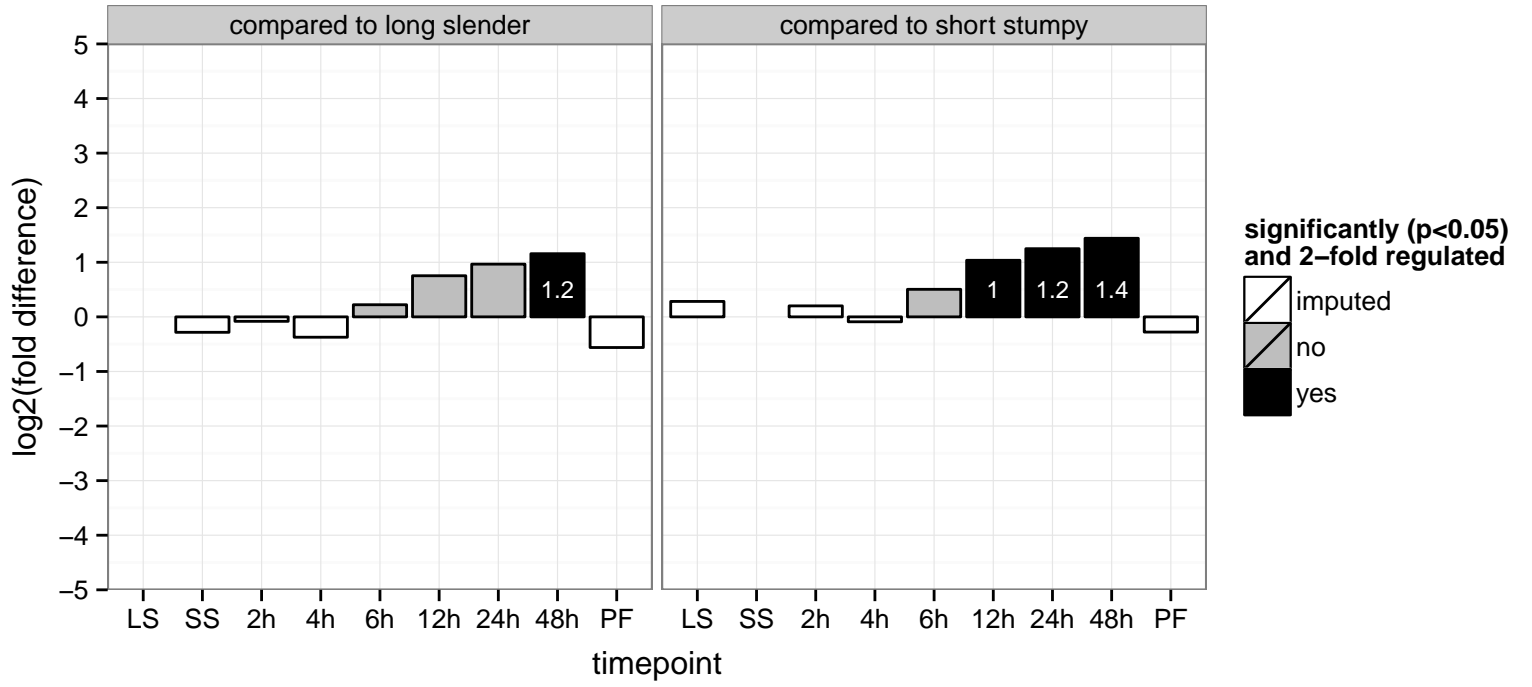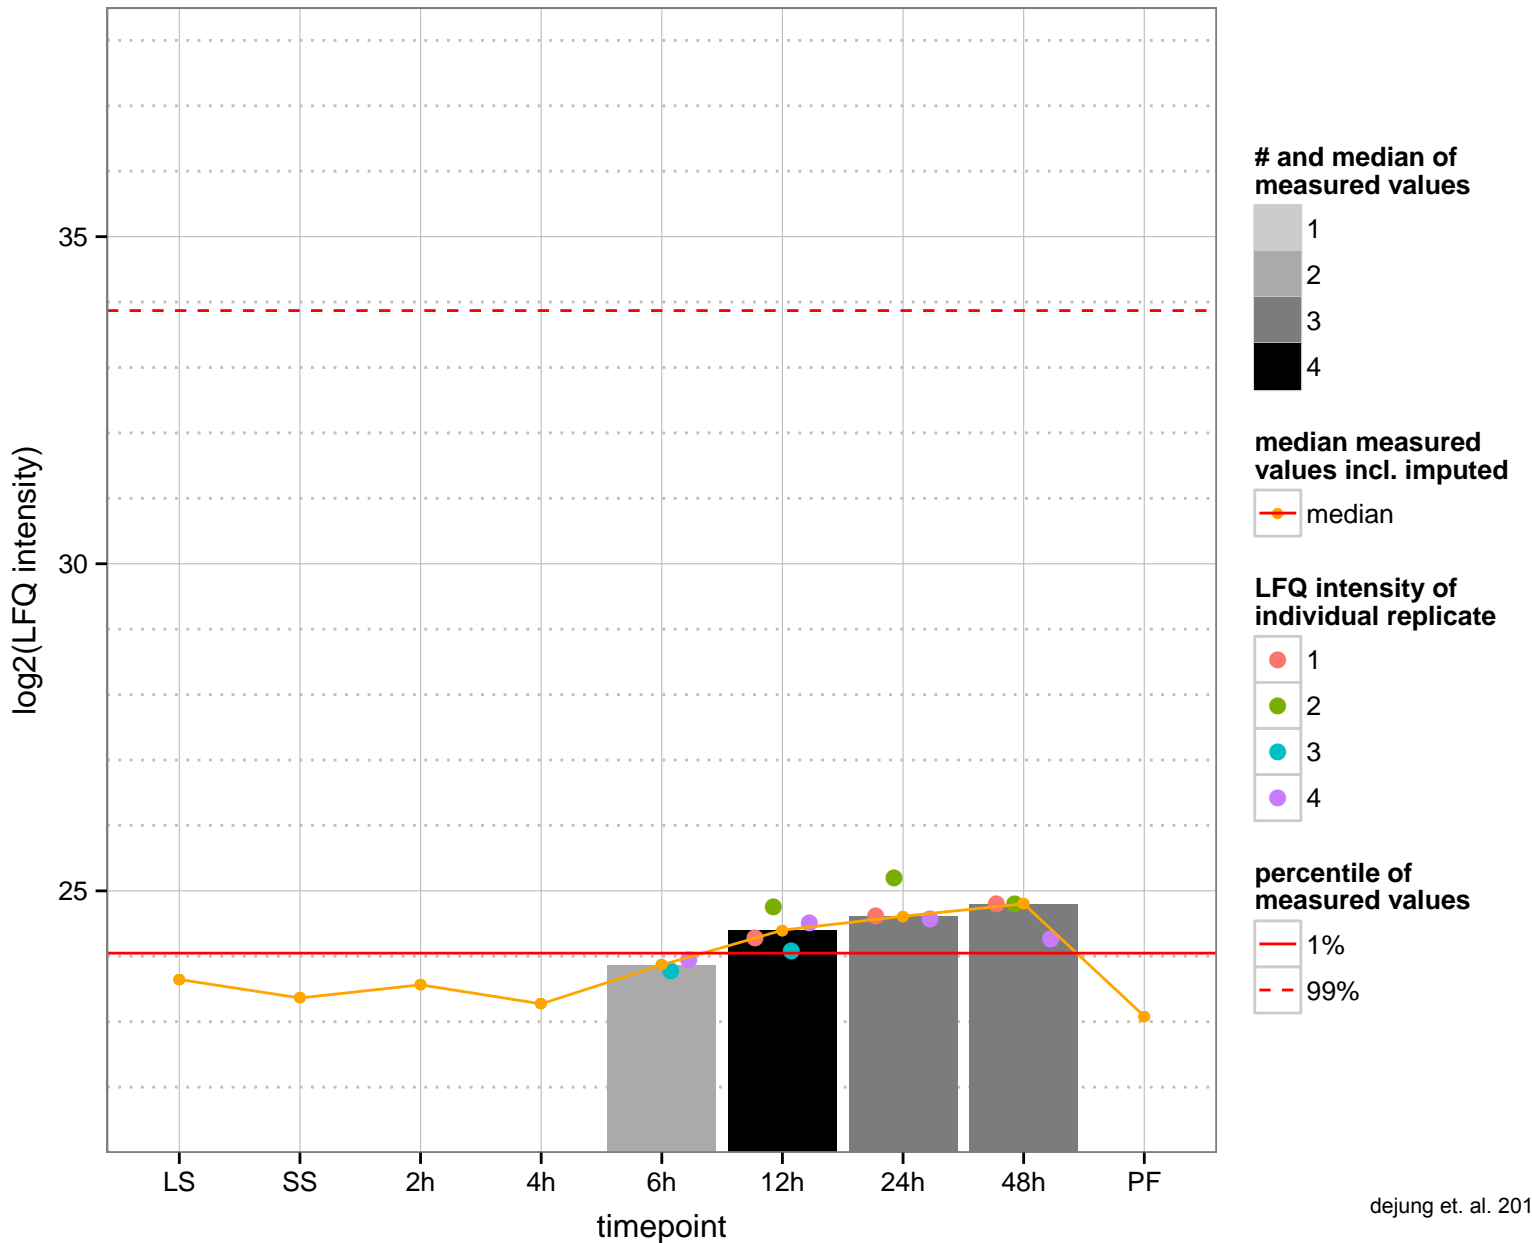

mitochondrial RNA binding complex 1 subunit (MRB1860)  
 Tb927.2.1860  
 AGOF: RNA binding  
 AGOC: mitochondrion  
 AGOP: cytidine to uridine editing, mRNA stabilization  
 PGO: null  
 PGO: null  
 PGO: null

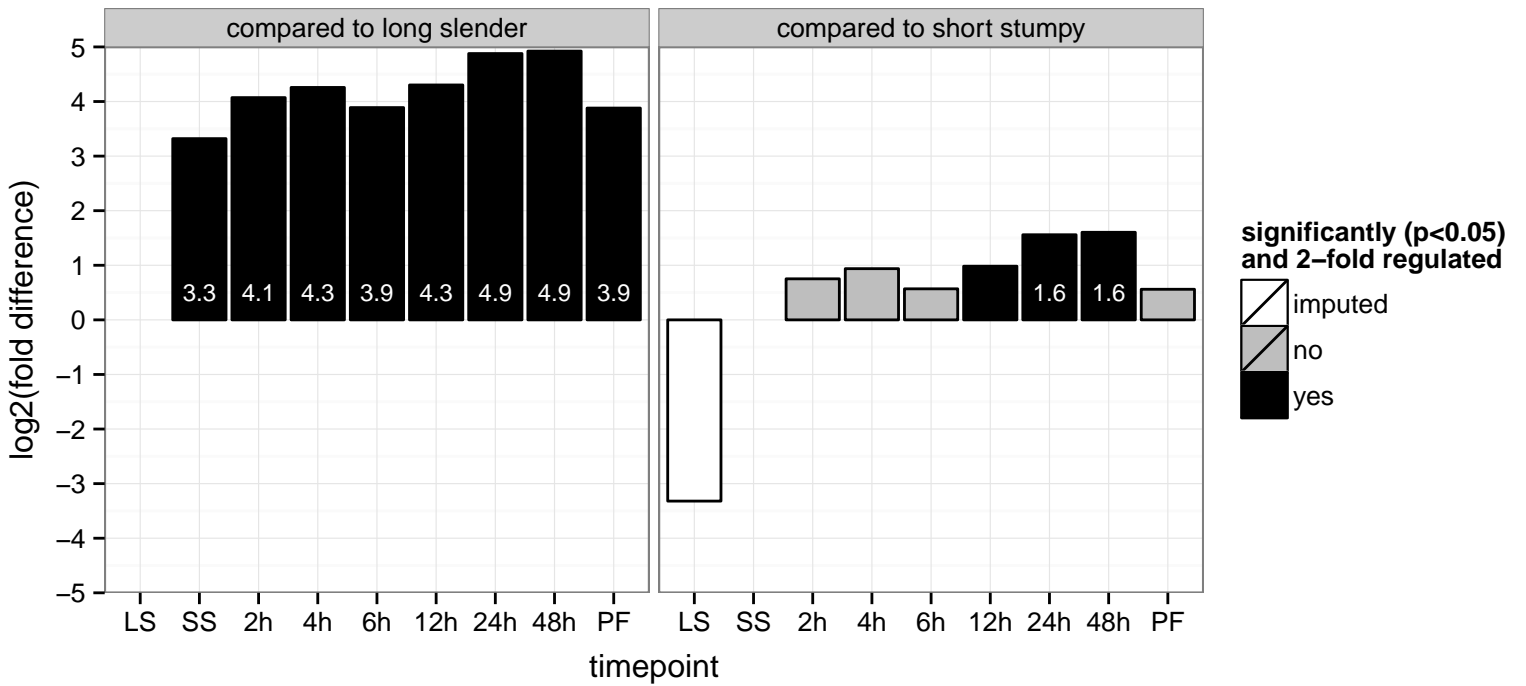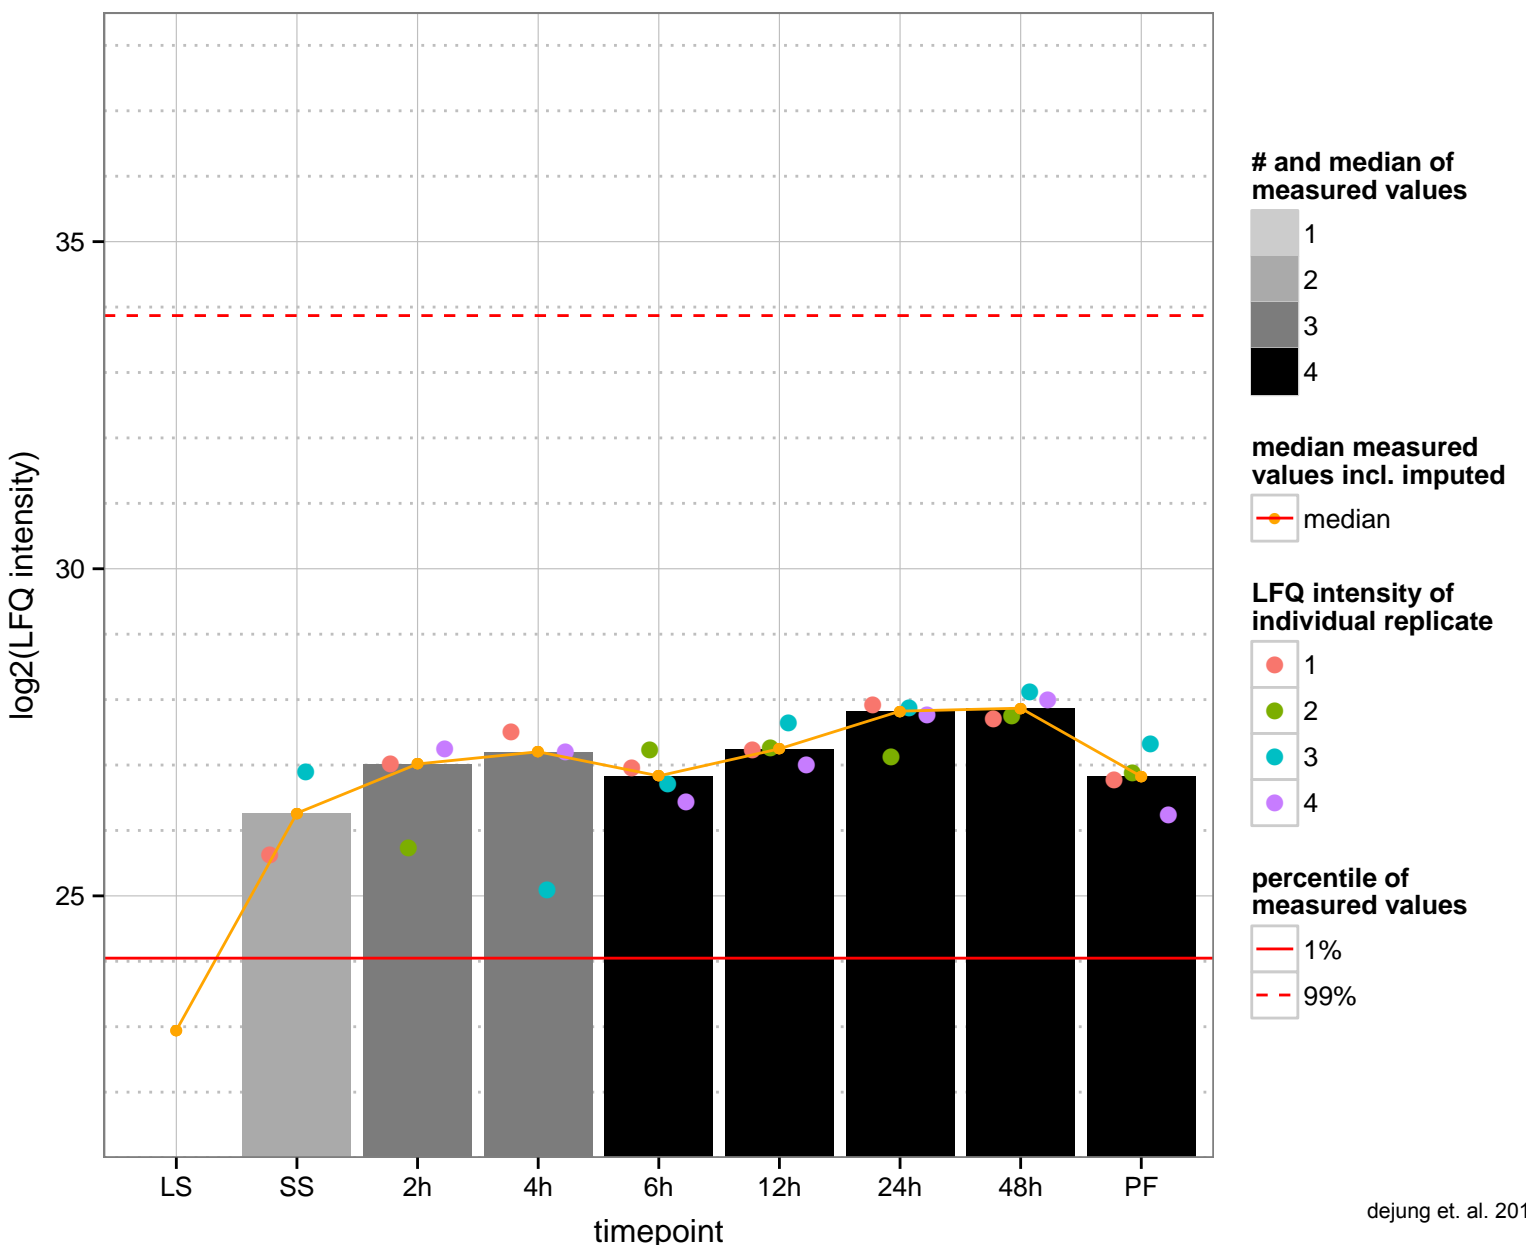

hypothetical protein, conserved  
 Tb927.2.3160  
 AGOF: null  
 AGOC: null  
 AGOP: null  
 PGO: snoRNA binding  
 PGOC: null  
 PGO: ribosome biogenesis, snRNA pseudouridine synthesis

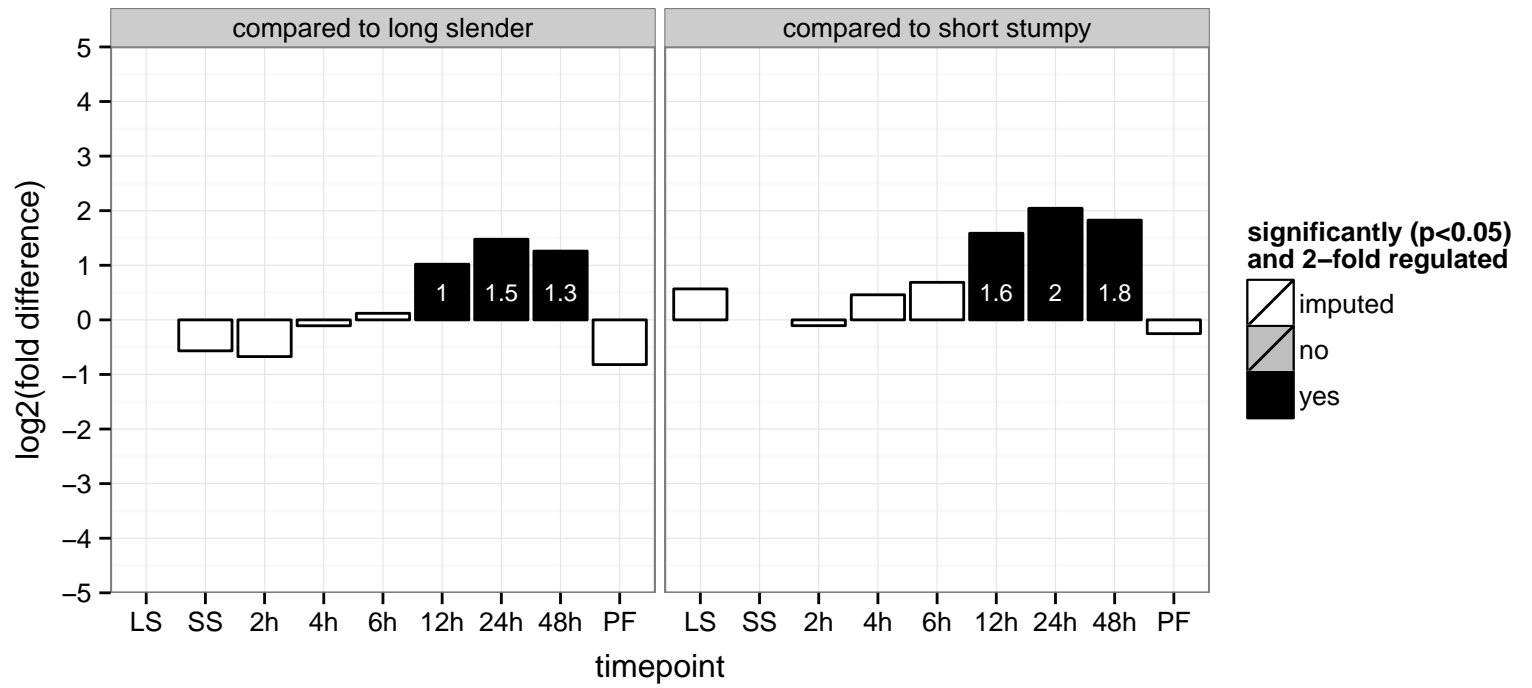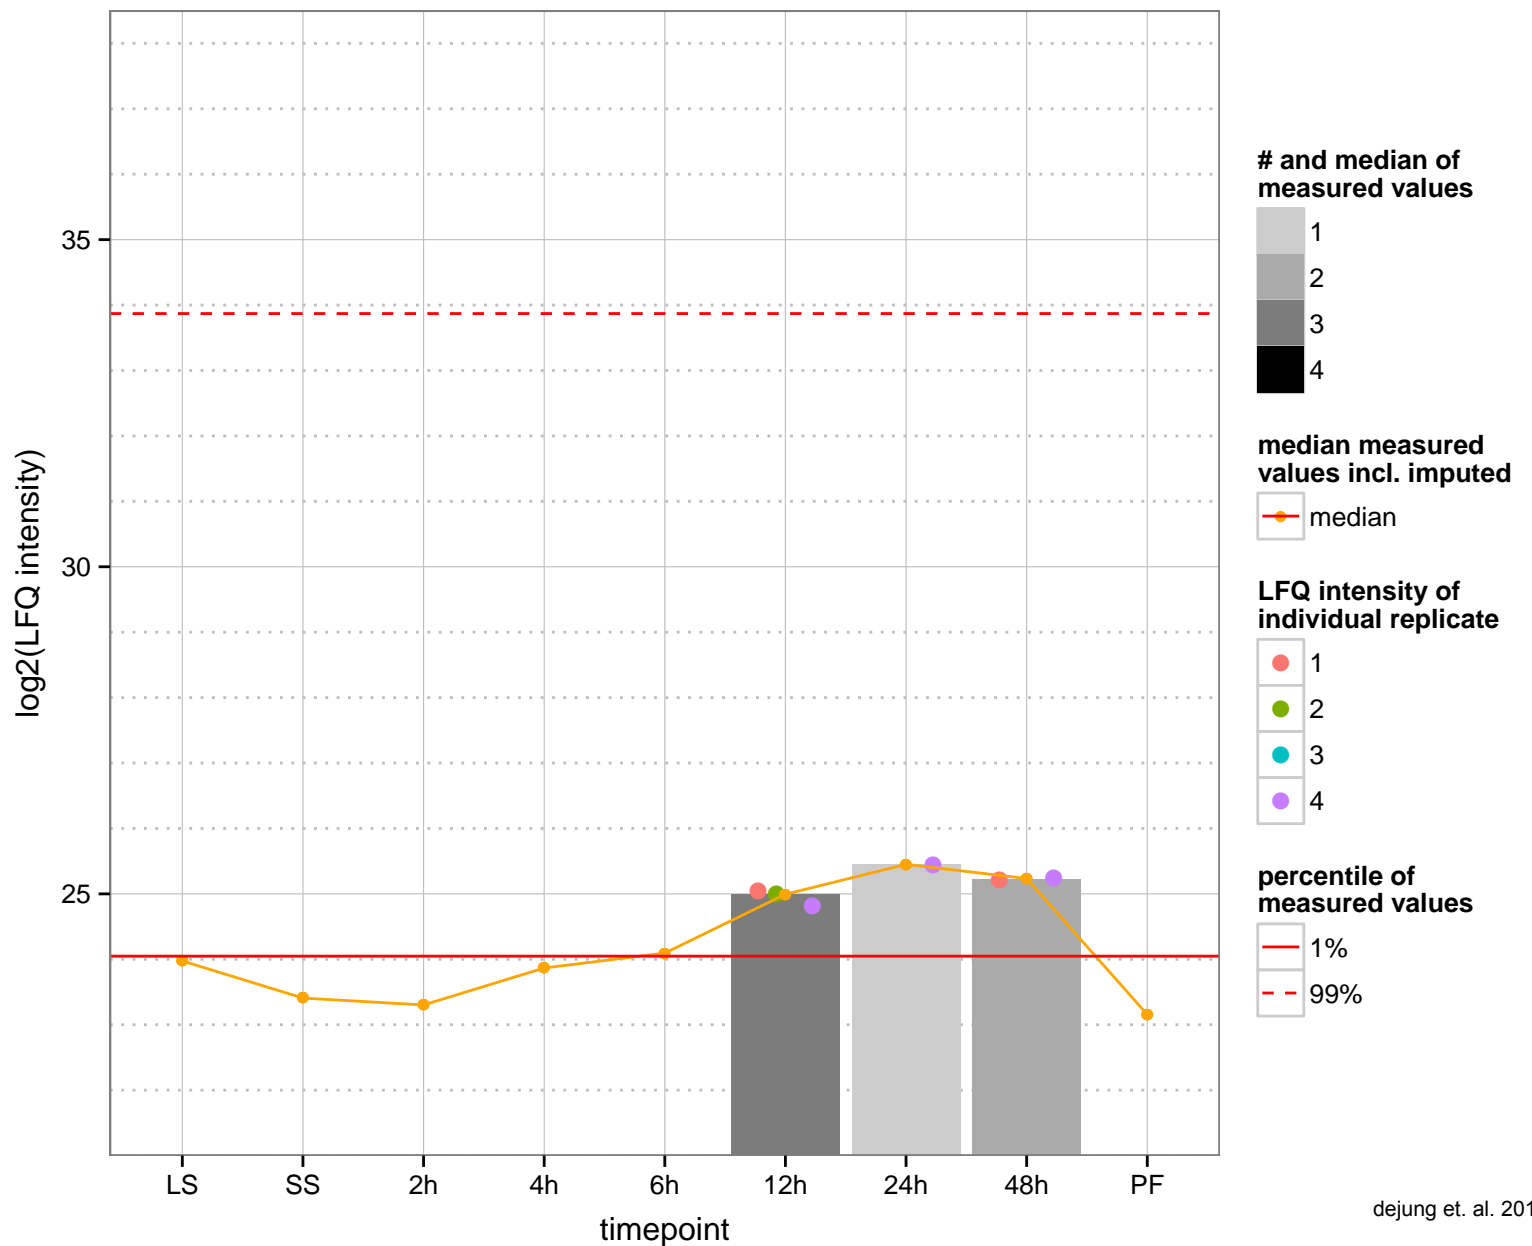

aldo-keto reductase, putative  
 Tb927.2.5180  
 AGOF: alditol:NADP+ 1-oxidoreductase activity  
 AGOC: mitochondrion  
 AGOP: oxidation-reduction process  
 PGO: oxidation-reduction process  
 PGO: null  
 PGO: oxidation-reduction process

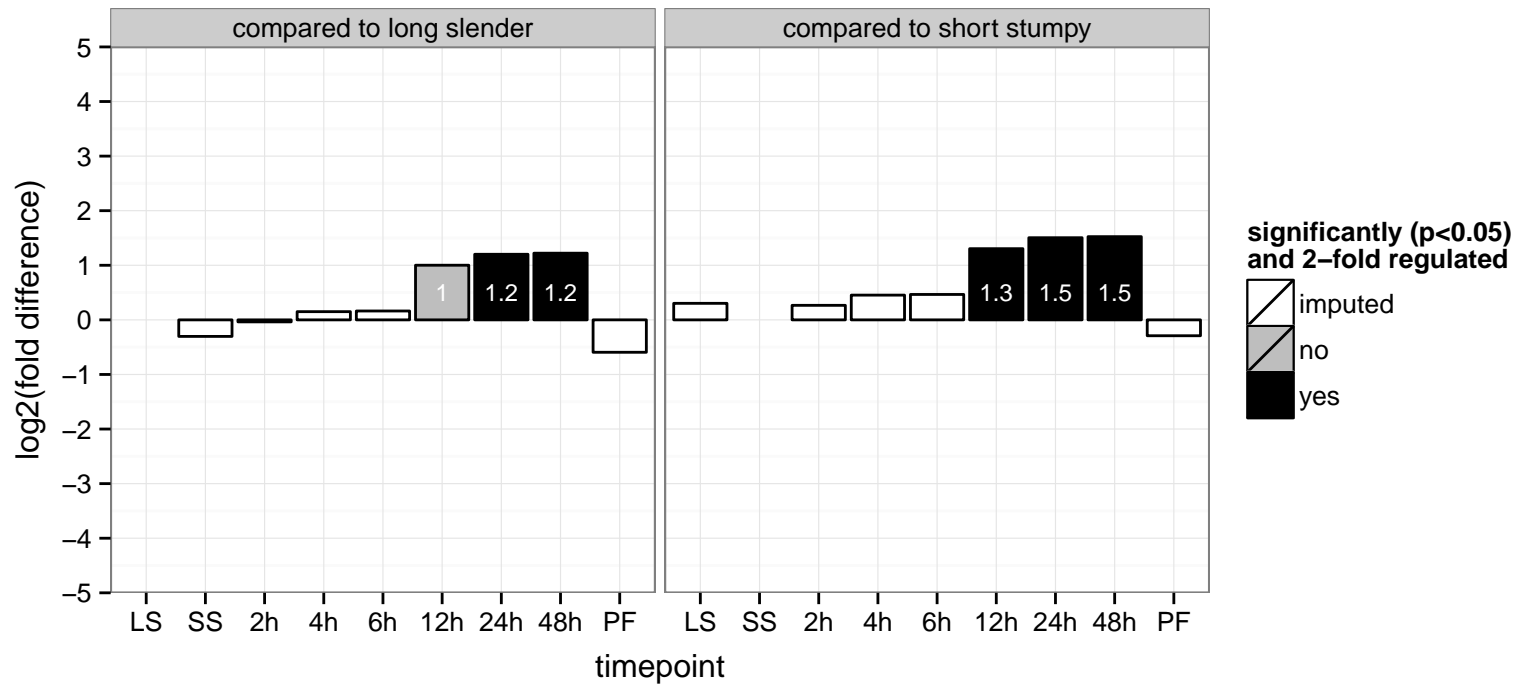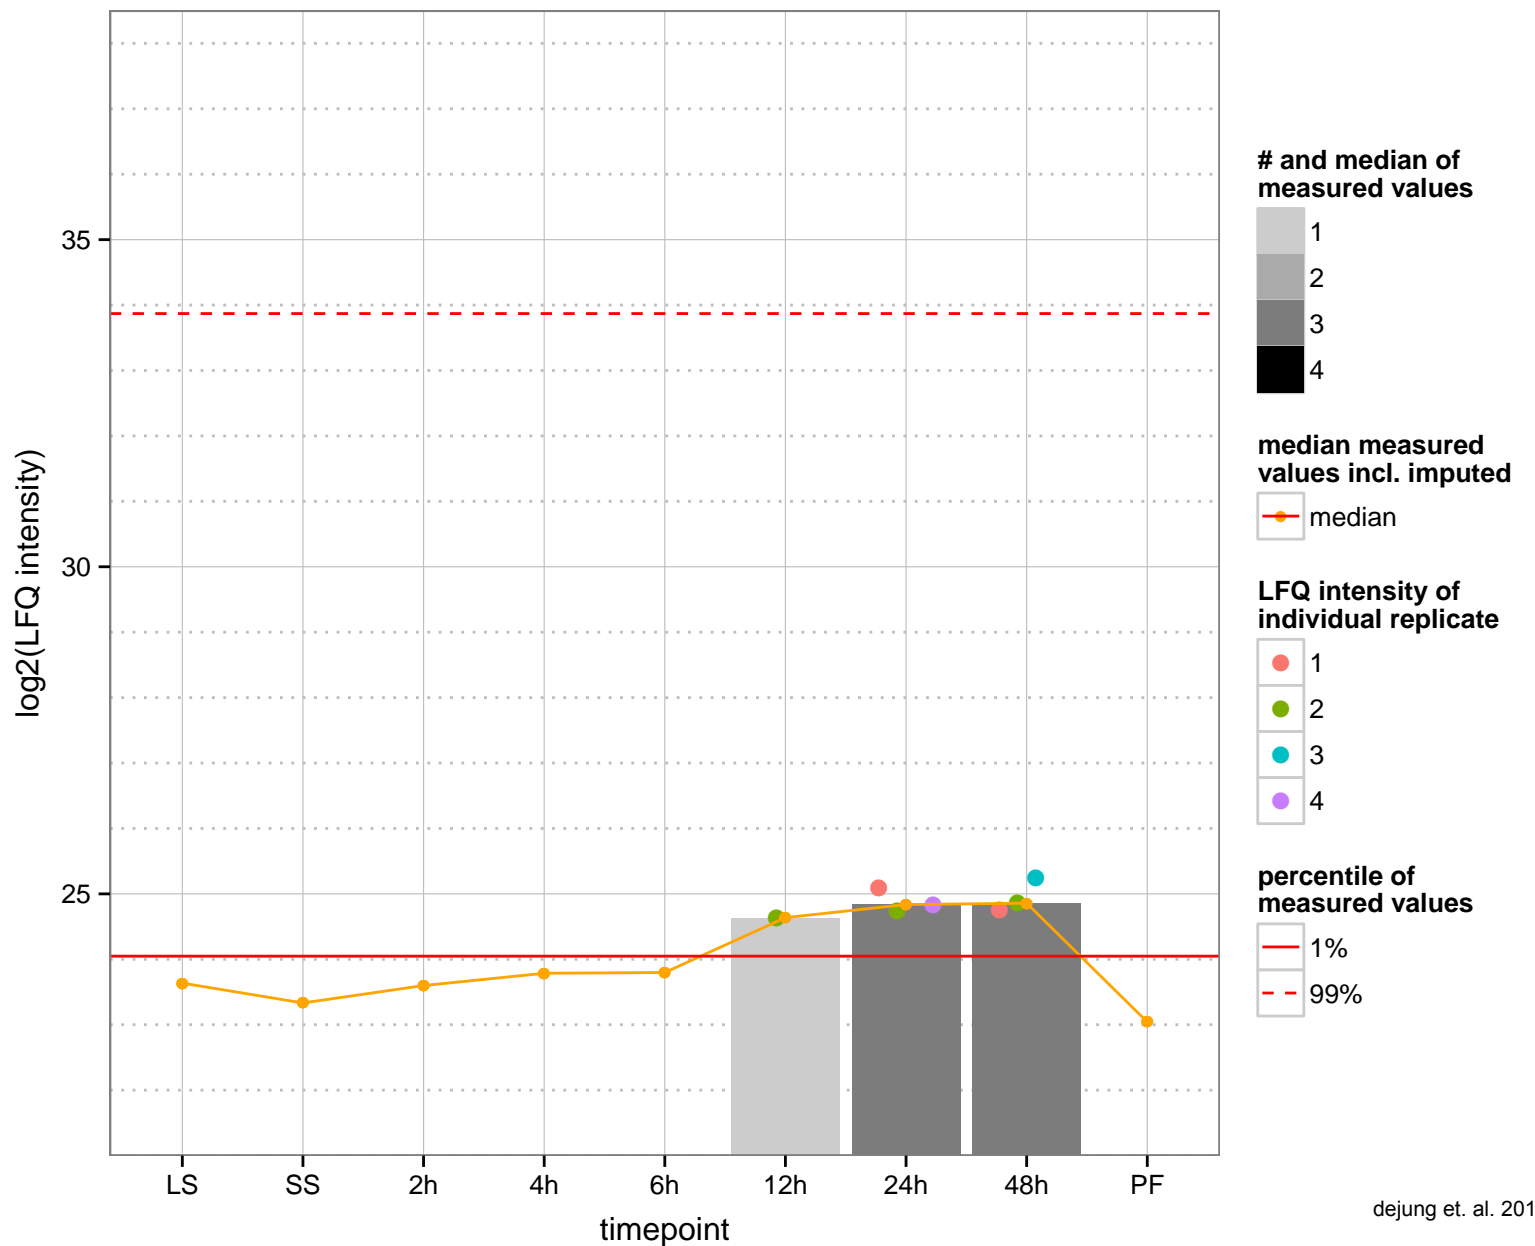

hypothetical protein, conserved  
 Tb927.3.2010  
 AGOF: null  
 AGOC: mitochondrion  
 AGOP: null  
 PGO: null  
 PGOC: null  
 PGOP: null

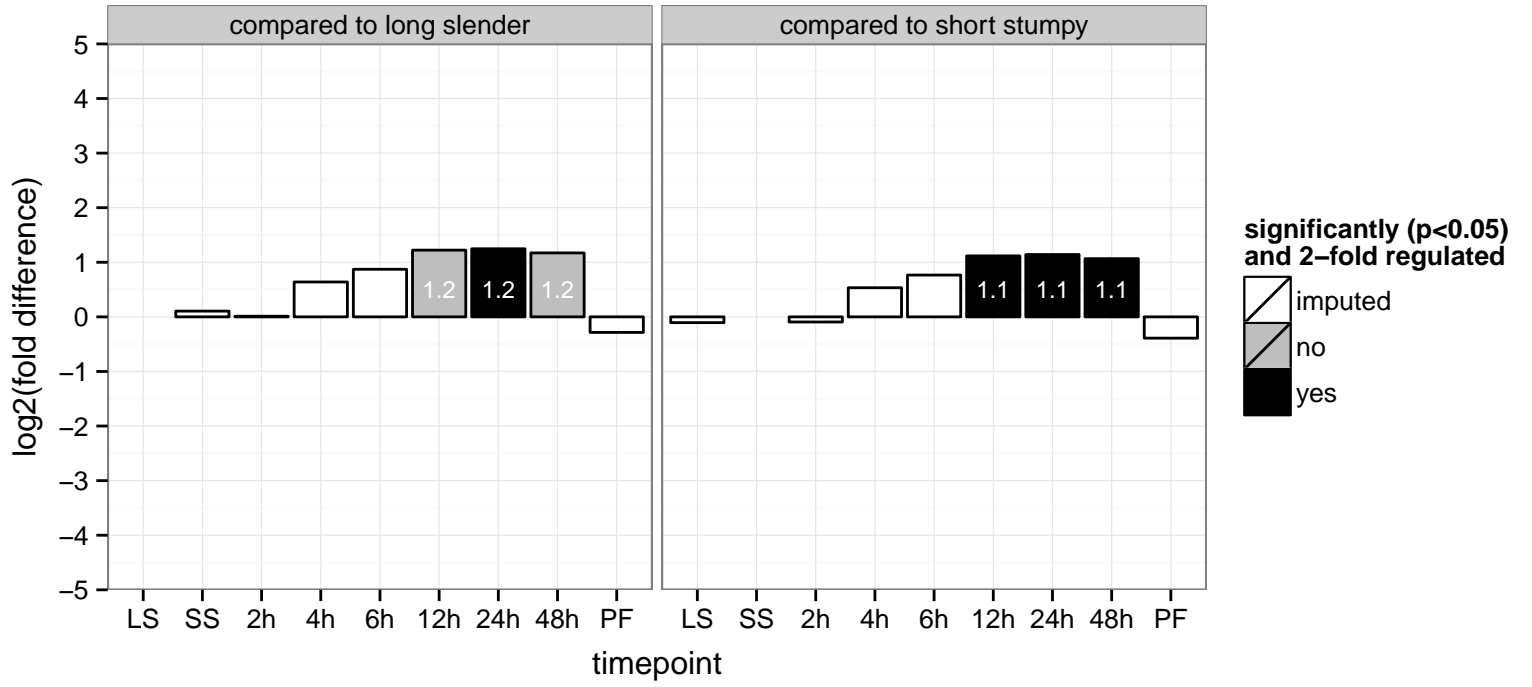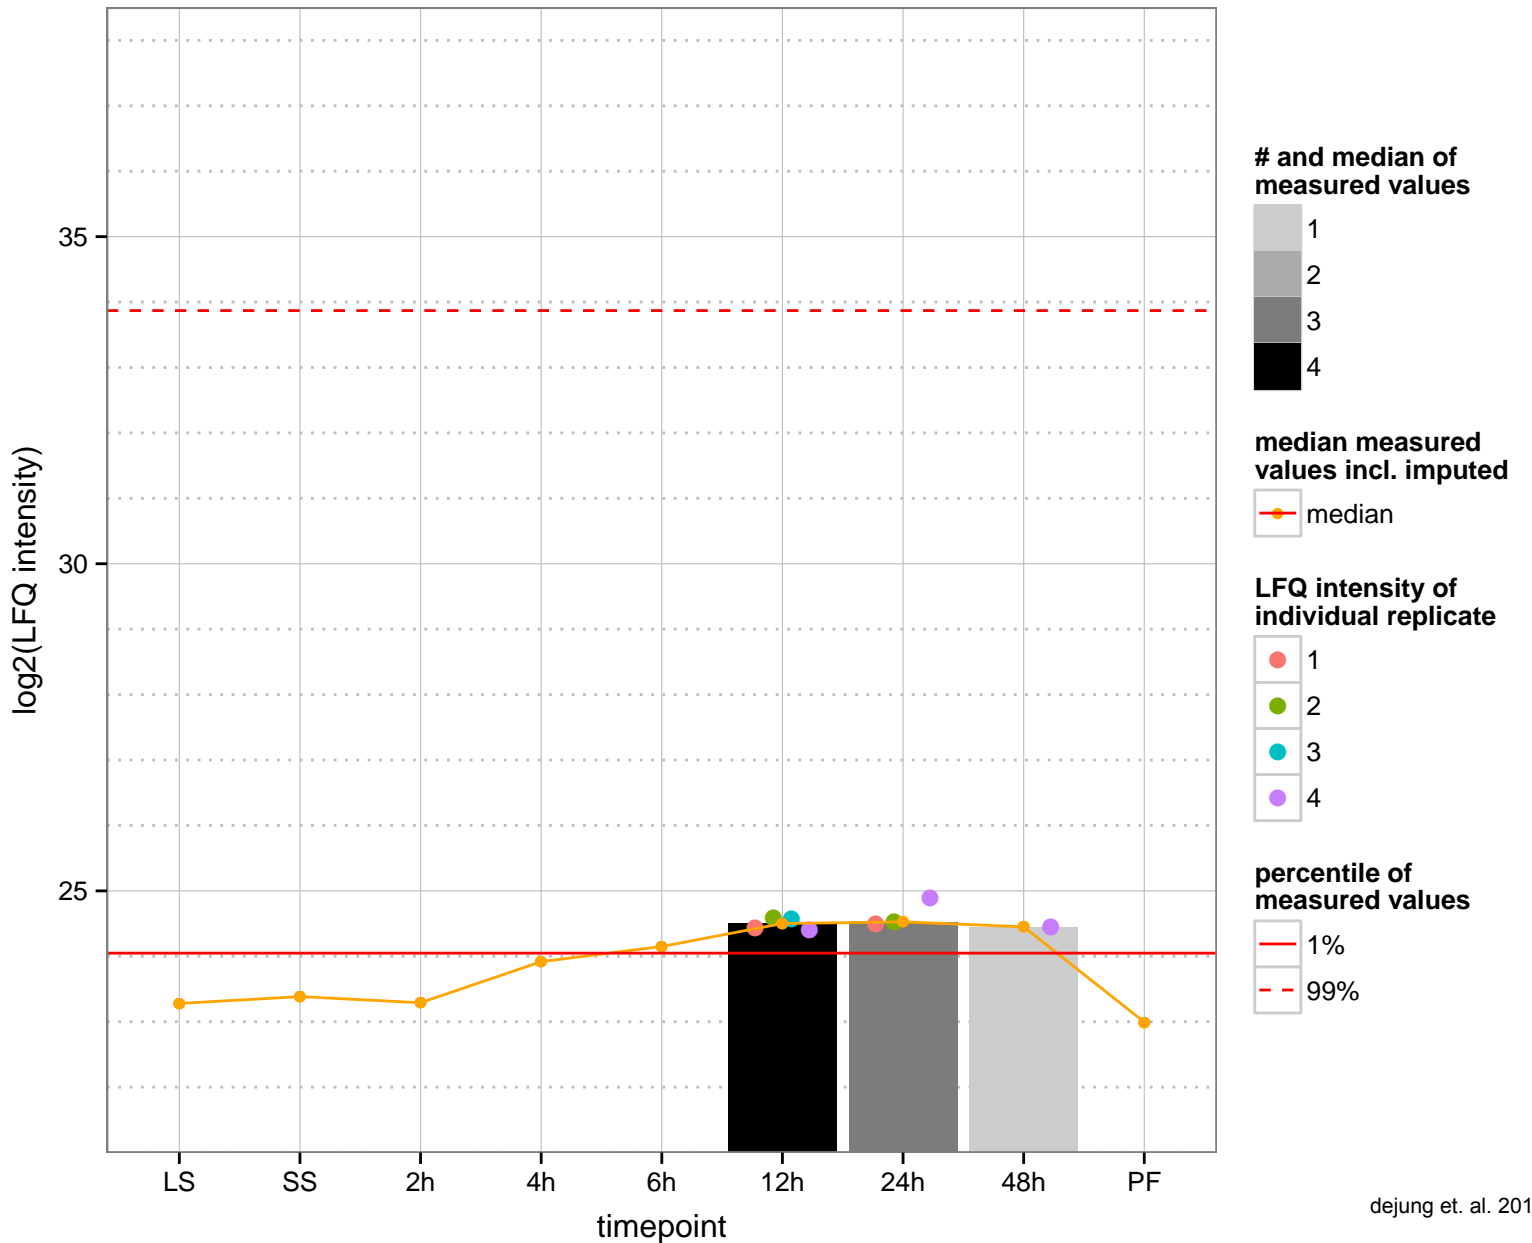

chaperone protein DNAj, putative  
 Tb927.3.2290  
 AGOF: heat shock protein binding, unfolded protein binding  
 AGOC: null  
 AGOP: protein folding  
 PGOF: heat shock protein binding  
 PGOC: null  
 PGOP: null

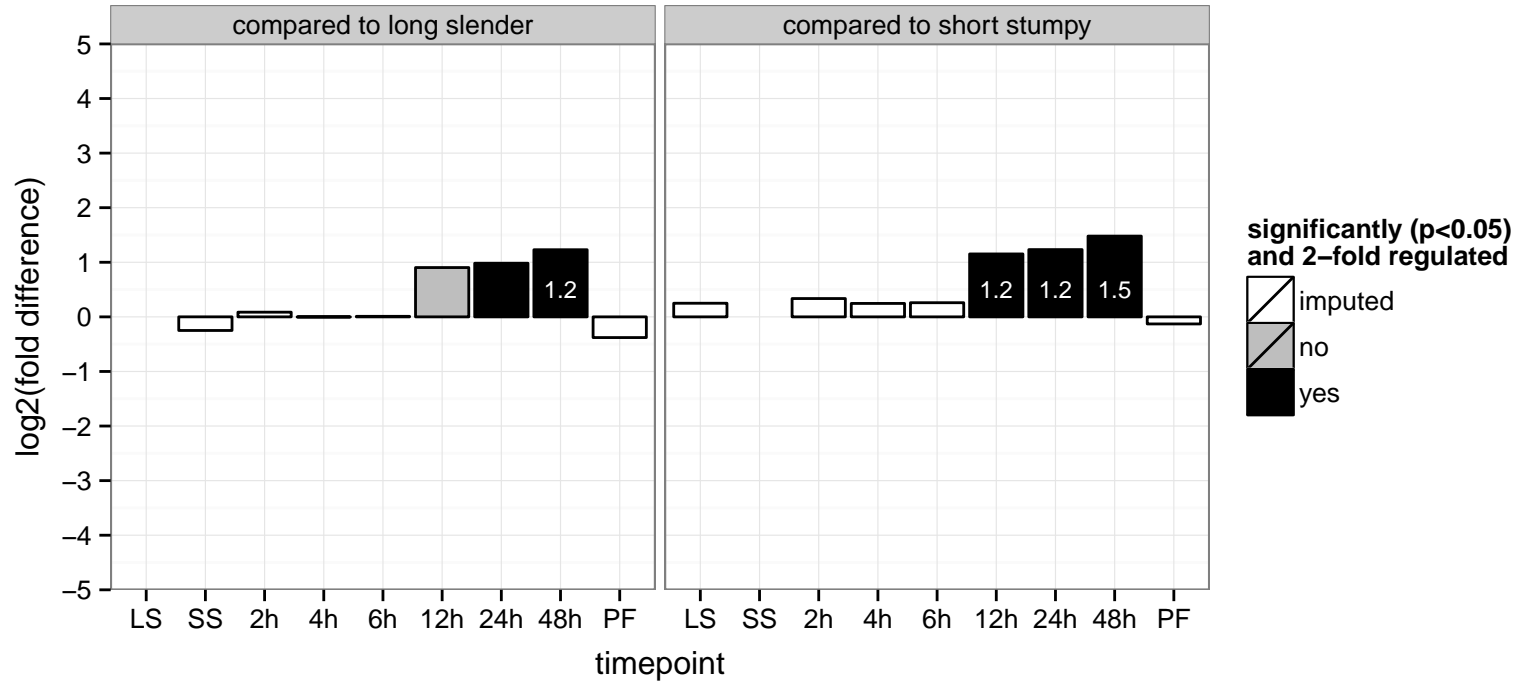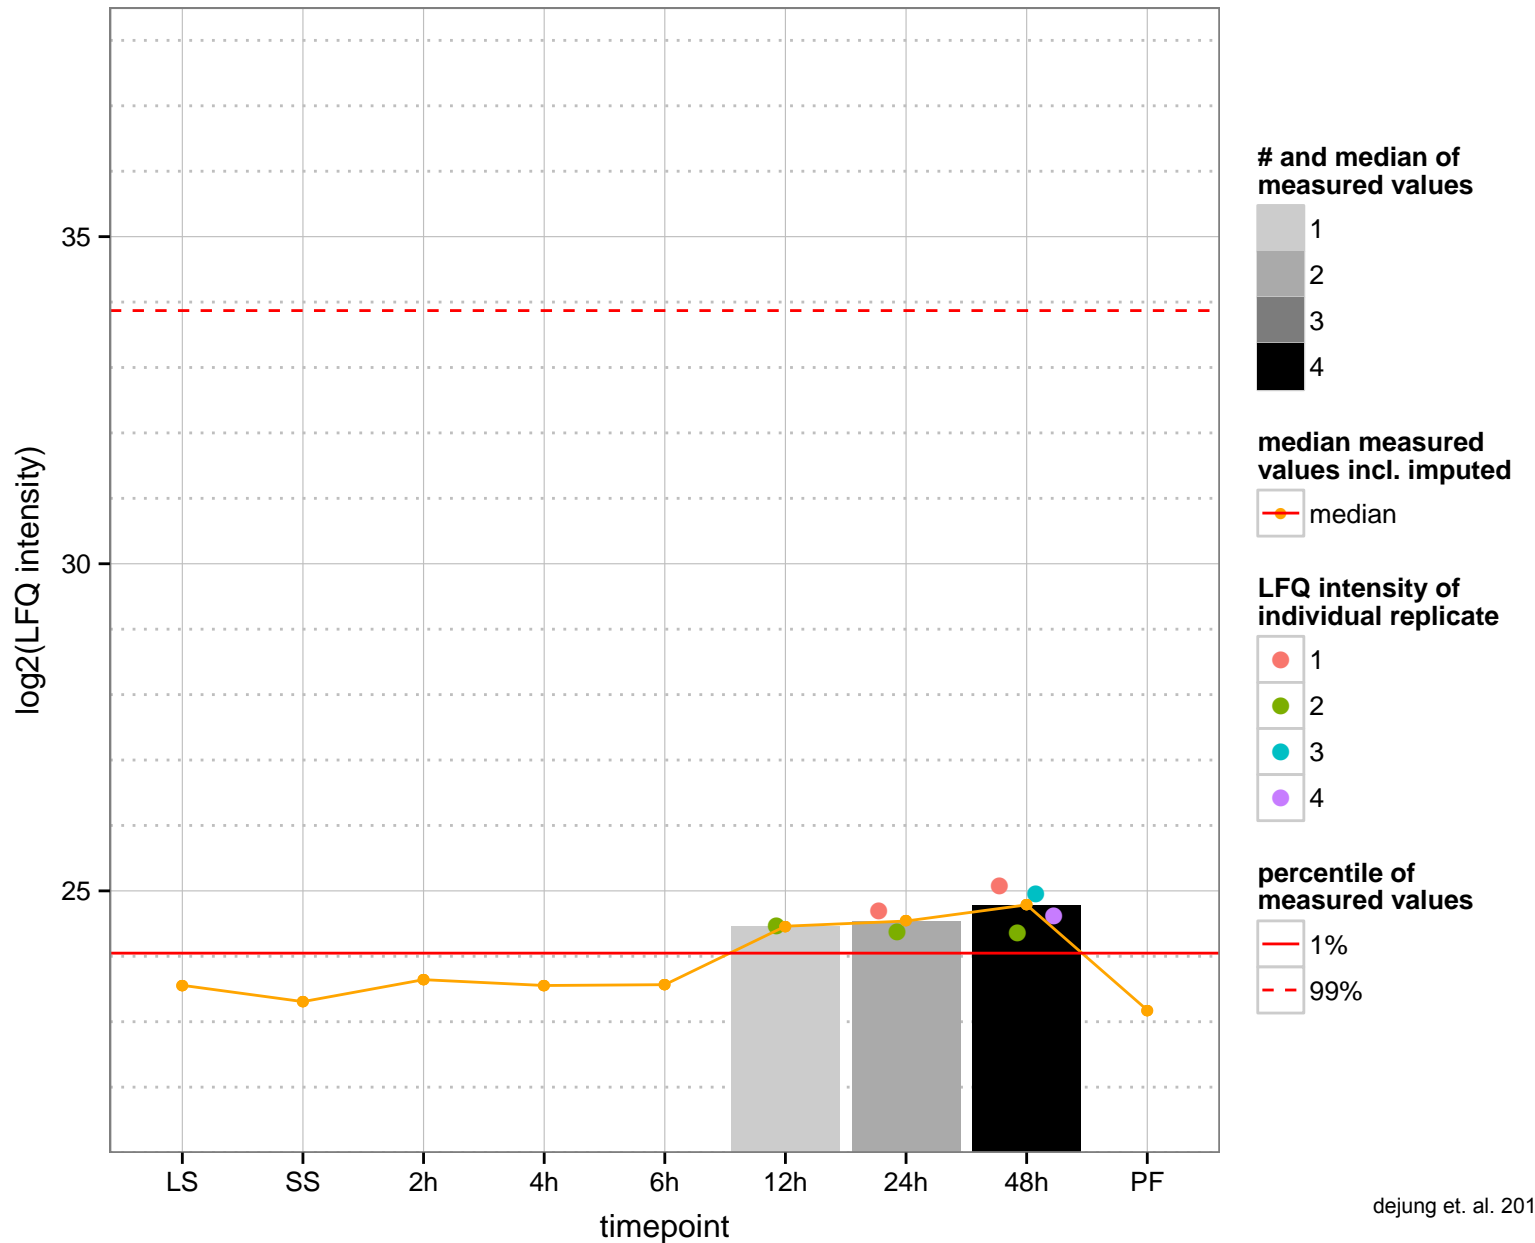

hypothetical protein, conserved  
 Tb927.3.3950  
 AGOF: null  
 AGOC: null  
 AGOP: null  
 PGO: null  
 PGOC: null  
 PGOP: null

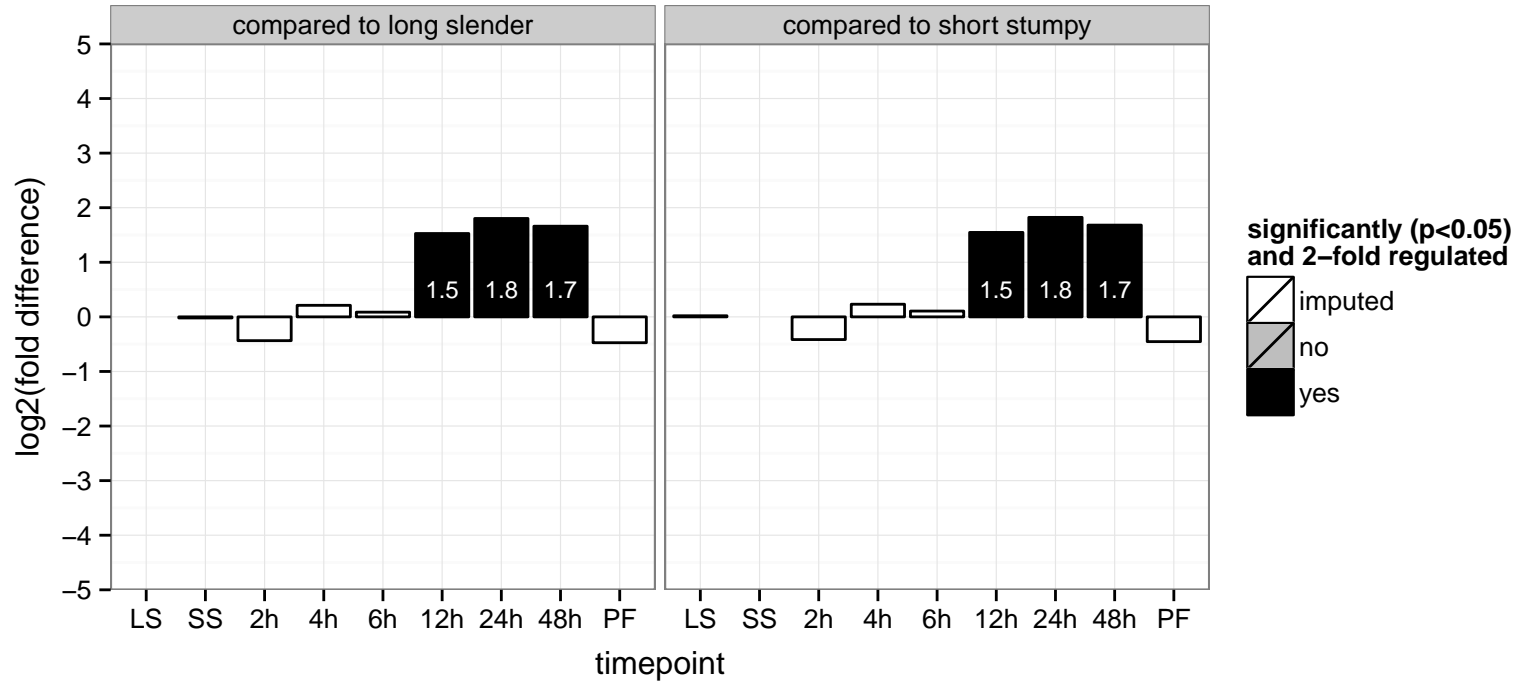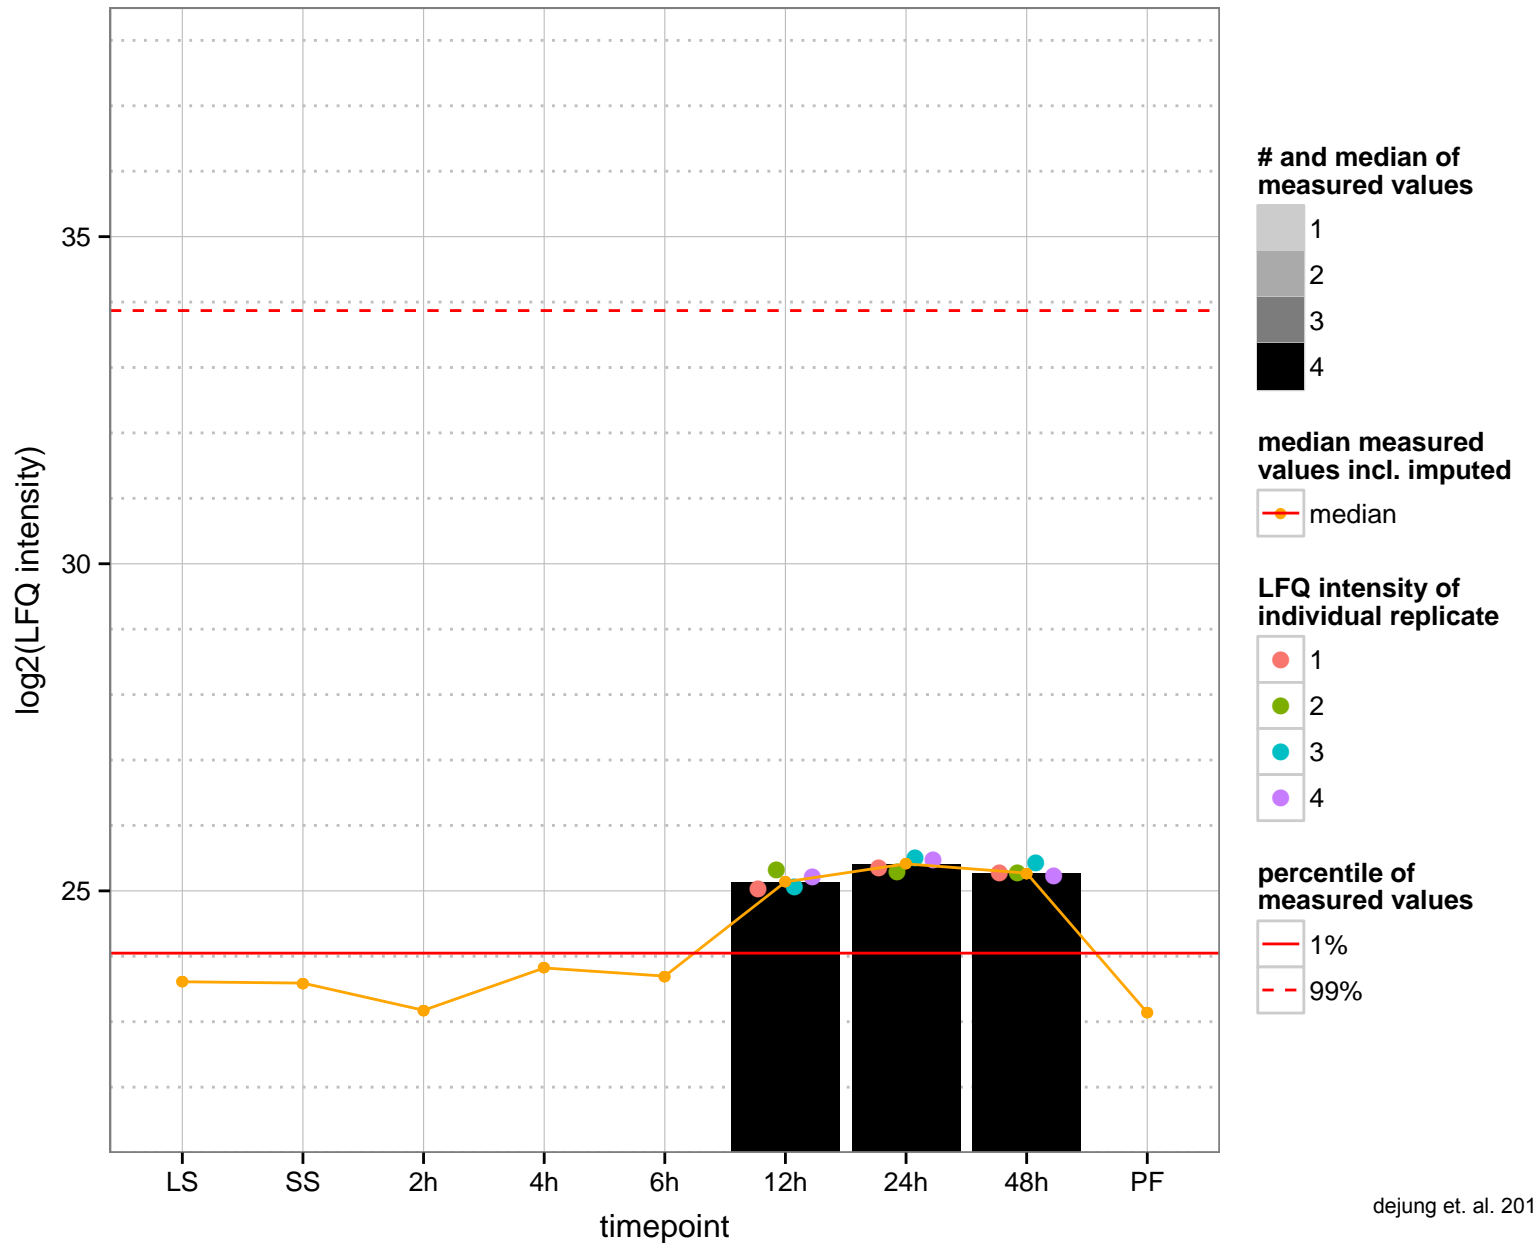

hypothetical protein, conserved, leucine-rich repeat protein (LRRP), putative  
 Tb927.3.4770;Tb927.3.4730  
 AGOF: null  
 AGOC: null  
 AGOP: null  
 PGO: protein binding  
 PGOC: null  
 PGOP: null

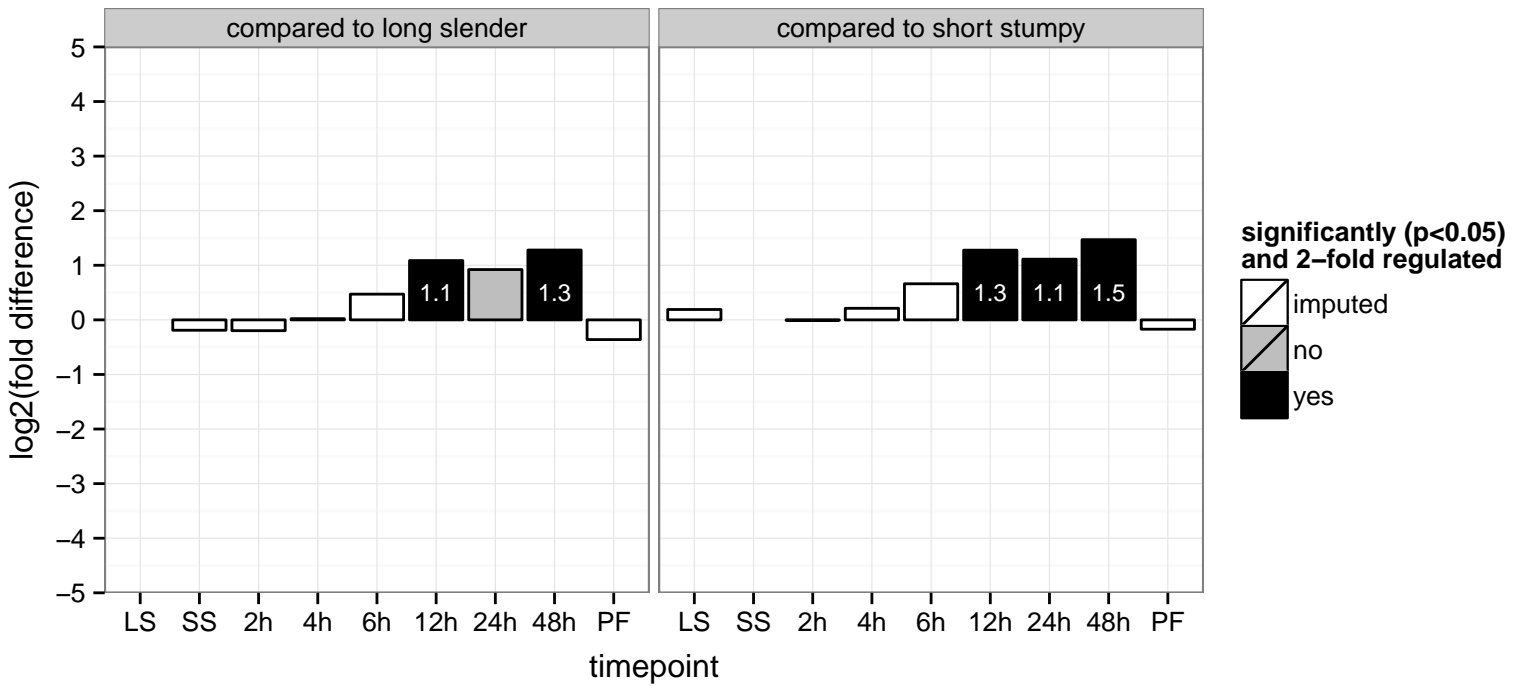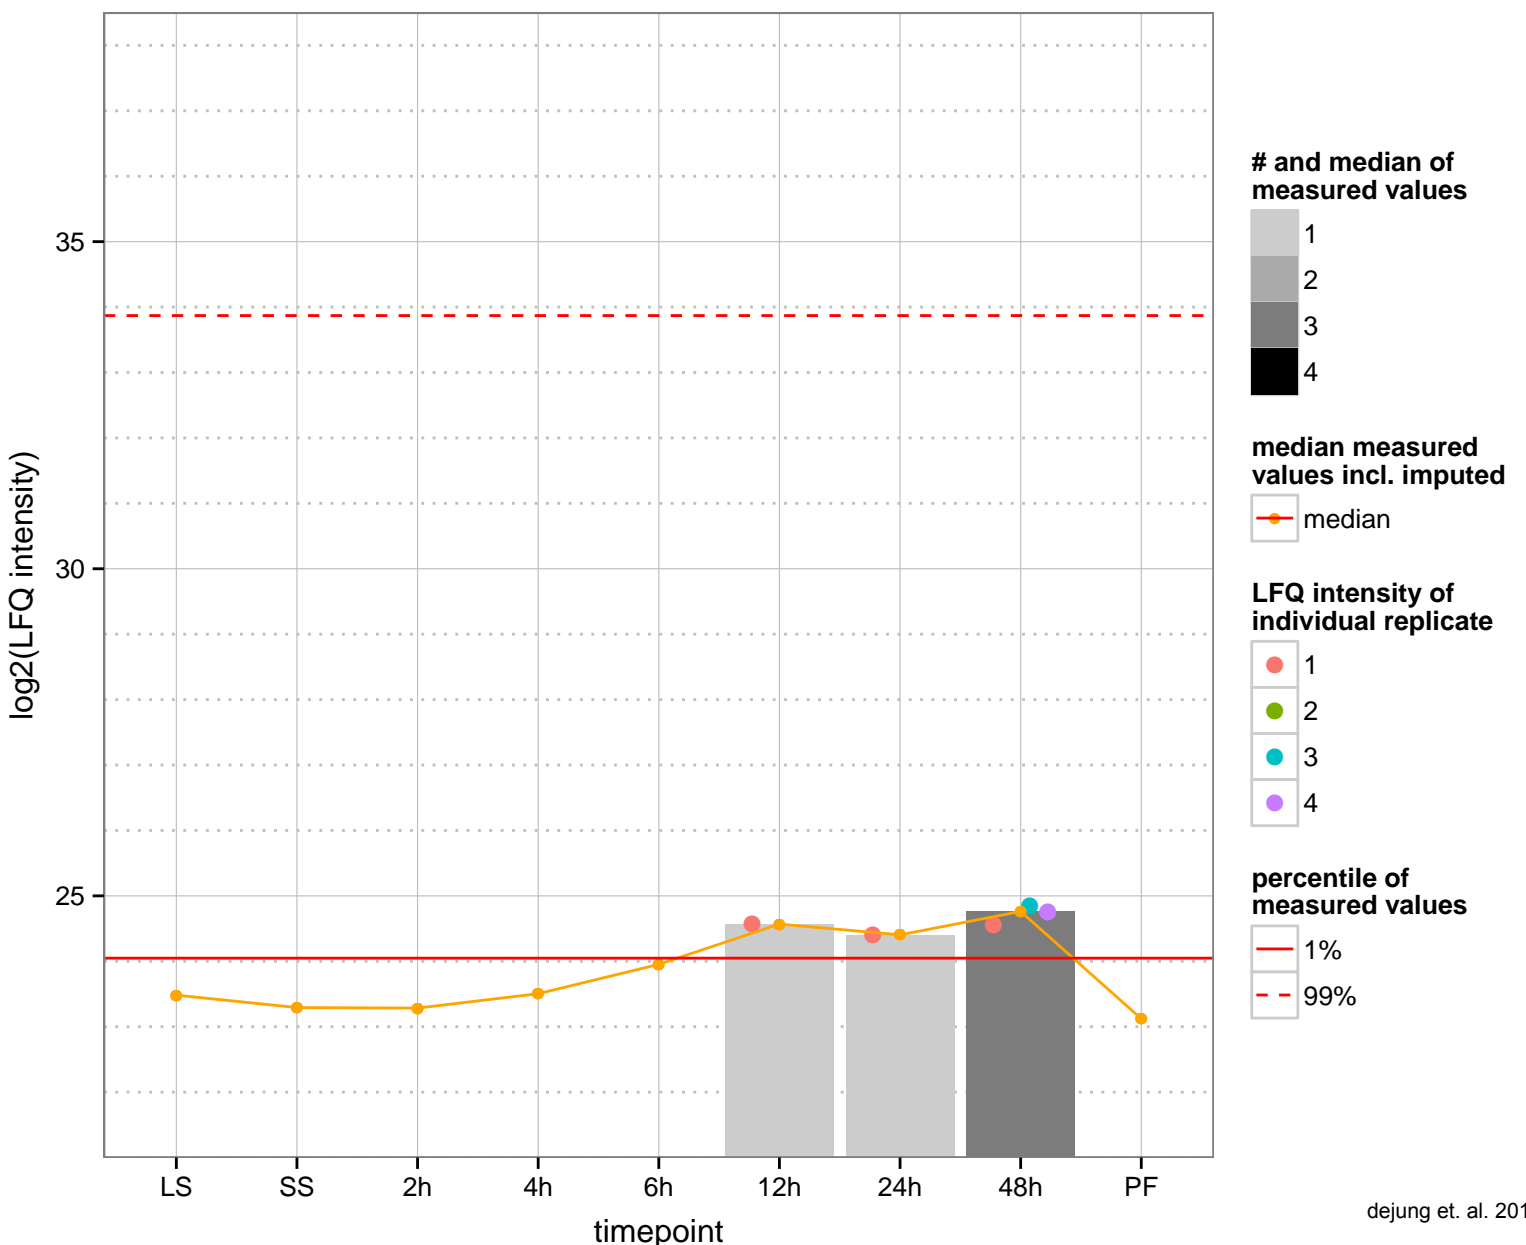



hypothetical protein, conserved  
 Tb927.3.4870  
 AGOF: null  
 AGOC: null  
 AGOP: null  
 PGOF: null  
 PGOC: null  
 PGOP: null

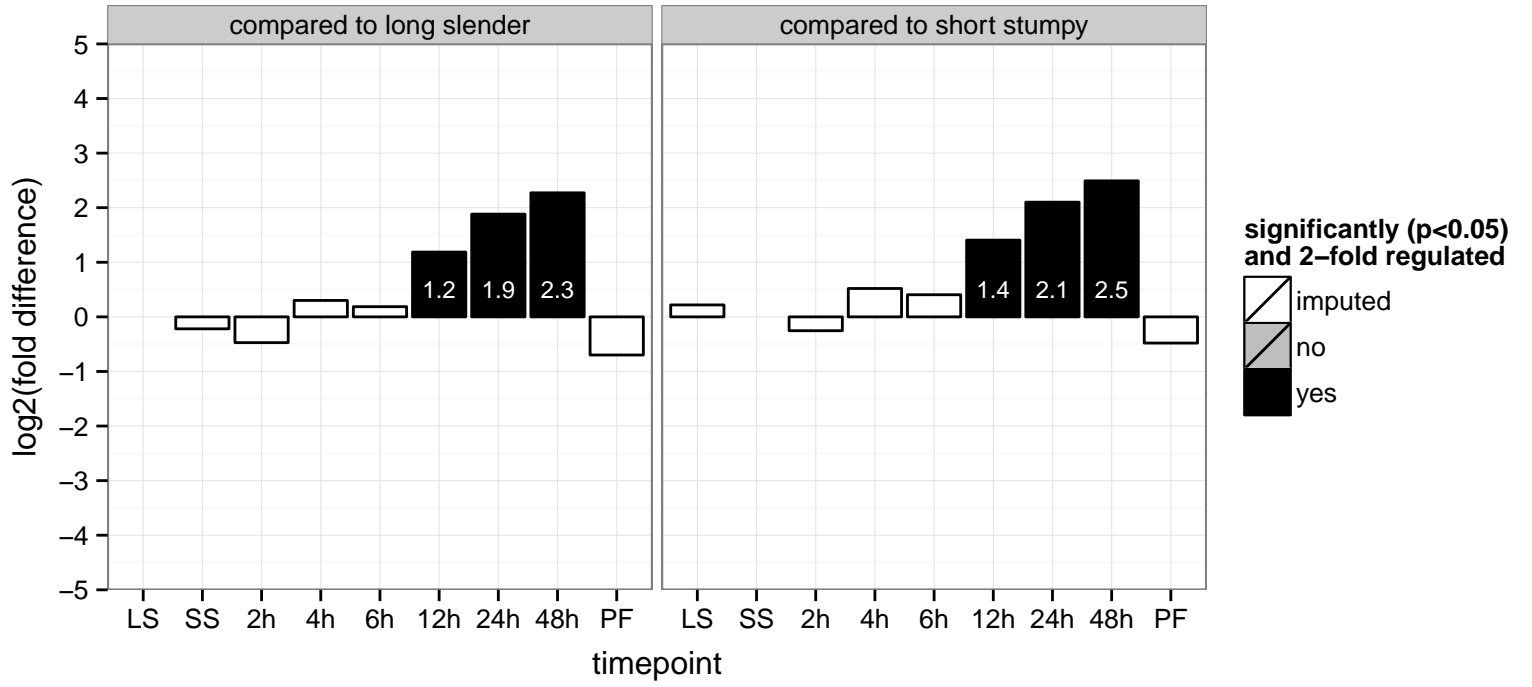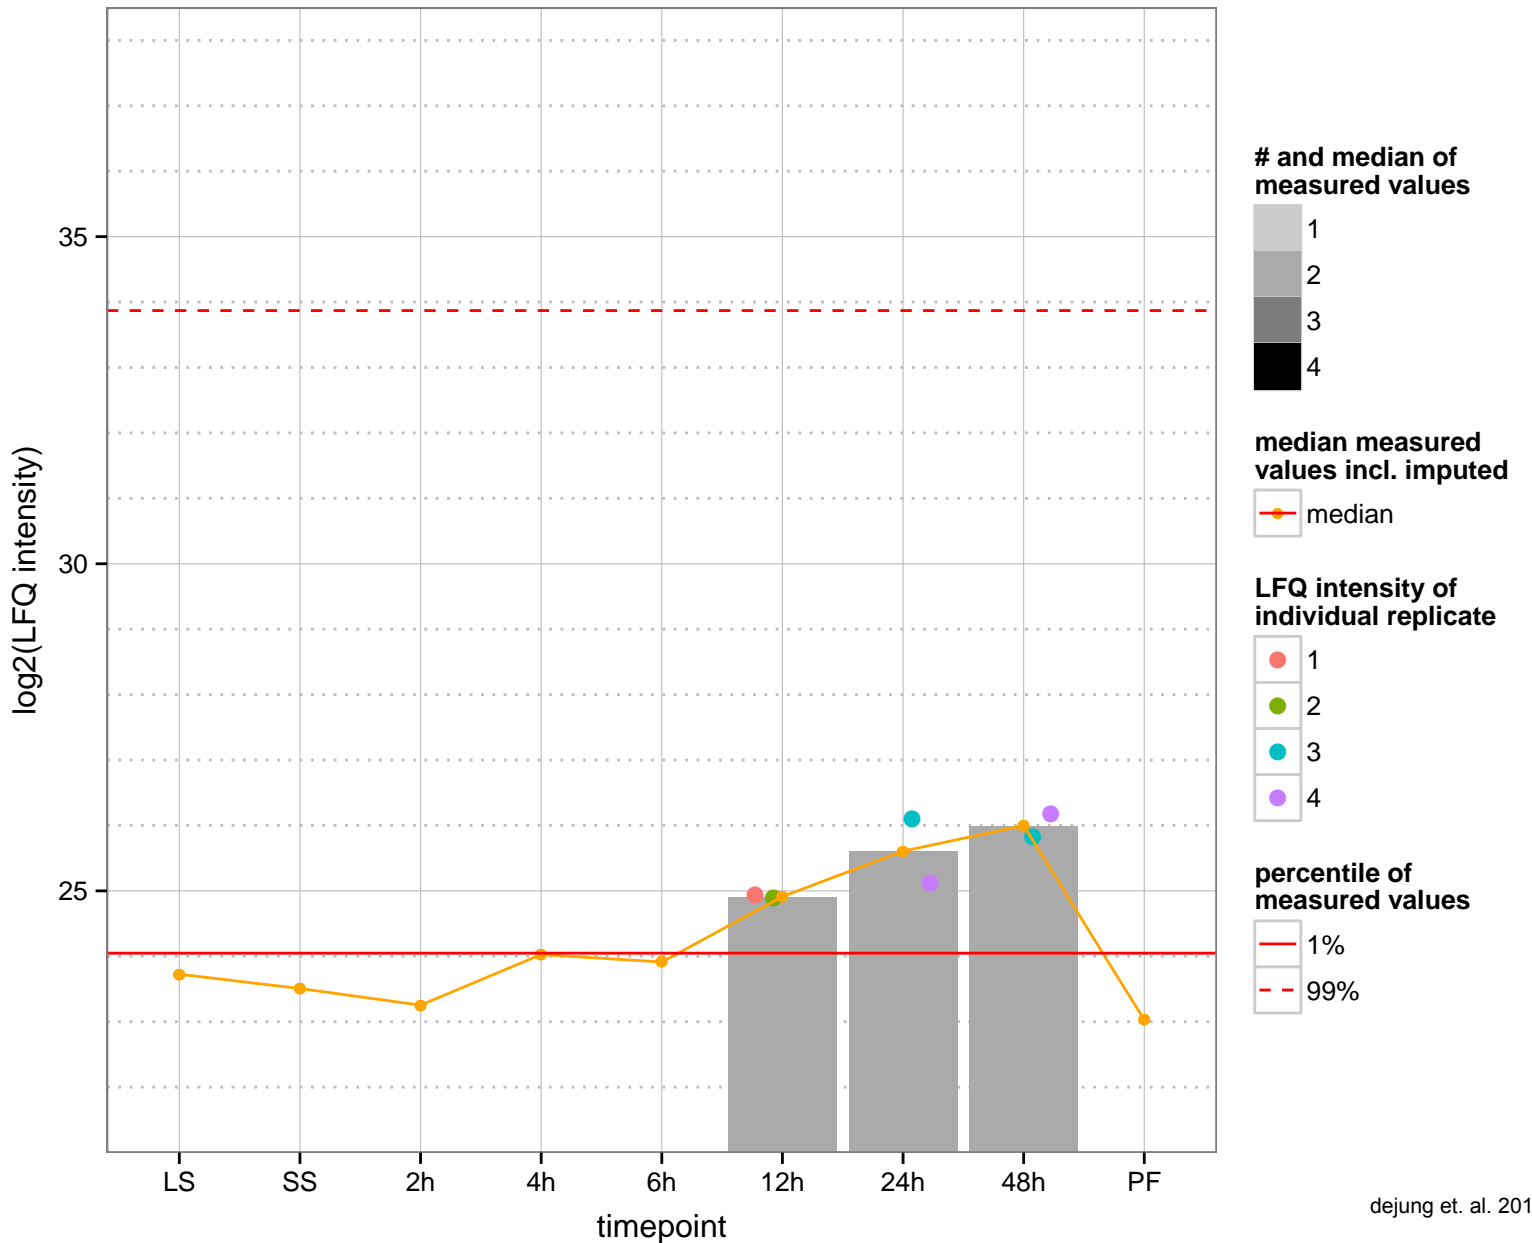

hypothetical protein, conserved  
 Tb927.3.5210  
 AGOF: null  
 AGOC: null  
 AGOP: null  
 PGOF: null  
 PGO C: null  
 PGOP: null

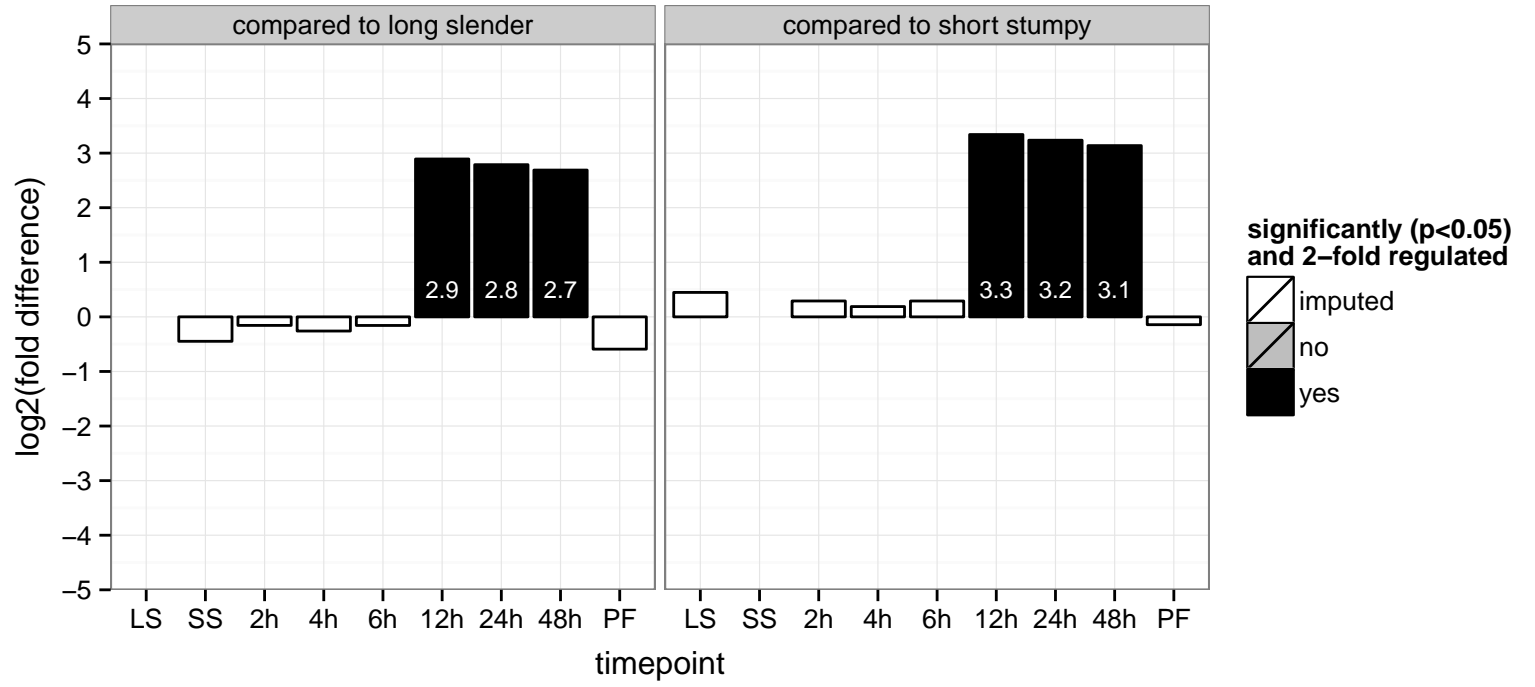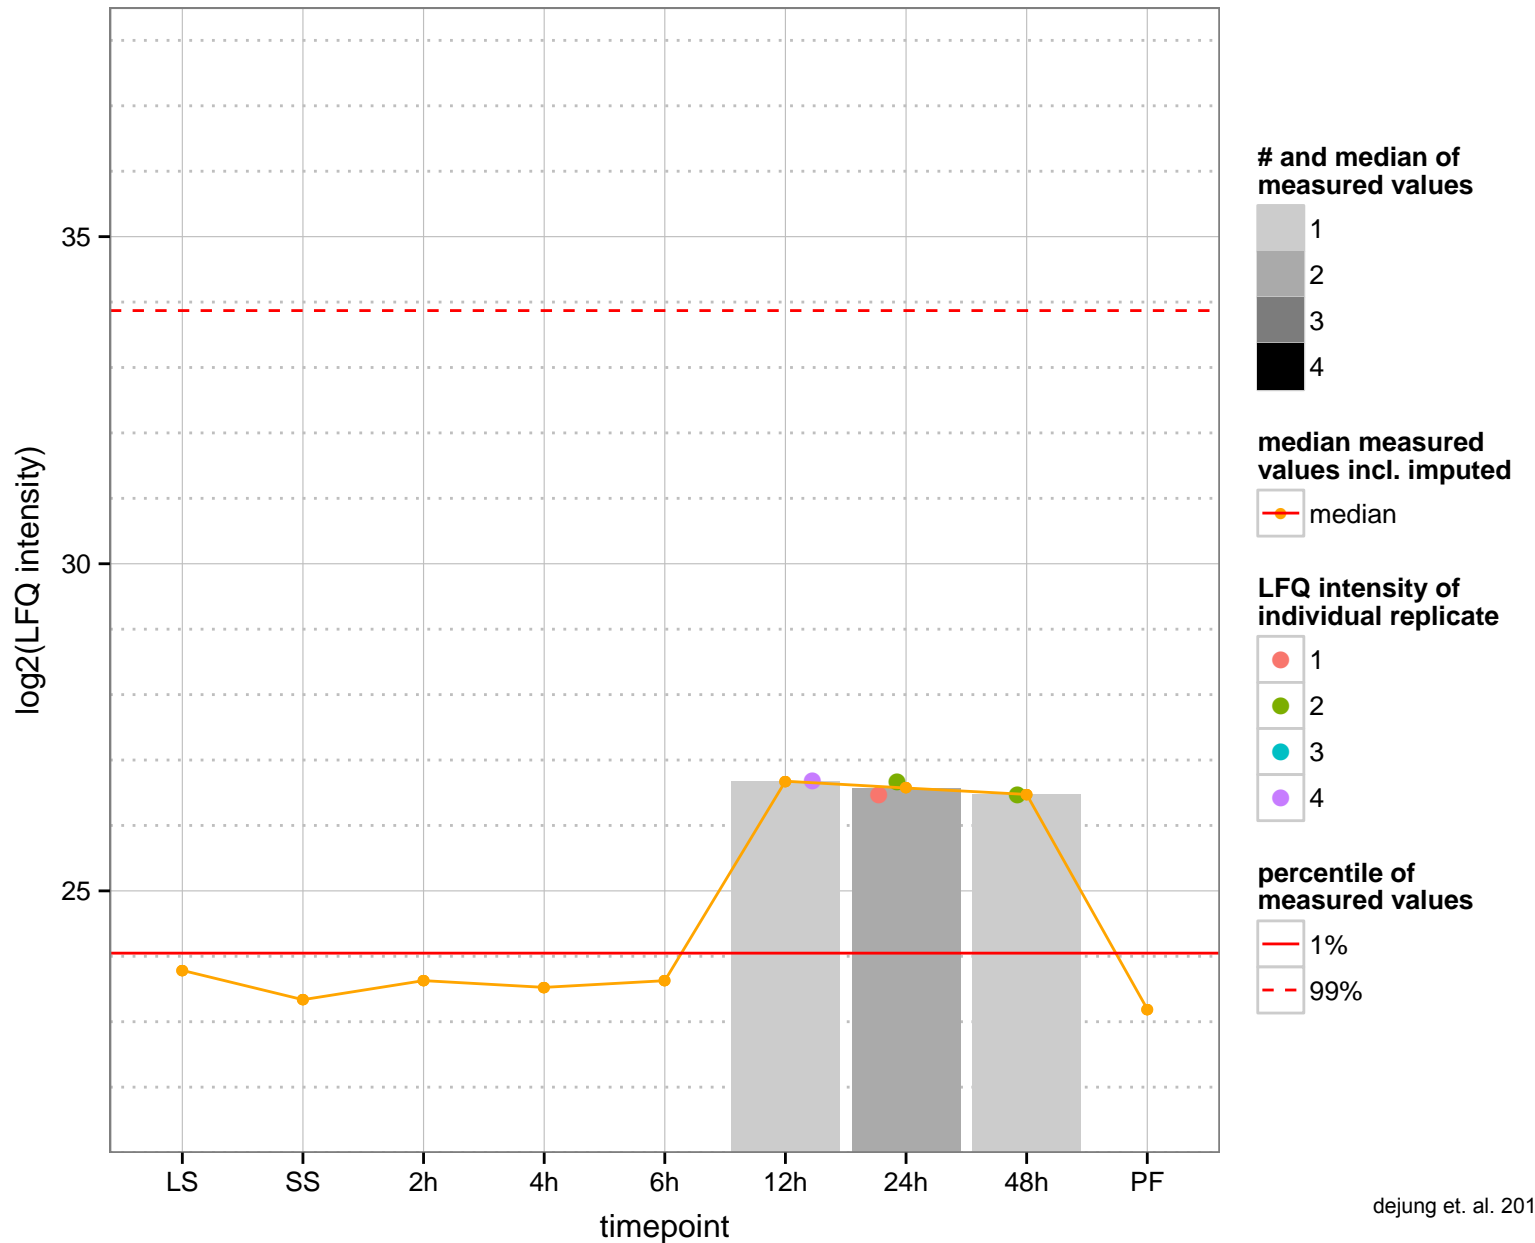

adenosine transporter, putative  
 Tb927.3.590  
 AGOF: nucleoside transmembrane transporter activity  
 AGOC: integral to membrane, membrane  
 AGOP: nucleoside transport  
 PGOF: nucleoside transmembrane transporter activity  
 PGOC: integral to membrane  
 PGOP: transport

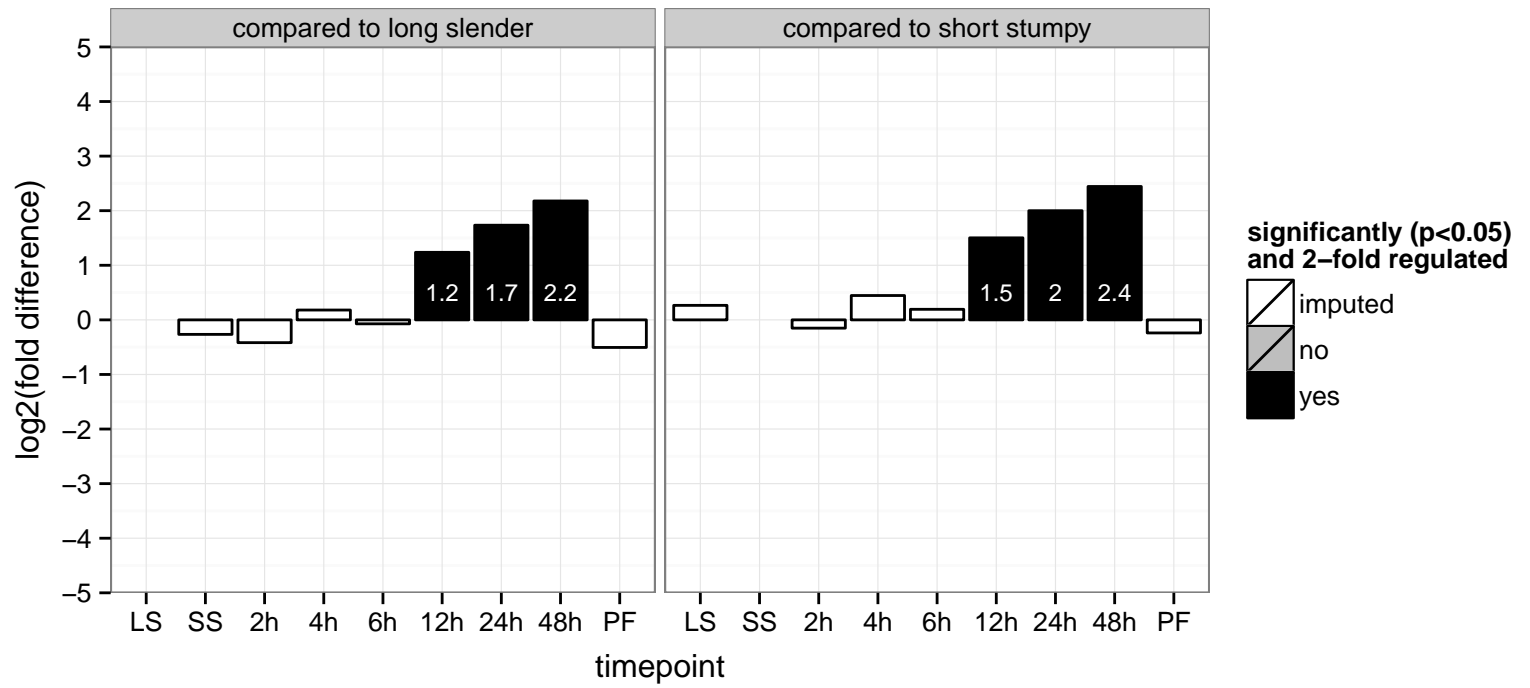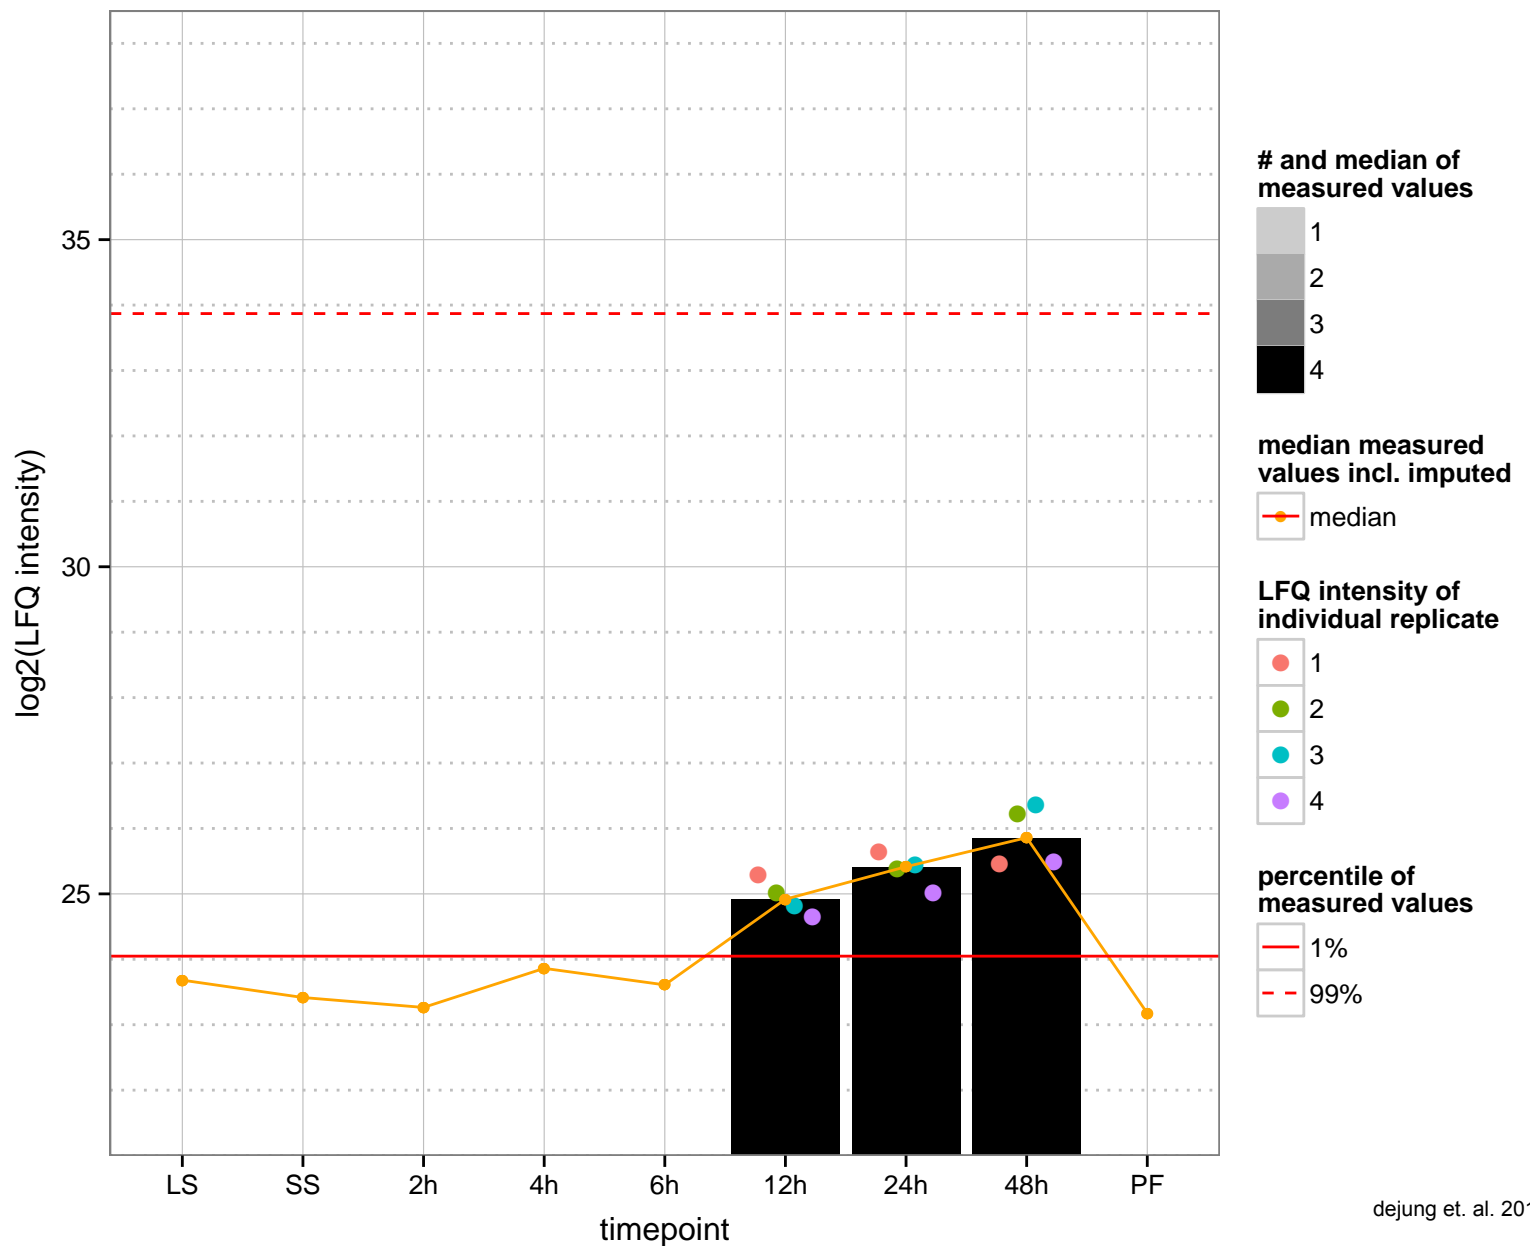

hypothetical protein, conserved  
 Tb927.4.1760  
 AGOF: null  
 AGOC: mitochondrion  
 AGOP: null  
 PGO: null  
 PGOC: null  
 PGOP: null

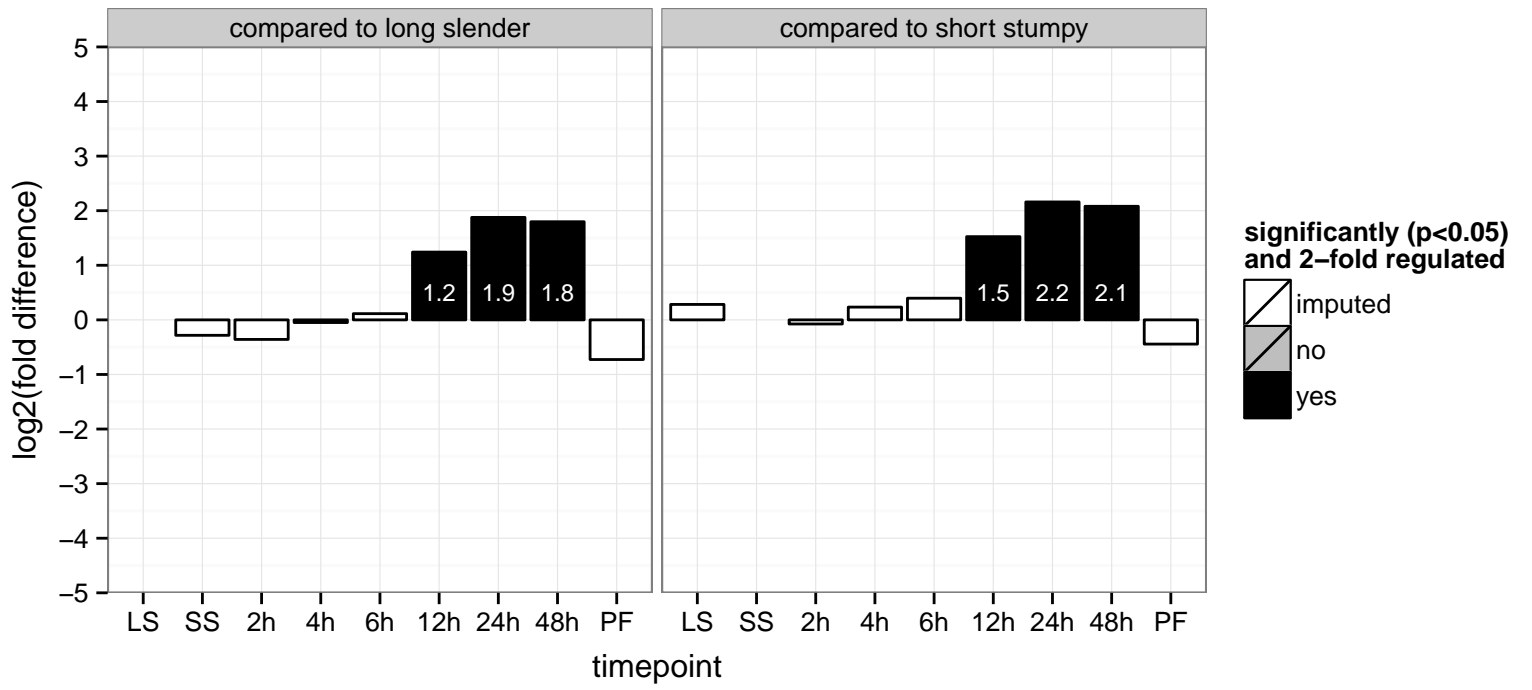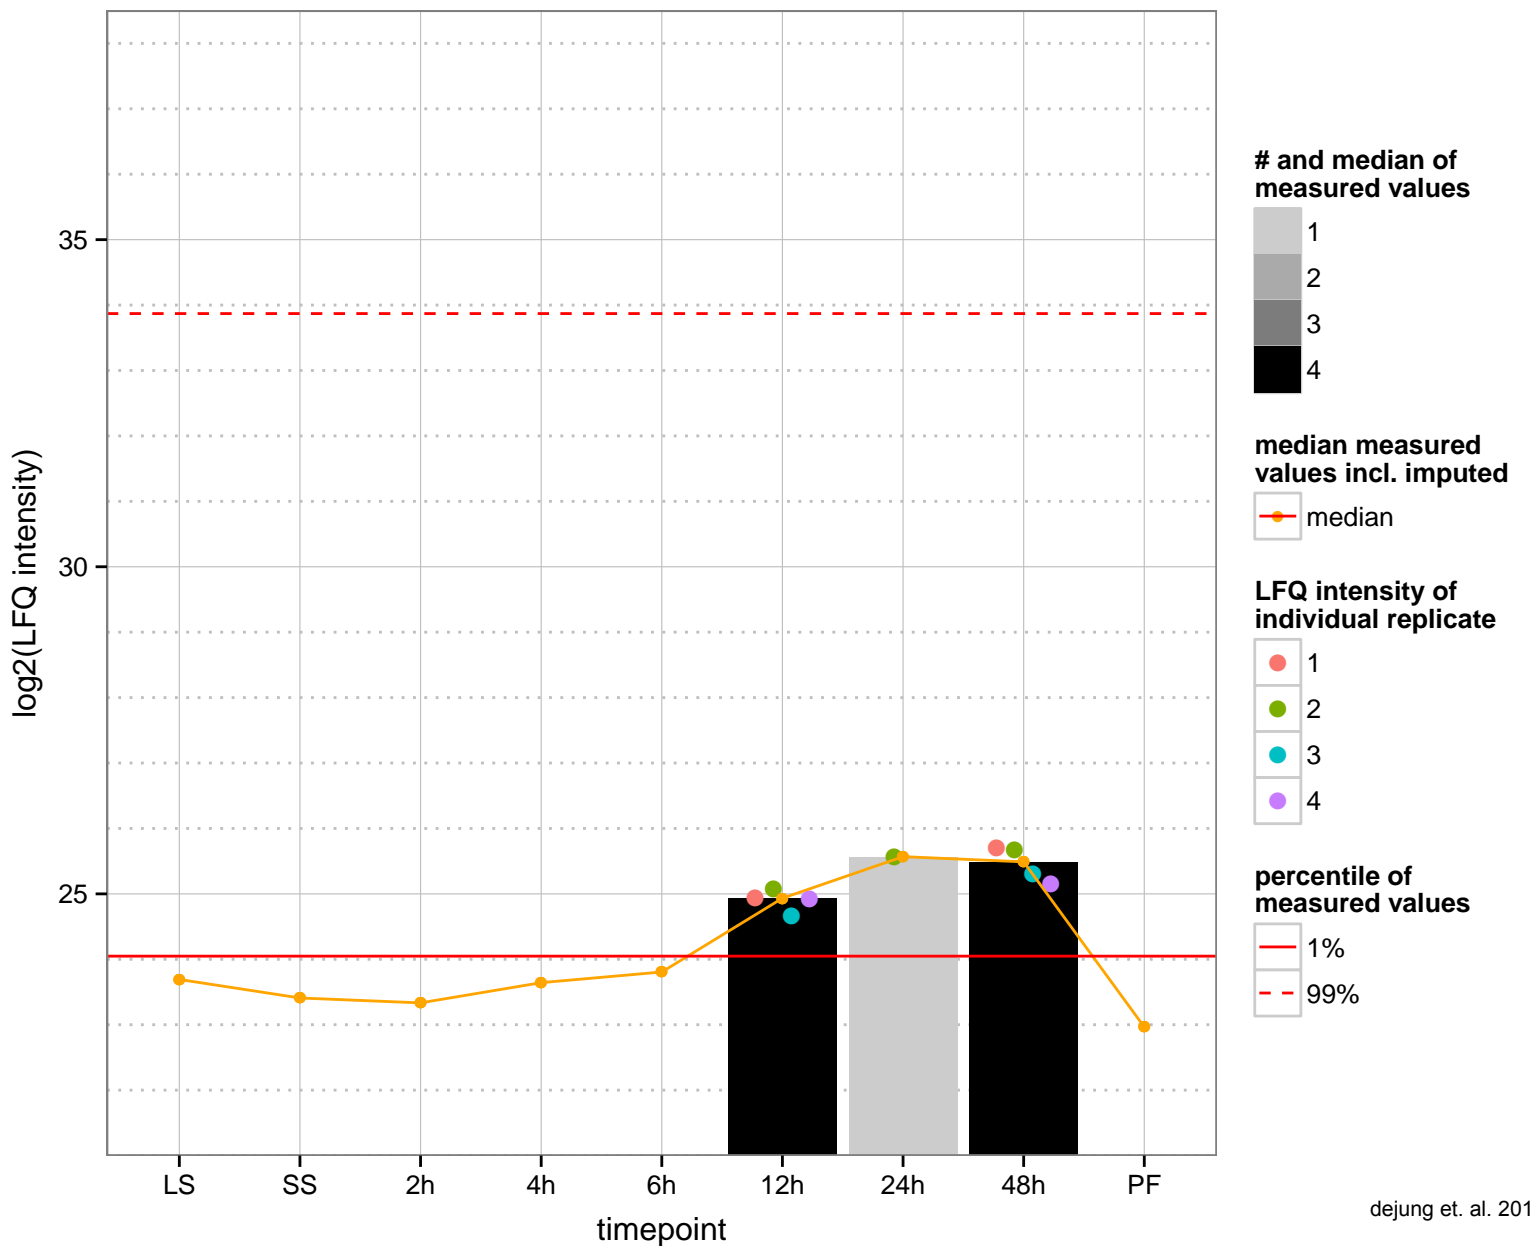

hypothetical protein, conserved  
 Tb927.4.4110  
 AGOF: null  
 AGOC: null  
 AGOP: null  
 PGO: null  
 PGOC: null  
 PGOP: null

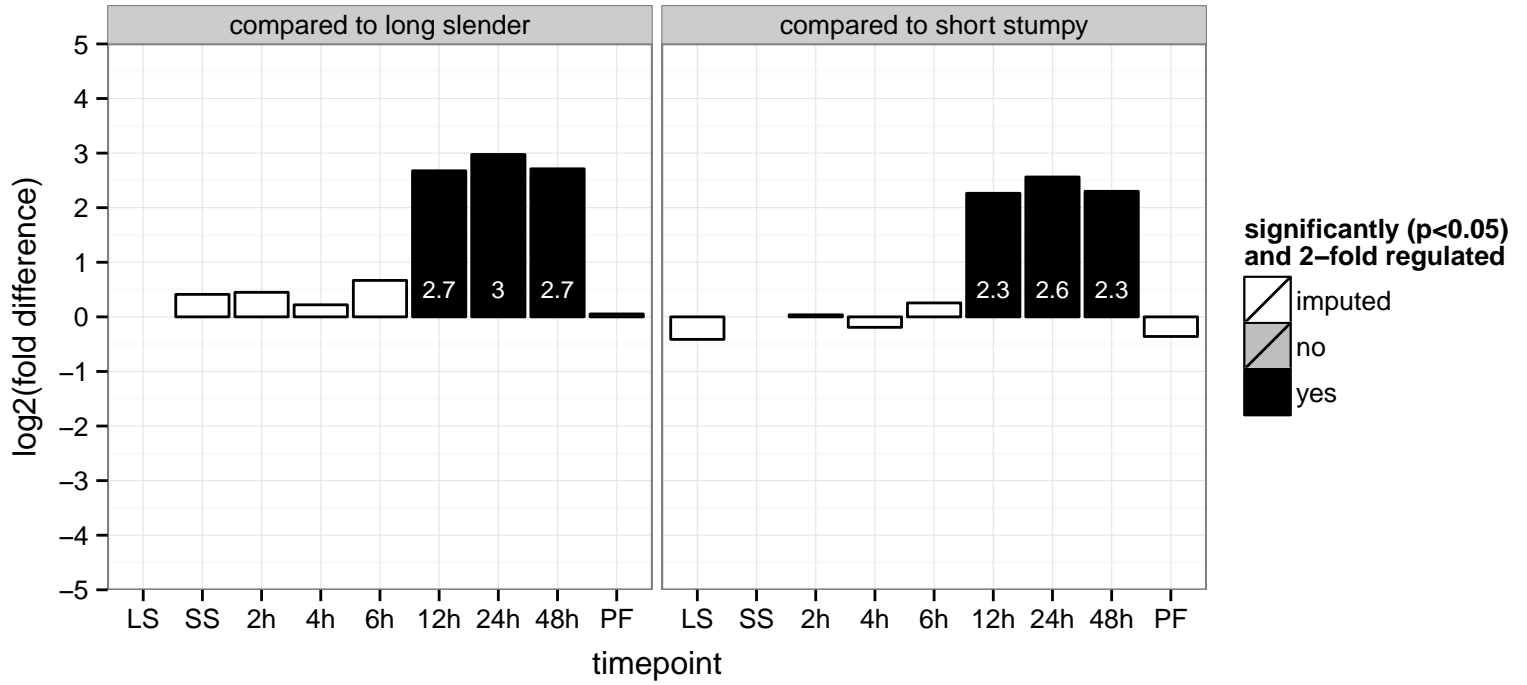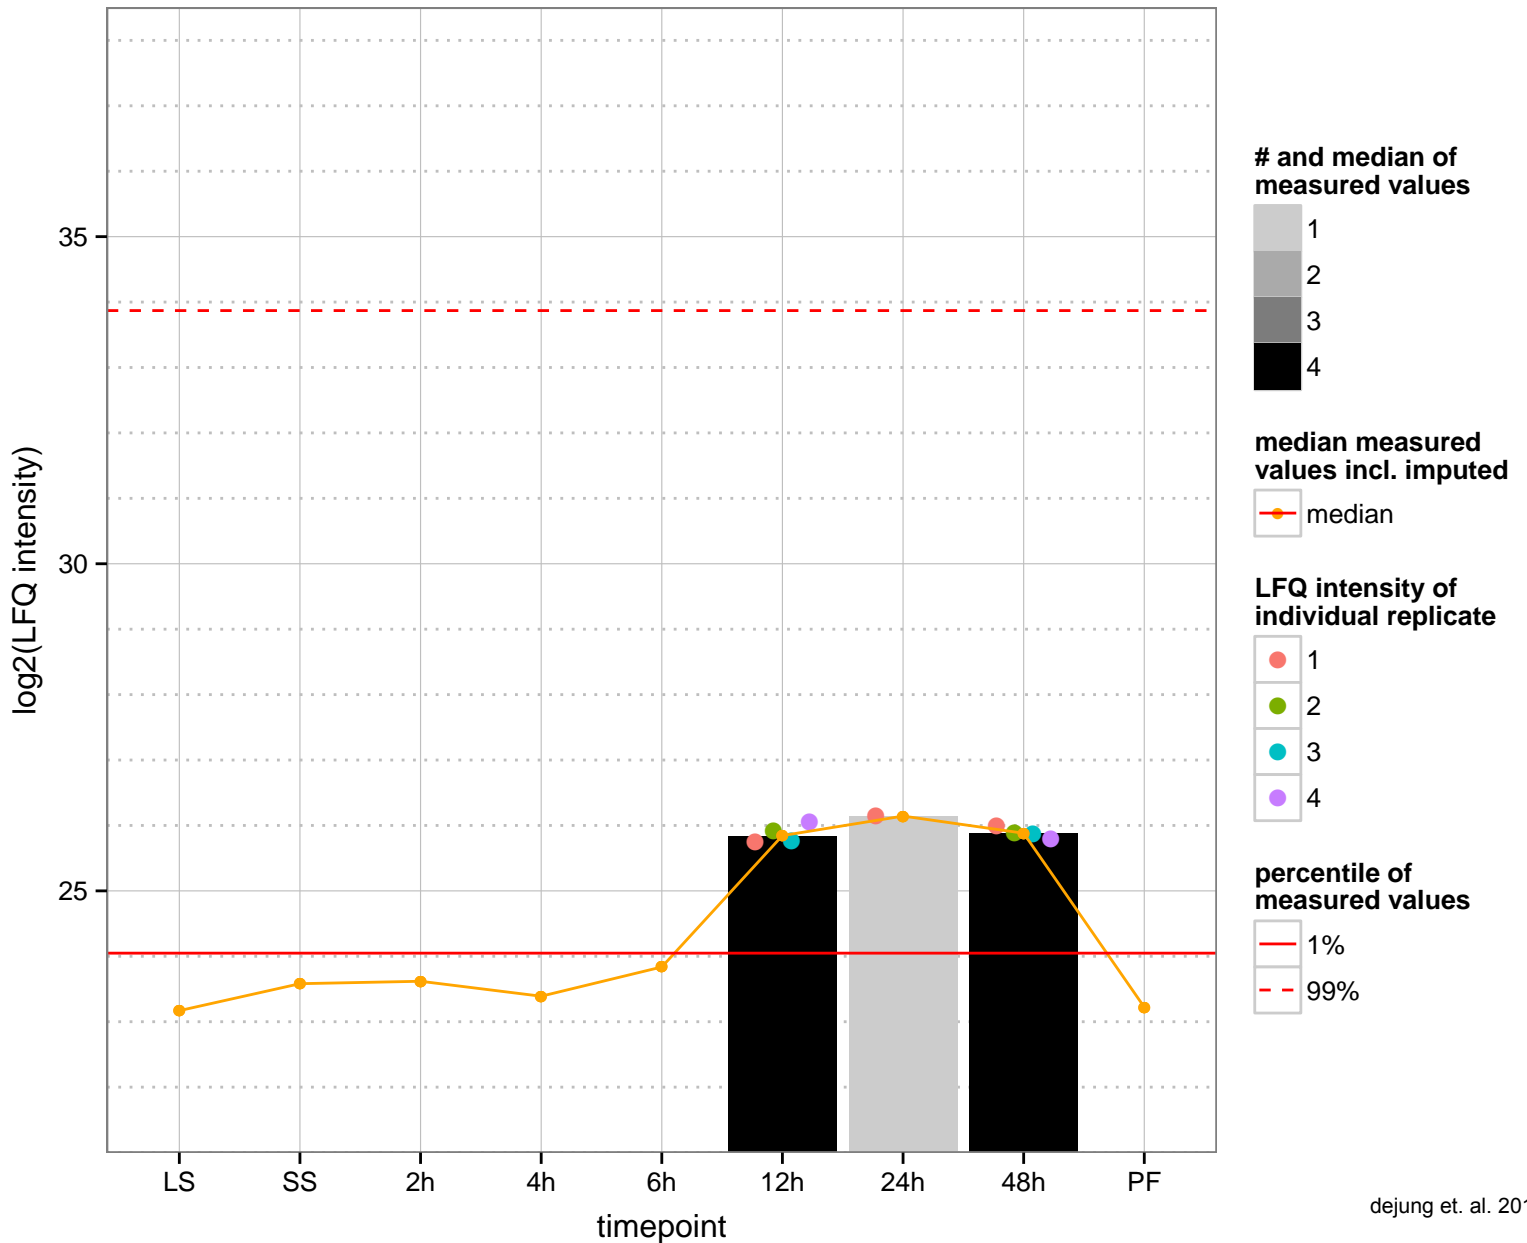

hypothetical protein, conserved  
 Tb927.4.940  
 AGOF: null  
 AGOC: mitochondrion  
 AGOP: null  
 PGO: null  
 PGOC: null  
 PGOP: null

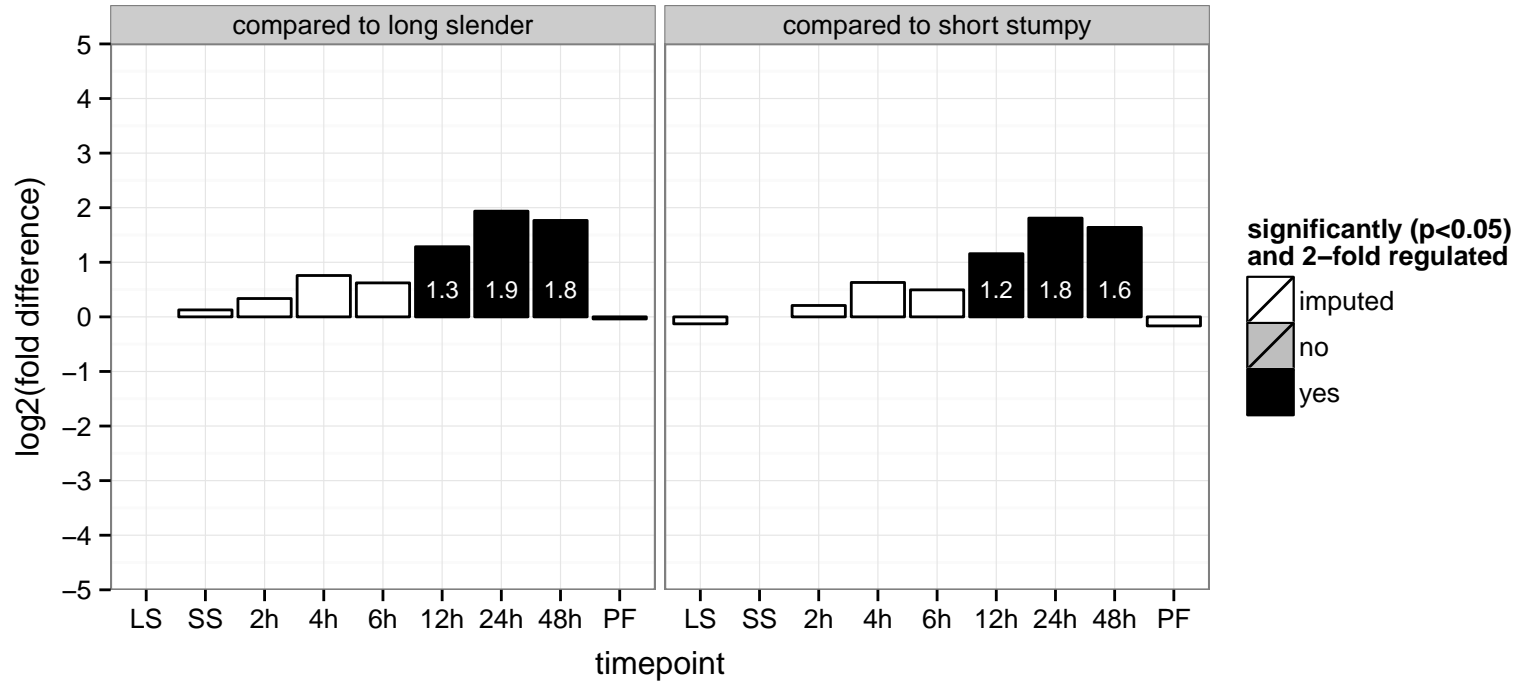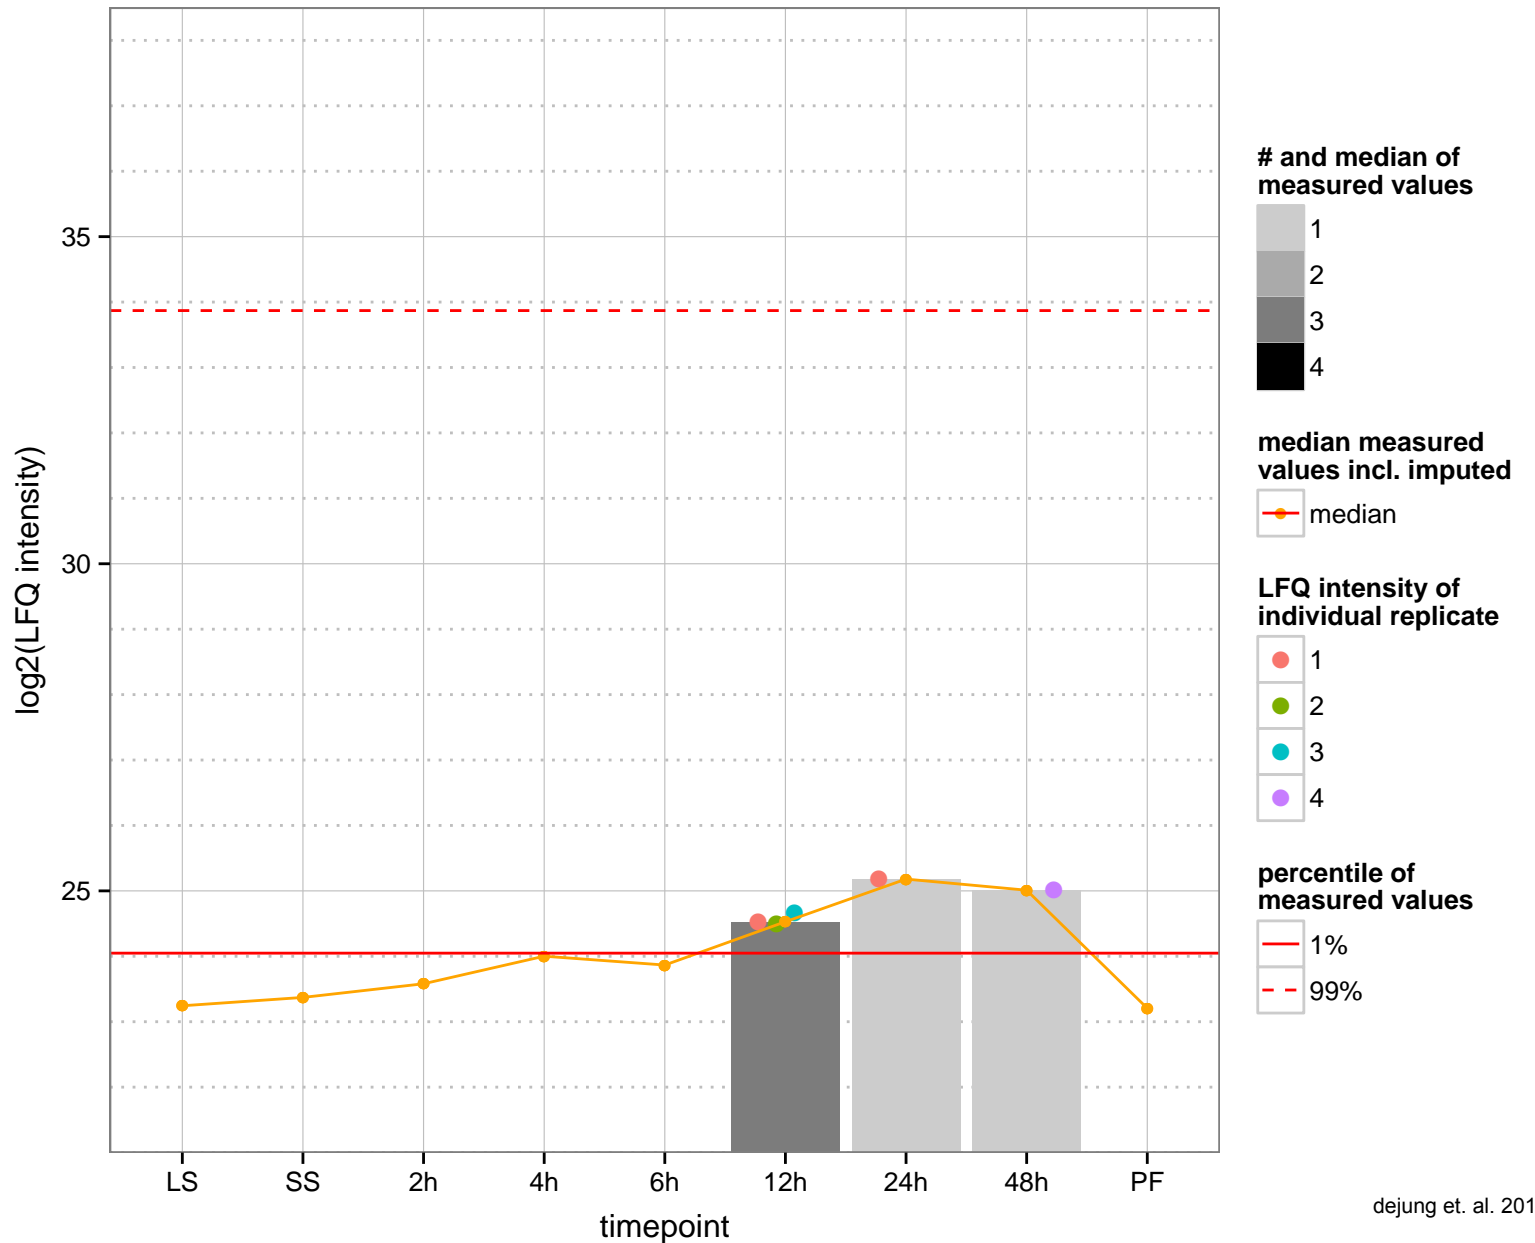

hypothetical protein, conserved  
 Tb927.5.2240;Tb927.5.2210;Tb927.5.2180  
 AGOF: null  
 AGOC: null  
 AGOP: null  
 PGO: null  
 PGOC: null  
 PGOP: null

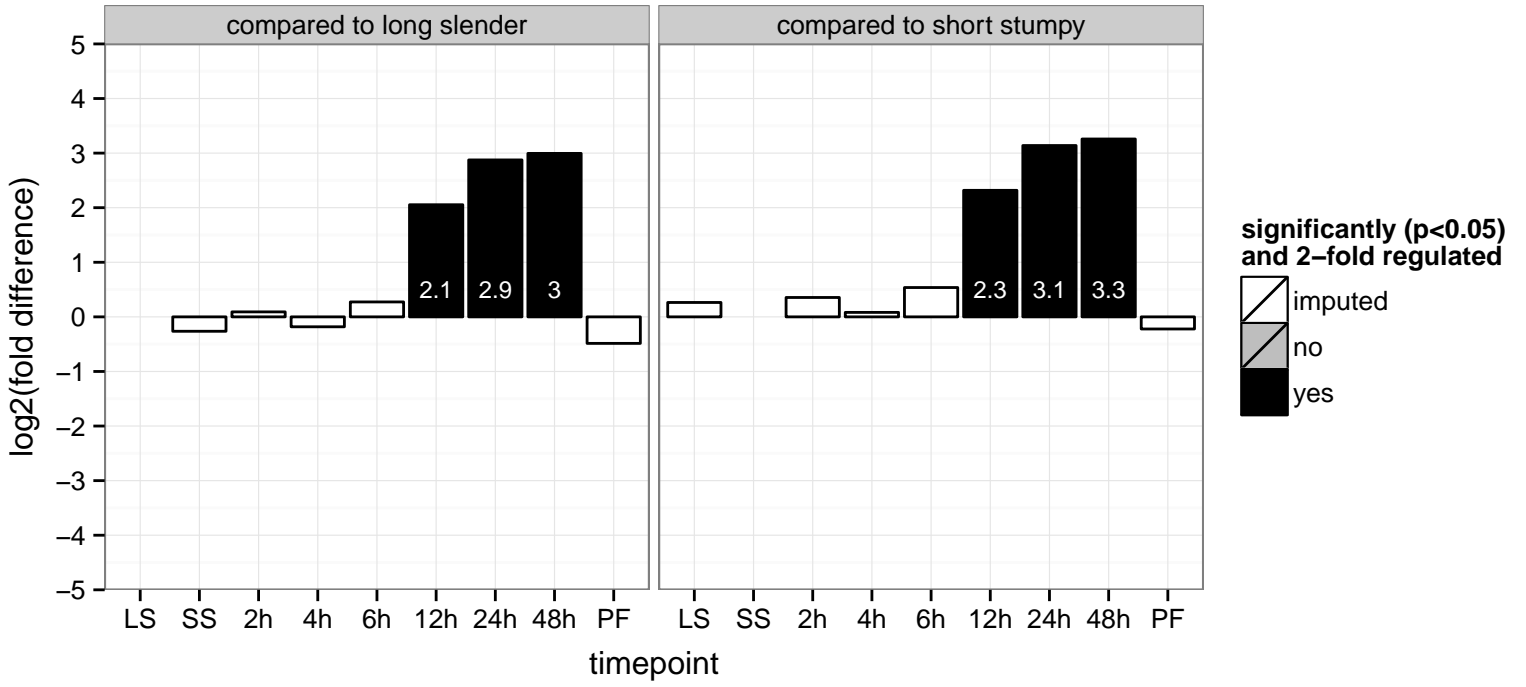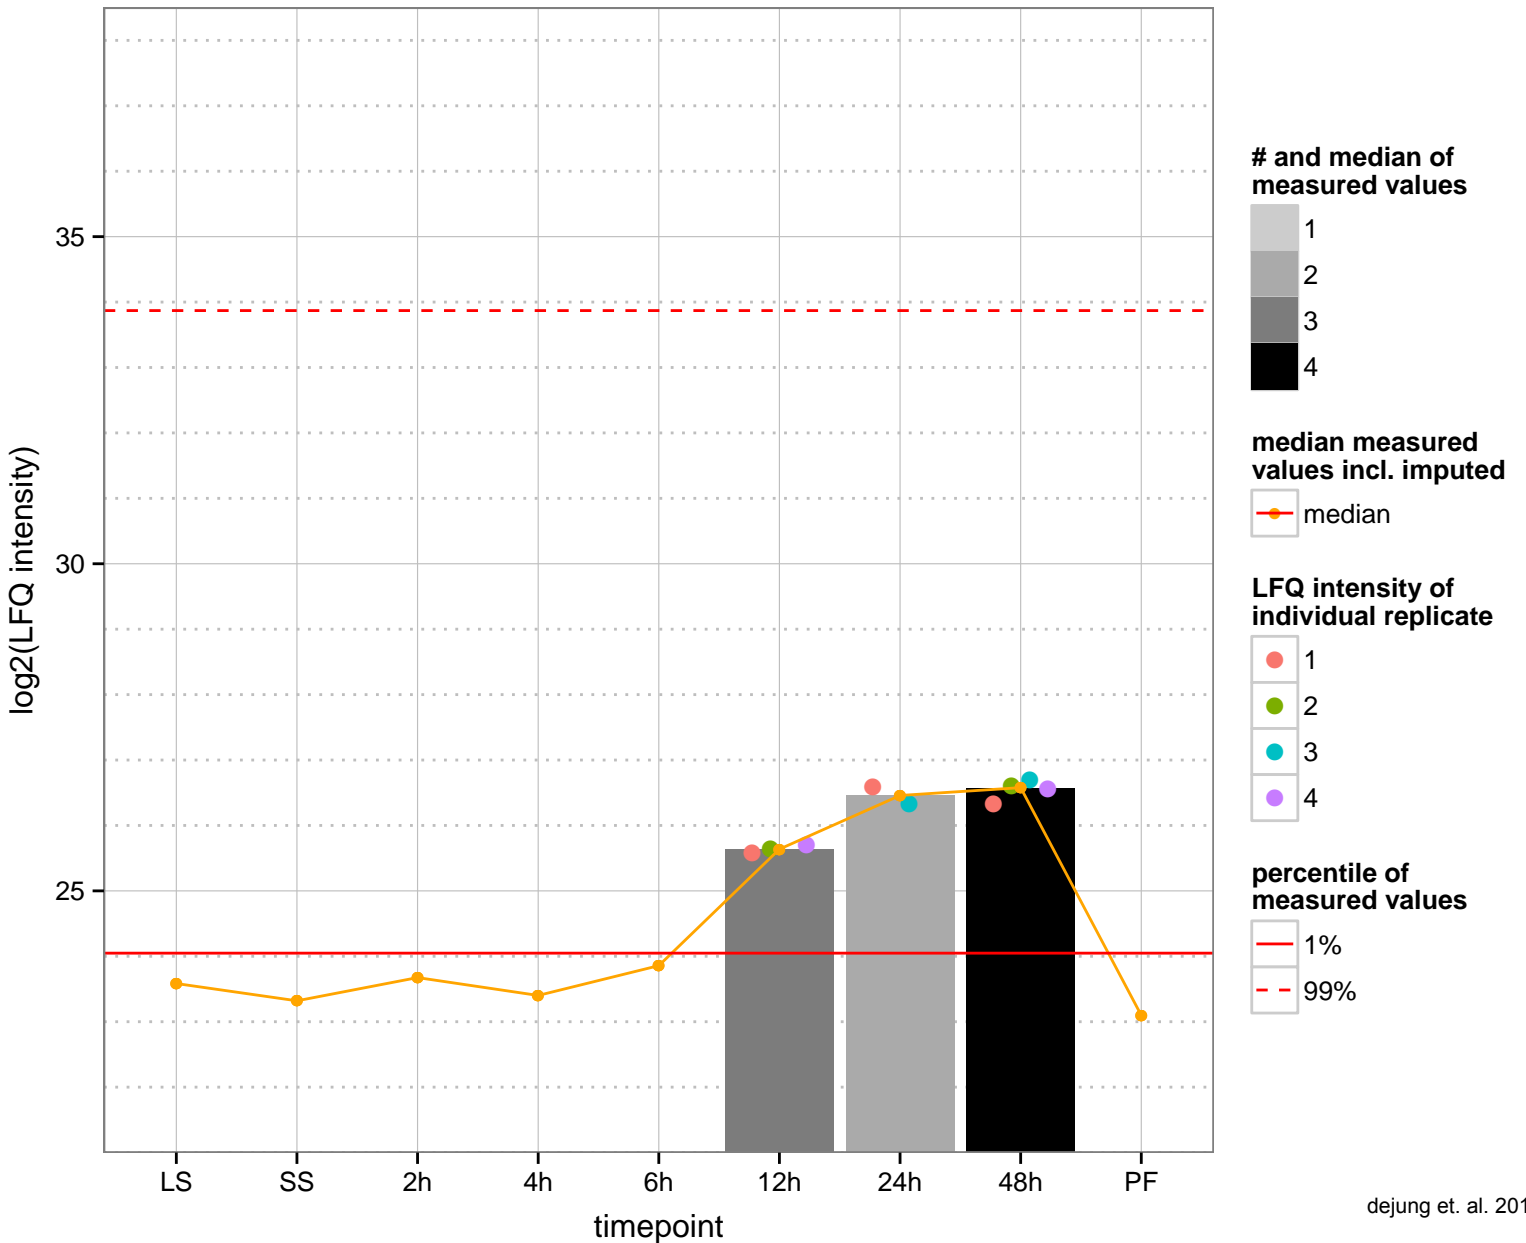

hypothetical protein, conserved  
 Tb927.5.680  
 AGOF: null  
 AGOC: mitochondrion  
 AGOP: null  
 PGO: null  
 PGO: null  
 PGO: null

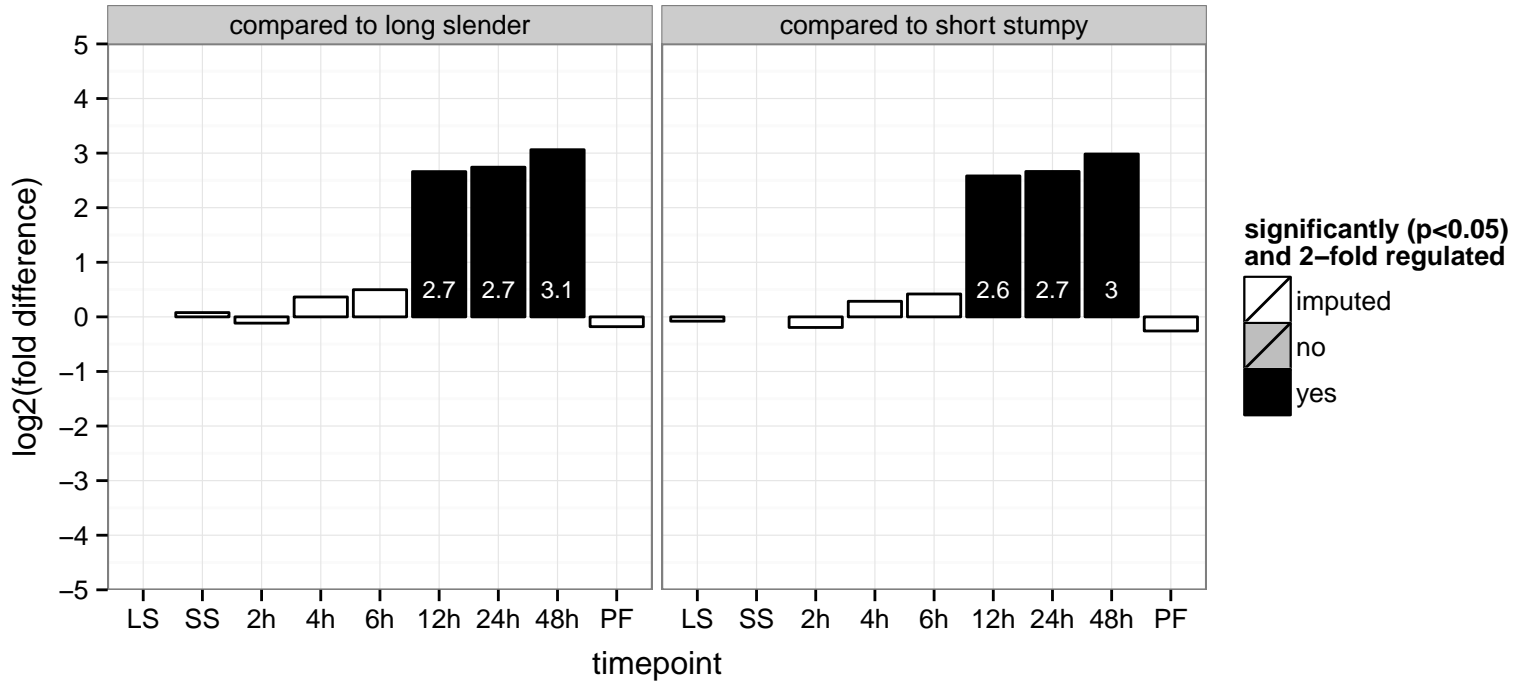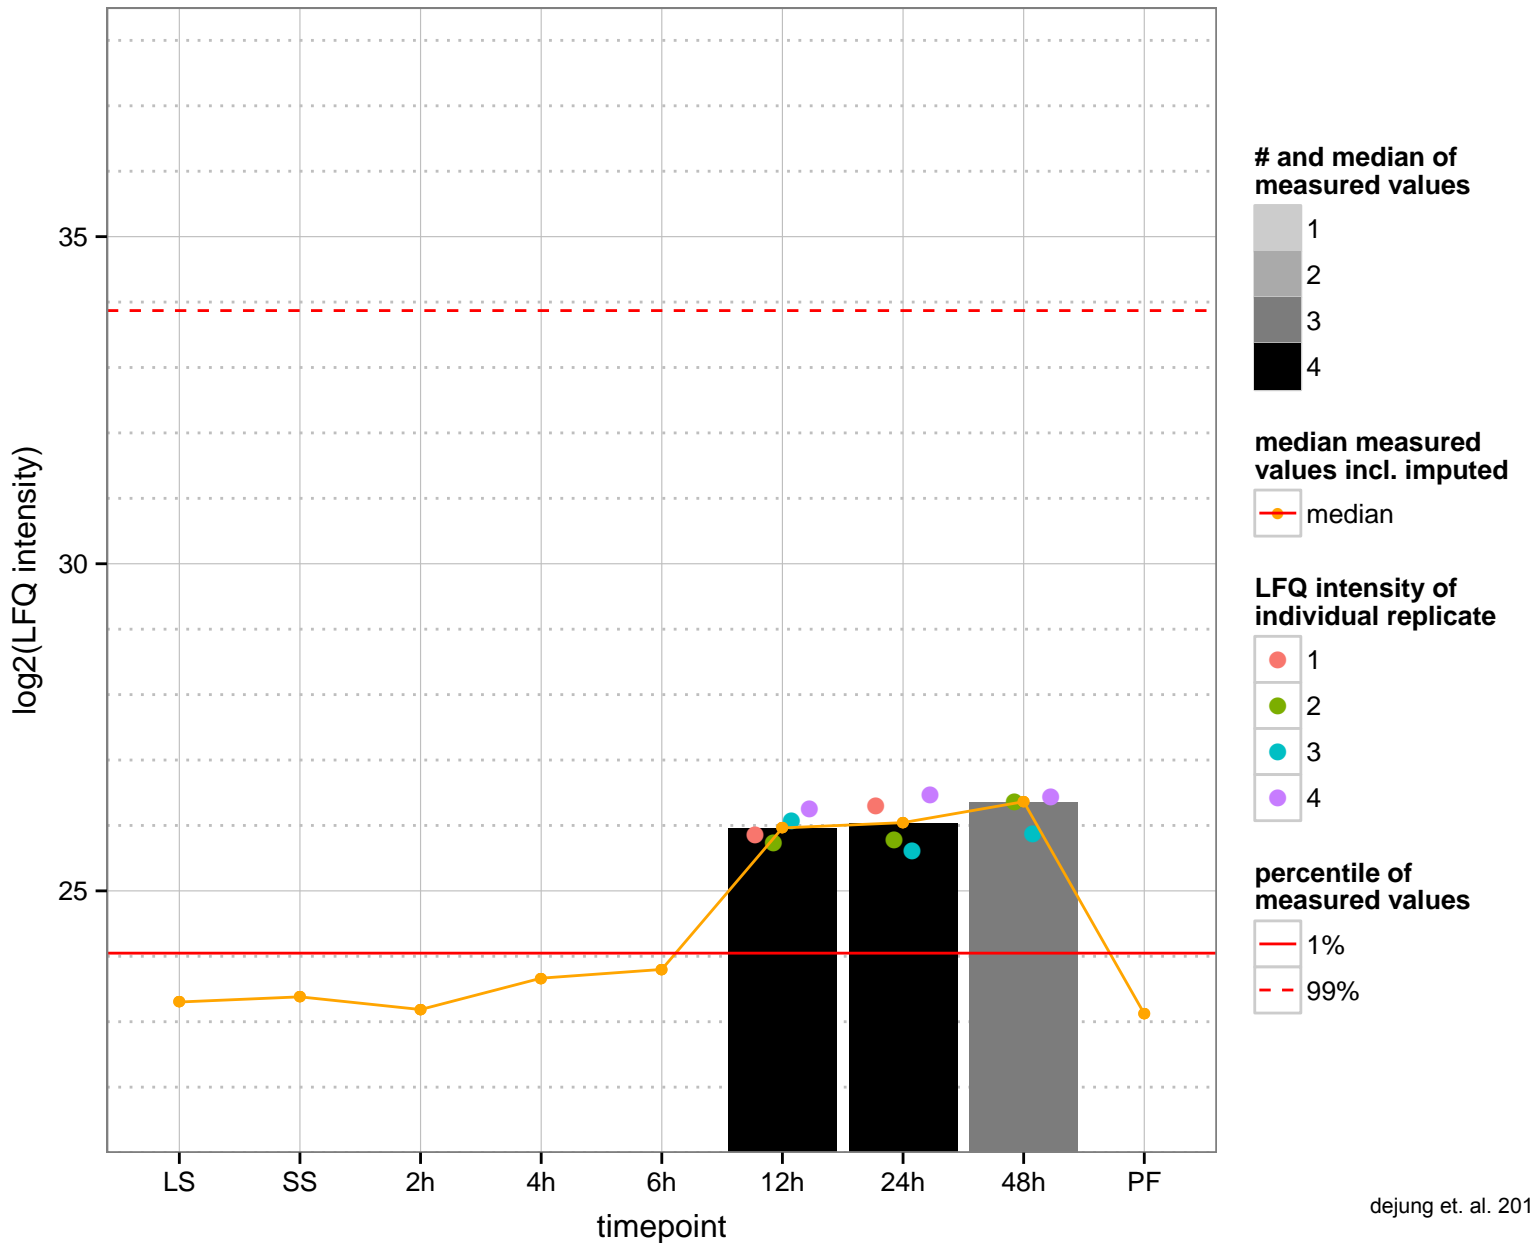



hypothetical protein, conserved  
 Tb927.6.1560  
 AGOF: null  
 AGOC: null  
 AGOP: null  
 PGOF: null  
 PGOC: null  
 PGOP: null

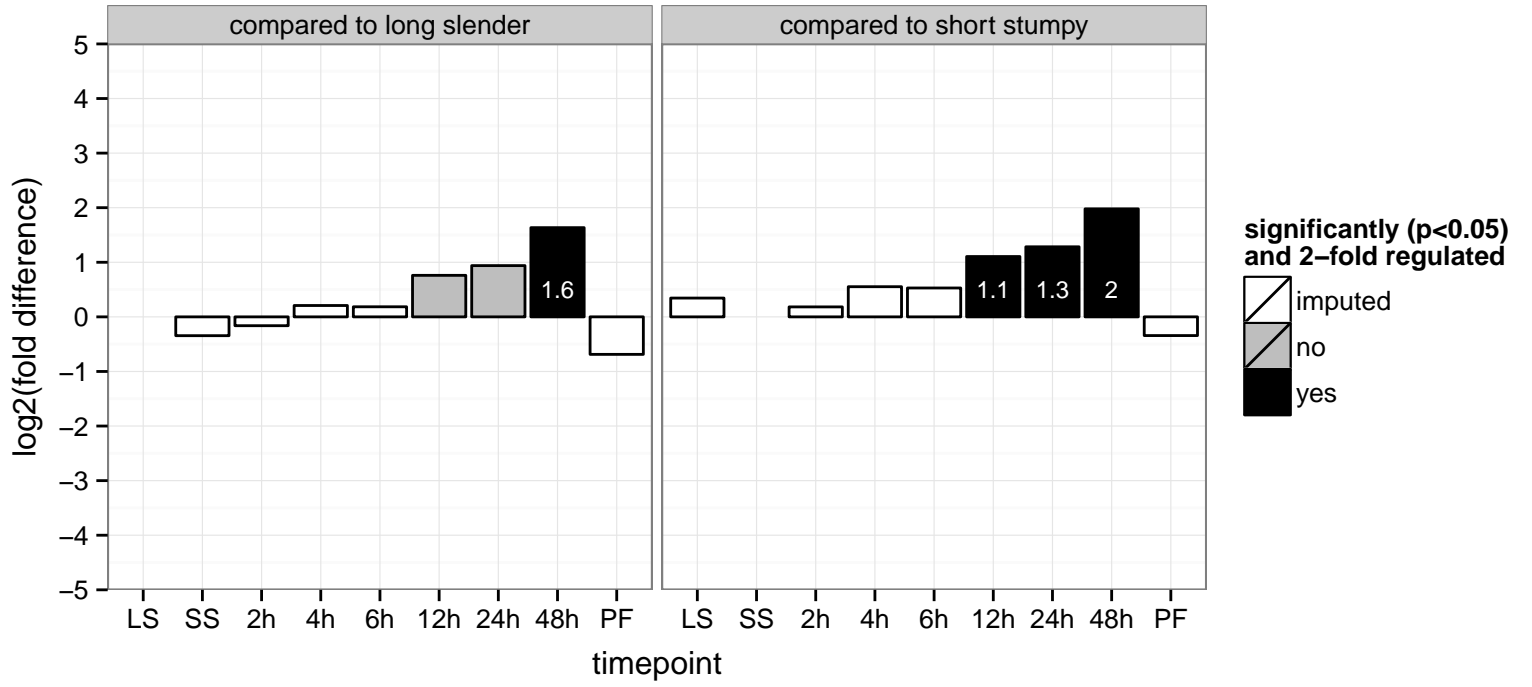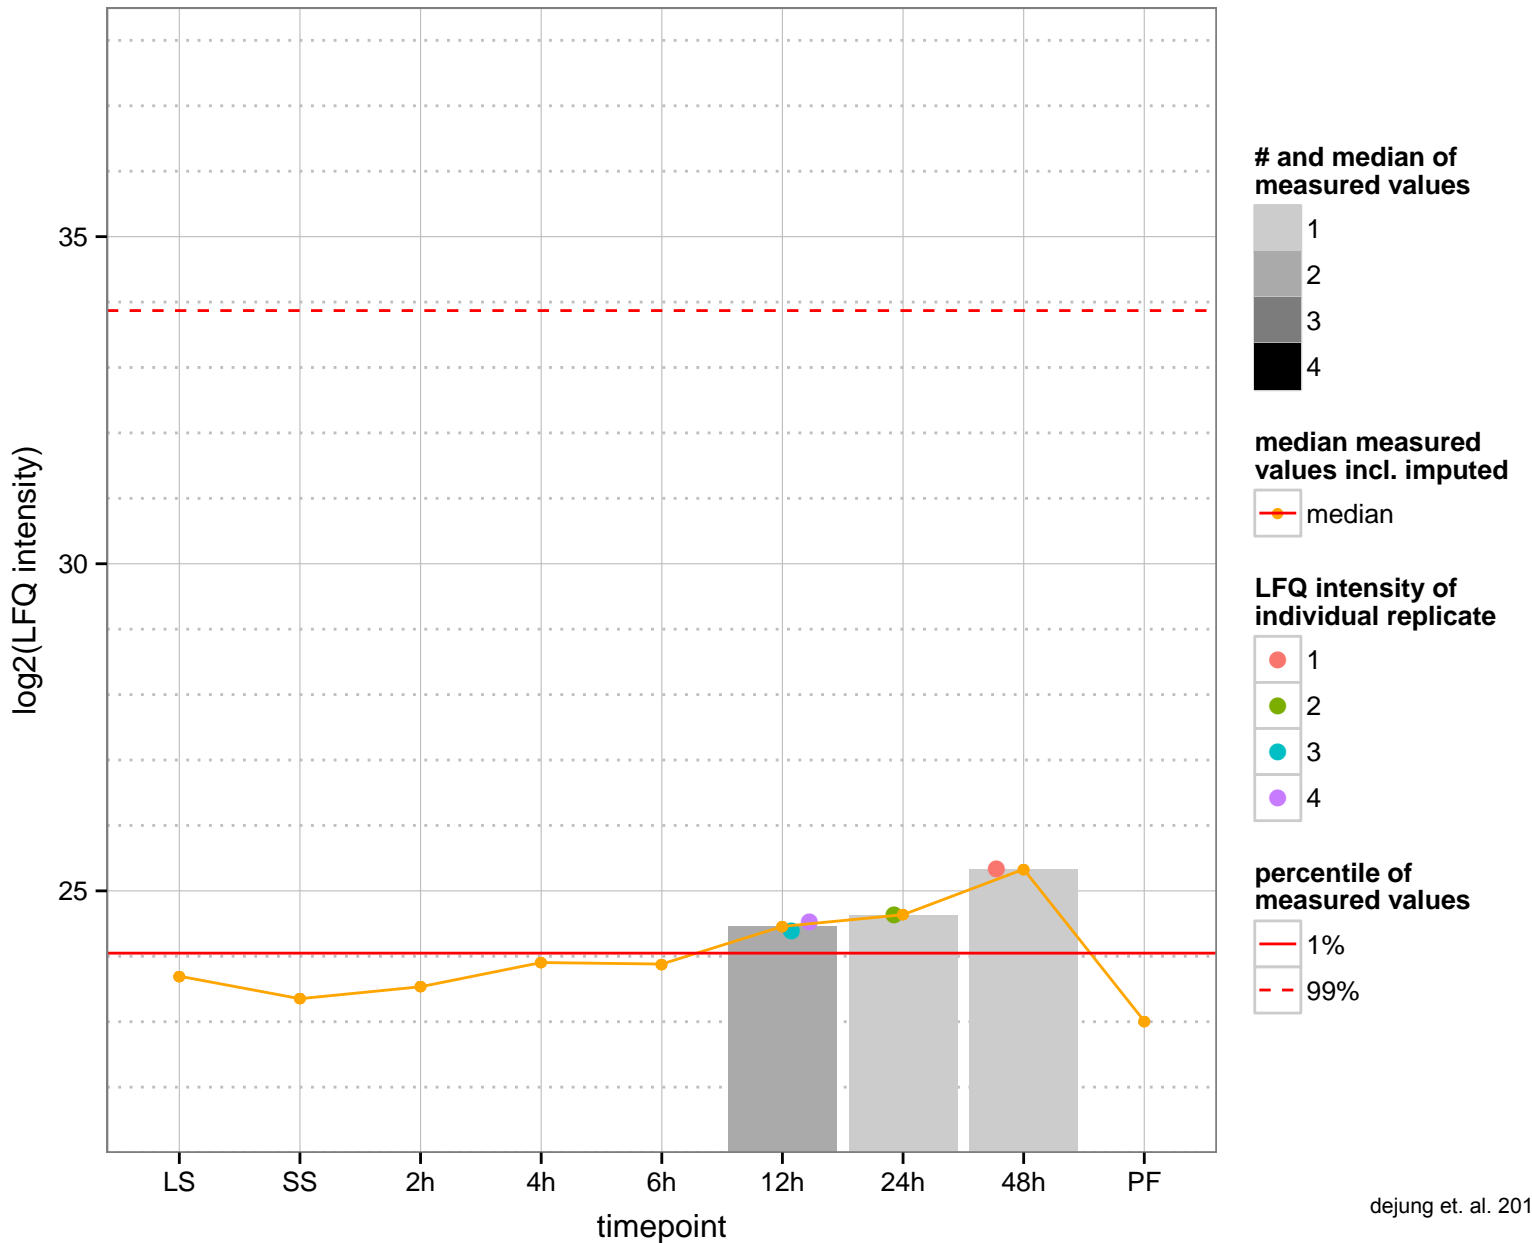

heat shock 70 kDa protein, putative (HSP70)

Tb927.7.1030

AGOF: ATP binding

AGOC: null

AGOP: null

PGOF: null

PGOC: null

PGOP: null

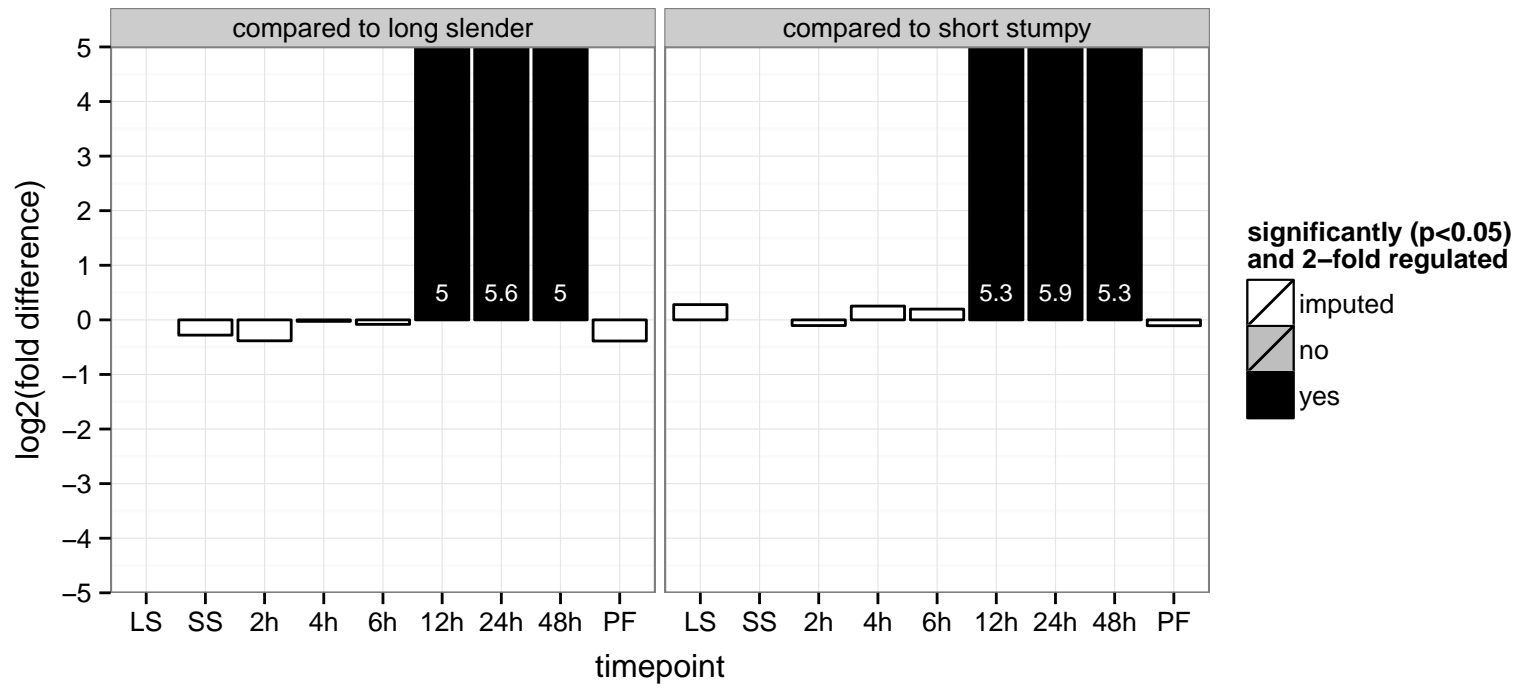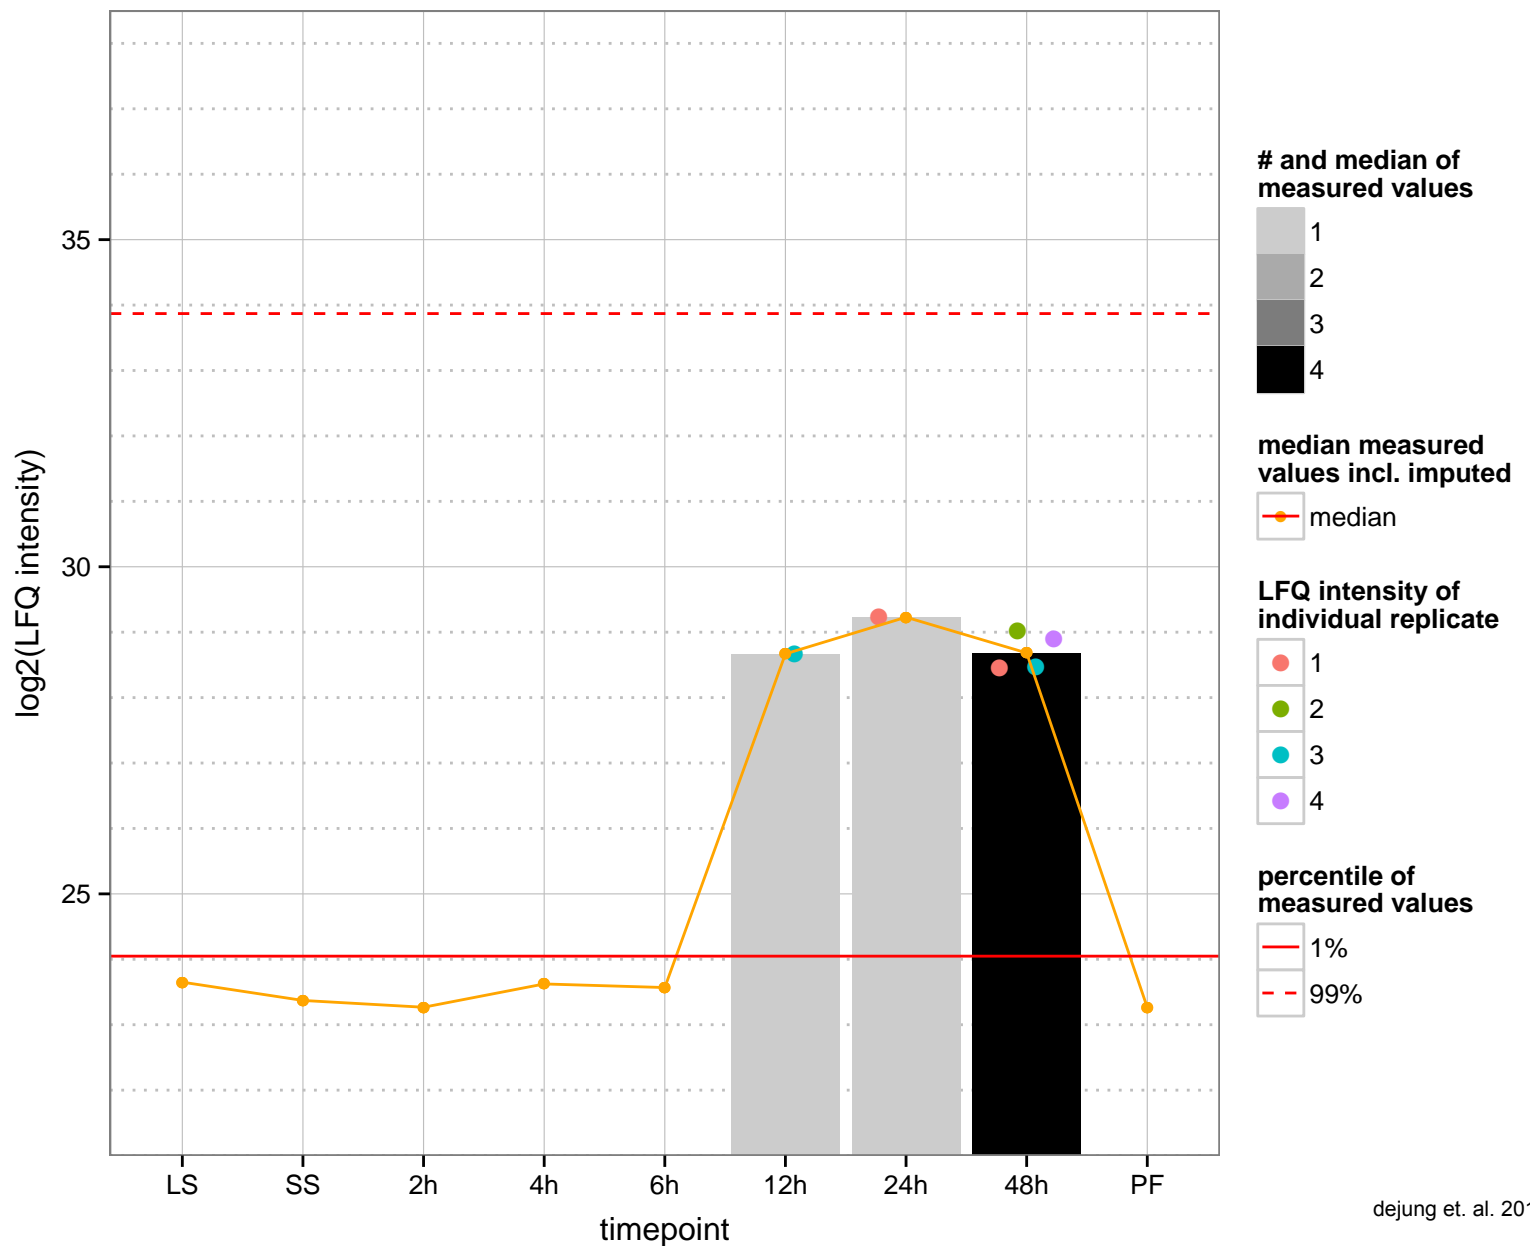

eukaryotic peptide chain release factor subunit 1, putative  
 Tb927.7.1710  
 AGOF: null  
 AGOC: nucleus  
 AGOP: translation  
 PGOF: null  
 PGOC: null  
 PGOP: null

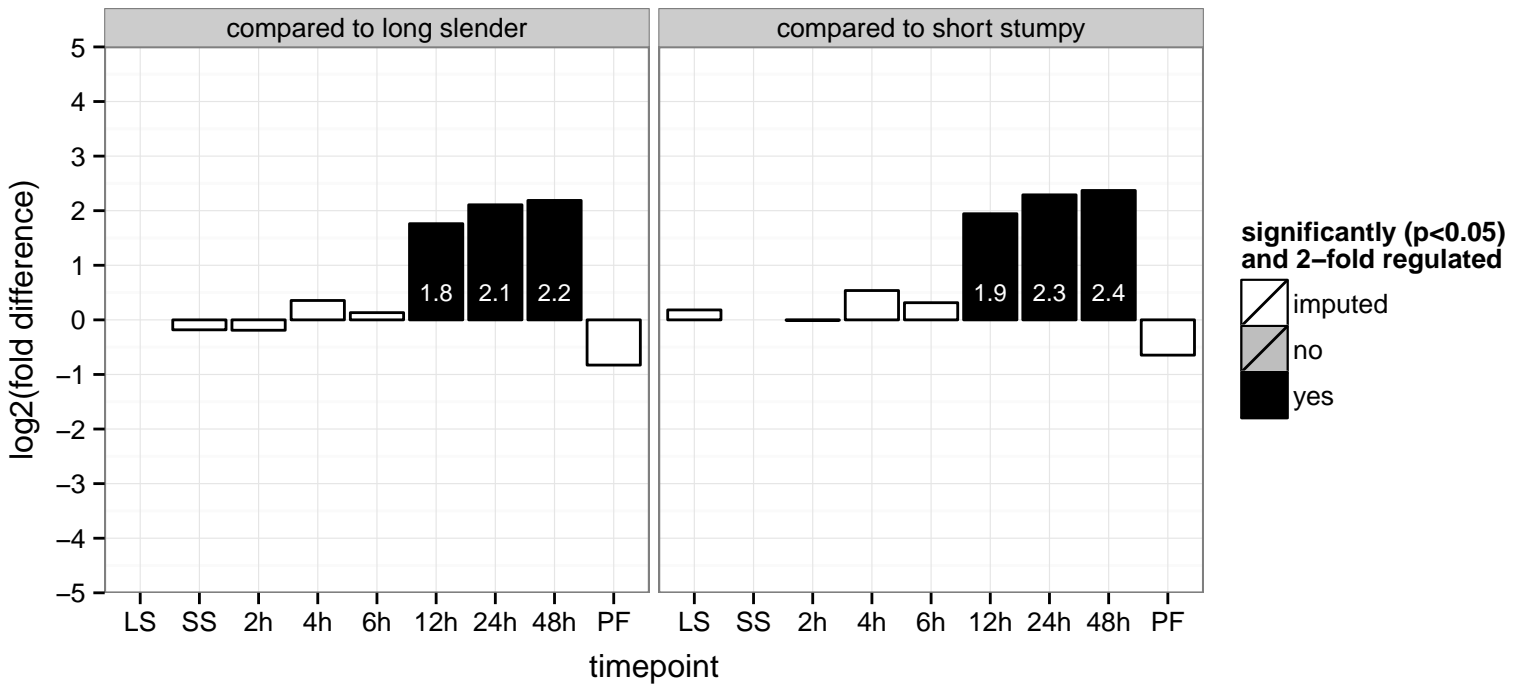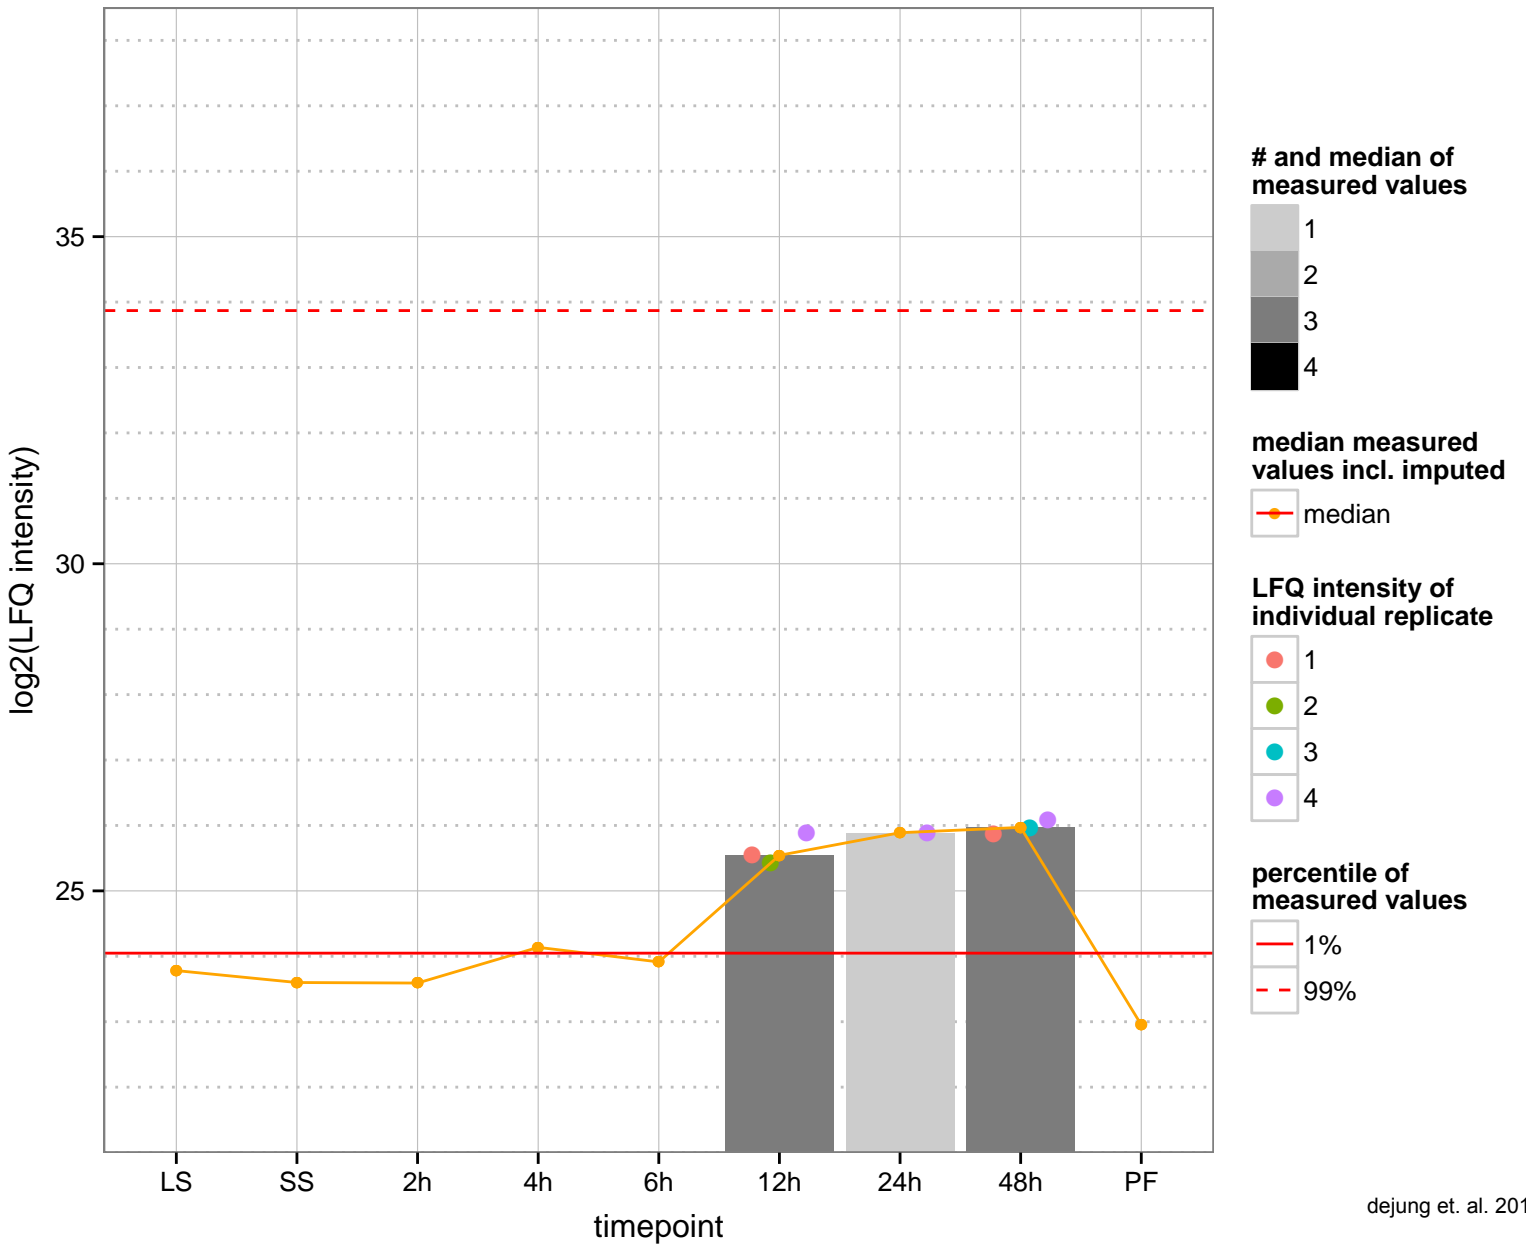

hypothetical protein, conserved  
 Tb927.7.3140  
 AGOF: null  
 AGOC: null  
 AGOP: null  
 PGOF: null  
 PGOC: null  
 PGOP: null

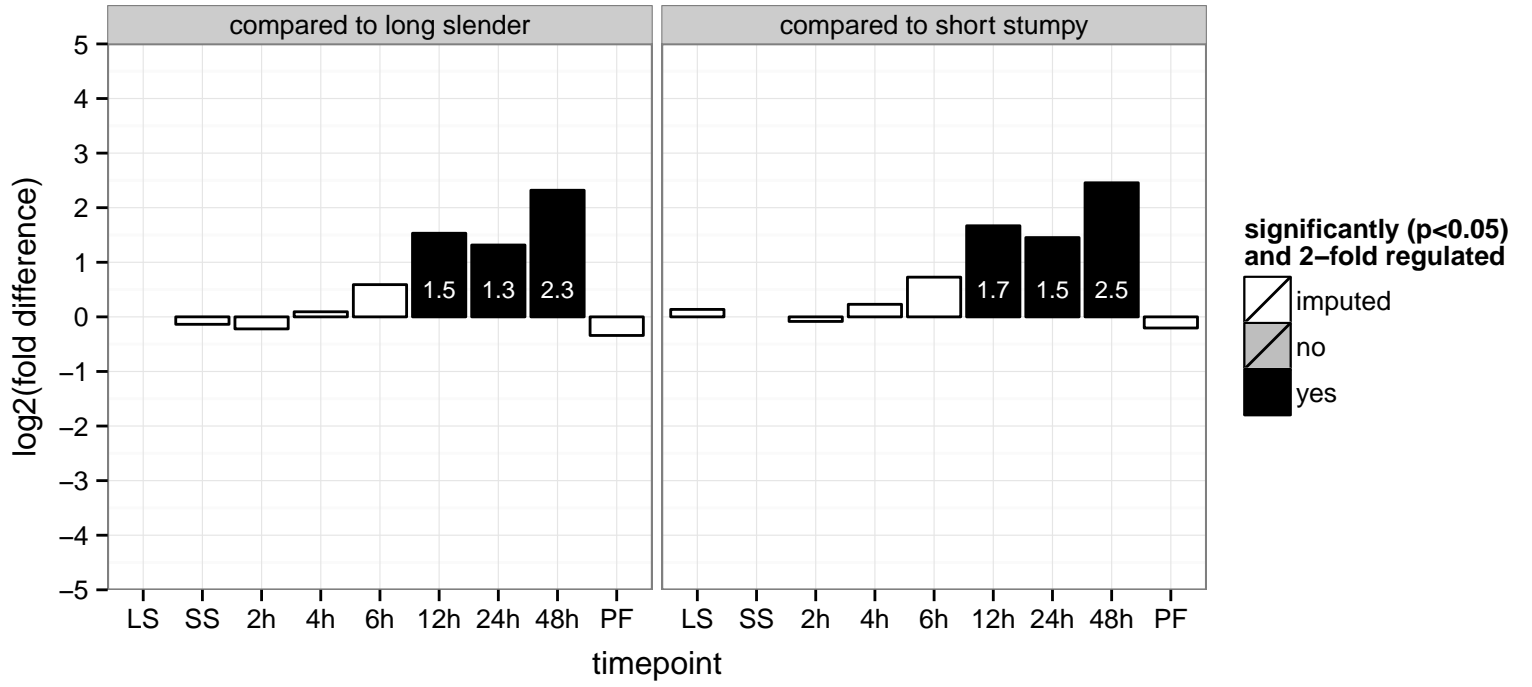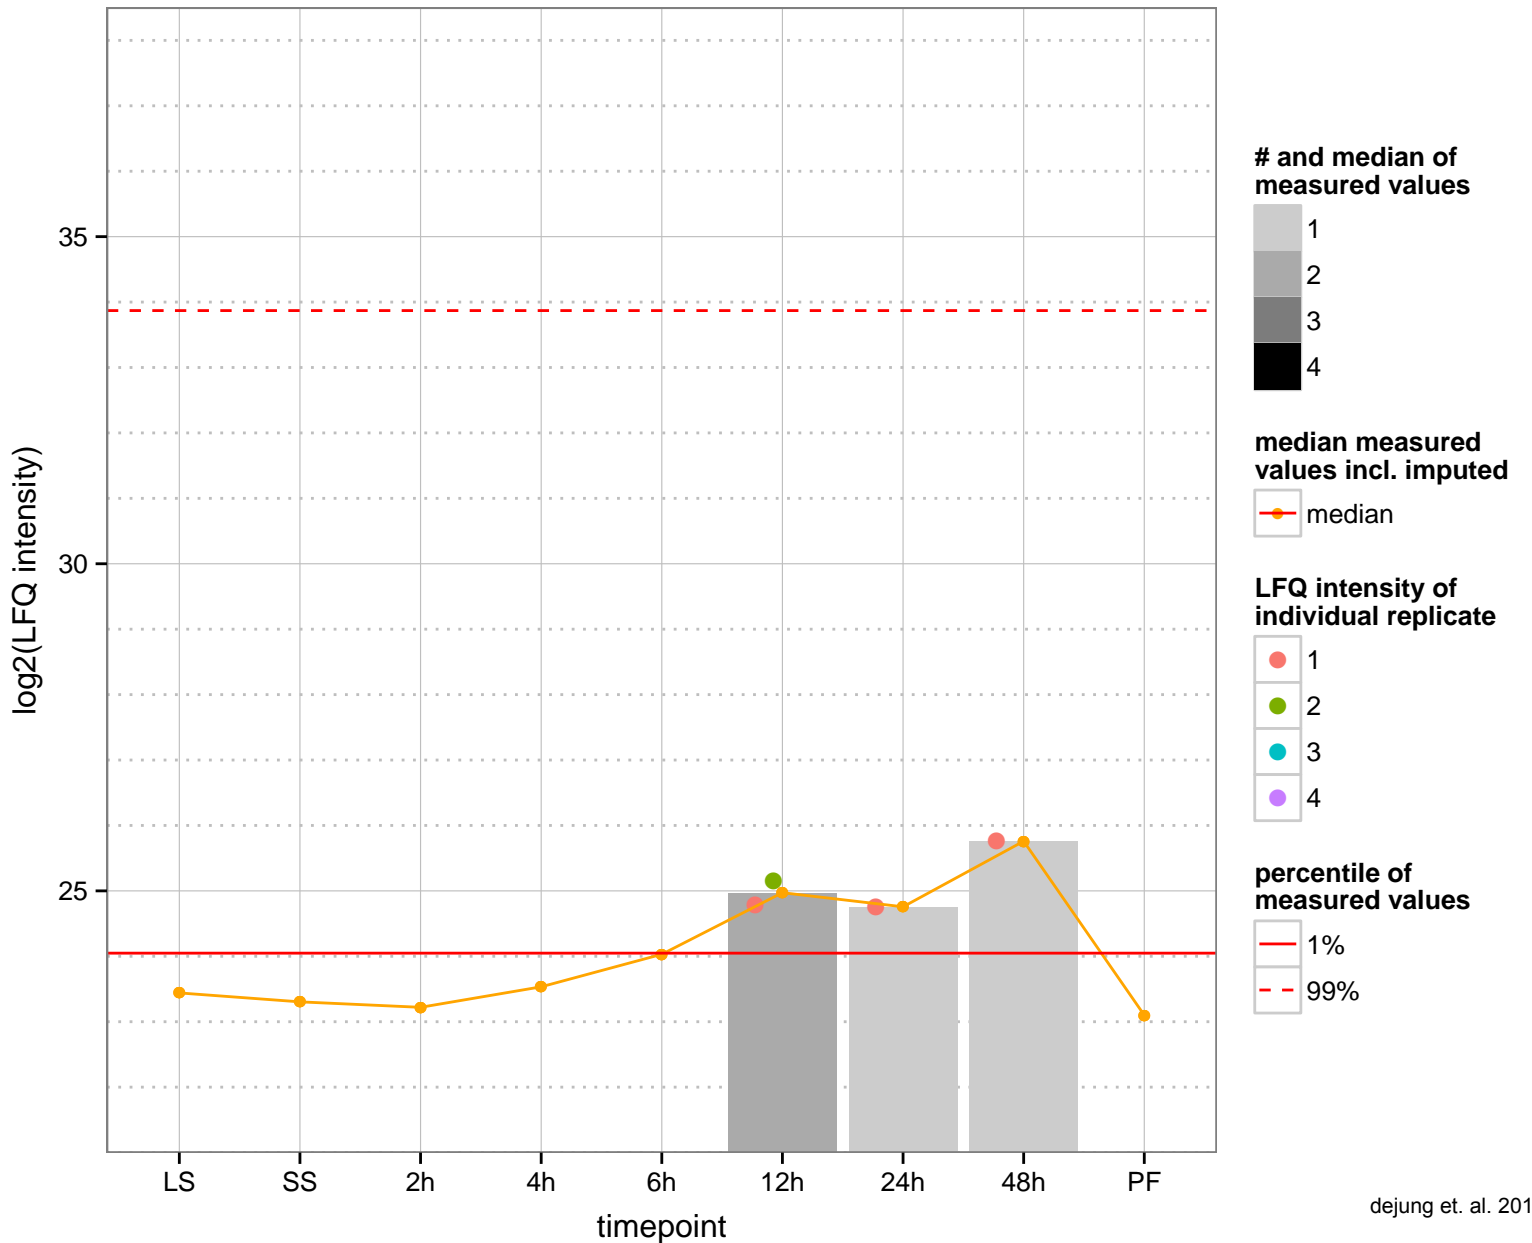

centrin, putative  
 Tb927.7.3410  
 AGOF: calcium ion binding  
 AGOC: cilium basal body  
 AGOP: null  
 PGOF: calcium ion binding  
 PGOC: null  
 PGOP: null

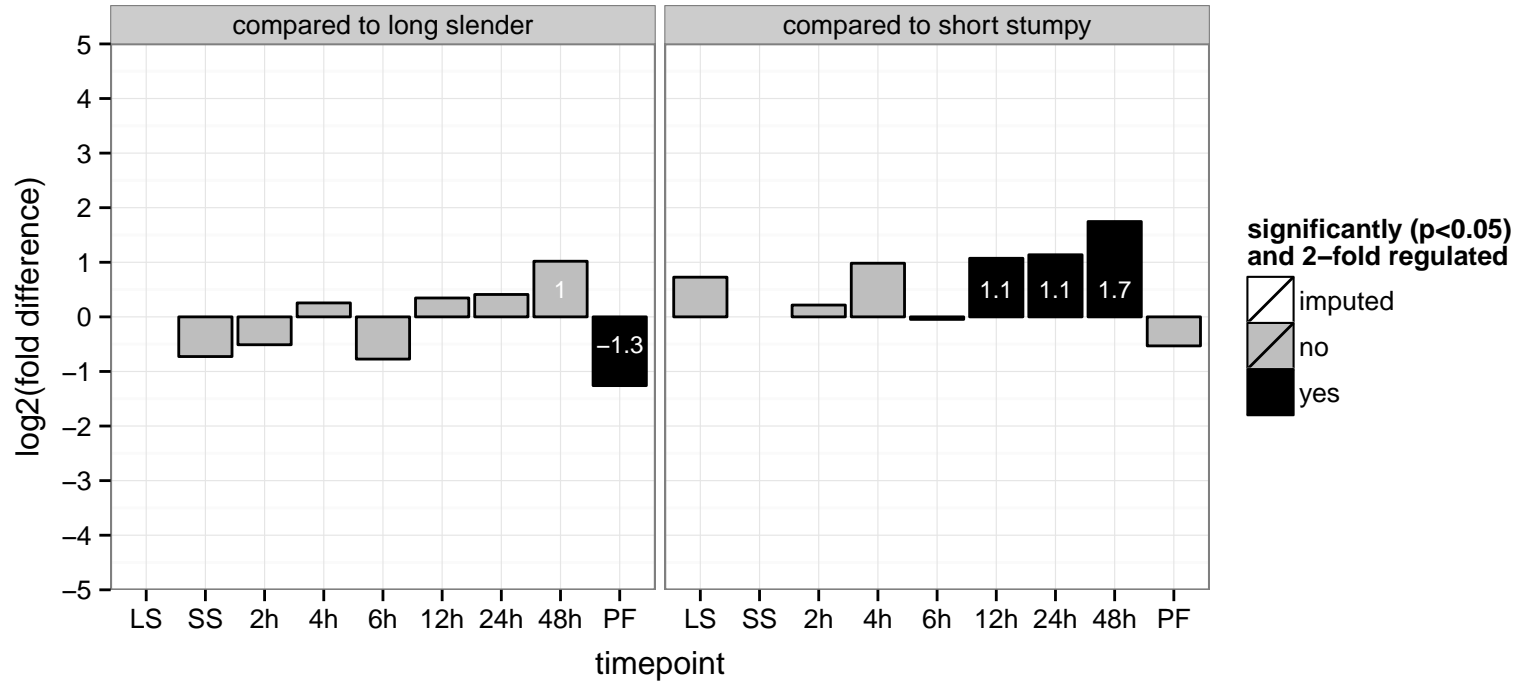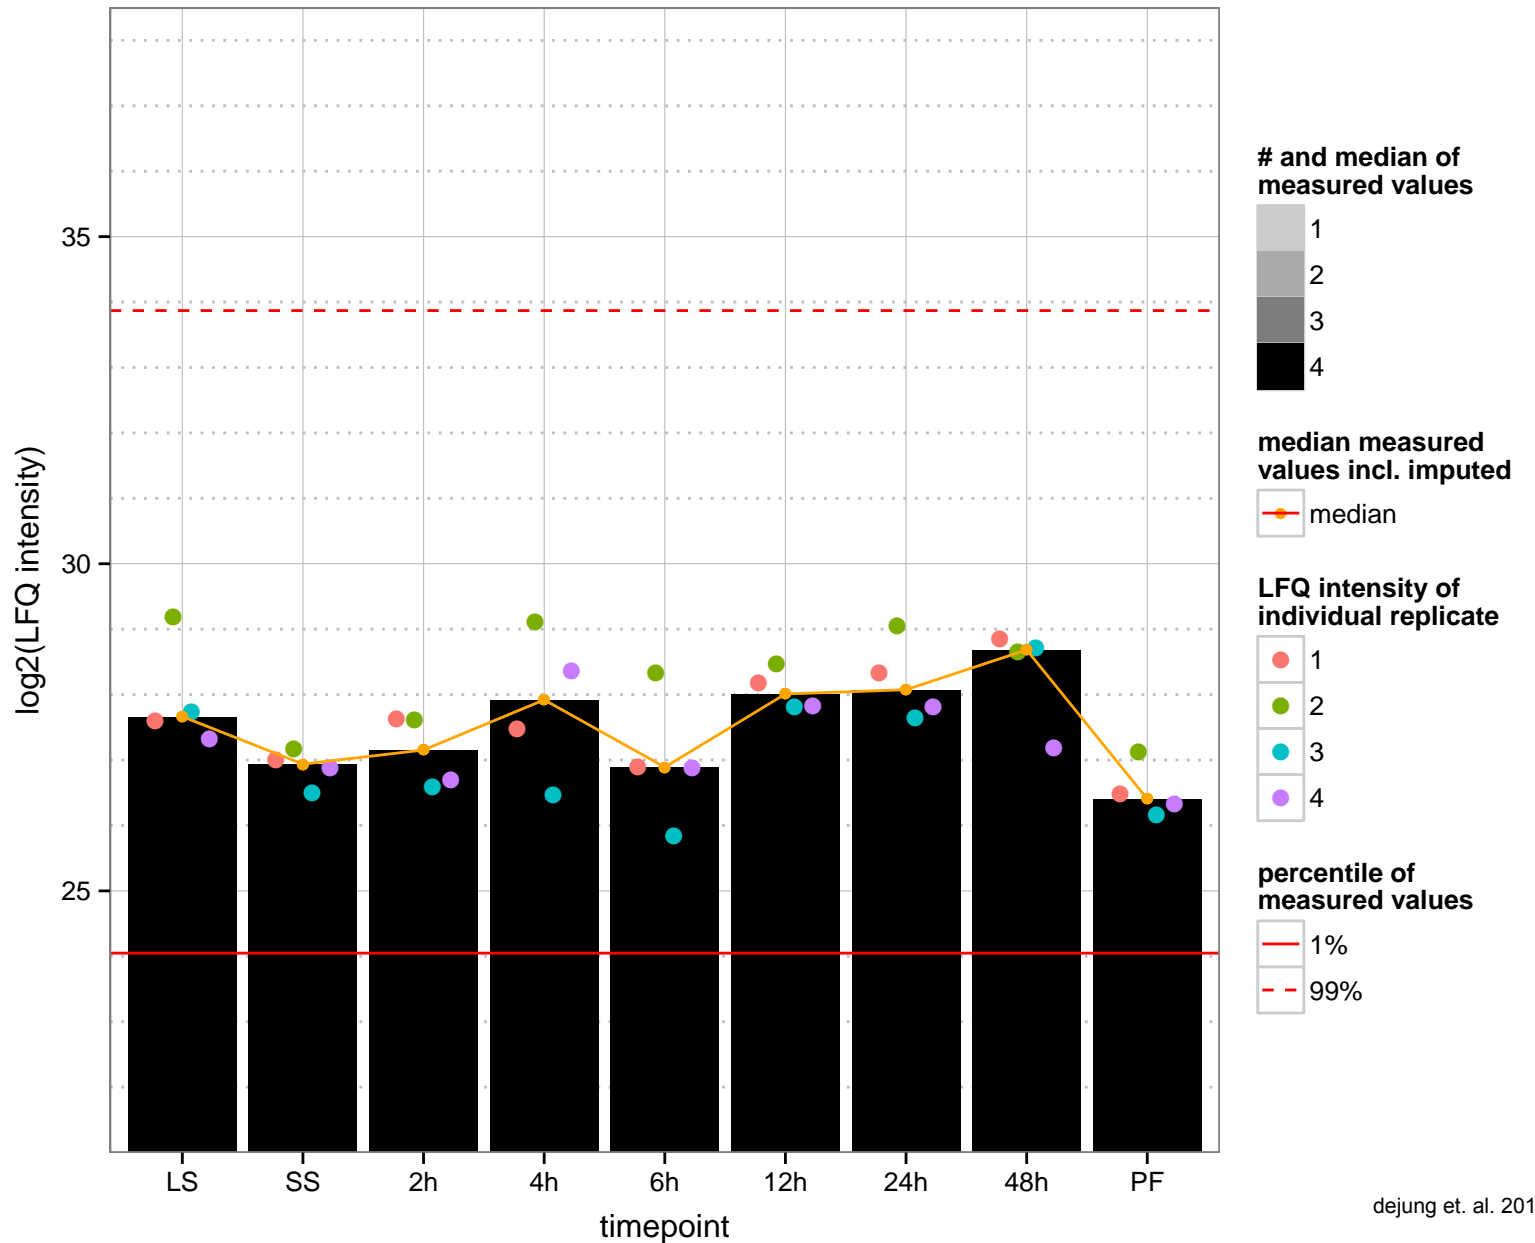

50S ribosomal protein L16, putative  
 Tb927.7.3960  
 AGOF: structural constituent of ribosome  
 AGOC: intracellular, mitochondrion, ribosome  
 AGOP: translation  
 PGOF: structural constituent of ribosome  
 PGO: ribosome  
 PGOP: translation

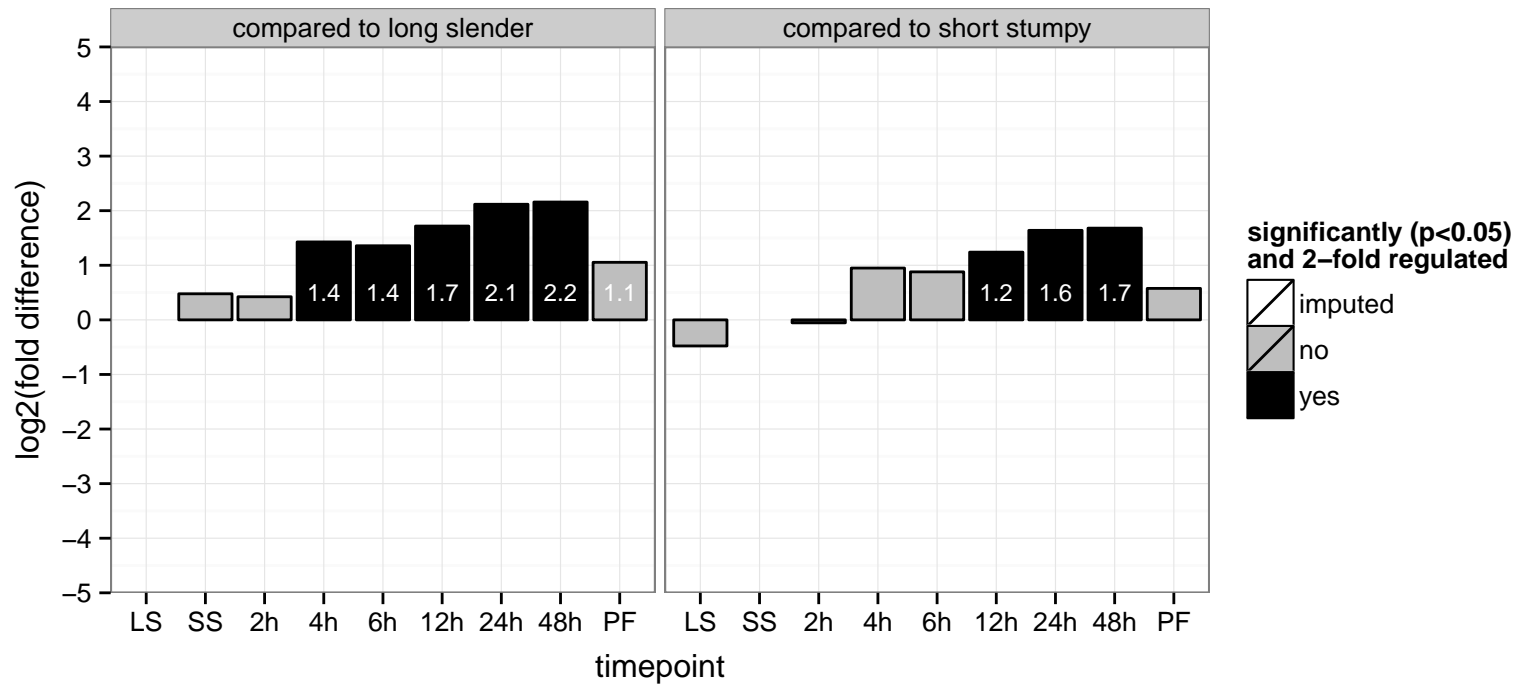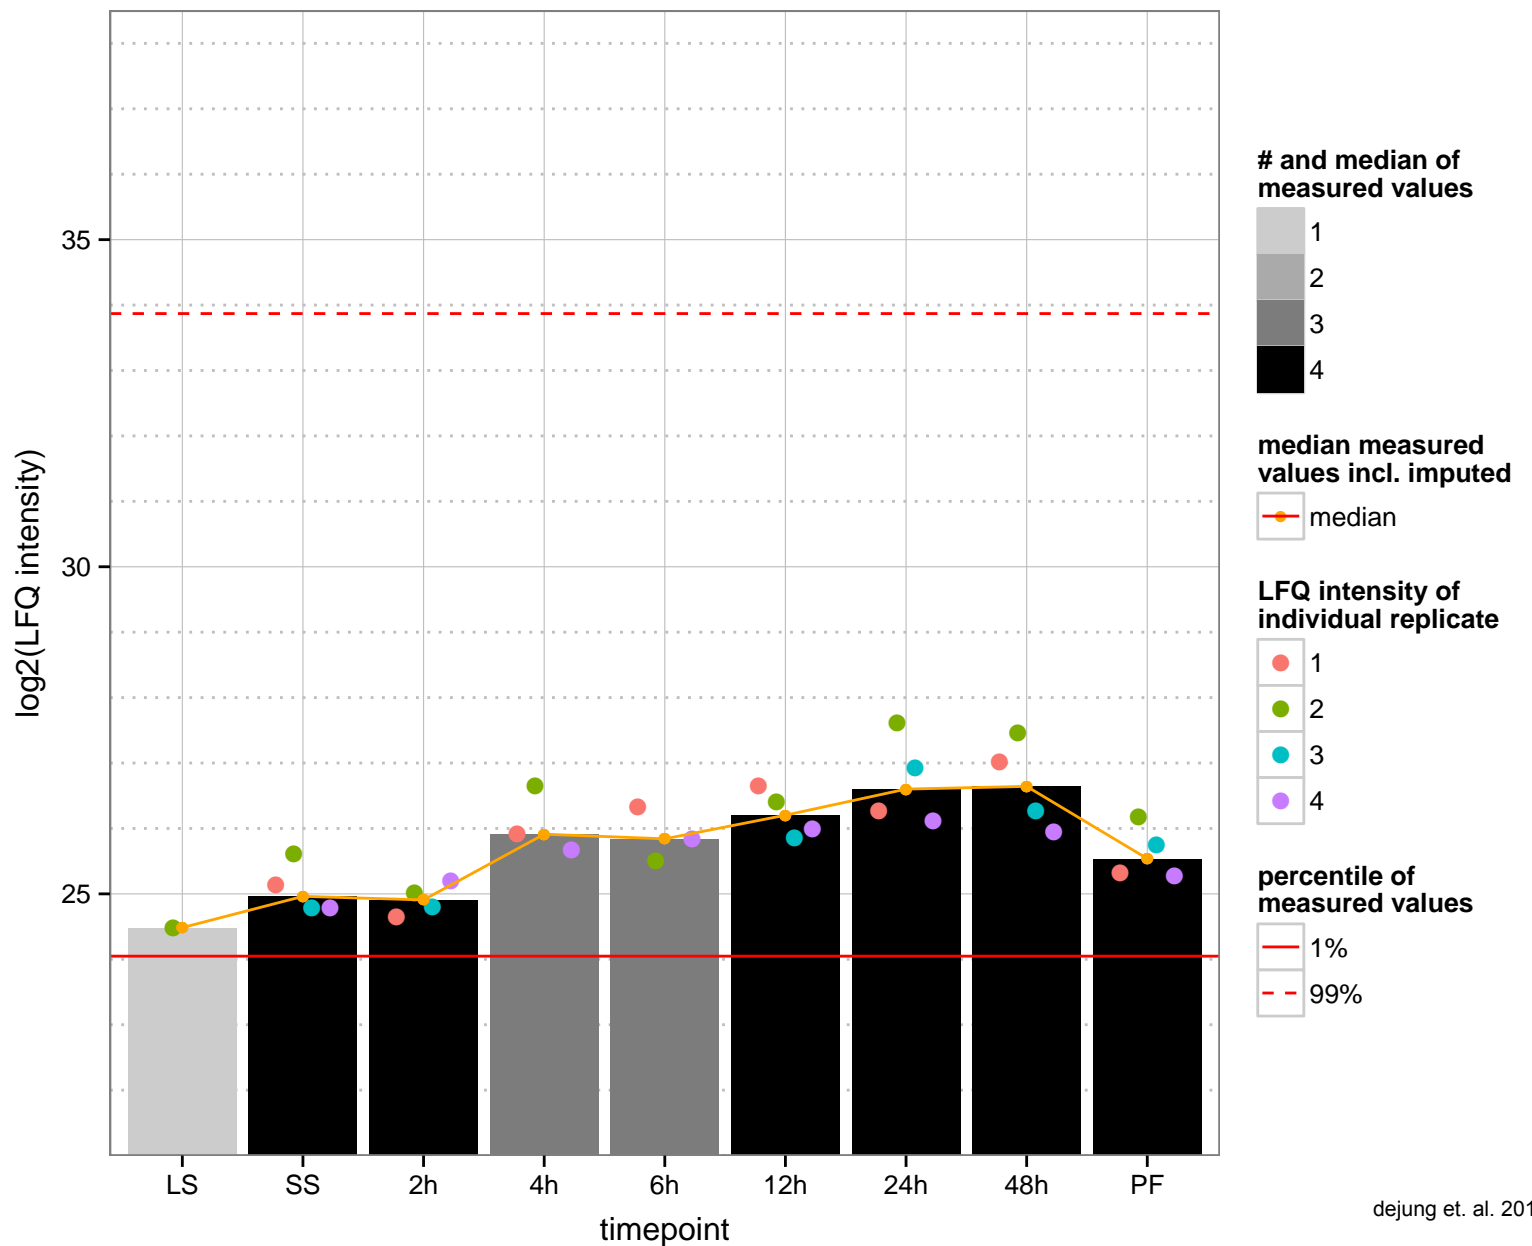

hypothetical protein, conserved  
 Tb927.7.5280  
 AGOF: null  
 AGOC: mitochondrion  
 AGOP: null  
 PGO: null  
 PGOC: null  
 PGOP: null

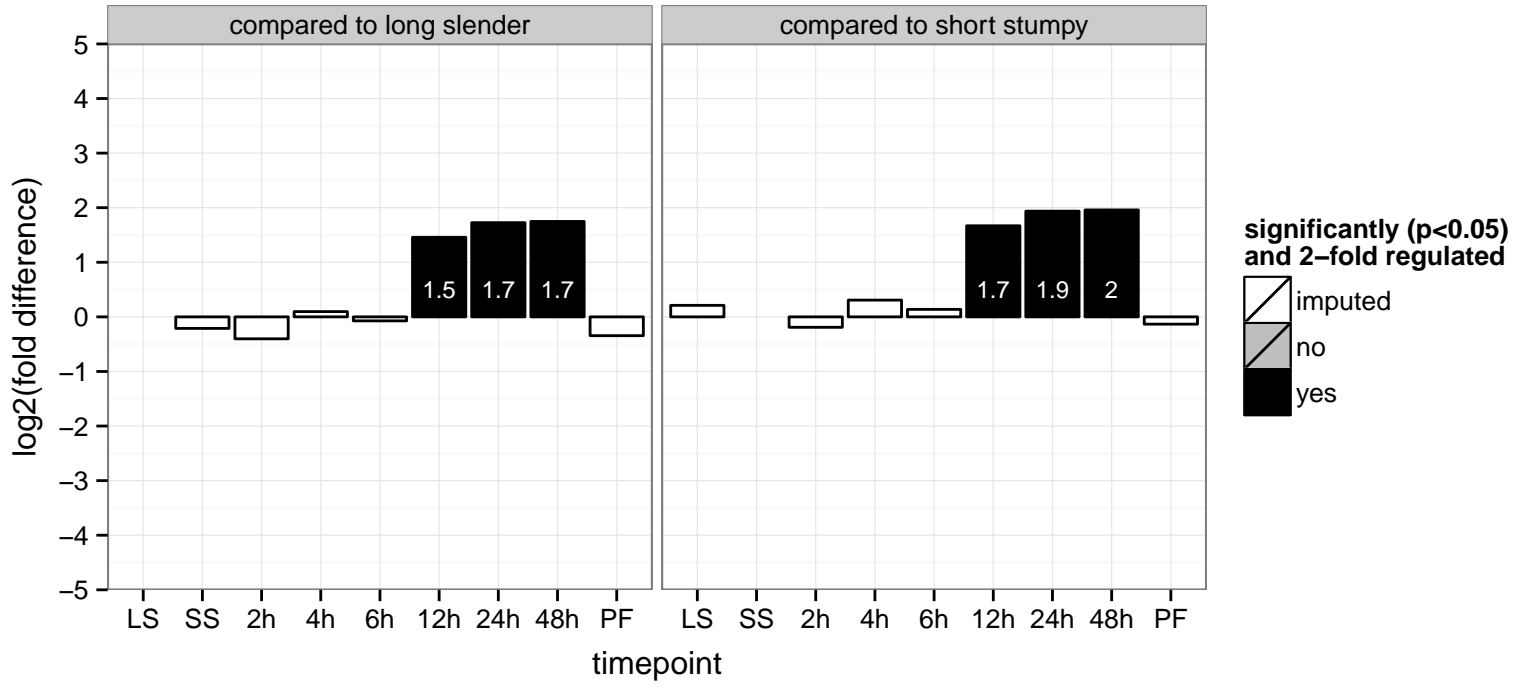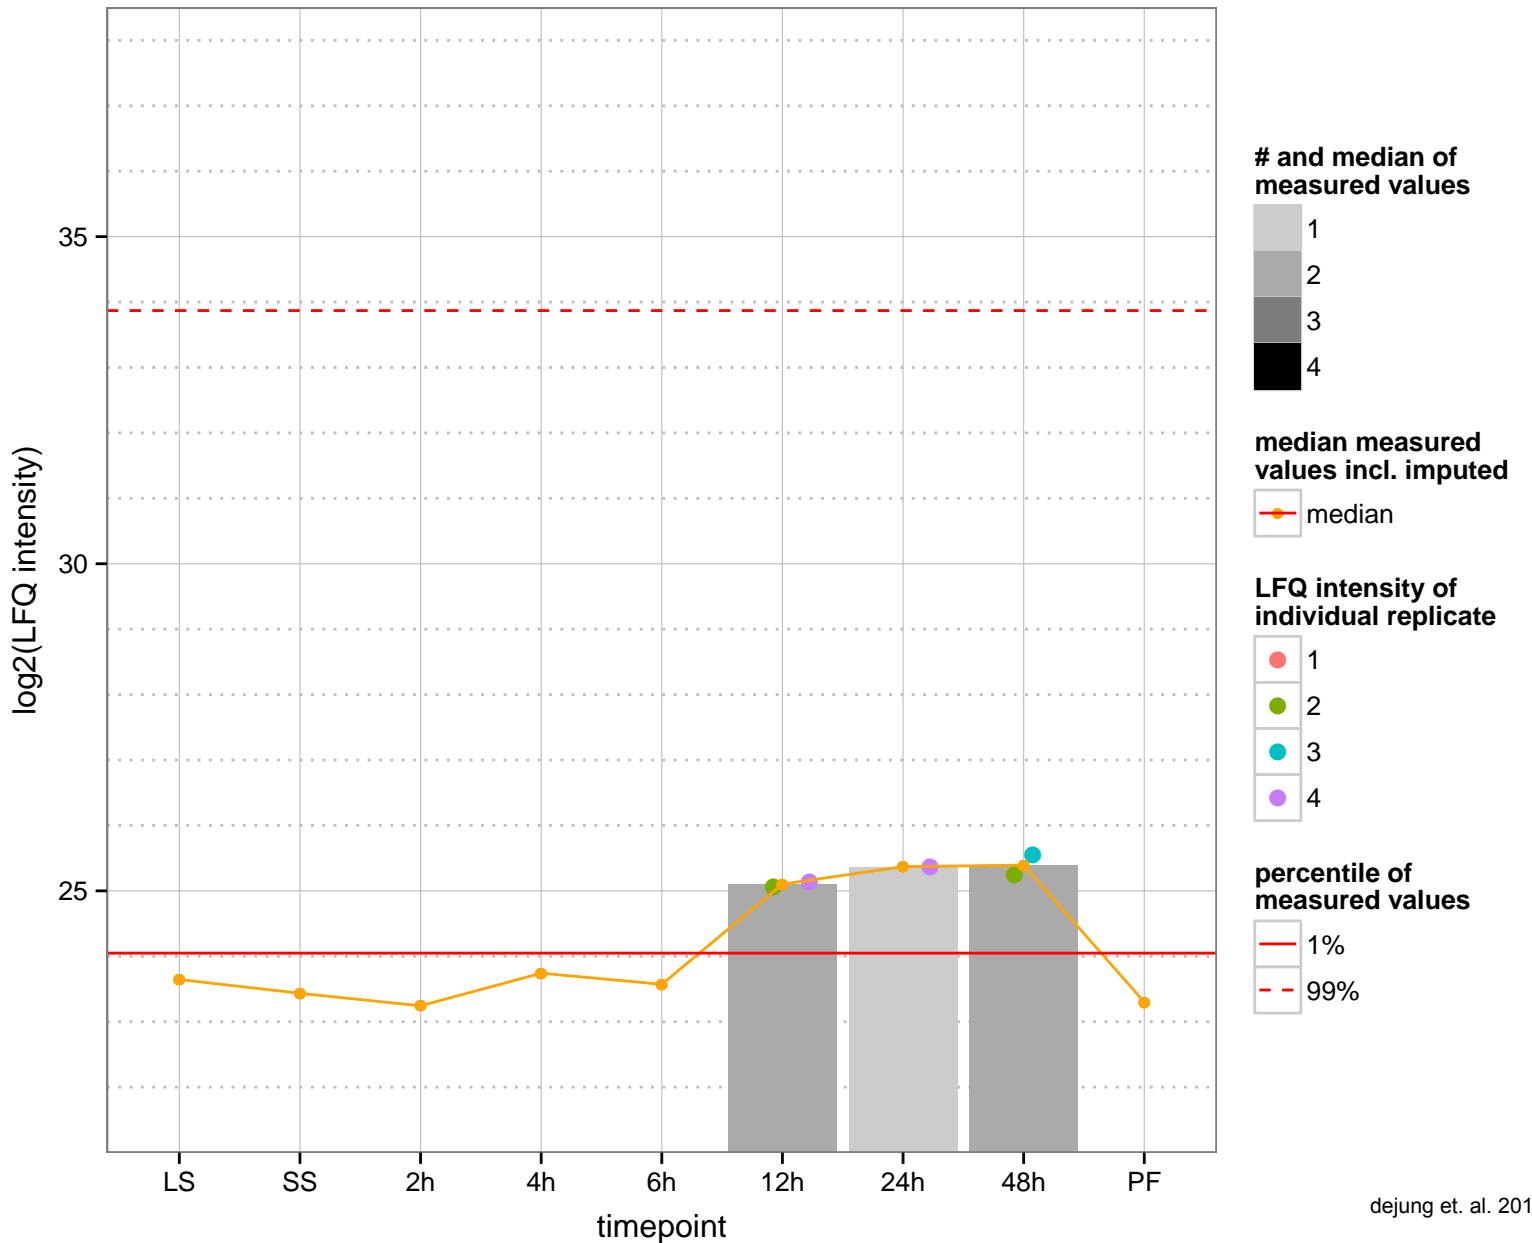

hypothetical protein, conserved  
 Tb927.7.5320  
 AGOF: null  
 AGOC: null  
 AGOP: null  
 PGO: null  
 PGO: null  
 PGO: null

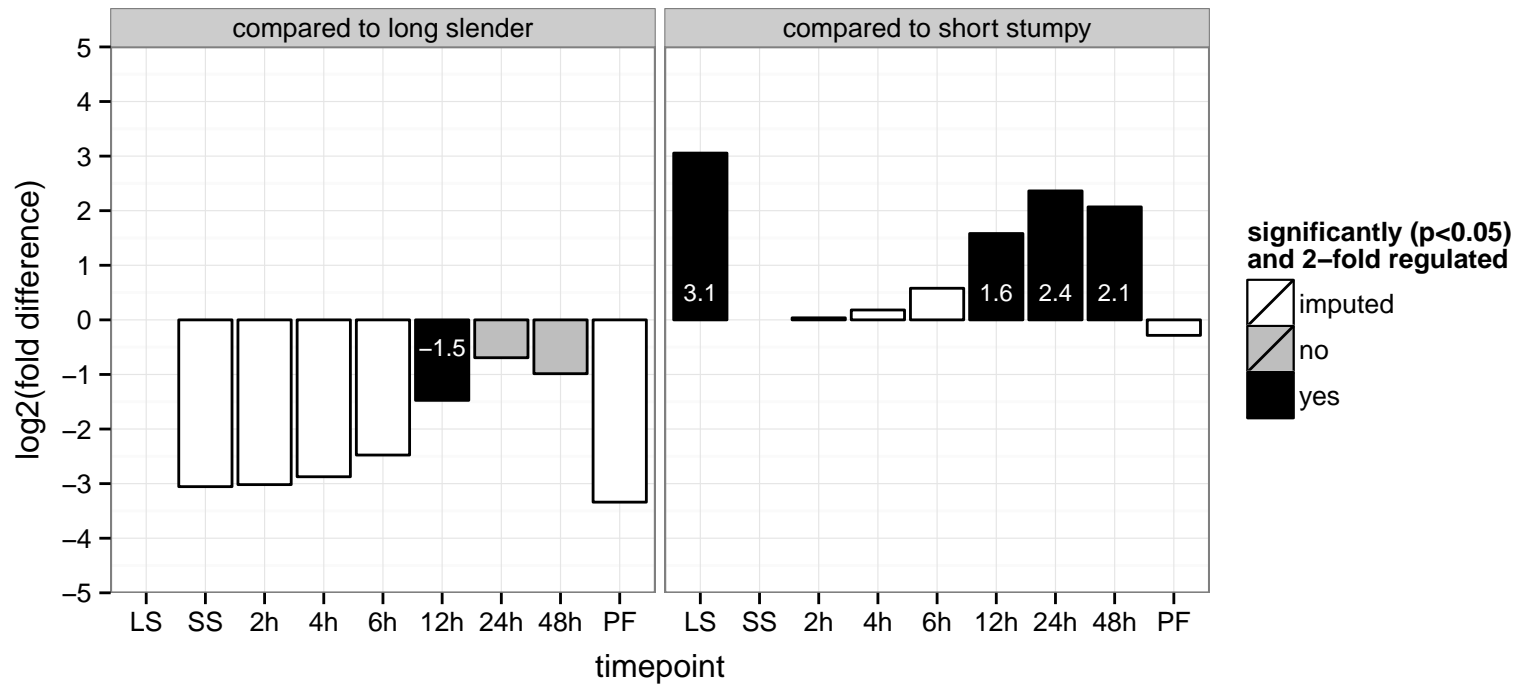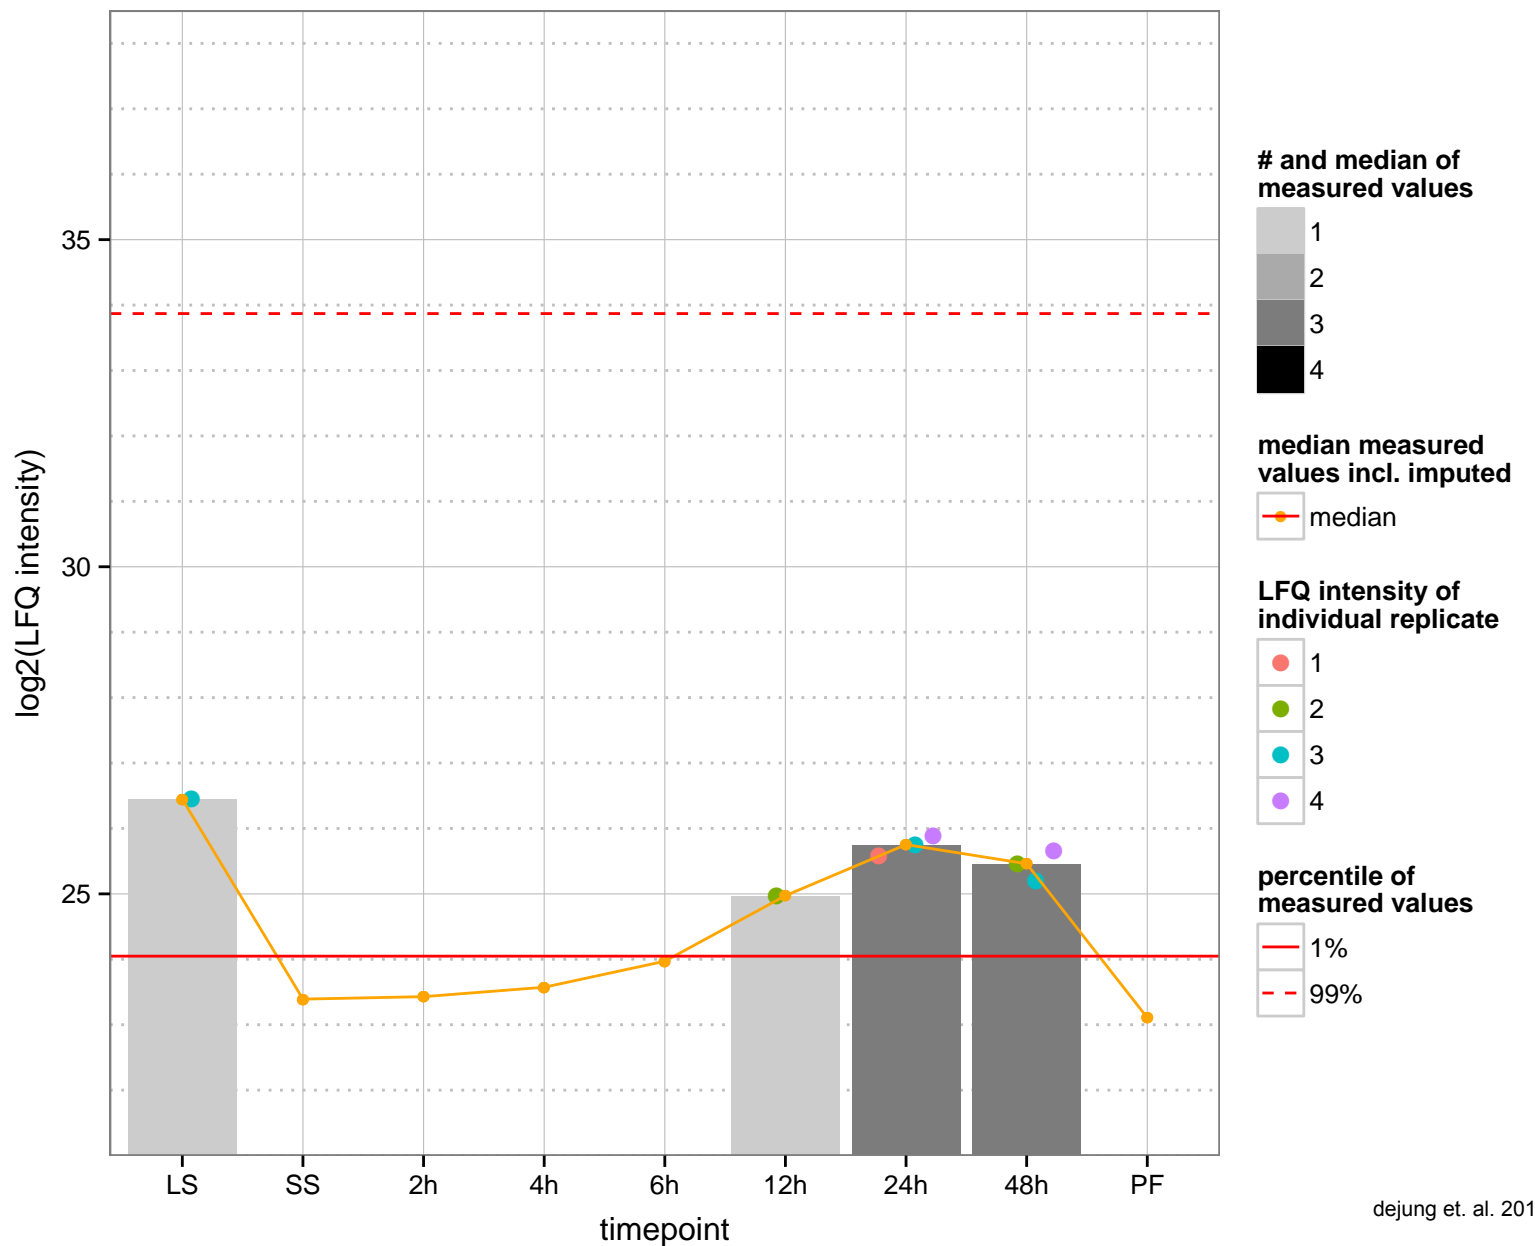



hypothetical protein, conserved  
 Tb927.7.5610  
 AGOF: null  
 AGOC: null  
 AGOP: null  
 PGO: protein binding  
 PGOC: null  
 PGOP: null

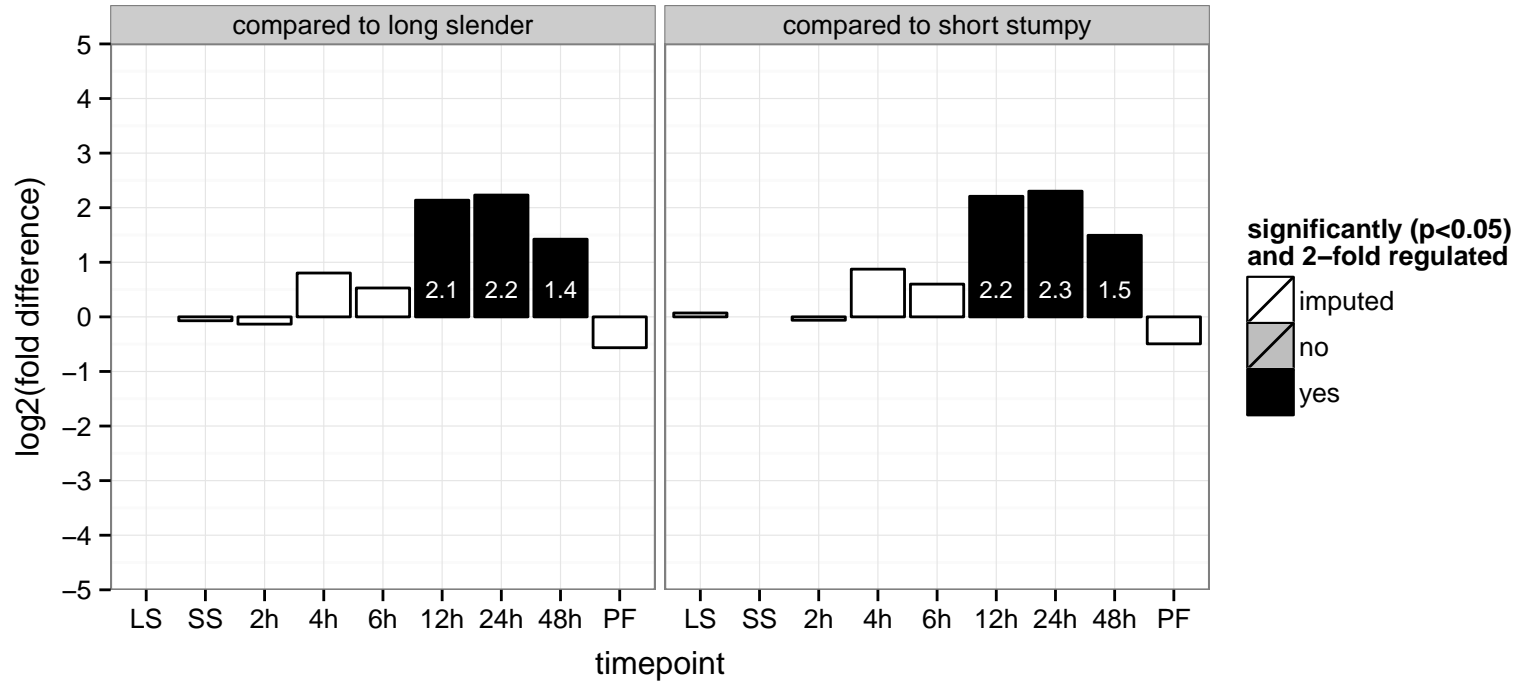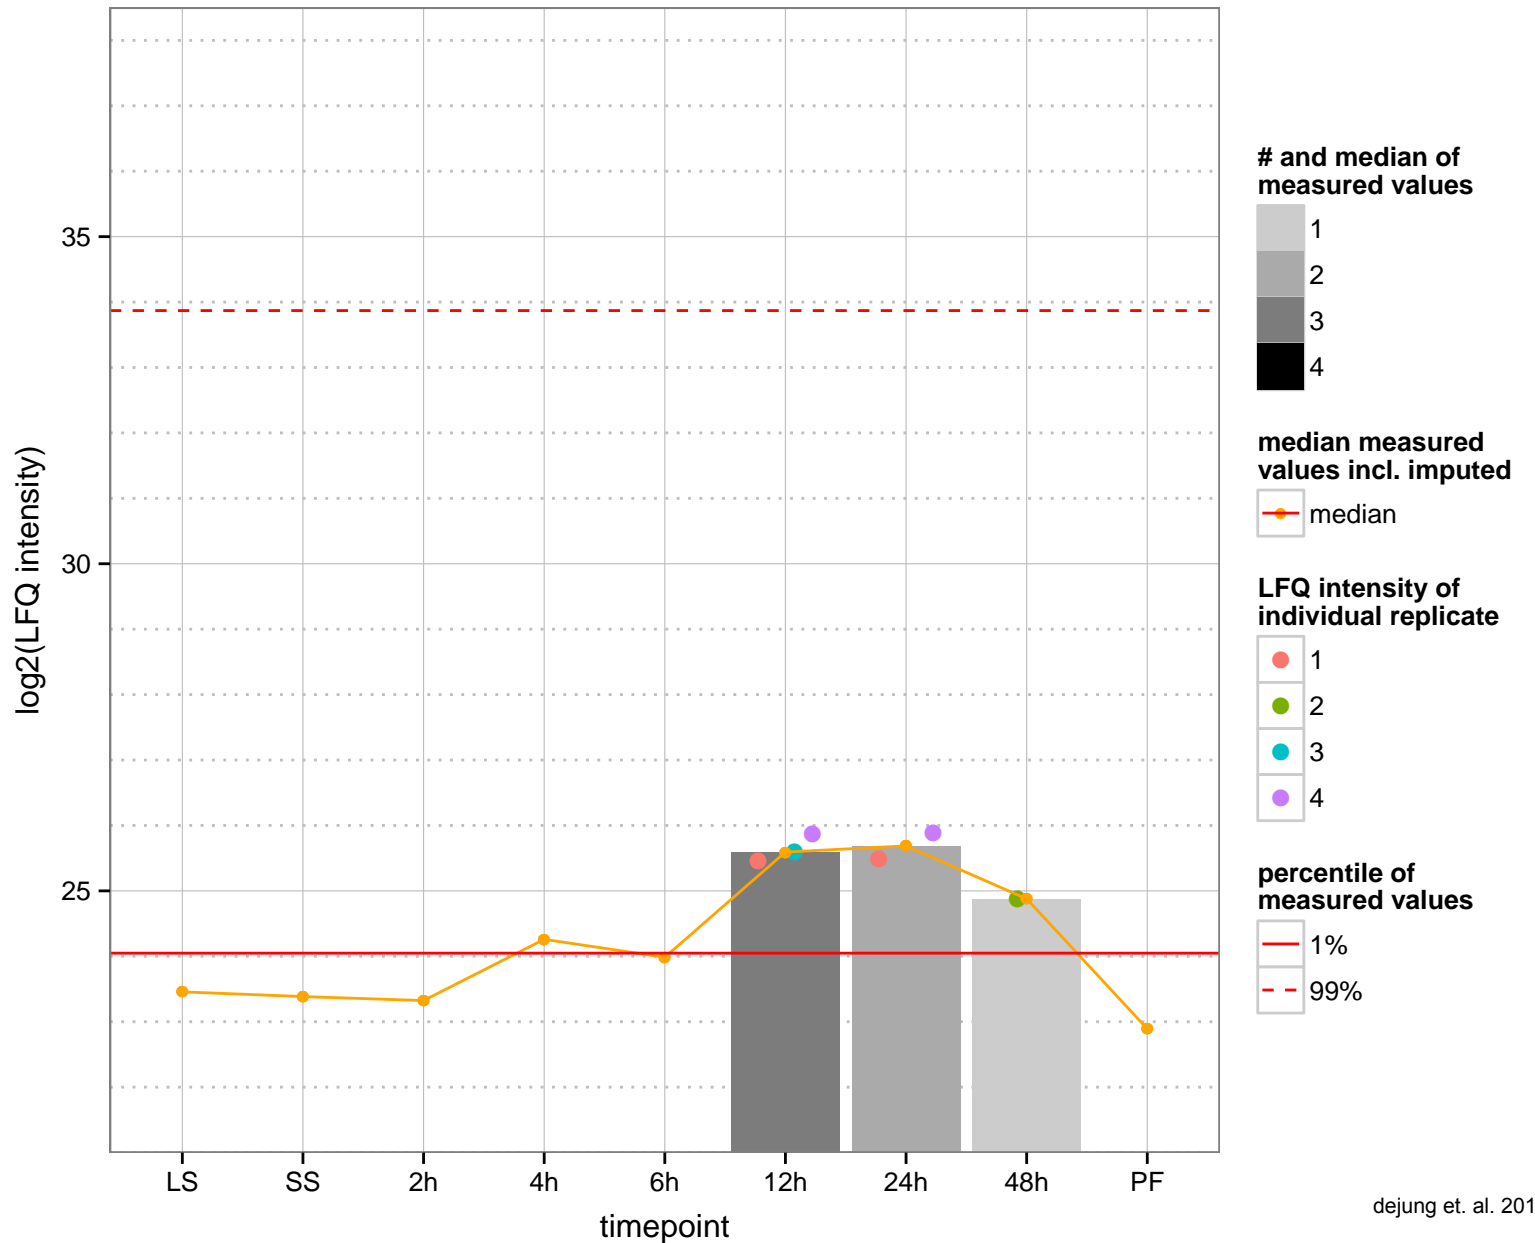

protein associated with differentiation 3, putative (PAD3)

Tb927.7.5950

AGOF: null

AGOC: null

AGOP: null

PGOF: null

PGOC: integral to membrane

PGOP: transmembrane transport

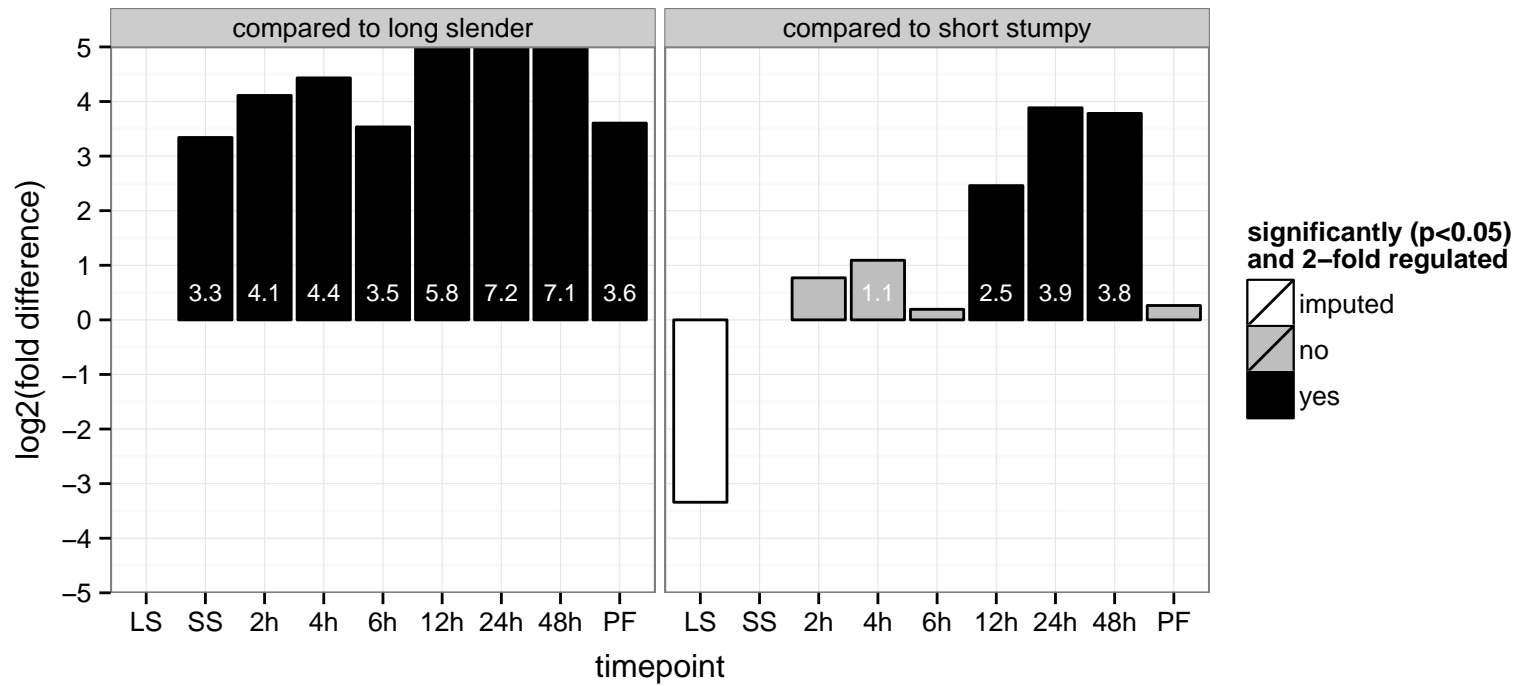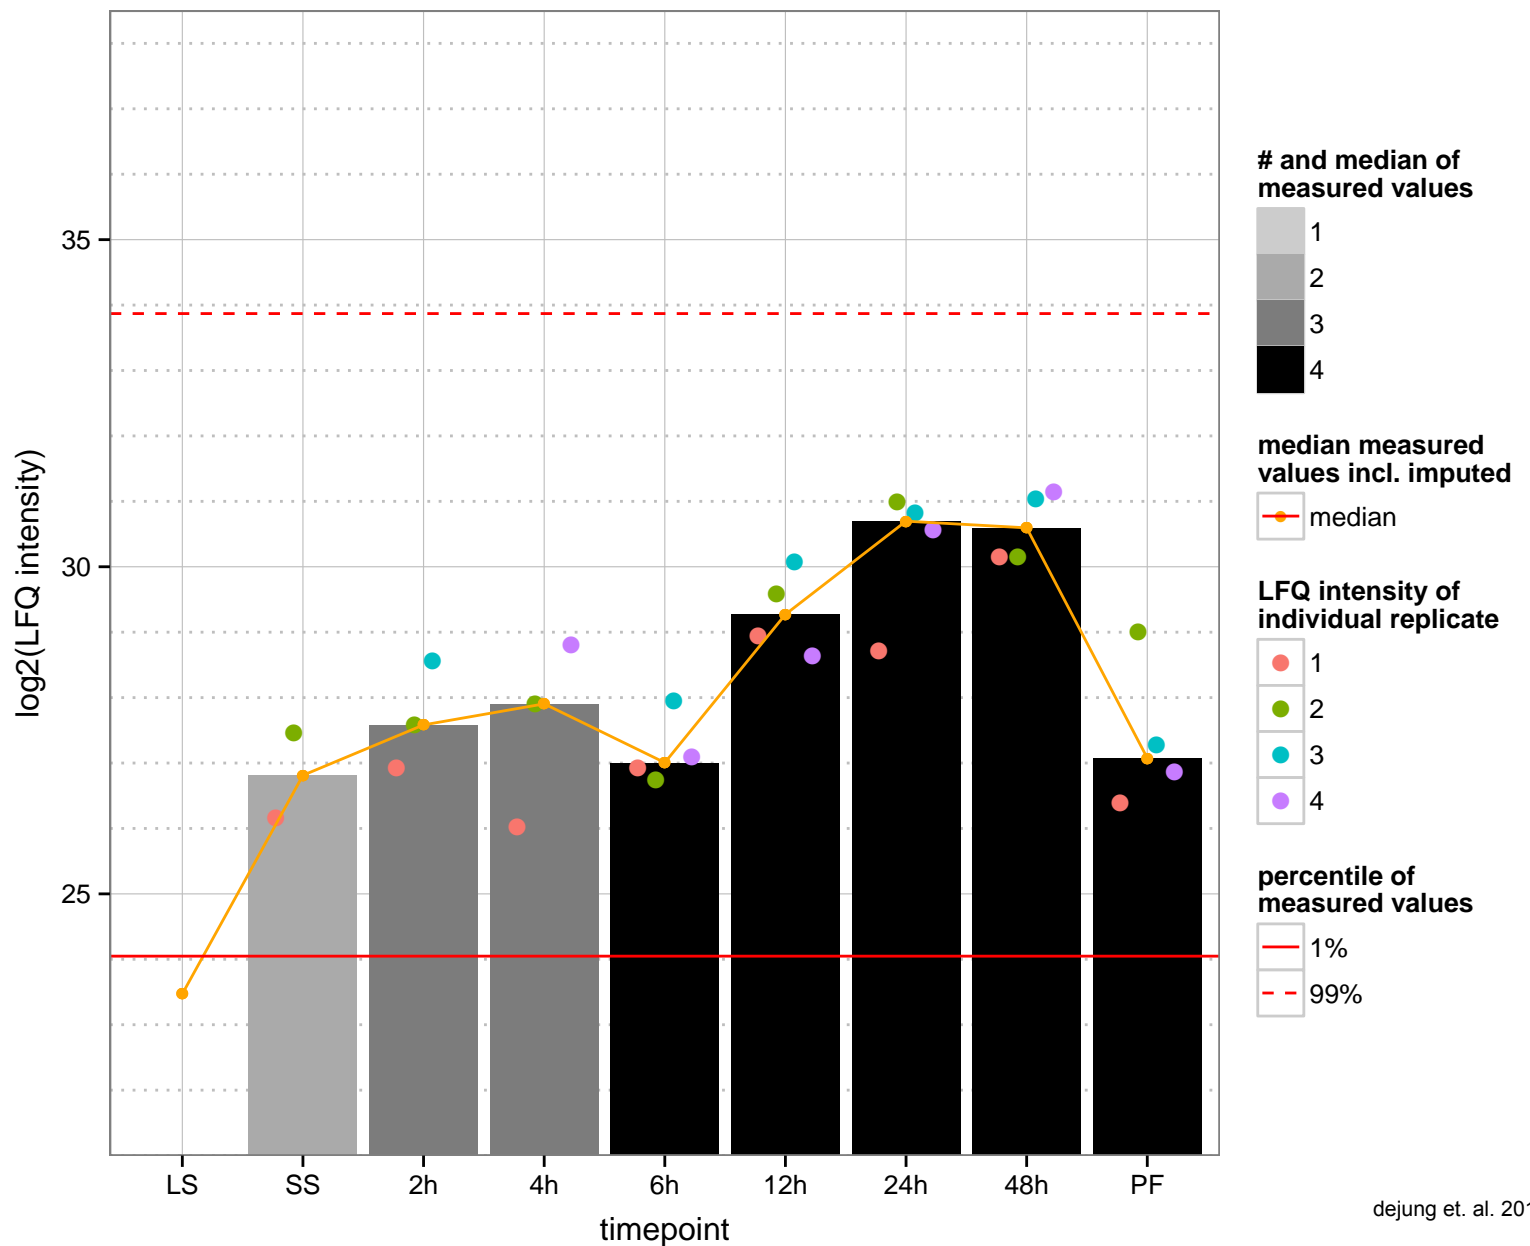

hypothetical protein, conserved  
 Tb927.8.4220  
 AGOF: null  
 AGOC: null  
 AGOP: null  
 PGO: null  
 PGOC: null  
 PGOP: null

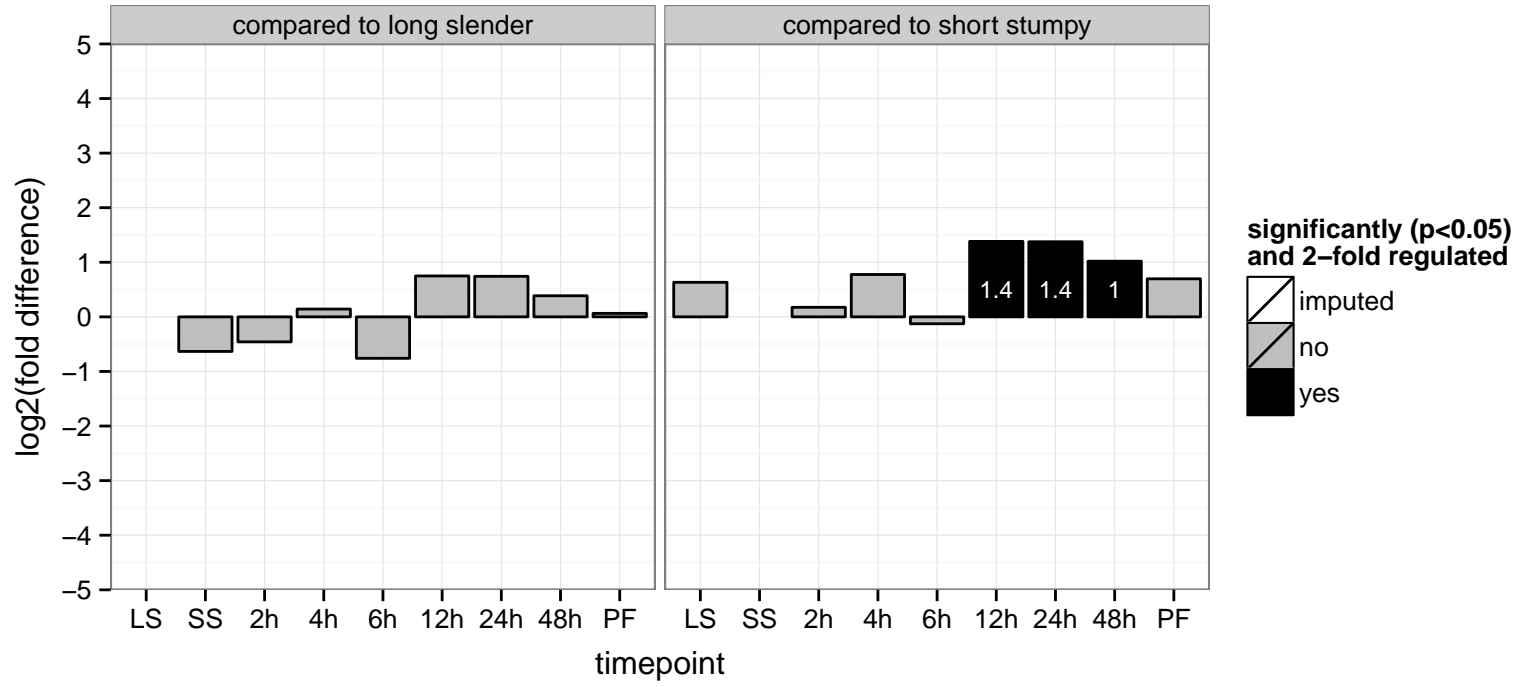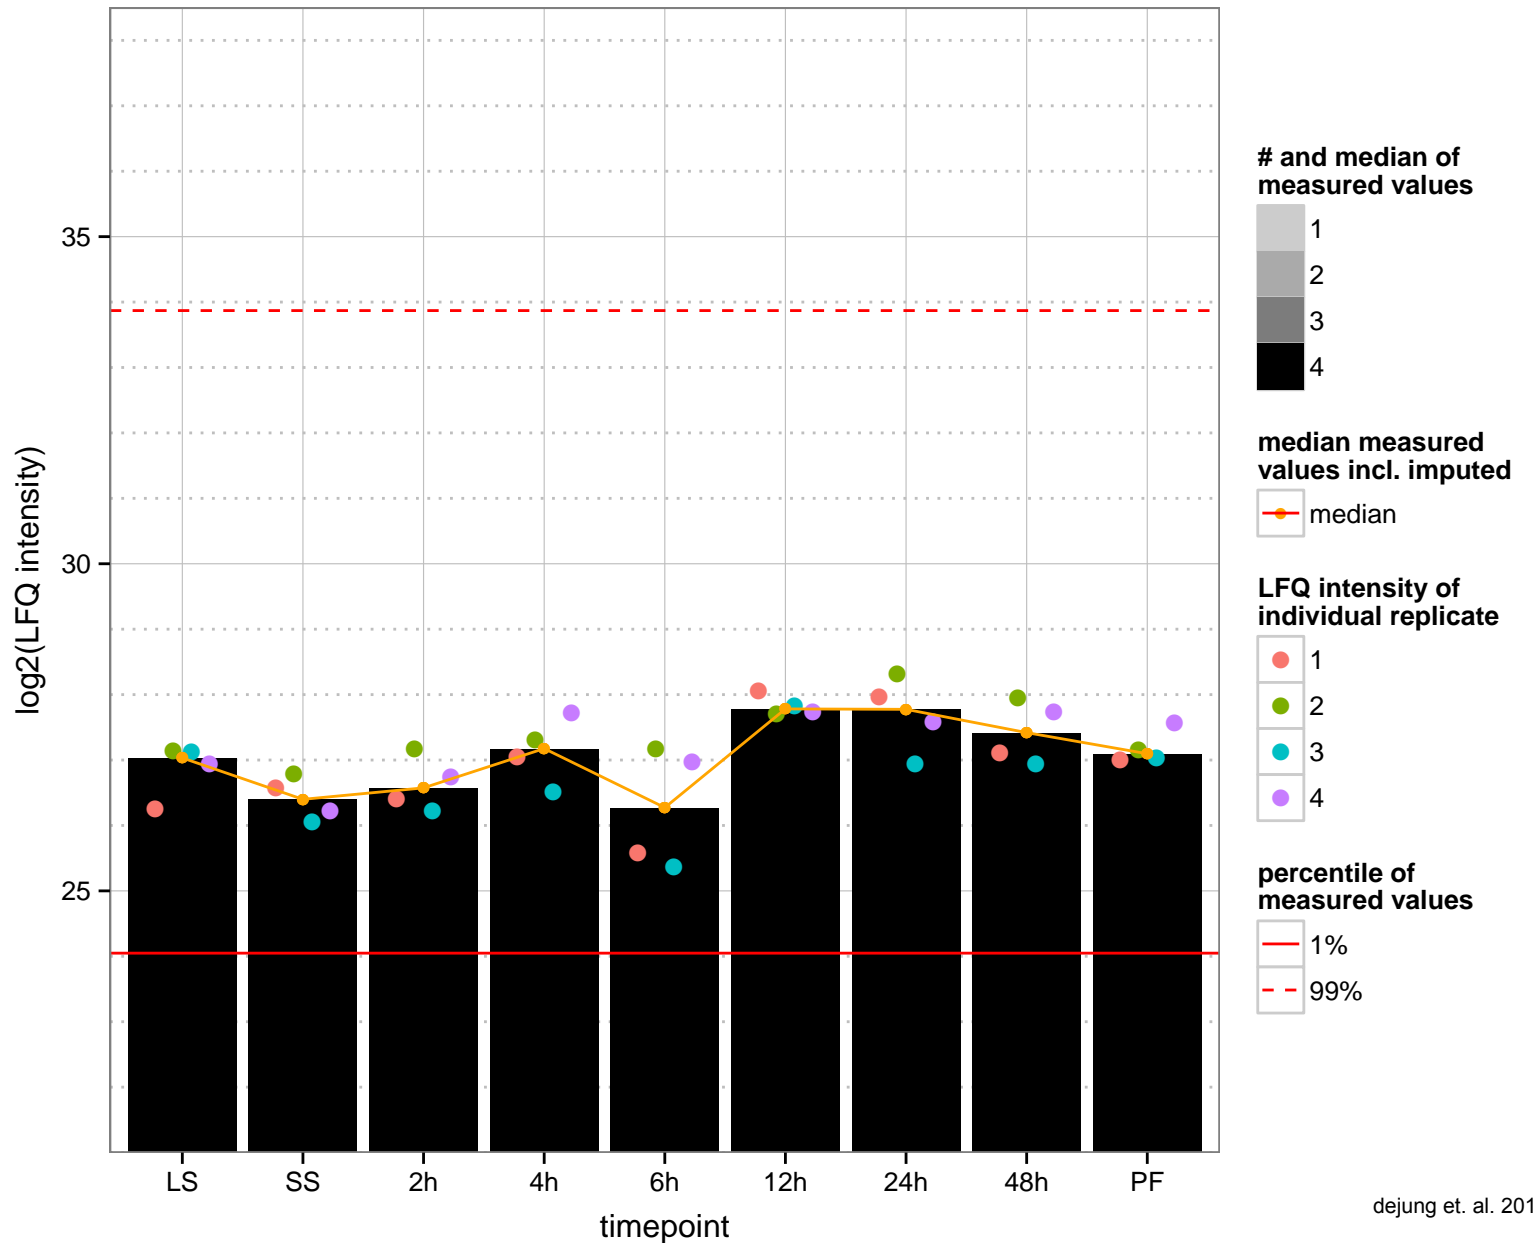

hypothetical protein, conserved  
 Tb927.8.5370  
 AGOF: null  
 AGOC: null  
 AGOP: null  
 PGOF: null  
 PGOC: null  
 PGOP: null

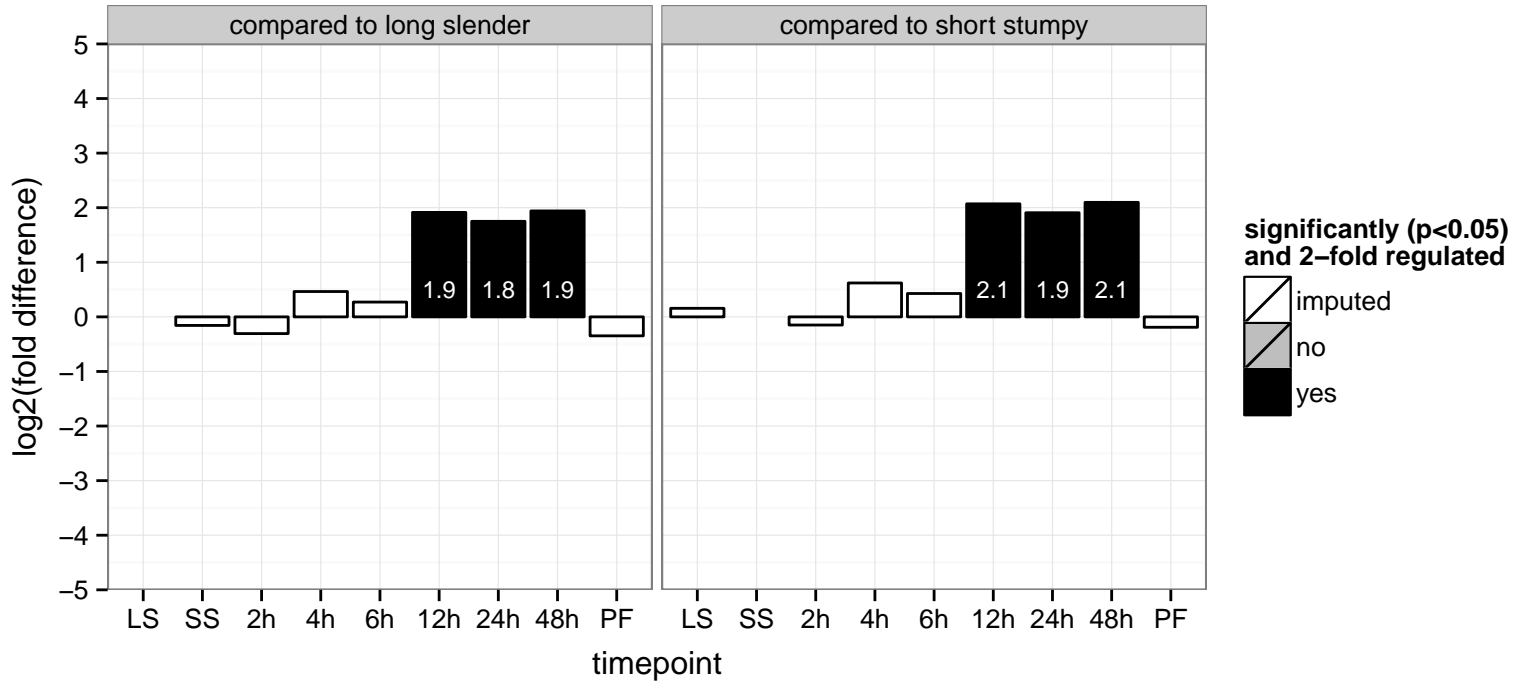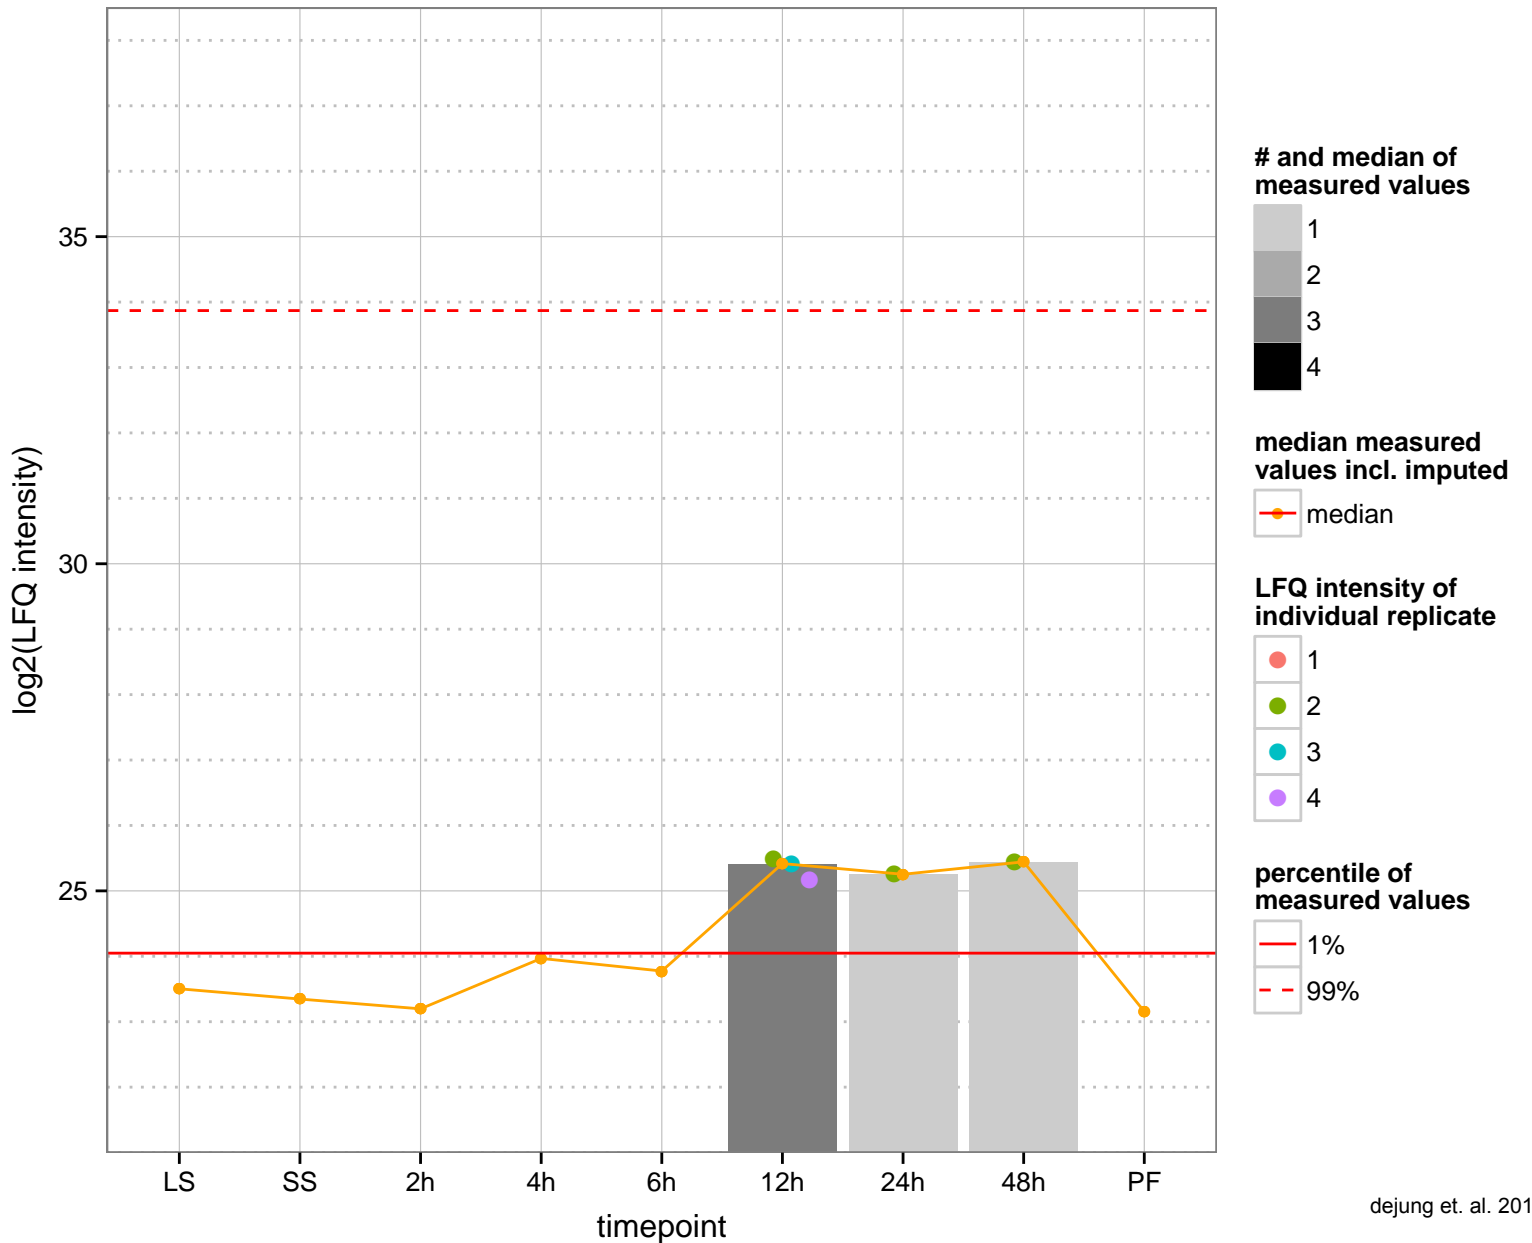

hypothetical protein, conserved

Tb927.8.5660

AGOF: null

AGOC: mitochondrial inner membrane, mitochondrial membrane, mitochondrion

AGOP: null

PGOF: null

PGOC: null

PGOP: null

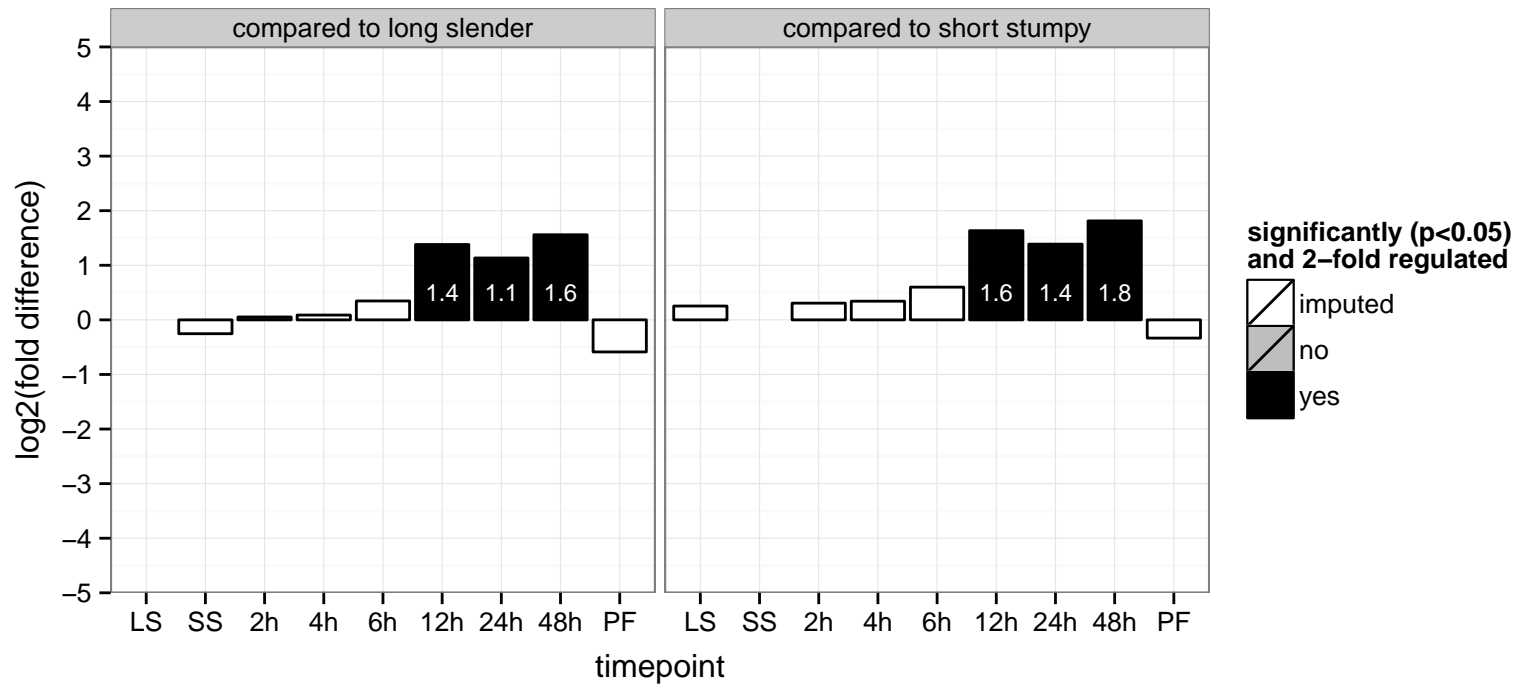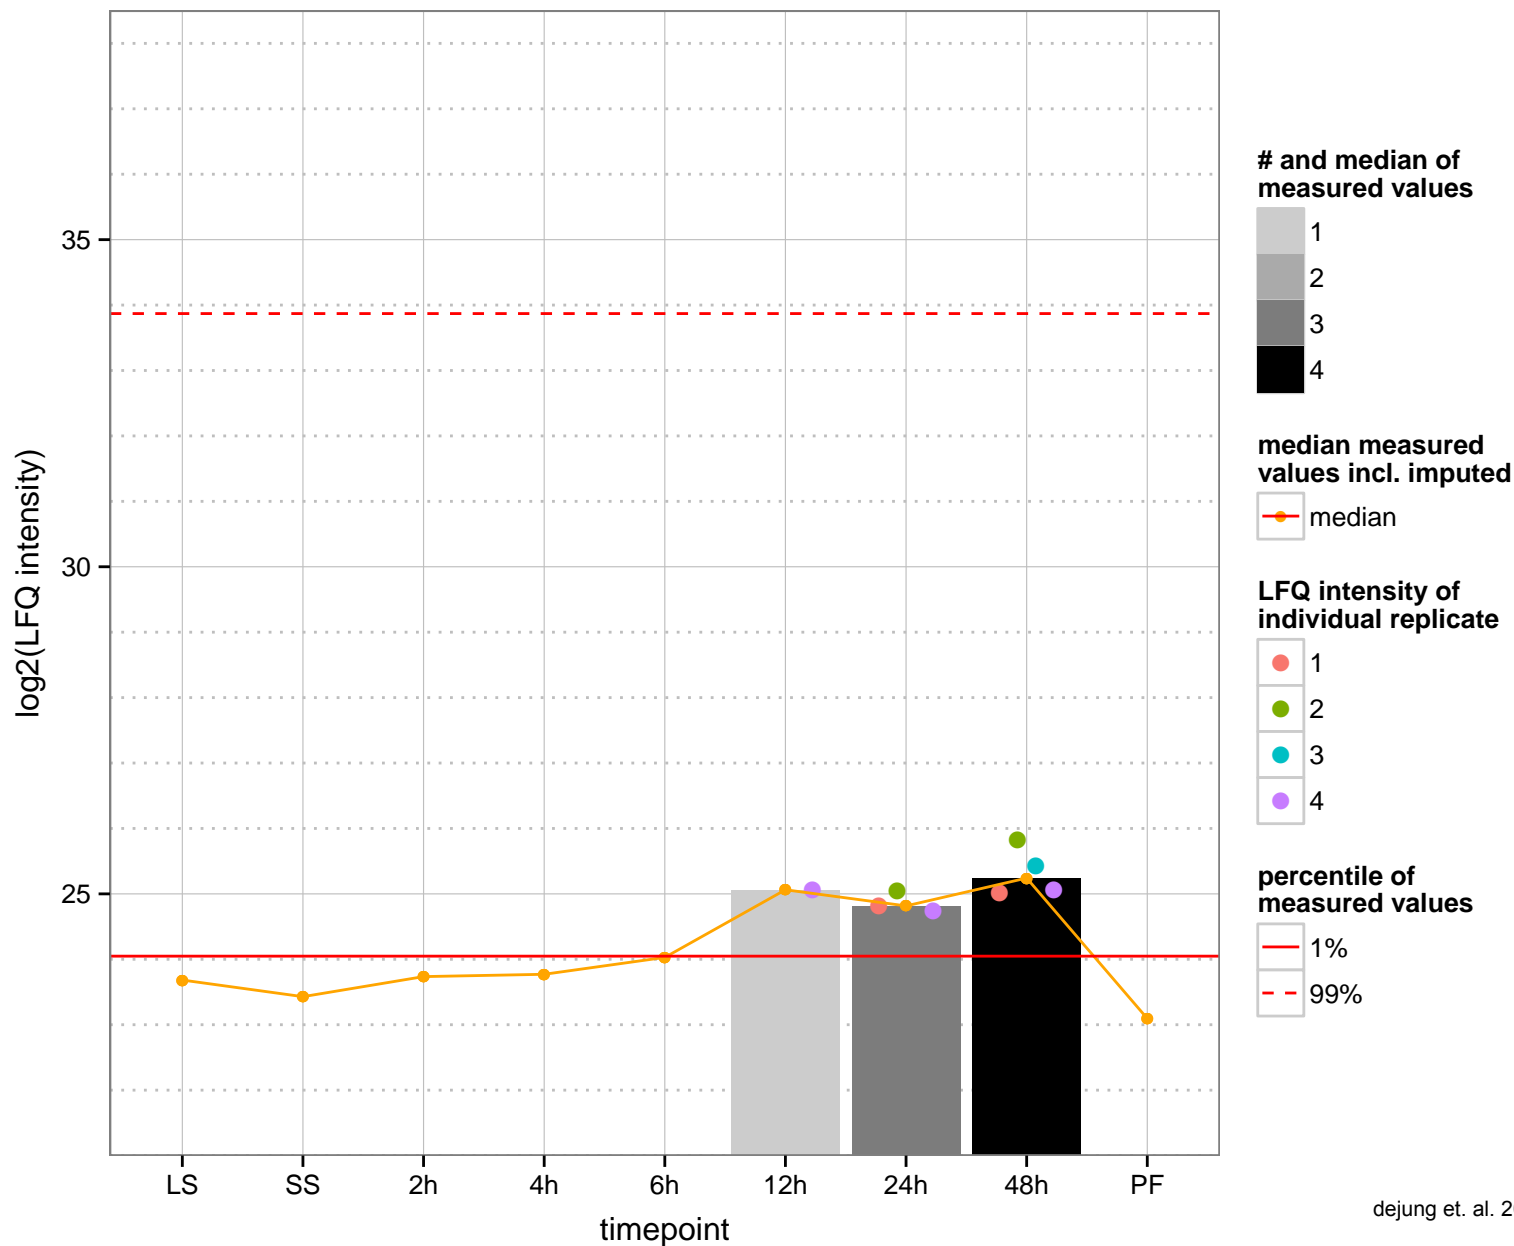

Elongator-like Protein 3a

Tb927.8.5770

AGOF: N-acetyltransferase activity, iron-sulfur cluster binding

AGOC: nucleolus

AGOP: null

PGOF: N-acetyltransferase activity, catalytic activity, iron-sulfur cluster binding

PGOC: null

PGOP: null

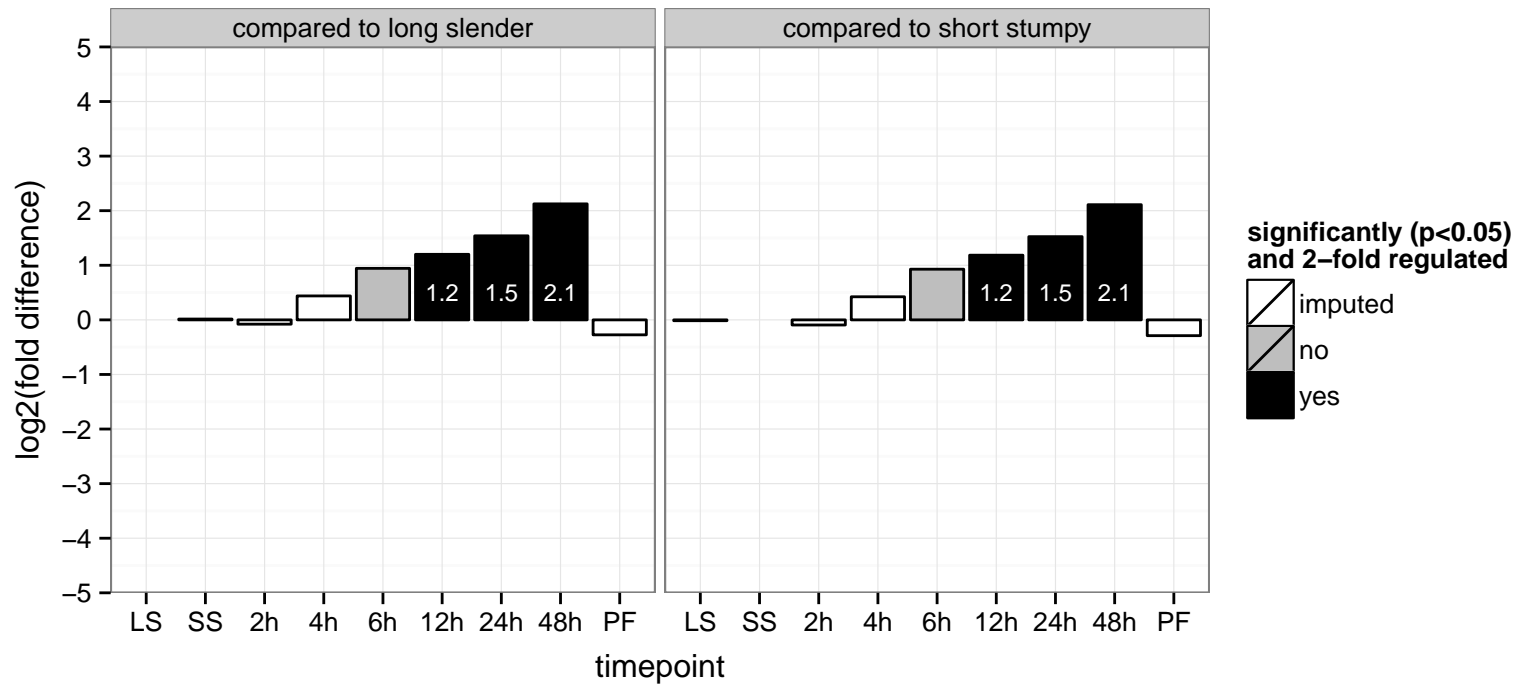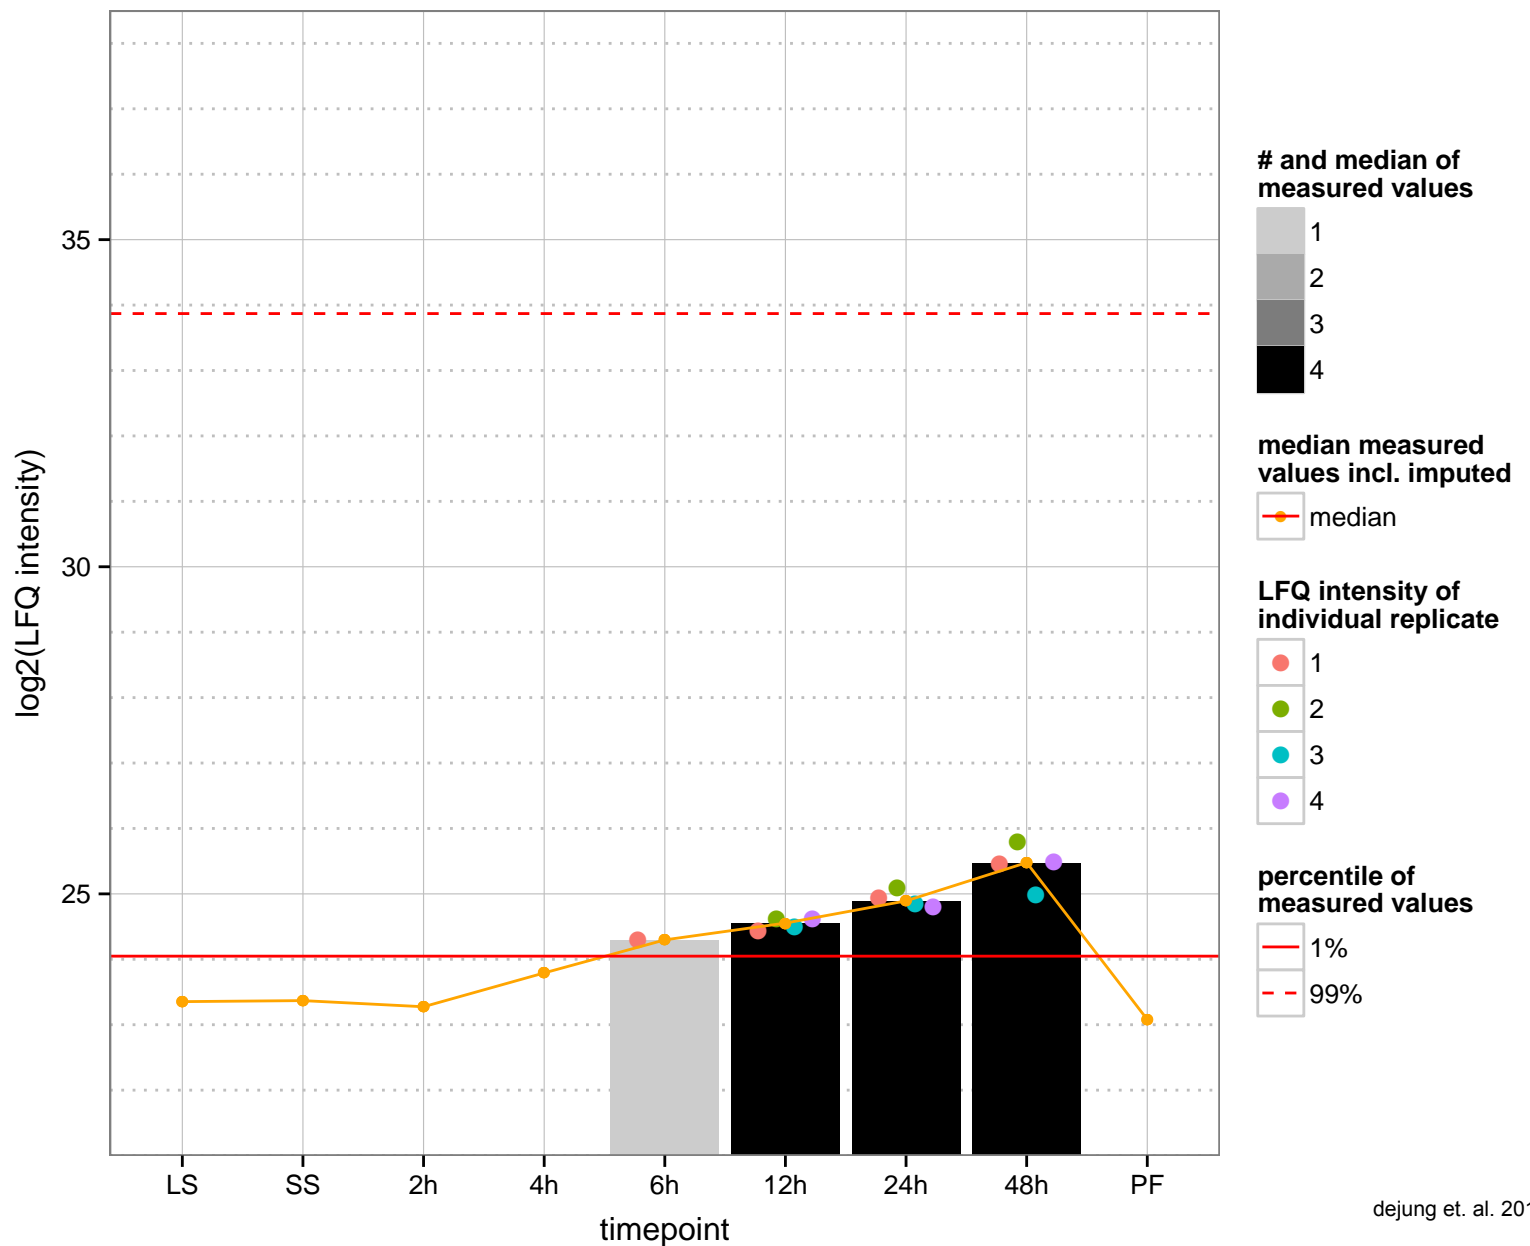

hypothetical protein, conserved  
 Tb927.8.6670  
 AGOF: null  
 AGOC: null  
 AGOP: null  
 PGOF: null  
 PGO C: null  
 PGOP: null

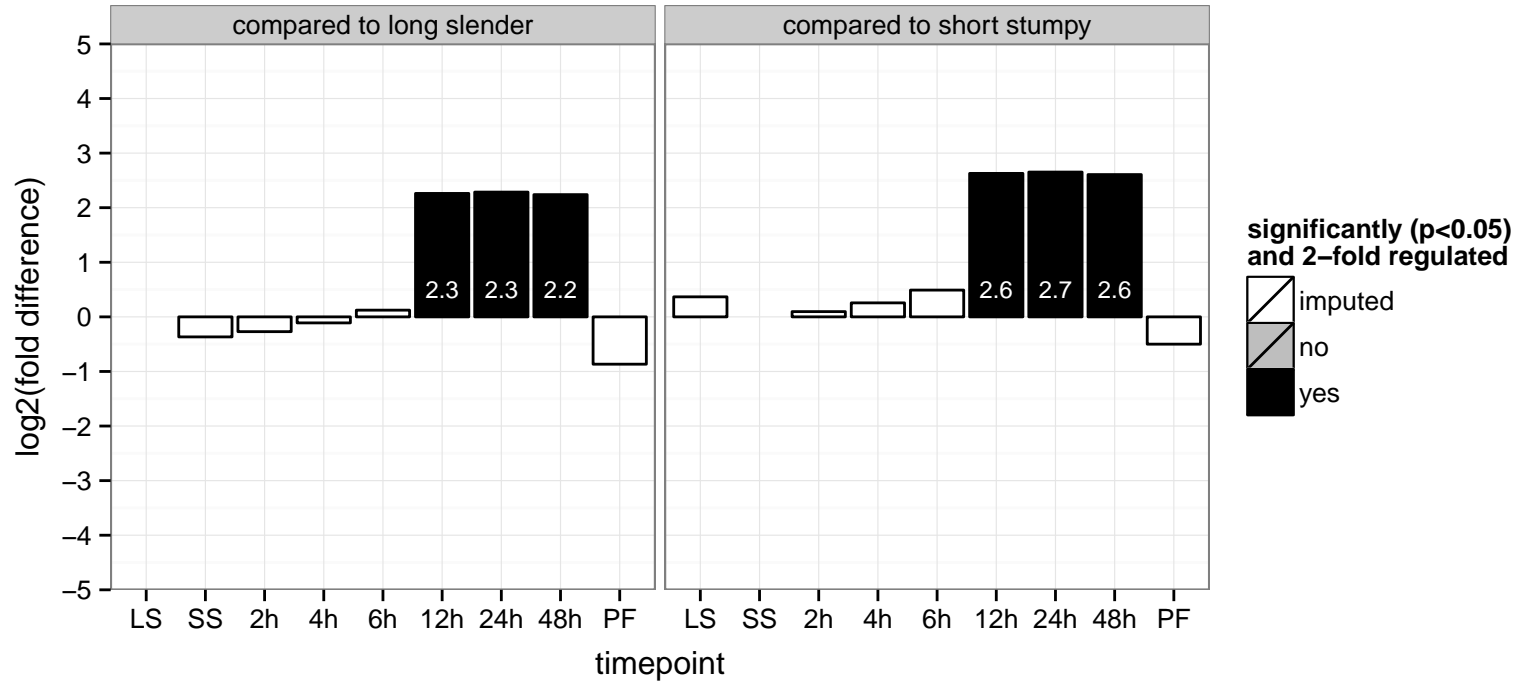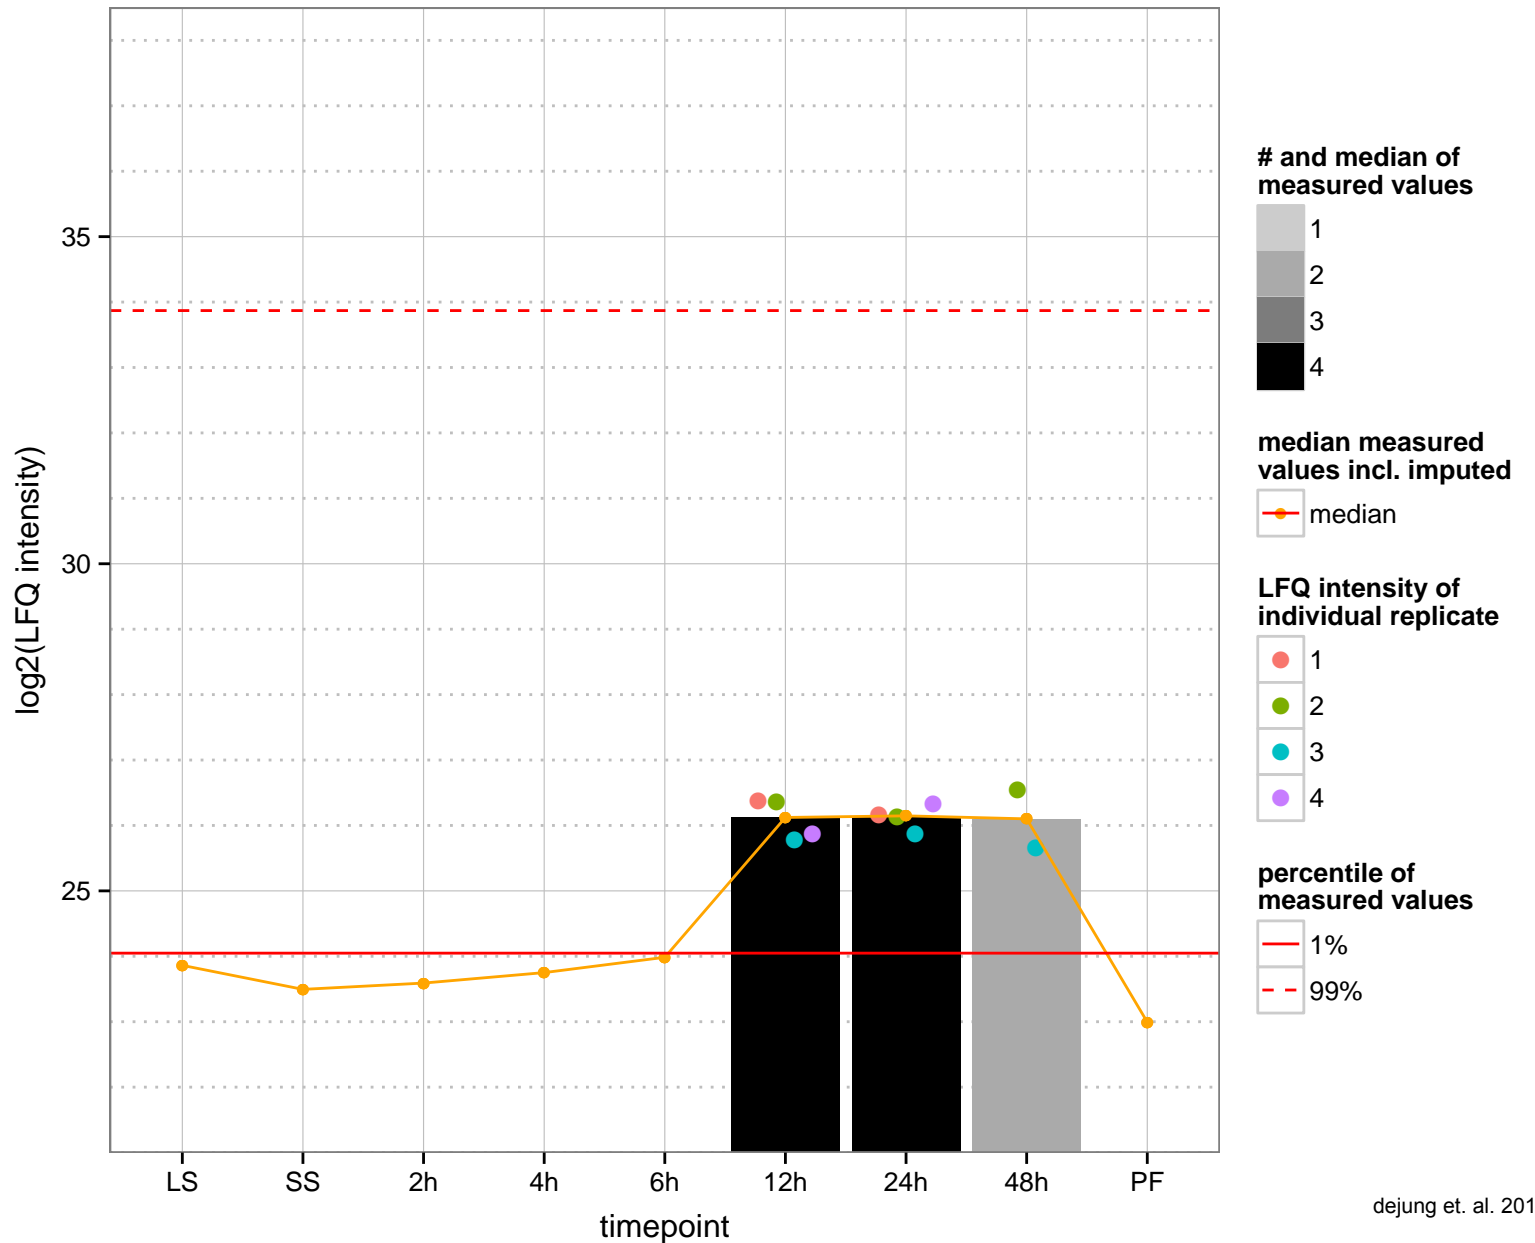

hypothetical protein, conserved  
 Tb927.8.6850  
 AGOF: calcium ion binding, zinc ion binding  
 AGOC: null  
 AGOP: null  
 PGOF: calcium ion binding, protein binding, zinc ion binding  
 PGOC: null  
 PGOP: null

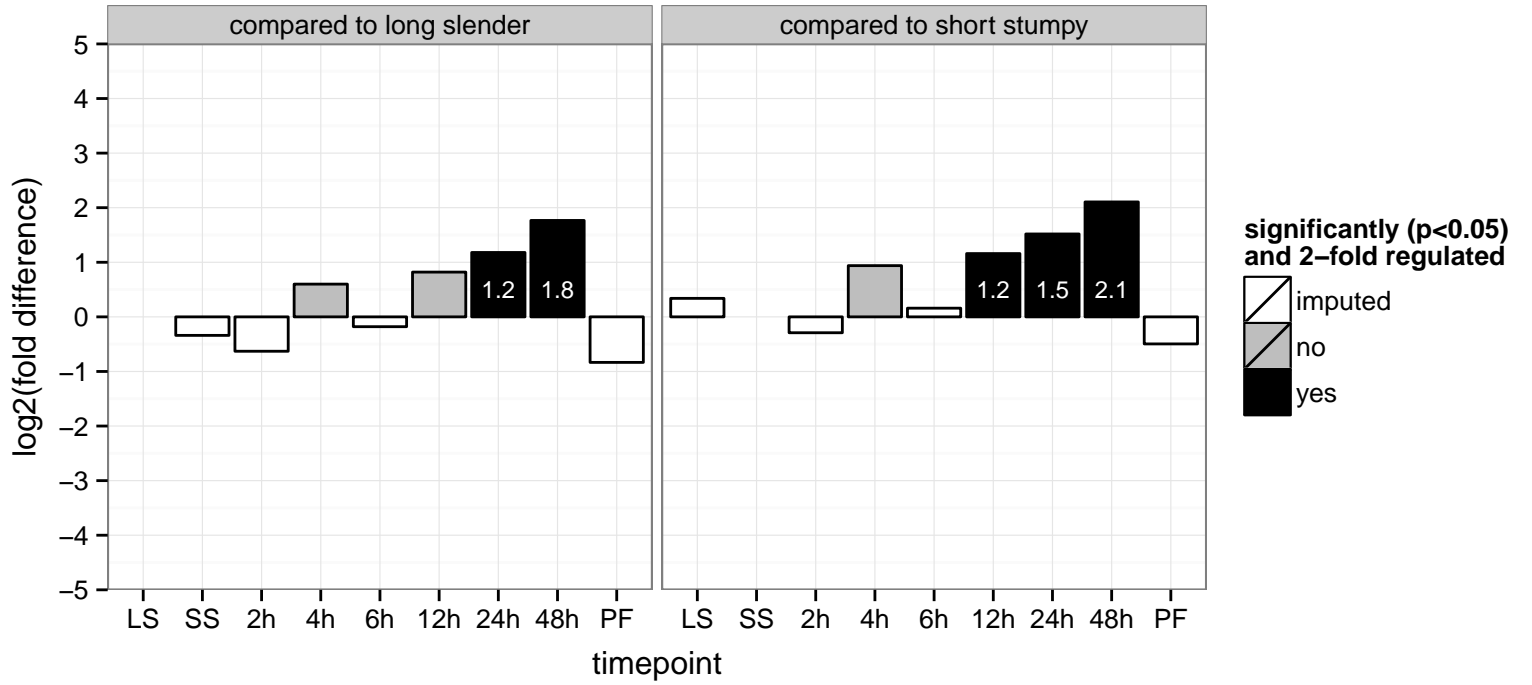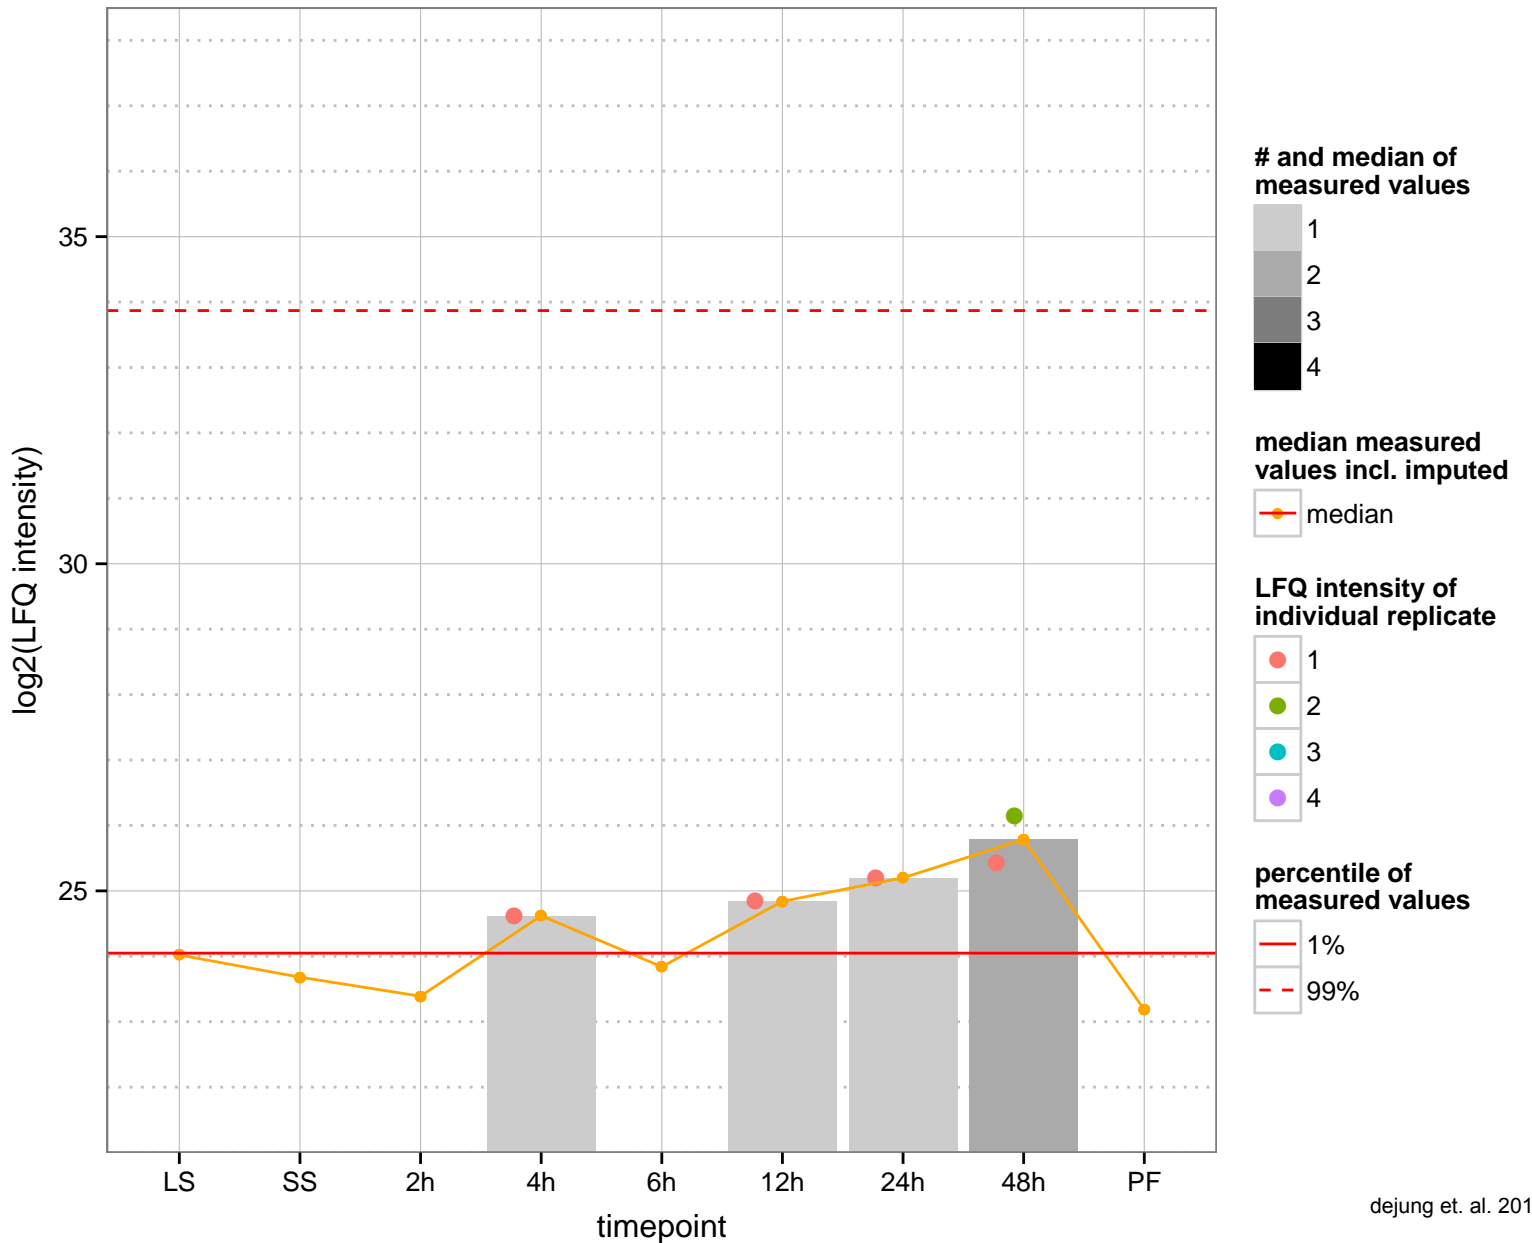



hypothetical protein, conserved  
 Tb927.9.12800  
 AGOF: null  
 AGOC: null  
 AGOP: null  
 PGO: null  
 PGOC: null  
 PGOP: null

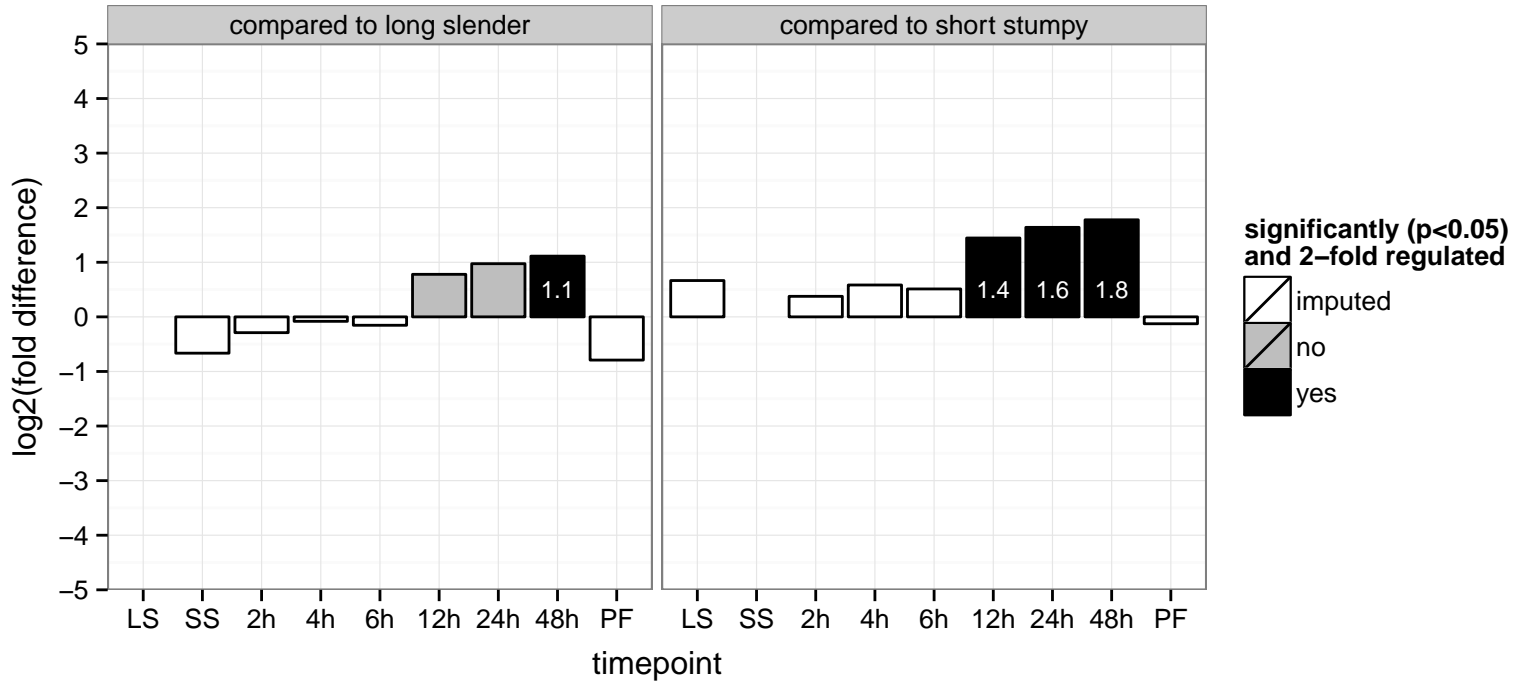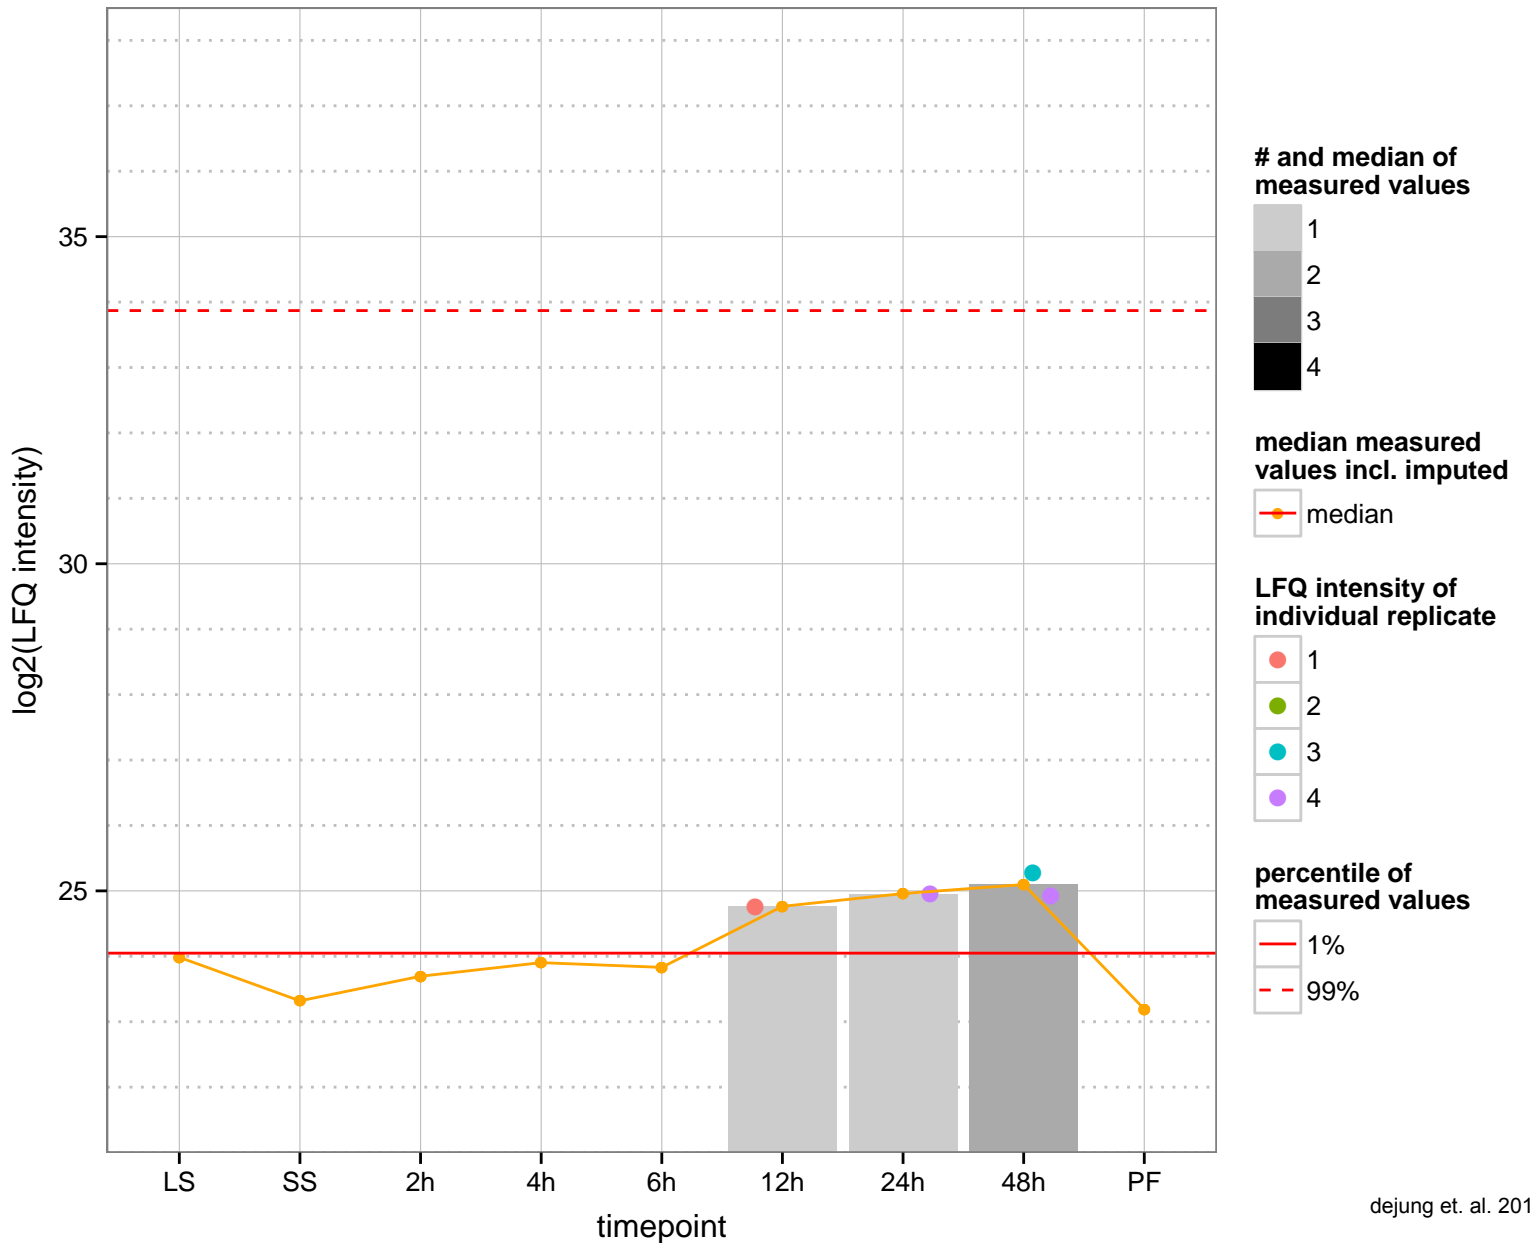

calcium motive p-type ATPase, putative

Tb927.9.15460

AGOF: ATP binding, ATPase activity, coupled to transmembrane movement of ions, phosphorylative mechanism, calcium-transport

AGOC: integral to membrane, plasma membrane

AGOP: ATP biosynthetic process, cation transport, metabolic process

PGOF: ATP binding, ATPase activity, coupled to transmembrane movement of ions, phosphorylative mechanism, catalytic activity

PGOC: membrane

PGOP: cation transport, metabolic process

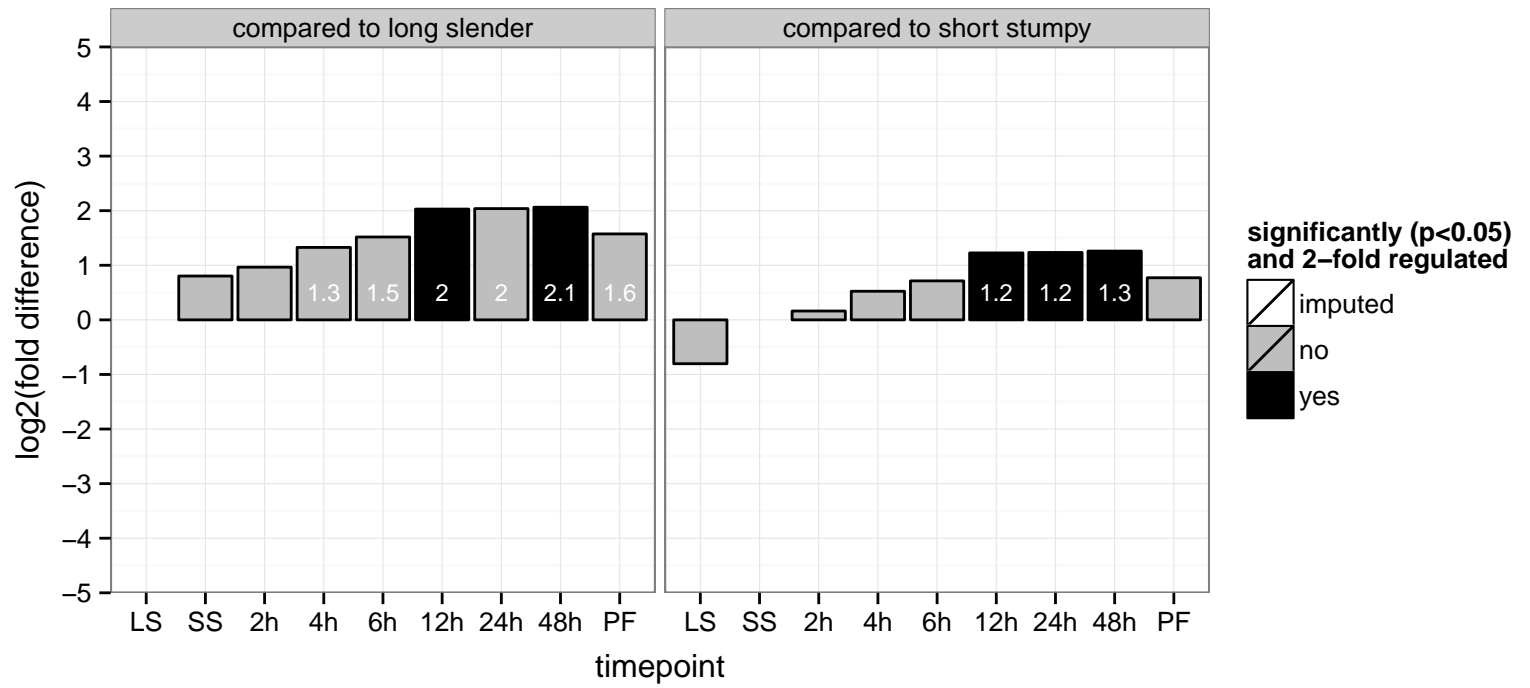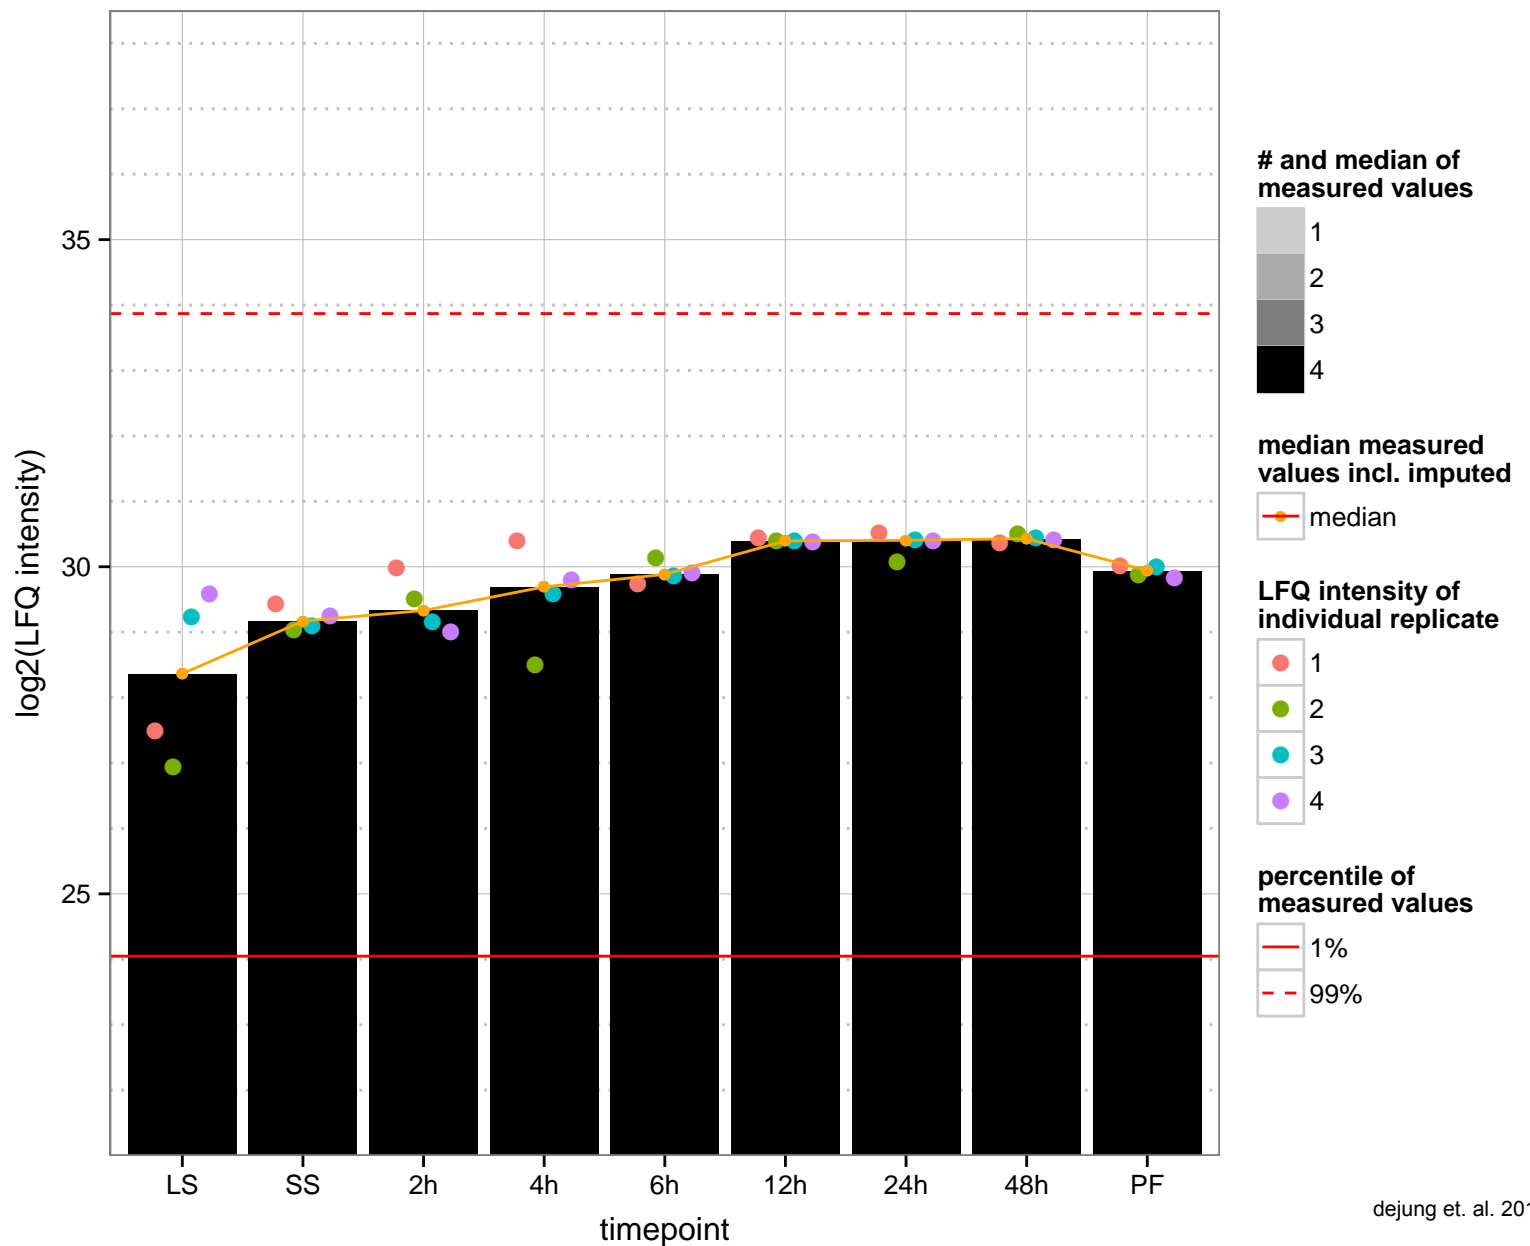

hypothetical protein, conserved

Tb927.9.6650

AGOF: ATP binding, alanine-tRNA ligase activity, nucleic acid binding

AGOC: cytoplasm

AGOP: alanyl-tRNA aminoacylation, translation

PGOF: ATP binding, alanine-tRNA ligase activity, ligase activity, forming aminoacyl-tRNA and related compounds, nucleic acid binding

PGOC: cytoplasm

PGOP: alanyl-tRNA aminoacylation, tRNA aminoacylation

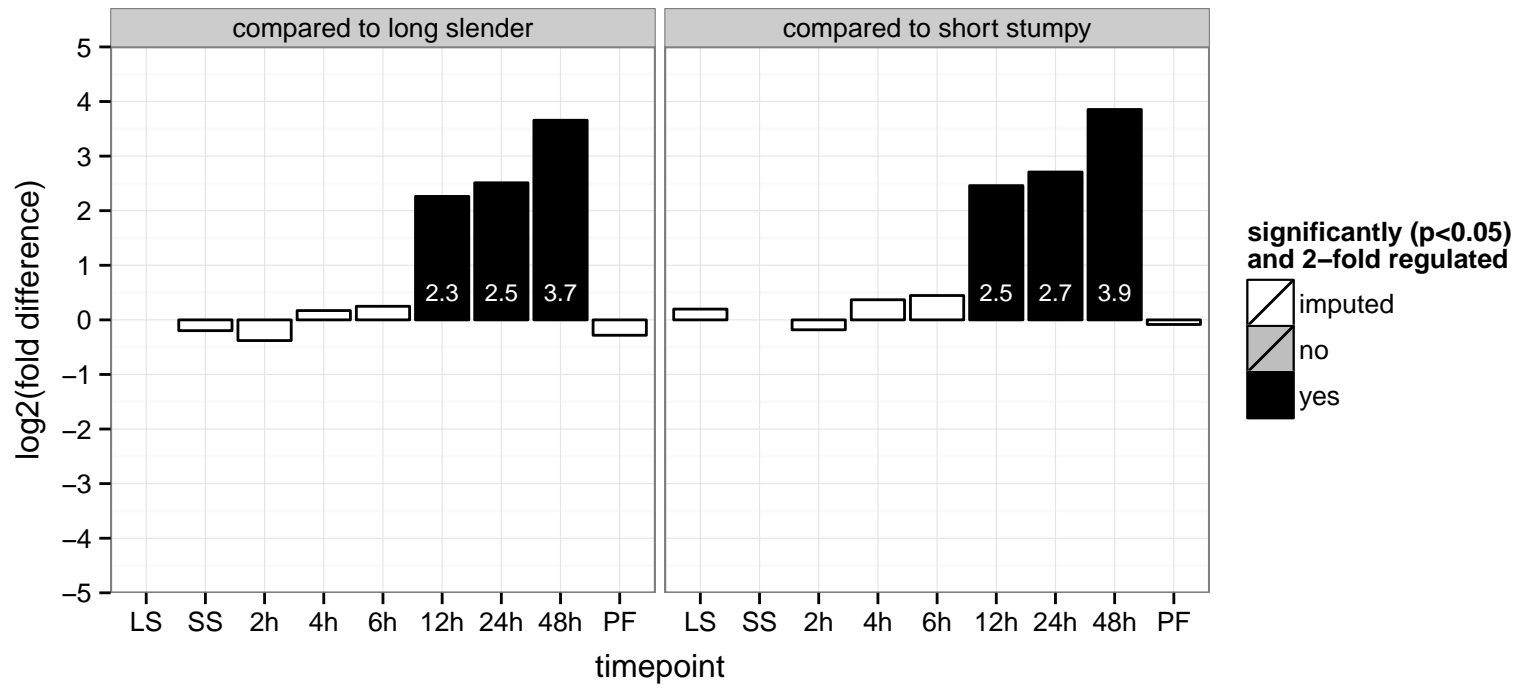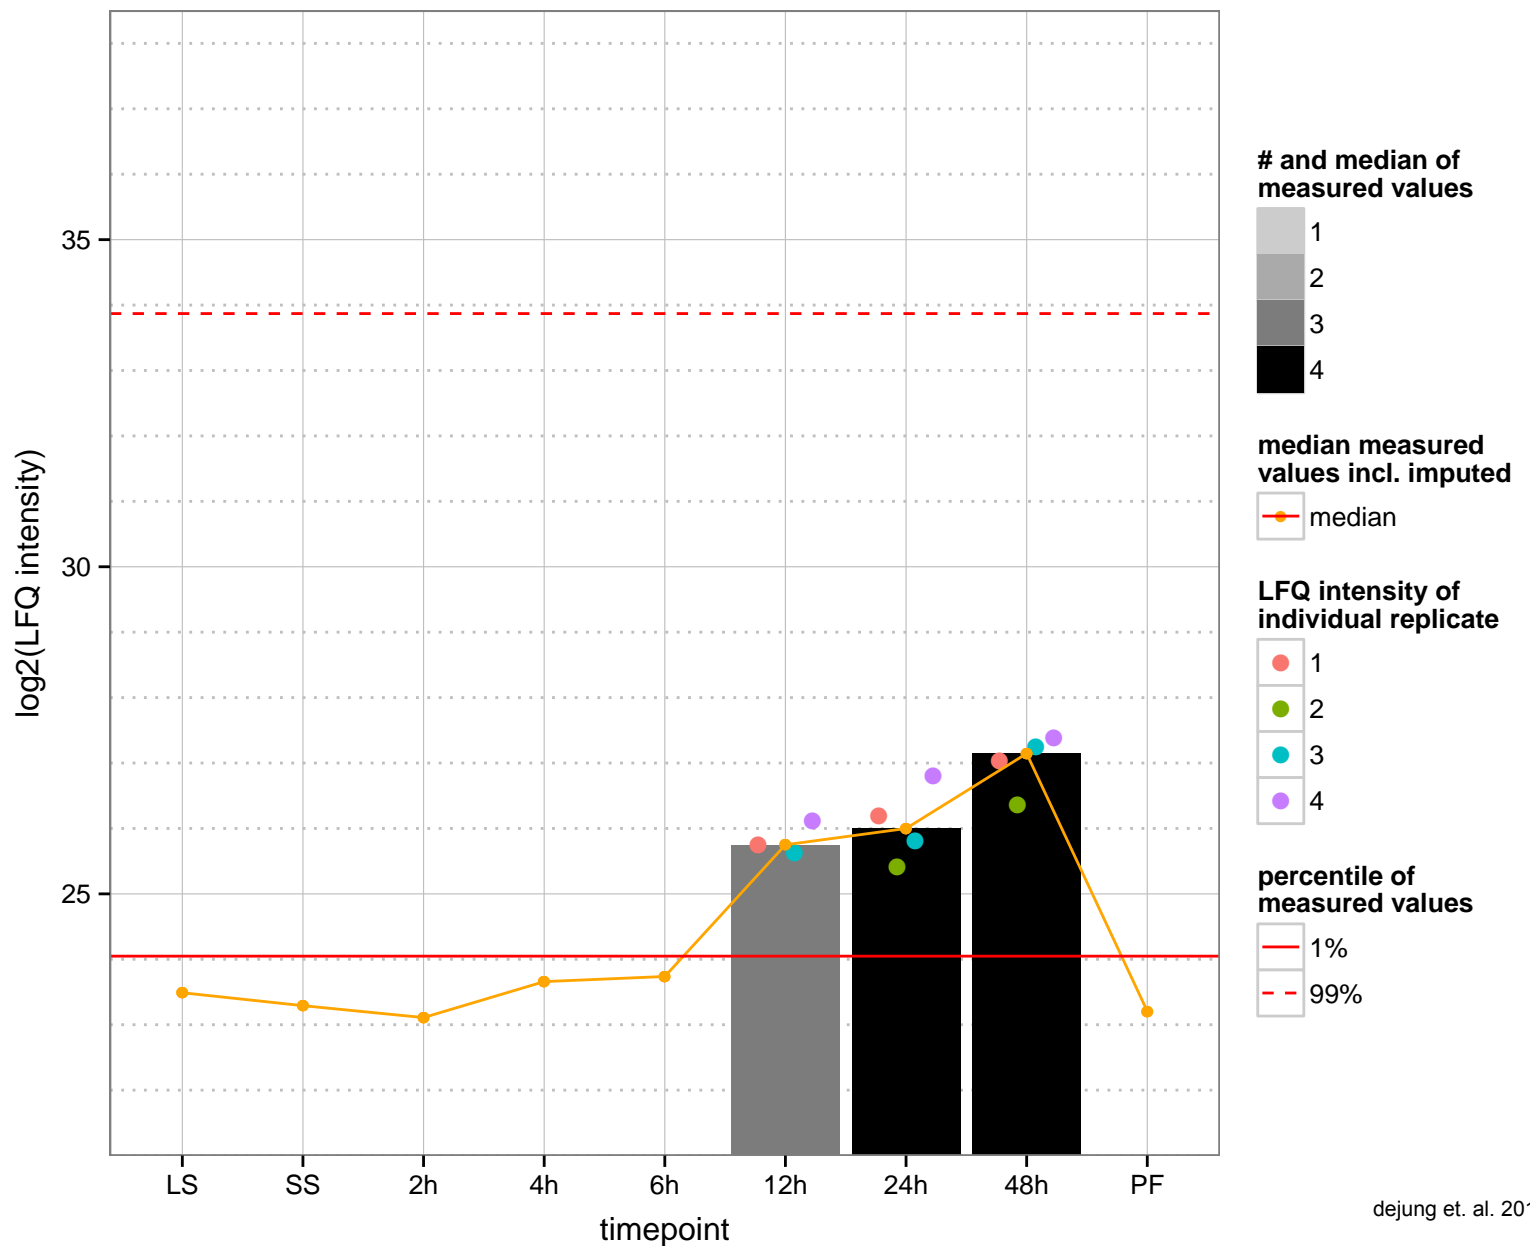

hypothetical protein, conserved  
 Tb927.9.6720  
 AGOF: null  
 AGOC: null  
 AGOP: null  
 PGOF: null  
 PGO C: null  
 PGOP: null

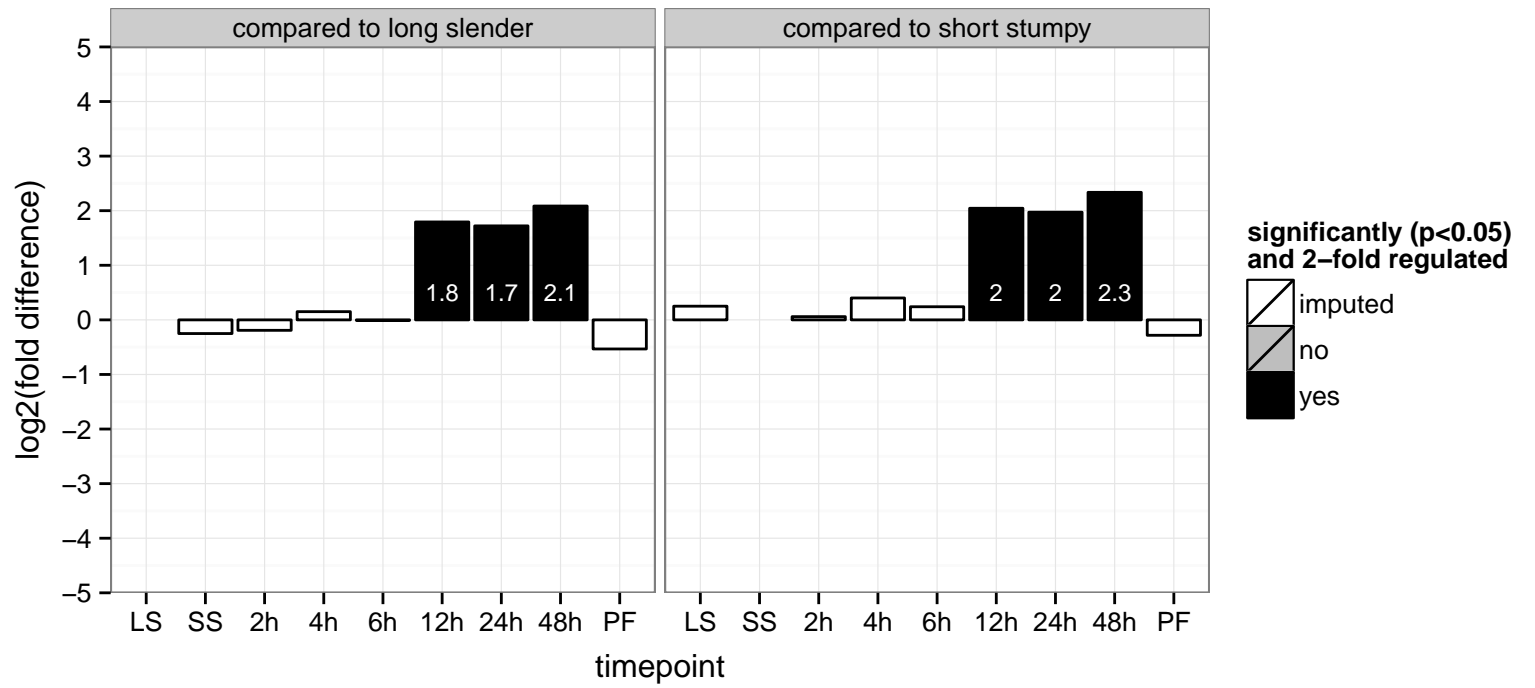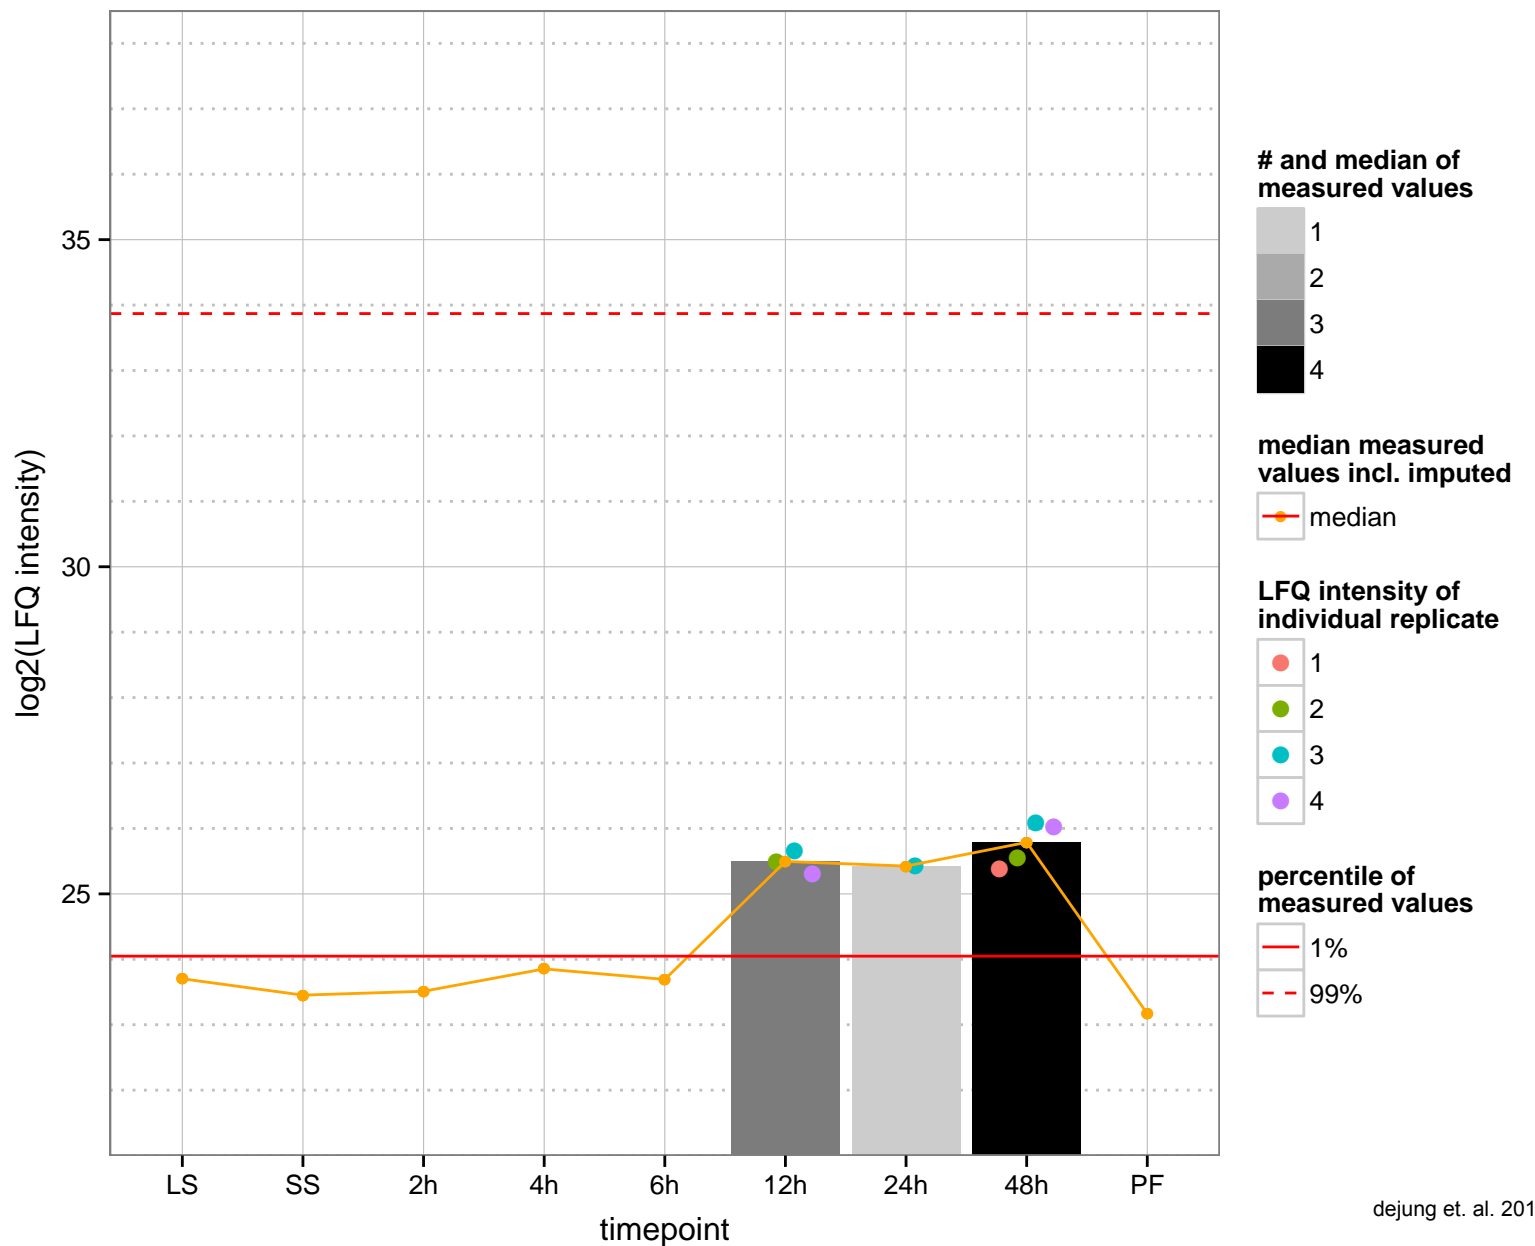

cytochrome c oxidase assembly factor, putative

Tb927.9.8680

AGOF: copper ion binding

AGOC: mitochondrial inner membrane, mitochondrion

AGOP: cellular copper ion homeostasis, copper ion transport, oxidation–reduction process, respiratory chain complex IV asse

PGOF: copper ion binding

PGOC: mitochondrial inner membrane

PGOP: cellular copper ion homeostasis, copper ion transport, respiratory chain complex IV assembly

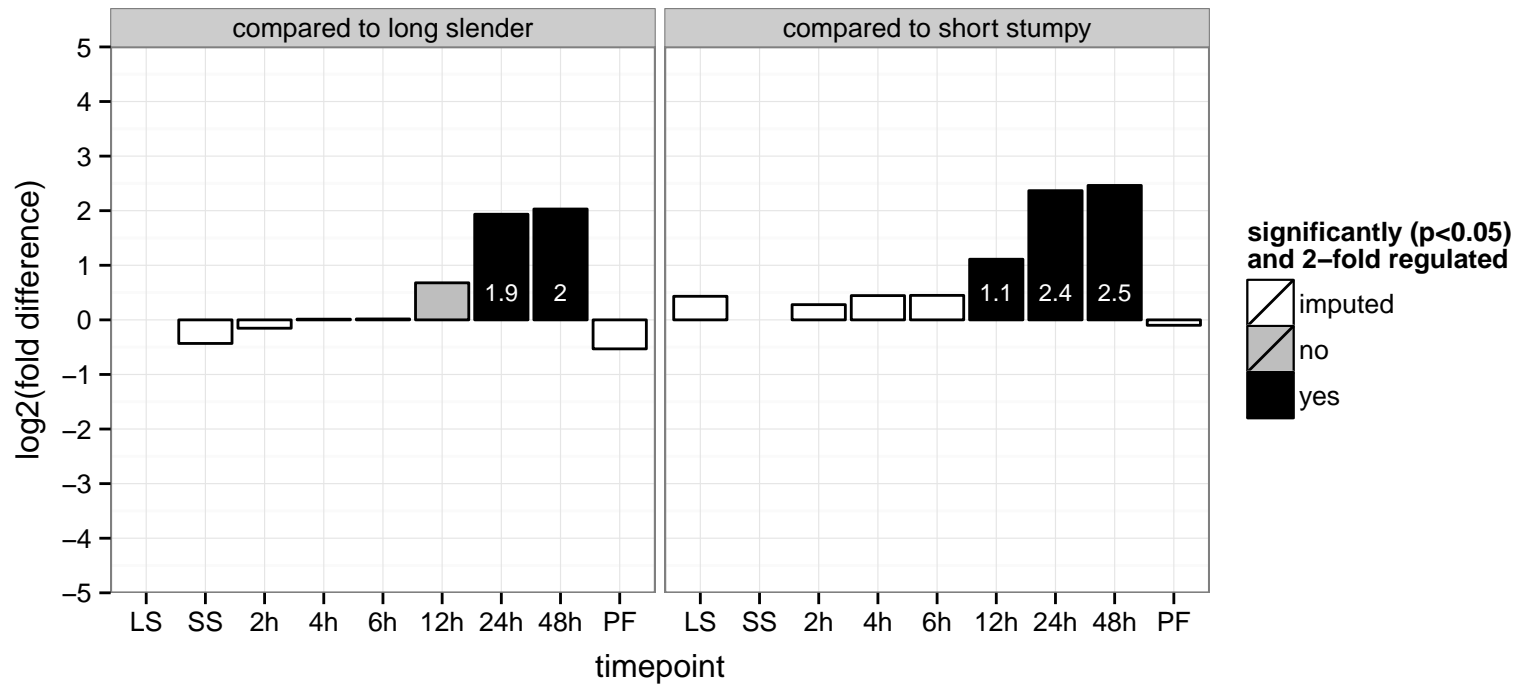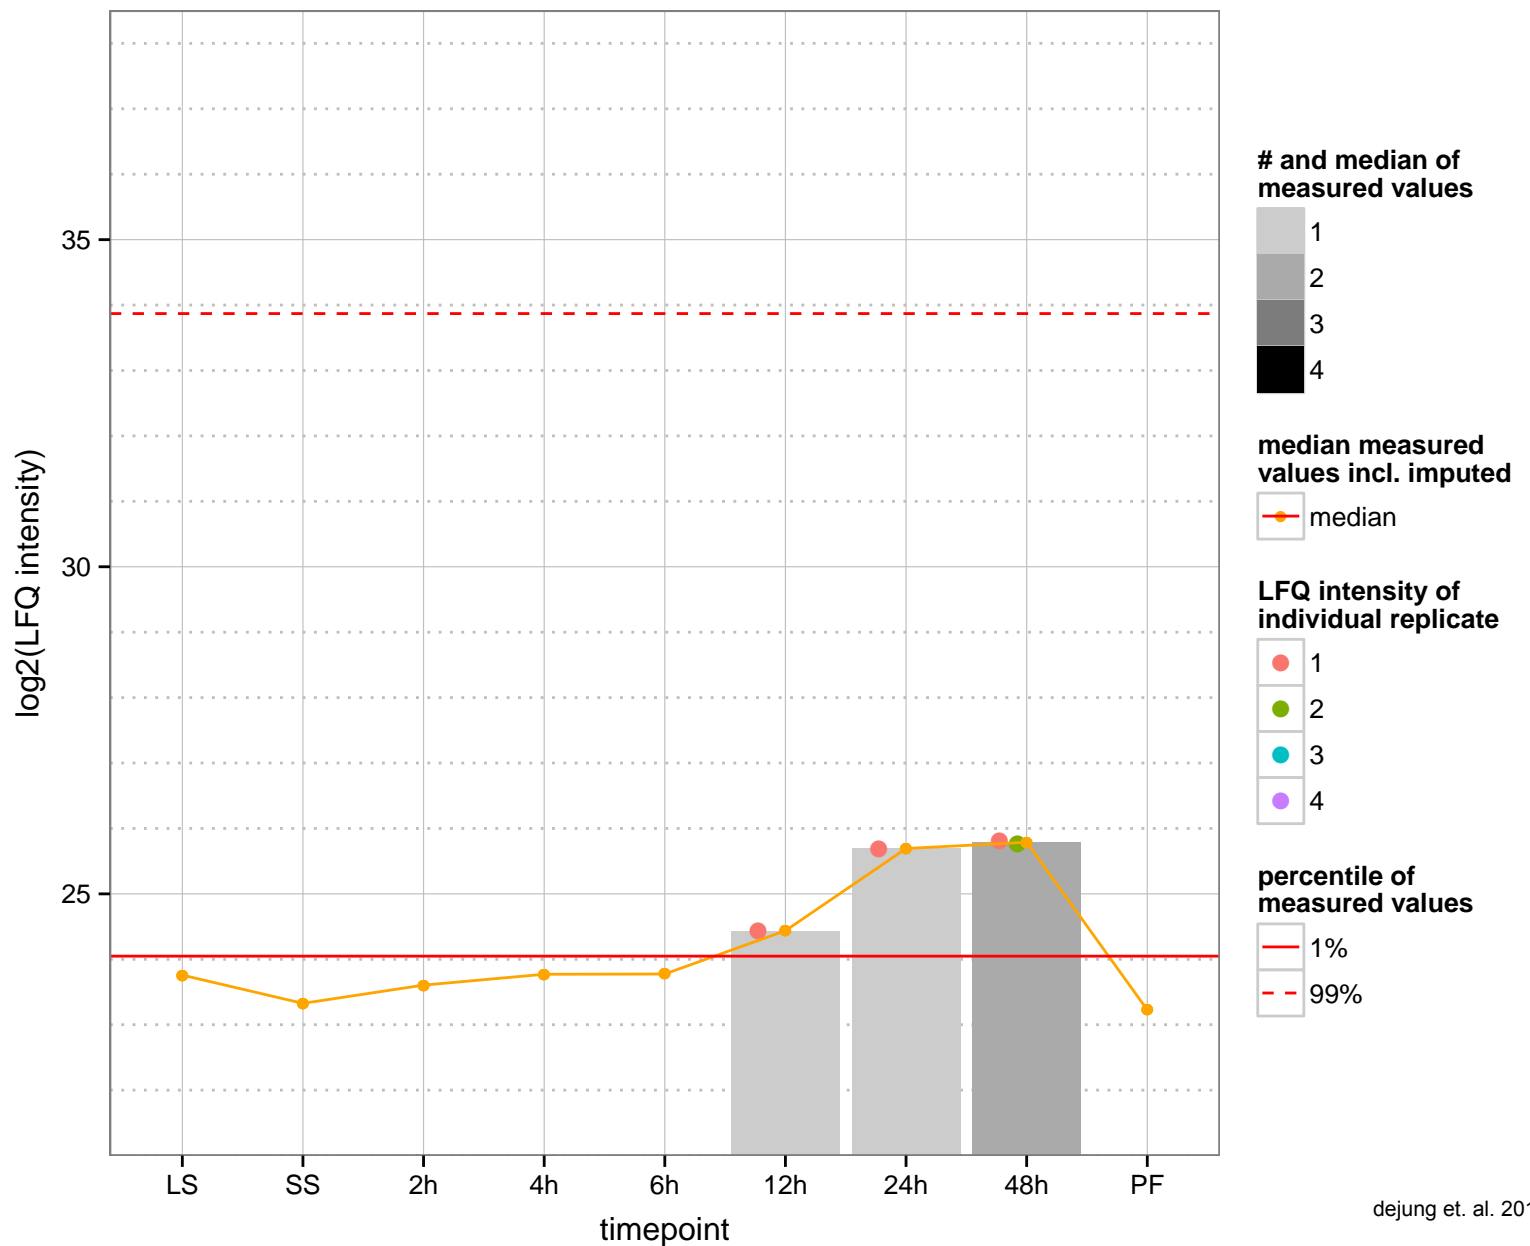

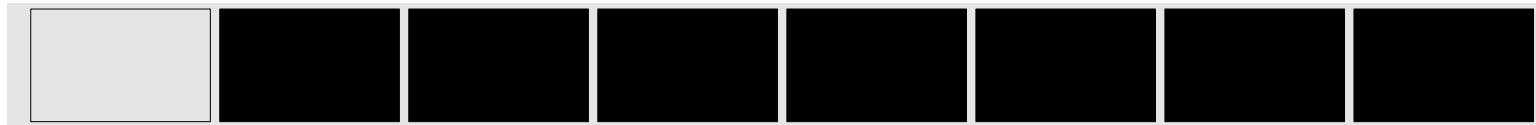

SS

2h

4h

6h

12h

24h

48h

PF

timepoint

**regulated**

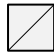

not regulated

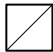

significant down

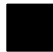

significant up

NA, cystathionine beta-synthase, putative  
 Tb11.02.5400b;Tb11.02.5400  
 AGOF: NA, cystathionine beta-synthase activity, pyridoxal phosphate binding  
 AGOC: NA, null  
 AGOP: NA, cysteine biosynthetic process  
 PGO: NA, catalytic activity, pyridoxal phosphate binding  
 PGO: NA, null  
 PGO: NA, metabolic process

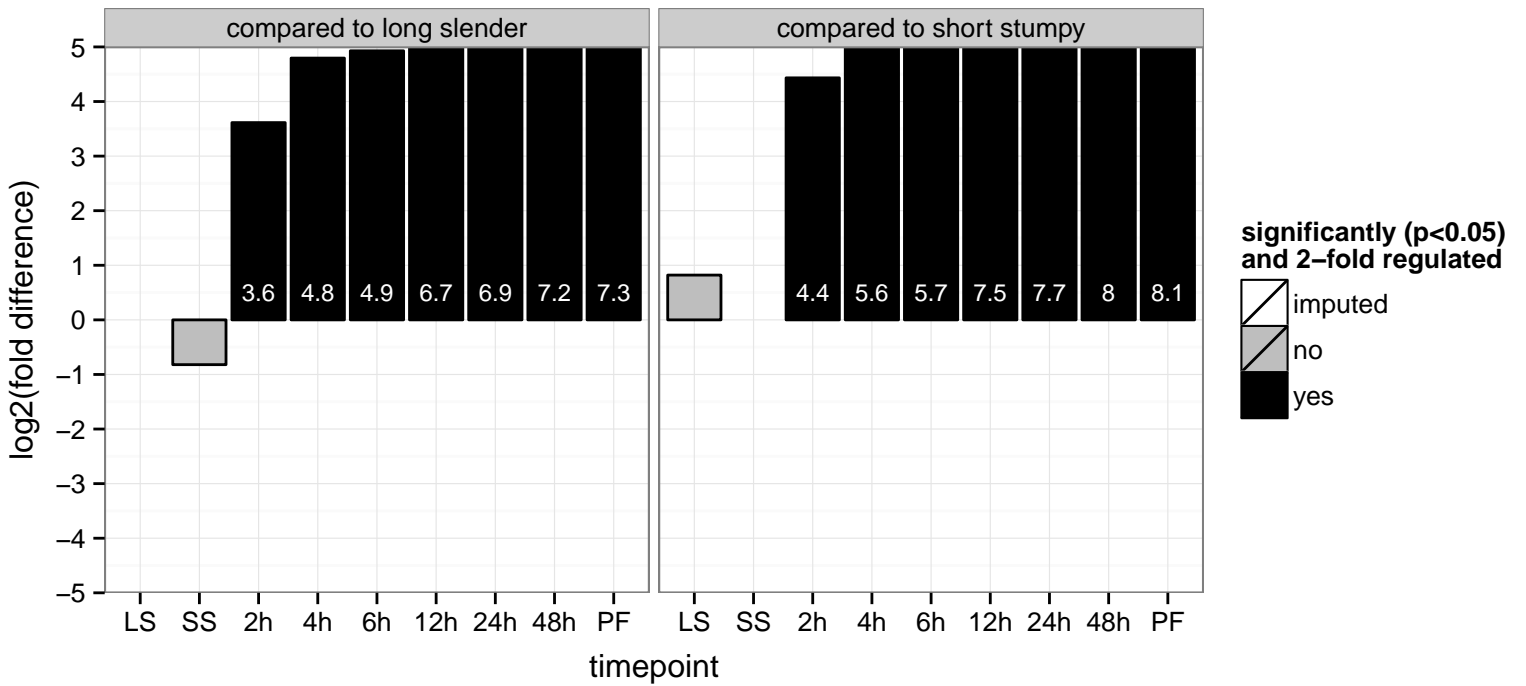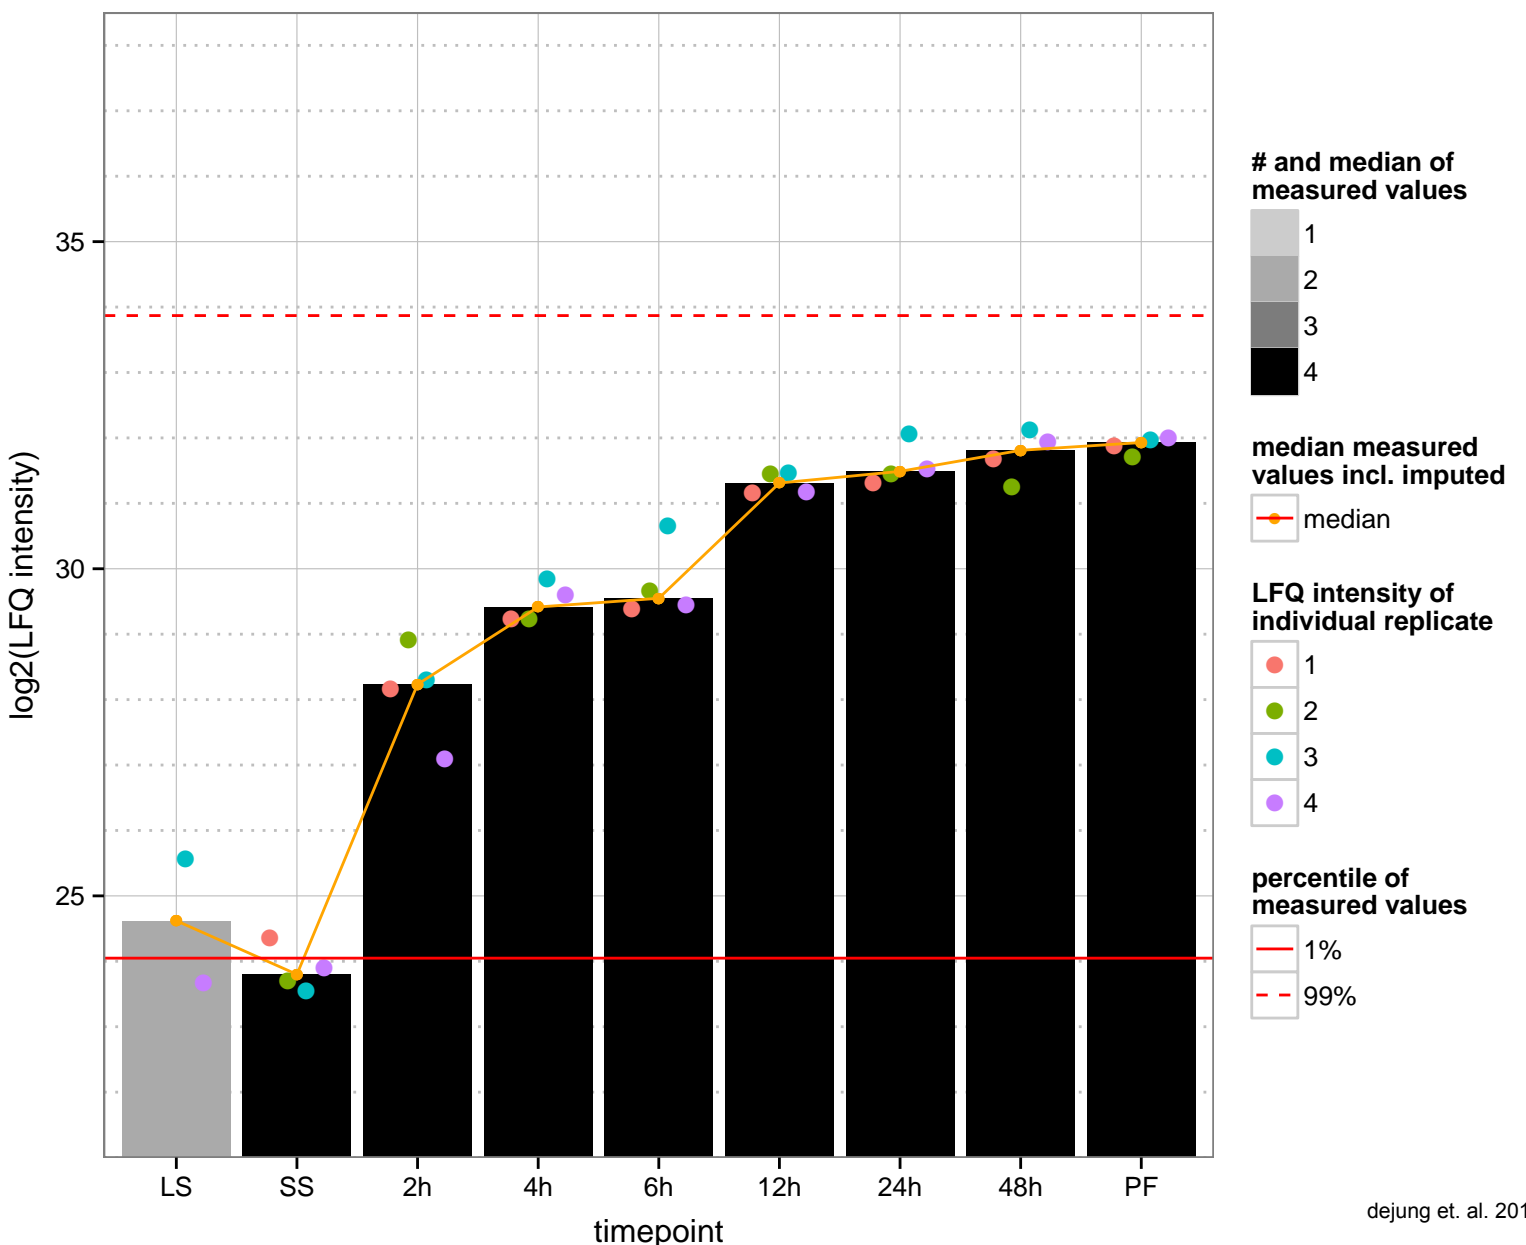

NAD(p)-dependent steroid dehydrogenase-like protein, NAD(P)-dependent steroid dehydrogenase protein, putative  
 Tb927.7.4950;Tb11.v5.0176  
 AGOF: null, 3-beta-hydroxy-delta5-steroid dehydrogenase activity, catalytic activity  
 AGOC: null  
 AGOP: null, steroid biosynthetic process  
 PGOF: 3-beta-hydroxy-delta5-steroid dehydrogenase activity, oxidoreductase activity, acting on the CH-OH group of donors  
 PGOC: null  
 PGOP: oxidation-reduction process, steroid biosynthetic process

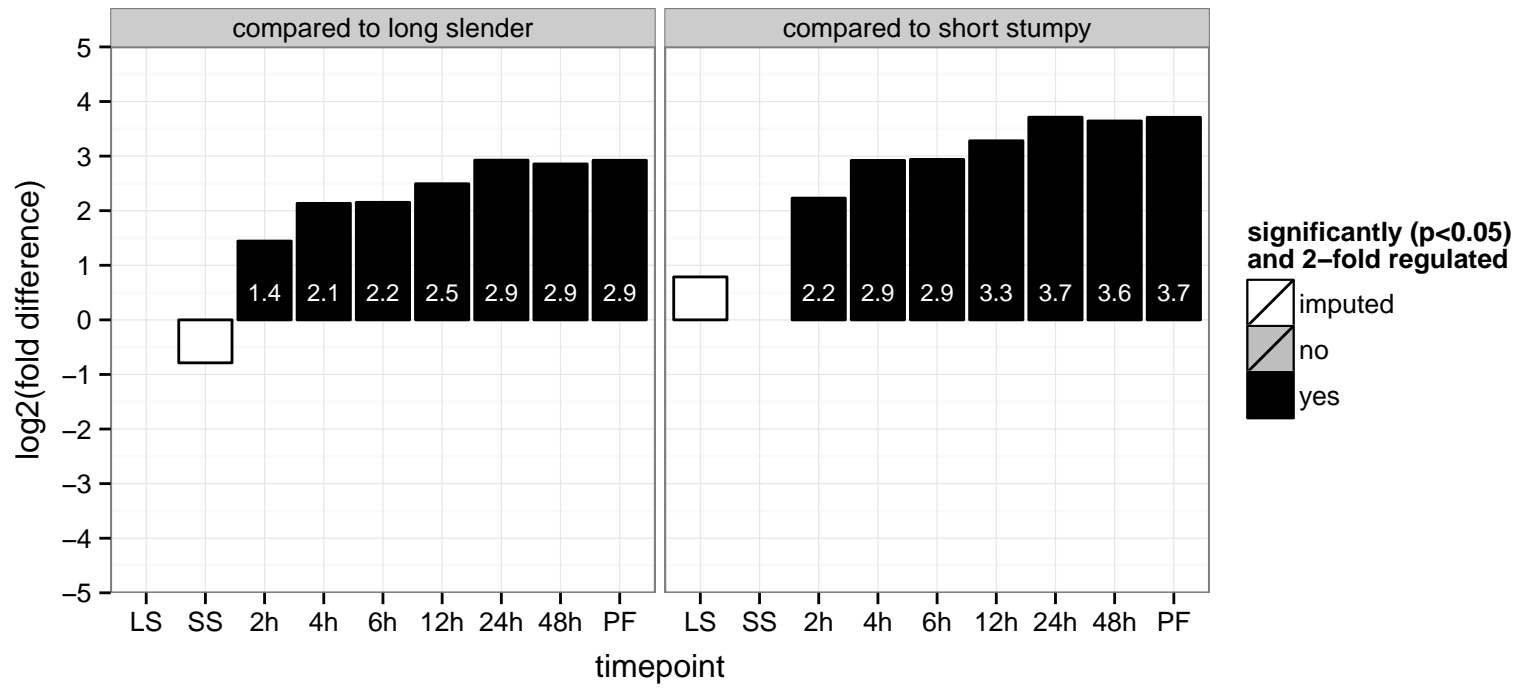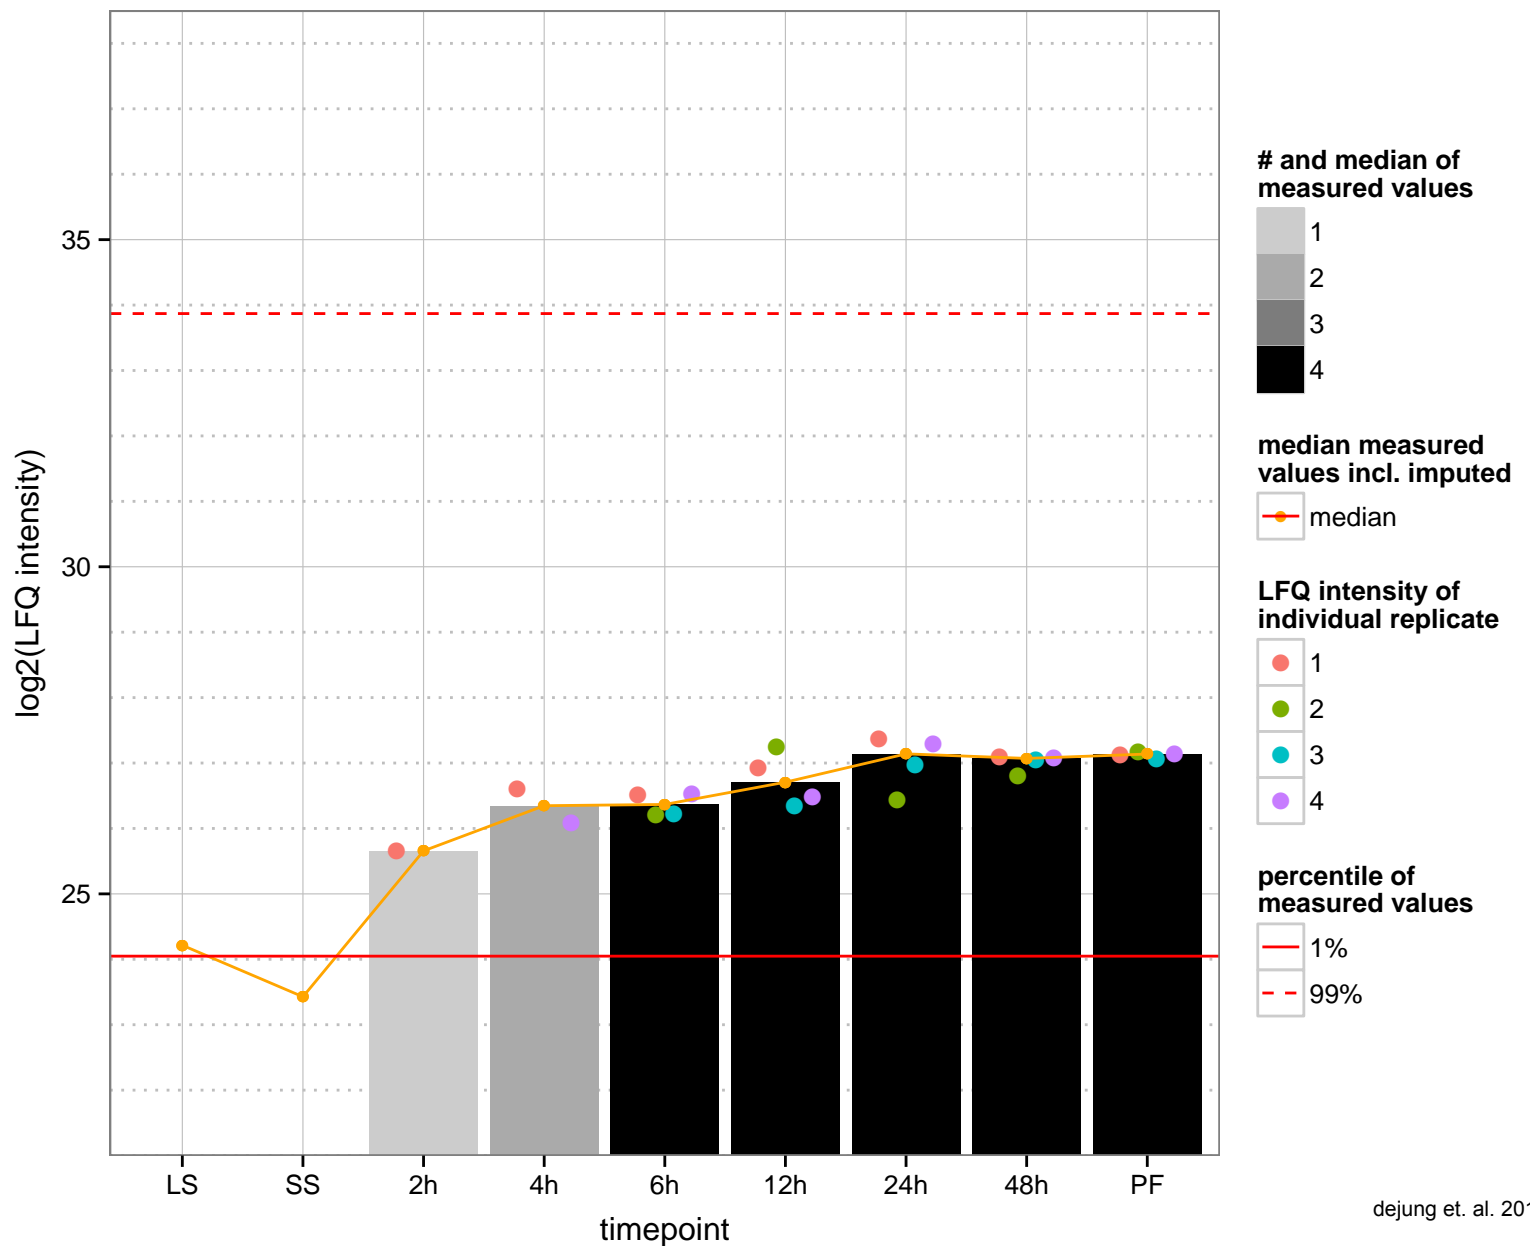



hypothetical protein, conserved, conserved protein, unknown function  
 Tb927.1.1470;Tb11.v5.0315  
 AGOF: null  
 AGOC: null  
 AGOP: null  
 PGO: null  
 PGOC: null  
 PGOP: null

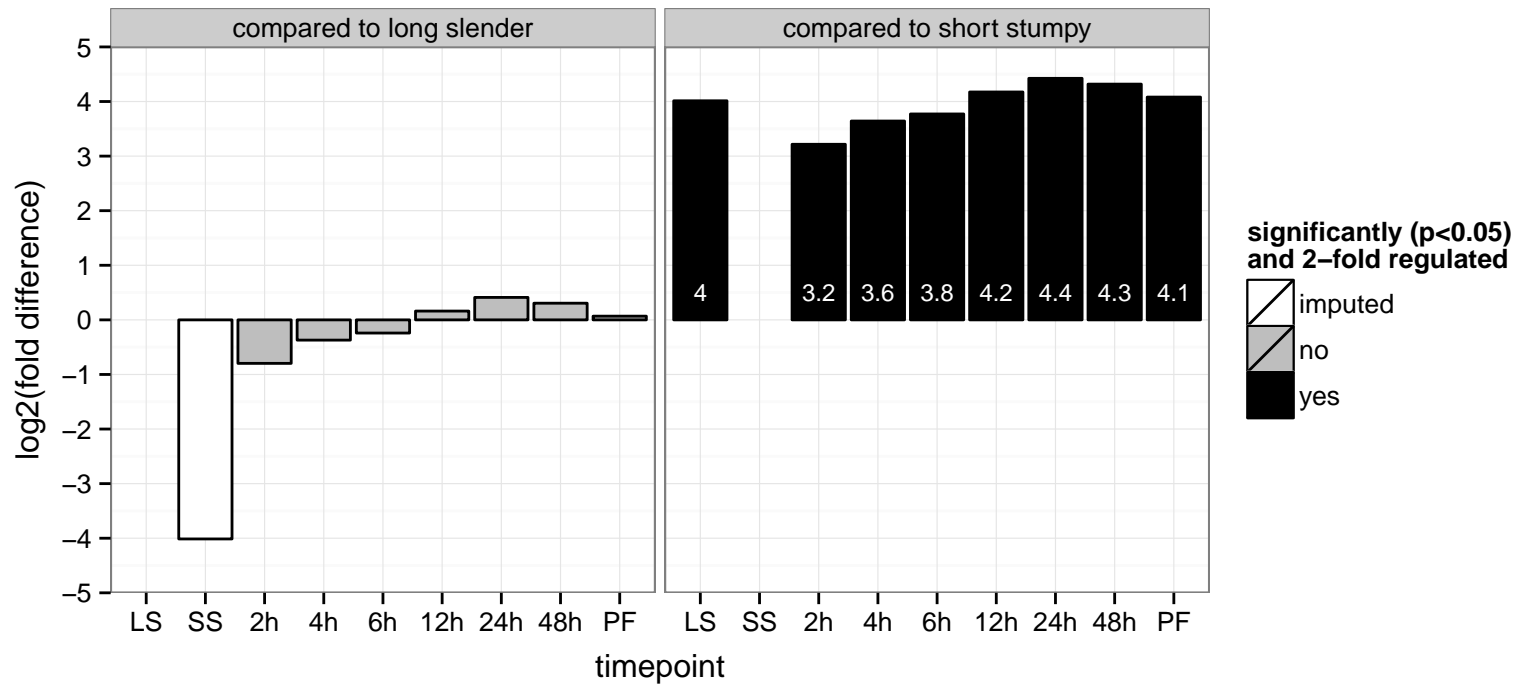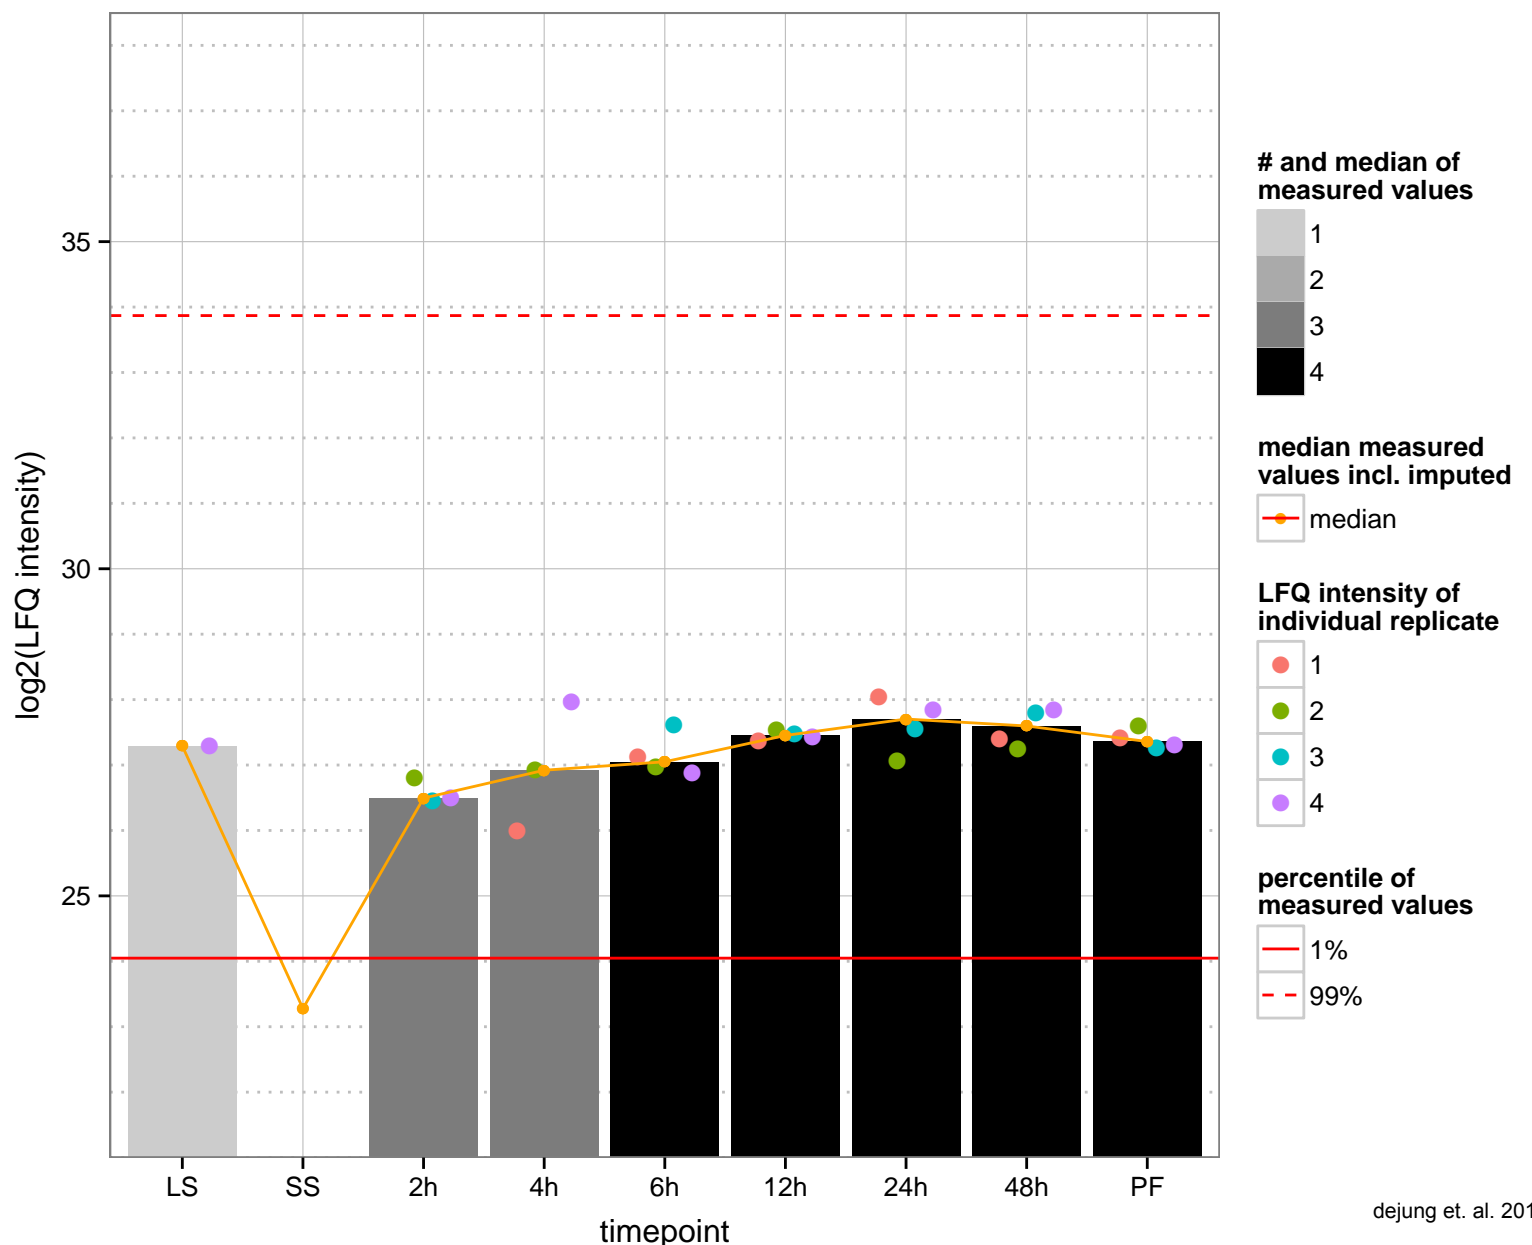

THT1 – hexose transporter, putative, THT2A – glucose transporter, fragment, glucose transporter, glucose transporter 2A (Tb927.10.8520;Tb927.10.8510;Tb927.10.8500;Tb11.v5.0331;Tb927.10.8530;Tb927.10.8490;Tb11.v5.0332;Tb11.v5.0333)  
 AGOF: null, substrate-specific transmembrane transporter activity, hexose transmembrane transporter activity  
 AGOC: null, integral to membrane, membrane  
 AGOP: null, transmembrane transport, transport, hexose transport, transmembrane transport  
 PGO: substrate-specific transmembrane transporter activity, transmembrane transporter activity  
 PGOC: integral to membrane, membrane  
 PGOP: transmembrane transport

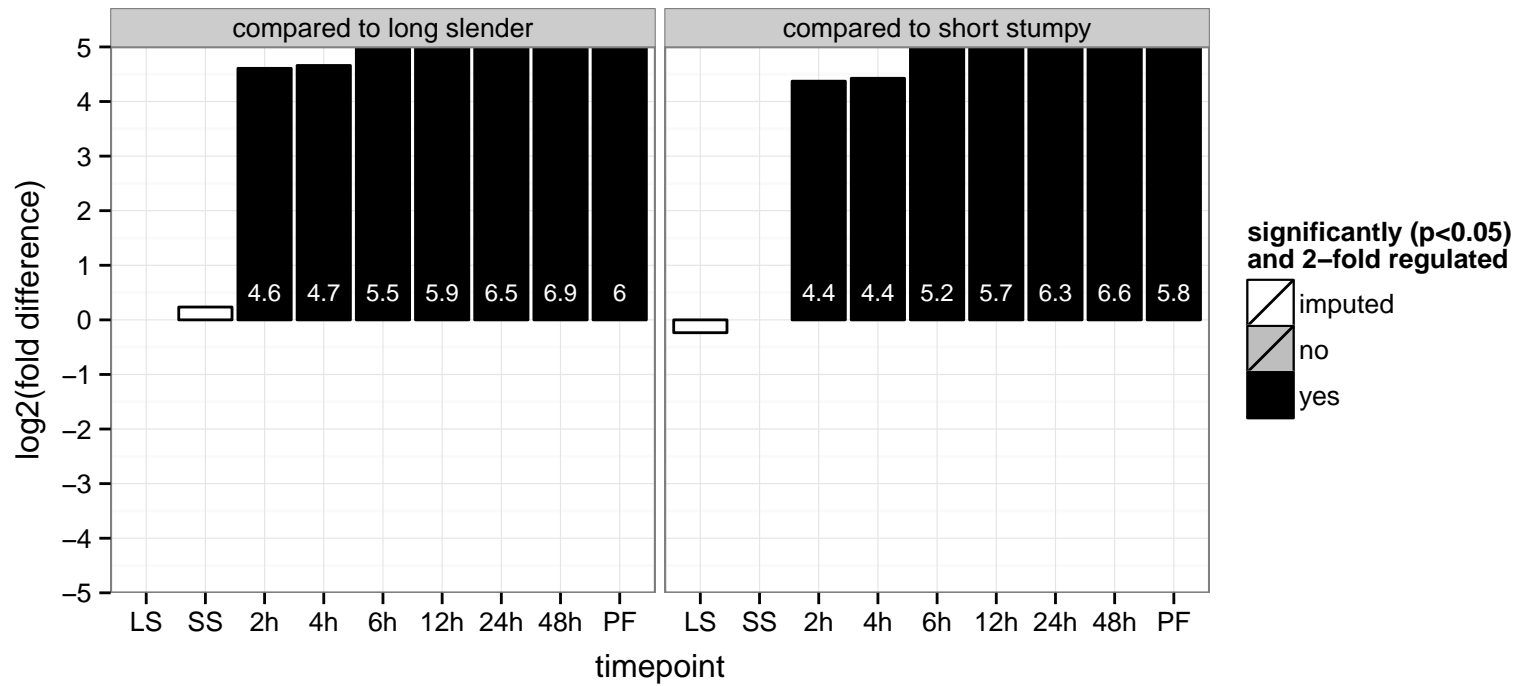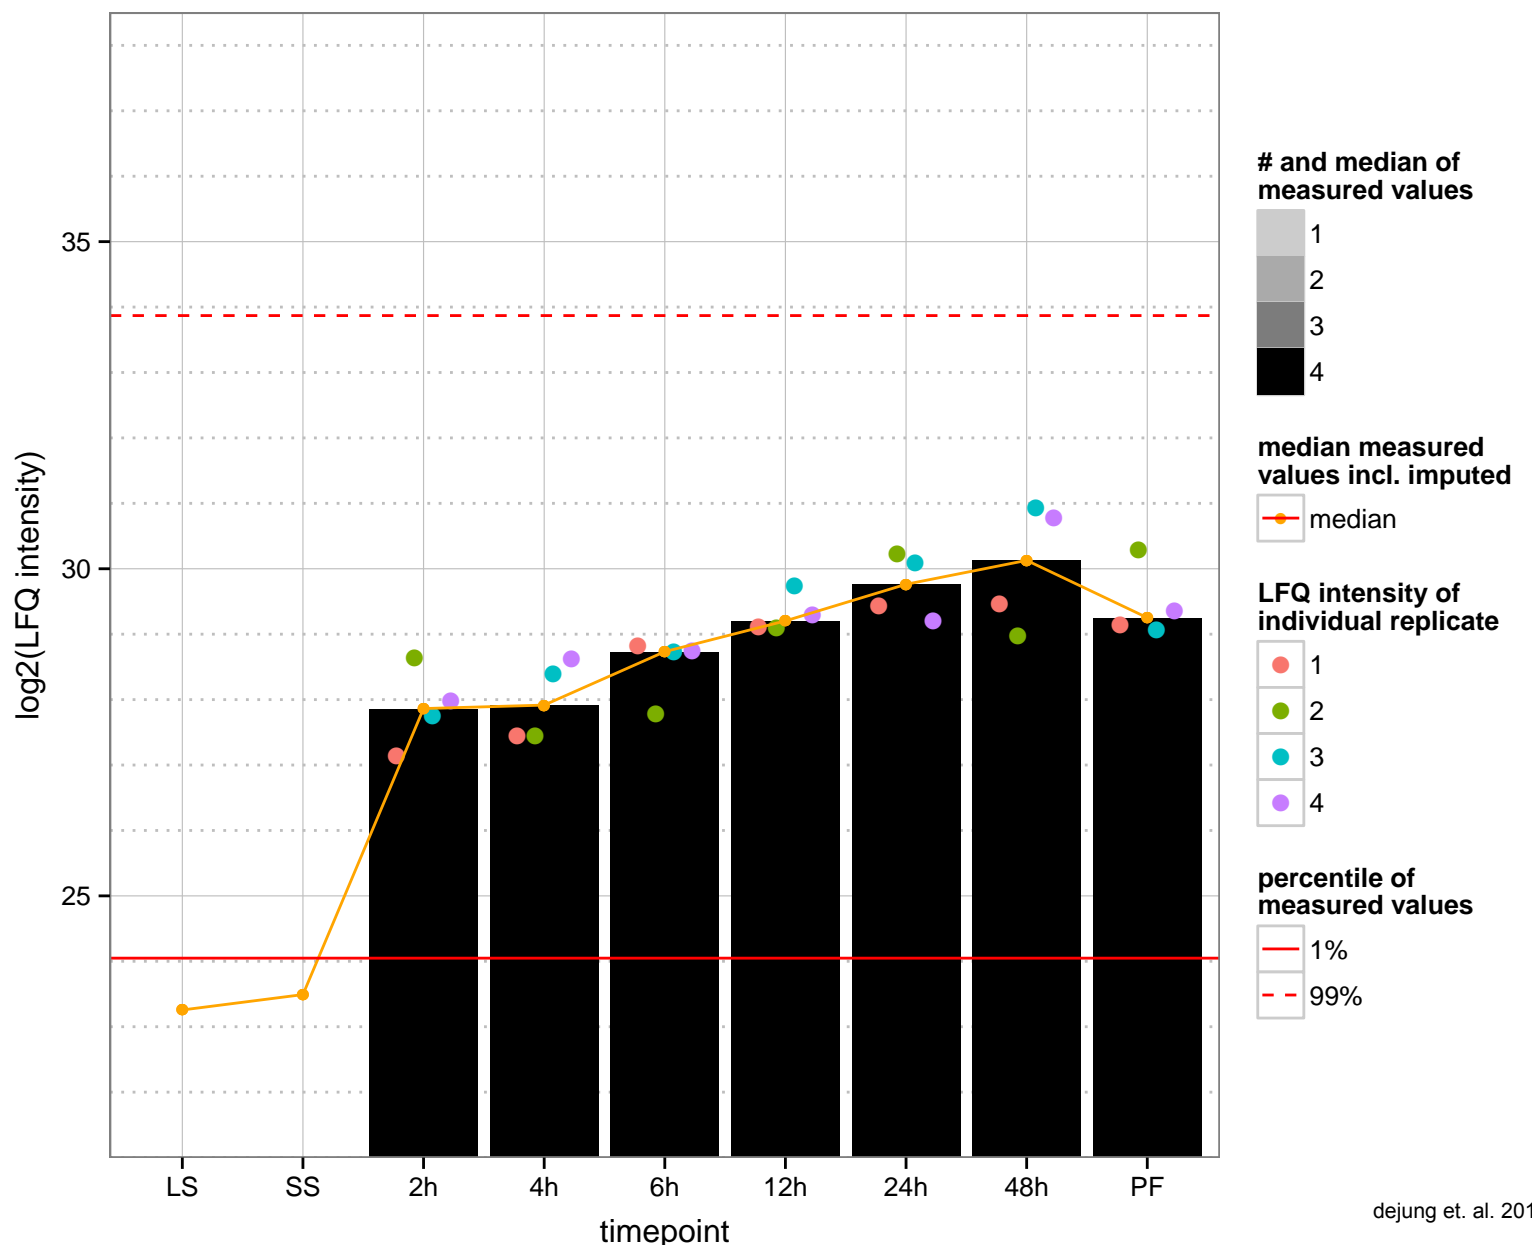

major surface protease gp63, putative, MSP-B  
 Tb927.8.1630;Tb927.8.1620;Tb927.8.1610;Tb11.v5.0601  
 AGOF: null, metalloendopeptidase activity, zinc ion binding  
 AGOC: null, membrane  
 AGOP: null, cell adhesion, proteolysis  
 PGO: metalloendopeptidase activity, zinc ion binding, null  
 PGO: membrane, null  
 PGO: cell adhesion, proteolysis, null

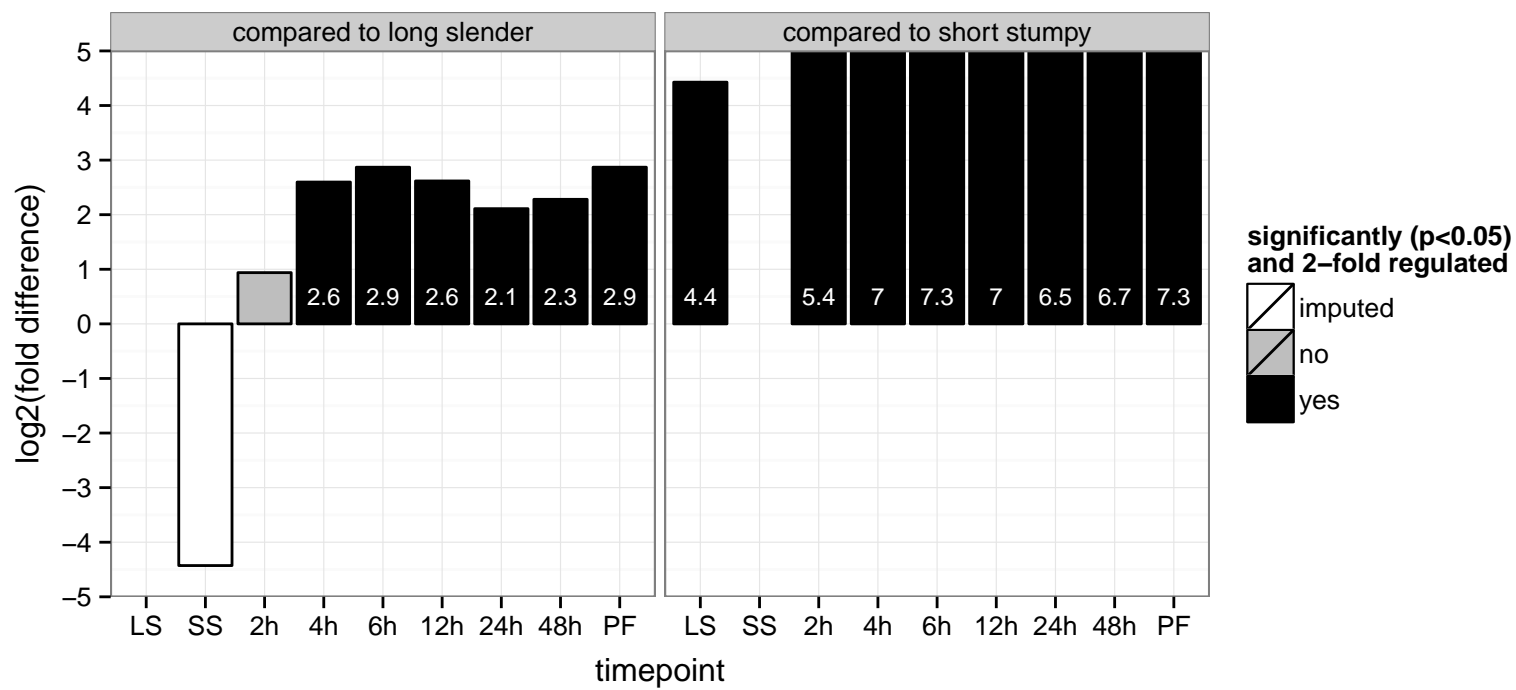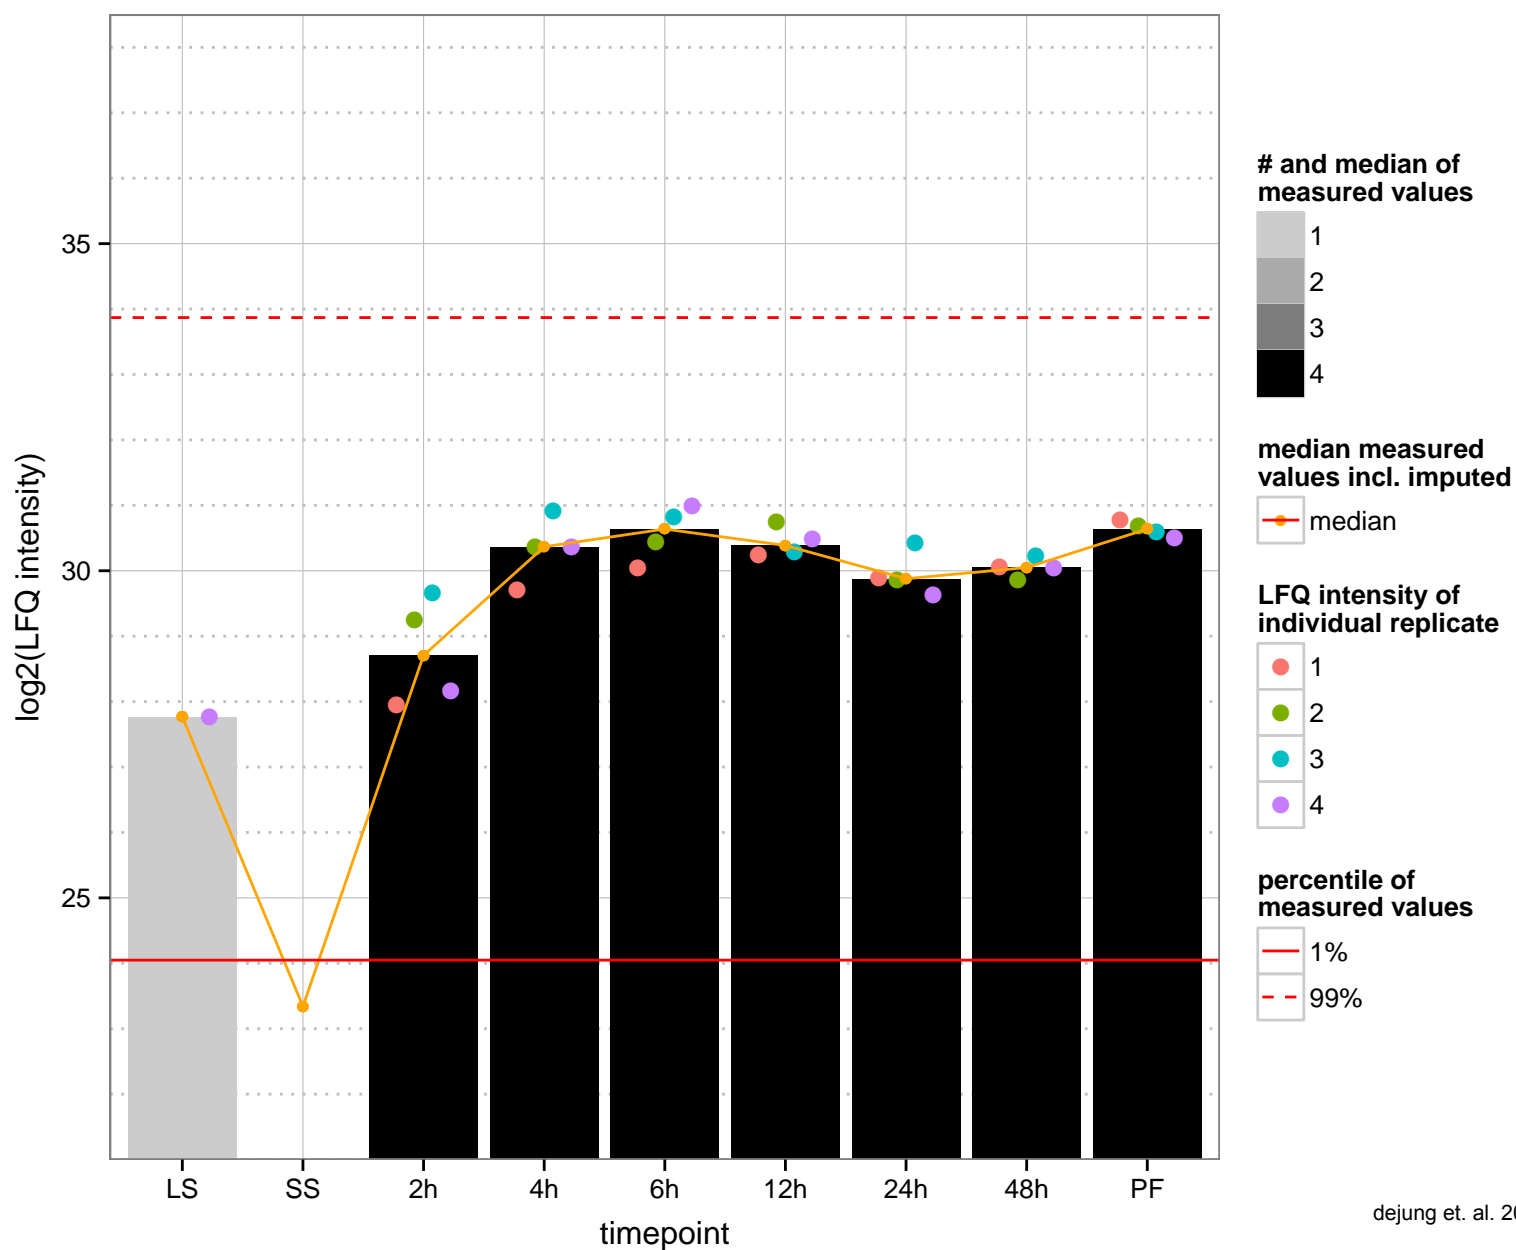

phosphatidylinositol 3-kinase, putative

Tb927.1.1930

AGOF: 1-phosphatidylinositol-3-kinase activity, phosphotransferase activity, alcohol group as acceptor

AGOC: null

AGOP: cell proliferation, phosphatidylinositol phosphorylation

PGOF: binding, phosphotransferase activity, alcohol group as acceptor, protein binding, transferase activity, transferring phospho

PGOC: null

PGOP: null

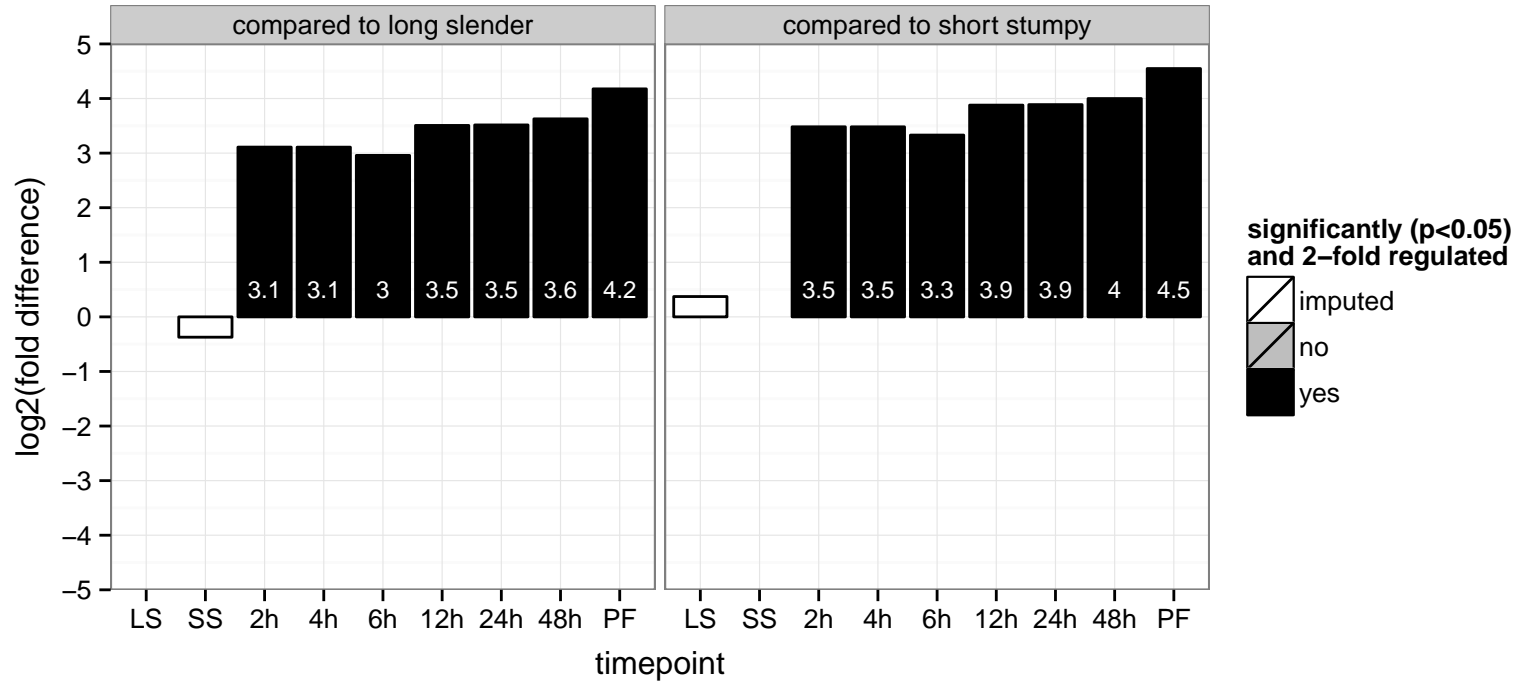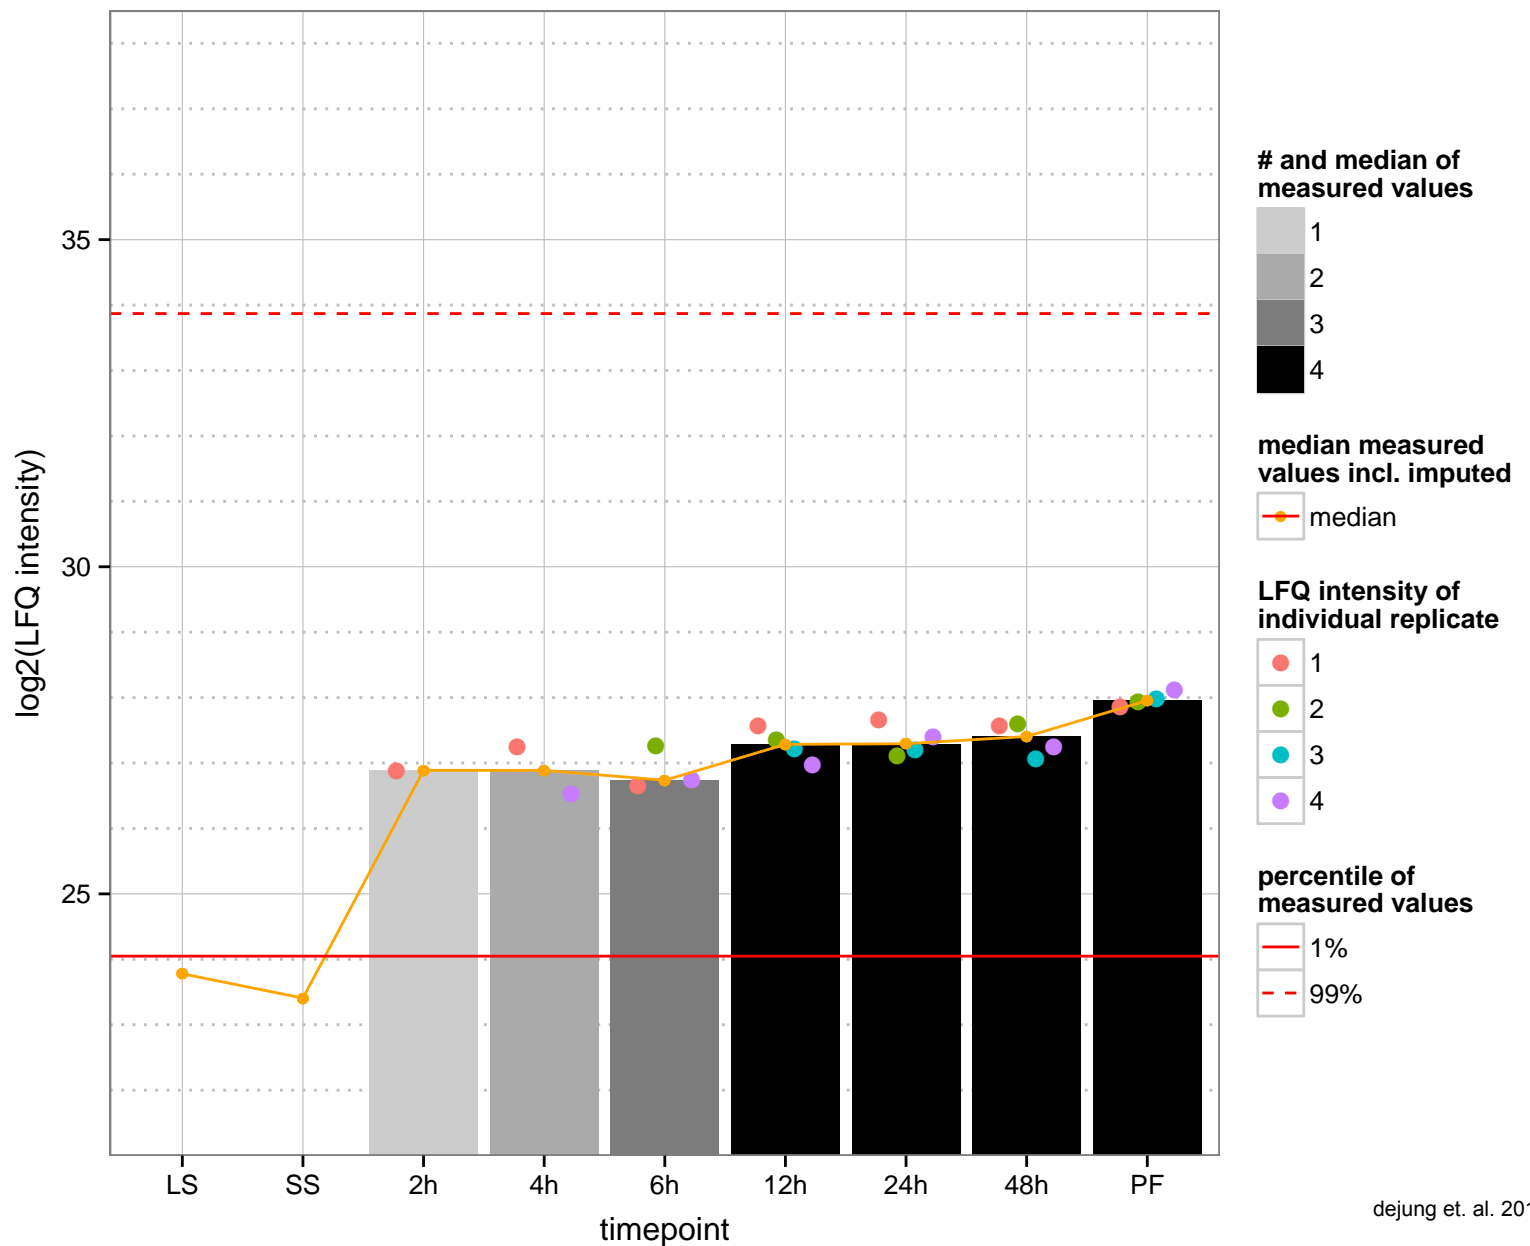

hypothetical protein, conserved  
 Tb927.10.10000  
 AGOF: null  
 AGOC: null  
 AGOP: null  
 PGO: null  
 PGOC: null  
 PGOP: null

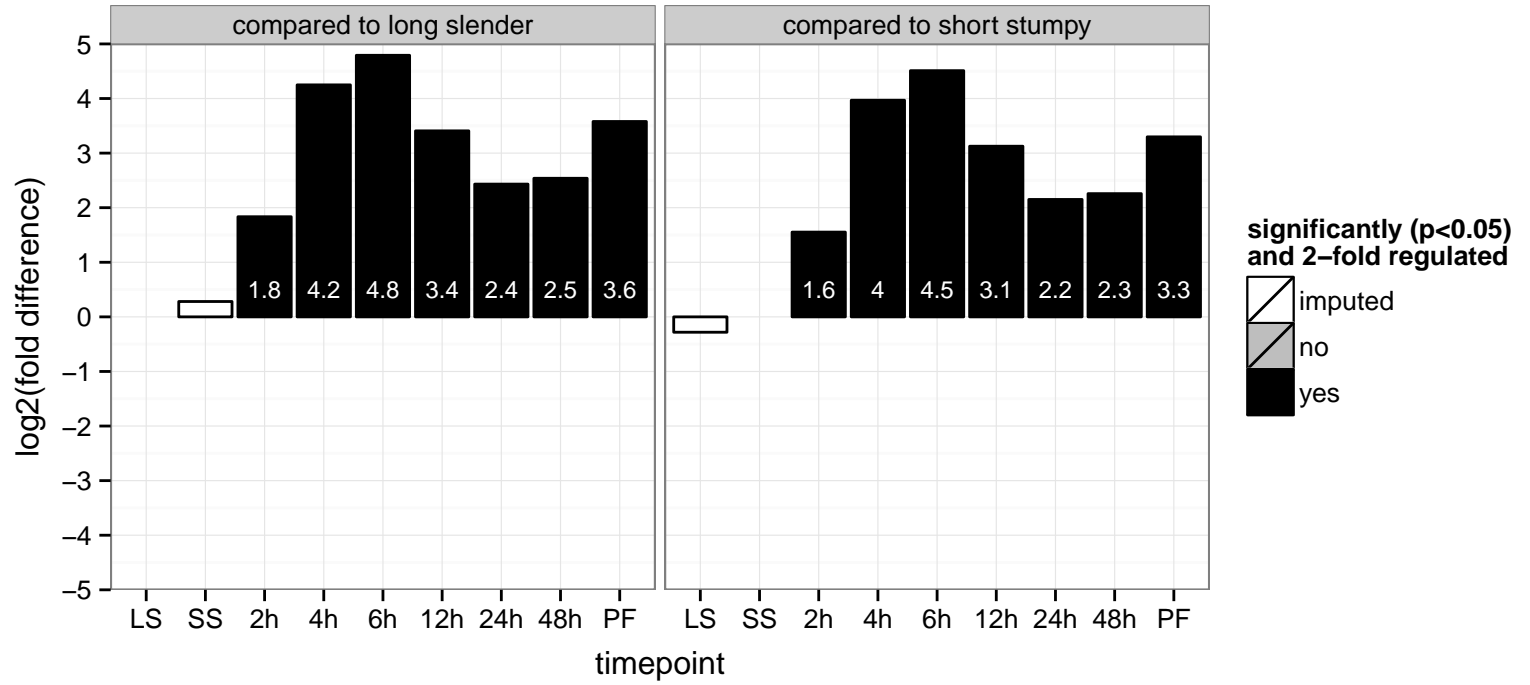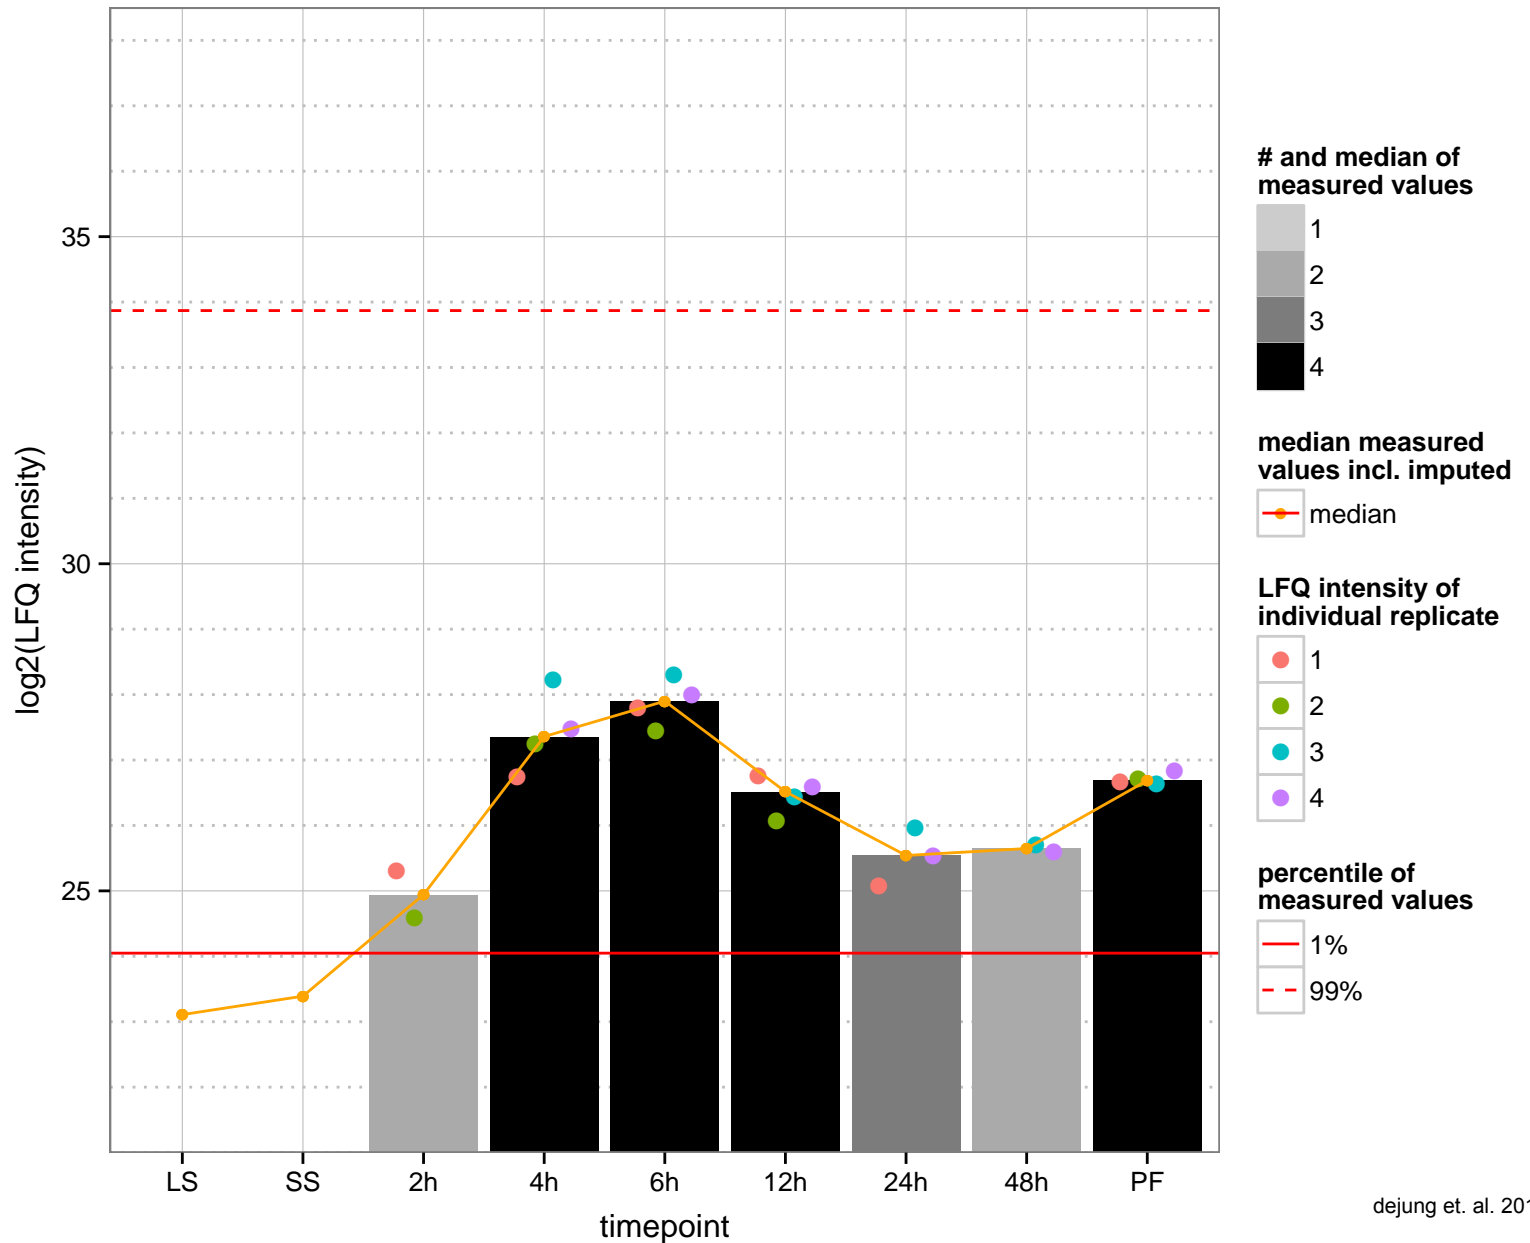

procyclic form surface phosphoprotein (PSSA-2)  
 Tb927.10.11220  
 AGOF: structural constituent of cell wall  
 AGOC: cell surface  
 AGOP: plant-type cell wall organization  
 PGOF: structural constituent of cell wall  
 PGO: null  
 PGOP: plant-type cell wall organization

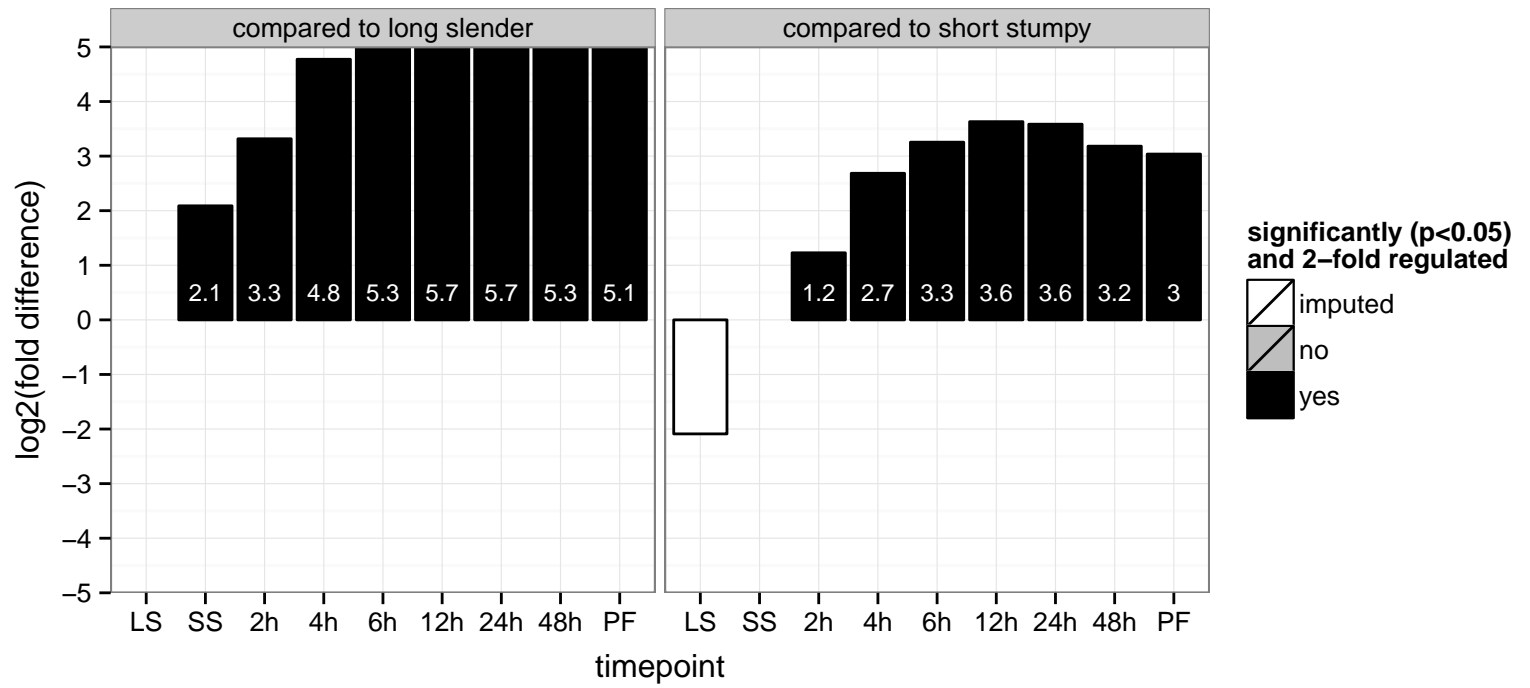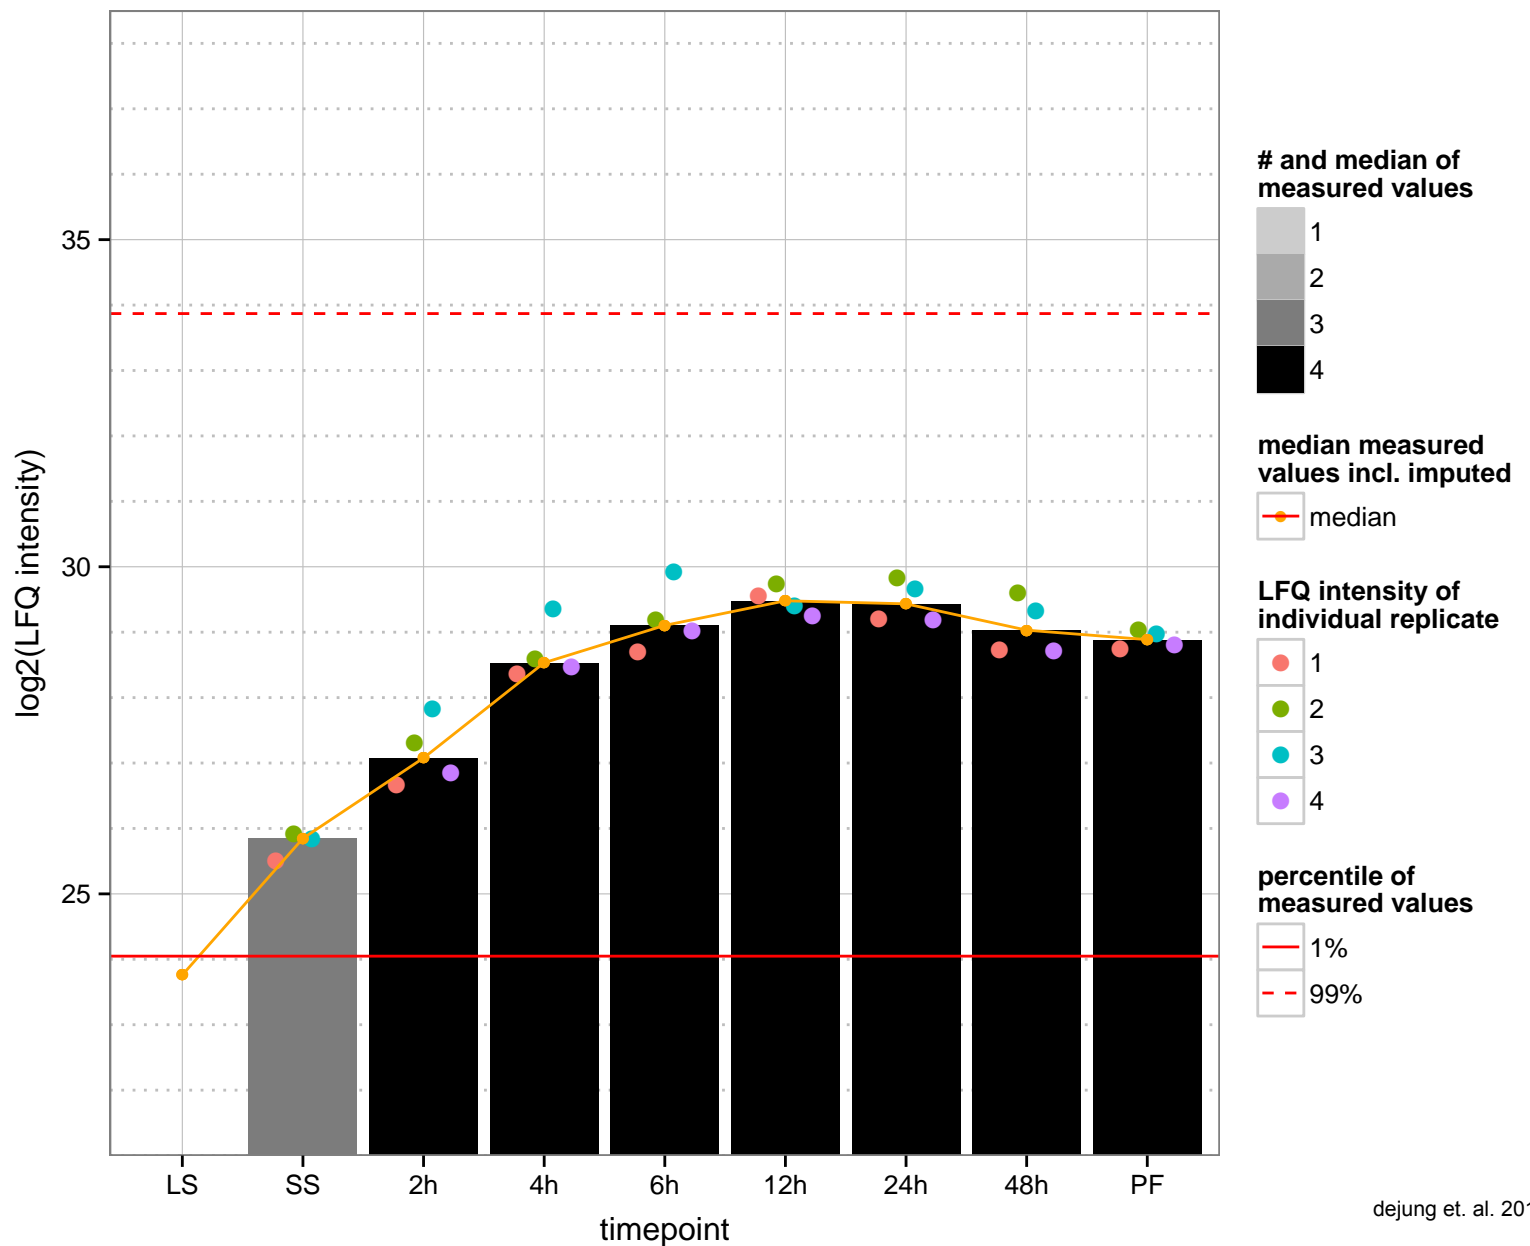

Tb927.10.13620

AGOF: NAD binding, oxidoreductase activity, acting on the aldehyde or oxo group of donors, NAD or NADP as acceptor

AGOC: cytoplasm, mitochondrion

AGOP: cellular amino acid metabolic process

PGOF: 3-beta-hydroxy-delta5-steroid dehydrogenase activity, oxidoreductase activity, acting on the CH-OH group of donors

PGOC: null

PGOP: oxidation-reduction process, steroid biosynthetic process

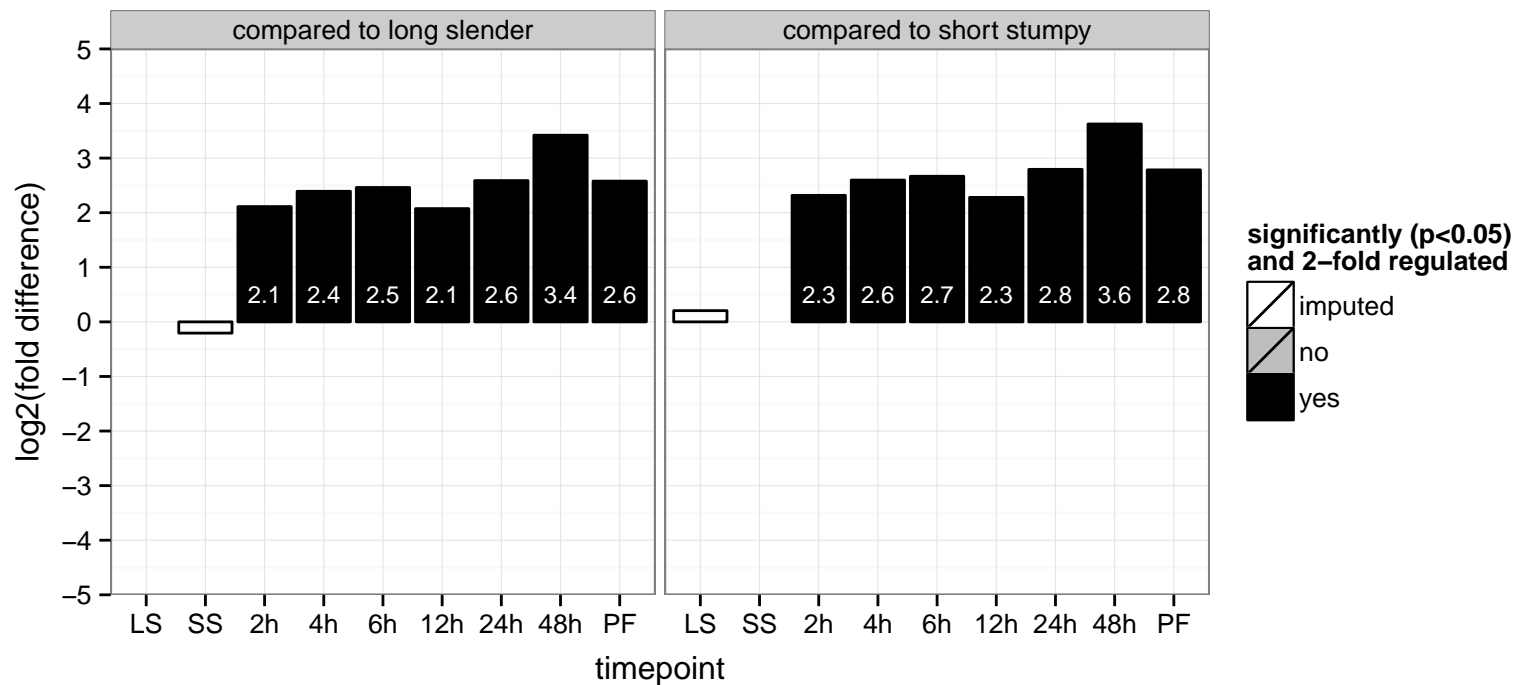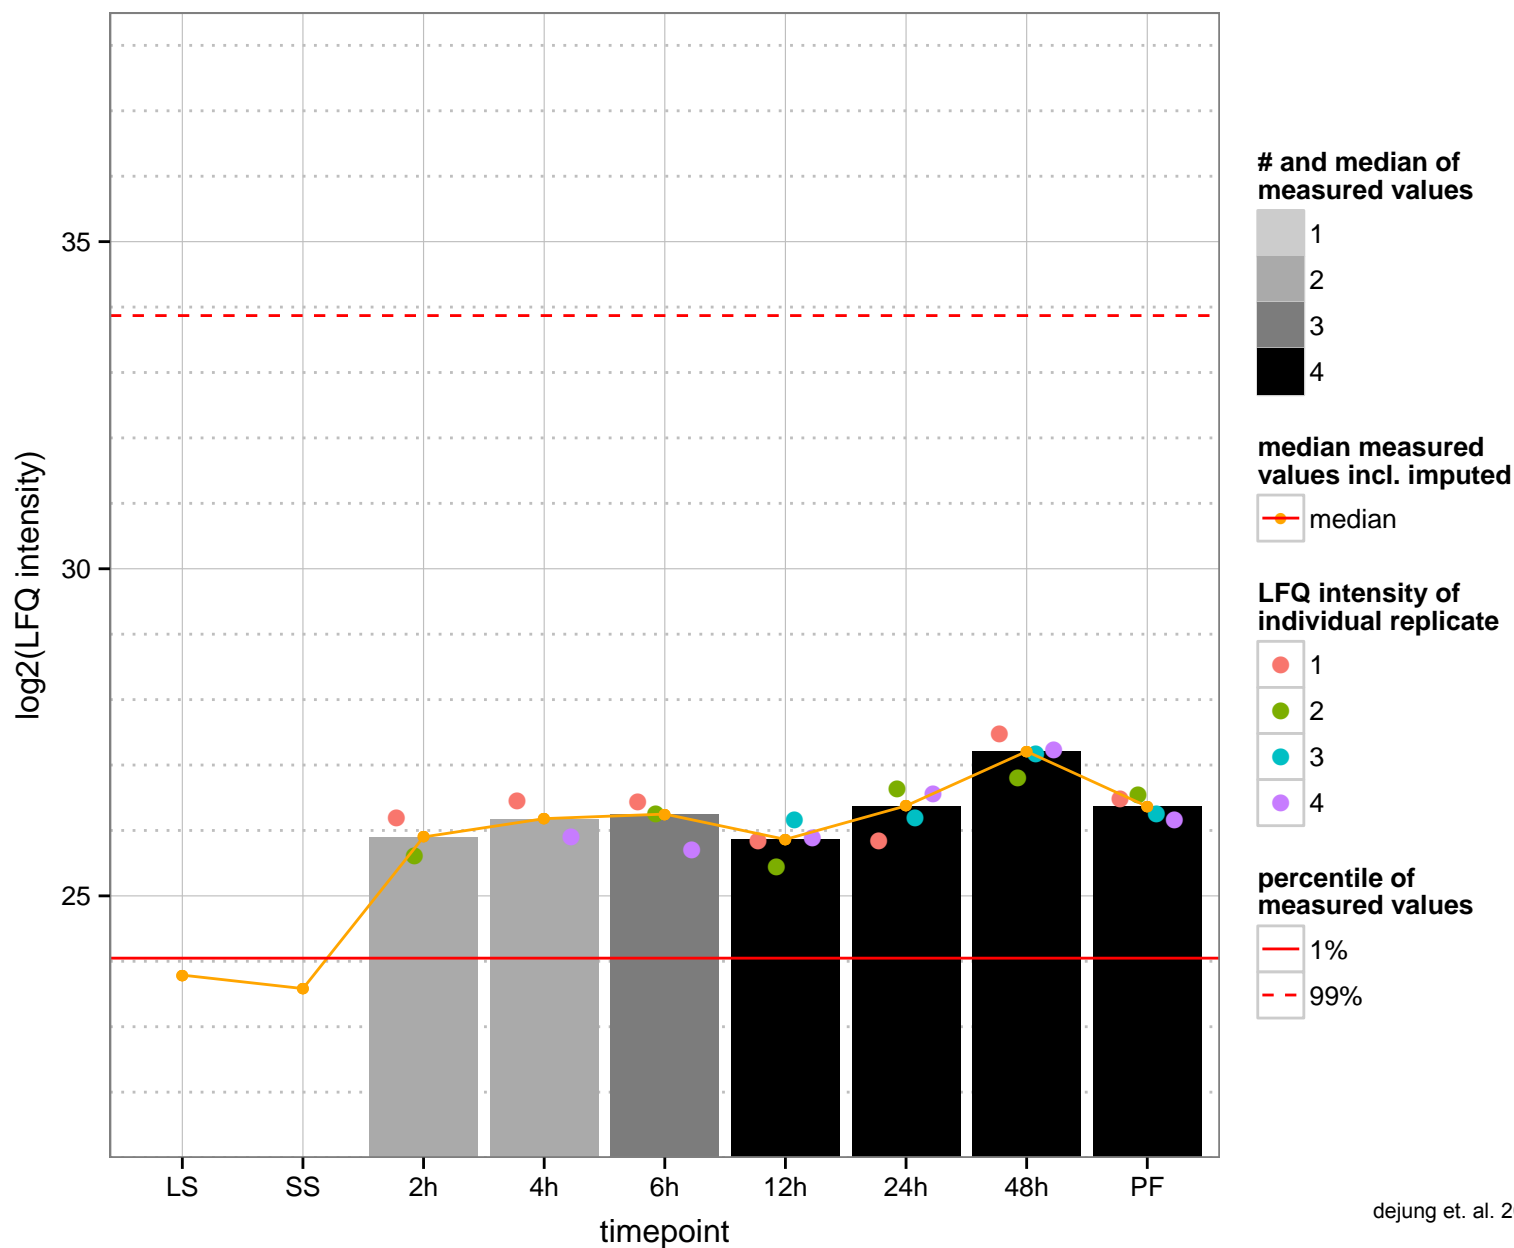

chaperone protein DNAj, putative

Tb927.10.13830

AGOF: heat shock protein binding, unfolded protein binding

AGOC: integral to membrane, mitochondrial inner membrane, mitochondrion

AGOP: protein folding

PGOF: heat shock protein binding

PGOC: null

PGOP: null

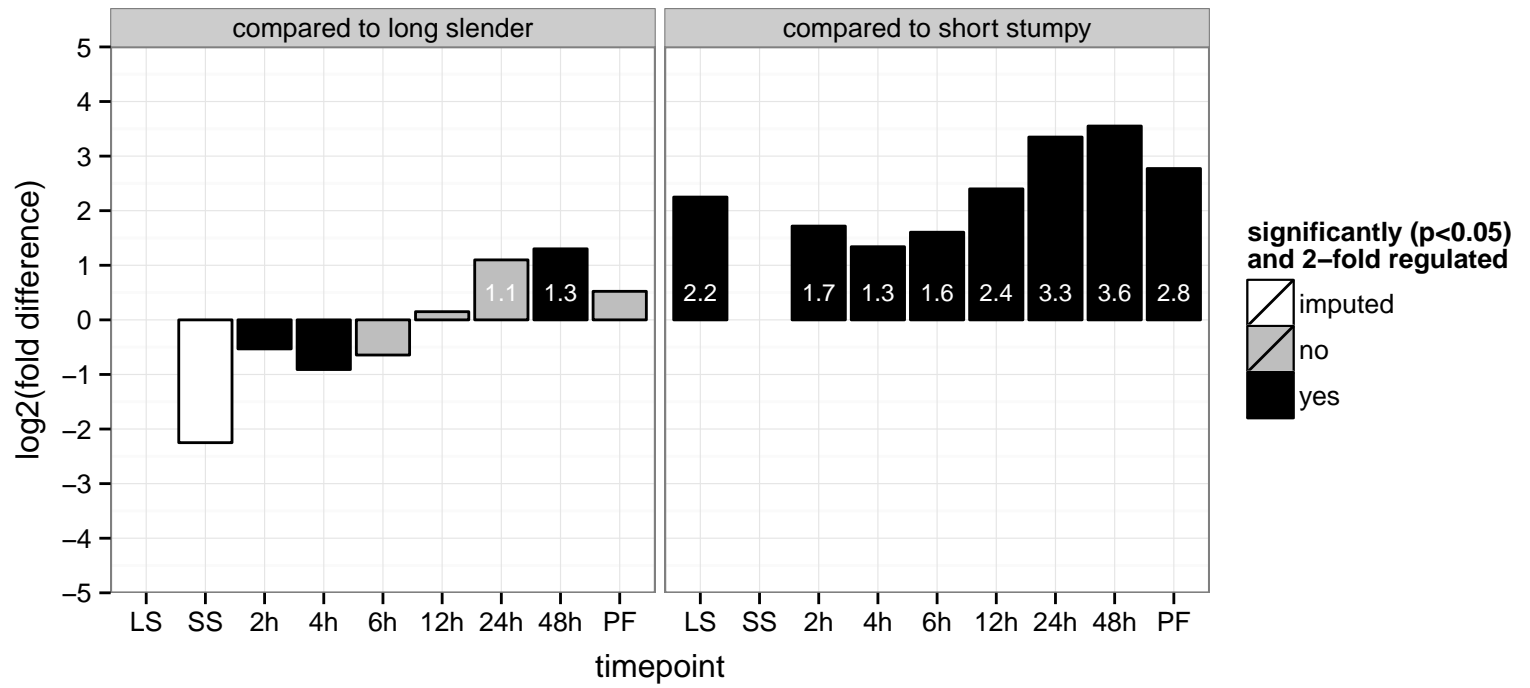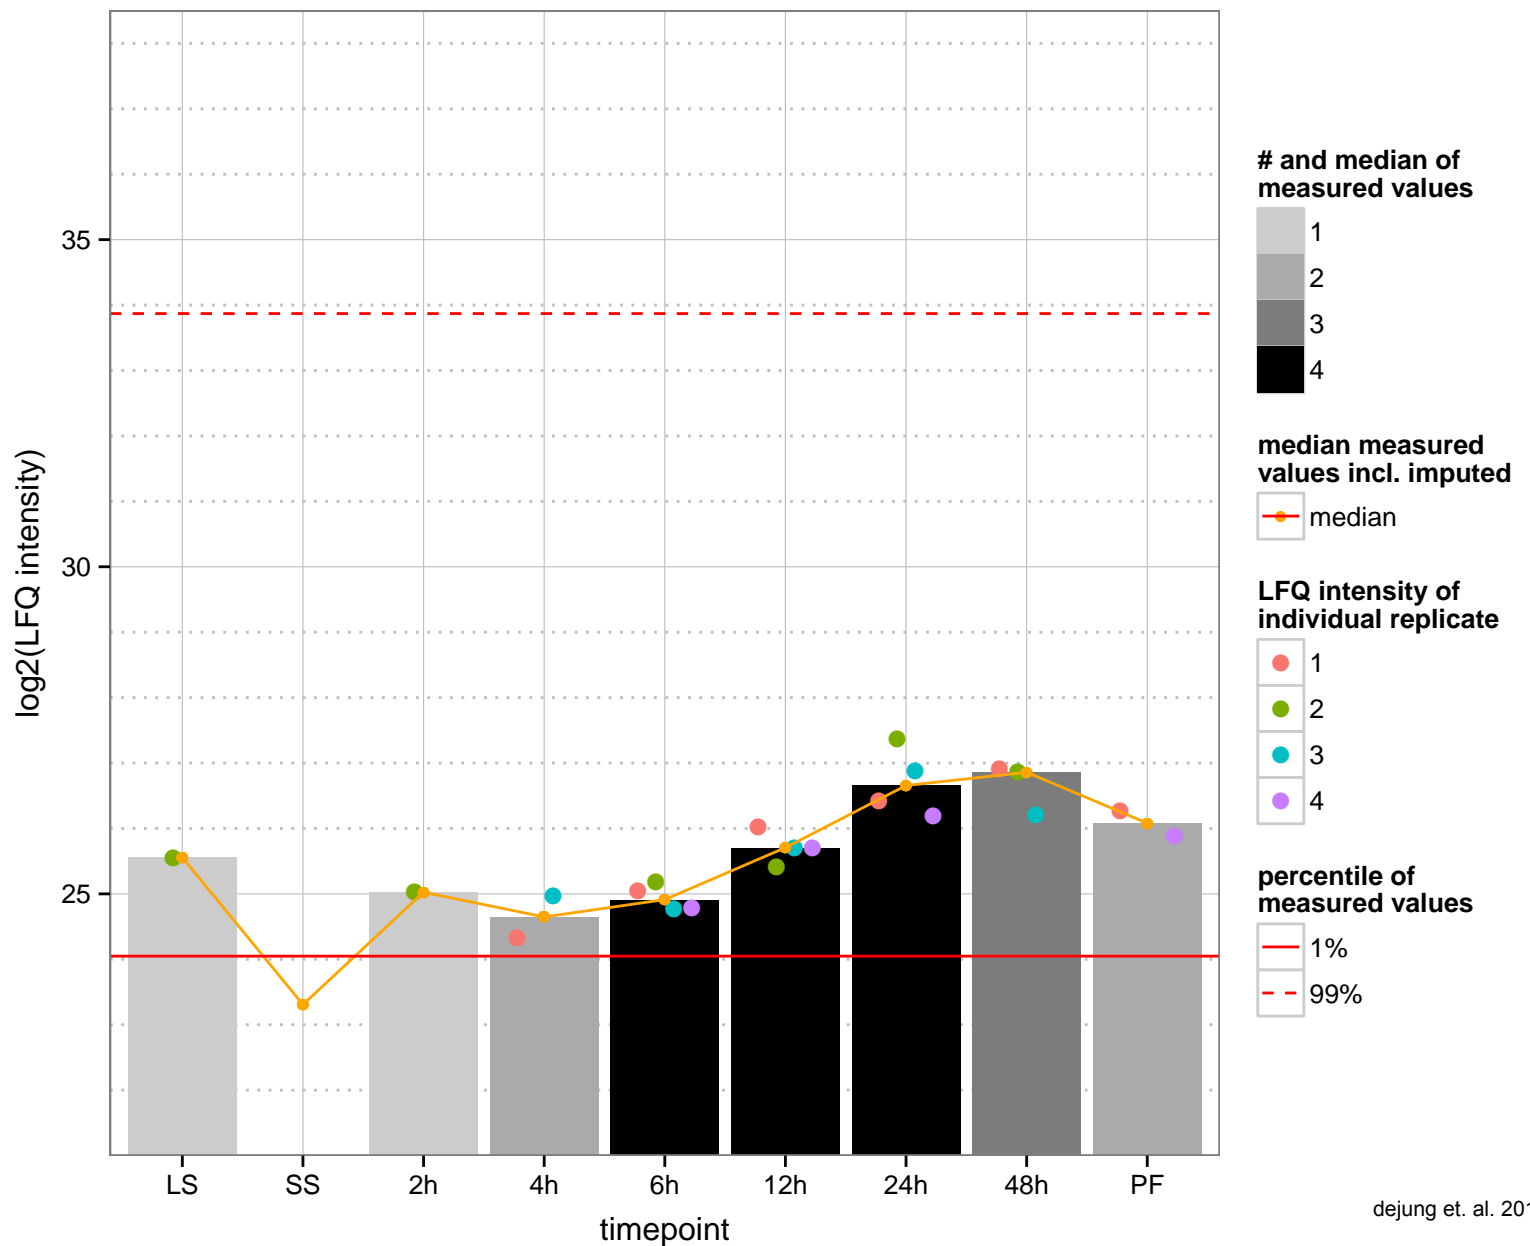



hypothetical protein, conserved  
 Tb927.10.13850  
 AGOF: null  
 AGOC: mitochondrion  
 AGOP: proton-transporting ATP synthase complex assembly  
 PGO: null  
 PGOC: null  
 PGOP: proton-transporting ATP synthase complex assembly

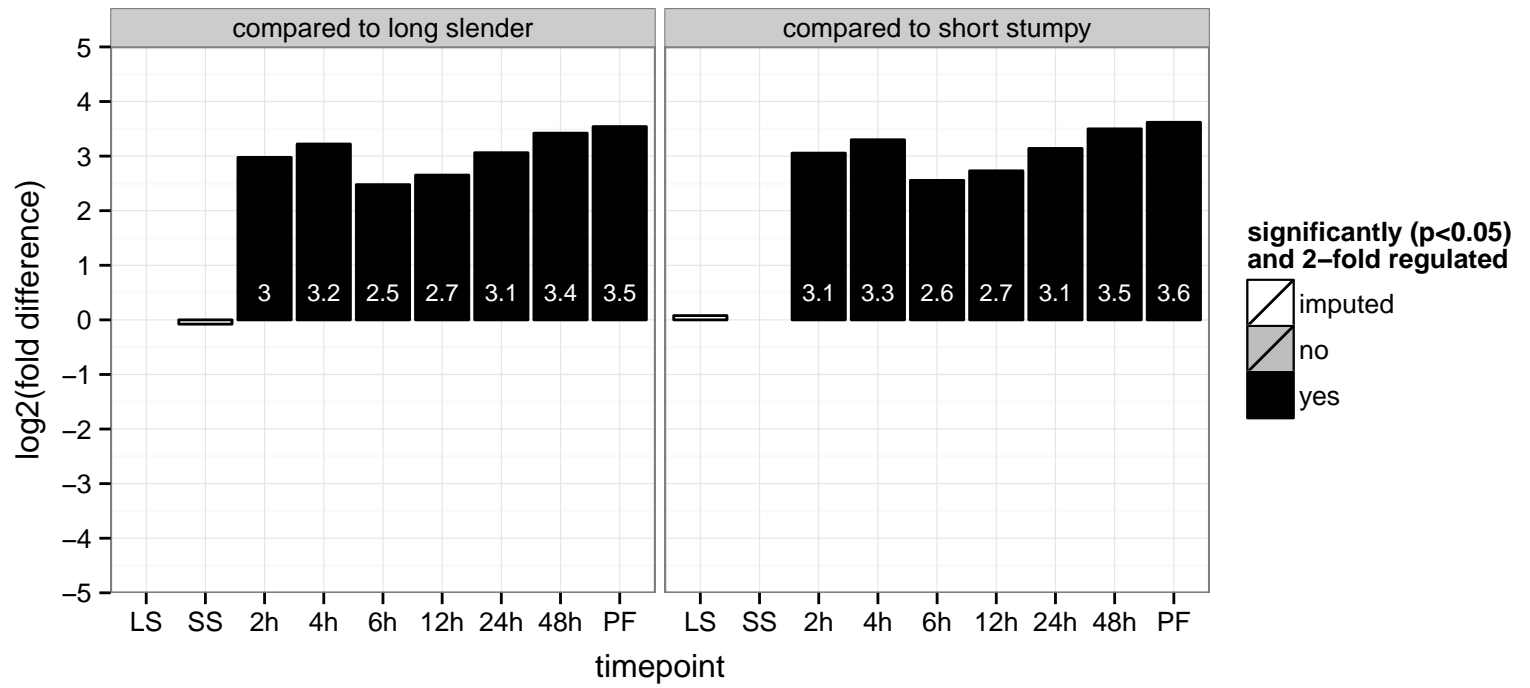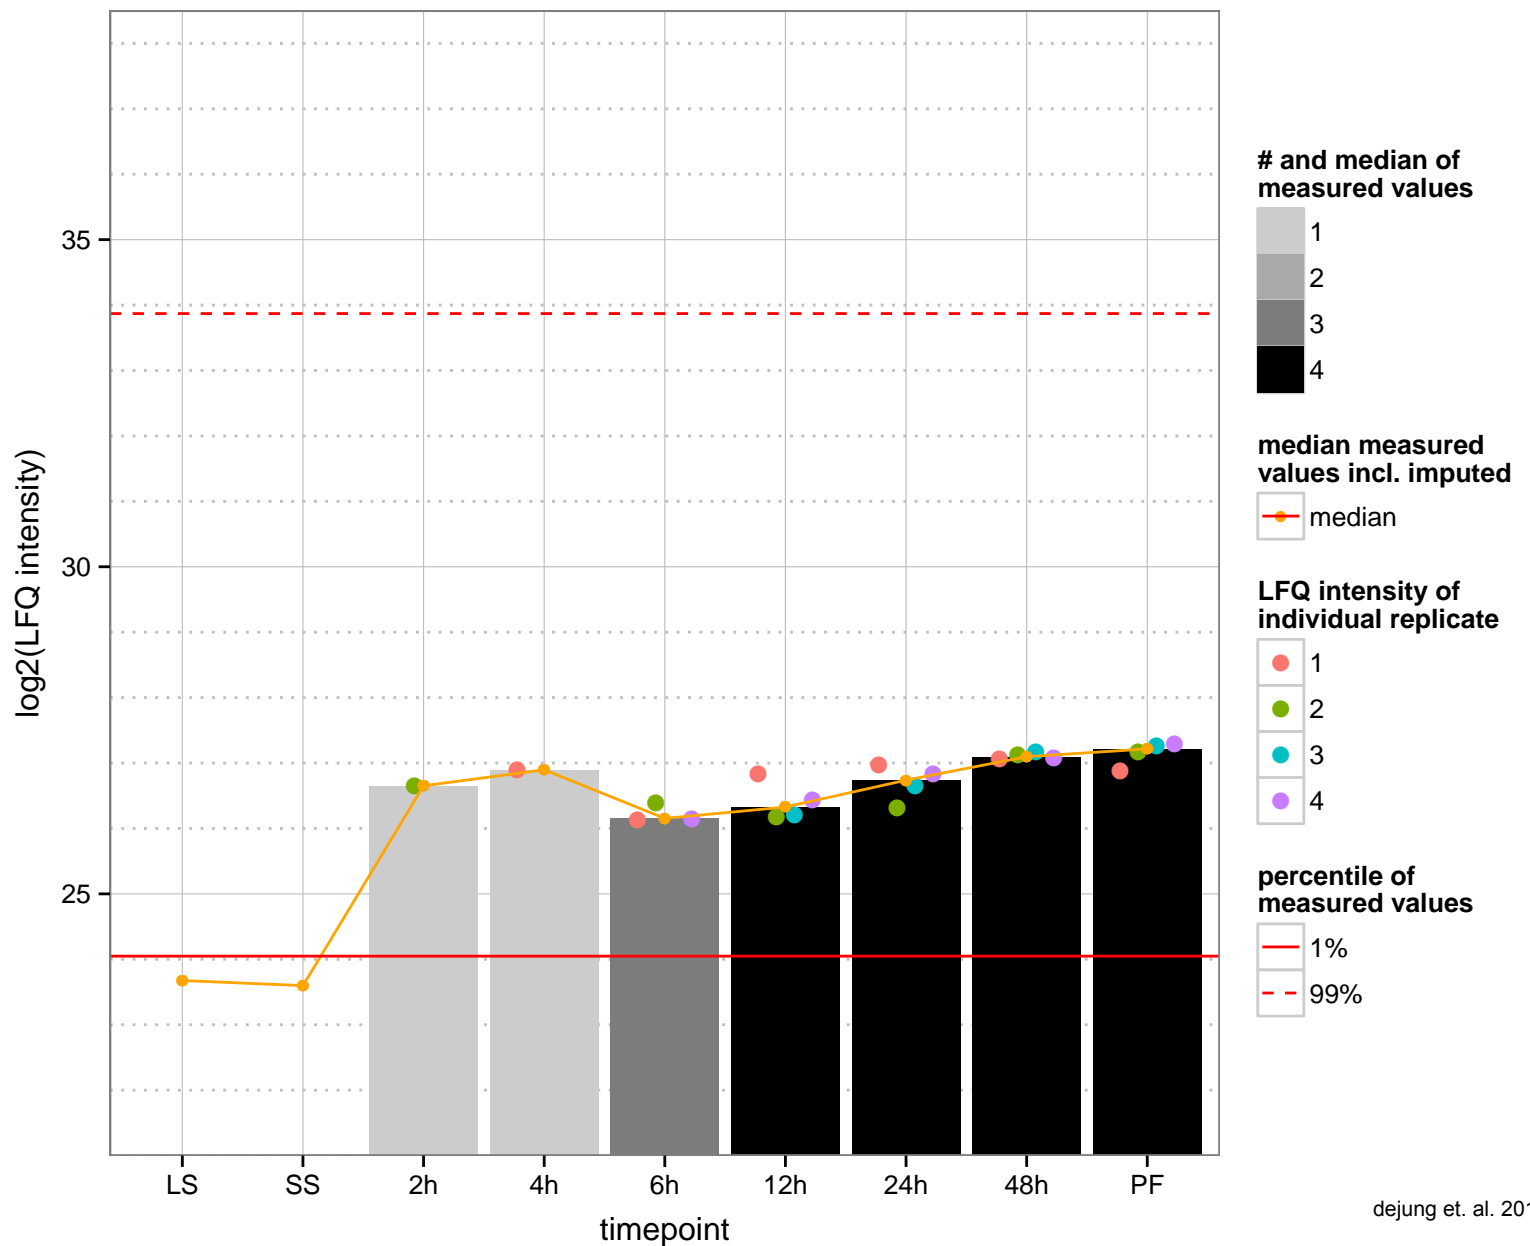

hypothetical protein, conserved  
 Tb927.10.15280;Tb11.v5.0999  
 AGOF: null  
 AGOC: null  
 AGOP: null  
 PGOF: protein binding  
 PGO: null  
 PGOP: null

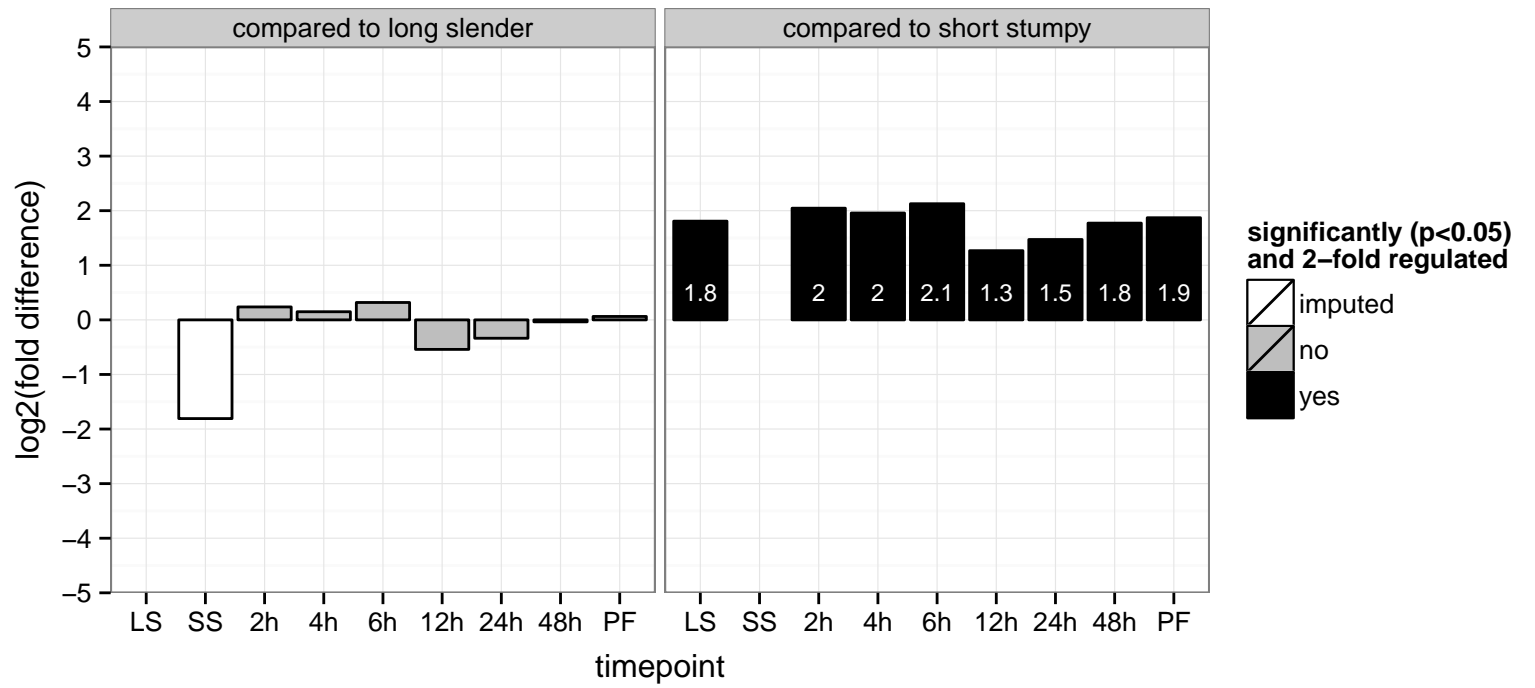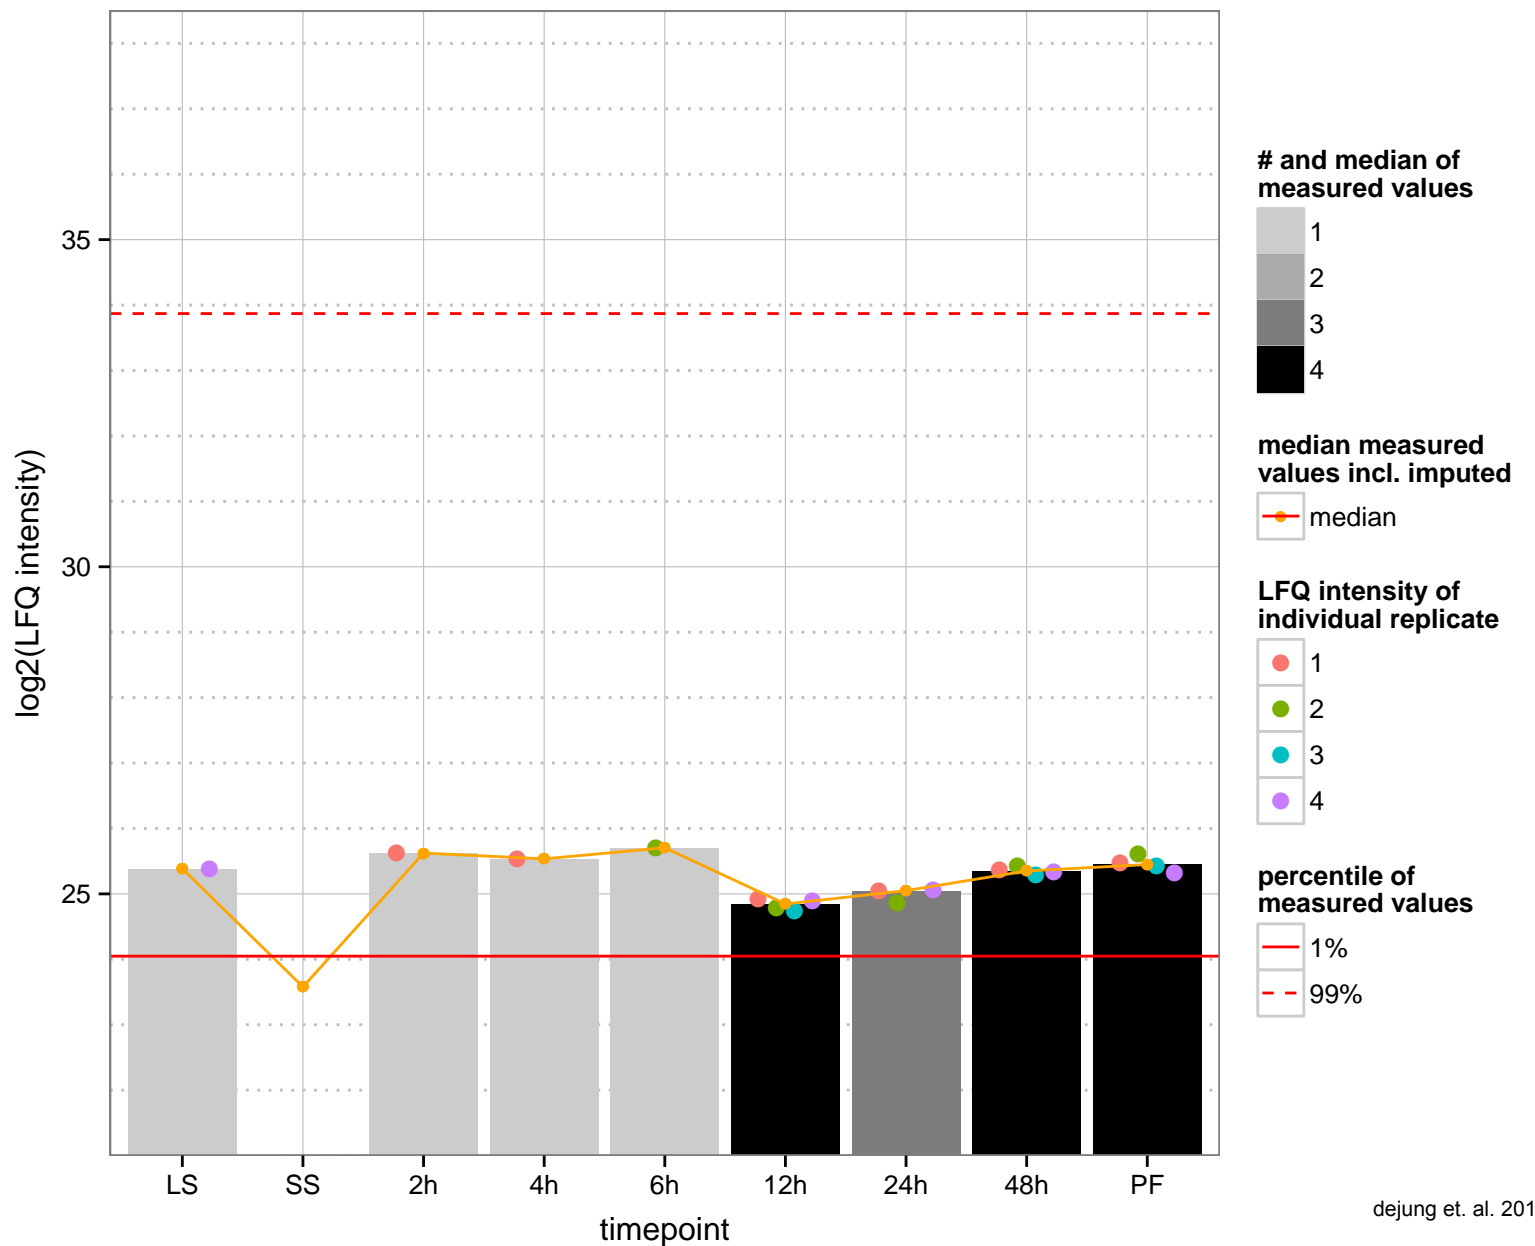

glycosomal malate dehydrogenase (gMDH)

Tb927.10.15410

AGOF: L-malate dehydrogenase activity, malate dehydrogenase activity, oxidoreductase activity

AGOC: glycosome

AGOP: glycolysis, malate metabolic process, oxidation-reduction process, tricarboxylic acid cycle

PGOF: L-malate dehydrogenase activity, catalytic activity, oxidoreductase activity, acting on the CH-OH group of donors, NAD

PGOC: null

PGOP: carbohydrate metabolic process, cellular carbohydrate metabolic process, malate metabolic process, oxidation-reduct

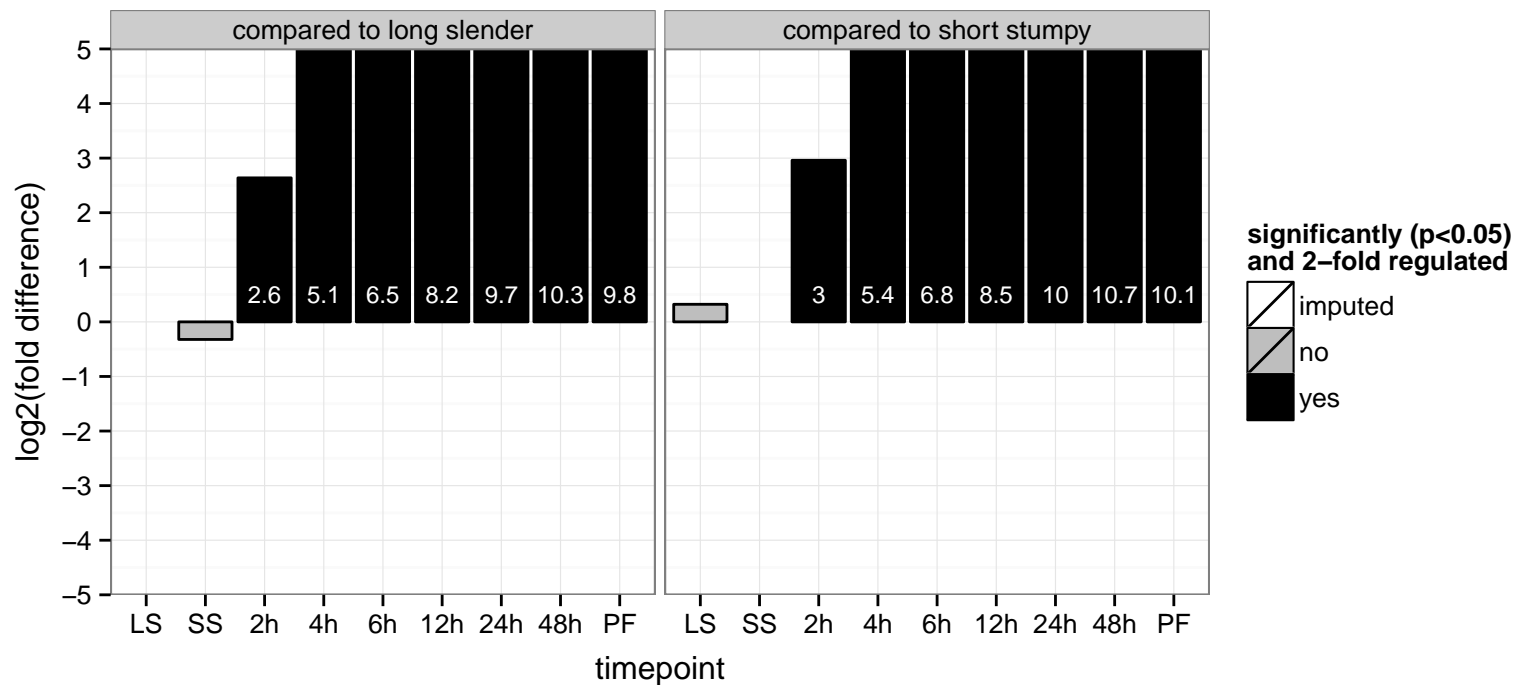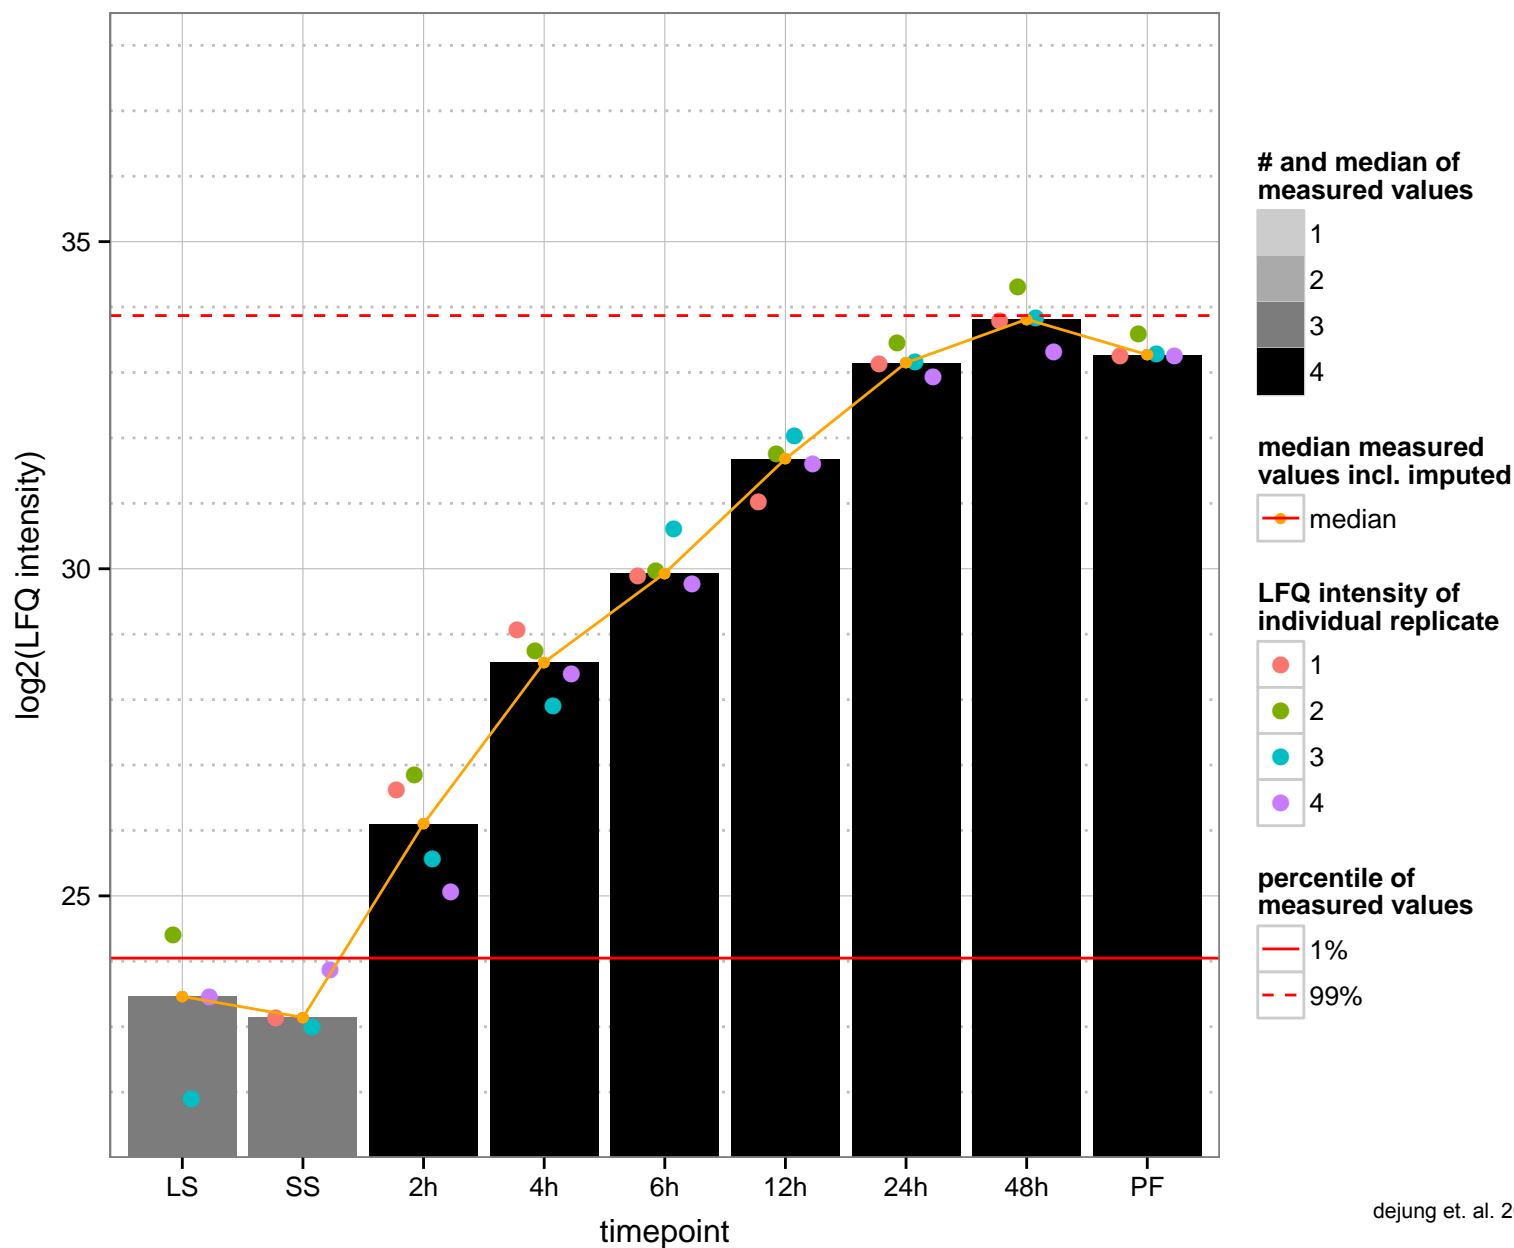

hypothetical protein, conserved  
 Tb927.10.1960  
 AGOF: null  
 AGOC: null  
 AGOP: null  
 PGOF: binding  
 PGO: null  
 PGOP: null

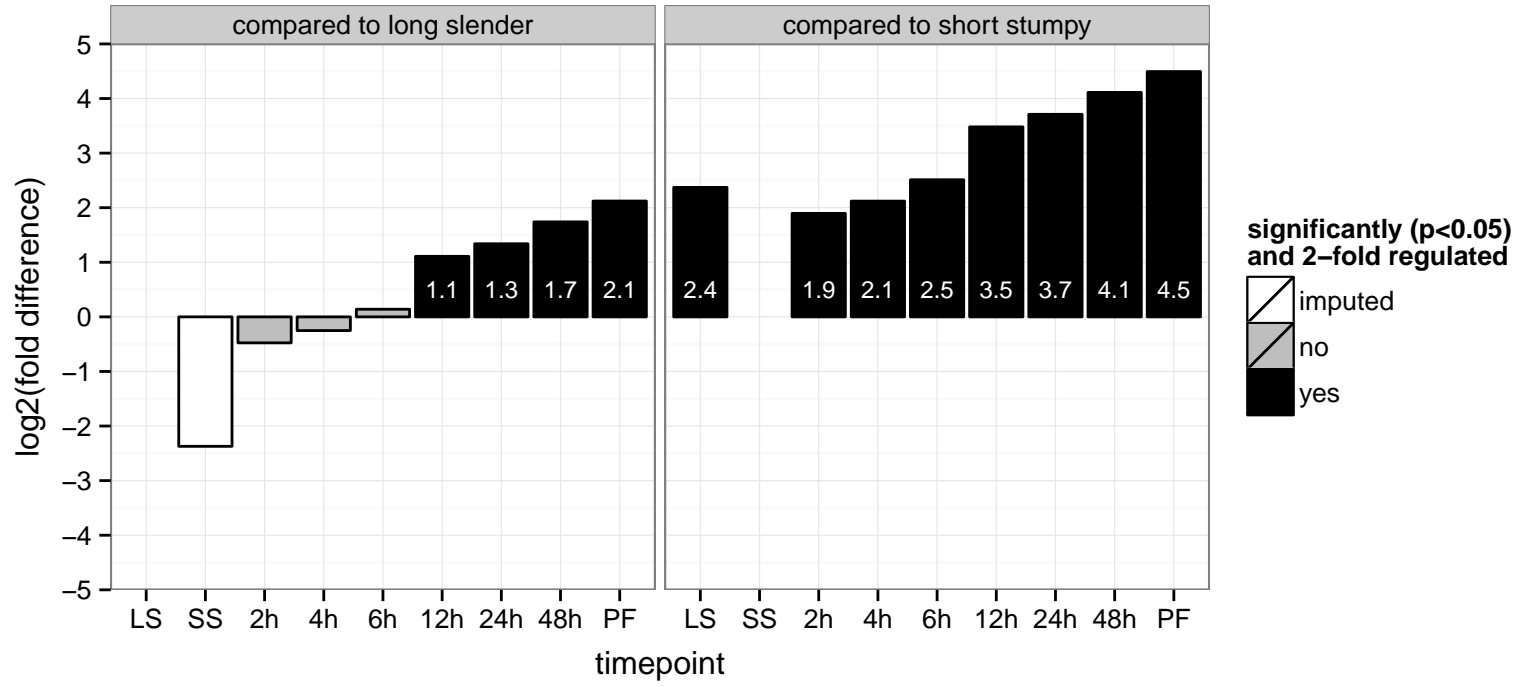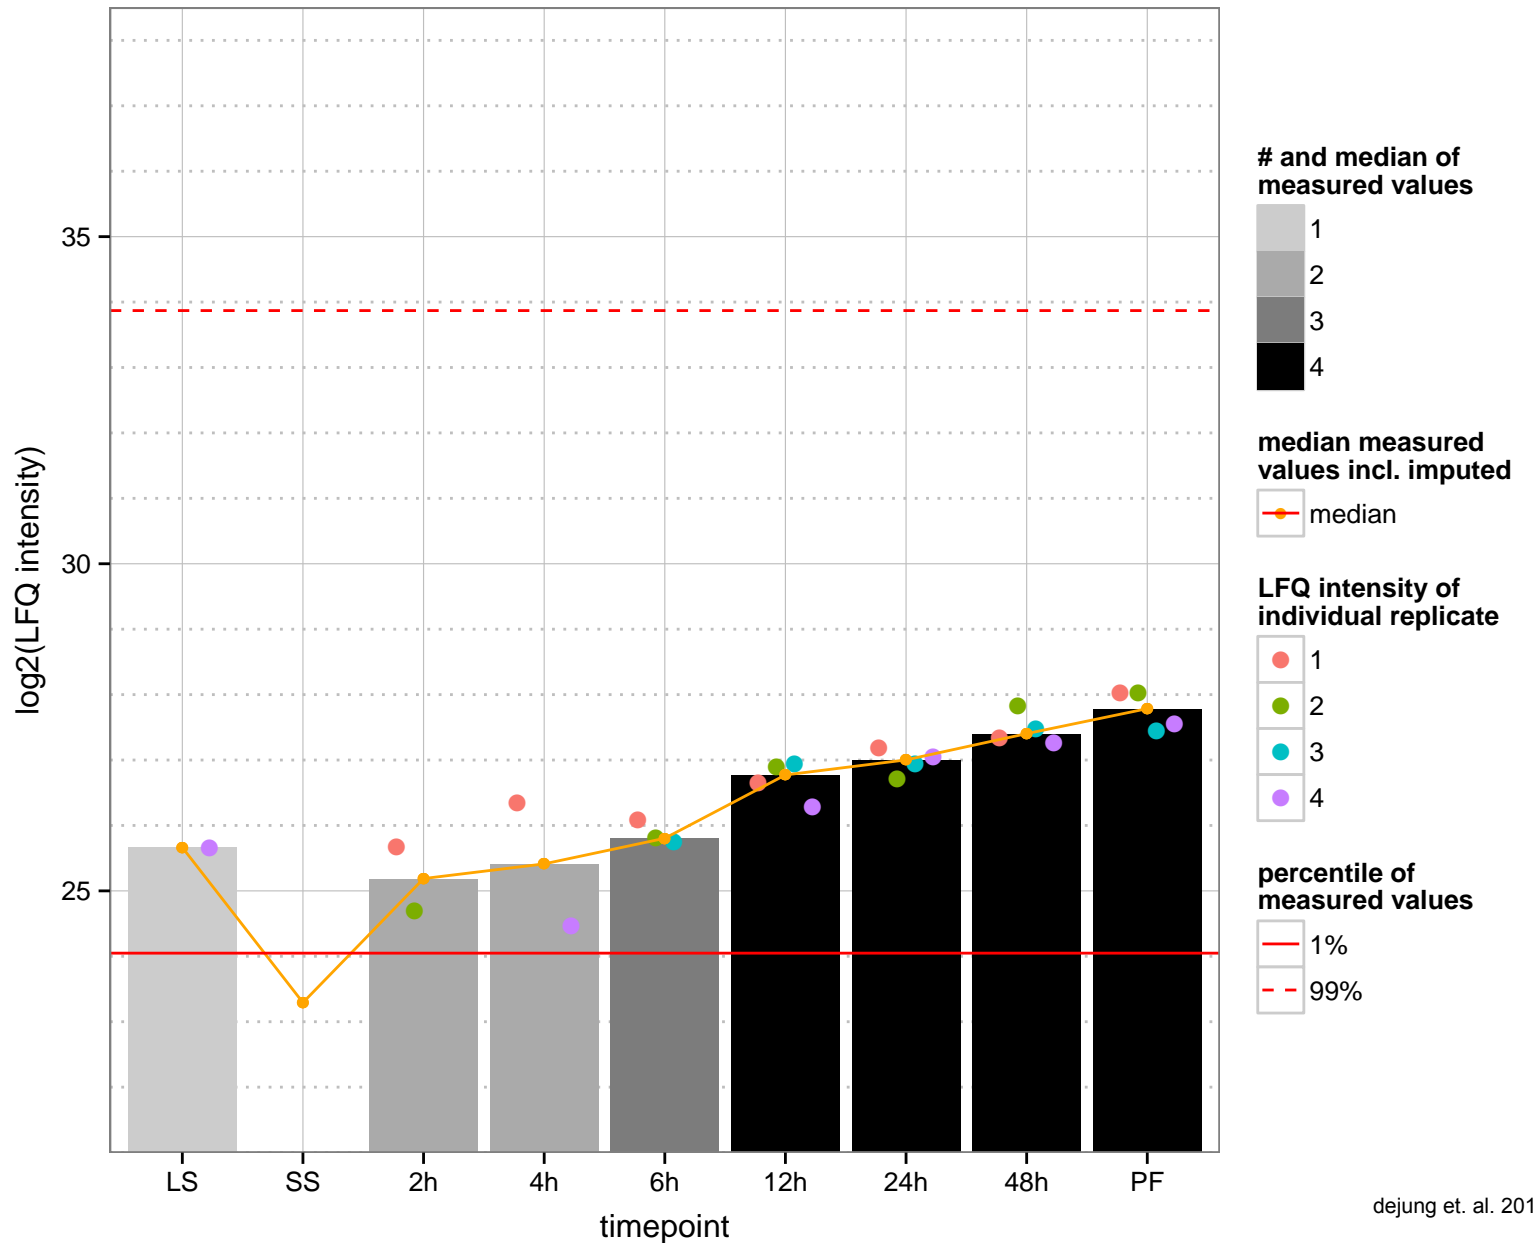

ubiquitin carboxyl-terminal hydrolase, putative, Peptidase C19, ubiquitin carboxyl-terminal hydrolase  
 Tb927.10.2210  
 AGOF: null, cysteine-type endopeptidase activity, ubiquitin thiolesterase activity  
 AGOC: null  
 AGOP: null, ubiquitin-dependent protein catabolic process  
 PGO: ubiquitin thiolesterase activity  
 PGO: null  
 PGO: ubiquitin-dependent protein catabolic process

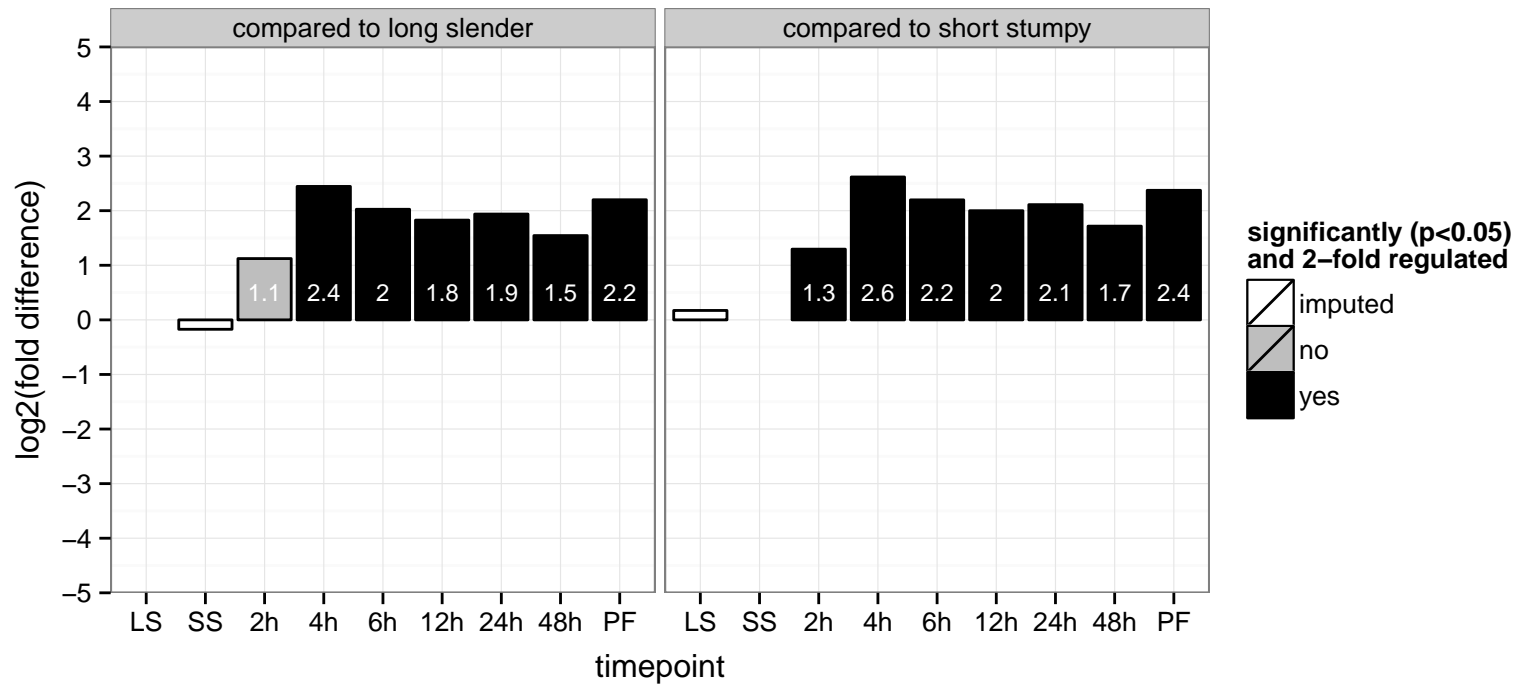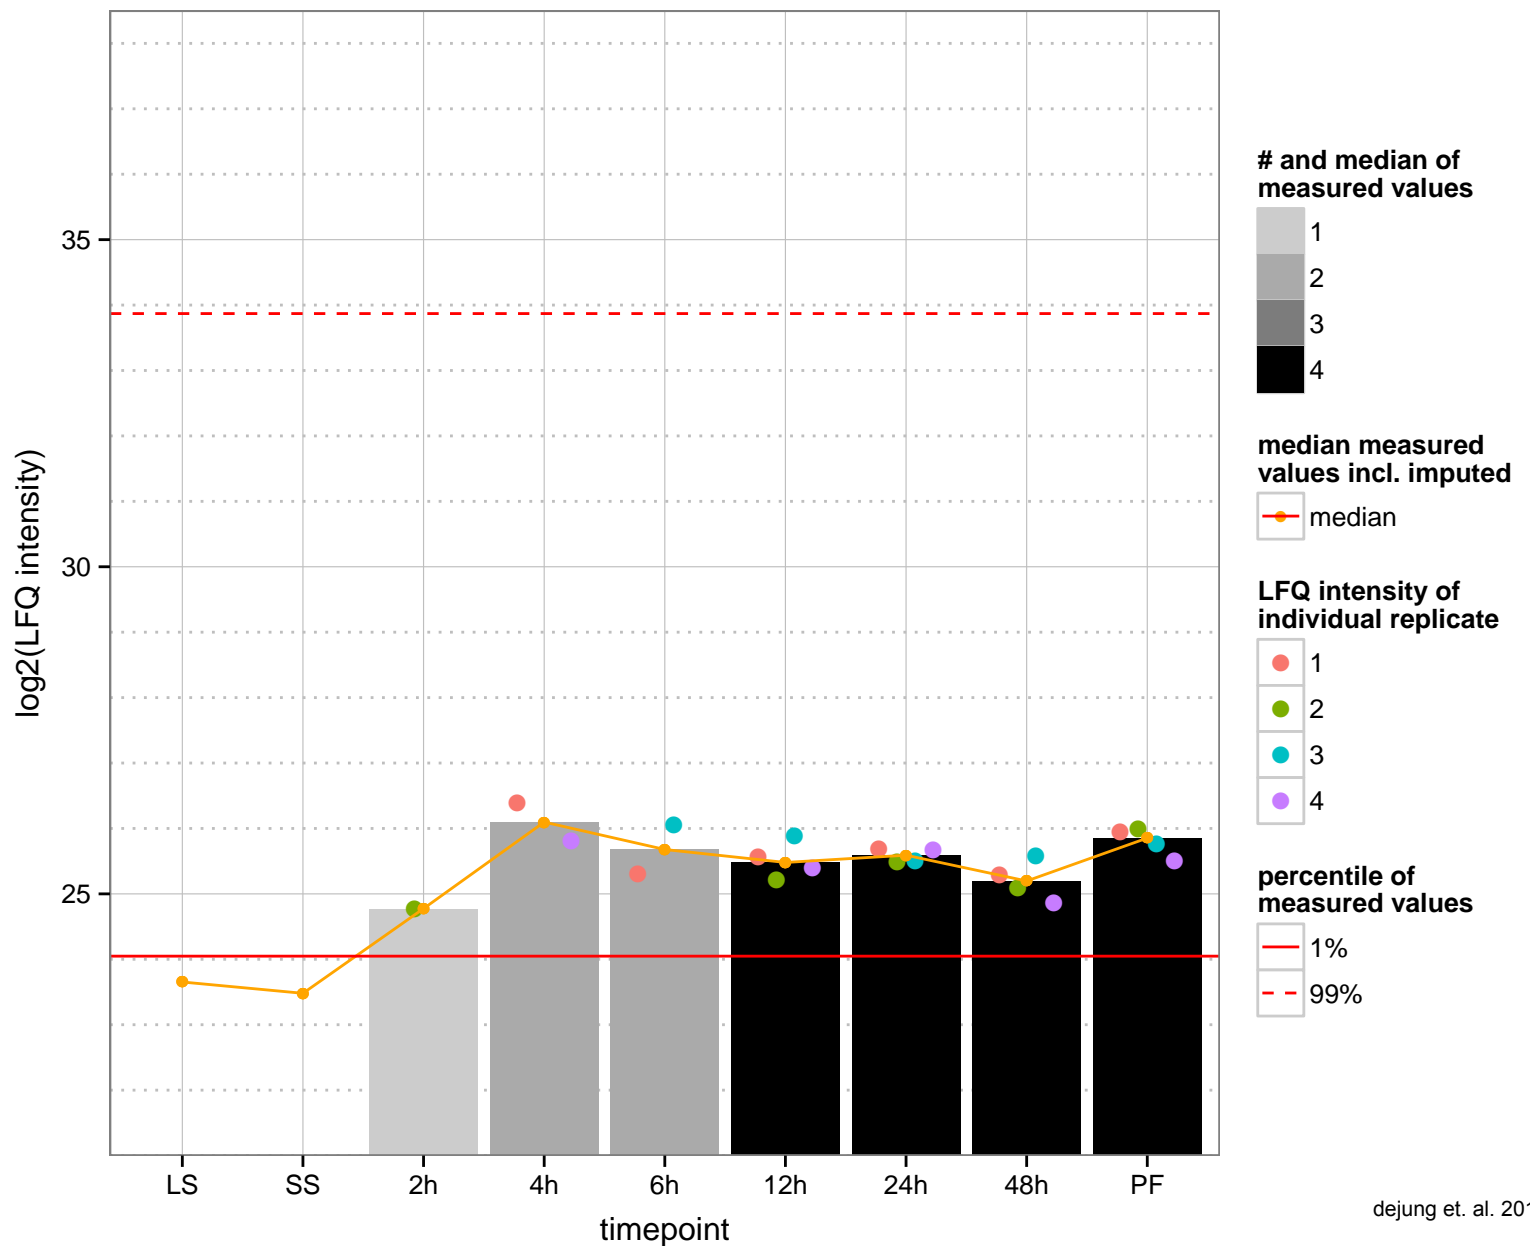

hypothetical protein, conserved  
 Tb927.10.3040  
 AGOF: null  
 AGOC: mitochondrial inner membrane, mitochondrion  
 AGOP: null  
 PGO: null  
 PGO: null  
 PGO: null

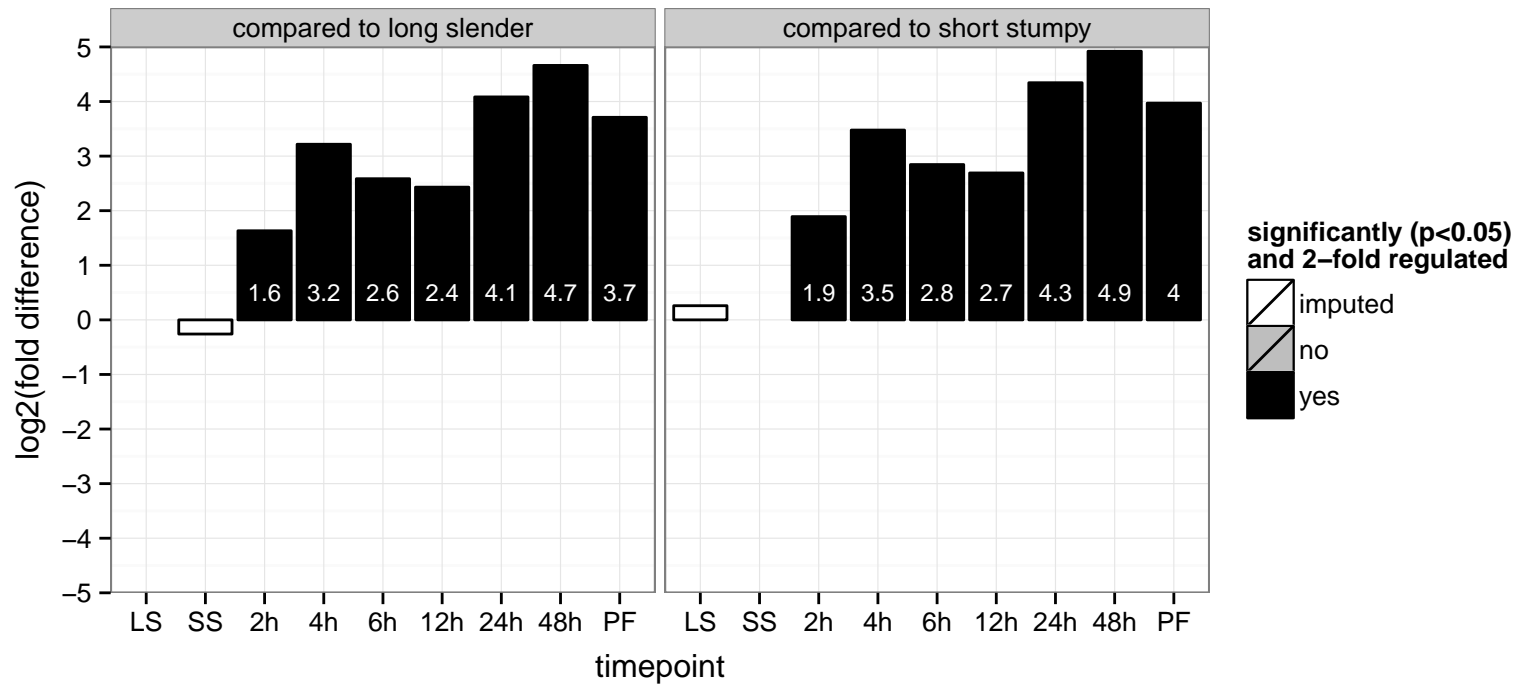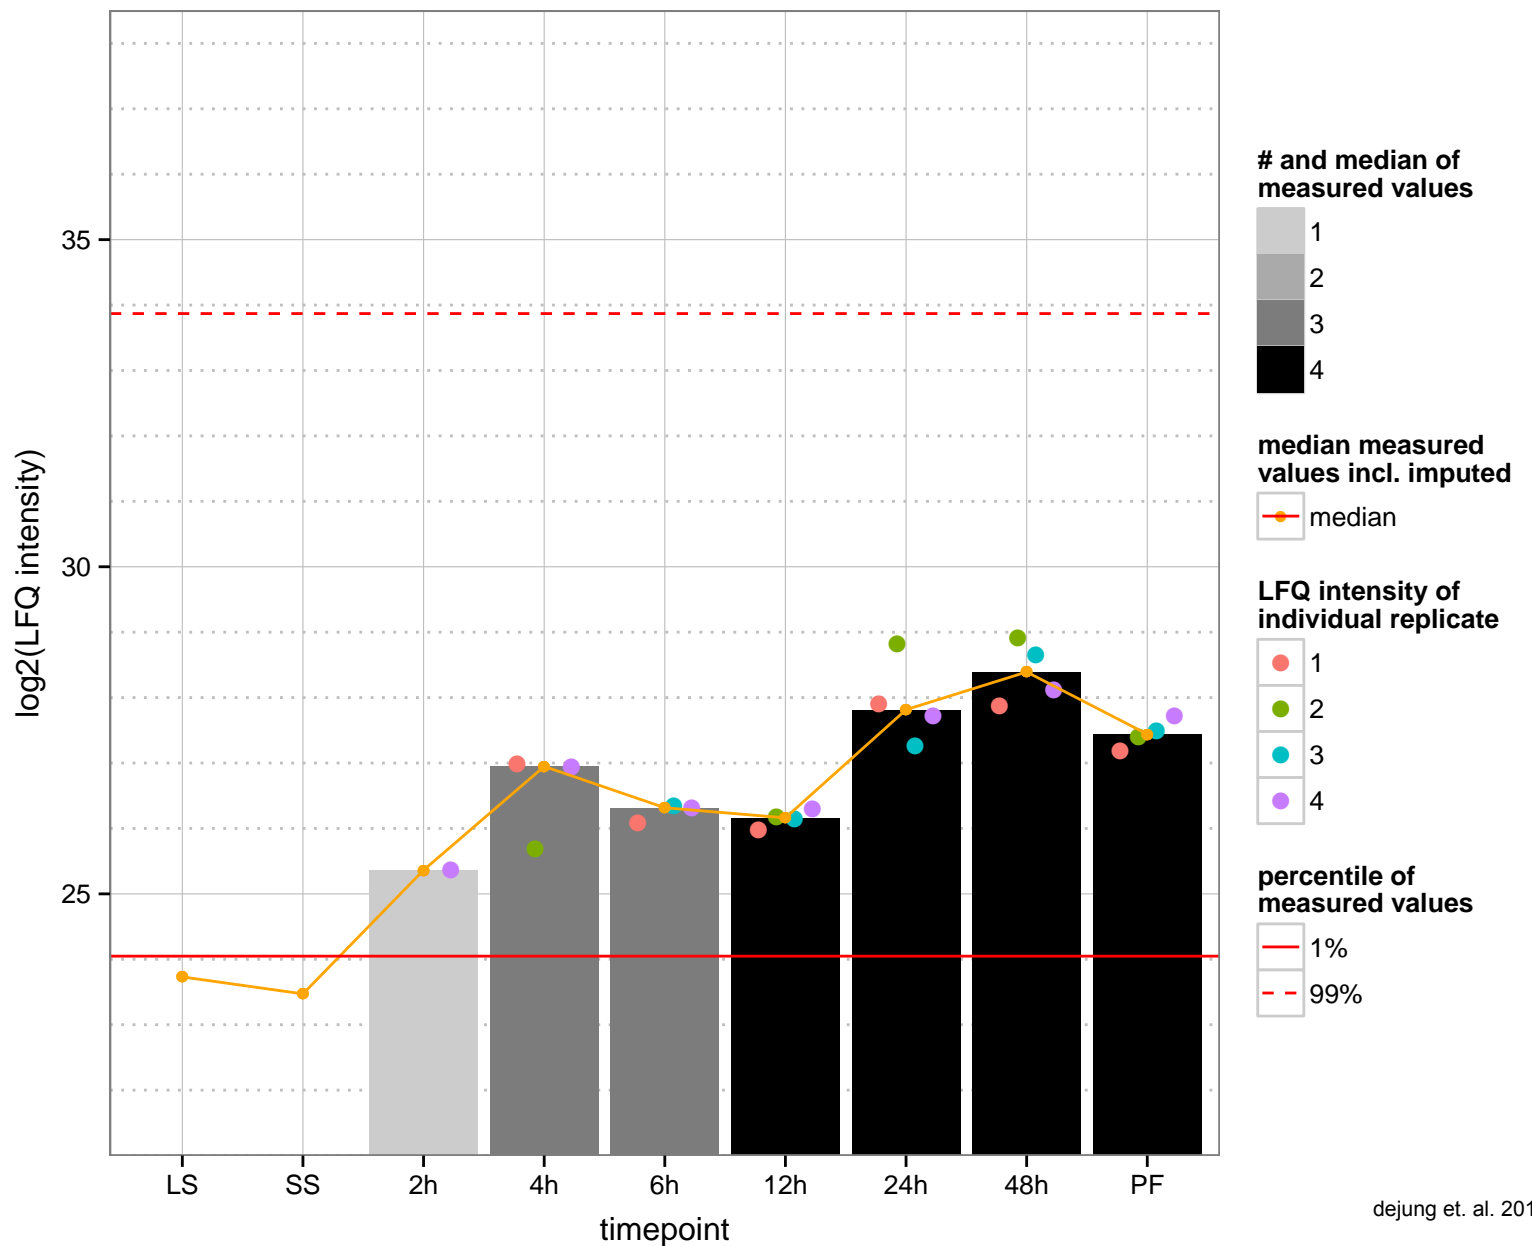

hypothetical protein, conserved  
 Tb927.10.3160  
 AGOF: null  
 AGOC: null  
 AGOP: null  
 PGO: null  
 PGO: null  
 PGO: null

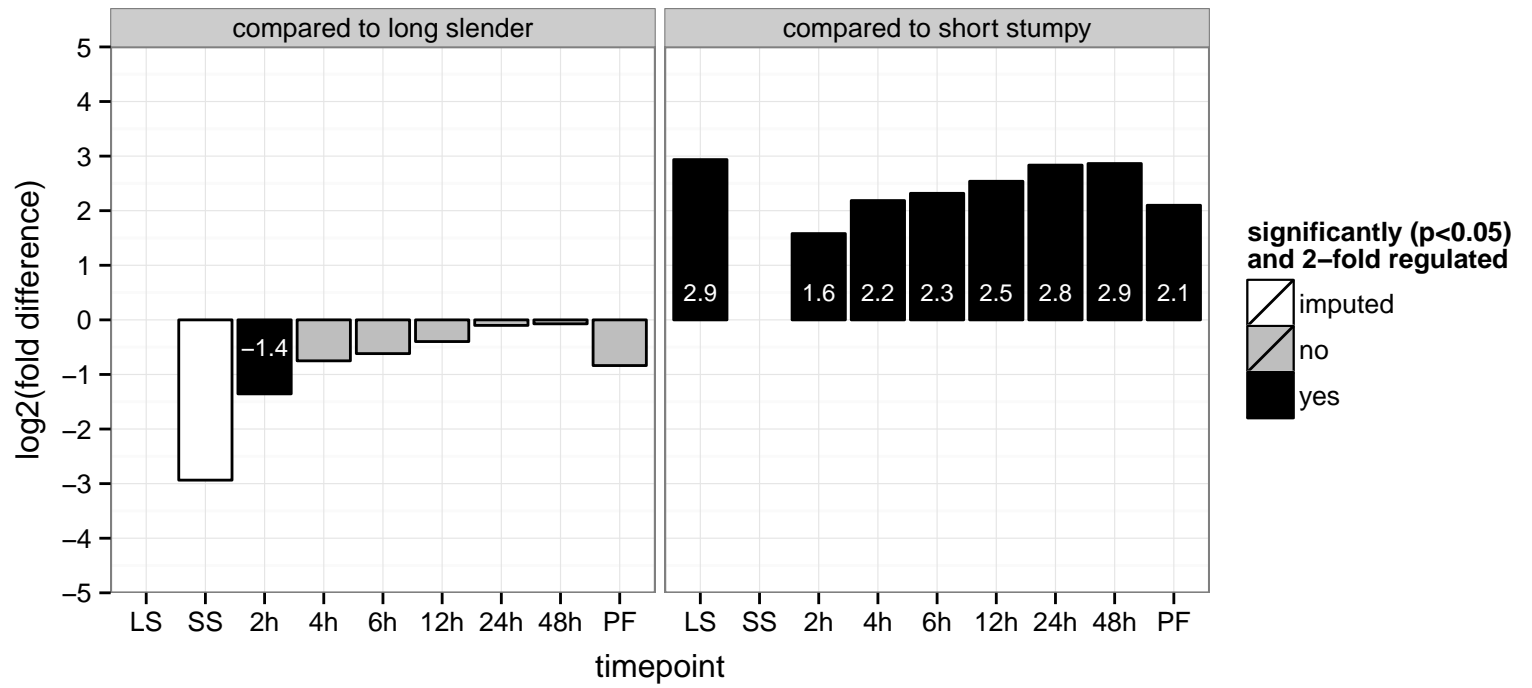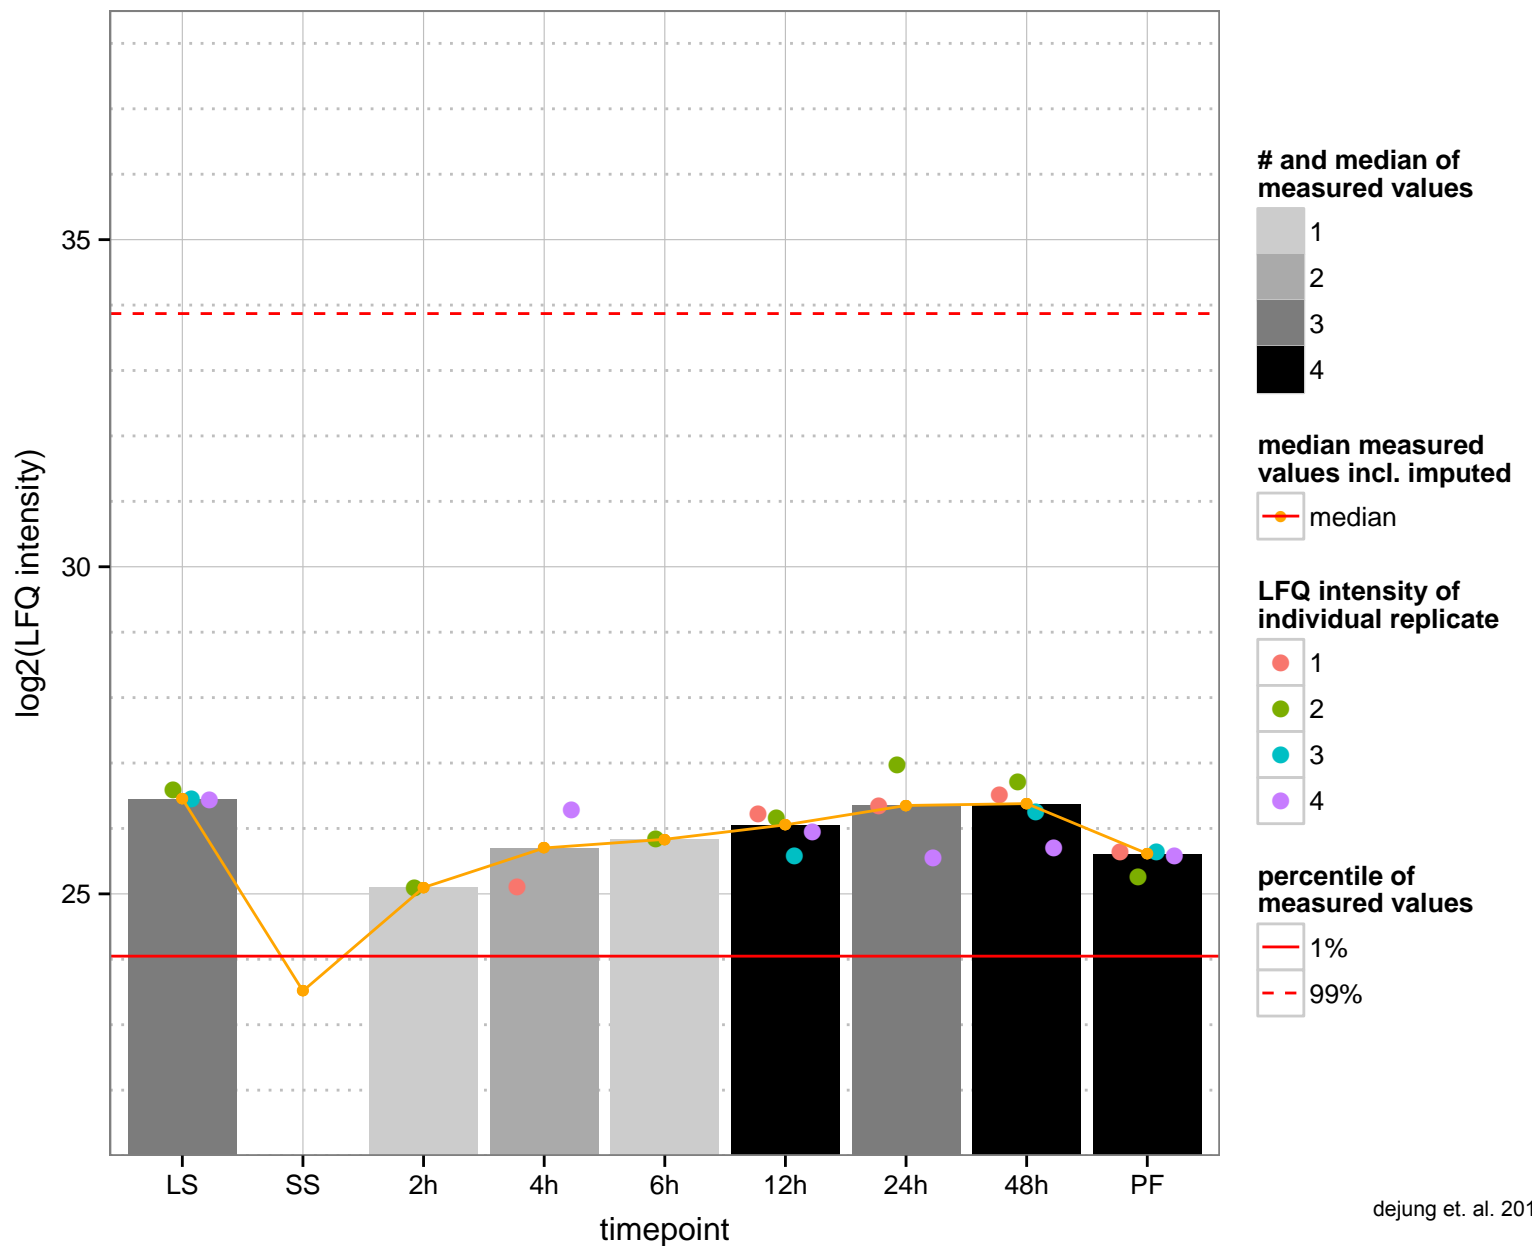

hypothetical protein, conserved  
 Tb927.10.6550  
 AGOF: DNA binding, zinc ion binding  
 AGOC: null  
 AGOP: null  
 PGOF: DNA binding, zinc ion binding  
 PGOC: null  
 PGOP: null

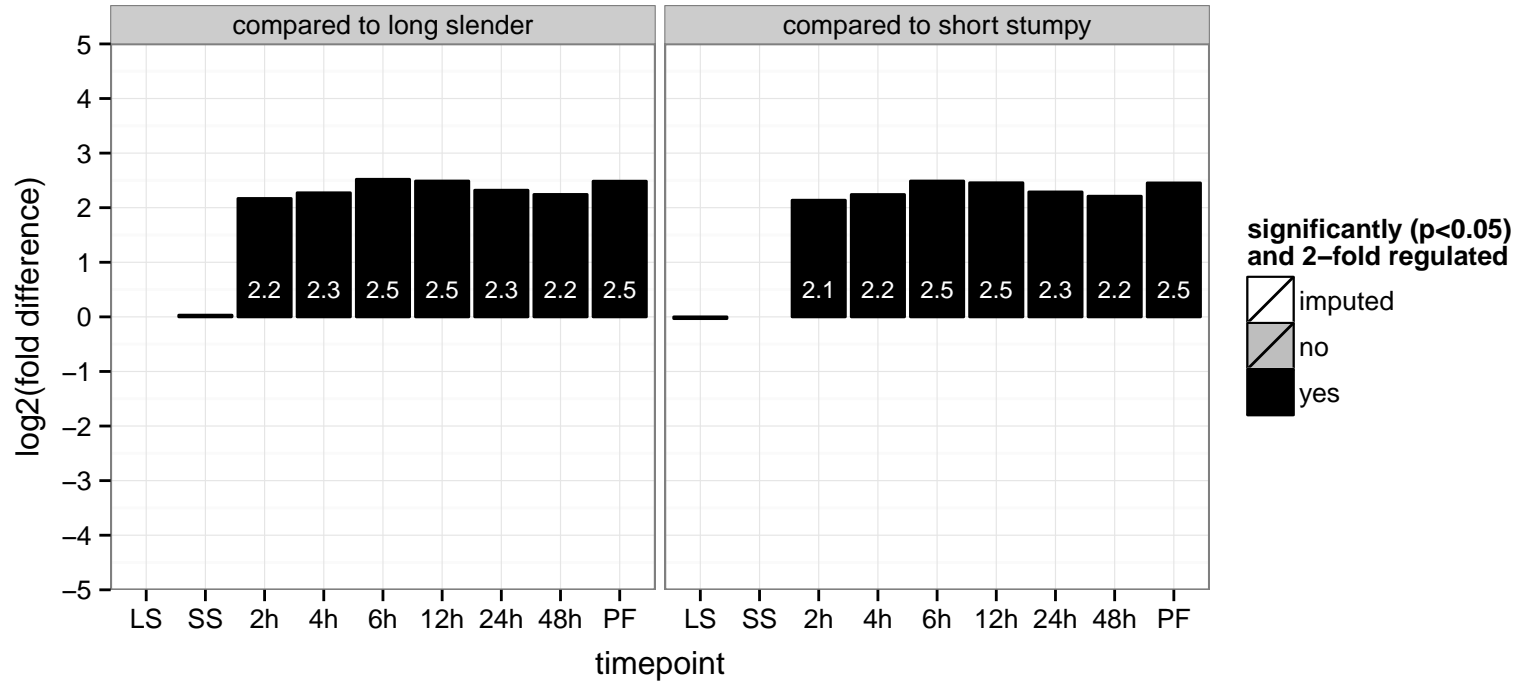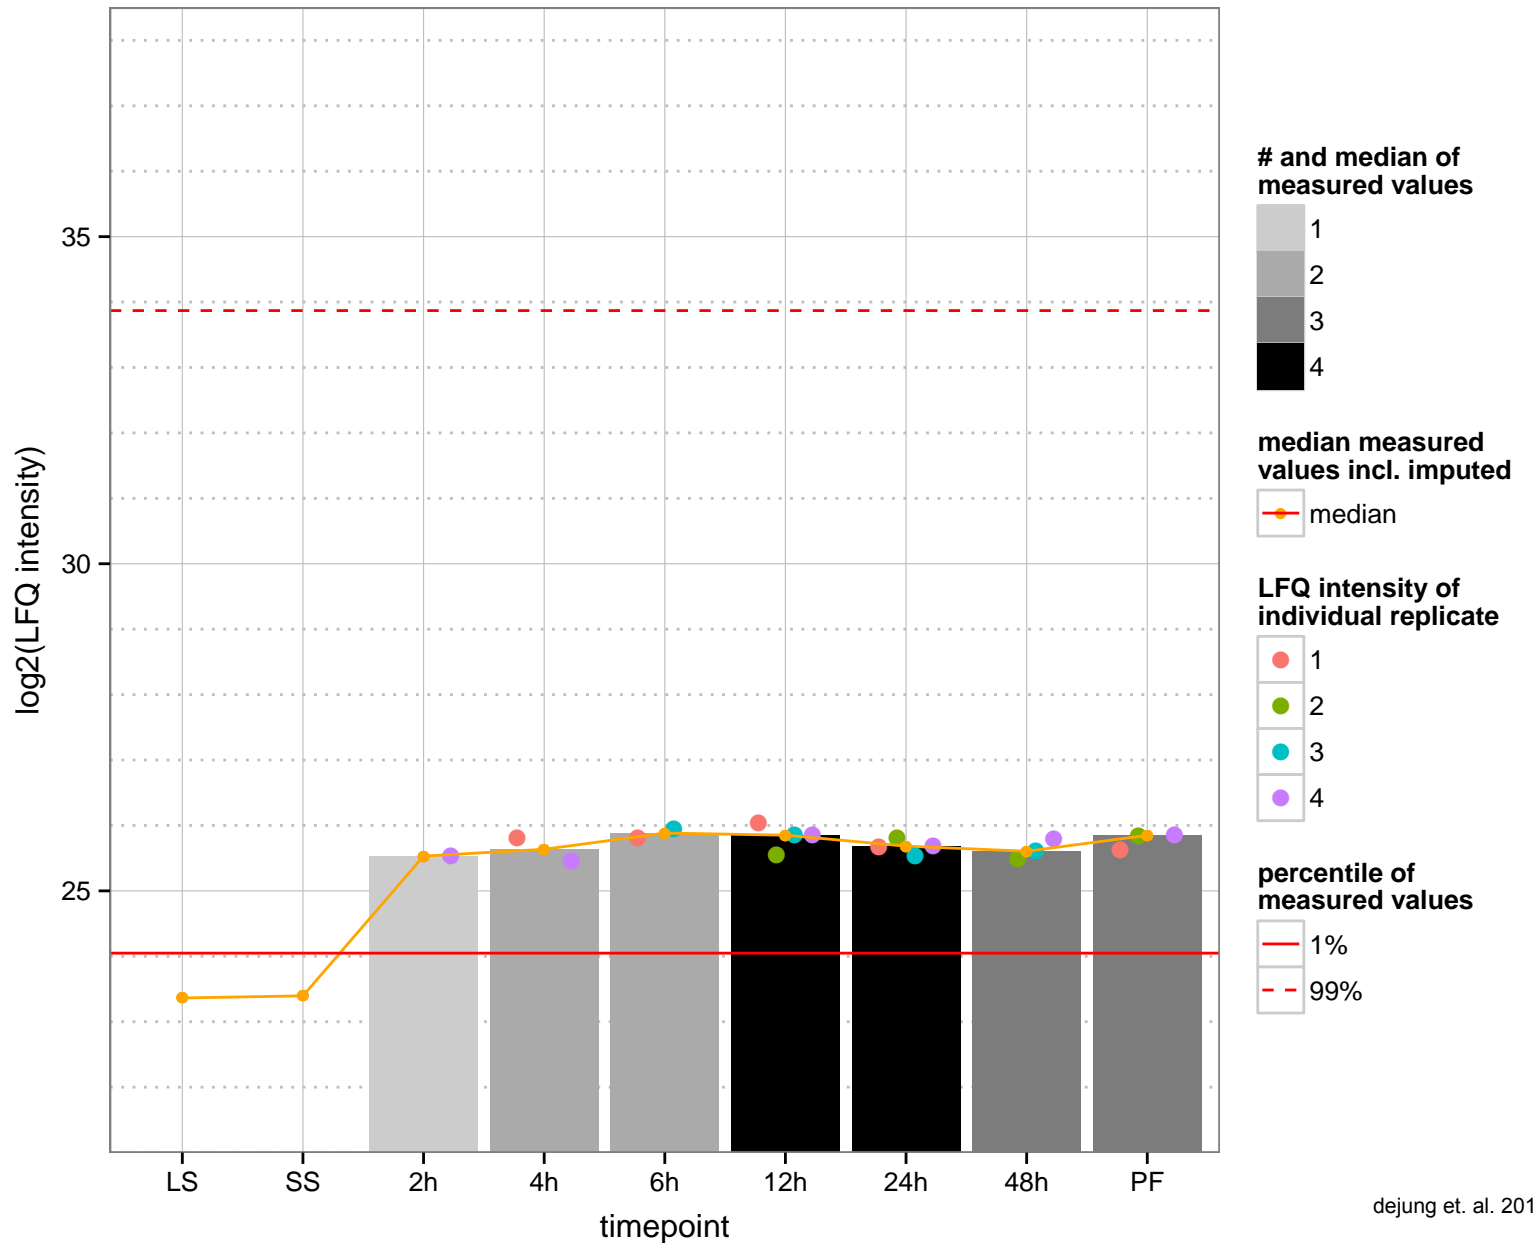



tRNA pseudouridine synthase TruD, putative, pseudouridine synthase TruD, putative (pus7)  
 Tb927.10.9050  
 AGOF: RNA binding, pseudouridine synthase activity  
 AGOC: null  
 AGOP: pseudouridine synthesis  
 PGOF: RNA binding, pseudouridine synthase activity  
 PGO: null  
 PGOP: RNA modification, pseudouridine synthesis

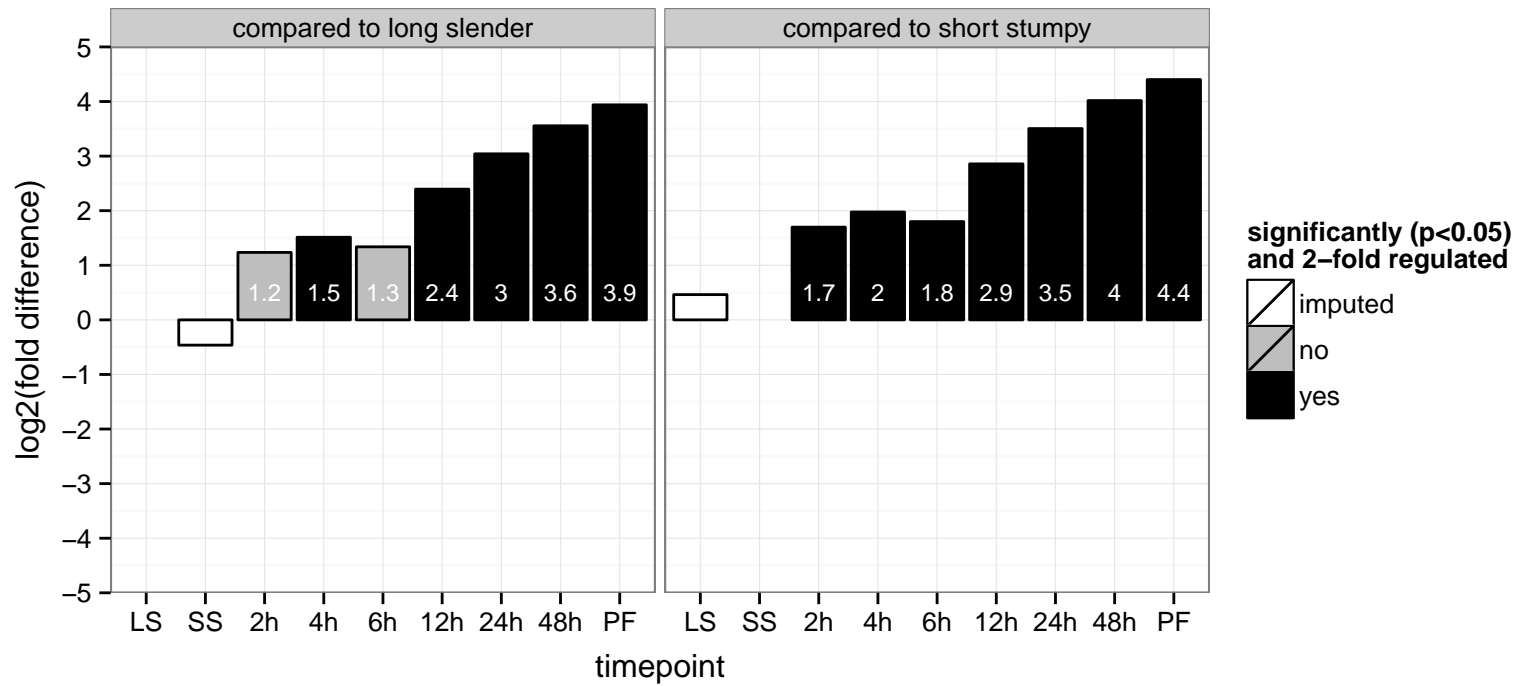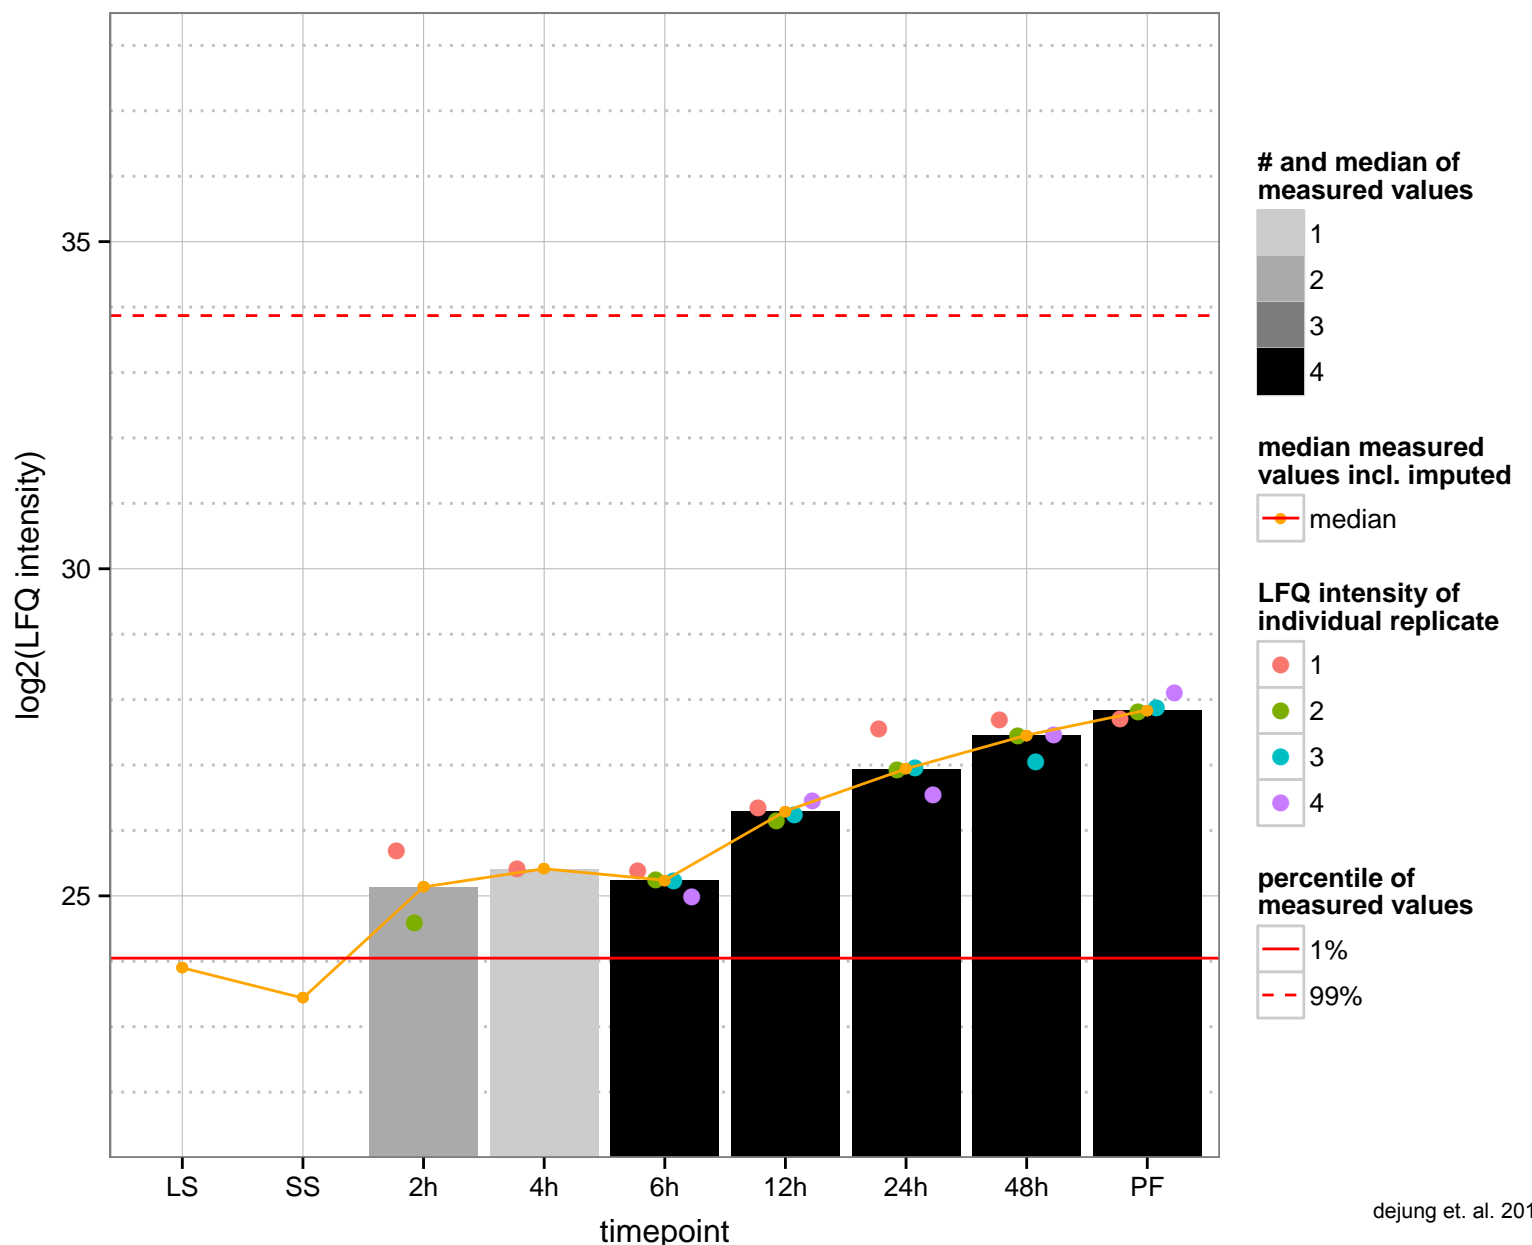

pteridine transporter, putative  
 Tb927.10.9080  
 AGOF: biopterin transporter activity  
 AGOC: null  
 AGOP: biopterin transport  
 PGO: null  
 PGO: null  
 PGO: null

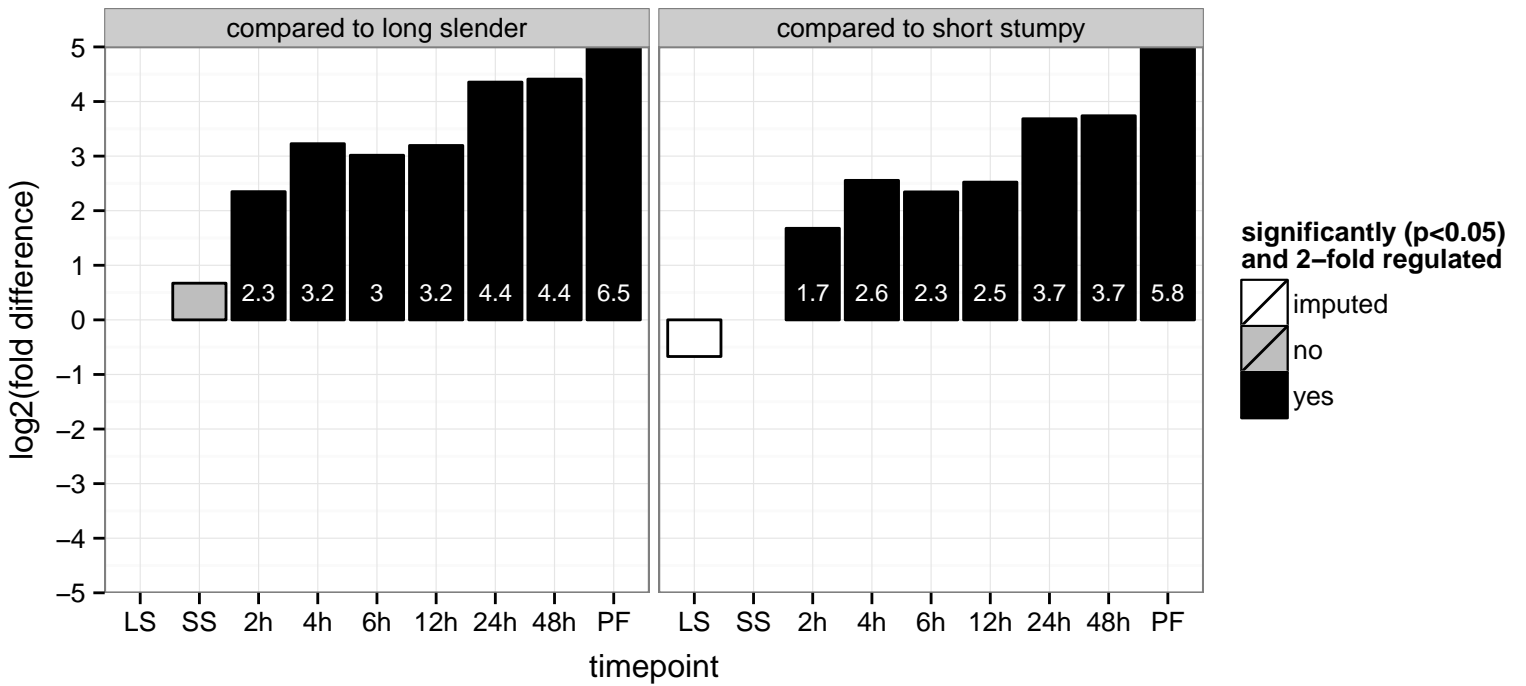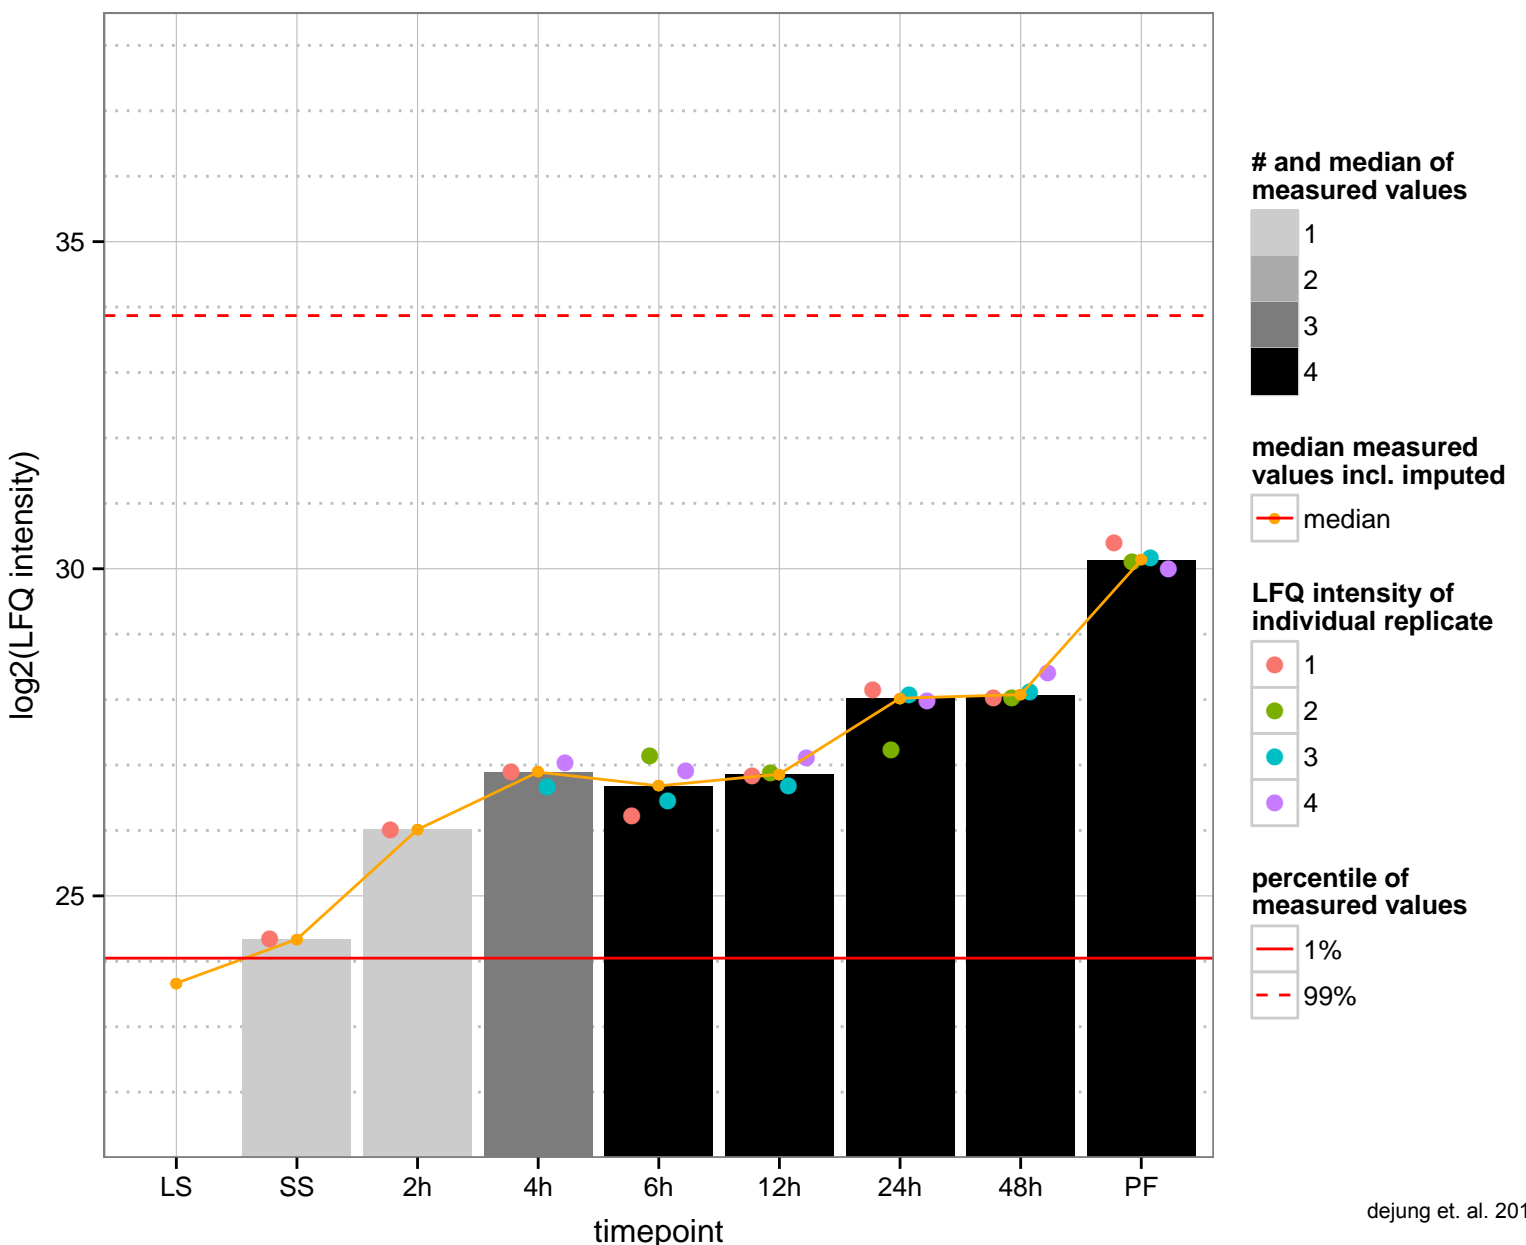

hypothetical protein, conserved  
 Tb927.11.10880  
 AGOF: transferase activity  
 AGOC: null  
 AGOP: null  
 PGOF: protein binding, transferase activity  
 PGO: null  
 PGOP: null

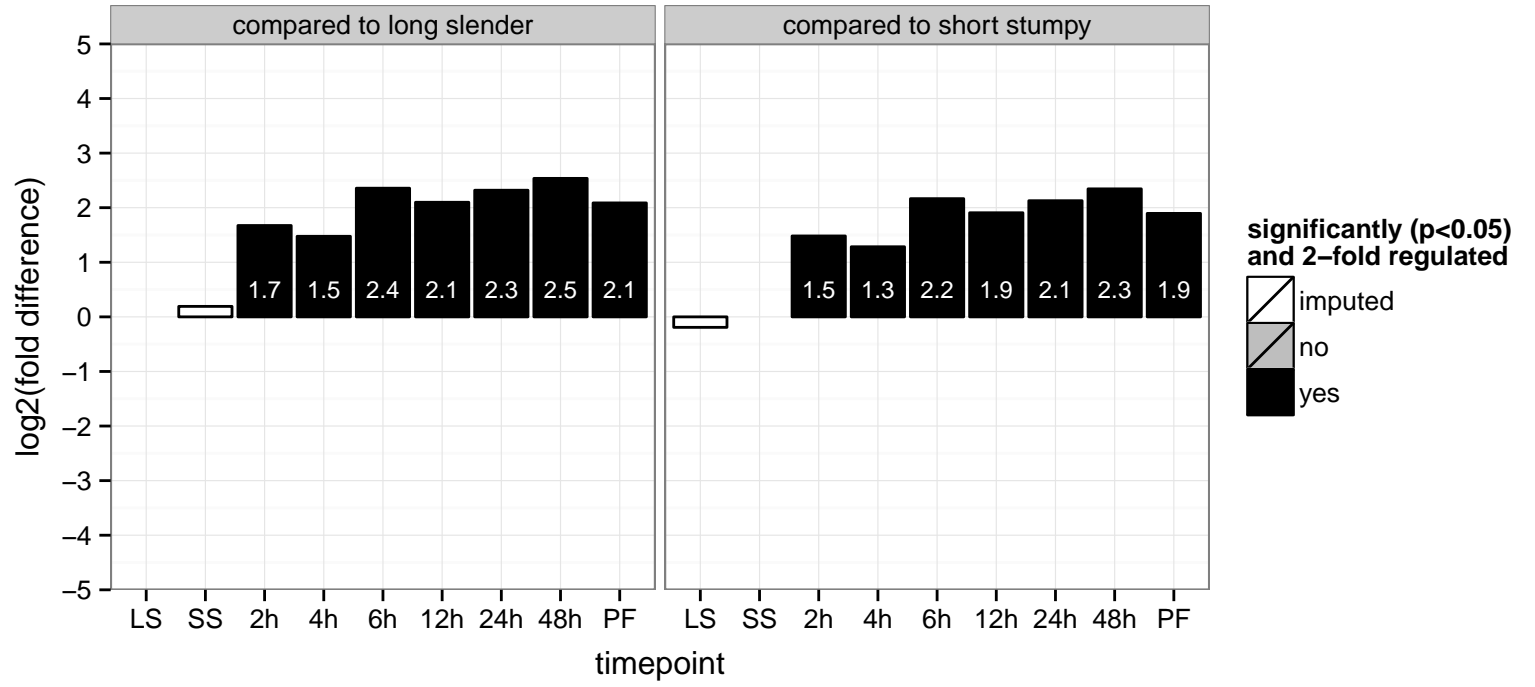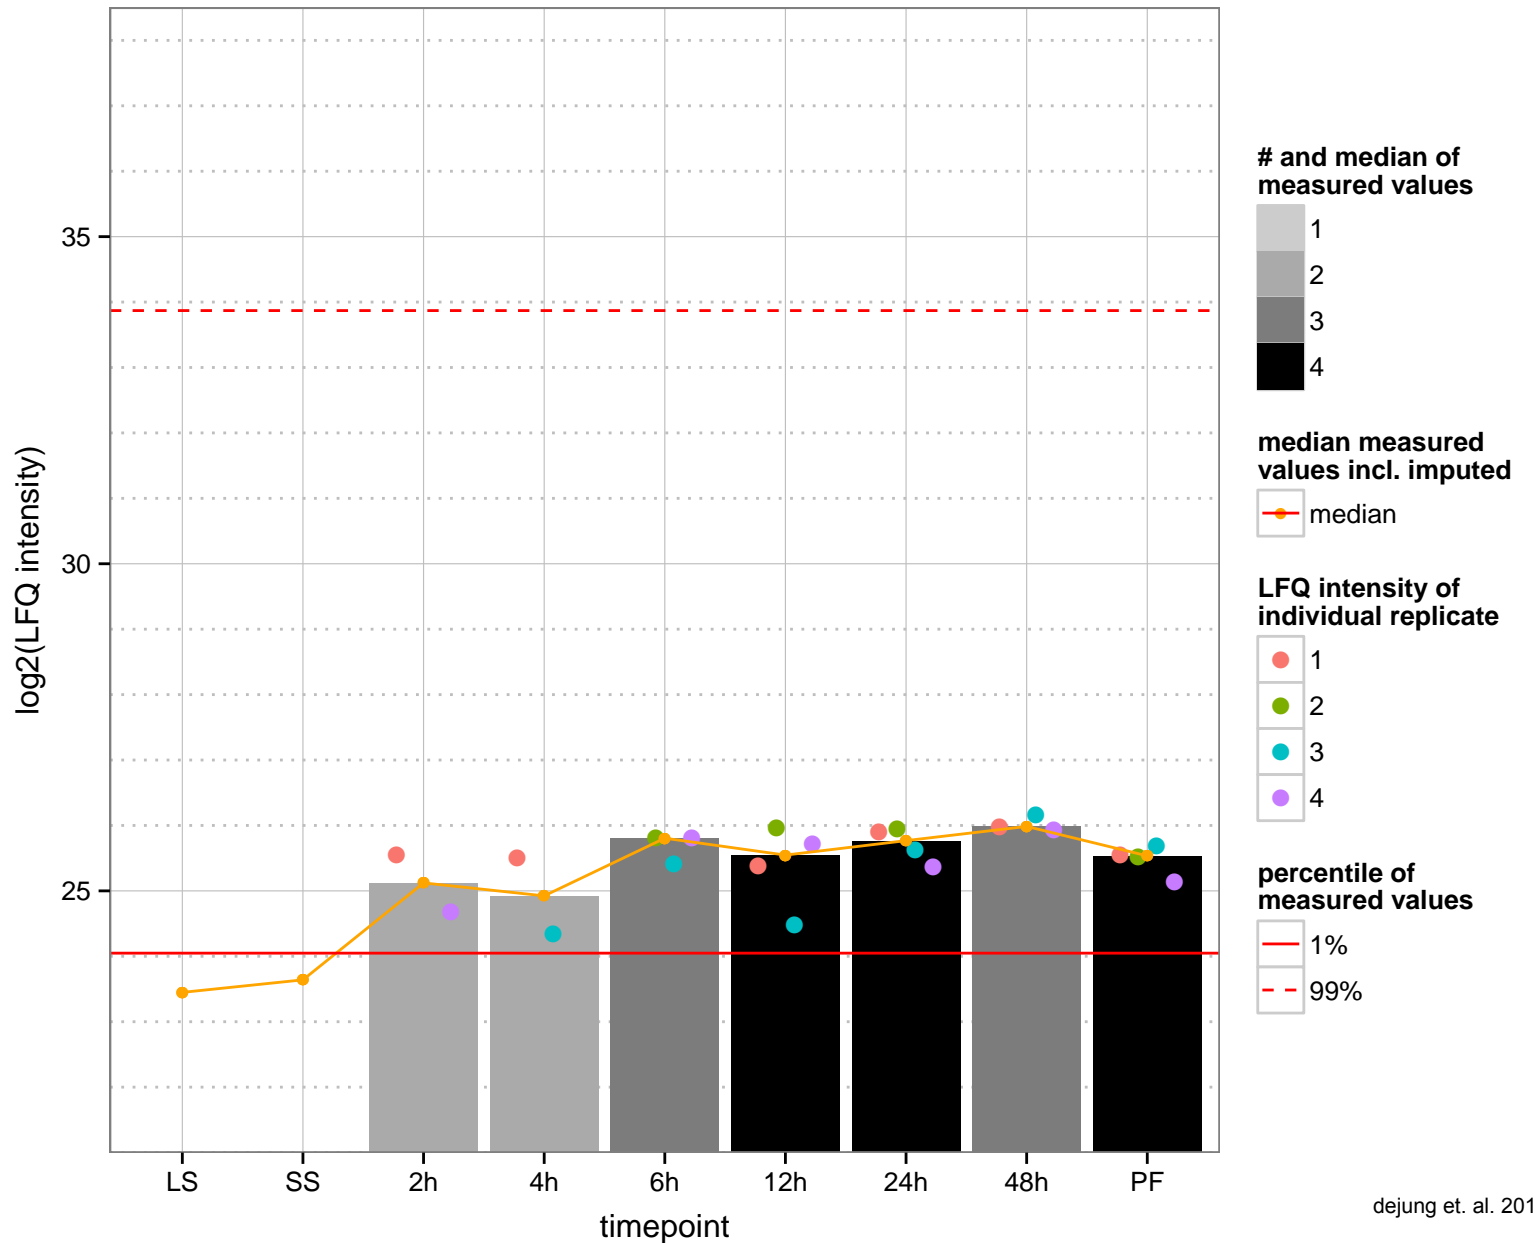

membrane-bound acid phosphatase, putative  
 Tb927.11.11740;Tb927.11.11750  
 AGOF: acid phosphatase activity  
 AGOC: null  
 AGOP: null  
 PGO: null  
 PGOC: null  
 PGOP: null

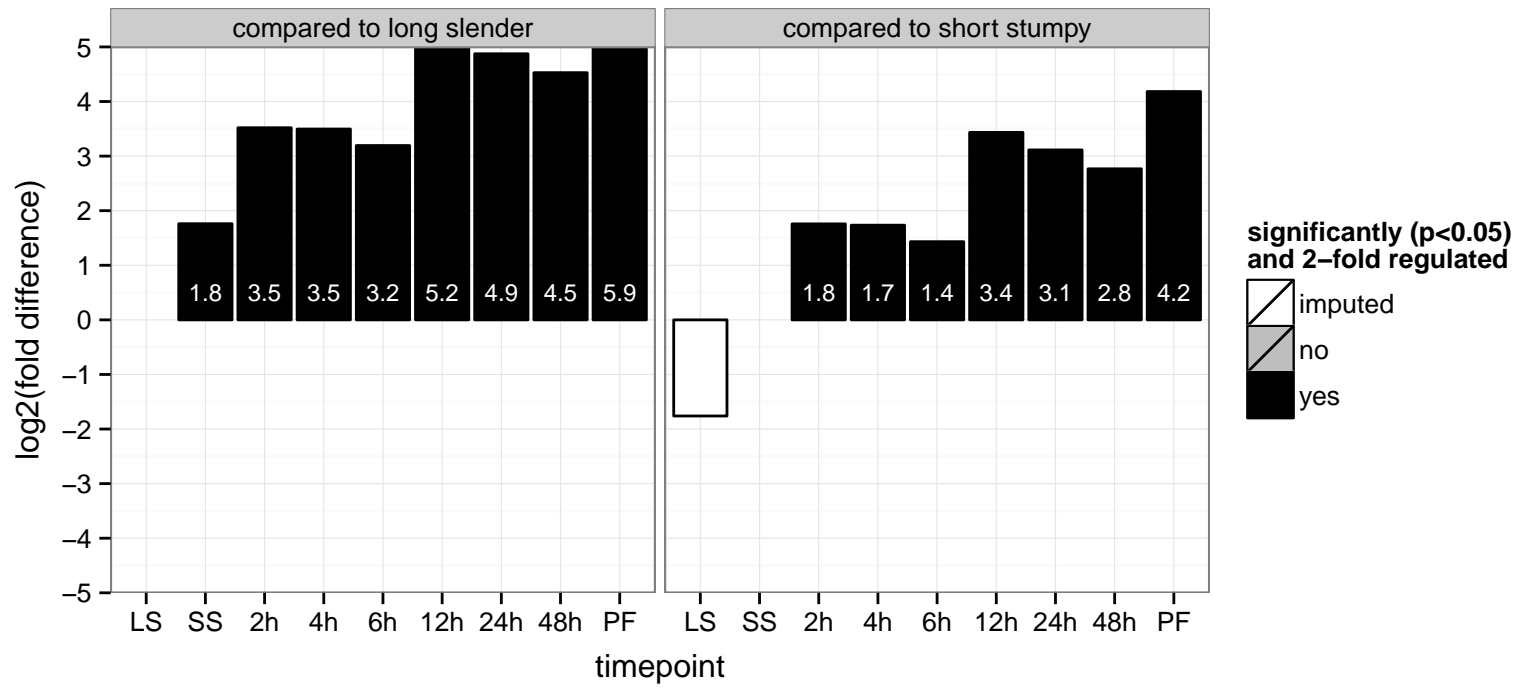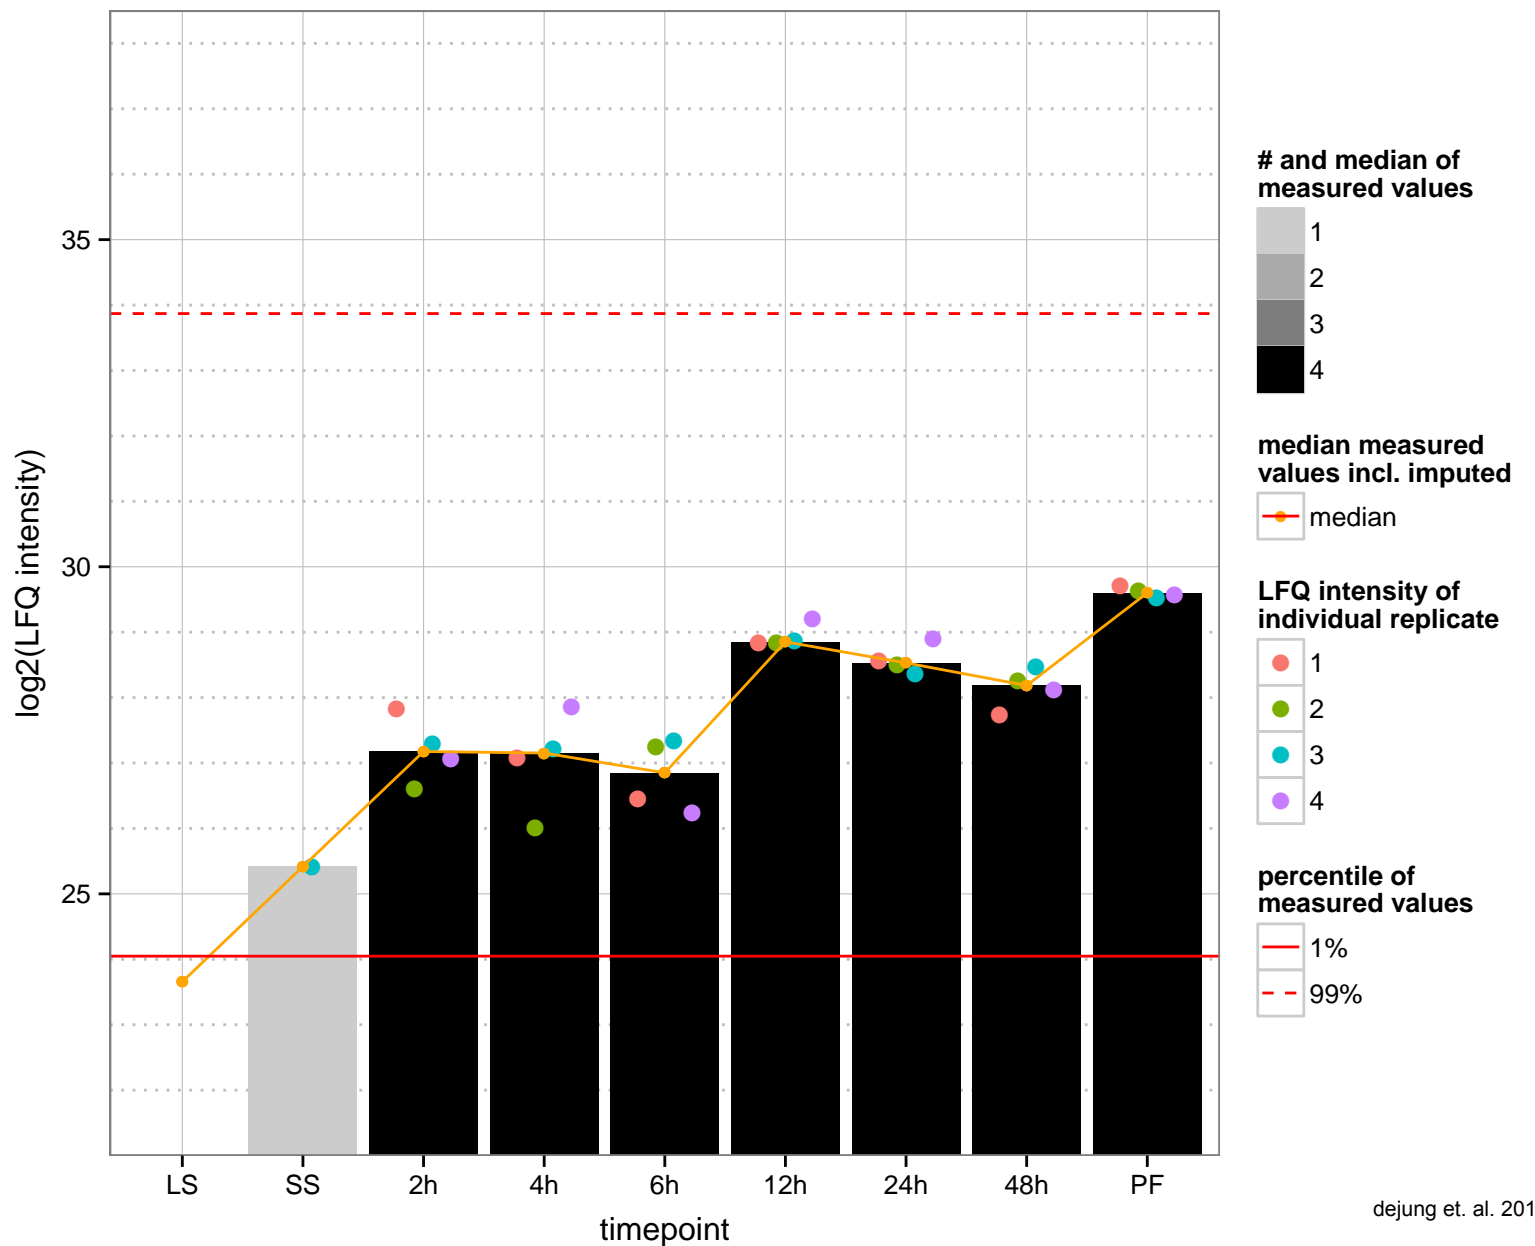

serine/threonine-protein kinase, putative

Tb927.11.15010

AGOF: ATP binding, protein serine/threonine kinase activity, protein tyrosine kinase activity

AGOC: null

AGOP: protein phosphorylation

PGOF: ATP binding, phospholipid binding, protein binding, protein kinase activity, transferase activity, transferring phosphorus

PGOC: null

PGOP: protein phosphorylation

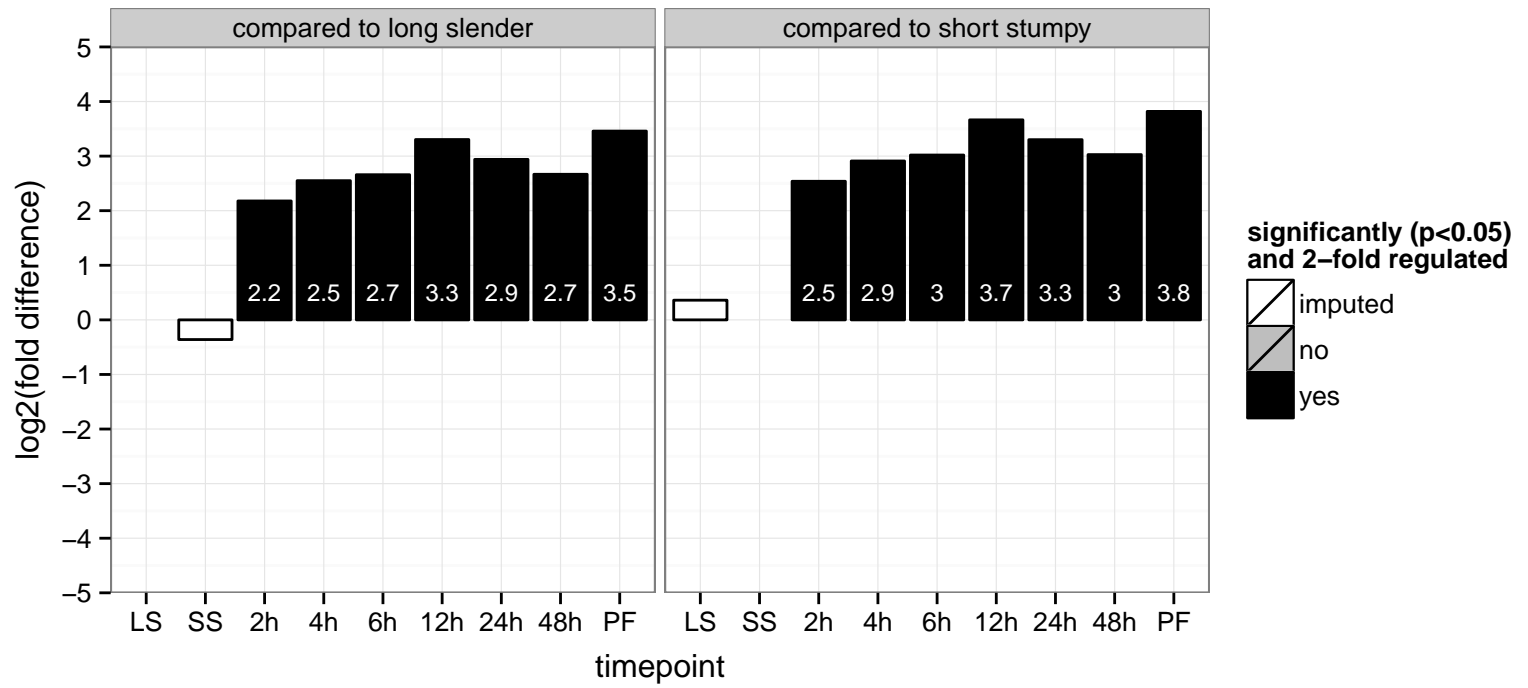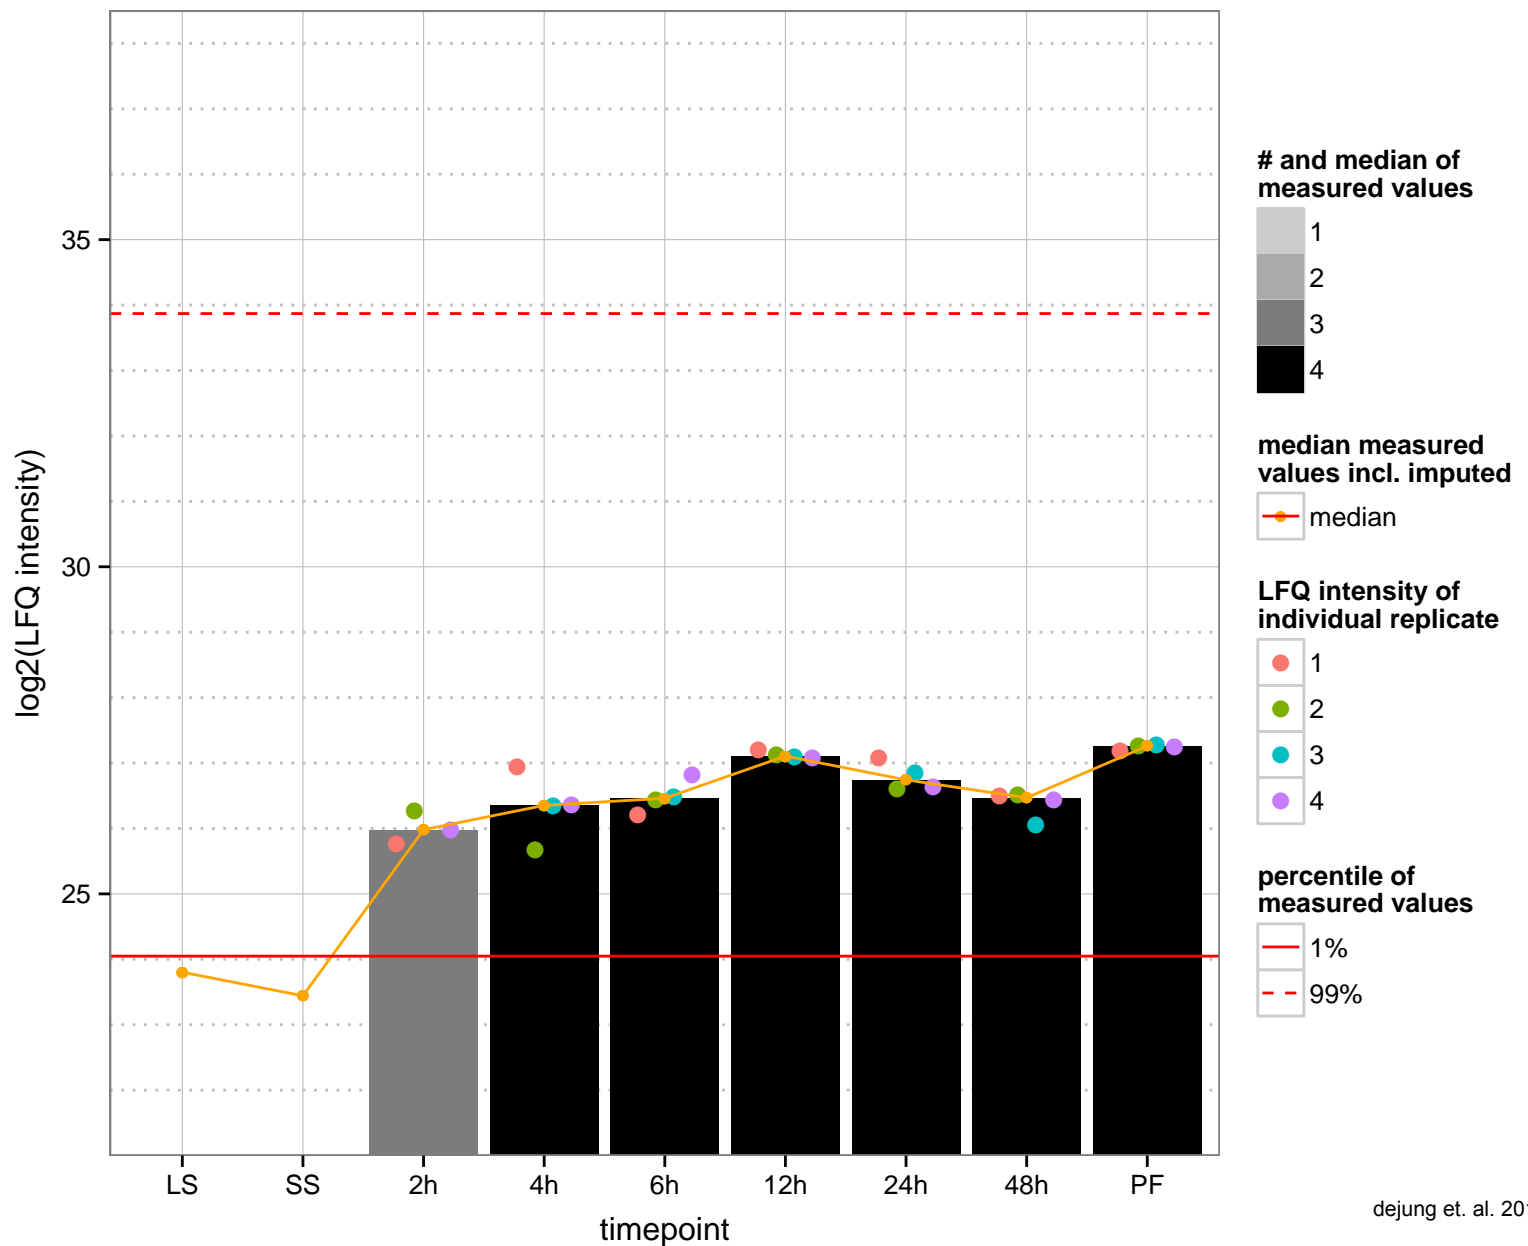

amino acid transporter, putative  
 Tb927.11.15950  
 AGOF: amine transmembrane transporter activity  
 AGOC: integral to membrane  
 AGOP: amino acid transport  
 PGO: null  
 PGOC: null  
 PGOP: null

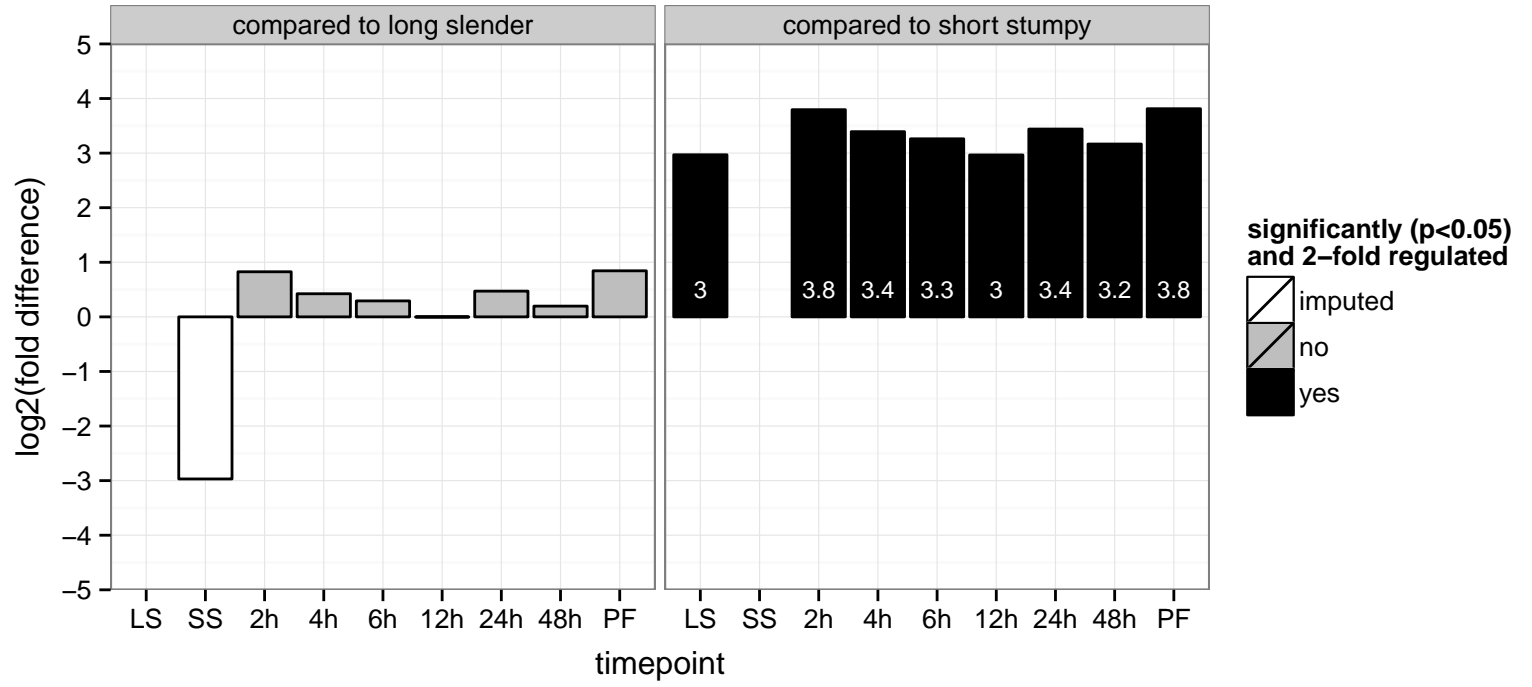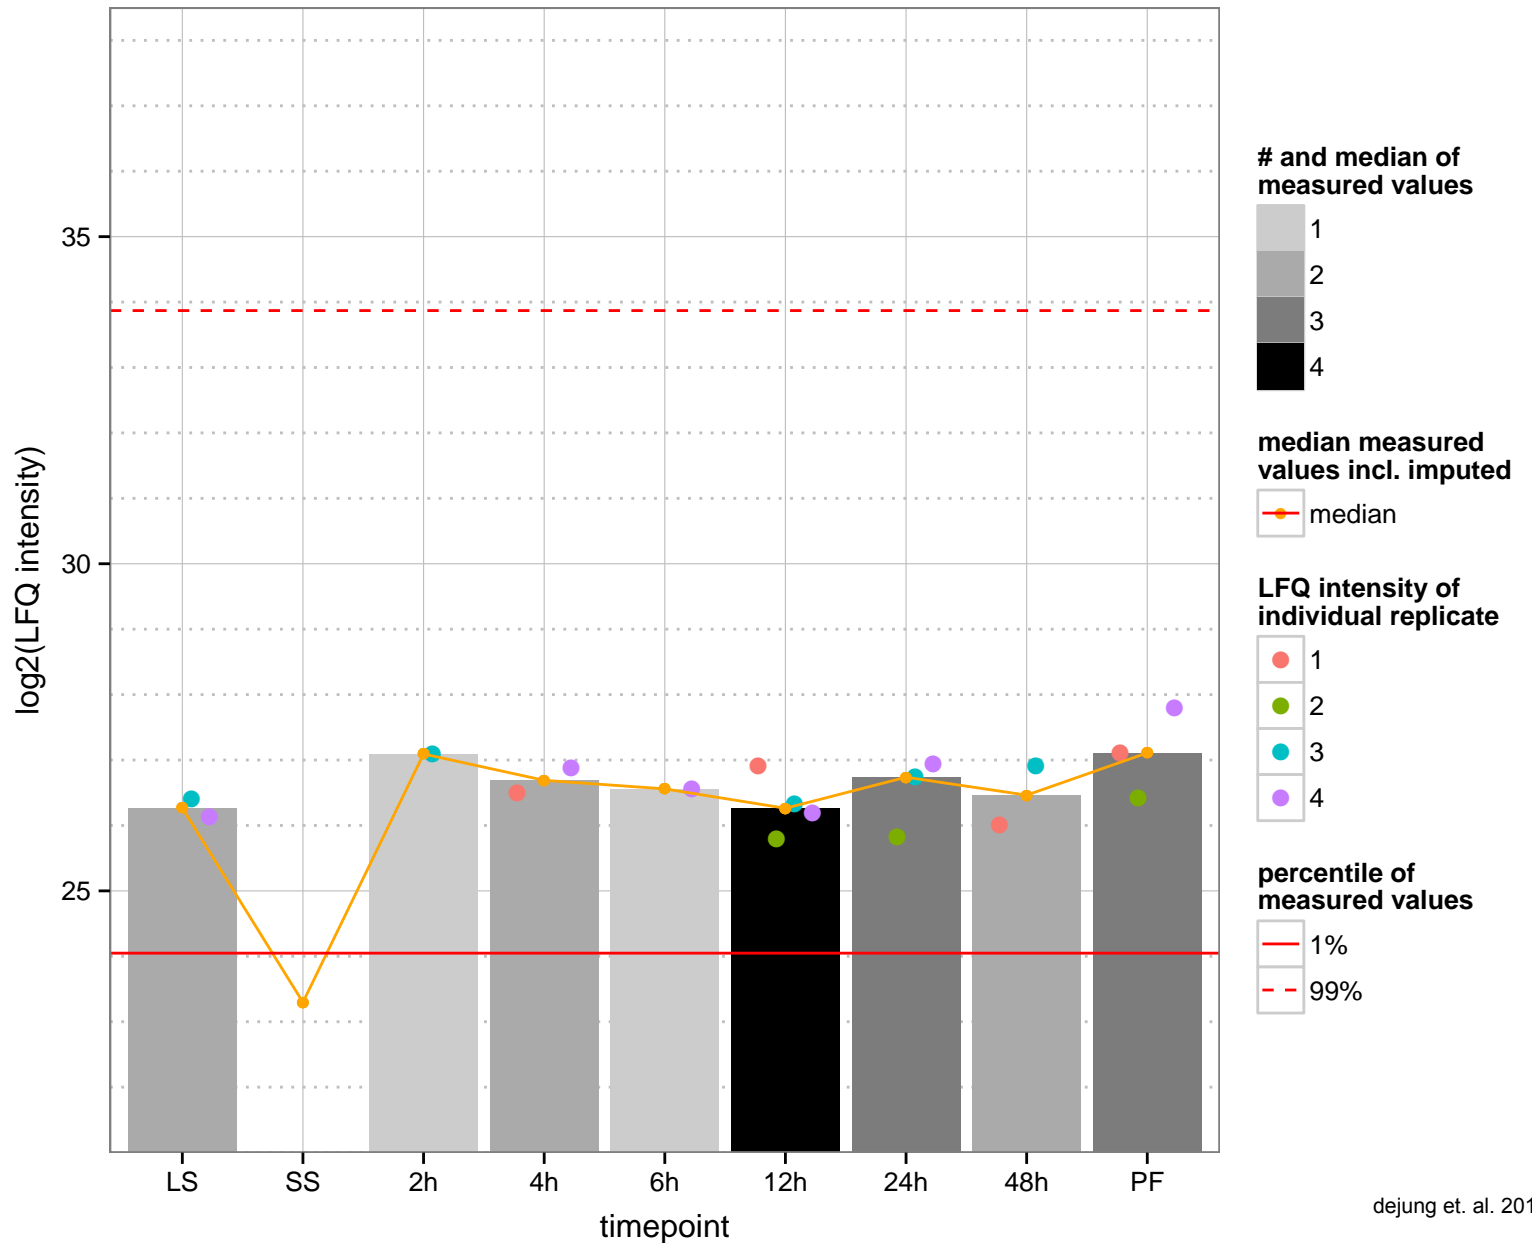

hypothetical protein, conserved  
 Tb927.11.2100  
 AGOF: null  
 AGOC: null  
 AGOP: null  
 PGO: ATP binding  
 PGO: null  
 PGO: null

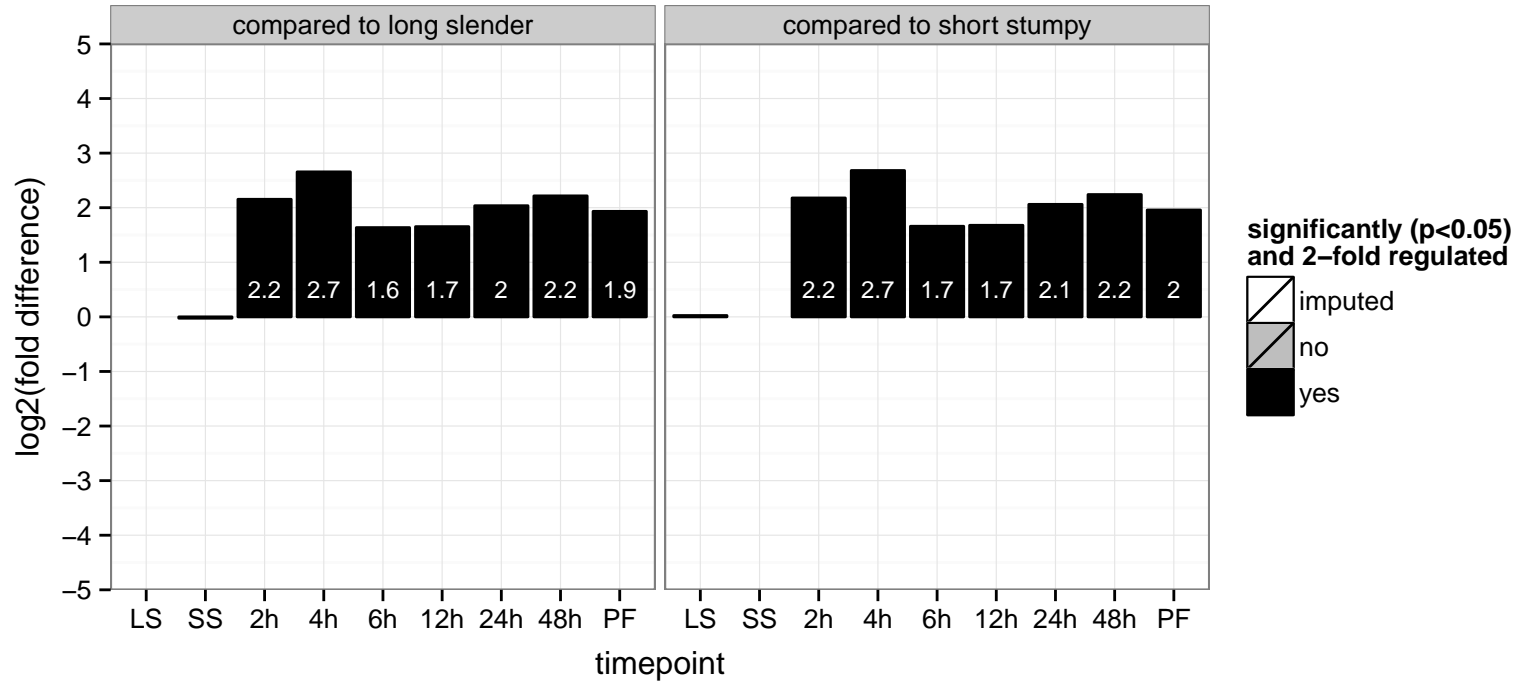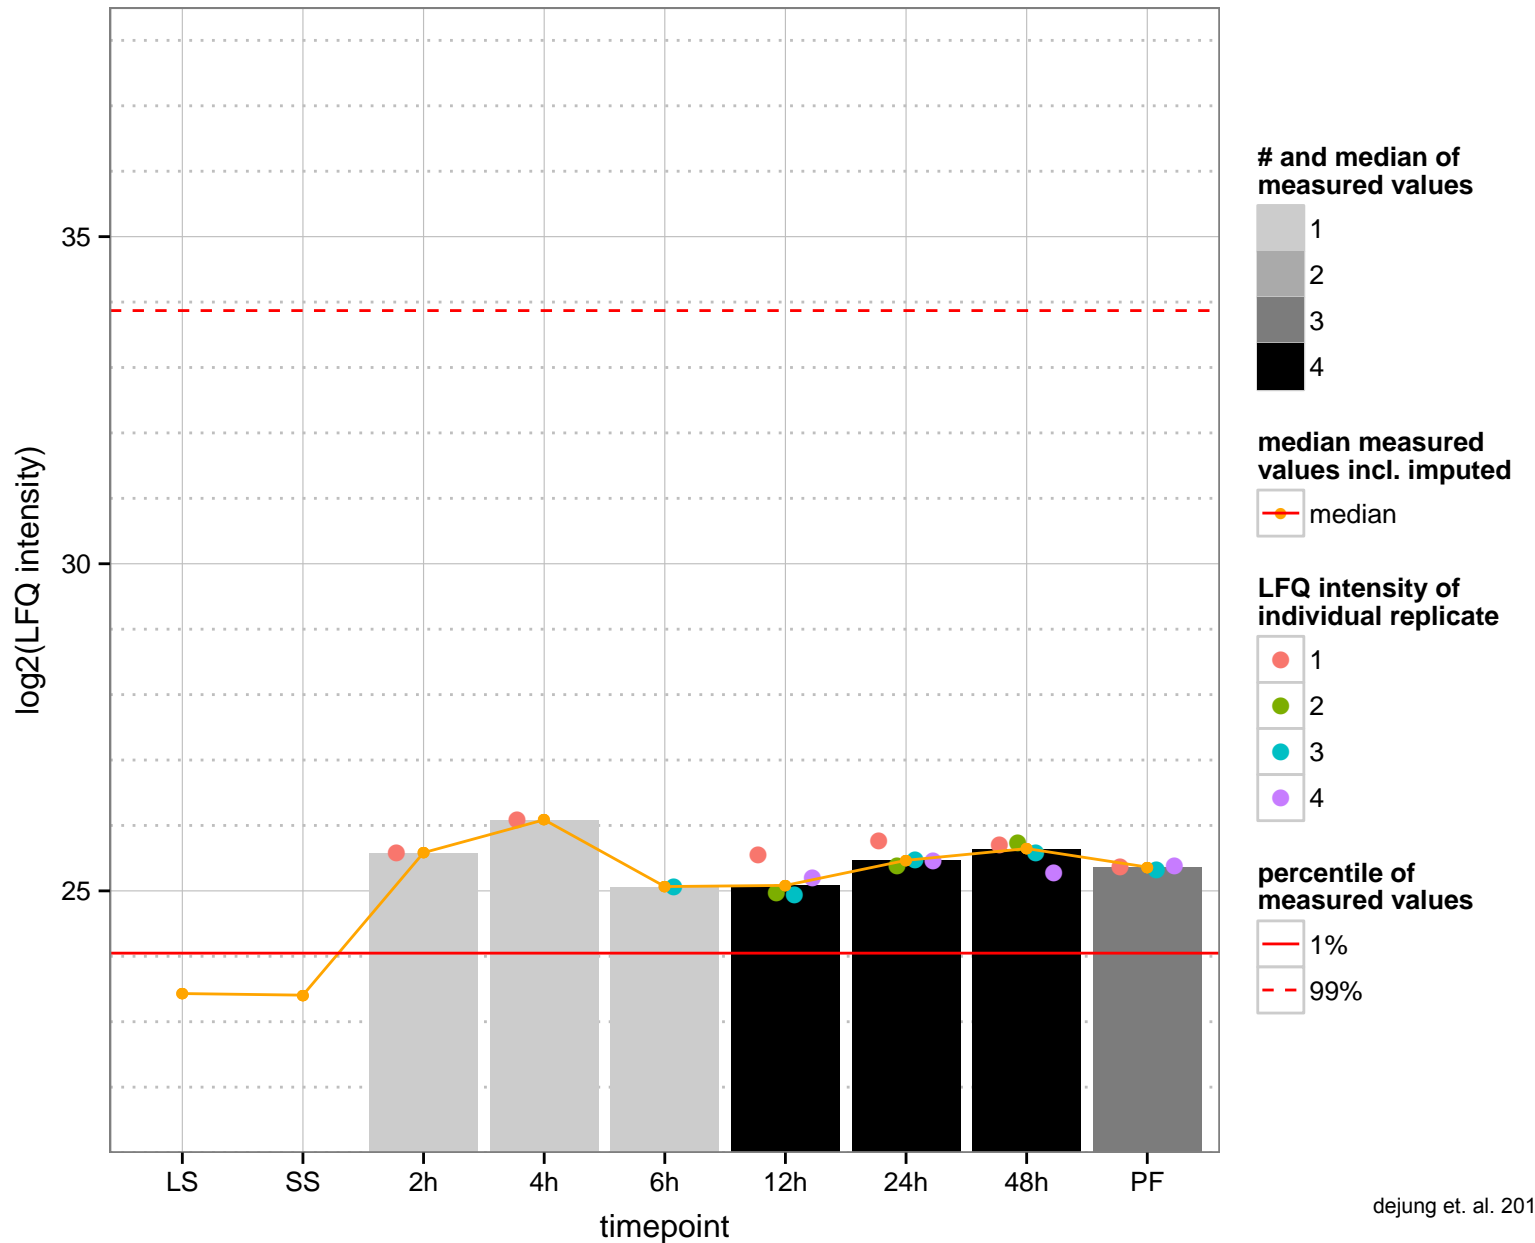

hypothetical protein, conserved  
 Tb927.11.2410  
 AGOF: null  
 AGOC: null  
 AGOP: null  
 PGO: null  
 PGO: null  
 PGO: null

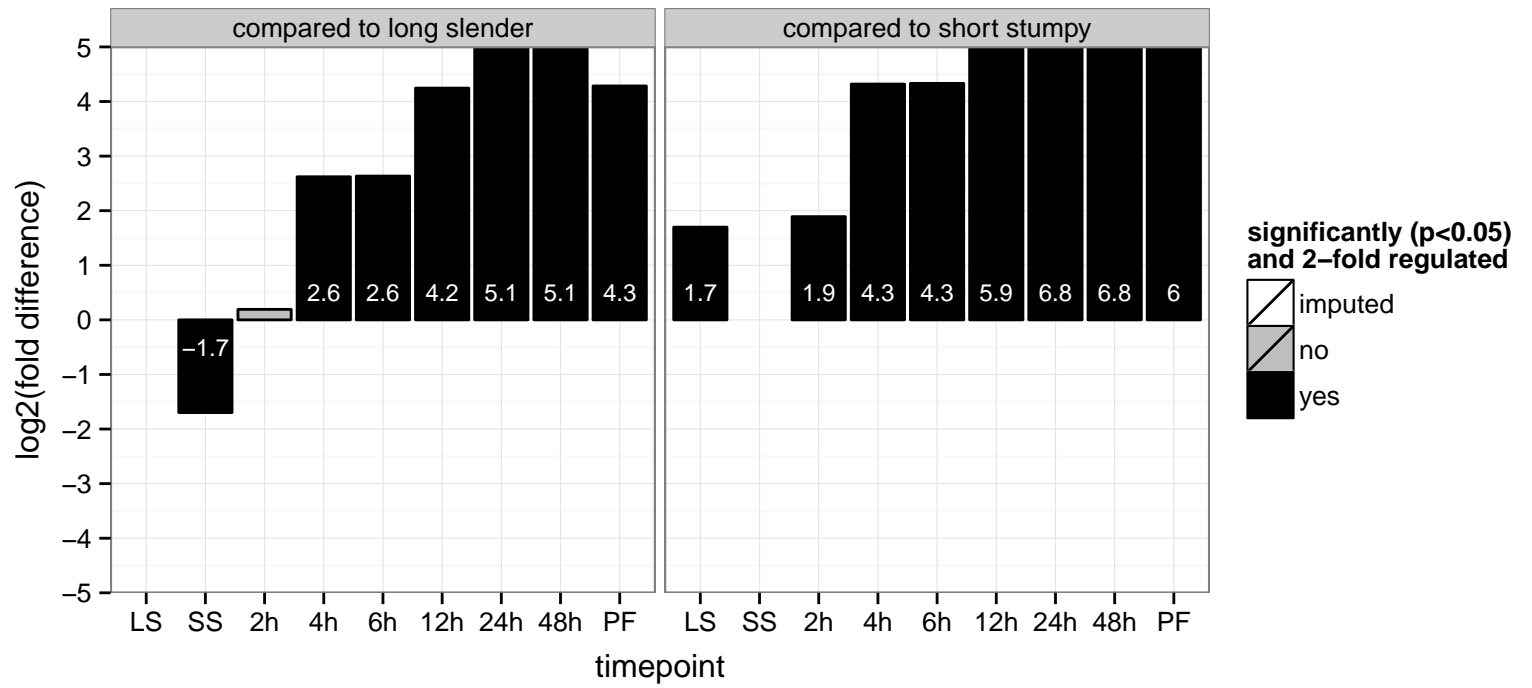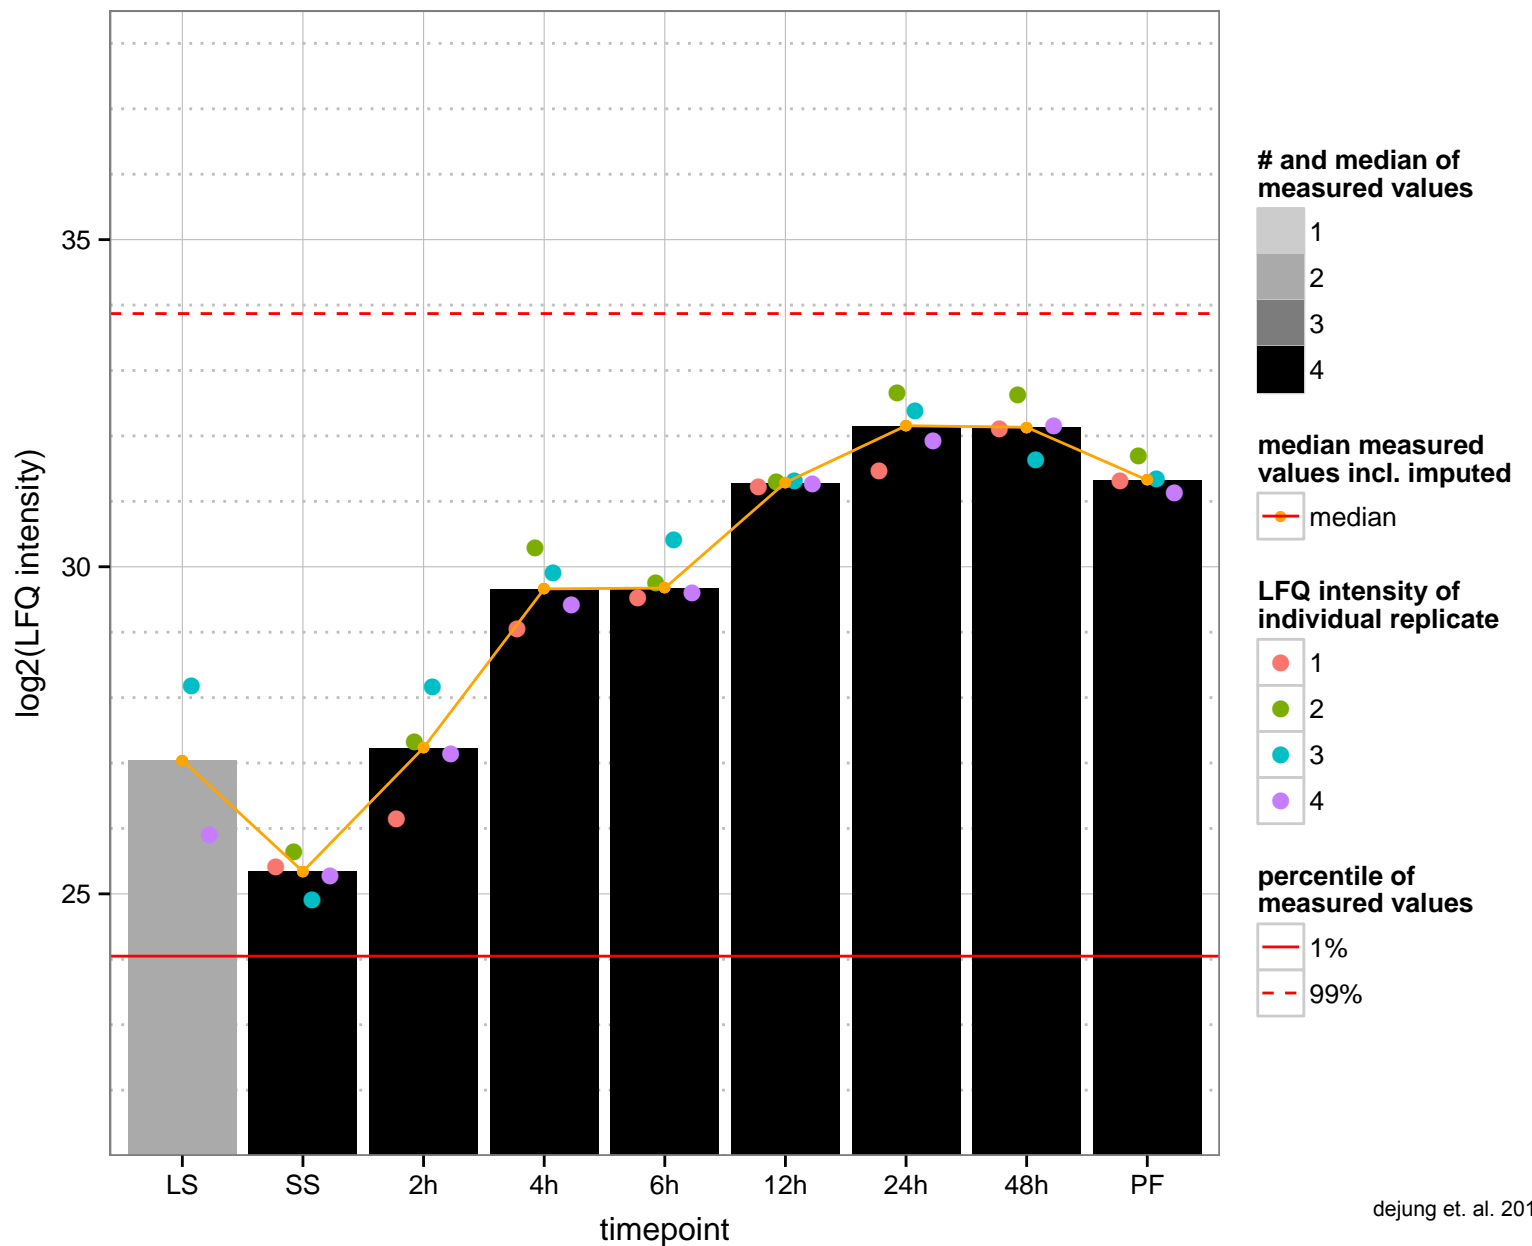



hypothetical protein, conserved (p166)  
 Tb927.11.3290  
 AGOF: null  
 AGOC: kinetoplast  
 AGOP: null  
 PGO: null  
 PGOC: null  
 PGOP: null

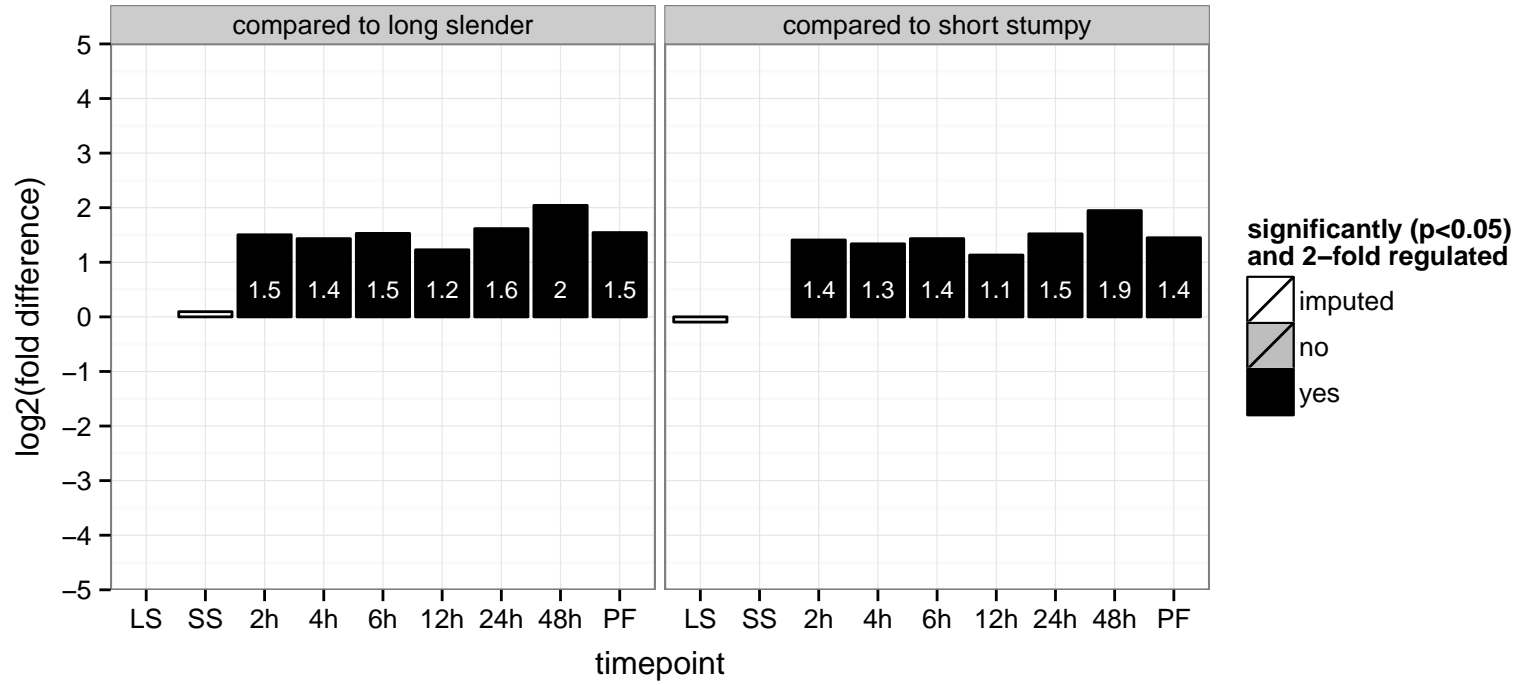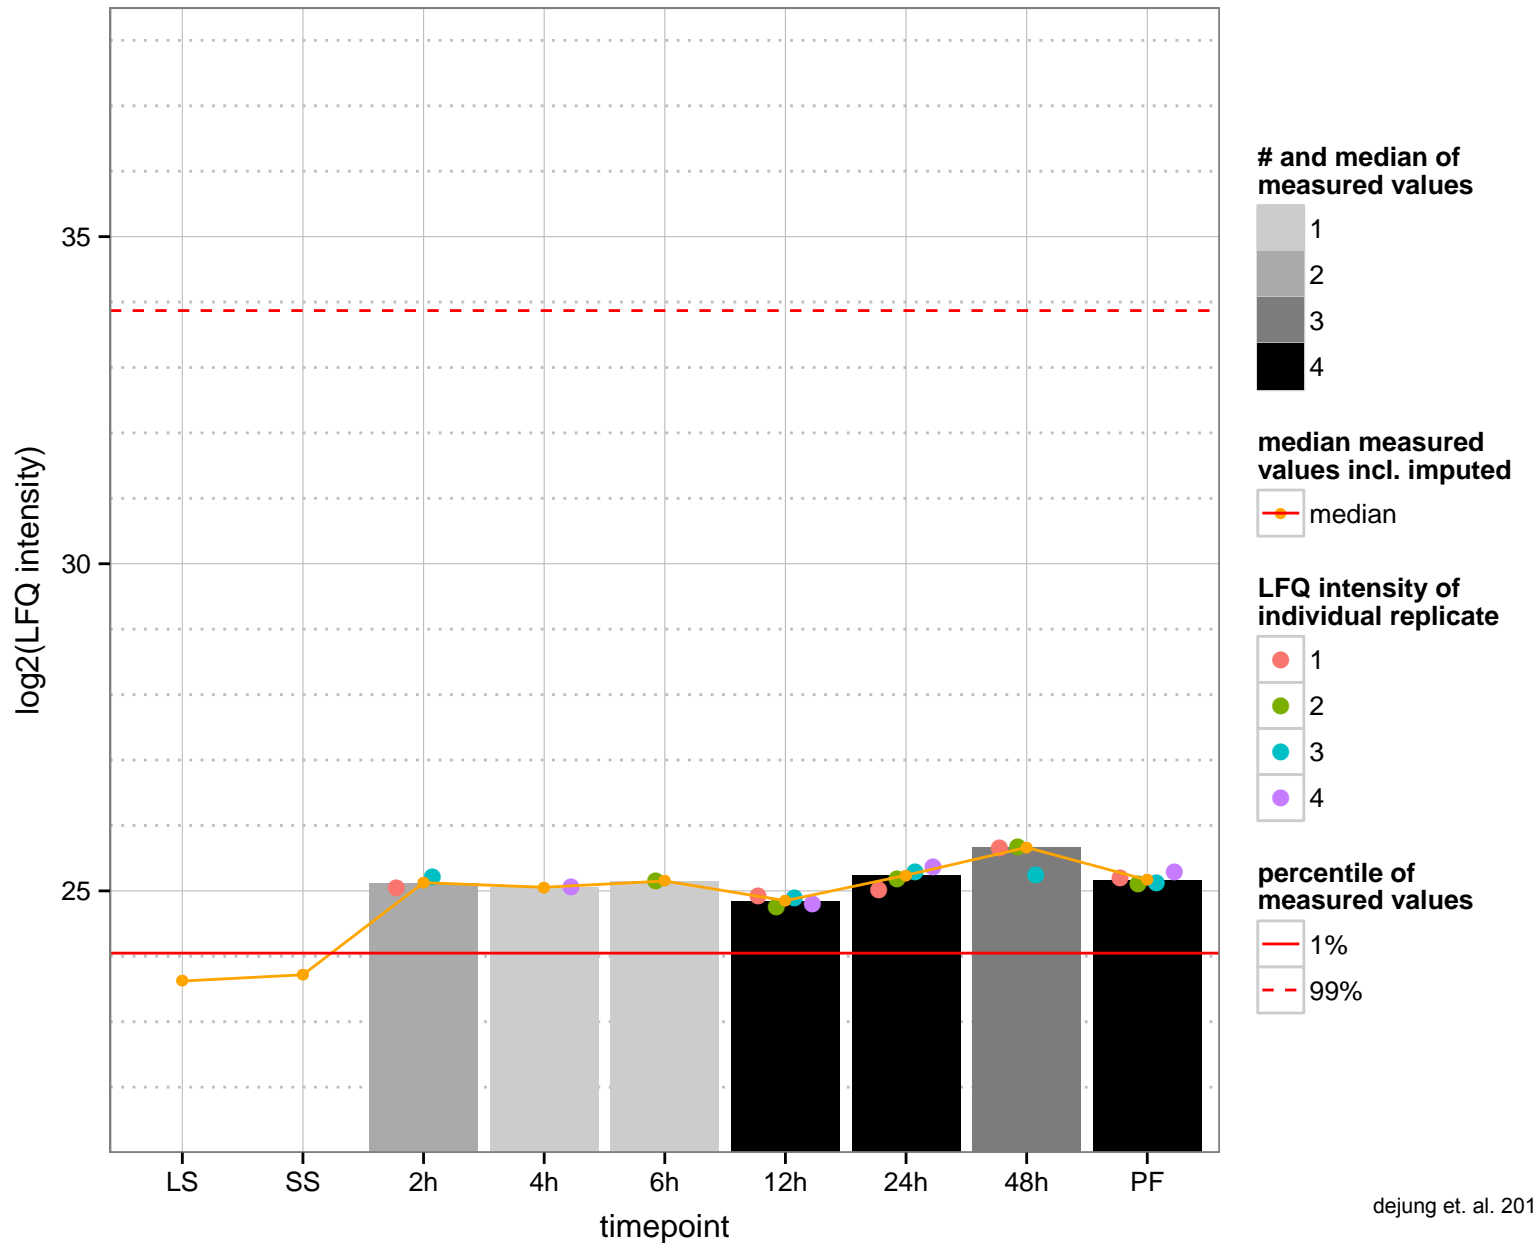

hypothetical protein, conserved  
 Tb927.11.4680  
 AGOF: null  
 AGOC: mitochondrion  
 AGOP: null  
 PGO: null  
 PGO: null  
 PGO: membrane  
 PGO: null

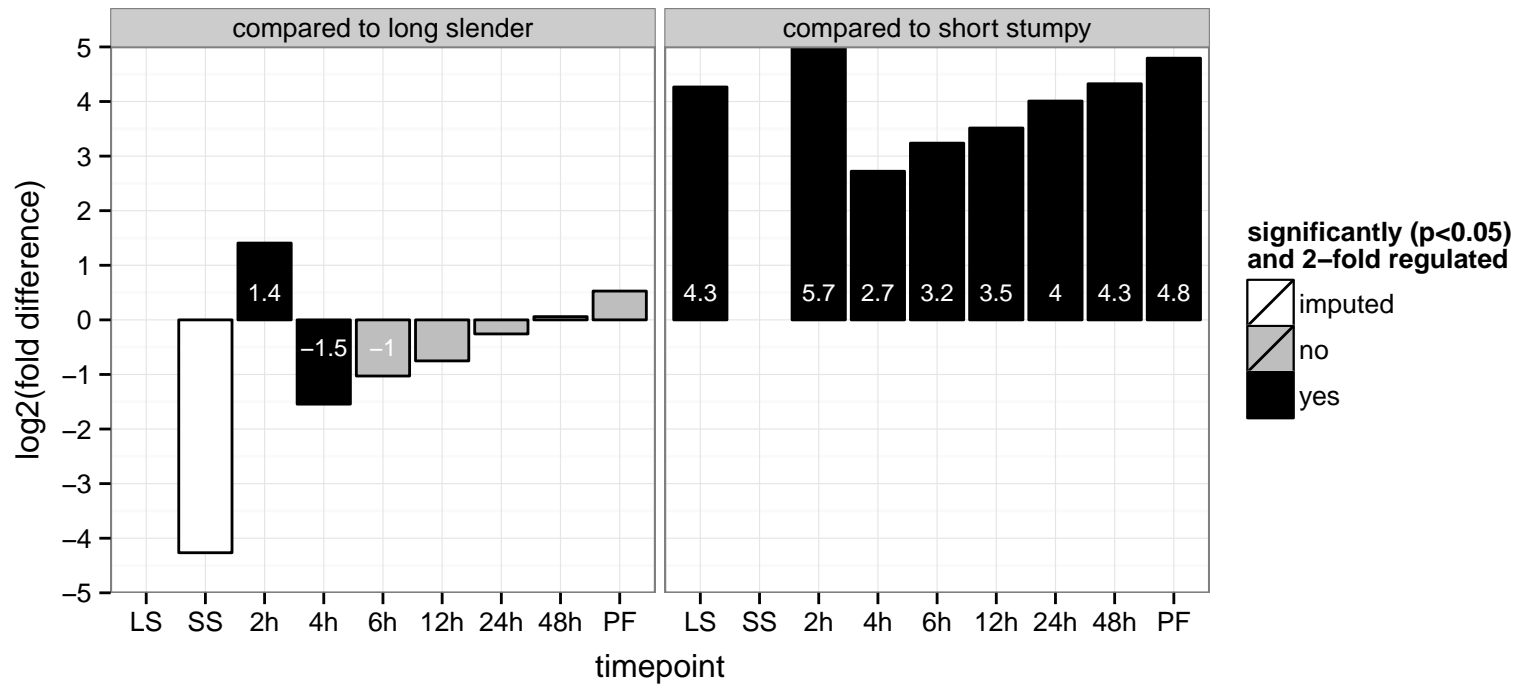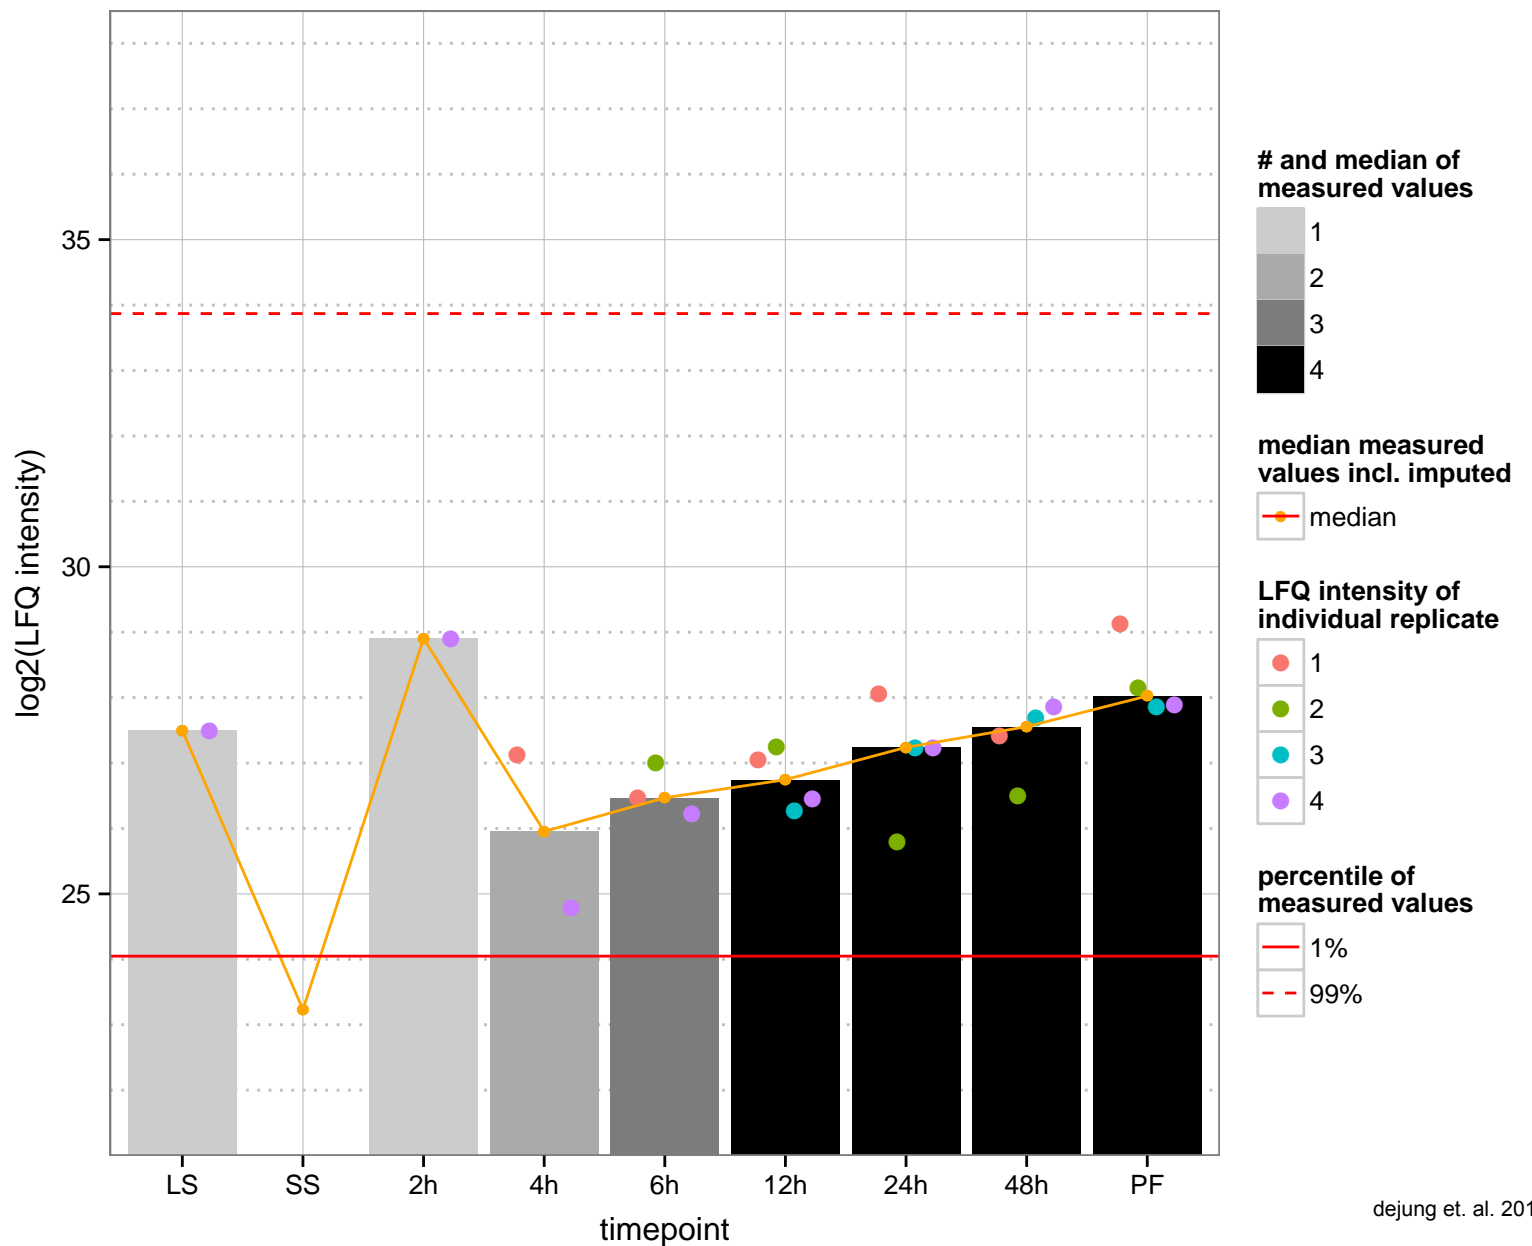

Mitochondrial SSU ribosomal protein, putative, kinetoplast ribosomal PPR-repeat containing protein 1 (KRIPP1)

Tb927.11.5500

AGOF: null

AGOC: mitochondrion

AGOP: null

PGOF: null

PGOC: null

PGOP: null

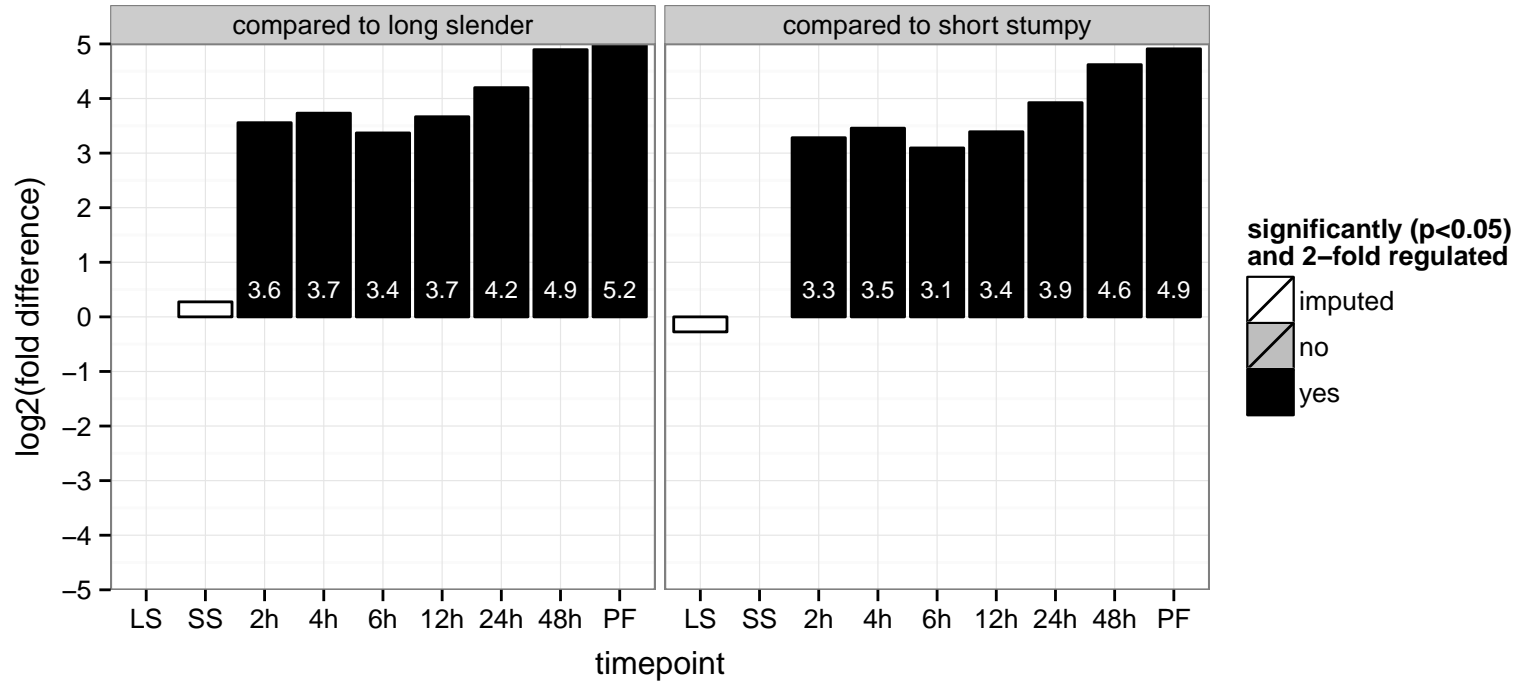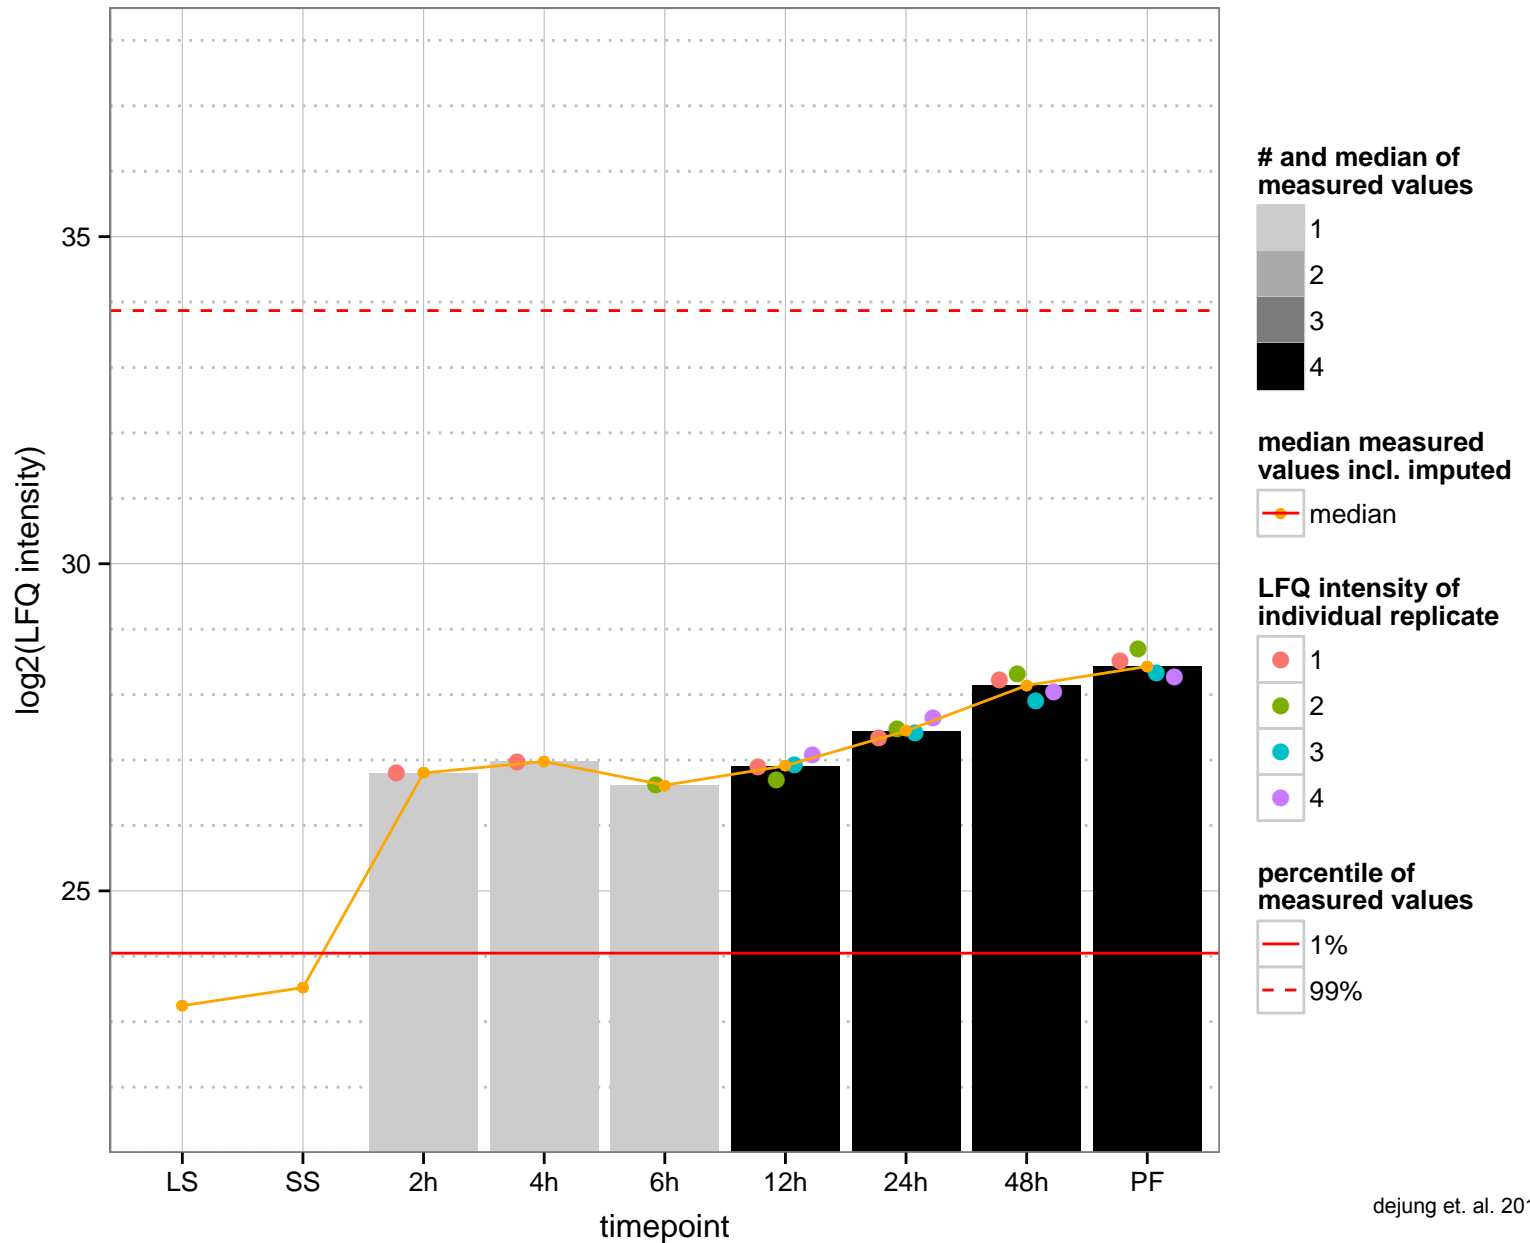

RNA-binding protein, putative (RBP38)  
 Tb927.11.5850  
 AGOF: RNA binding  
 AGOC: cytosol  
 AGOP: null  
 PGO: null  
 PGO: null  
 PGO: null

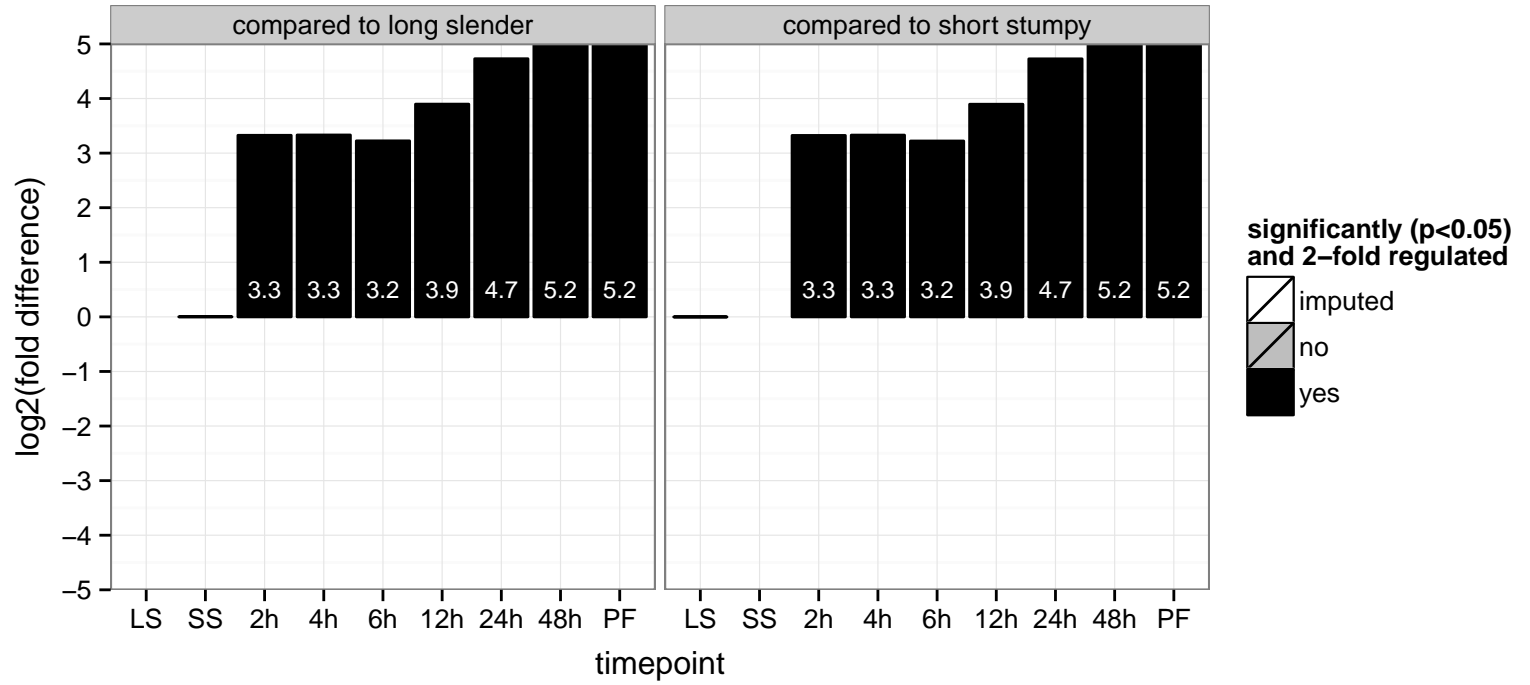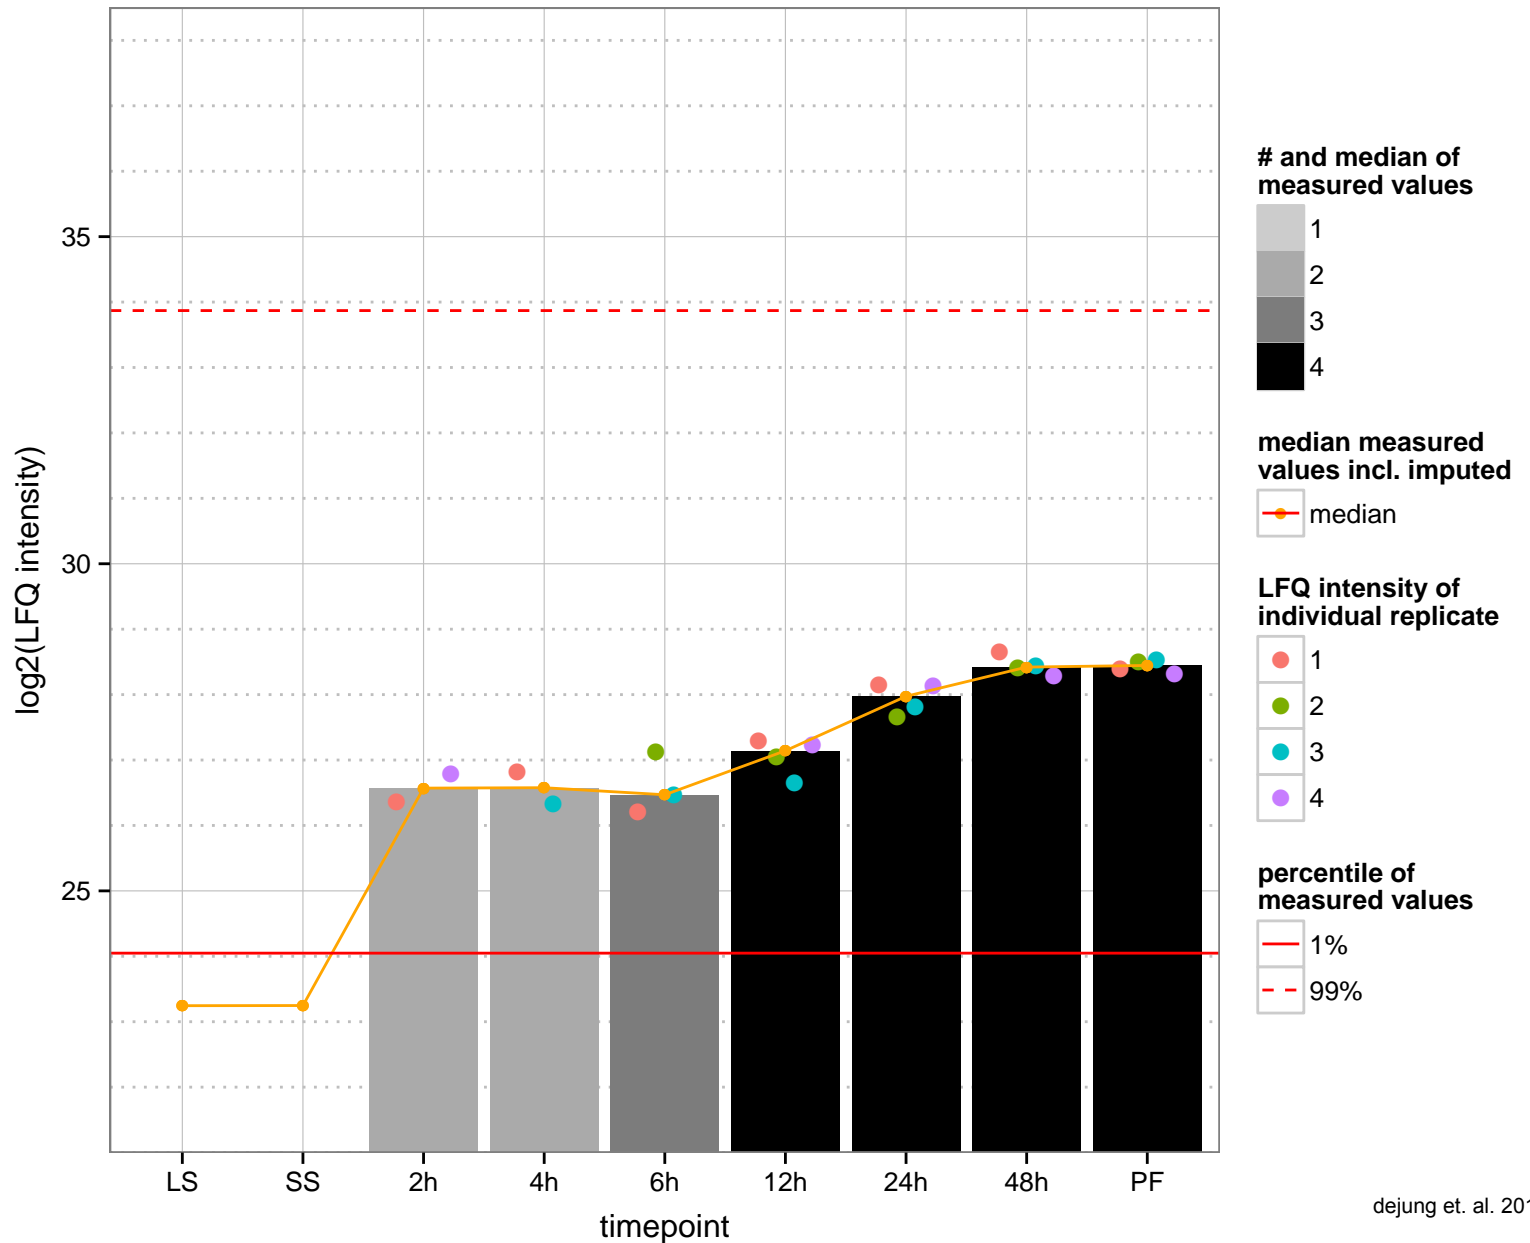

phosphoinositide-specific phospholipase C, putative

Tb927.11.5970

AGOF: phosphatidylinositol phospholipase C activity, phospholipase C activity

AGOC: membrane

AGOP: intracellular signal transduction, lipid metabolic process, signal transduction

PGOF: phosphatidylinositol phospholipase C activity, phospholipase C activity, phosphoric diester hydrolase activity, protein b

PGOC: null

PGOP: intracellular signal transduction, lipid metabolic process, signal transduction

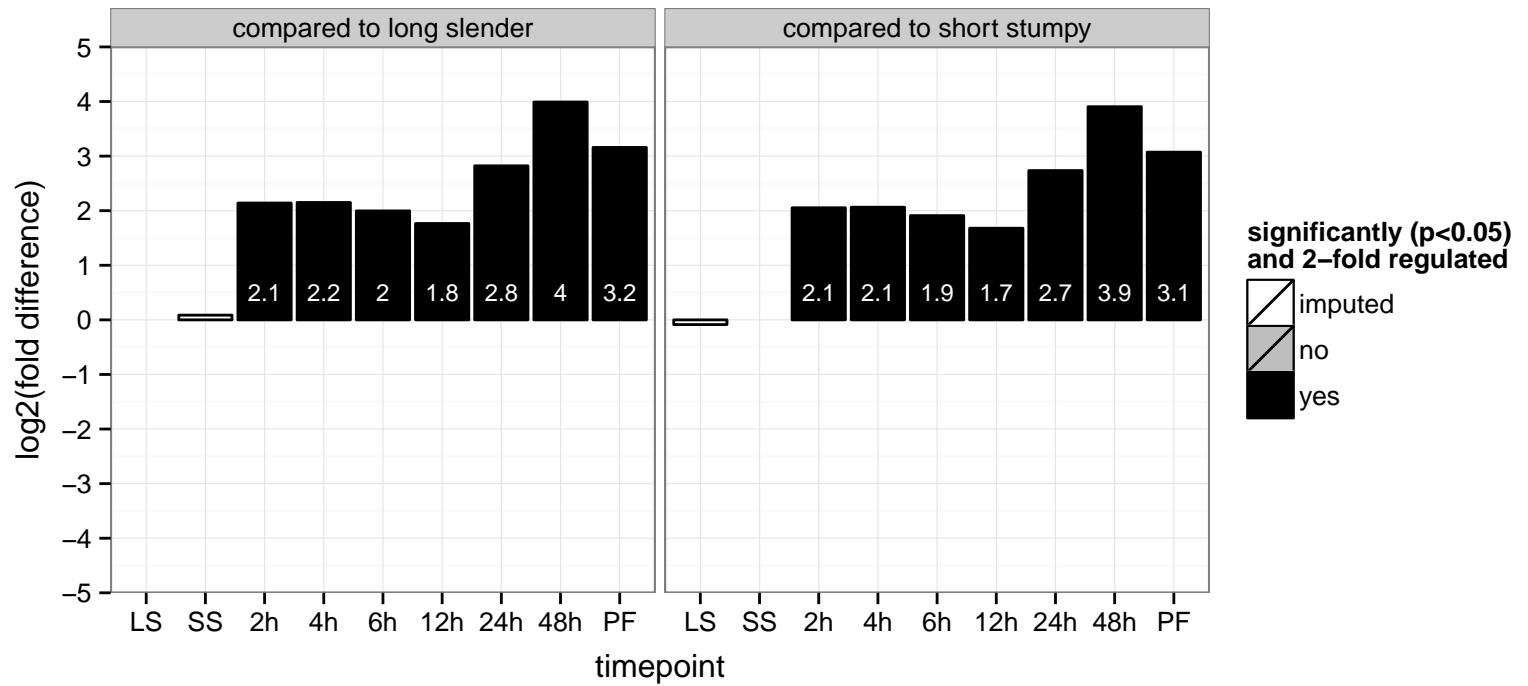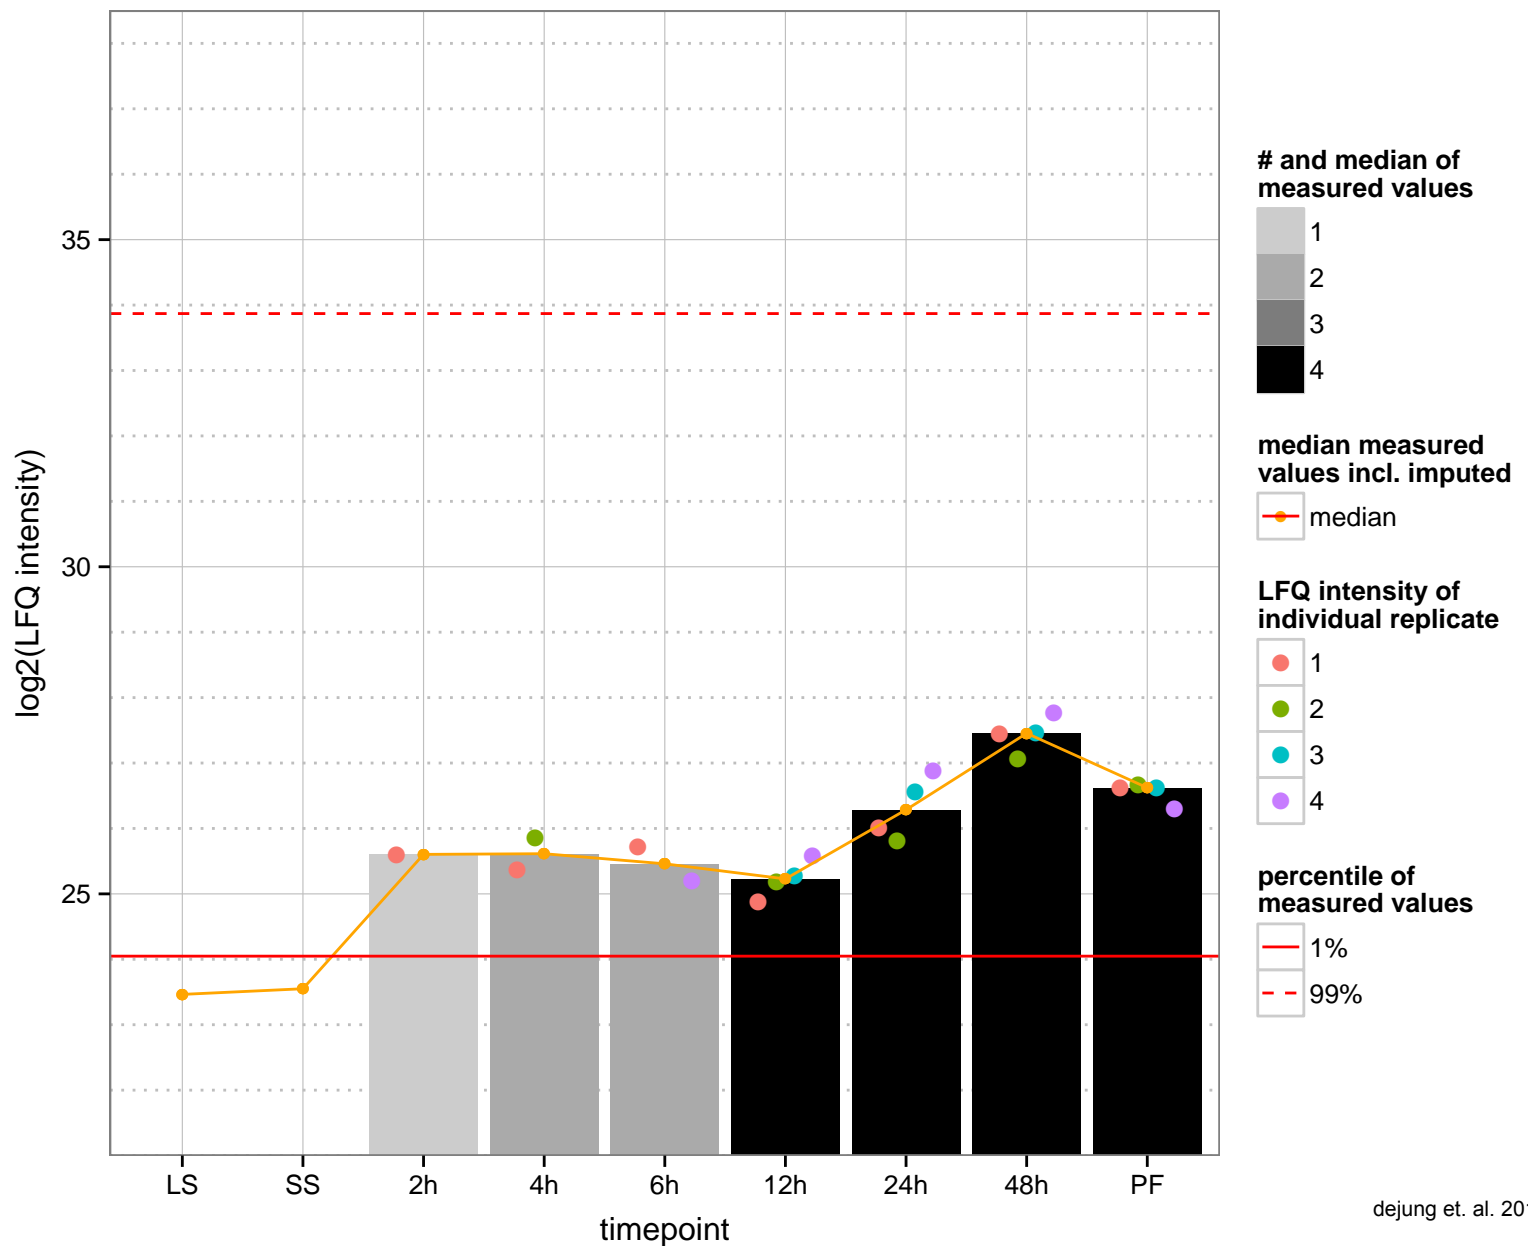

hypothetical protein, conserved  
 Tb927.11.6660  
 AGOF: hydrolase activity, acting on ester bonds  
 AGOC: mitochondrion  
 AGOP: nucleobase-containing compound metabolic process  
 PGO: hydrolase activity, acting on ester bonds, nucleic acid binding  
 PGOC: null  
 PGO: nucleobase-containing compound metabolic process

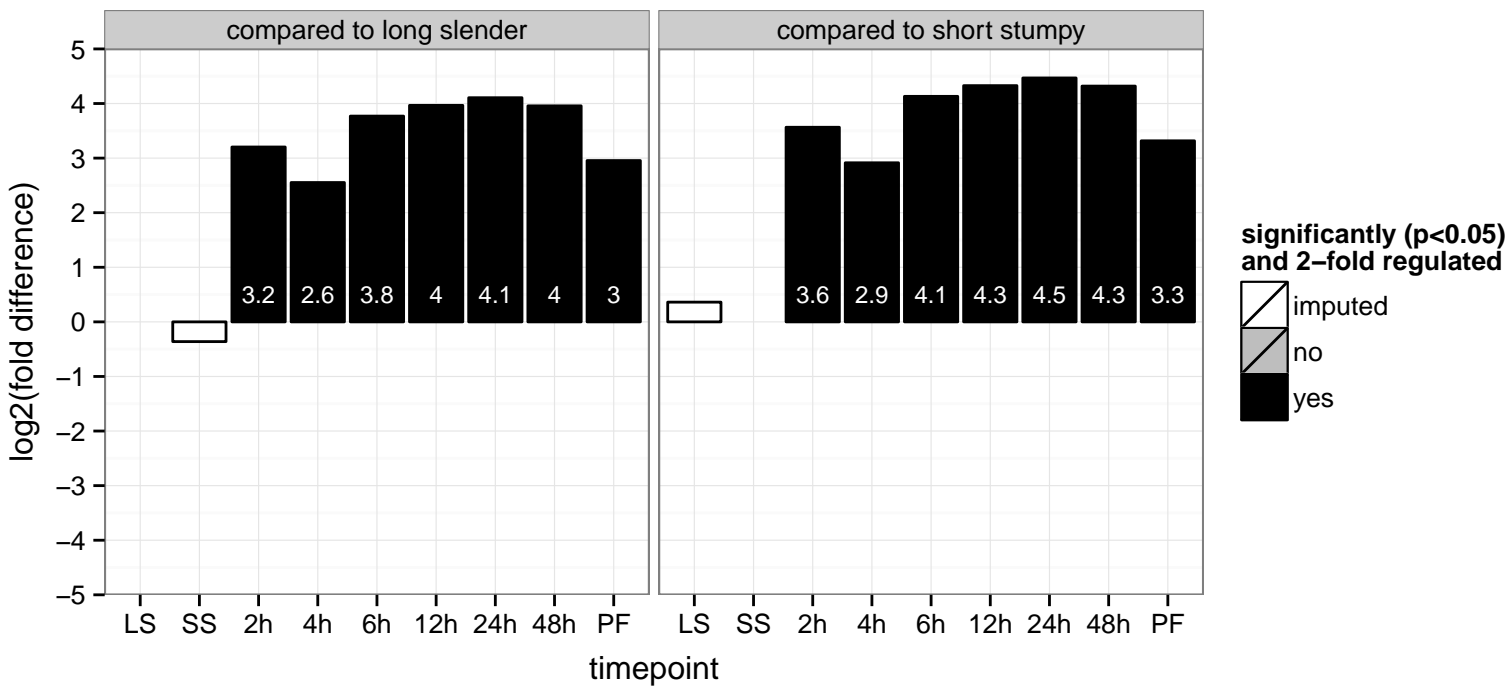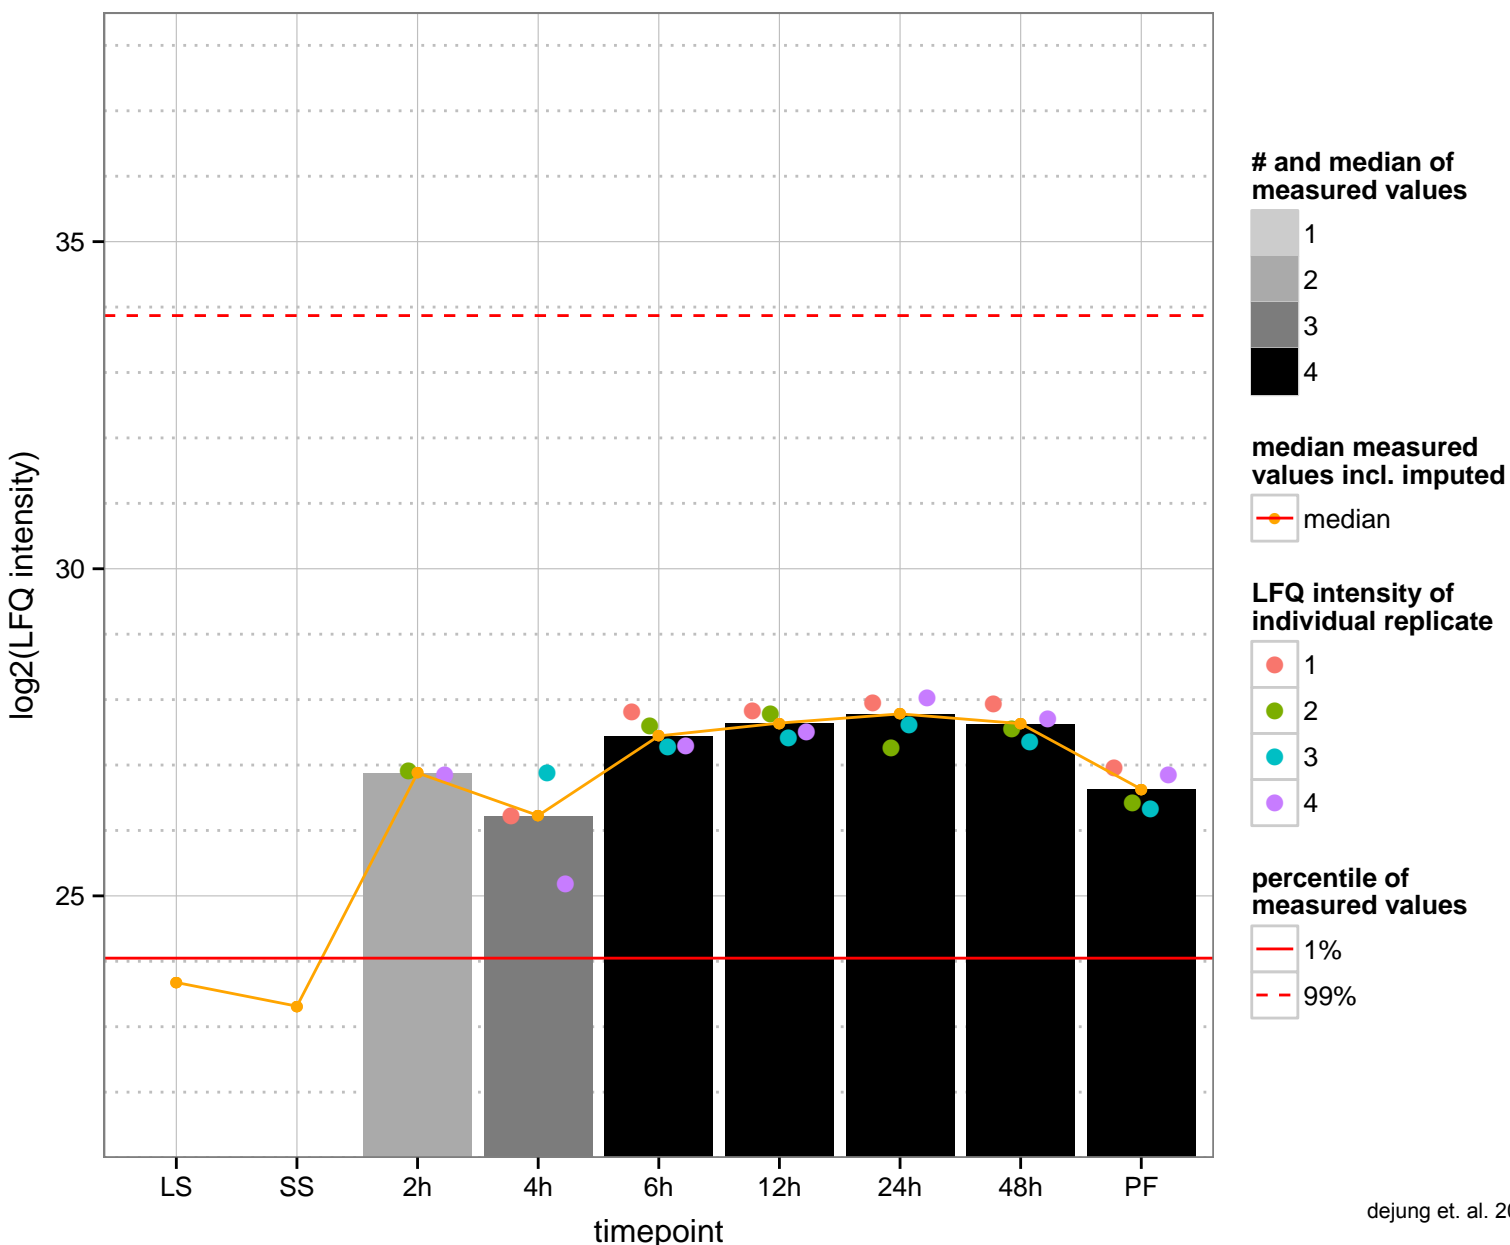

hypothetical protein, conserved  
 Tb927.11.840.1;Tb927.11.840.2  
 AGOF: solute:hydrogen antiporter activity  
 AGOC: integral to membrane  
 AGOP: cation transport  
 PGOF: solute:hydrogen antiporter activity  
 PGOC: integral to membrane  
 PGOP: cation transport, transmembrane transport

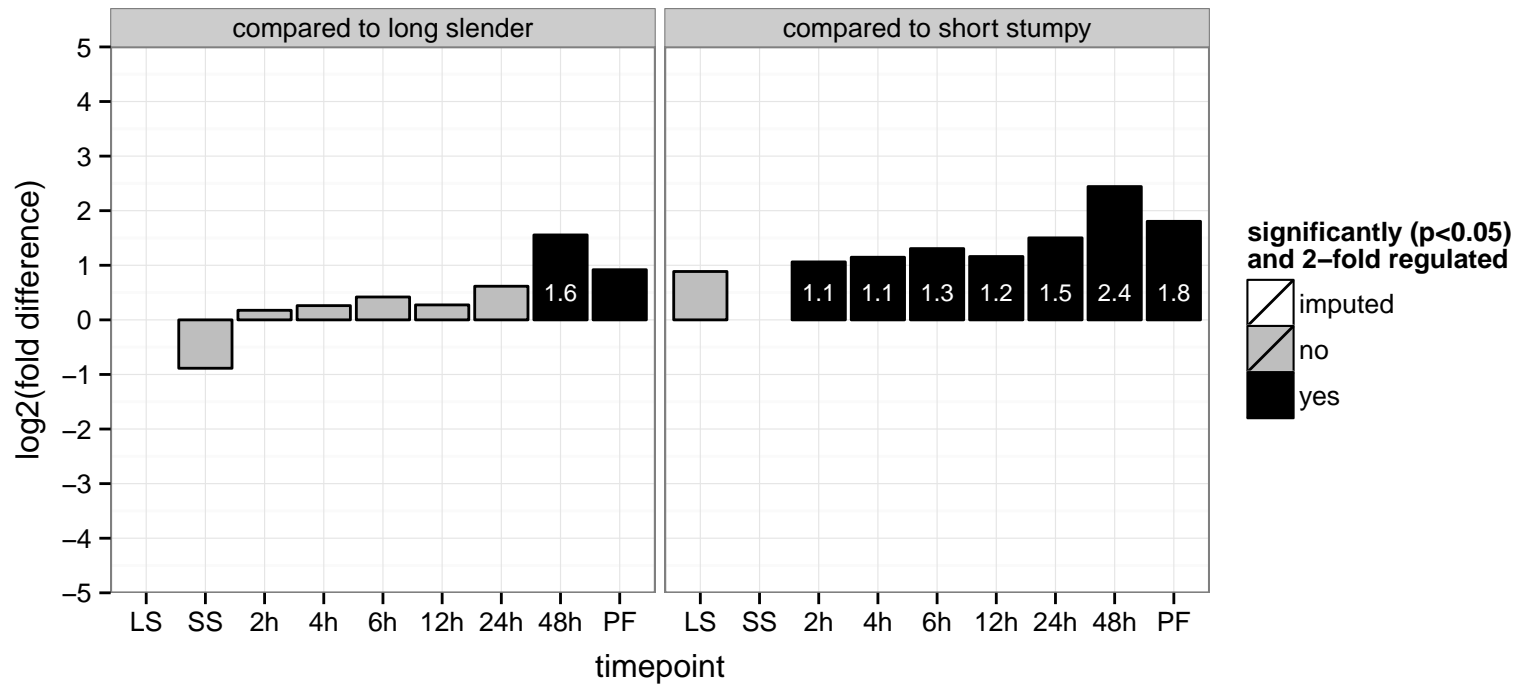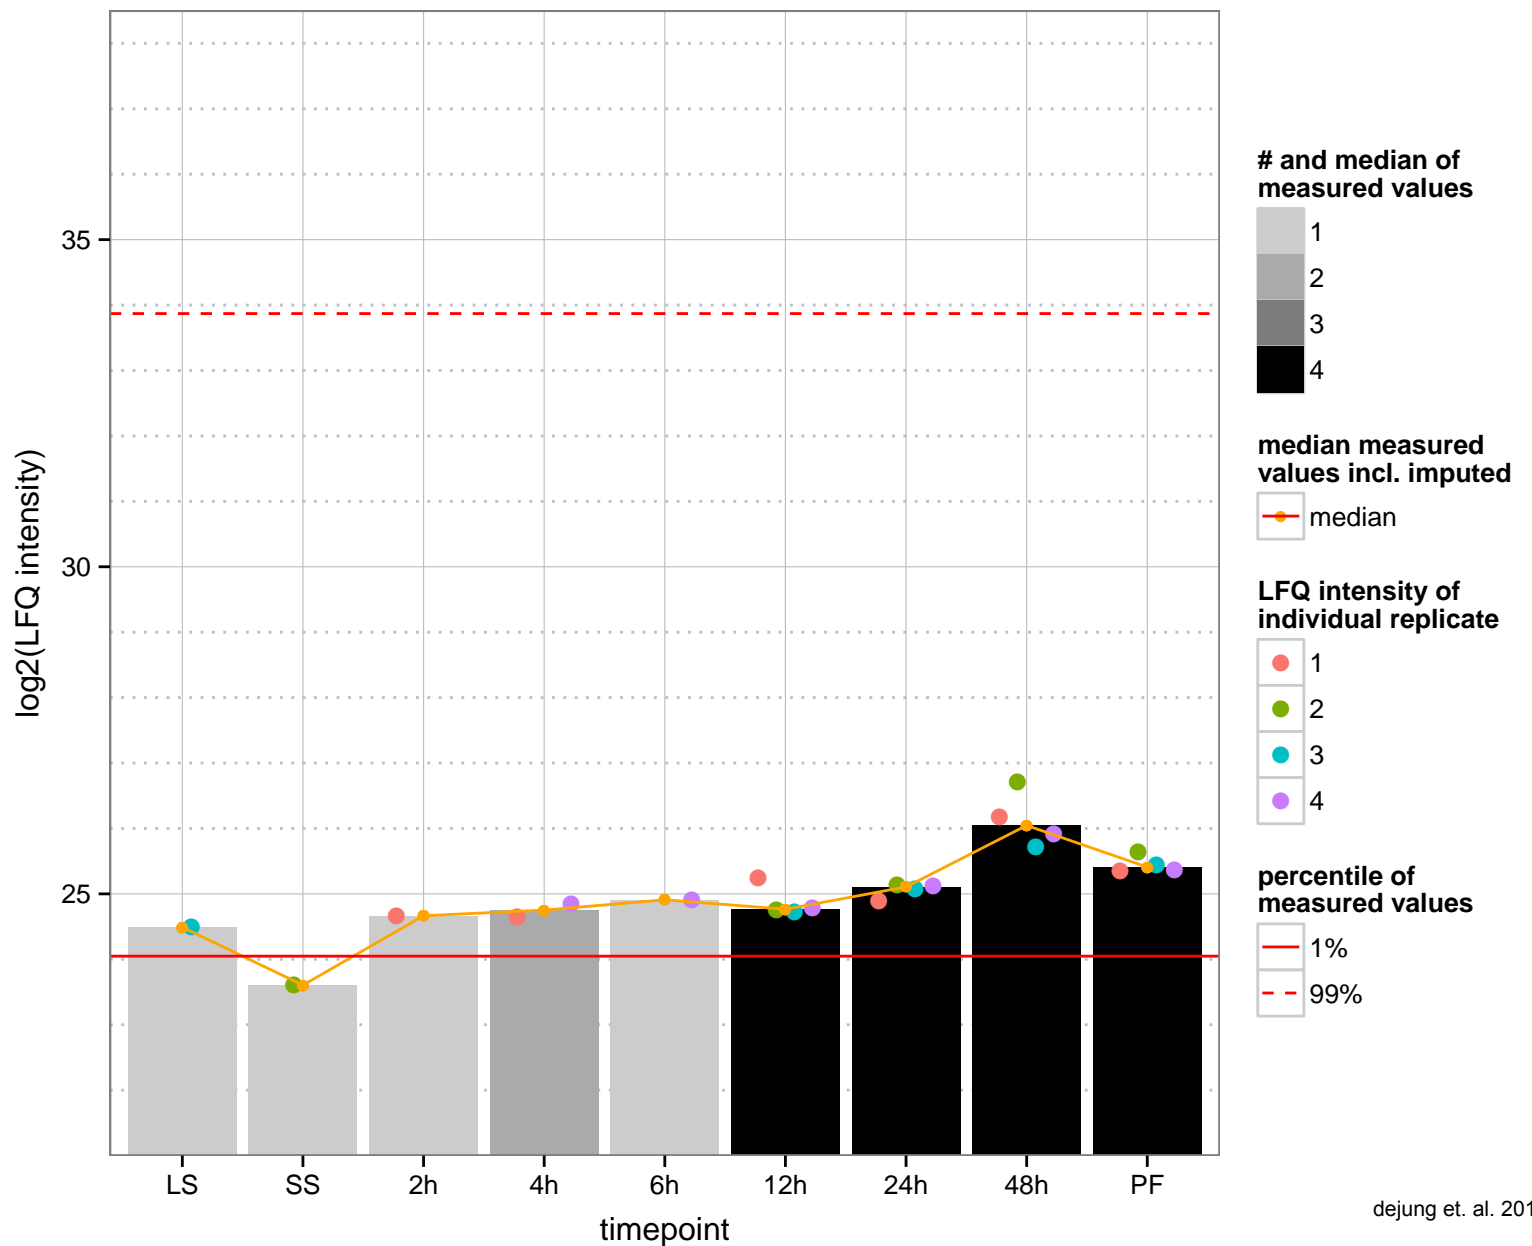

retrotransposon hot spot protein (RHS, pseudogene), putative, retrotransposon hot spot protein 6 (RHS6), degenerate  
 Tb927.2.1330  
 AGOF: null  
 AGOC: null  
 AGOP: null  
 PGO: null  
 PGO: null  
 PGO: null

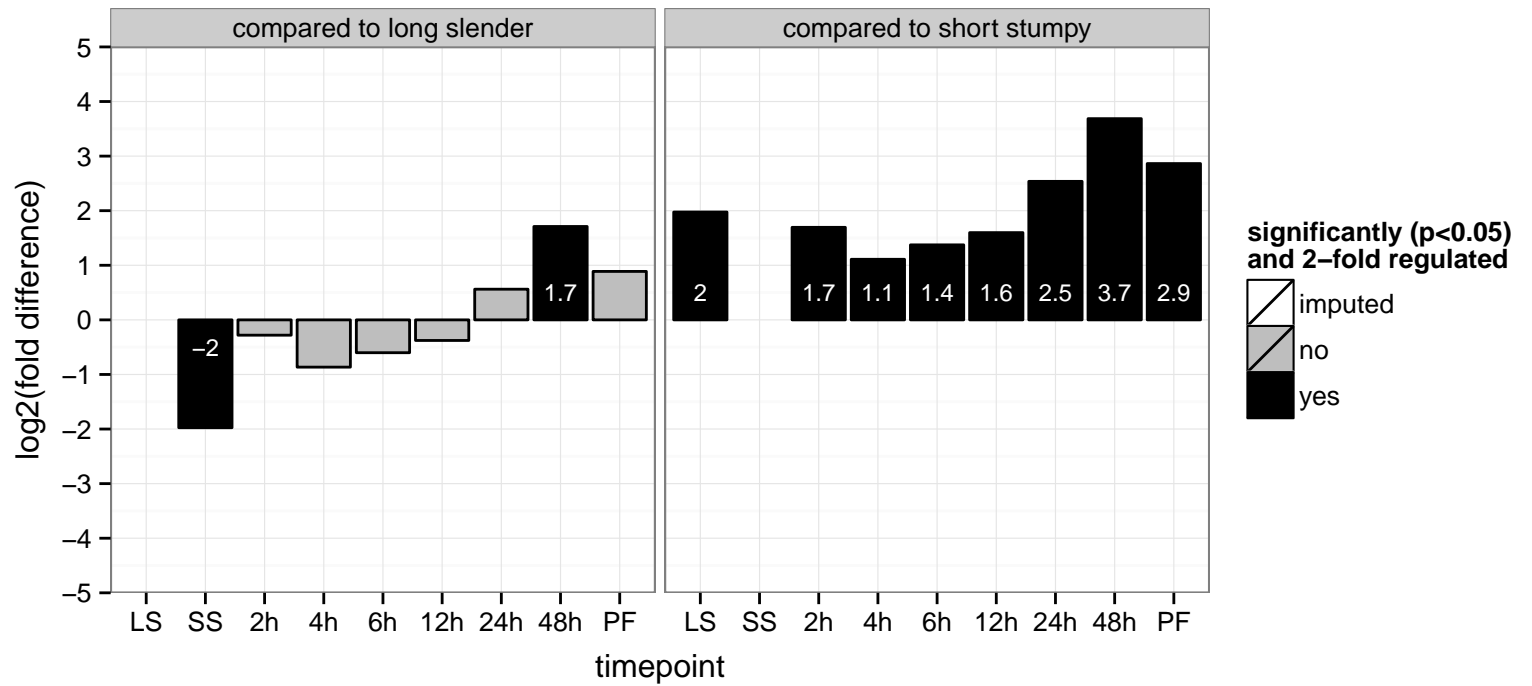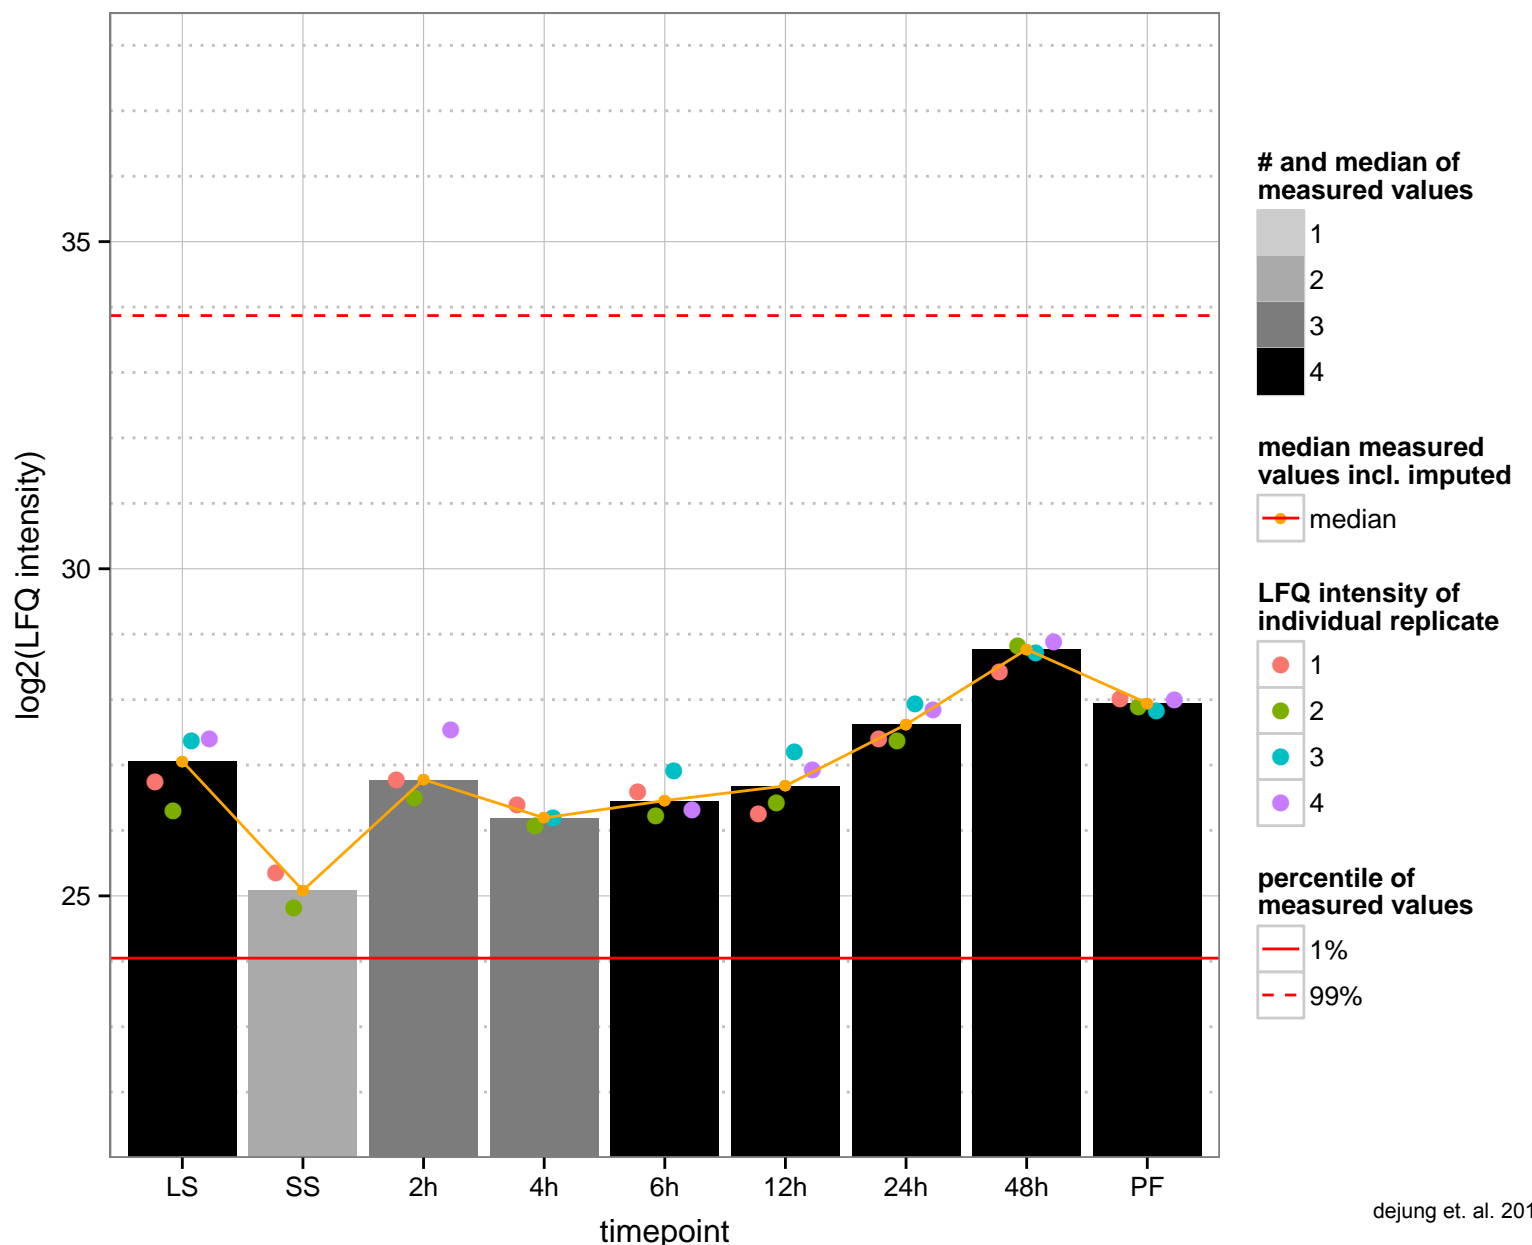



hypothetical protein, conserved  
 Tb927.3.1970  
 AGOF: null  
 AGOC: null  
 AGOP: null  
 PGO: null  
 PGO: null  
 PGO: null

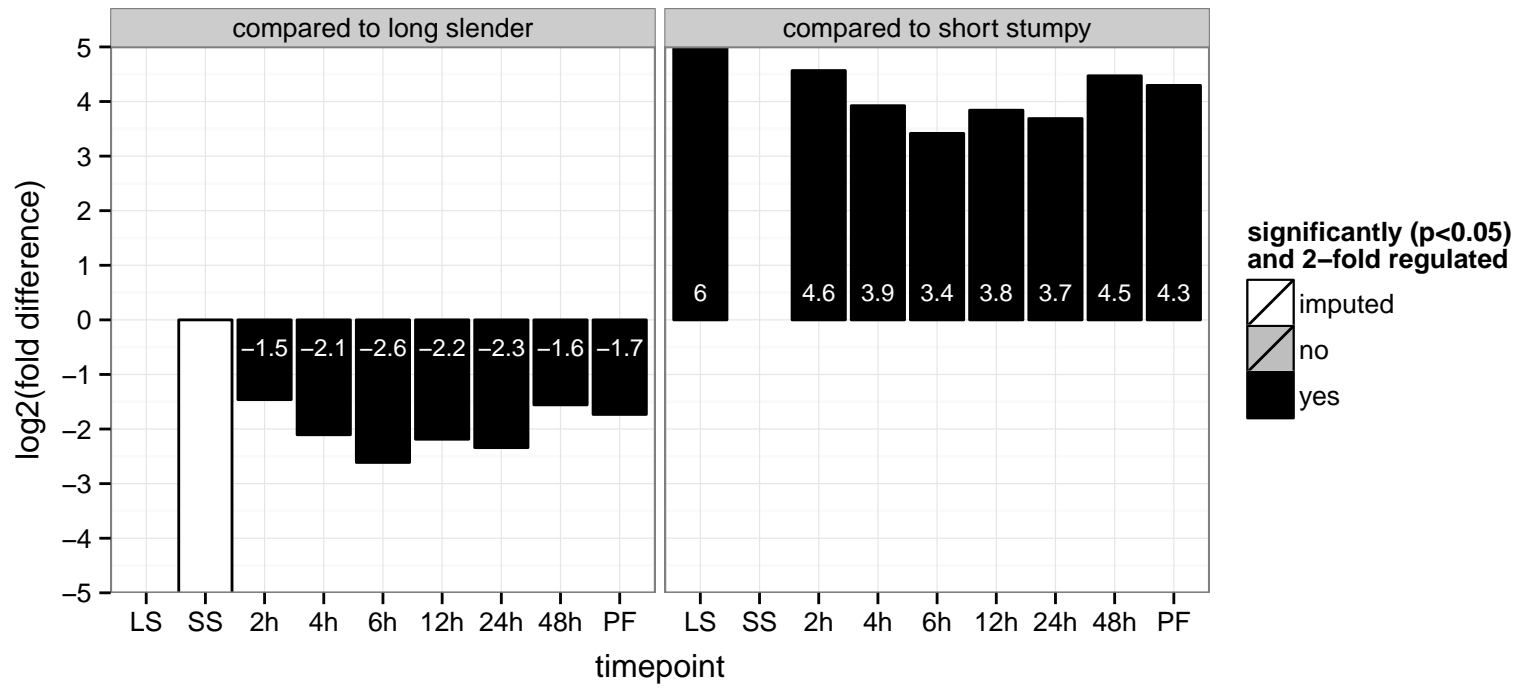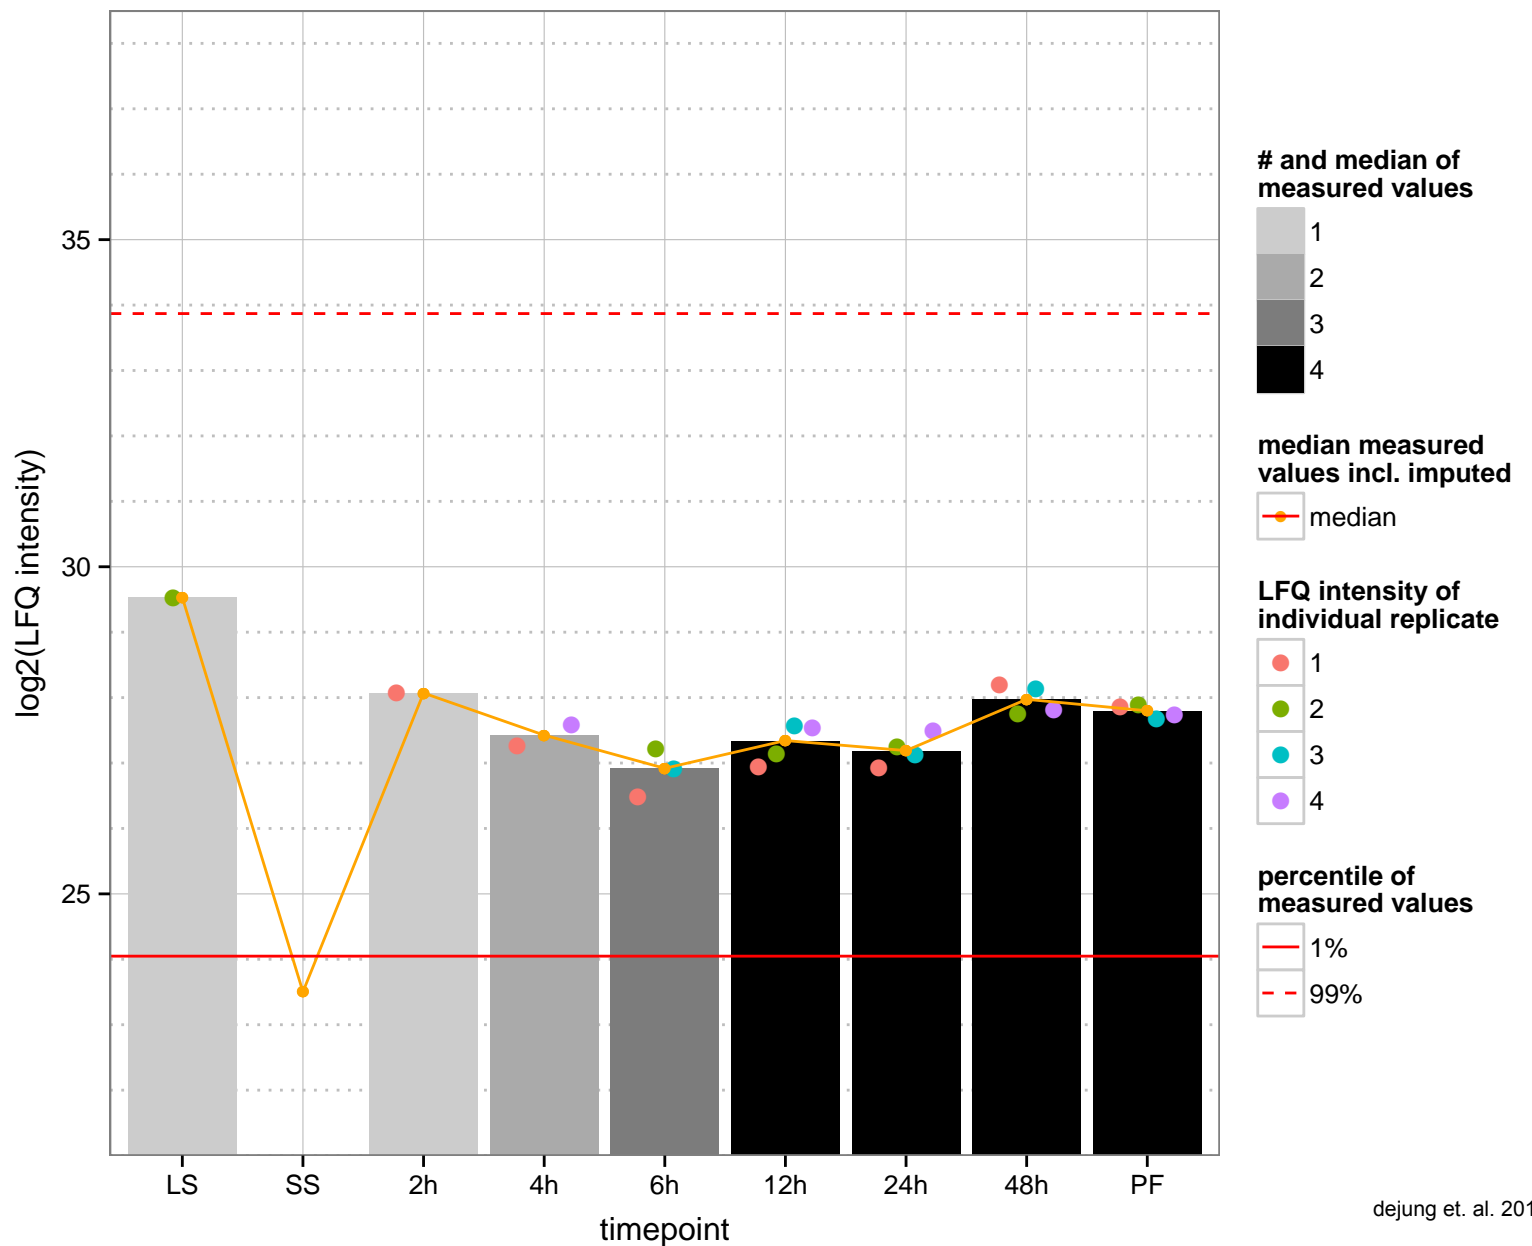

hypothetical protein, conserved  
 Tb927.3.750  
 AGOF: null  
 AGOC: mitochondrial inner membrane, mitochondrion  
 AGOP: null  
 PGO: protein binding  
 PGOC: null  
 PGOP: null

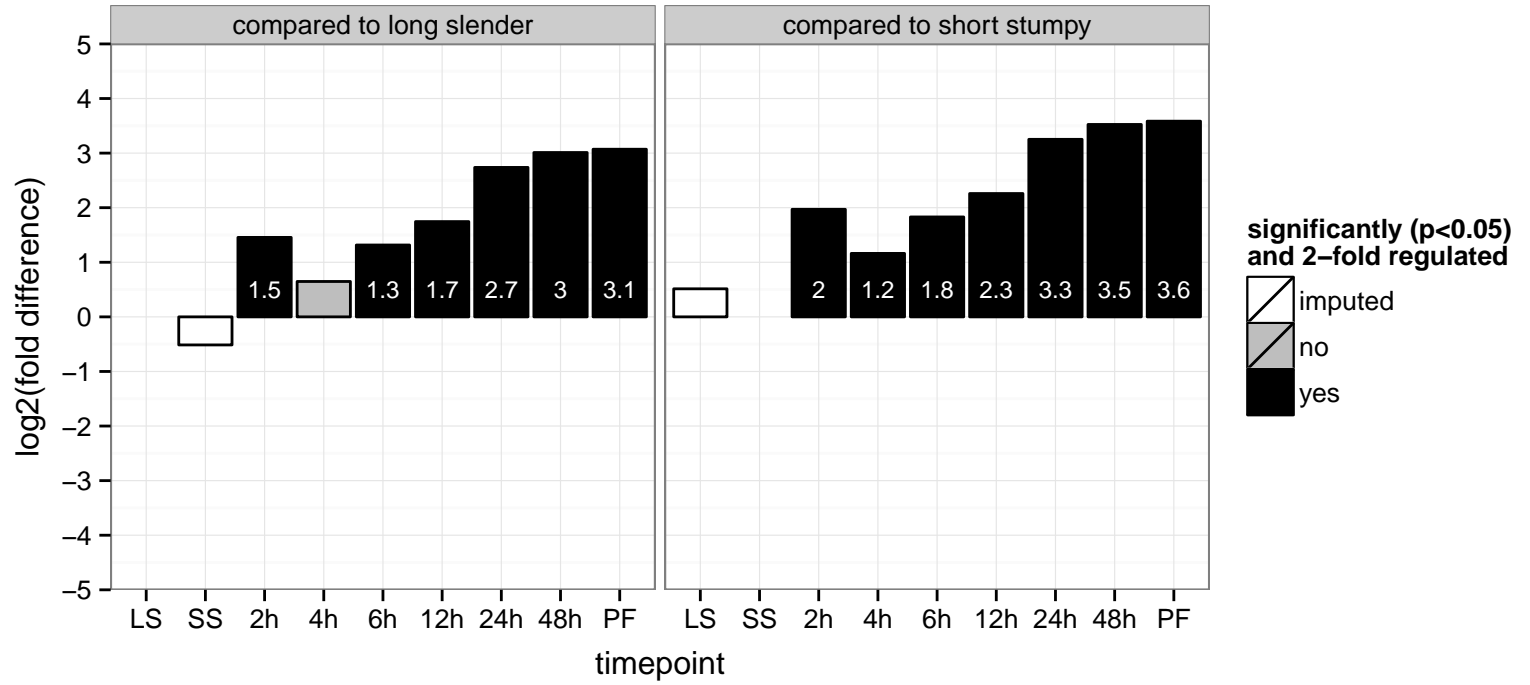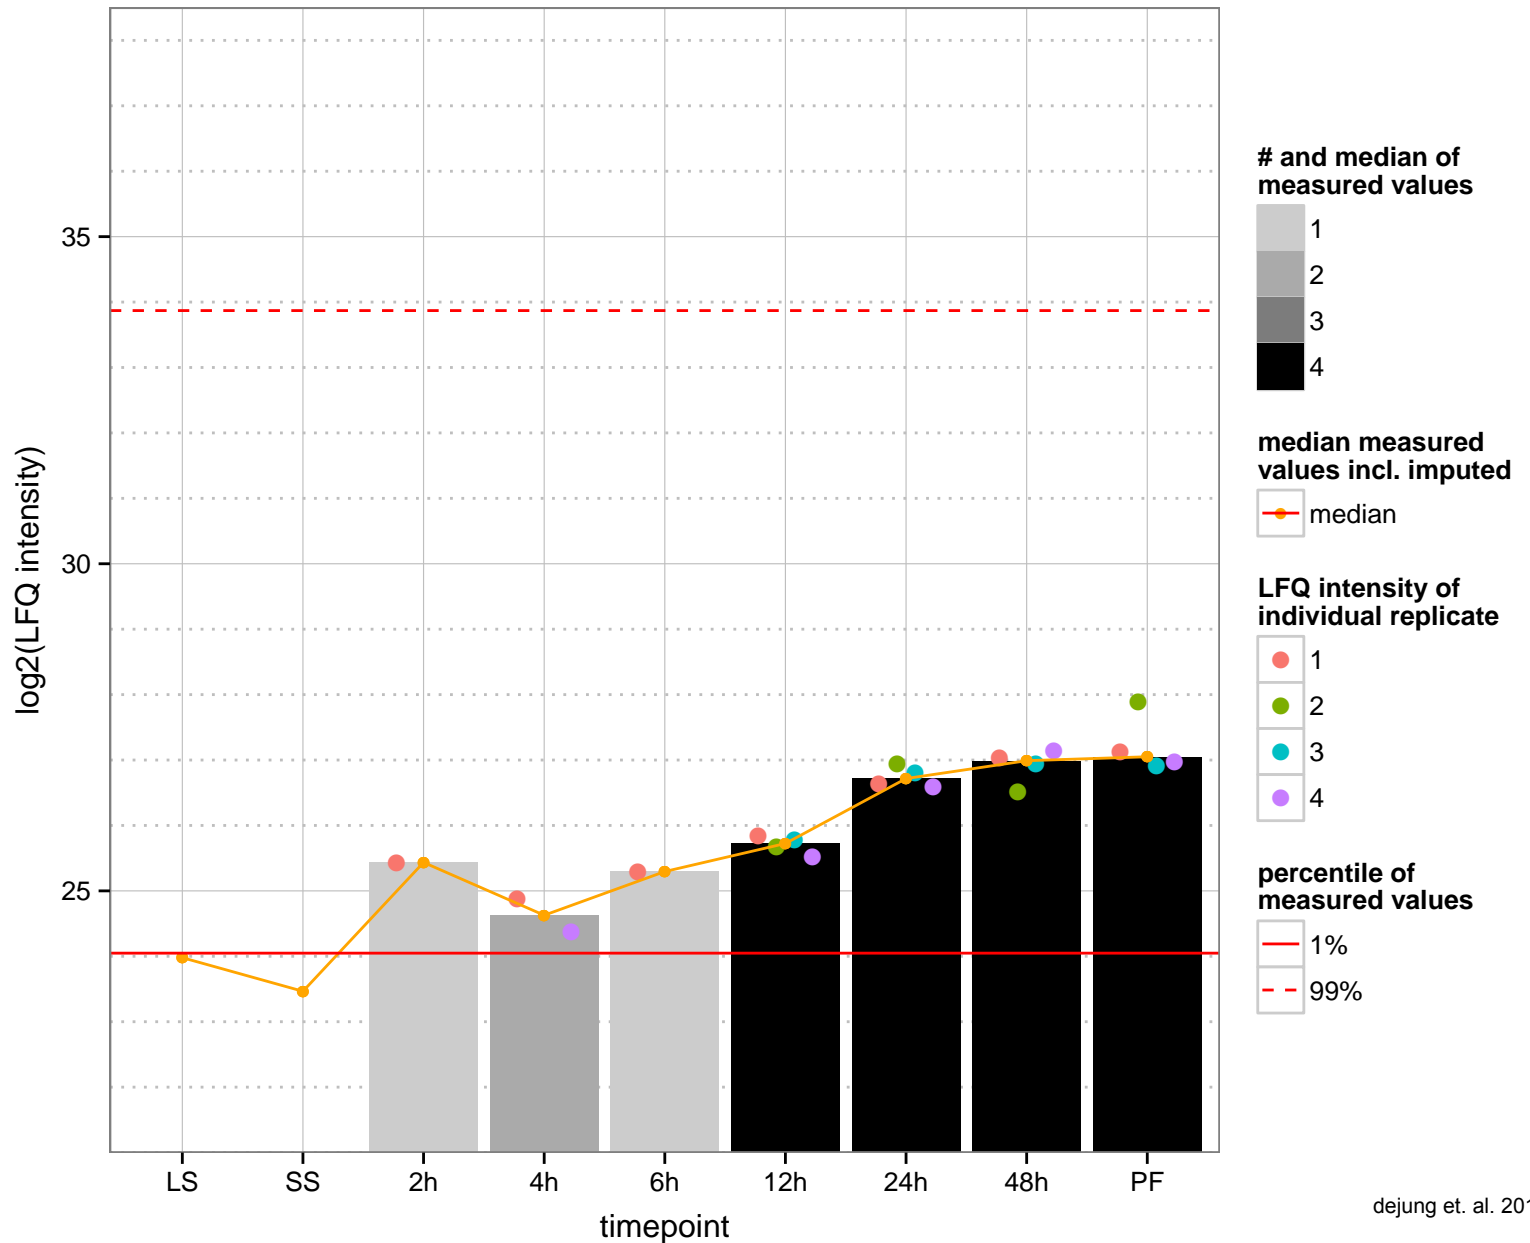

hypothetical protein, conserved  
 Tb927.4.1670  
 AGOF: heme binding  
 AGOC: null  
 AGOP: null  
 PGOF: heme binding  
 PGOC: null  
 PGOP: null

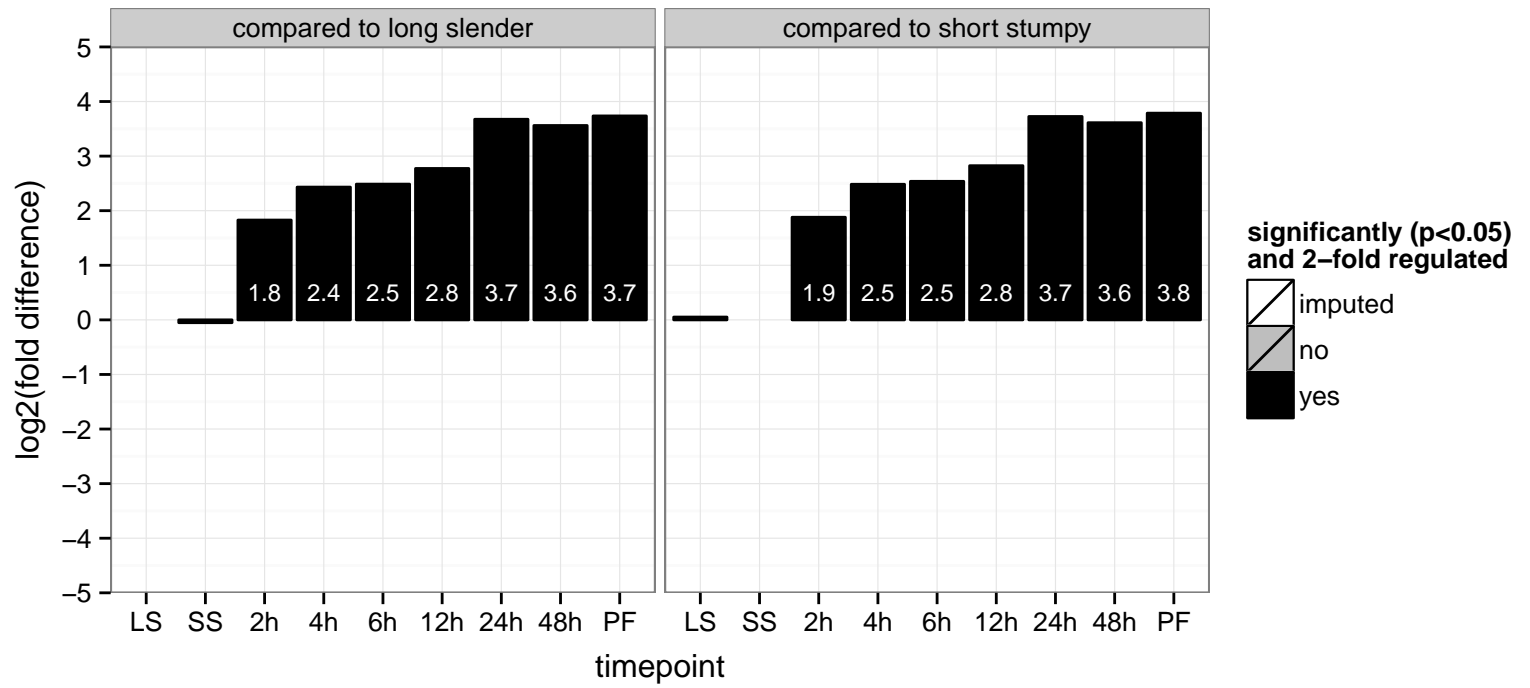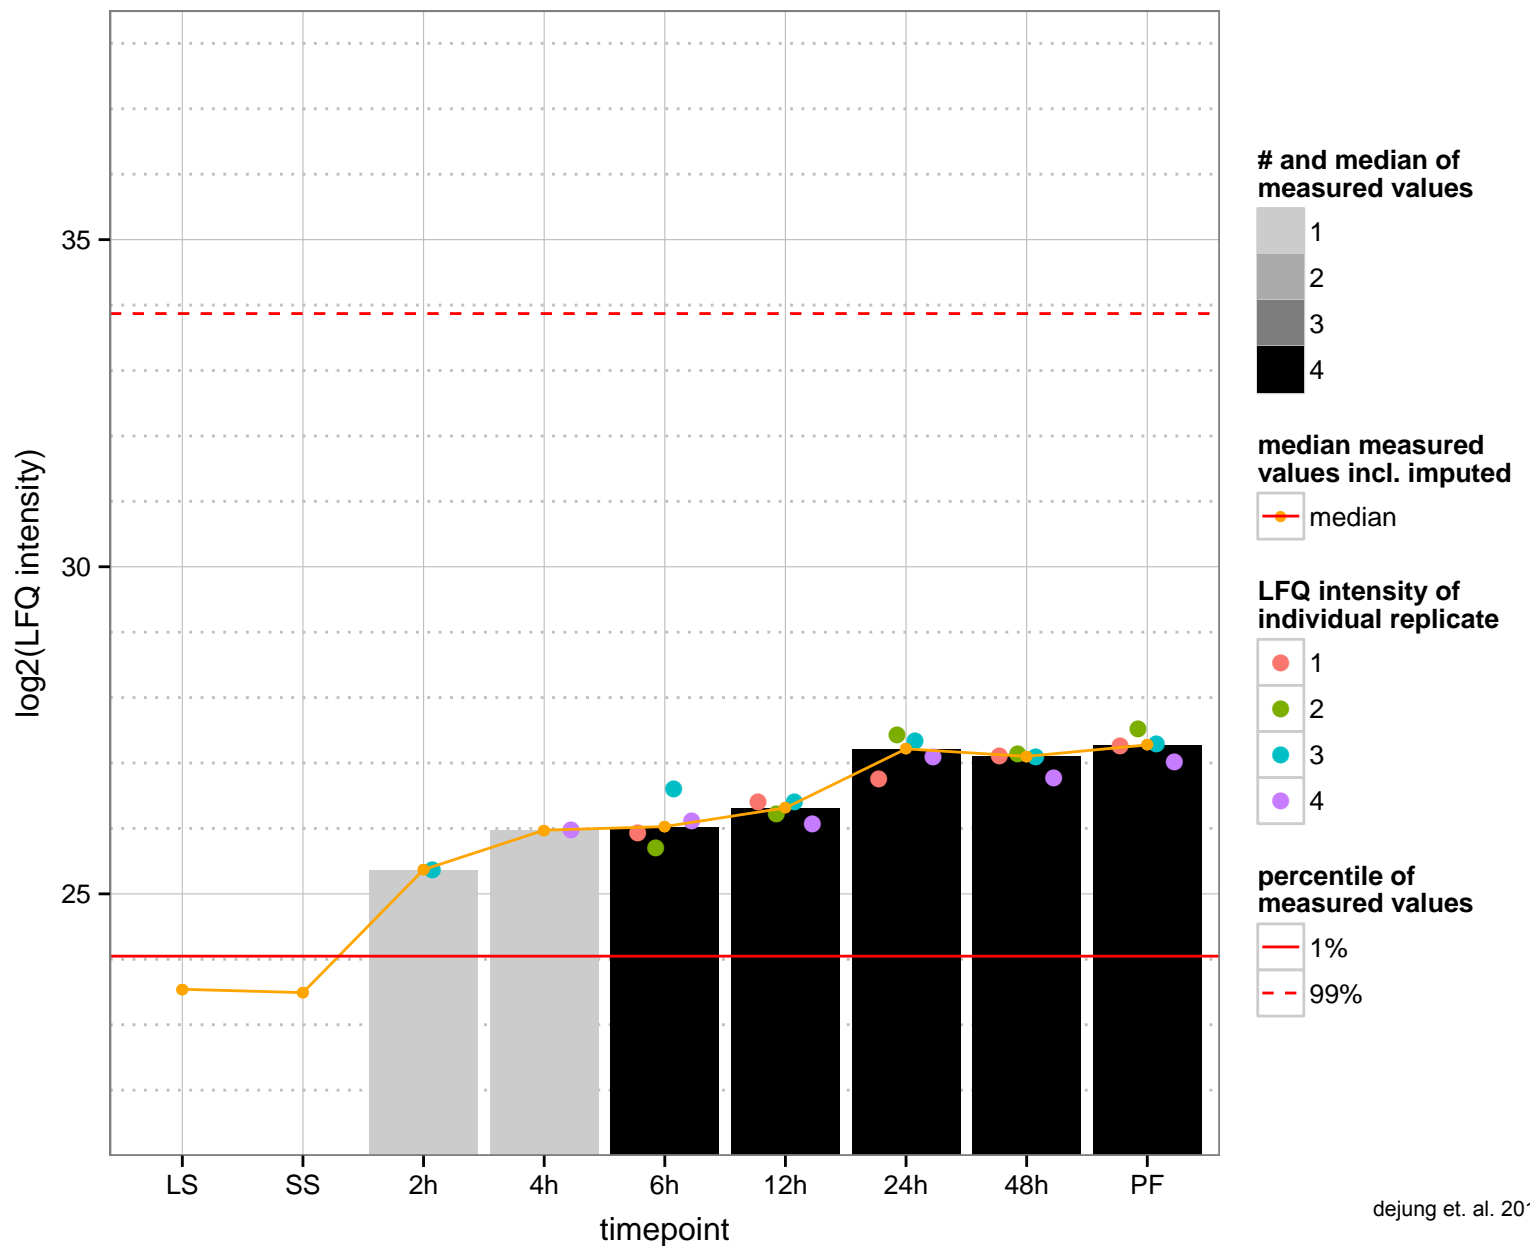

L-galactonolactone oxidase, D-arabinolactone oxidase (GAL/ALO)

Tb927.5.2650

AGOF: D-arabinono-1, 4-lactone oxidase activity, FMN binding, L-galactonolactone oxidase activity, flavin adenine dinucleotide

AGOC: glycosome, membrane

AGOP: L-ascorbic acid biosynthetic process

PGOF: D-arabinono-1, 4-lactone oxidase activity, UDP-N-acetylmuramate dehydrogenase activity, catalytic activity, flavin a

PGOC: membrane

PGOP: oxidation-reduction process

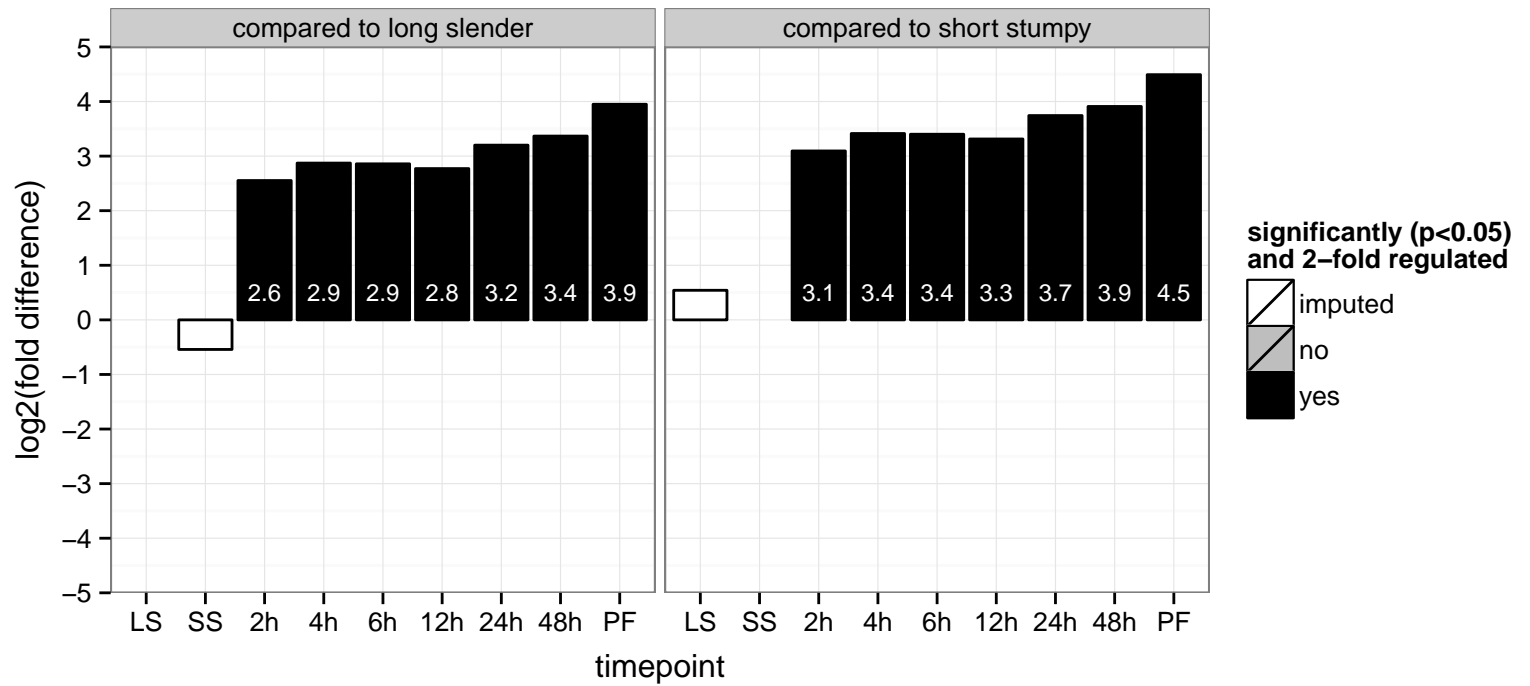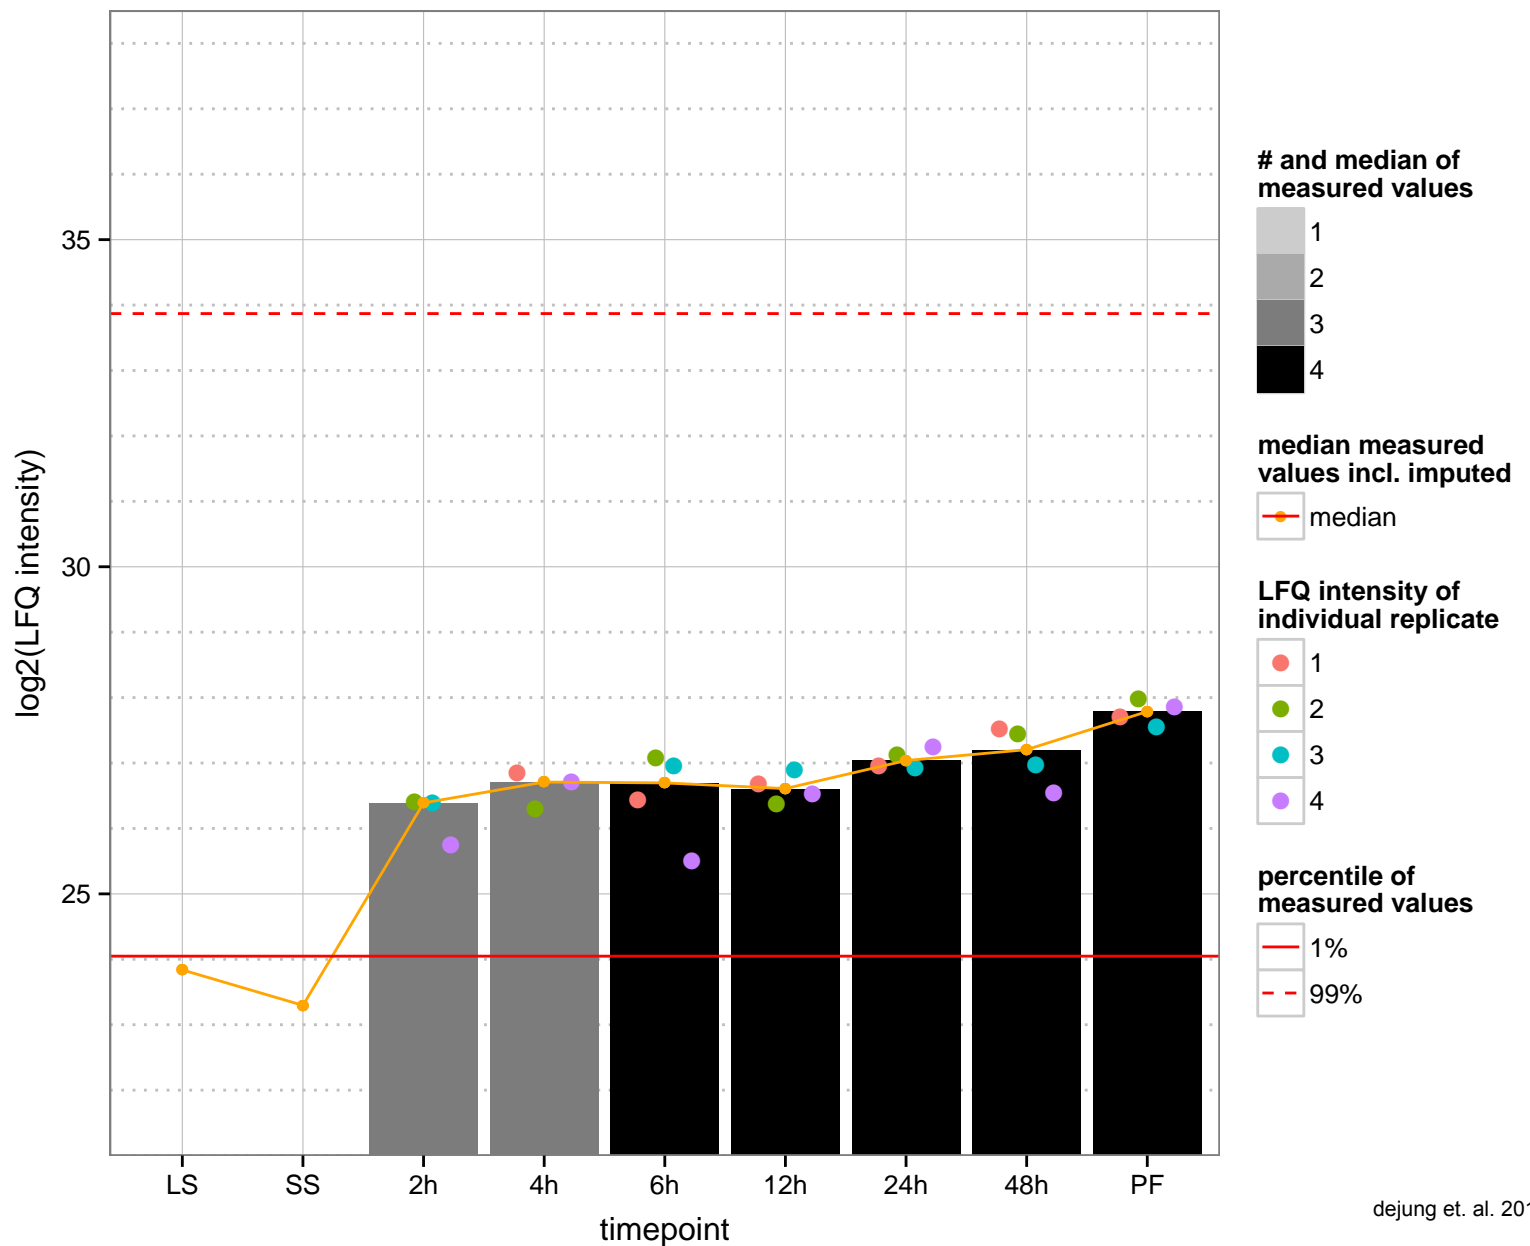

cell cycle sequence binding phosphoprotein (RBP33), putative  
 Tb927.5.760  
 AGOF: phosphoprotein binding  
 AGOC: null  
 AGOP: null  
 PGO: null  
 PGO: null  
 PGO: null

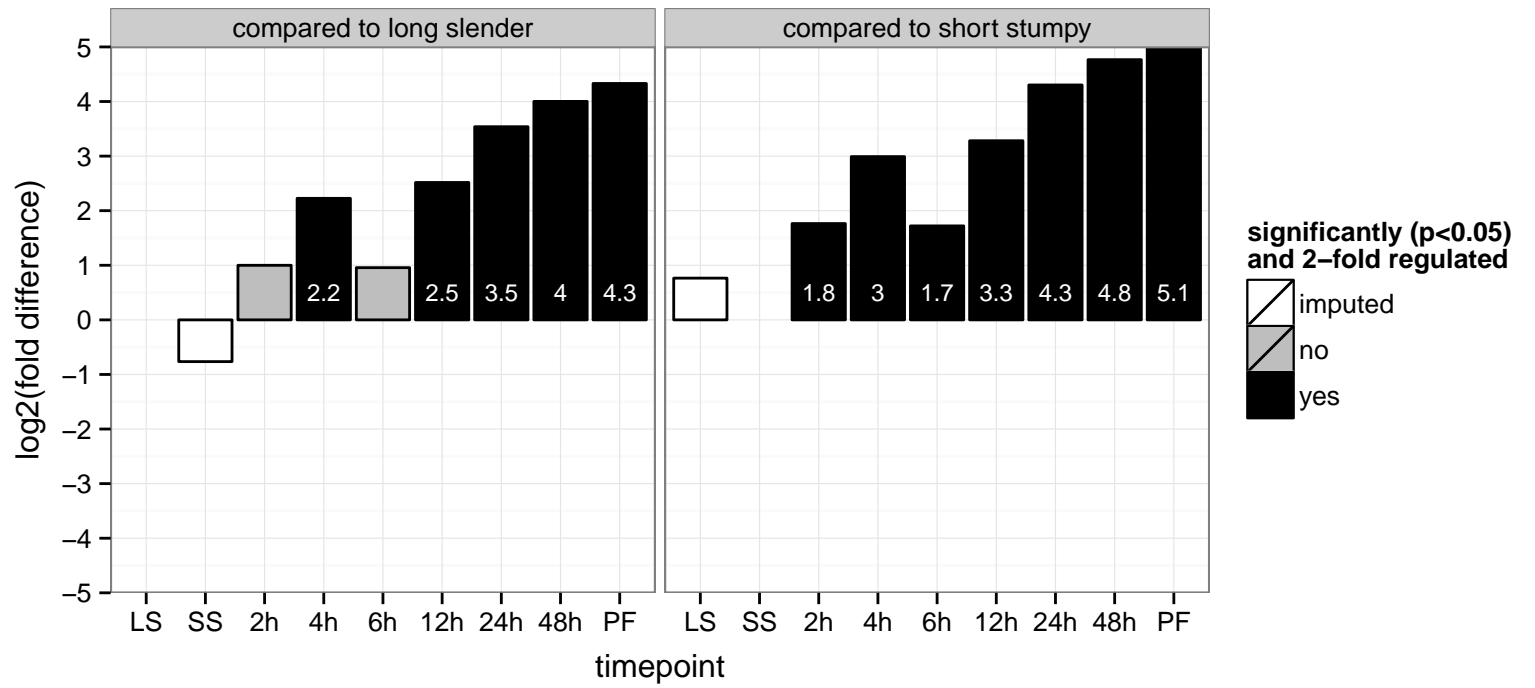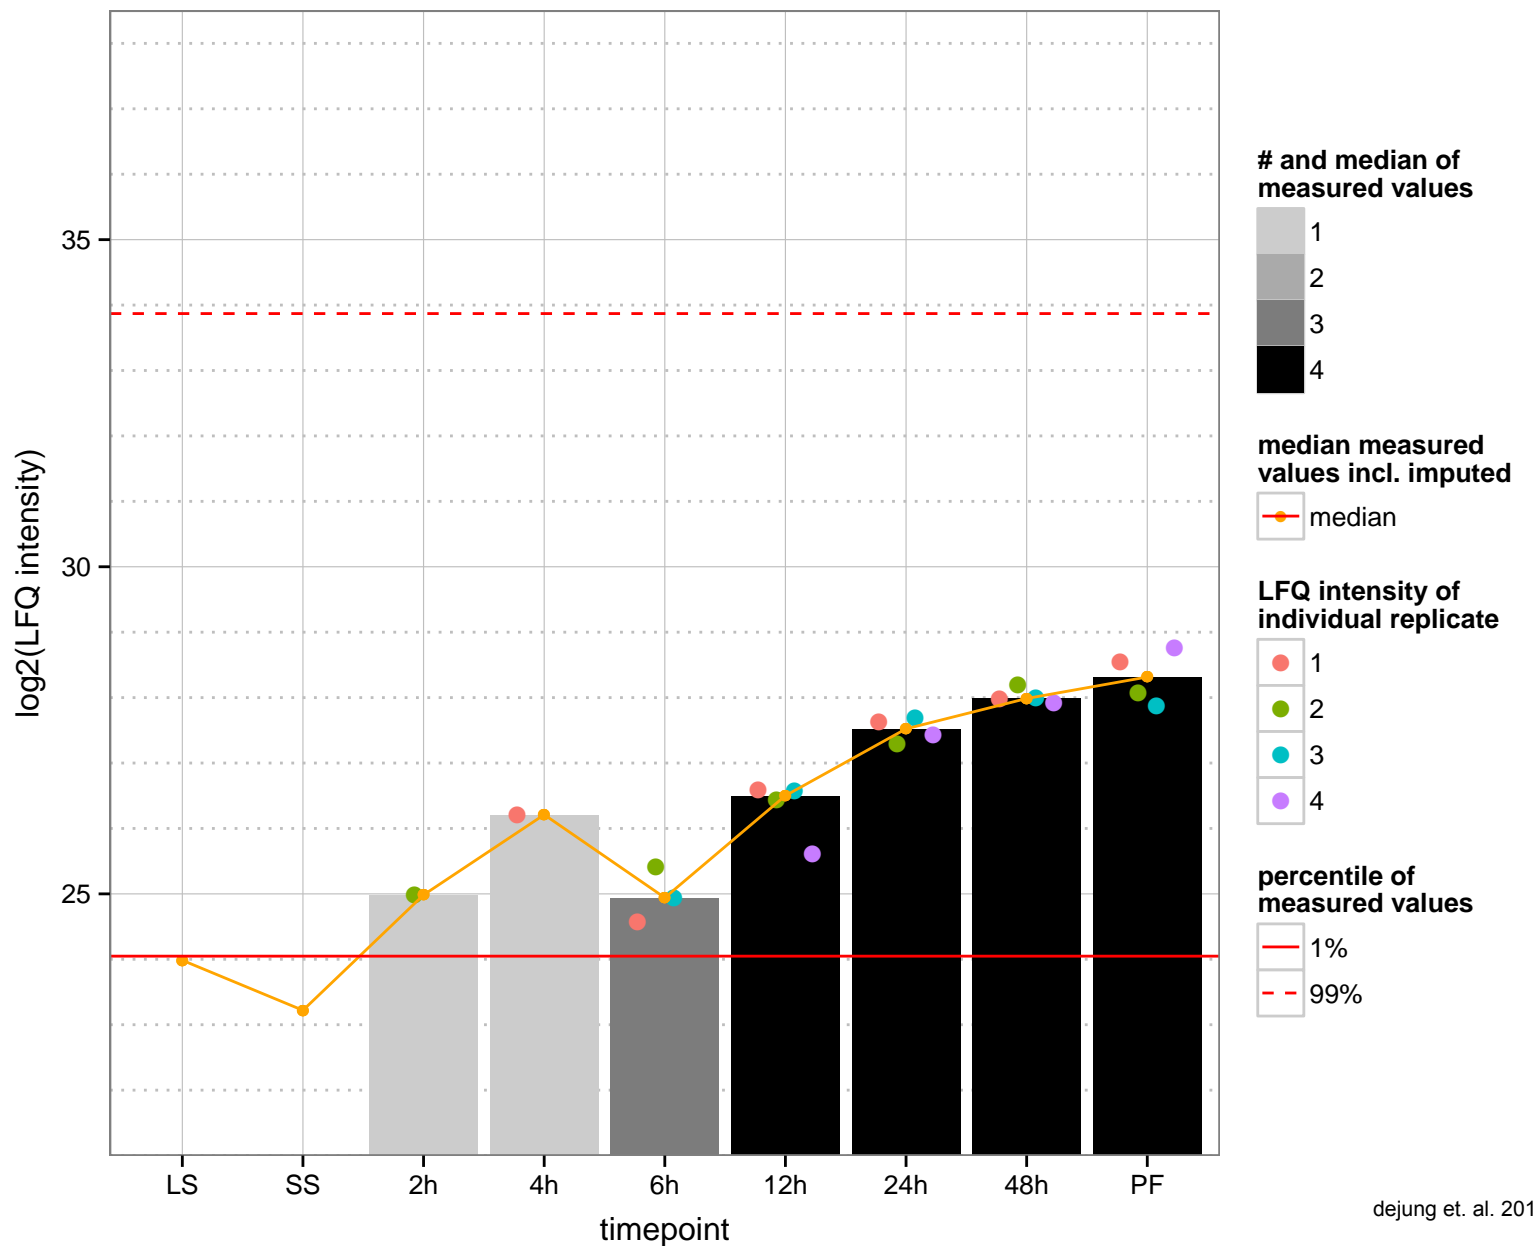

single strand-specific nuclease, putative

Tb927.6.1650

AGOF: endonuclease activity, nucleic acid binding

AGOC: null

AGOP: DNA catabolic process

PGOF: endonuclease activity, hydrolase activity, acting on ester bonds, nucleic acid binding

PGOC: null

PGOP: DNA catabolic process

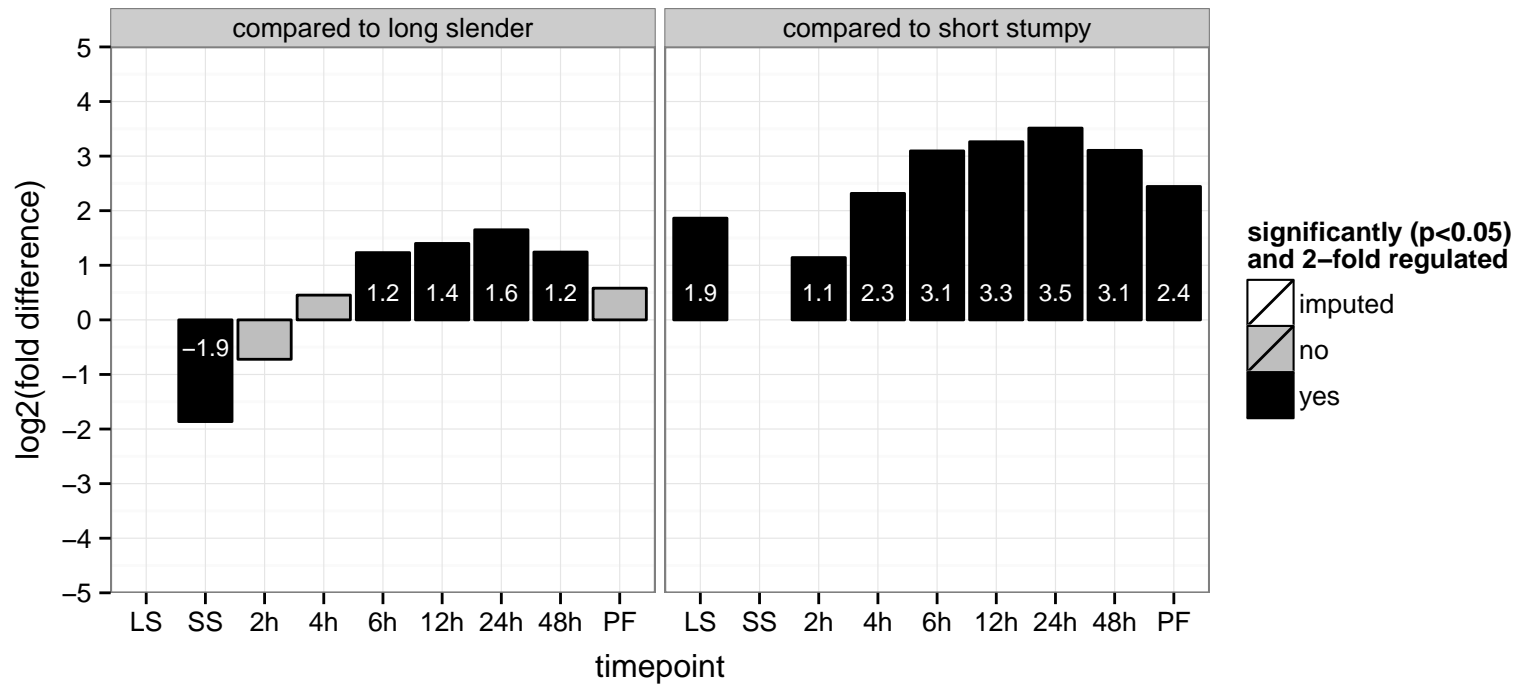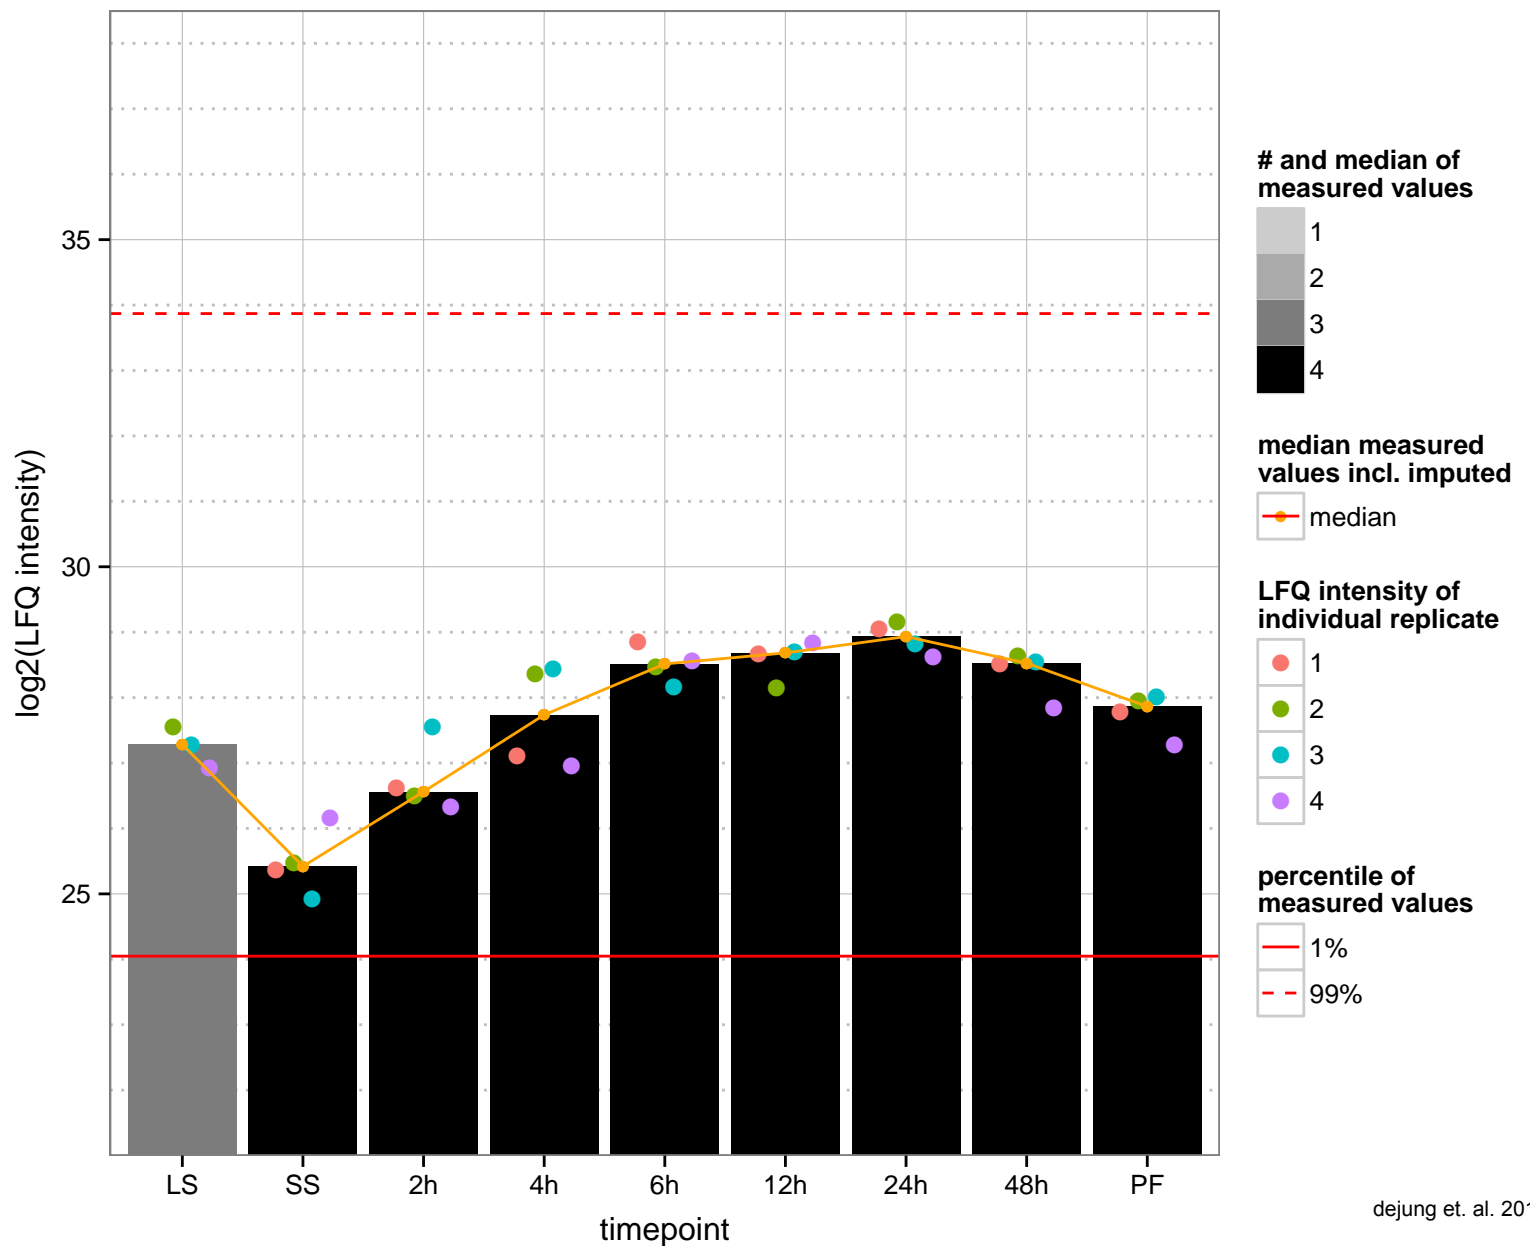

single strand-specific nuclease, putative  
 Tb927.6.2890  
 AGOF: endonuclease activity, nucleic acid binding  
 AGOC: null  
 AGOP: DNA catabolic process  
 PGOF: endonuclease activity, hydrolase activity, acting on ester bonds, nucleic acid binding  
 PGOC: null  
 PGOP: DNA catabolic process

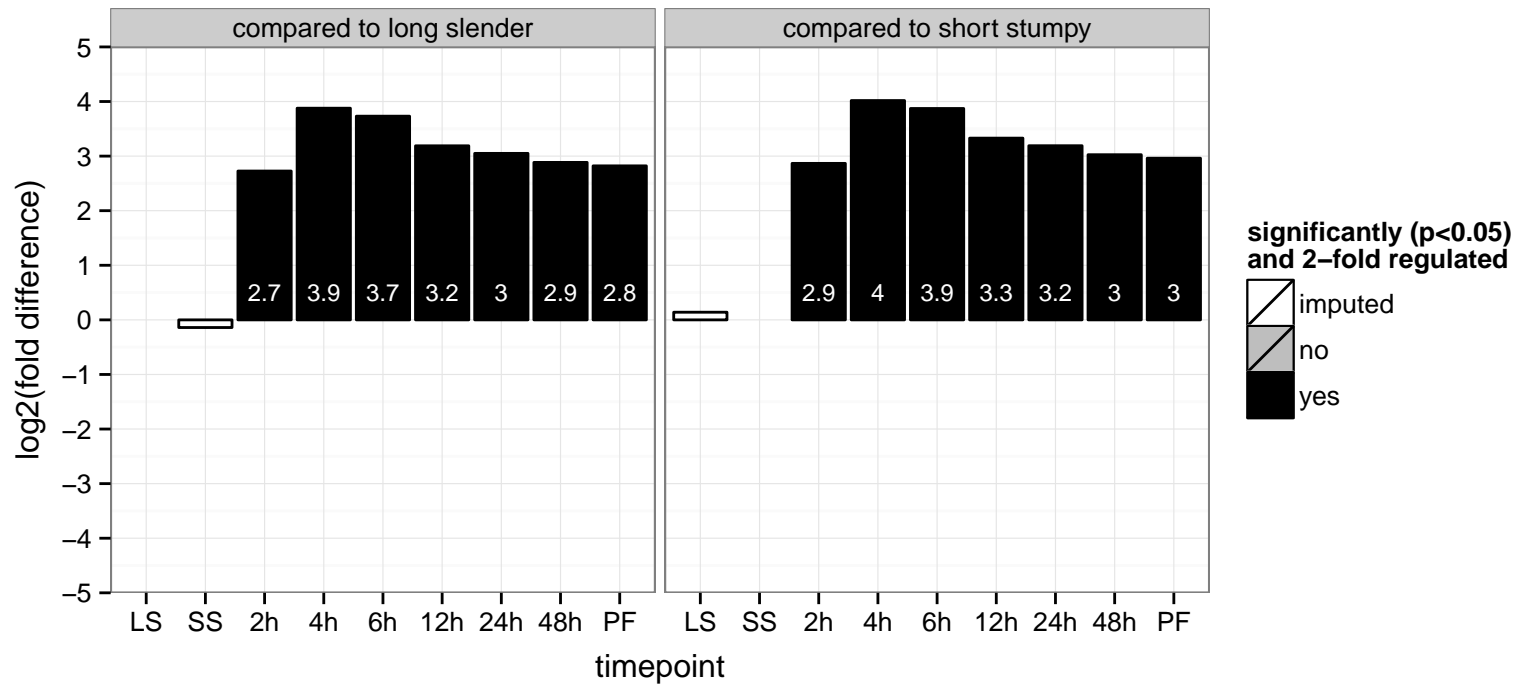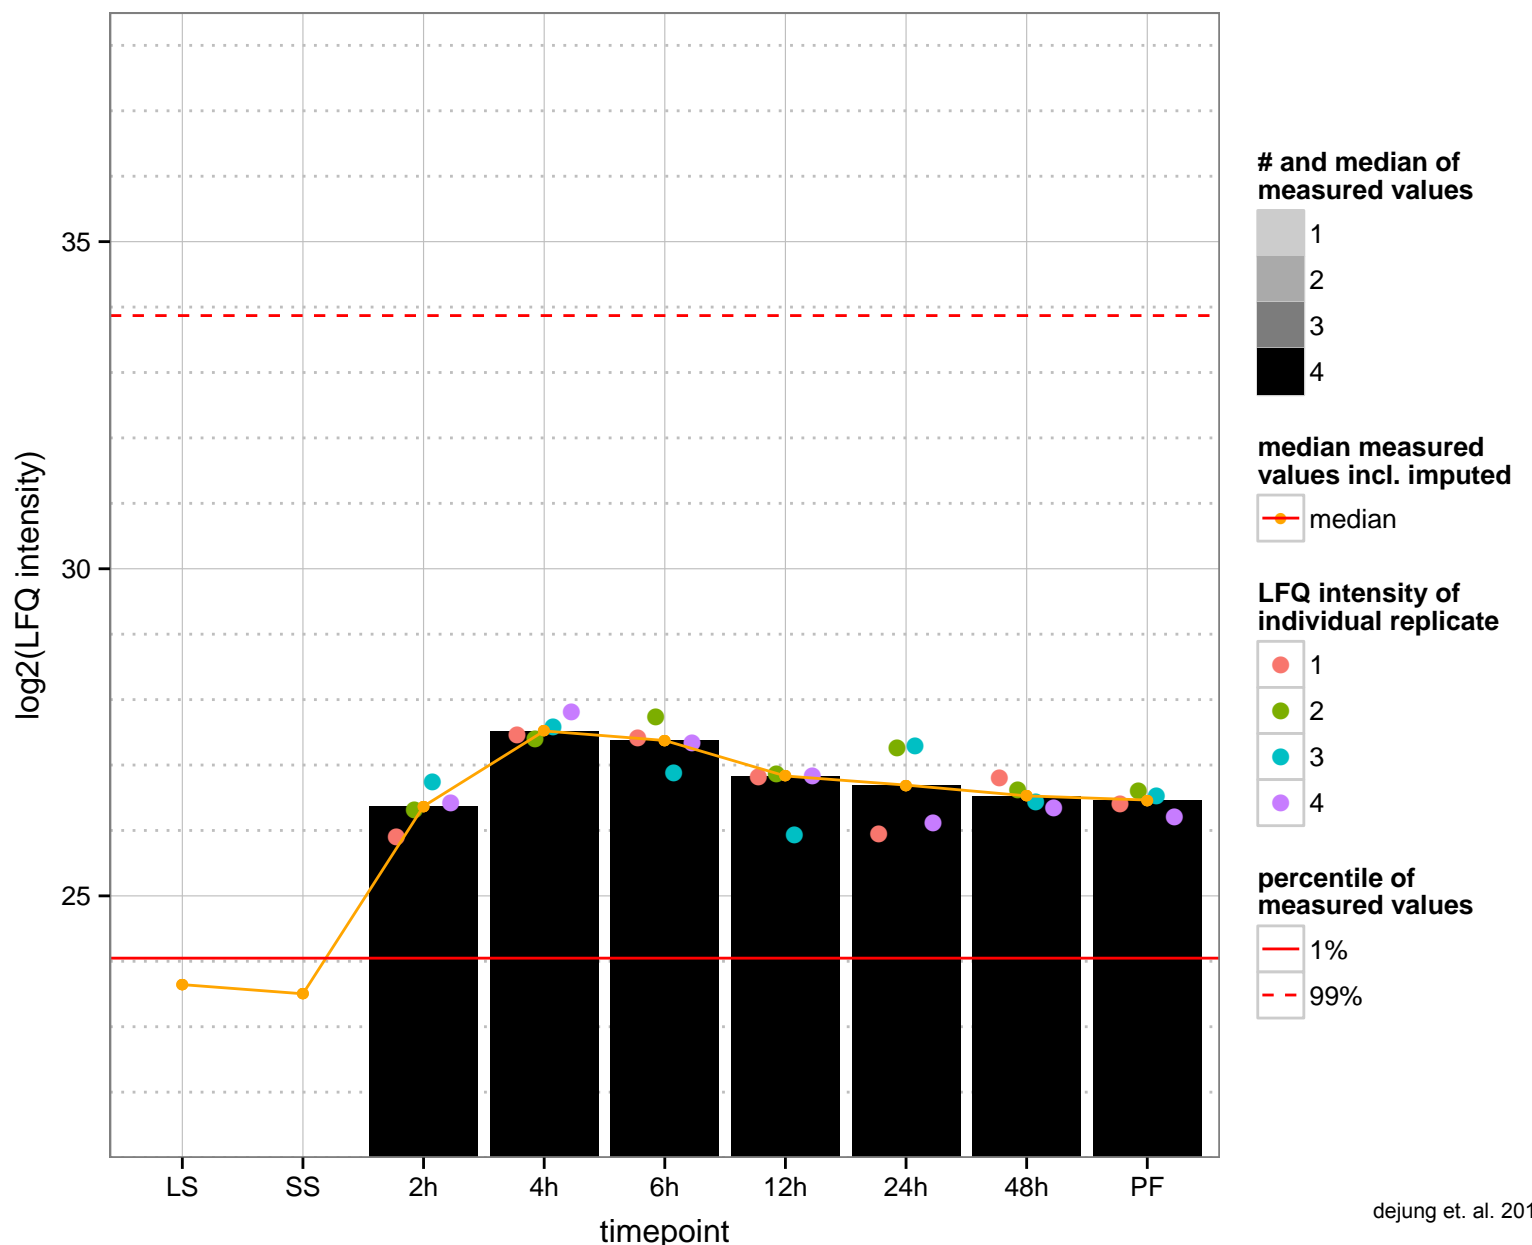

hypothetical protein, conserved  
 Tb927.6.4080  
 AGOF: null  
 AGOC: mitochondrion  
 AGOP: null  
 PGO: null  
 PGO: null  
 PGO: null

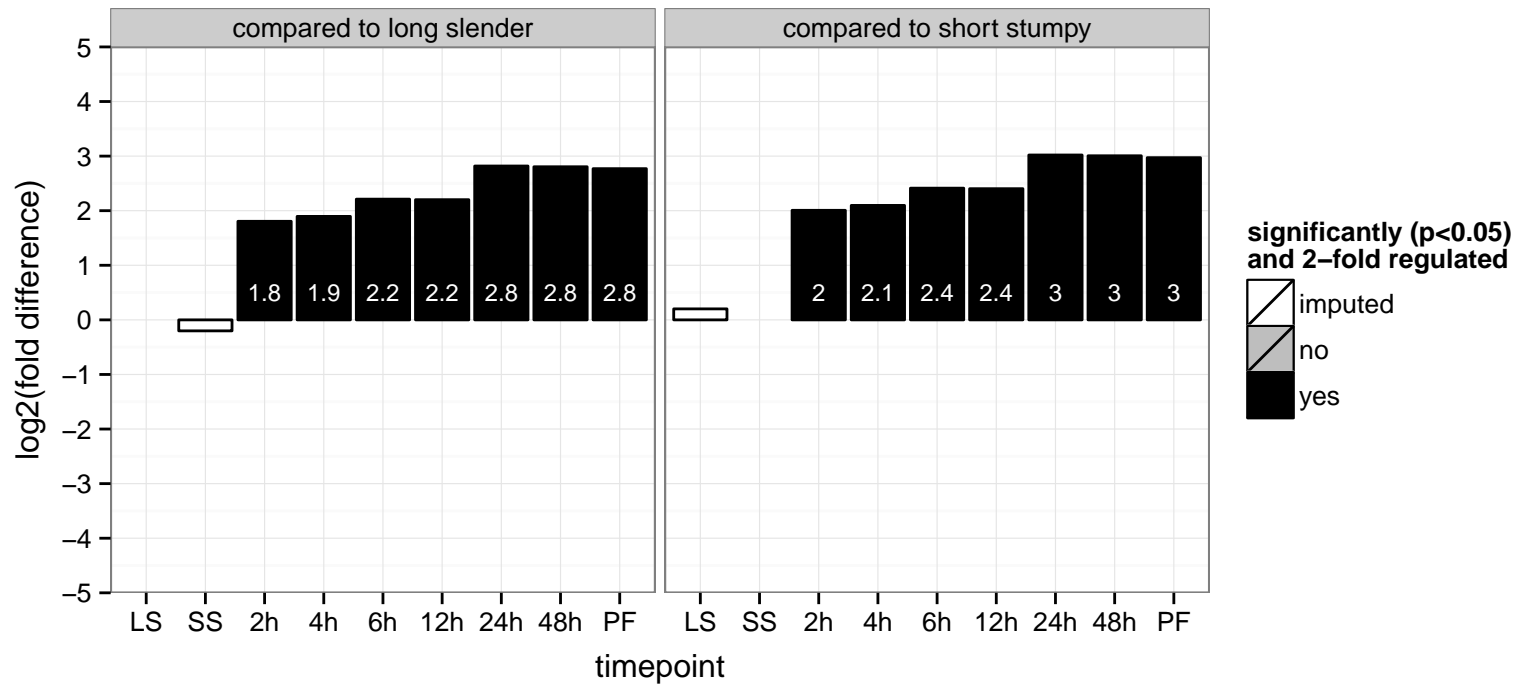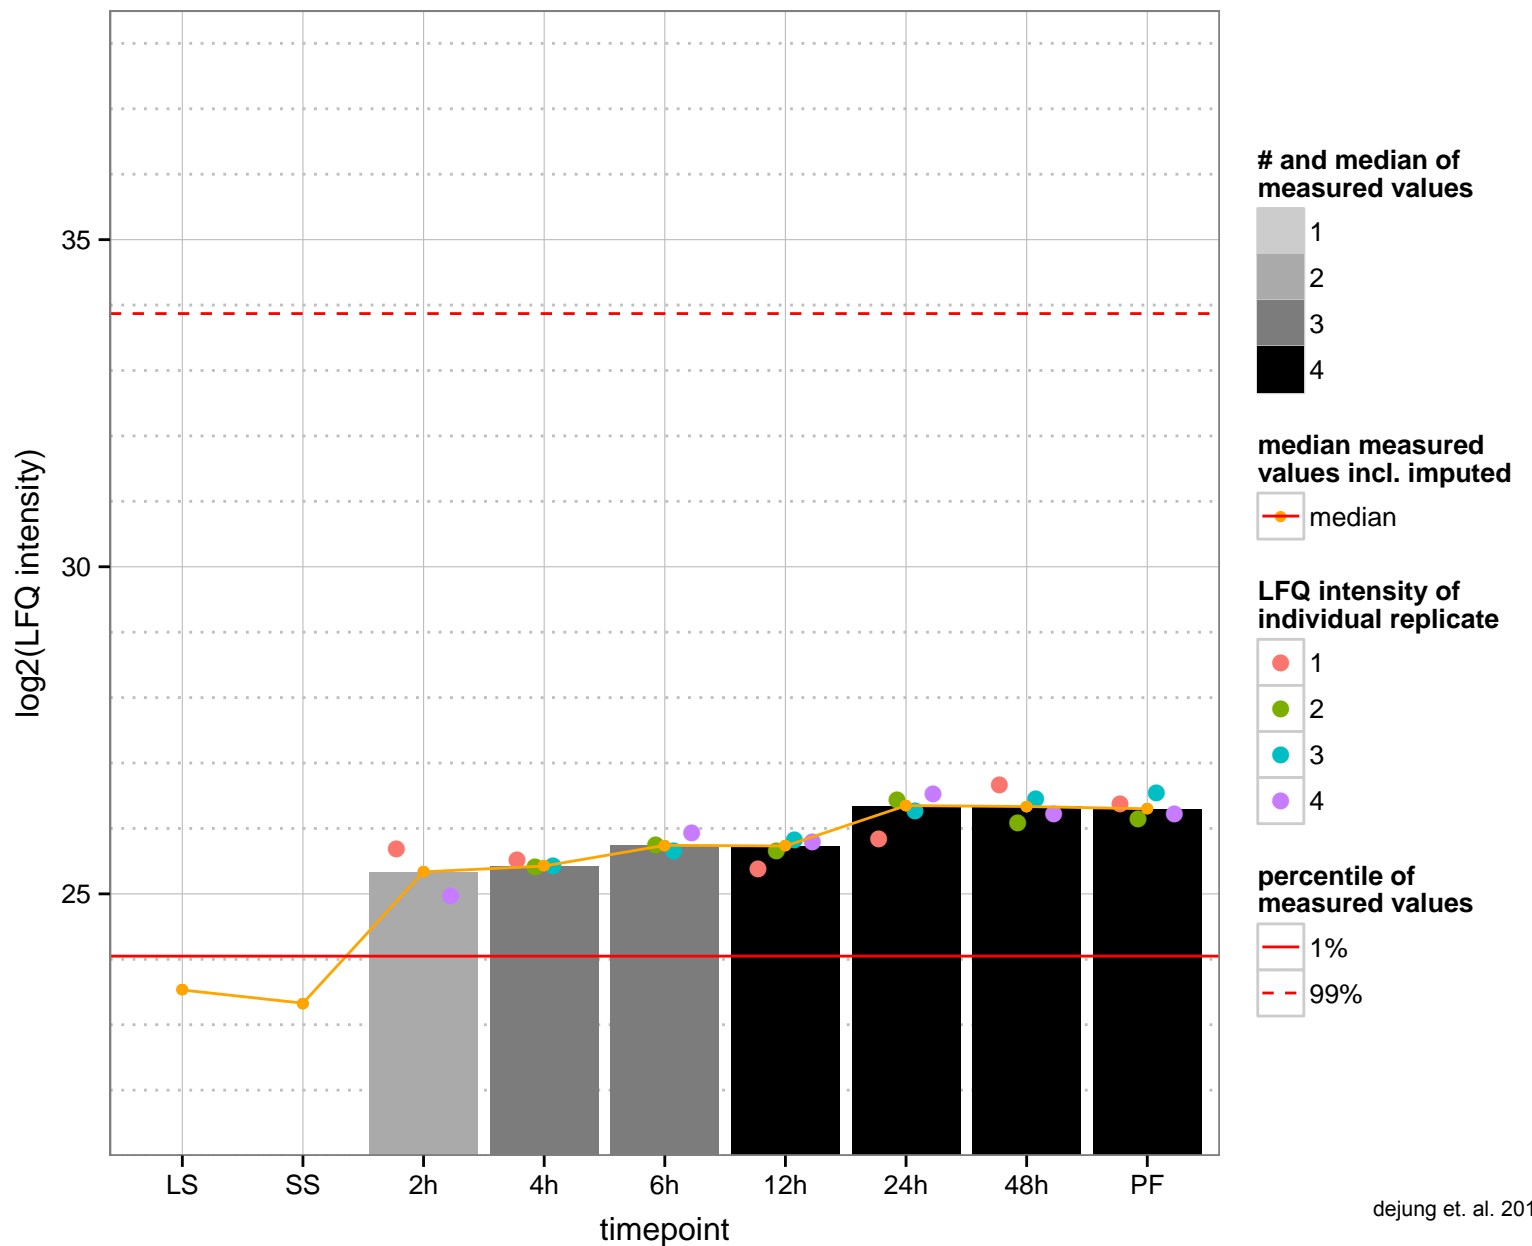



zinc finger protein family member, putative (ZC3H22)  
 Tb927.7.2680  
 AGOF: RNA binding, zinc ion binding  
 AGOC: null  
 AGOP: null  
 PGOF: nucleic acid binding, zinc ion binding  
 PGO: null  
 PGOP: null

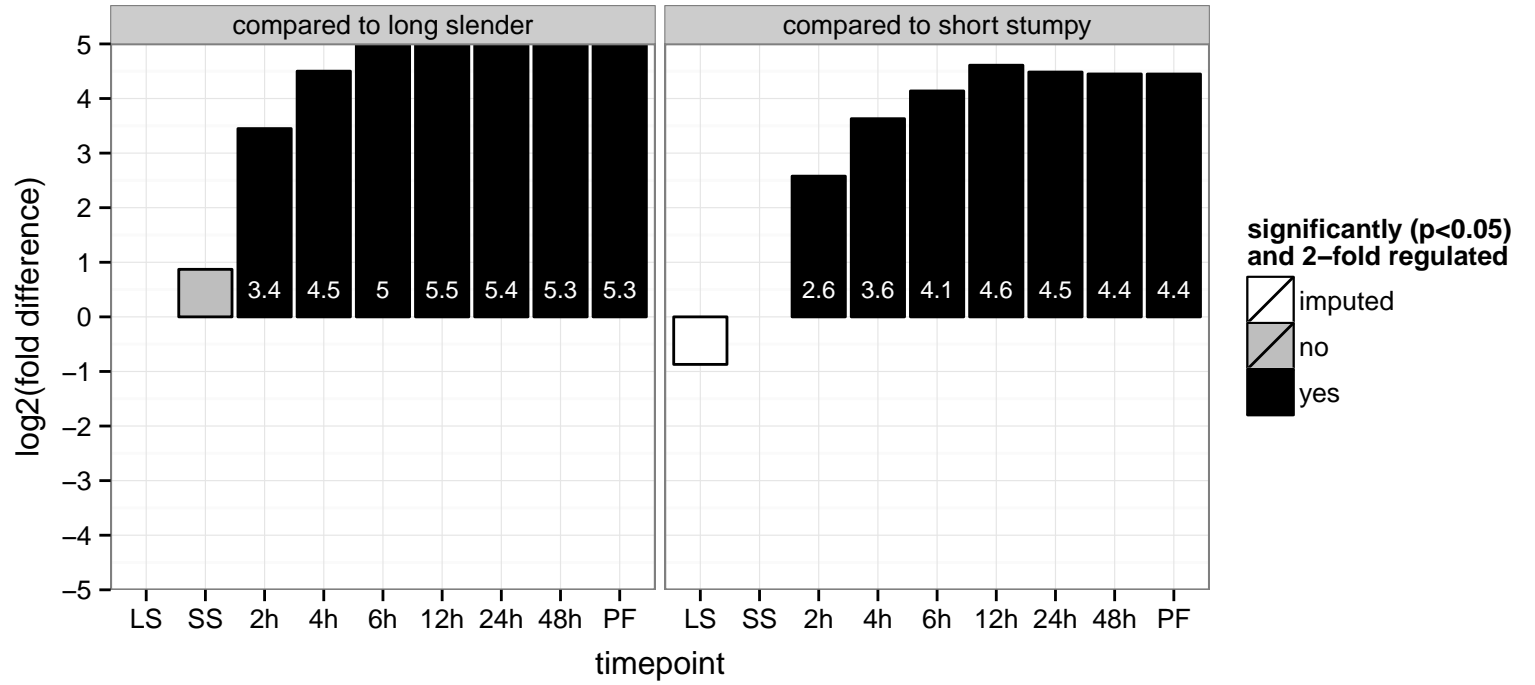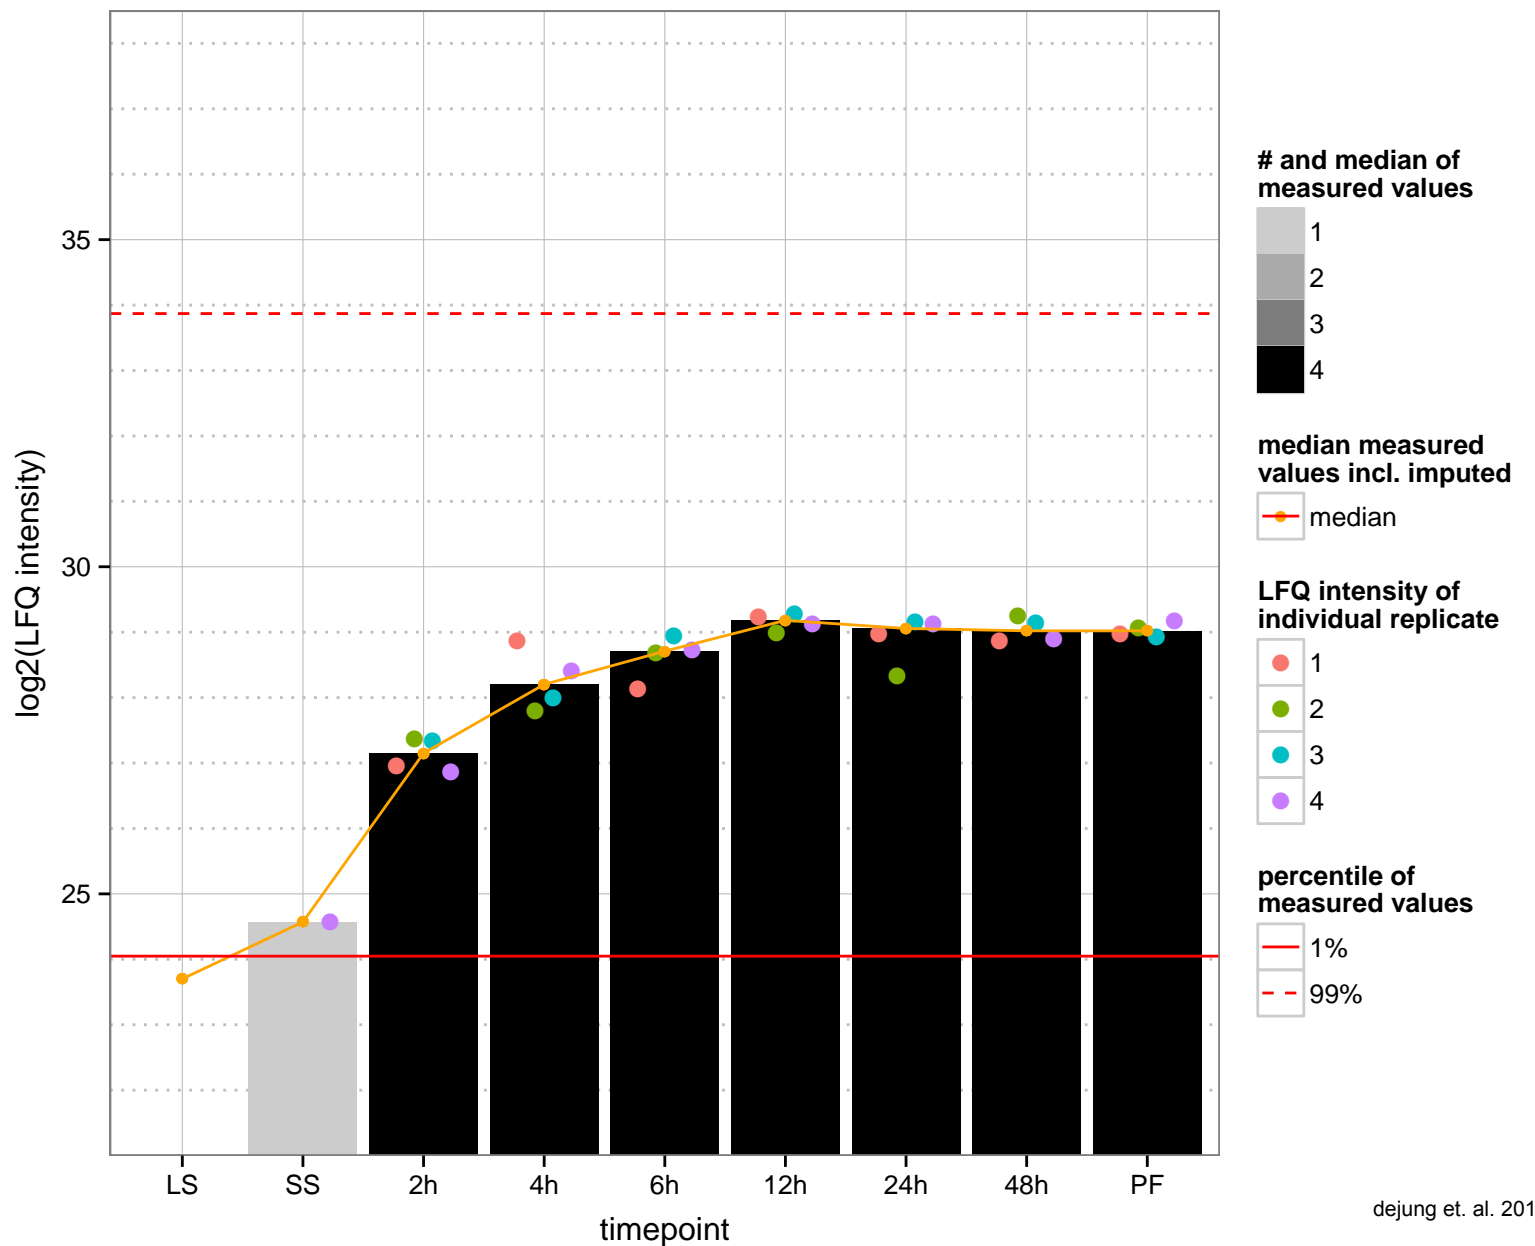

hypothetical protein, conserved  
 Tb927.7.3090  
 AGOF: null  
 AGOC: null  
 AGOP: null  
 PGO: protein binding  
 PGO: null  
 PGO: null

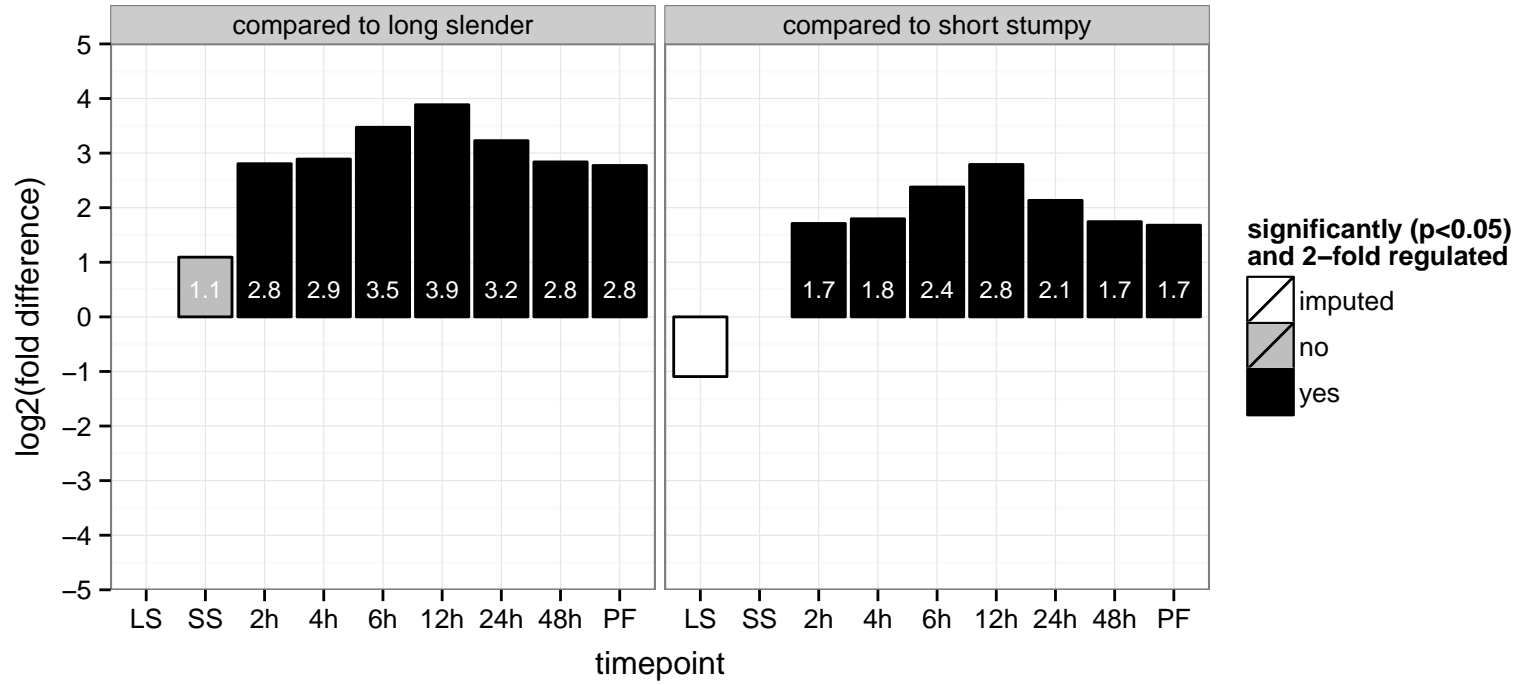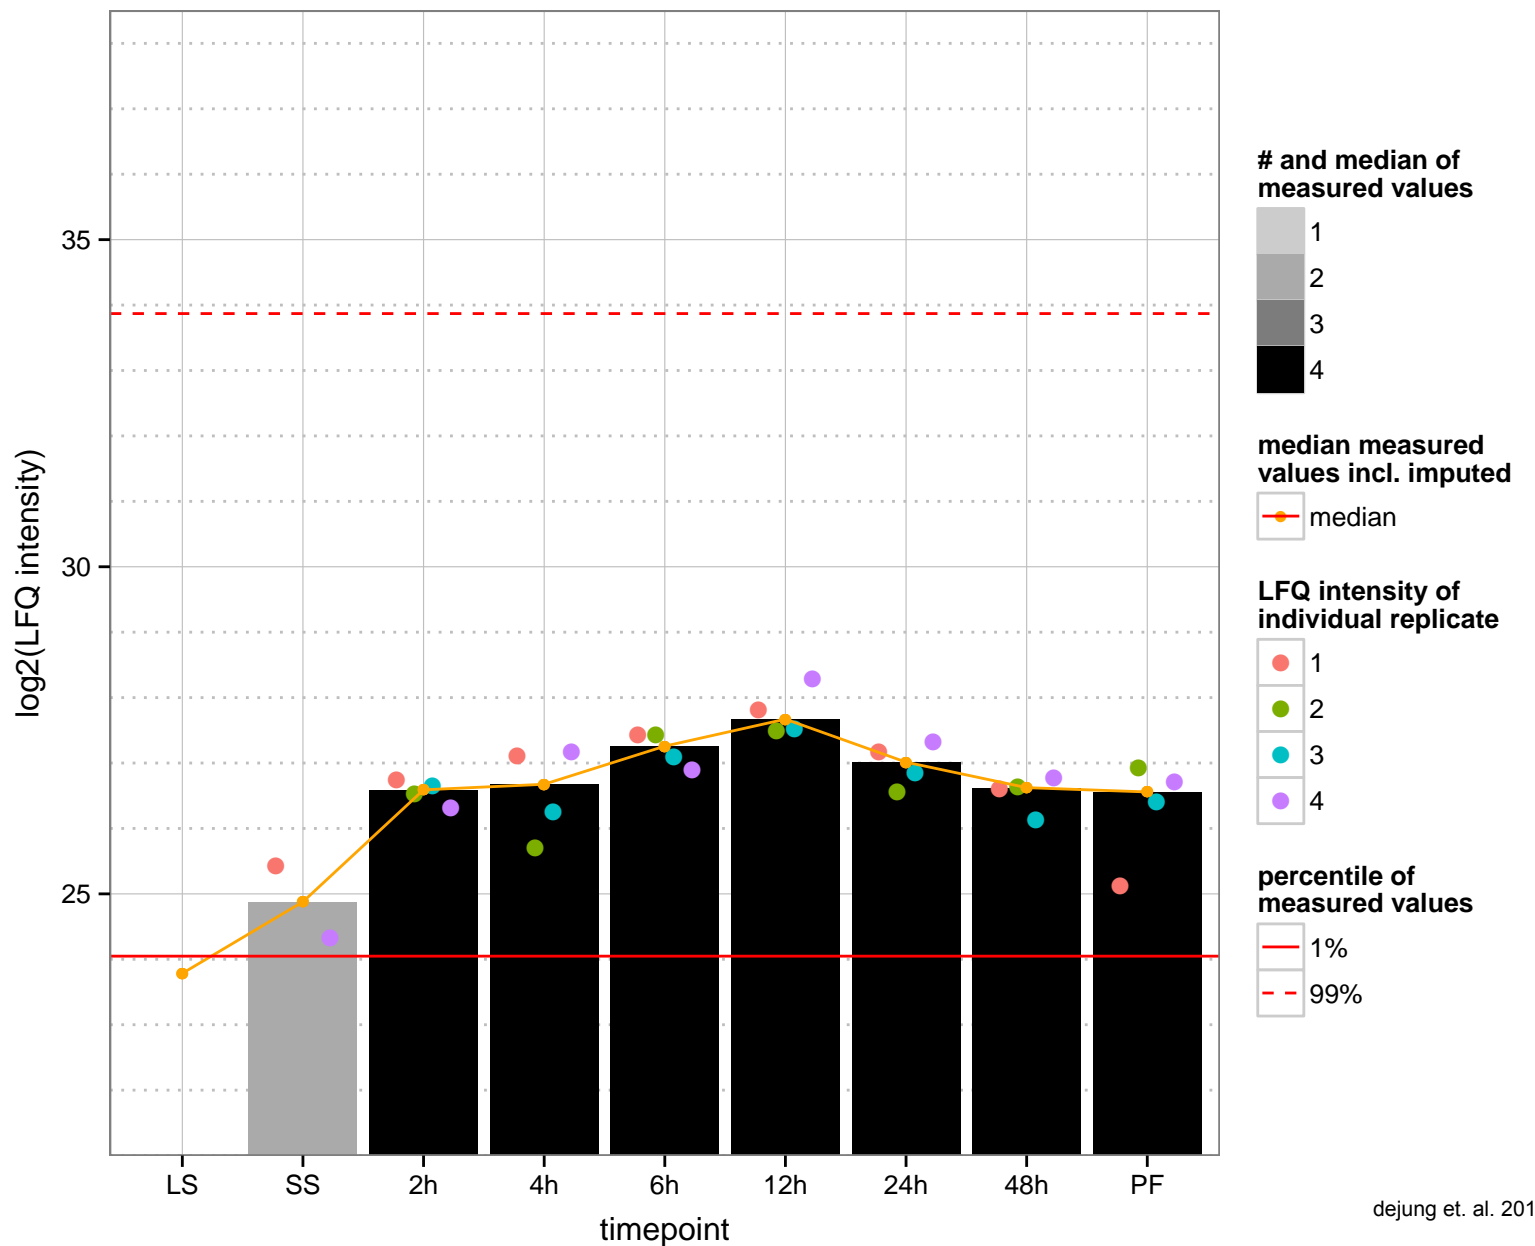

glutamine synthetase, putative, putative (GS)  
 Tb927.7.4970;Tb11.v5.0178  
 AGOF: null, glutamate-ammonia ligase activity  
 AGOC: null, cytoplasm, mitochondrion  
 AGOP: null, glutamine biosynthetic process, nitrogen compound metabolic process  
 PGO: glutamate-ammonia ligase activity  
 PGO: null  
 PGO: glutamine biosynthetic process, nitrogen compound metabolic process

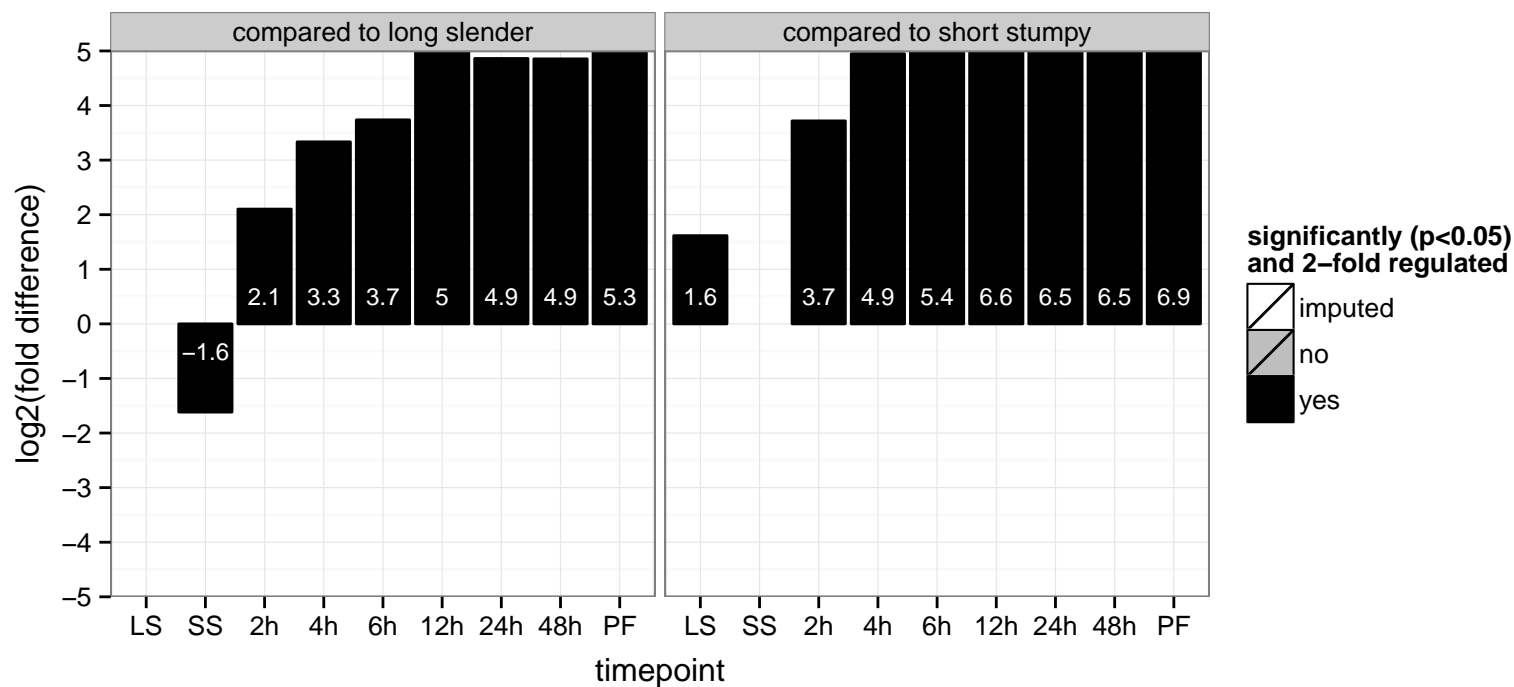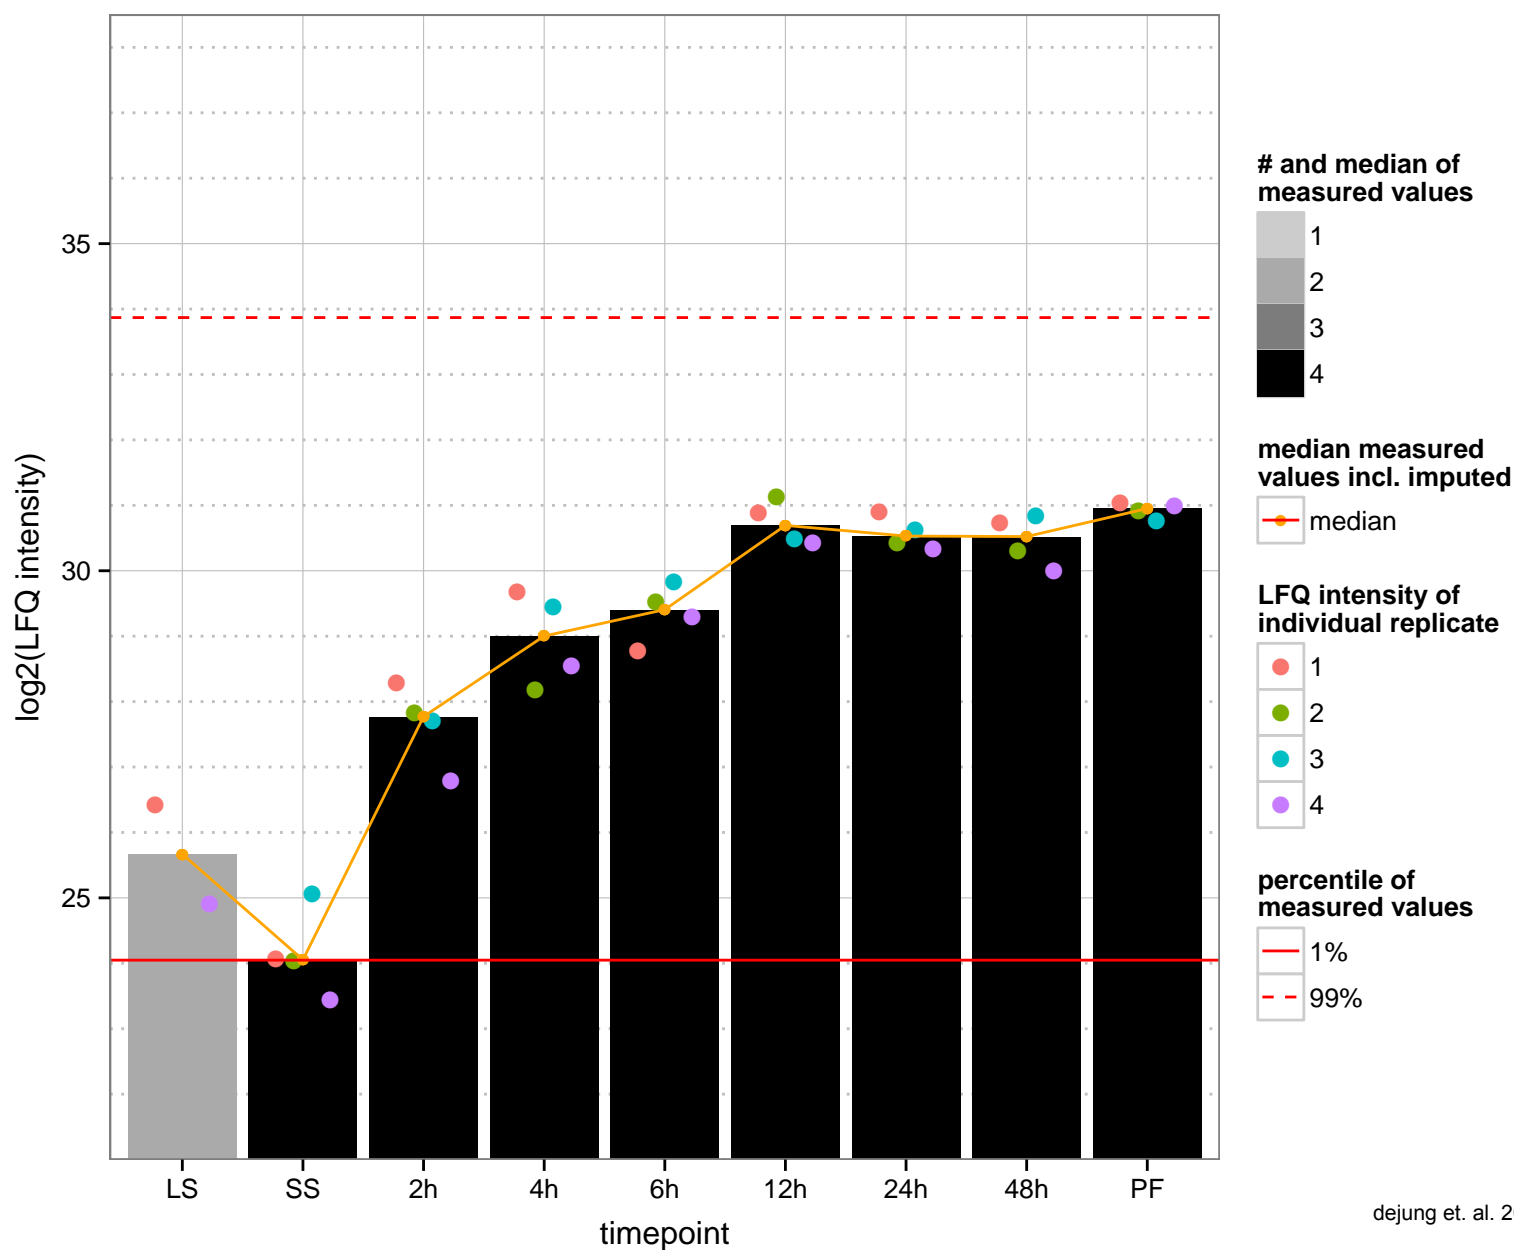

trans-sialidase (TS)  
 Tb927.7.6850  
 AGOF: exo-alpha-sialidase activity, sialyltransferase activity  
 AGOC: cell surface  
 AGOP: pathogenesis, sialic acid transport  
 PGO: null  
 PGO: null  
 PGO: null

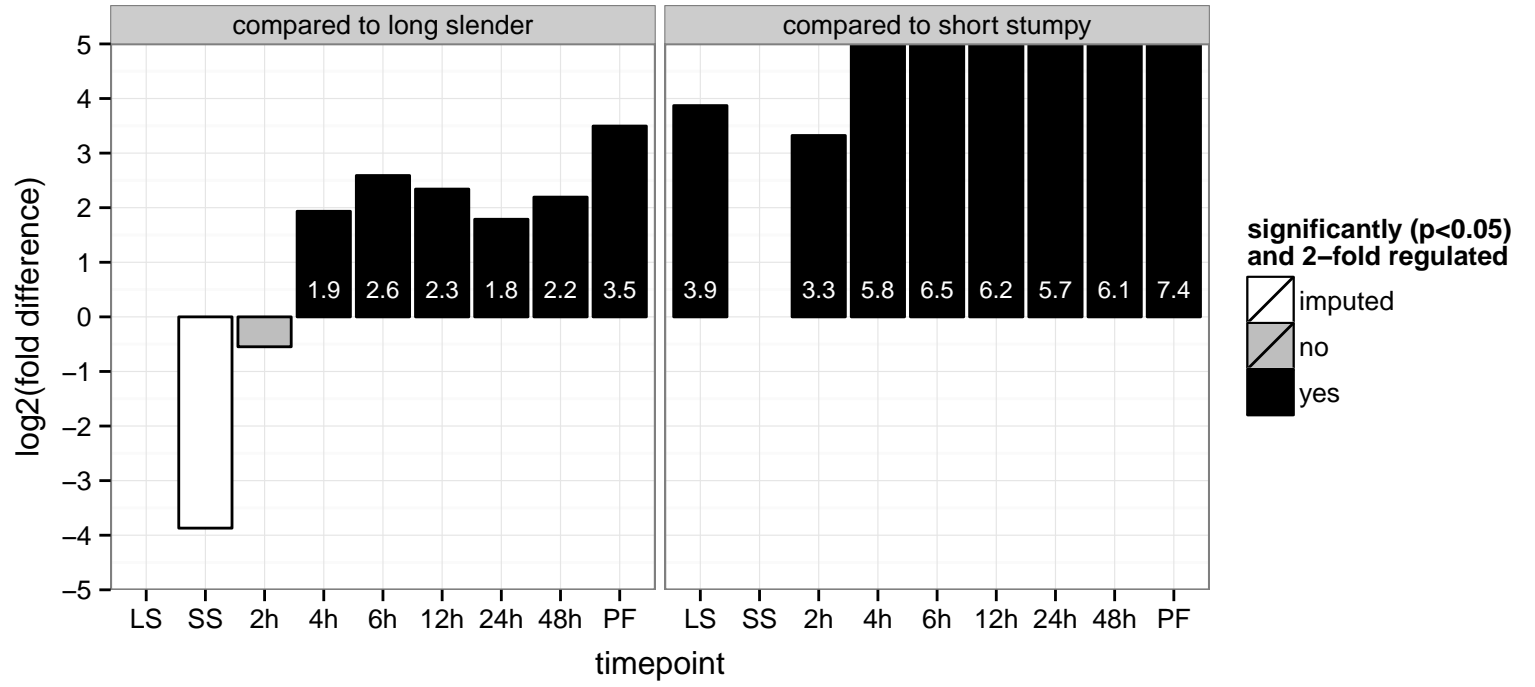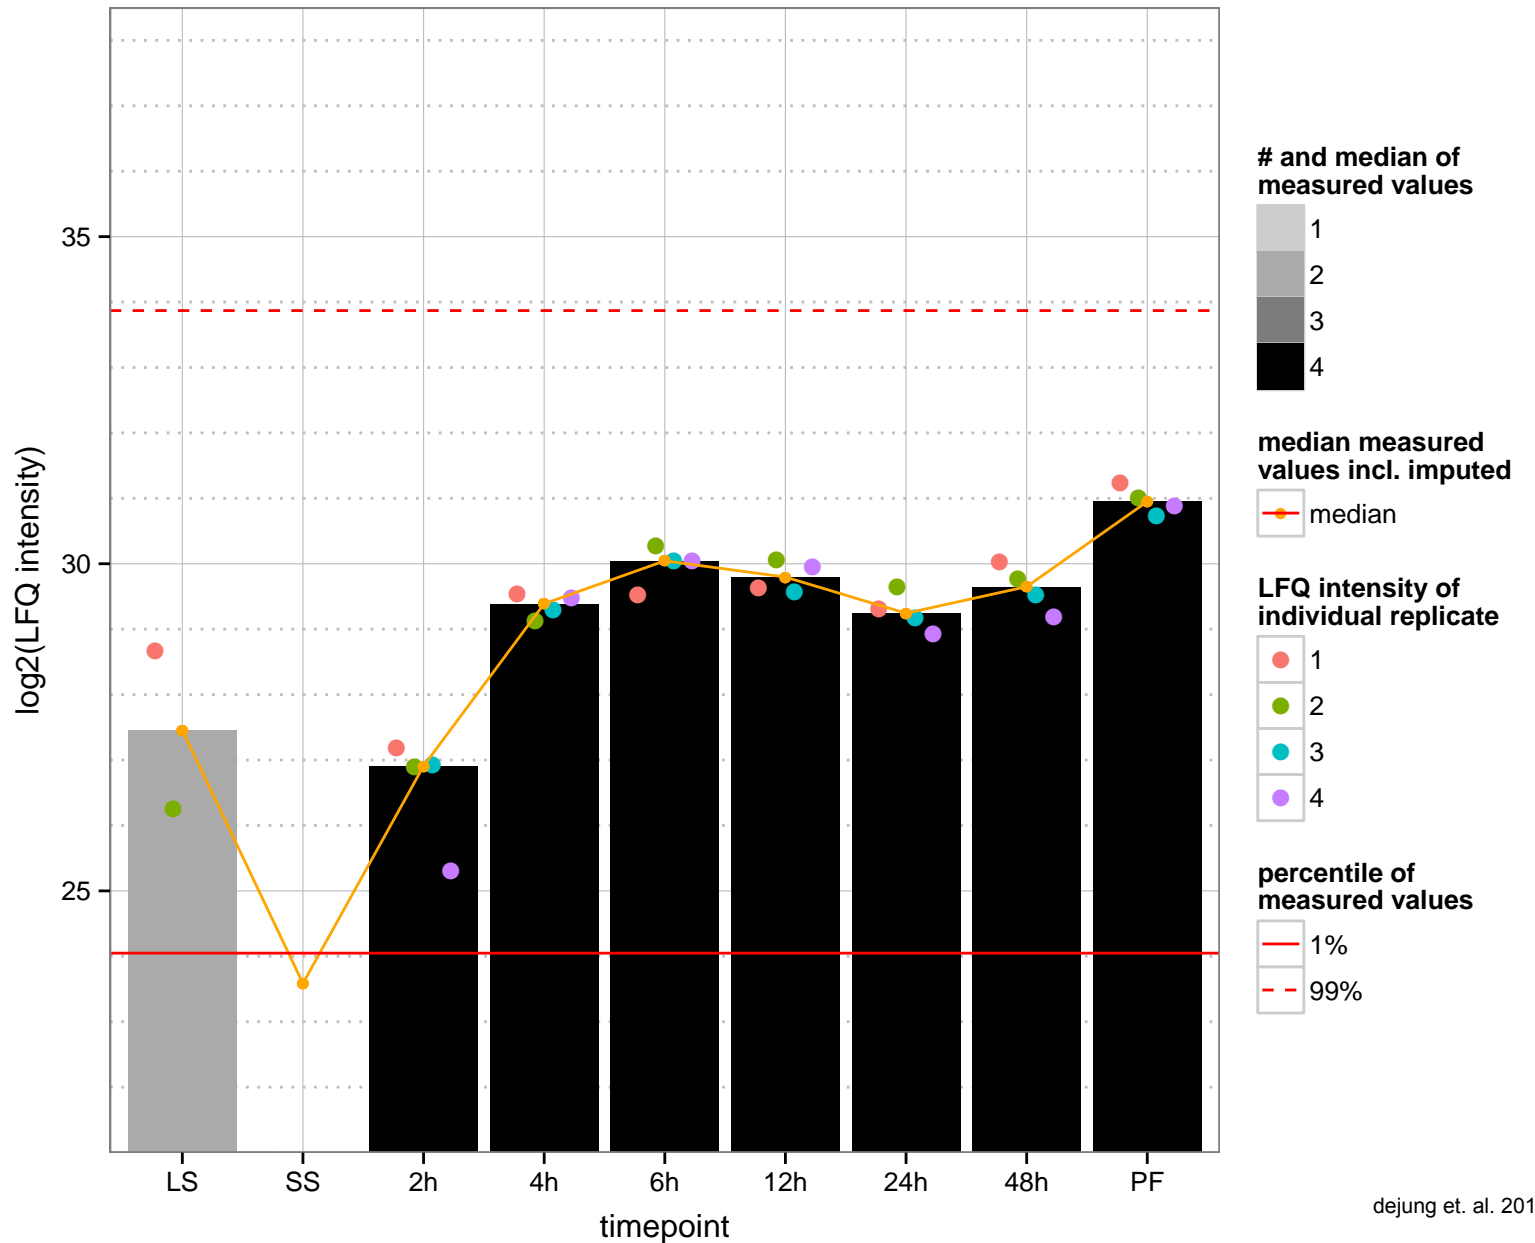

kinesin, putative  
 Tb927.8.4950  
 AGOF: ATP binding, microtubule motor activity, motor activity  
 AGOC: kinesin complex, microtubule associated complex  
 AGOP: microtubule-based movement  
 PGOF: ATP binding, microtubule motor activity  
 PGO: null  
 PGOP: microtubule-based movement

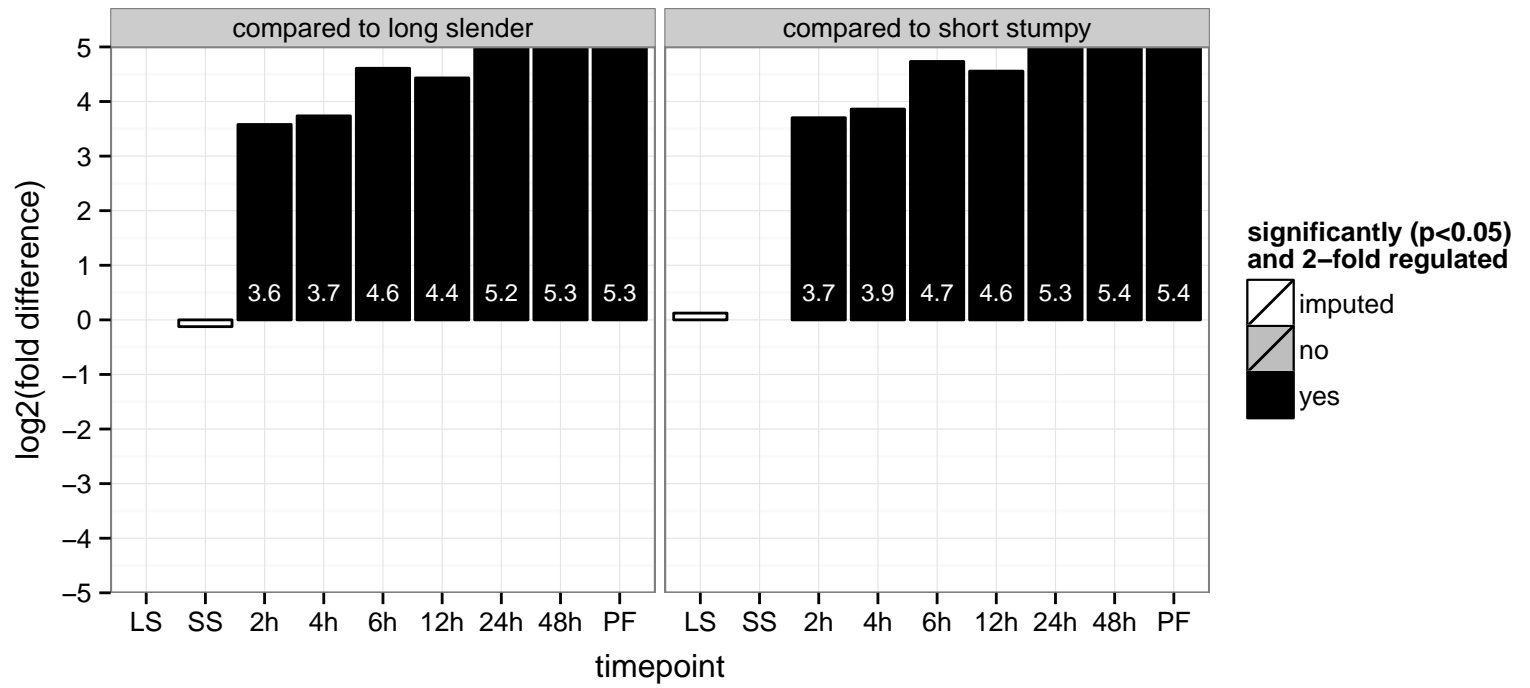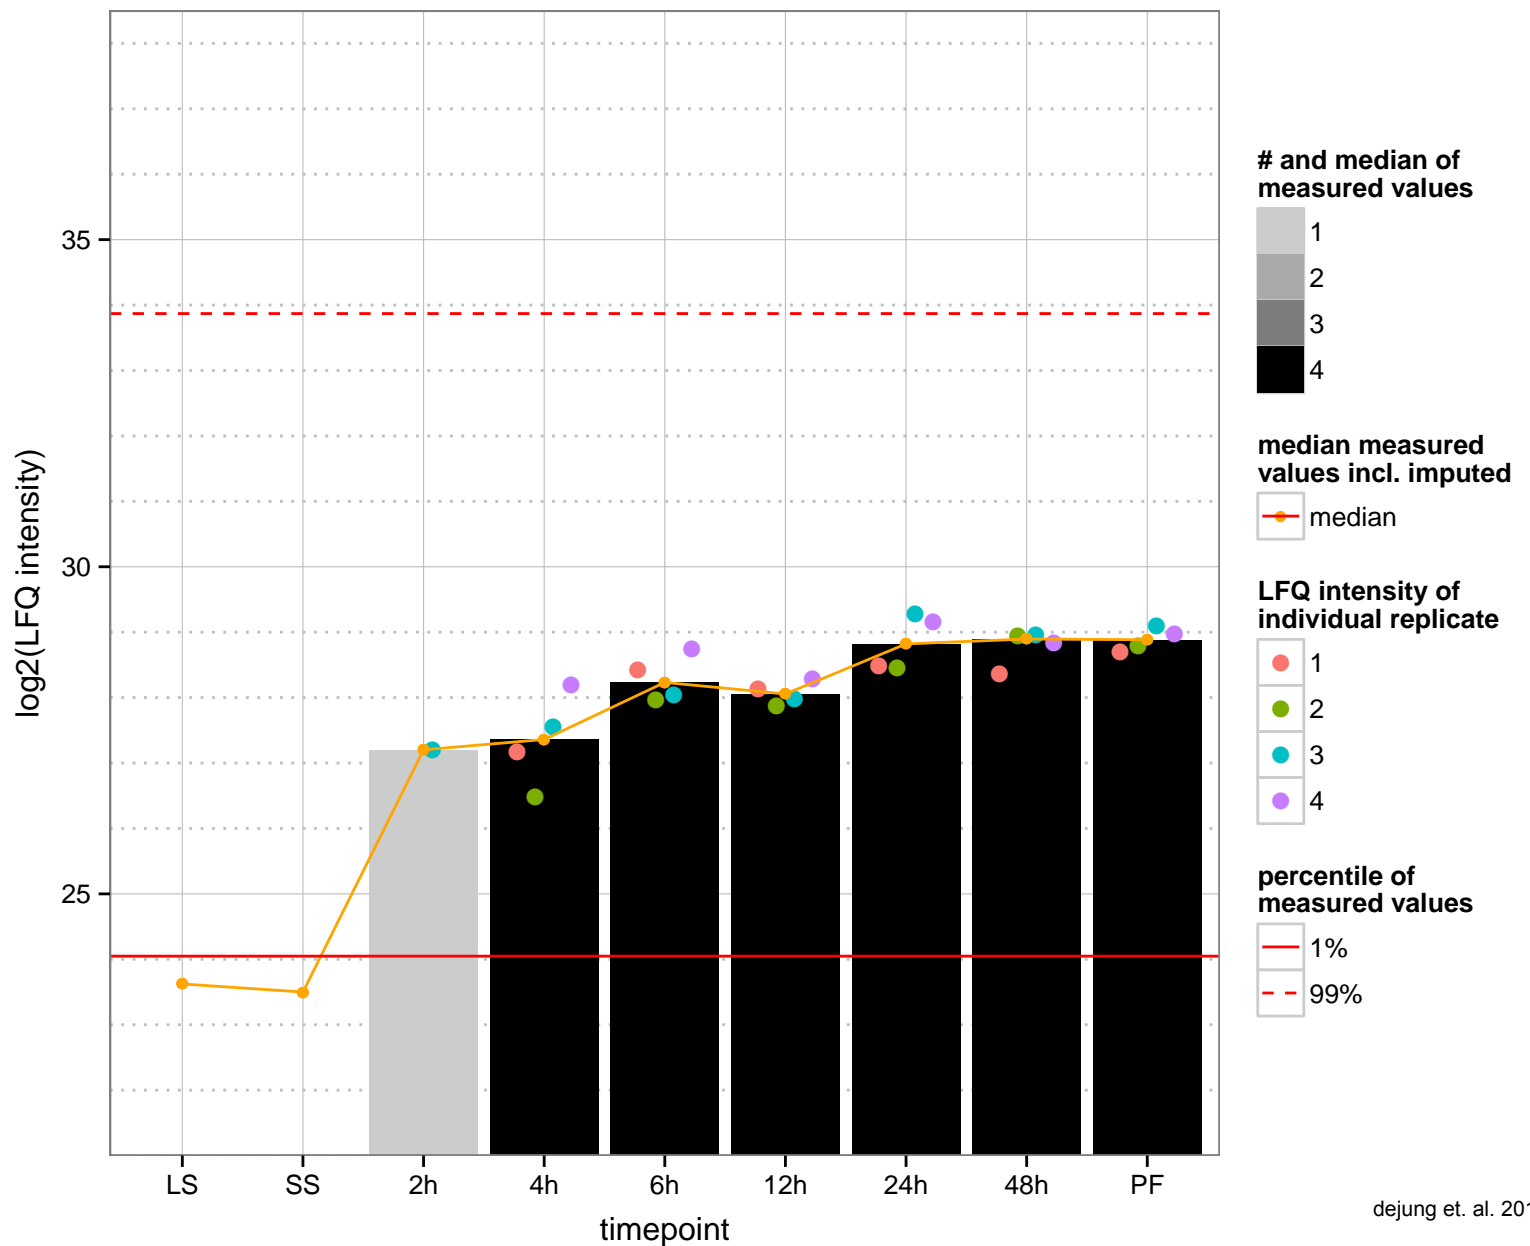

amino acid transporter, putative  
 Tb927.8.8300  
 AGOF: amine transmembrane transporter activity  
 AGOC: integral to membrane  
 AGOP: amino acid transport  
 PGO: null  
 PGOC: null  
 PGOP: null

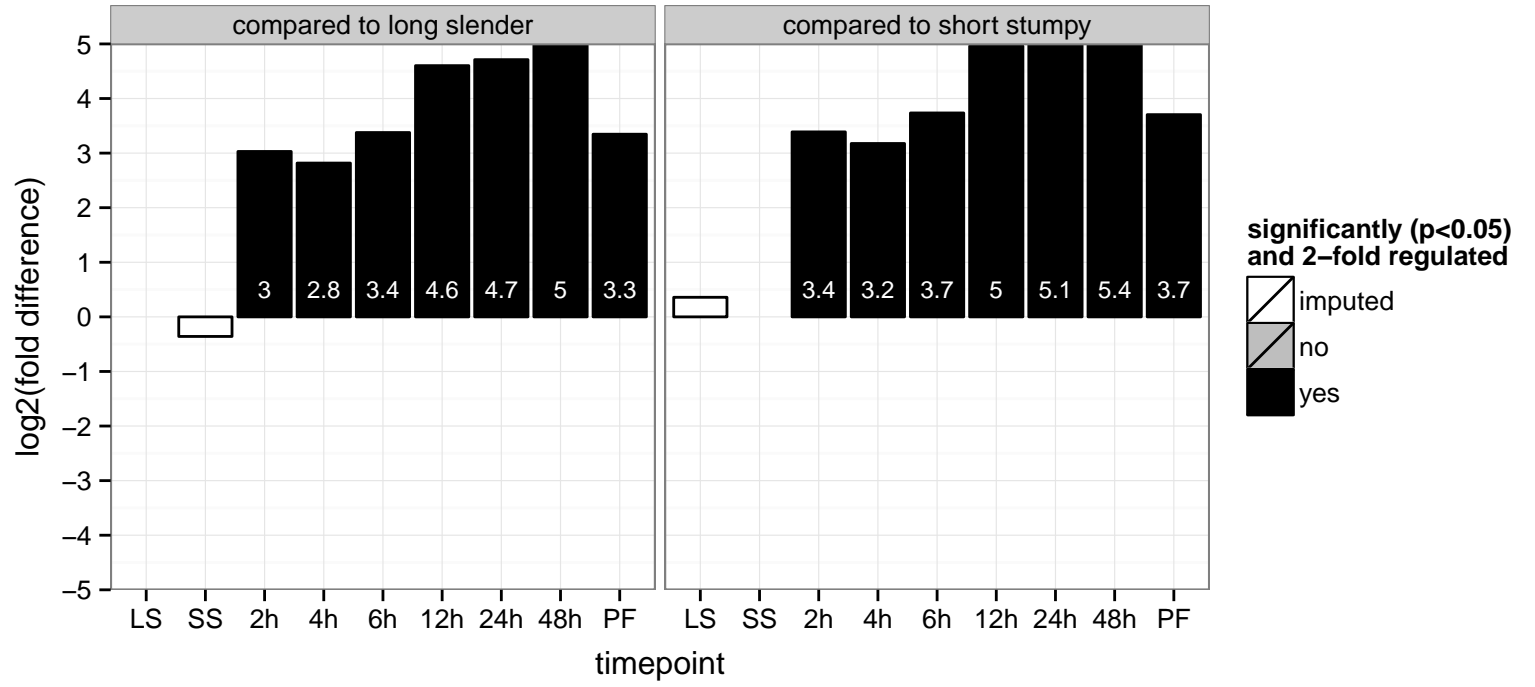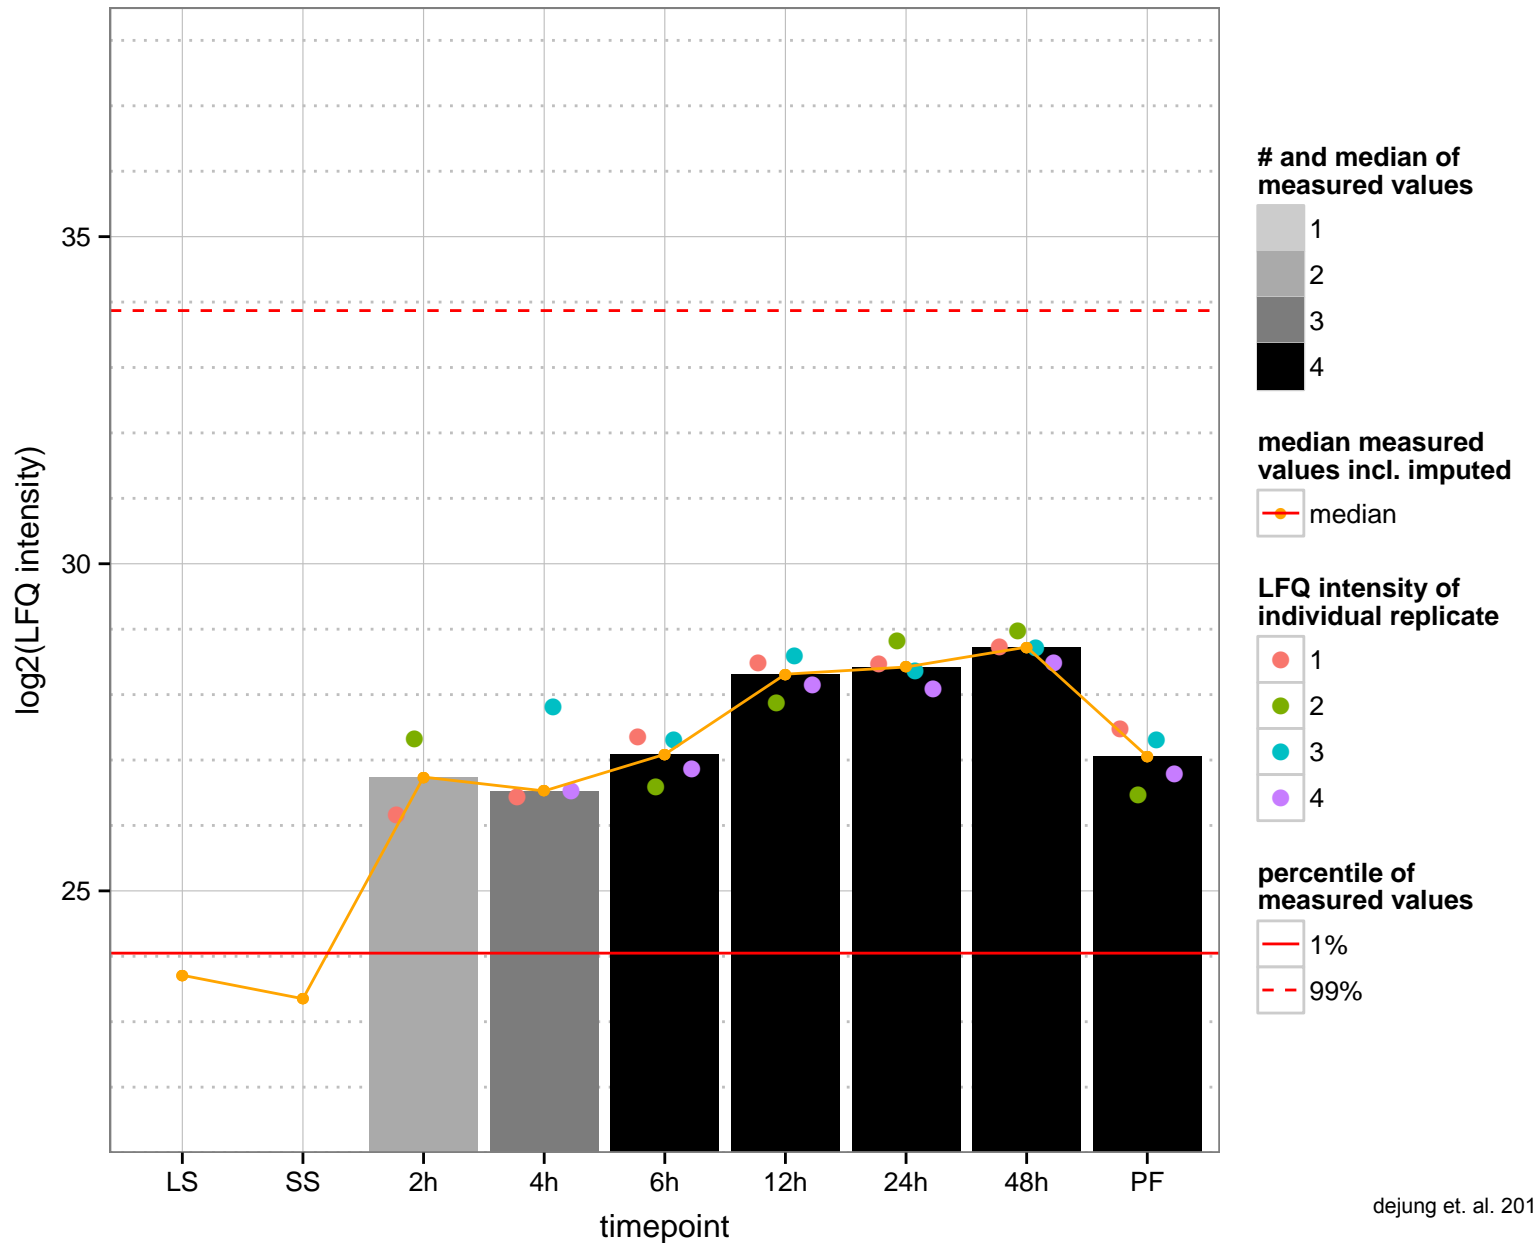

hypothetical protein, conserved  
 Tb927.9.13240  
 AGOF: null  
 AGOC: null  
 AGOP: null  
 PGO: null  
 PGOC: null  
 PGOP: null

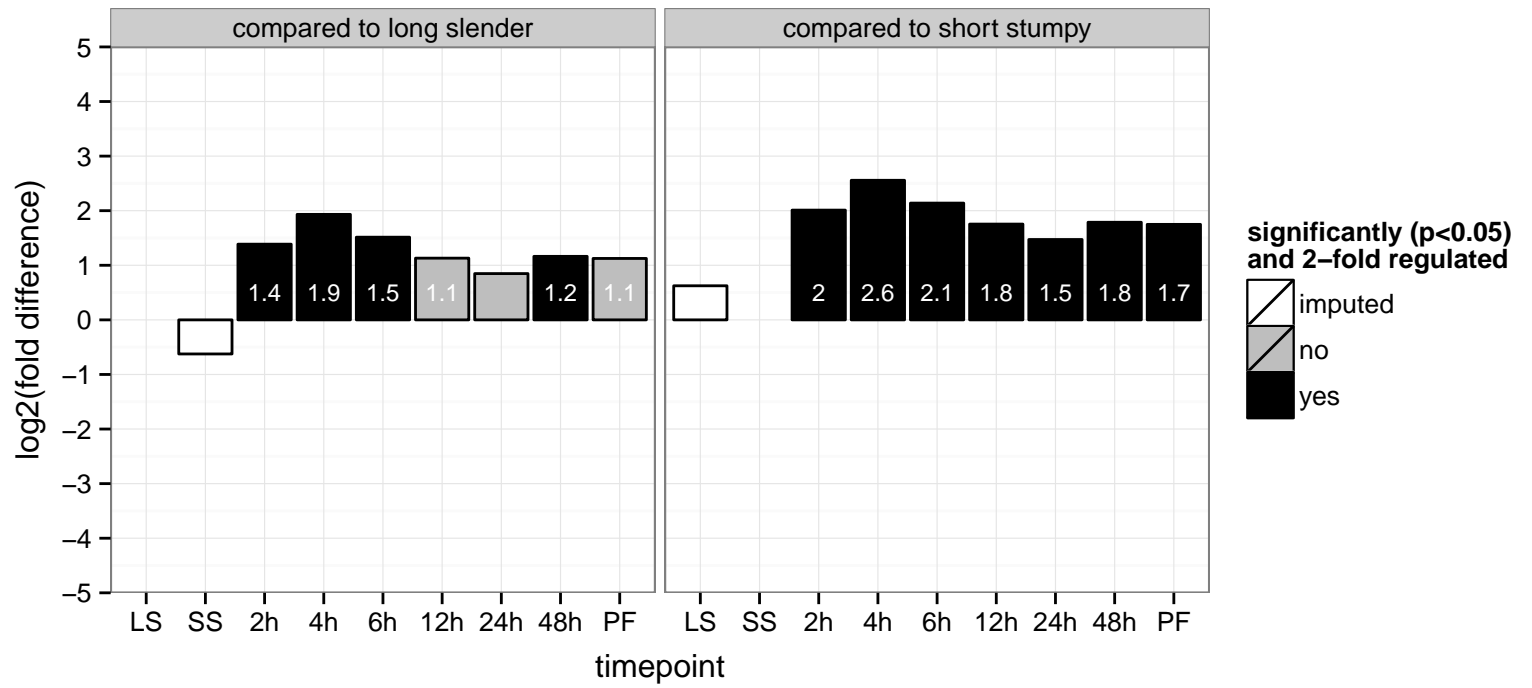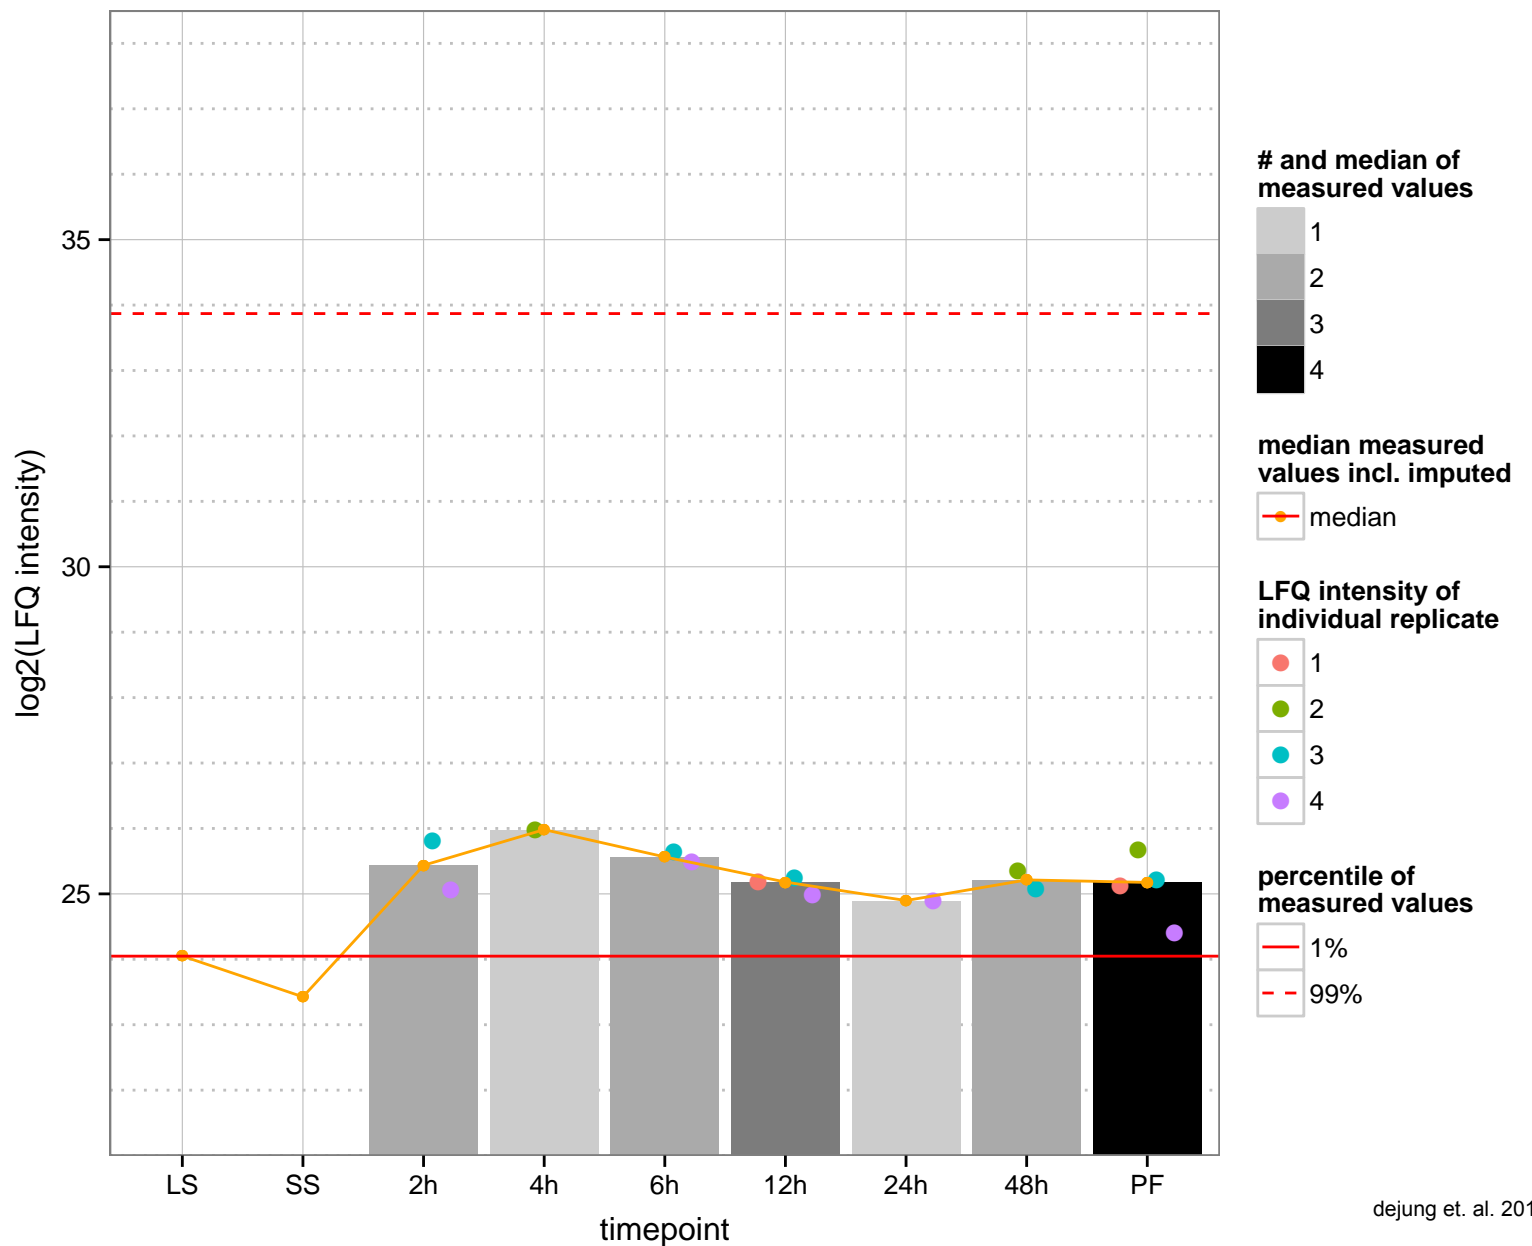

hypothetical protein, conserved  
 Tb927.9.14120  
 AGOF: RNA binding  
 AGOC: null  
 AGOP: null  
 PGO: protein binding  
 PGOC: null  
 PGOP: null

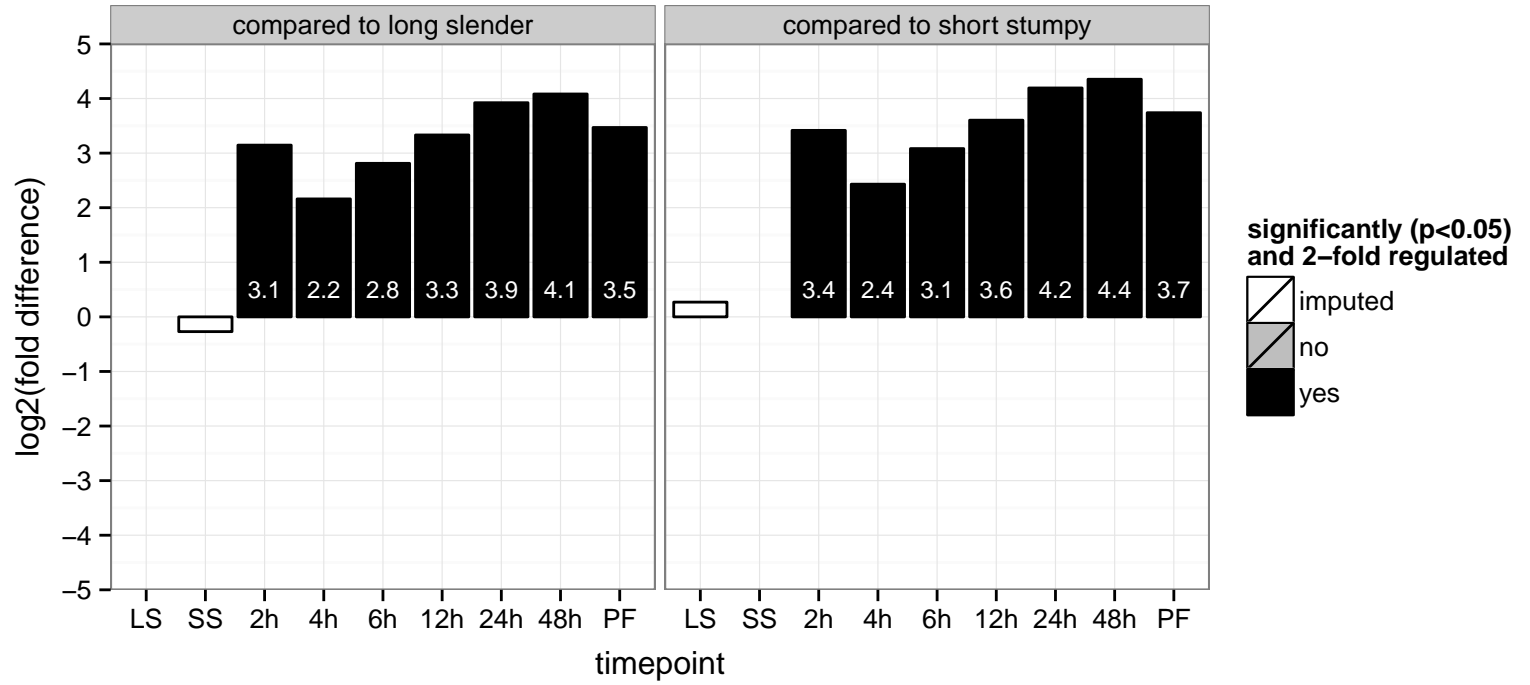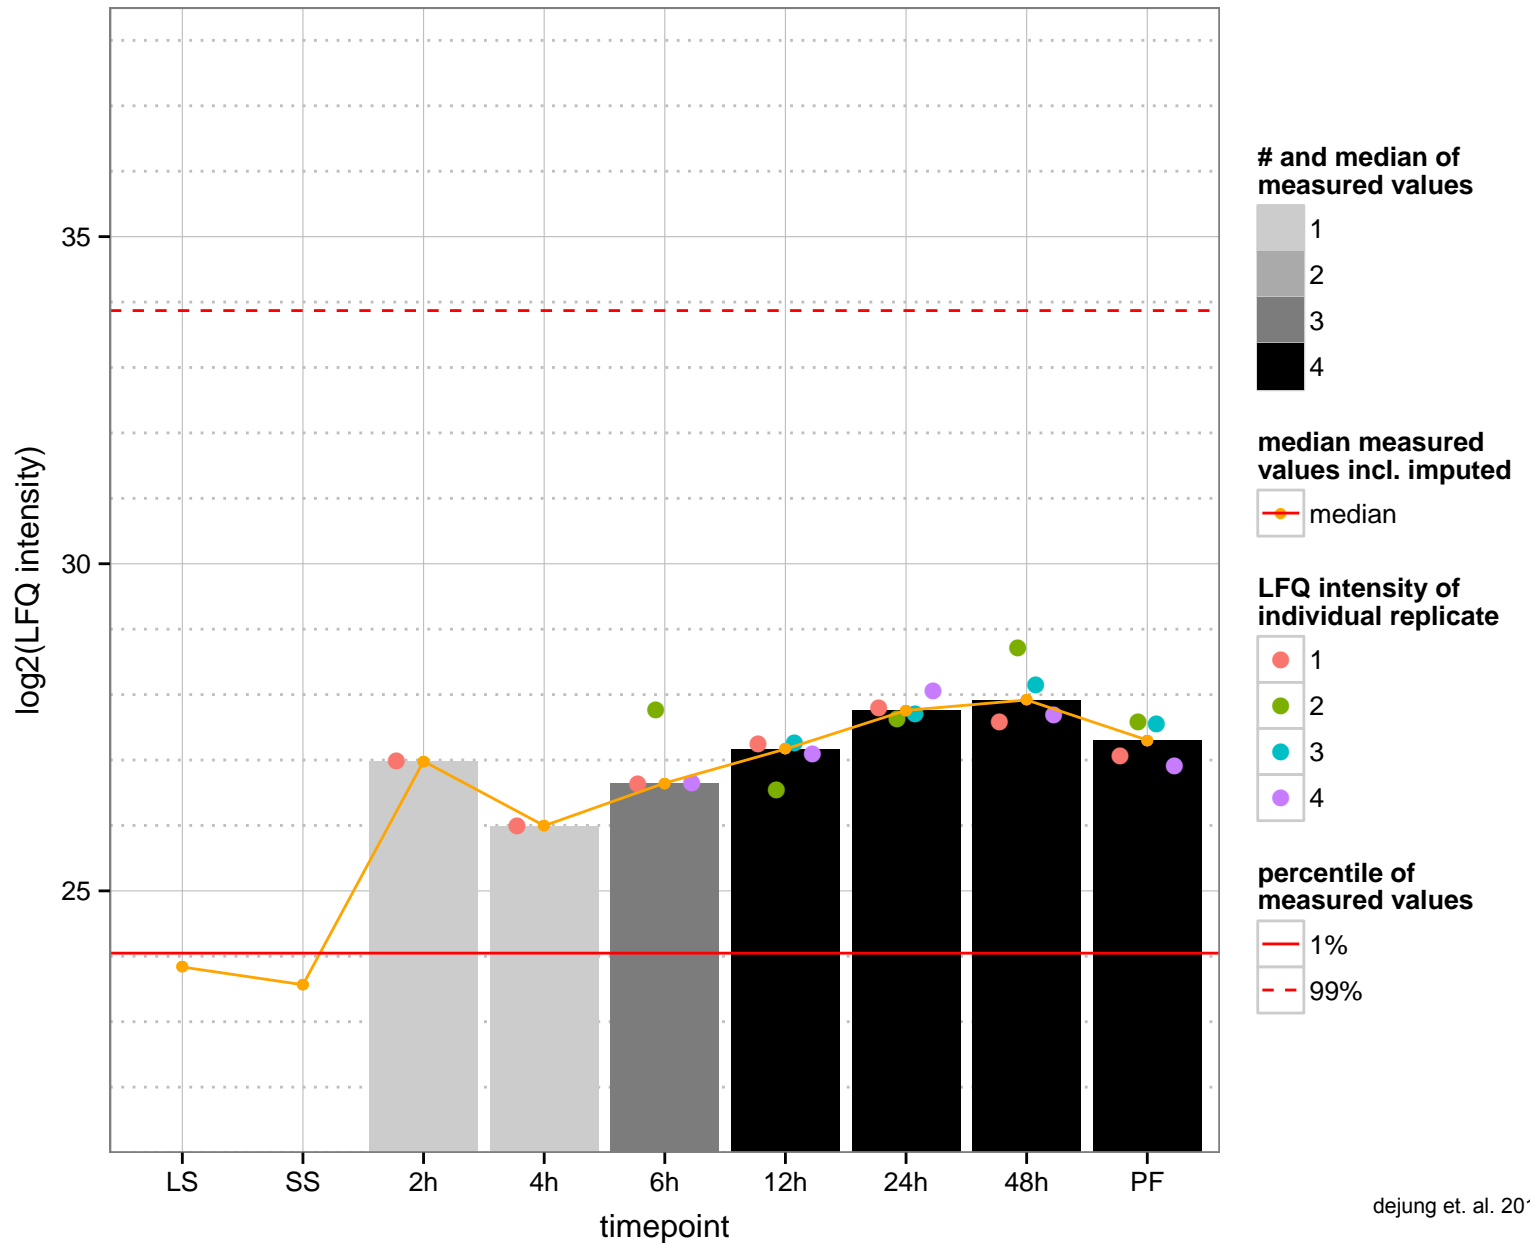



rieske iron-sulfur protein, mitochondrial precursor (RISP)

Tb927.9.14160

AGOF: 2 iron, 2 sulfur cluster binding, electron carrier activity, glutathione-disulfide reductase activity, ubiquinol-cytochrome-

AGOC: mitochondrial inner membrane, mitochondrion, respiratory chain complex III

AGOP: aerobic respiration, oxidation-reduction process

PGOF: 2 iron, 2 sulfur cluster binding, oxidoreductase activity, ubiquinol-cytochrome-c reductase activity

PGOC: null

PGOP: oxidation-reduction process

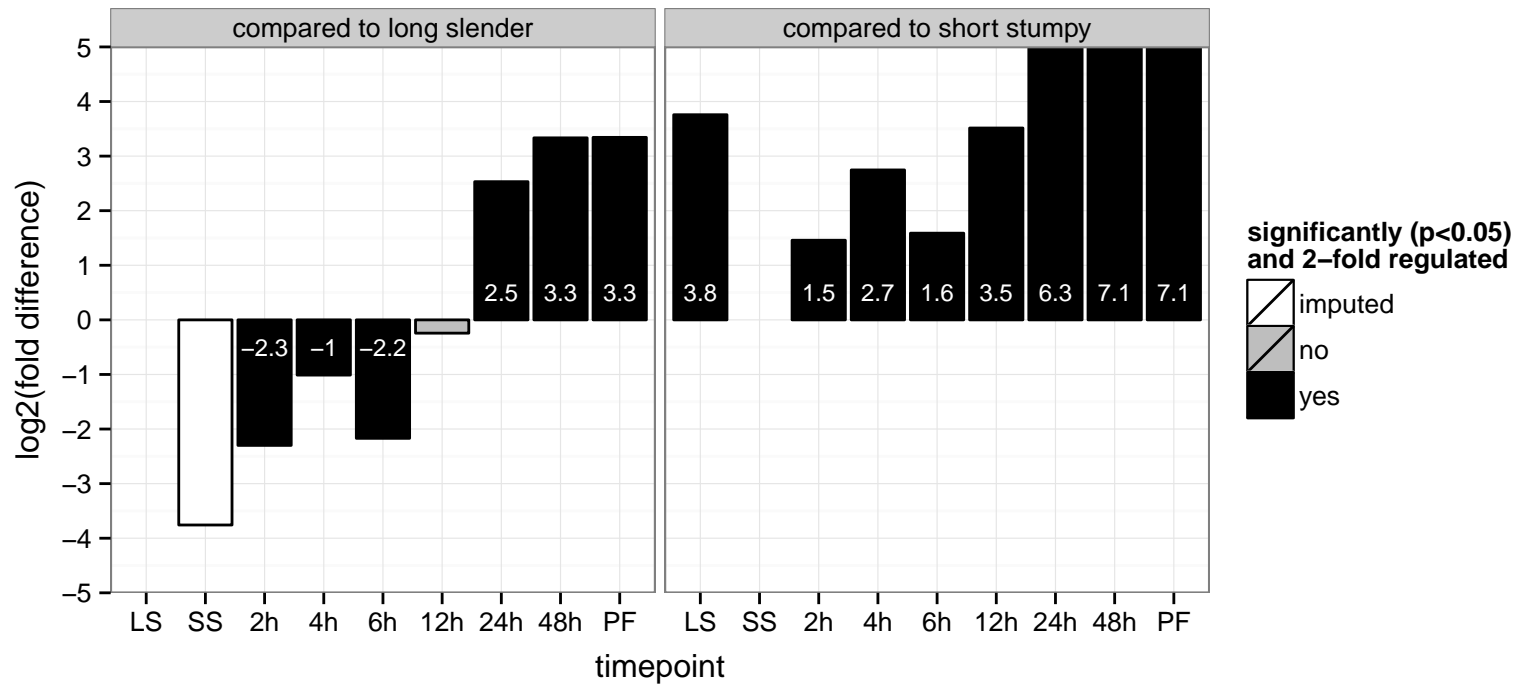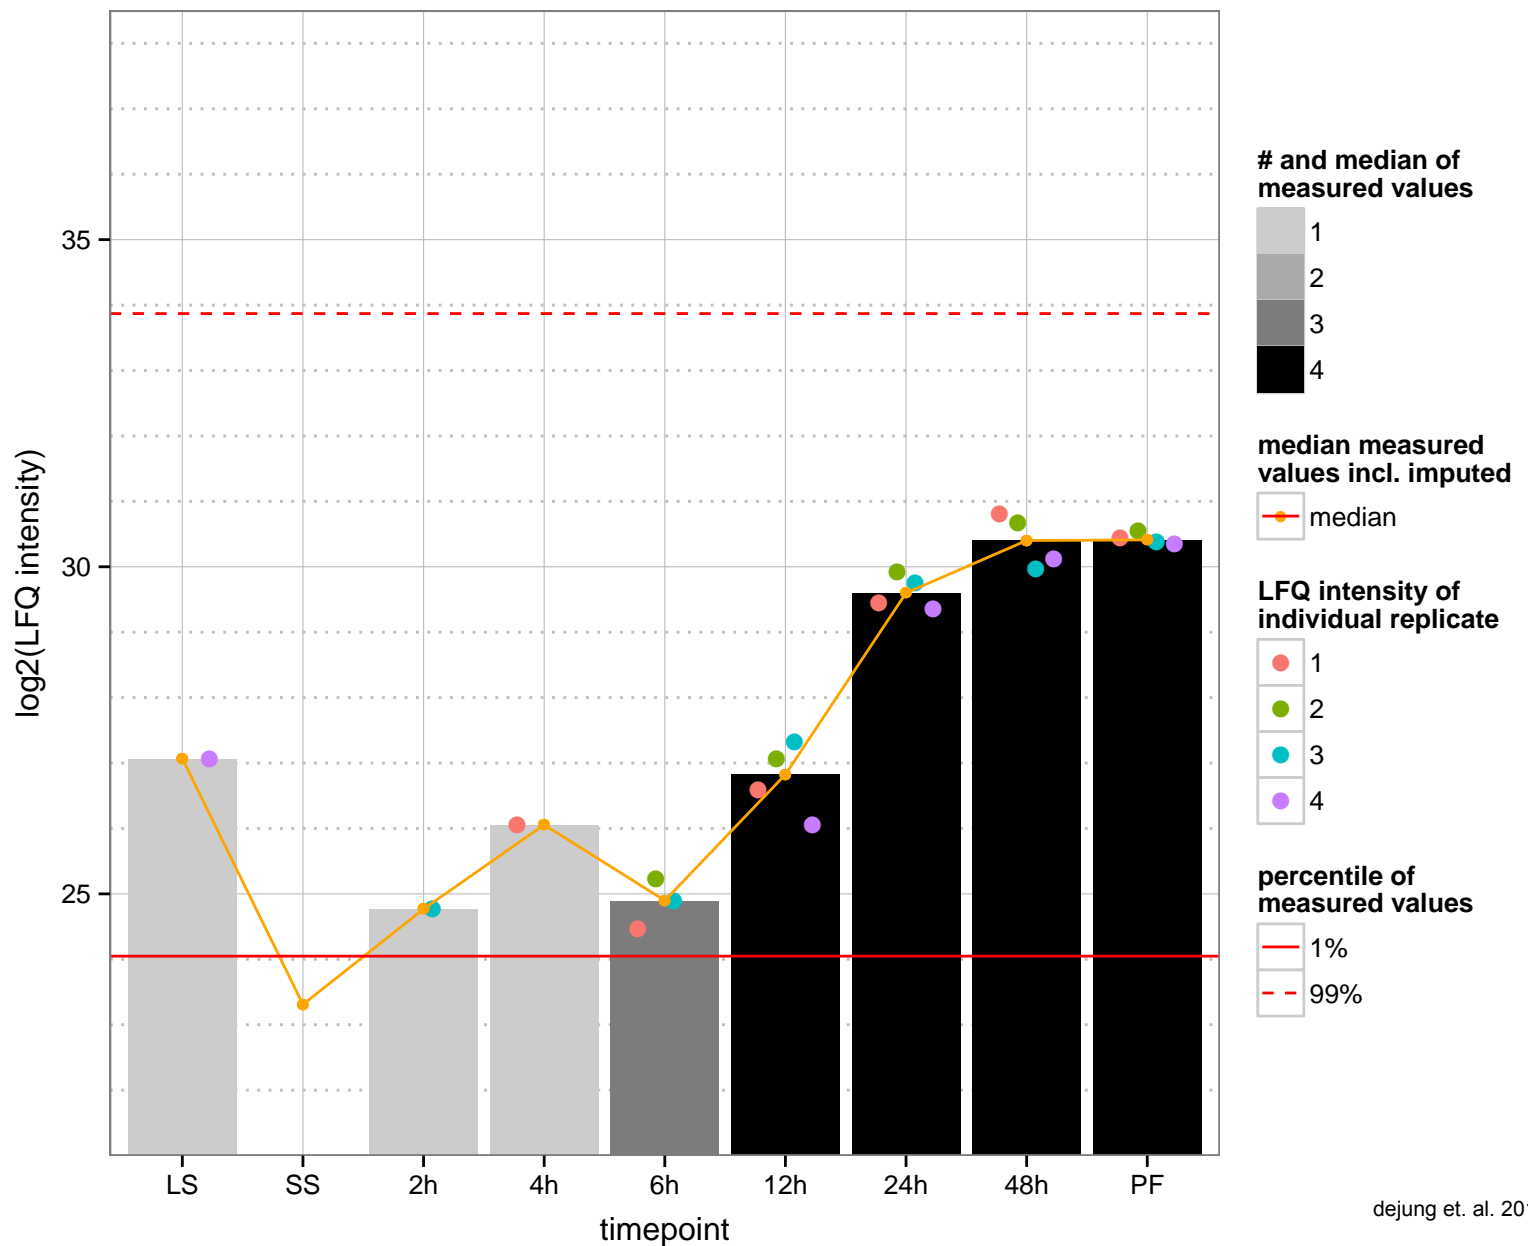

hypothetical protein, conserved  
 Tb927.9.15240  
 AGOF: null  
 AGOC: mitochondrion  
 AGOP: protein complex assembly  
 PGO: null  
 PGO: mitochondrion  
 PGO: protein complex assembly

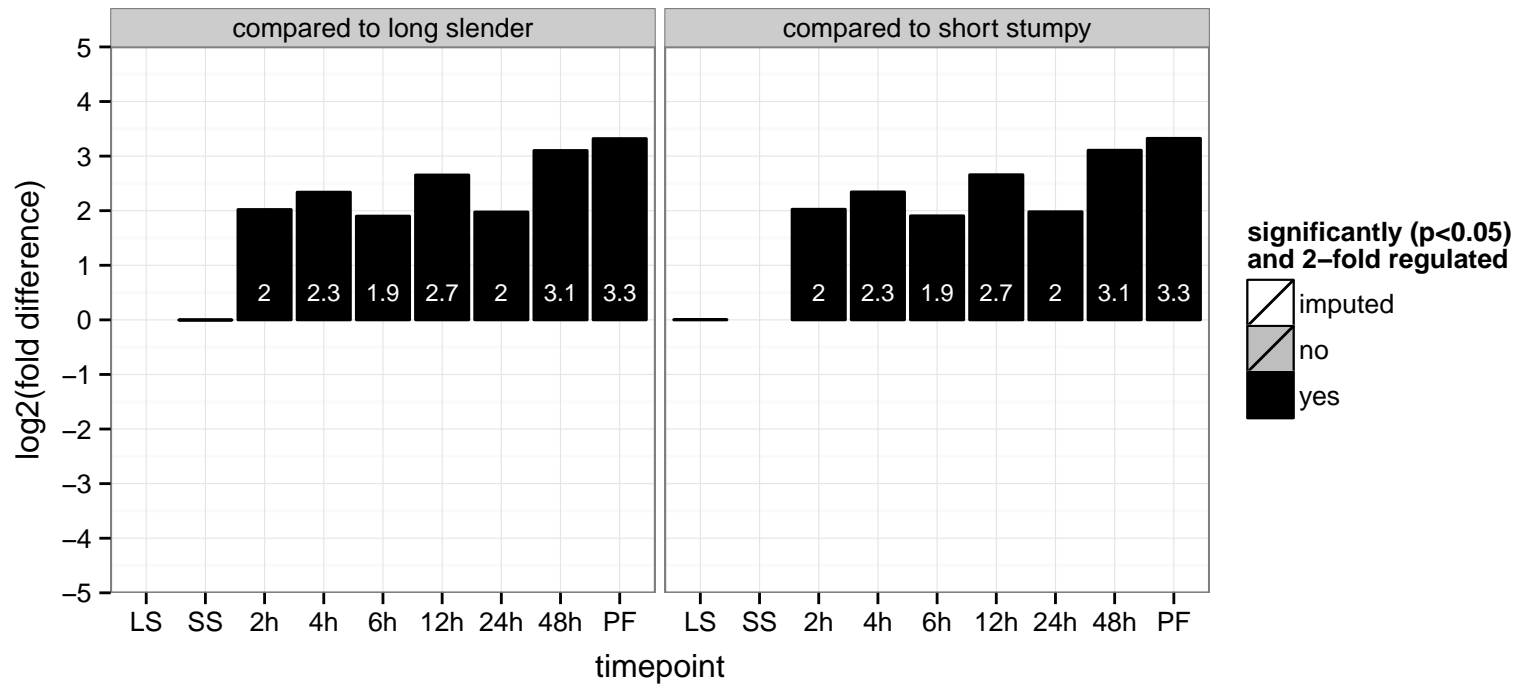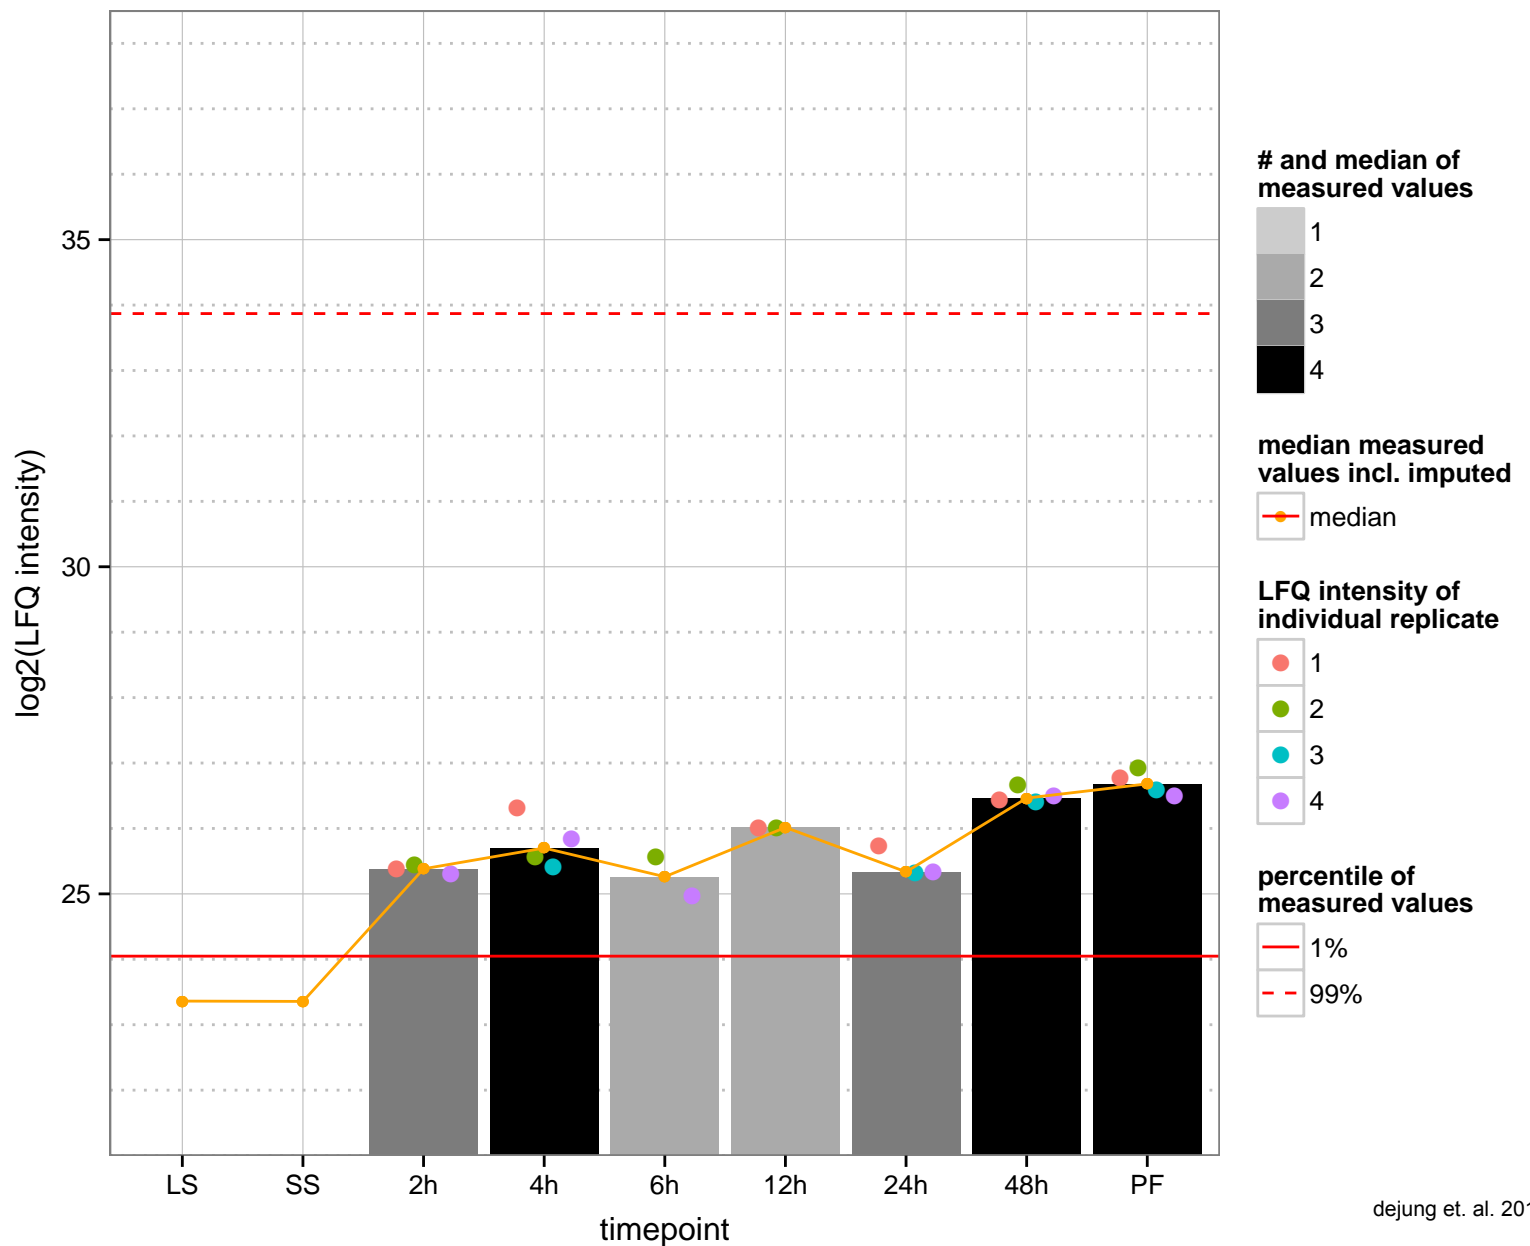

hypothetical protein, conserved, PTP1-interacting protein, 39 kDa

Tb927.9.6090

AGOF: null, magnesium-dependent protein serine/threonine phosphatase activity

AGOC: null, cytosol, glycosome, mitochondrion

AGOP: null, protein dephosphorylation

PGOF: protein binding

PGOC: null

PGOP: null

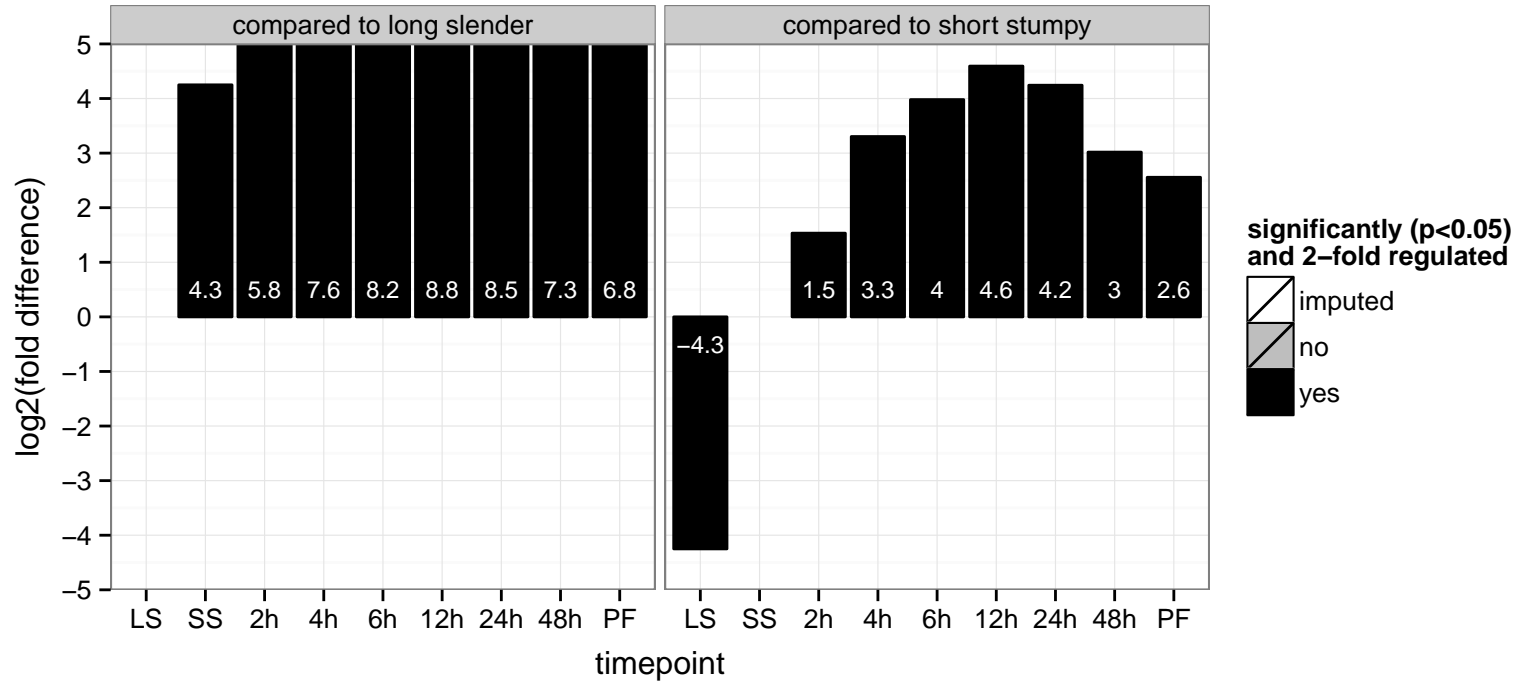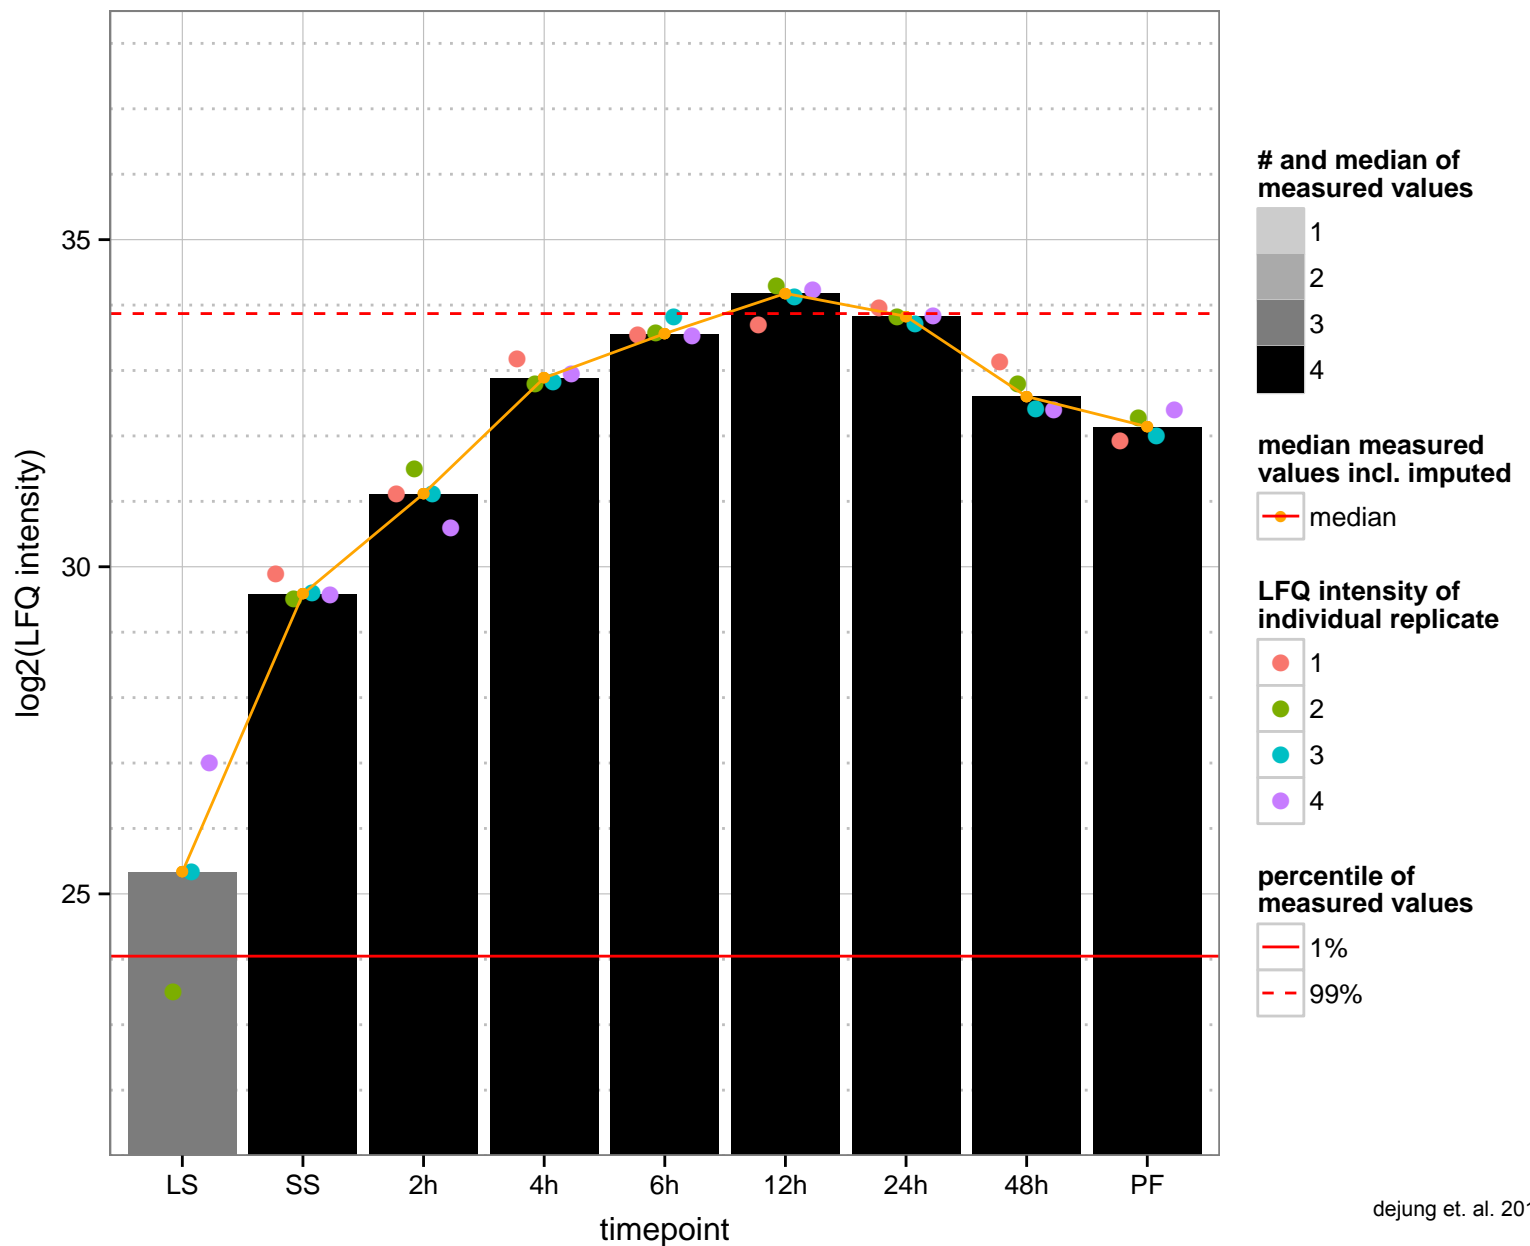

hypothetical protein, conserved  
 Tb927.9.9730  
 AGOF: null  
 AGOC: intracellular  
 AGOP: null  
 PGO: null  
 PGO: null  
 PGO: null

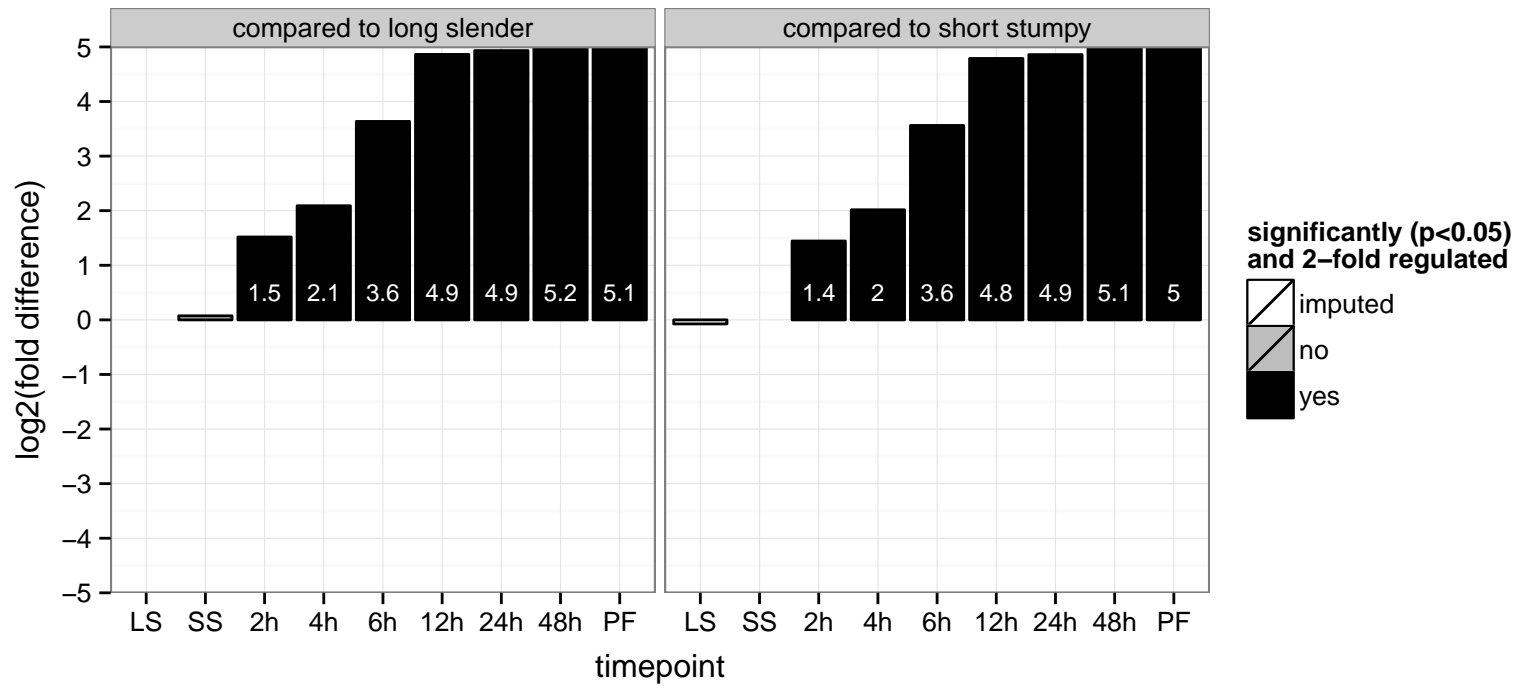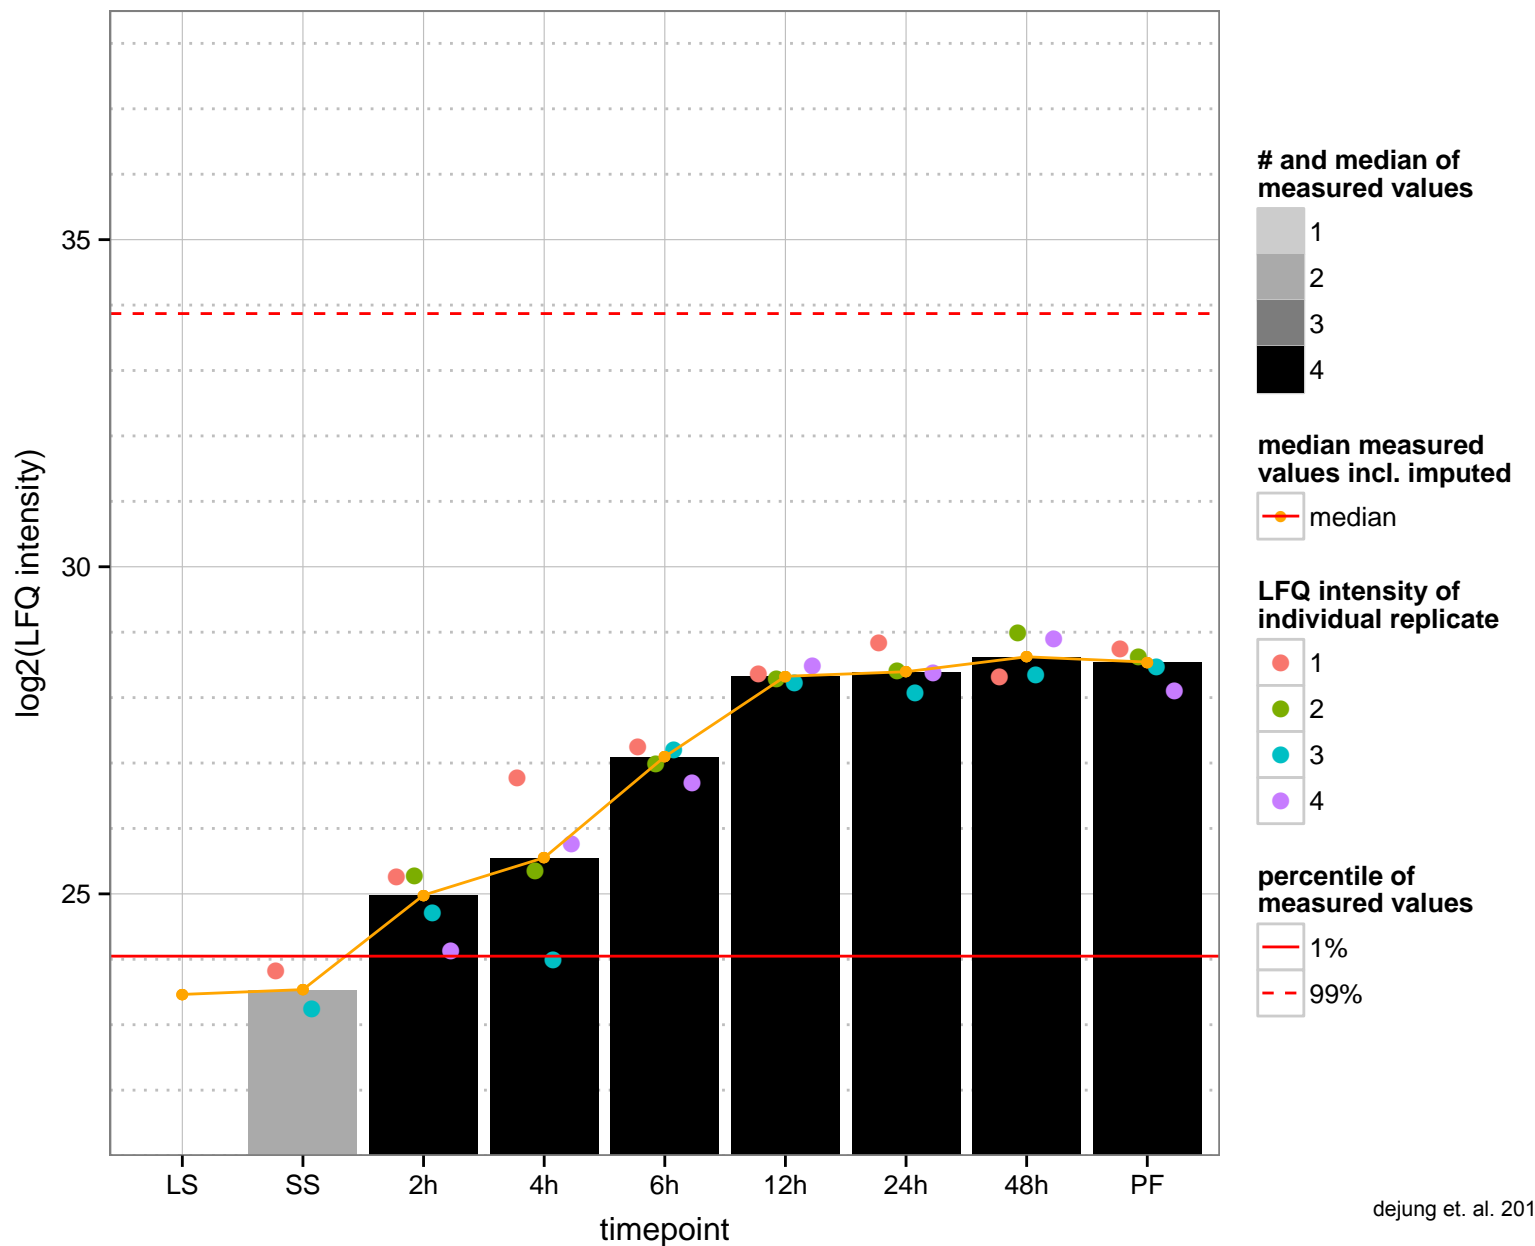

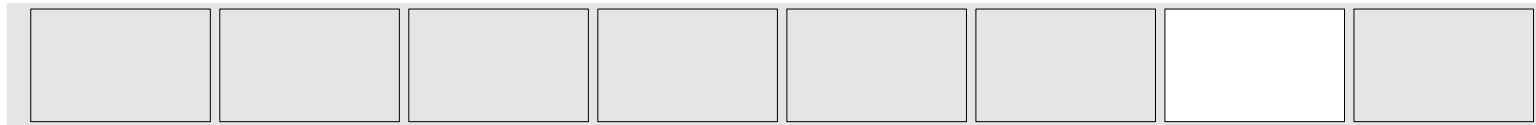

SS

2h

4h

6h

12h

24h

48h

PF

timepoint

**regulated**



not regulated



significant down

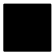

significant up

hypothetical protein, conserved  
 Tb927.7.4750;Tb11.v5.0158  
 AGOF: null  
 AGOC: null  
 AGOP: null  
 PGO: null  
 PGOC: null  
 PGOP: null

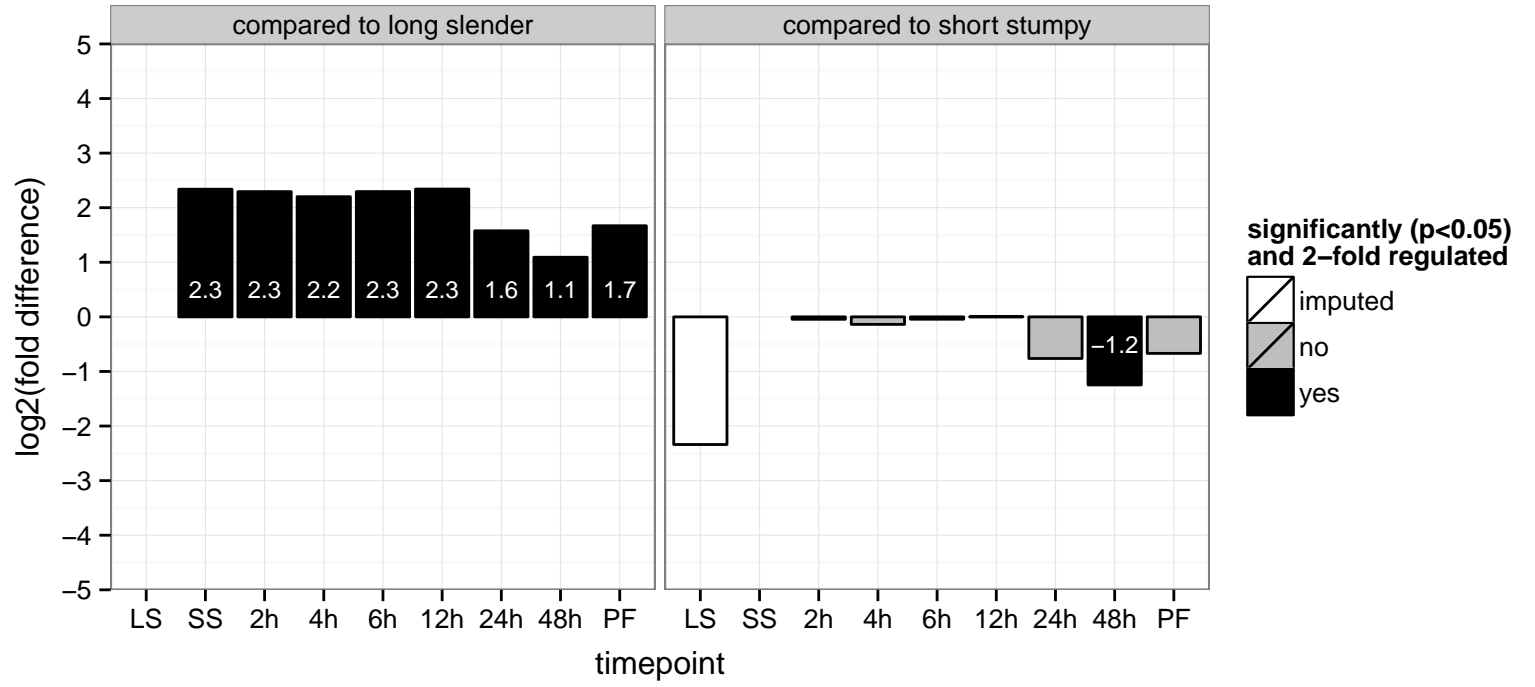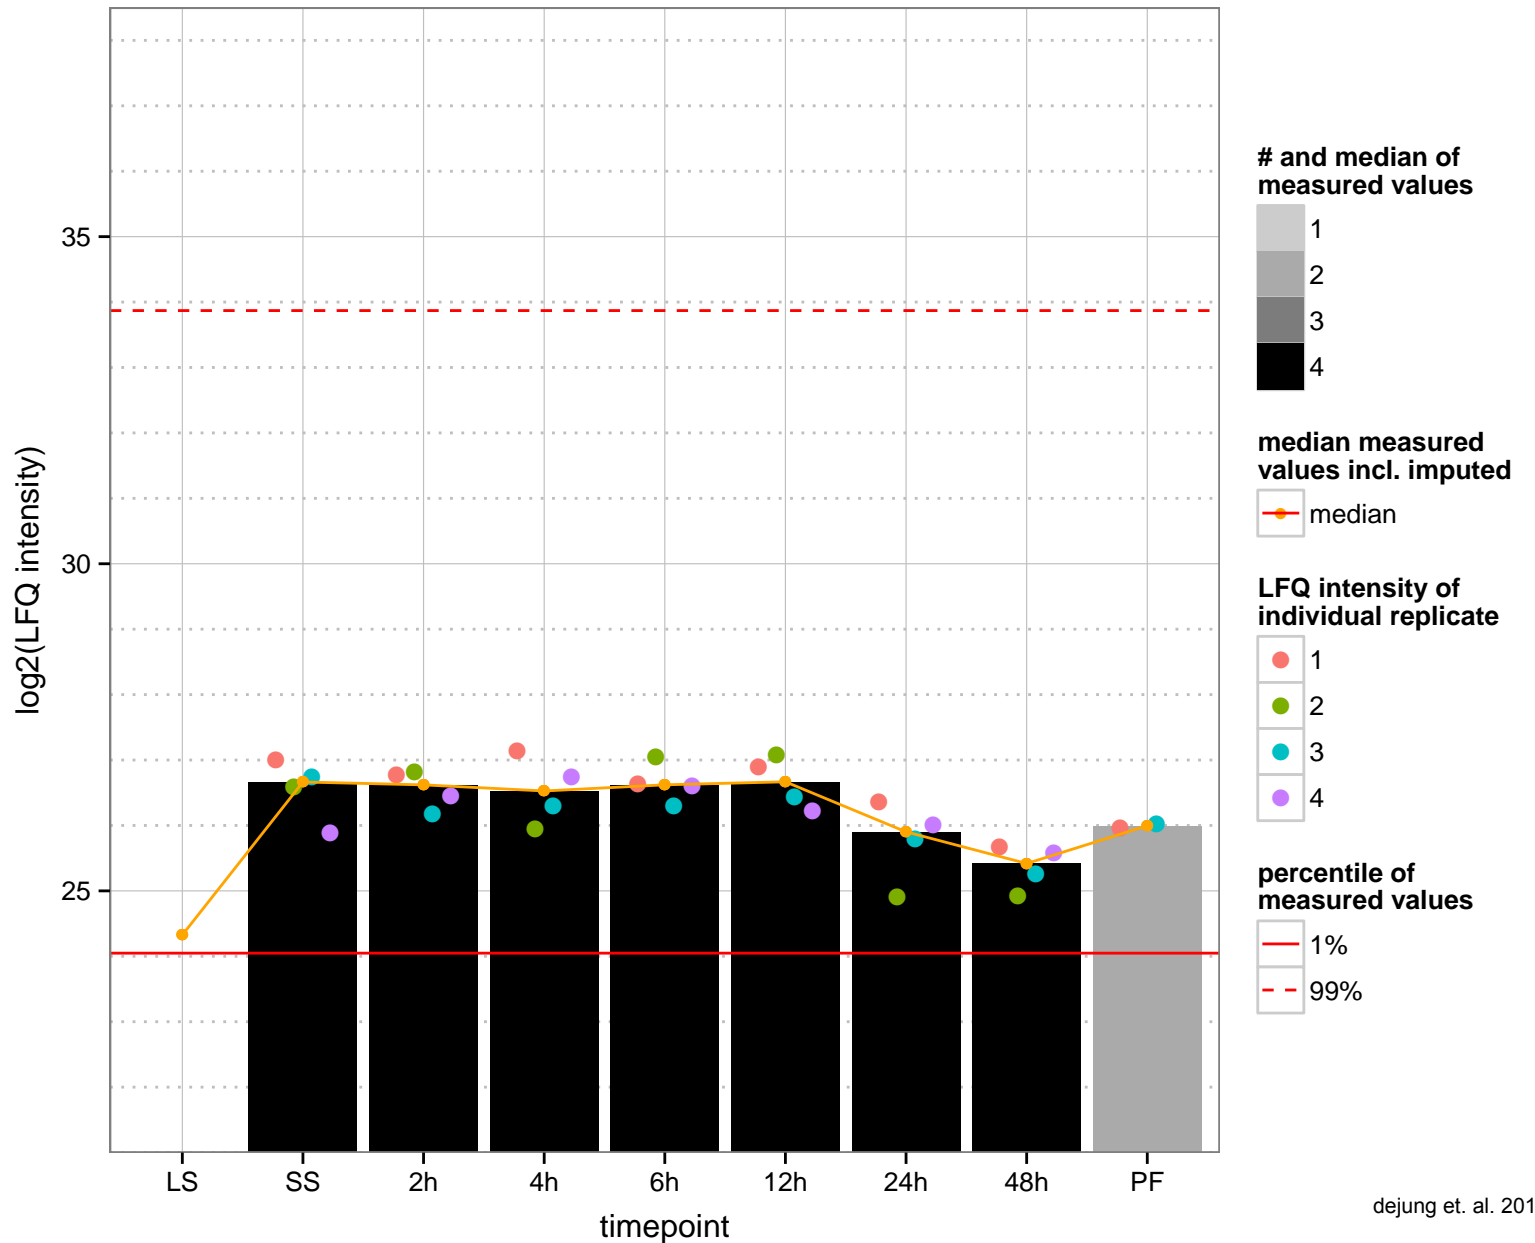

hypothetical protein, conserved  
 Tb927.7.4490;Tb11.v5.0262  
 AGOF: null  
 AGOC: null  
 AGOP: null  
 PGO: null  
 PGOC: null  
 PGOP: null

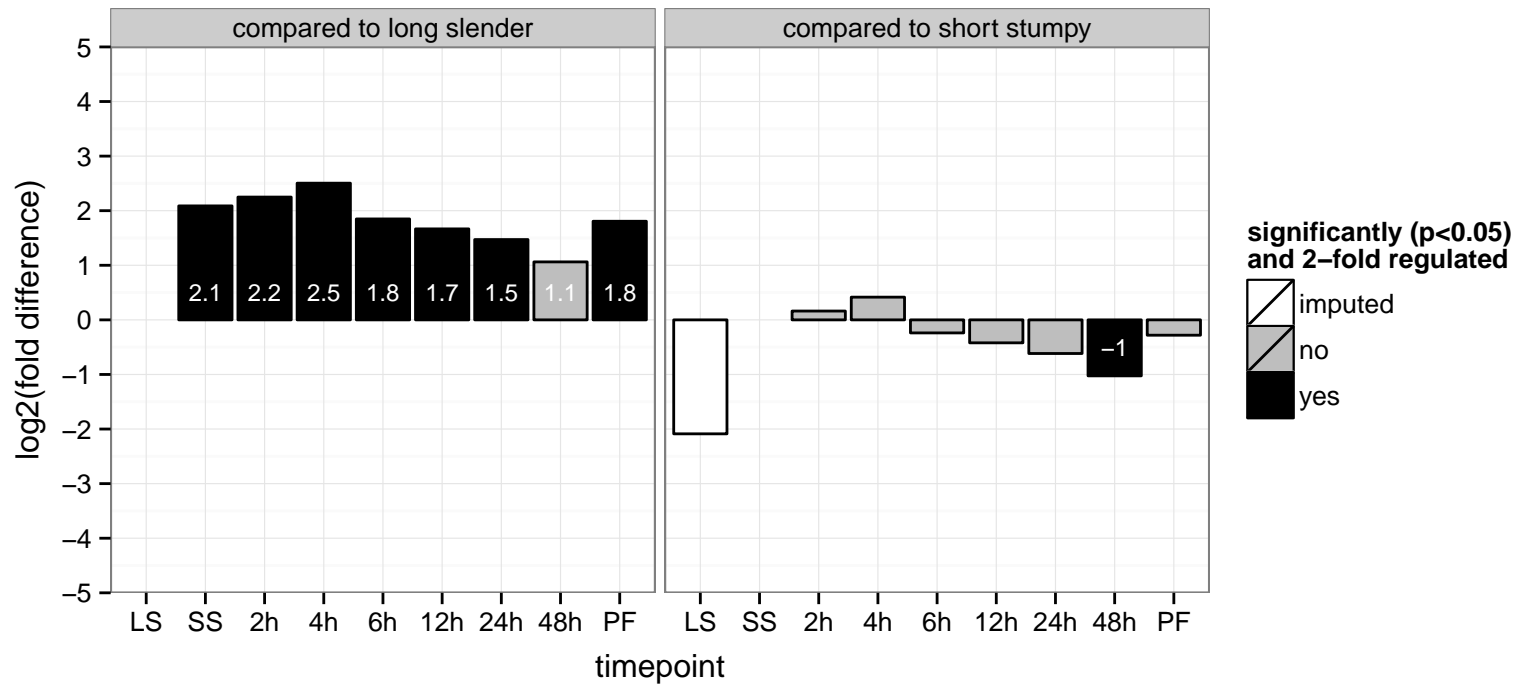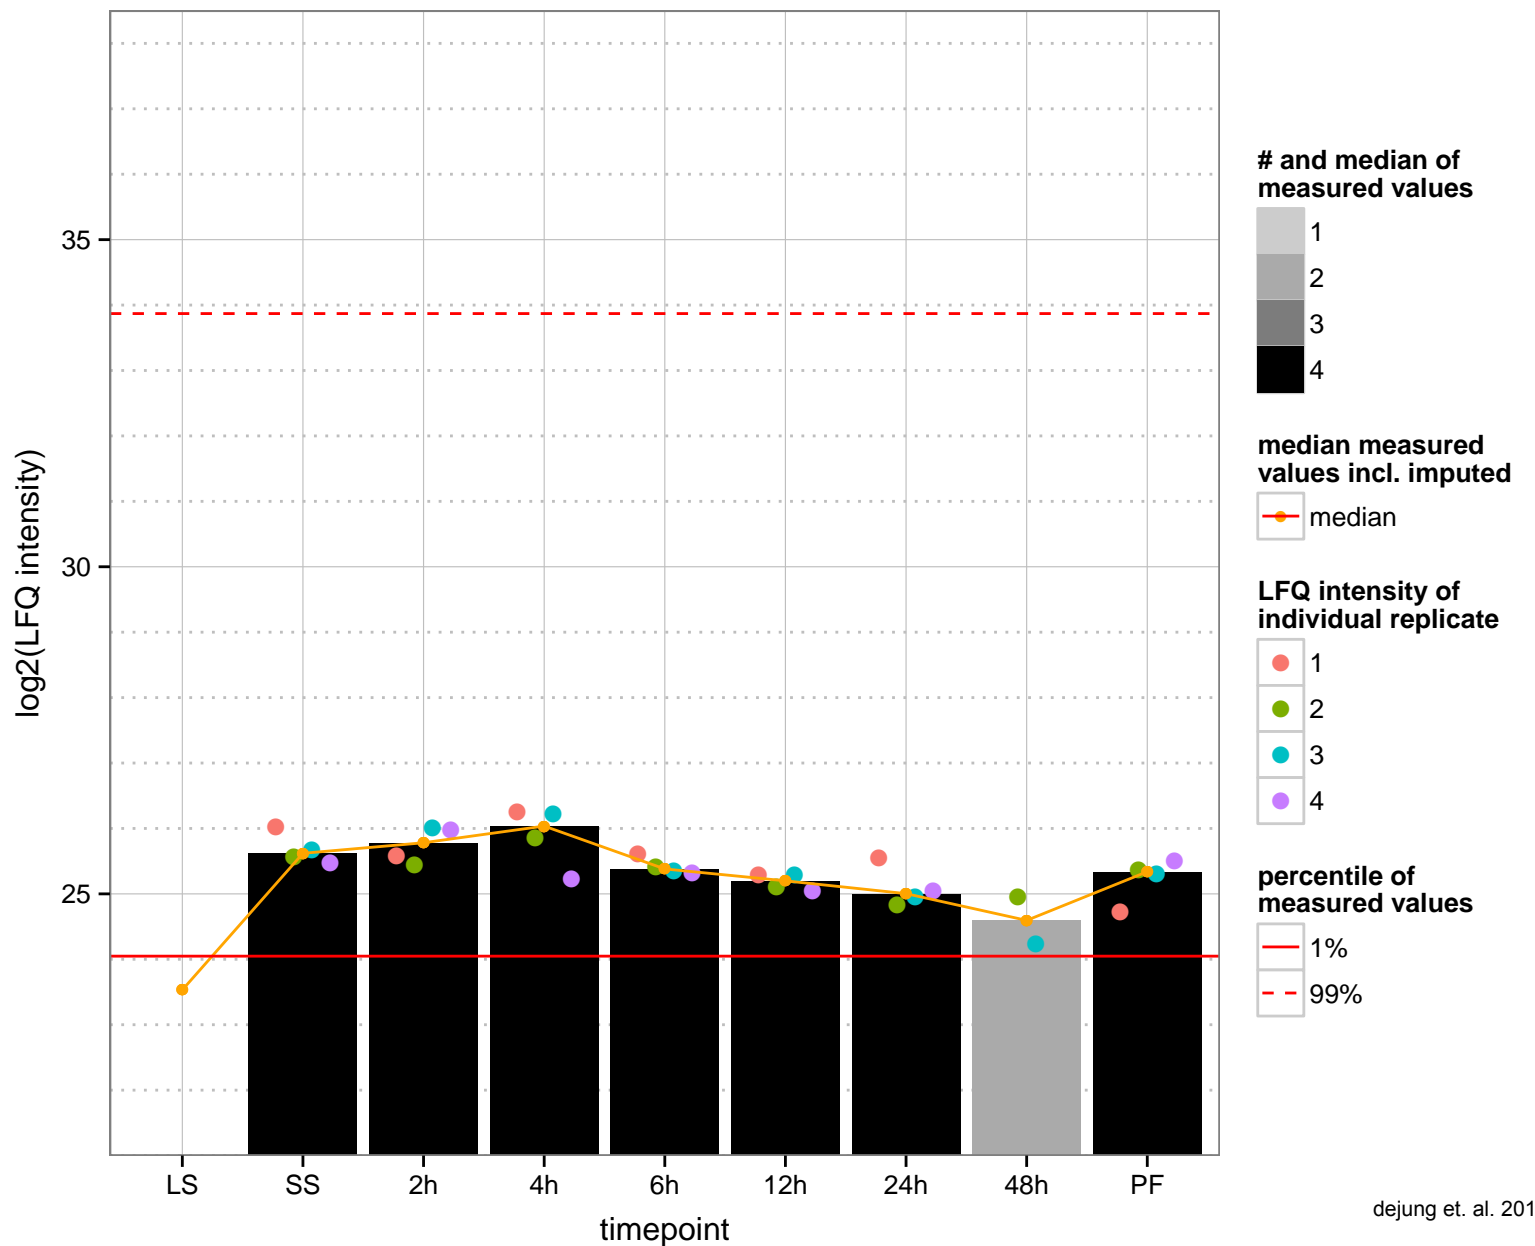

nicotinate phosphoribosyltransferase, putative

Tb927.10.11590

AGOF: nicotinate phosphoribosyltransferase activity

AGOC: null

AGOP: nicotinate nucleotide biosynthetic process, nicotinate nucleotide salvage, pyridine nucleotide biosynthetic process

PGOF: nicotinate phosphoribosyltransferase activity, nicotinate-nucleotide diphosphorylase (carboxylating) activity

PGOC: cytoplasm

PGOP: NAD biosynthetic process, nicotinate nucleotide biosynthetic process

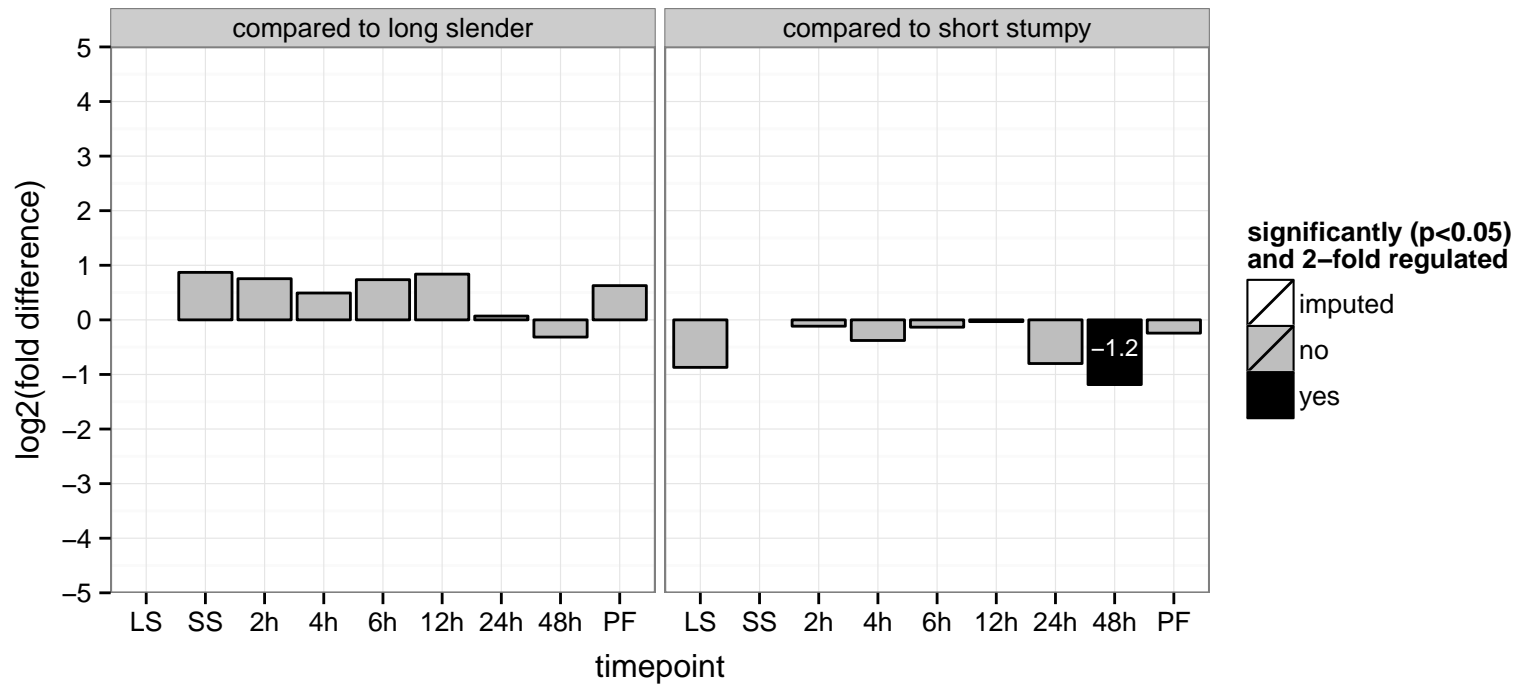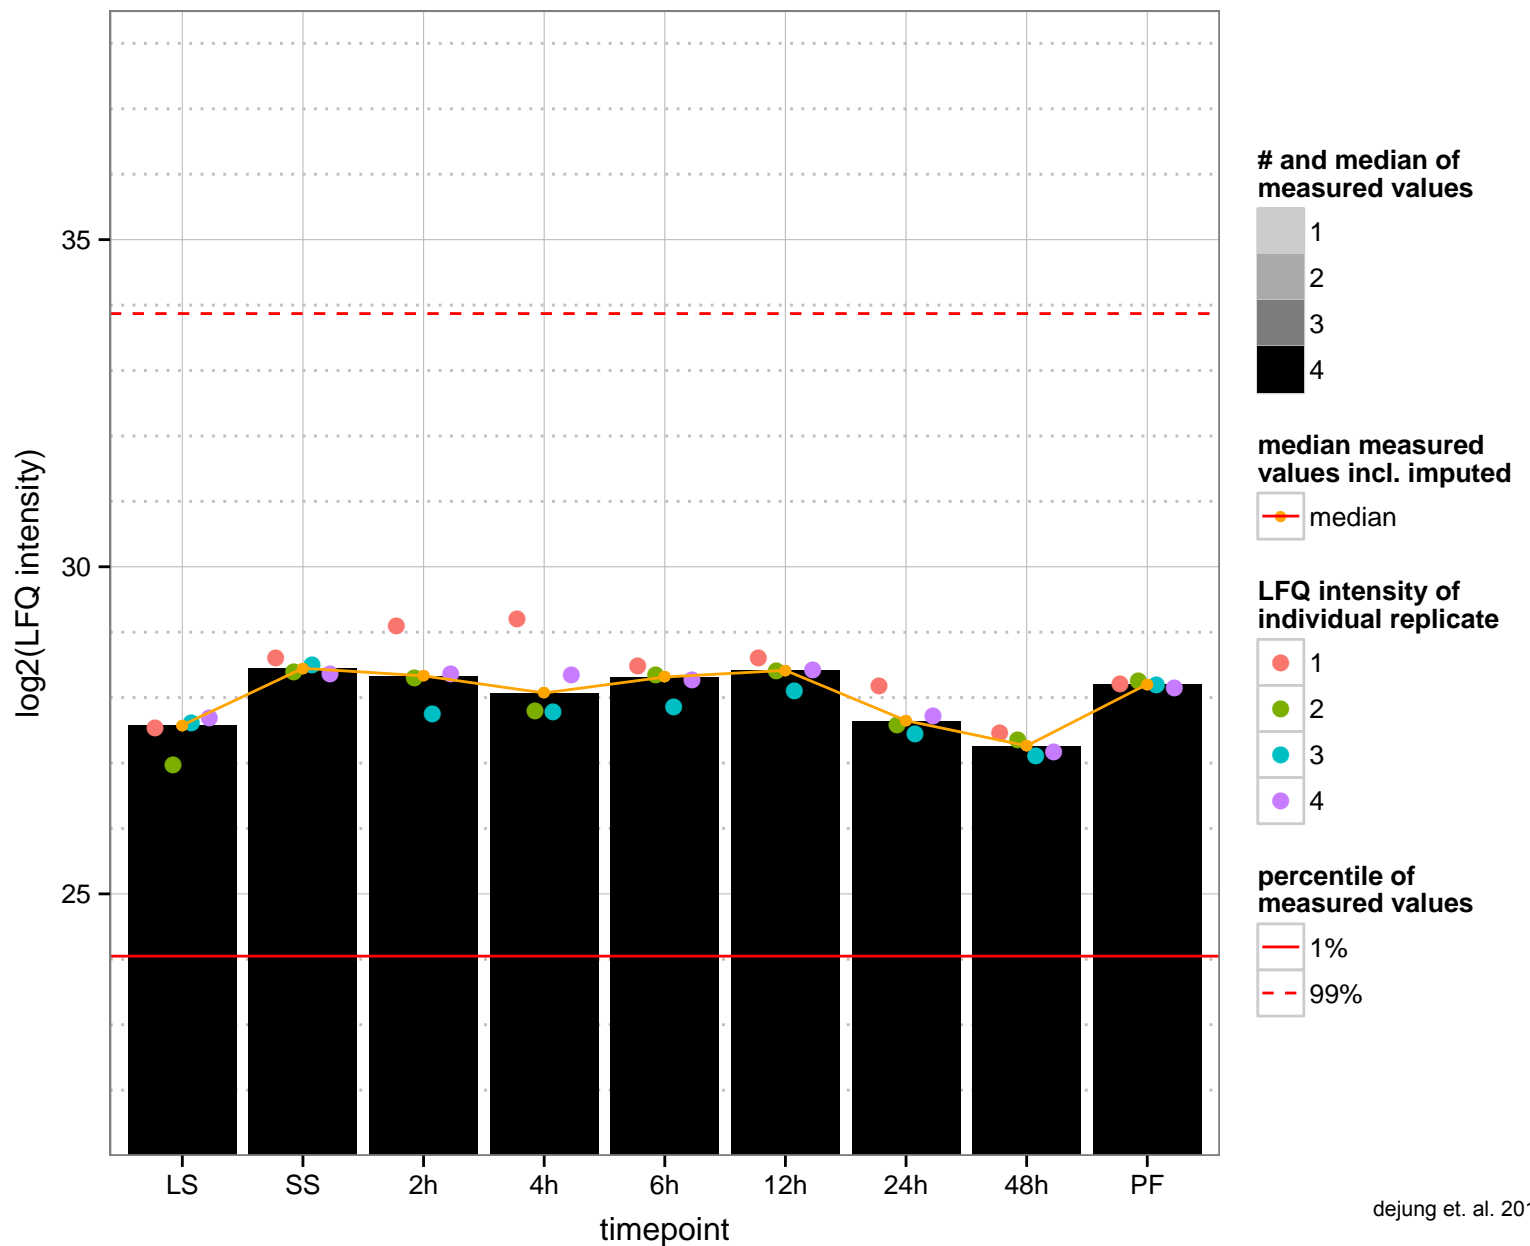



chrX additional, unordered contigs, hypothetical protein, conserved, intraflagellar transport protein IFT172, putative (IFT172)  
 Tb927.10.1170;Tb11.0560  
 AGOF: null  
 AGOC: null  
 AGOP: null  
 PGOF: null, protein binding  
 PGO: null  
 PGOP: null

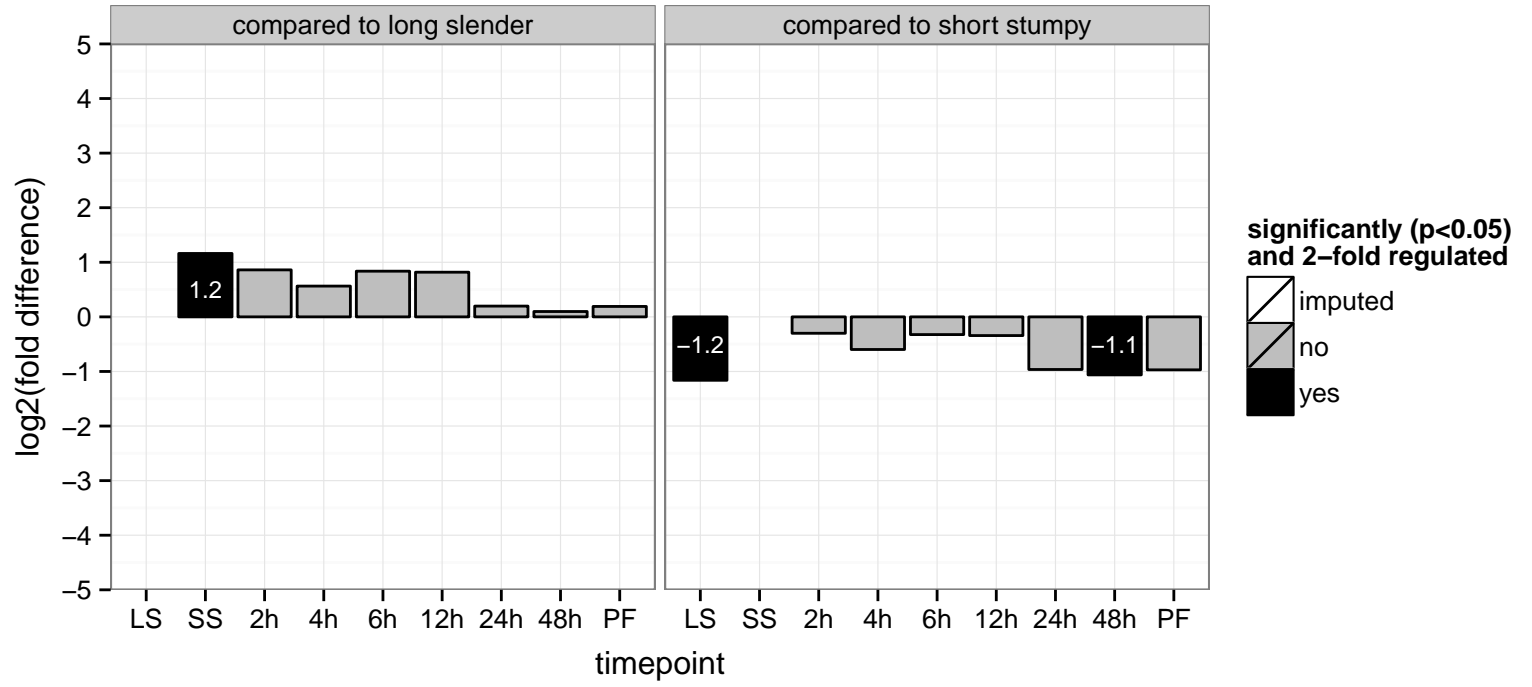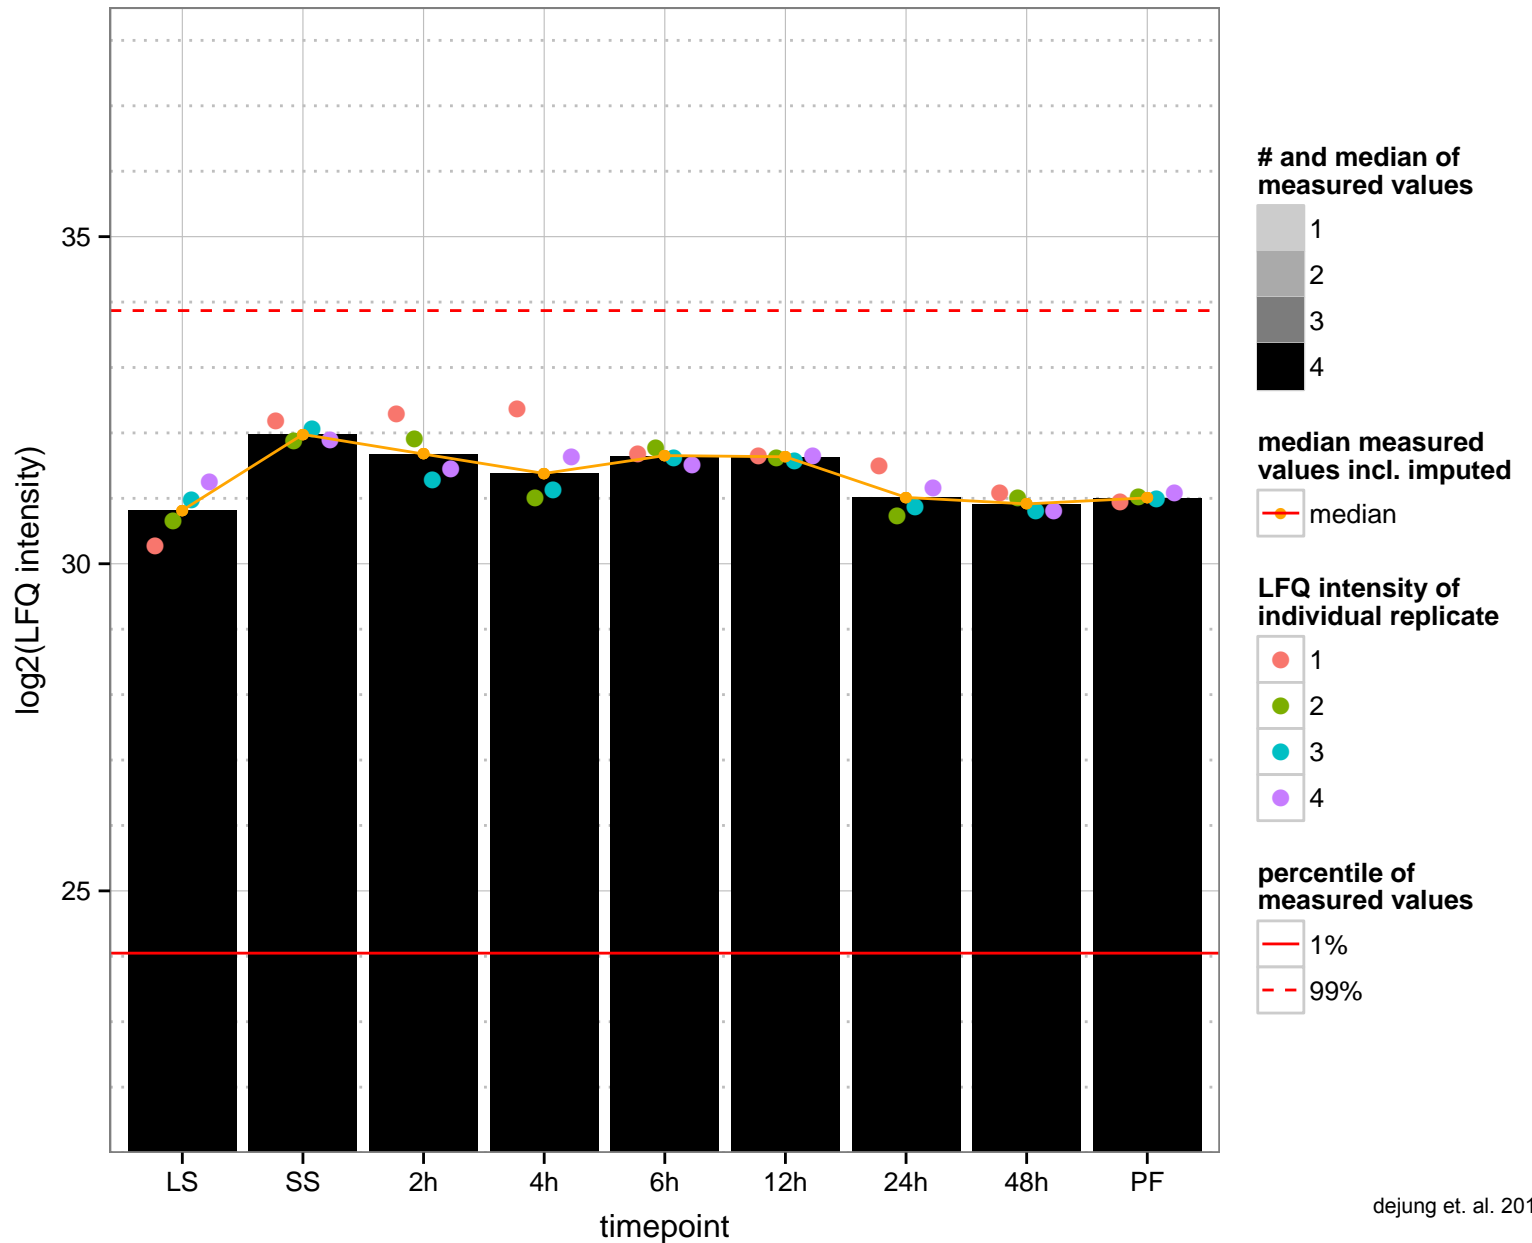

P-type H<sup>+</sup>-ATPase, putative

Tb927.10.12510

AGOF: ATP binding, ATPase activity, coupled to transmembrane movement of ions, phosphorylative mechanism

AGOC: integral to membrane, plasma membrane

AGOP: ATP biosynthetic process, metabolic process, proton transport

PGOF: ATP binding, ATPase activity, coupled to transmembrane movement of ions, phosphorylative mechanism, catalytic acti

PGOC: integral to membrane, membrane

PGOP: ATP biosynthetic process, ATP catabolic process, cation transport, metabolic process

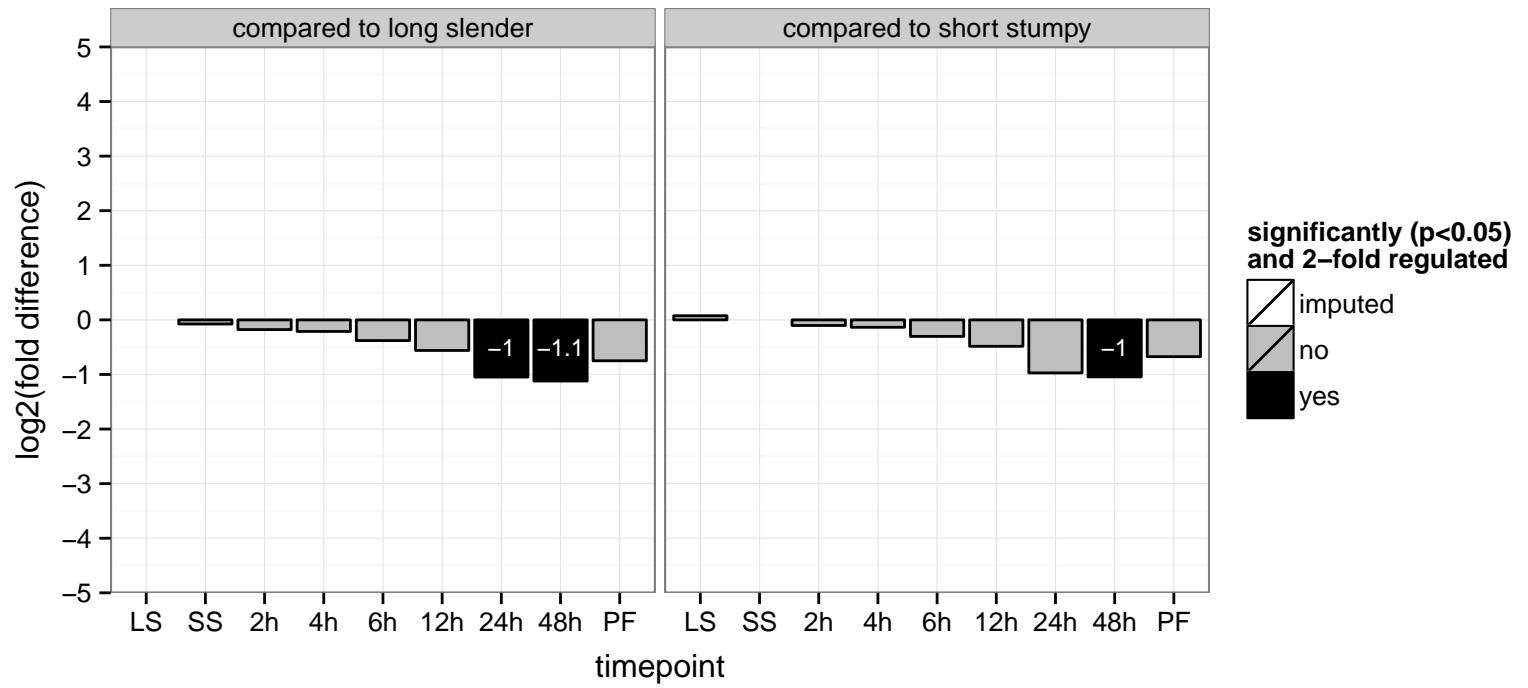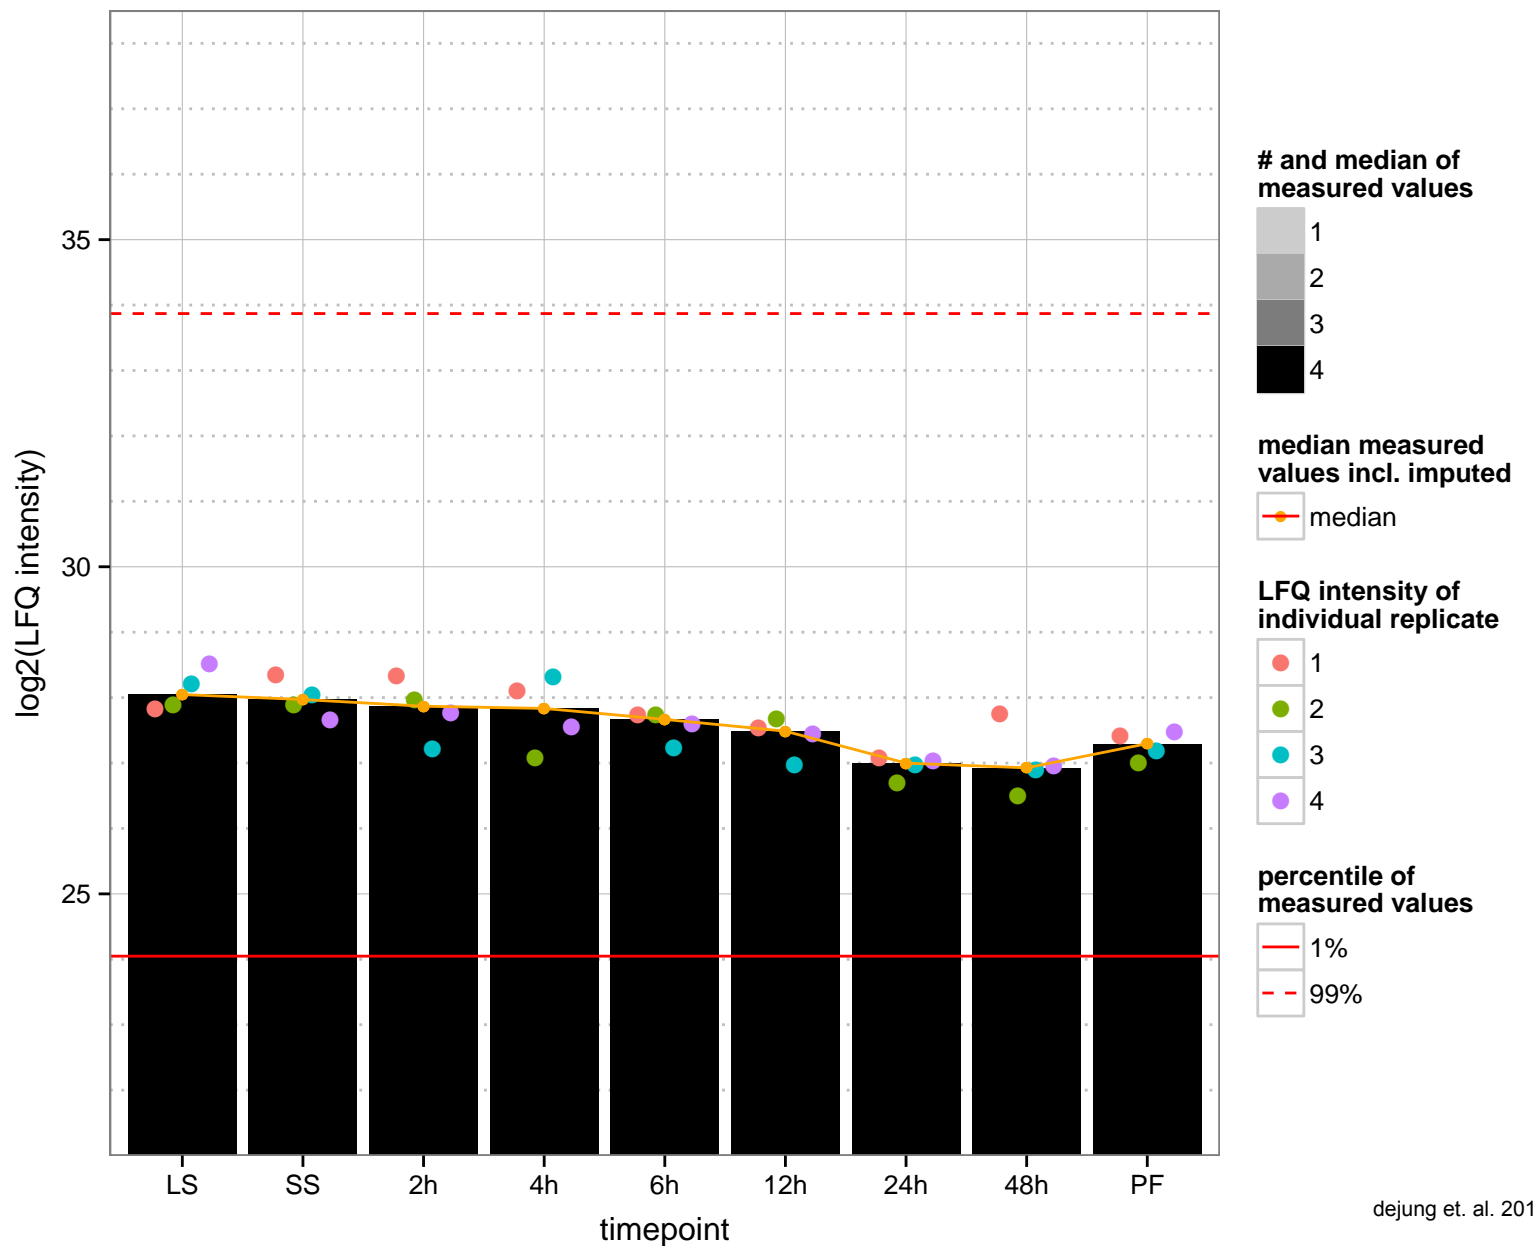

ethanolamine phosphotransferase (EPT)

Tb927.10.13290

AGOF: ethanolaminephosphotransferase activity

AGOC: membrane

AGOP: phosphatidylethanolamine biosynthetic process, phospholipid biosynthetic process

PGOF: phosphotransferase activity, for other substituted phosphate groups

PGOC: membrane

PGOP: phospholipid biosynthetic process

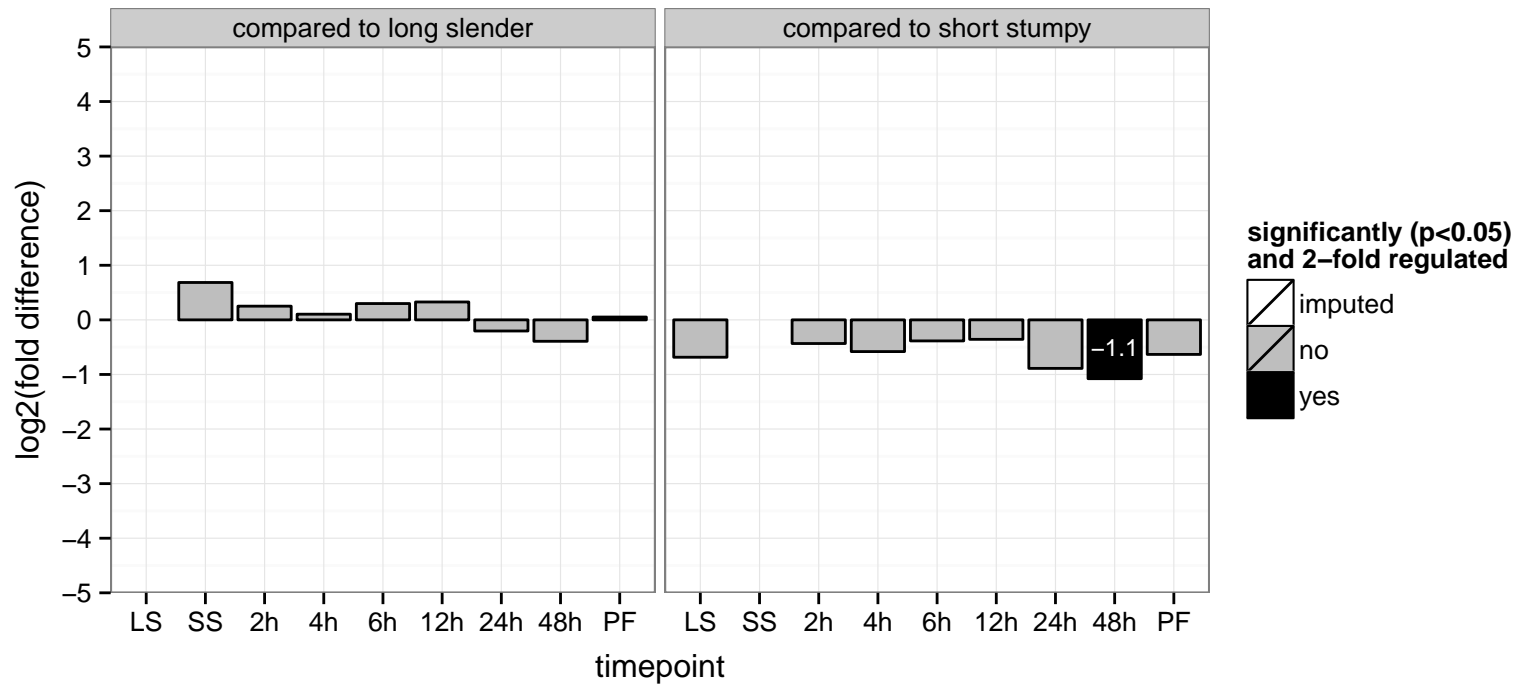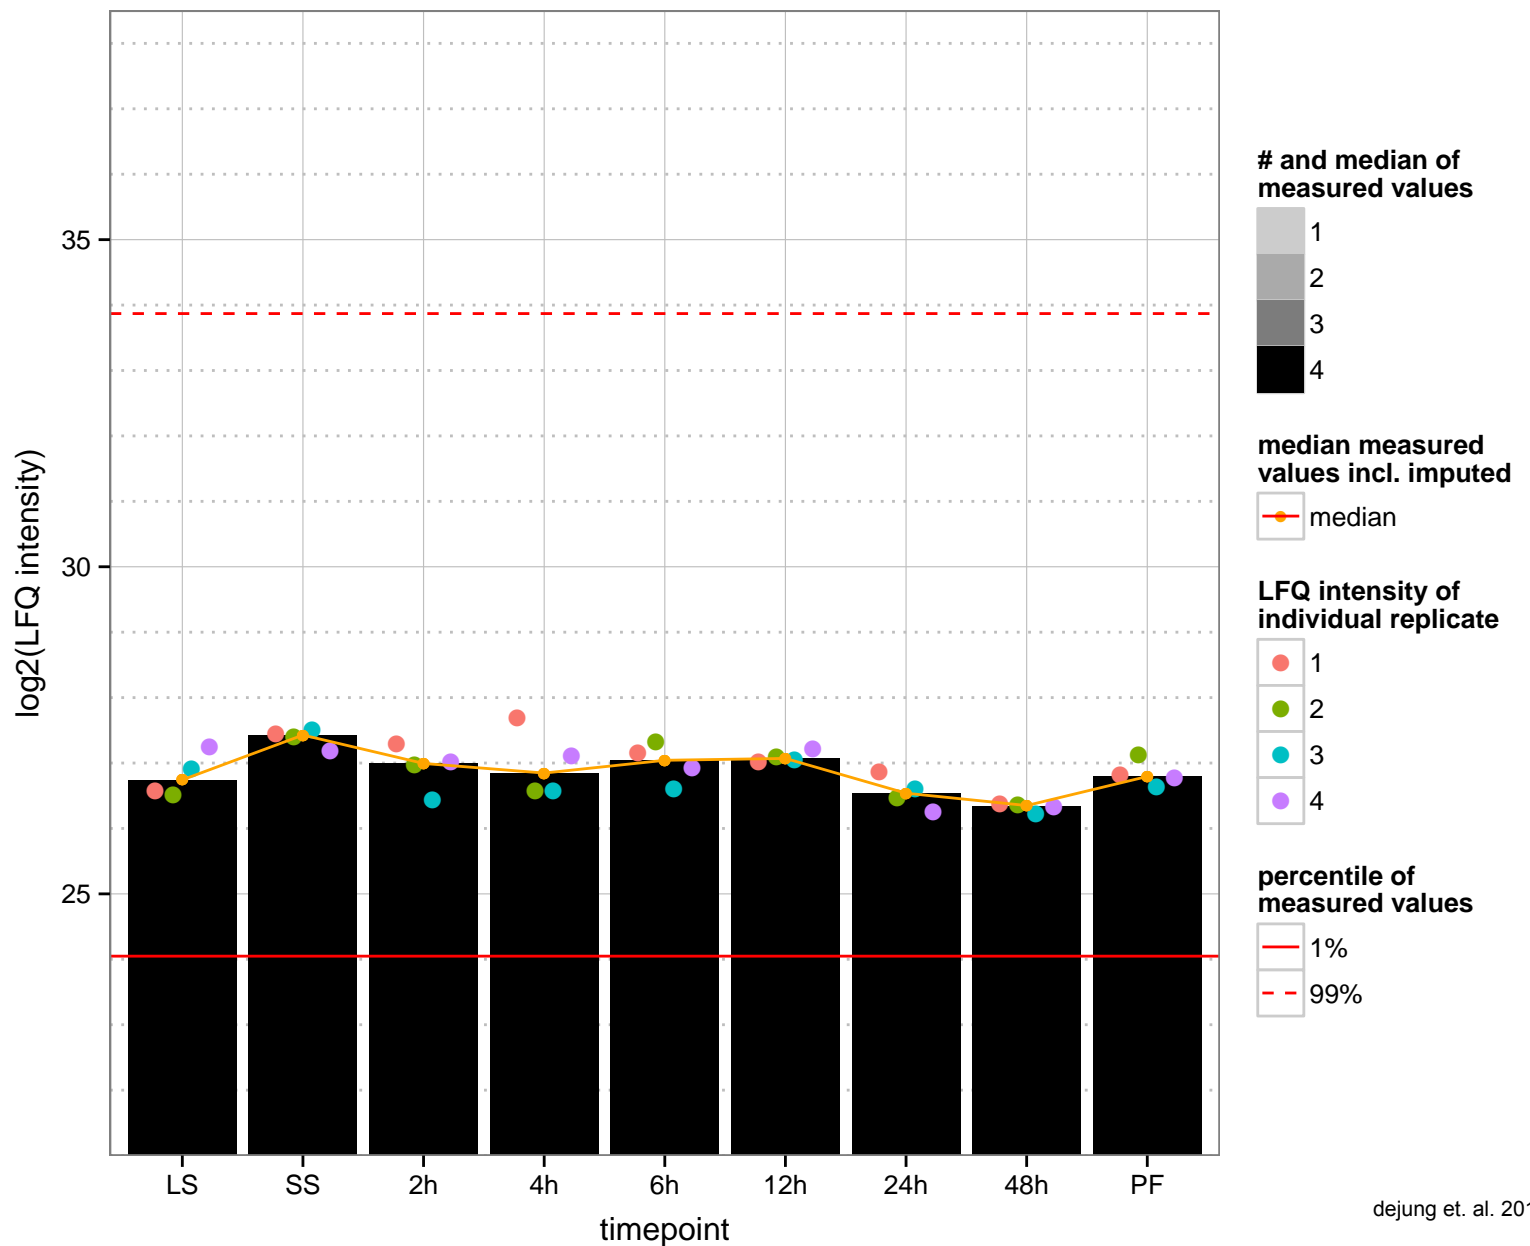

hypothetical protein, conserved, variant surface glycoprotein (VSG), pseudogene  
 Tb927.10.14740;Tb927.10.14620;Tb11.v5.1063  
 AGOF: null, heat shock protein binding  
 AGOC: null  
 AGOP: null  
 PGOF: heat shock protein binding, null  
 PGO: null  
 PGOP: null

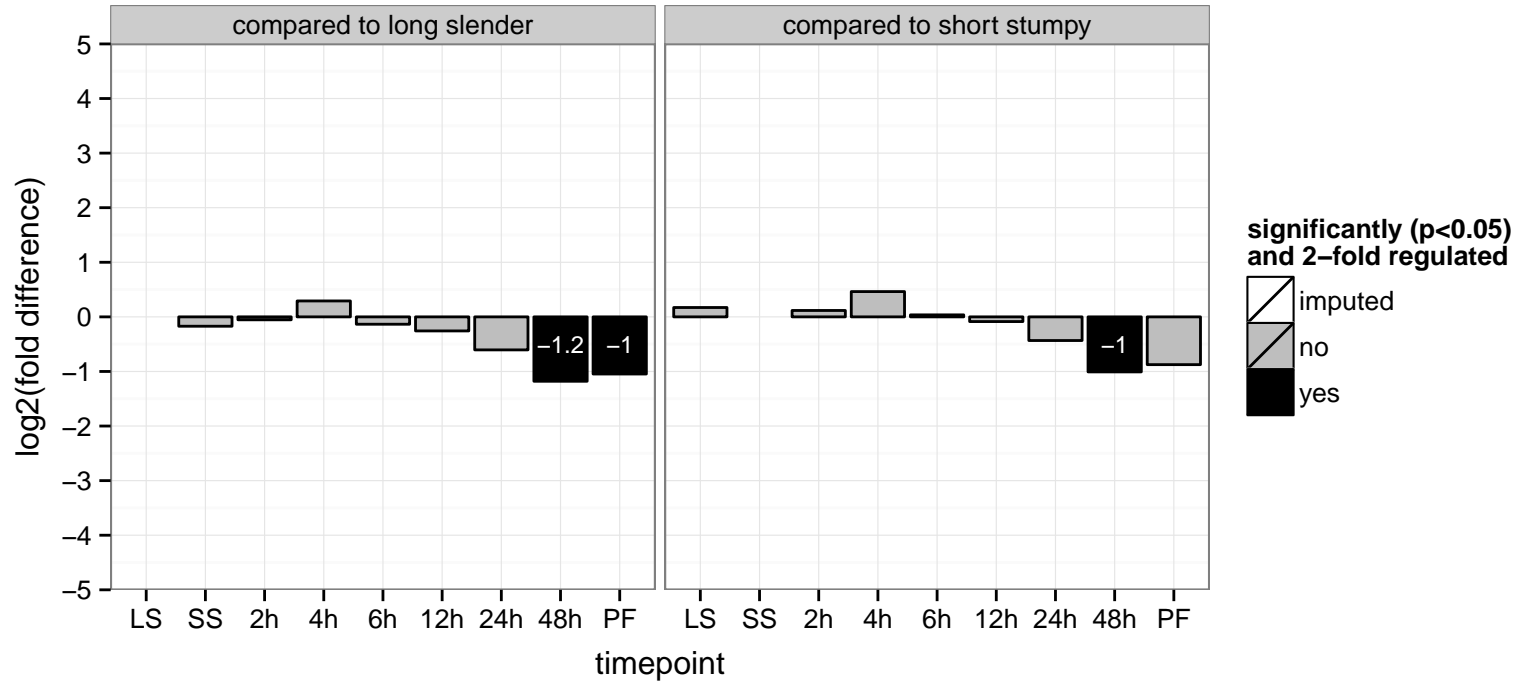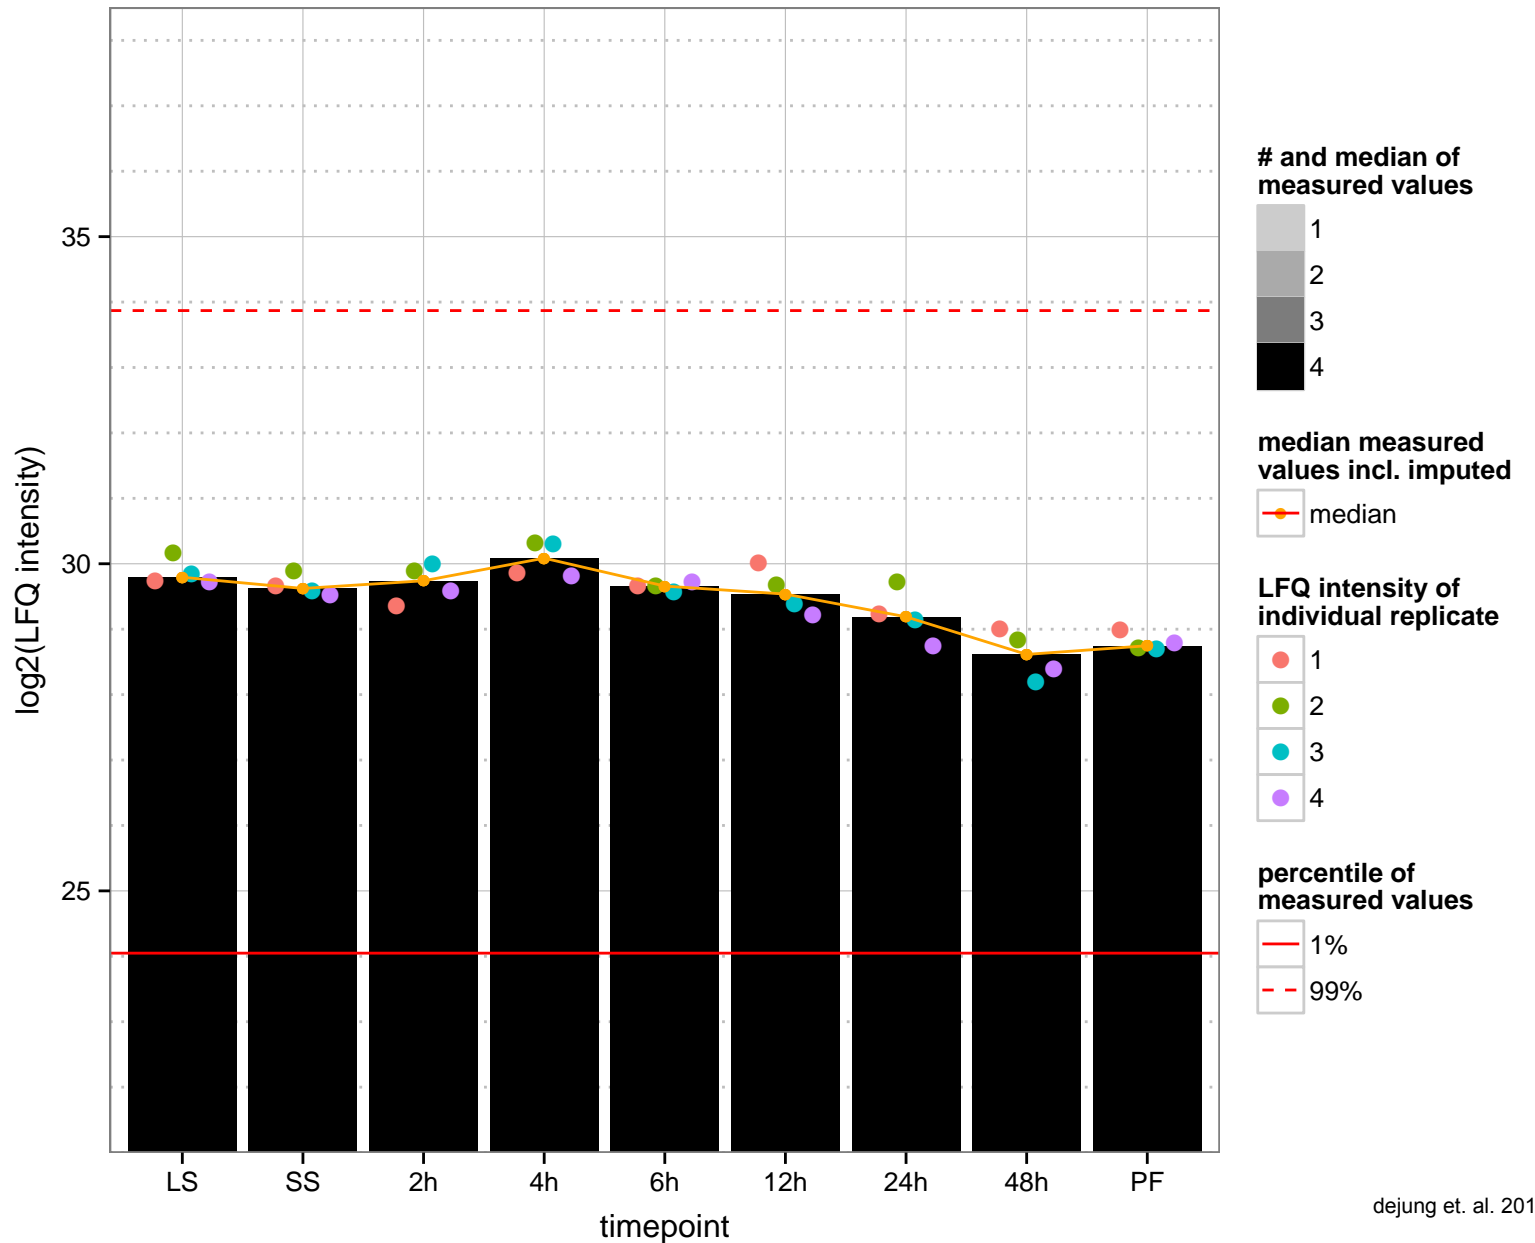

ATP synthase, putative

Tb927.10.730;Tb11.v5.0822

AGOF: null, proton-transporting ATPase activity, rotational mechanism

AGOC: null, proton-transporting two-sector ATPase complex, vacuolar proton-transporting V-type ATPase, V1 domain

AGOP: null, ATP synthesis coupled proton transport

PGOF: binding, hydrolase activity, acting on acid anhydrides, catalyzing transmembrane movement of substances, proton-transport

PGOC: vacuolar proton-transporting V-type ATPase, V1 domain

PGOP: ATP hydrolysis coupled proton transport

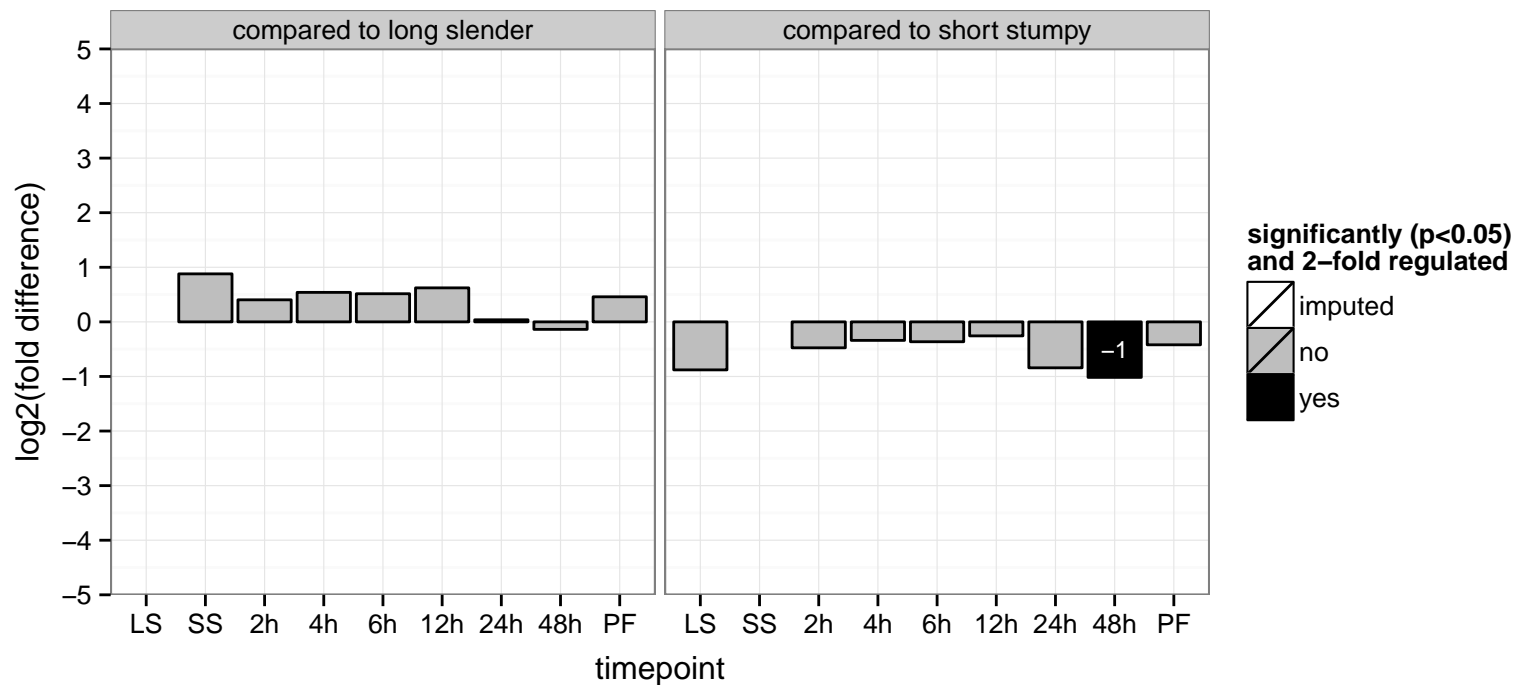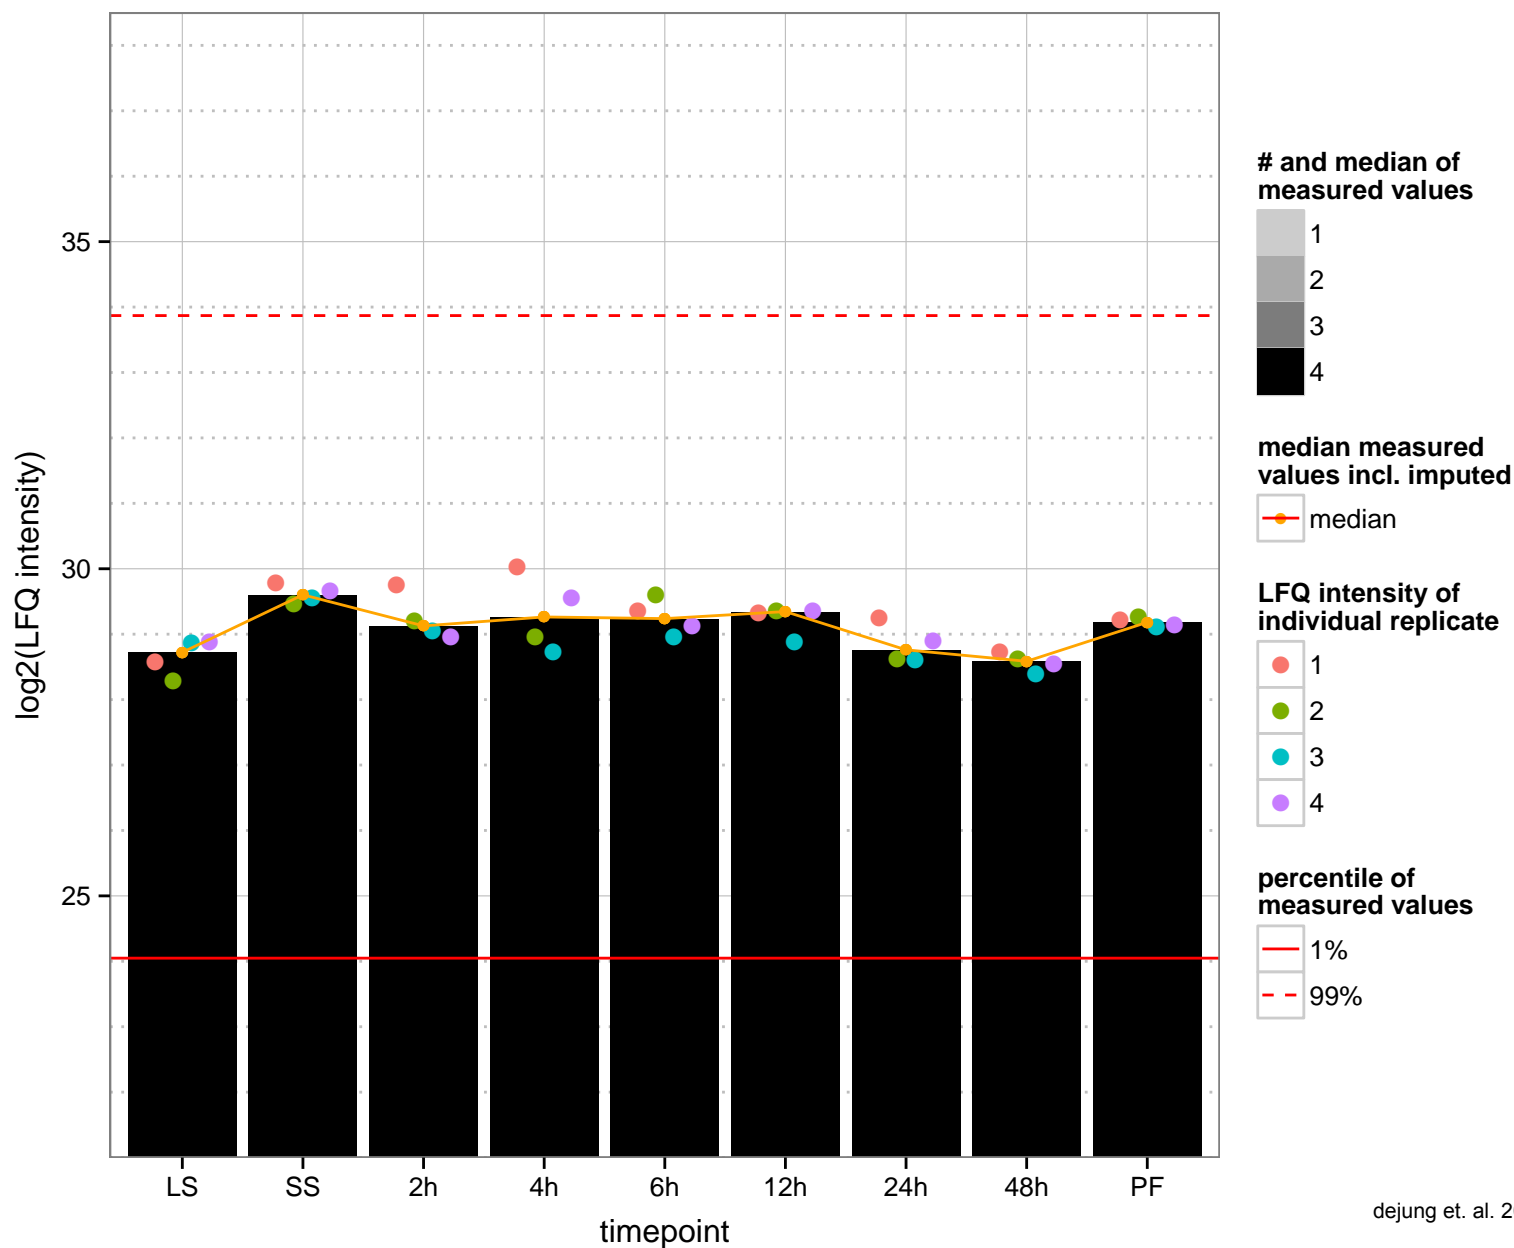

vesicle-associated membrane protein, putative, synaptobrevin, putative (VAMP)

Tb927.10.790

AGOF: SNAP receptor activity

AGOC: integral to membrane

AGOP: synaptic vesicle exocytosis

PGOF: protein binding

PGOC: integral to membrane

PGOP: vesicle-mediated transport

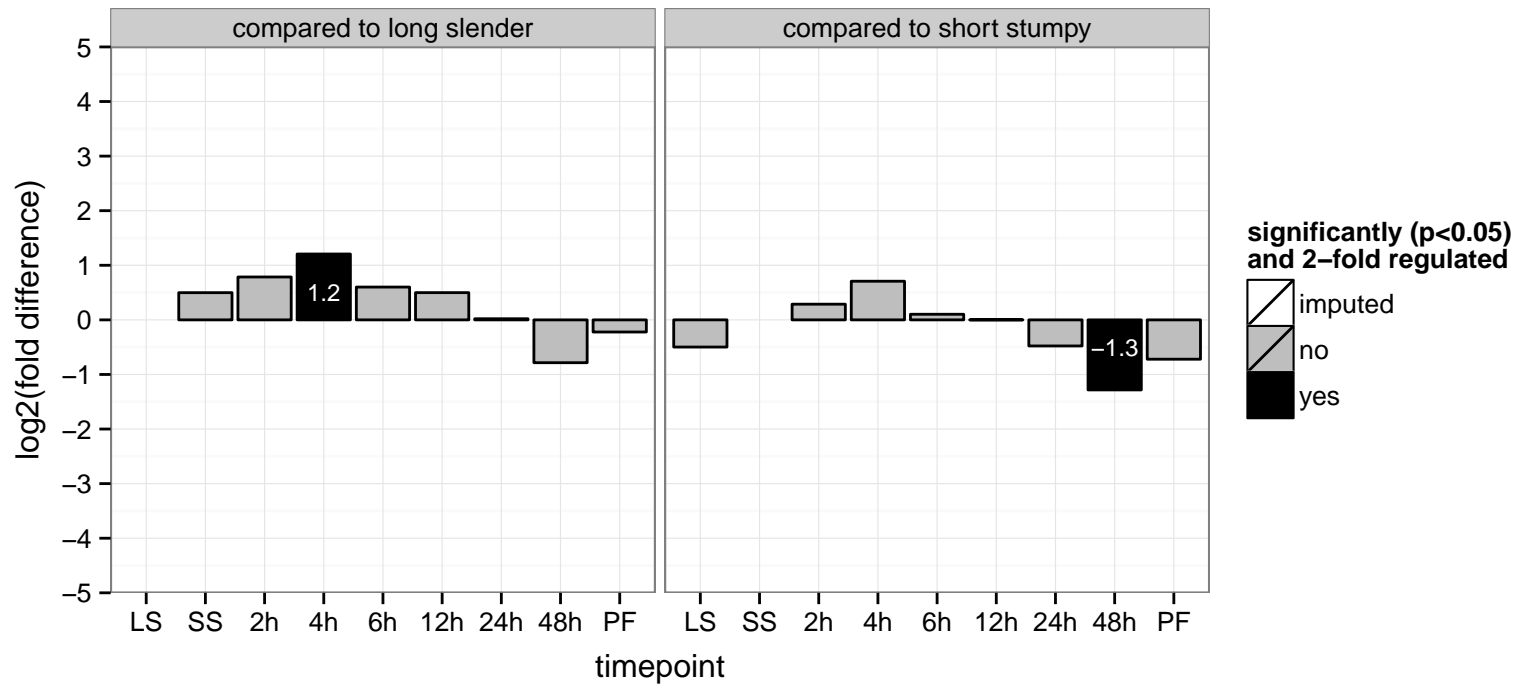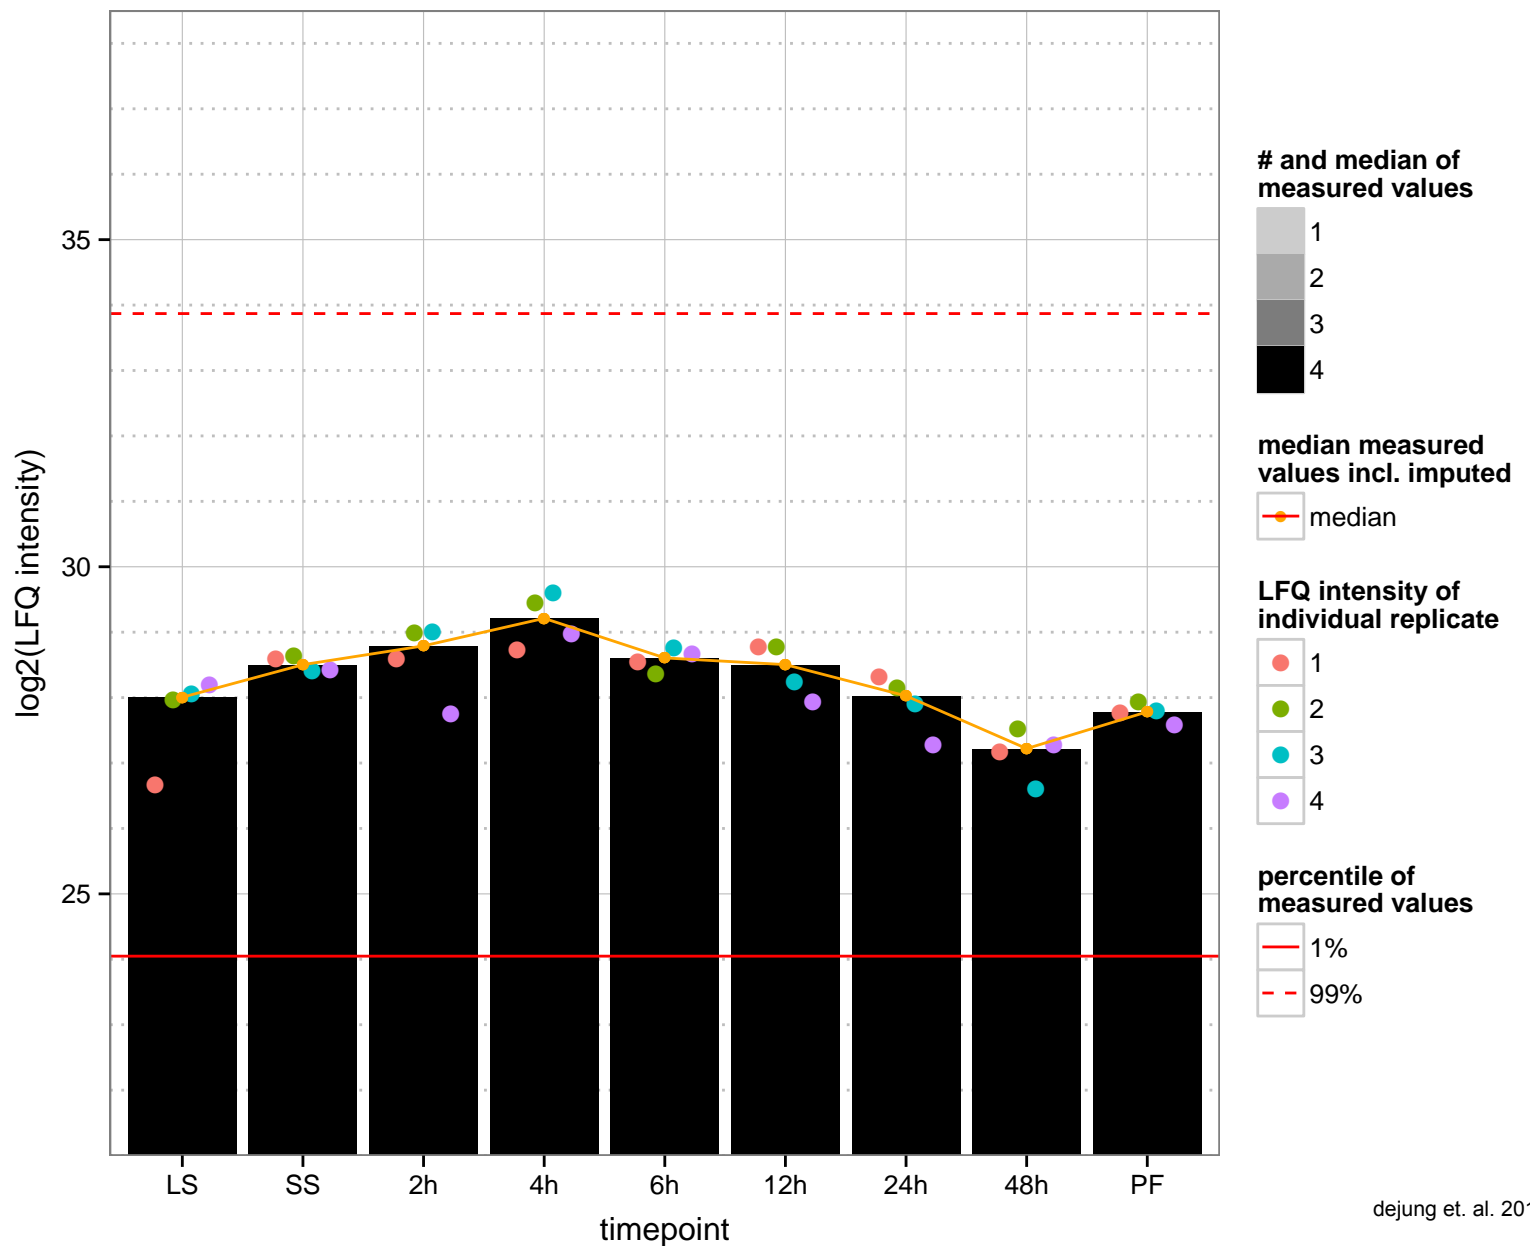

vacuolar sorting–associated protein–like, putative  
 Tb927.11.10010  
 AGOF: null  
 AGOC: retromer complex  
 AGOP: retrograde transport, endosome to Golgi, vacuolar transport  
 PGO: null  
 PGO: retromer complex  
 PGO: vacuolar transport

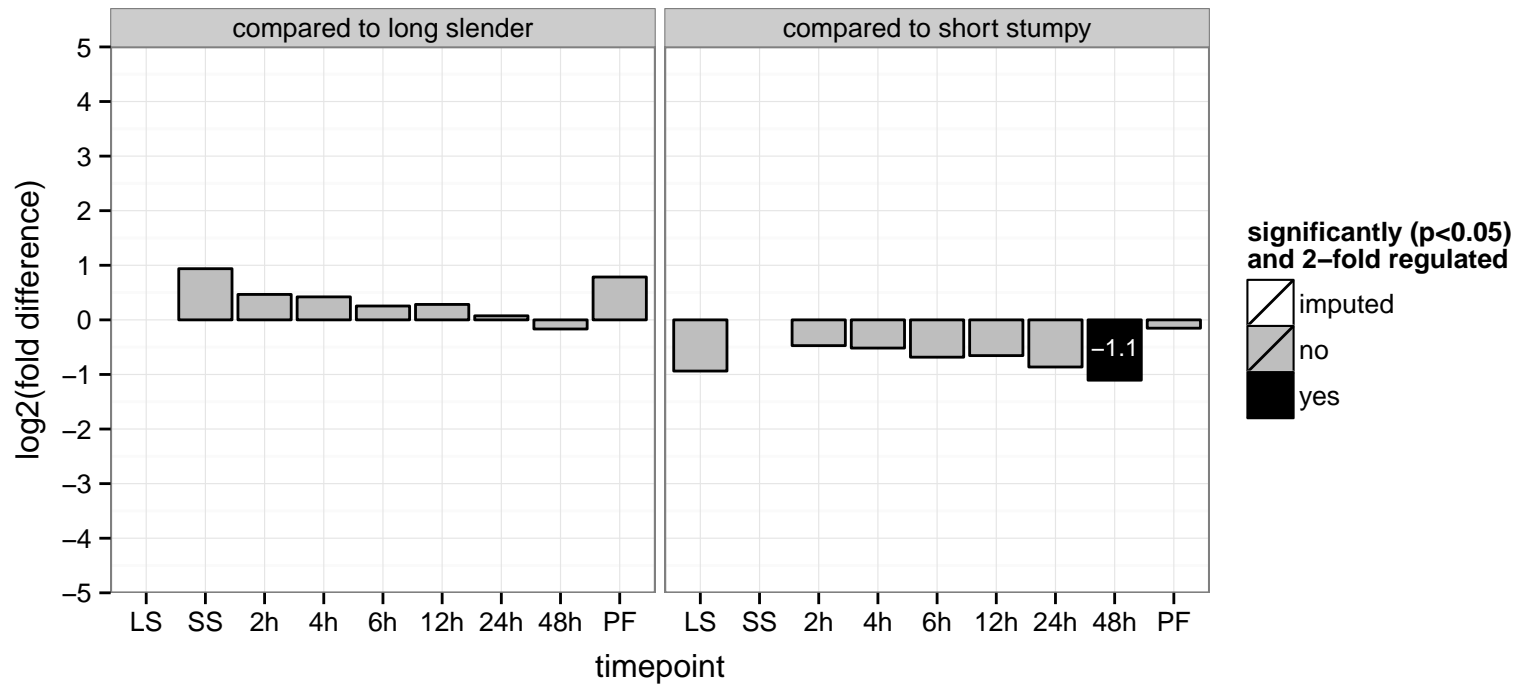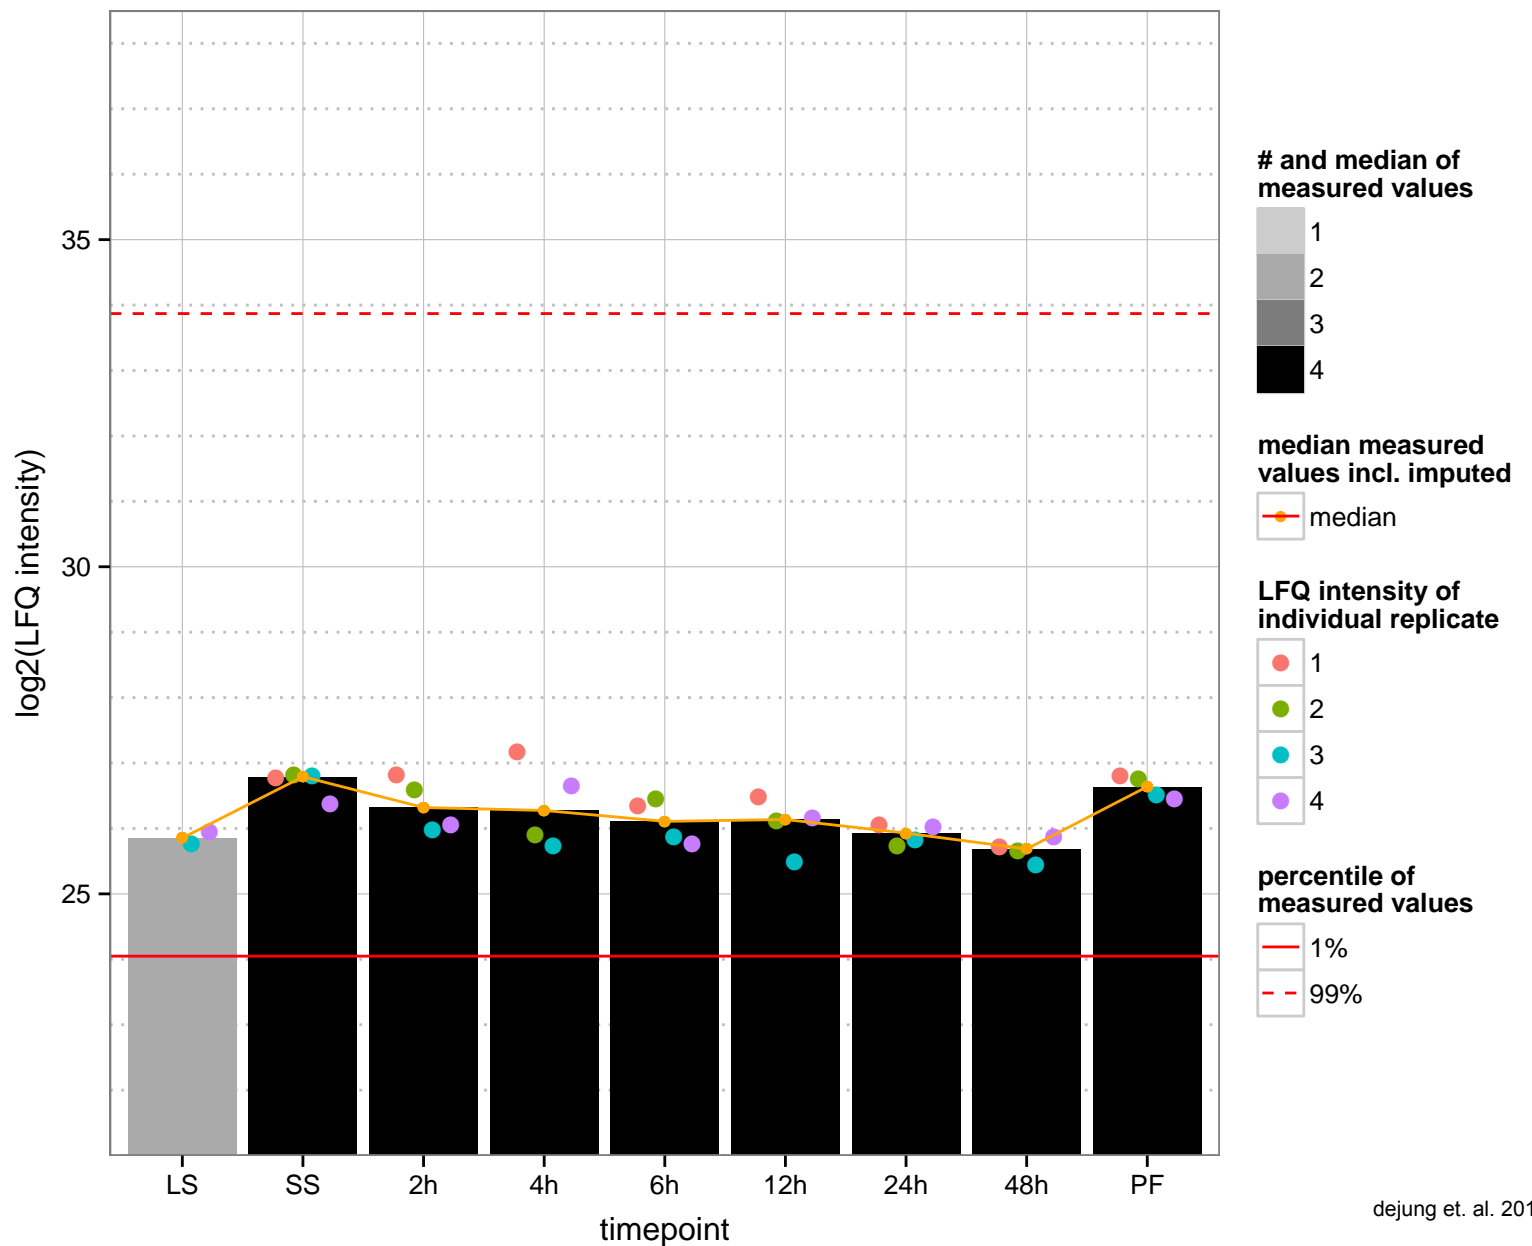

vacuolar ATP synthase subunit b, putative, v-ATPase B subunit, vacuolar proton pump B subunit

Tb927.11.11690

AGOF: hydrogen ion transporting ATP synthase activity, rotational mechanism, hydrogen-exporting ATPase activity, phospho

AGOC: contractile vacuole, lysosomal proton-transporting V-type ATPase complex, proton-transporting V-type ATPase, V1 d

AGOP: ATP hydrolysis coupled proton transport, ATP synthesis coupled proton transport

PGOF: ATP binding, hydrogen ion transporting ATP synthase activity, rotational mechanism, hydrolase activity, acting on acid

PGOC: proton-transporting V-type ATPase, V1 domain, proton-transporting two-sector ATPase complex, catalytic domain

PGOP: ATP hydrolysis coupled proton transport, ATP metabolic process, proton transport

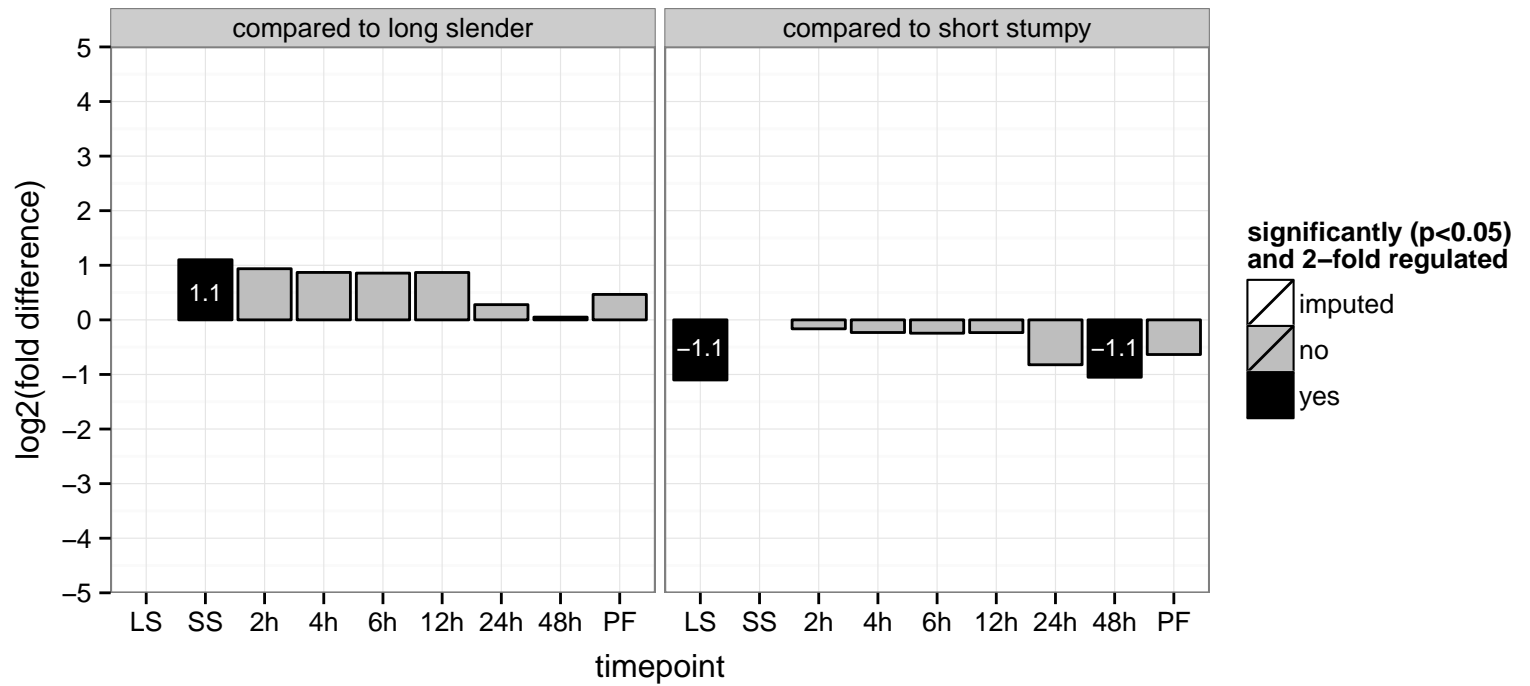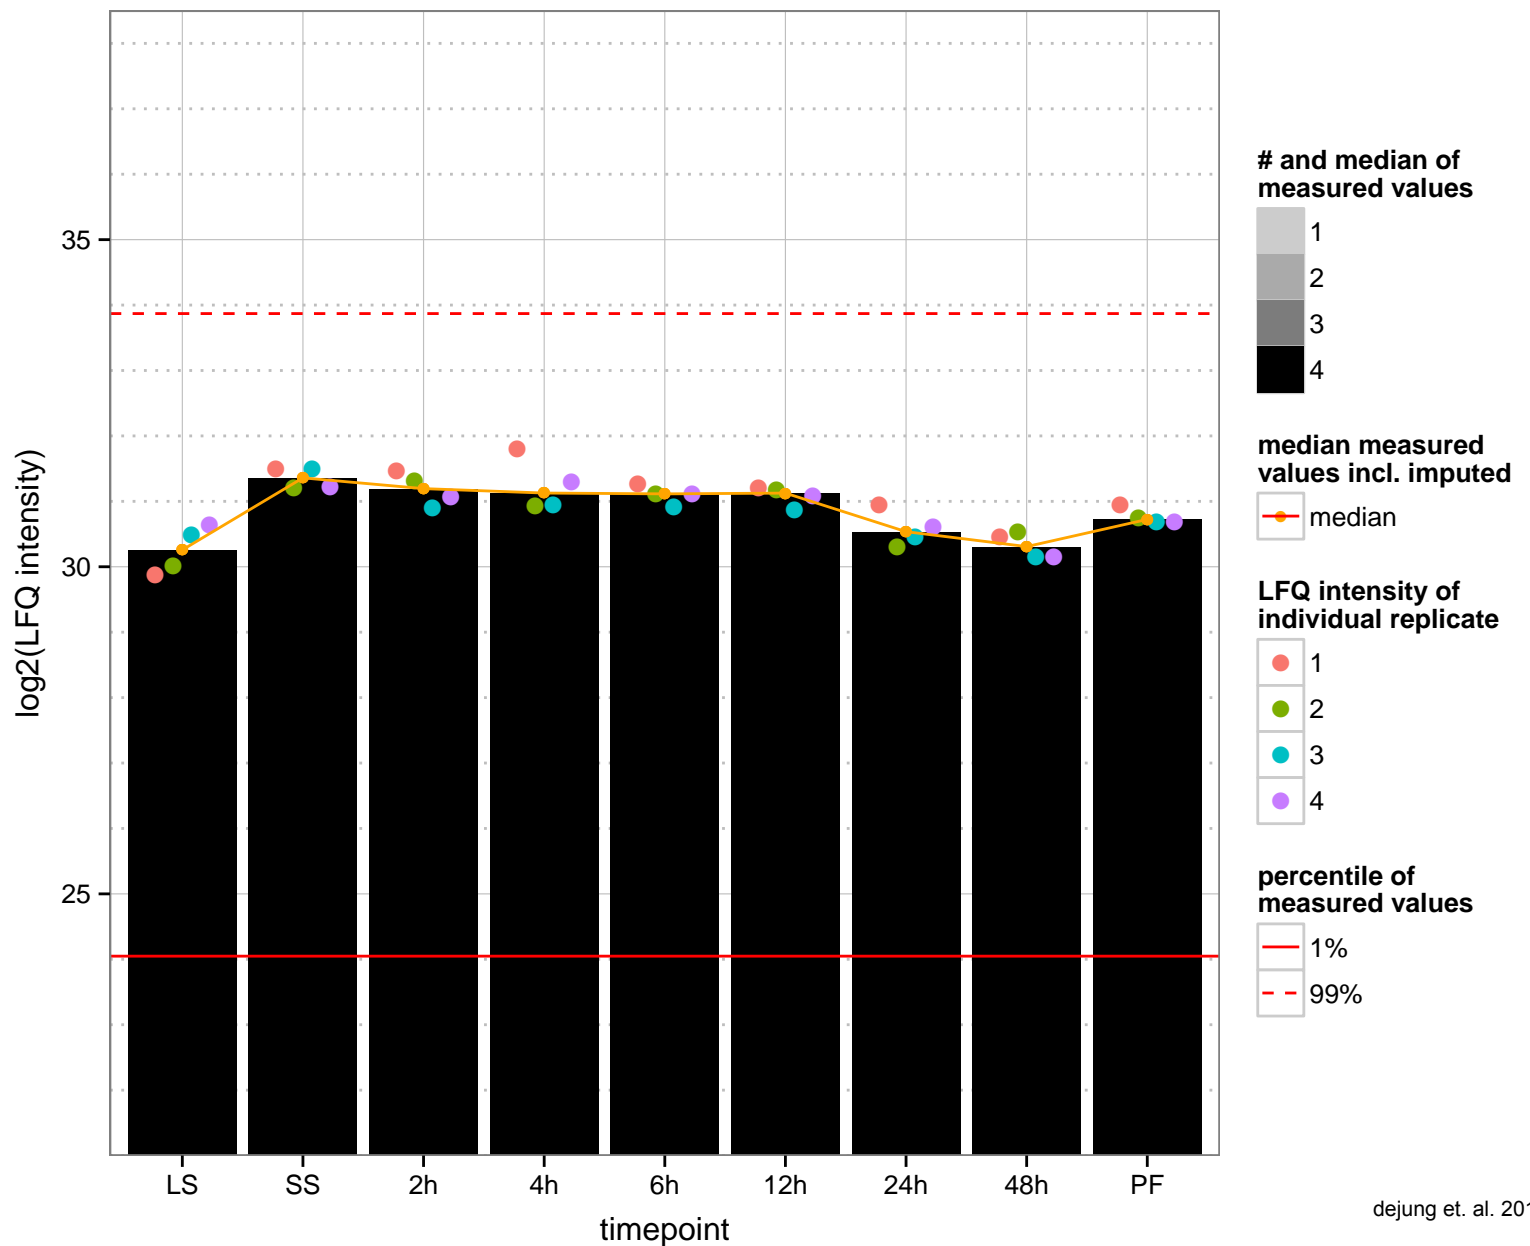



vacuolar sorting protein, putative  
 Tb927.11.14290  
 AGOF: hydrolase activity, acting on ester bonds  
 AGOC: cytoplasm, membrane  
 AGOP: protein transport, vesicle-mediated transport  
 PGO: hydrolase activity, acting on ester bonds  
 PGO: null  
 PGO: null

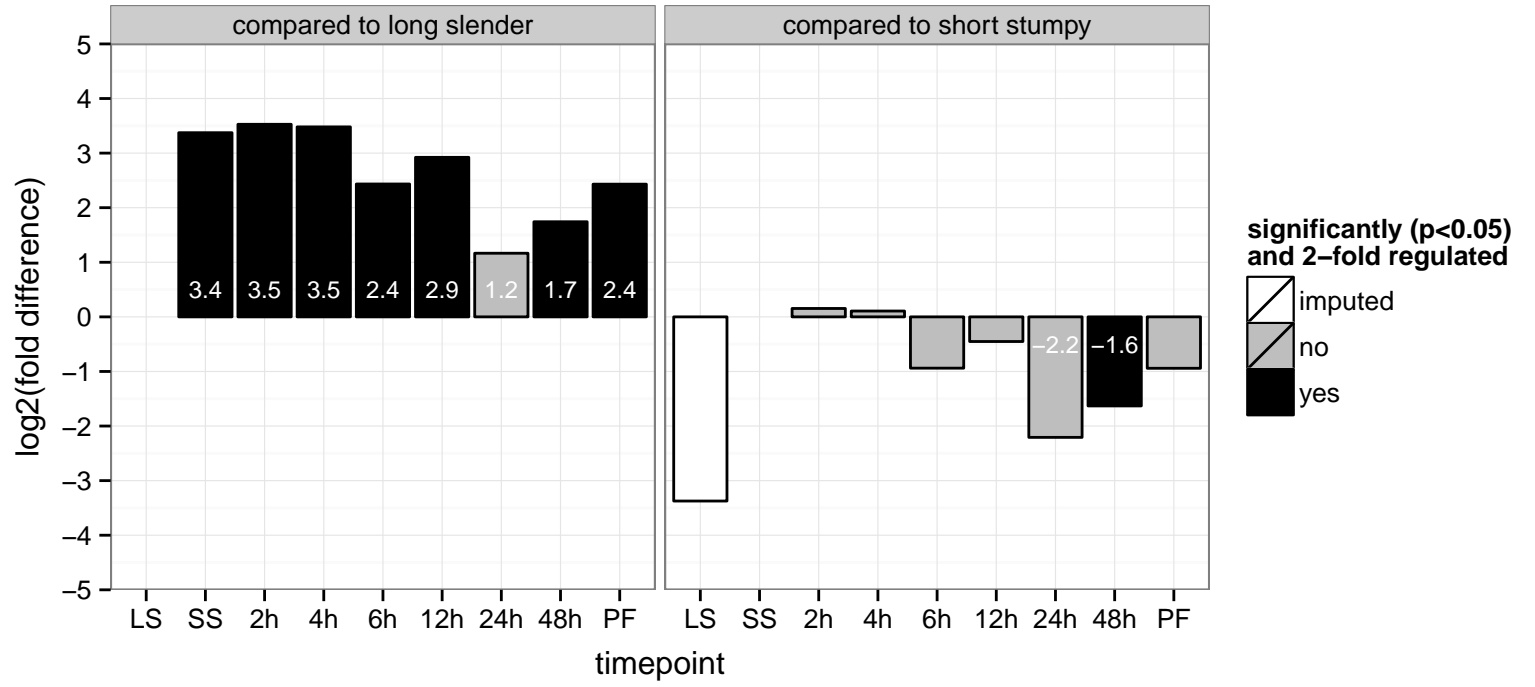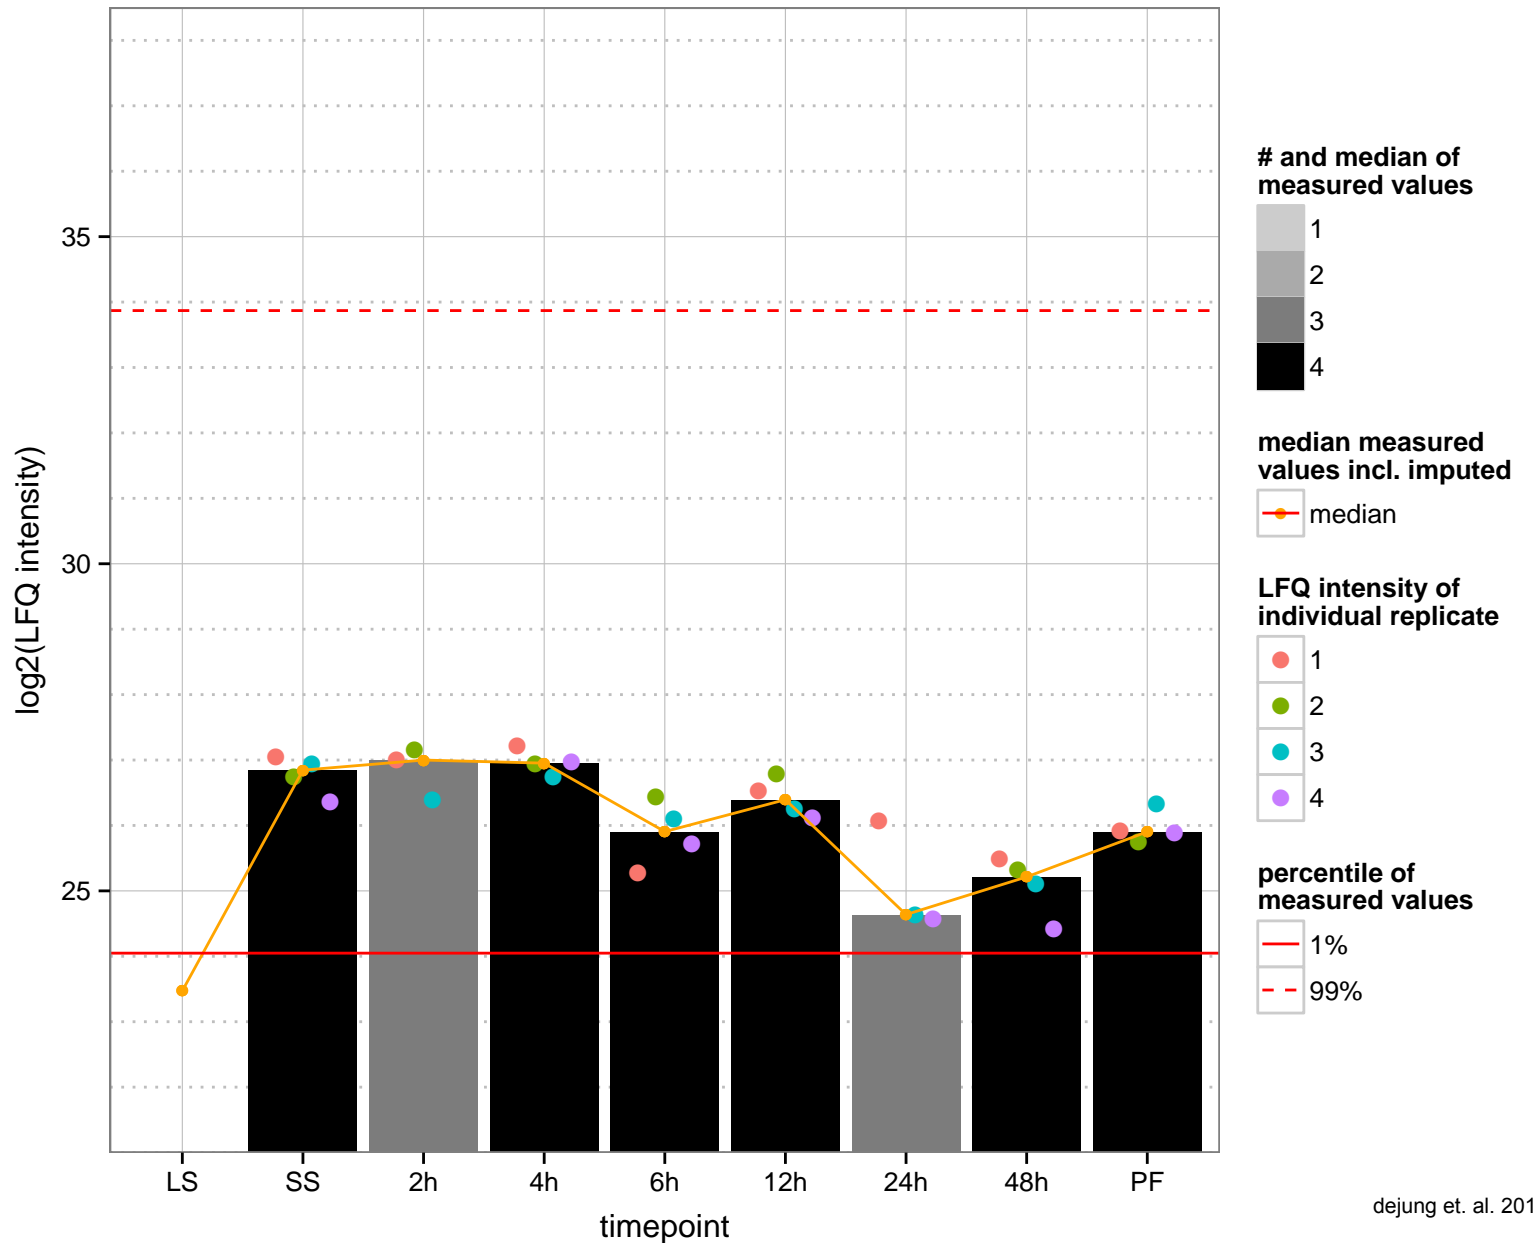

mitochondrial carrier protein (MCP2)  
 Tb927.11.14360  
 AGOF: null  
 AGOC: integral to membrane, mitochondrial part  
 AGOP: transport  
 PGO: null  
 PGOC: null  
 PGOP: null

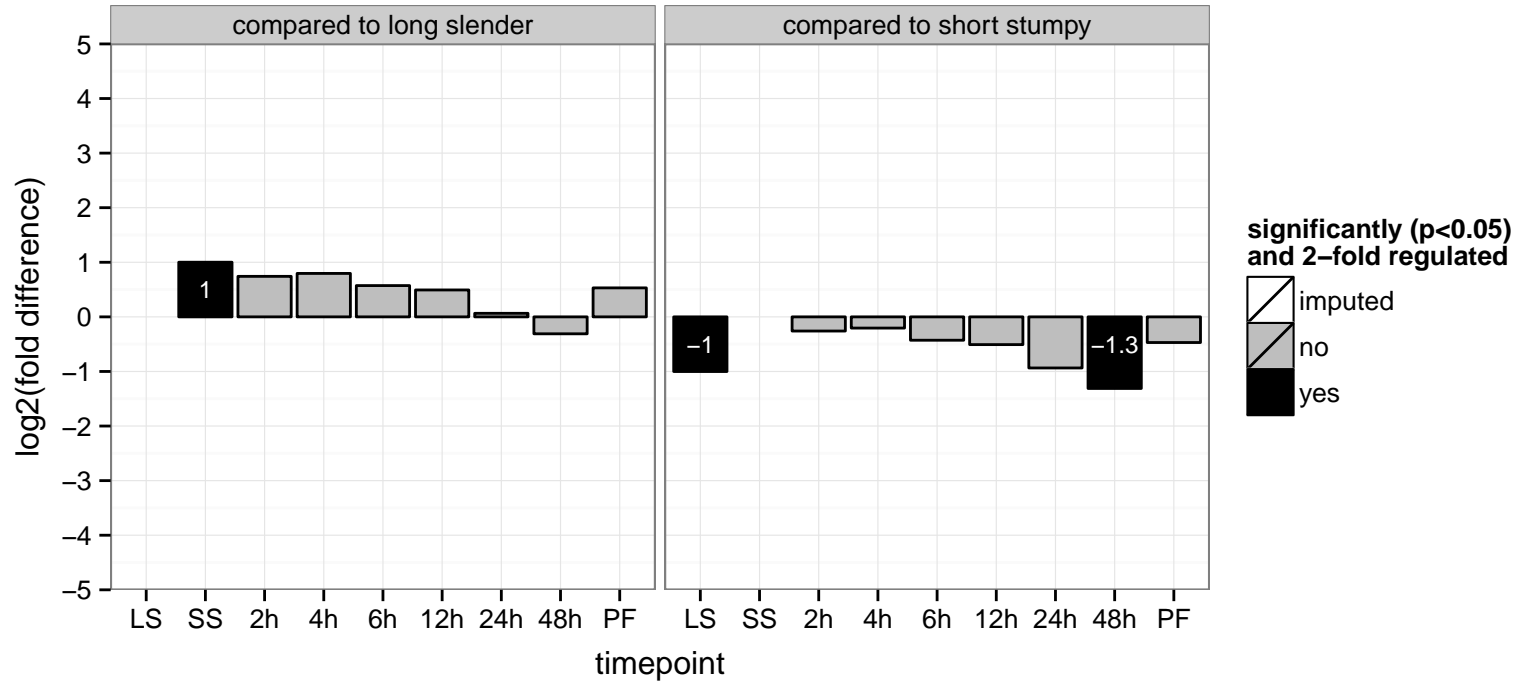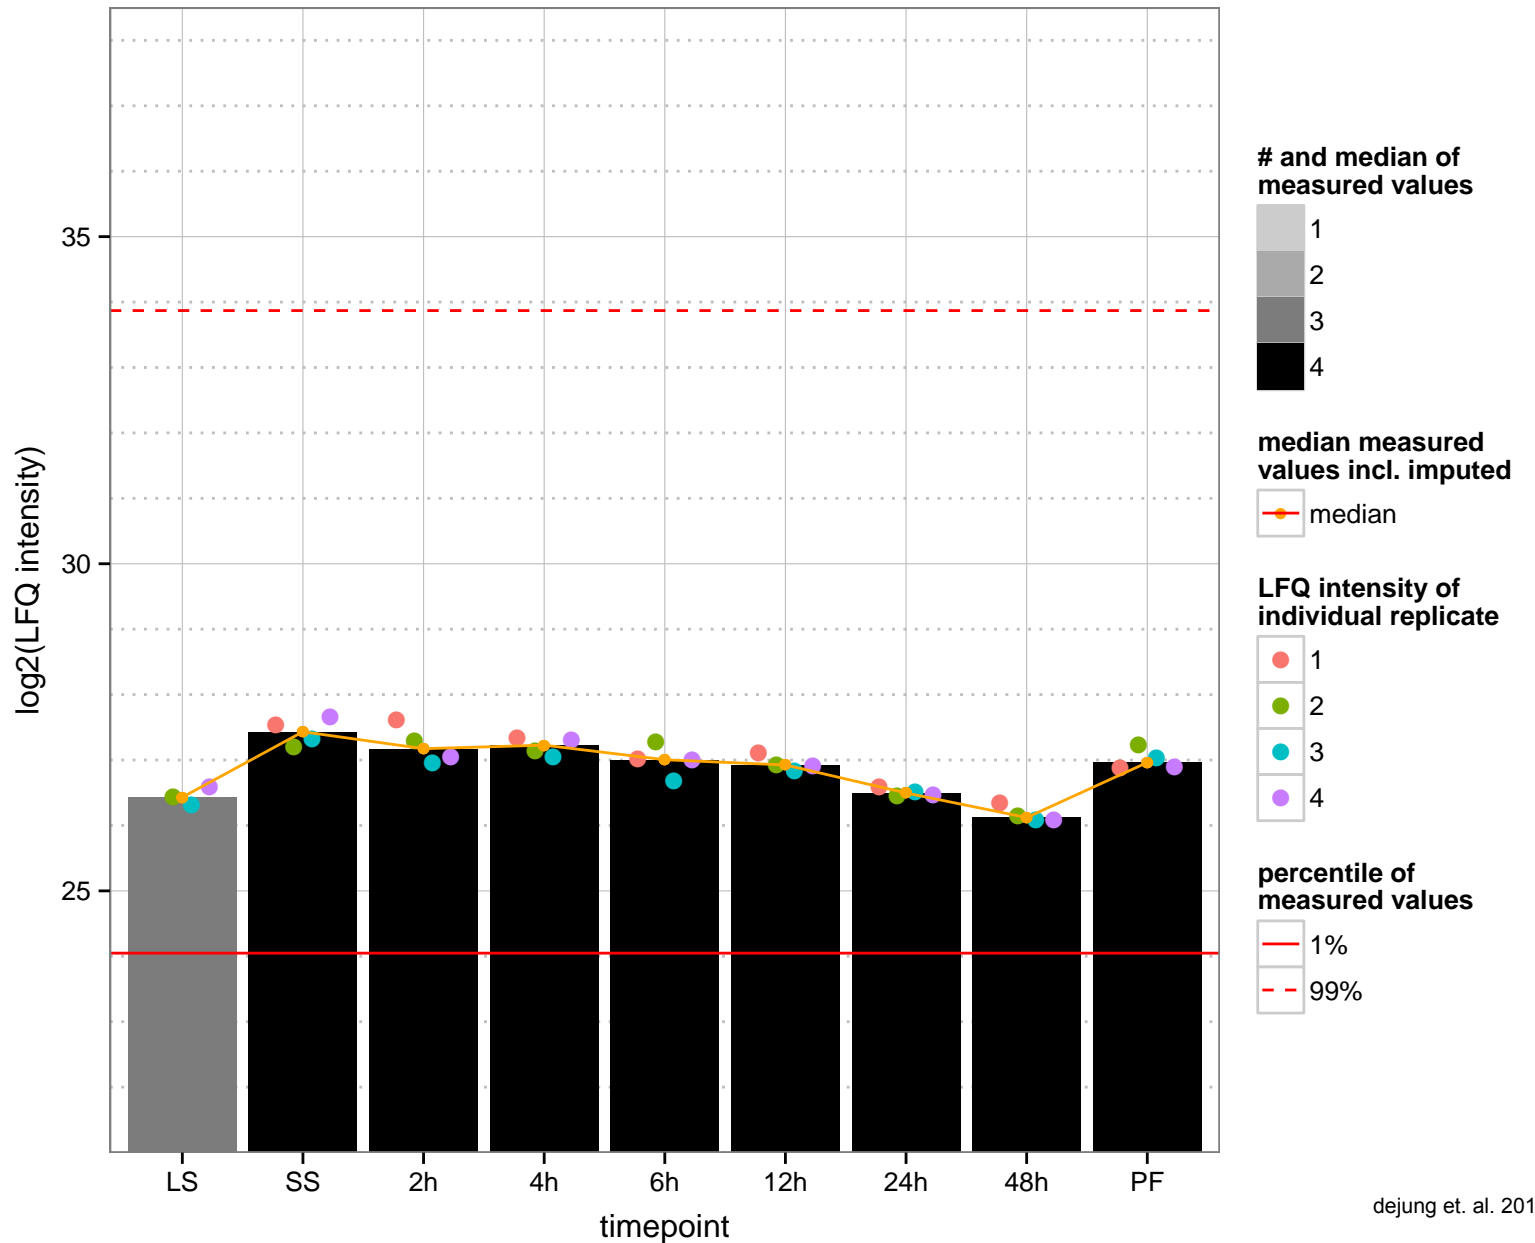

Ras-related protein Rab2 (RAB2)

Tb927.11.15240

AGOF: GTP binding, GTPase activity

AGOC: intracellular

AGOP: intracellular protein transport, nucleocytoplasmic transport, small GTPase mediated signal transduction

PGOF: GTP binding, GTPase activity

PGOC: intracellular, membrane

PGOP: GTP catabolic process, intracellular protein transport, nucleocytoplasmic transport, protein transport, signal transduction

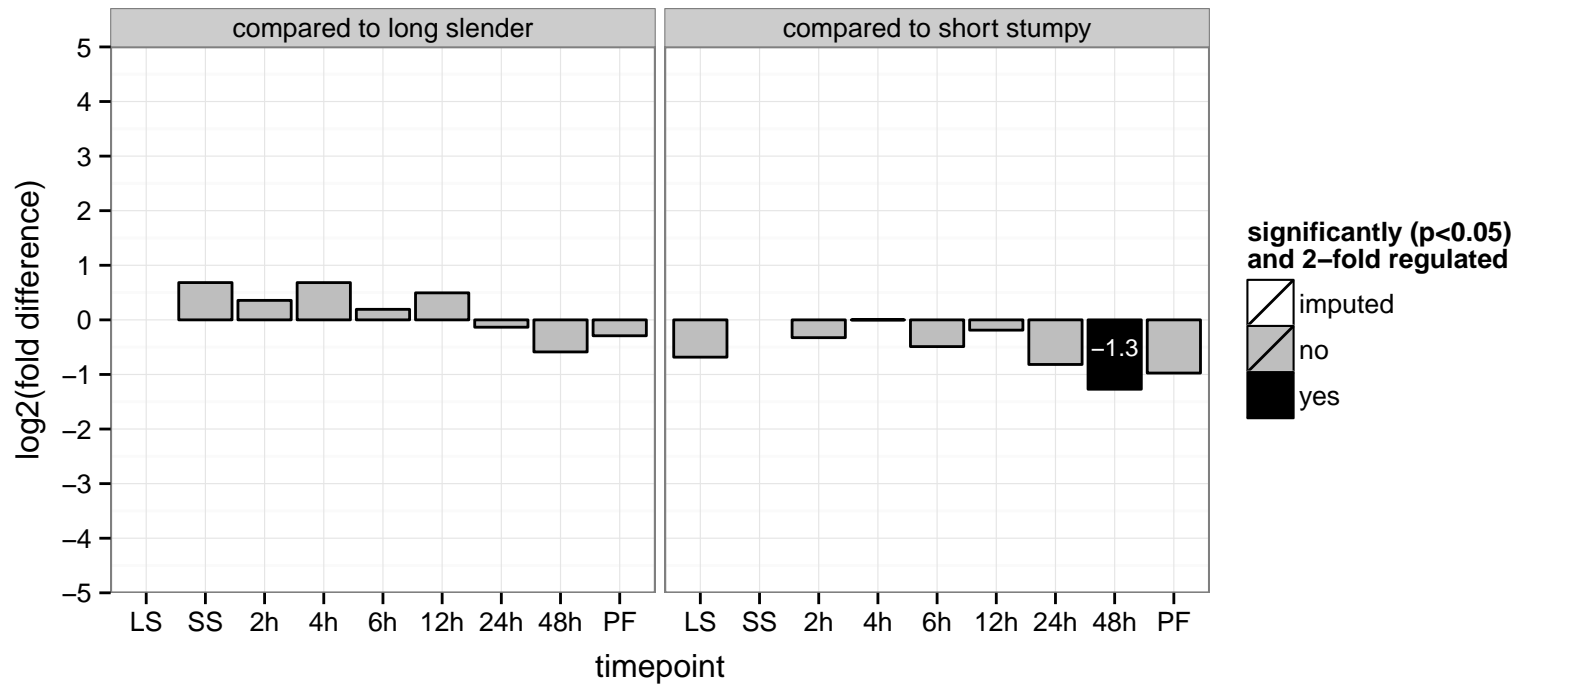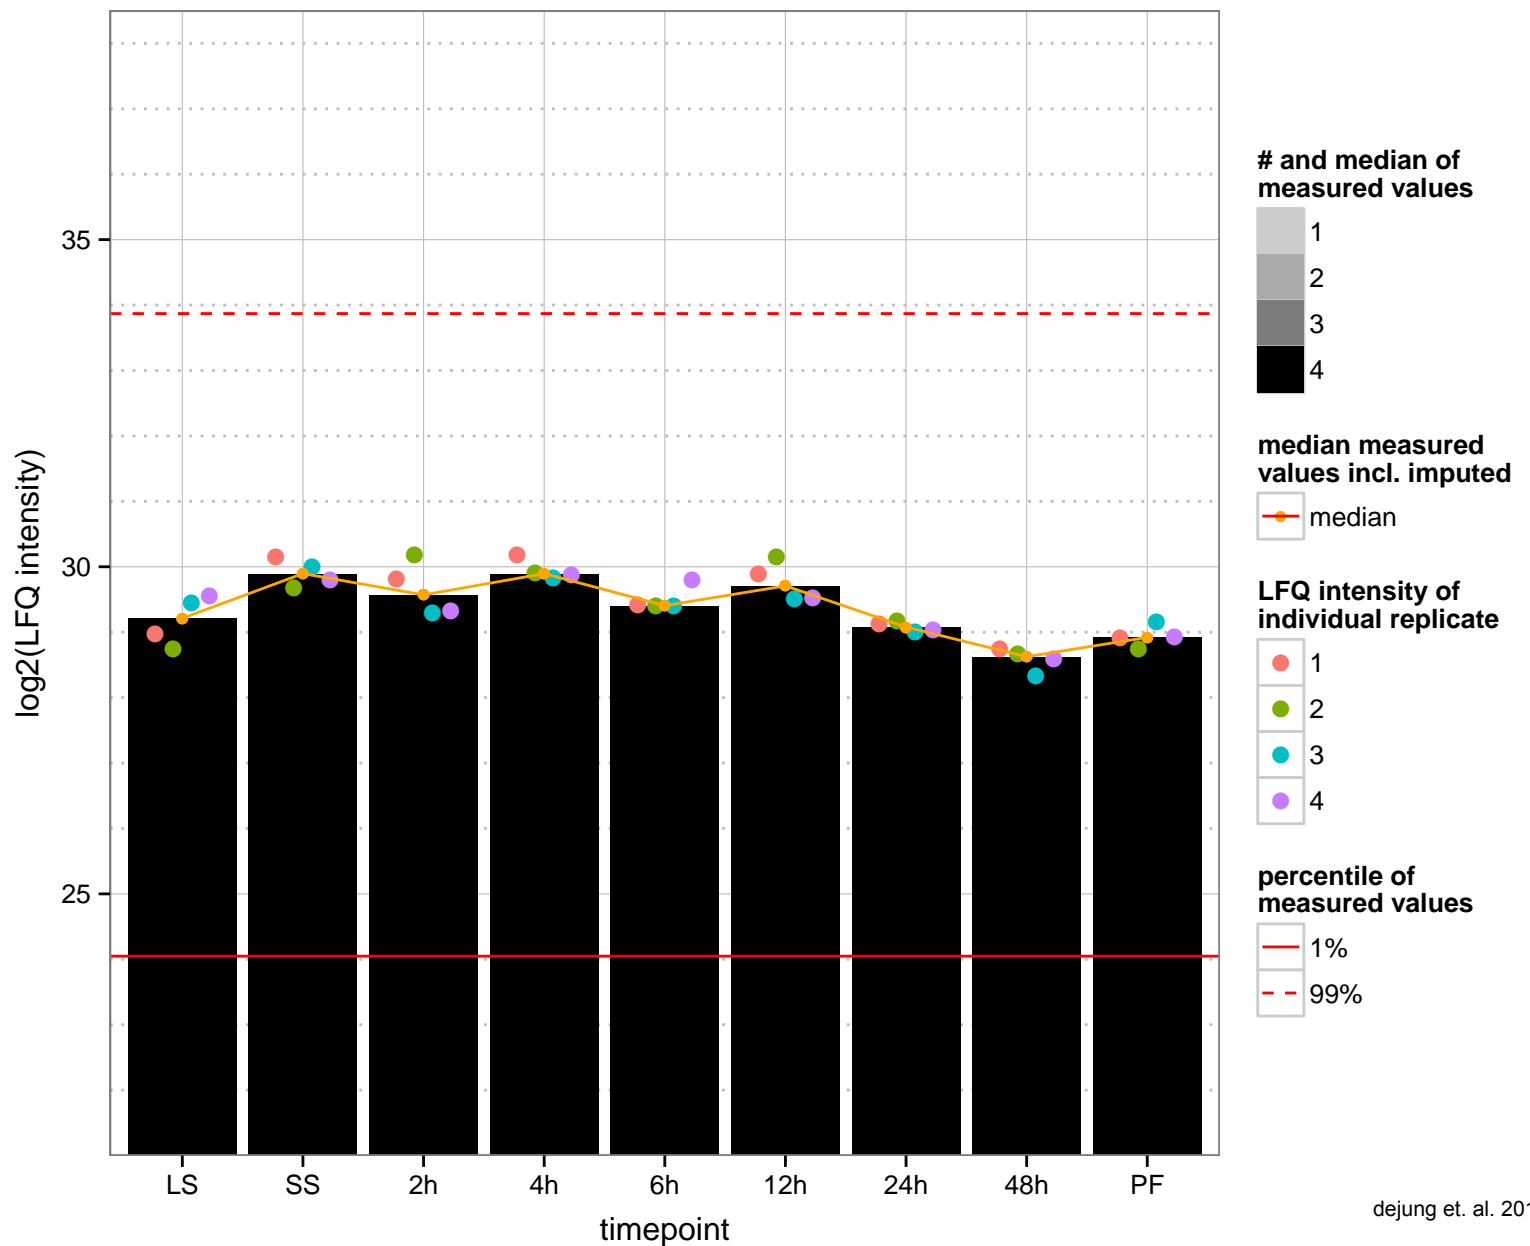

GPI transamidase subunit Tta1 (TTA1)  
 Tb927.11.15760  
 AGOF: GPI-anchor transamidase activity  
 AGOC: GPI-anchor transamidase complex, integral to membrane  
 AGOP: null  
 PGO: null  
 PGOC: null  
 PGOP: null

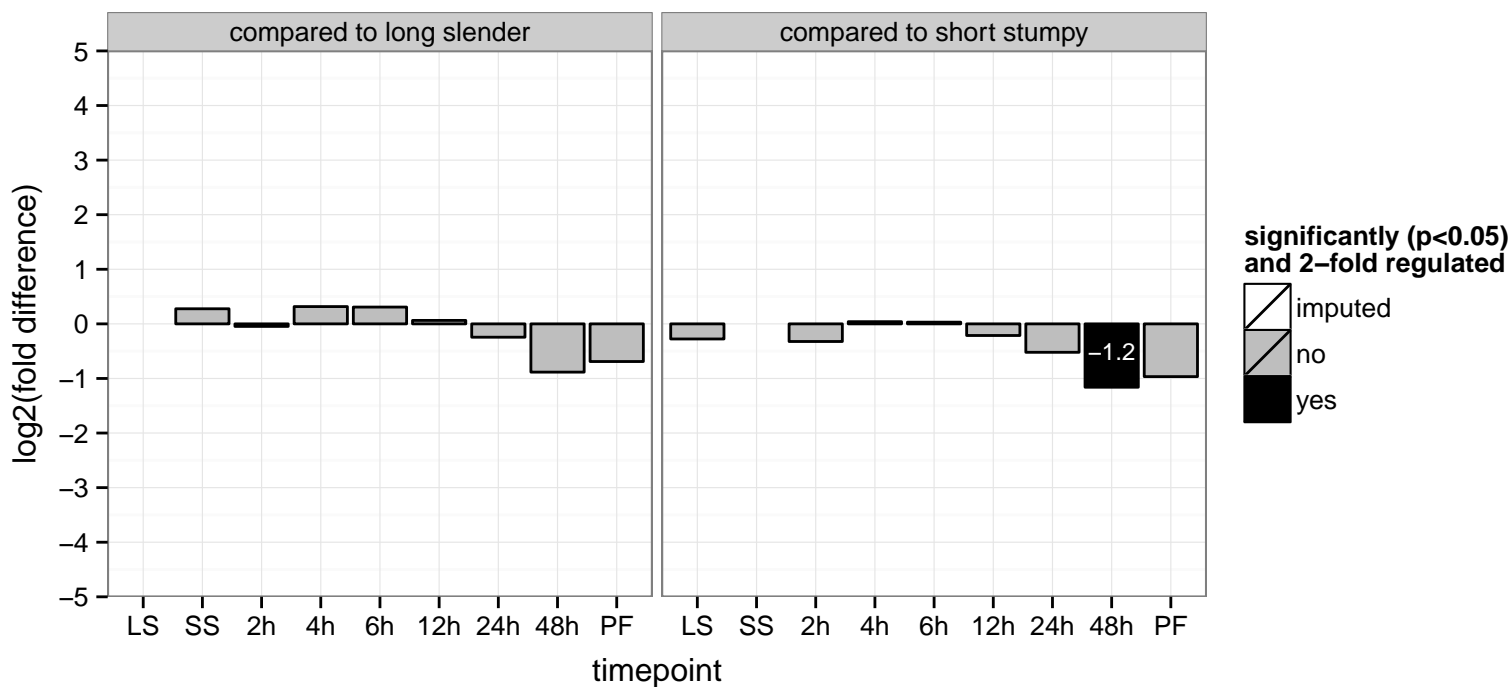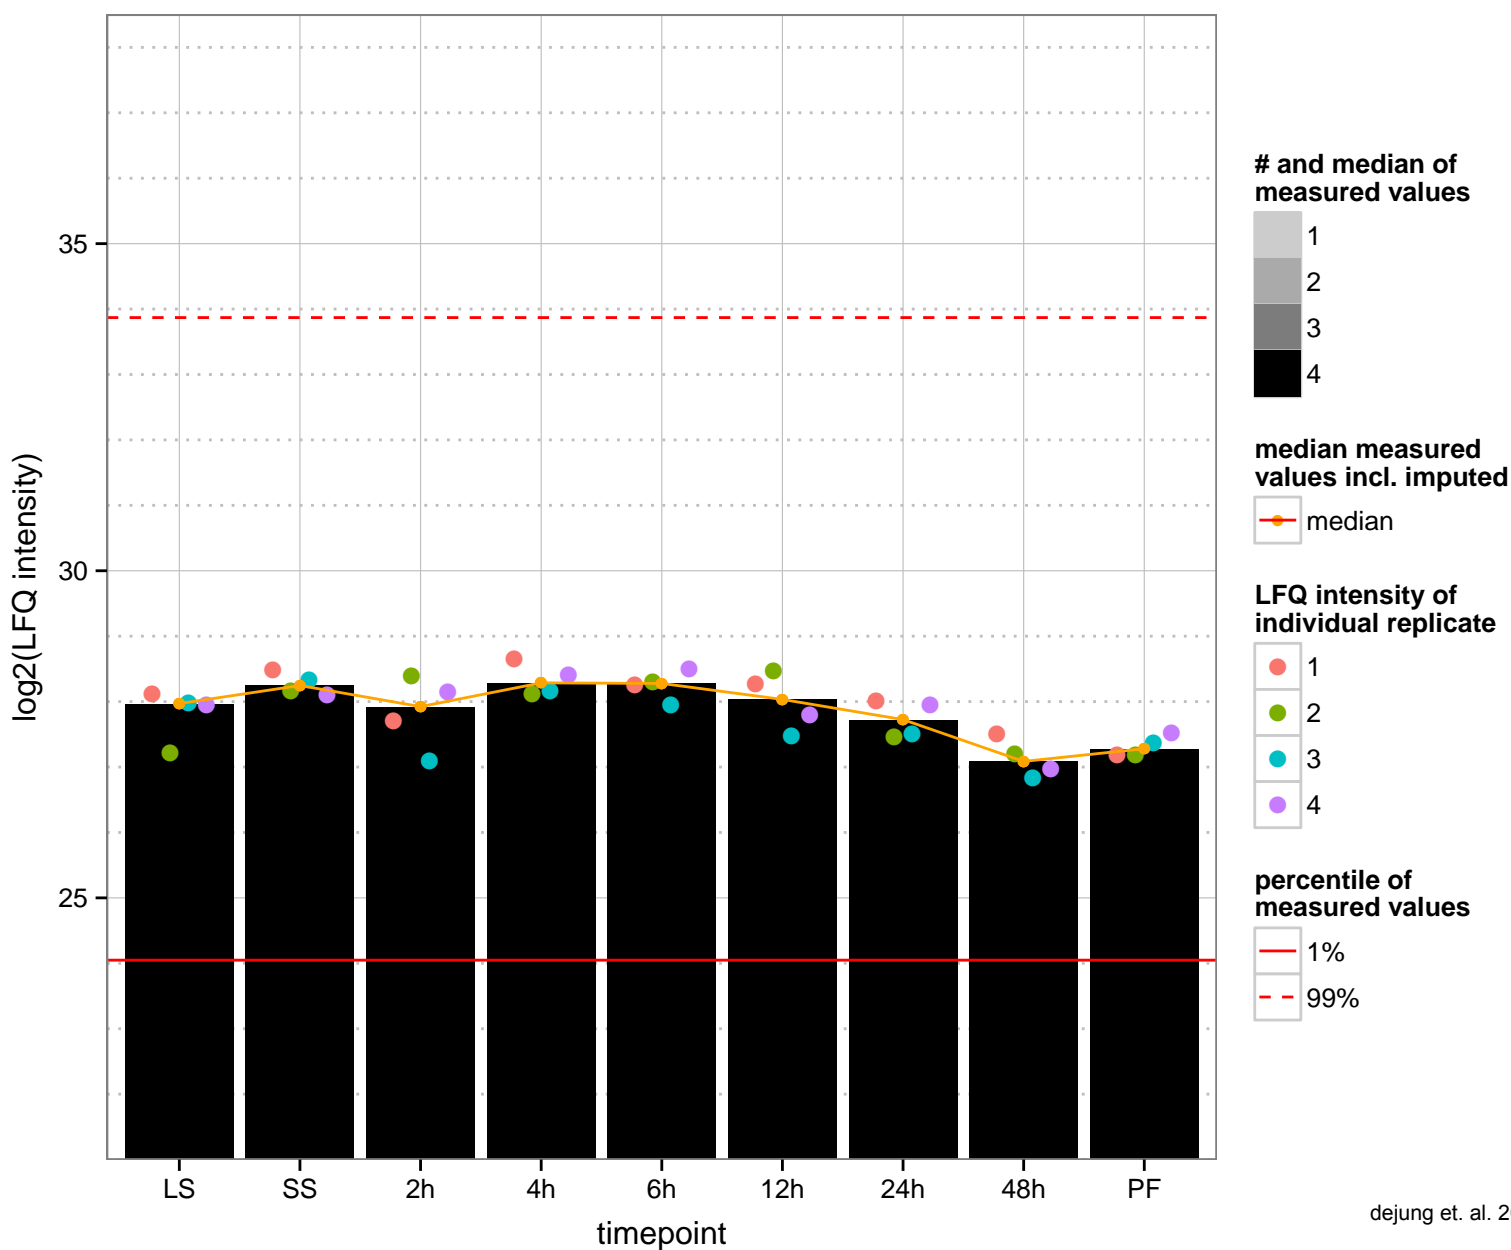

hypothetical protein, conserved  
 Tb927.11.15970  
 AGOF: ARF guanyl-nucleotide exchange factor activity  
 AGOC: intracellular  
 AGOP: regulation of ARF protein signal transduction  
 PGOF: ARF guanyl-nucleotide exchange factor activity  
 PGOC: intracellular  
 PGOP: regulation of ARF protein signal transduction

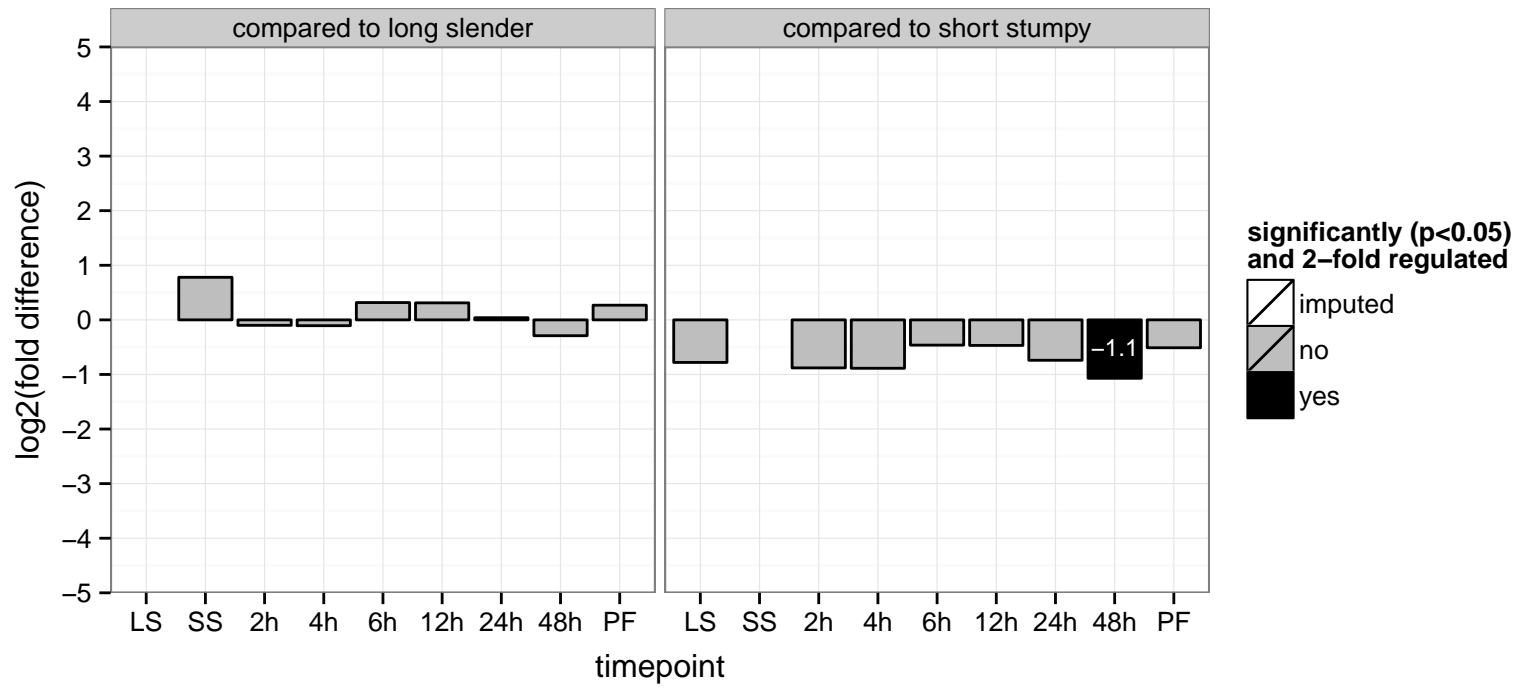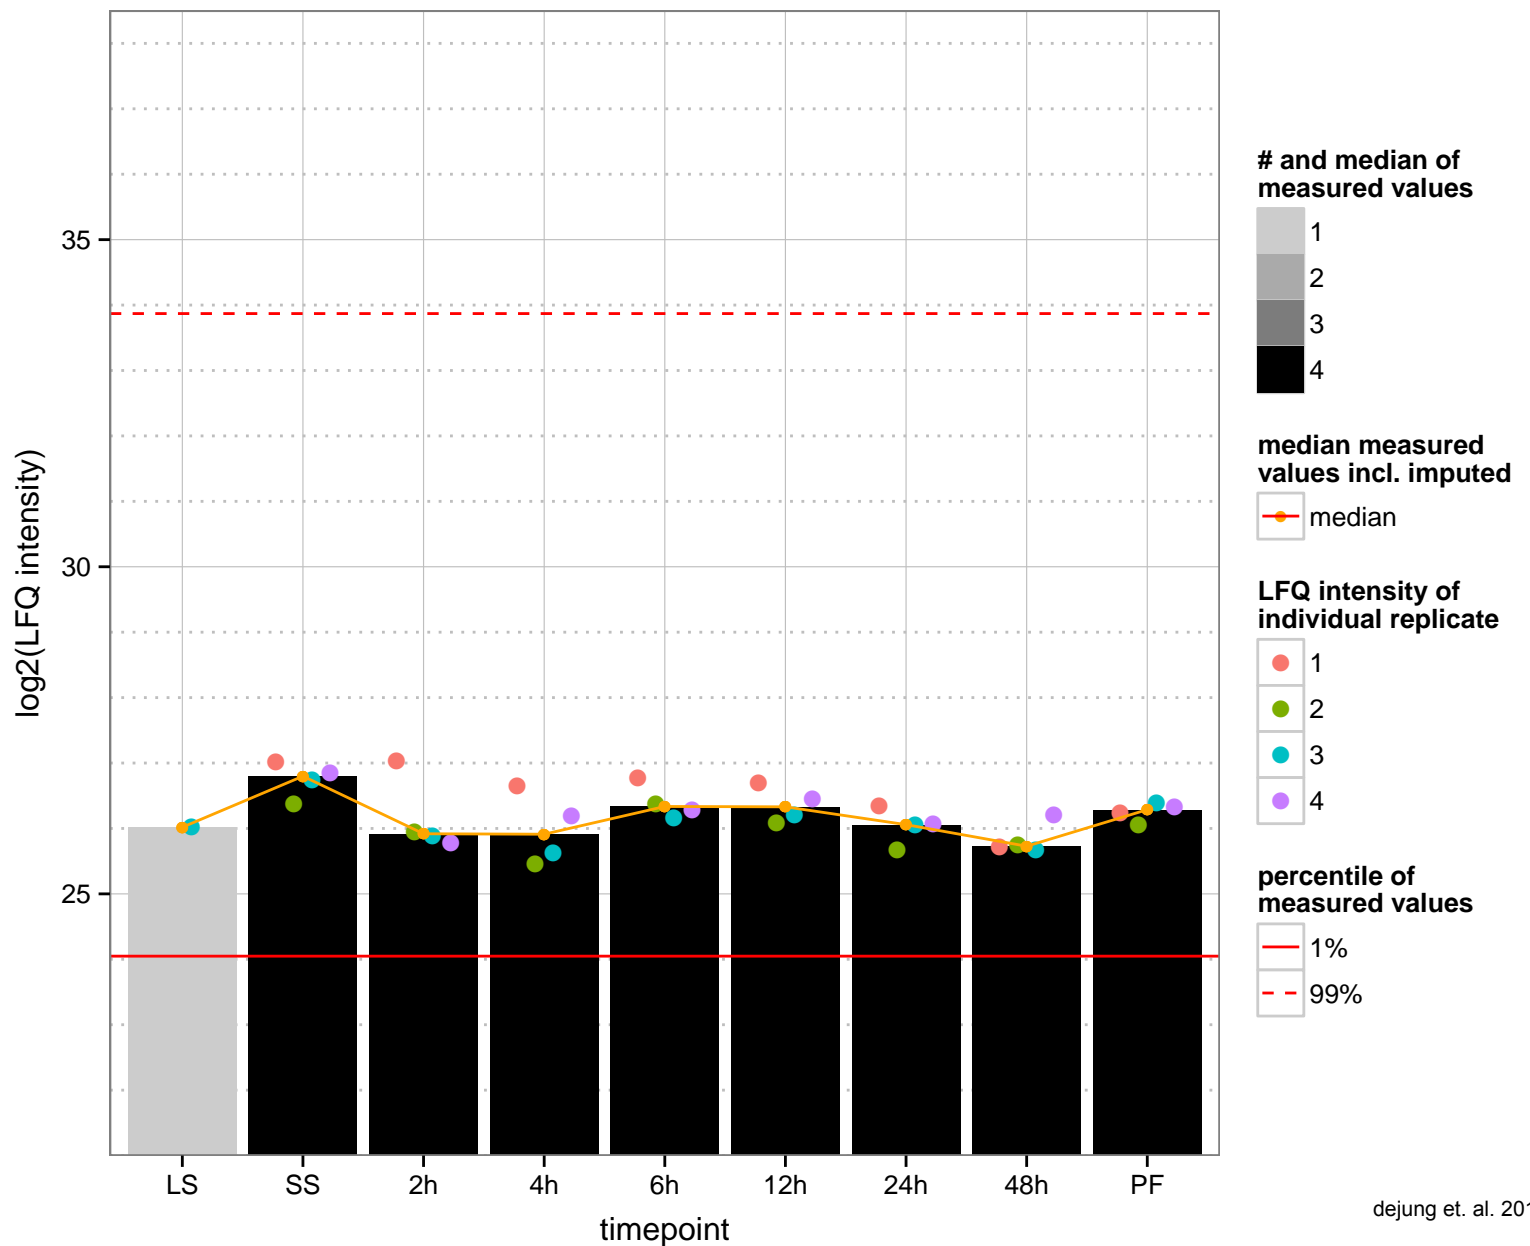

hypothetical protein, conserved  
 Tb927.11.16490  
 AGOF: null  
 AGOC: null  
 AGOP: null  
 PGO: protein binding  
 PGOC: null  
 PGOP: null

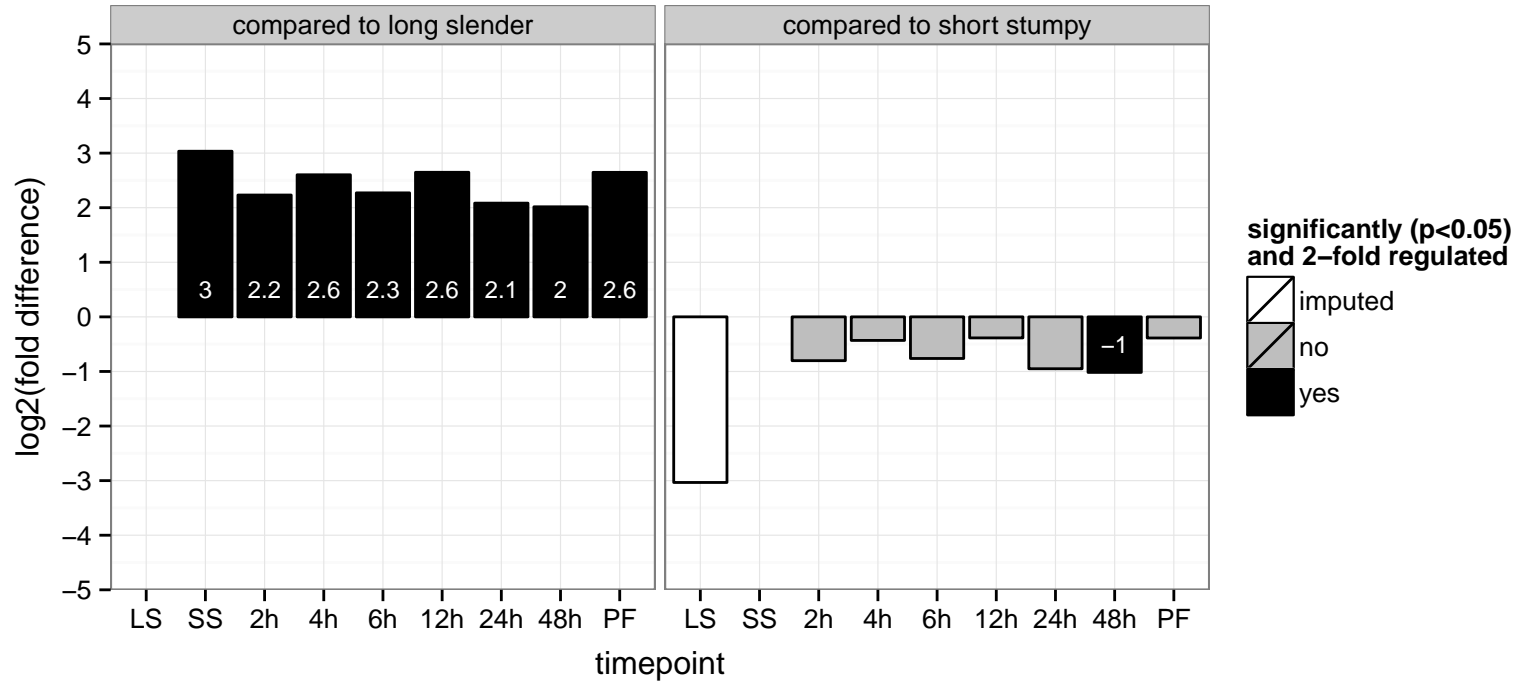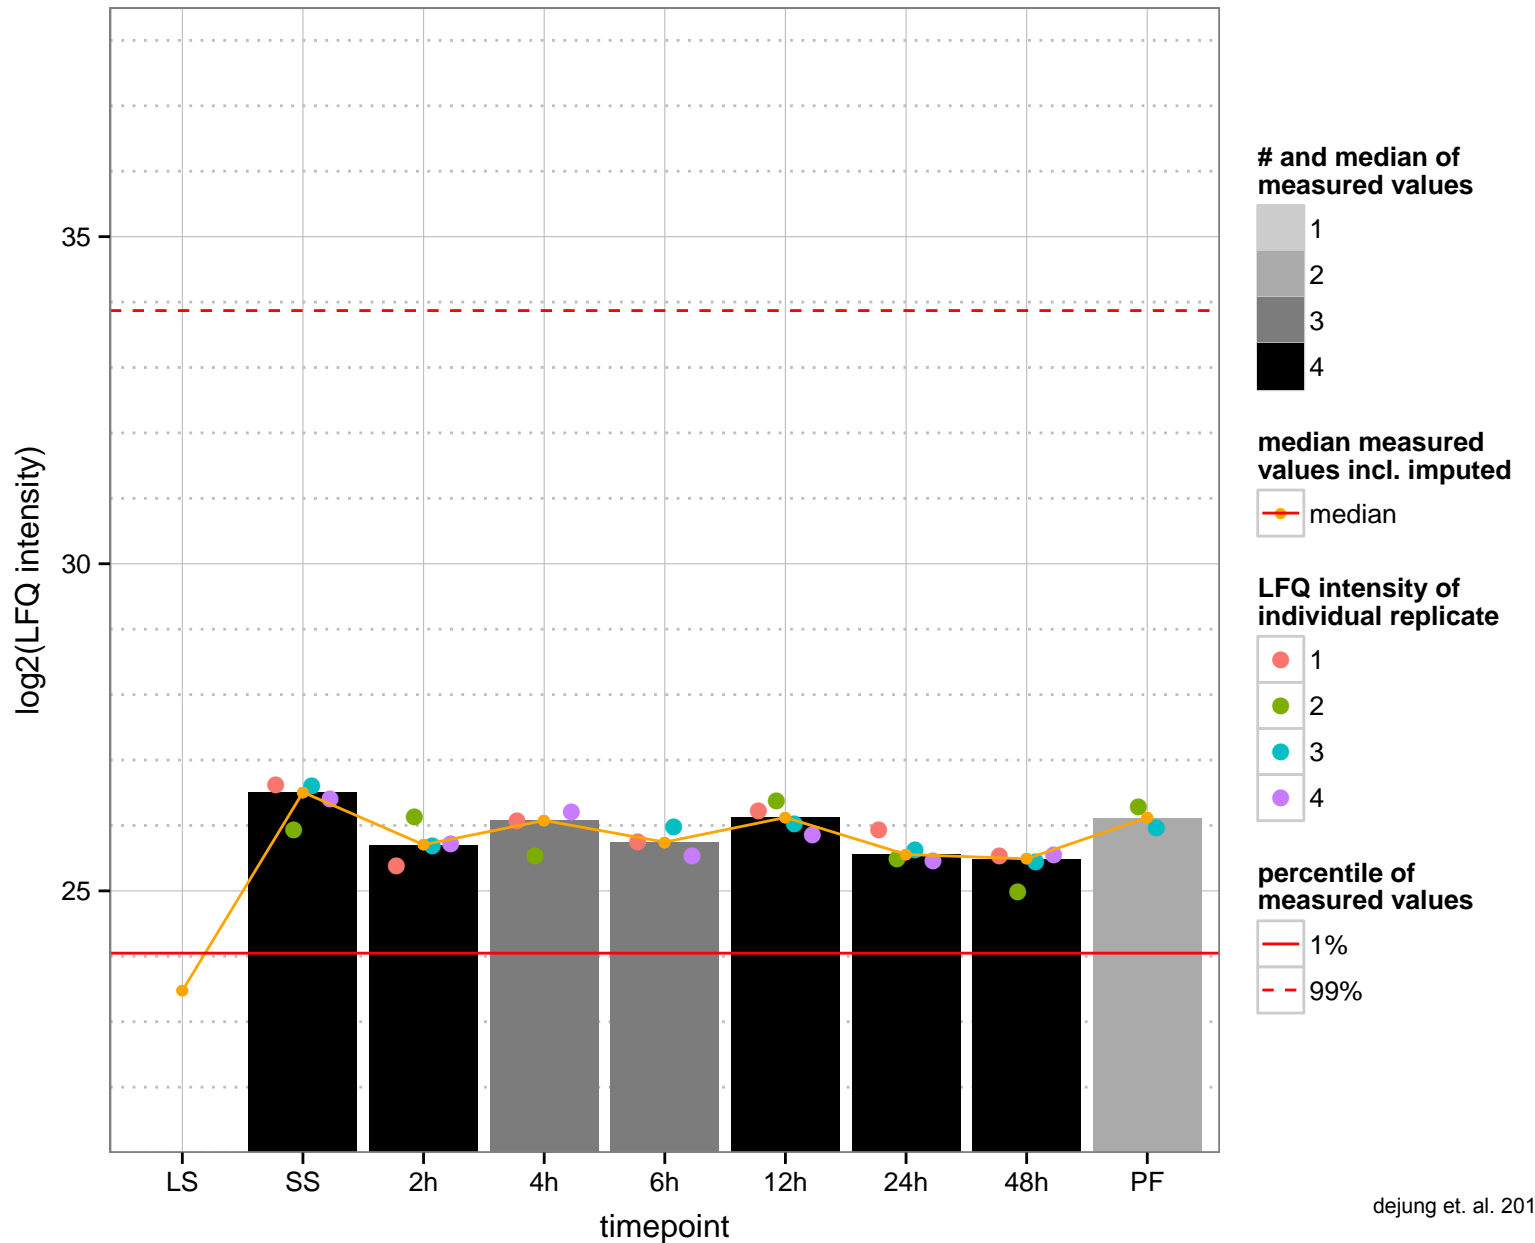

hypothetical protein, conserved  
 Tb927.11.8060  
 AGOF: null  
 AGOC: integral to membrane  
 AGOP: null  
 PGO: null  
 PGO: null  
 PGO: null

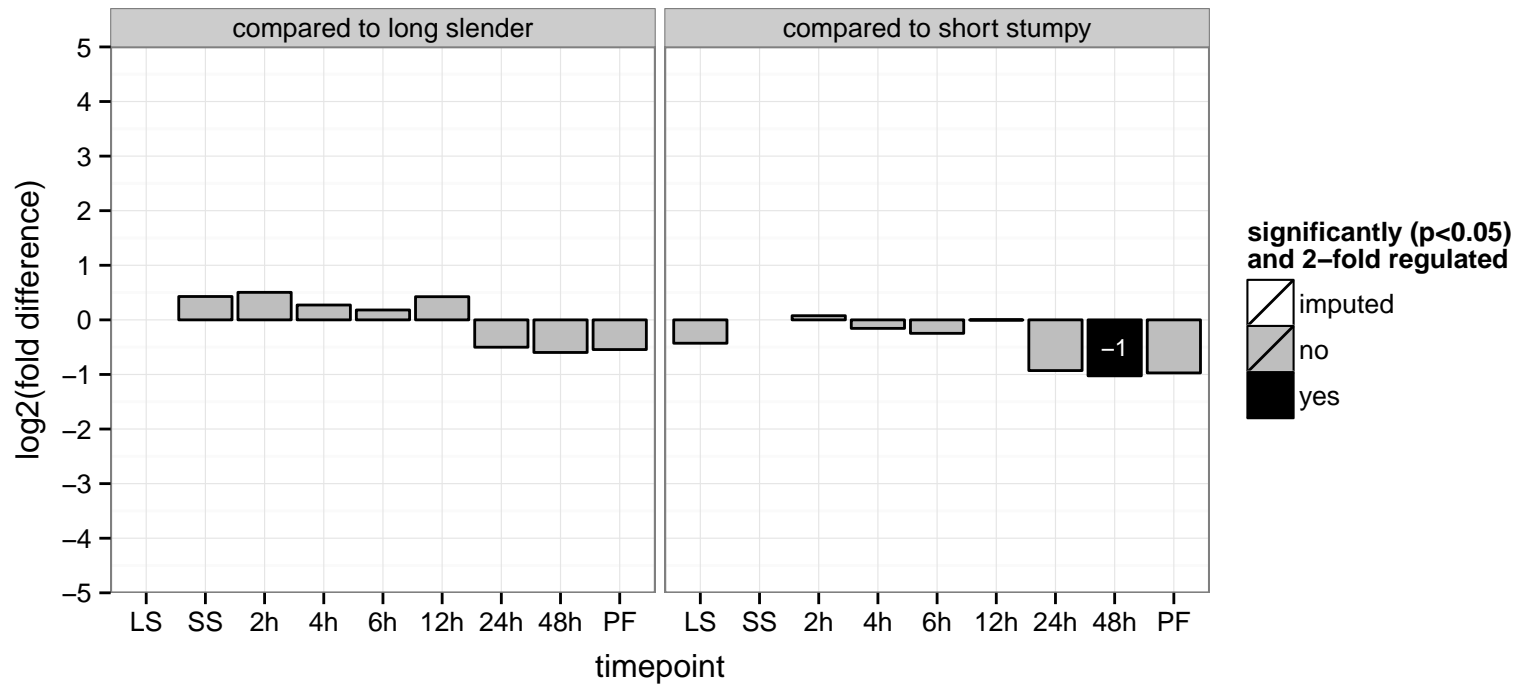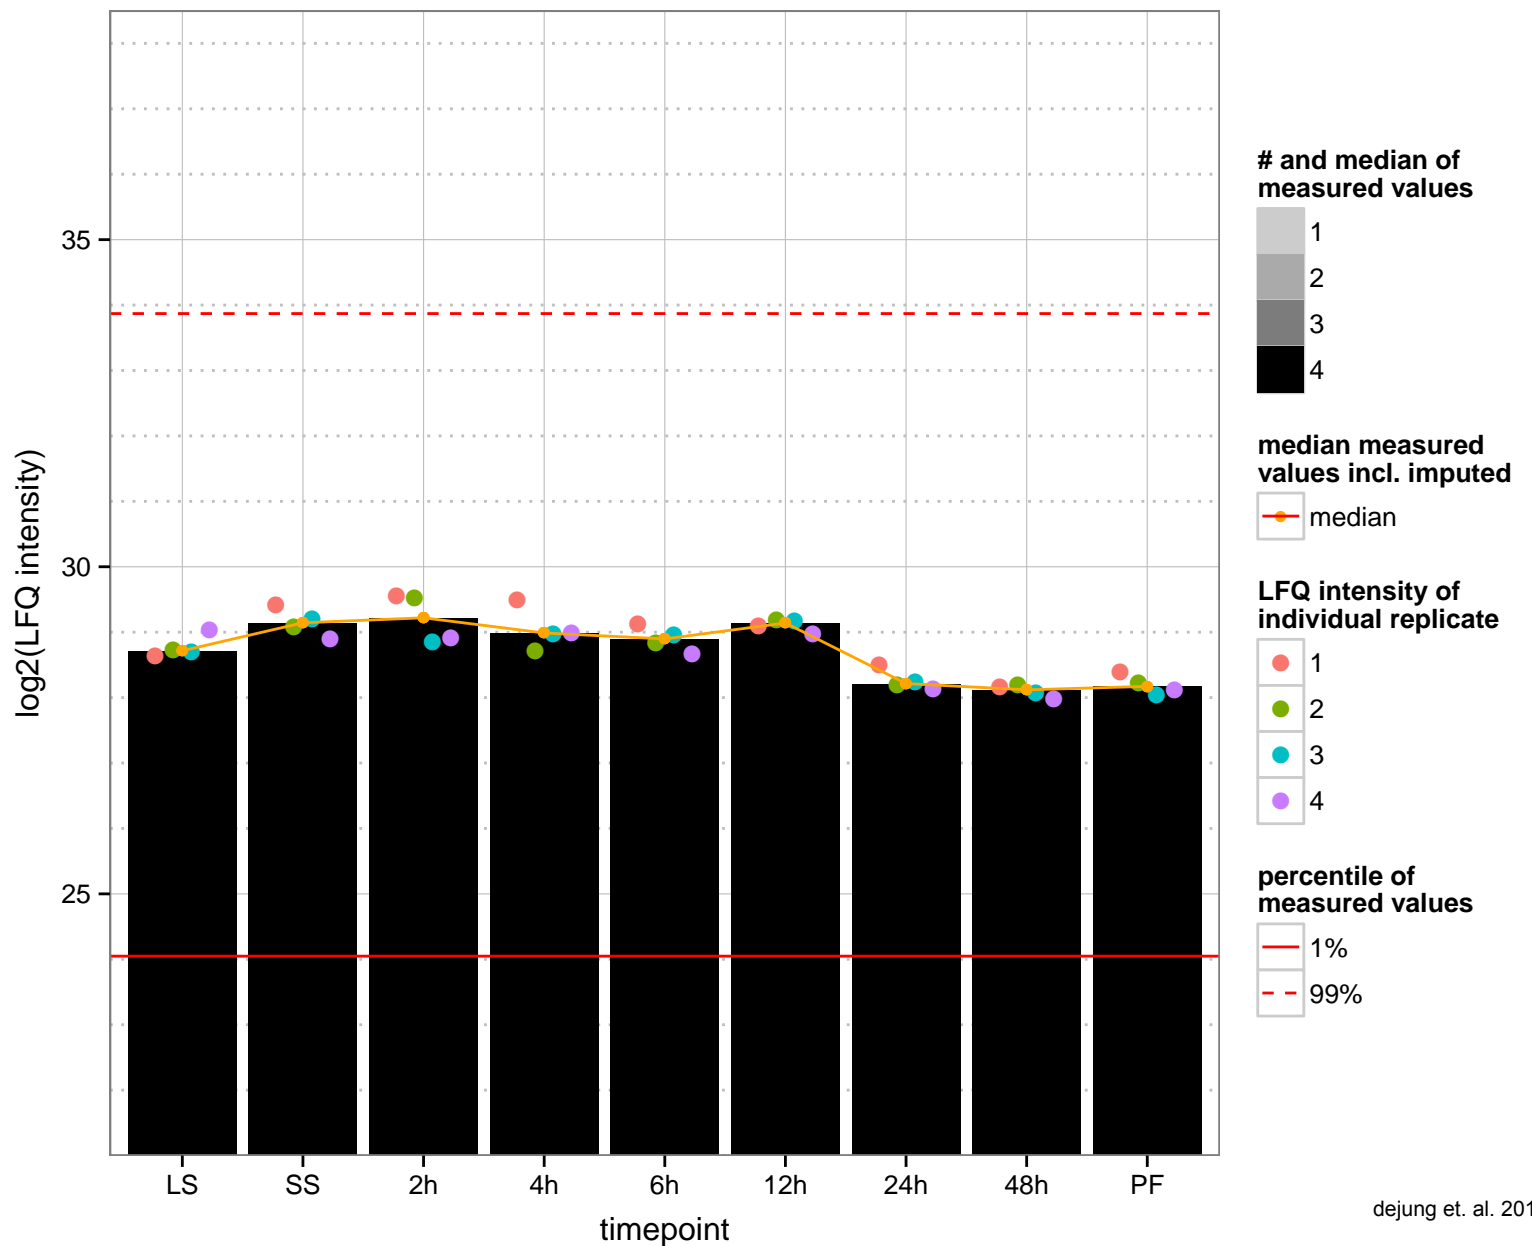

hypothetical protein, conserved  
 Tb927.11.9650  
 AGOF: null  
 AGOC: null  
 AGOP: null  
 PGOF: null  
 PGOC: null  
 PGOP: null

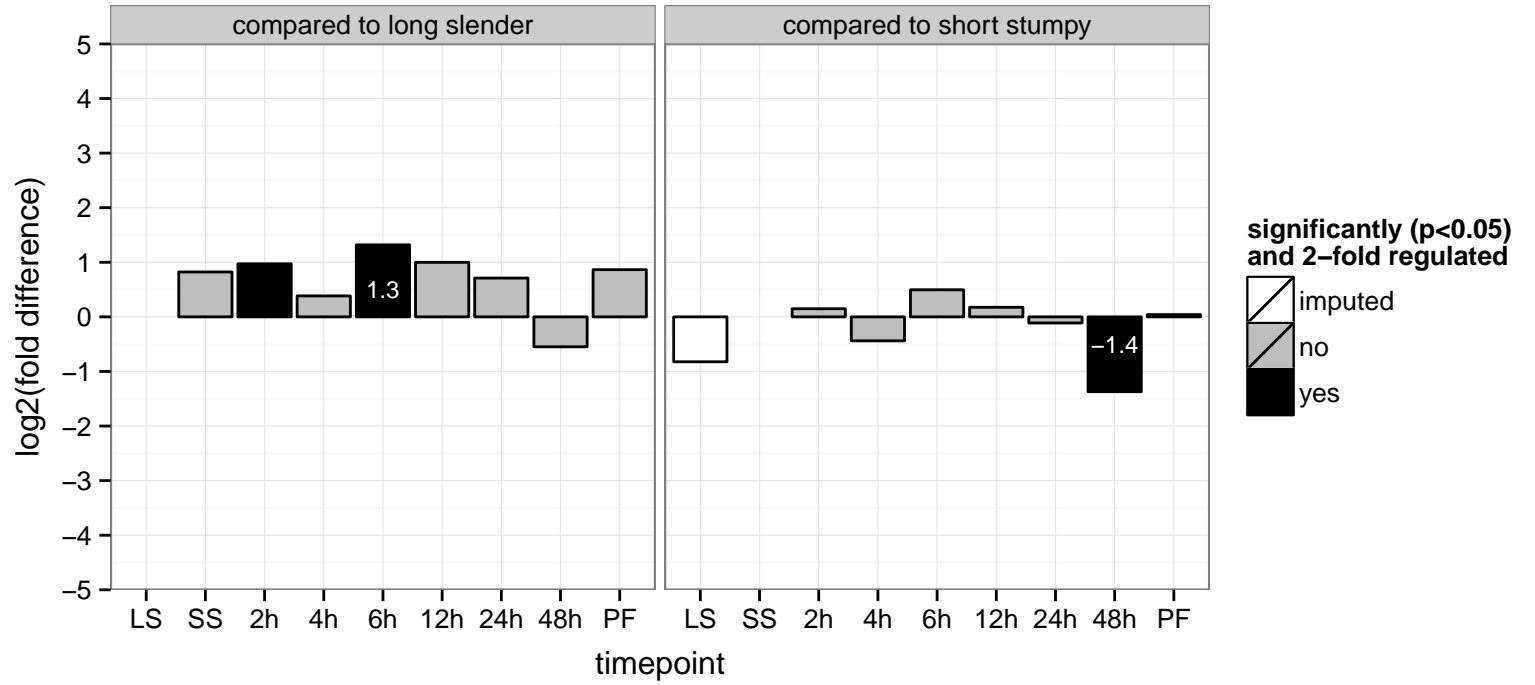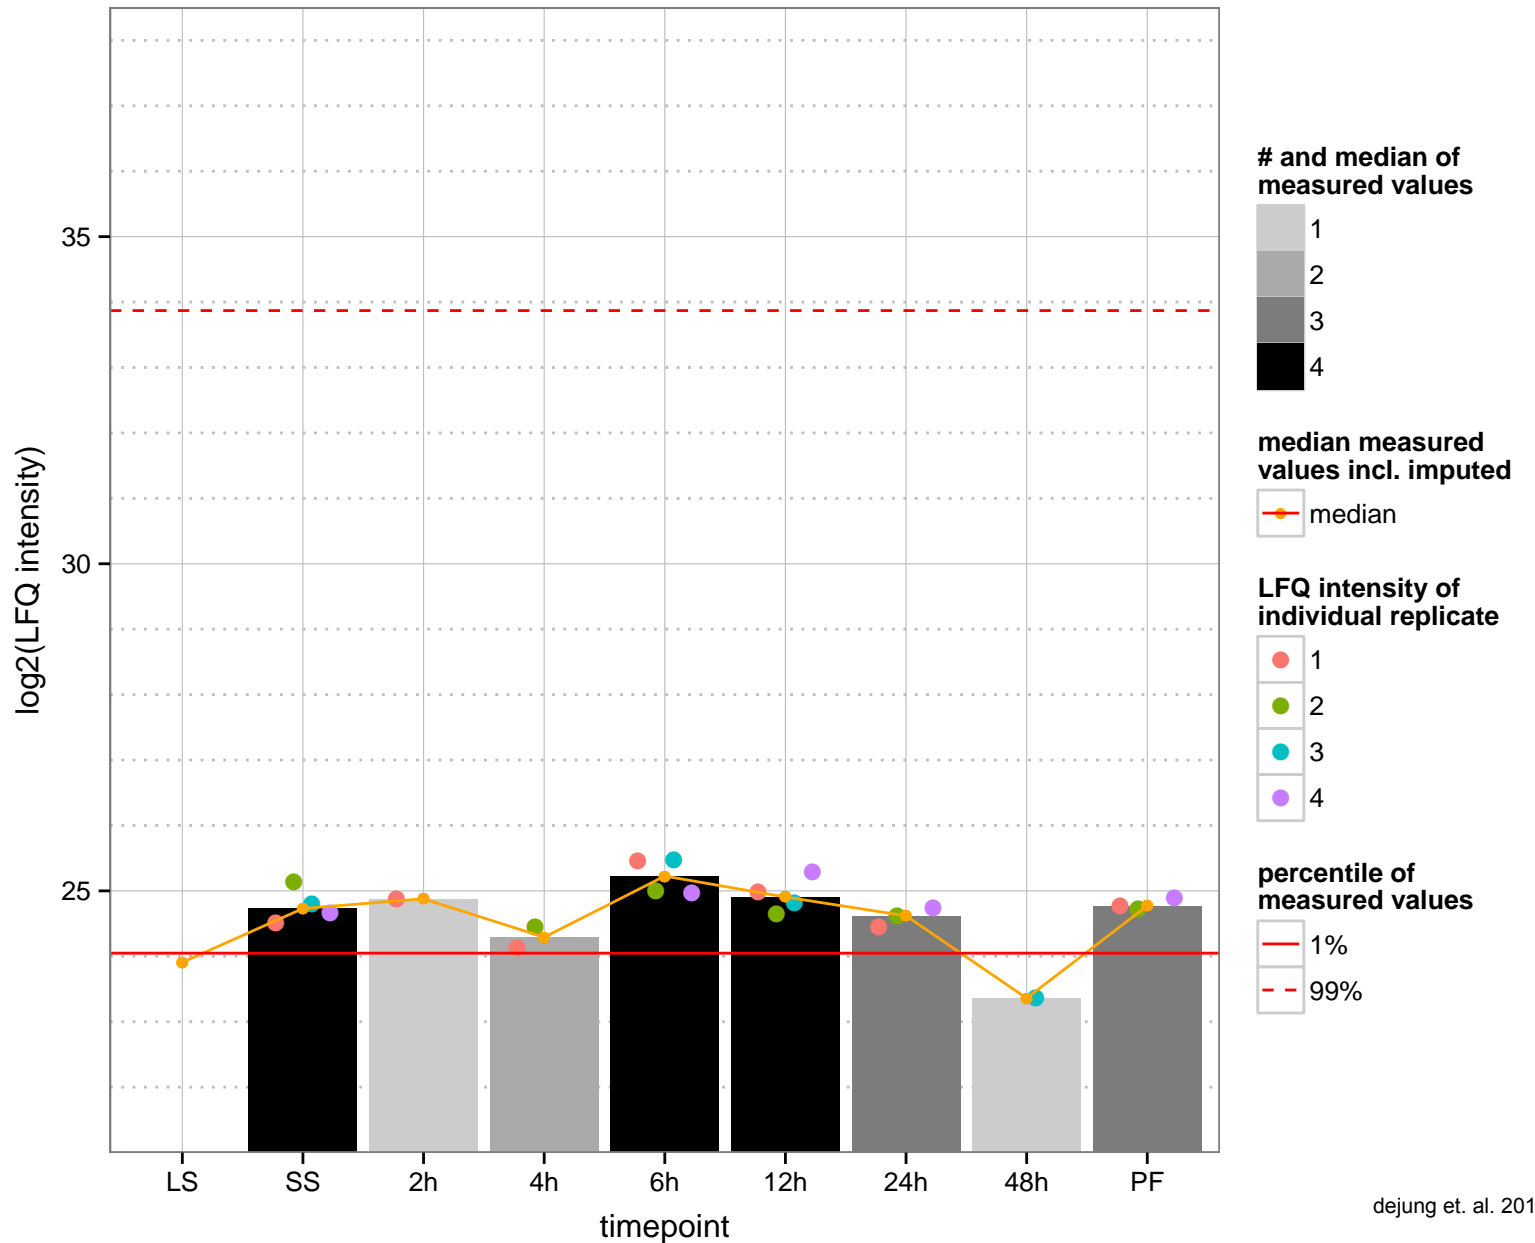



G-actin binding protein, putative, twinfilin  
 Tb927.4.2350  
 AGOF: actin binding  
 AGOC: intracellular  
 AGOP: null  
 PGOF: actin binding  
 PGO: intracellular  
 PGOP: null

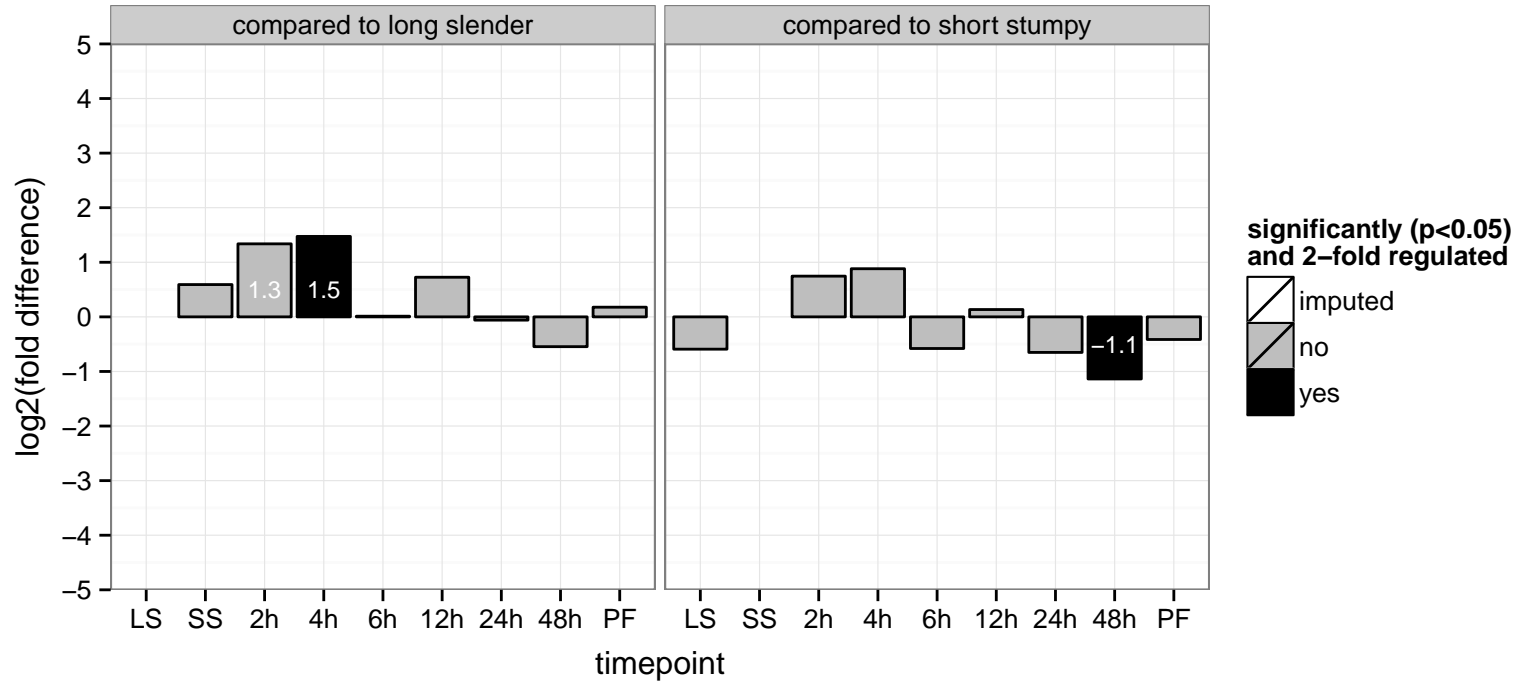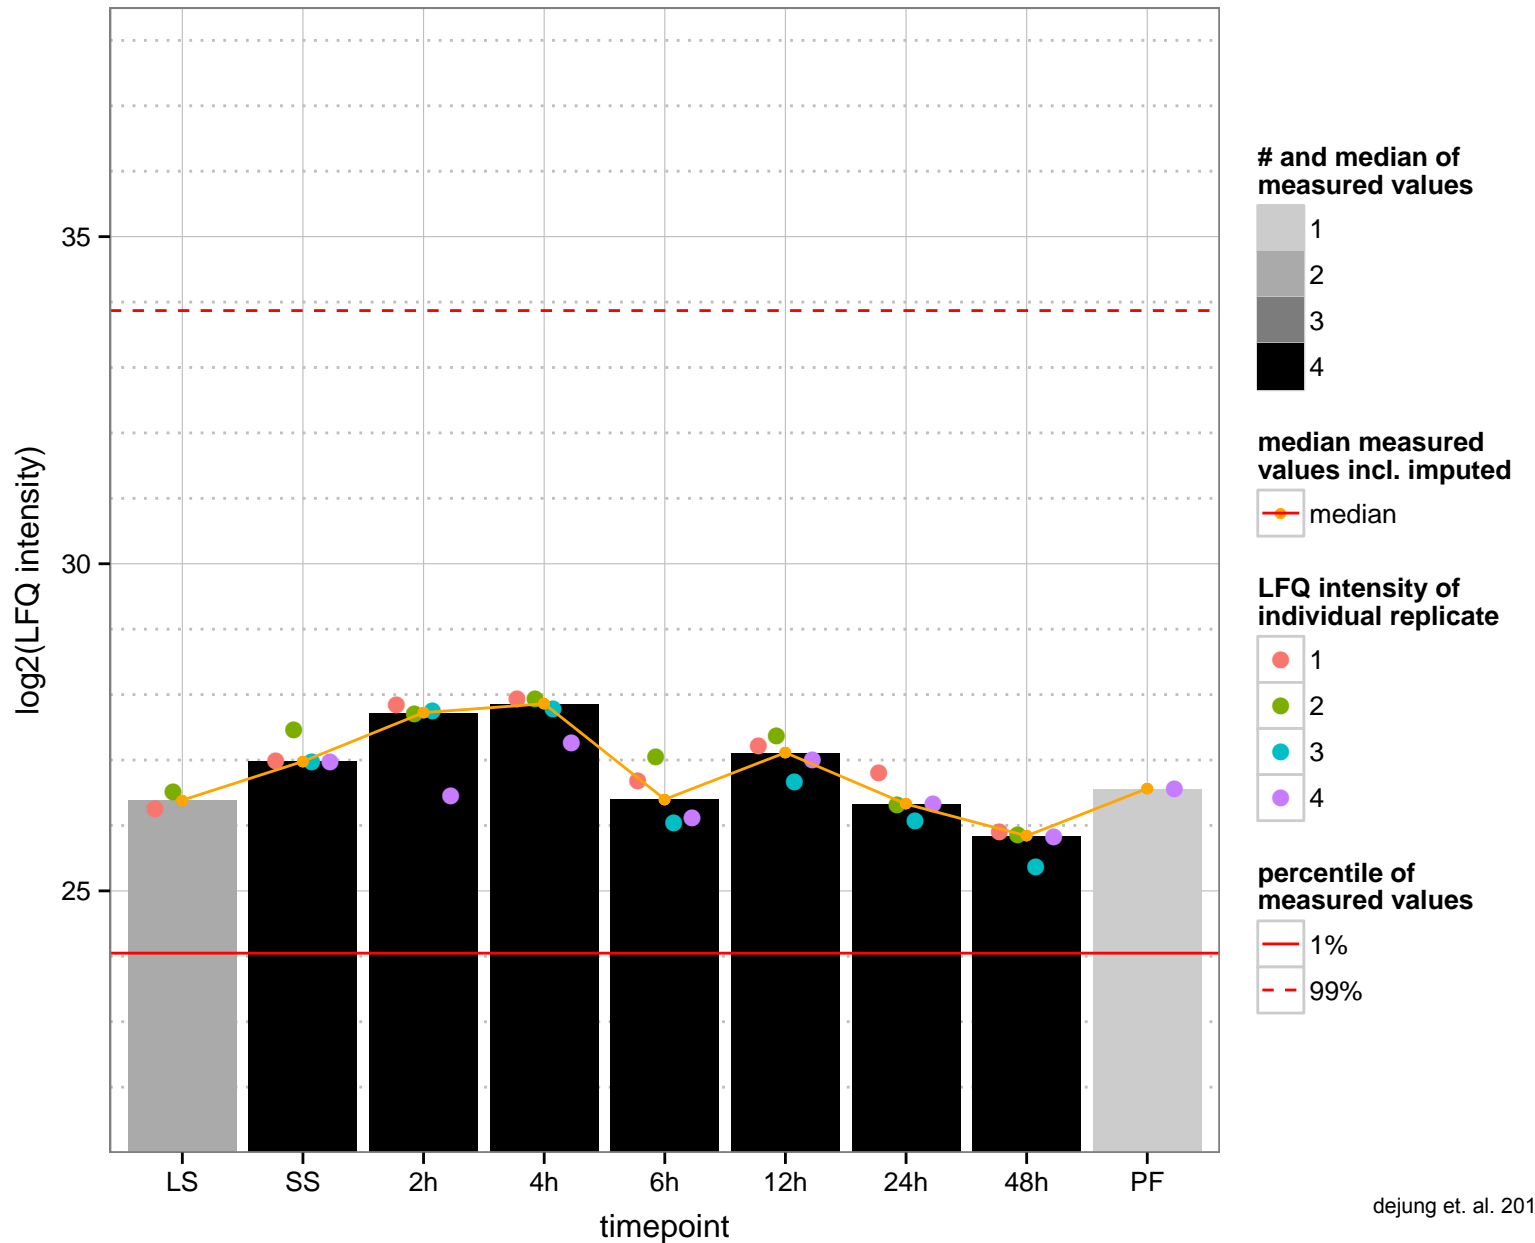

hypothetical protein, conserved  
 Tb927.4.3350  
 AGOF: null  
 AGOC: null  
 AGOP: null  
 PGO: null  
 PGOC: null  
 PGOP: null

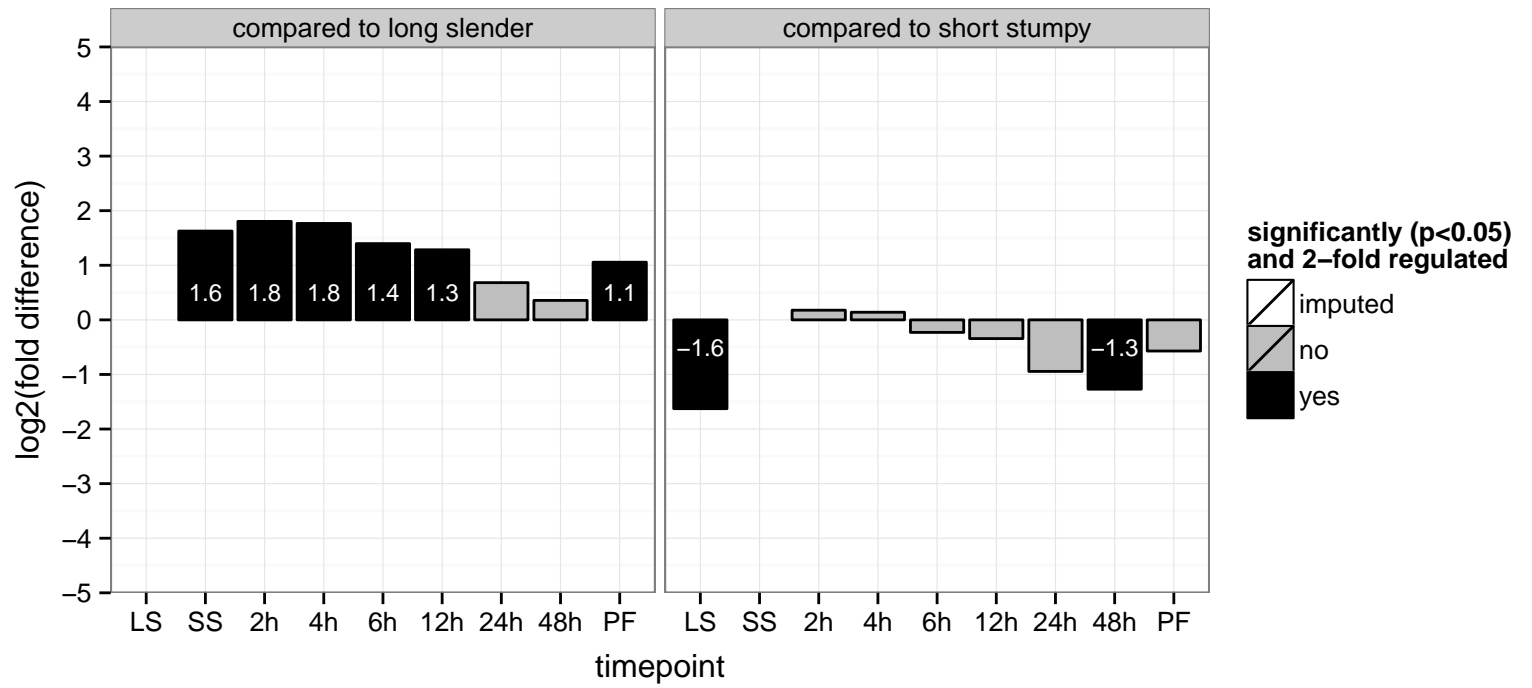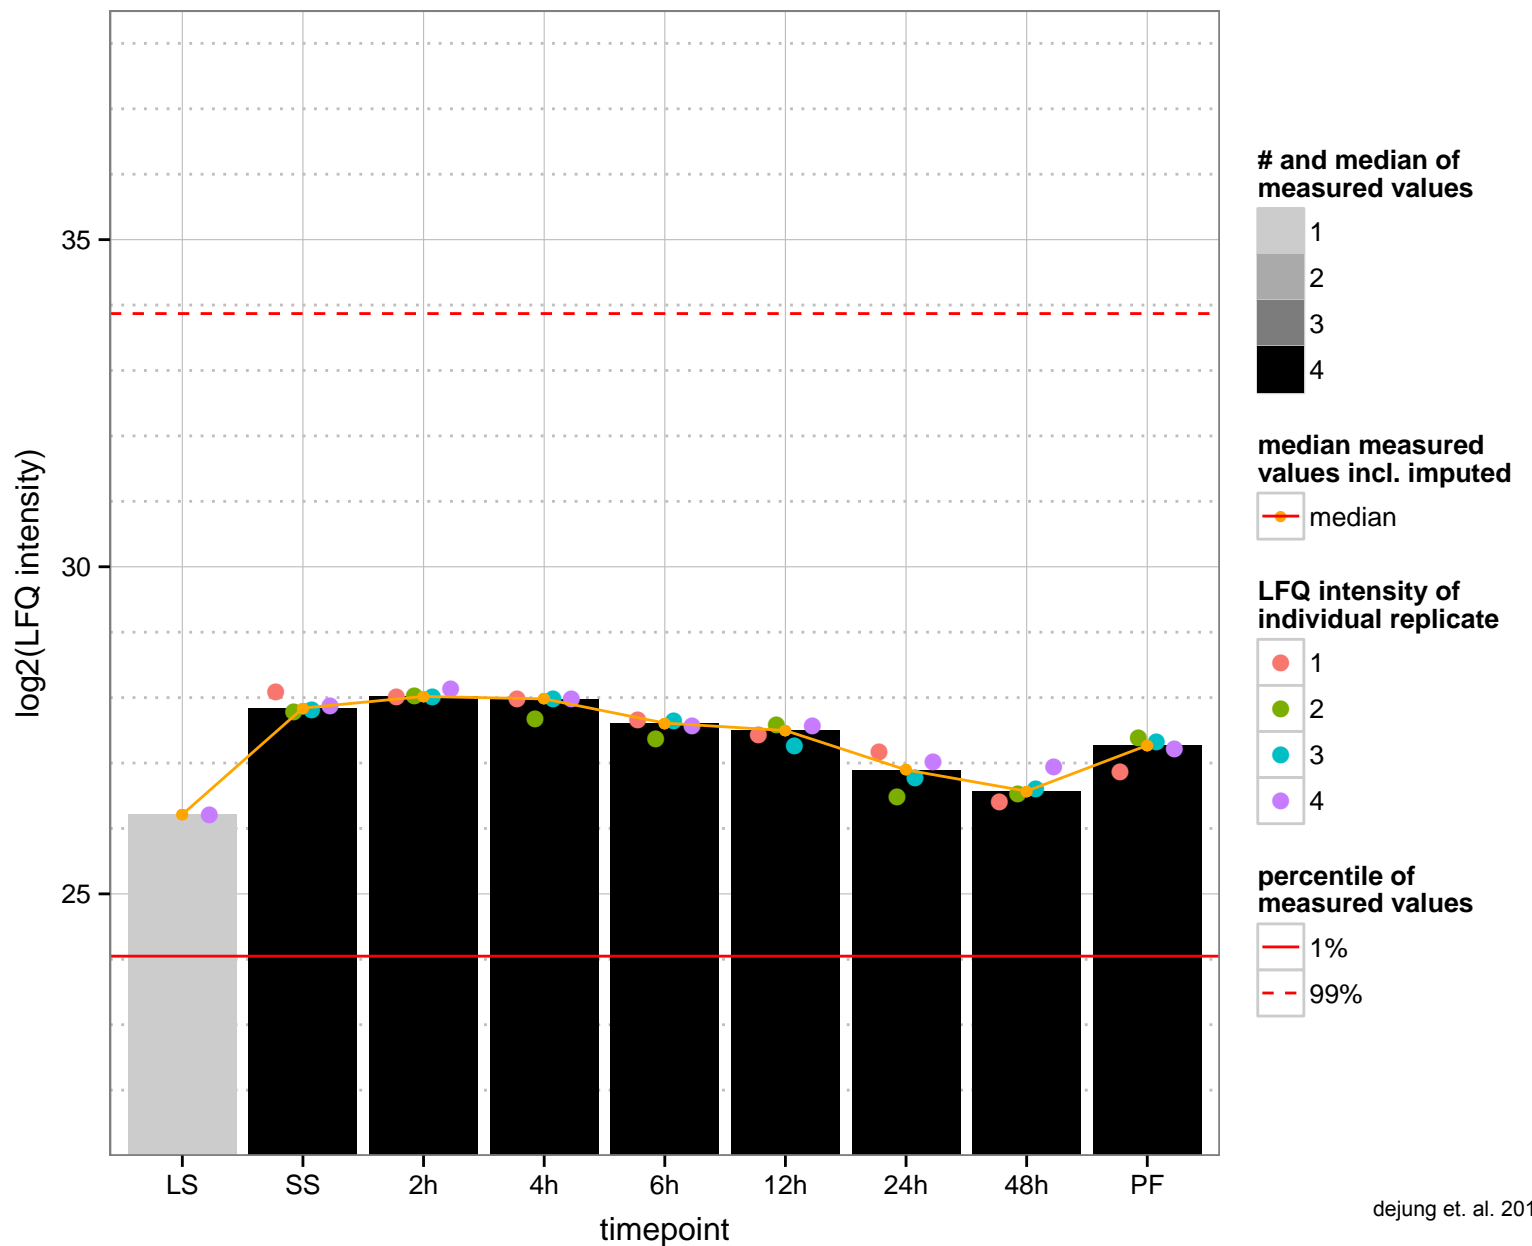

vacuolar proton translocating ATPase subunit A, putative

Tb927.5.1300

AGOF: hydrogen ion transmembrane transporter activity

AGOC: proton-transporting two-sector ATPase complex, proton-transporting domain

AGOP: ATP synthesis coupled proton transport

PGOF: hydrogen ion transmembrane transporter activity

PGOC: proton-transporting two-sector ATPase complex, proton-transporting domain, vacuolar proton-transporting V-type A

PGOP: ATP hydrolysis coupled proton transport

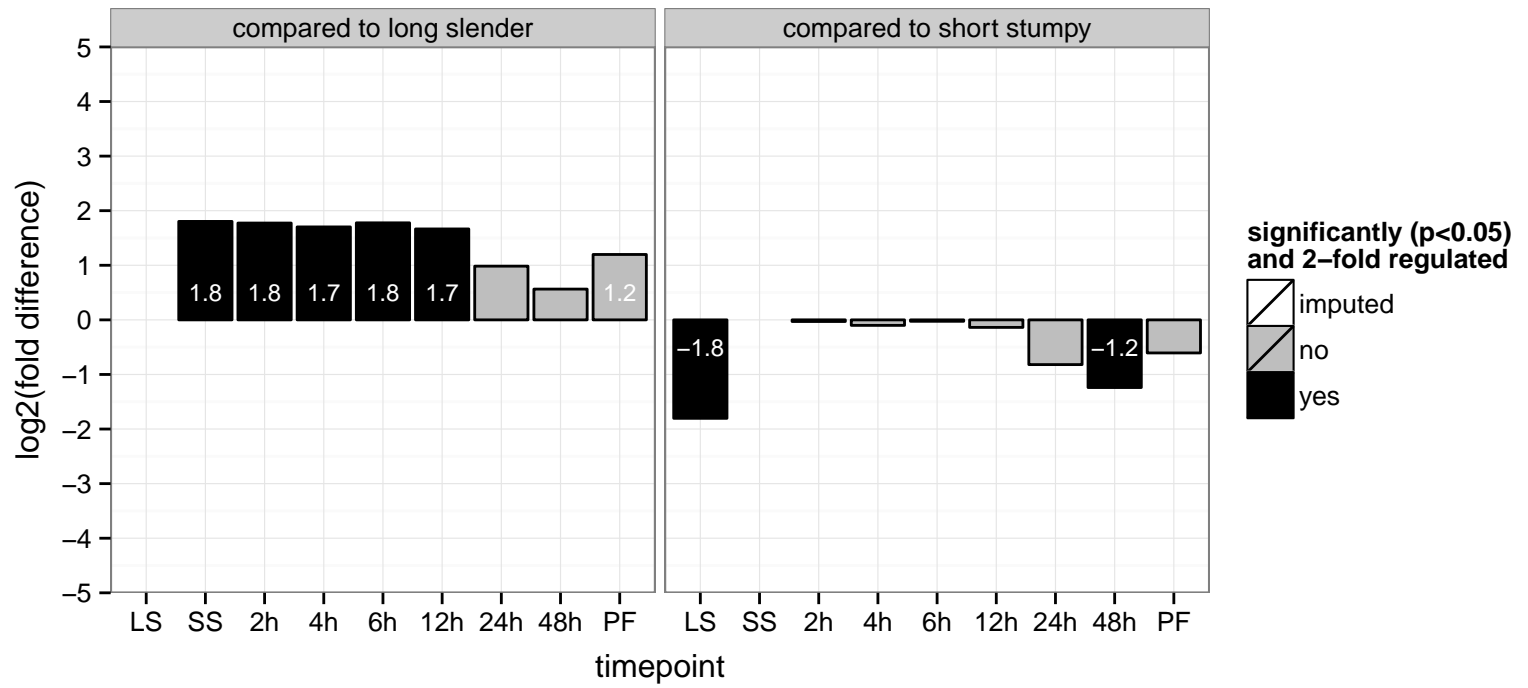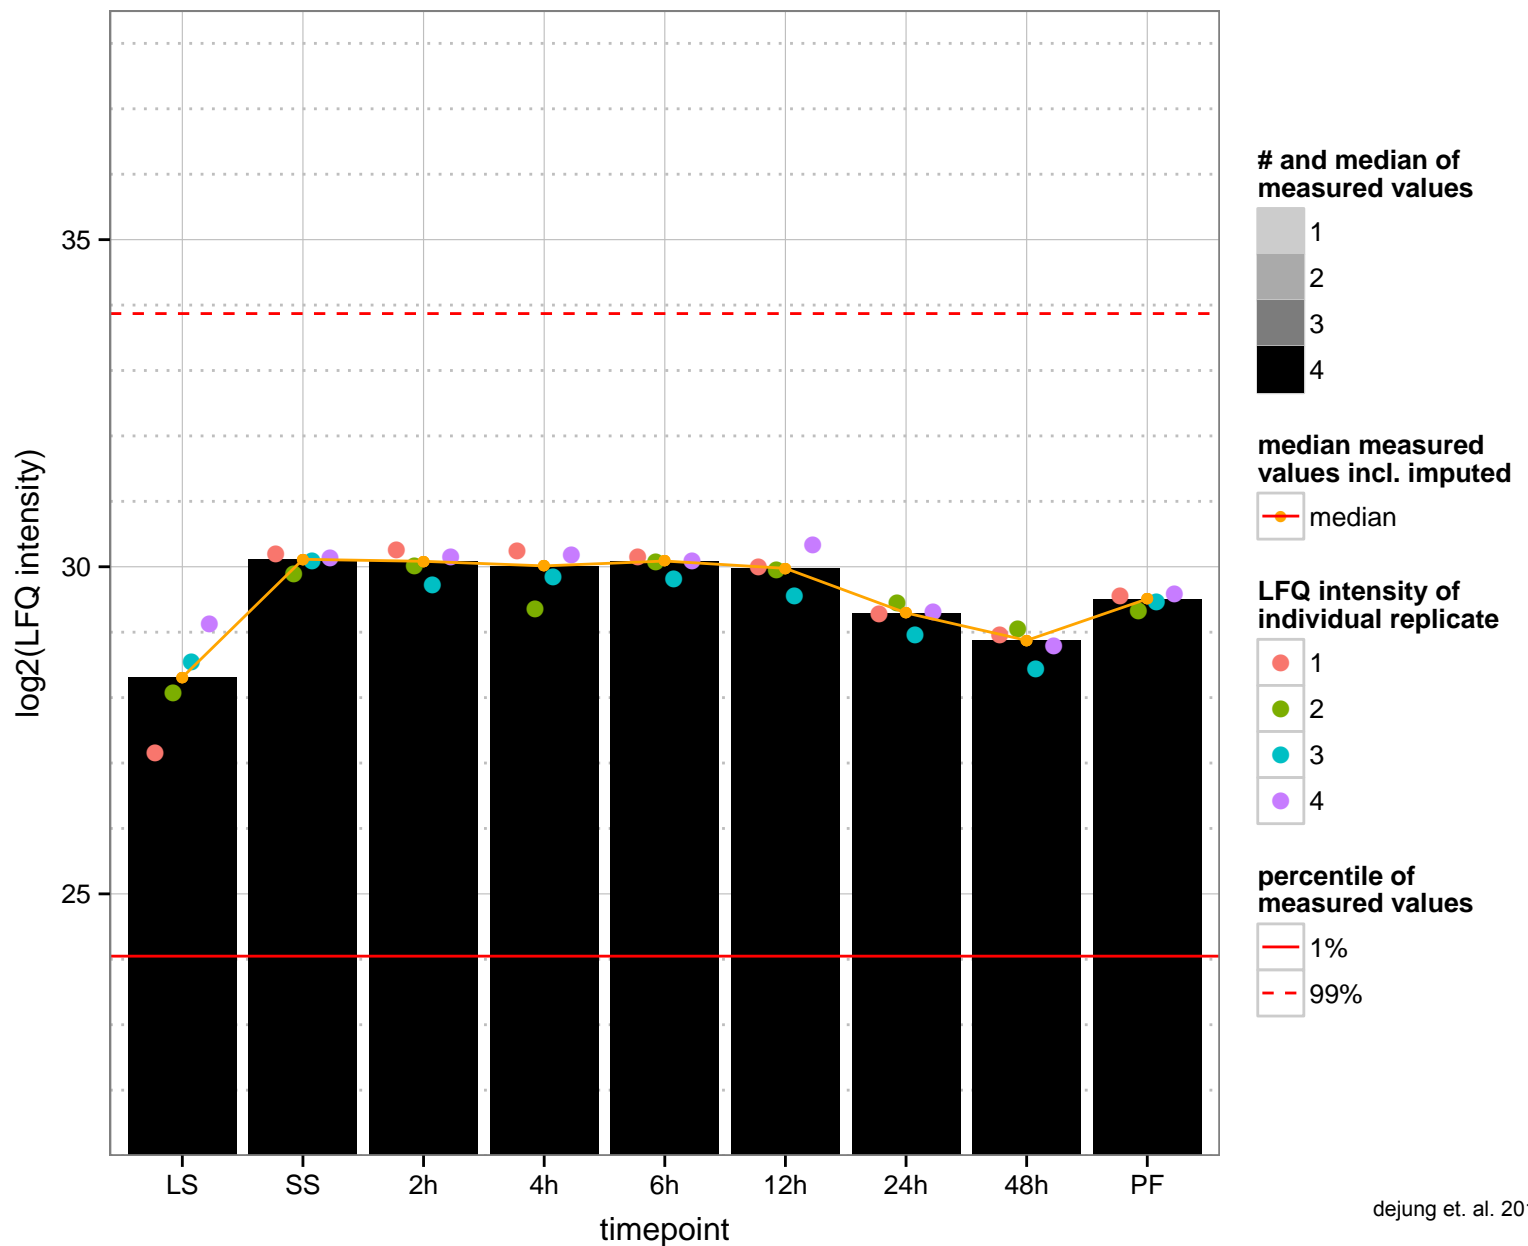

signal peptidase type I, putative, serine peptidase, Clan SF, Family S26A  
 Tb927.5.3220  
 AGOF: peptidase activity  
 AGOC: membrane  
 AGOP: proteolysis, signal peptide processing  
 PGO: peptidase activity  
 PGOC: membrane  
 PGOP: signal peptide processing

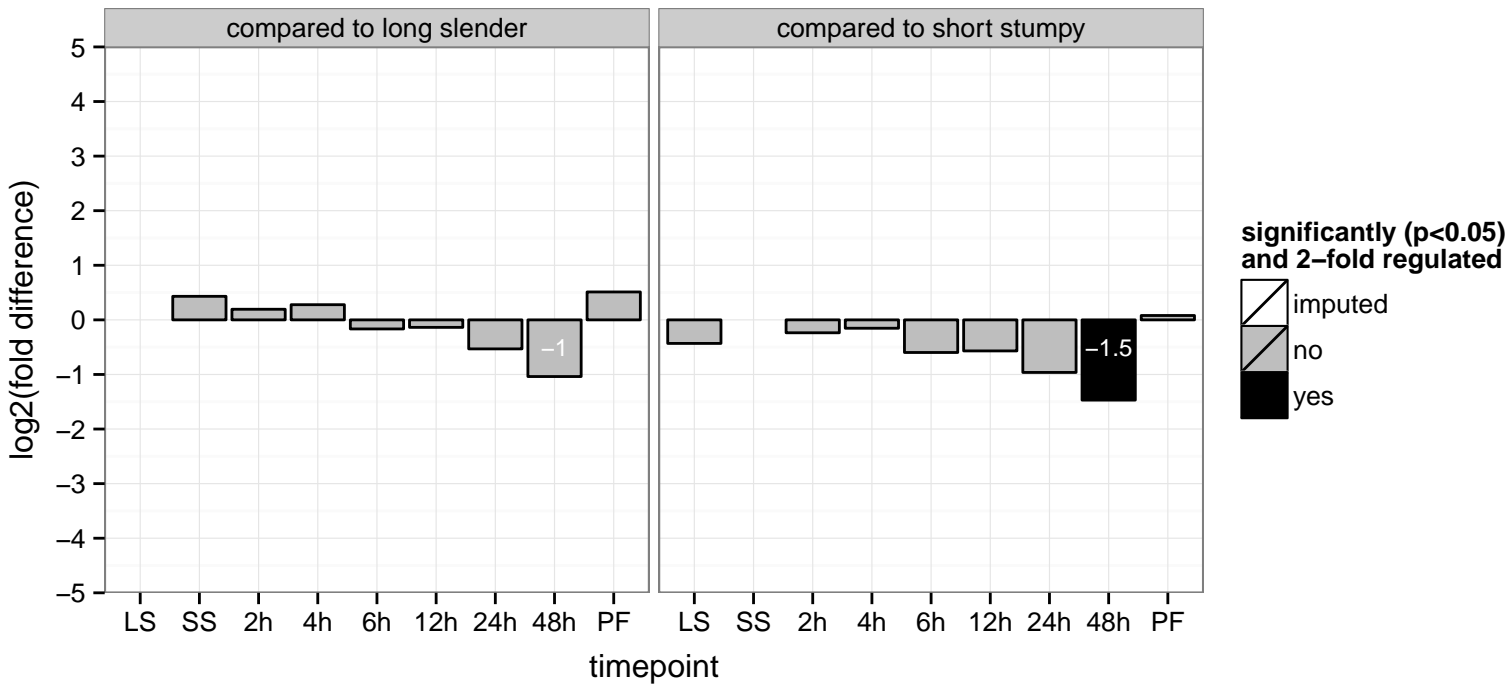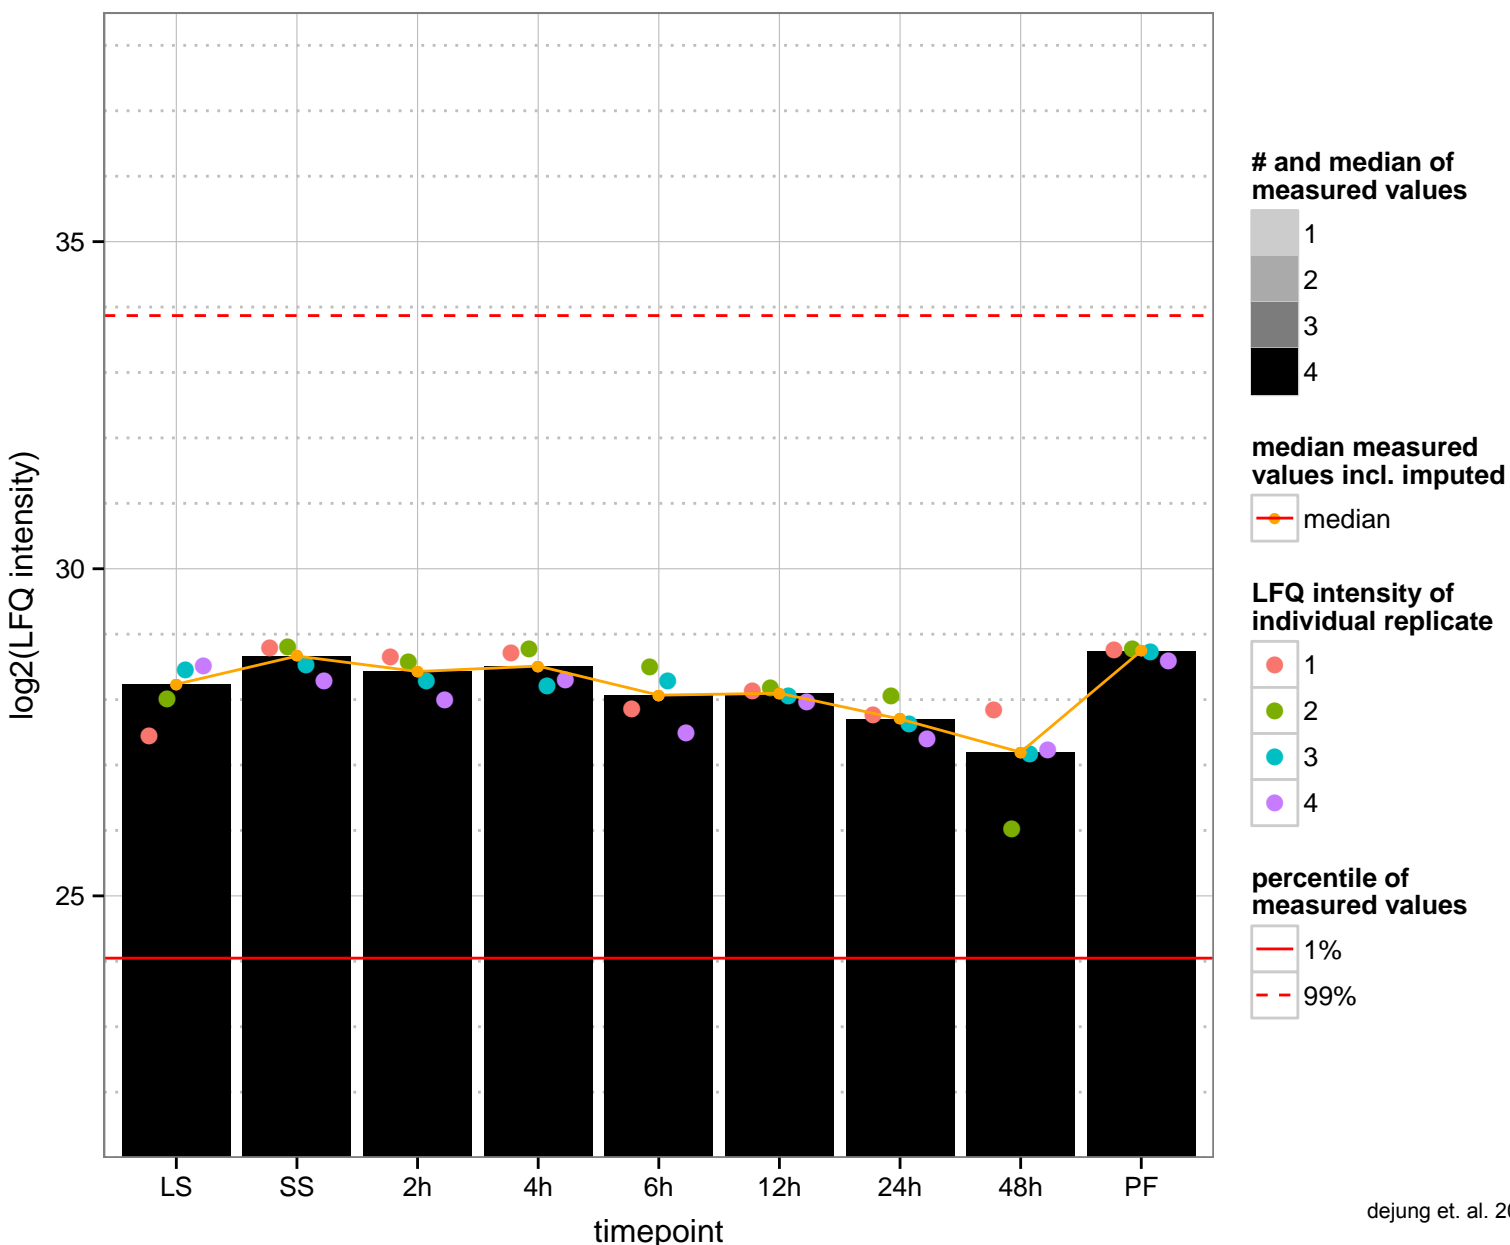

hypothetical protein, conserved  
 Tb927.6.3610  
 AGOF: null  
 AGOC: mitochondrion  
 AGOP: null  
 PGO: protein binding  
 PGOC: null  
 PGOP: null

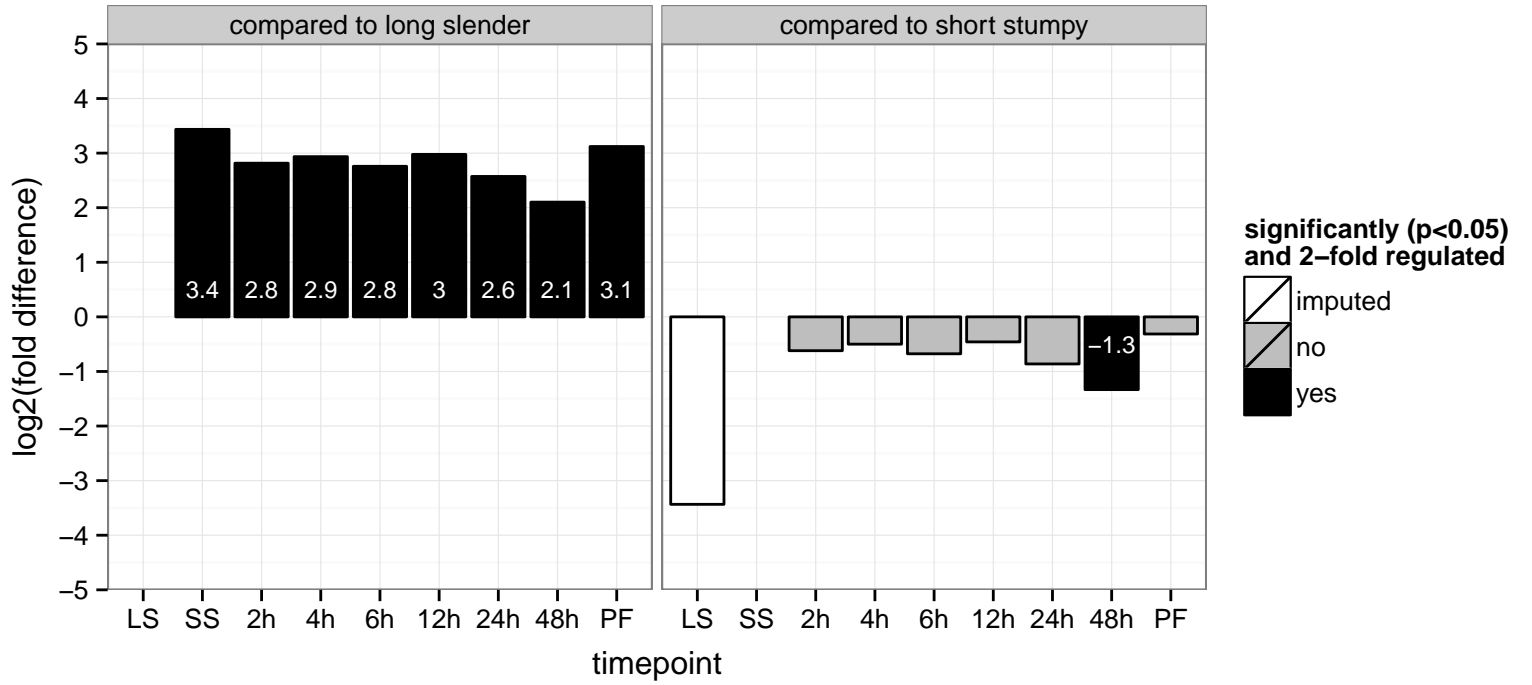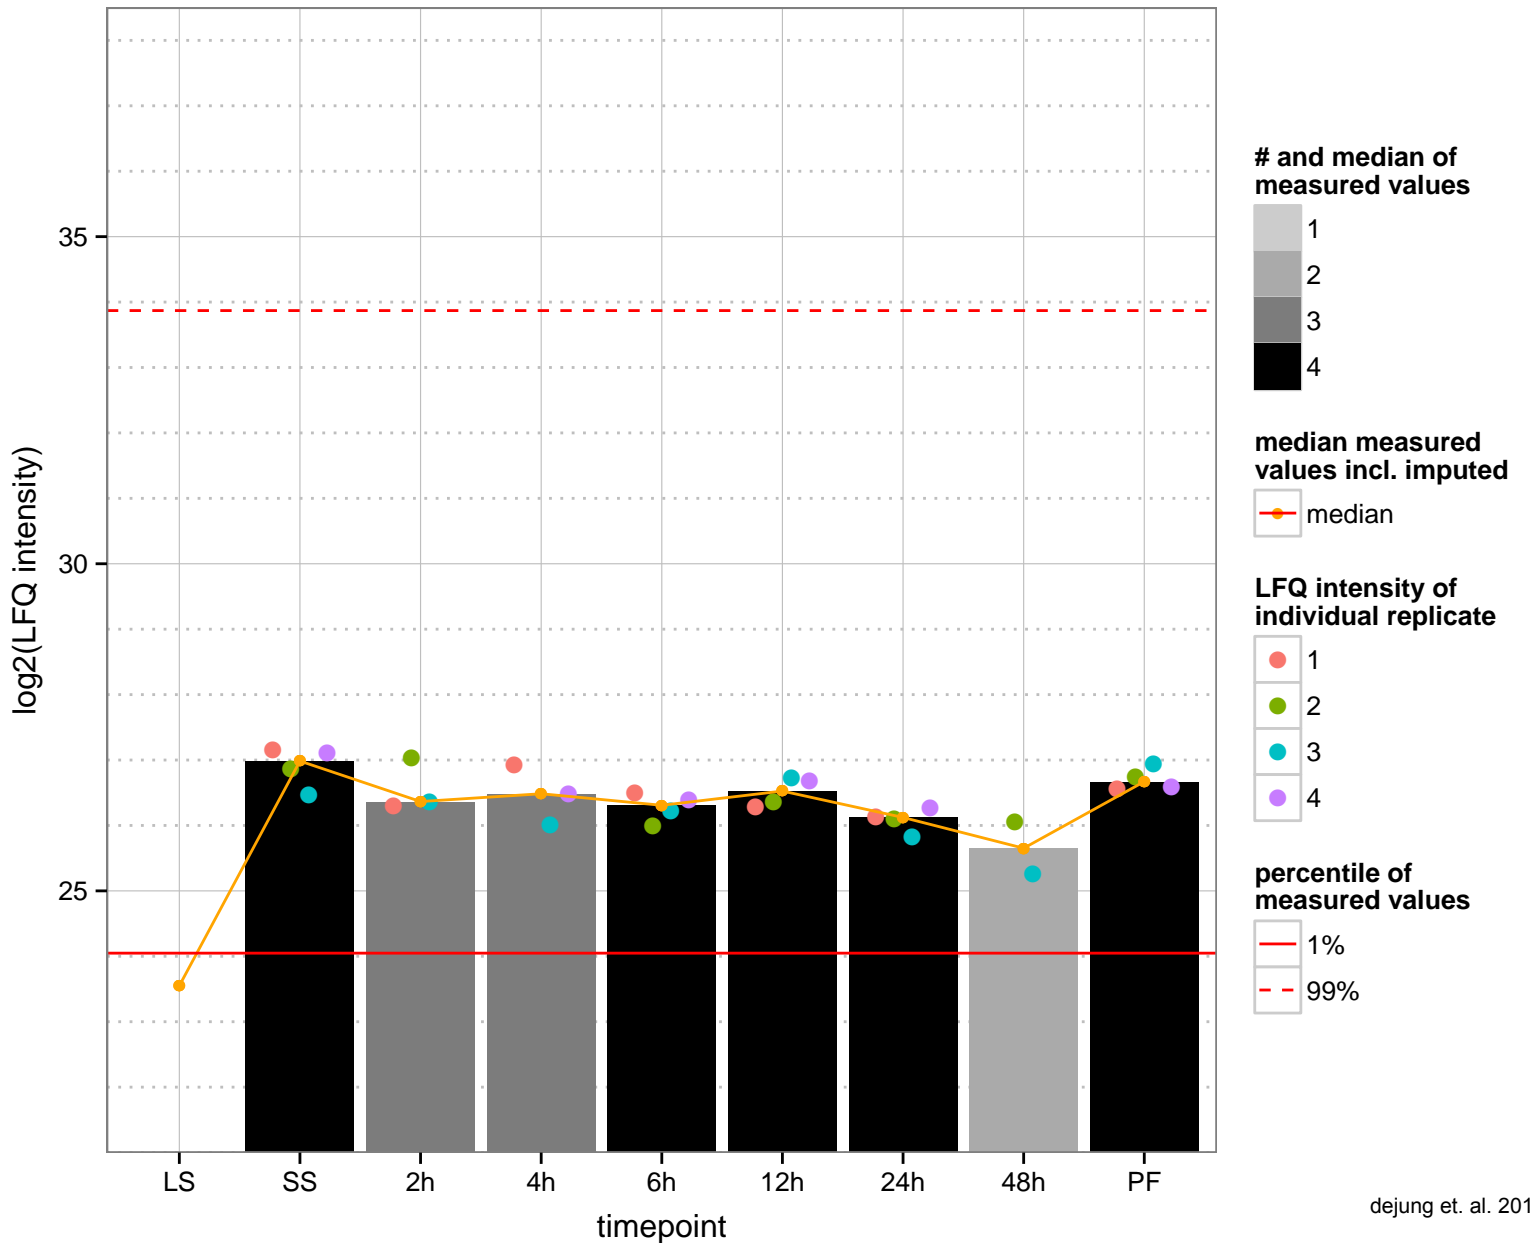

peptidase M20/M25/M40, putative  
 Tb927.6.400  
 AGOF: metallopeptidase activity  
 AGOC: null  
 AGOP: proteolysis  
 PGO: hydrolase activity  
 PGO: null  
 PGO: metabolic process

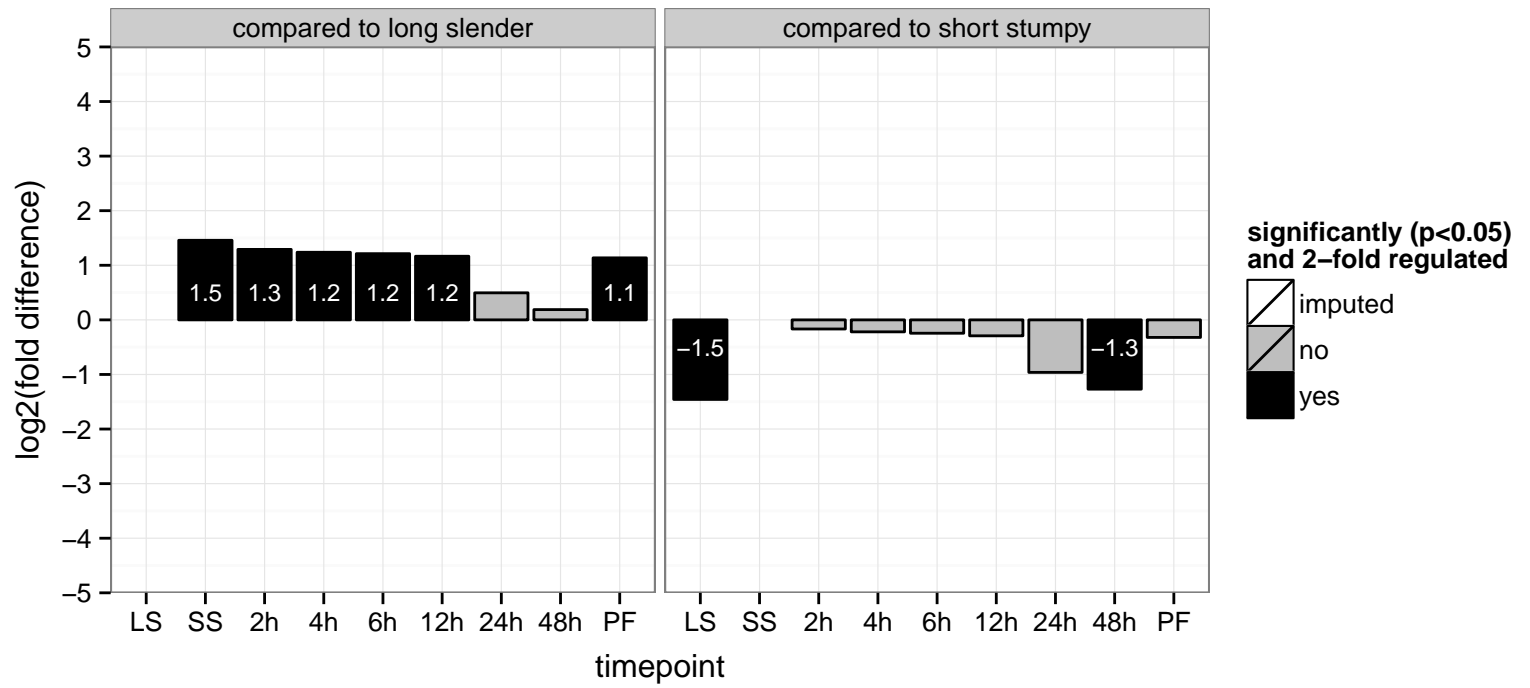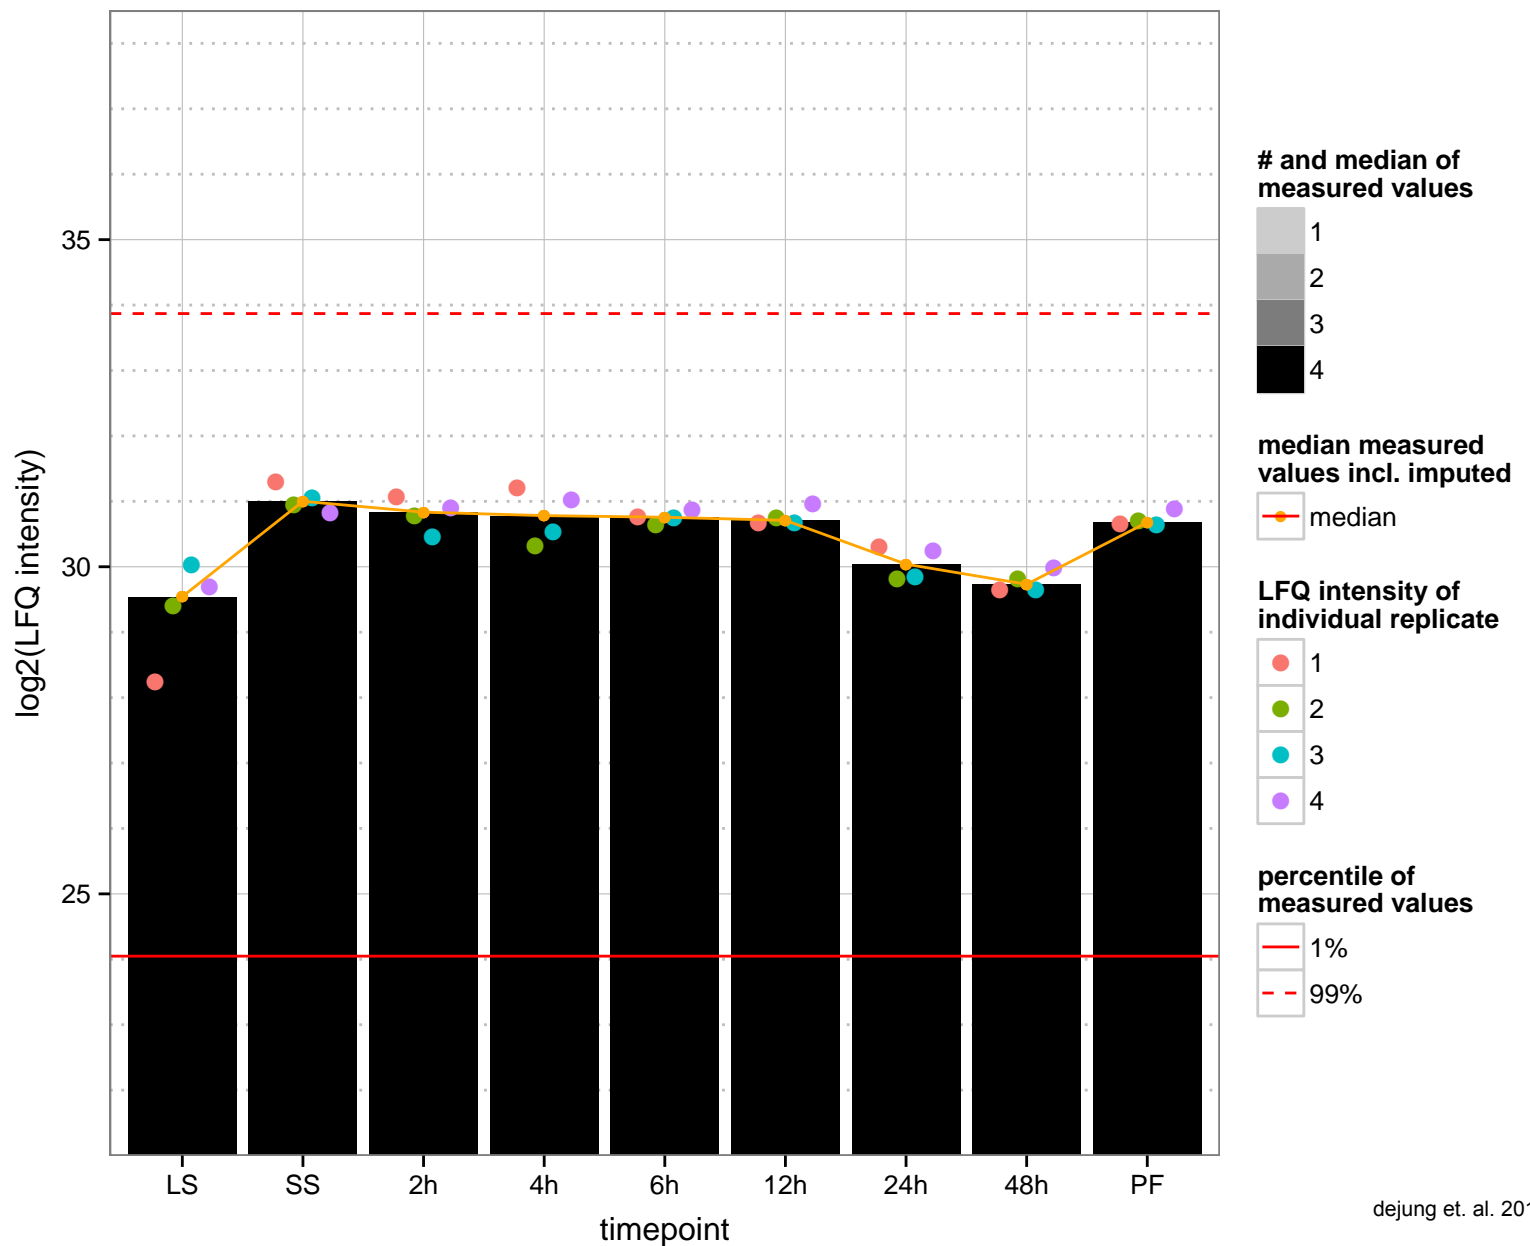

hypothetical protein, conserved  
 Tb927.6.5010  
 AGOF: null  
 AGOC: null  
 AGOP: null  
 PGO: null  
 PGOC: null  
 PGOP: null

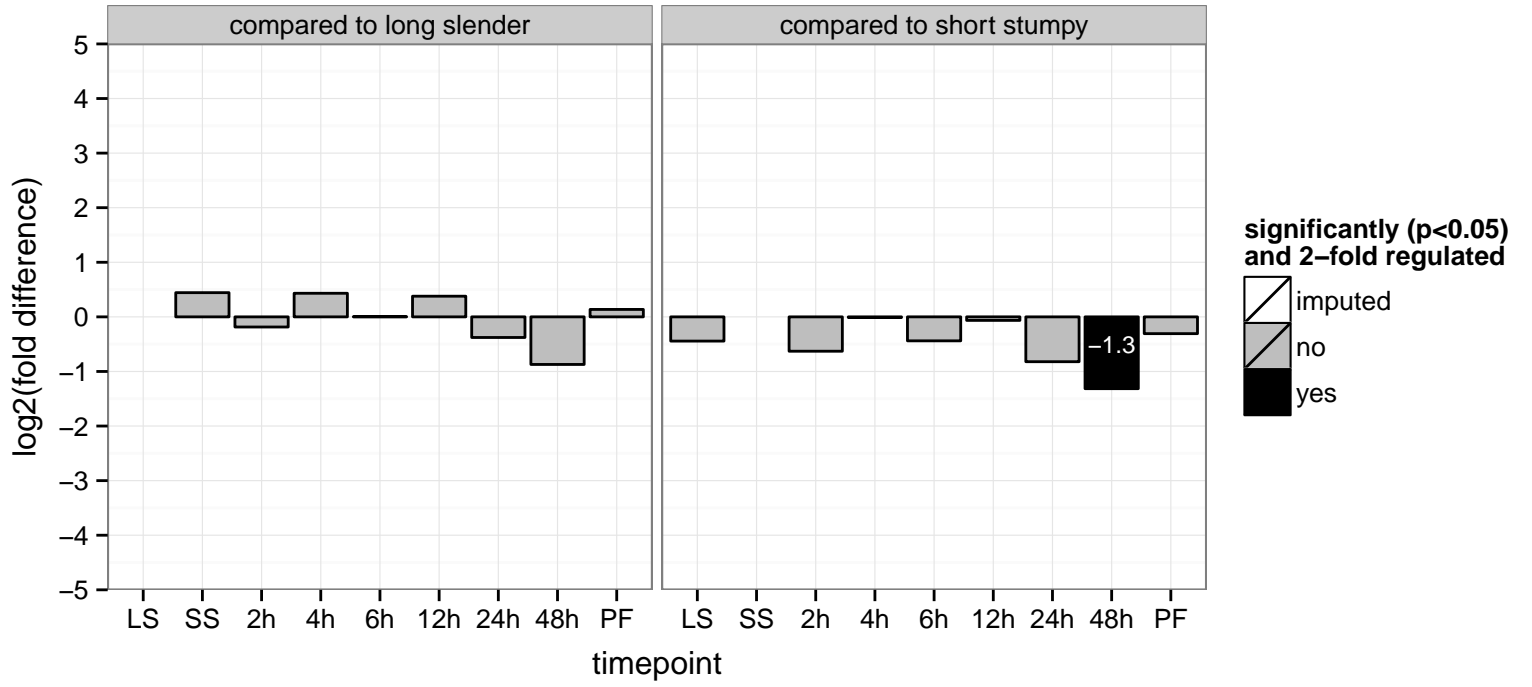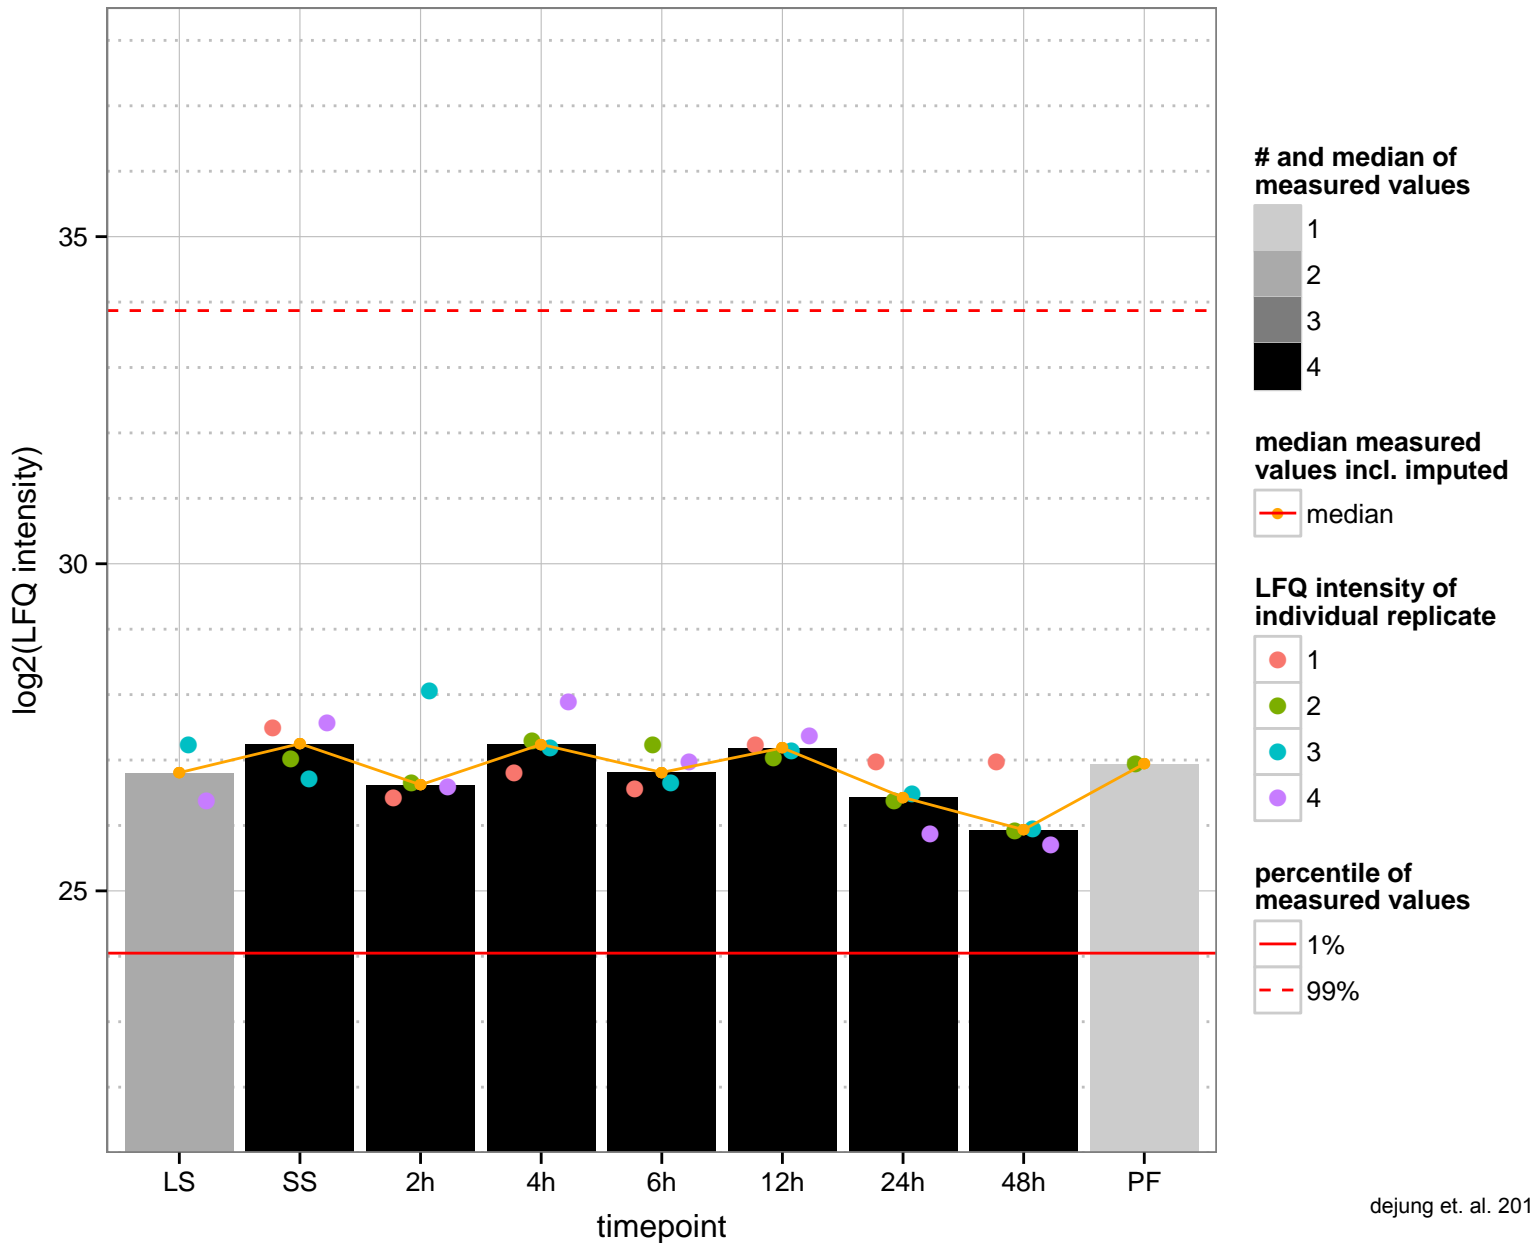

hypothetical protein, conserved  
 Tb927.7.2950  
 AGOF: ATP binding, nucleoside-triphosphatase activity  
 AGOC: null  
 AGOP: null  
 PGOF: ATP binding, nucleoside-triphosphatase activity, nucleotide binding  
 PGOC: null  
 PGOP: null

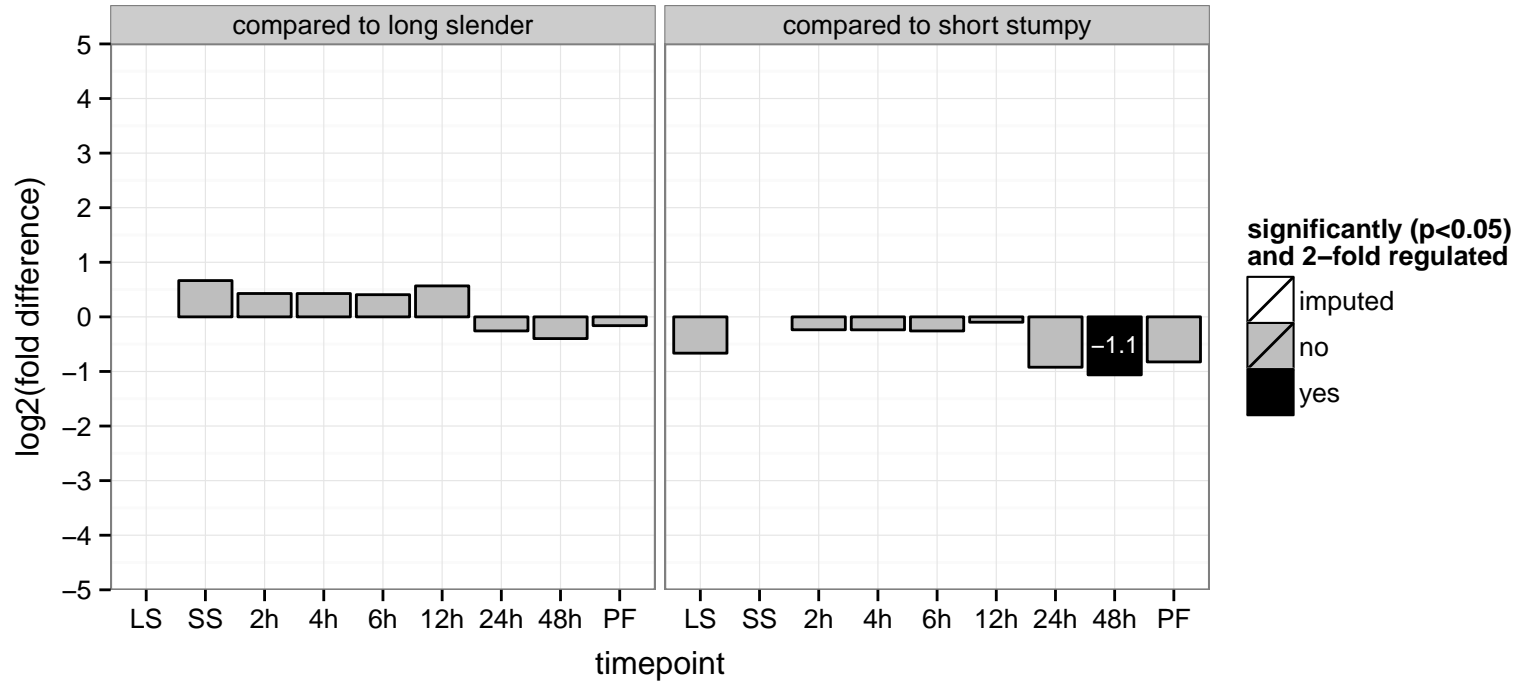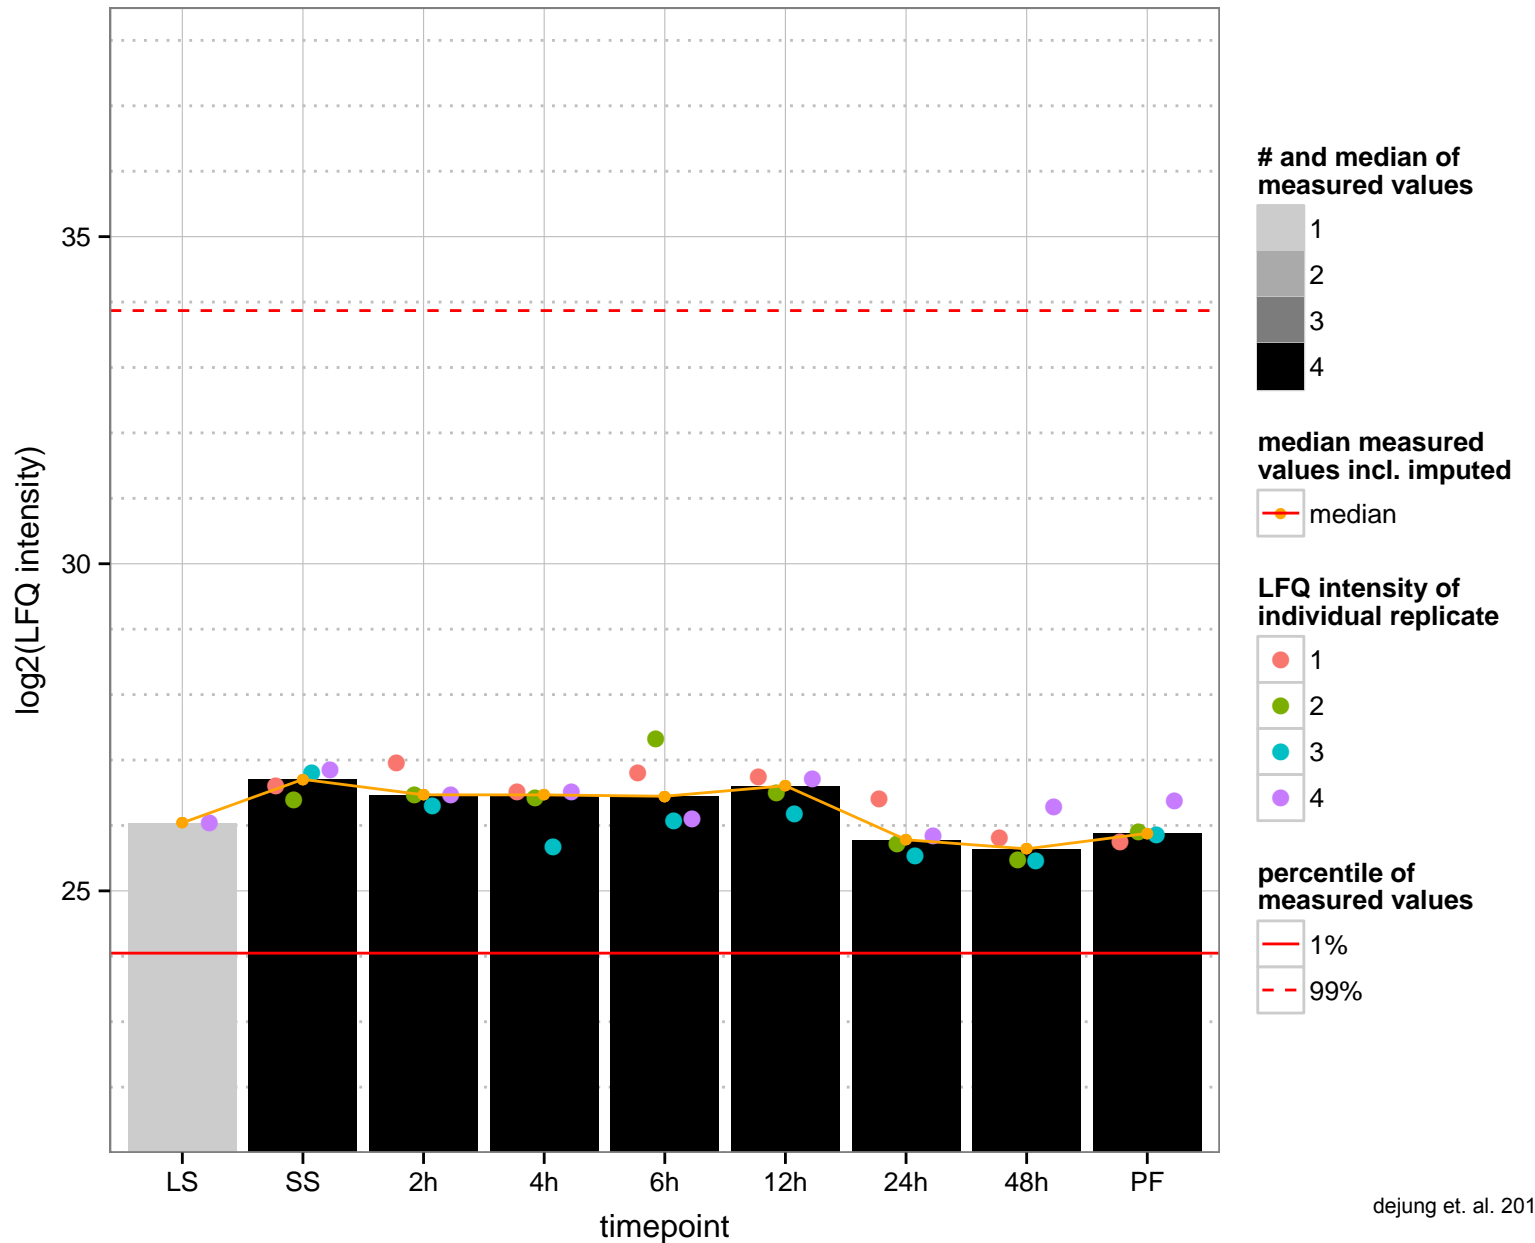



I/6 autoantigen  
 Tb927.7.3450  
 AGOF: calcium ion binding, structural constituent of cytoskeleton  
 AGOC: microtubule cytoskeleton  
 AGOP: null  
 PGO: null  
 PGO: null  
 PGO: null

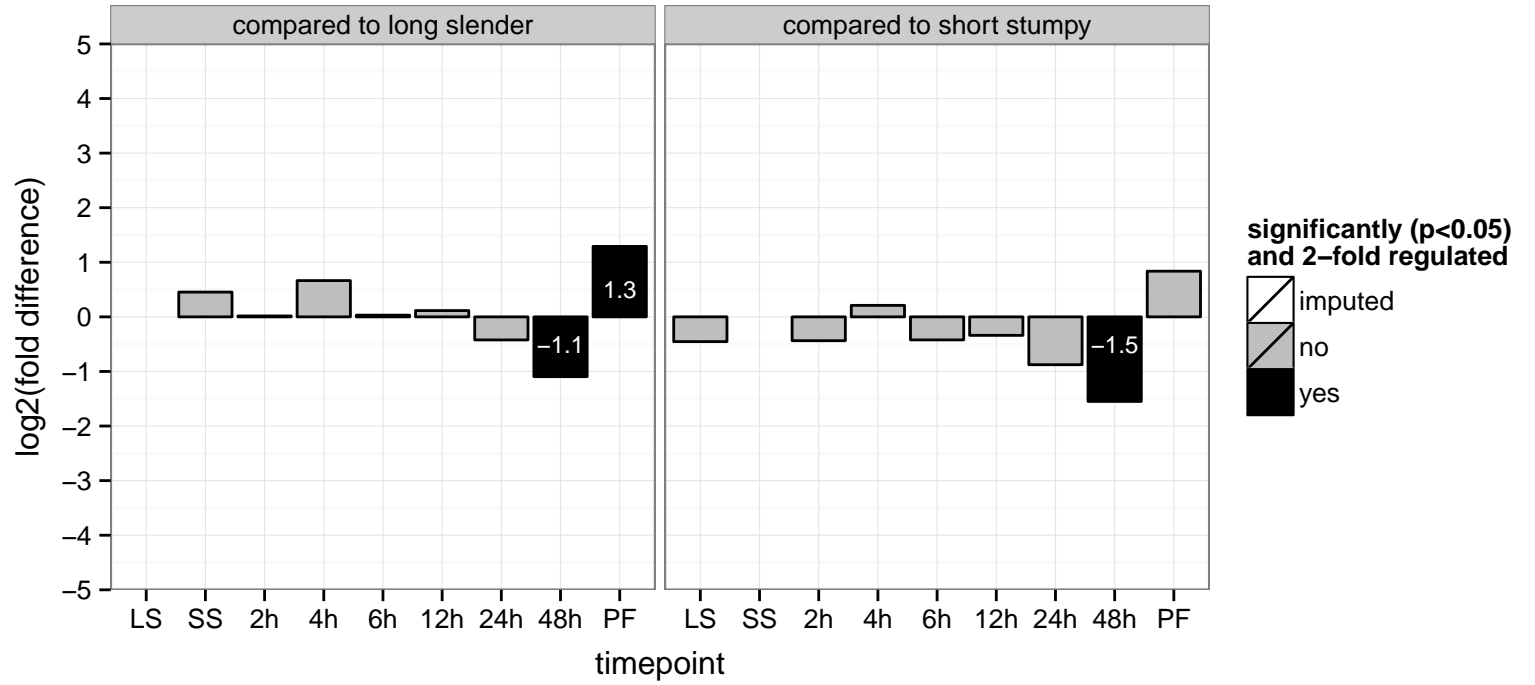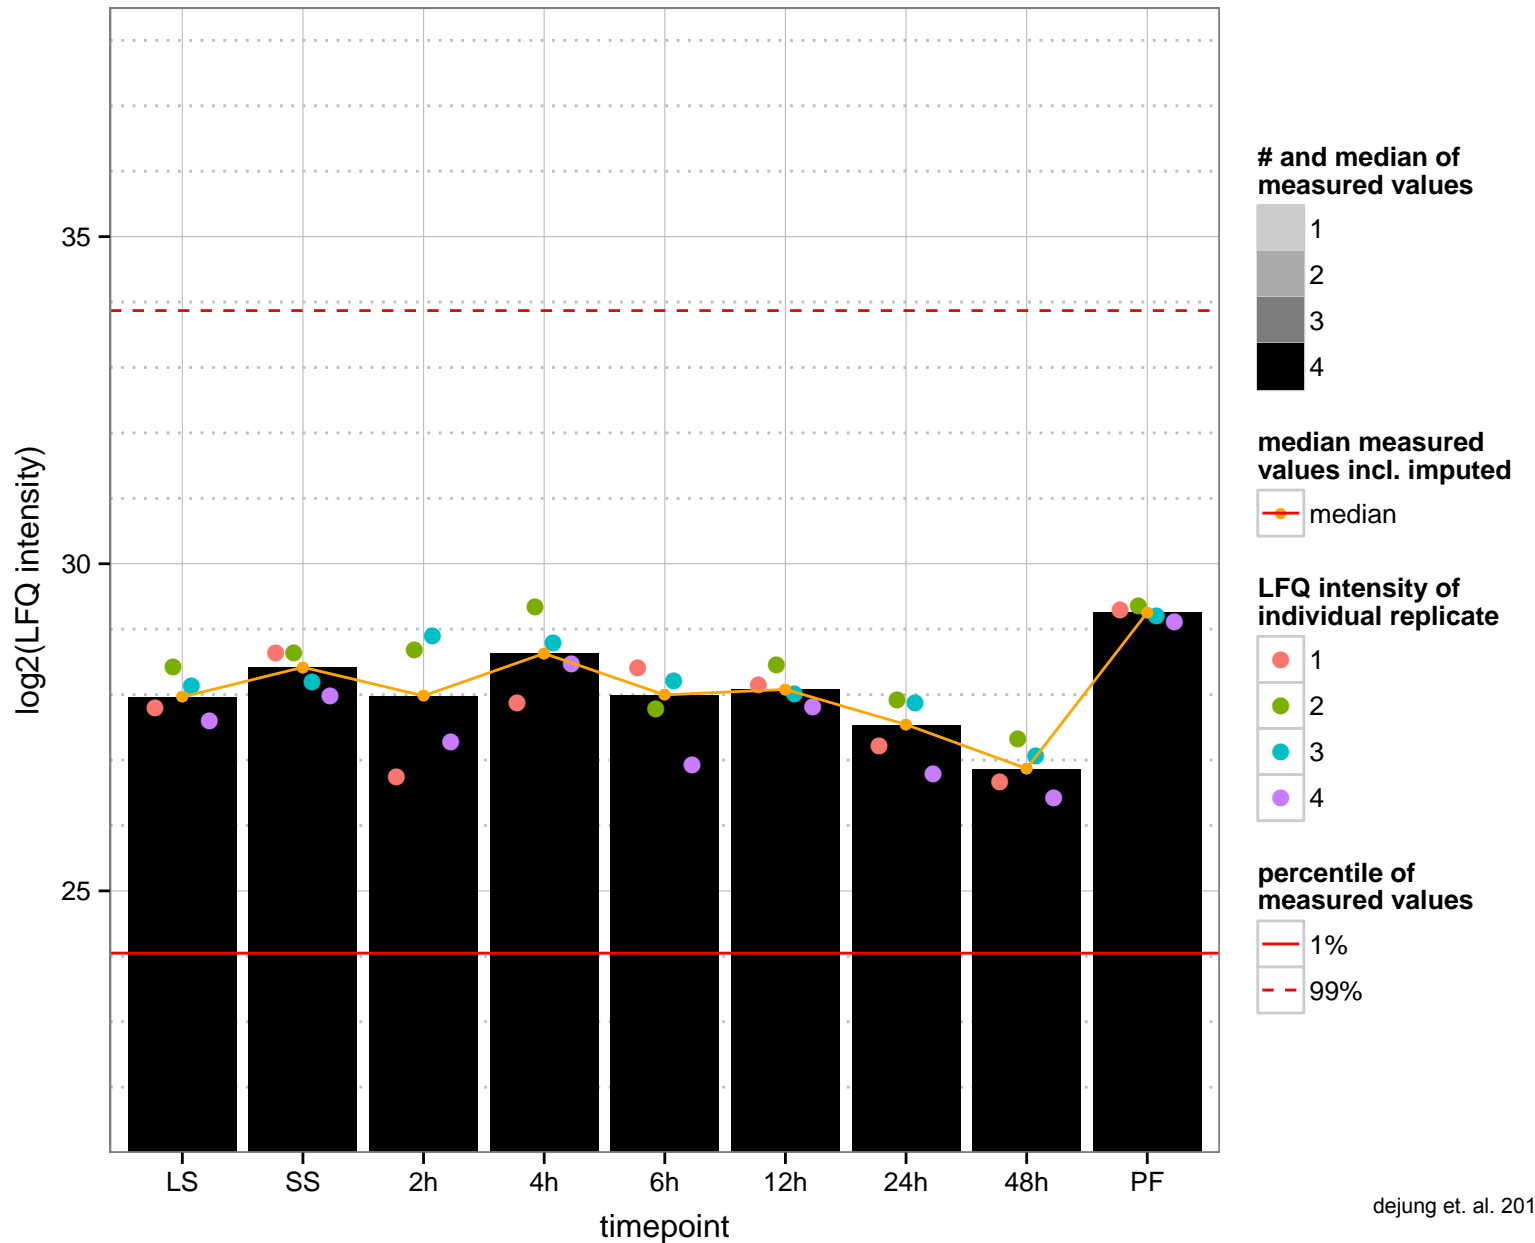

hypothetical protein, conserved  
 Tb927.7.590  
 AGOF: null  
 AGOC: null  
 AGOP: null  
 PGO: null  
 PGOC: null  
 PGOP: null

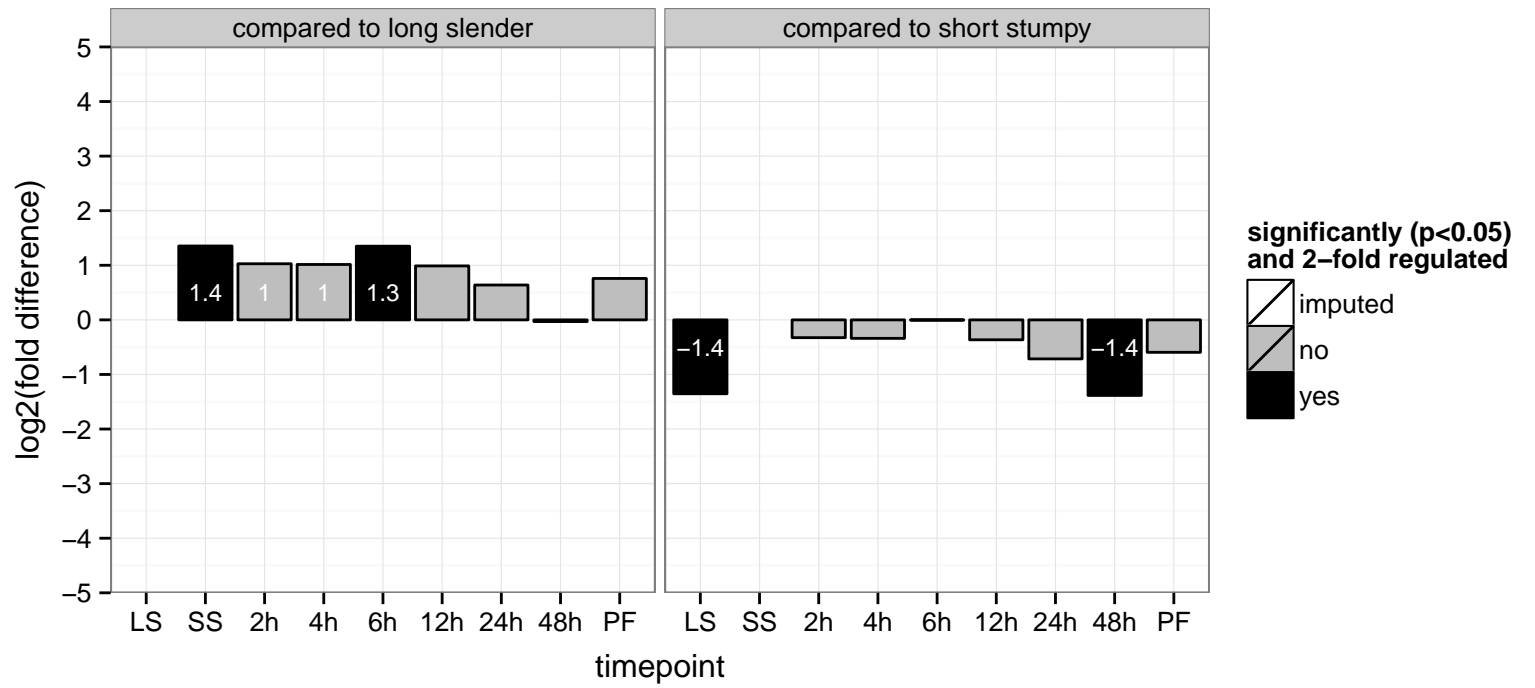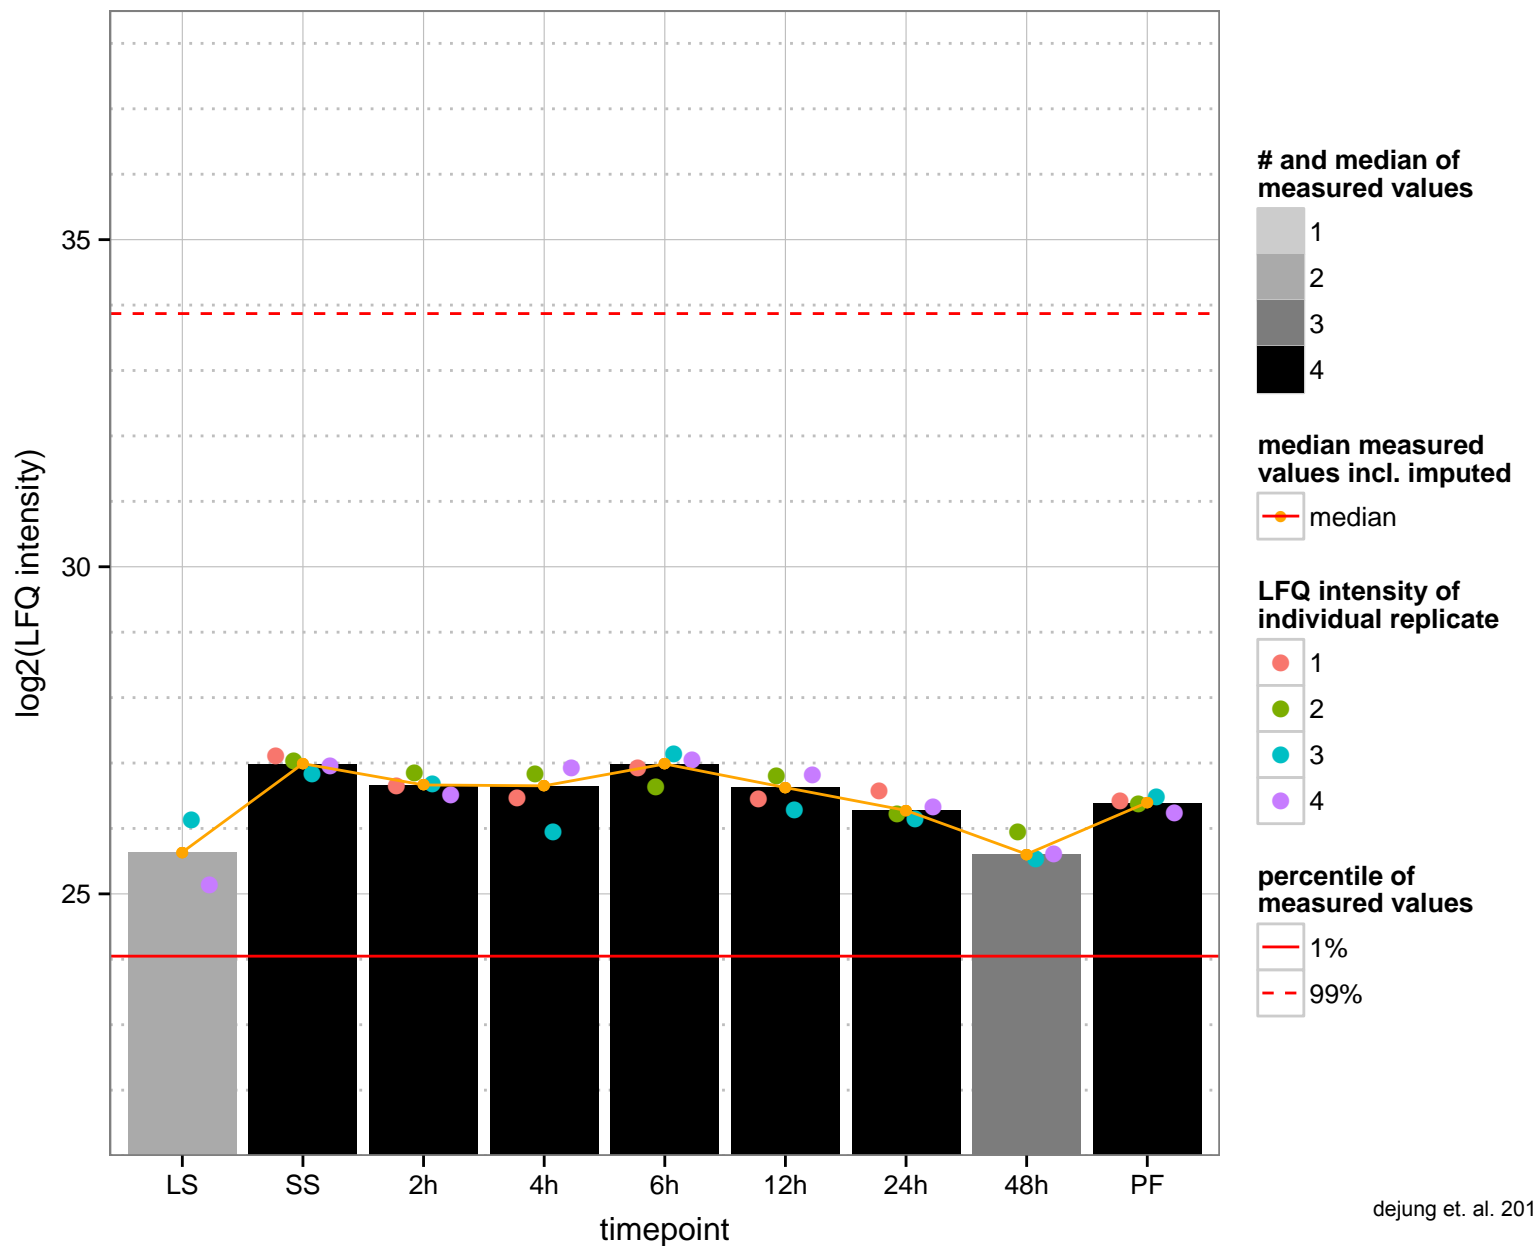

hypothetical protein, conserved  
 Tb927.8.1210  
 AGOF: DNA topoisomerase type I activity  
 AGOC: chromosome  
 AGOP: DNA topological change  
 PGO: null  
 PGOC: null  
 PGOP: null

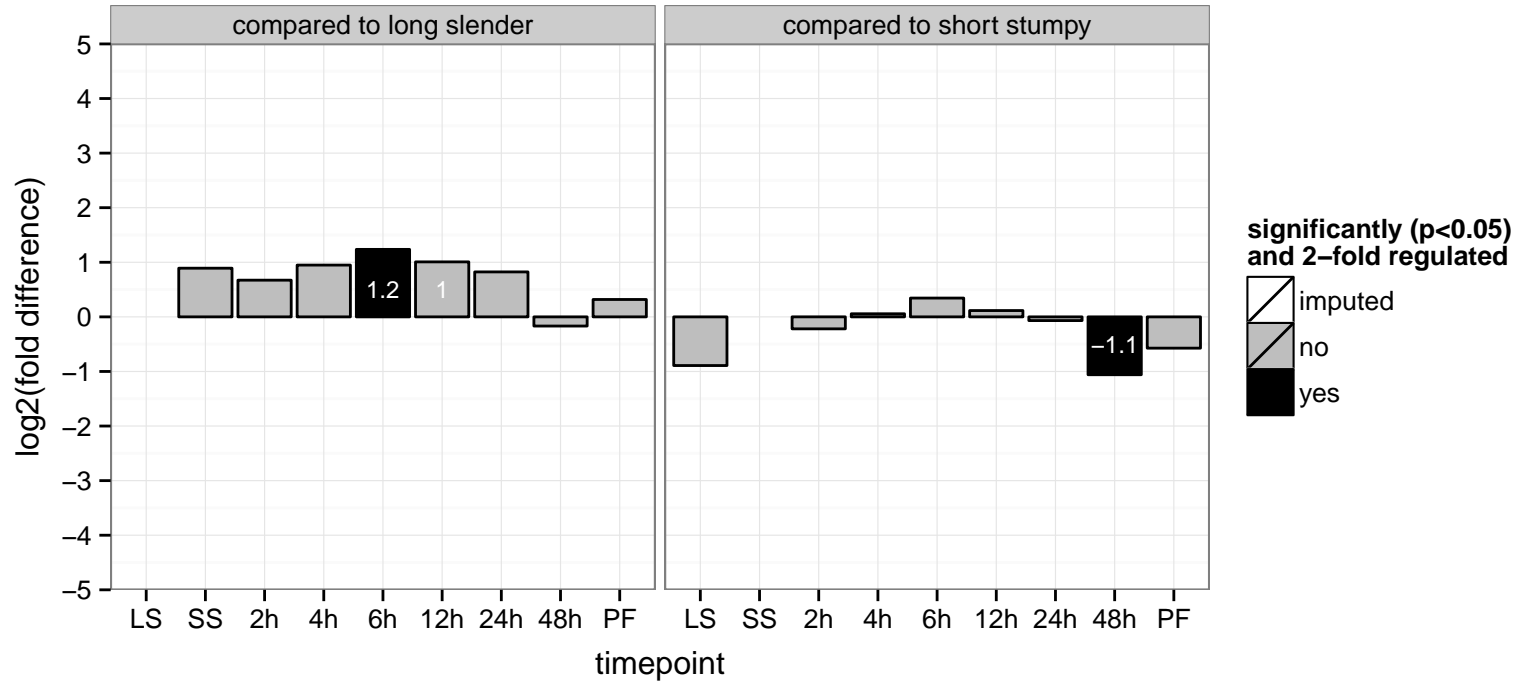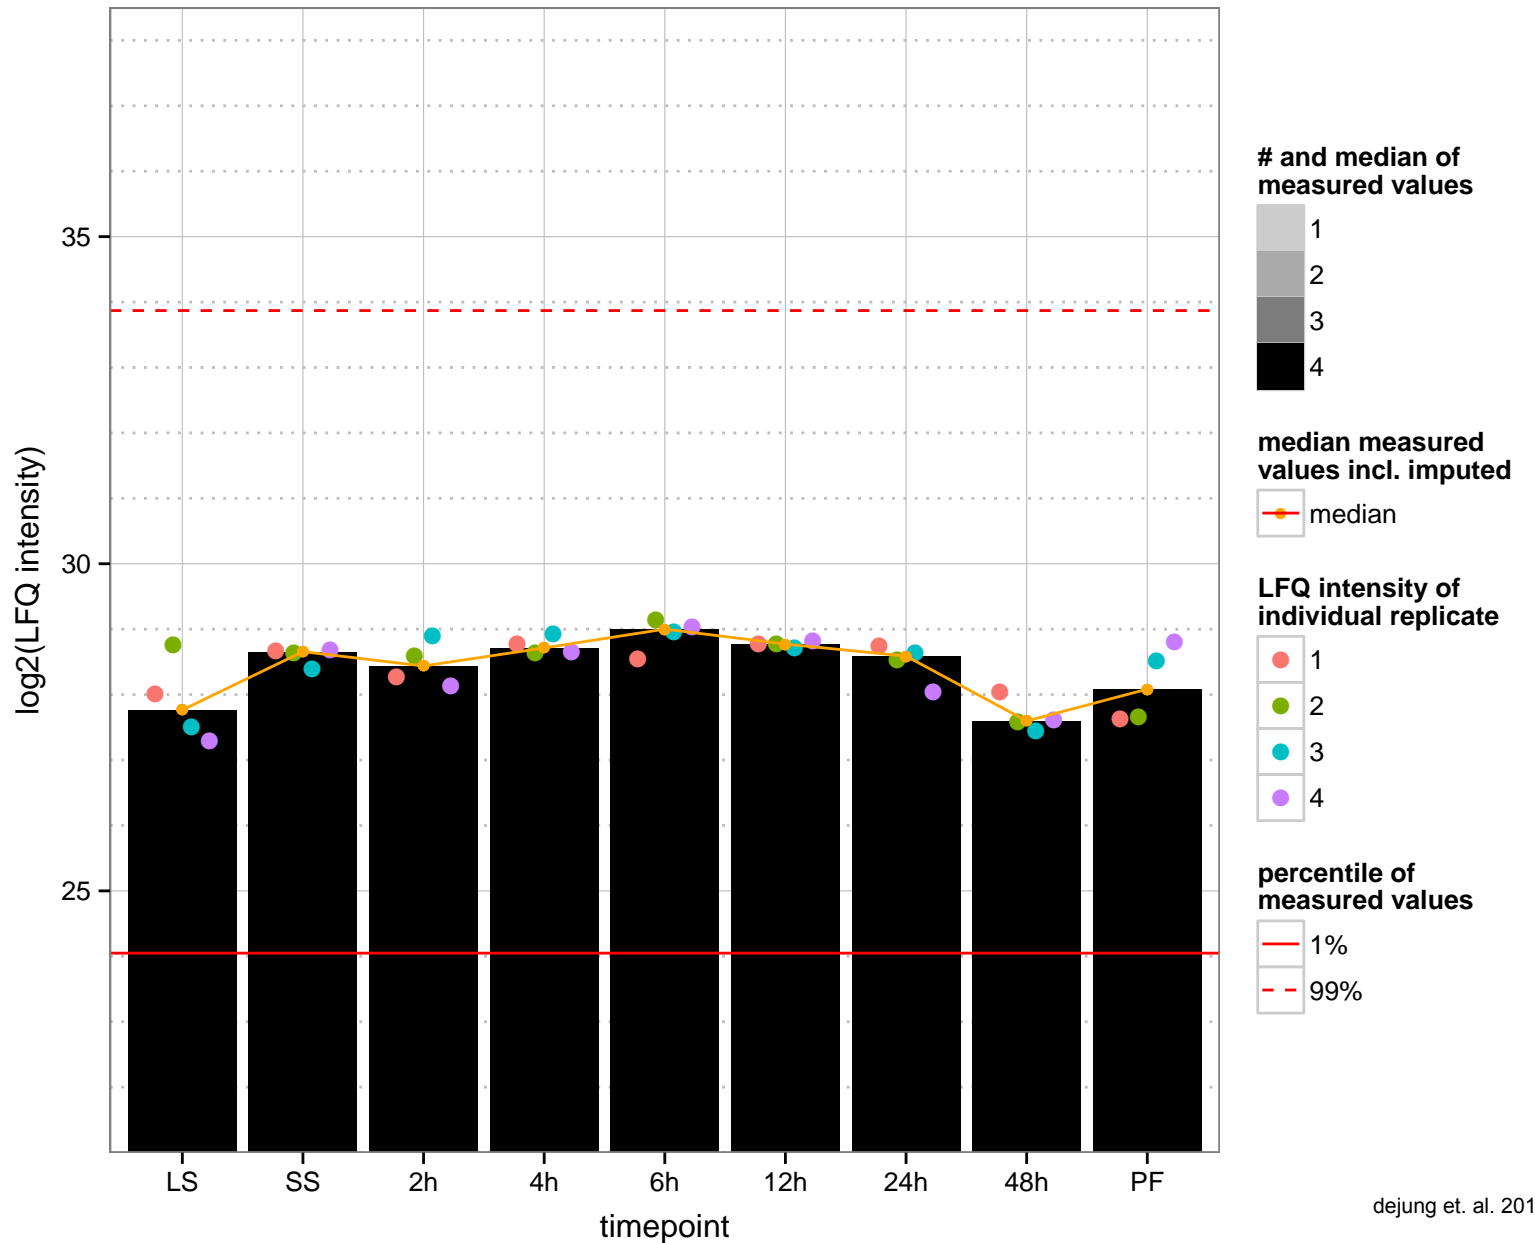

Golgi/lysosome glycoprotein 1 (tGLP1)  
 Tb927.8.1870  
 AGOF: null  
 AGOC: Golgi apparatus, lysosomal membrane  
 AGOP: null  
 PGO: null  
 PGOC: null  
 PGOP: null

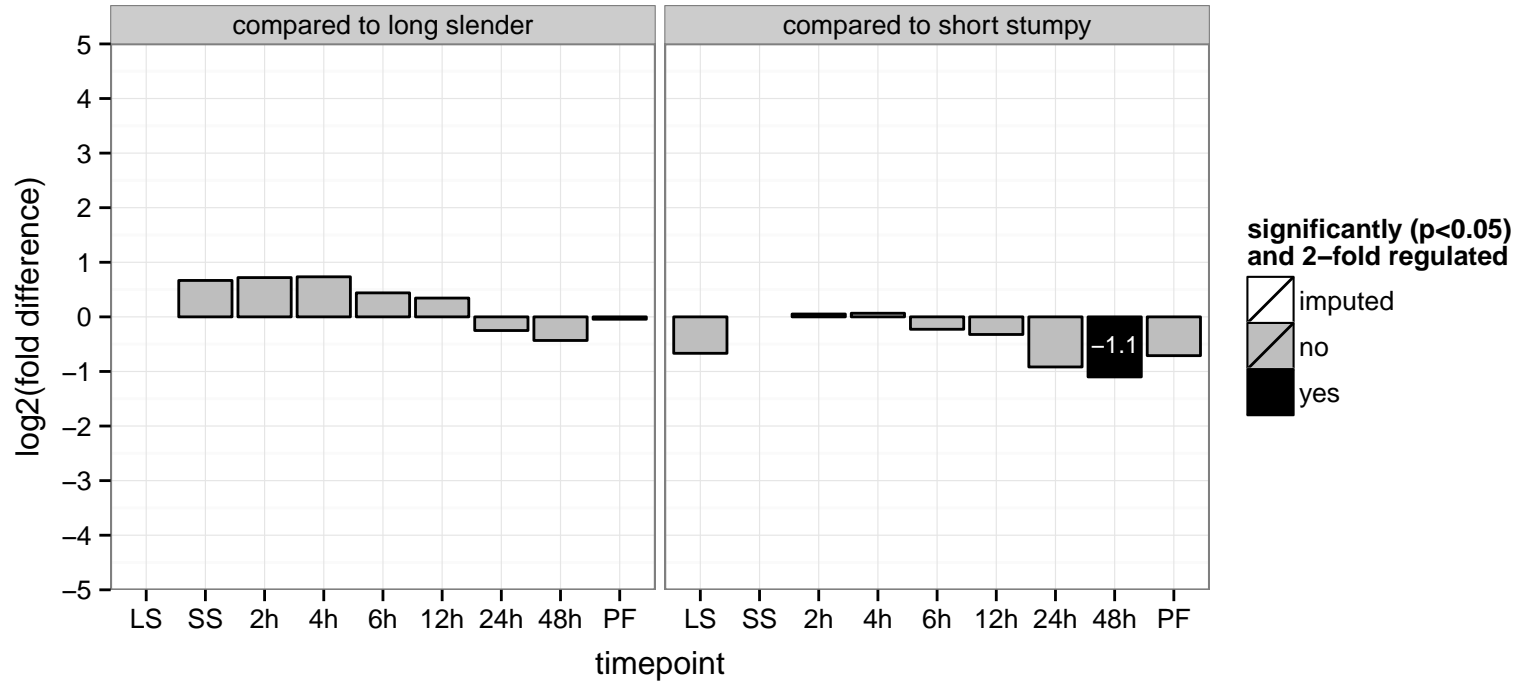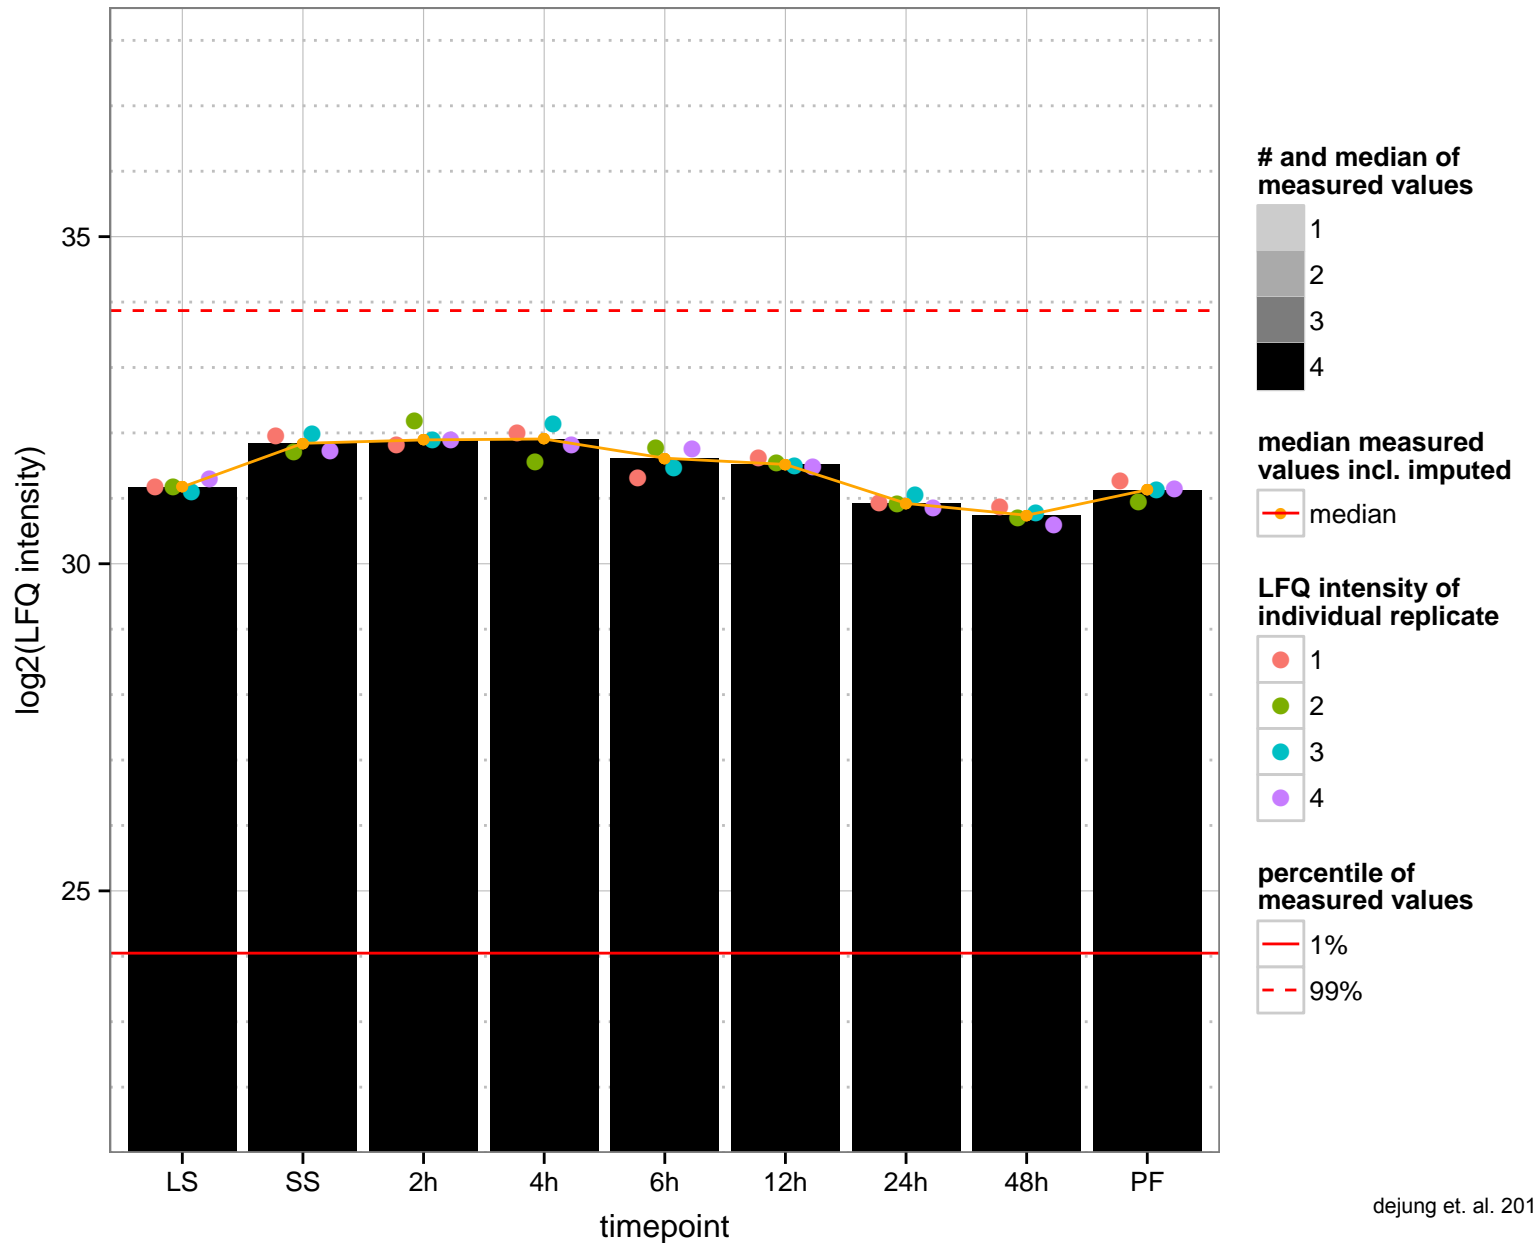

coronin, putative (CRN12)

Tb927.8.3100

AGOF: actin binding, kinesin binding, microtubule binding

AGOC: cell surface, cilium basal body, flagellar pocket

AGOP: microtubule cytoskeleton organization, microtubule-based process

PGOF: protein binding

PGOC: null

PGOP: null

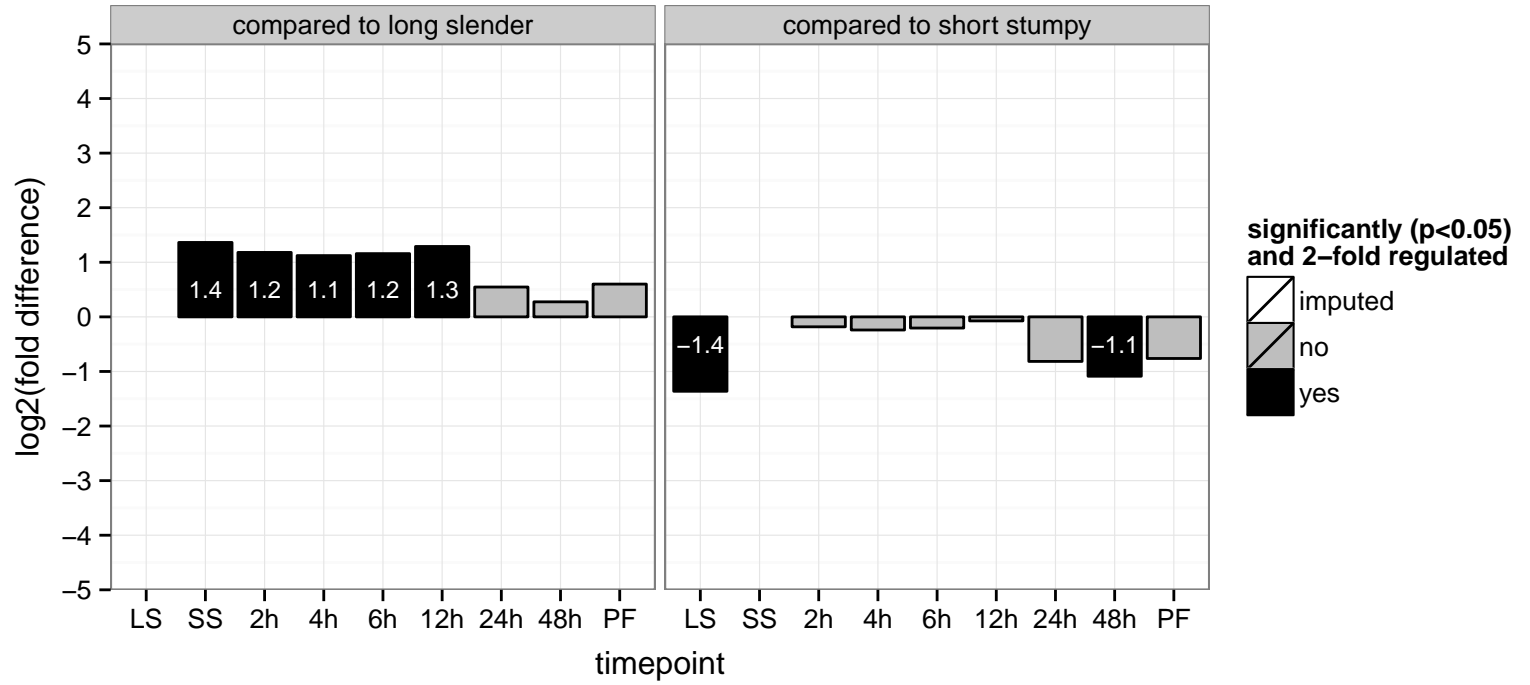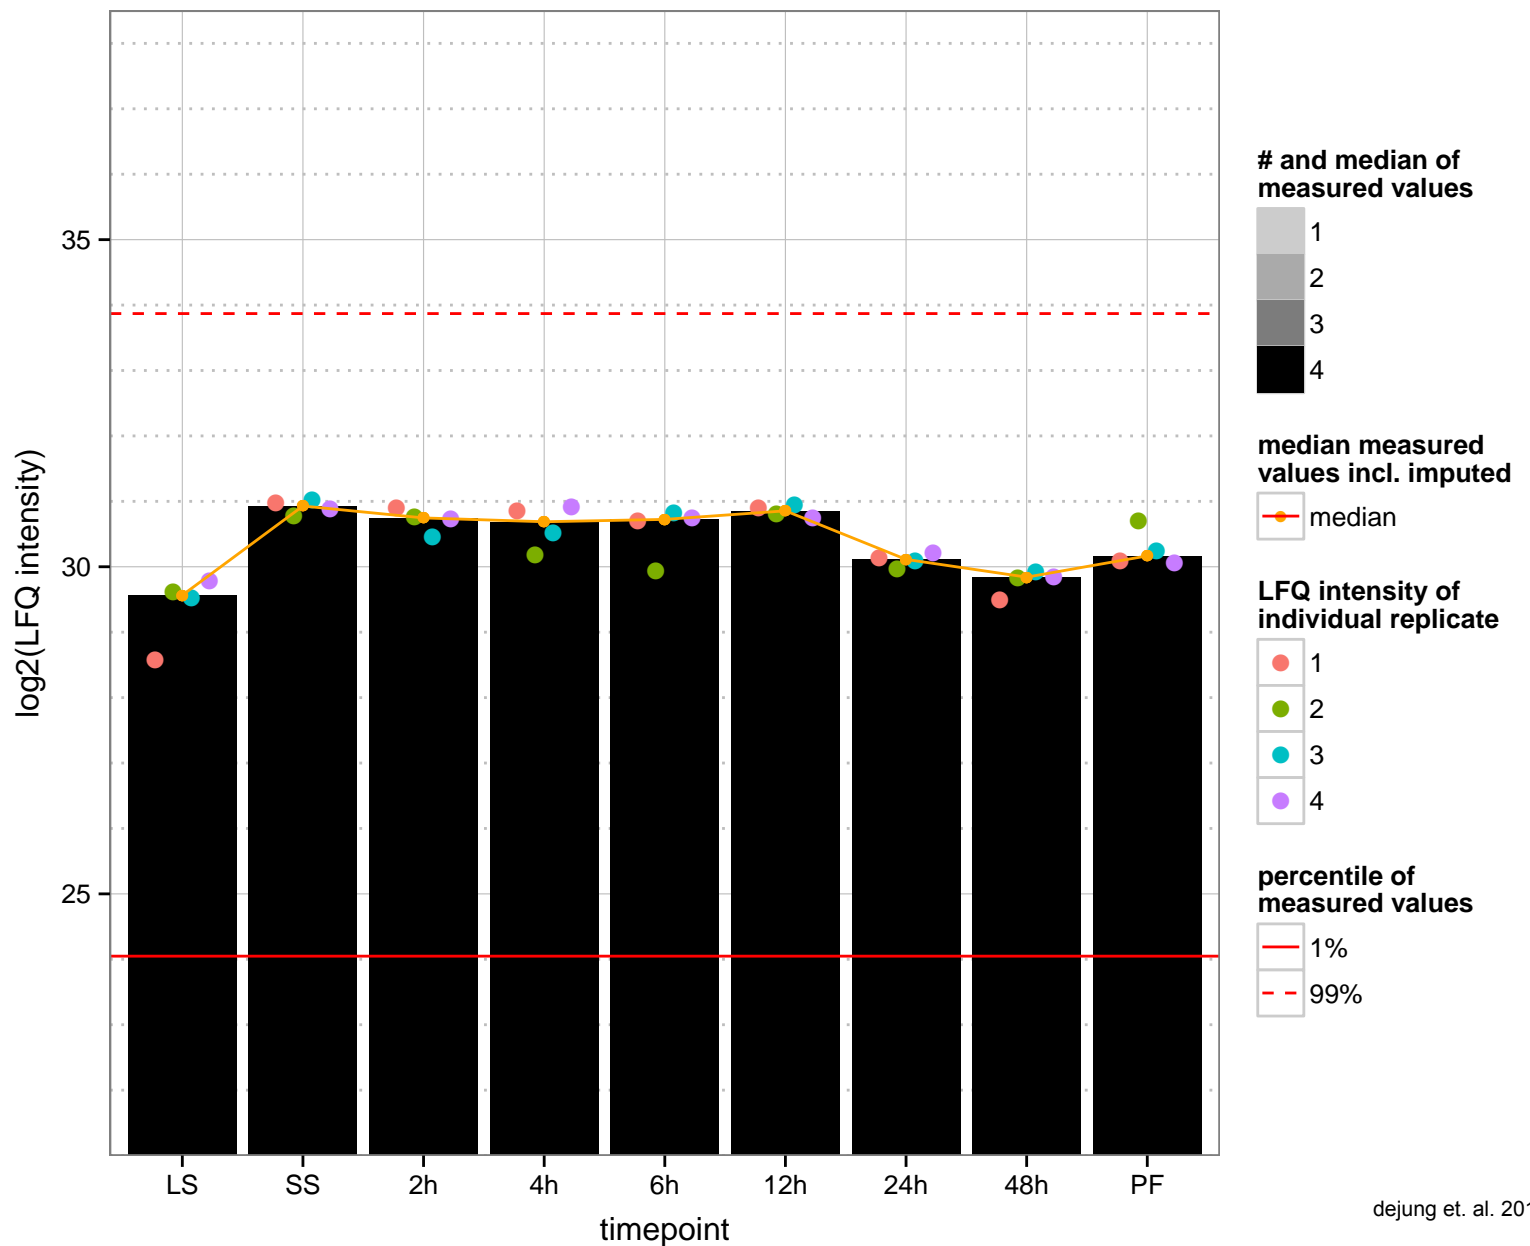

nucleoside phosphatase, putative, guanosine diphosphatase  
 Tb927.8.3800  
 AGOF: guanosine-diphosphatase activity, nucleoside-diphosphatase activity  
 AGOC: Golgi membrane, extracellular region  
 AGOP: cellular protein modification process, nucleoside metabolic process  
 PGO: hydrolase activity  
 PGOC: null  
 PGOP: null

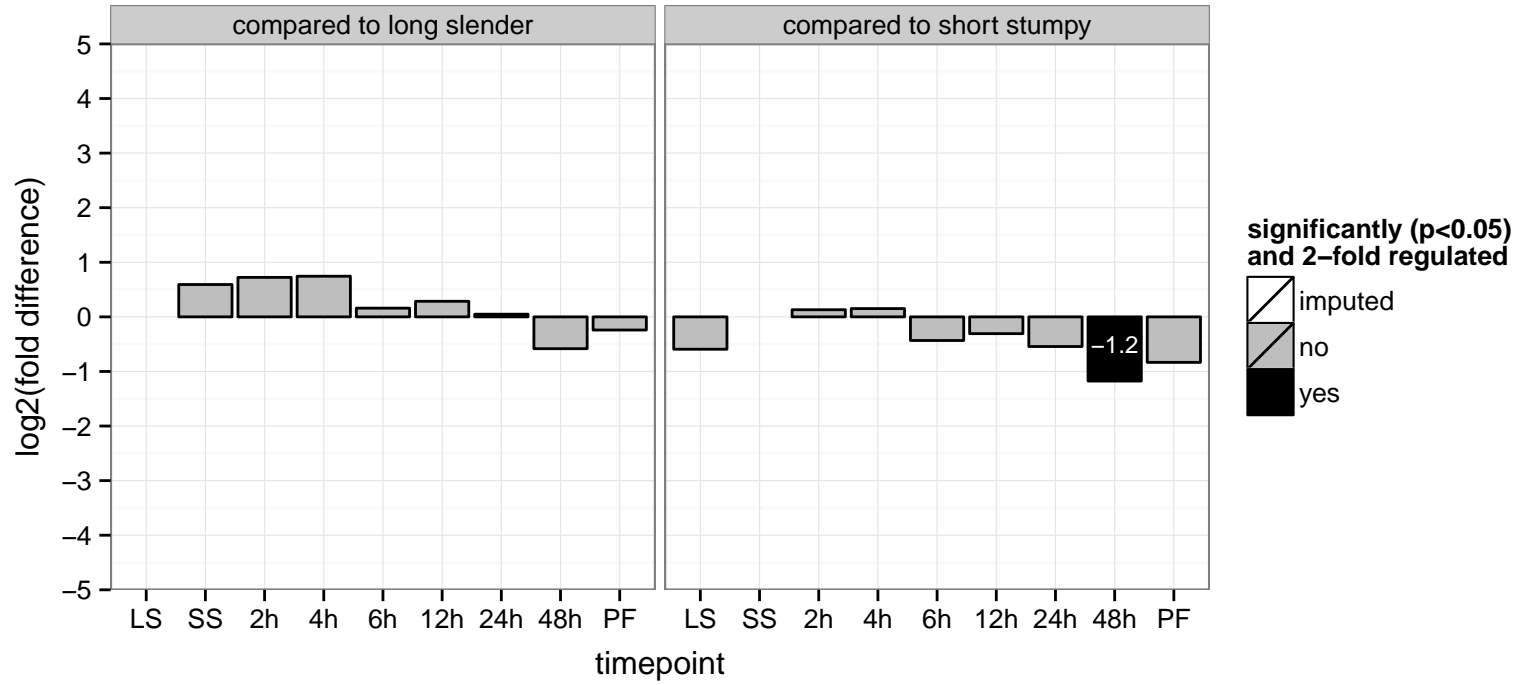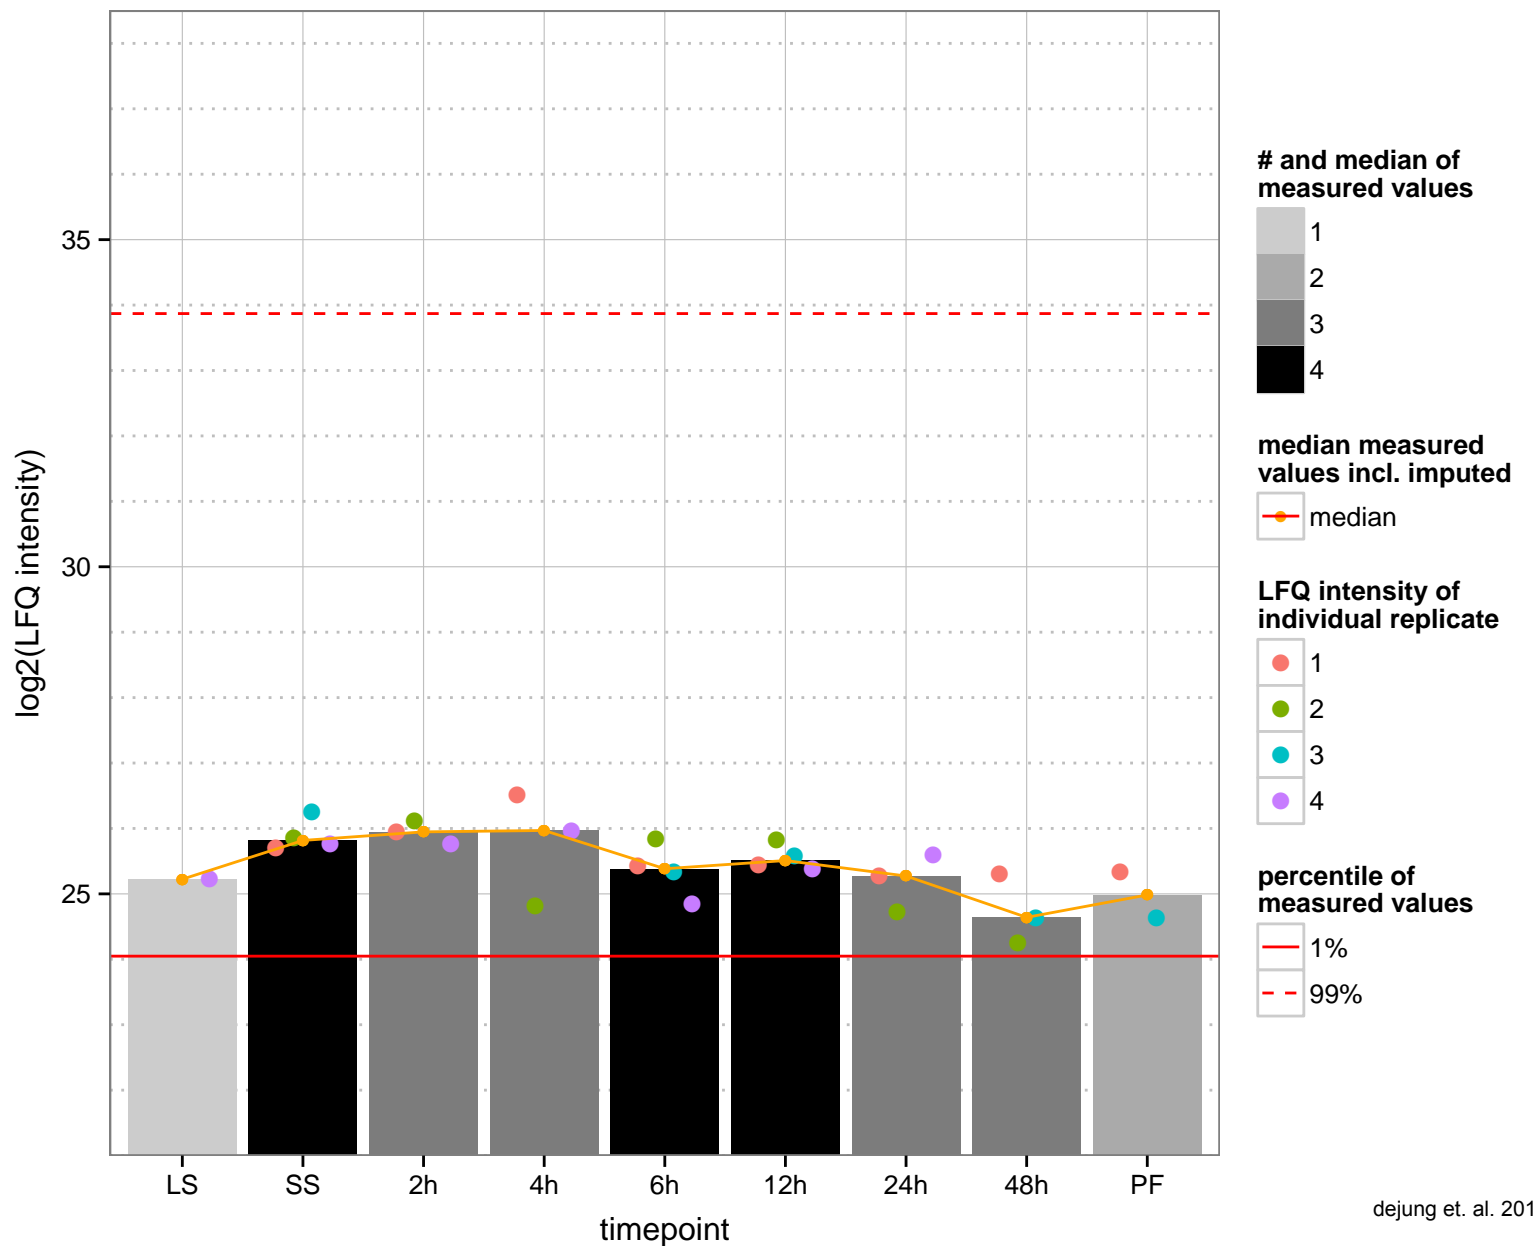

hypothetical protein, conserved  
 Tb927.8.4570  
 AGOF: zinc ion binding  
 AGOC: null  
 AGOP: null  
 PGOF: protein binding, zinc ion binding  
 PGOC: null  
 PGOP: null

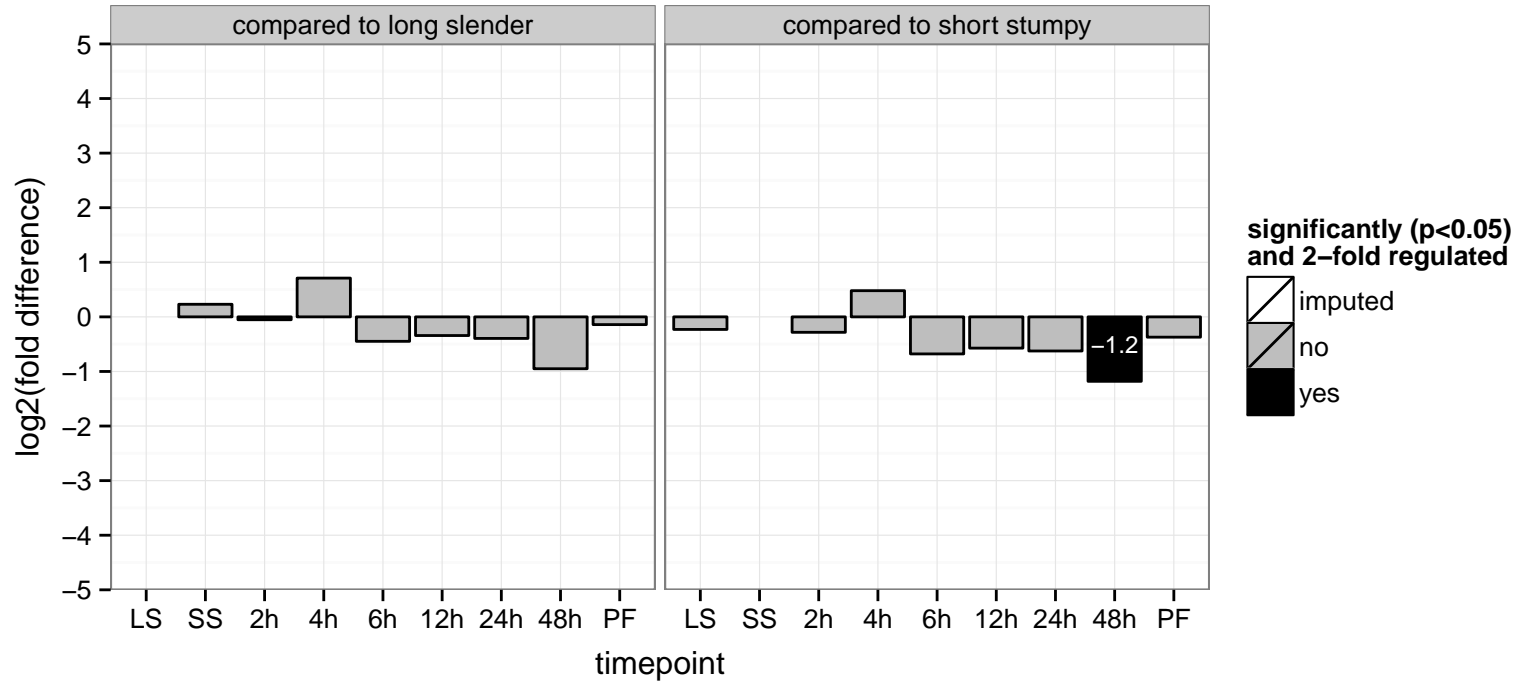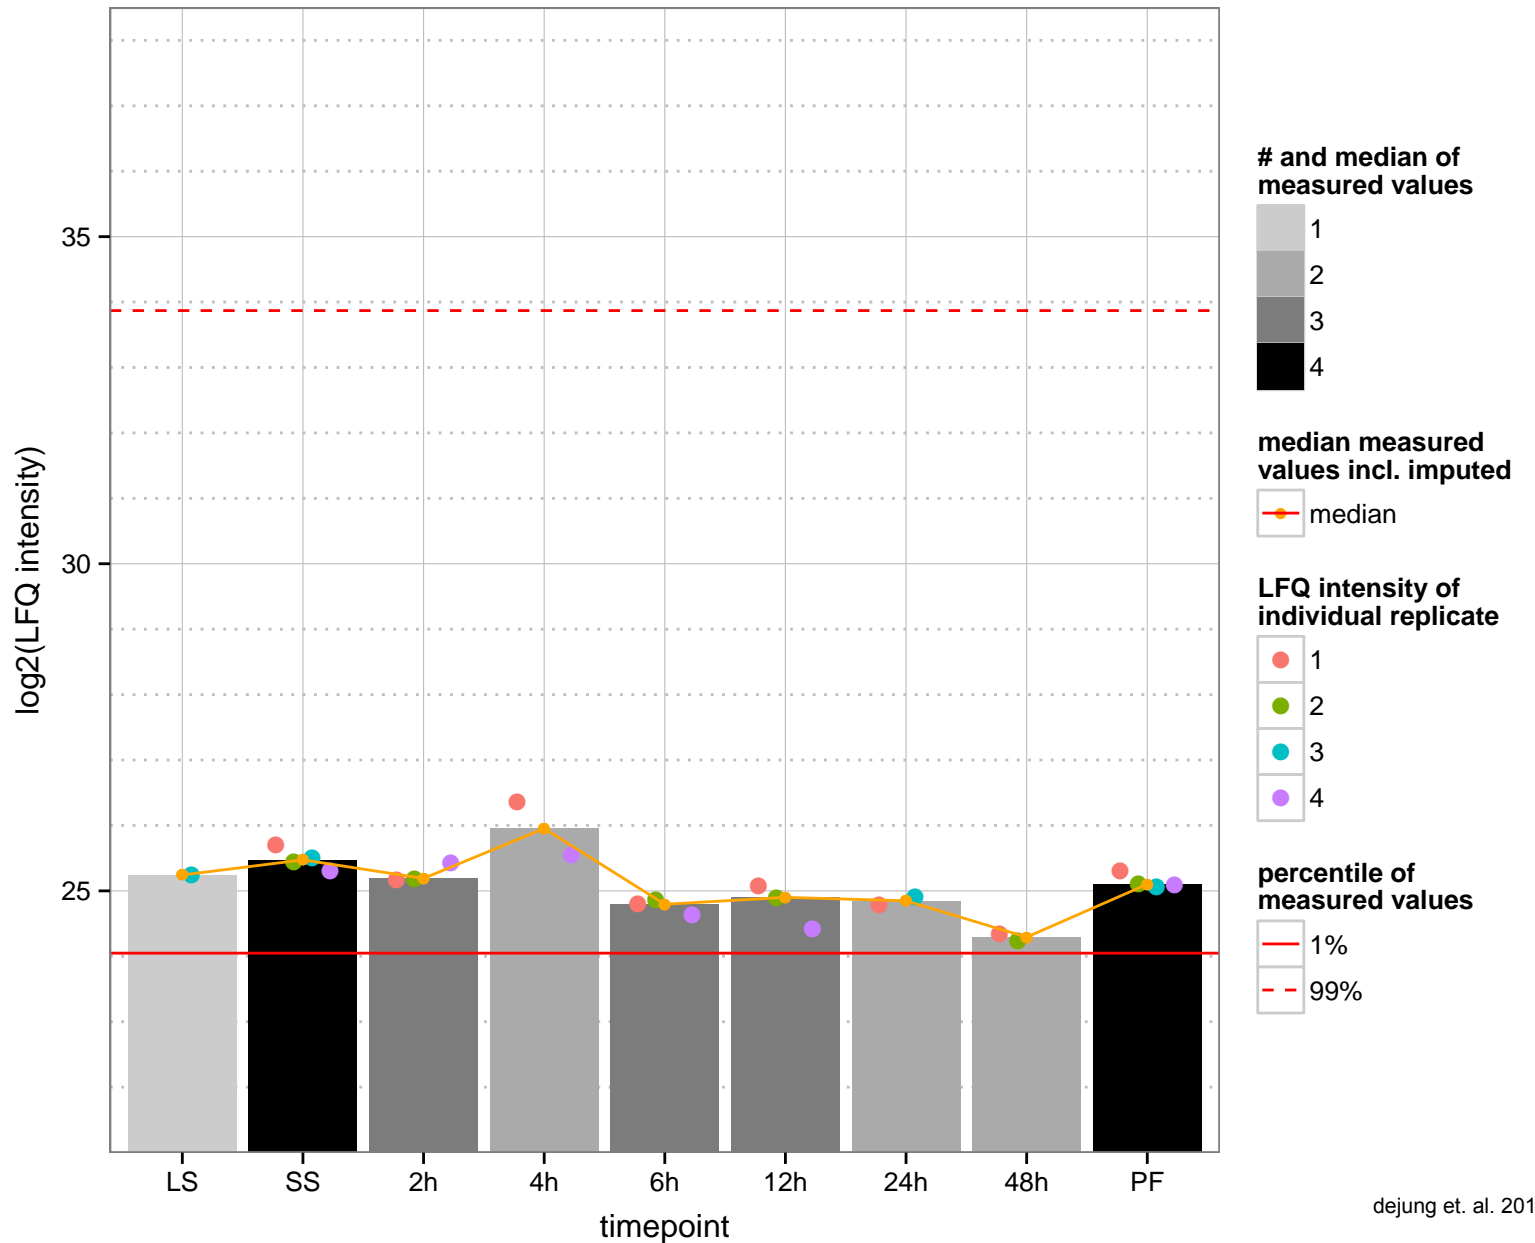

hypothetical protein, conserved  
 Tb927.8.5760  
 AGOF: null  
 AGOC: null  
 AGOP: null  
 PGO: protein binding  
 PGOC: null  
 PGOP: null

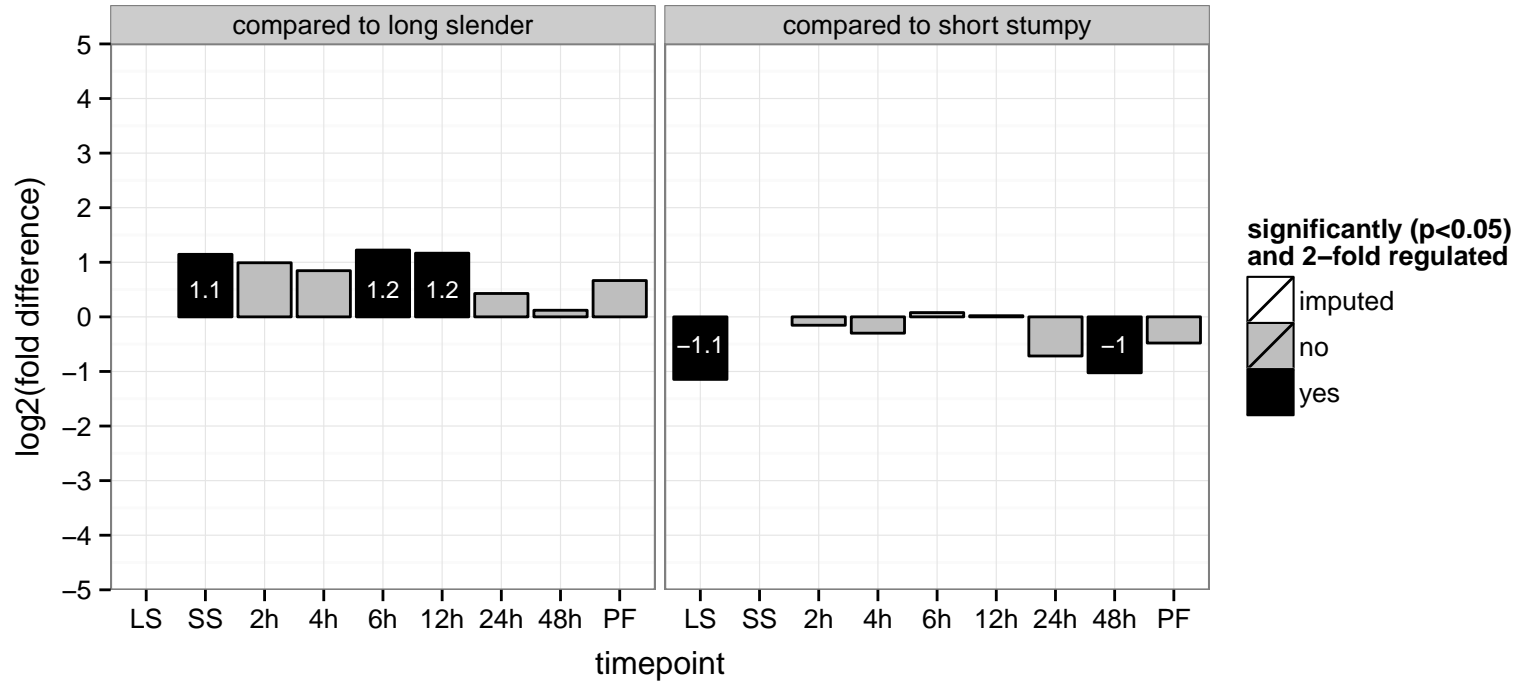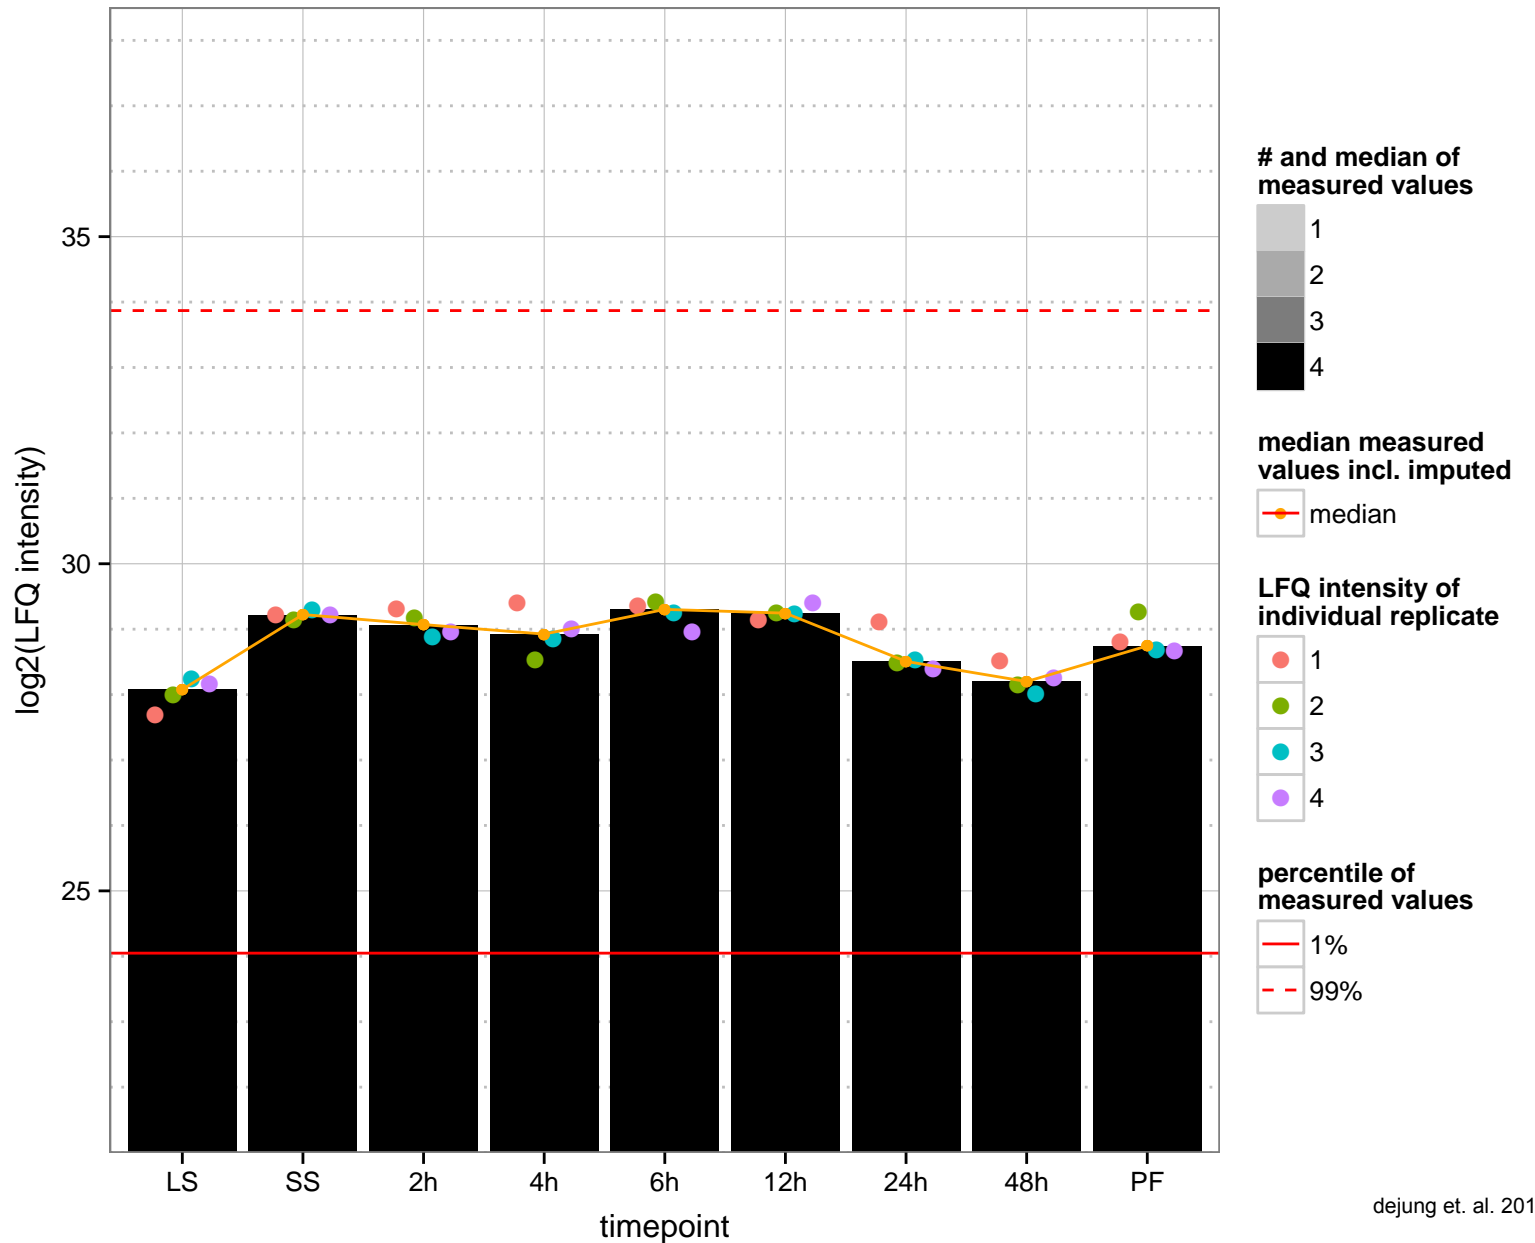



hypothetical protein, conserved  
 Tb927.8.7270  
 AGOF: null  
 AGOC: null  
 AGOP: null  
 PGO: null  
 PGOC: null  
 PGOP: null

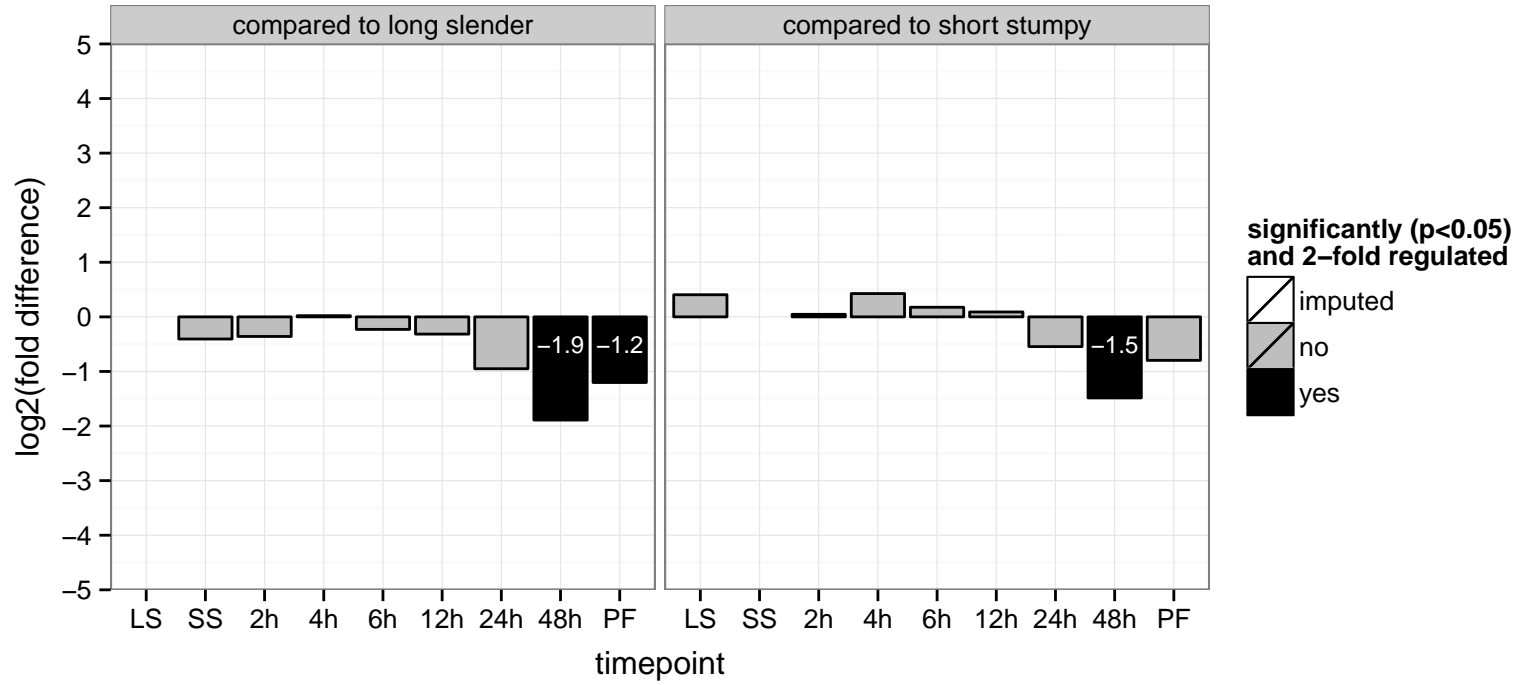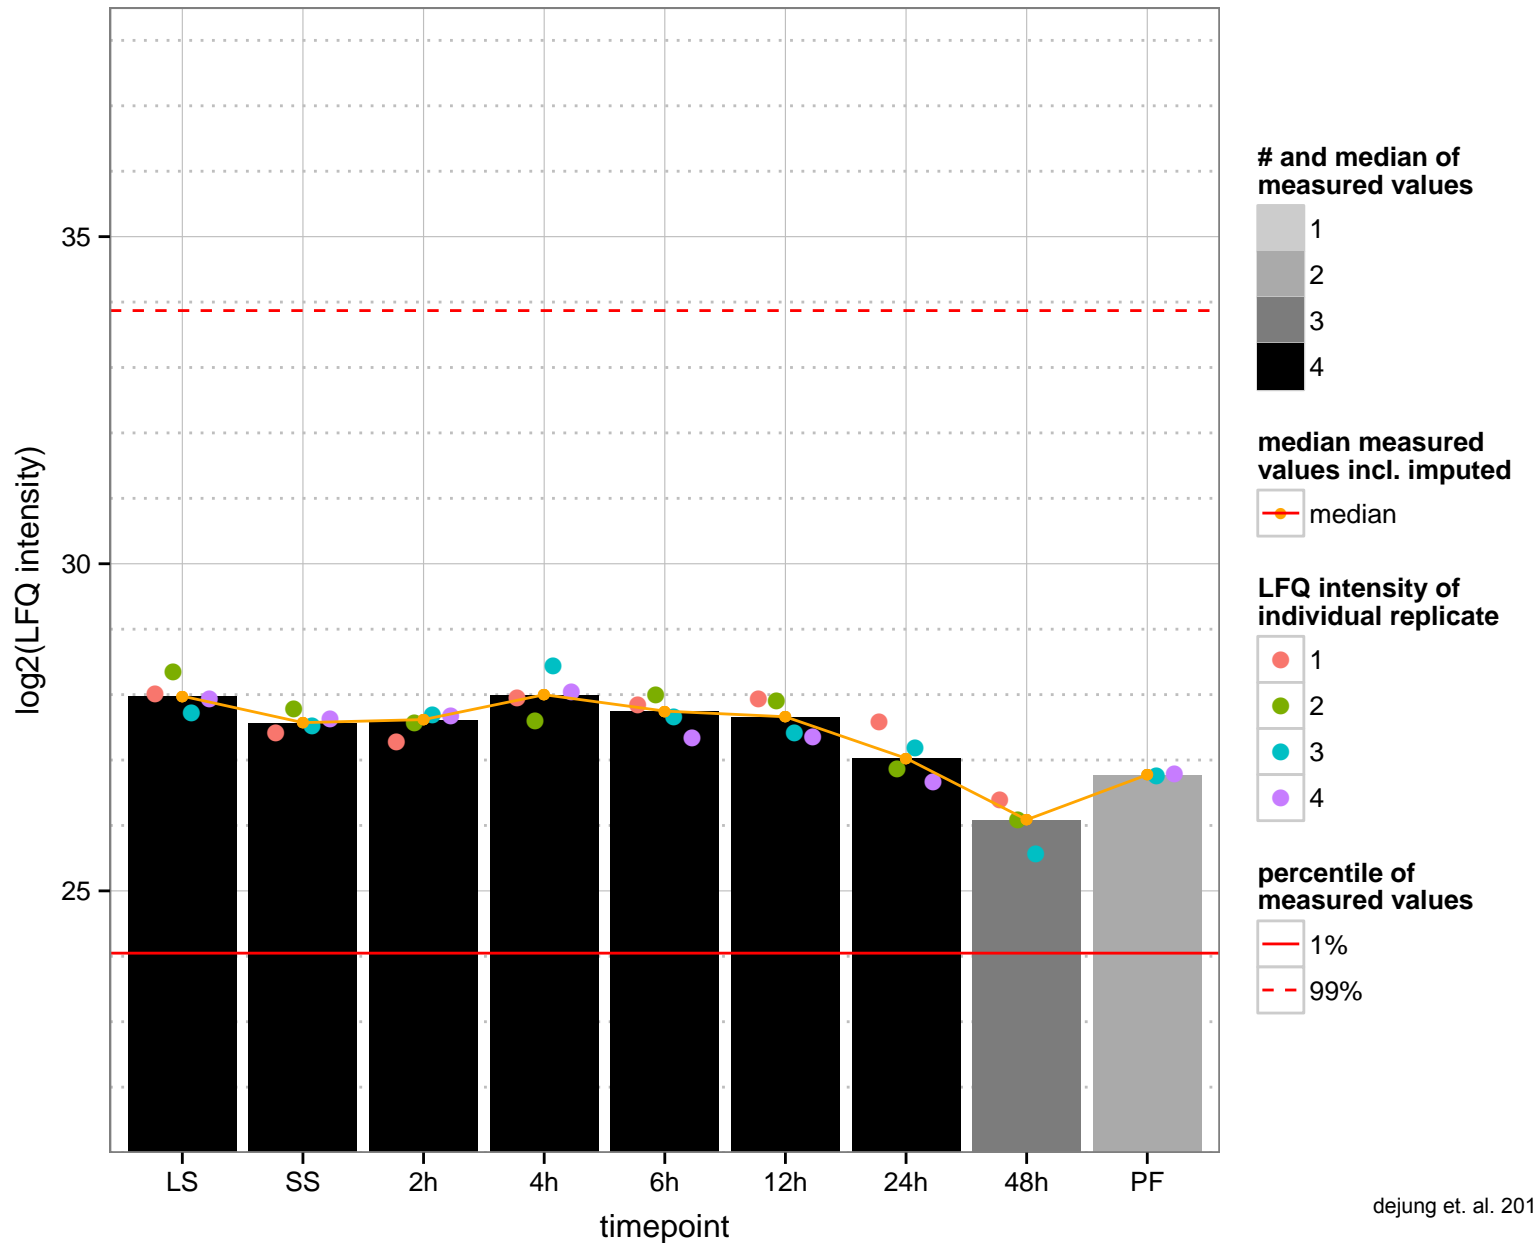

calpain, putative, cysteine peptidase  
 Tb927.8.8330  
 AGOF: calcium-dependent cysteine-type endopeptidase activity  
 AGOC: intracellular  
 AGOP: proteolysis  
 PGOF: calcium-dependent cysteine-type endopeptidase activity  
 PGOC: intracellular  
 PGOP: proteolysis

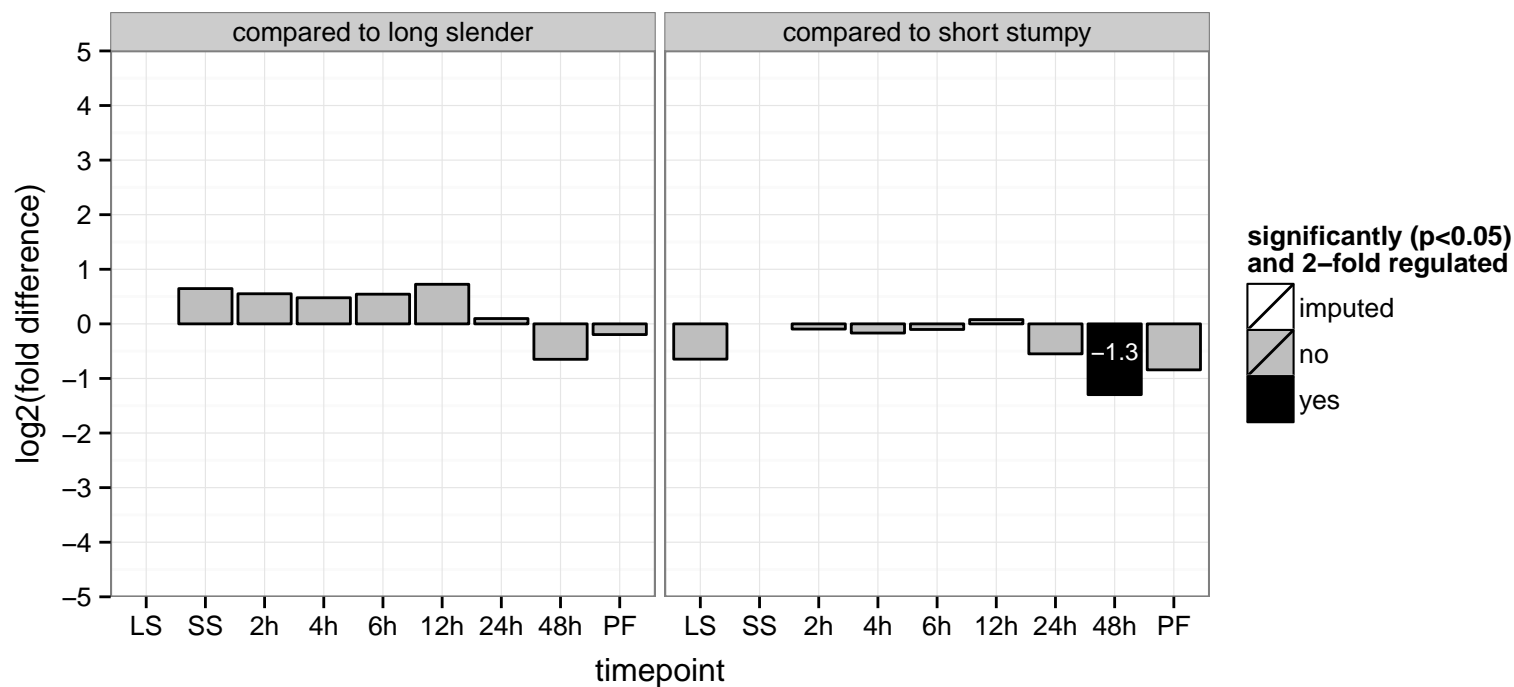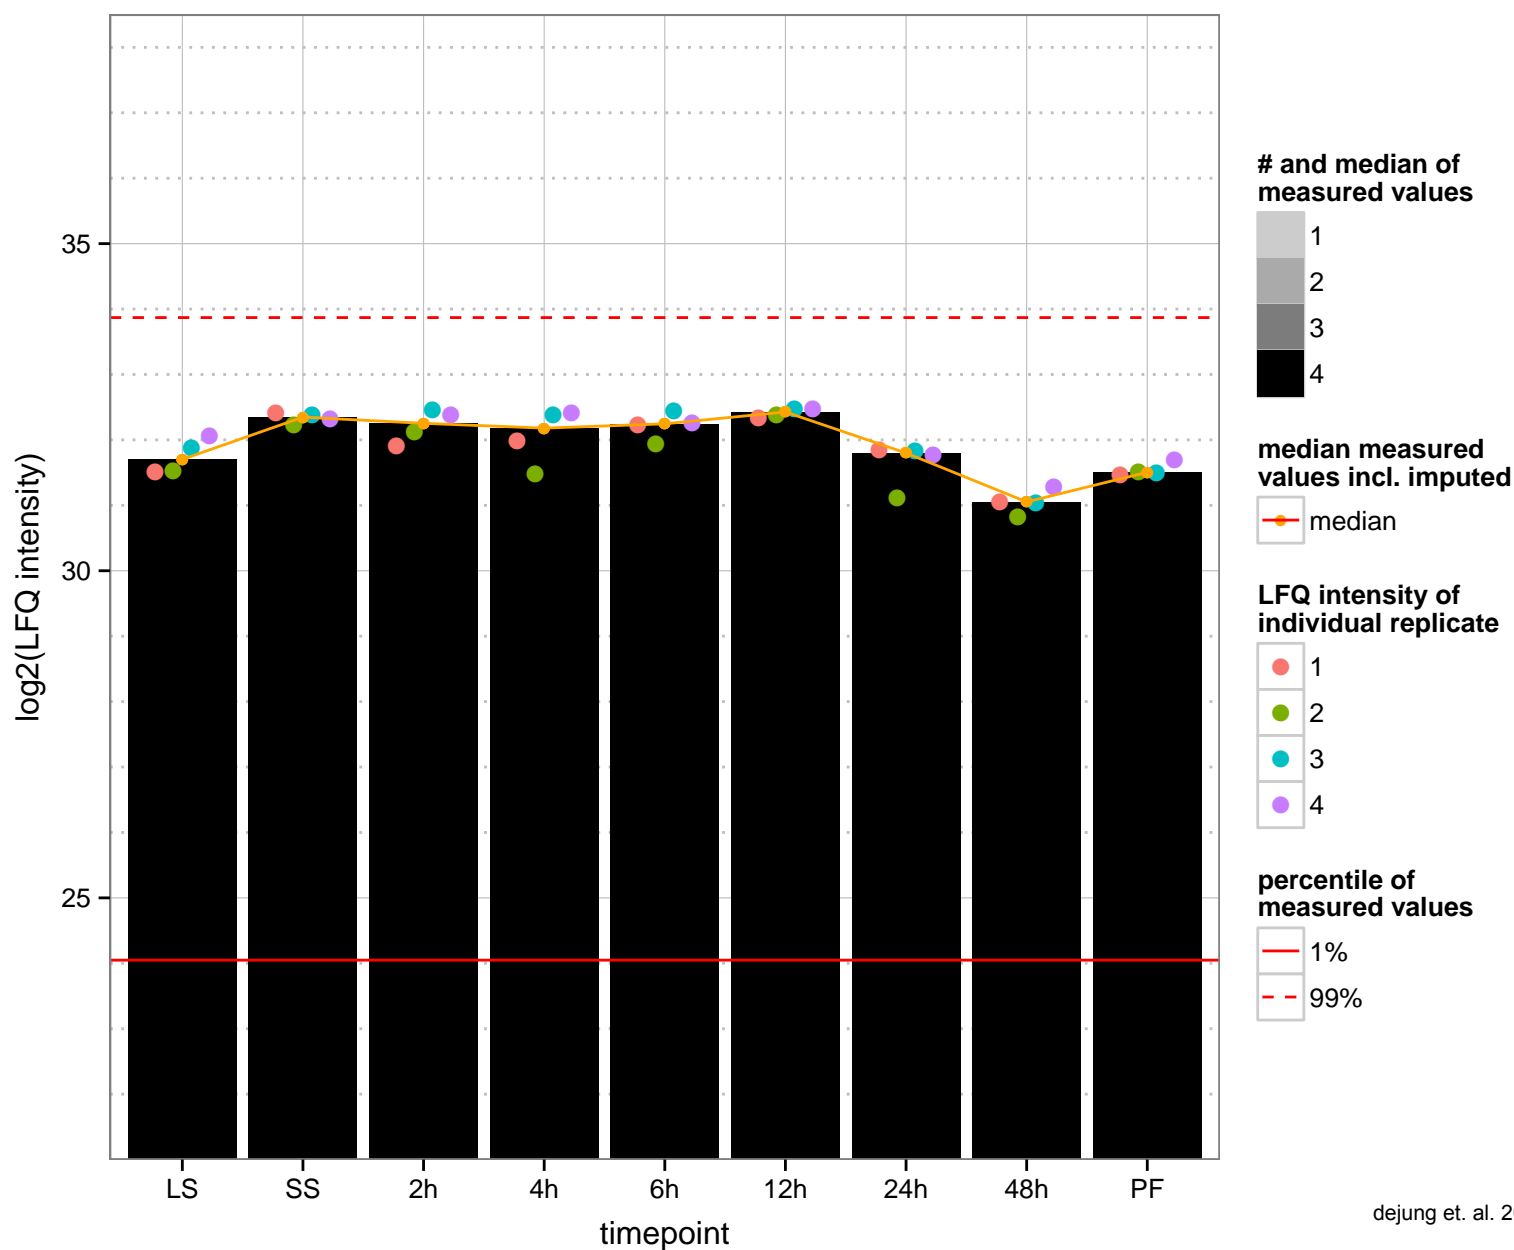

hypothetical protein, conserved  
 Tb927.9.11640  
 AGOF: null  
 AGOC: null  
 AGOP: null  
 PGO: null  
 PGOC: null  
 PGOP: null

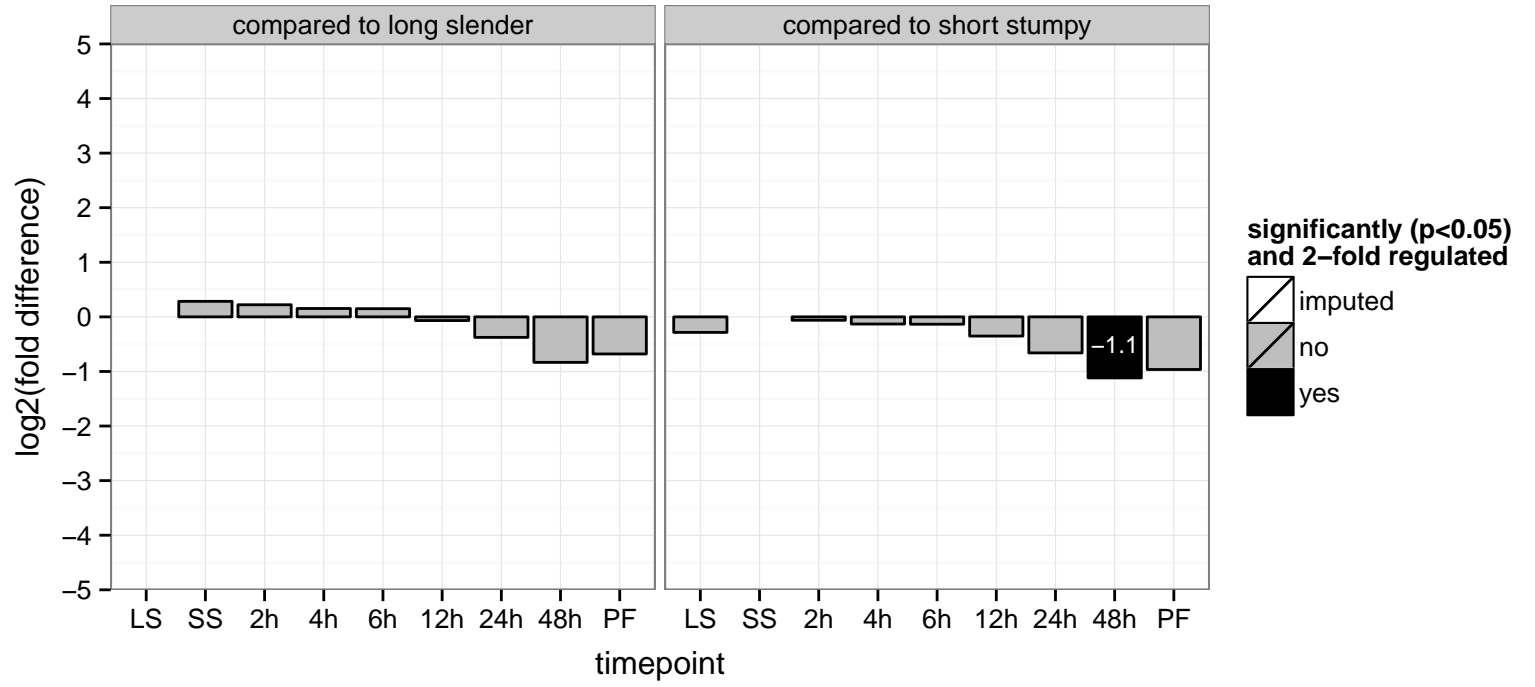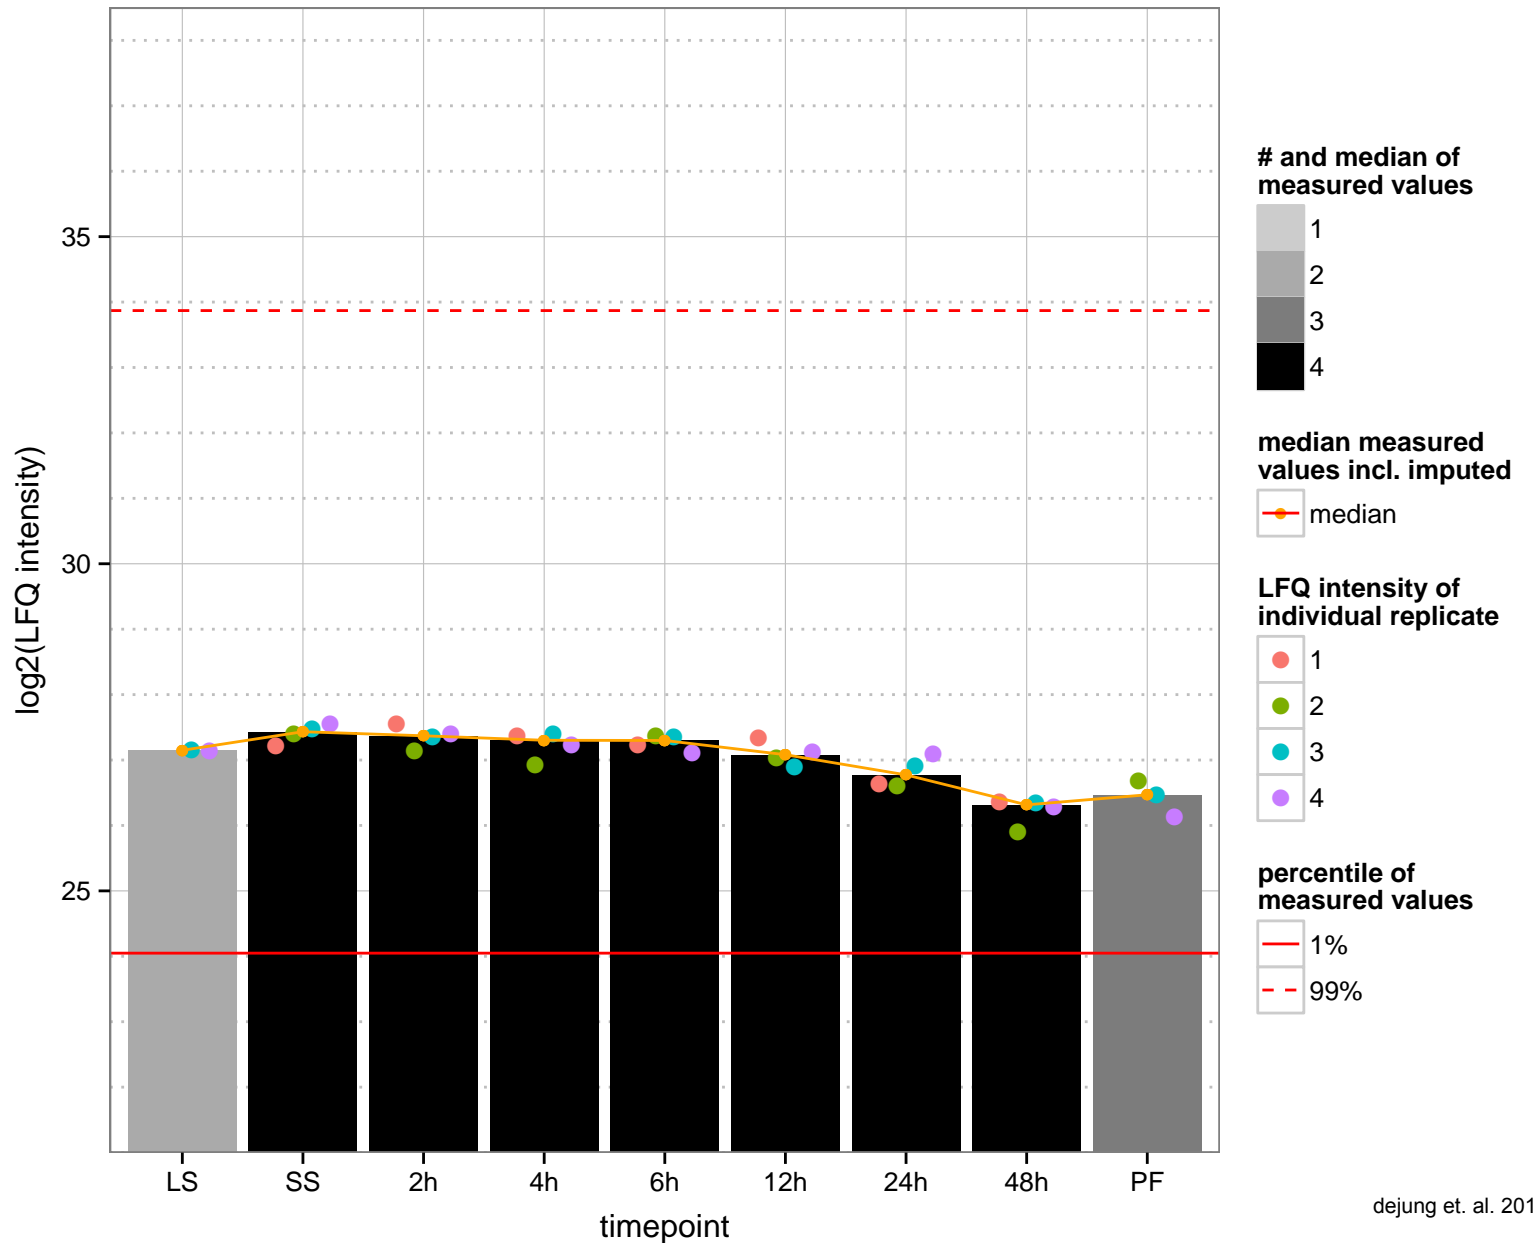

6-phosphogluconate dehydrogenase, decarboxylating (gnD)  
 Tb927.9.12110  
 AGOF: NADP binding, phosphogluconate dehydrogenase (decarboxylating) activity  
 AGOC: cytoplasm  
 AGOP: oxidation-reduction process, pentose-phosphate shunt  
 PGOF: NADP binding, phosphogluconate dehydrogenase (decarboxylating) activity  
 PGO: null  
 PGOP: oxidation-reduction process, pentose-phosphate shunt

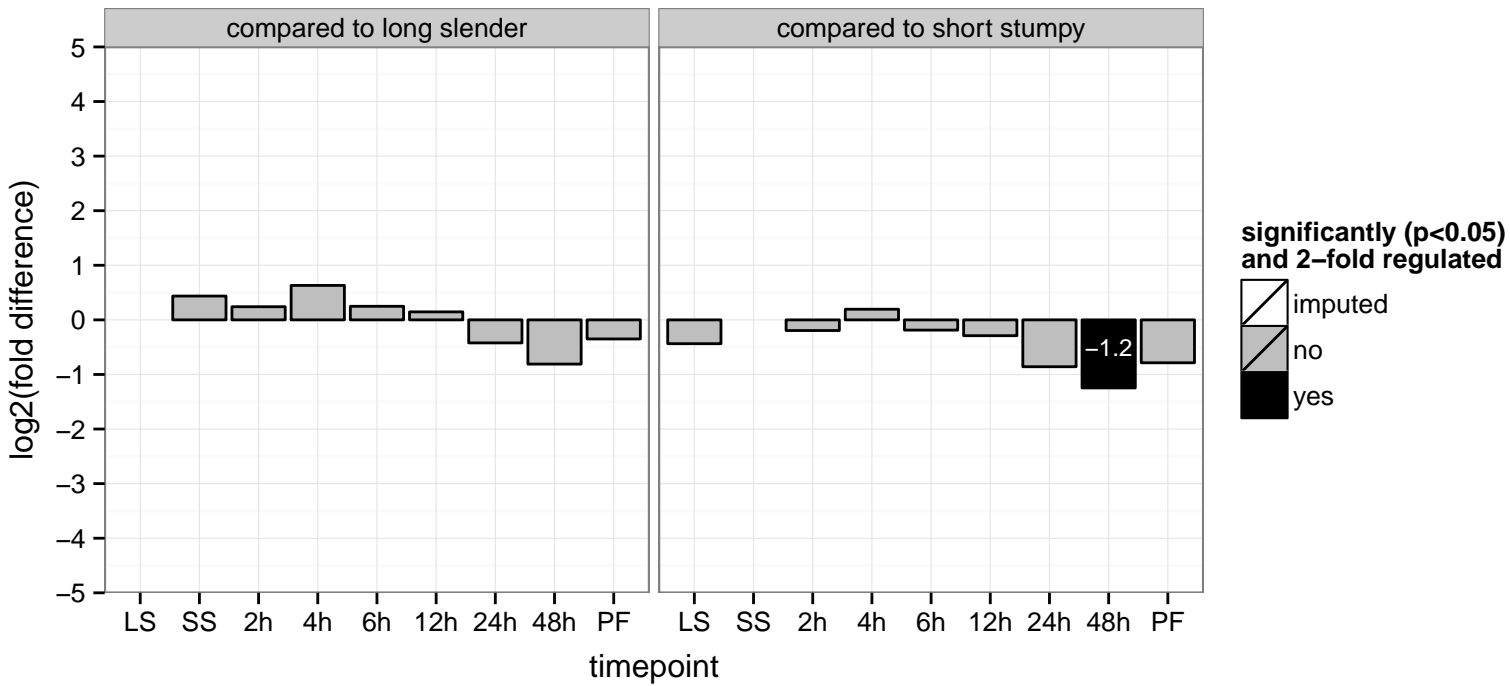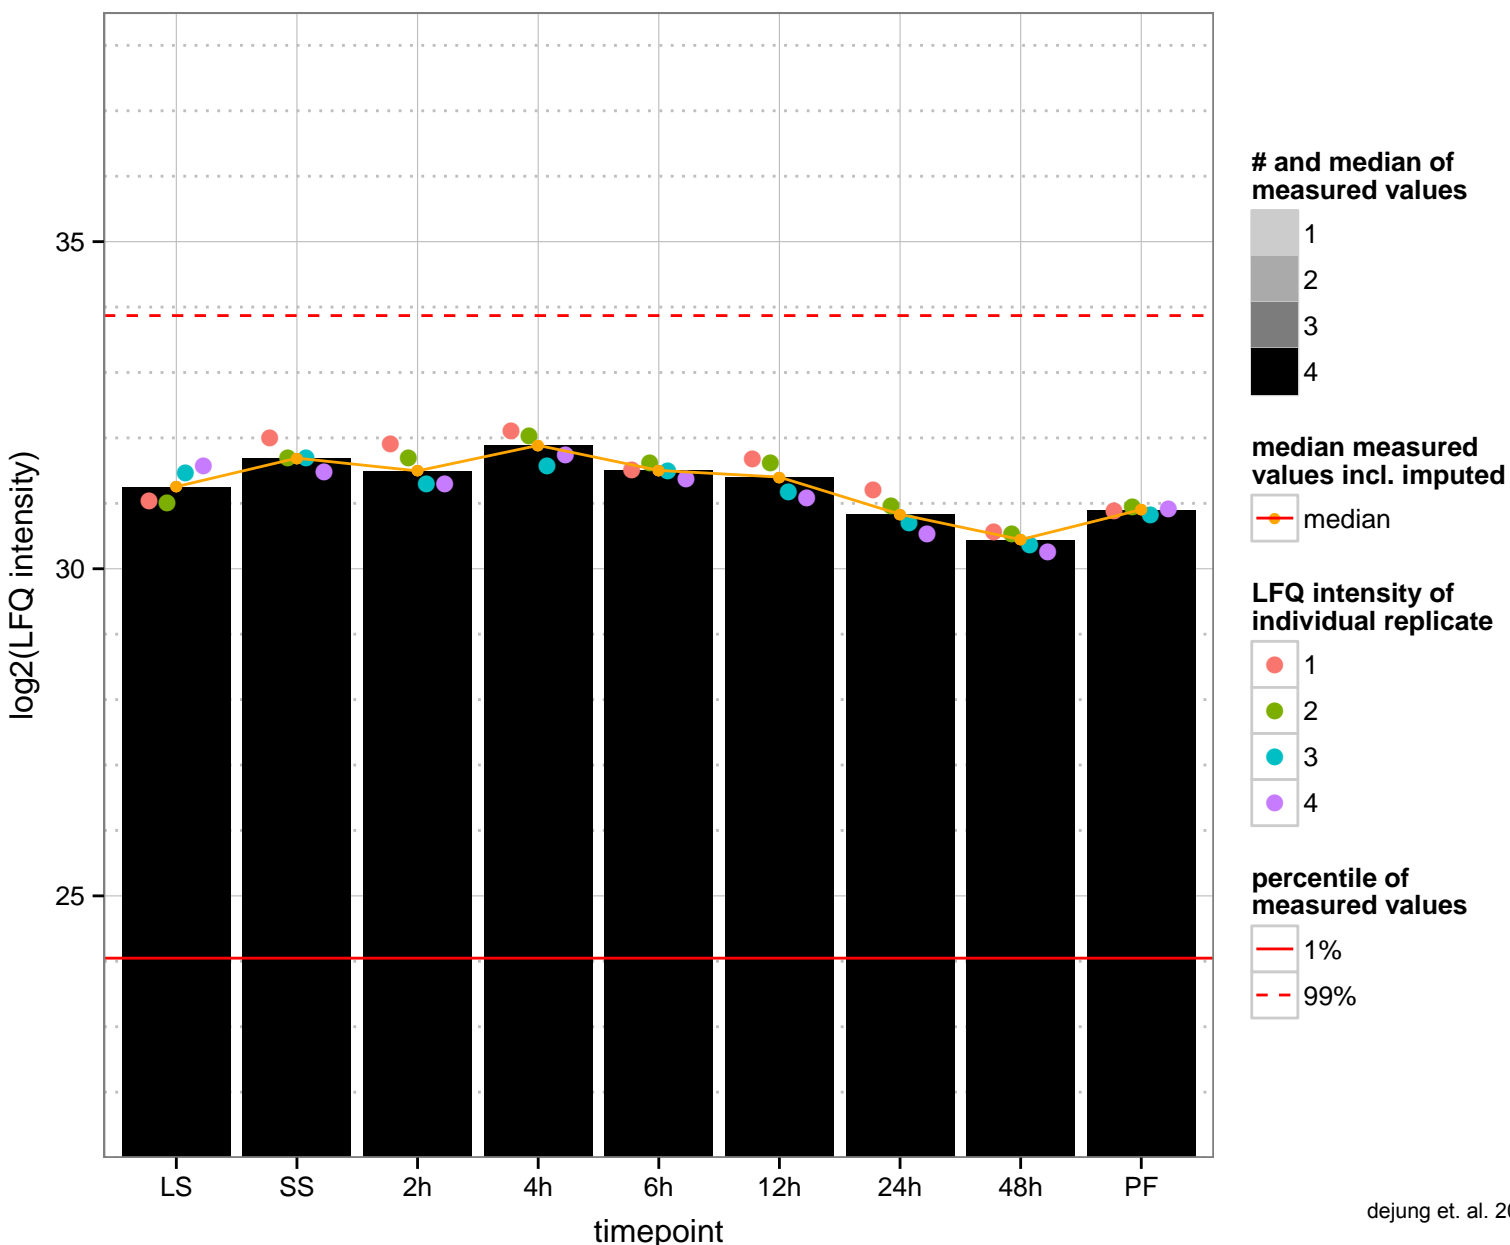

QA-SNARE protein putative  
 Tb927.9.13030  
 AGOF: SNAP receptor activity  
 AGOC: integral to membrane, membrane  
 AGOP: membrane fusion, vesicle-mediated transport  
 PGO: protein binding  
 PGO: membrane  
 PGO: vesicle-mediated transport

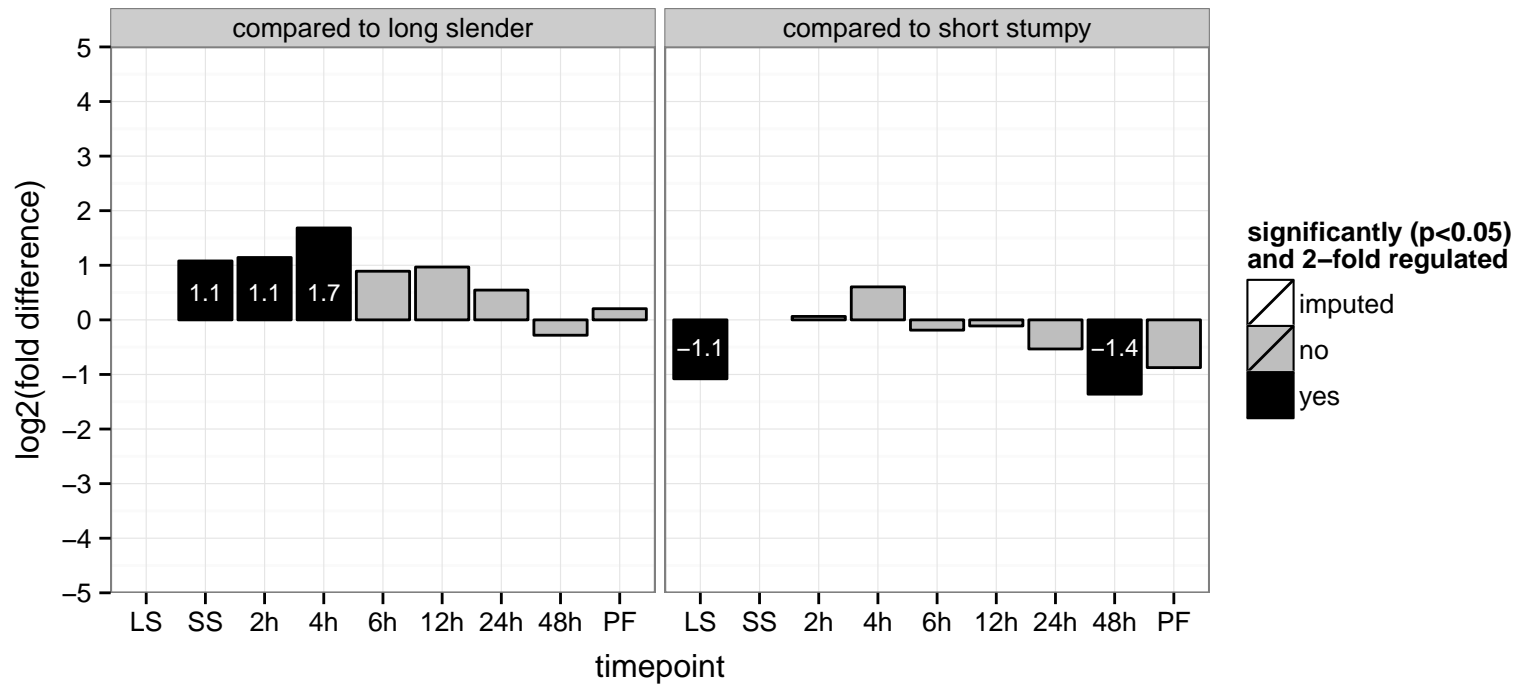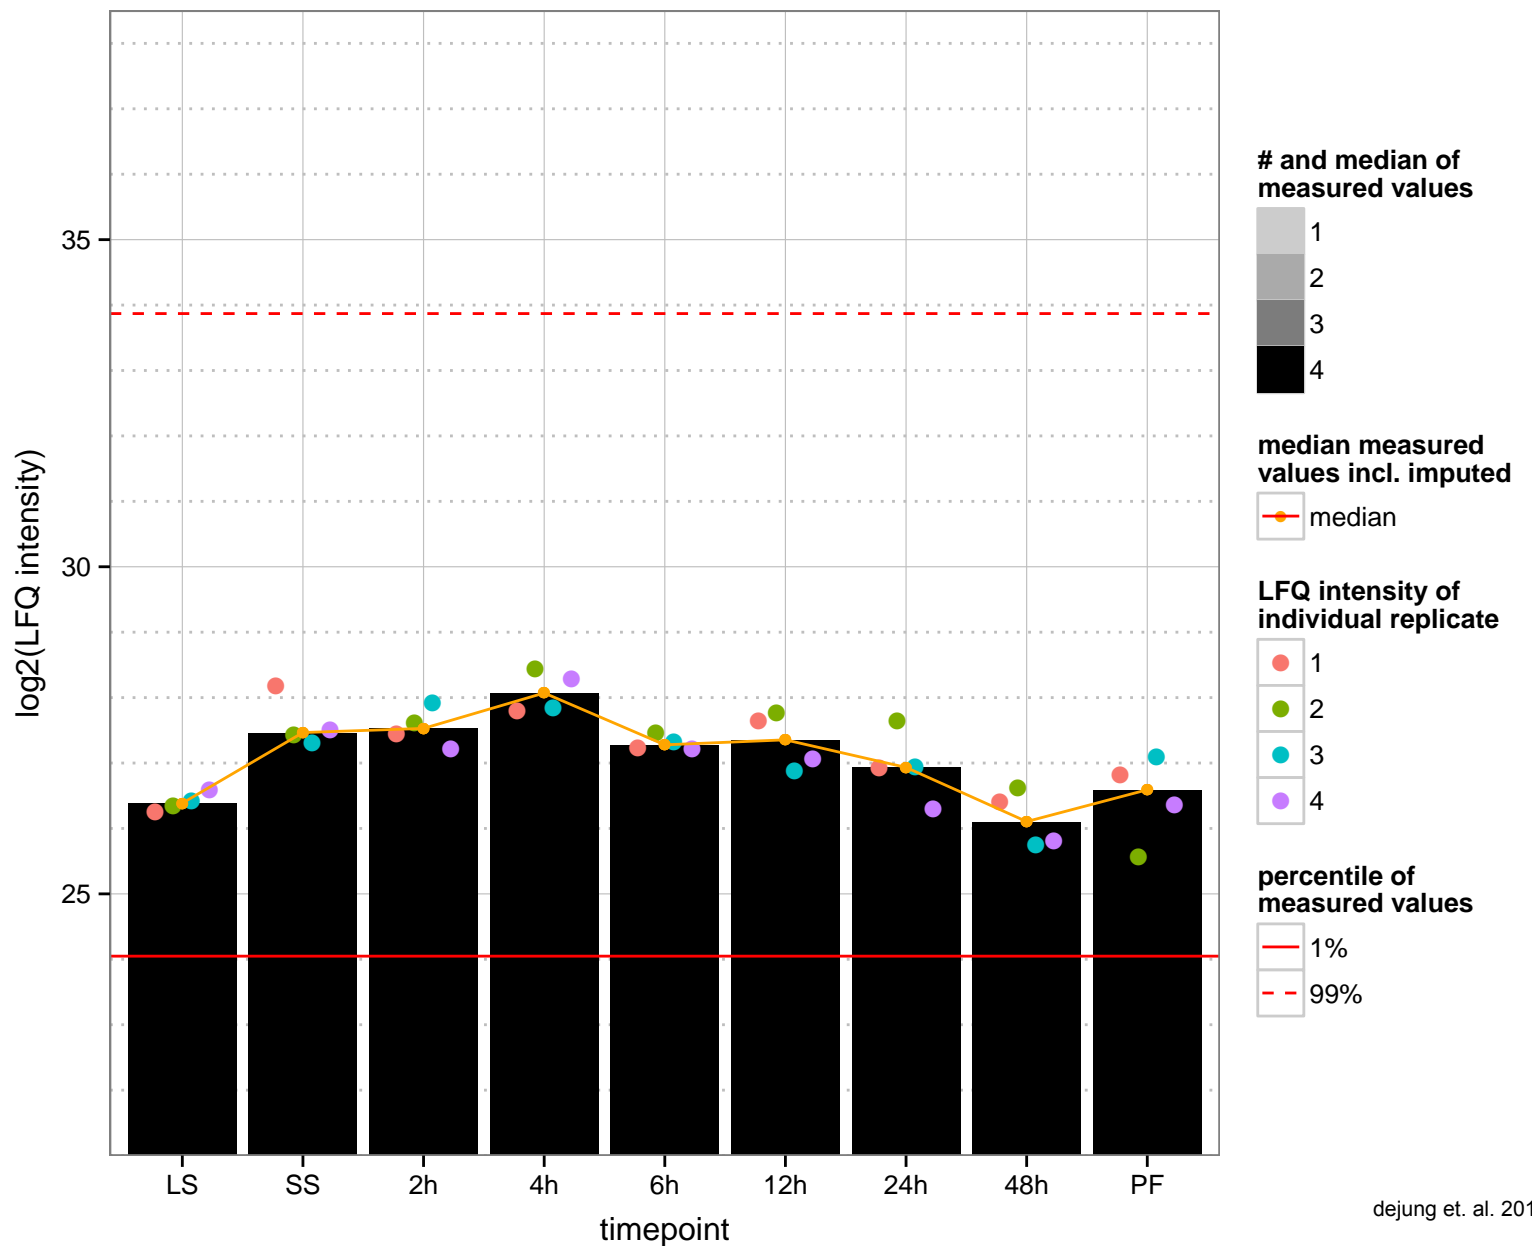

hypothetical protein, conserved  
 Tb927.9.3770  
 AGOF: null  
 AGOC: null  
 AGOP: null  
 PGO: null  
 PGOC: null  
 PGOP: null

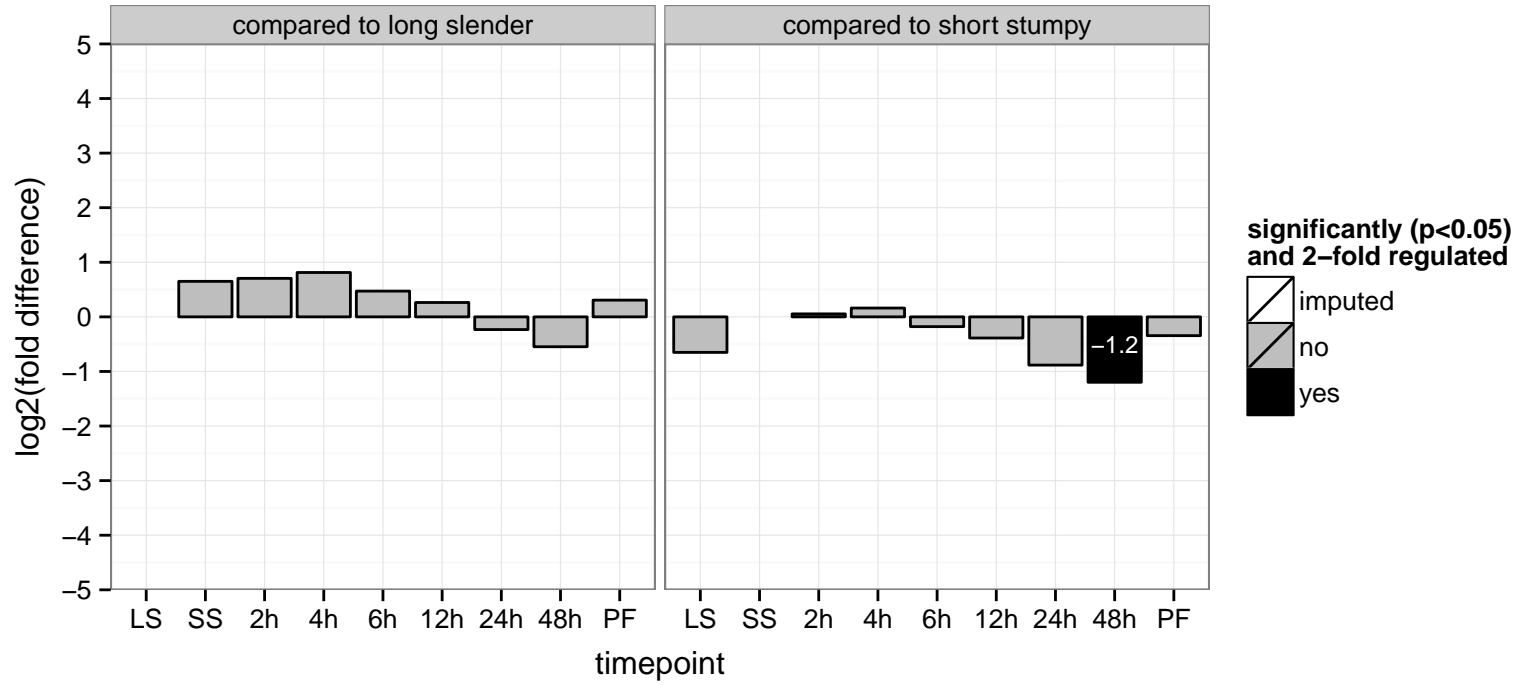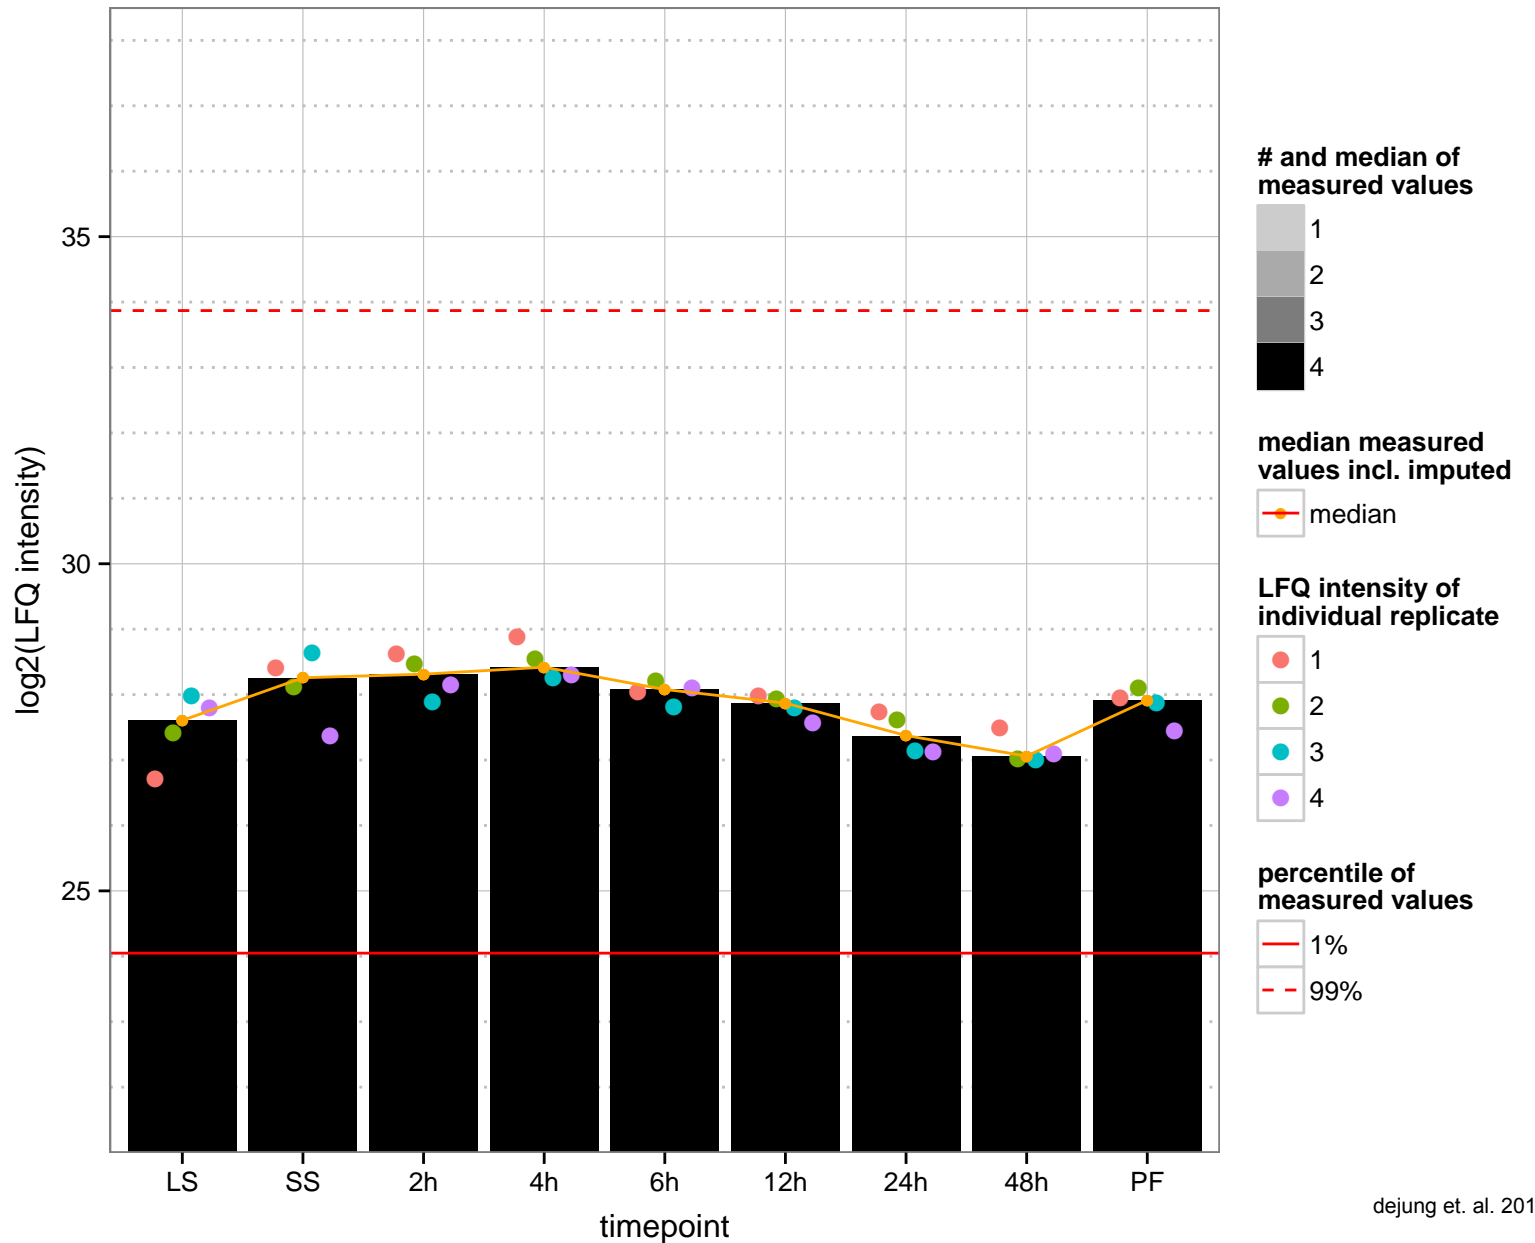

heat shock protein, putative, HSP70-like protein  
 Tb927.9.4500  
 AGOF: ATP binding  
 AGOC: mitochondrial inner membrane  
 AGOP: protein folding  
 PGO: null  
 PGOC: null  
 PGOP: null

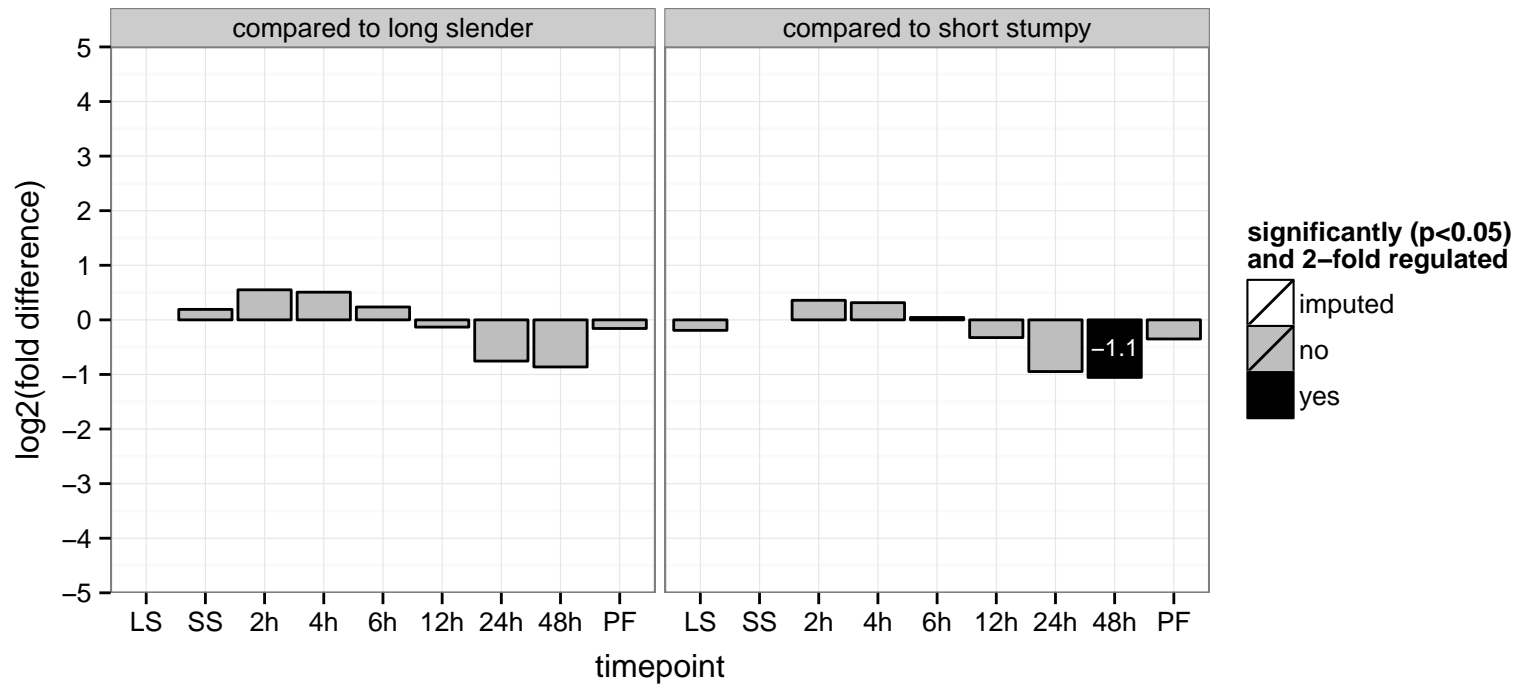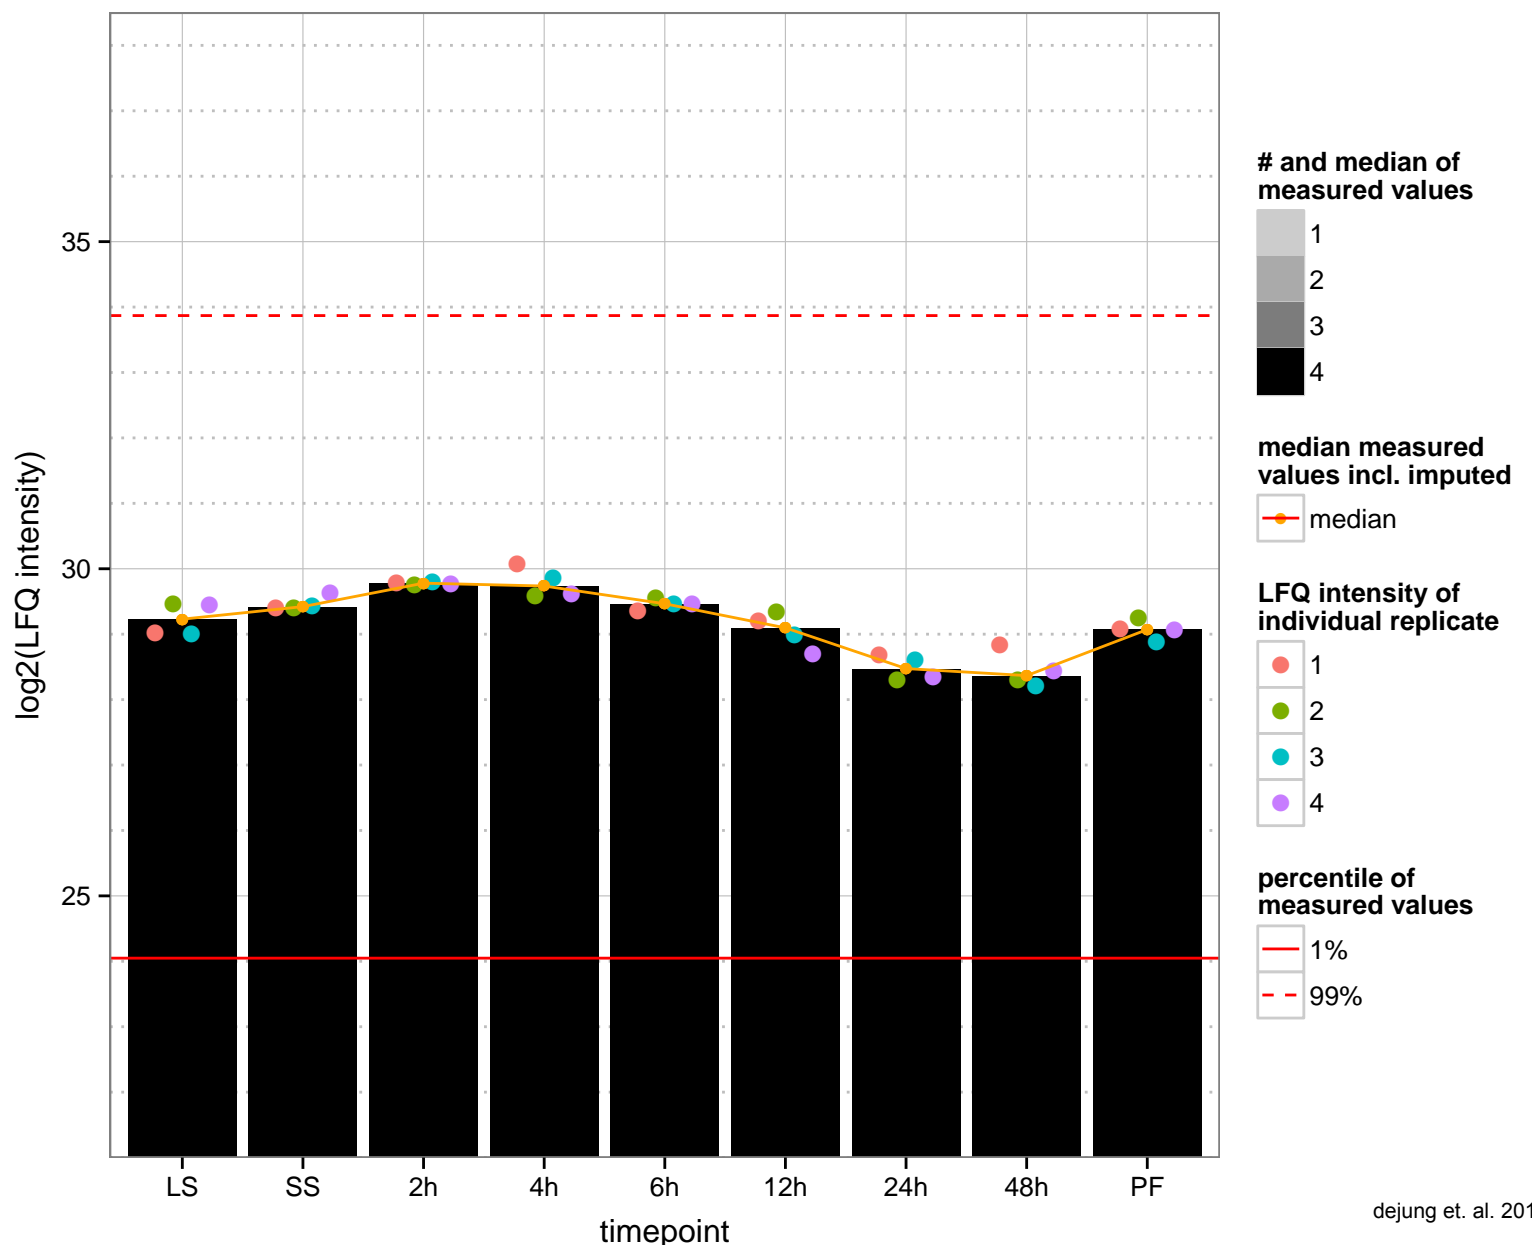

inositol-1(or 4)-monophosphatase, putative (IMPase)  
 Tb927.9.6350  
 AGOF: inositol monophosphate 1-phosphatase activity  
 AGOC: null  
 AGOP: phosphate-containing compound metabolic process, signal transduction  
 PGO: null  
 PGOC: null  
 PGOP: phosphatidylinositol phosphorylation

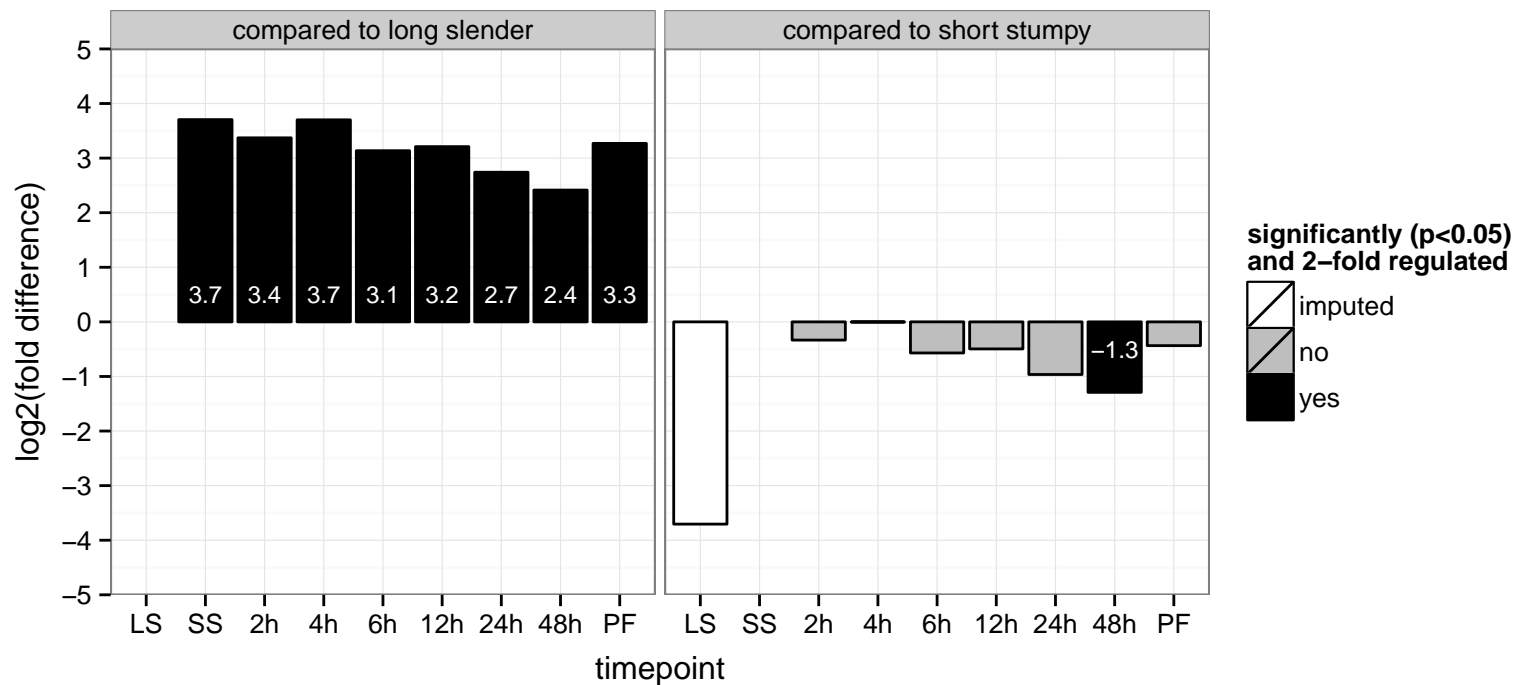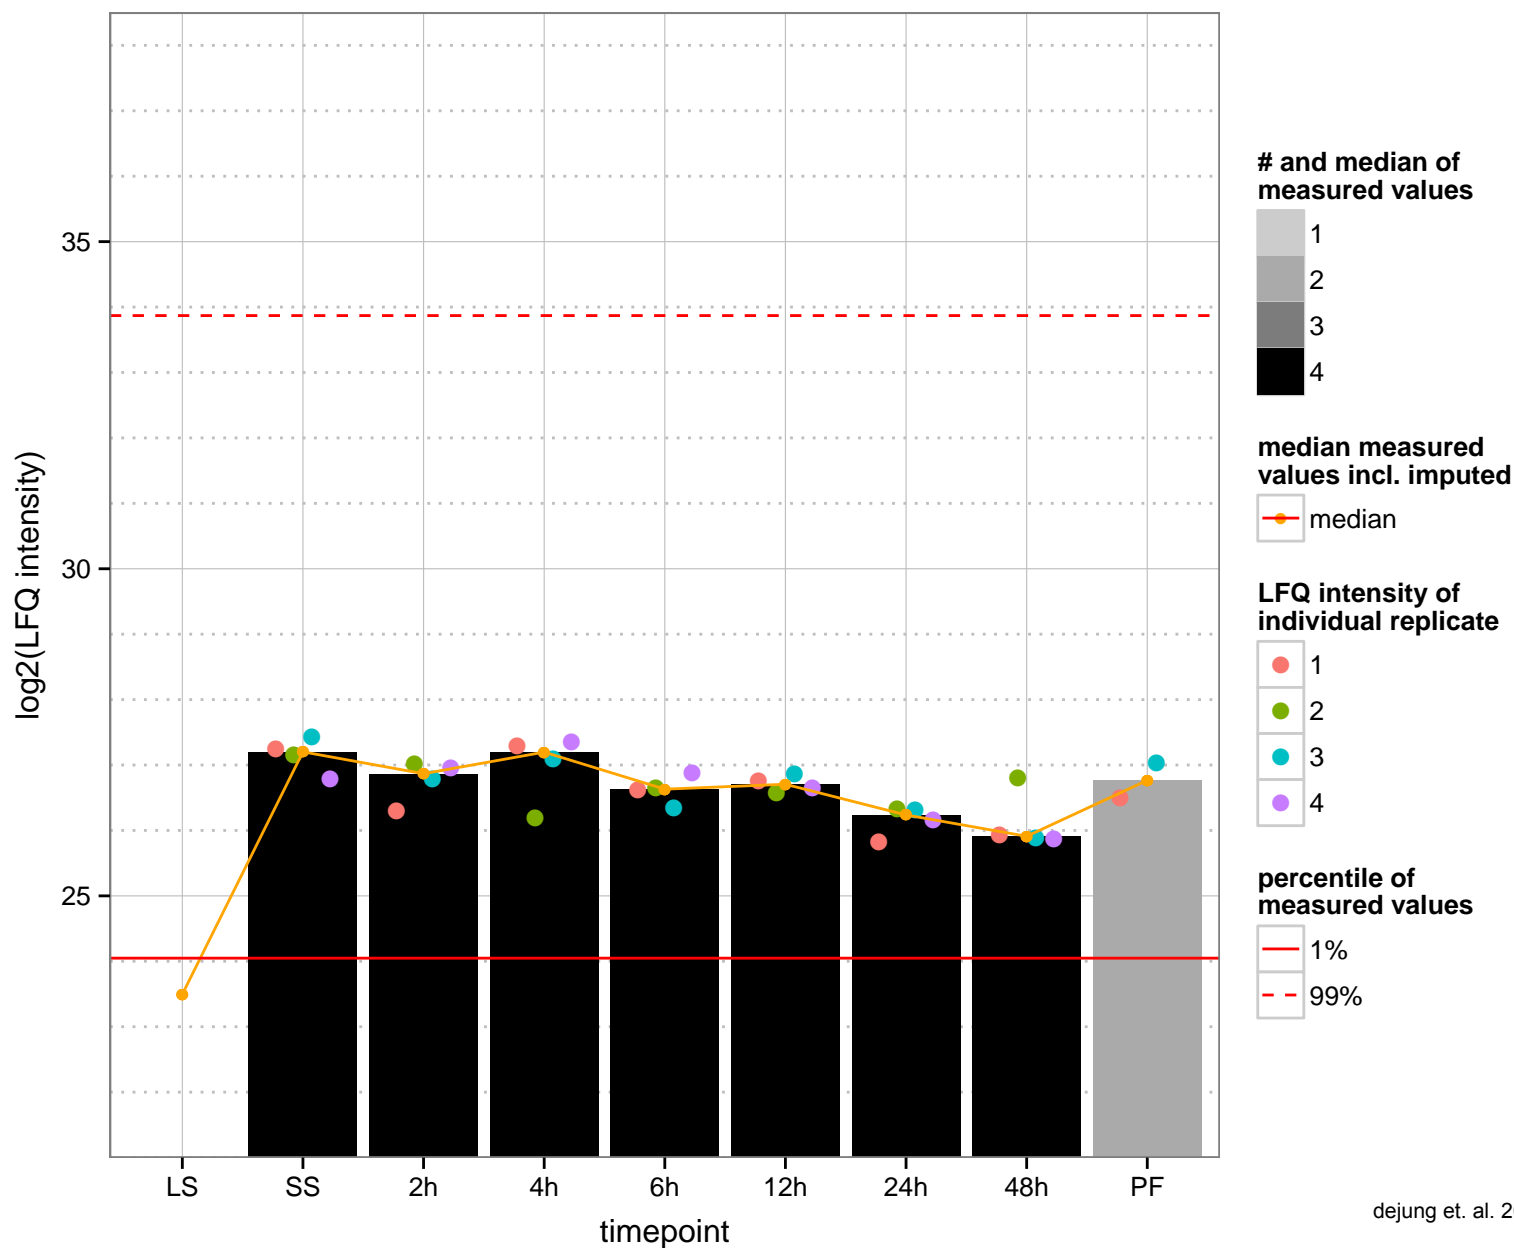



hypothetical protein, conserved  
 Tb927.9.7110  
 AGOF: null  
 AGOC: null  
 AGOP: null  
 PGO: null  
 PGOC: null  
 PGOP: null

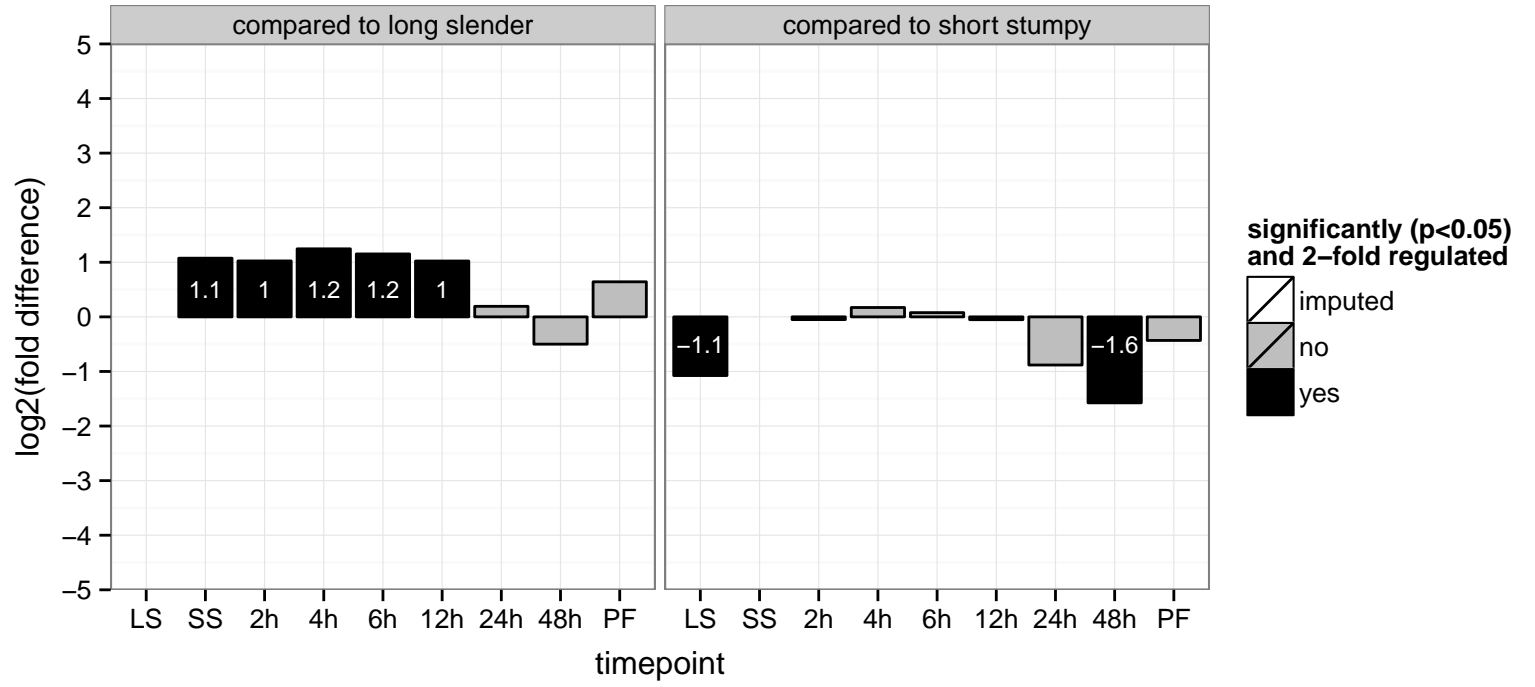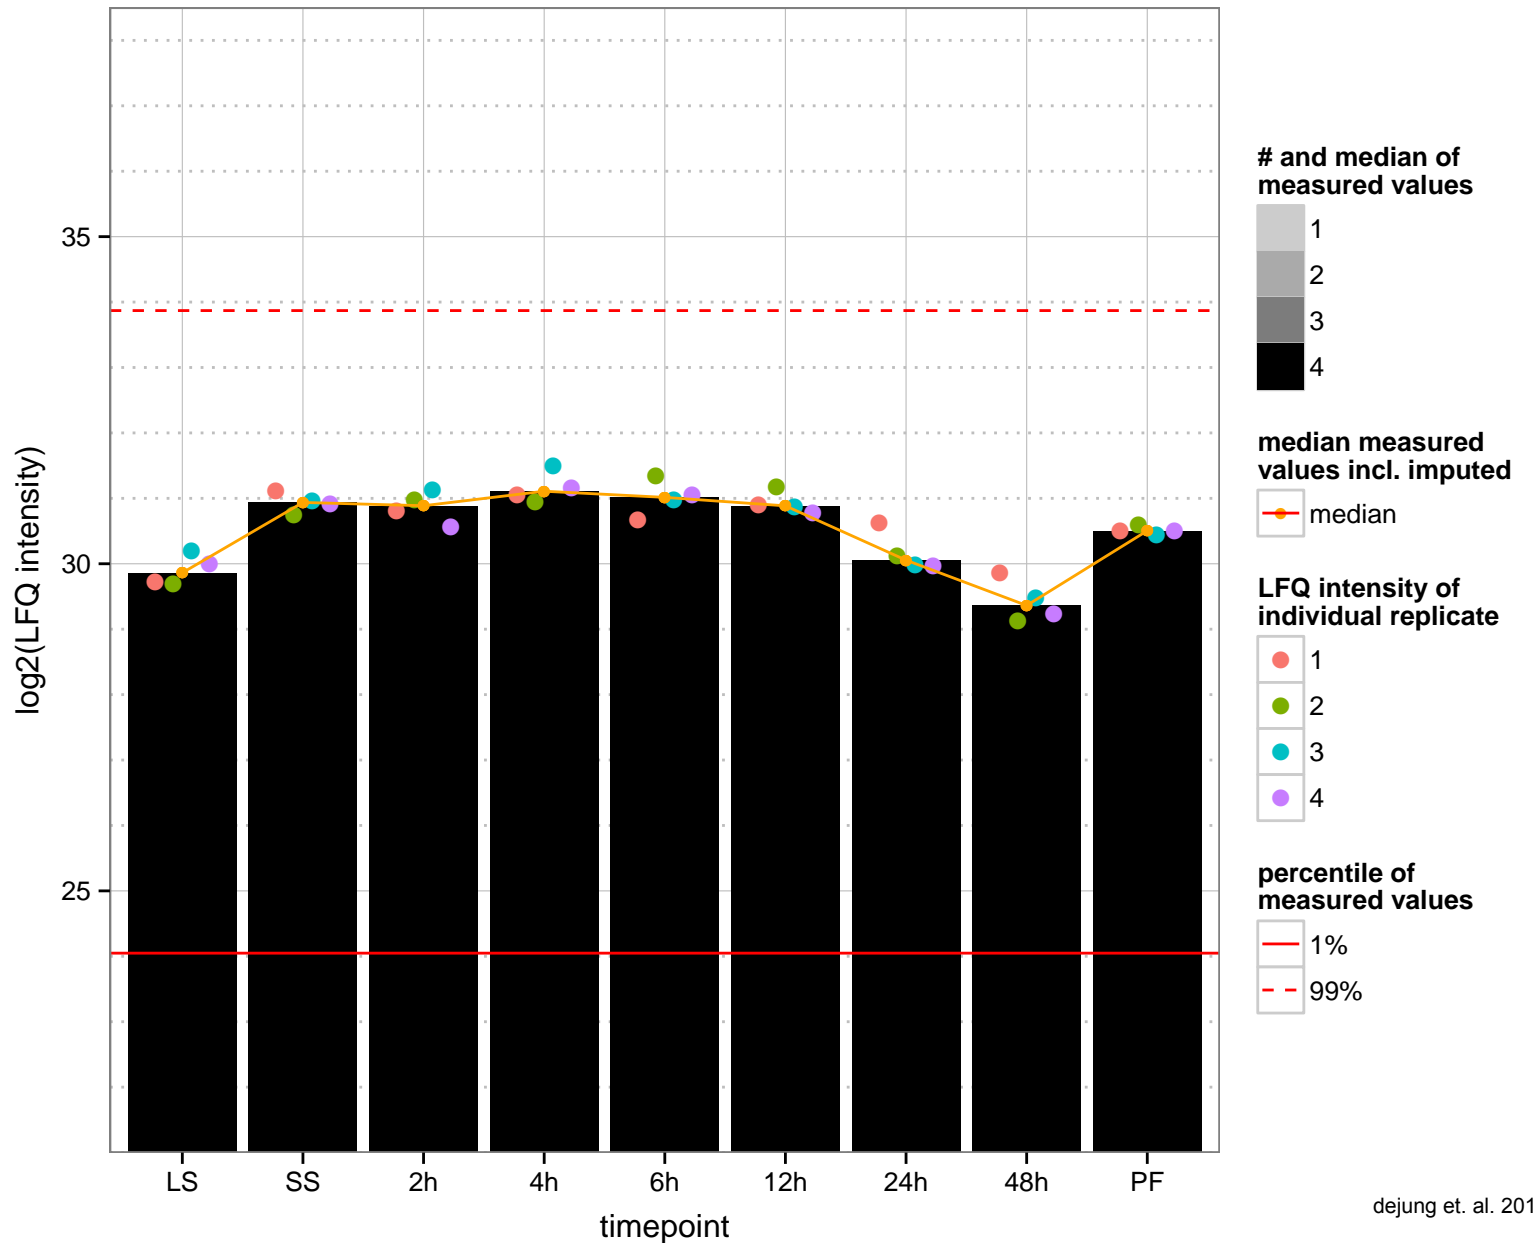

peptidyl-prolyl cis-trans isomerase (cyclophilin- 40), putative, cyclophilin-40  
 Tb927.9.9780  
 AGOF: peptidyl-prolyl cis-trans isomerase activity  
 AGOC: null  
 AGOP: null  
 PGOF: peptidyl-prolyl cis-trans isomerase activity, protein binding  
 PGOC: null  
 PGOP: protein folding

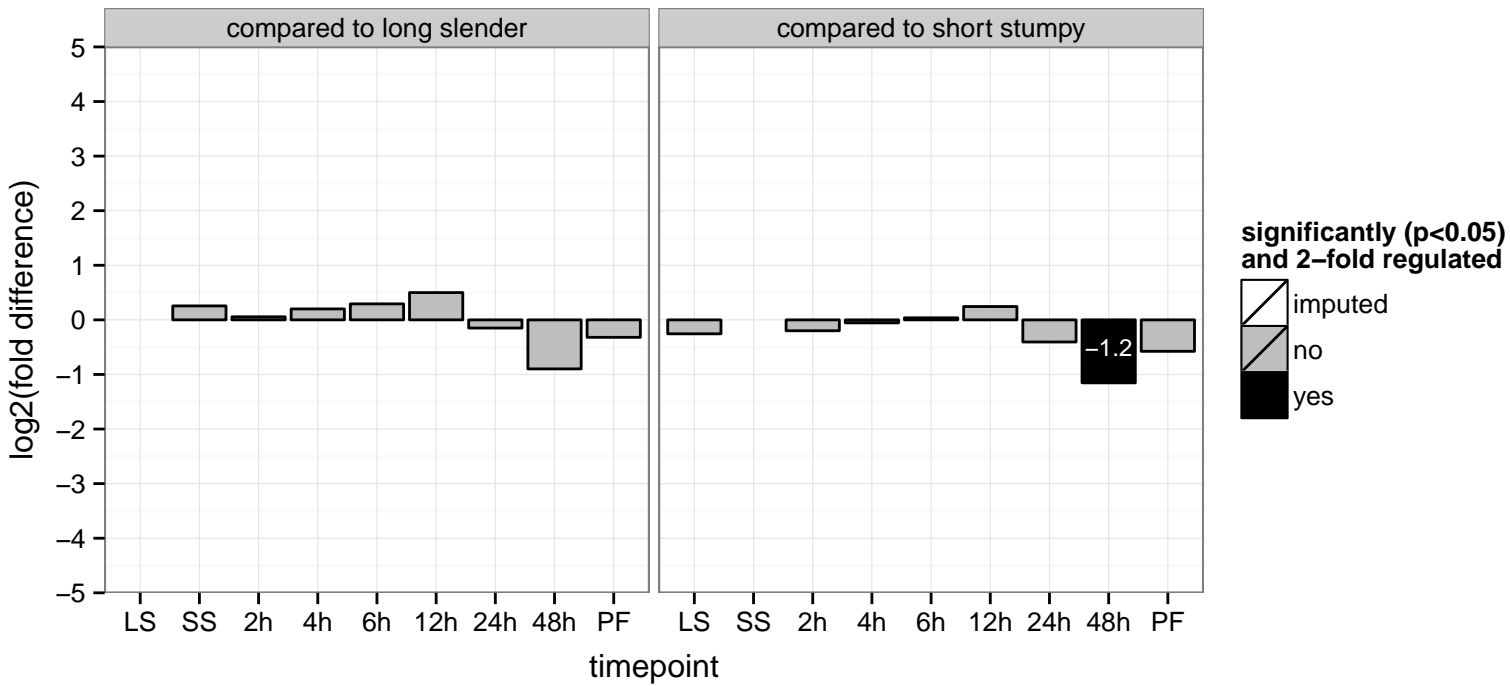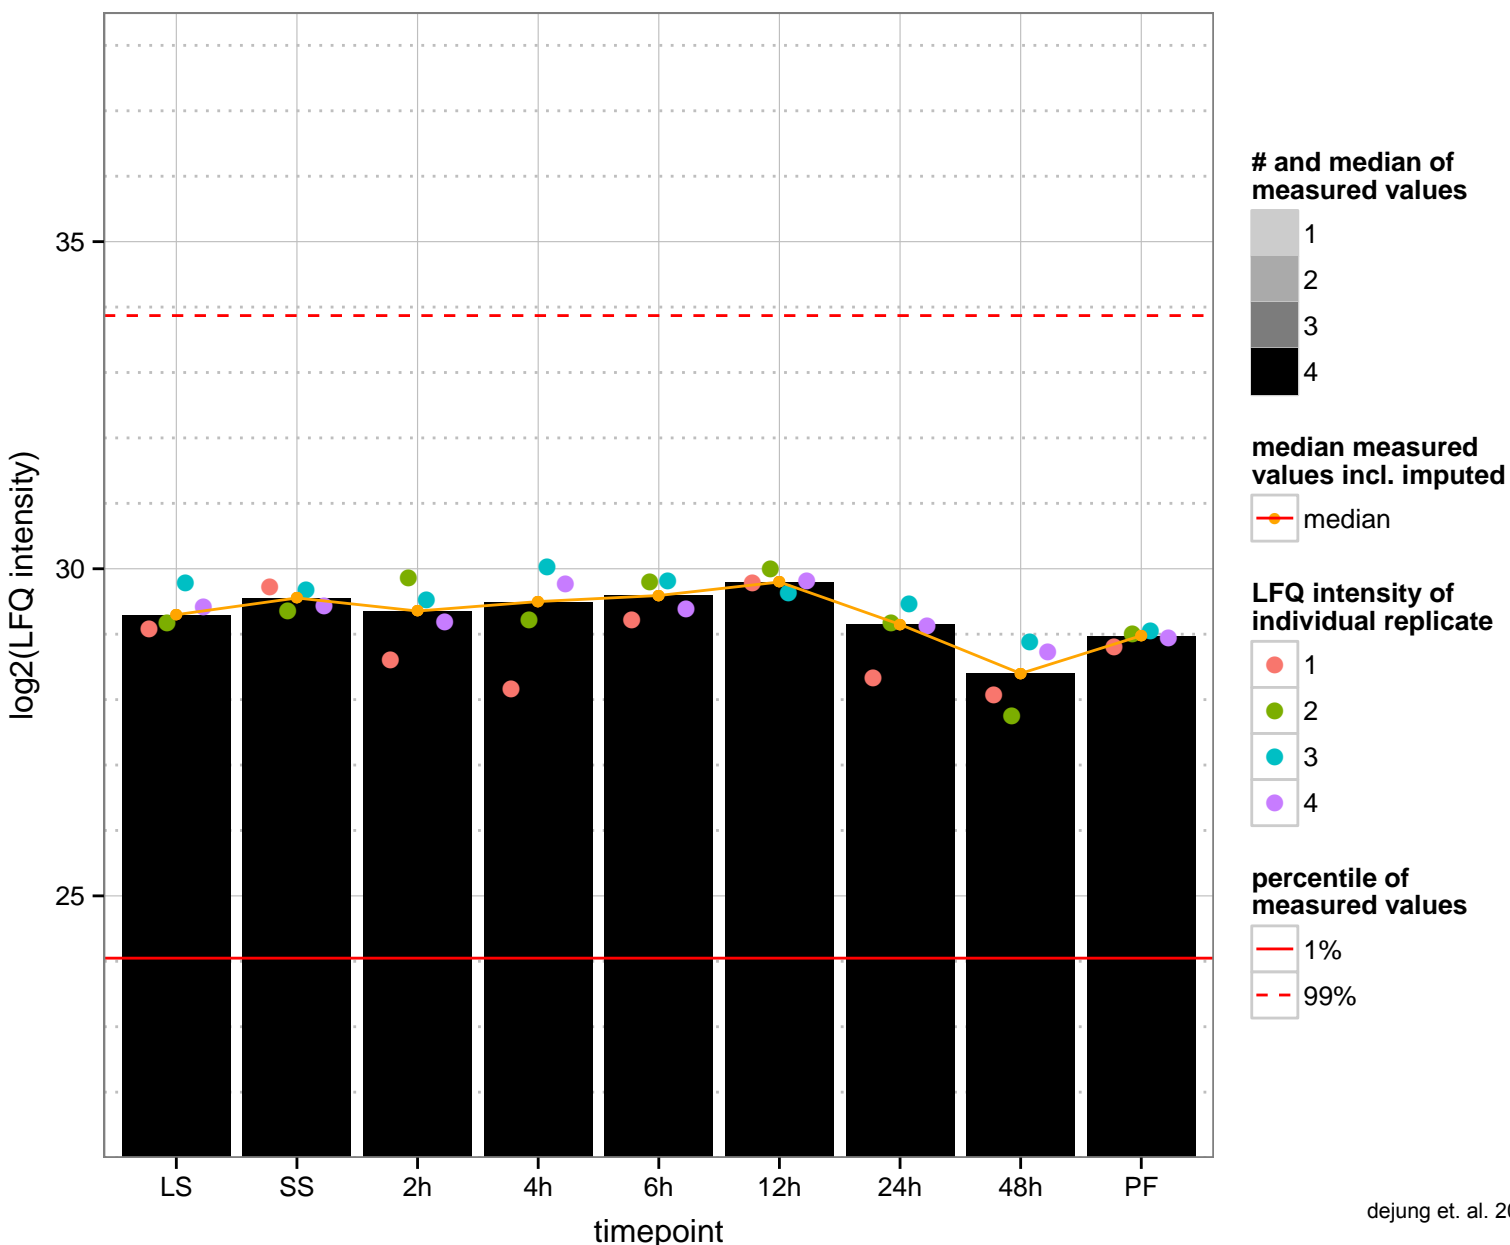

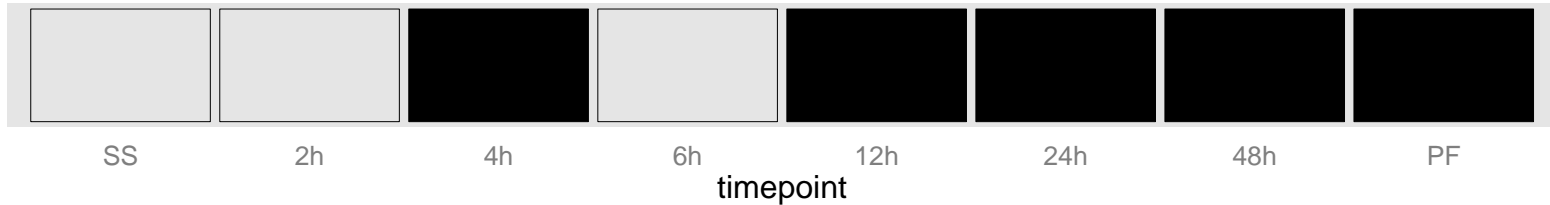

**regulated**  **not regulated**  **significant down**  **significant up**

branched-chain alpha-keto acid dehydrogenase e1-beta subunit precursor, putative, chrX additional, unordered contigs, 2-  
 Tb927.10.4330;Tb11.v5.1012;Tb10.v4.0043  
 AGOF: catalytic activity, null, 3-methyl-2-oxobutanoate dehydrogenase (2-methylpropanoyl-transferring) activity  
 AGOC: null, mitochondrial alpha-ketoglutarate dehydrogenase complex, mitochondrion  
 AGOP: metabolic process, null  
 PGO: catalytic activity  
 PGOC: null  
 PGOP: metabolic process

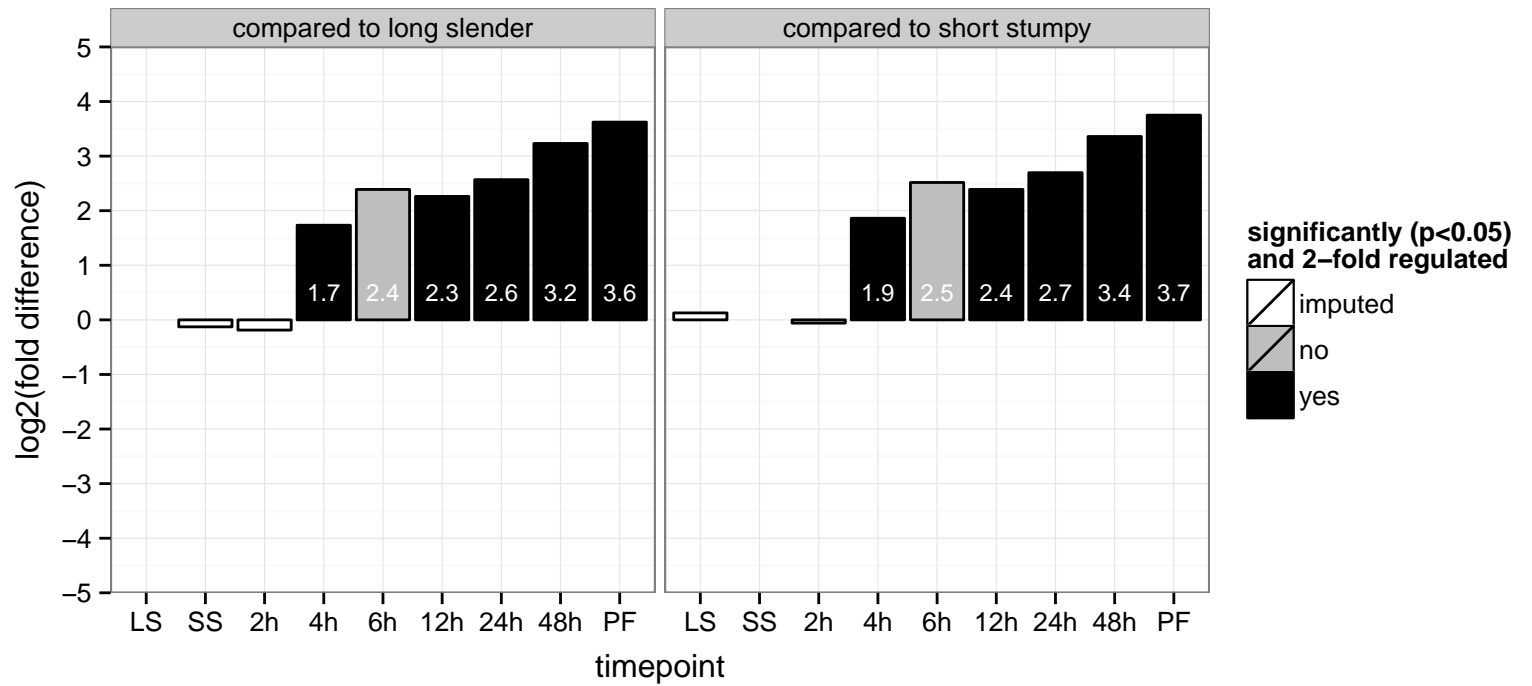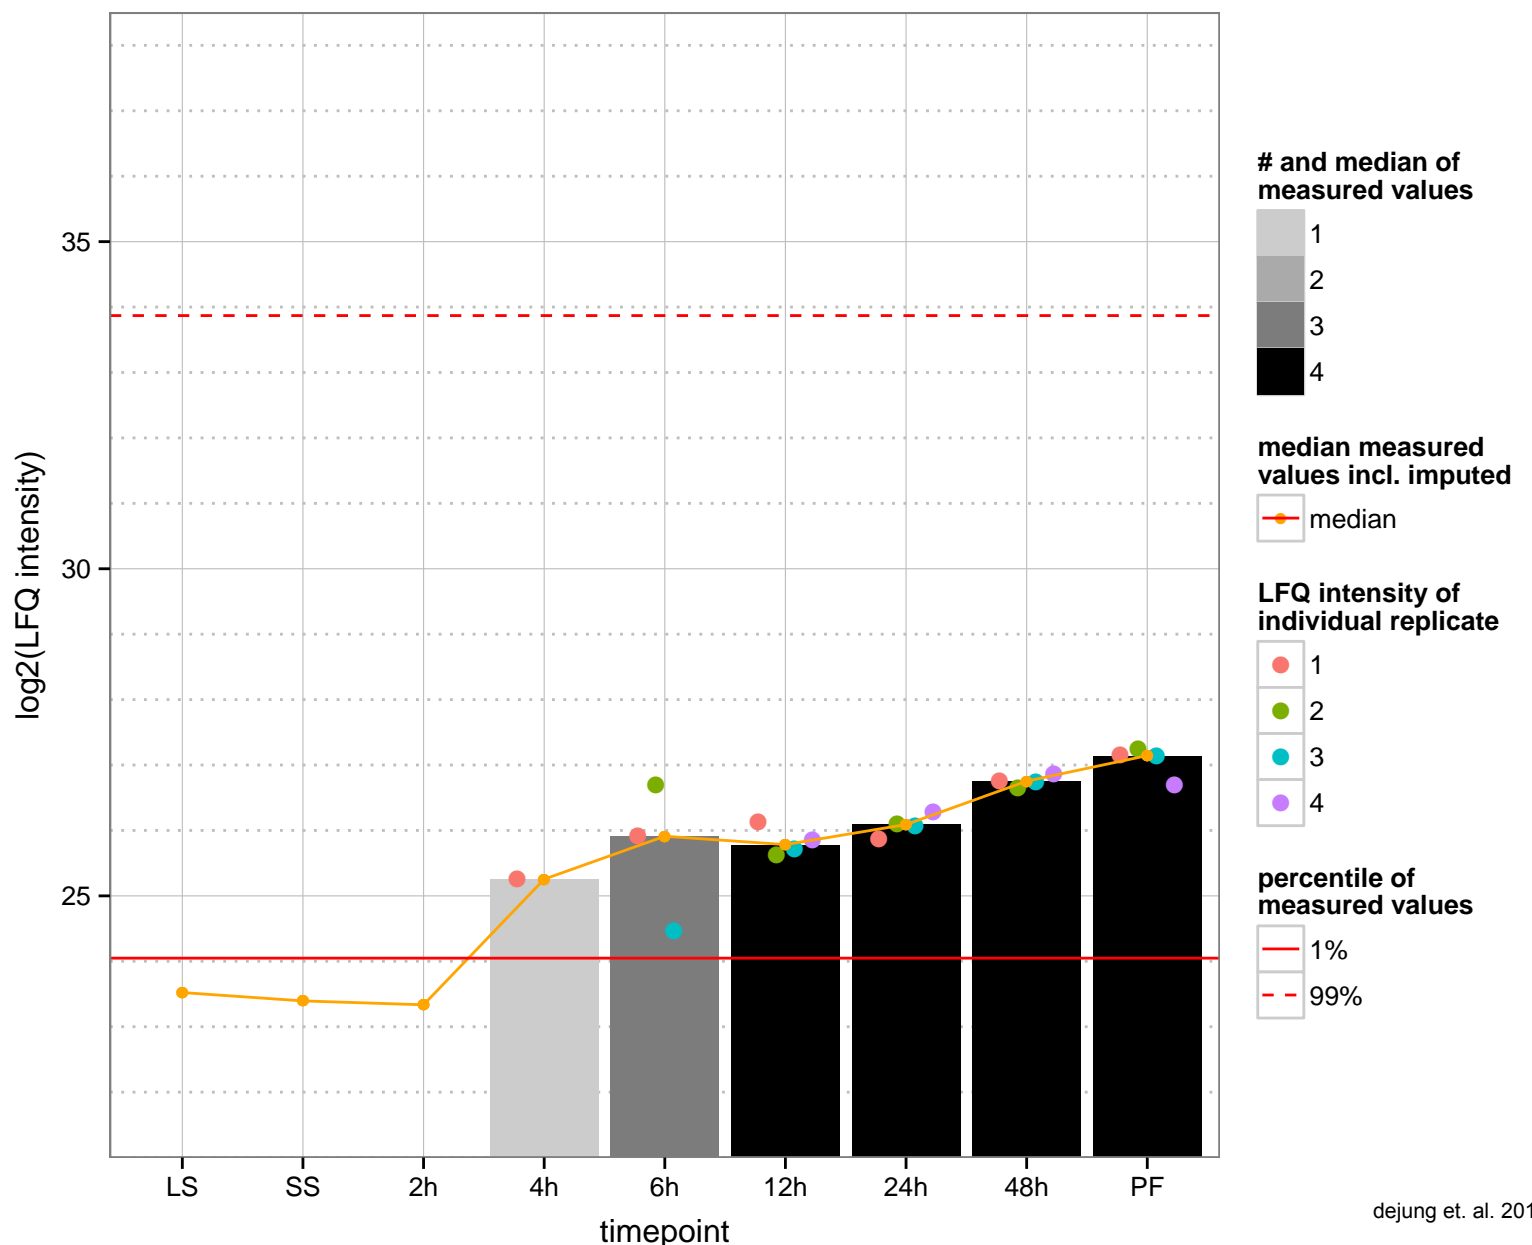

chrX additional, unordered contigs, epsilon tubulin, epsilon tubulin (TUBE1)

Tb927.10.1140;Tb11.0530

AGOF: GTP binding, GTPase activity, structural molecule activity

AGOC: microtubule, protein complex

AGOP: microtubule-based movement, protein polymerization, microtubule polymerization, microtubule-based movement

PGOF: GTP binding, GTPase activity

PGOC: protein complex

PGOP: GTP catabolic process, protein polymerization

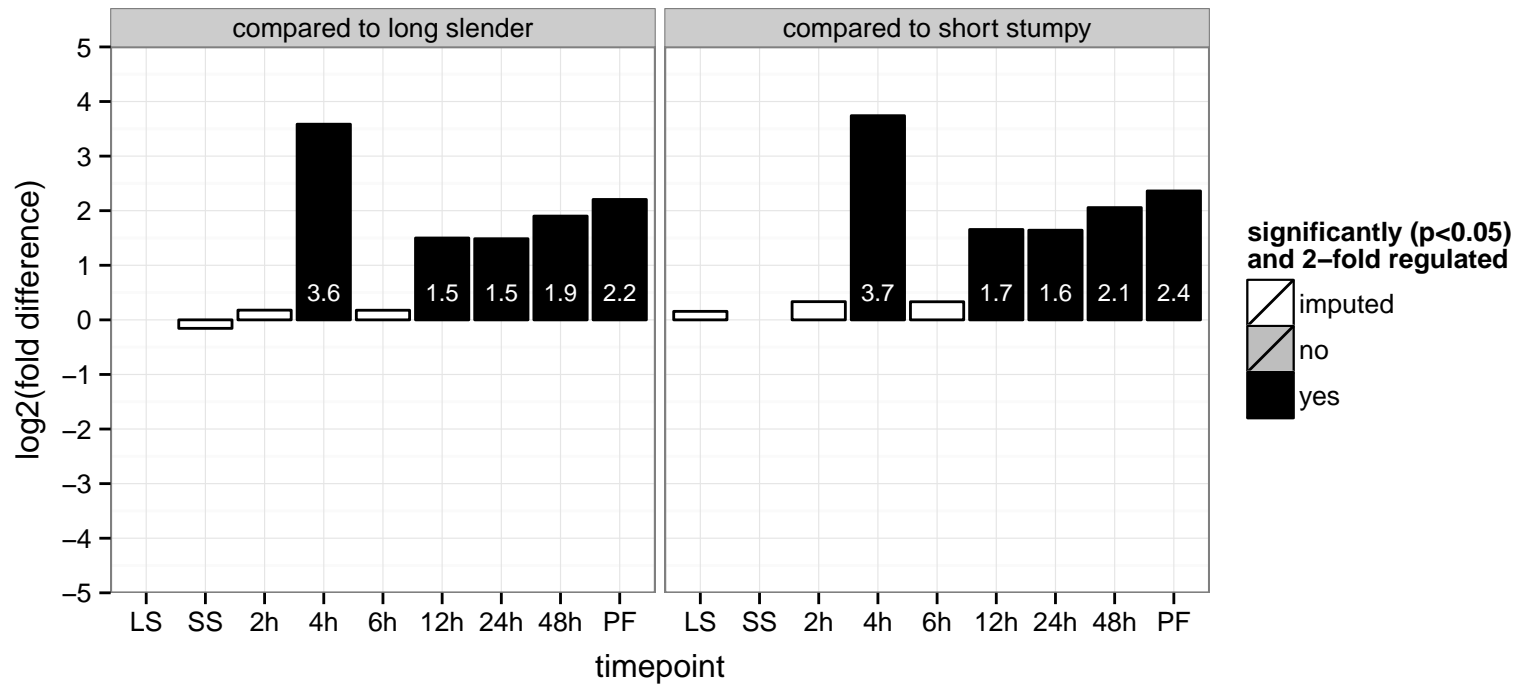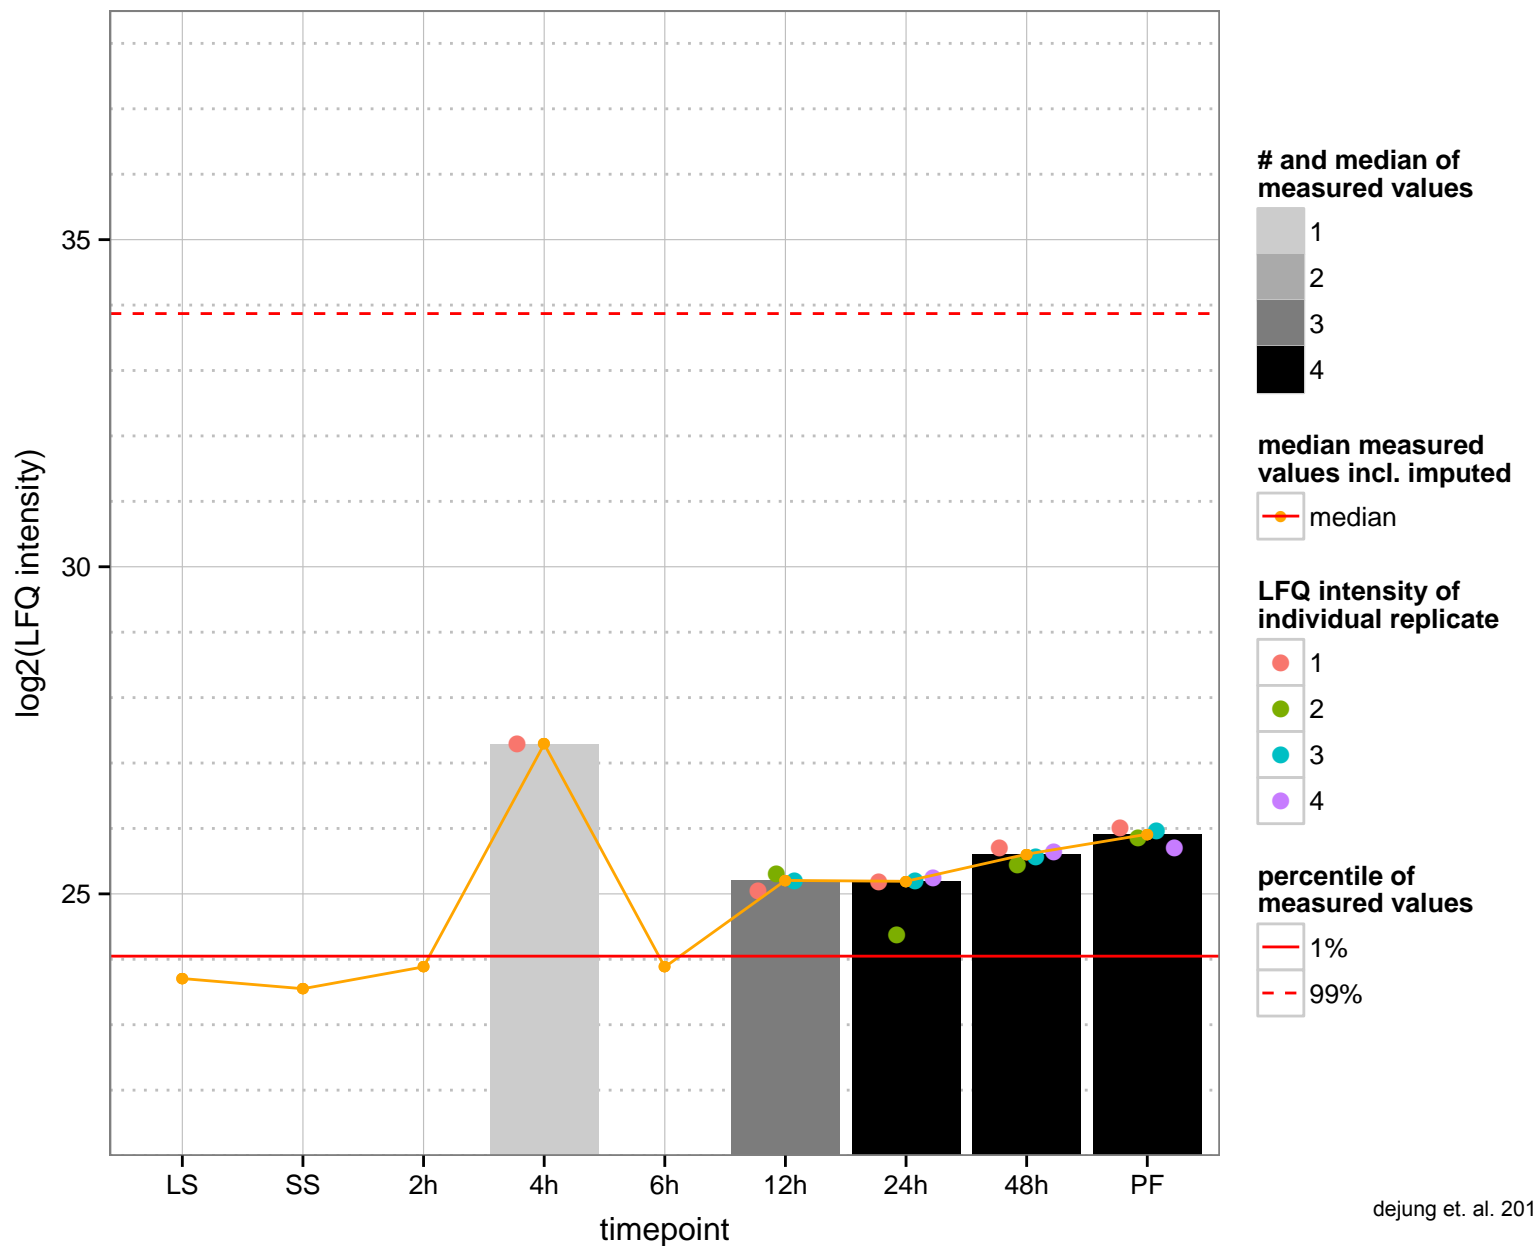

amino acid transporter, putative, putative (AATP6)  
 Tb927.8.4740;Tb927.8.4730;Tb927.8.4720;Tb927.8.4710;Tb927.8.4700;Tb11.v5.0569  
 AGOF: null, amine transmembrane transporter activity  
 AGOC: null, integral to membrane, membrane  
 AGOP: null, amino acid transport  
 PGO: null  
 PGO: null  
 PGO: null

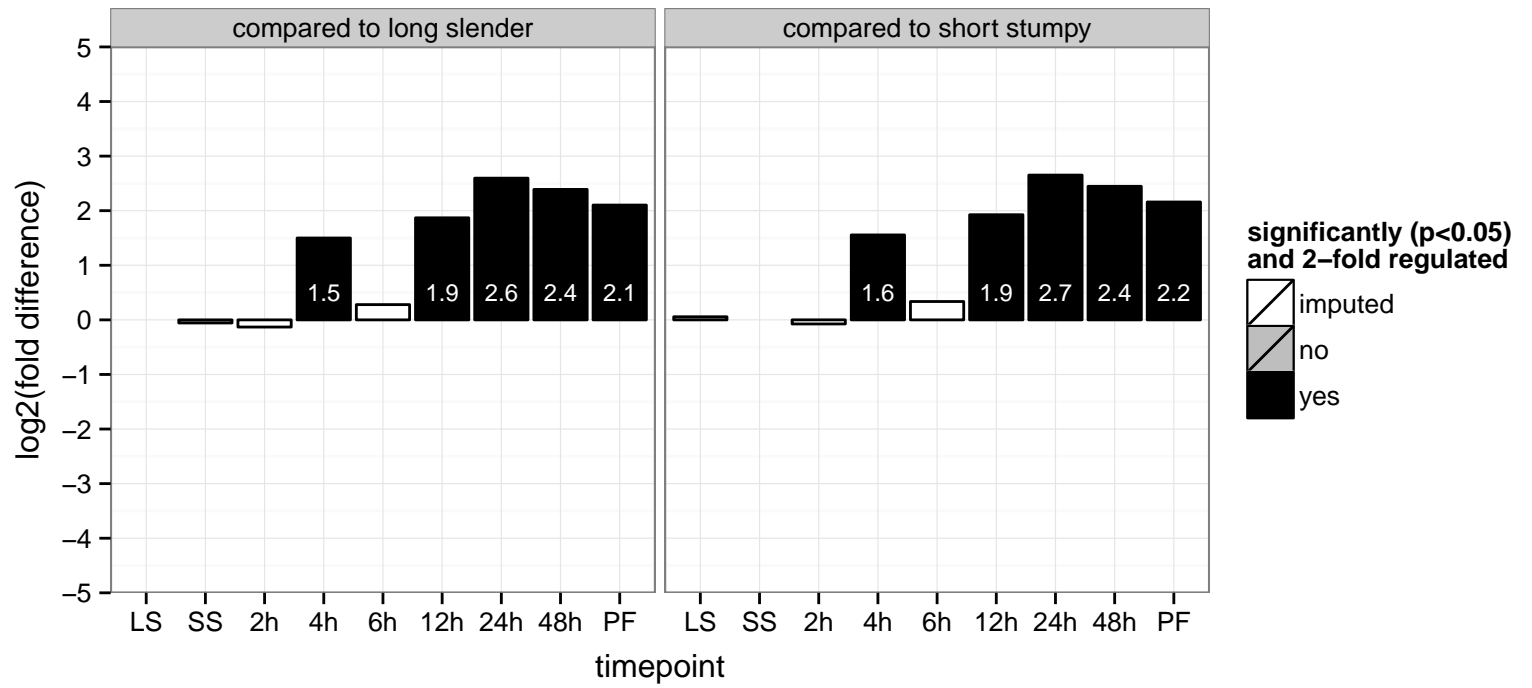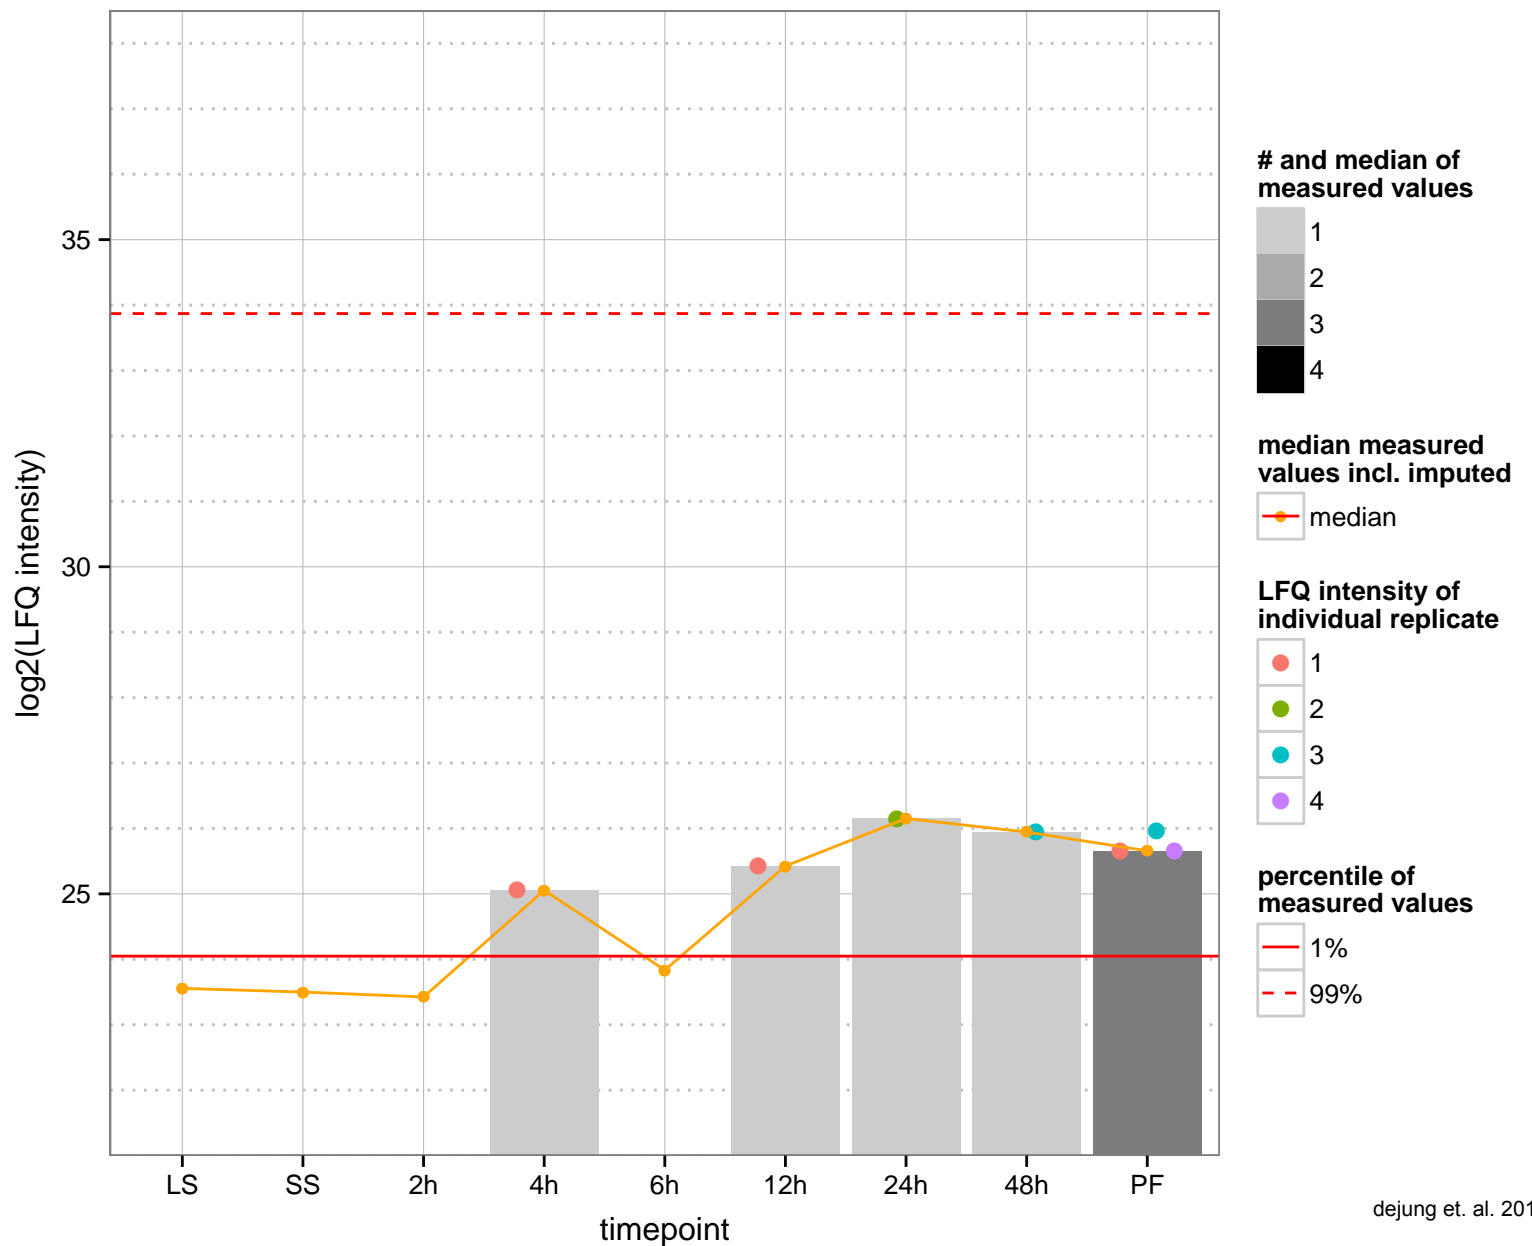

cytochrome c oxidase assembly factor, putative, electron transport protein SCO1/2  
 Tb927.1.1580  
 AGOF: copper ion binding  
 AGOC: mitochondrion  
 AGOP: respiratory chain complex IV assembly  
 PGO: null  
 PGOC: null  
 PGOP: null

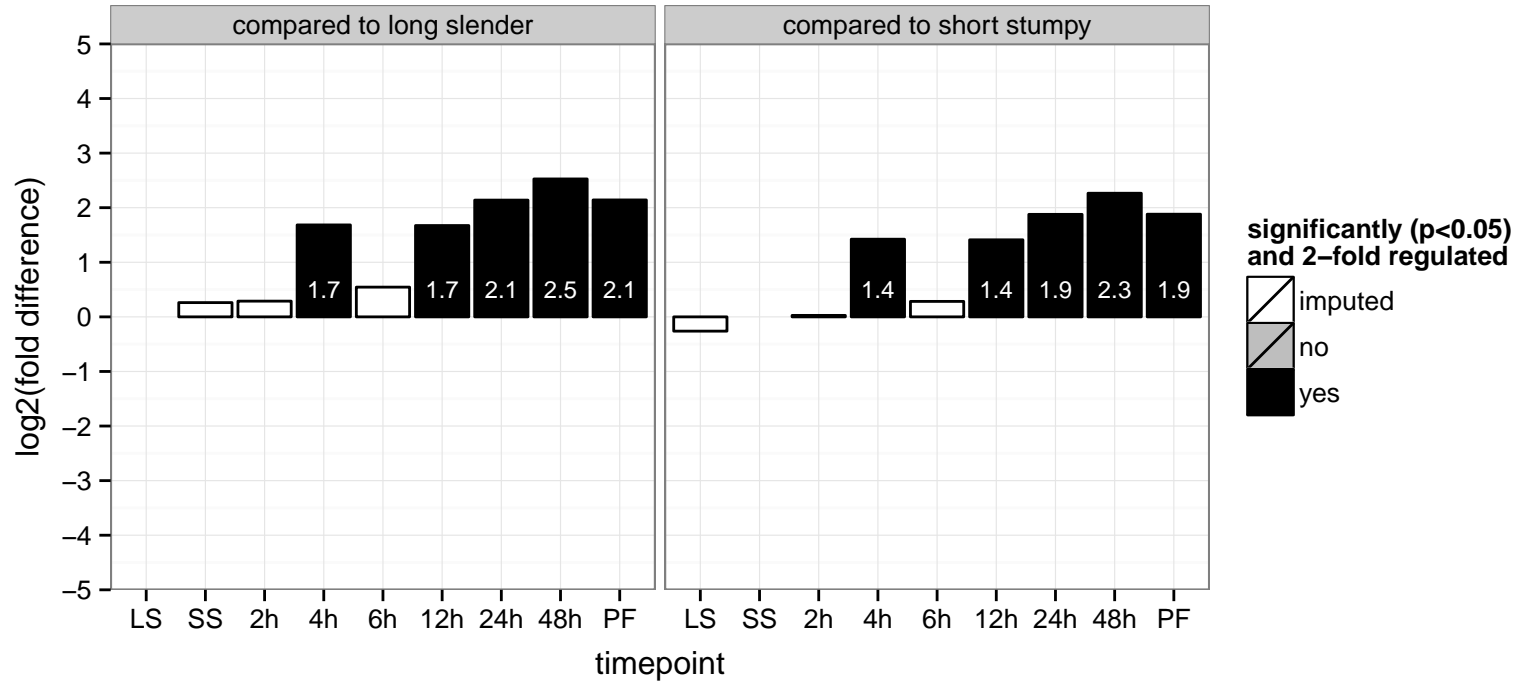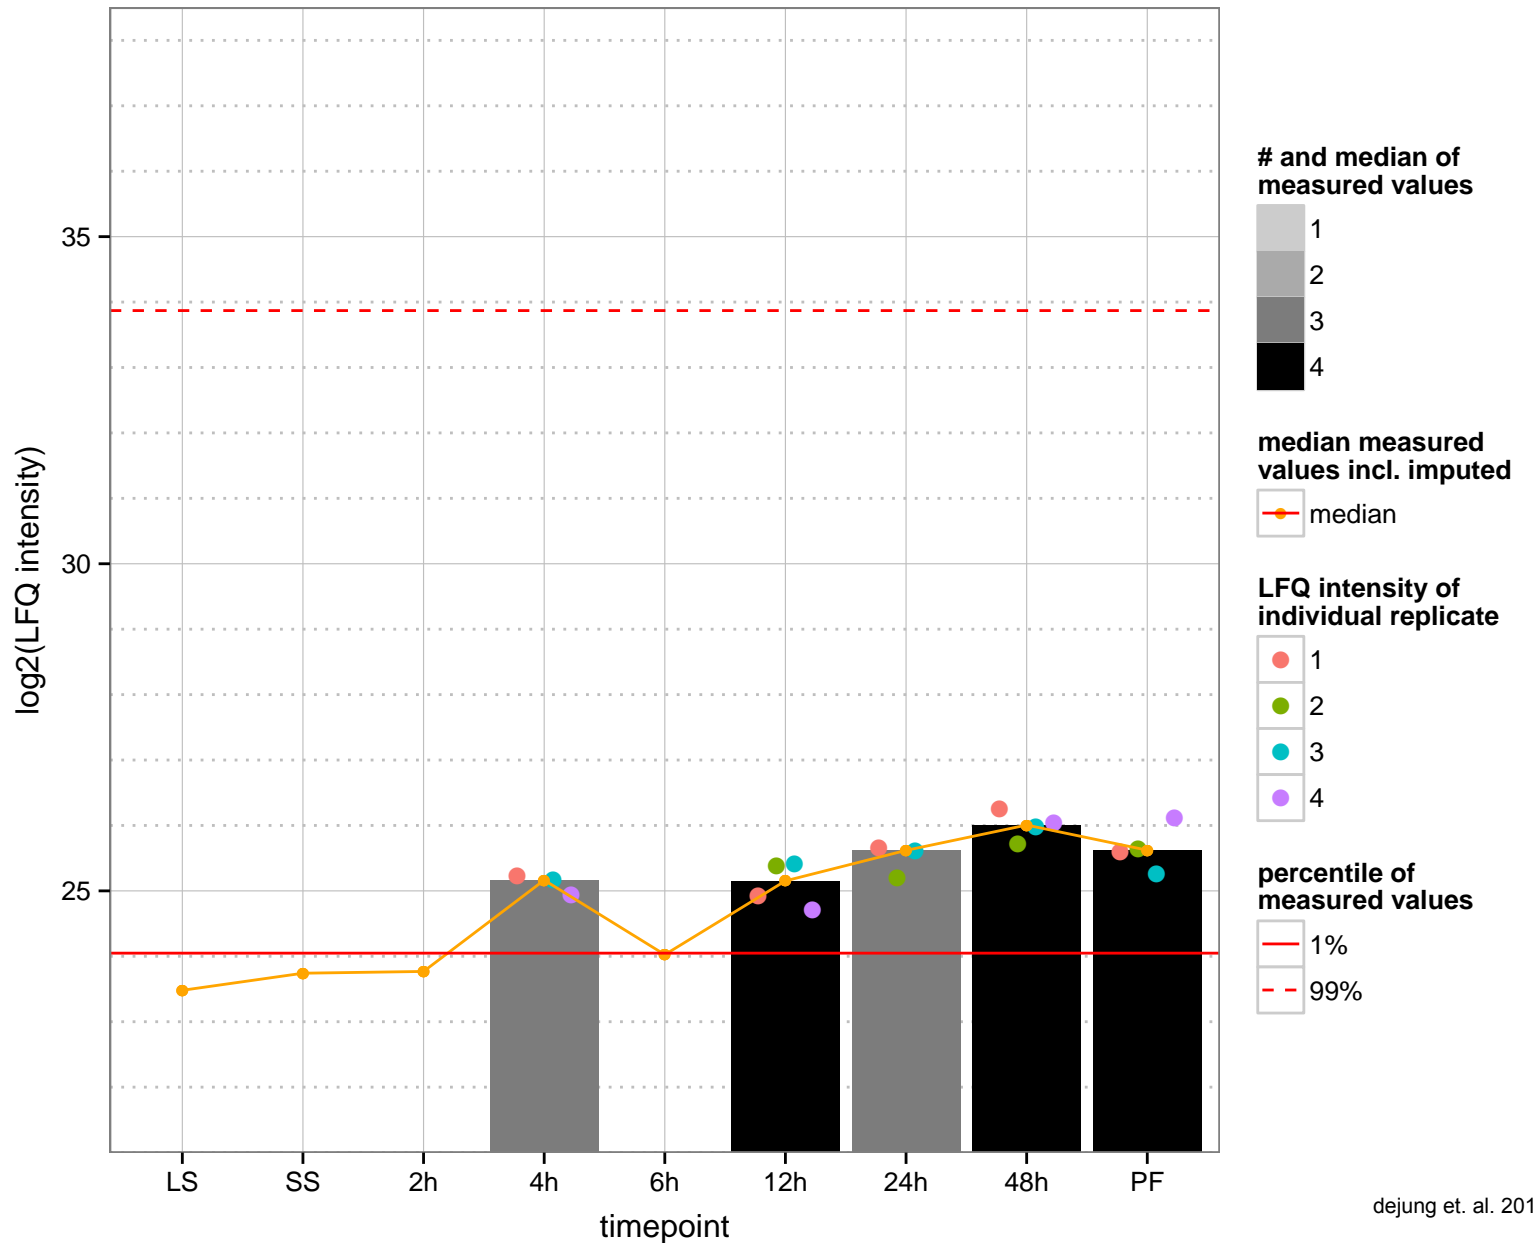

palmitoyl acyltransferase 2, putative  
 Tb927.10.10800  
 AGOF: zinc ion binding  
 AGOC: integral to membrane  
 AGOP: endocytosis, protein palmitoylation, transport  
 PGO: zinc ion binding  
 PGO: null  
 PGO: null

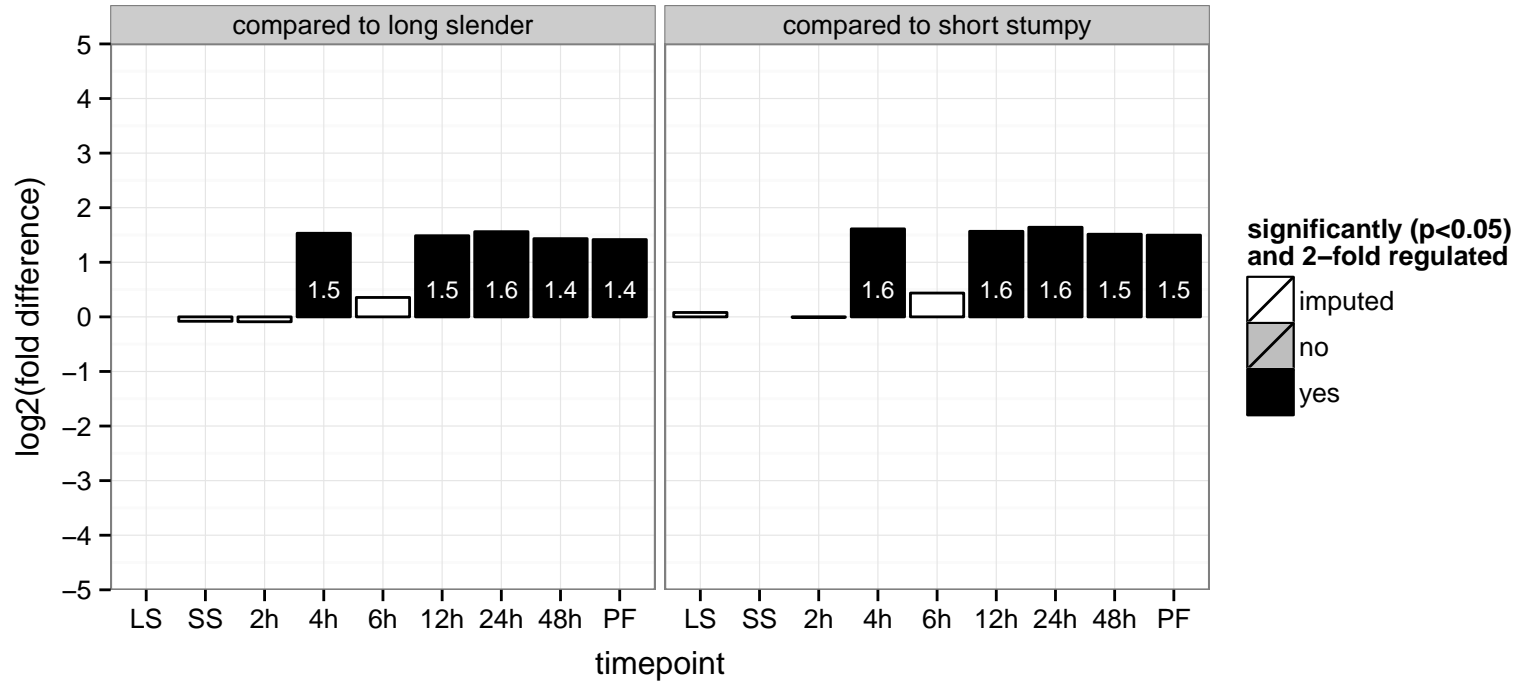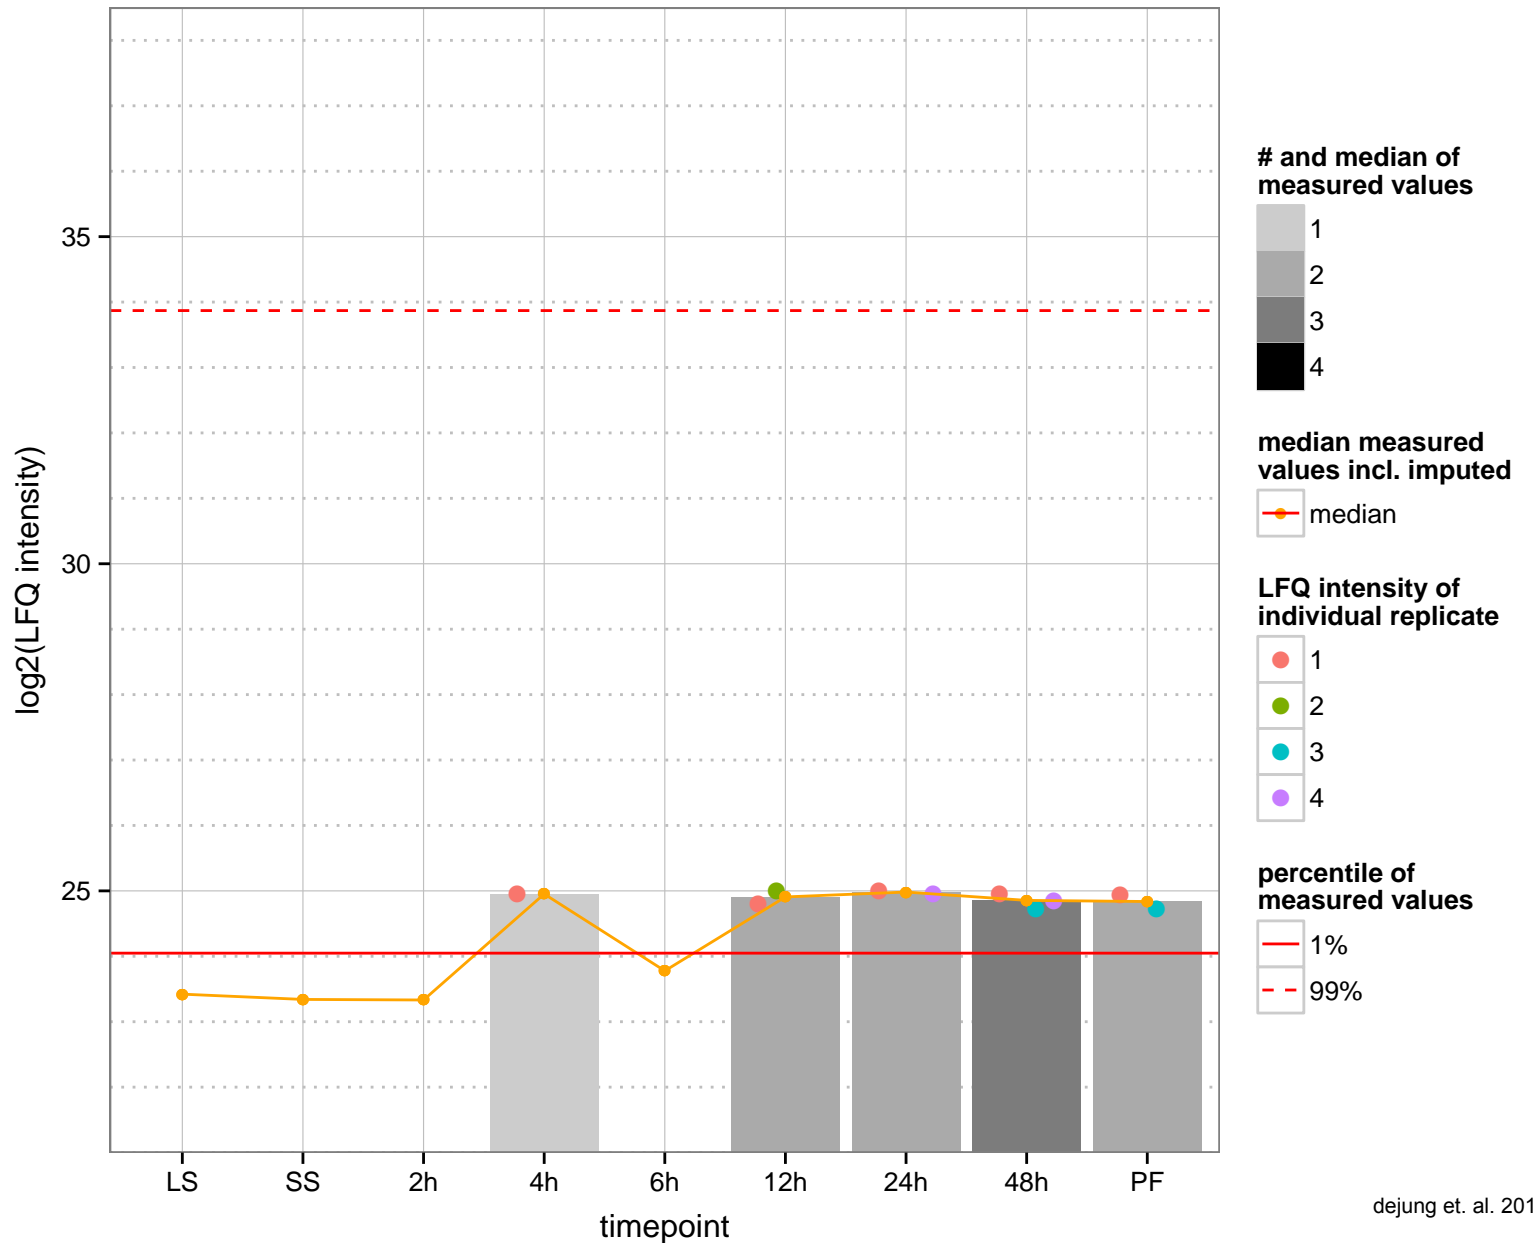



hypothetical protein, conserved  
 Tb927.10.13600  
 AGOF: null  
 AGOC: mitochondrion  
 AGOP: null  
 PGO: null  
 PGO: null  
 PGO: null

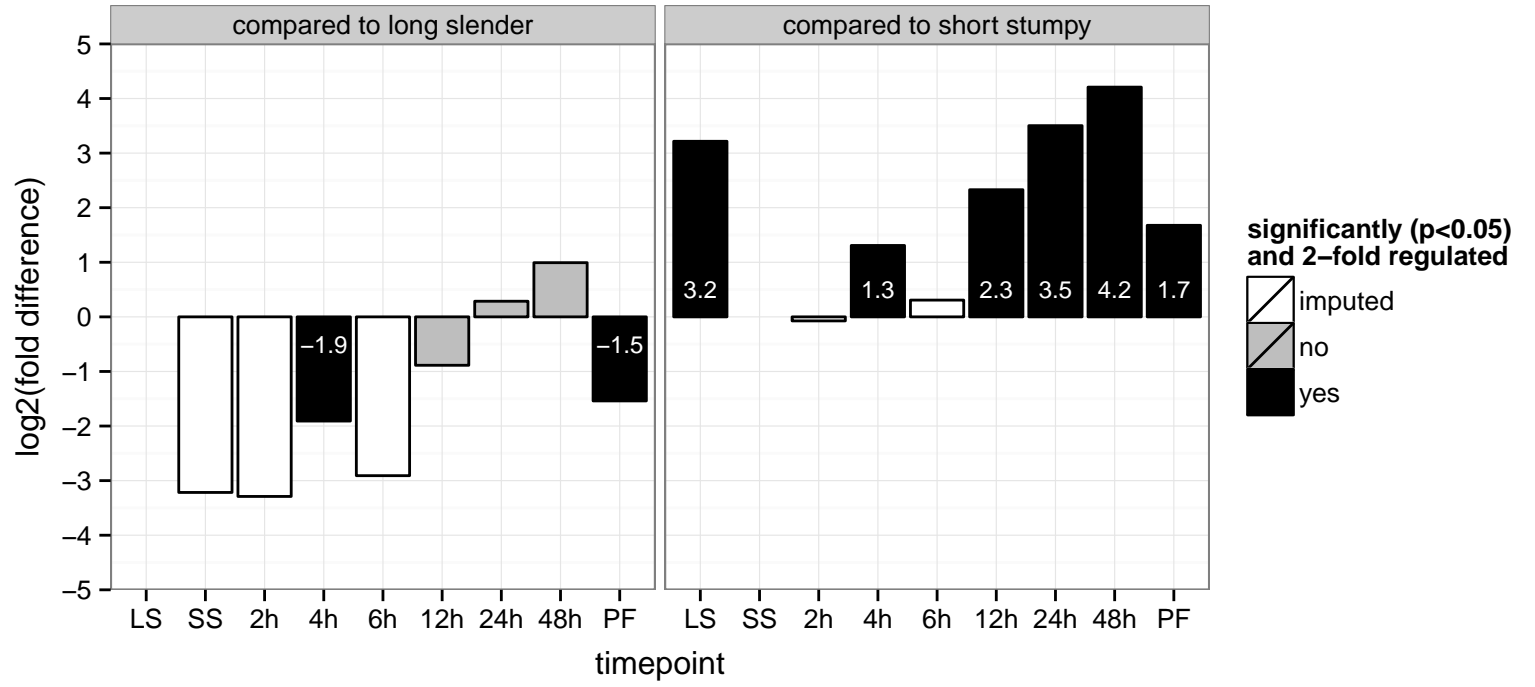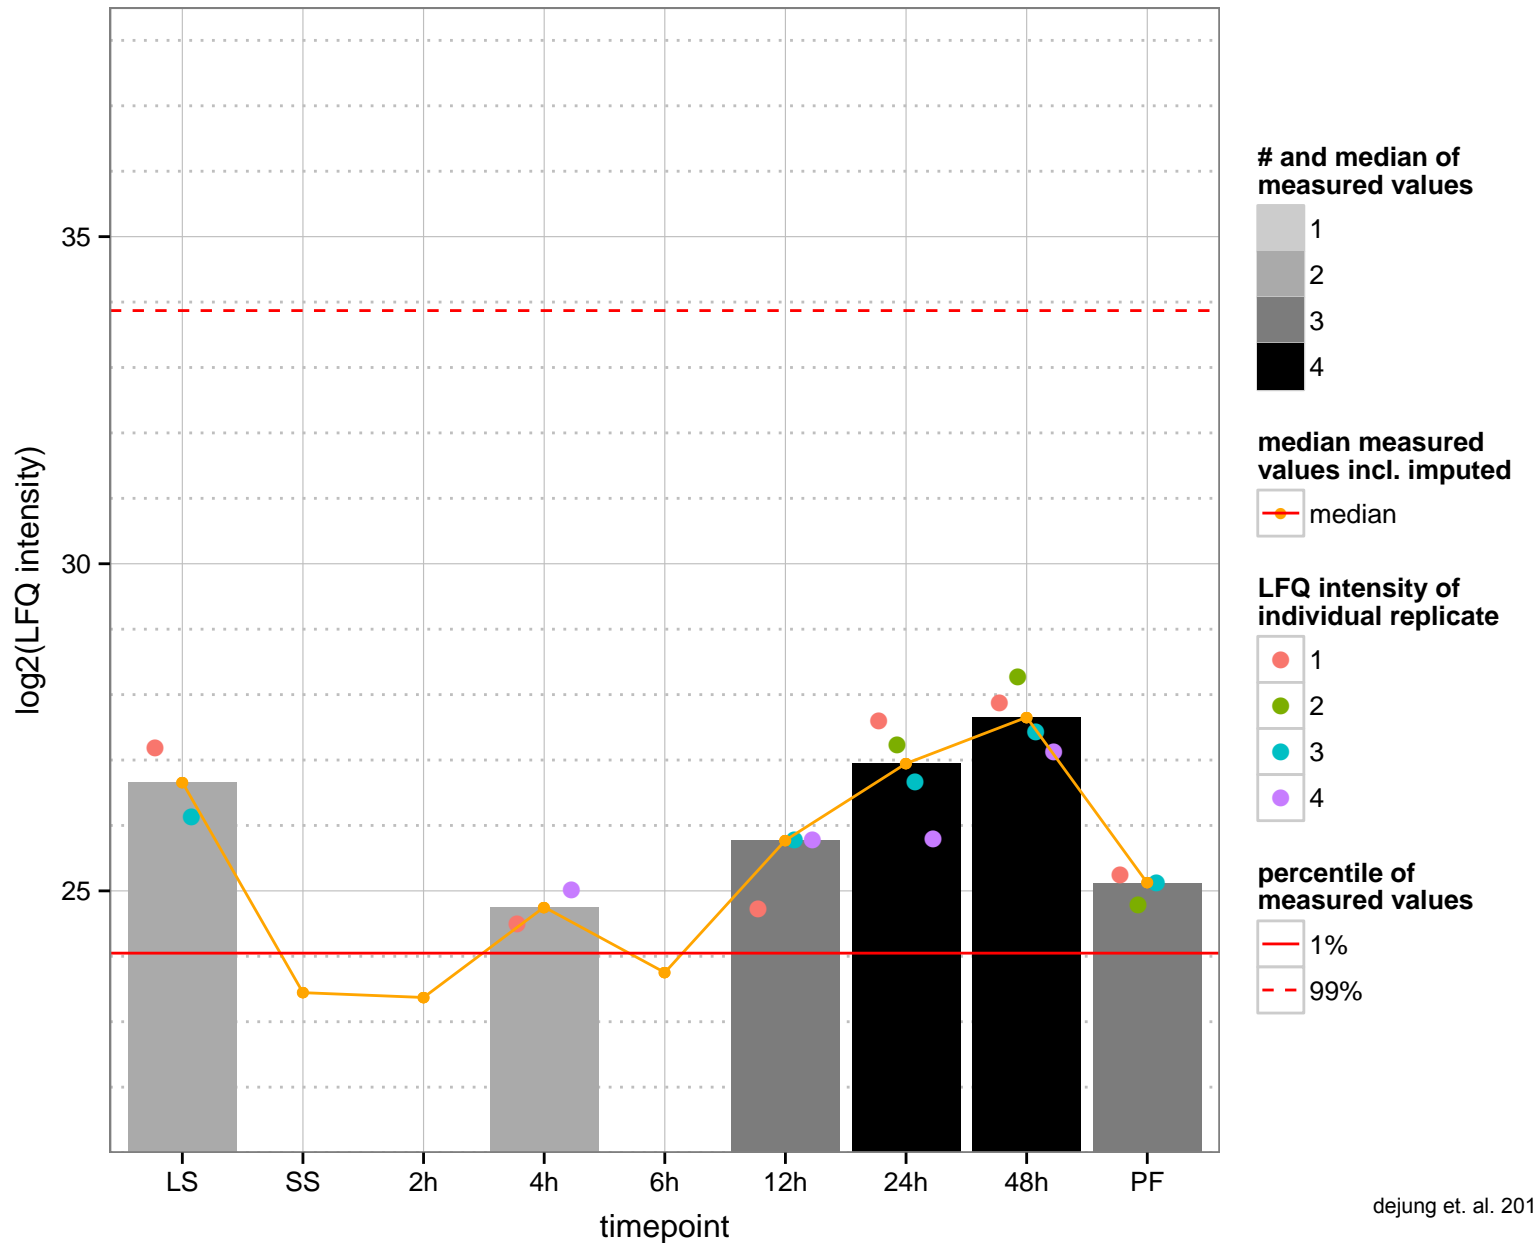

Zinc finger CCCH domain-containing protein 40, RNA binding protein, putative (ZC3H40)  
 Tb927.10.14950  
 AGOF: RNA binding, zinc ion binding  
 AGOC: null  
 AGOP: null  
 PGOF: nucleic acid binding, zinc ion binding  
 PGO: null  
 PGOP: null

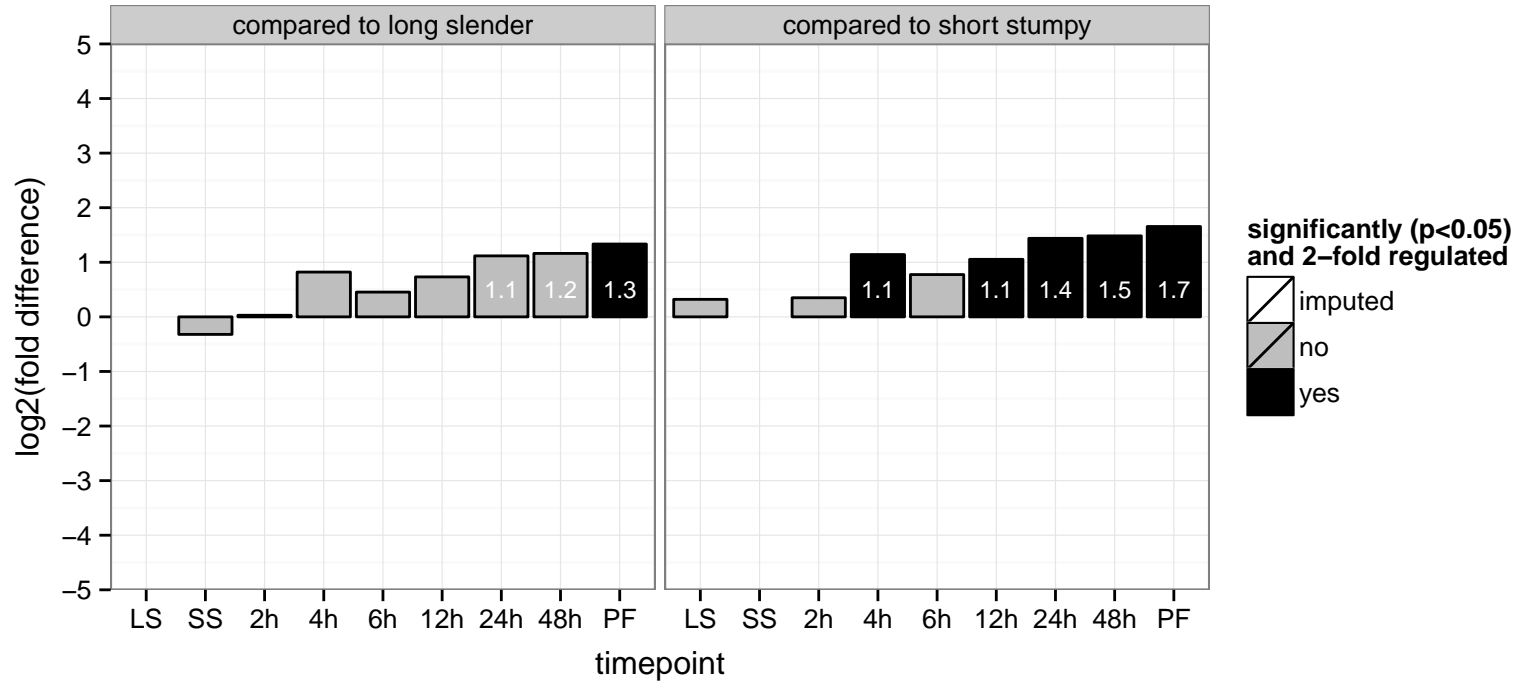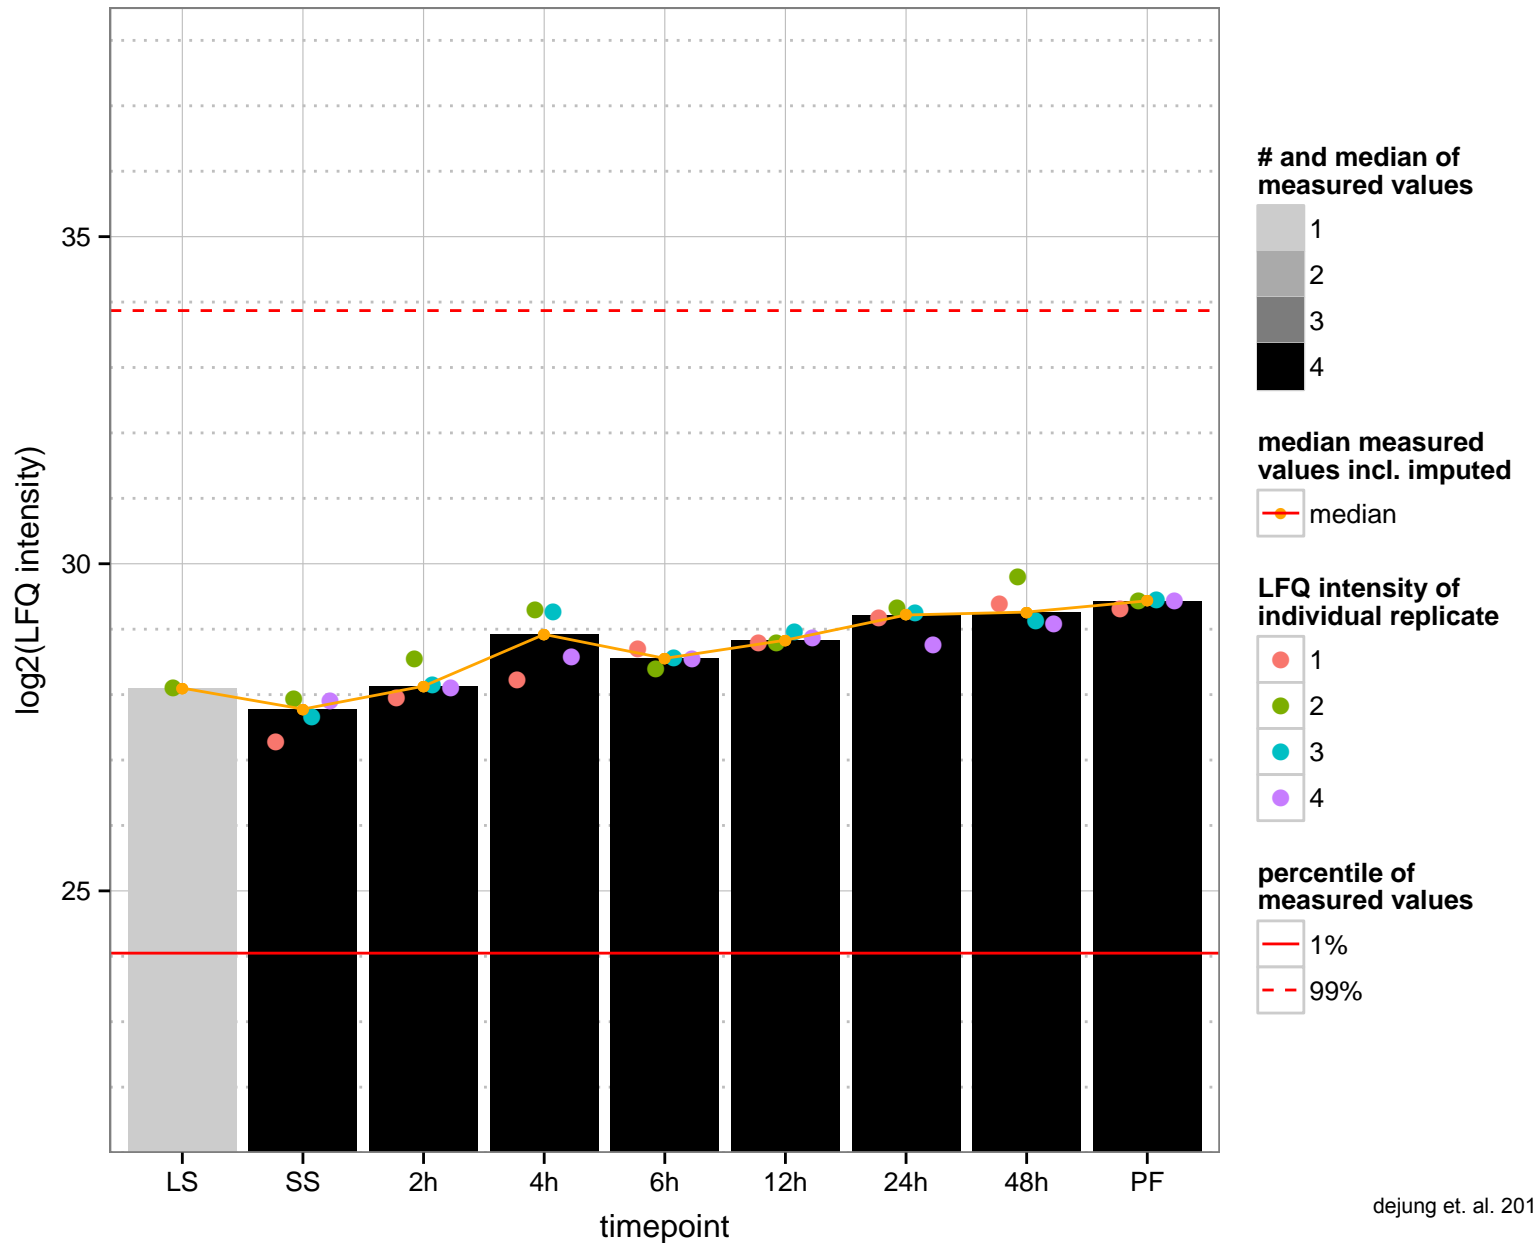

hypothetical protein, conserved  
 Tb927.10.2310  
 AGOF: null  
 AGOC: null  
 AGOP: null  
 PGOF: null  
 PGO C: null  
 PGOP: null

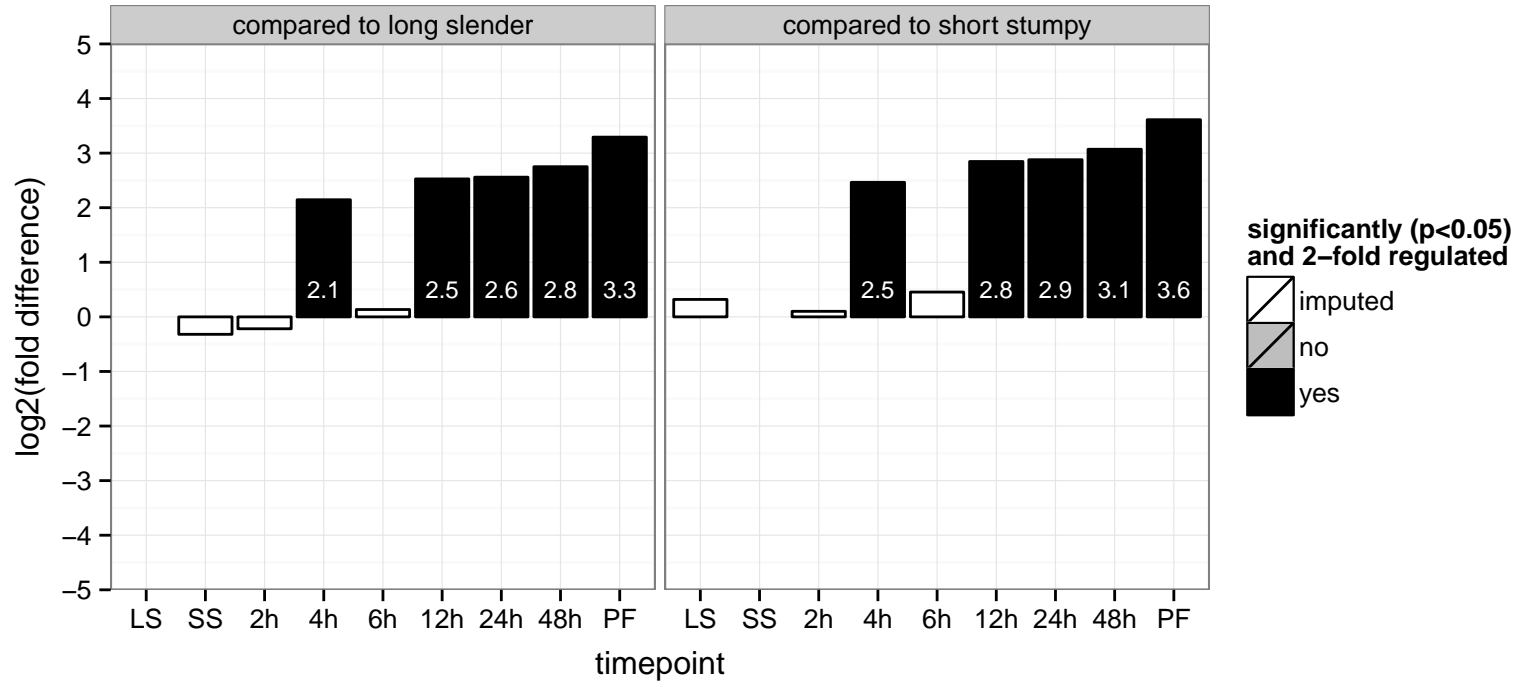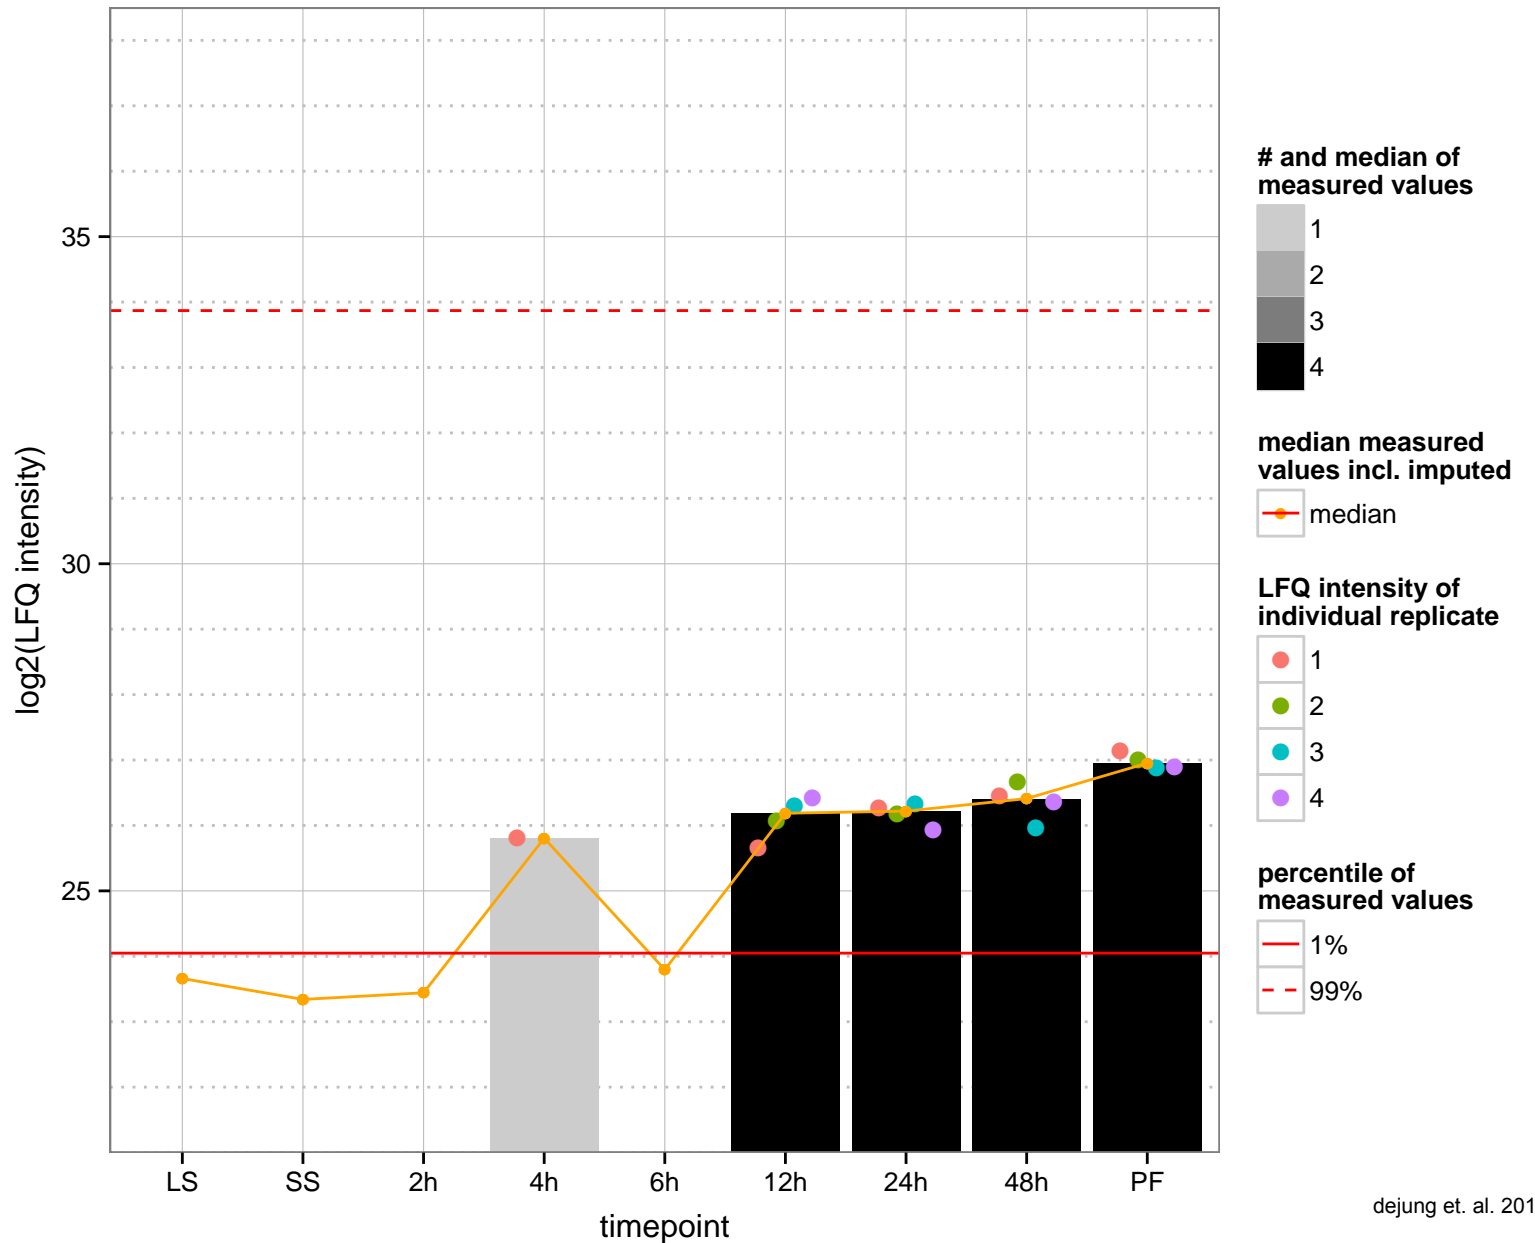

hypothetical protein, conserved

Tb927.10.5050

AGOF: hydrogen ion transporting ATP synthase activity, rotational mechanism, proton-transporting ATPase activity

AGOC: mitochondrial proton-transporting ATP synthase complex, catalytic core F(1), mitochondrion

AGOP: ATP synthesis coupled proton transport

PGOF: hydrogen ion transporting ATP synthase activity, rotational mechanism, proton-transporting ATPase activity

PGOC: mitochondrial proton-transporting ATP synthase complex, catalytic core F(1)

PGOP: ATP synthesis coupled proton transport

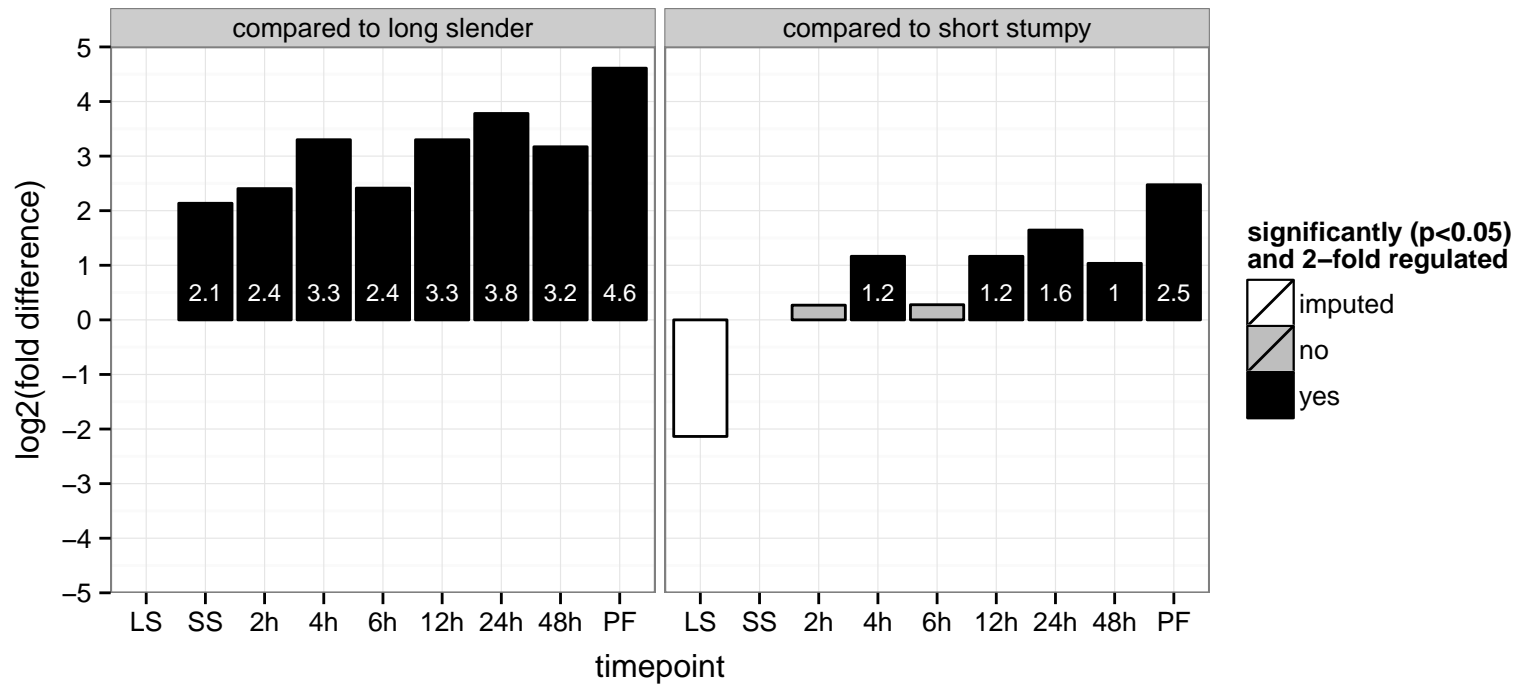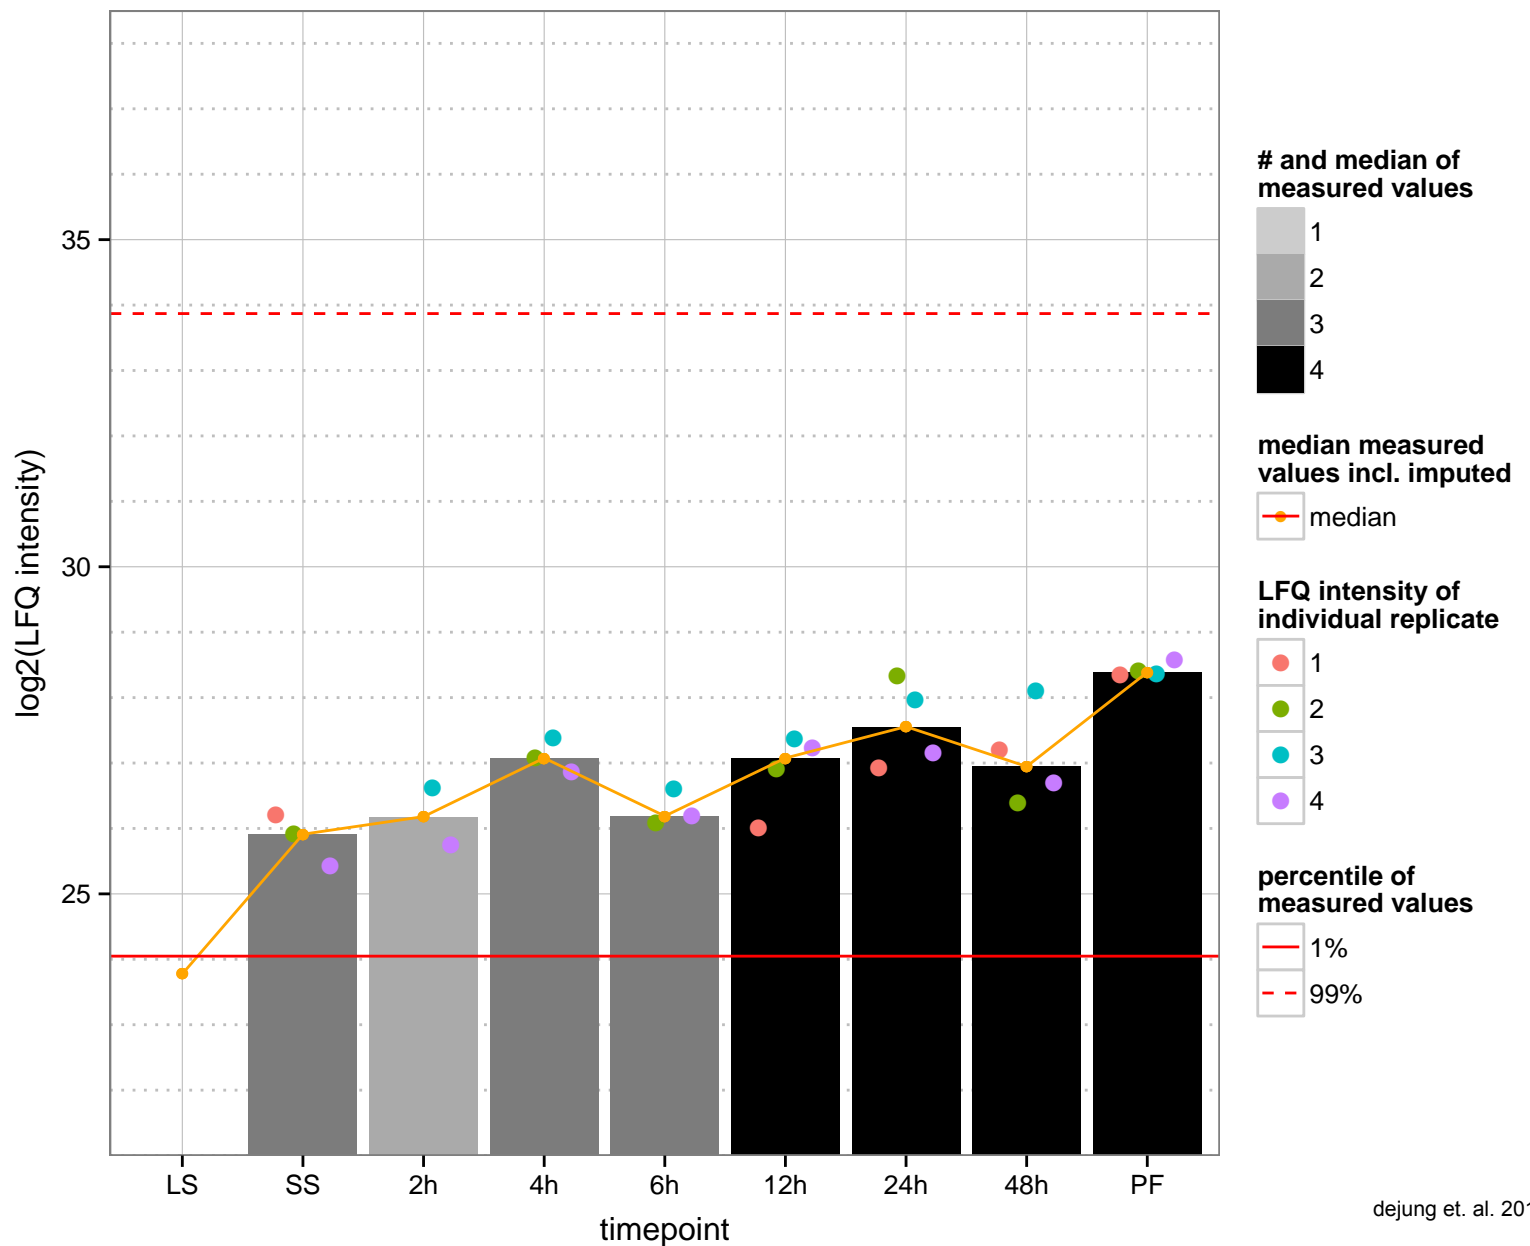

hypothetical protein, conserved  
 Tb927.10.5870  
 AGOF: null  
 AGOC: null  
 AGOP: null  
 PGOF: null  
 PGO: null  
 PGOP: null

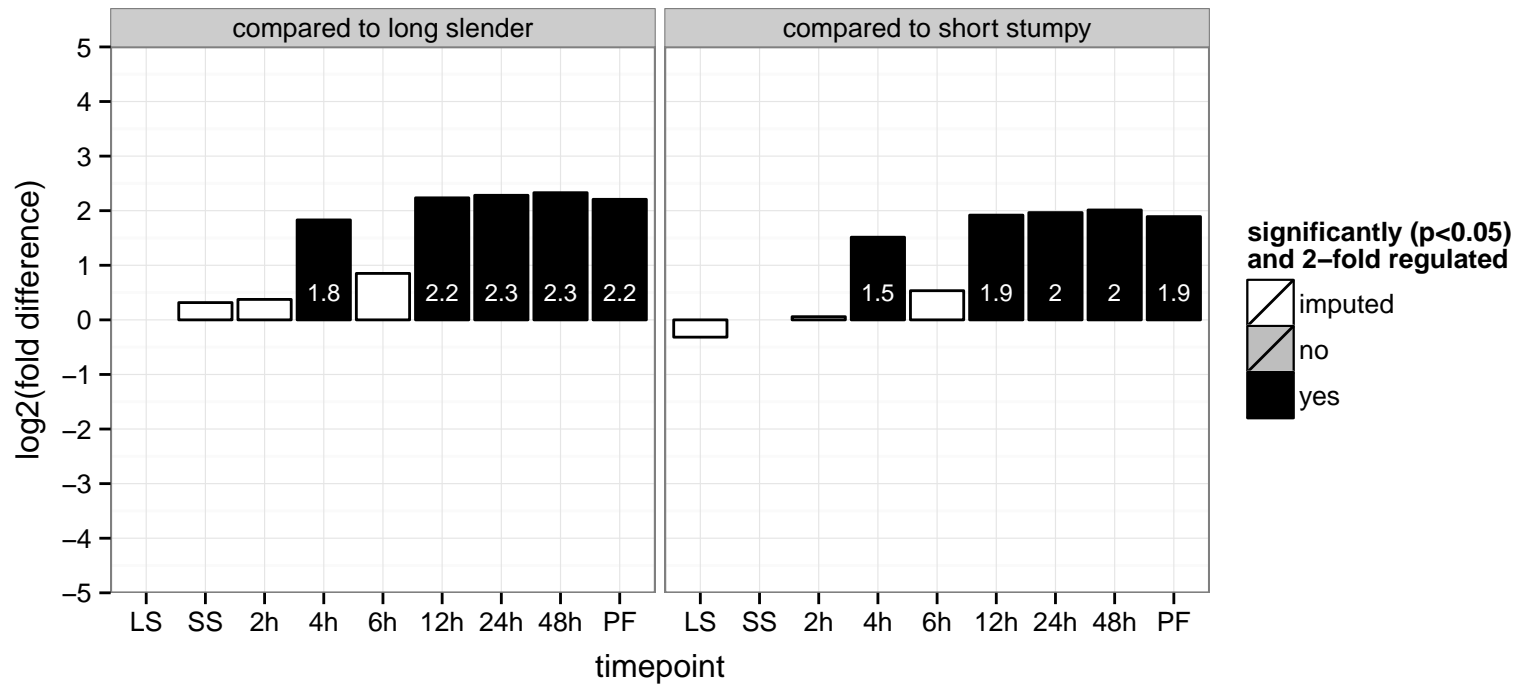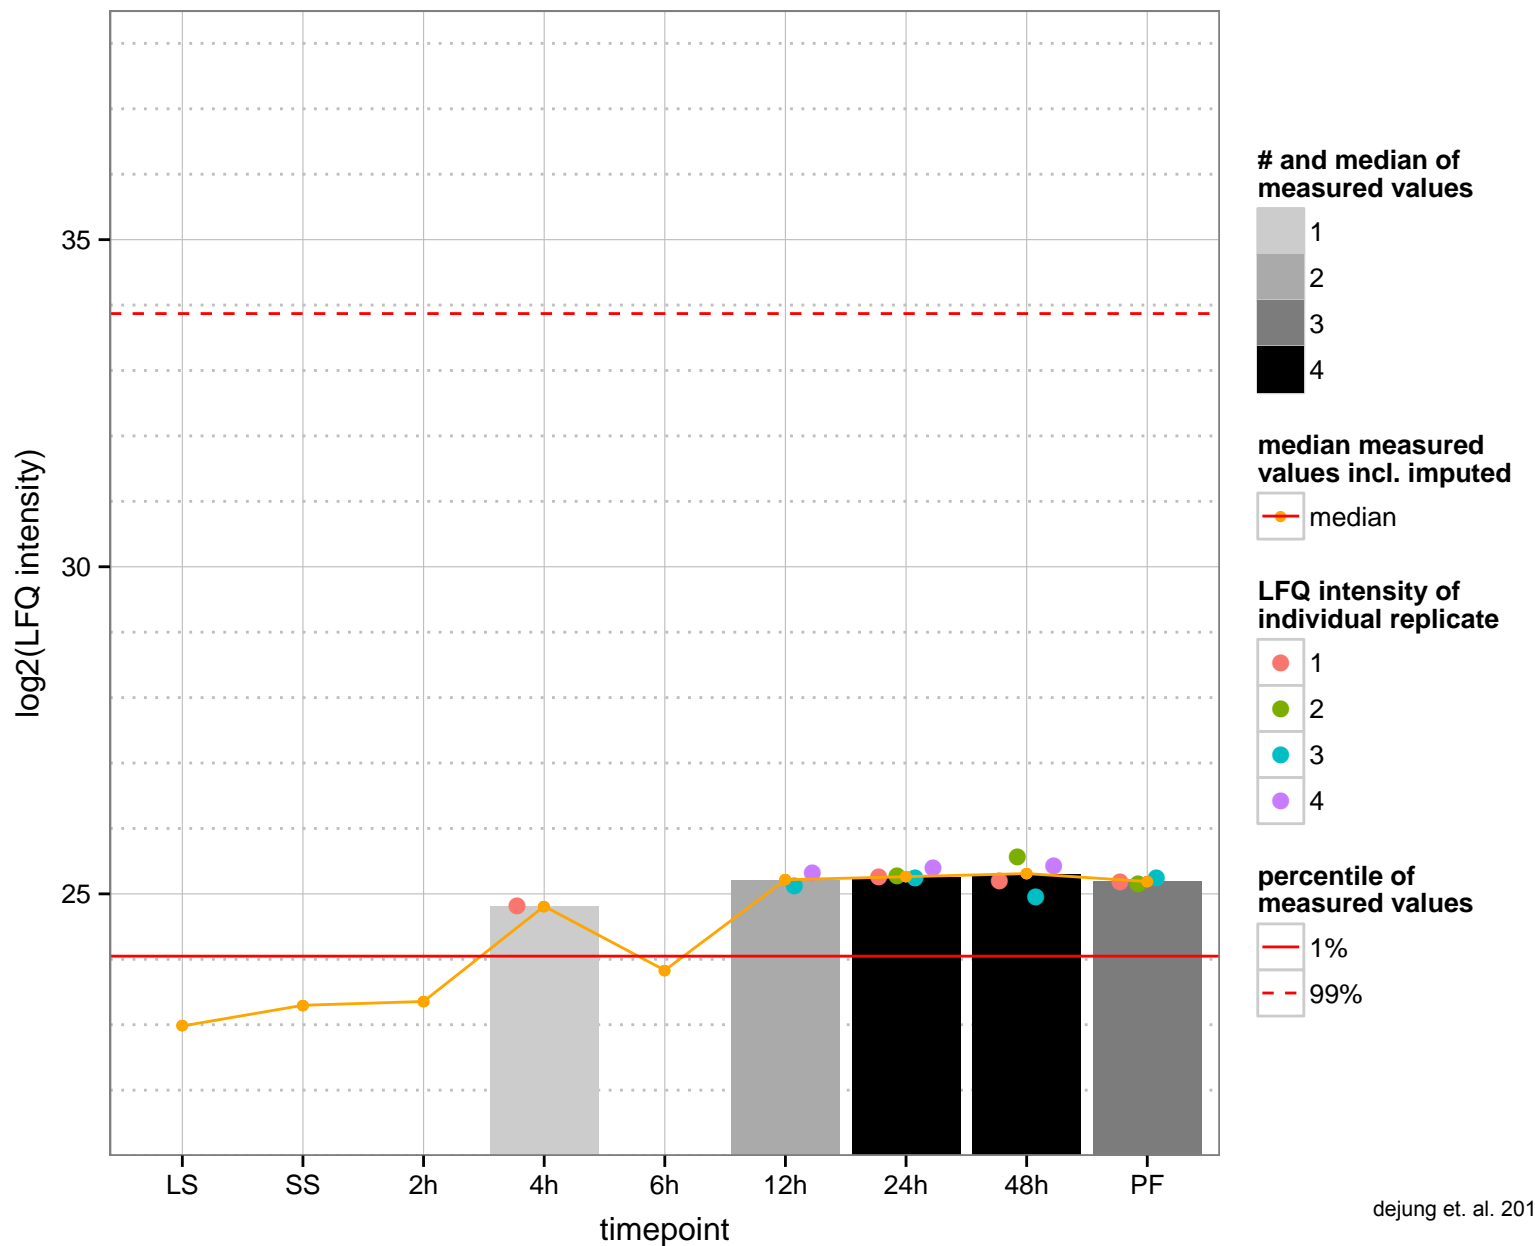

hypothetical protein, conserved  
 Tb927.10.8030  
 AGOF: null  
 AGOC: mitochondrion  
 AGOP: null  
 PGOF: hydrogen ion transporting ATP synthase activity, rotational mechanism  
 PGOC: null  
 PGOB: ATP synthesis coupled proton transport

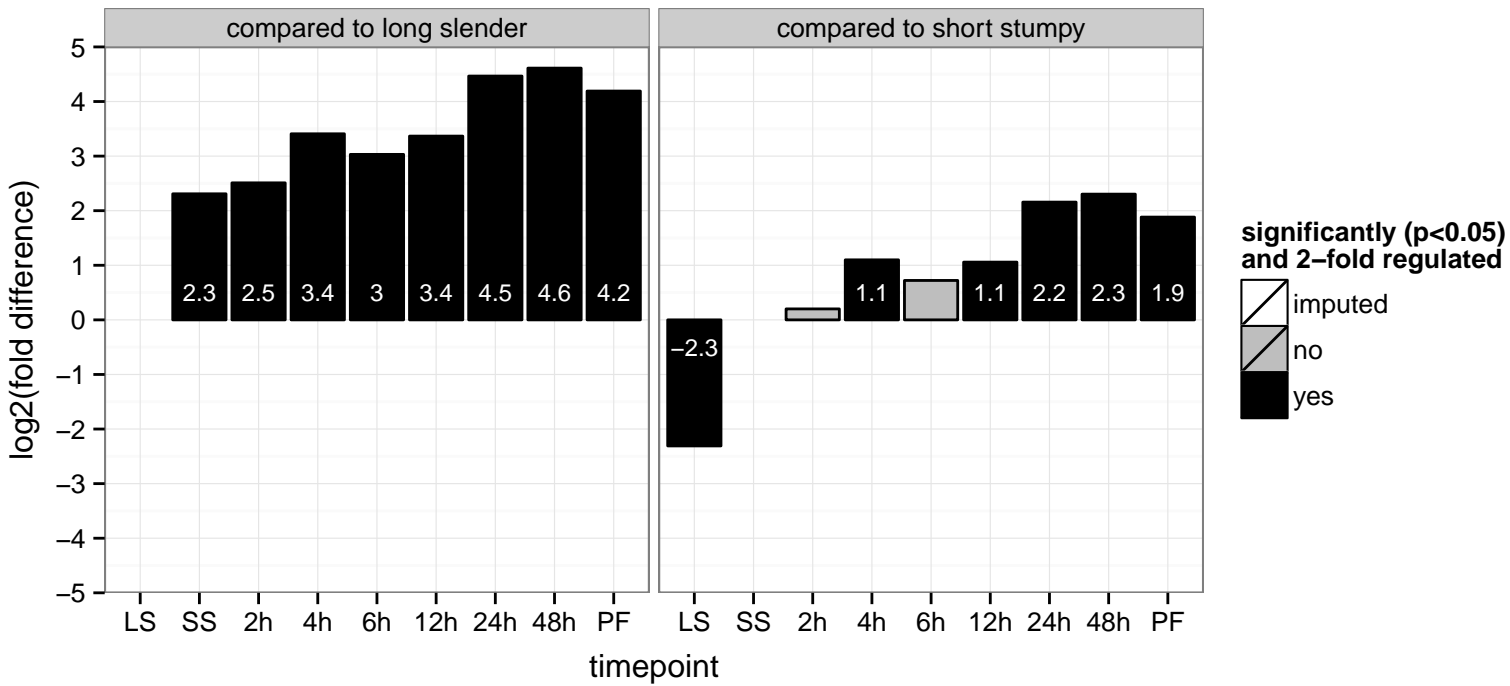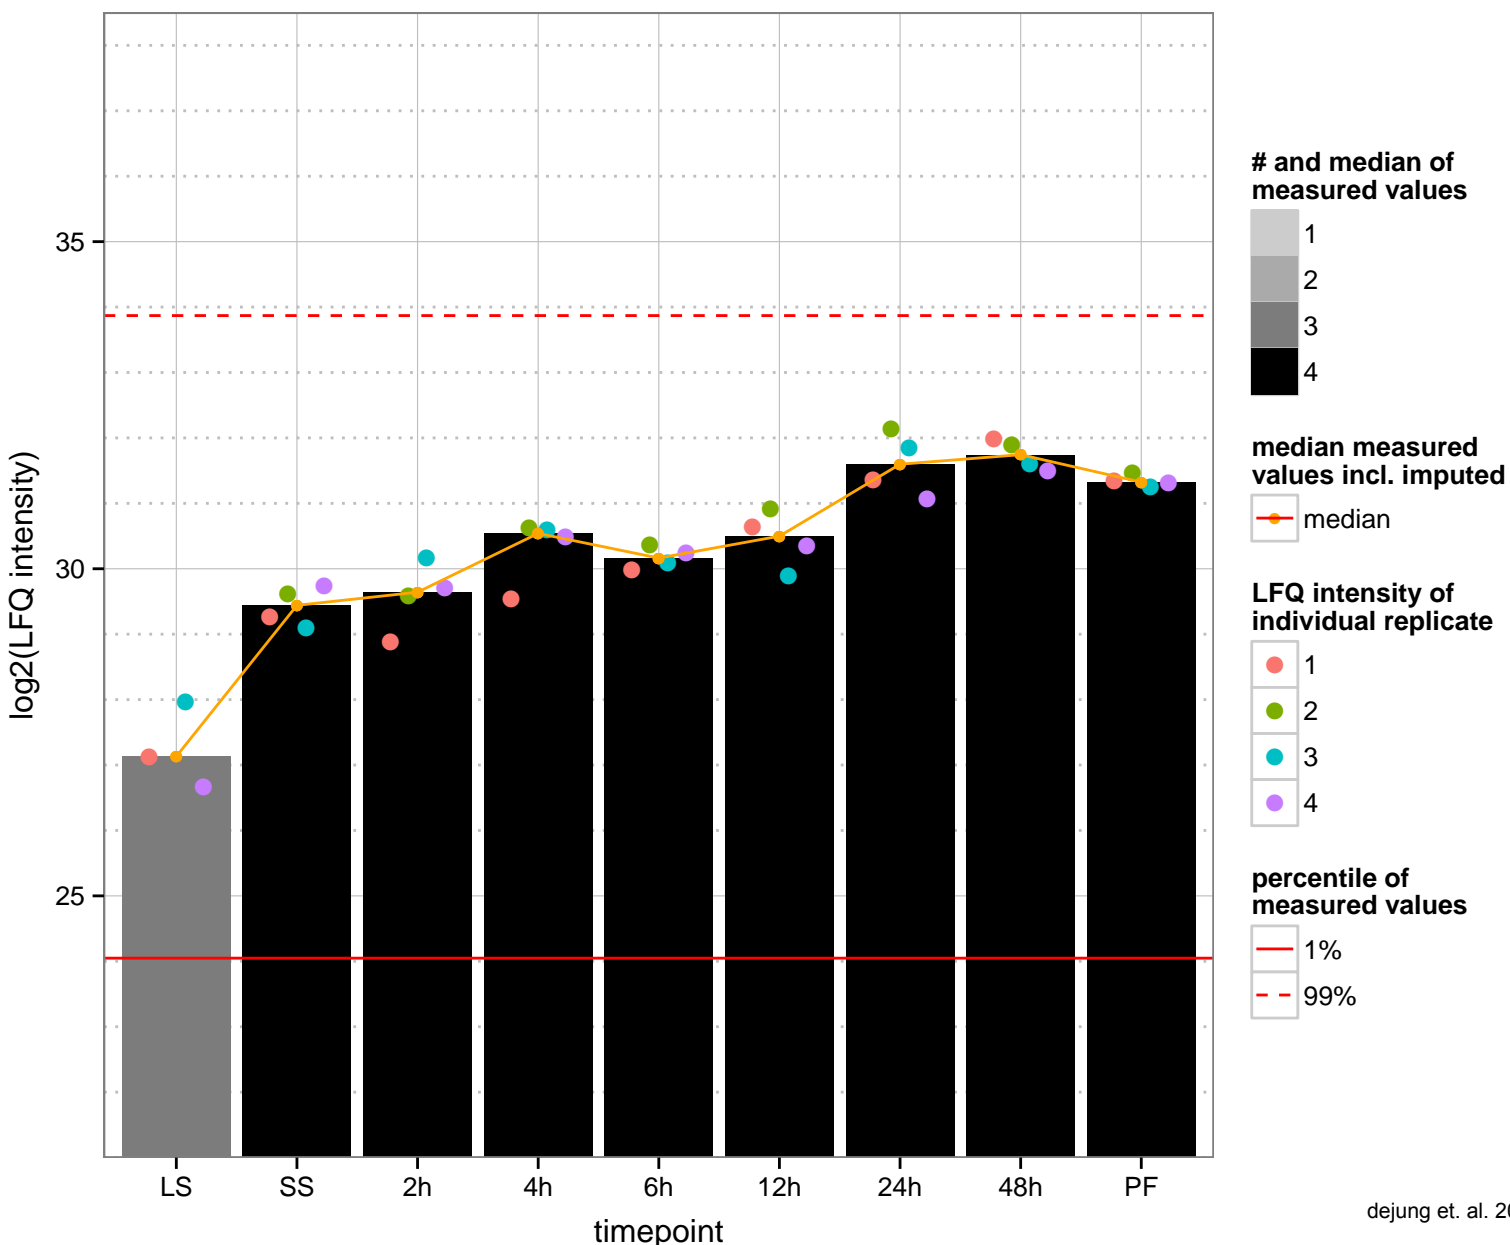

hypothetical protein, conserved  
 Tb927.10.8240  
 AGOF: null  
 AGOC: null  
 AGOP: null  
 PGO: null  
 PGOC: null  
 PGOP: null

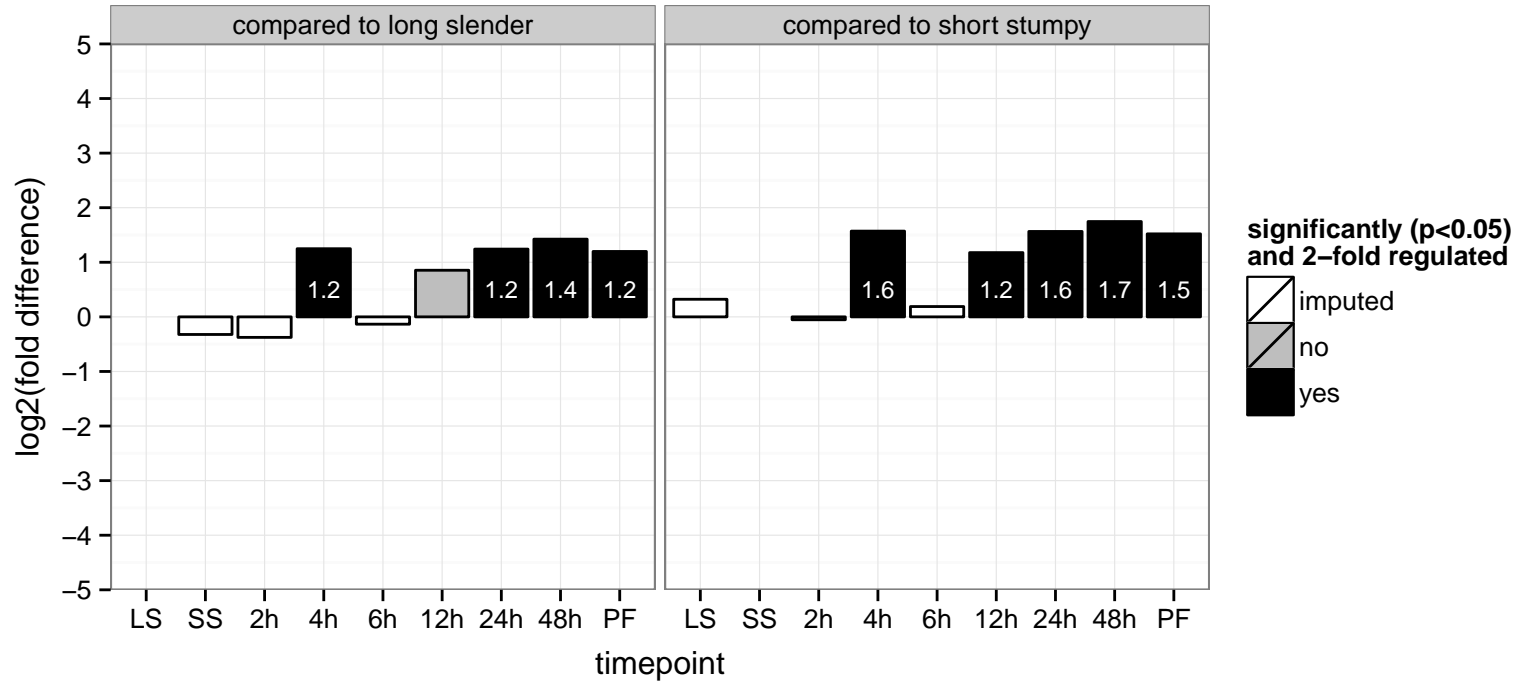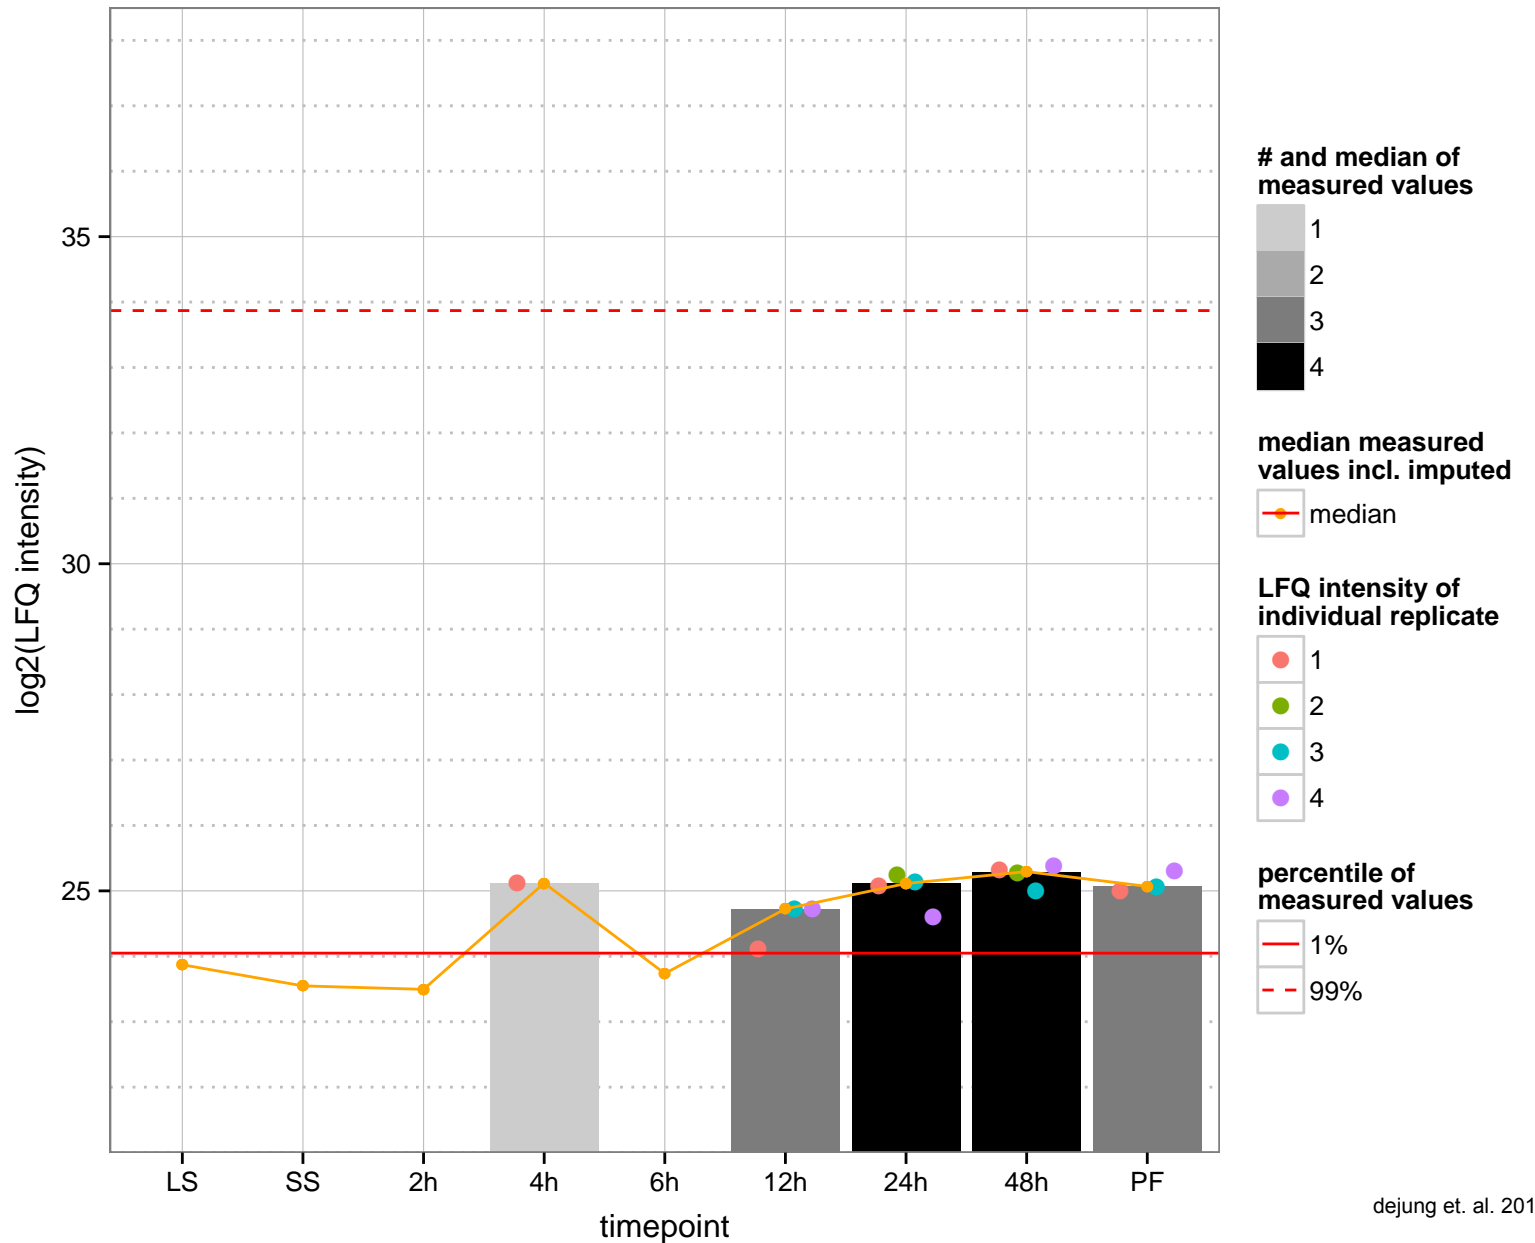

hypothetical protein, conserved  
 Tb927.11.10040  
 AGOF: null  
 AGOC: null  
 AGOP: null  
 PGOF: null  
 PGO: null  
 PGOP: null

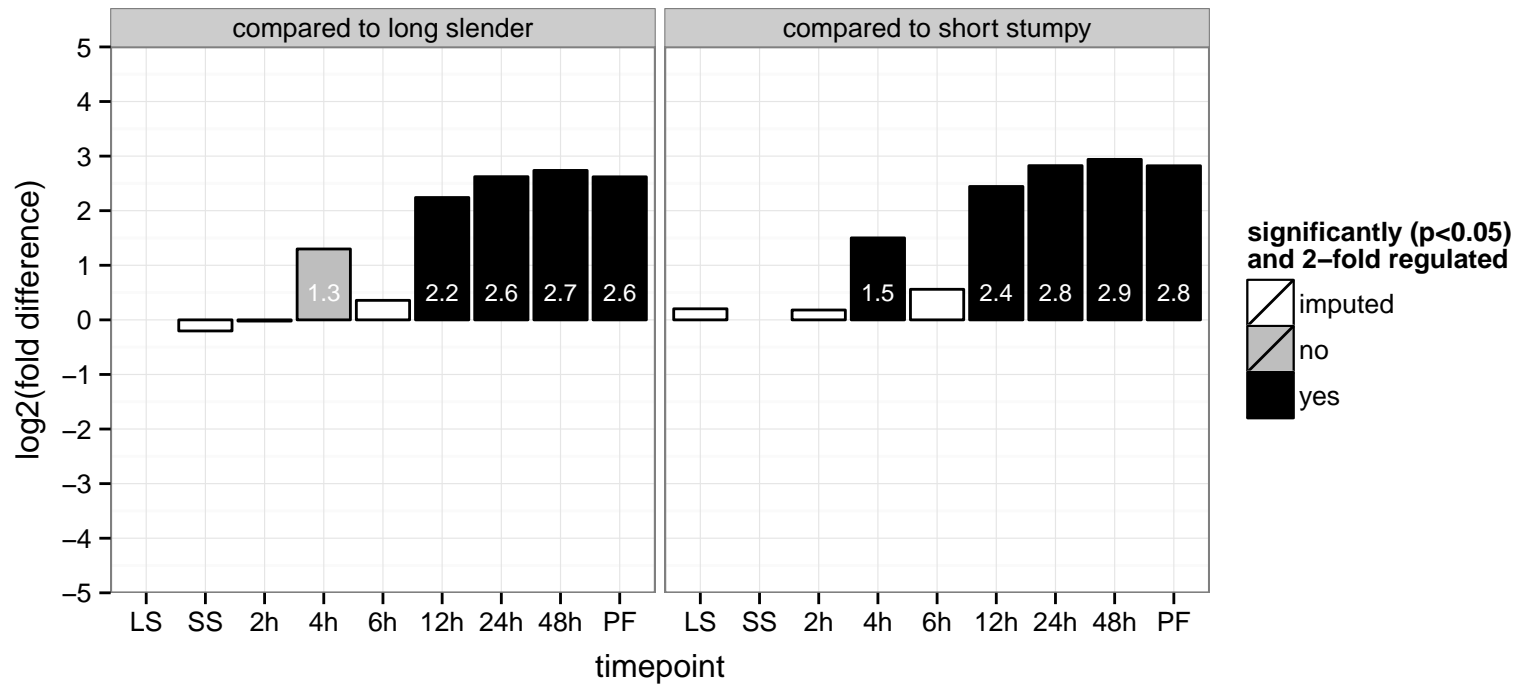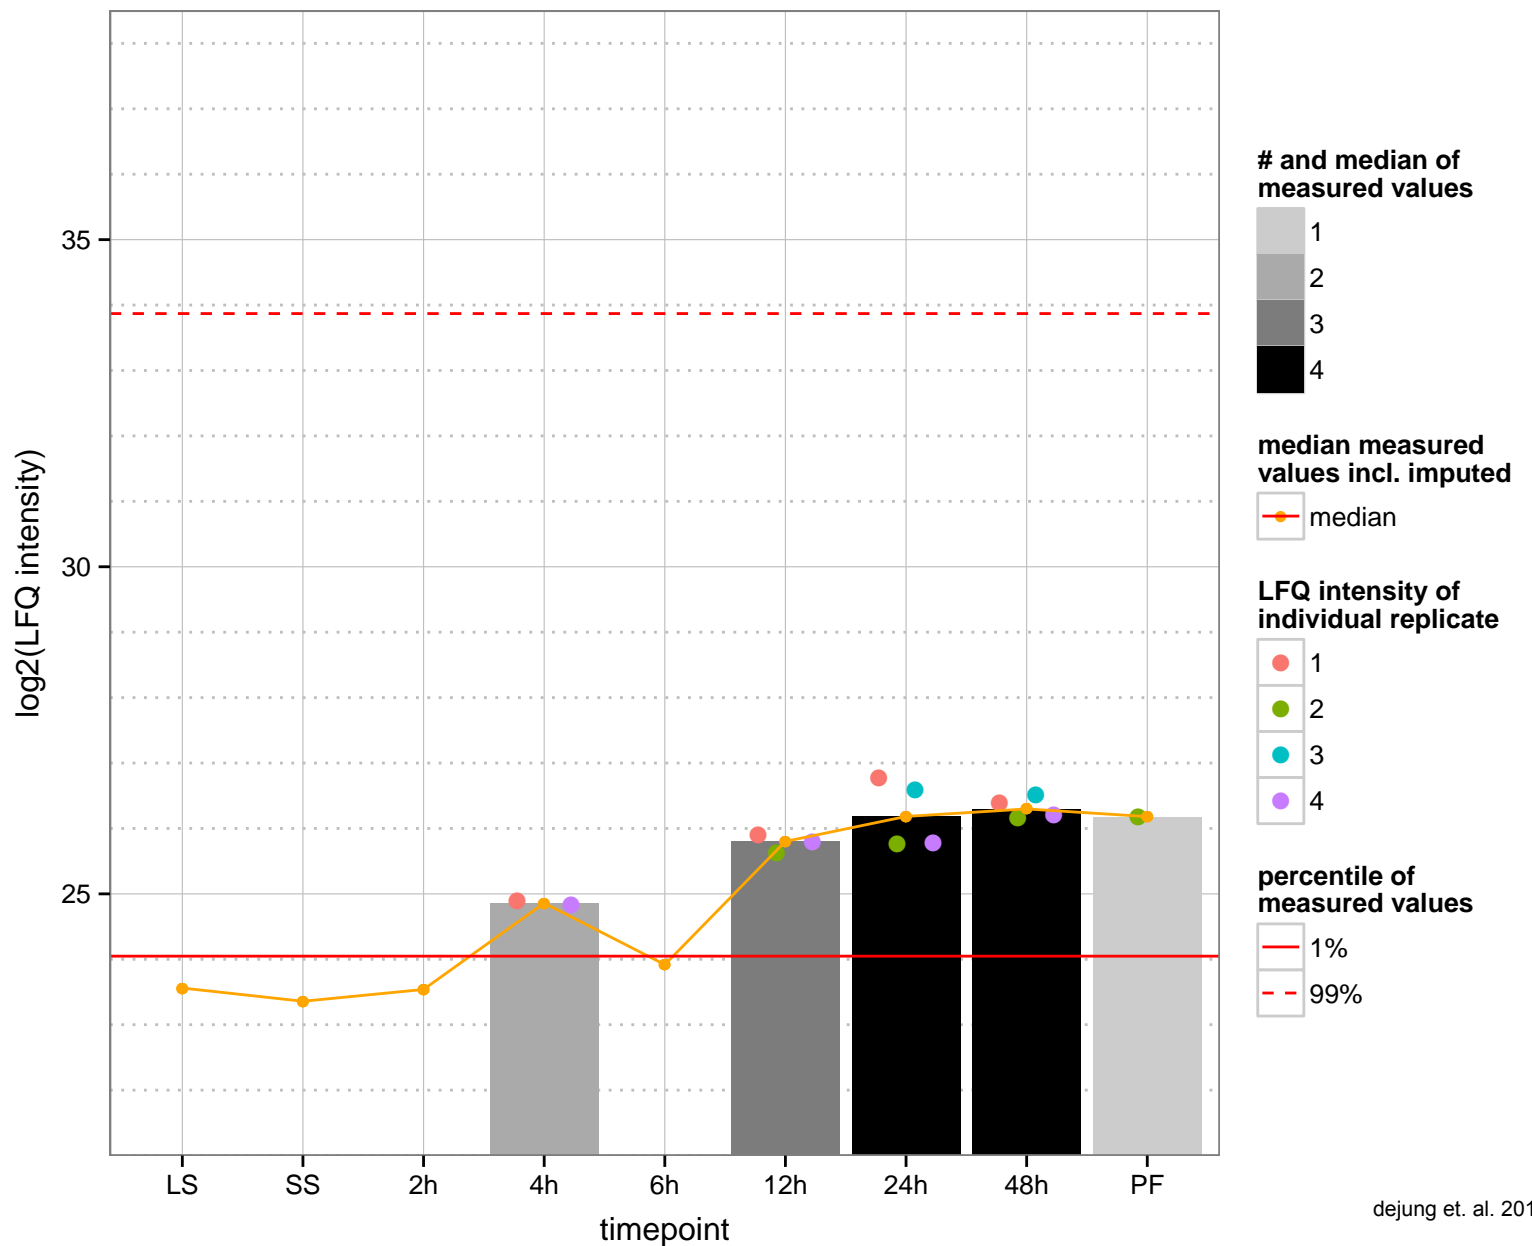



RNA processing factor 1, putative, ribosome biogenesis protein  
 Tb927.11.1050  
 AGOF: rRNA primary transcript binding  
 AGOC: nucleolus  
 AGOP: RNA processing  
 PGO: null  
 PGOC: null  
 PGOP: null

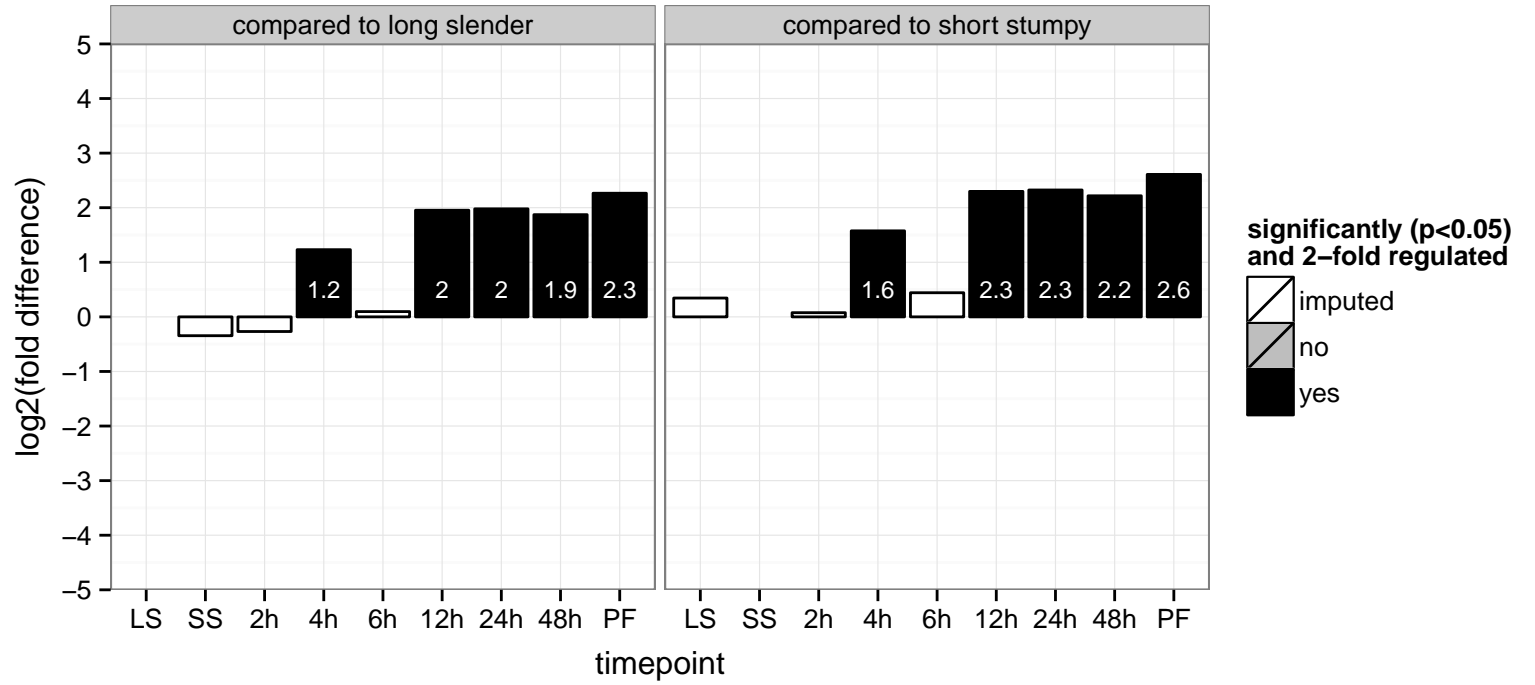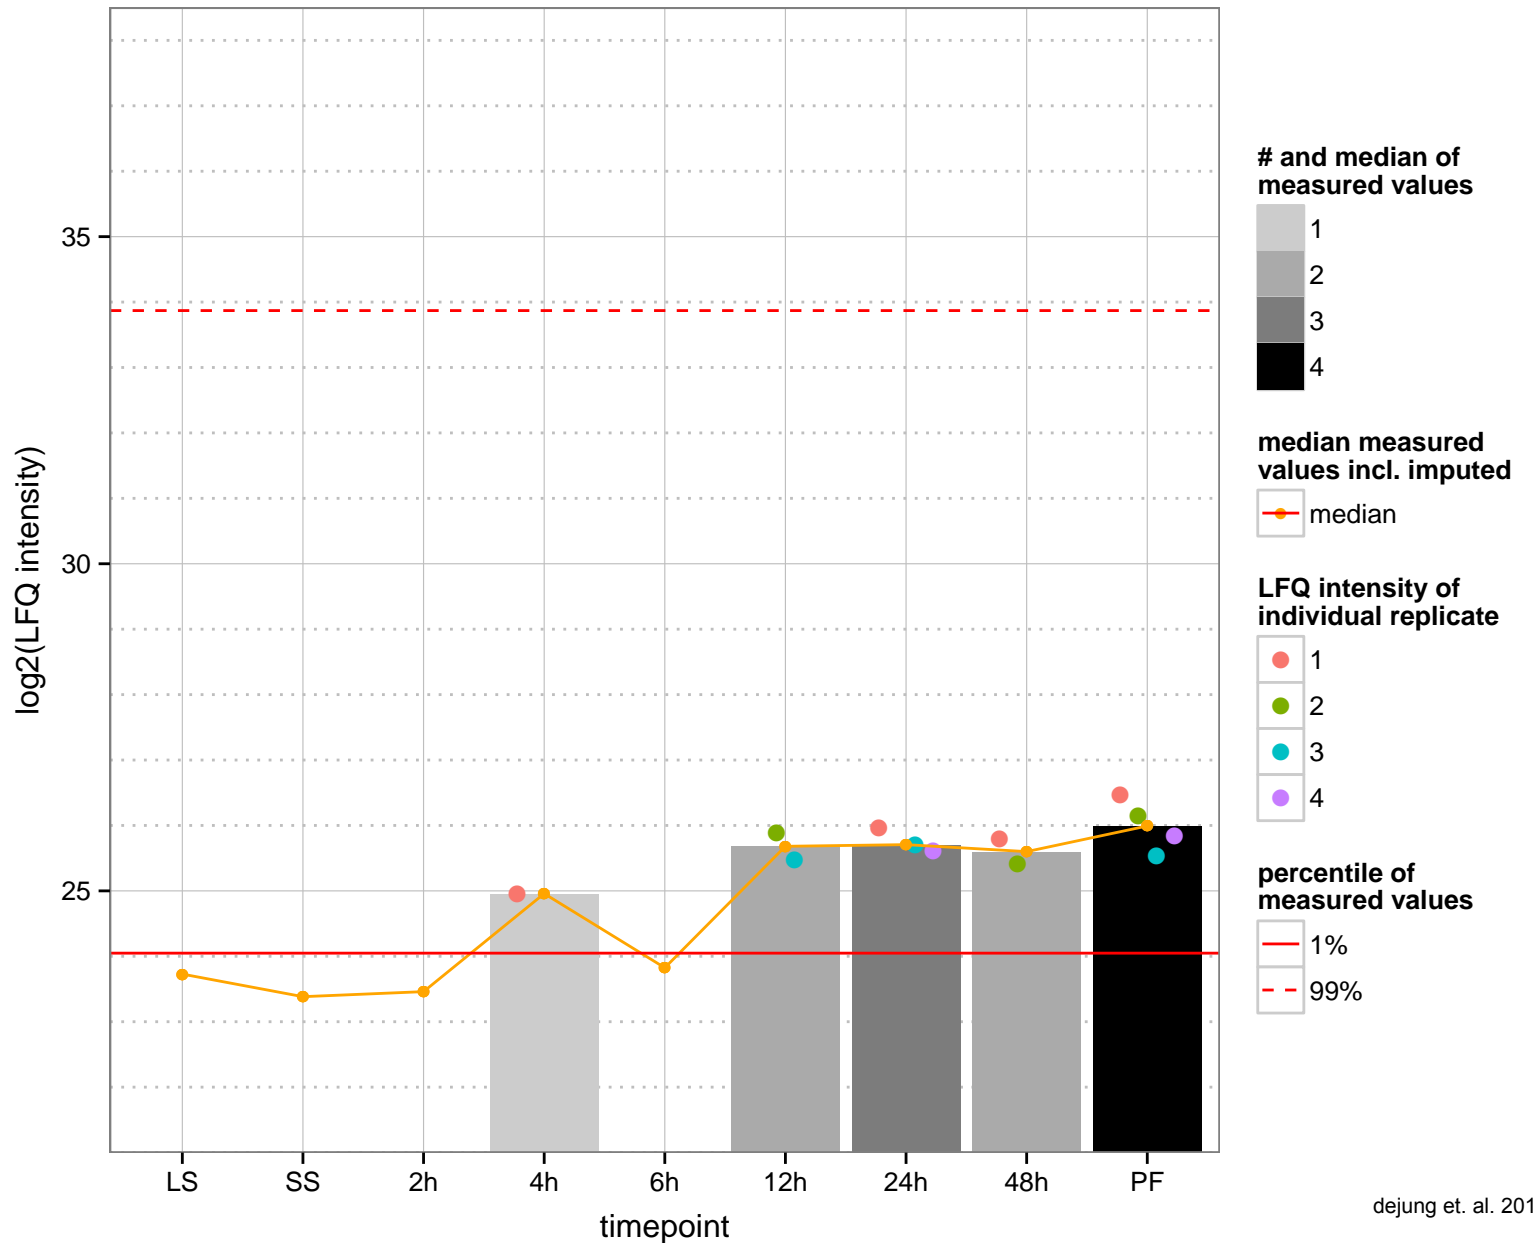

DNA-directed RNA polymerase II, putative, RNA polymerase subunit, putative (RPB11)  
 Tb927.11.2200  
 AGOF: DNA binding, DNA-directed RNA polymerase activity, protein dimerization activity  
 AGOC: nucleus  
 AGOP: transcription, DNA-dependent  
 PGOF: DNA binding, DNA-directed RNA polymerase activity  
 PGO: null  
 PGOP: transcription, DNA-dependent

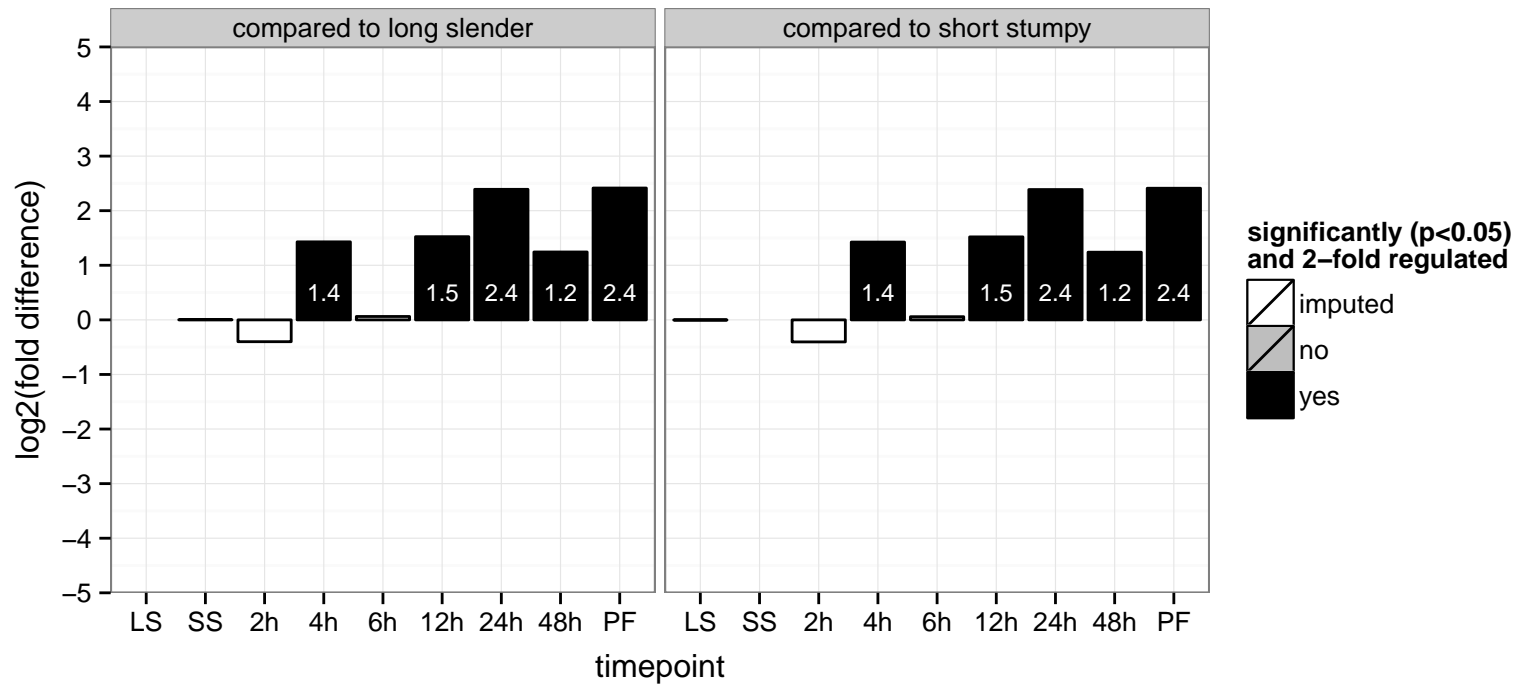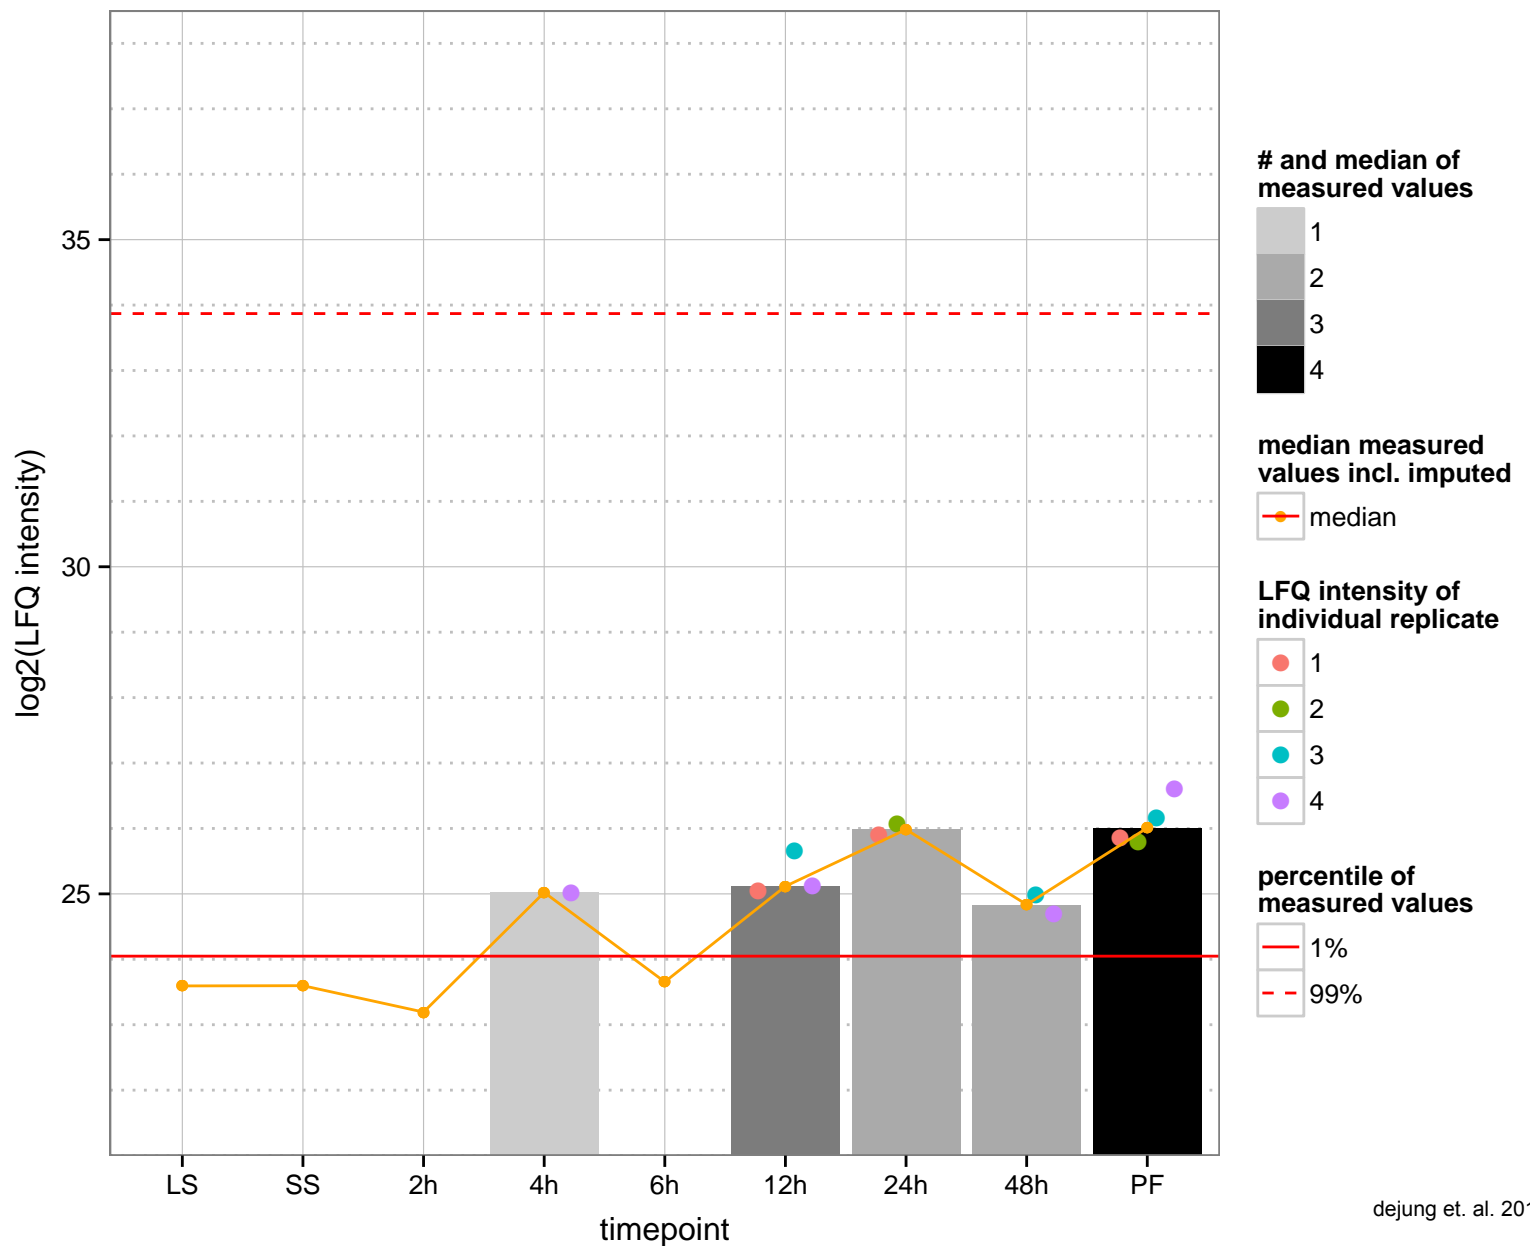

glycosomal transporter (GAT2) (GAT2)

Tb927.11.3130

AGOF: ATP binding, ATPase activity, coupled to transmembrane movement of substances

AGOC: glycosome membrane, integral to membrane

AGOP: fatty acid transport

PGOF: ATP binding, ATPase activity, coupled to transmembrane movement of substances, nucleoside-triphosphatase activity

PGOC: integral to membrane, membrane

PGOP: transmembrane transport, transport

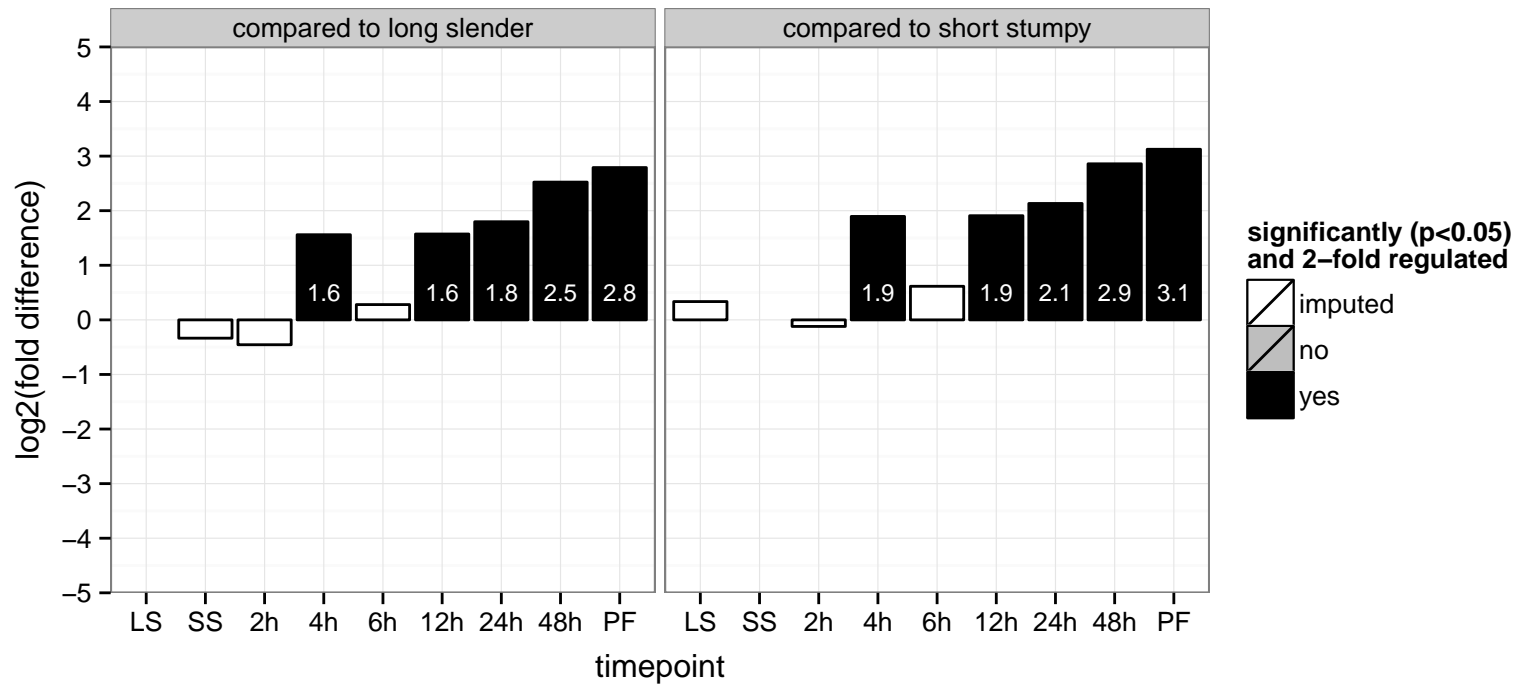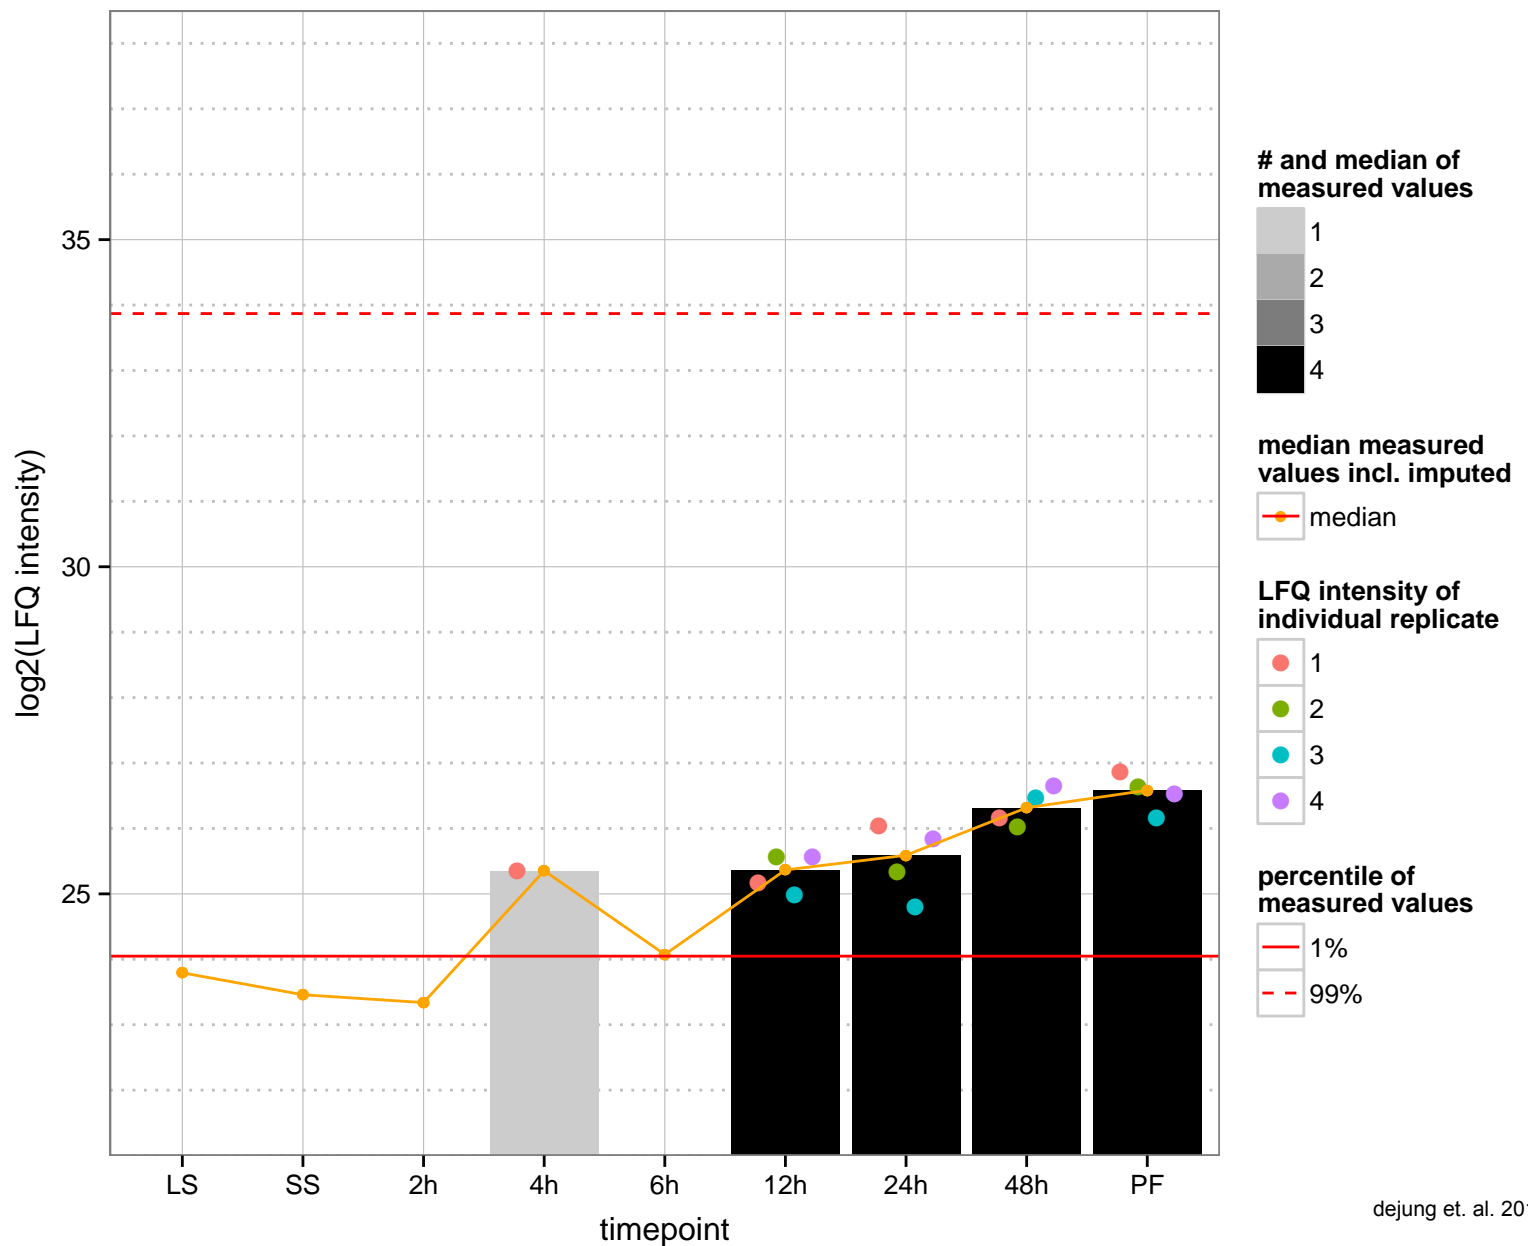

hypothetical protein  
 Tb927.11.3370  
 AGOF: null  
 AGOC: null  
 AGOP: null  
 PGO: null  
 PGOC: null  
 PGOP: null

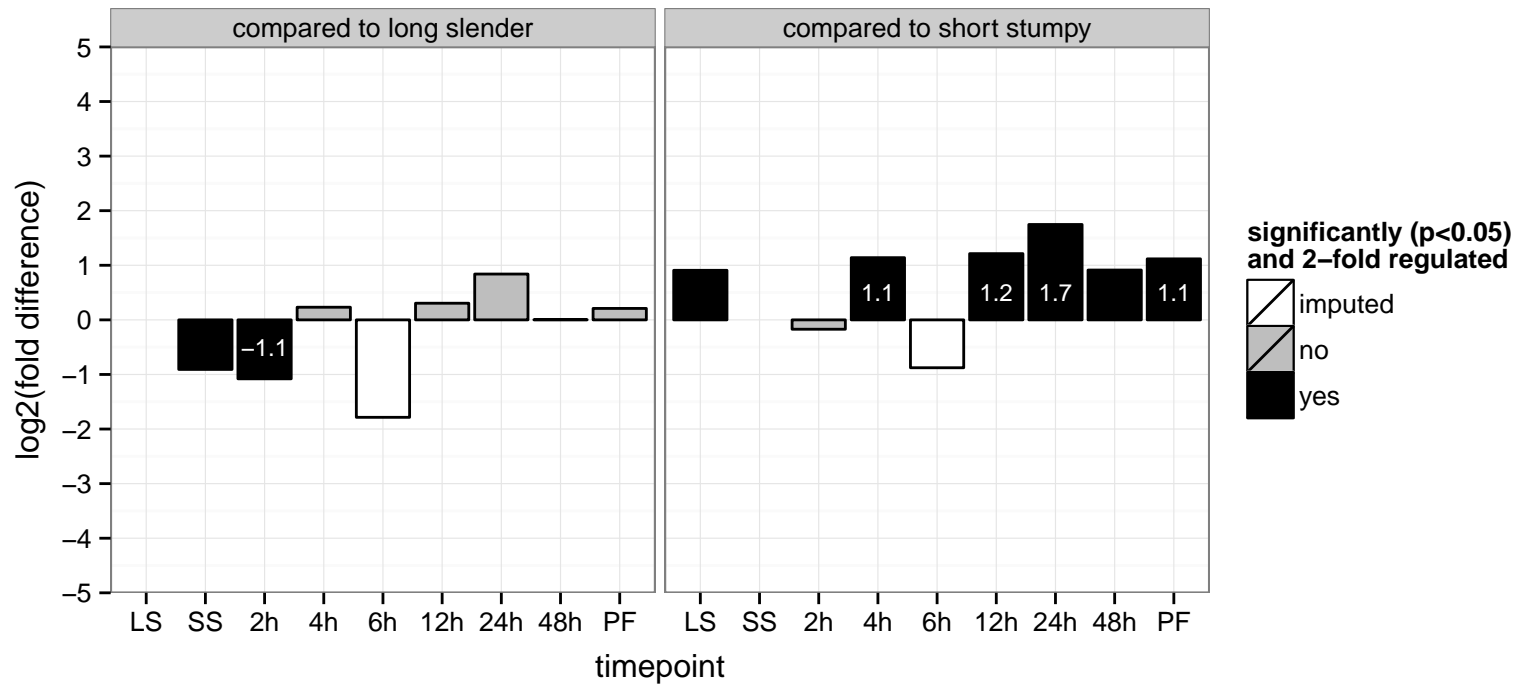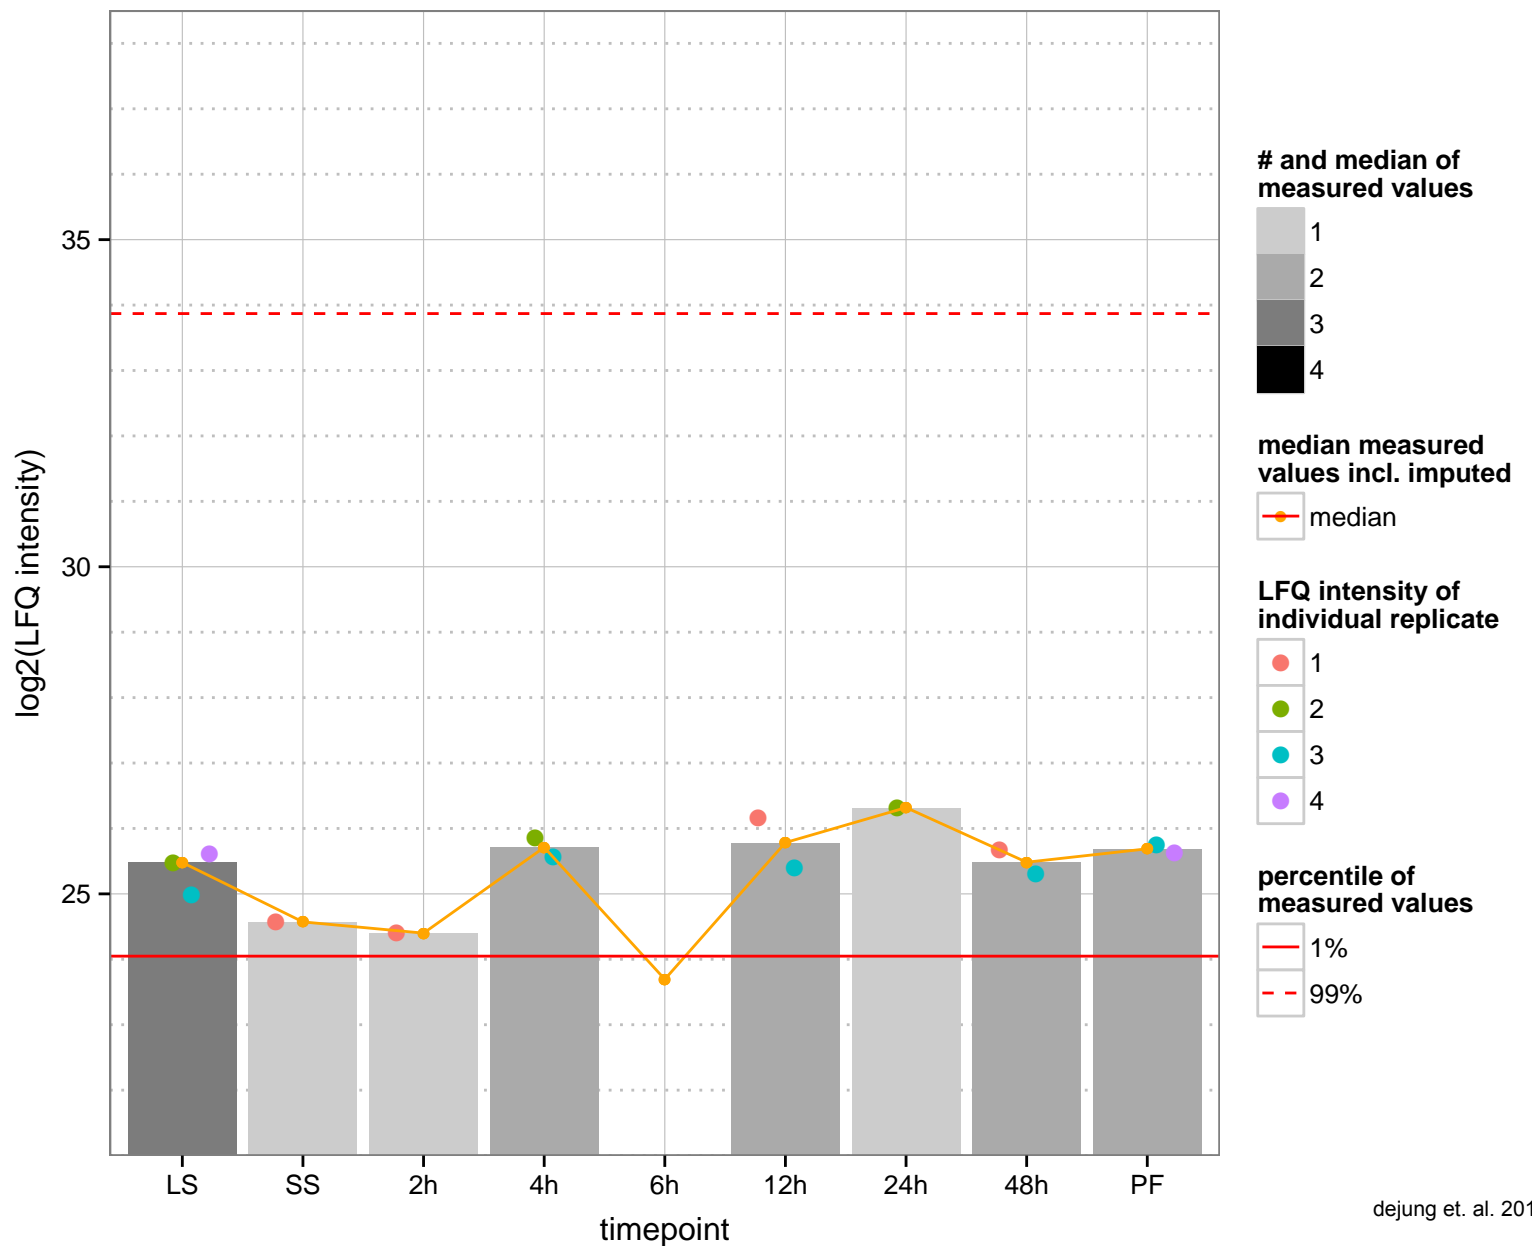

nucleic acid binding protein, putative  
 Tb927.11.6620  
 AGOF: nucleic acid binding, zinc ion binding  
 AGOC: null  
 AGOP: null  
 PGOF: nucleic acid binding, zinc ion binding  
 PGOC: null  
 PGOP: null

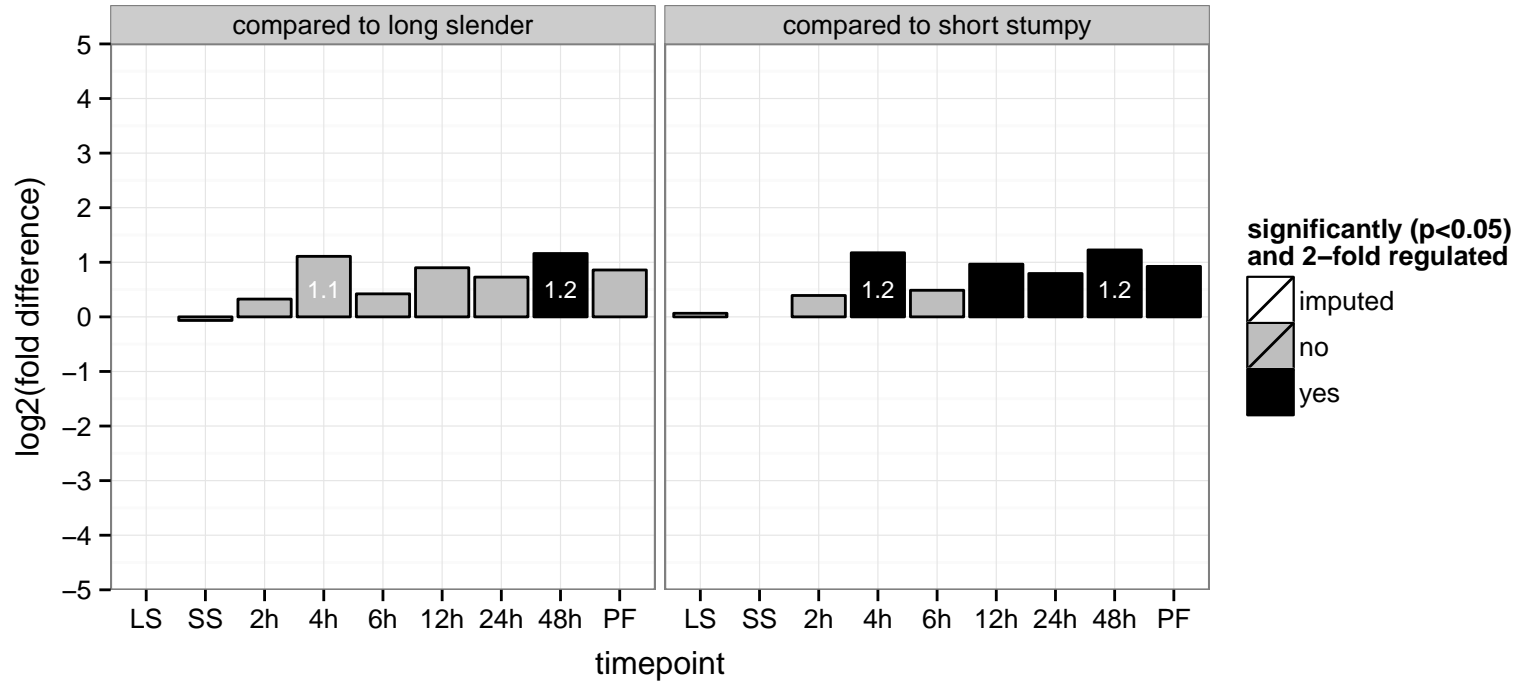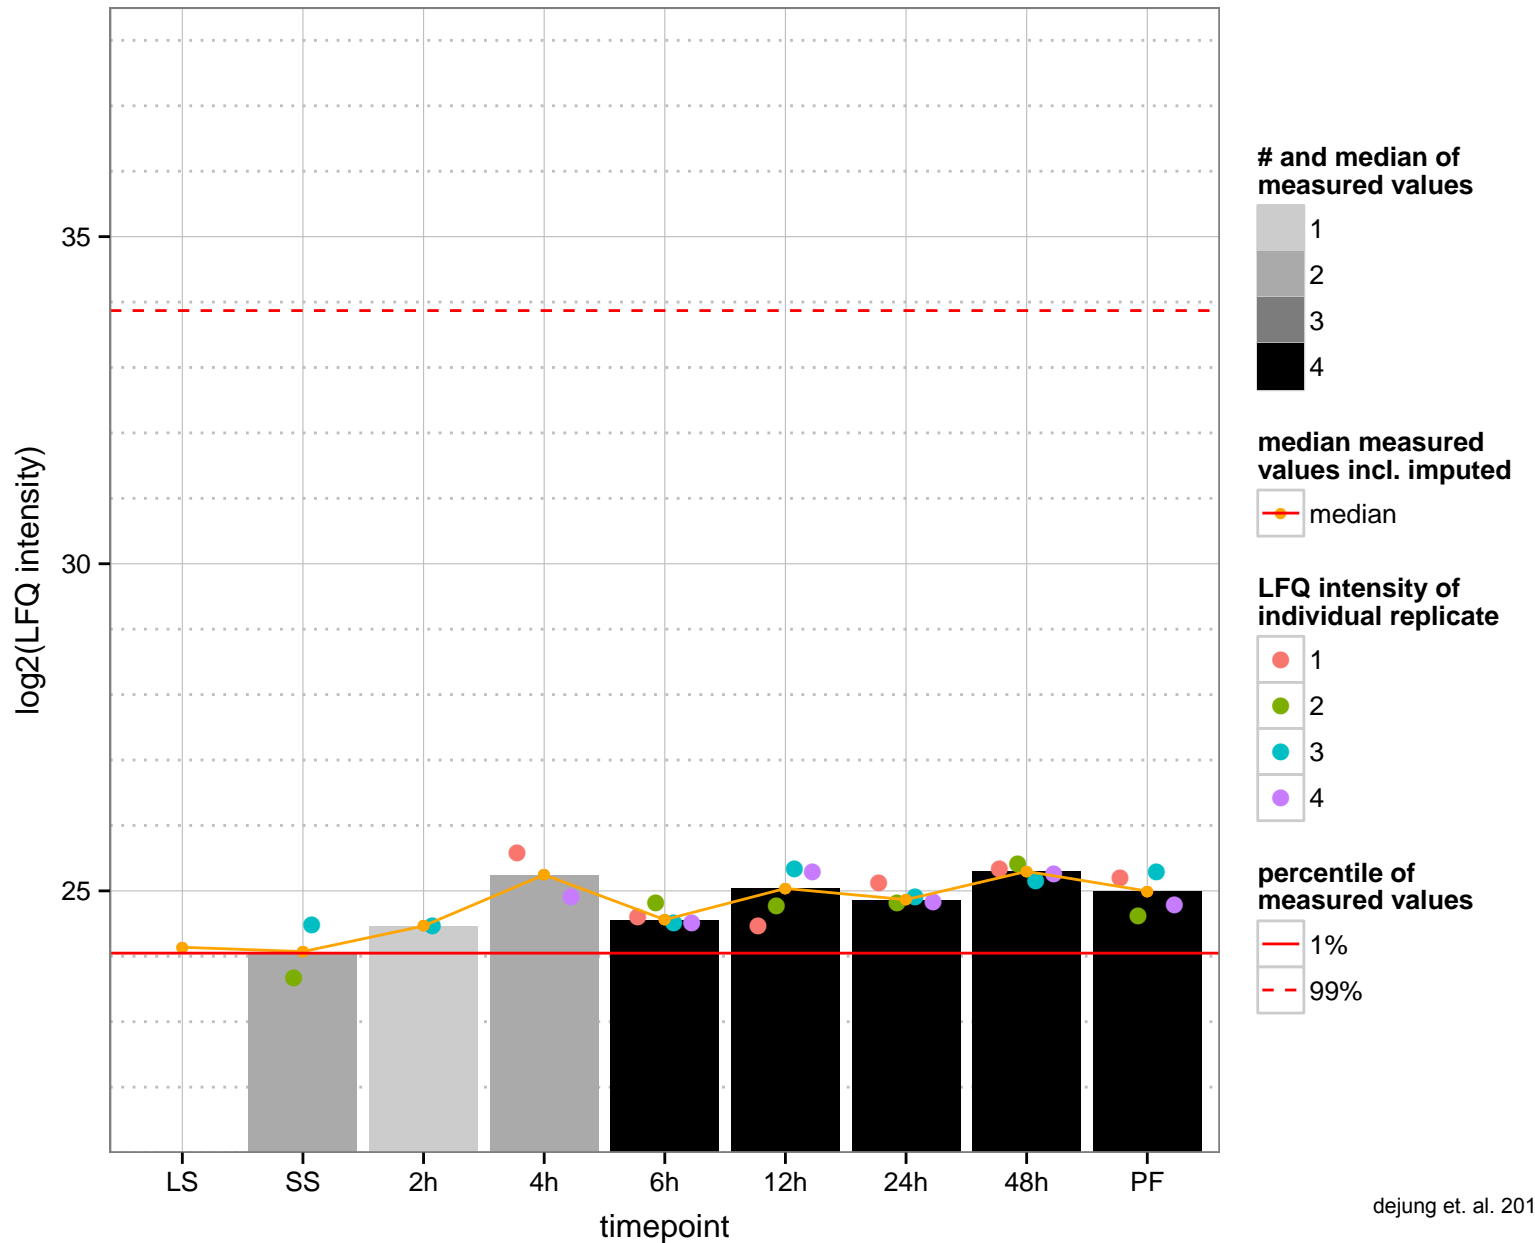

cytochrome b5, putative (CYB5)  
 Tb927.11.6640  
 AGOF: glutathione–disulfide reductase activity, heme binding  
 AGOC: integral to membrane, mitochondrial inner membrane  
 AGOP: oxidation–reduction process  
 PGOF: heme binding  
 PGO: null  
 PGOP: null

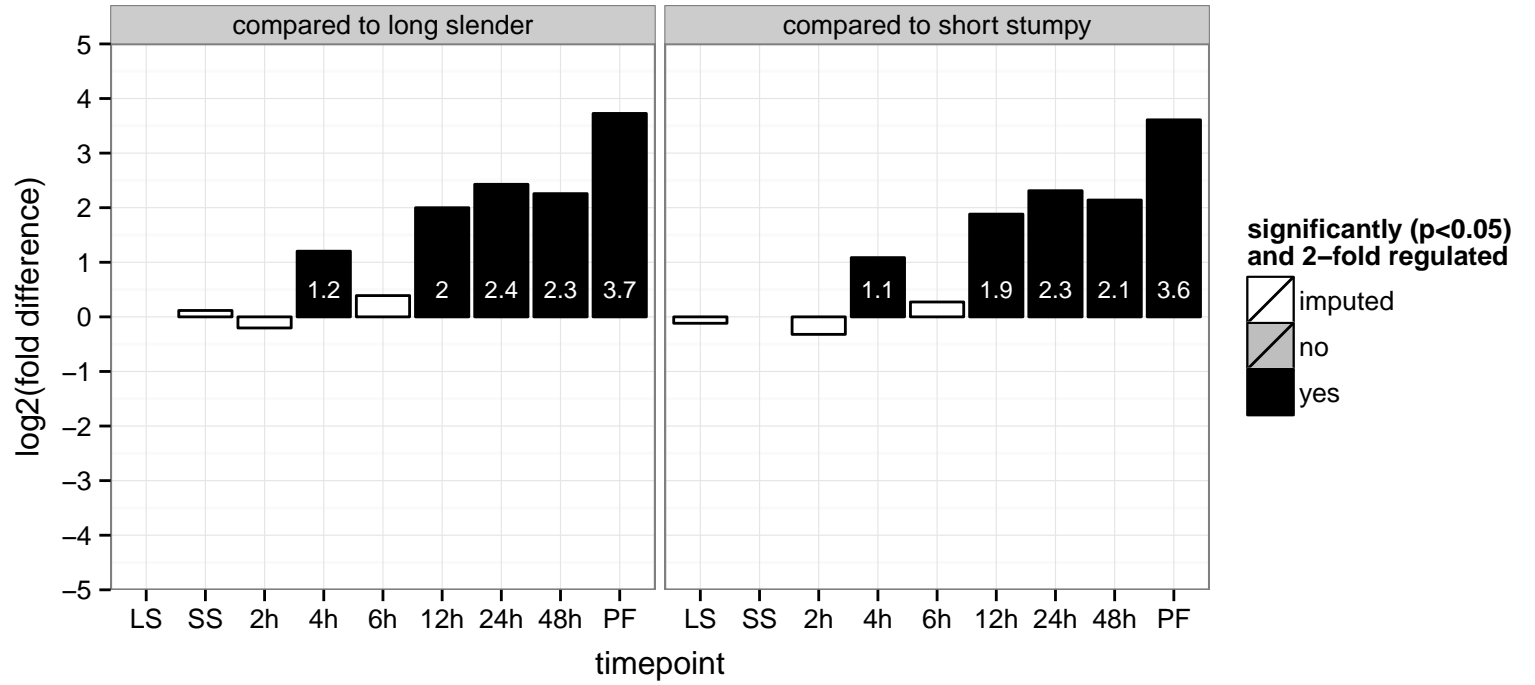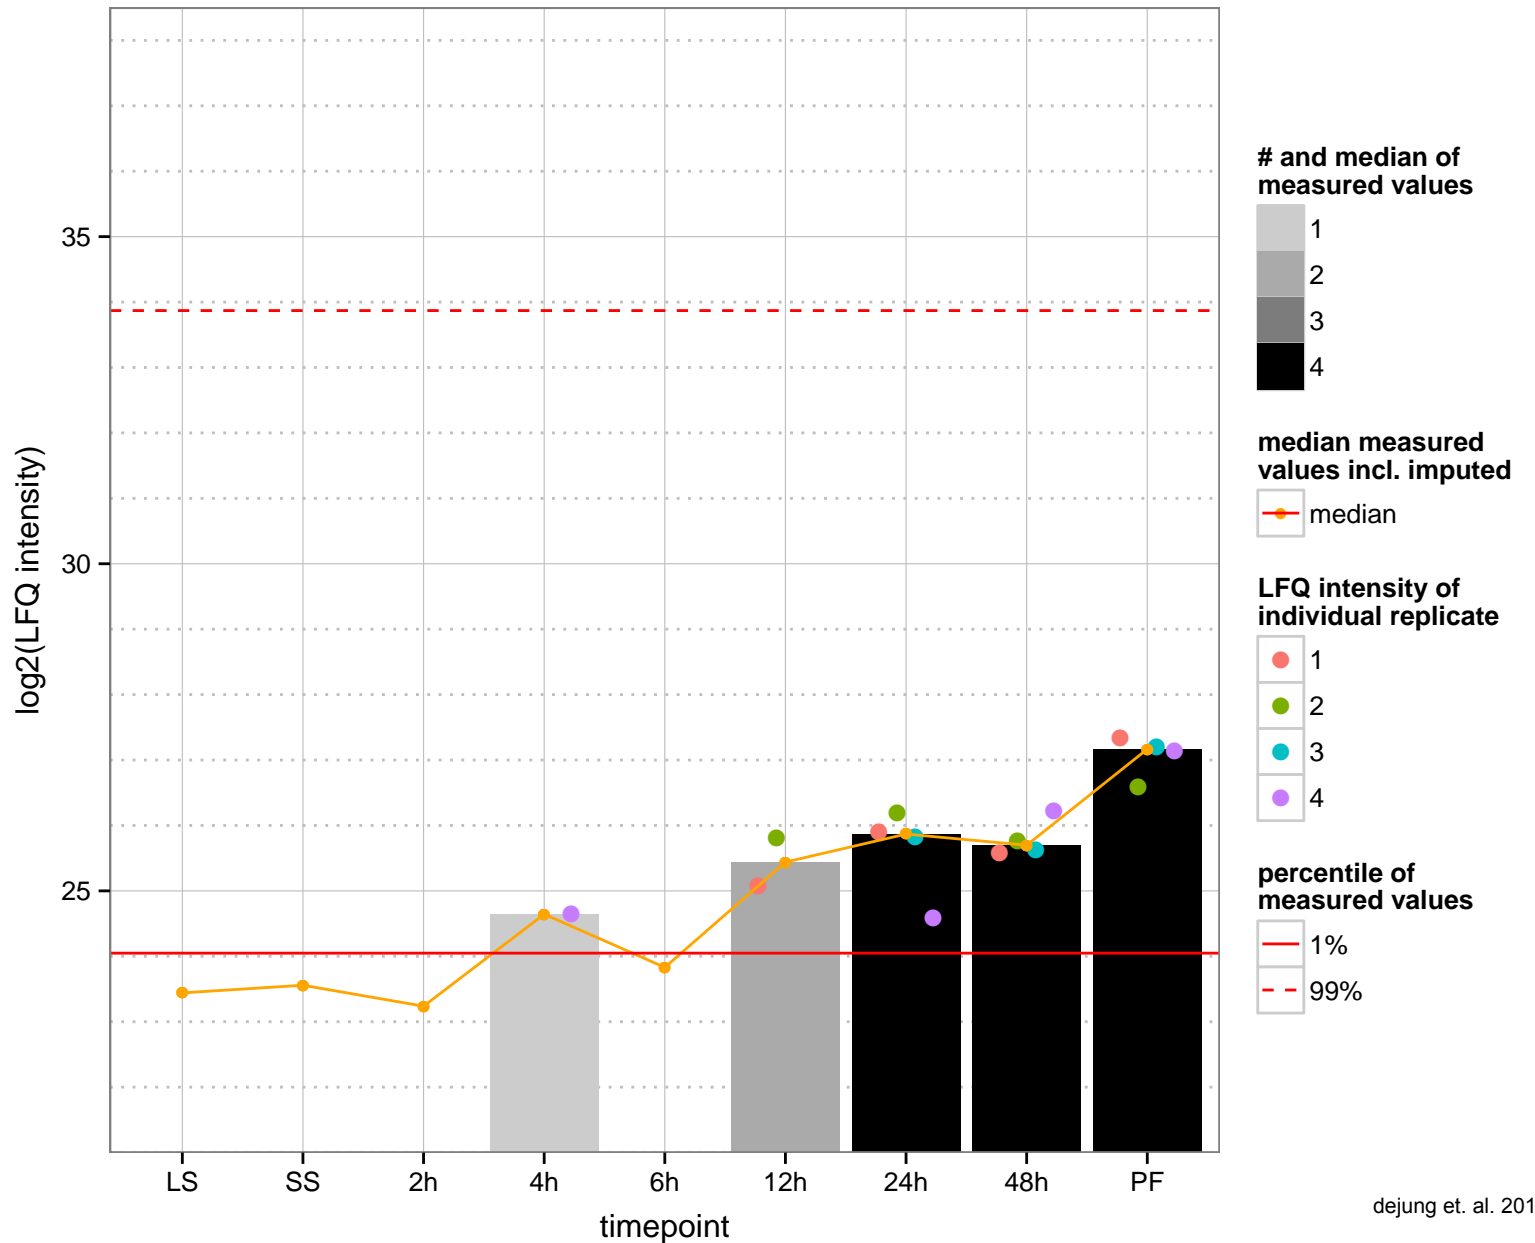

hypothetical protein, conserved  
 Tb927.11.6830  
 AGOF: null  
 AGOC: mitochondrion  
 AGOP: null  
 PGO: null  
 PGO: null  
 PGO: null

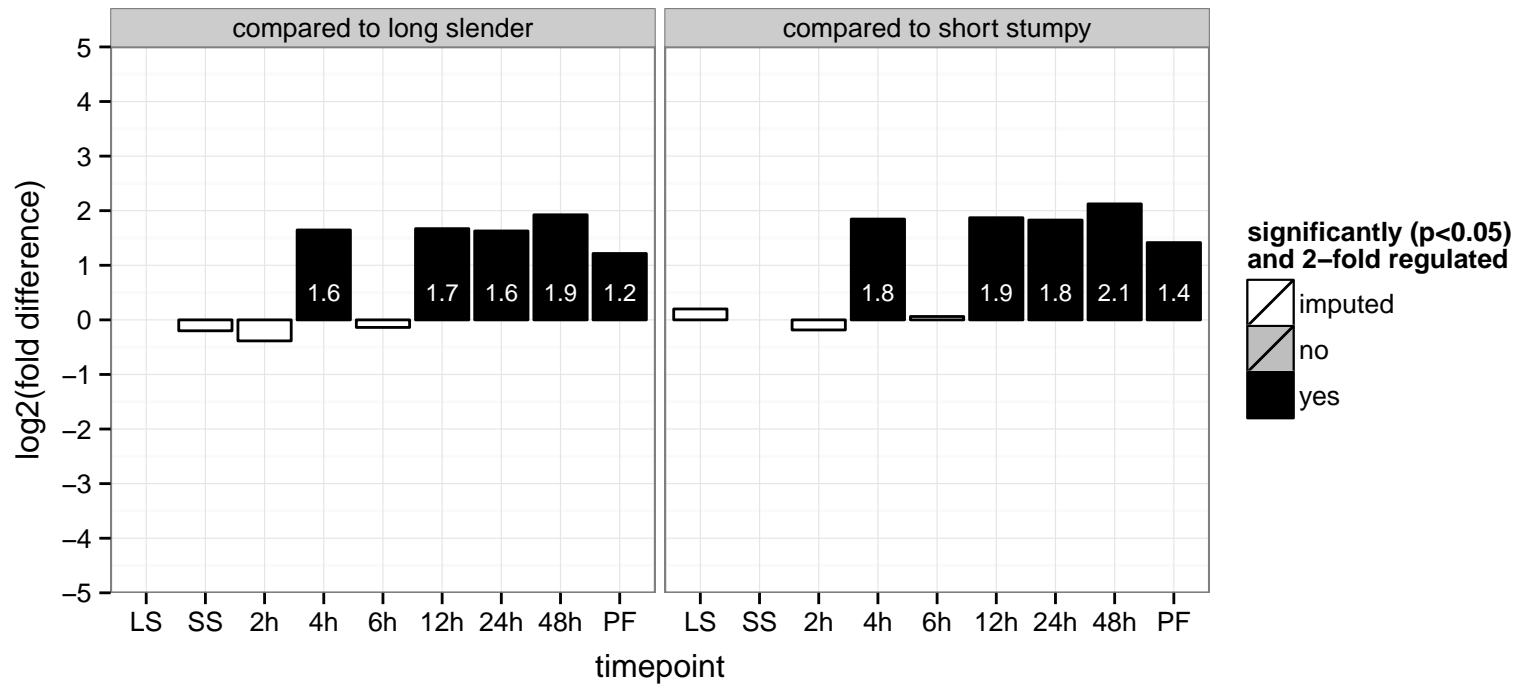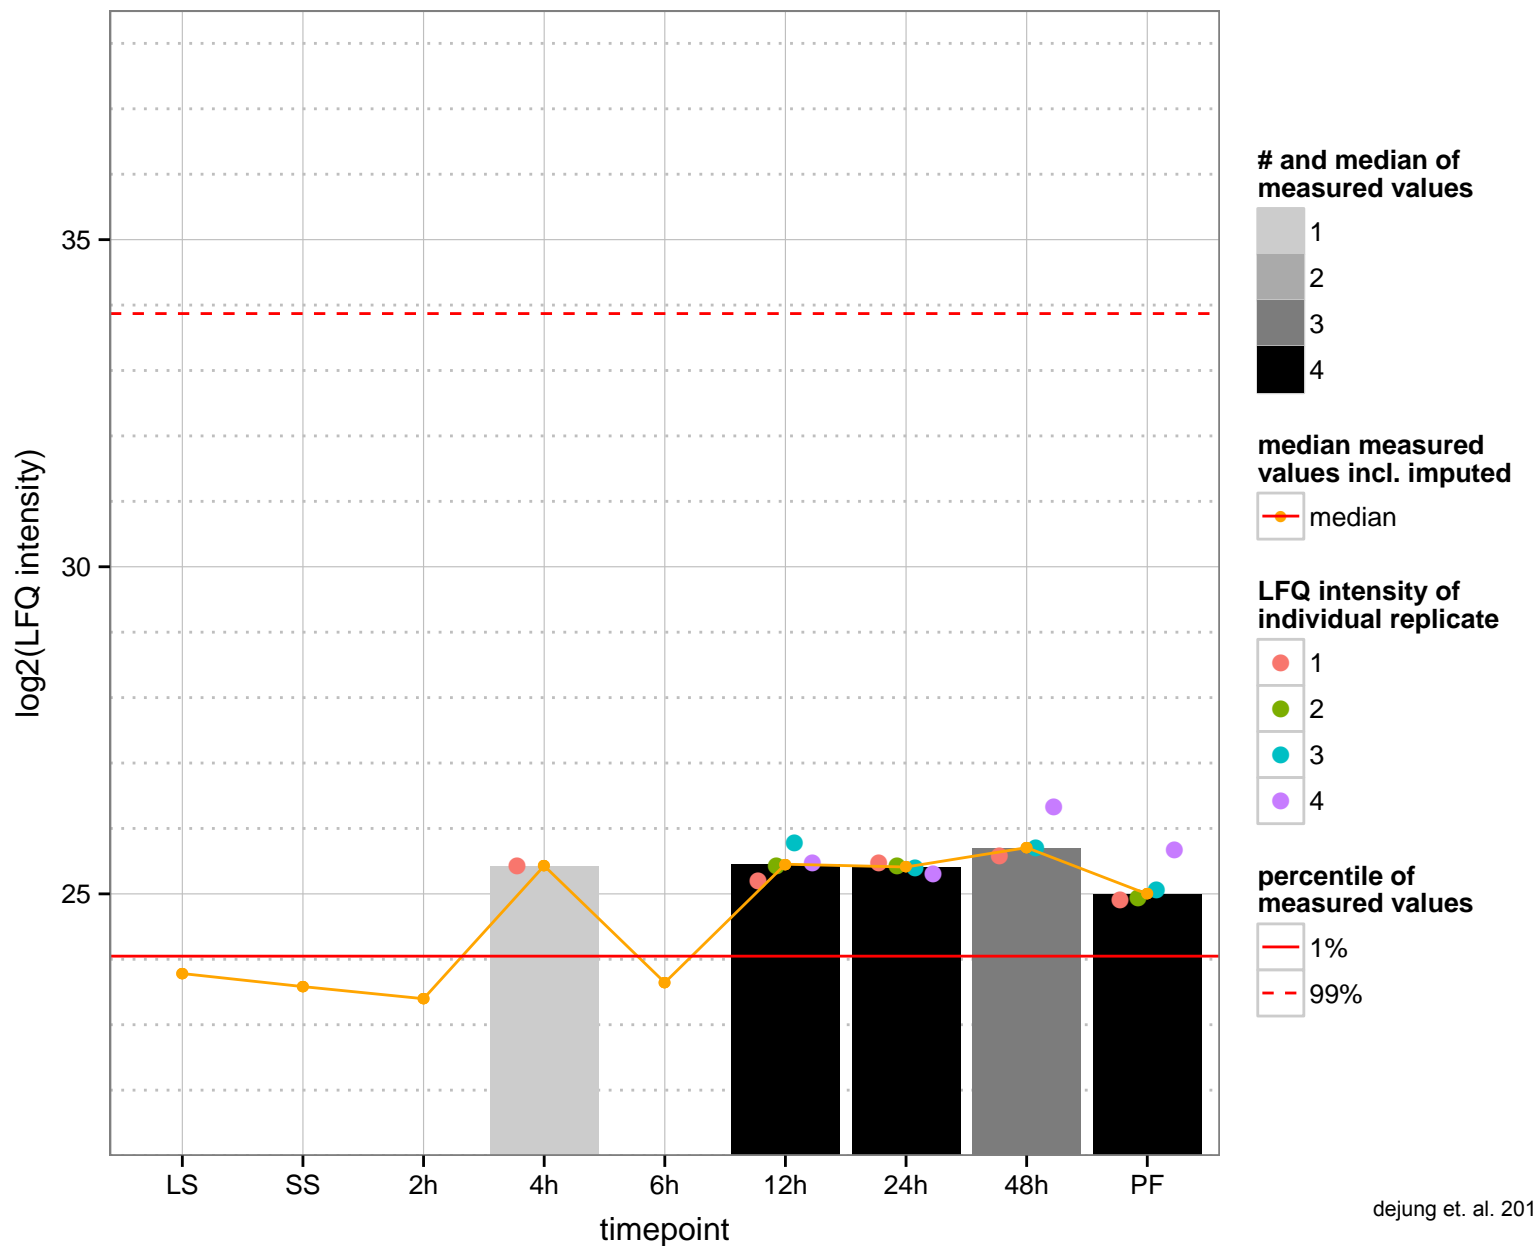

hypothetical protein, conserved  
 Tb927.11.9600  
 AGOF: null  
 AGOC: mitochondrial matrix, mitochondrion  
 AGOP: null  
 PGO: null  
 PGO: null  
 PGO: null  
 PGO: null  
 PGO: null

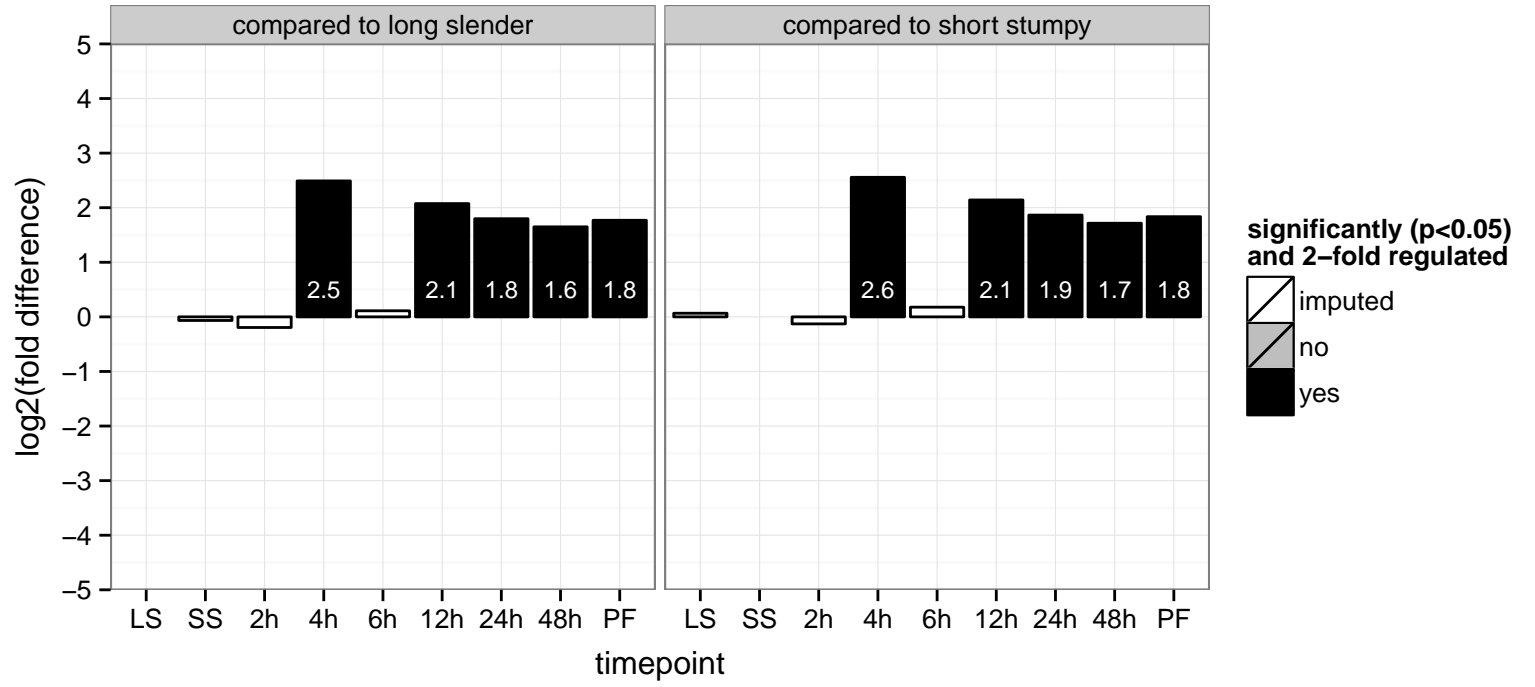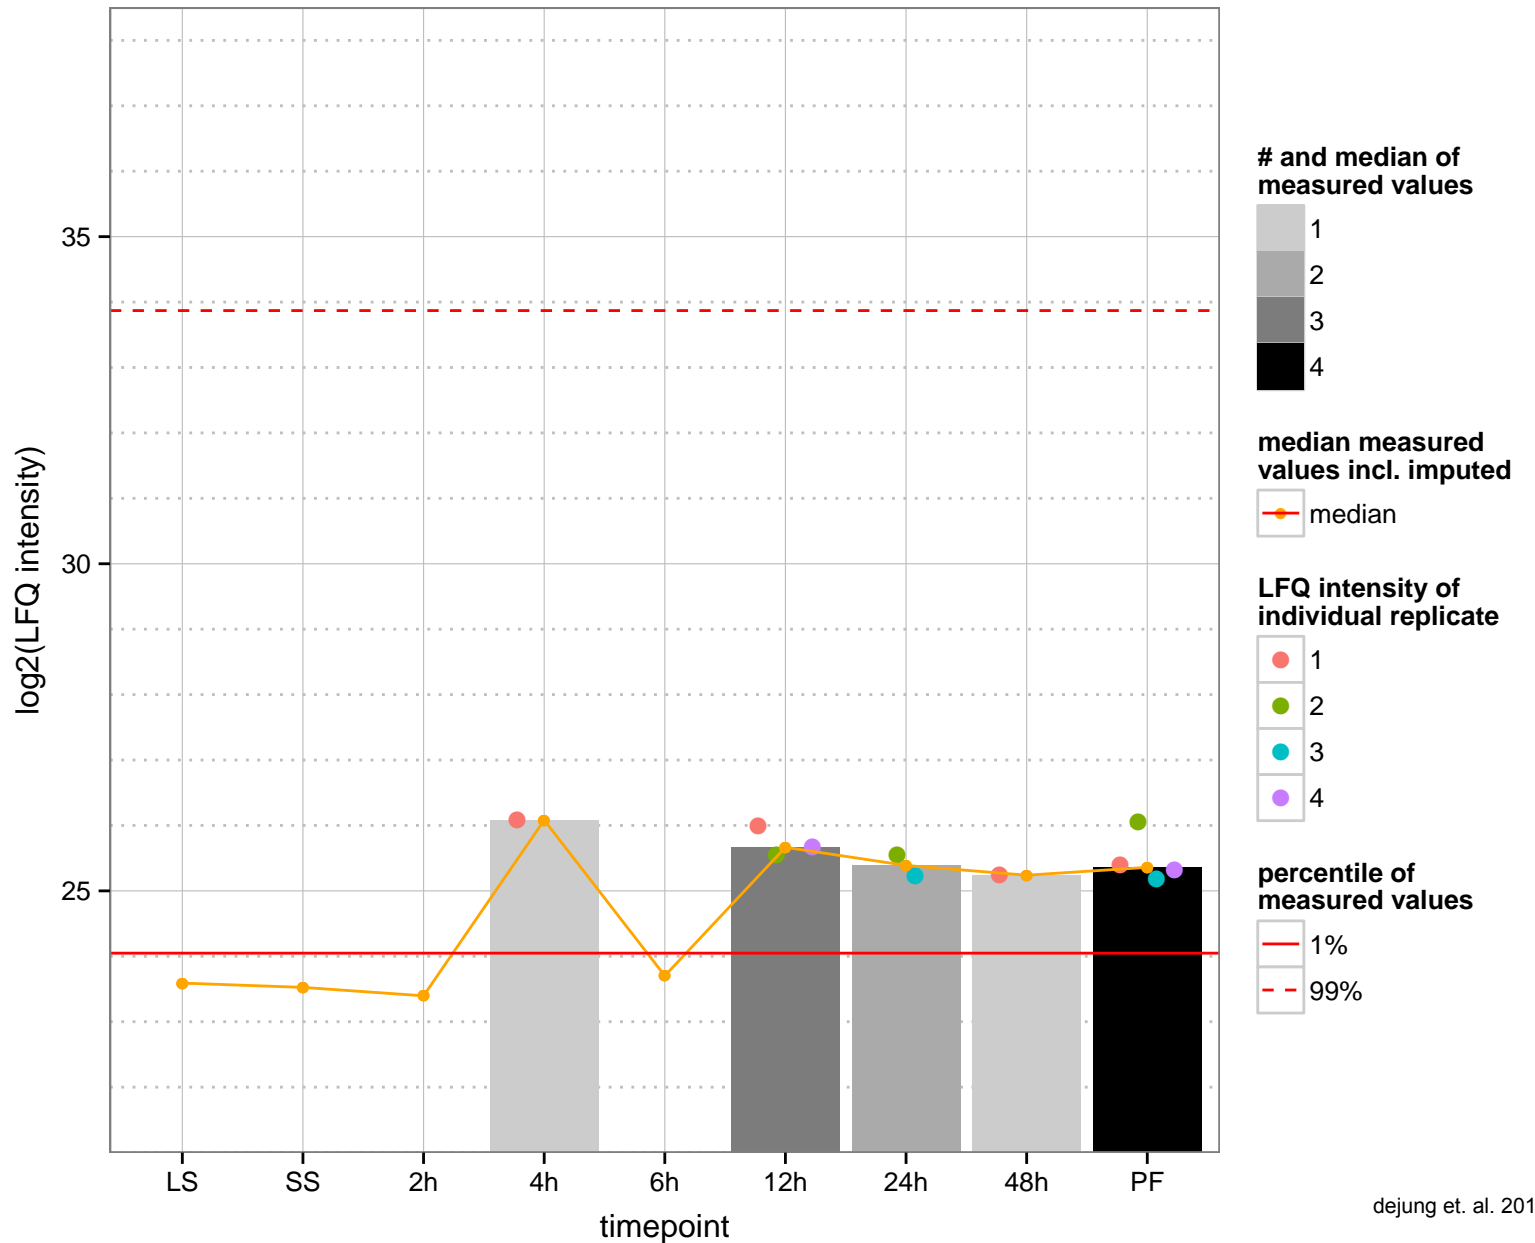



hypothetical protein, conserved  
 Tb927.11.9750  
 AGOF: null  
 AGOC: mitochondrion  
 AGOP: null  
 PGO: null  
 PGOC: null  
 PGOP: null

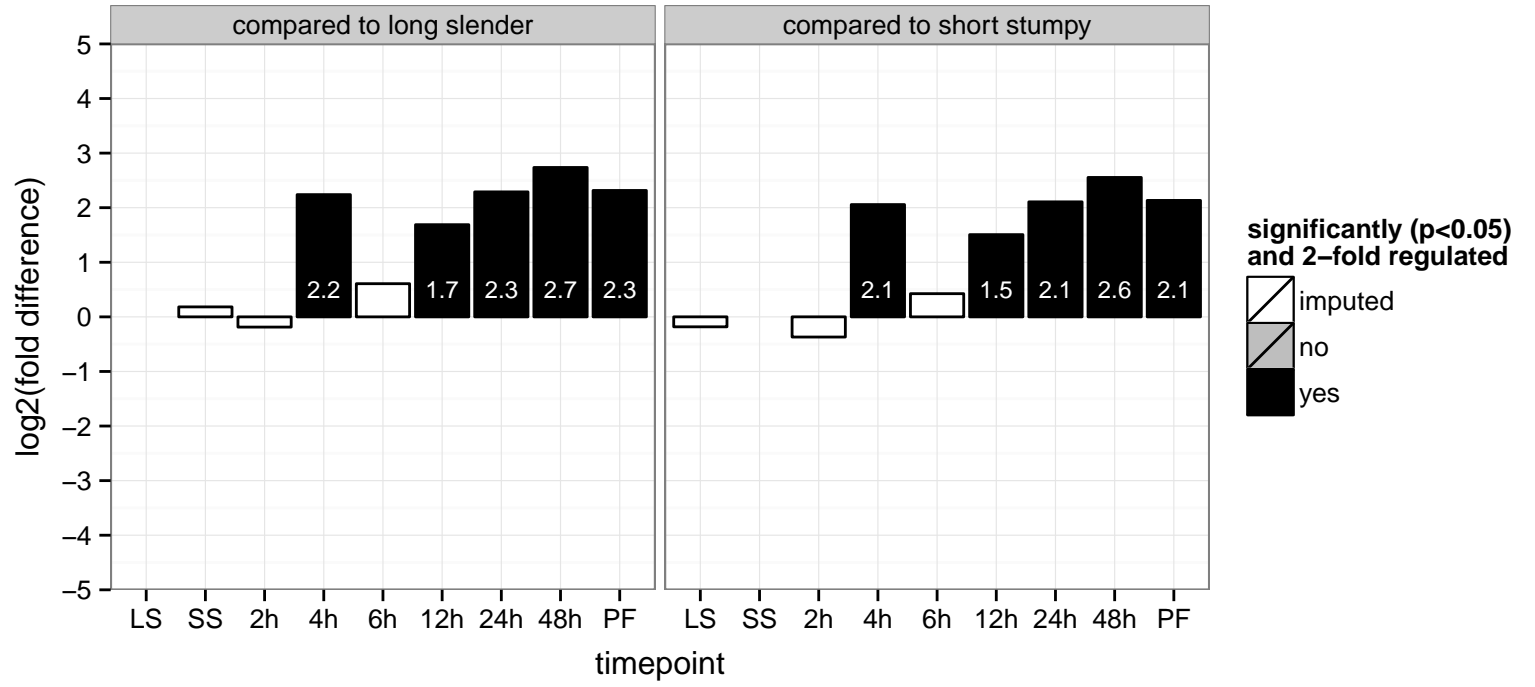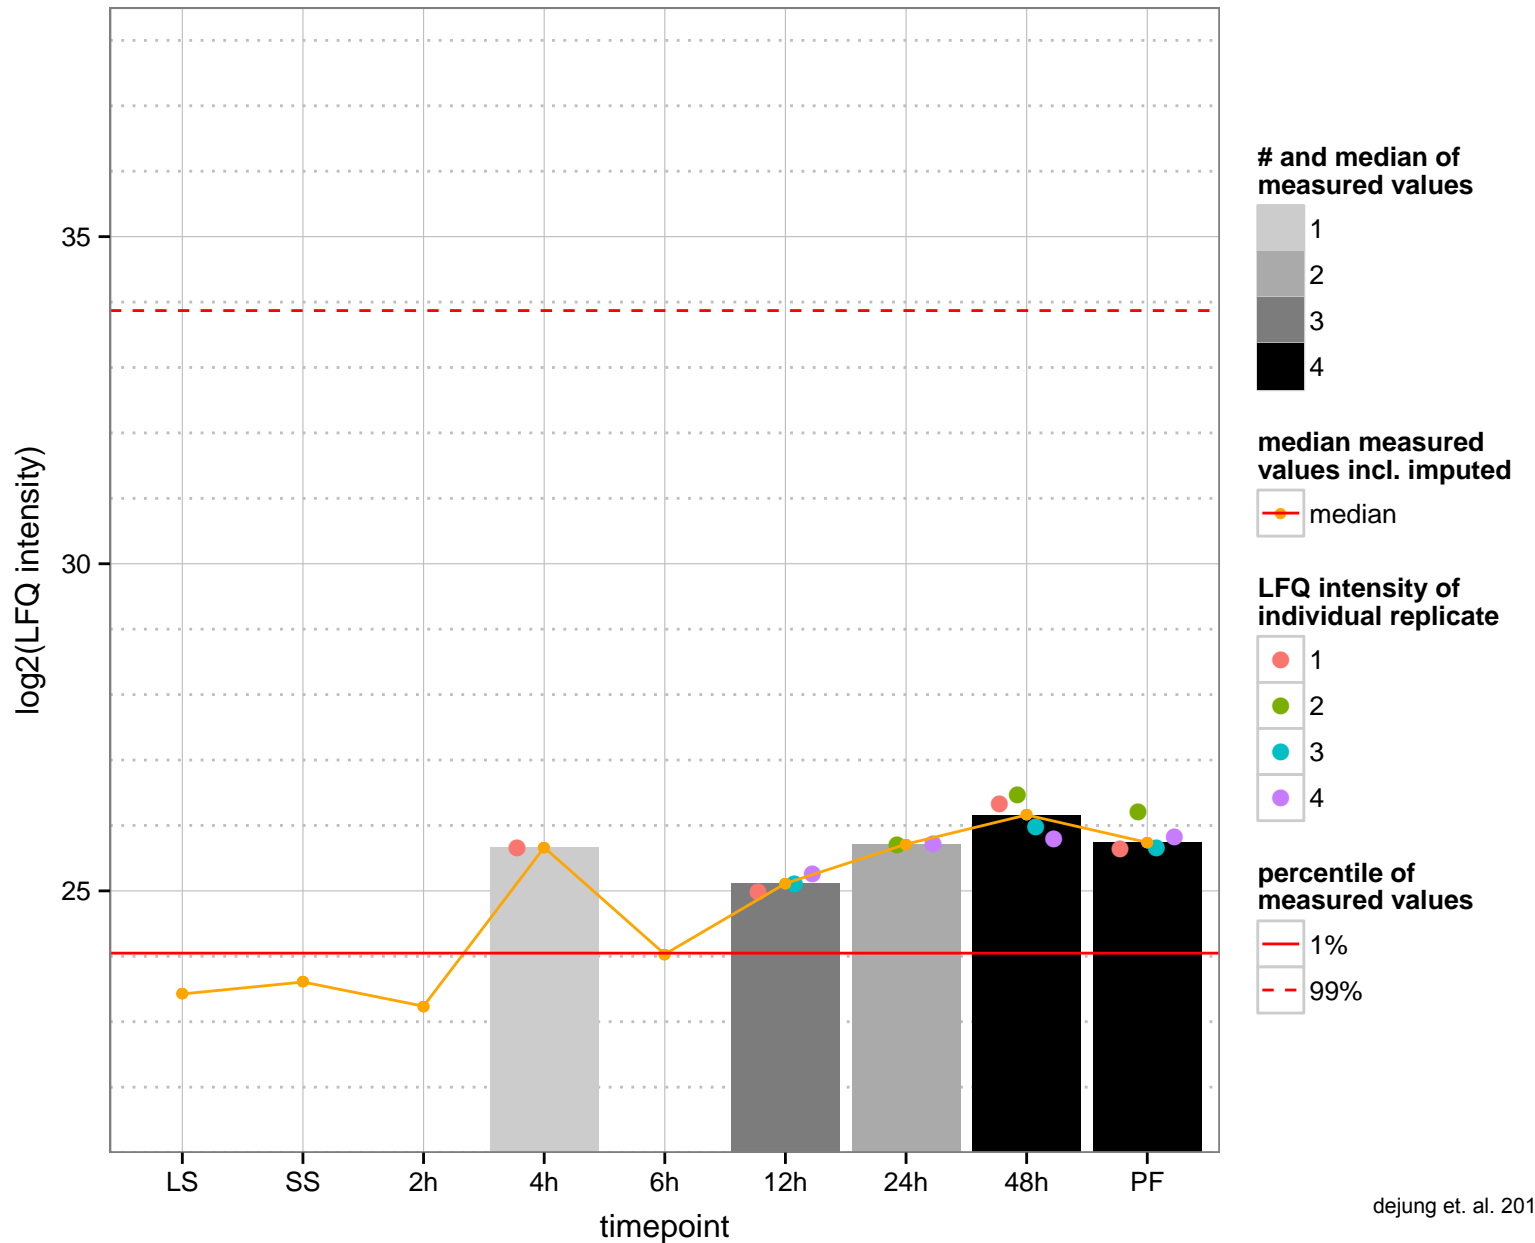

endo/exonuclease Mre11 (MRE11)

Tb927.2.4390

AGOF: damaged DNA binding, endonuclease activity, exonuclease activity, hydrolase activity, manganese ion binding

AGOC: nucleus

AGOP: double-strand break repair

PGOF: endonuclease activity, exonuclease activity, hydrolase activity, manganese ion binding

PGOC: nucleus

PGOP: DNA metabolic process, double-strand break repair

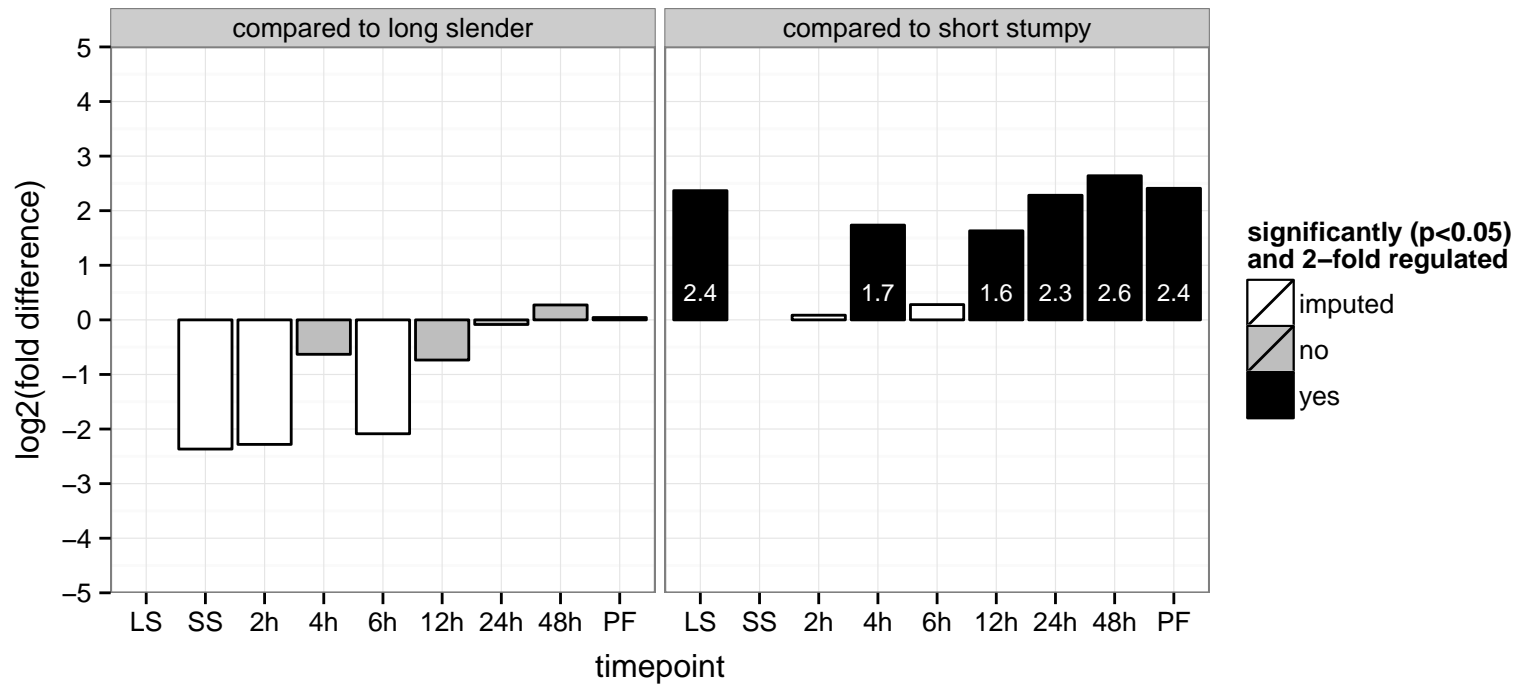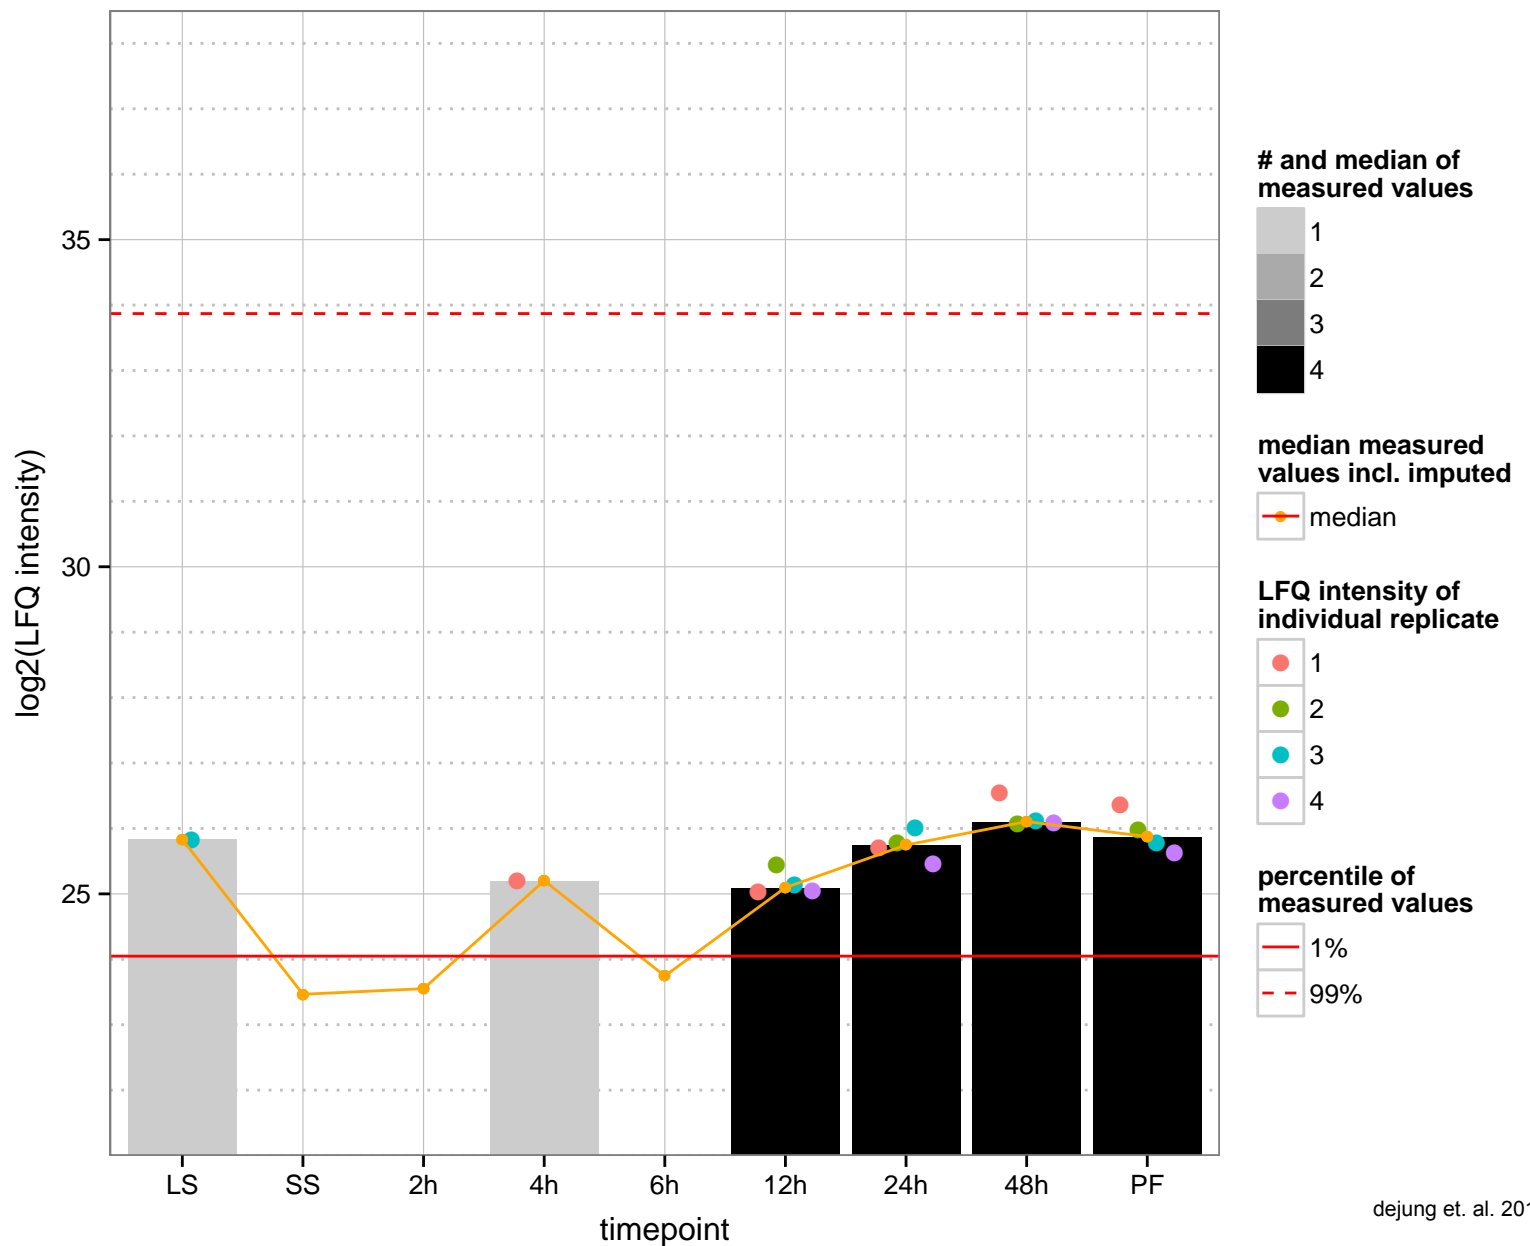

hypothetical protein, conserved  
 Tb927.2.4850  
 AGOF: null  
 AGOC: null  
 AGOP: null  
 PGO: null  
 PGO: null  
 PGO: null

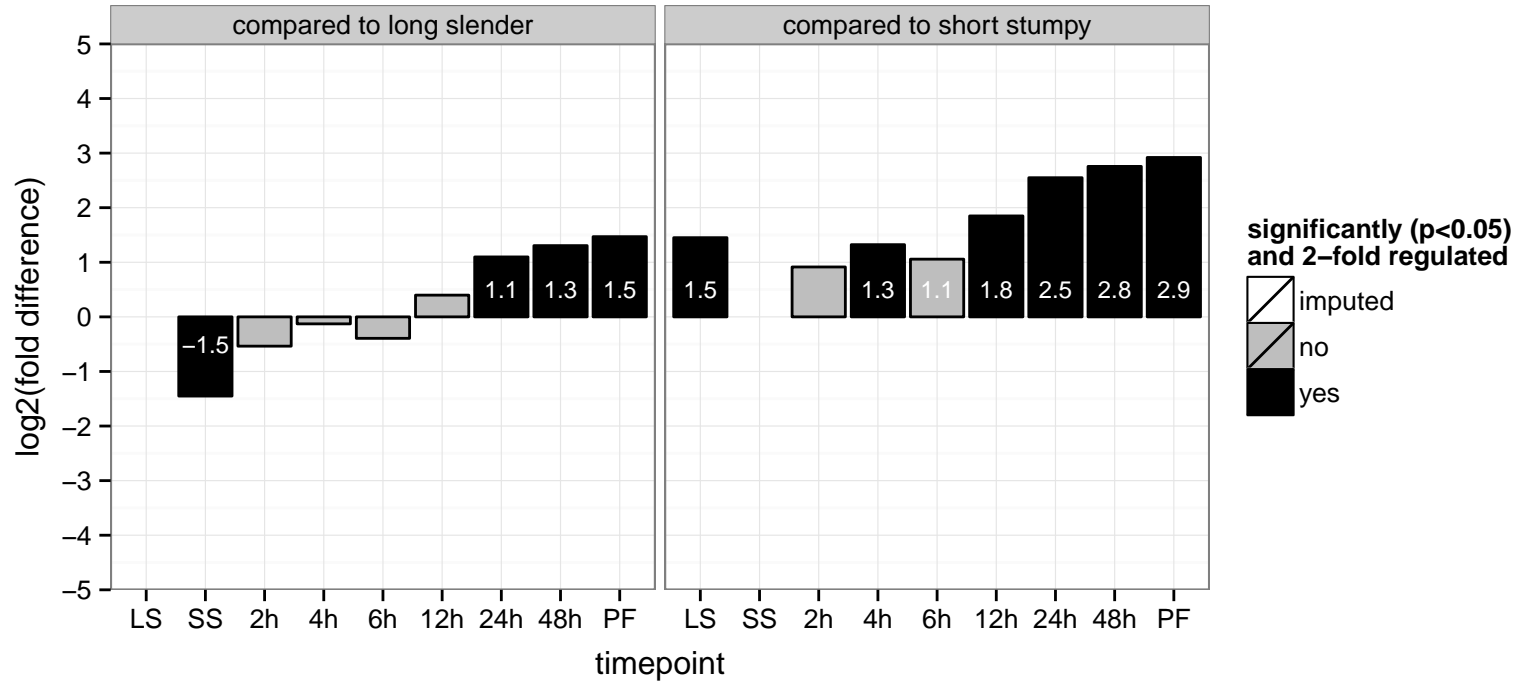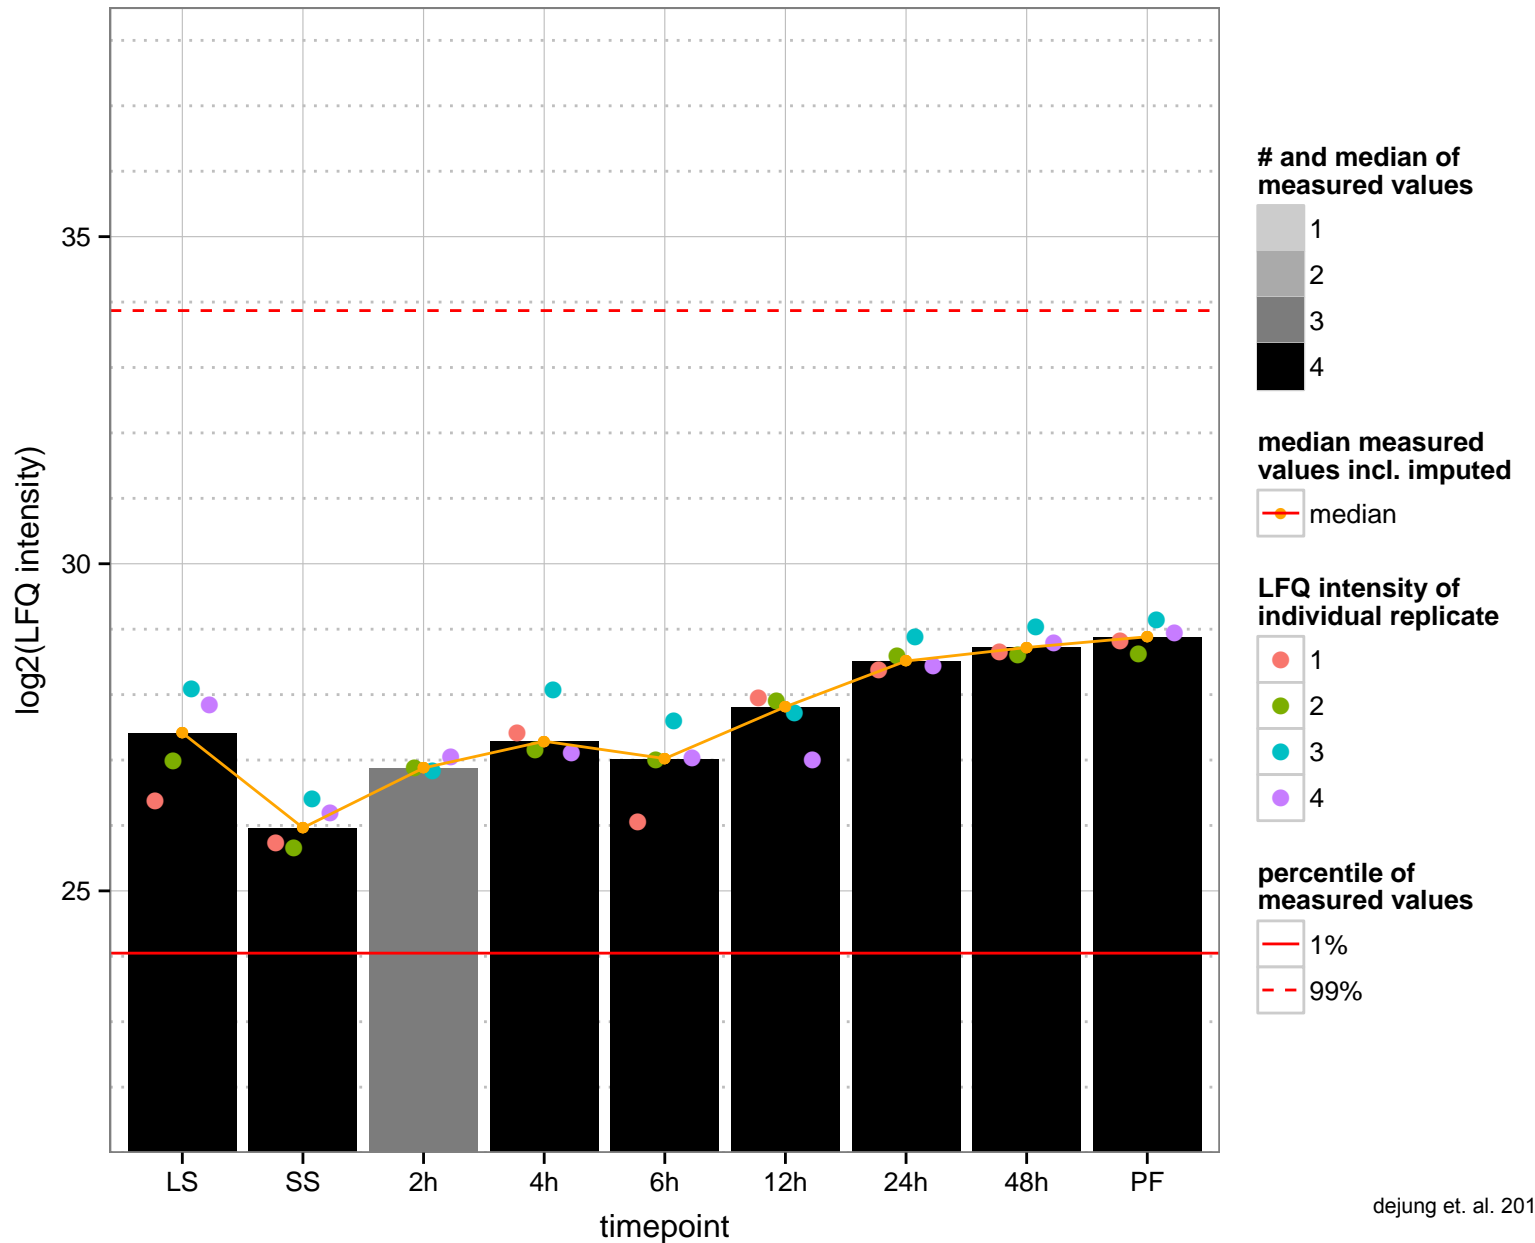

hypothetical protein, conserved  
 Tb927.2.5970  
 AGOF: null  
 AGOC: null  
 AGOP: null  
 PGO: null  
 PGOC: null  
 PGOP: null

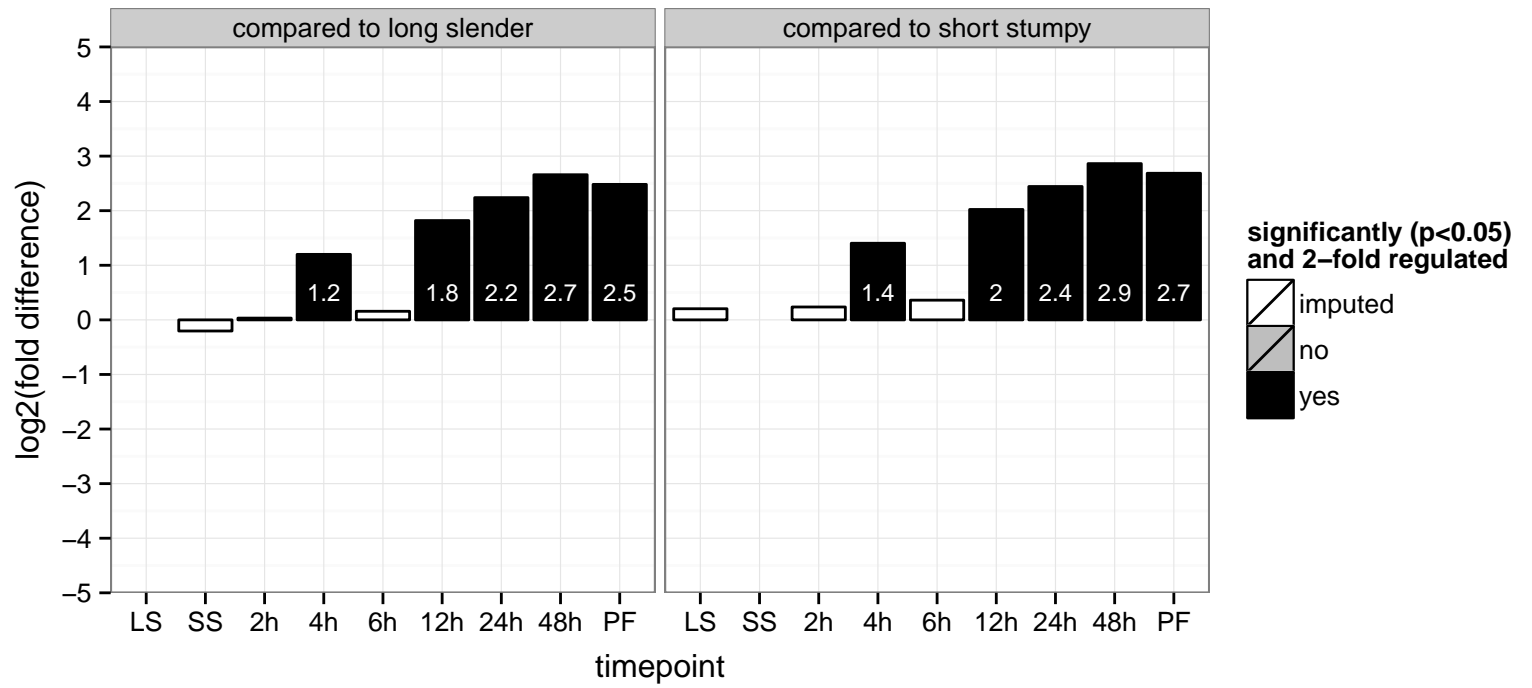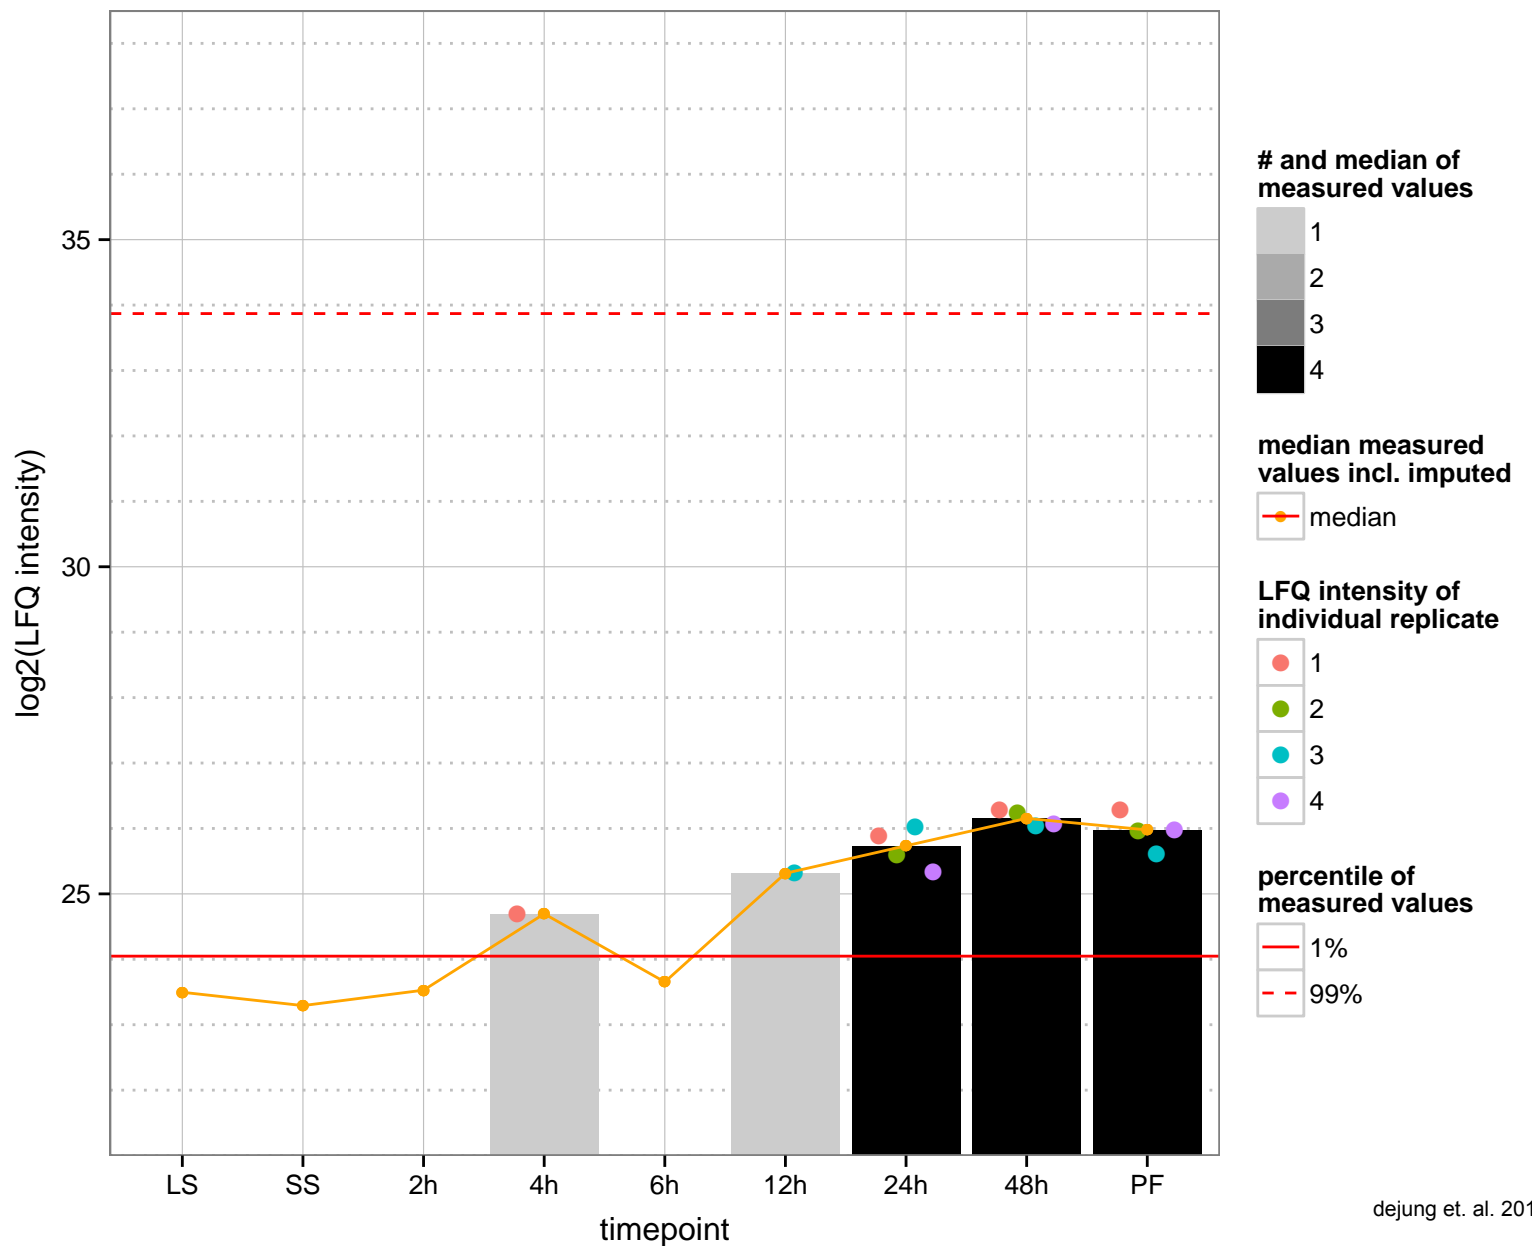

hypothetical protein, conserved  
 Tb927.3.2080  
 AGOF: null  
 AGOC: mitochondrion  
 AGOP: null  
 PGO: null  
 PGO: null  
 PGO: null

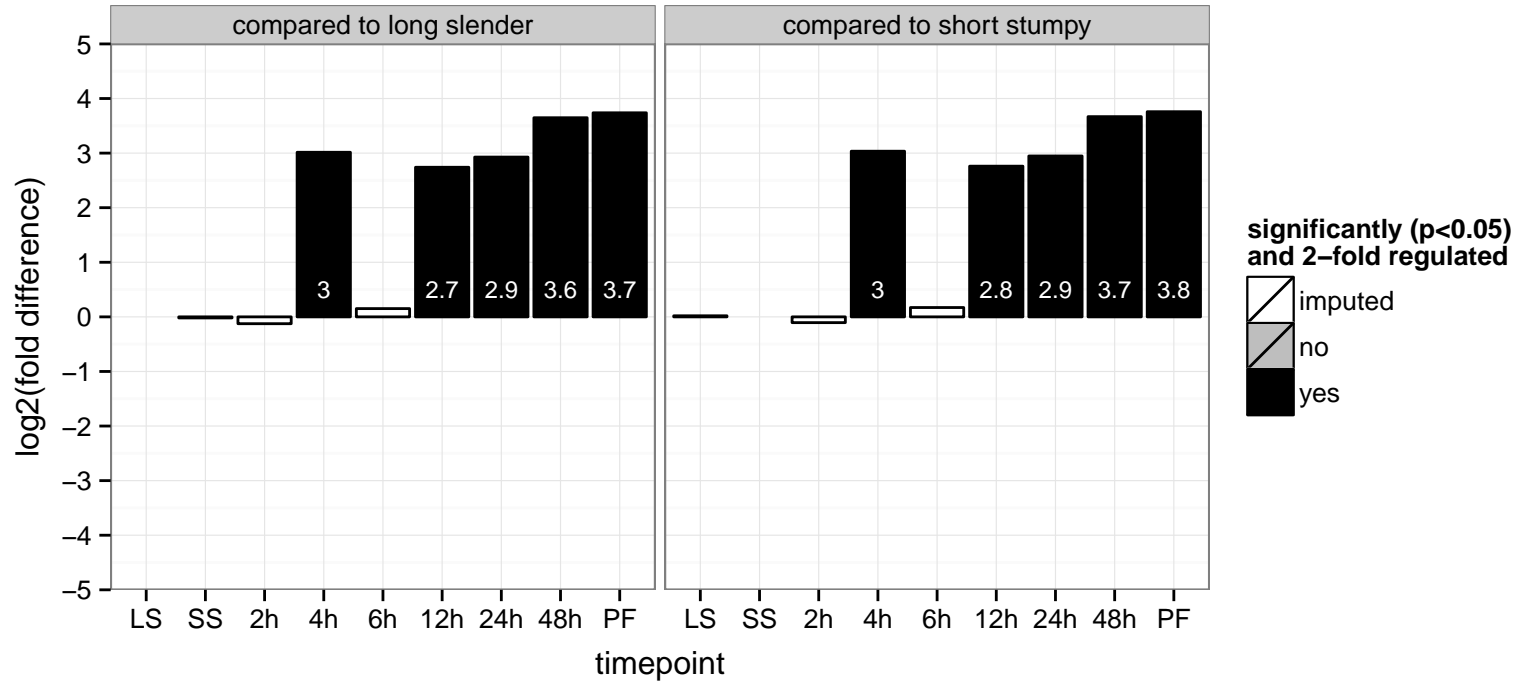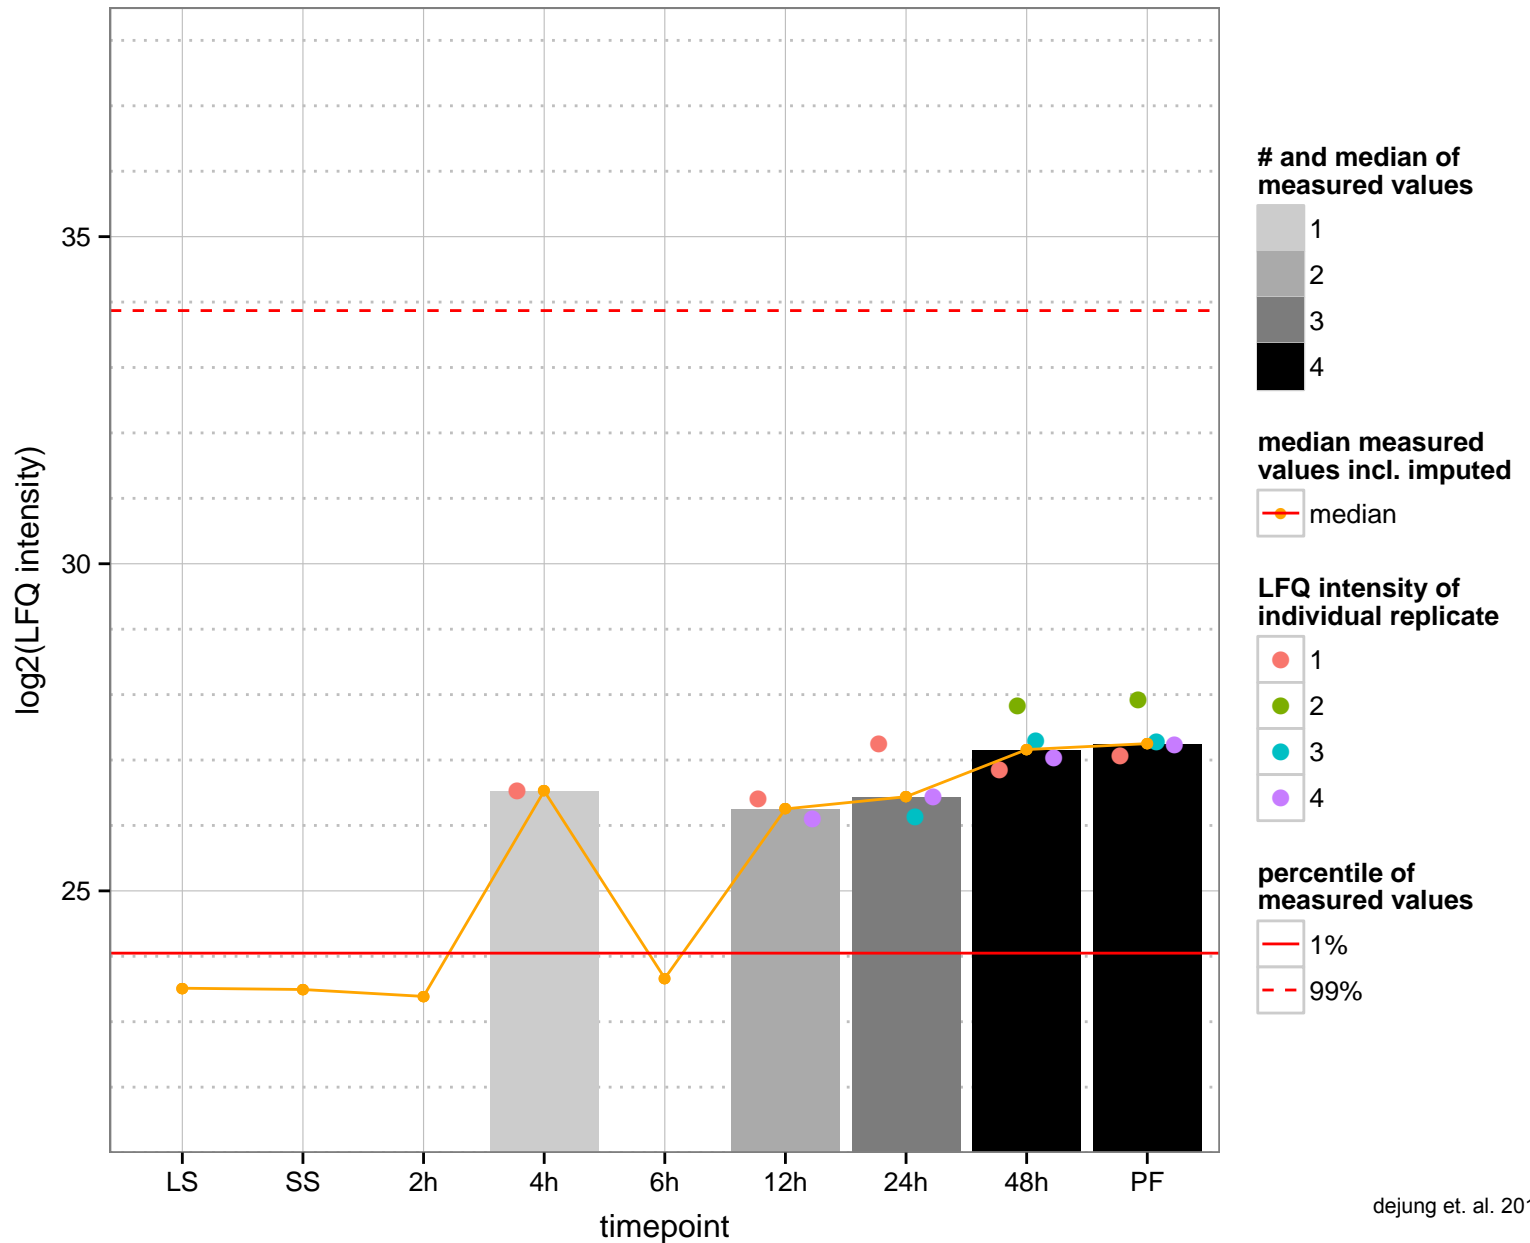

hypothetical protein, conserved  
 Tb927.3.2130  
 AGOF: RNA binding, pseudouridine synthase activity  
 AGOC: mitochondrion  
 AGOP: pseudouridine synthesis  
 PGO: RNA binding, pseudouridine synthase activity  
 PGO: null  
 PGO: RNA modification, pseudouridine synthesis

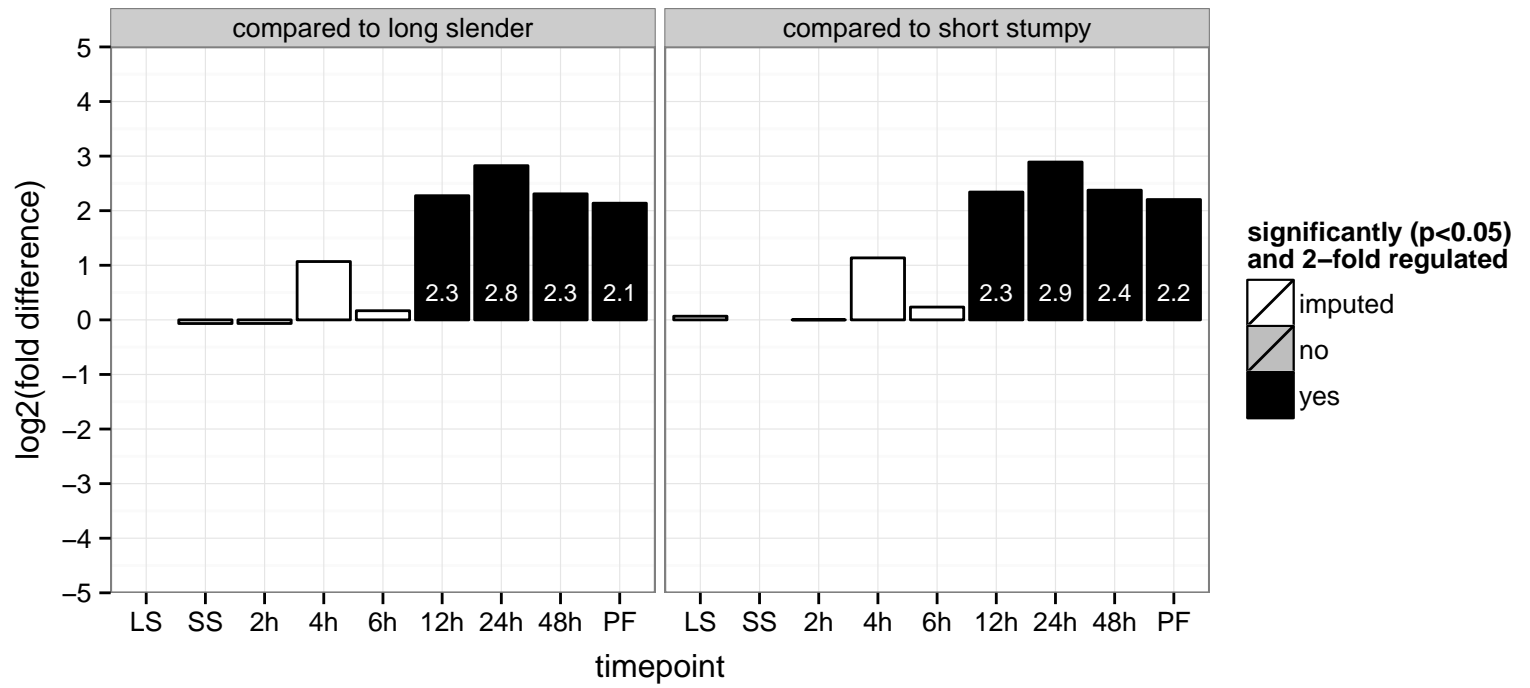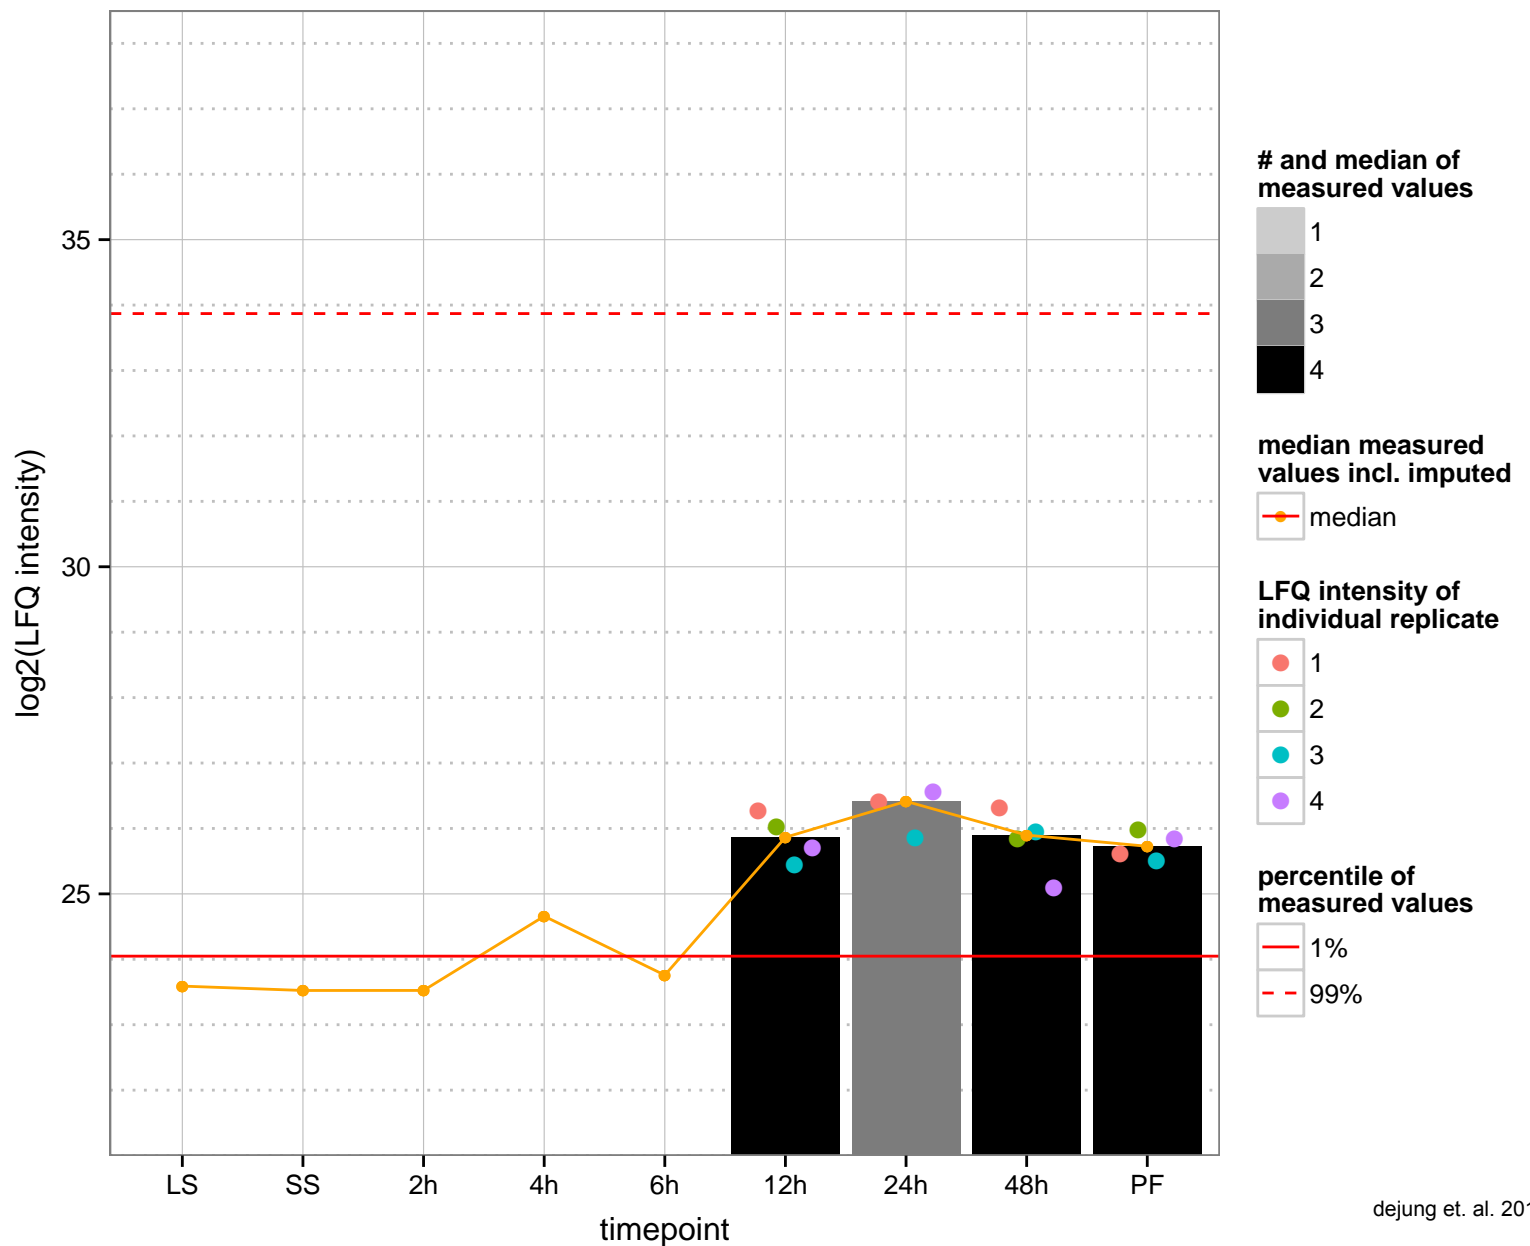

C-8 sterol isomerase, putative  
 Tb927.3.4650  
 AGOF: C-8 sterol isomerase activity  
 AGOC: endoplasmic reticulum  
 AGOP: ergosterol biosynthetic process  
 PGO: C-8 sterol isomerase activity  
 PGOC: endoplasmic reticulum  
 PGOP: ergosterol biosynthetic process

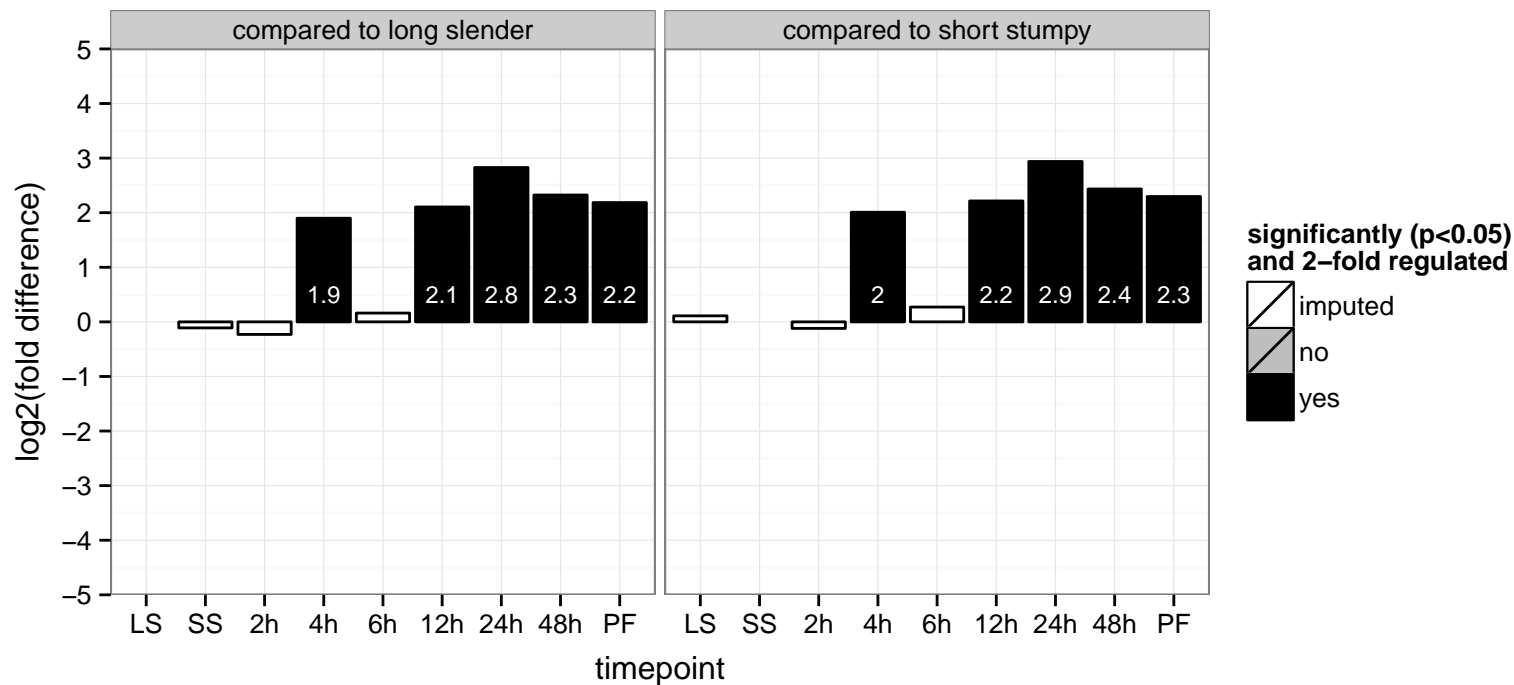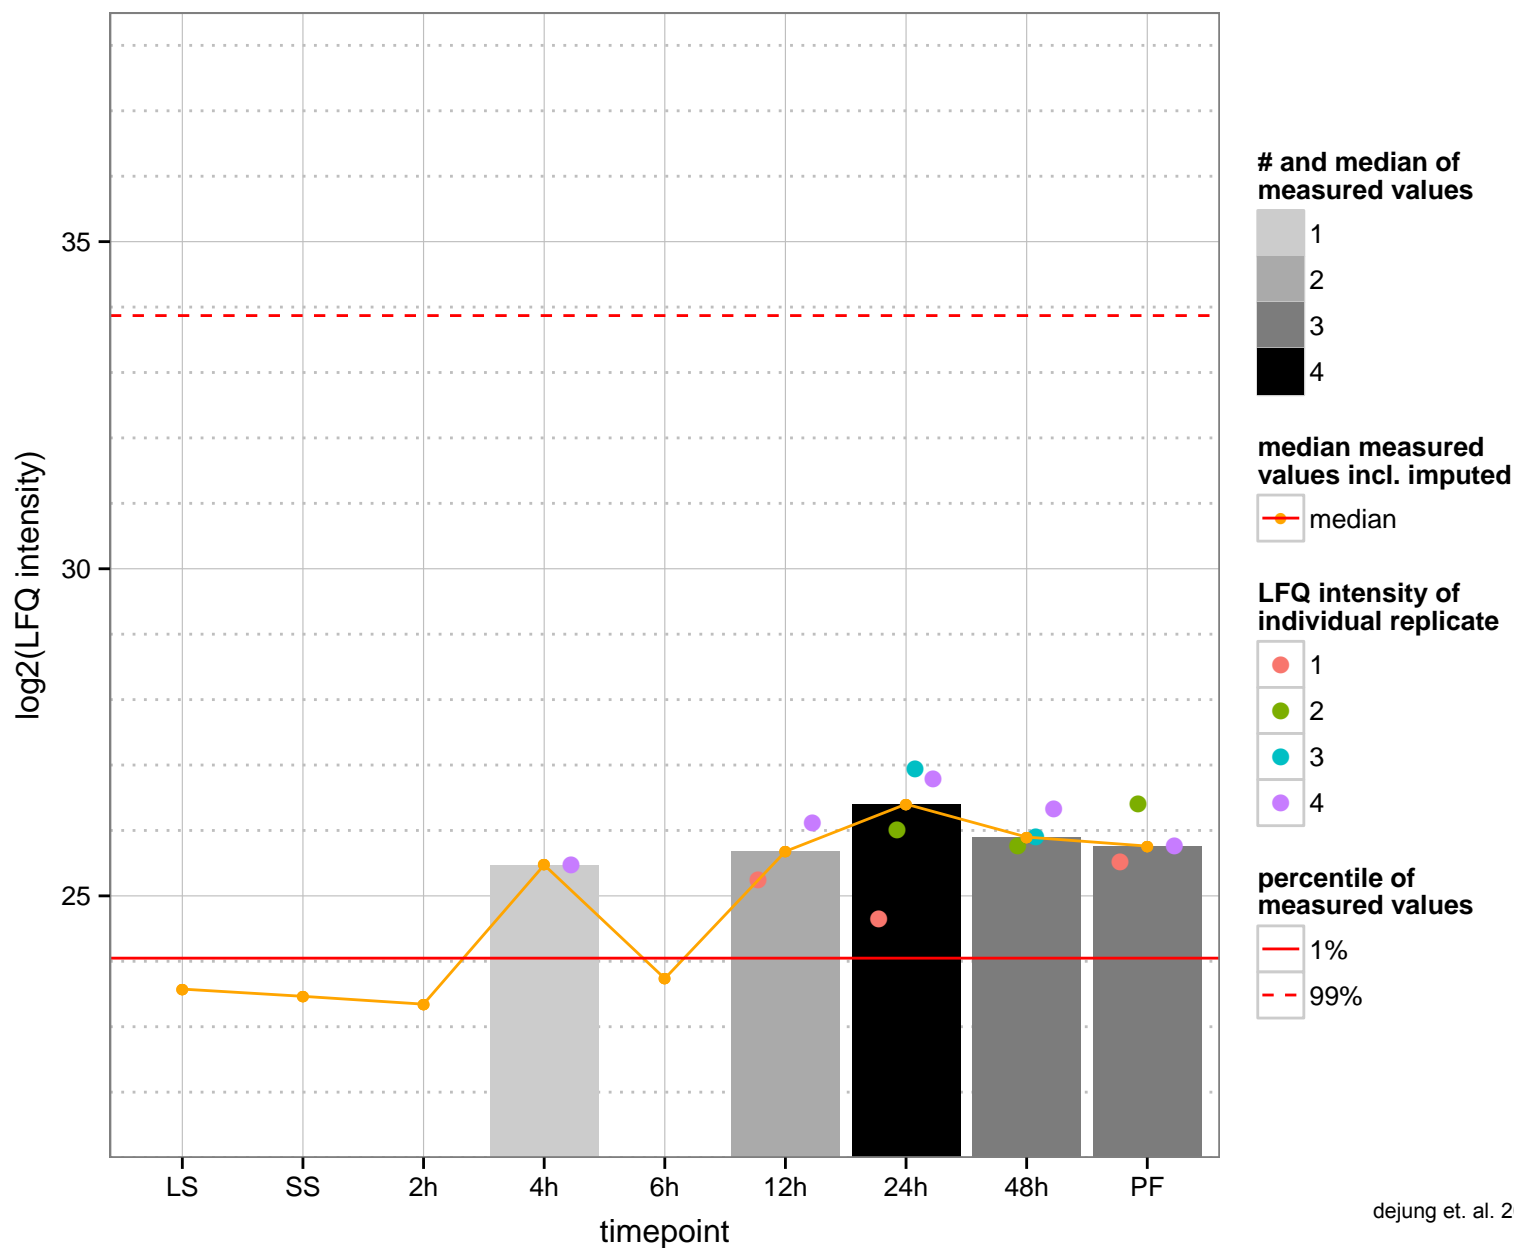

hypothetical protein, conserved  
 Tb927.5.1120  
 AGOF: null  
 AGOC: null  
 AGOP: null  
 PGO: null  
 PGO: null  
 PGO: null

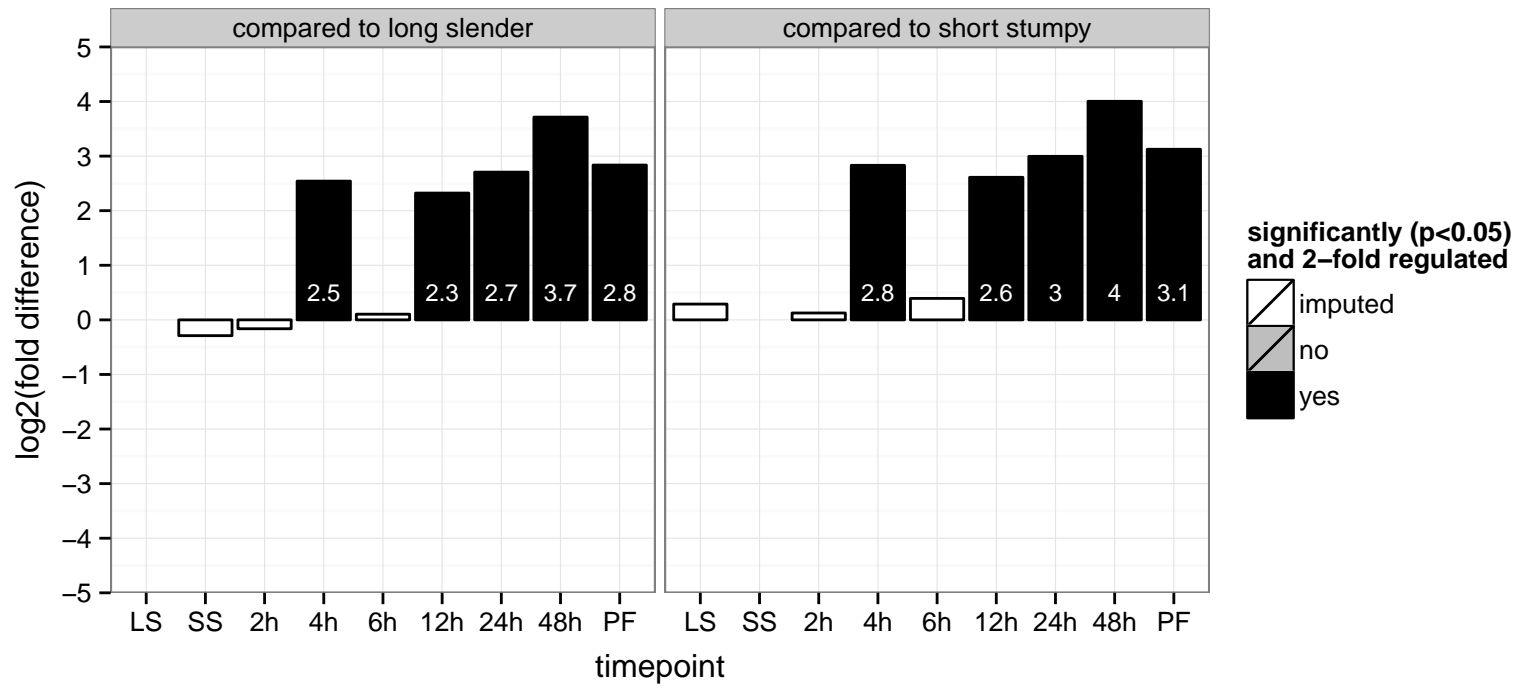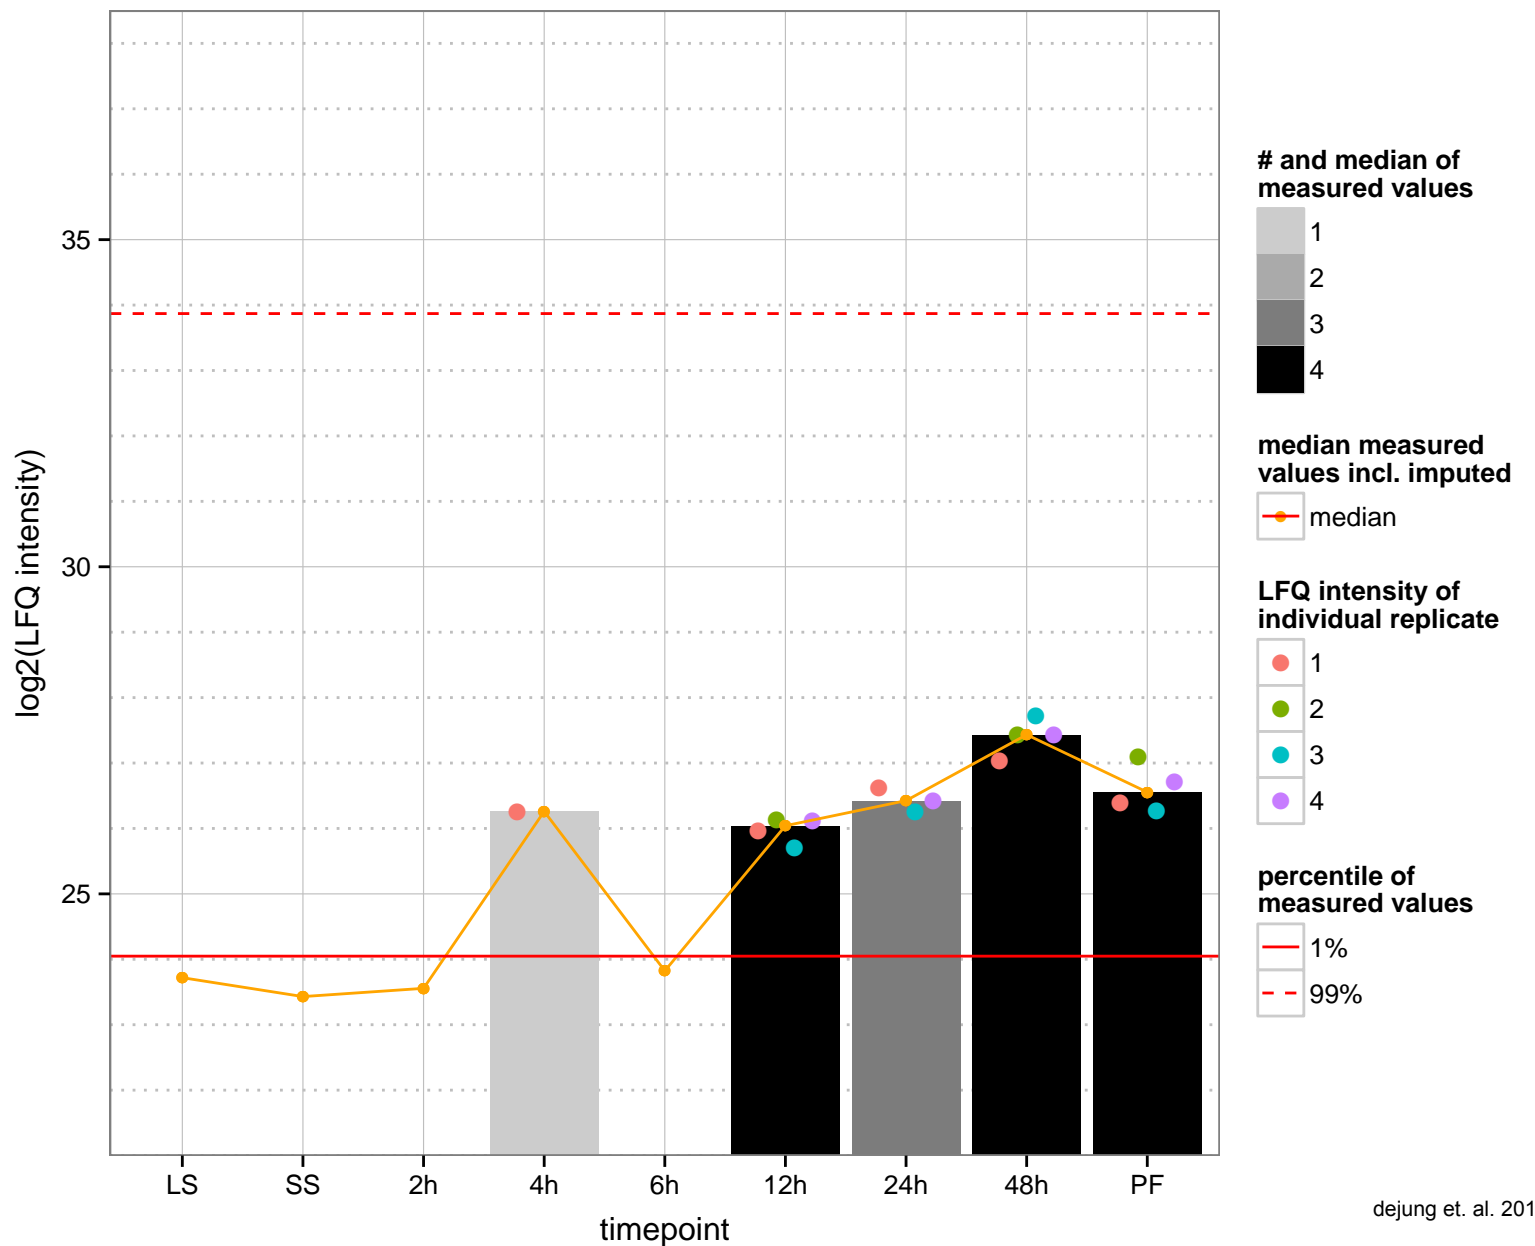



conserved protein  
 Tb927.5.2260  
 AGOF: null  
 AGOC: null  
 AGOP: null  
 PGO: null  
 PGO: null  
 PGO: null

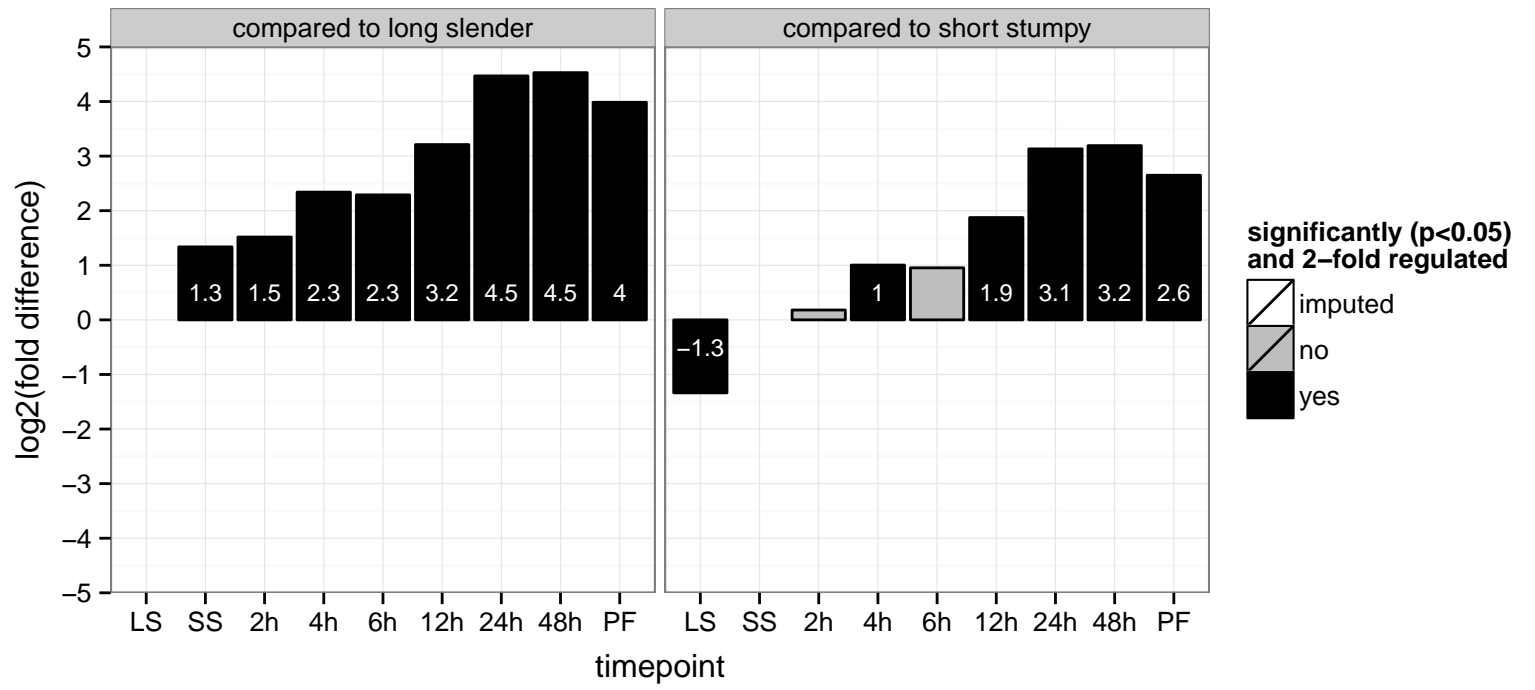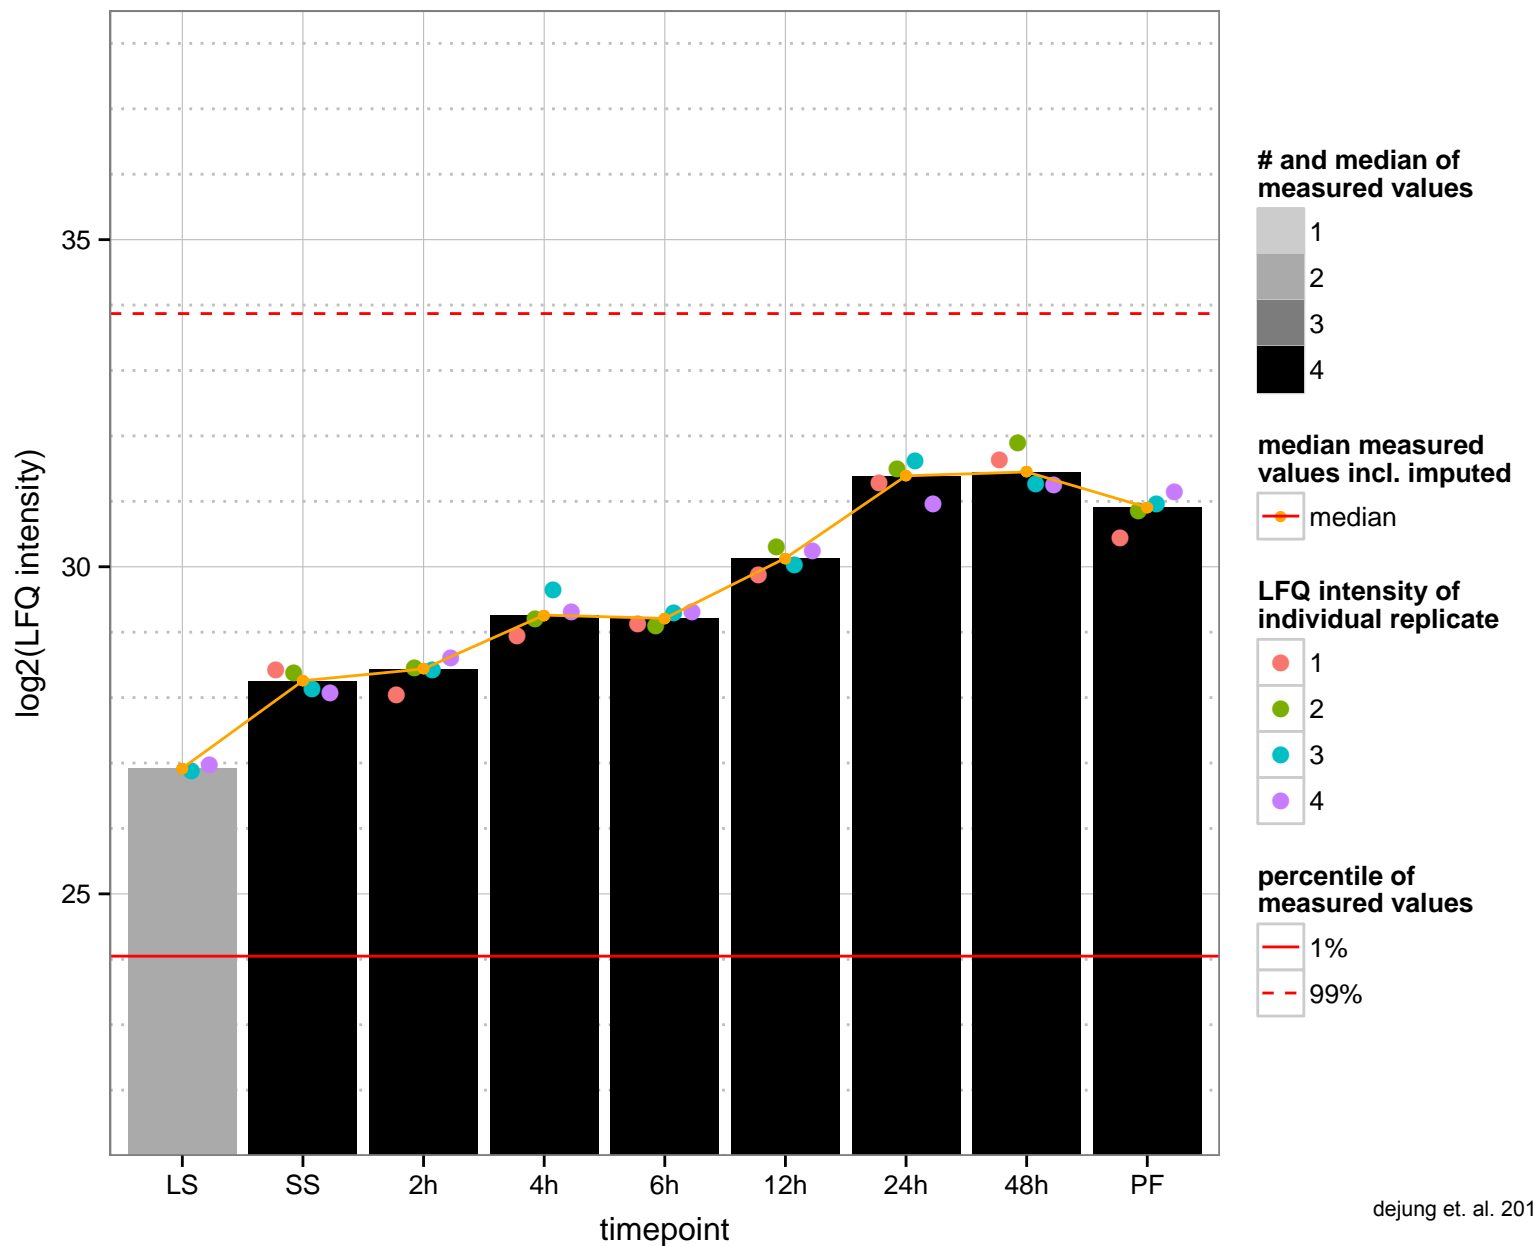

co-chaperone GrpE, putative

Tb927.6.2170

AGOF: adenylnucleotide exchange factor activity, chaperone binding, protein homodimerization activity

AGOC: mitochondrion

AGOP: protein folding, protein import into mitochondrial matrix

PGOF: adenylnucleotide exchange factor activity, chaperone binding, protein homodimerization activity

PGOC: null

PGOP: protein folding

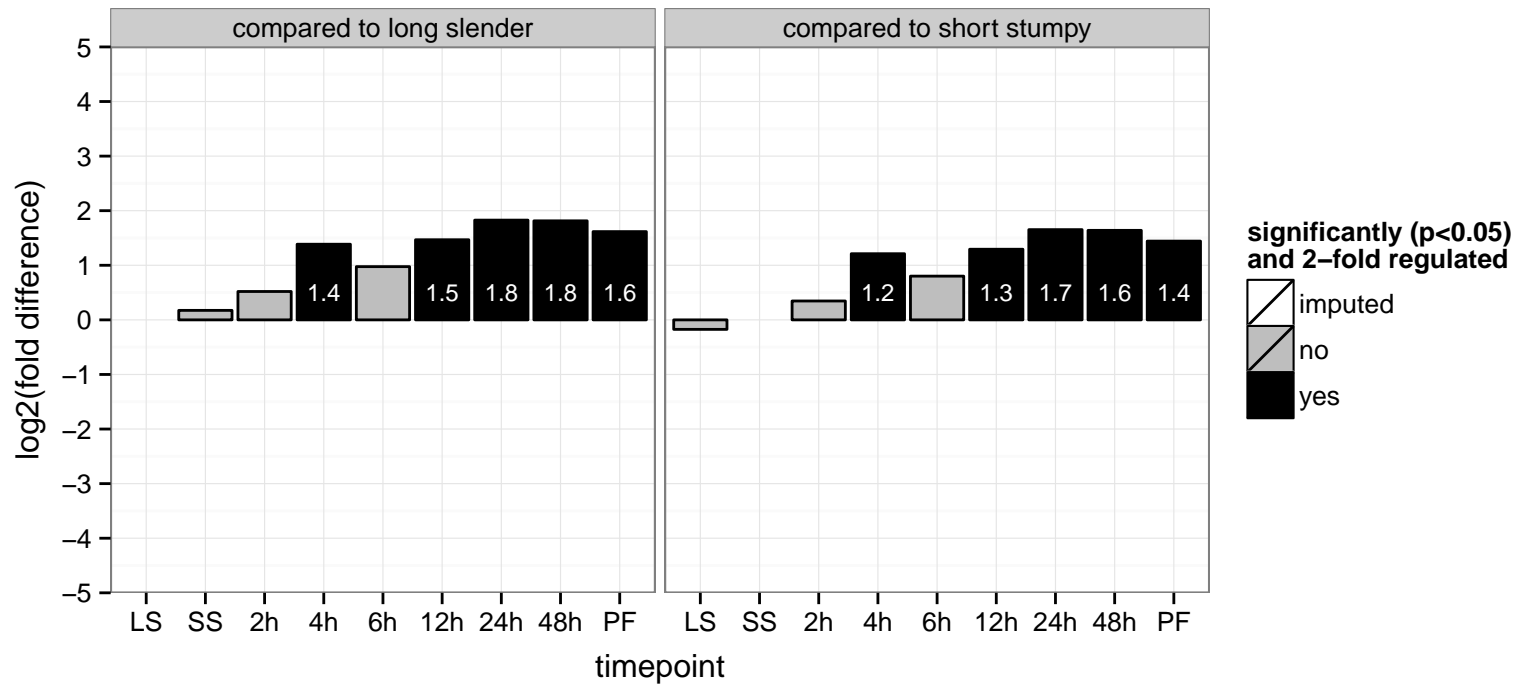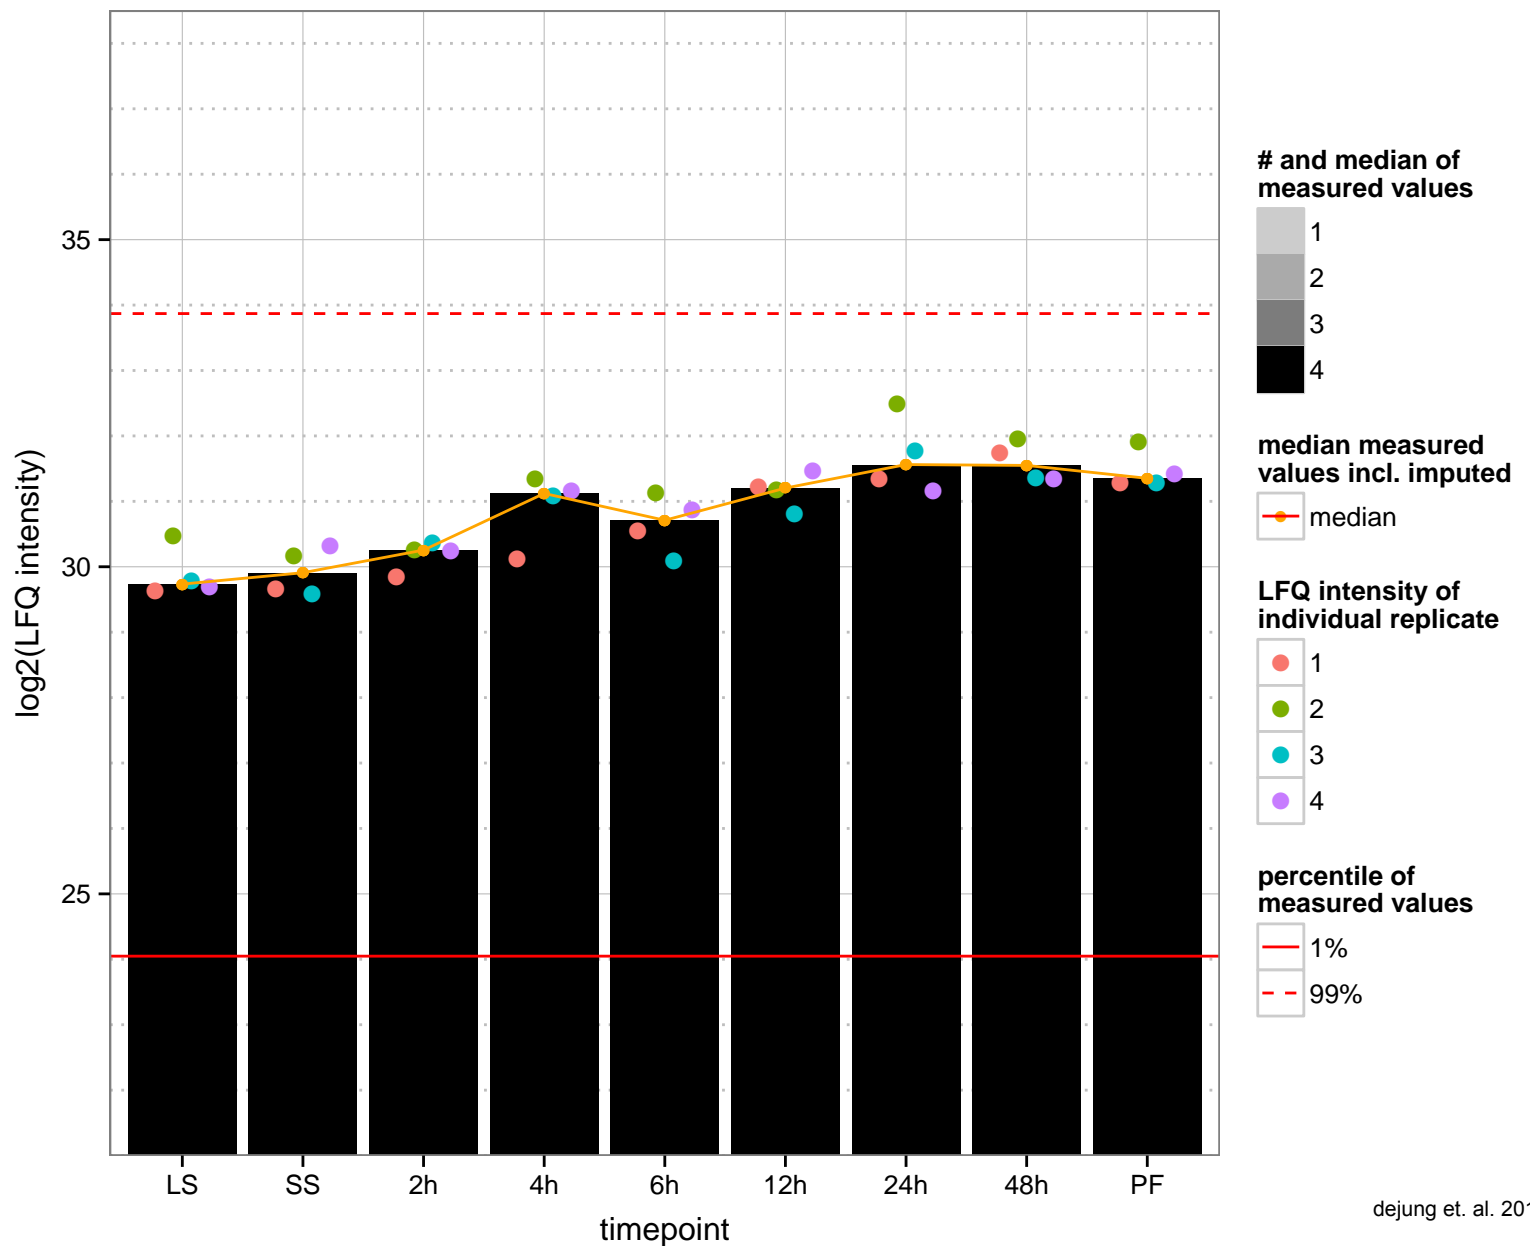

tRNA modification enzyme, putative  
 Tb927.6.3510  
 AGOF: null, catalytic activity, iron-sulfur cluster binding  
 AGOC: null  
 AGOP: null  
 PGO: 4 iron, 4 sulfur cluster binding, catalytic activity, iron-sulfur cluster binding, transferase activity  
 PGOC: null  
 PGOP: RNA modification, macromolecule modification

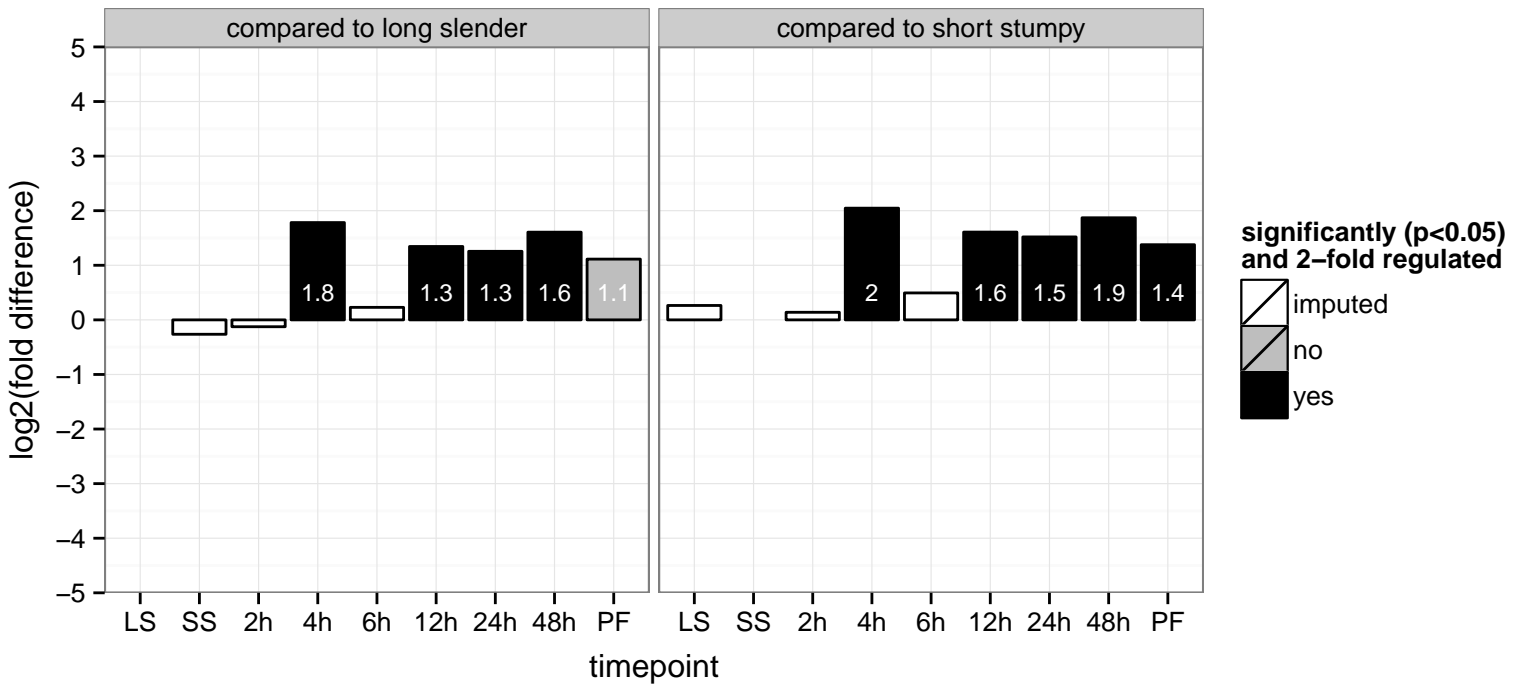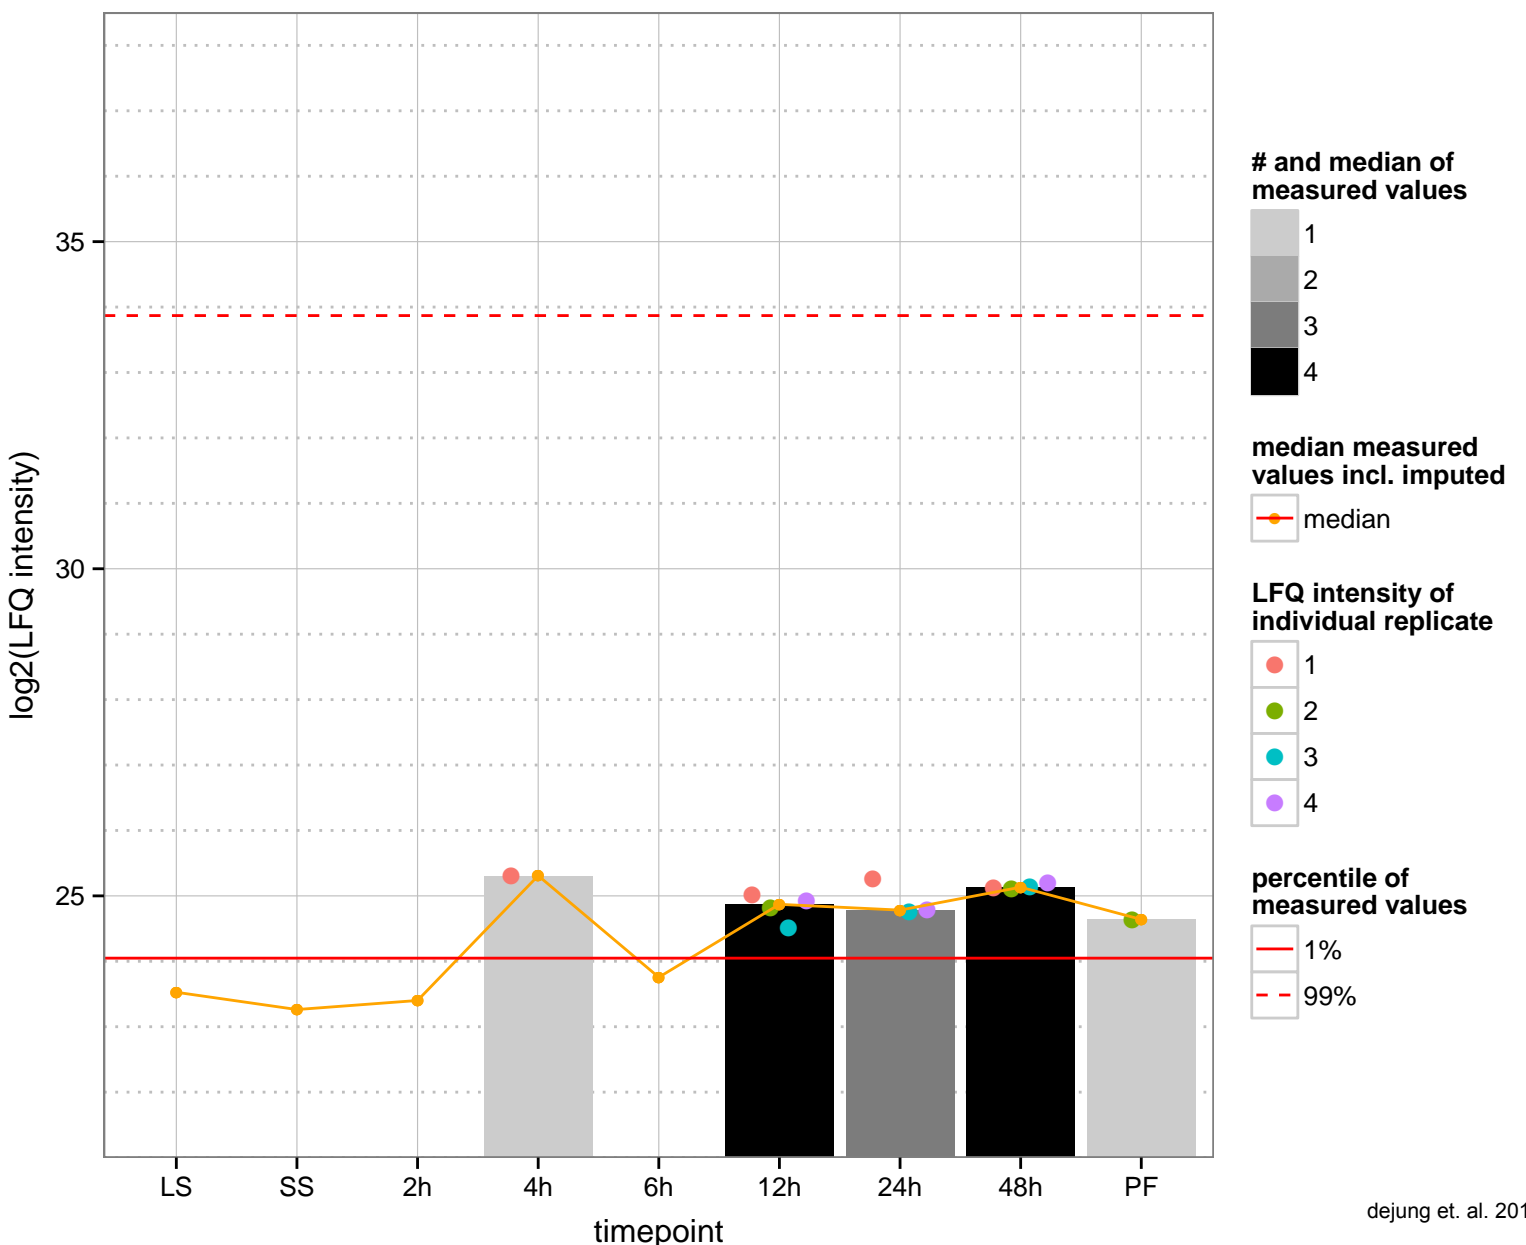

UV excision repair RAD23 protein, putative

Tb927.6.4650

AGOF: damaged DNA binding

AGOC: null

AGOP: nucleotide–excision repair, proteasomal ubiquitin–dependent protein catabolic process

PGOF: damaged DNA binding, protein binding

PGOC: null

PGOP: nucleotide–excision repair, proteasomal ubiquitin–dependent protein catabolic process

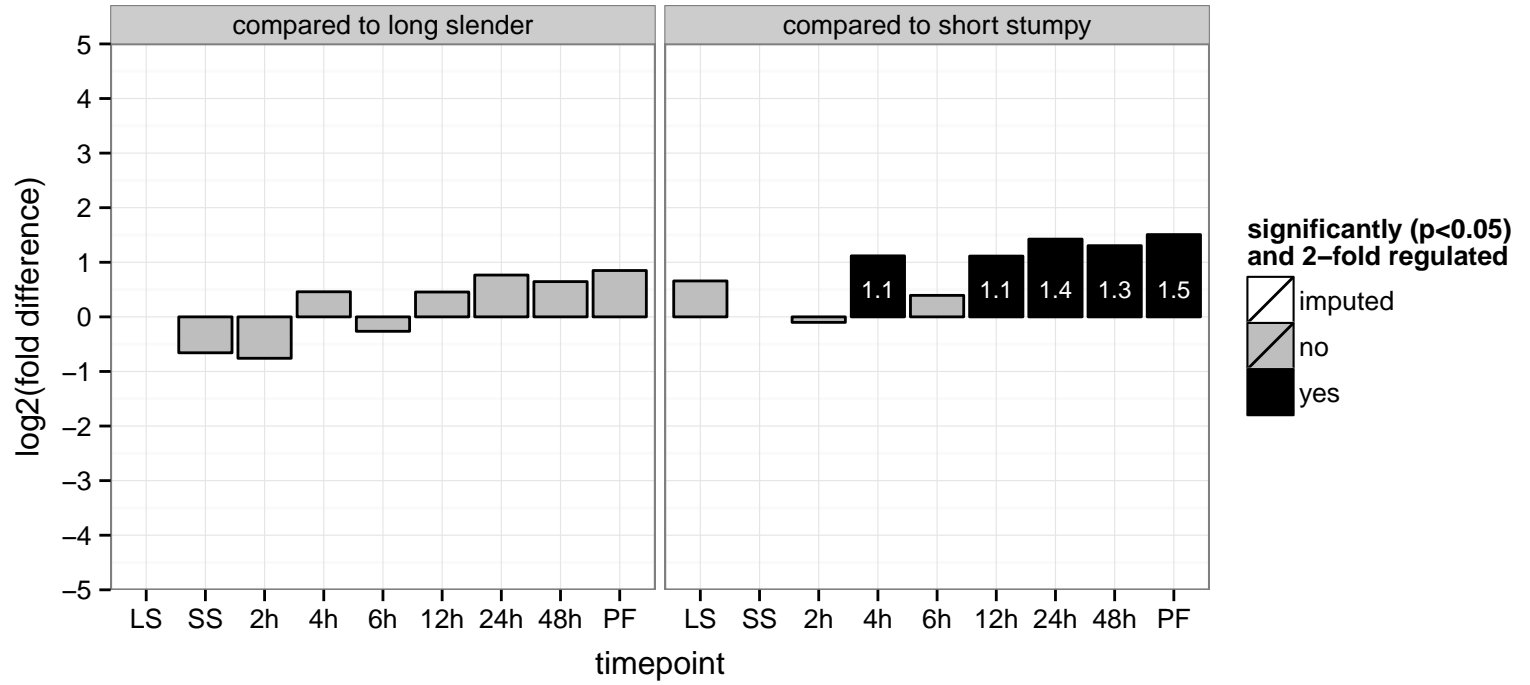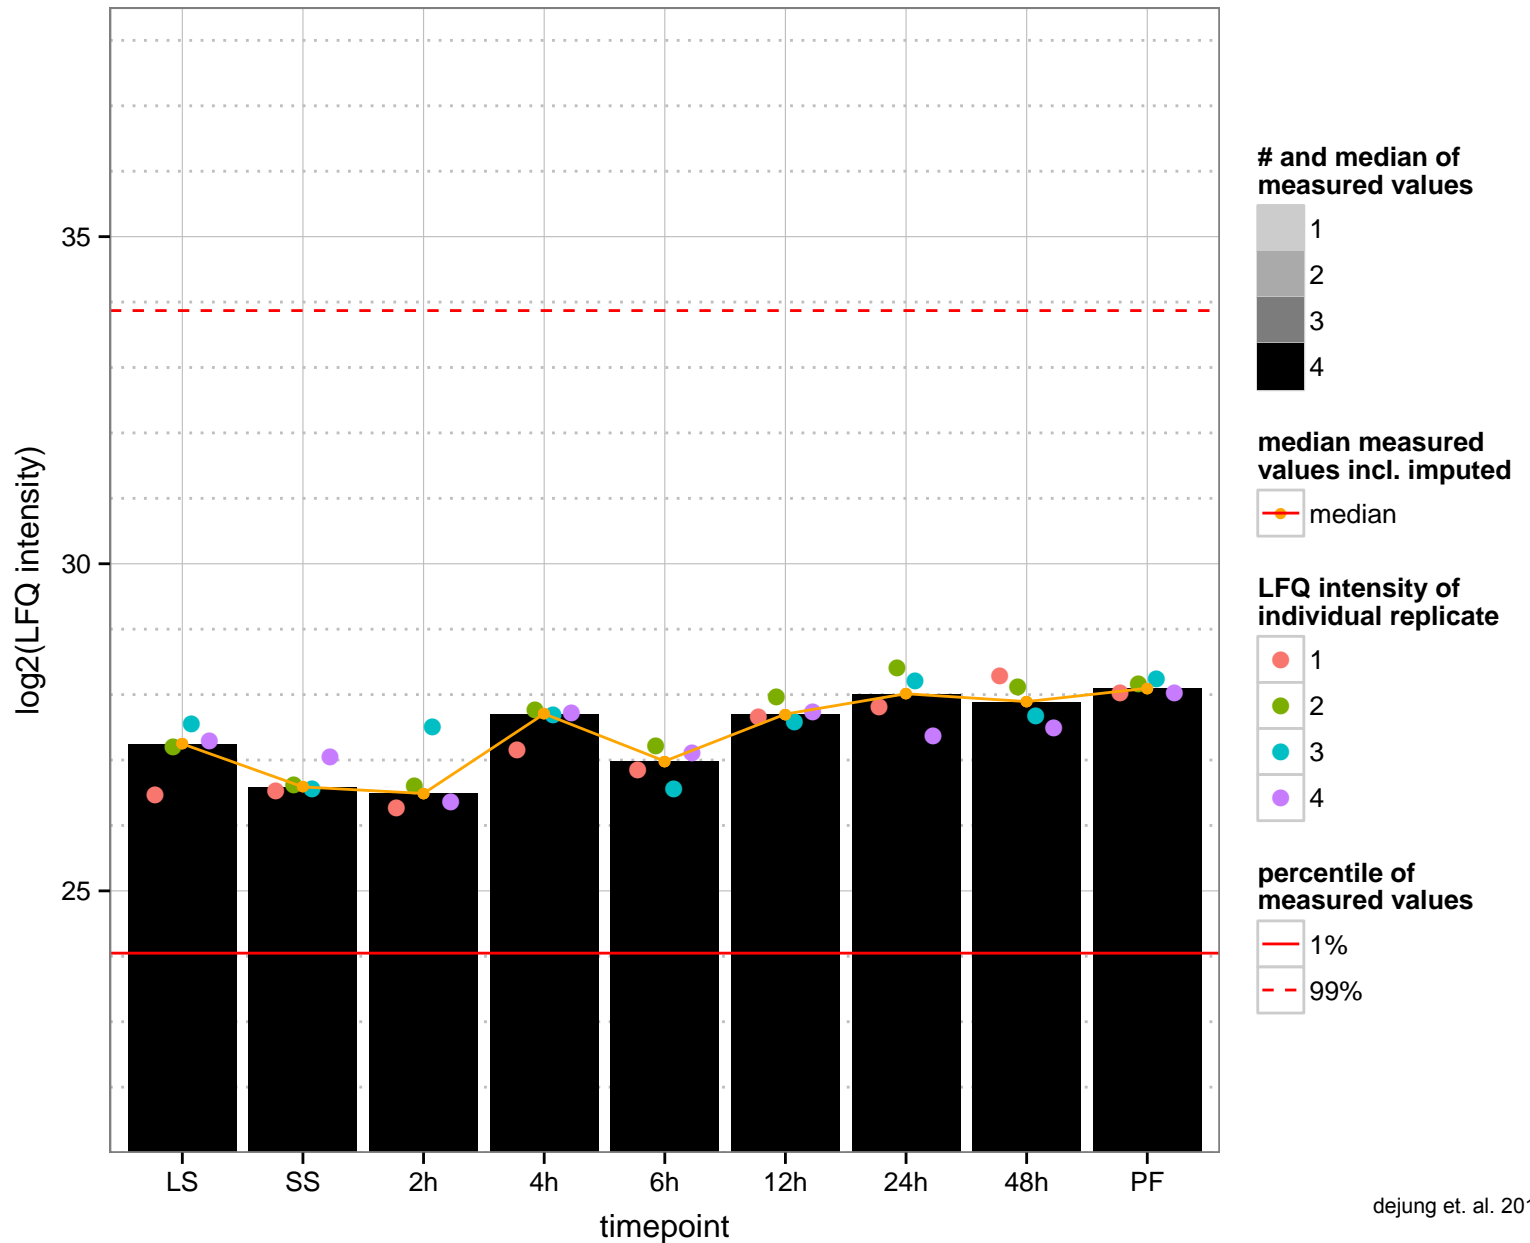

ras-like small GTPase, putative (TbEAR)  
 Tb927.7.1640  
 AGOF: GTP binding  
 AGOC: intracellular, mitochondrion  
 AGOP: null  
 PGOF: GTP binding  
 PGOC: null  
 PGOP: null

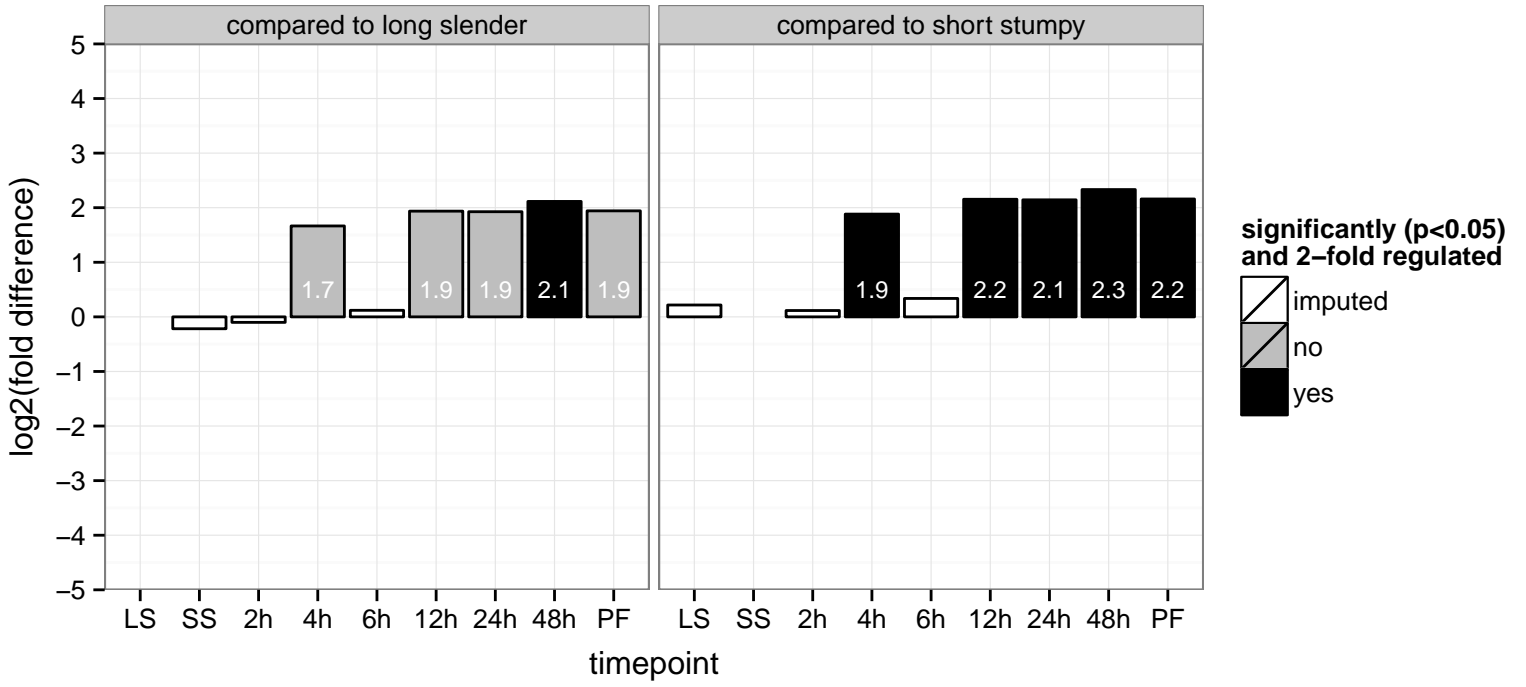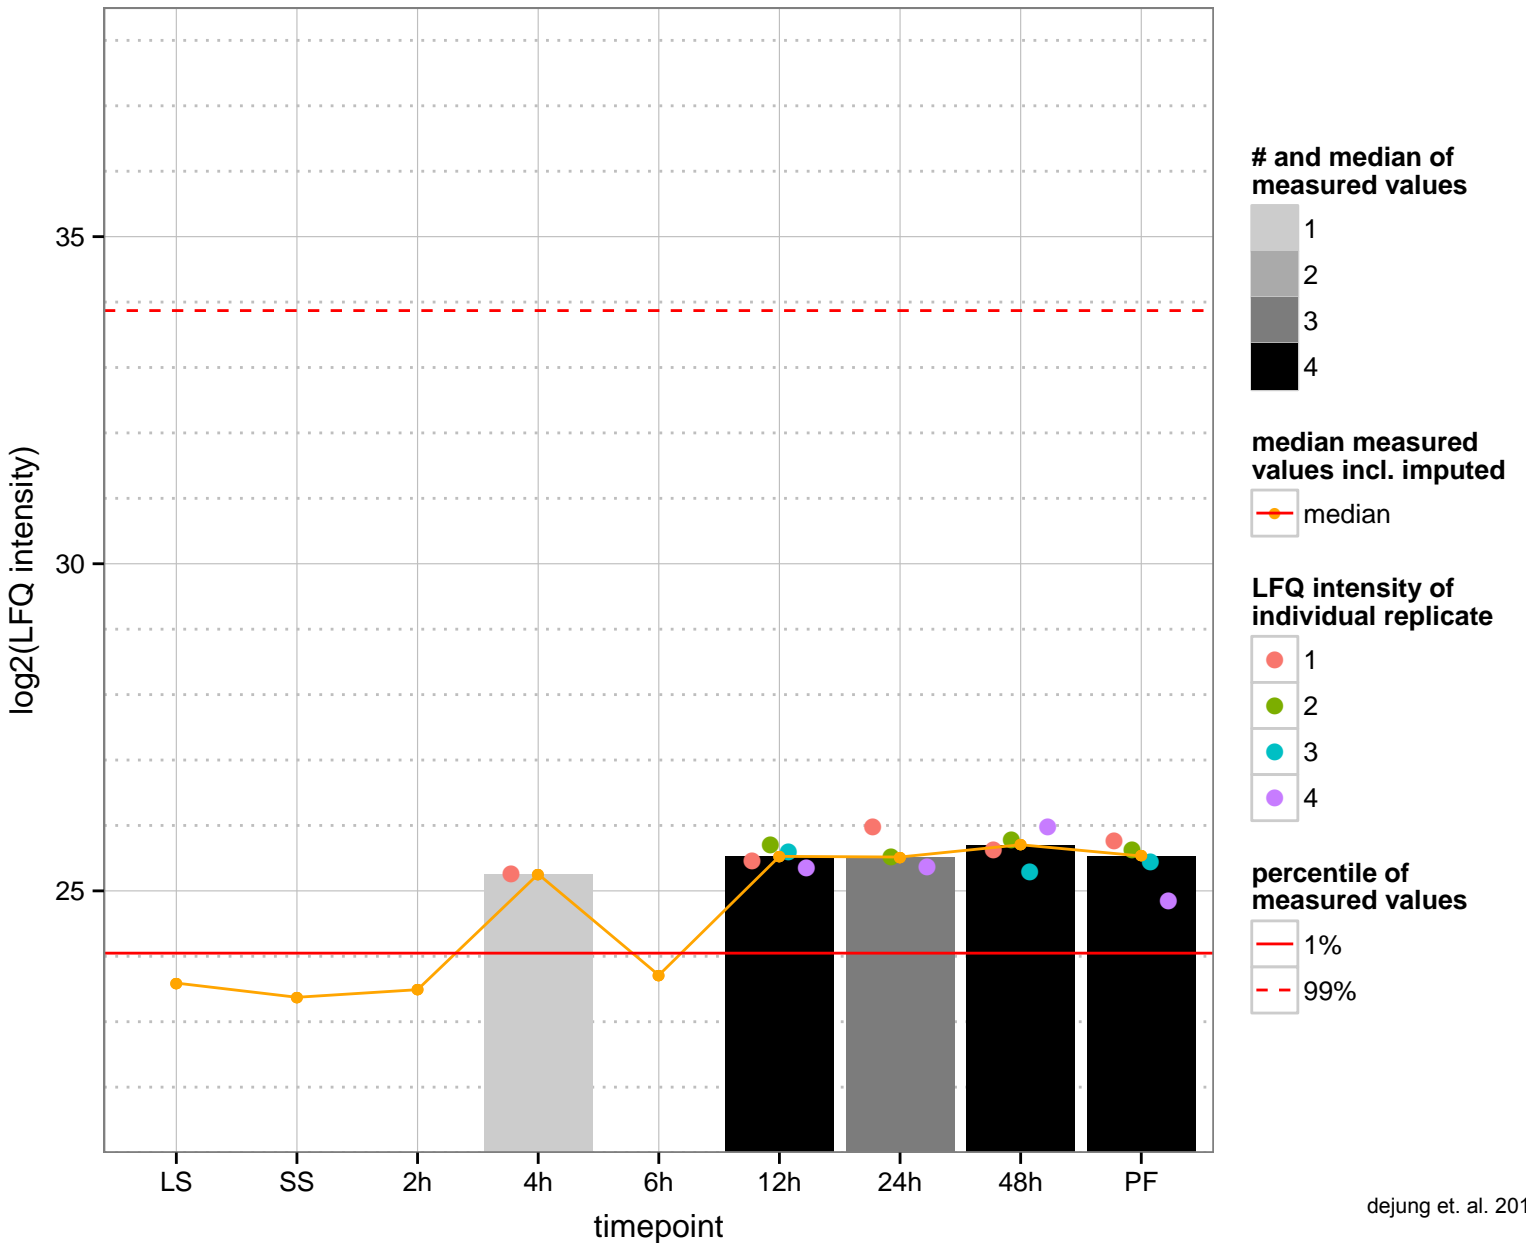

calpain-like cysteine peptidase, putative, cysteine peptidase, Clan CA, family C2  
 Tb927.7.4070  
 AGOF: null  
 AGOC: null  
 AGOP: null  
 PGOF: null  
 PGOC: null  
 PGOP: null

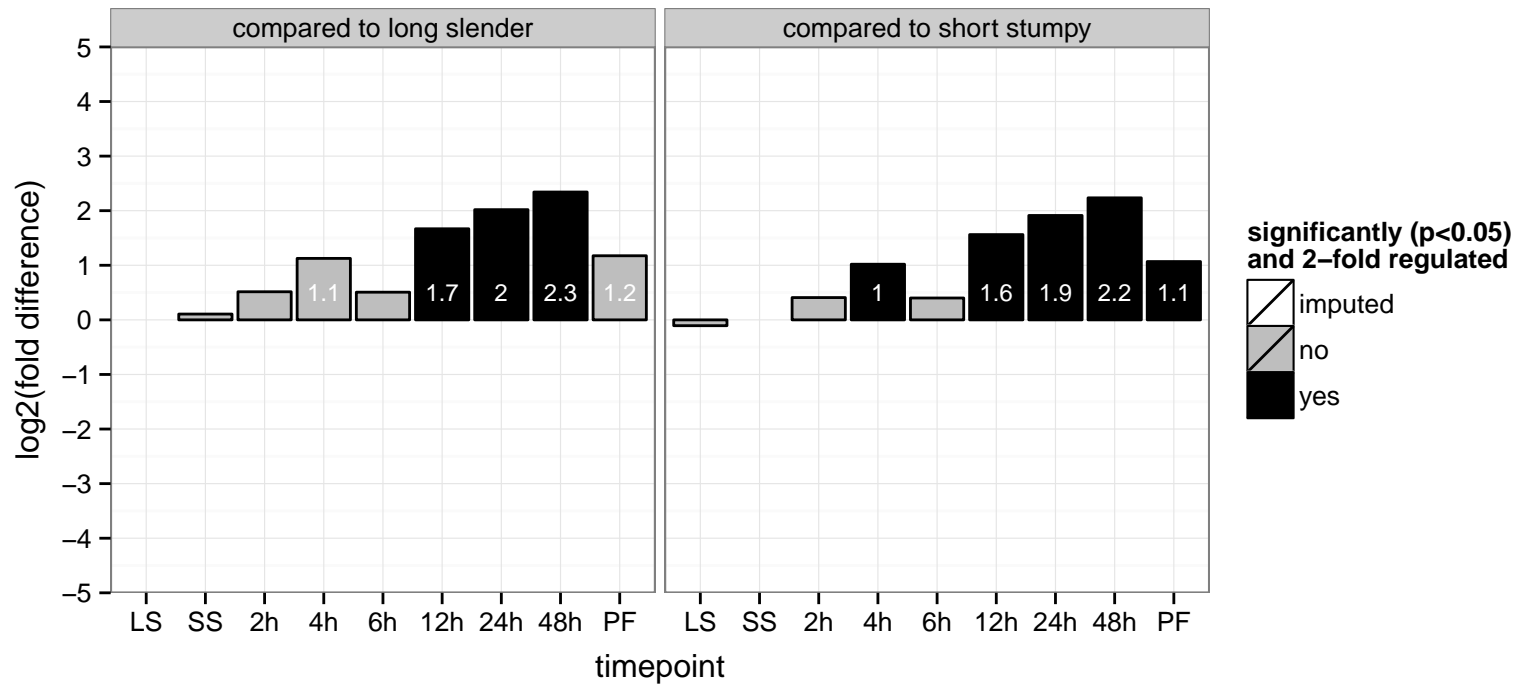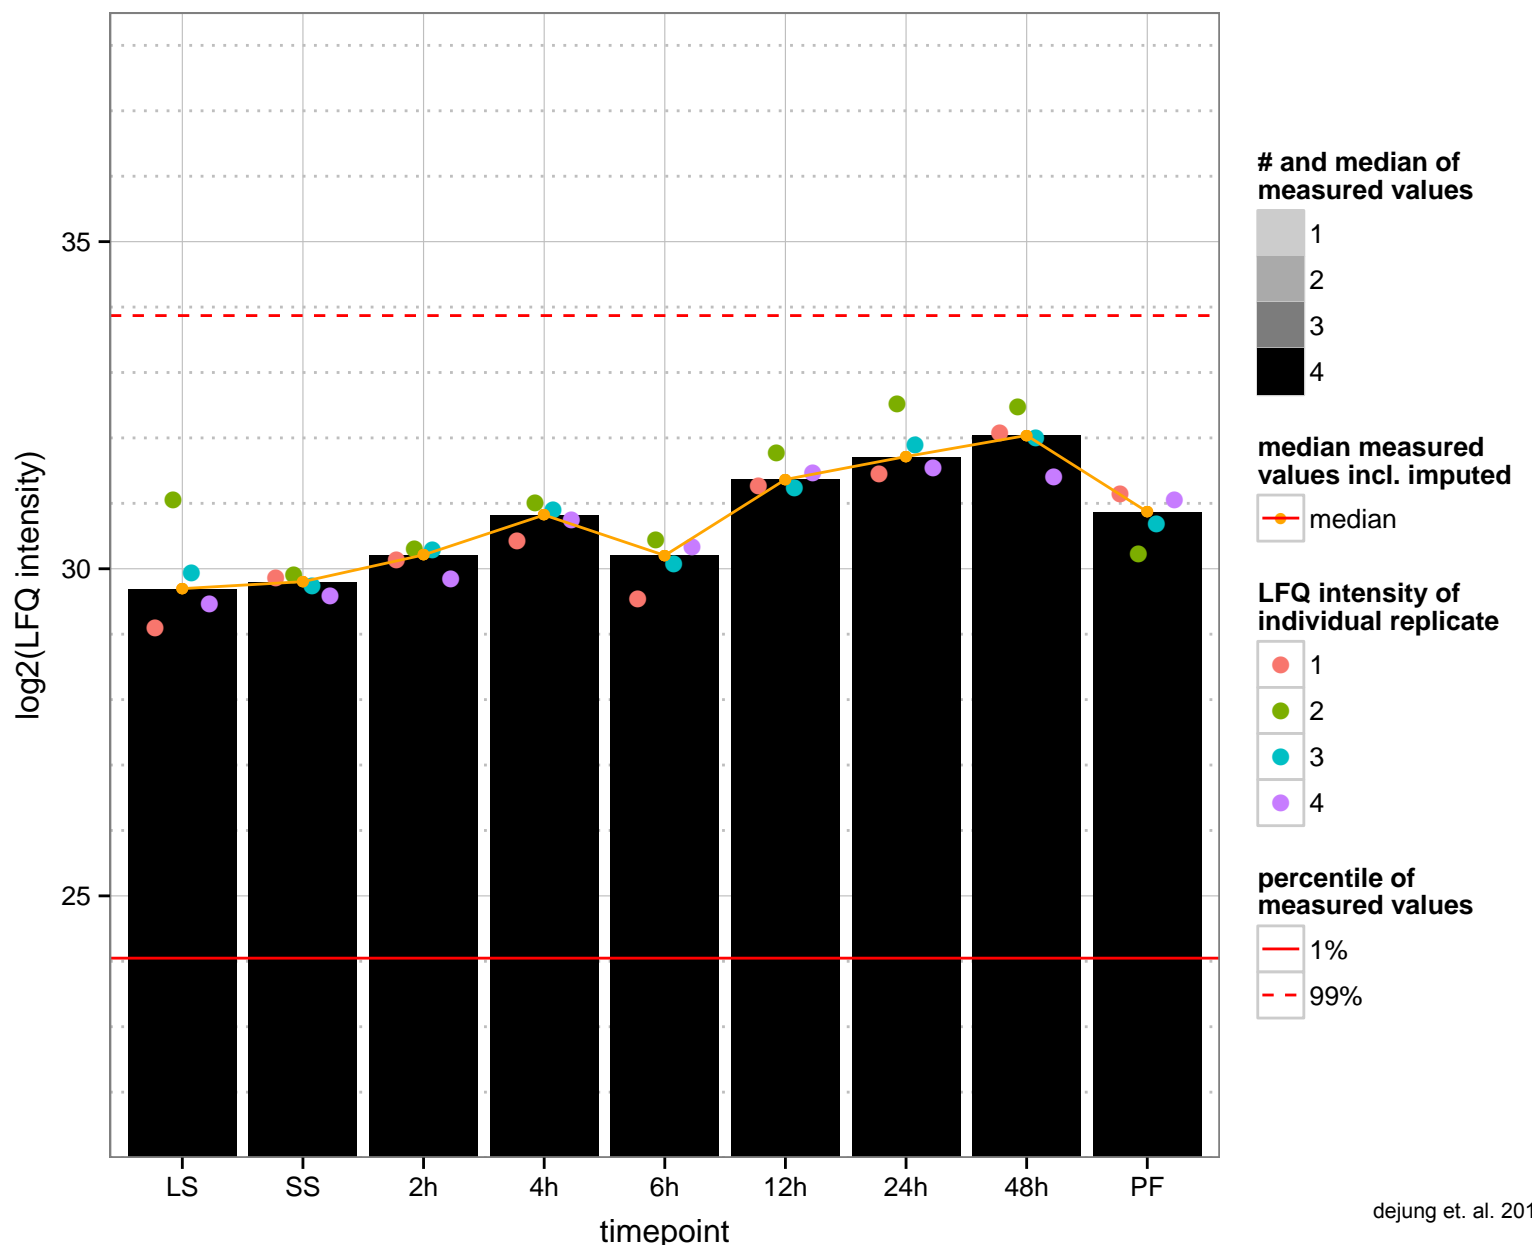

zinc finger CCCH domain containing protein 17 (ZC3H17)  
 Tb927.7.930  
 AGOF: RNA binding  
 AGOC: null  
 AGOP: null  
 PGO: null  
 PGOC: null  
 PGOP: null

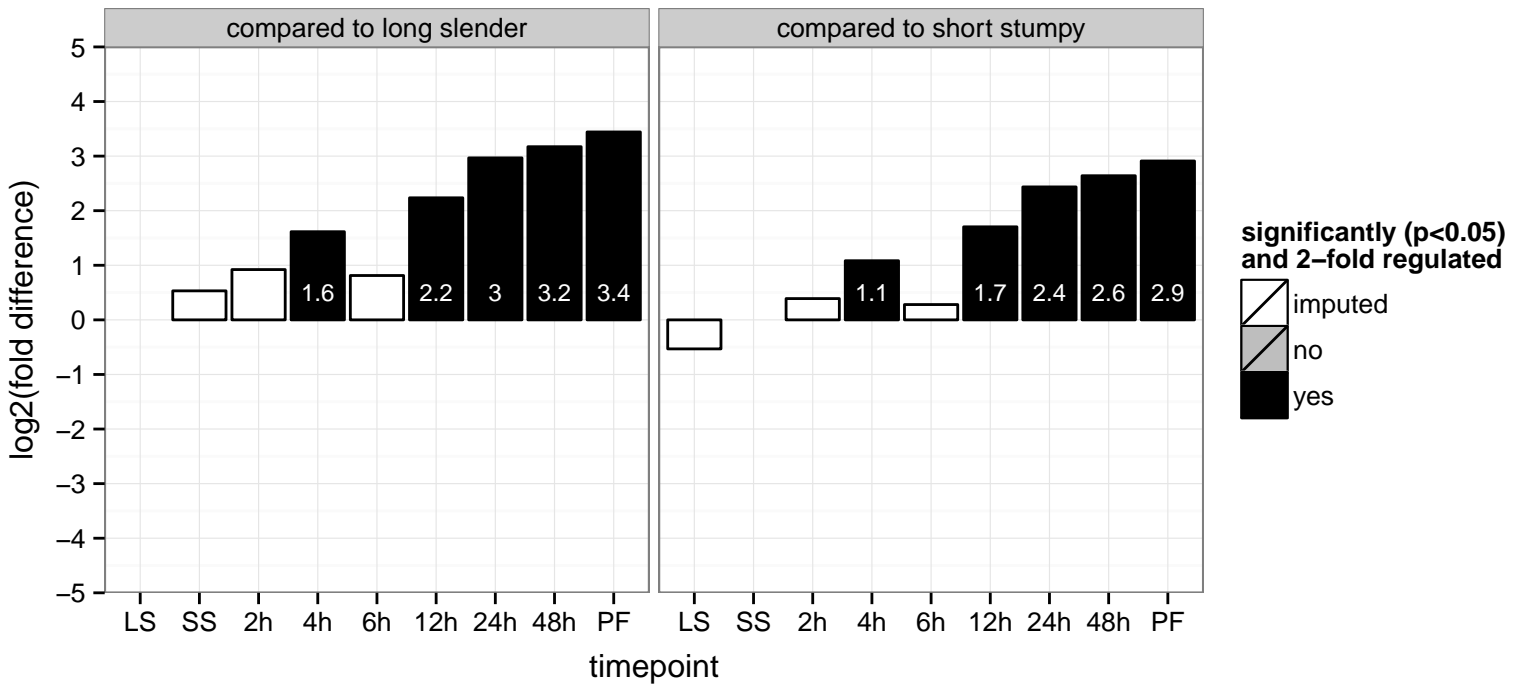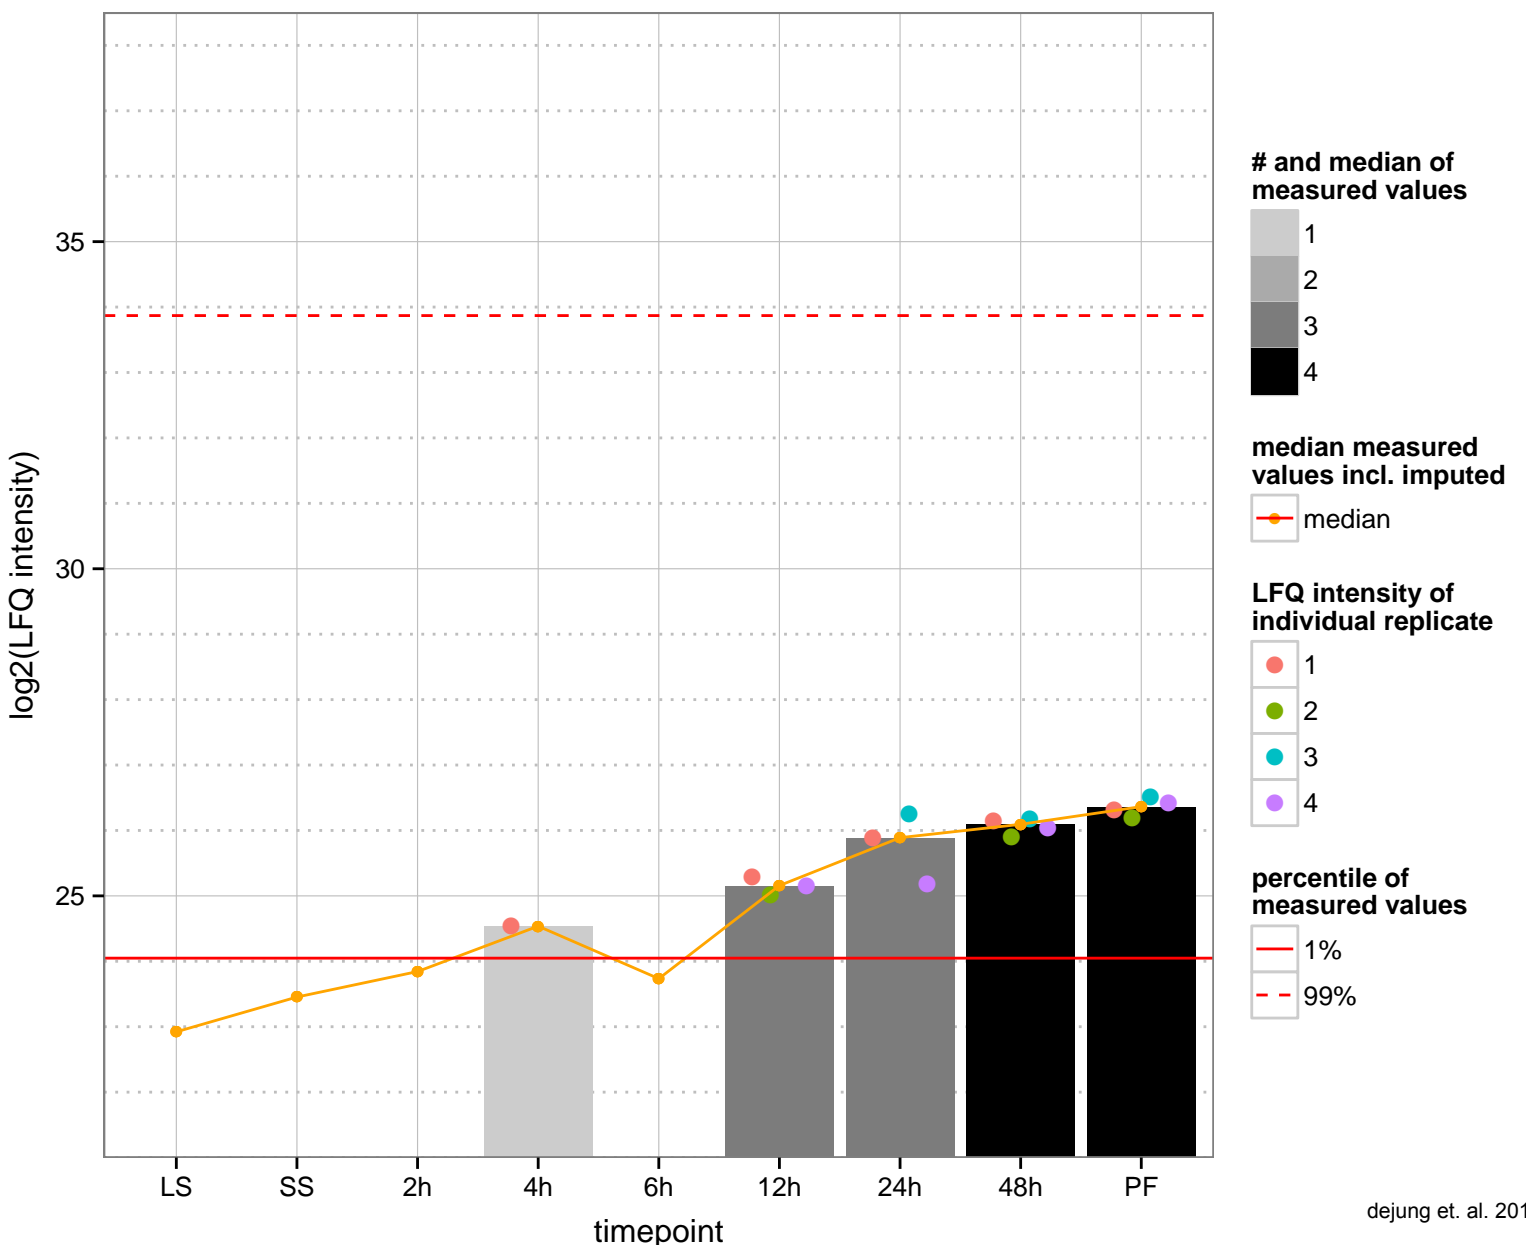

hypothetical protein, conserved  
 Tb927.8.5300  
 AGOF: null  
 AGOC: null  
 AGOP: null  
 PGO: null  
 PGO: null  
 PGO: null

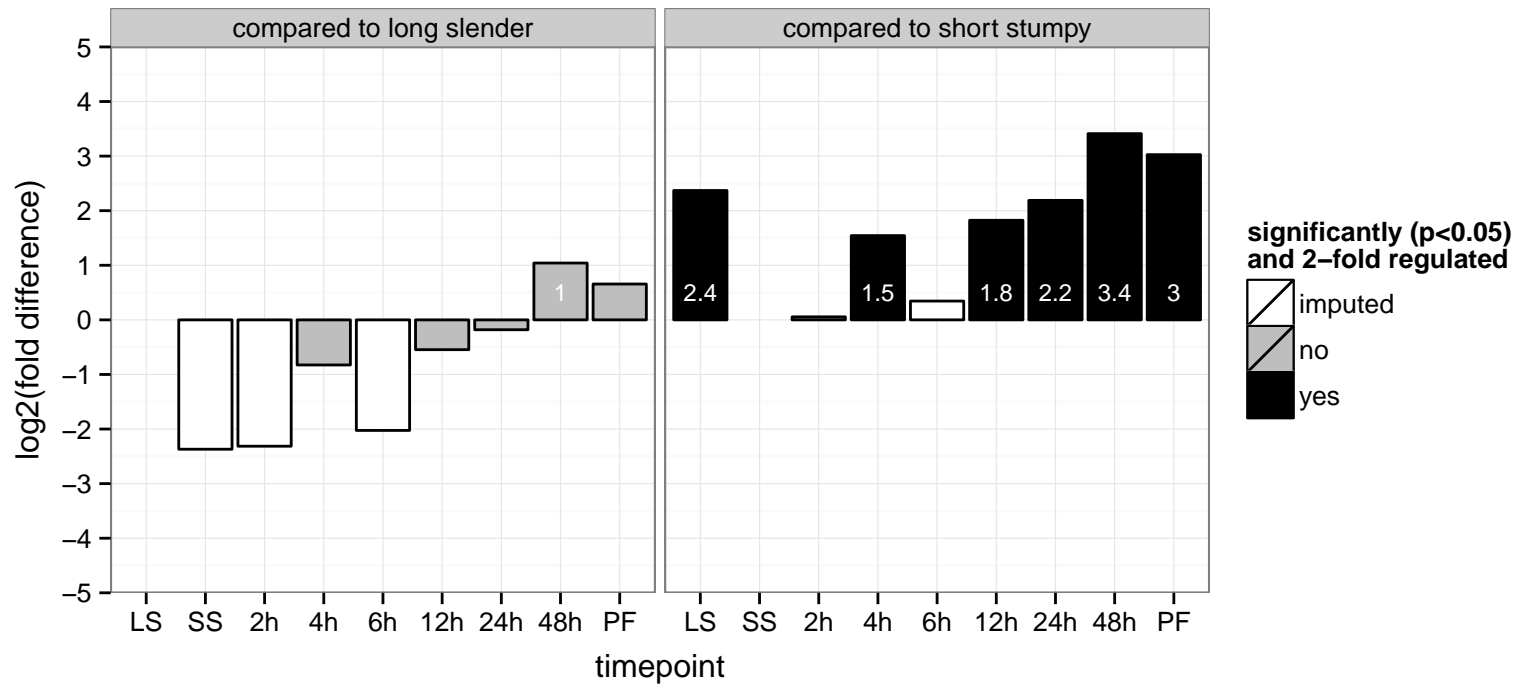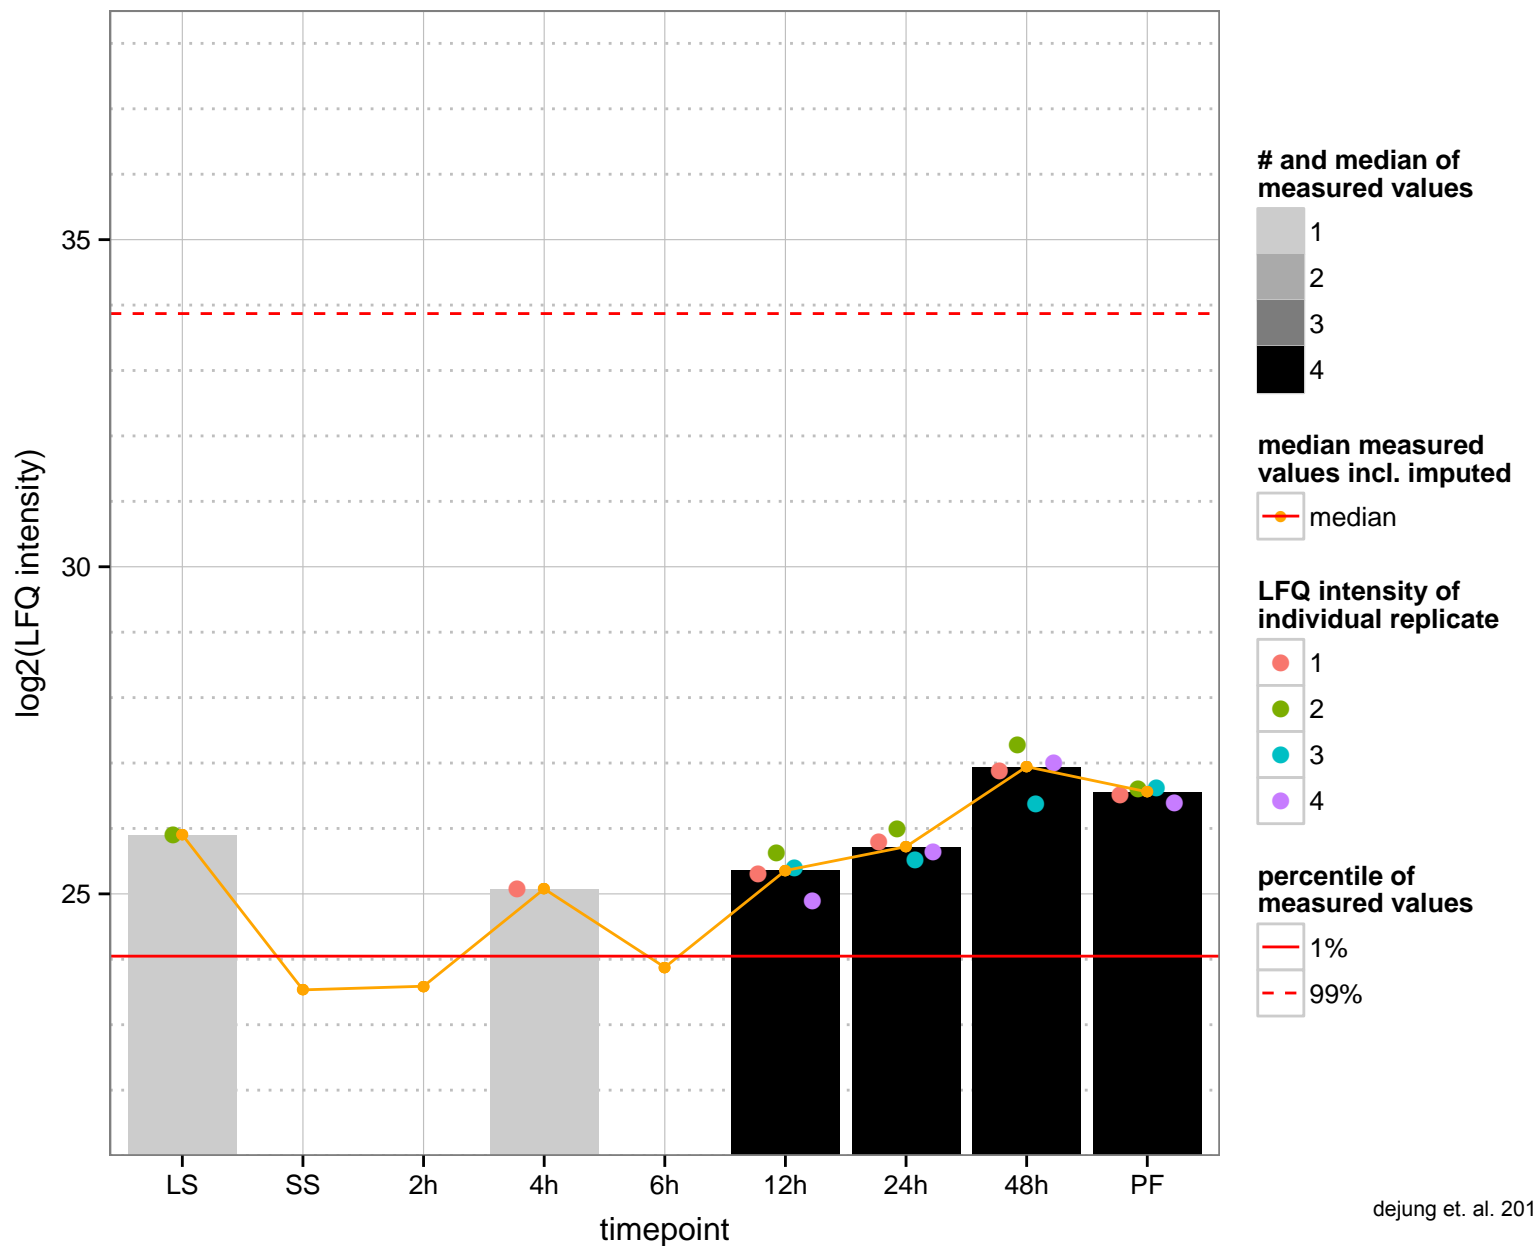



hypothetical protein, conserved  
 Tb927.8.6380  
 AGOF: null  
 AGOC: null  
 AGOP: null  
 PGOF: null  
 PGOC: null  
 PGOP: null

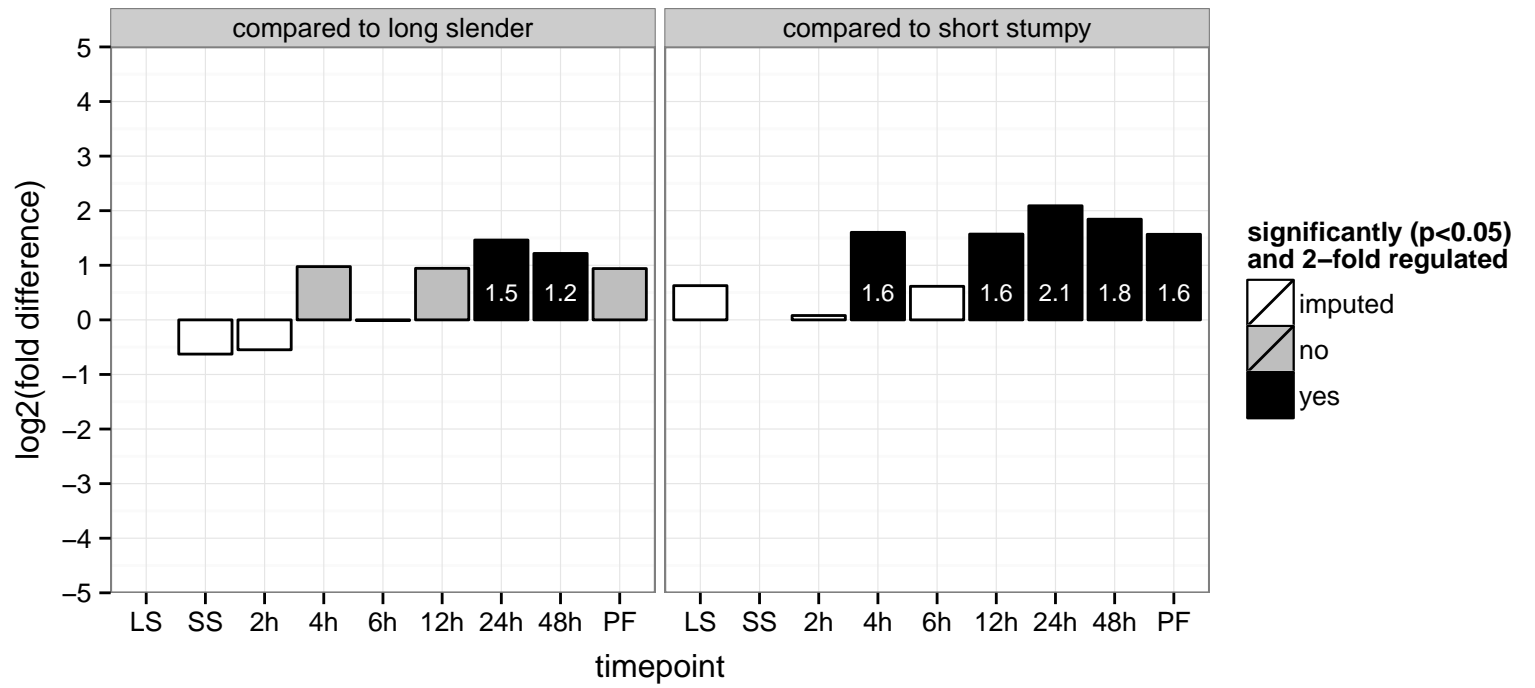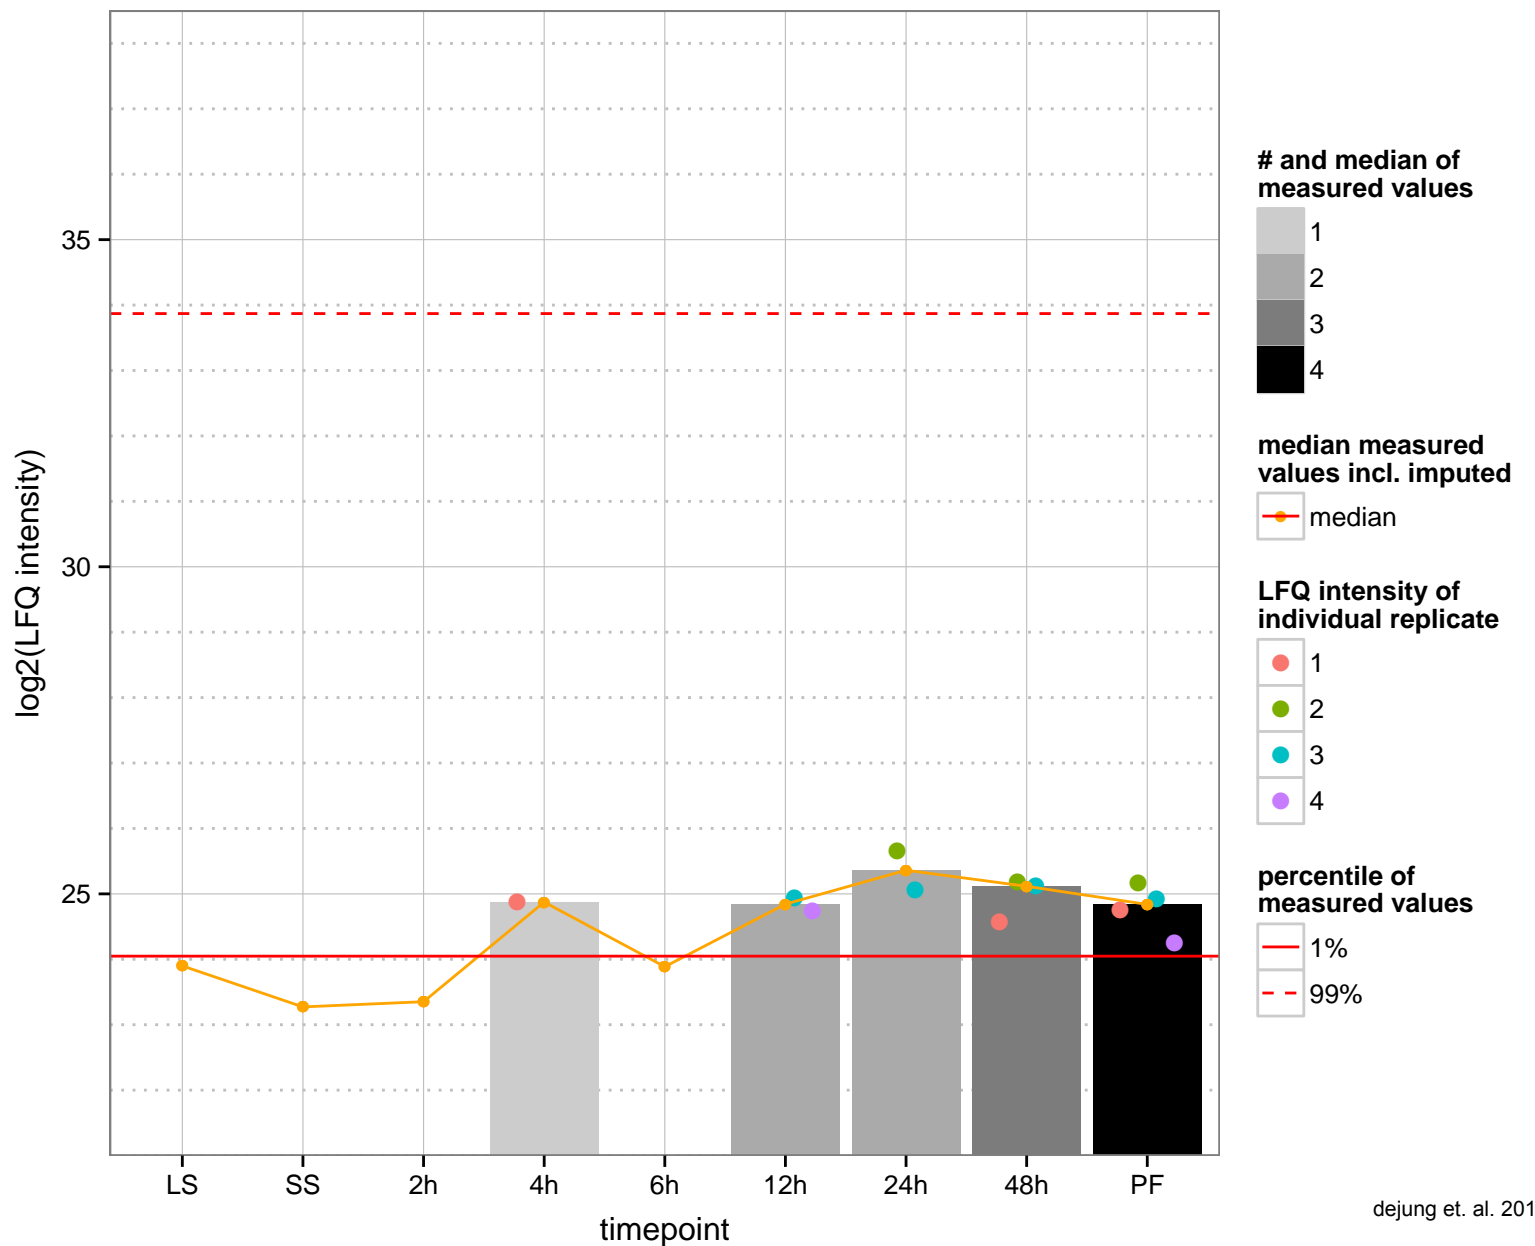

dihydrolipoamide dehydrogenase, pseudogene, putative, acetoin dehydrogenase e3 component, point mutation  
 Tb927.8.7380;Tb927.4.5050  
 AGOF: dihydrolipoyl dehydrogenase activity, flavin adenine dinucleotide binding, disulfide oxidoreductase activity  
 AGOC: cytoplasm, mitochondrion  
 AGOP: cell redox homeostasis, oxidation–reduction process  
 PGO: flavin adenine dinucleotide binding, oxidoreductase activity  
 PGO: cytoplasm  
 PGO: cell redox homeostasis, oxidation–reduction process

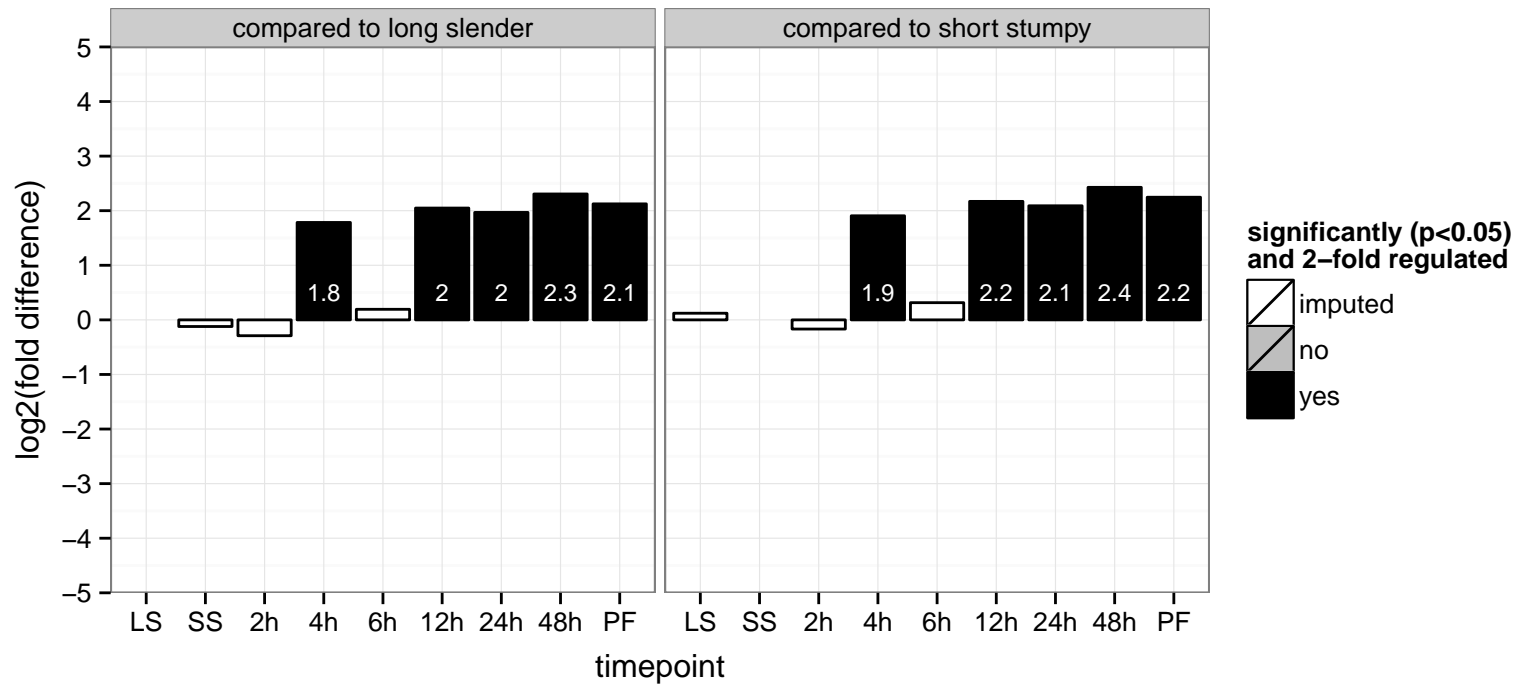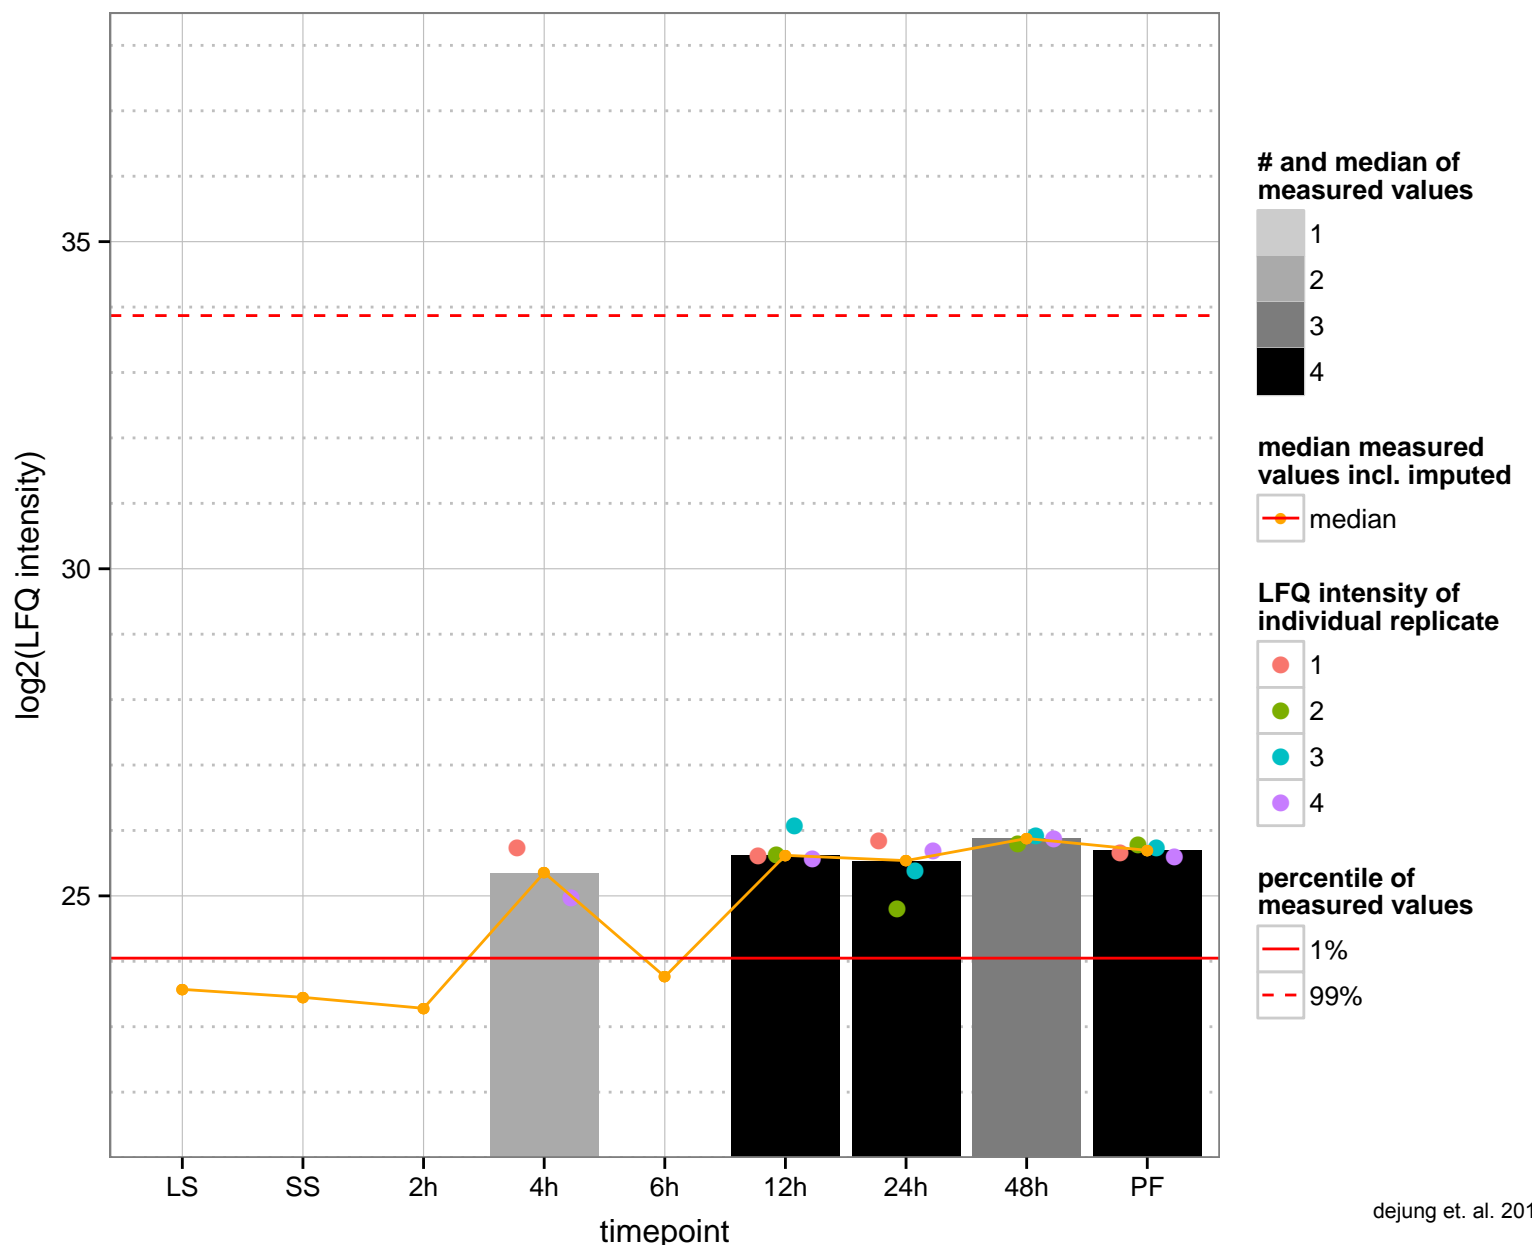

hypothetical protein, conserved  
 Tb927.9.10470  
 AGOF: null  
 AGOC: null  
 AGOP: null  
 PGOF: null  
 PGO: null  
 PGOP: null

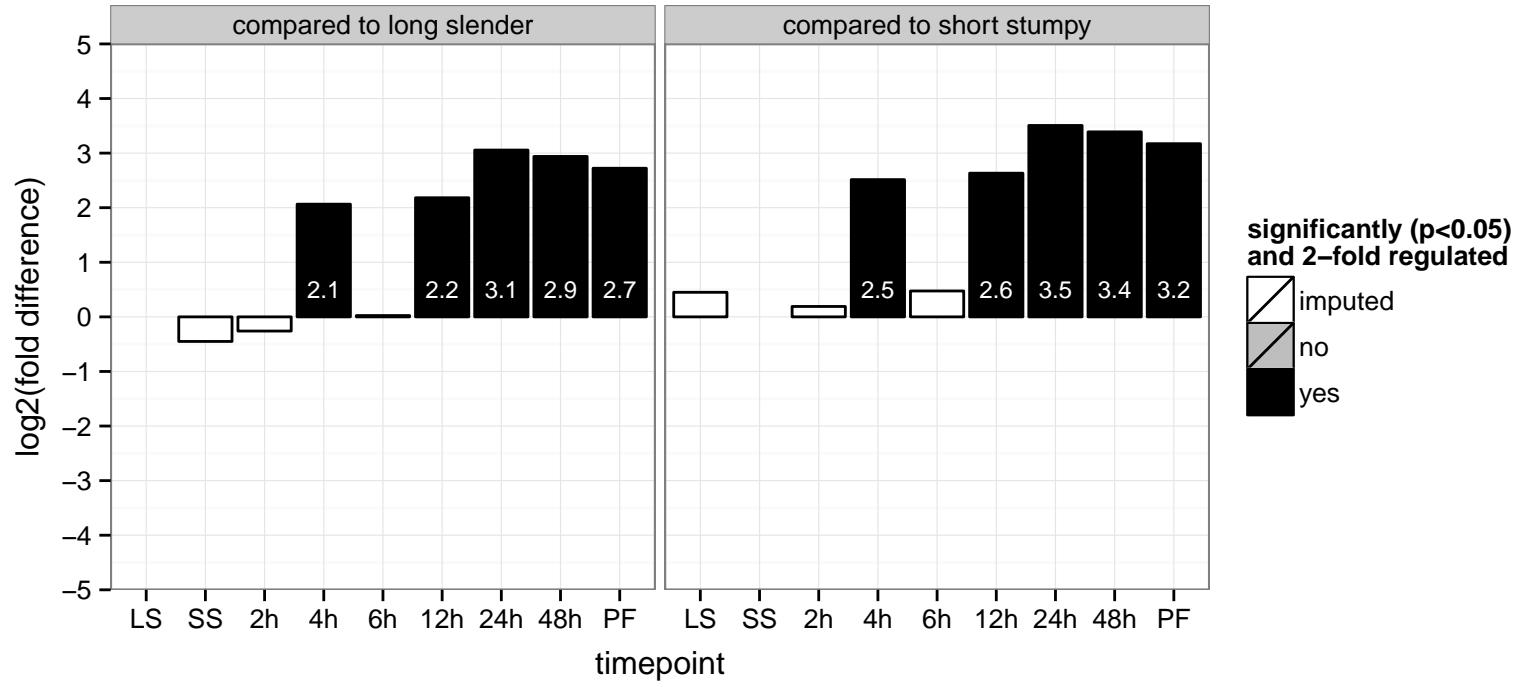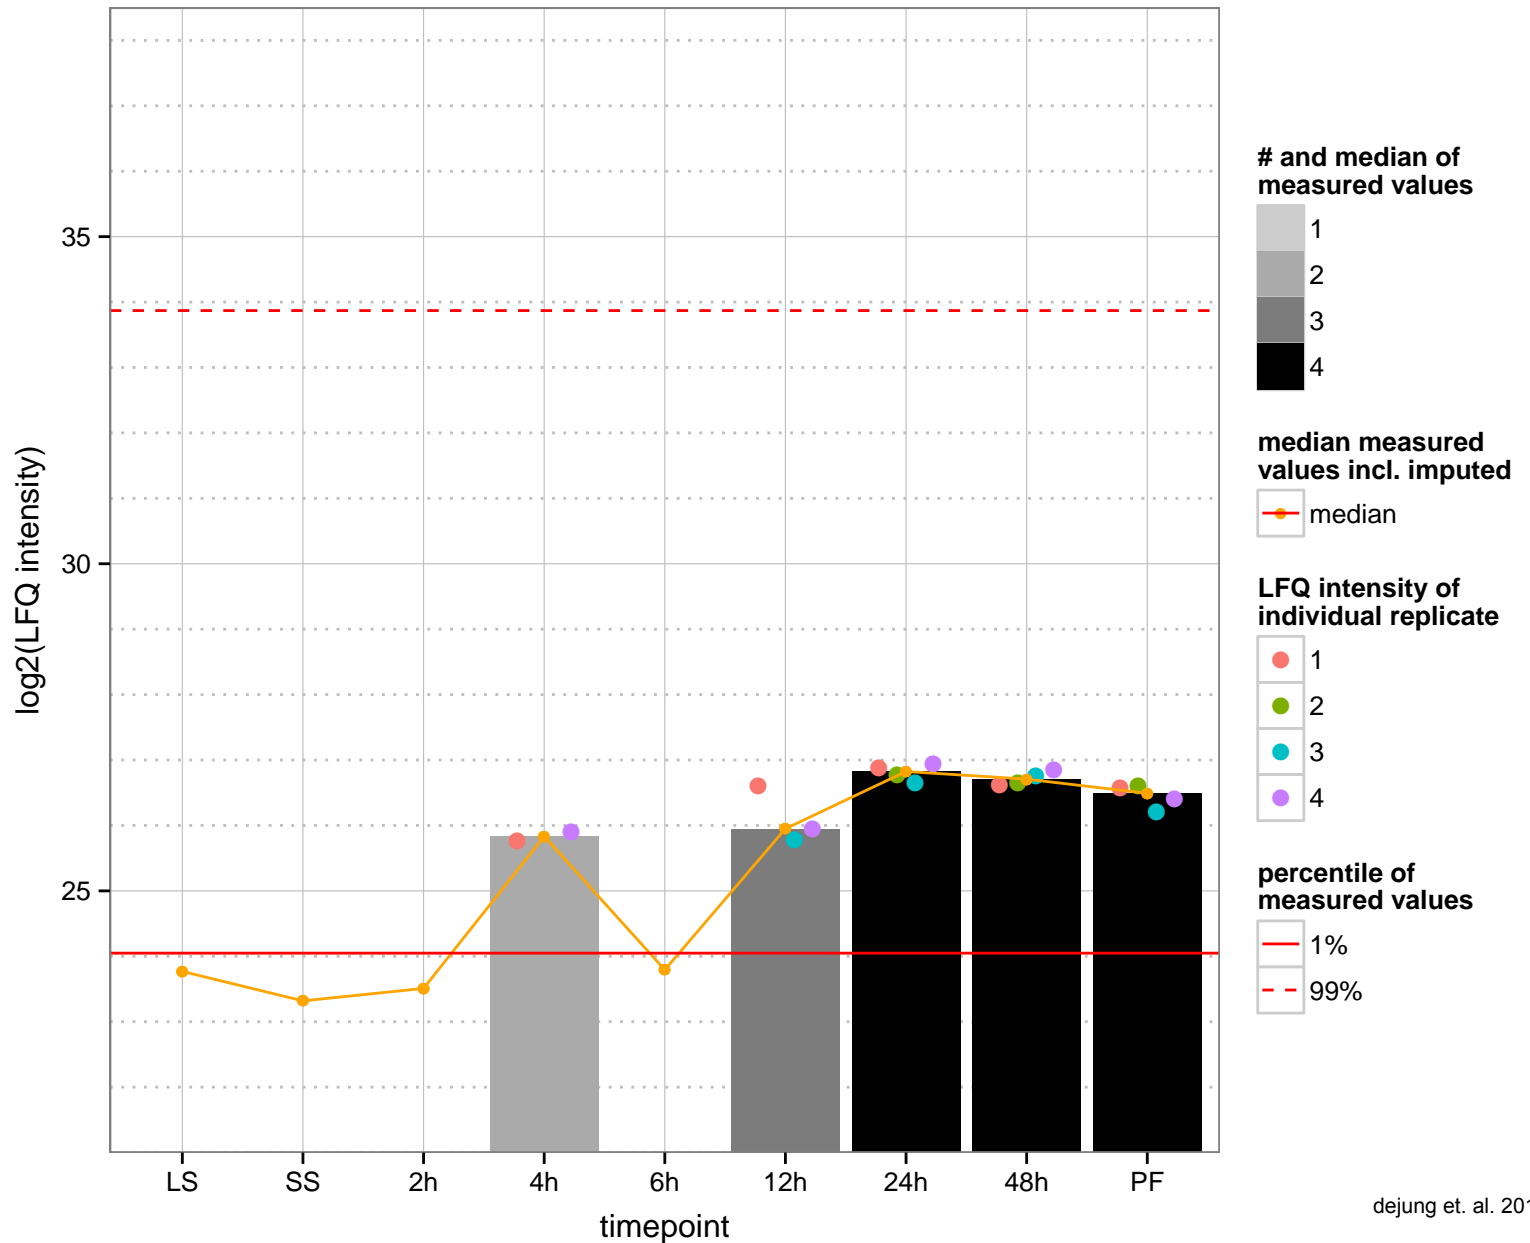

hypothetical protein, conserved  
 Tb927.9.12750  
 AGOF: null  
 AGOC: null  
 AGOP: null  
 PGOF: null  
 PGOC: null  
 PGOP: null

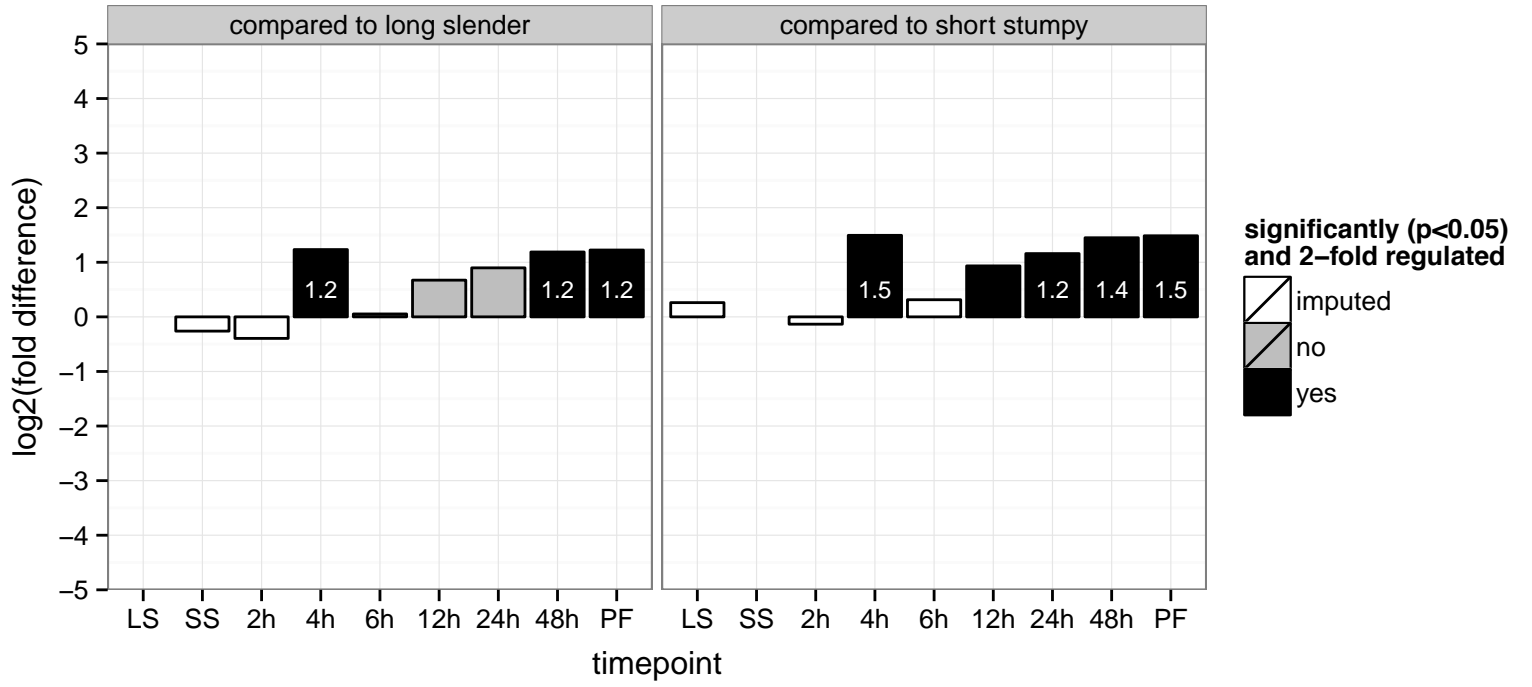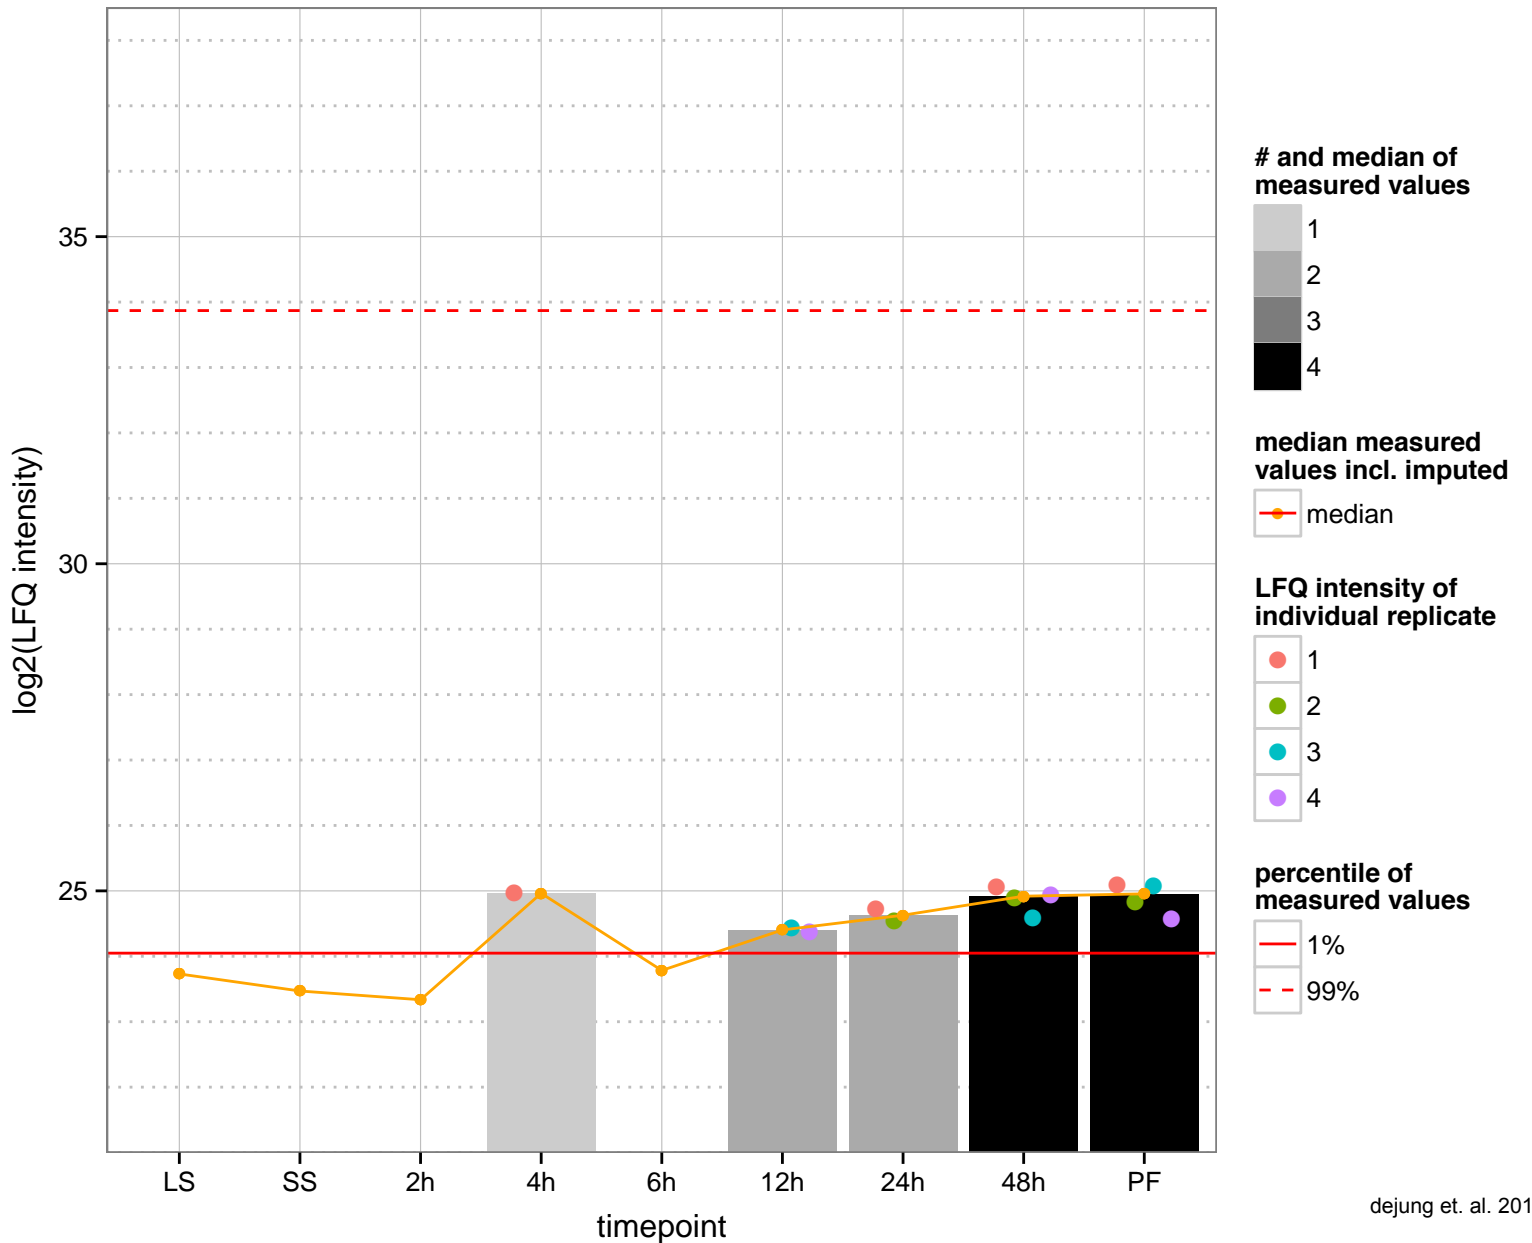

hypothetical protein, conserved  
 Tb927.9.7000  
 AGOF: null  
 AGOC: null  
 AGOP: null  
 PGOF: null  
 PGO: null  
 PGOP: null

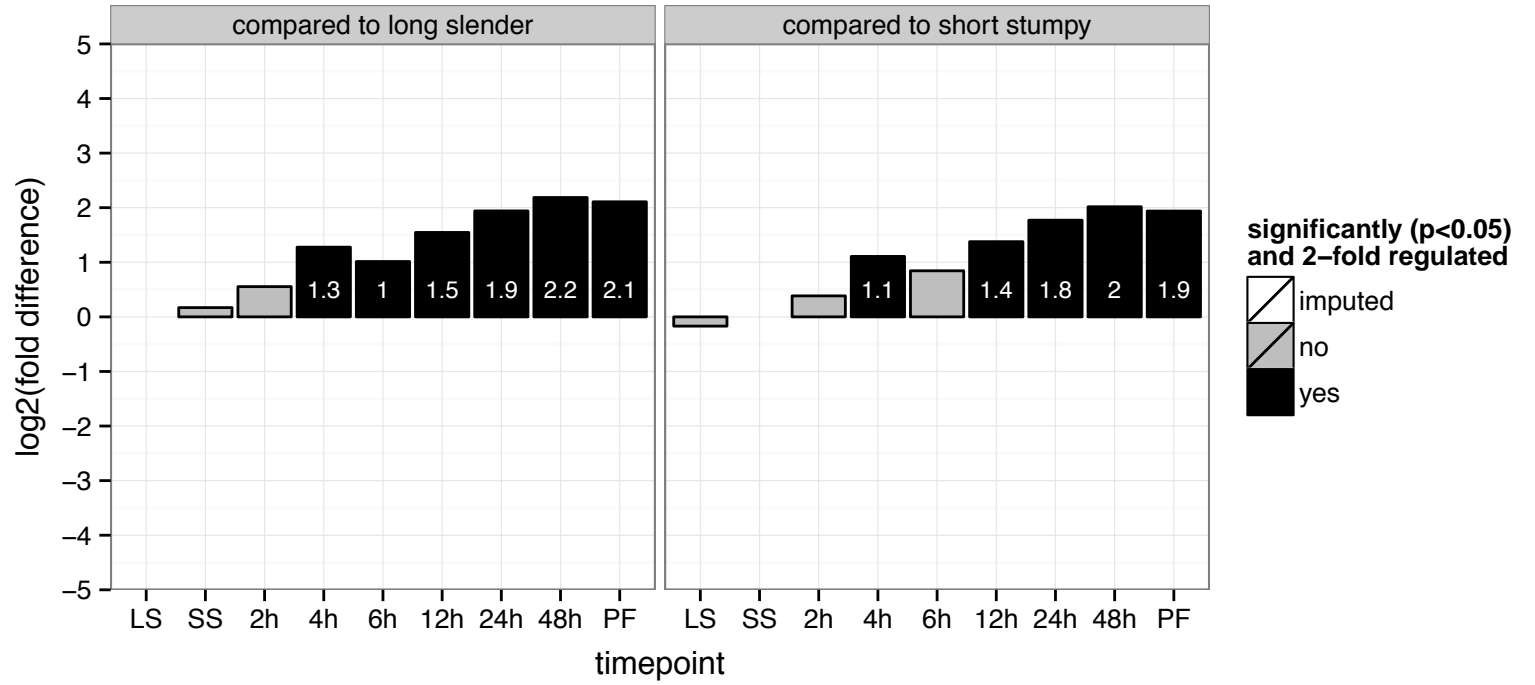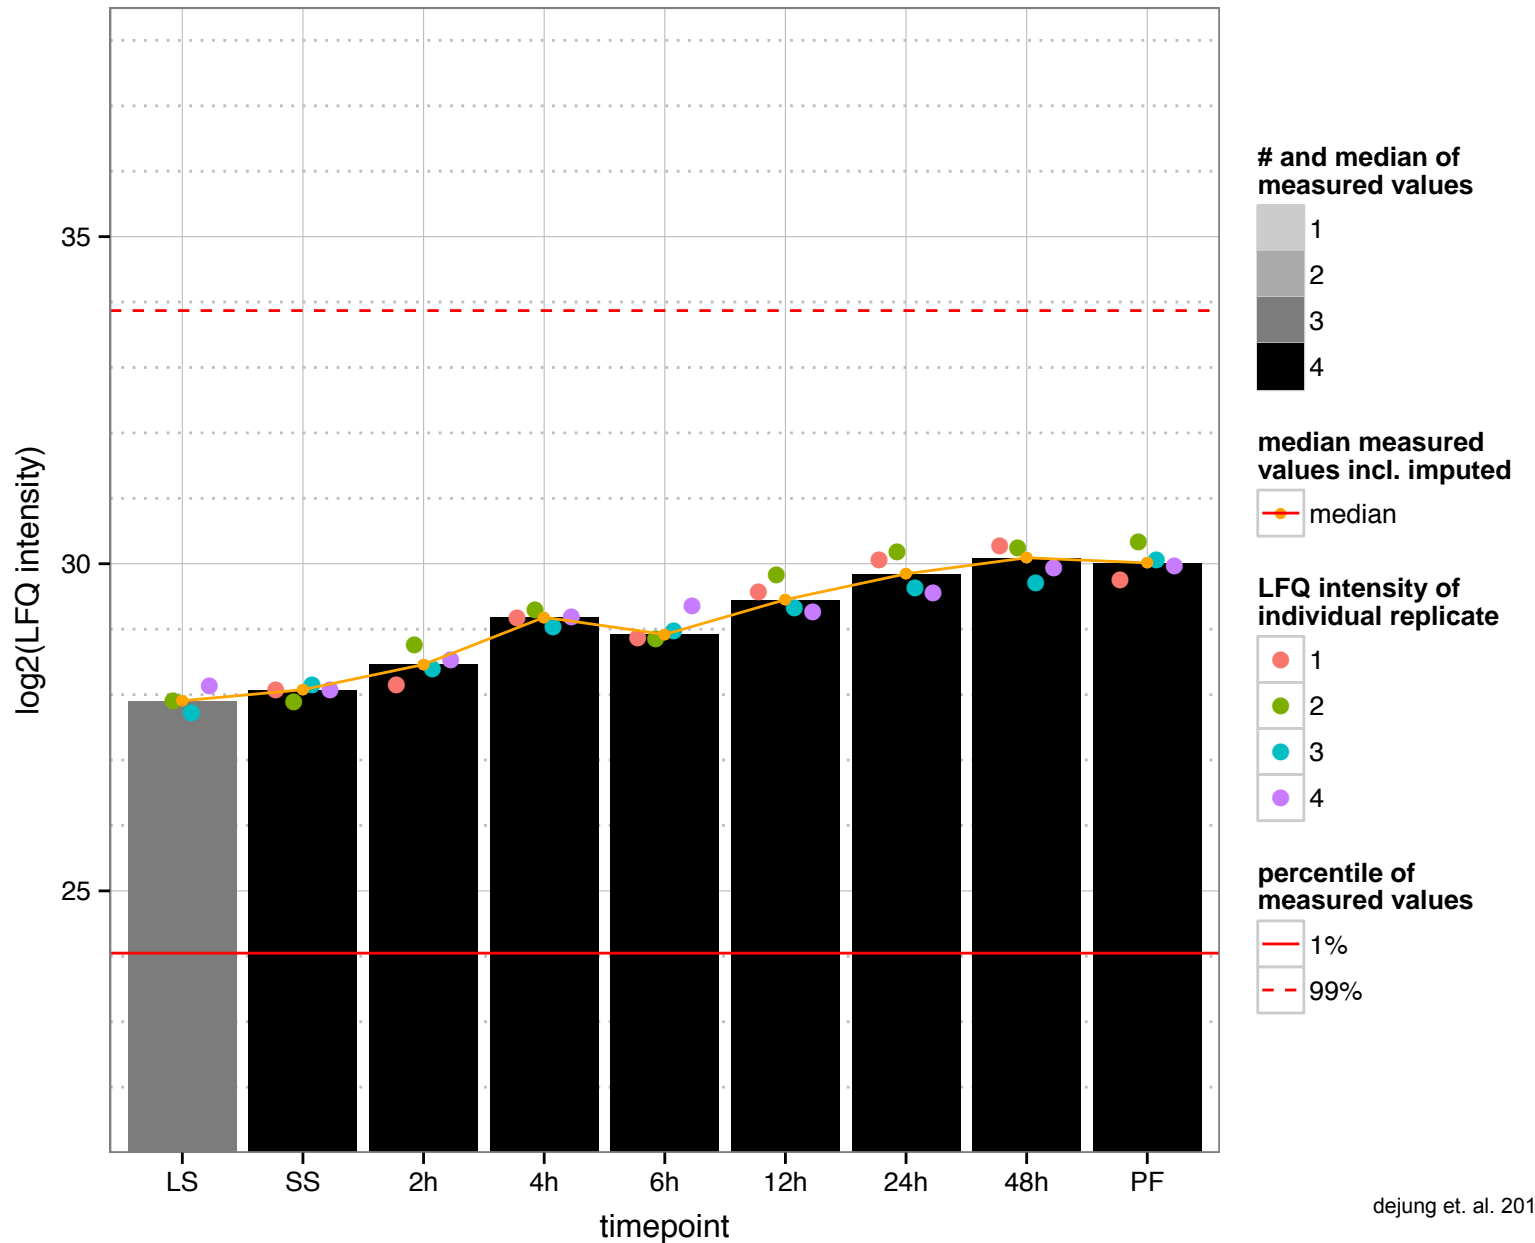

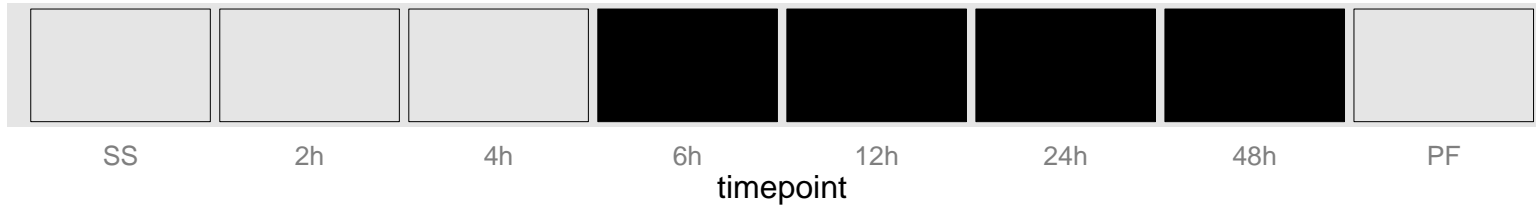

**regulated**  not regulated  significant down  significant up

hypothetical protein, conserved  
 Tb927.1.3800  
 AGOF: null  
 AGOC: mitochondrion  
 AGOP: response to stress  
 PGO: null  
 PGO: null  
 PGO: null  
 PGO: response to stress

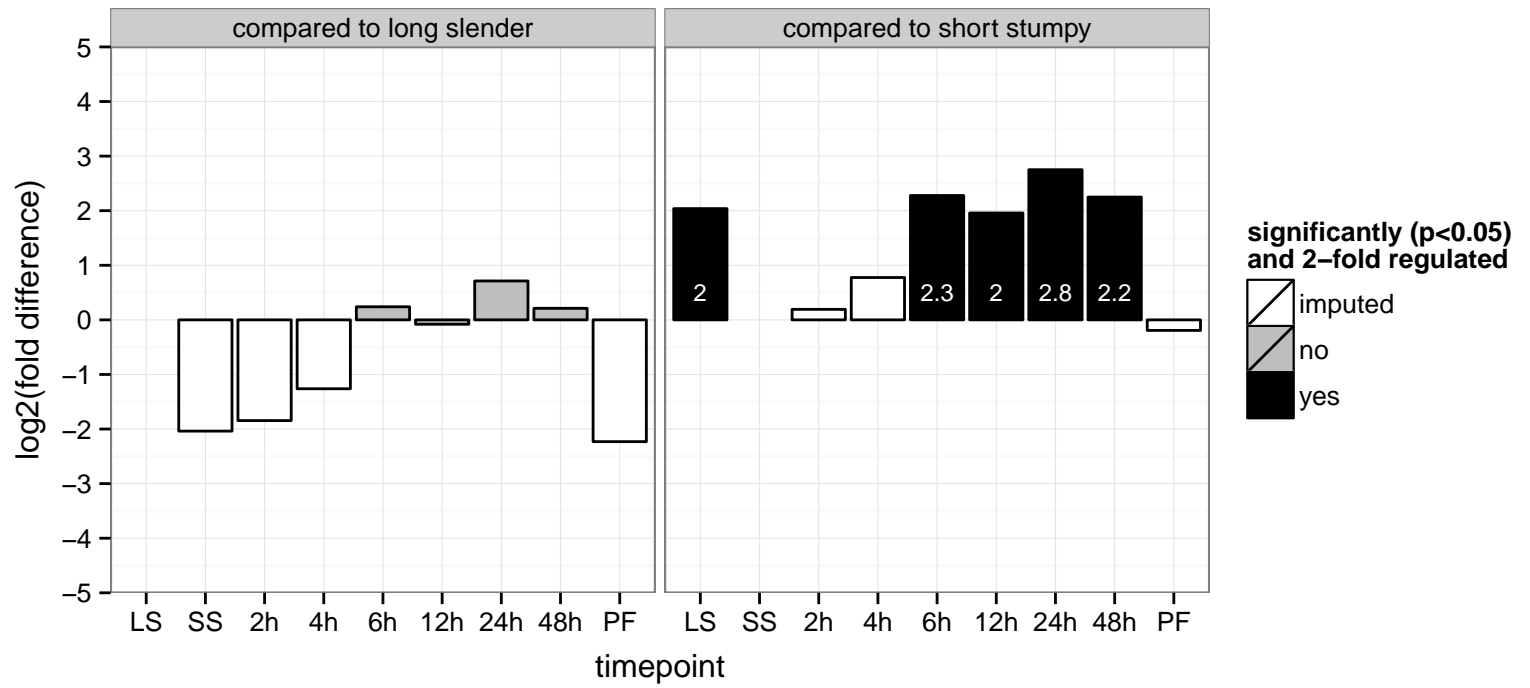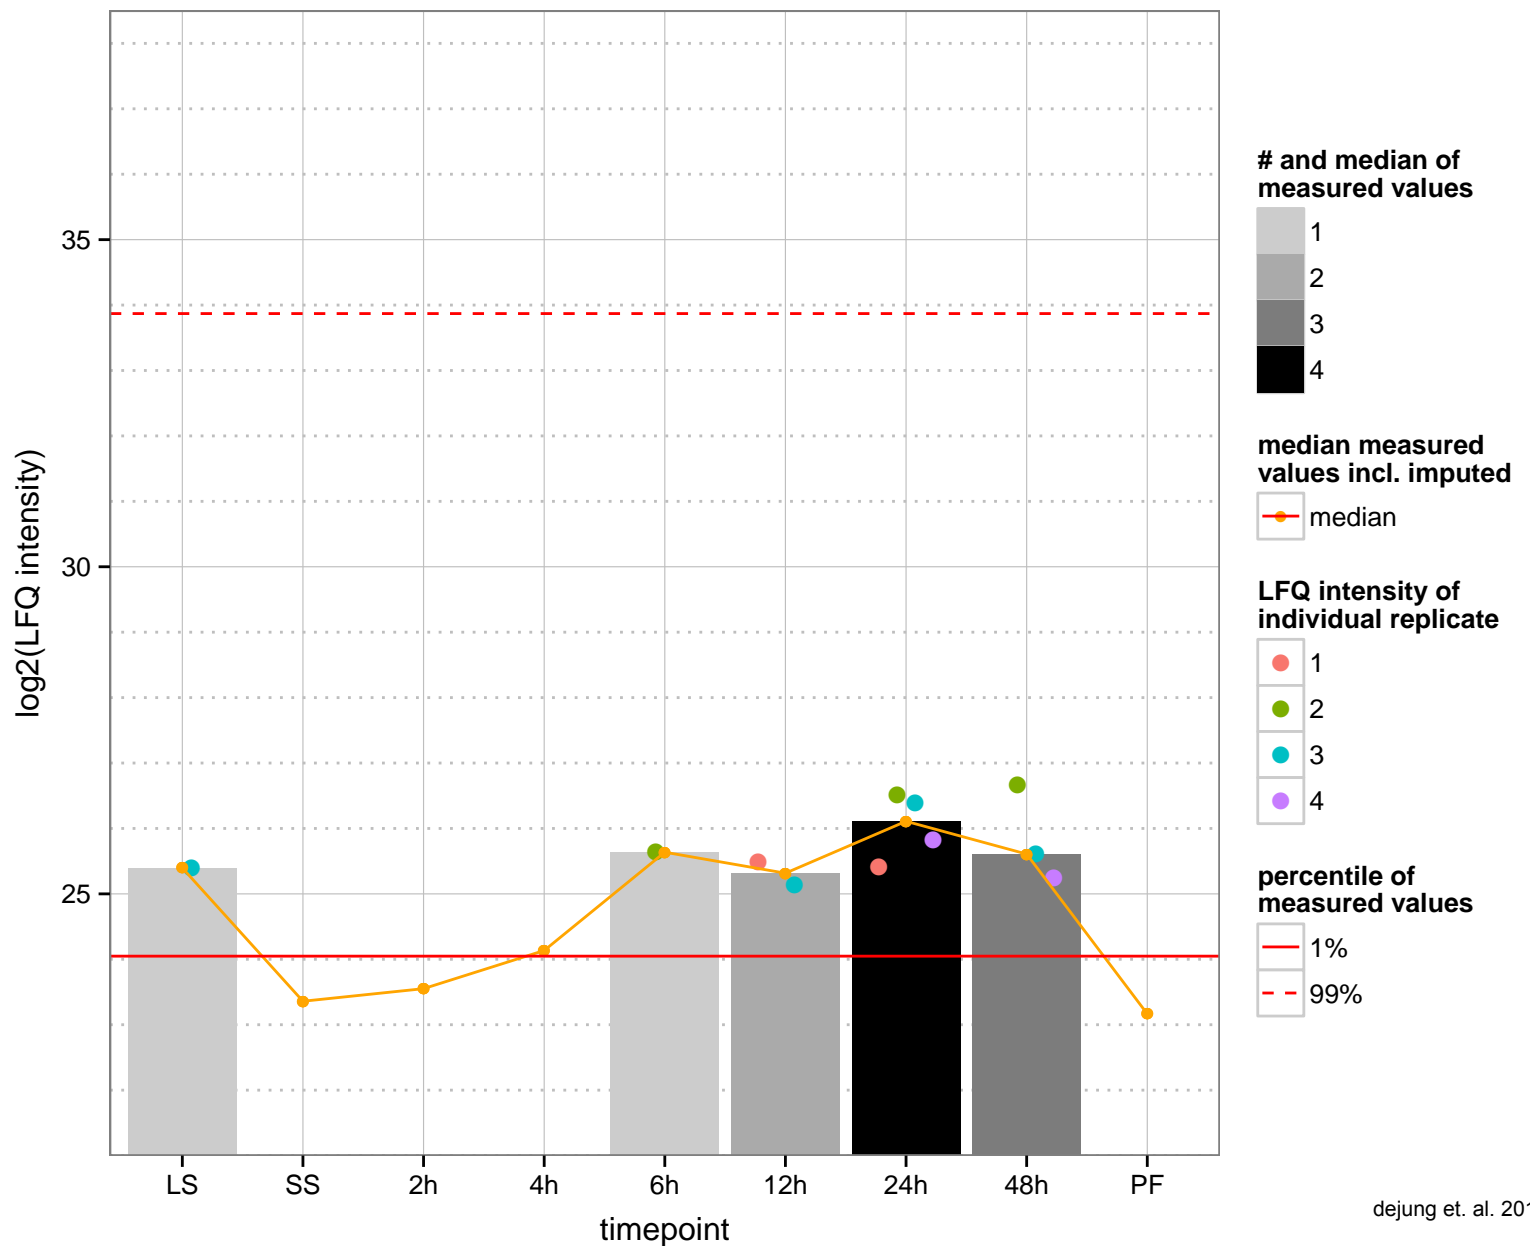

hypothetical protein, conserved  
 Tb927.10.12050  
 AGOF: null  
 AGOC: mitochondrion  
 AGOP: null  
 PGO: null  
 PGOC: null  
 PGOP: null

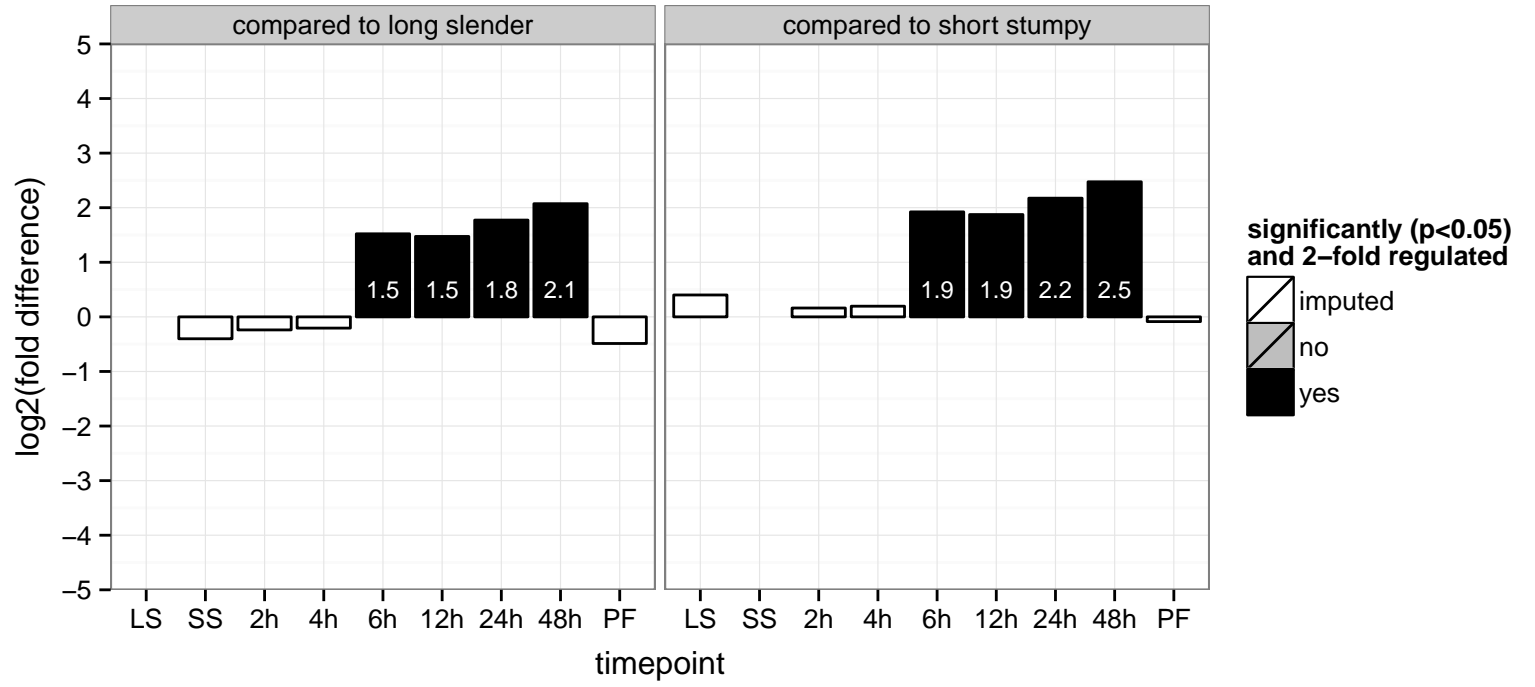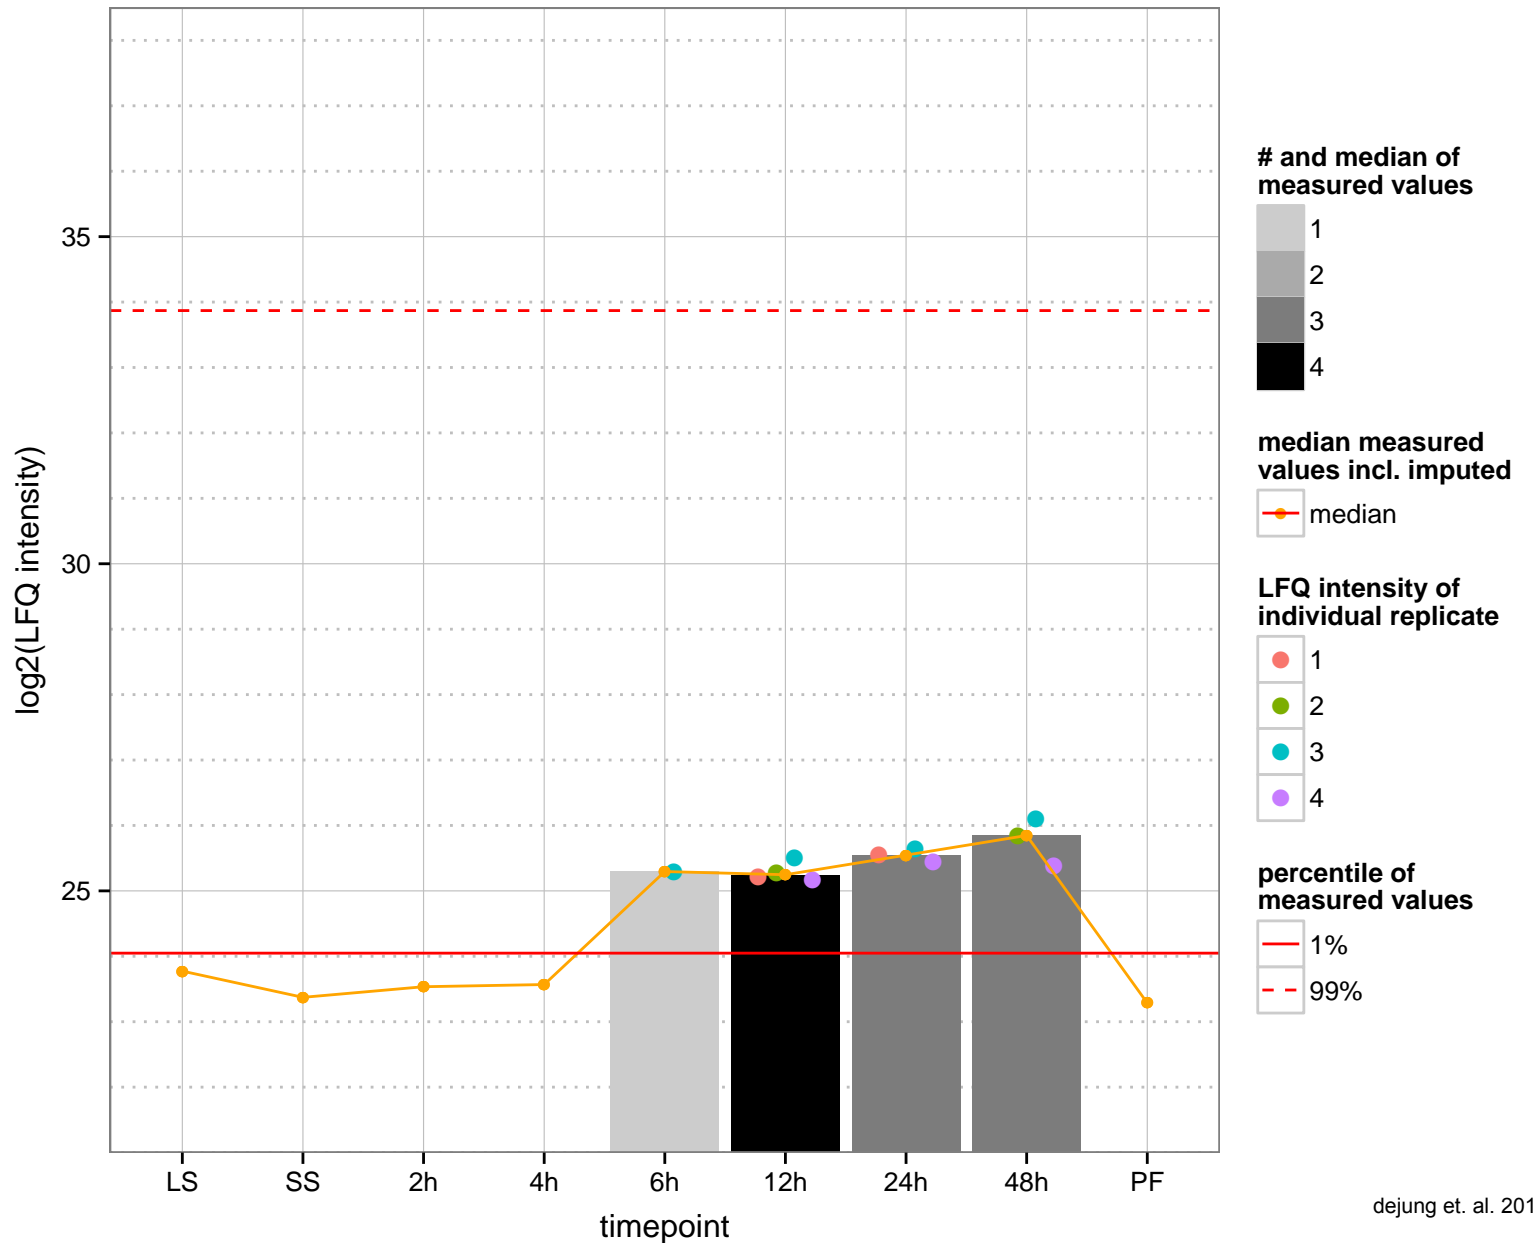



Zinc finger CCCH domain-containing protein 37 (ZC3H37), Zinc finger CCCH domain-containing protein 38 (ZC3H38)  
 Tb927.10.12780  
 AGOF: RNA binding, nucleic acid binding, zinc ion binding, nucleic acid binding  
 AGOC: null  
 AGOP: null  
 PGOF: nucleic acid binding, zinc ion binding  
 PGOC: null  
 PGOP: null

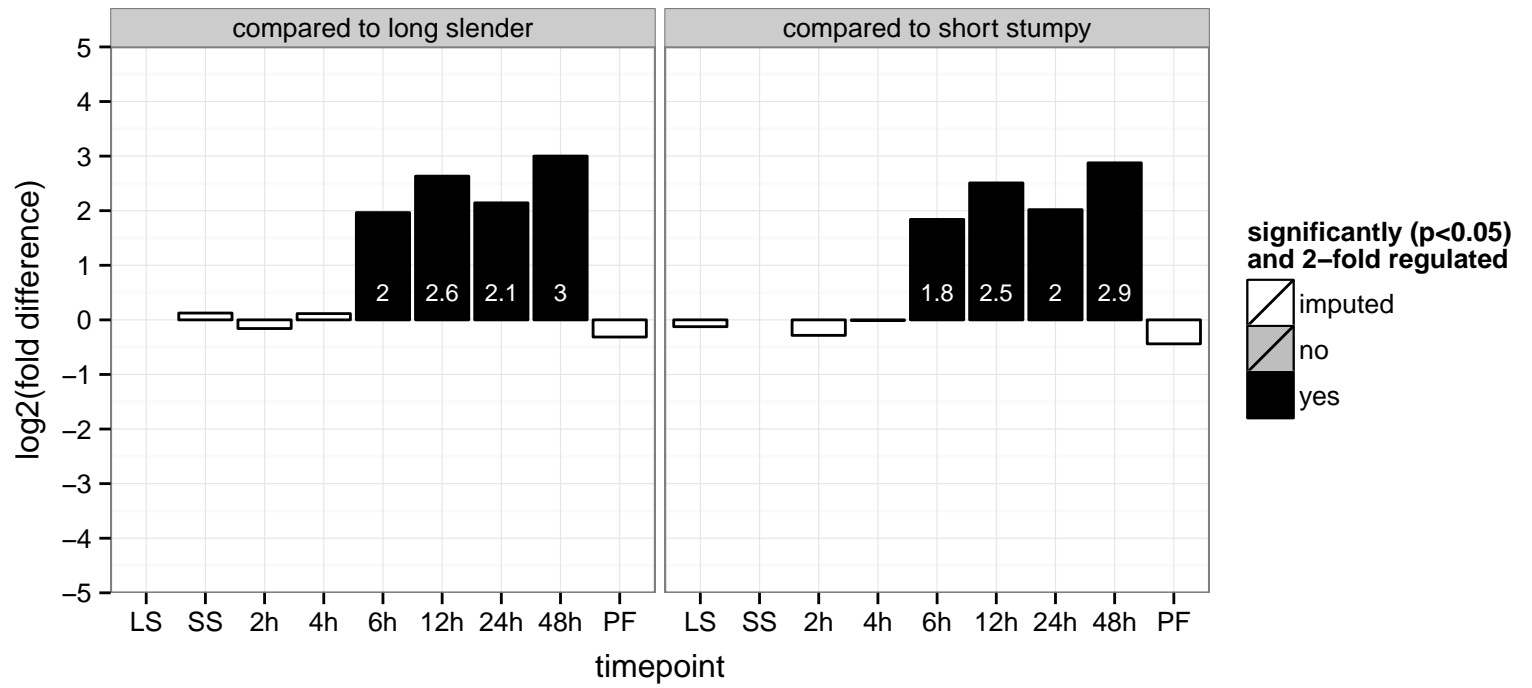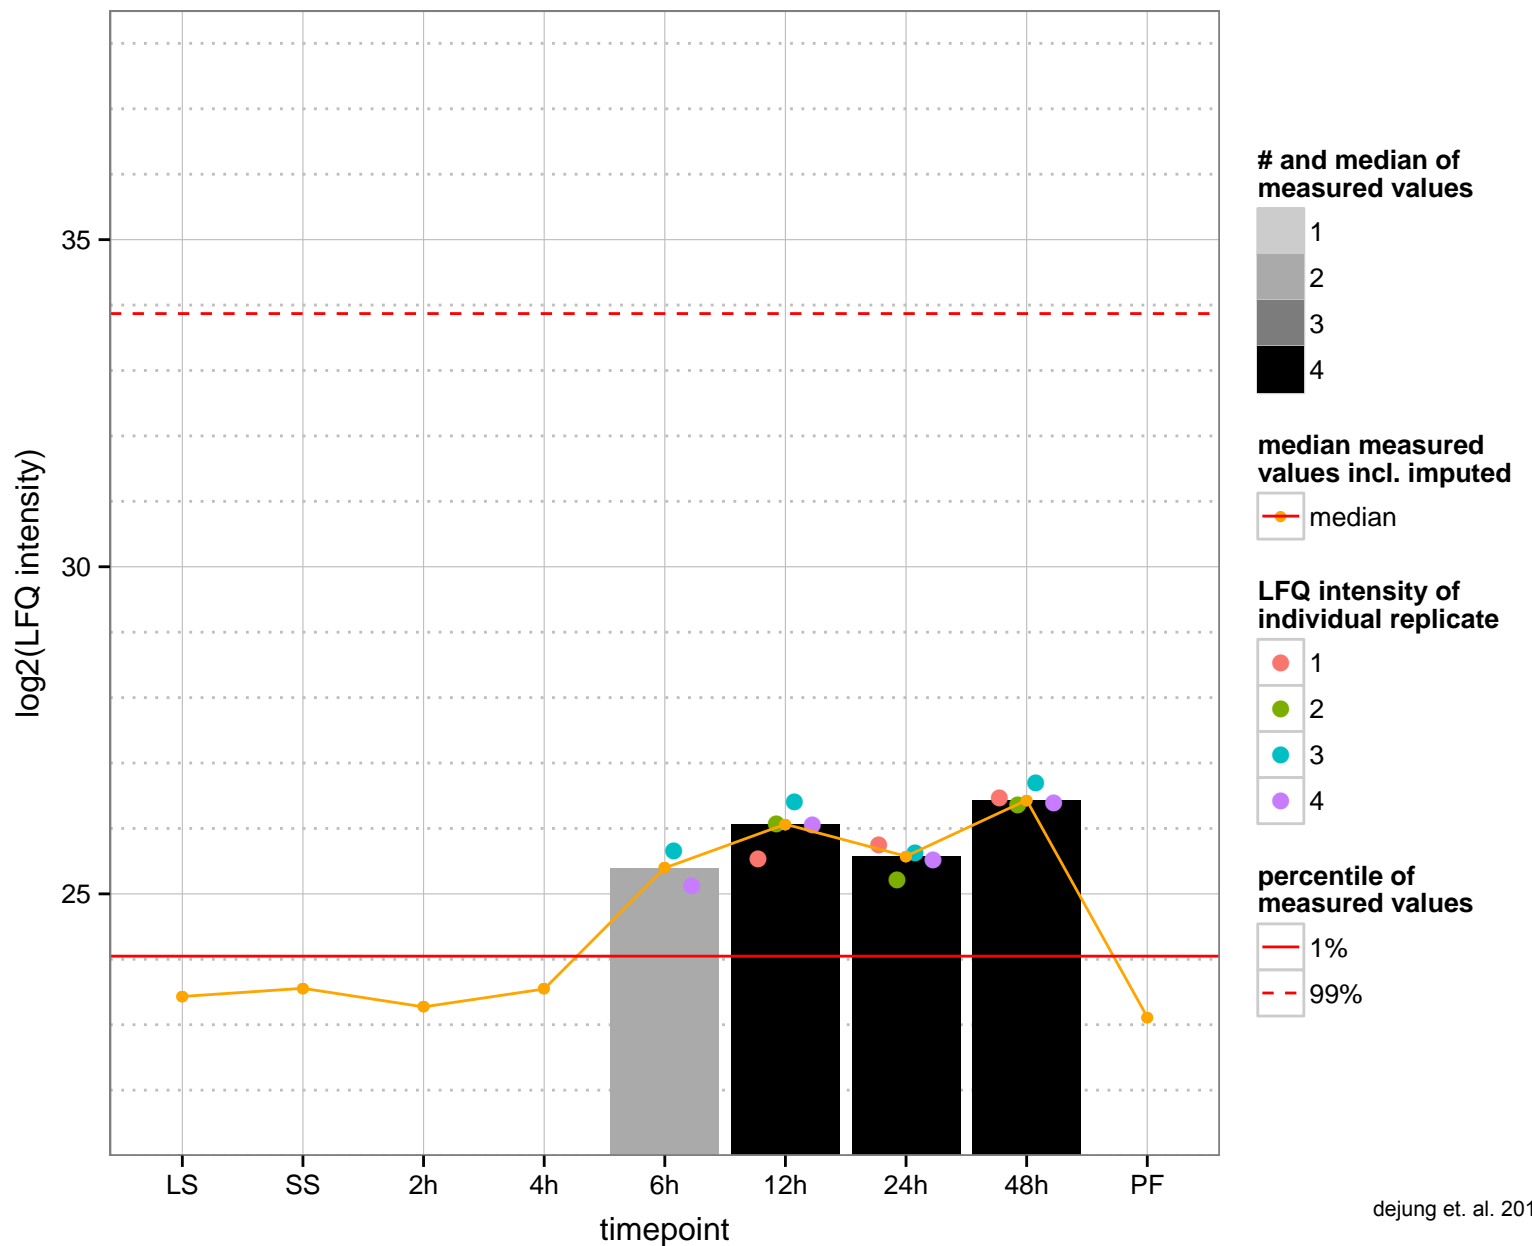

hypothetical protein, conserved  
 Tb927.10.5860  
 AGOF: null  
 AGOC: null  
 AGOP: null  
 PGO: cAMP-dependent protein kinase regulator activity  
 PGO: null  
 PGO: signal transduction

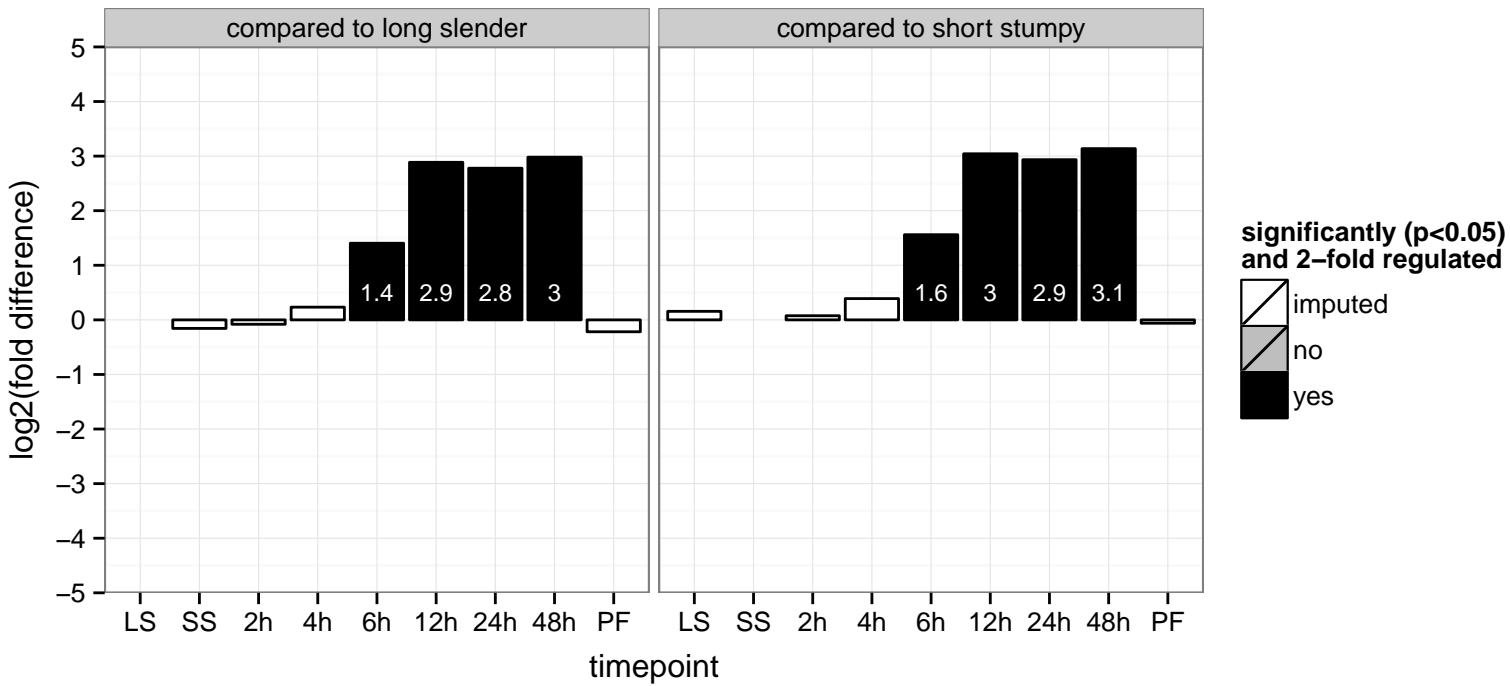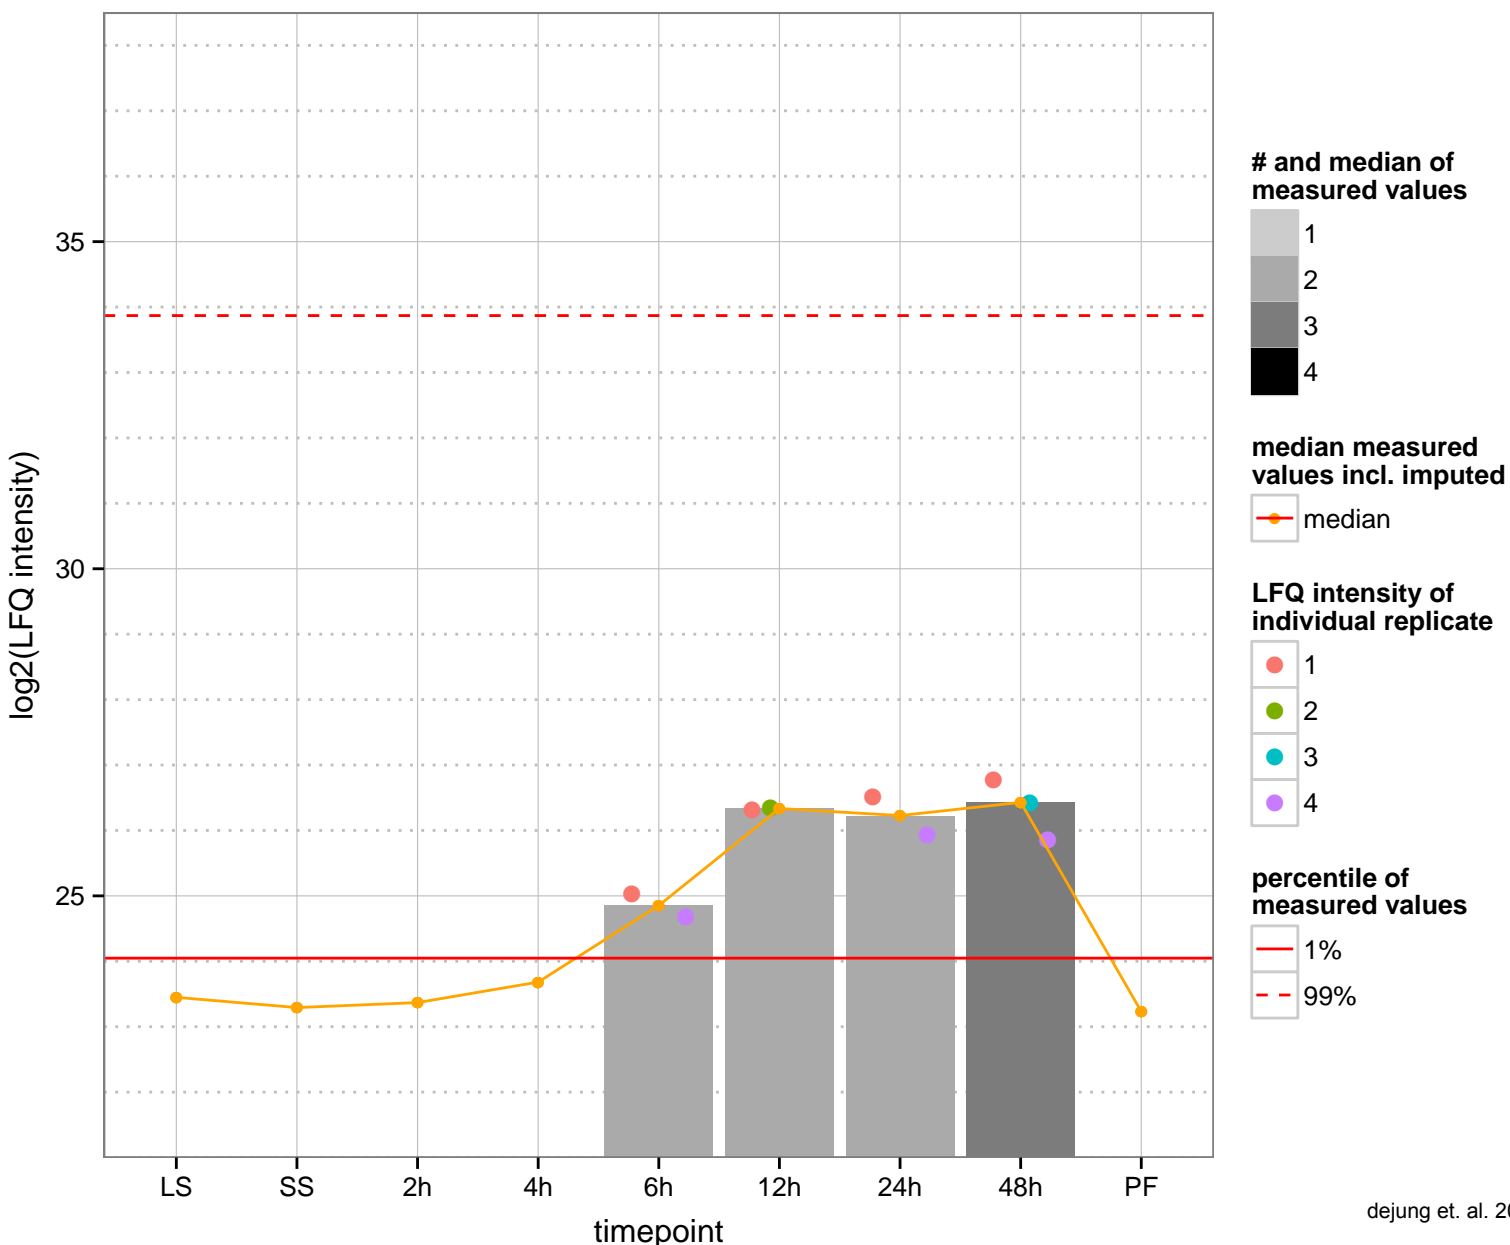

ras-like small GTPase, putative (TbRHP)

Tb927.10.6240

AGOF: GTP binding, GTPase activity

AGOC: intracellular

AGOP: protein transport

PGOF: GTP binding, GTPase activity

PGOC: intracellular, membrane

PGOP: GTP catabolic process, protein transport, signal transduction, small GTPase mediated signal transduction

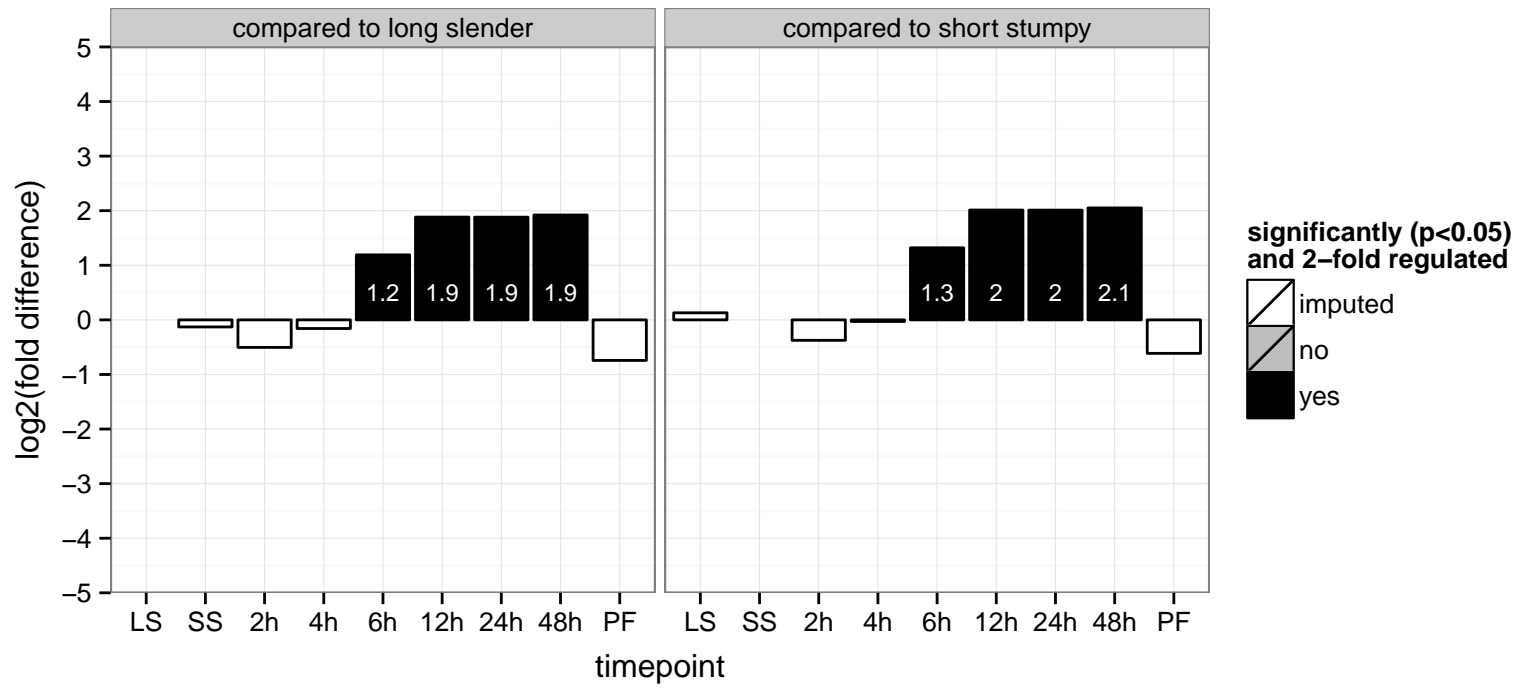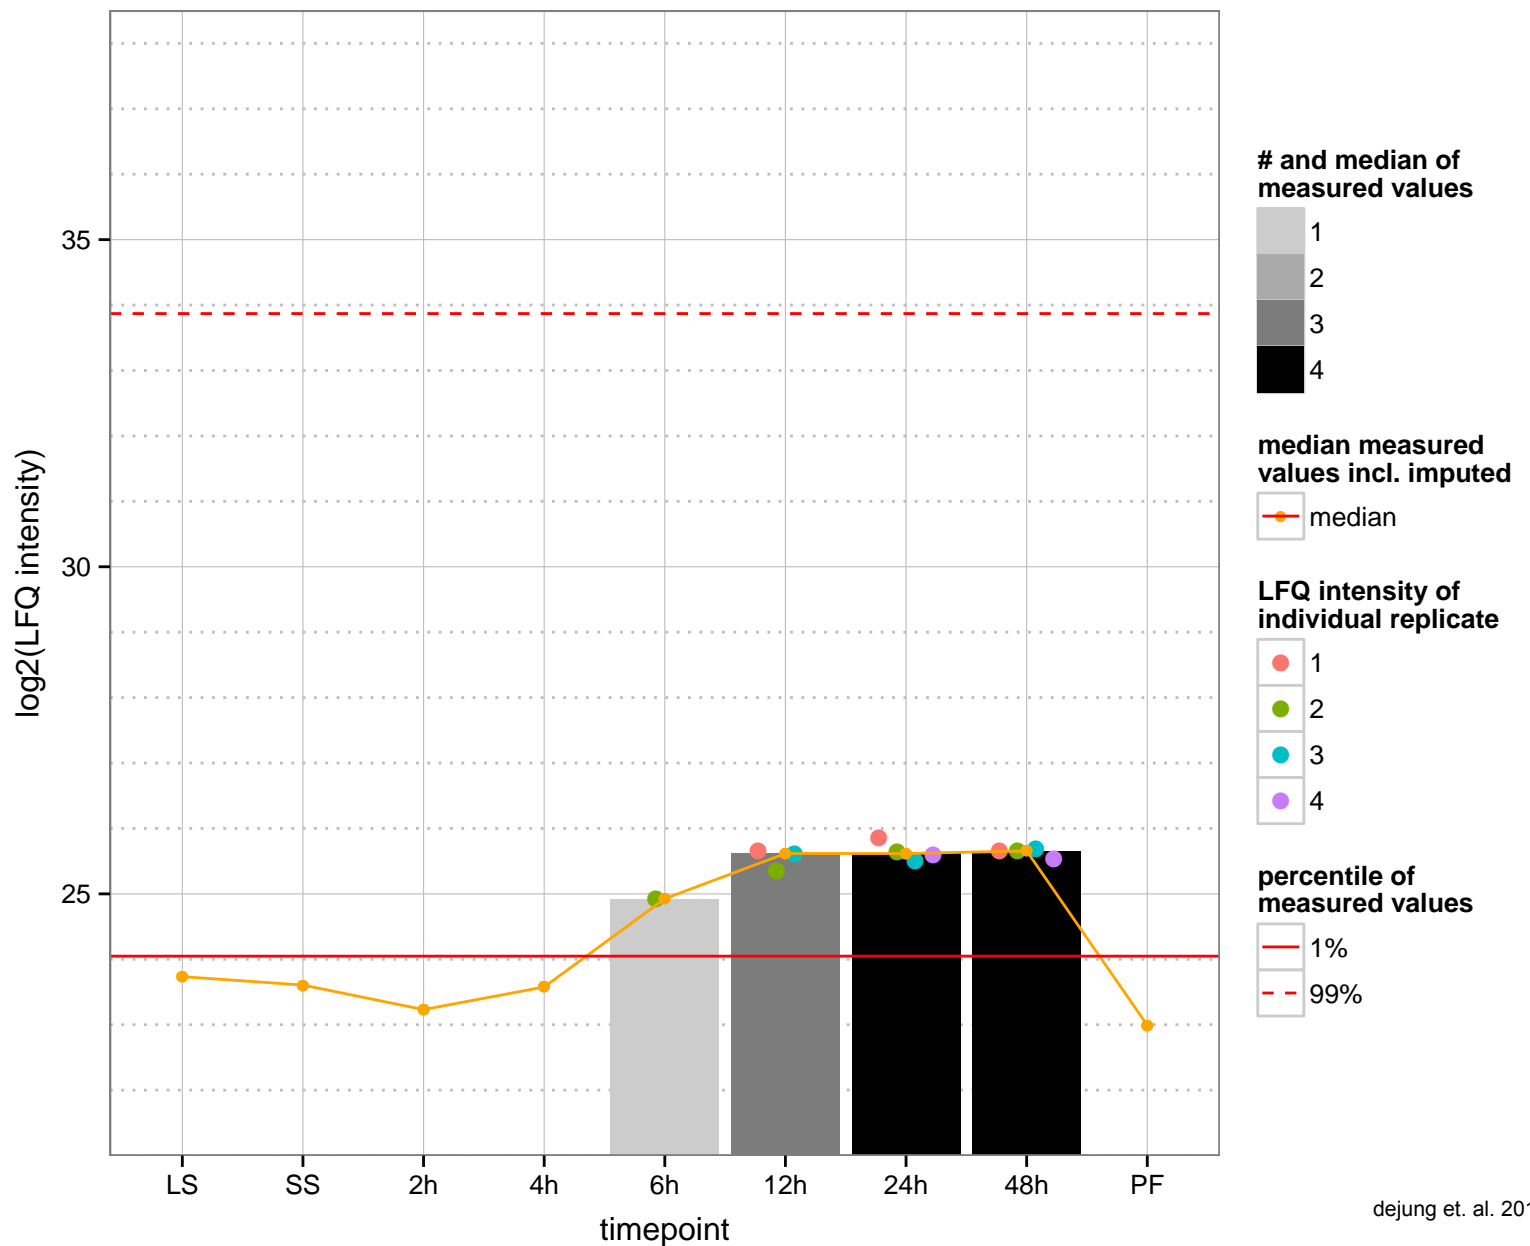

hypothetical protein, conserved  
 Tb927.10.6360  
 AGOF: null  
 AGOC: null  
 AGOP: null  
 PGOF: null  
 PGO: null  
 PGOP: null

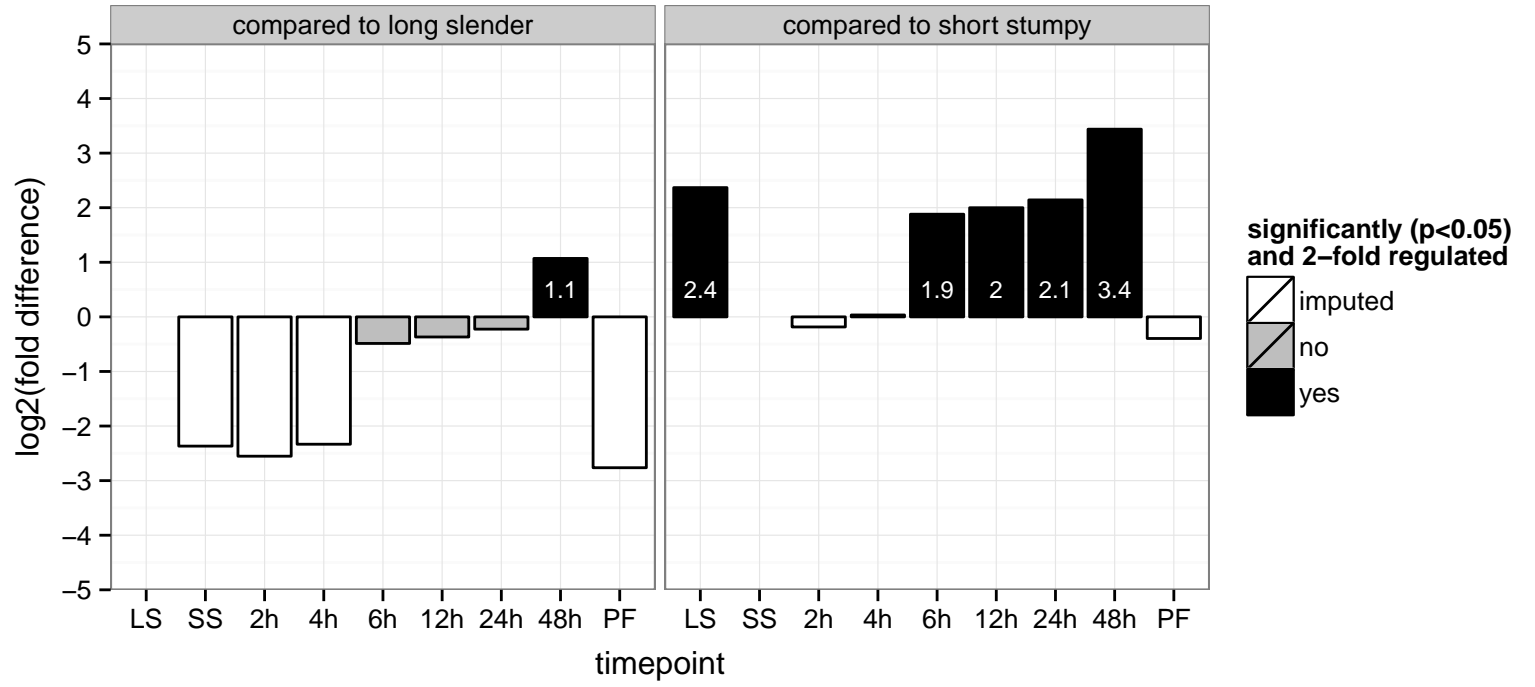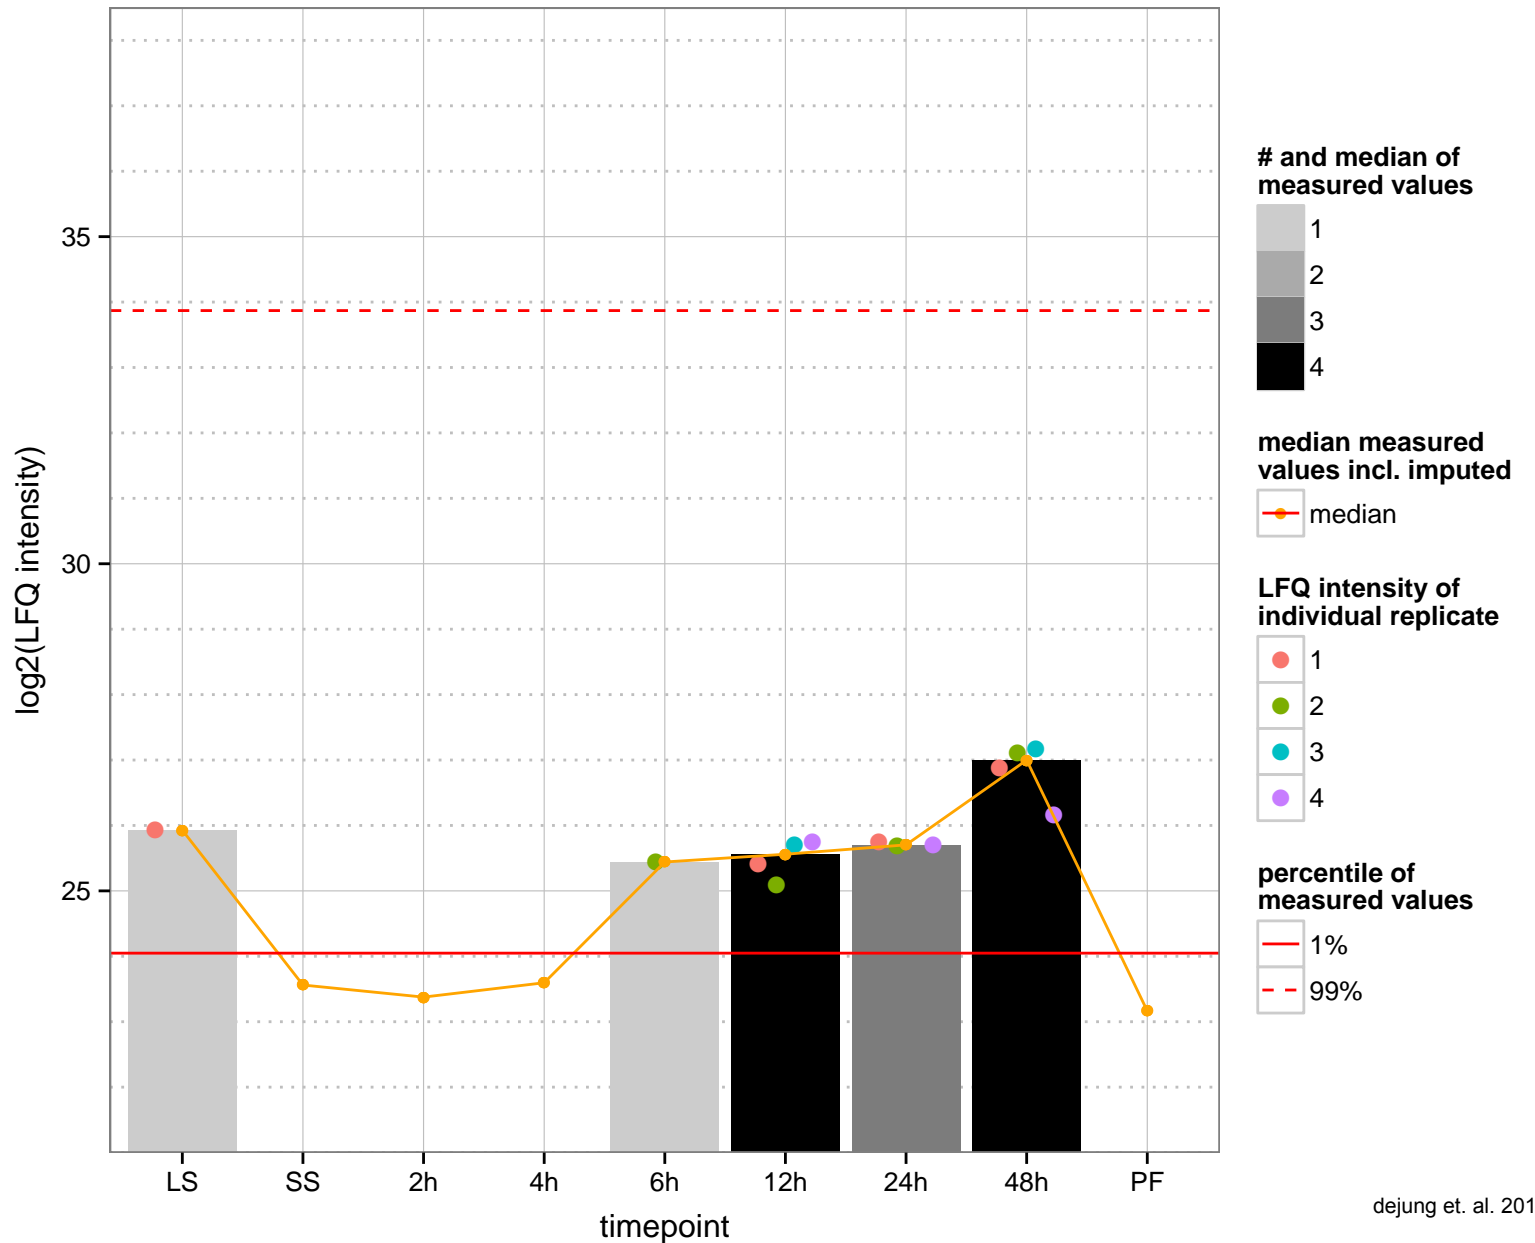

hypothetical protein, conserved  
 Tb927.10.9280;Tb11.v5.0485  
 AGOF: null  
 AGOC: null, mitochondrion  
 AGOP: null  
 PGO: null  
 PGO: null  
 PGO: null

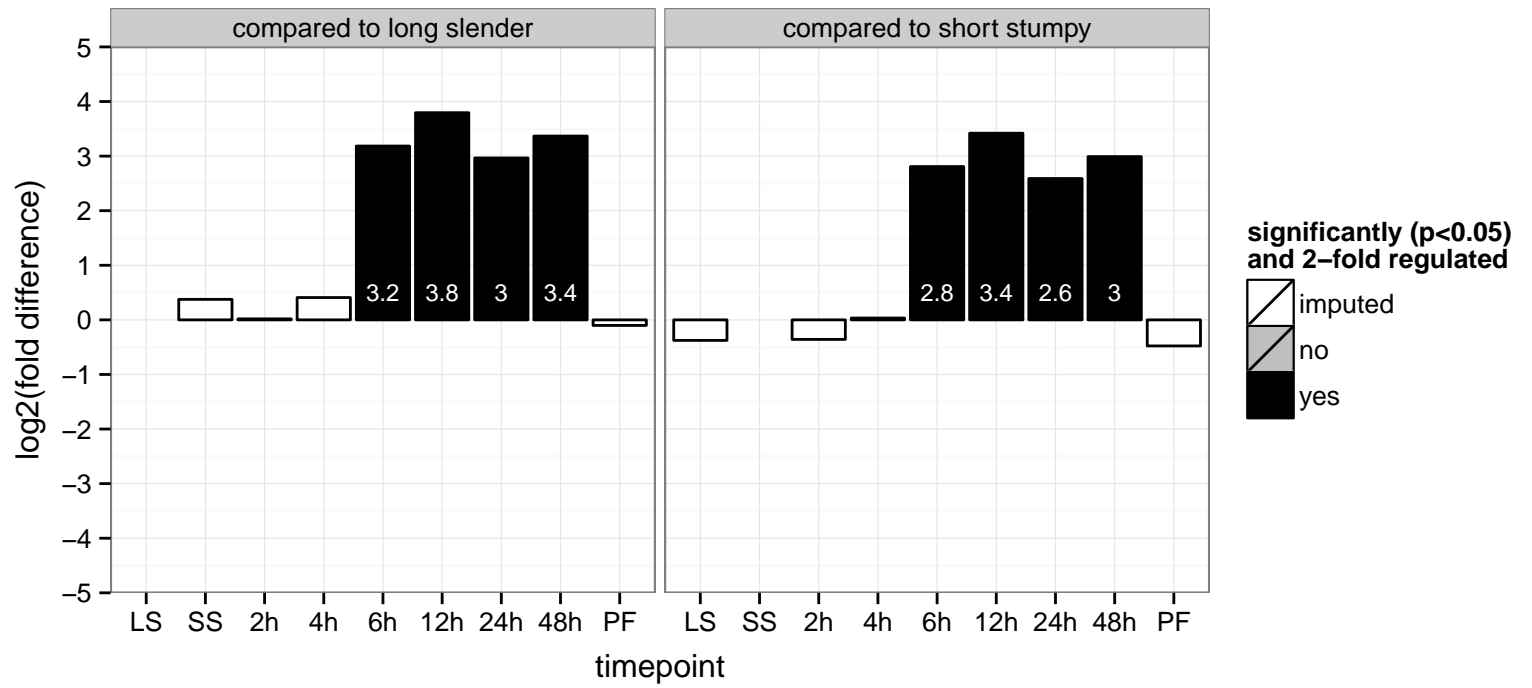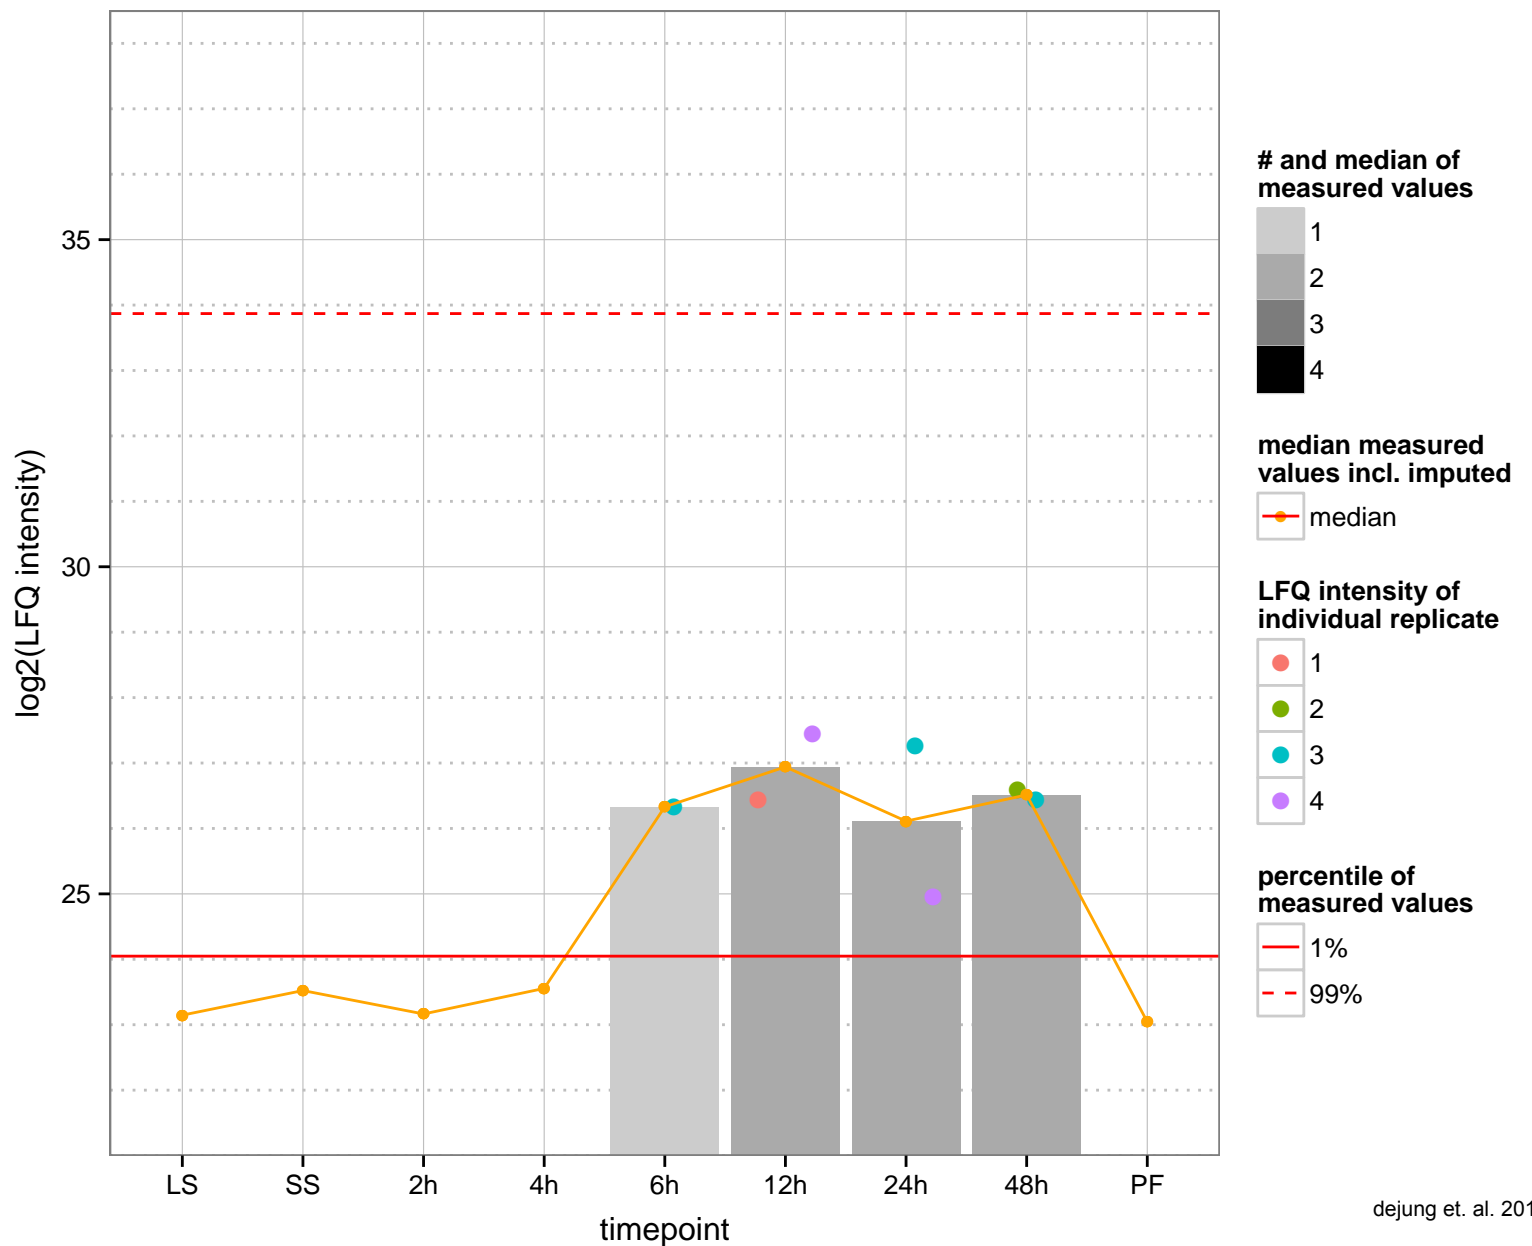

actin-like protein, putative  
 Tb927.11.10110  
 AGOF: structural constituent of cytoskeleton  
 AGOC: actin cytoskeleton  
 AGOP: cytoskeleton organization  
 PGO: null  
 PGOC: null  
 PGOP: null

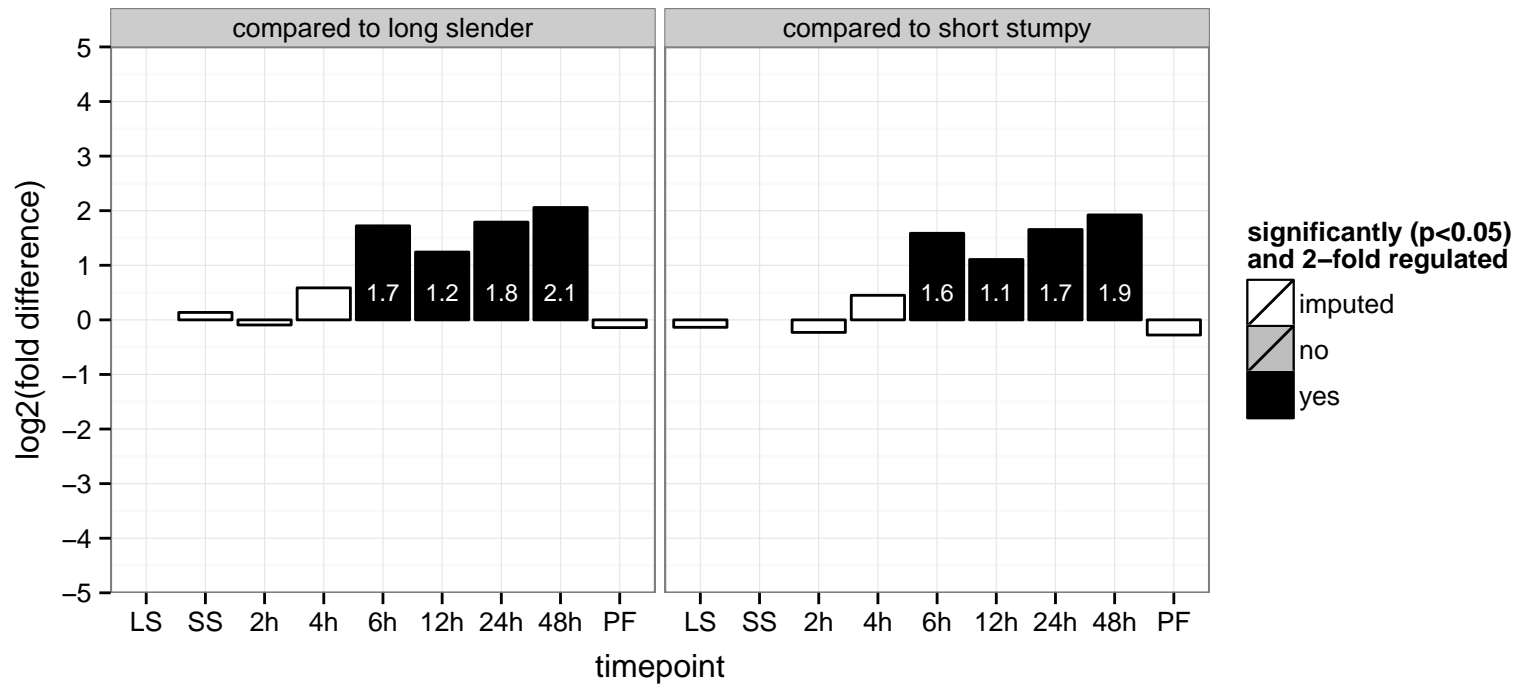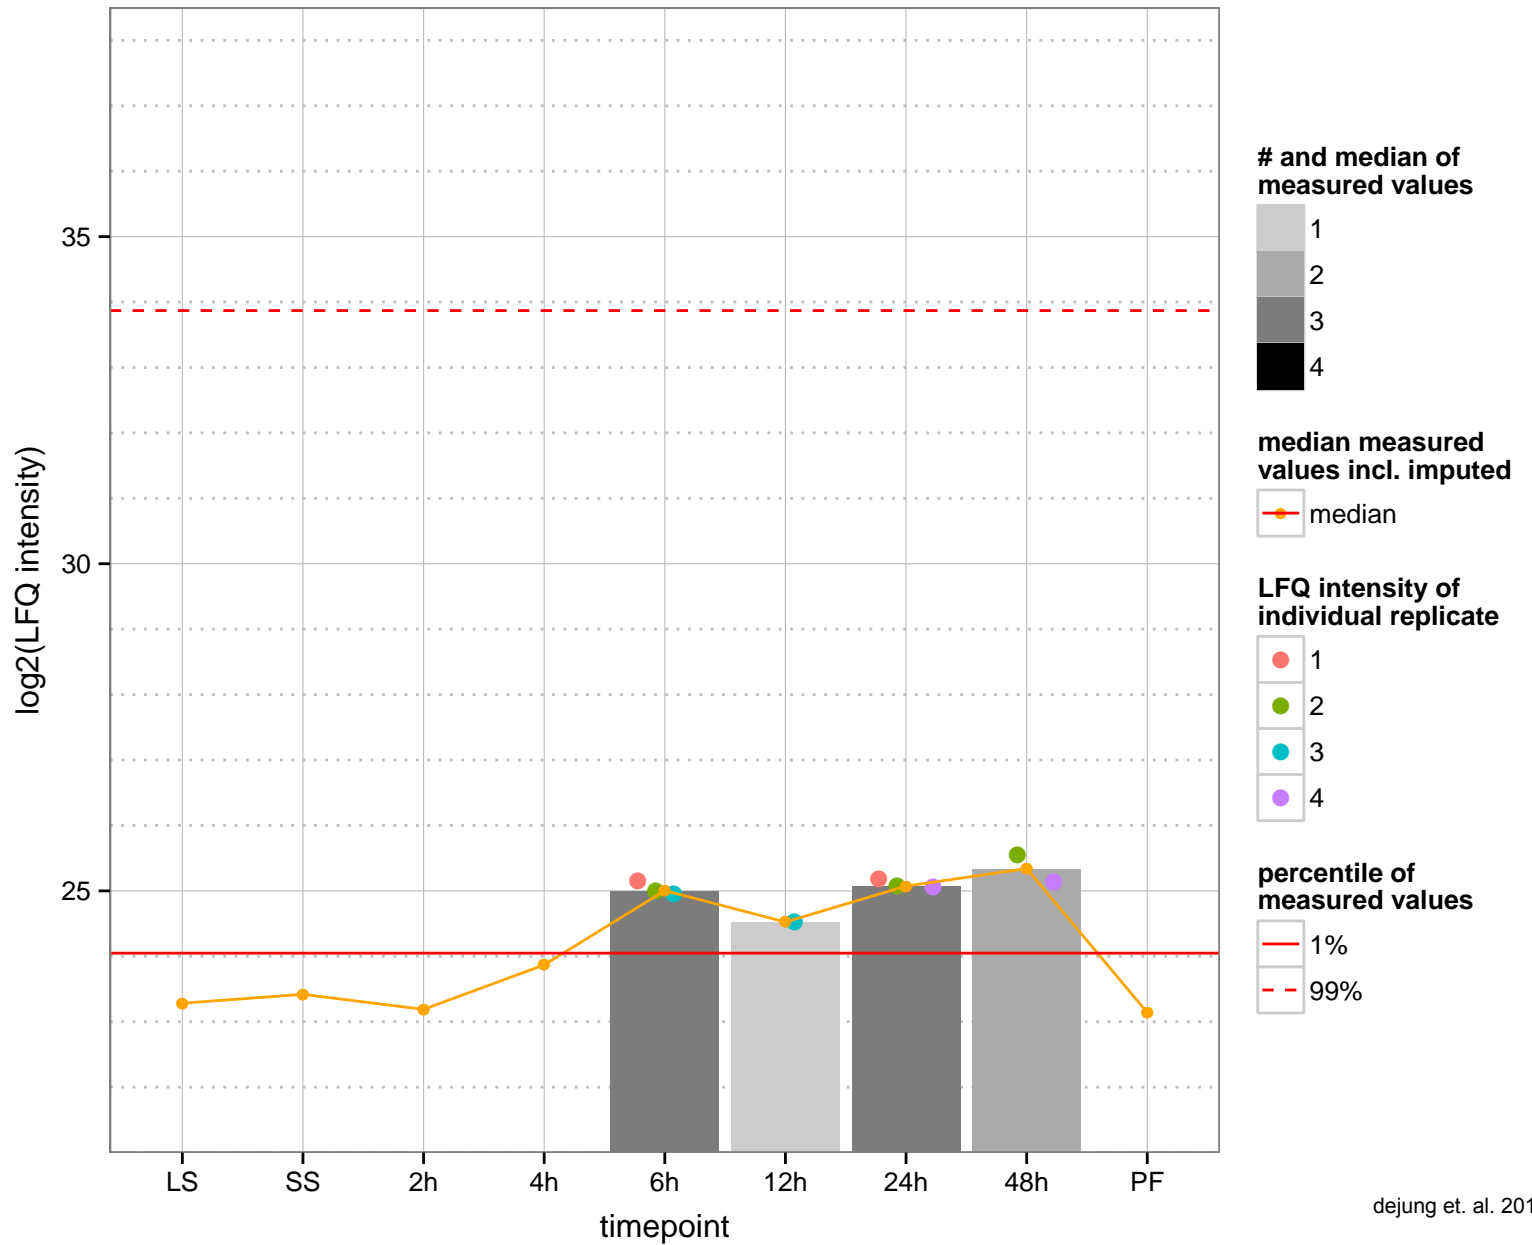

hypothetical protein, conserved  
 Tb927.11.1300  
 AGOF: null  
 AGOC: integral to membrane  
 AGOP: null  
 PGO: protein binding  
 PGOC: null  
 PGOP: null

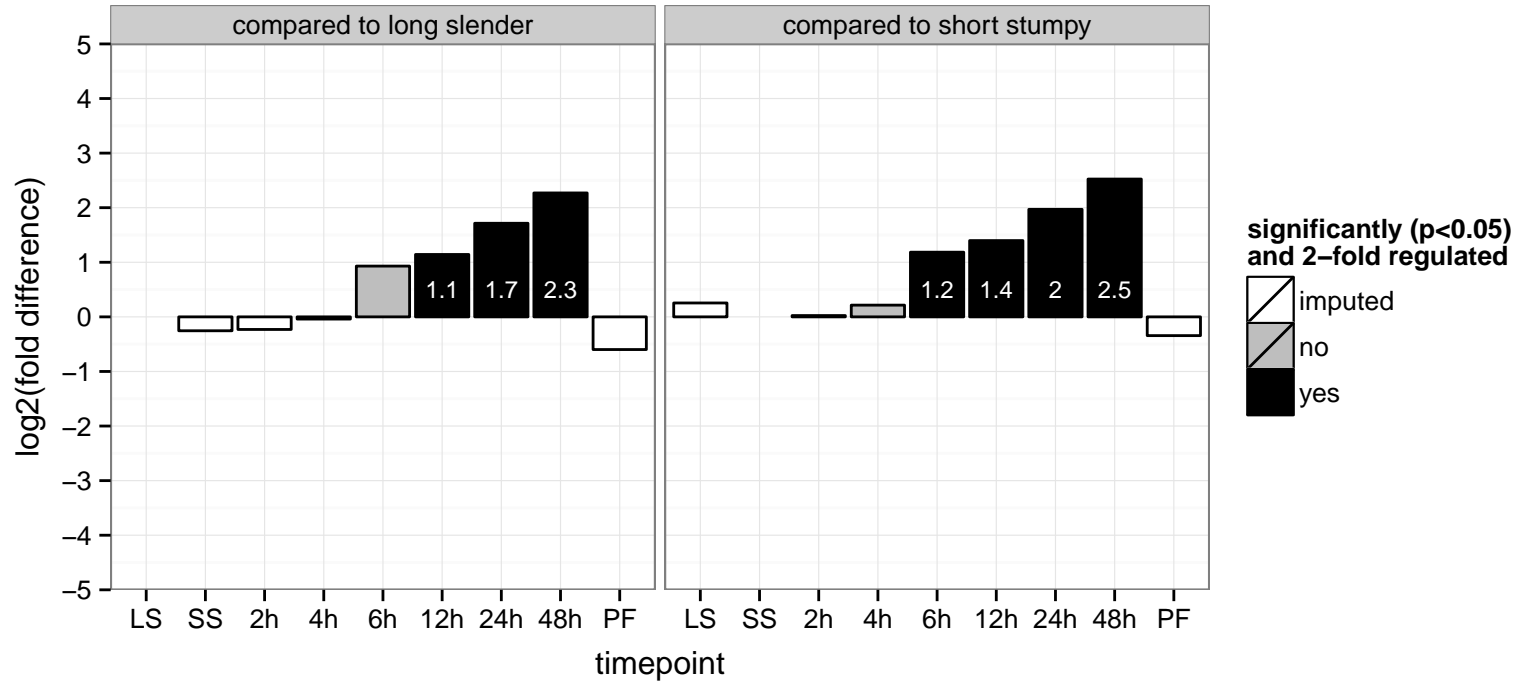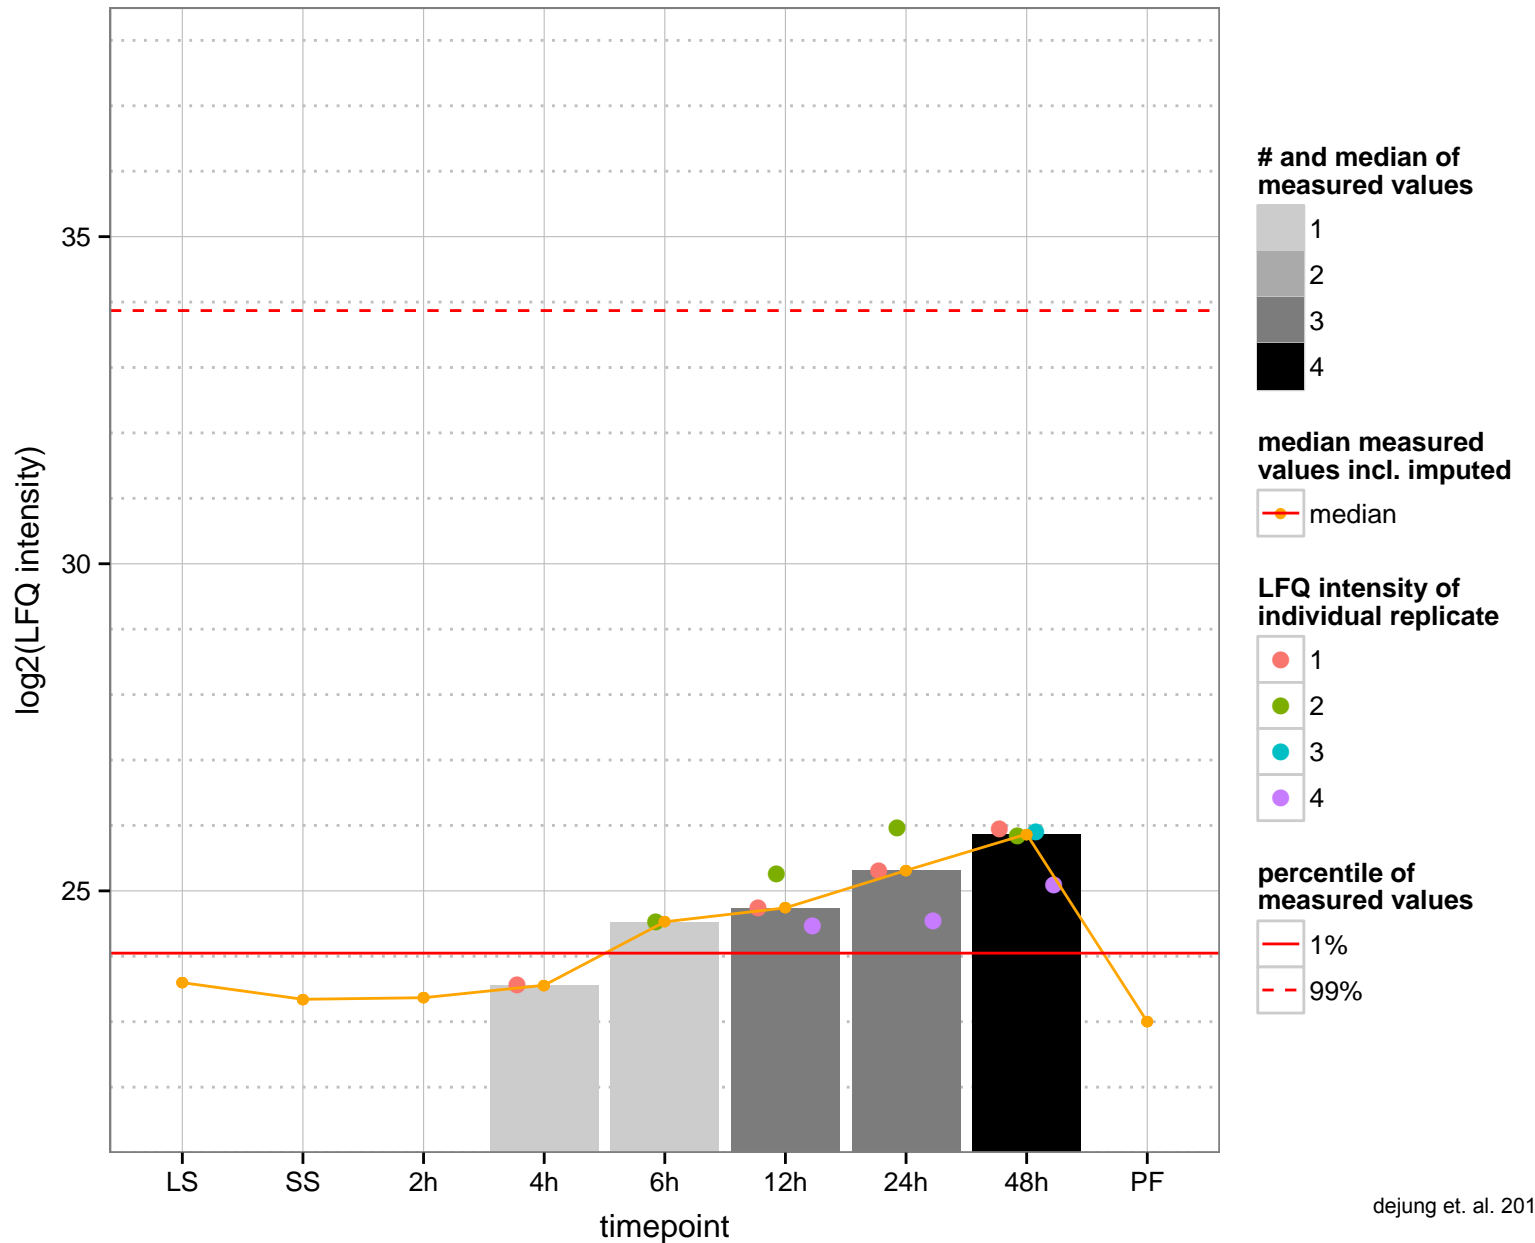

hypothetical protein, conserved  
 Tb927.11.13840  
 AGOF: null  
 AGOC: mitochondrion  
 AGOP: null  
 PGO: null  
 PGO: null  
 PGO: null

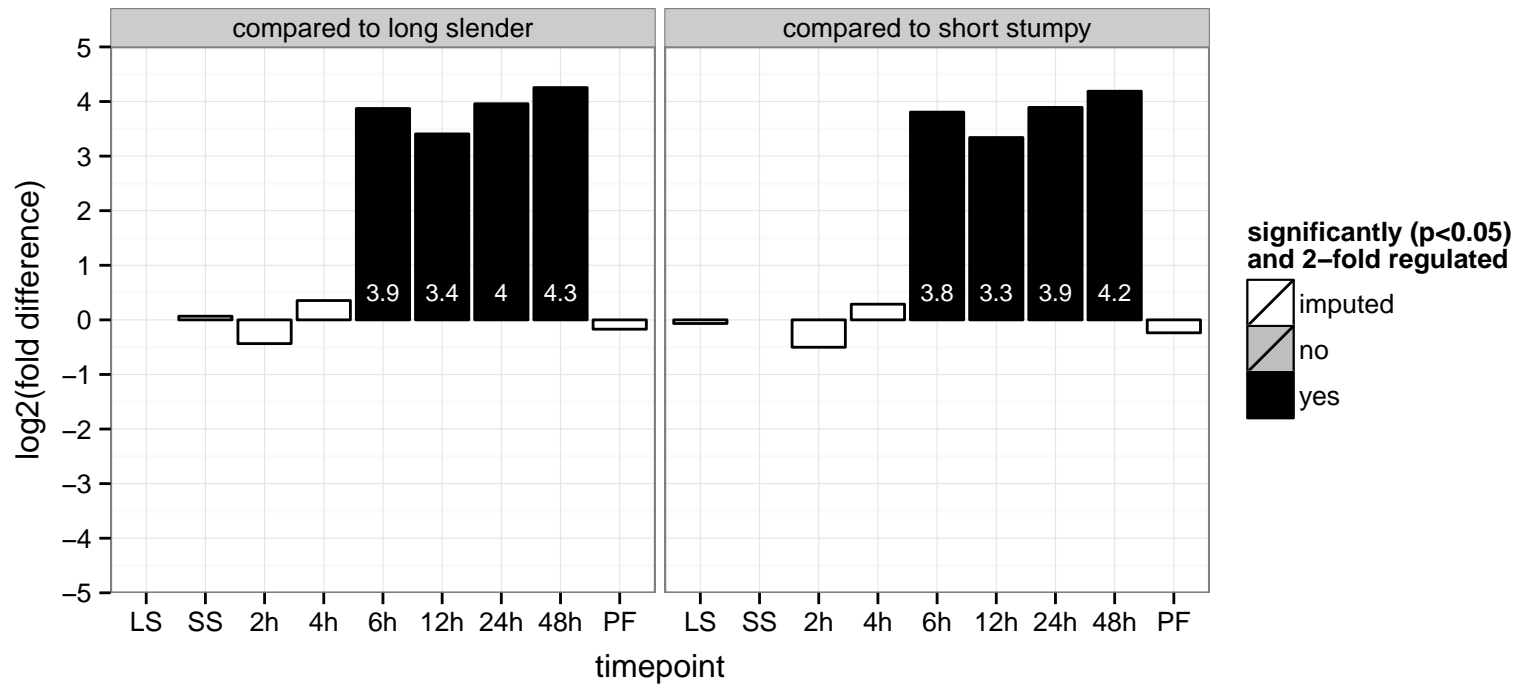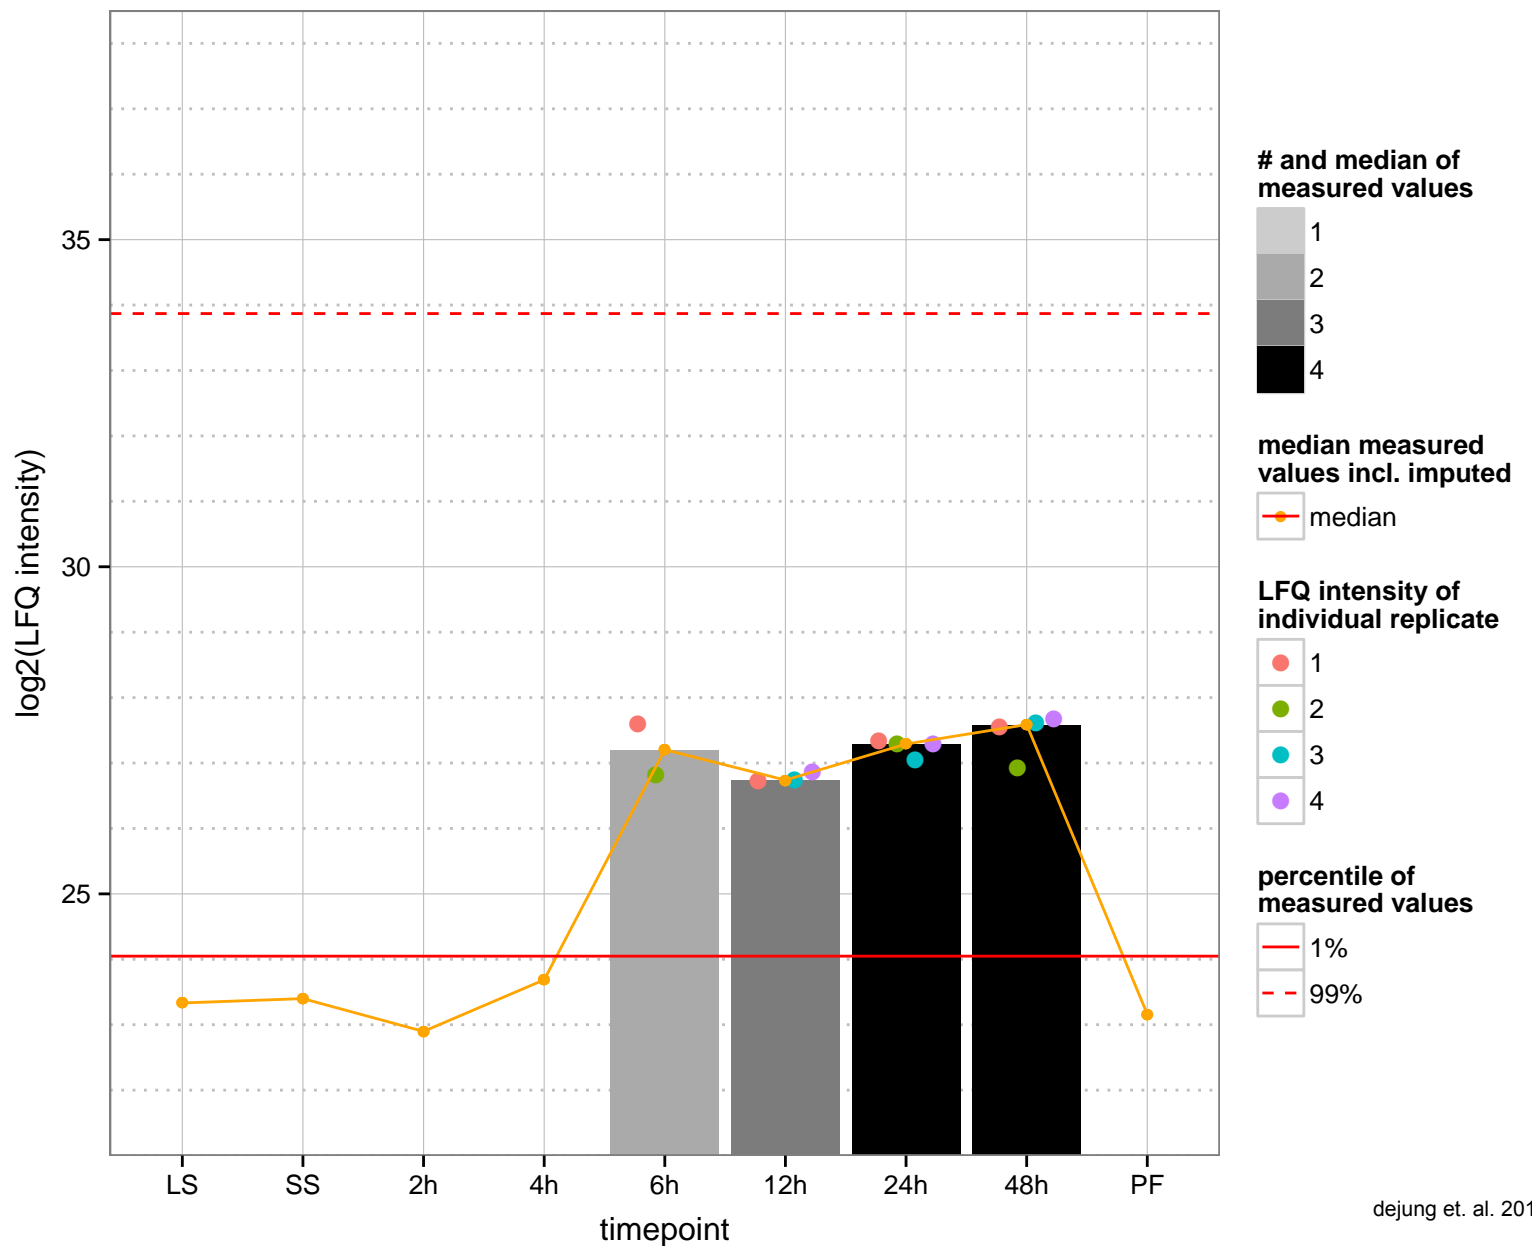



hypothetical protein, conserved  
 Tb927.11.15440  
 AGOF: null  
 AGOC: mitochondrion  
 AGOP: null  
 PGO: null  
 PGO: null  
 PGO: null

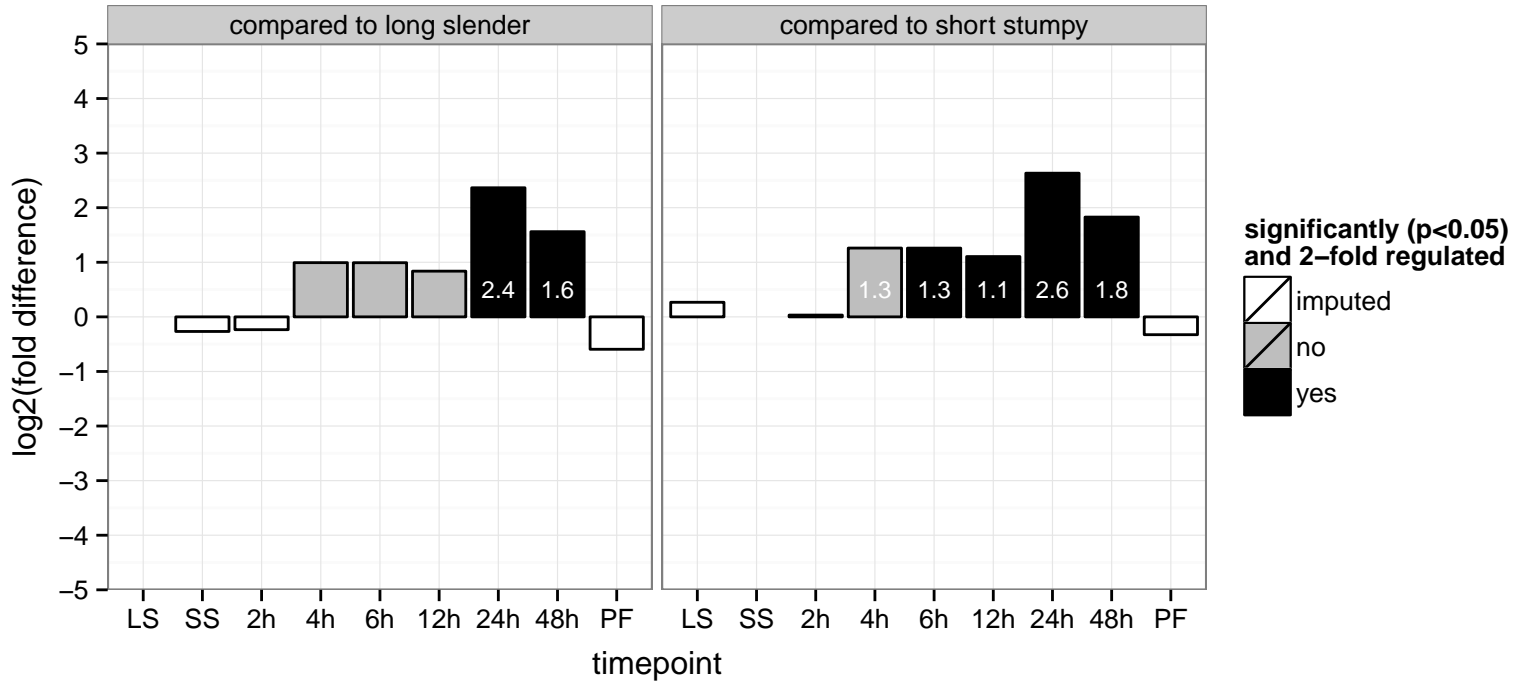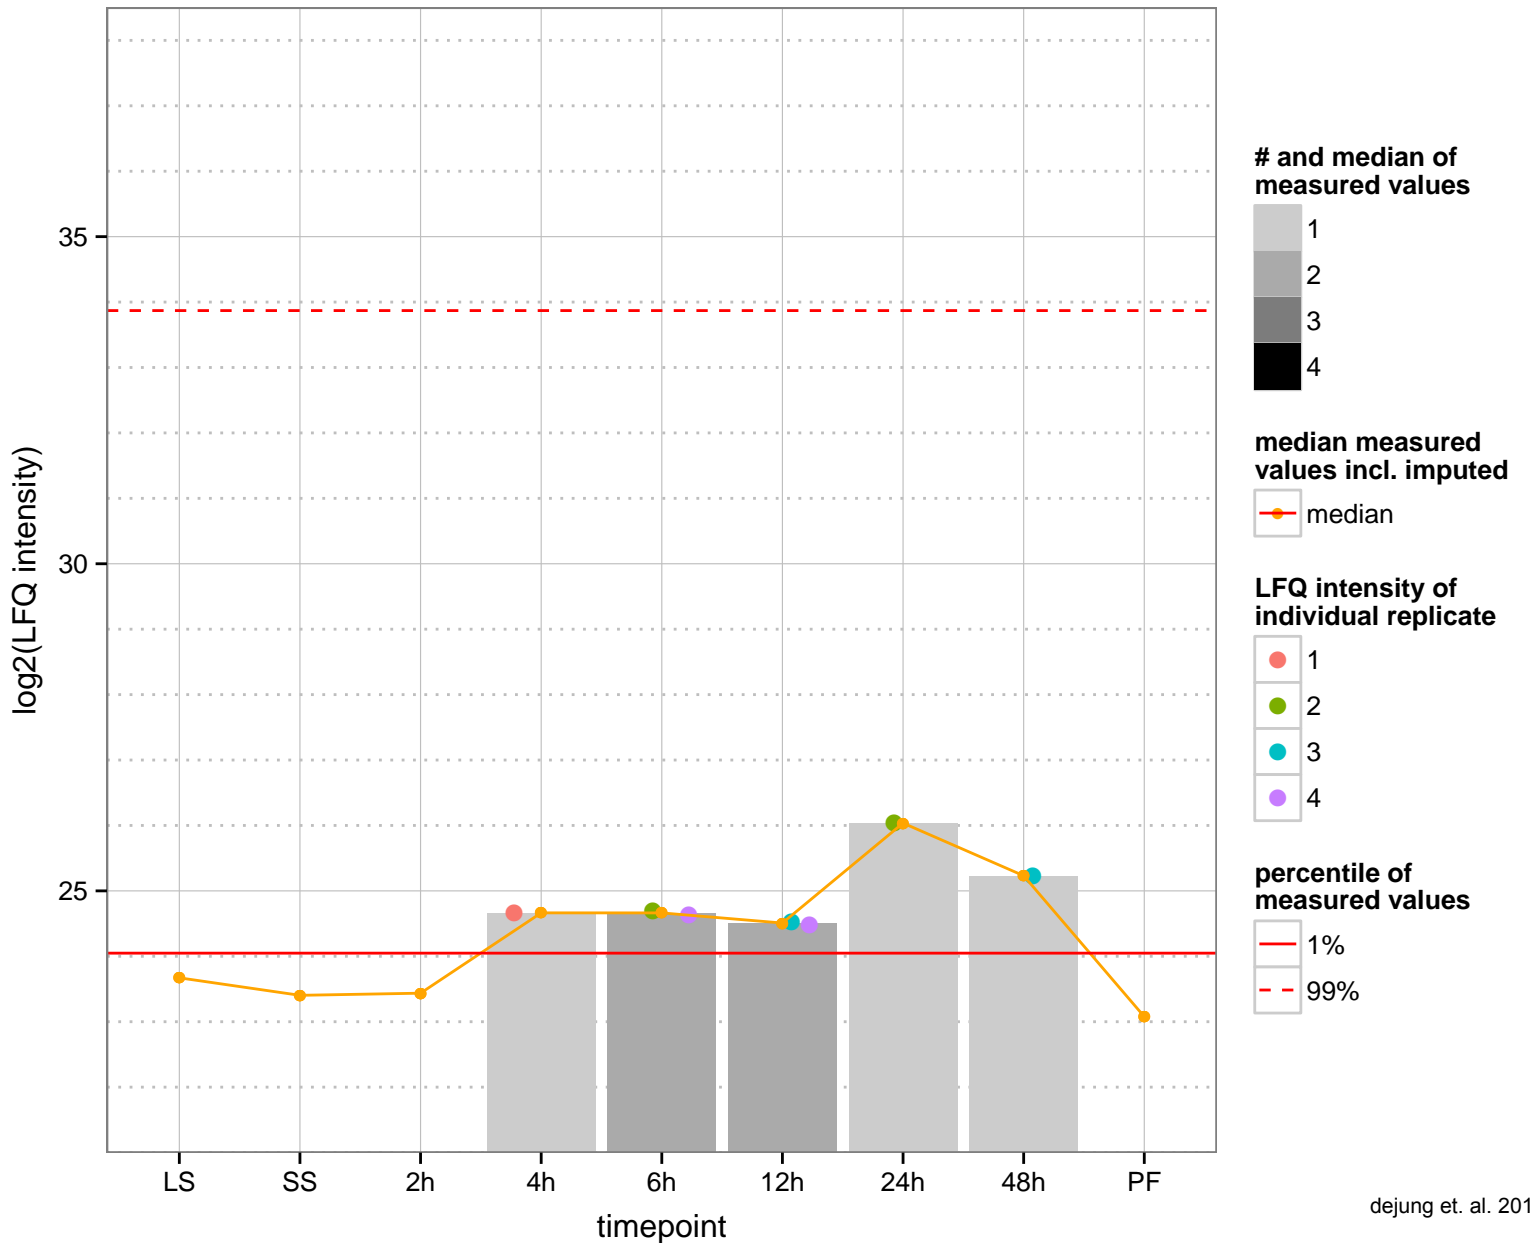

hypothetical protein, conserved  
 Tb927.11.15580  
 AGOF: null  
 AGOC: null  
 AGOP: null  
 PGOF: null  
 PGO: null  
 PGOP: null

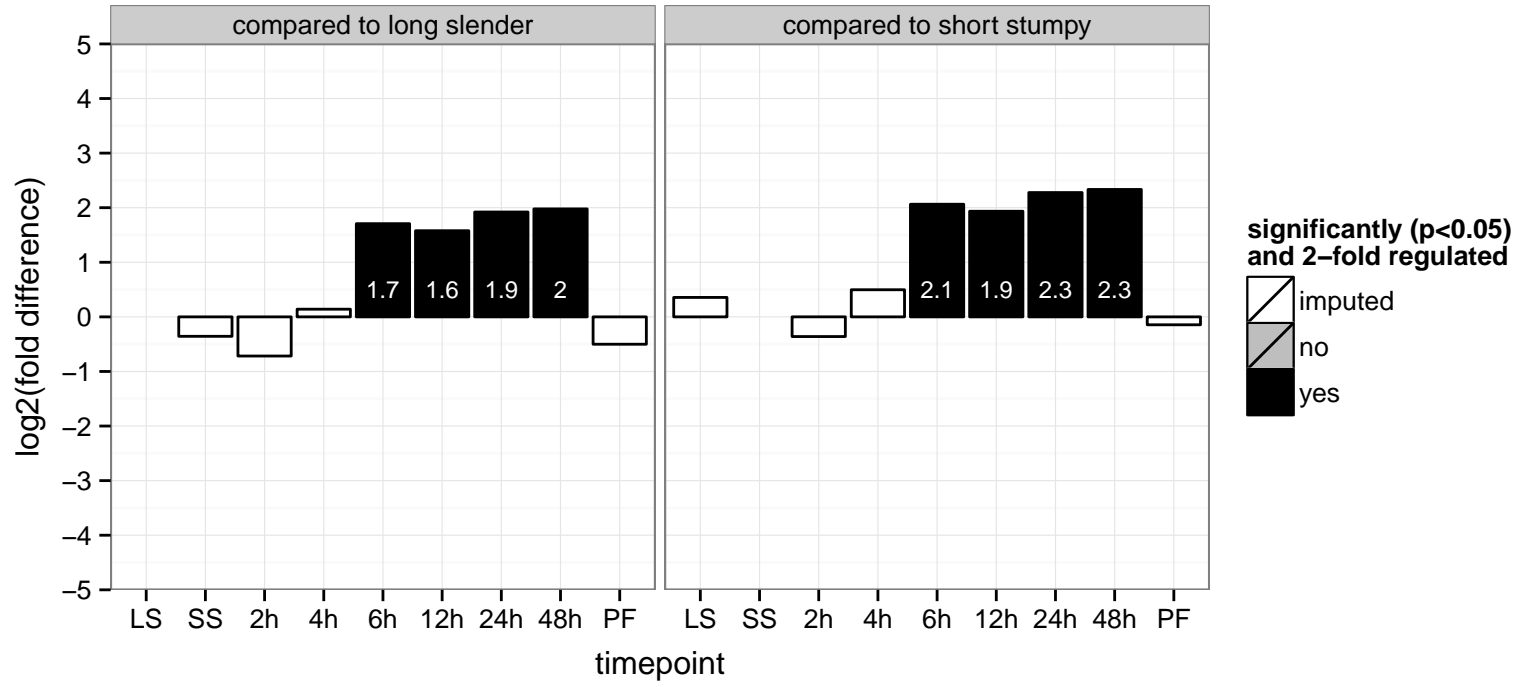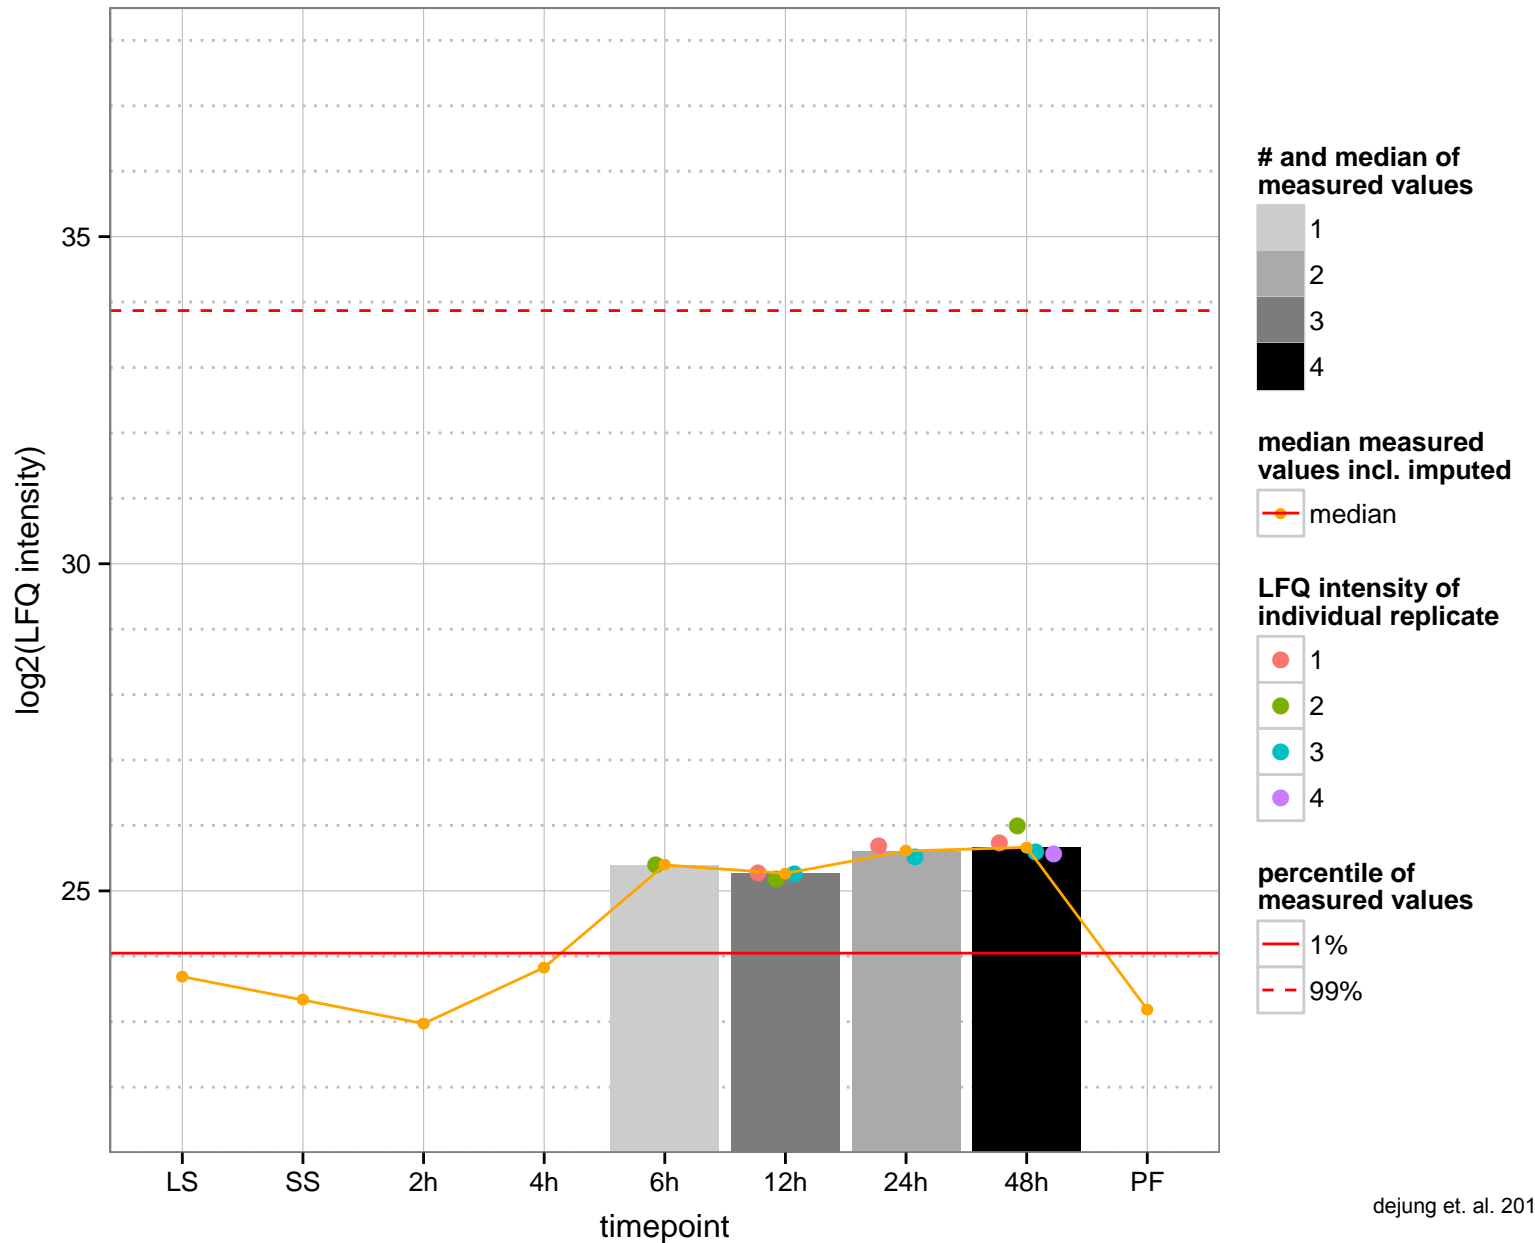

hypothetical protein, conserved  
 Tb927.11.17020  
 AGOF: null  
 AGOC: null  
 AGOP: null  
 PGOF: null  
 PGO C: null  
 PGOP: null

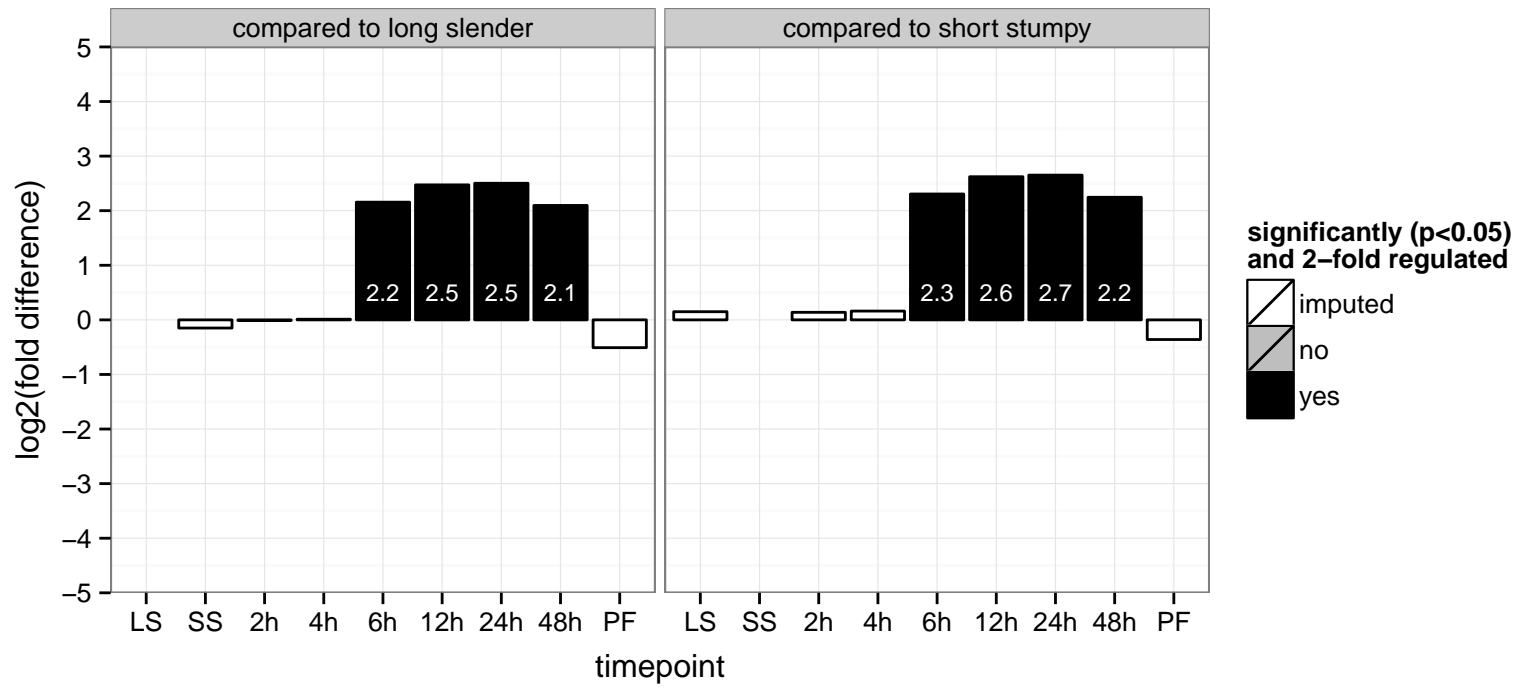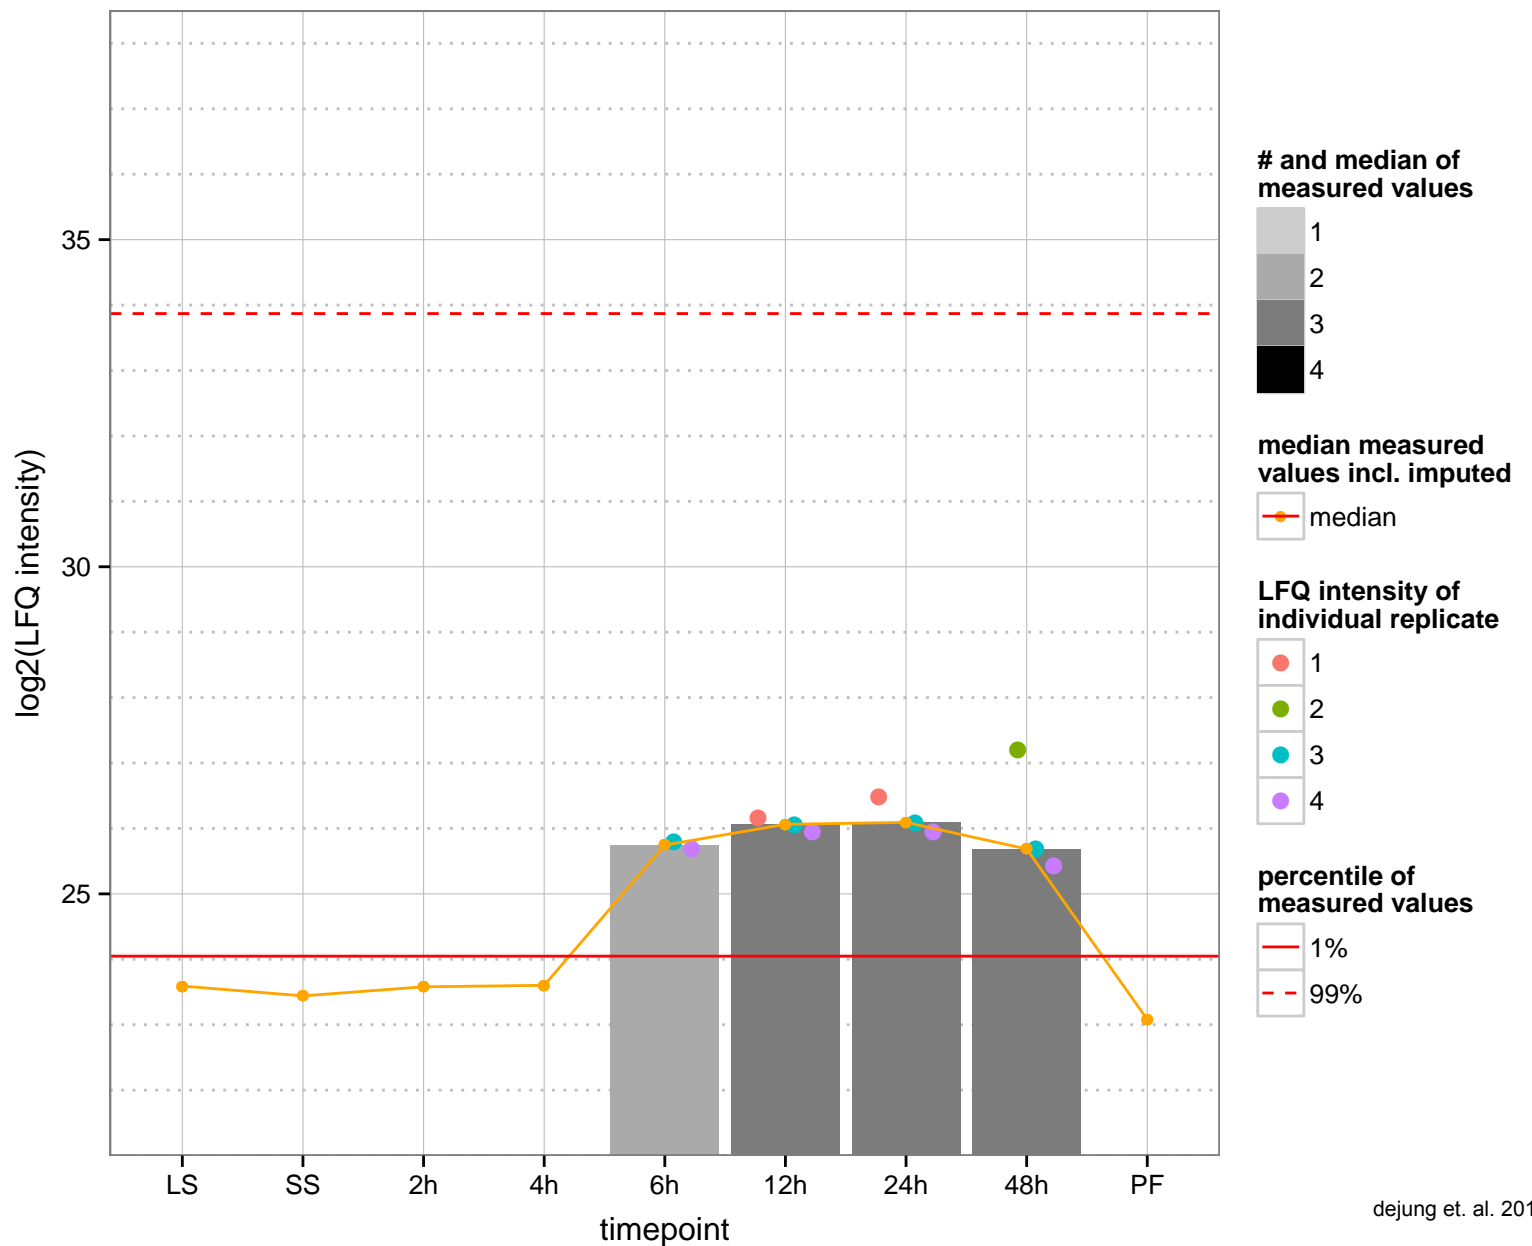

hypothetical protein, conserved  
 Tb927.11.1770  
 AGOF: null  
 AGOC: null  
 AGOP: null  
 PGO: null  
 PGOC: null  
 PGOP: null

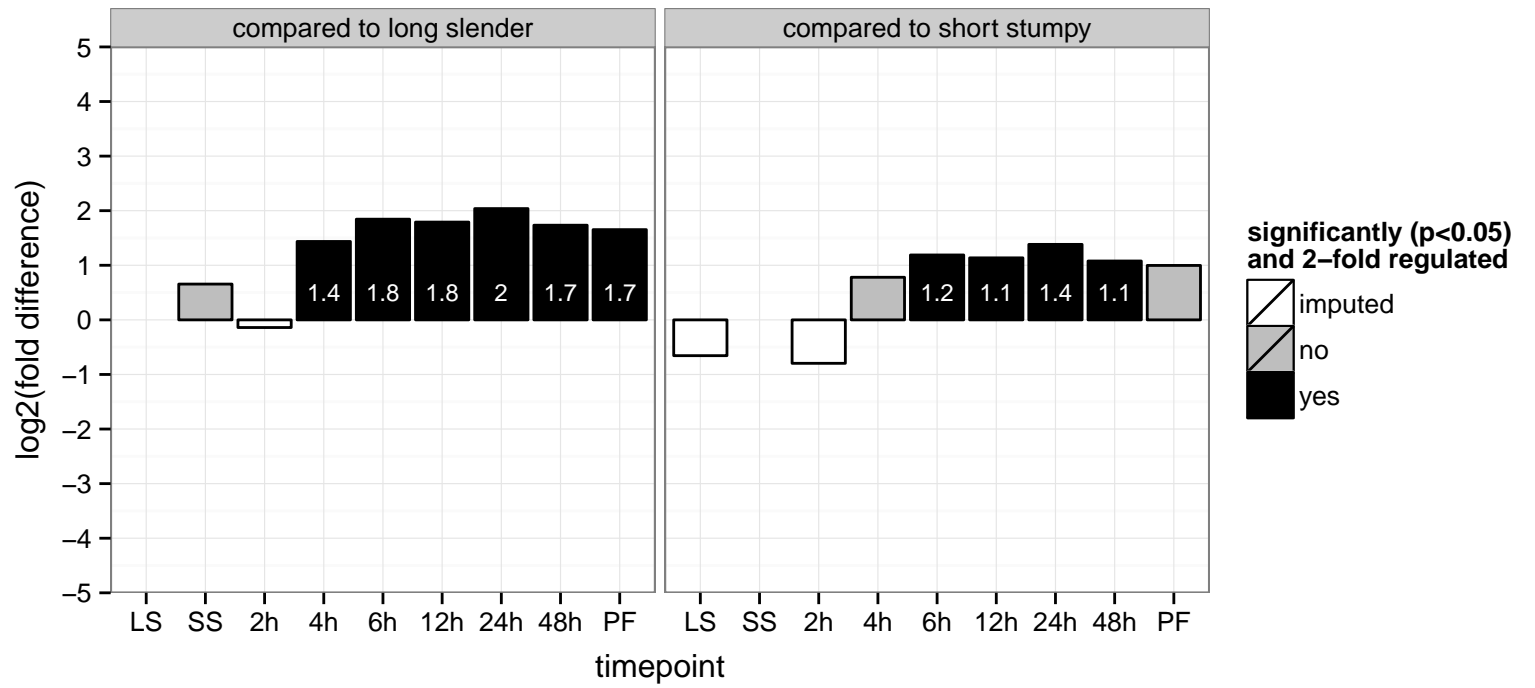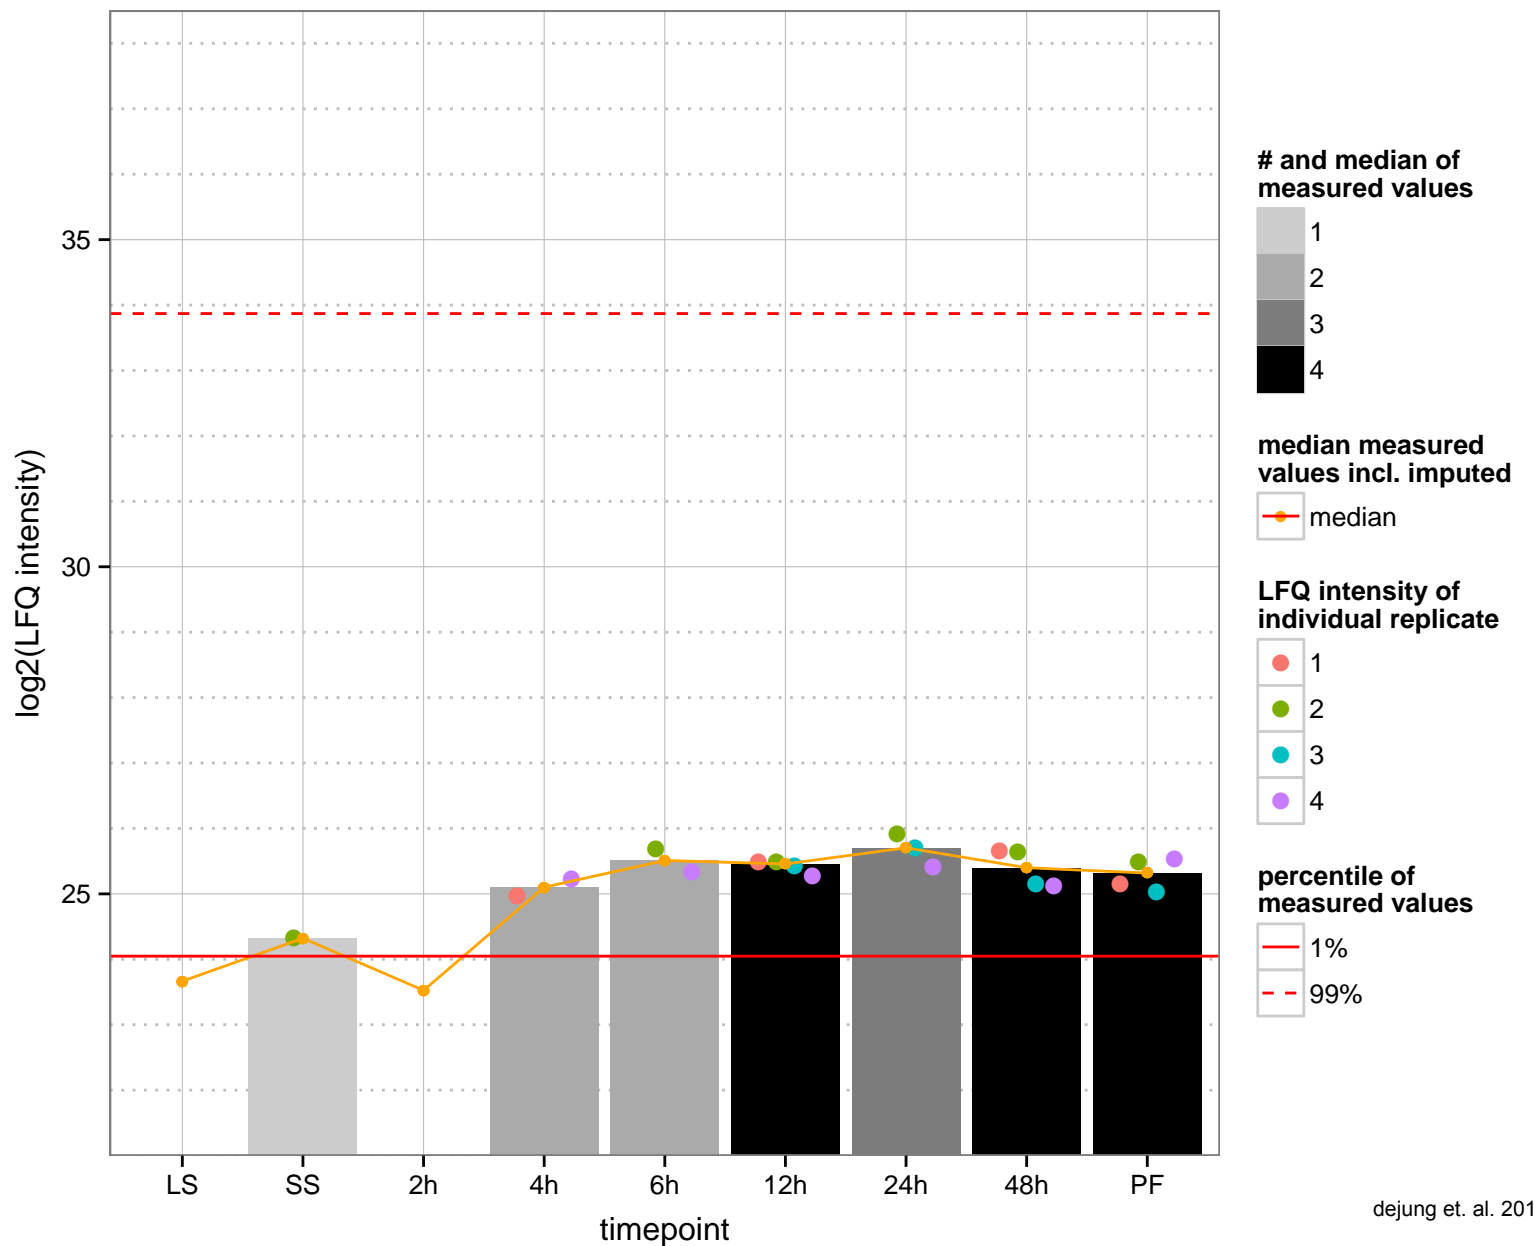

hypothetical protein, conserved  
 Tb927.11.2070  
 AGOF: null  
 AGOC: null  
 AGOP: null  
 PGOF: null  
 PGO C: null  
 PGOP: null

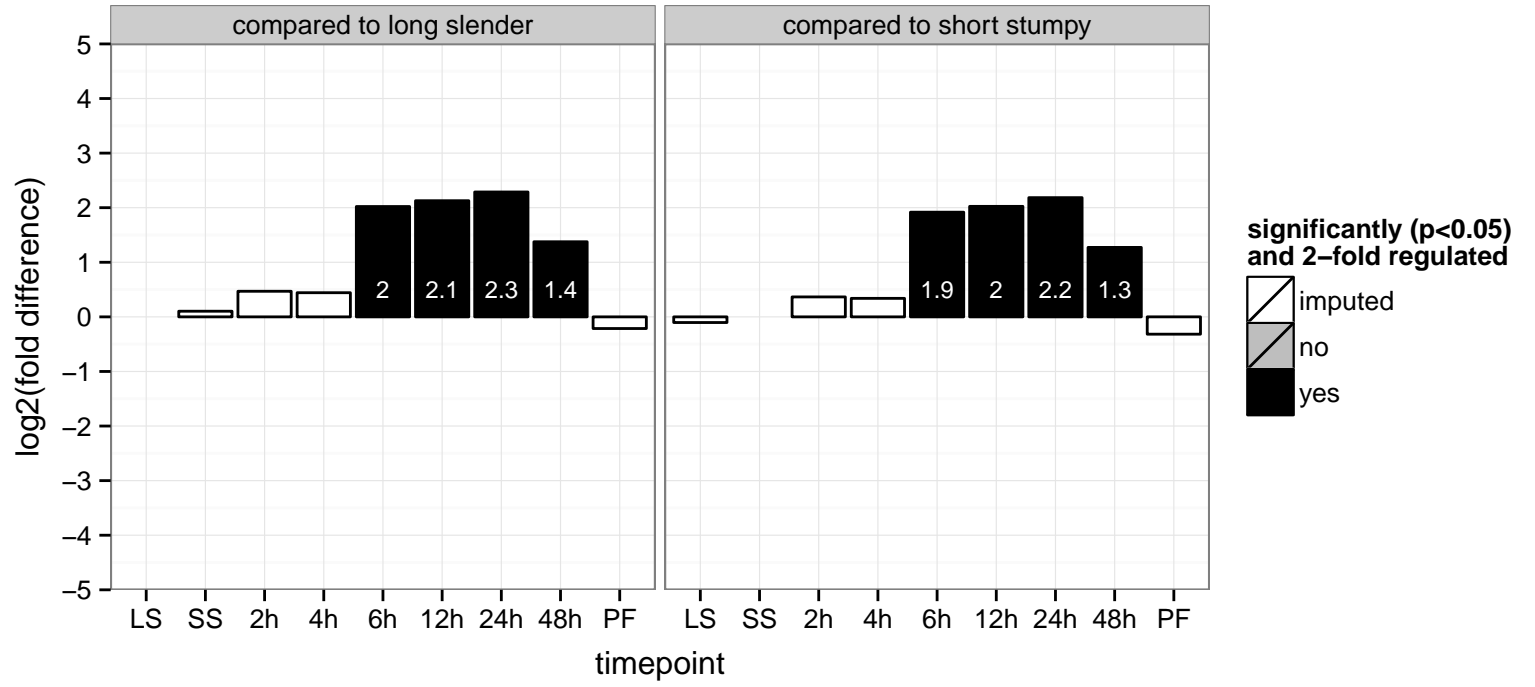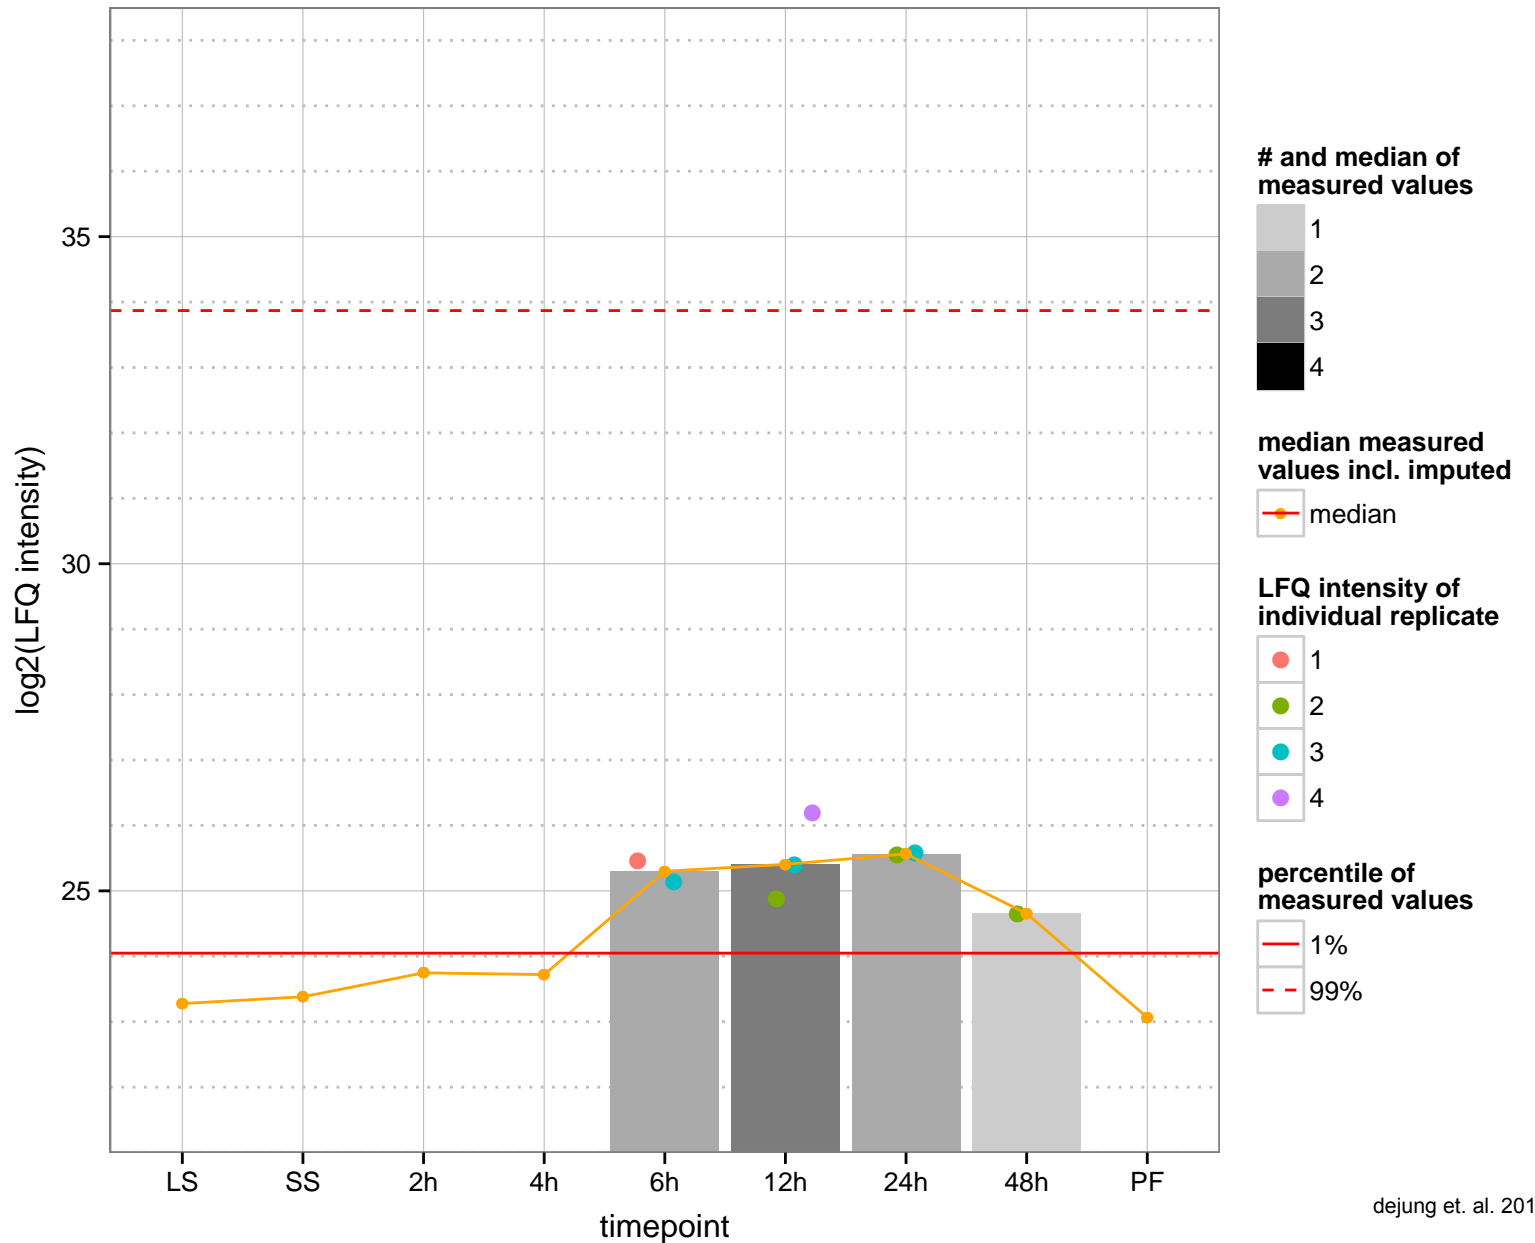

hypothetical protein, conserved  
 Tb927.11.2150  
 AGOF: null  
 AGOC: null  
 AGOP: null  
 PGOF: null  
 PGO C: null  
 PGOP: null

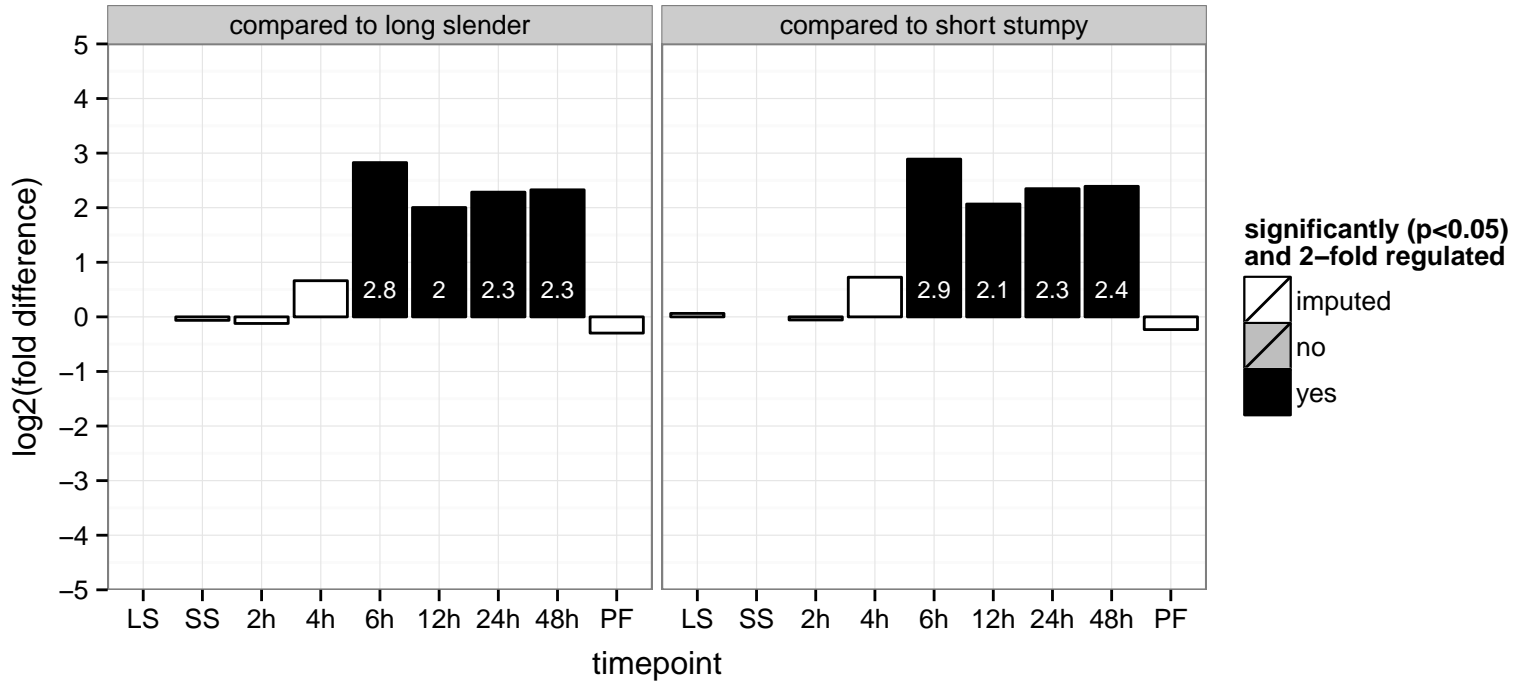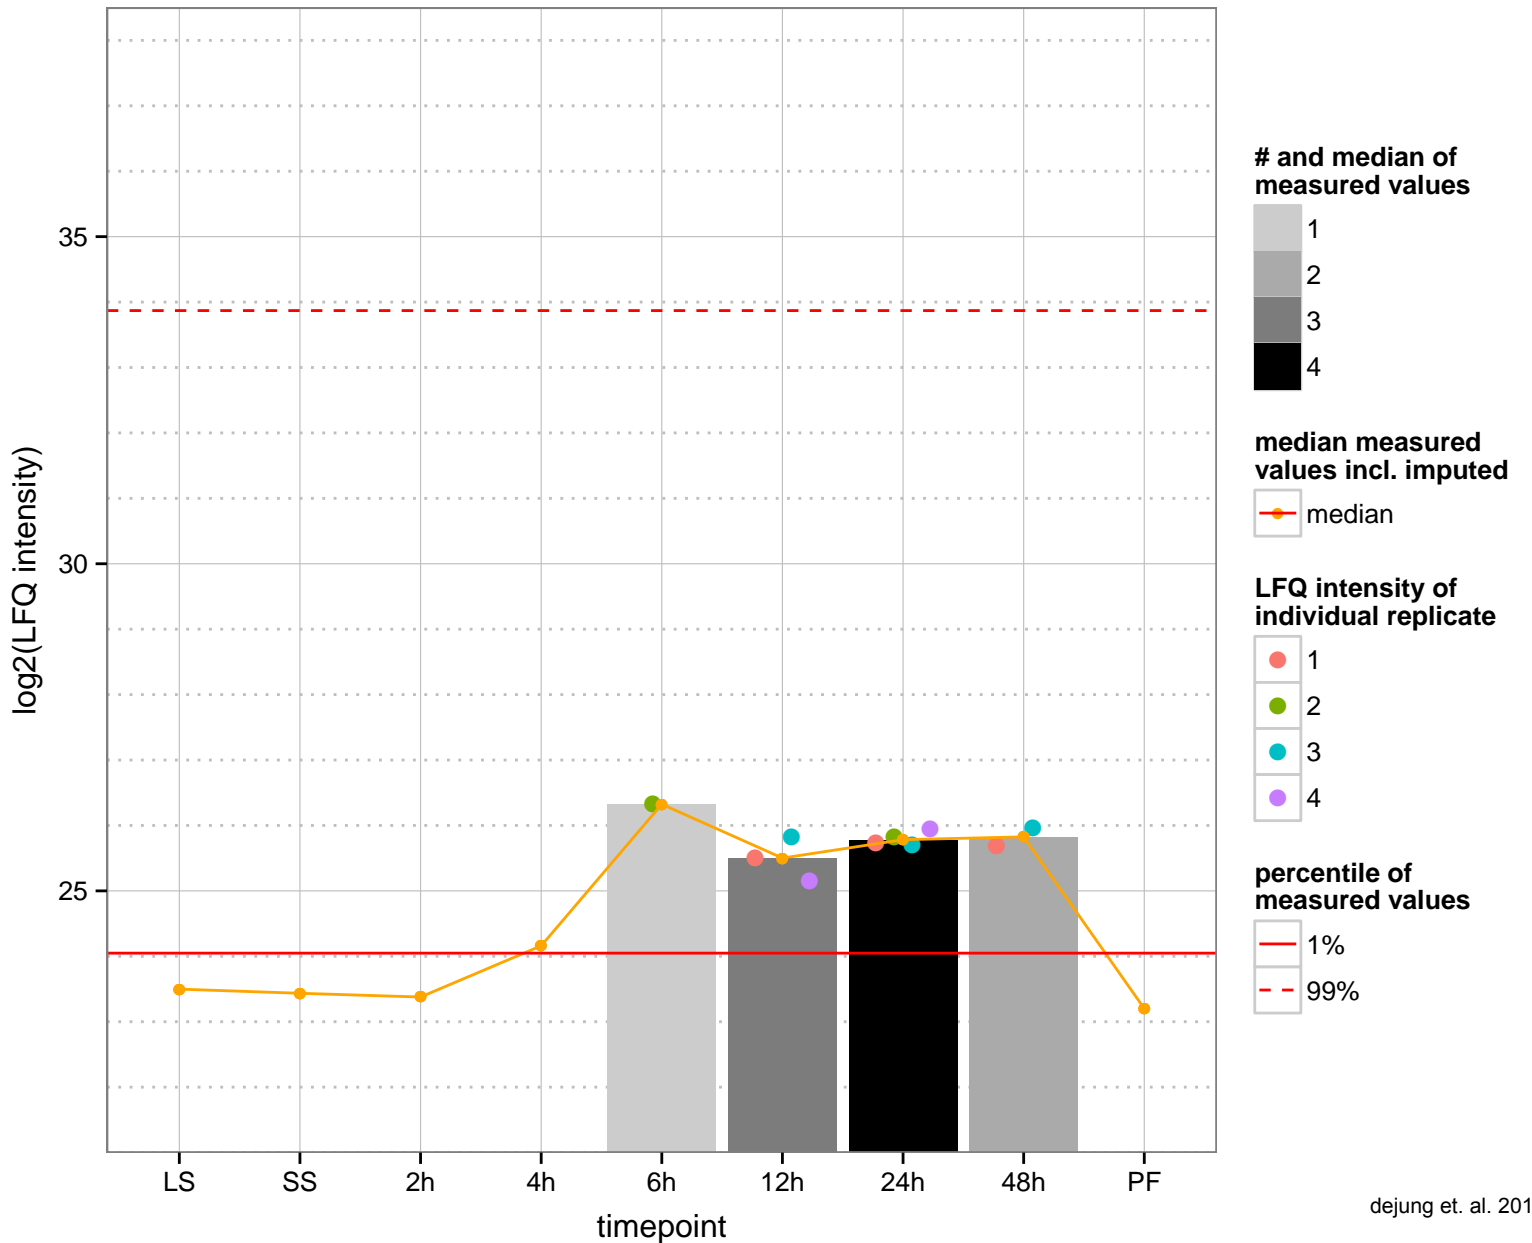

molybdopterin synthase sulphurylase protein, putative  
 Tb927.11.2330  
 AGOF: catalytic activity  
 AGOC: integral to membrane  
 AGOP: null  
 PGO: catalytic activity  
 PGOC: null  
 PGOP: null

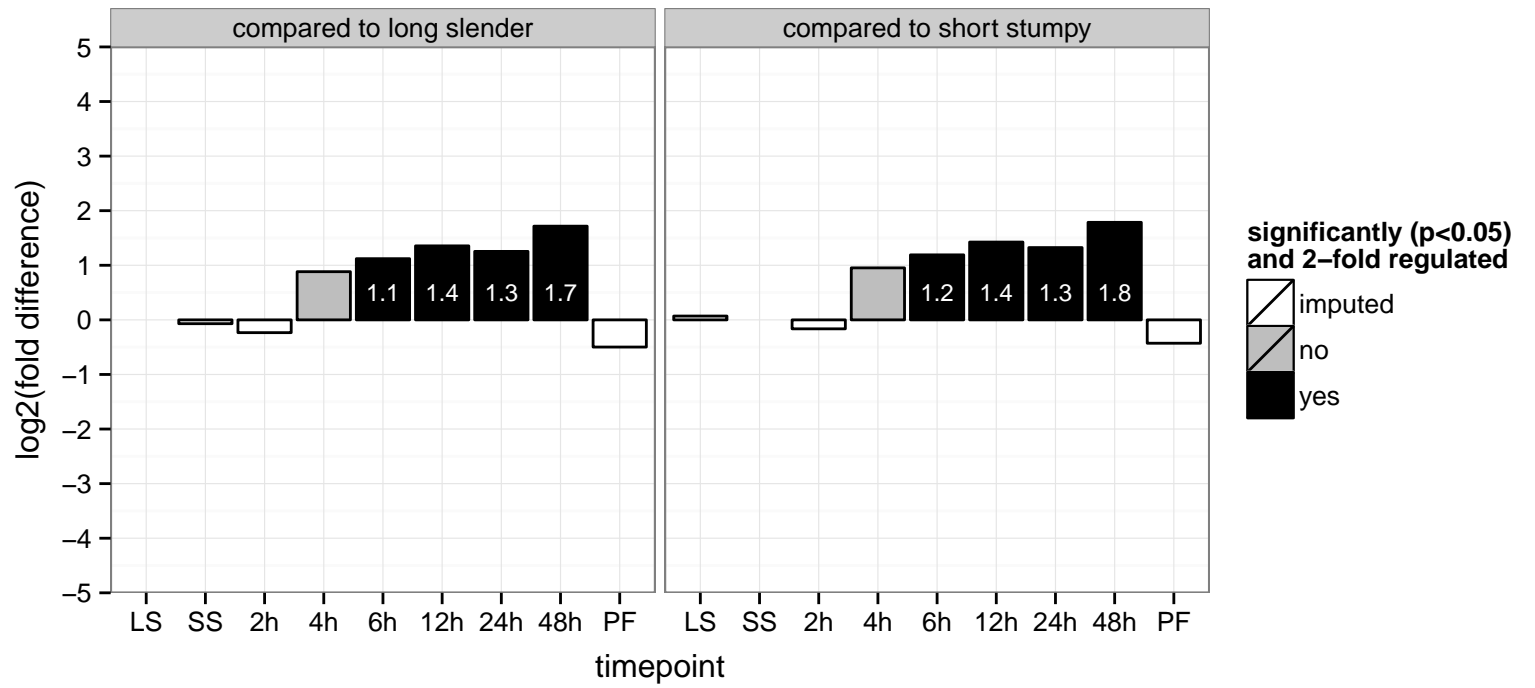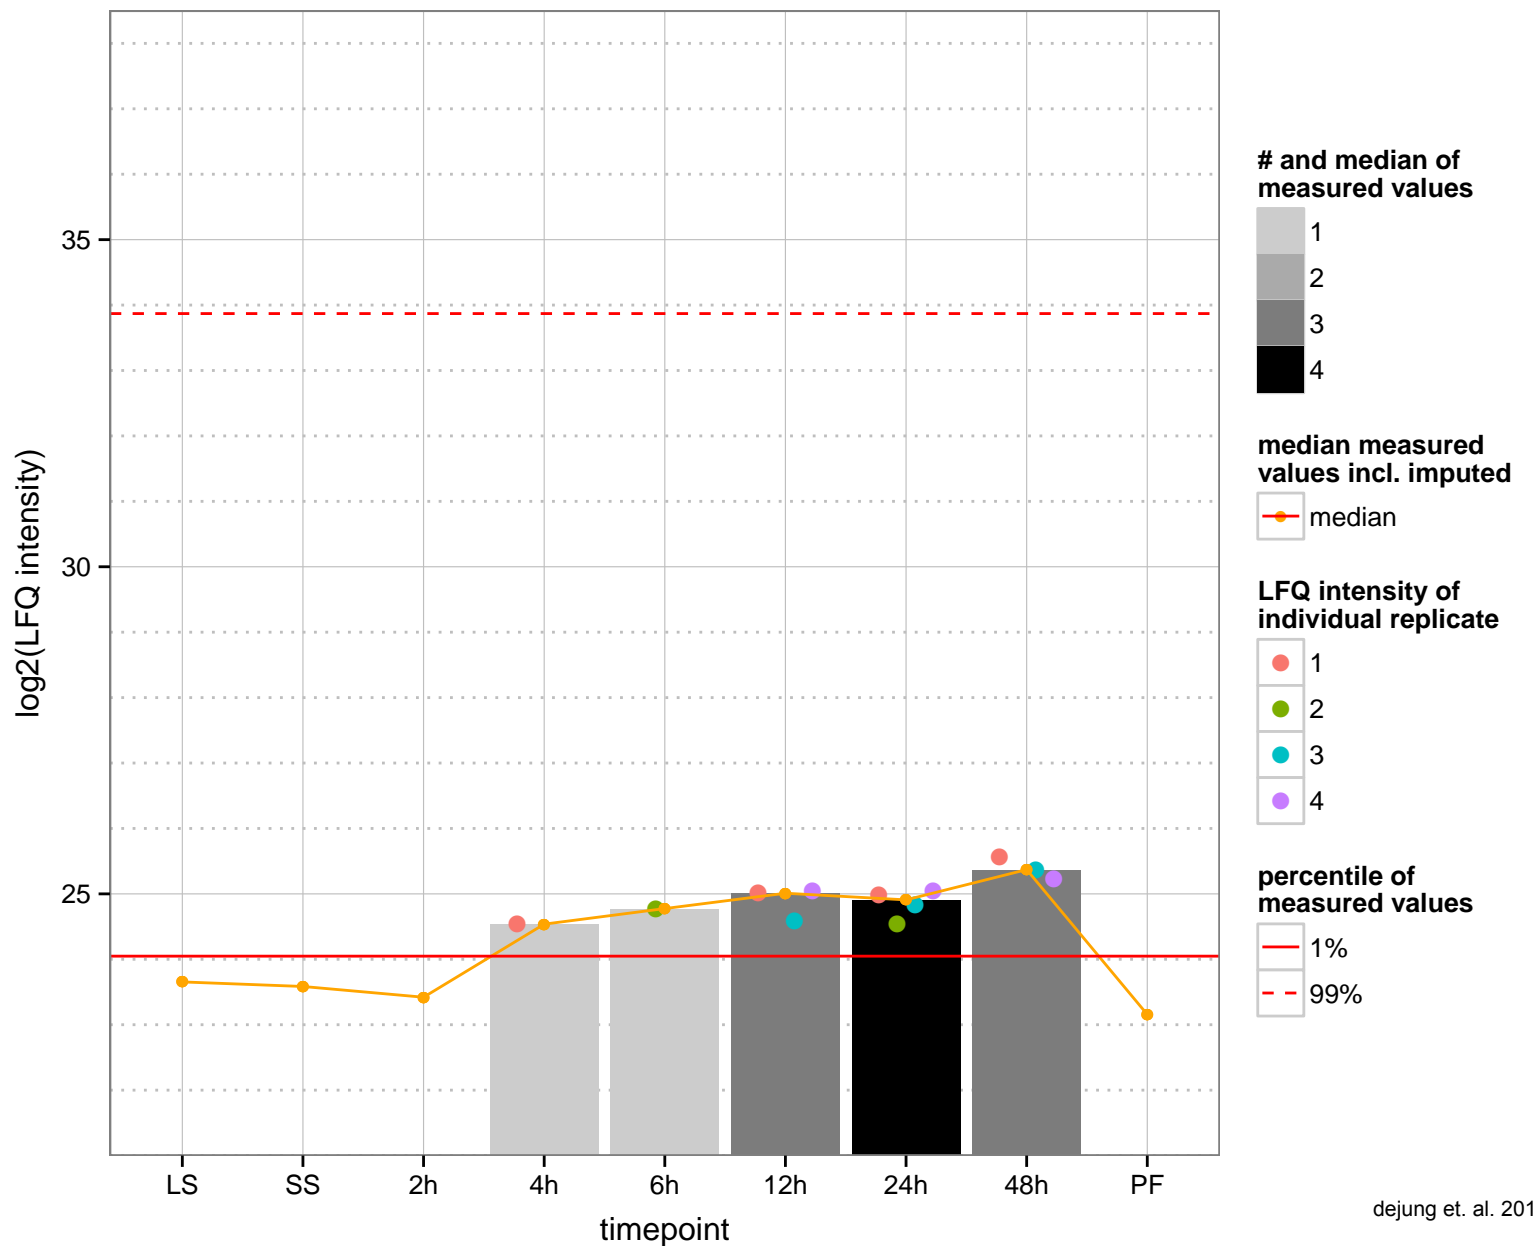

NUDIX hydrolase, conserved  
 Tb927.11.9810  
 AGOF: hydrolase activity  
 AGOC: null  
 AGOP: metabolic process  
 PGO: hydrolase activity  
 PGOC: null  
 PGOP: null

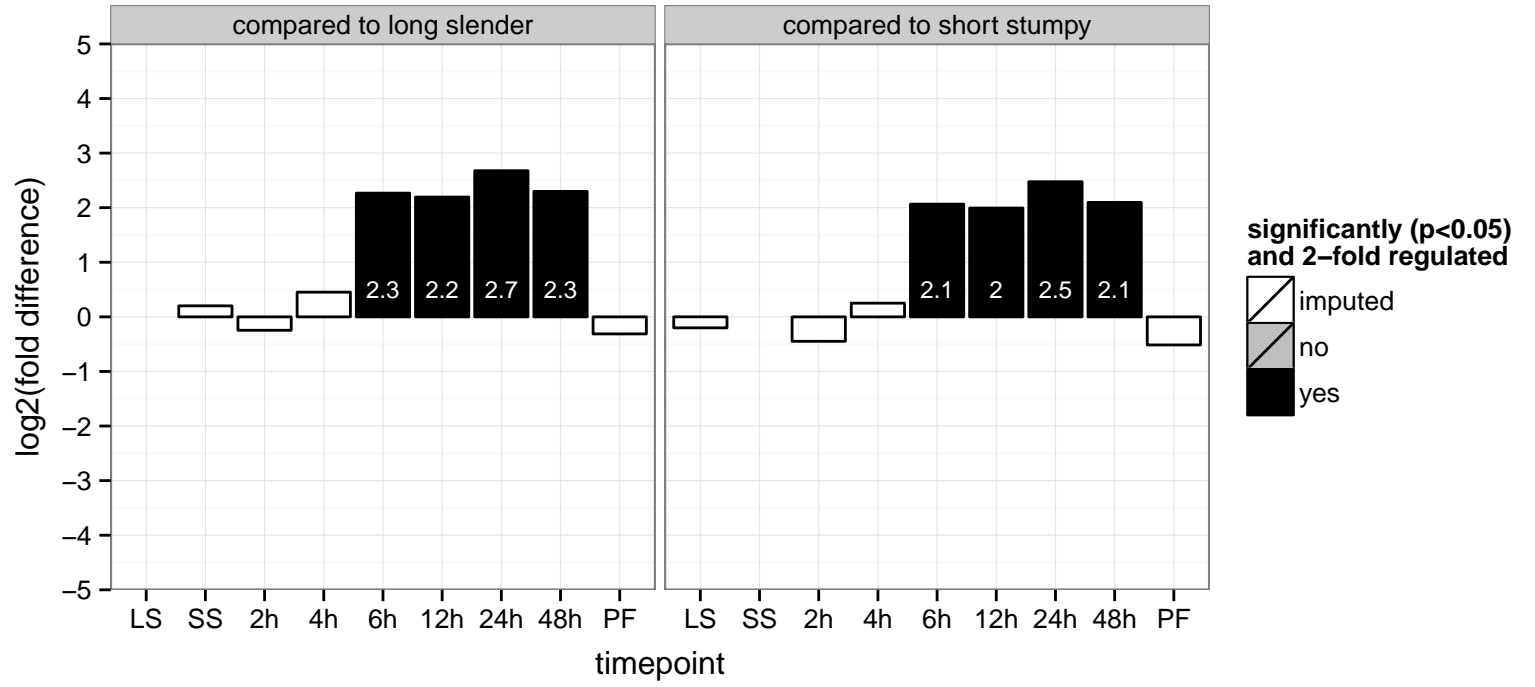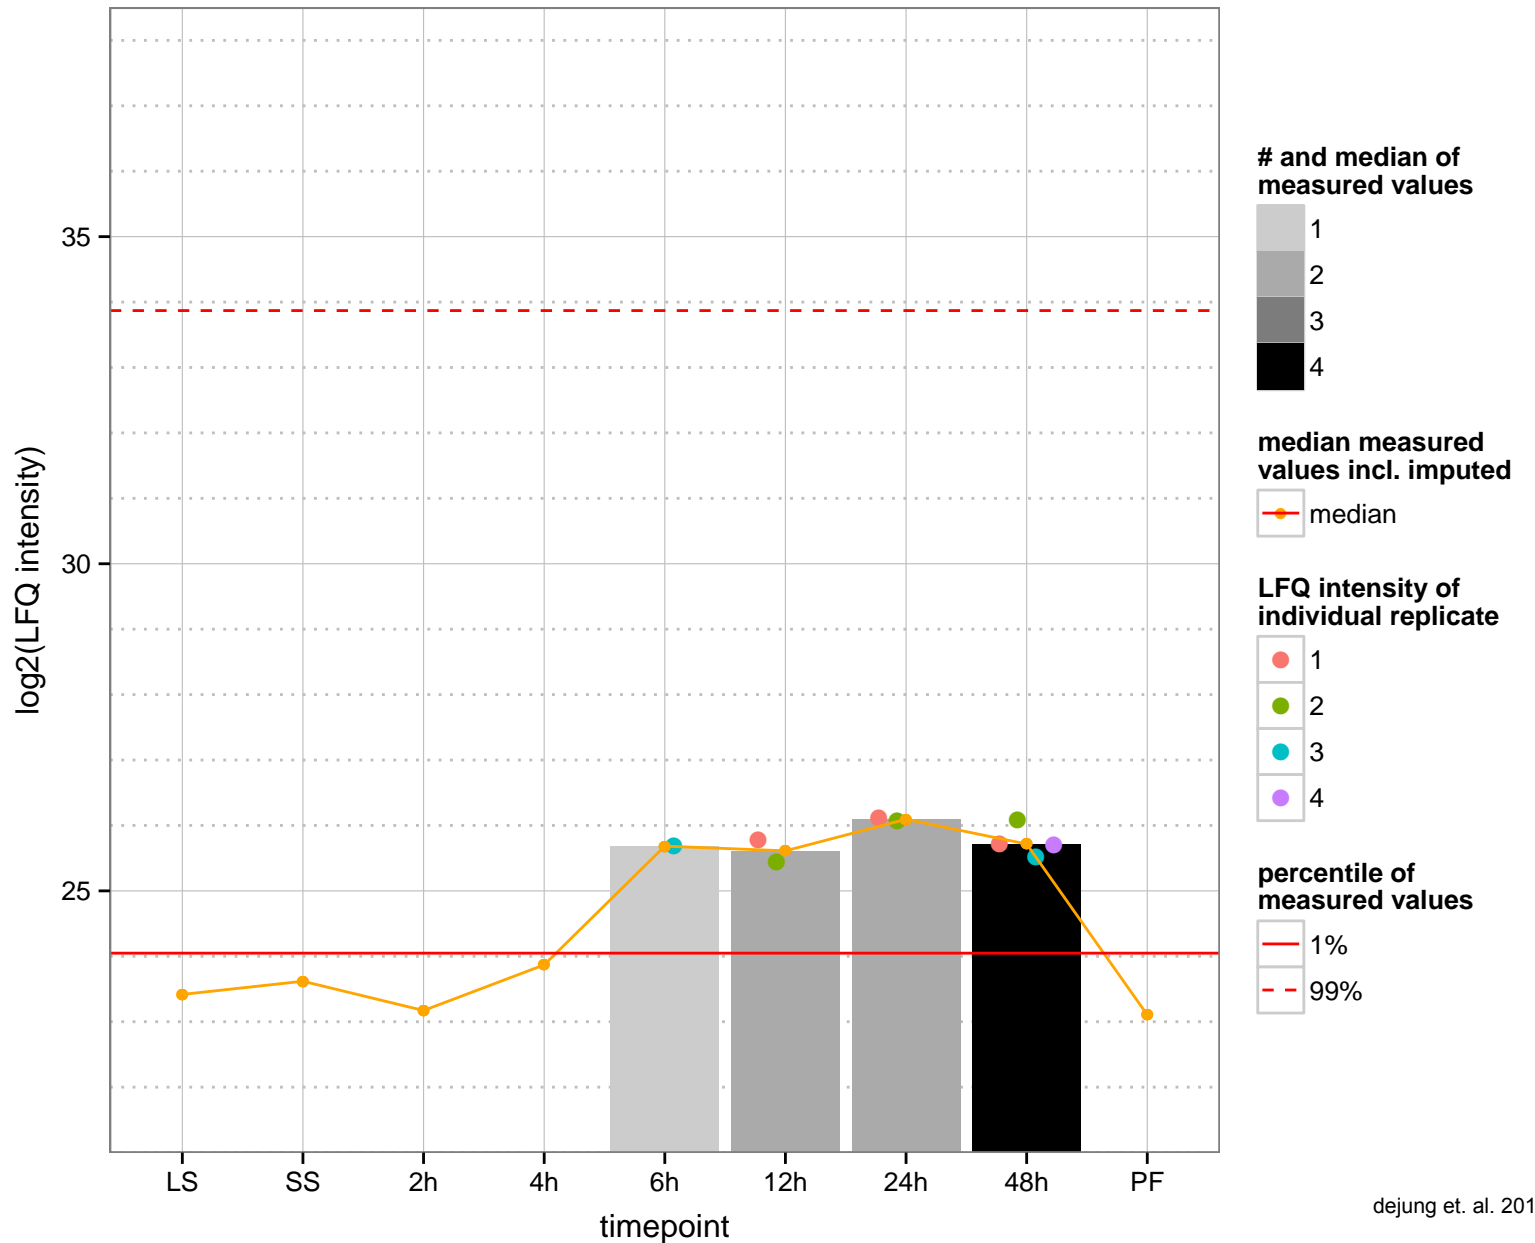



minichromosome maintenance (MCM) complex subunit, putative, DNA replication licensing factor MCM3  
 Tb927.2.3930;Tb11.v5.0640  
 AGOF: null, ATP binding, DNA binding  
 AGOC: null, nucleus  
 AGOP: null, DNA replication, DNA-dependent DNA replication initiation  
 PGO: ATP binding, DNA binding  
 PGO: null  
 PGO: DNA replication

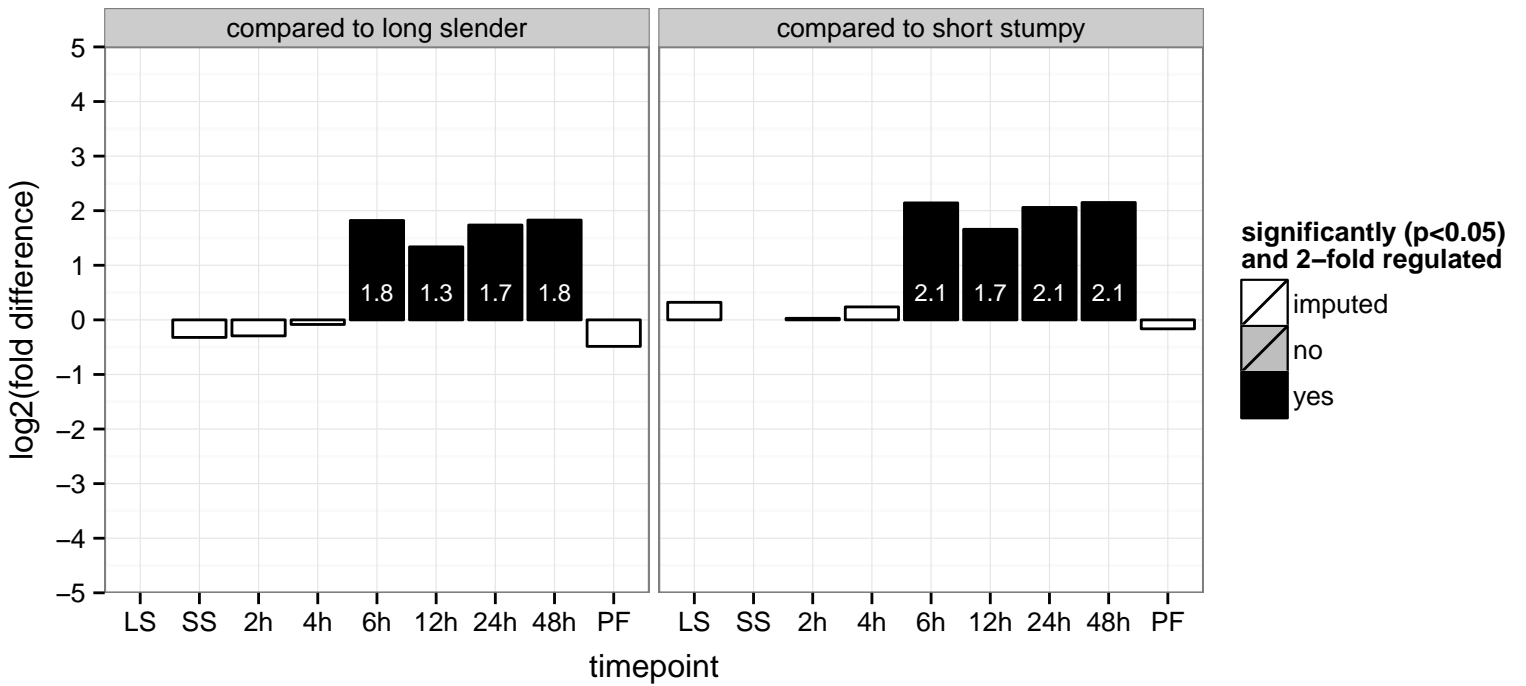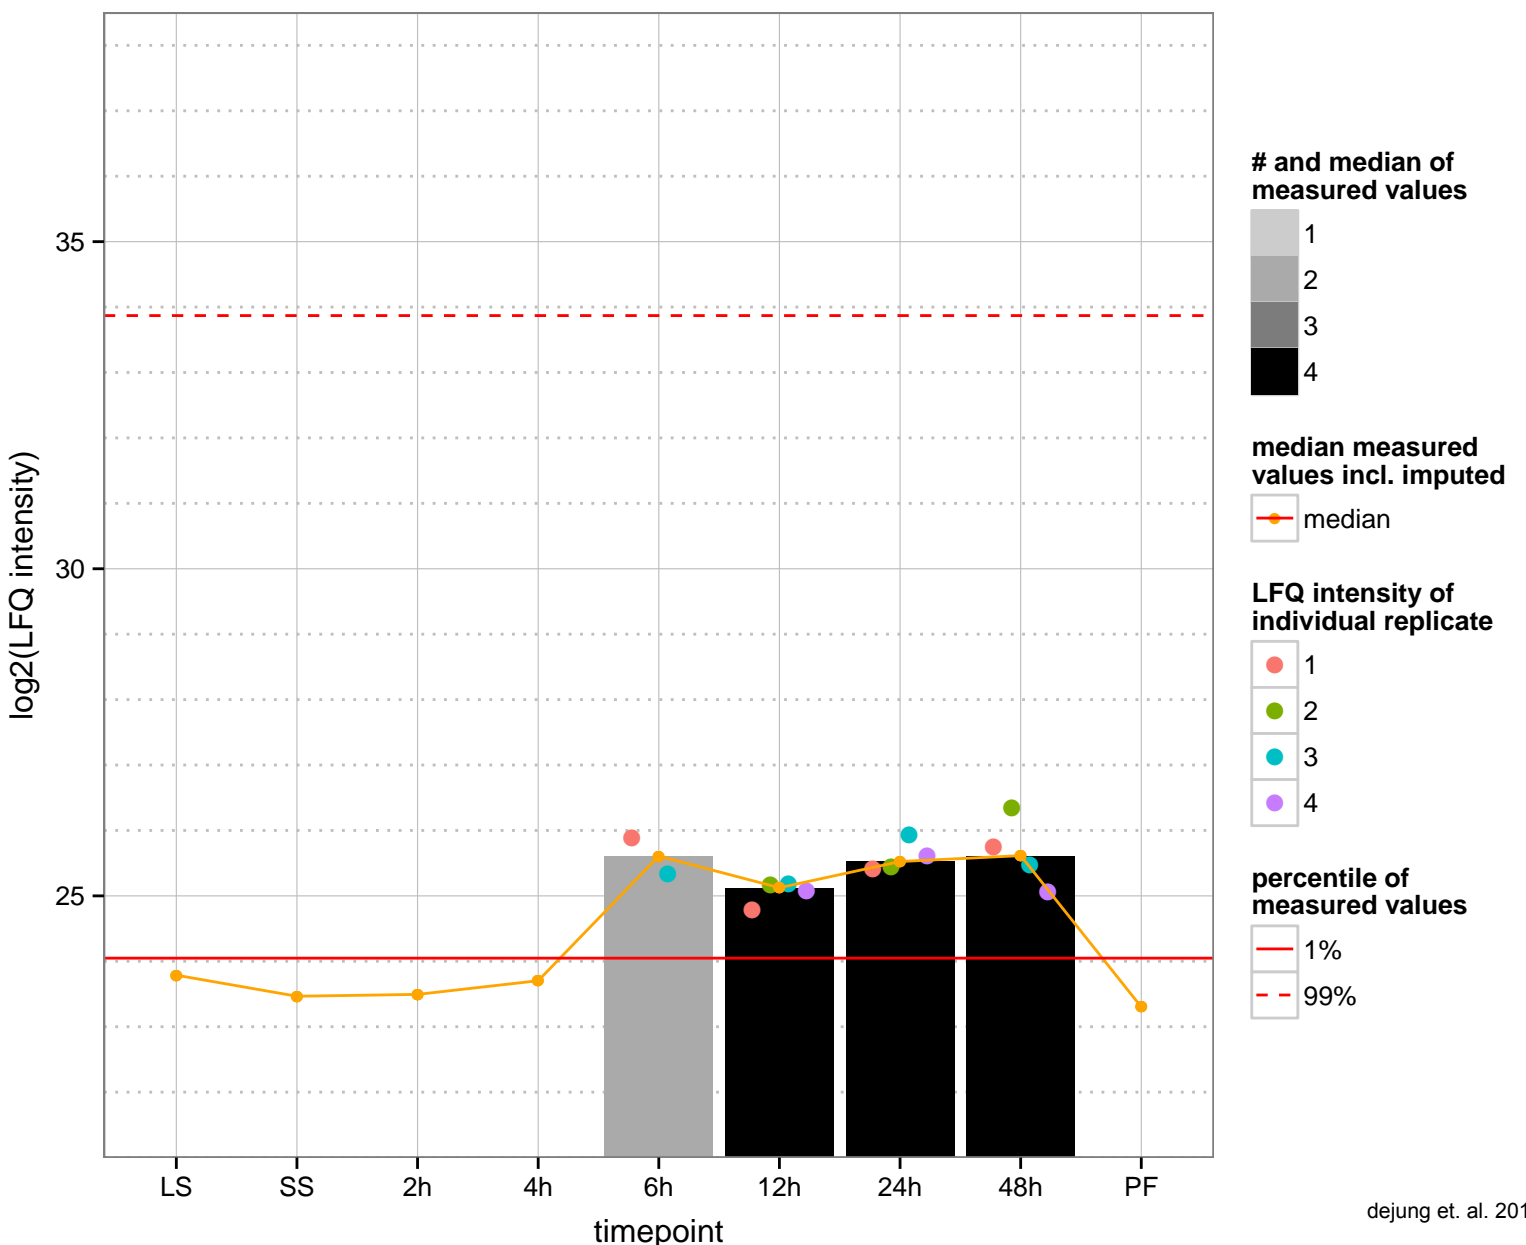

hypothetical protein, conserved  
 Tb927.2.5870  
 AGOF: null  
 AGOC: null  
 AGOP: null  
 PGO: null  
 PGOC: null  
 PGOP: null

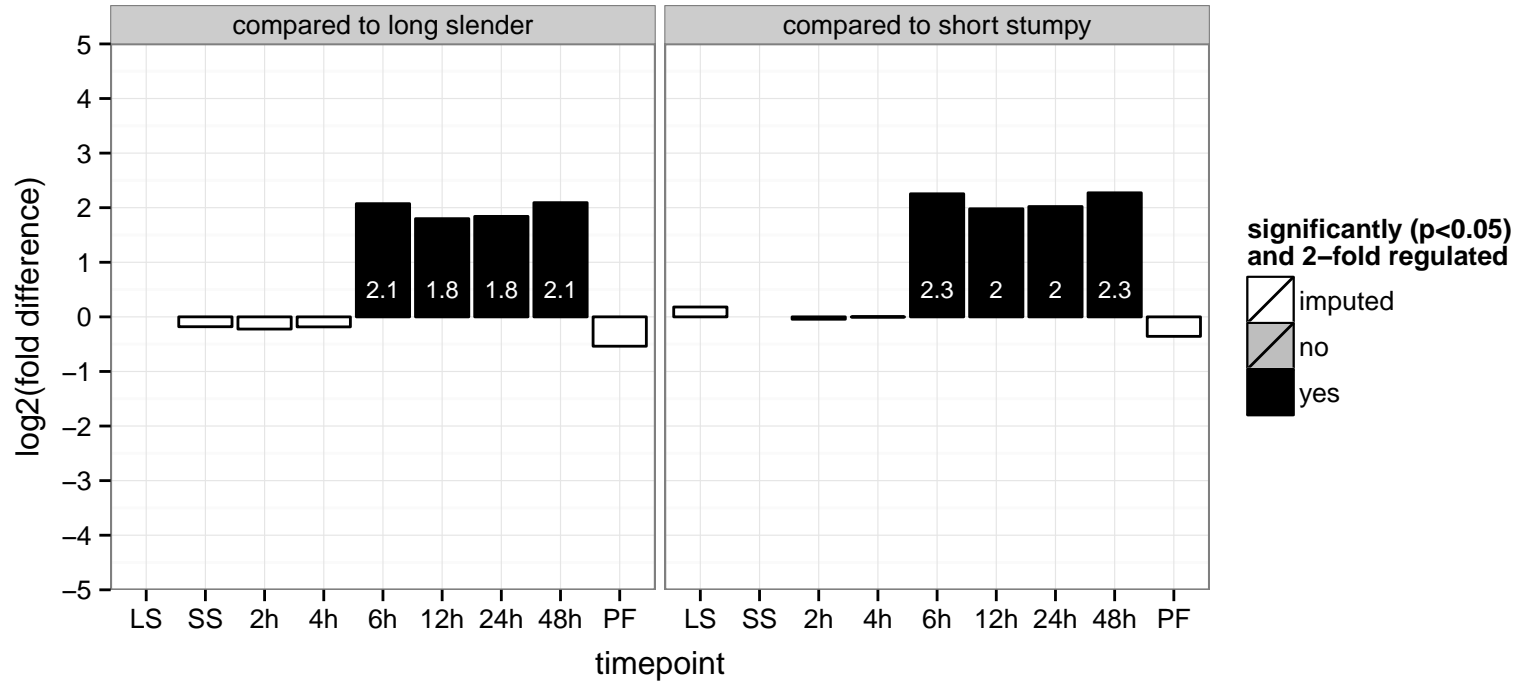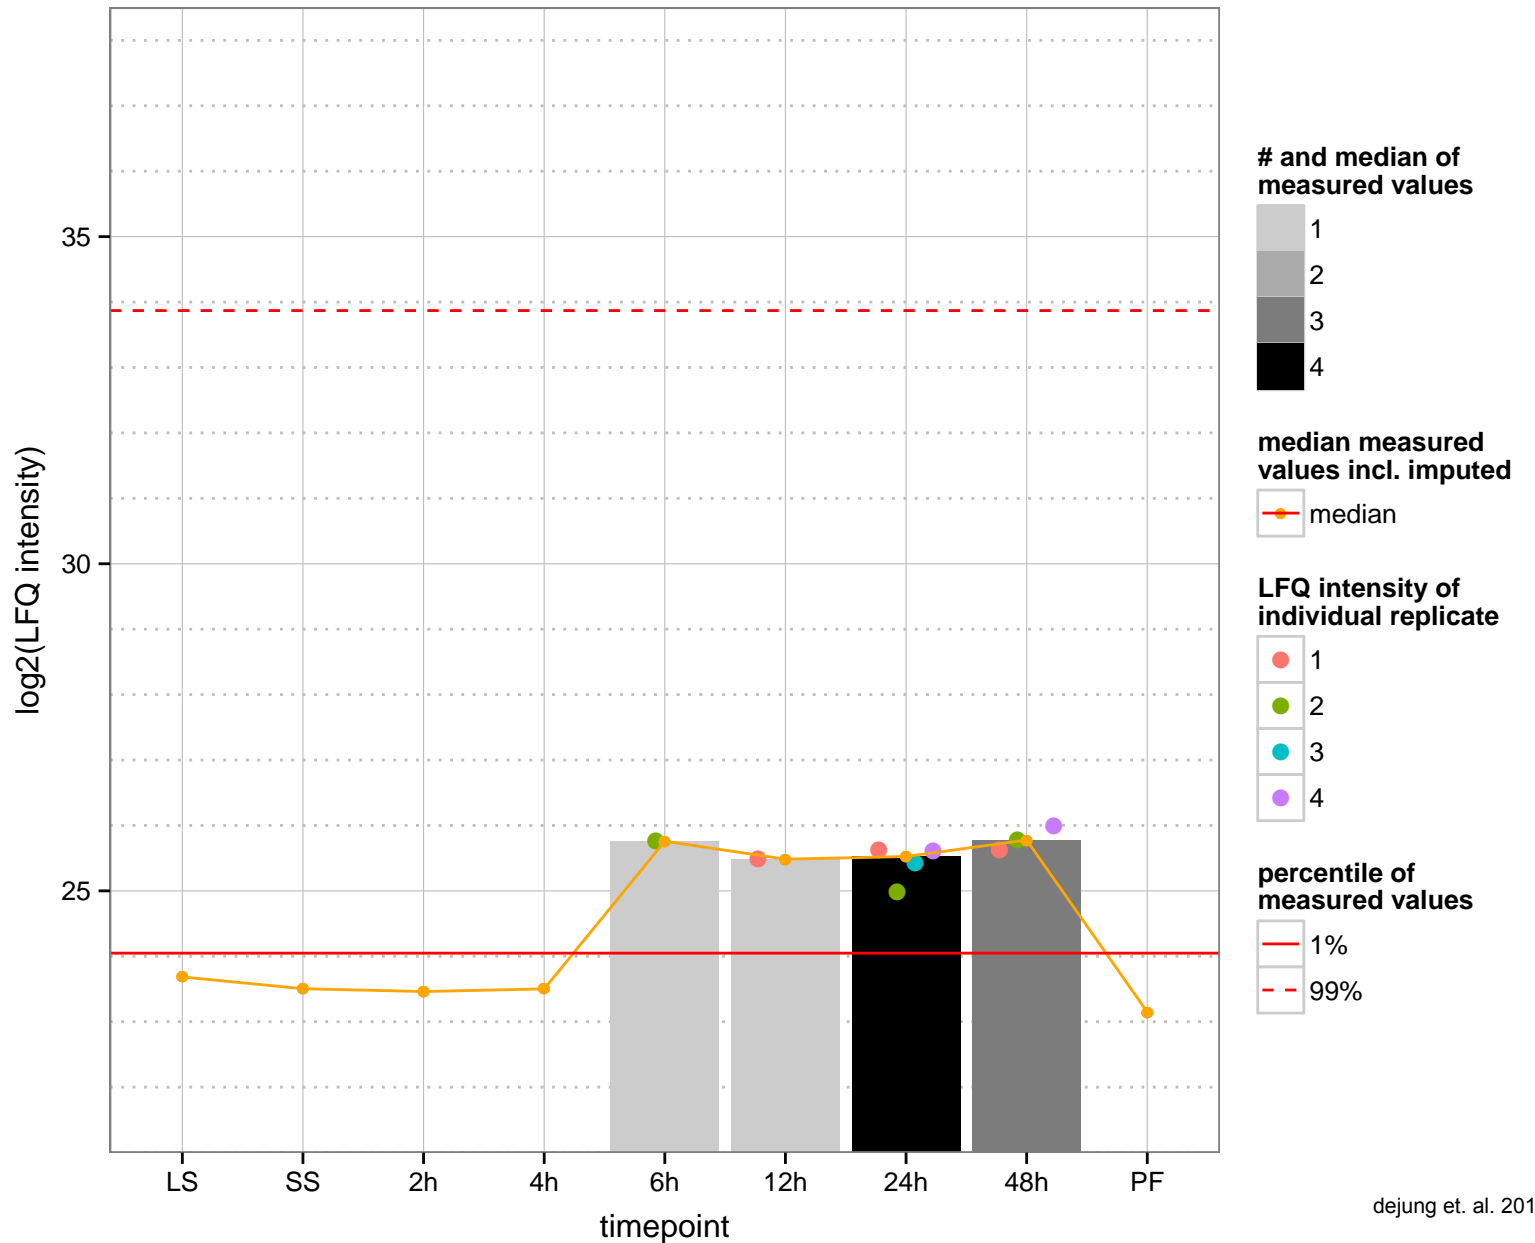

peroxisome biogenesis factor 1, putative  
 Tb927.4.1250  
 AGOF: ATP binding, nucleoside-triphosphatase activity  
 AGOC: peroxisome  
 AGOP: peroxisome organization, protein import into peroxisome membrane  
 PGO: ATP binding, nucleoside-triphosphatase activity, nucleotide binding  
 PGOC: peroxisome  
 PGOP: peroxisome organization

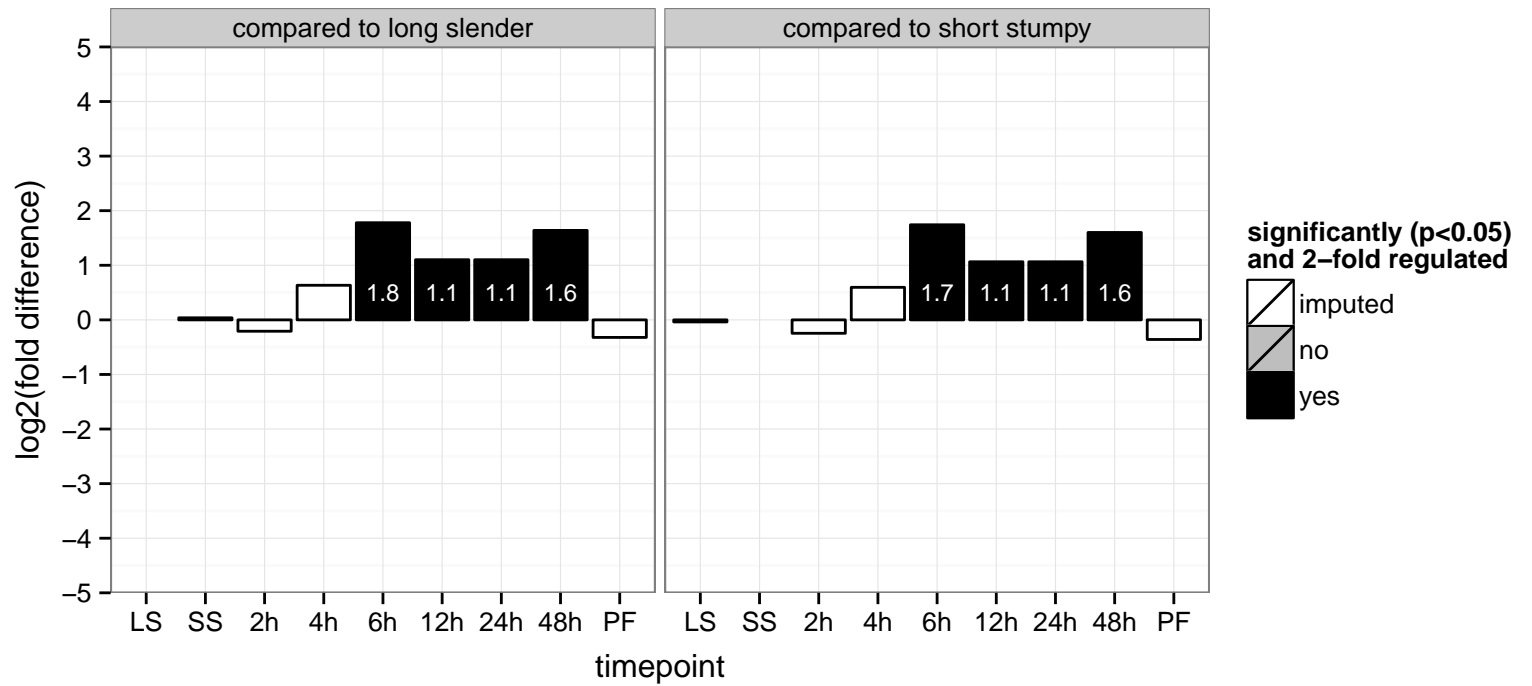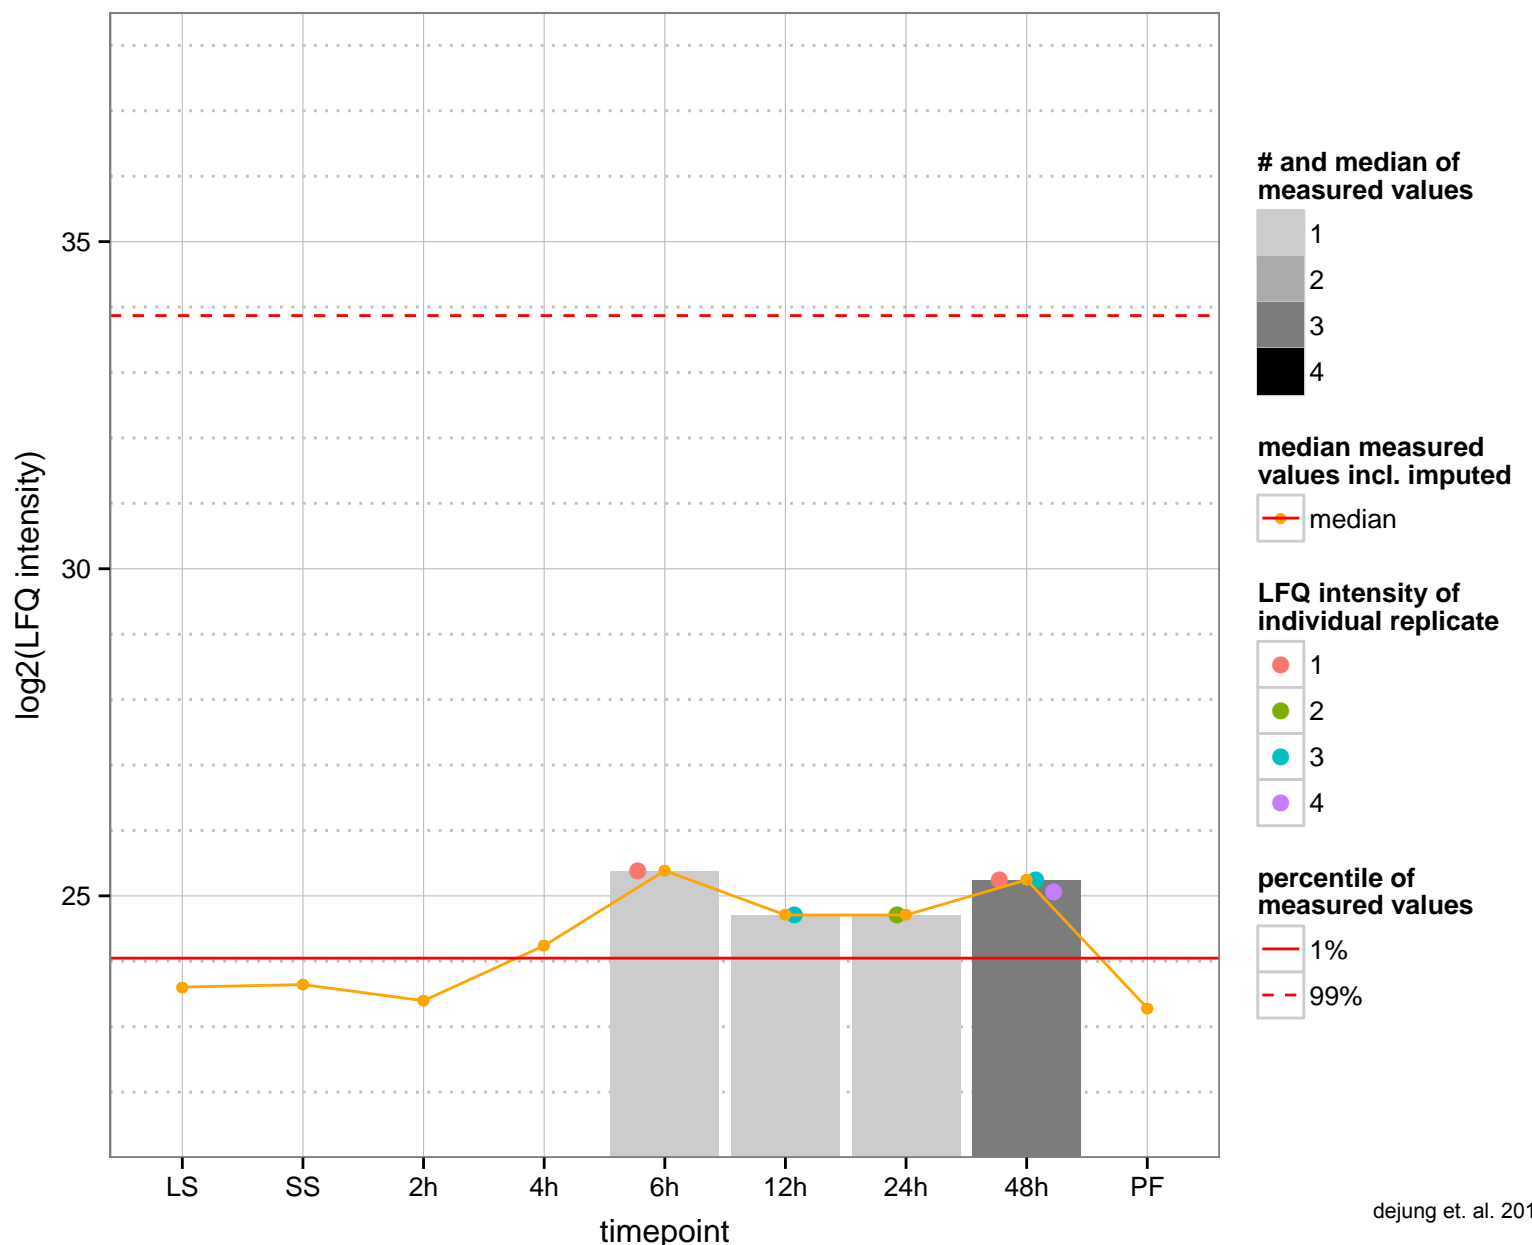

leucine-rich repeat protein (LRRP, pseudogene), putative, leucine-rich repeat protein 1 (LRRP1), frameshift  
 Tb927.4.160  
 AGOF: null  
 AGOC: null  
 AGOP: null  
 PGOF: null  
 PGO: null  
 PGOP: null

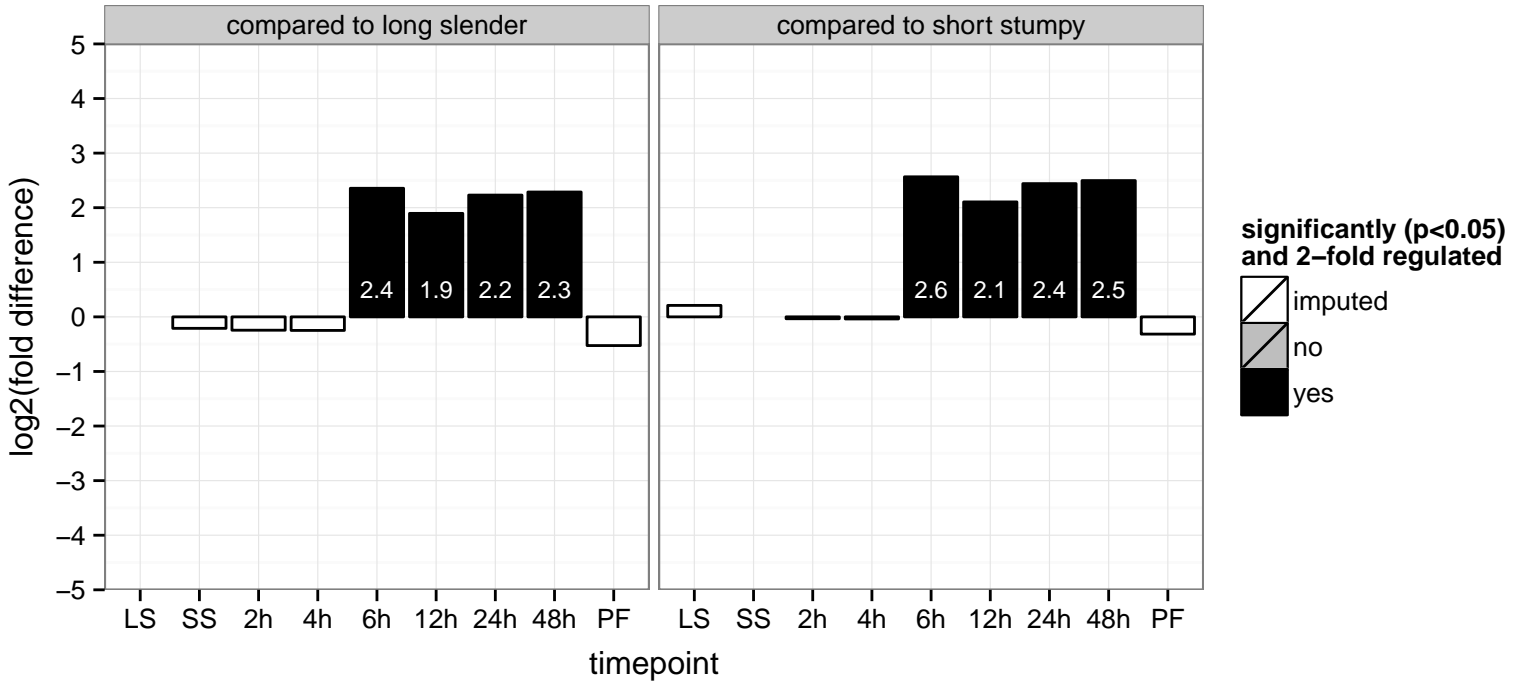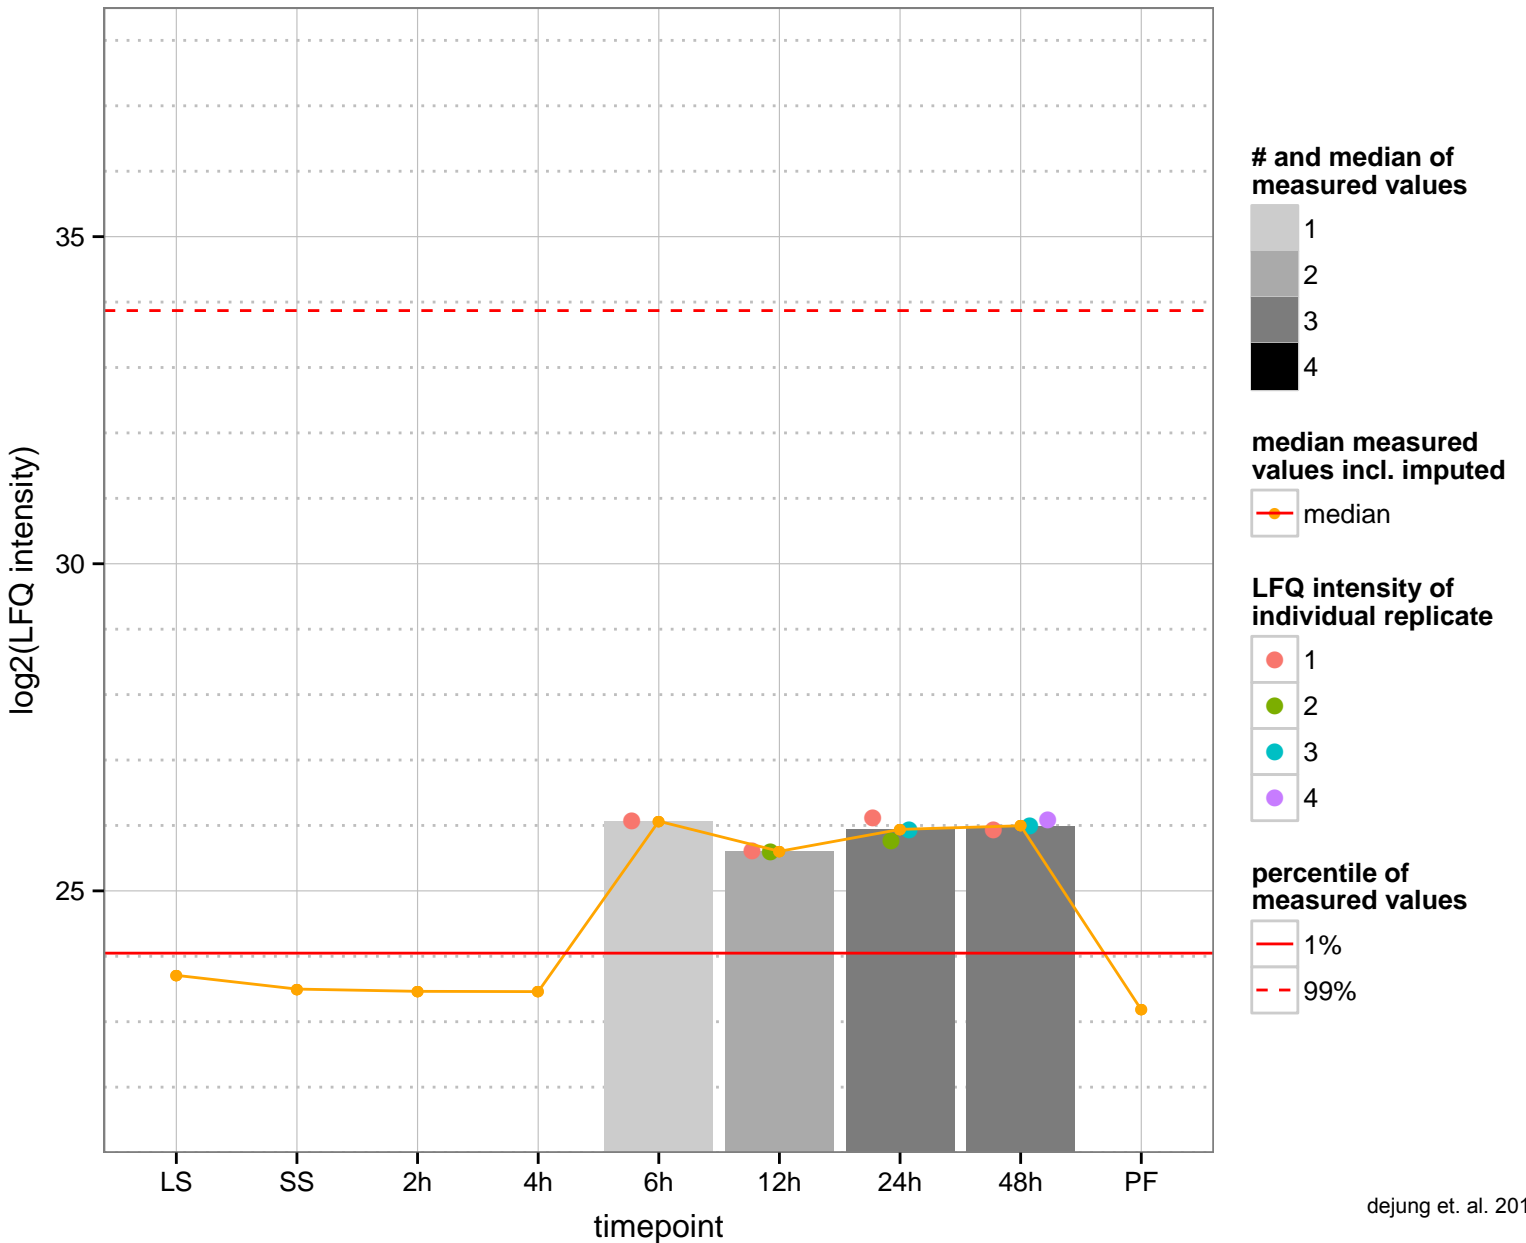

hypothetical protein, conserved  
 Tb927.4.5190  
 AGOF: null  
 AGOC: null  
 AGOP: null  
 PGOF: null  
 PGOC: null  
 PGOP: null

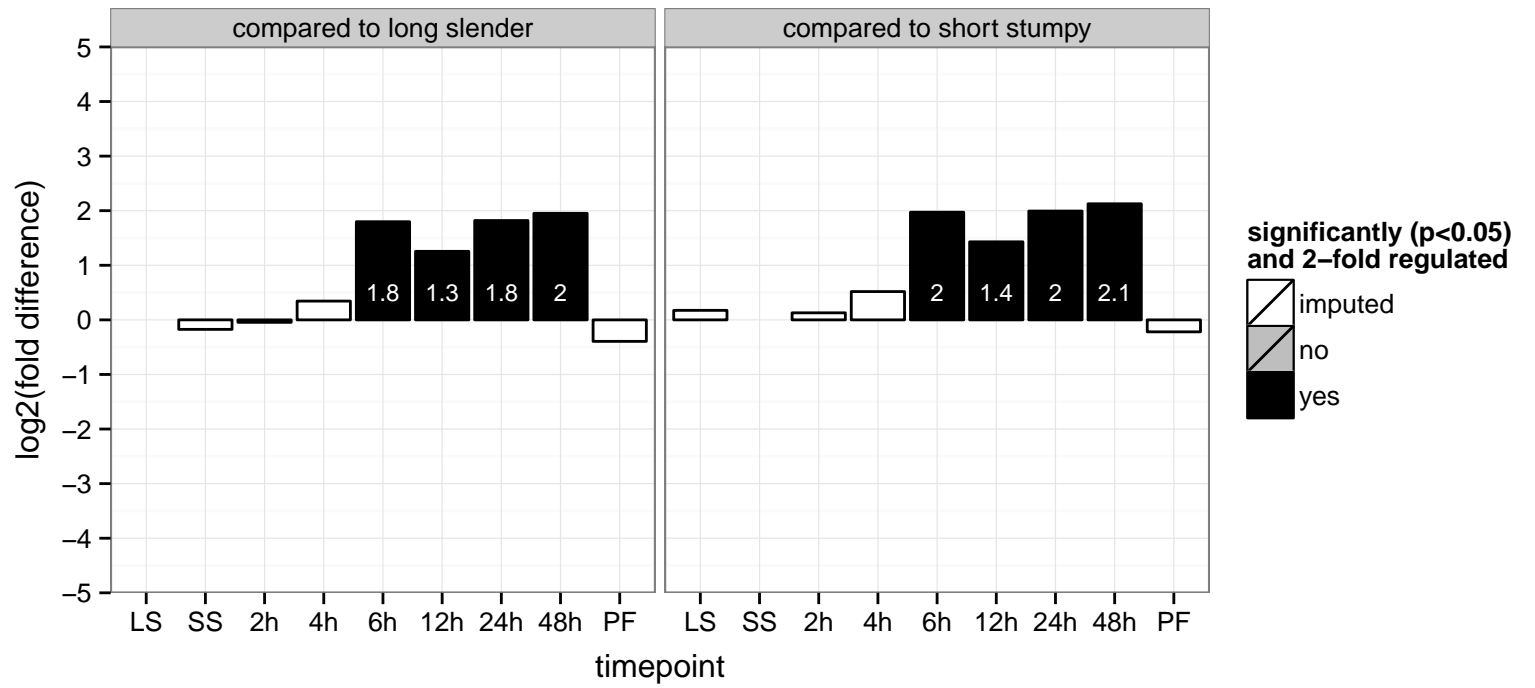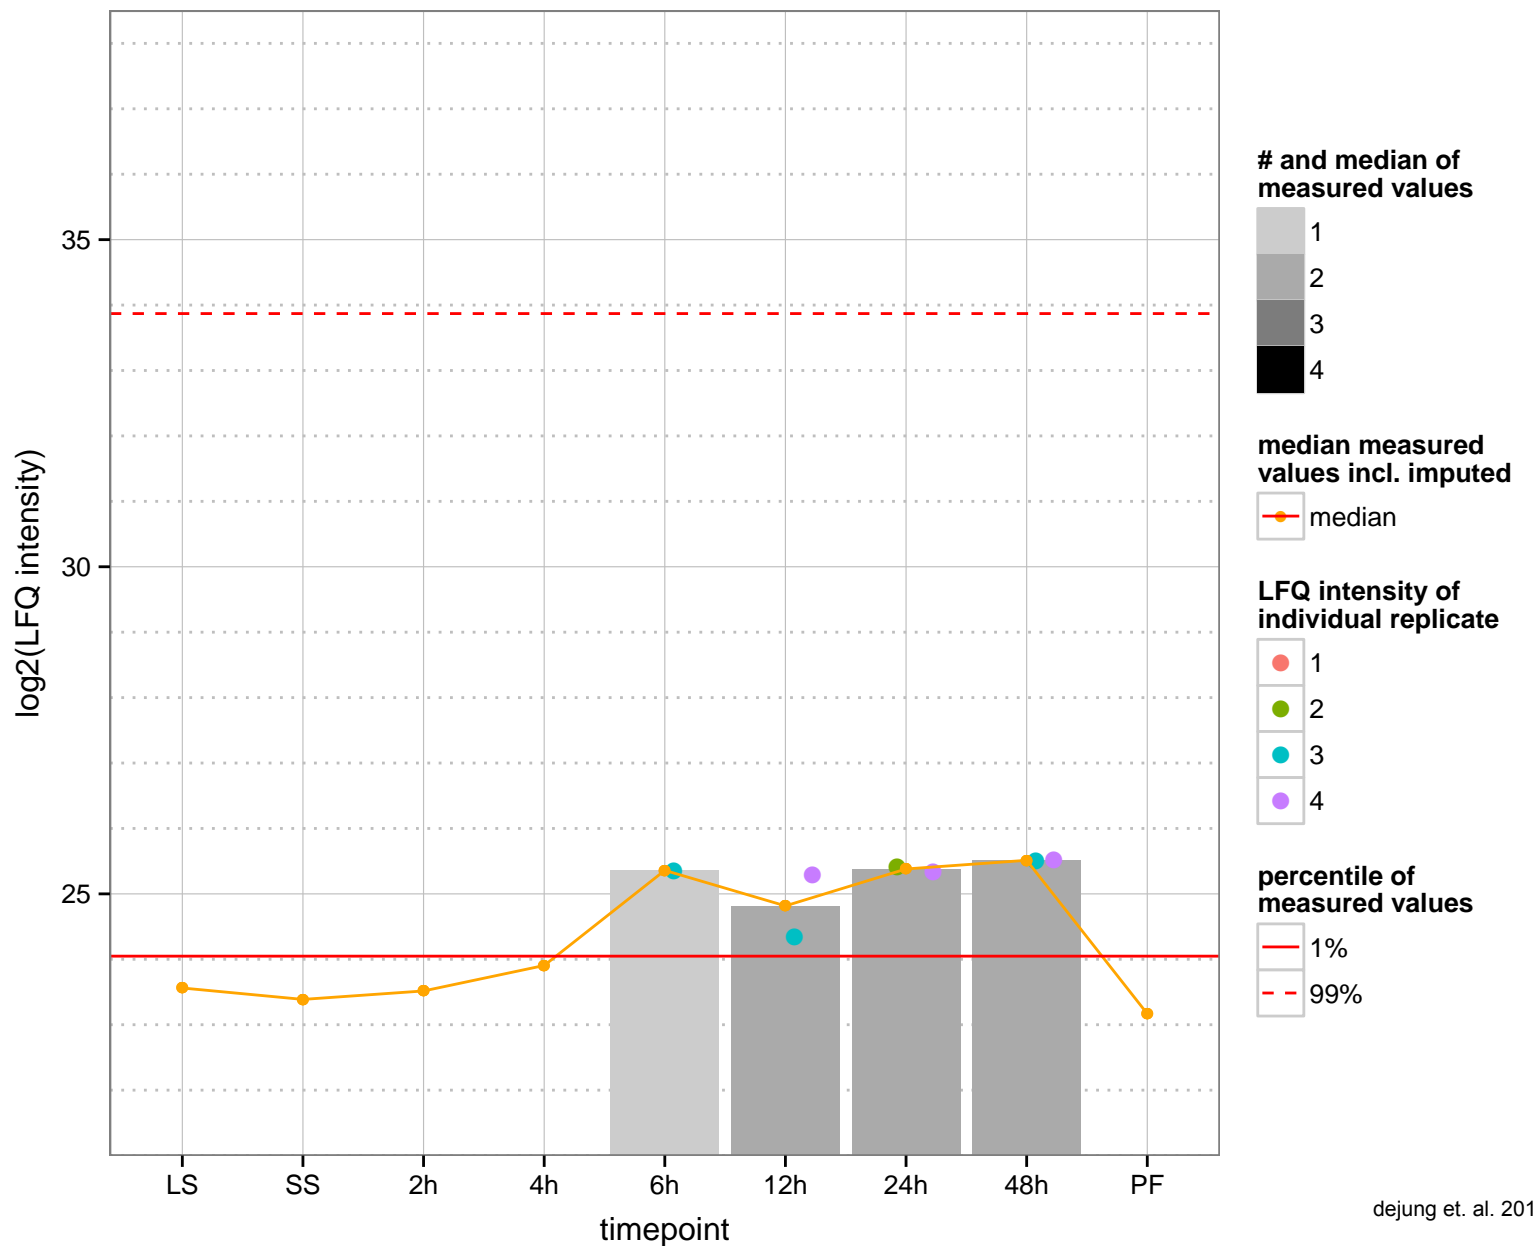

hypothetical protein, conserved  
 Tb927.7.3380  
 AGOF: null  
 AGOC: null  
 AGOP: null  
 PGO: null  
 PGOC: null  
 PGOP: null

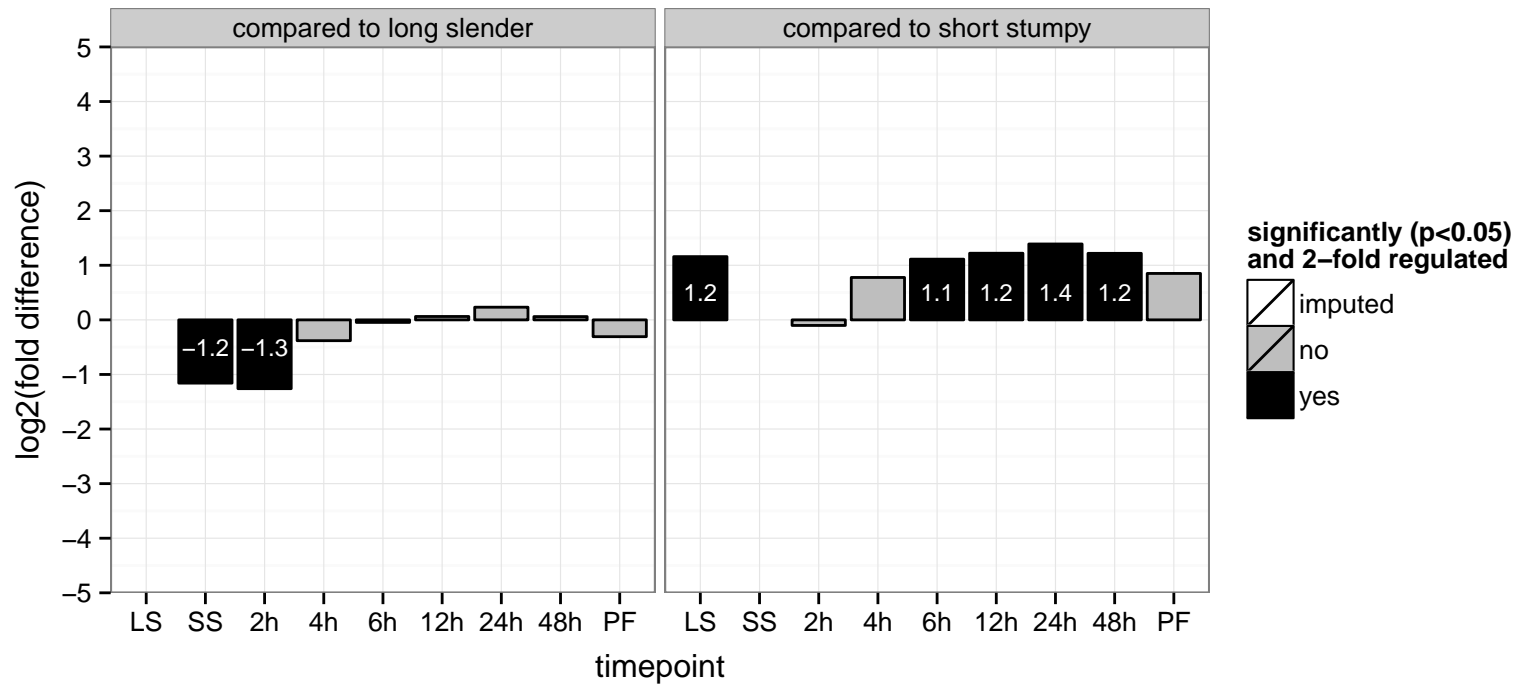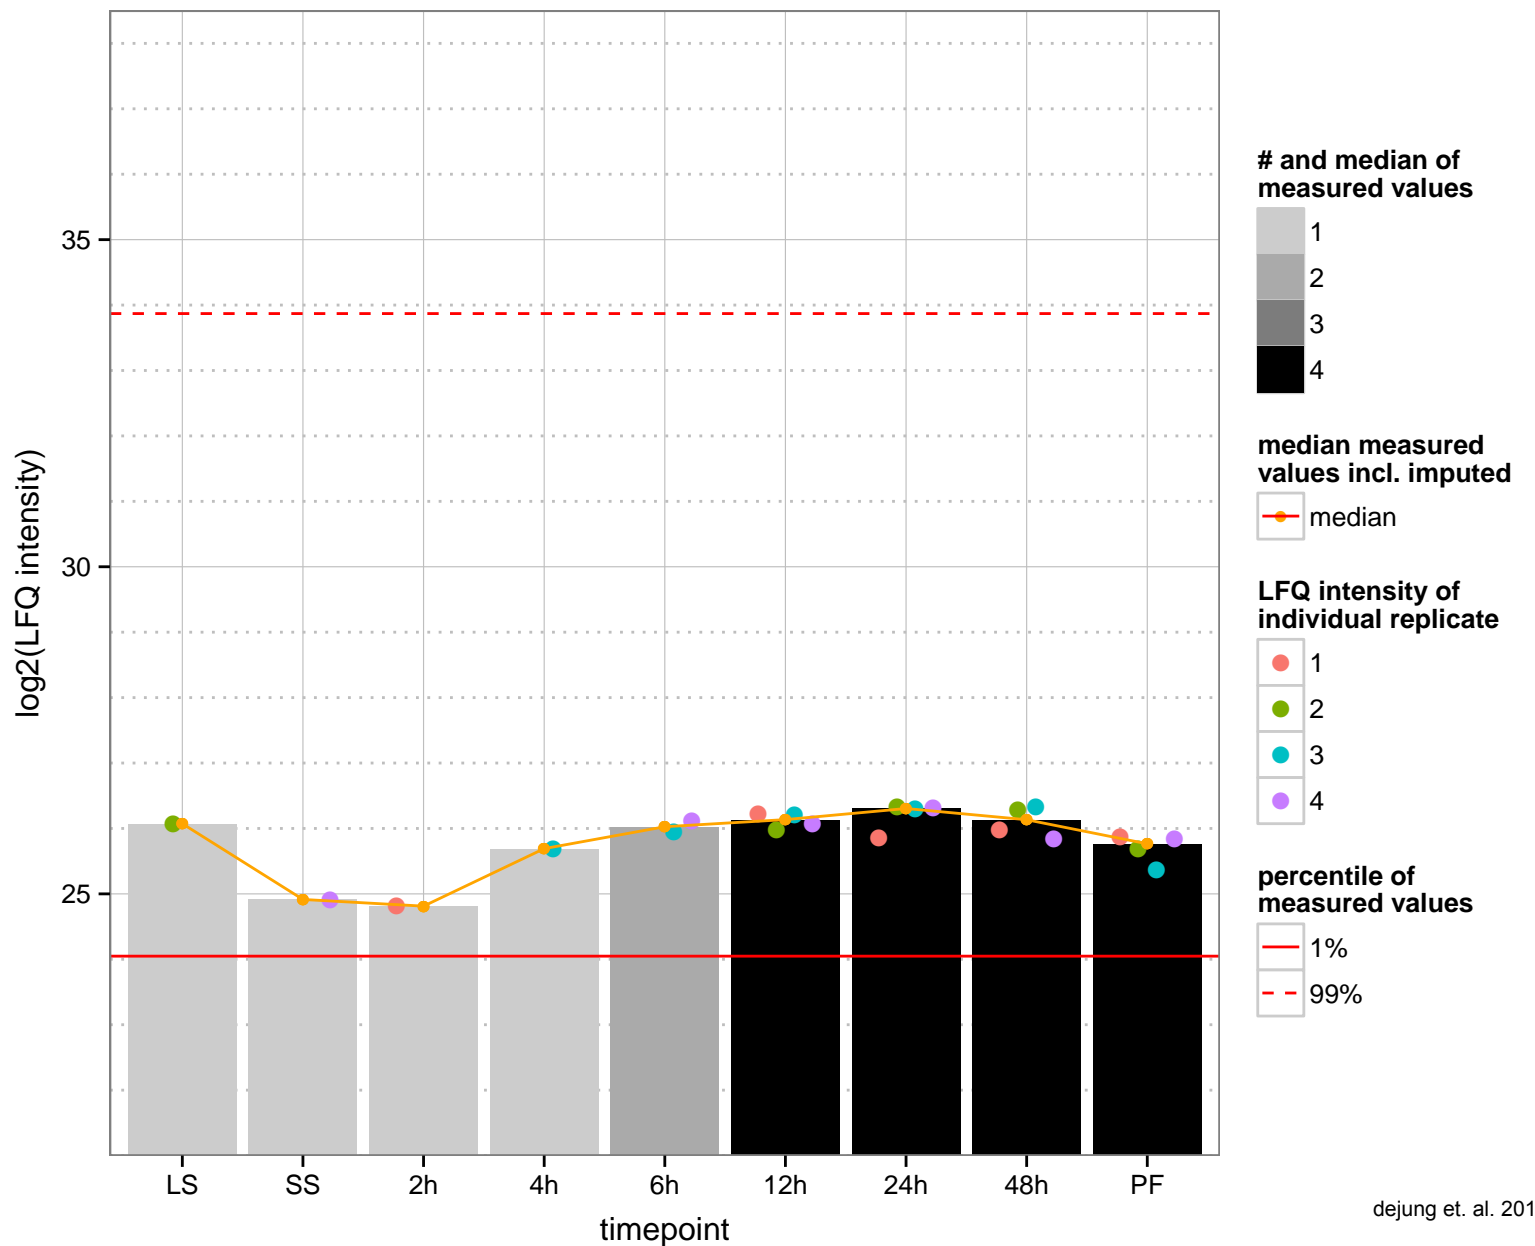

Protein Associated with Differentiation (PAD2)

Tb927.7.5940

AGOF: null

AGOC: flagellar pocket, plasma membrane

AGOP: citrate transport, regulation of developmental process, response to temperature stimulus

PGOF: null

PGOC: integral to membrane

PGOP: transmembrane transport

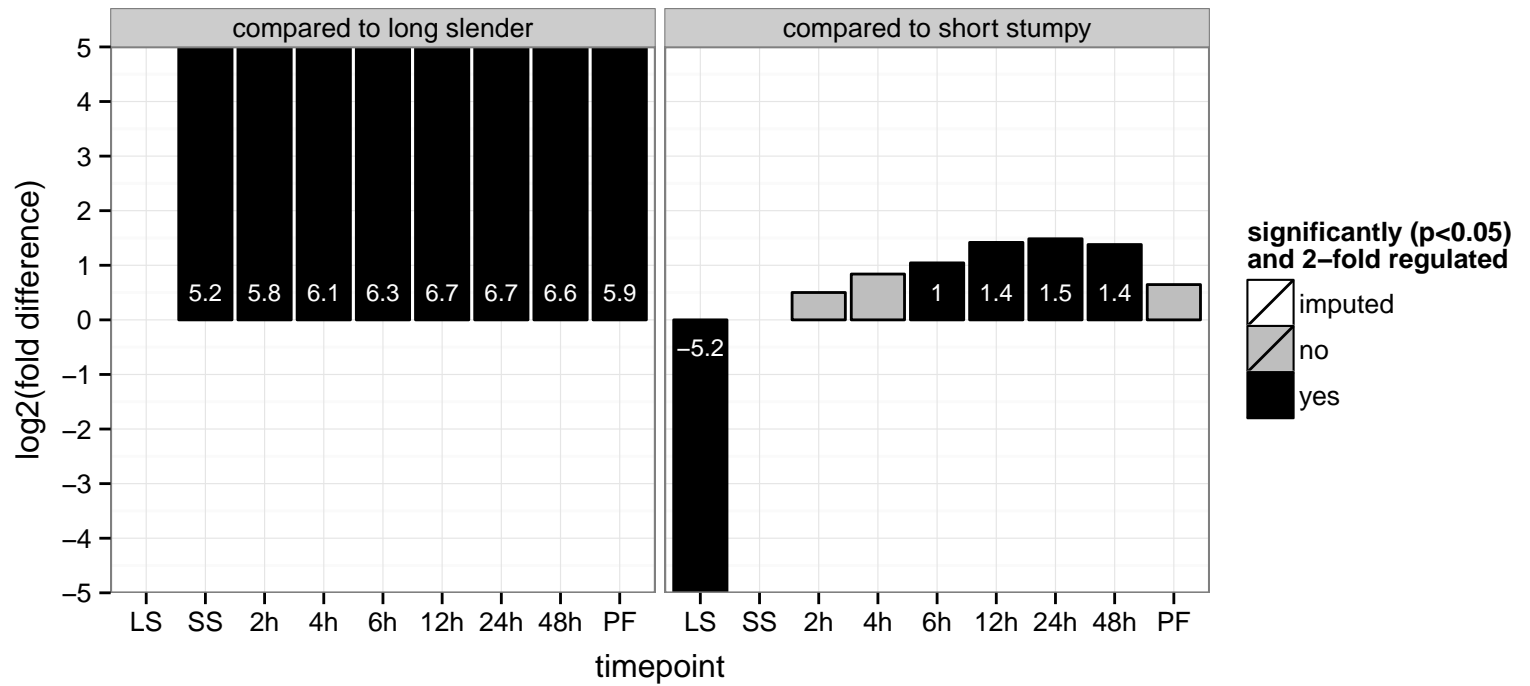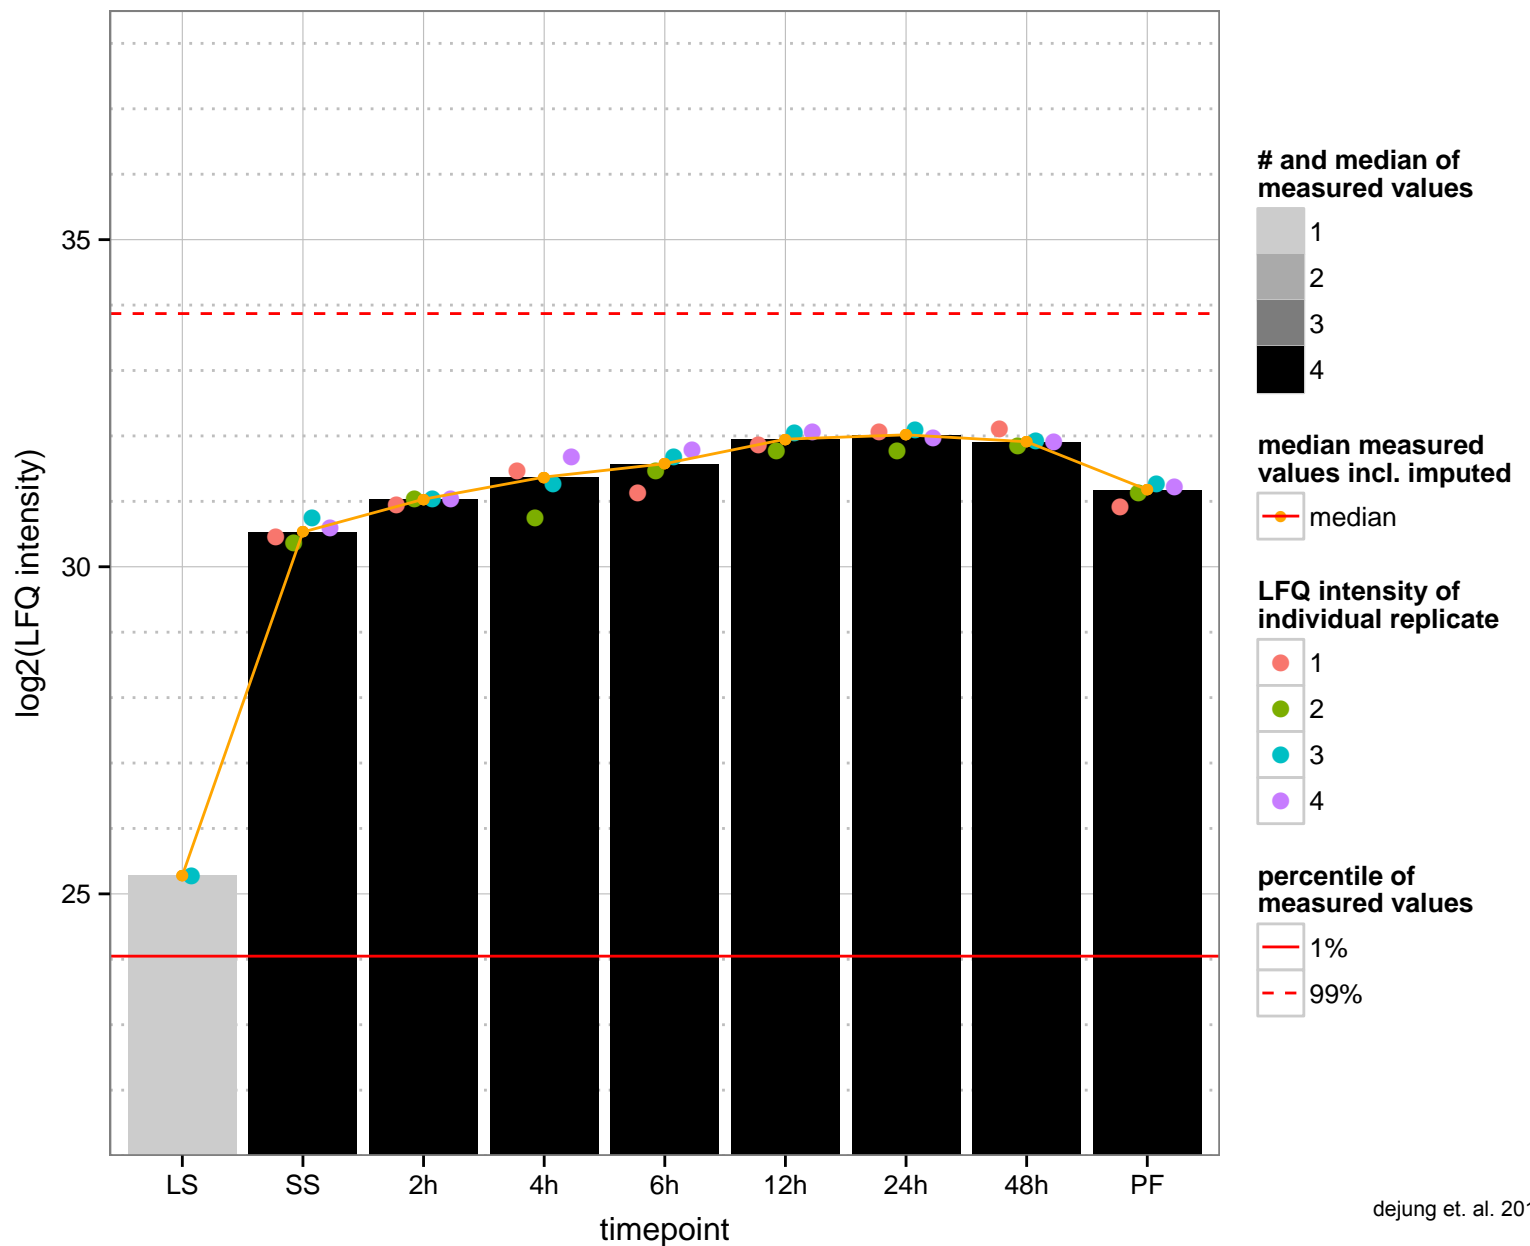

nitroreductase, NADH dehydrogenase, putative (NTR)  
 Tb927.7.7230  
 AGOF: oxidoreductase activity  
 AGOC: mitochondrion  
 AGOP: drug metabolic process  
 PGO: oxidoreductase activity  
 PGOC: null  
 PGOP: null

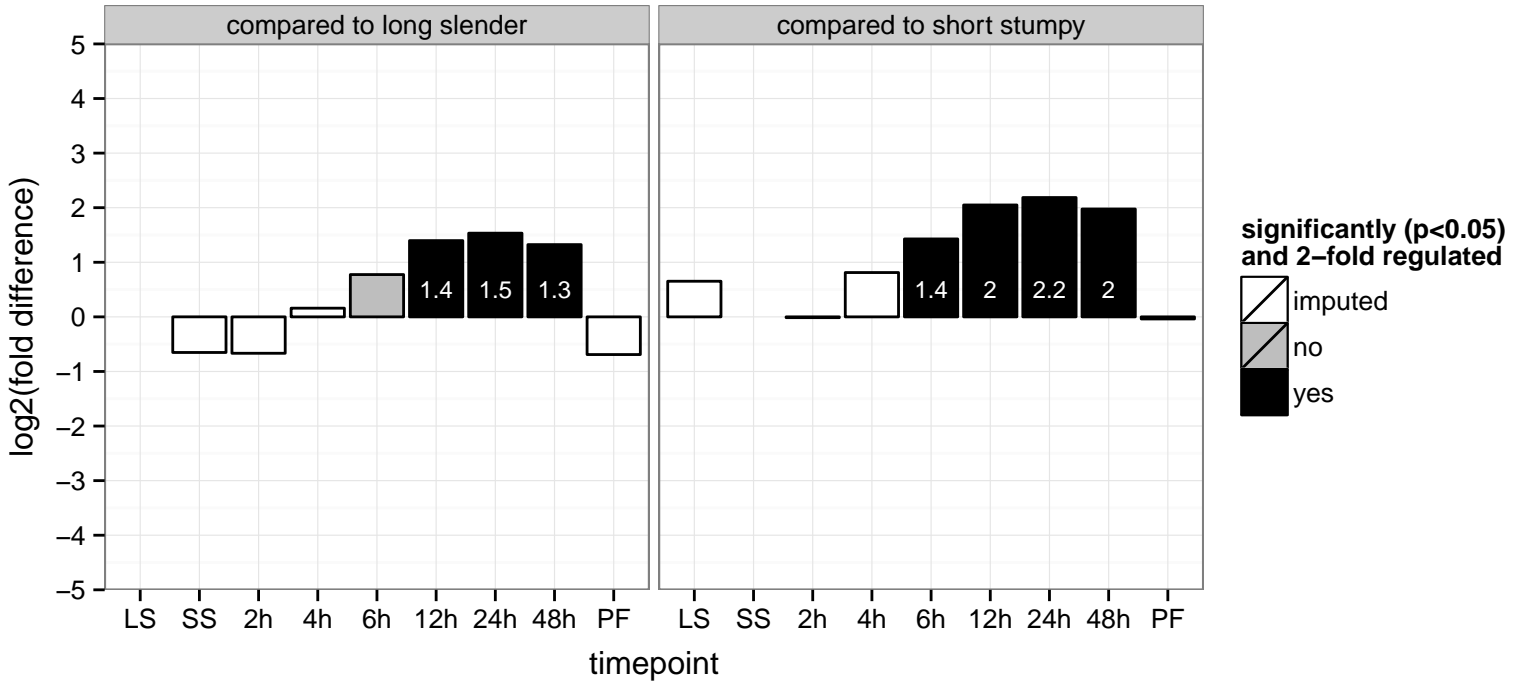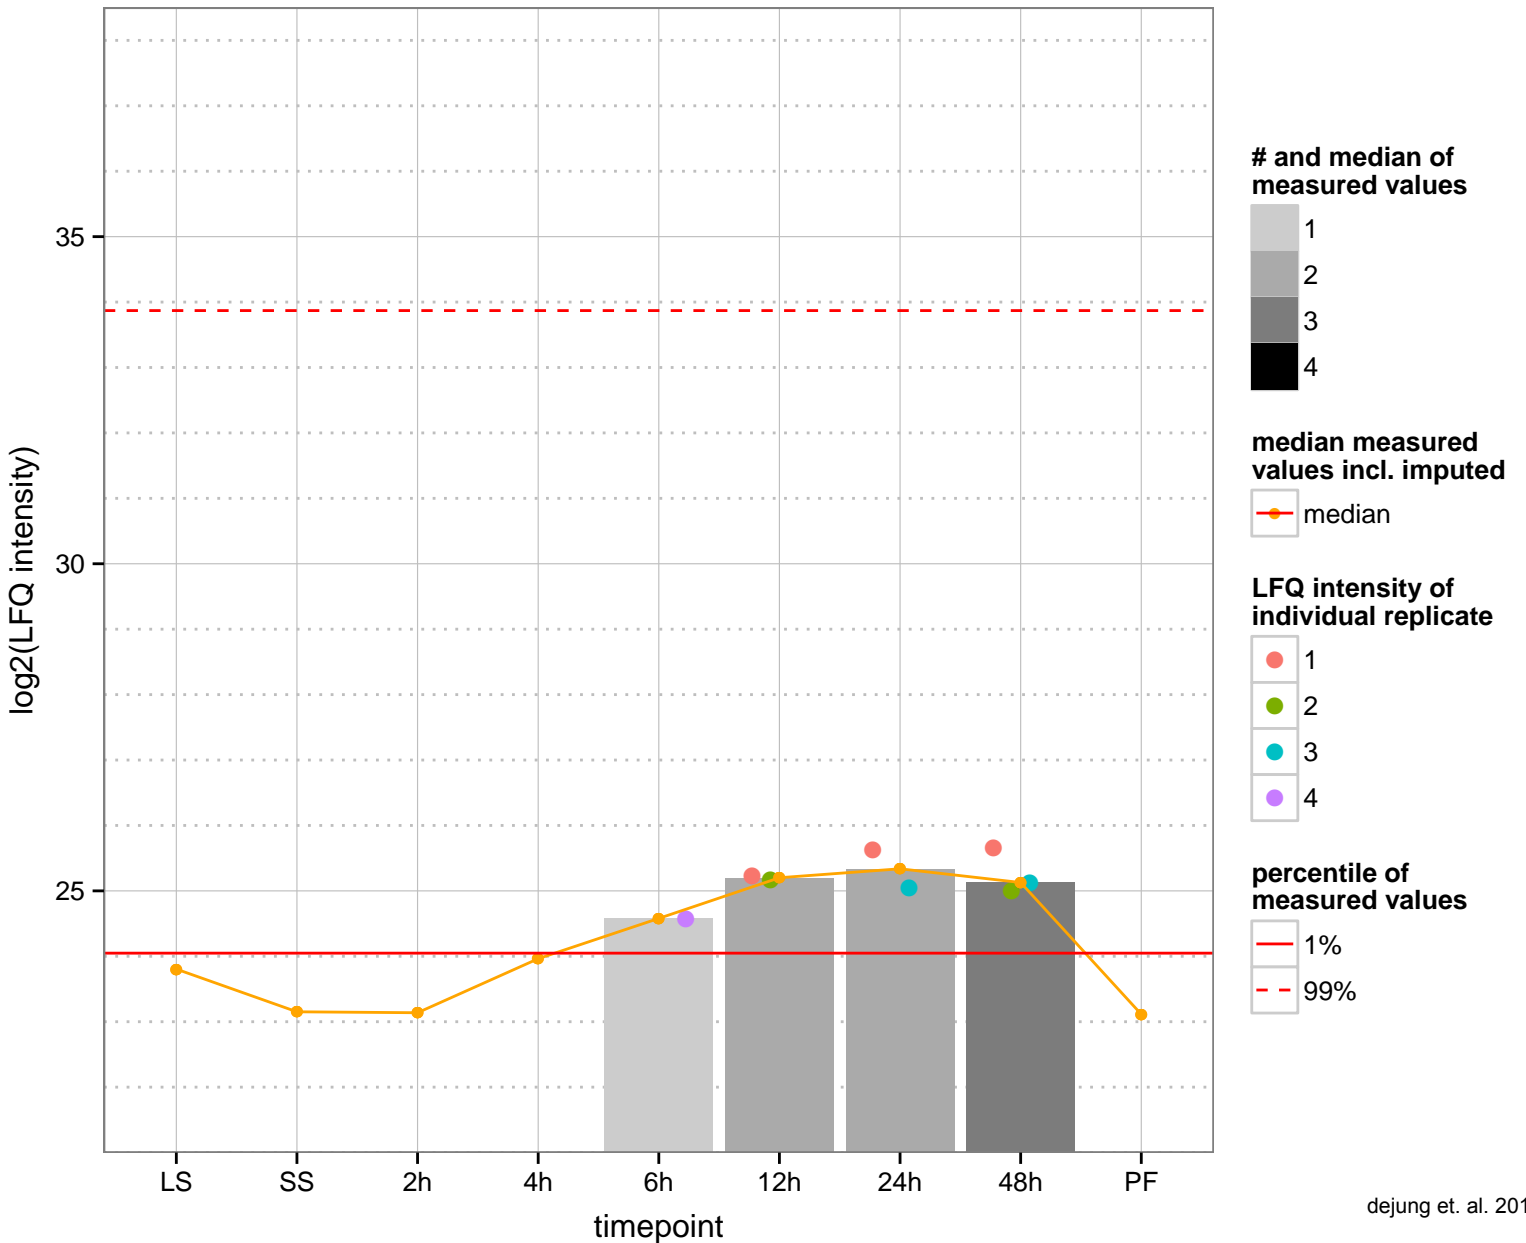



hypothetical protein, conserved  
 Tb927.8.4860  
 AGOF: null  
 AGOC: mitochondrion  
 AGOP: null  
 PGO: null  
 PGOC: null  
 PGOP: null

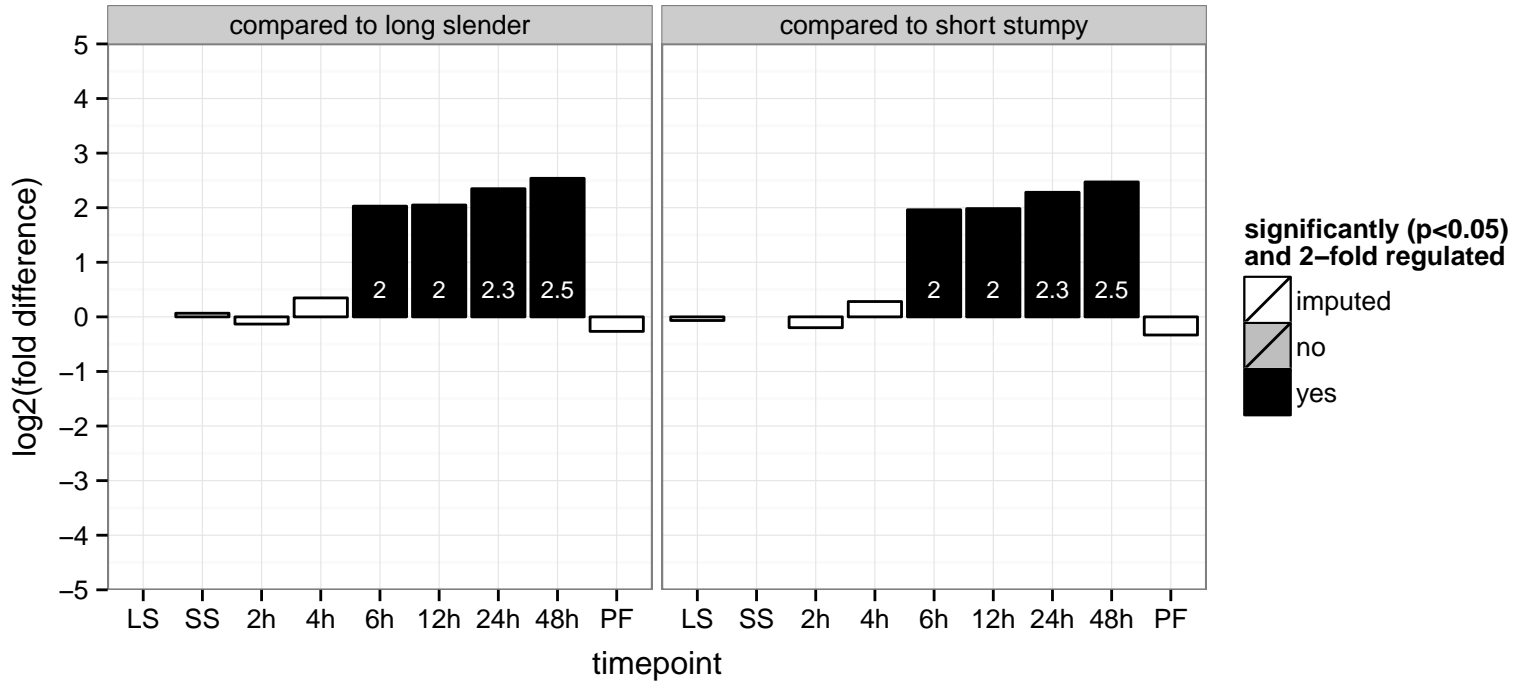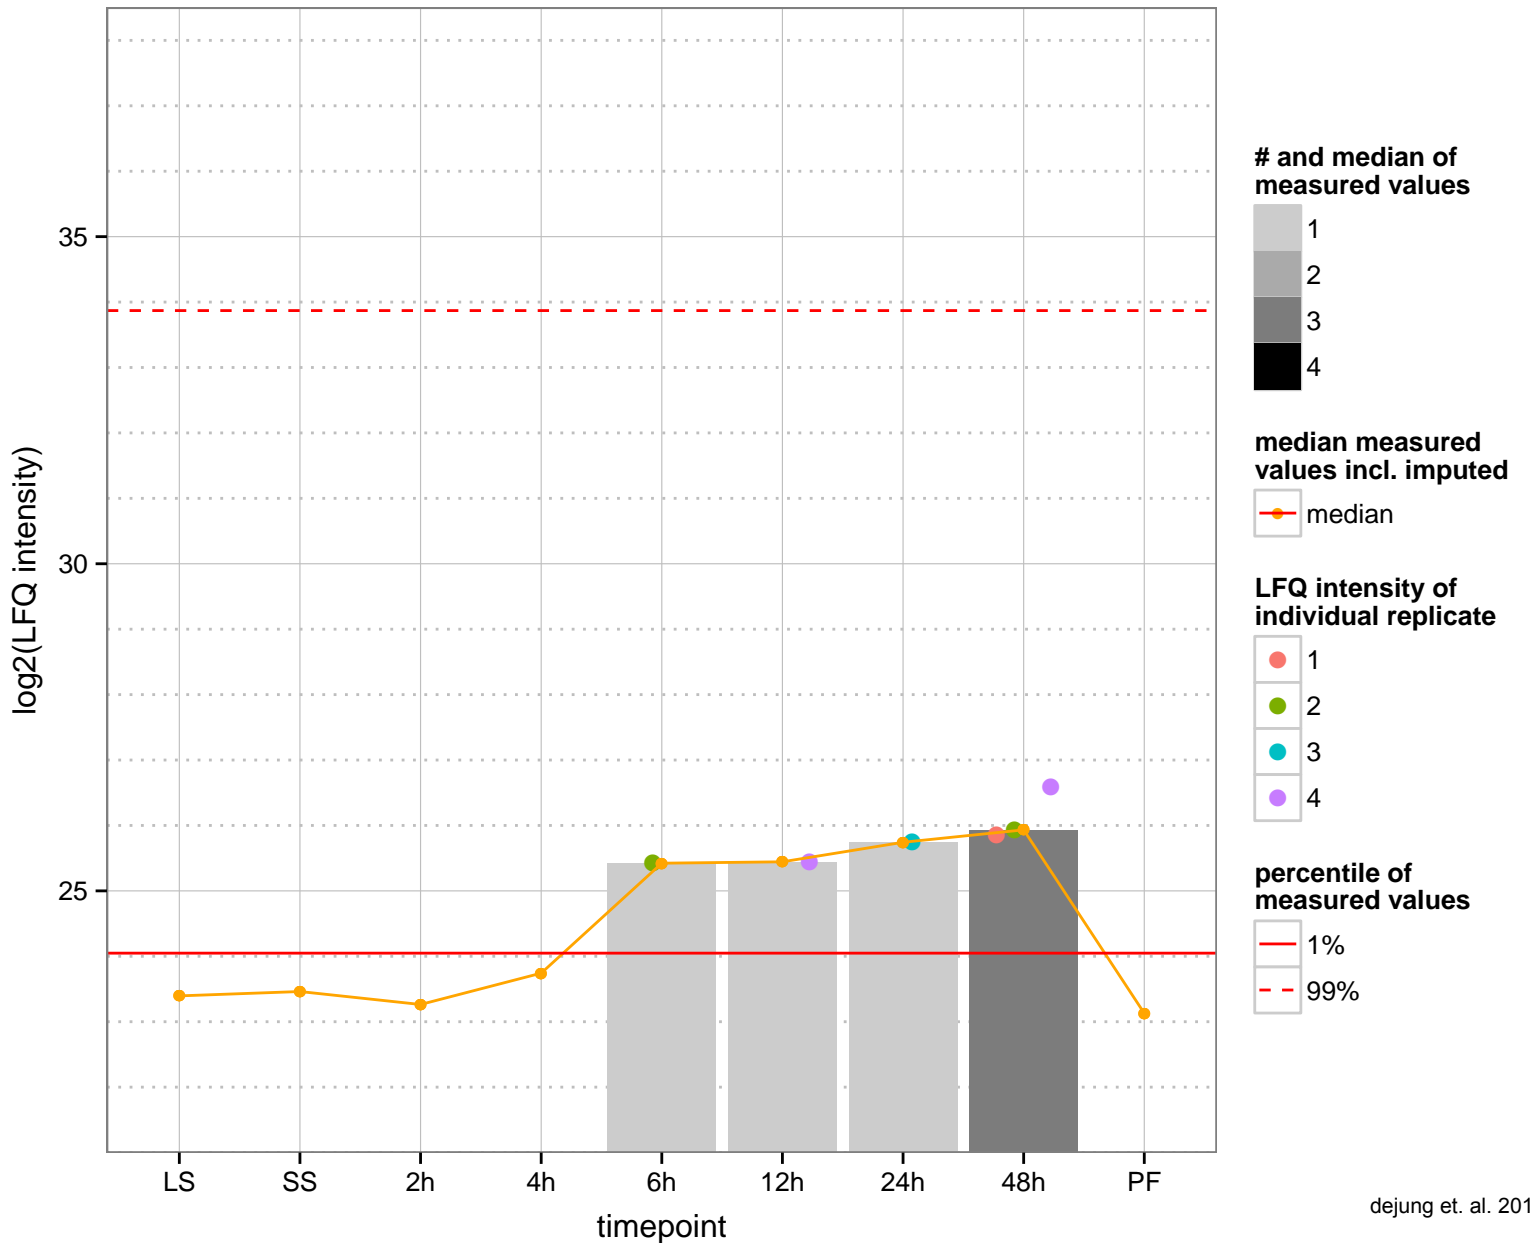

hypothetical protein, conserved  
 Tb927.9.11820  
 AGOF: null  
 AGOC: null  
 AGOP: null  
 PGO: null  
 PGOC: null  
 PGOP: null

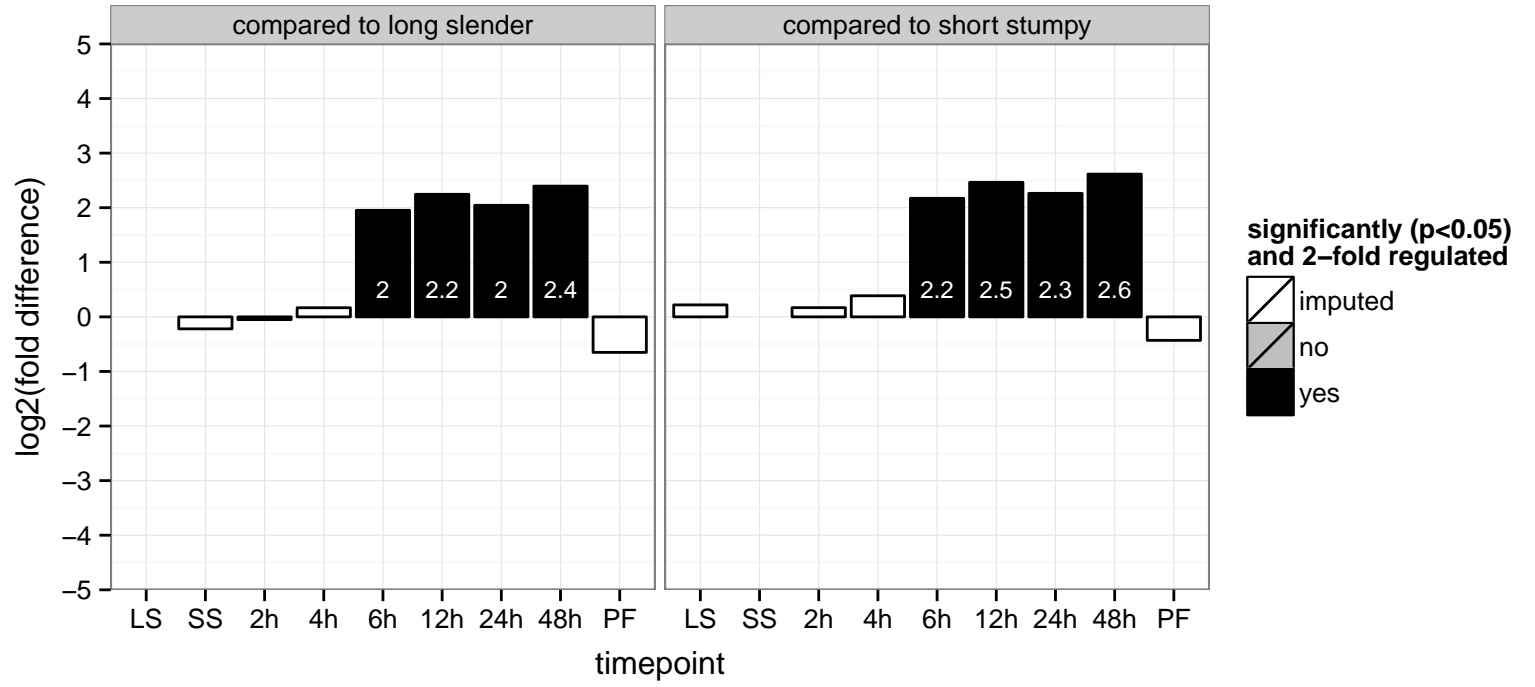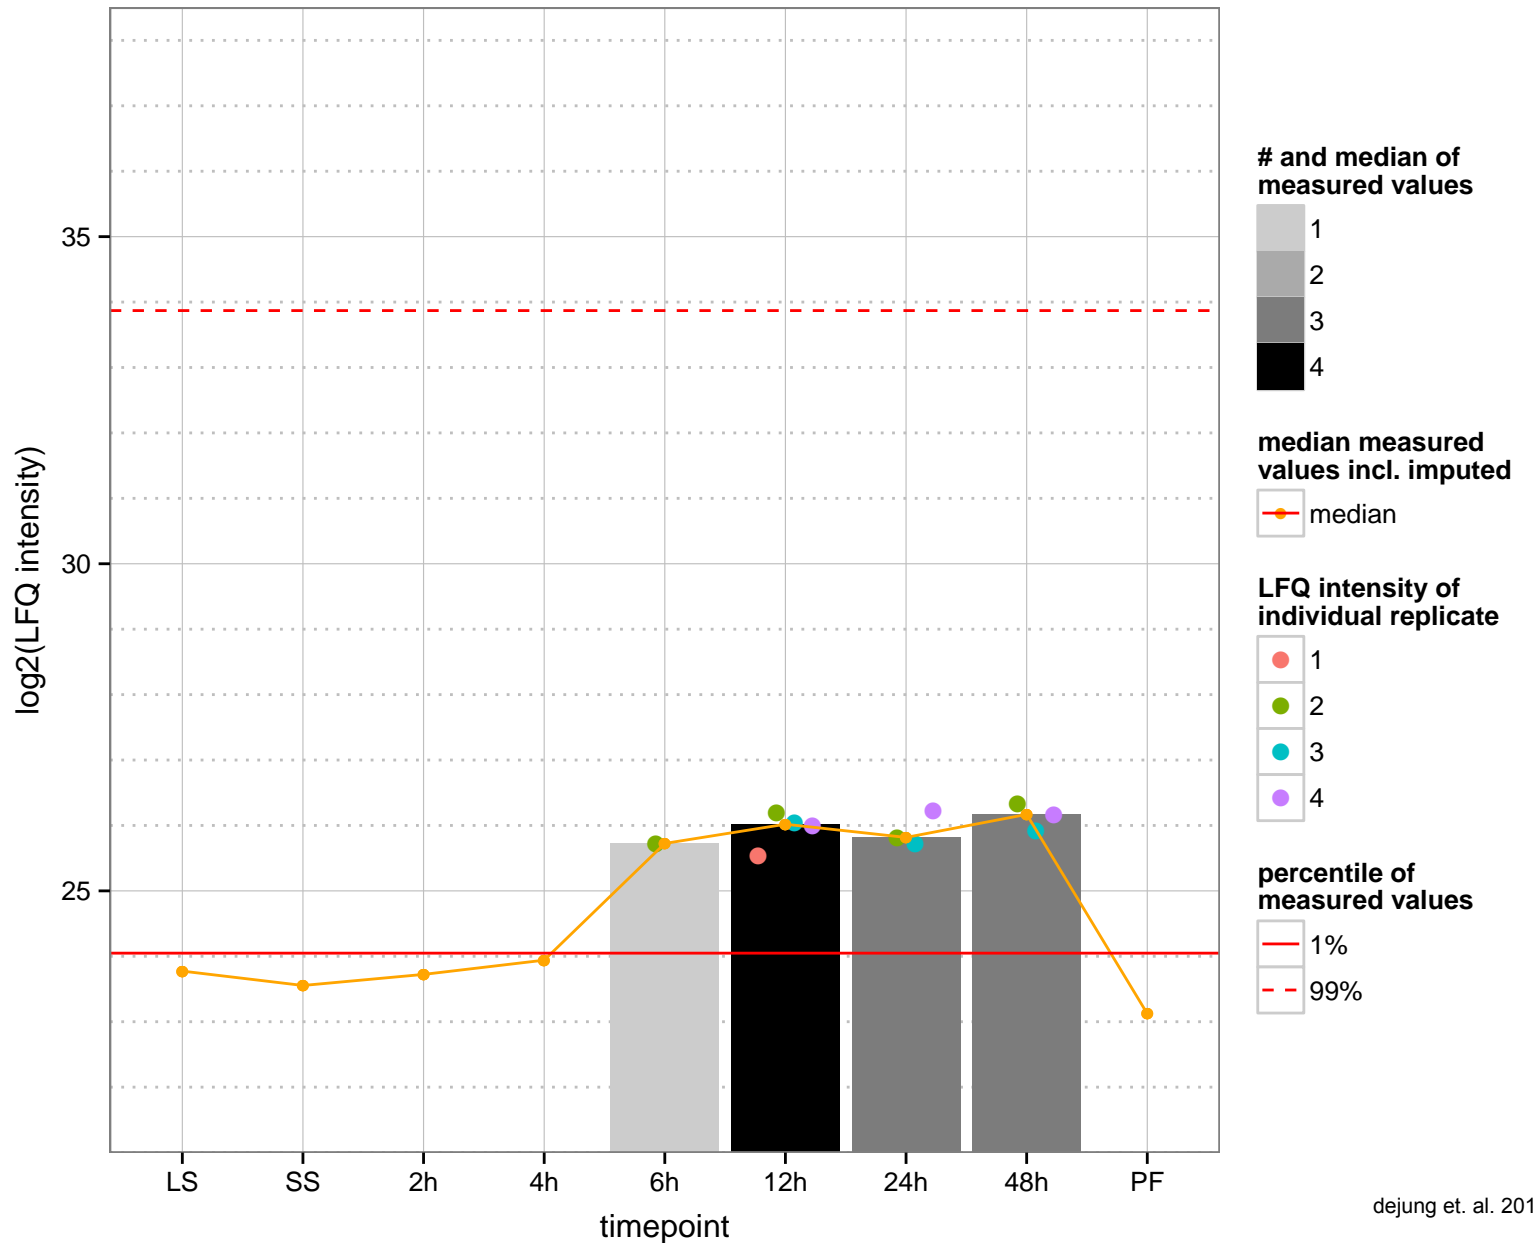

ankyrin repeat protein, putative  
 Tb927.9.13100  
 AGOF: null  
 AGOC: null  
 AGOP: null  
 PGO: protein binding  
 PGOC: null  
 PGOP: null

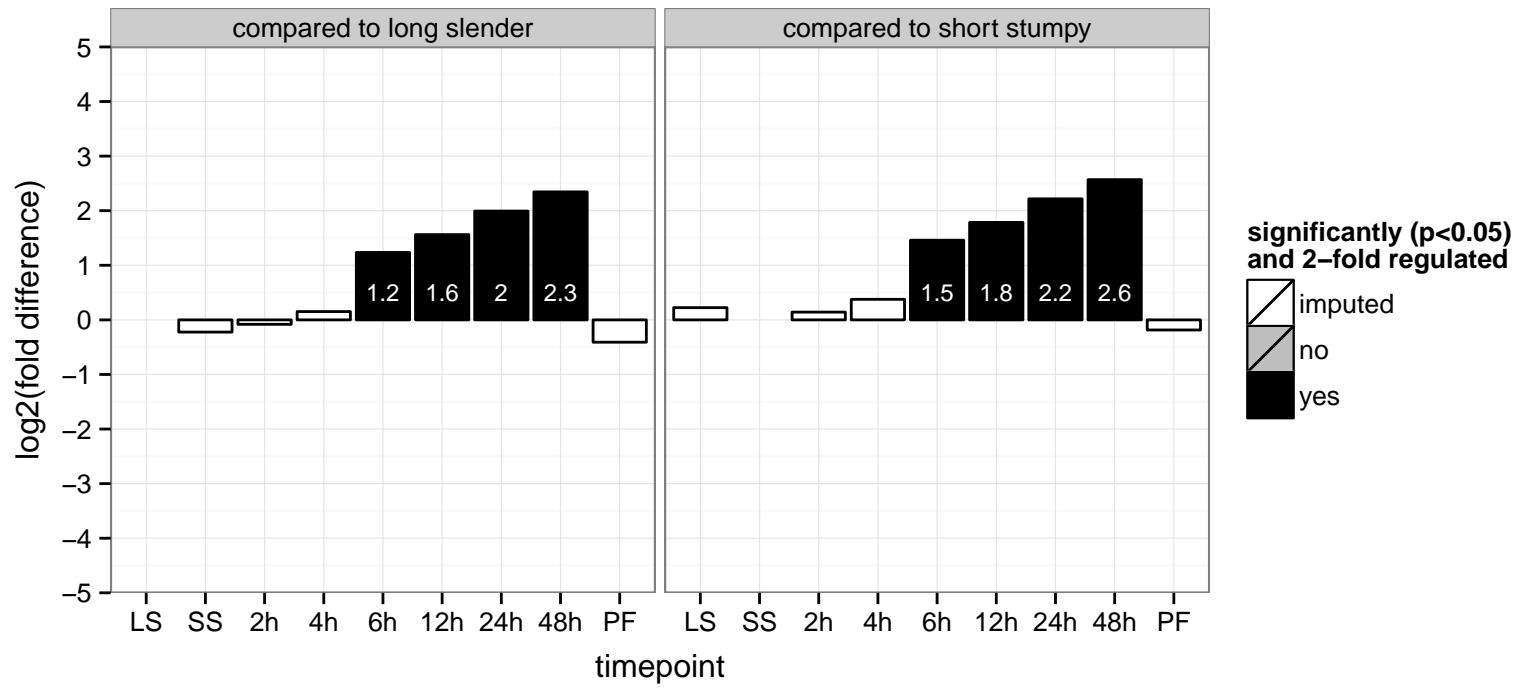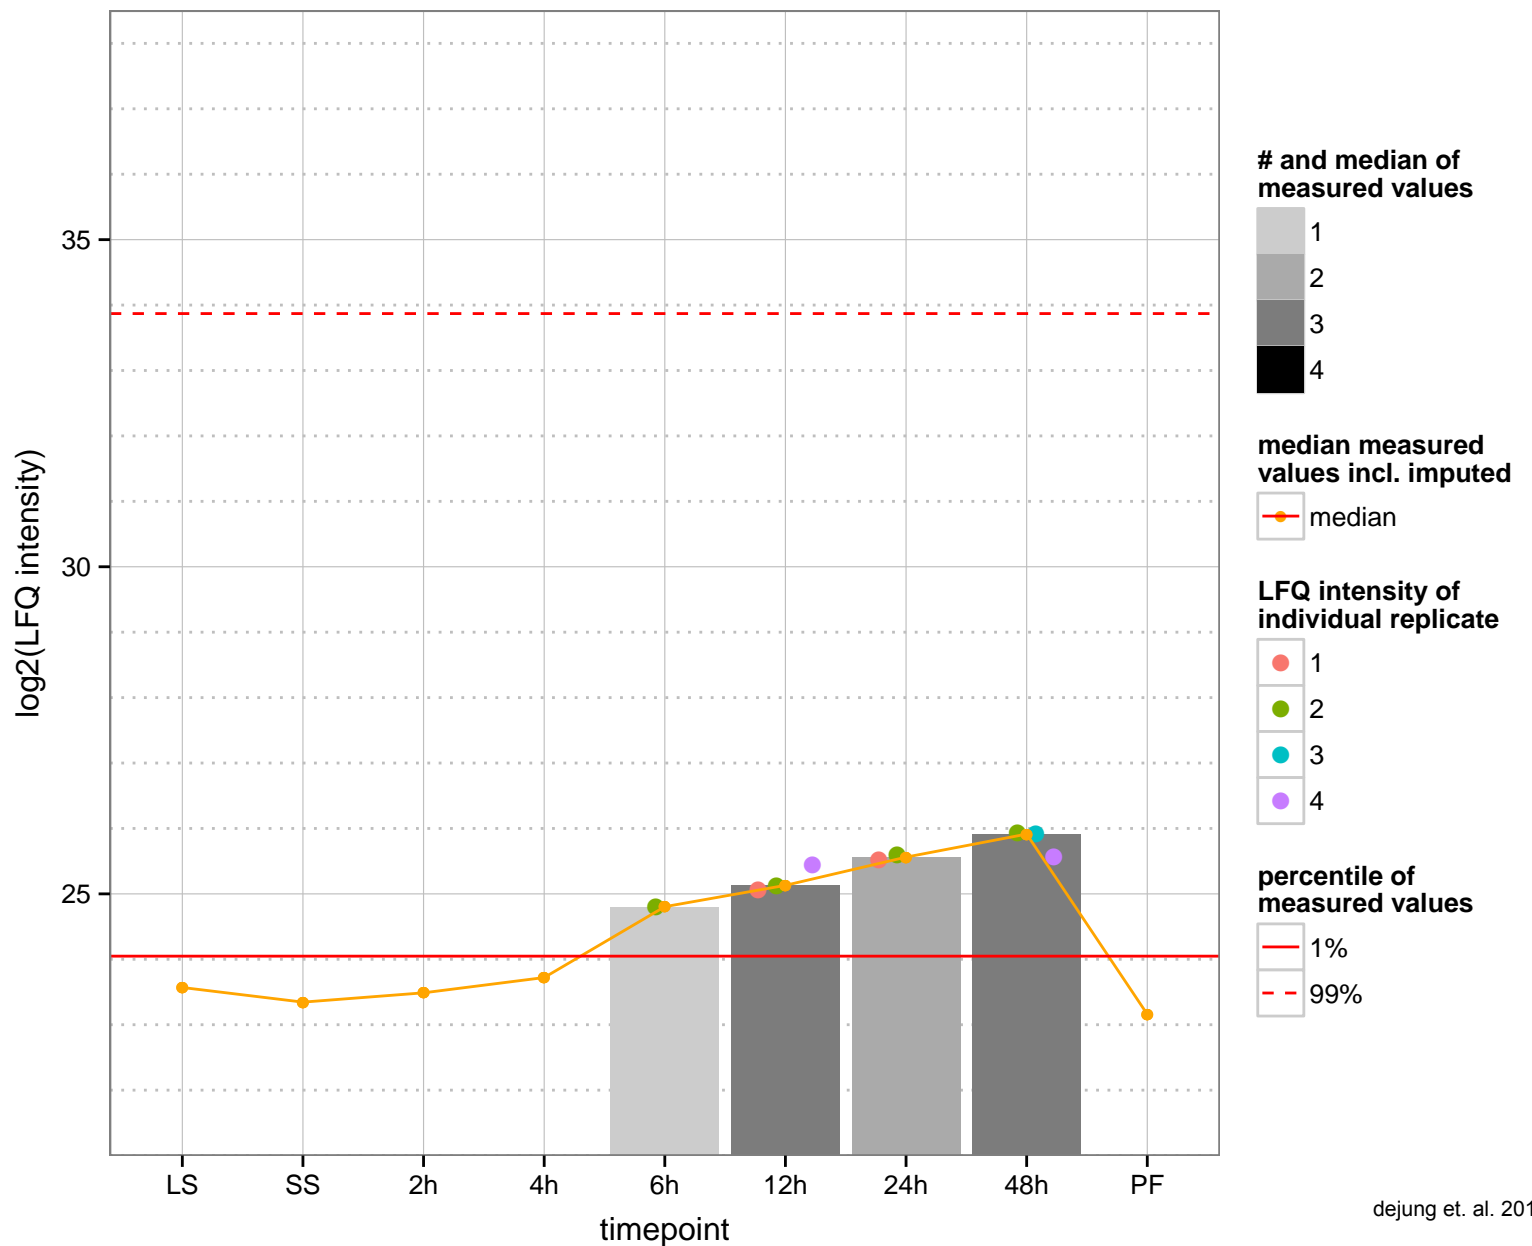

hypothetical protein, conserved  
 Tb927.9.13120  
 AGOF: null  
 AGOC: null  
 AGOP: null  
 PGO: null  
 PGOC: null  
 PGOP: null

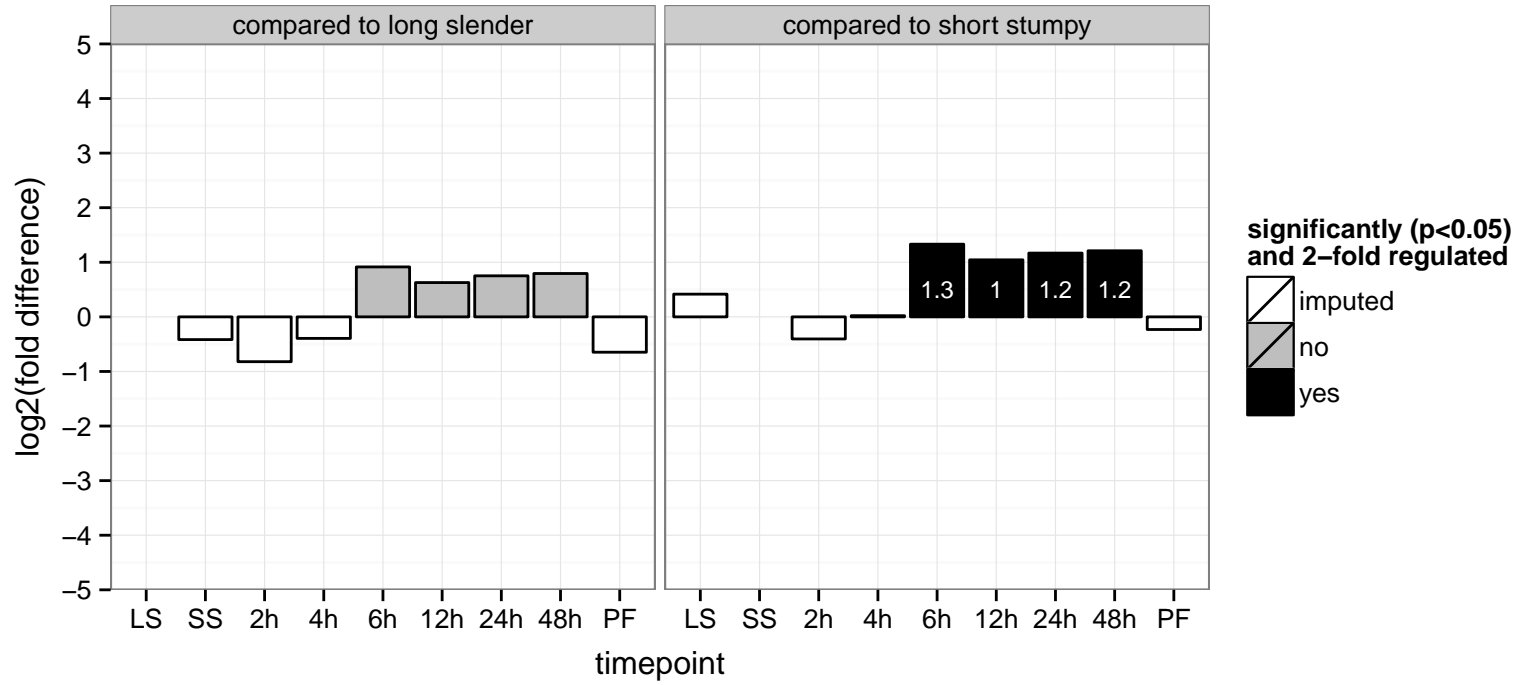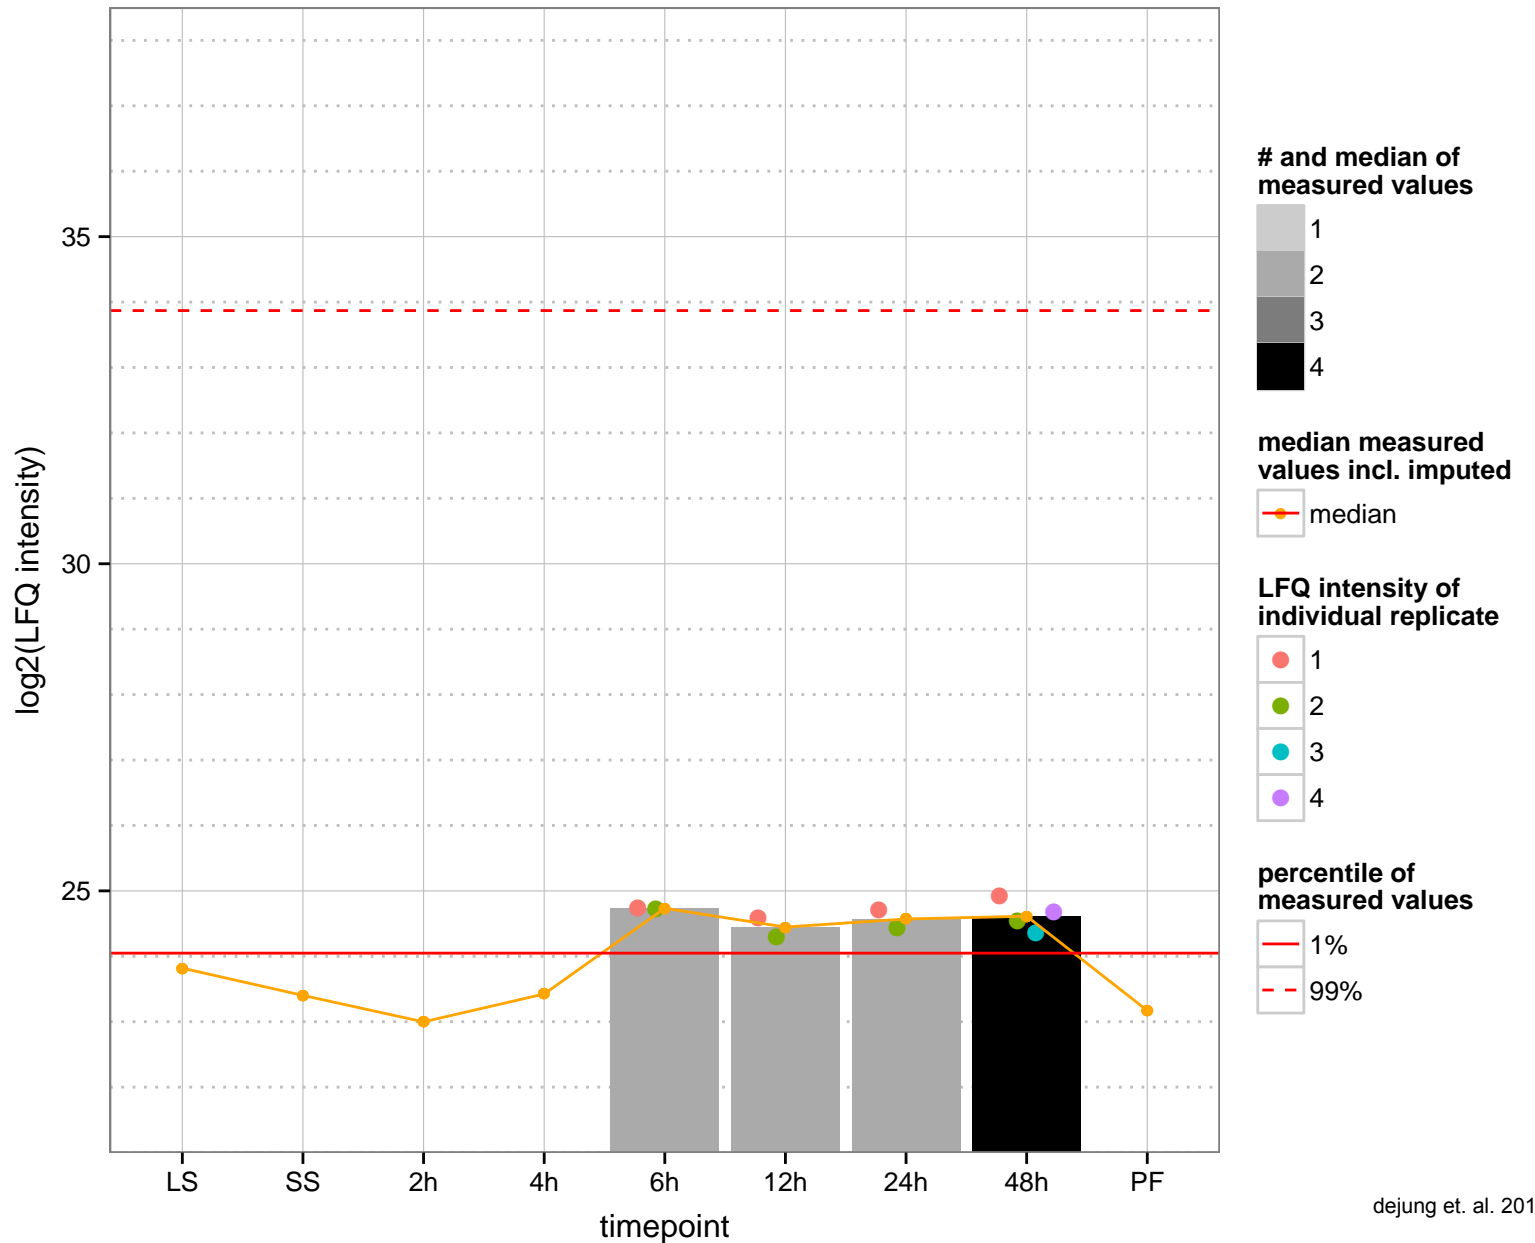

hypothetical protein, conserved  
 Tb927.9.1440  
 AGOF: null  
 AGOC: null  
 AGOP: null  
 PGOF: null  
 PGOE: null  
 PGOP: null

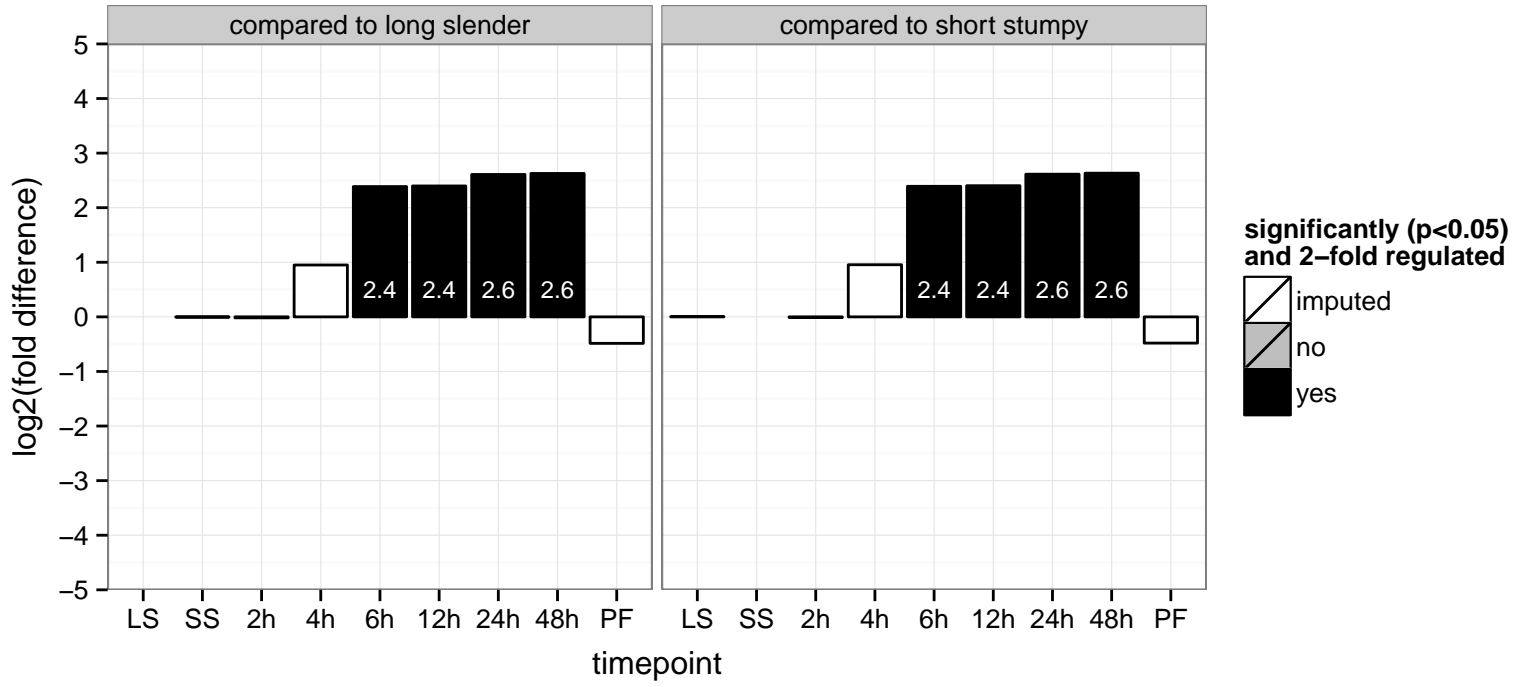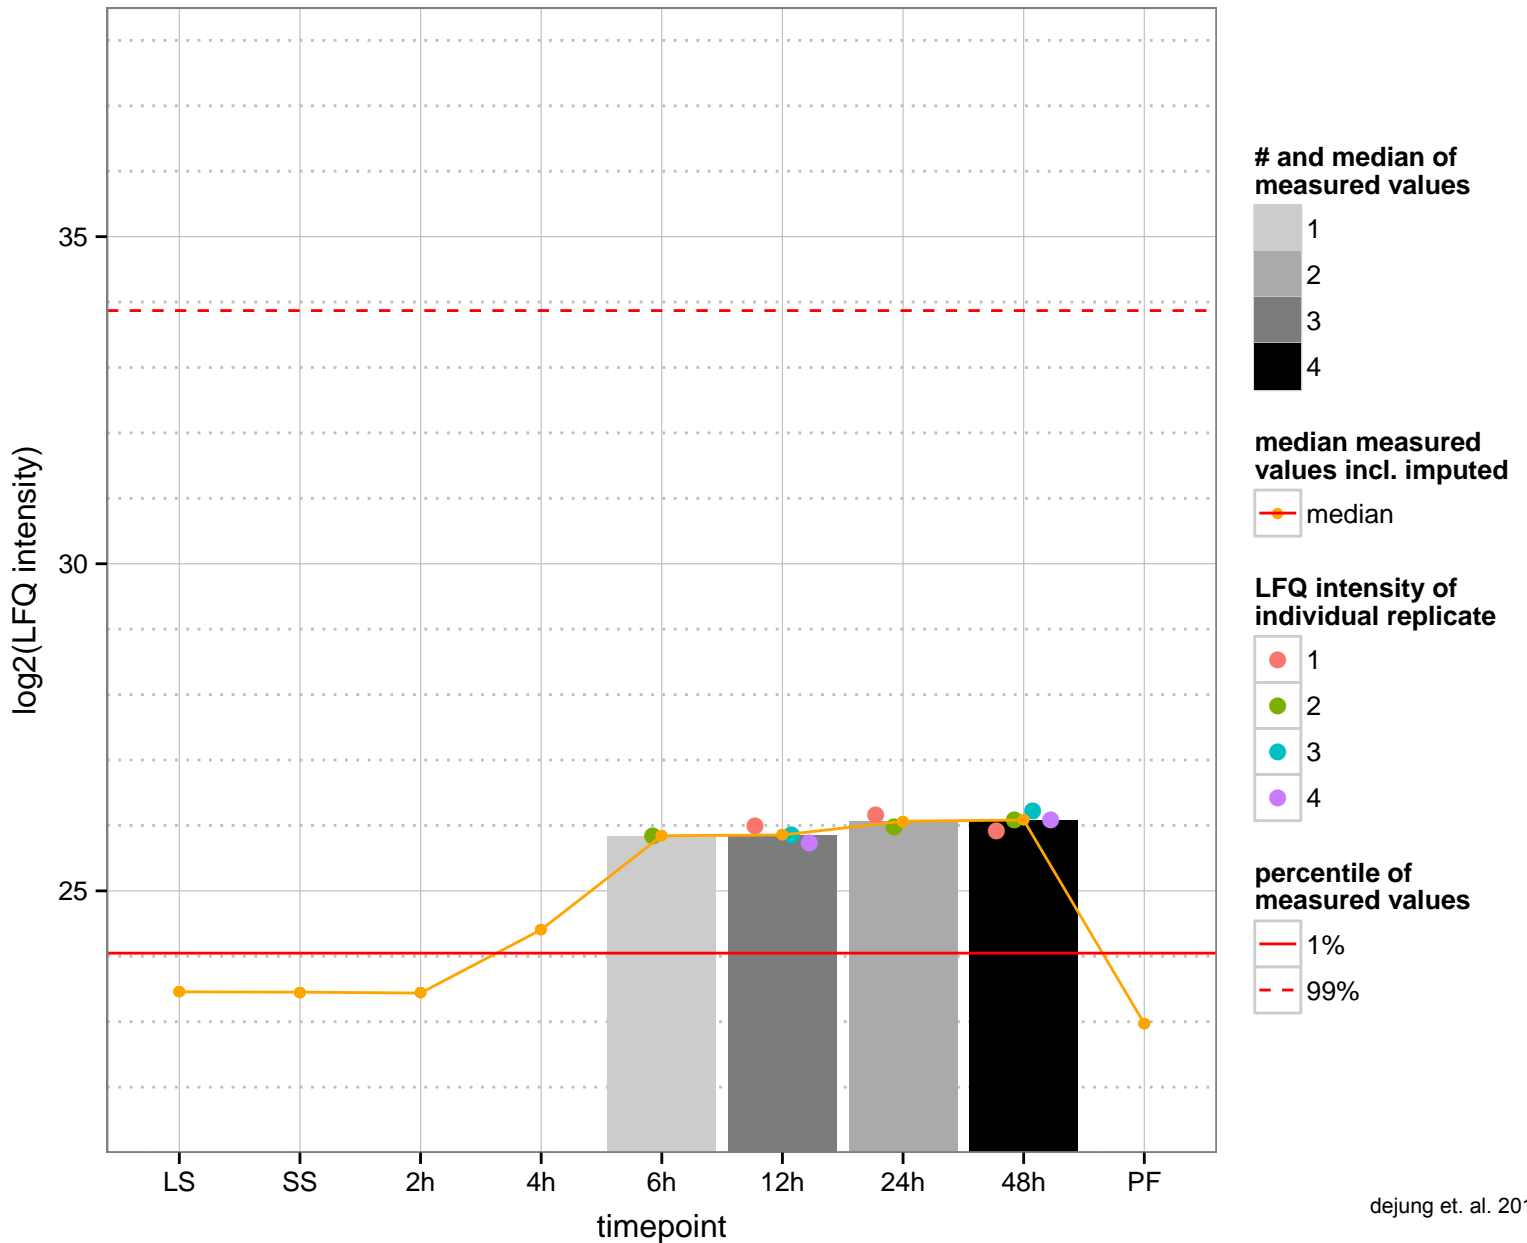

hypothetical protein, conserved  
 Tb927.9.15040  
 AGOF: null  
 AGOC: null  
 AGOP: null  
 PGOF: null  
 PGOC: null  
 PGOP: null

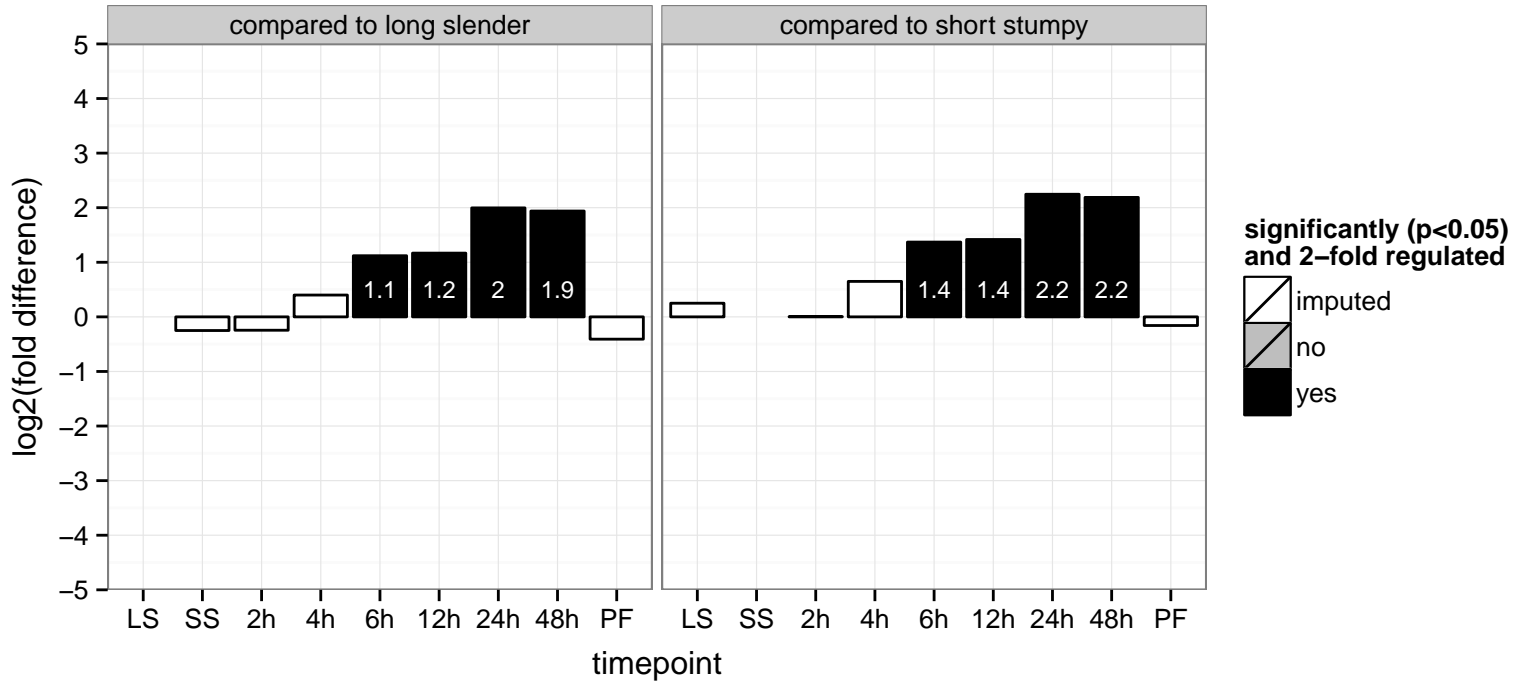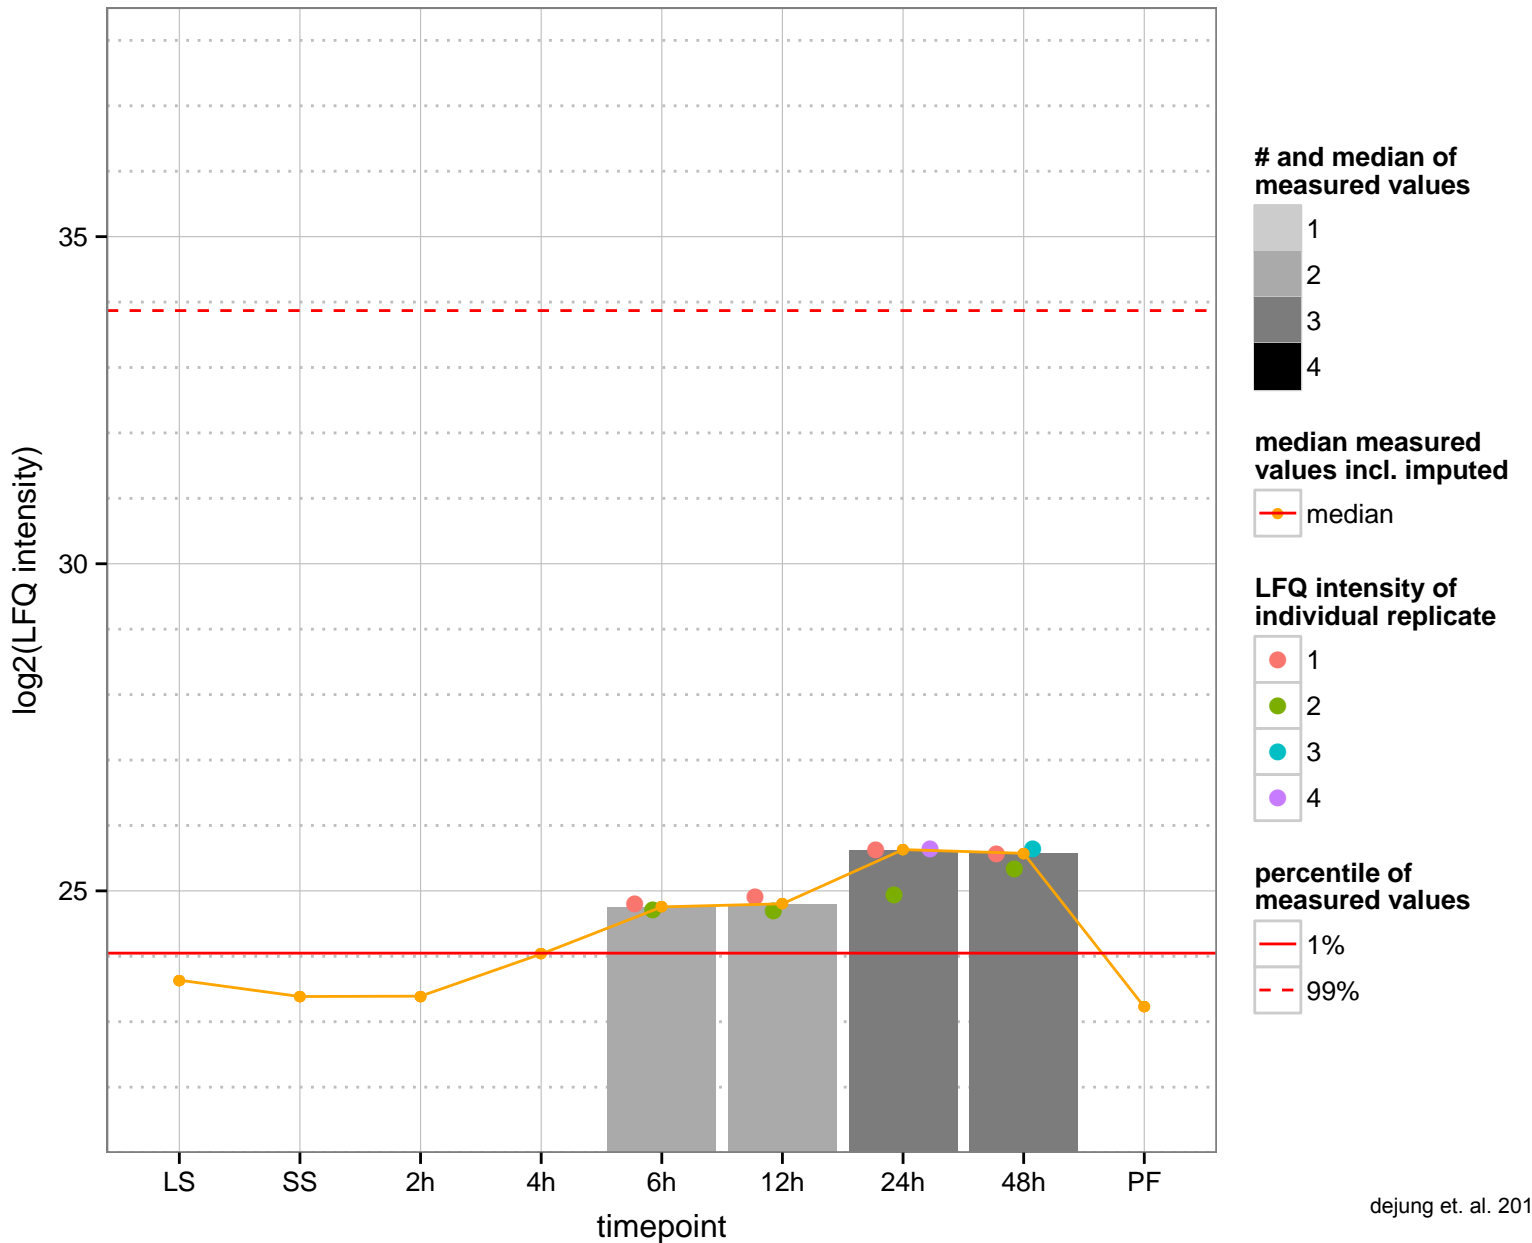

hypothetical protein, conserved  
 Tb927.9.2060  
 AGOF: GTP binding  
 AGOC: null  
 AGOP: null  
 PGOF: GTP binding  
 PGOC: intracellular  
 PGOP: small GTPase mediated signal transduction

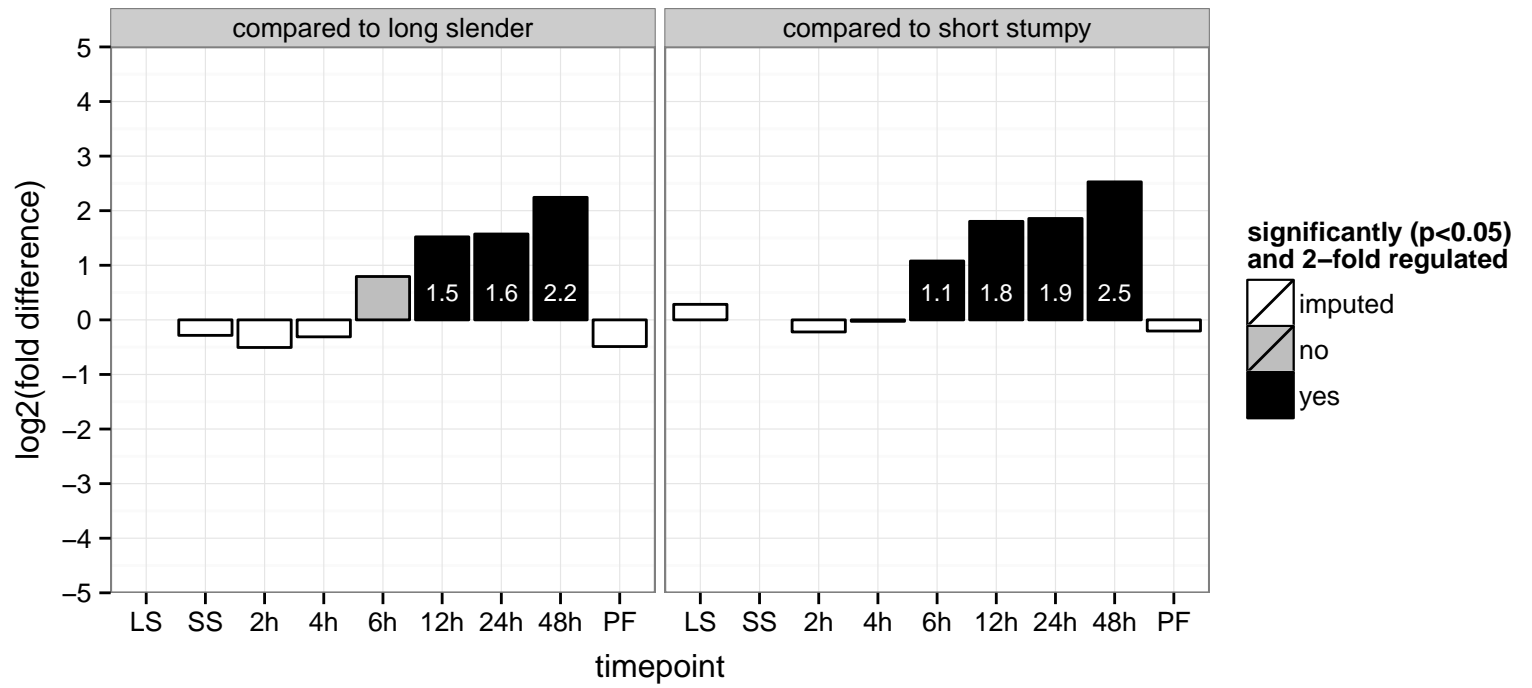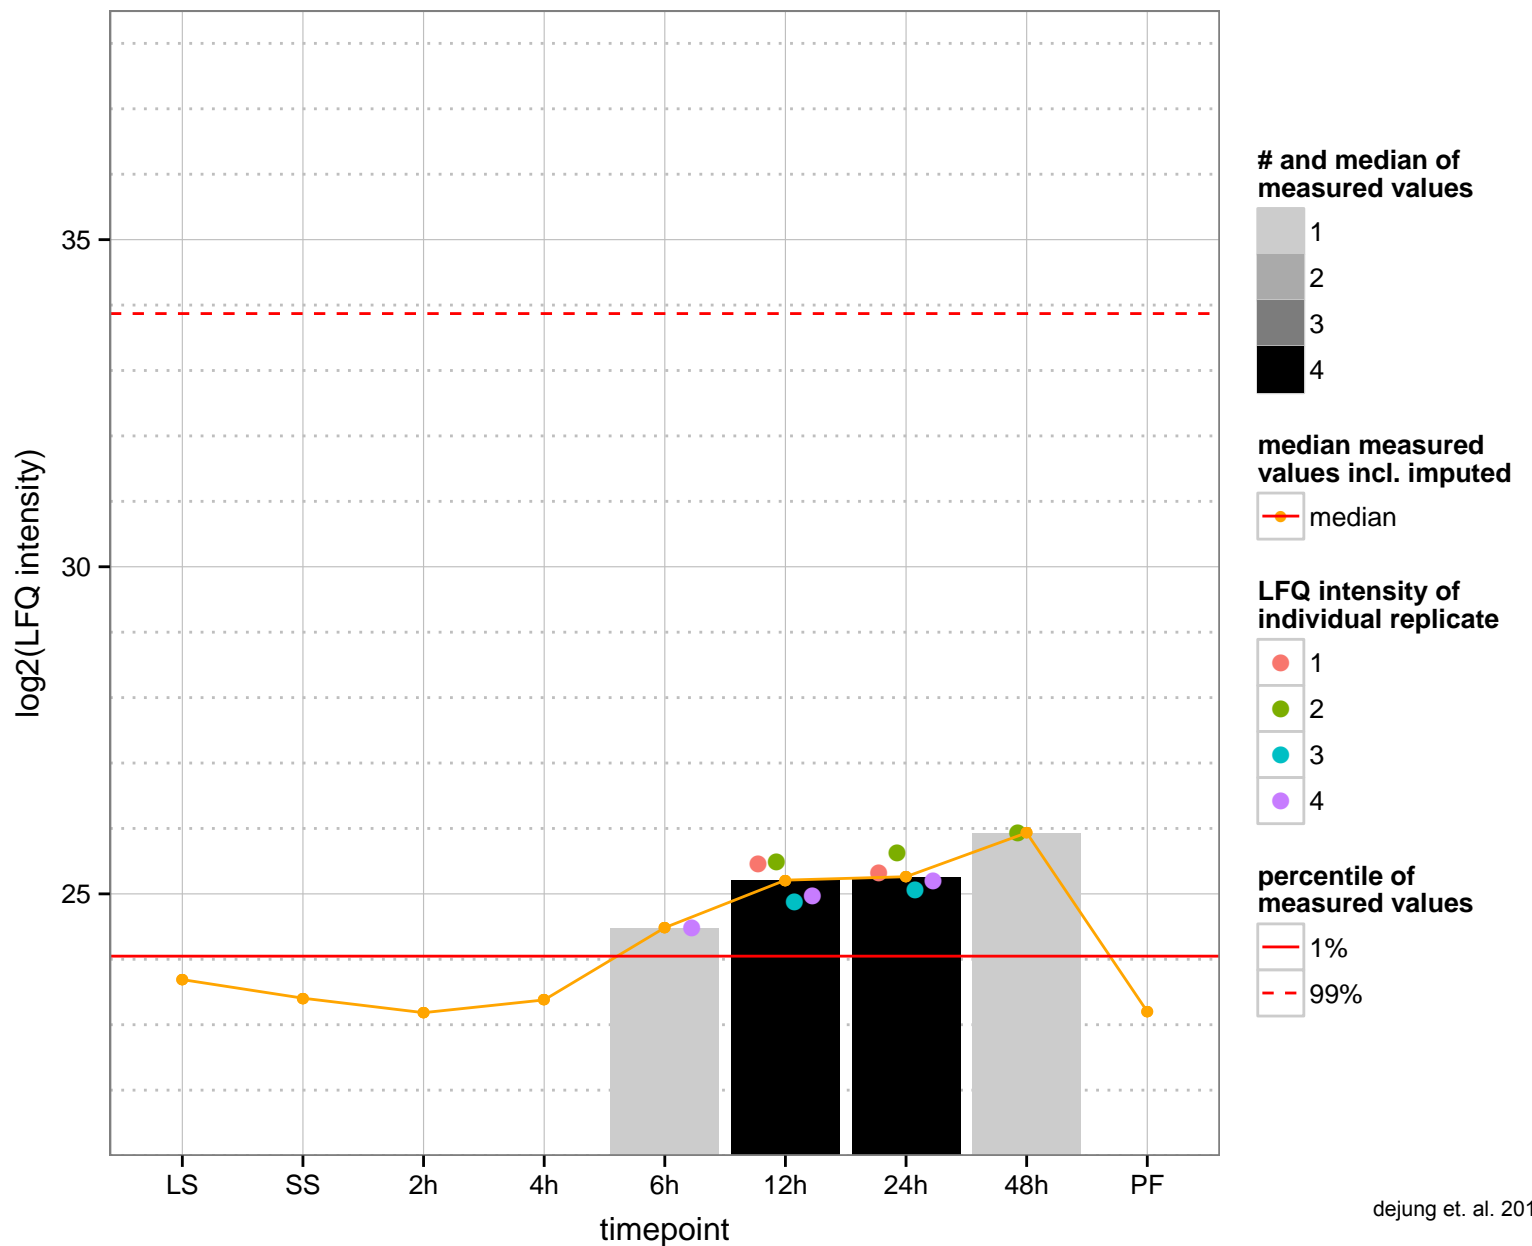

hypothetical protein, conserved  
 Tb927.9.7980  
 AGOF: null  
 AGOC: mitochondrion  
 AGOP: null  
 PGO: null  
 PGO: null  
 PGO: null

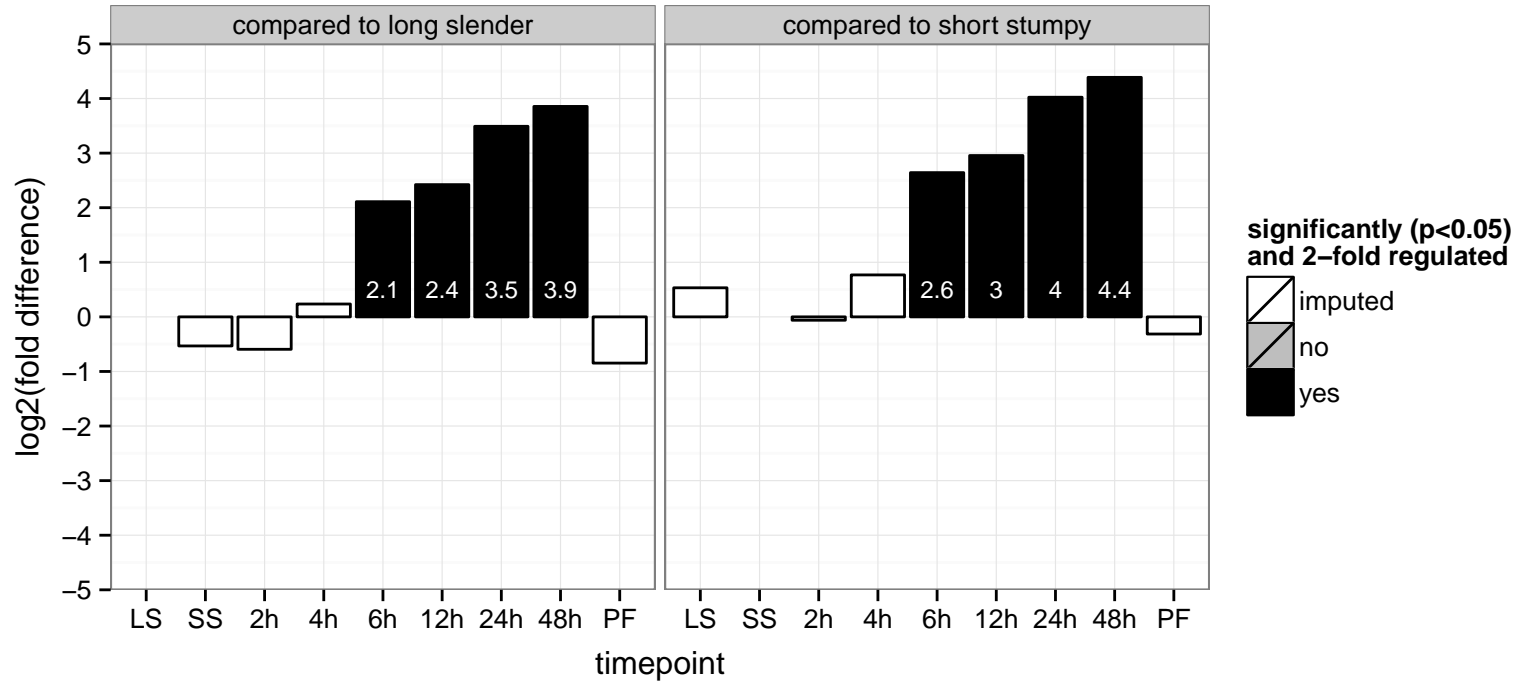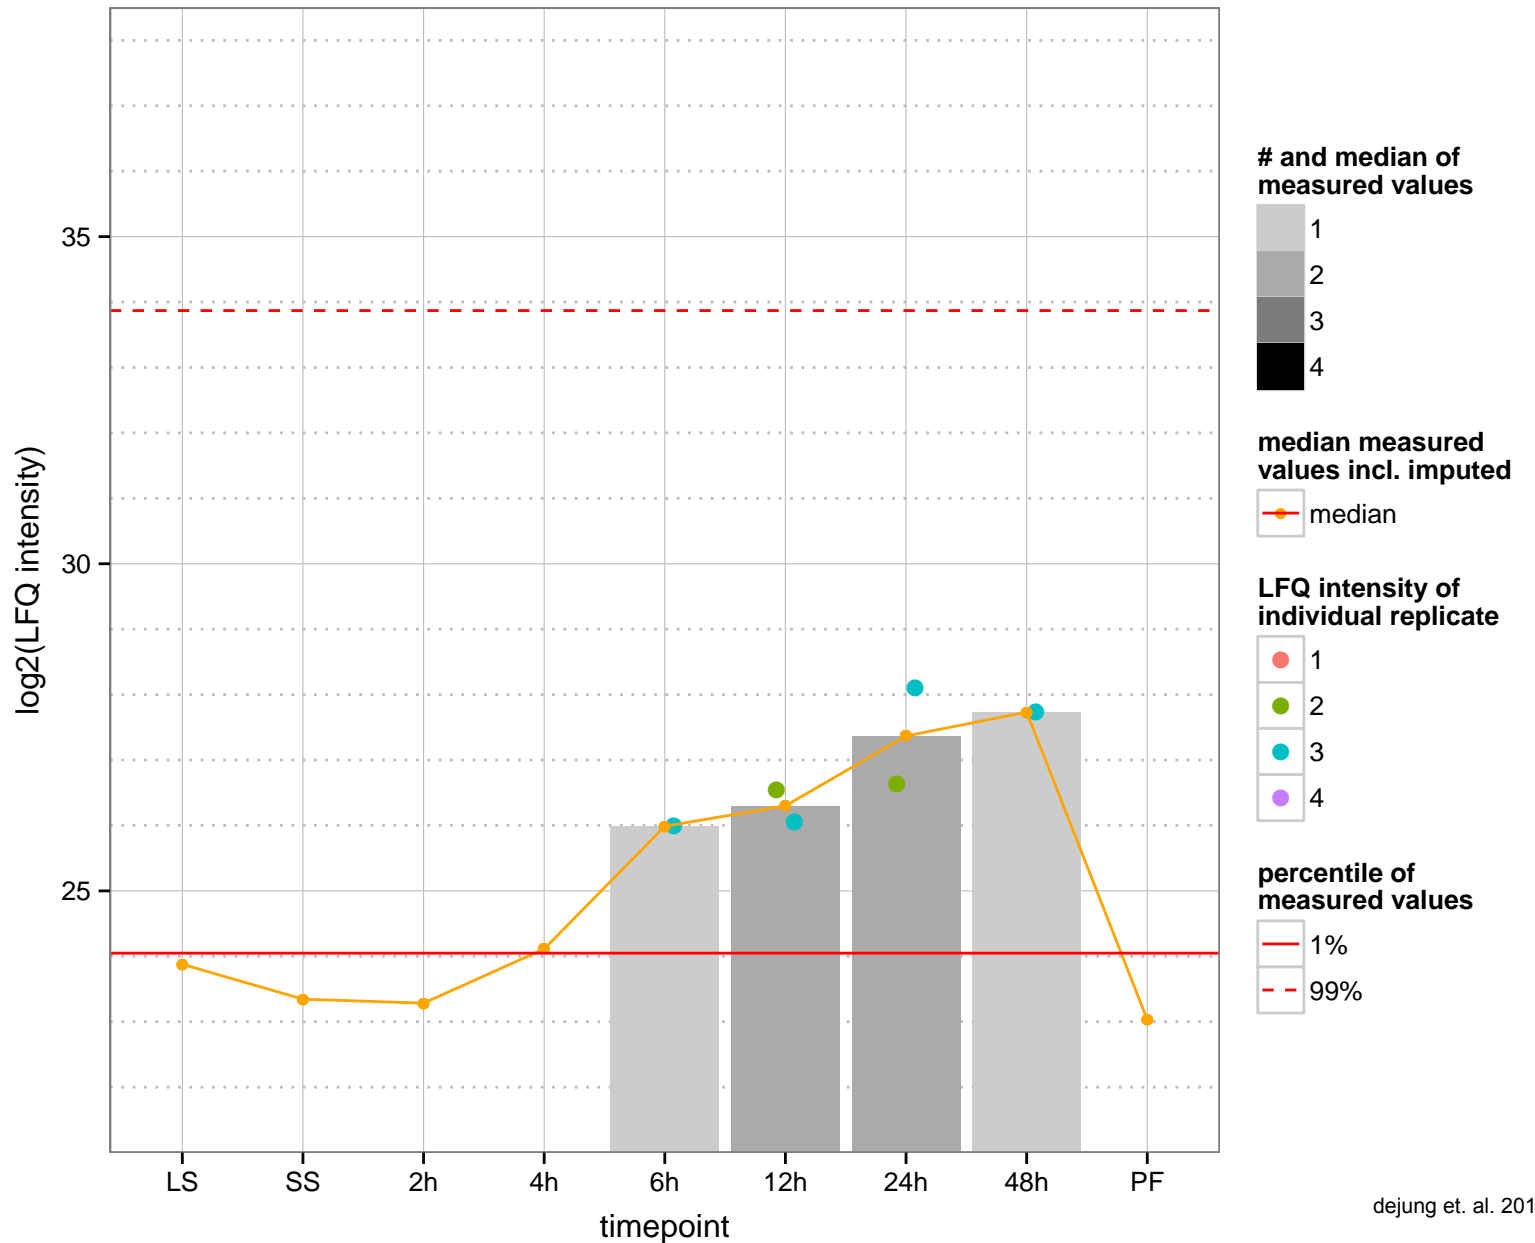



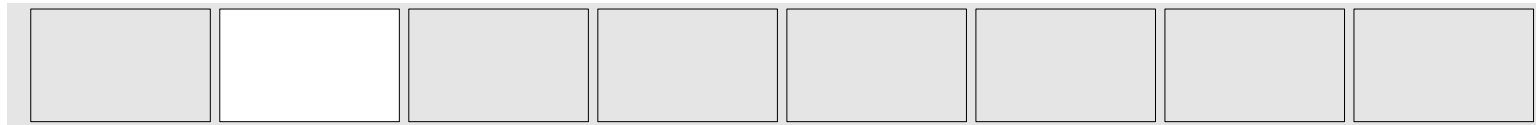

SS

2h

4h

6h

12h

24h

48h

PF

timepoint

**regulated**



not regulated



significant down

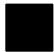

significant up

hypothetical protein, conserved, chrX additional, unordered contigs  
 Tb927.10.4470;Tb10.v4.0037  
 AGOF: null  
 AGOC: null  
 AGOP: null  
 PGO: binding  
 PGOC: null  
 PGOP: null

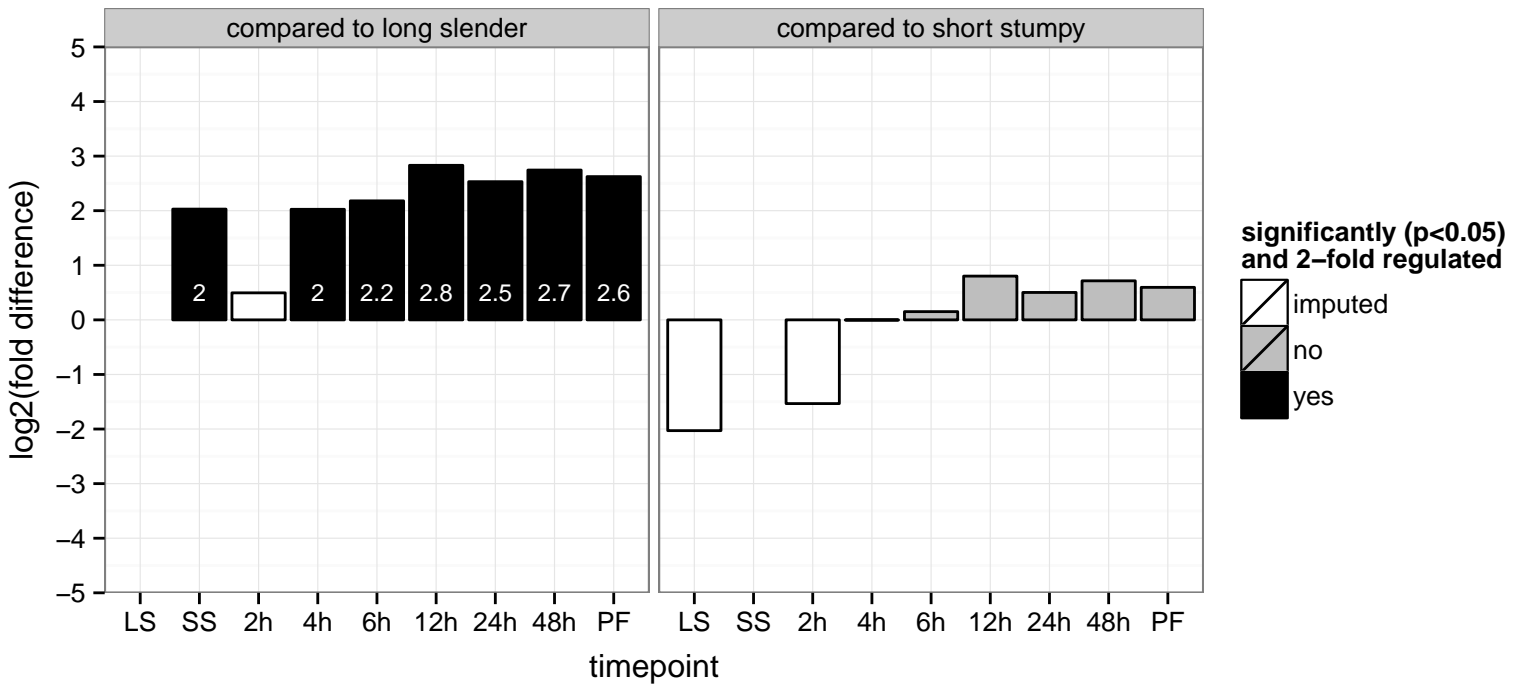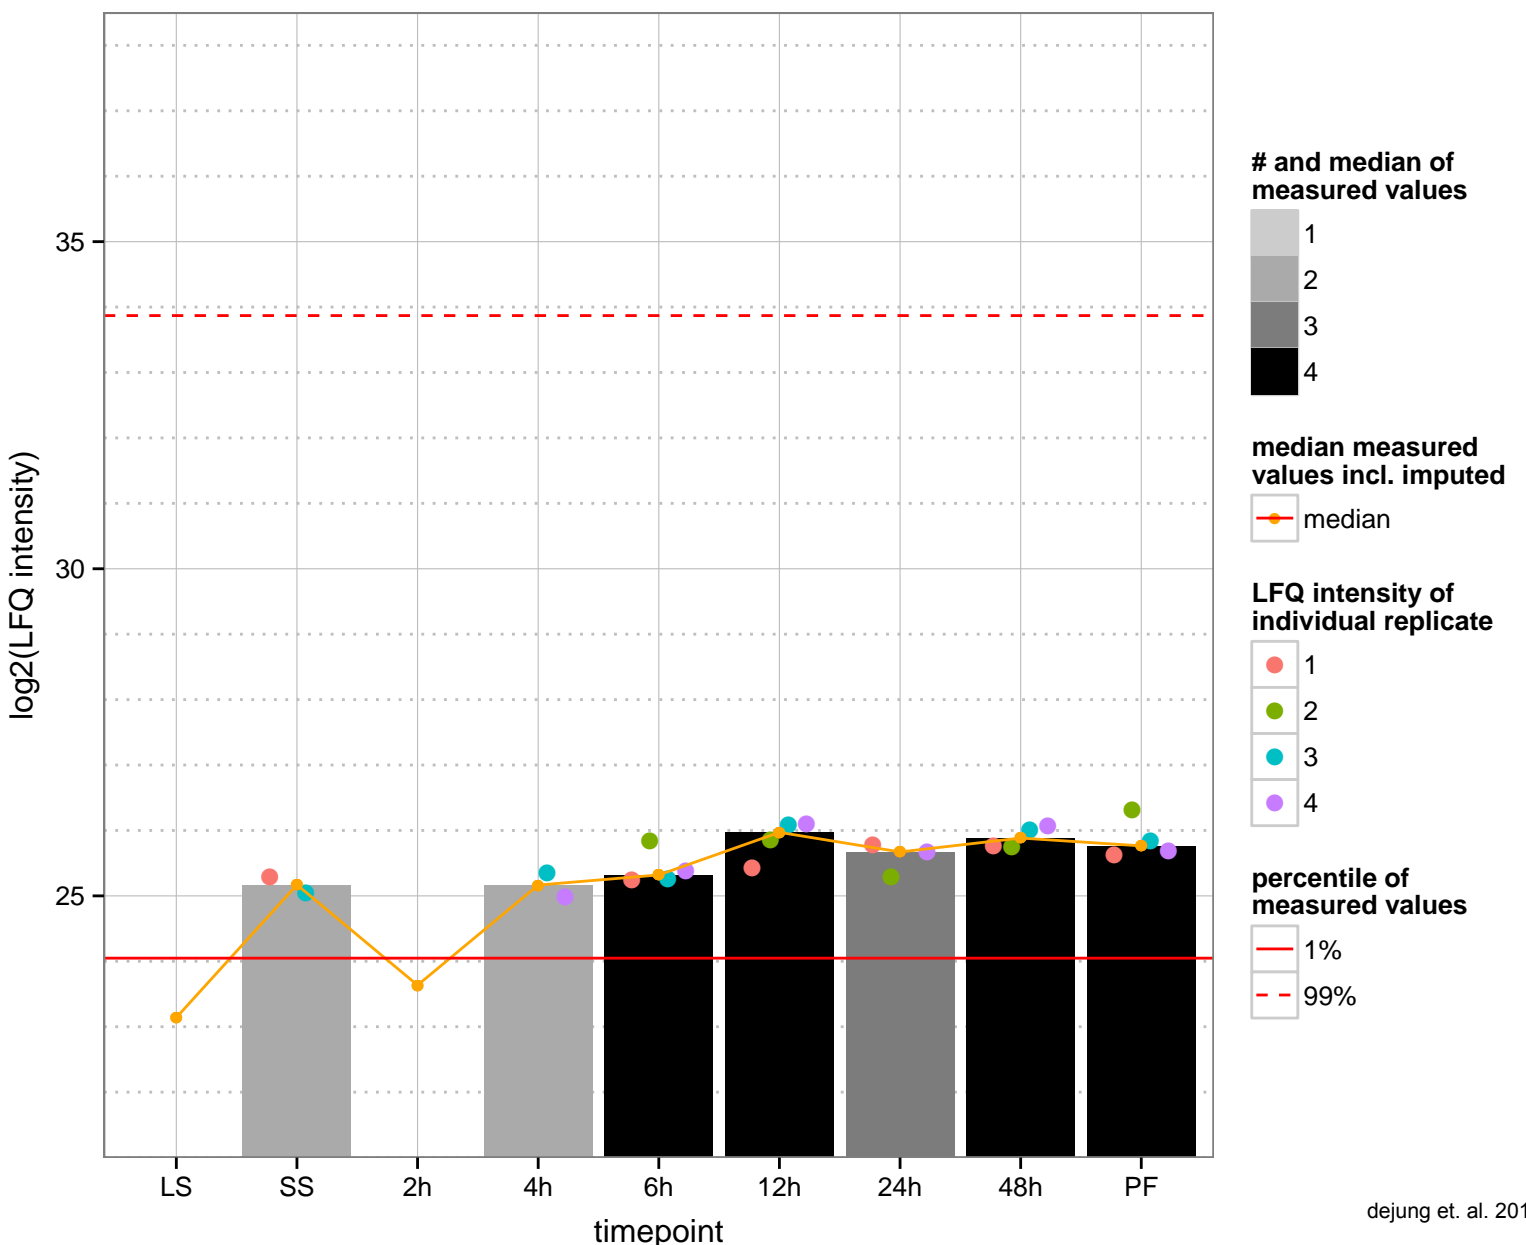

hypothetical protein, conserved  
 Tb927.7.4840;Tb11.v5.0166  
 AGOF: null  
 AGOC: null  
 AGOP: null  
 PGOF: null  
 PGOE: null  
 PGOP: null

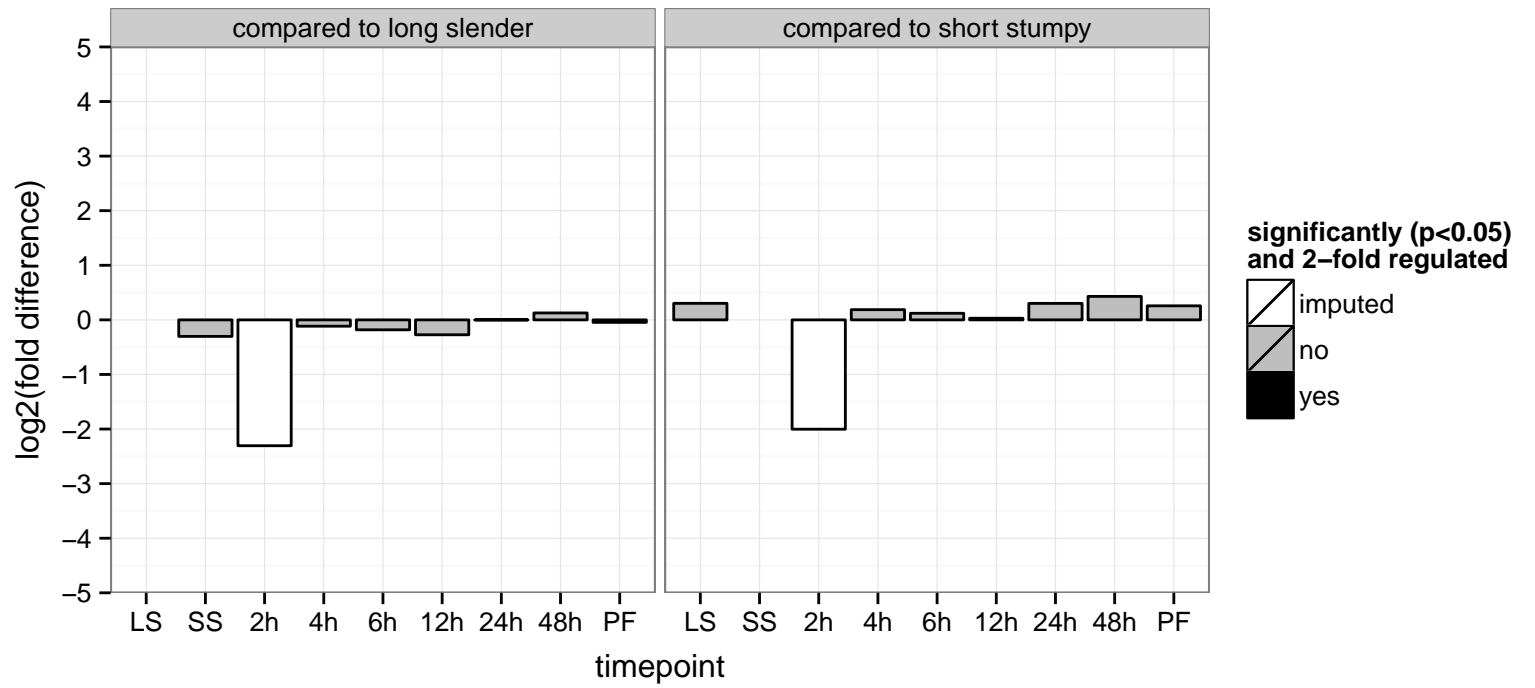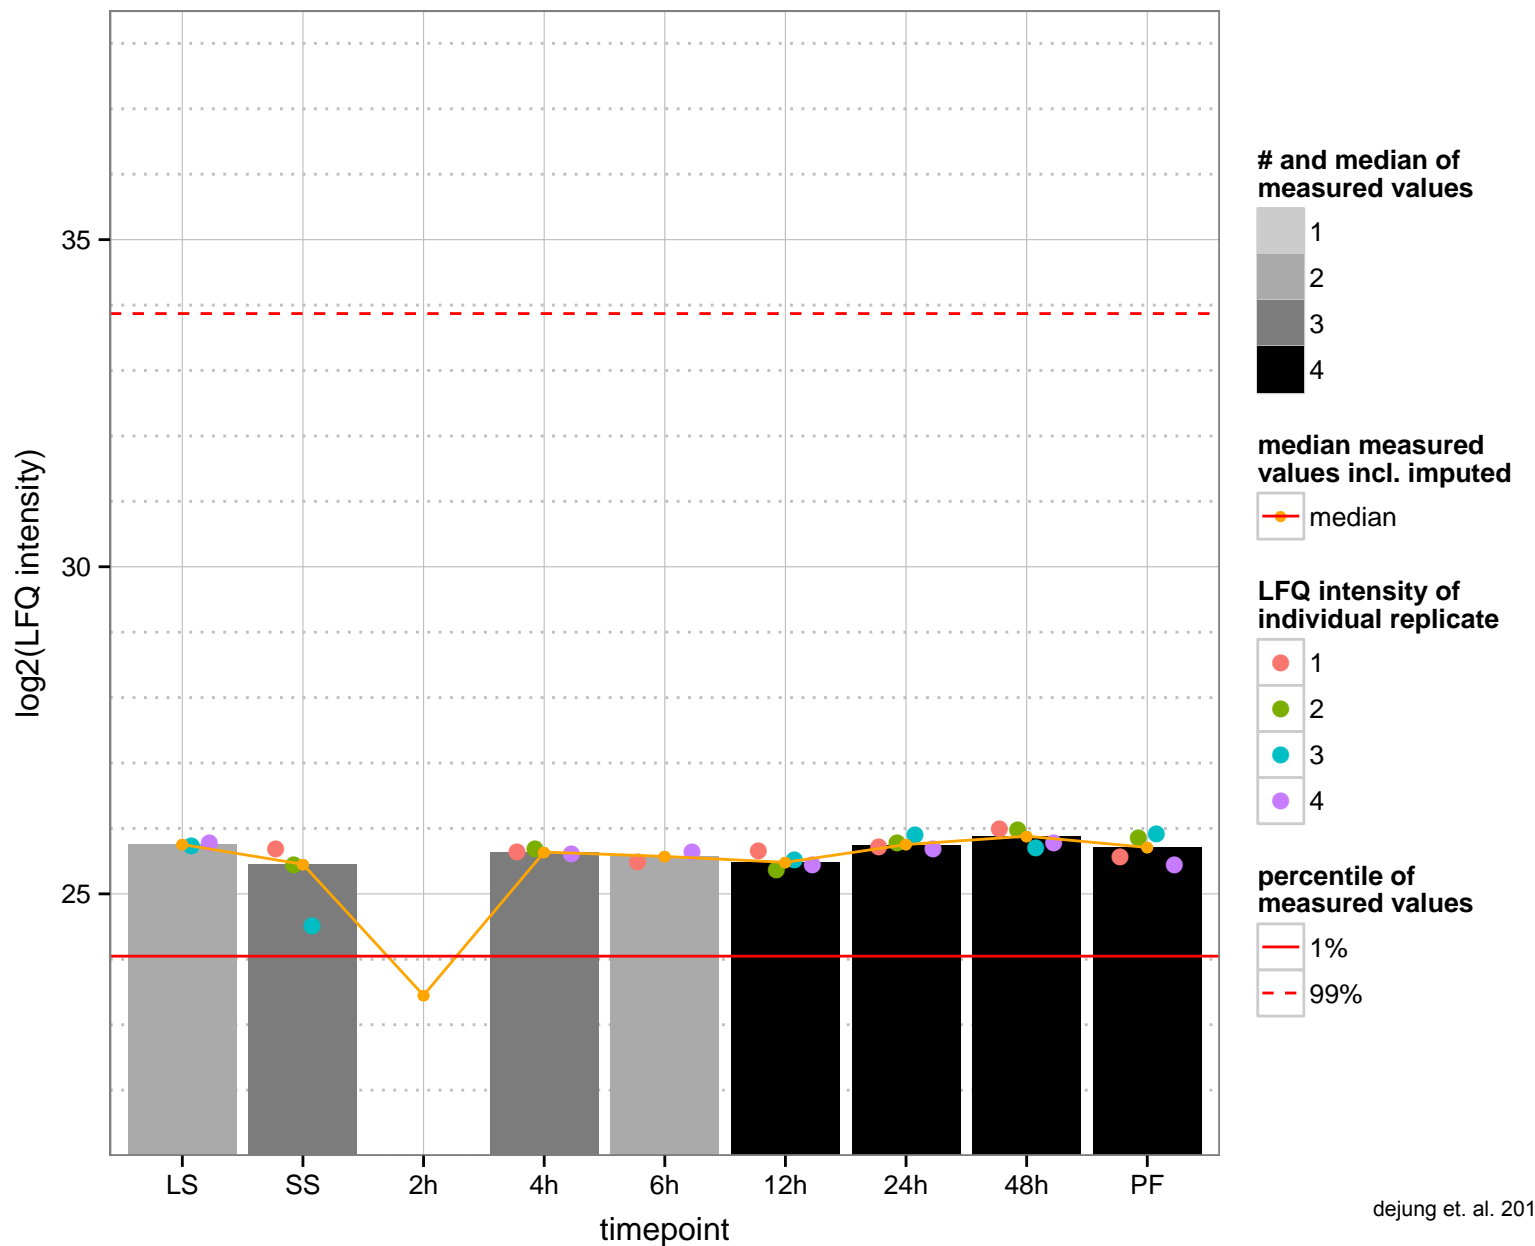

hypothetical protein, conserved  
 Tb927.11.7250;Tb11.v5.0257  
 AGOF: null  
 AGOC: null, mitochondrion  
 AGOP: null  
 PGO: null  
 PGOC: null  
 PGOP: null

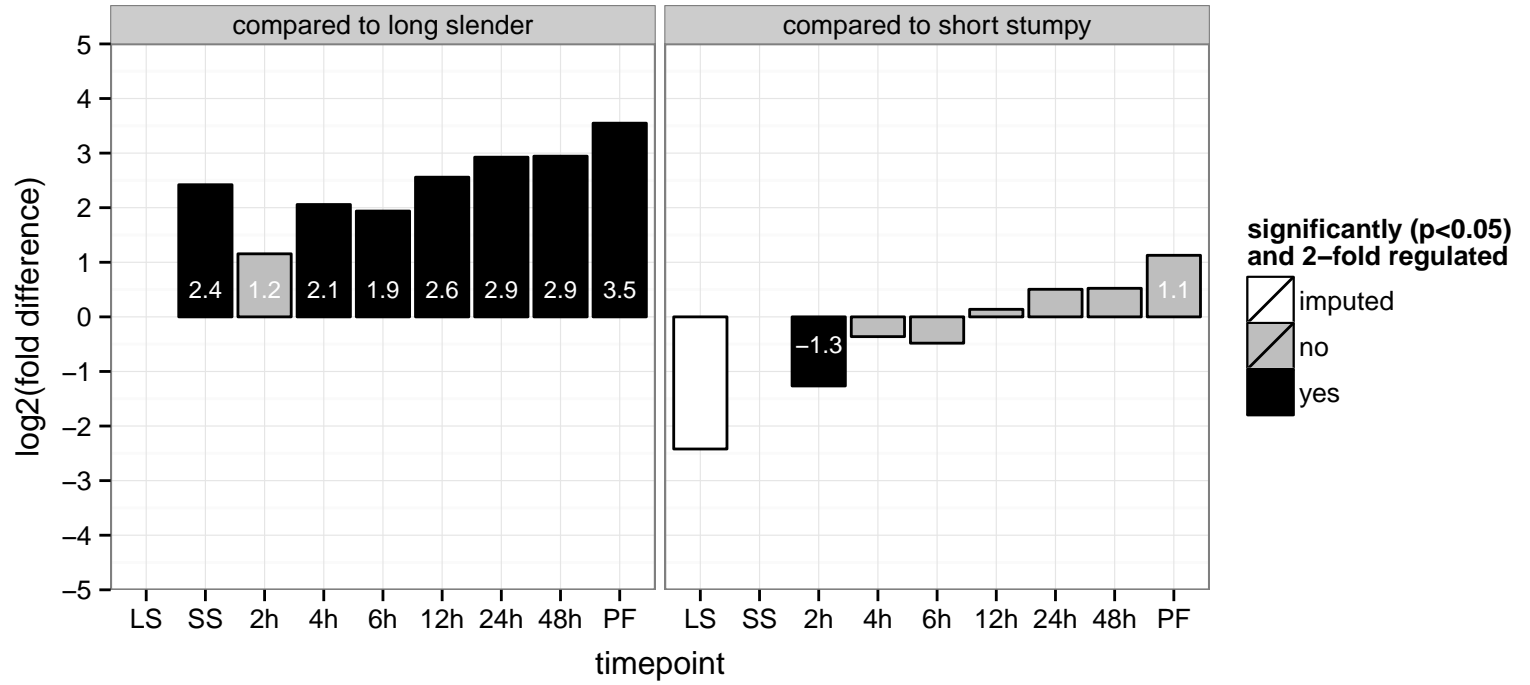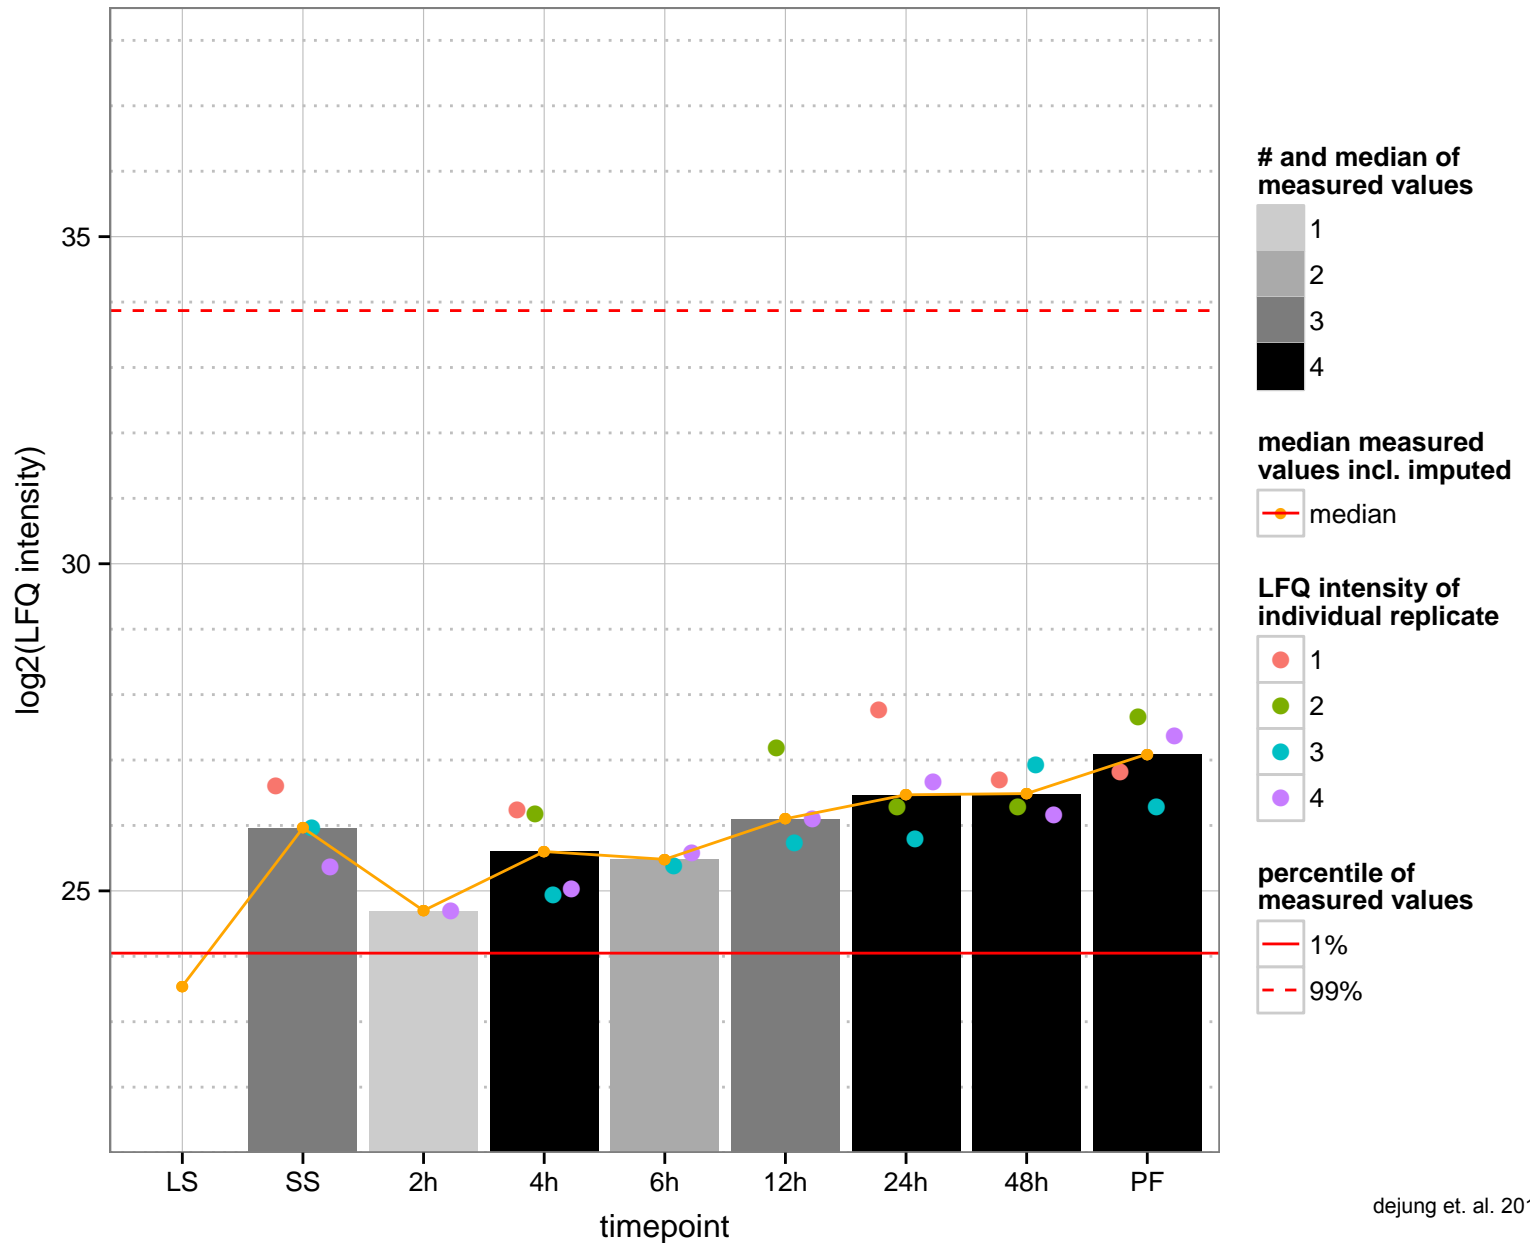

hypothetical protein, conserved  
 Tb11.v5.0562;Tb927.8.1260  
 AGOF: null  
 AGOC: null  
 AGOP: null  
 PGOF: null  
 PGO: null  
 PGOP: null

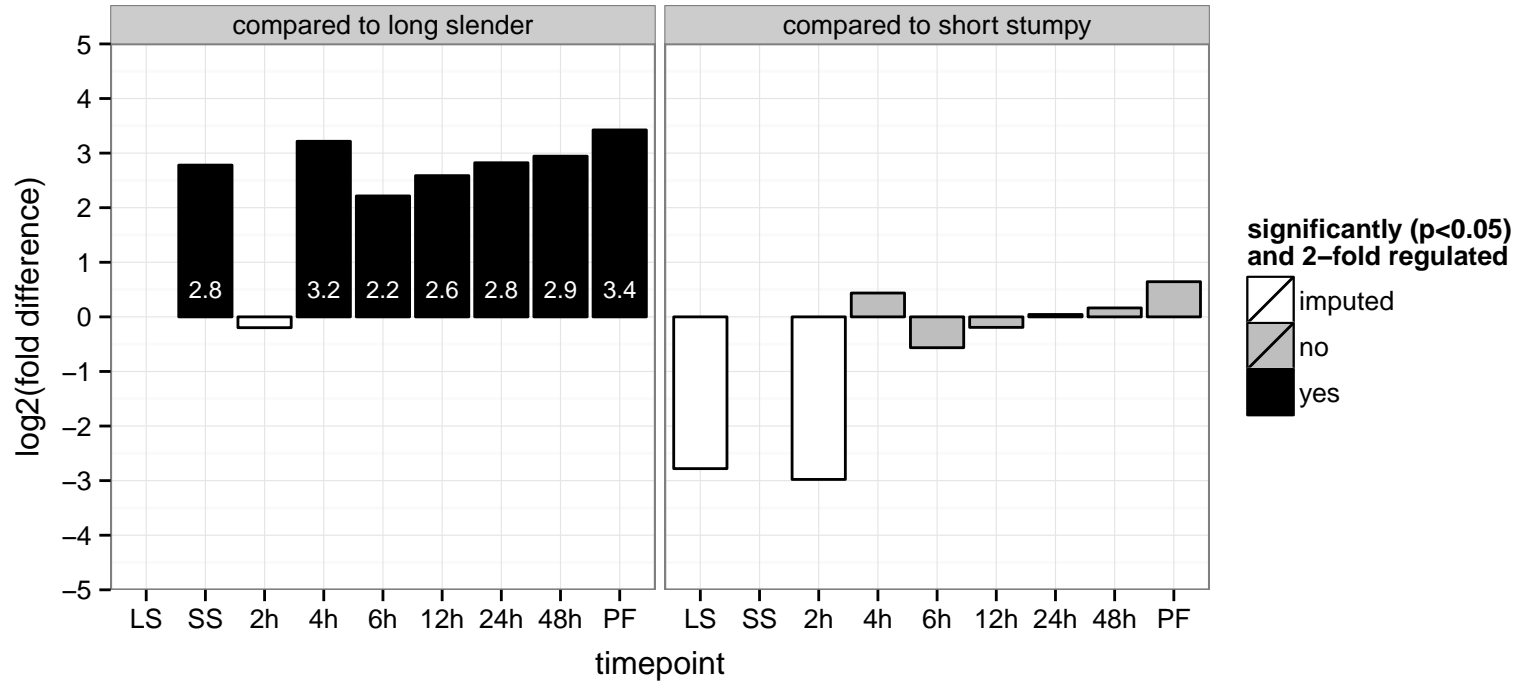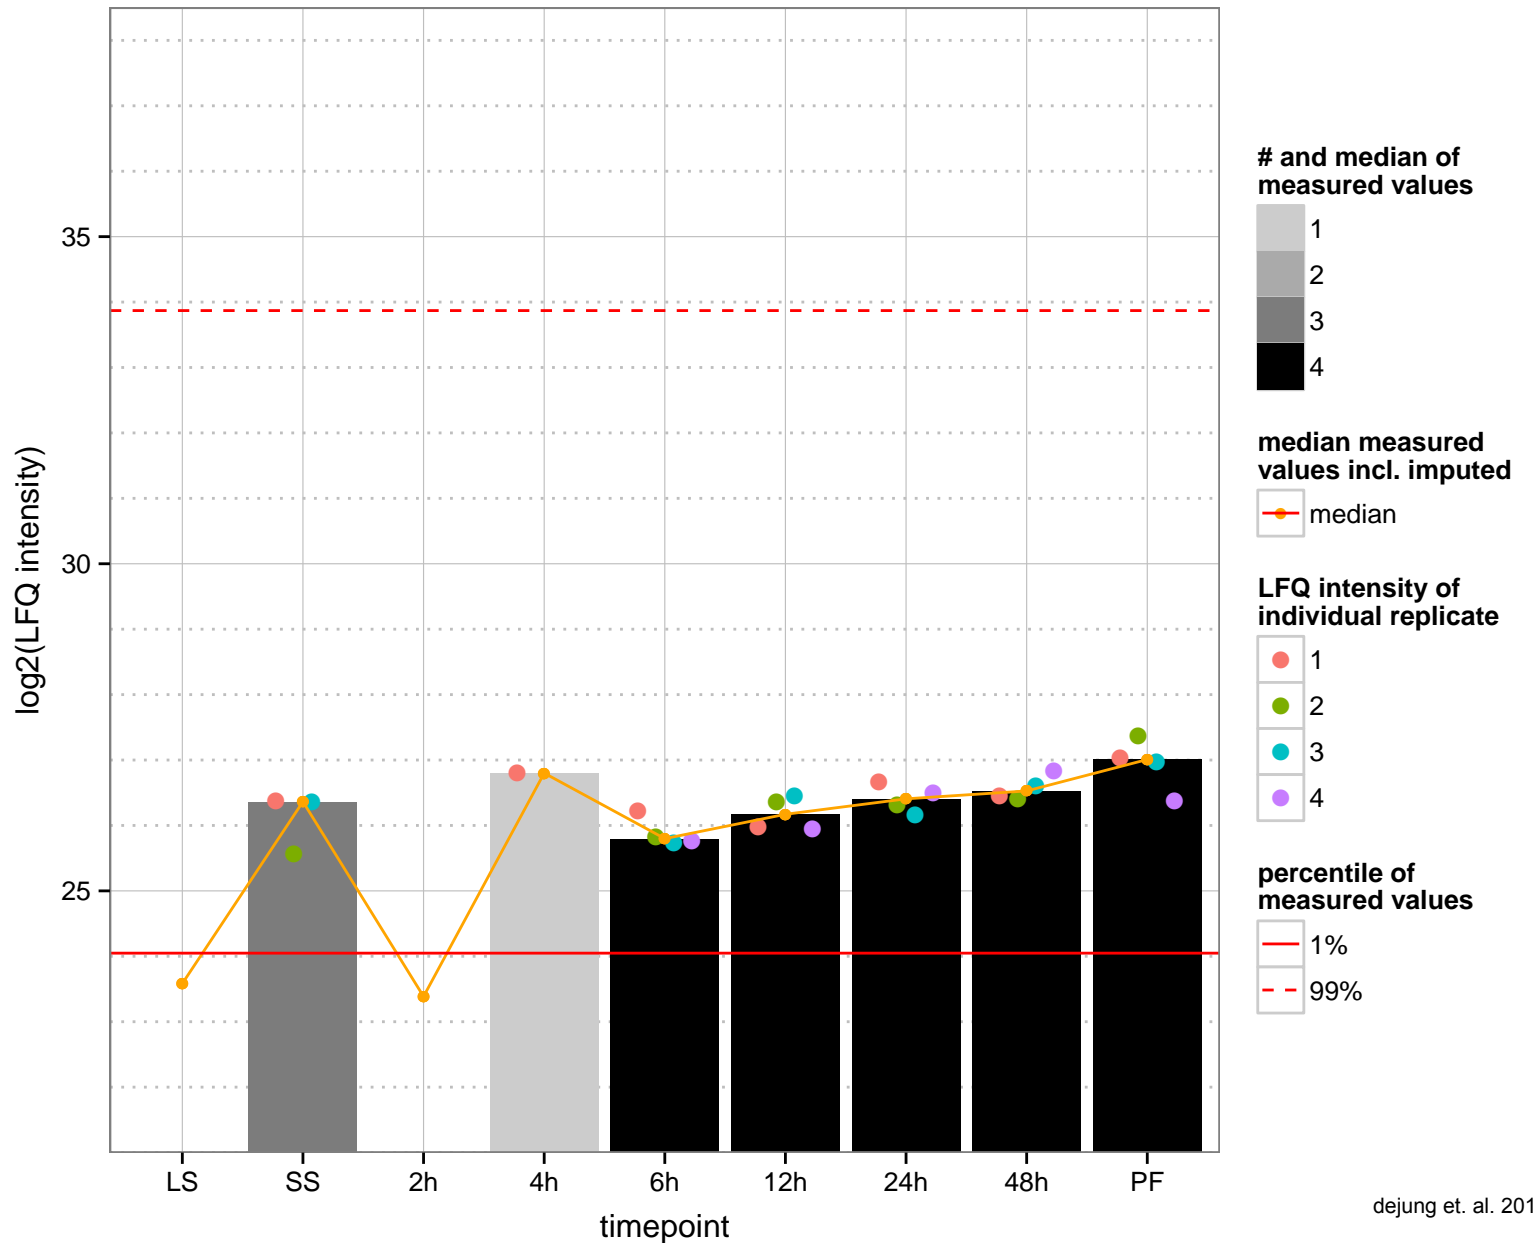

hypothetical protein, conserved  
 Tb927.10.3470  
 AGOF: null  
 AGOC: null  
 AGOP: null  
 PGOF: protein binding  
 PGO: null  
 PGOP: null

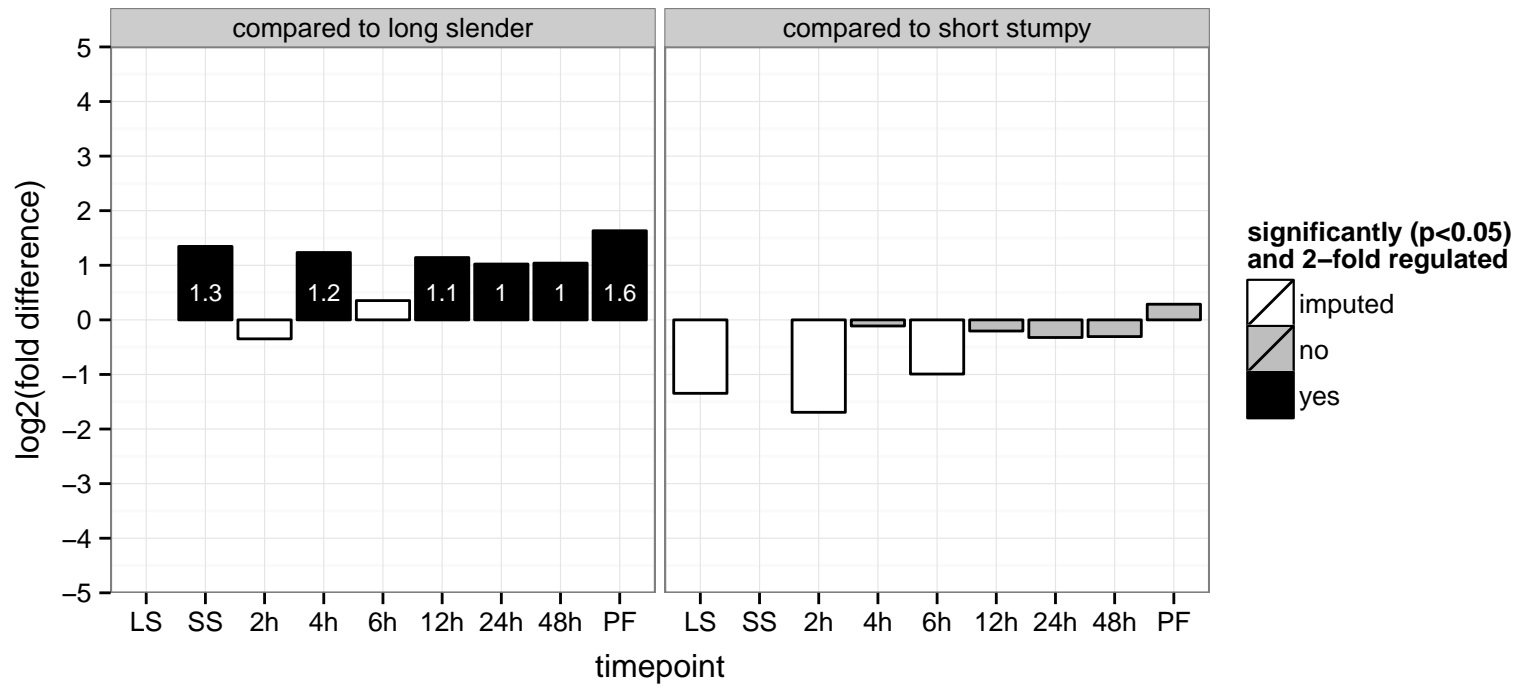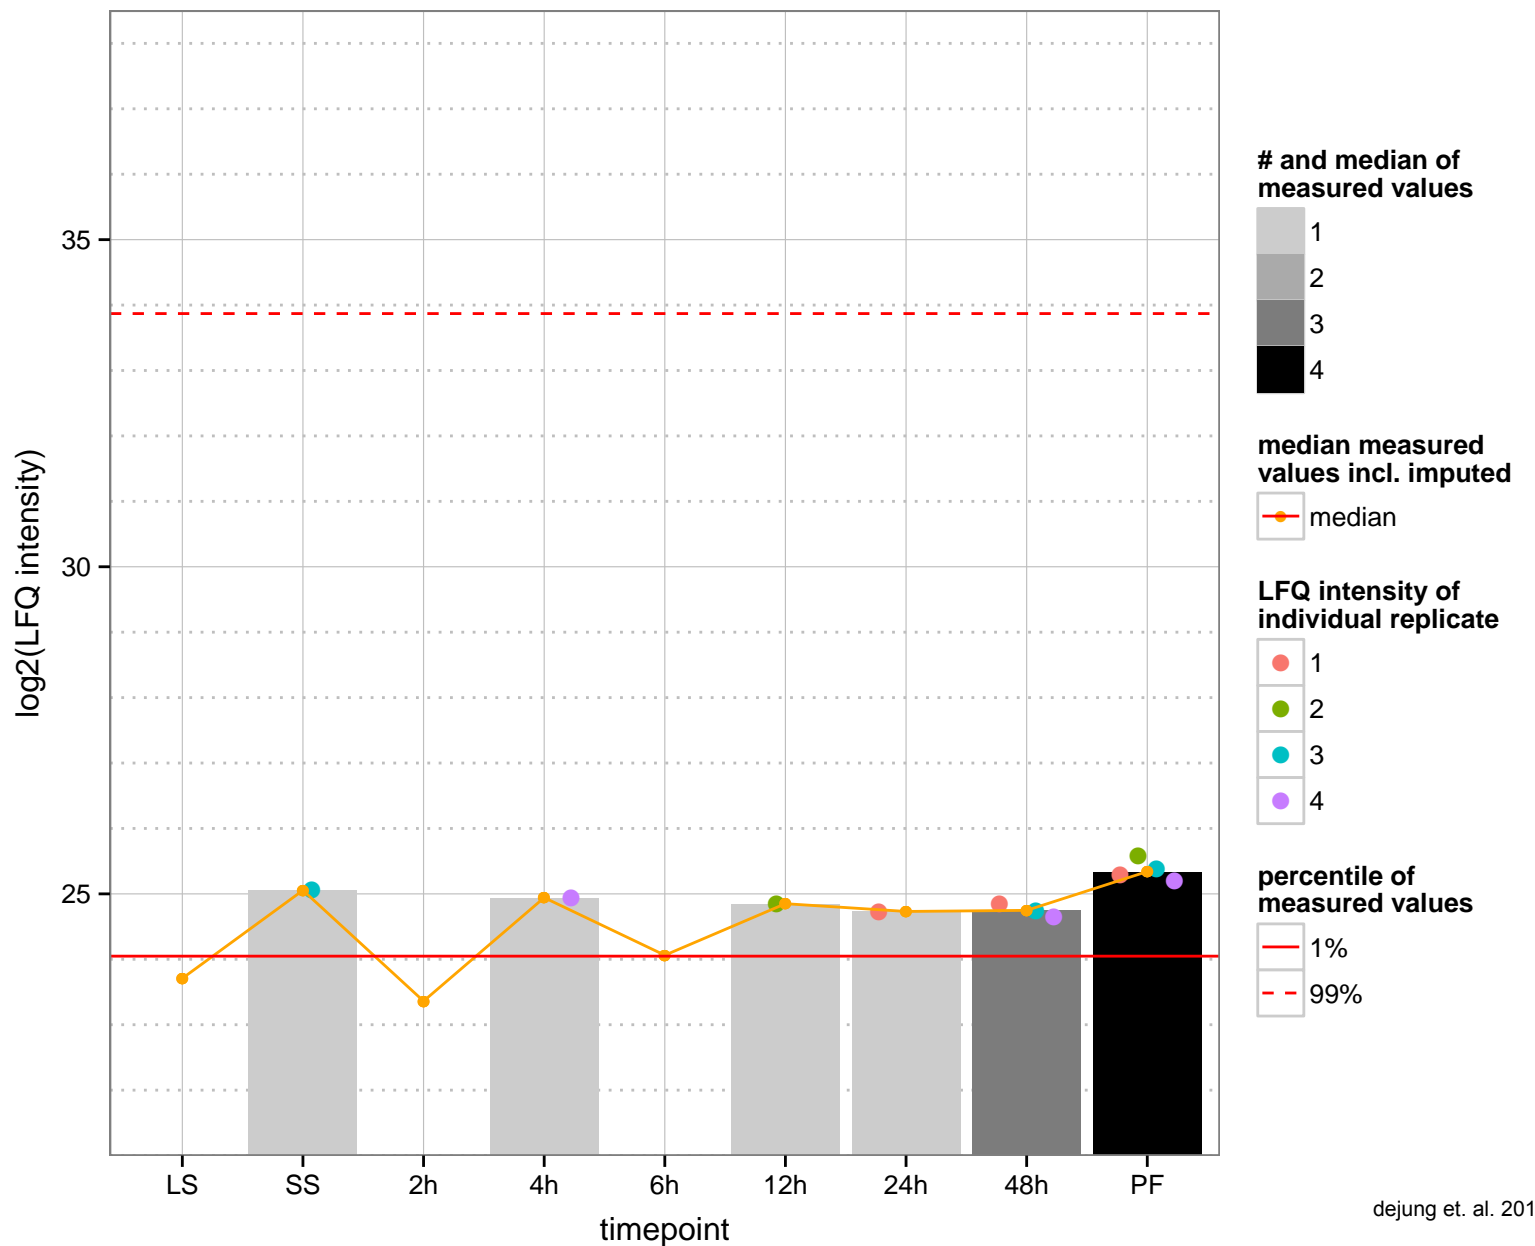

hypothetical protein, conserved  
 Tb927.10.3580  
 AGOF: null  
 AGOC: mitochondrion  
 AGOP: null  
 PGO: null  
 PGO: null  
 PGO: null

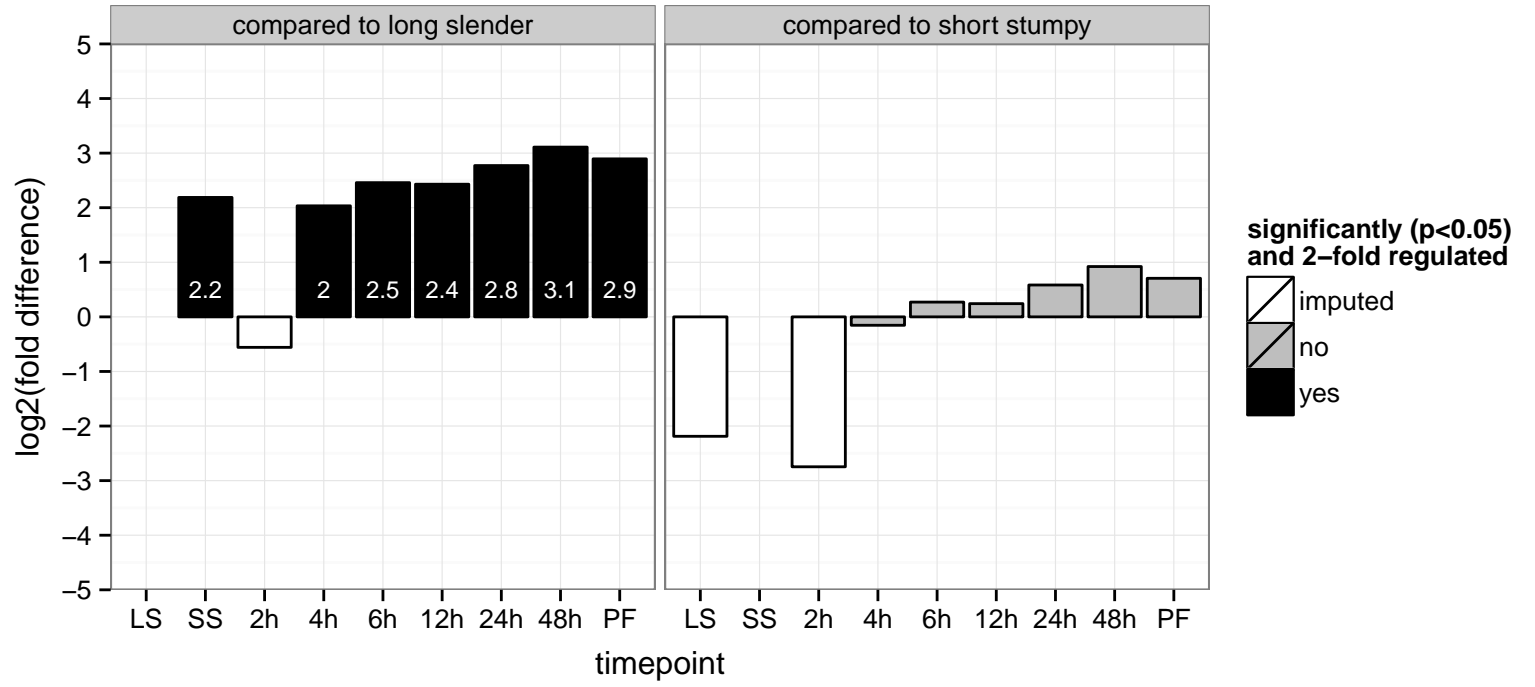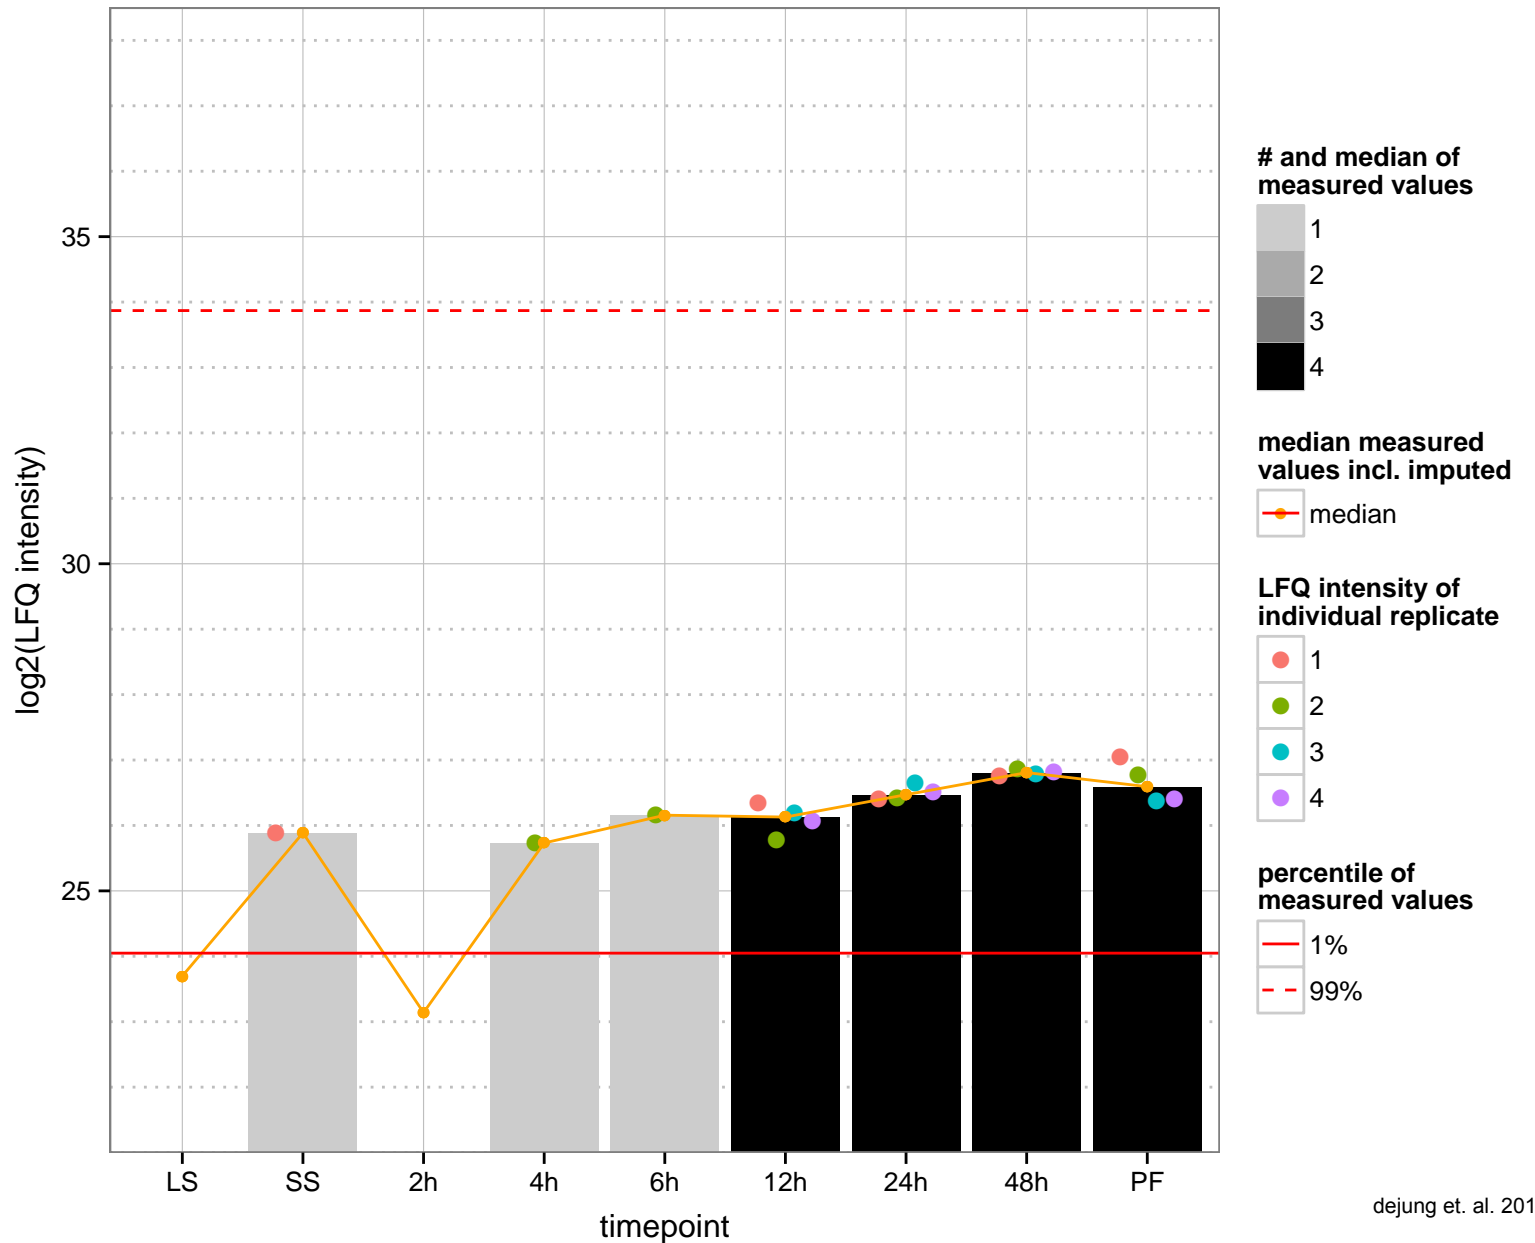

hypothetical protein, conserved  
 Tb927.10.4220  
 AGOF: null  
 AGOC: null  
 AGOP: null  
 PGOF: null  
 PGO: null  
 PGOP: null

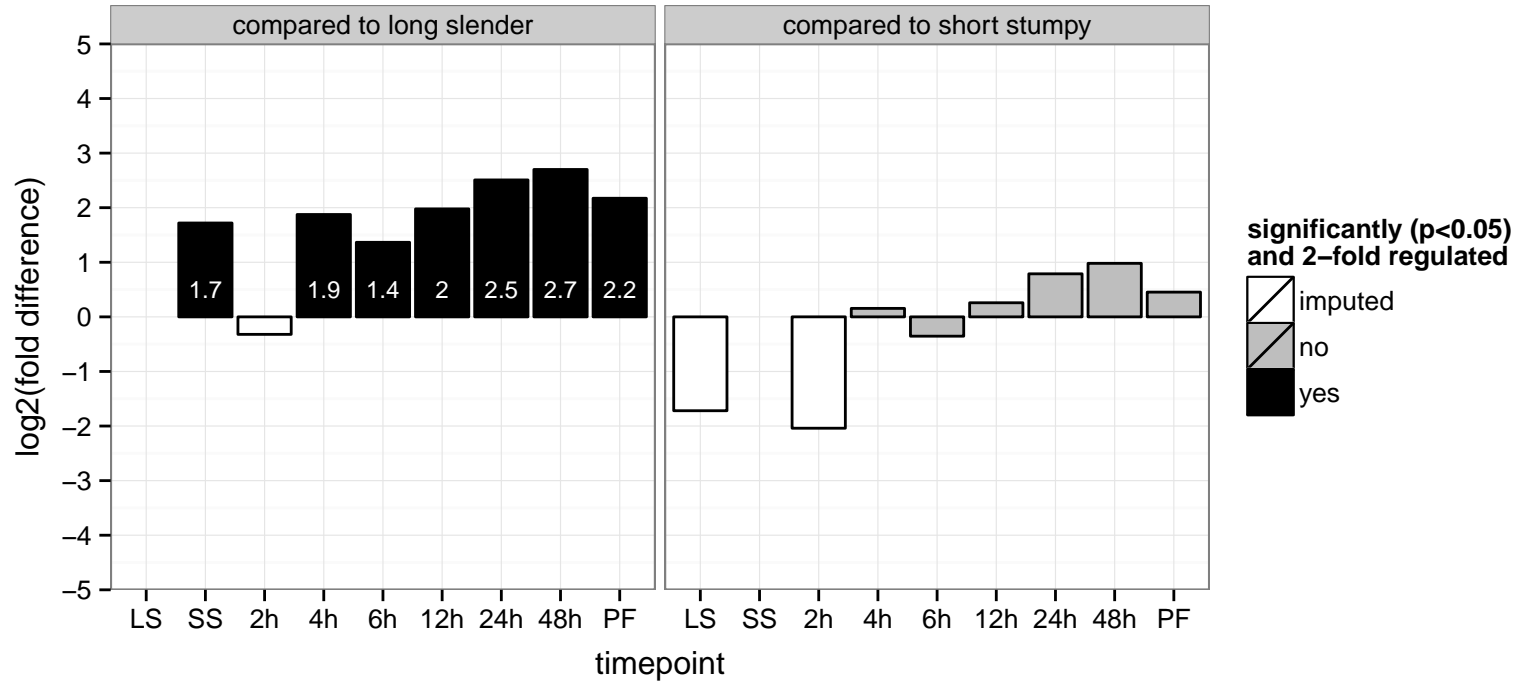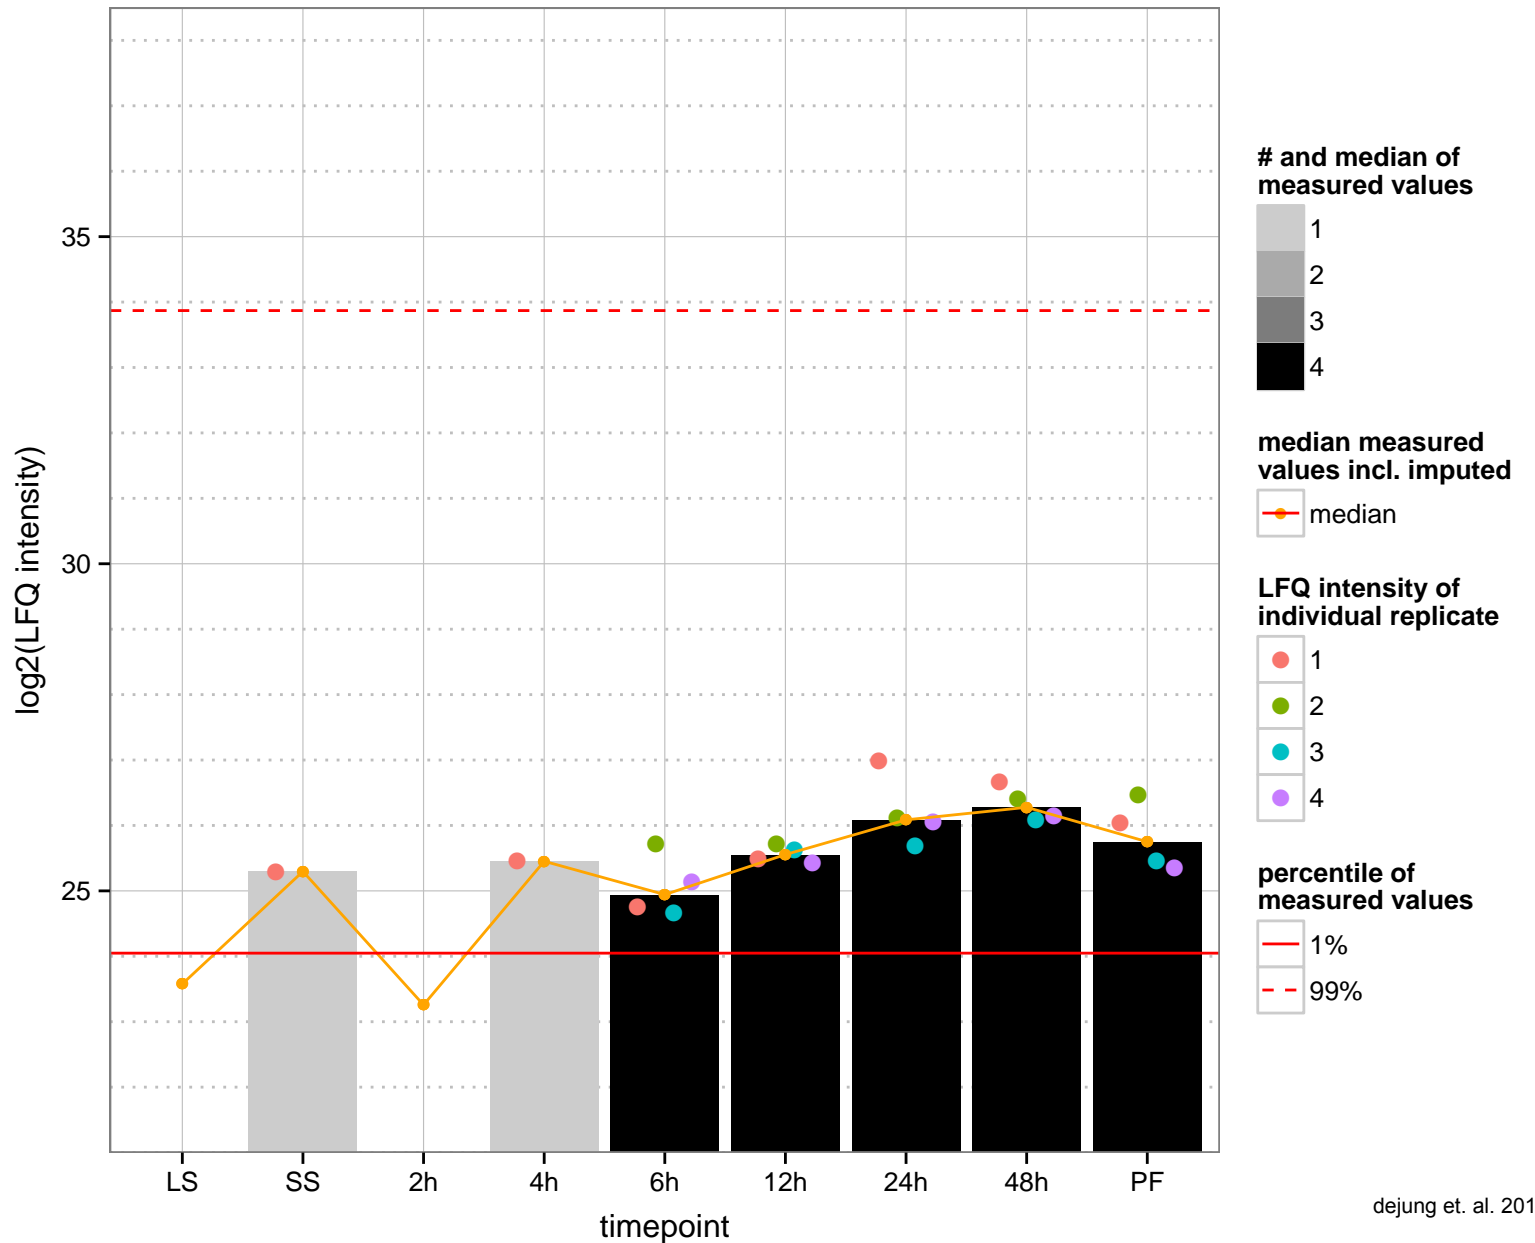



caltractin, putative  
 Tb927.10.6980  
 AGOF: calcium ion binding  
 AGOC: null  
 AGOP: null  
 PGOF: calcium ion binding  
 PGOC: null  
 PGOP: null

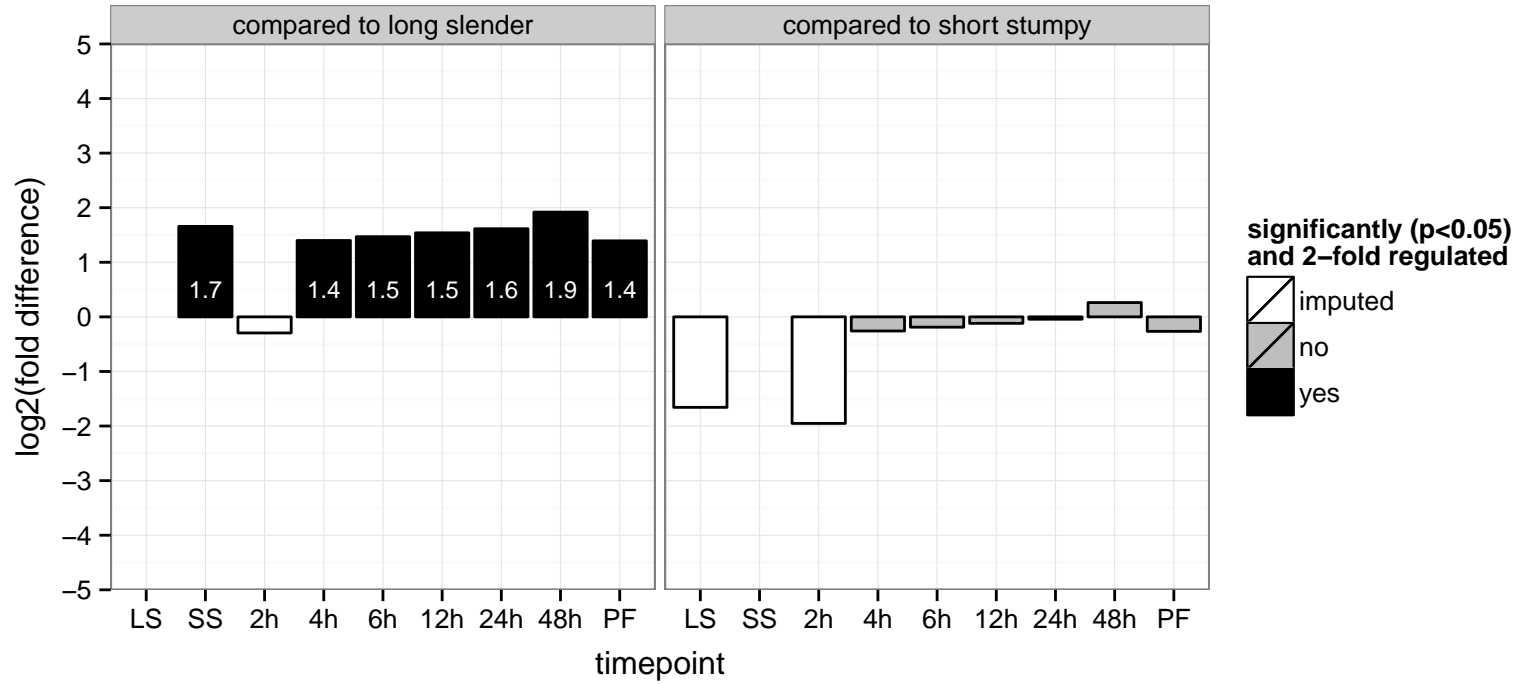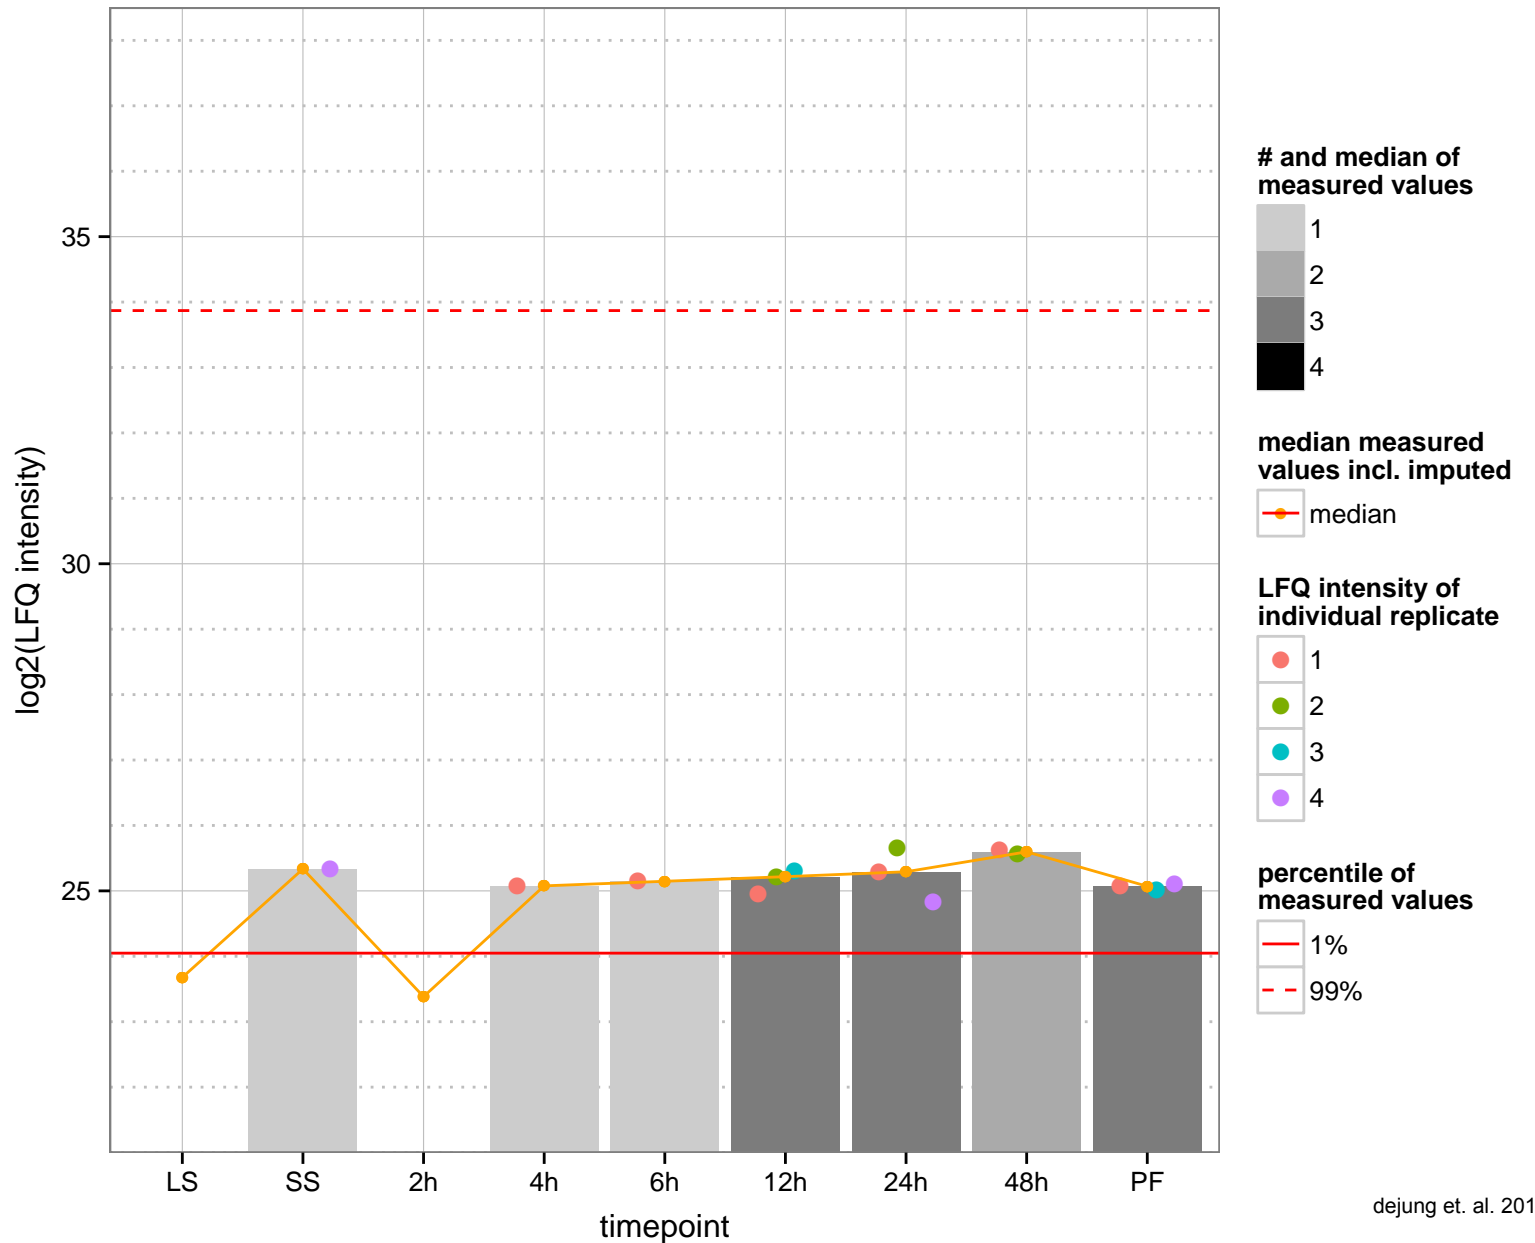

beta-adaptin 3, putative, adaptin complex 3 subunit  
 Tb927.11.10650  
 AGOF: null  
 AGOC: Golgi apparatus, coated pit, membrane coat  
 AGOP: intracellular protein transport, vesicle-mediated transport  
 PGO: binding  
 PGO: membrane coat  
 PGO: intracellular protein transport, vesicle-mediated transport

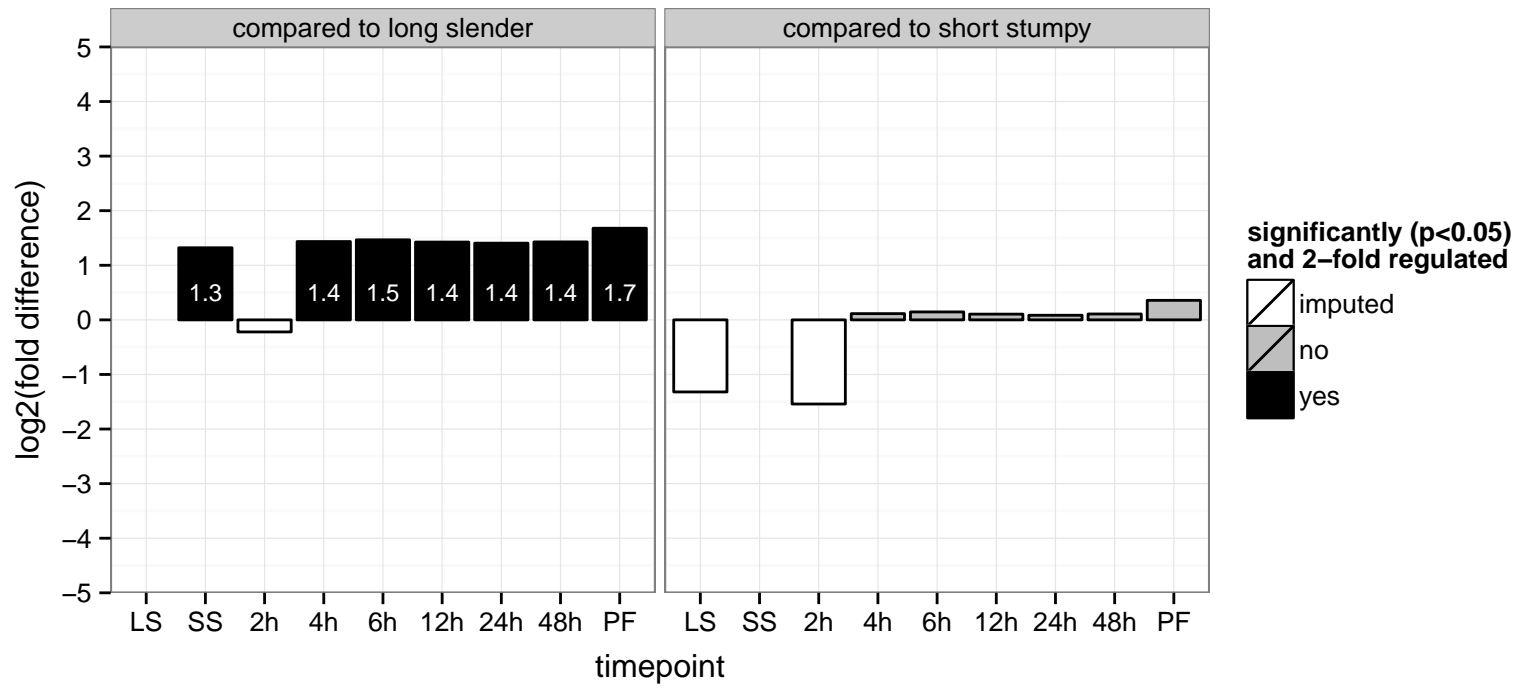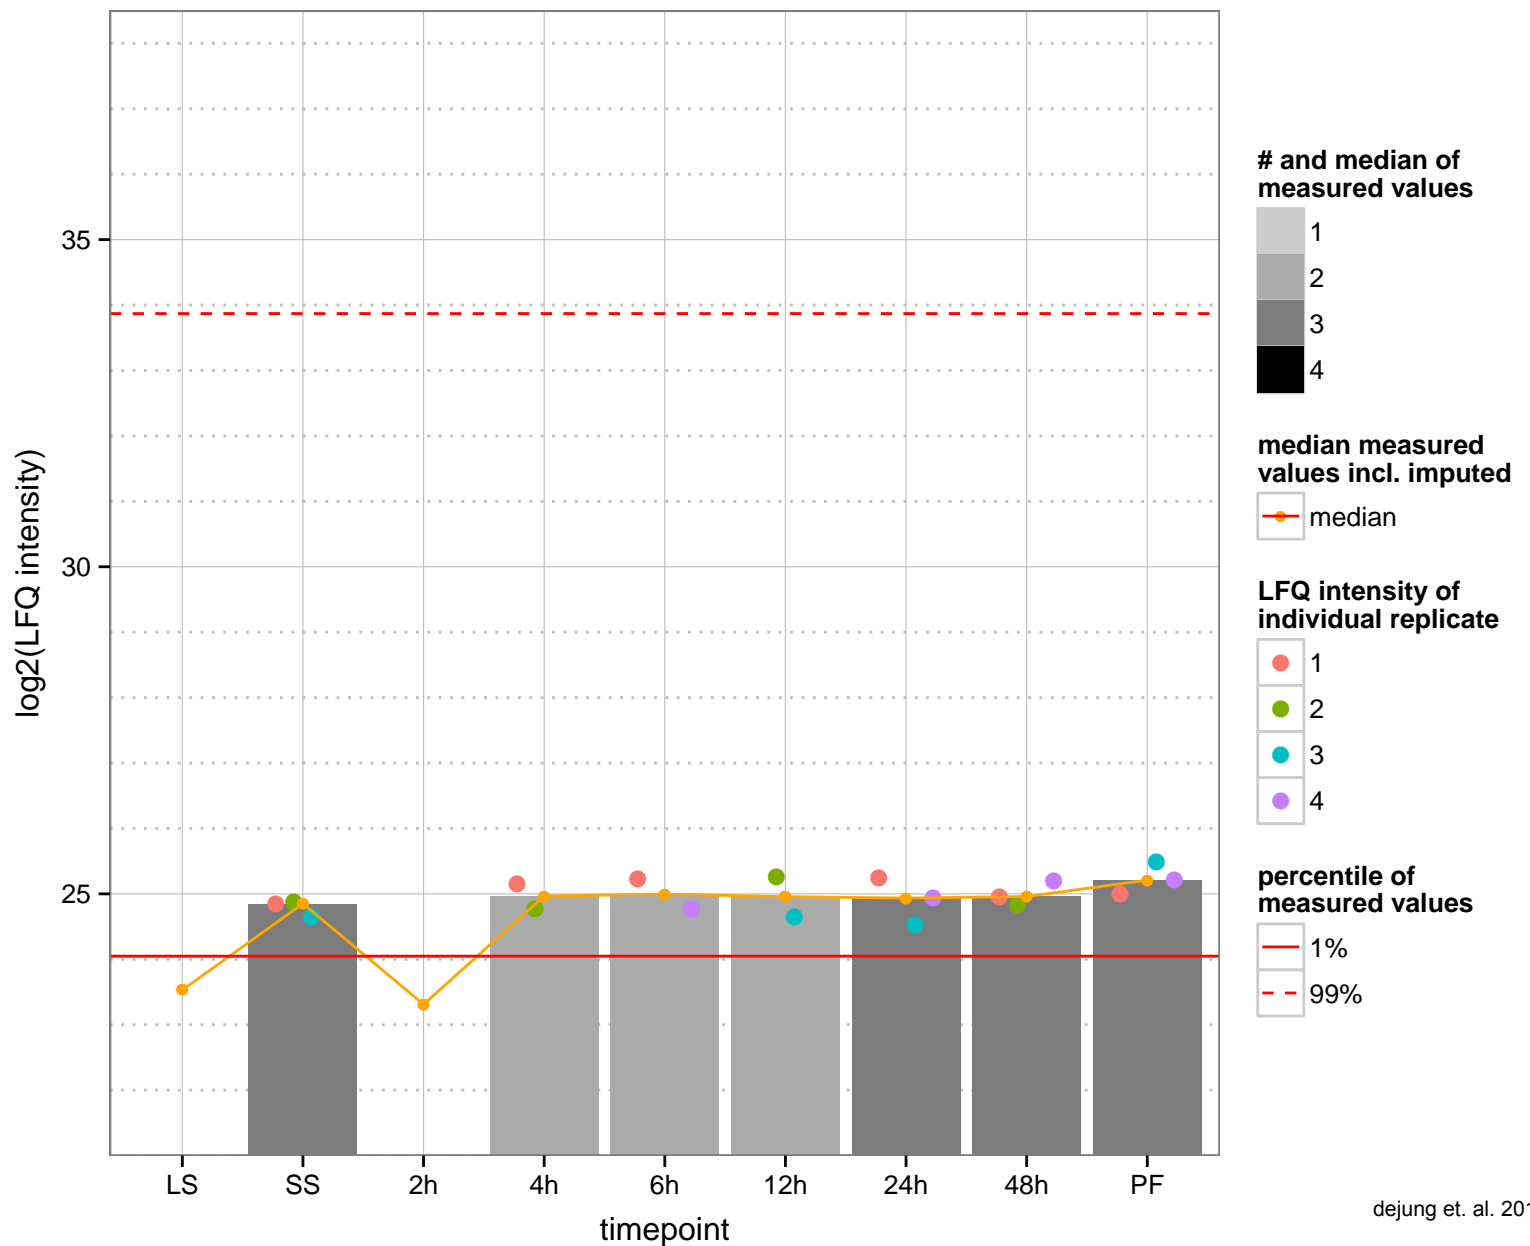

RNA helicase, putative

Tb927.11.12110

AGOF: ATP binding, ATP-dependent helicase activity, helicase activity, nucleic acid binding, zinc ion binding

AGOC: intracellular

AGOP: nucleobase-containing compound metabolic process, transport

PGOF: ATP binding, ATP-dependent helicase activity, helicase activity, nucleic acid binding, protein binding, zinc ion binding

PGOC: null

PGOP: null

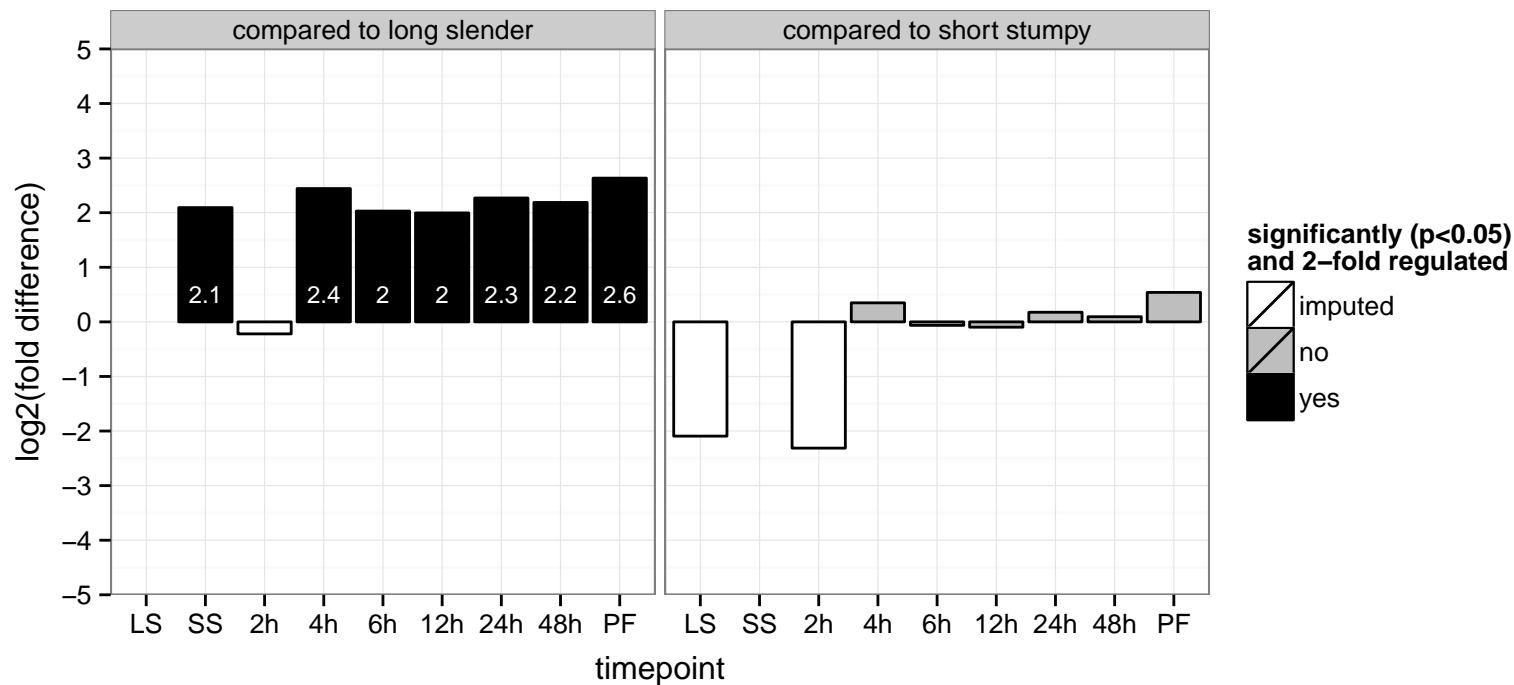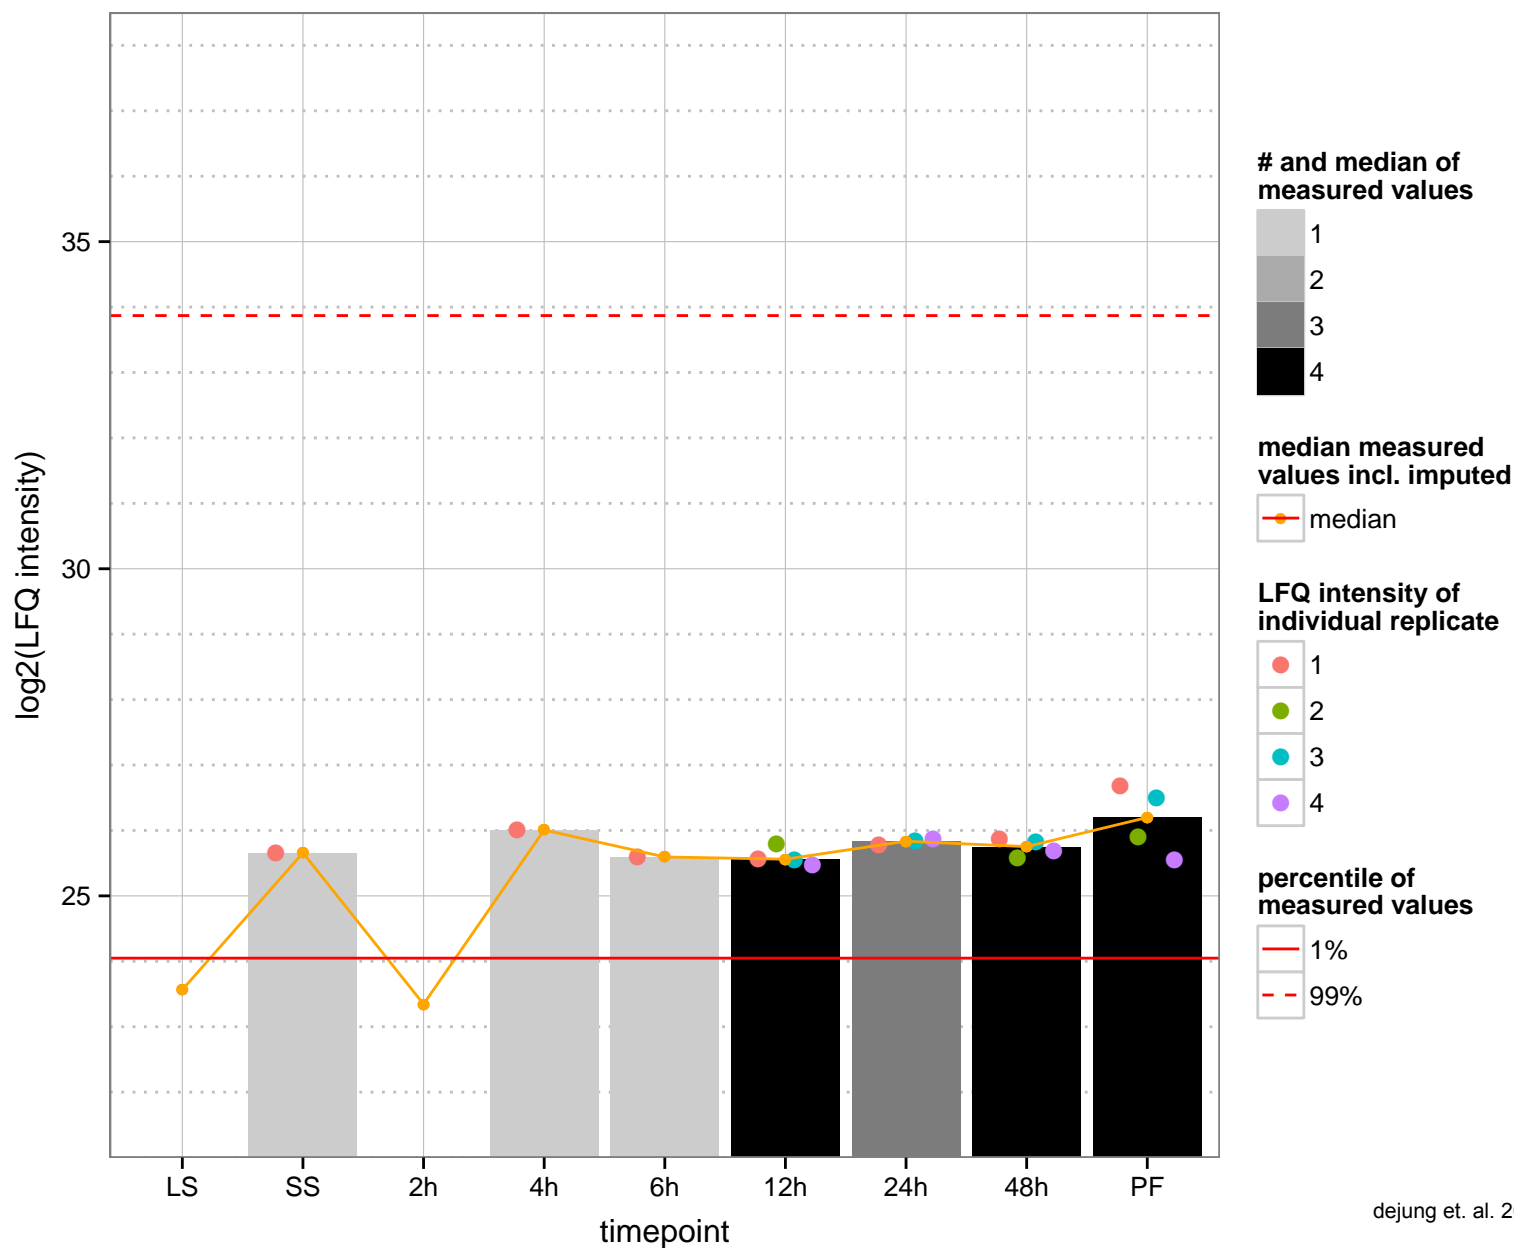

phospholipid:diacylglycerol acyltransferase-like protein  
 Tb927.11.13220  
 AGOF: phosphatidylcholine-sterol O-acyltransferase activity  
 AGOC: null  
 AGOP: lipid metabolic process  
 PGO: O-acyltransferase activity  
 PGOC: null  
 PGOP: lipid metabolic process

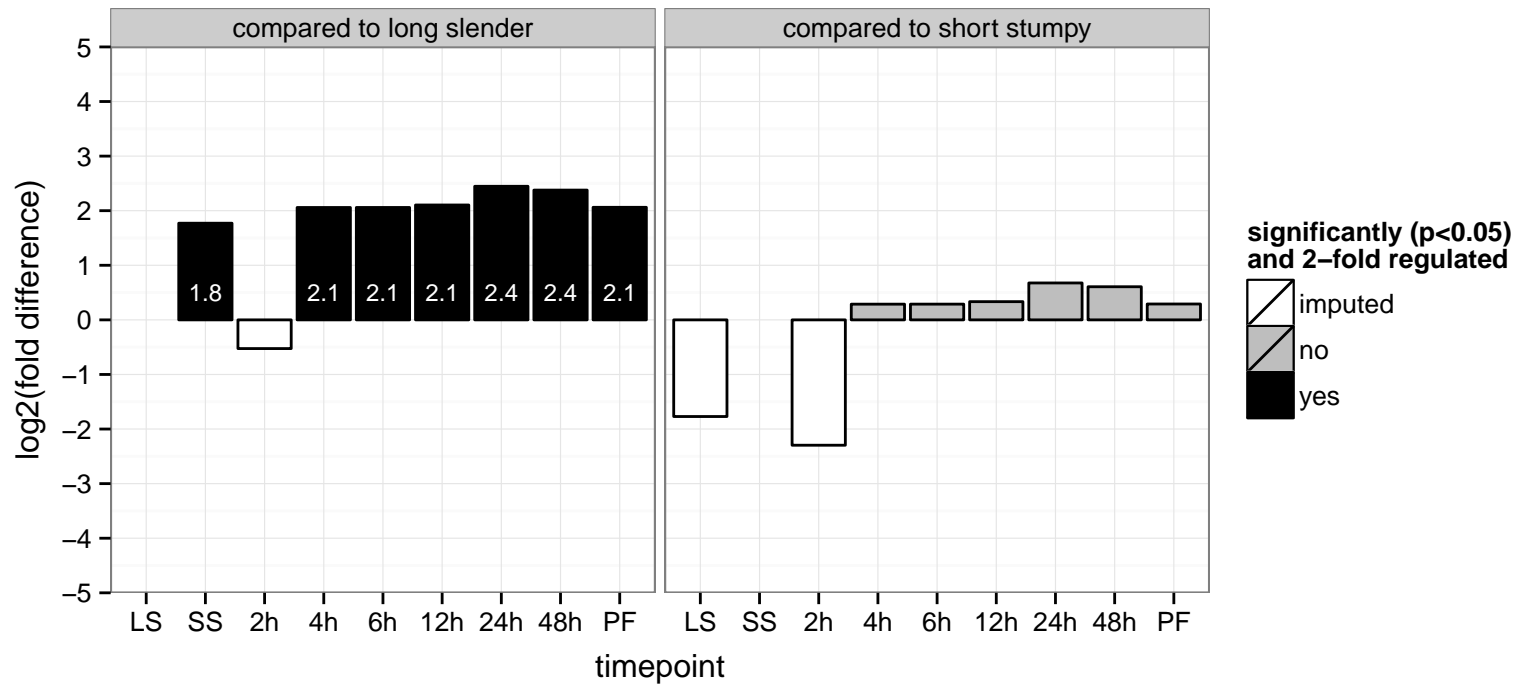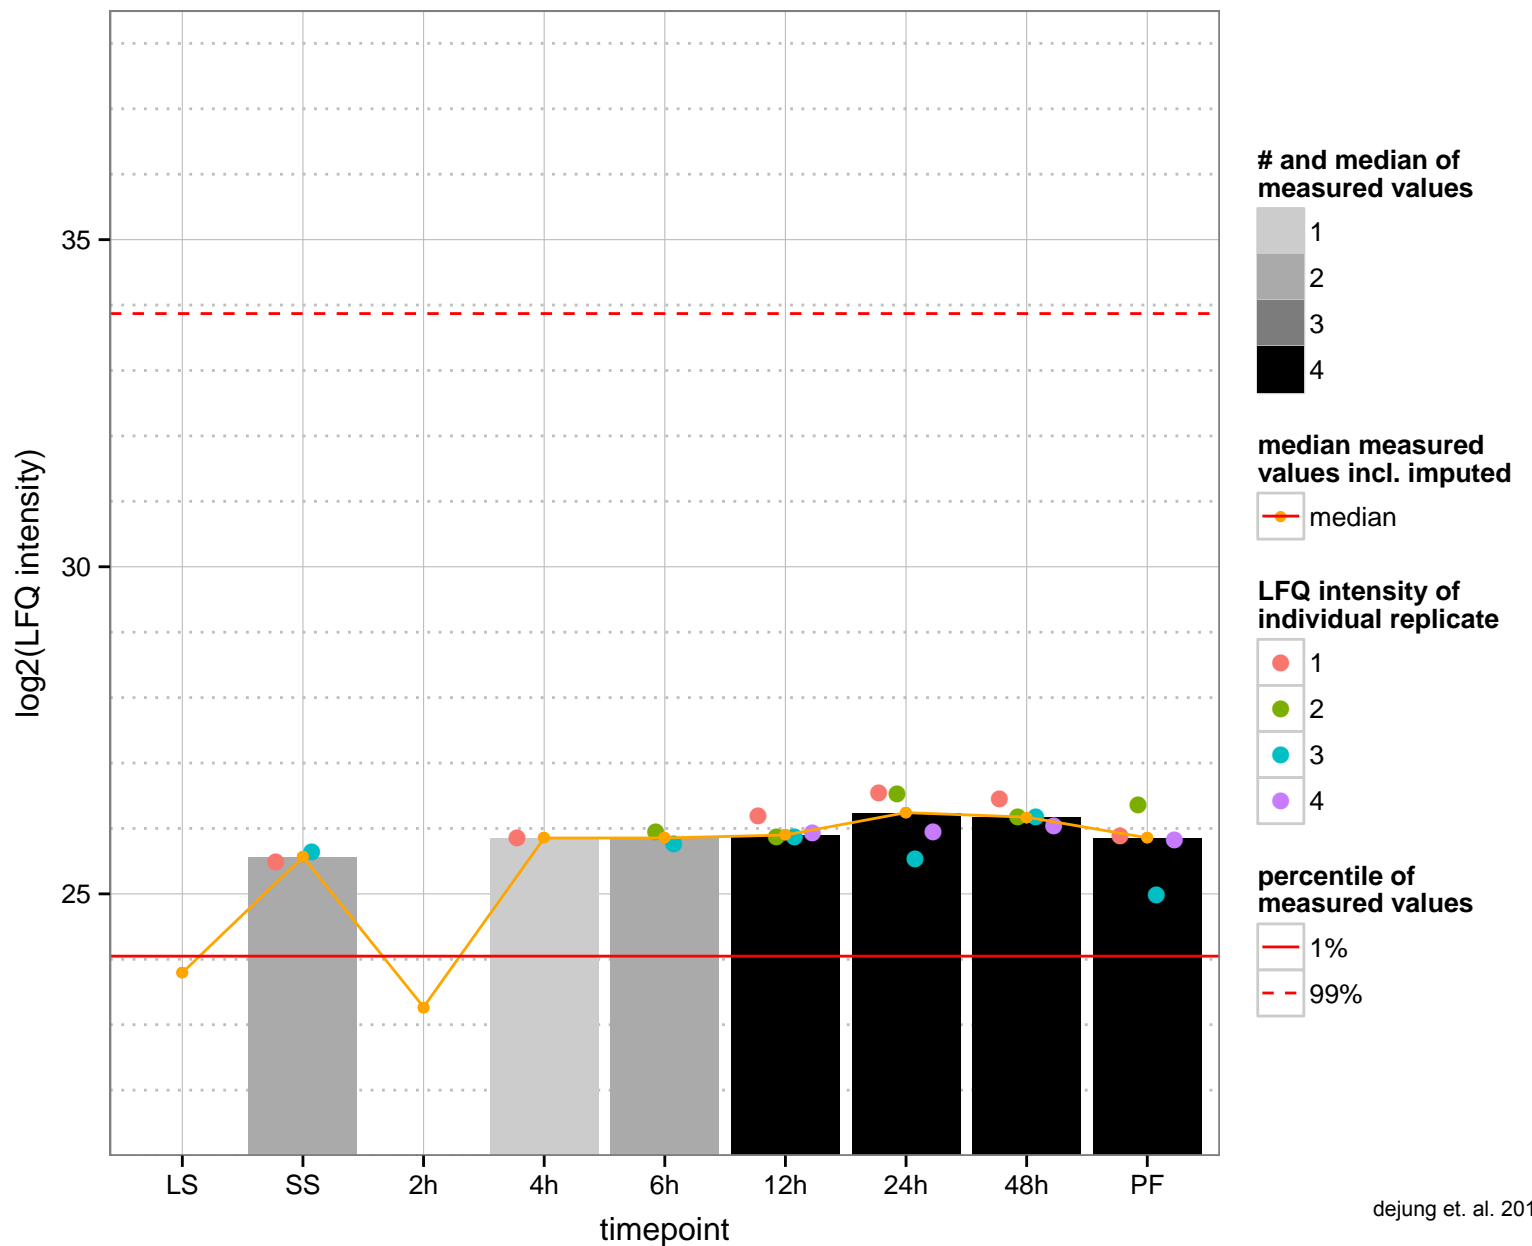

hypothetical protein, conserved  
 Tb927.11.16230  
 AGOF: null  
 AGOC: null  
 AGOP: null  
 PGO: null  
 PGOC: null  
 PGOP: null

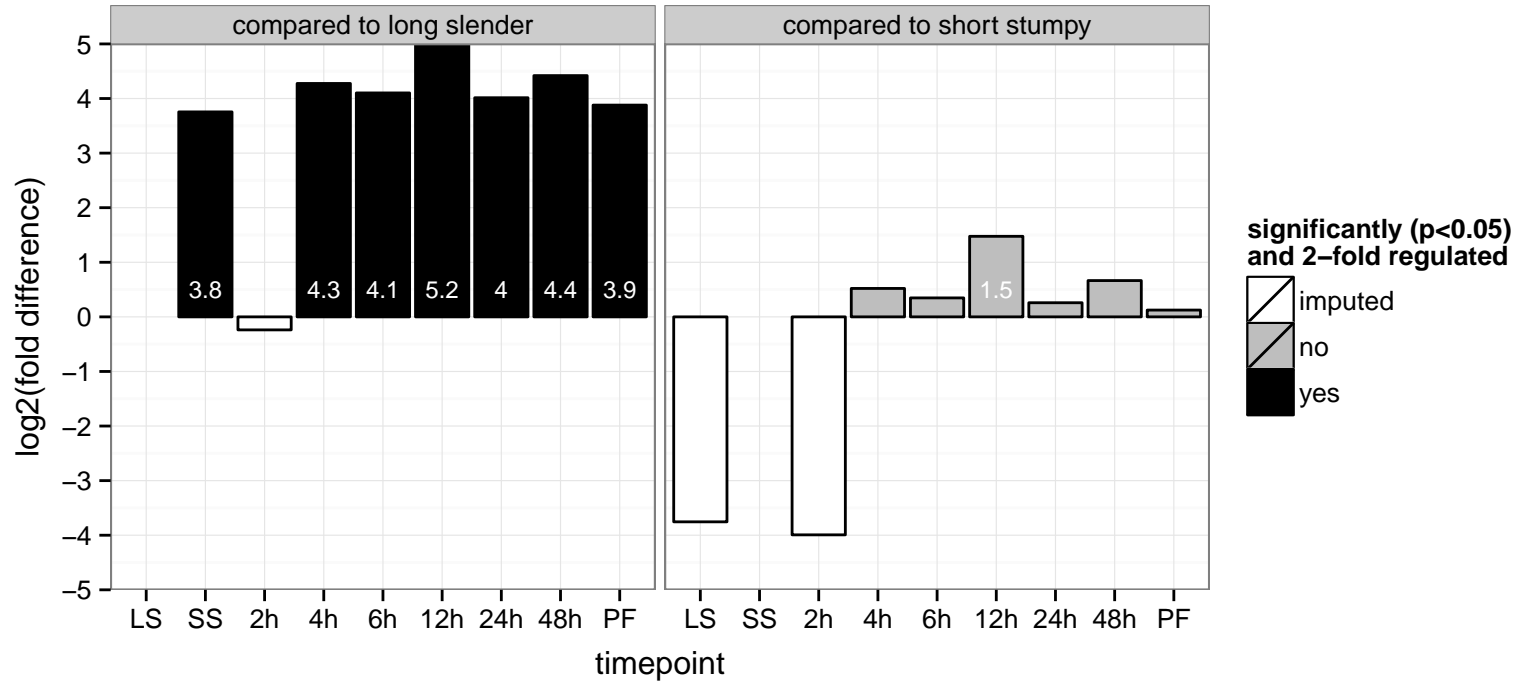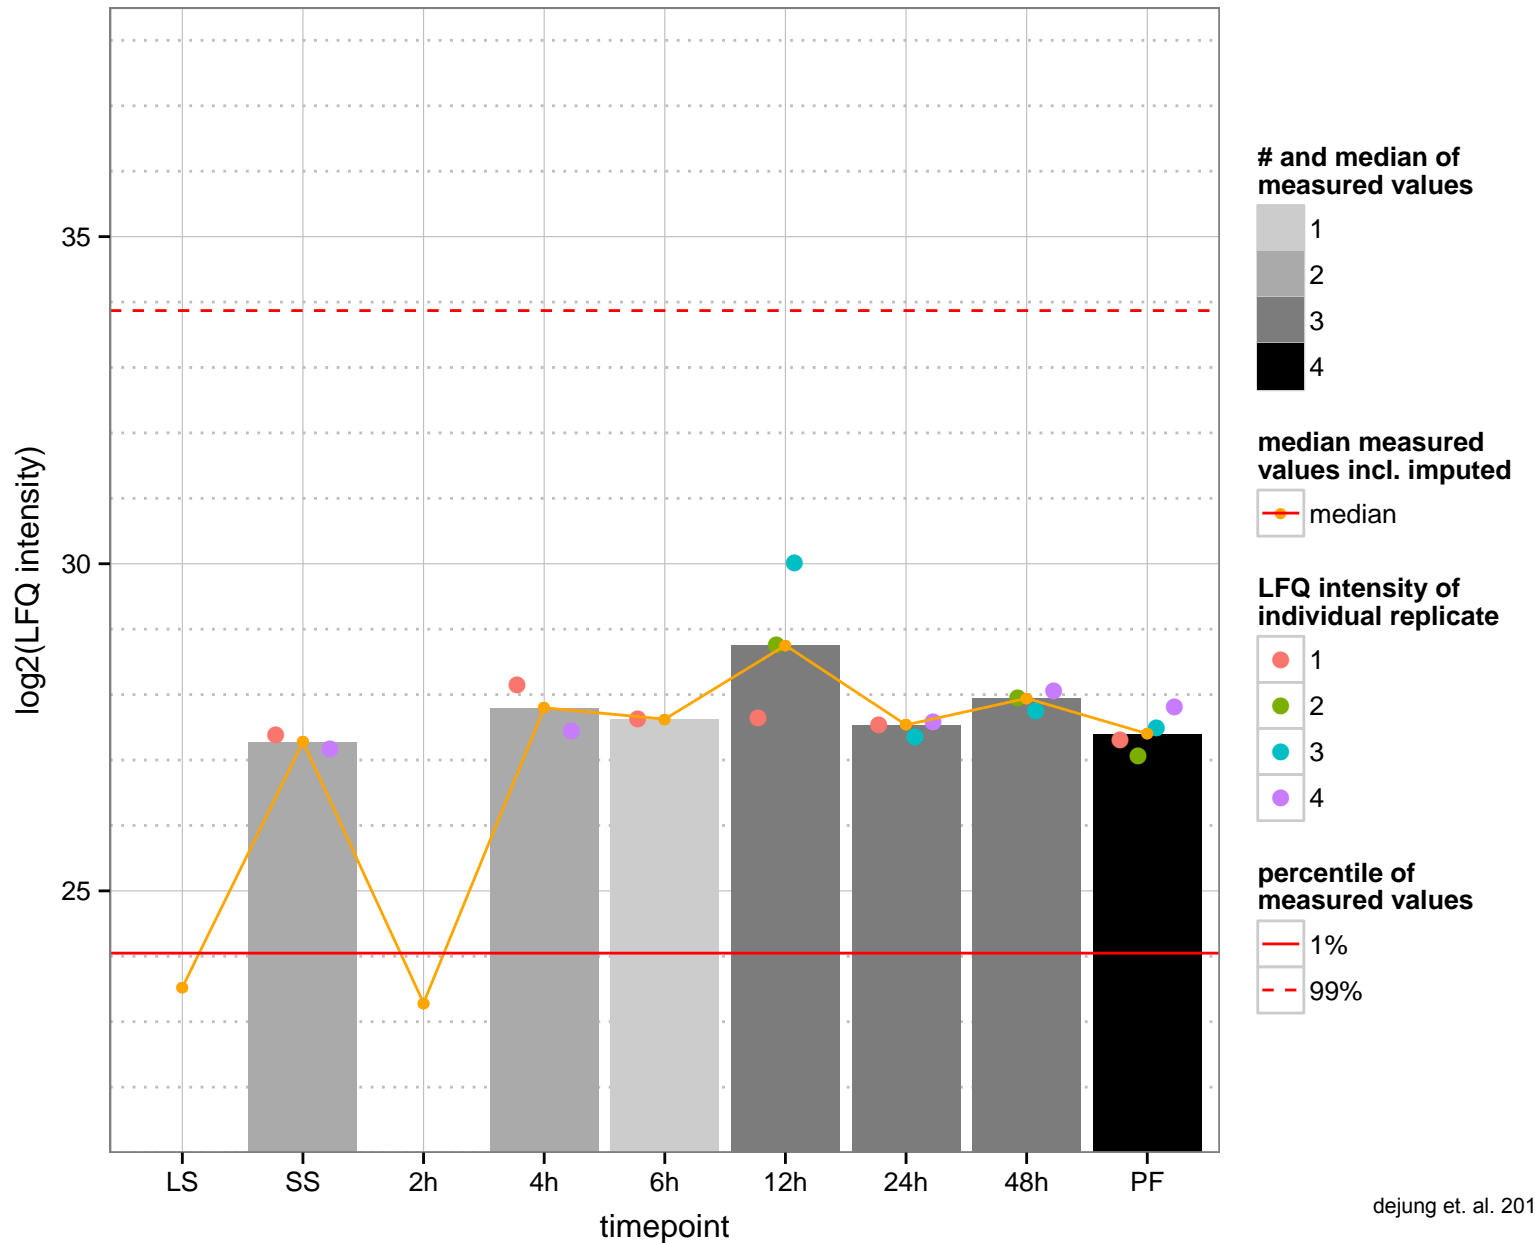

KREPB4, RNA-editing complex protein (KREPB4)

Tb927.11.2990

AGOF: RNA binding

AGOC: mRNA editing complex, mitochondrial mRNA editing complex, mitochondrion

AGOP: RNA modification

PGOF: null

PGOC: null

PGOP: null

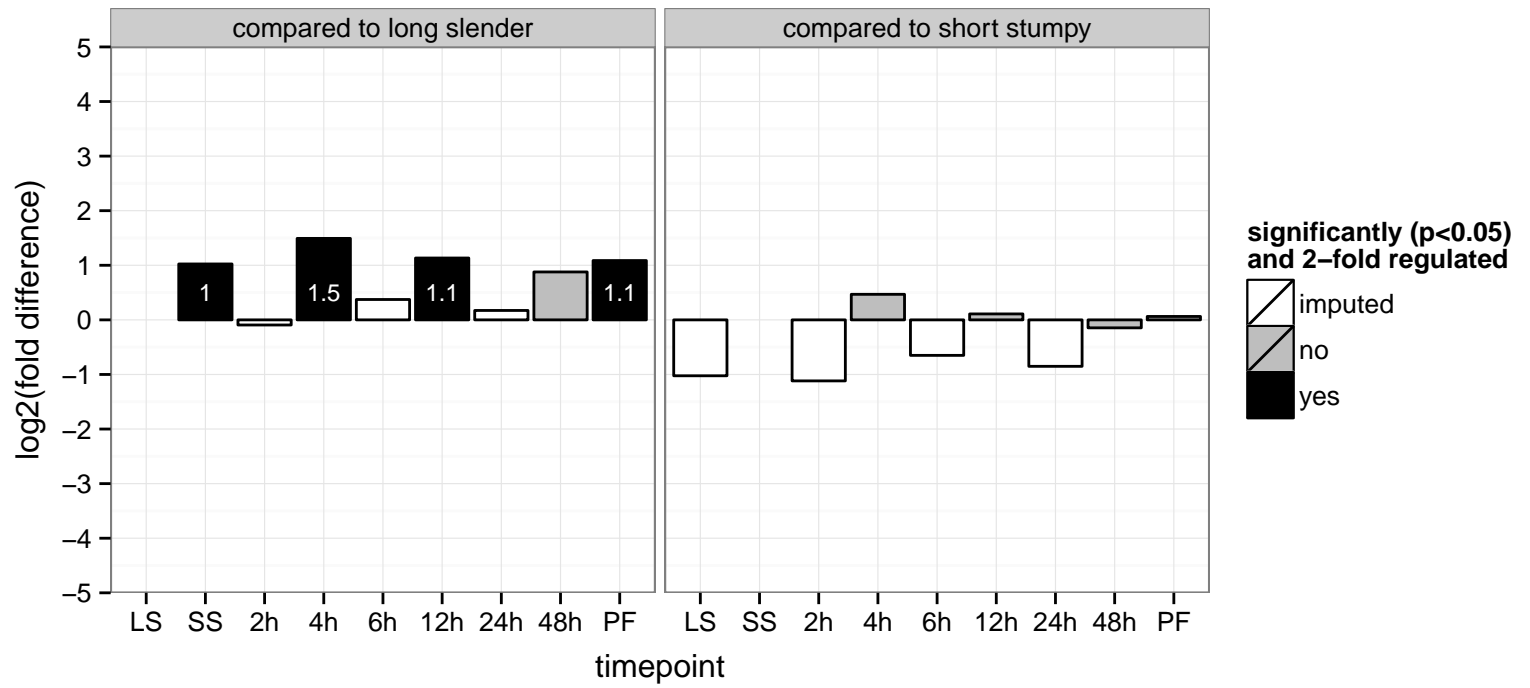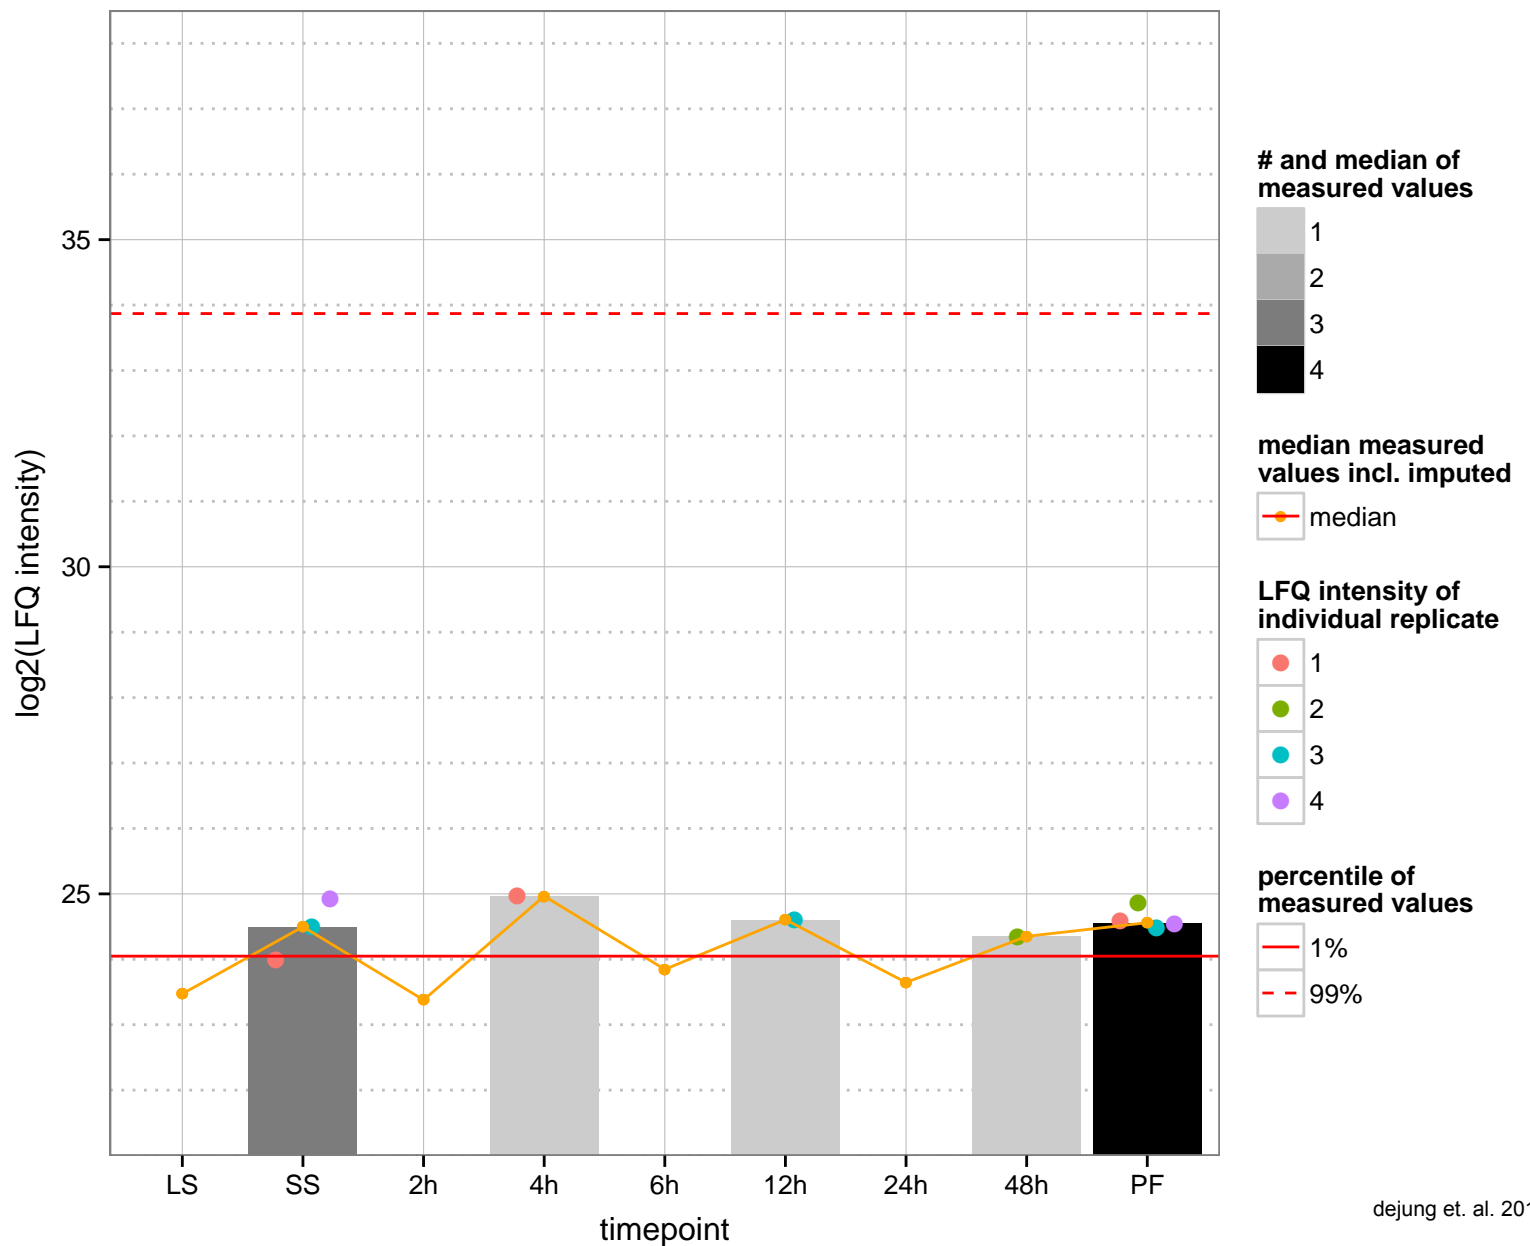

glycosyltransferase family-like protein, putative  
 Tb927.11.3900  
 AGOF: null  
 AGOC: null  
 AGOP: lipopolysaccharide biosynthetic process  
 PGO: null  
 PGOC: null  
 PGOP: lipopolysaccharide biosynthetic process

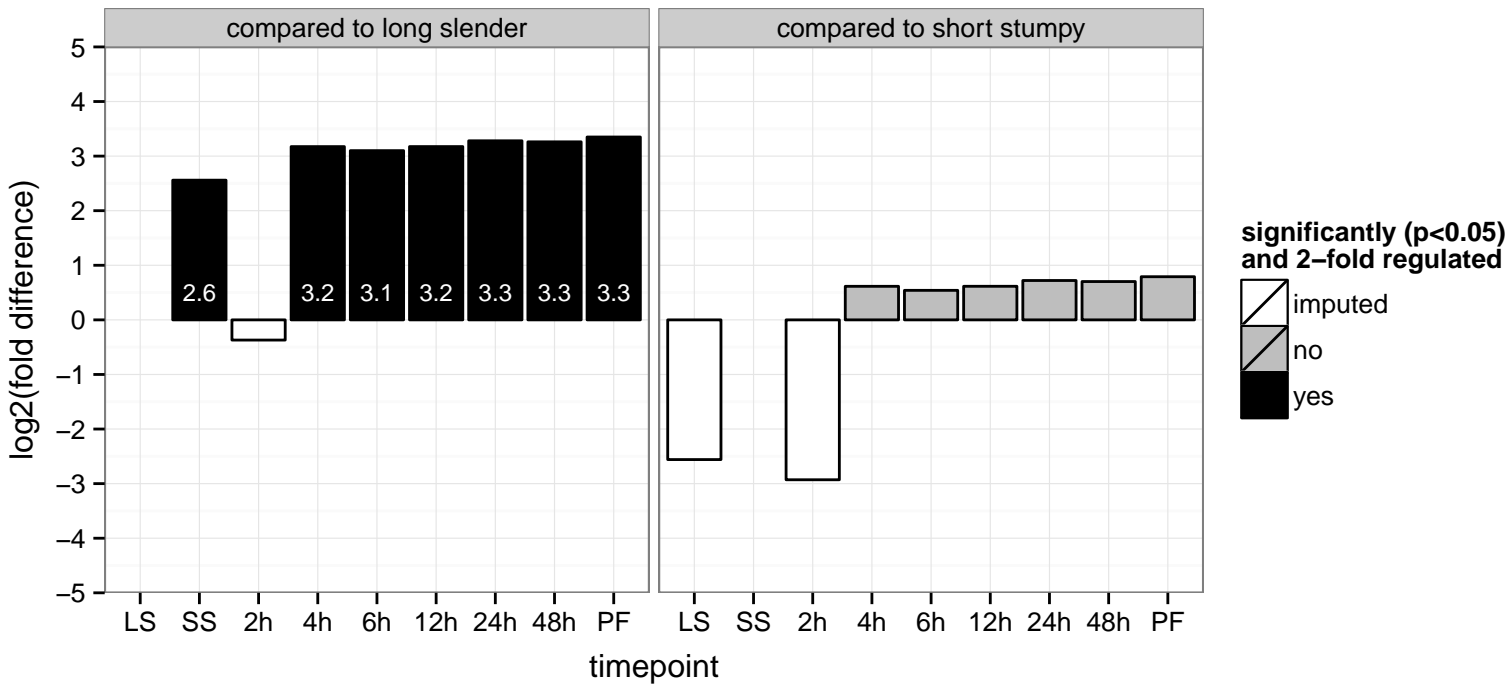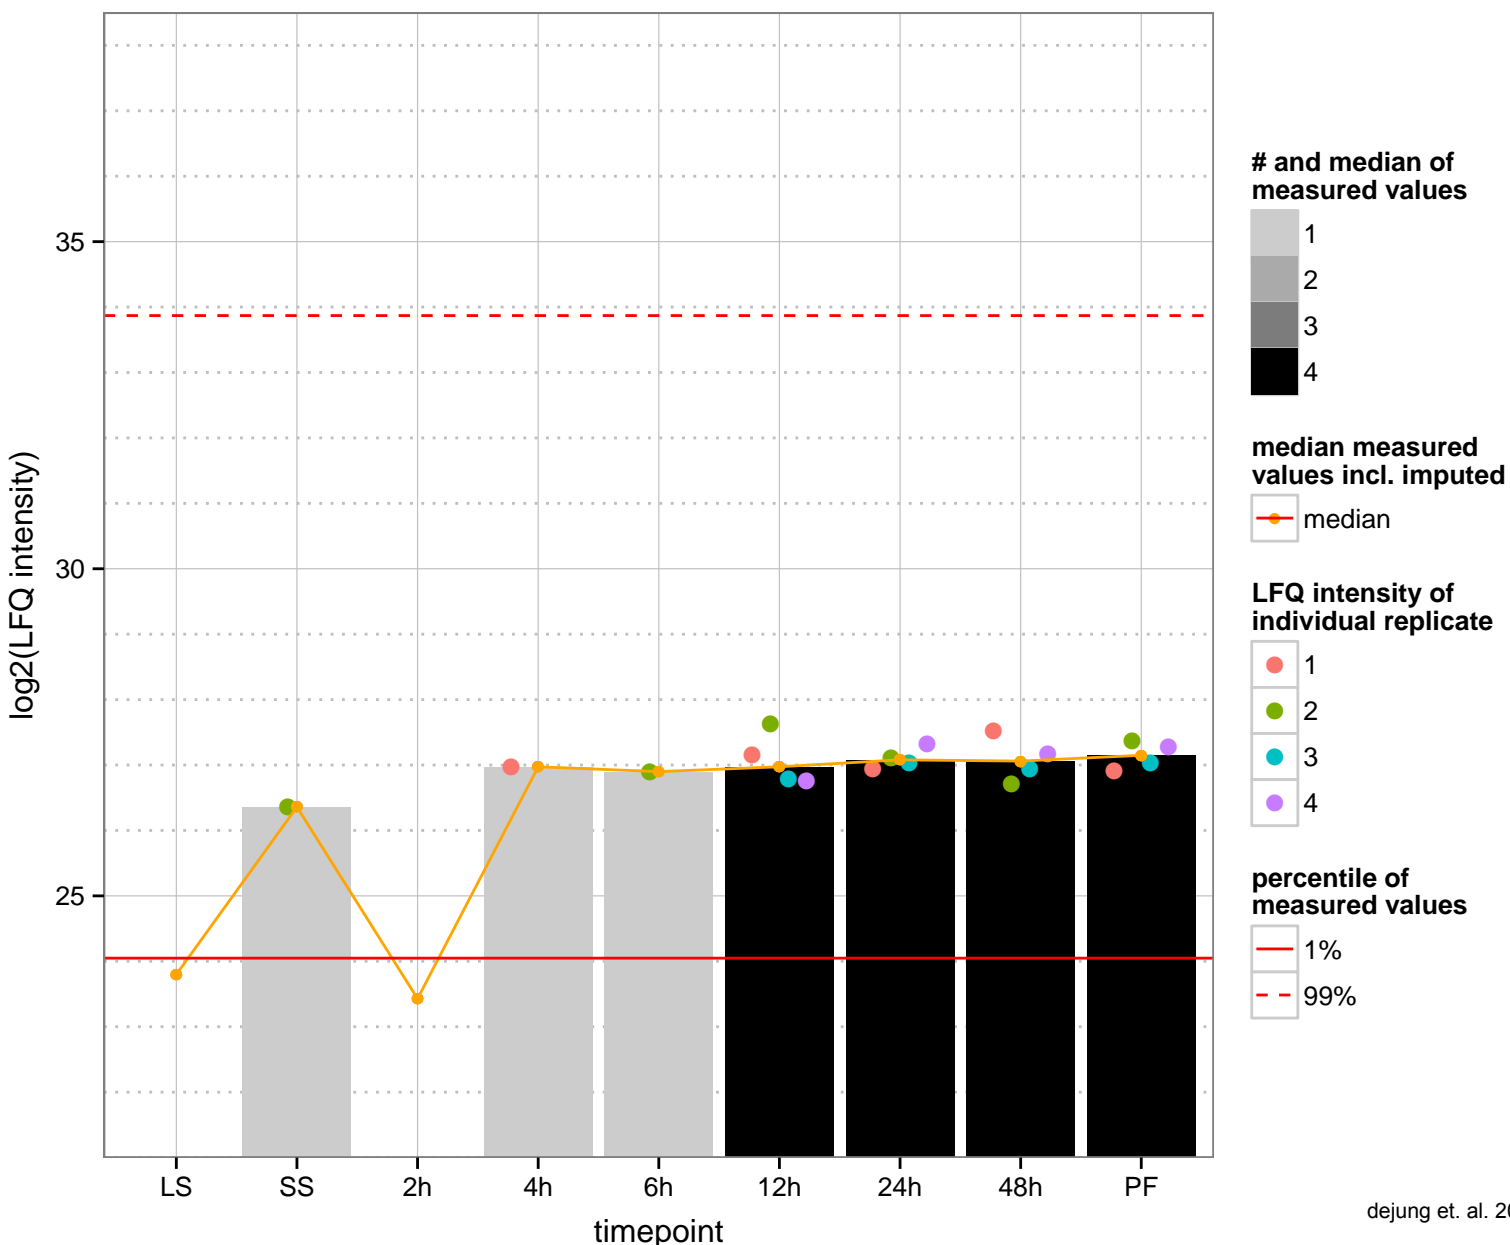

NADH-cytochrome b5 reductase-like protein  
 Tb927.11.6970  
 AGOF: cytochrome-b5 reductase activity, electron carrier activity  
 AGOC: mitochondrion  
 AGOP: oxidation-reduction process  
 PGO: oxidoreductase activity  
 PGO: null  
 PGO: oxidation-reduction process

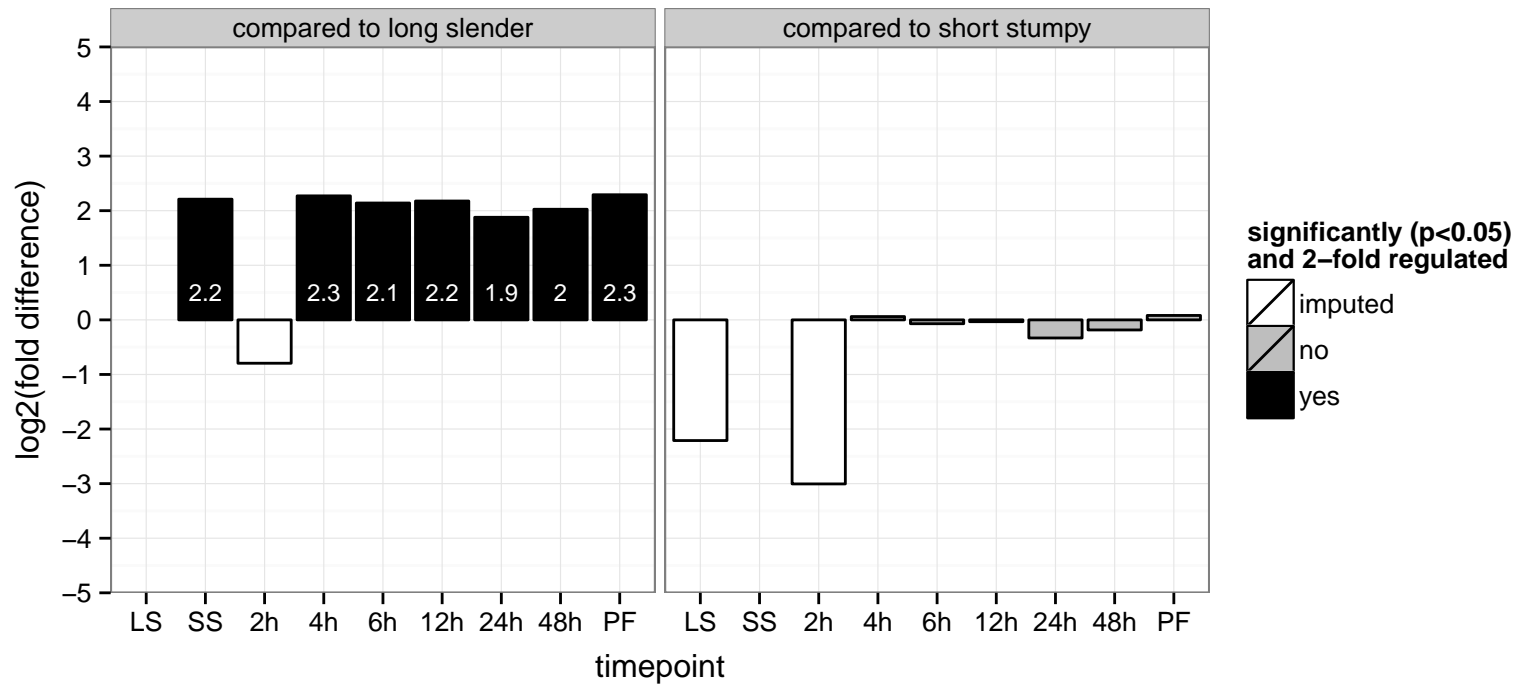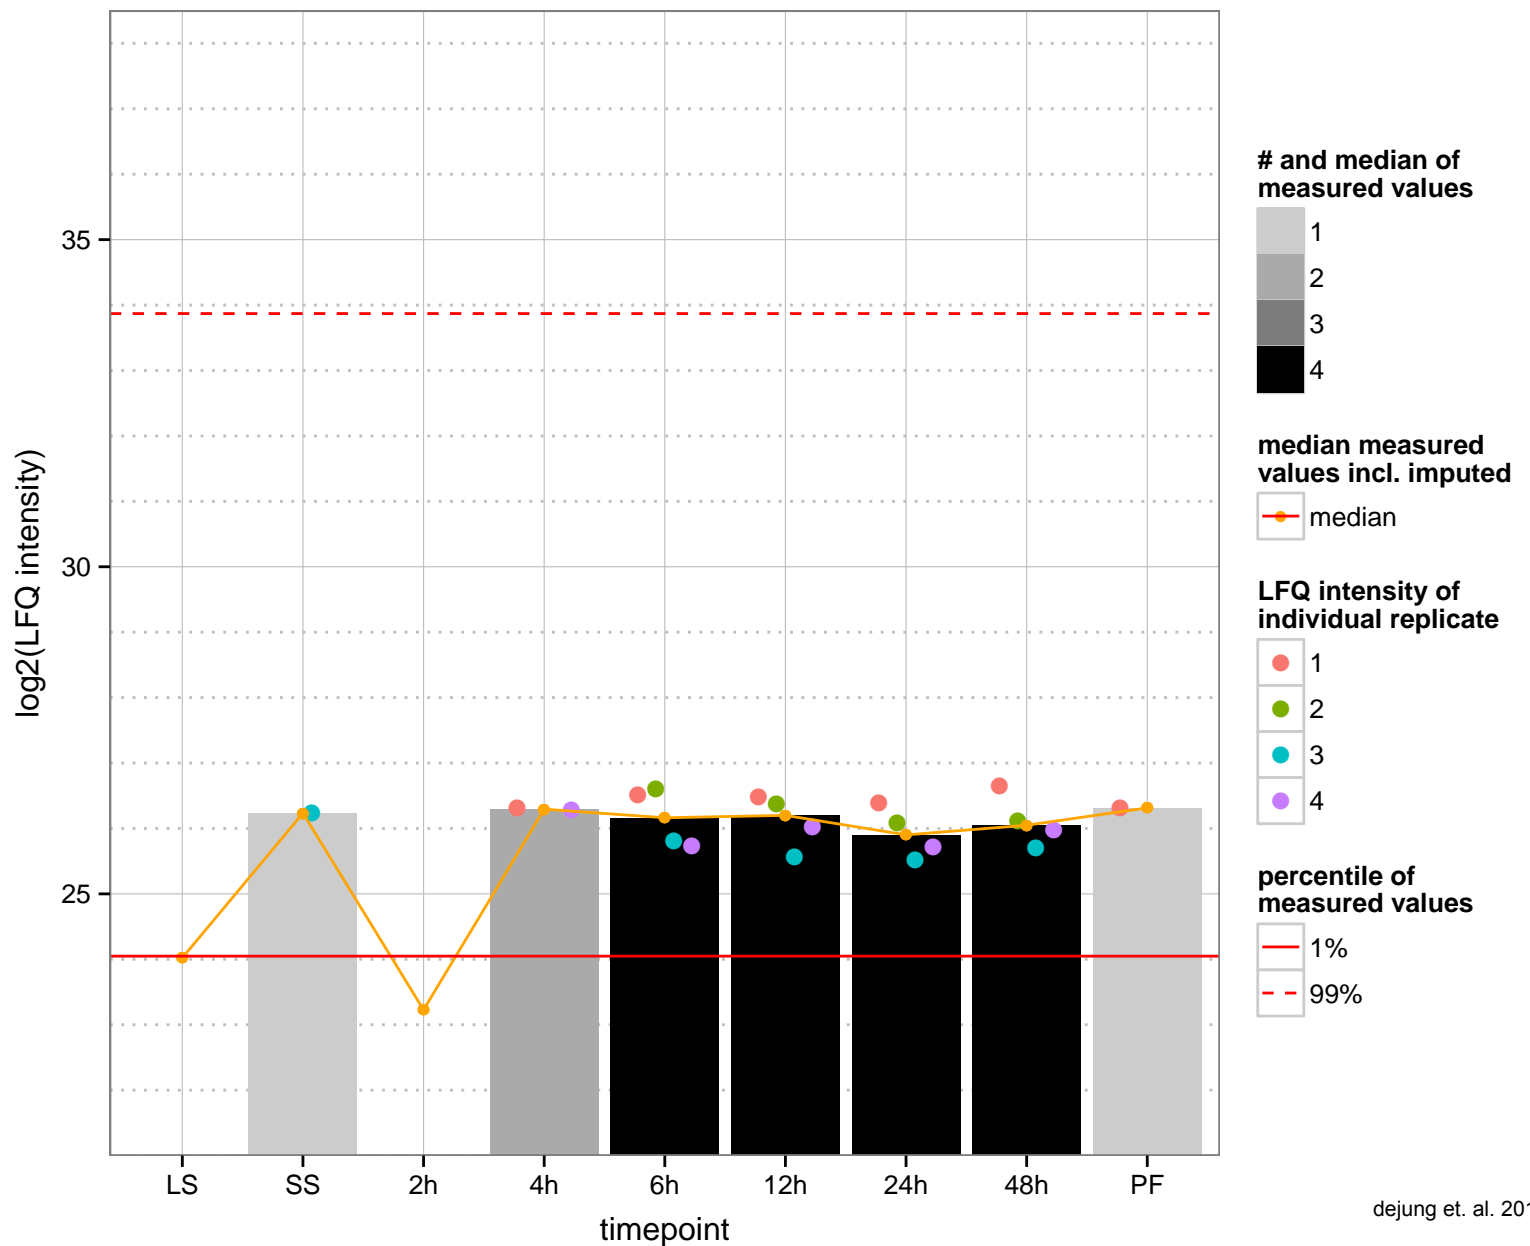



prenyltransferase, putative  
 Tb927.11.9360  
 AGOF: 4-hydroxybenzoate octaprenyltransferase activity  
 AGOC: integral to membrane, mitochondrion  
 AGOP: ubiquinone biosynthetic process  
 PGO: prenyltransferase activity  
 PGO: integral to membrane  
 PGO: null

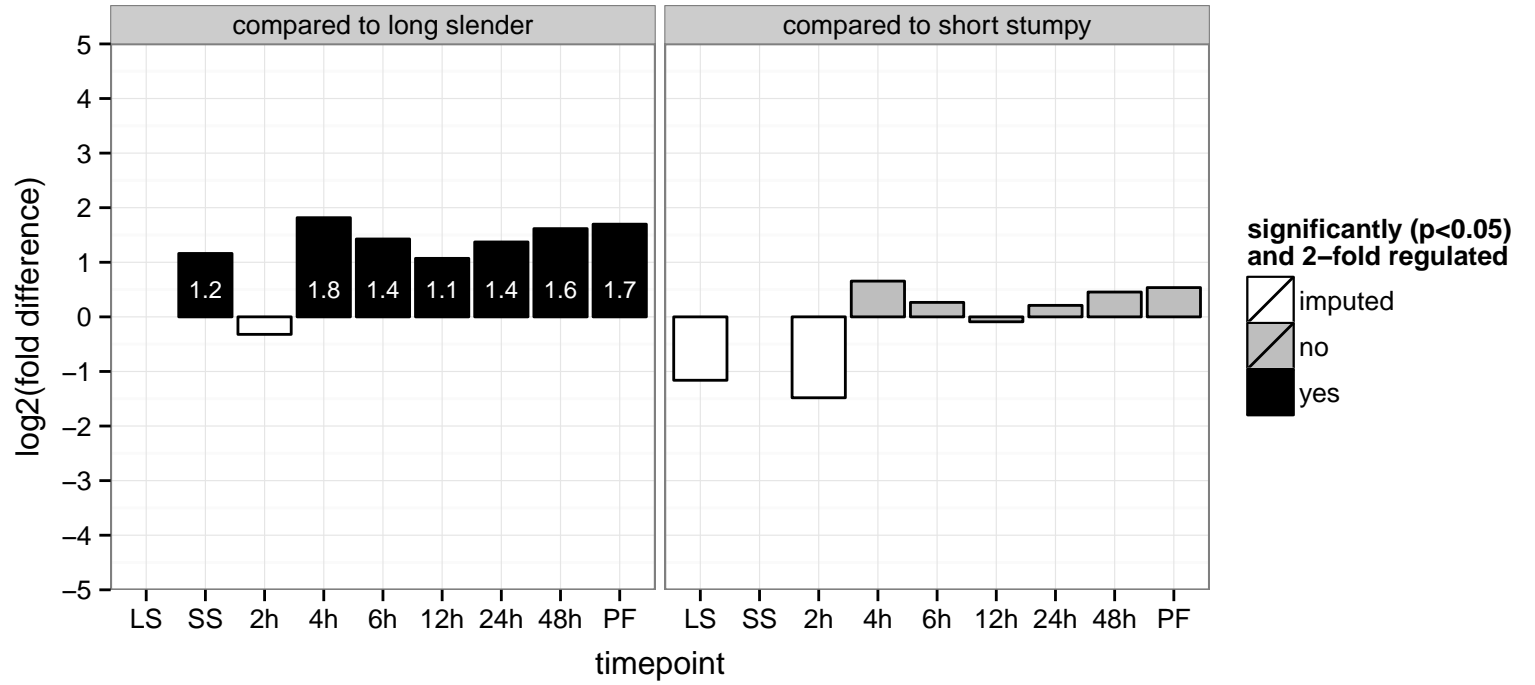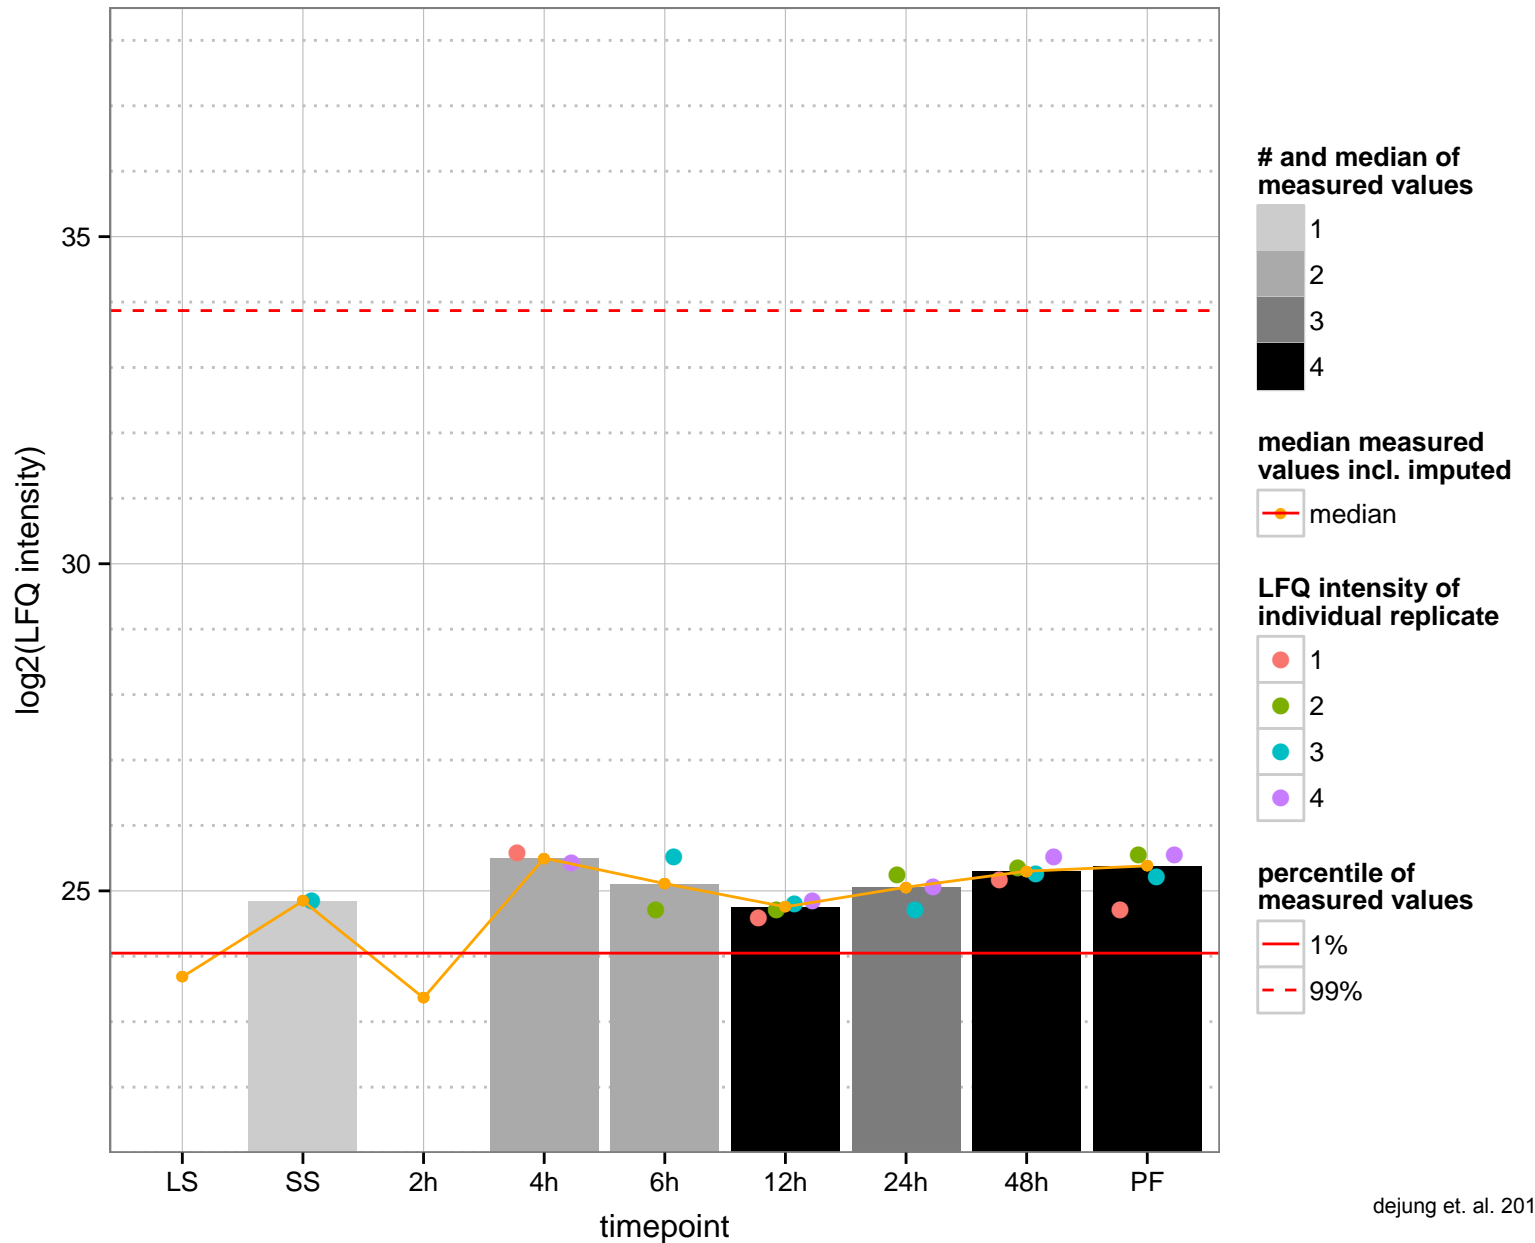

DNA polymerase delta catalytic subunit, putative

Tb927.2.1800

AGOF: DNA binding, DNA-directed DNA polymerase activity, nucleotide binding

AGOC: null

AGOP: DNA replication

PGOF: DNA binding, DNA-directed DNA polymerase activity, nucleic acid binding, nucleotide binding

PGOC: null

PGOP: DNA replication, nucleobase-containing compound metabolic process

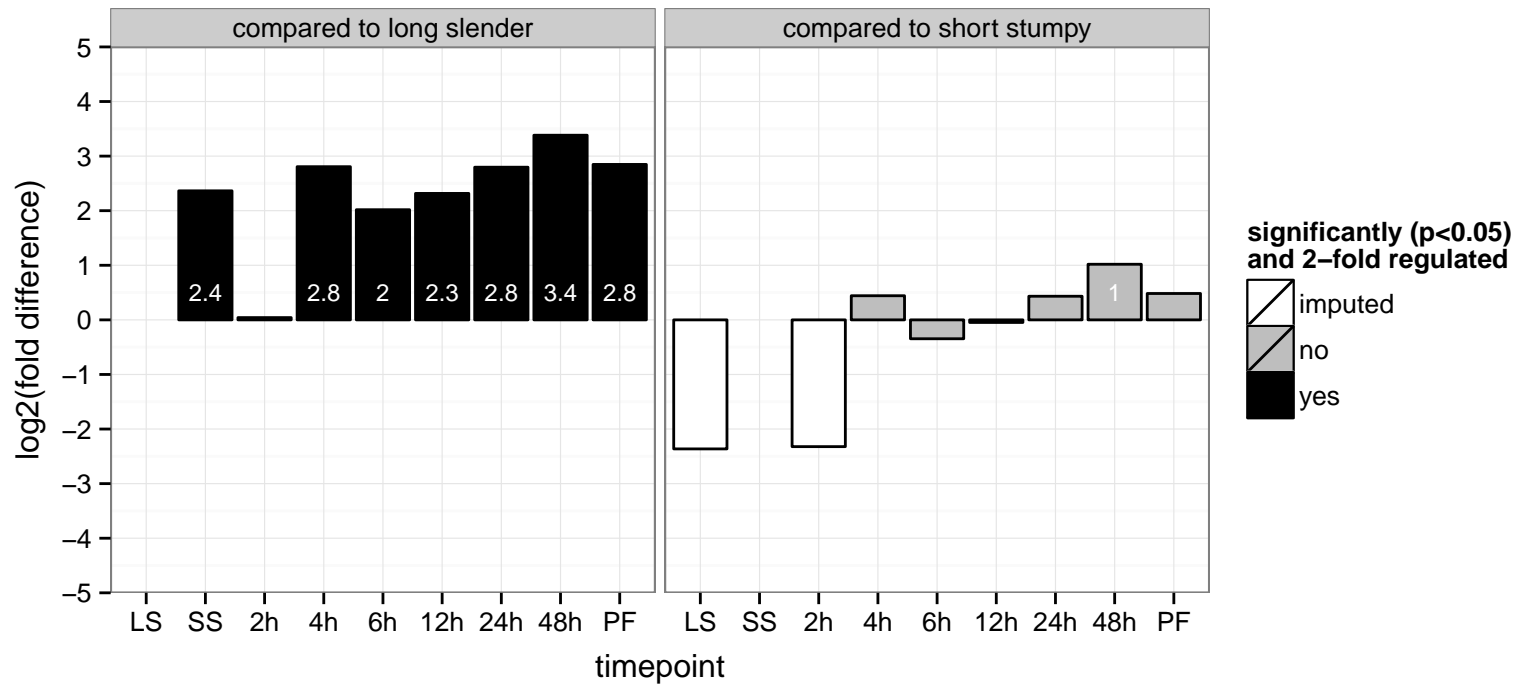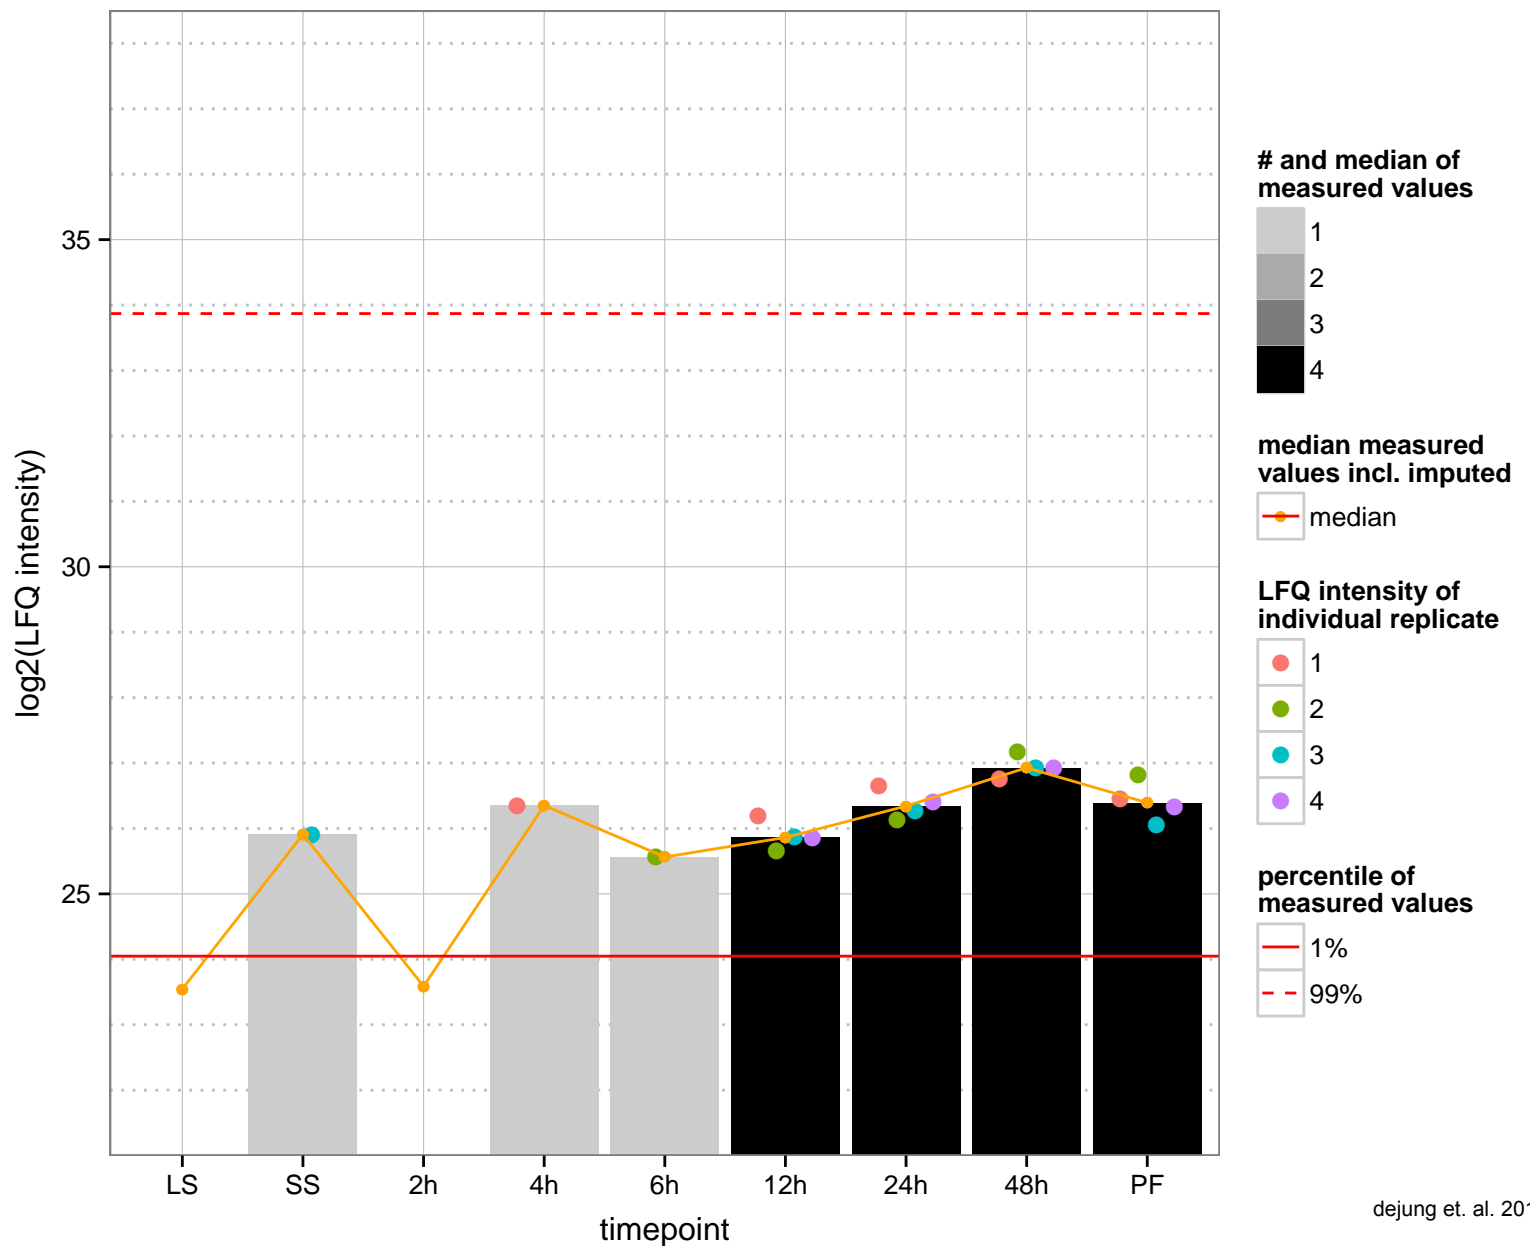

hypothetical protein, conserved  
 Tb927.2.2370  
 AGOF: null  
 AGOC: null  
 AGOP: null  
 PGO: null  
 PGOC: null  
 PGOP: null

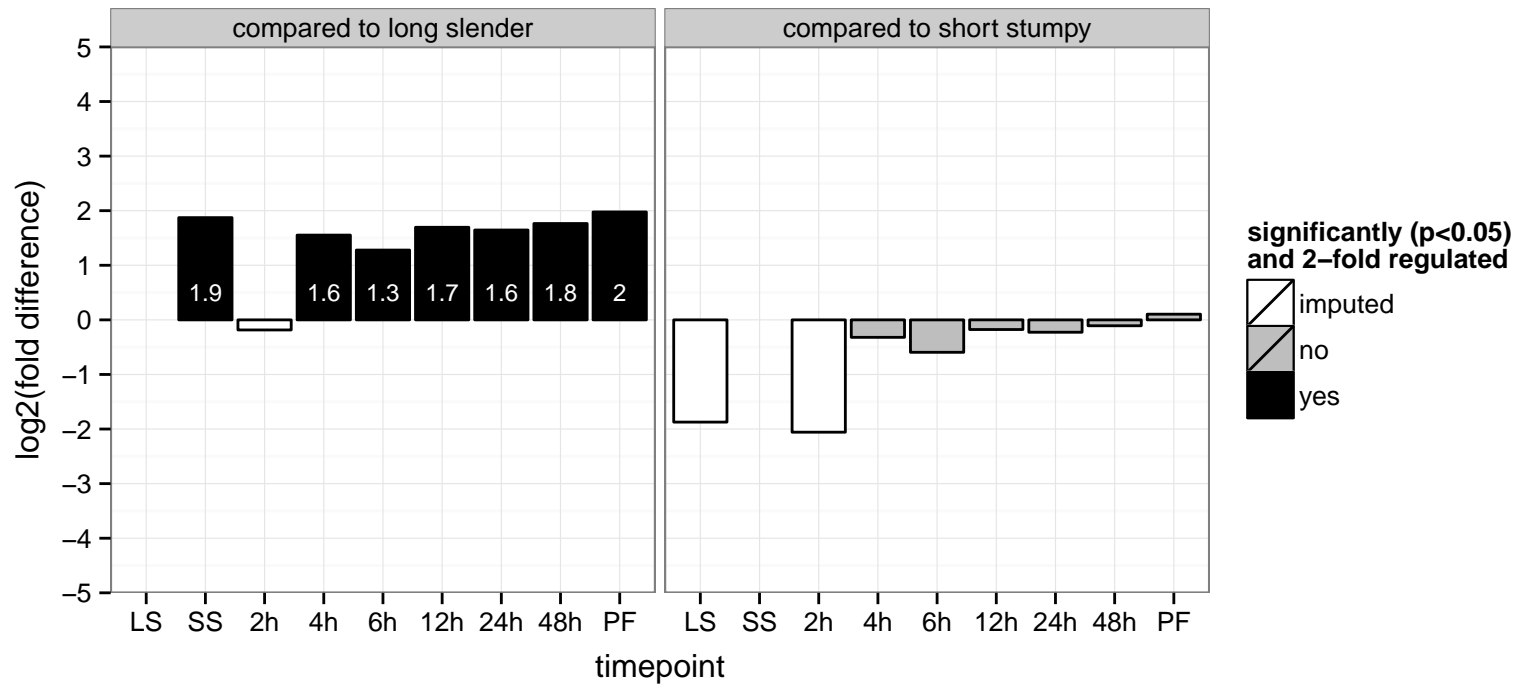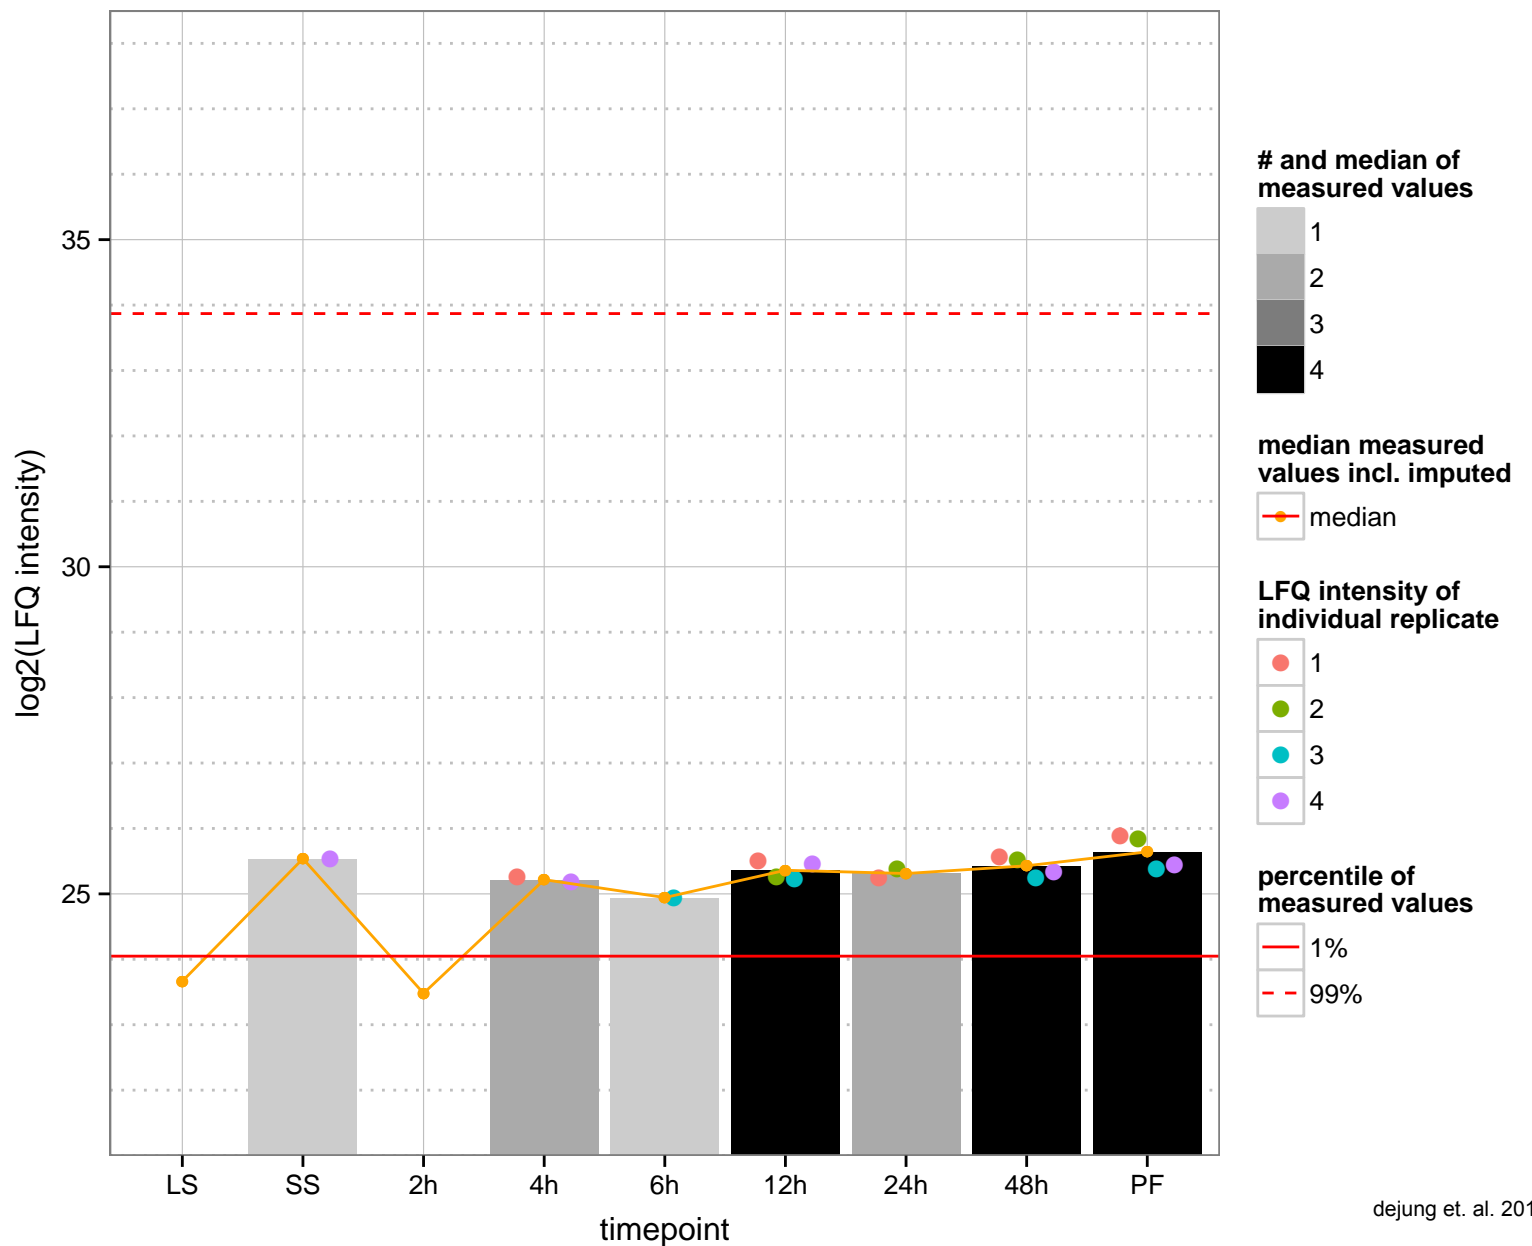

hypothetical protein, conserved  
 Tb927.2.6080  
 AGOF: null  
 AGOC: null  
 AGOP: null  
 PGO: null  
 PGOC: null  
 PGOP: null

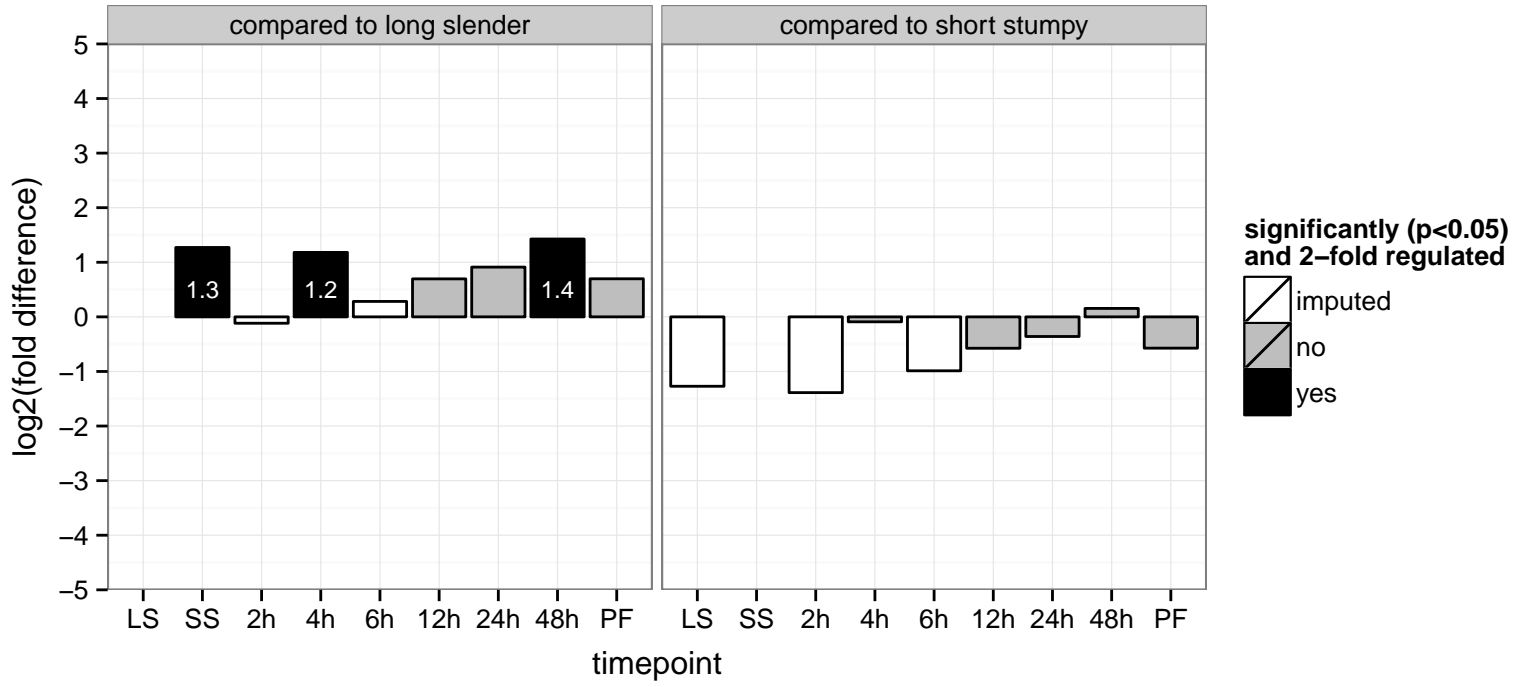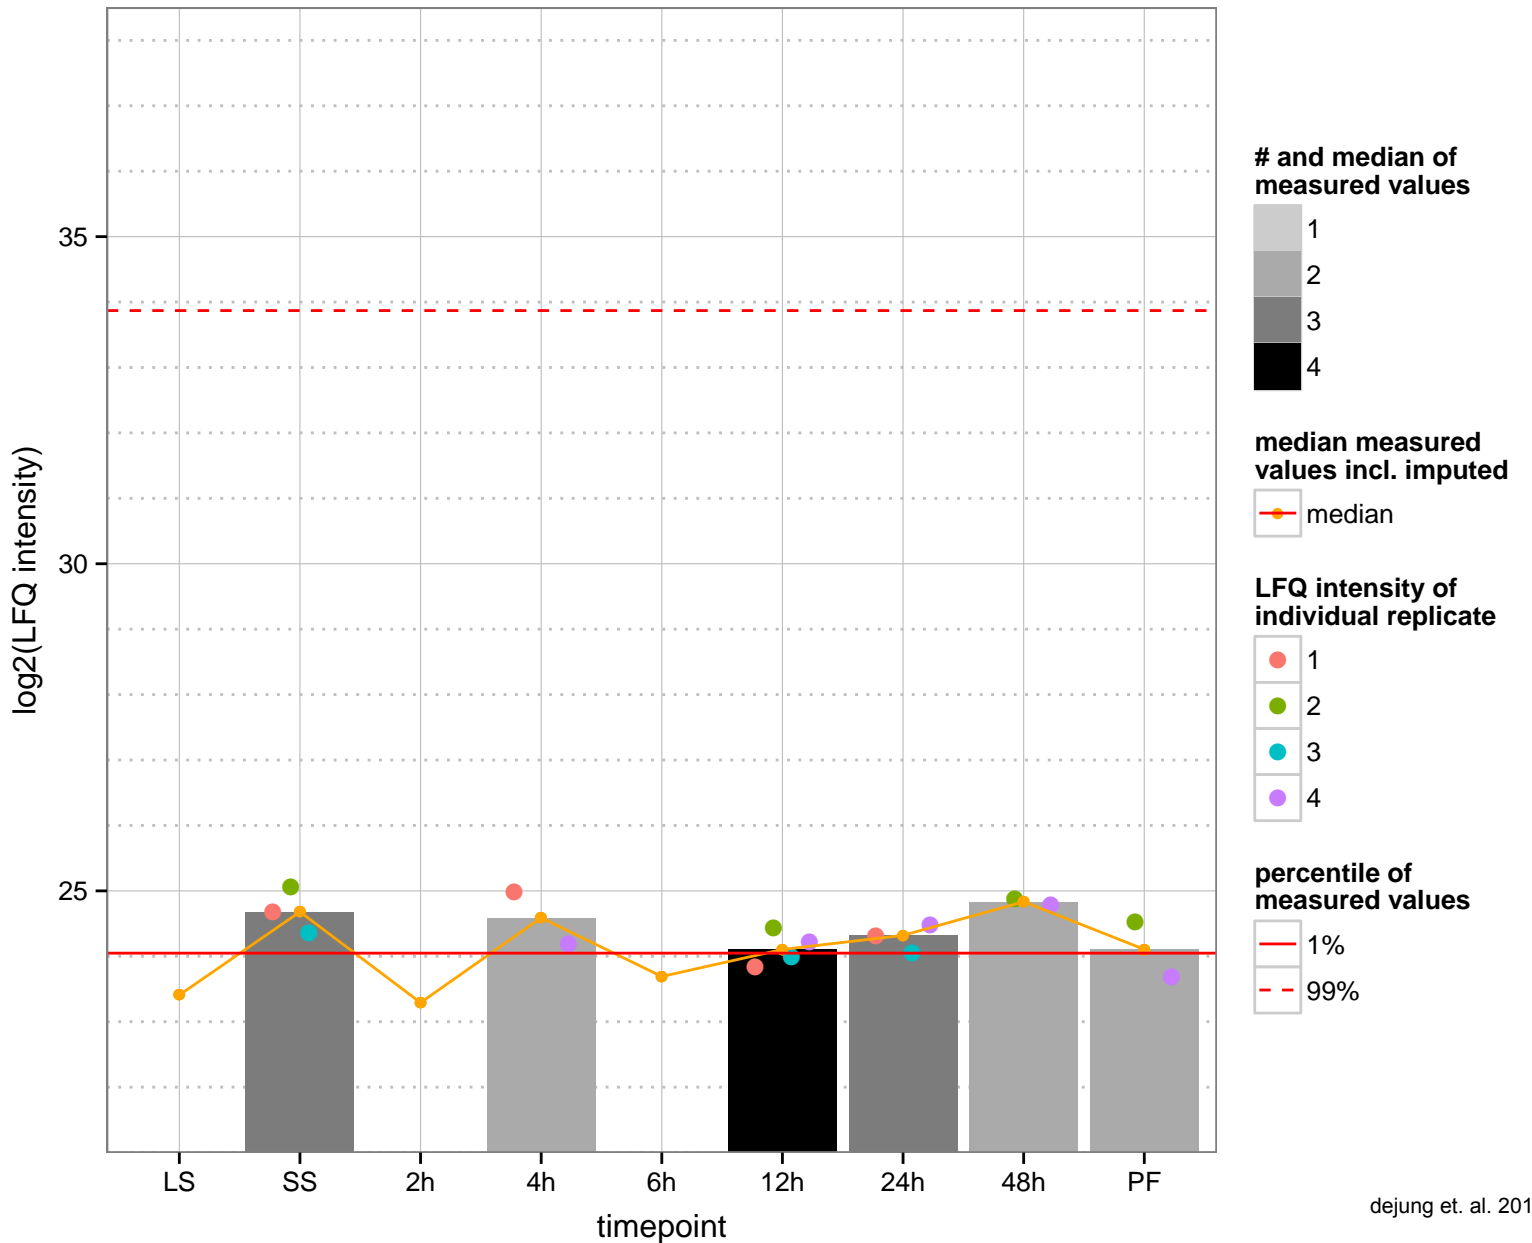

hypothetical protein, conserved  
 Tb927.3.1100  
 AGOF: exonuclease activity, nucleic acid binding  
 AGOC: intracellular, mitochondrion  
 AGOP: null  
 PGOF: exonuclease activity, nucleic acid binding  
 PGO: intracellular  
 PGOP: null

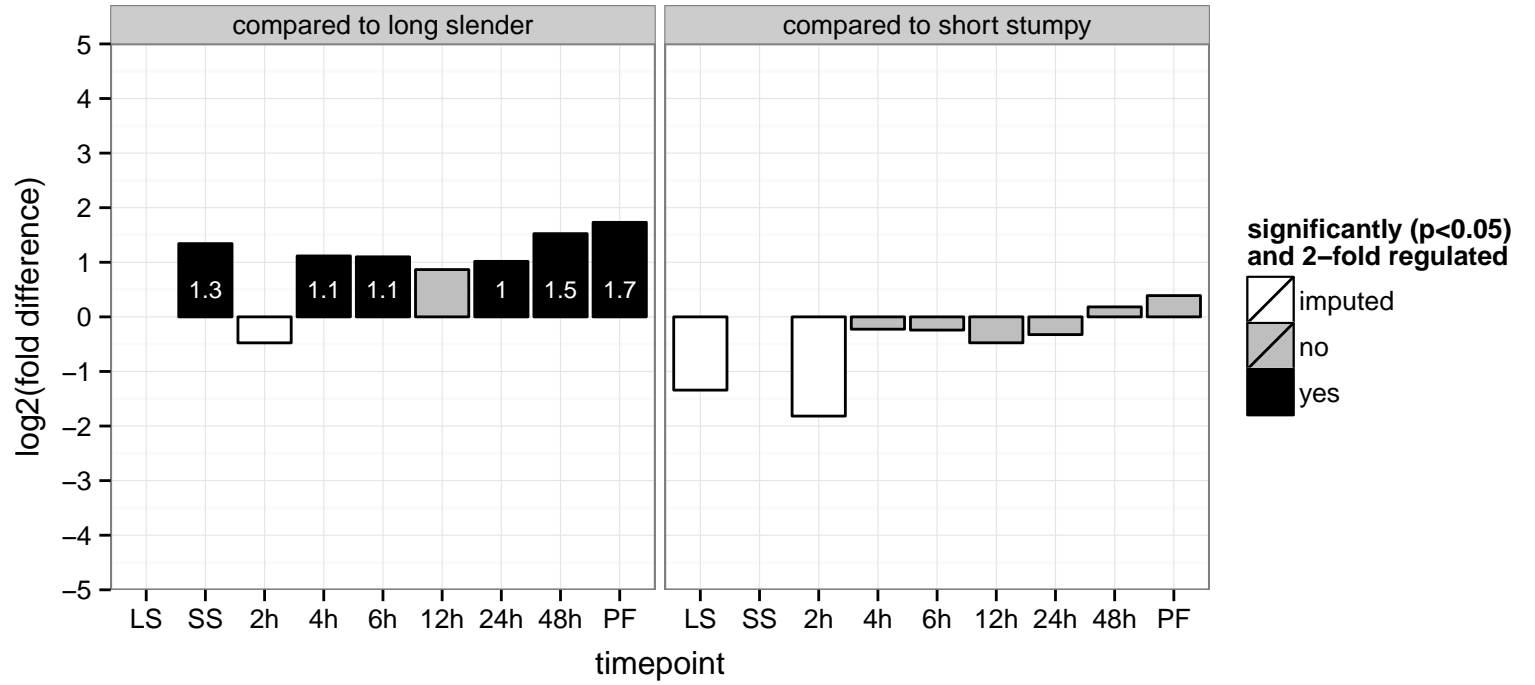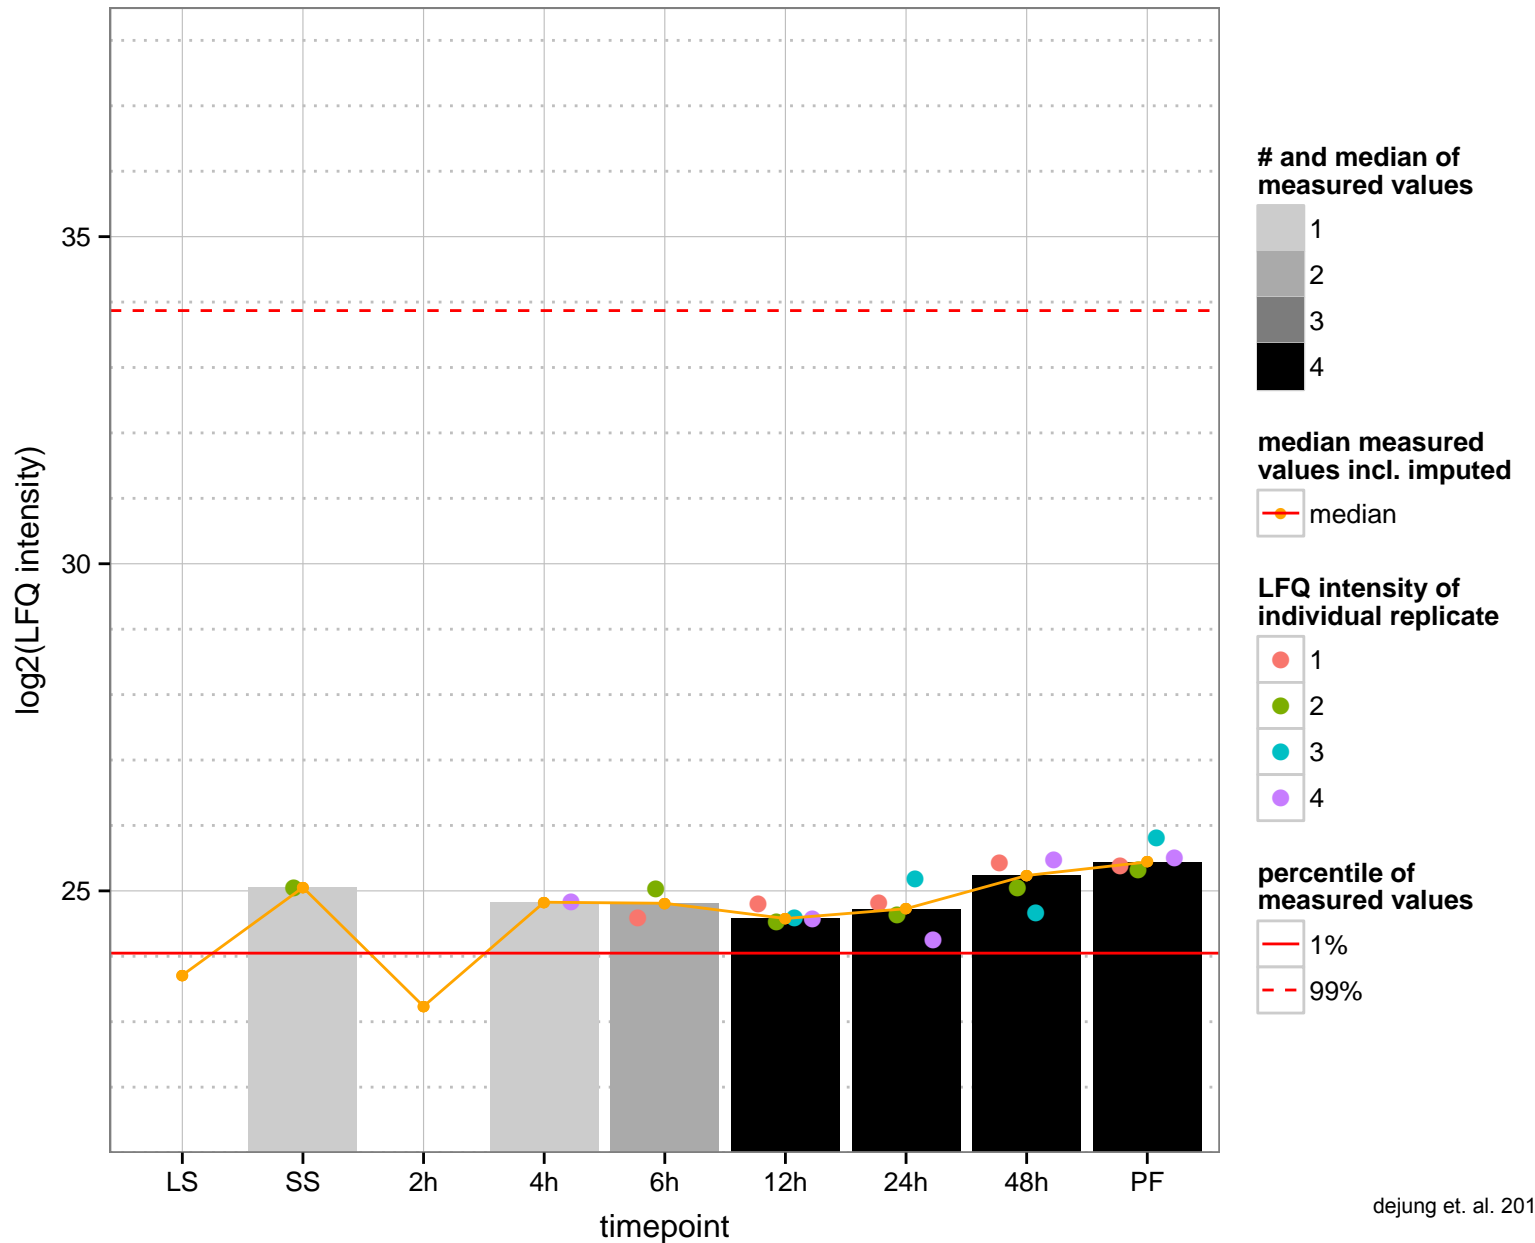

hypothetical protein, conserved  
 Tb927.3.2300  
 AGOF: null  
 AGOC: mitochondrion  
 AGOP: null  
 PGO: zinc ion binding  
 PGOC: null  
 PGOP: null

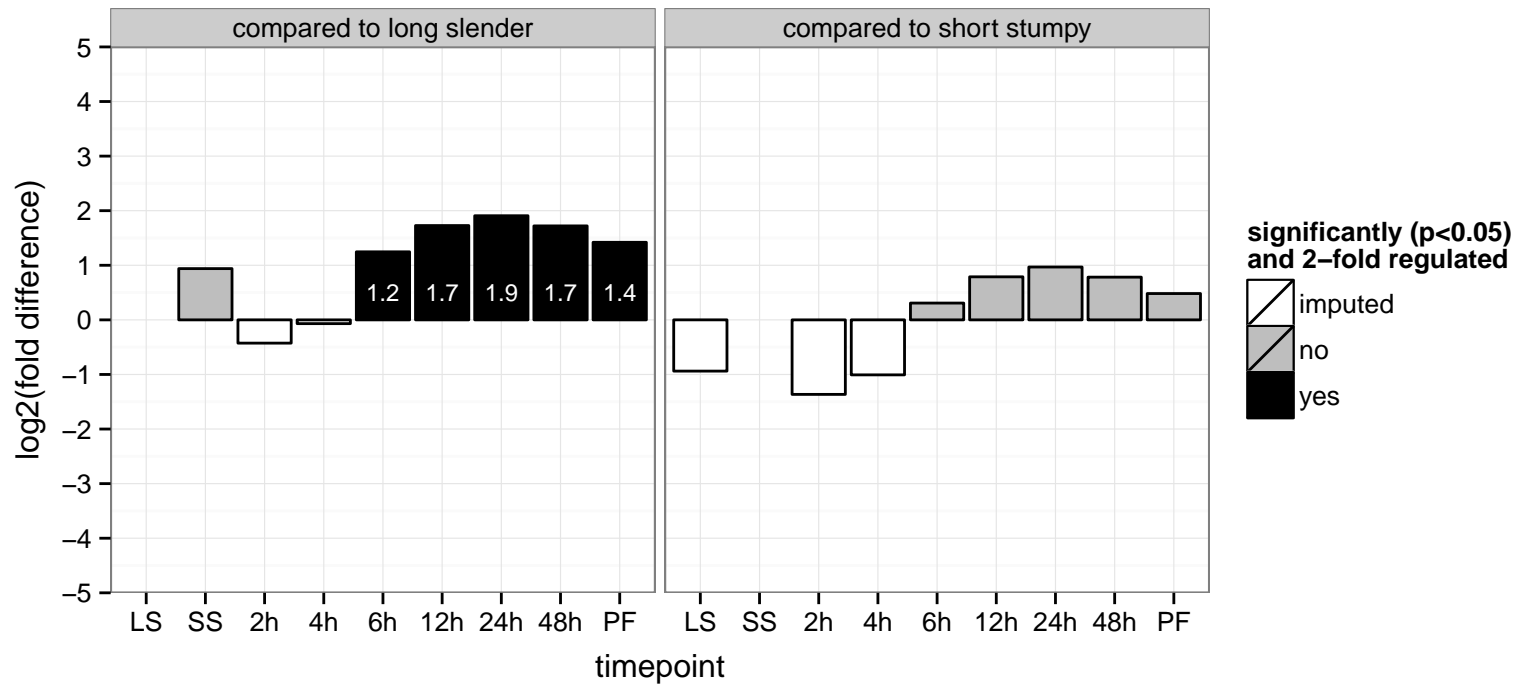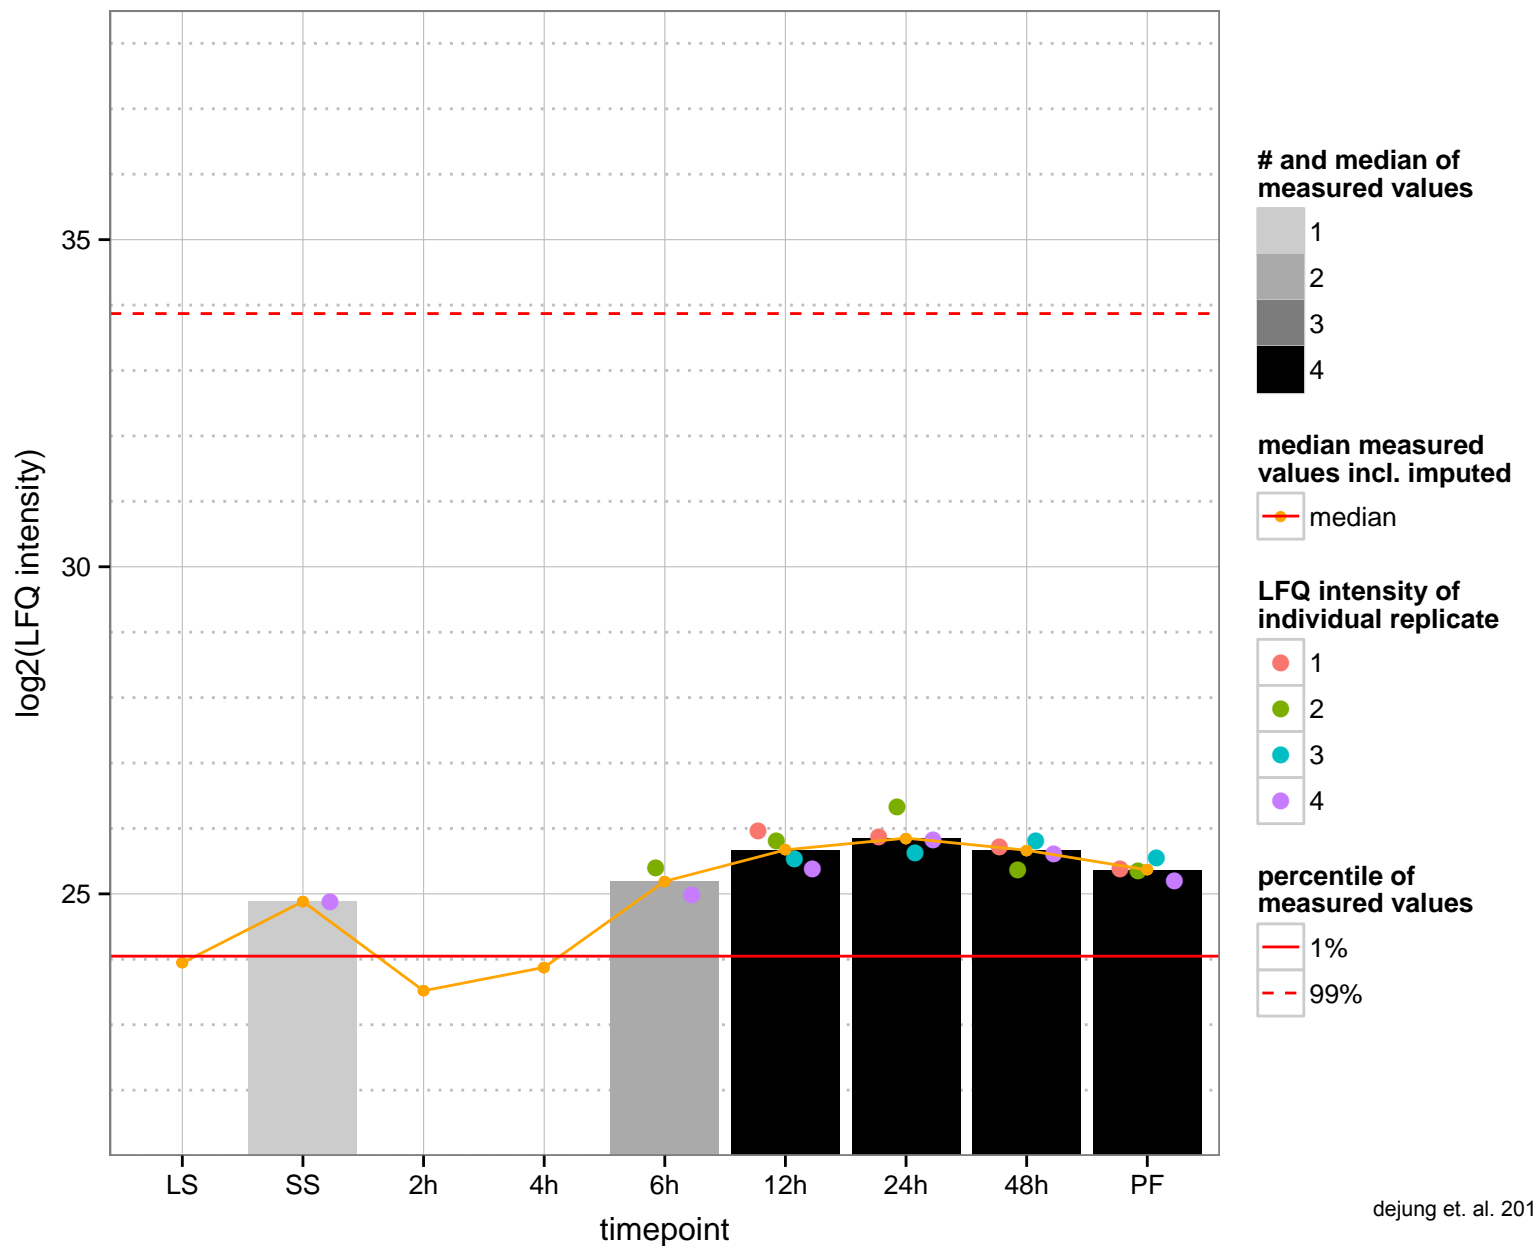

ubiquinone biosynthesis protein COQ7 homolog, putative  
 Tb927.3.4890  
 AGOF: null  
 AGOC: mitochondrion  
 AGOP: protein metabolic process, ubiquinone biosynthetic process  
 PGO: null  
 PGOC: null  
 PGOP: oxidation–reduction process, ubiquinone biosynthetic process

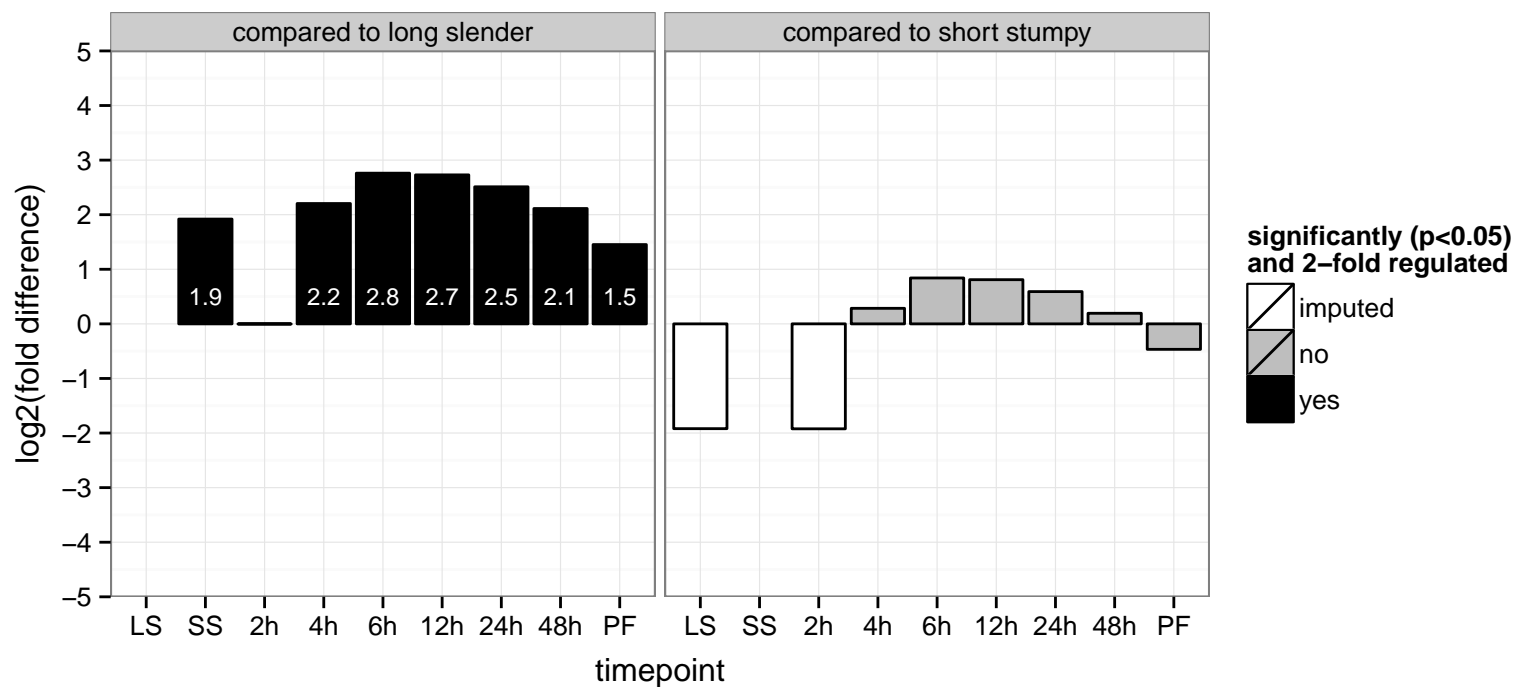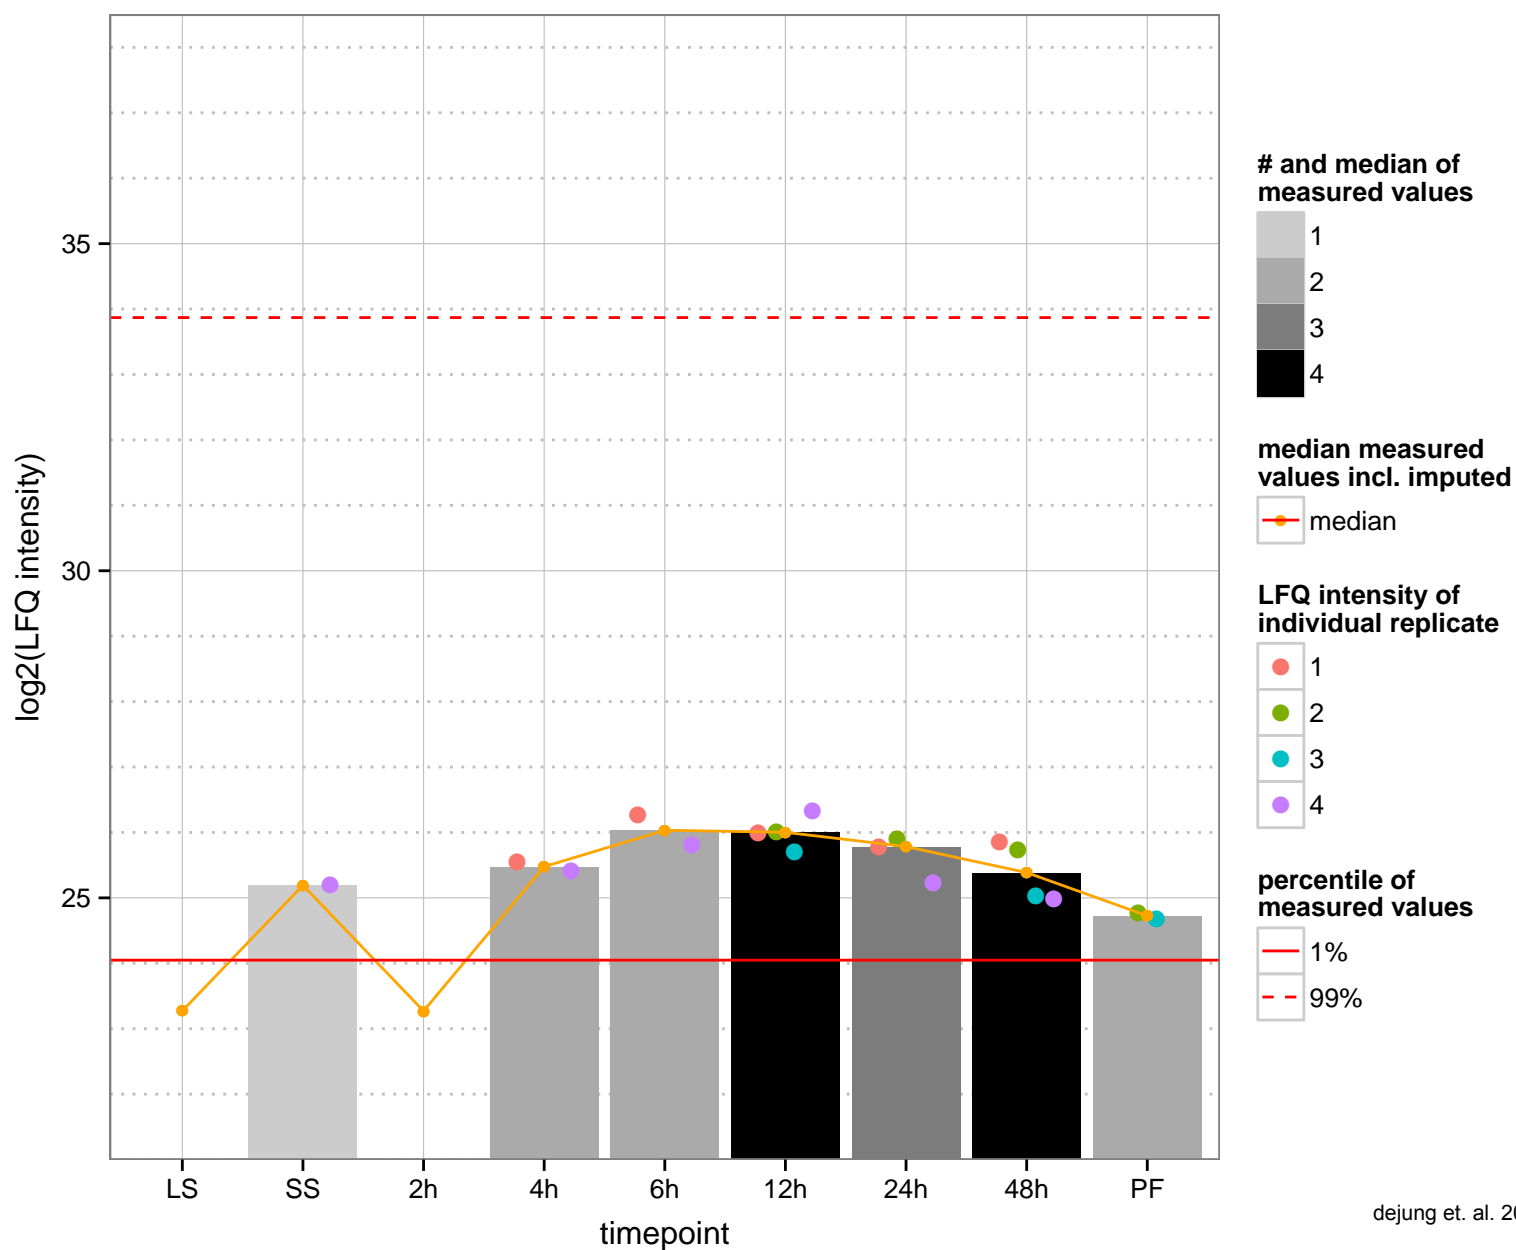

centrin, putative (centrin1)  
 Tb927.4.2260  
 AGOF: calcium ion binding  
 AGOC: centrosome, mitochondrion  
 AGOP: null  
 PGO: calcium ion binding  
 PGOC: null  
 PGOP: null

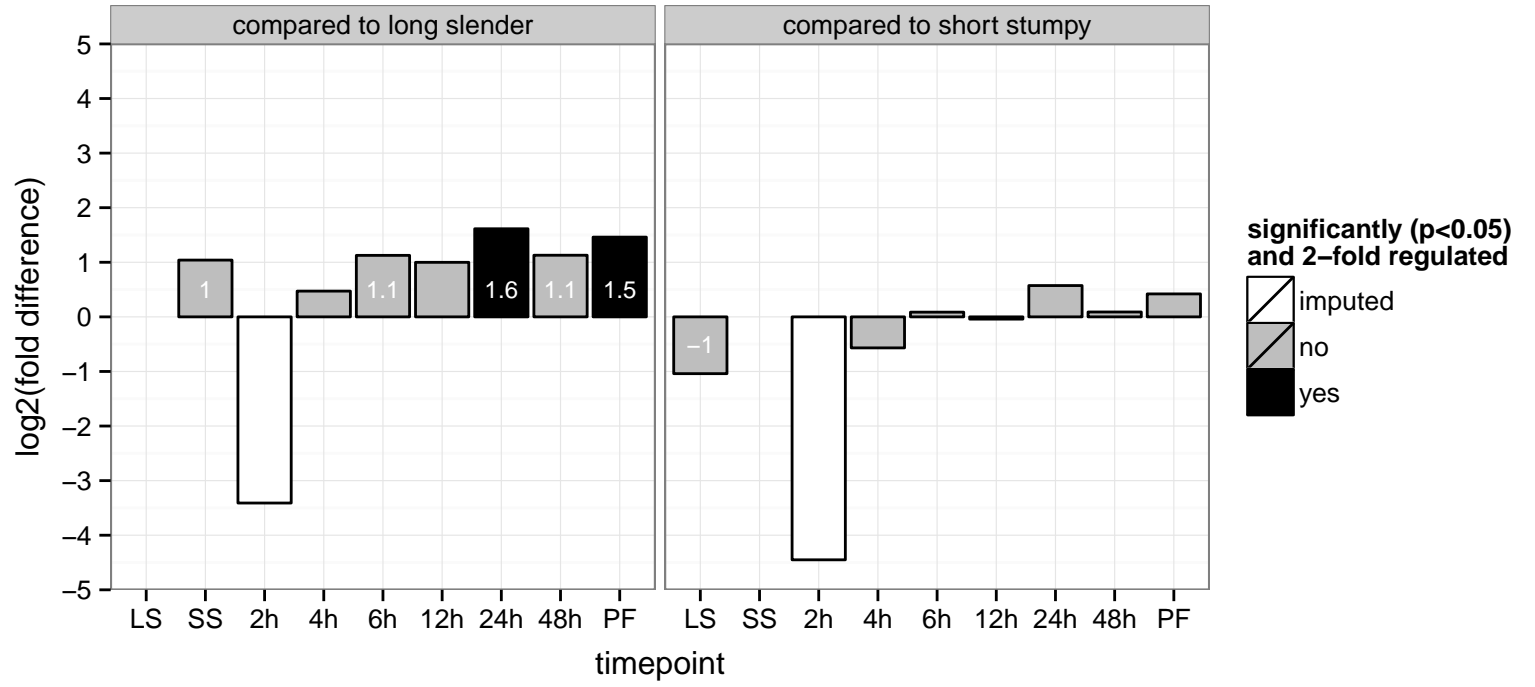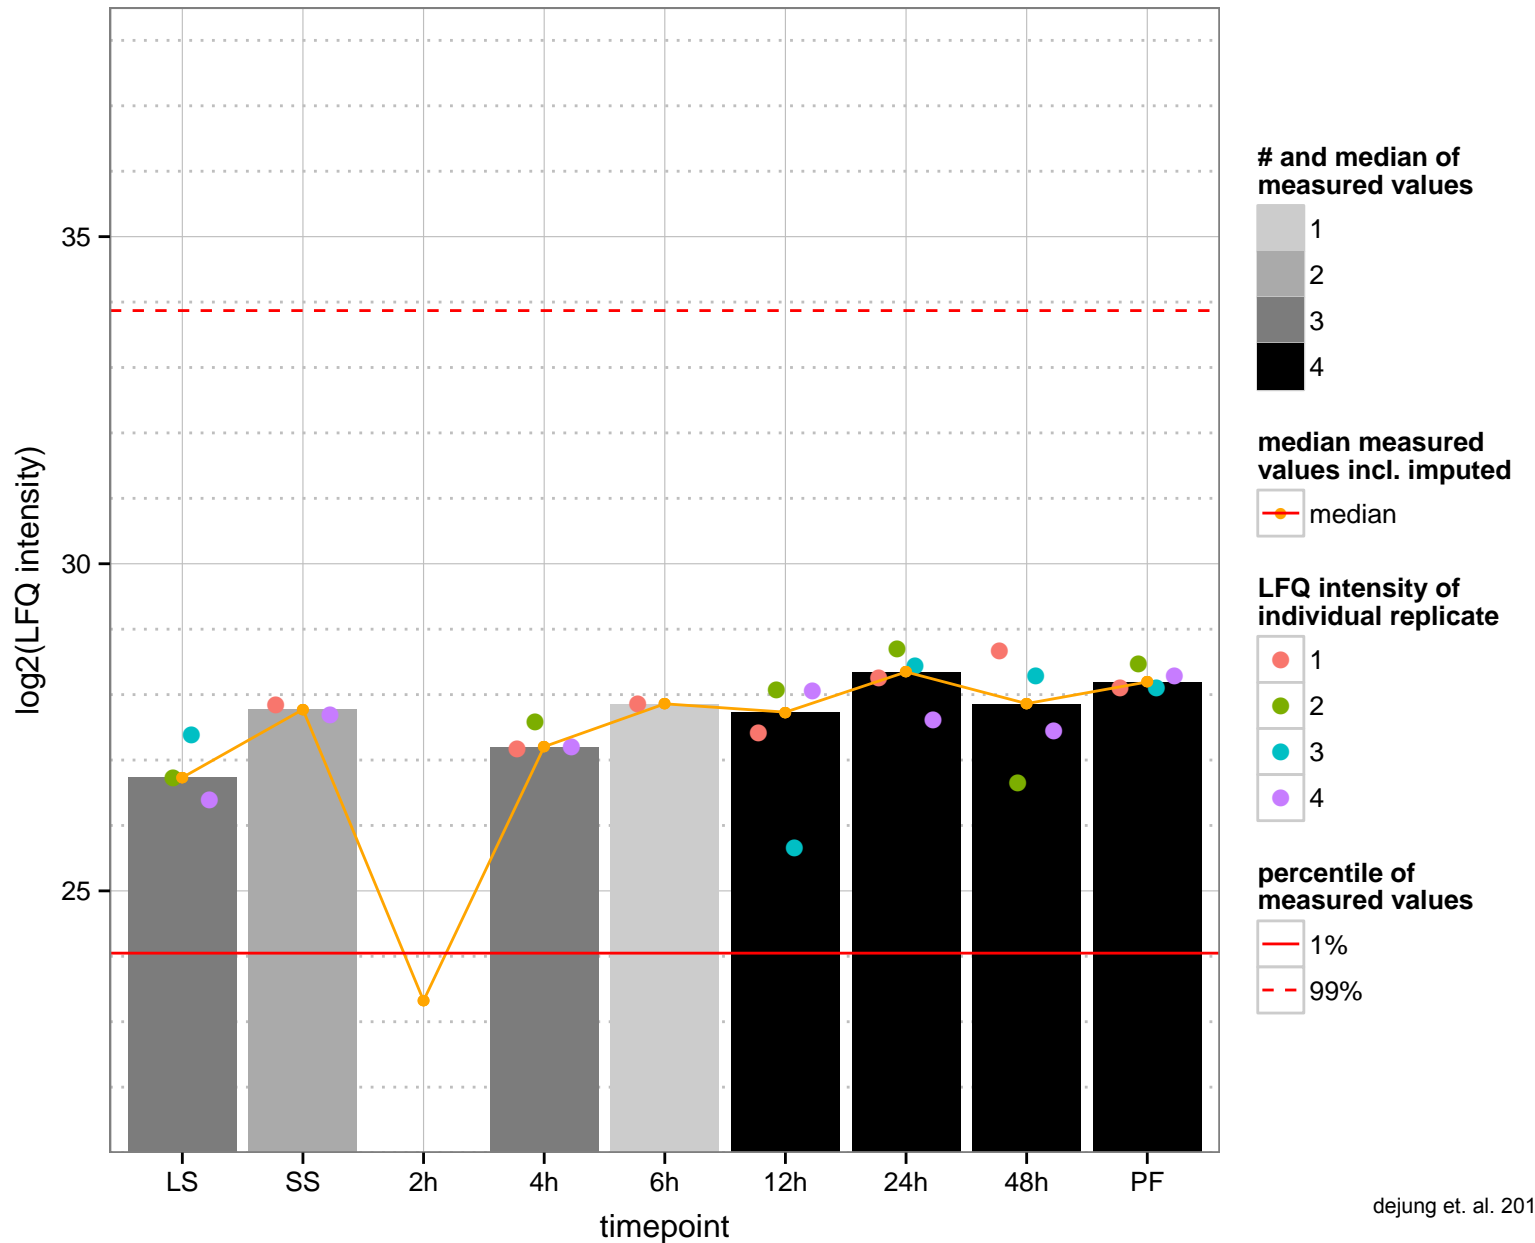



protein phosphatase 1 (PP1)  
 Tb927.4.5030  
 AGOF: protein serine/threonine phosphatase activity  
 AGOC: nucleus  
 AGOP: null  
 PGO: hydrolase activity  
 PGOC: null  
 PGOP: null

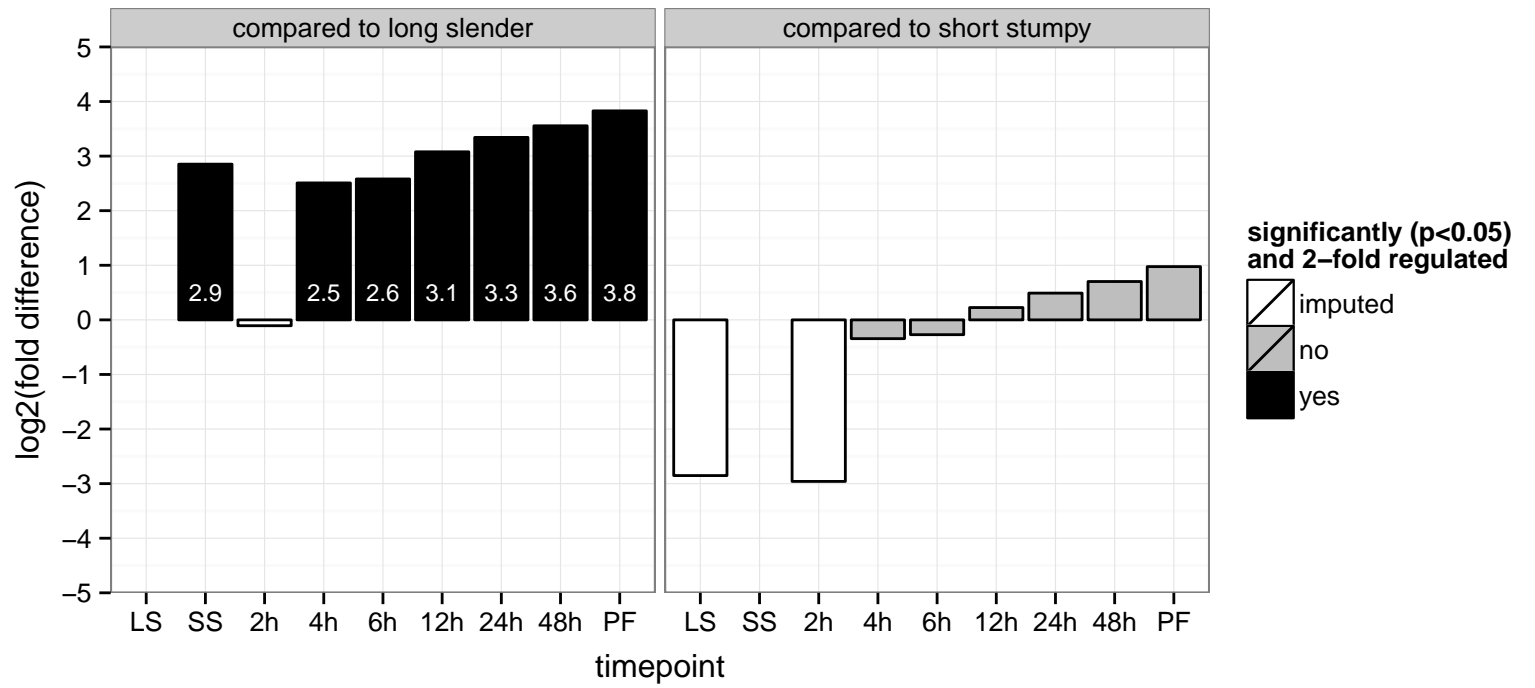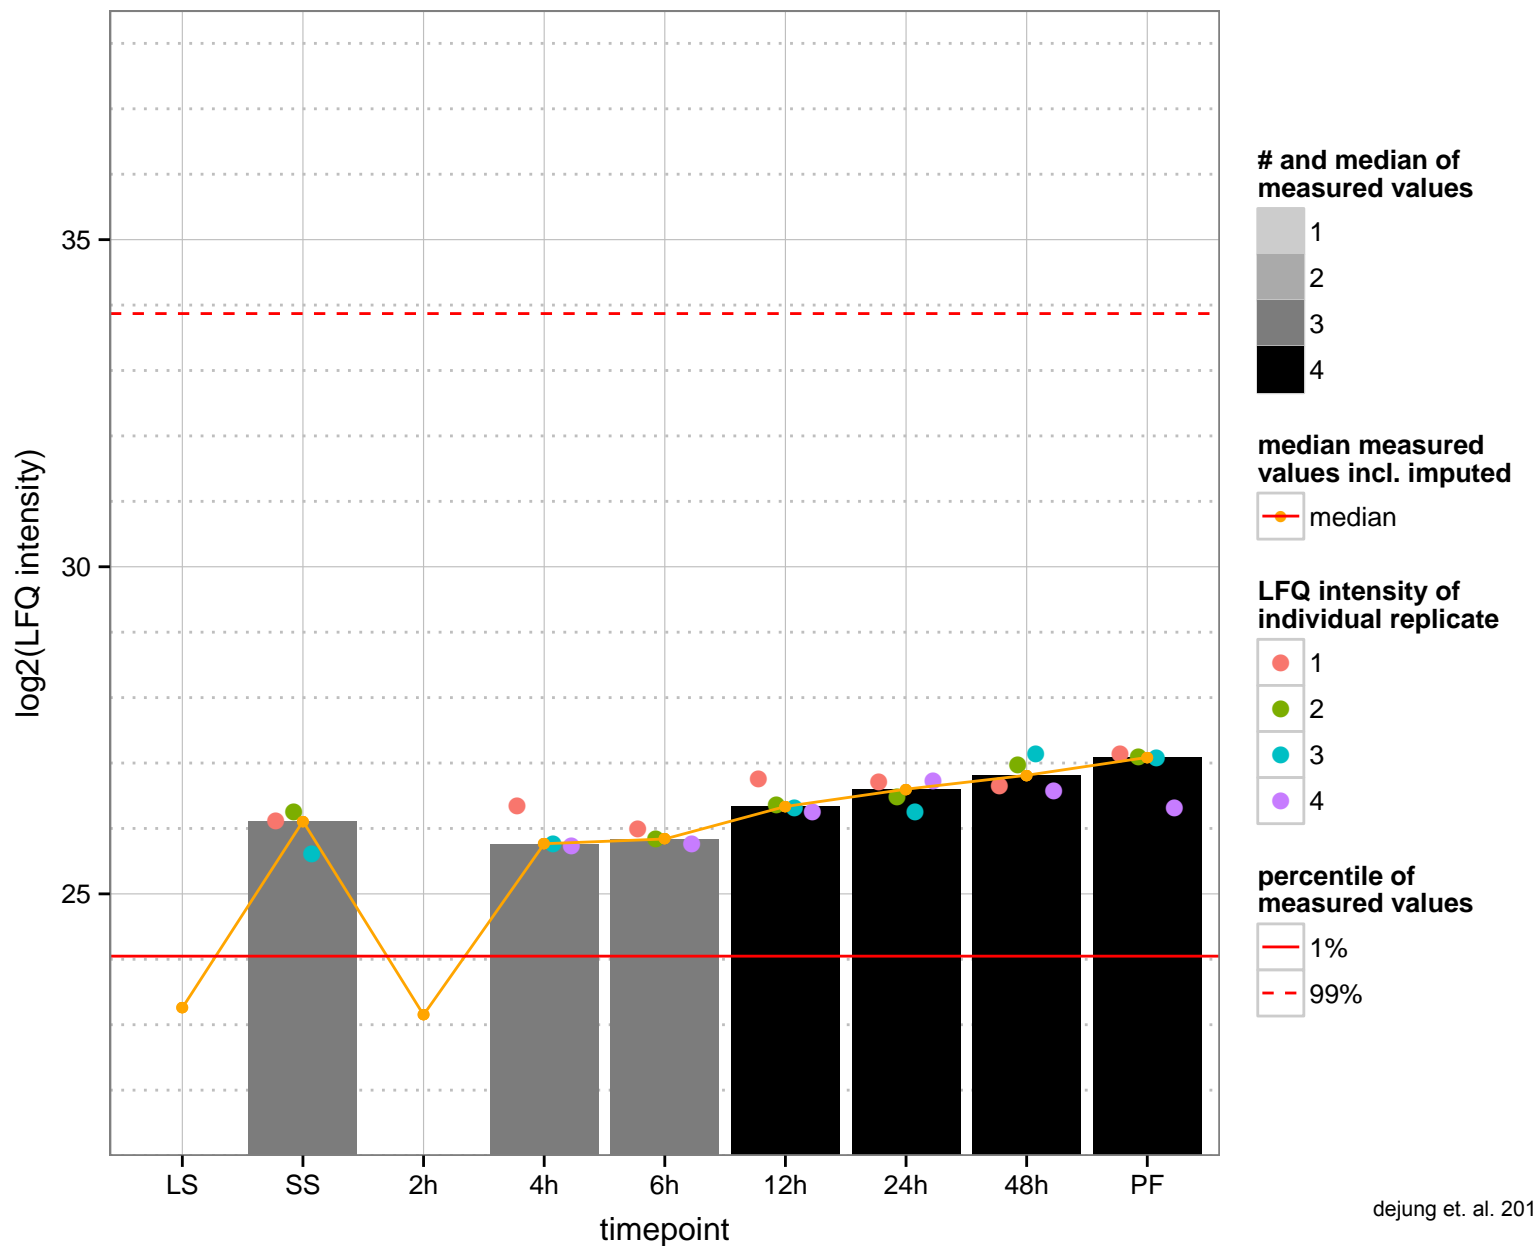

geranylgeranyl transferase type II beta subunit, putative  
 Tb927.4.690  
 AGOF: catalytic activity  
 AGOC: null  
 AGOP: null  
 PGOF: catalytic activity  
 PGO: null  
 PGOP: null

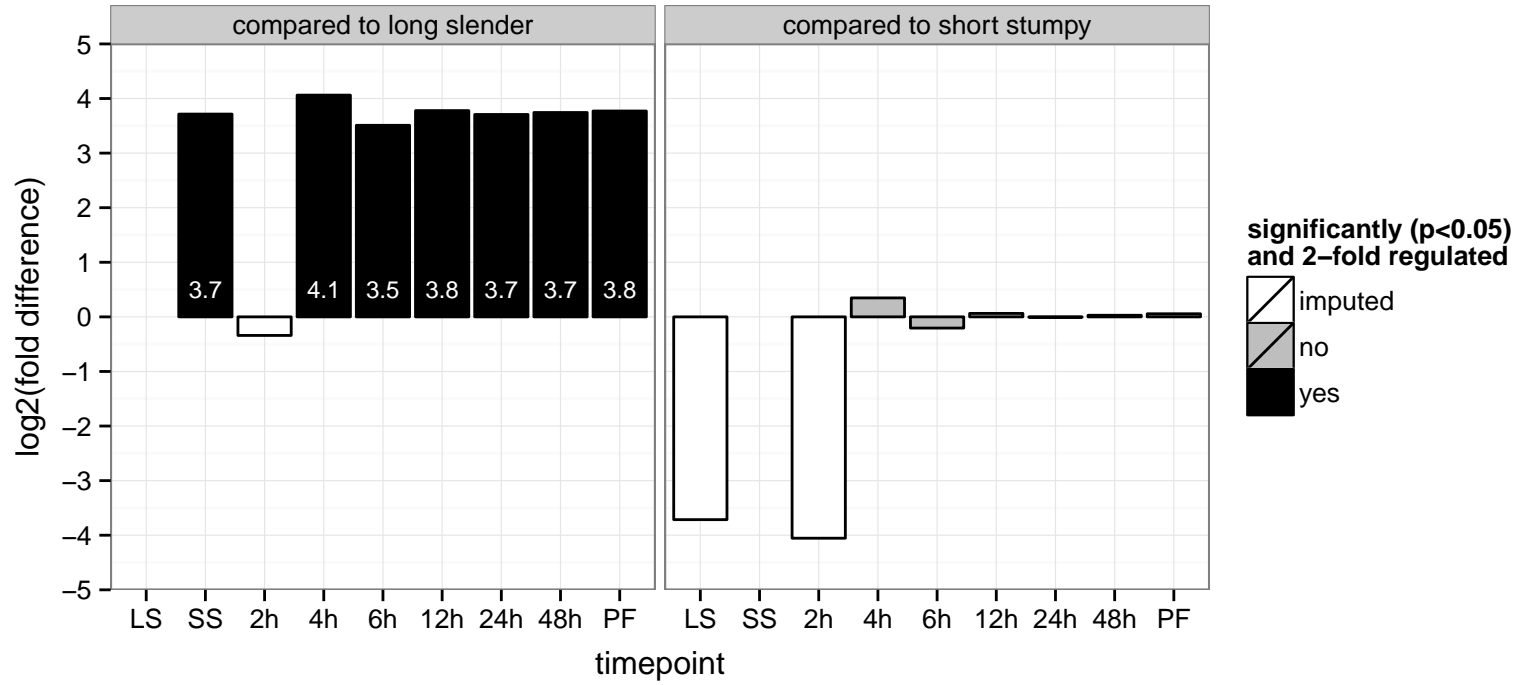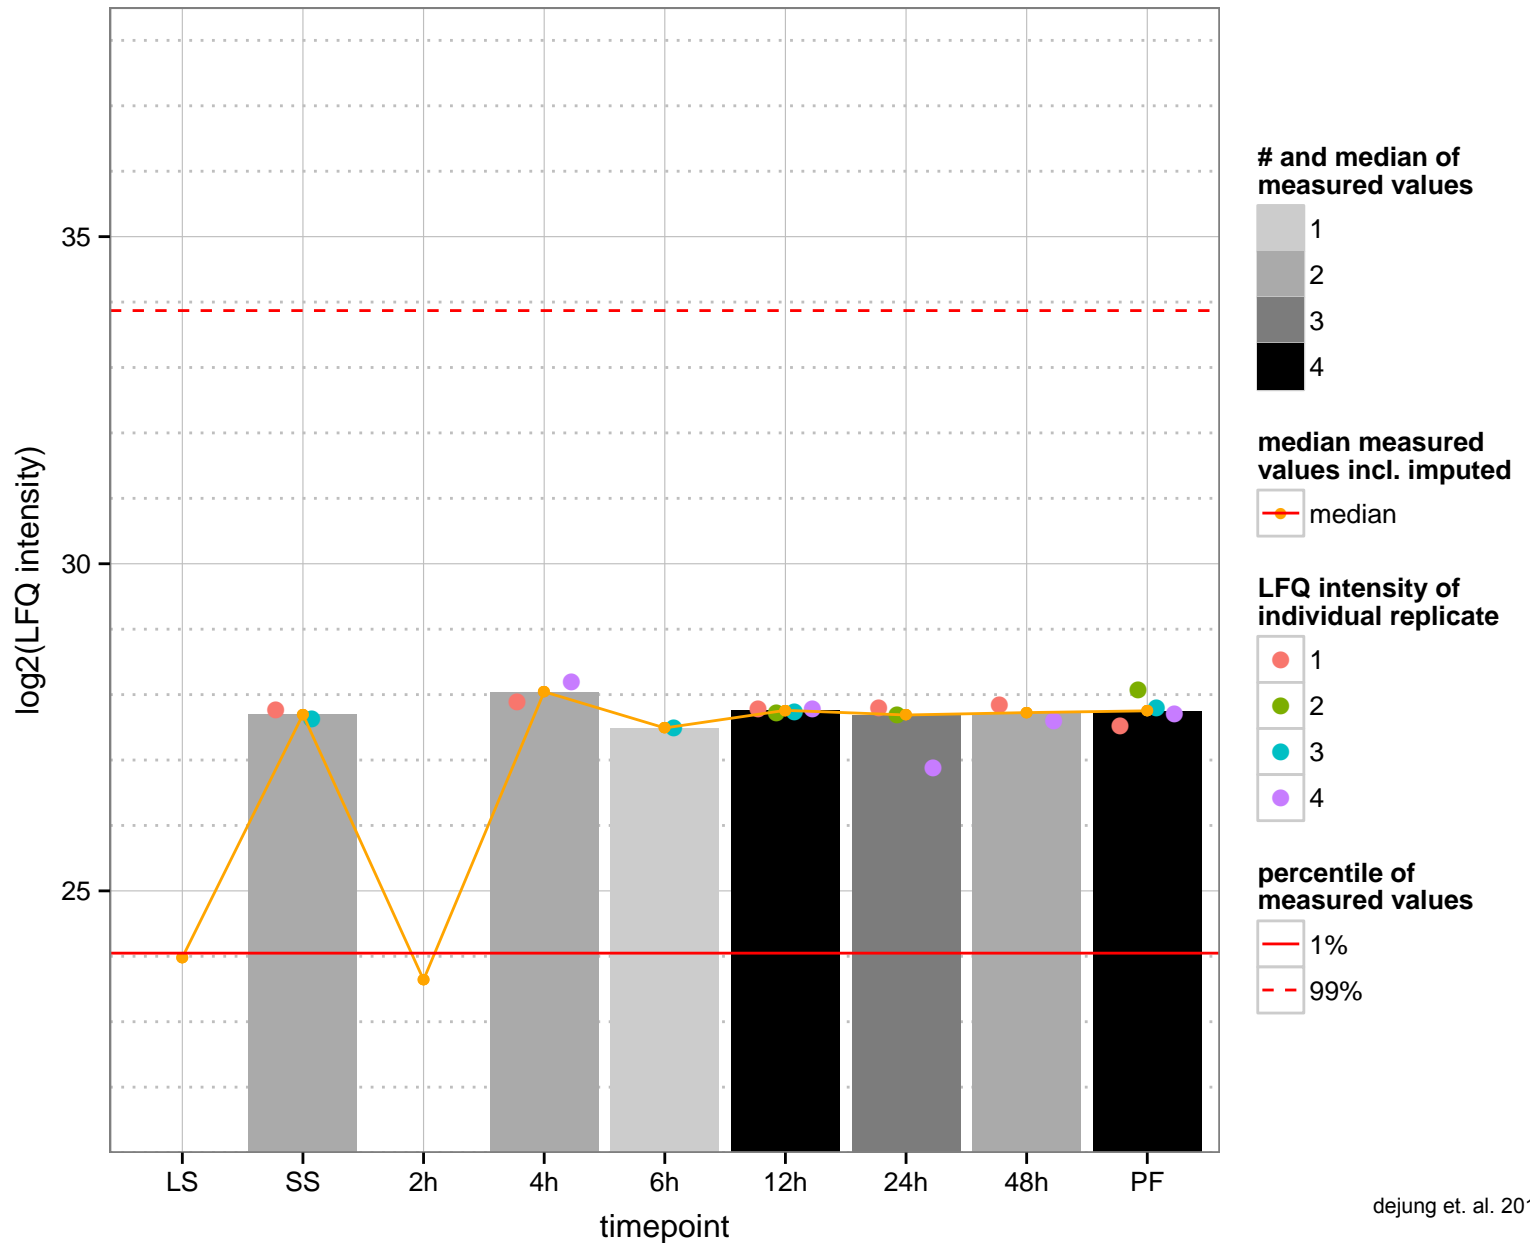

hypothetical protein, conserved  
 Tb927.5.2070  
 AGOF: null  
 AGOC: mitochondrion  
 AGOP: null  
 PGO: null  
 PGO: null  
 PGO: null

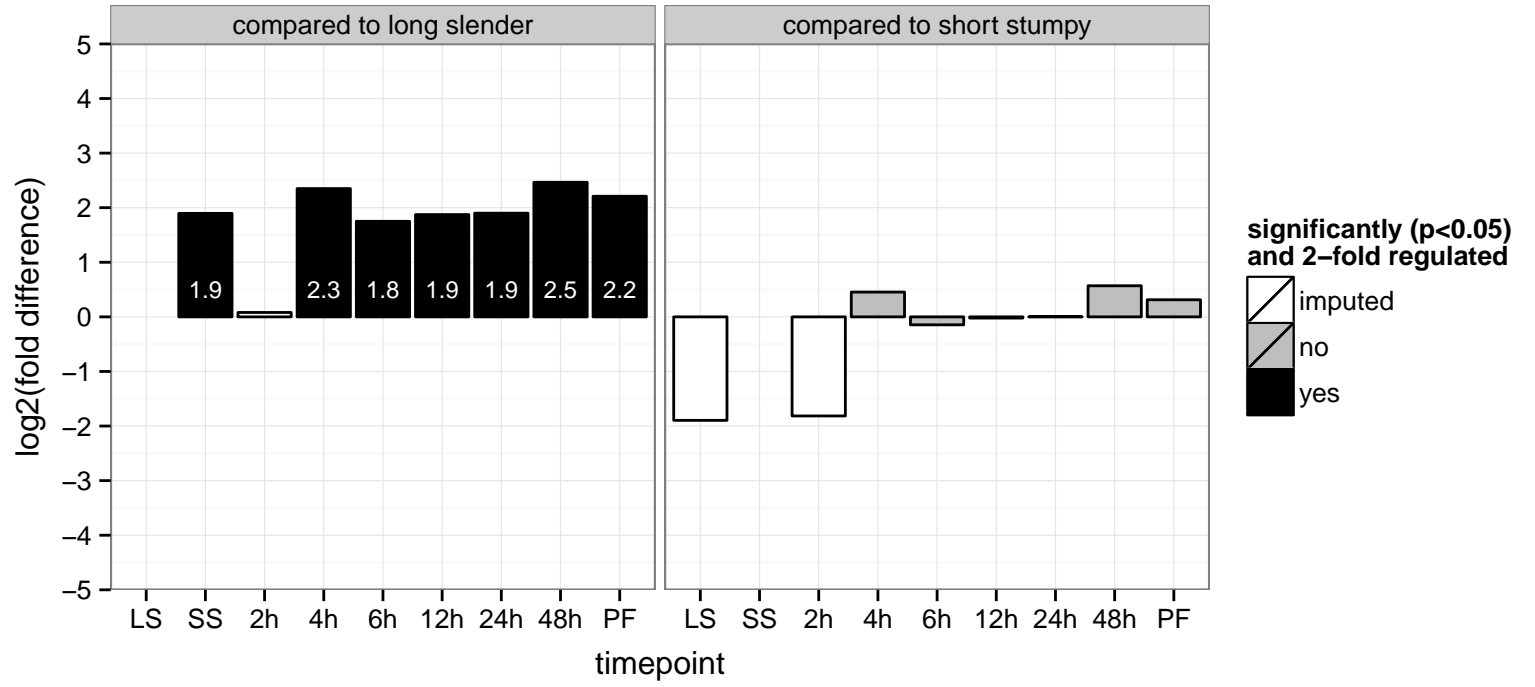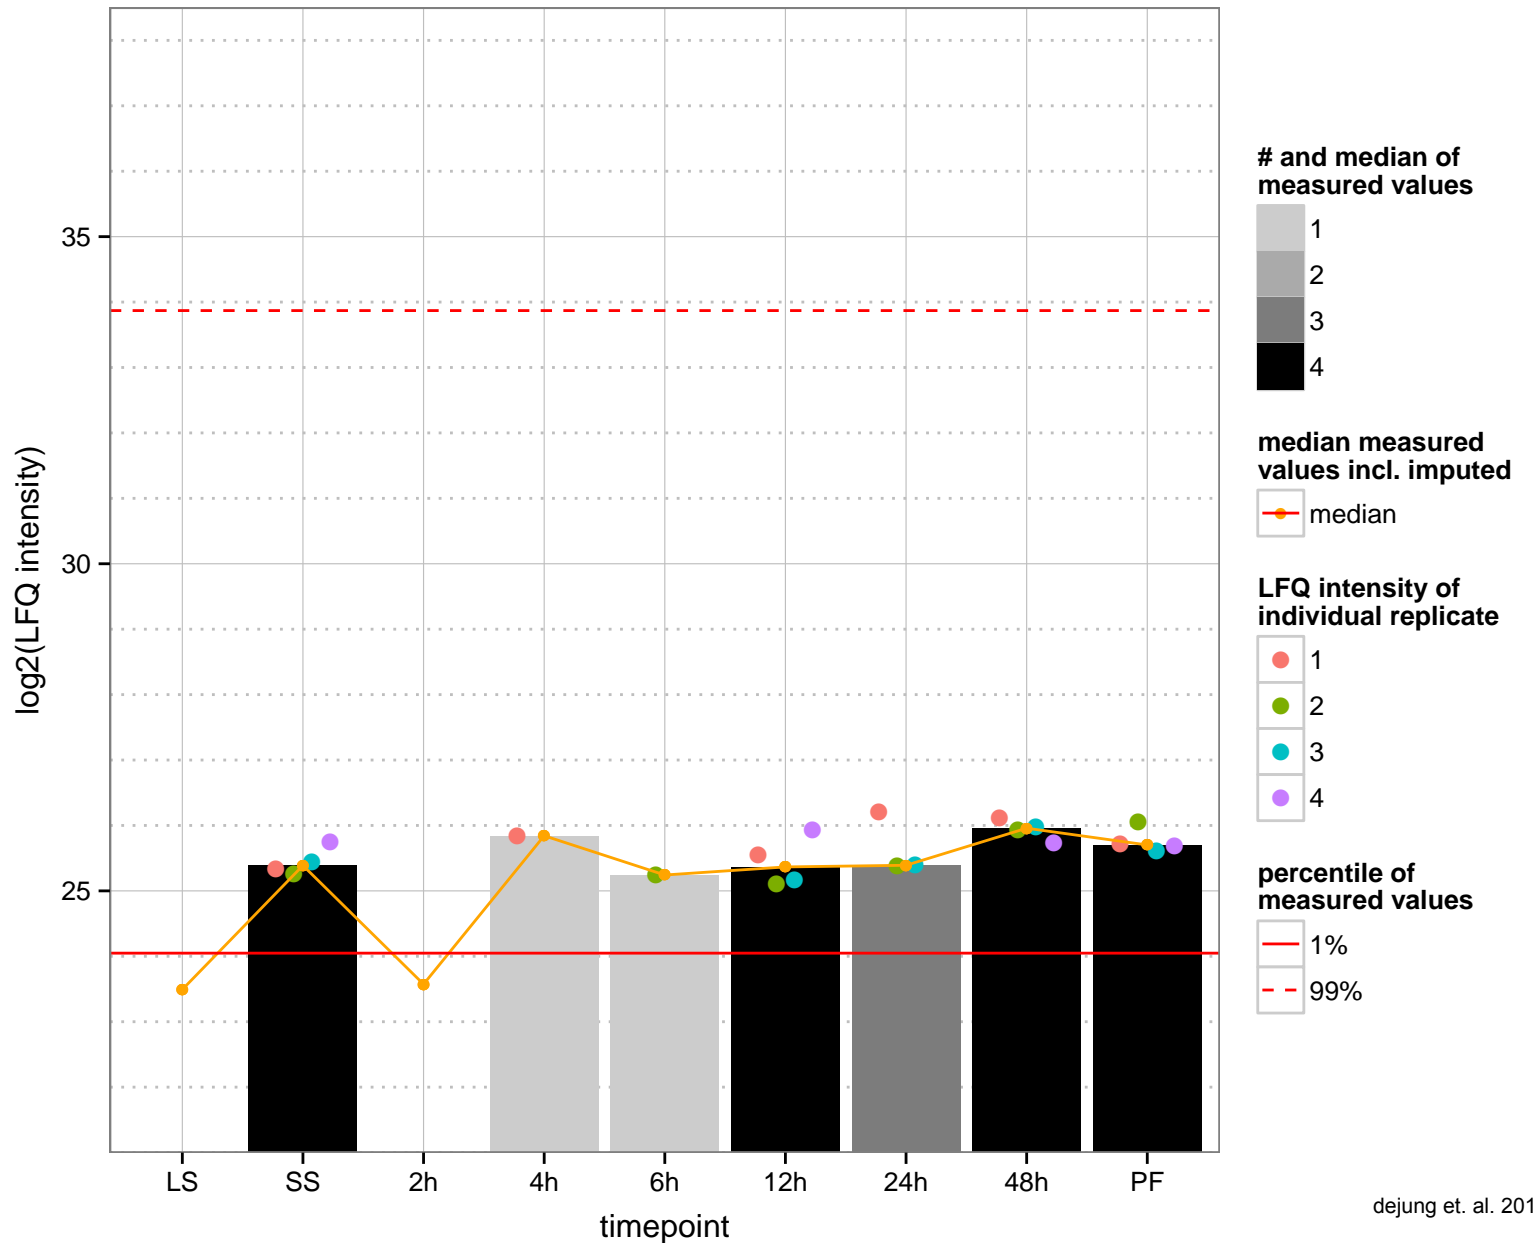

hypothetical protein, conserved  
 Tb927.5.3240  
 AGOF: null  
 AGOC: null  
 AGOP: null  
 PGOF: null  
 PGO: null  
 PGOP: null

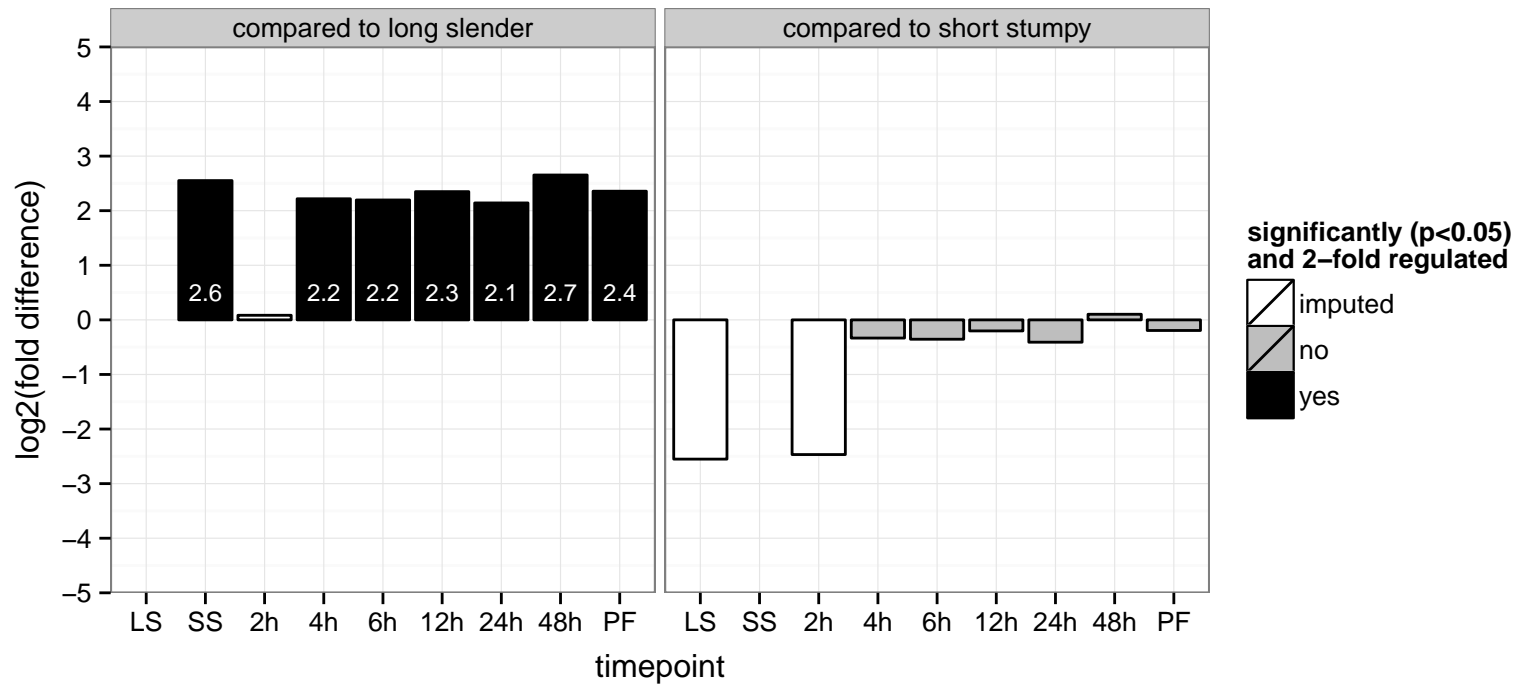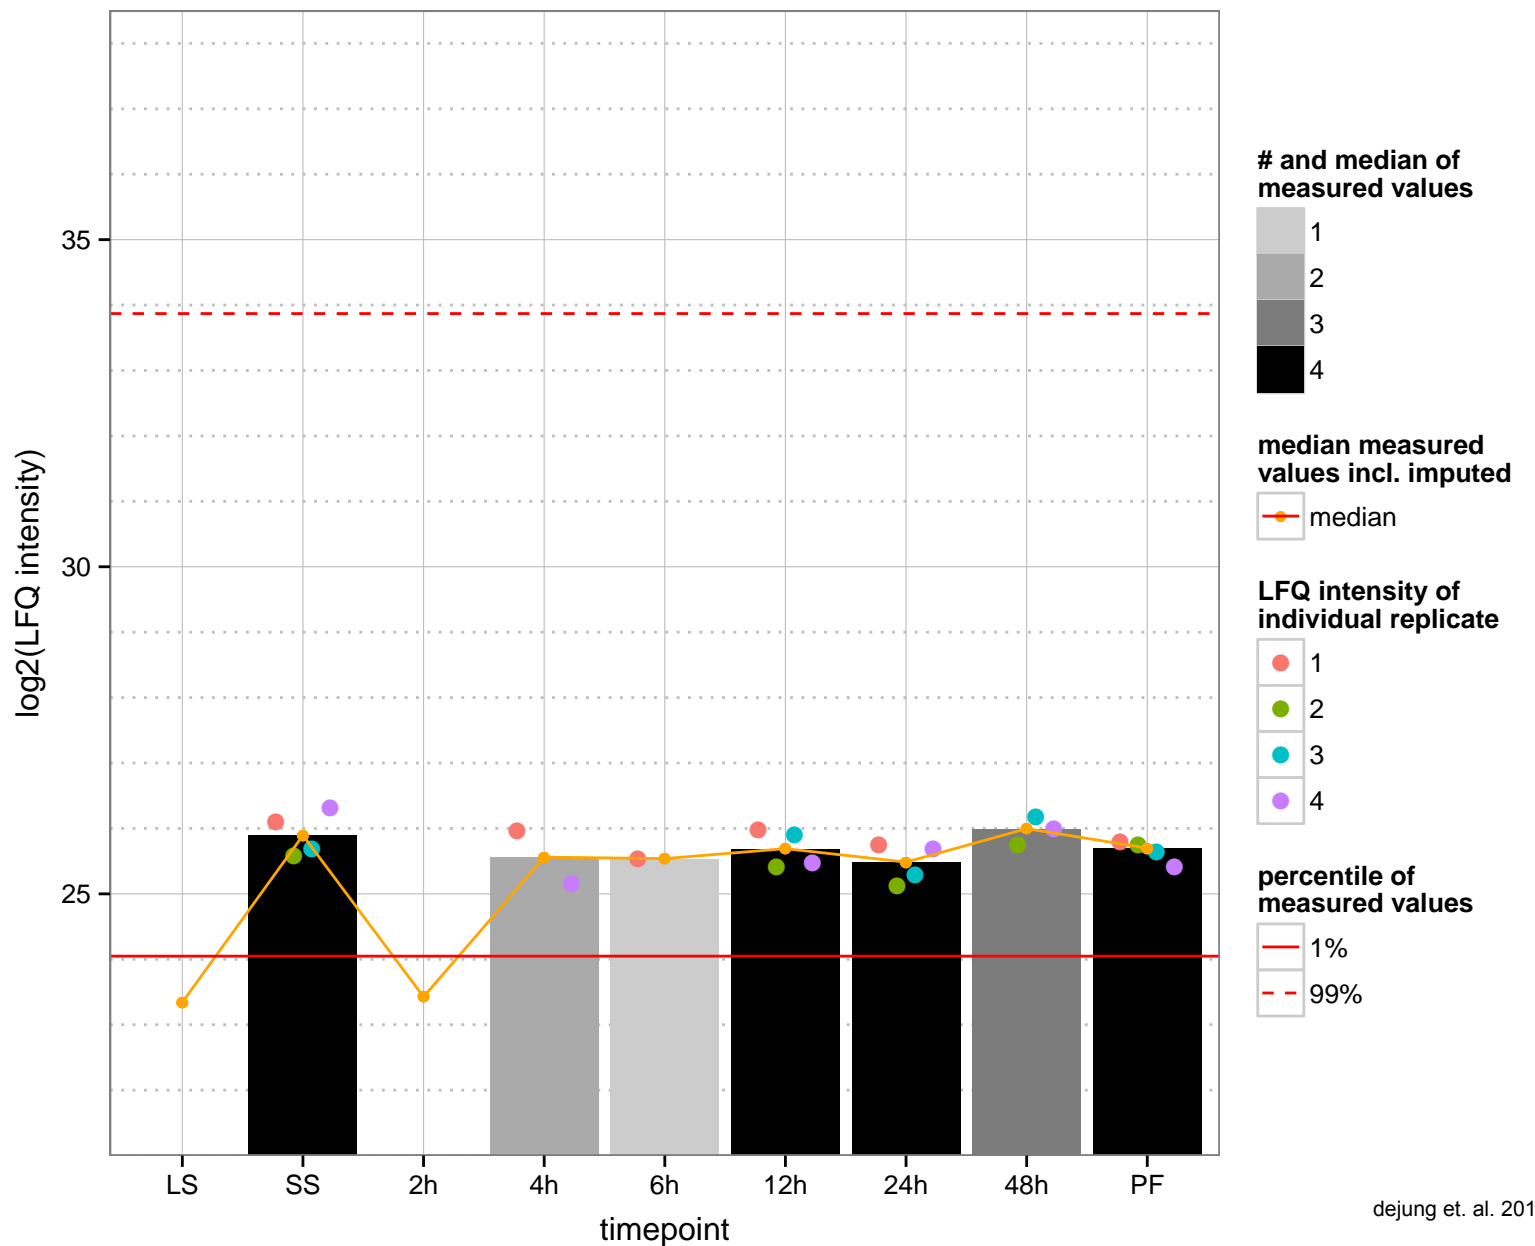

hypothetical protein, conserved  
 Tb927.6.1830  
 AGOF: null  
 AGOC: null  
 AGOP: null  
 PGO: protein binding  
 PGO: null  
 PGO: null

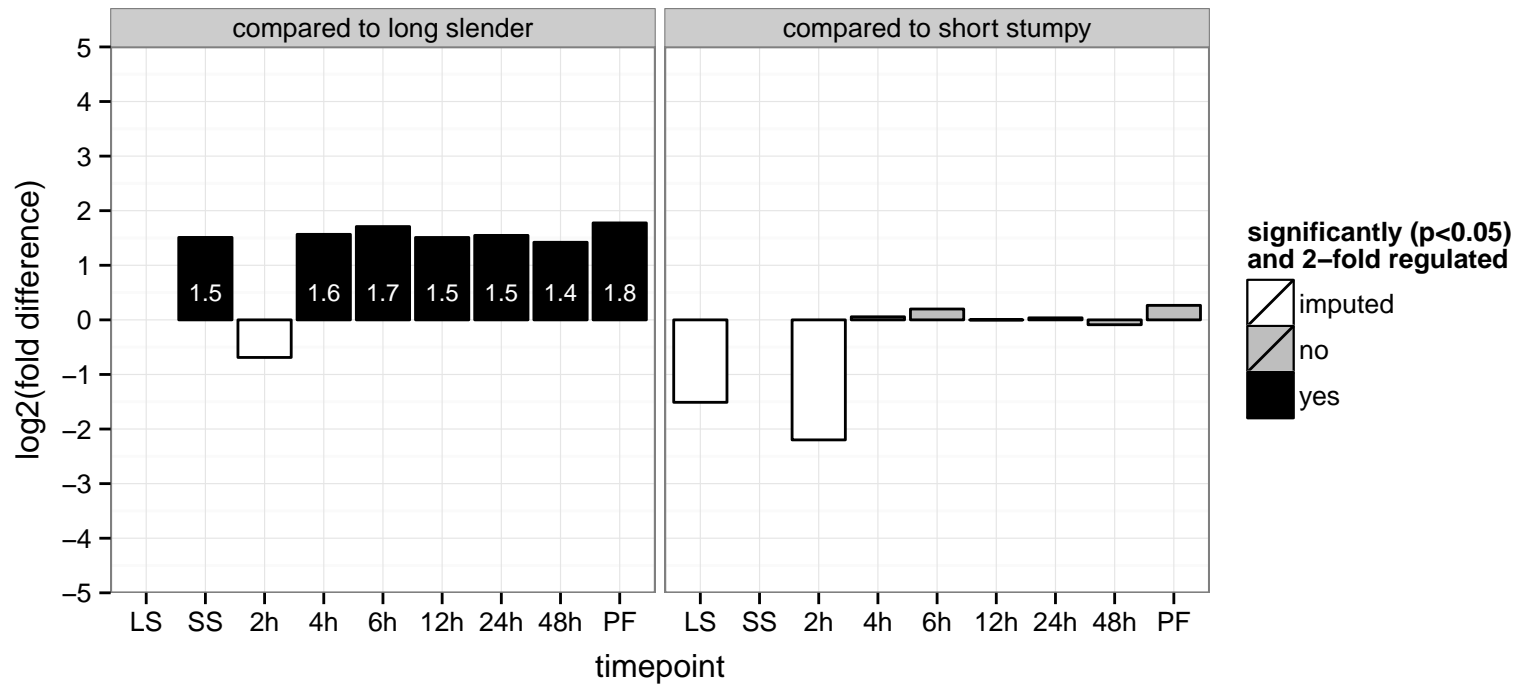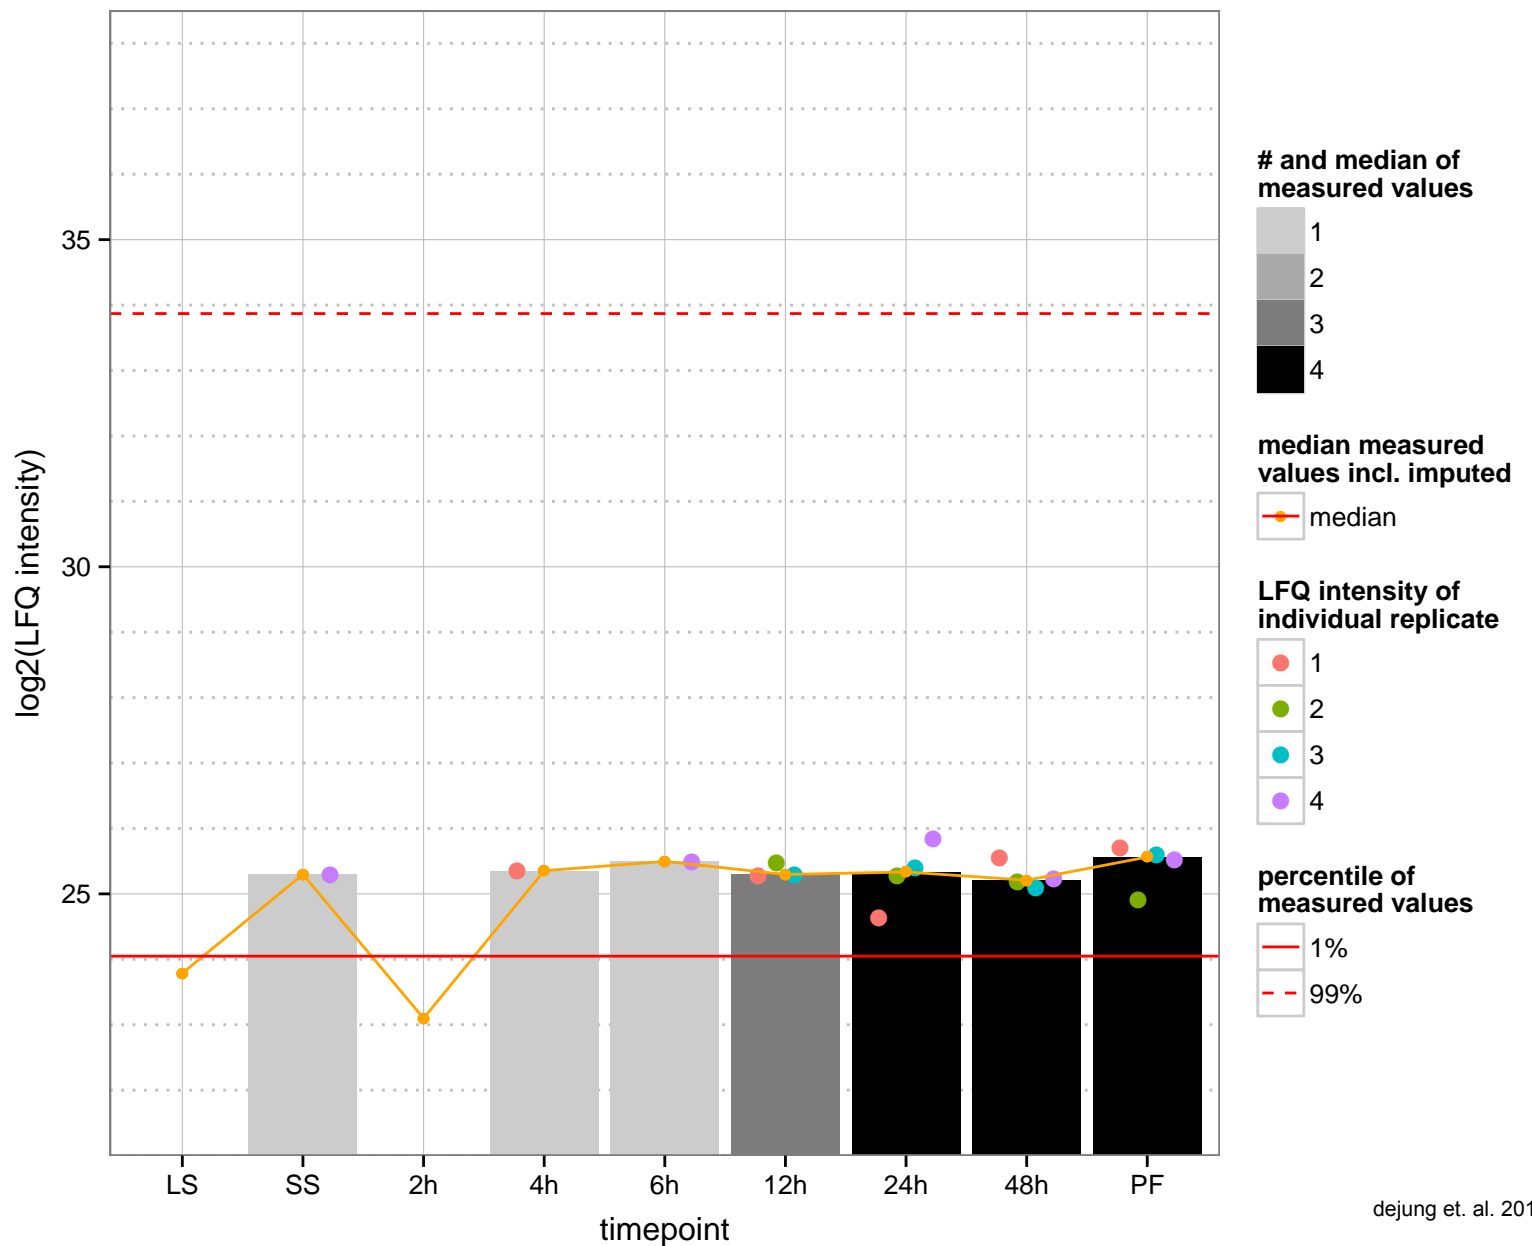

hypothetical protein, conserved

Tb927.7.1530

AGOF: oxidoreductase activity

AGOC: null

AGOP: null

PGOF: oxidoreductase activity, oxidoreductase activity, acting on paired donors, with incorporation or reduction of molecular oxygen

PGOC: null

PGOP: oxidation-reduction process

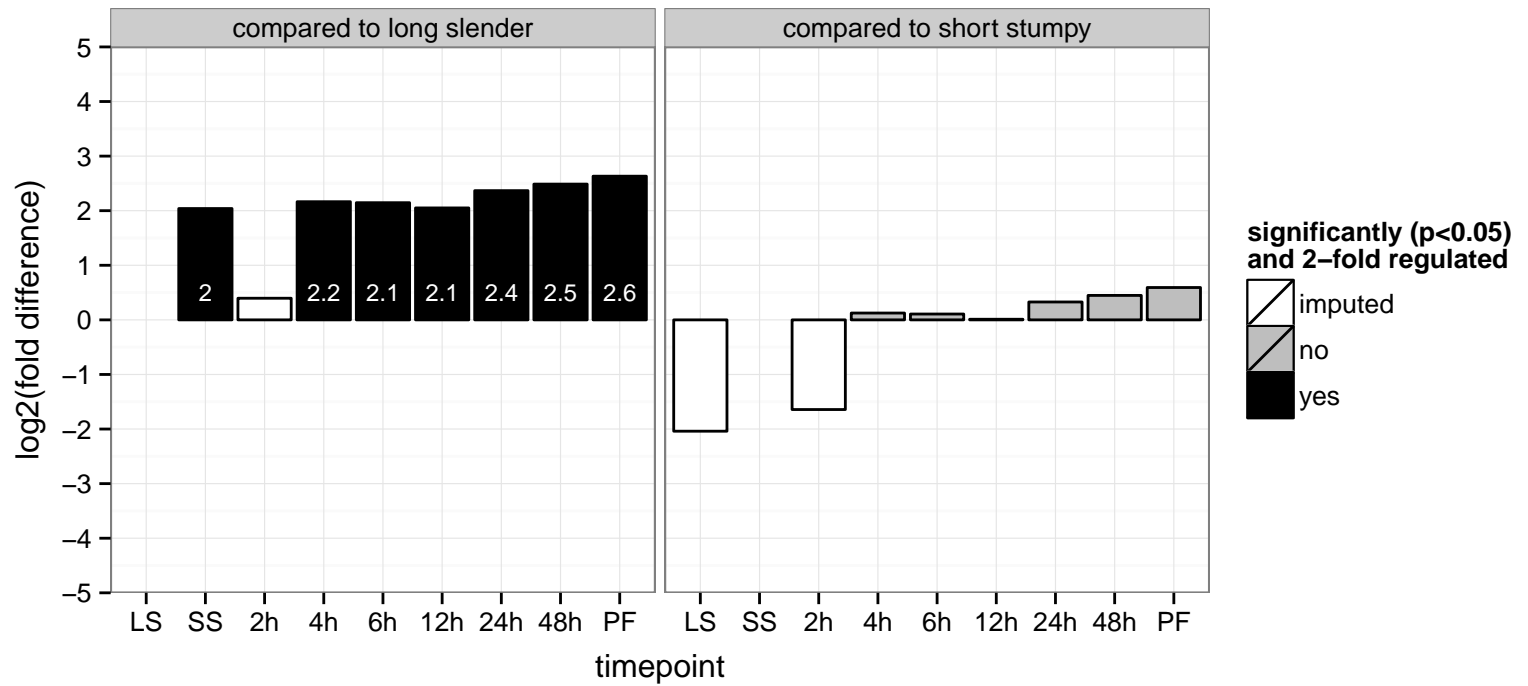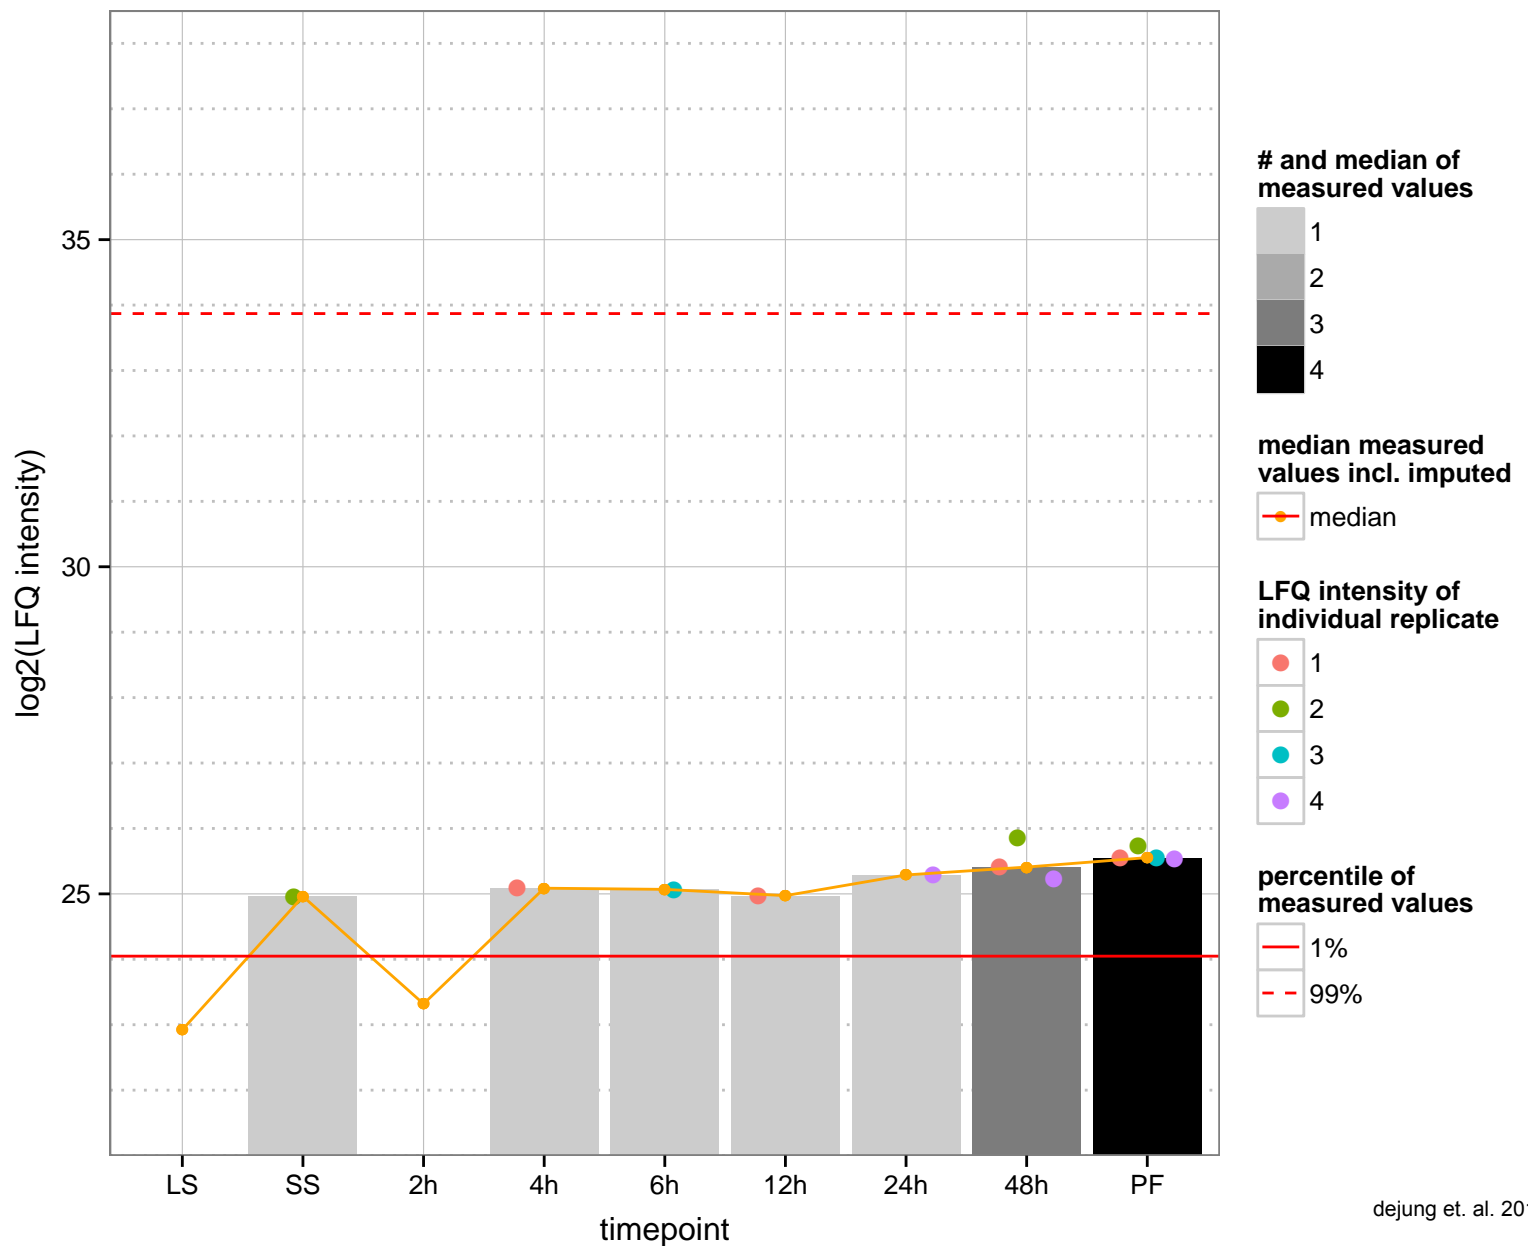

hypothetical protein, conserved  
 Tb927.7.5750  
 AGOF: null  
 AGOC: null  
 AGOP: null  
 PGOF: null  
 PGOC: null  
 PGOP: null

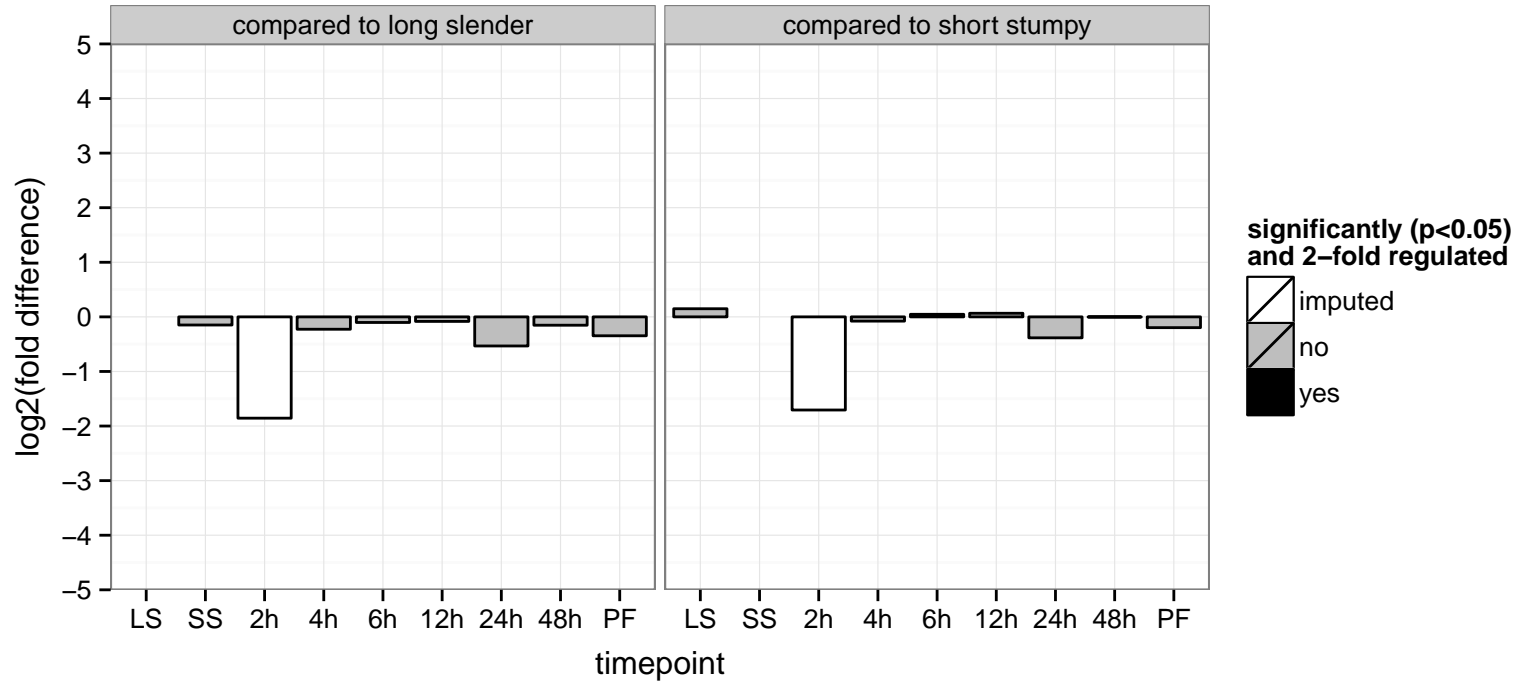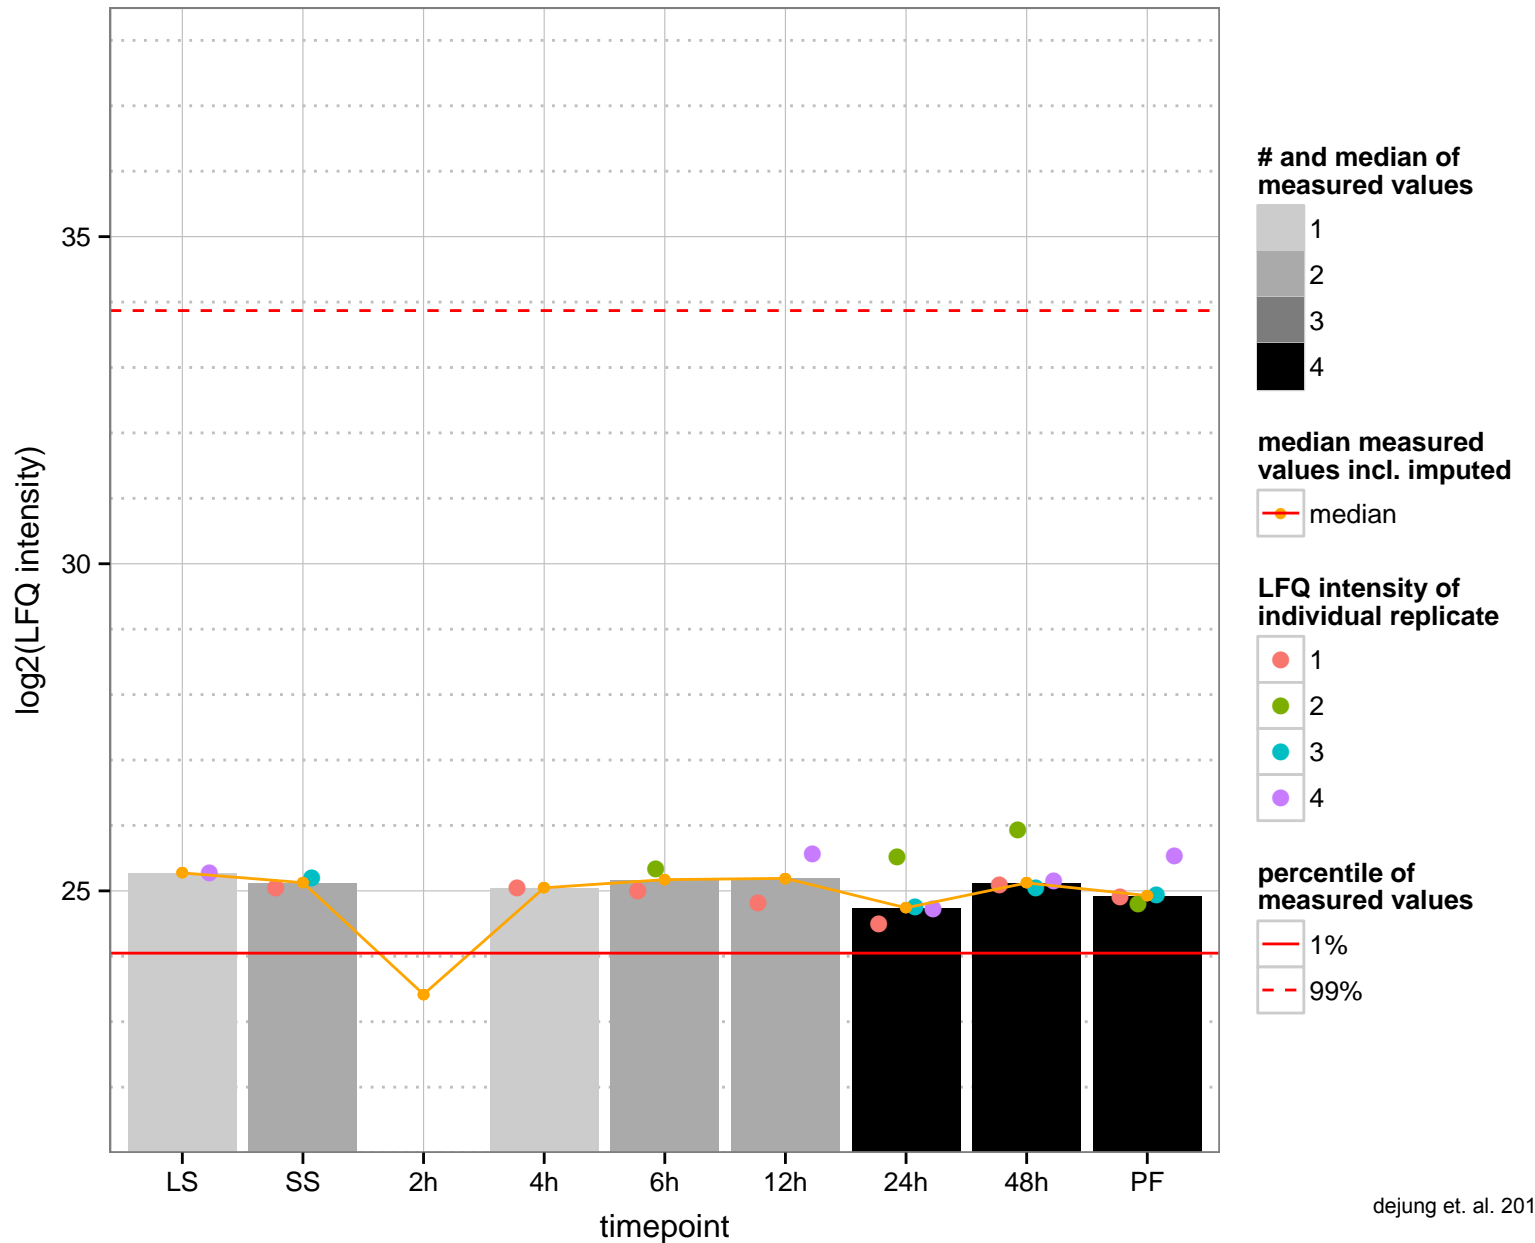

telomerase-associated protein, putative  
 Tb927.7.830  
 AGOF: RNA binding  
 AGOC: ribonucleoprotein complex  
 AGOP: null  
 PGO: RNA binding, protein binding  
 PGOC: ribonucleoprotein complex  
 PGOP: null

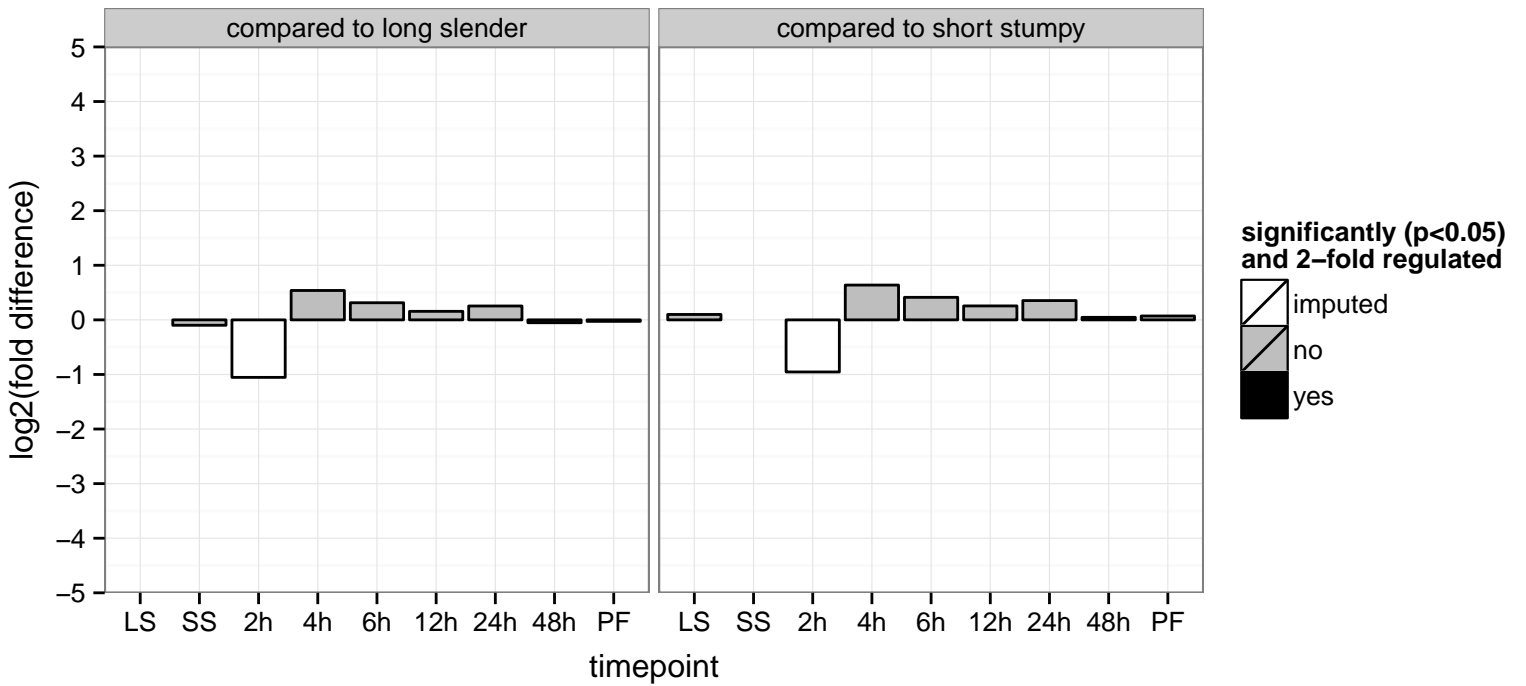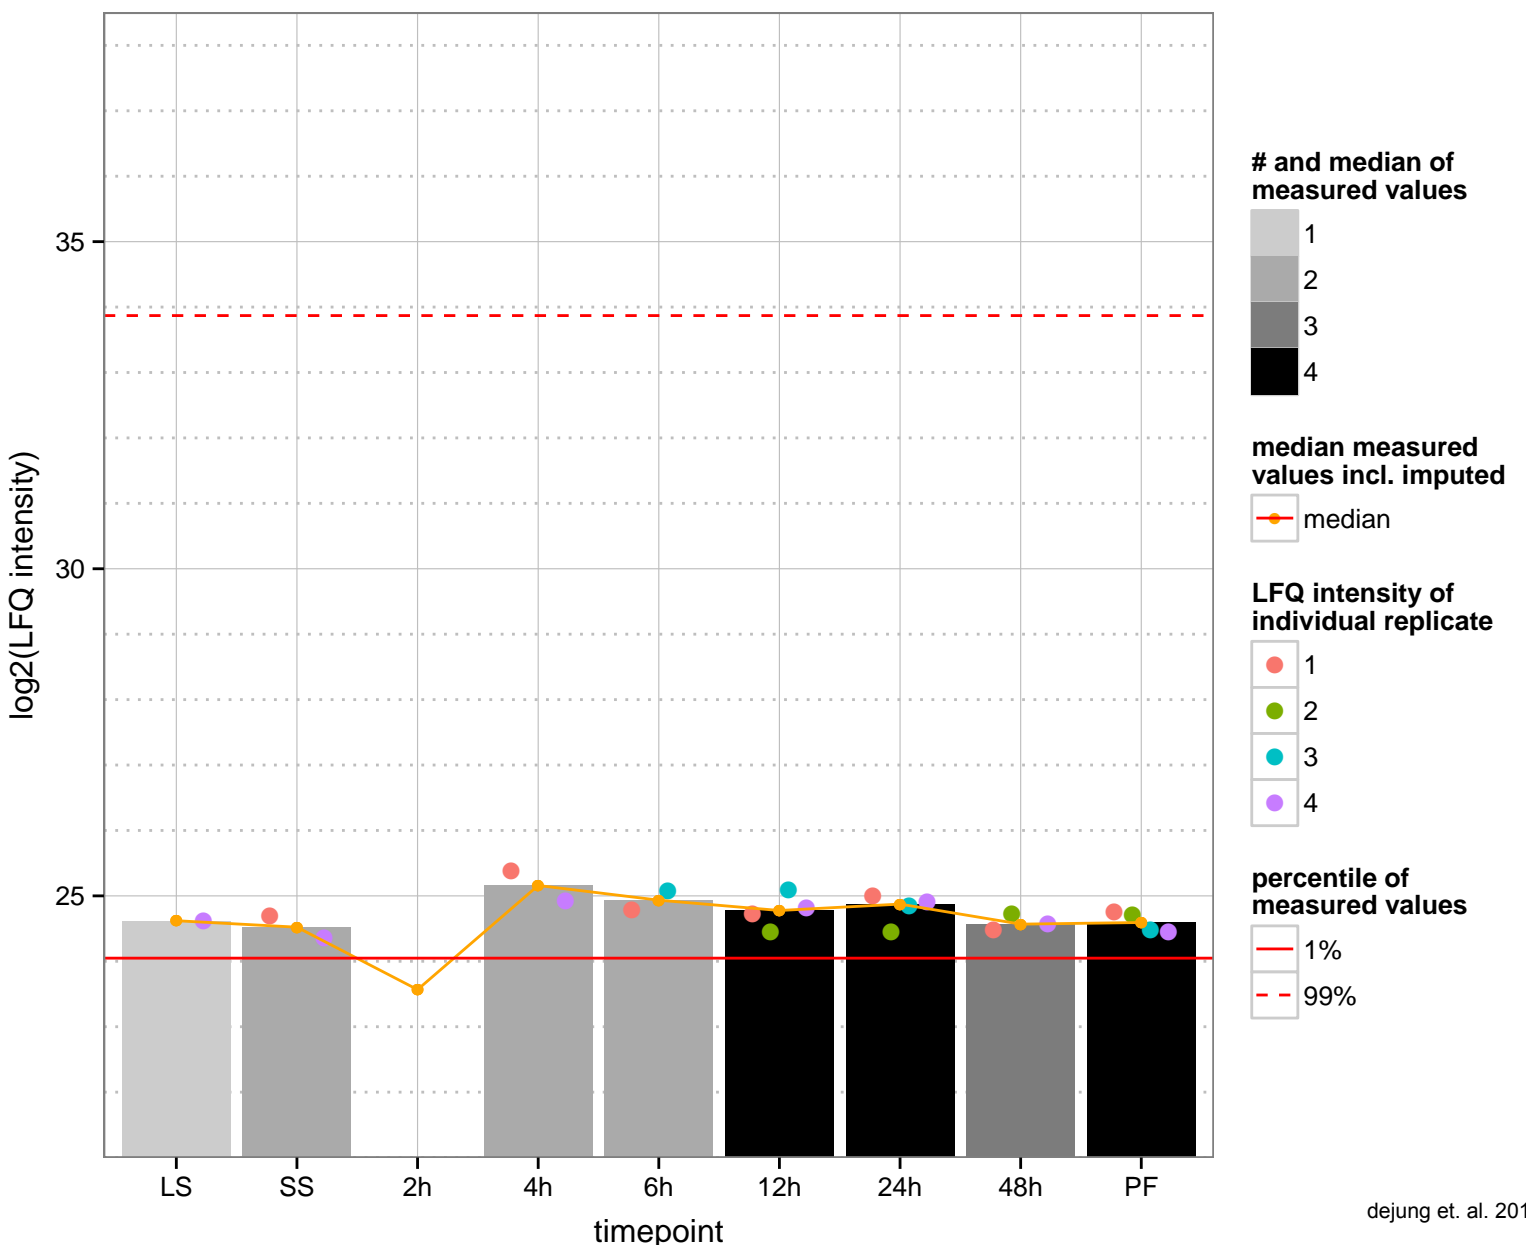



hypothetical protein, conserved  
 Tb927.8.5650  
 AGOF: null  
 AGOC: null  
 AGOP: null  
 PGO: null  
 PGOC: null  
 PGOP: null

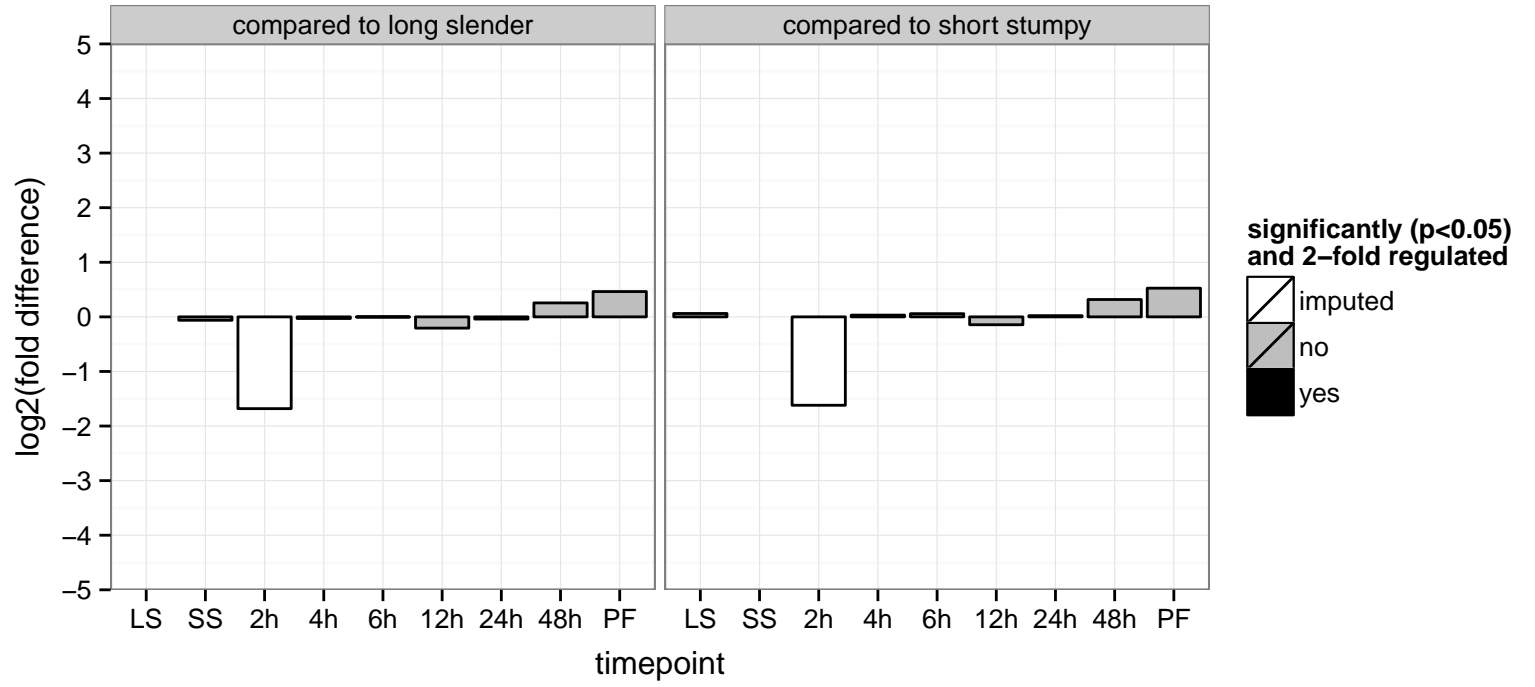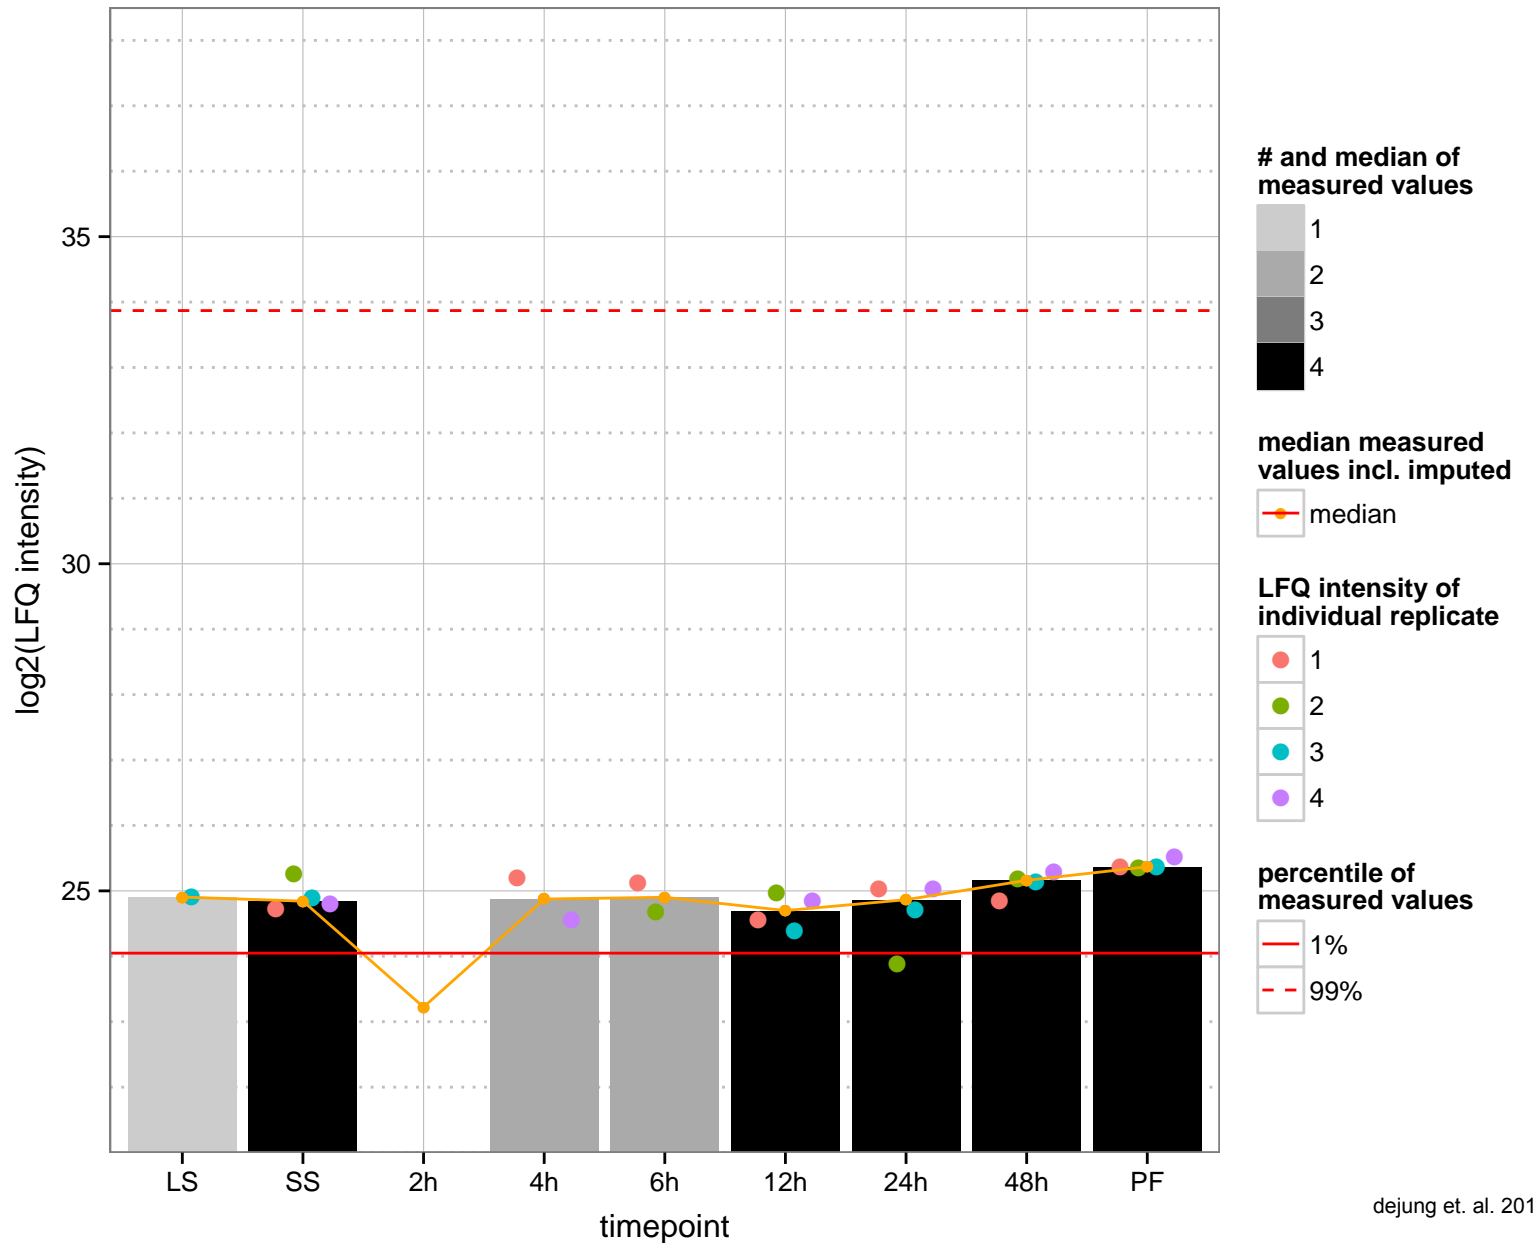

hypothetical protein, conserved  
 Tb927.8.6460  
 AGOF: null  
 AGOC: null  
 AGOP: null  
 PGOF: null  
 PGO: null  
 PGOP: null

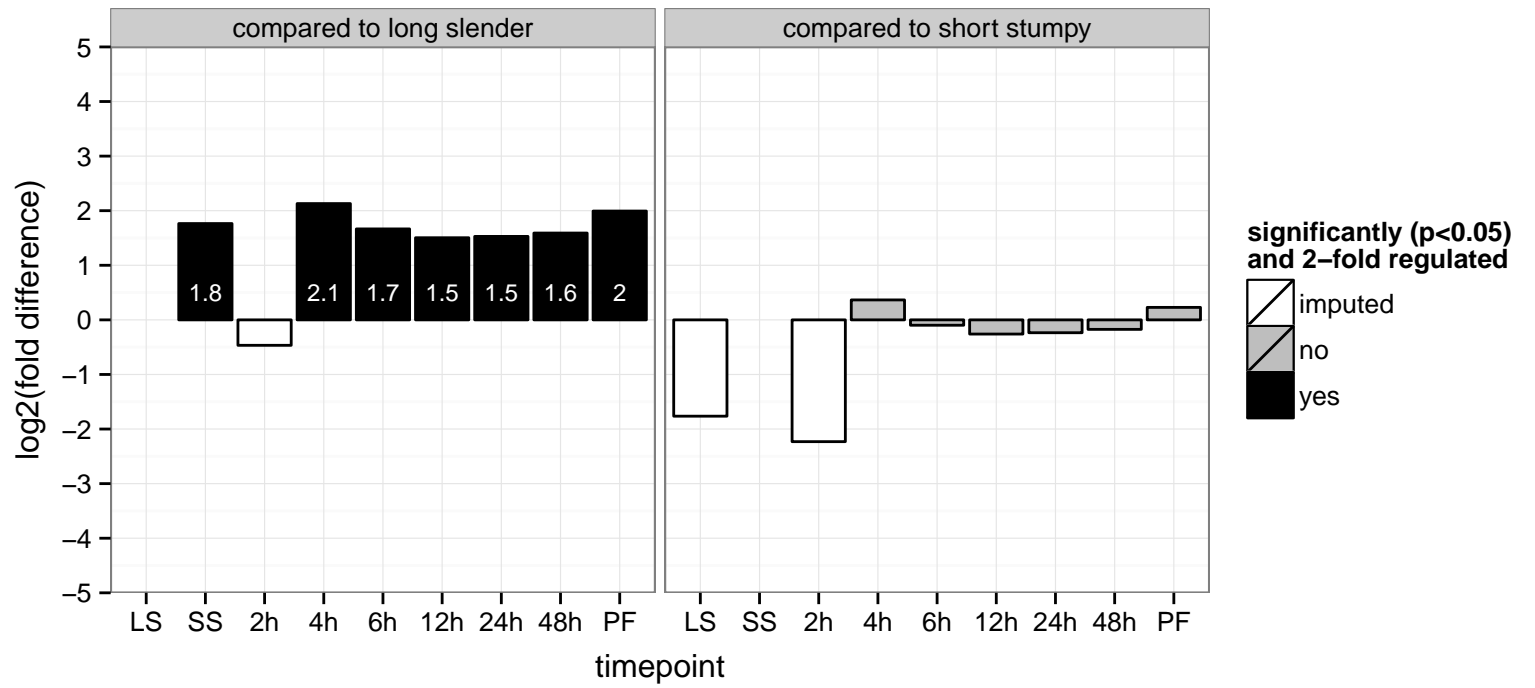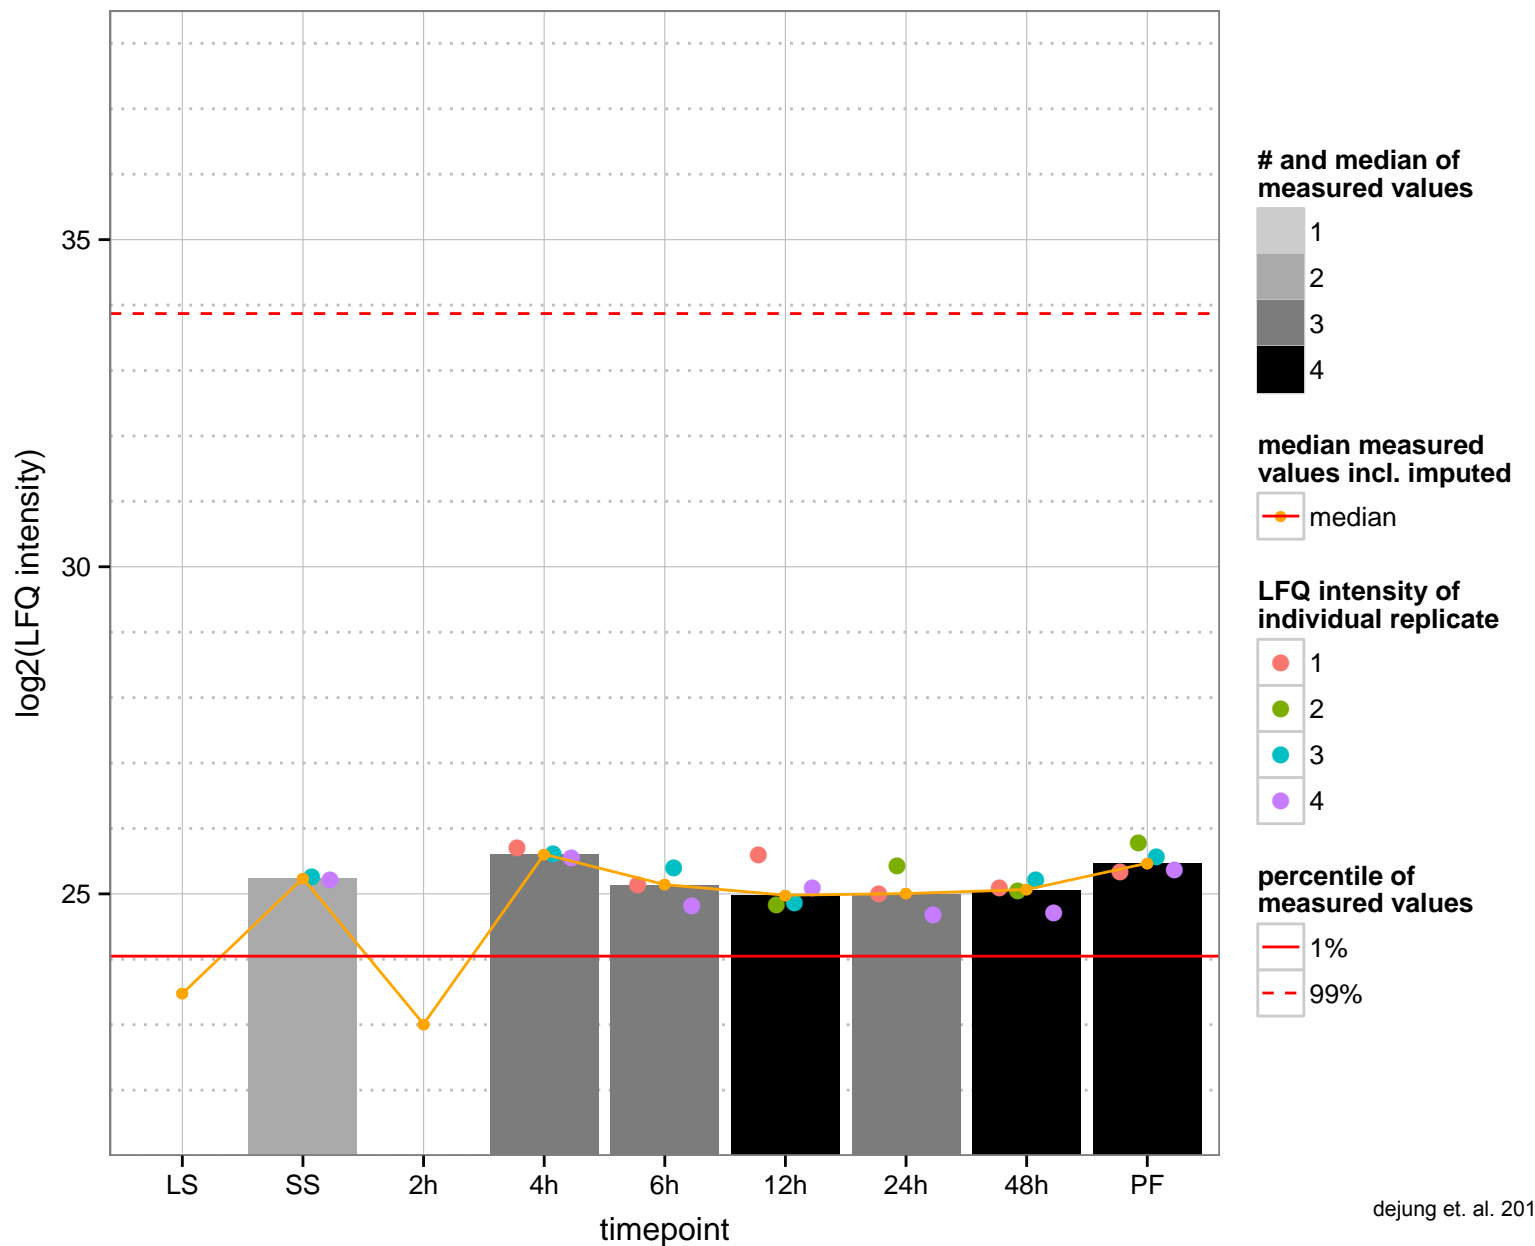

kinetoplast-associated protein, putative  
 Tb927.8.7260  
 AGOF: structural molecule activity  
 AGOC: kinetoplast, mitochondrion  
 AGOP: cell morphogenesis  
 PGO: null  
 PGO: null  
 PGO: null

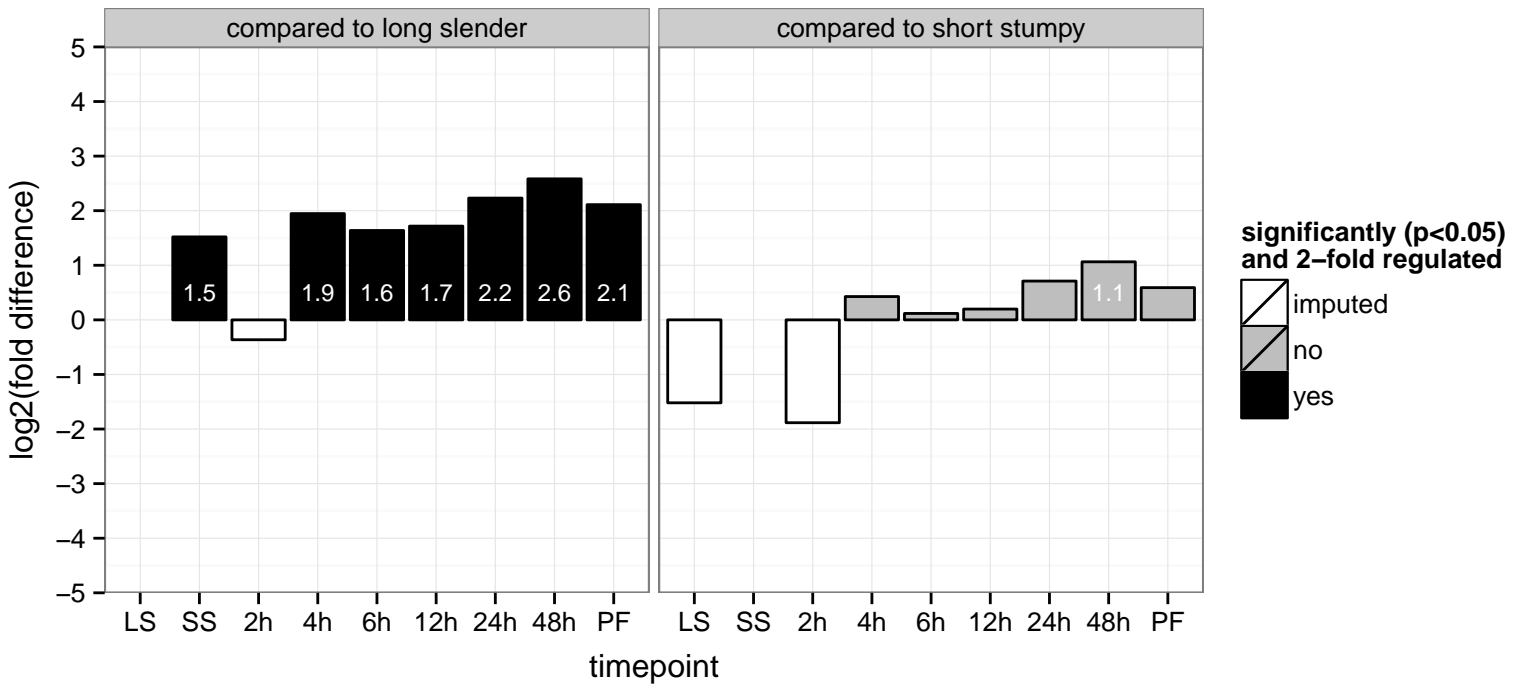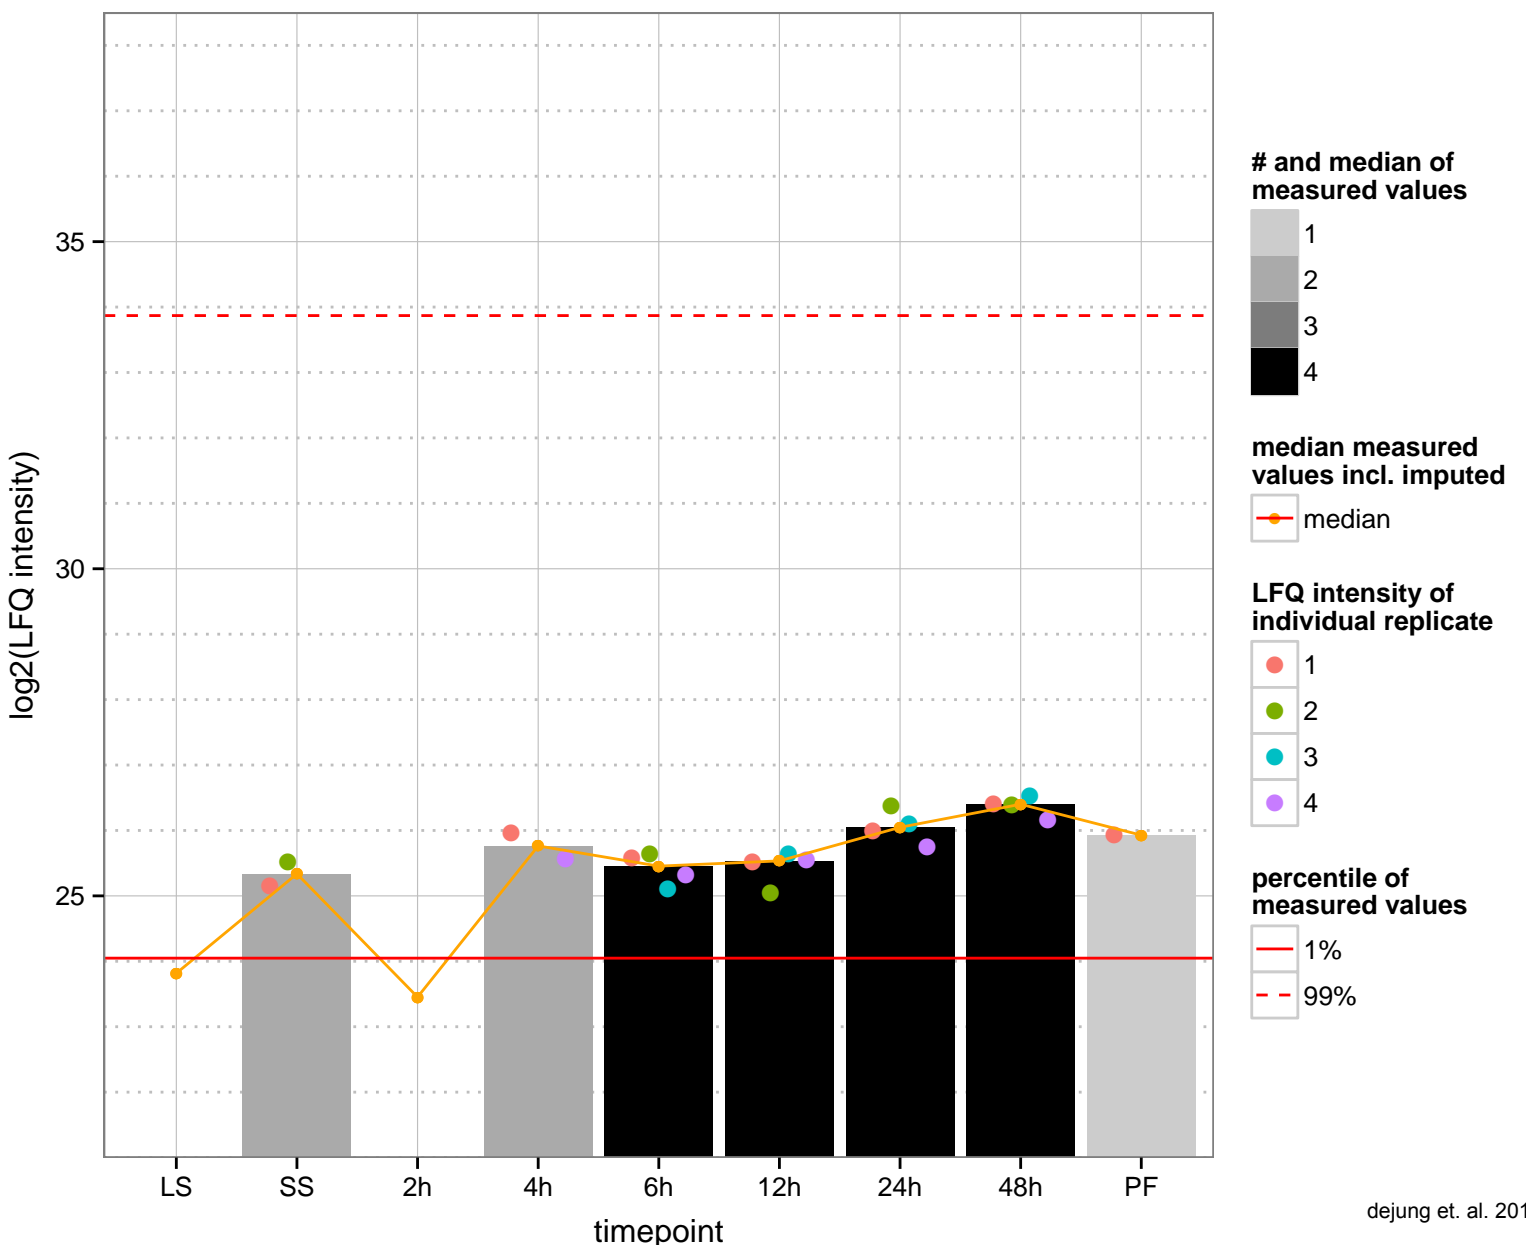

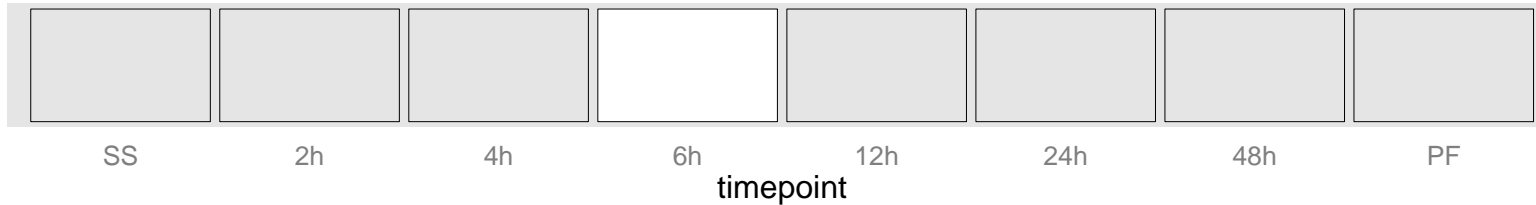

**regulated**  **not regulated**  **significant down**  **significant up**

tRNA pseudouridine synthase A-like protein, putative  
 Tb927.10.15650;Tb11.v5.0465  
 AGOF: null, RNA binding, pseudouridine synthase activity  
 AGOC: null, mitochondrion  
 AGOP: null, pseudouridine synthesis, tRNA modification  
 PGO: RNA binding, pseudouridine synthase activity  
 PGO: null  
 PGO: RNA modification, pseudouridine synthesis

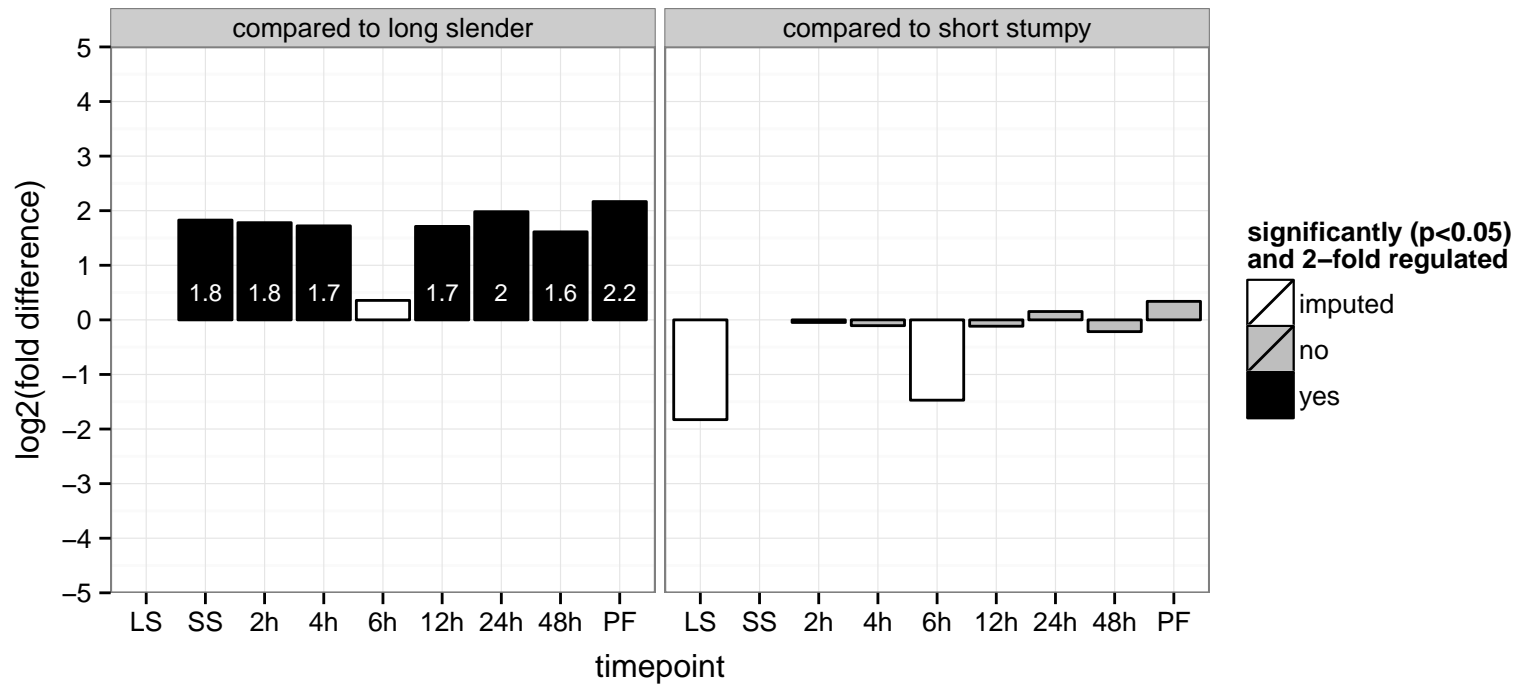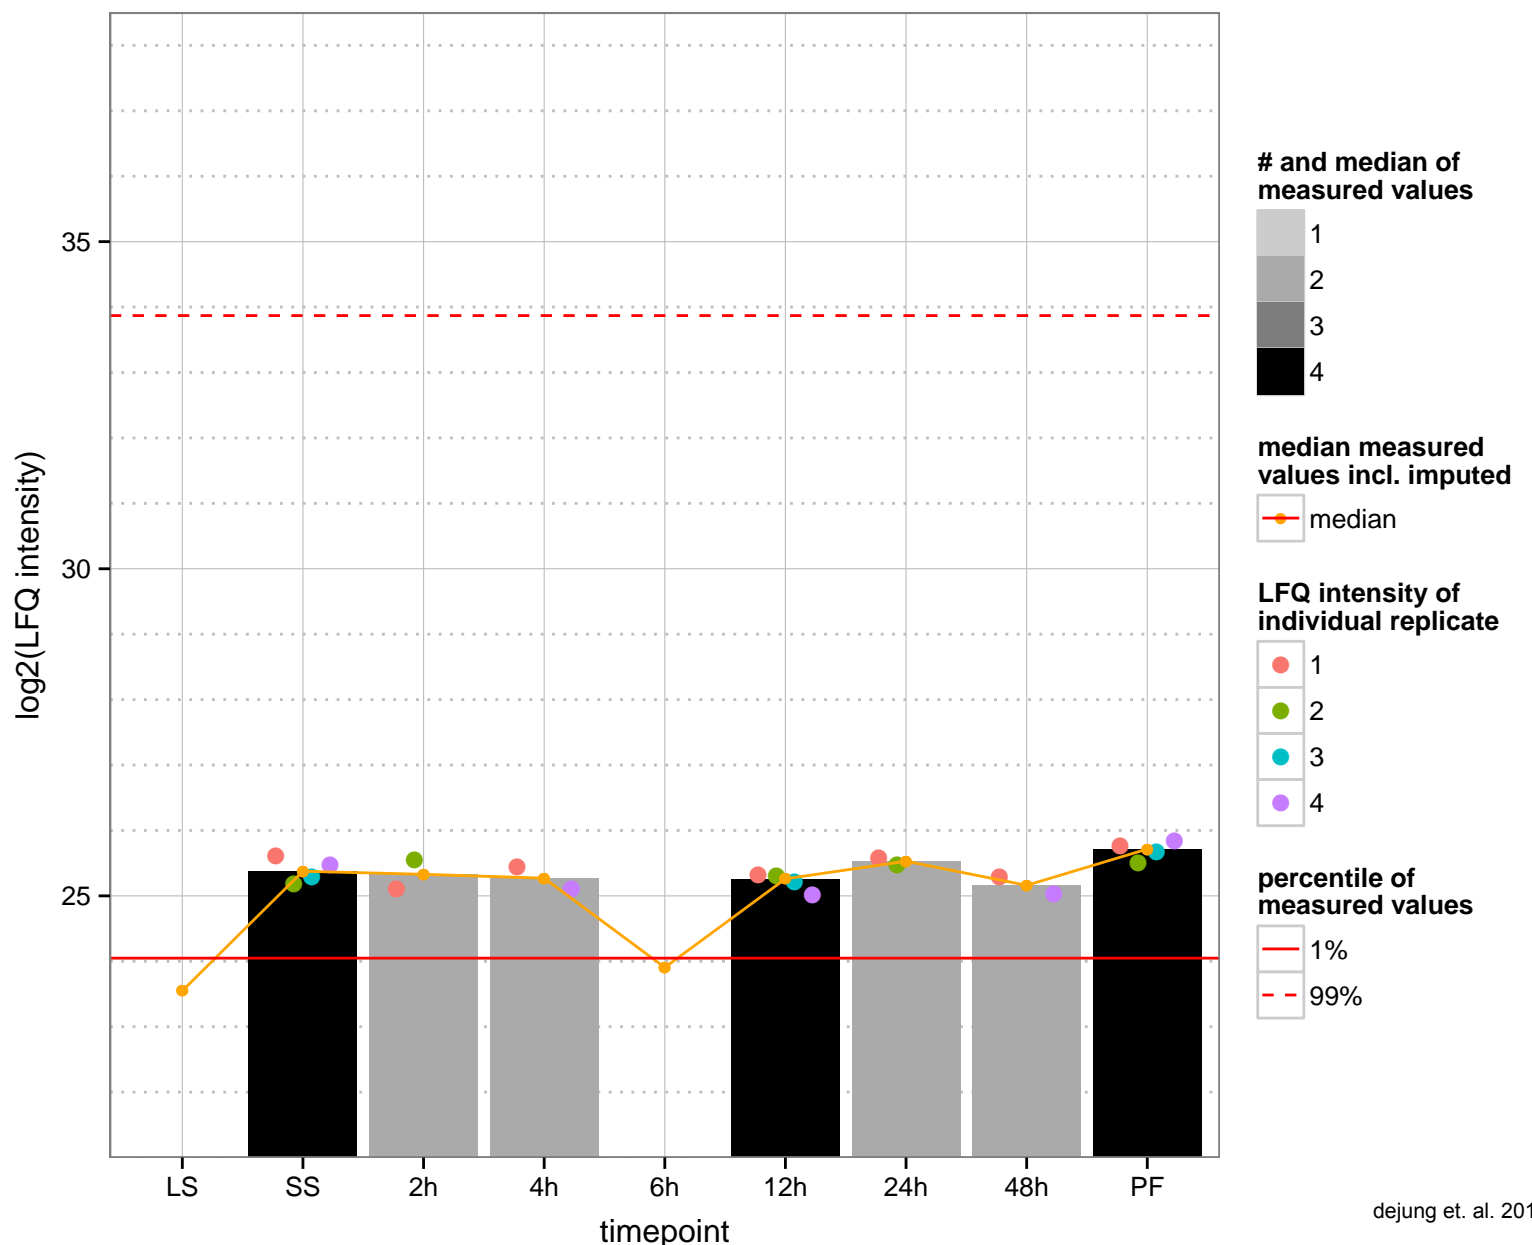

hypothetical protein, conserved  
 Tb927.10.1800;Tb11.v5.0832  
 AGOF: null, methyltransferase activity  
 AGOC: null  
 AGOP: null  
 PGO: methyltransferase activity  
 PGOC: null  
 PGOP: null

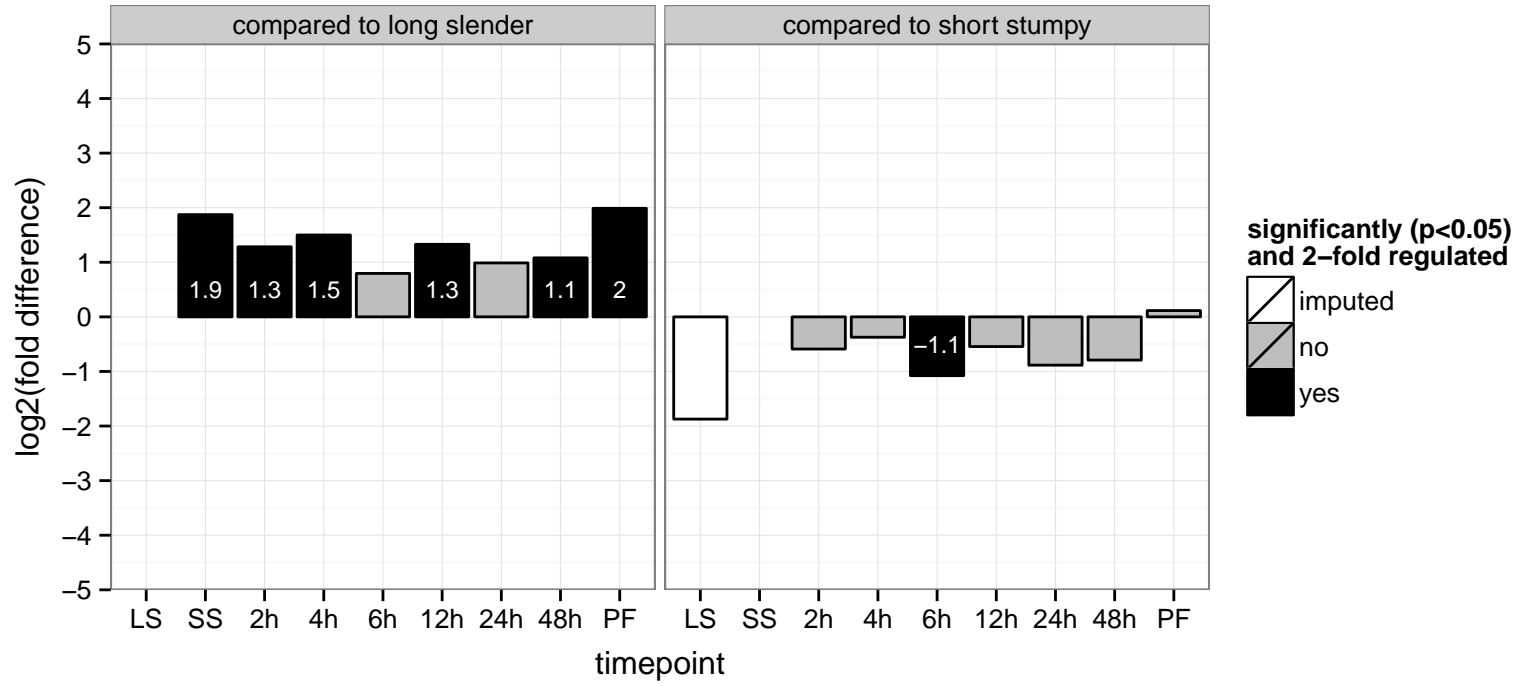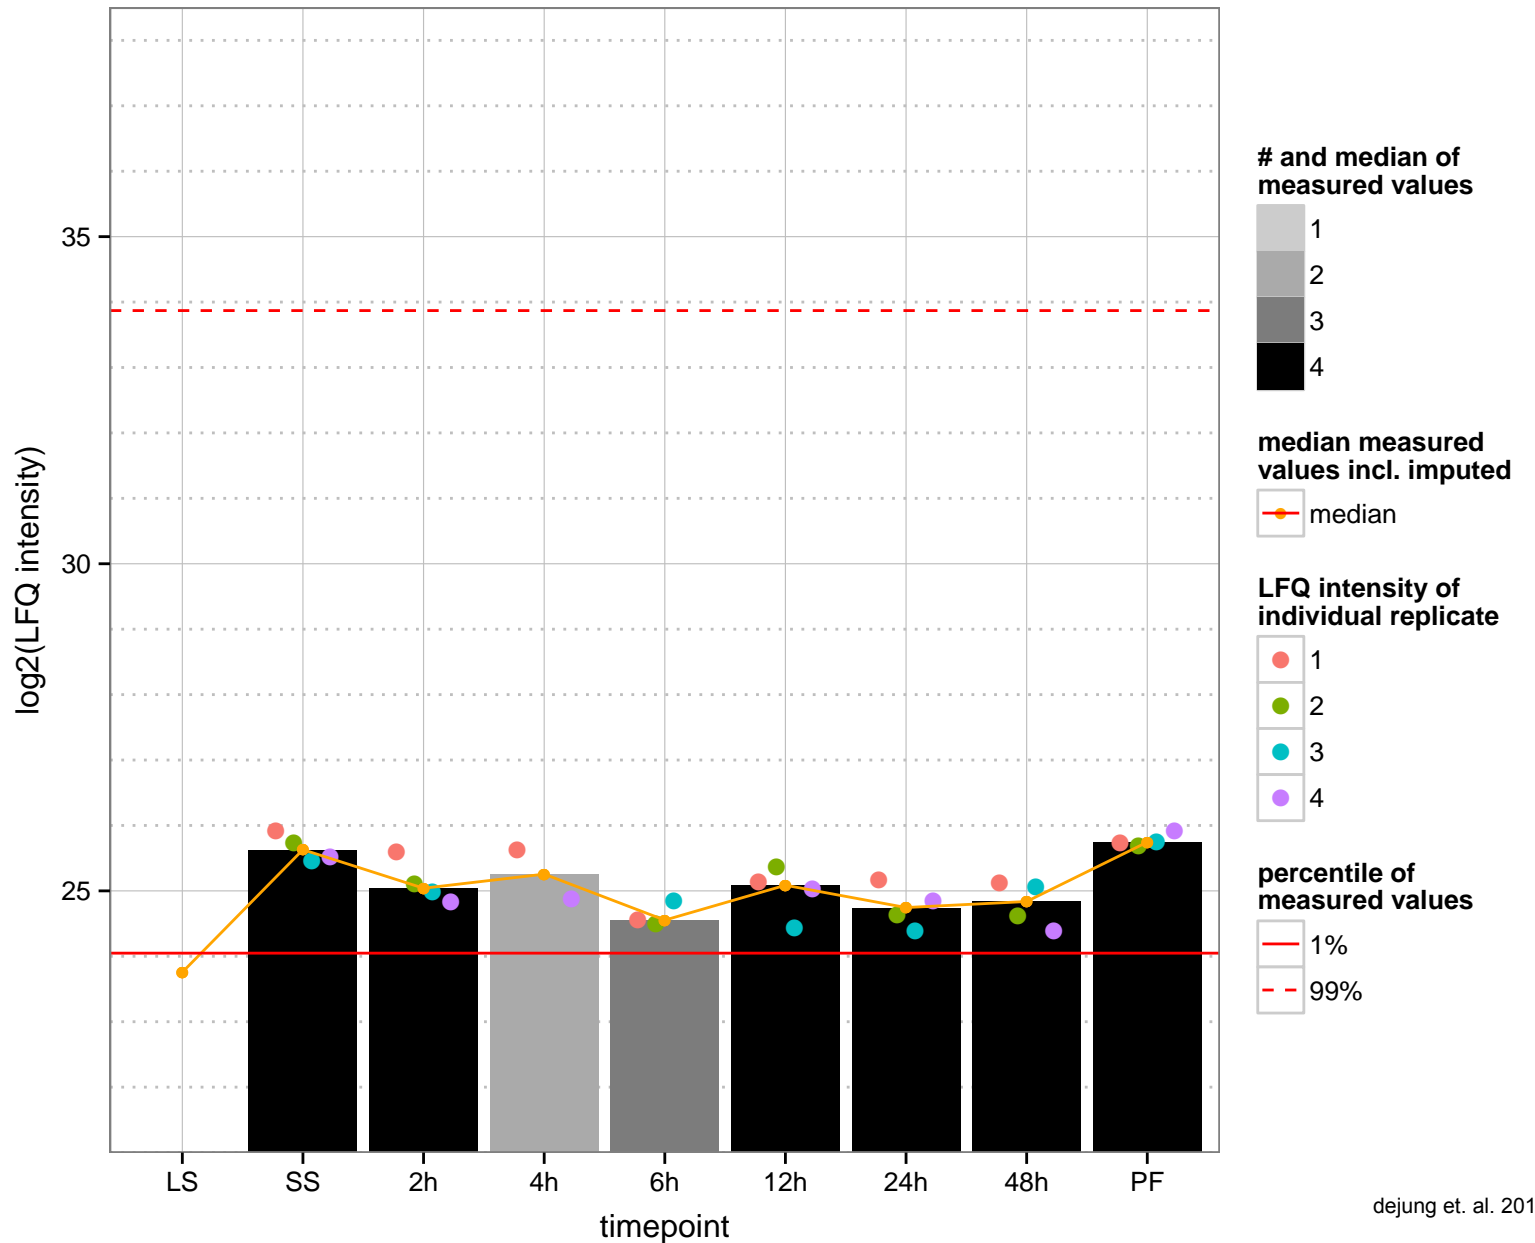

hypothetical protein, conserved  
 Tb927.10.2930  
 AGOF: null  
 AGOC: null  
 AGOP: null  
 PGOF: null  
 PGO: null  
 PGOP: null

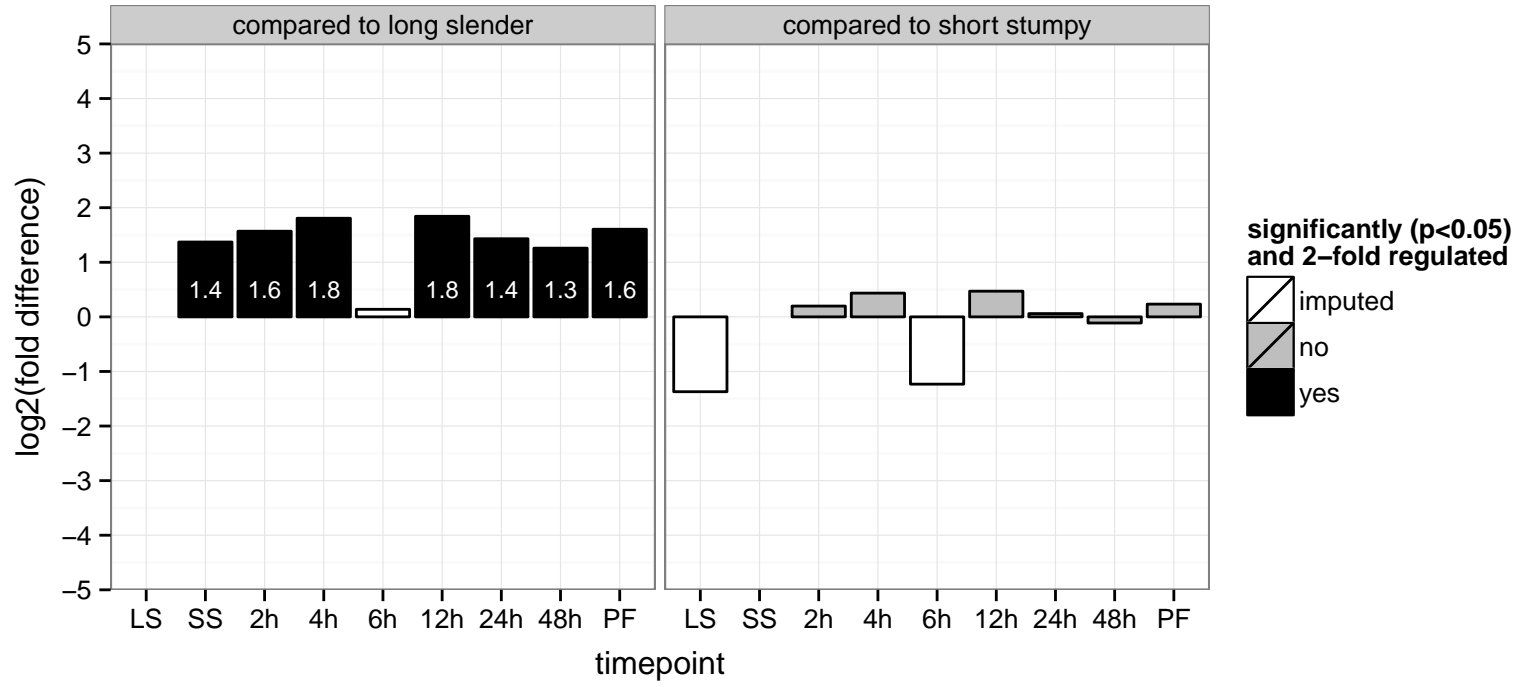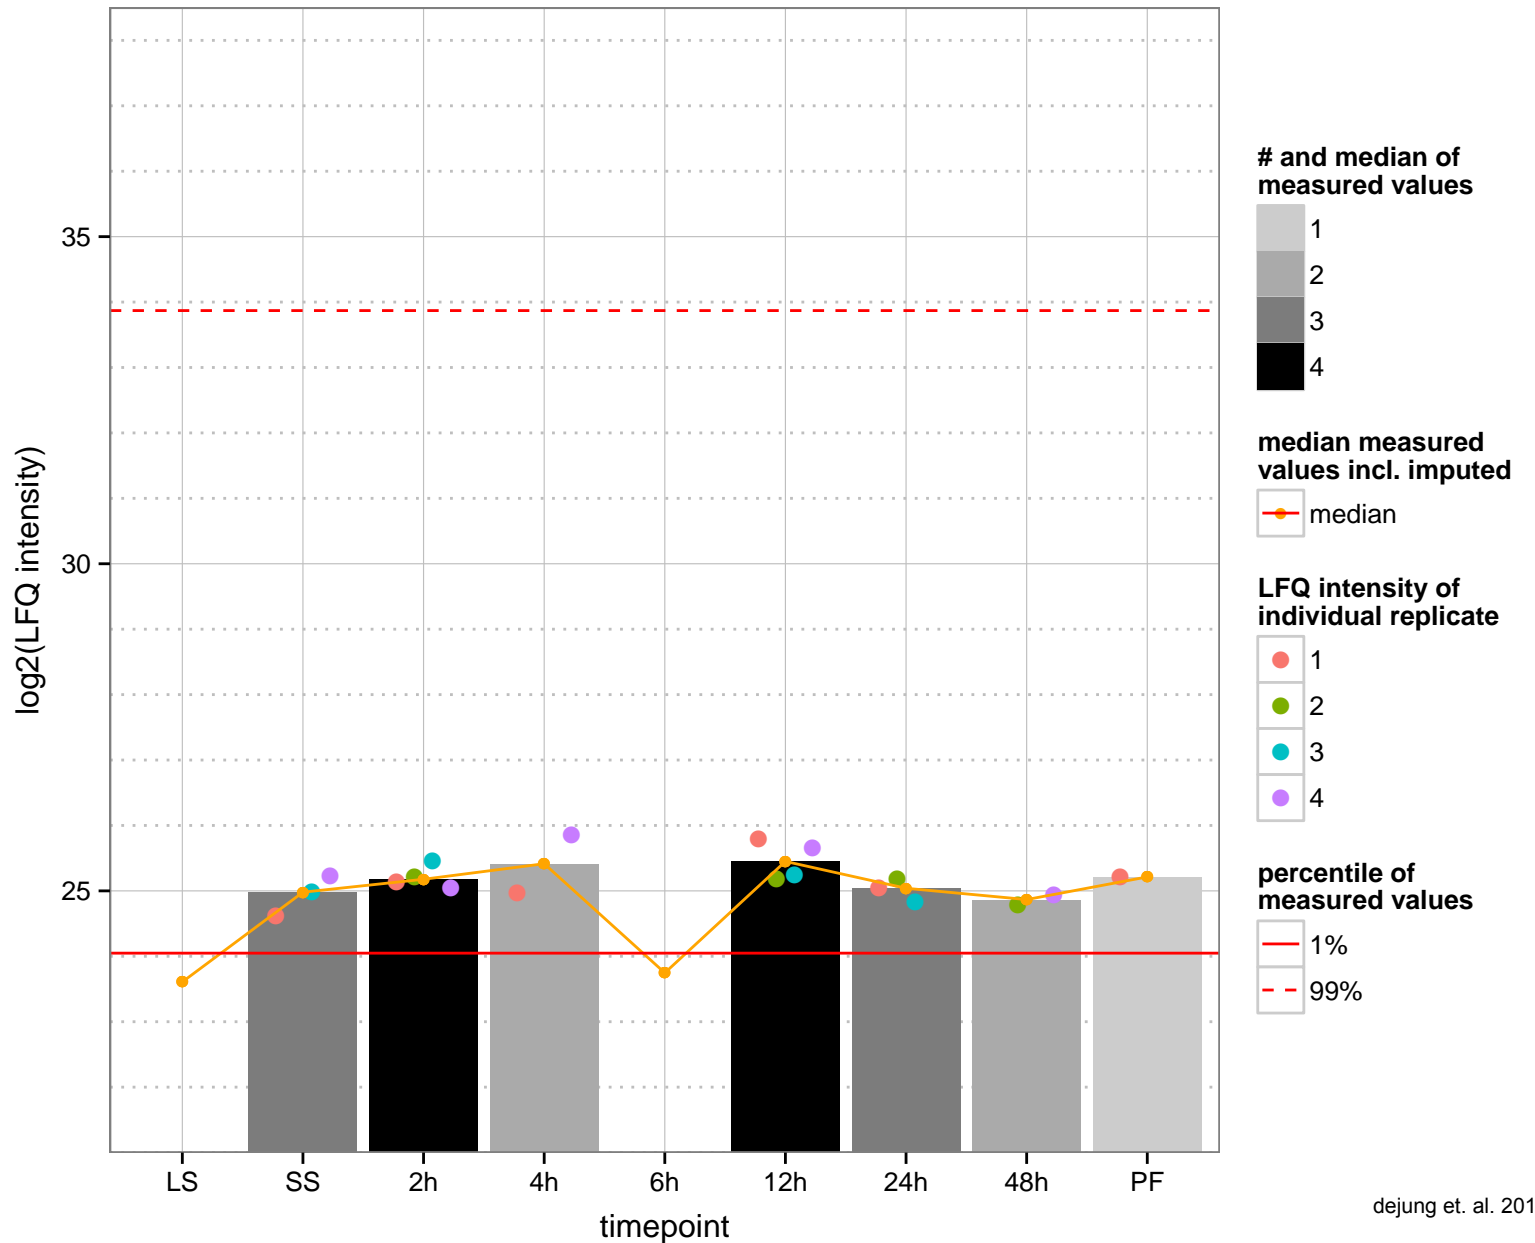

TPR-repeat-containing chaperone protein DNAJ, putative, TPR repeat protein  
 Tb927.10.4900  
 AGOF: heat shock protein binding  
 AGOC: null  
 AGOP: protein folding  
 PGOF: heat shock protein binding, protein binding  
 PGO: null  
 PGOP: null

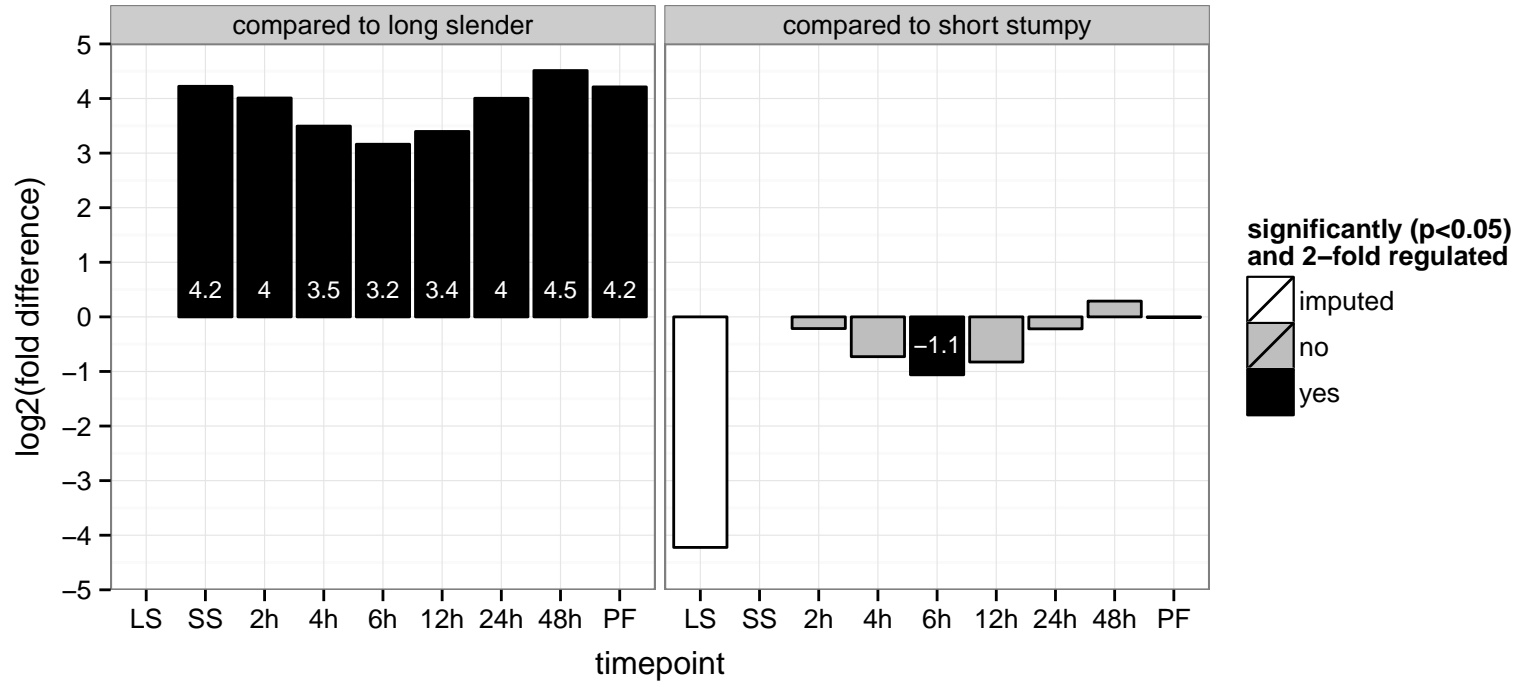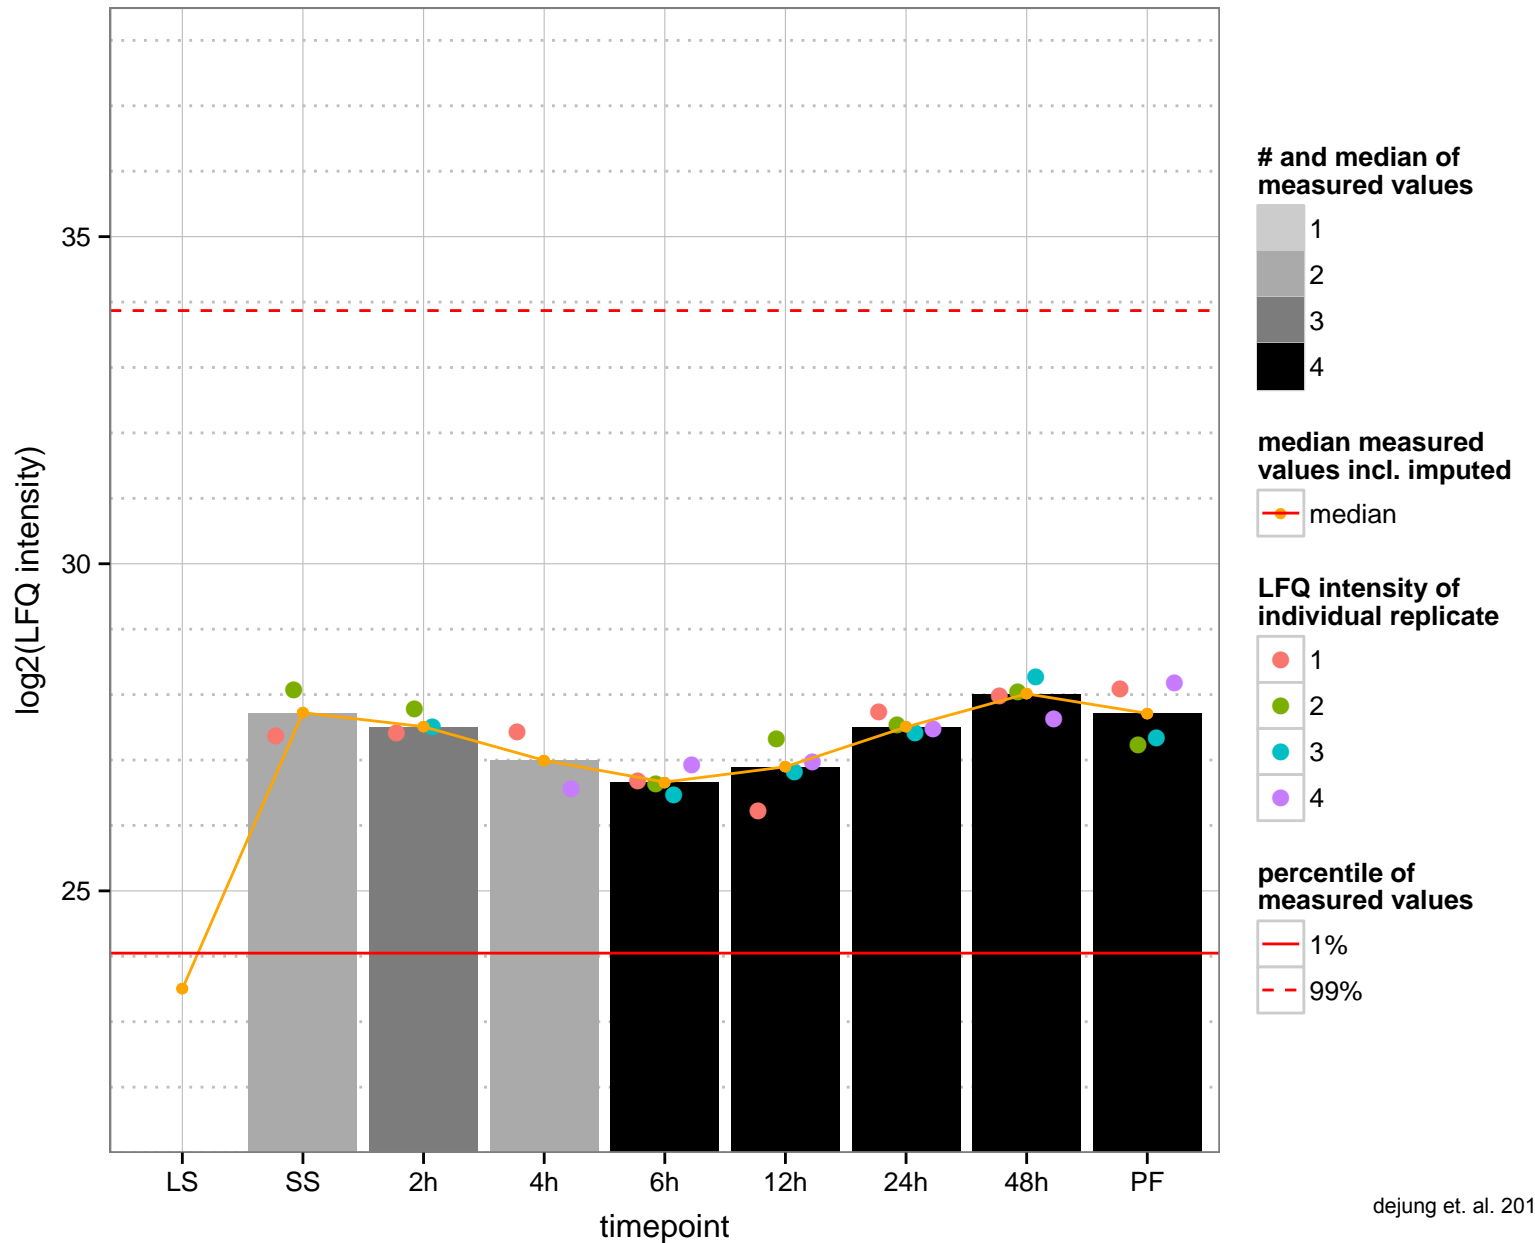



hypothetical protein, conserved  
 Tb927.10.7380  
 AGOF: null  
 AGOC: mitochondrion  
 AGOP: null  
 PGO: null  
 PGOC: null  
 PGOP: null

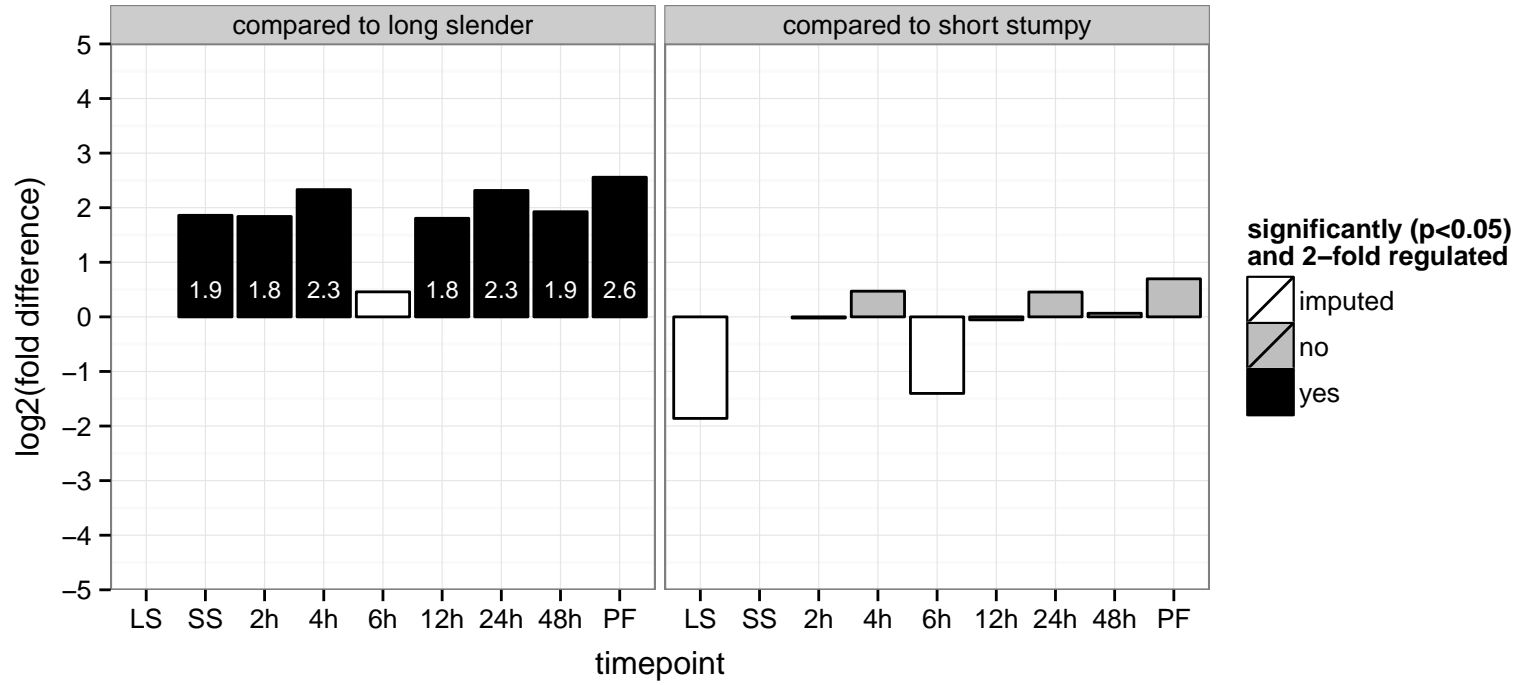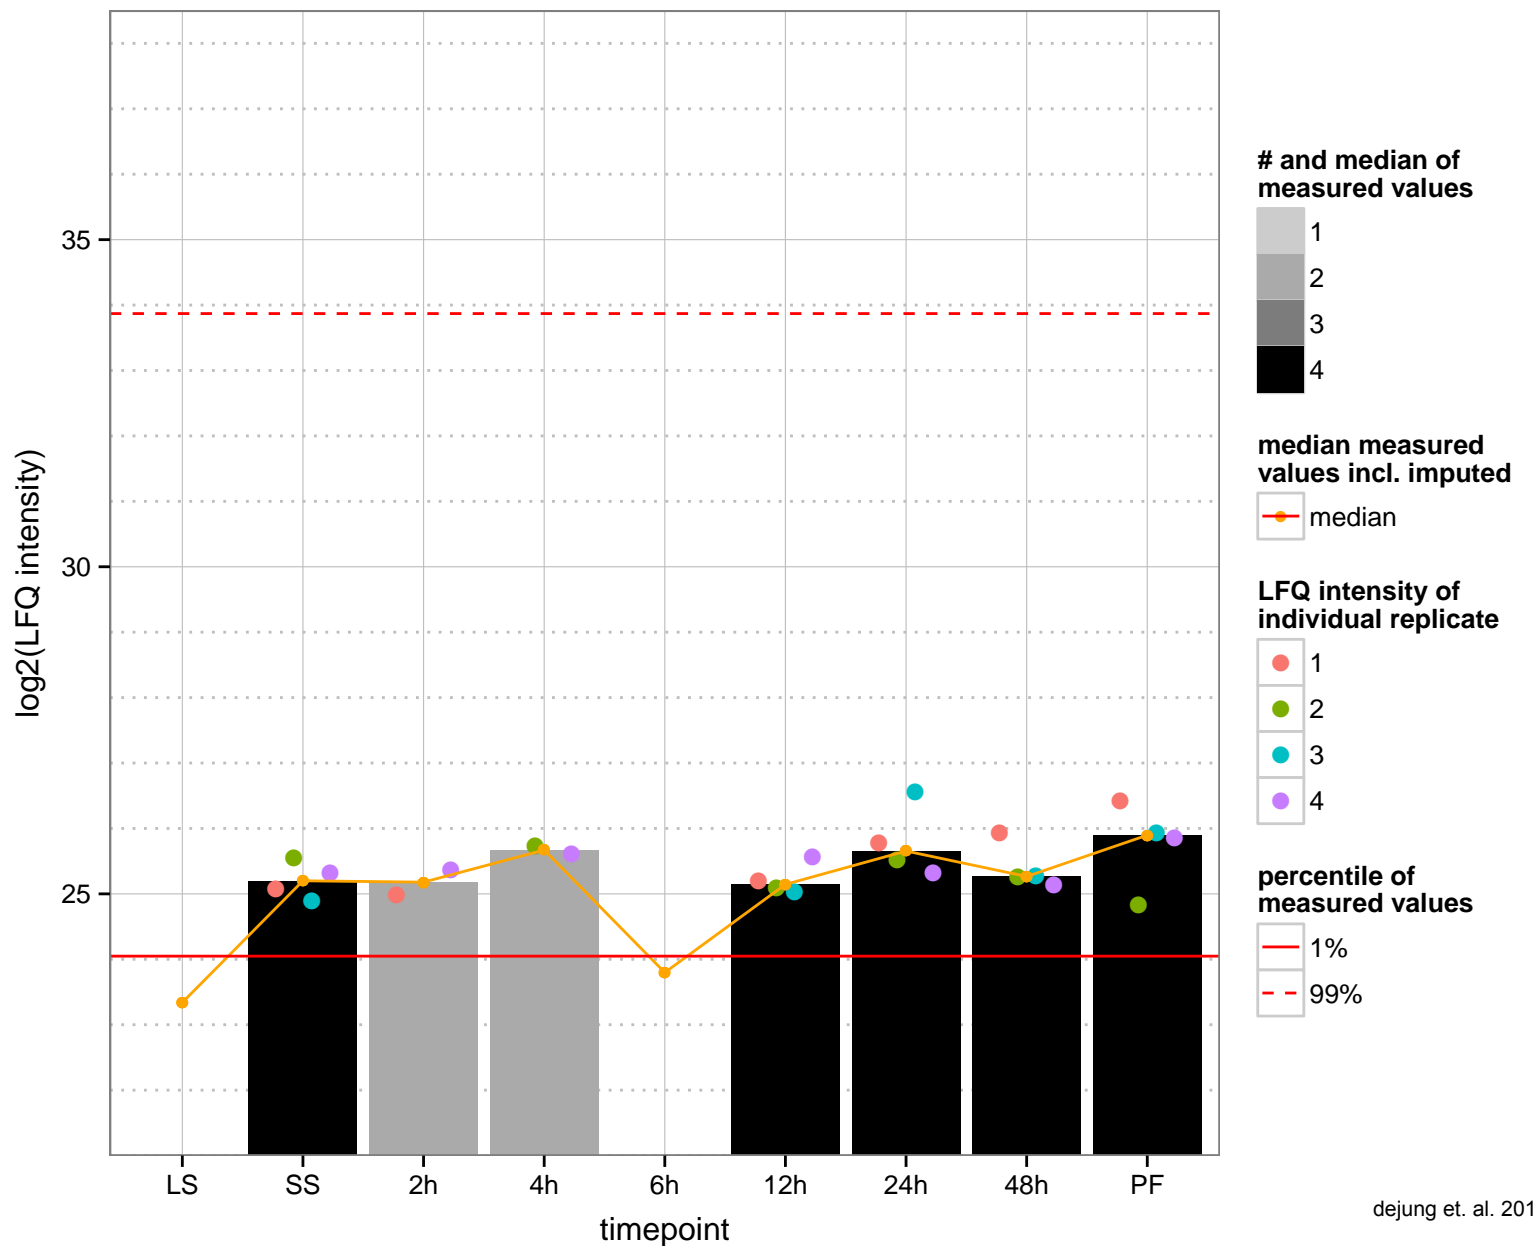

gamma-tubulin complex subunit, putative, spindle pole body protein, putative (GCP2)  
 Tb927.10.9770;Tb11.v5.0848  
 AGOF: null  
 AGOC: null, microtubule organizing center, spindle pole  
 AGOP: null, microtubule cytoskeleton organization  
 PGO: null  
 PGOC: microtubule organizing center, spindle pole  
 PGOP: microtubule cytoskeleton organization

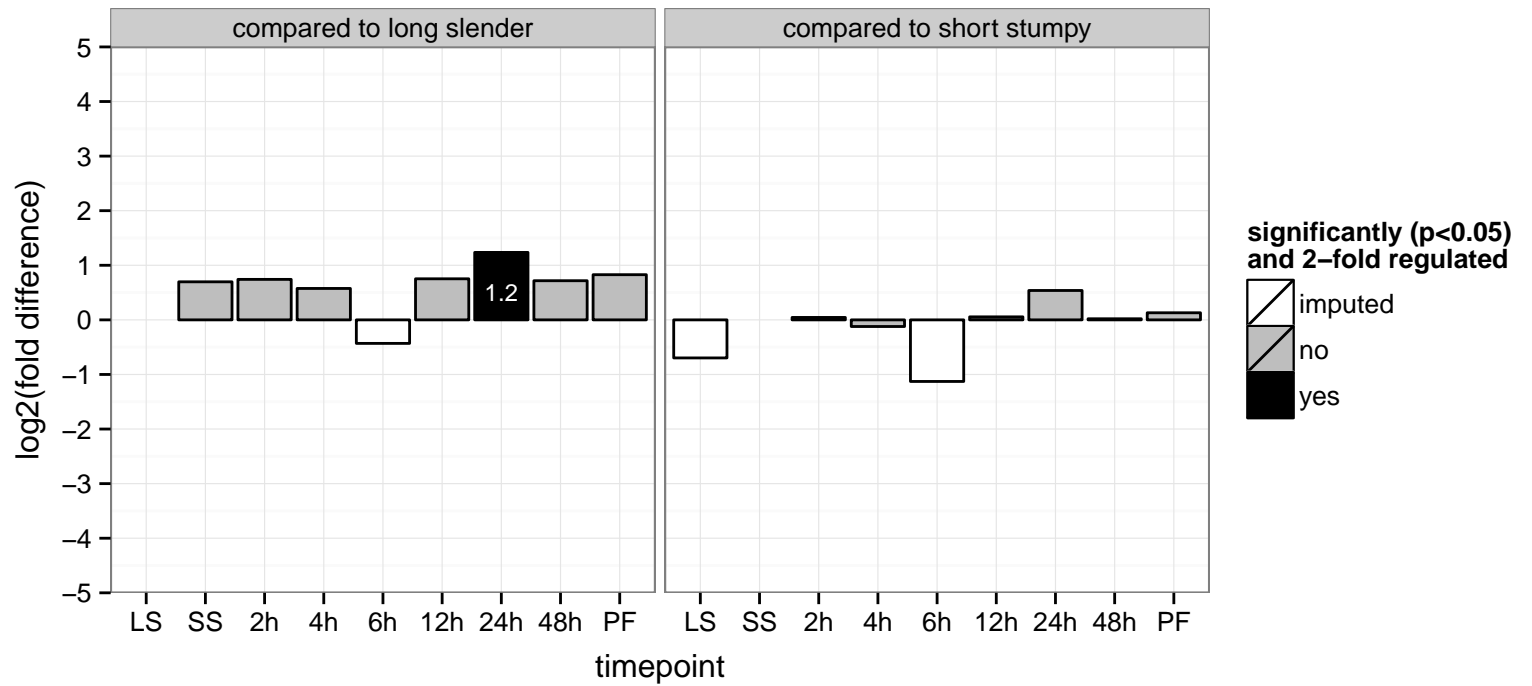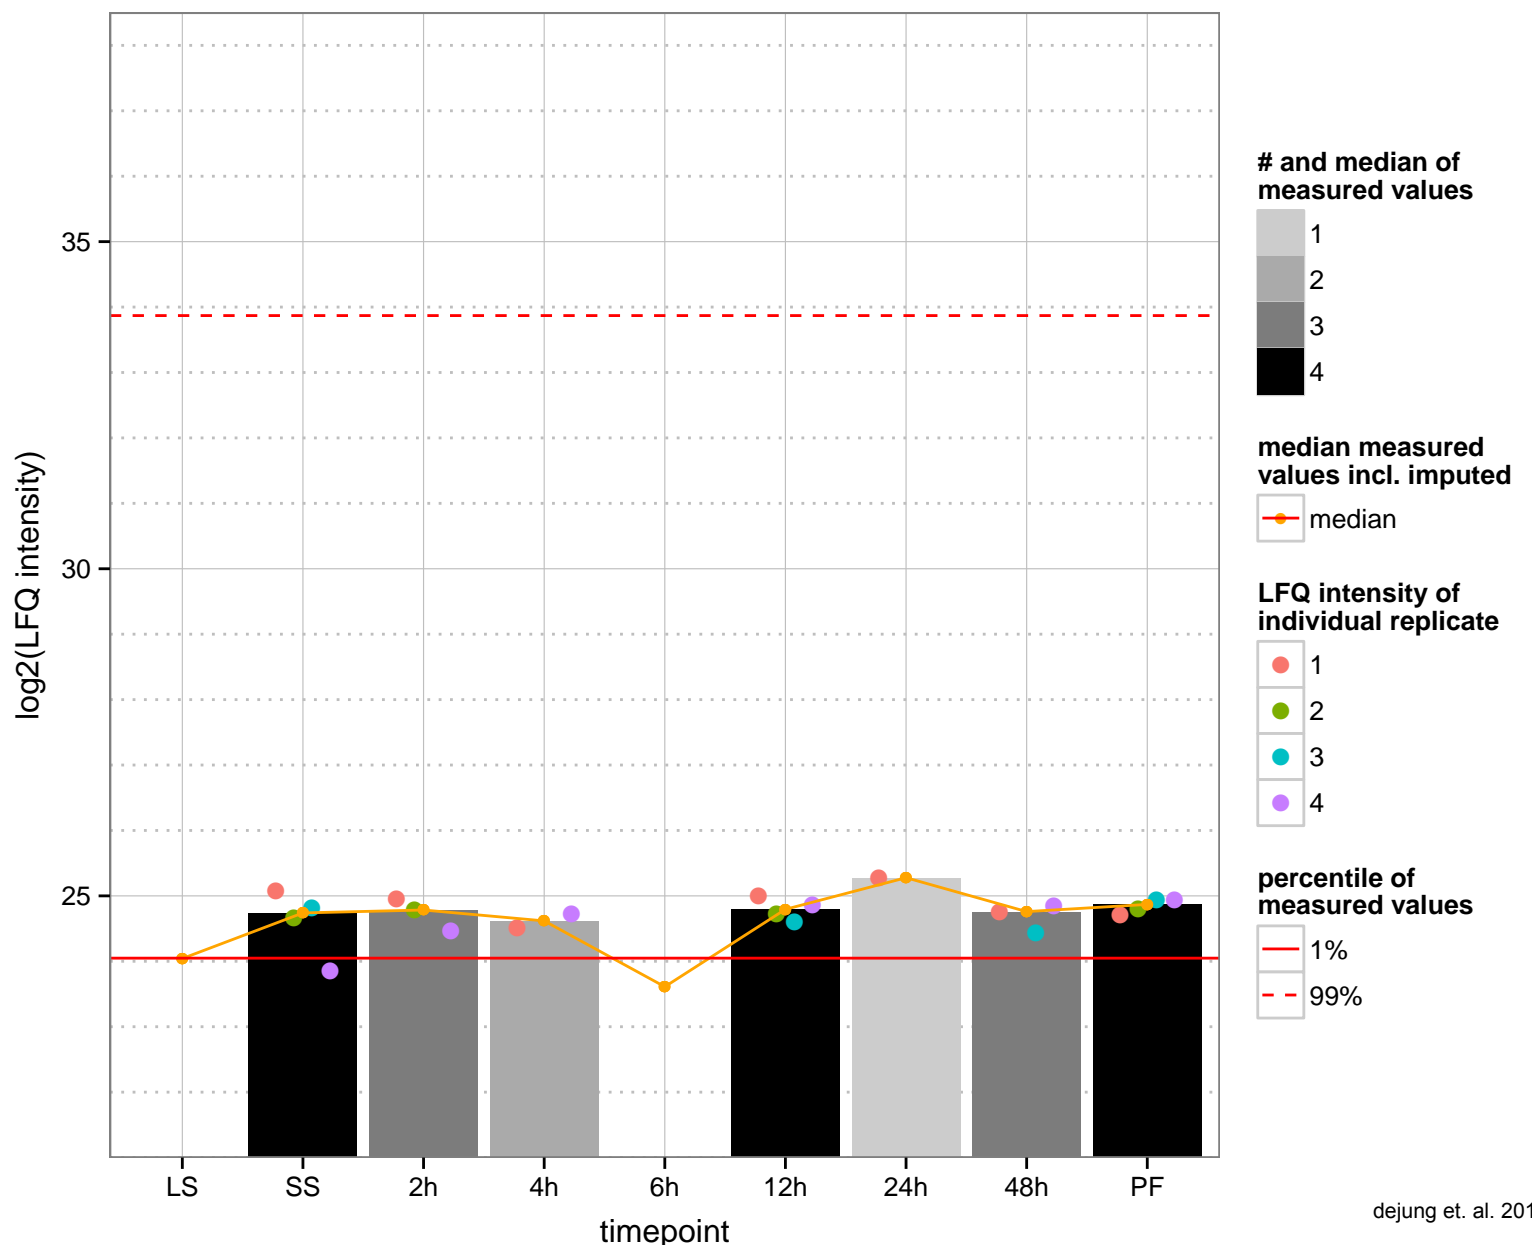

calpain-like cysteine peptidase, putative, antigen  
 Tb927.11.1130  
 AGOF: null, calcium-dependent cysteine-type endopeptidase activity  
 AGOC: null, intracellular  
 AGOP: null, proteolysis  
 PGOF: null, calcium-dependent cysteine-type endopeptidase activity  
 PGOC: null, intracellular  
 PGOP: null, proteolysis

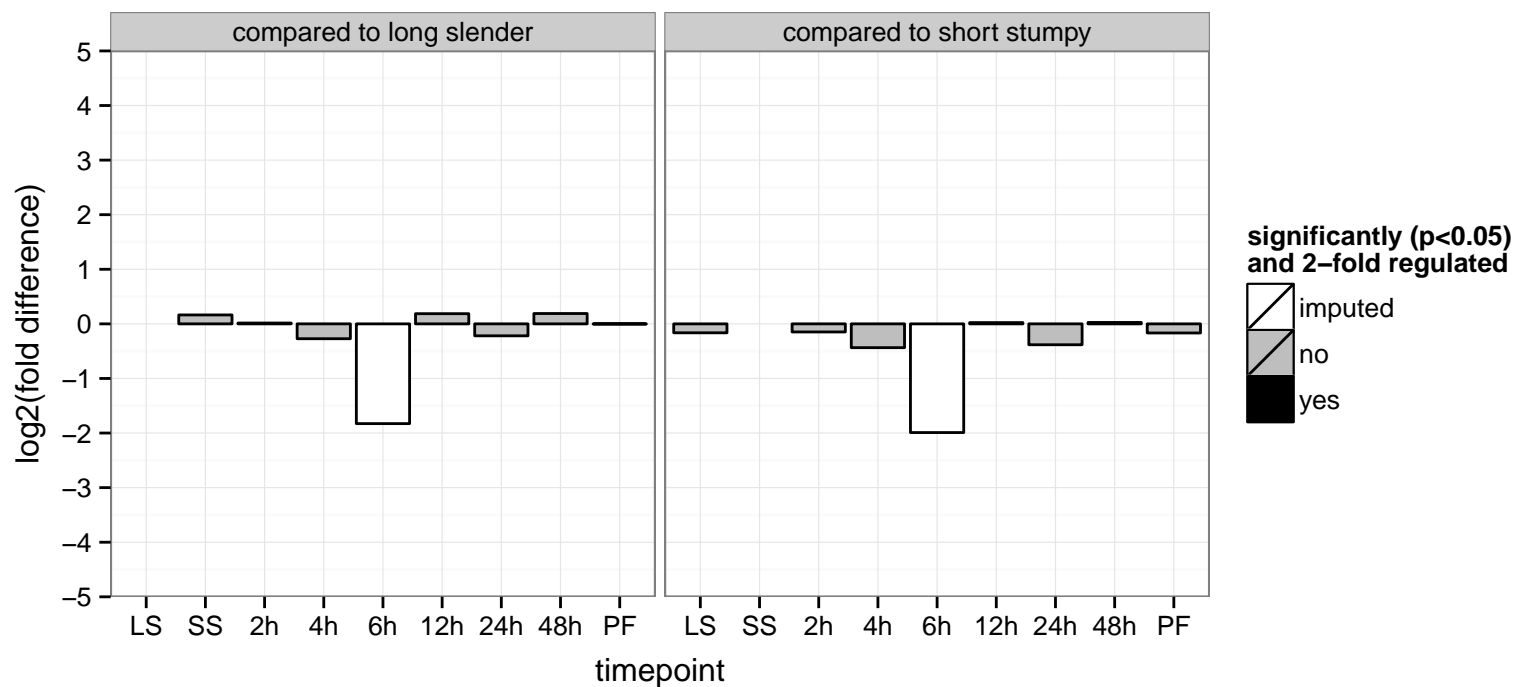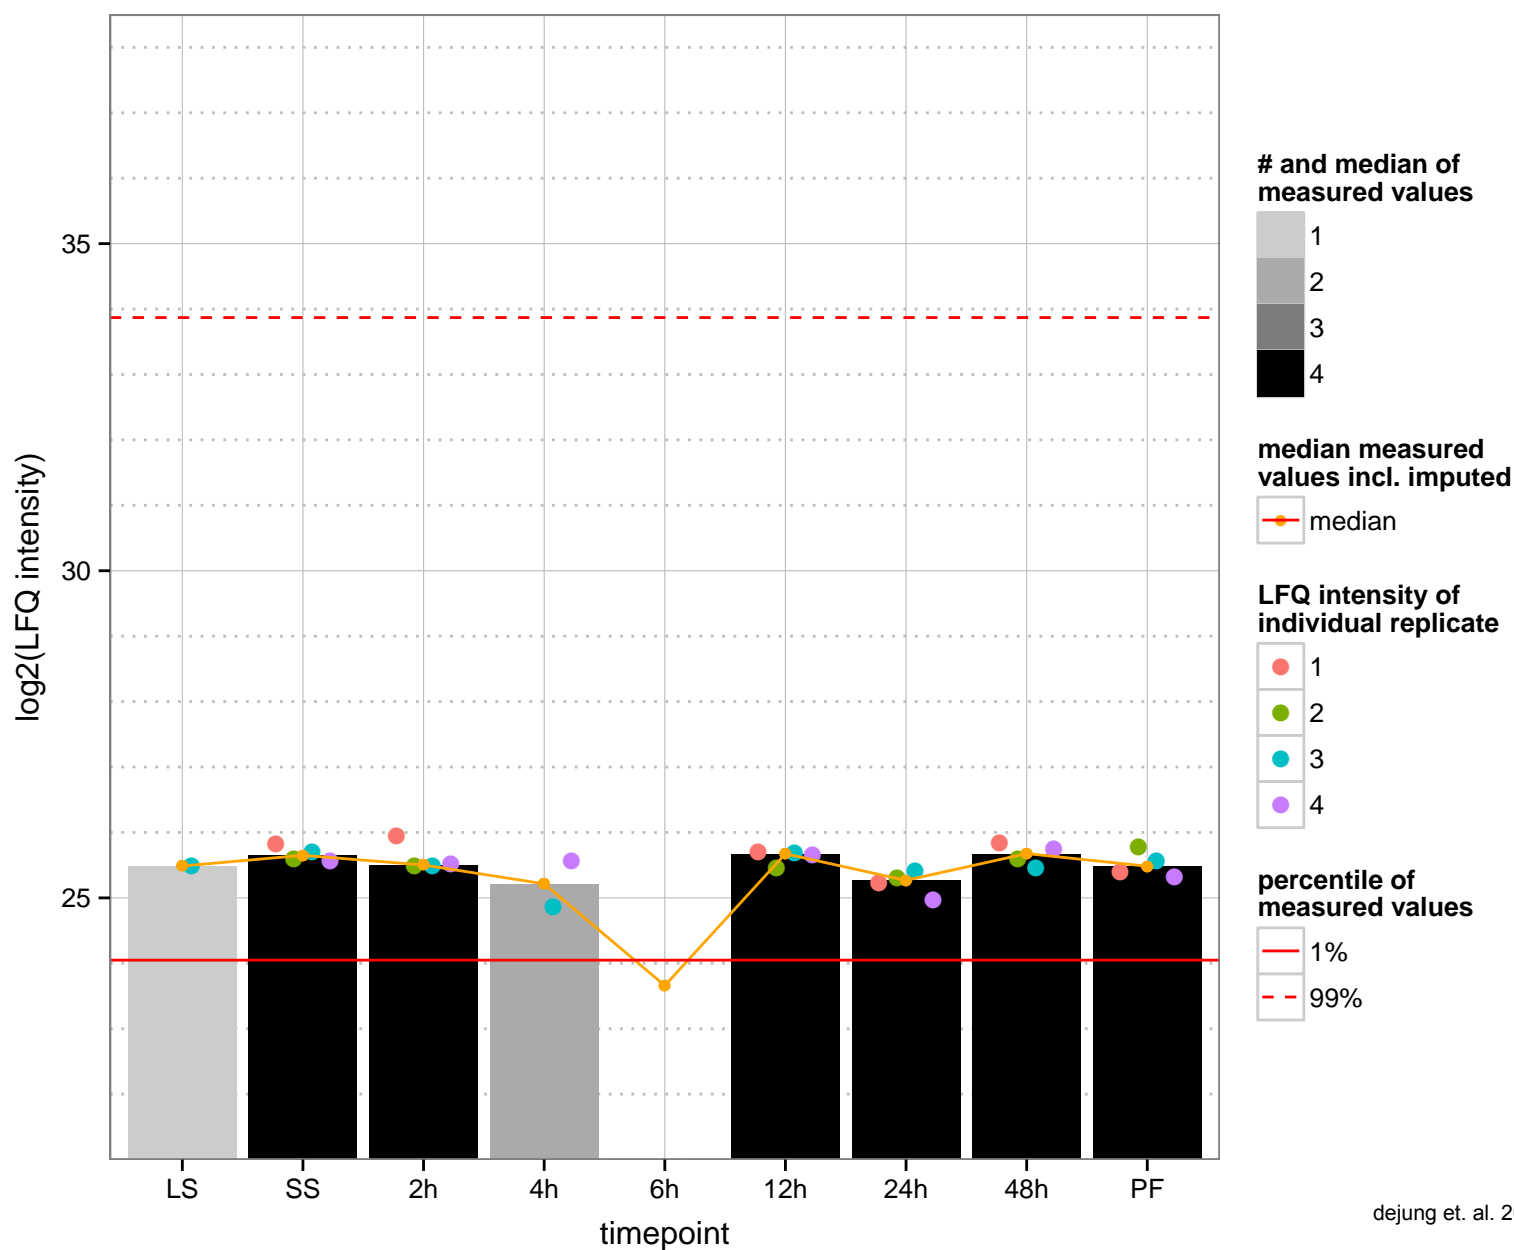

ornithine decarboxylase (ODC)  
 Tb927.11.13730  
 AGOF: ornithine decarboxylase activity  
 AGOC: null  
 AGOP: polyamine biosynthetic process  
 PGO: catalytic activity  
 PGOC: null  
 PGOP: null

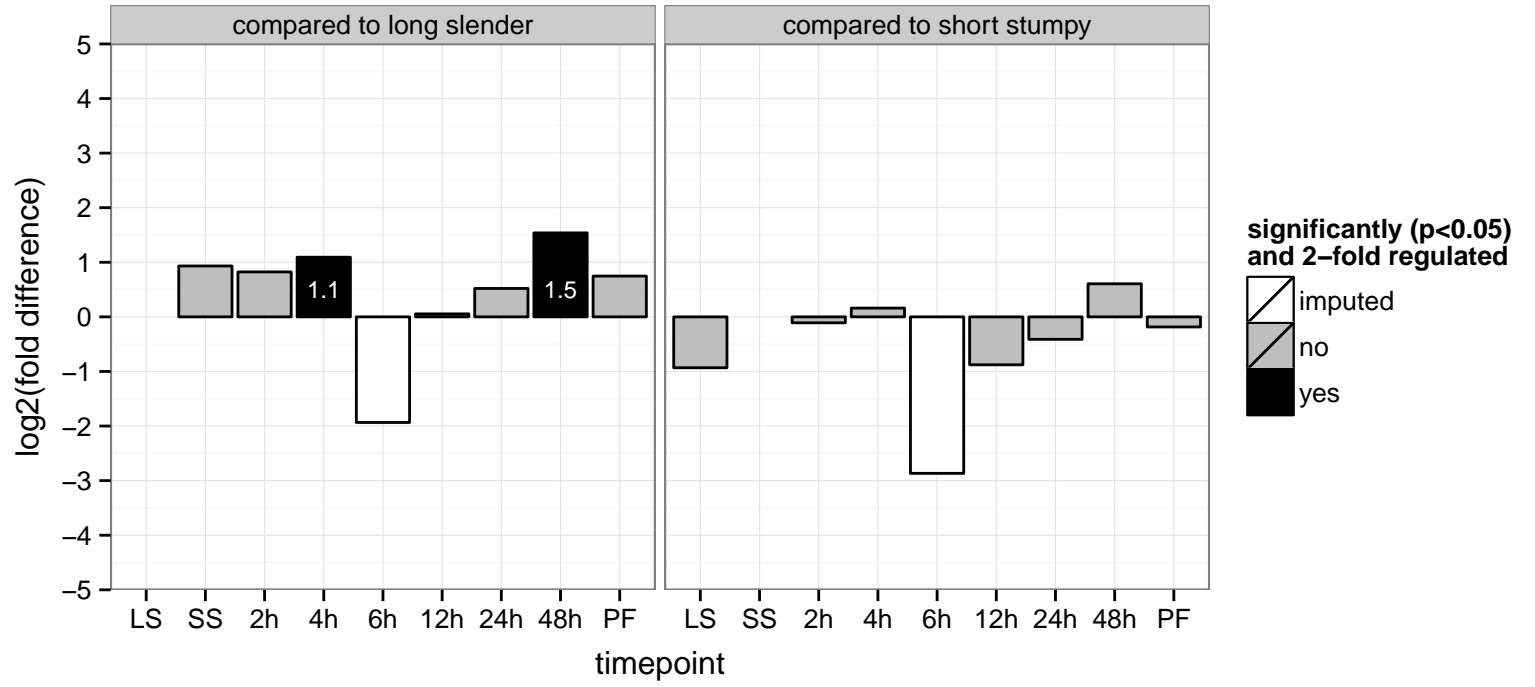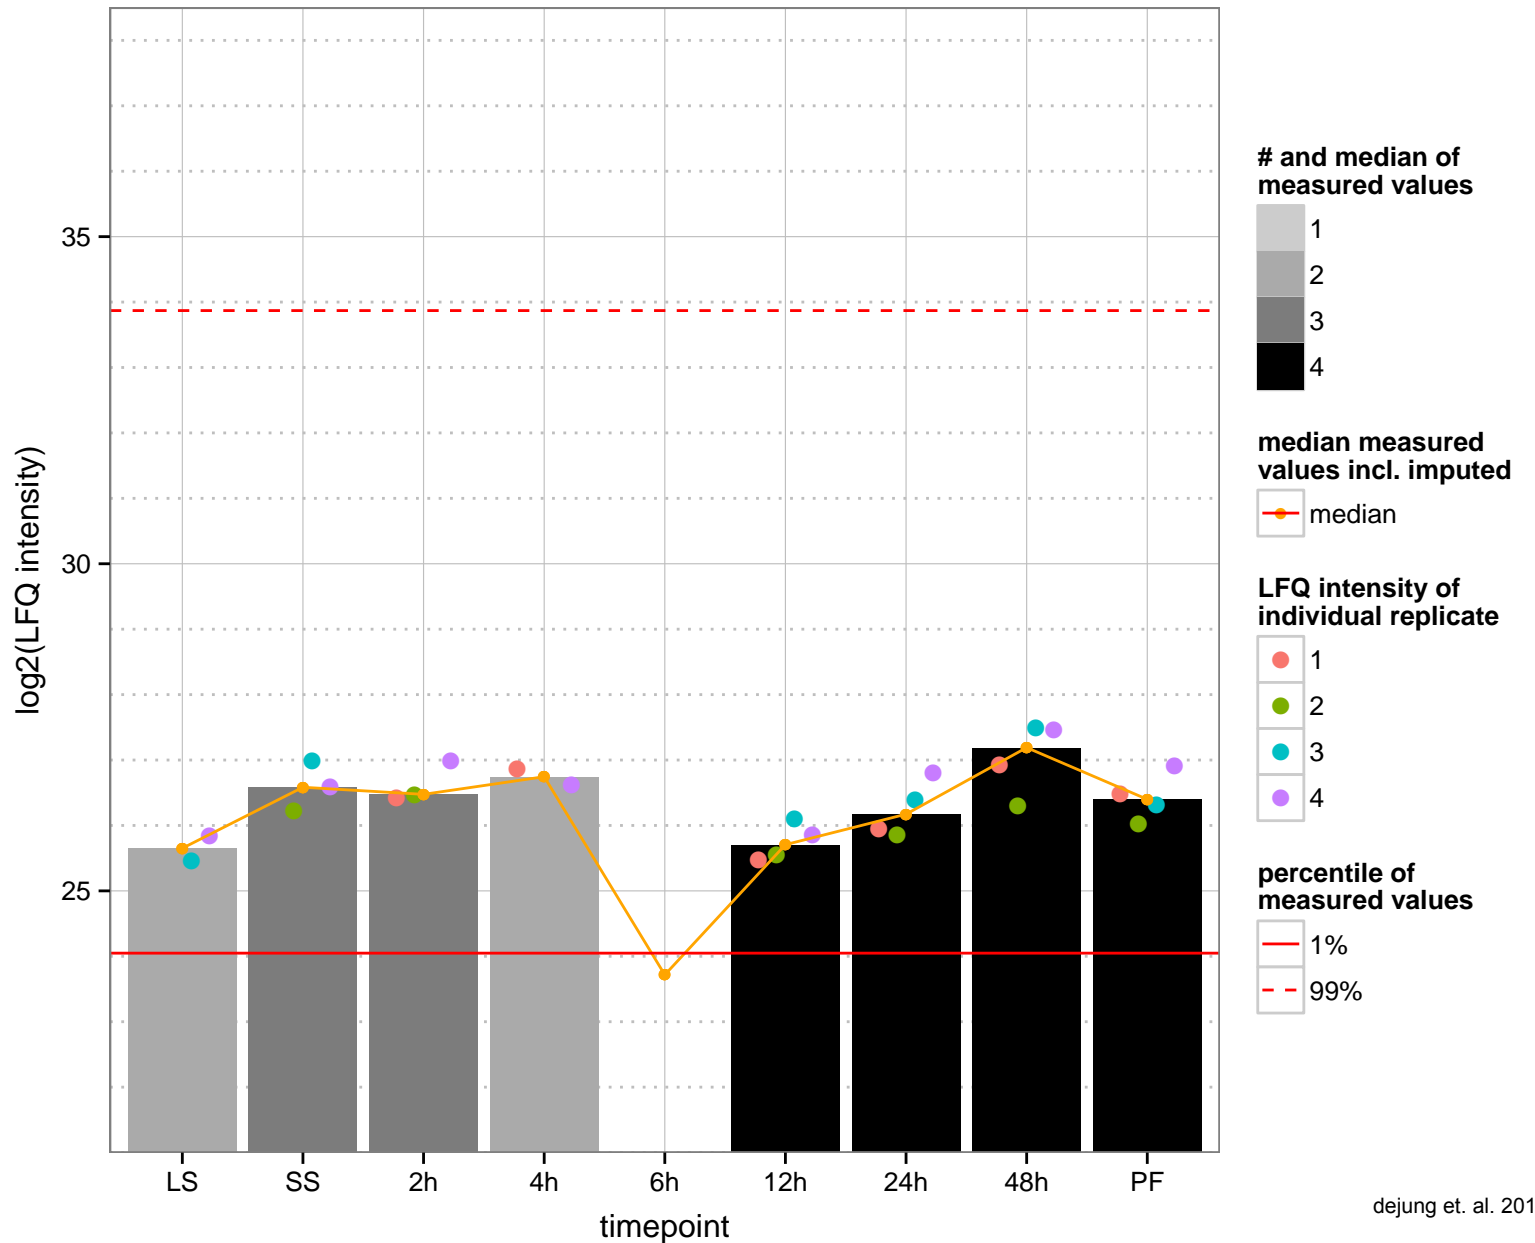

hypothetical protein, conserved  
 Tb927.11.15940  
 AGOF: null  
 AGOC: null  
 AGOP: null  
 PGOF: null  
 PGO: null  
 PGOP: null

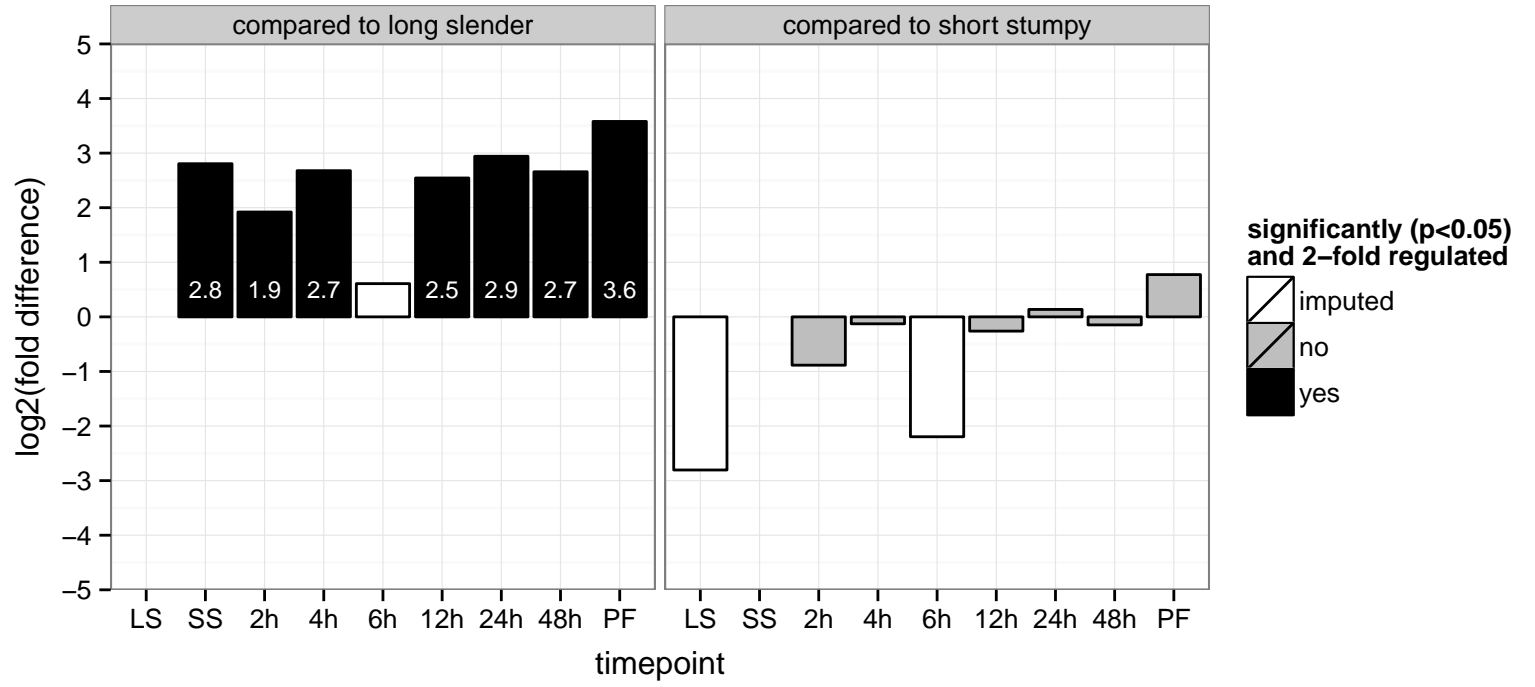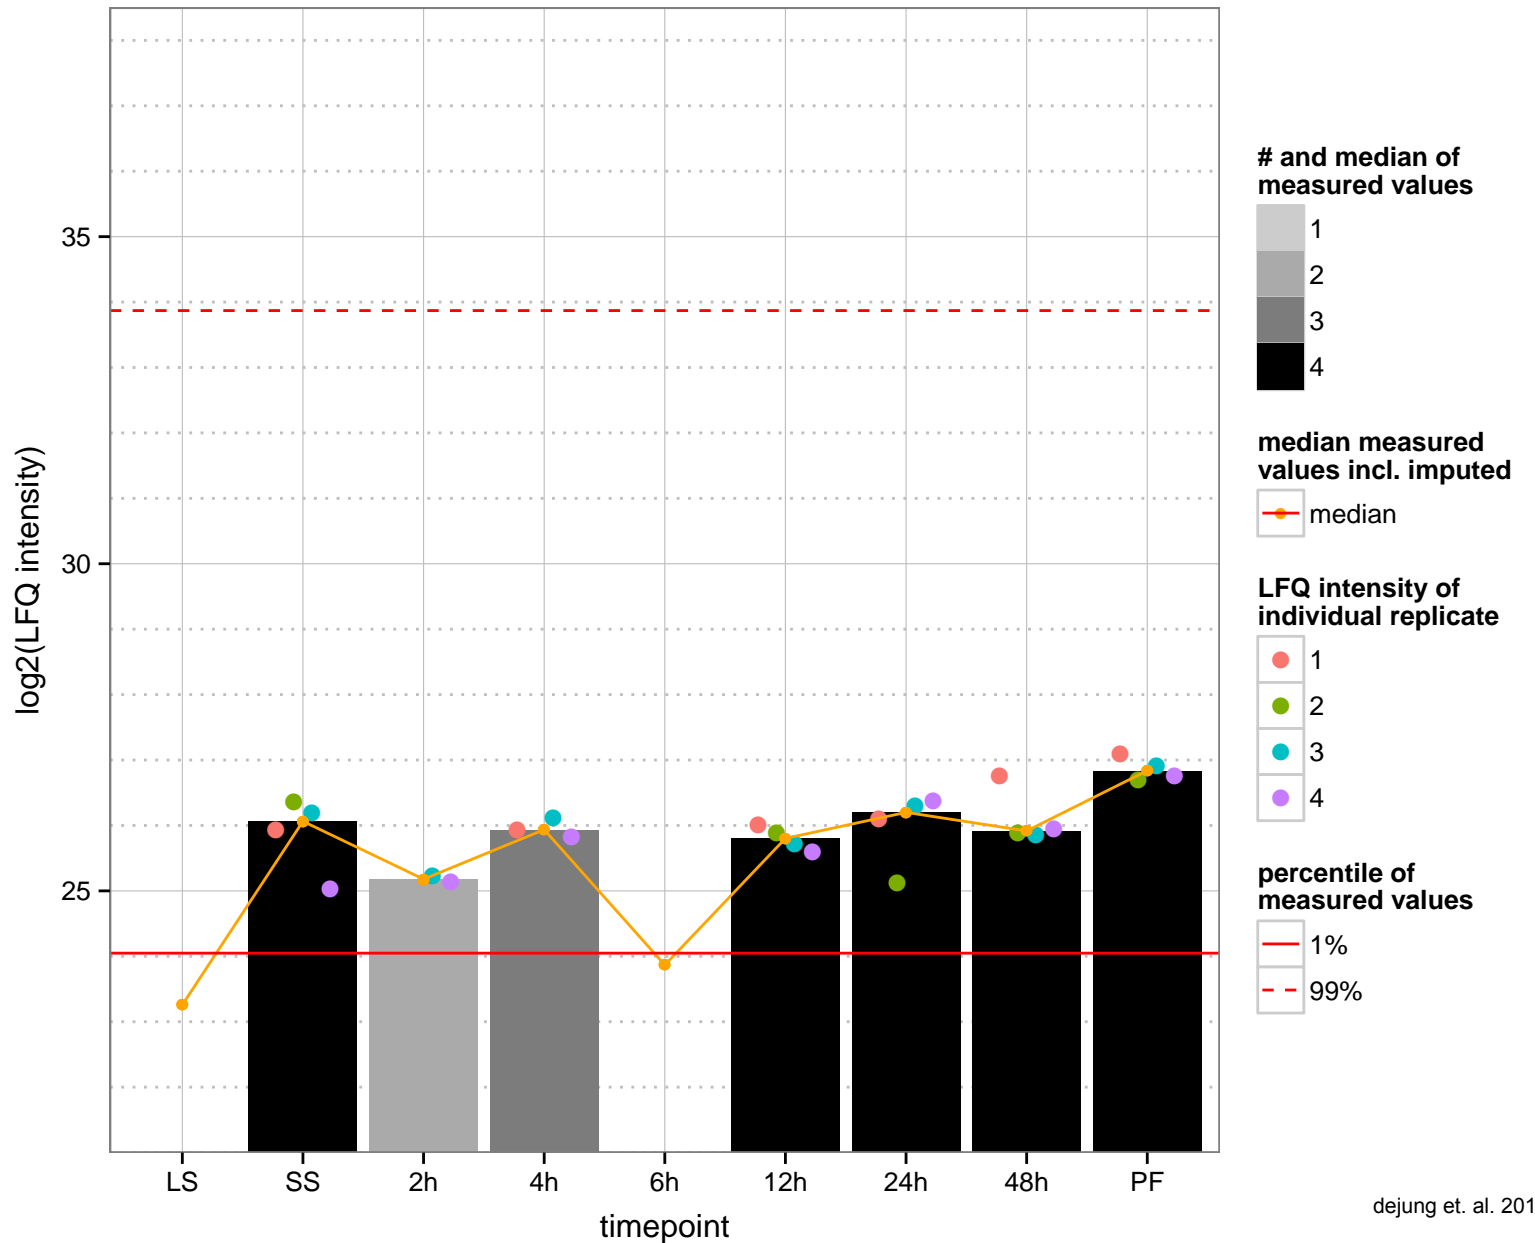

hypothetical protein, conserved  
 Tb927.11.2580  
 AGOF: null  
 AGOC: mitochondrion  
 AGOP: null  
 PGO: null  
 PGO: null  
 PGO: null

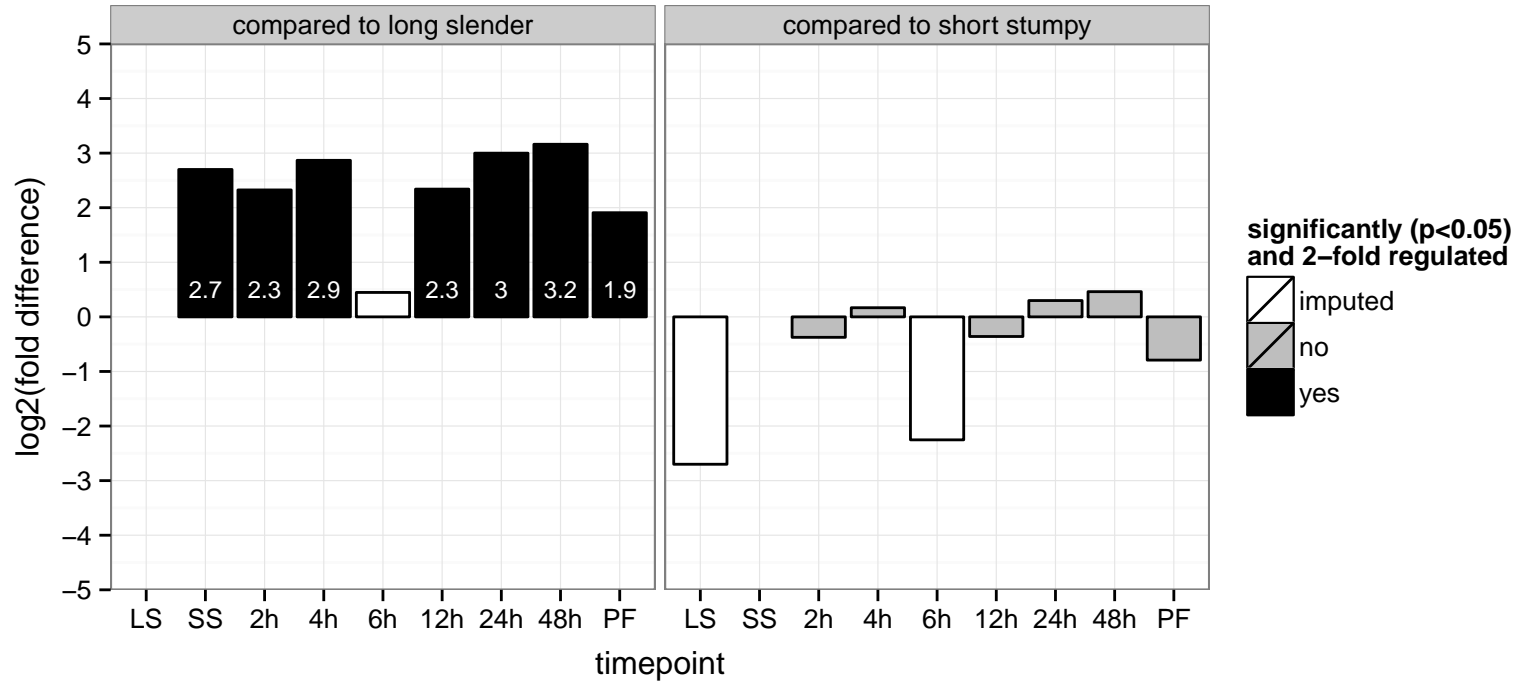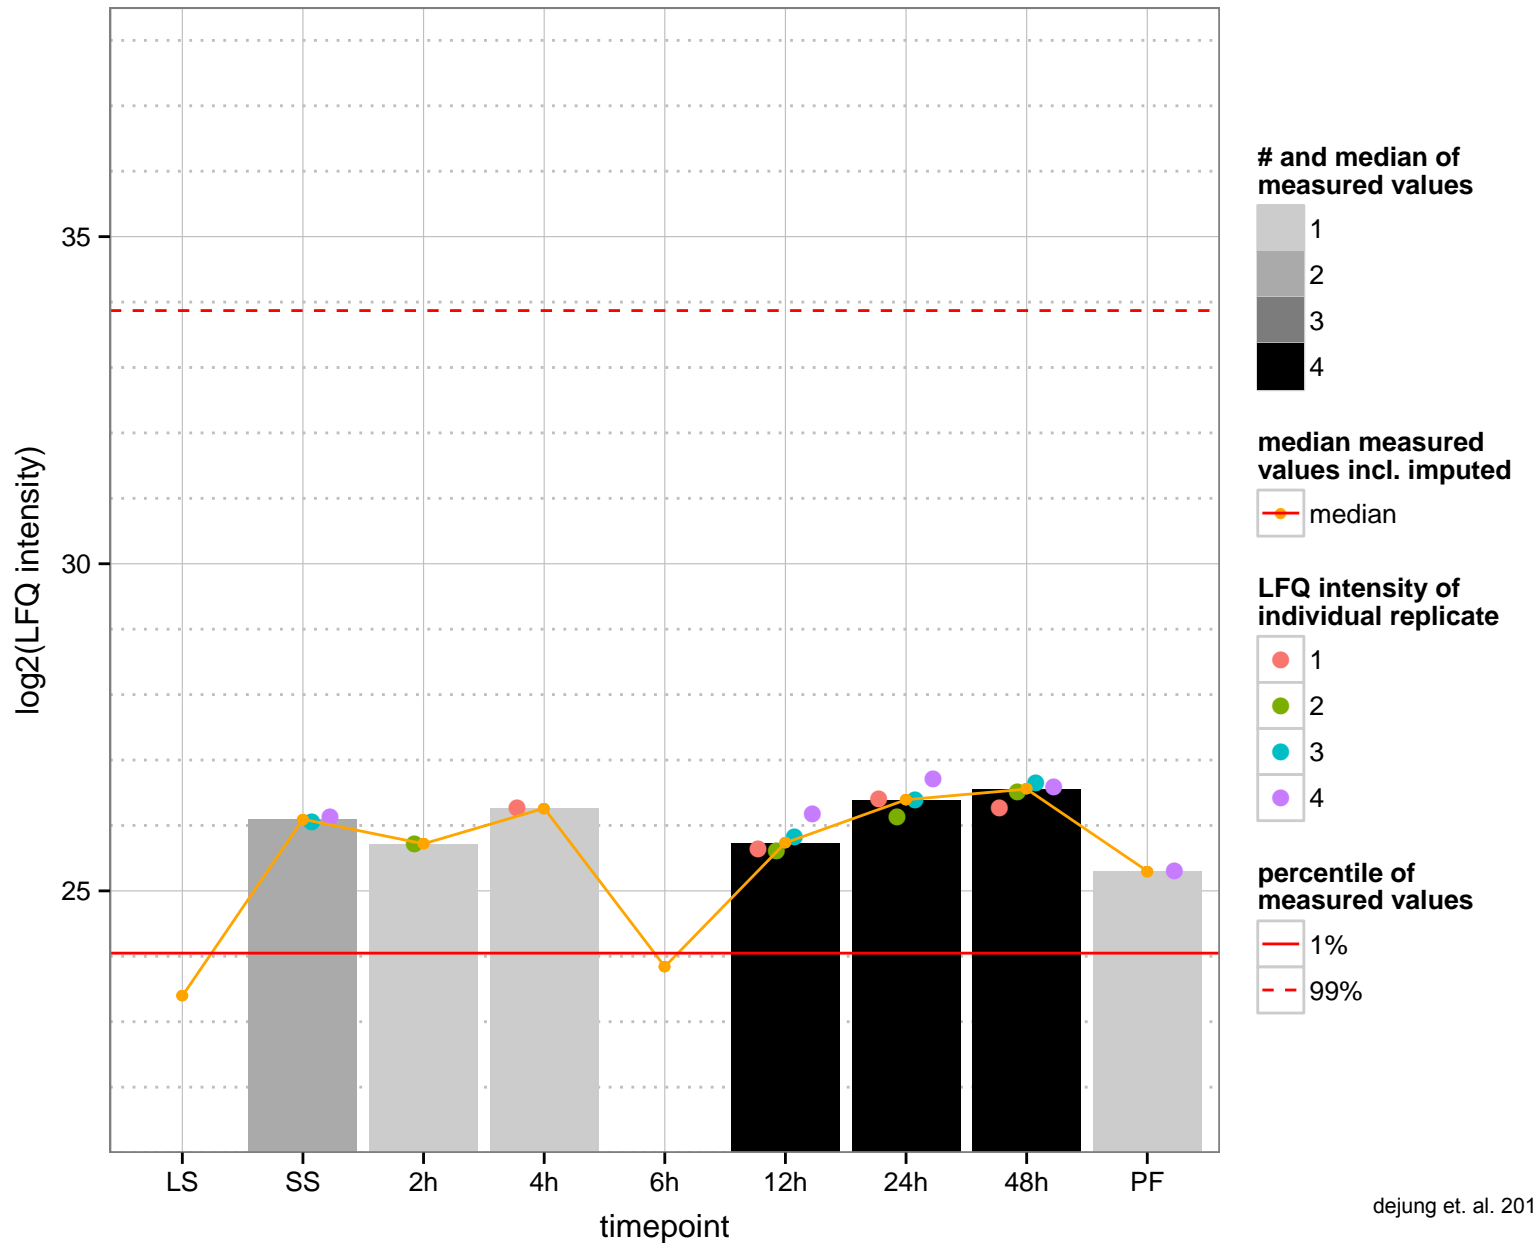

long-chain-fatty-acid-CoA ligase, putative, acyl-CoA synthetase, fatty acid thioinase (long chain)

Tb927.11.4490

AGOF: catalytic activity

AGOC: mitochondrion

AGOP: metabolic process

PGOF: catalytic activity

PGOC: null

PGOP: metabolic process

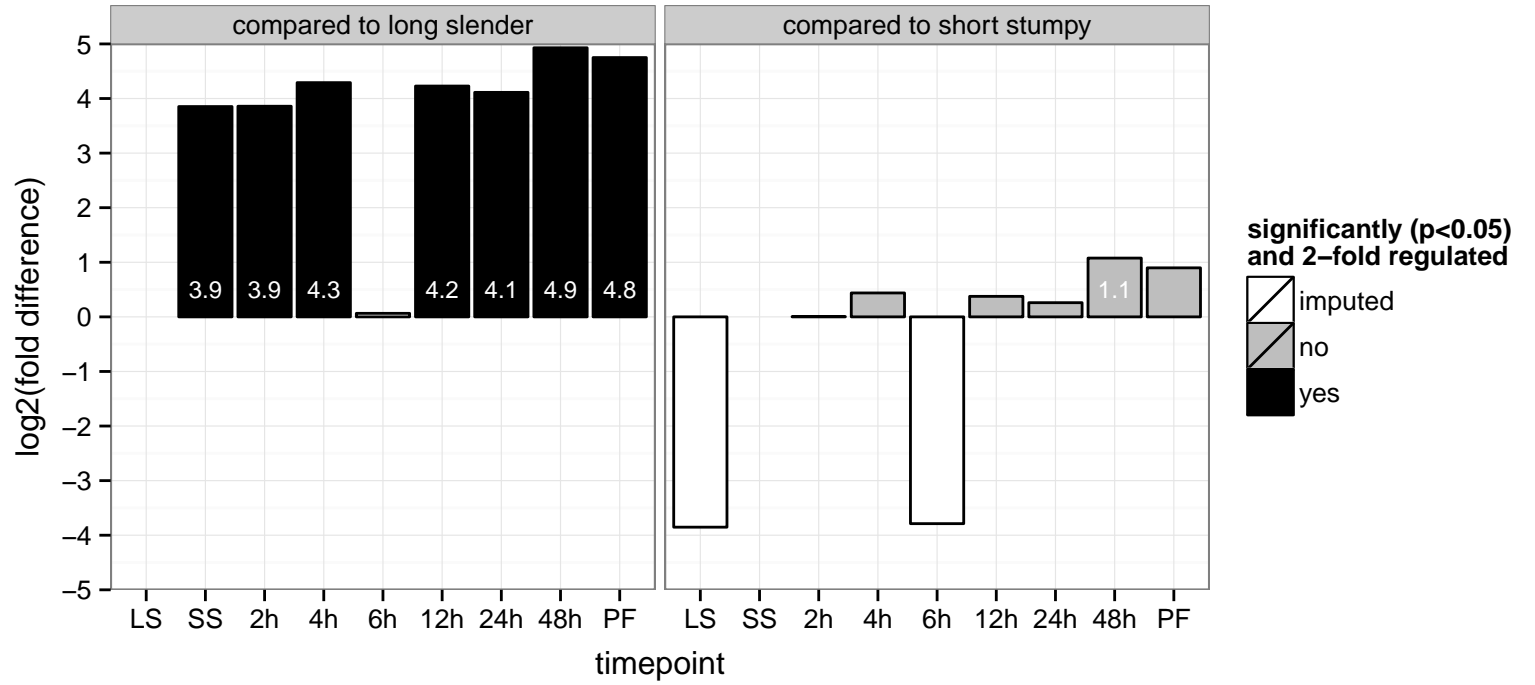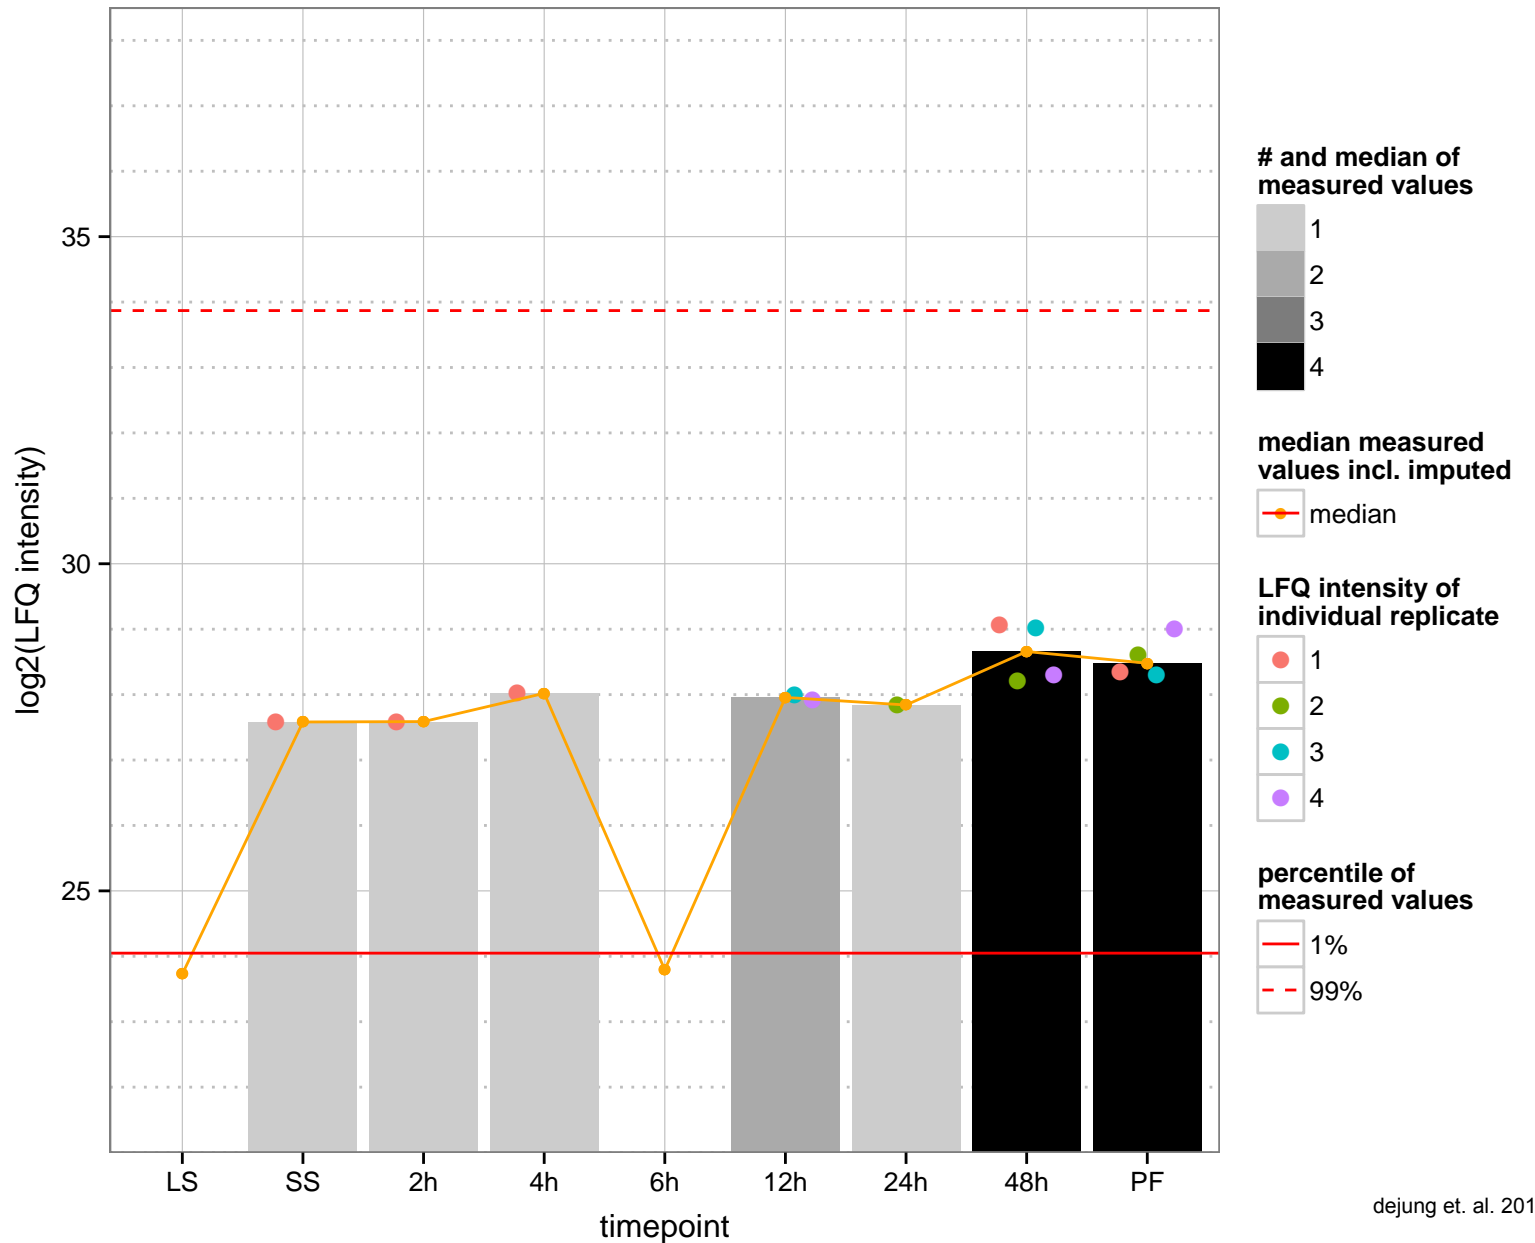

protein kinase, putative

Tb927.11.7210

AGOF: ATP binding, protein serine/threonine kinase activity, protein tyrosine kinase activity, histone serine kinase activity

AGOC: null

AGOP: protein phosphorylation

PGOF: ATP binding, protein binding, protein kinase activity, transferase activity, transferring phosphorus-containing groups

PGOC: null

PGOP: protein phosphorylation

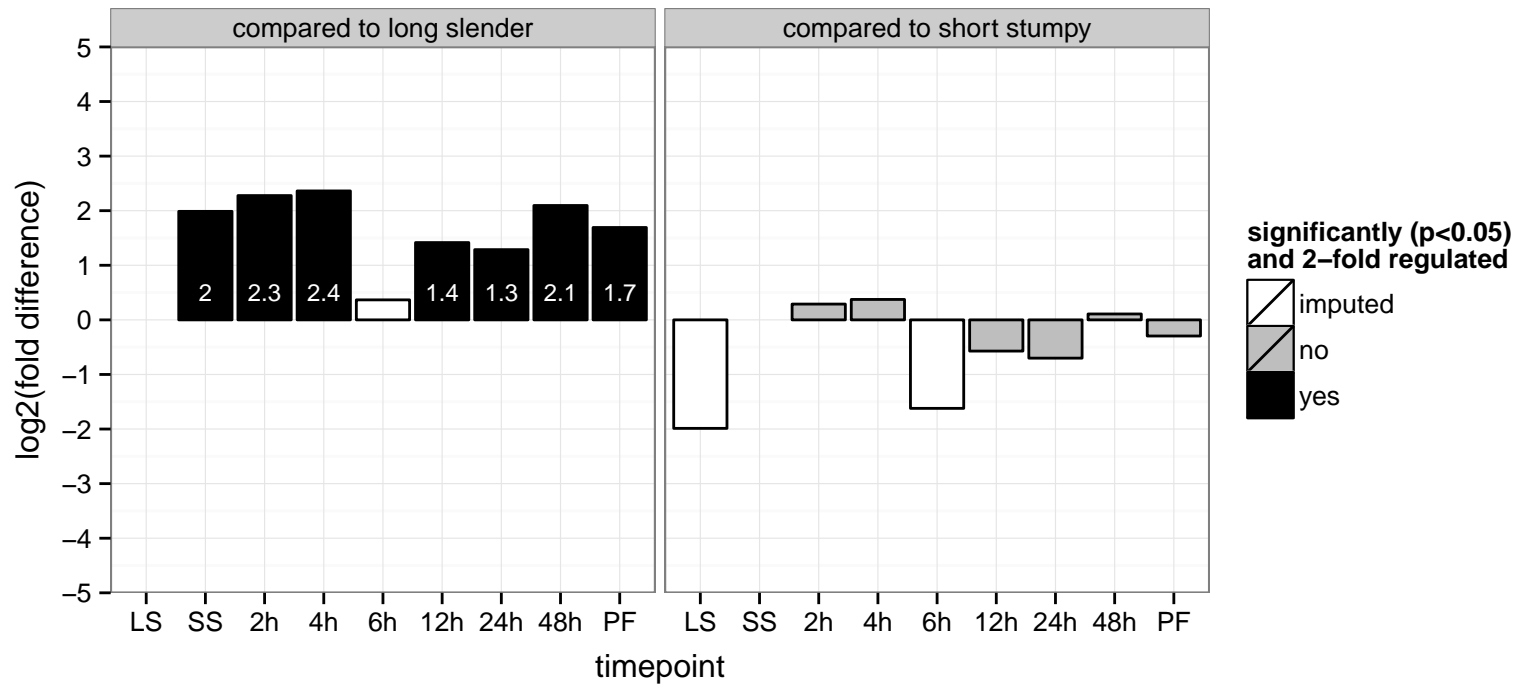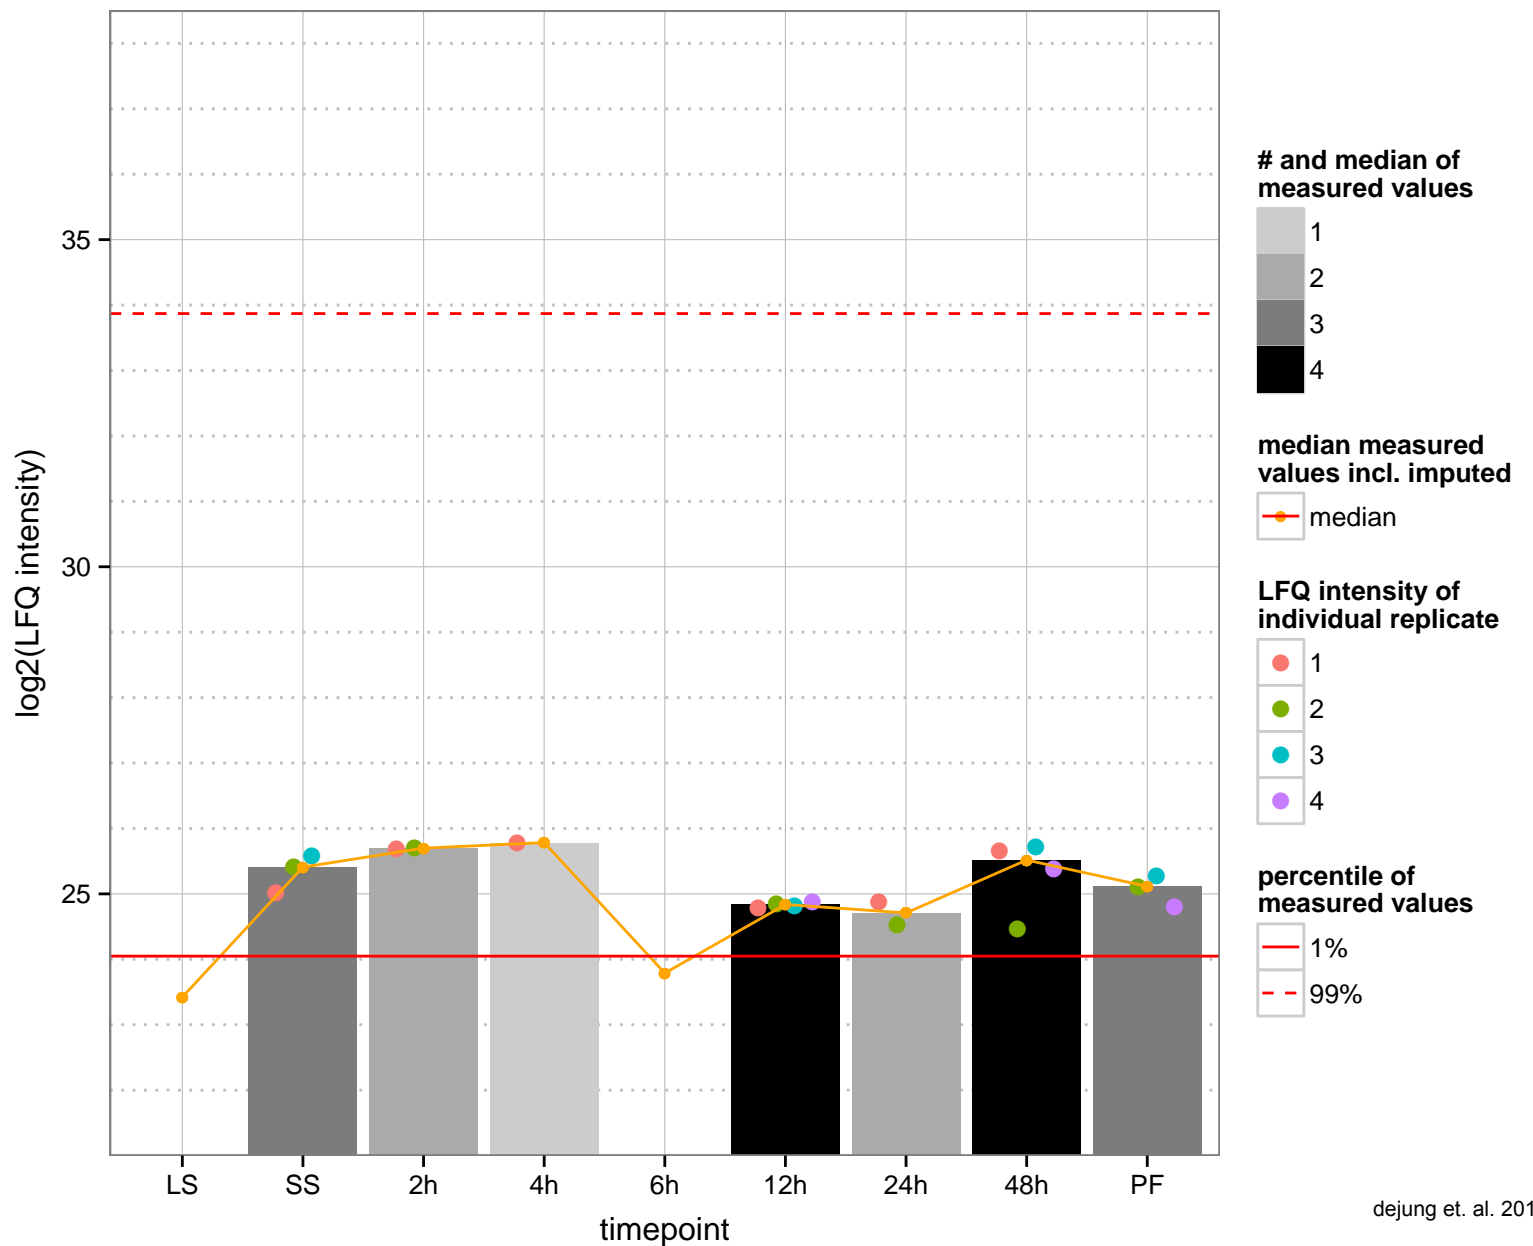



hypothetical protein, conserved  
 Tb927.11.7330  
 AGOF: null  
 AGOC: null  
 AGOP: null  
 PGOF: null  
 PGO: null  
 PGOP: null

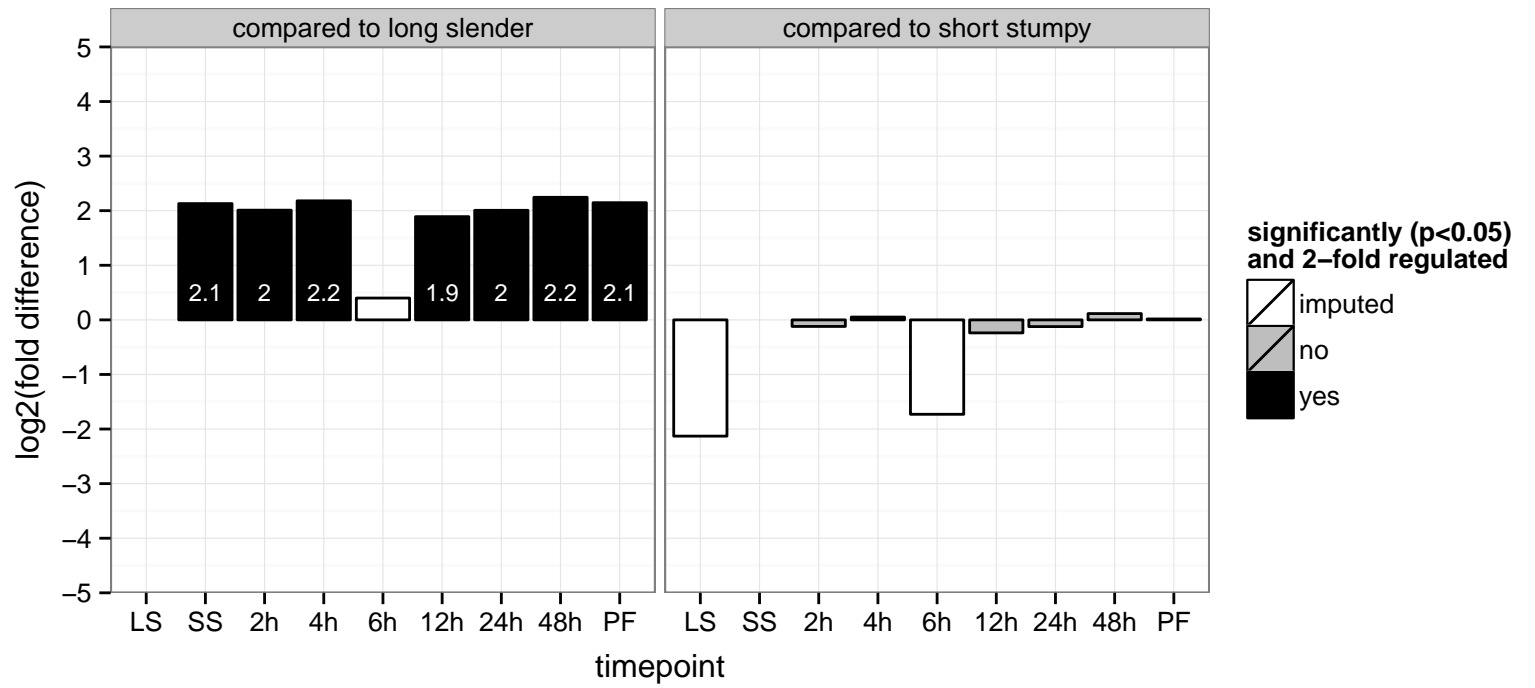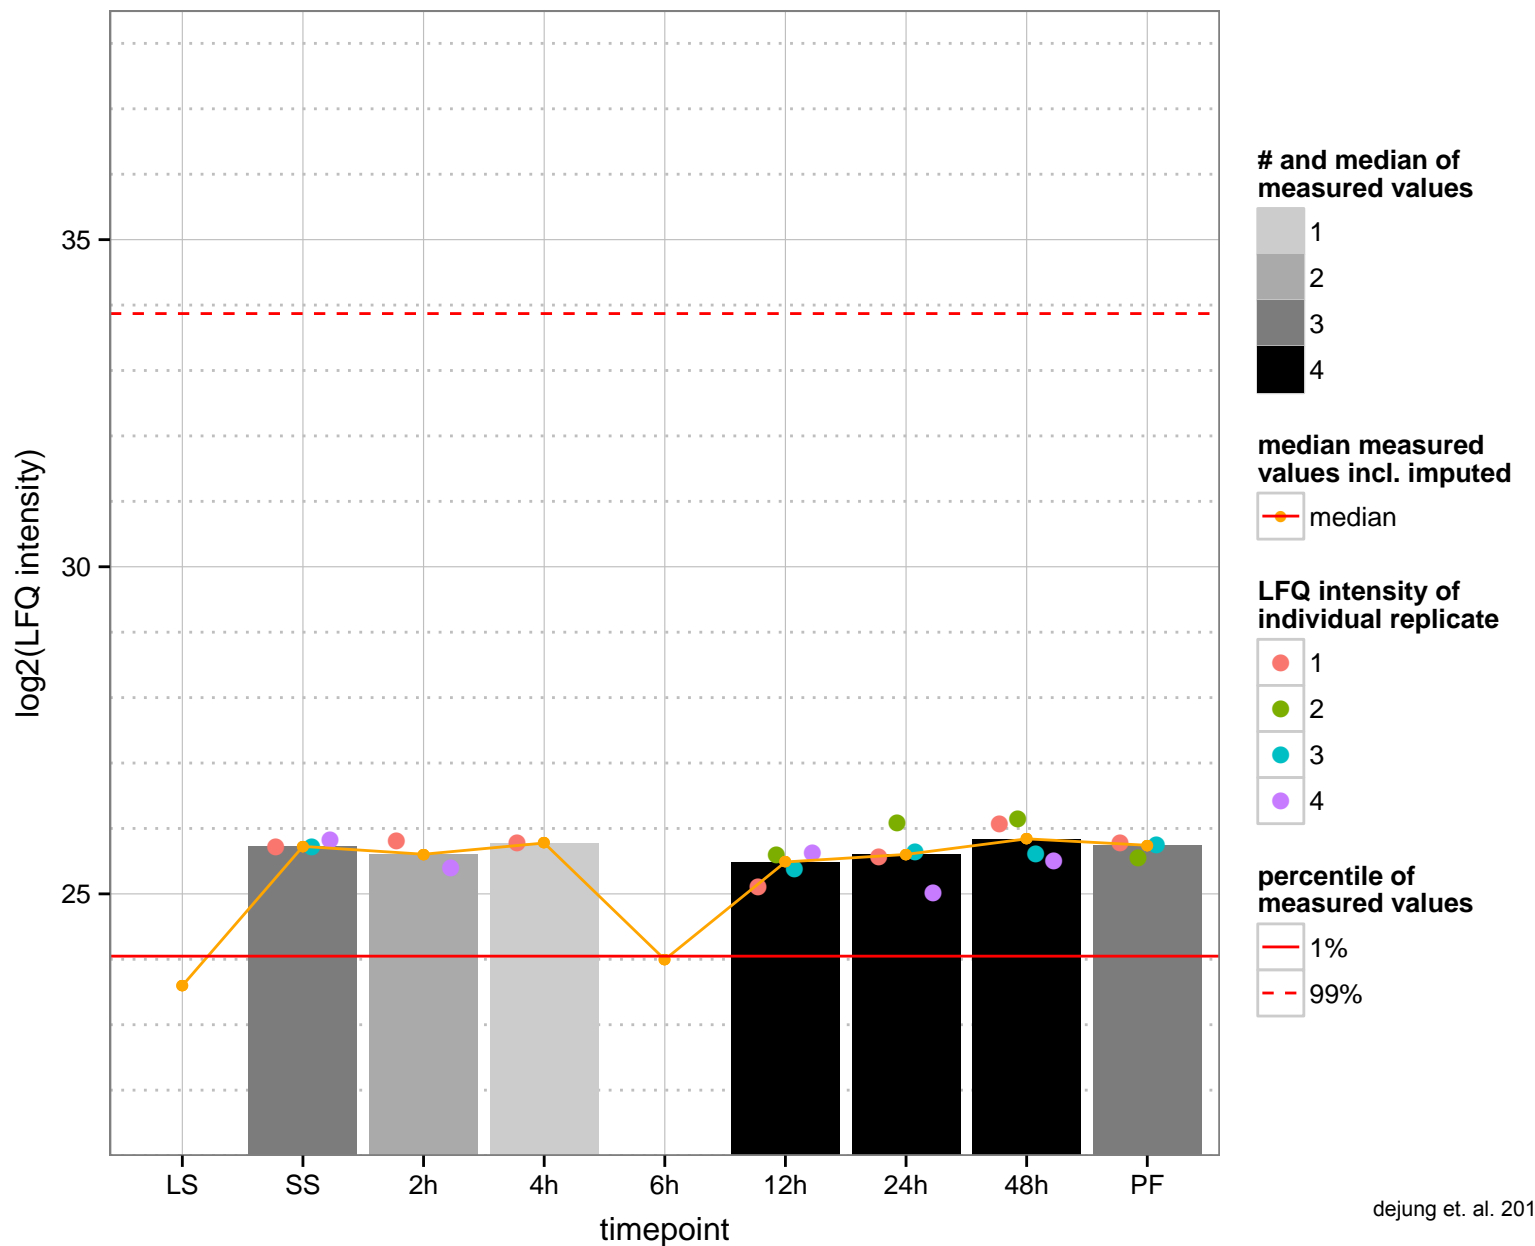

hypothetical protein, conserved  
 Tb927.2.2200  
 AGOF: null  
 AGOC: null  
 AGOP: null  
 PGO: null  
 PGOC: null  
 PGOP: null

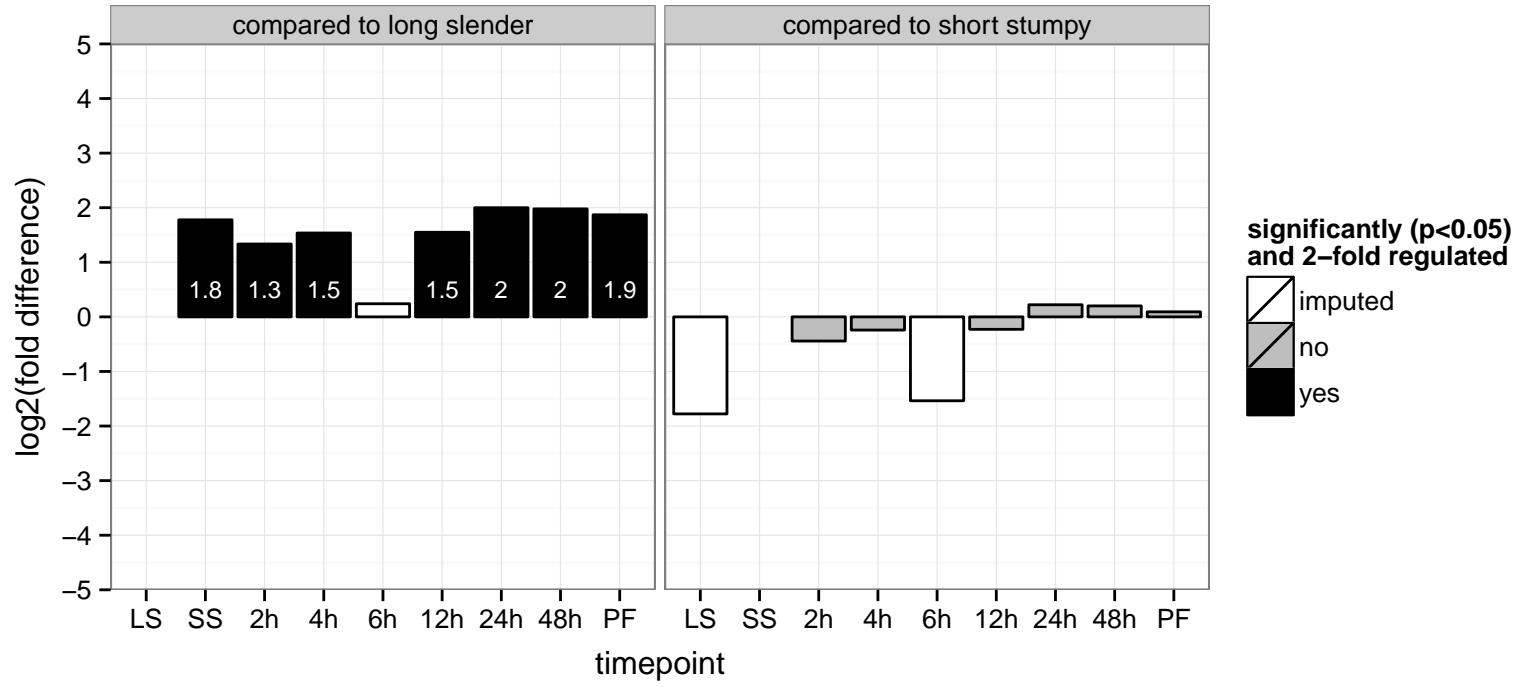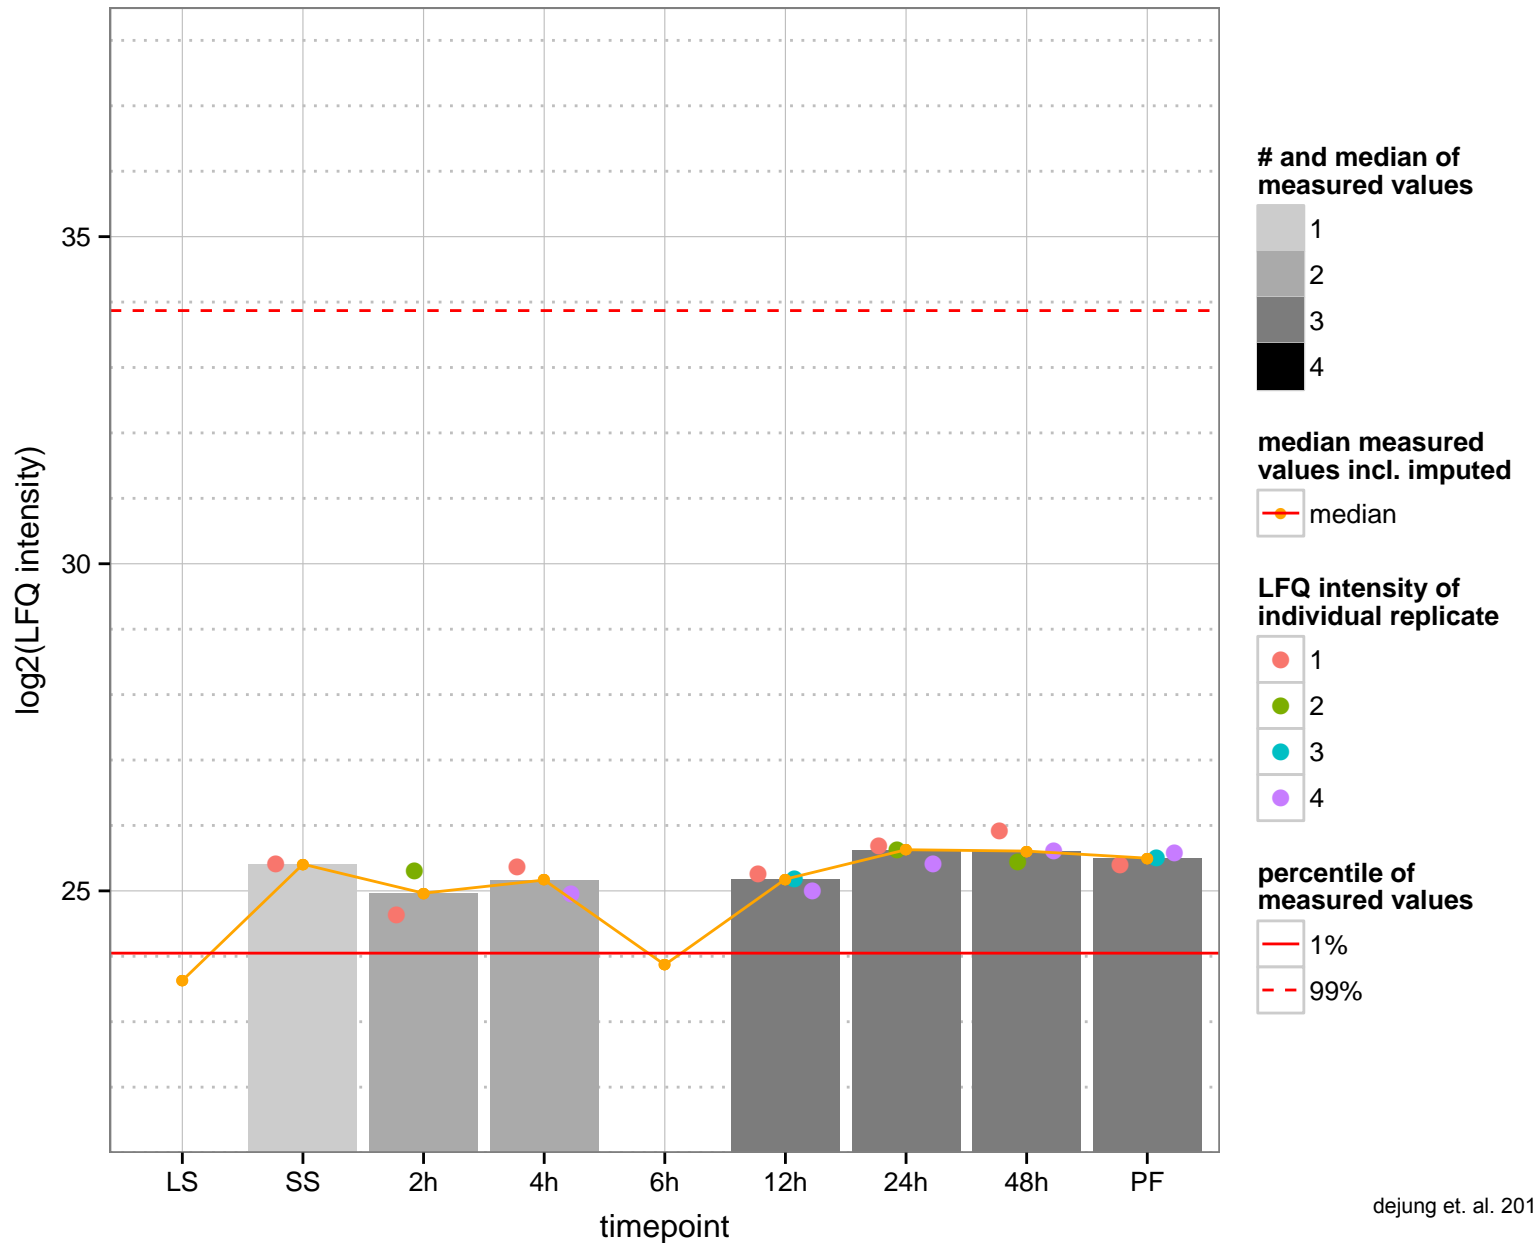

protein kinase, putative

Tb927.2.5230

AGOF: ATP binding, protein kinase activity, protein serine/threonine kinase activity, protein tyrosine kinase activity

AGOC: null

AGOP: protein phosphorylation

PGOF: ATP binding, protein kinase activity, transferase activity, transferring phosphorus-containing groups

PGOC: null

PGOP: protein phosphorylation

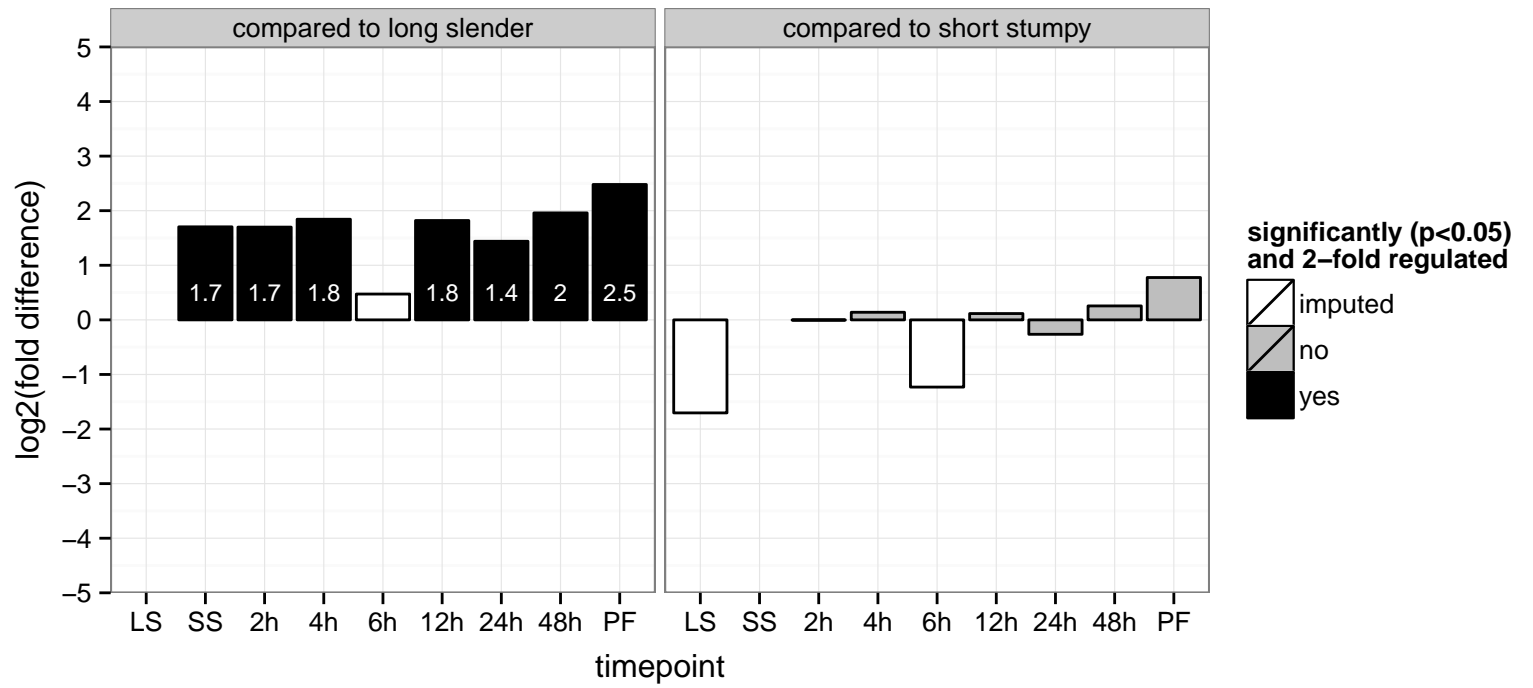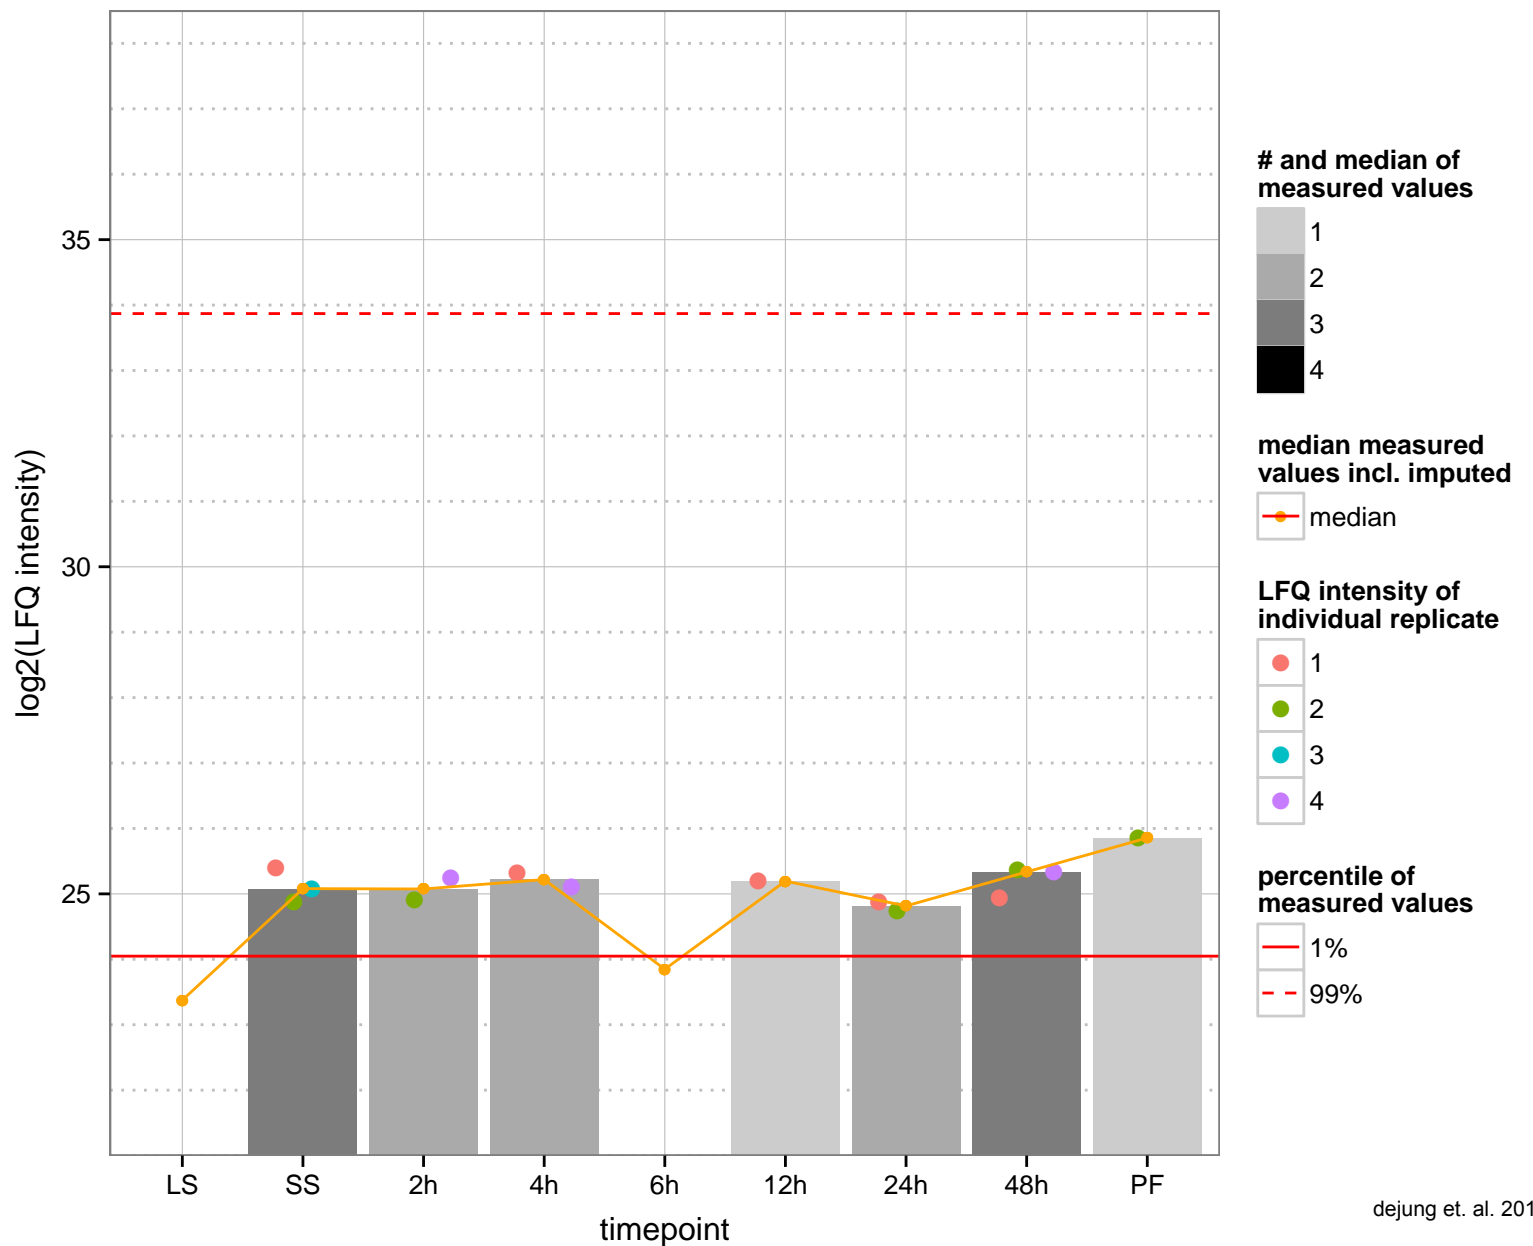

hypothetical protein, conserved  
 Tb927.3.2210  
 AGOF: null  
 AGOC: null  
 AGOP: null  
 PGOF: null  
 PGOE: null  
 PGOP: null

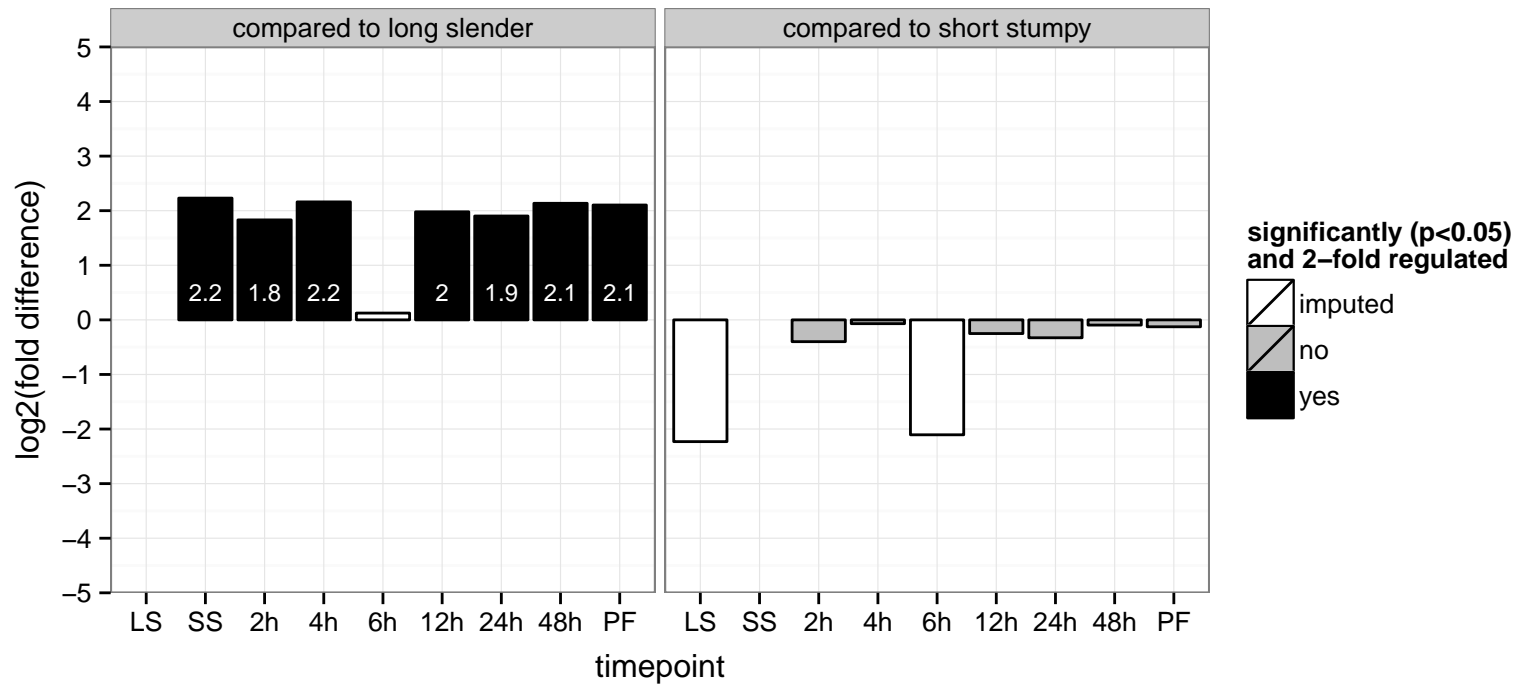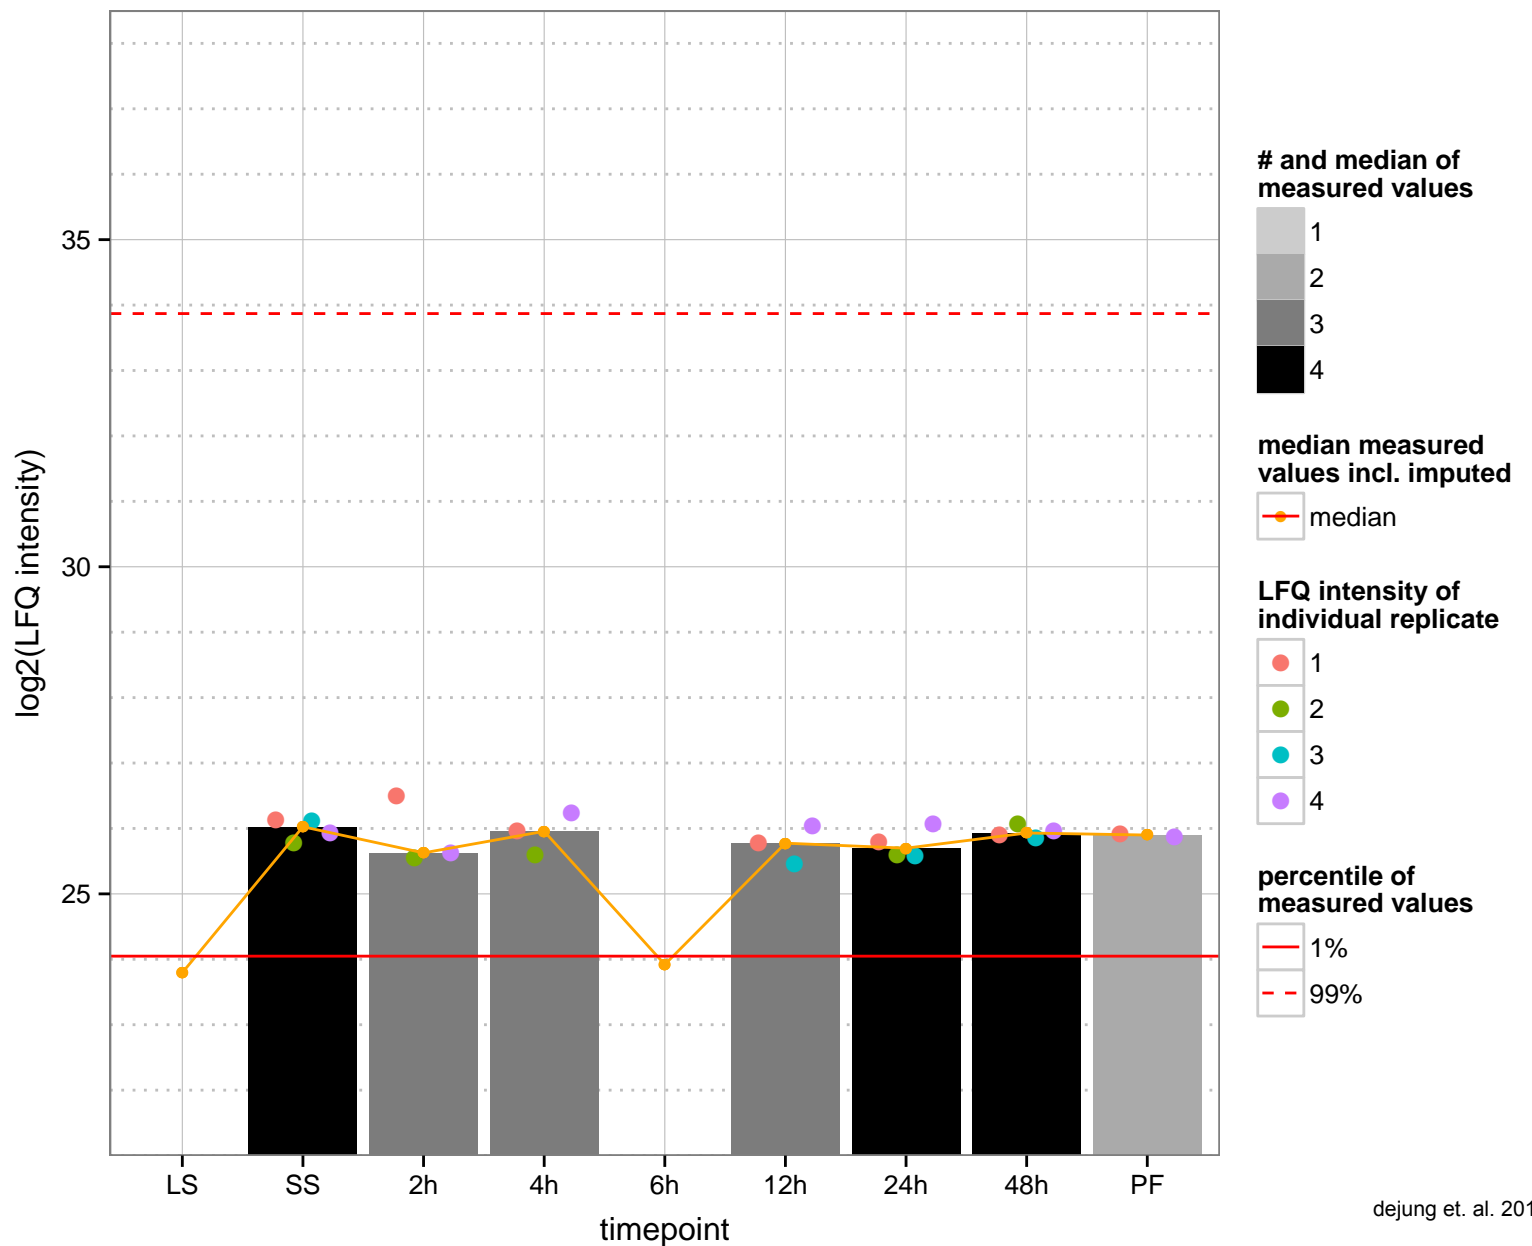

hypothetical protein, conserved  
 Tb927.3.5350  
 AGOF: null  
 AGOC: null  
 AGOP: null  
 PGO: null  
 PGO: null  
 PGO: null

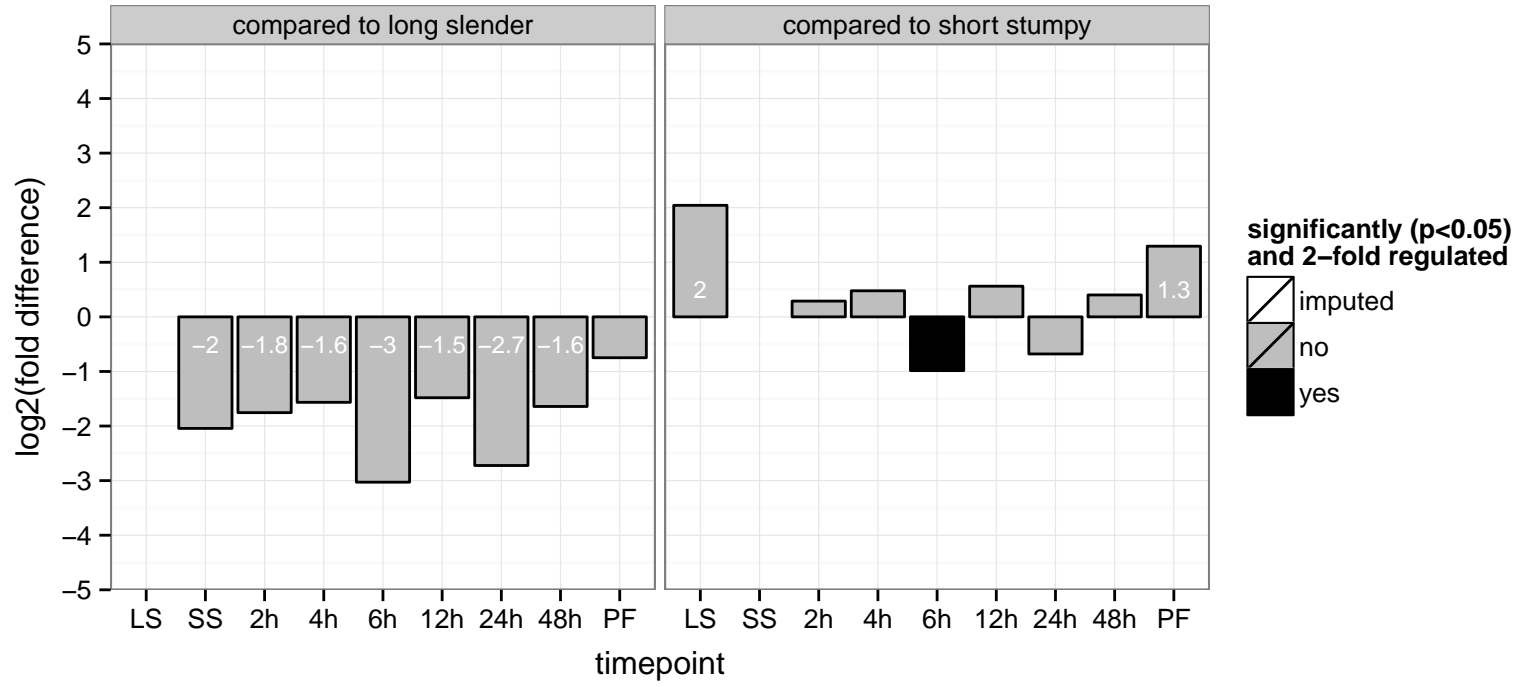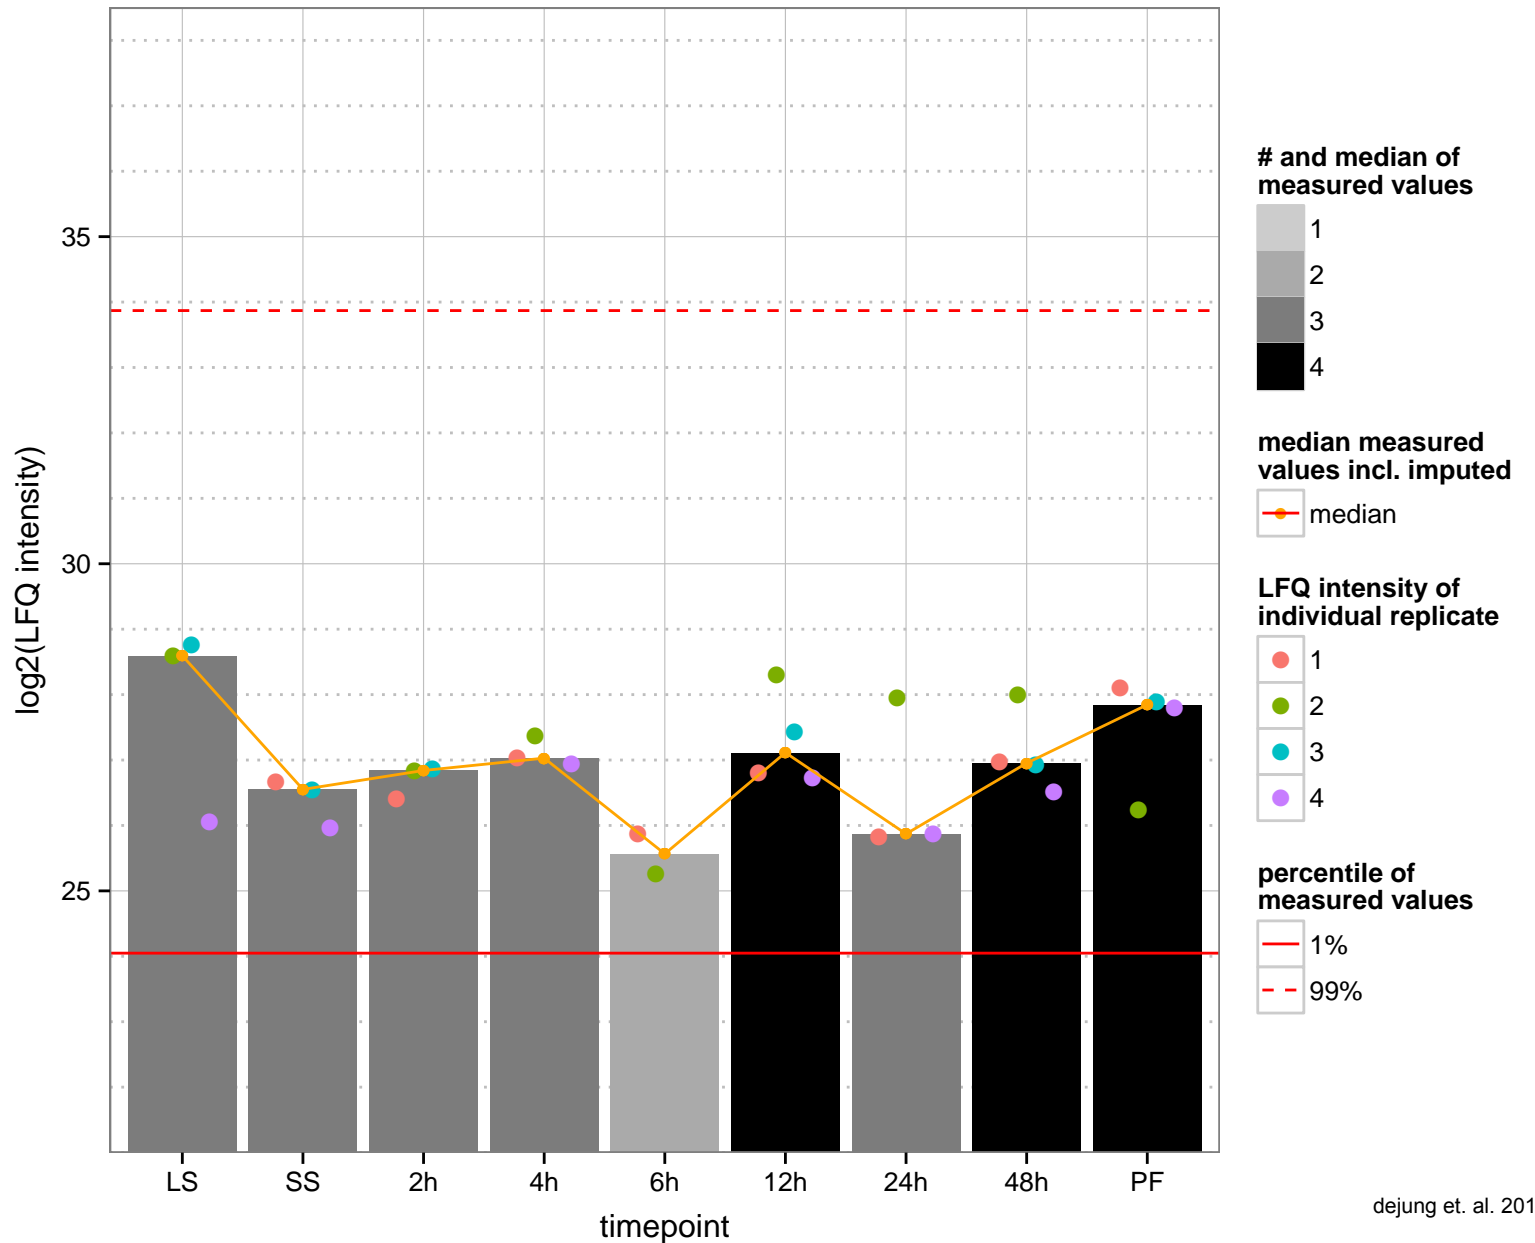

hypothetical protein, conserved  
 Tb927.4.4560  
 AGOF: null  
 AGOC: null  
 AGOP: null  
 PGOF: null  
 PGO: null  
 PGOP: null

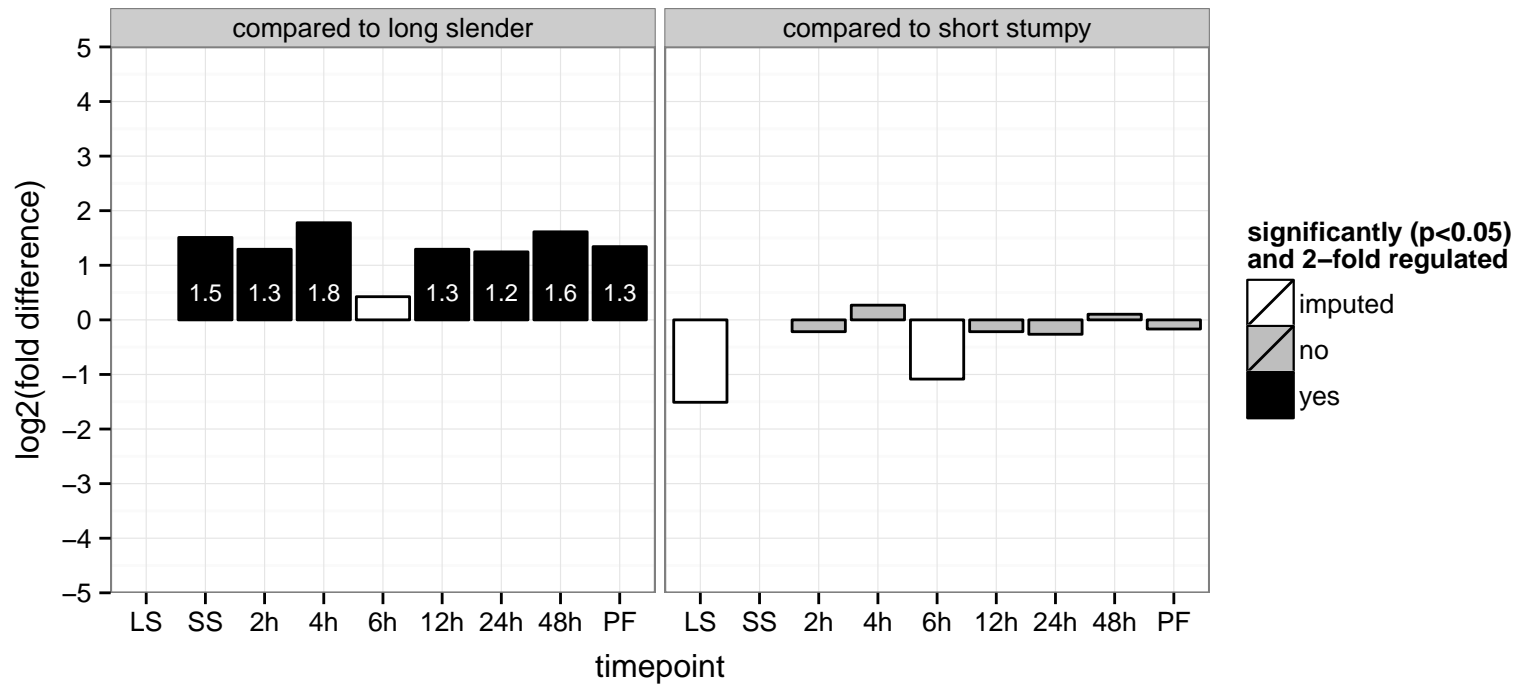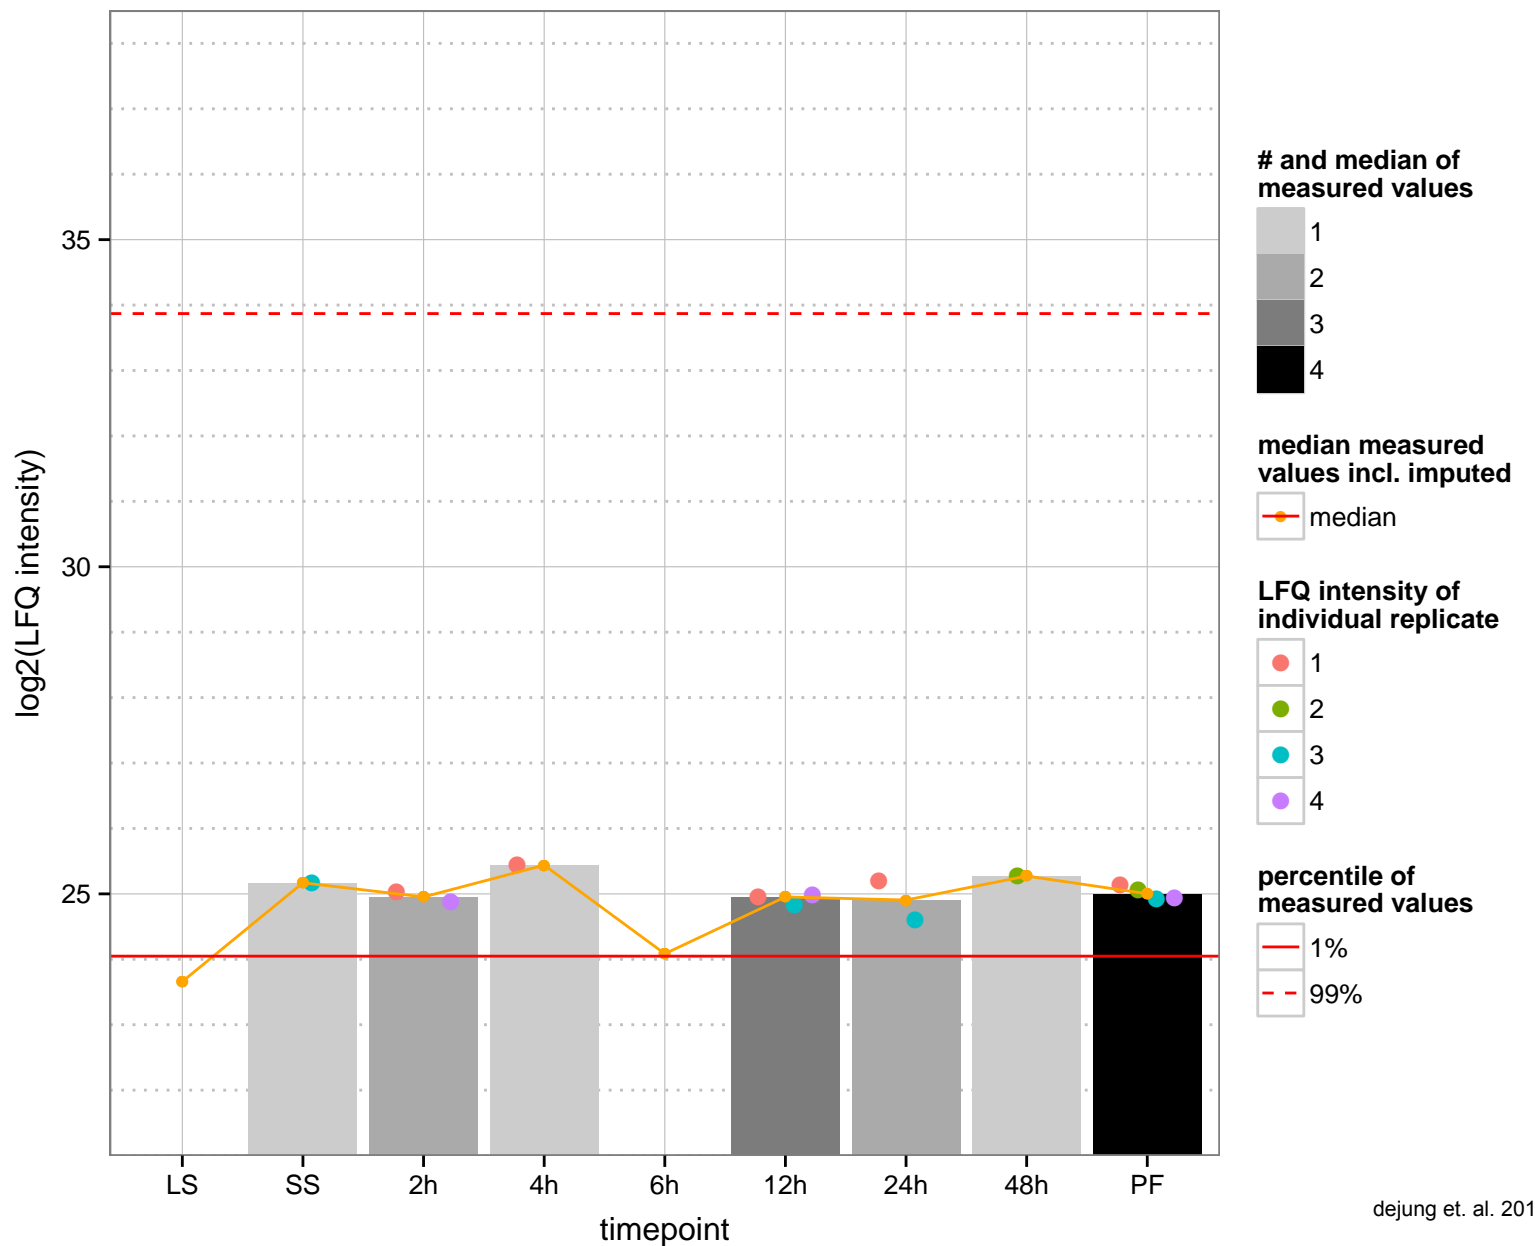

hypothetical protein, conserved  
 Tb927.5.1940  
 AGOF: null  
 AGOC: mitochondrion  
 AGOP: null  
 PGO: null  
 PGOC: null  
 PGOP: null

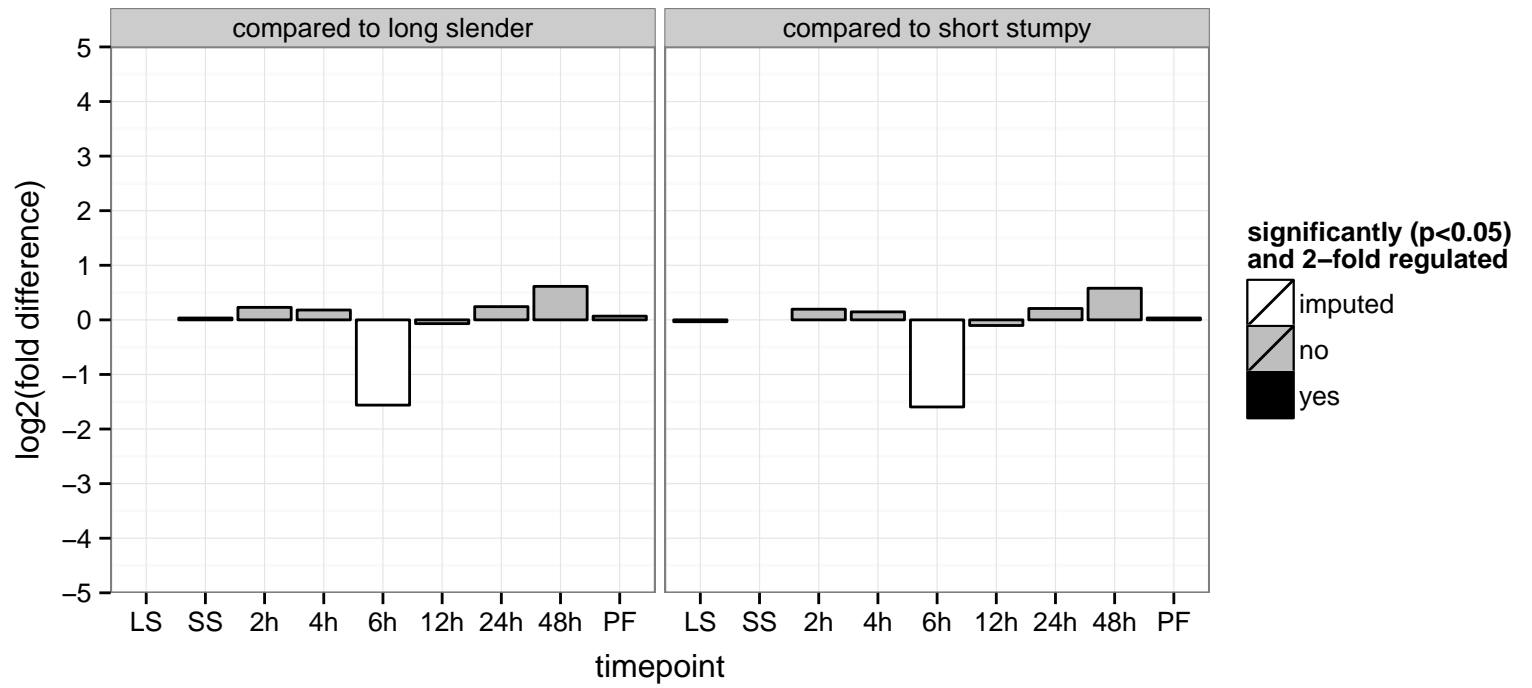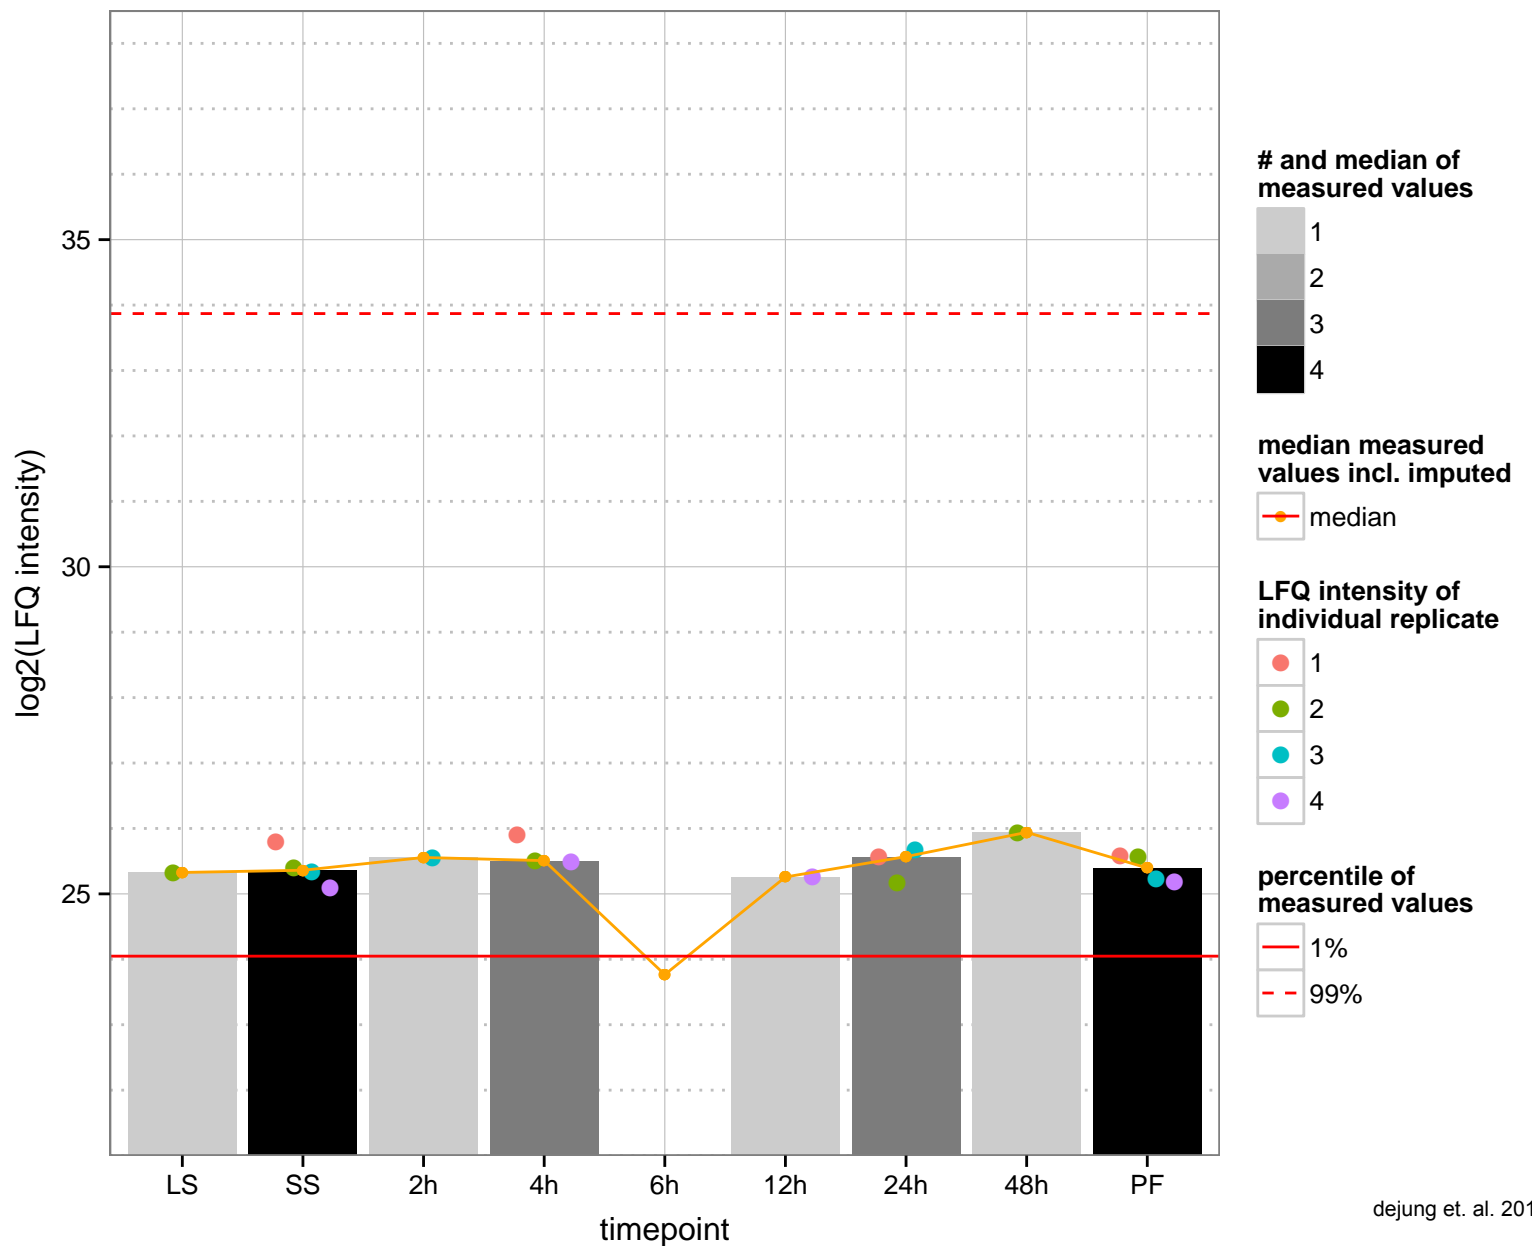

hypothetical protein, conserved  
 Tb927.6.1590  
 AGOF: null  
 AGOC: mitochondrion  
 AGOP: null  
 PGO: null  
 PGOC: null  
 PGOP: null

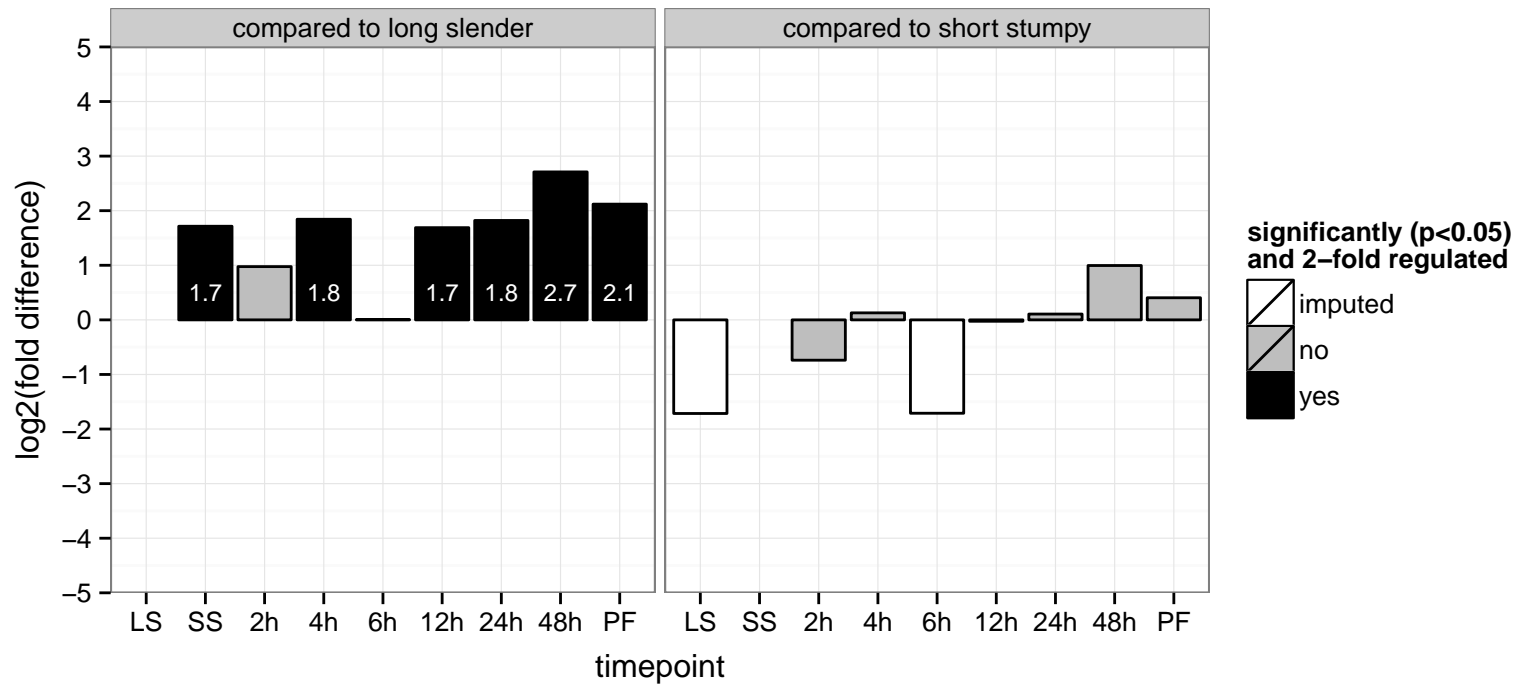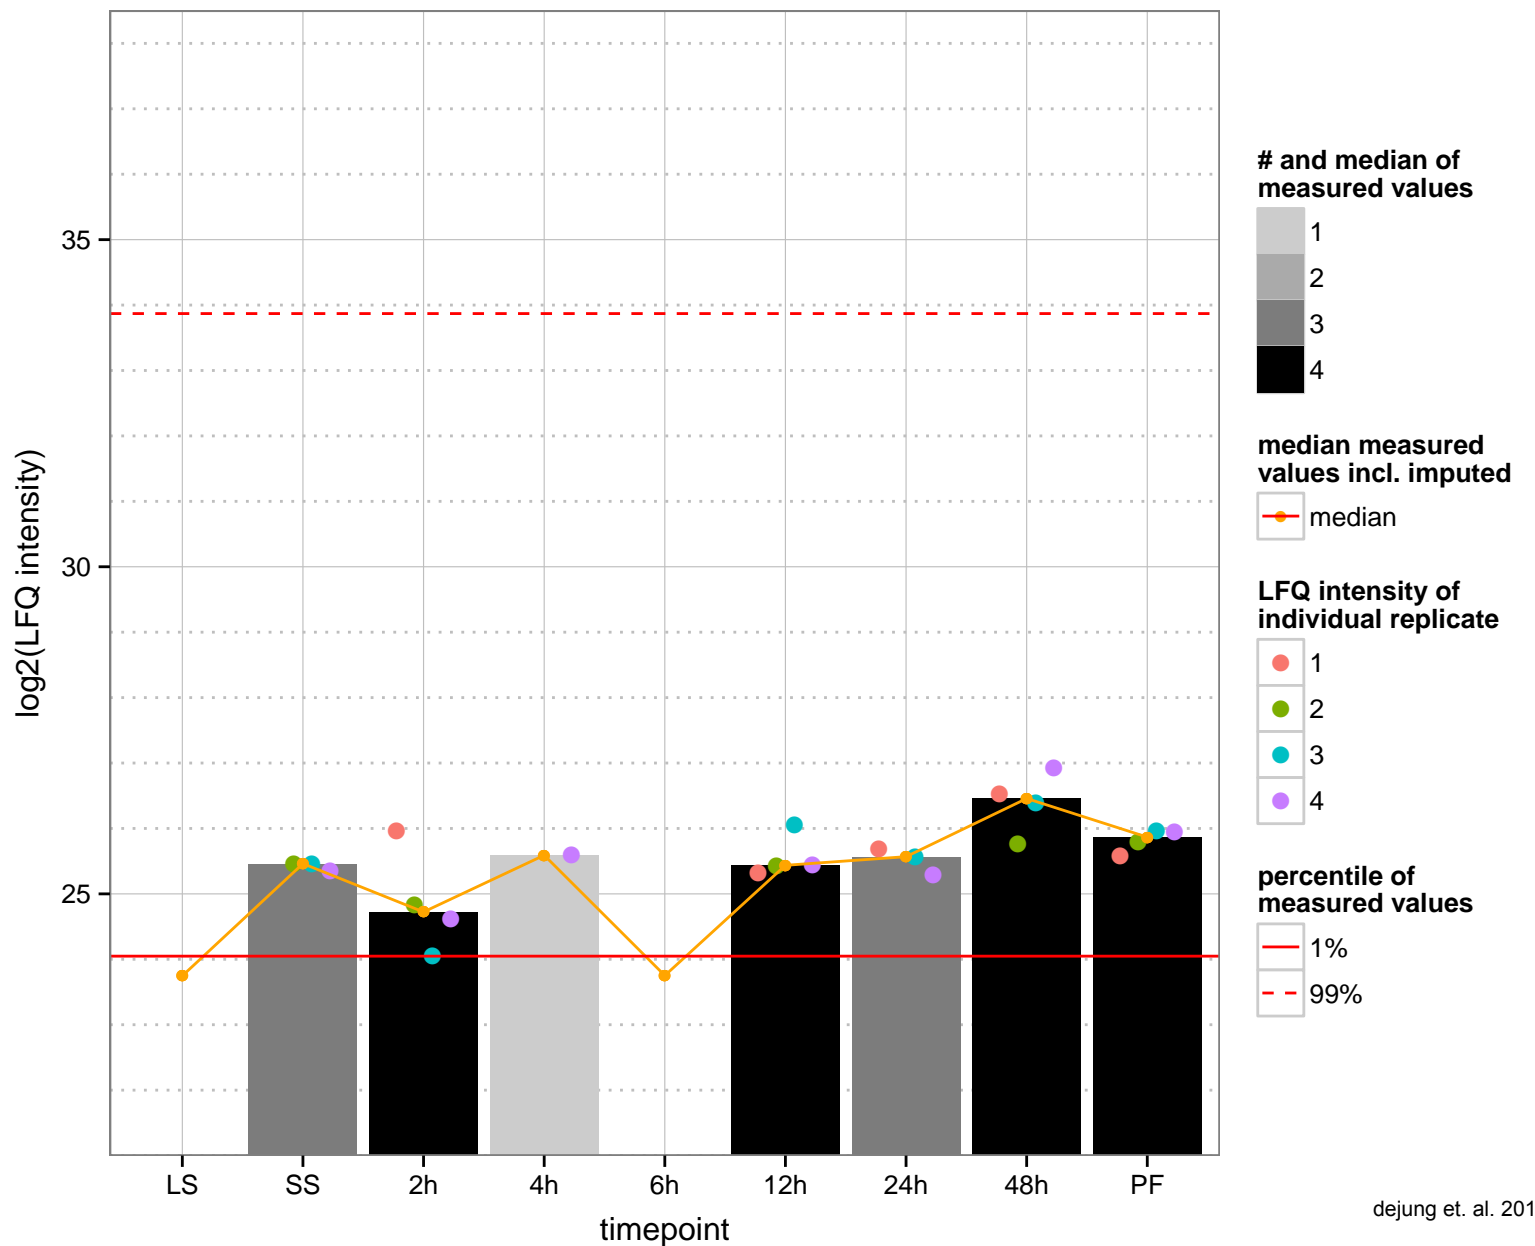



mitochondrial RNA binding protein 1 (MRB1680)

Tb927.6.1680

AGOF: zinc ion binding

AGOC: intracellular, mitochondrion

AGOP: RNA processing

PGOF: zinc ion binding

PGOC: intracellular

PGOP: null

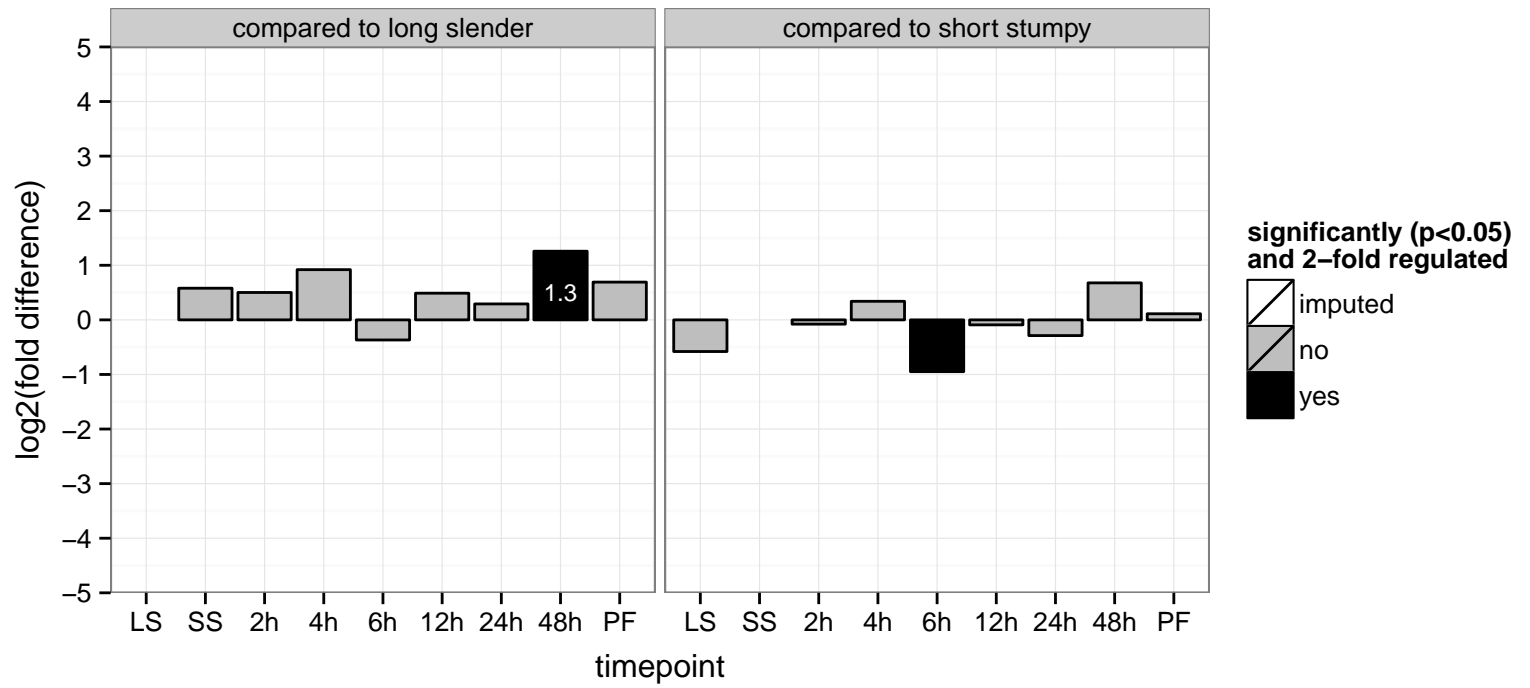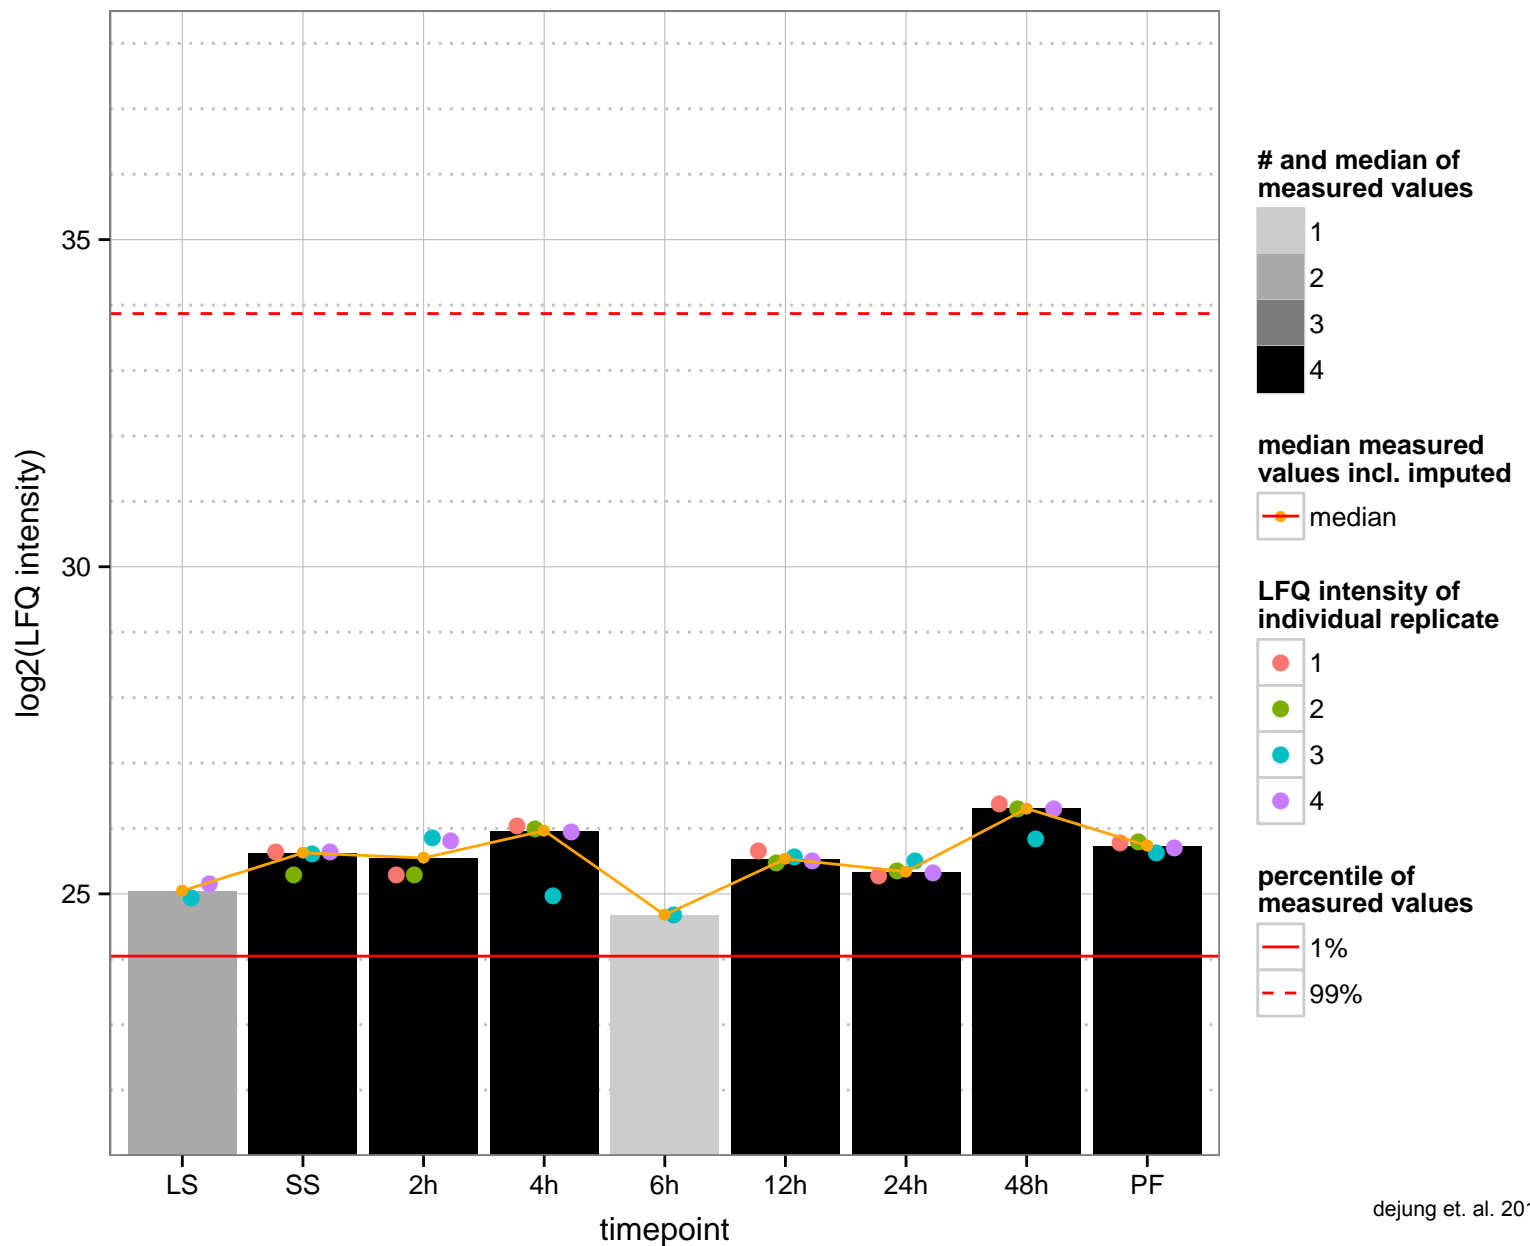

prozyme, S-adenosylmethionine decarboxylaseregulator  
 Tb927.6.4470  
 AGOF: adenosylmethionine decarboxylase activity  
 AGOC: null  
 AGOP: spermidine biosynthetic process, spermine biosynthetic process  
 PGO: adenosylmethionine decarboxylase activity  
 PGOC: null  
 PGOP: spermidine biosynthetic process, spermine biosynthetic process

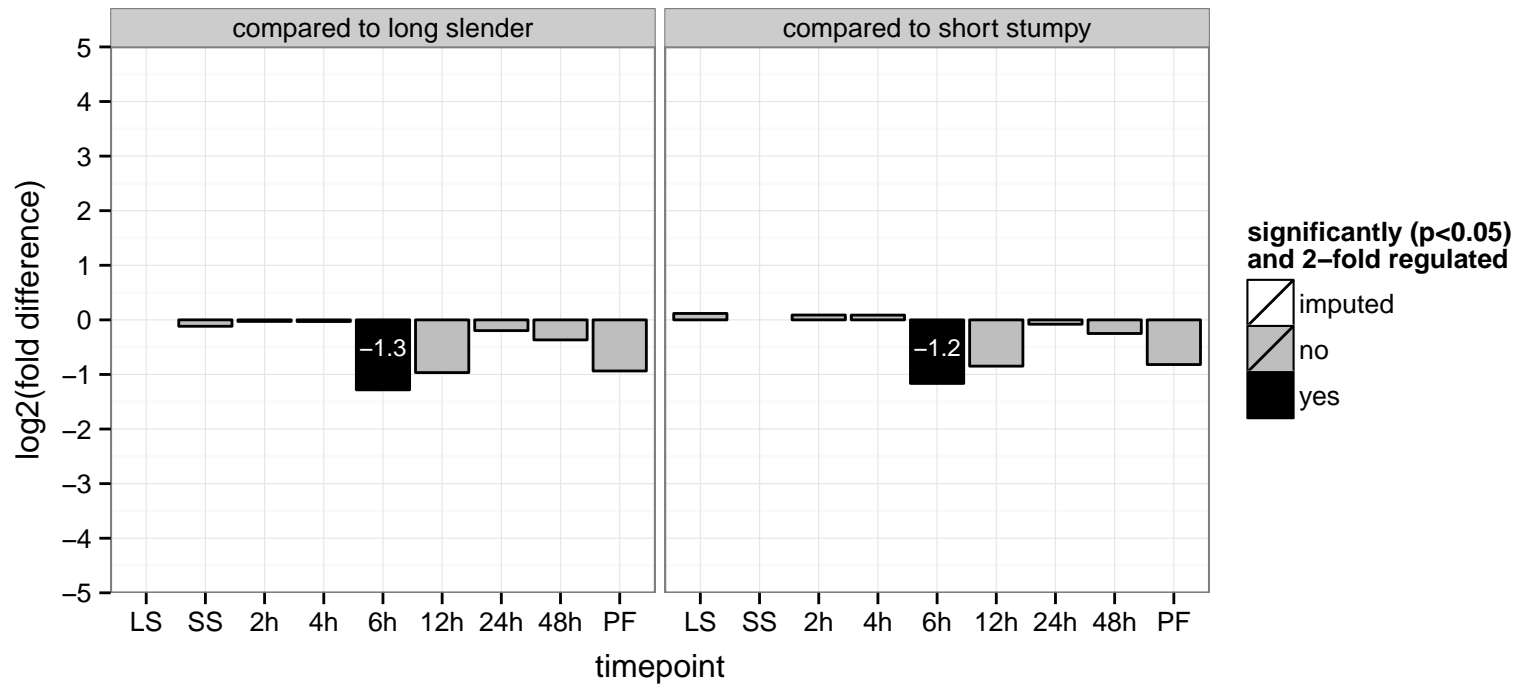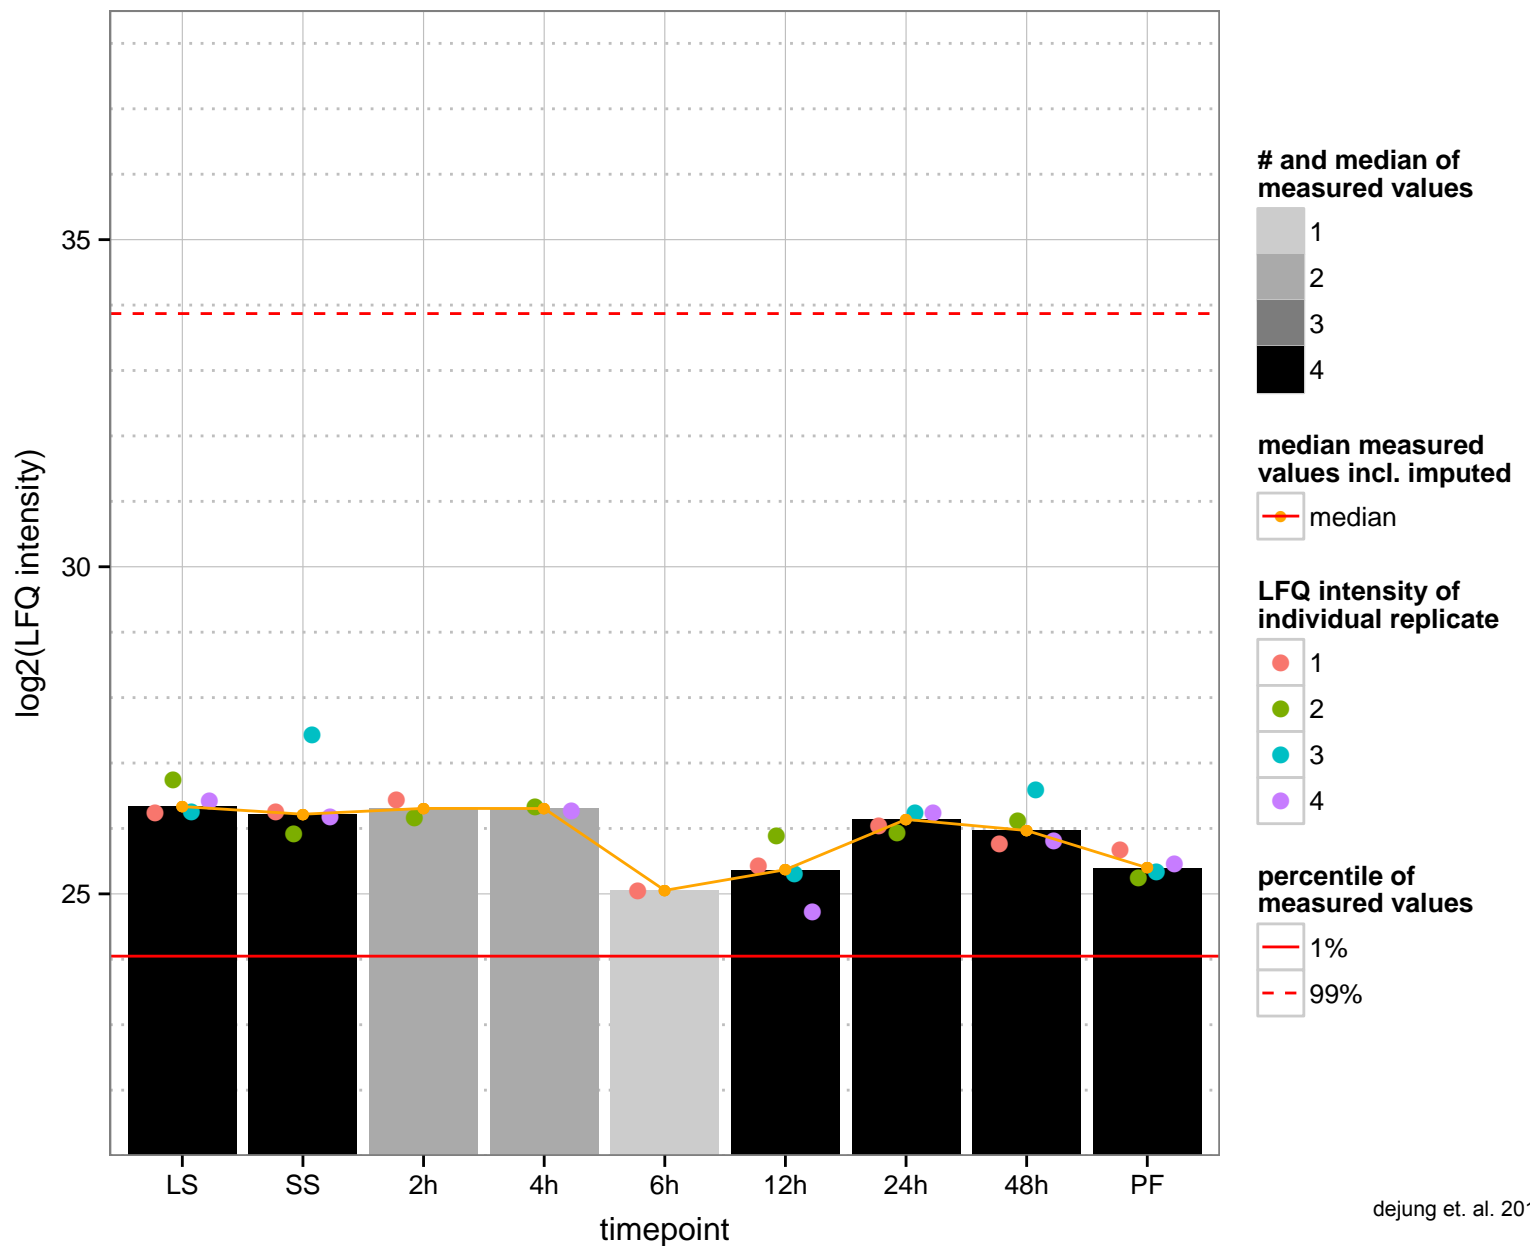

RNA-binding protein, putative (Y14)  
 Tb927.7.1170  
 AGOF: RNA binding, protein binding  
 AGOC: exon-exon junction complex, nucleus  
 AGOP: RNA processing  
 PGO: nucleic acid binding  
 PGO: null  
 PGO: null

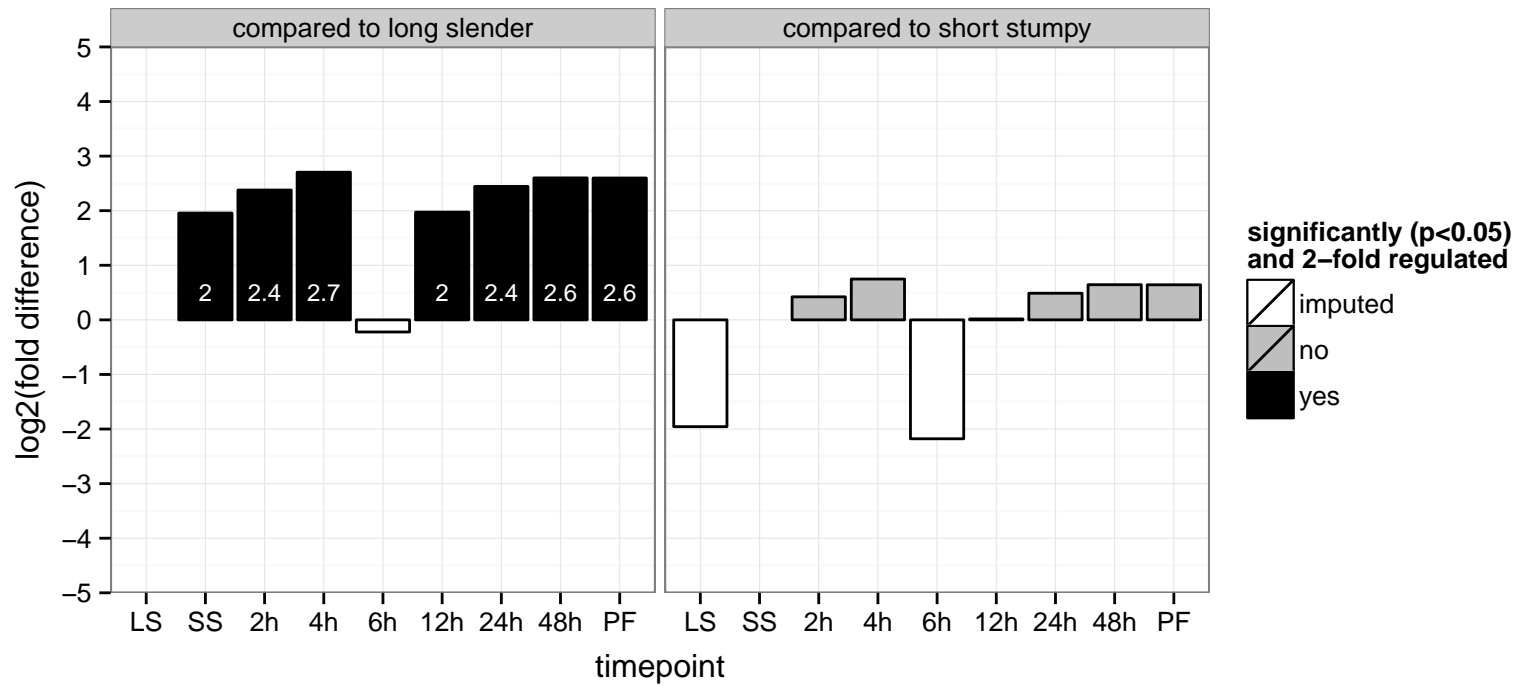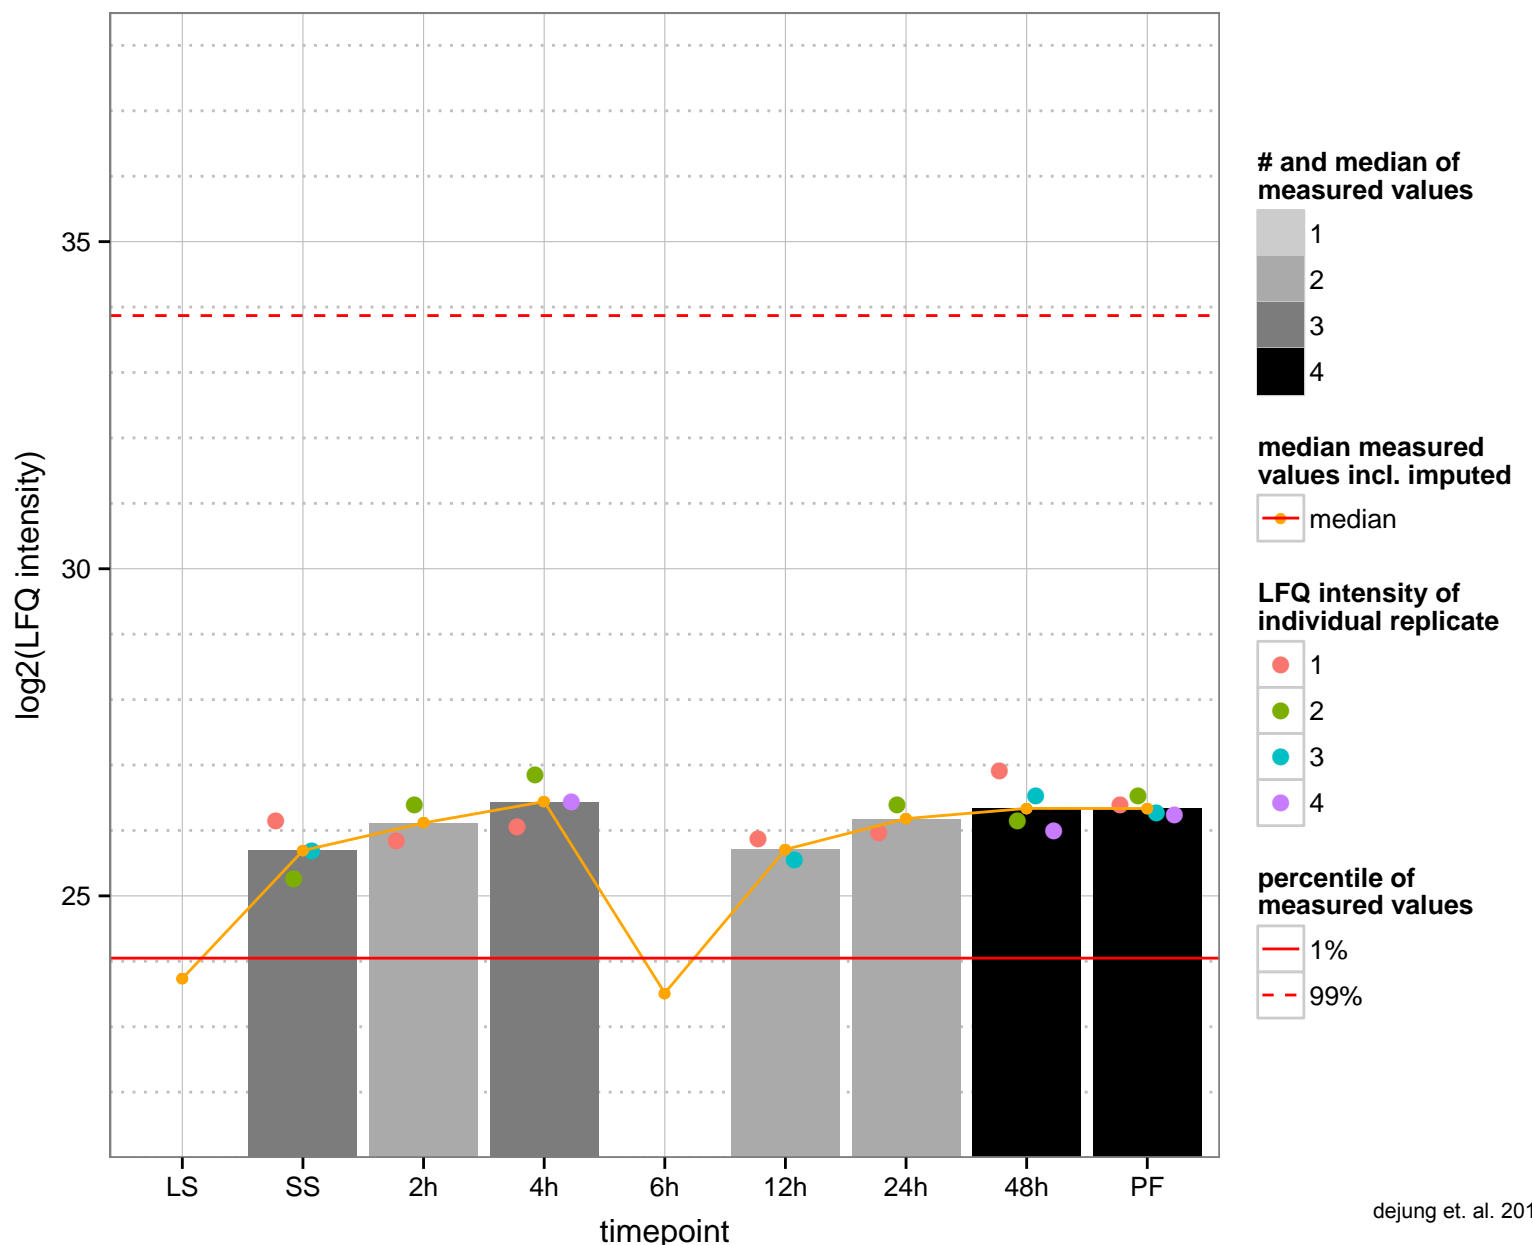

zinc finger protein family member, putative (ZC3H21)  
 Tb927.7.2670  
 AGOF: RNA binding  
 AGOC: null  
 AGOP: null  
 PGOF: nucleic acid binding, zinc ion binding  
 PGO: null  
 PGOP: null

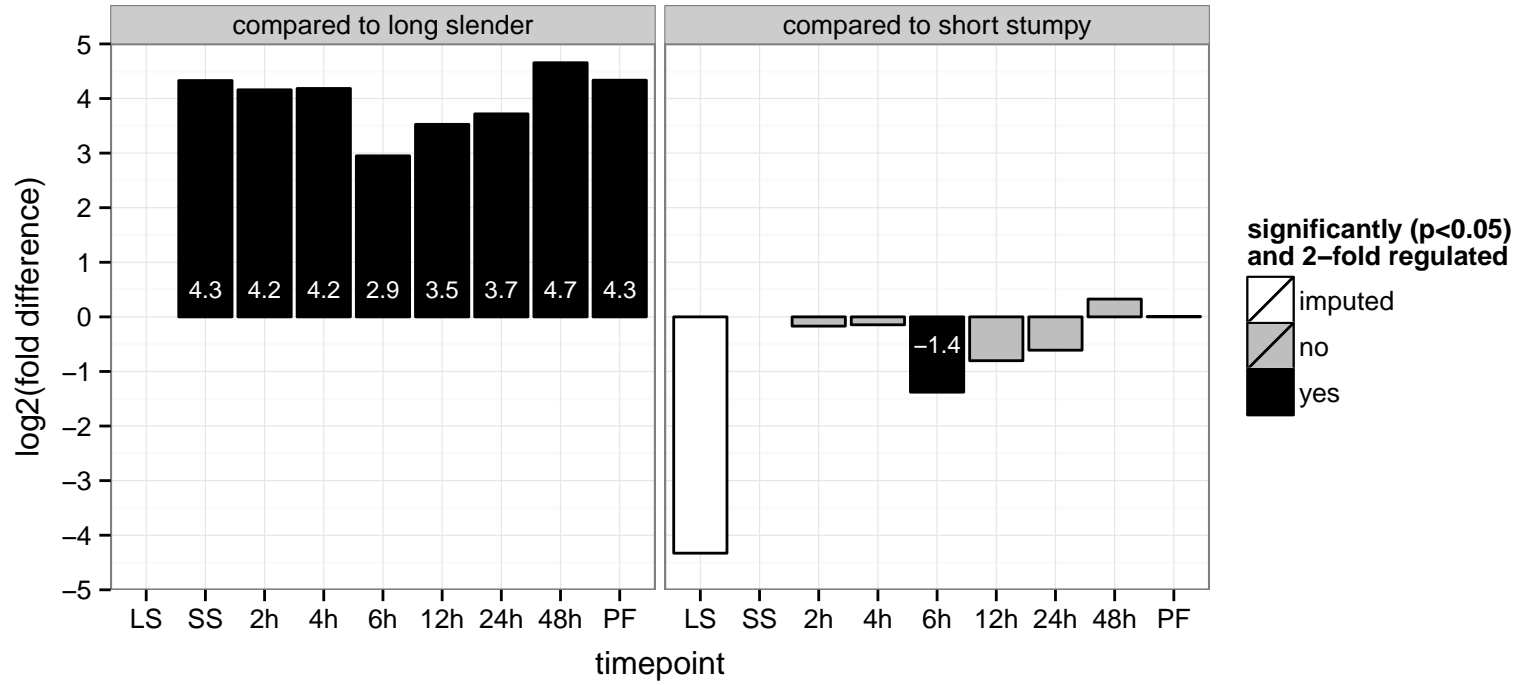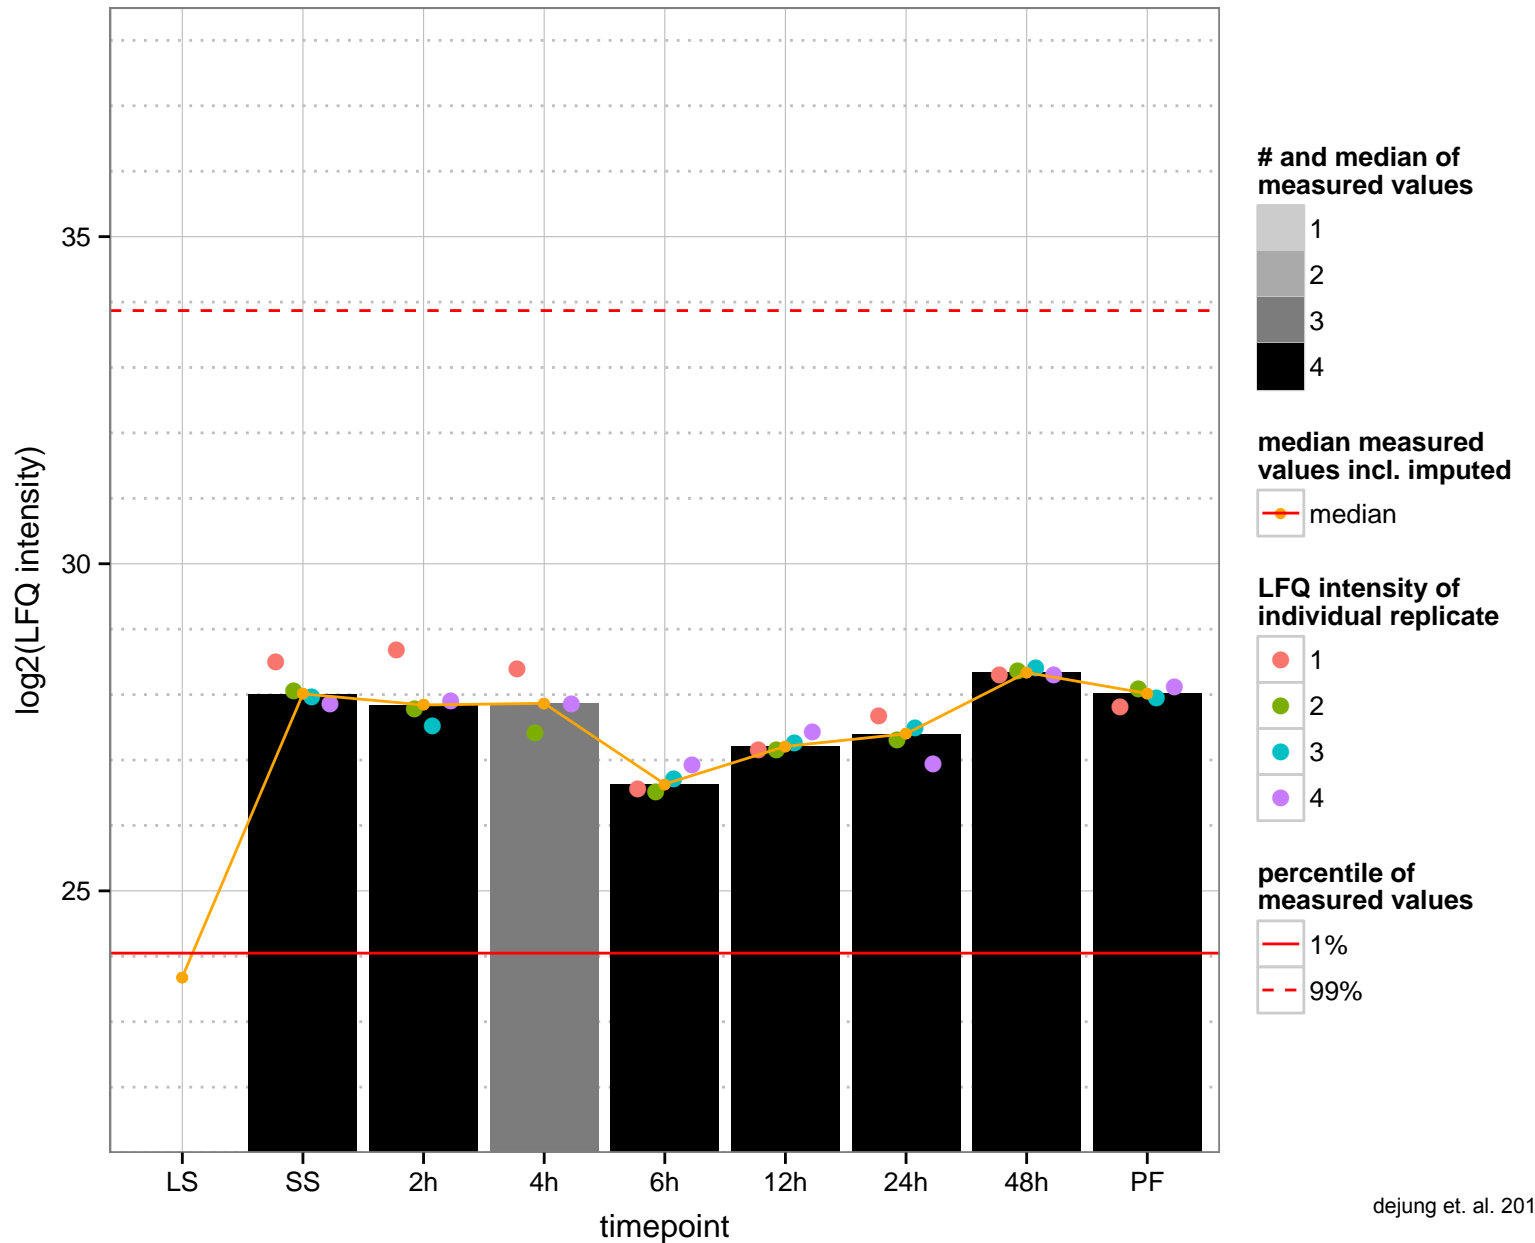

hypothetical protein, conserved  
 Tb927.8.1770  
 AGOF: null  
 AGOC: mitochondrion  
 AGOP: null  
 PGO: null  
 PGO: null  
 PGO: null

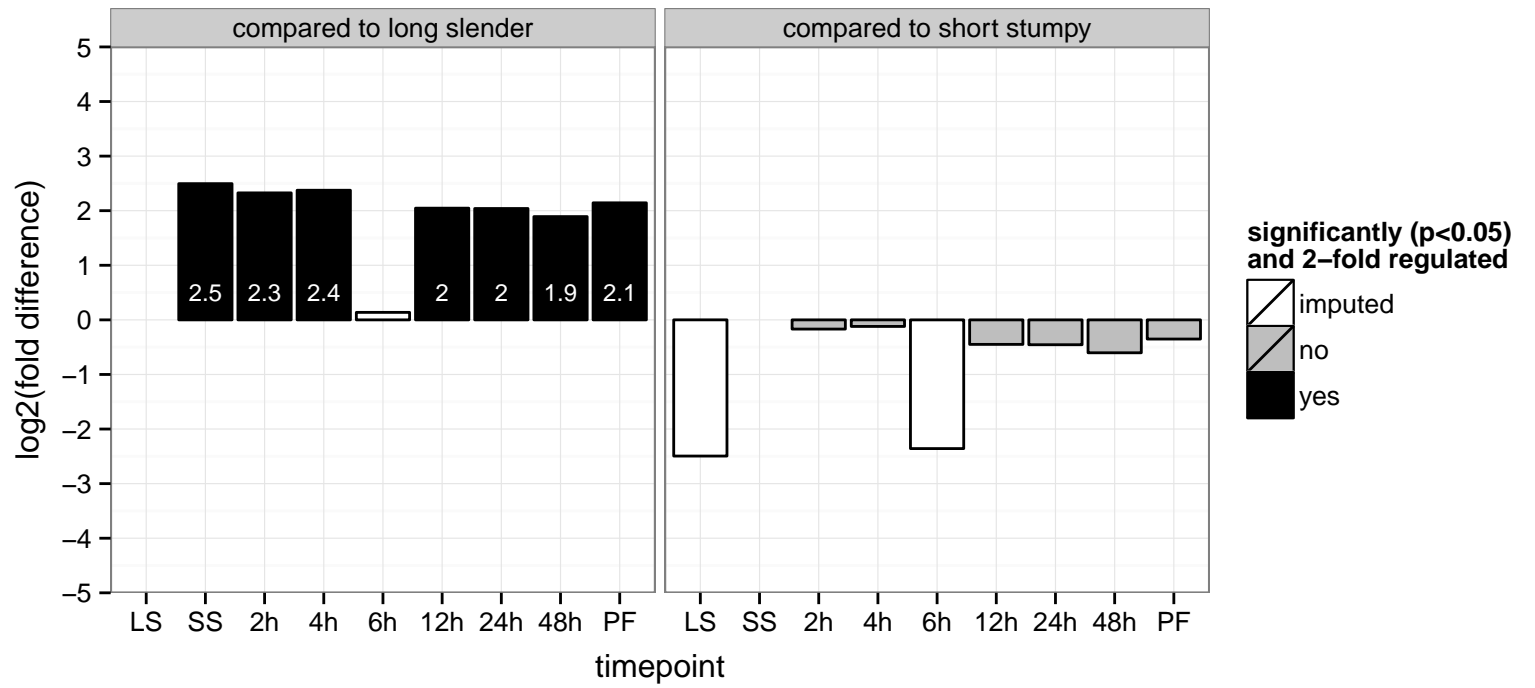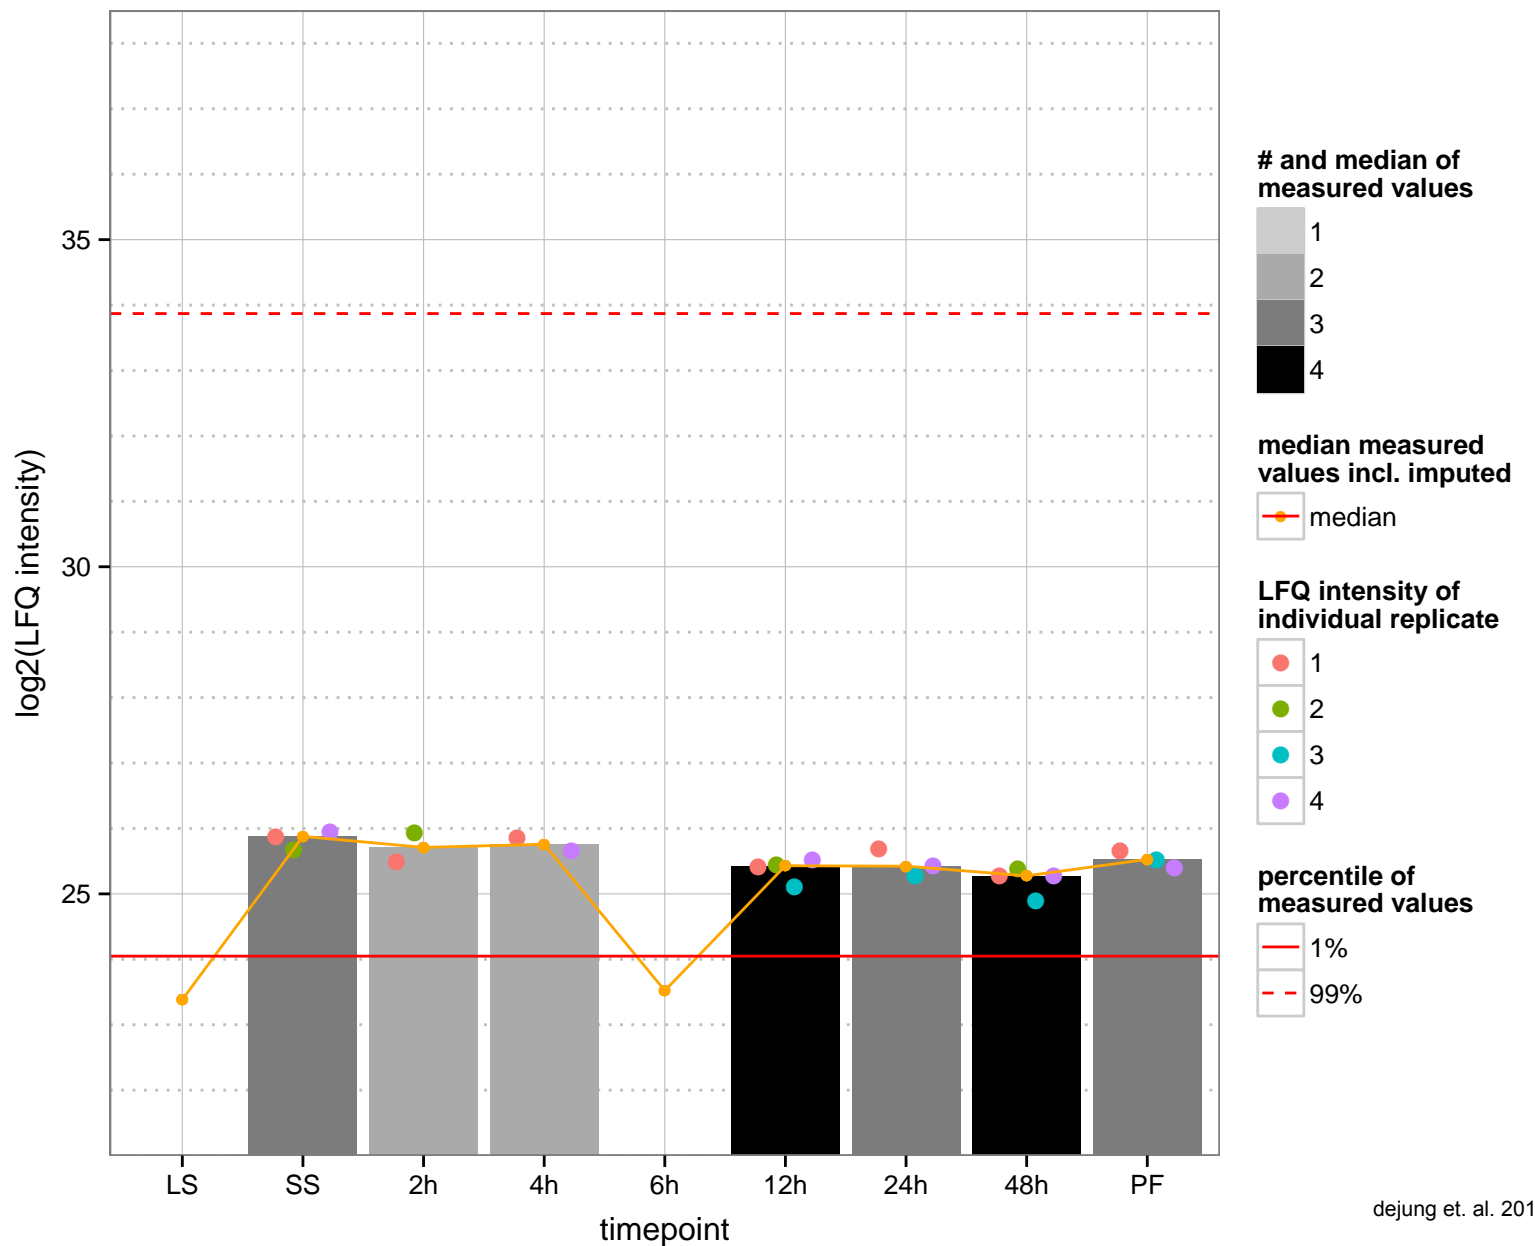

cullin, putative  
 Tb927.8.5970  
 AGOF: ubiquitin protein ligase binding  
 AGOC: cullin-RING ubiquitin ligase complex  
 AGOP: cell cycle, ubiquitin-dependent protein catabolic process  
 PGO: ubiquitin protein ligase binding  
 PGO: cullin-RING ubiquitin ligase complex  
 PGO: ubiquitin-dependent protein catabolic process

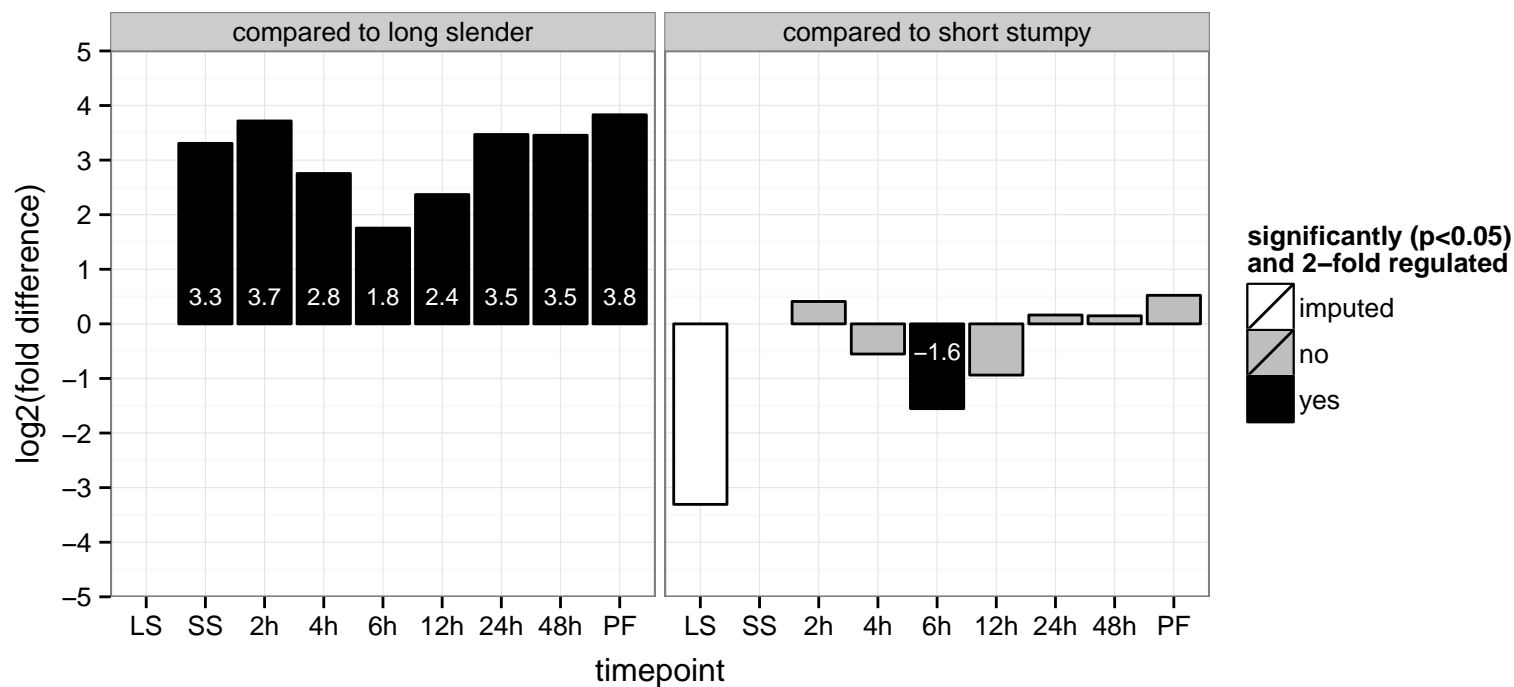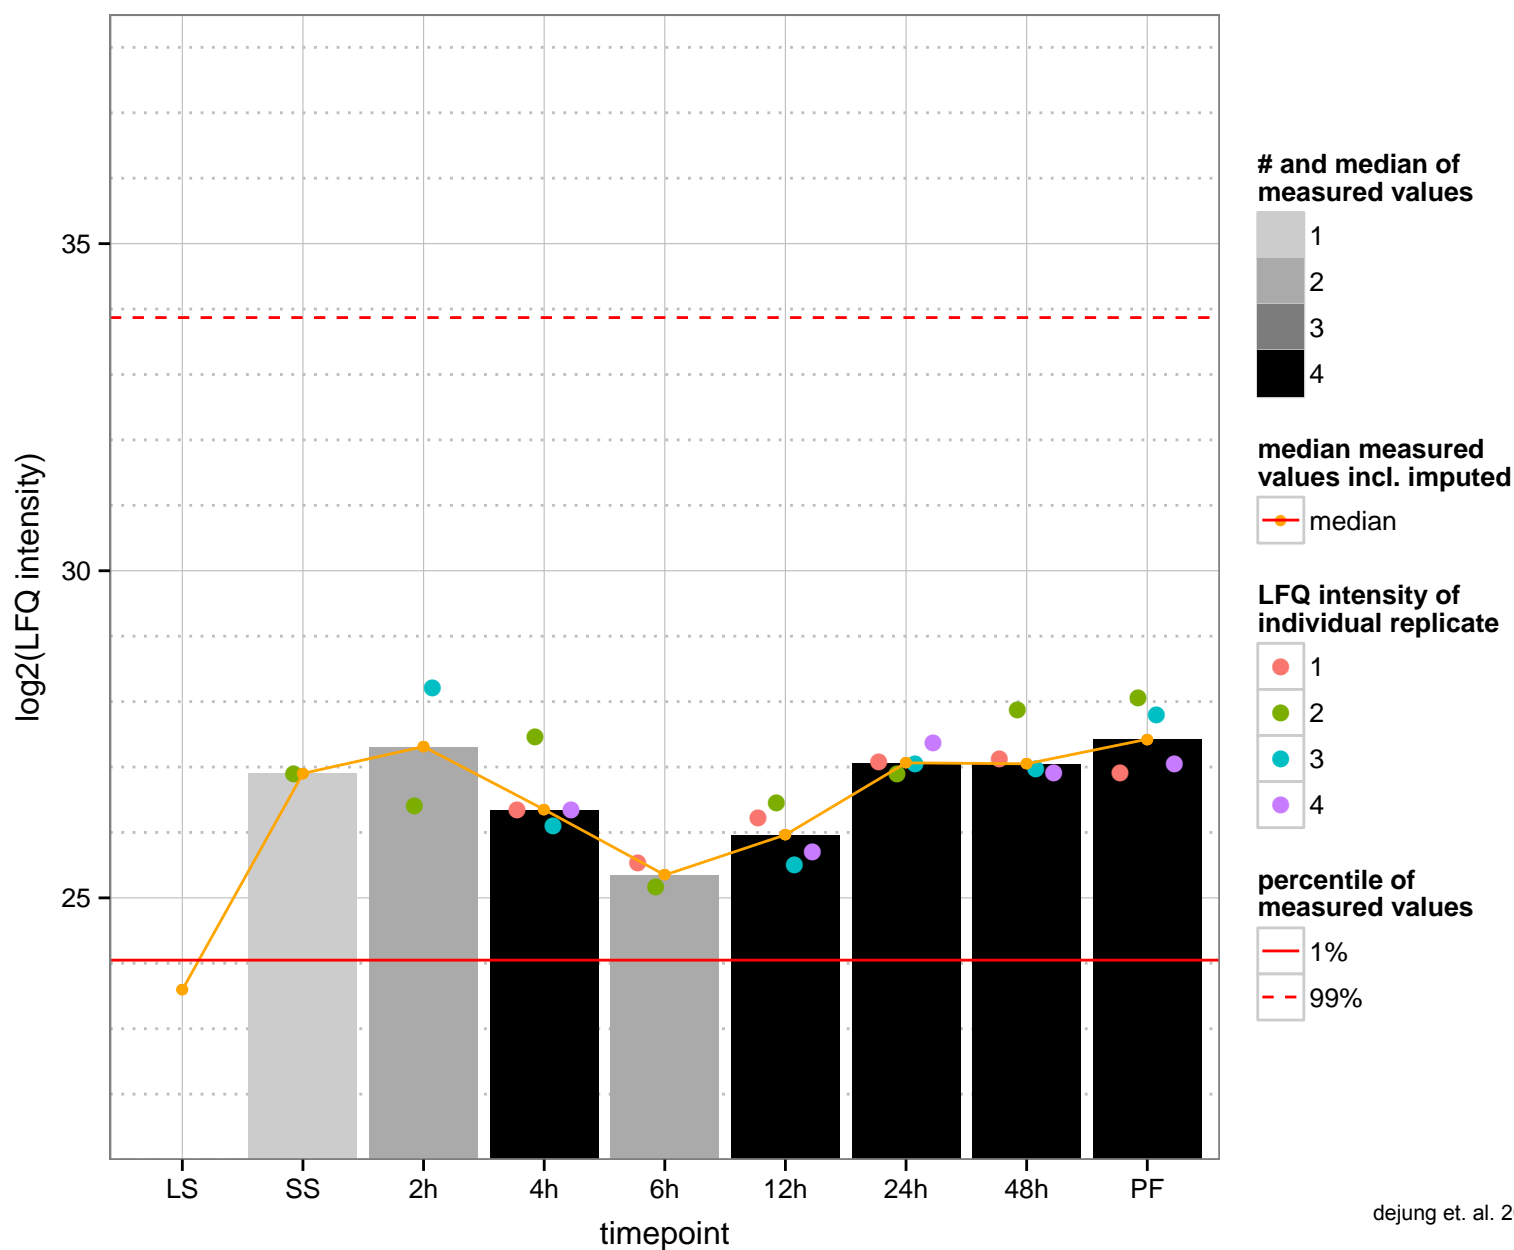

hypothetical protein, conserved  
 Tb927.8.6050  
 AGOF: null  
 AGOC: null  
 AGOP: null  
 PGOF: null  
 PGO: null  
 PGOP: null

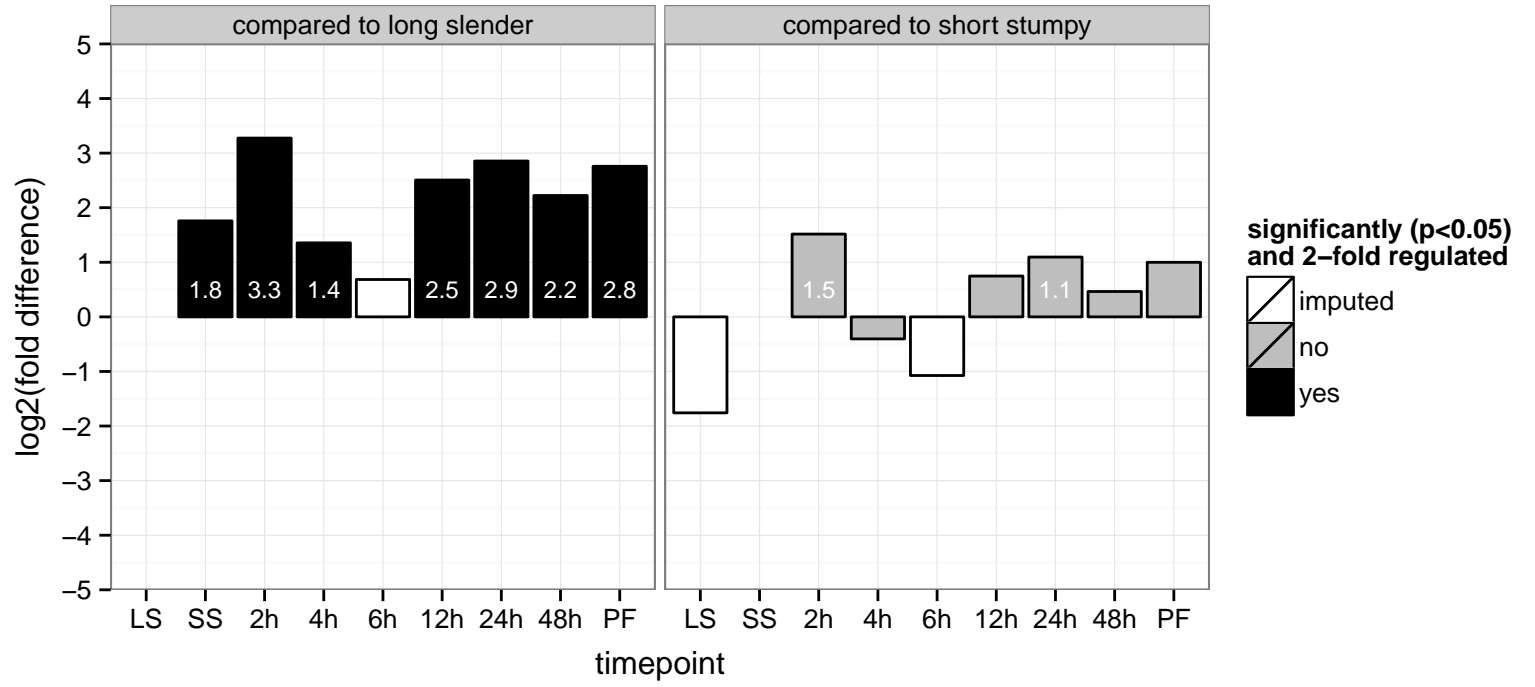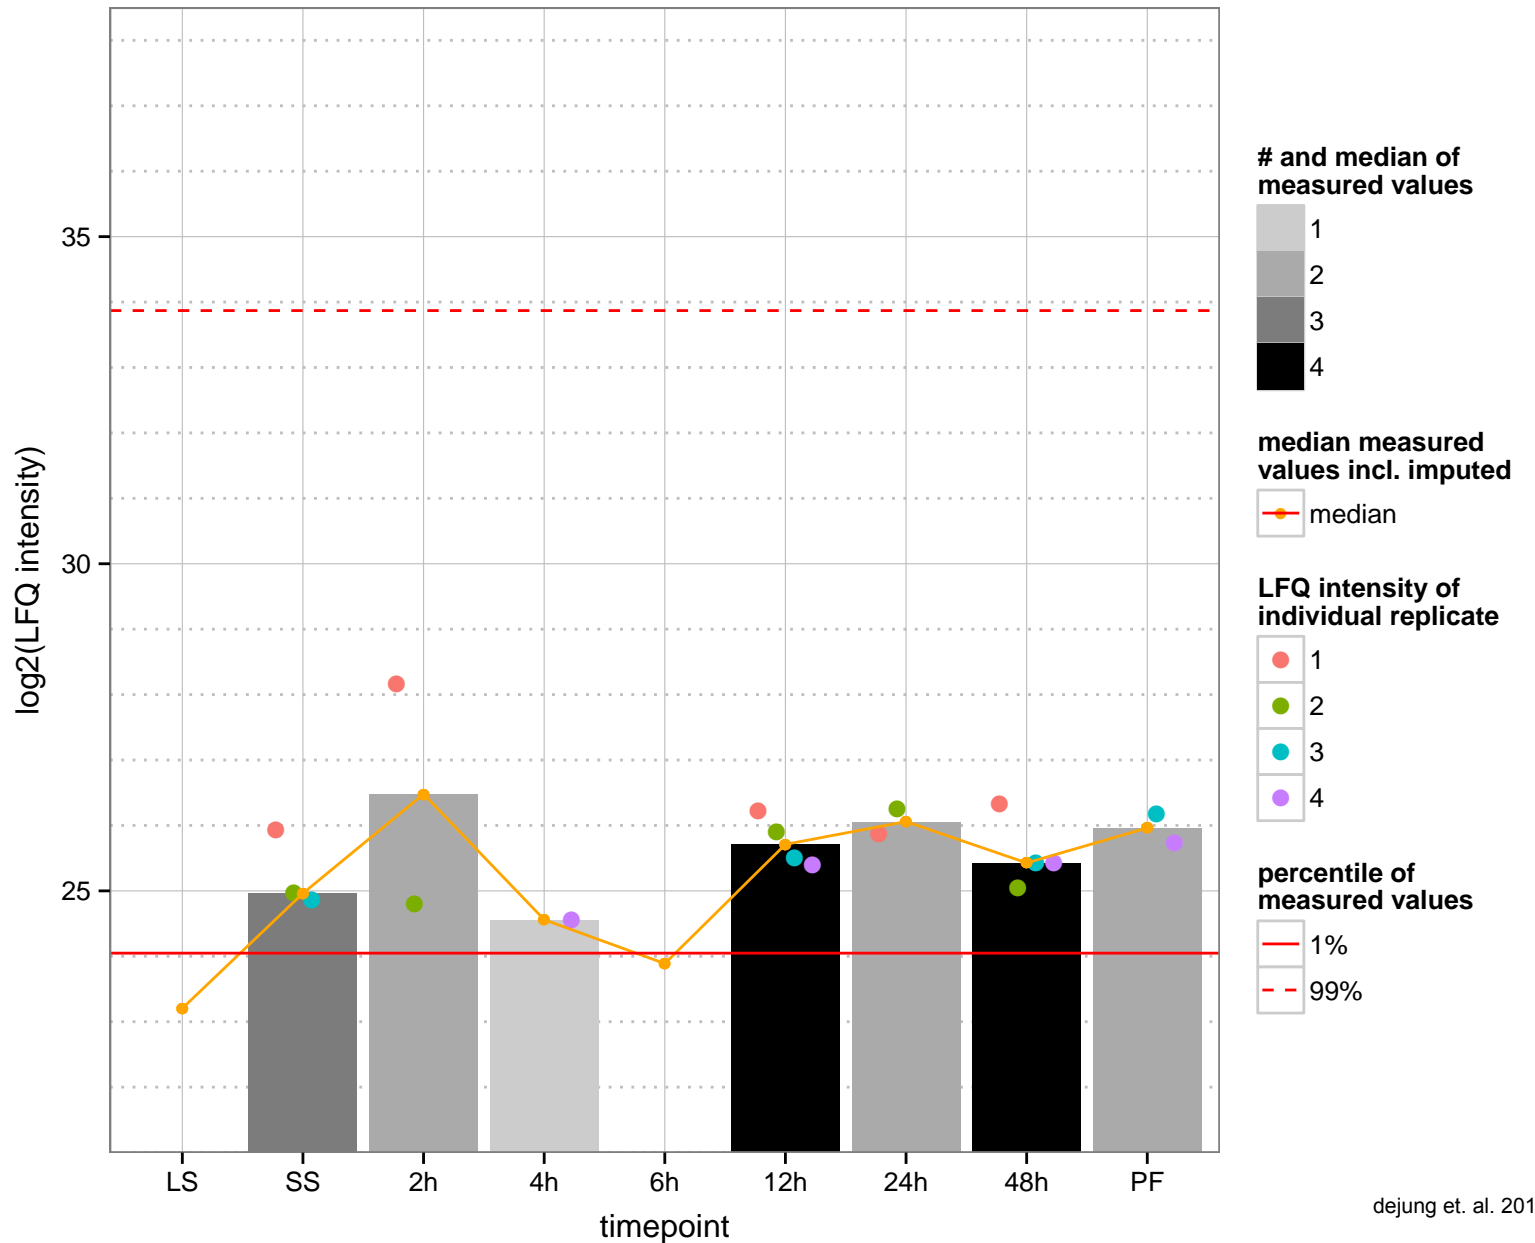

hypothetical protein, conserved  
 Tb927.8.610  
 AGOF: null  
 AGOC: null  
 AGOP: null  
 PGOF: protein binding  
 PGO: null  
 PGOP: null

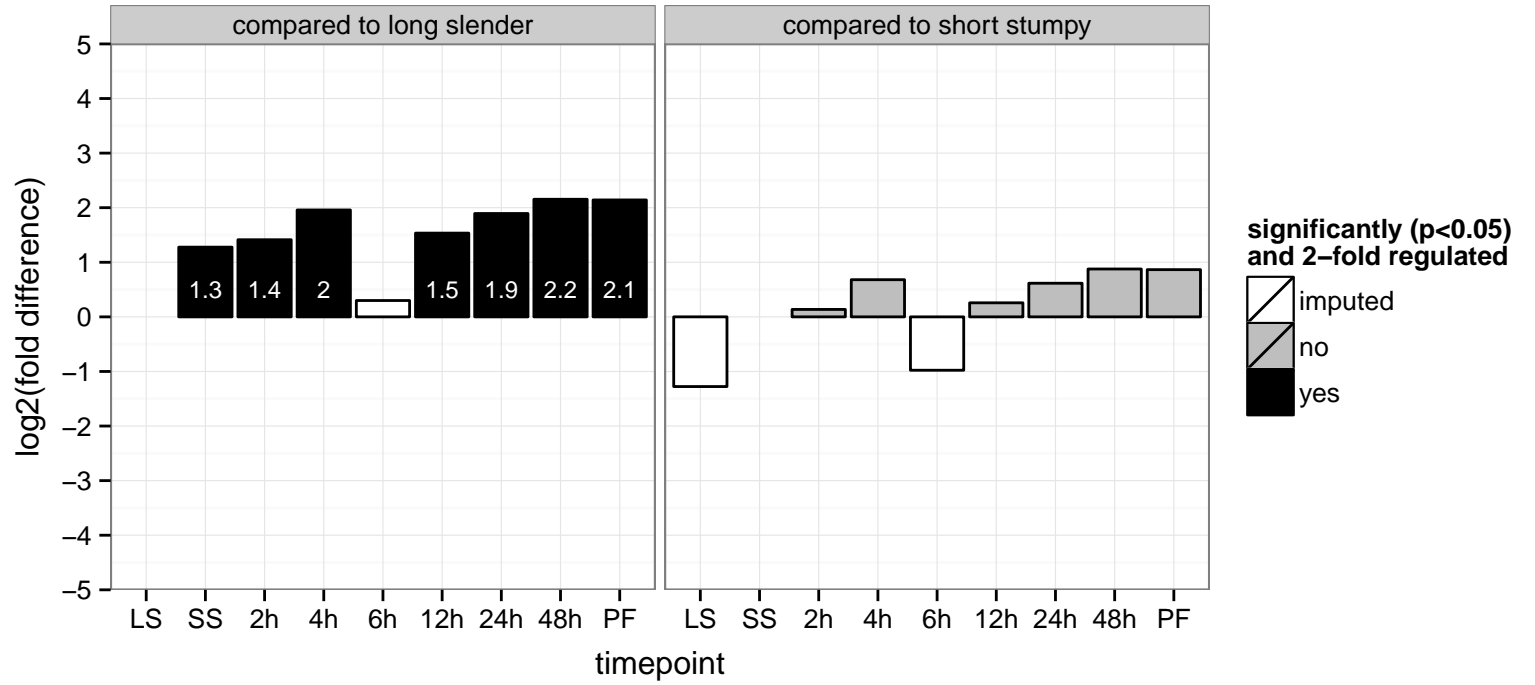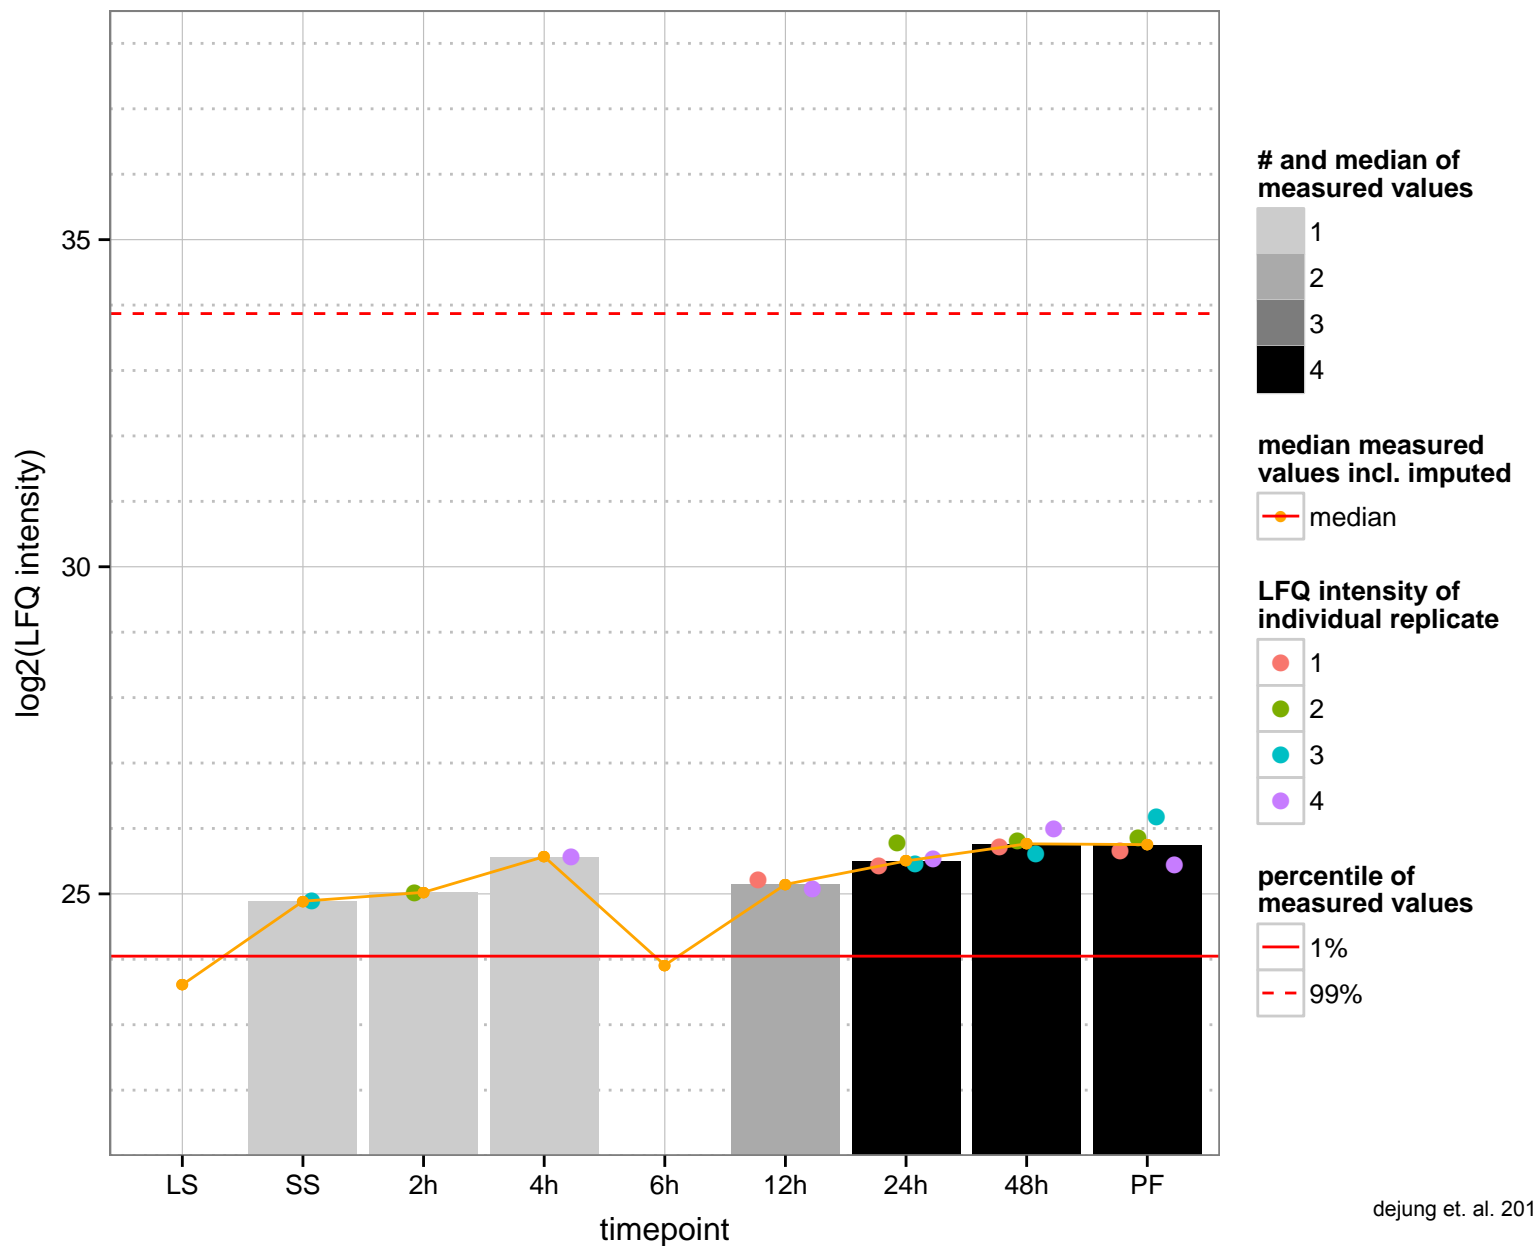



kinetoplastid kinetochore protein 3, protein kinase, putative (kkt3)

Tb927.9.10920

AGOF: ATP binding, protein serine/threonine kinase activity, protein tyrosine kinase activity, zinc ion binding

AGOC: intracellular, kinetochore

AGOP: cell proliferation, chromosome segregation, protein phosphorylation

PGOF: ATP binding, protein kinase activity, transferase activity, transferring phosphorus-containing groups, zinc ion binding

PGOC: intracellular

PGOP: protein phosphorylation

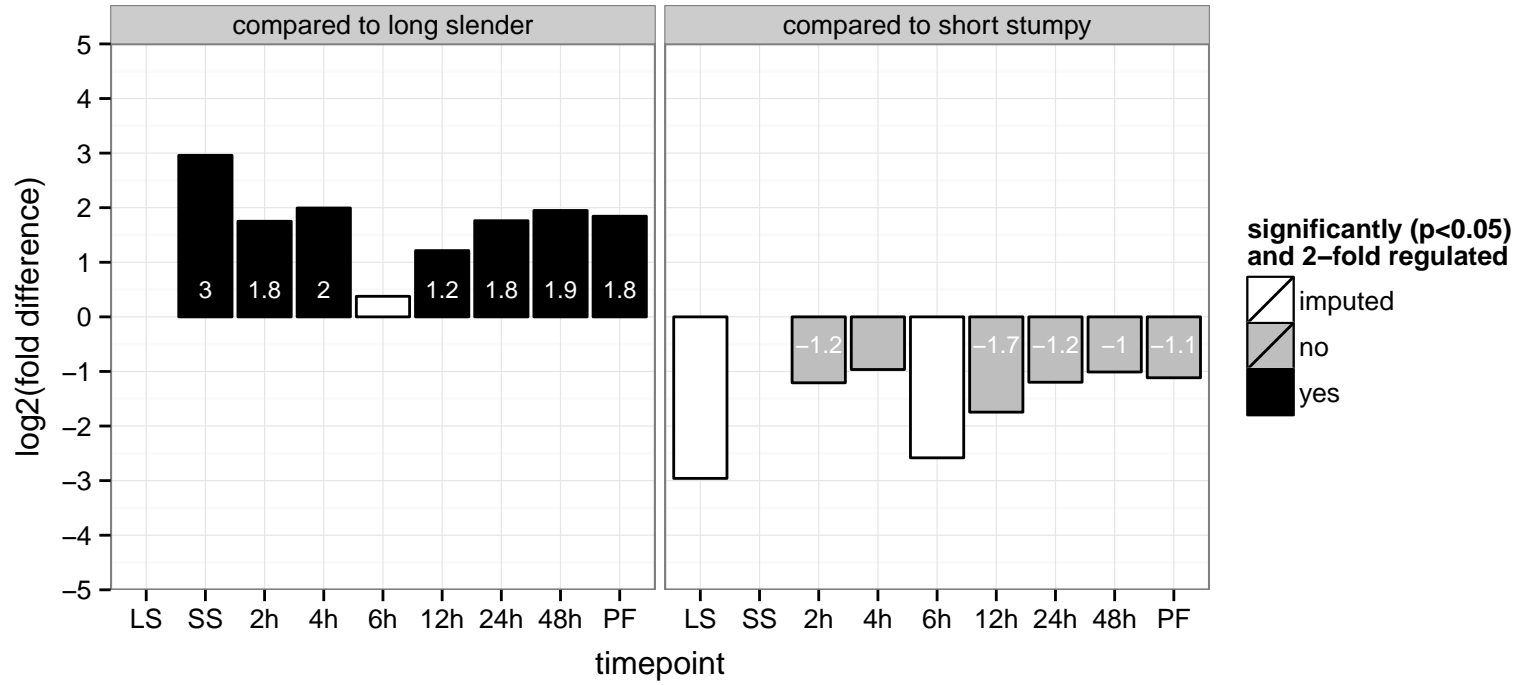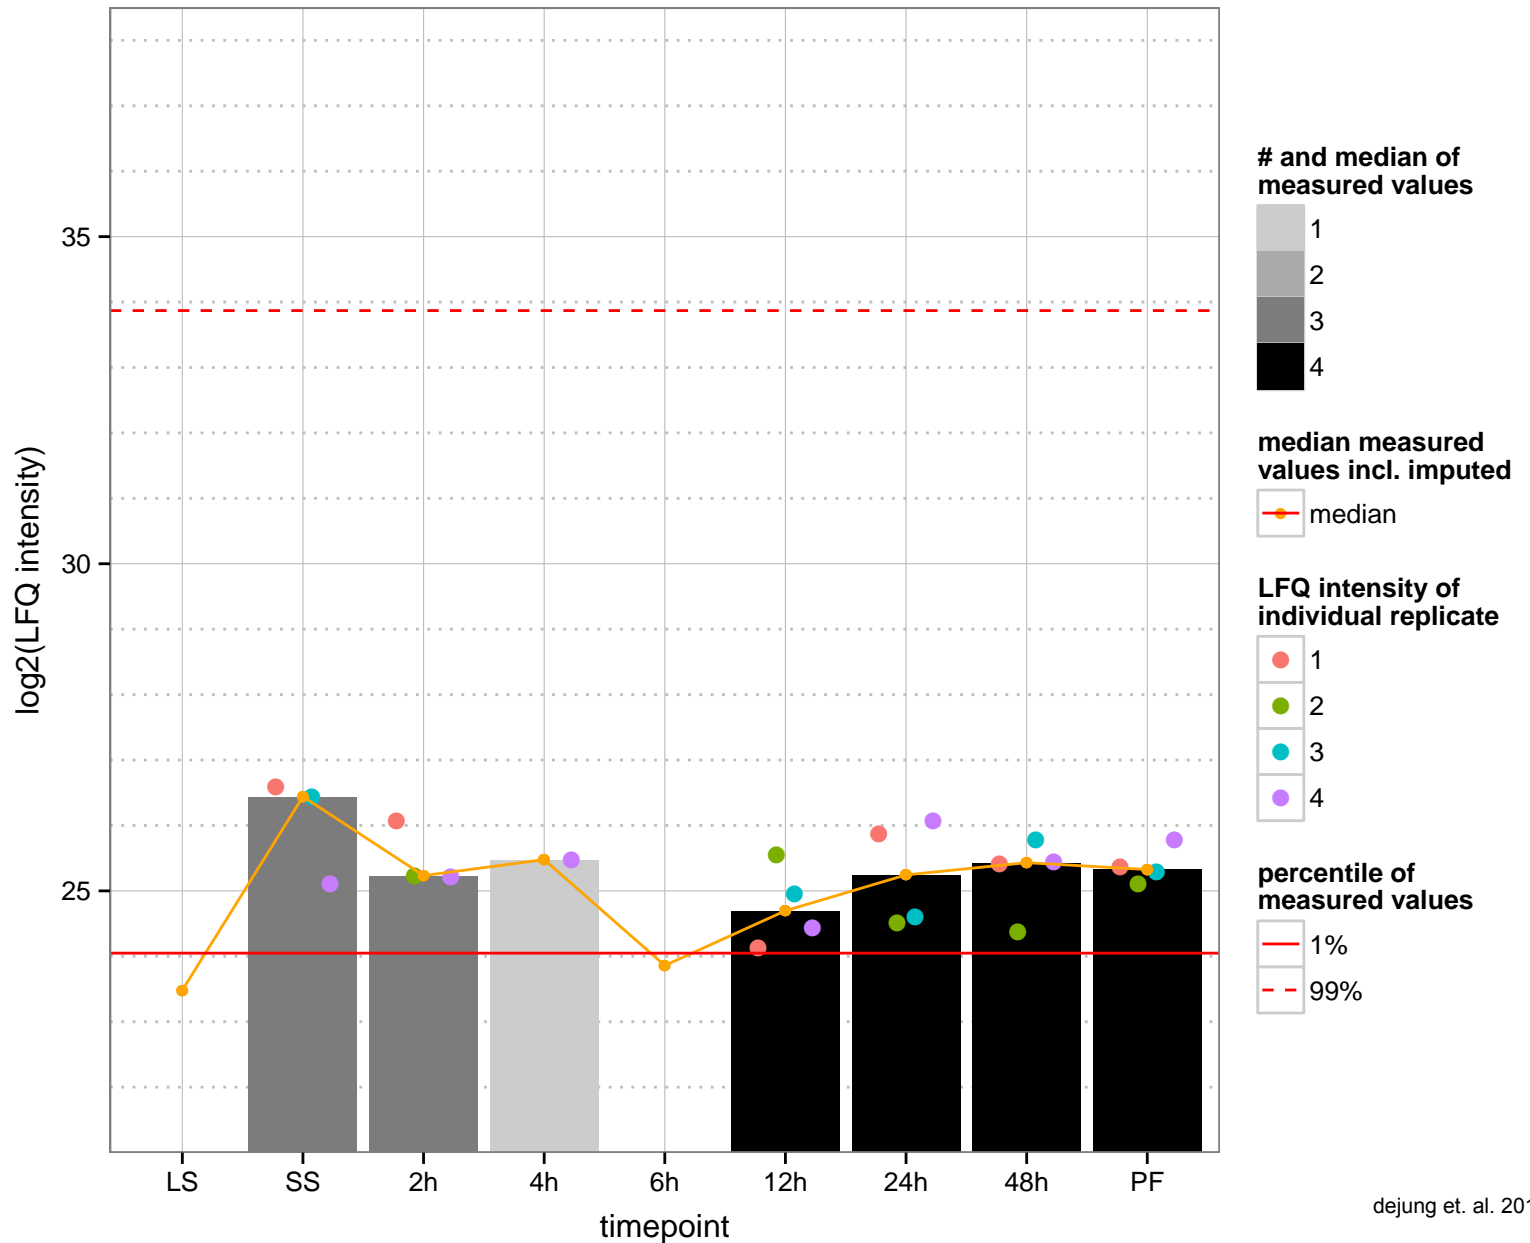

hypothetical protein, conserved  
 Tb927.9.8180  
 AGOF: null  
 AGOC: null  
 AGOP: null  
 PGO: null  
 PGOC: null  
 PGOP: null

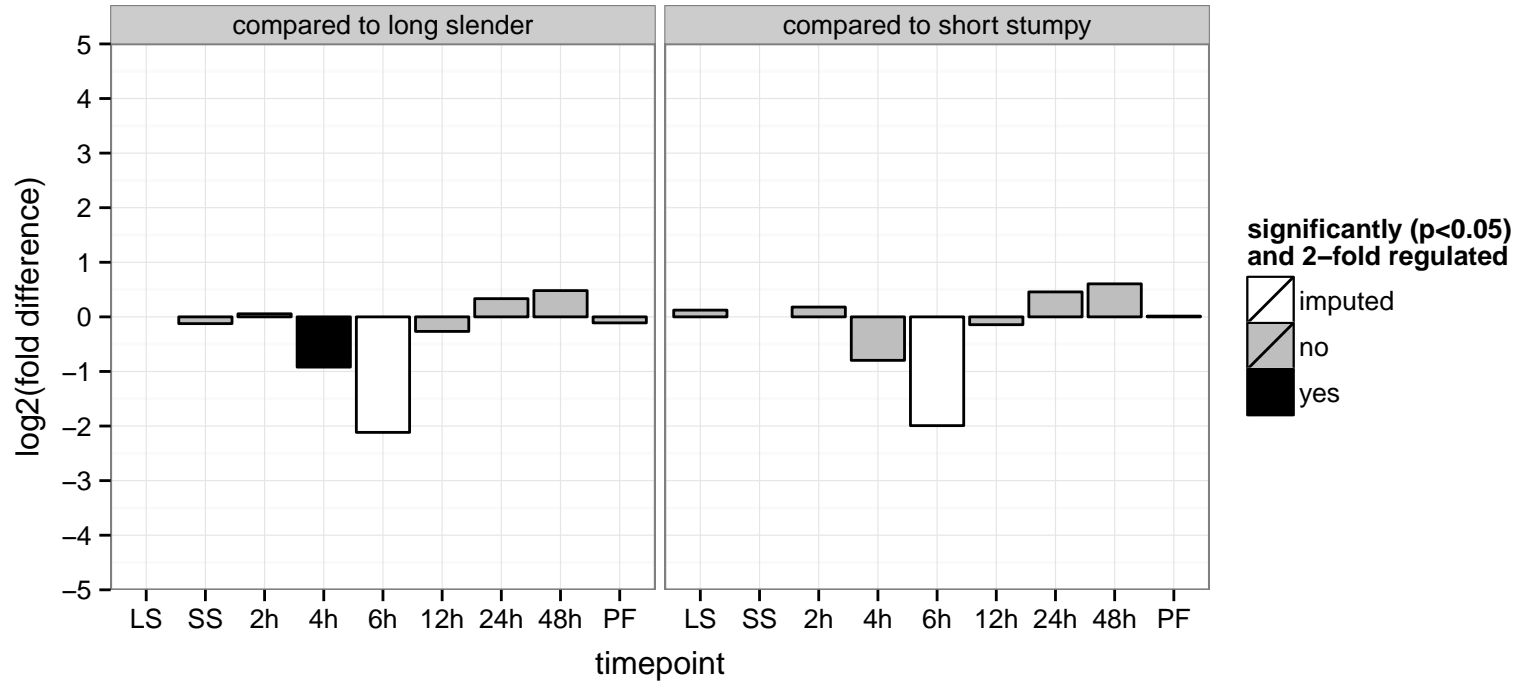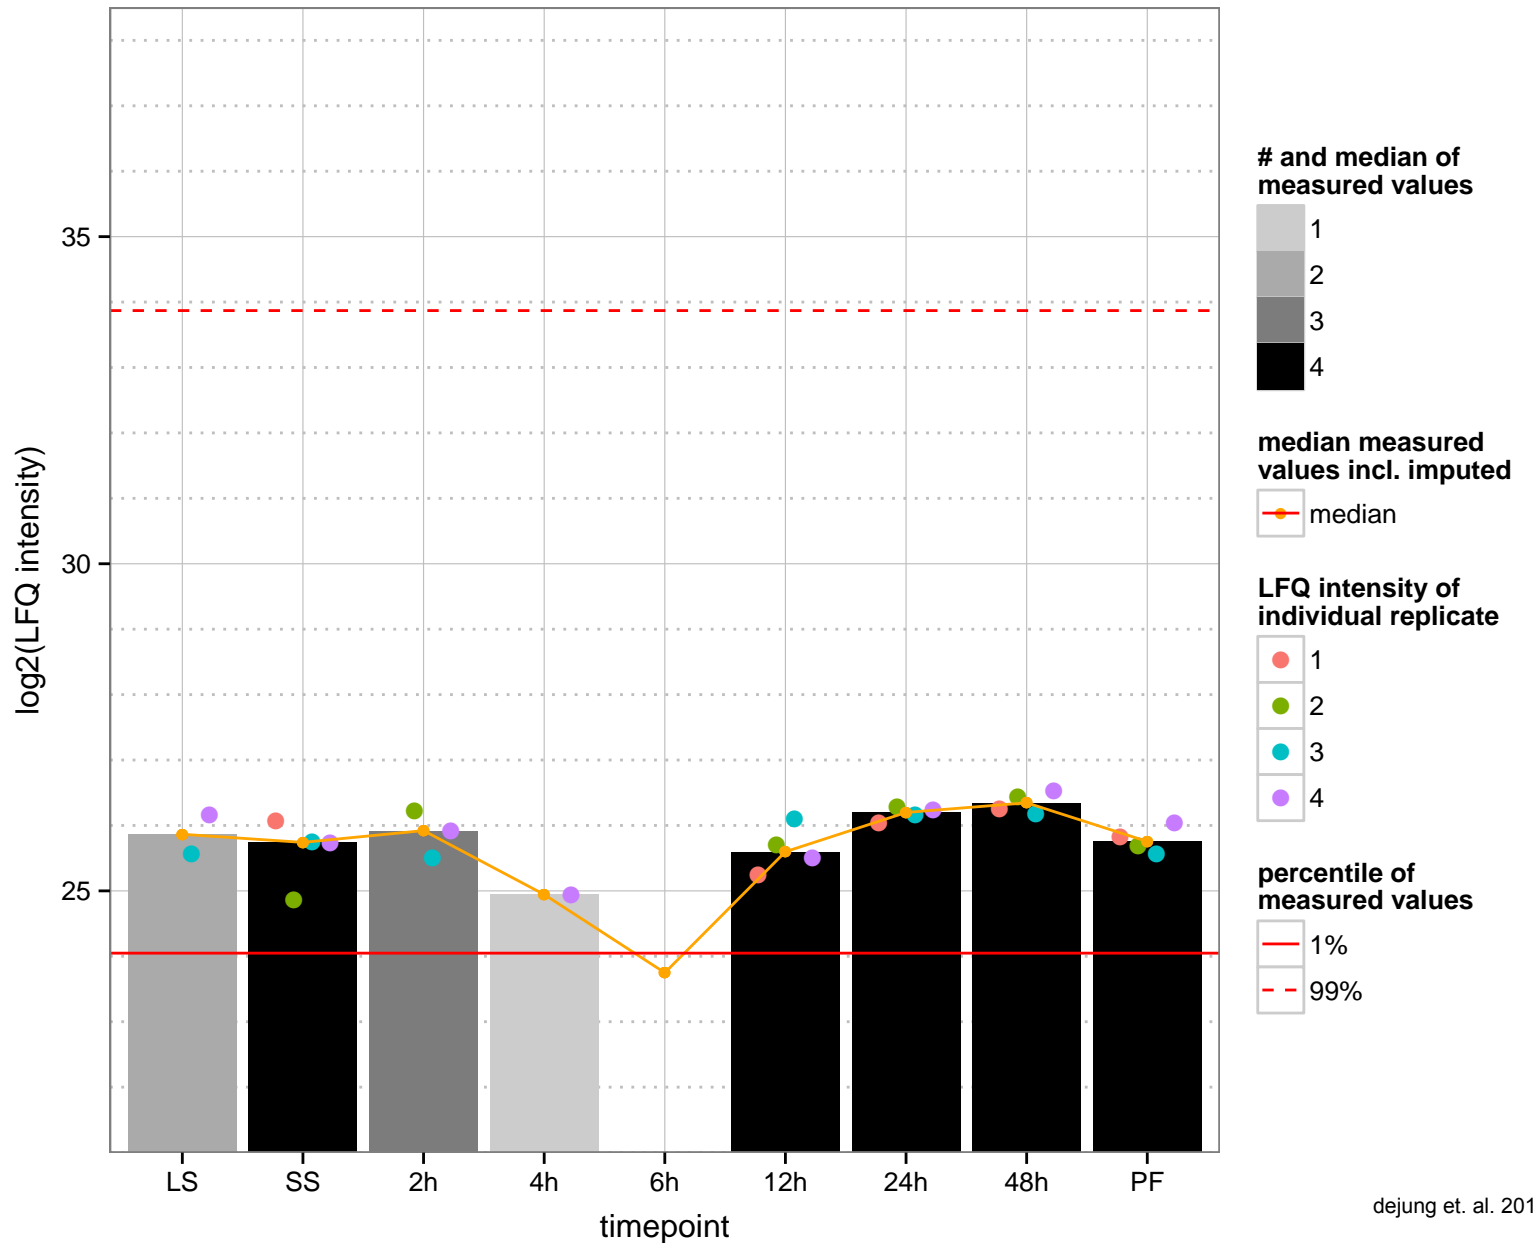

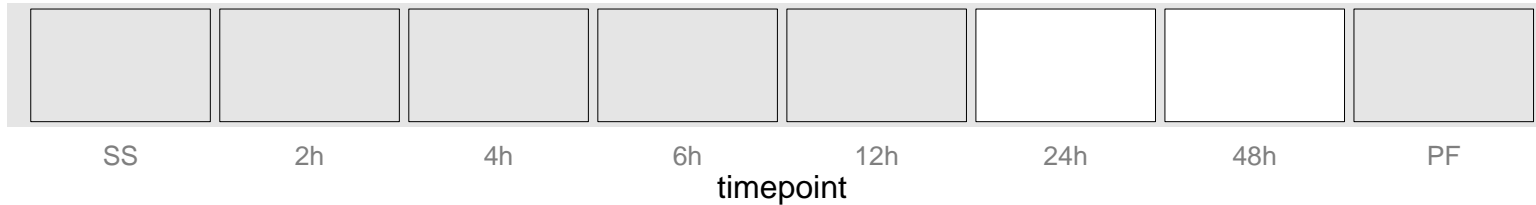

**regulated**  **not regulated**  **significant down**  **significant up**

protein kinase, putative, mitogen-activated protein kinase 9, putative (MPK9)

Tb927.10.14800;Tb11.v5.0626

AGOF: null, ATP binding, protein serine/threonine kinase activity, protein tyrosine kinase activity

AGOC: null

AGOP: null, protein phosphorylation

PGOF: ATP binding, protein kinase activity, transferase activity, transferring phosphorus-containing groups

PGOC: null

PGOP: protein phosphorylation

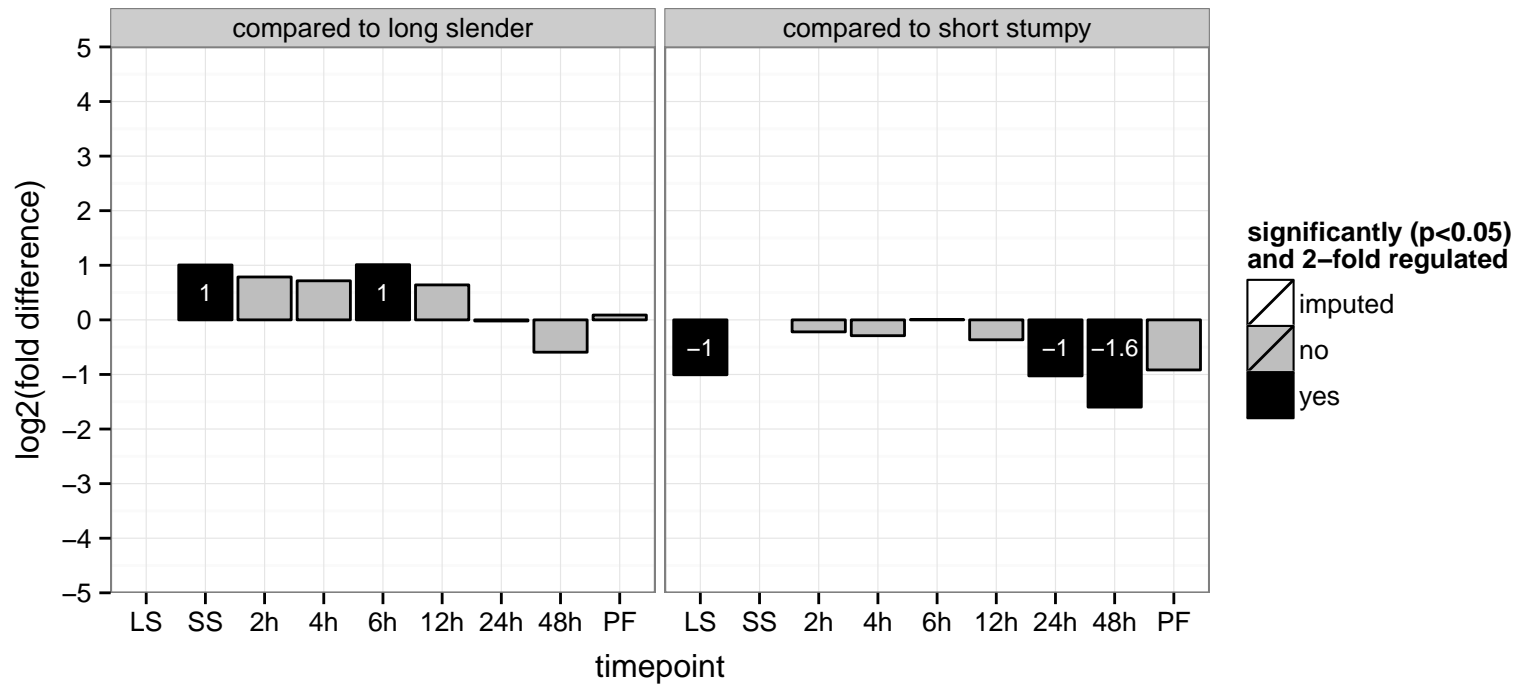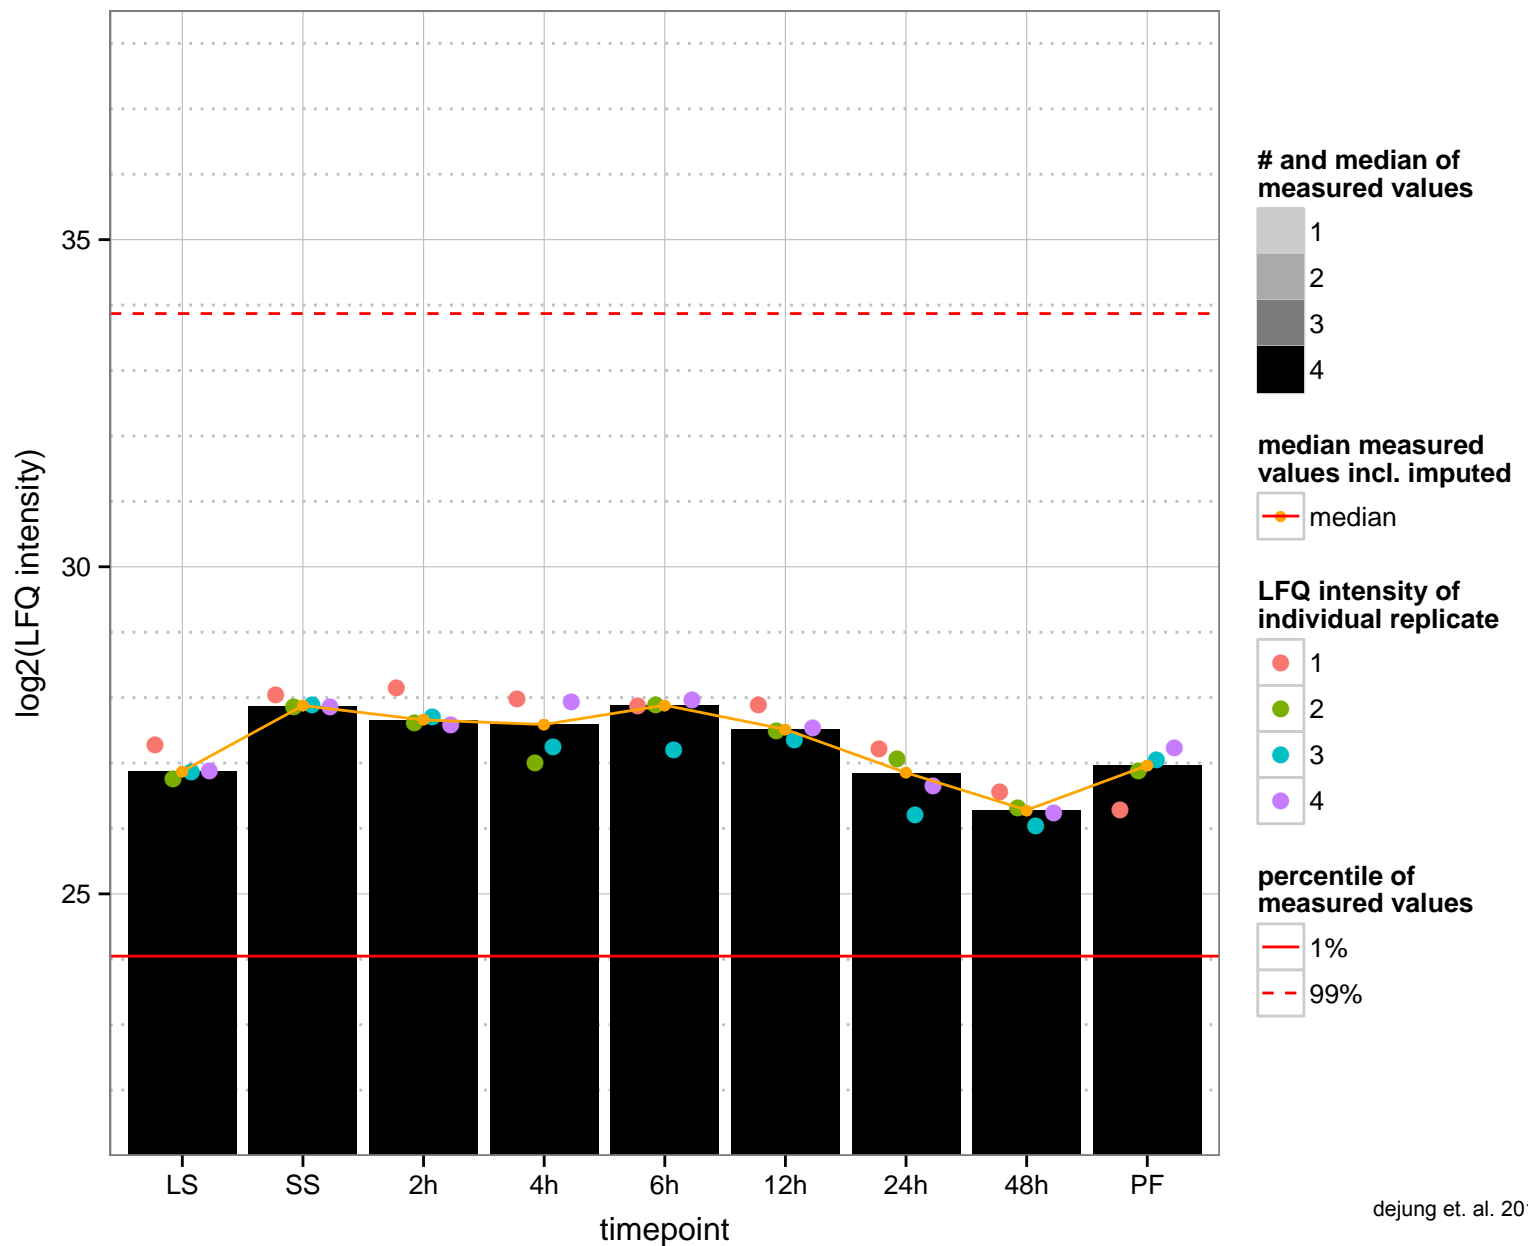

hypothetical protein, conserved  
 Tb927.1.4500  
 AGOF: null  
 AGOC: null  
 AGOP: null  
 PGO: null  
 PGOC: null  
 PGOP: null

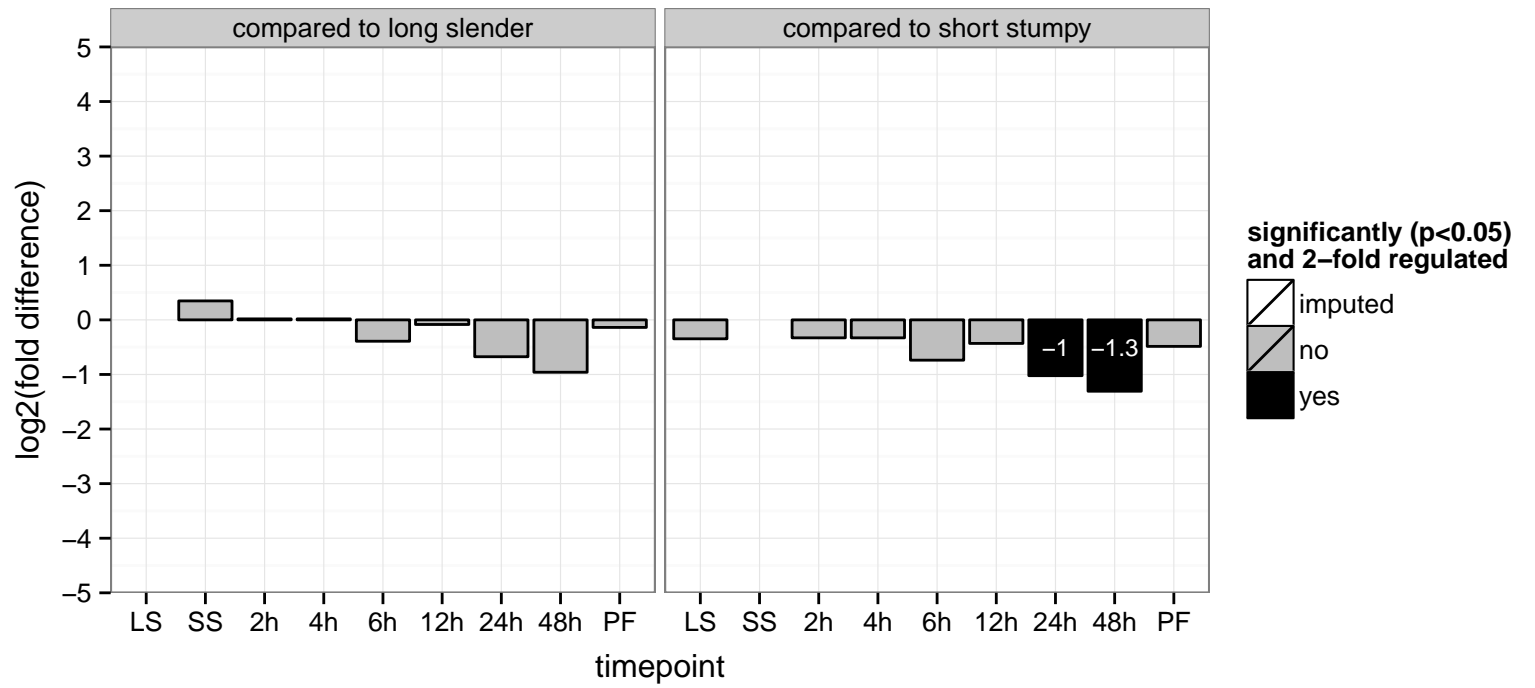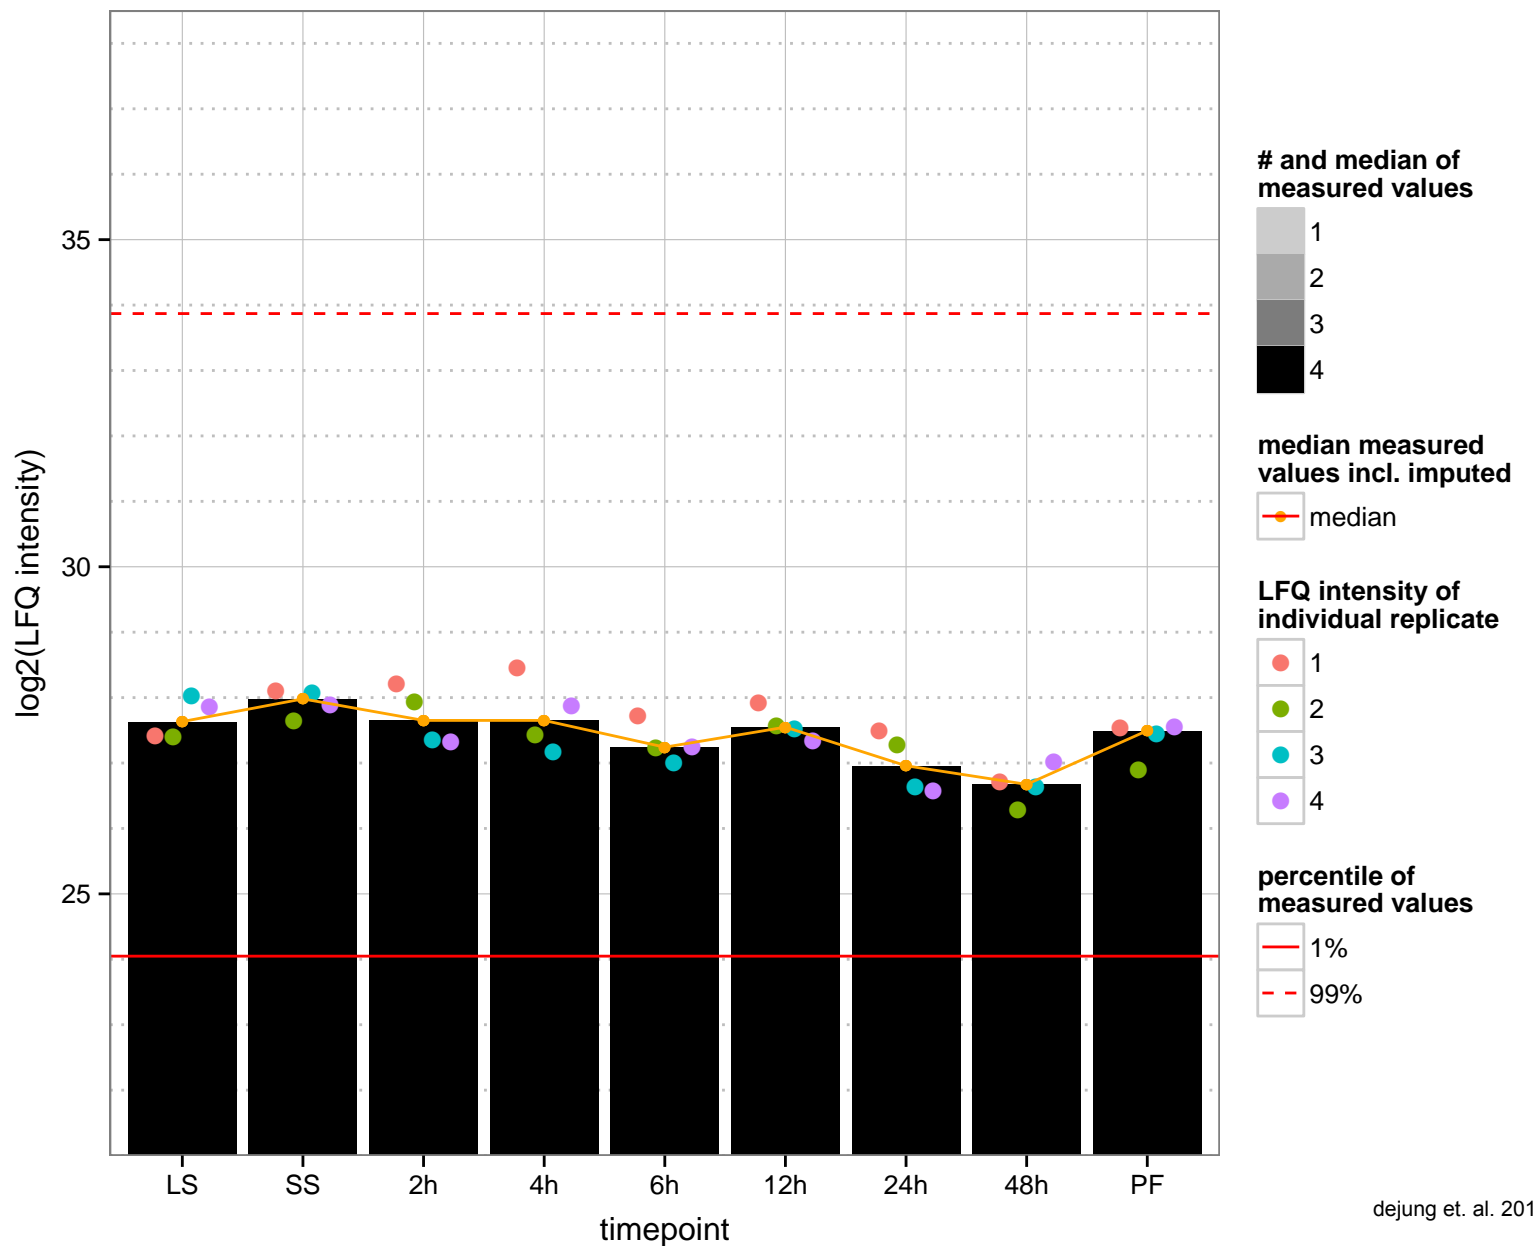

vacuolar ATP synthase, putative

Tb927.10.200

AGOF: hydrogen-exporting ATPase activity, phosphorylative mechanism

AGOC: proton-transporting V-type ATPase, V0 domain, vacuolar proton-transporting V-type ATPase complex

AGOP: ATP hydrolysis coupled proton transport, ATP synthesis coupled proton transport

PGOF: hydrogen ion transmembrane transporter activity

PGOC: proton-transporting V-type ATPase, V0 domain, proton-transporting two-sector ATPase complex, proton-transporting

PGOP: ATP hydrolysis coupled proton transport

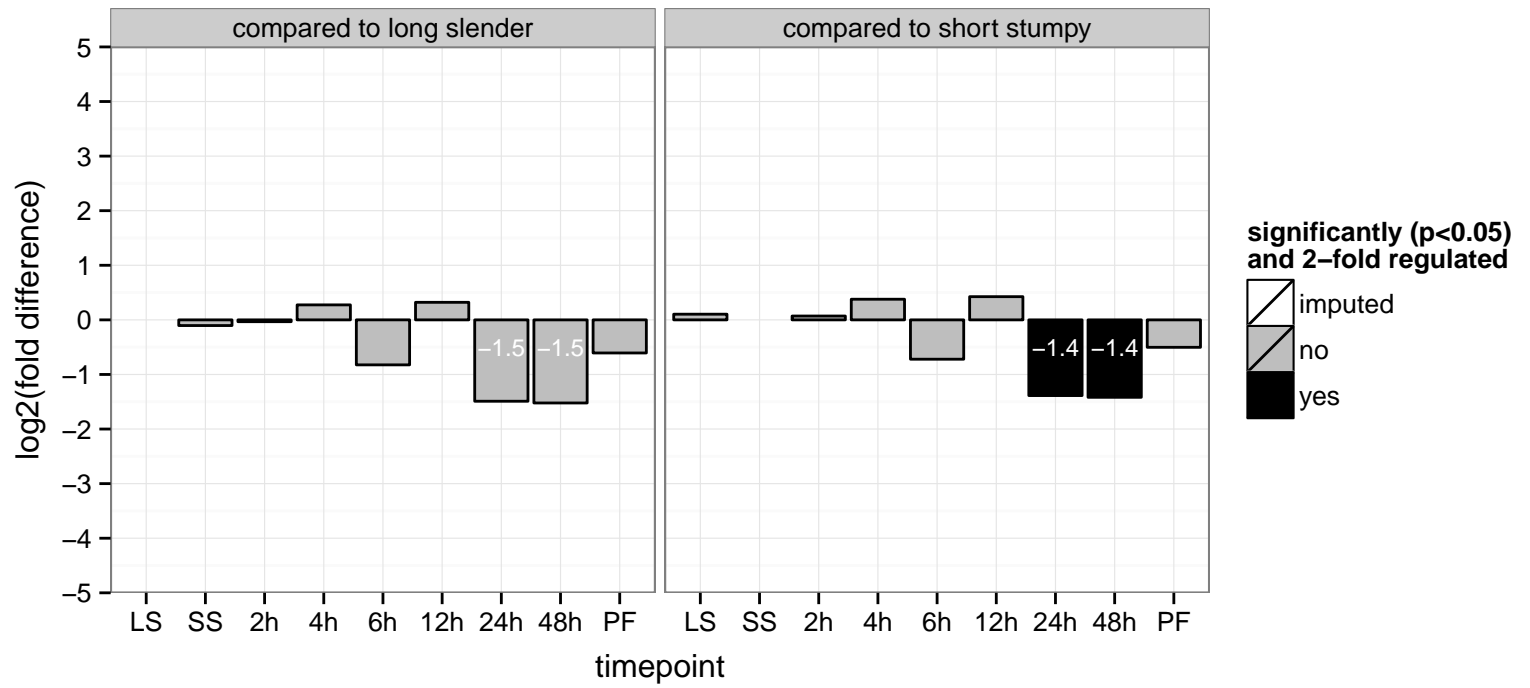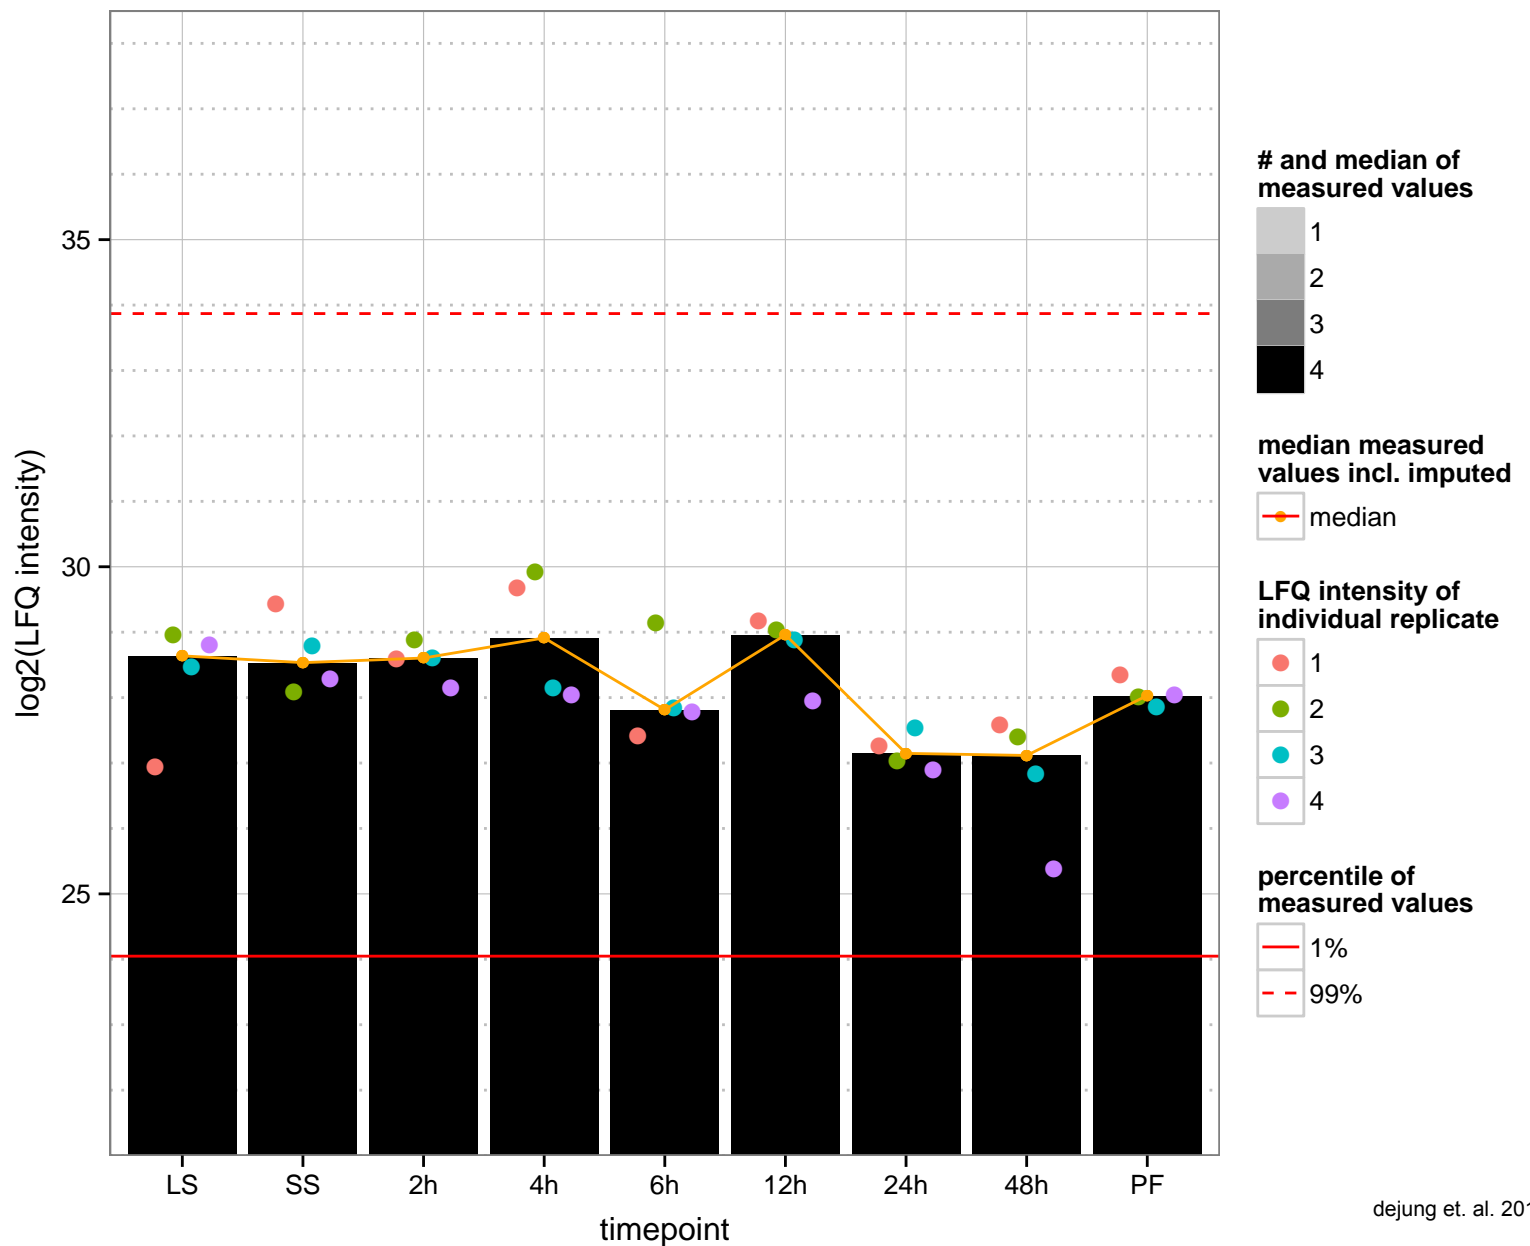

hypothetical protein, conserved  
 Tb927.11.15140  
 AGOF: null  
 AGOC: null  
 AGOP: null  
 PGOF: null  
 PGO: null  
 PGOP: null

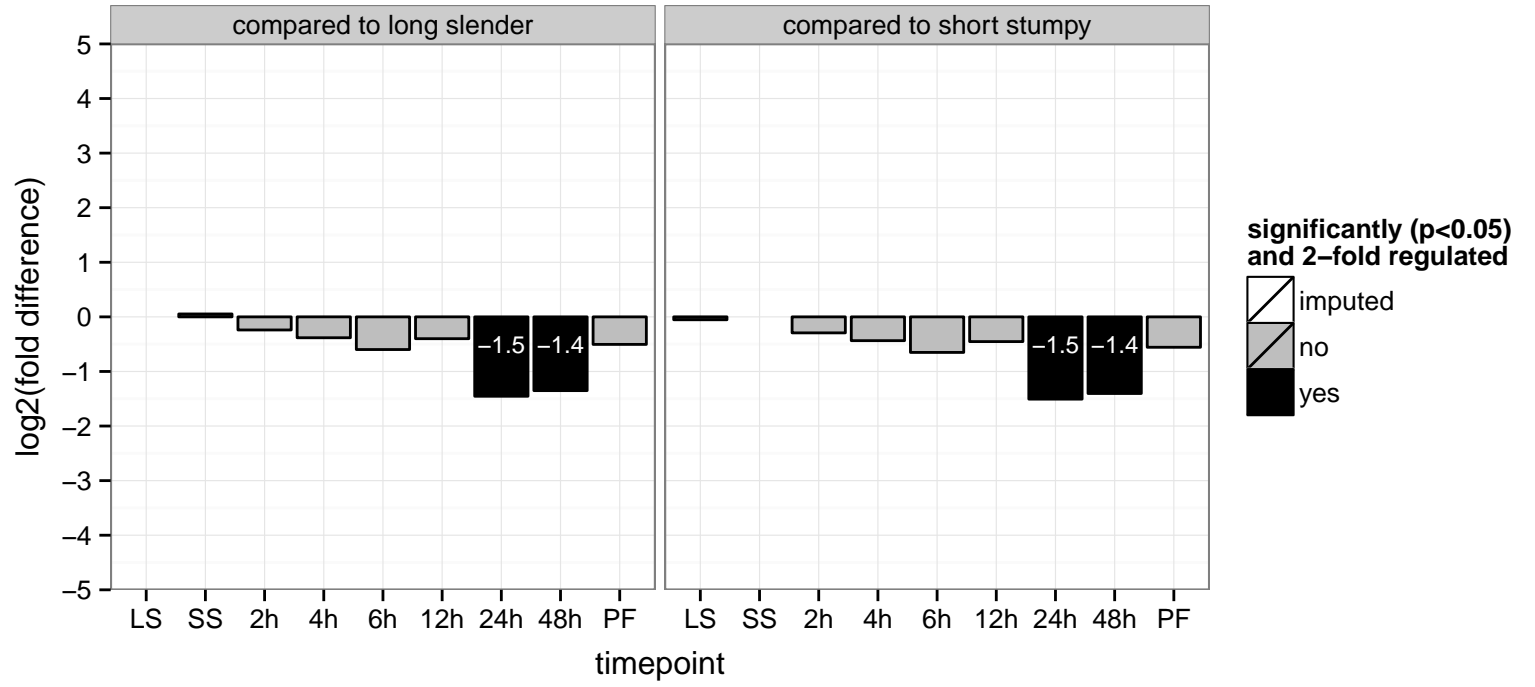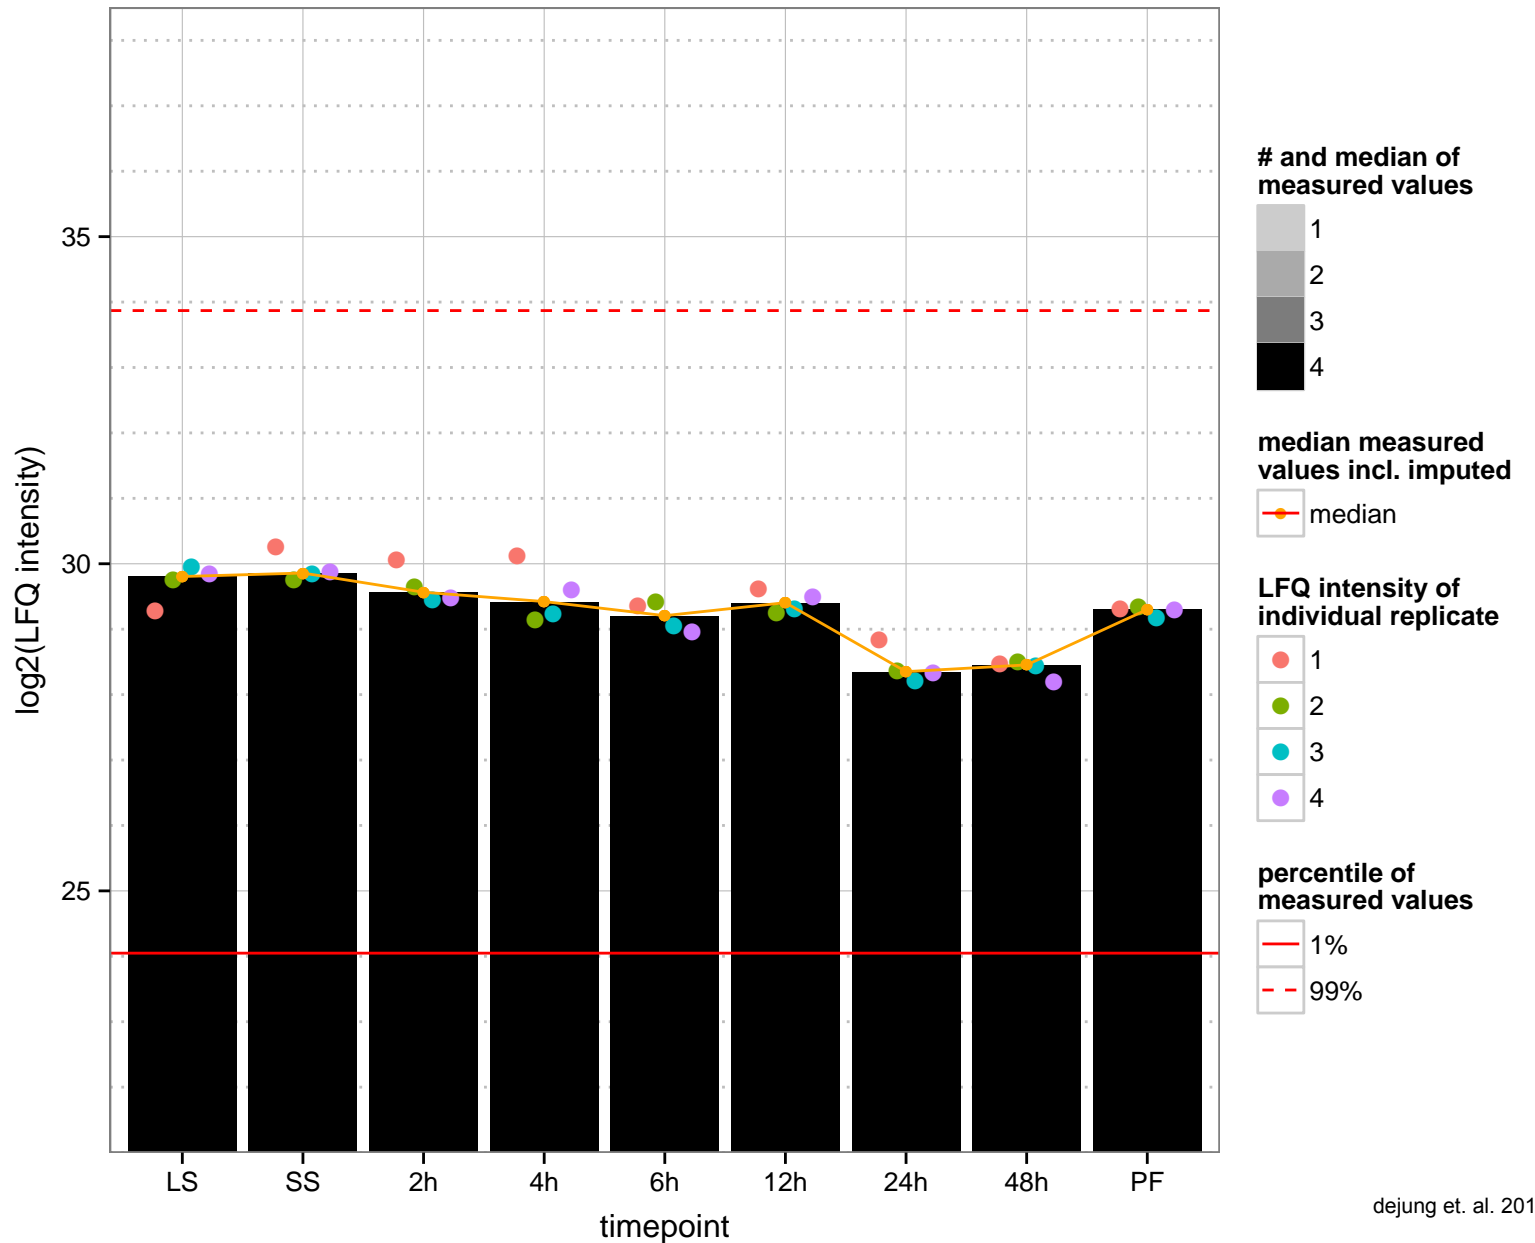

6-phosphogluconolactonase (6PGL)  
 Tb927.11.6330  
 AGOF: 6-phosphogluconolactonase activity  
 AGOC: cytoplasm, glycosome  
 AGOP: pentose-phosphate shunt  
 PGO: 6-phosphogluconolactonase activity  
 PGOC: null  
 PGOP: carbohydrate metabolic process, pentose-phosphate shunt

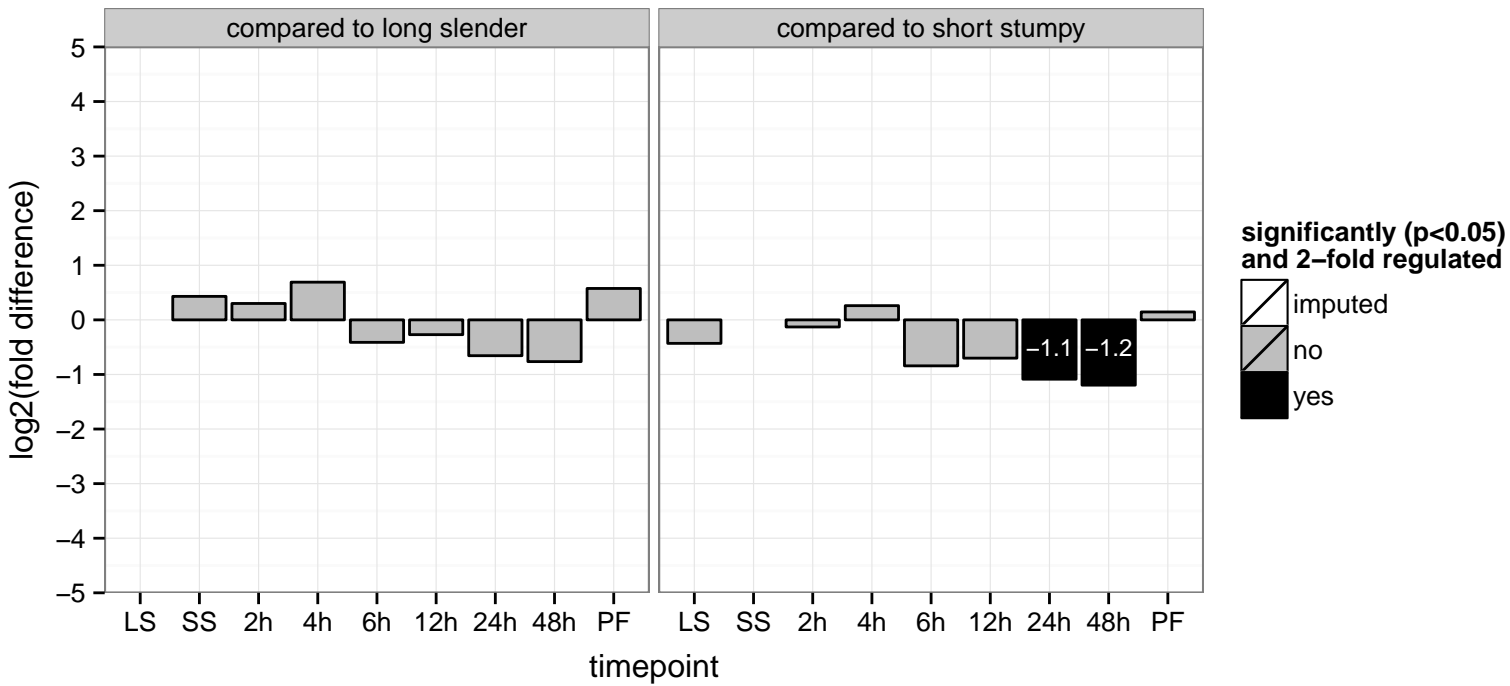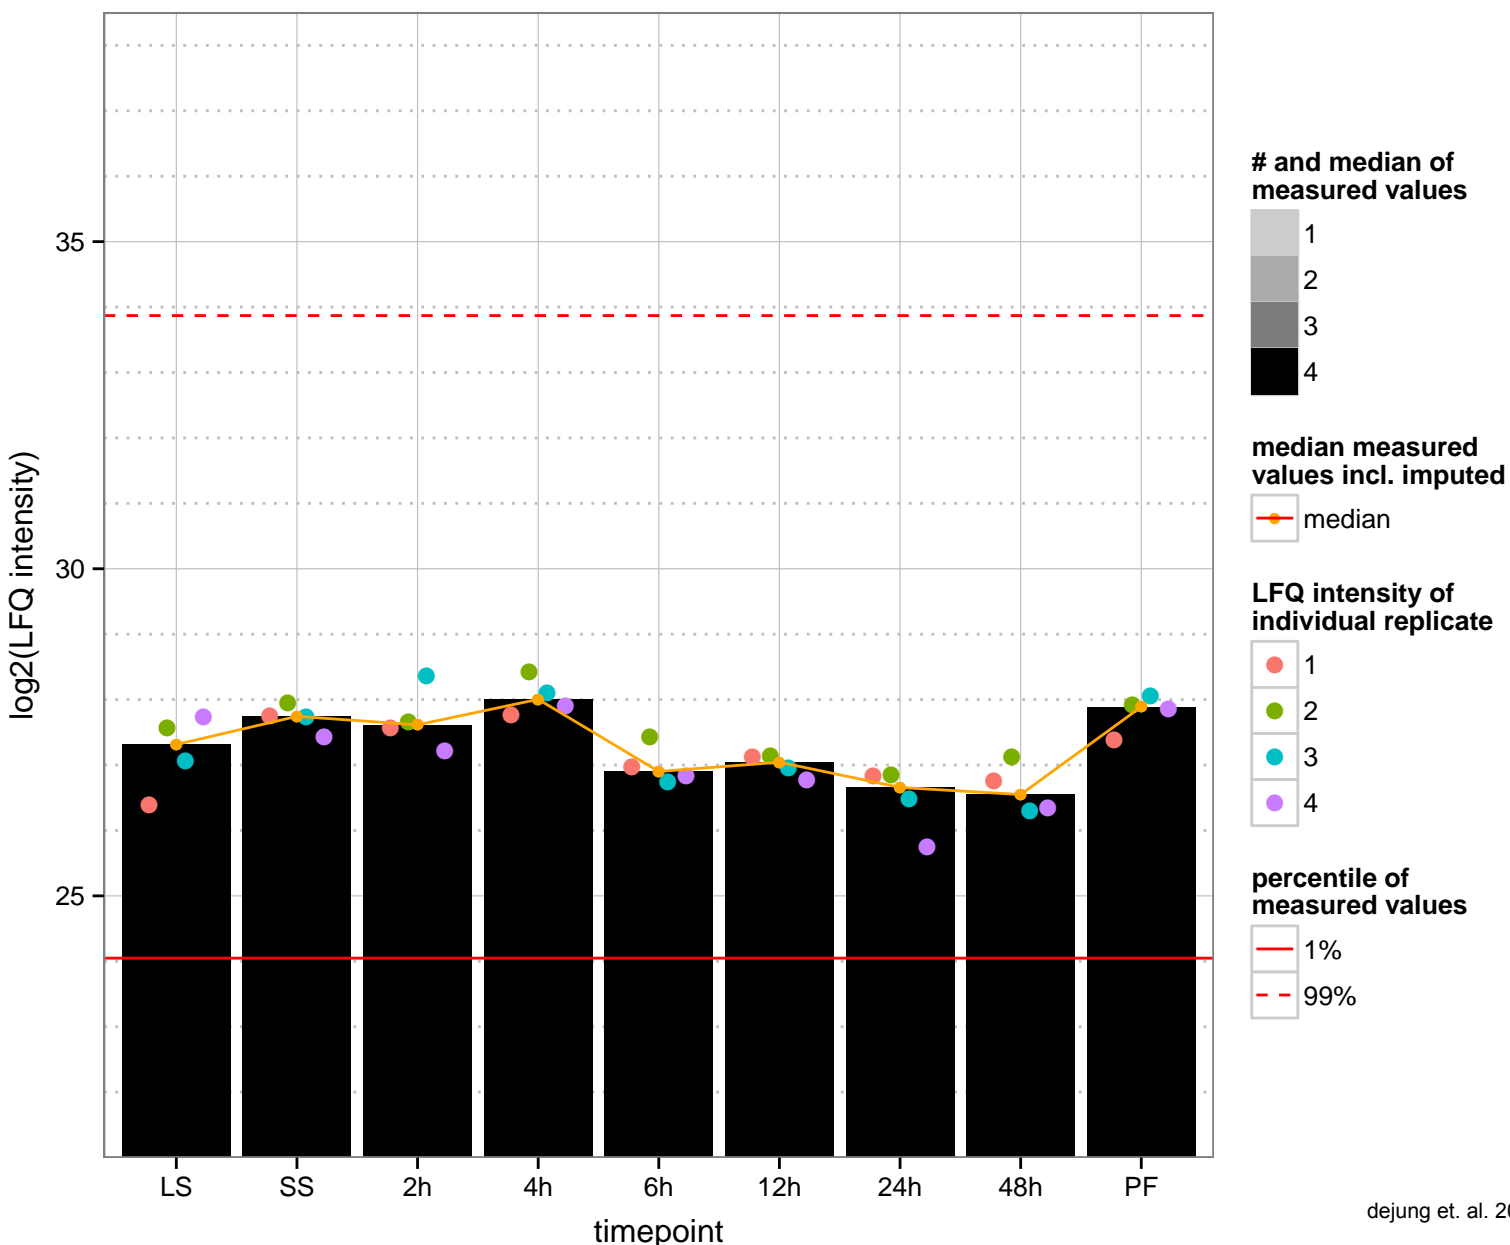



branched-chain amino acid aminotransferase, putative

Tb927.2.4590;Tb11.v5.0820;Tb927.2.4610

AGOF: null, branched-chain-amino-acid transaminase activity

AGOC: null, mitochondrion

AGOP: null, branched chain family amino acid metabolic process, cellular amino acid metabolic process, branched chain family amino acid metabolic process

PGOF: branched-chain-amino-acid transaminase activity, catalytic activity

PGOC: null

PGOP: branched chain family amino acid metabolic process, metabolic process

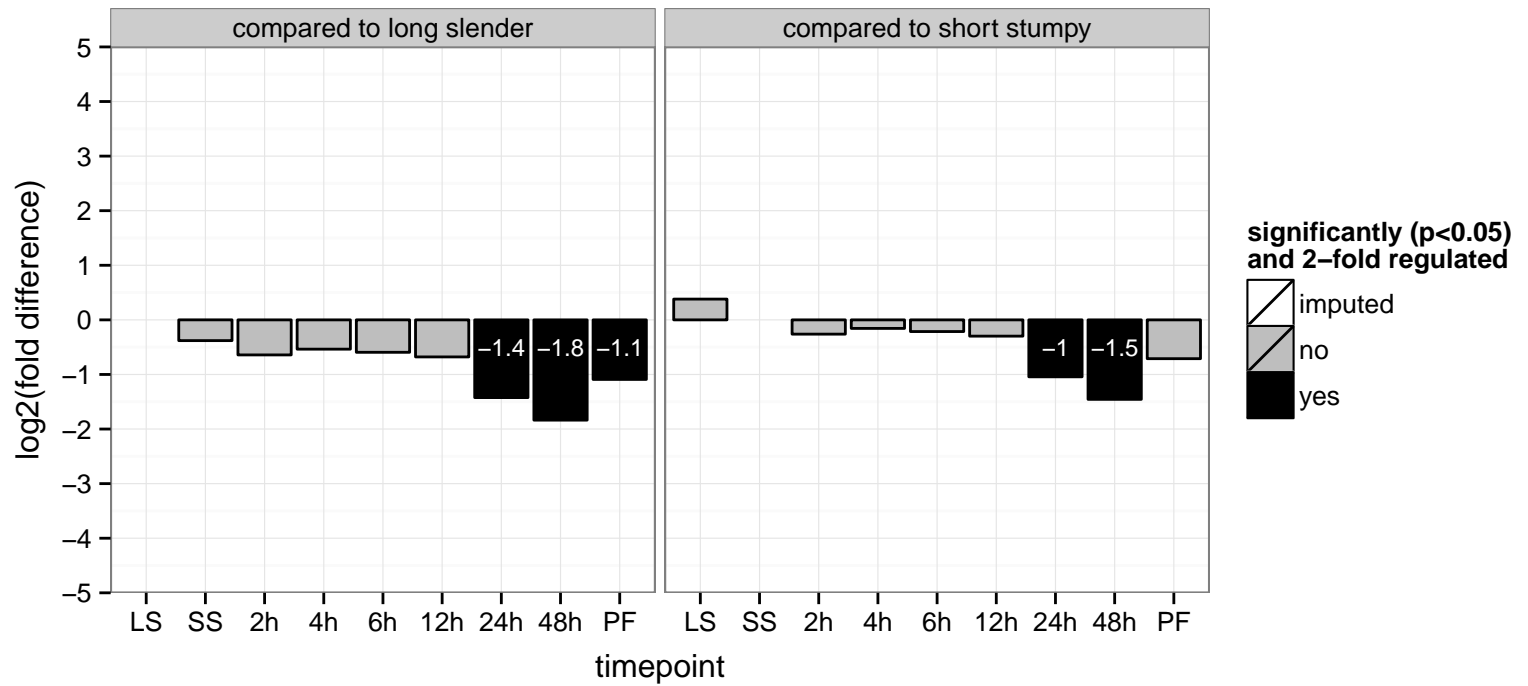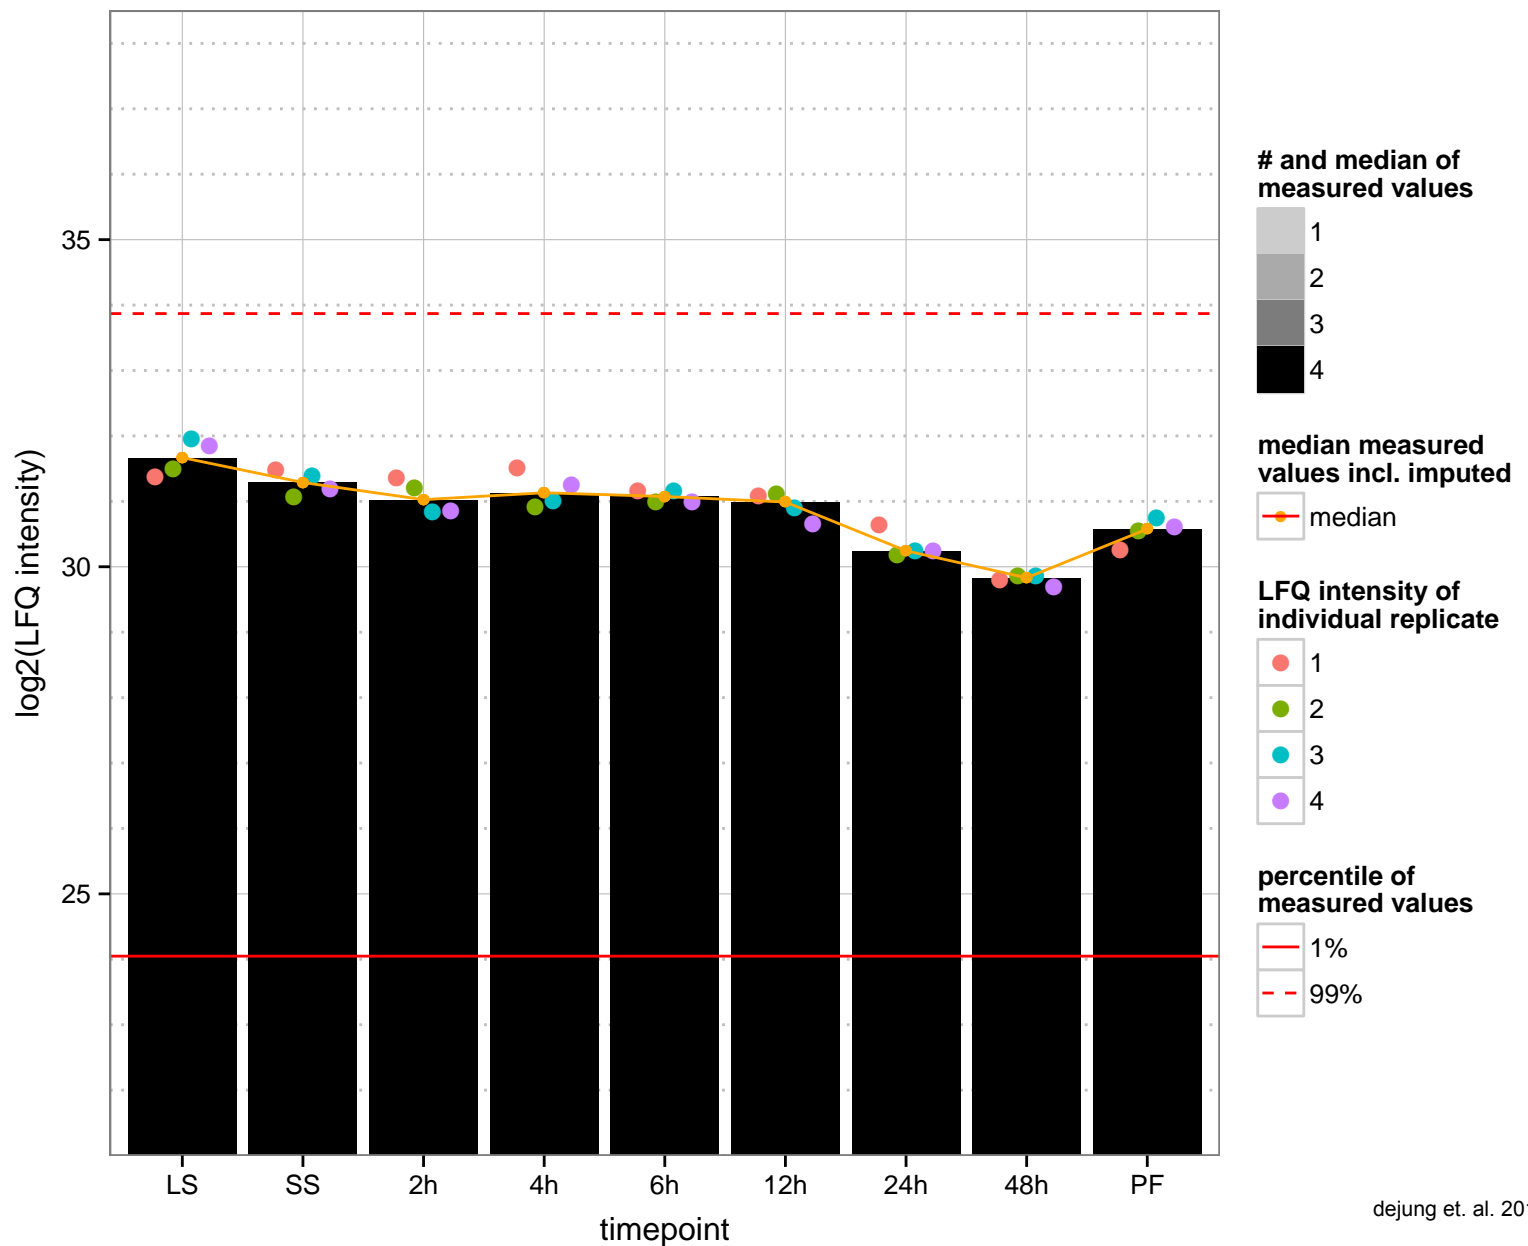

hypothetical protein, conserved, flagellar transport protein, putative (PIFTA1)

Tb927.3.11110;Tb11.v5.0589

AGOF: null

AGOC: null

AGOP: null

PGOF: null

PGOC: null

PGOP: null

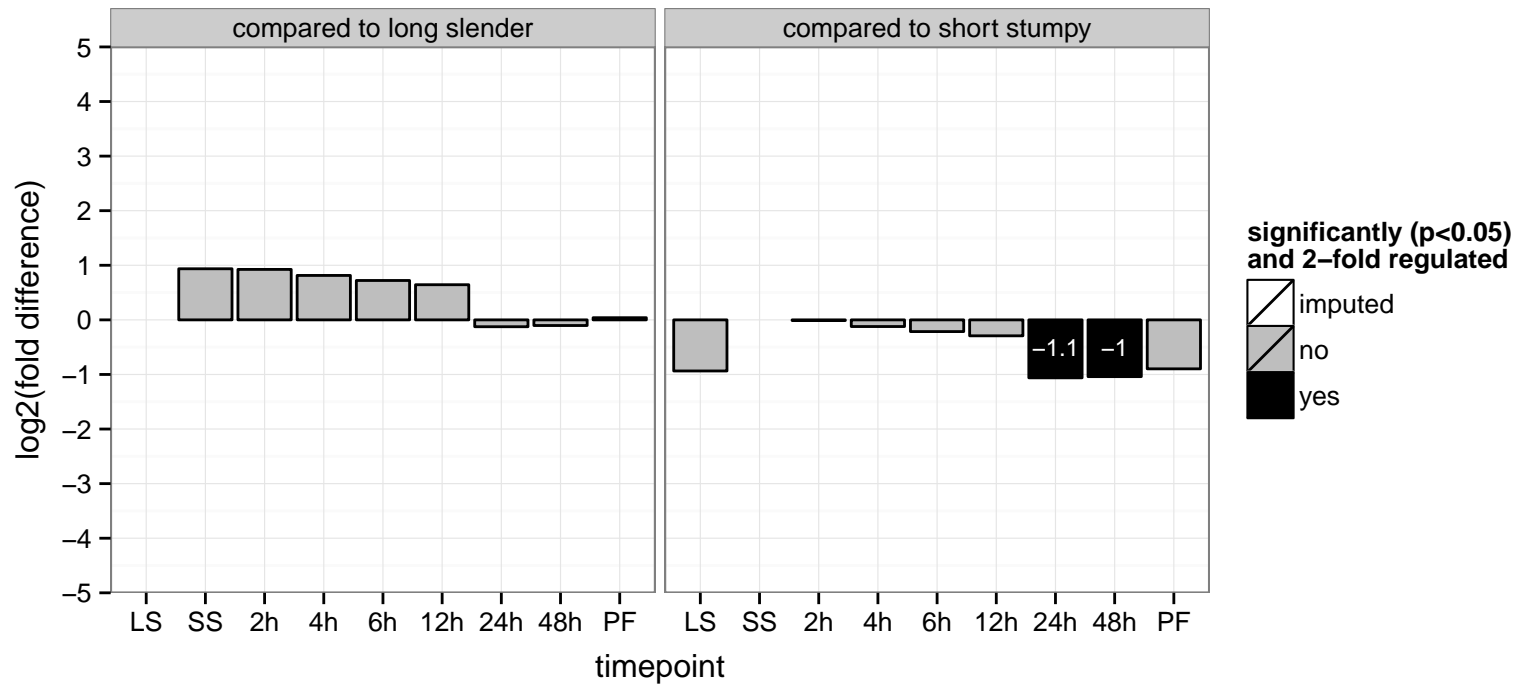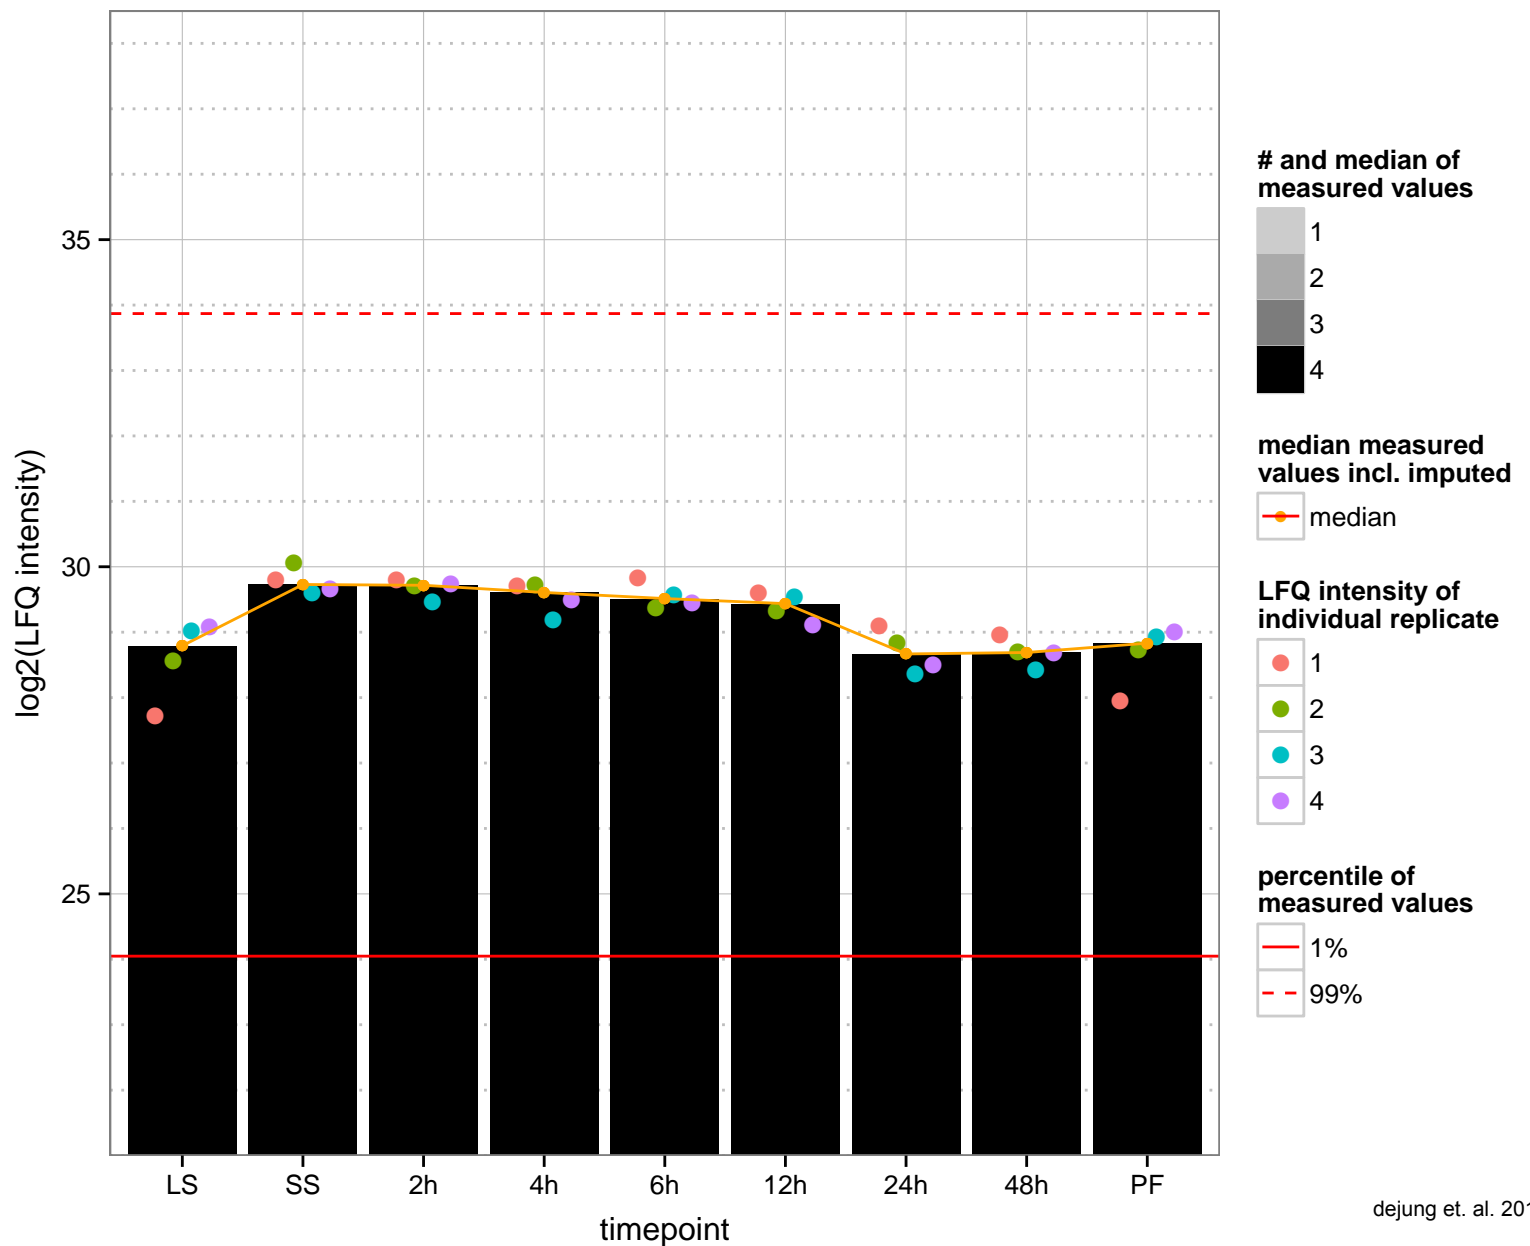

flagellar transport protein, putative (PIFTC3)  
 Tb927.3.3000  
 AGOF: null  
 AGOC: null  
 AGOP: null  
 PGOF: protein binding  
 PGO: null  
 PGOP: null

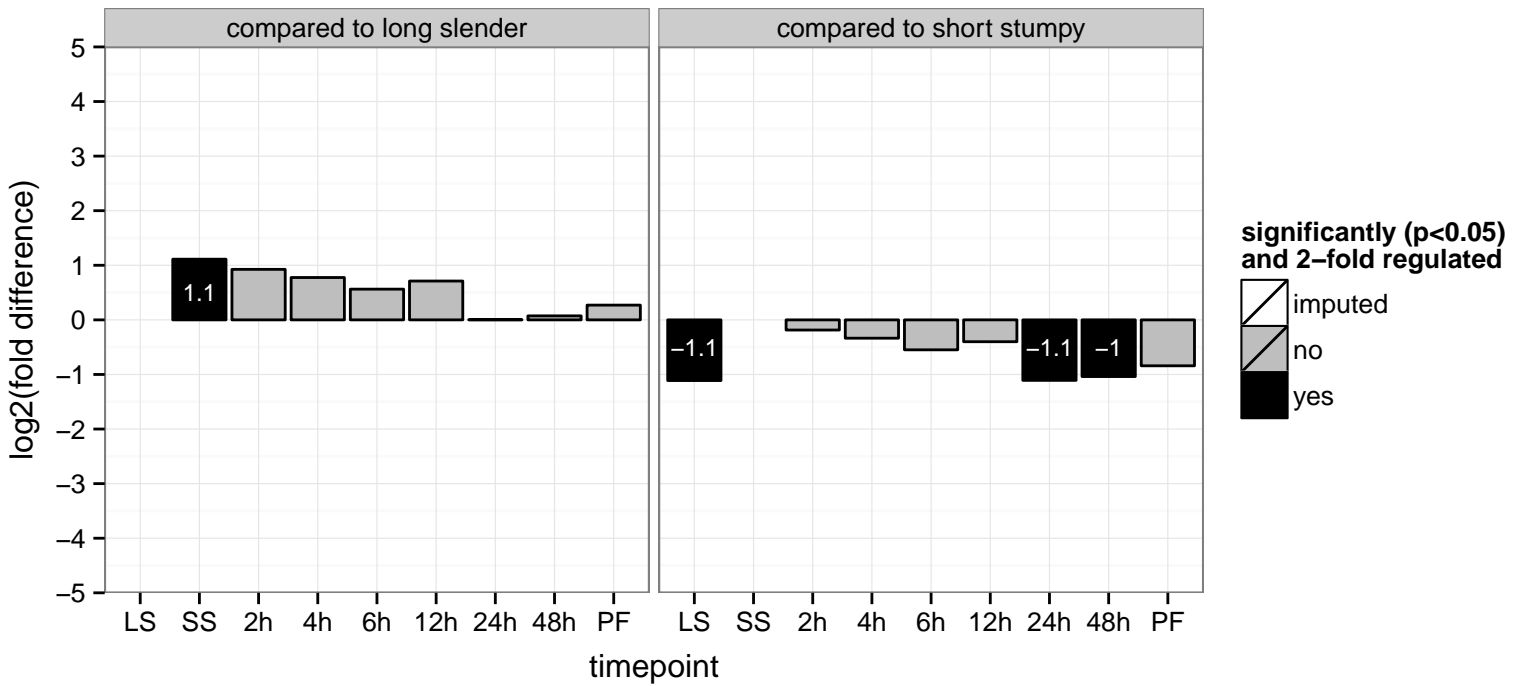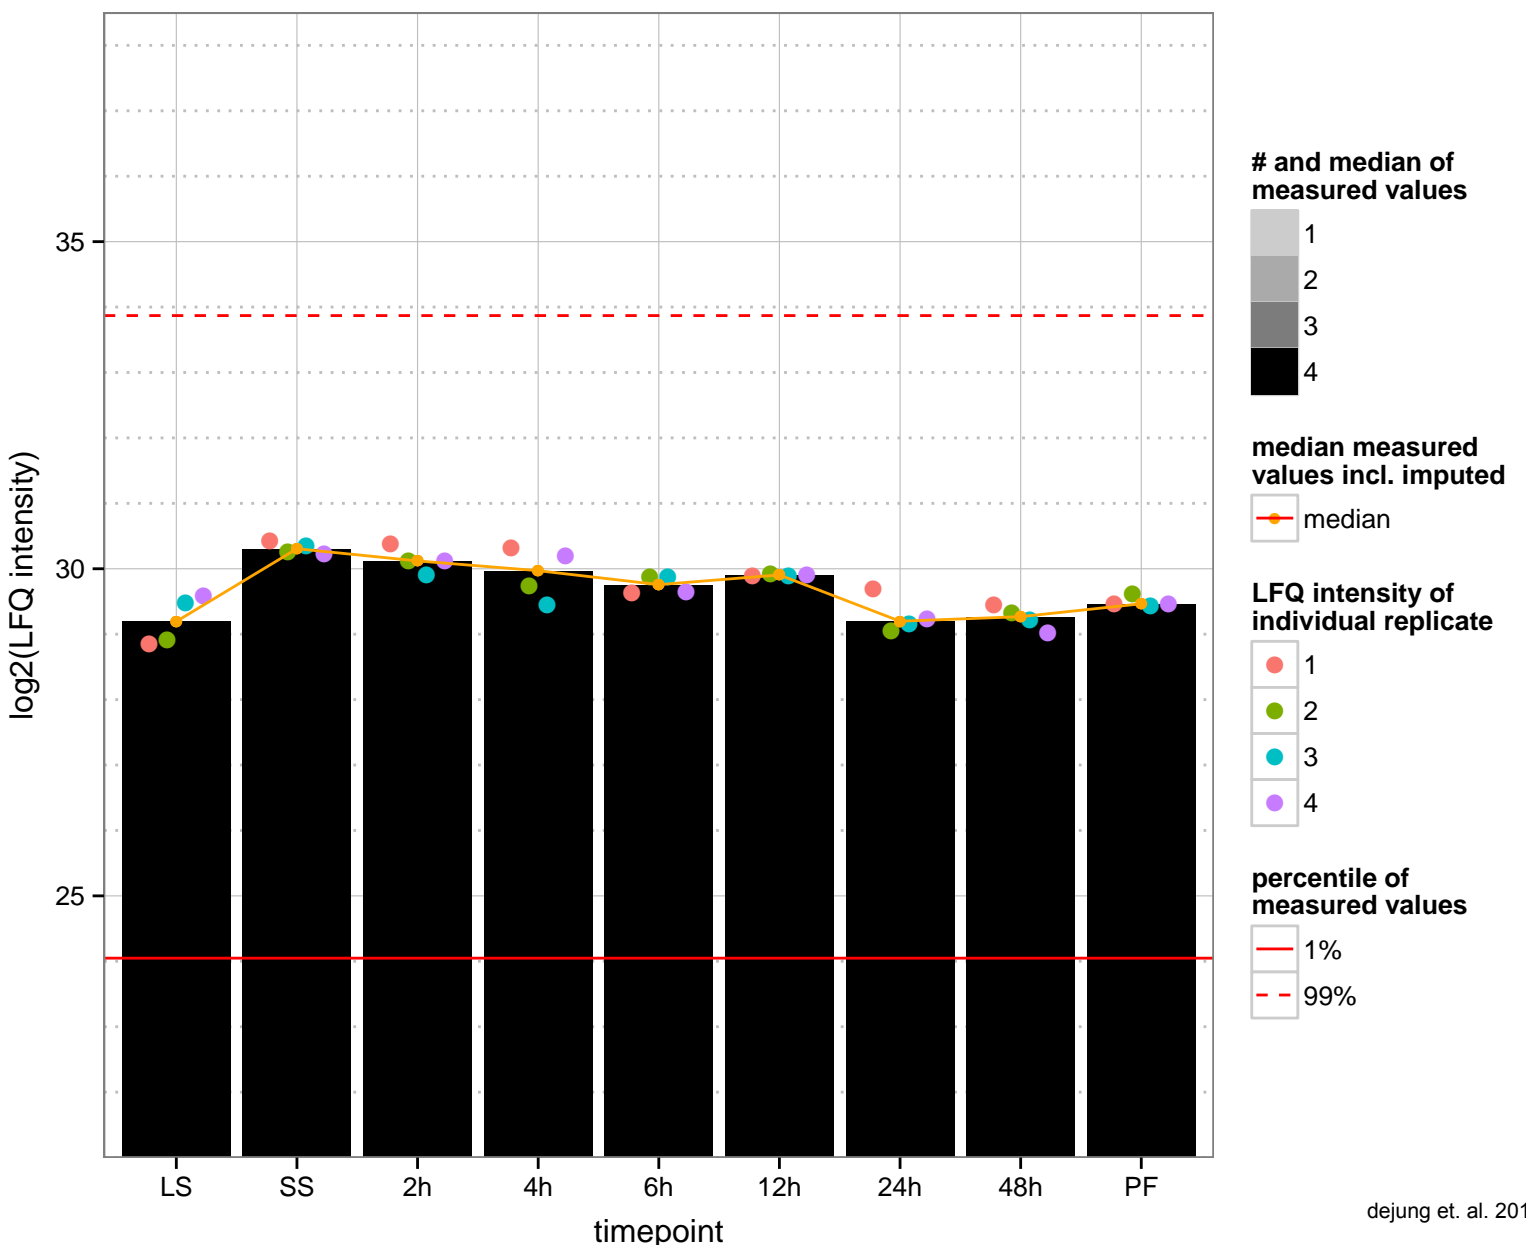

hypothetical protein, conserved  
 Tb927.3.3560  
 AGOF: ubiquitin-protein ligase activity  
 AGOC: ubiquitin ligase complex  
 AGOP: protein ubiquitination  
 PGO: ubiquitin-protein ligase activity  
 PGOC: ubiquitin ligase complex  
 PGOP: protein ubiquitination

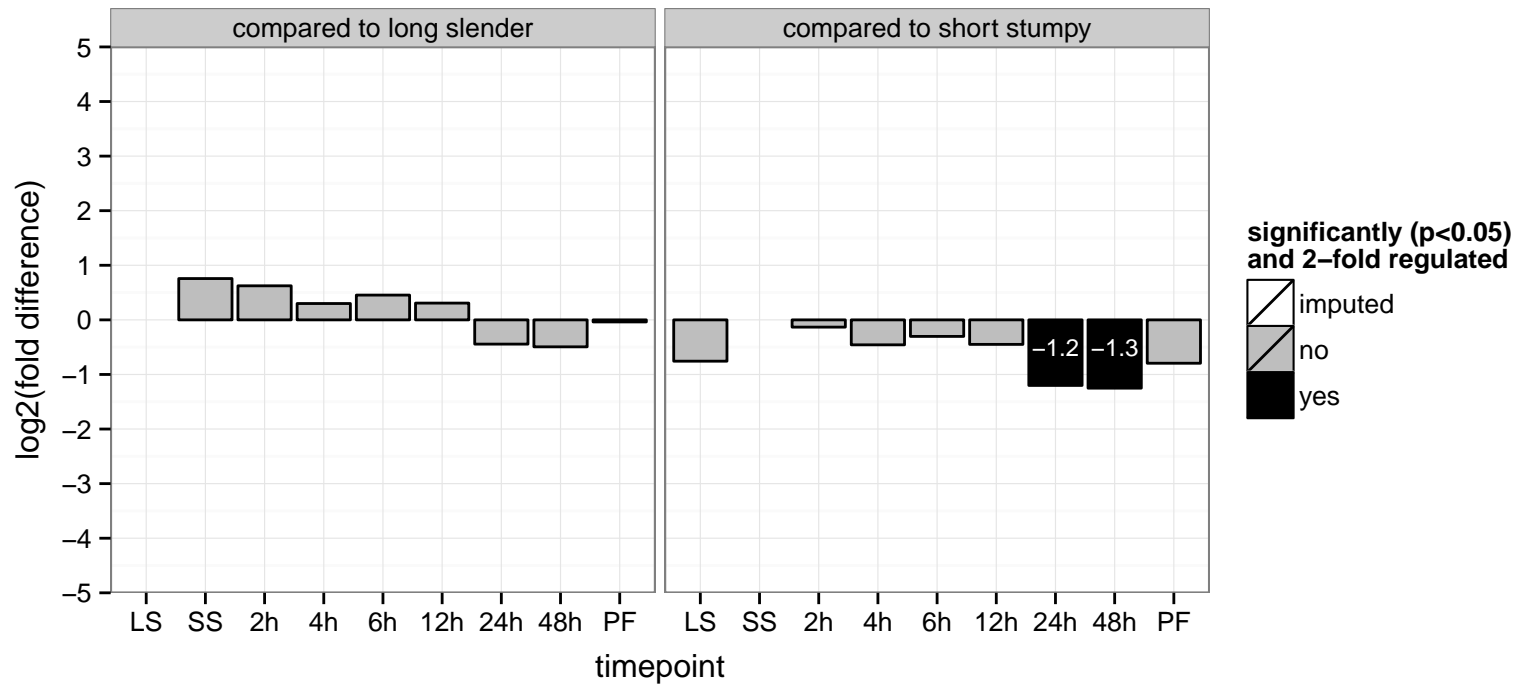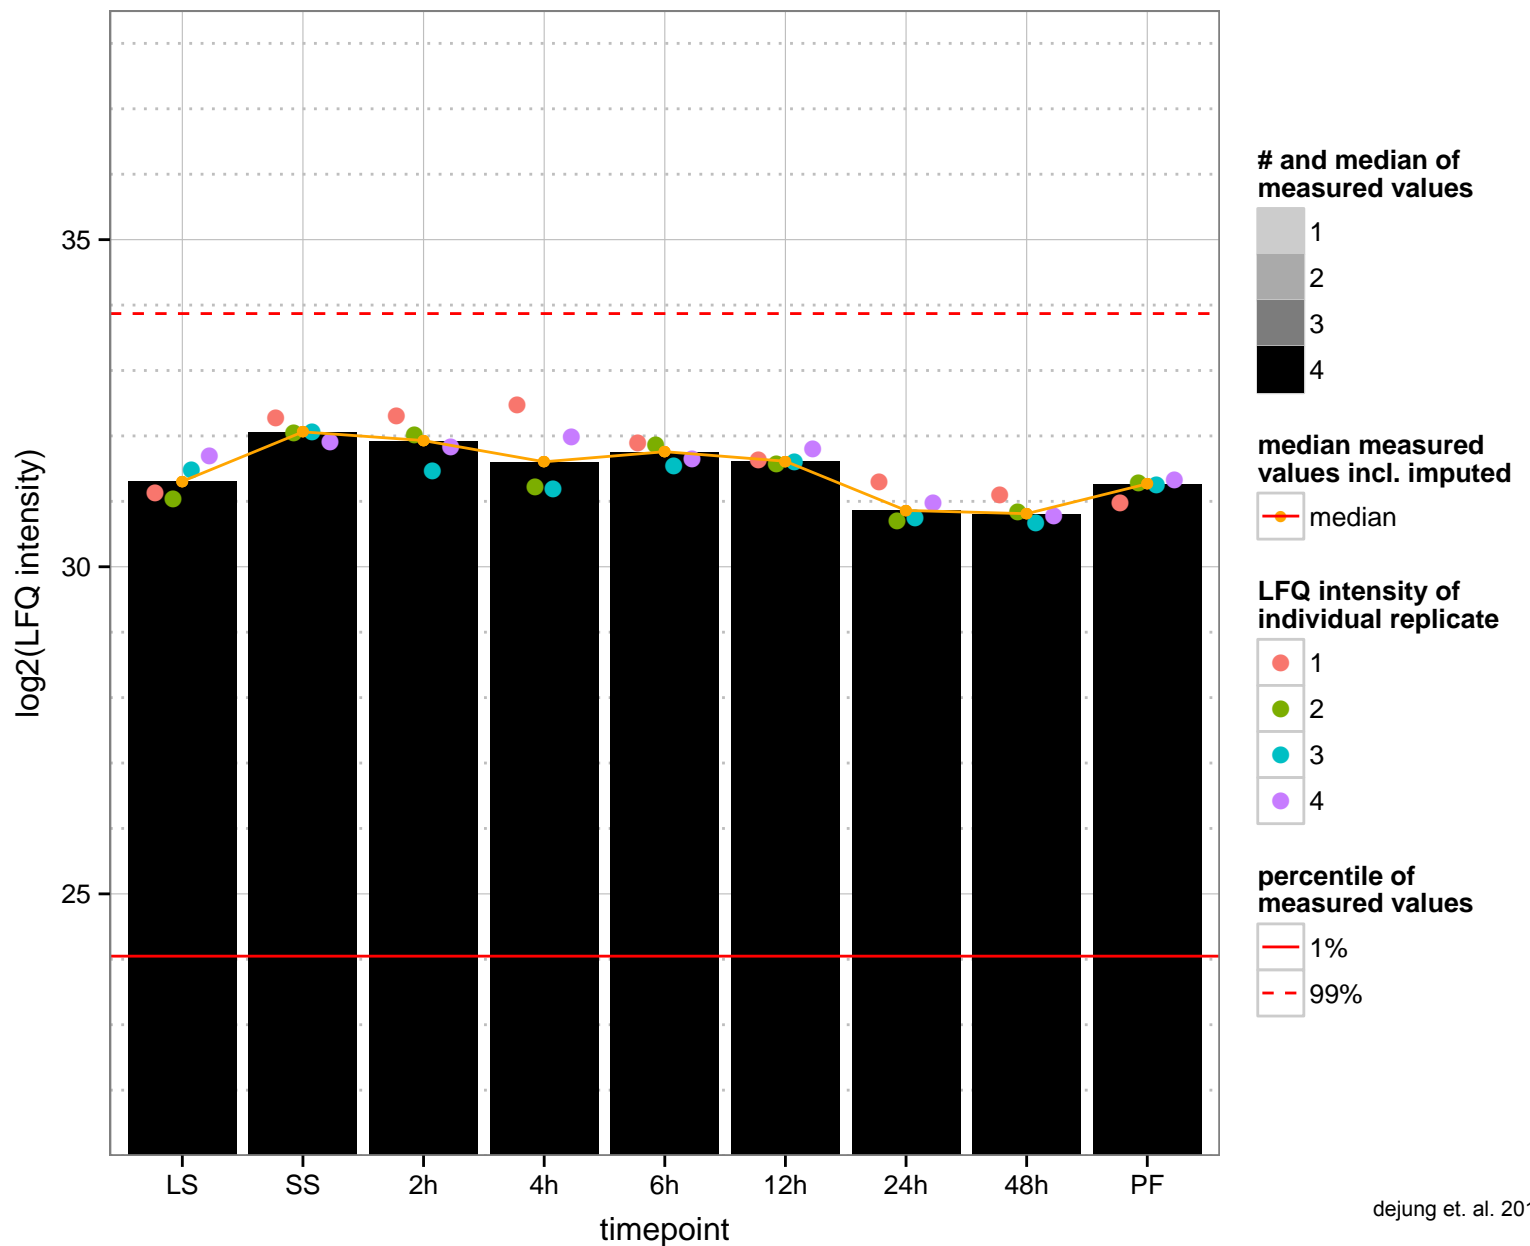

dynein intermediate chain WDRD34, putative  
 Tb927.3.5540  
 AGOF: null  
 AGOC: null  
 AGOP: ciliary or flagellar motility  
 PGO: protein binding  
 PGO: null  
 PGO: null

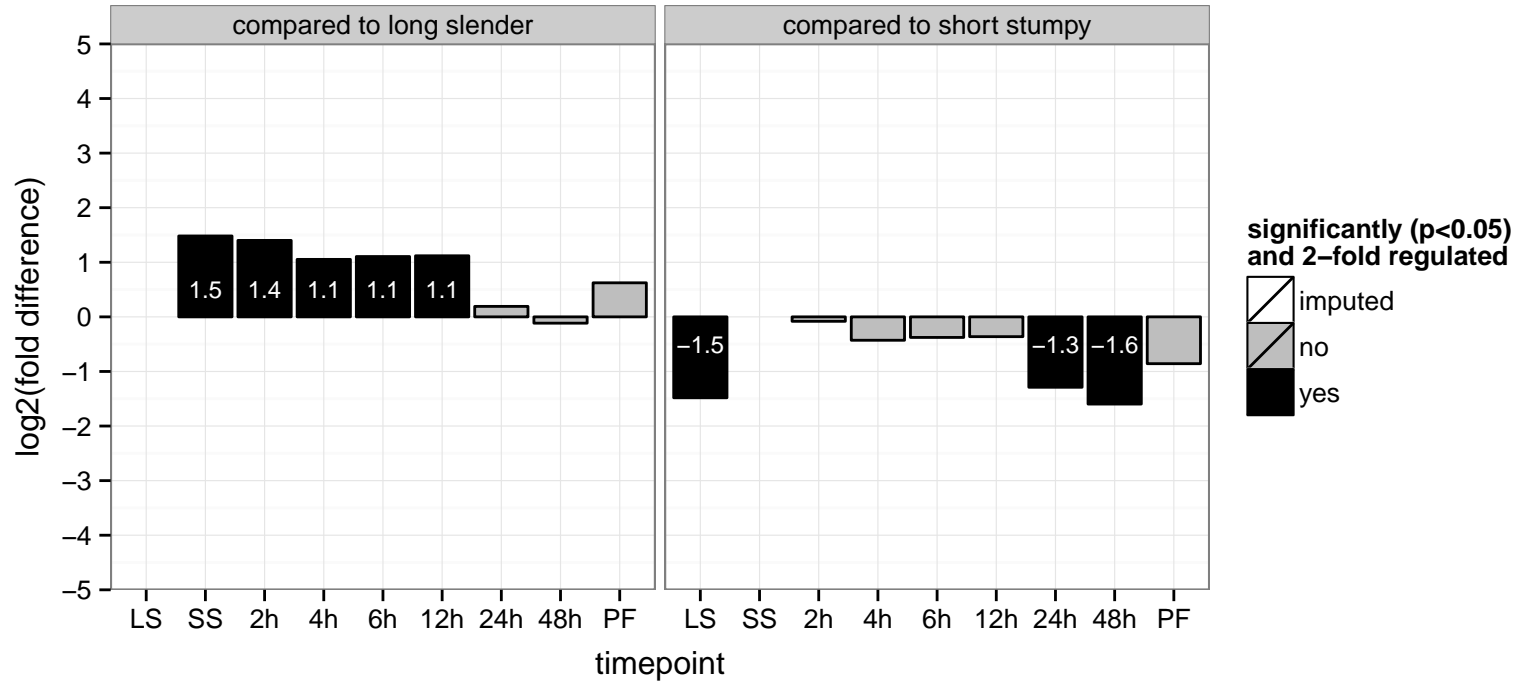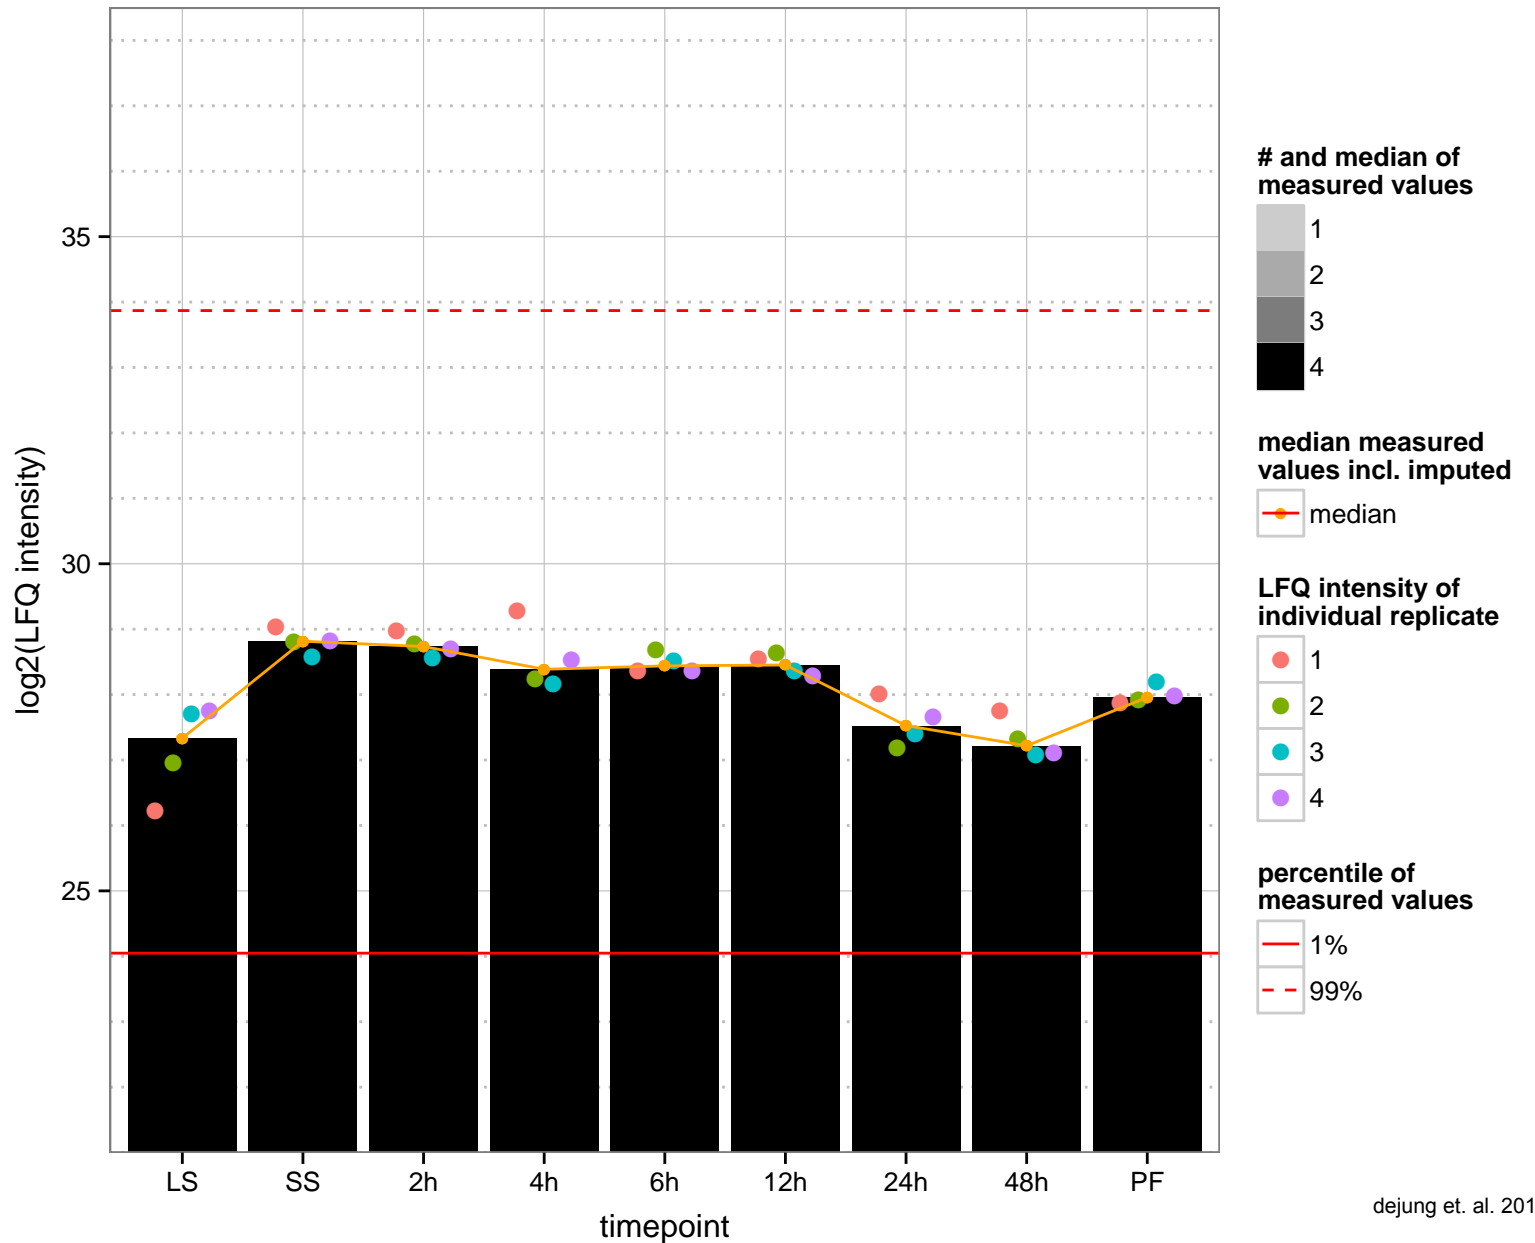

thioredoxin, putative  
 Tb927.4.2450  
 AGOF: glutathione–disulfide reductase activity  
 AGOC: null  
 AGOP: cell redox homeostasis, oxidation–reduction process  
 PGO: null  
 PGO: null  
 PGO: null  
 PGO: null  
 PGO: cell redox homeostasis

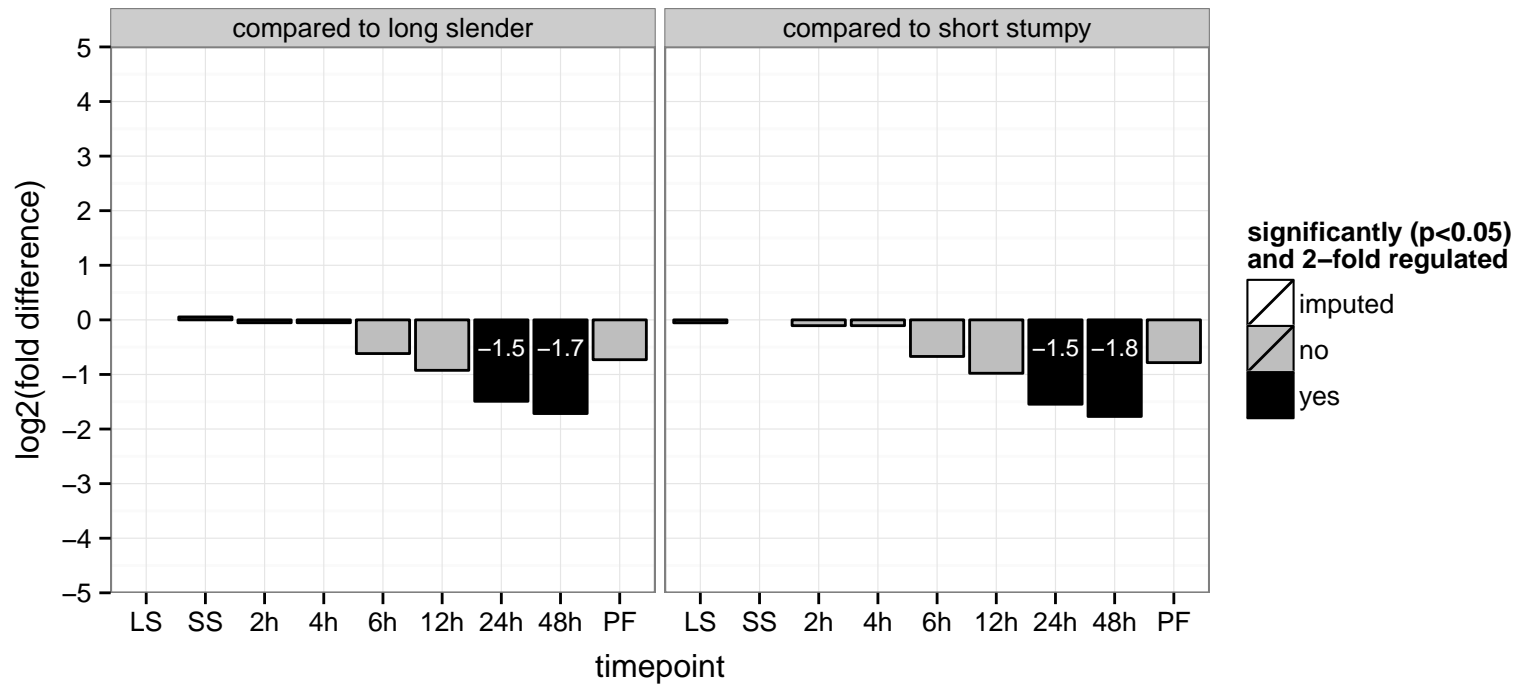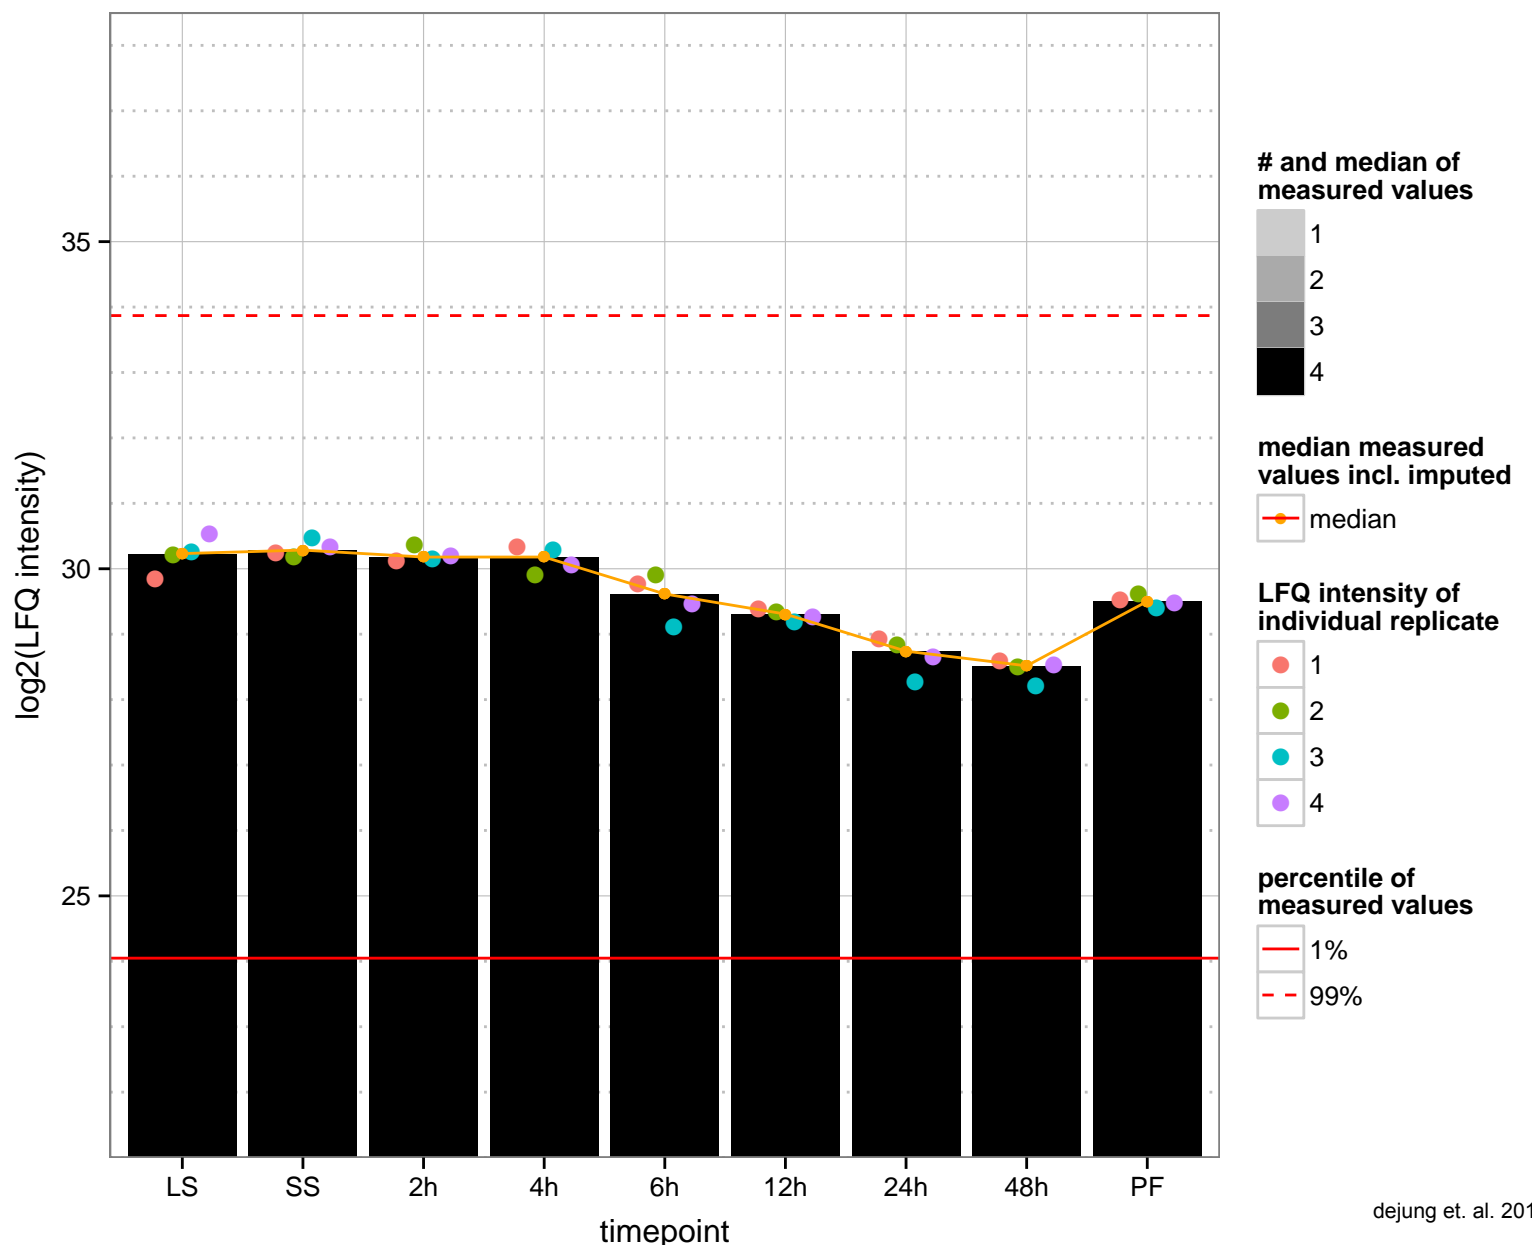

choline/ethanolamine kinase (C/EK1)

Tb927.5.1140

AGOF: choline kinase activity, ethanolamine kinase activity

AGOC: cytoplasm

AGOP: phosphatidylcholine biosynthetic process, phosphatidylethanolamine biosynthetic process

PGOF: phosphotransferase activity, alcohol group as acceptor, transferase activity, transferring phosphorus-containing groups

PGOC: null

PGOP: null

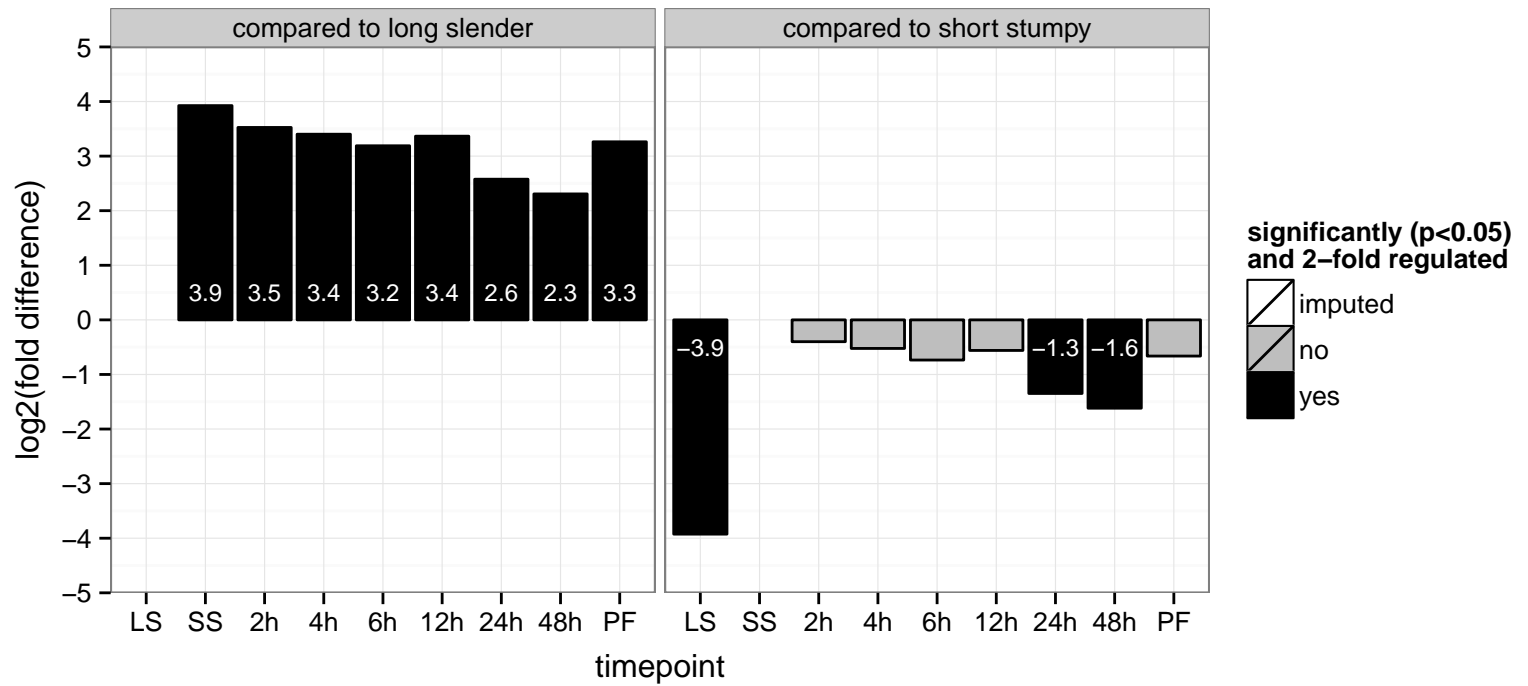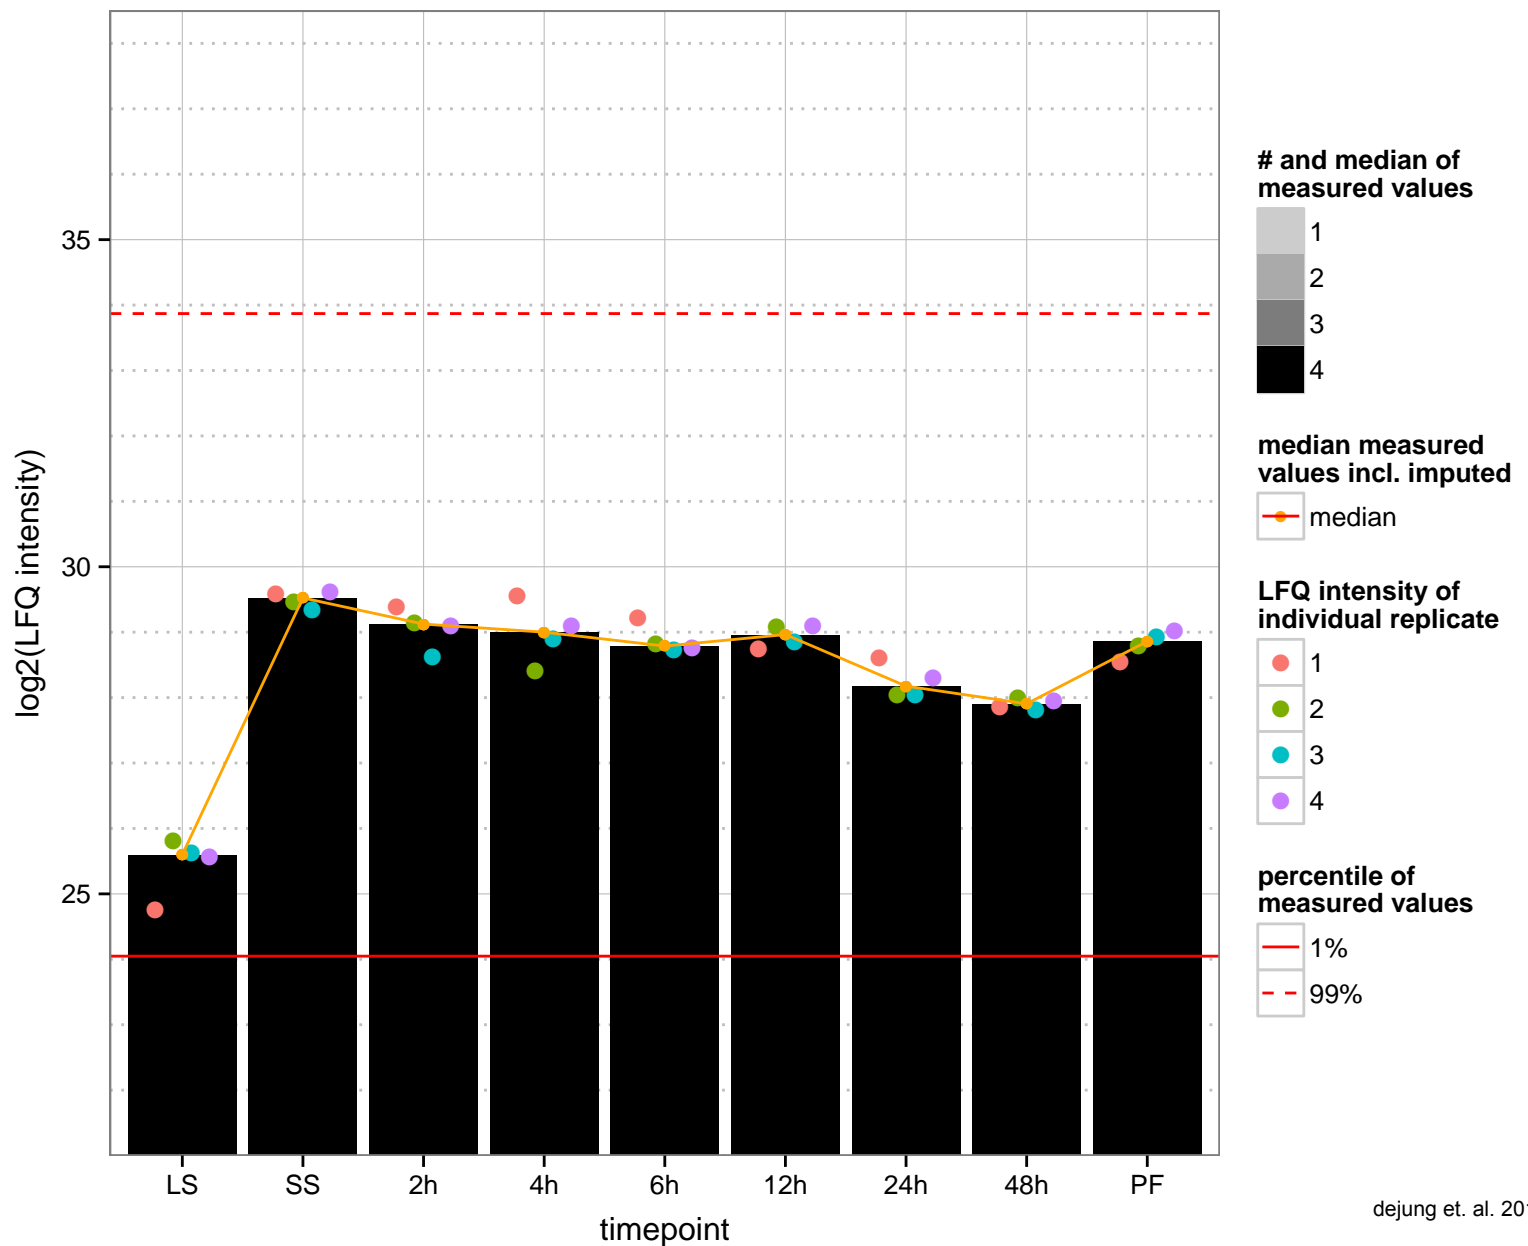

hypothetical protein, conserved  
 Tb927.5.1460  
 AGOF: null  
 AGOC: null  
 AGOP: null  
 PGO: null  
 PGO: null  
 PGO: null

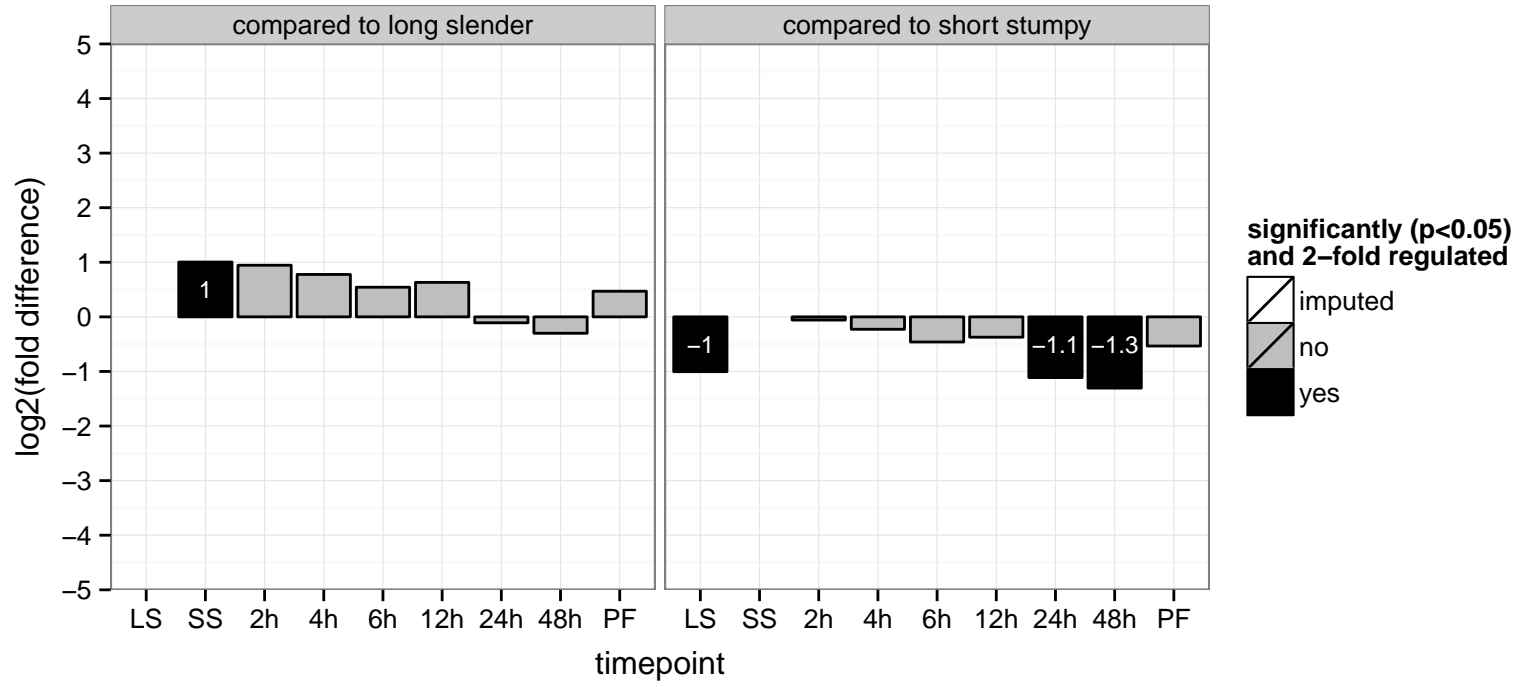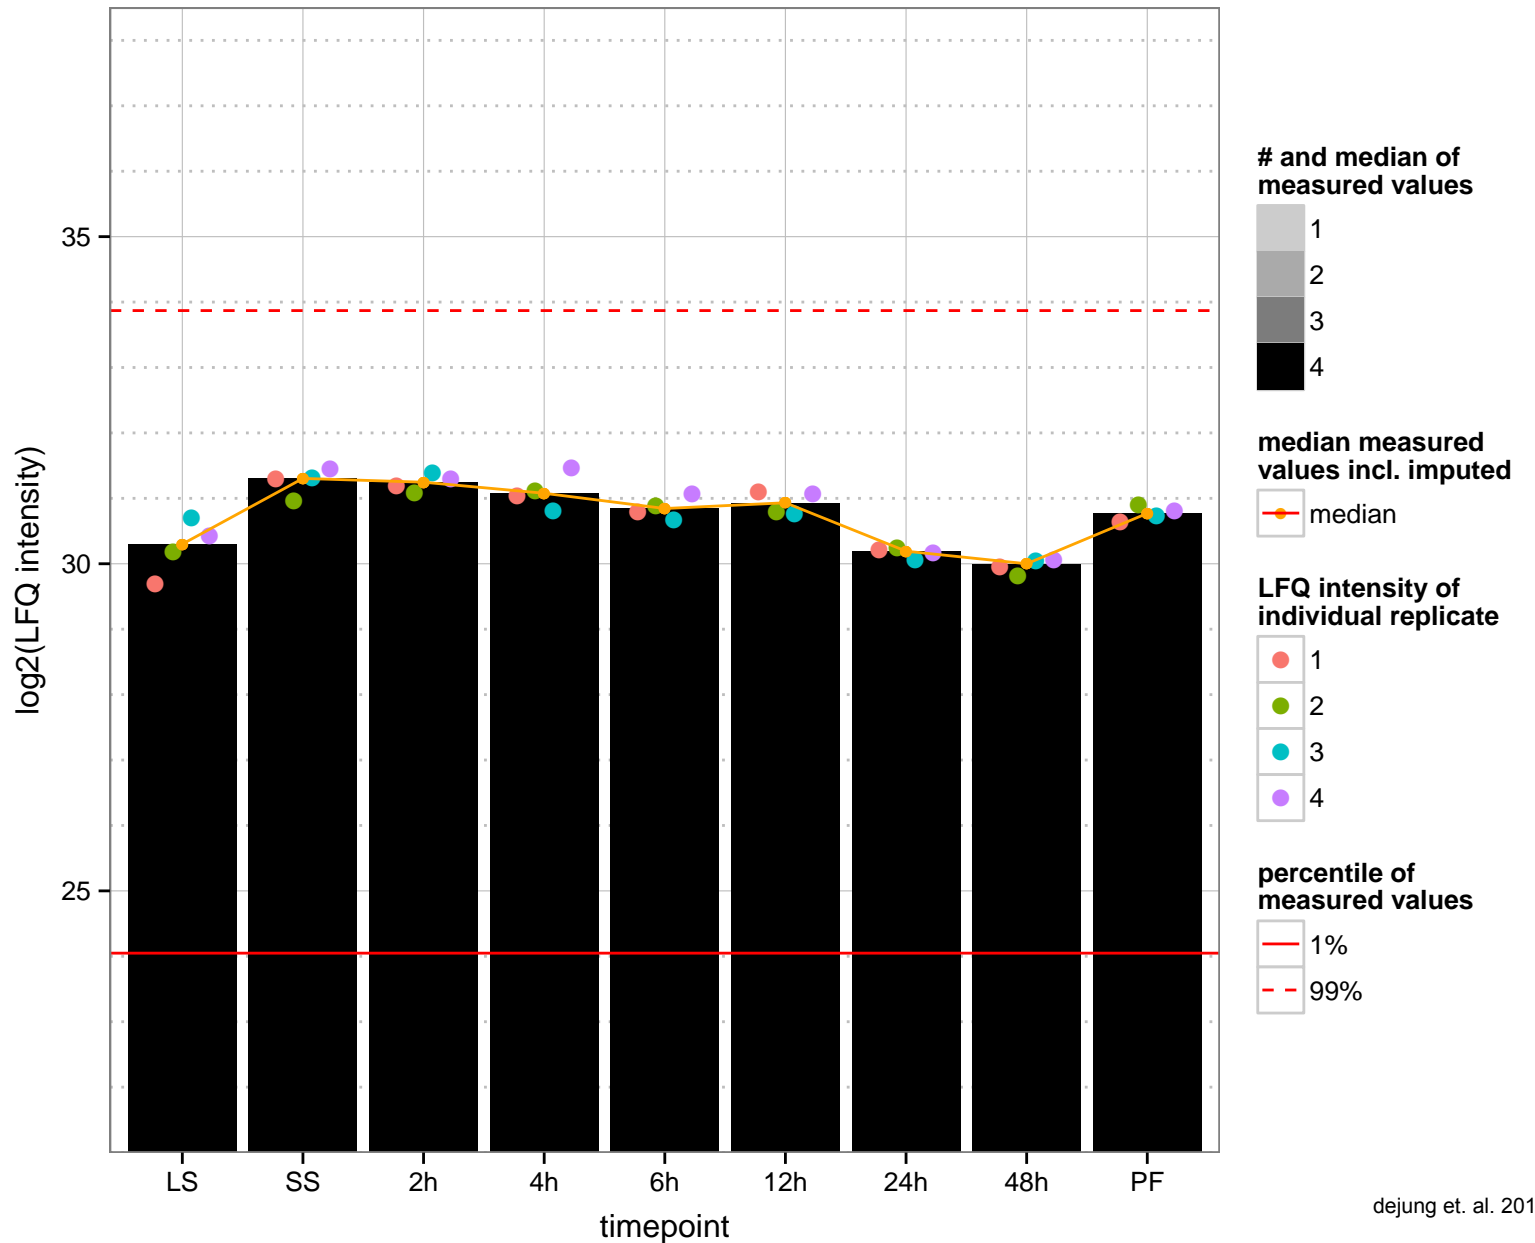



protein kinase, putative

Tb927.5.2820

AGOF: ATP binding, protein serine/threonine kinase activity, protein tyrosine kinase activity

AGOC: null

AGOP: protein phosphorylation

PGOF: ATP binding, protein kinase activity, transferase activity, transferring phosphorus-containing groups

PGOC: null

PGOP: protein phosphorylation

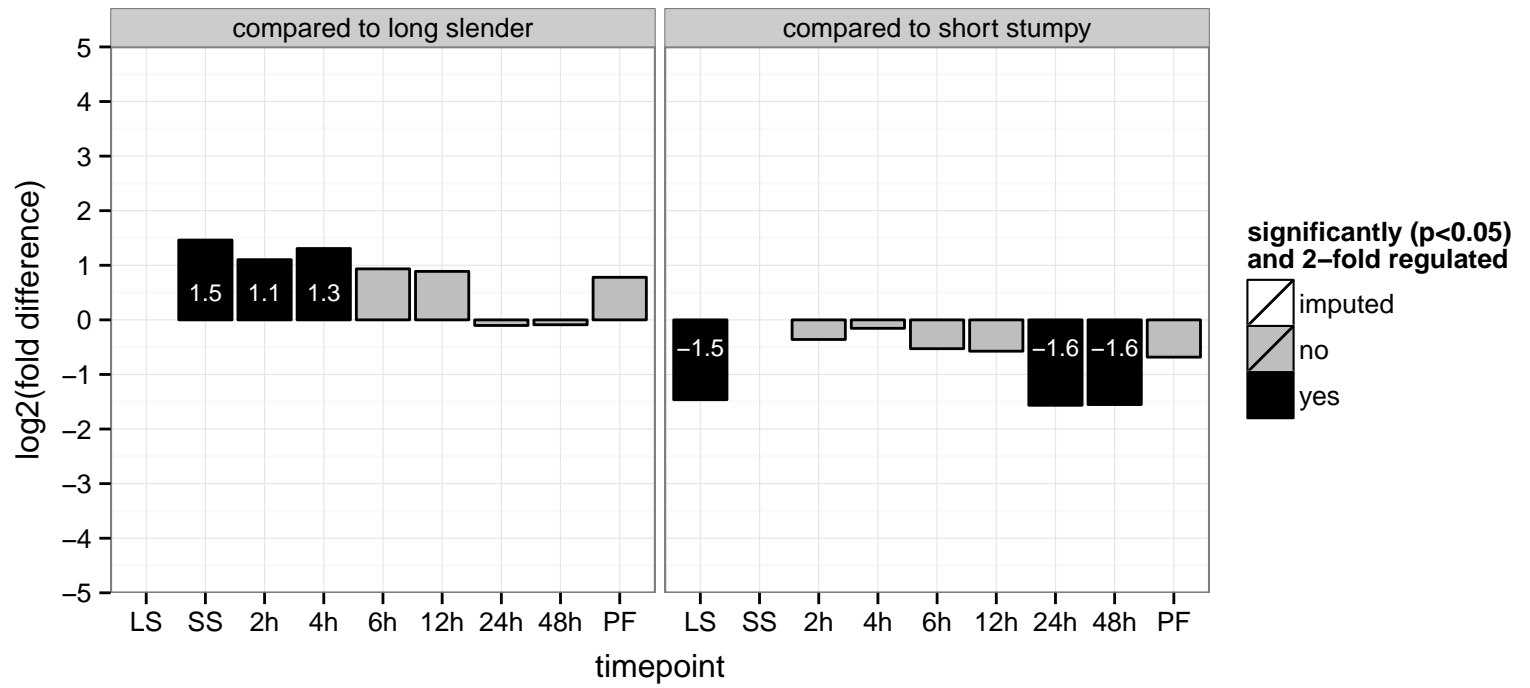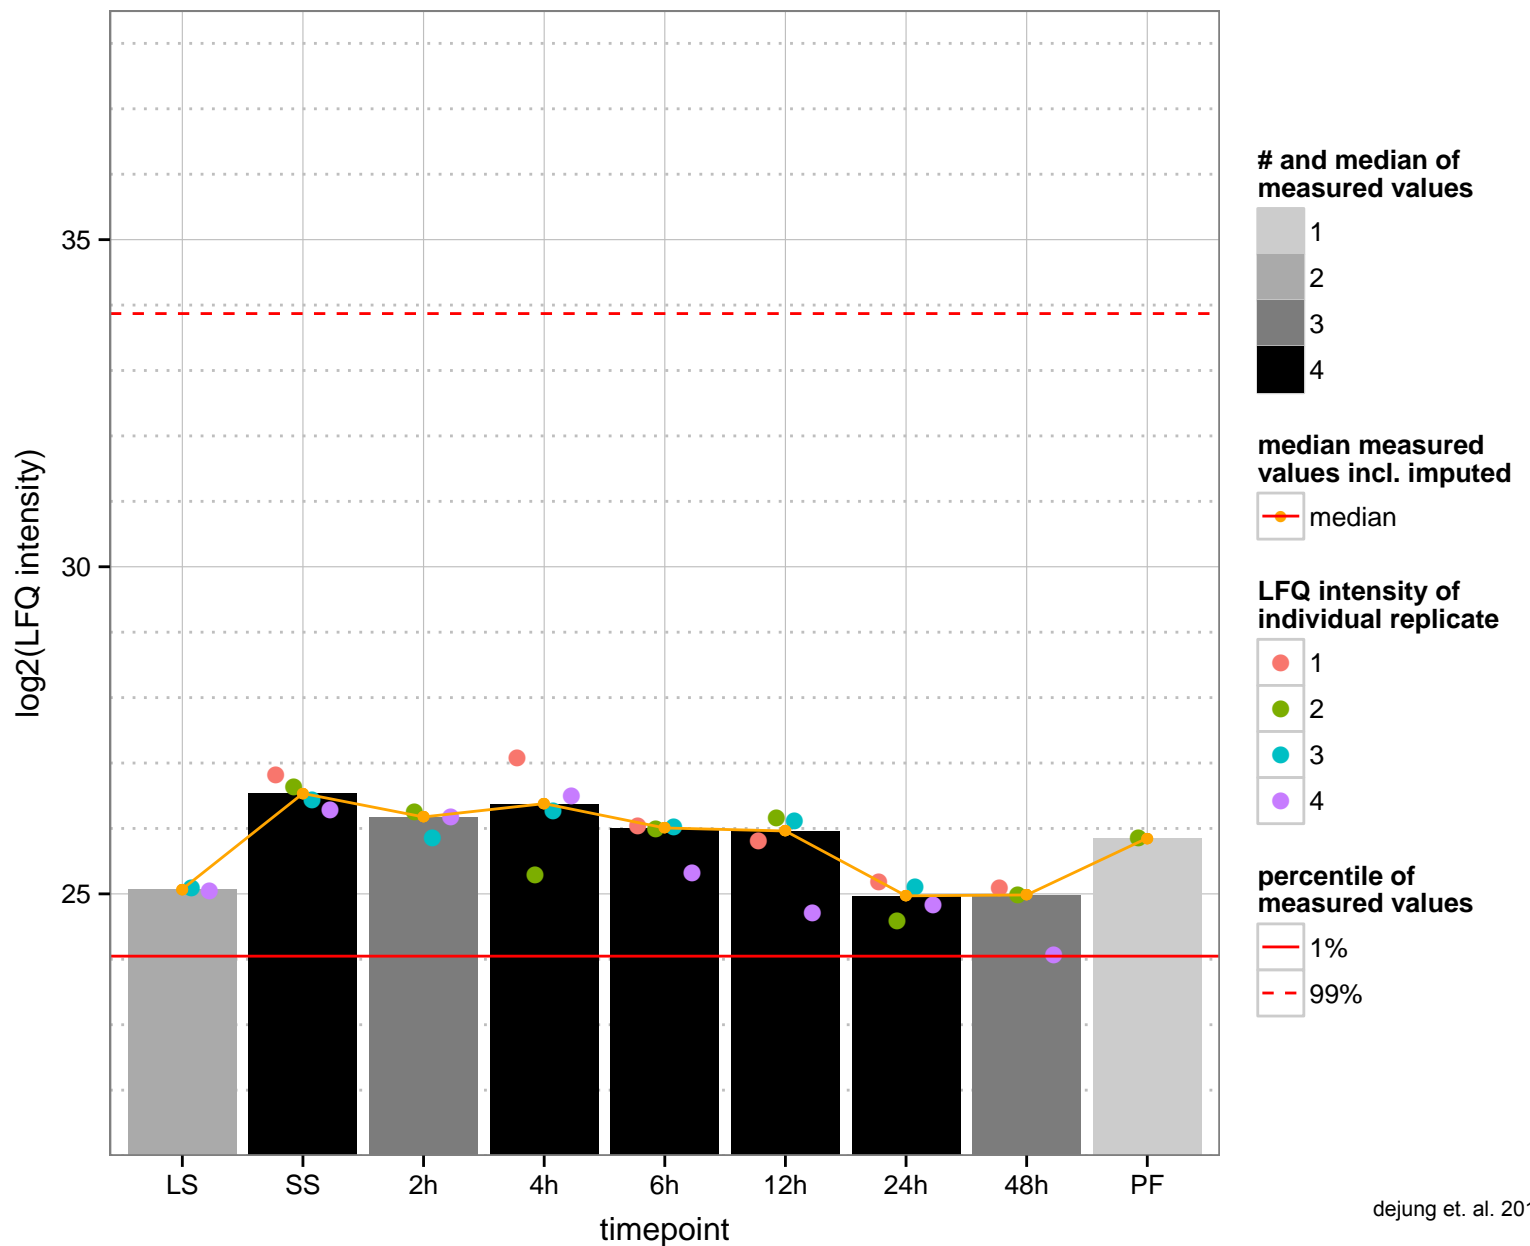

NADH-dependent fumarate reductase, putative  
 Tb927.5.940  
 AGOF: electron carrier activity, succinate dehydrogenase activity  
 AGOC: null  
 AGOP: null  
 PGO: oxidoreductase activity, succinate dehydrogenase activity  
 PGOC: null  
 PGOP: oxidation-reduction process

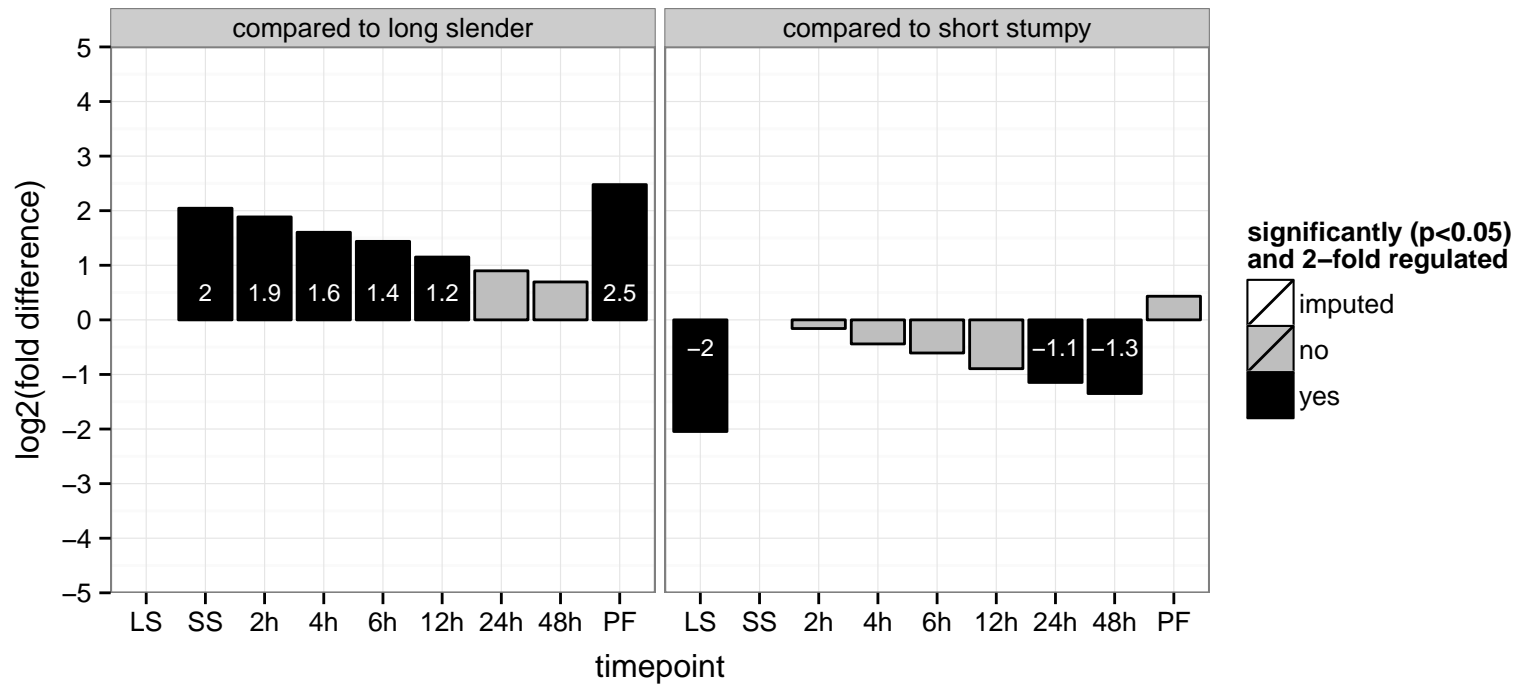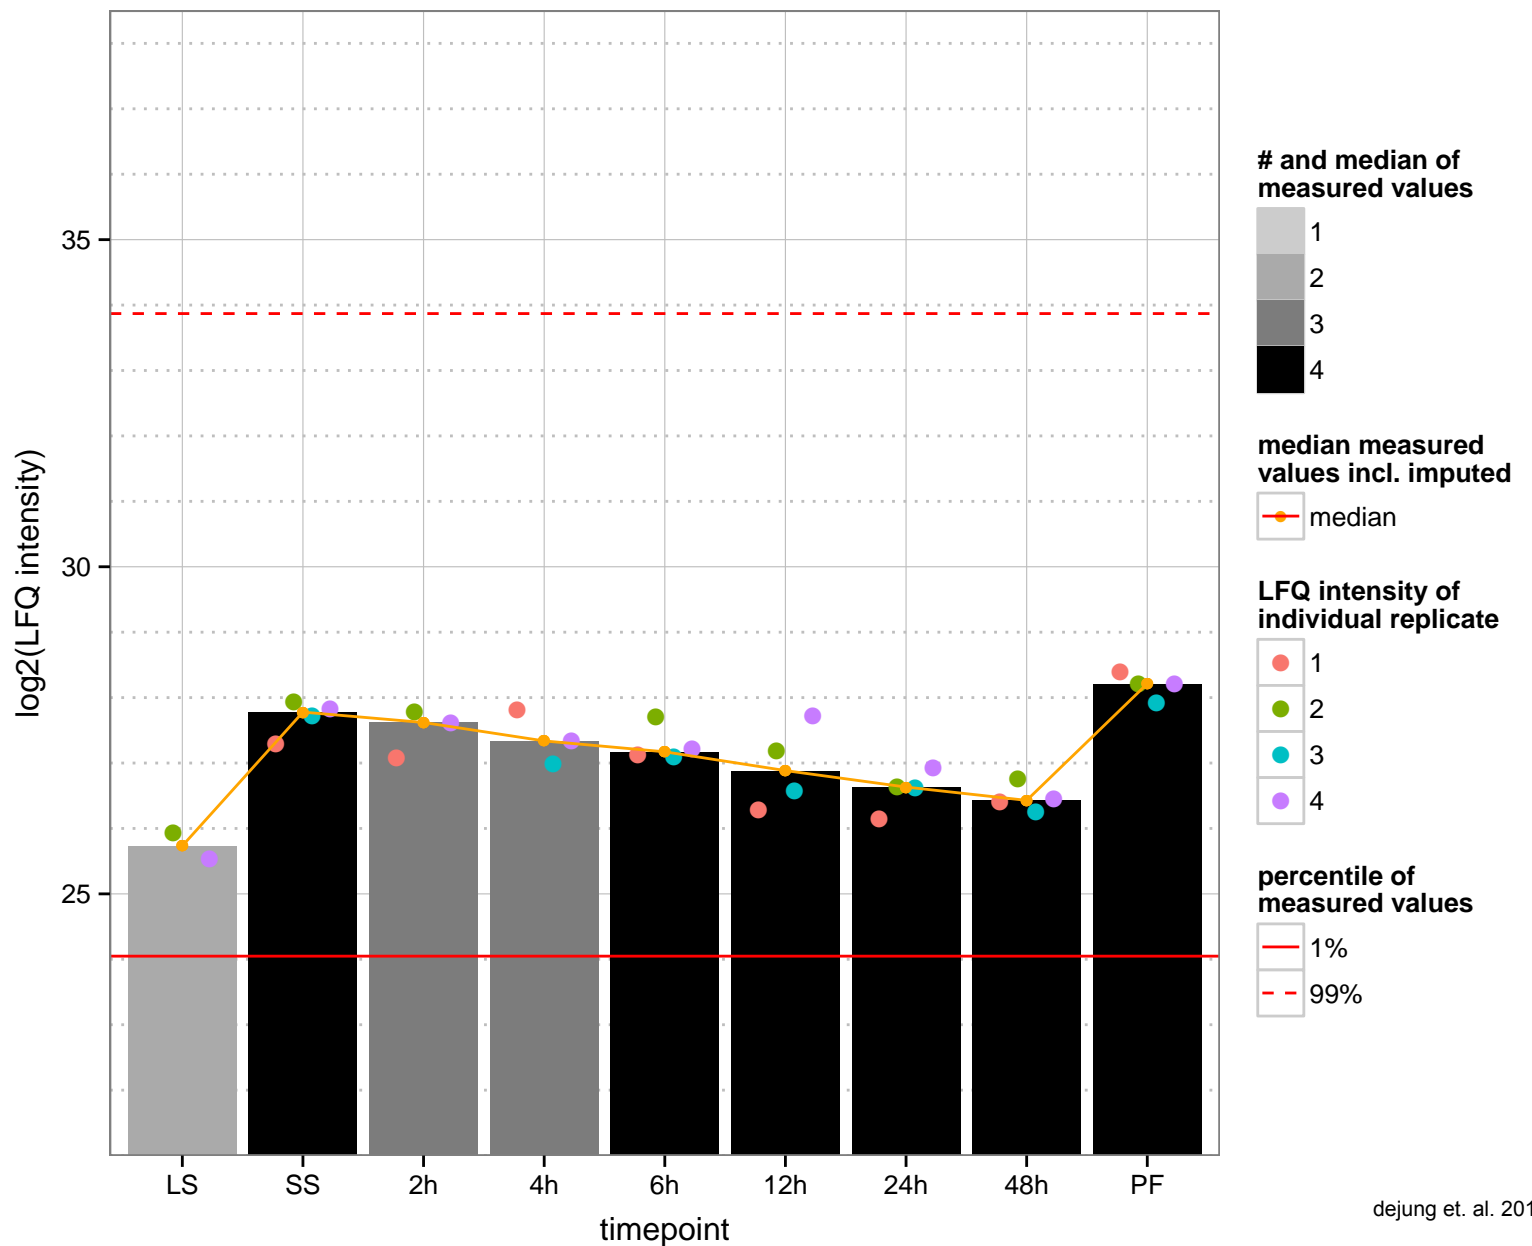

endosomal trafficking protein RME-8, putative  
 Tb927.6.3500  
 AGOF: heat shock protein binding  
 AGOC: null  
 AGOP: endocytosis  
 PGOF: binding, heat shock protein binding  
 PGO: null  
 PGOP: null

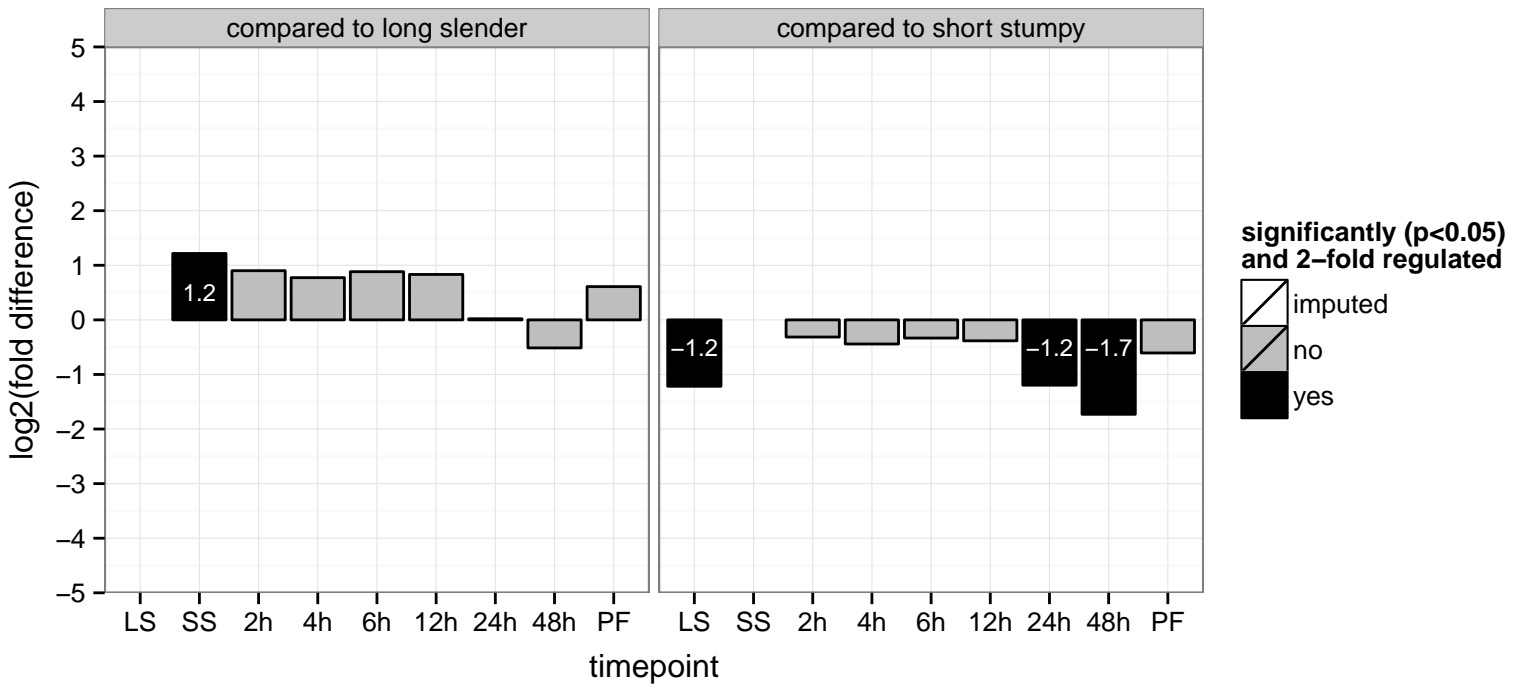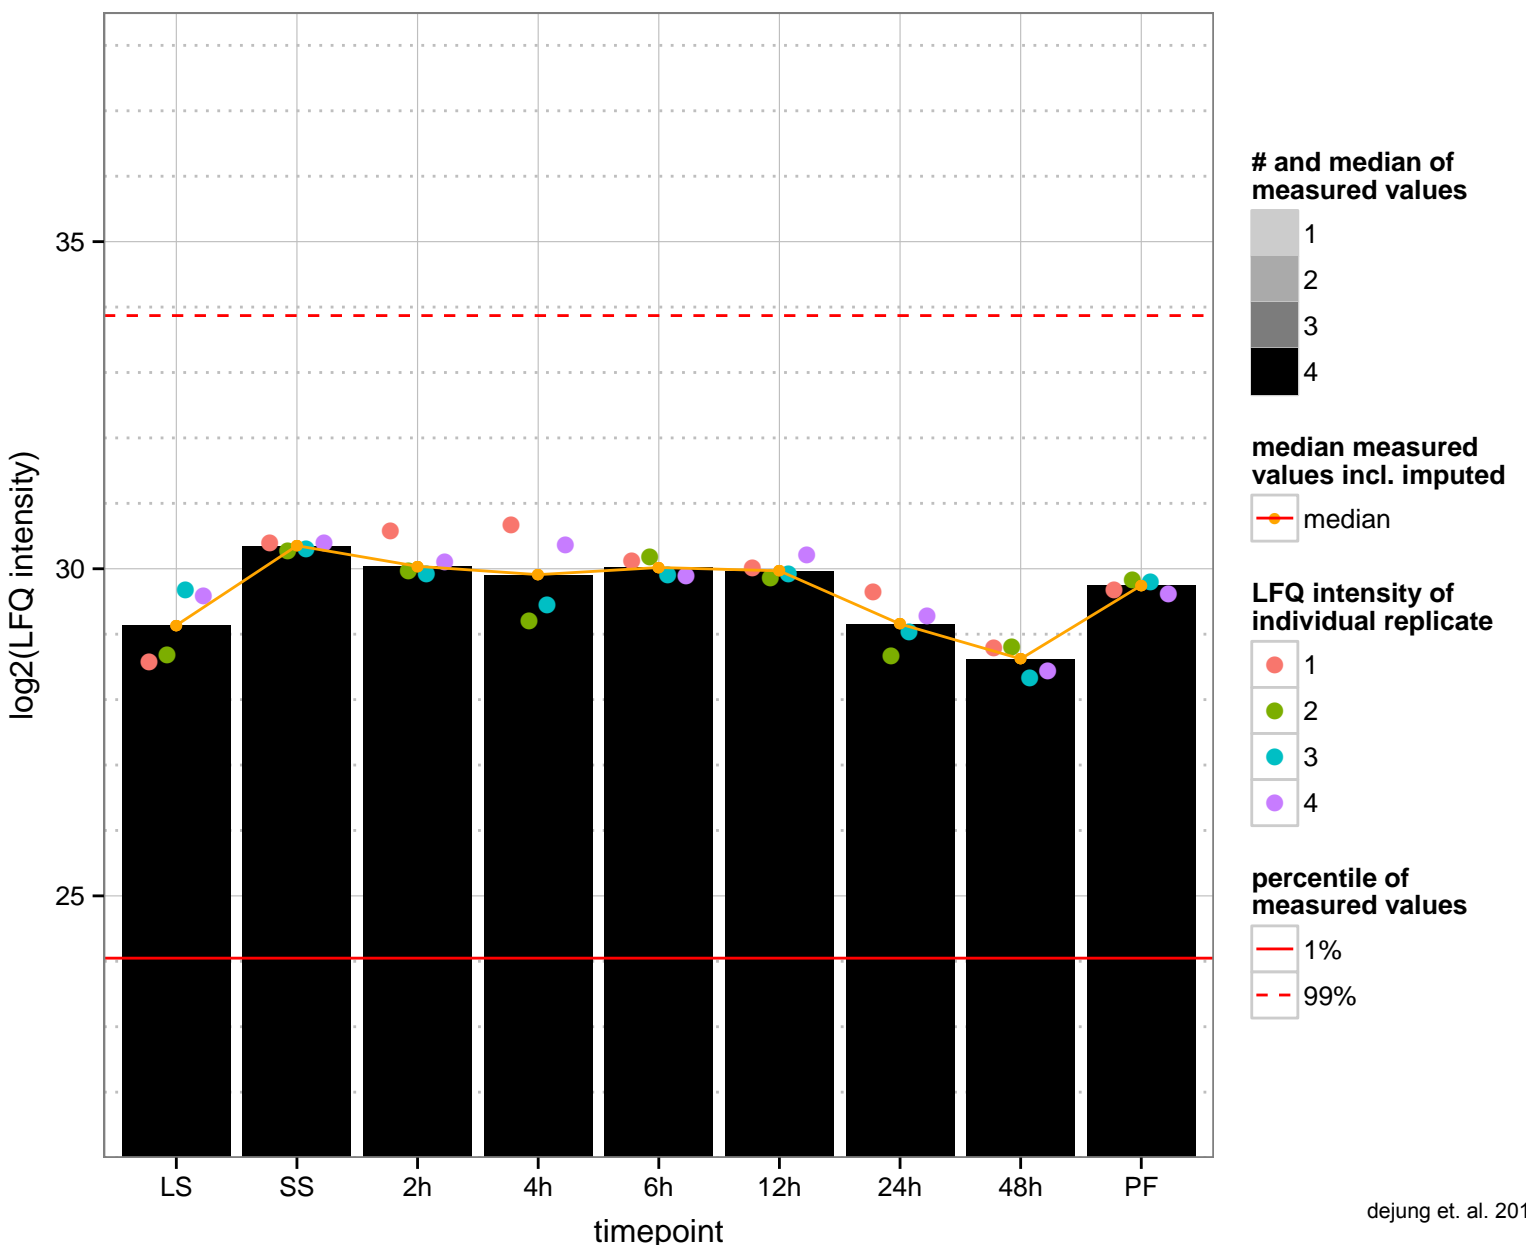

pre-mRNA splicing factor ATP-dependent RNA helicase, putative, ATP-dependent RNA helicase  
 Tb927.6.4600  
 AGOF: ATP binding, helicase activity, nucleic acid binding  
 AGOC: null  
 AGOP: null  
 PGOF: ATP binding, ATP-dependent helicase activity, helicase activity, nucleic acid binding  
 PGOC: null  
 PGOP: null

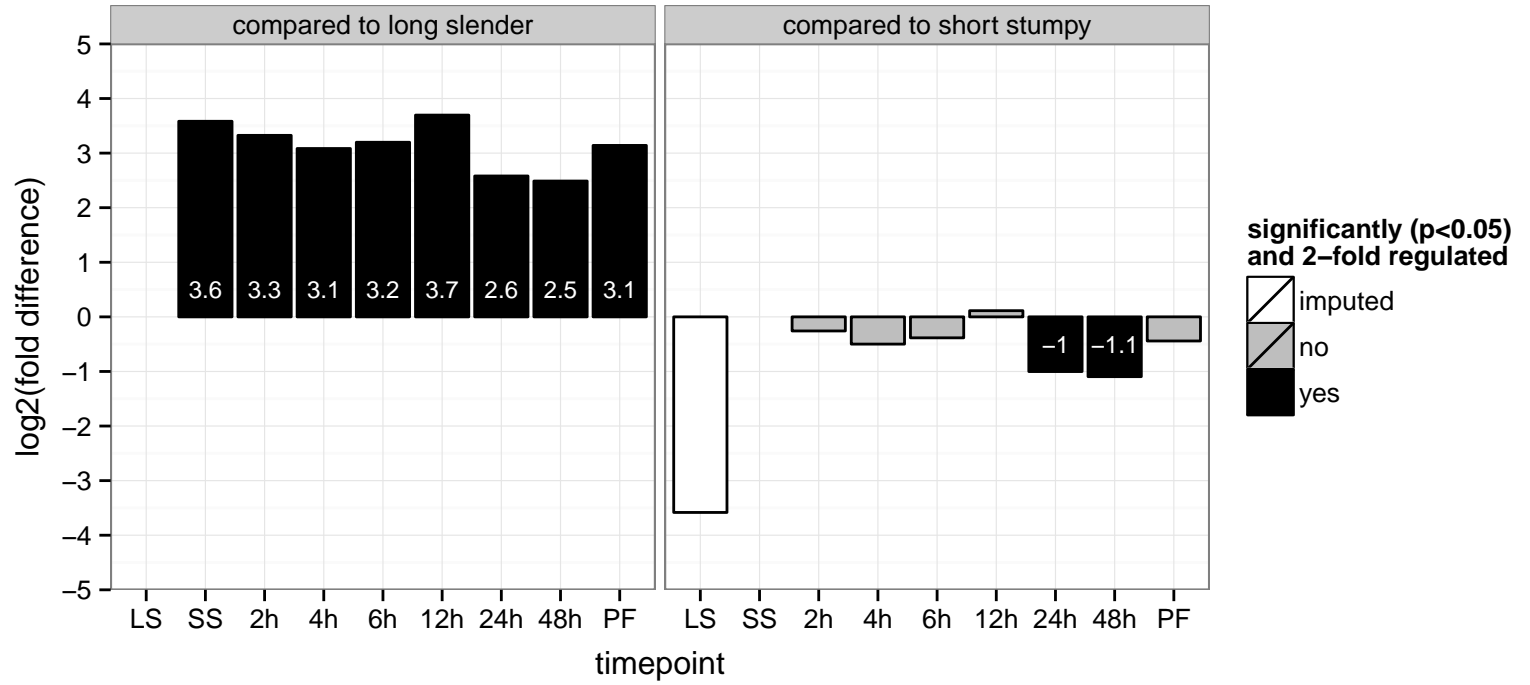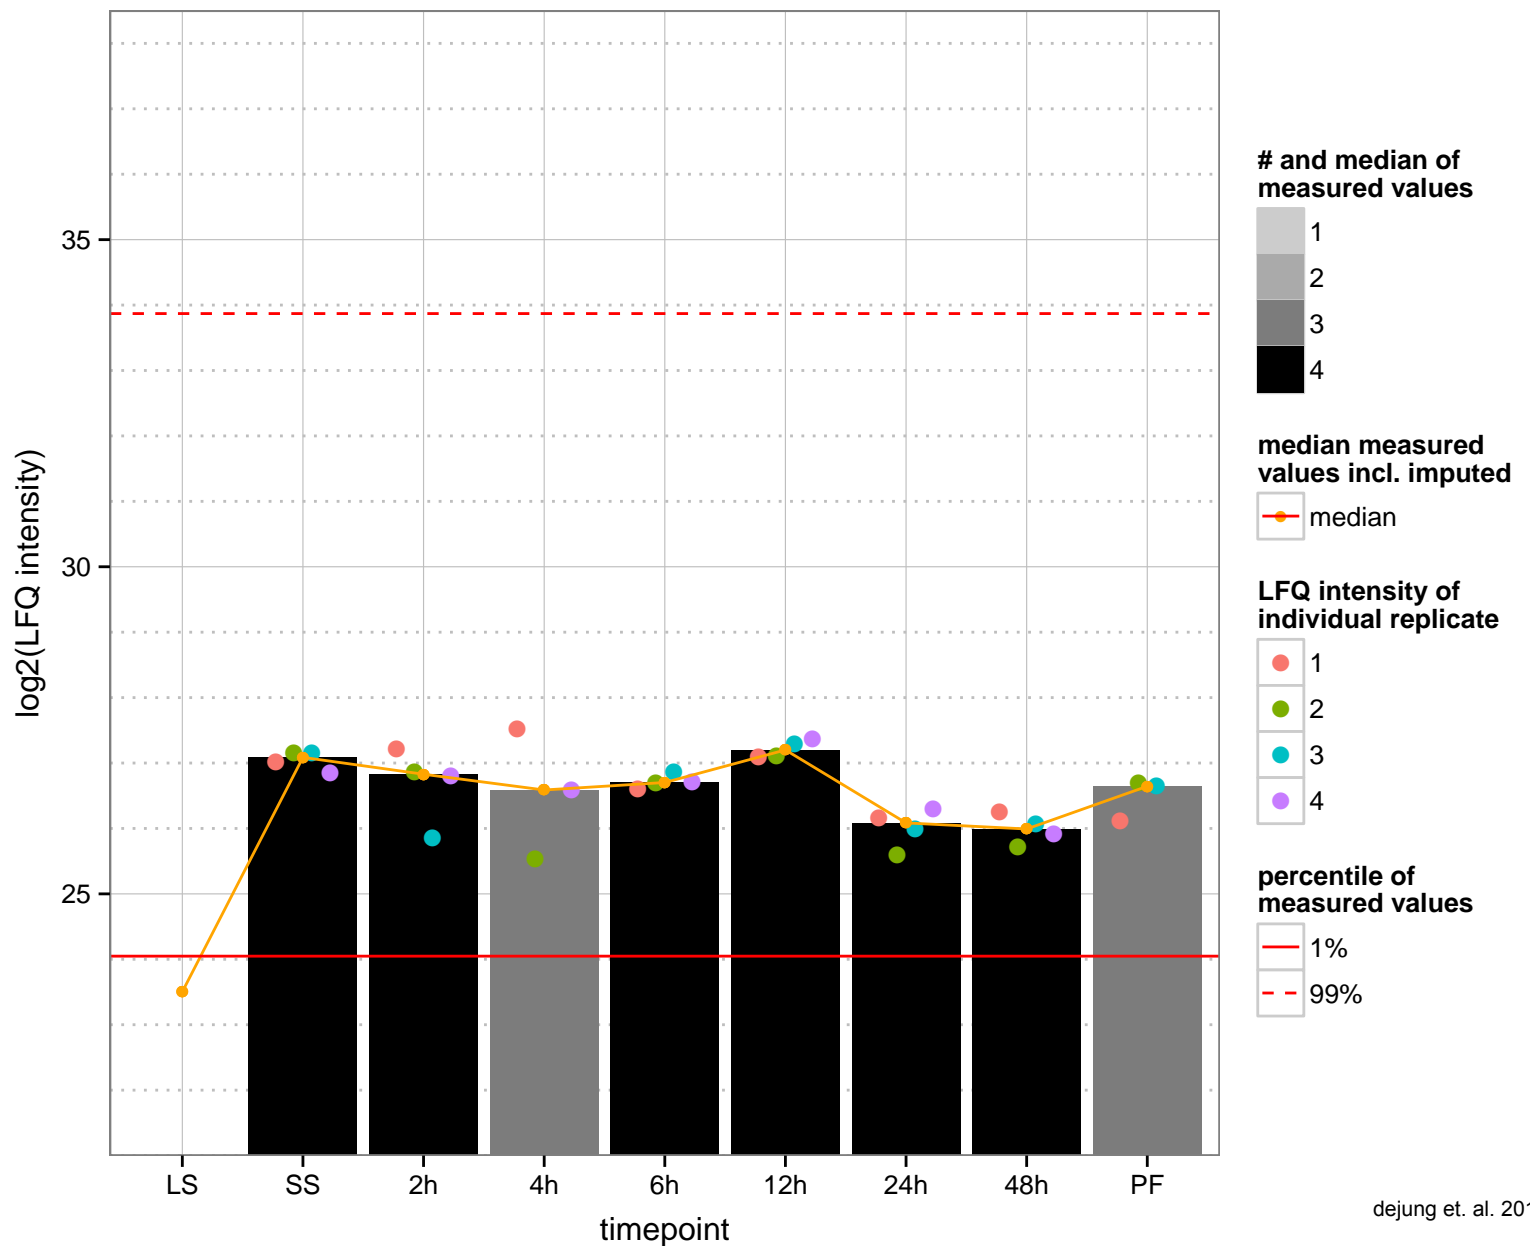

cysteine peptidase C (CPC), CPC cysteine peptidase, Clan CA, family C1, Cathepsin B-like (TbcatB)  
 Tb927.6.560  
 AGOF: cysteine-type peptidase activity  
 AGOC: null  
 AGOP: proteolysis  
 PGOF: cysteine-type peptidase activity  
 PGO: null  
 PGOP: proteolysis

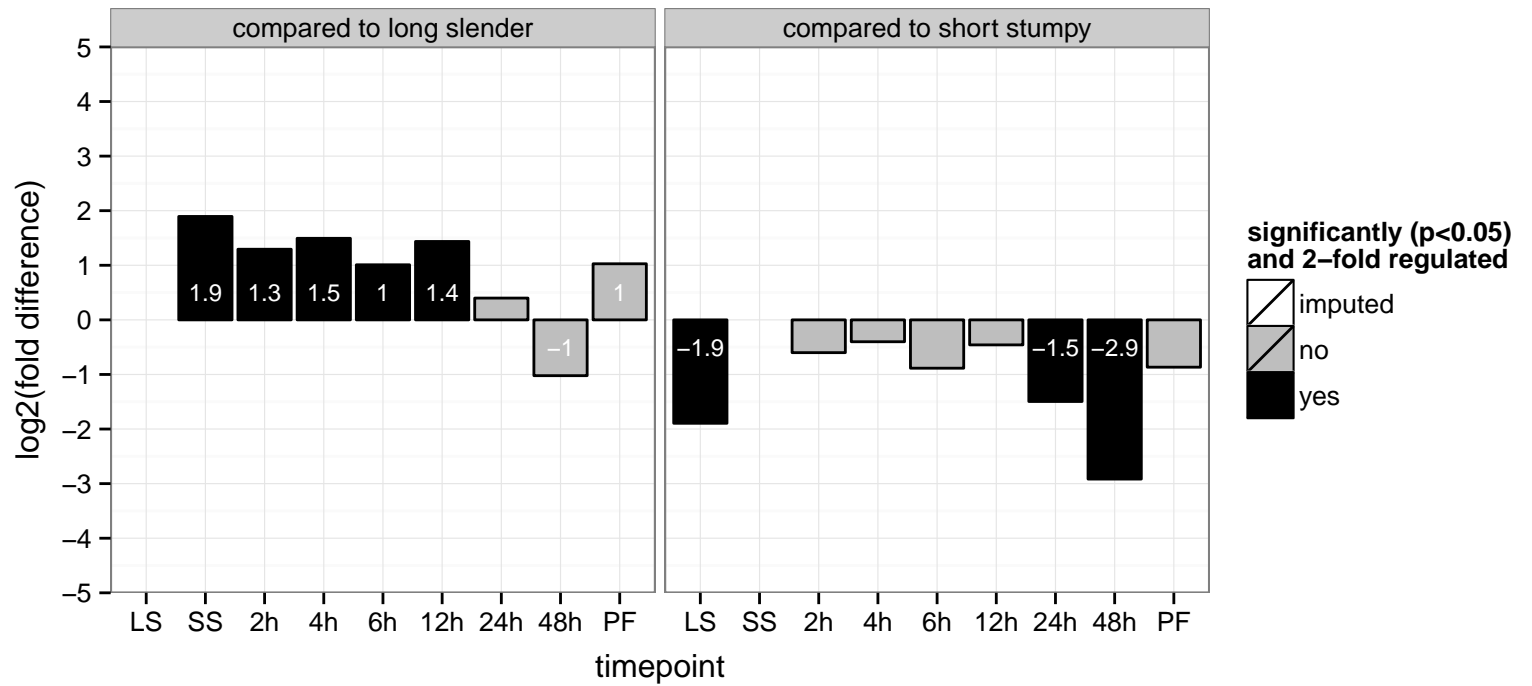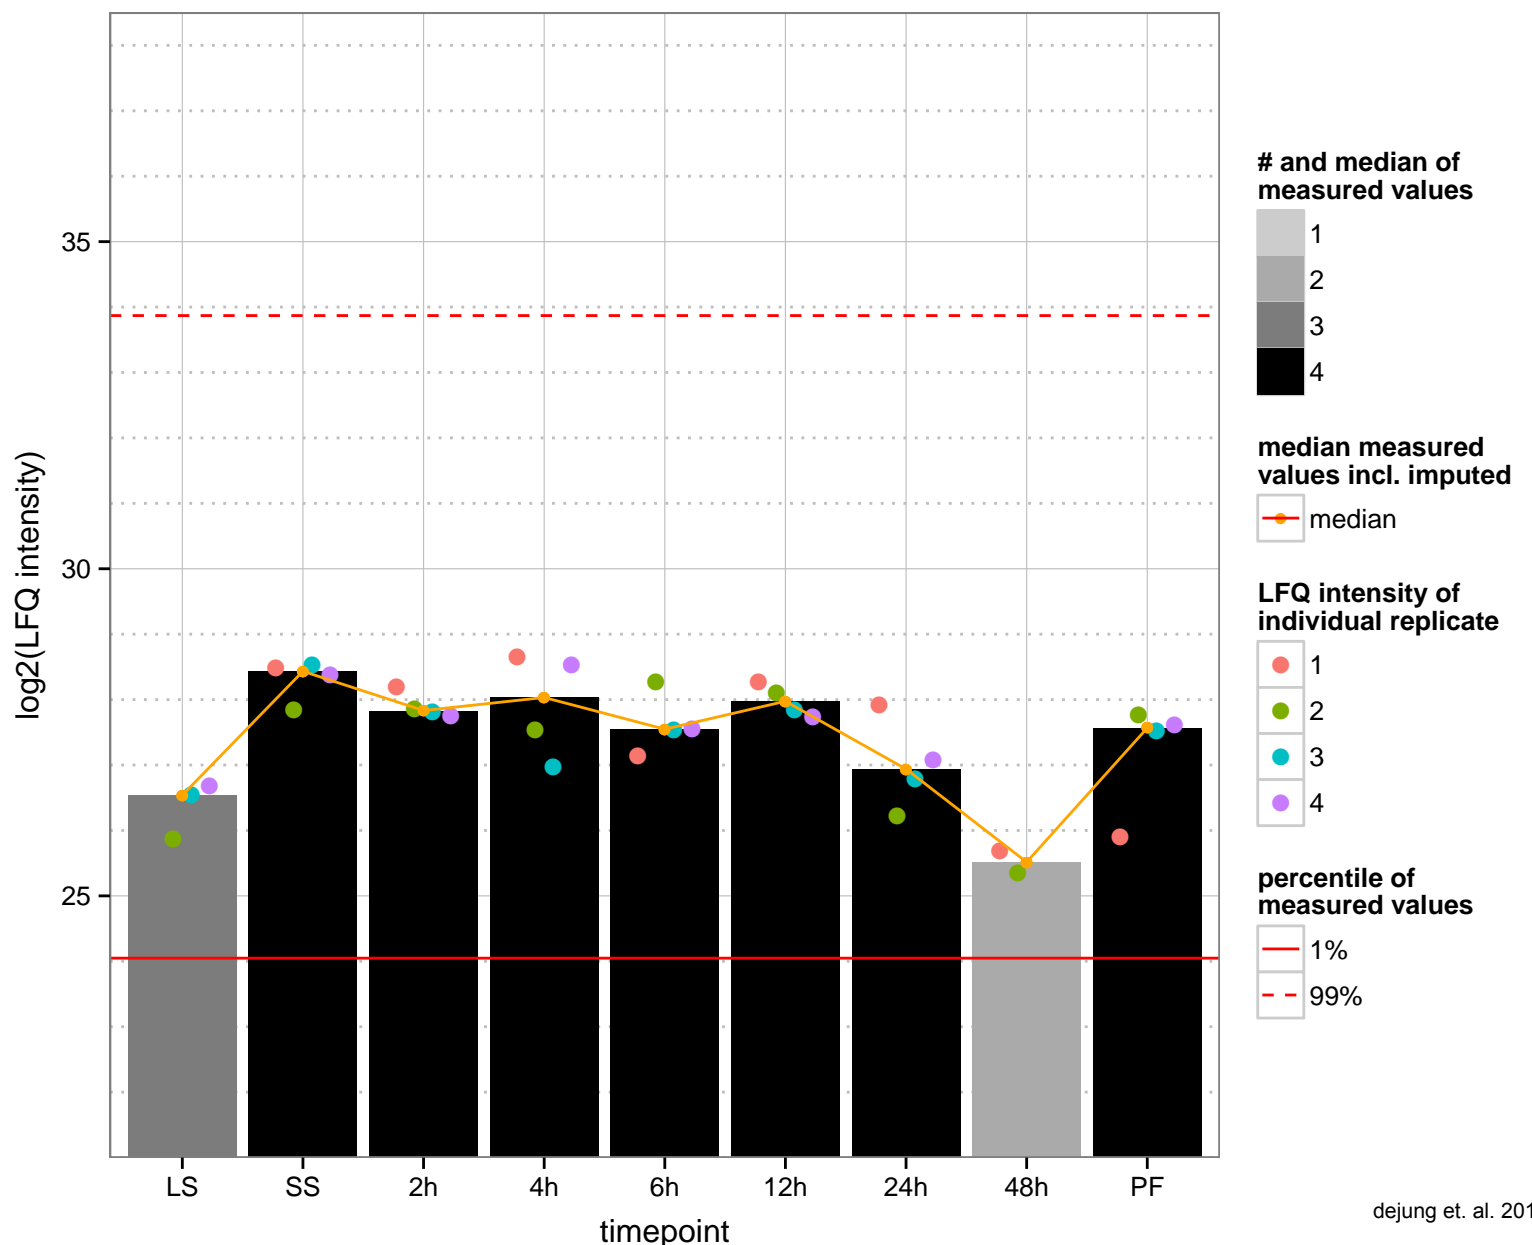

Mu-adaptin 1, putative, adaptor complex AP-1 medium subunit  
 Tb927.7.3180  
 AGOF: null  
 AGOC: clathrin adaptor complex  
 AGOP: intracellular protein transport, vesicle-mediated transport  
 PGO: protein binding  
 PGOC: clathrin adaptor complex  
 PGO: intracellular protein transport, transport, vesicle-mediated transport

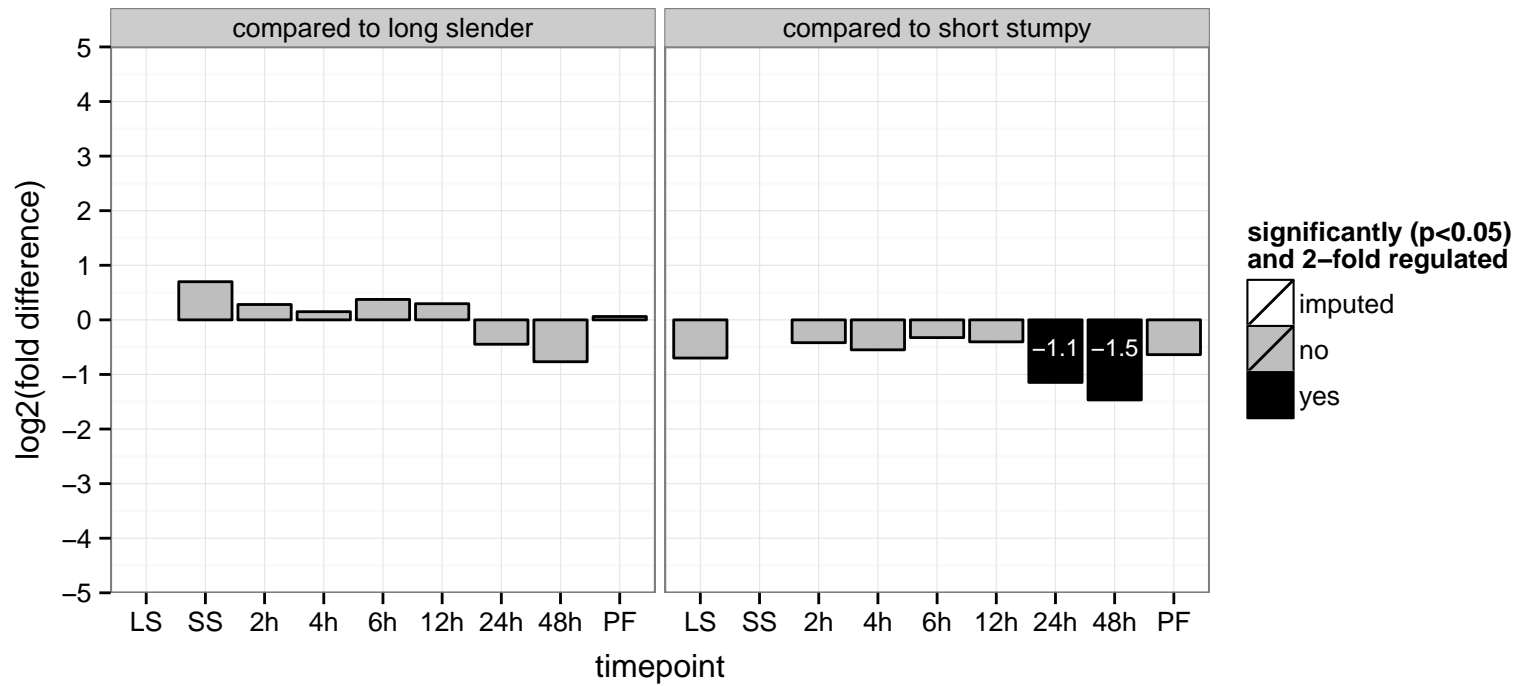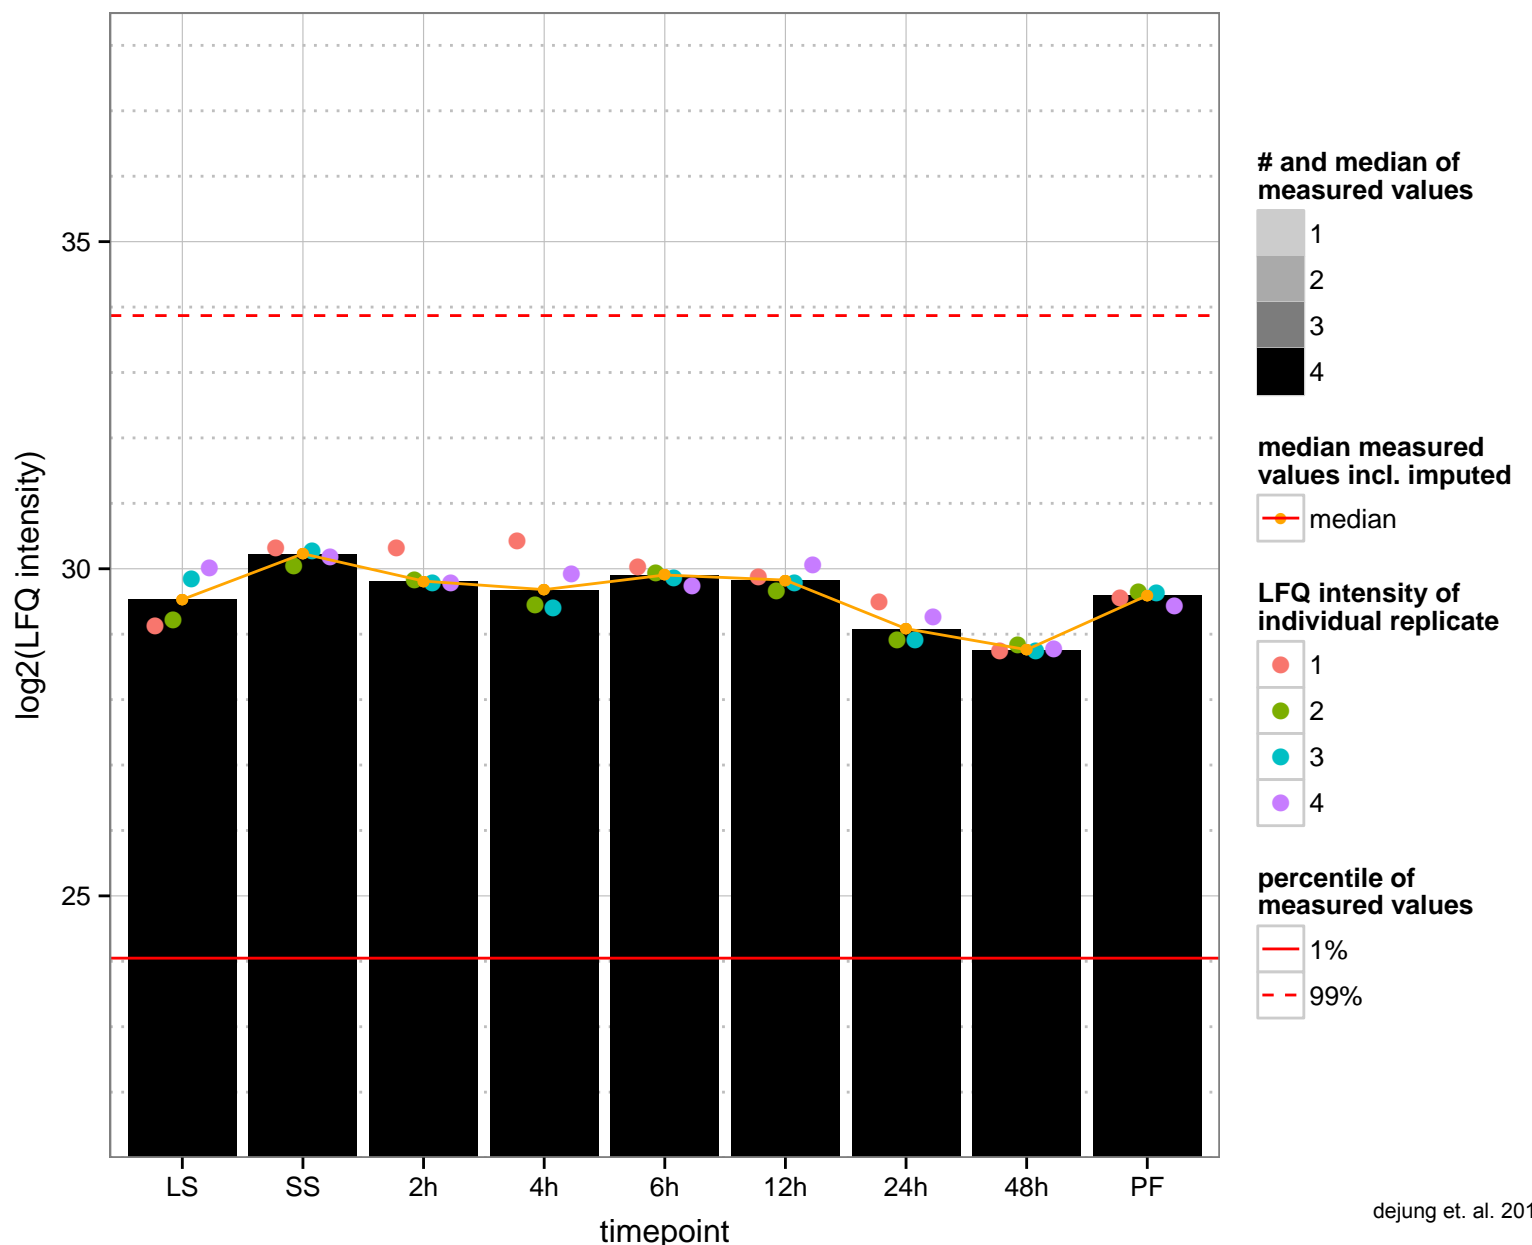

hypothetical protein, conserved  
 Tb927.7.550  
 AGOF: null  
 AGOC: null  
 AGOP: null  
 PGO: protein binding  
 PGOC: null  
 PGOP: null

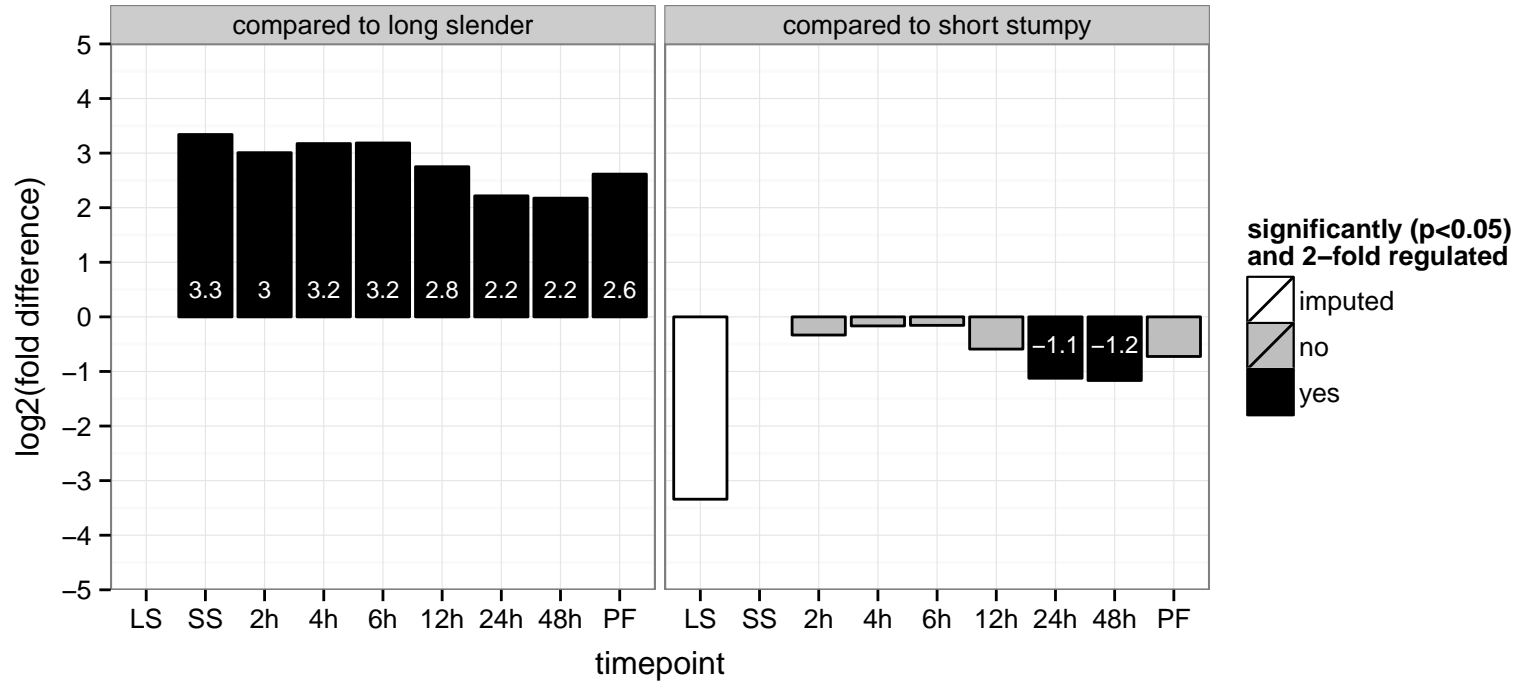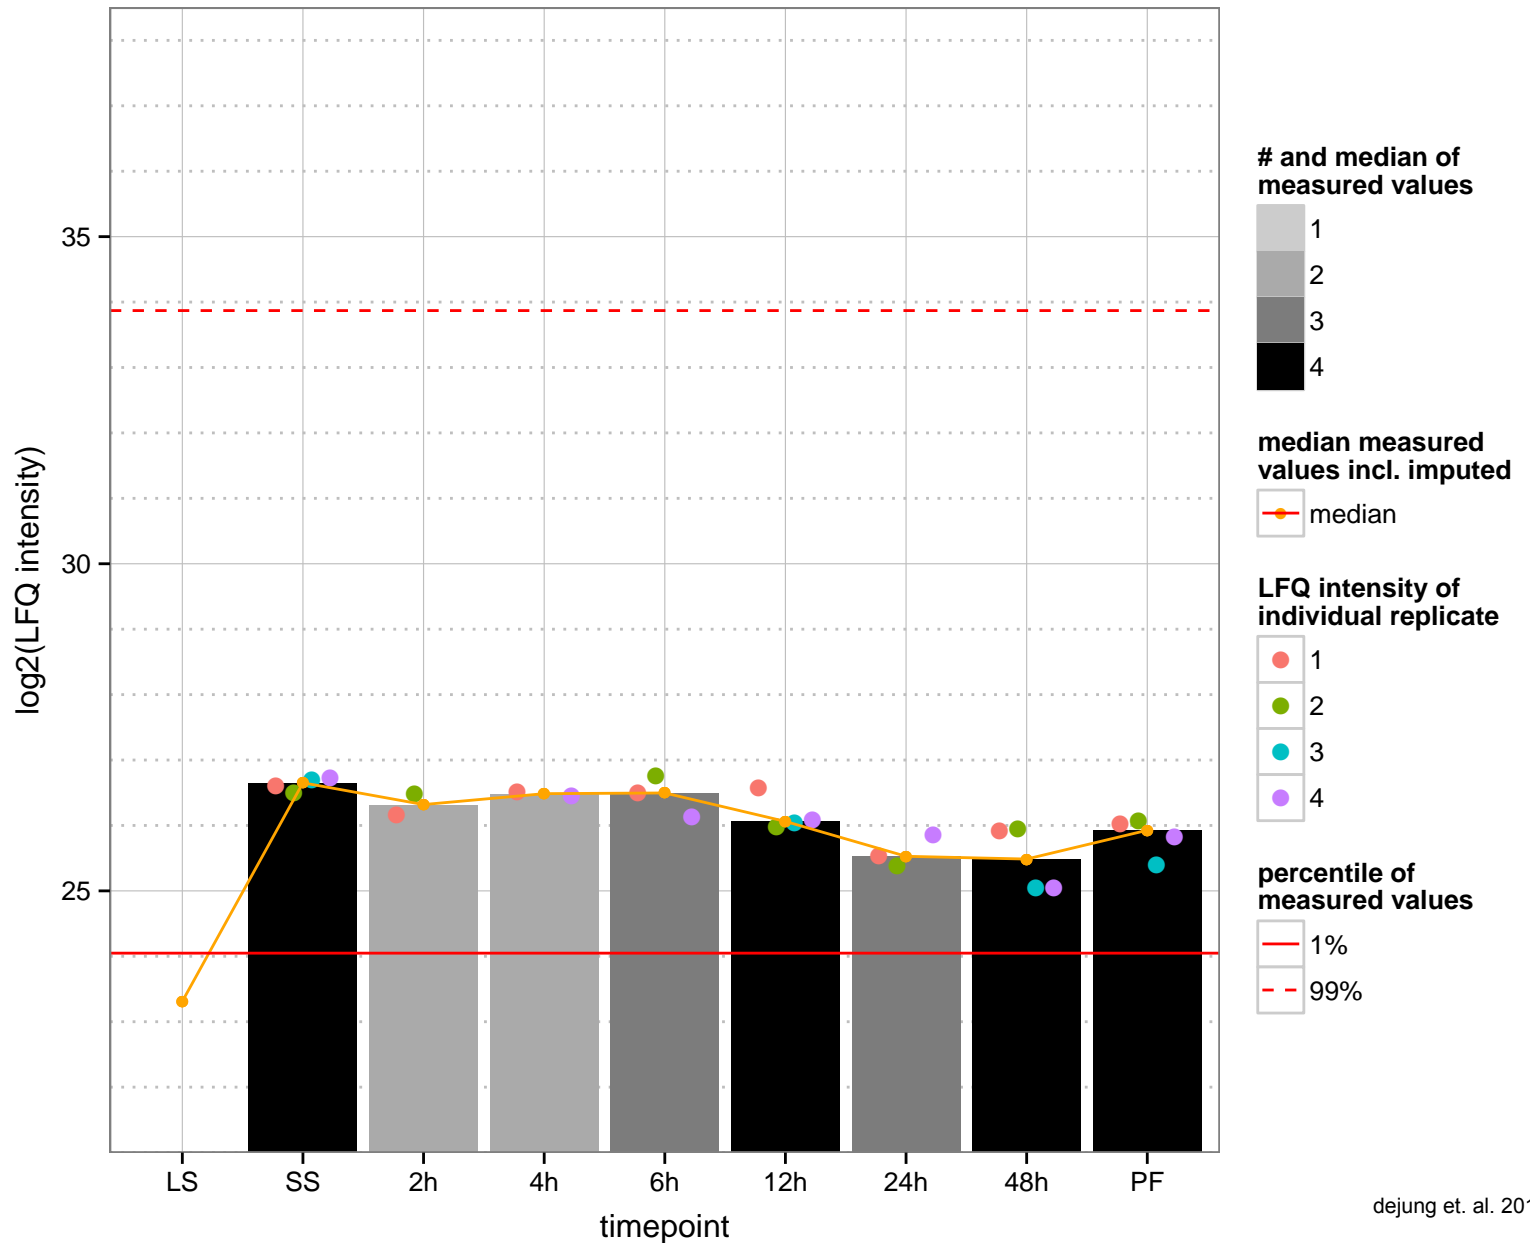

hypothetical protein, conserved  
 Tb927.8.3470  
 AGOF: null  
 AGOC: membrane  
 AGOP: intracellular protein transport  
 PGO: null  
 PGO: membrane  
 PGO: intracellular protein transport, vesicle-mediated transport

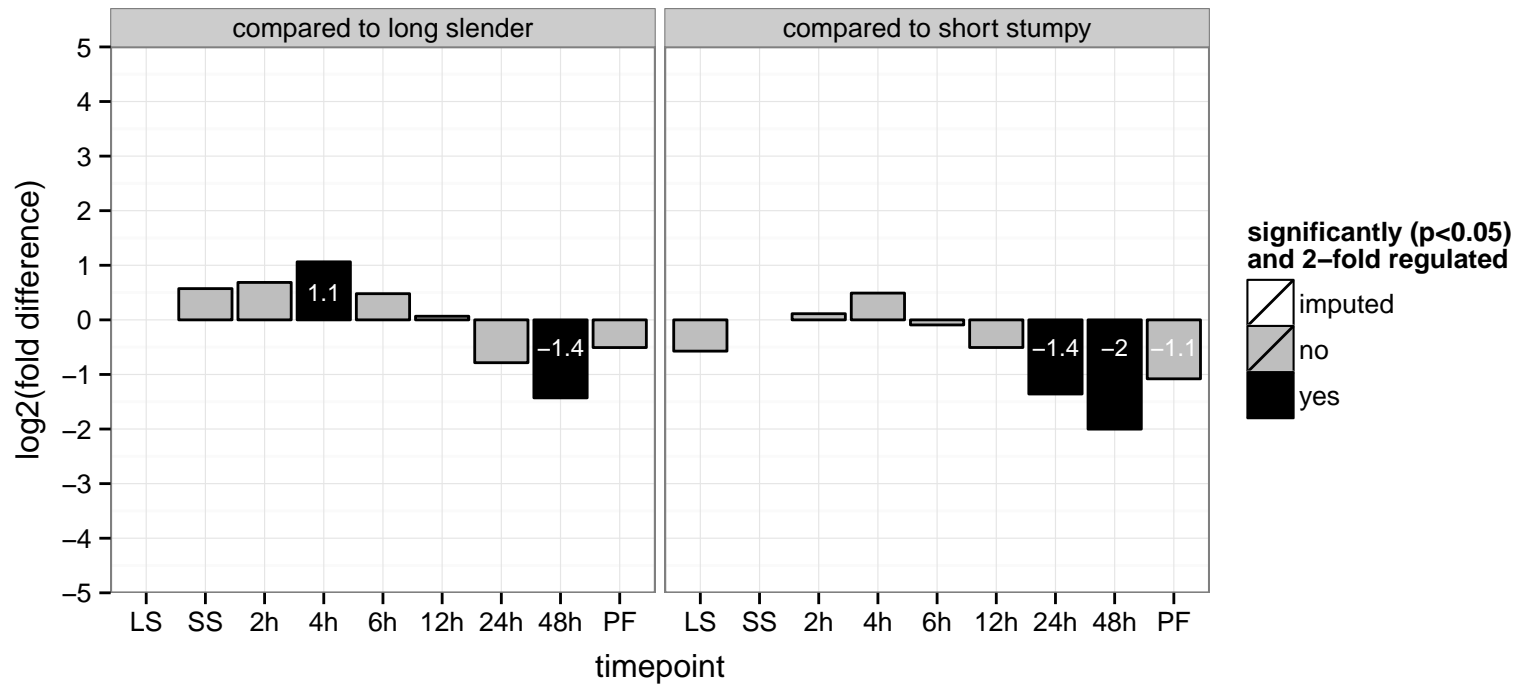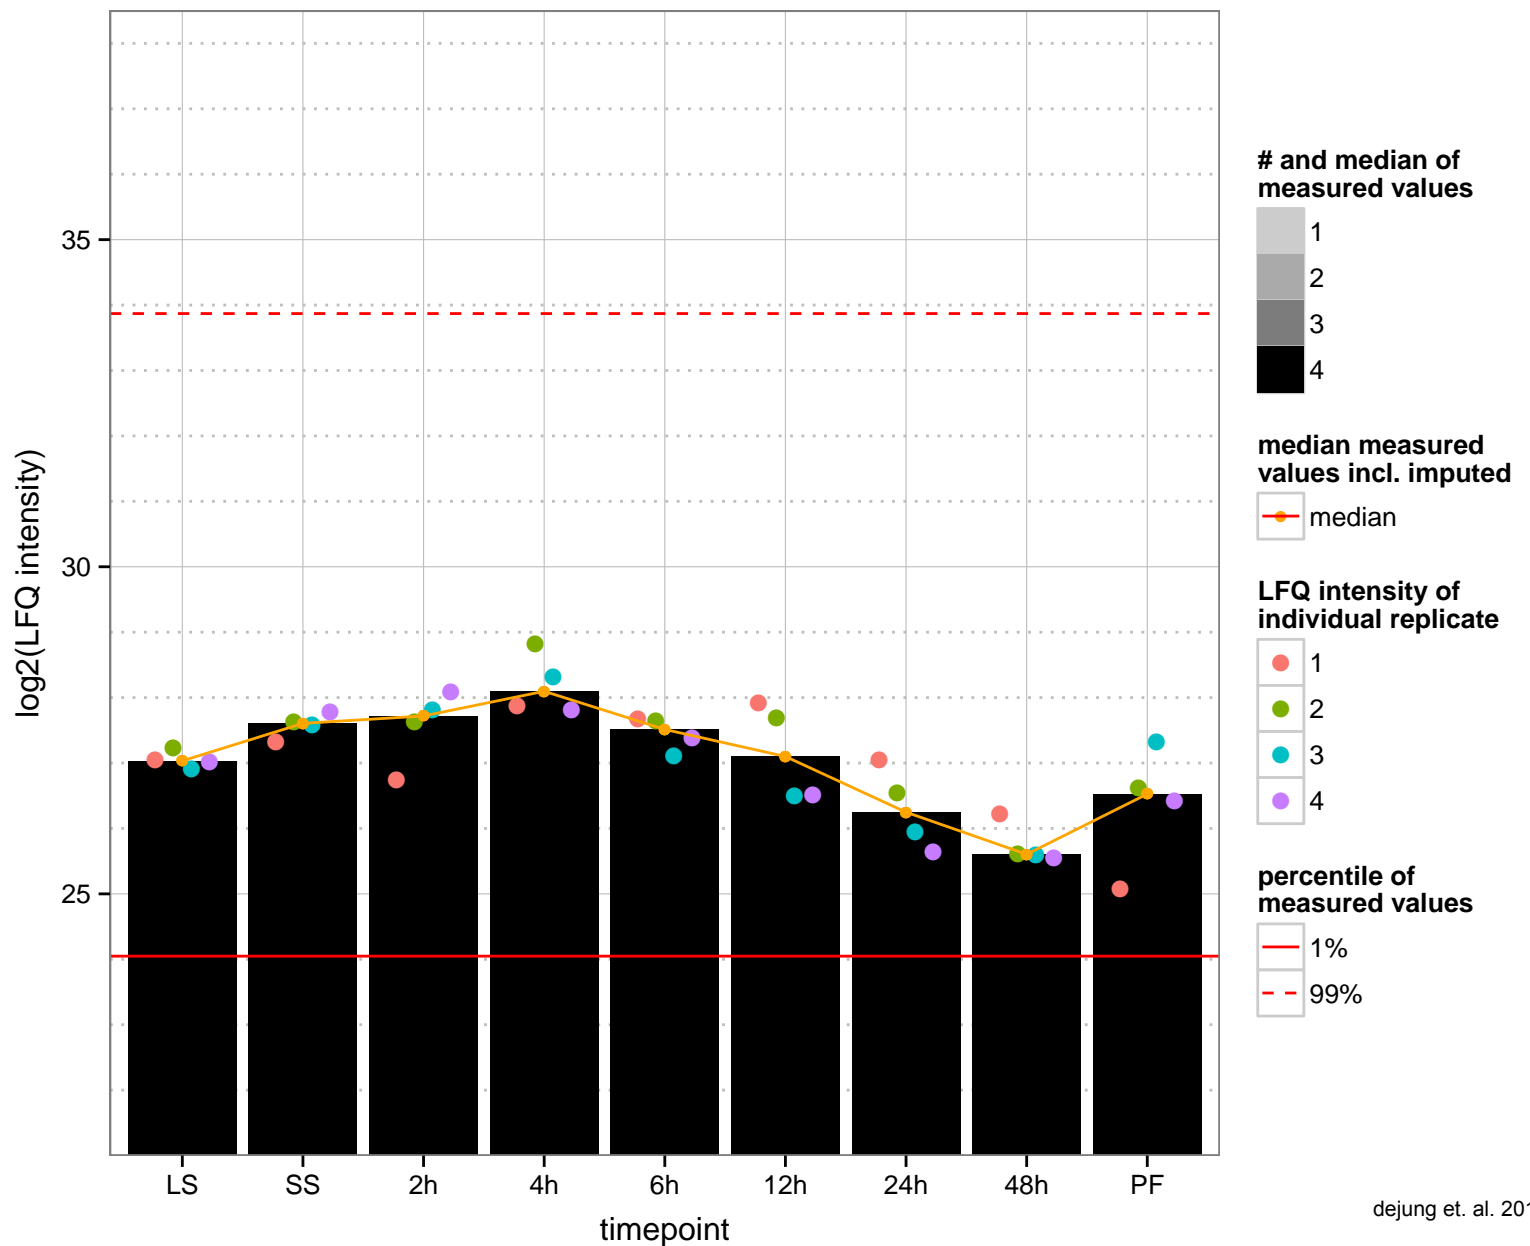



uridine phosphorylase  
 Tb927.8.4430  
 AGOF: purine–nucleoside phosphorylase activity, uridine phosphorylase activity  
 AGOC: null  
 AGOP: nucleoside metabolic process  
 PGO: catalytic activity  
 PGOC: null  
 PGOP: nucleoside metabolic process

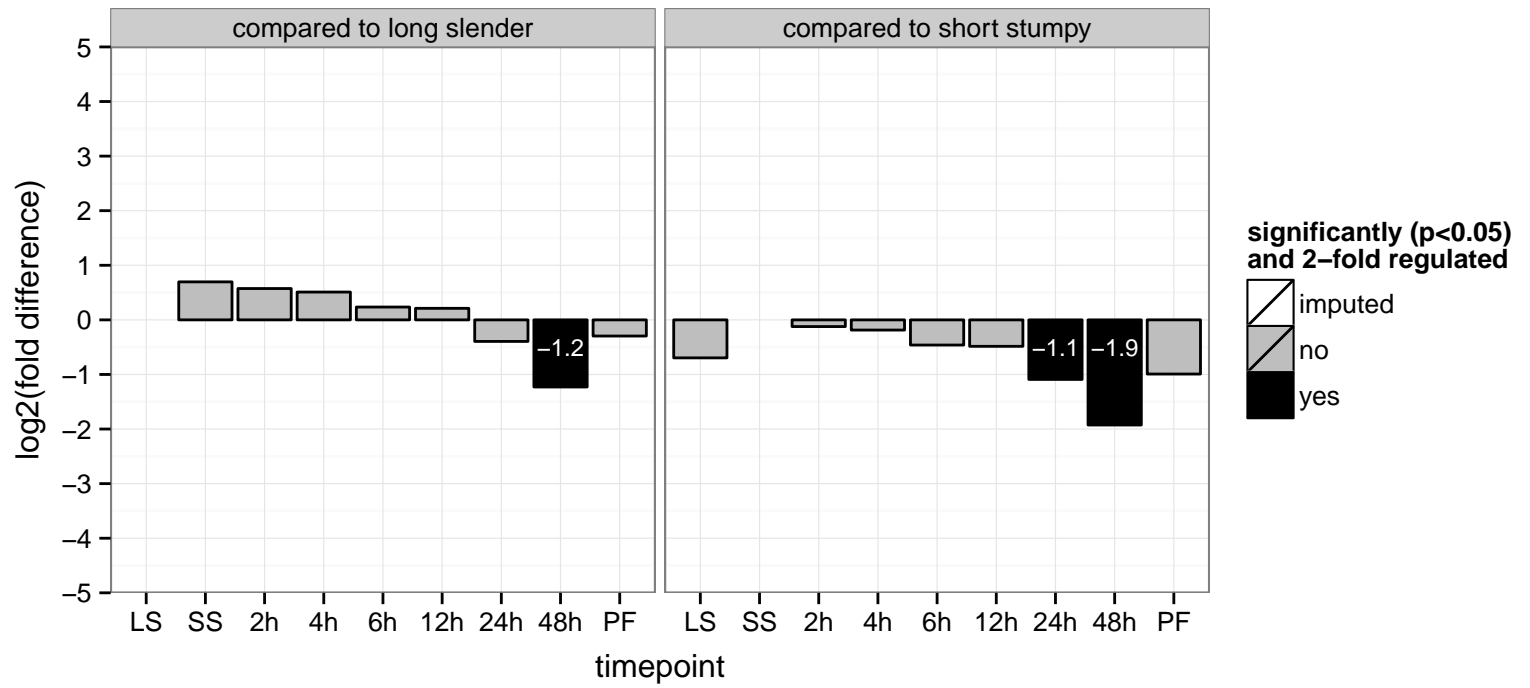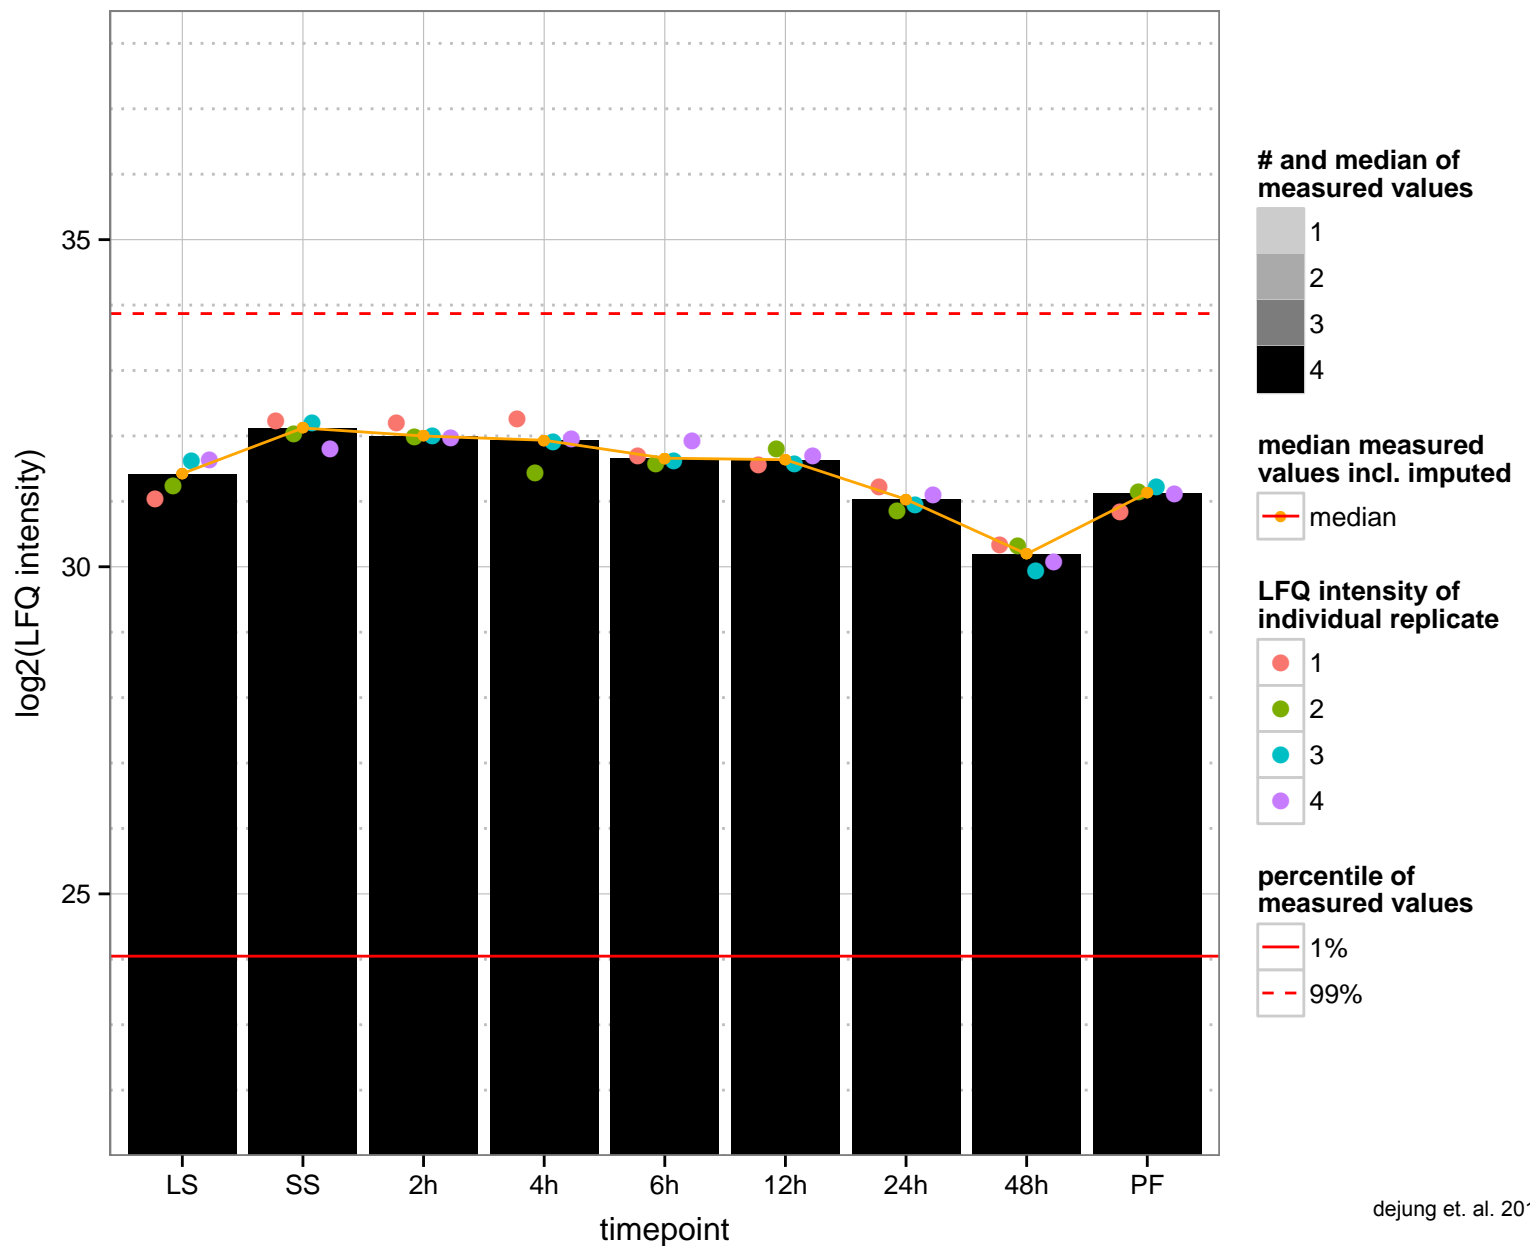

hypothetical protein, conserved  
 Tb927.9.6380;Tb927.9.6360;Tb927.9.6370  
 AGOF: null  
 AGOC: null  
 AGOP: null  
 PGO: null  
 PGO: null, integral to membrane  
 PGO: null, transmembrane transport

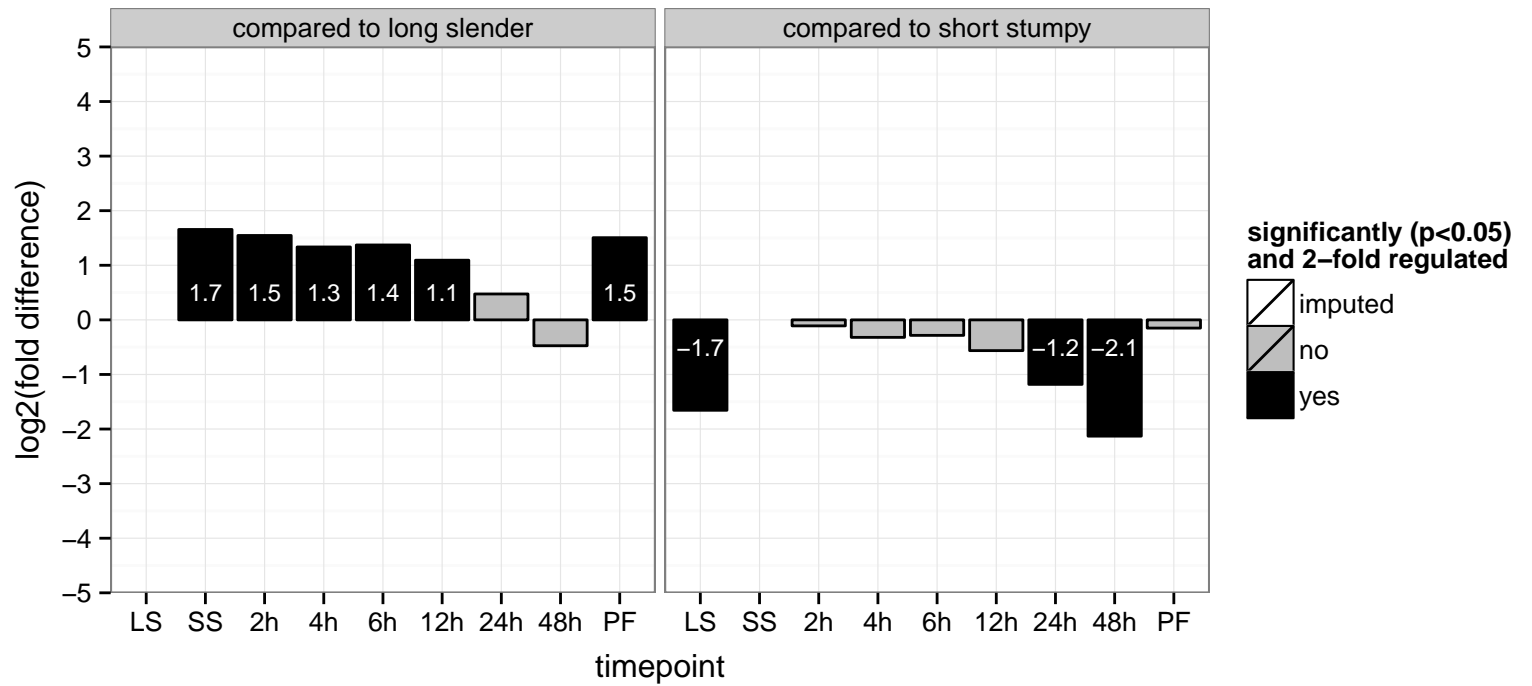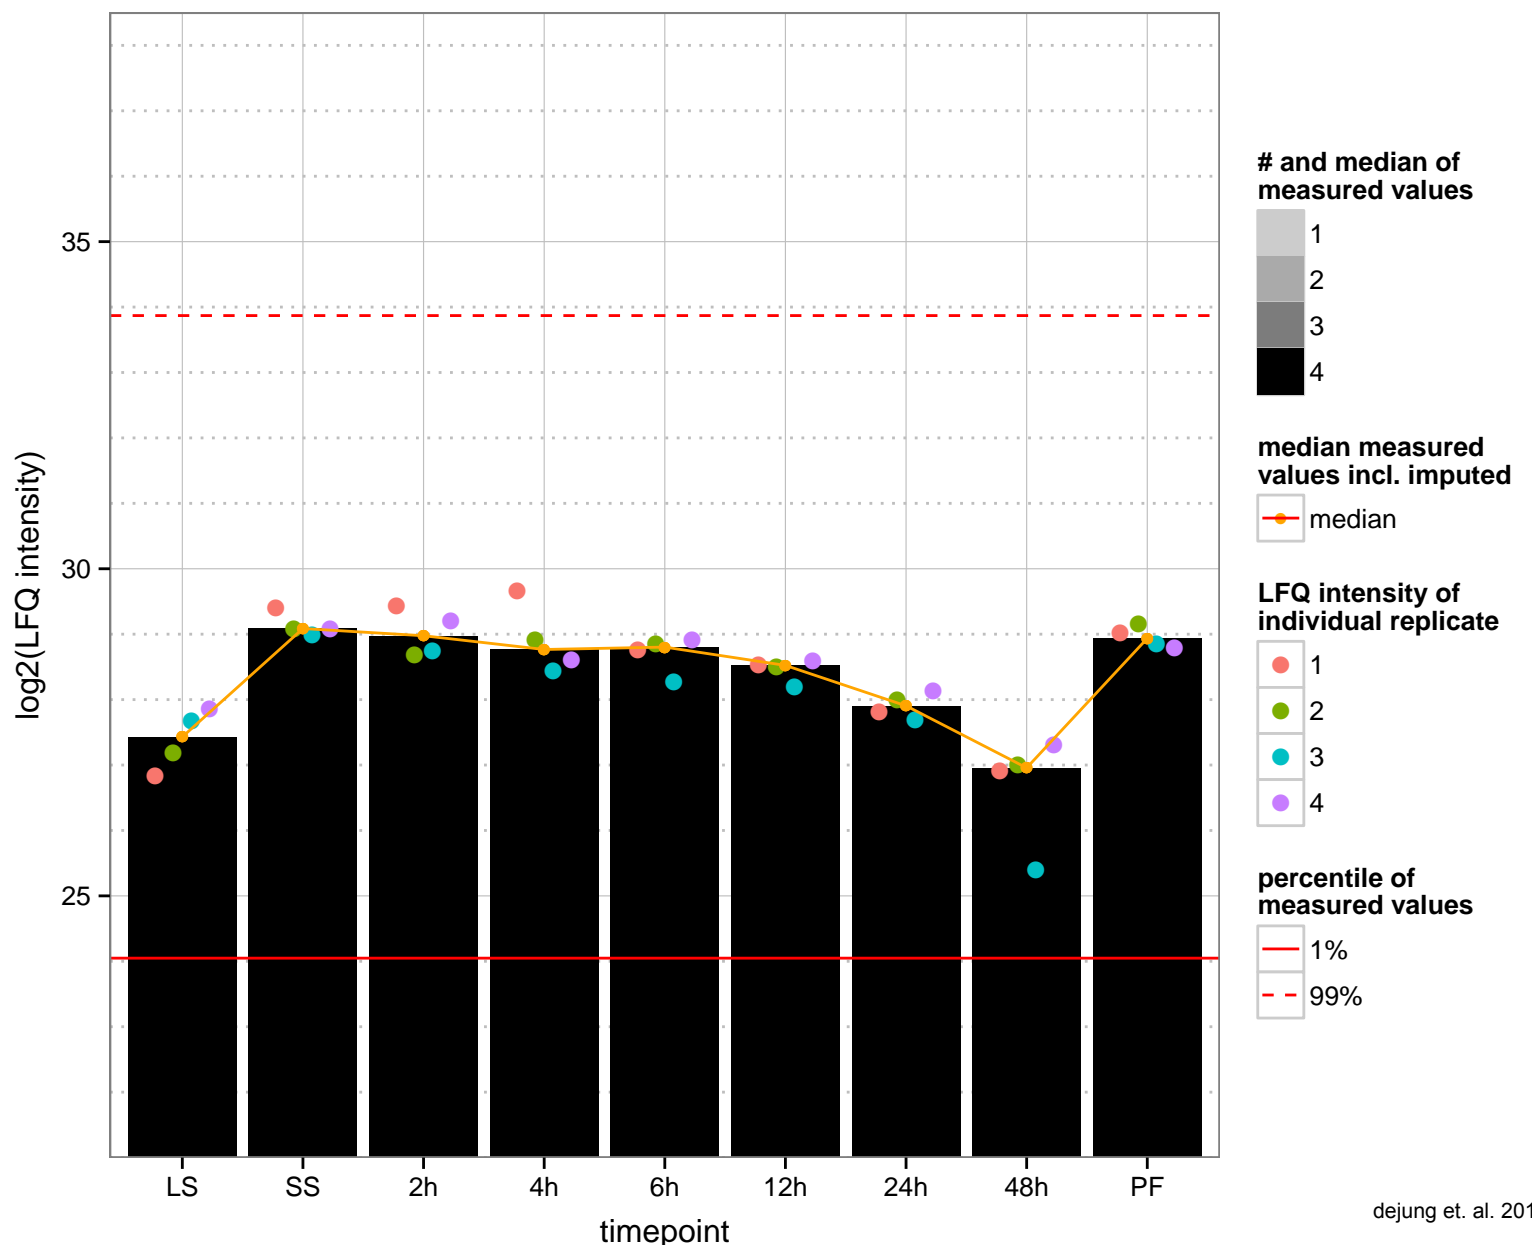

protein kinase, putative

Tb927.9.6560

AGOF: ATP binding, protein kinase activity, protein serine/threonine kinase activity

AGOC: null

AGOP: growth, protein phosphorylation

PGOF: ATP binding, protein kinase activity, transferase activity, transferring phosphorus-containing groups

PGOC: null

PGOP: protein phosphorylation

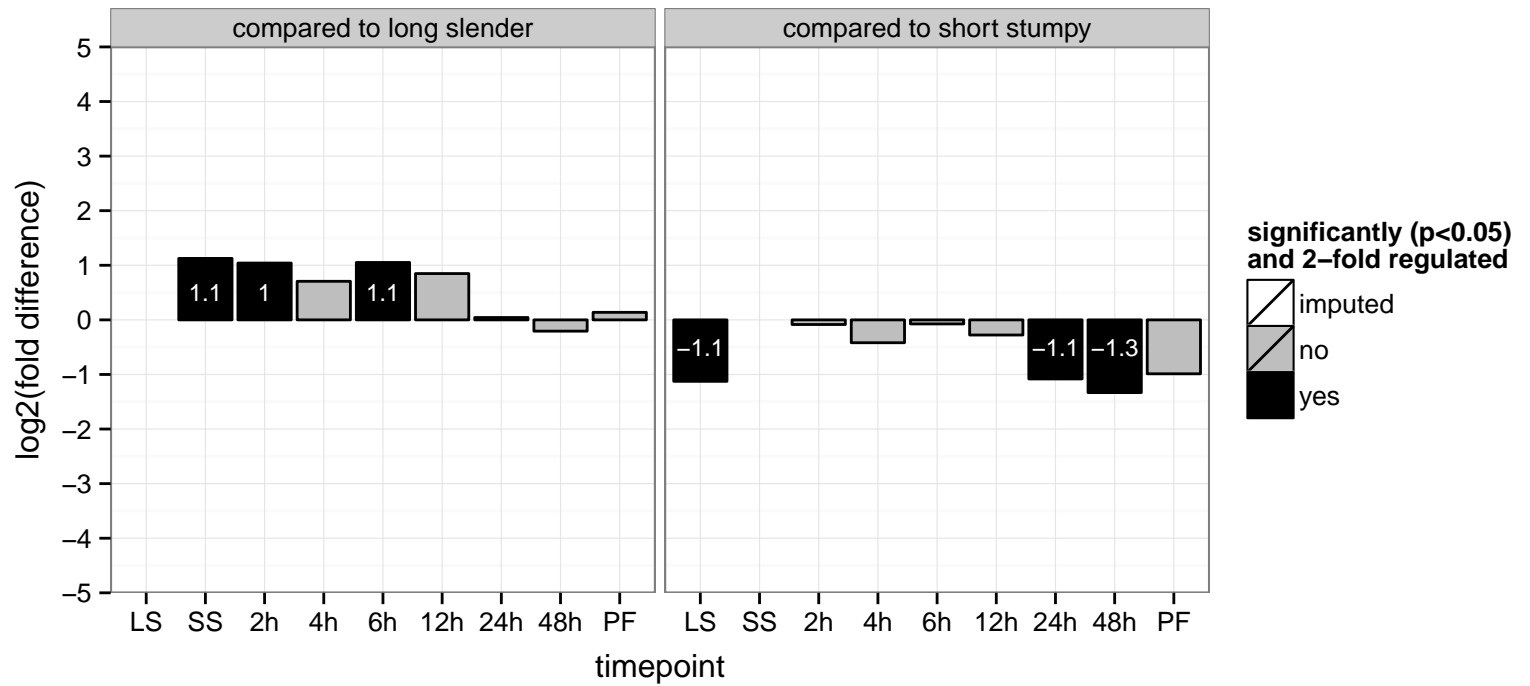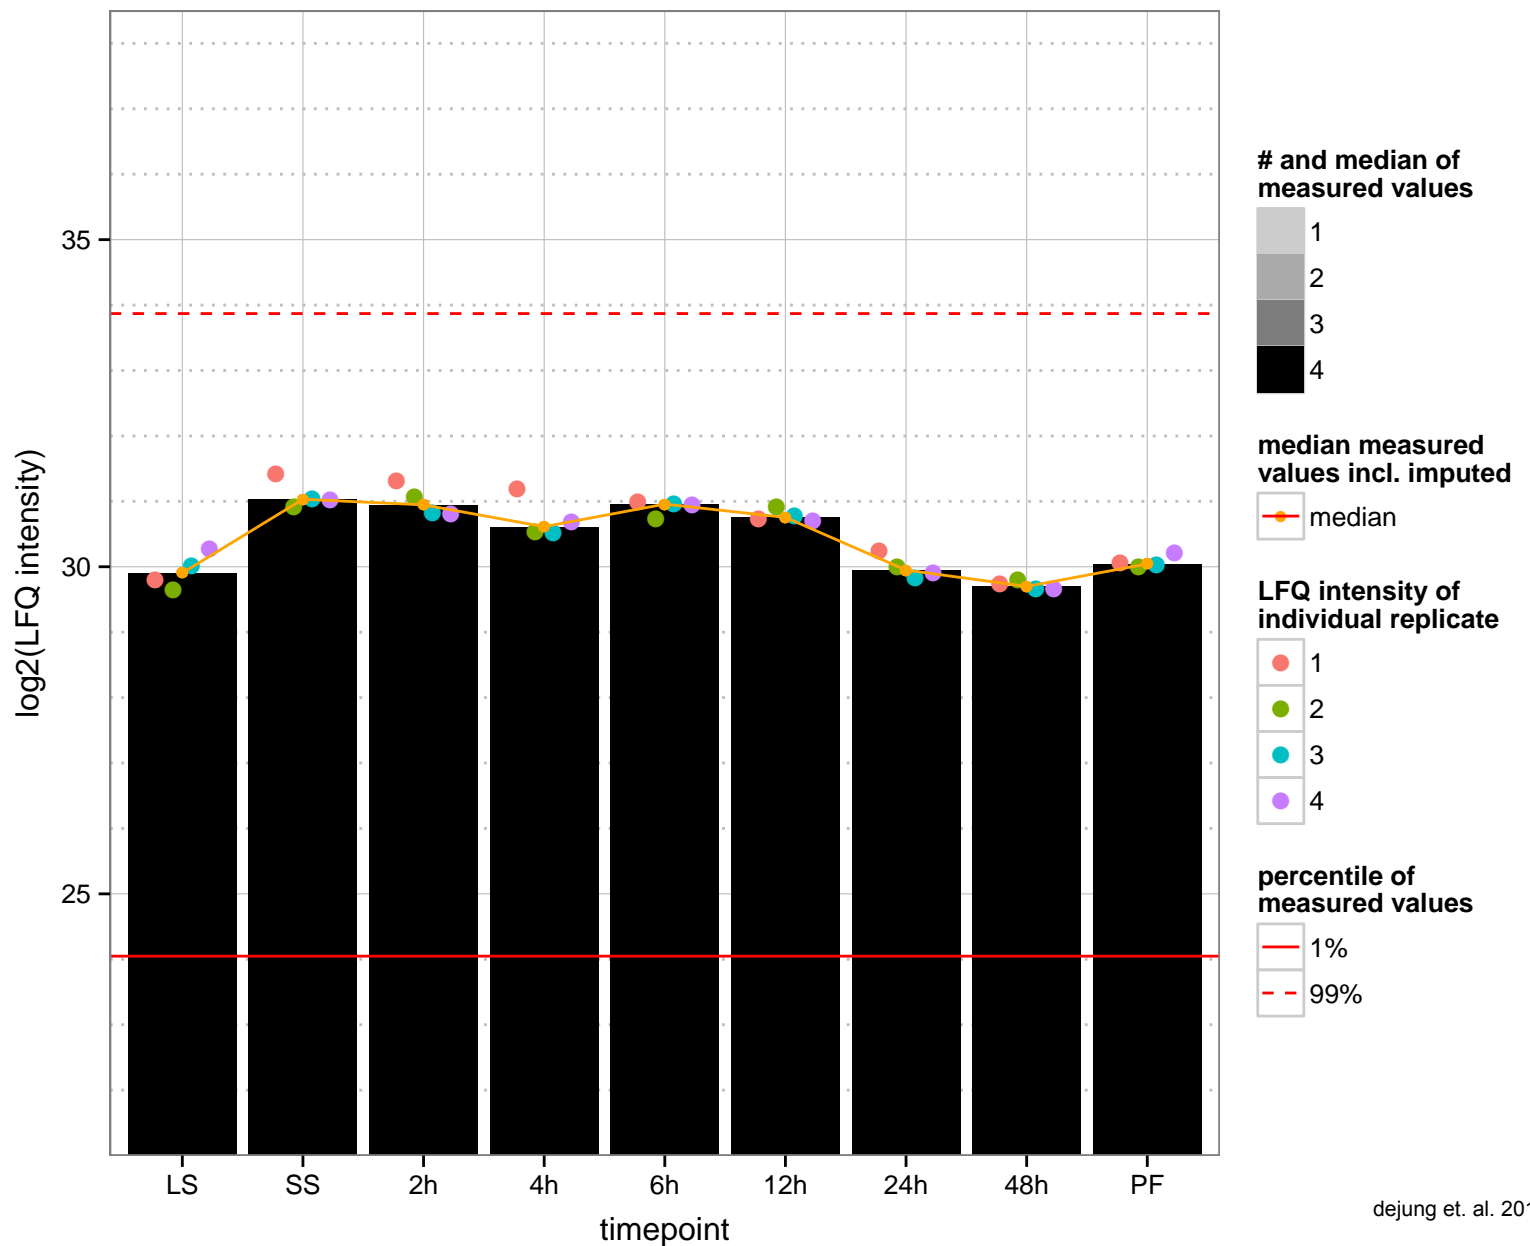

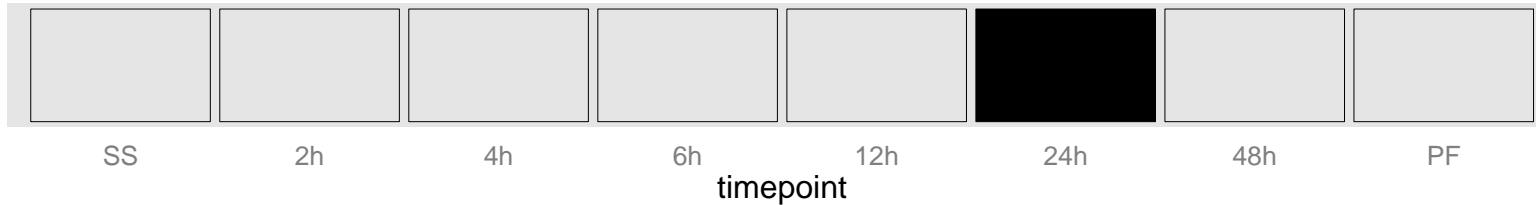

**regulated**  not regulated  significant down  significant up

hypothetical protein, conserved  
 Tb11.v5.0685;Tb927.8.3110  
 AGOF: null  
 AGOC: null, mitochondrion  
 AGOP: null  
 PGOF: null, structural constituent of ribosome  
 PGO: null, intracellular, ribosome  
 PGOP: null, translation

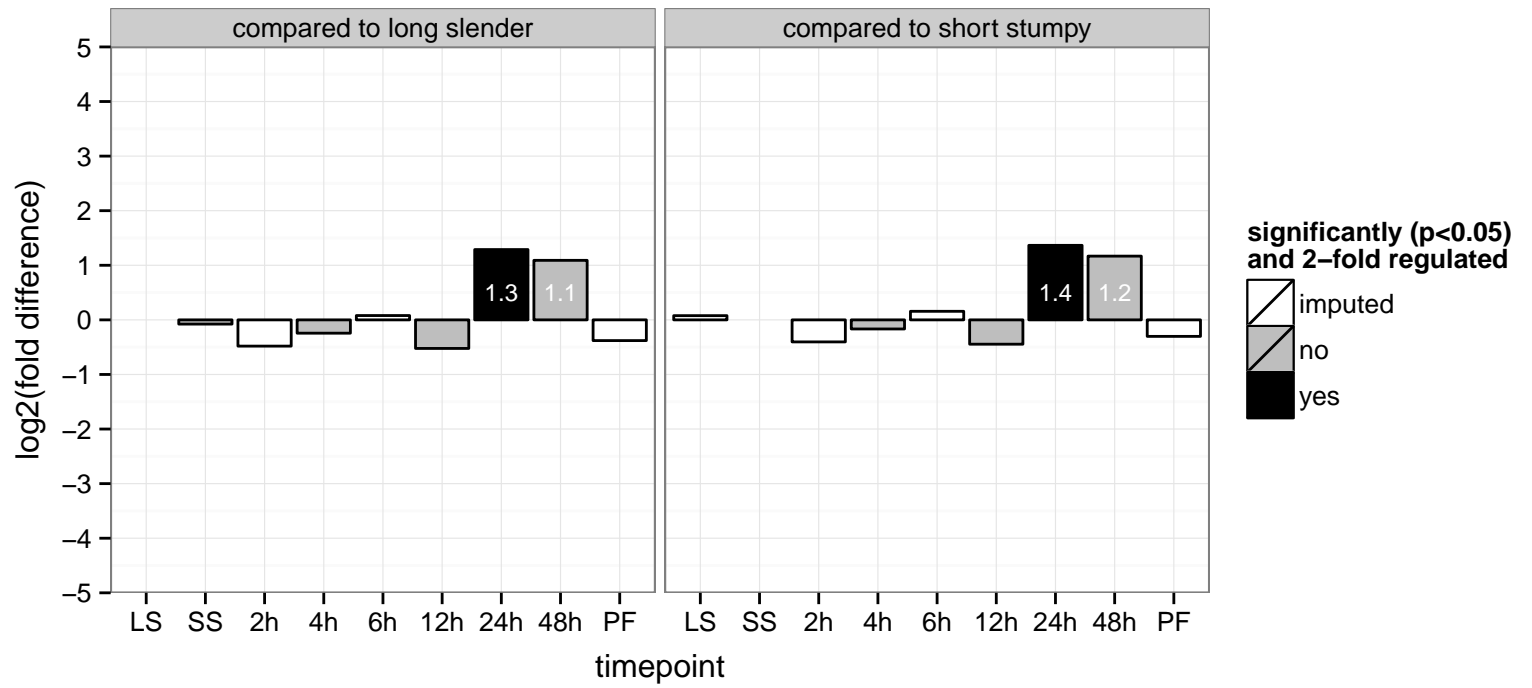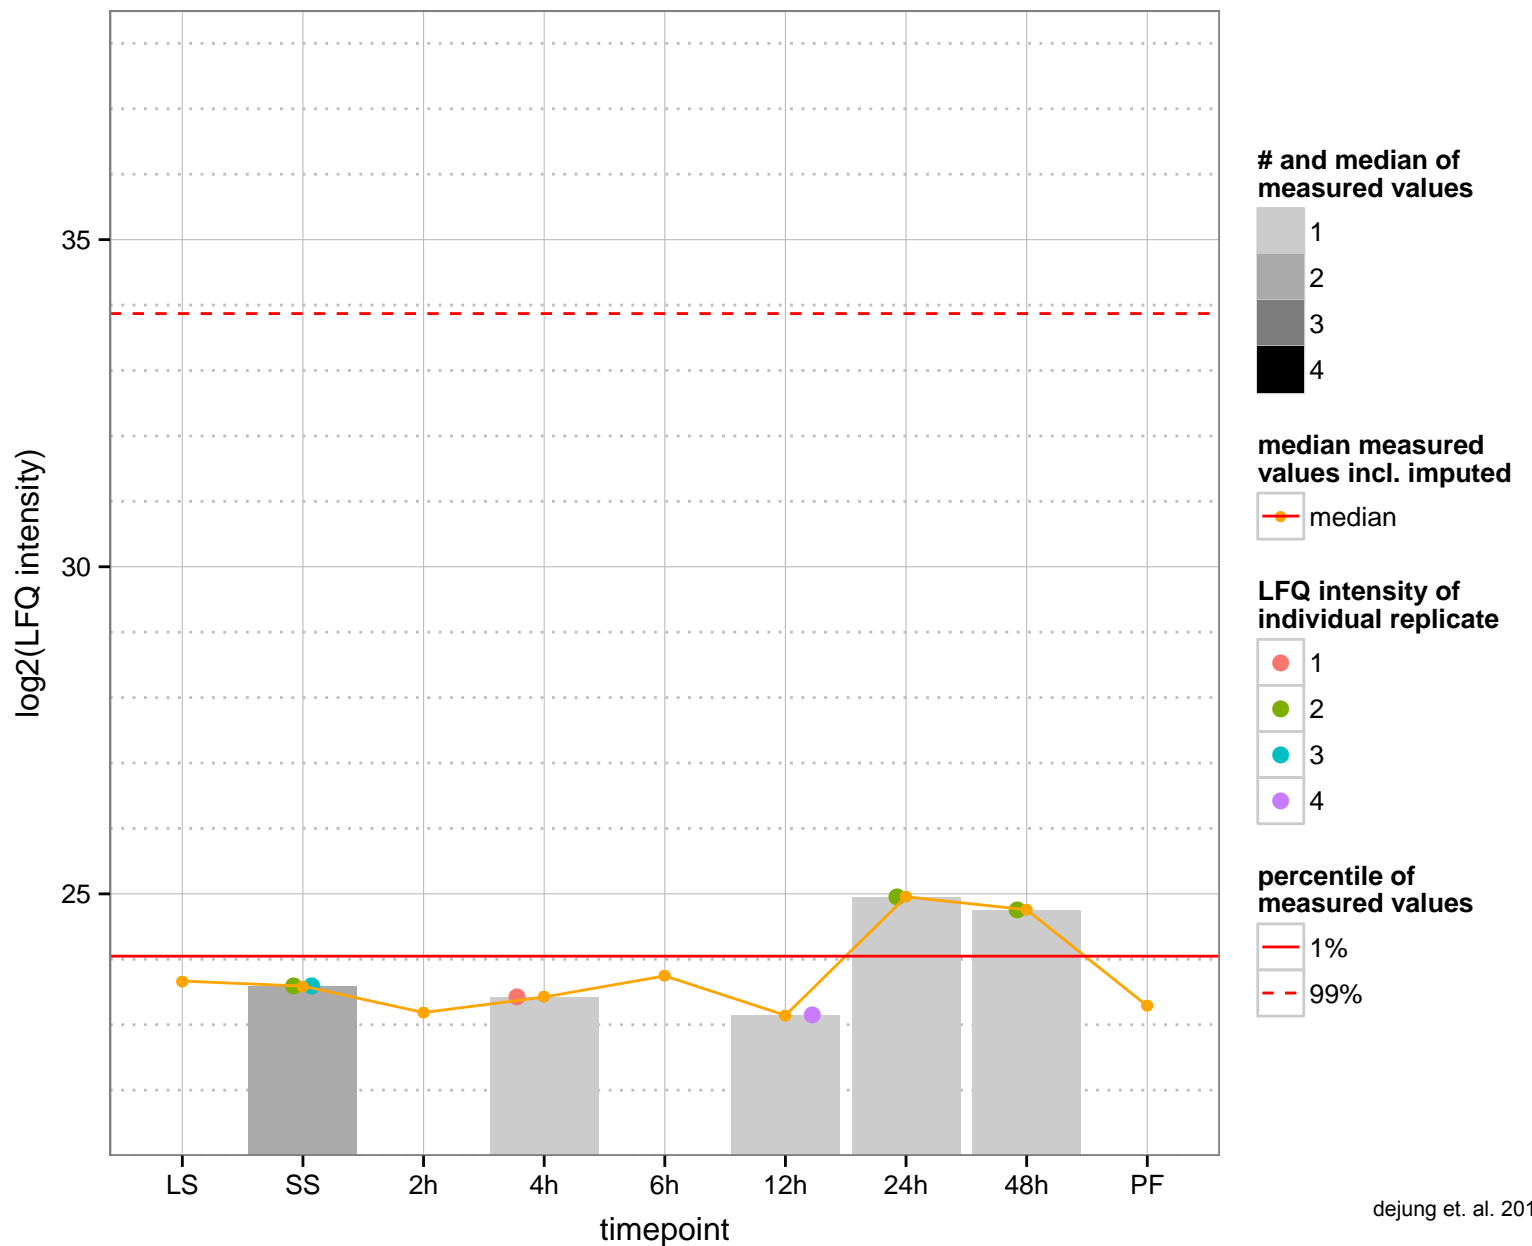

hypothetical protein, conserved  
 Tb927.10.11750  
 AGOF: null  
 AGOC: null  
 AGOP: null  
 PGO: null  
 PGOC: null  
 PGOP: null

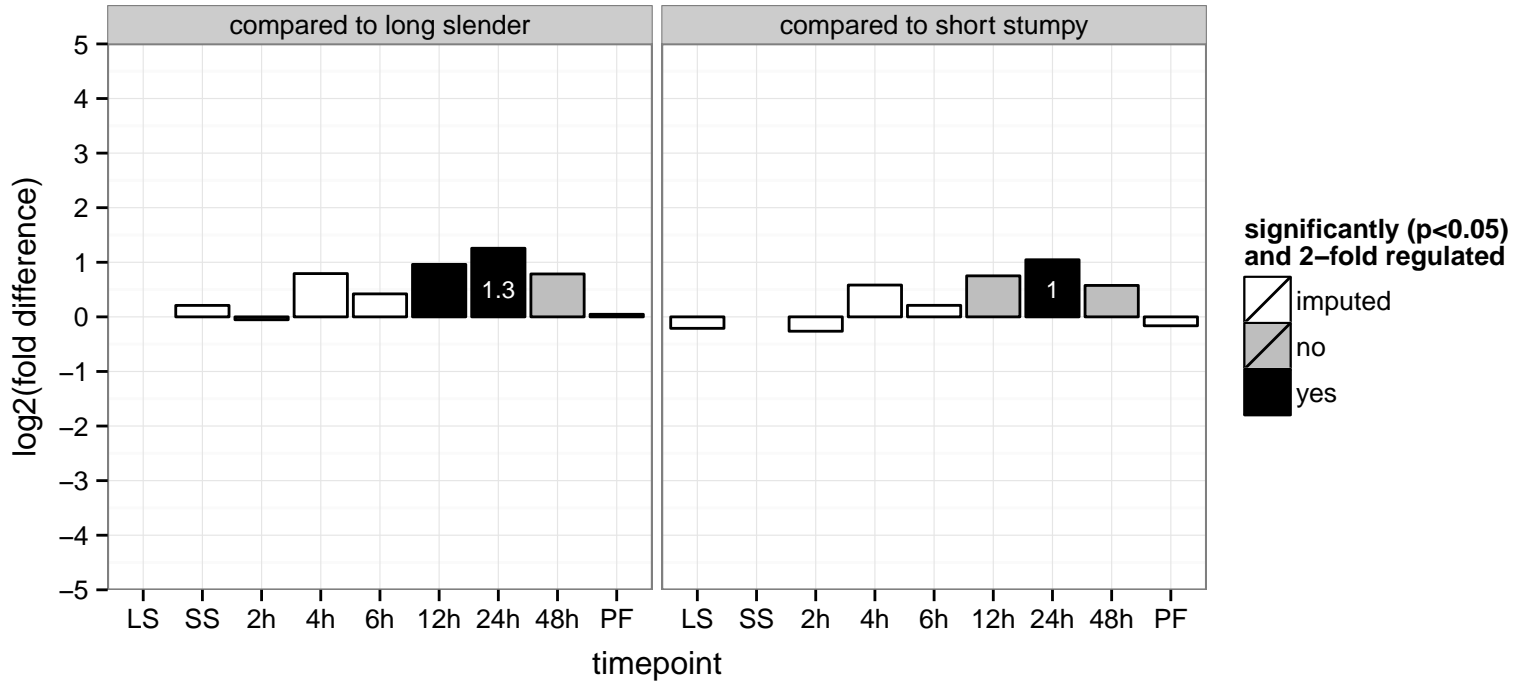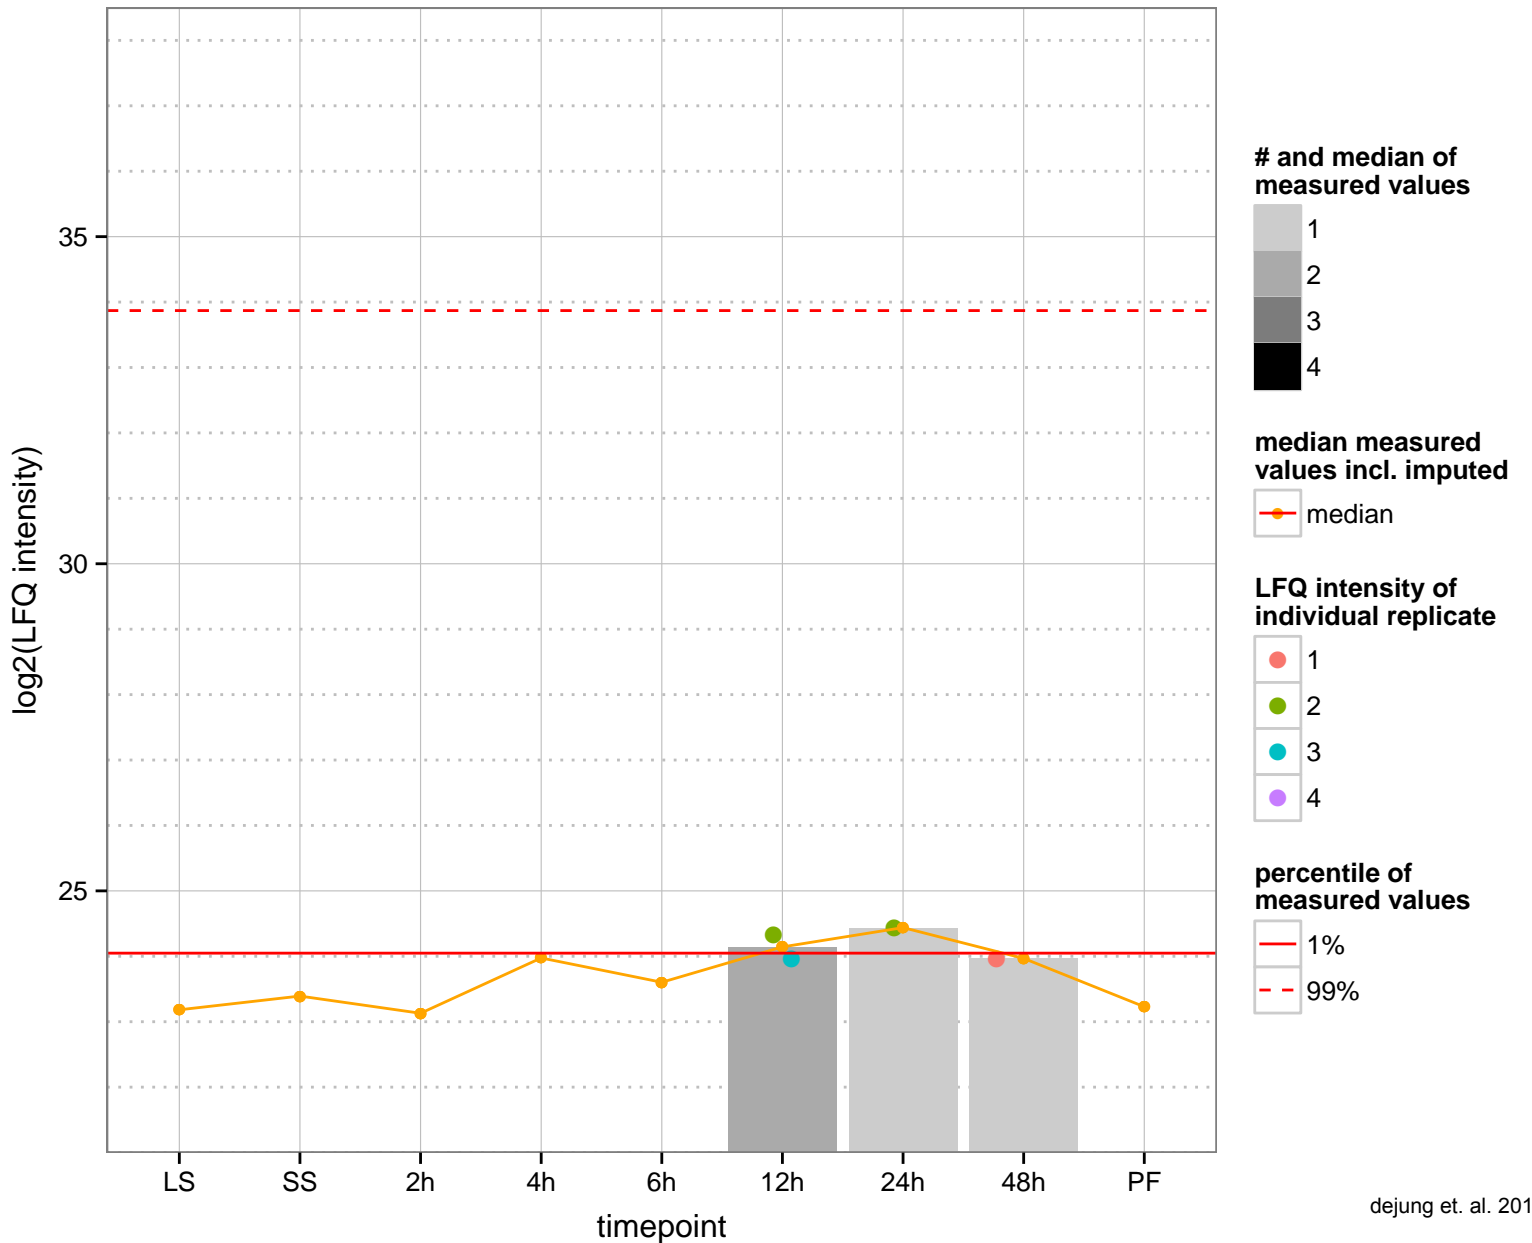

nucleosome assembly protein, putative  
 Tb927.10.15180  
 AGOF: histone binding  
 AGOC: nucleus  
 AGOP: nucleosome assembly  
 PGO: null  
 PGO: nucleus  
 PGO: nucleosome assembly

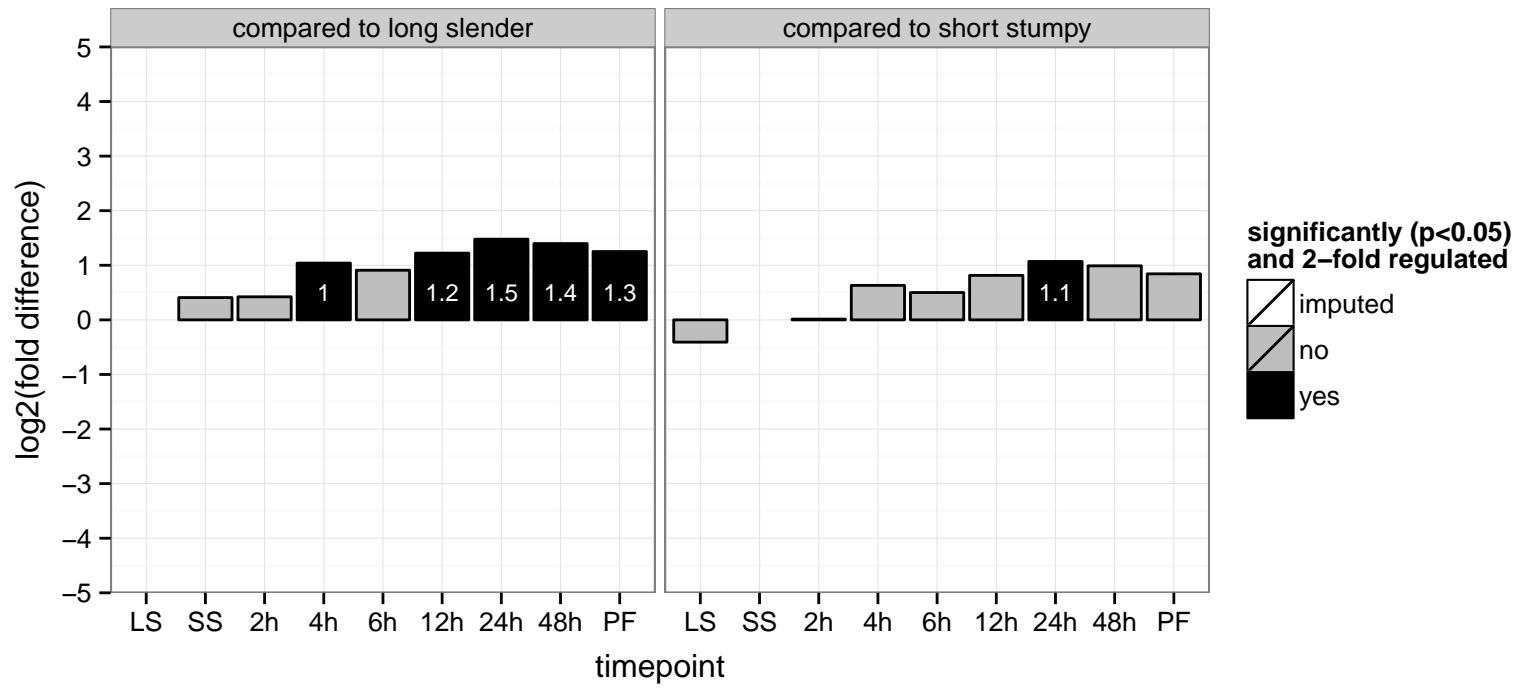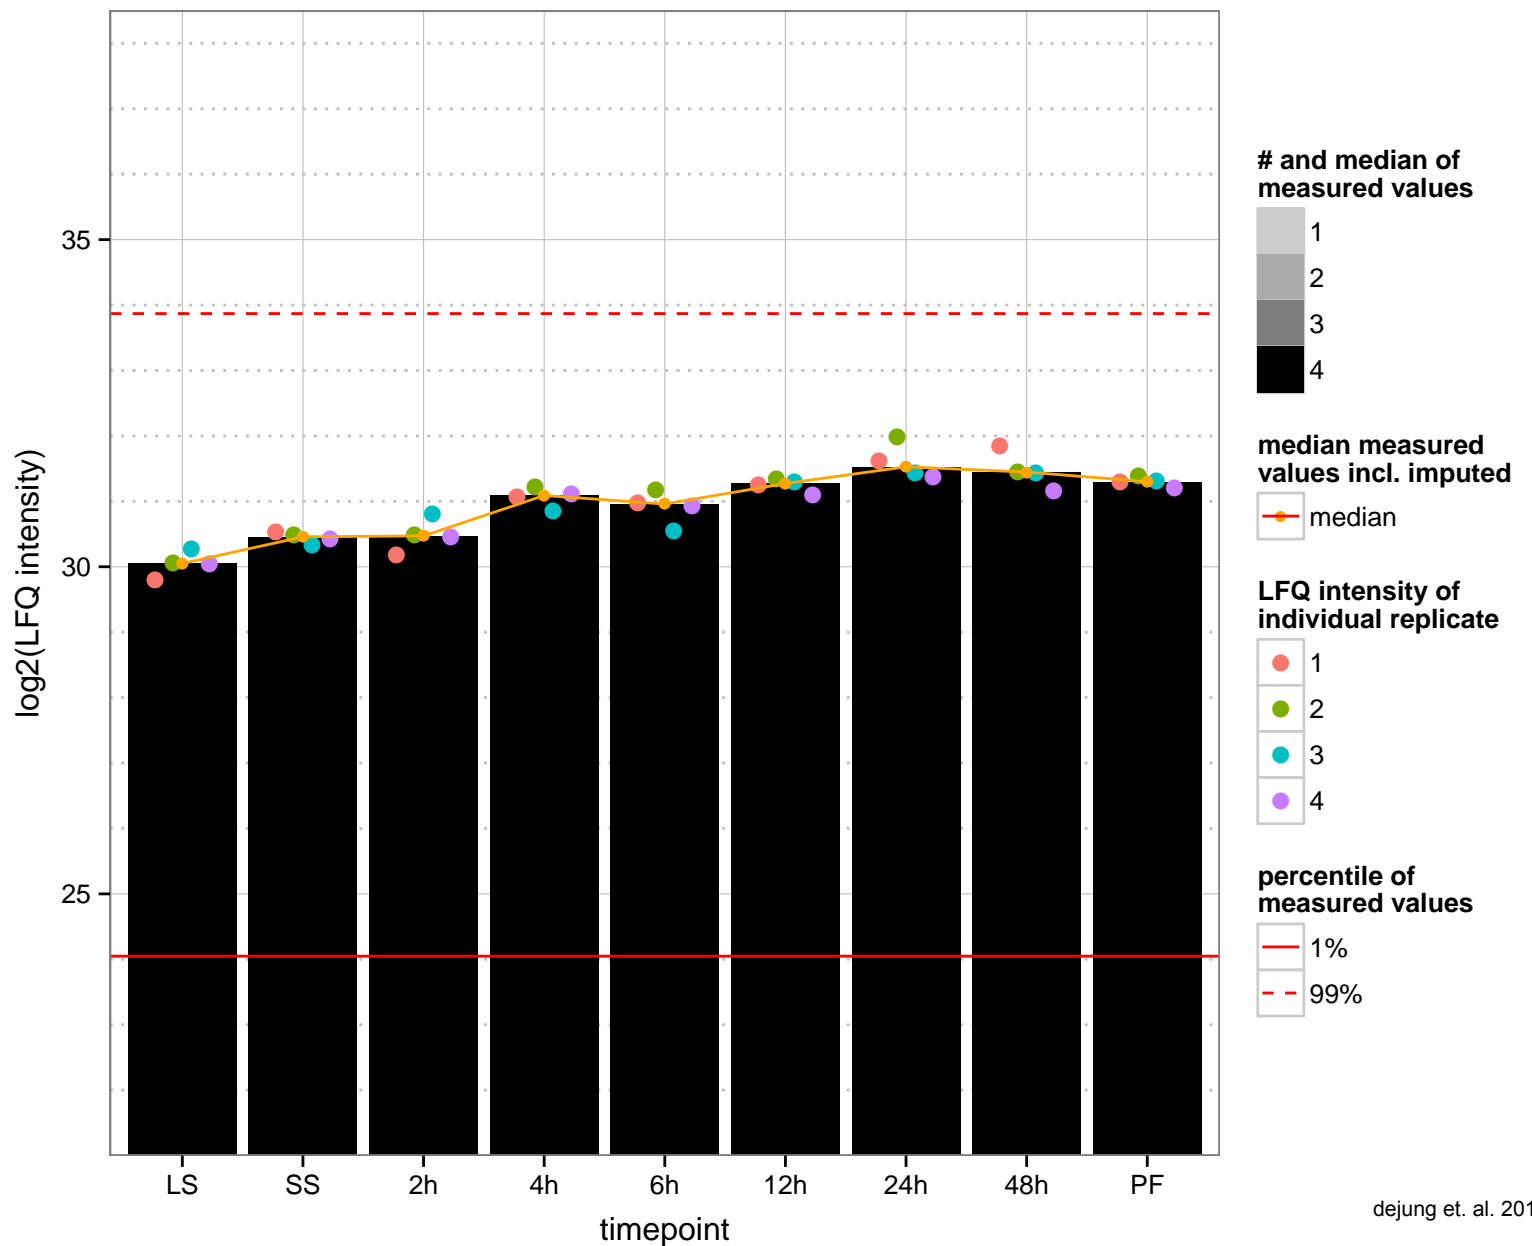

hypothetical protein, conserved  
 Tb927.10.7750  
 AGOF: null  
 AGOC: null  
 AGOP: null  
 PGO: null  
 PGOC: null  
 PGOP: null

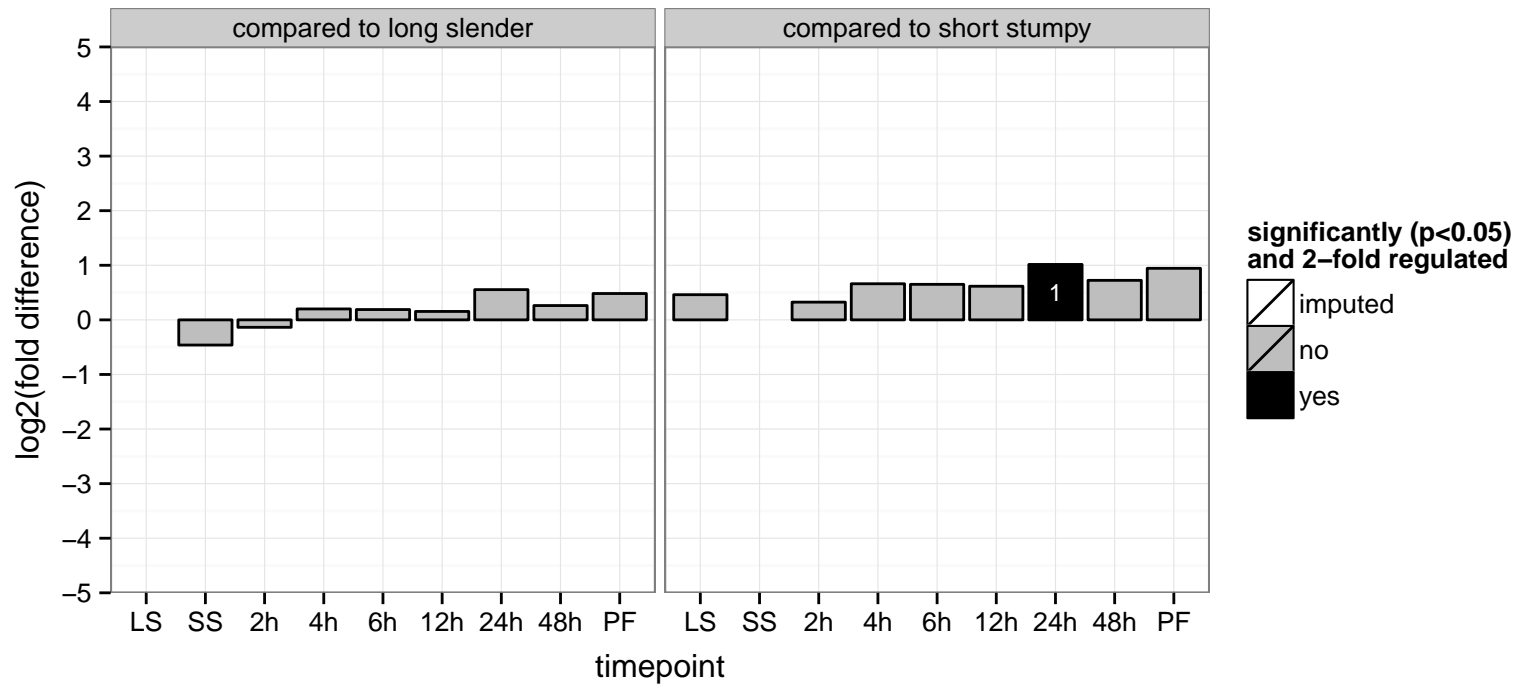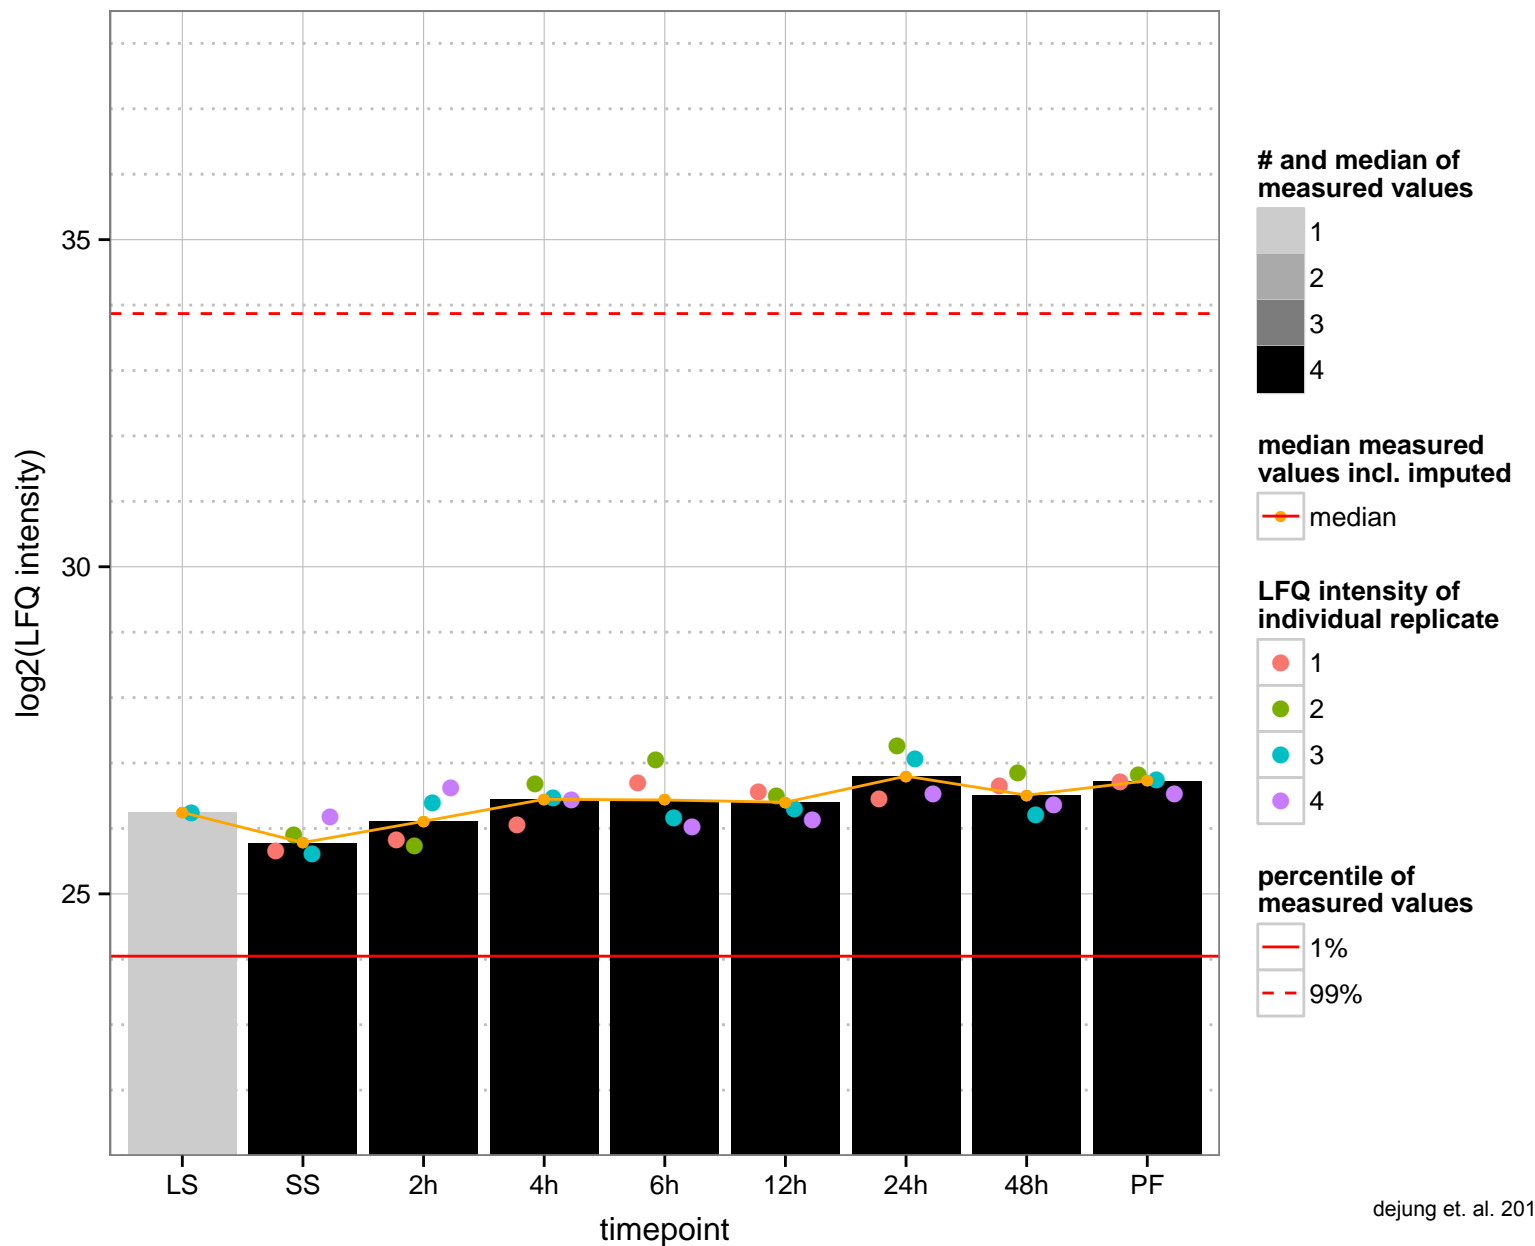



hslVU complex proteolytic subunit, putative, threonine peptidase, Clan T(1), family T1B

Tb927.11.10240

AGOF: endopeptidase activity, threonine-type endopeptidase activity

AGOC: HslUV protease complex, mitochondrion, proteasome core complex

AGOP: protein catabolic process, proteolysis involved in cellular protein catabolic process, rolling circle DNA replication

PGOF: threonine-type endopeptidase activity

PGOC: HslUV protease complex, proteasome core complex

PGOP: proteolysis, proteolysis involved in cellular protein catabolic process

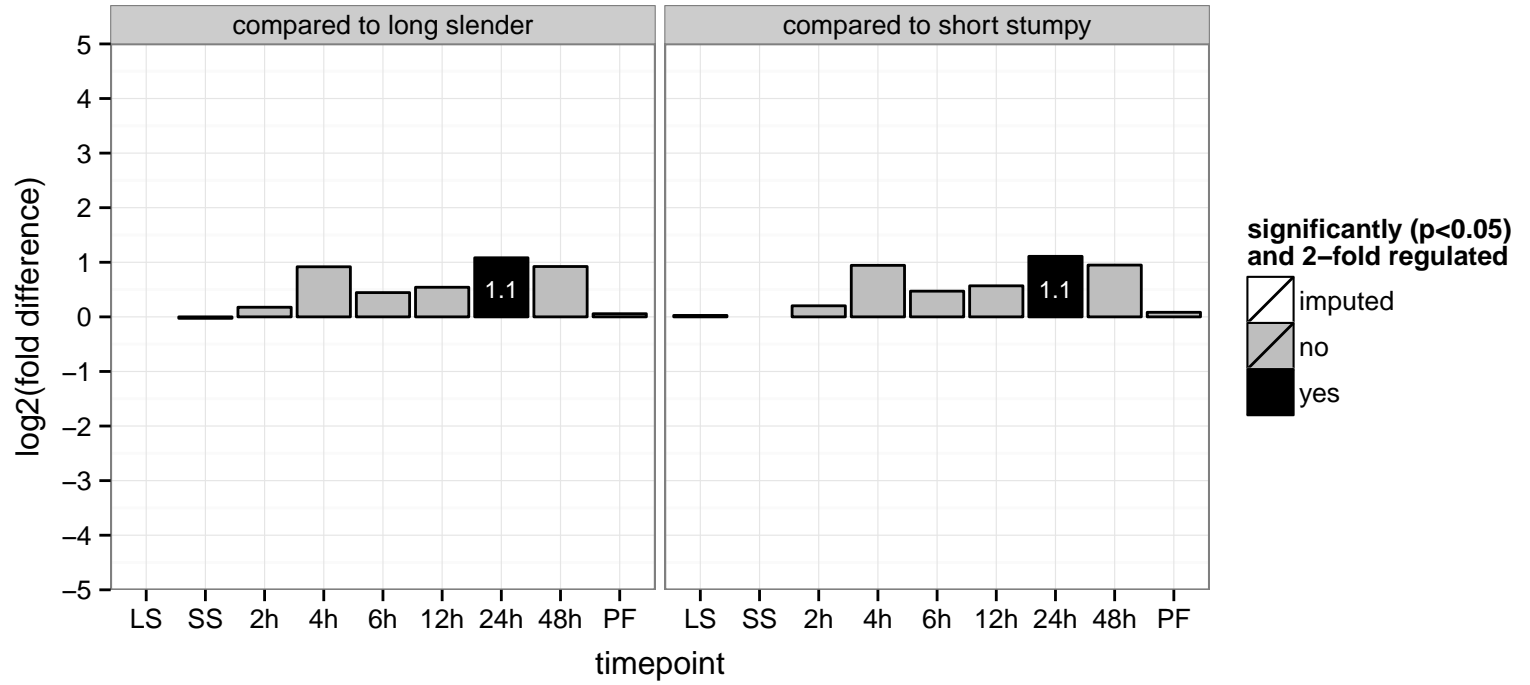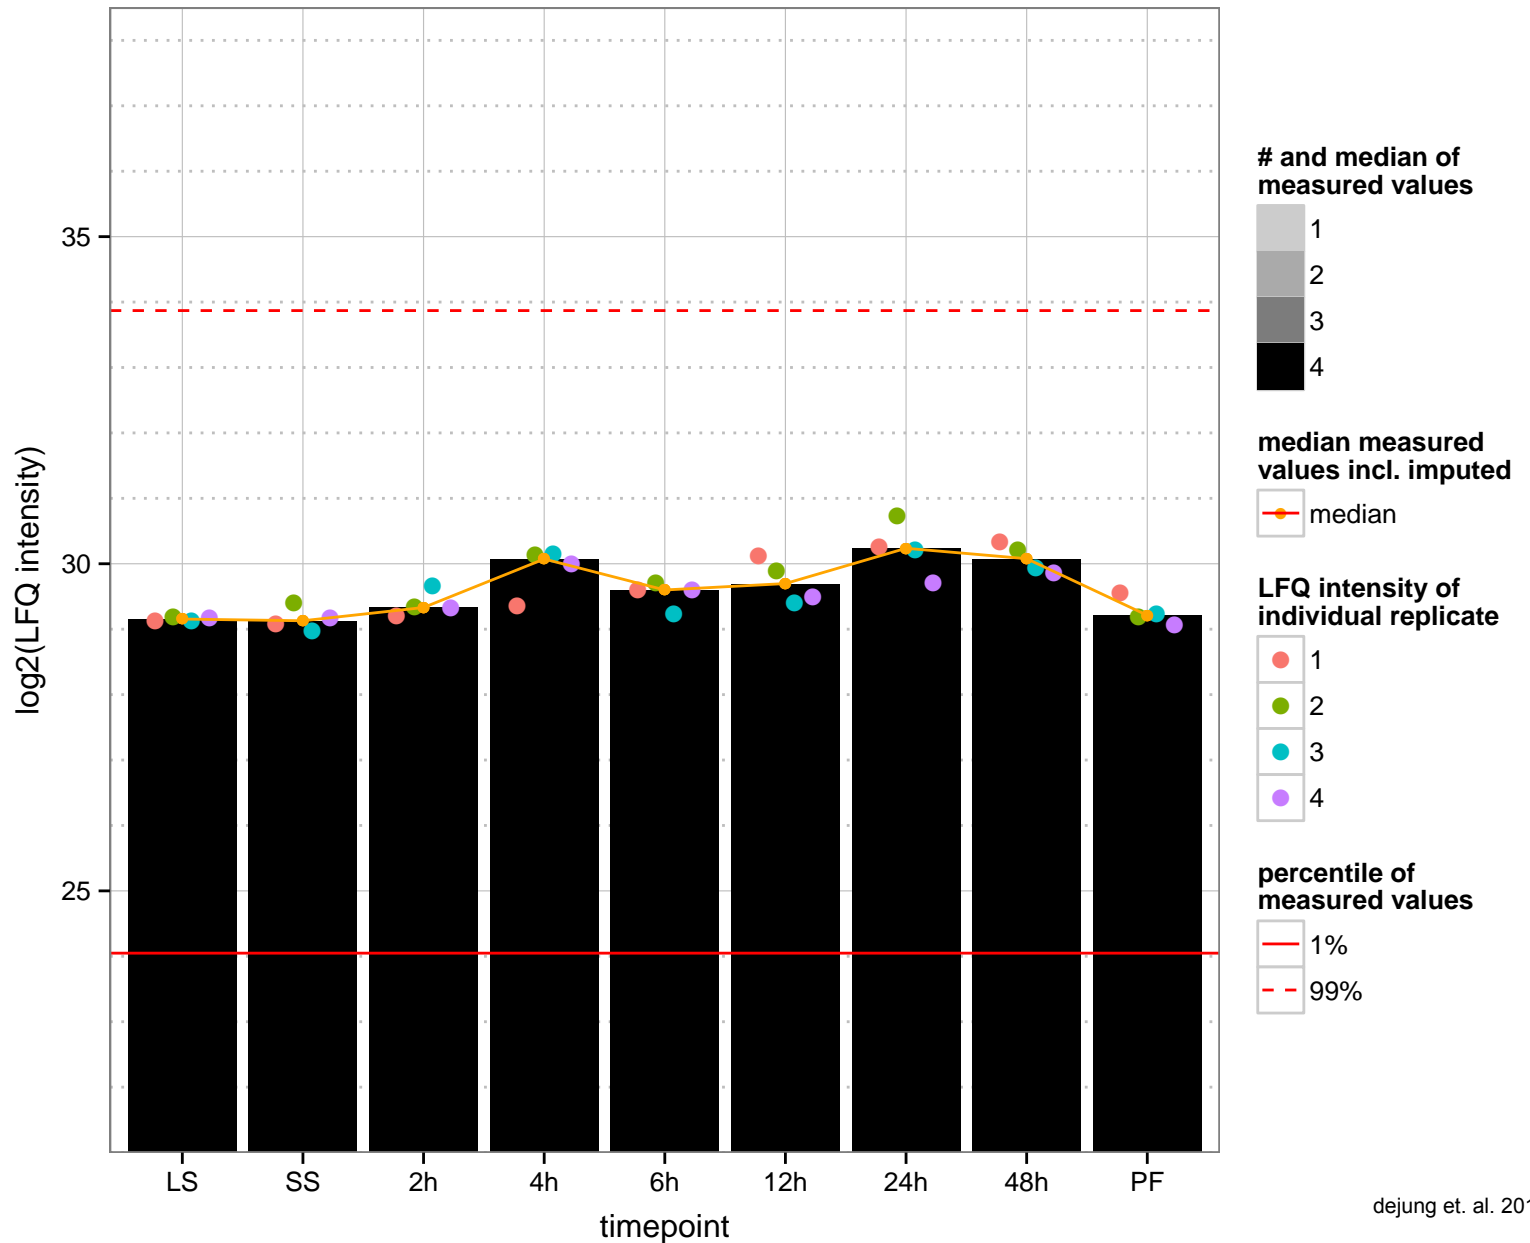

hypothetical protein, conserved  
 Tb927.11.10570  
 AGOF: null  
 AGOC: mitochondrion  
 AGOP: null  
 PGO: null  
 PGO: null  
 PGO: null

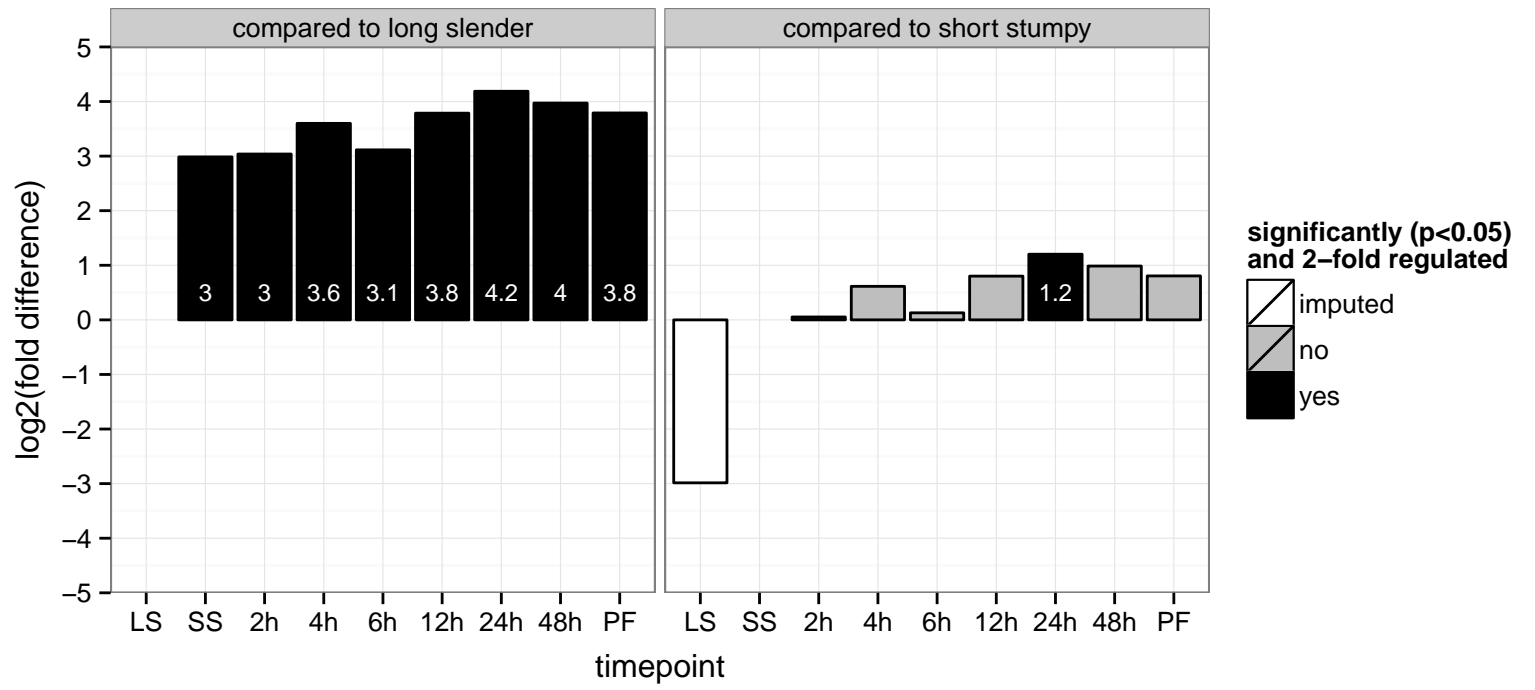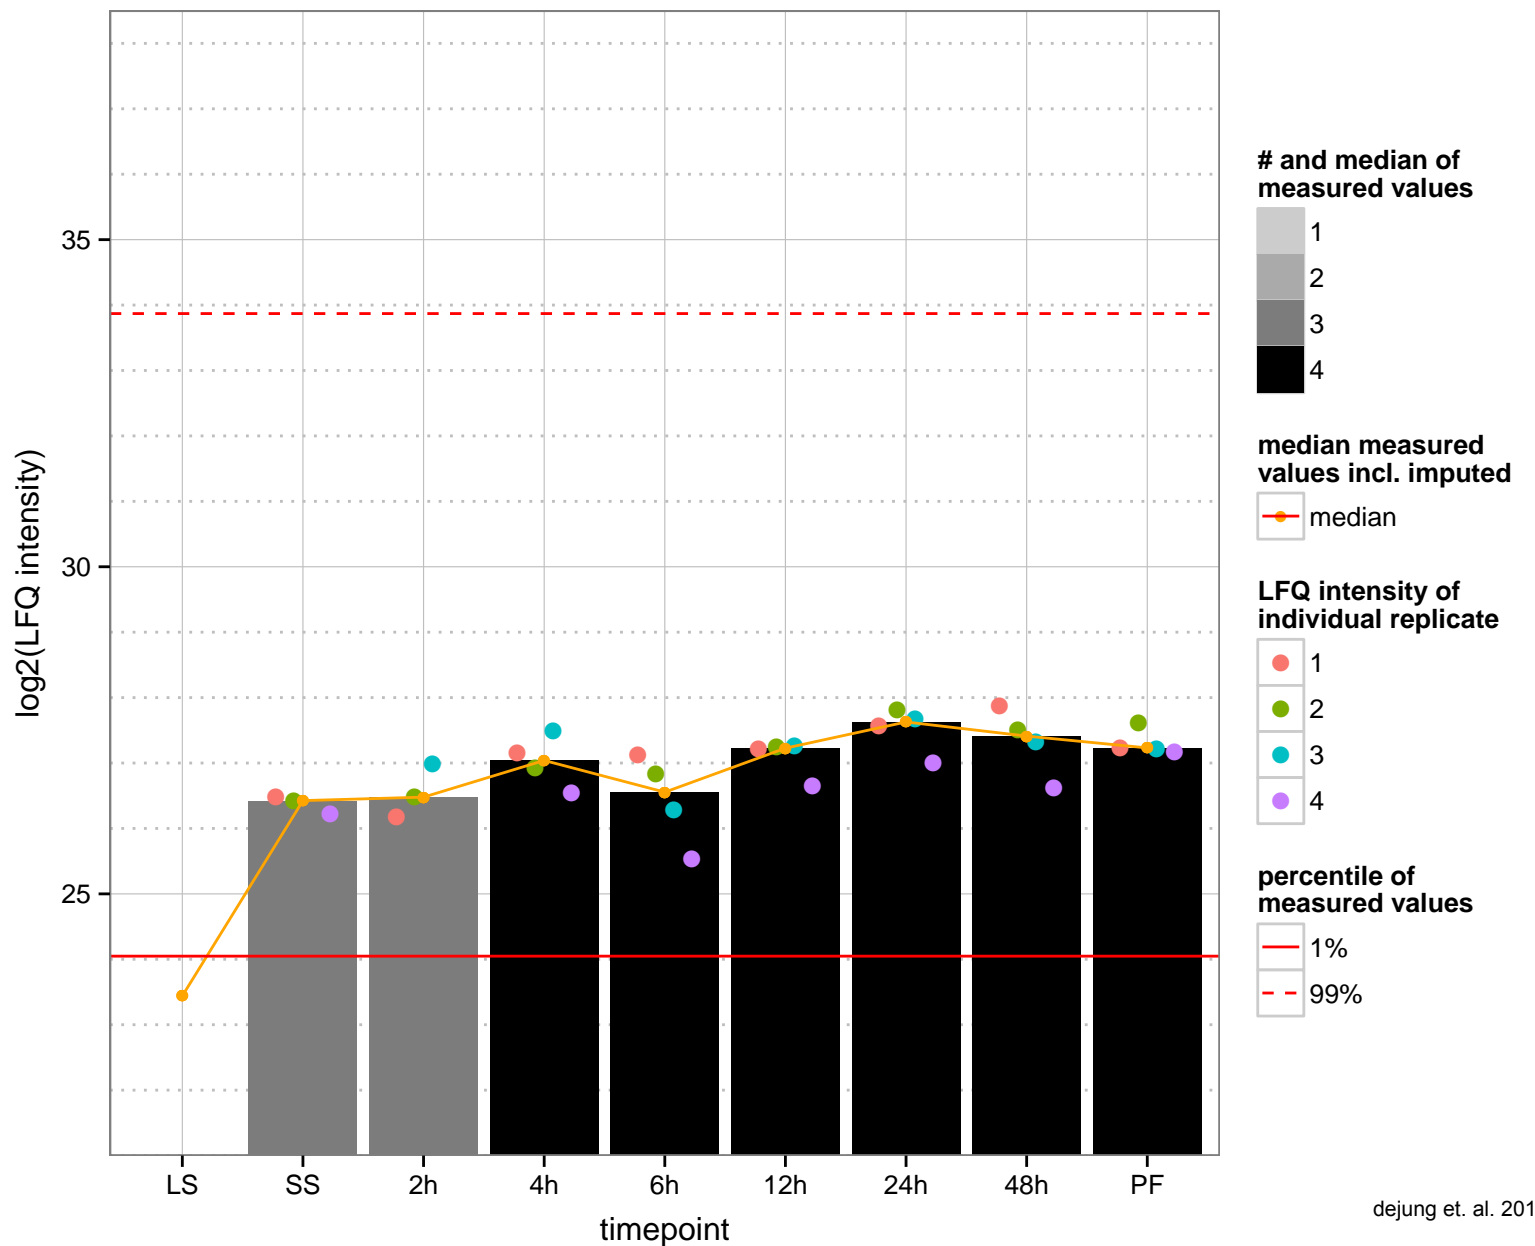

mitochondrial import inner membrane translocase subunit tim17 (Tim17)

Tb927.11.13290

AGOF: protein transporter activity

AGOC: integral to mitochondrial inner membrane, mitochondrial inner membrane, mitochondrial inner membrane presequence

AGOP: protein targeting to mitochondrion, stabilization of membrane potential

PGOF: null

PGOC: null

PGOP: null

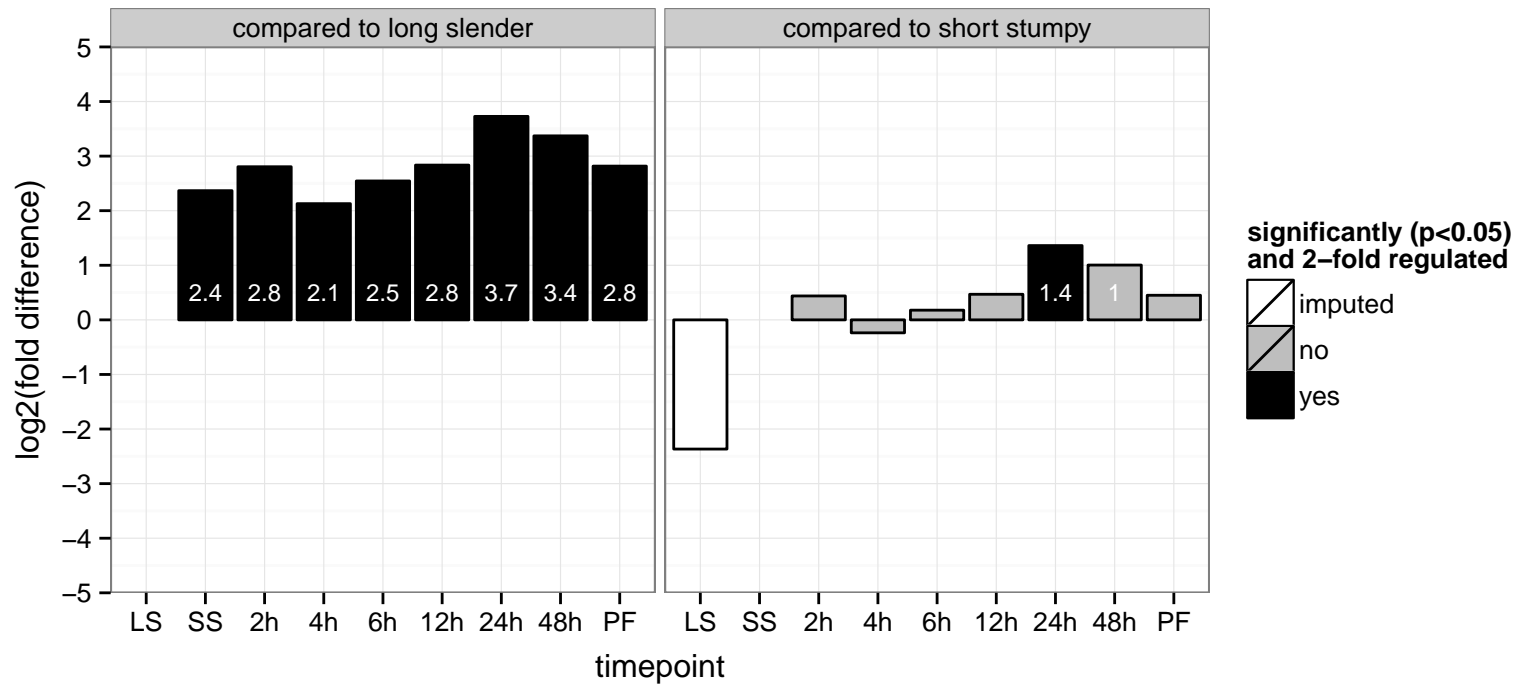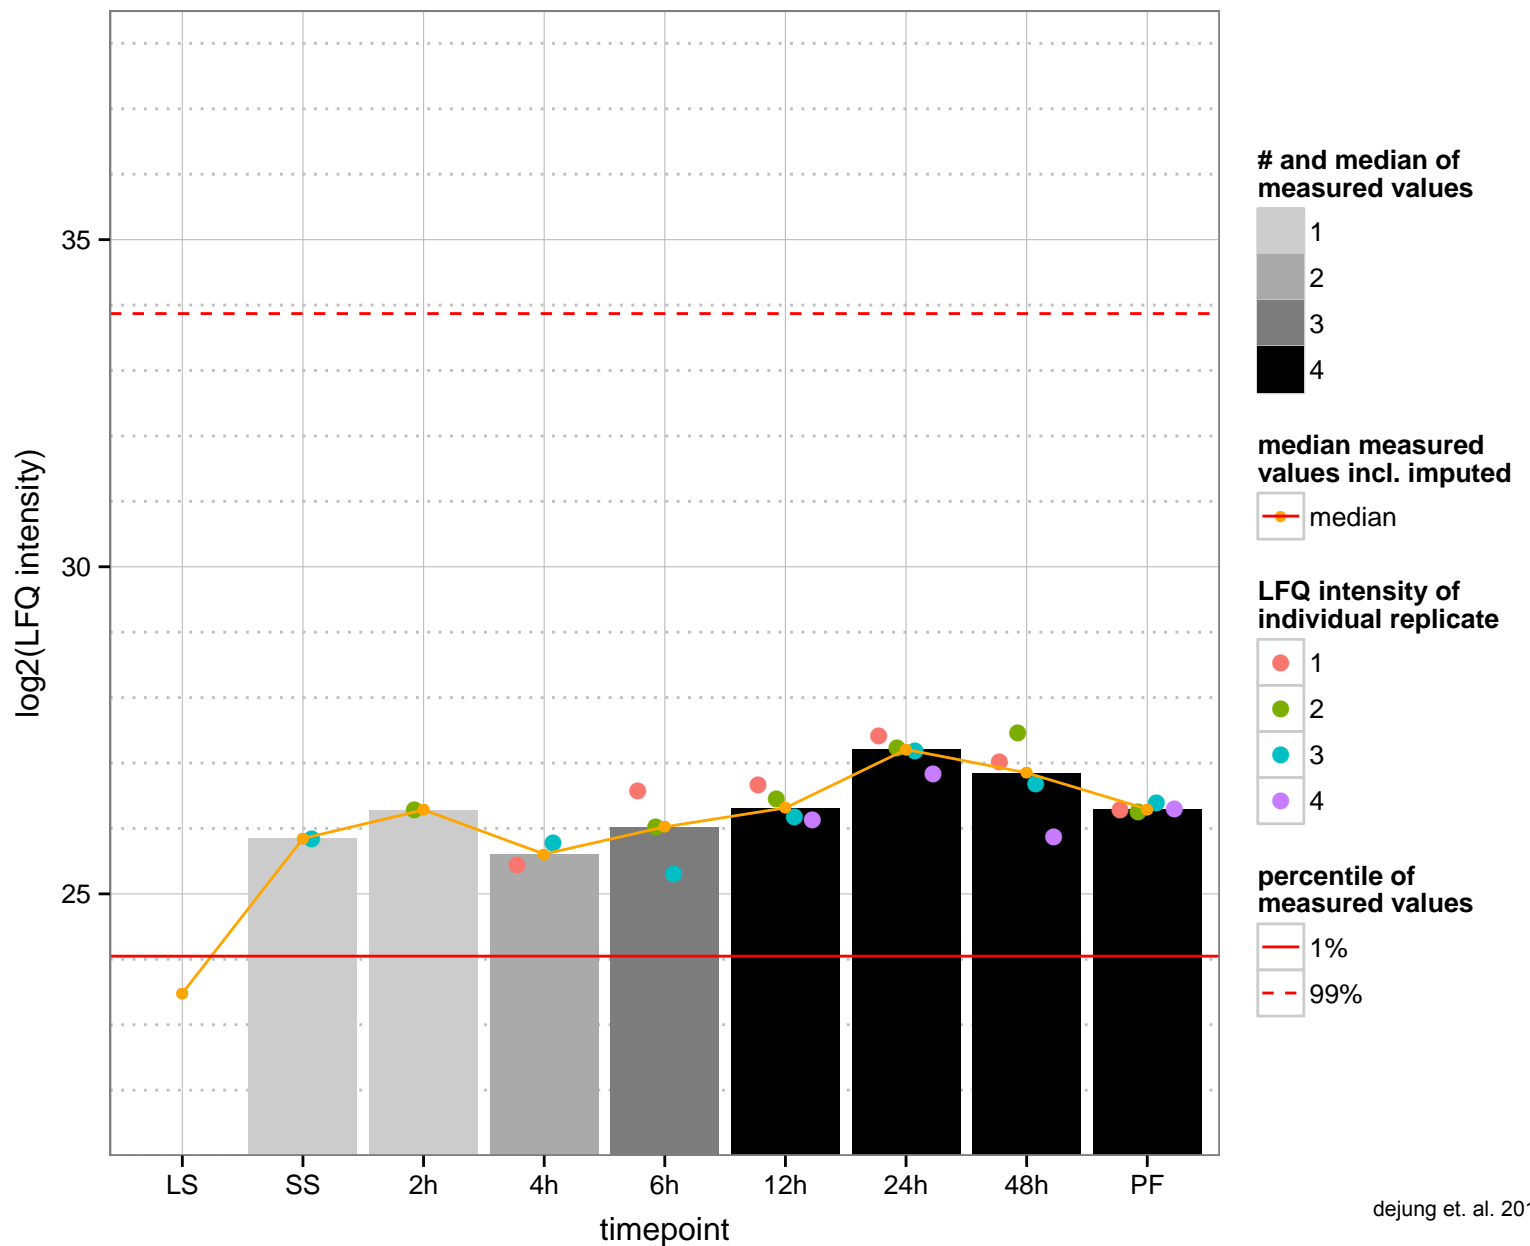

hypothetical protein, conserved  
 Tb927.11.13950  
 AGOF: null  
 AGOC: null  
 AGOP: null  
 PGO: null  
 PGOC: null  
 PGOP: null

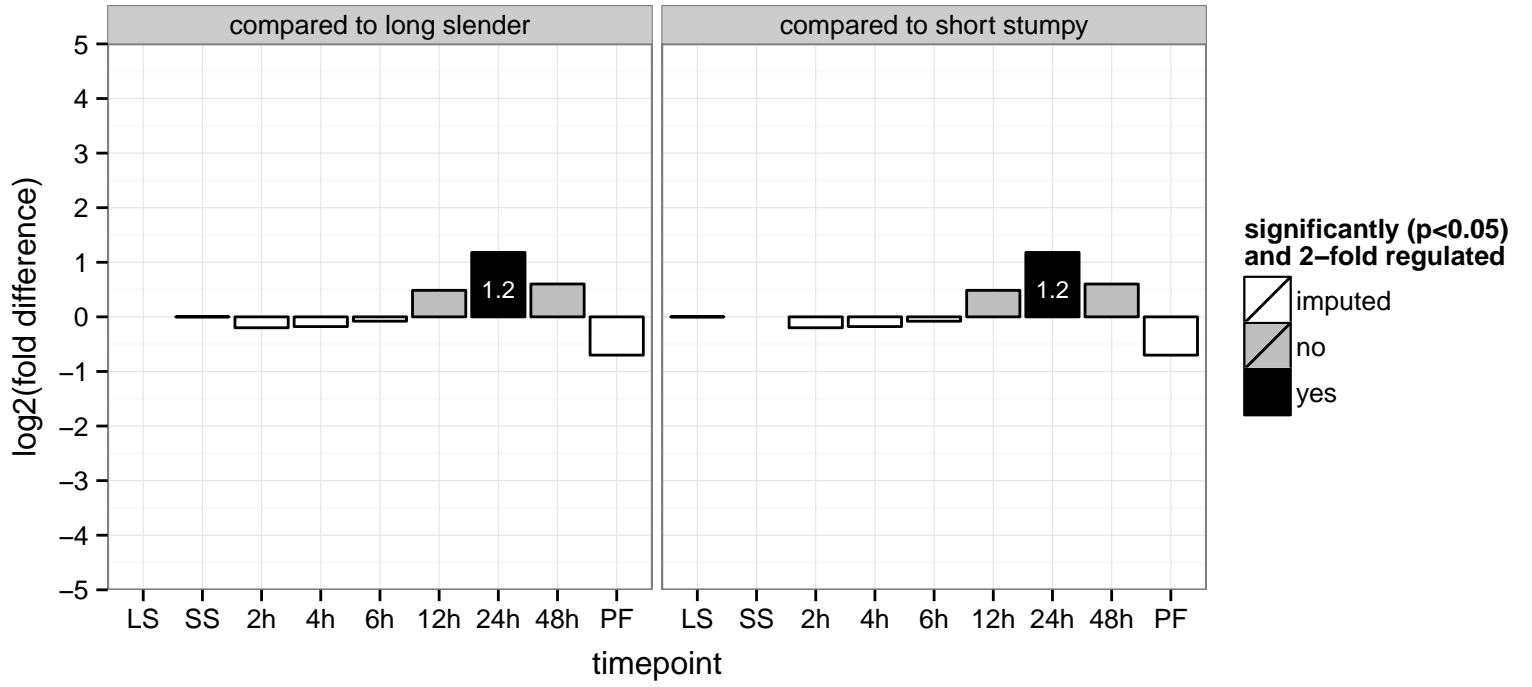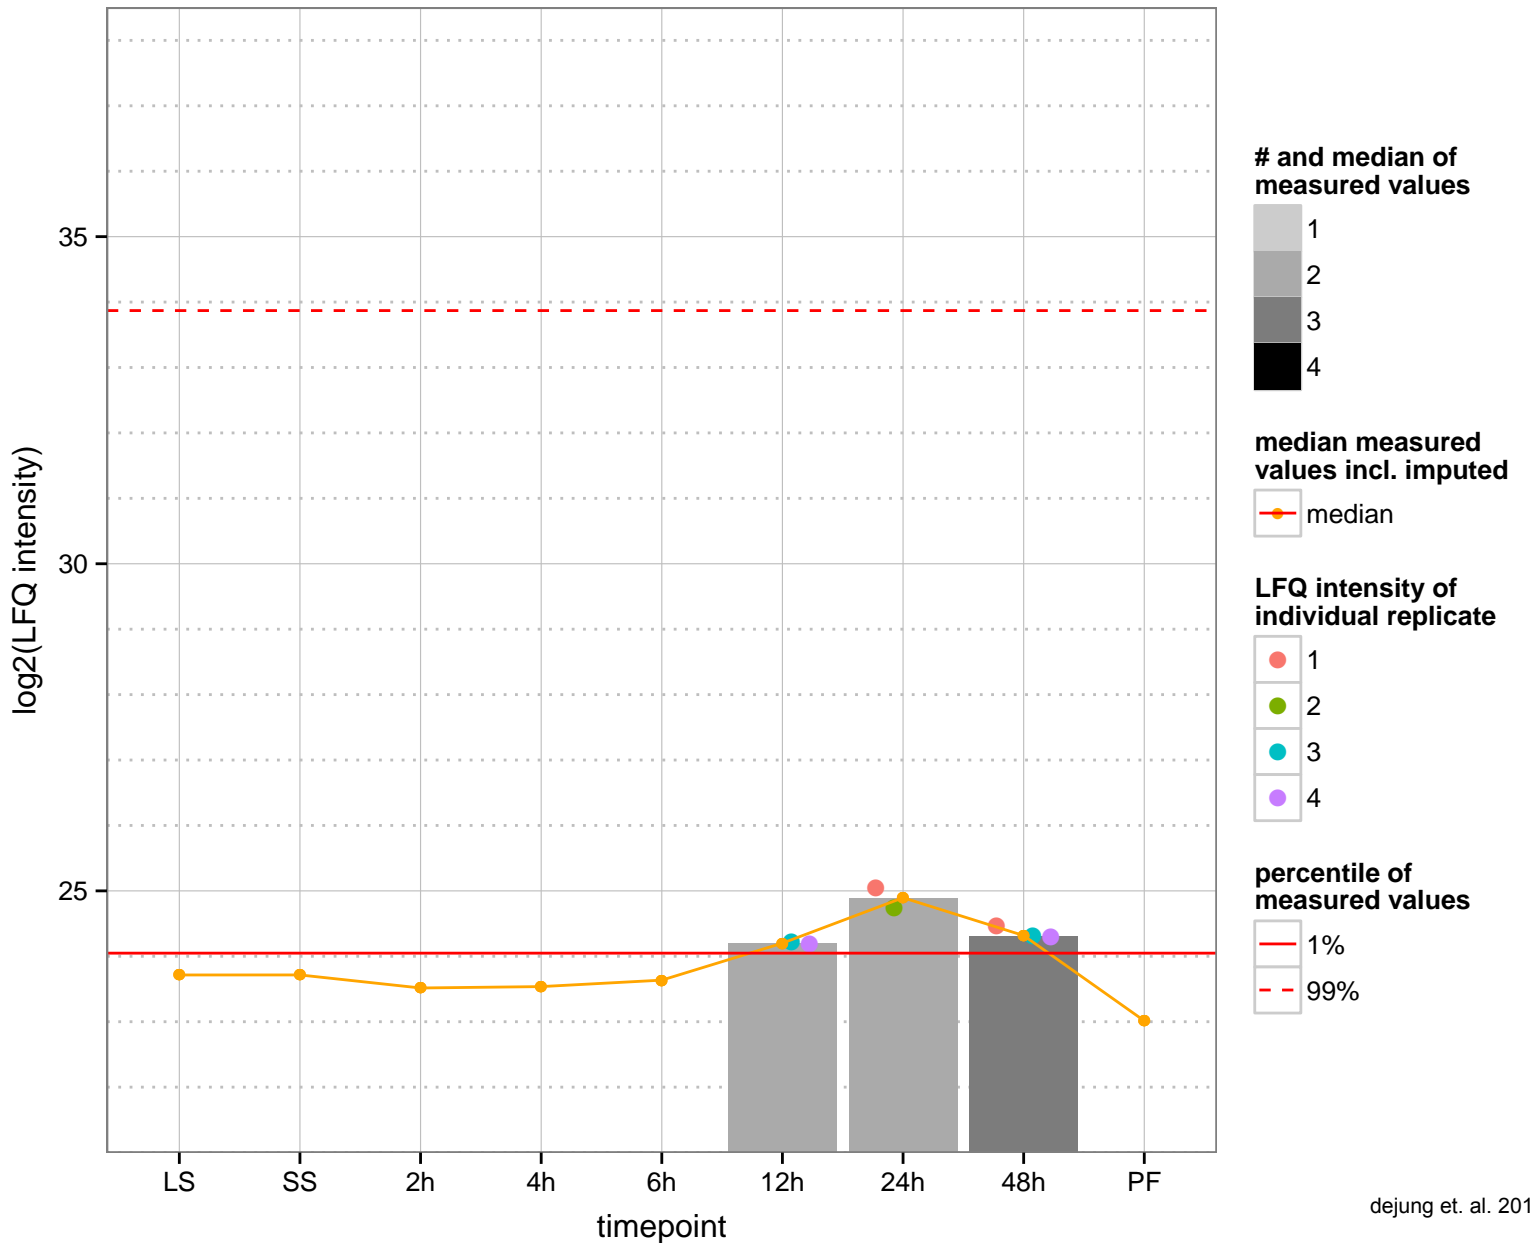

hypothetical protein, conserved  
 Tb927.11.16040  
 AGOF: null  
 AGOC: null  
 AGOP: null  
 PGO: unfolded protein binding  
 PGOC: prefoldin complex  
 PGOP: protein folding

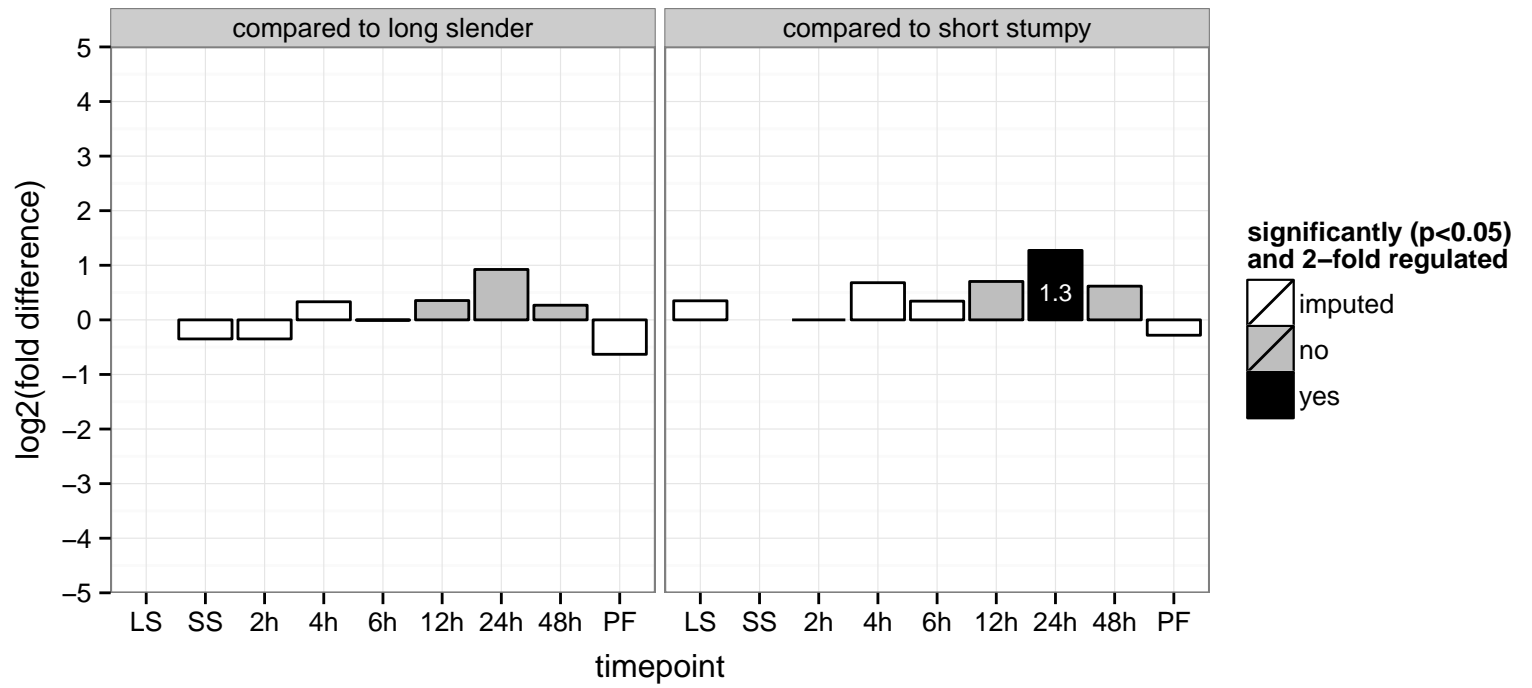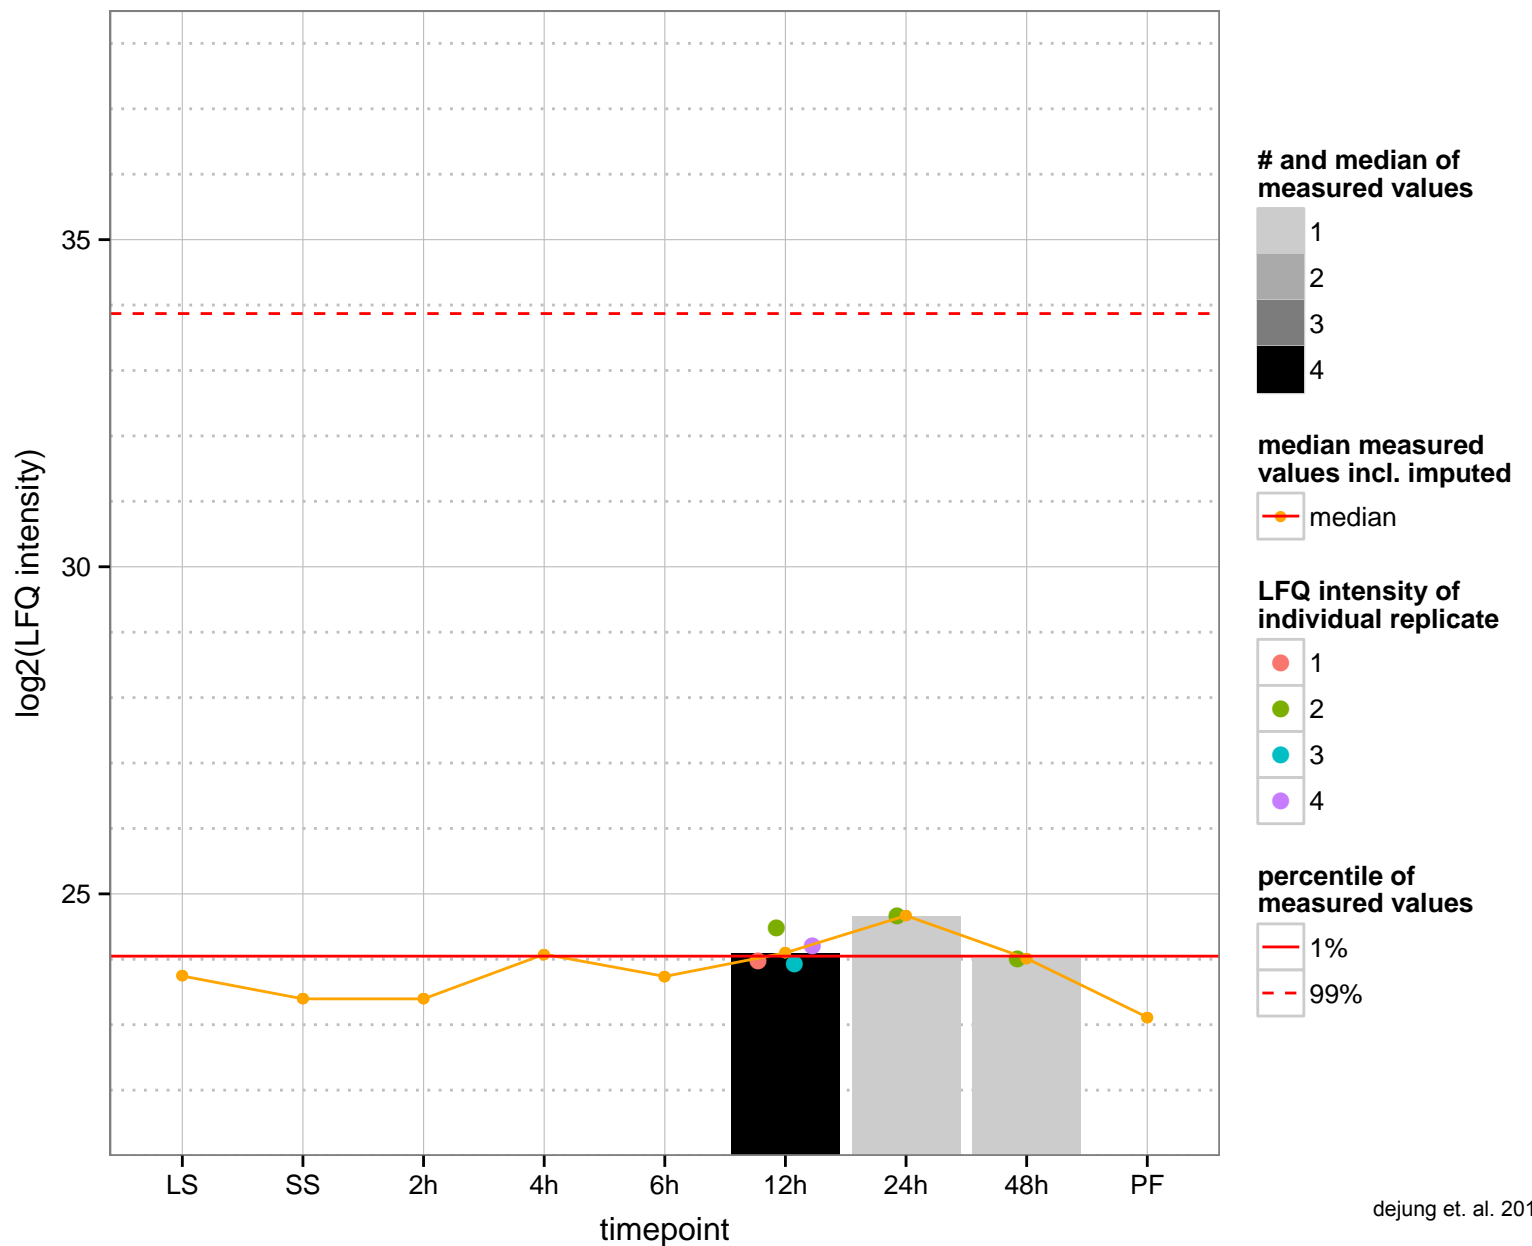

glycerolphosphate mutase, putative  
 Tb927.11.2920  
 AGOF: catalytic activity  
 AGOC: mitochondrion  
 AGOP: metabolic process  
 PGO: null  
 PGOC: null  
 PGOP: null

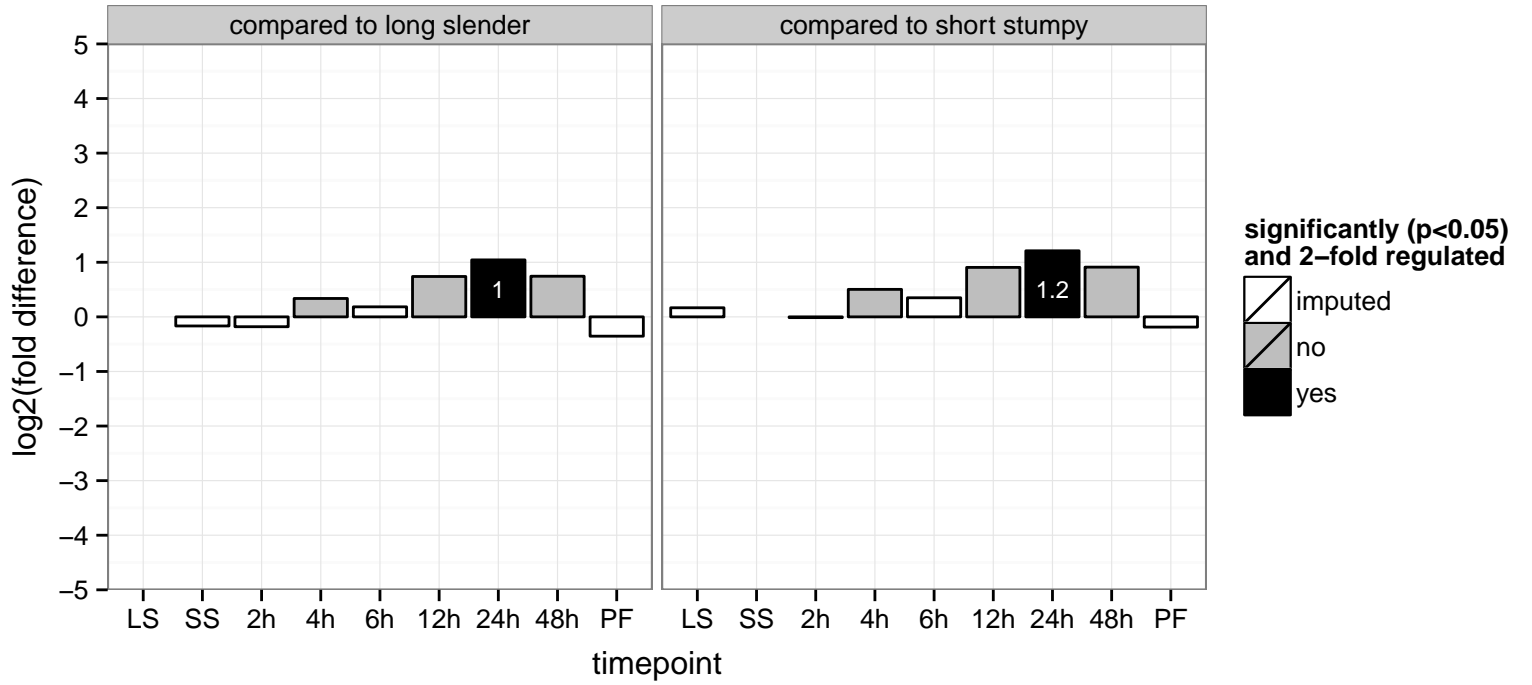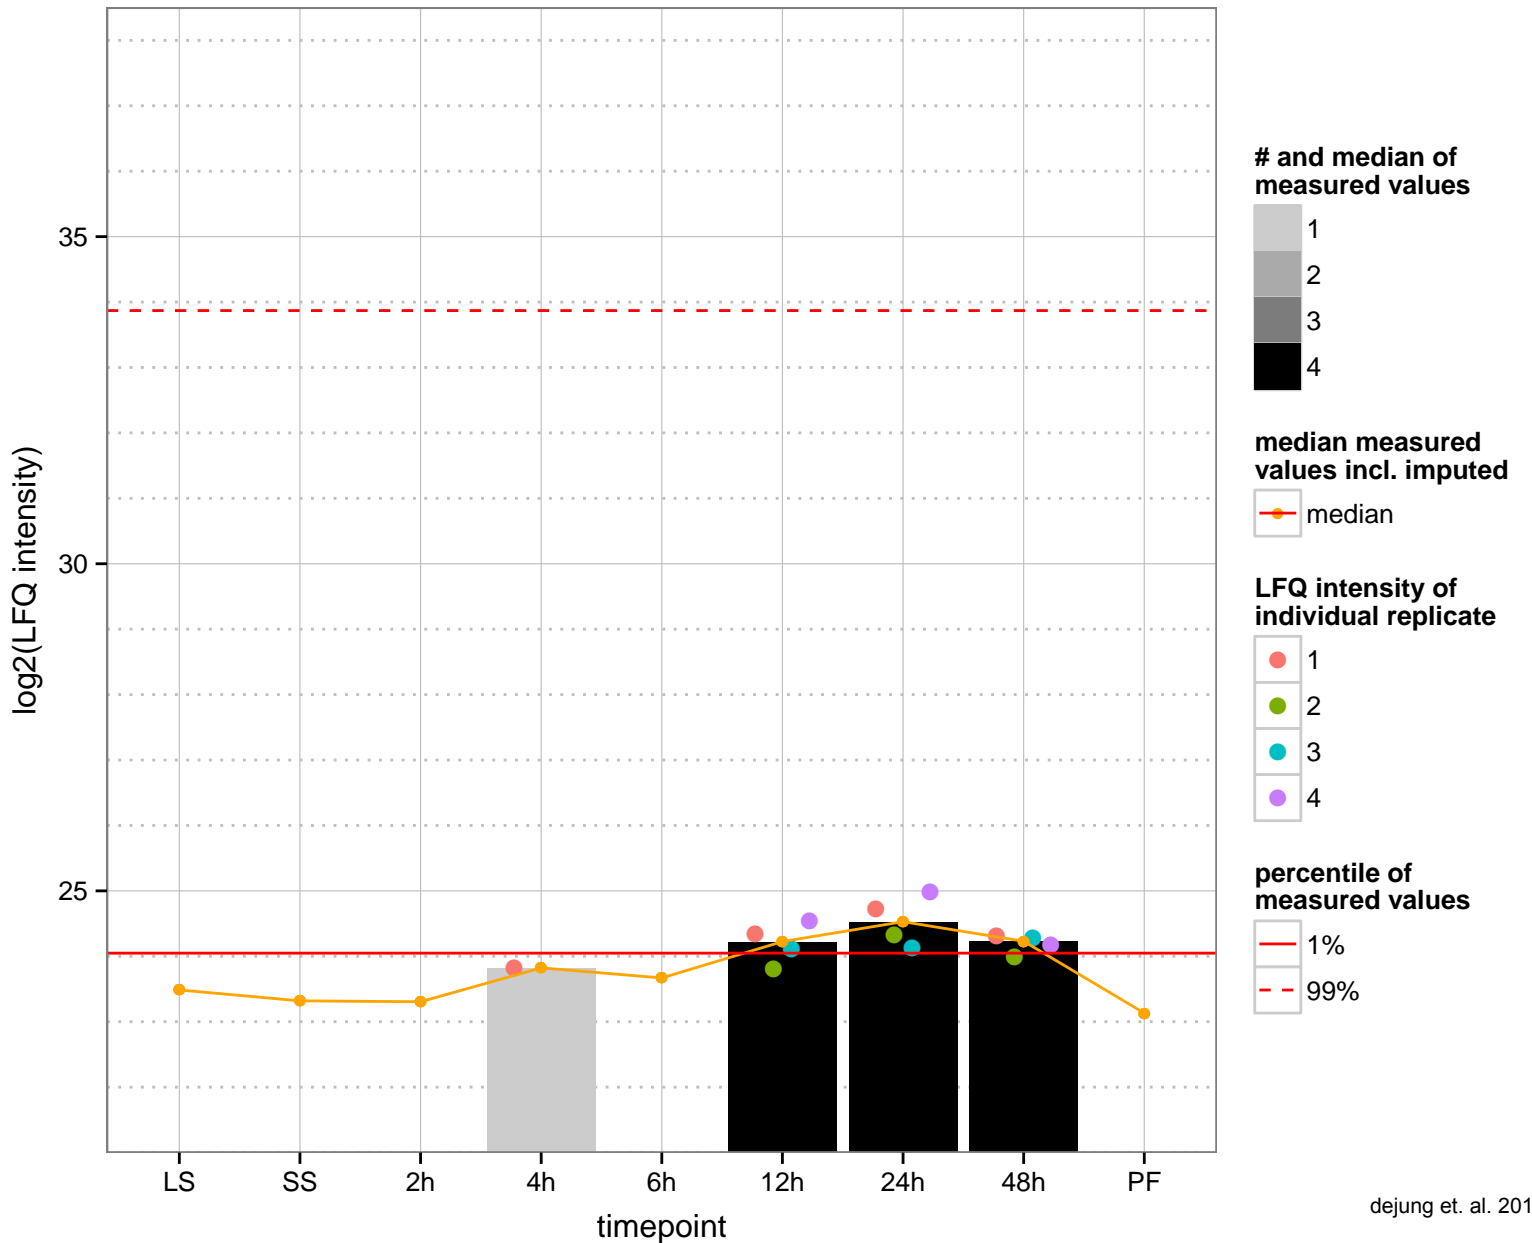

hypothetical protein, conserved  
 Tb927.11.5200  
 AGOF: null  
 AGOC: null  
 AGOP: null  
 PGO: null  
 PGOC: null  
 PGOP: null

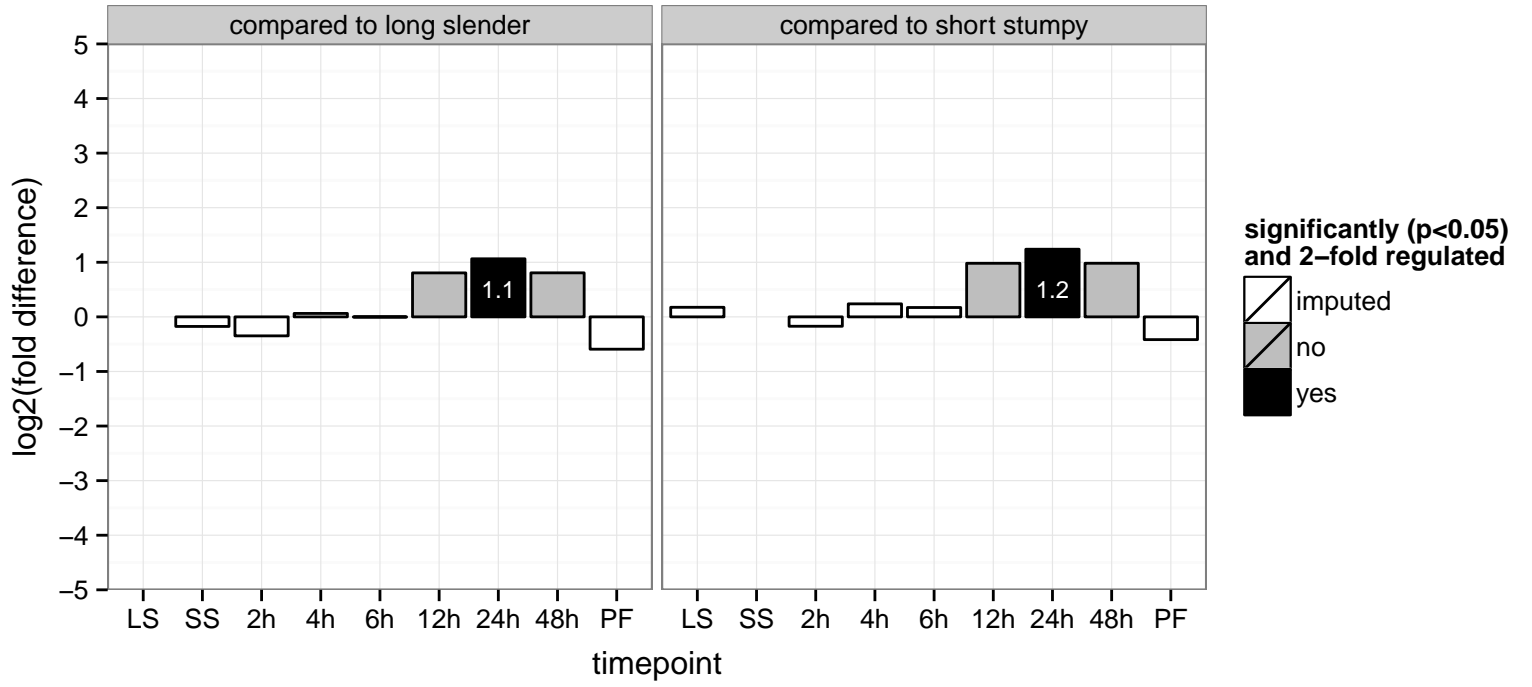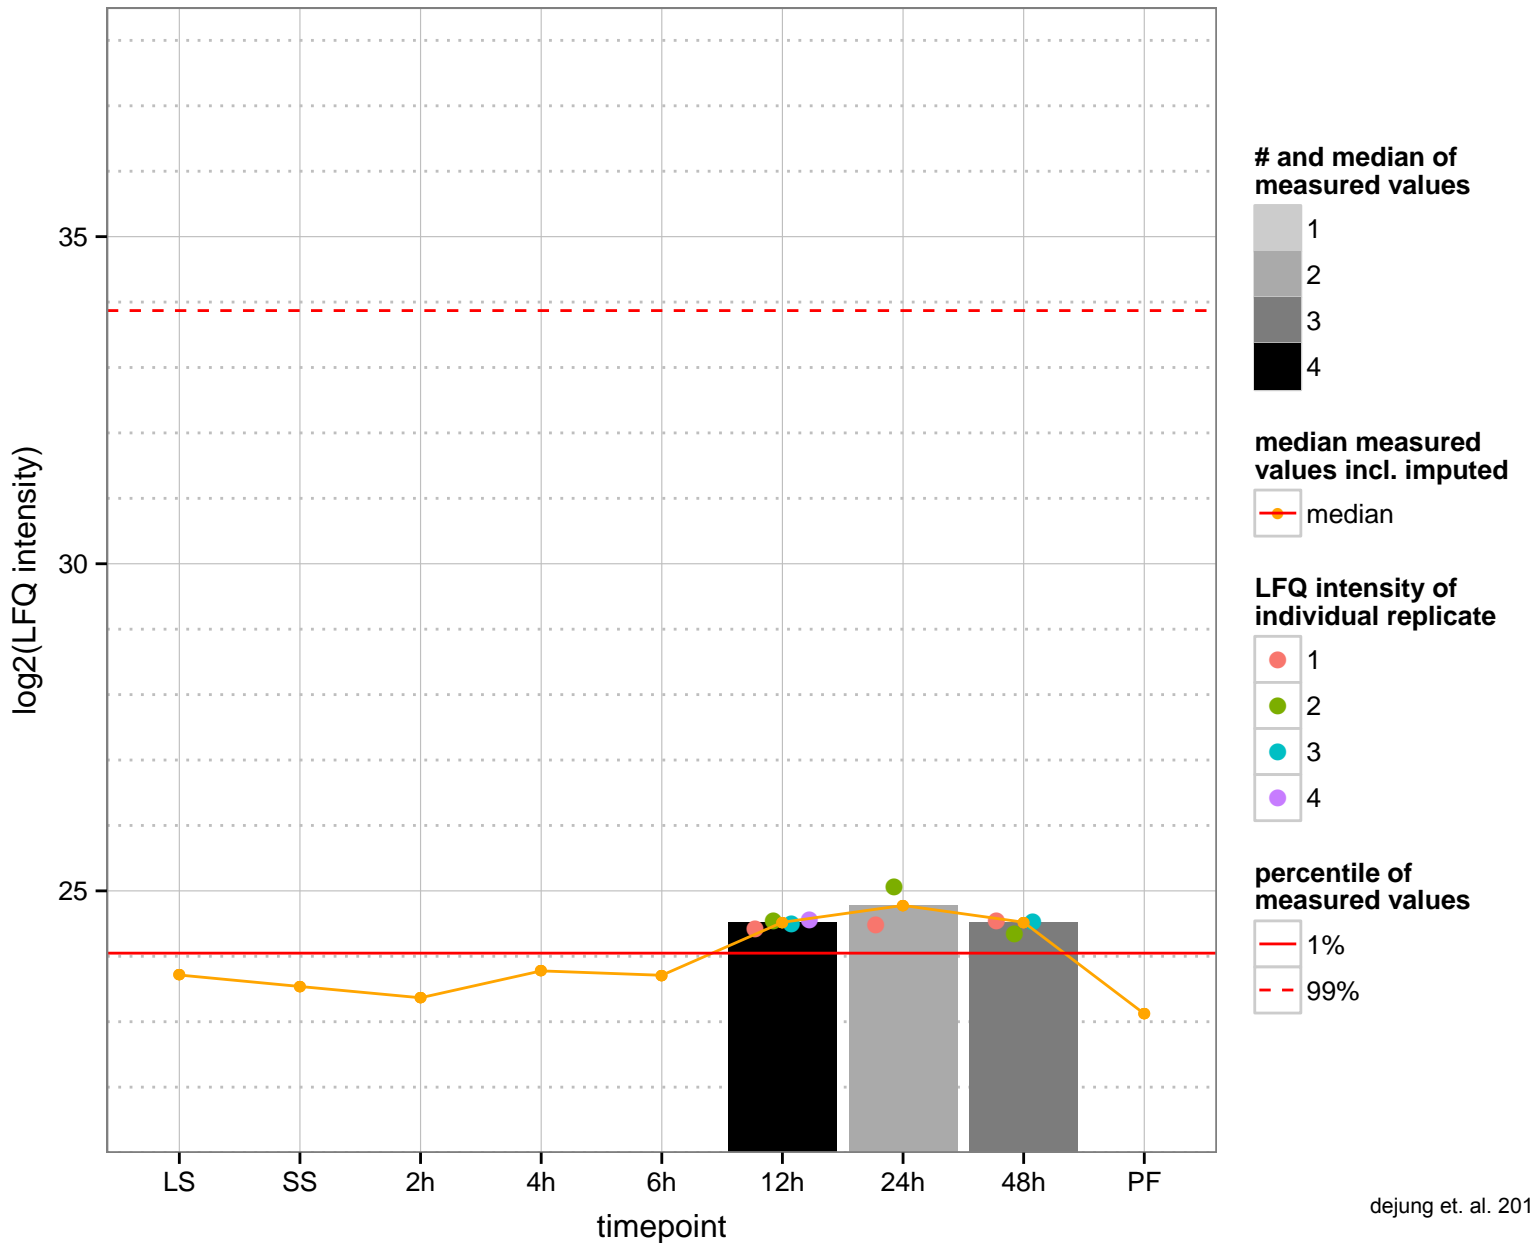

hypothetical protein, conserved  
 Tb927.3.4450  
 AGOF: null  
 AGOC: null  
 AGOP: null  
 PGO: null  
 PGOC: null  
 PGOP: null

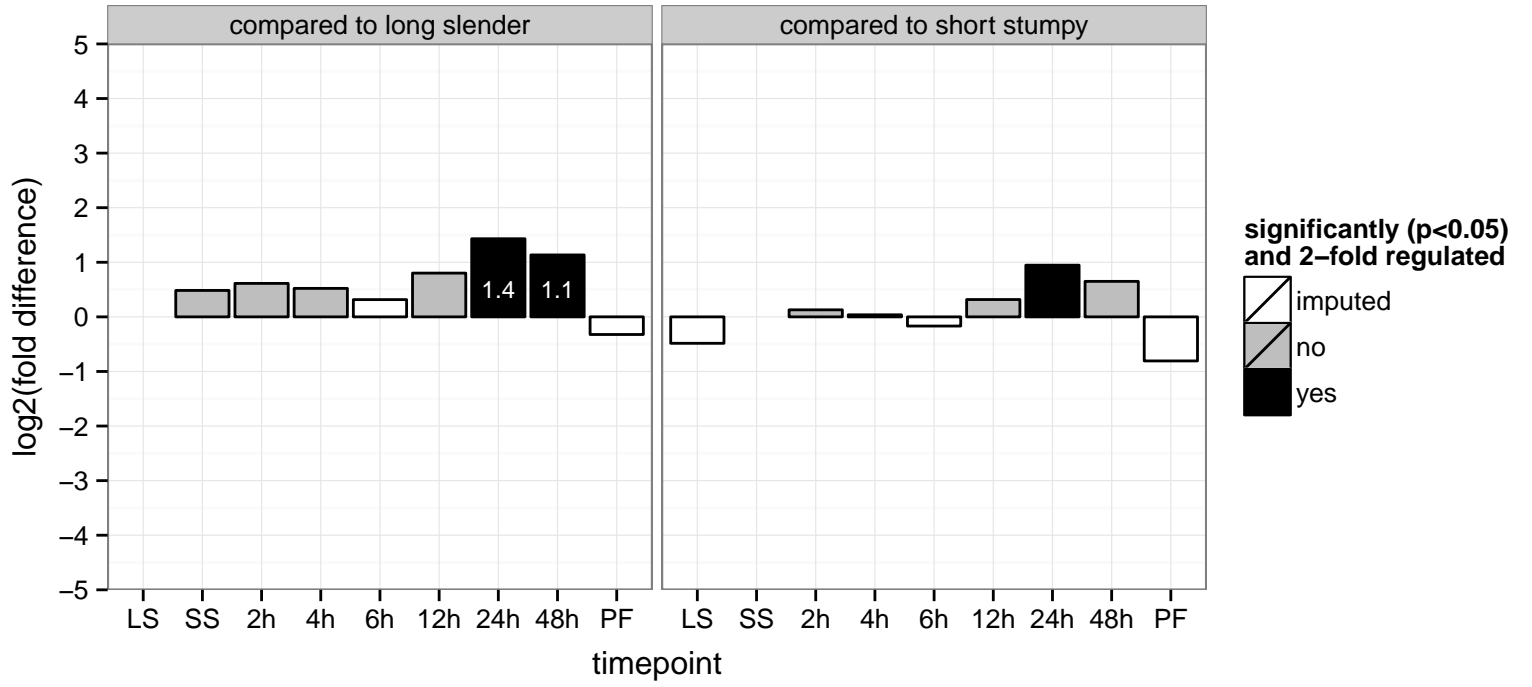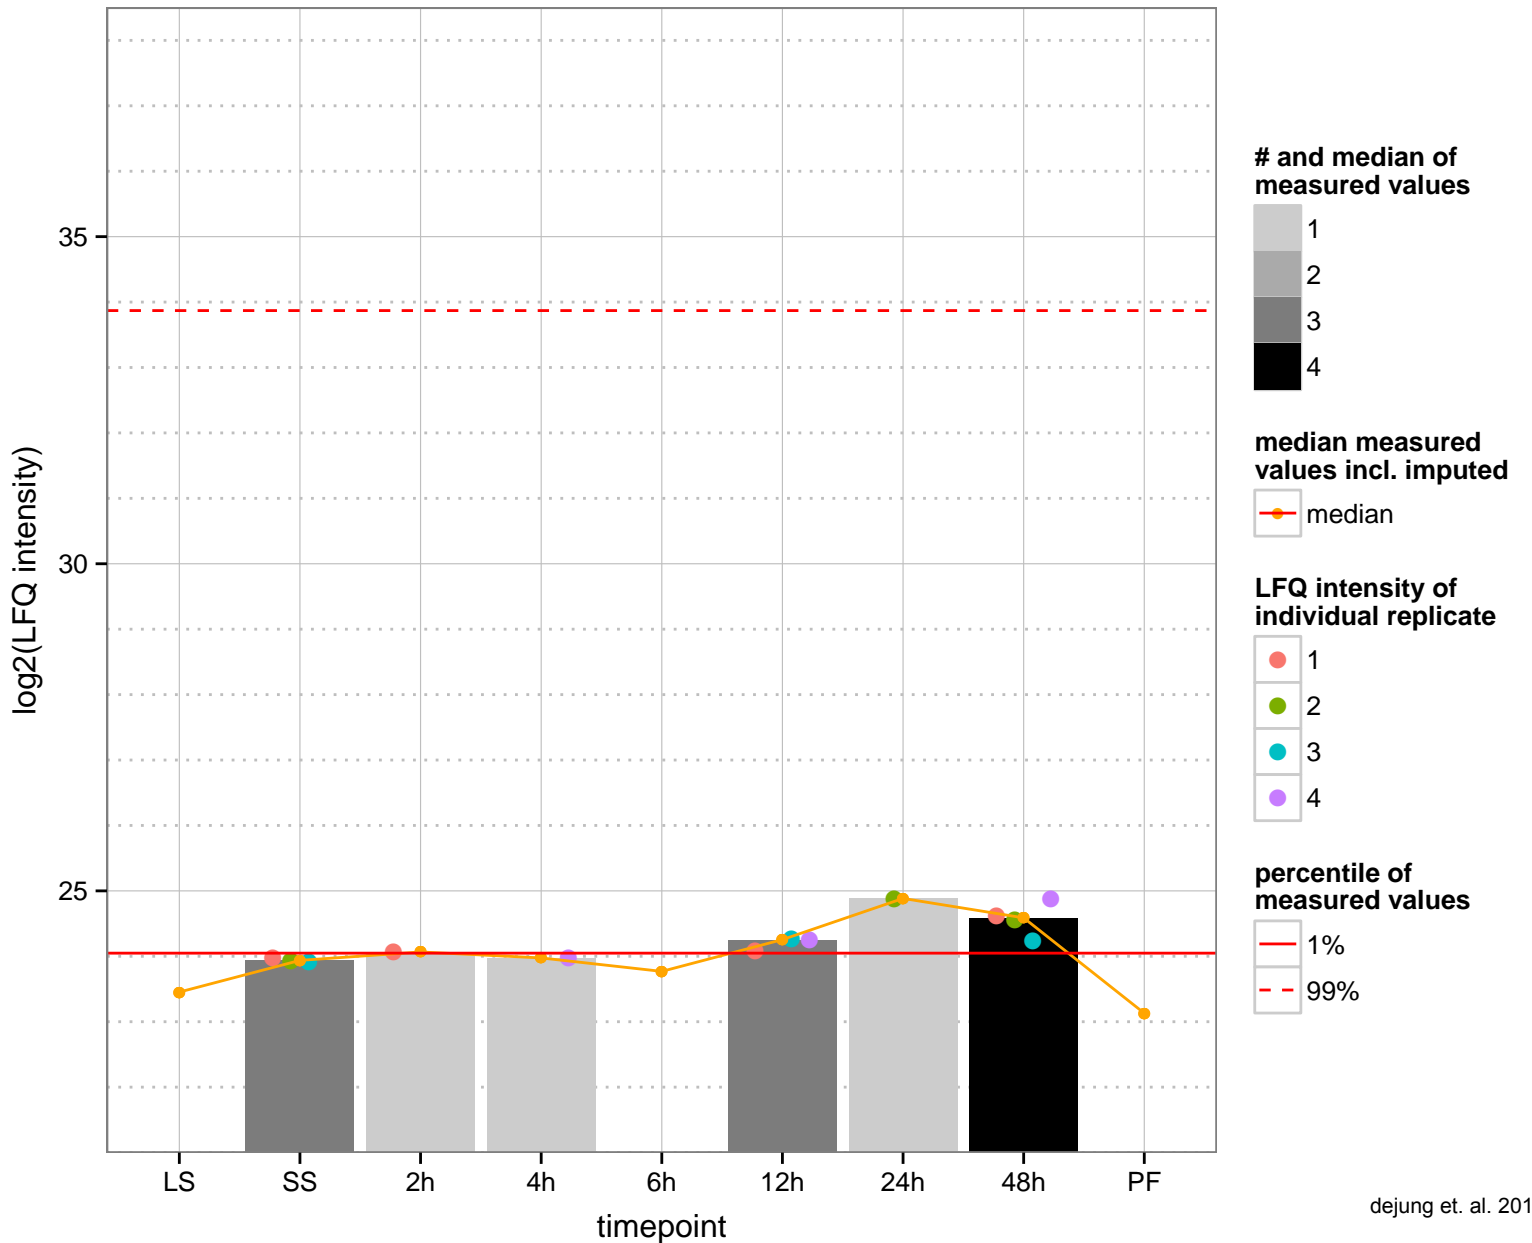



Spef1, flagellar component  
 Tb927.4.3130  
 AGOF: null  
 AGOC: null  
 AGOP: ciliary or flagellar motility  
 PGO: protein binding  
 PGO: null  
 PGO: null

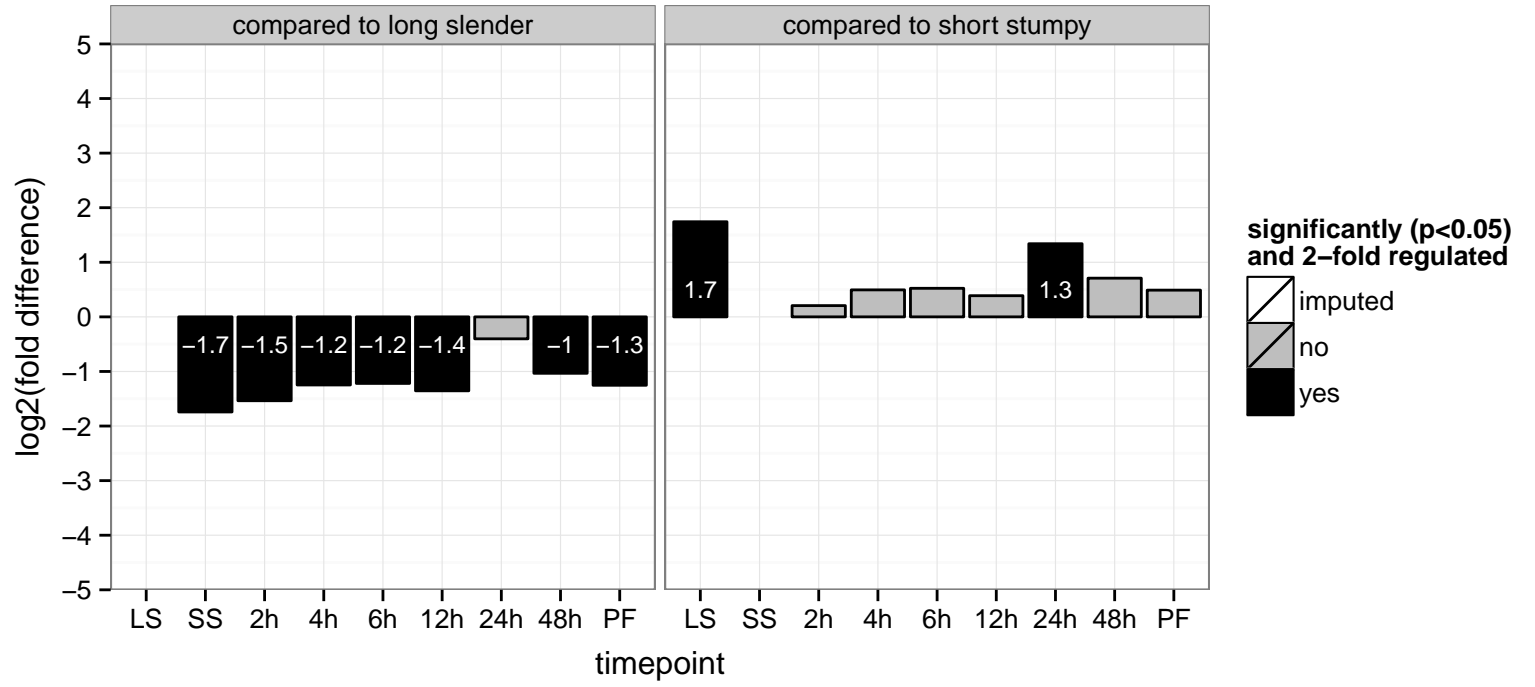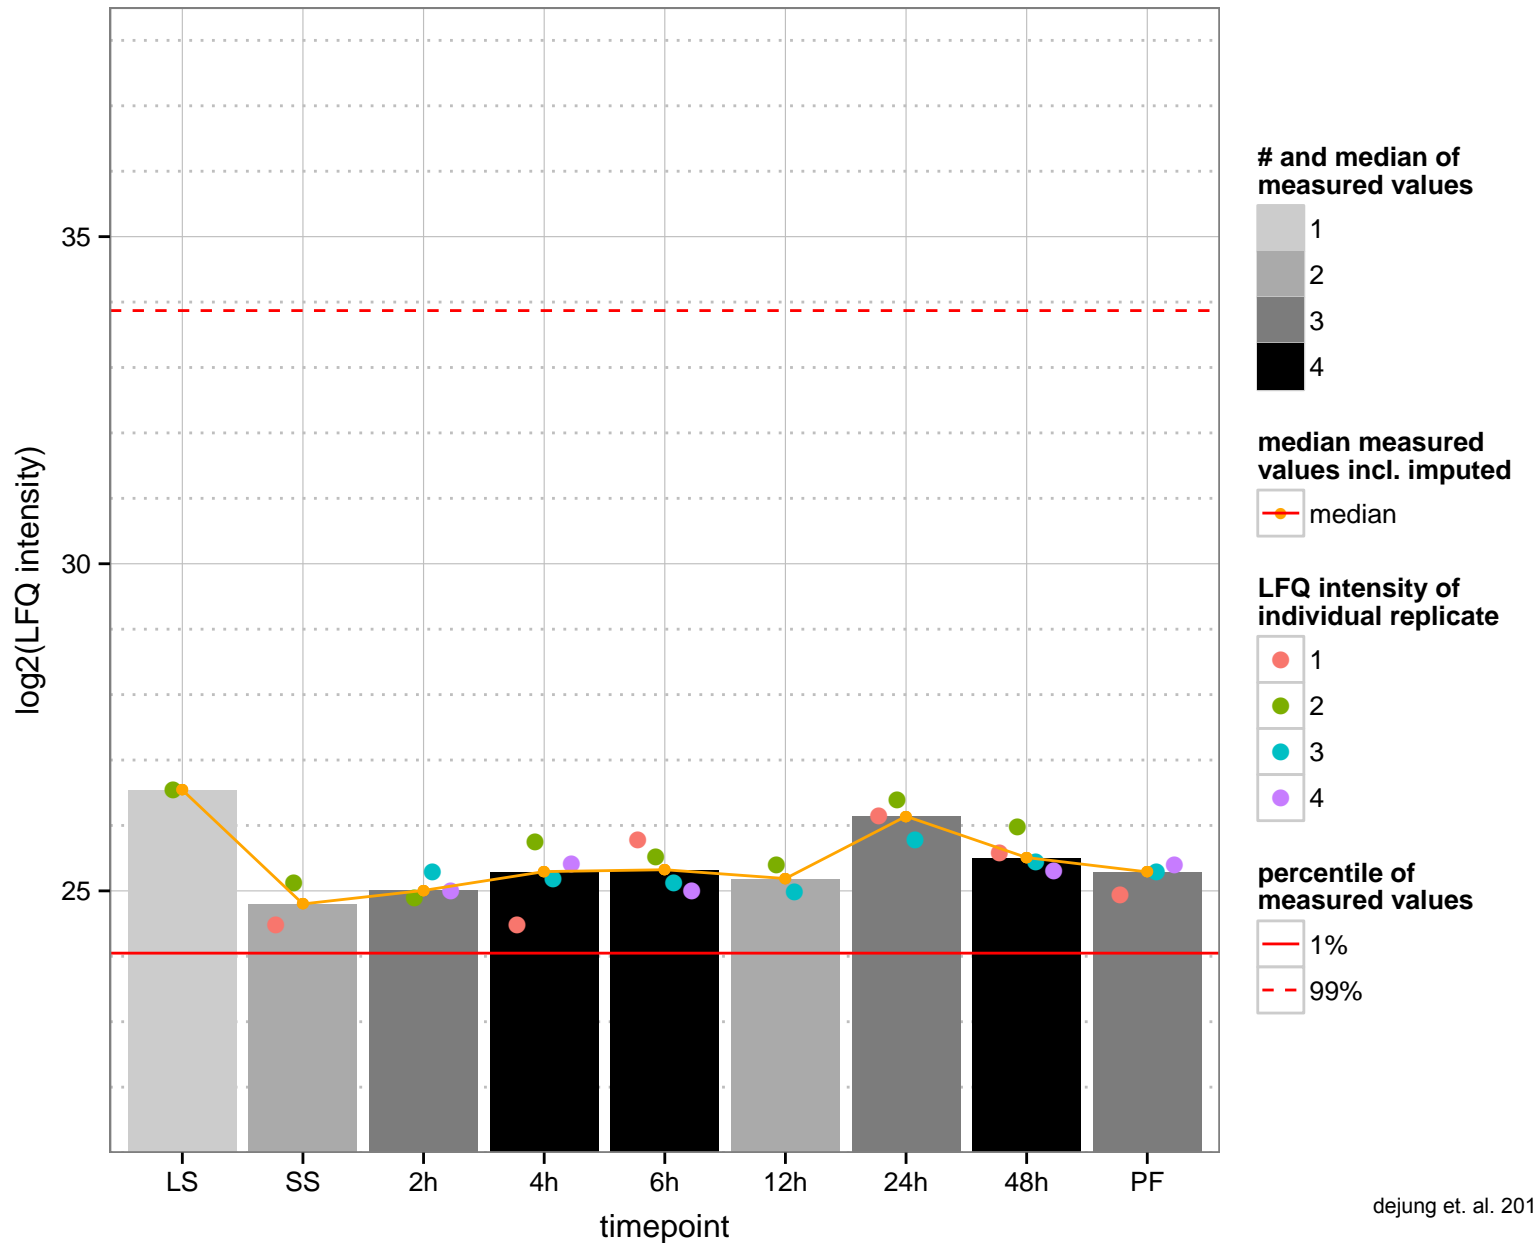

hypothetical protein, conserved  
 Tb927.5.1340  
 AGOF: null  
 AGOC: null, intracellular  
 AGOP: null, RNA processing  
 PGO: null  
 PGOC: null, intracellular  
 PGOP: null, RNA processing

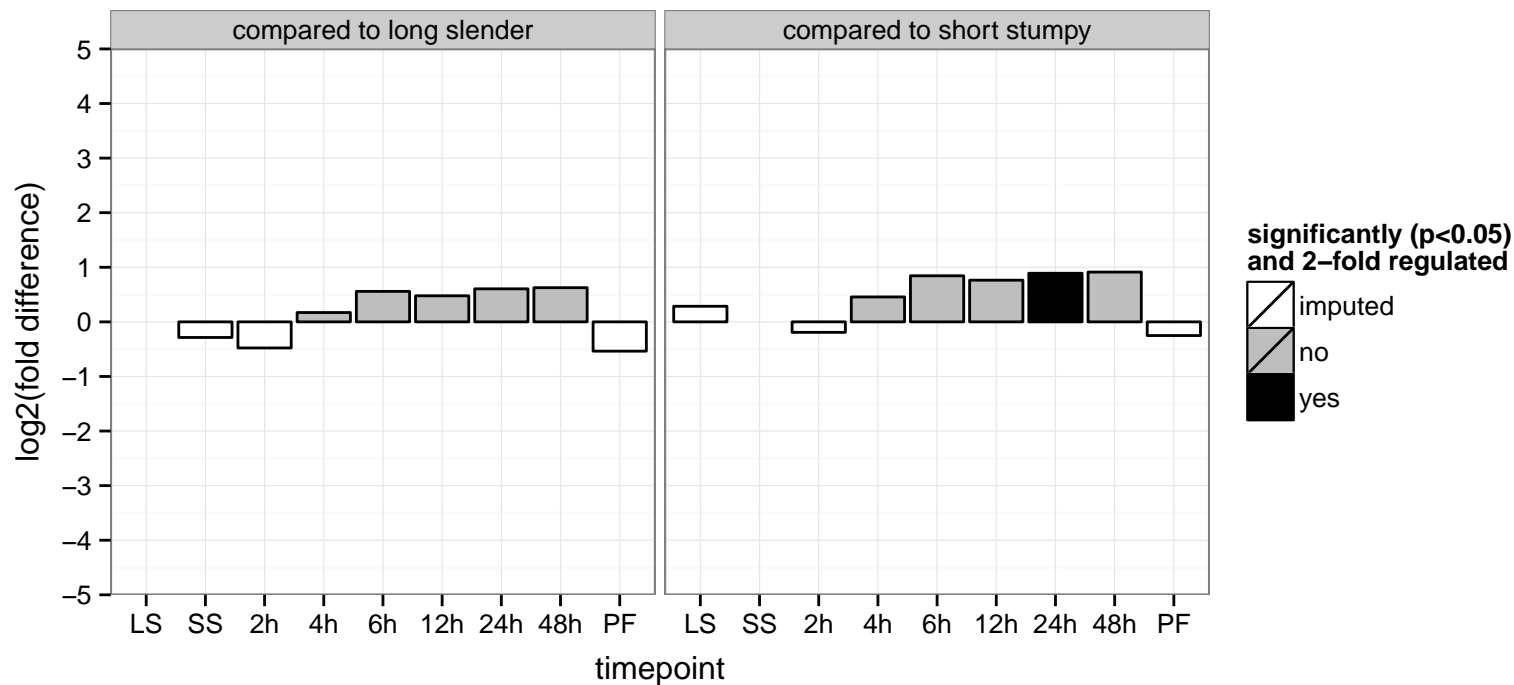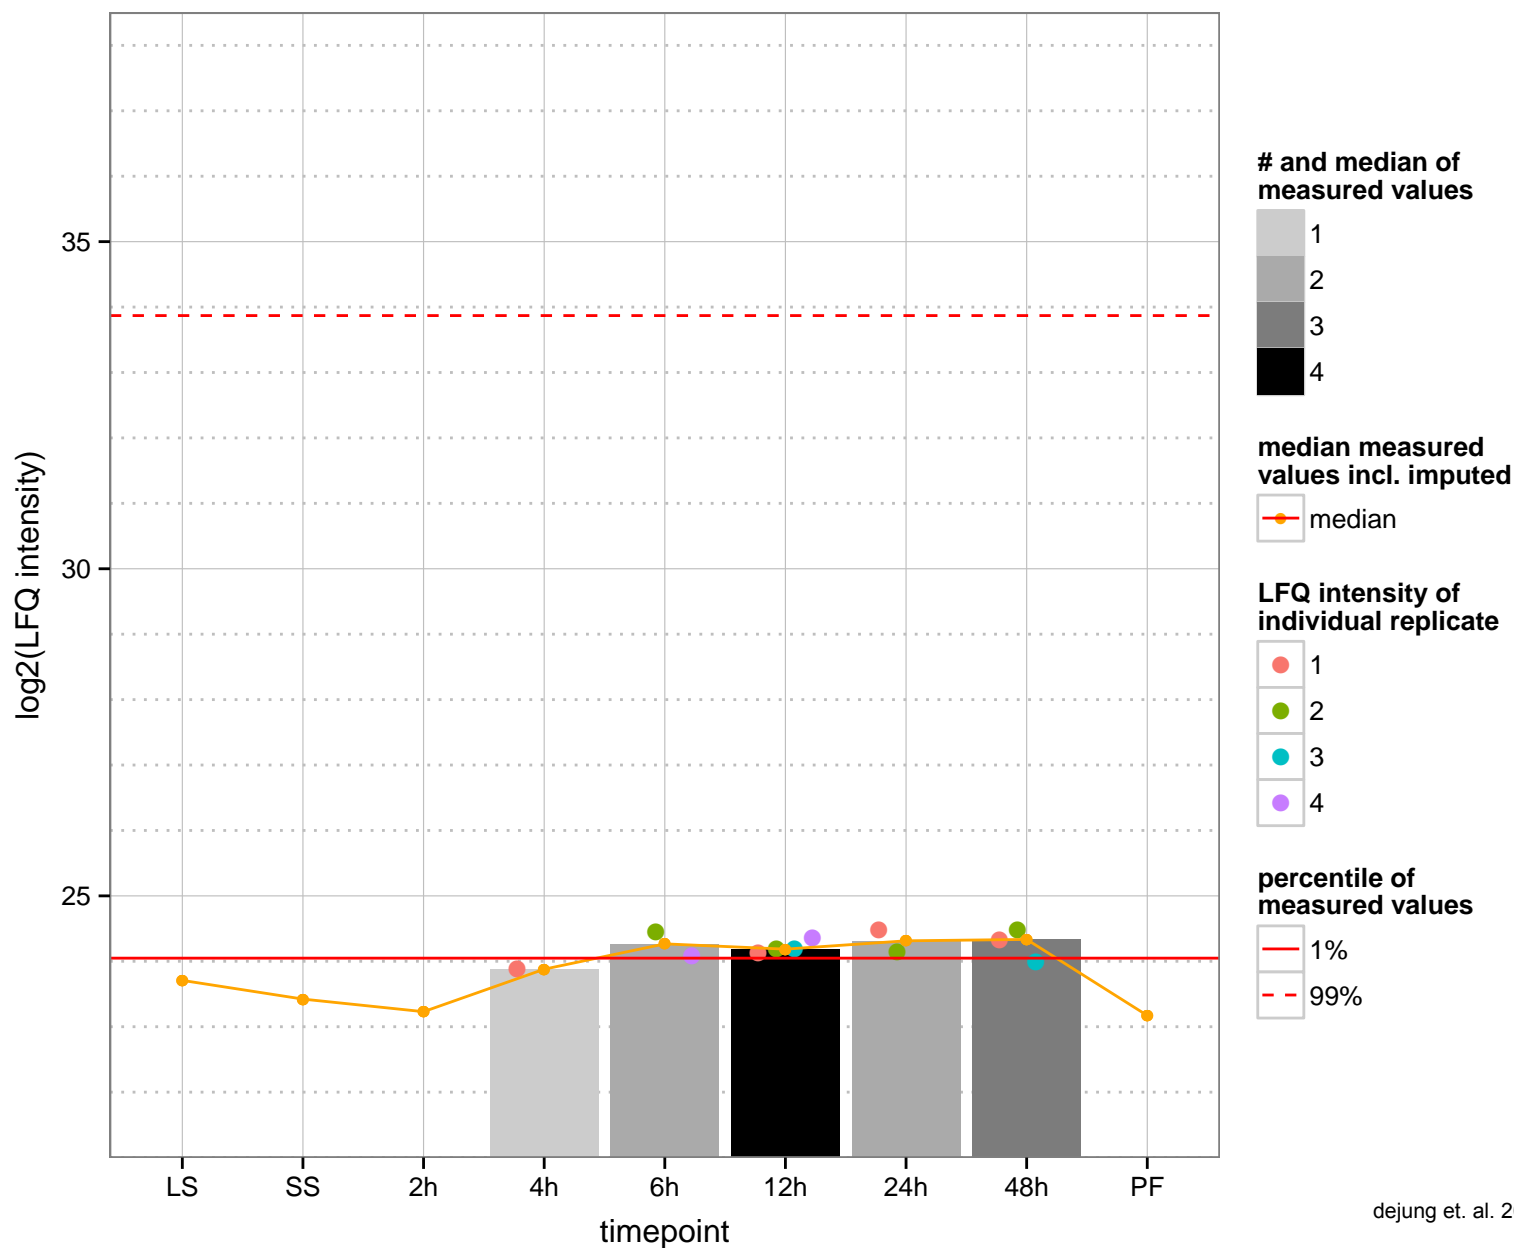

DNA repair and recombination helicase protein PIF1, putative (TbPIF8)

Tb927.7.1000

AGOF: null

AGOC: mitochondrion

AGOP: null

PGOF: null

PGOC: null

PGOP: null

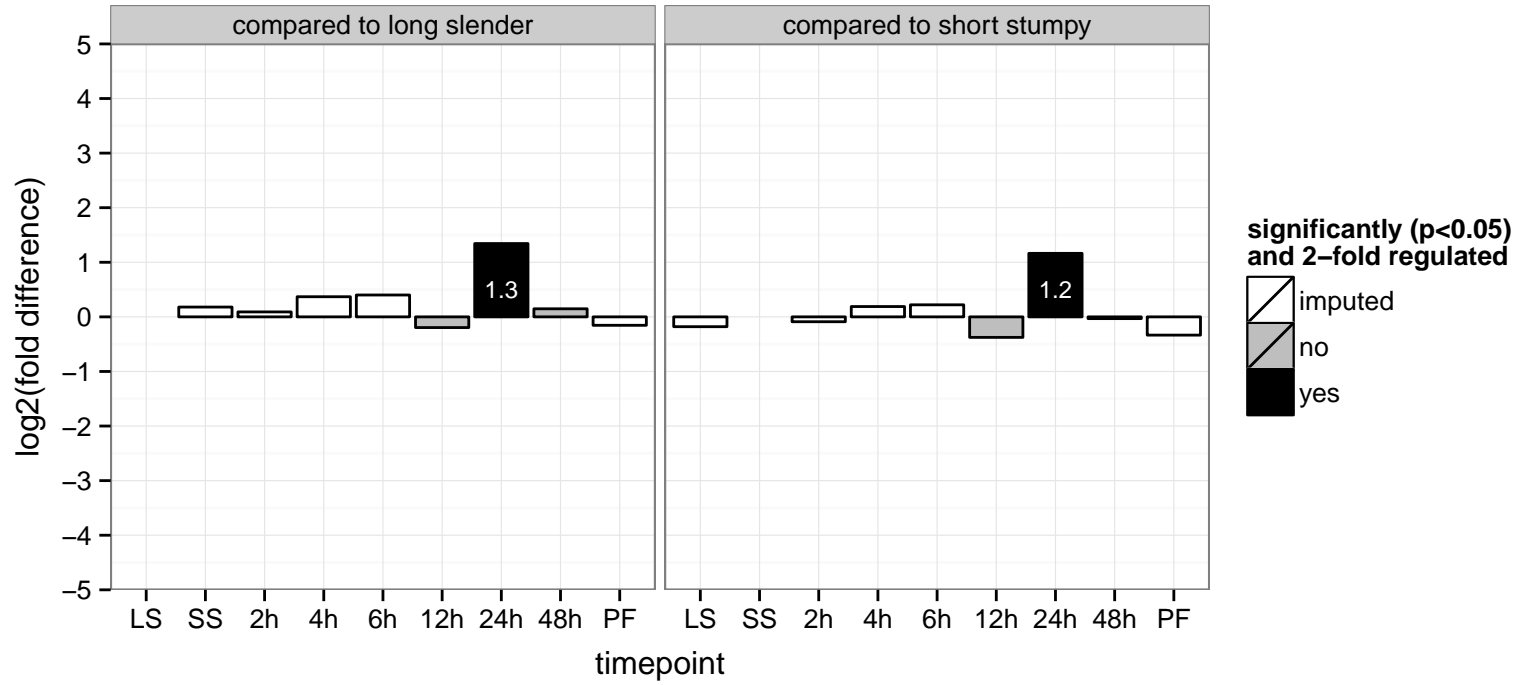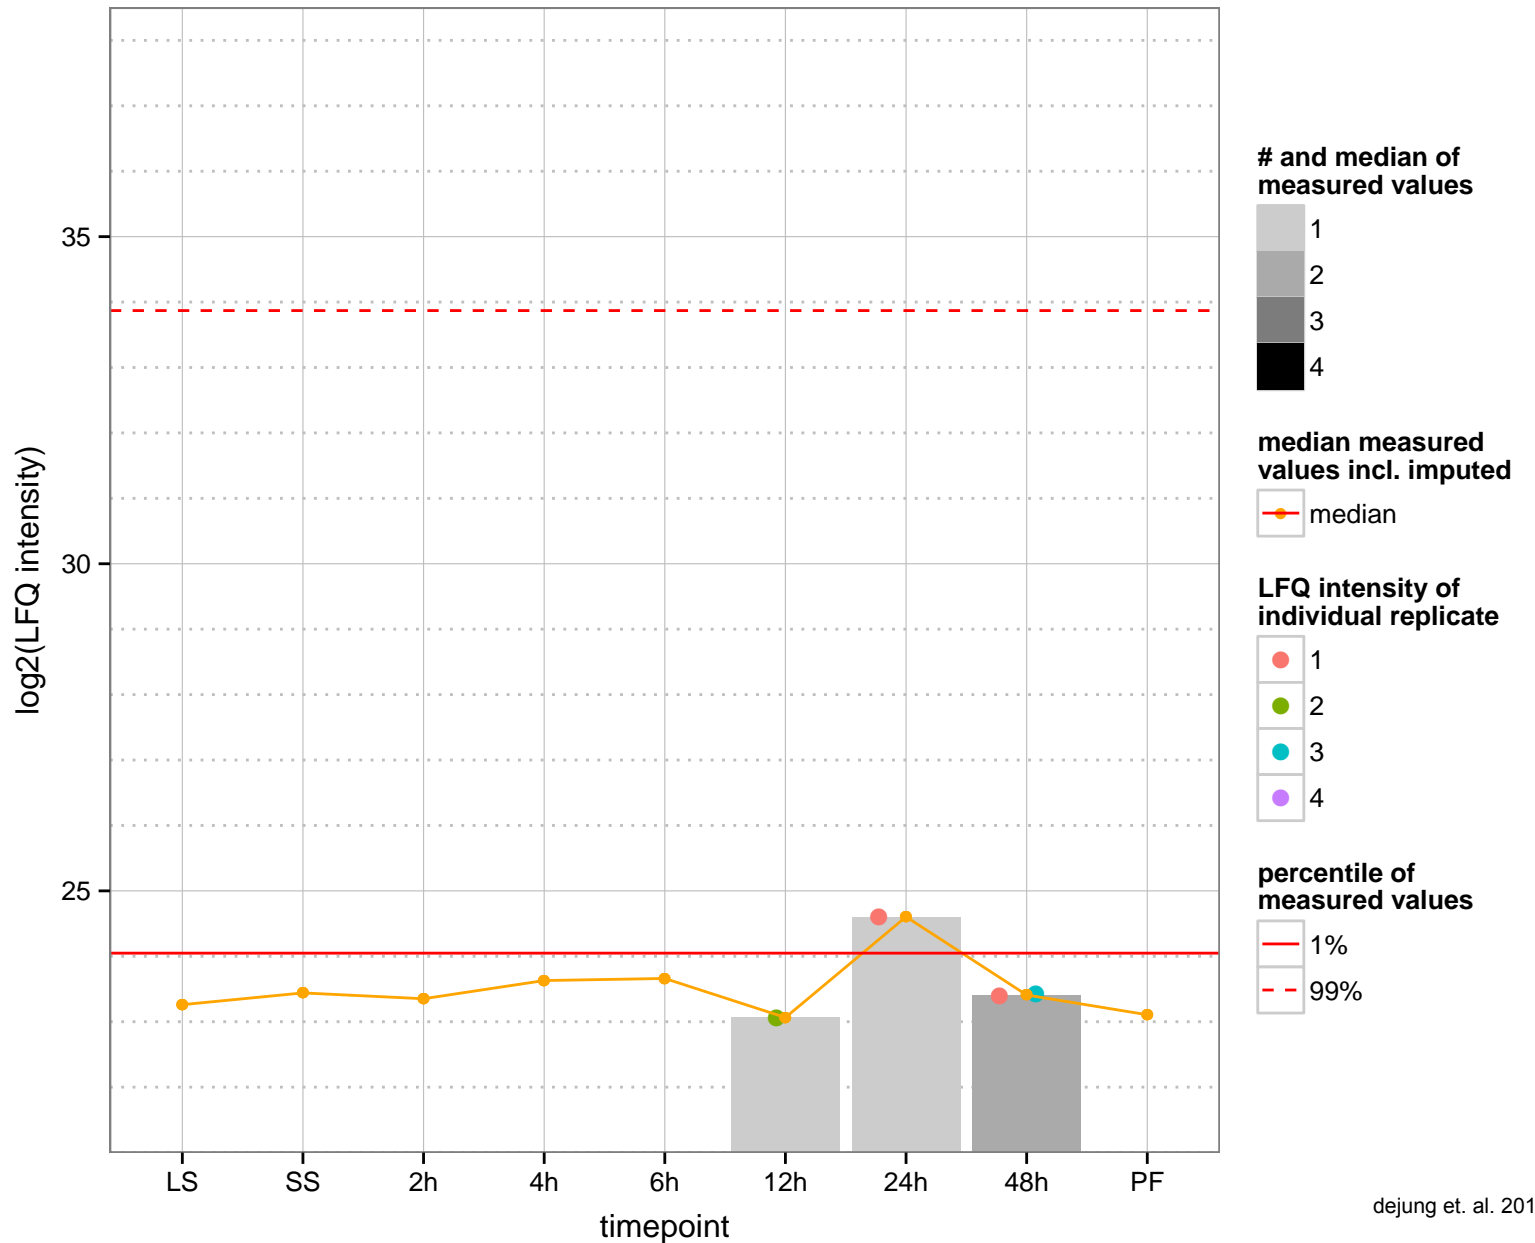

Eukaryotic translation initiation factor 4E type 6 (eif4e6)

Tb927.7.1670

AGOF: RNA 7-methylguanosine cap binding, RNA cap 4 binding, protein binding, translation initiation factor activity

AGOC: cytoplasm, eukaryotic translation initiation factor 4F complex

AGOP: cell motility, motile cilium assembly, translational initiation

PGOF: RNA binding, translation initiation factor activity

PGOC: cytoplasm

PGOP: translational initiation

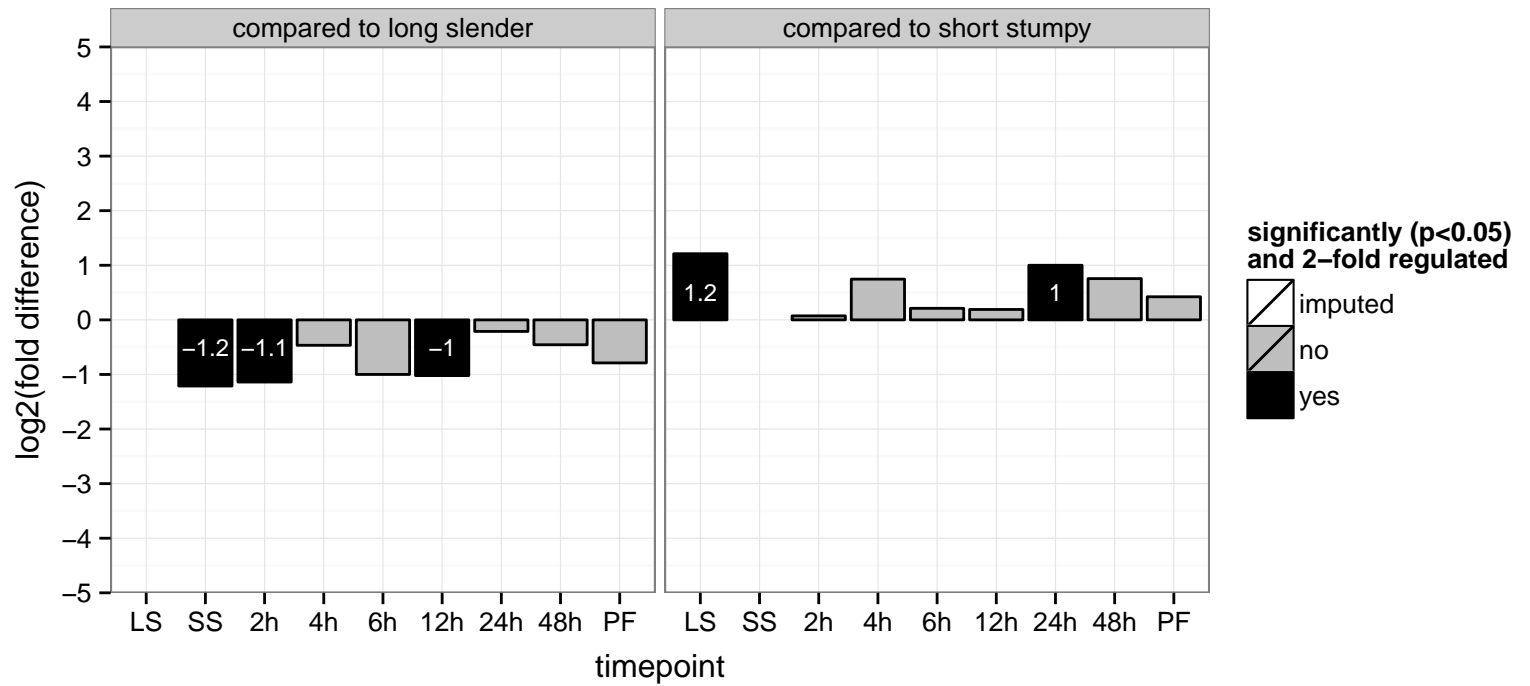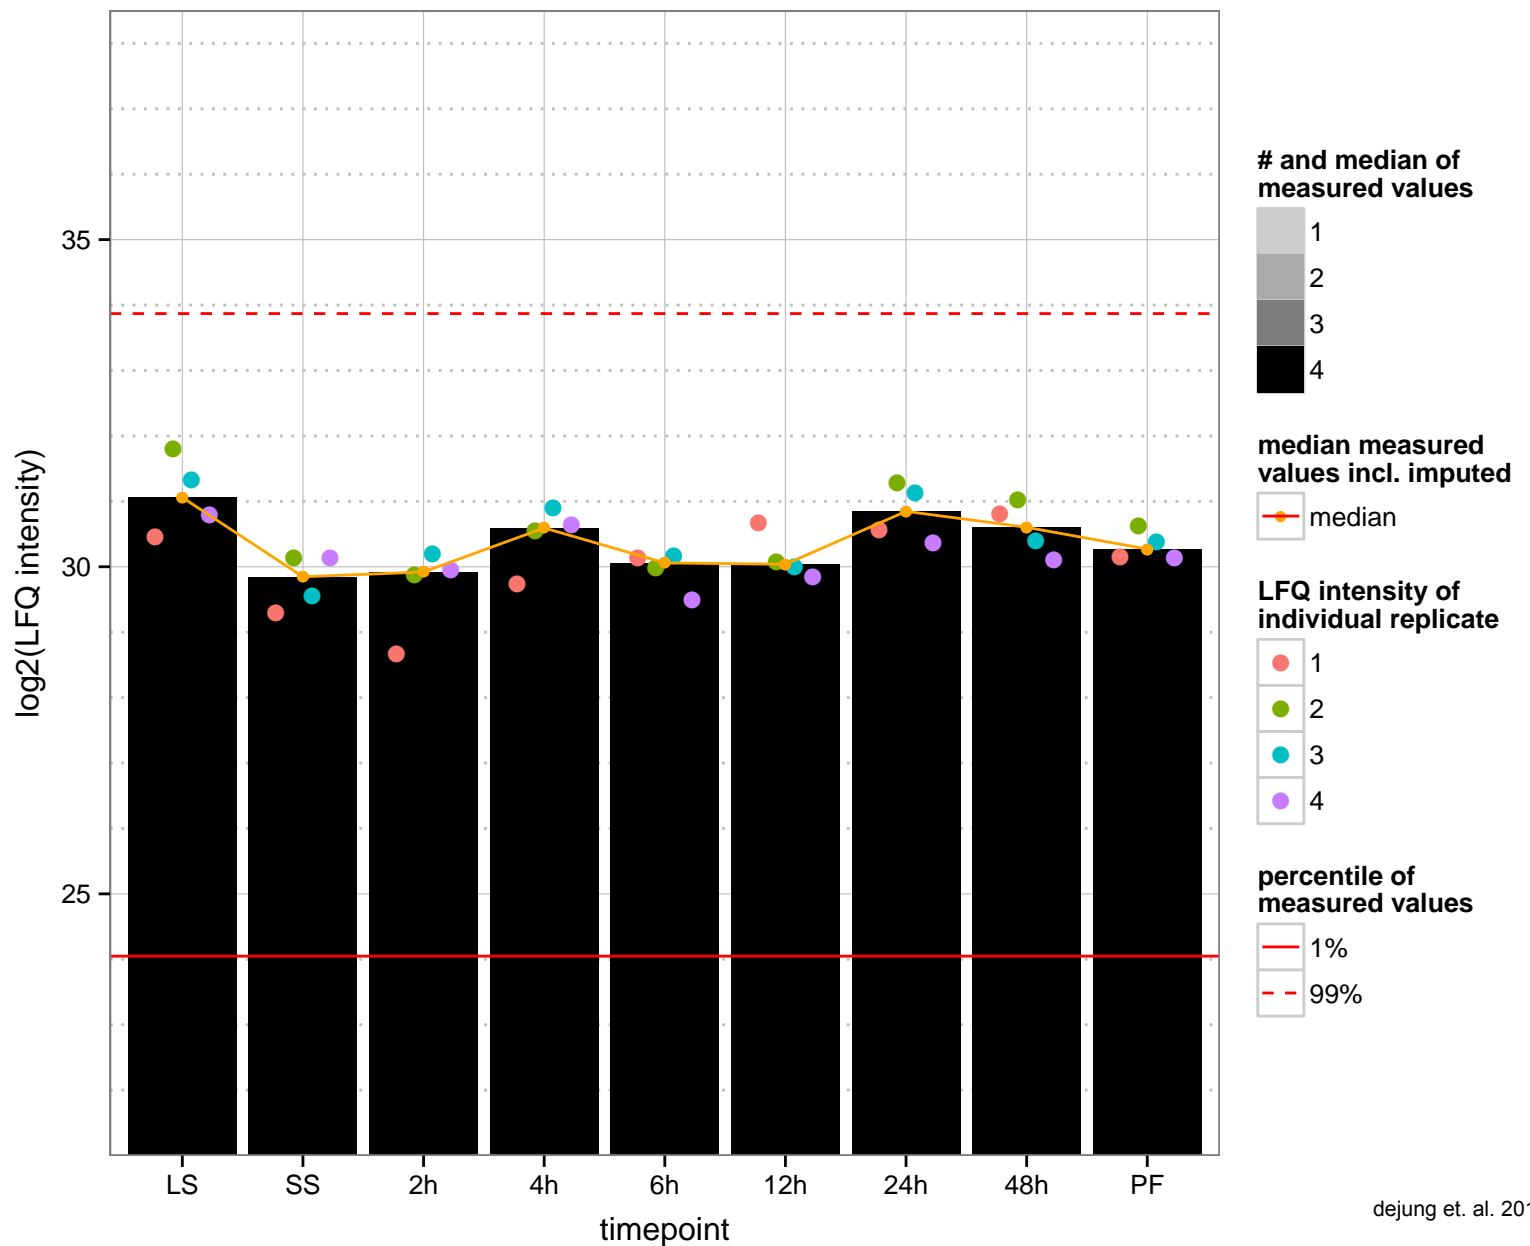

prefoldin, putative  
 Tb927.7.2590  
 AGOF: unfolded protein binding  
 AGOC: prefoldin complex  
 AGOP: protein folding  
 PGO: unfolded protein binding  
 PGOC: prefoldin complex  
 PGOP: protein folding

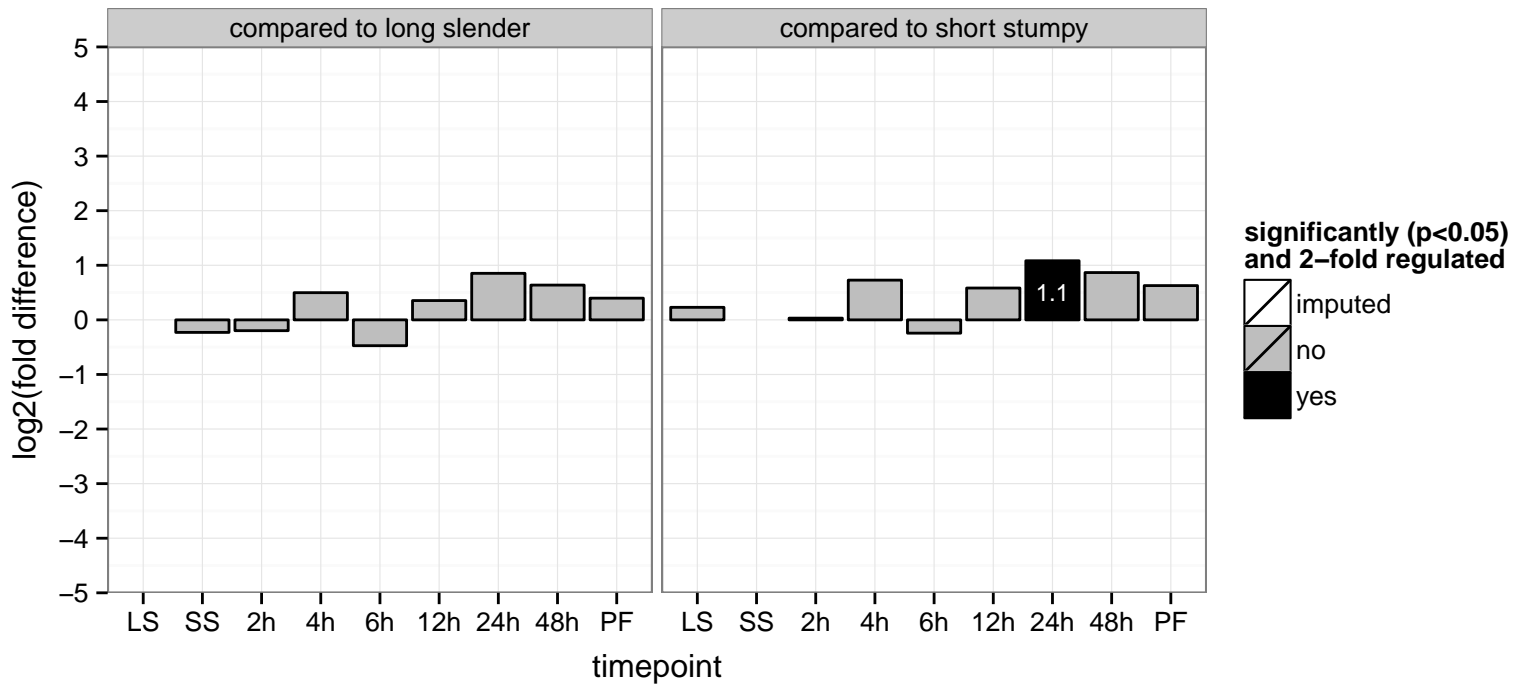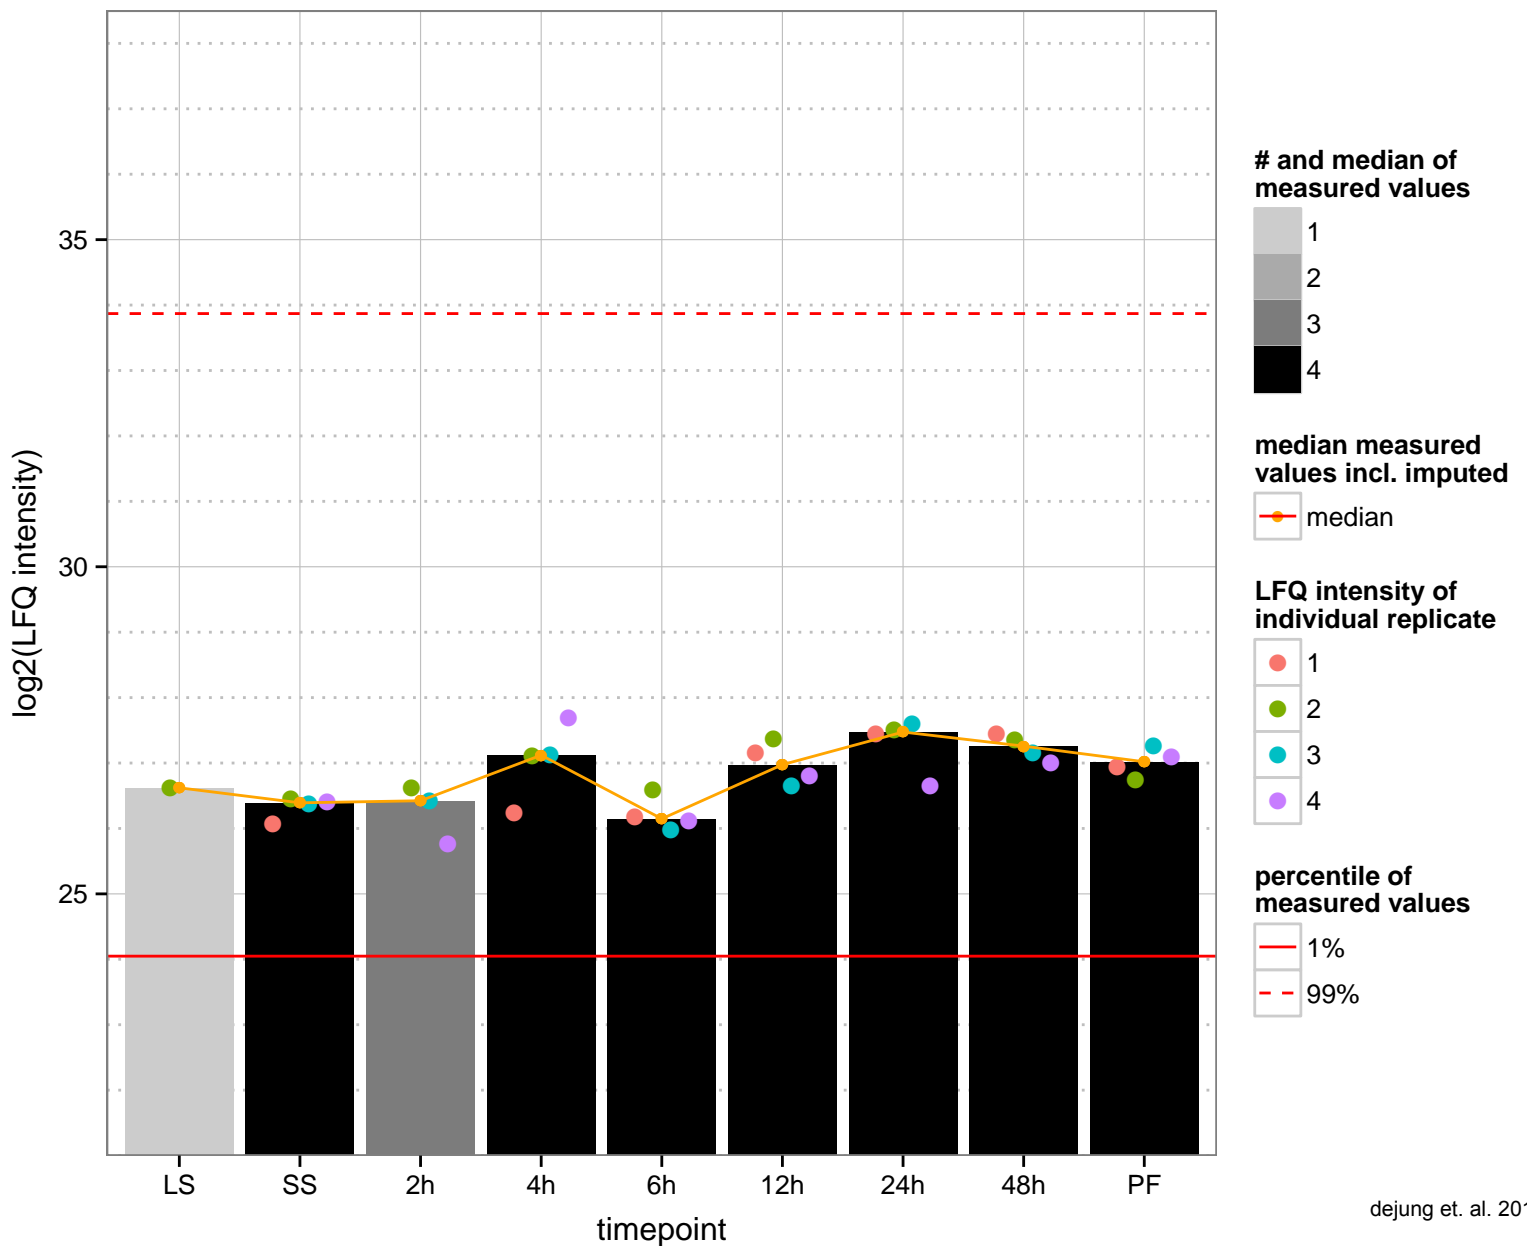

hypothetical protein, conserved  
 Tb927.7.4470  
 AGOF: null  
 AGOC: null  
 AGOP: null  
 PGO: null  
 PGOC: null  
 PGOP: null

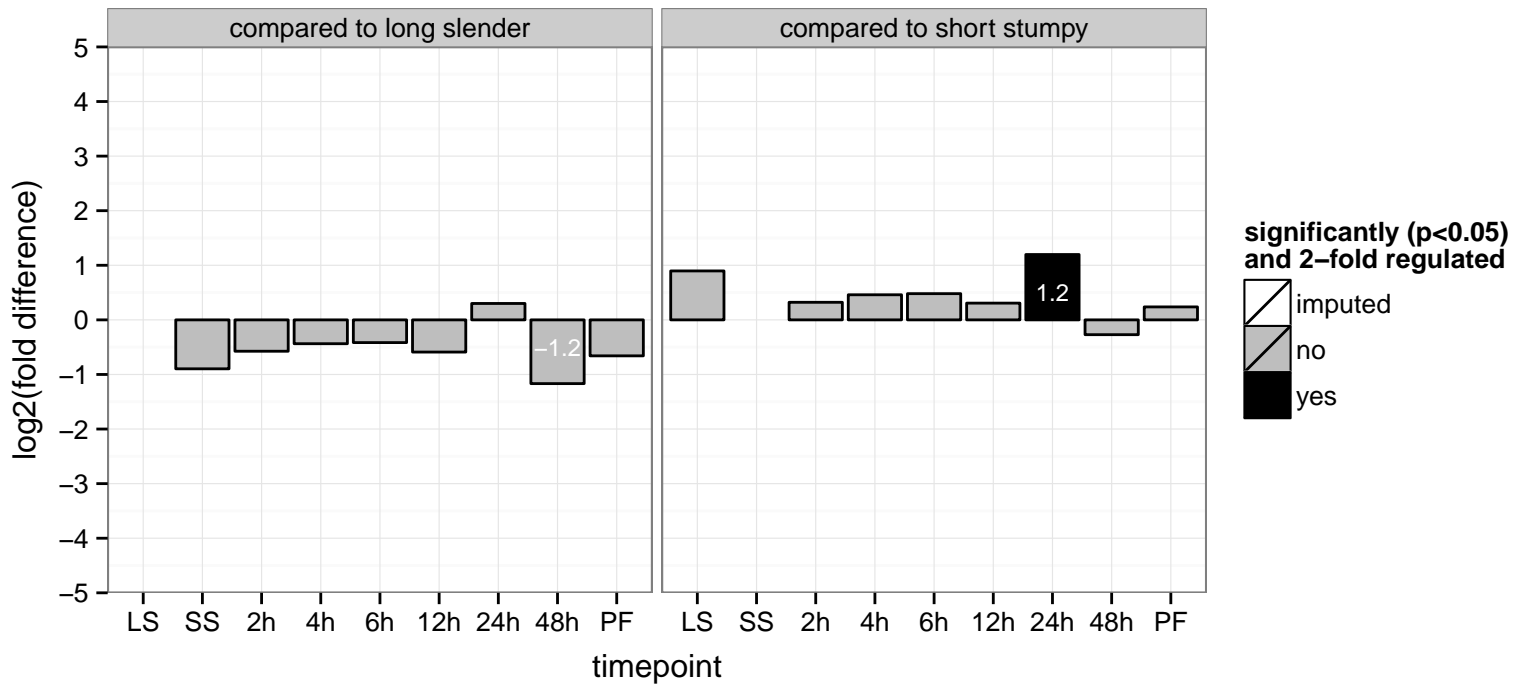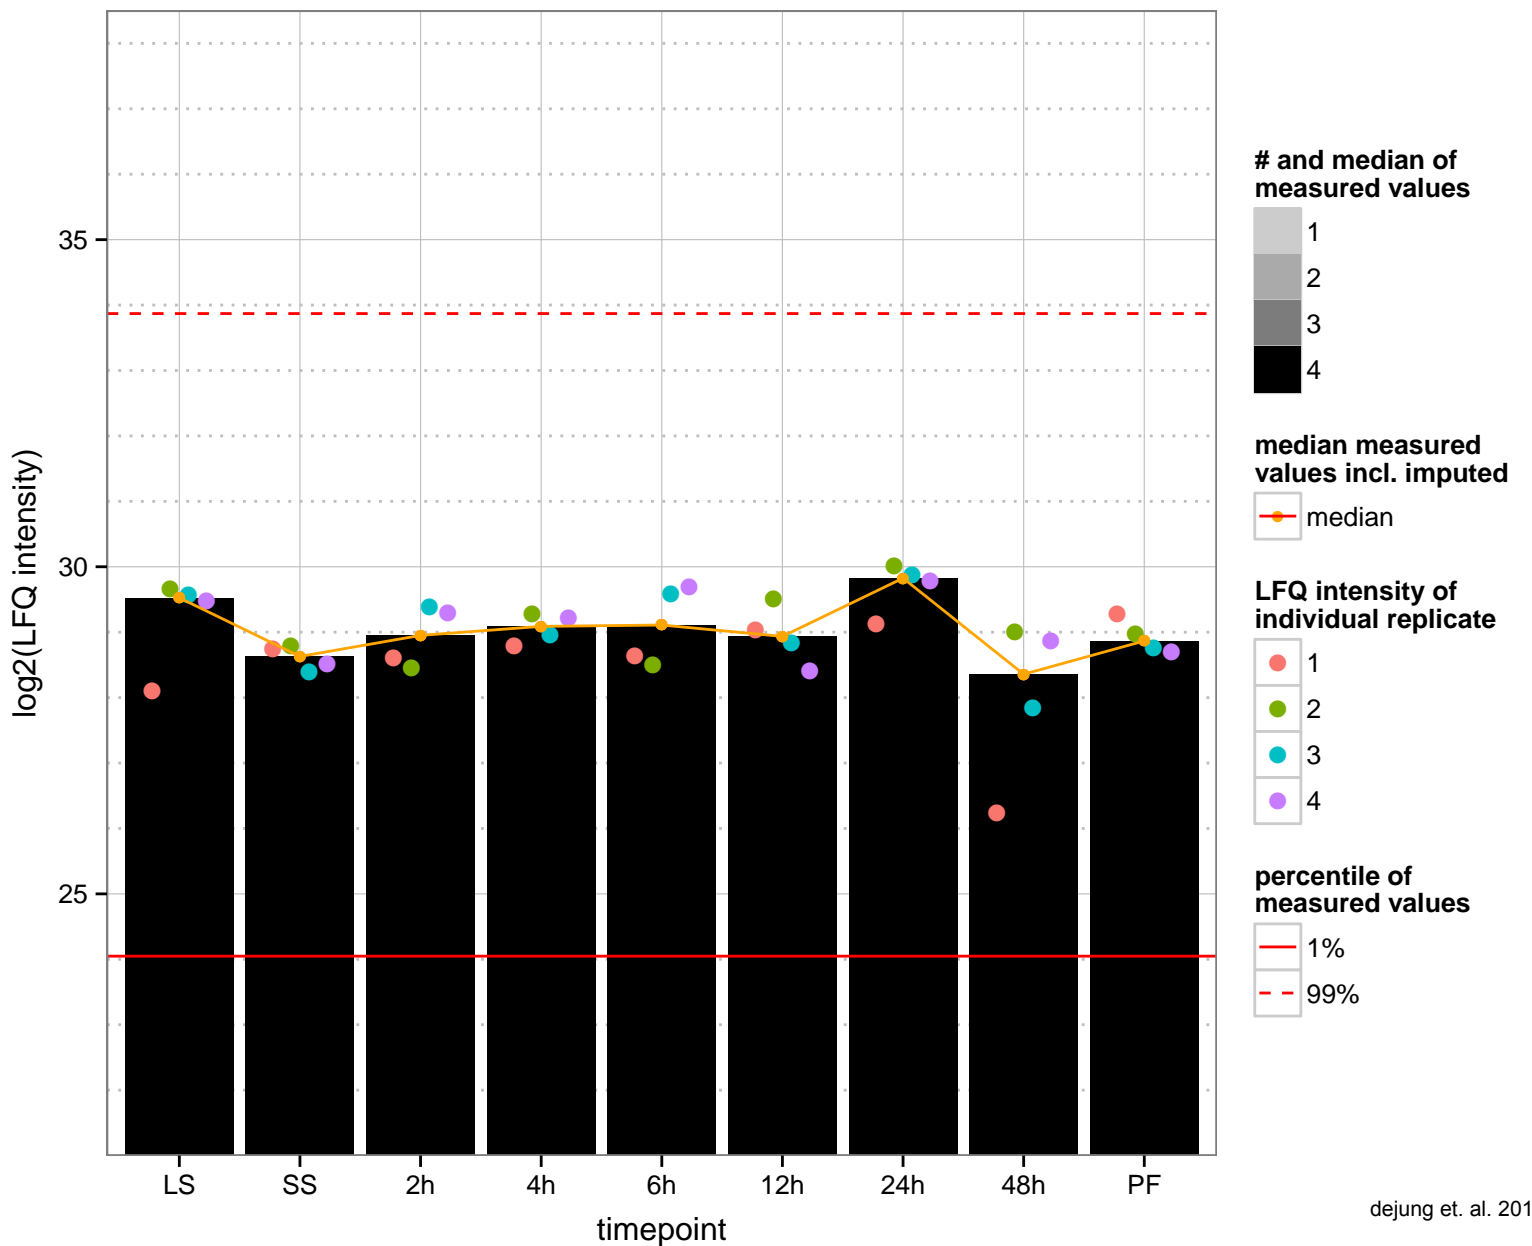

exosome-associated protein 3, 3' exoribonuclease, putative (EAP3)

Tb927.7.5460

AGOF: null

AGOC: null

AGOP: null

PGOF: null

PGOC: null

PGOP: null

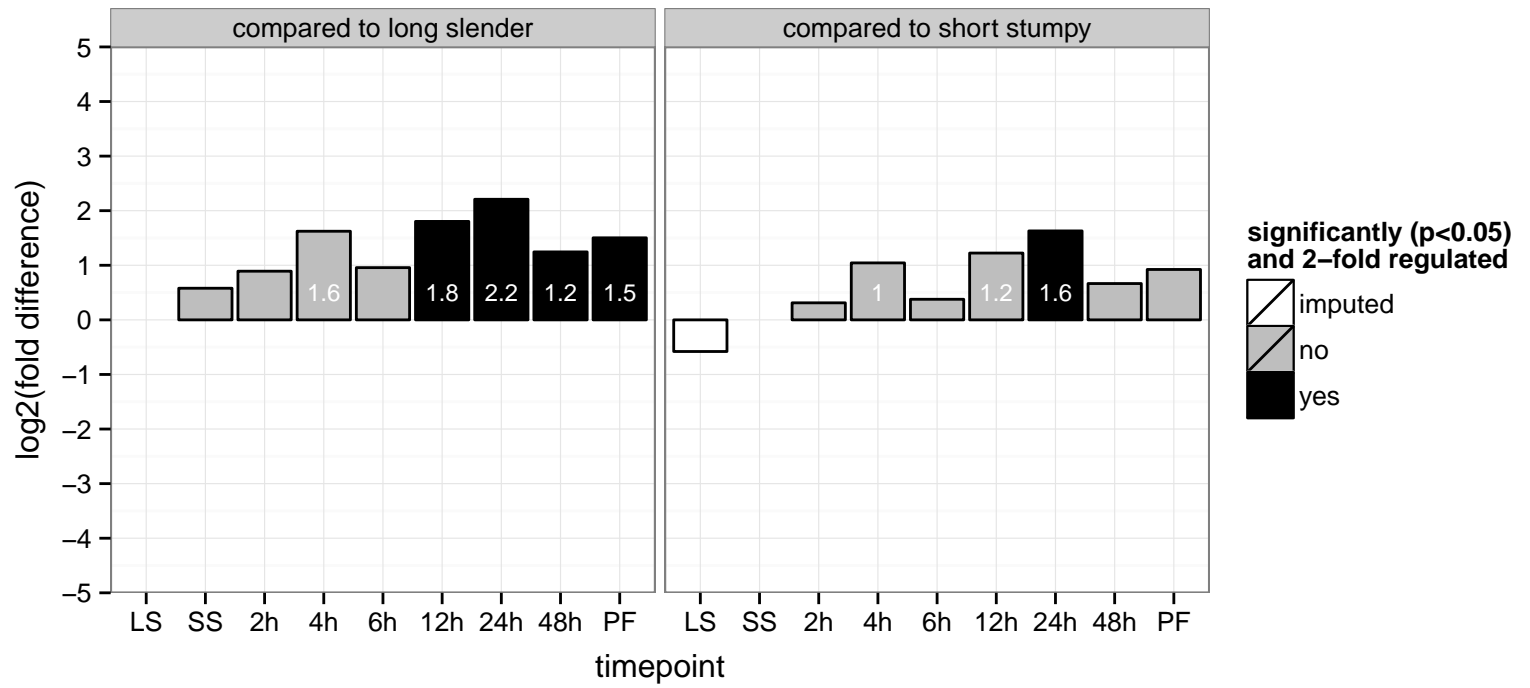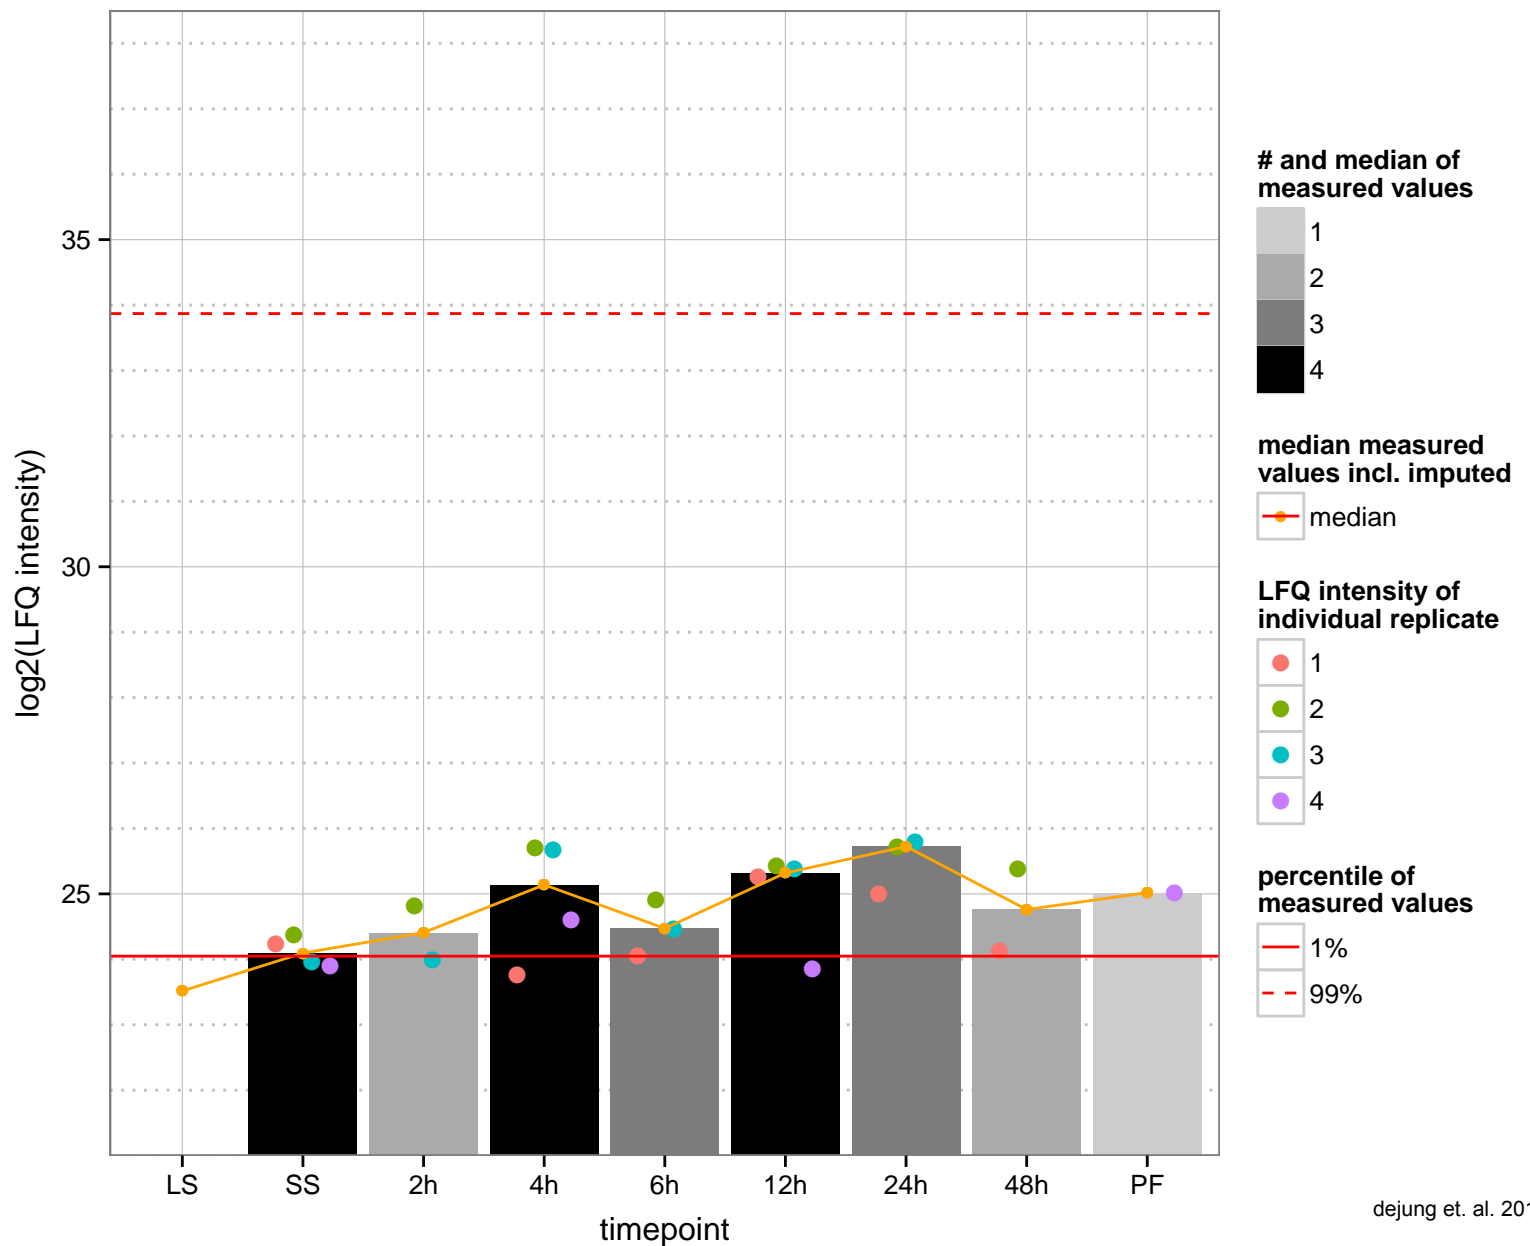

hypothetical protein, conserved  
 Tb927.8.6520  
 AGOF: null  
 AGOC: null  
 AGOP: null  
 PGOF: null  
 PGOC: null  
 PGOP: null

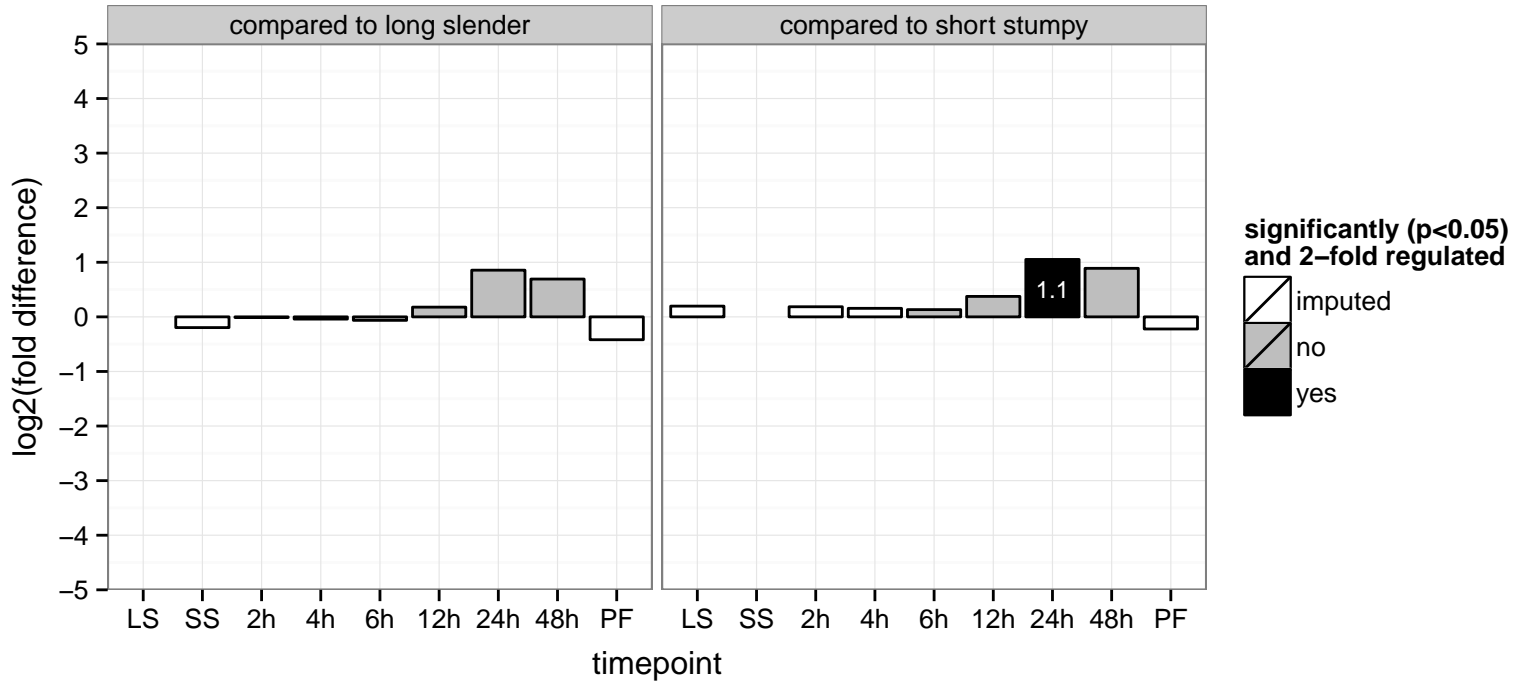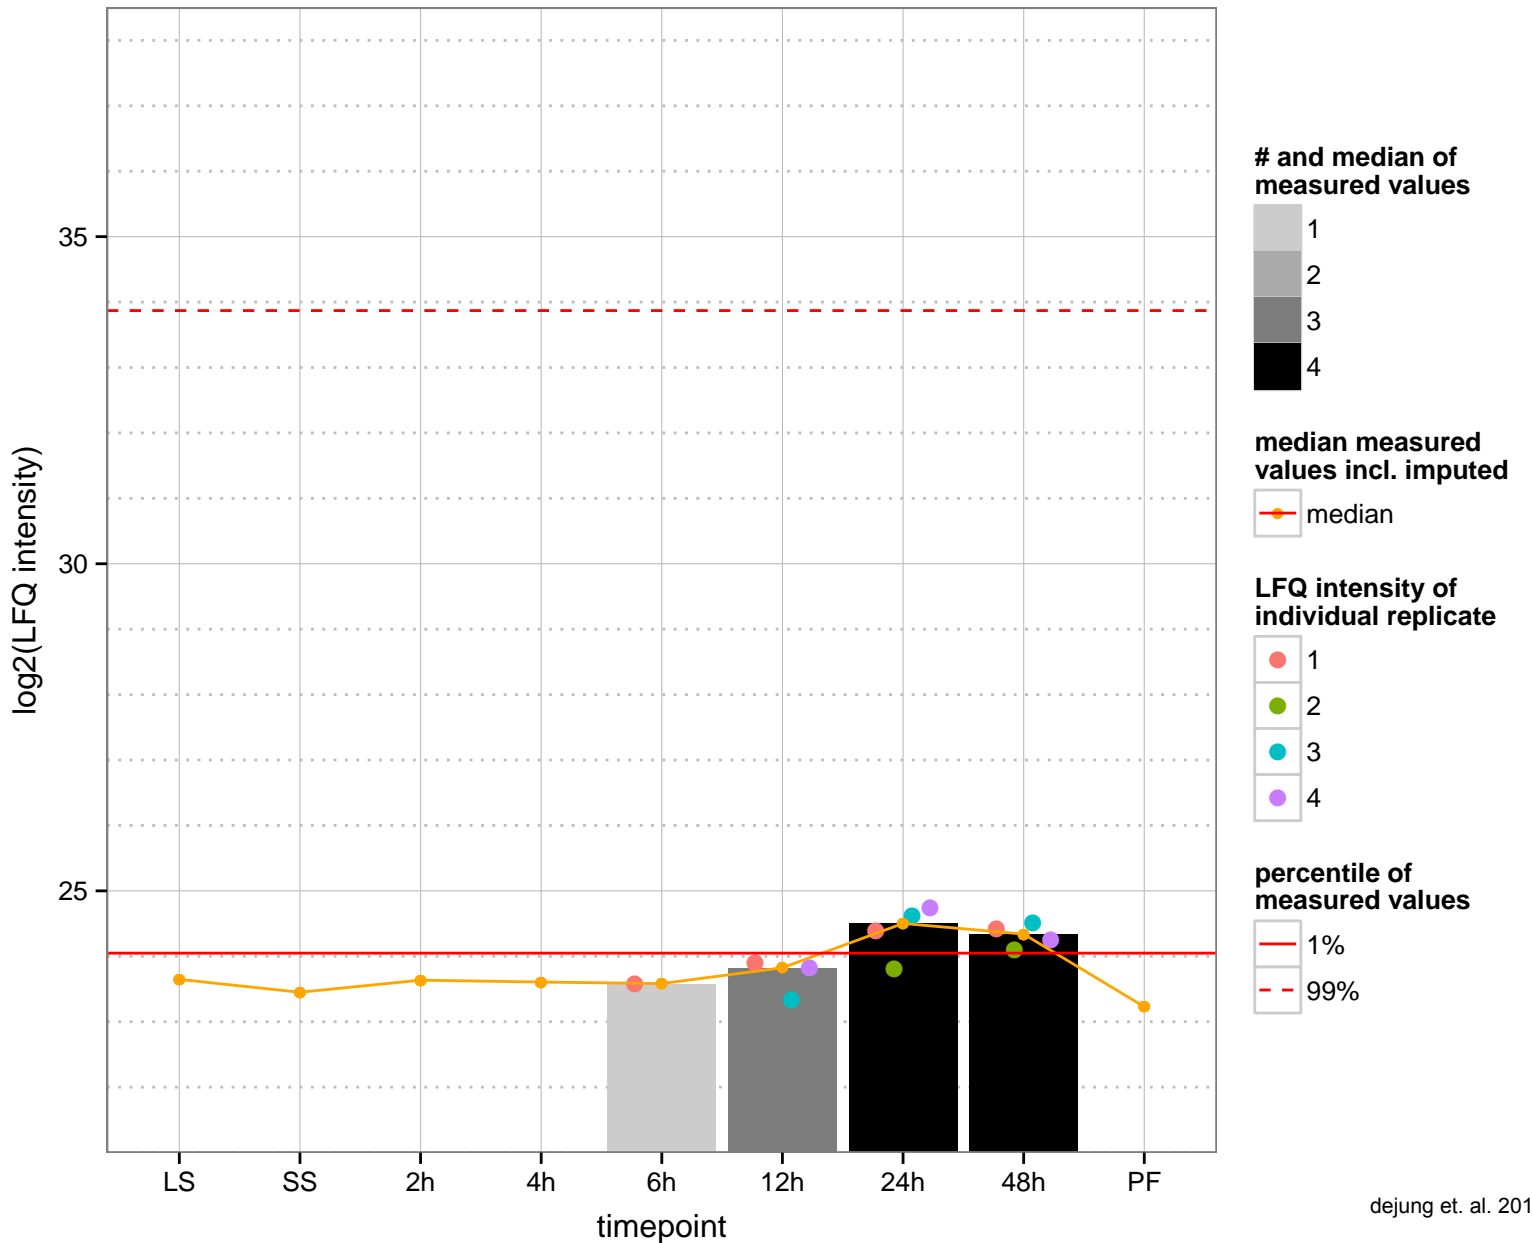



hypothetical protein, conserved  
 Tb927.9.11220  
 AGOF: null  
 AGOC: mitochondrion  
 AGOP: null  
 PGO: null  
 PGO: null  
 PGO: null

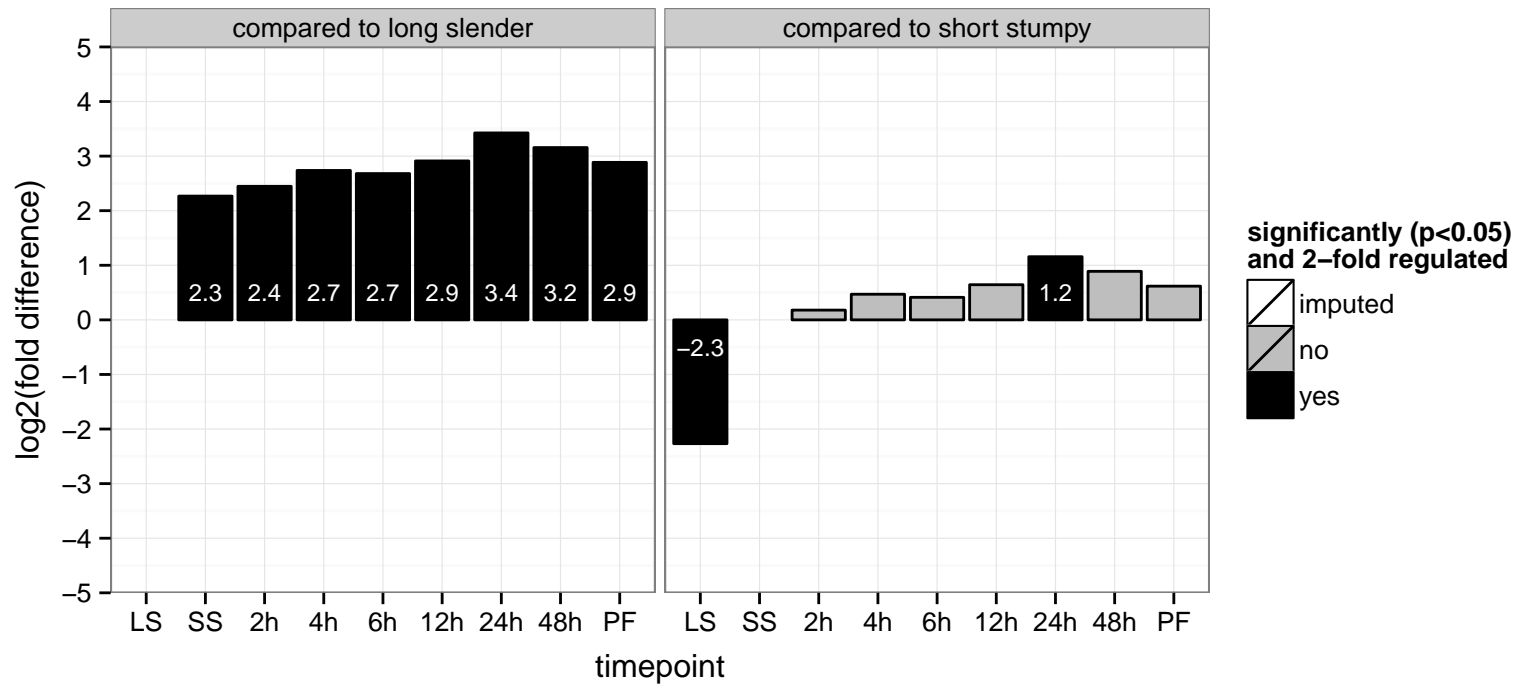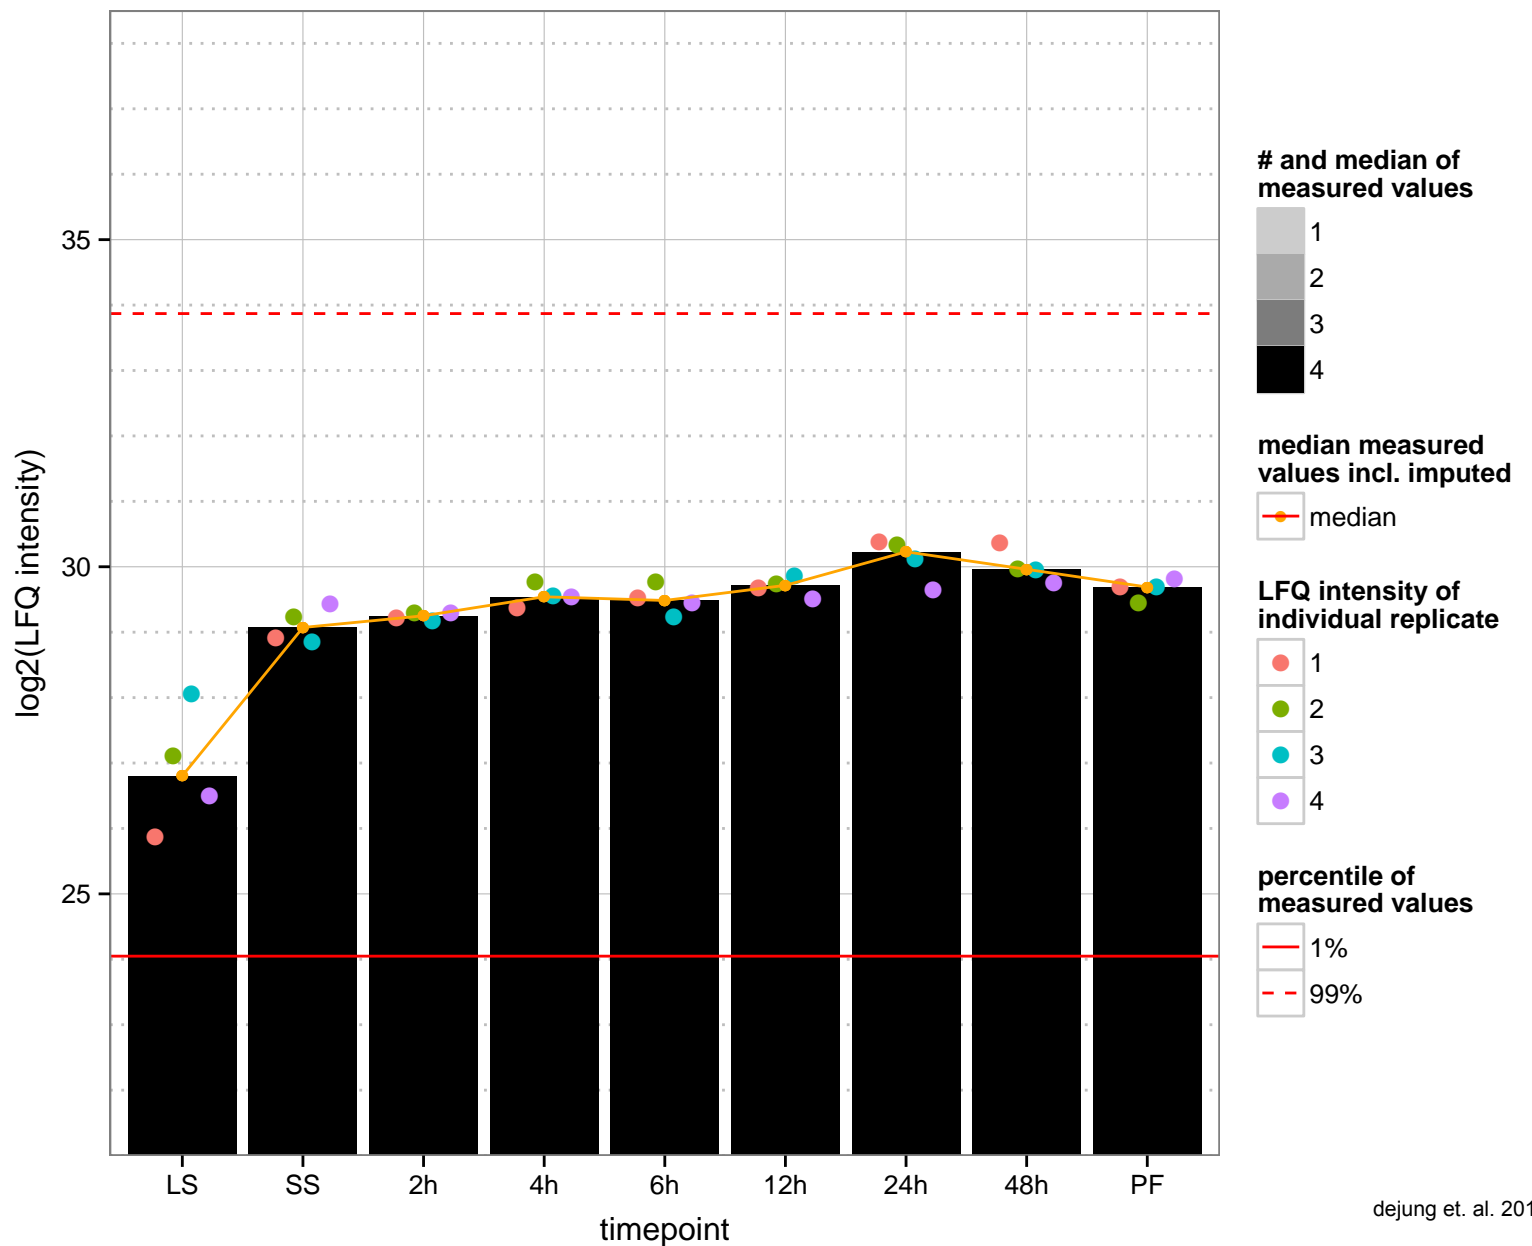

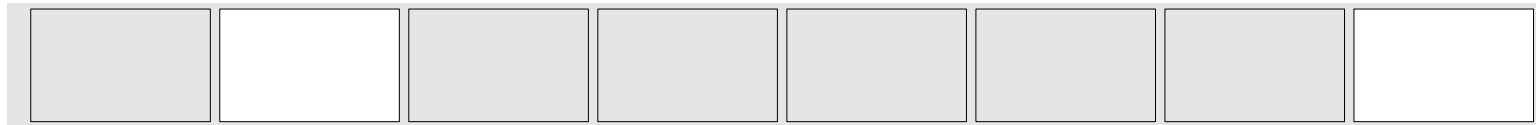

SS

2h

4h

6h

12h

24h

48h

PF

timepoint

**regulated**  **not regulated**  **significant down**  **significant up**

dejung et. al. 2015

kinesin, putative  
 Tb927.10.15390;Tb11.v5.0434  
 AGOF: null, microtubule motor activity, motor activity  
 AGOC: null, kinesin complex, microtubule associated complex  
 AGOP: null, microtubule-based movement  
 PGOF: ATP binding, microtubule motor activity  
 PGO: null  
 PGOP: microtubule-based movement

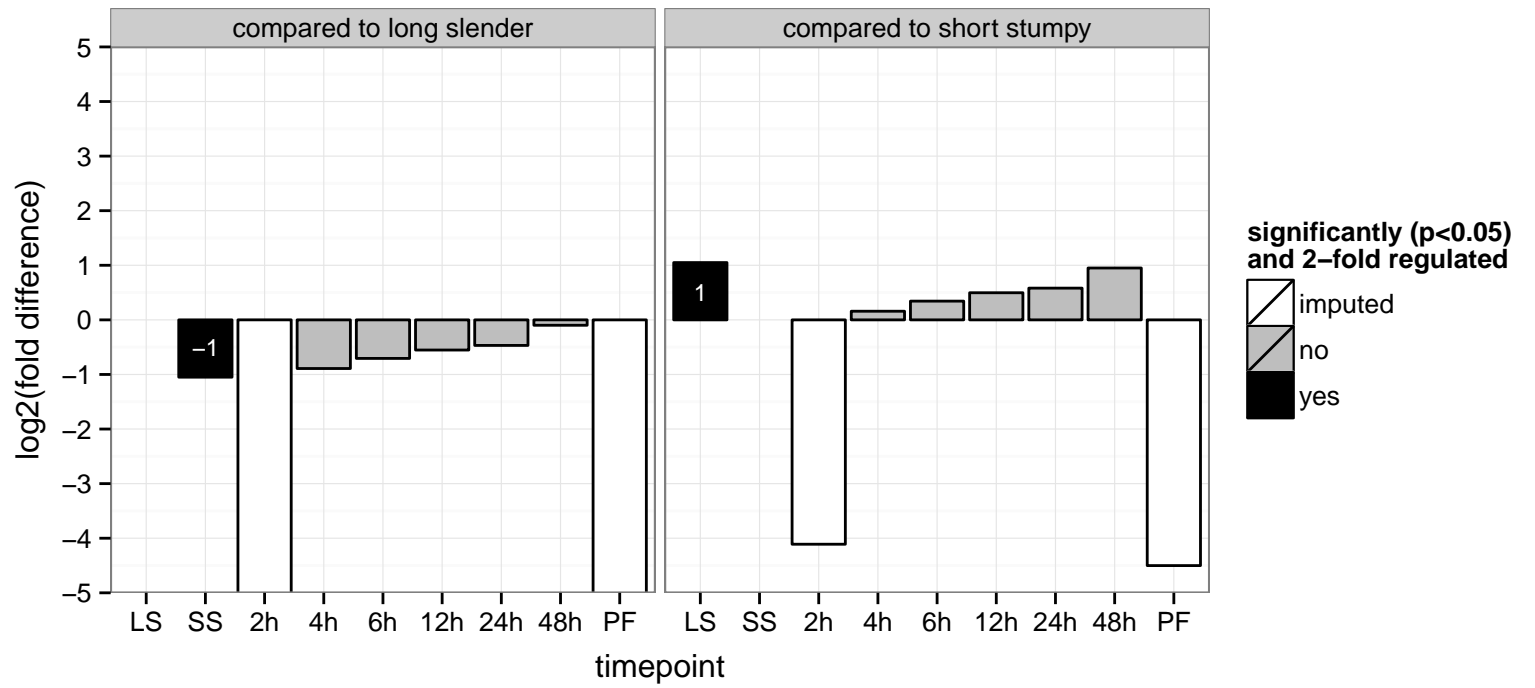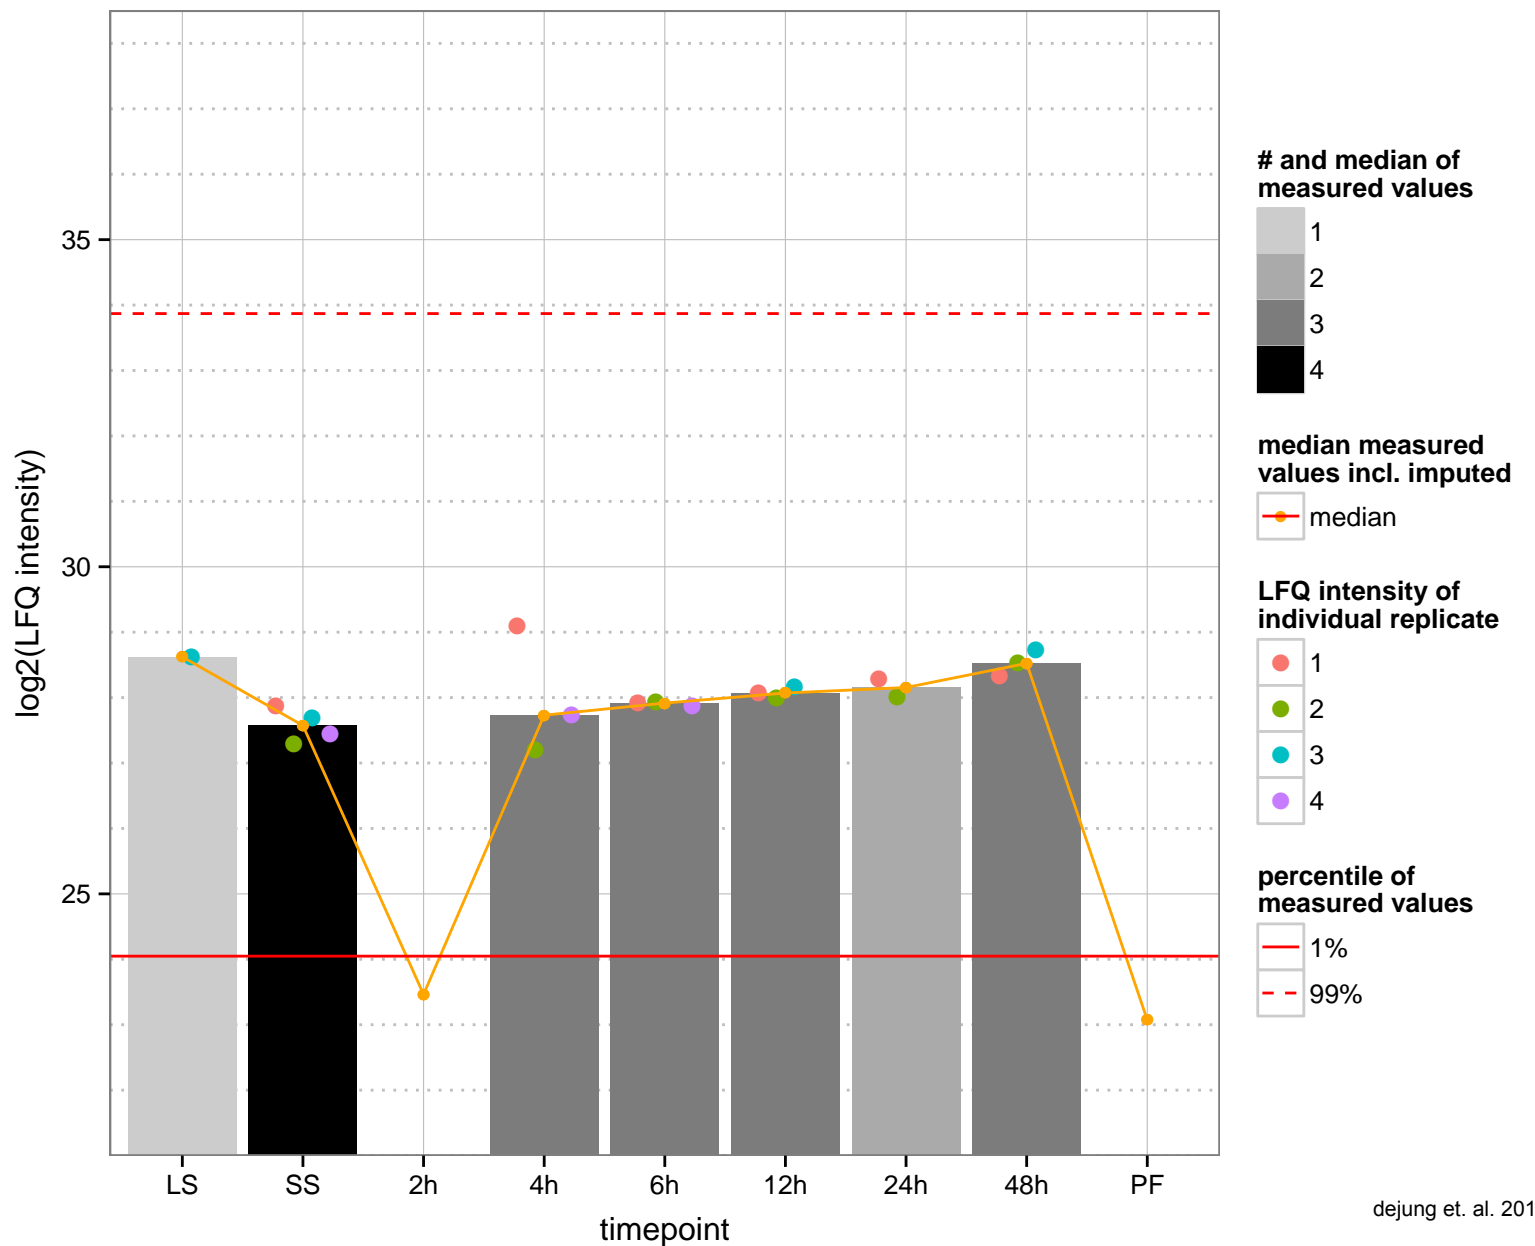

hypothetical protein, conserved  
 Tb11.v5.0736;Tb927.5.3420  
 AGOF: null  
 AGOC: null, mitochondrion  
 AGOP: null  
 PGO: transferase activity, transferring phosphorus-containing groups  
 PGOC: null  
 PGOP: null

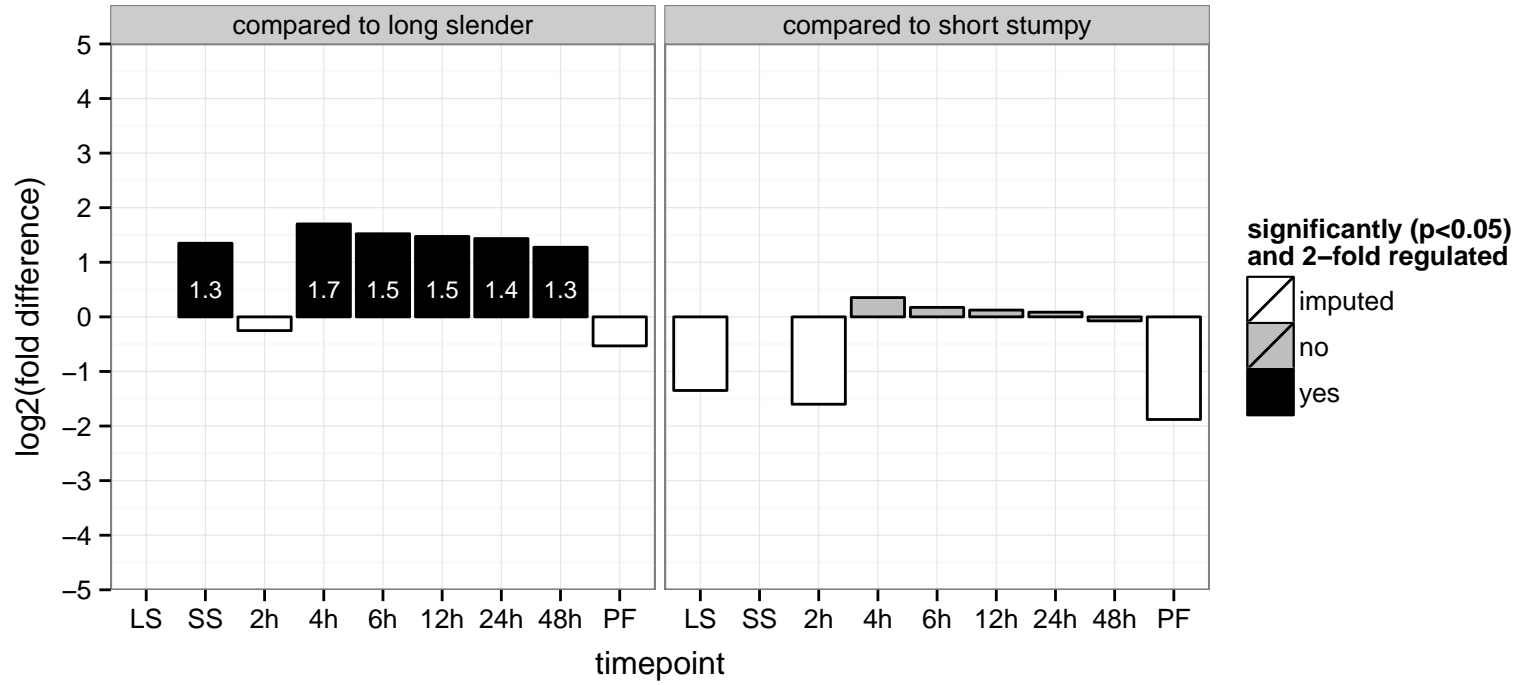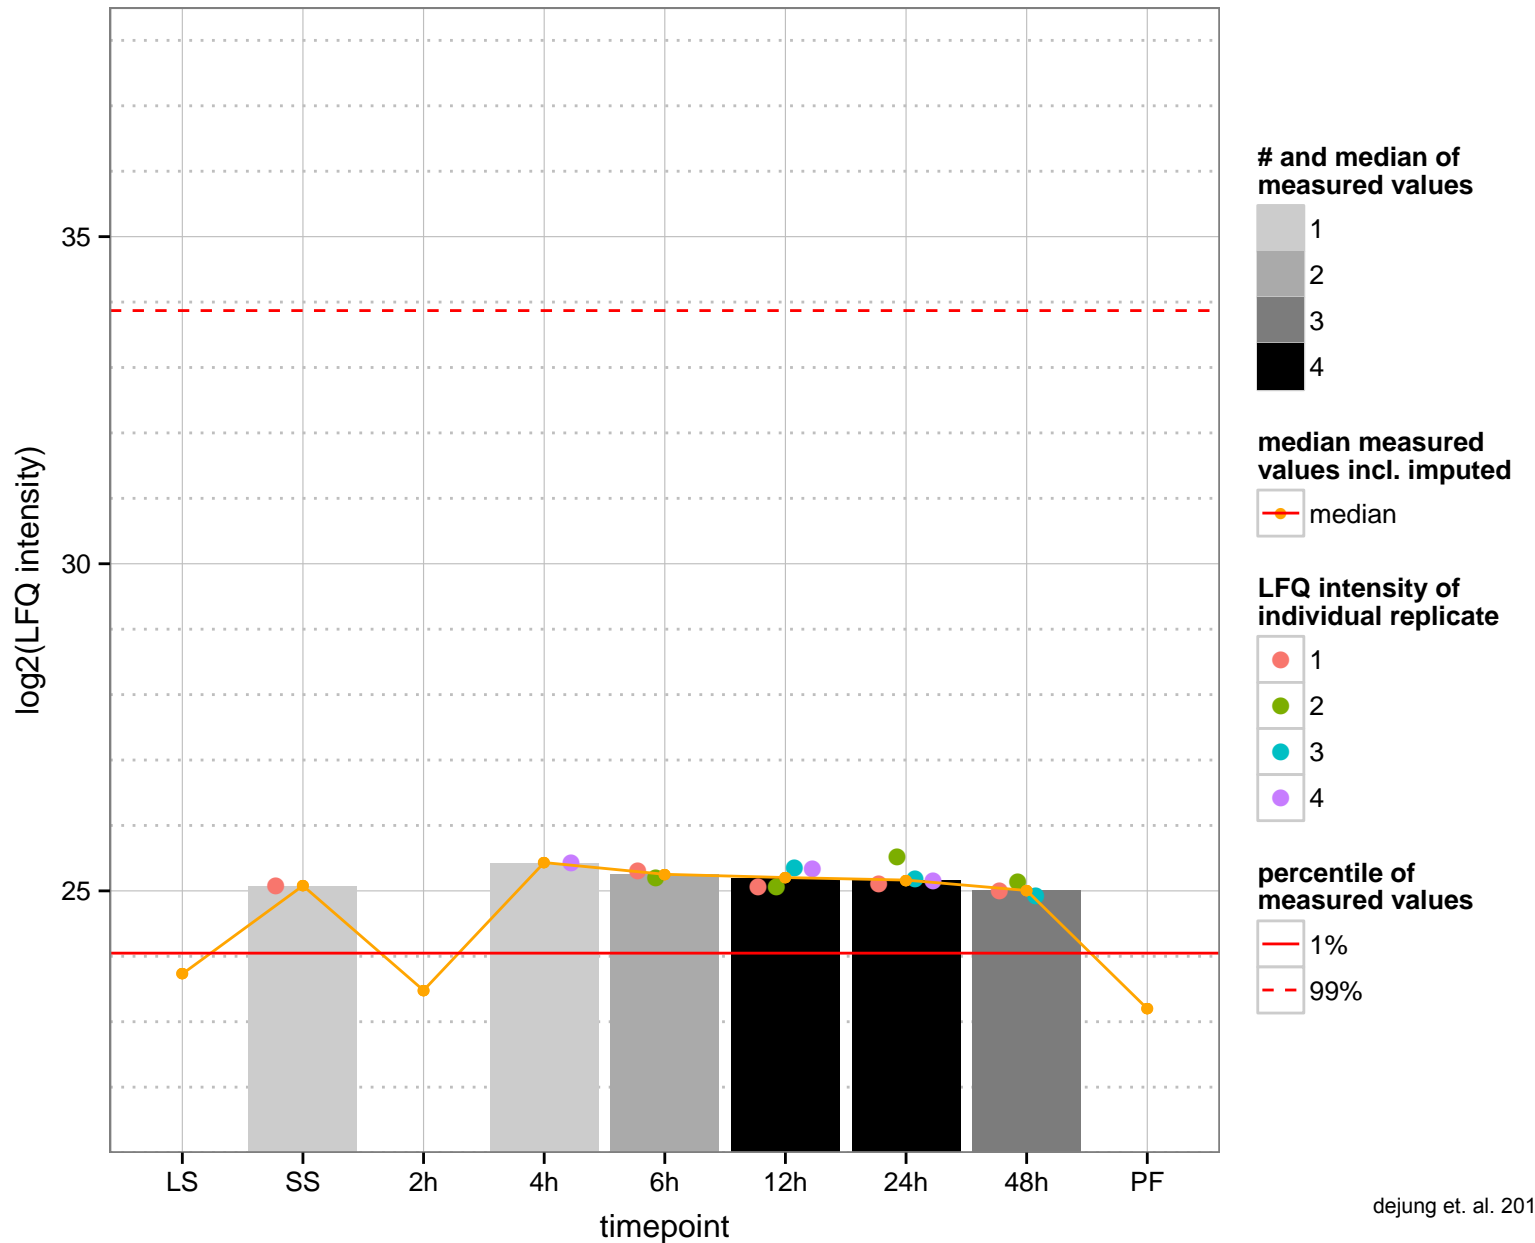

hypothetical protein, conserved  
 Tb927.10.15430  
 AGOF: null  
 AGOC: null  
 AGOP: null  
 PGO: protein binding  
 PGOC: null  
 PGOP: null

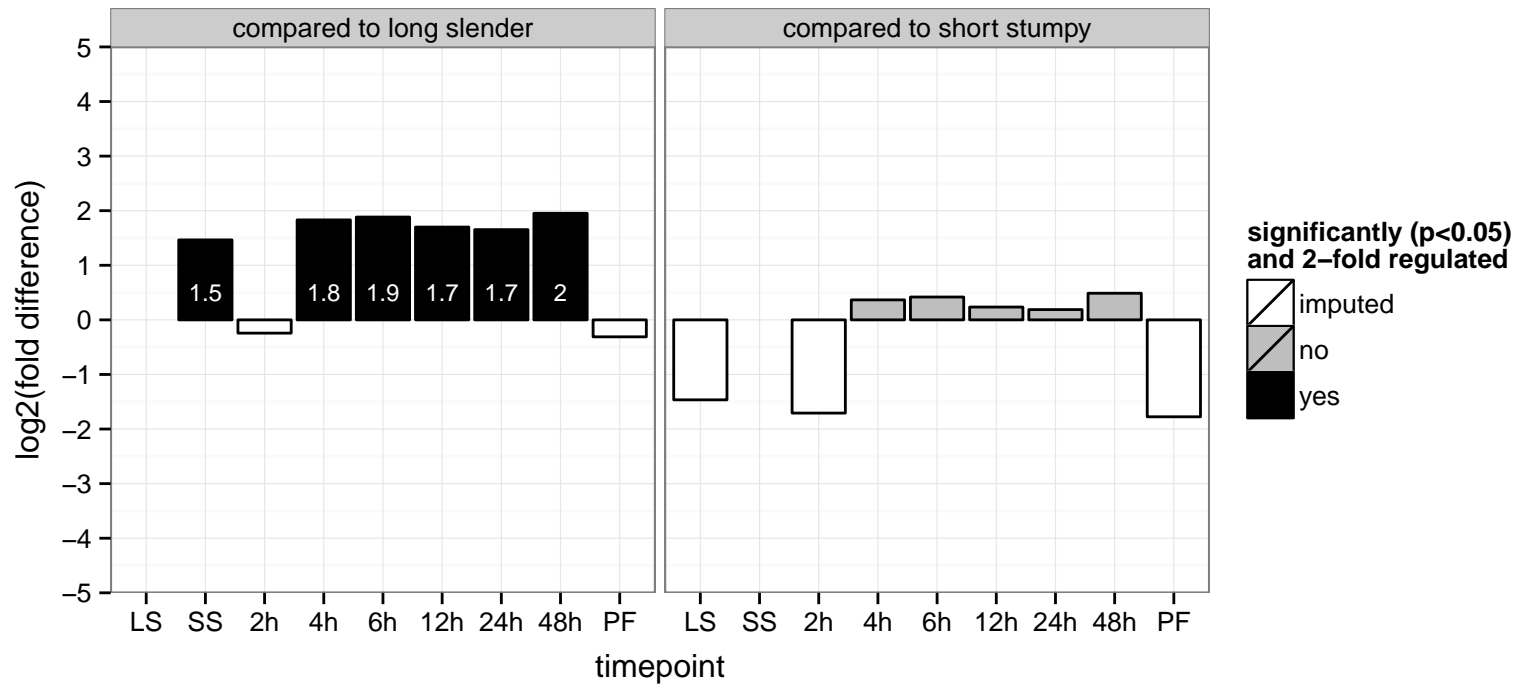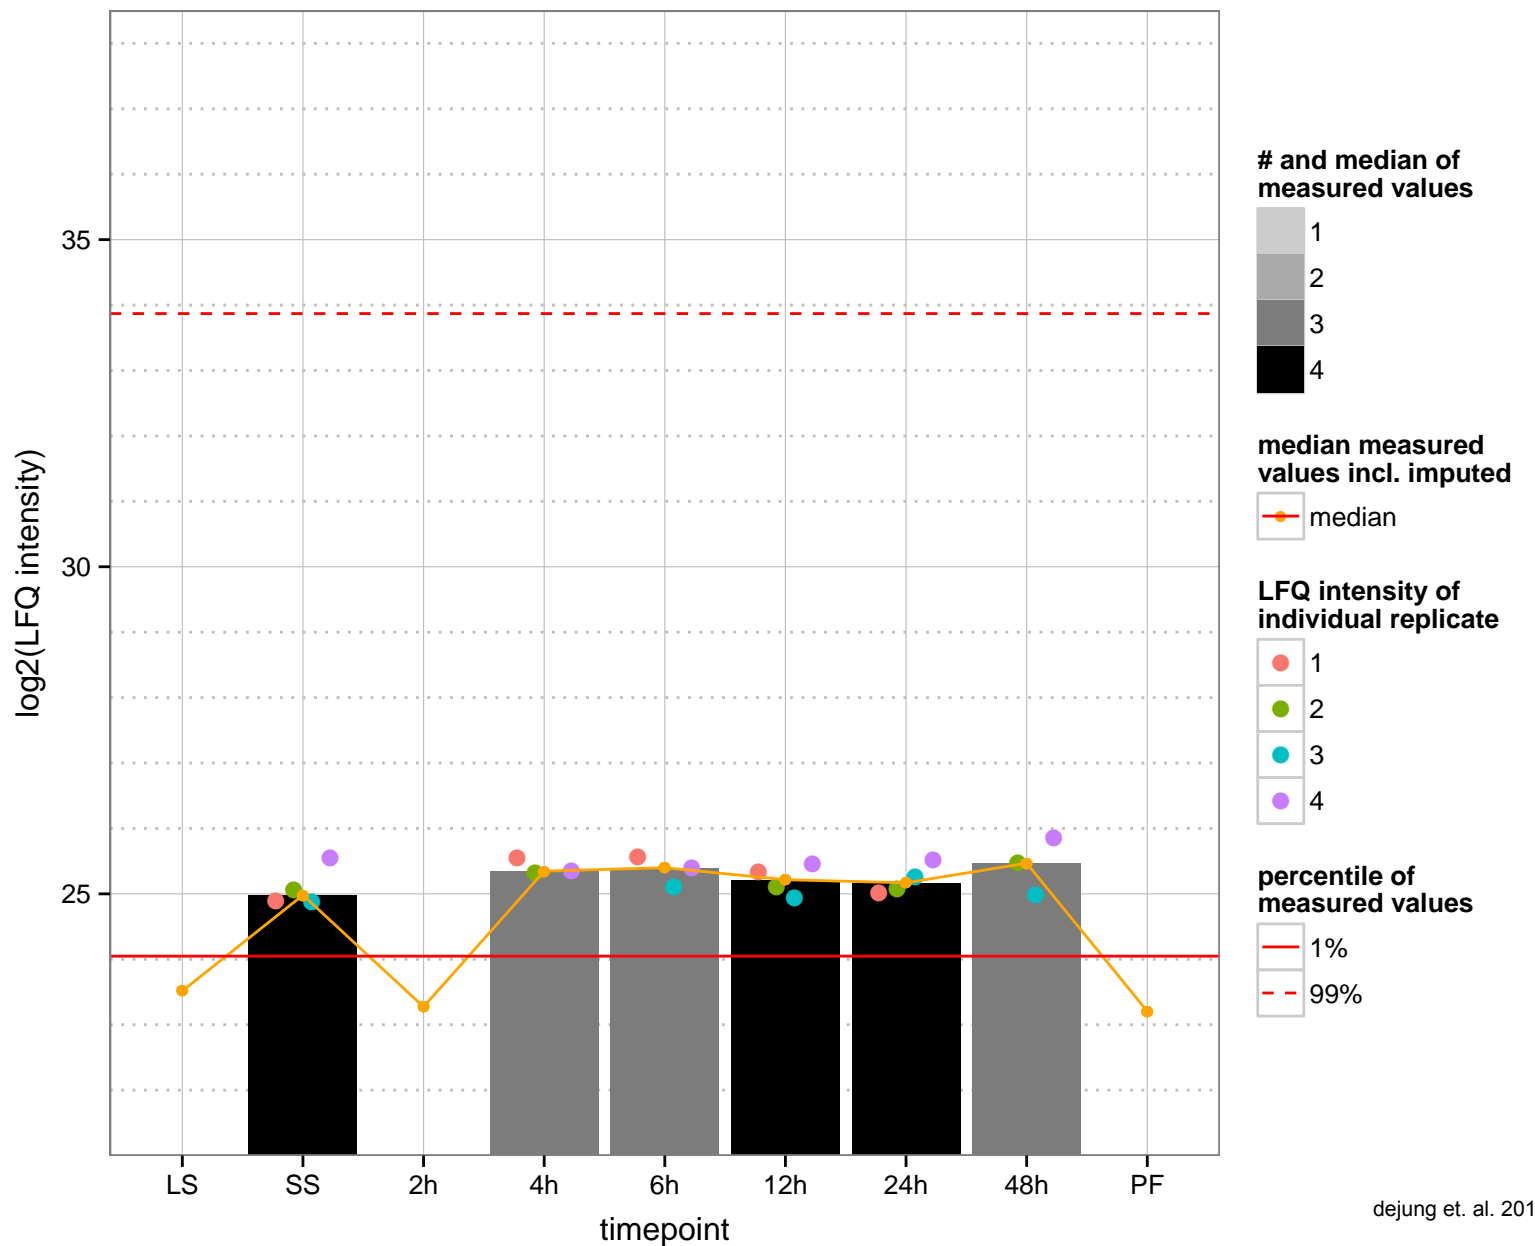

Pre-mRNA-splicing factor CWC22, putative (TbCWC22)  
 Tb927.11.10750  
 AGOF: RNA binding  
 AGOC: null  
 AGOP: RNA metabolic process, translation  
 PGOF: DNA binding, RNA binding, binding, protein binding  
 PGO: null  
 PGOP: null

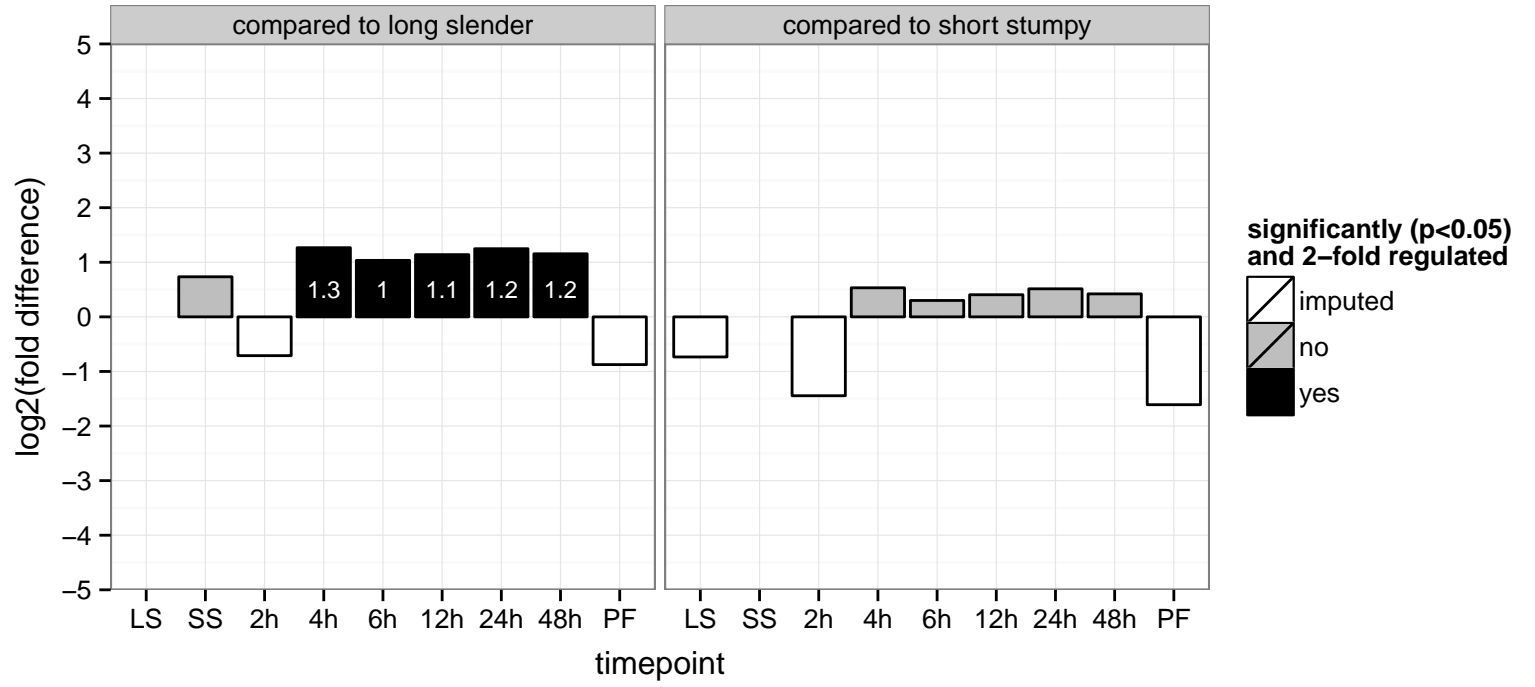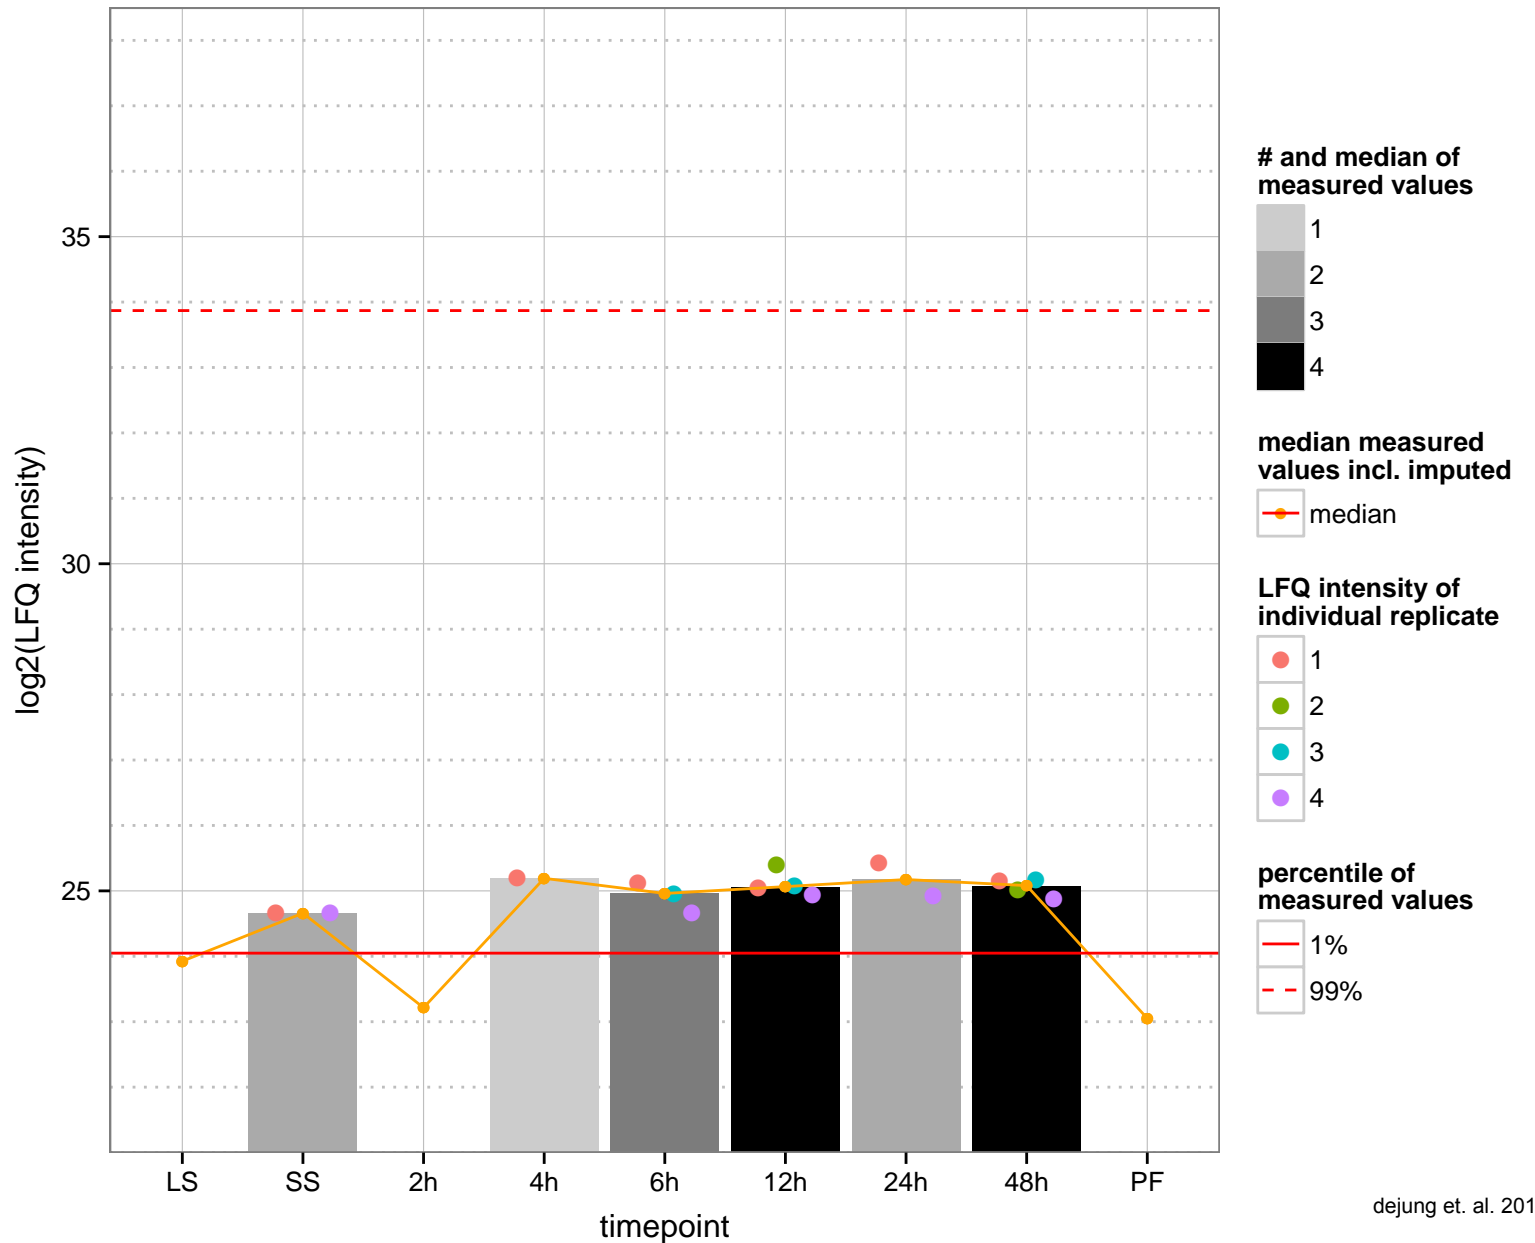

hypothetical protein, conserved  
 Tb927.11.14450  
 AGOF: null  
 AGOC: null  
 AGOP: null  
 PGOF: null  
 PGO: null  
 PGOP: null

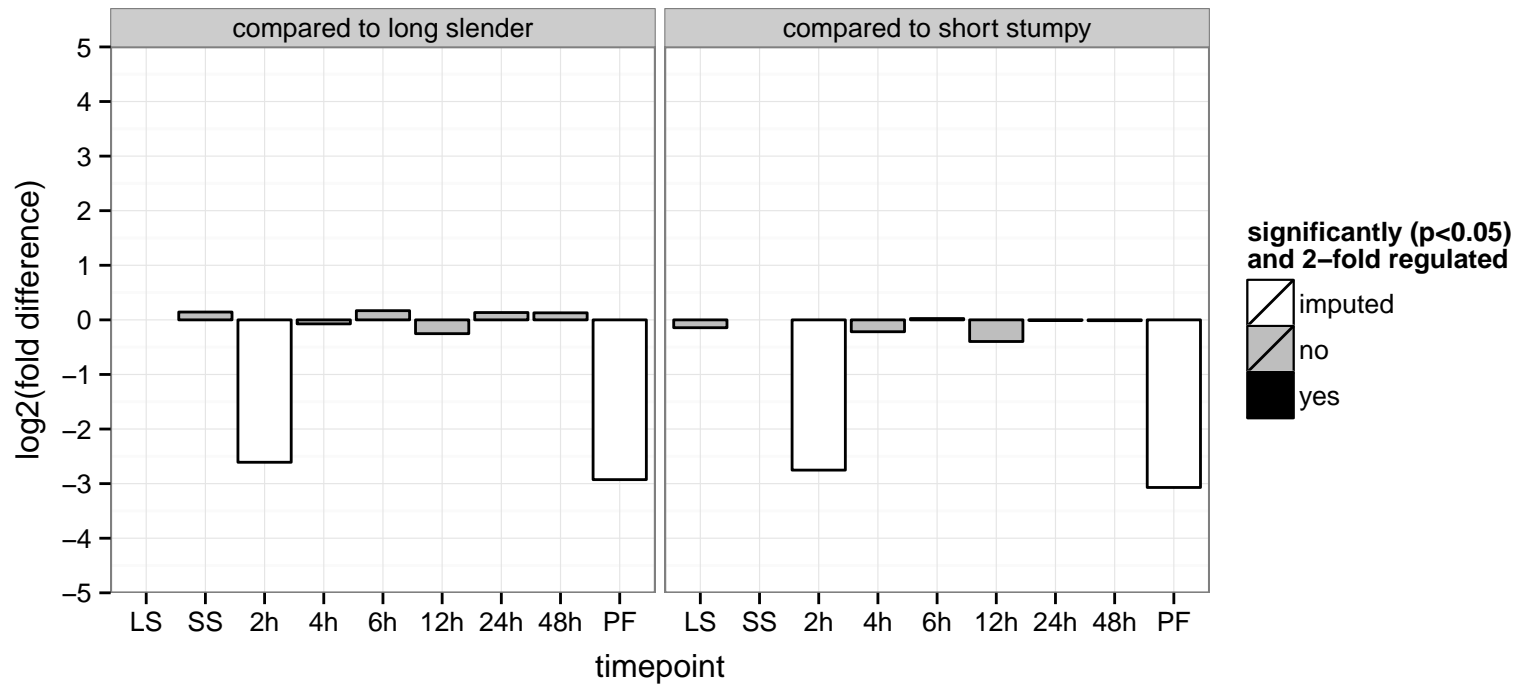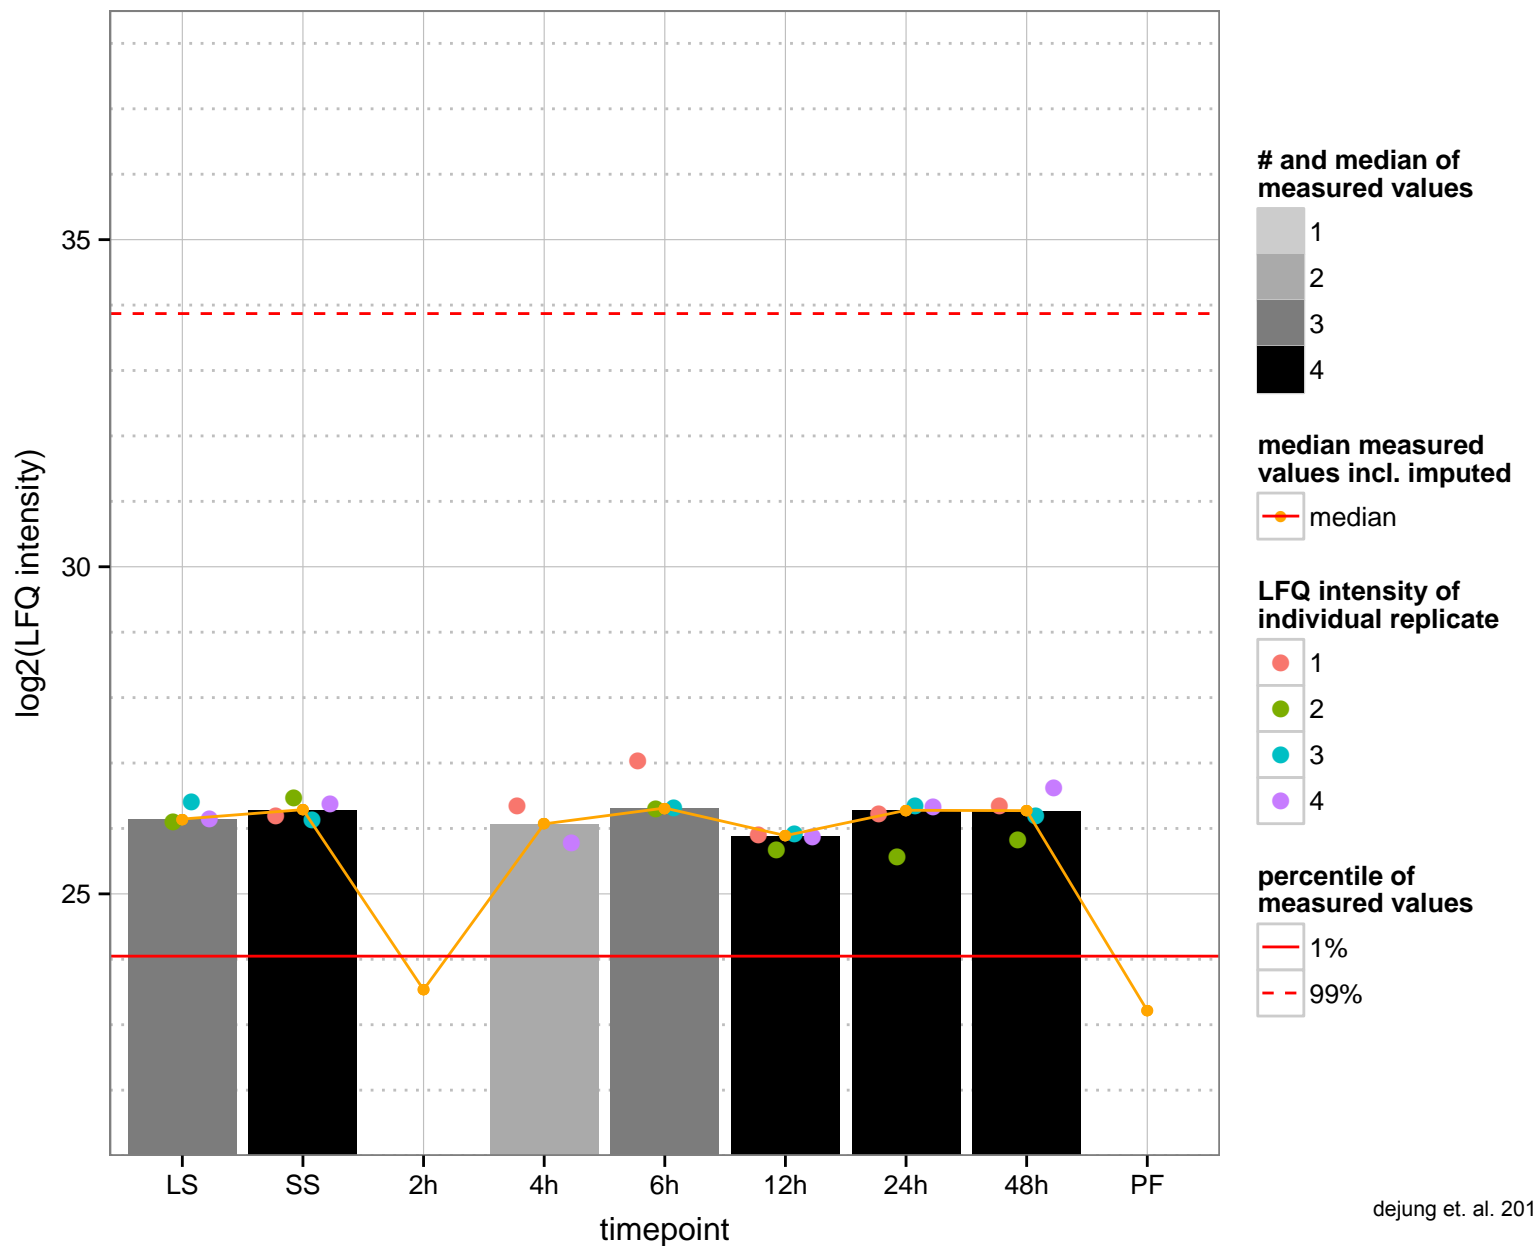

tatD related deoxyribonuclease, putative

Tb927.11.1600

AGOF: deoxyribonuclease activity, endodeoxyribonuclease activity, producing 5'-phosphomonoesters

AGOC: null

AGOP: metabolic process

PGOF: endodeoxyribonuclease activity, producing 5'-phosphomonoesters

PGOC: null

PGOP: null

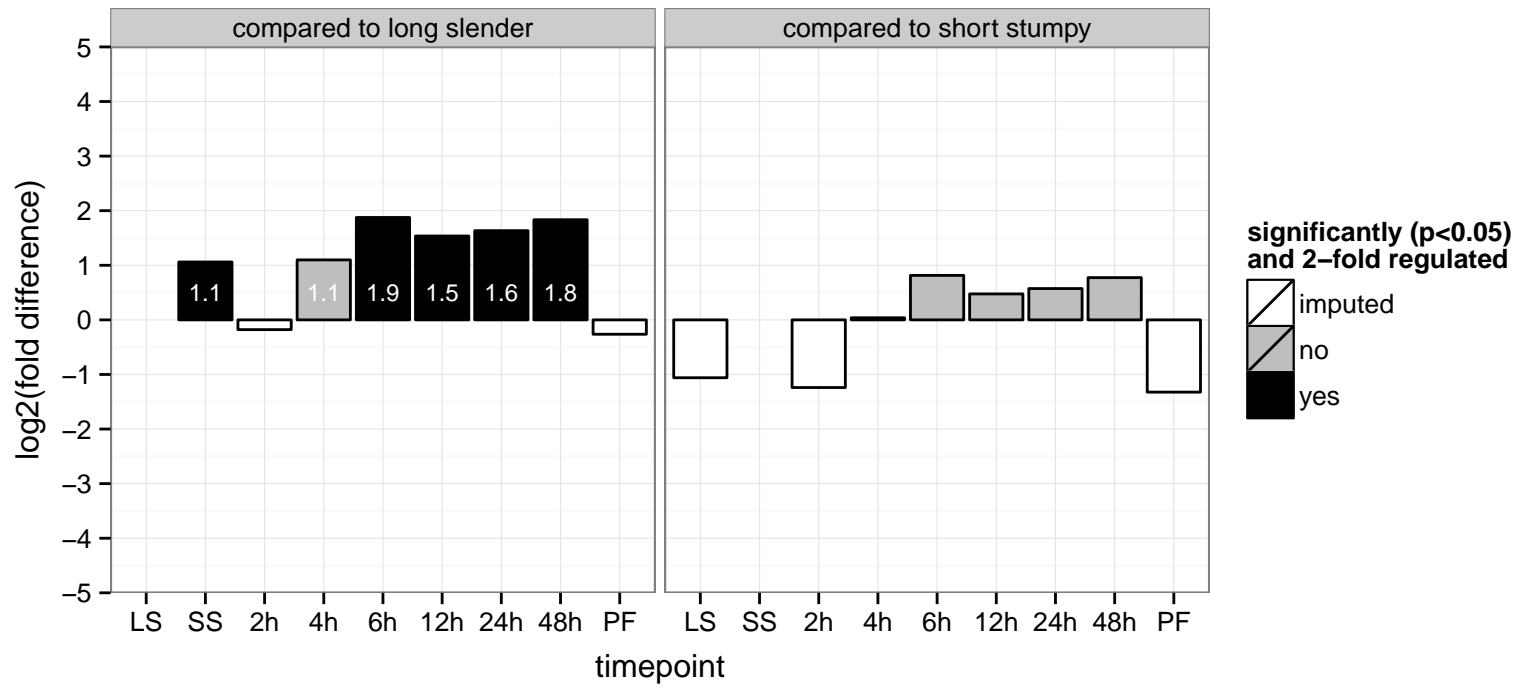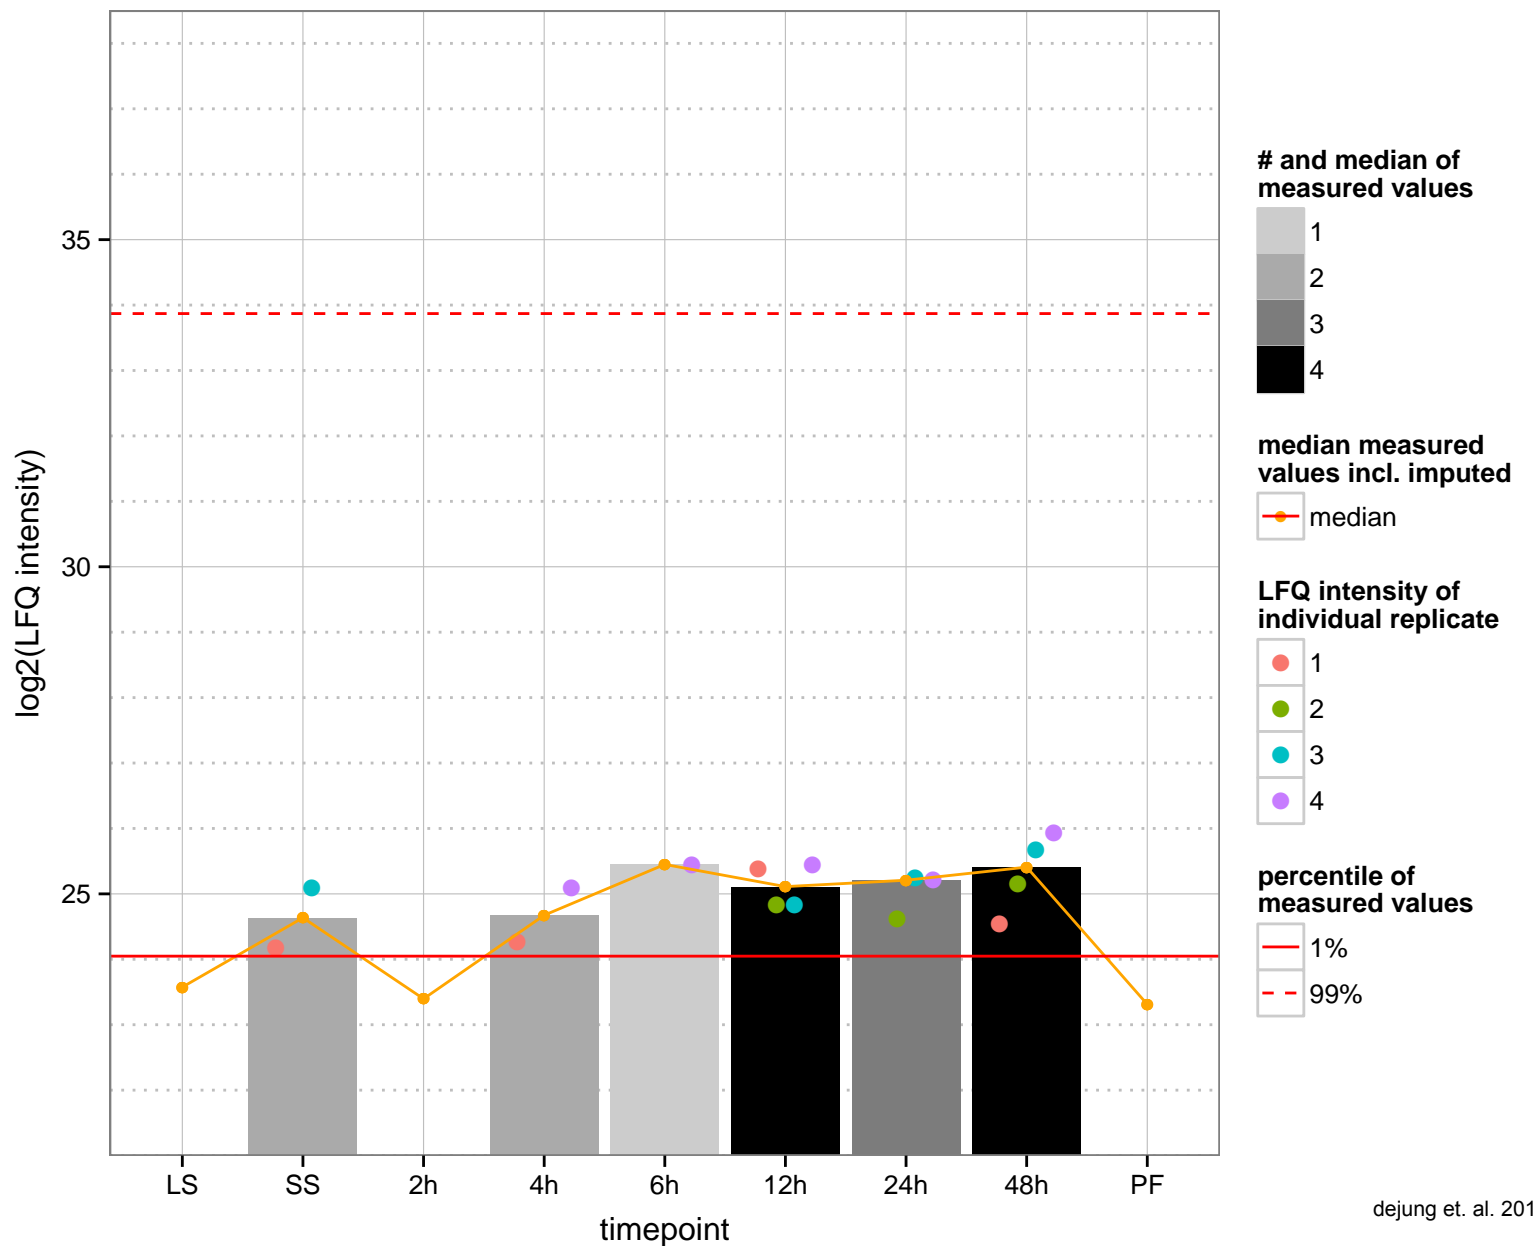



ras-like small GTPase, putative (TbGTR)  
 Tb927.11.3320  
 AGOF: GTP binding  
 AGOC: cytoplasm, nucleus  
 AGOP: null  
 PGO: GTP binding  
 PGOC: cytoplasm, nucleus  
 PGOP: null

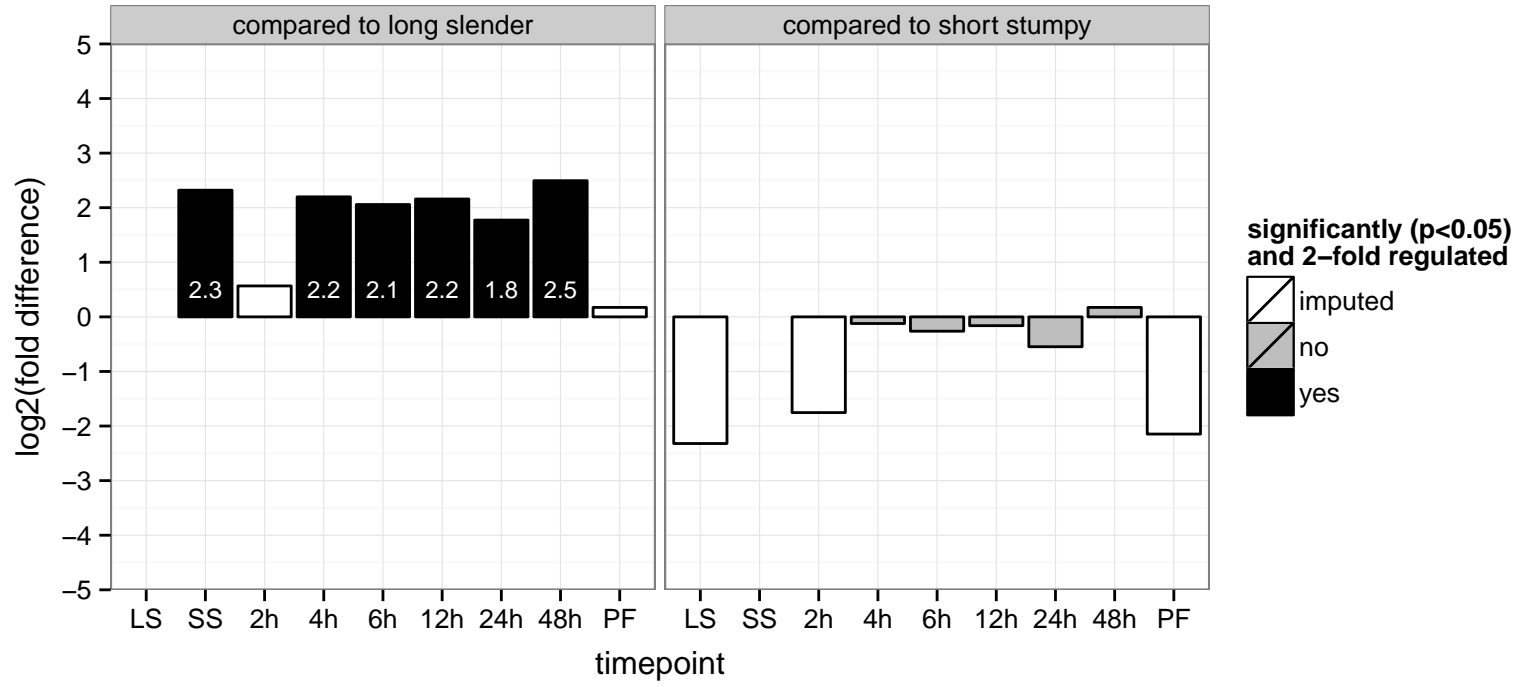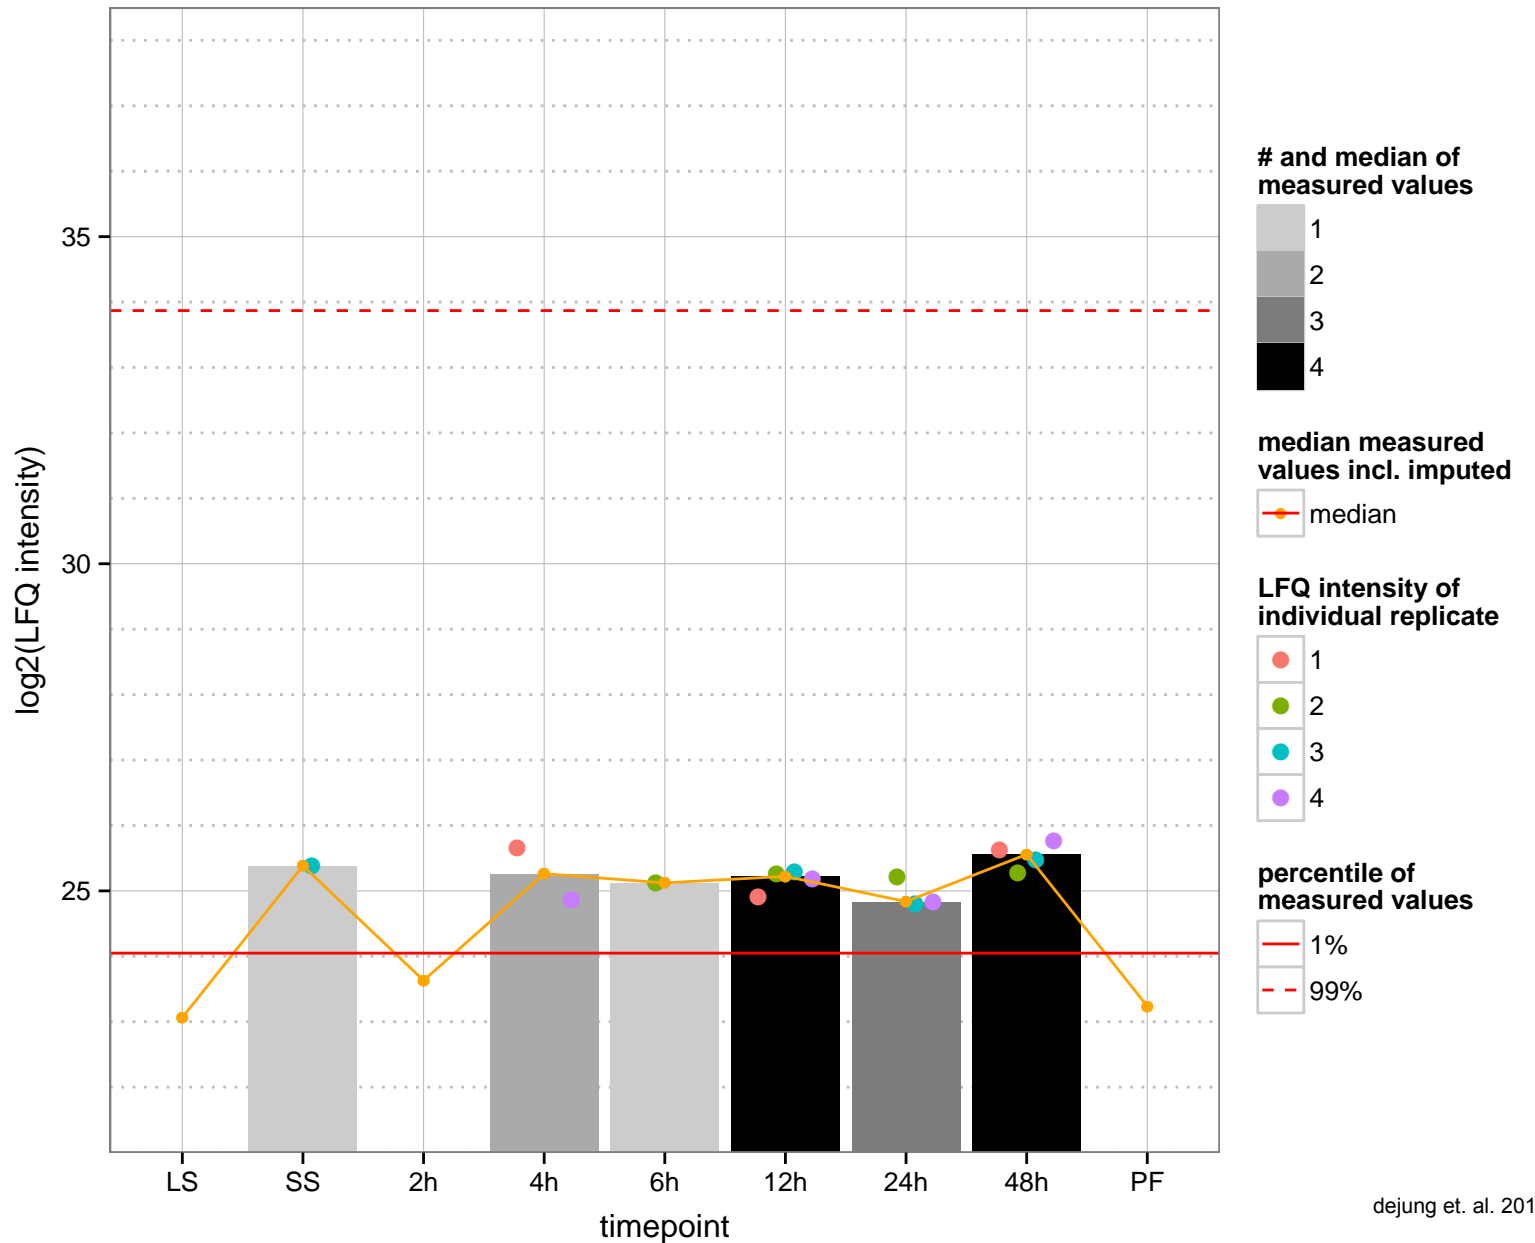

leucine-rich repeat protein (LRRP), putative  
 Tb927.11.5190  
 AGOF: null  
 AGOC: null  
 AGOP: null  
 PGO: protein binding  
 PGOC: null  
 PGOP: null

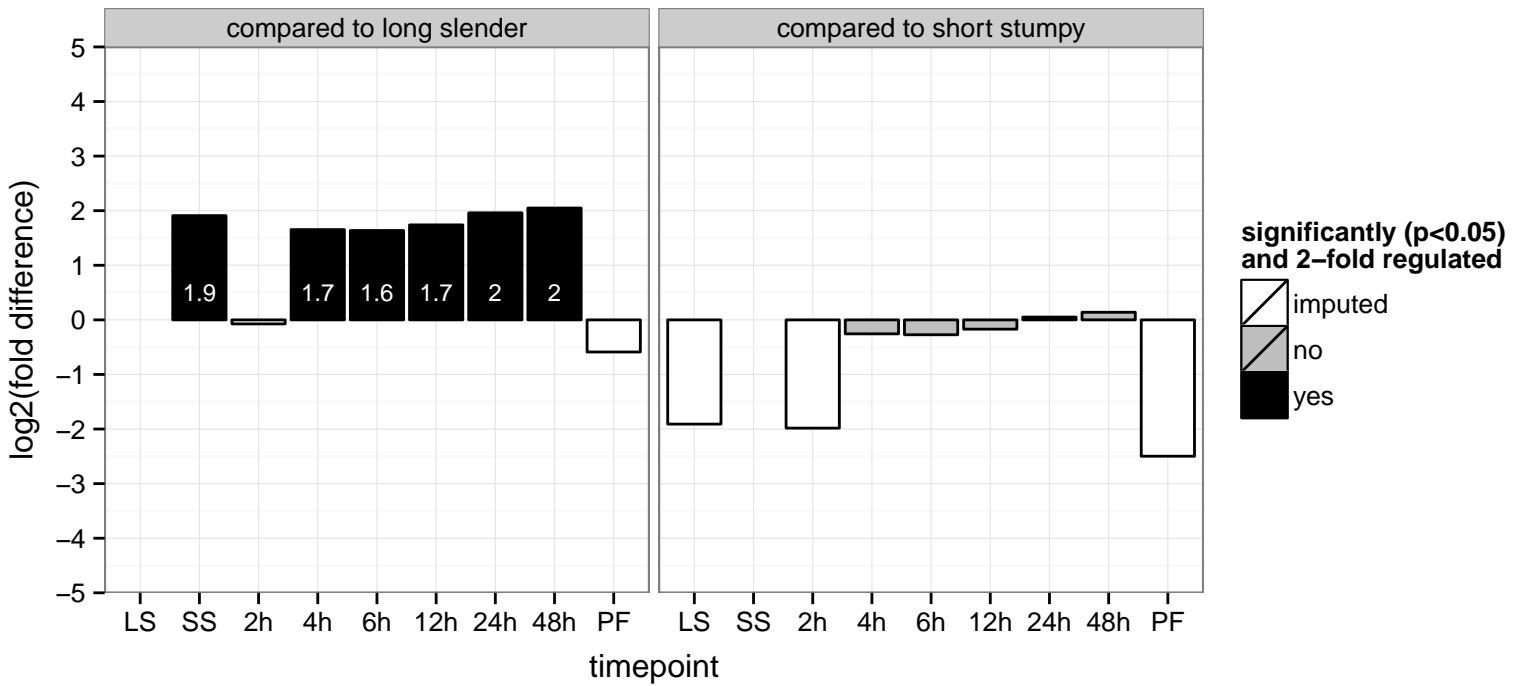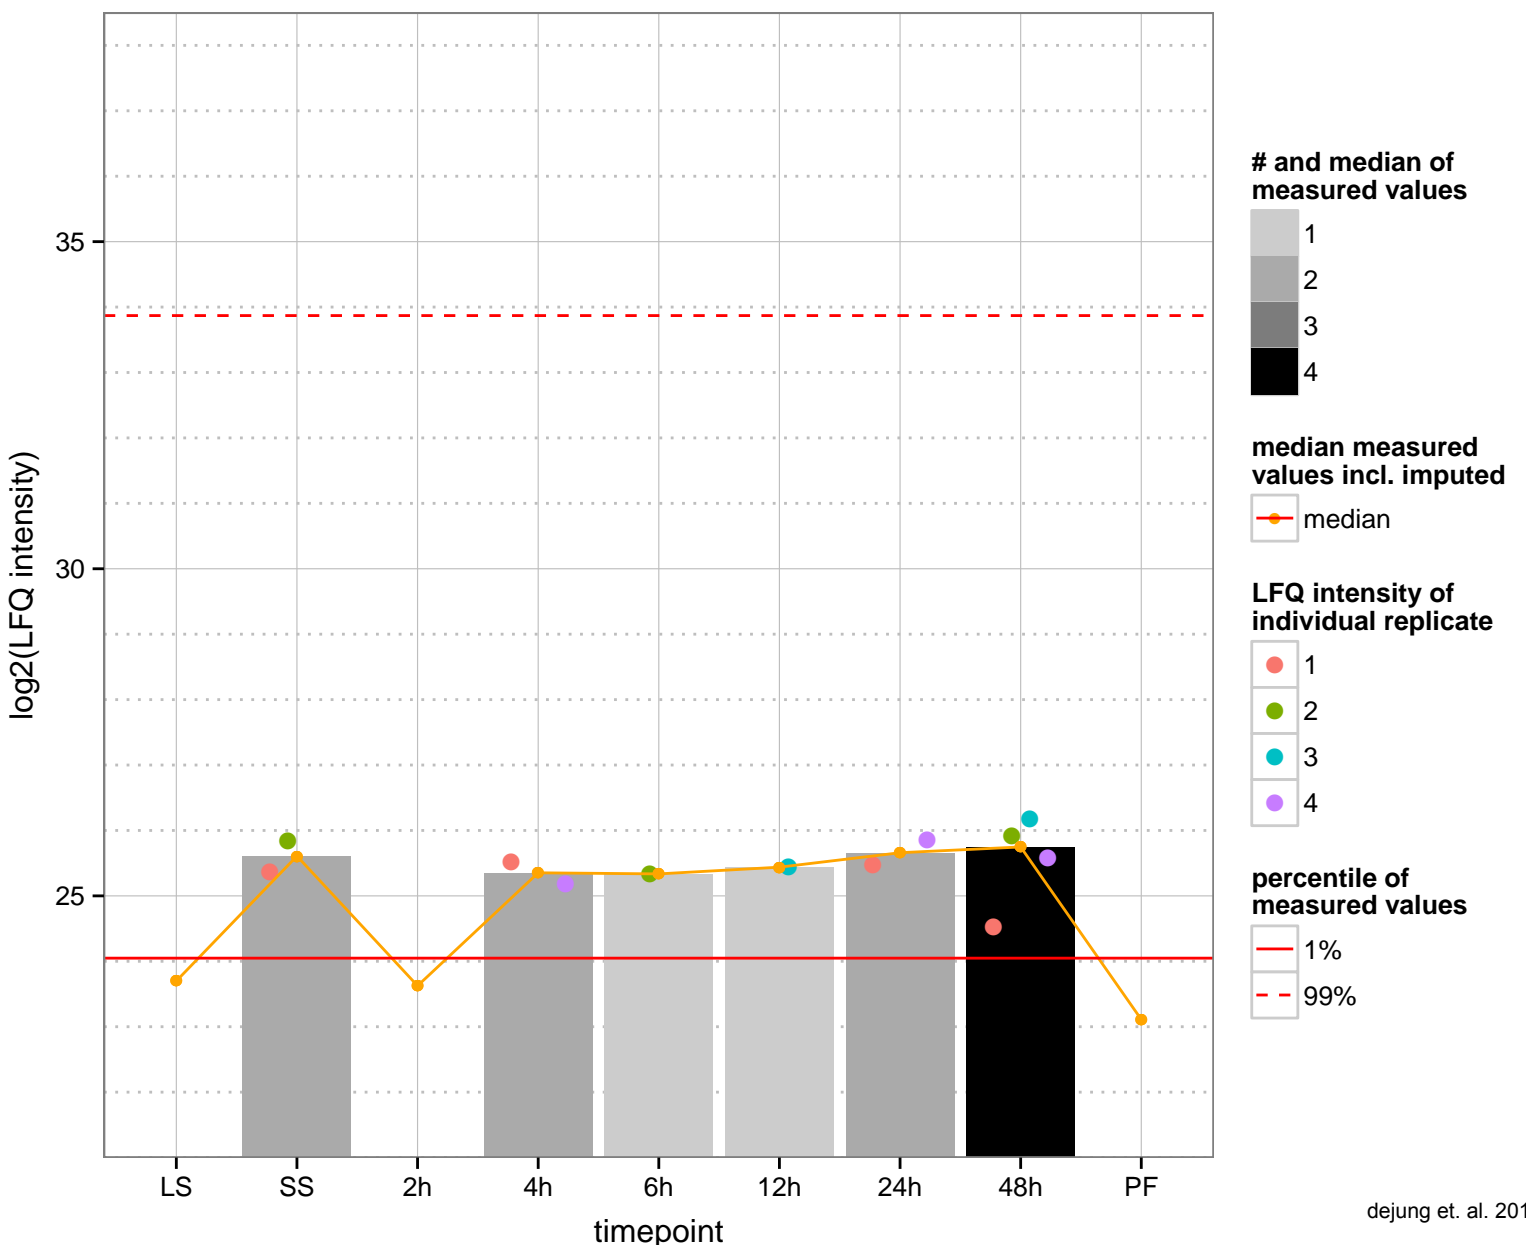

hypothetical protein, conserved  
 Tb927.11.6190  
 AGOF: null  
 AGOC: null  
 AGOP: null  
 PGO: null  
 PGOC: null  
 PGOP: null

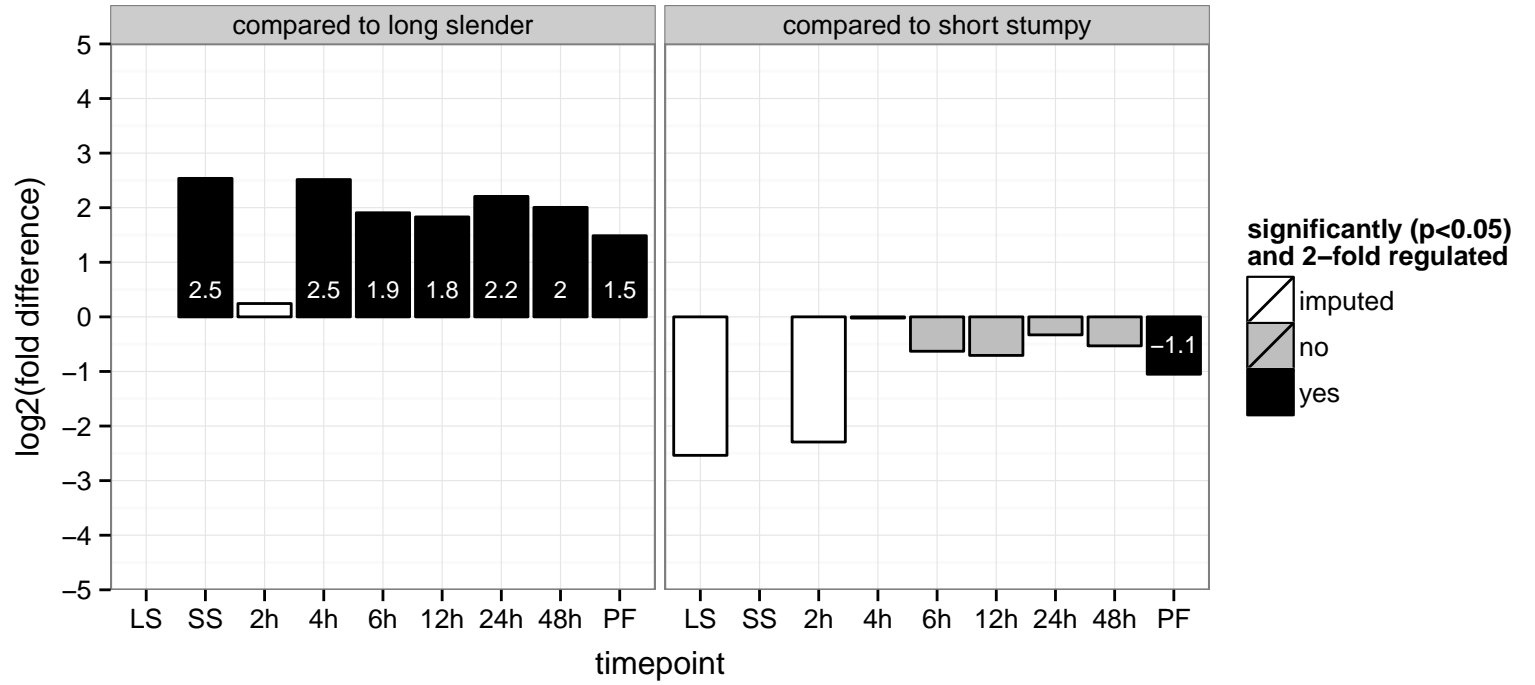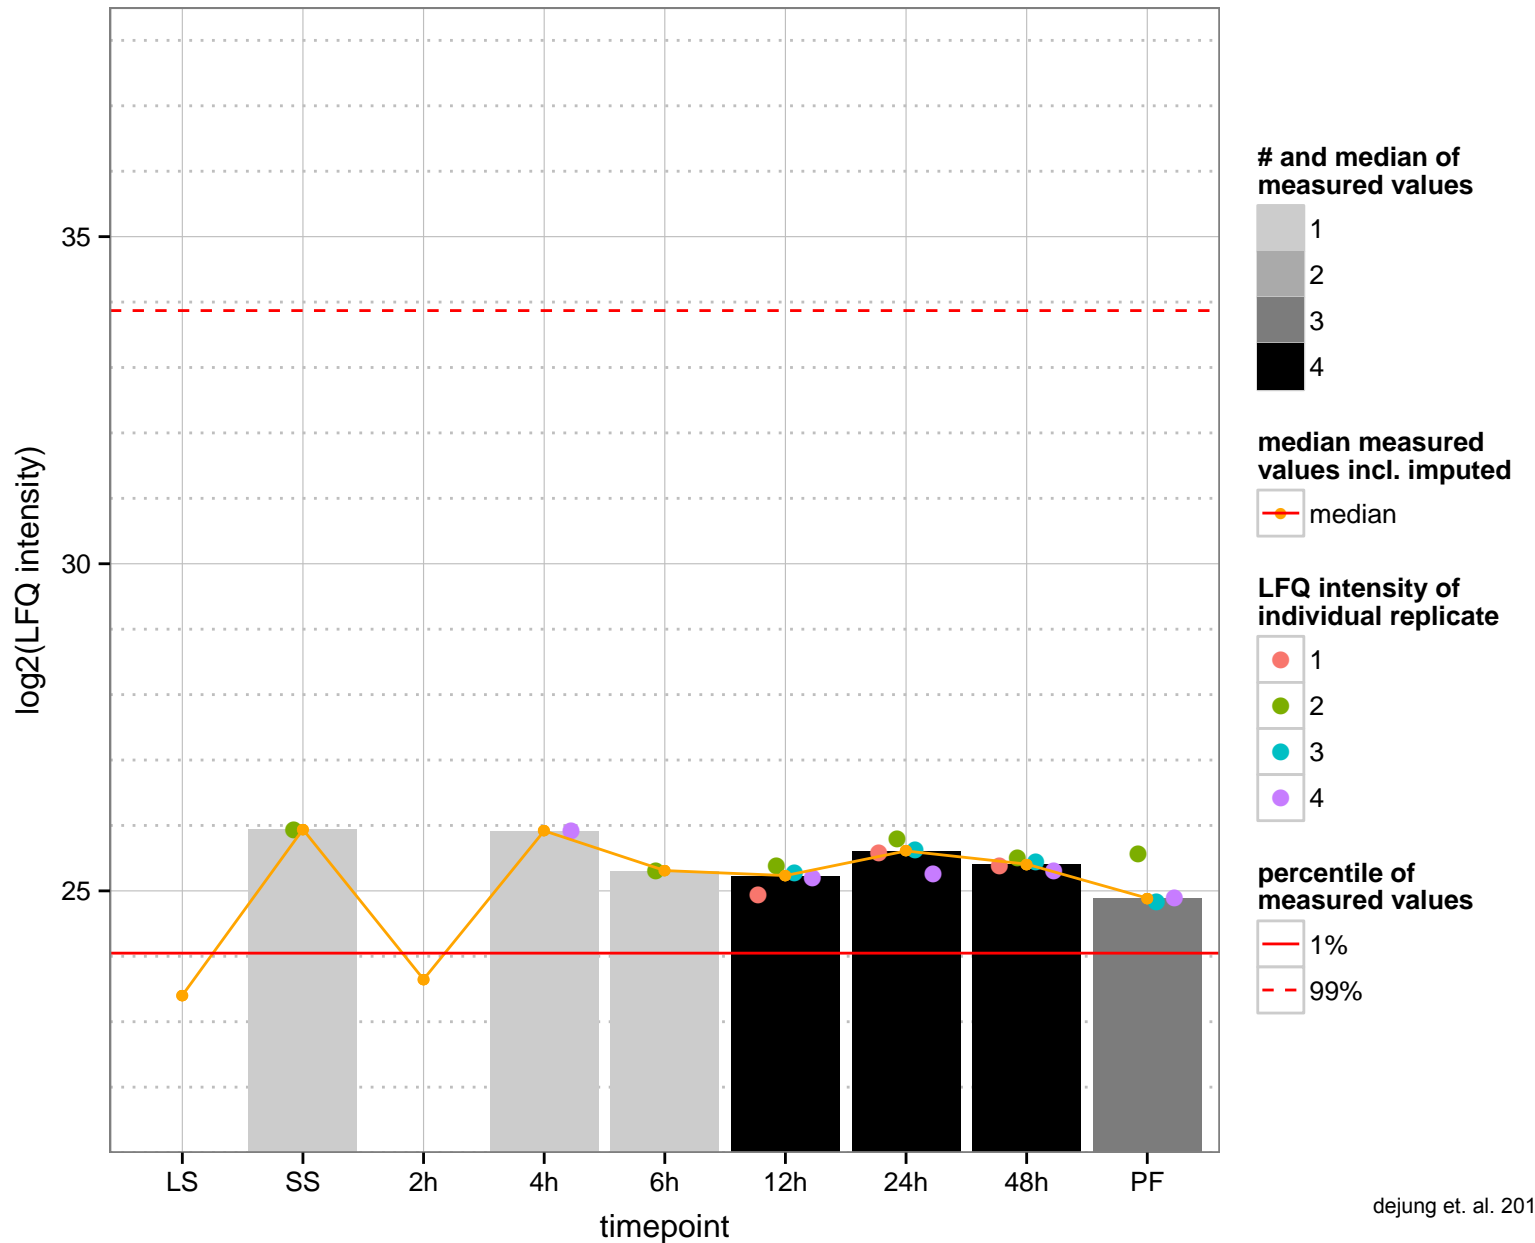

hypothetical protein, conserved  
 Tb927.11.8700  
 AGOF: null  
 AGOC: null  
 AGOP: null  
 PGO: null  
 PGOC: null  
 PGOP: null

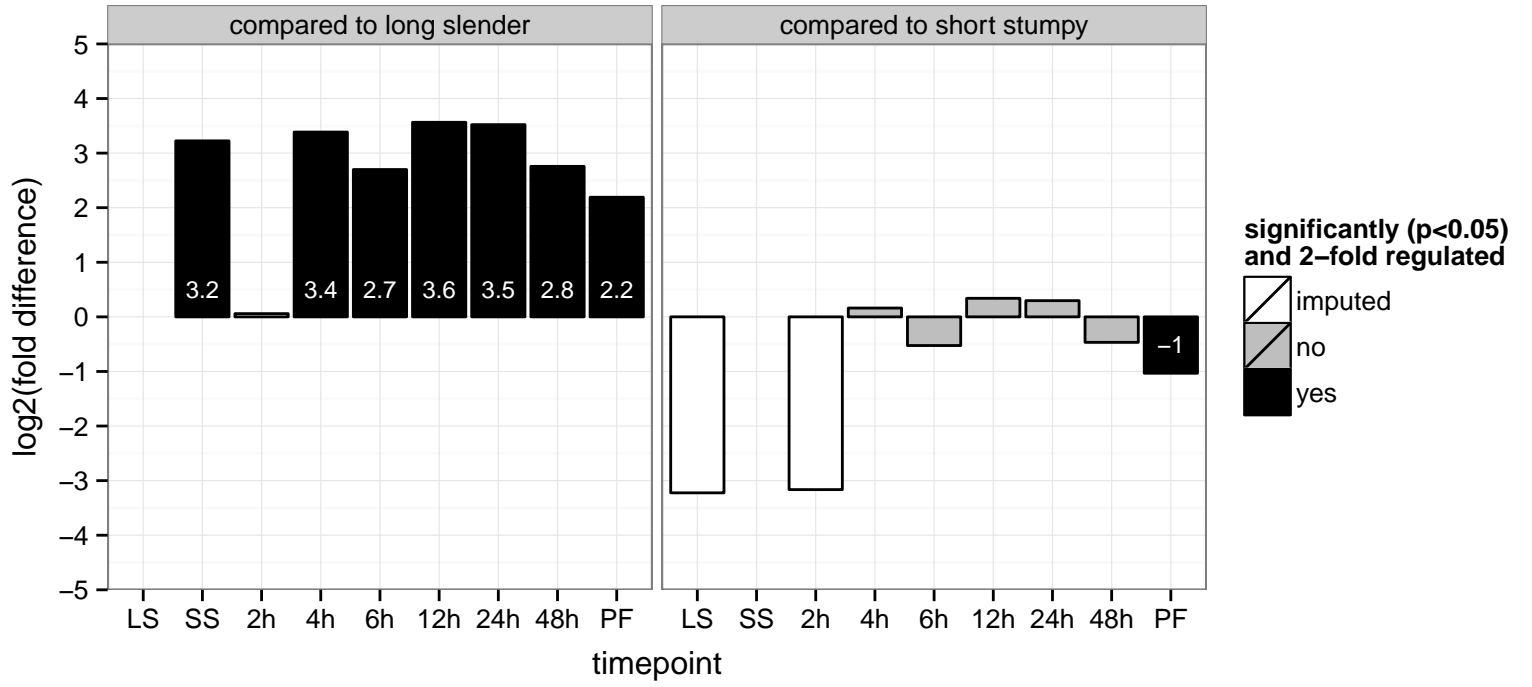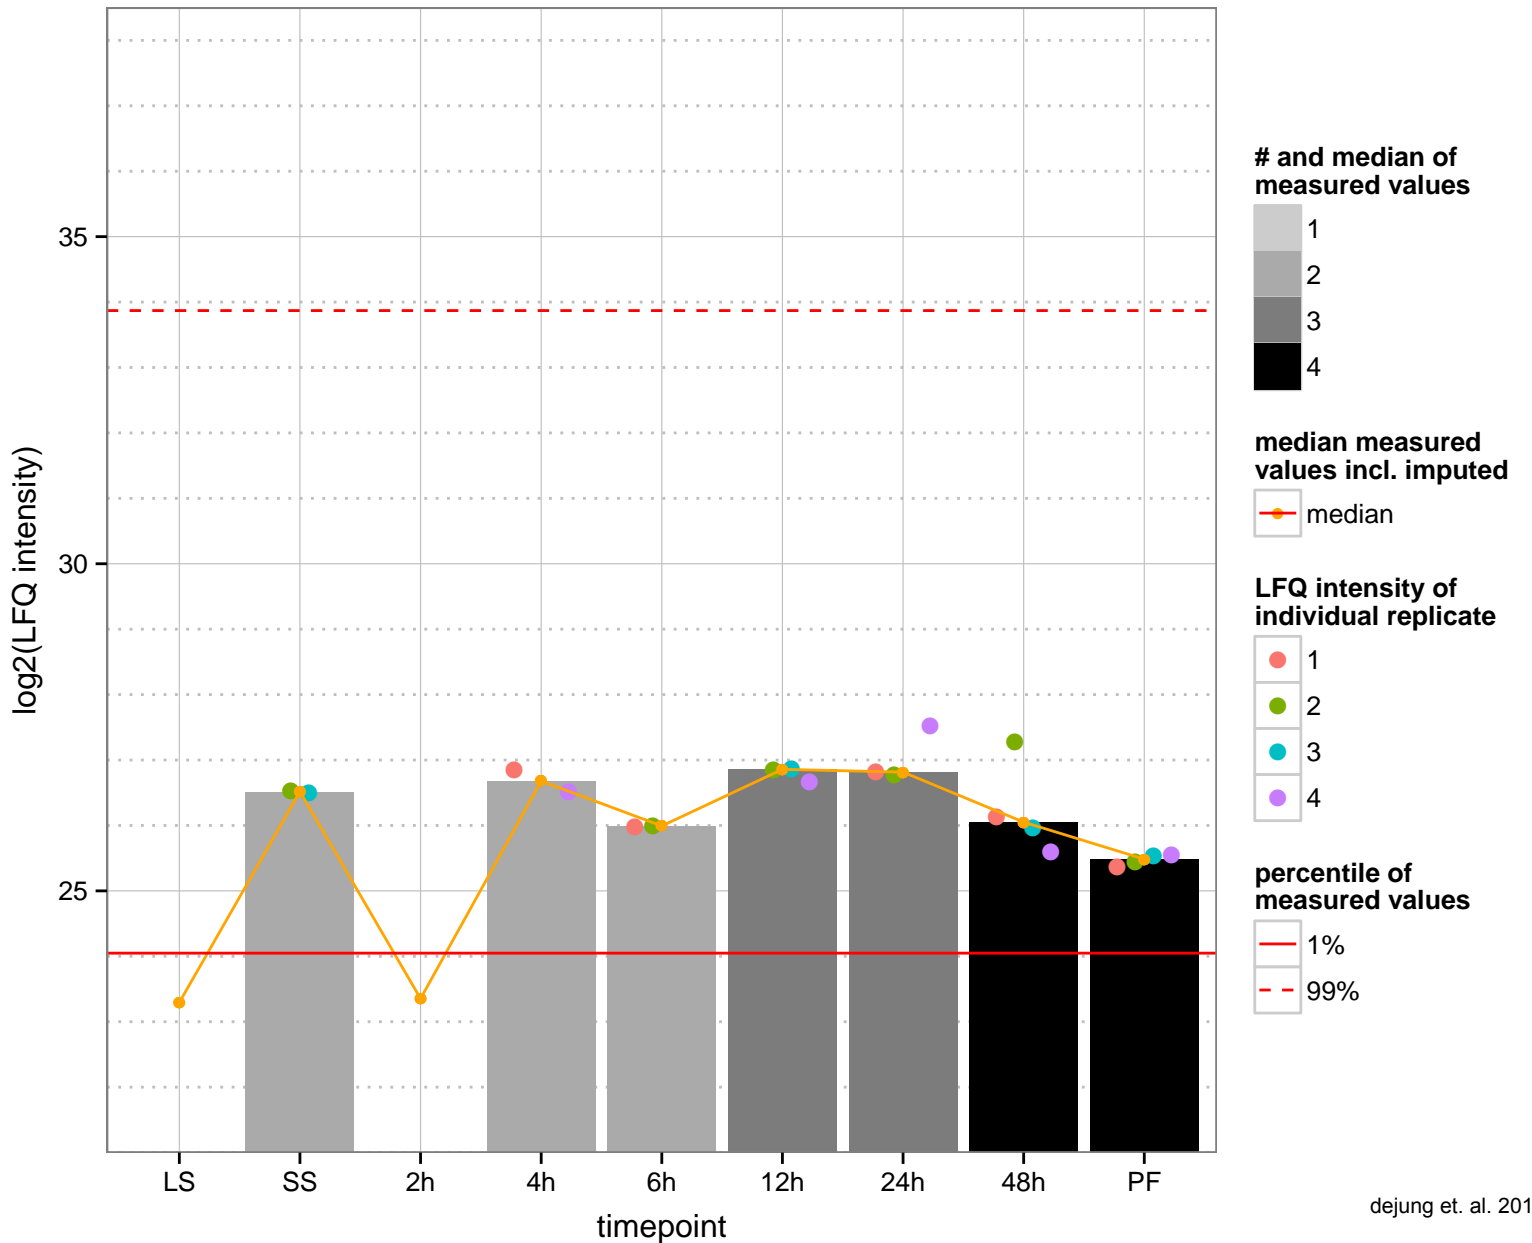

acyl-CoA binding protein, putative (ACBP)  
 Tb927.4.2010  
 AGOF: fatty-acyl-CoA binding  
 AGOC: null  
 AGOP: fatty acid metabolic process  
 PGOF: fatty-acyl-CoA binding  
 PGO: null  
 PGOP: null

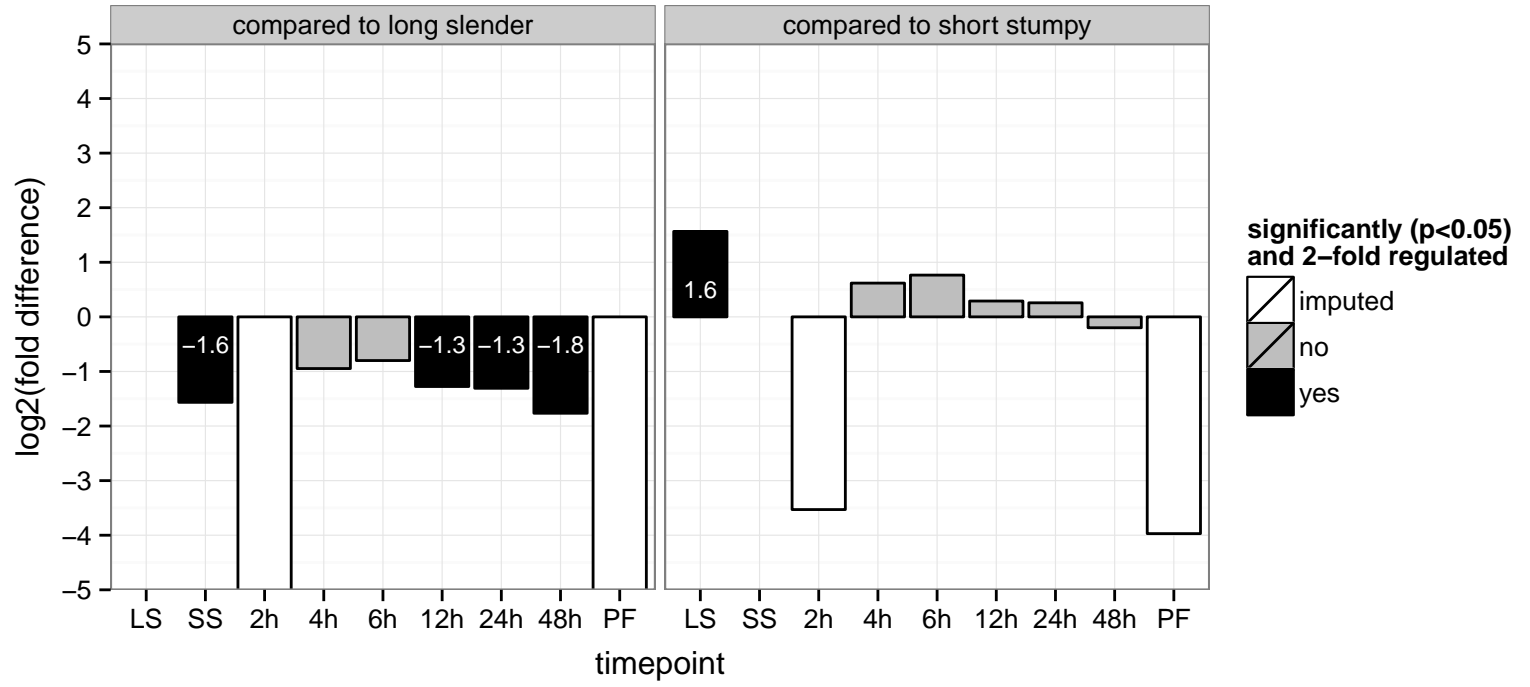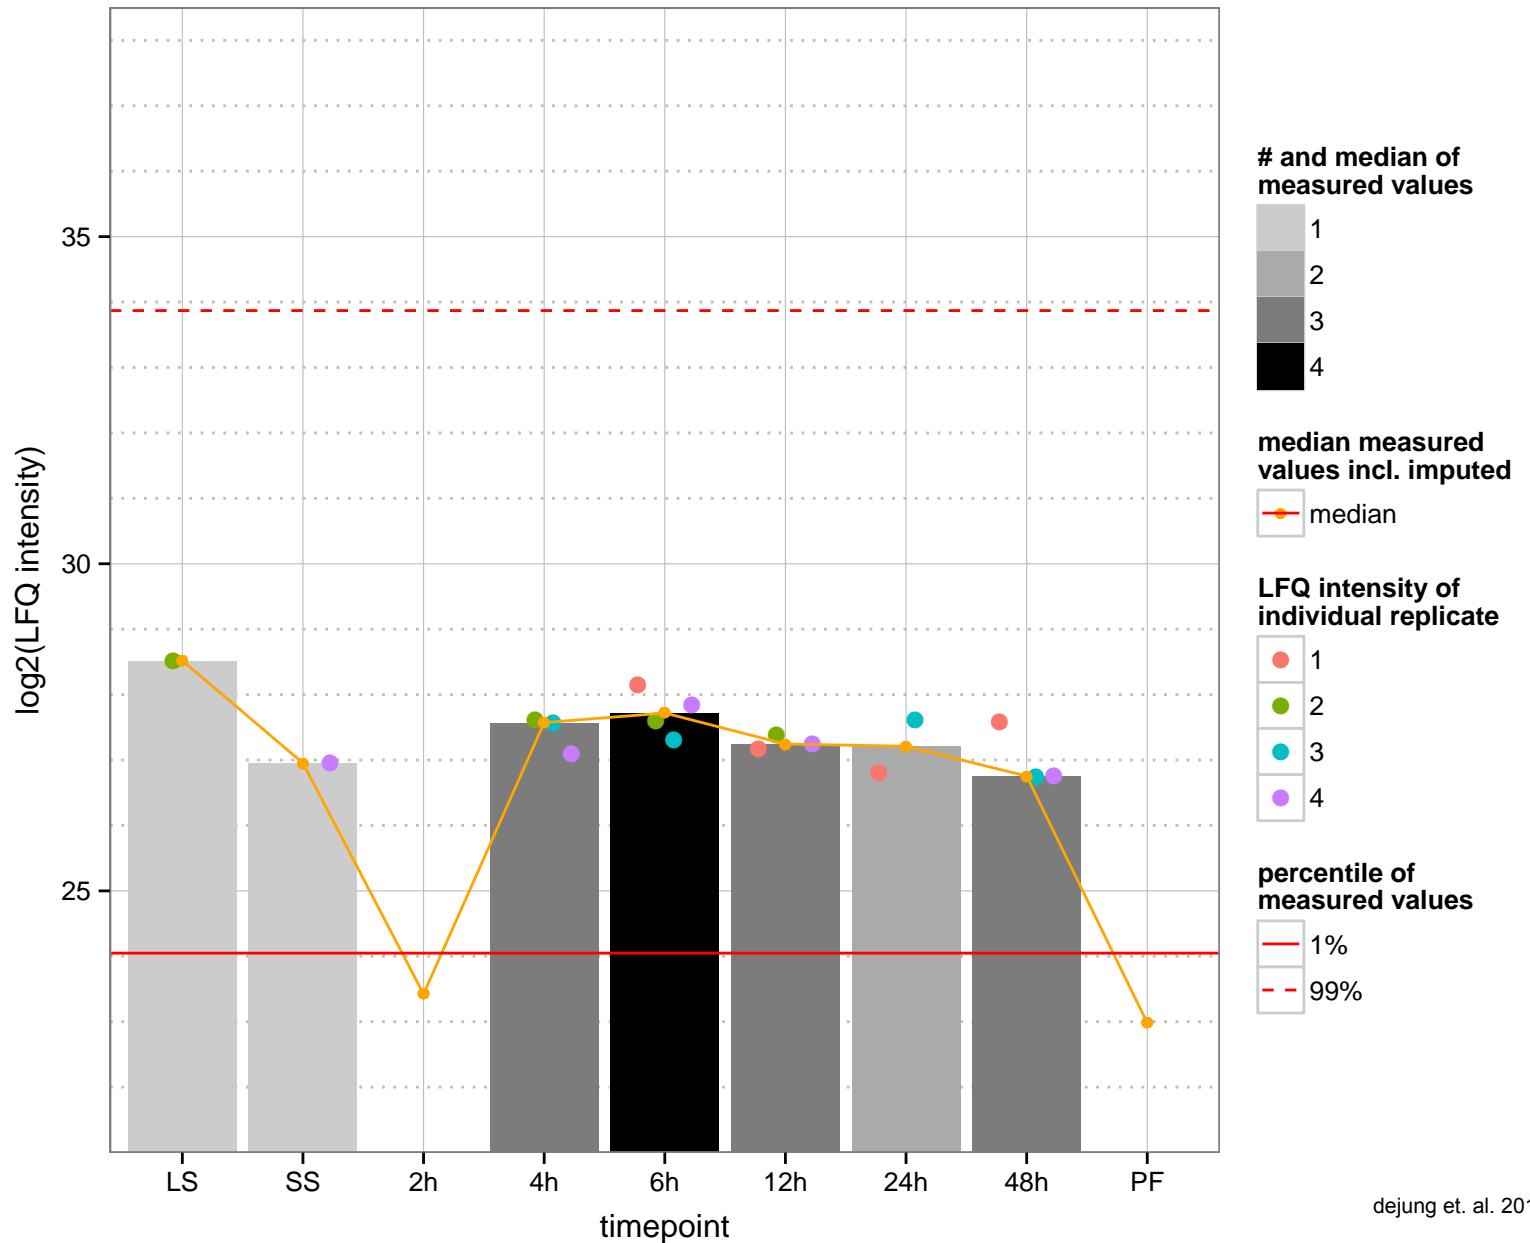

hypothetical protein, conserved  
 Tb927.4.2130  
 AGOF: null  
 AGOC: null  
 AGOP: null  
 PGO: null  
 PGOC: null  
 PGOP: null

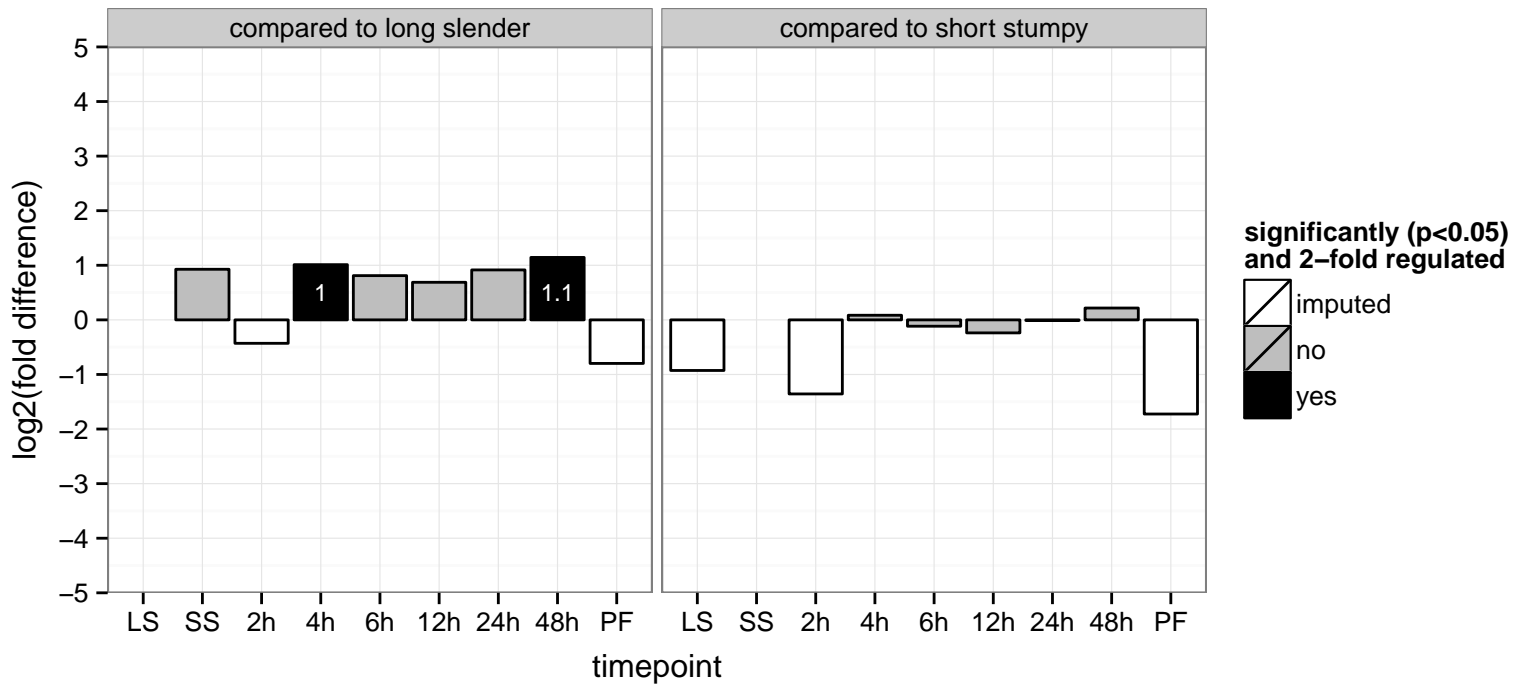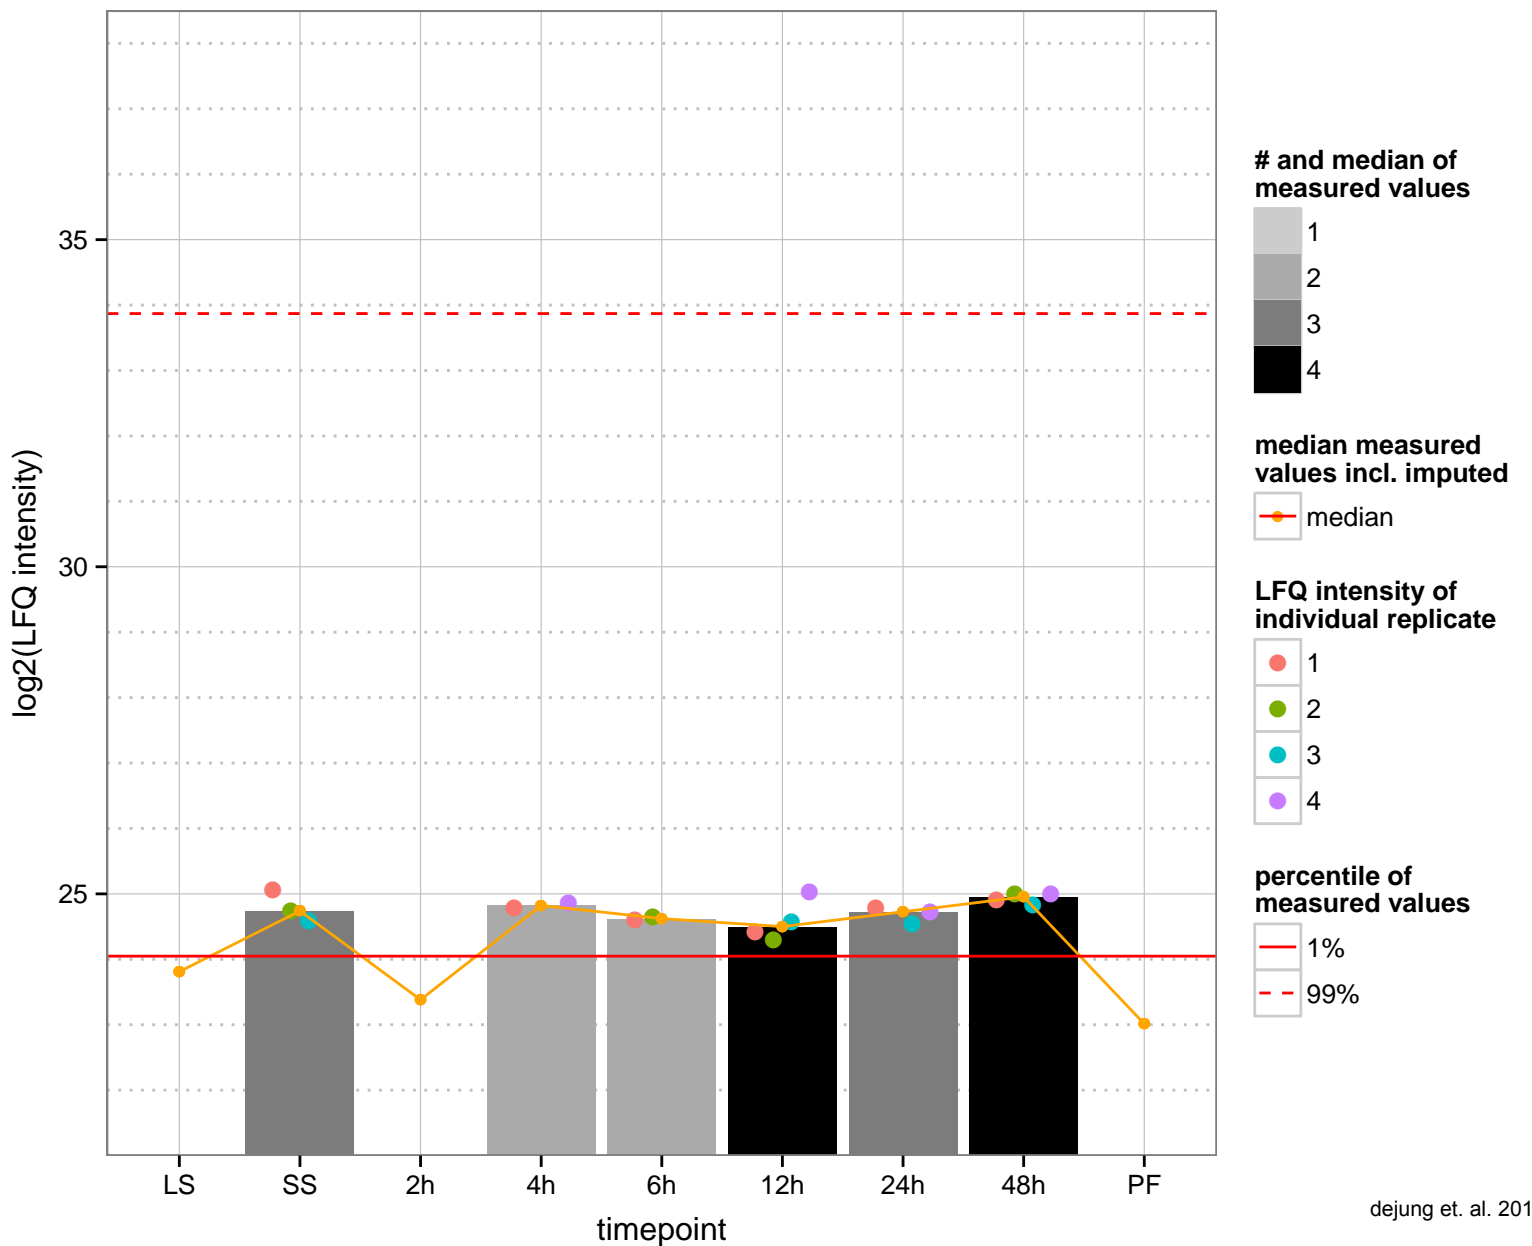

regulator of chromosome condensation, putative  
 Tb927.7.1190  
 AGOF: null  
 AGOC: null  
 AGOP: null  
 PGOF: null  
 PGOE: null  
 PGOP: null

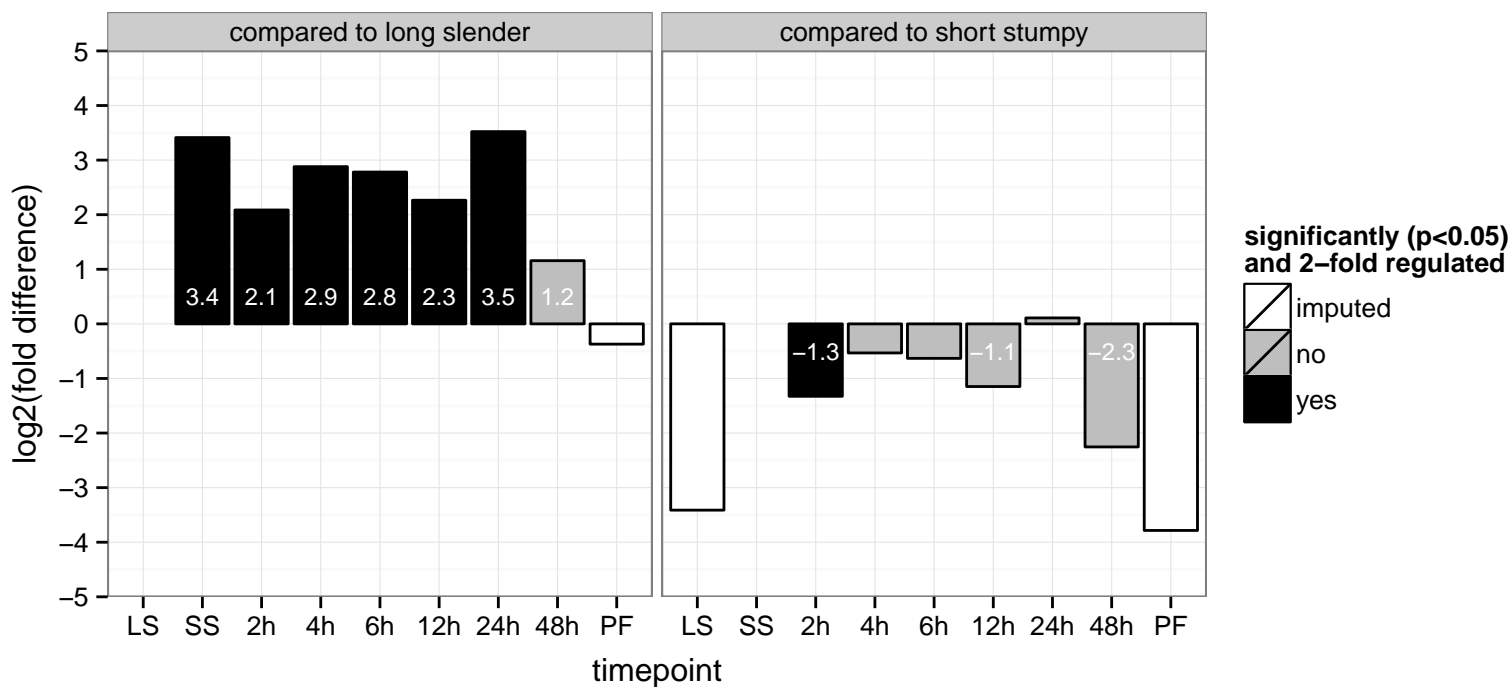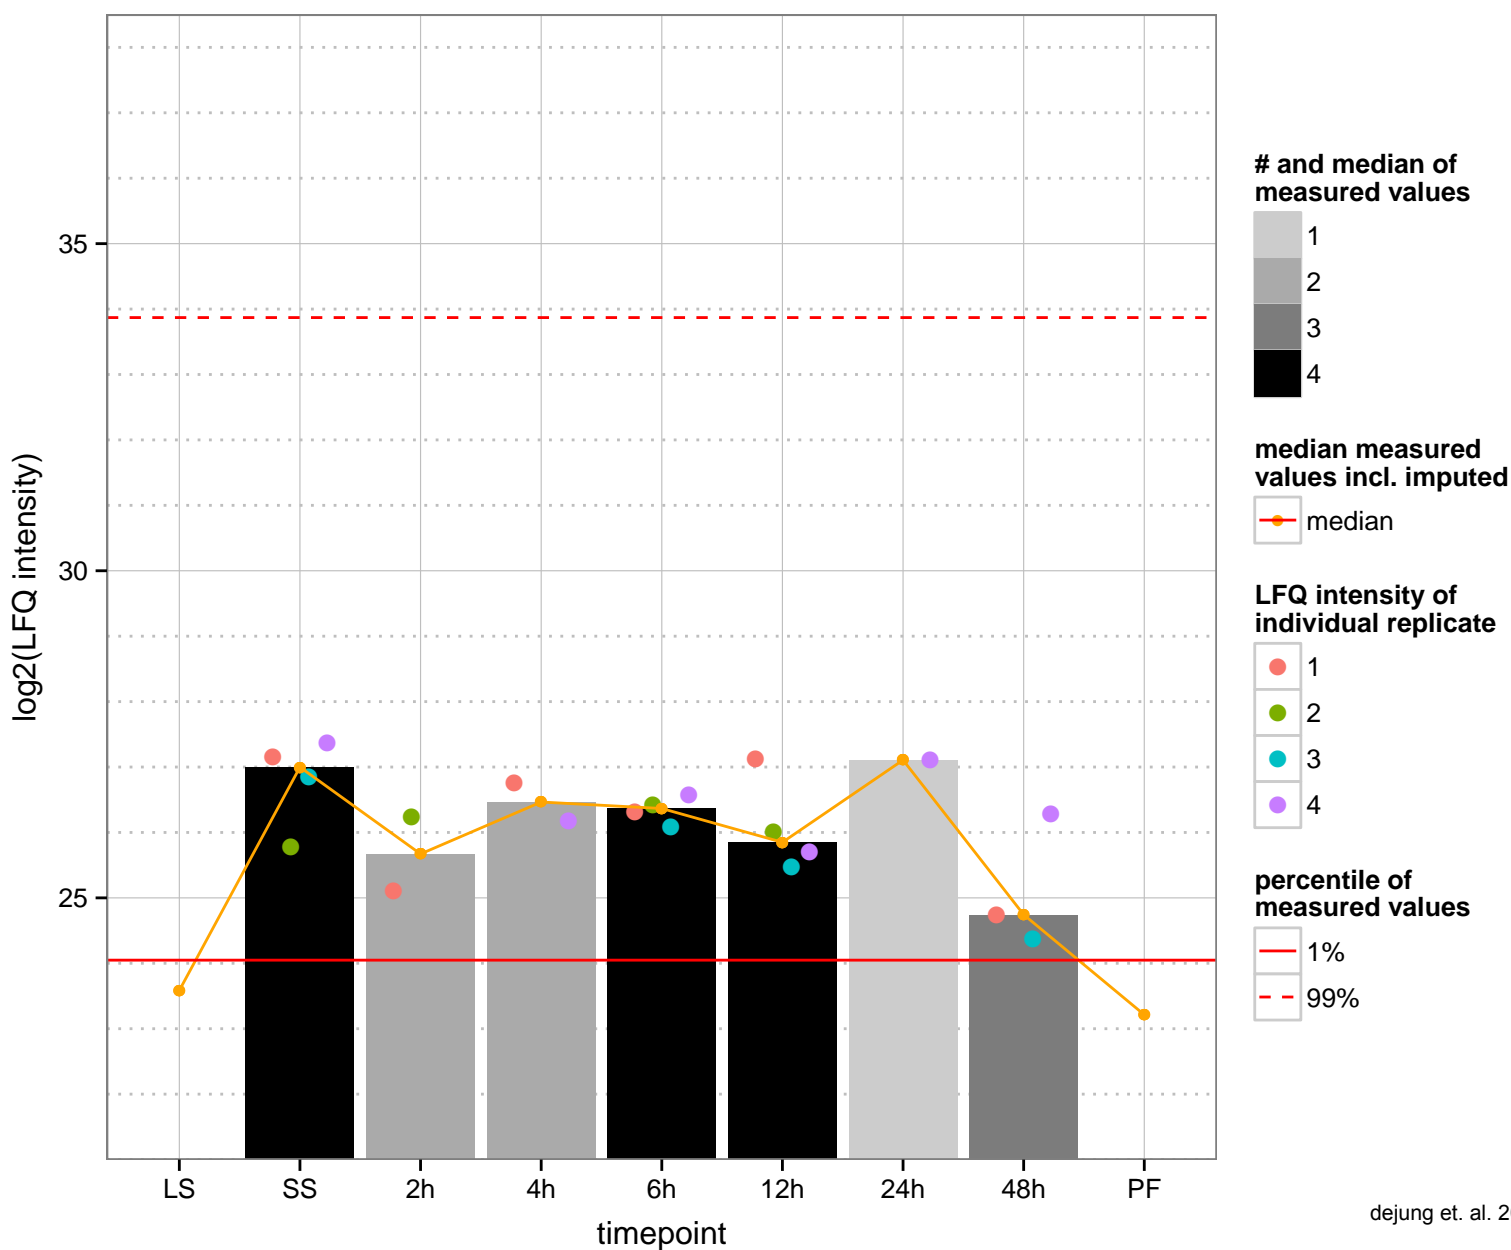

hypothetical protein, conserved  
 Tb927.7.4140  
 AGOF: RNA binding, structural constituent of ribosome  
 AGOC: intracellular, mitochondrion, ribosome  
 AGOP: translation  
 PGOF: RNA binding, structural constituent of ribosome  
 PGO: intracellular, ribosome  
 PGO: translation

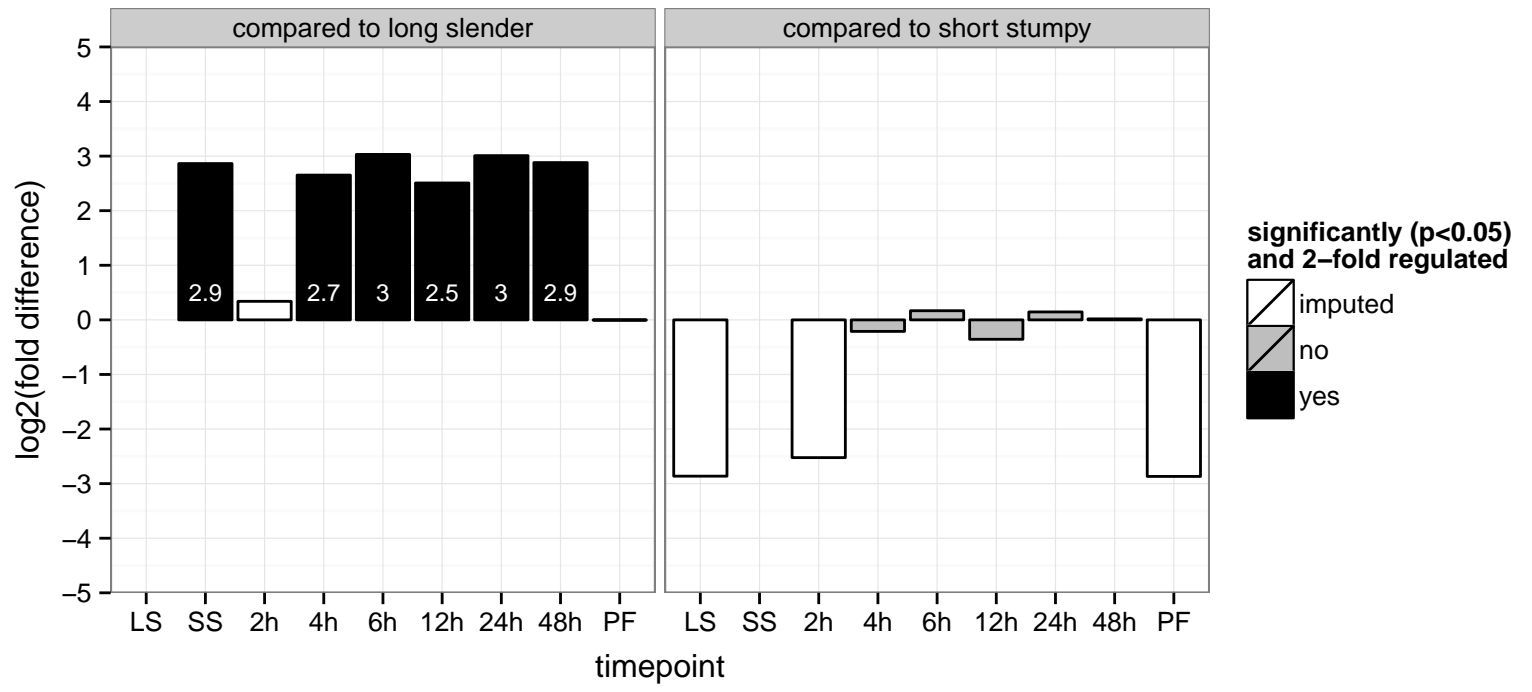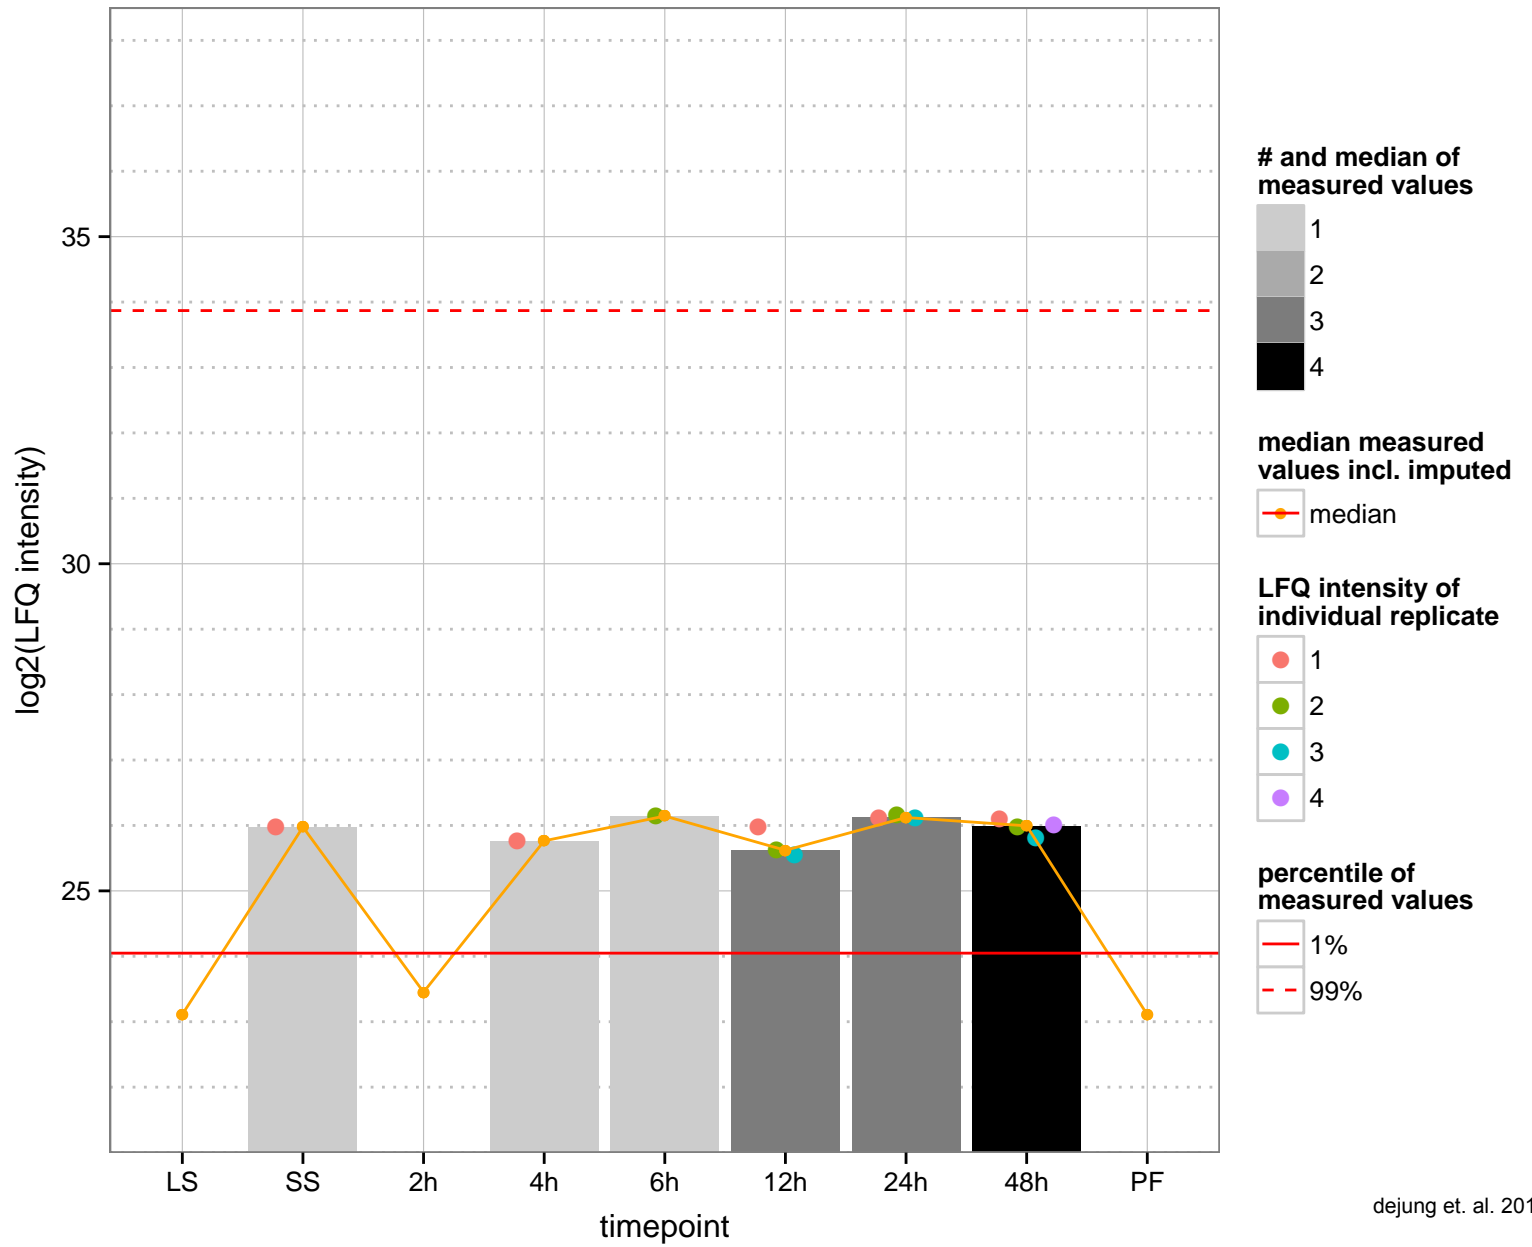



protein kinase, putative

Tb927.7.6220

AGOF: ATP binding, protein kinase activity, protein serine/threonine kinase activity, protein tyrosine kinase activity

AGOC: null

AGOP: cytokinesis after mitosis, growth, protein phosphorylation

PGOF: ATP binding, protein binding, protein kinase activity, transferase activity, transferring phosphorus-containing groups

PGOC: null

PGOP: protein phosphorylation

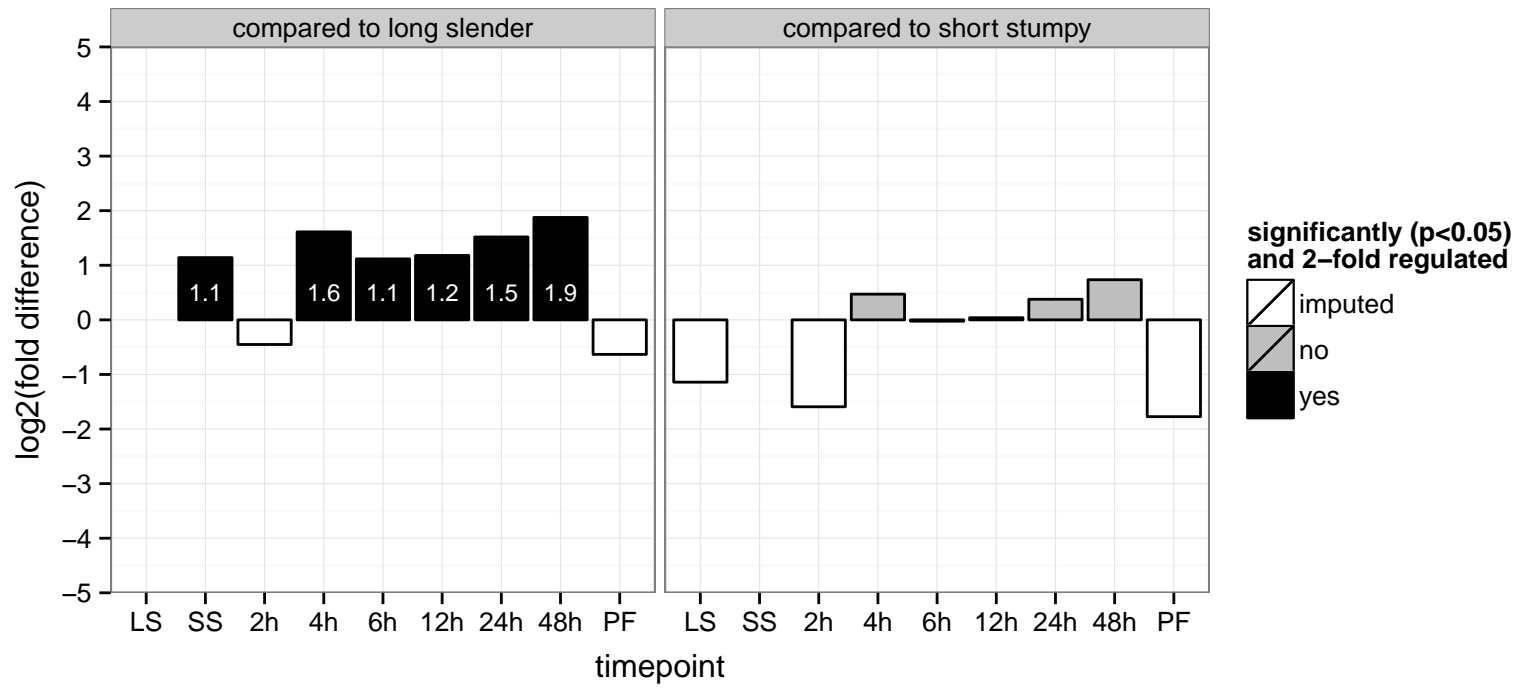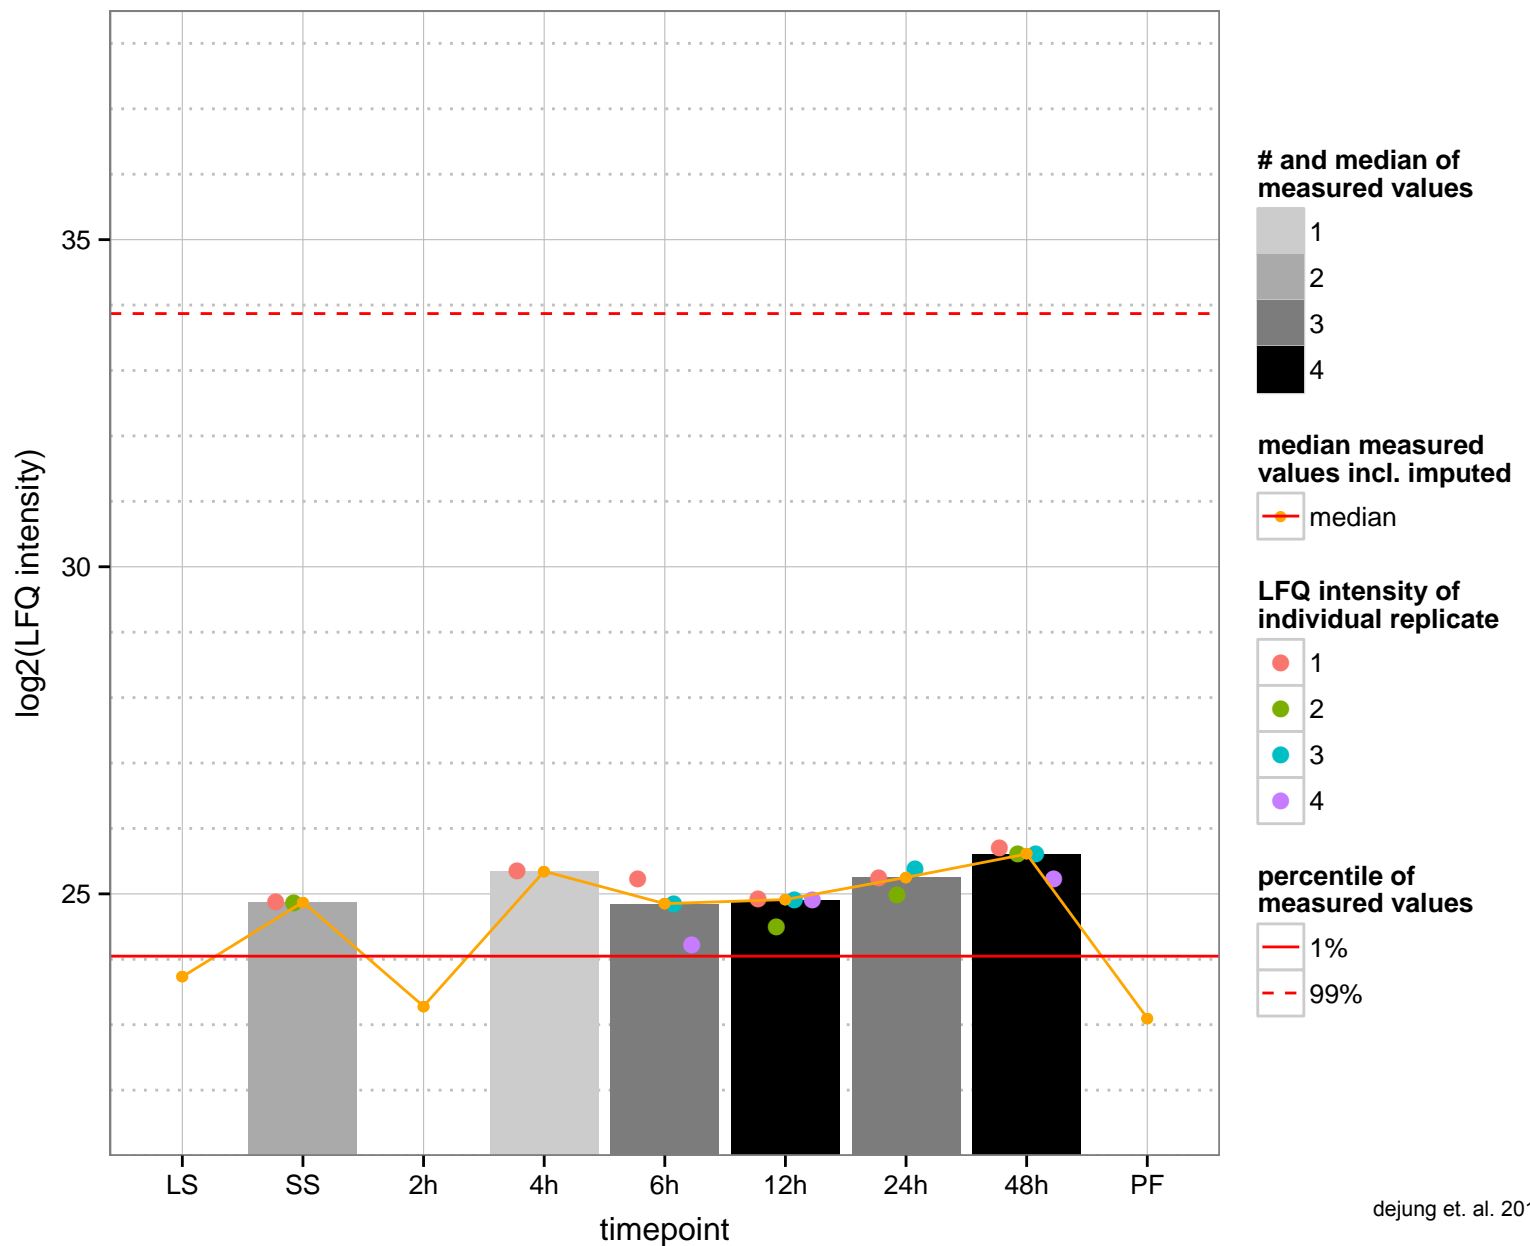

hypothetical protein, conserved  
 Tb927.8.1050  
 AGOF: null  
 AGOC: null  
 AGOP: null  
 PGO: protein binding  
 PGOC: null  
 PGOP: null

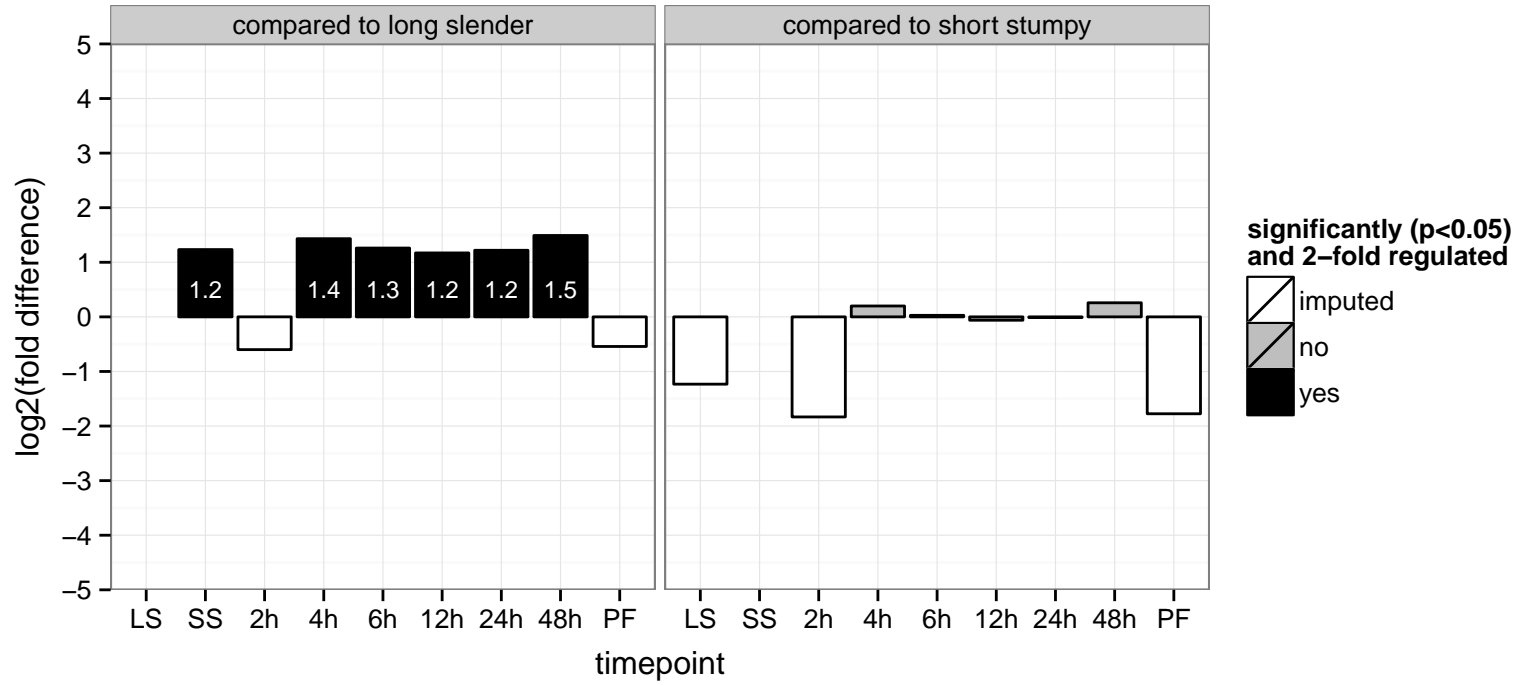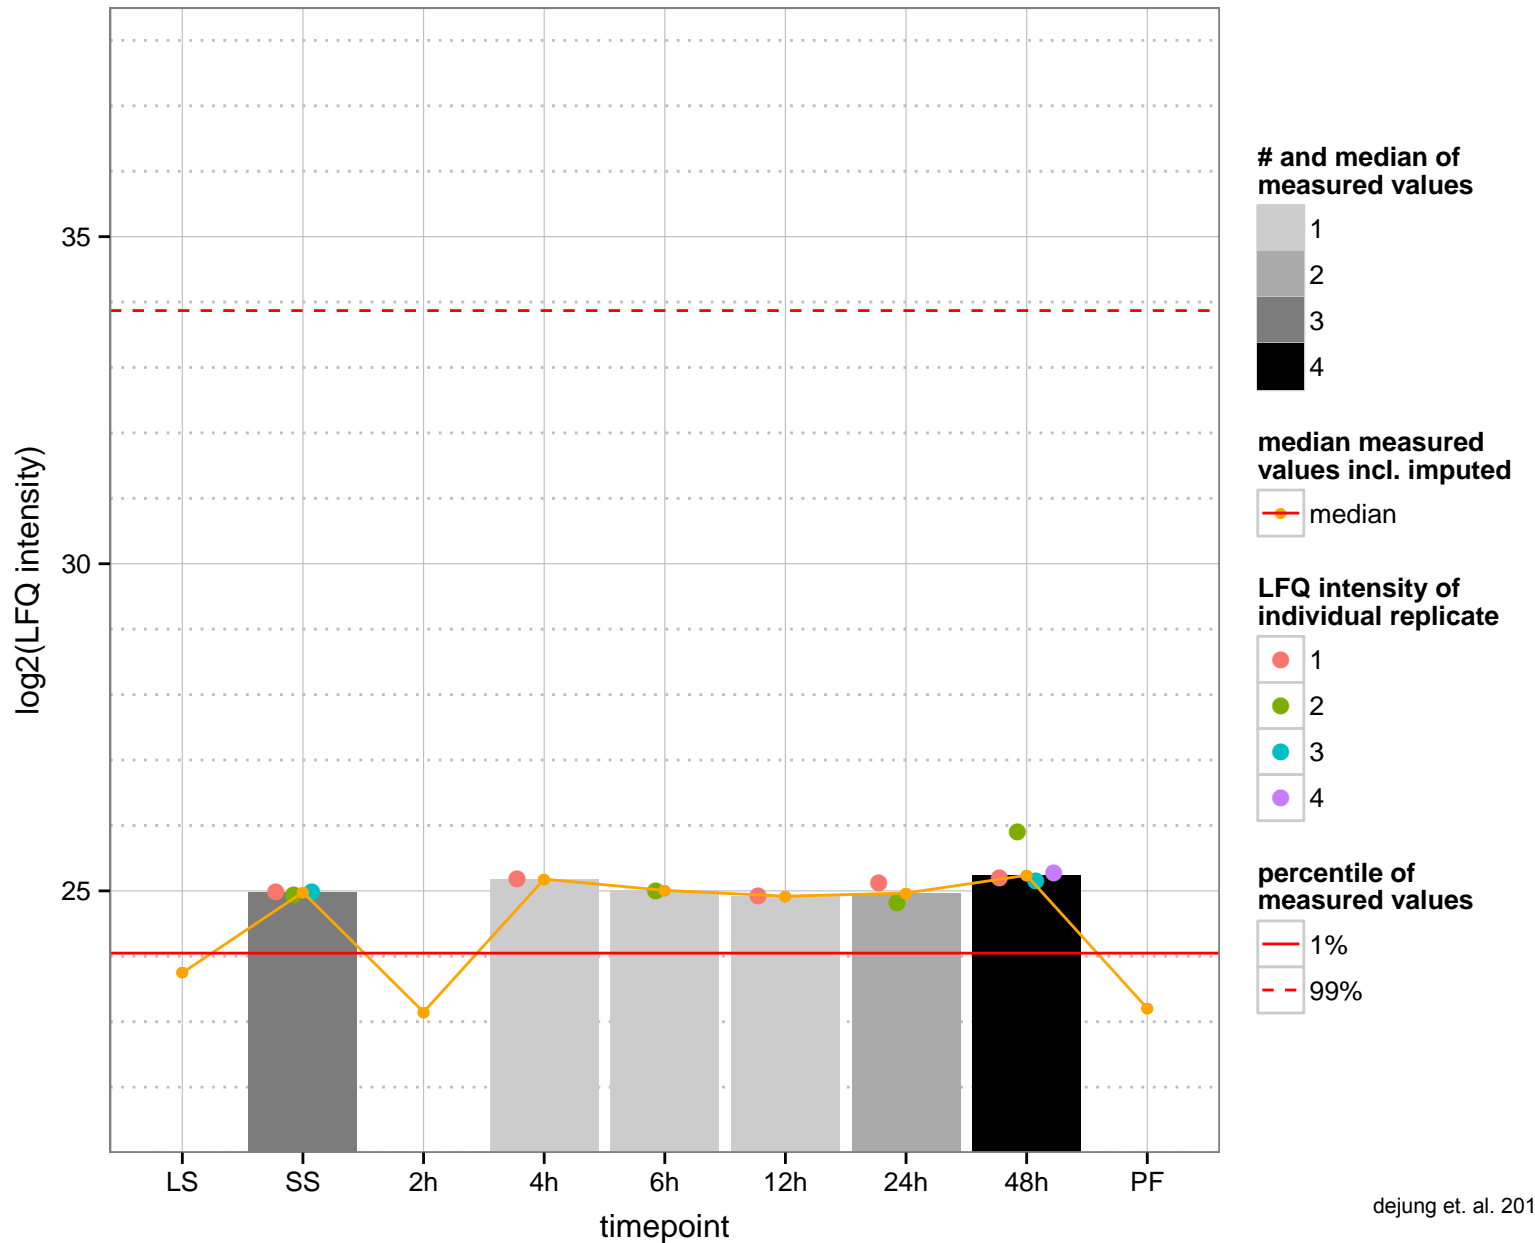

vacuolar-type Ca<sup>2+</sup>-ATPase, putative

Tb927.8.1160

AGOF: ATP binding, calcium-transporting ATPase activity

AGOC: acidocalcisome, integral to membrane, membrane

AGOP: ATP biosynthetic process, calcium ion transport, cell growth, cellular calcium ion homeostasis, metabolic process

PGOF: ATP binding, ATPase activity, coupled to transmembrane movement of ions, phosphorylative mechanism, calcium-transport

PGOC: membrane

PGOP: ATP biosynthetic process, calcium ion transmembrane transport, cation transport, metabolic process

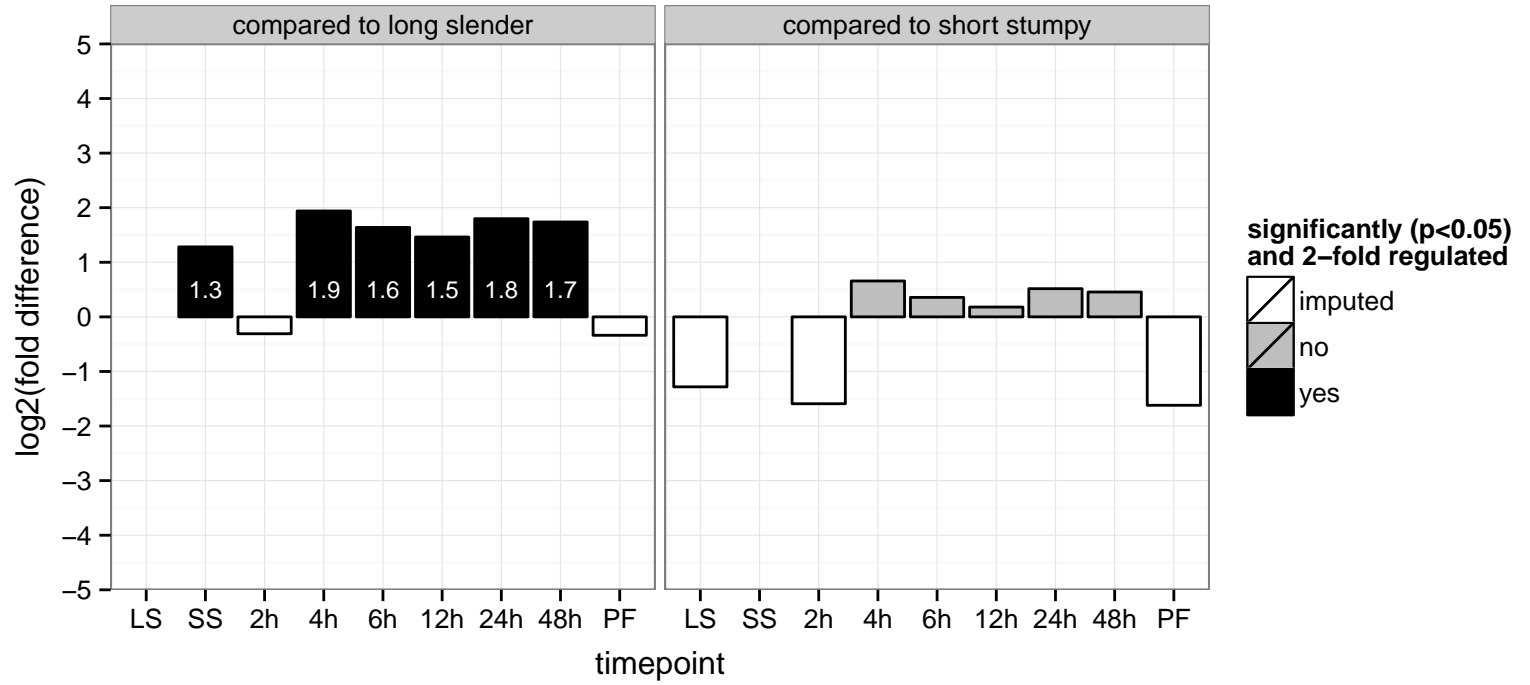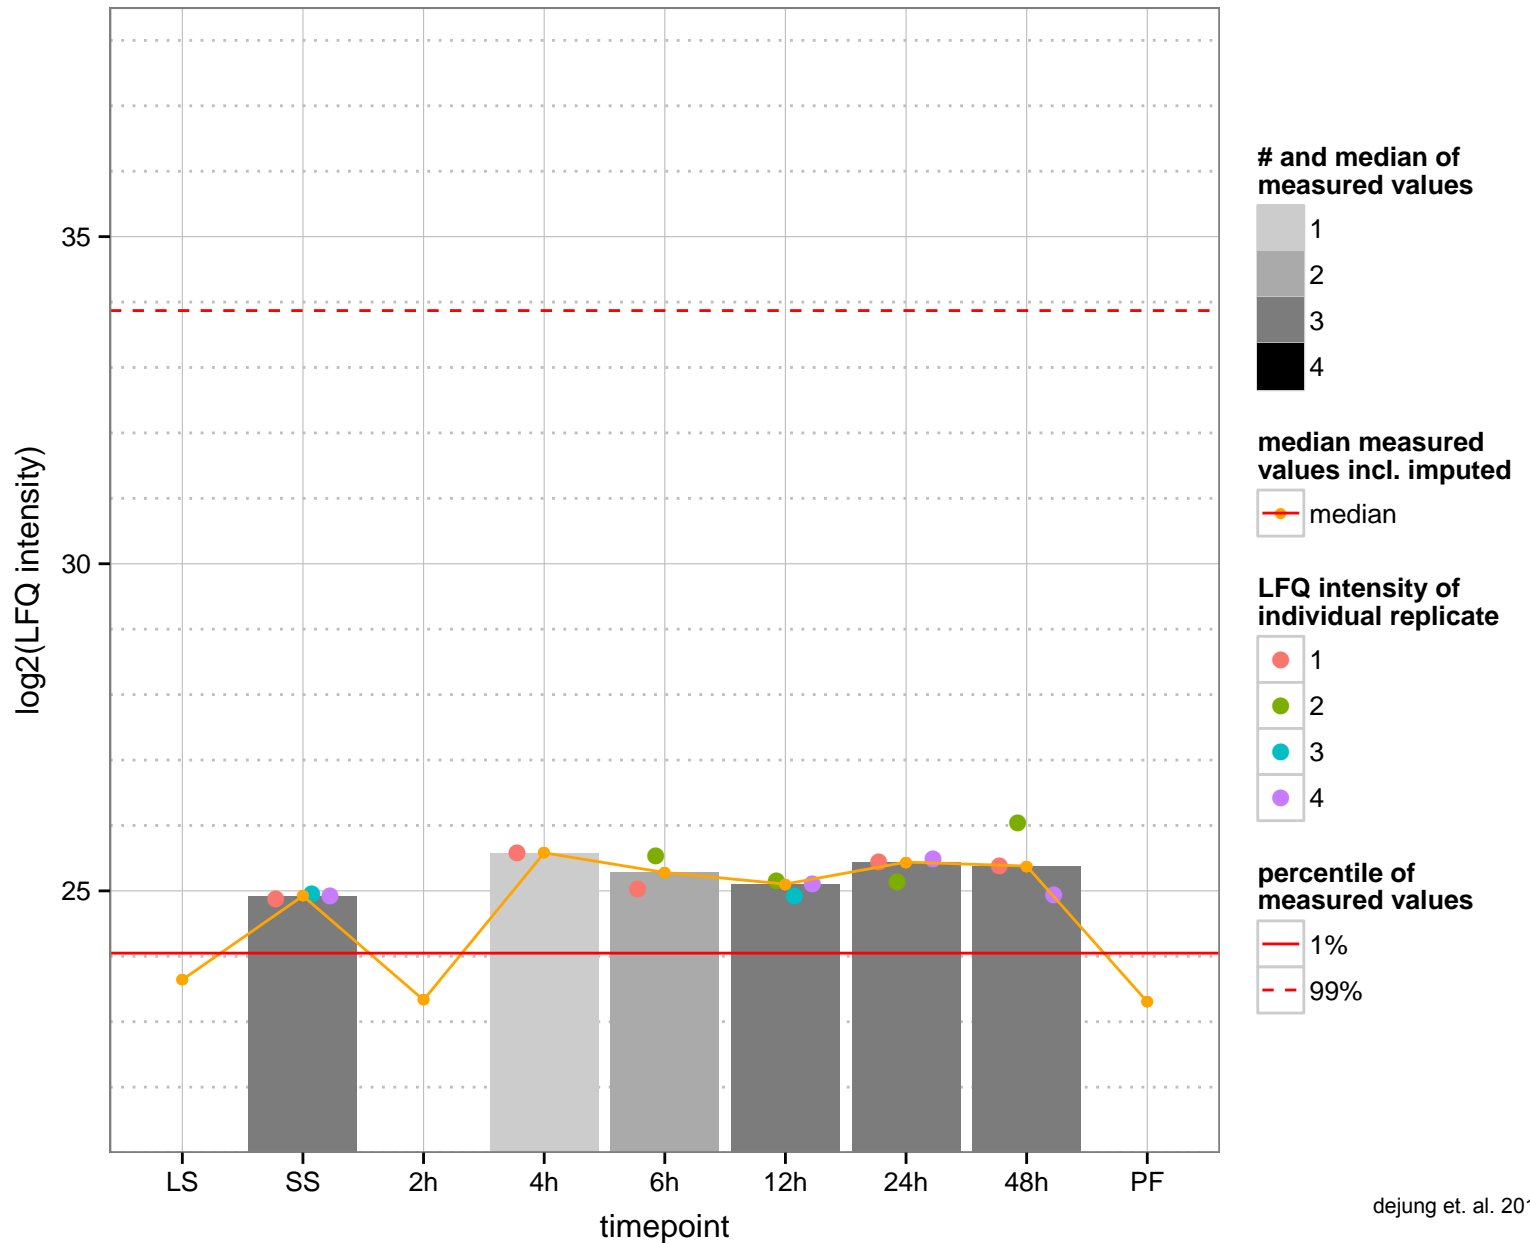

electron transfer flavoprotein–ubiquinone oxidoreductase, putative  
 Tb927.8.1240  
 AGOF: electron–transferring–flavoprotein dehydrogenase activity  
 AGOC: mitochondrion  
 AGOP: oxidation–reduction process  
 PGOF: electron–transferring–flavoprotein dehydrogenase activity, iron–sulfur cluster binding  
 PGO: null  
 PGO: oxidation–reduction process

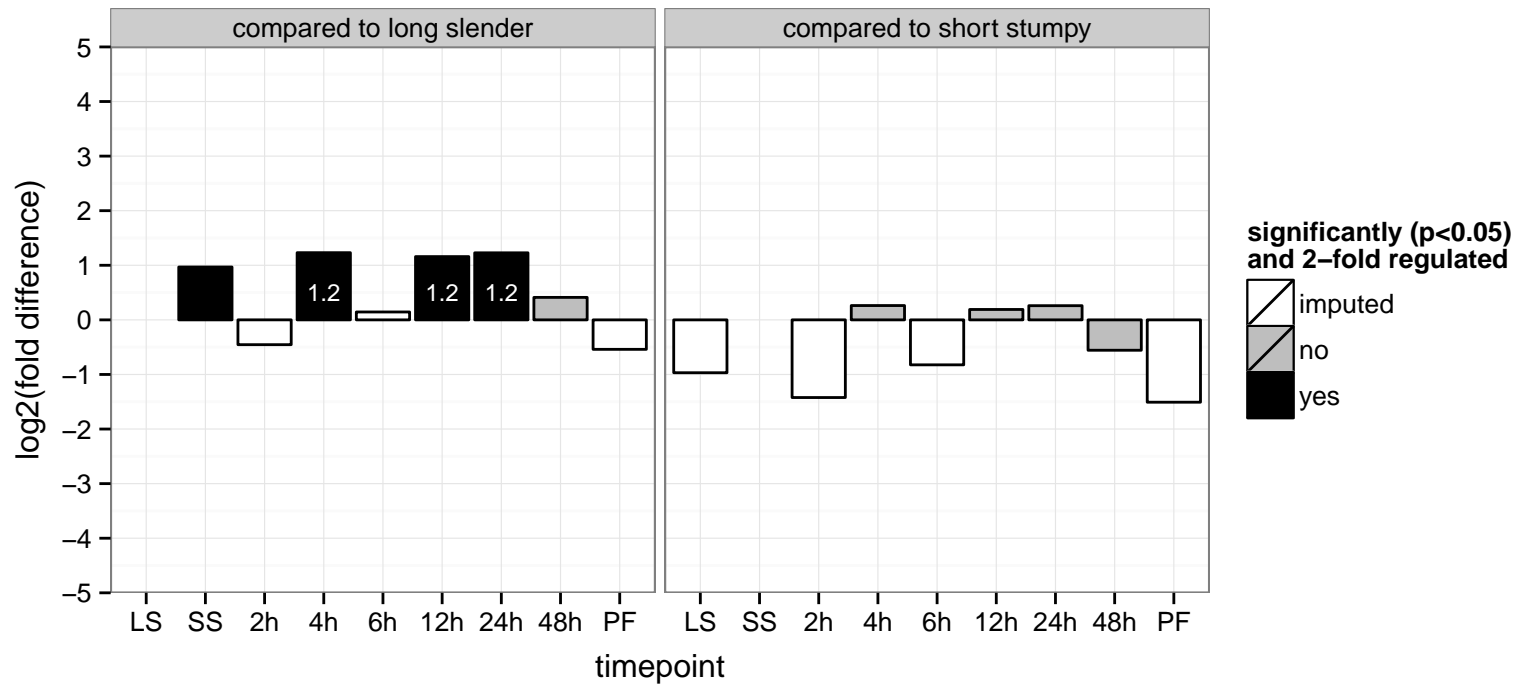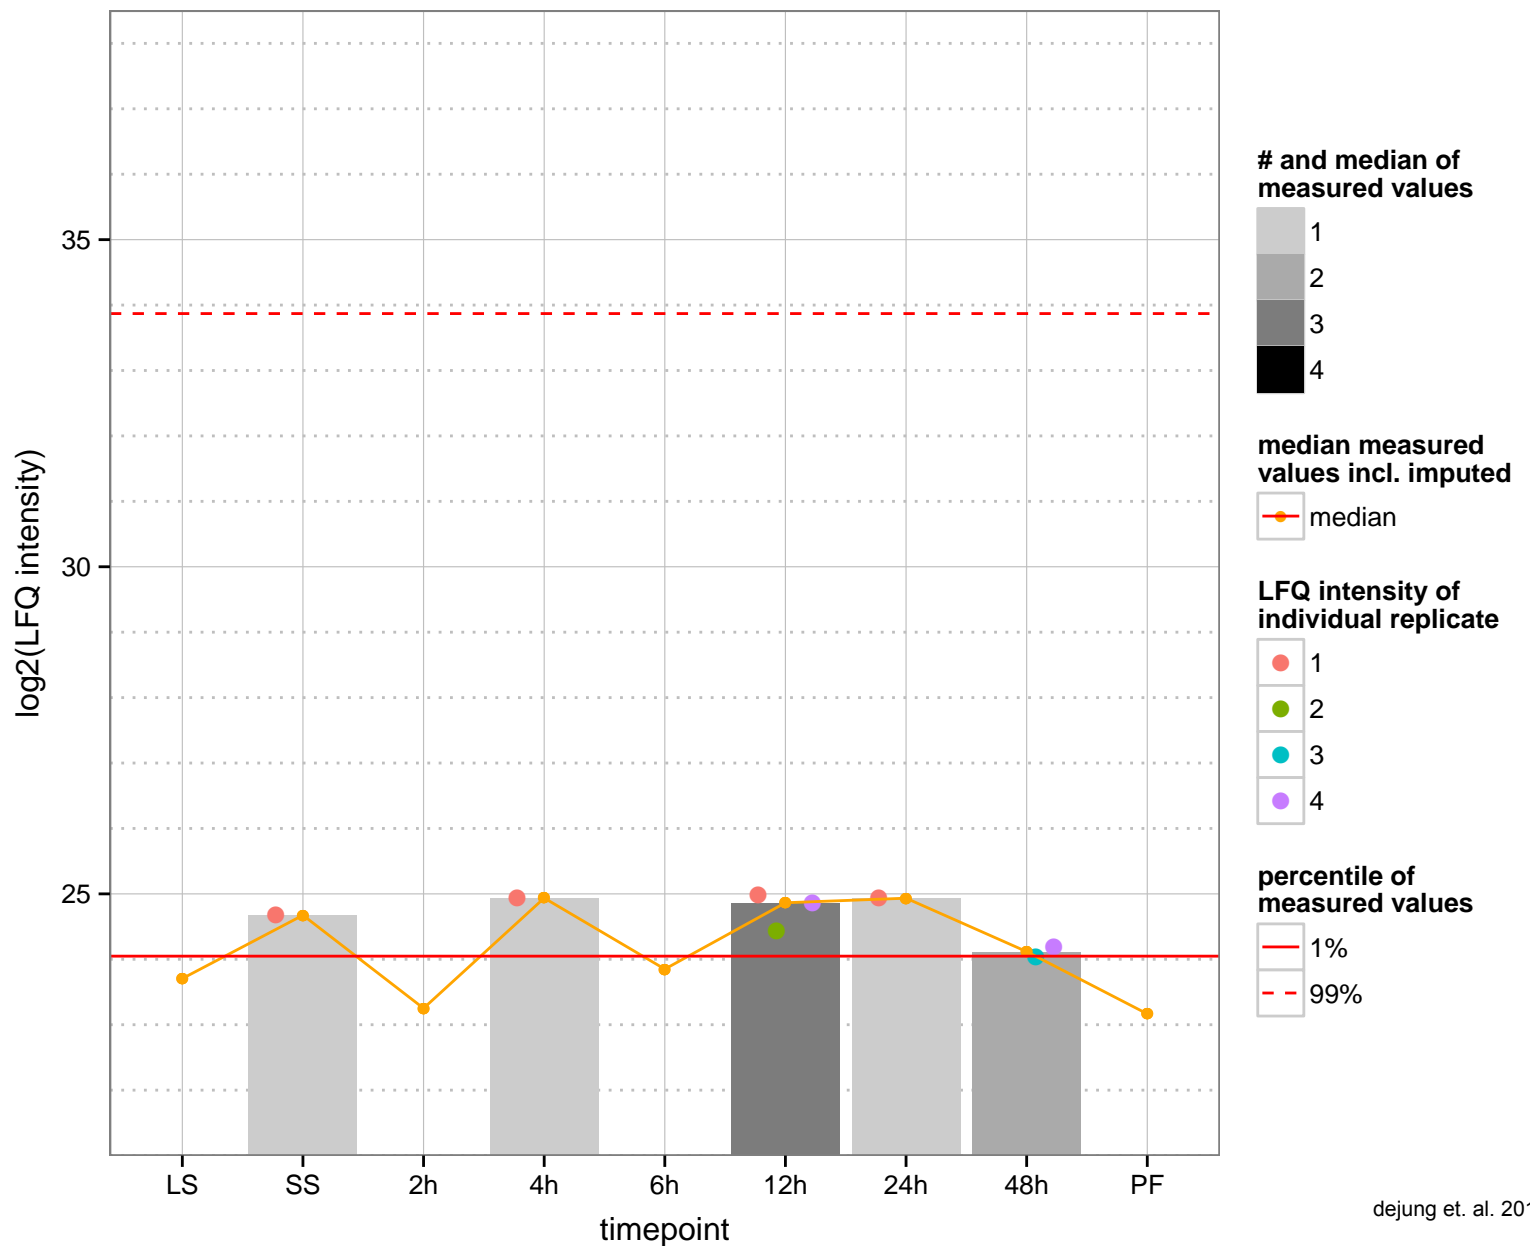

phosphatidylinositol 3-kinase, putative, PI3-kinase, putative (PI3K)

Tb927.8.6210

AGOF: 1-phosphatidylinositol-3-kinase activity, phosphotransferase activity, alcohol group as acceptor

AGOC: phosphatidylinositol 3-kinase complex

AGOP: phosphatidylinositol phosphorylation, phosphatidylinositol-mediated signaling

PGOF: binding, phosphotransferase activity, alcohol group as acceptor, protein binding, transferase activity, transferring phospho

PGOC: null

PGOP: null

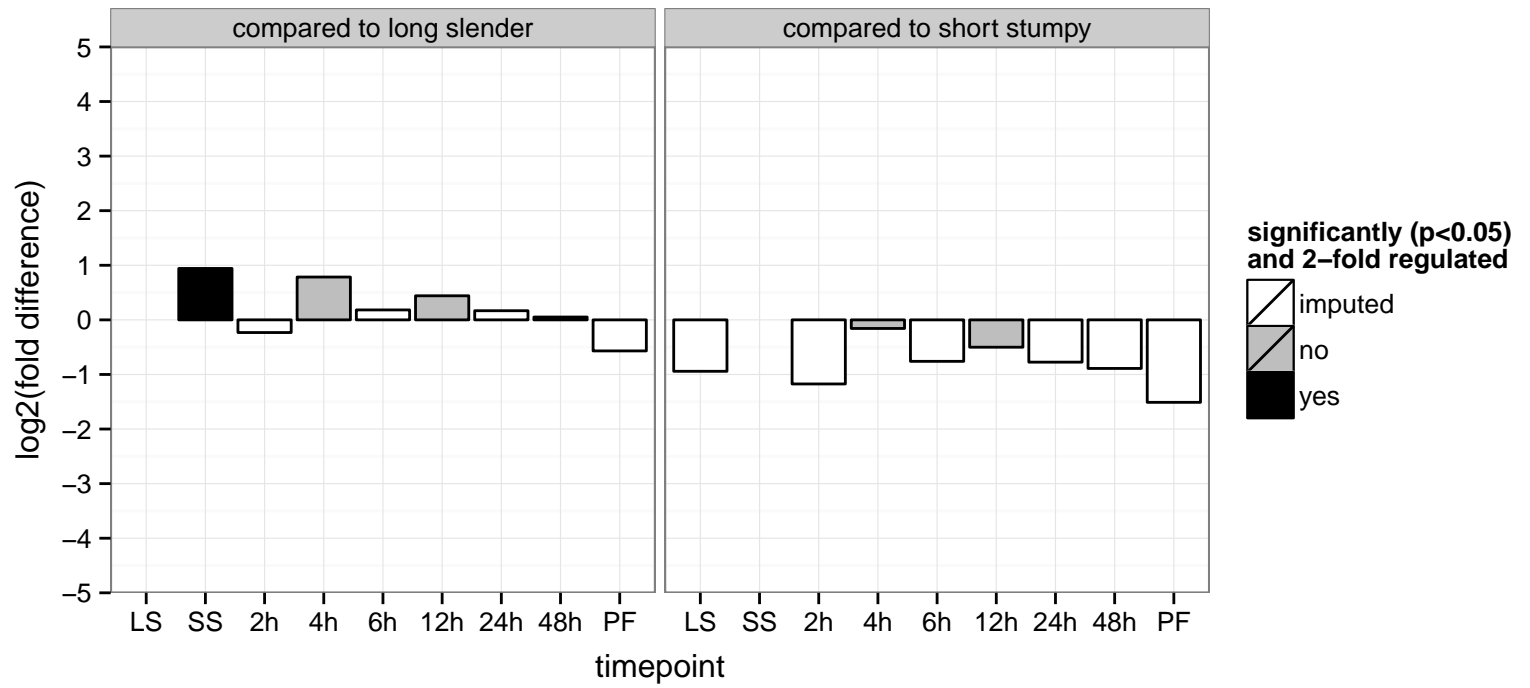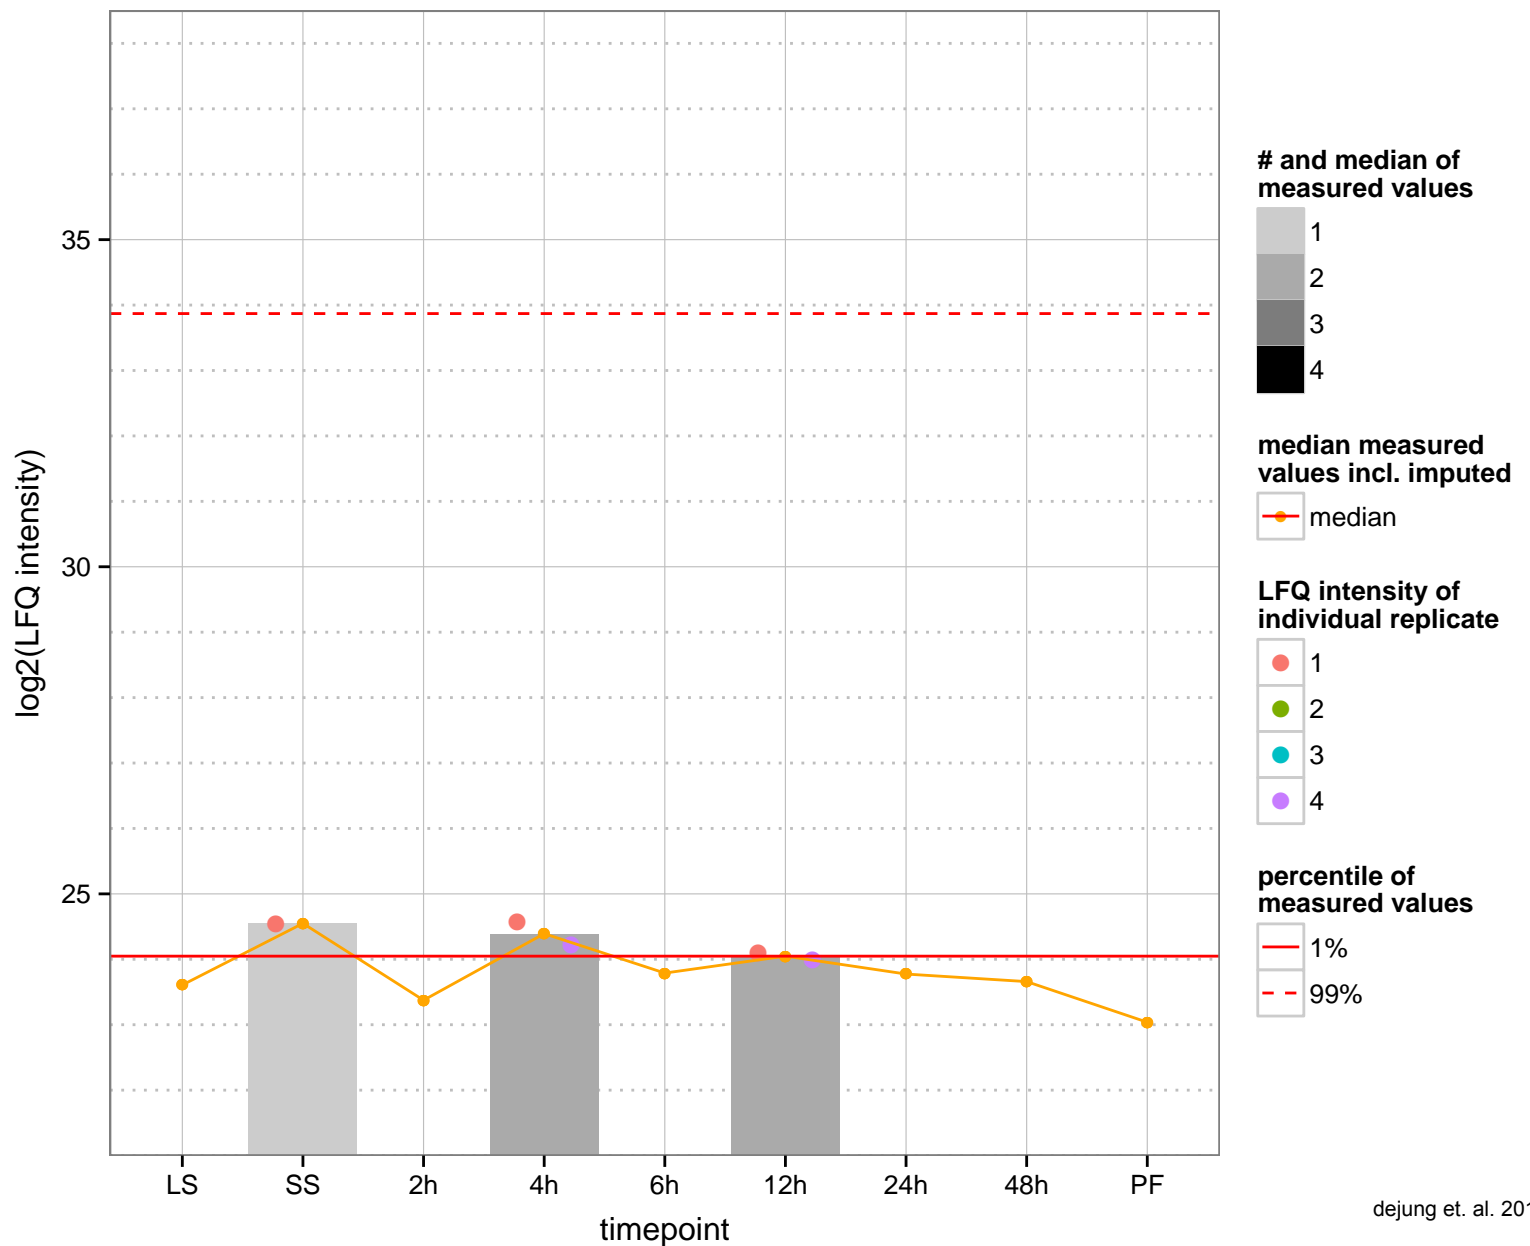

hypothetical protein, conserved  
 Tb927.9.13060  
 AGOF: voltage-gated potassium channel activity  
 AGOC: membrane, voltage-gated potassium channel complex  
 AGOP: potassium ion transport  
 PGO: protein binding  
 PGO: null  
 PGO: protein homooligomerization

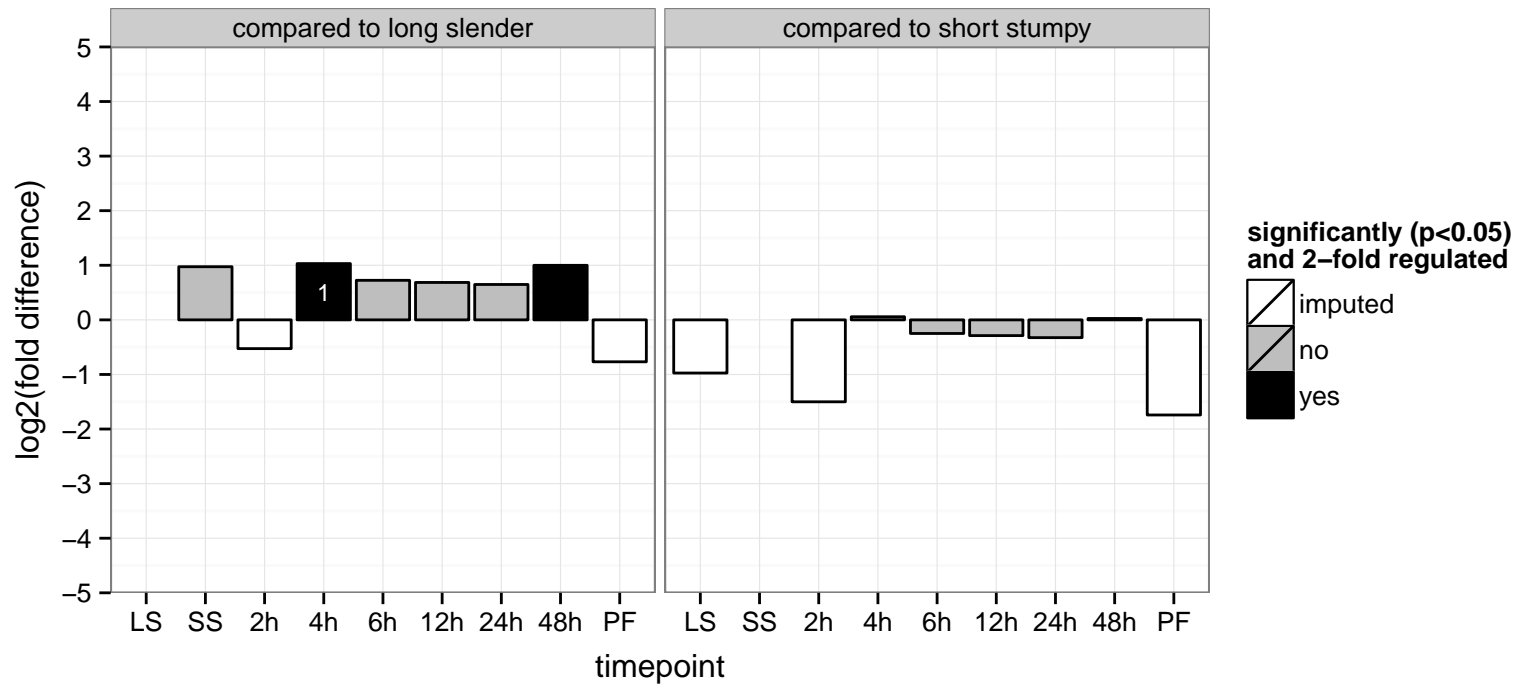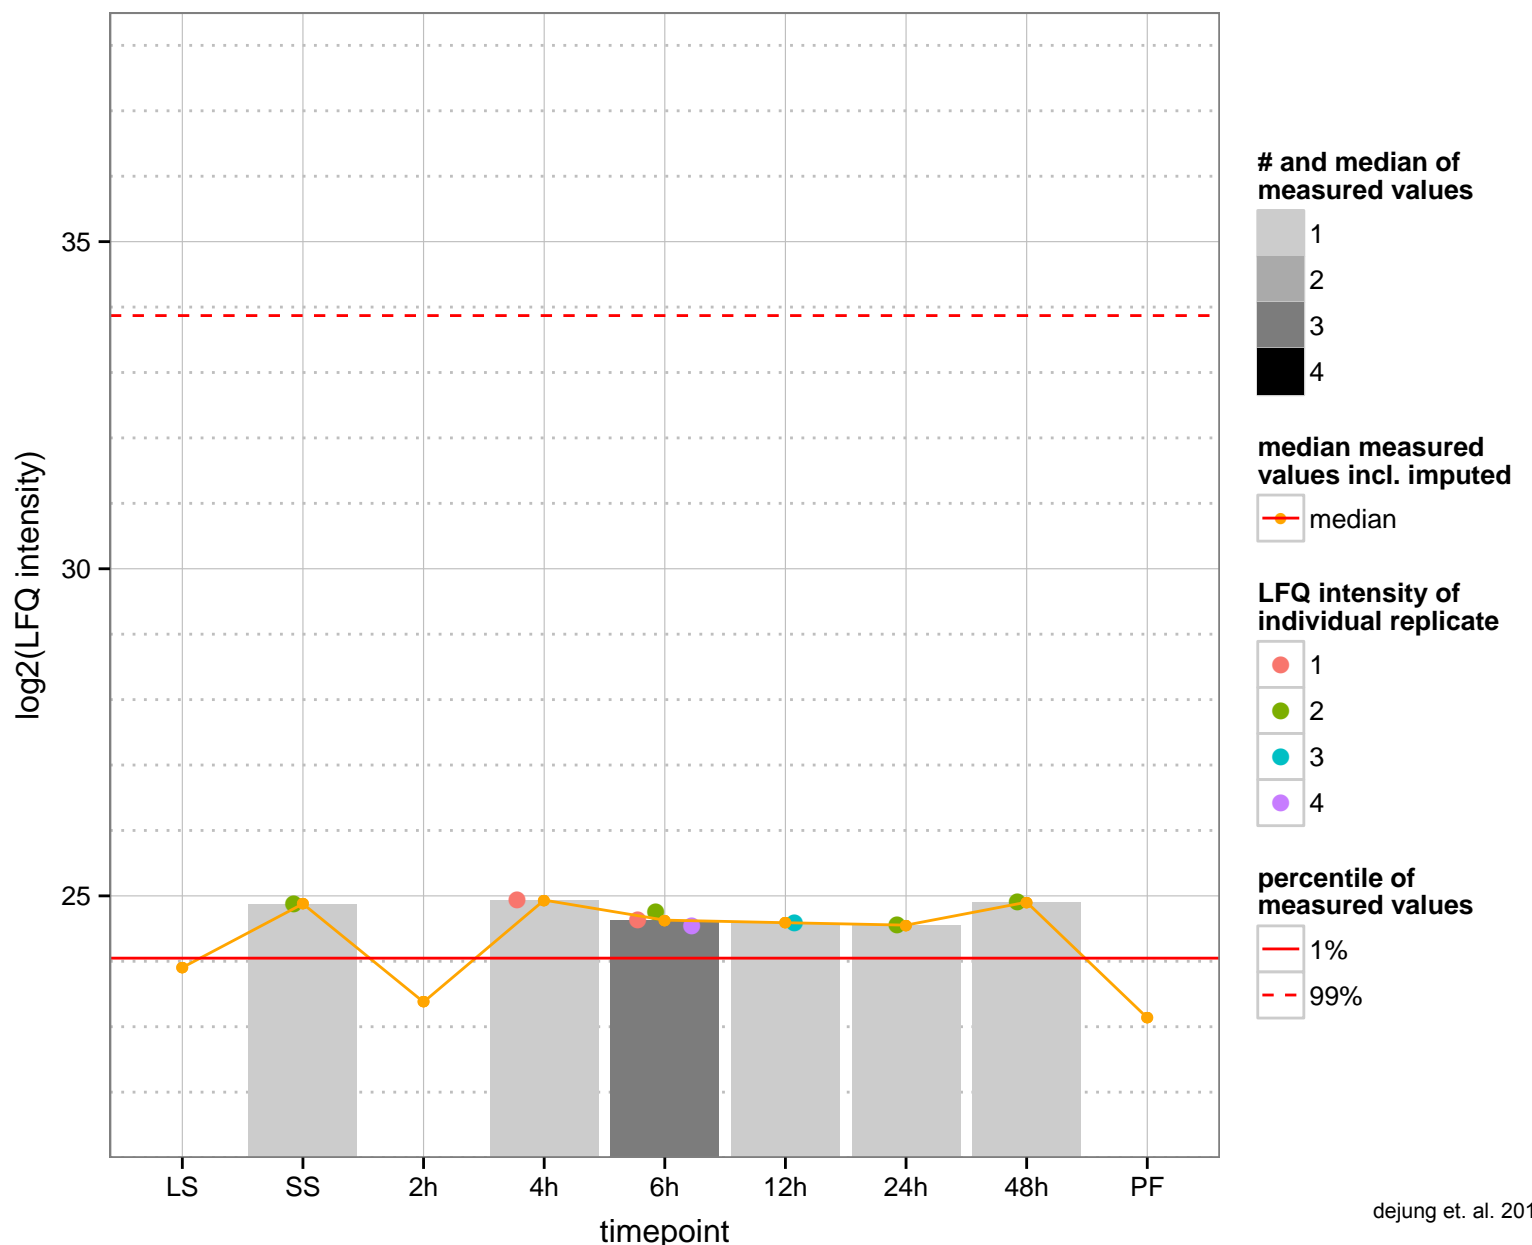

hypothetical protein, conserved  
 Tb927.9.9420  
 AGOF: null  
 AGOC: null  
 AGOP: null  
 PGO: null  
 PGOC: null  
 PGOP: null

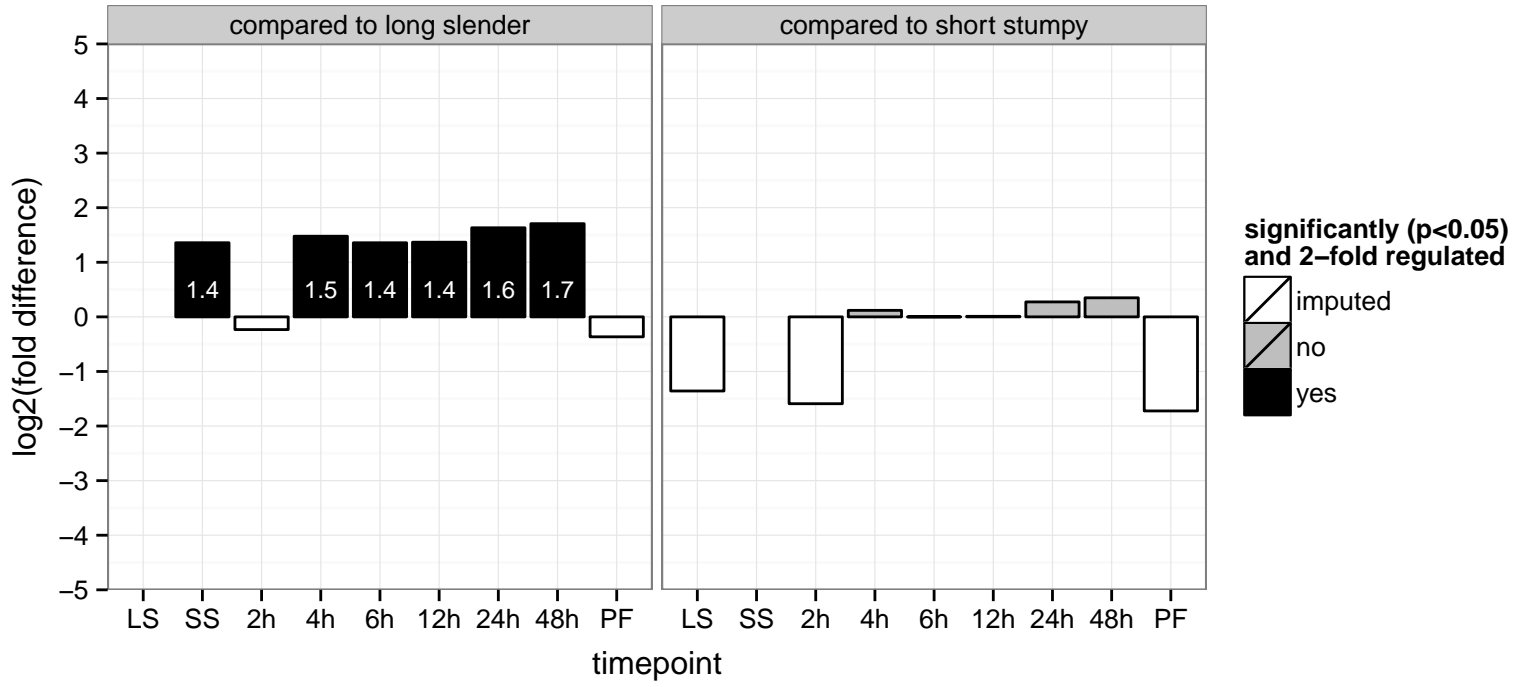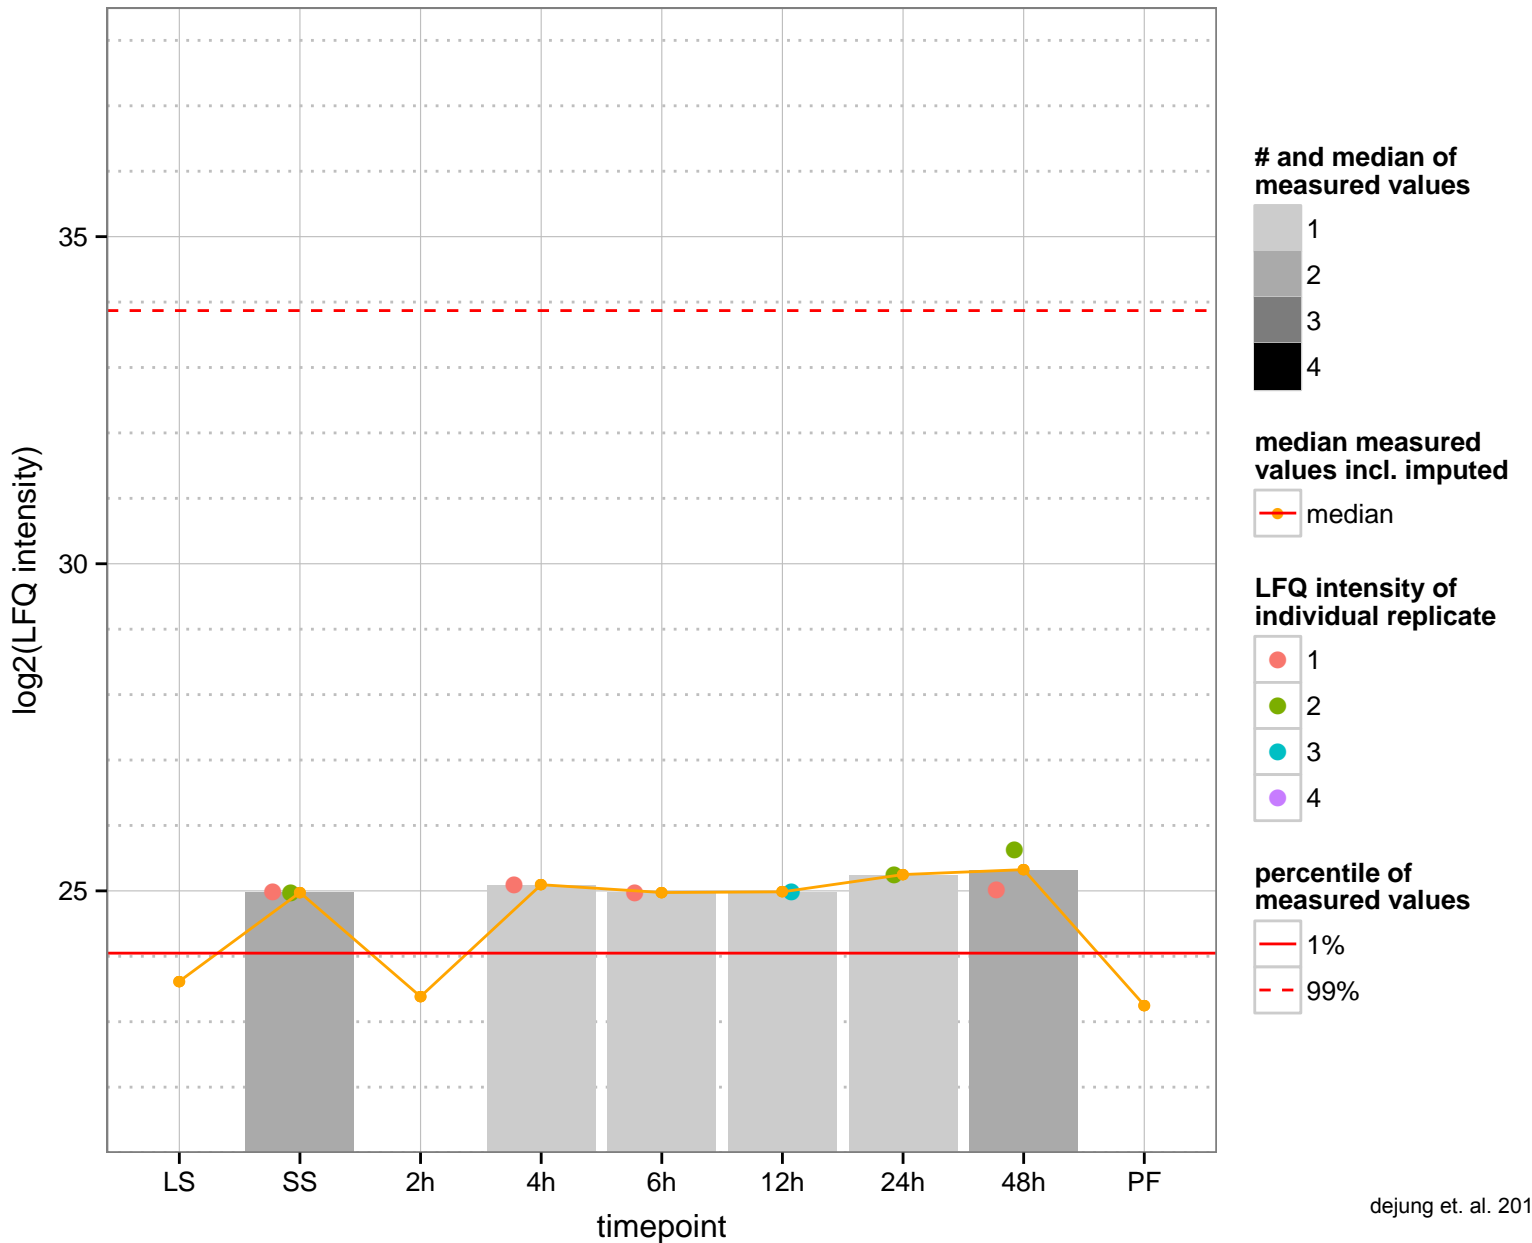

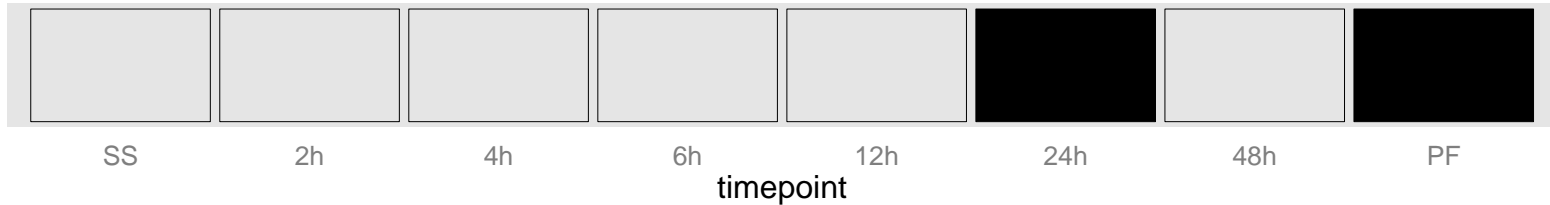

**regulated**  not regulated  significant down  significant up



dynein light chain LC8, putative, chrXI additional, unordered contigs (DYNLL2), putative (DYNLL1)  
 Tb927.11.18680;Tb11.0845  
 AGOF: microtubule motor activity  
 AGOC: microtubule associated complex  
 AGOP: microtubule-based process  
 PGO: null  
 PGOC: microtubule associated complex  
 PGOP: microtubule-based process

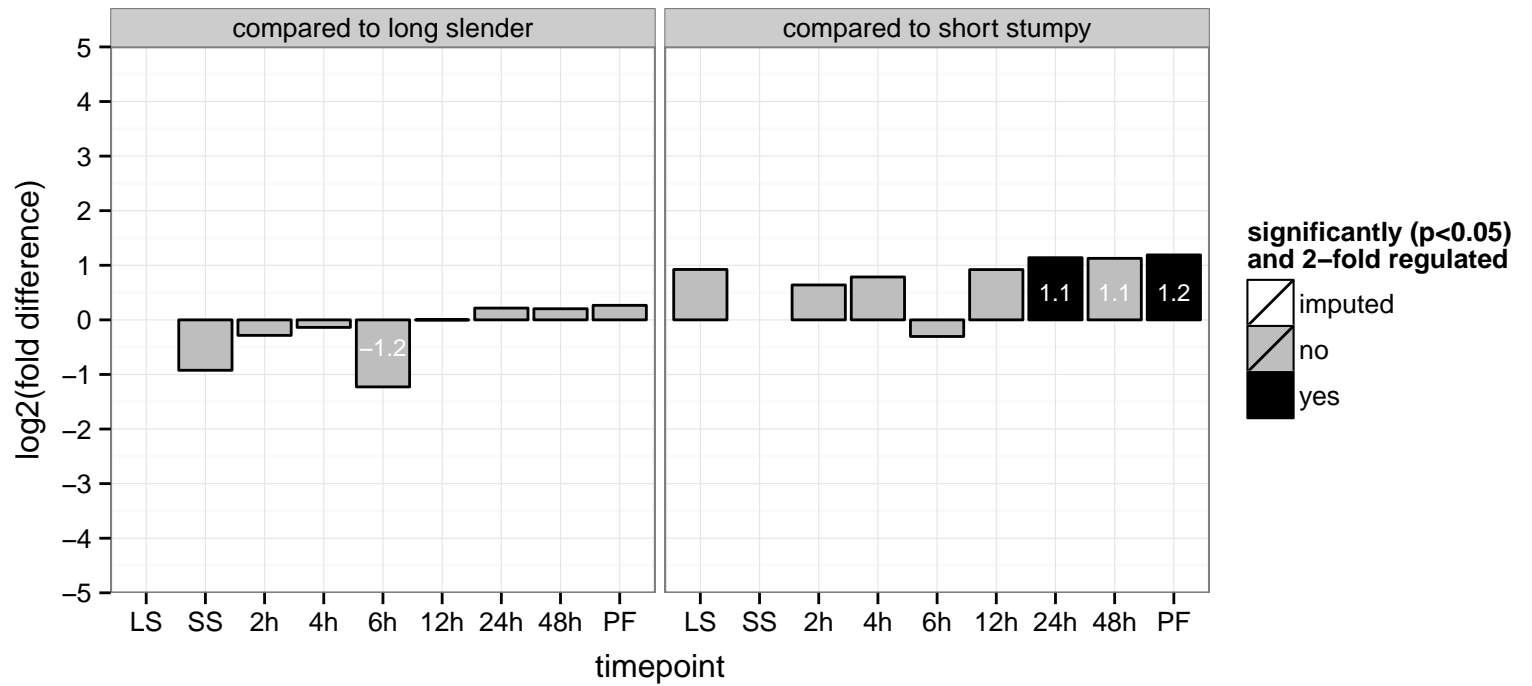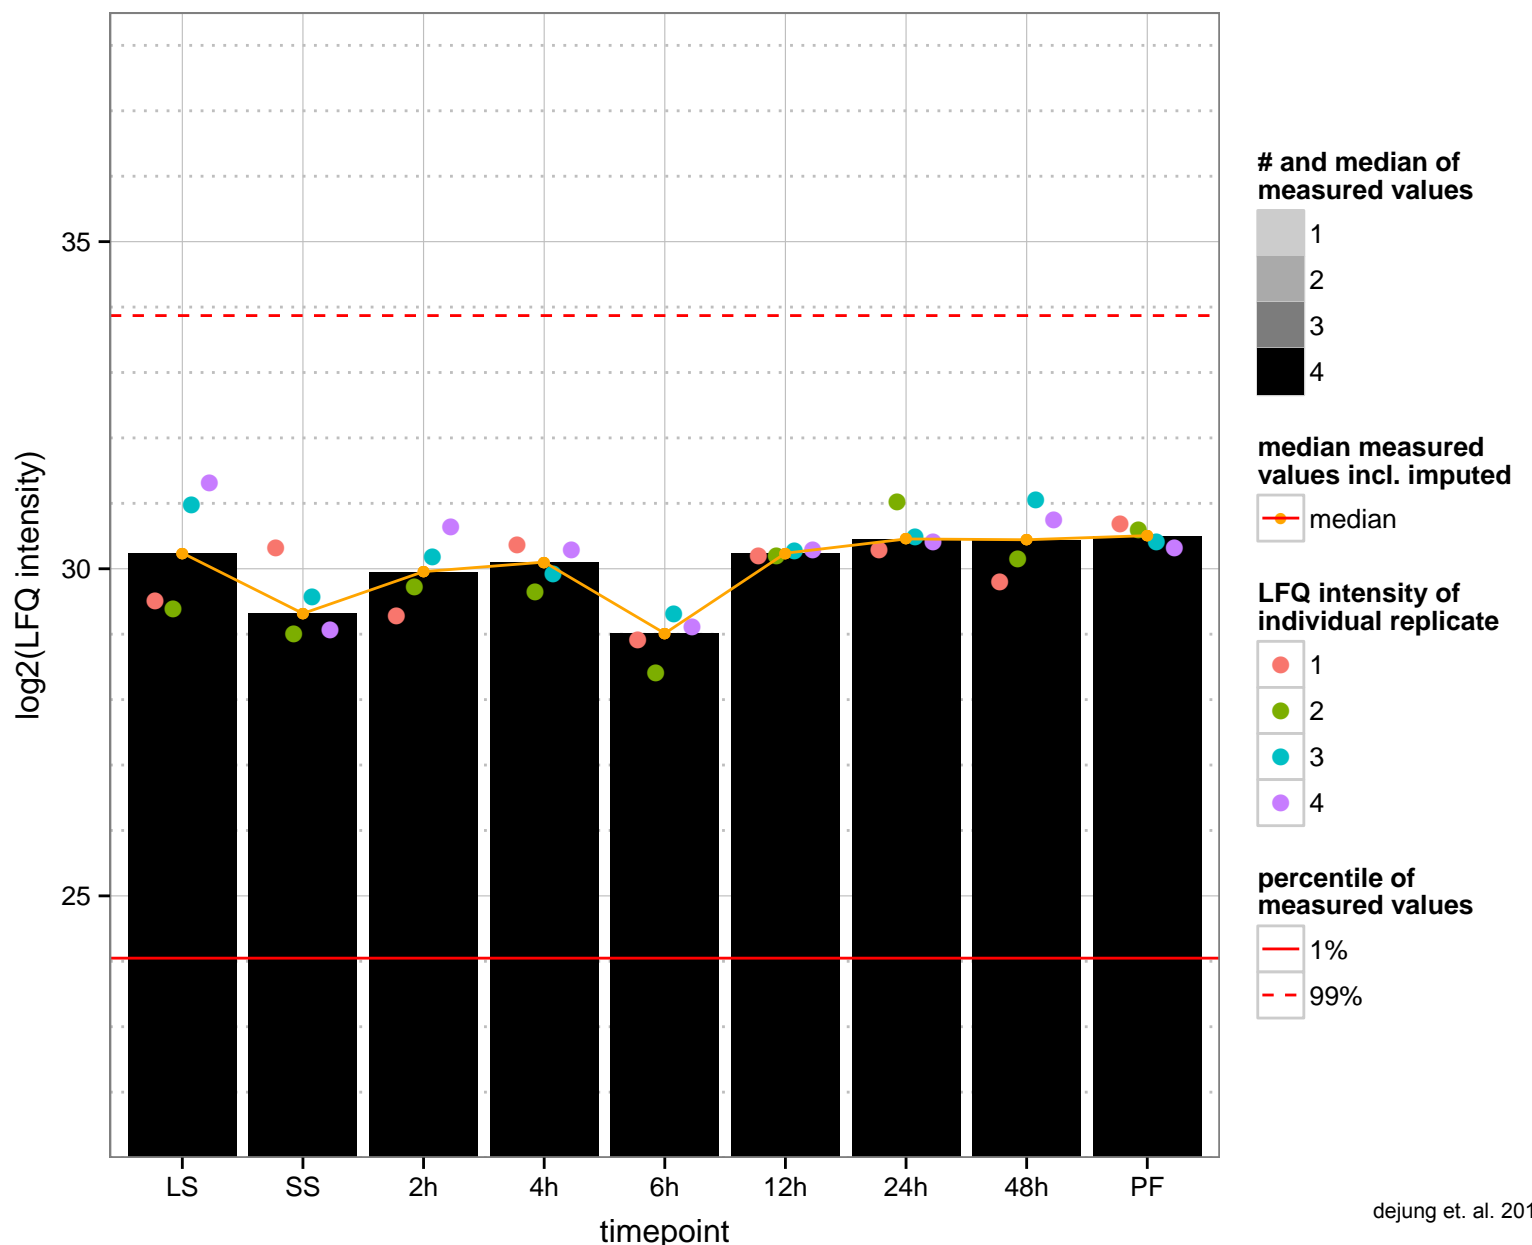

60S ribosomal protein L7, putative  
 Tb927.10.13730  
 AGOF: structural constituent of ribosome  
 AGOC: ribosome  
 AGOP: translation  
 PGO: null  
 PGOC: null  
 PGOP: null

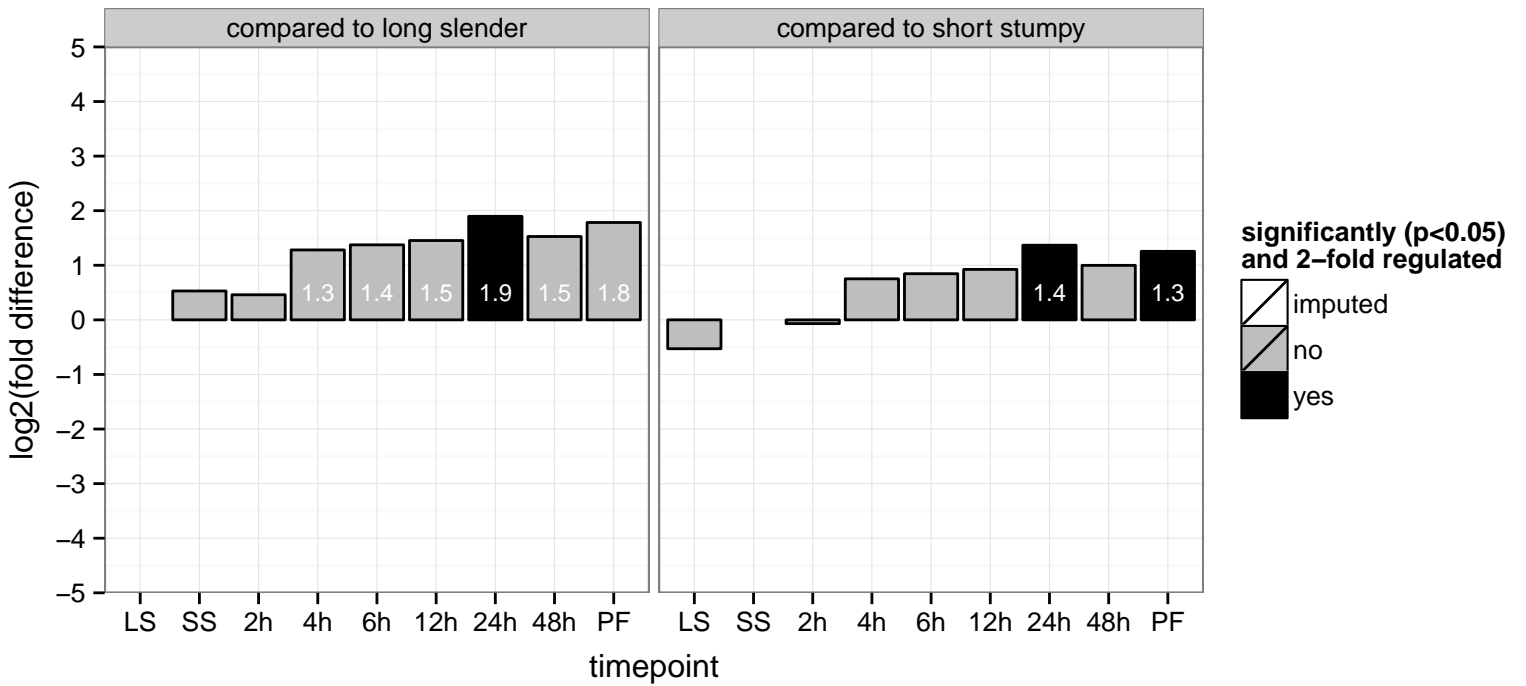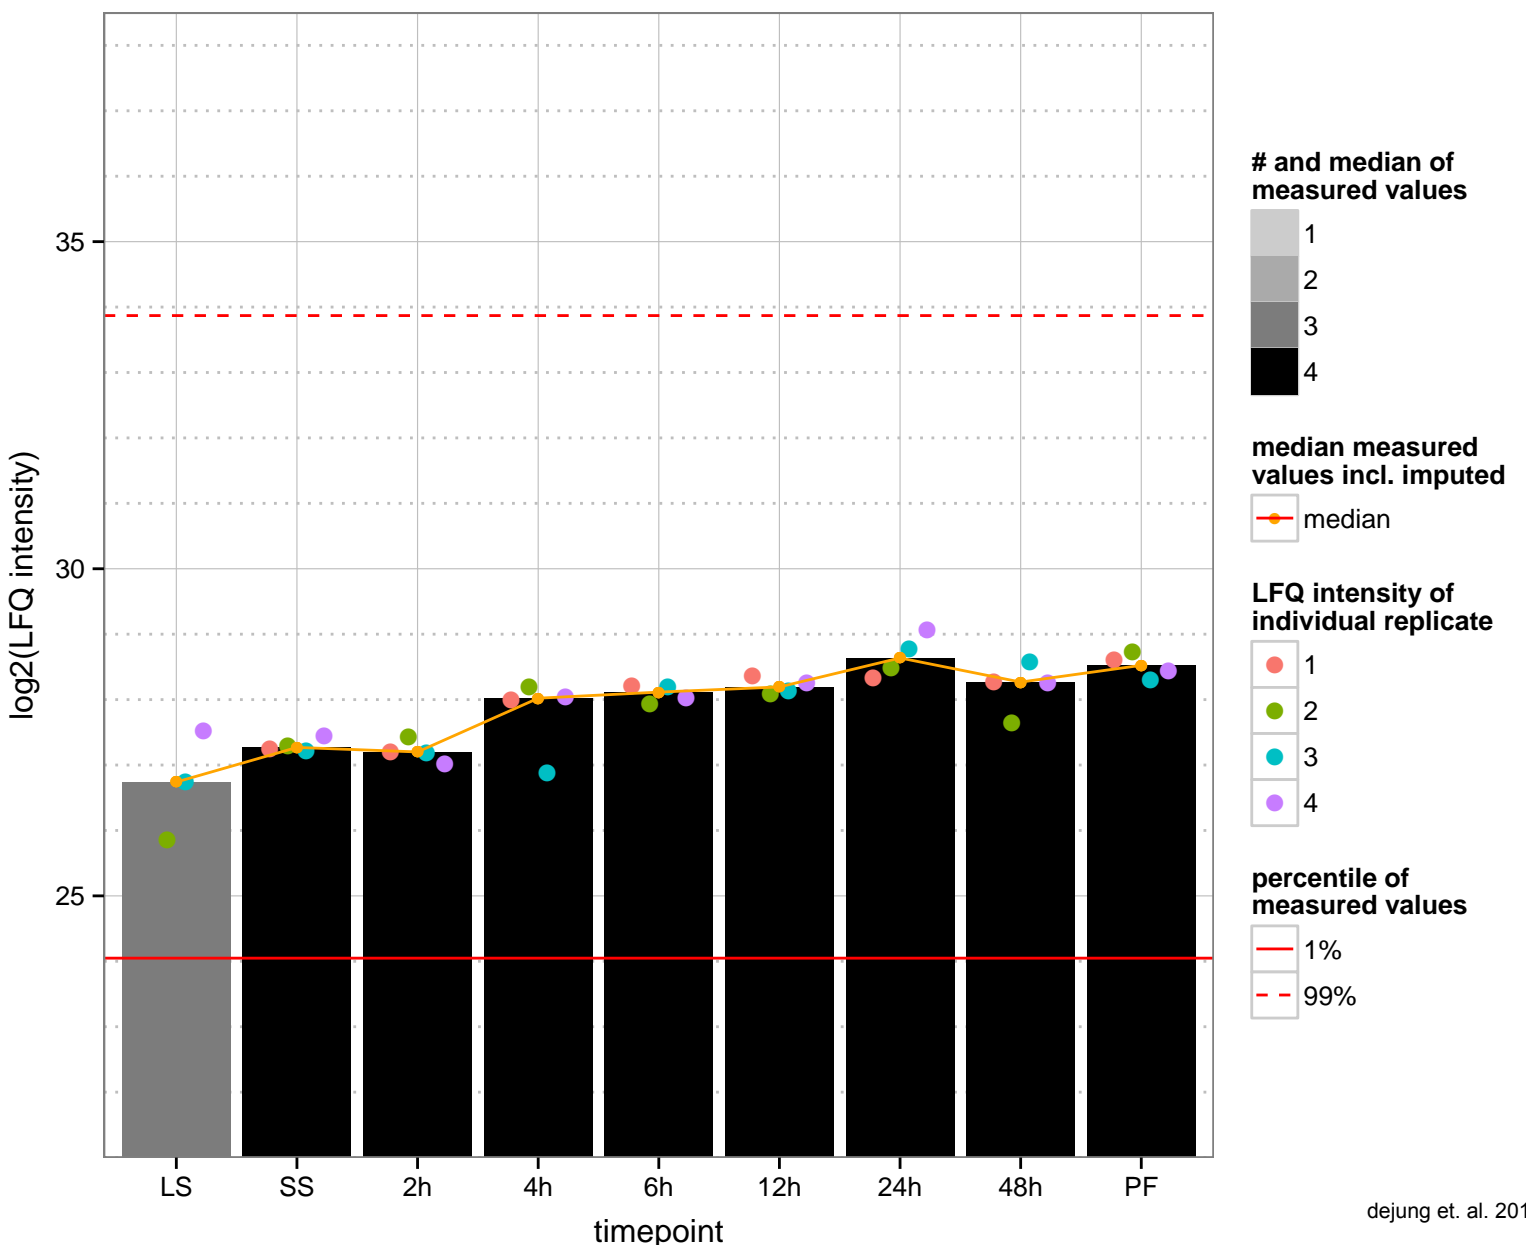

cell division related protein kinase 2, putative, CDC2-related protein kinase (CRK3)

Tb927.10.4990

AGOF: ATP binding, protein binding, protein serine/threonine kinase activity, protein tyrosine kinase activity

AGOC: mitochondrion

AGOP: cell cycle, protein phosphorylation

PGOF: ATP binding, protein kinase activity, transferase activity, transferring phosphorus-containing groups

PGOC: null

PGOP: protein phosphorylation

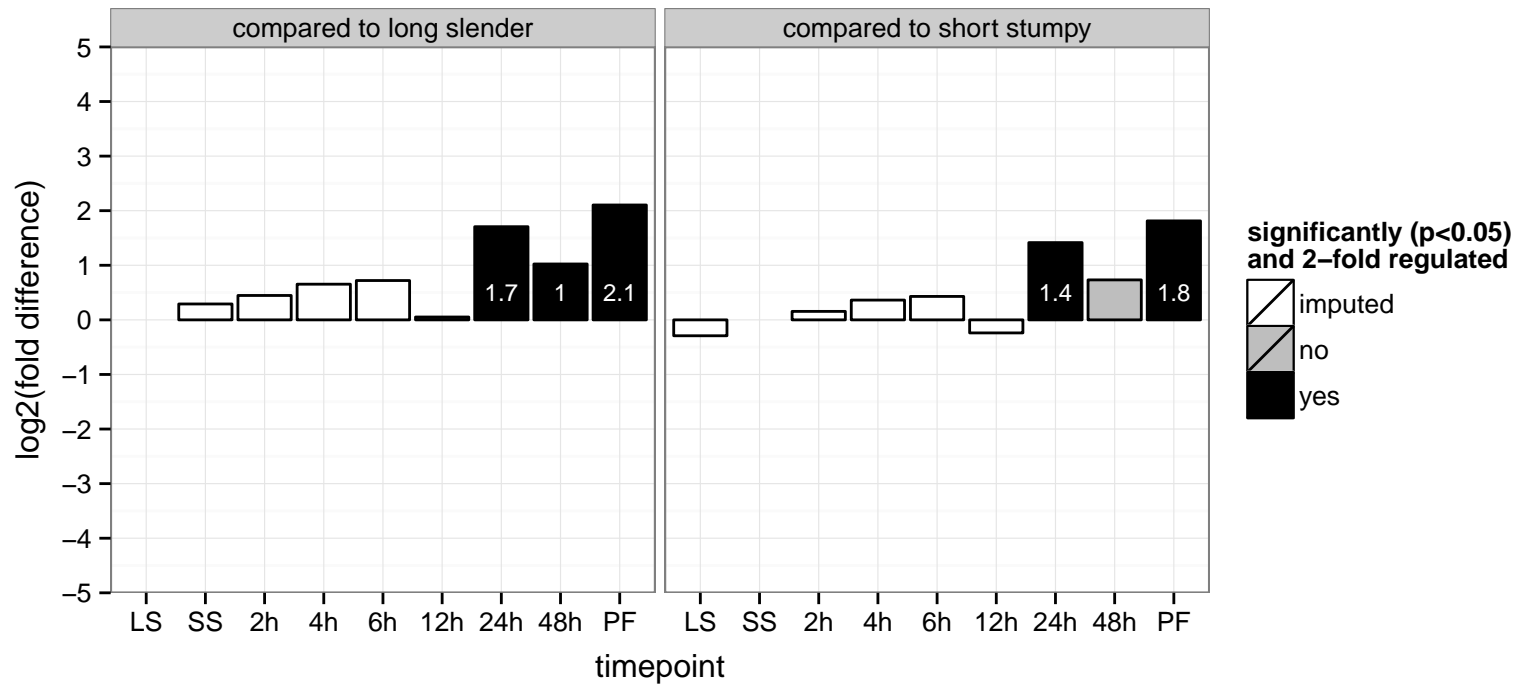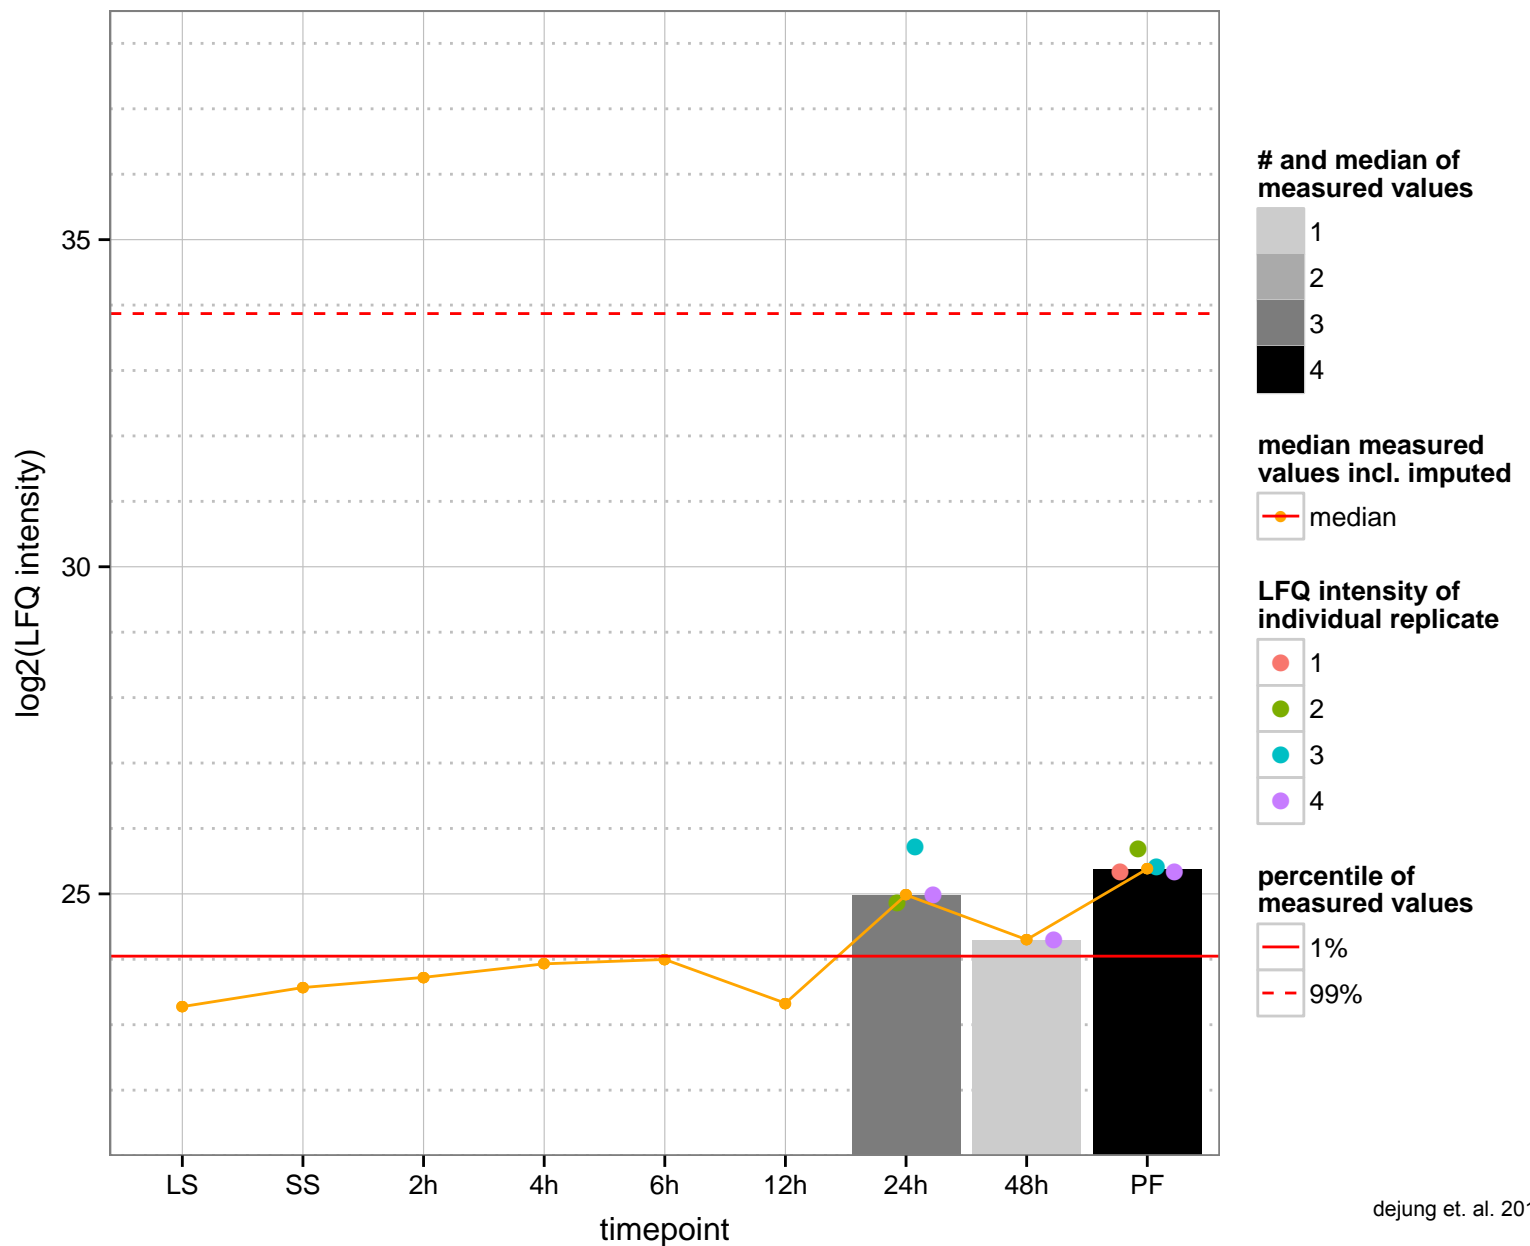

hypothetical protein, conserved  
 Tb927.10.7010;Tb11.v5.0806  
 AGOF: null  
 AGOC: null  
 AGOP: null  
 PGO: null  
 PGOC: null  
 PGOP: null

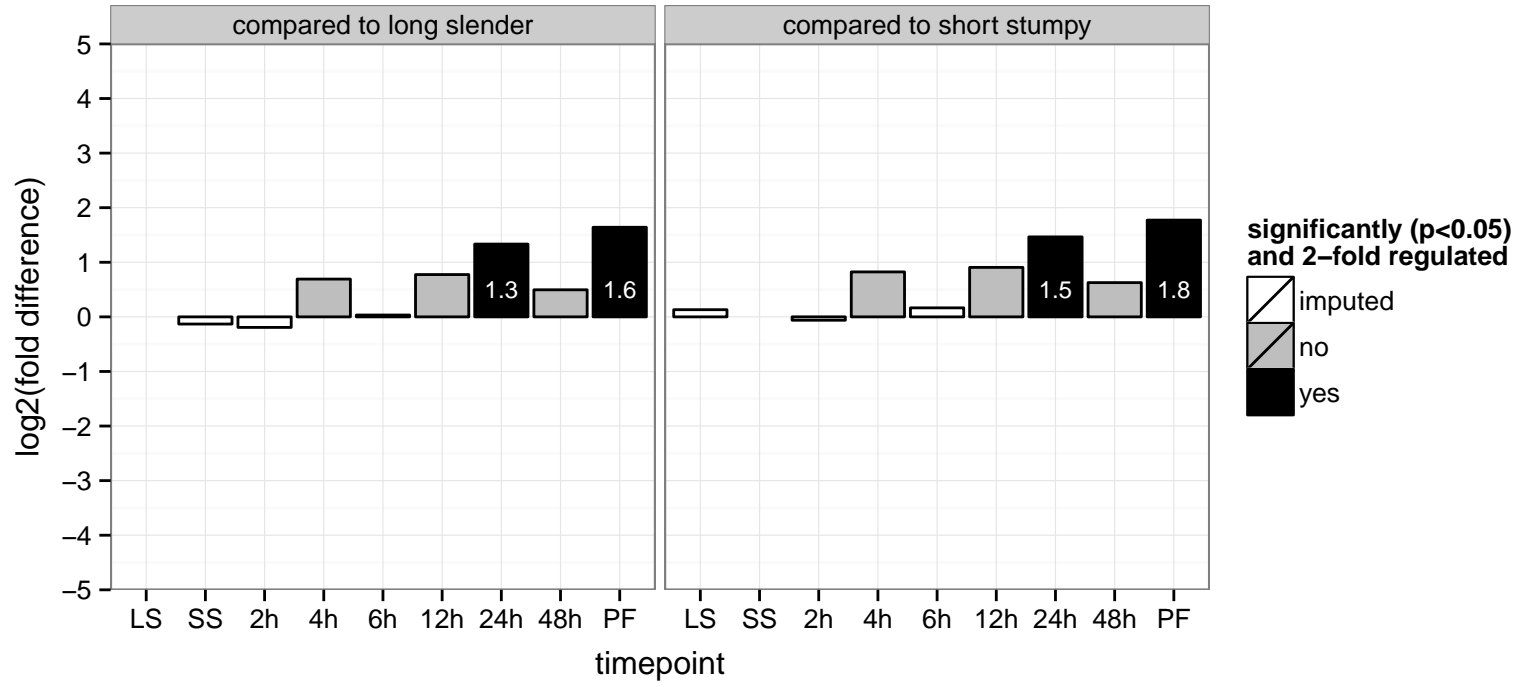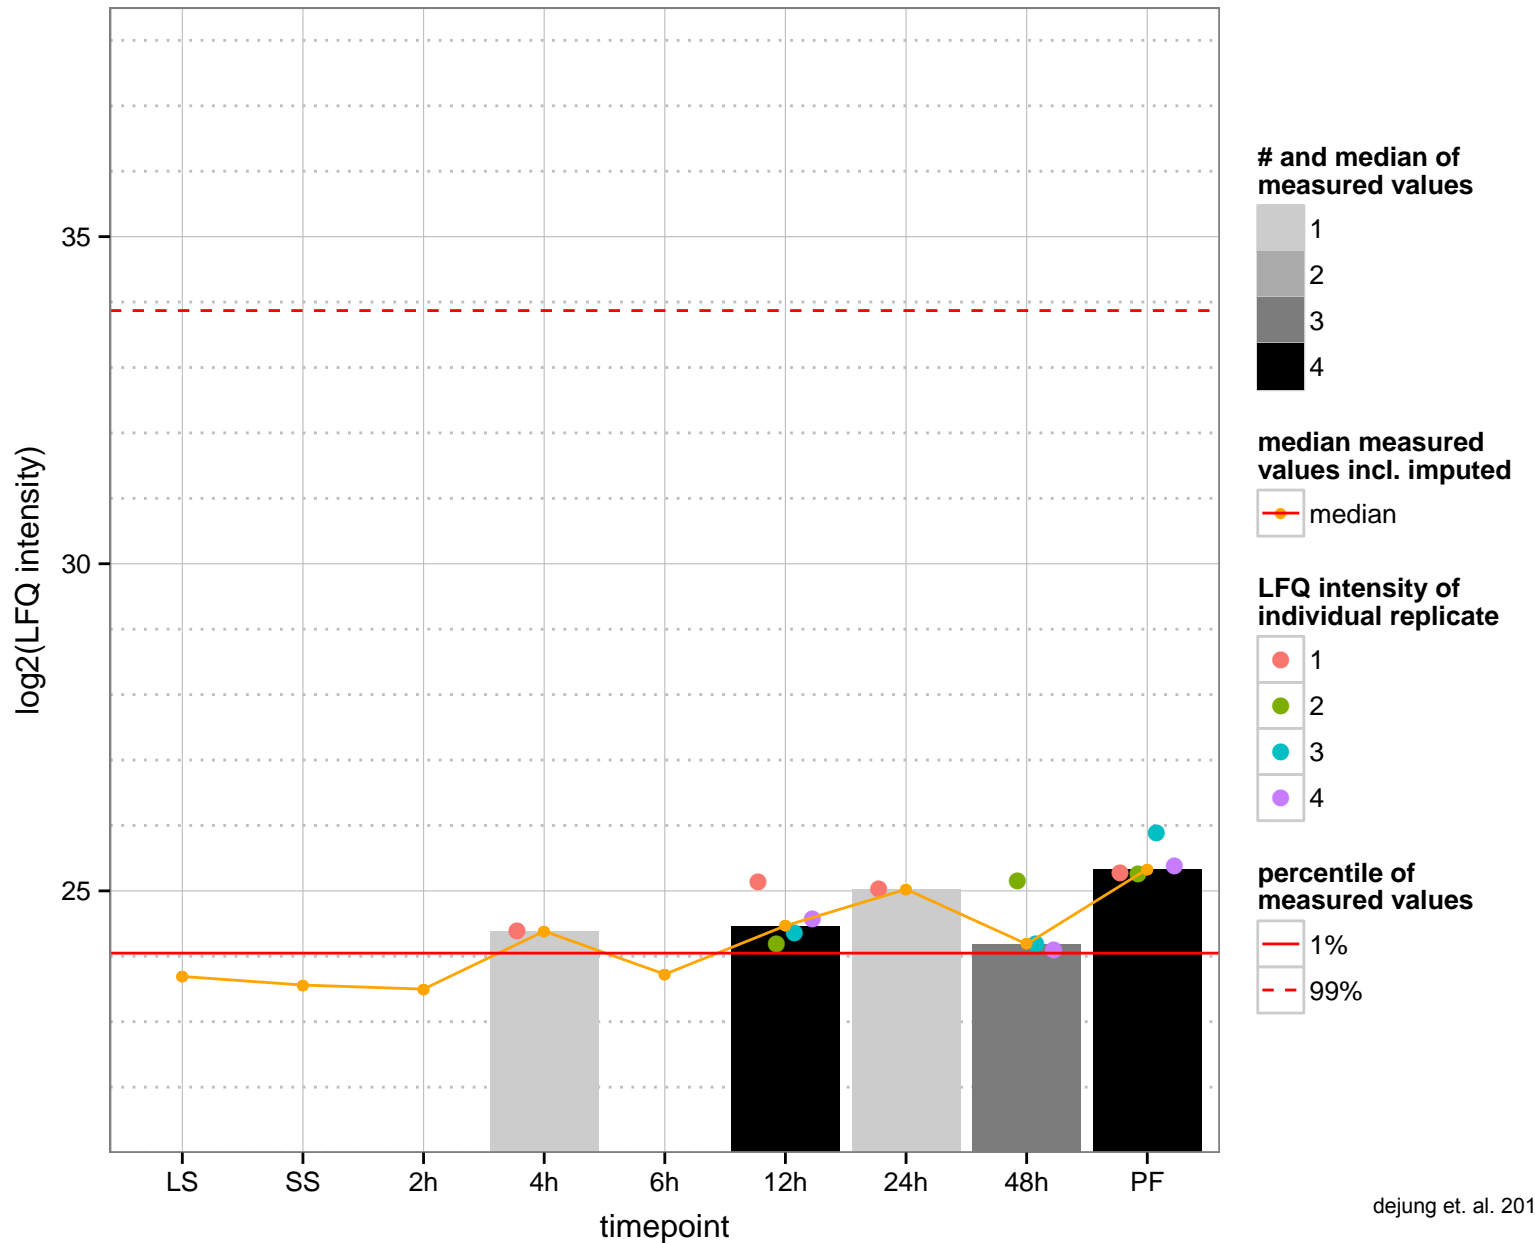

hypothetical protein, conserved  
 Tb927.10.9870  
 AGOF: null  
 AGOC: null  
 AGOP: ciliary or flagellar motility  
 PGO: null  
 PGOC: null  
 PGOP: null

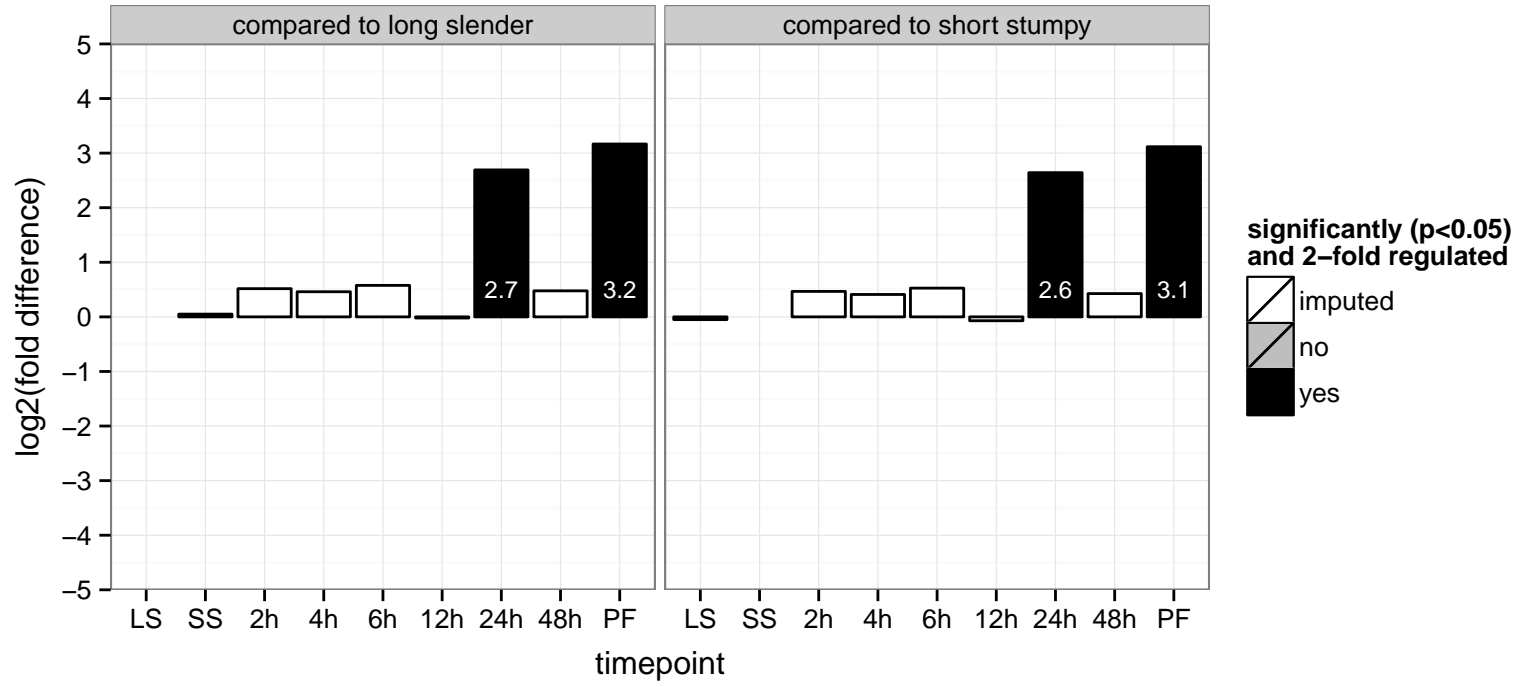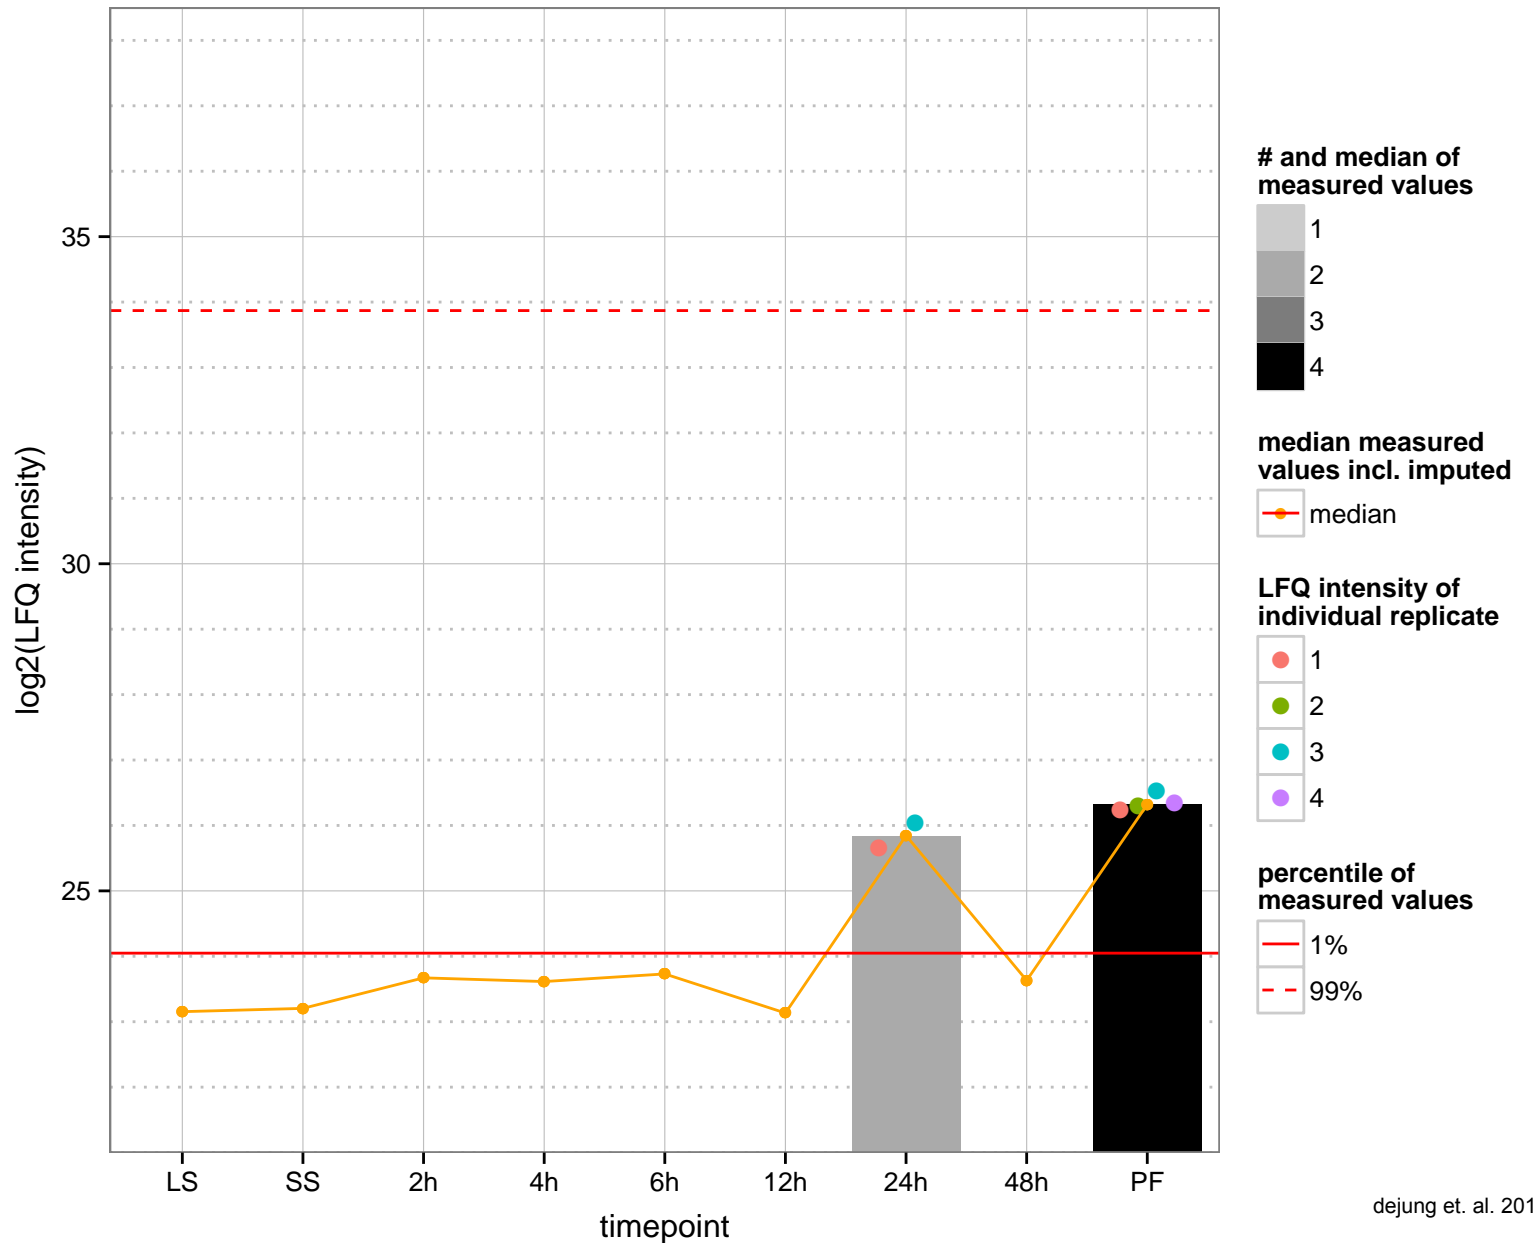

hypothetical protein, conserved  
 Tb927.11.1690  
 AGOF: cholesterol delta-isomerase activity  
 AGOC: endoplasmic reticulum, integral to membrane  
 AGOP: sterol metabolic process  
 PGOF: cholesterol delta-isomerase activity  
 PGOC: endoplasmic reticulum, integral to membrane  
 PGOP: sterol metabolic process

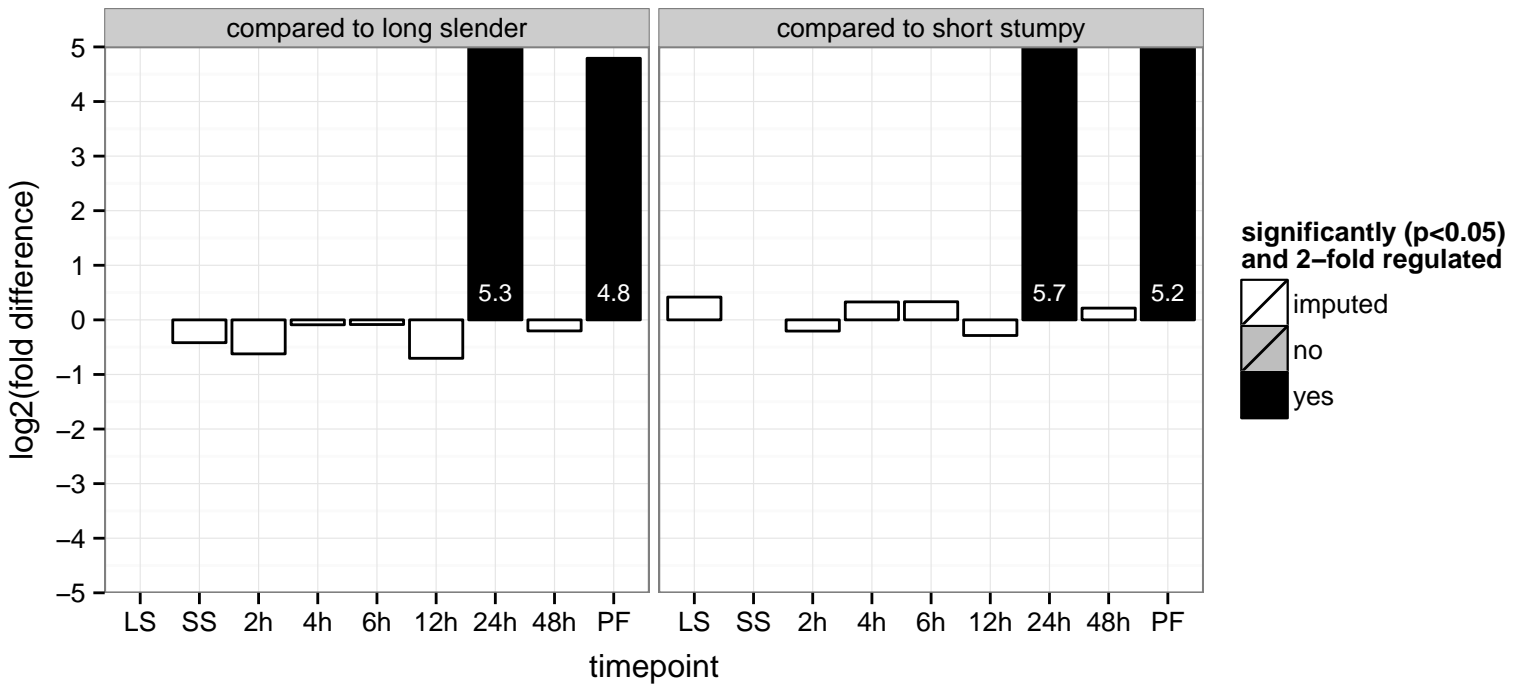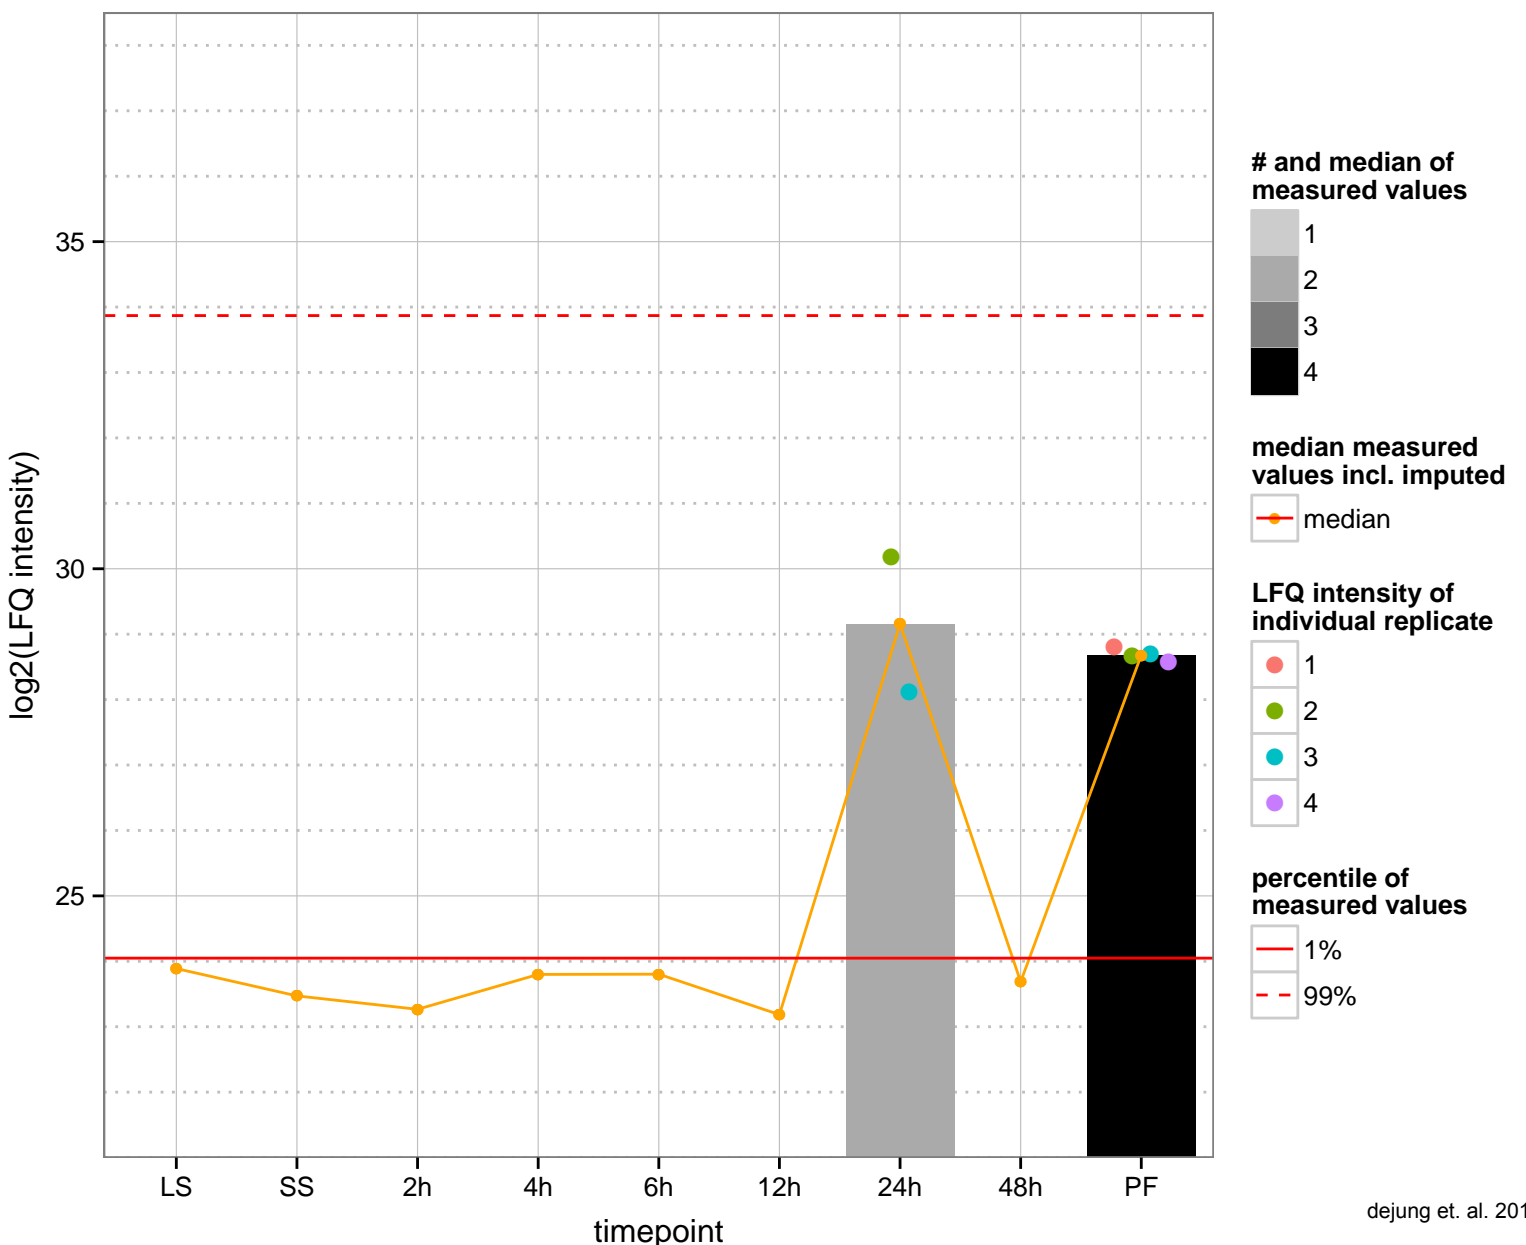

hypothetical protein, conserved  
 Tb927.11.2510  
 AGOF: null  
 AGOC: null  
 AGOP: null  
 PGOF: binding  
 PGO: null  
 PGOP: null

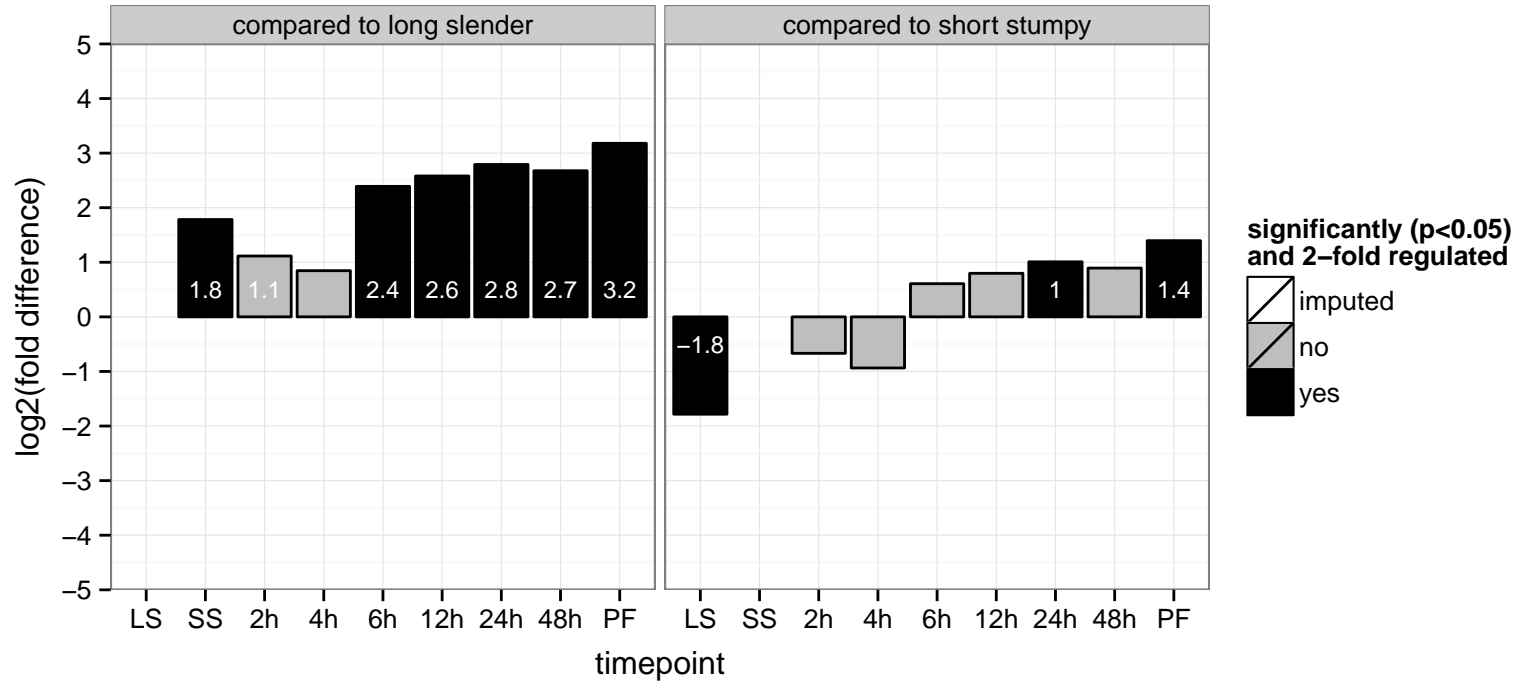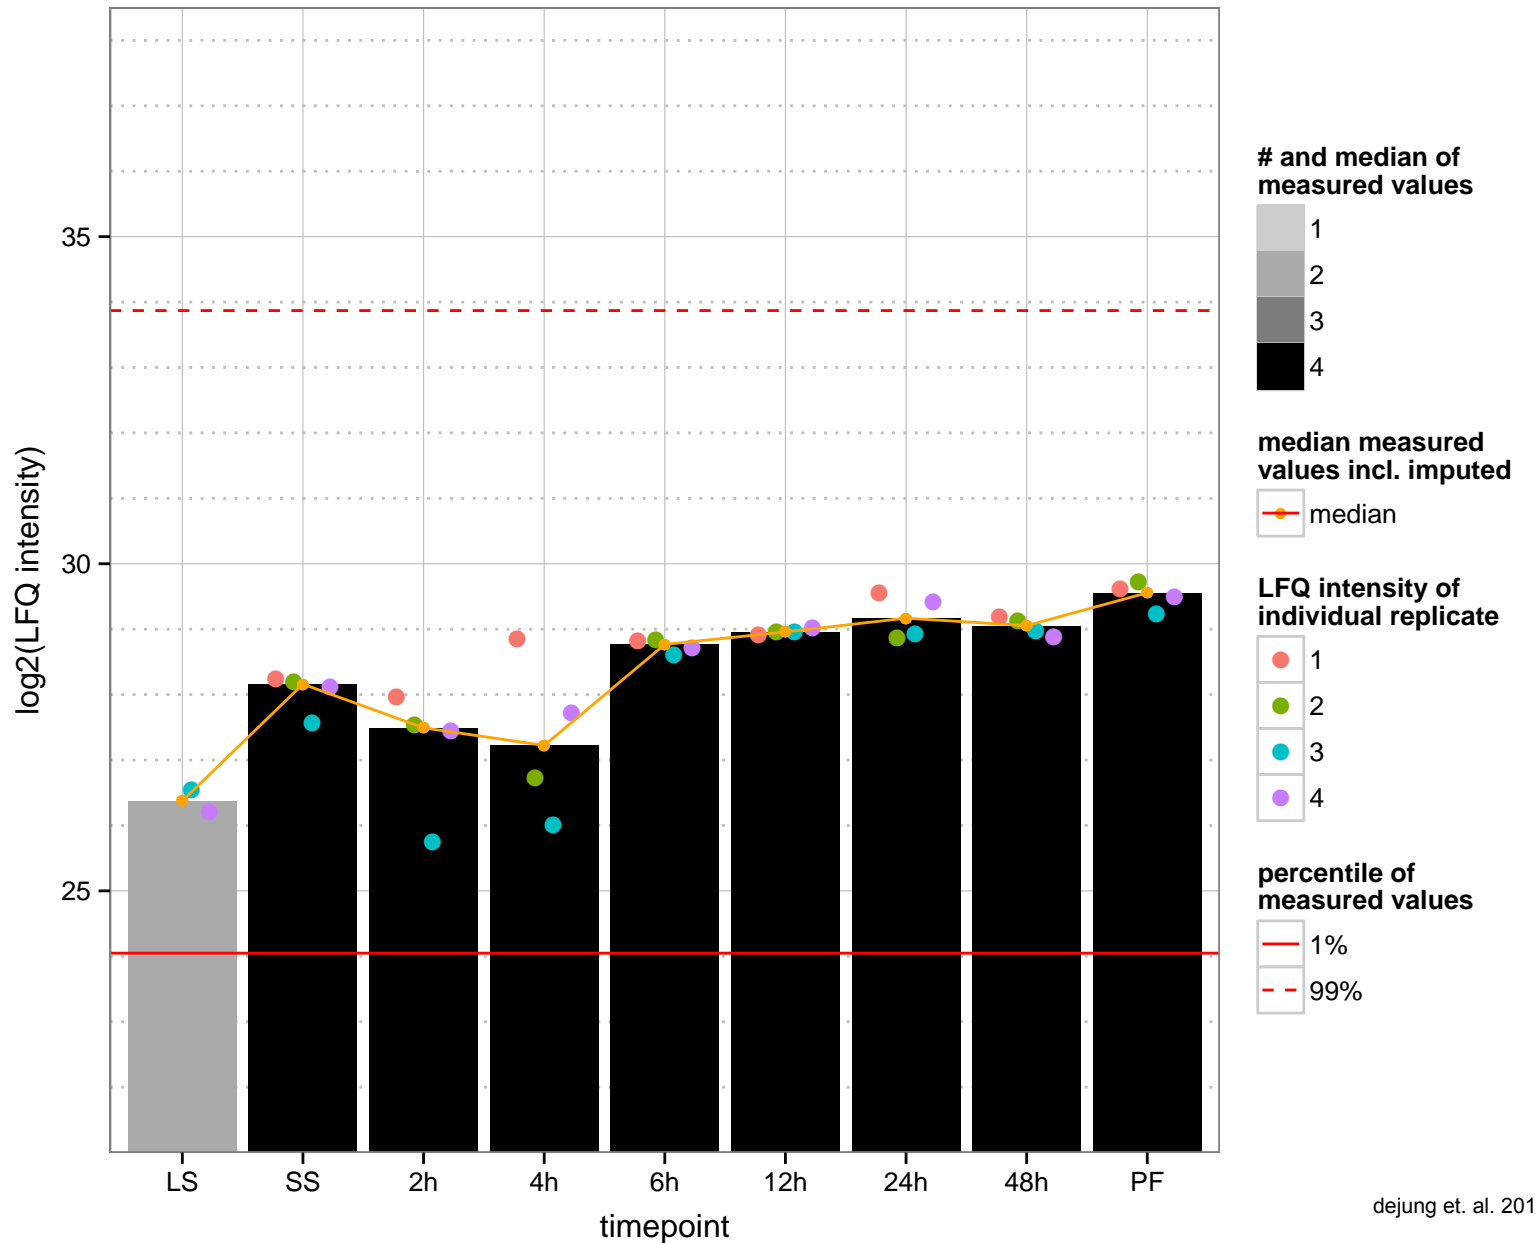

60S ribosomal protein L44, ribosomal protein L36a.e (RPL44)  
 Tb927.2.6090;Tb927.11.3230  
 AGOF: structural constituent of ribosome  
 AGOC: intracellular, ribosome  
 AGOP: translation  
 PGOF: structural constituent of ribosome  
 PGO: intracellular, ribosome  
 PGOP: translation

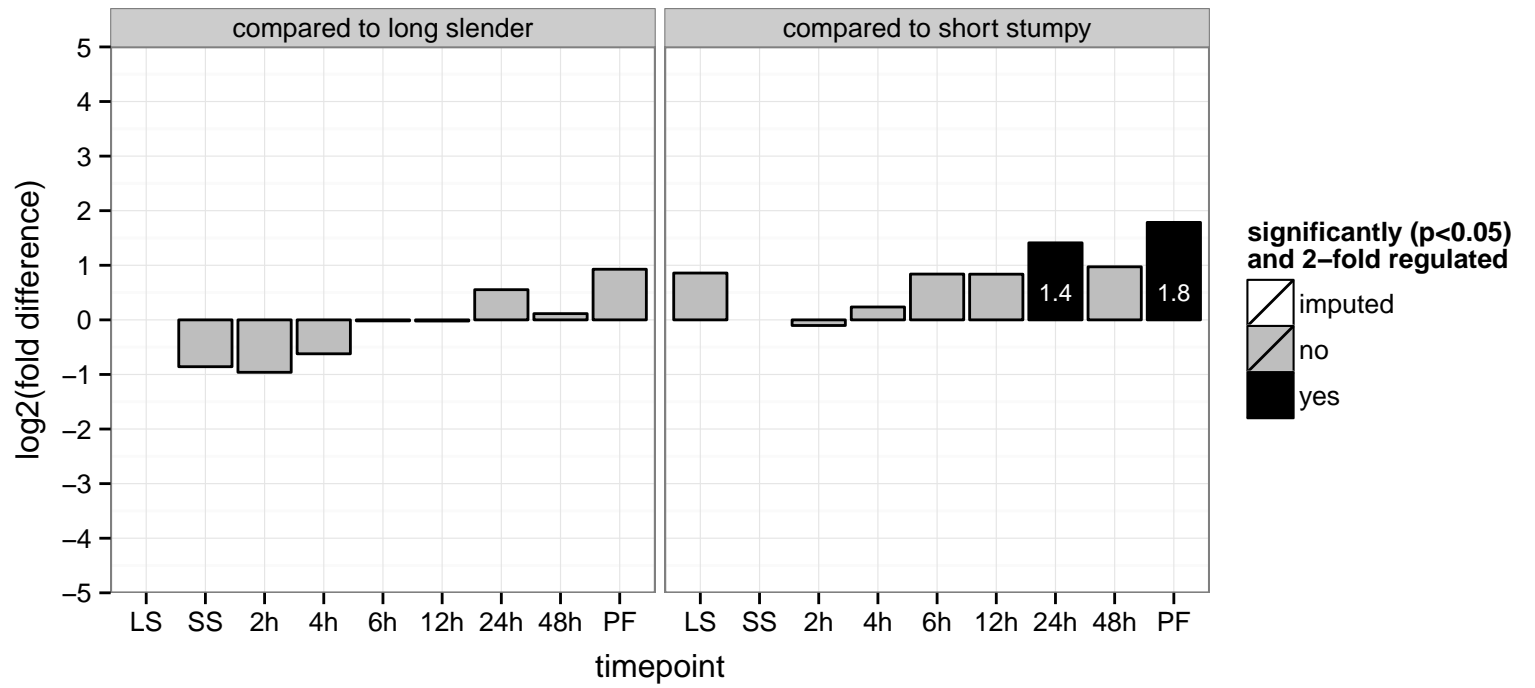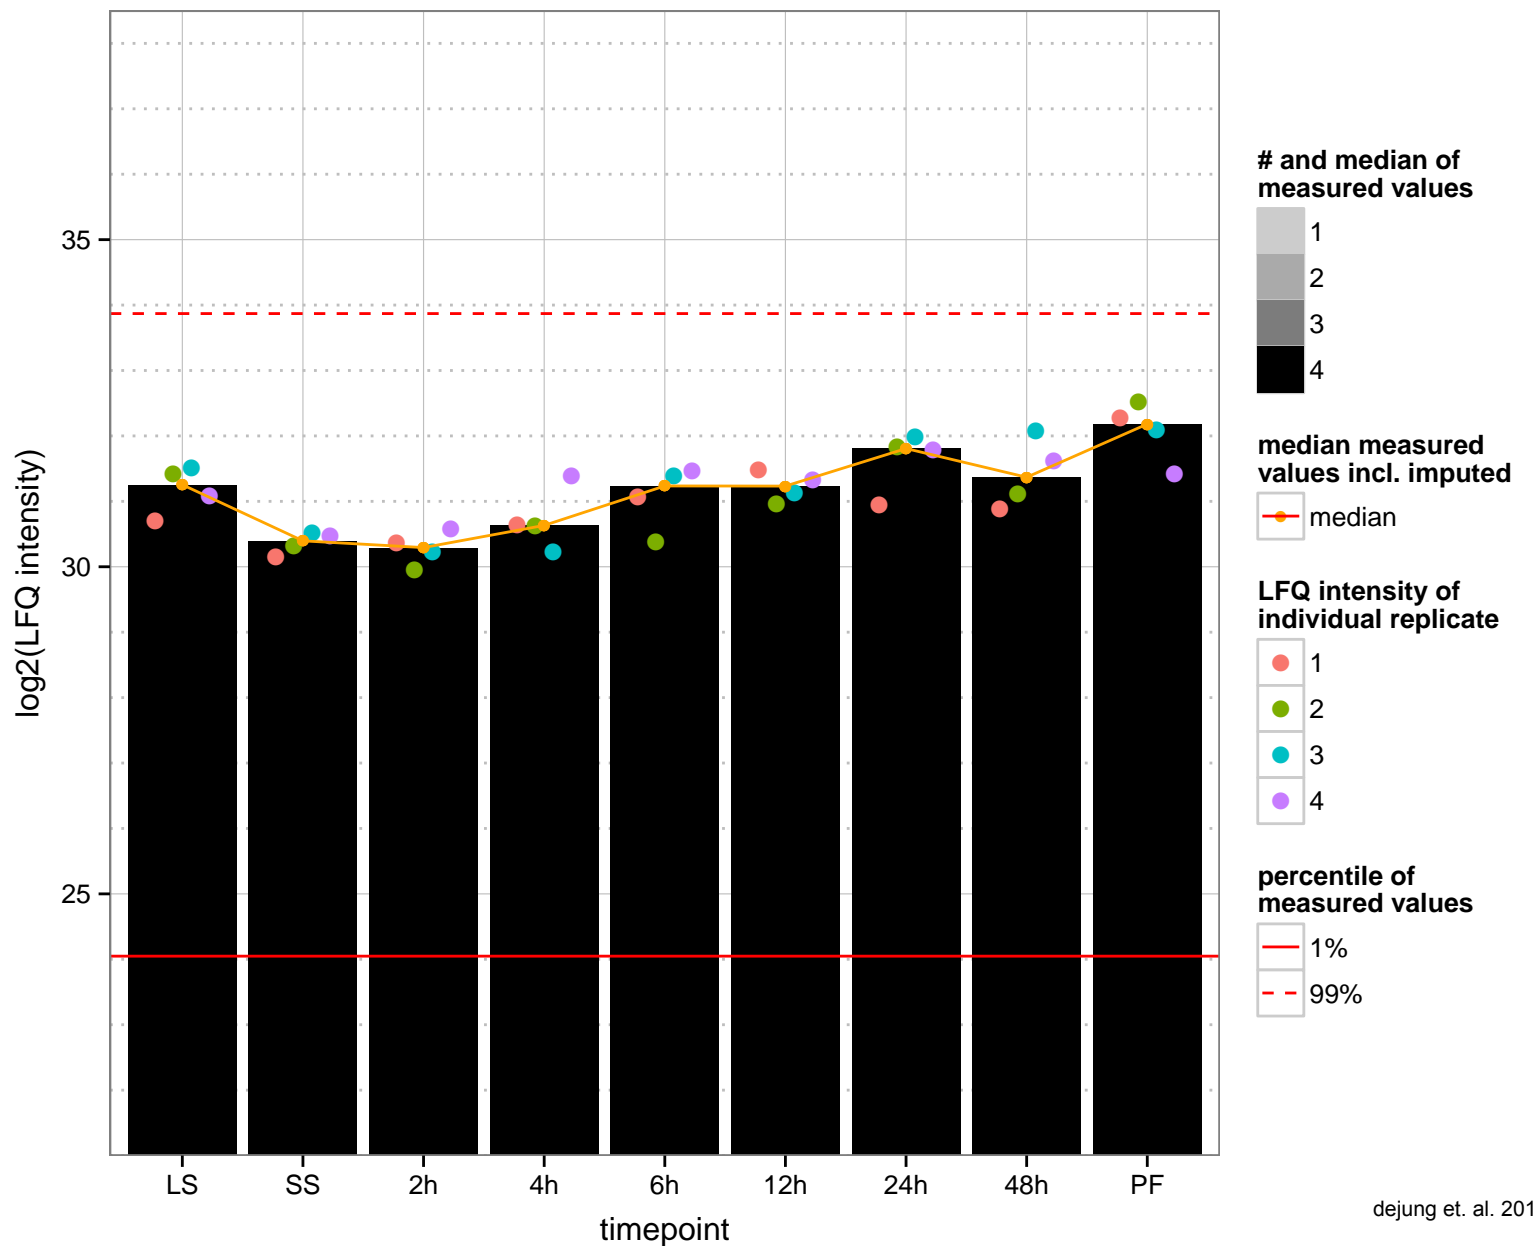



hypothetical protein, conserved  
 Tb927.11.4190  
 AGOF: null  
 AGOC: null  
 AGOP: cellular process  
 PGOF: null  
 PGO: null  
 PGOP: cellular process

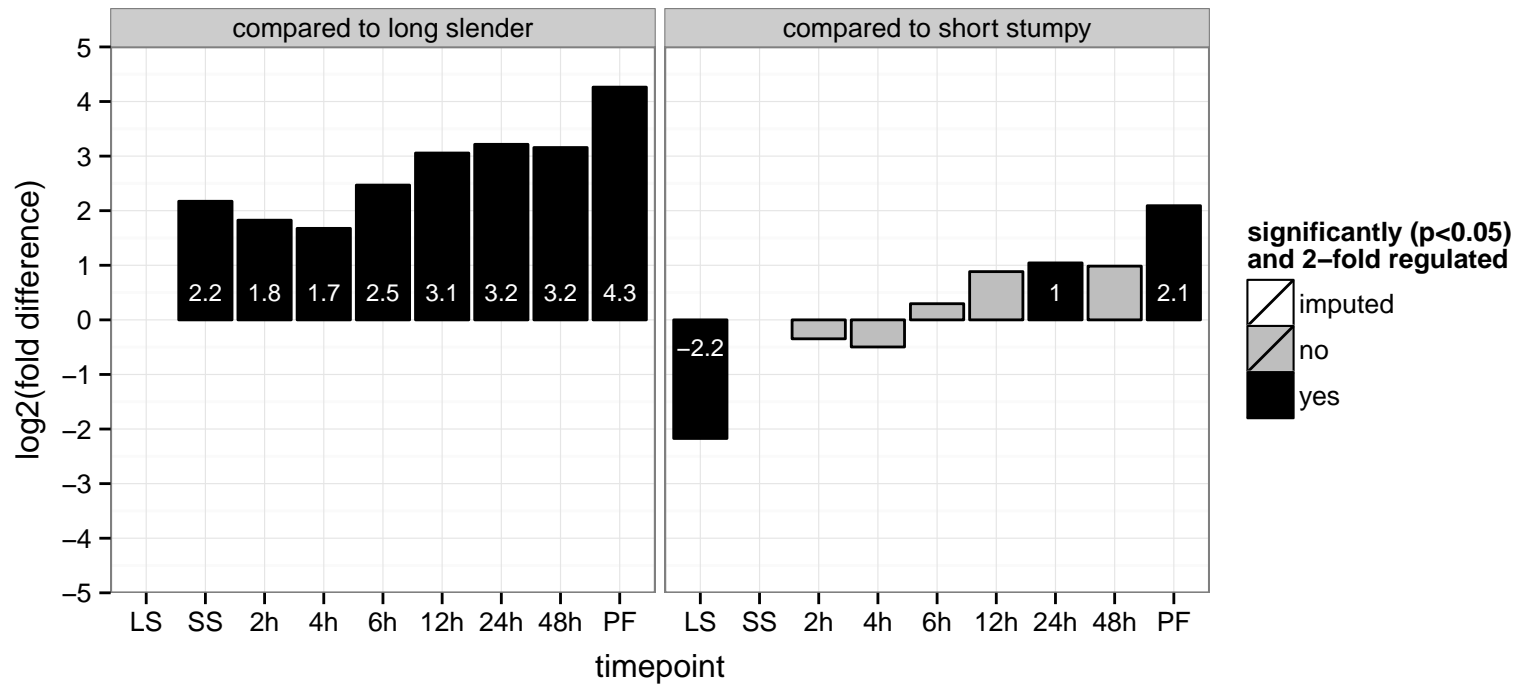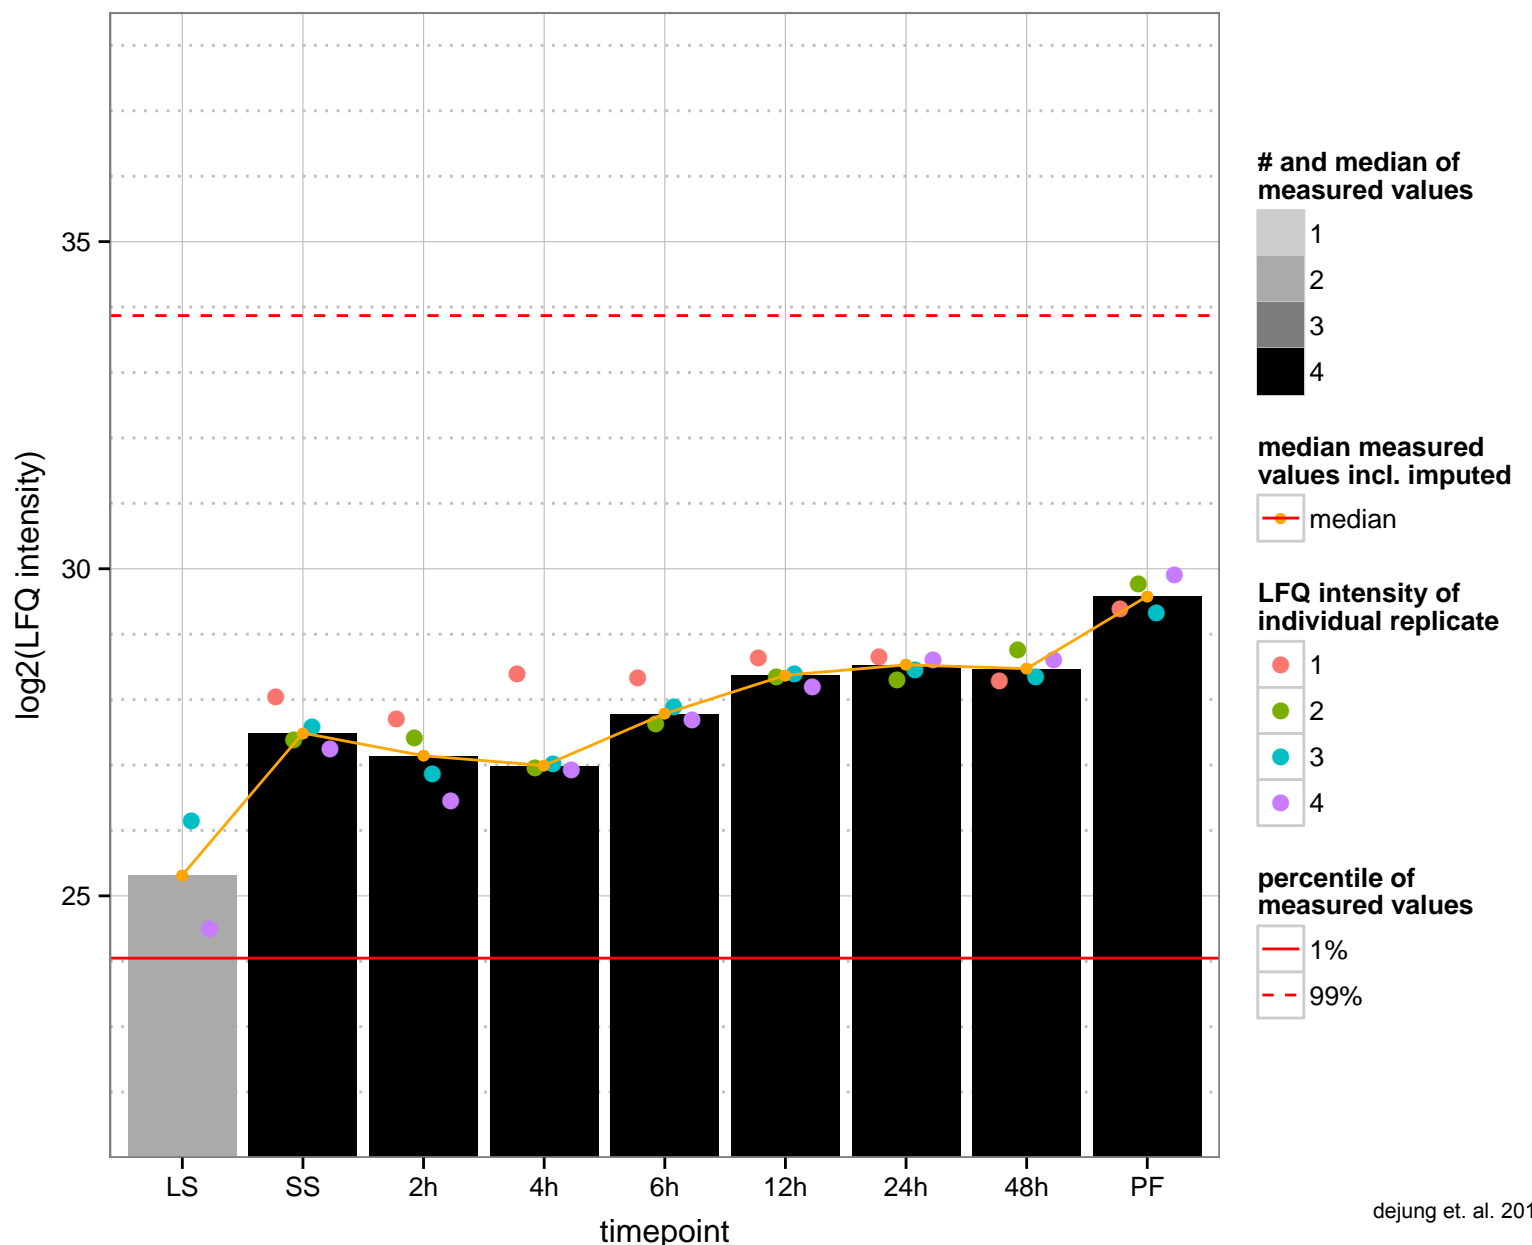

hypothetical protein, conserved  
 Tb927.11.5180  
 AGOF: null  
 AGOC: null  
 AGOP: null  
 PGO: null  
 PGOC: null  
 PGOP: null

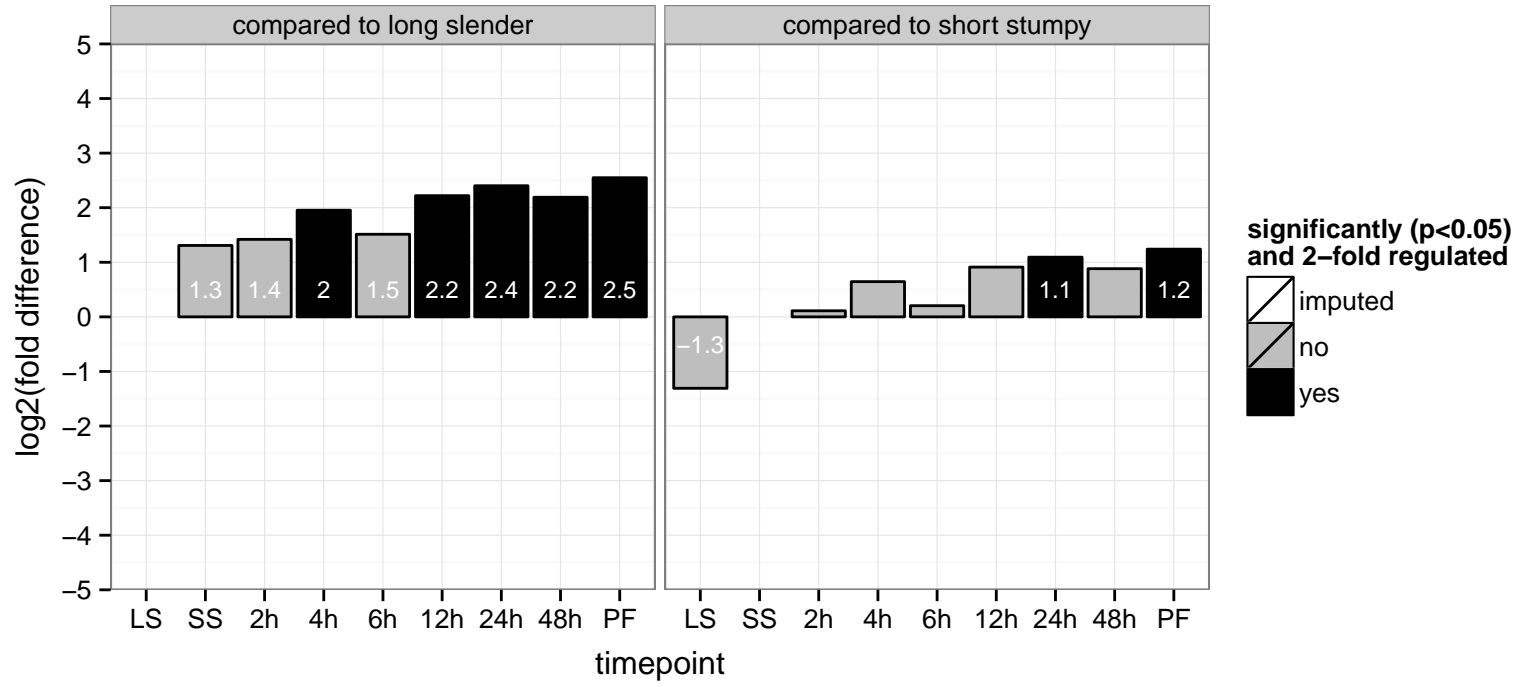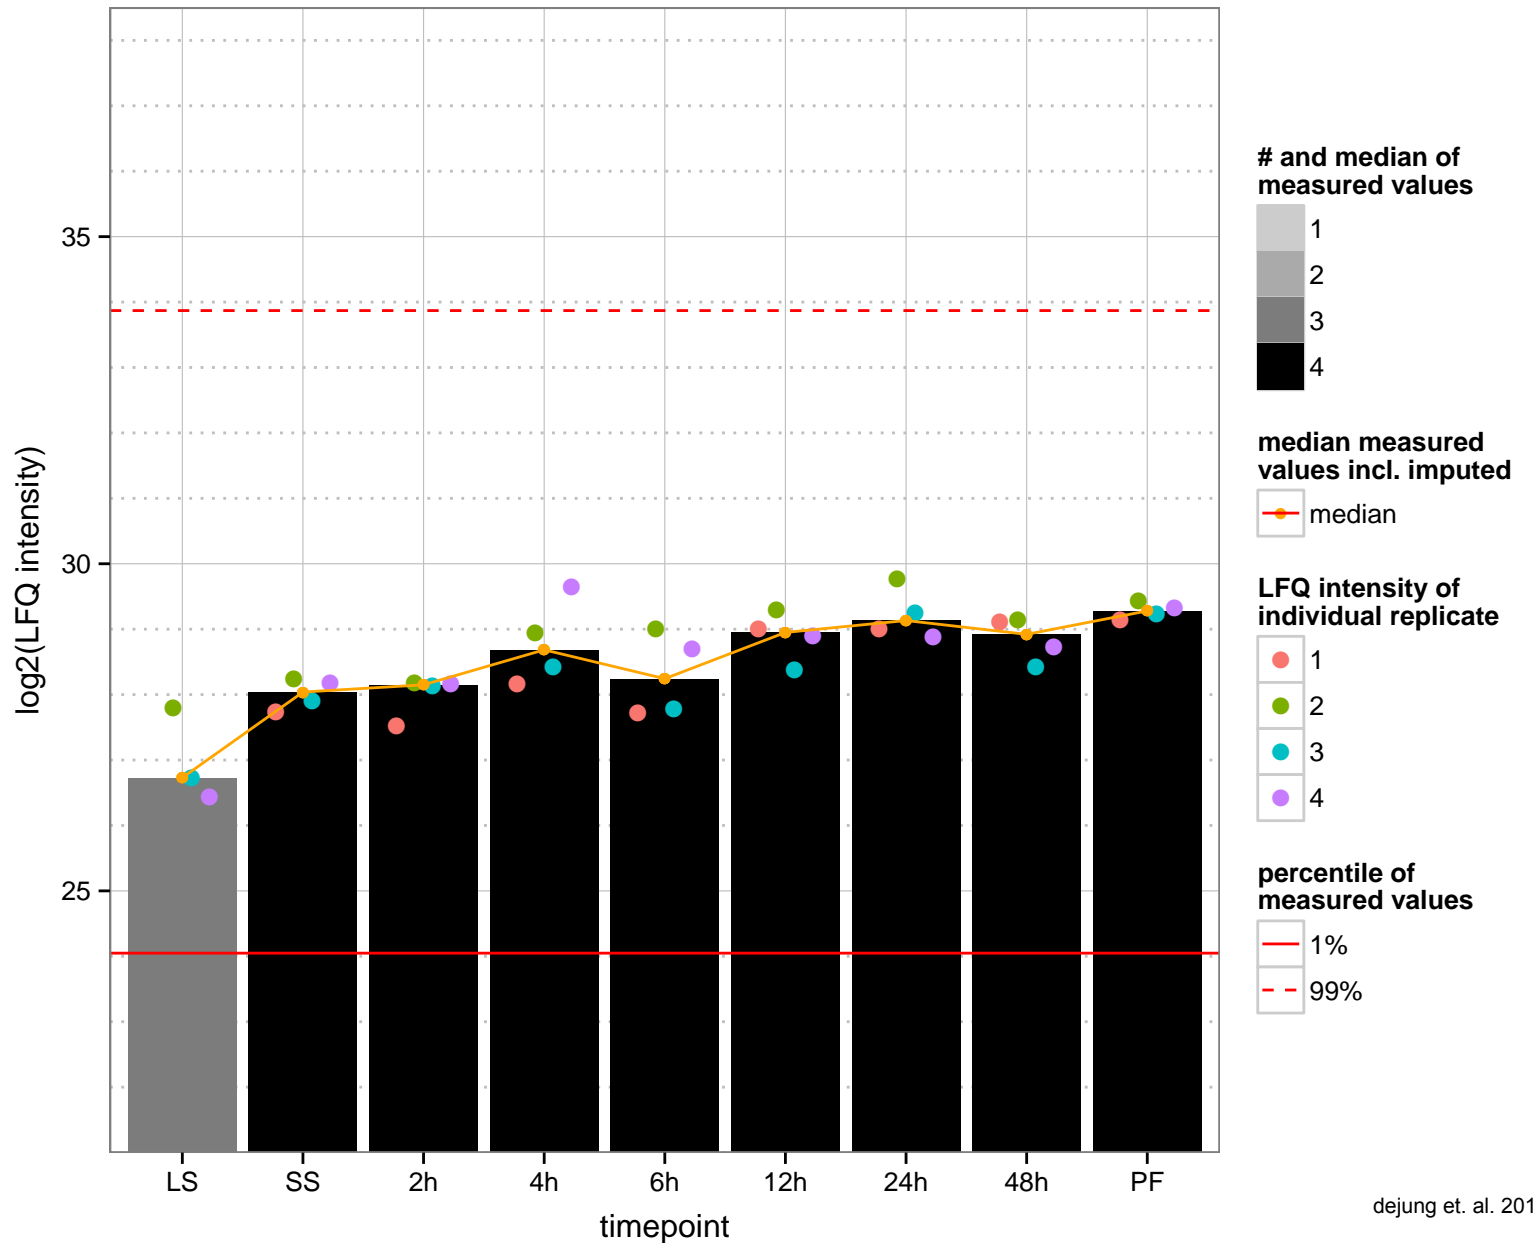

hypothetical protein, conserved  
 Tb927.11.7780  
 AGOF: null  
 AGOC: mitochondrial inner membrane, mitochondrion  
 AGOP: null  
 PGO: binding  
 PGOC: null  
 PGOP: null

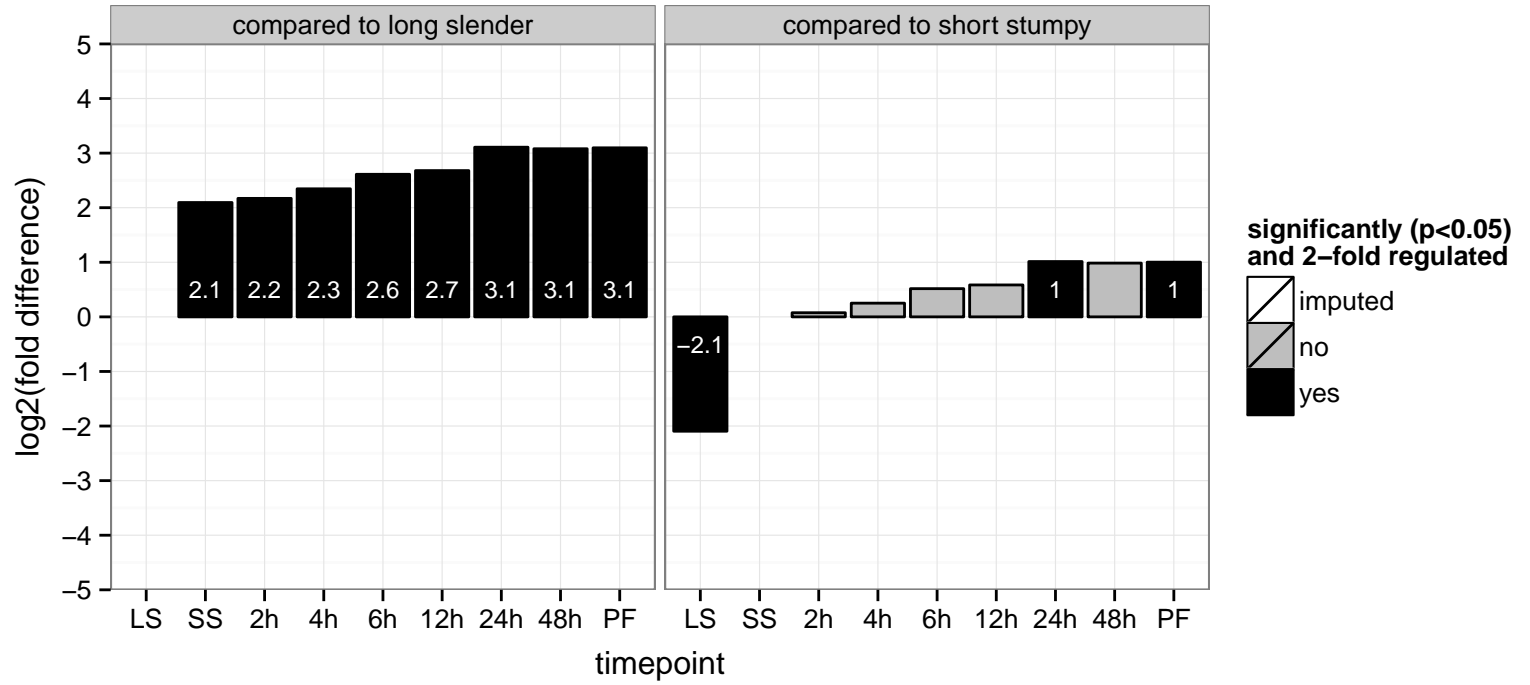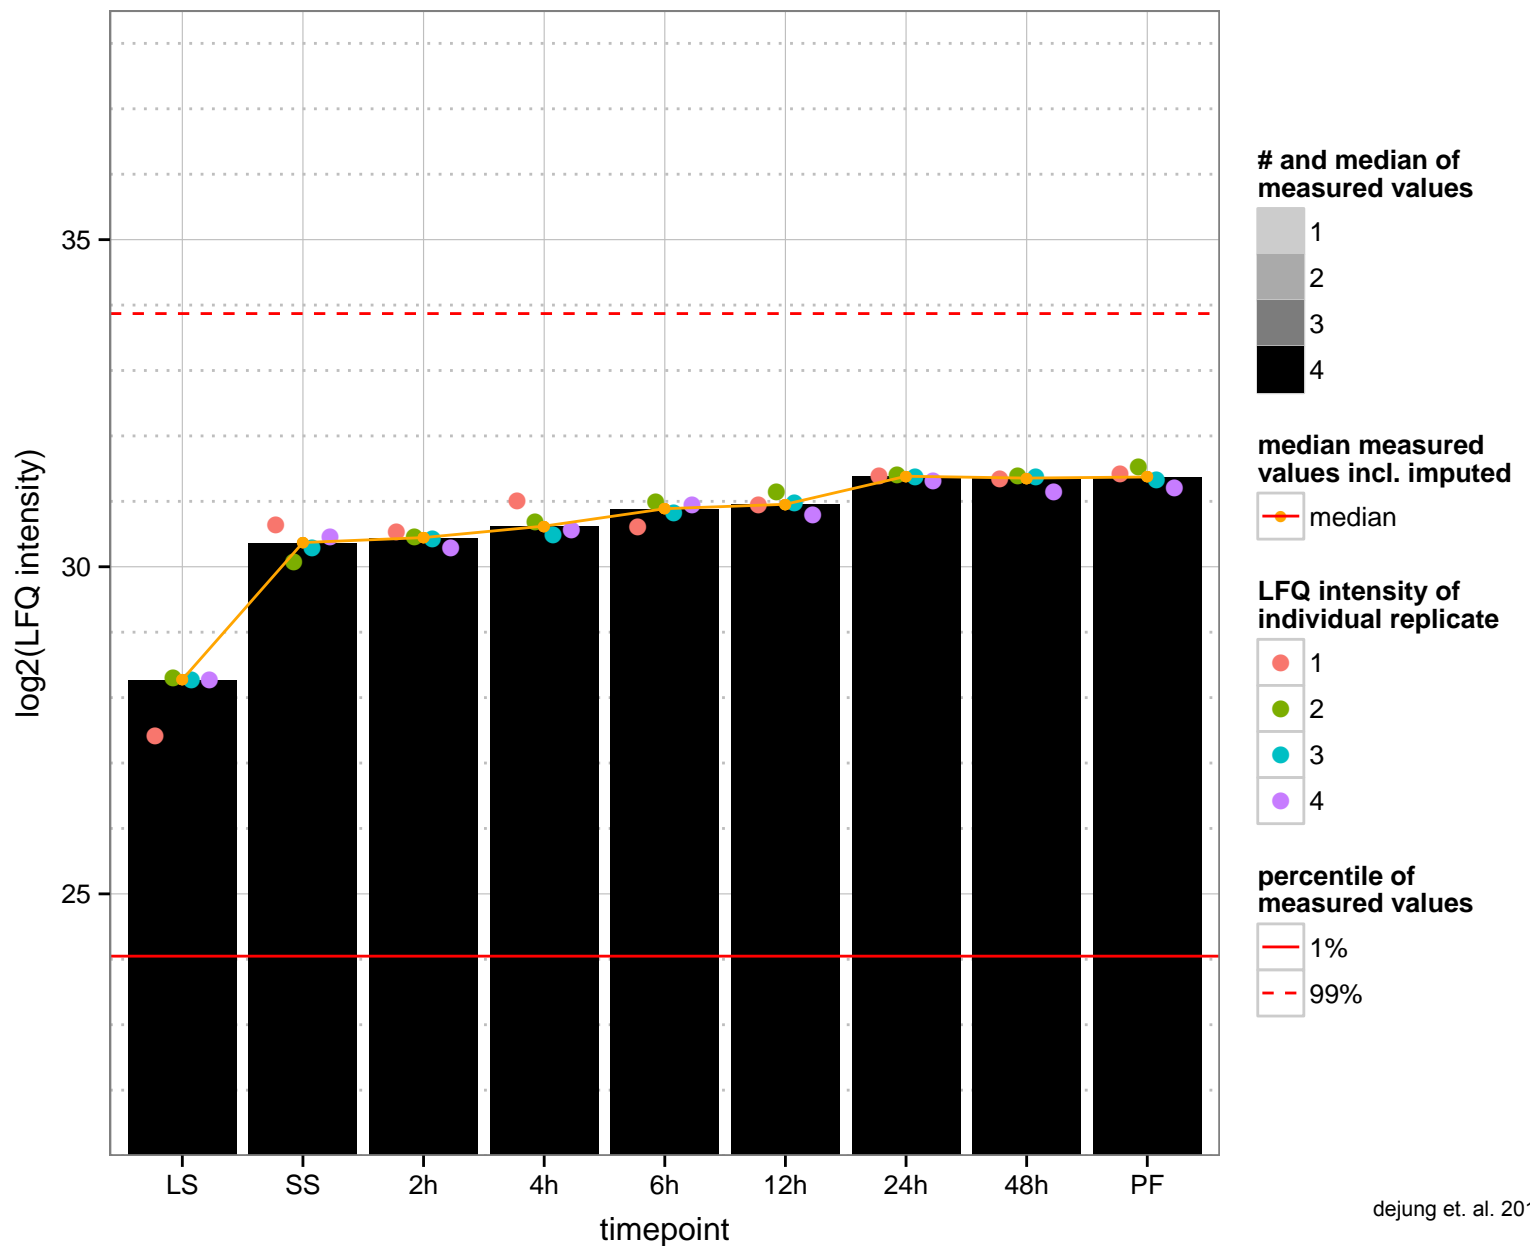

retrotransposon hot spot (RHS) protein, putative, retrotransposon hot spot protein (RHS, pseudogene), retrotransposon hot spot protein (RHS, pseudogene), retrotransposon hot spot protein (RHS, pseudogene)  
 Tb927.2.1100;Tb11.v5.0800  
 AGOF: null  
 AGOC: null  
 AGOP: null  
 PGO: null  
 PGOC: null  
 PGOP: null

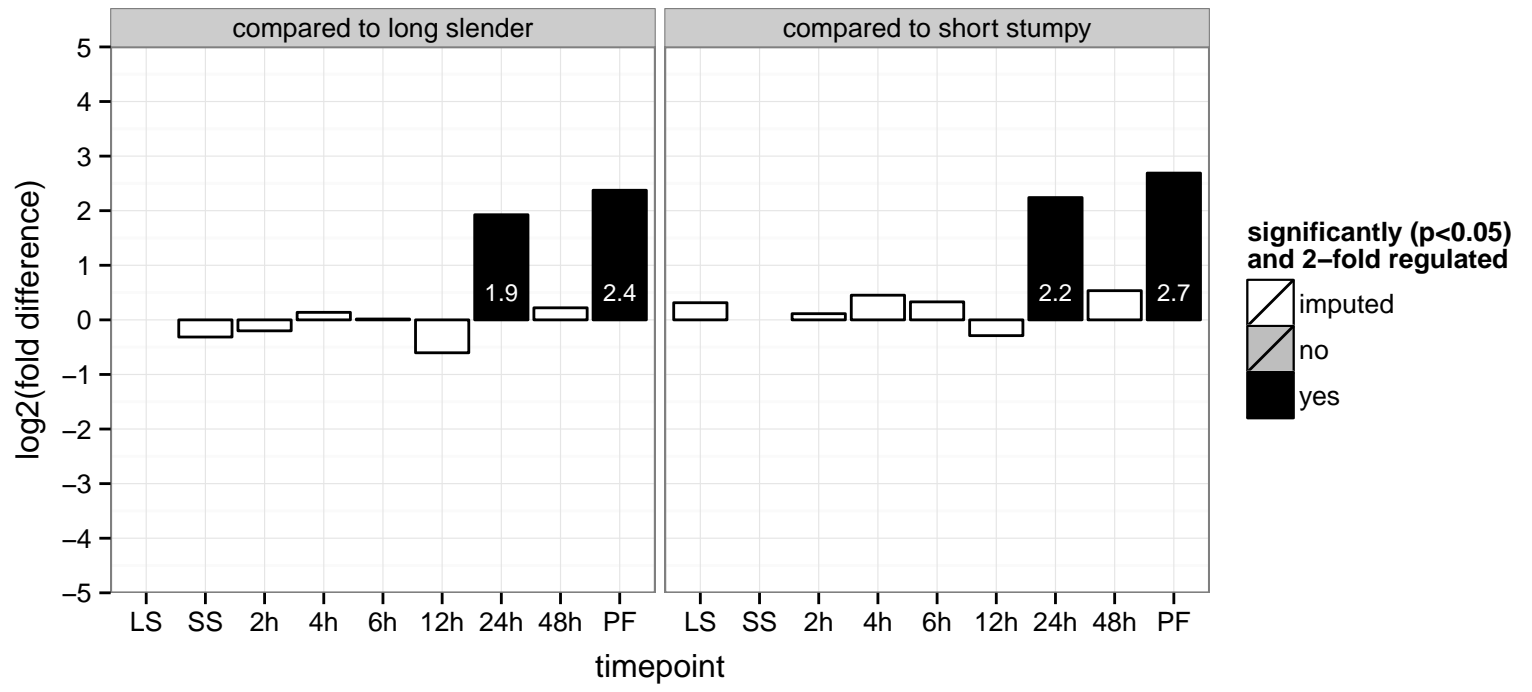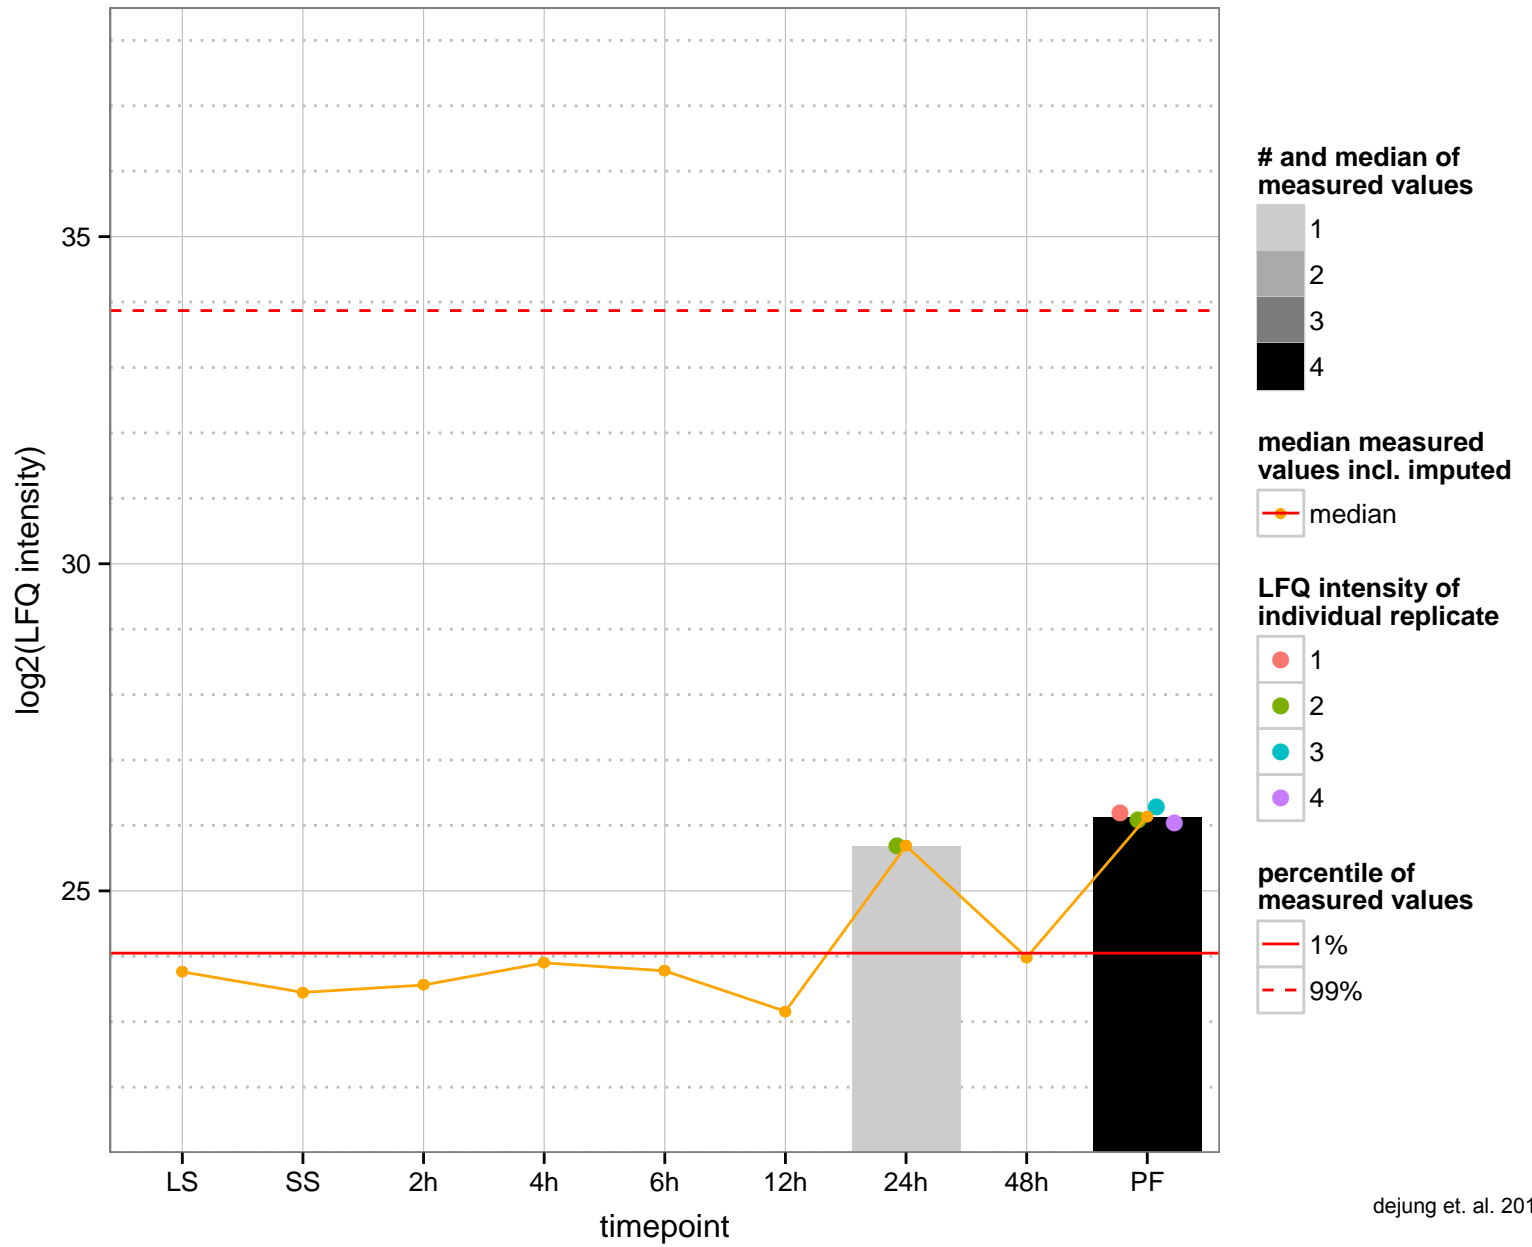

hypothetical protein, conserved  
 Tb927.6.1410  
 AGOF: null  
 AGOC: mitochondrion  
 AGOP: null  
 PGO: null  
 PGOC: null  
 PGOP: null

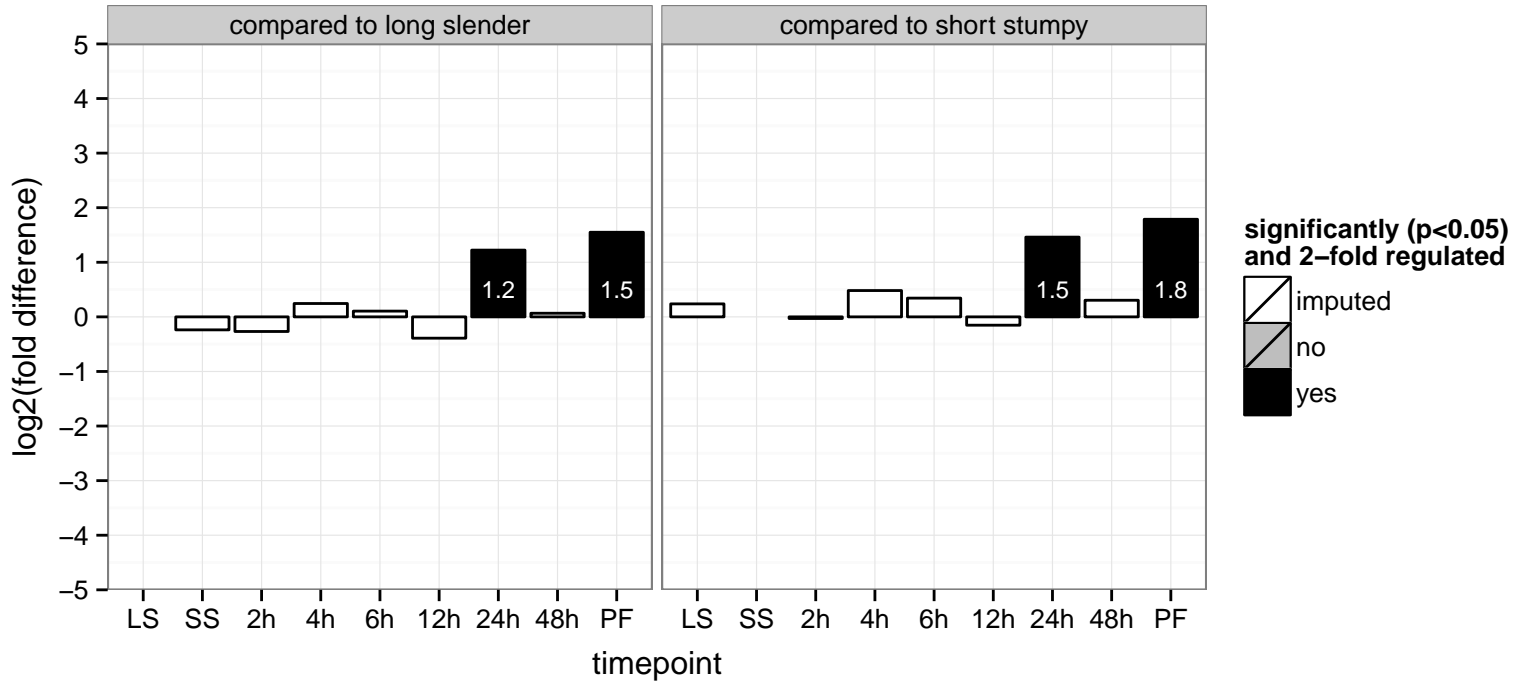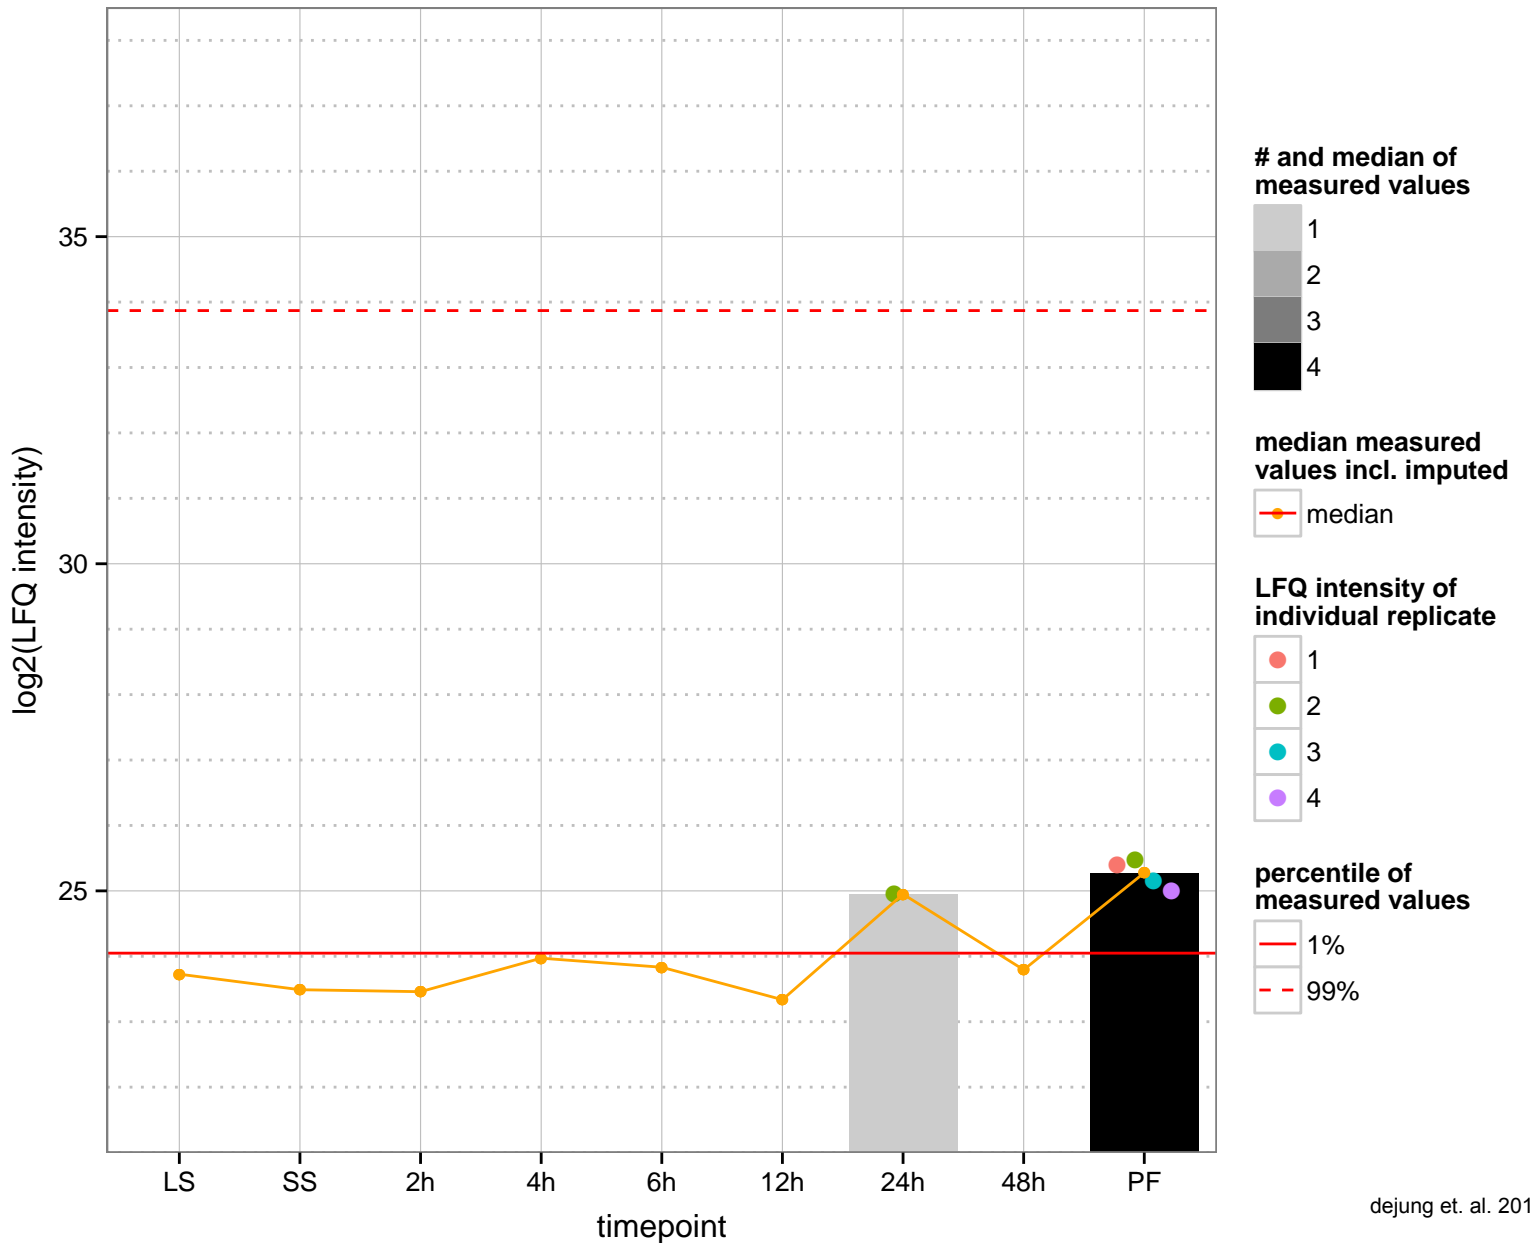

hypothetical protein, conserved  
 Tb927.6.2340;Tb927.6.2280  
 AGOF: unfolded protein binding  
 AGOC: prefoldin complex  
 AGOP: protein folding  
 PGOF: unfolded protein binding  
 PGO: prefoldin complex  
 PGOP: protein folding

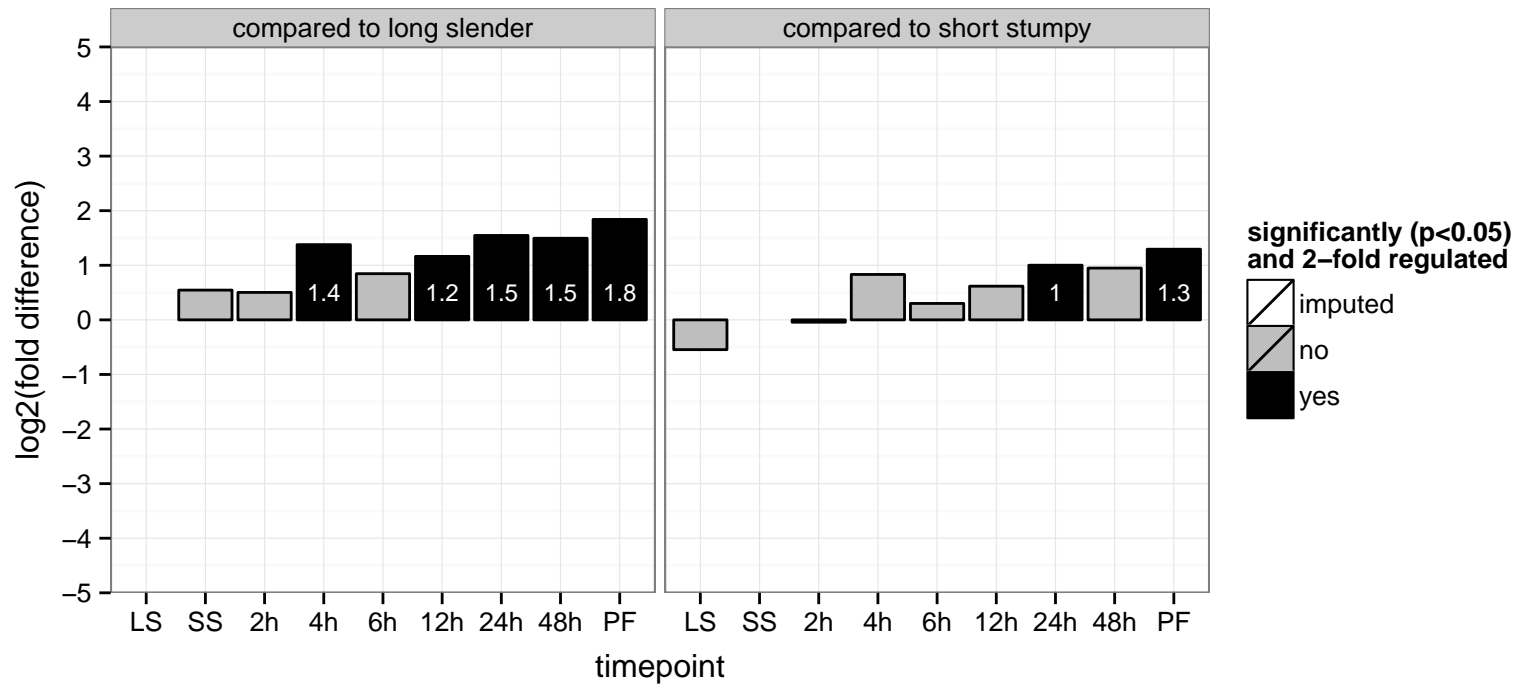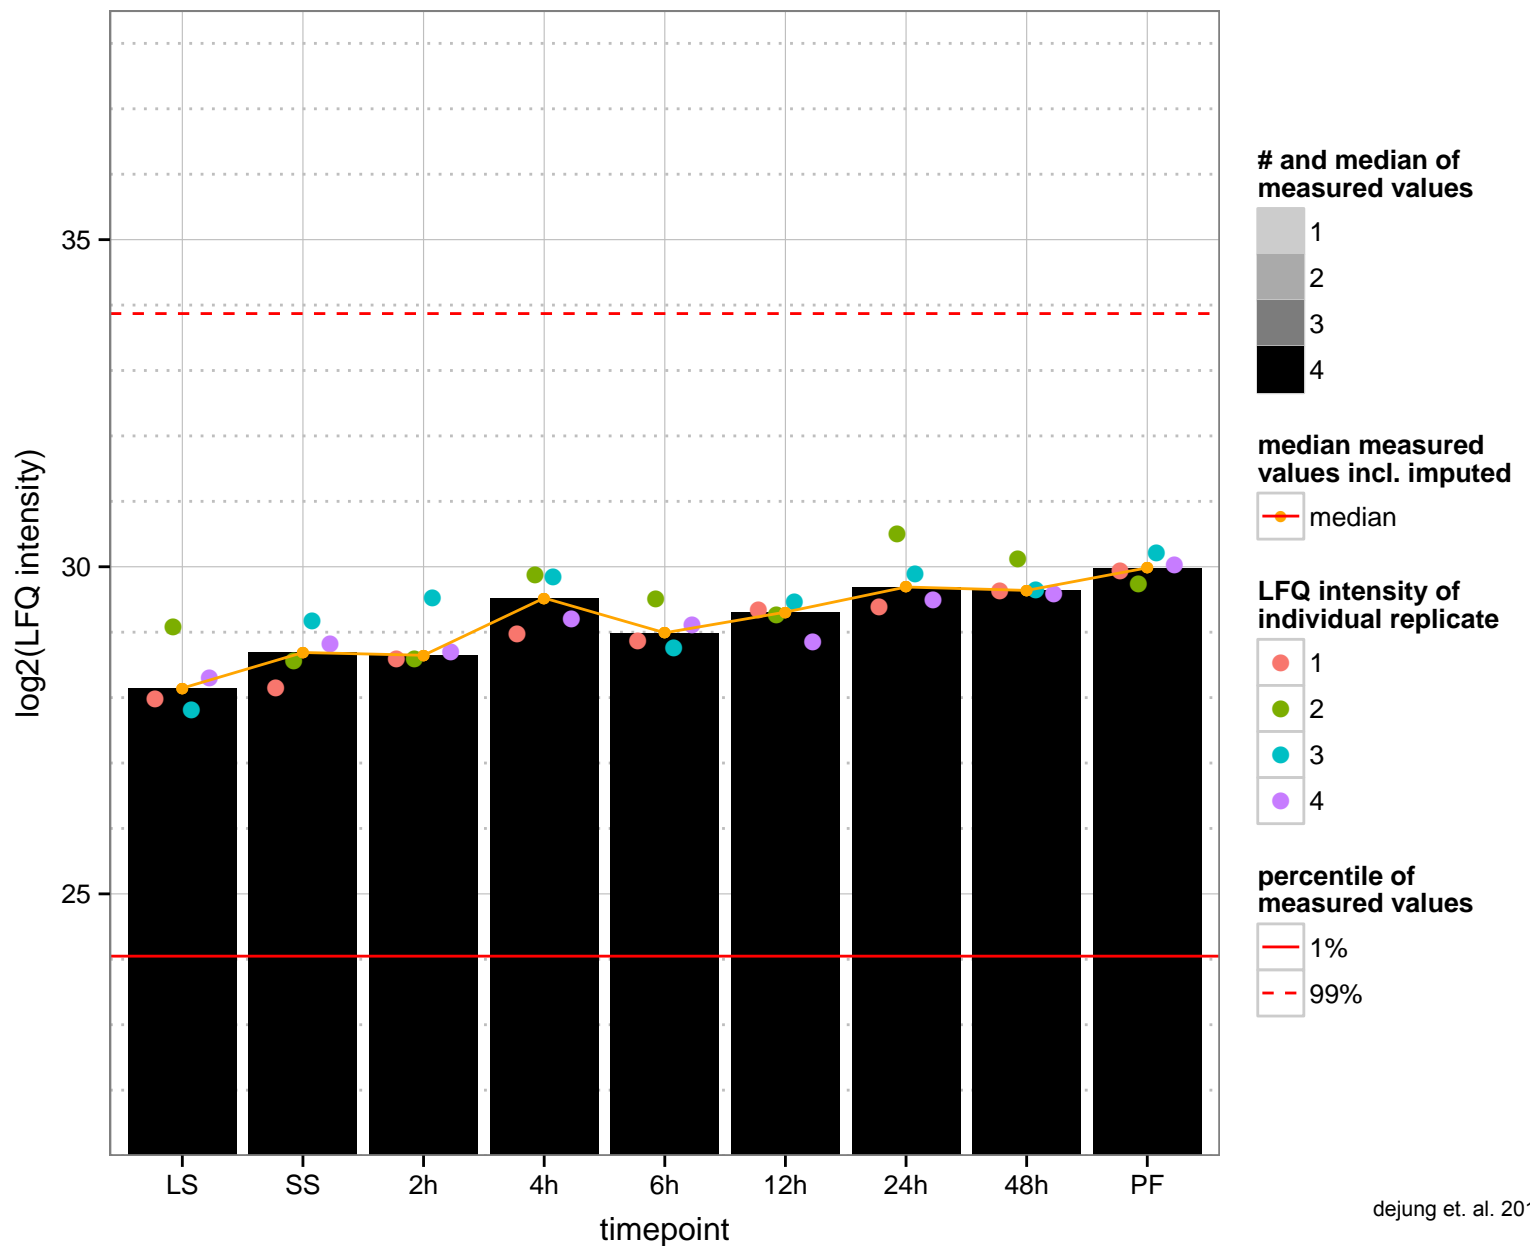

hypothetical protein, conserved  
 Tb927.7.2620  
 AGOF: null  
 AGOC: mitochondrion  
 AGOP: null  
 PGO: null  
 PGOC: null  
 PGOP: null

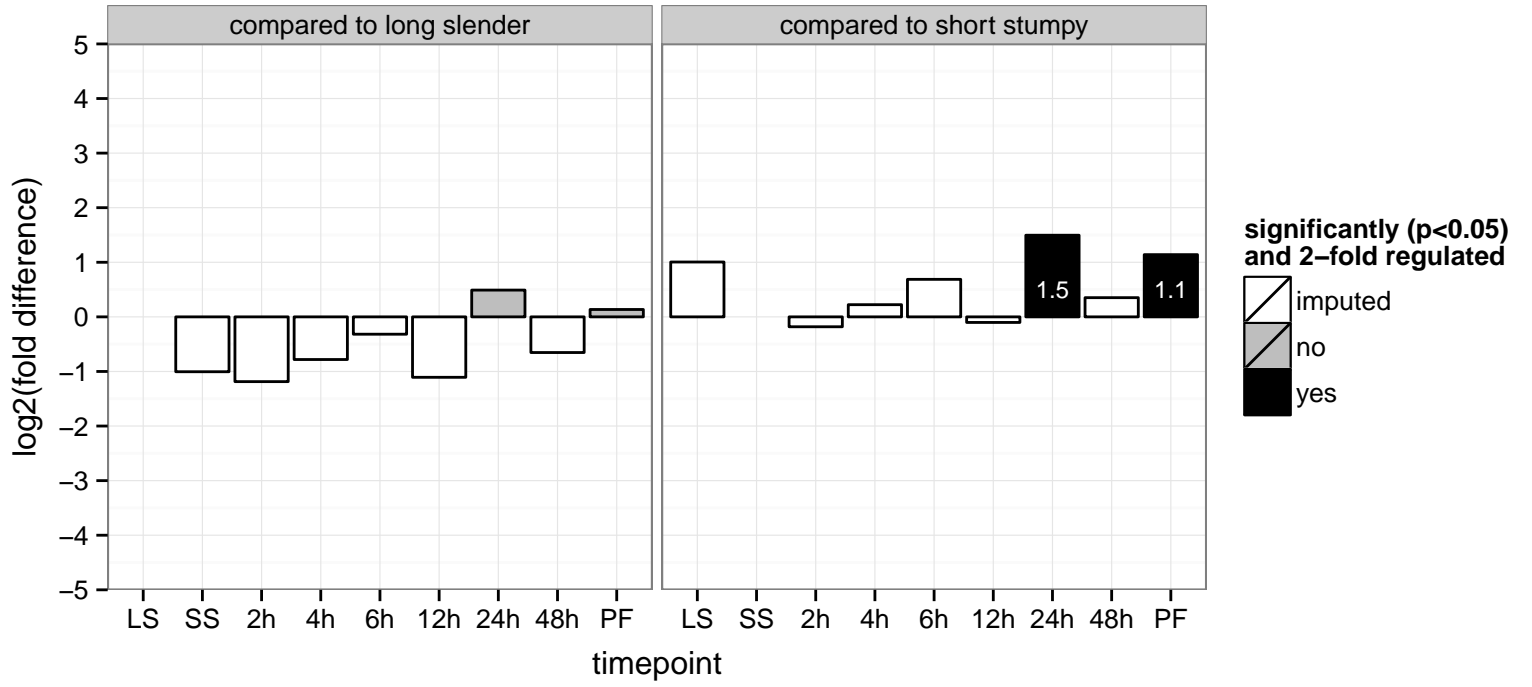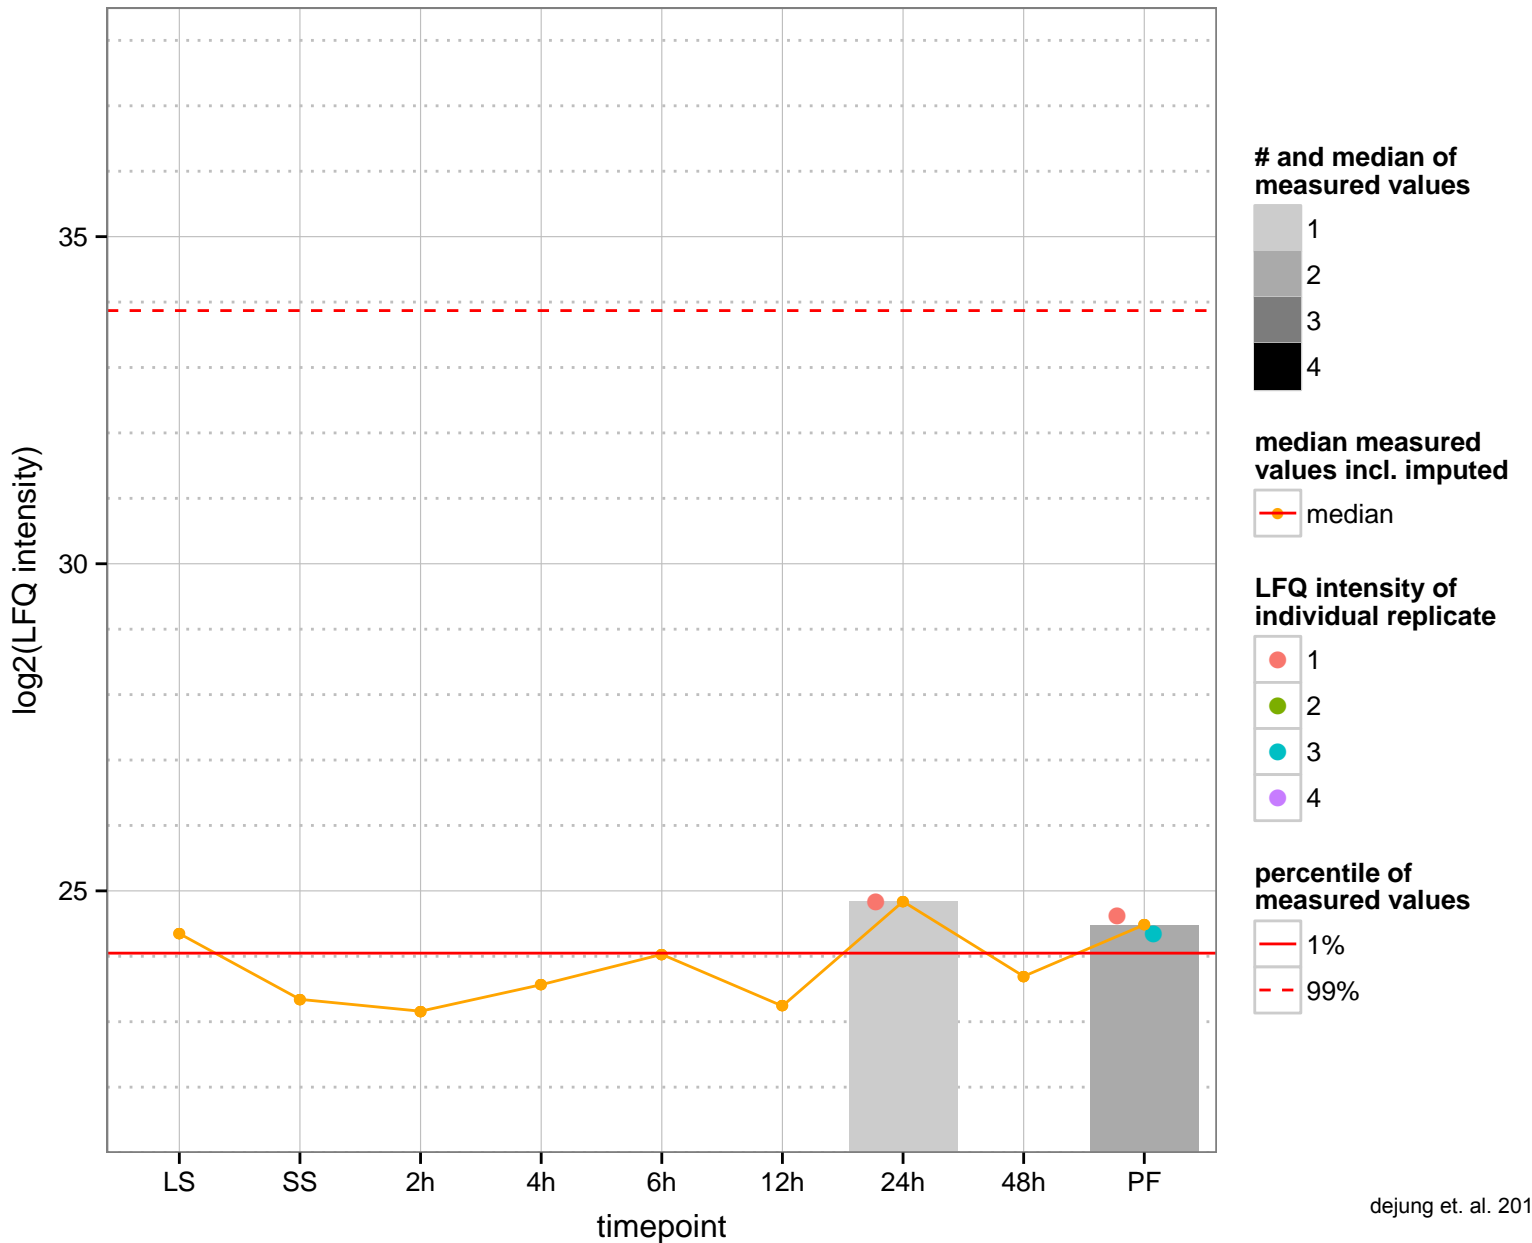

hypothetical protein, conserved  
 Tb927.7.3700  
 AGOF: null  
 AGOC: null  
 AGOP: null  
 PGO: null  
 PGOC: null  
 PGOP: null

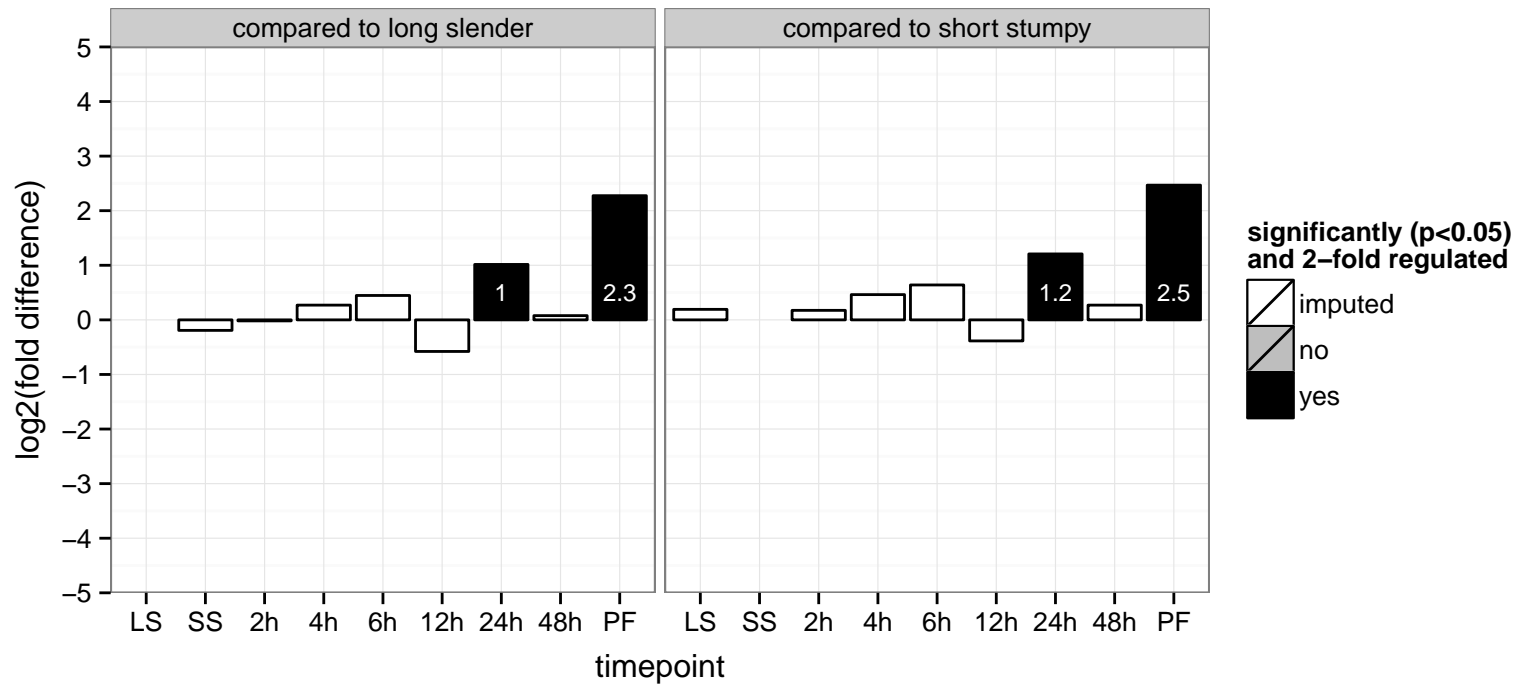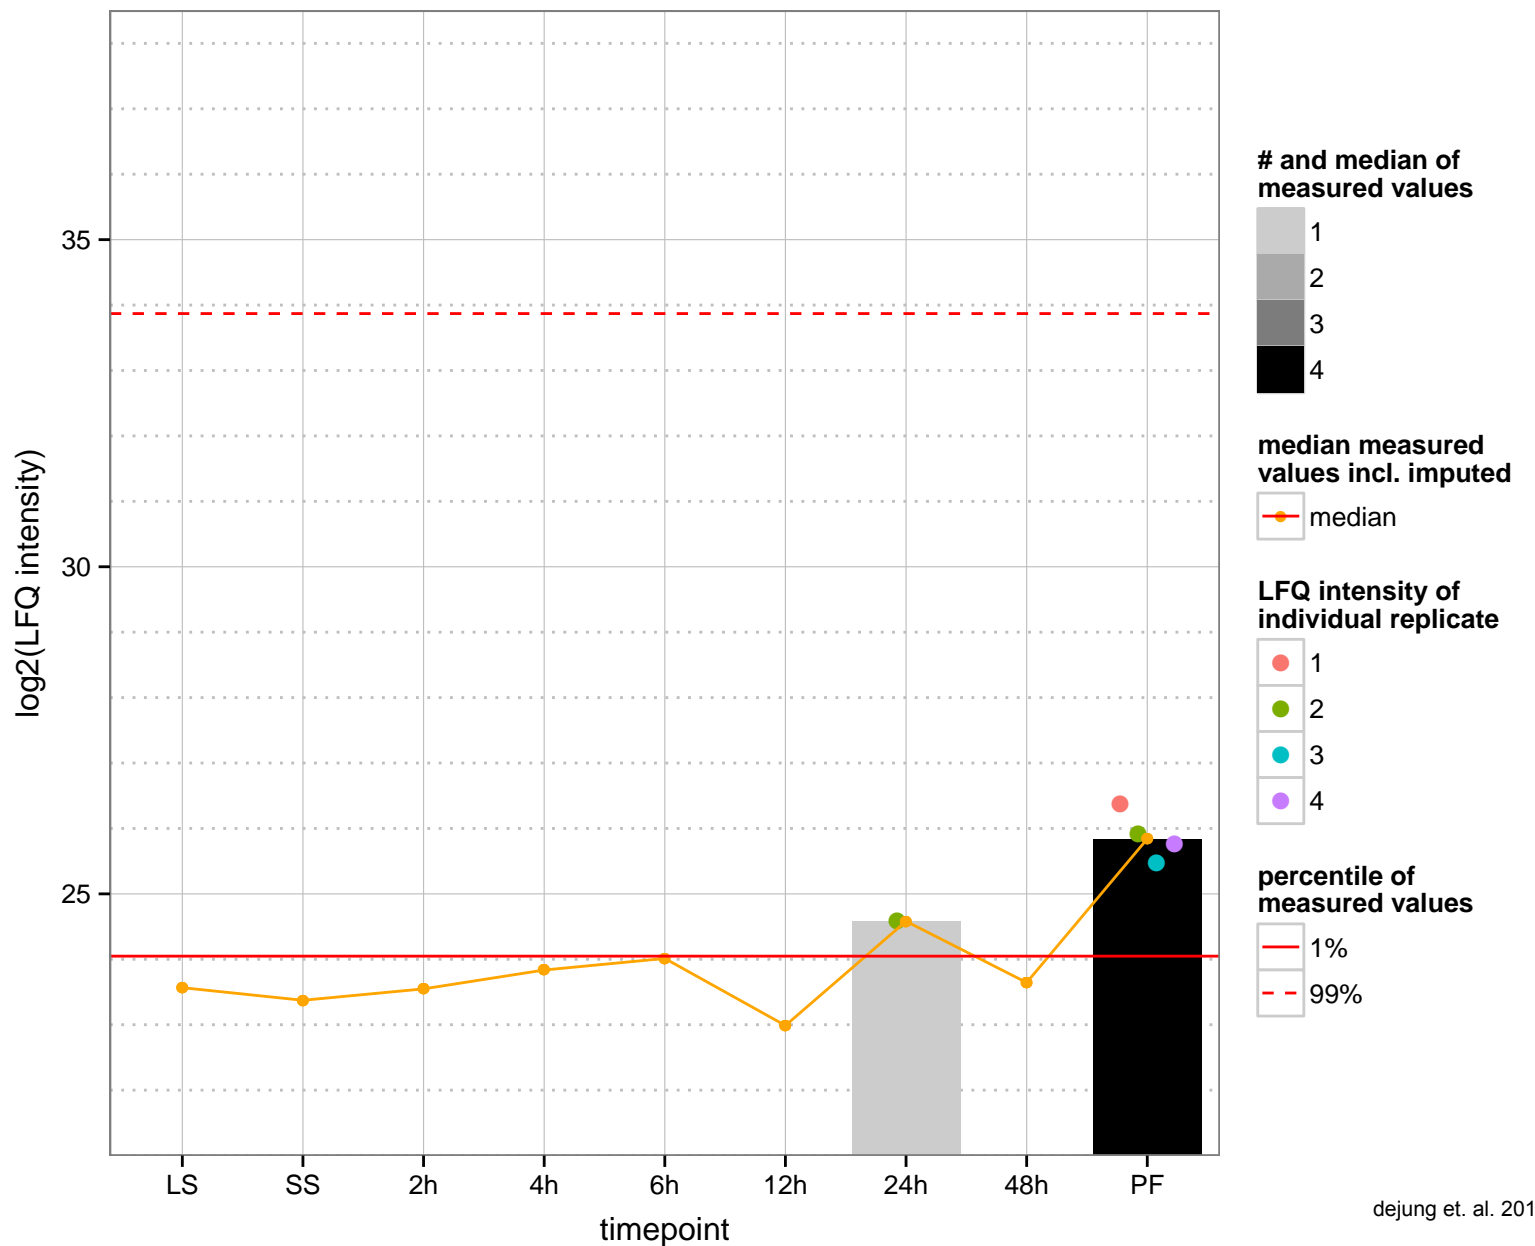



lanosterol synthase  
 Tb927.7.5230  
 AGOF: lanosterol synthase activity  
 AGOC: integral to membrane  
 AGOP: sterol biosynthetic process  
 PGO: catalytic activity, intramolecular transferase activity  
 PGOC: null  
 PGOP: null

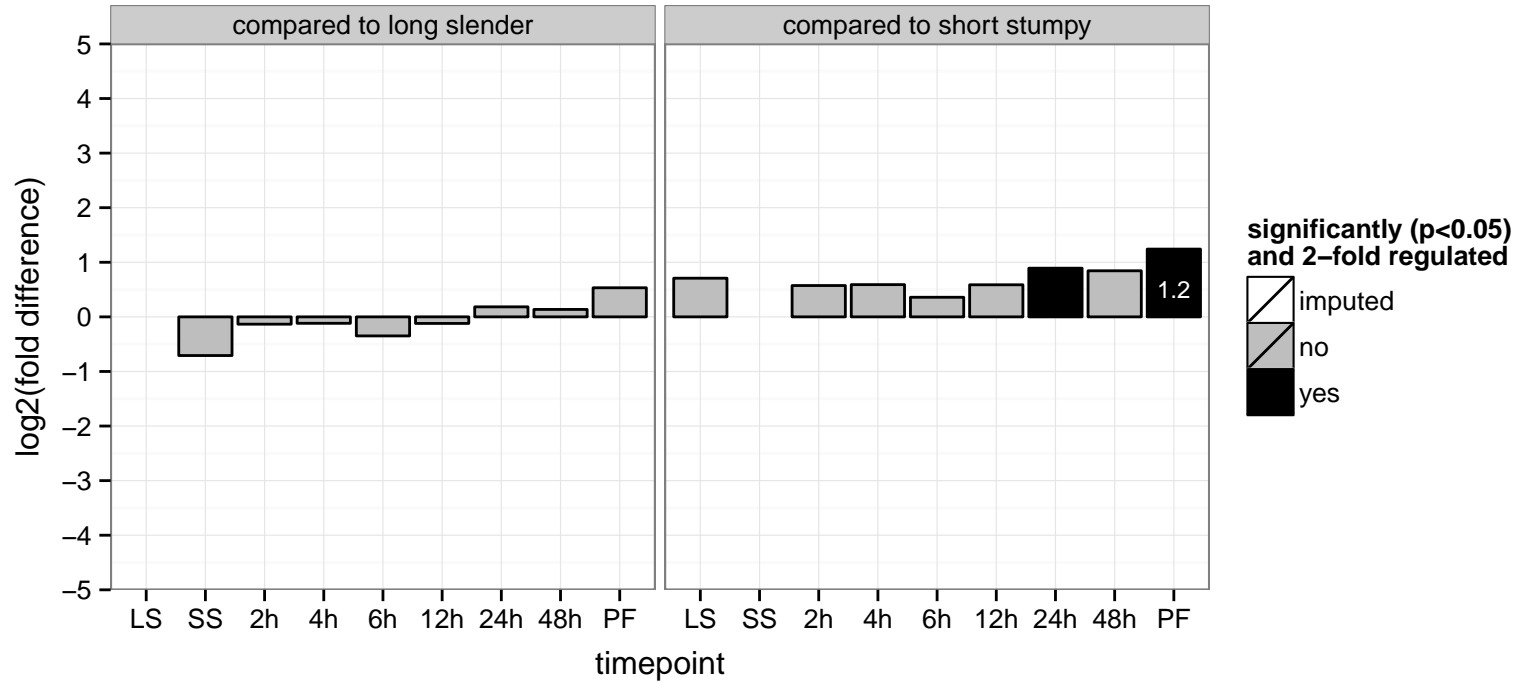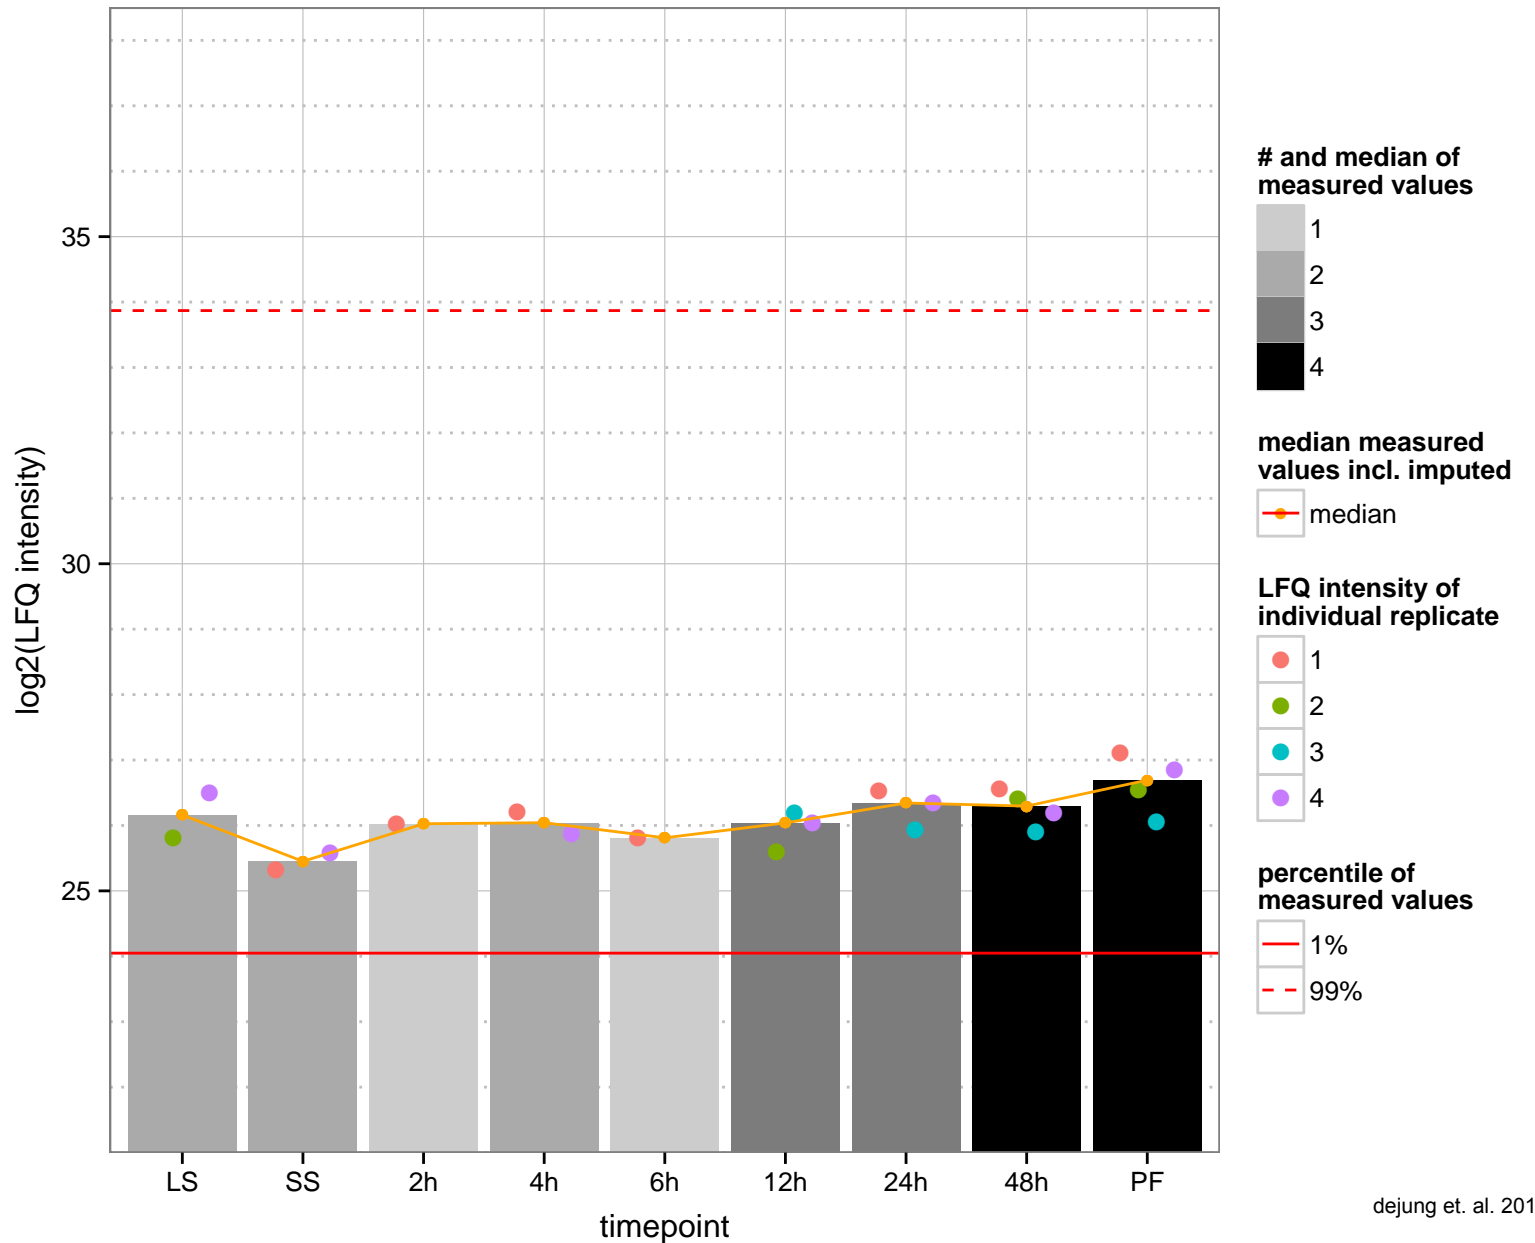

5'-3' exonuclease XRNC, putative, exoribonuclease 2, putative (XRNC)  
 Tb927.8.2810  
 AGOF: exonuclease activity, nucleic acid binding  
 AGOC: intracellular, nucleus  
 AGOP: RNA processing  
 PGOF: exonuclease activity, nucleic acid binding  
 PGO: intracellular  
 PGOP: null

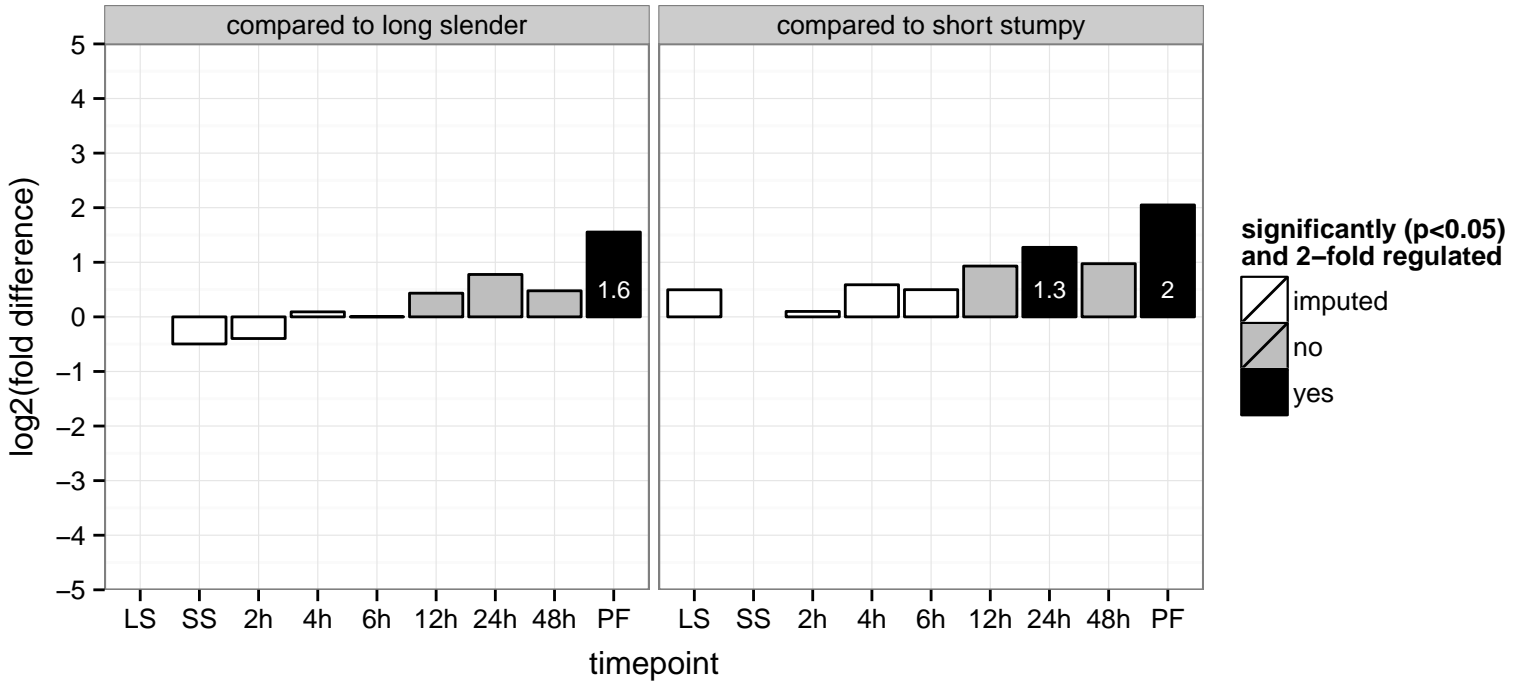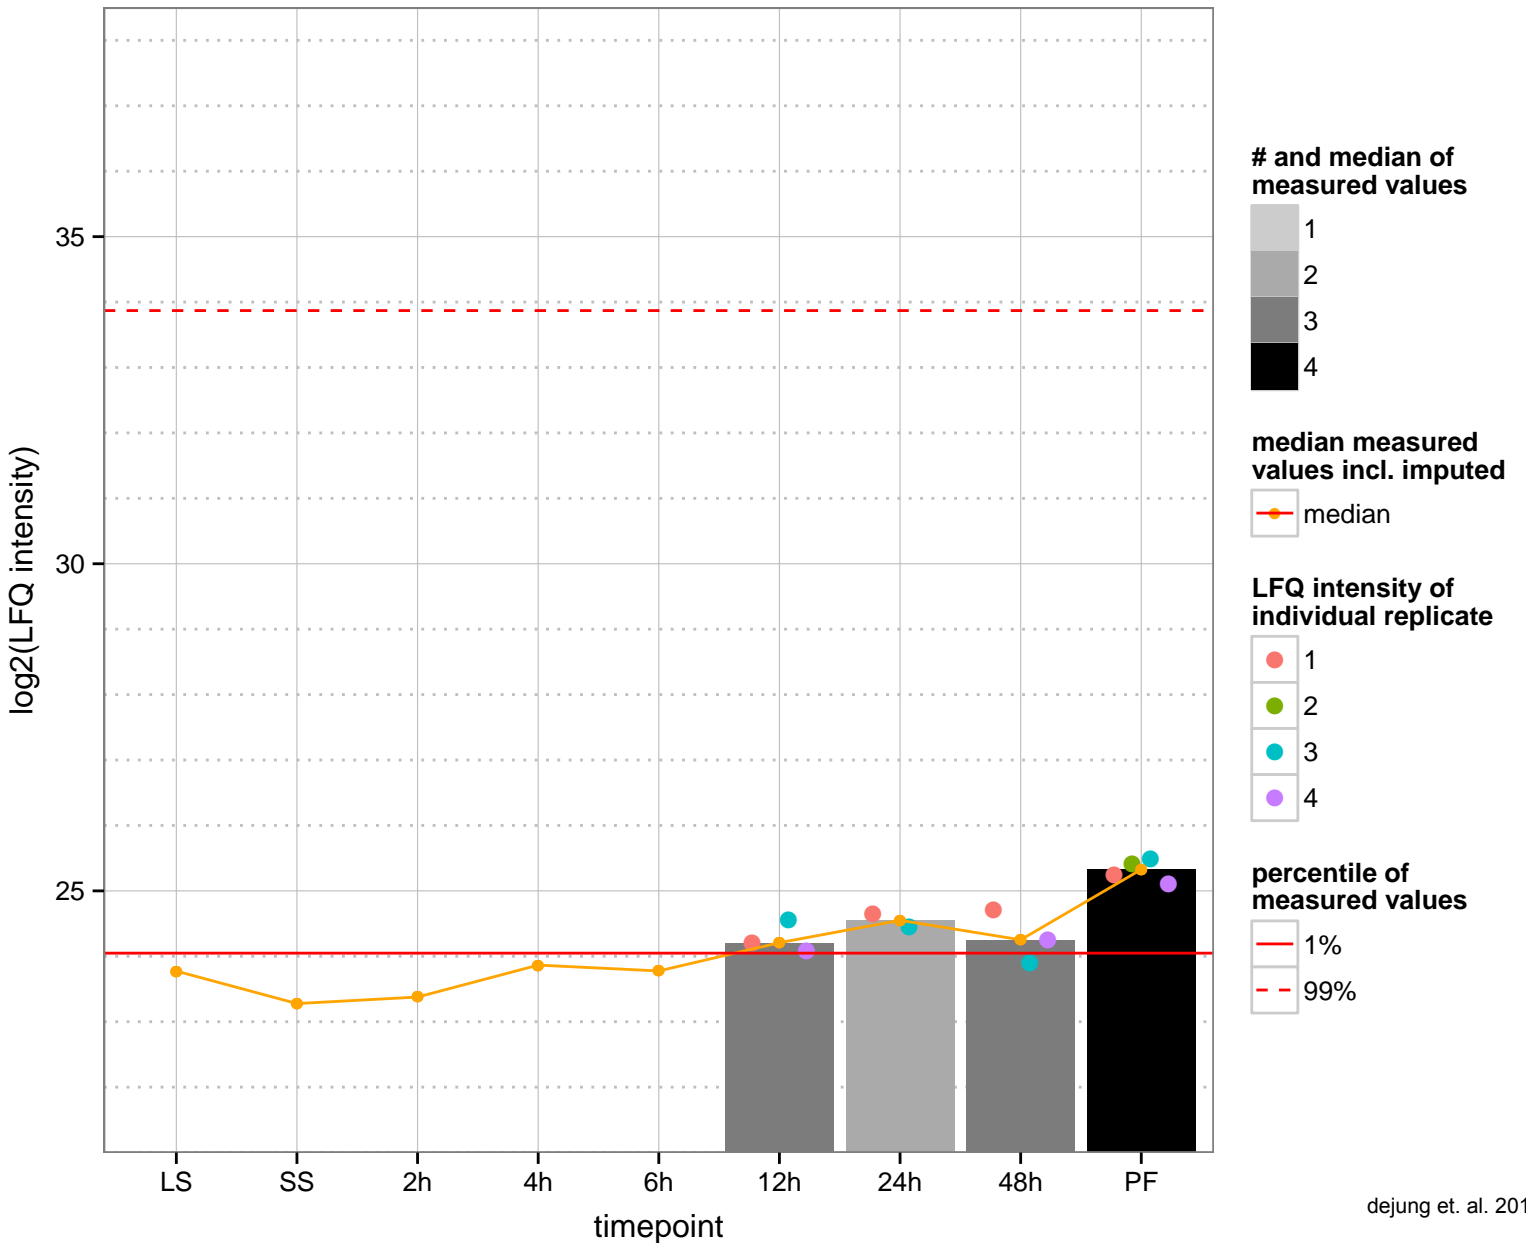

hypothetical protein, conserved  
 Tb927.8.5220  
 AGOF: null  
 AGOC: mitochondrion  
 AGOP: null  
 PGO: null  
 PGOC: null  
 PGOP: null

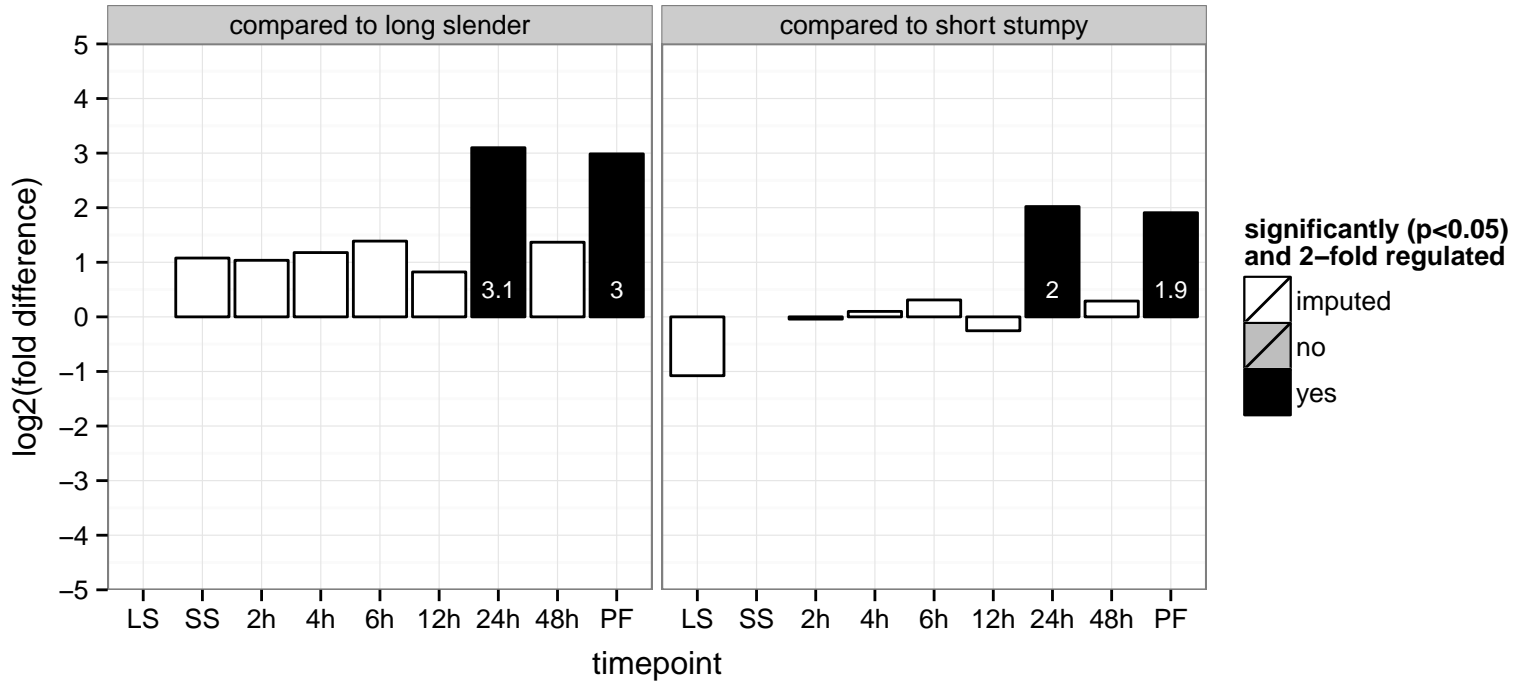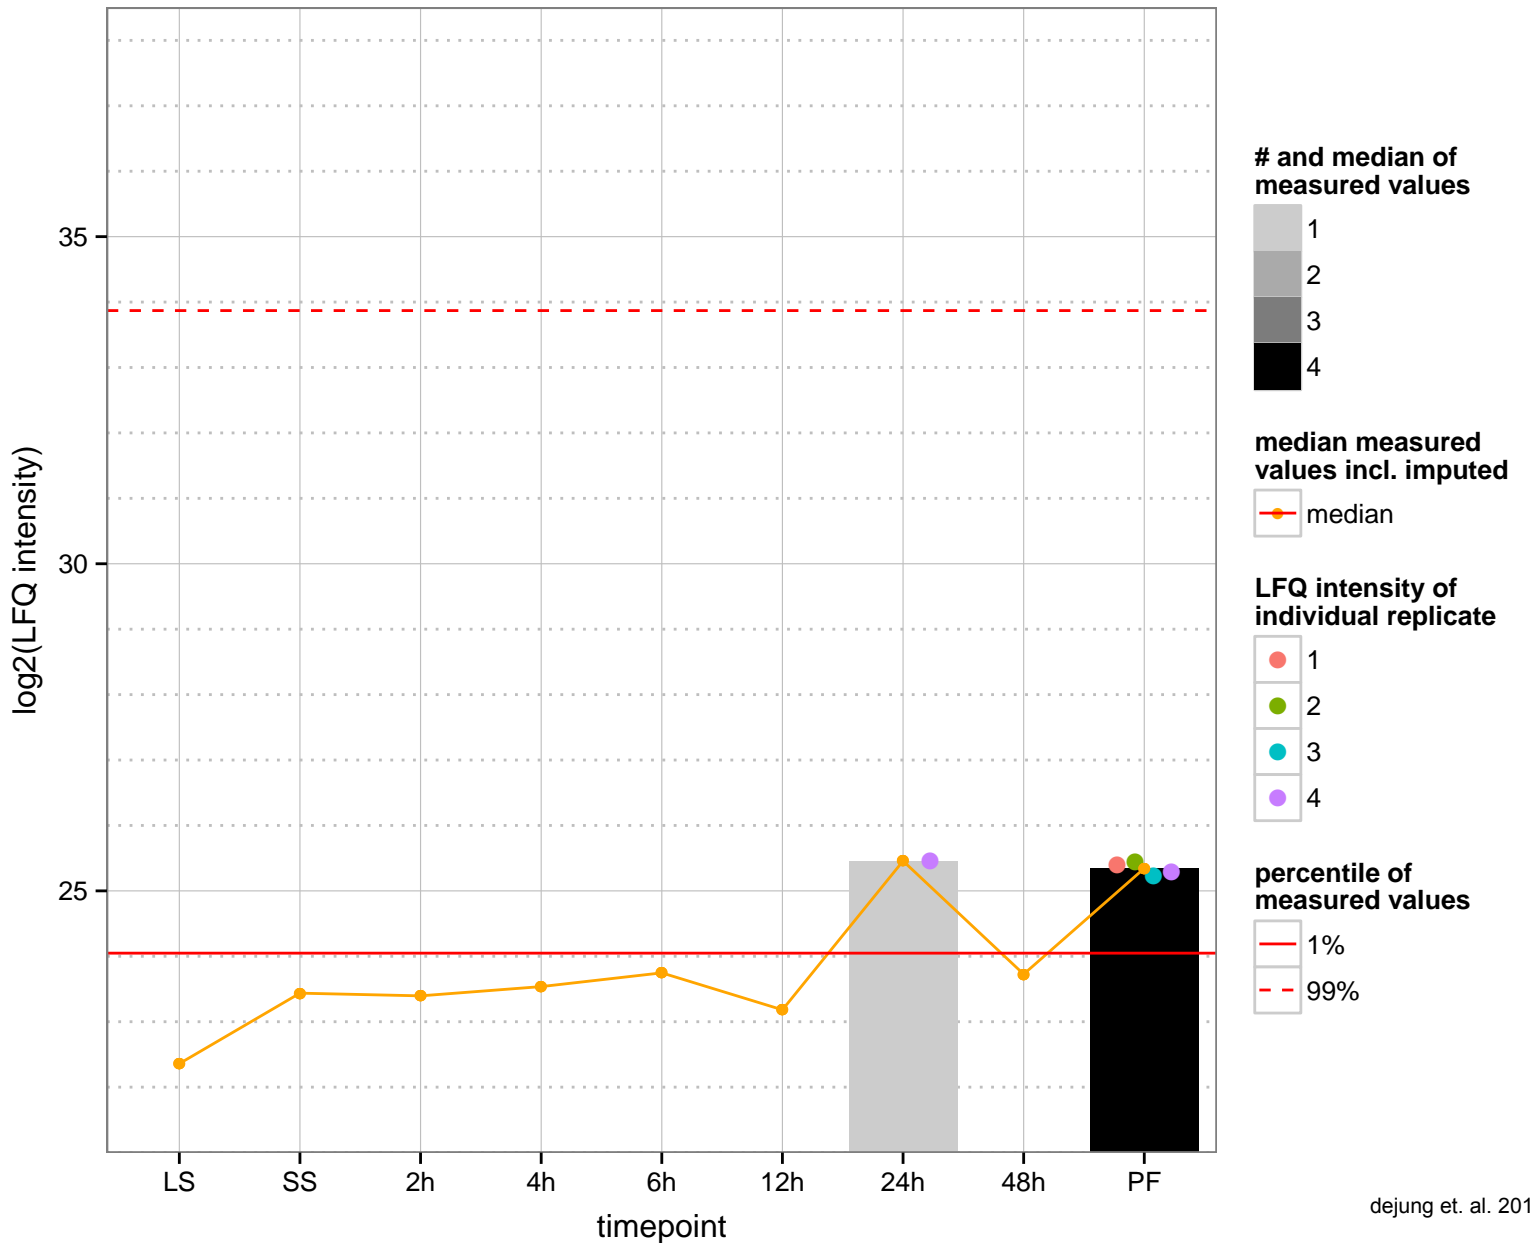

hypothetical protein, conserved  
 Tb927.9.9630  
 AGOF: null  
 AGOC: null  
 AGOP: null  
 PGO: protein binding  
 PGOC: null  
 PGOP: null

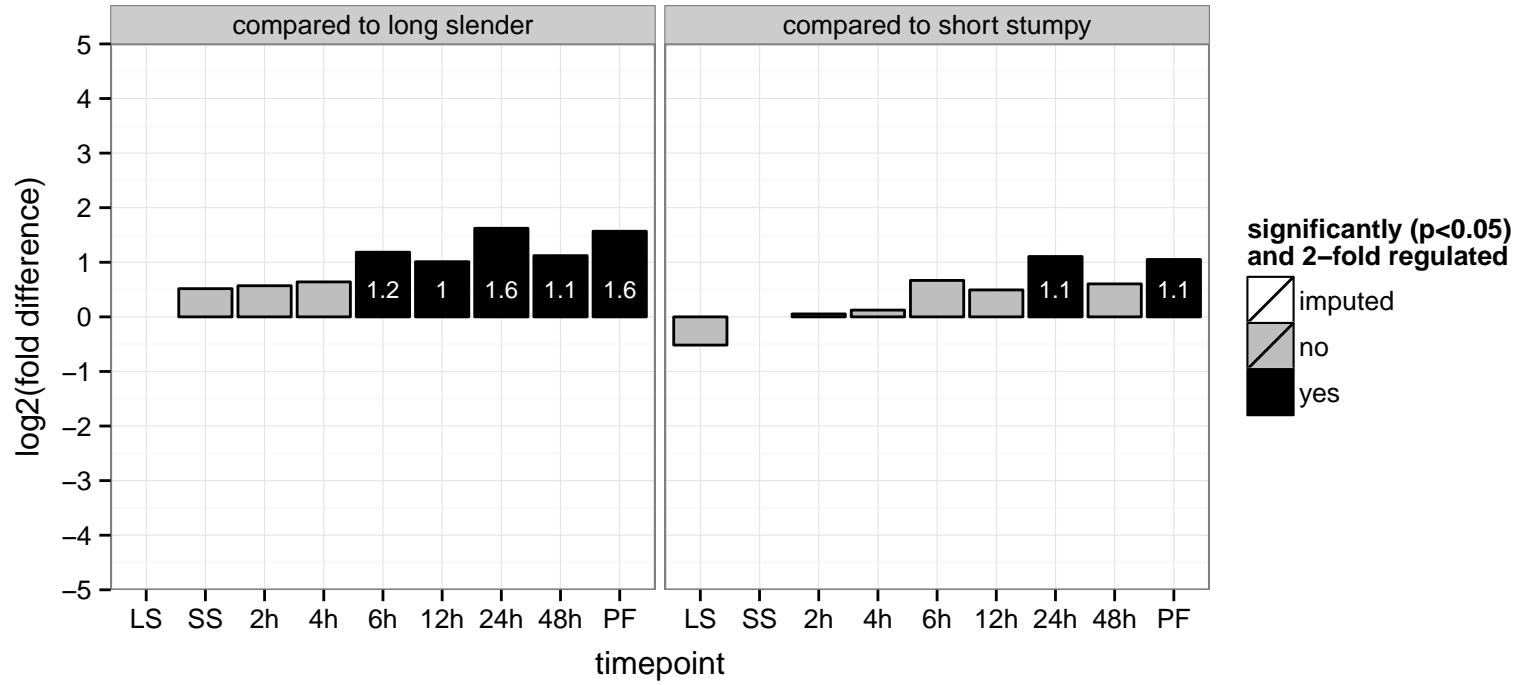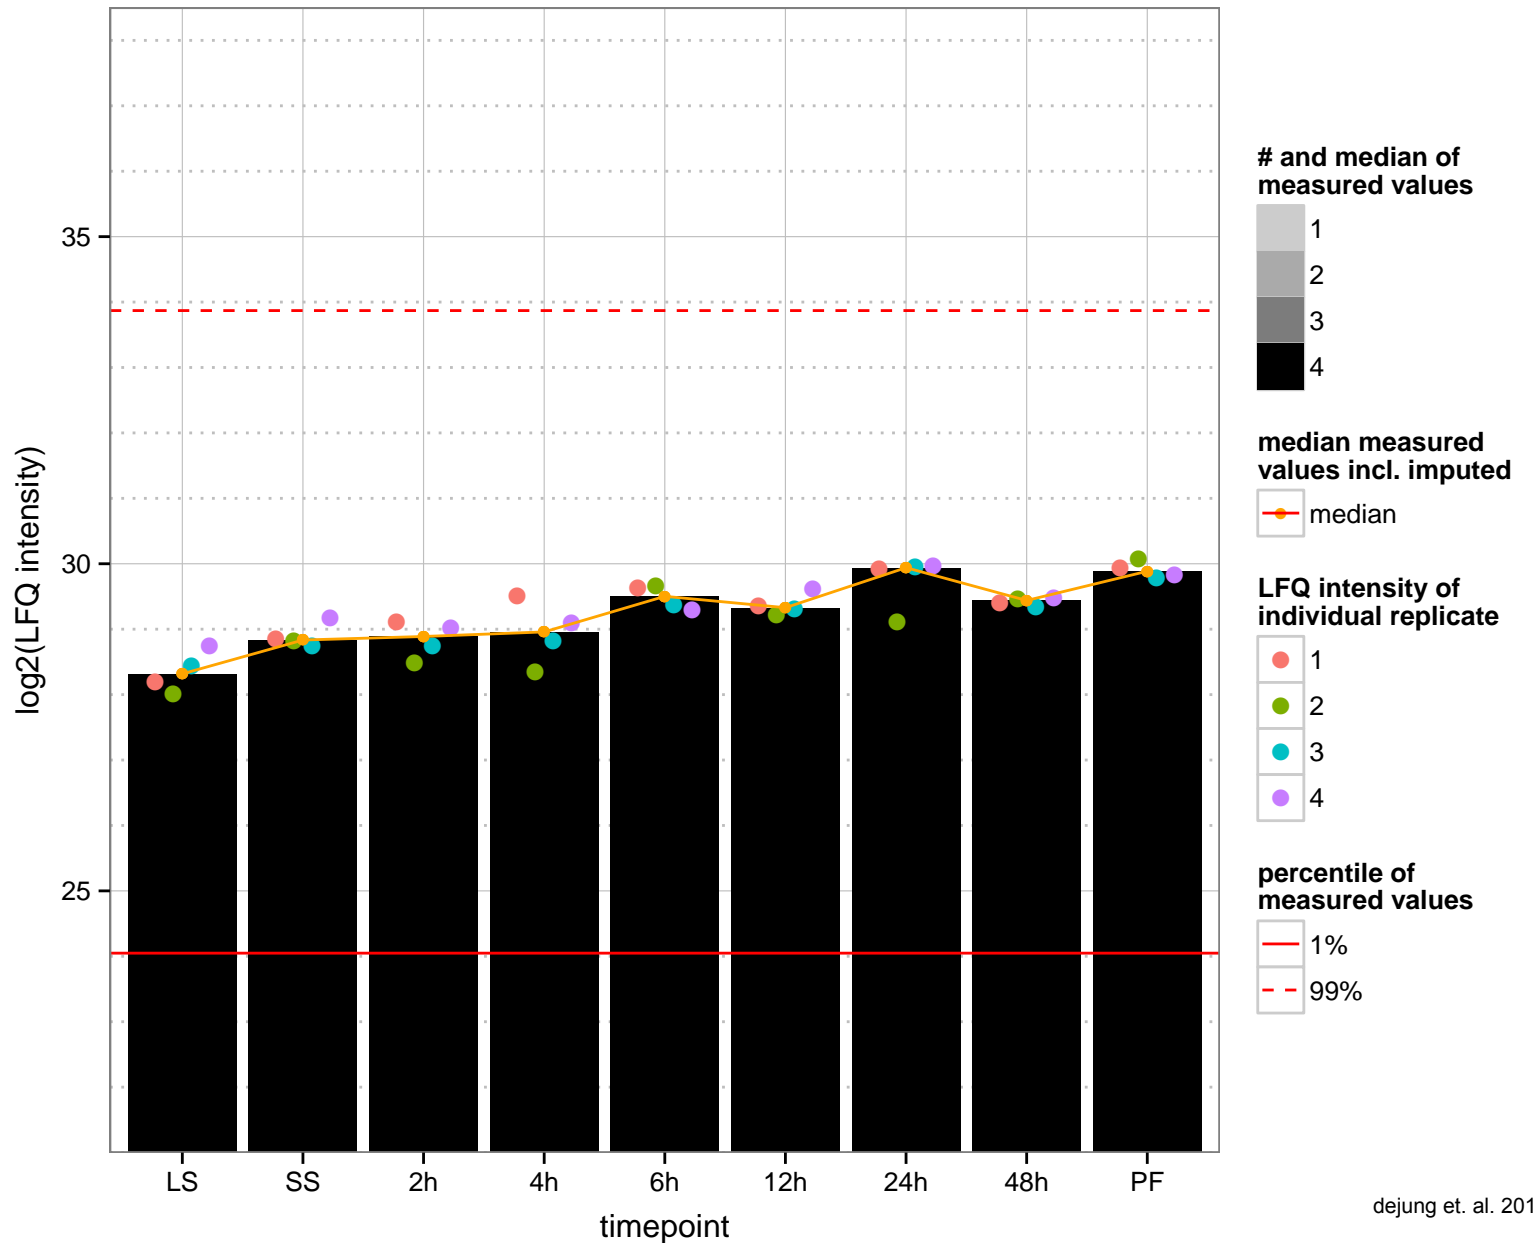

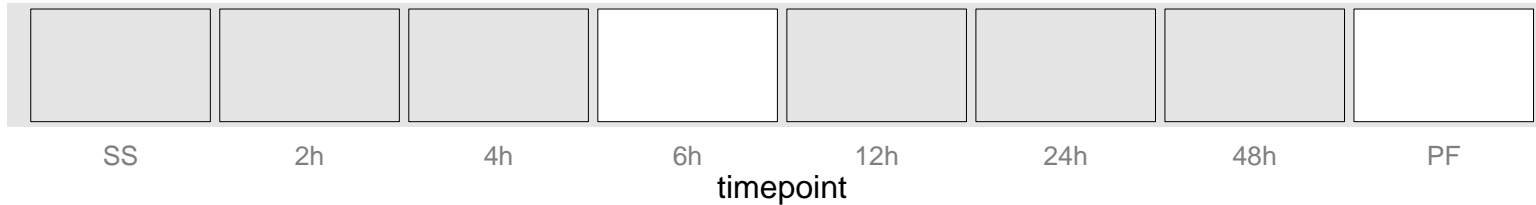

**regulated**  **not regulated**  **significant down**  **significant up**

hypothetical protein, conserved, hypothetical transmembrane protein  
 Tb927.1.790;Tb11.v5.0524  
 AGOF: null  
 AGOC: null, mitochondrion  
 AGOP: null  
 PGO: null  
 PGO: null  
 PGO: null

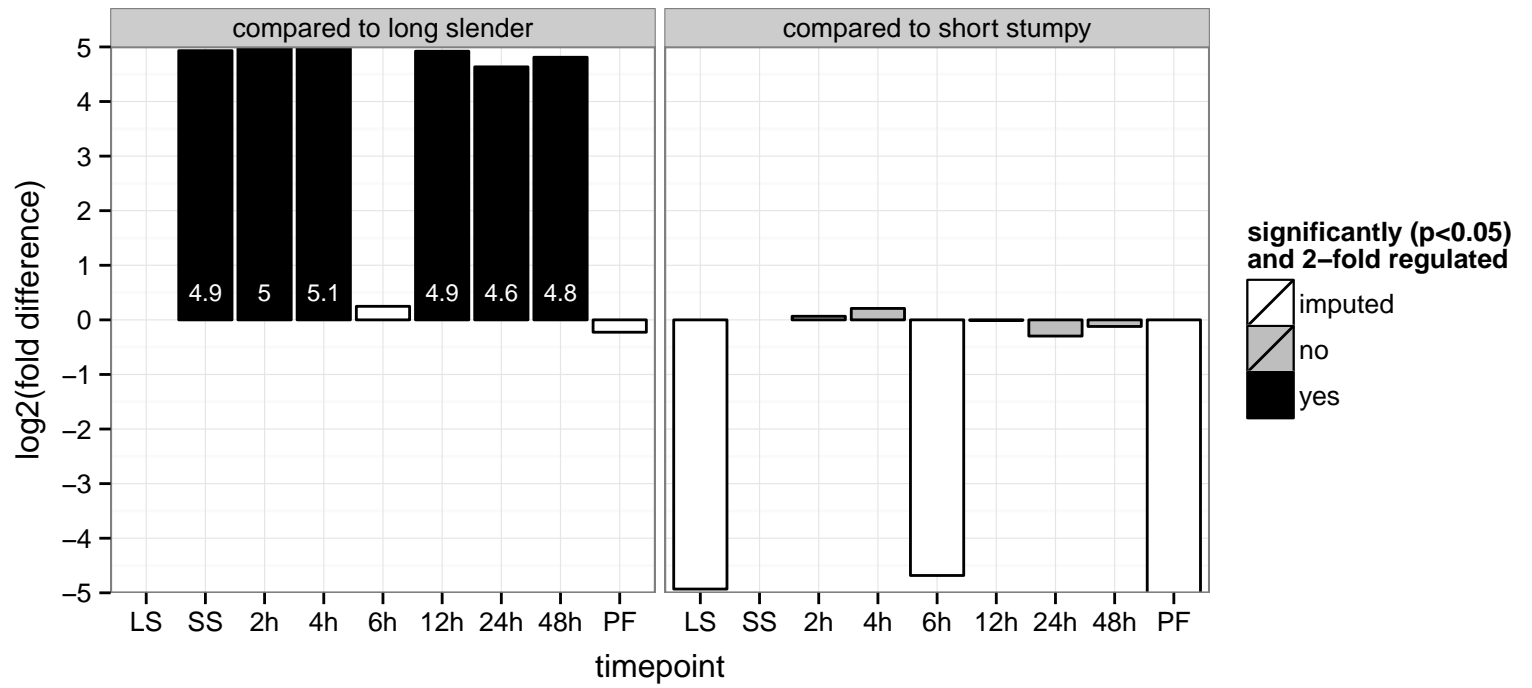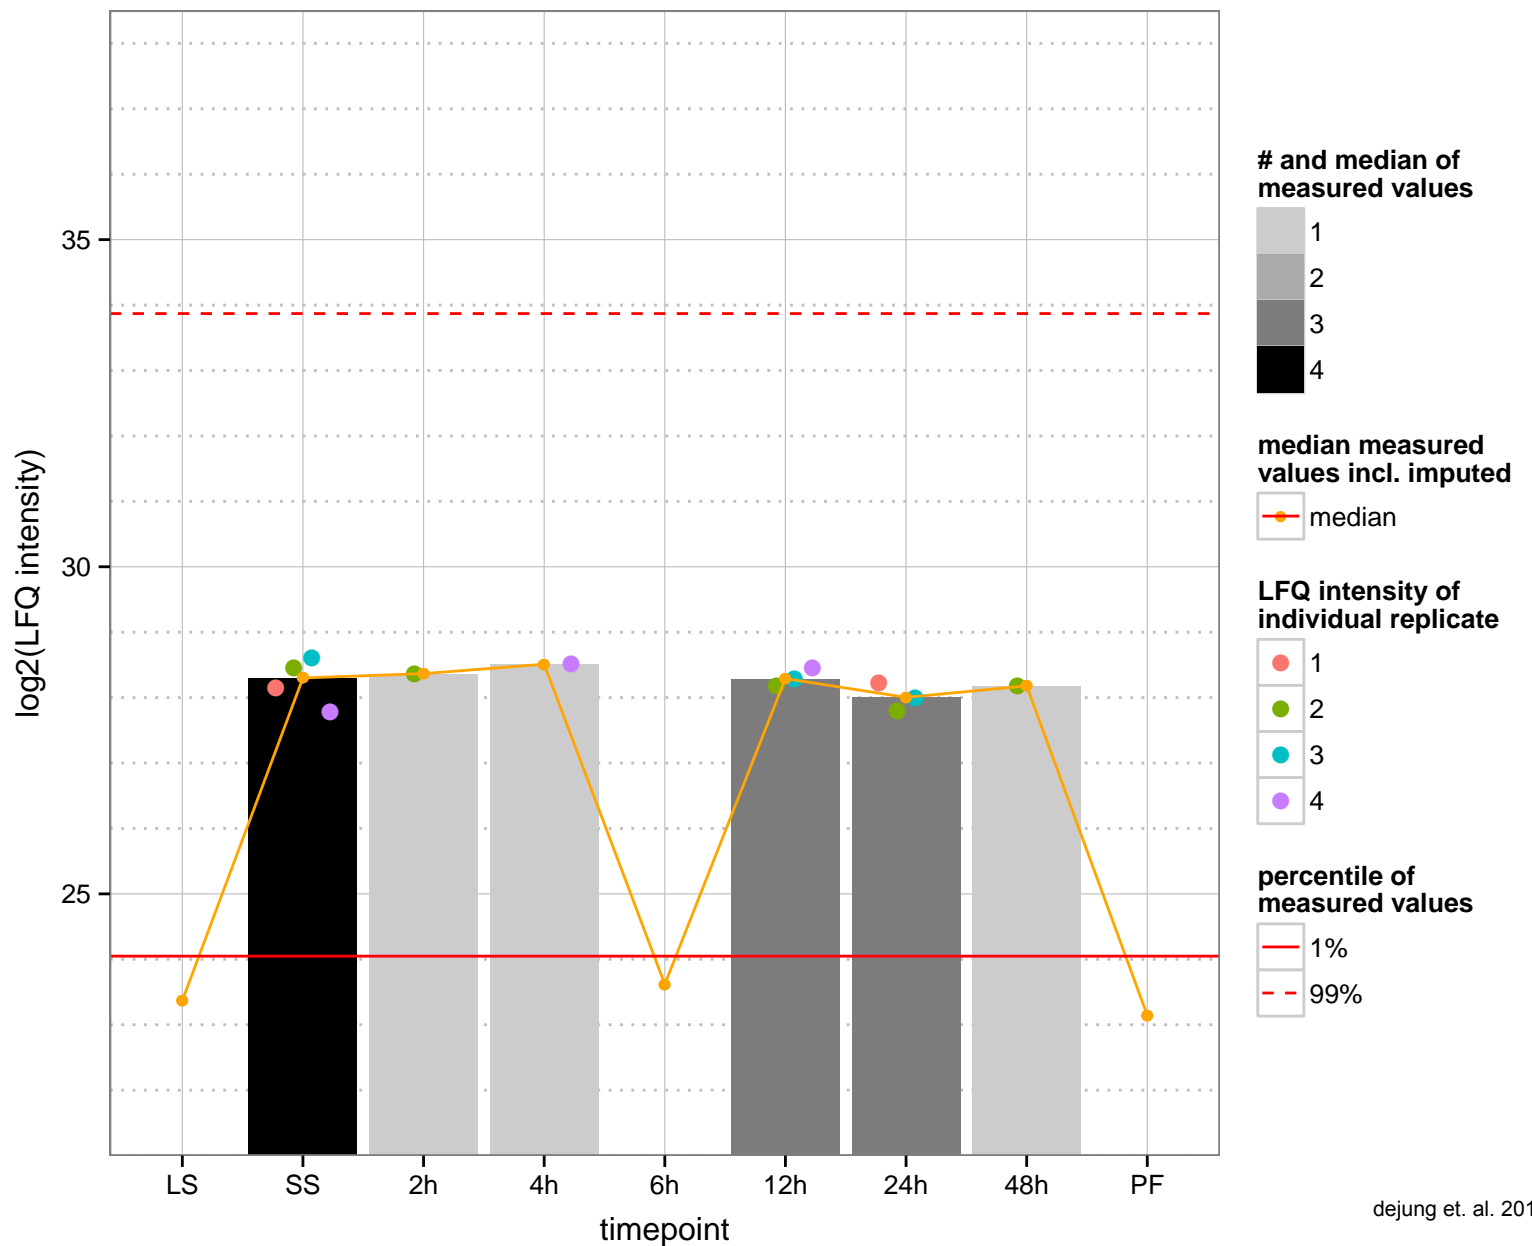

RNA-binding protein, putative (RBP27), RNA-binding protein 27  
 Tb927.10.14080;Tb927.10.13570  
 AGOF: RNA binding, nucleic acid binding  
 AGOC: null  
 AGOP: null  
 PGOF: null, nucleic acid binding  
 PGOC: null  
 PGOP: null

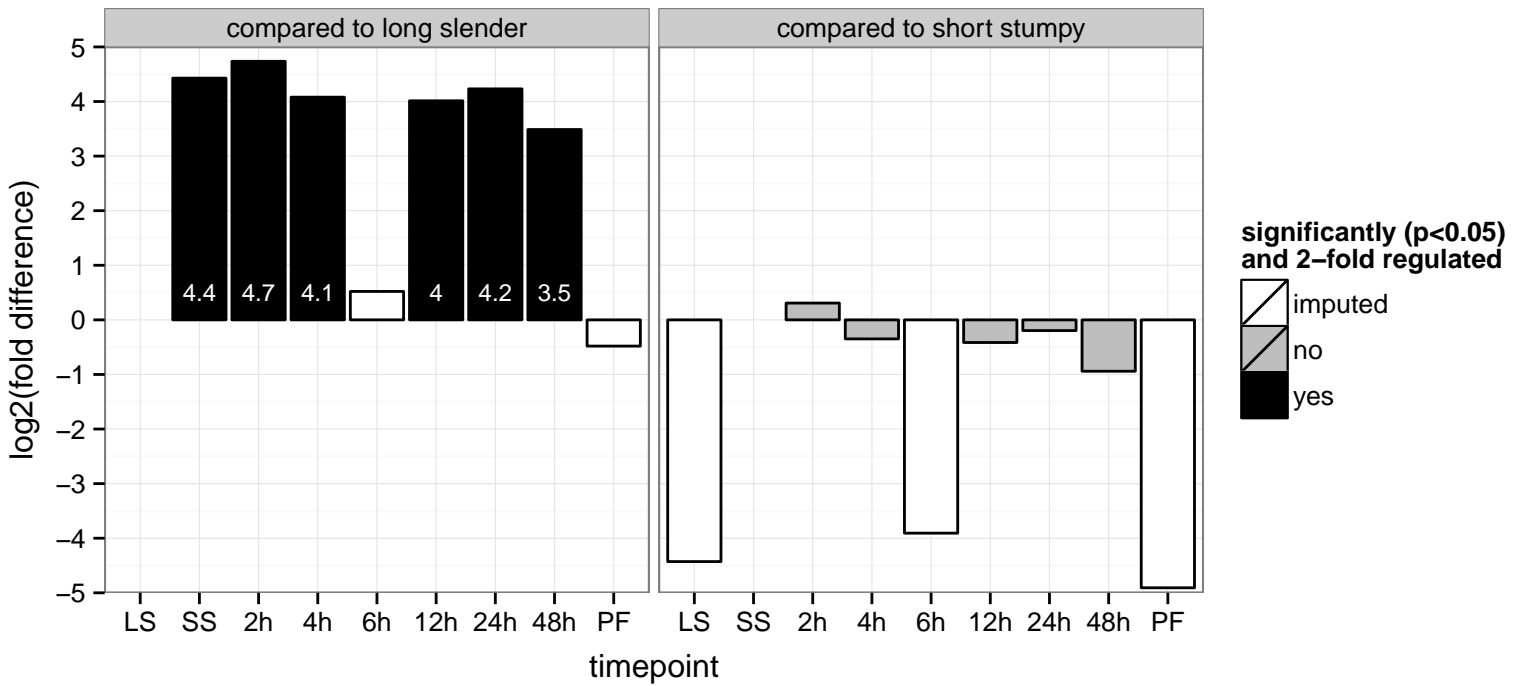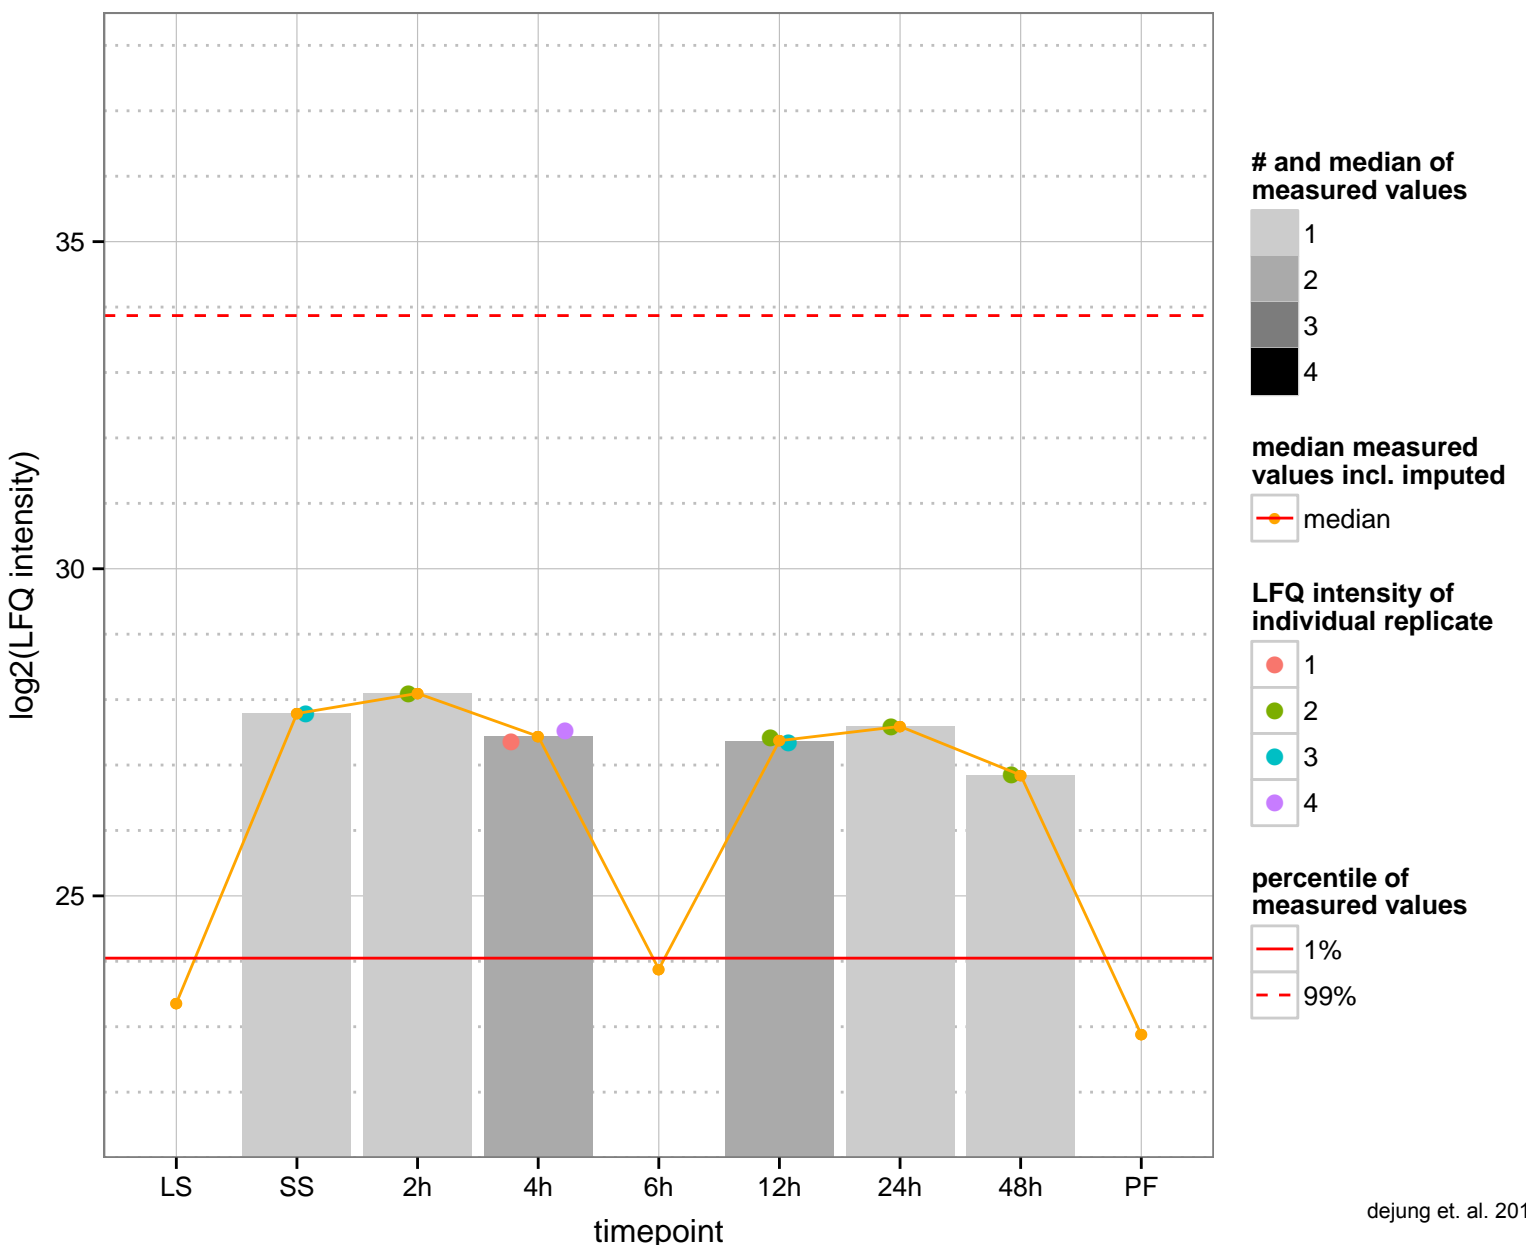

uracil-DNA glycosylase, putative  
 Tb927.10.13970  
 AGOF: uracil DNA N-glycosylase activity  
 AGOC: null  
 AGOP: base-excision repair  
 PGO: uracil DNA N-glycosylase activity  
 PGOC: null  
 PGOP: base-excision repair

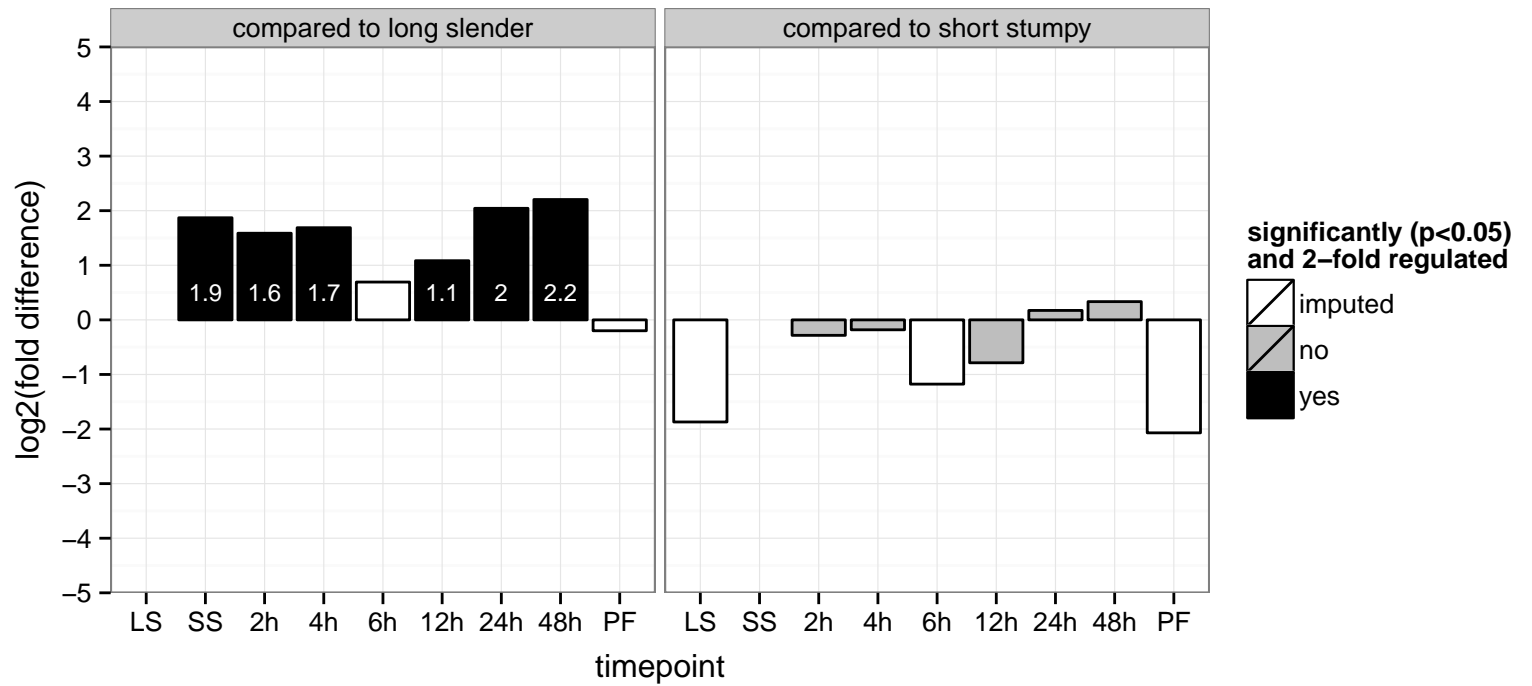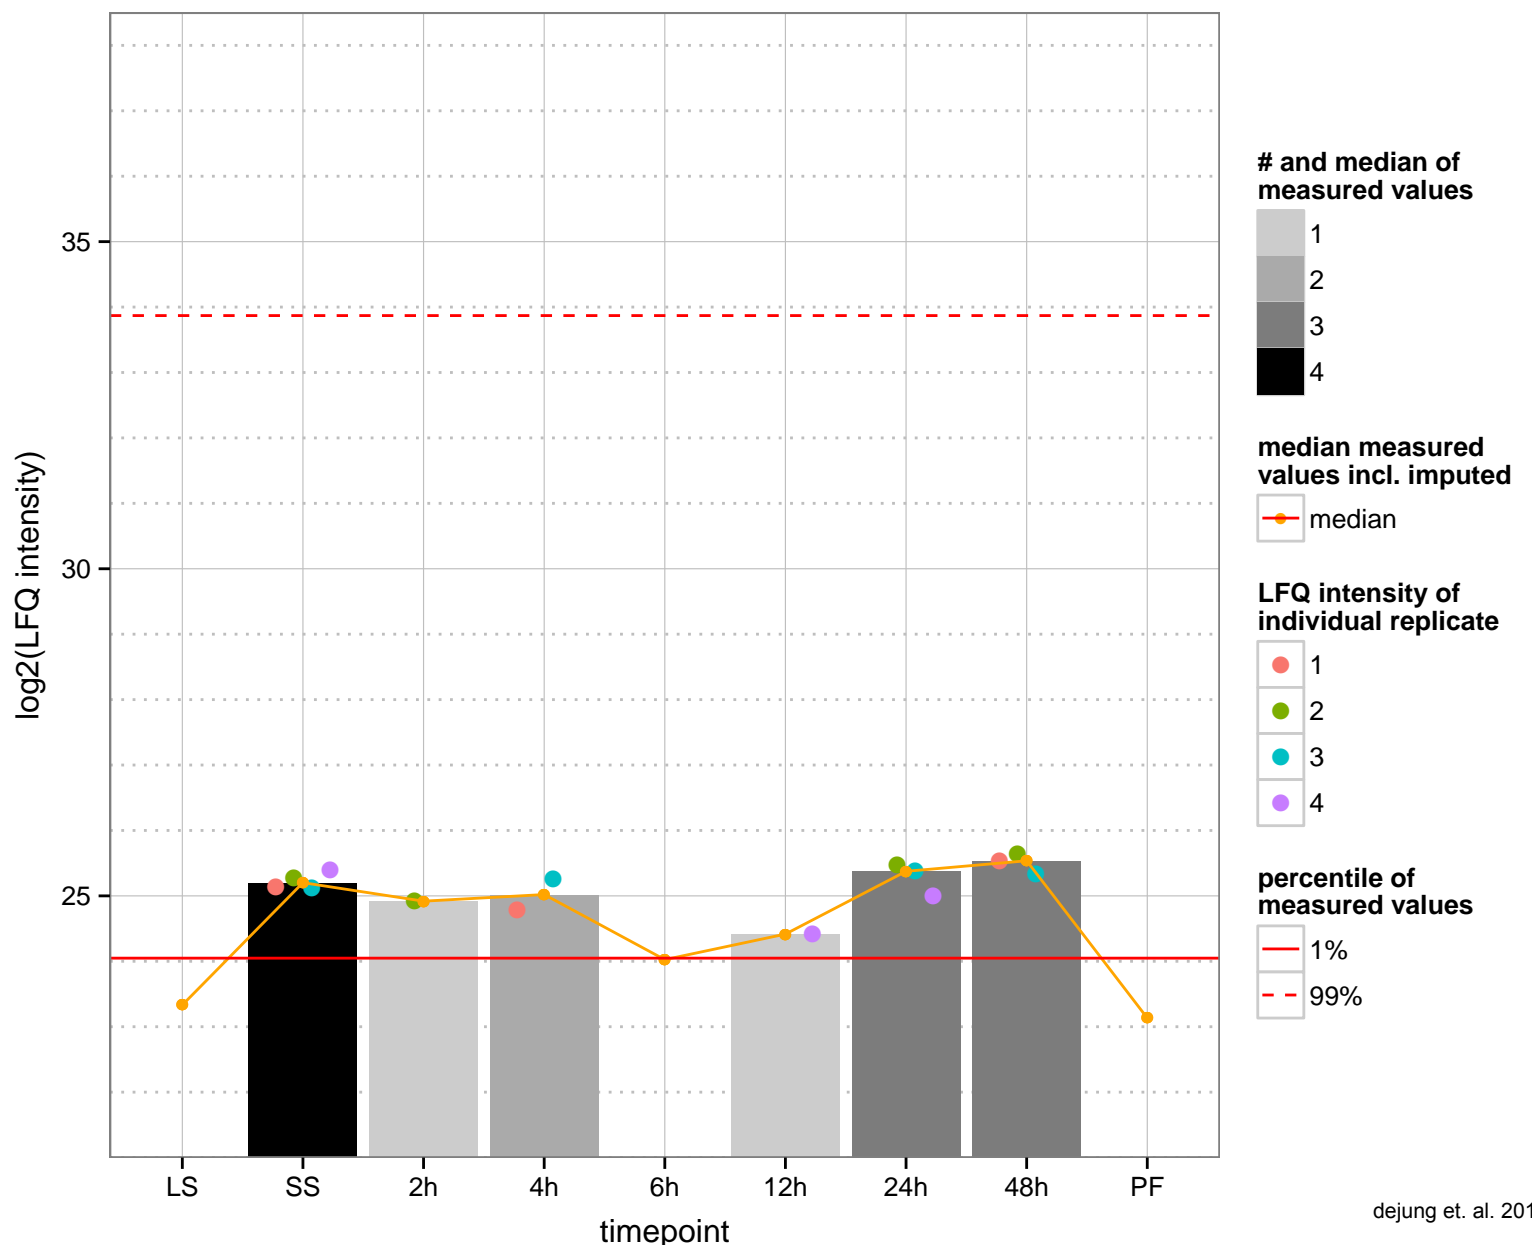



G10 protein homologue, putative  
 Tb927.10.6650  
 AGOF: null  
 AGOC: nucleus  
 AGOP: null  
 PGO: null  
 PGO: nucleus  
 PGOP: null

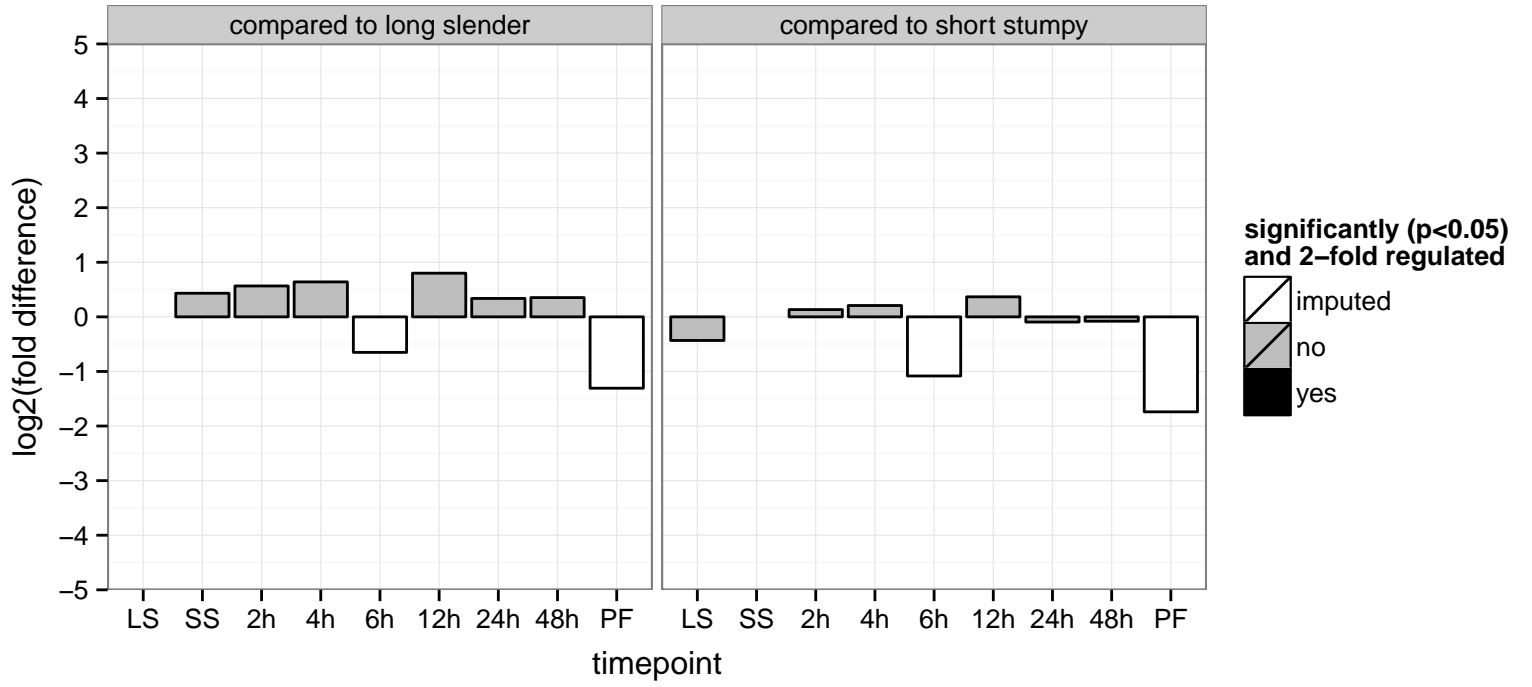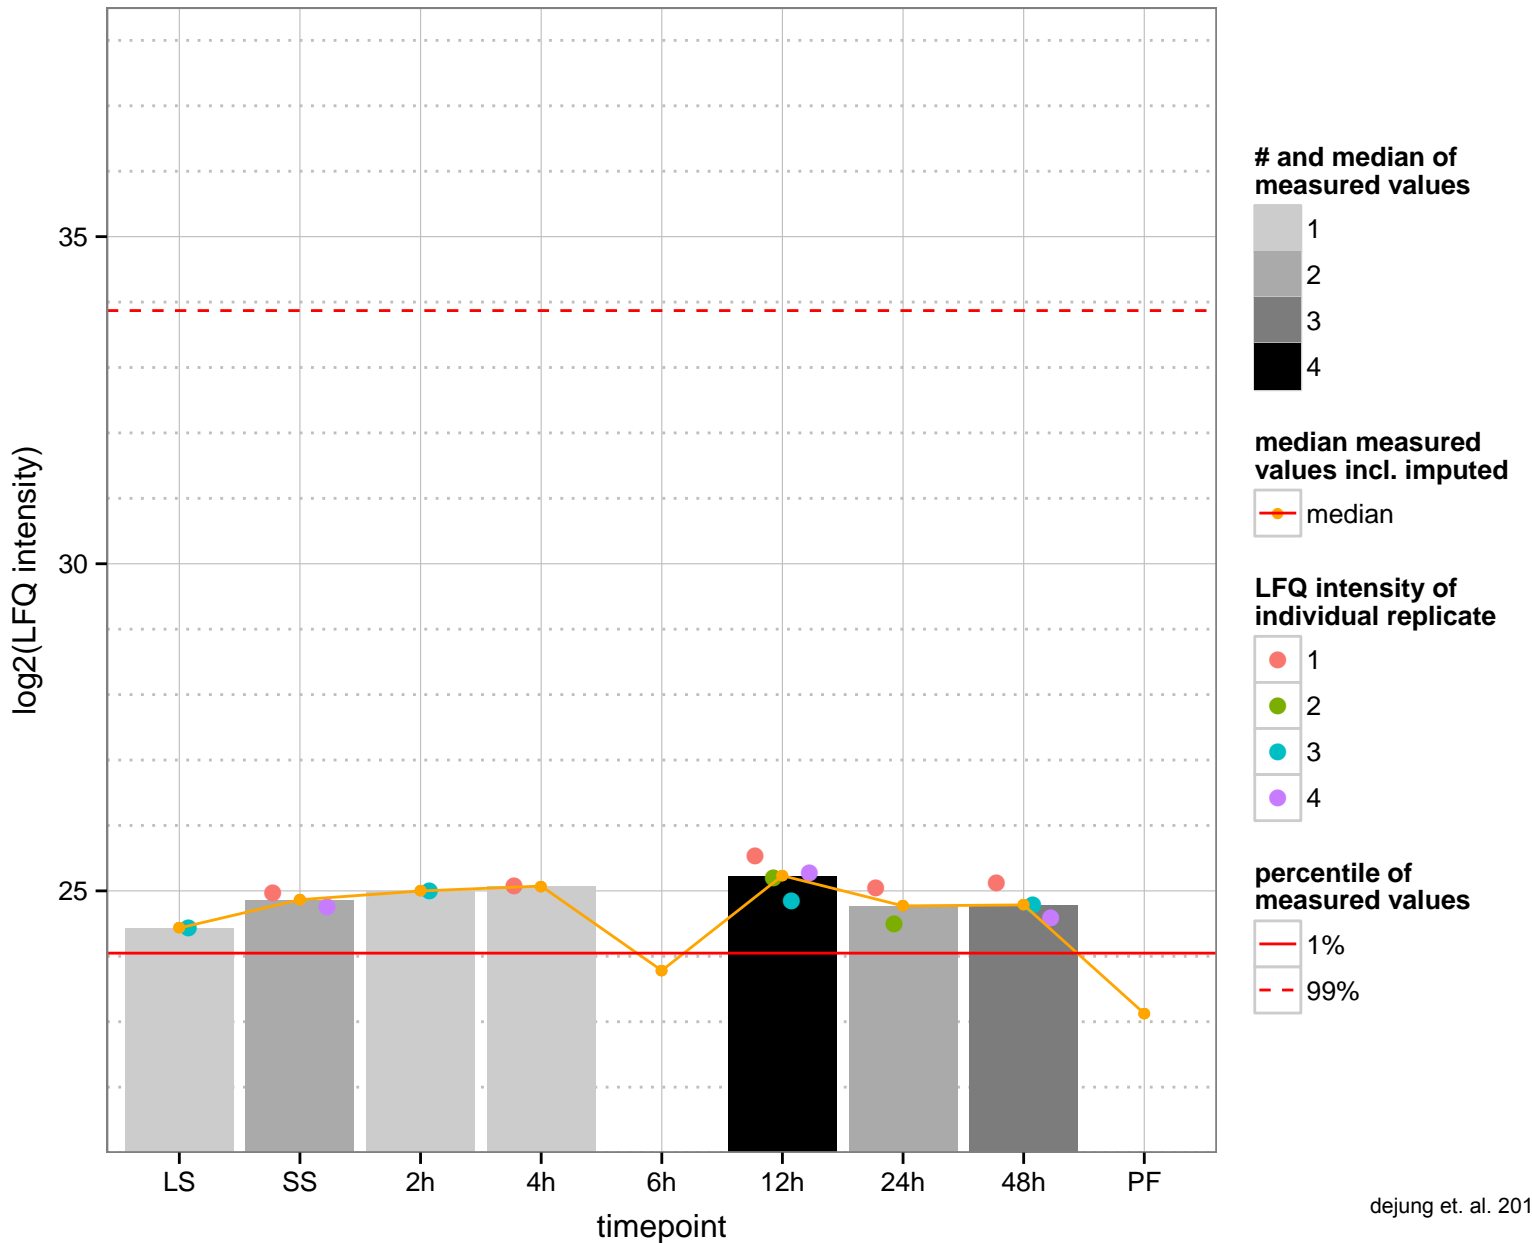

Poly(A)-specific ribonuclease PARN-2  
 Tb927.10.8360  
 AGOF: nuclease activity, nucleic acid binding  
 AGOC: nucleus  
 AGOP: null  
 PGO: nucleic acid binding  
 PGOC: nucleus  
 PGOP: null

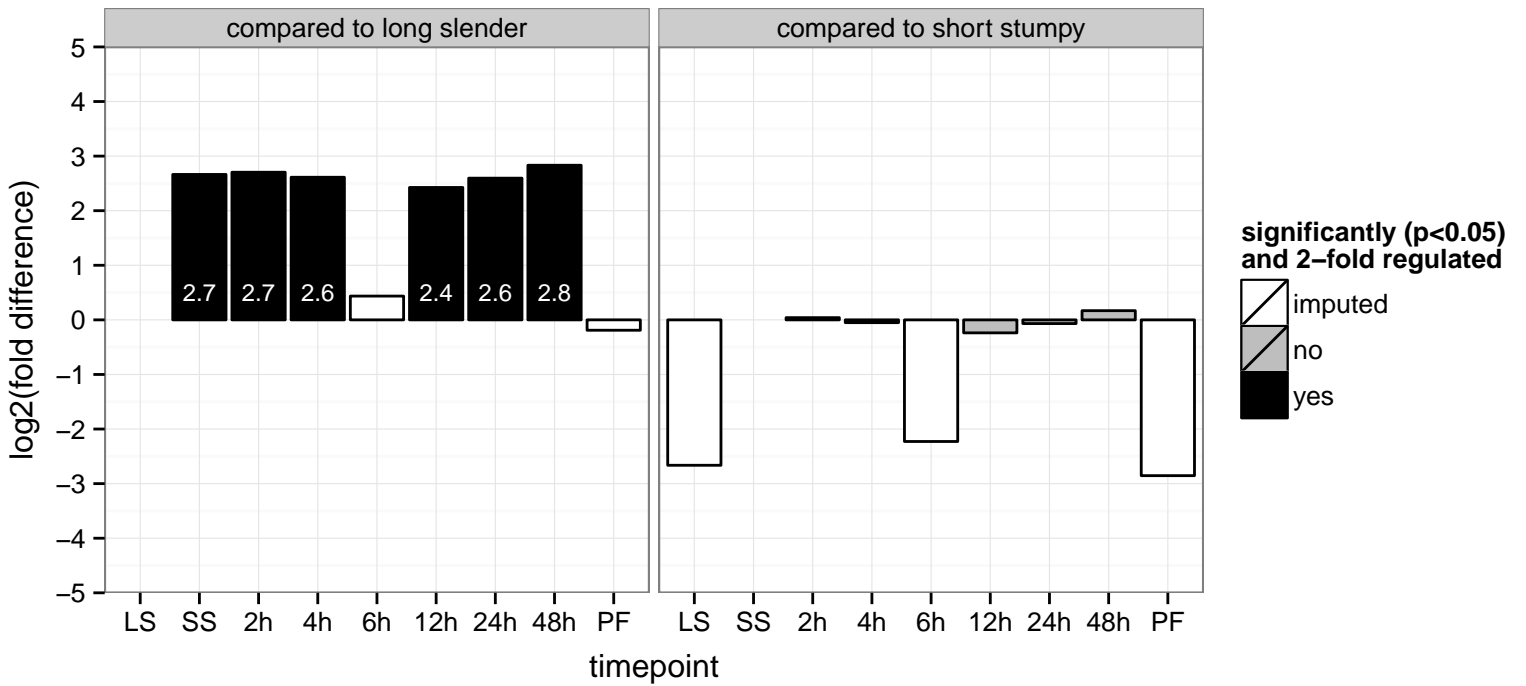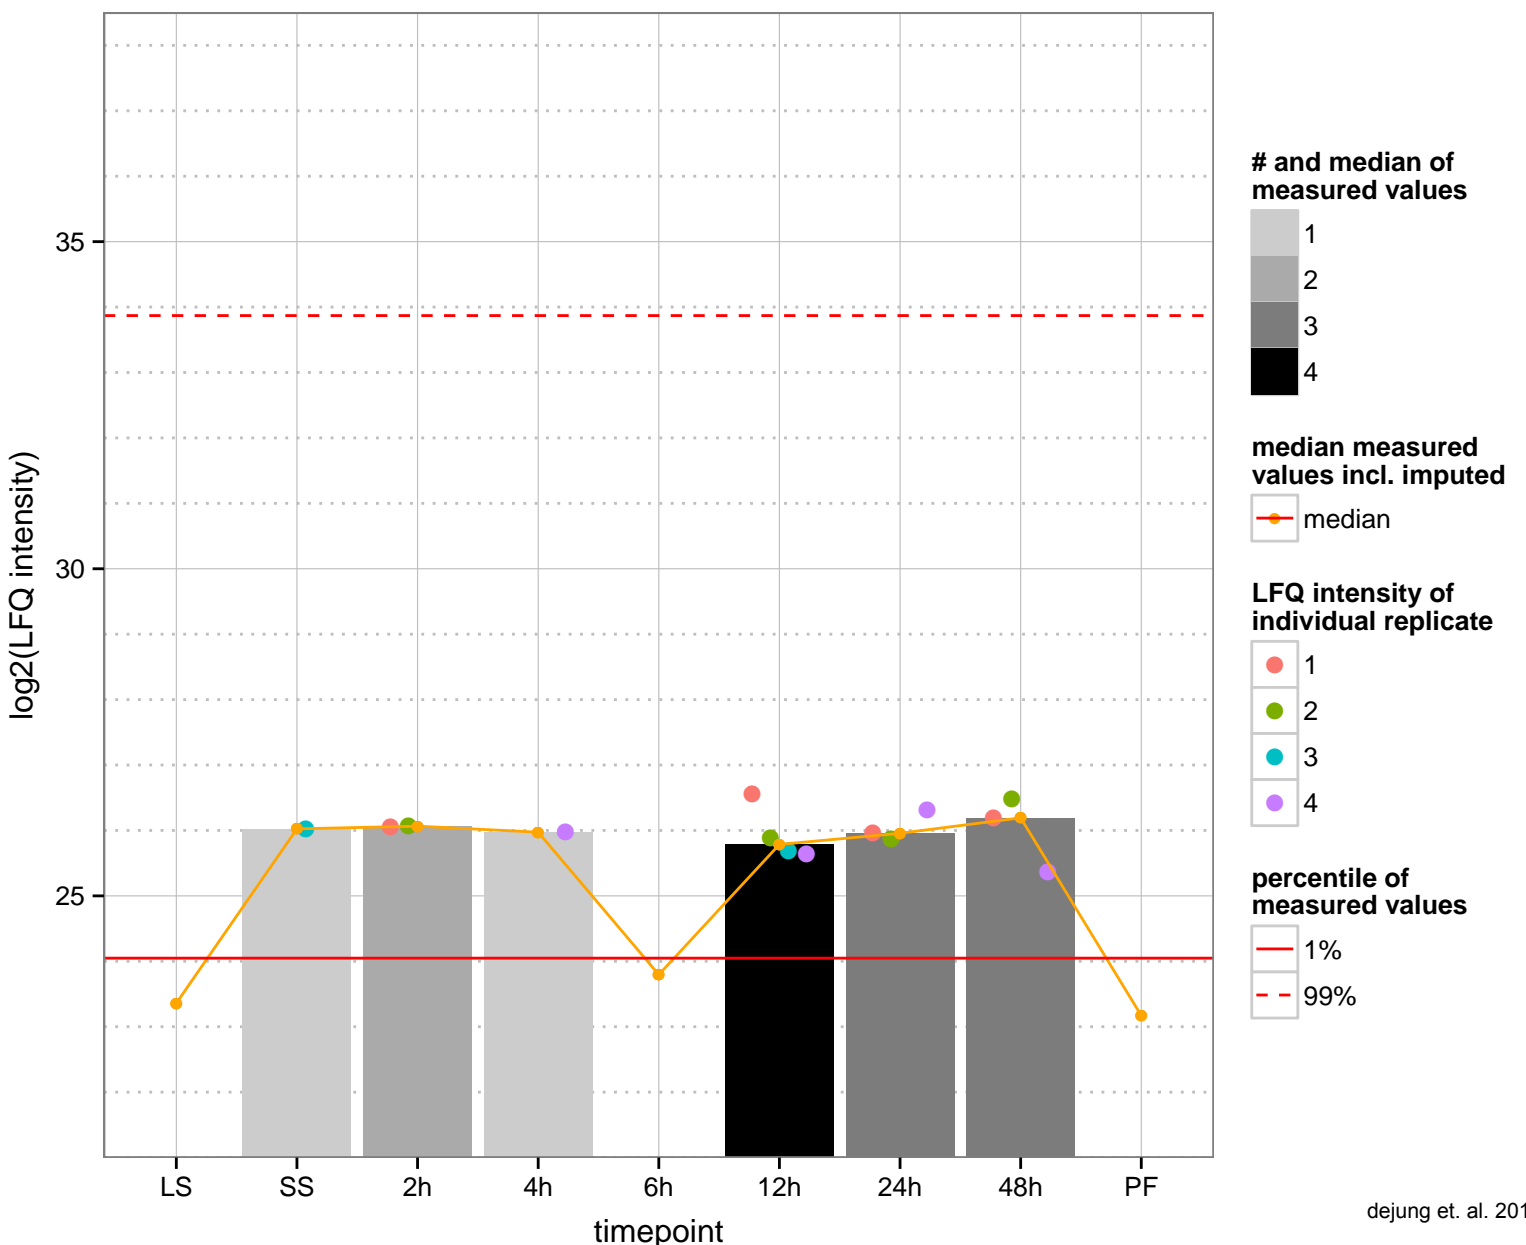

hypothetical protein, conserved  
 Tb927.11.13460  
 AGOF: null  
 AGOC: null  
 AGOP: null  
 PGO: null  
 PGOC: null  
 PGOP: null

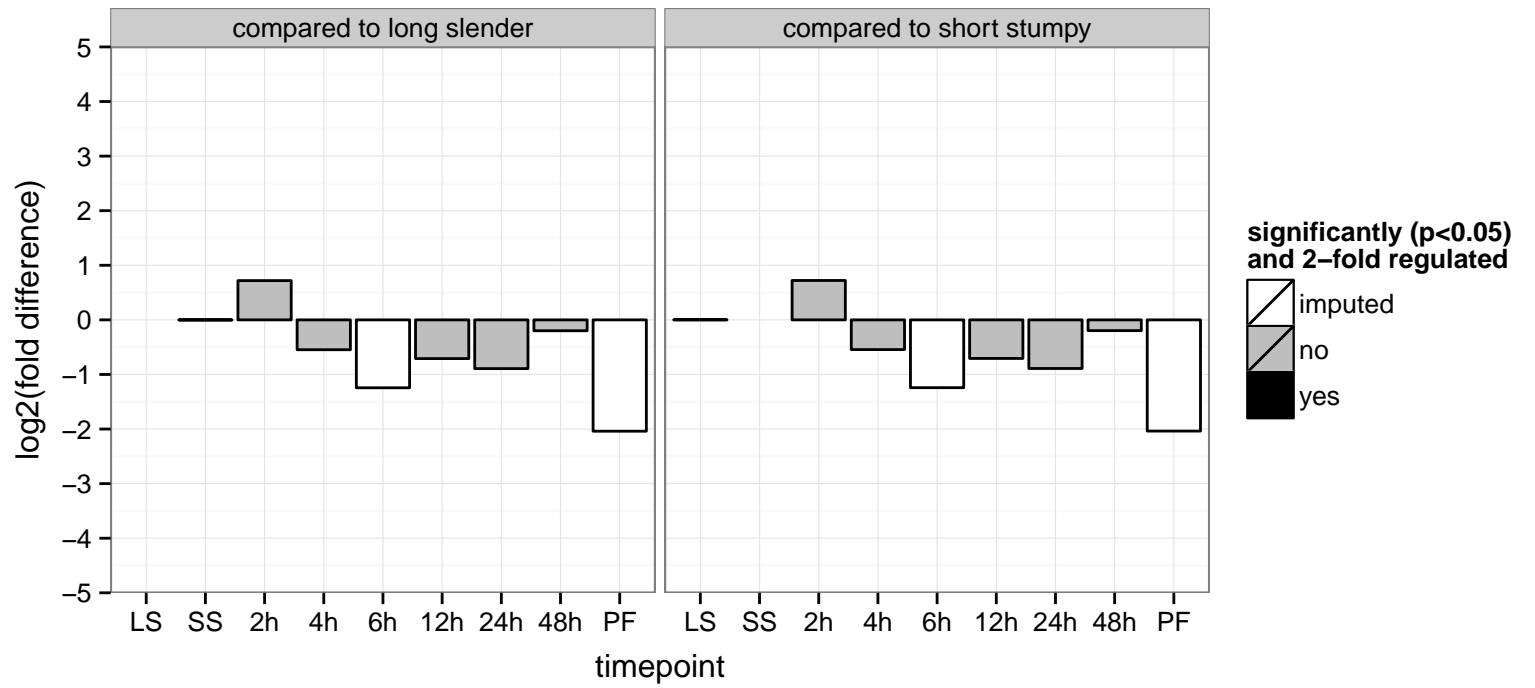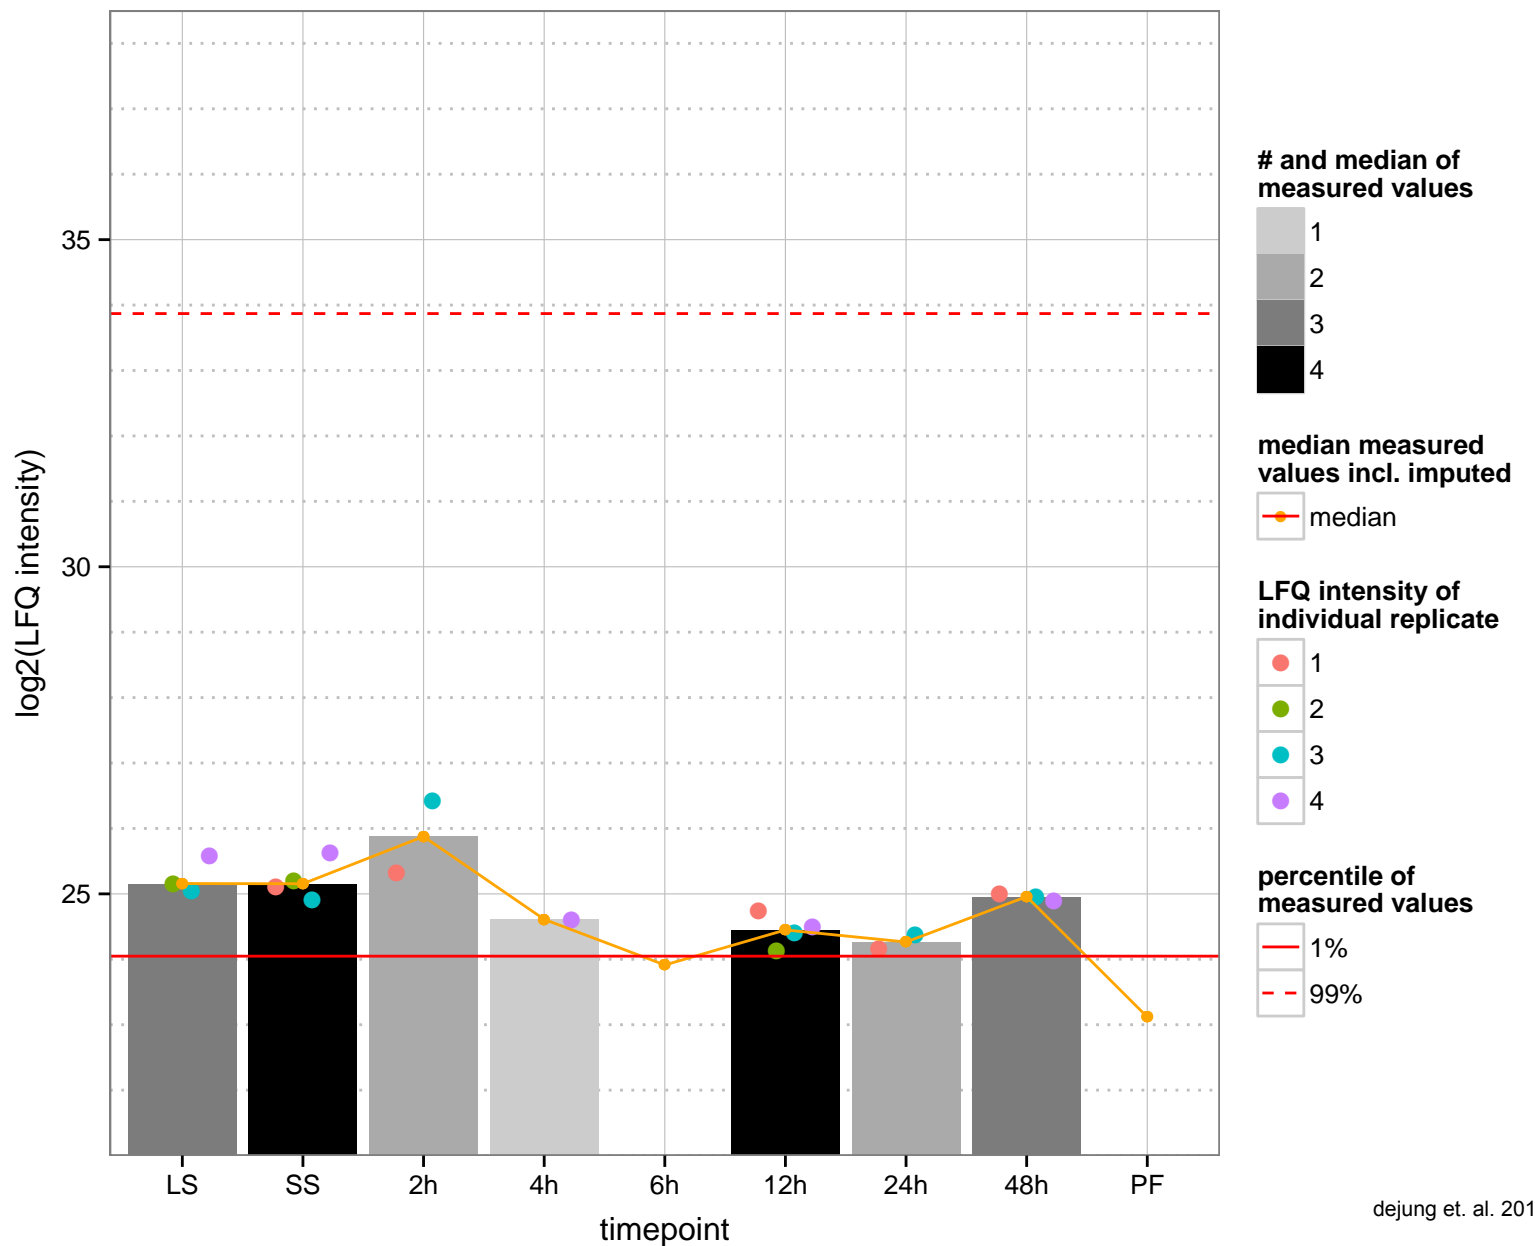

hypothetical protein, conserved  
 Tb927.11.620  
 AGOF: null  
 AGOC: null  
 AGOP: null  
 PGOF: binding, protein binding  
 PGO: null  
 PGOP: null

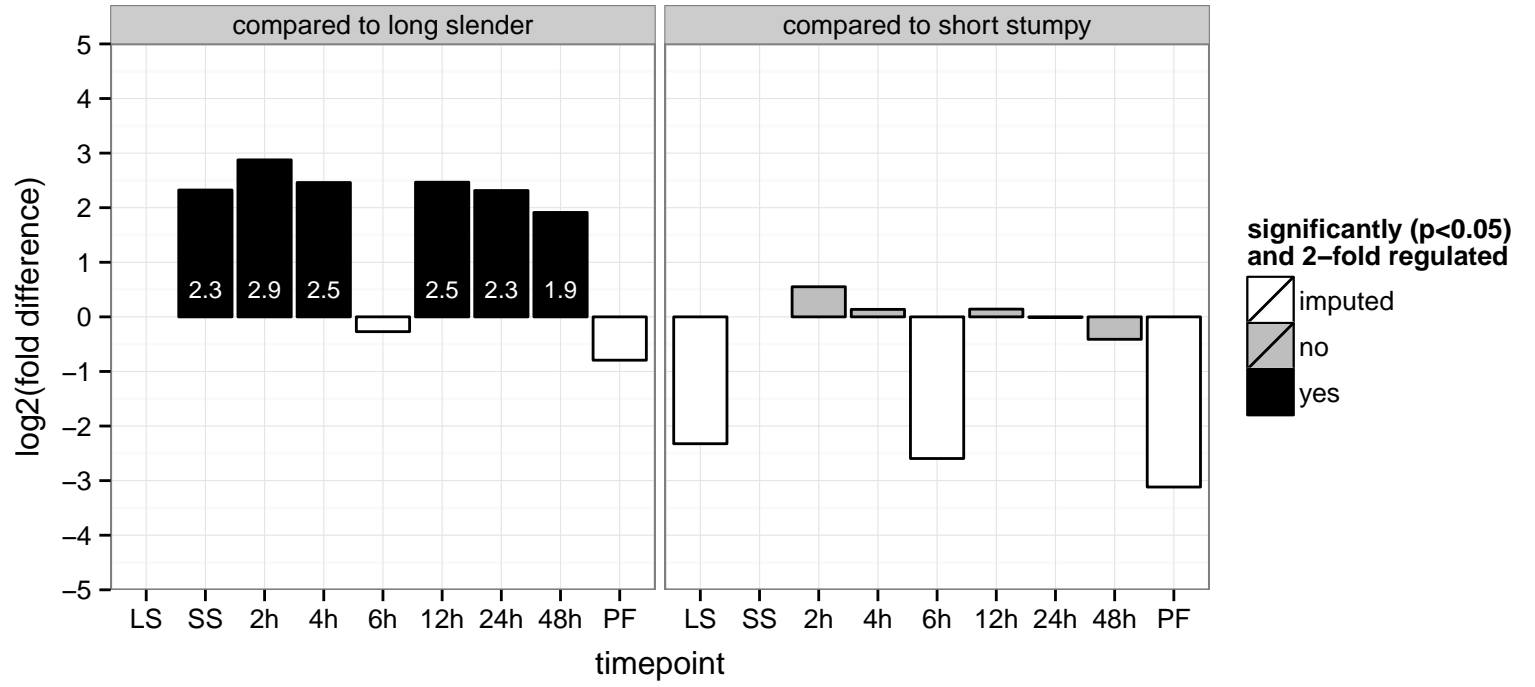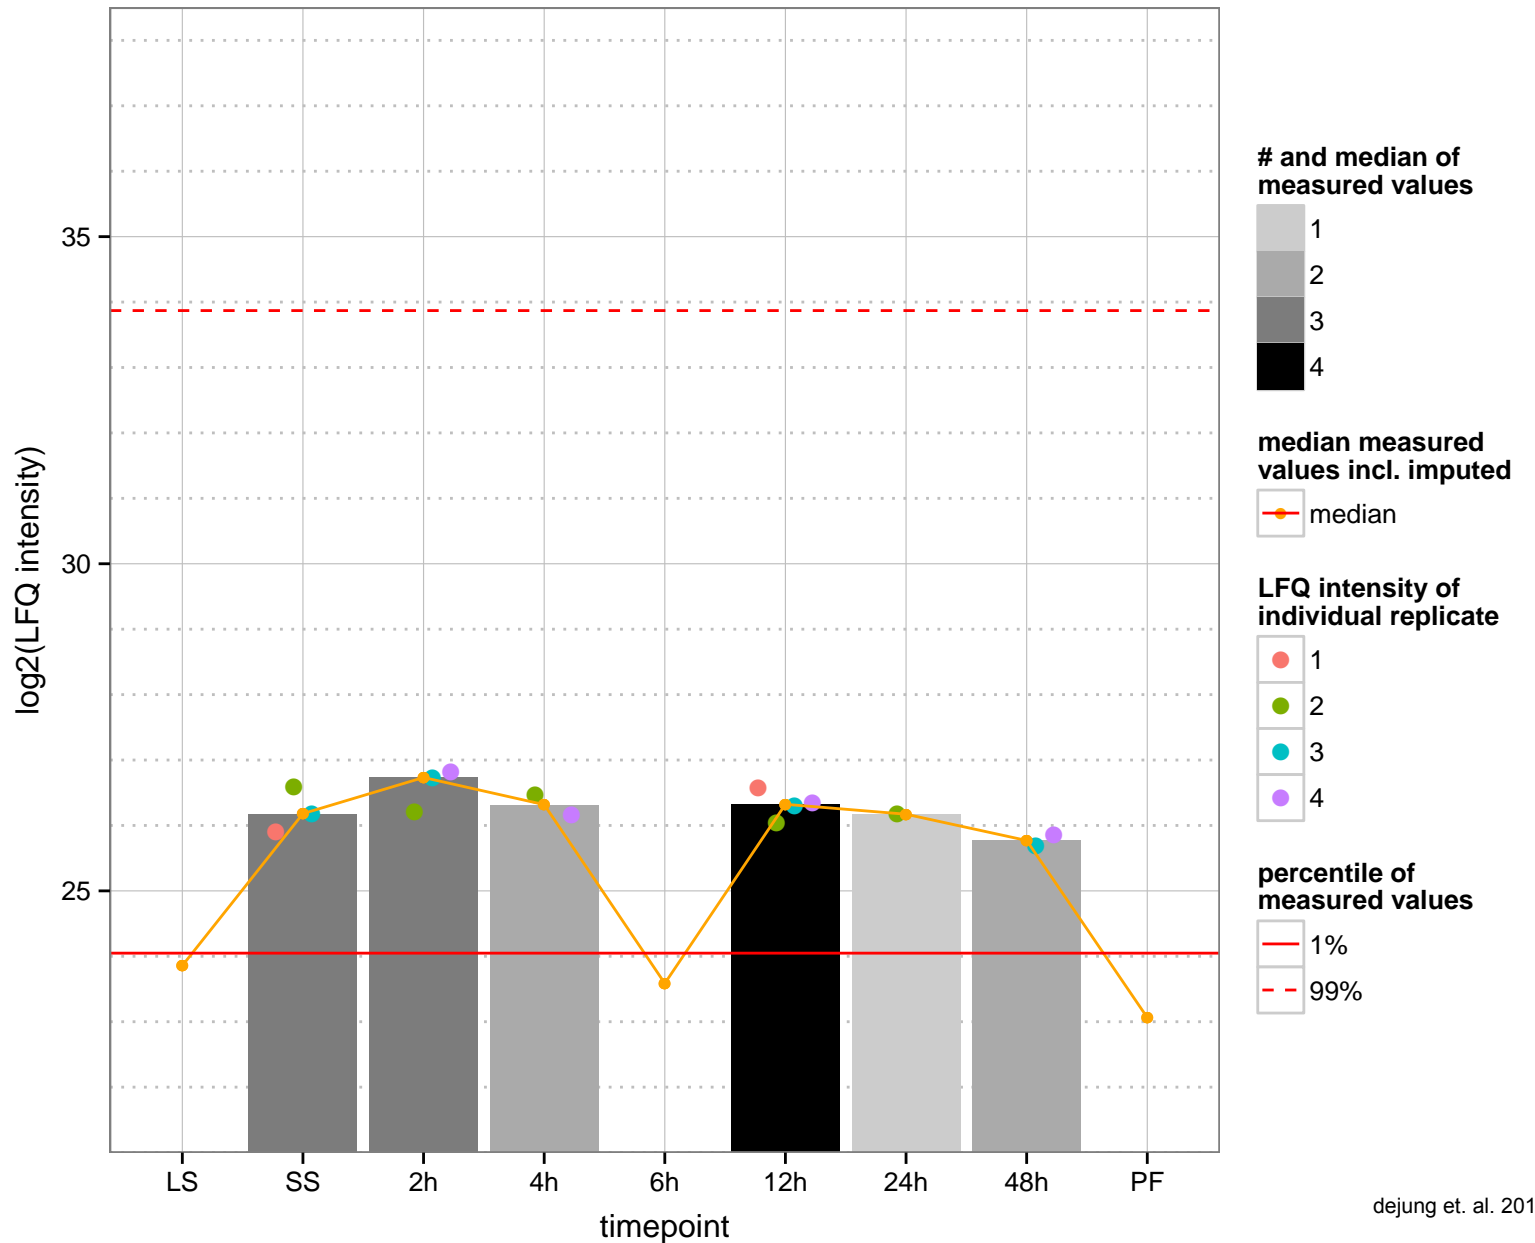

protein phosphatase 2C, putative  
 Tb927.2.5050  
 AGOF: phosphatase activity  
 AGOC: null  
 AGOP: dephosphorylation  
 PGOF: catalytic activity  
 PGOC: null  
 PGOP: null

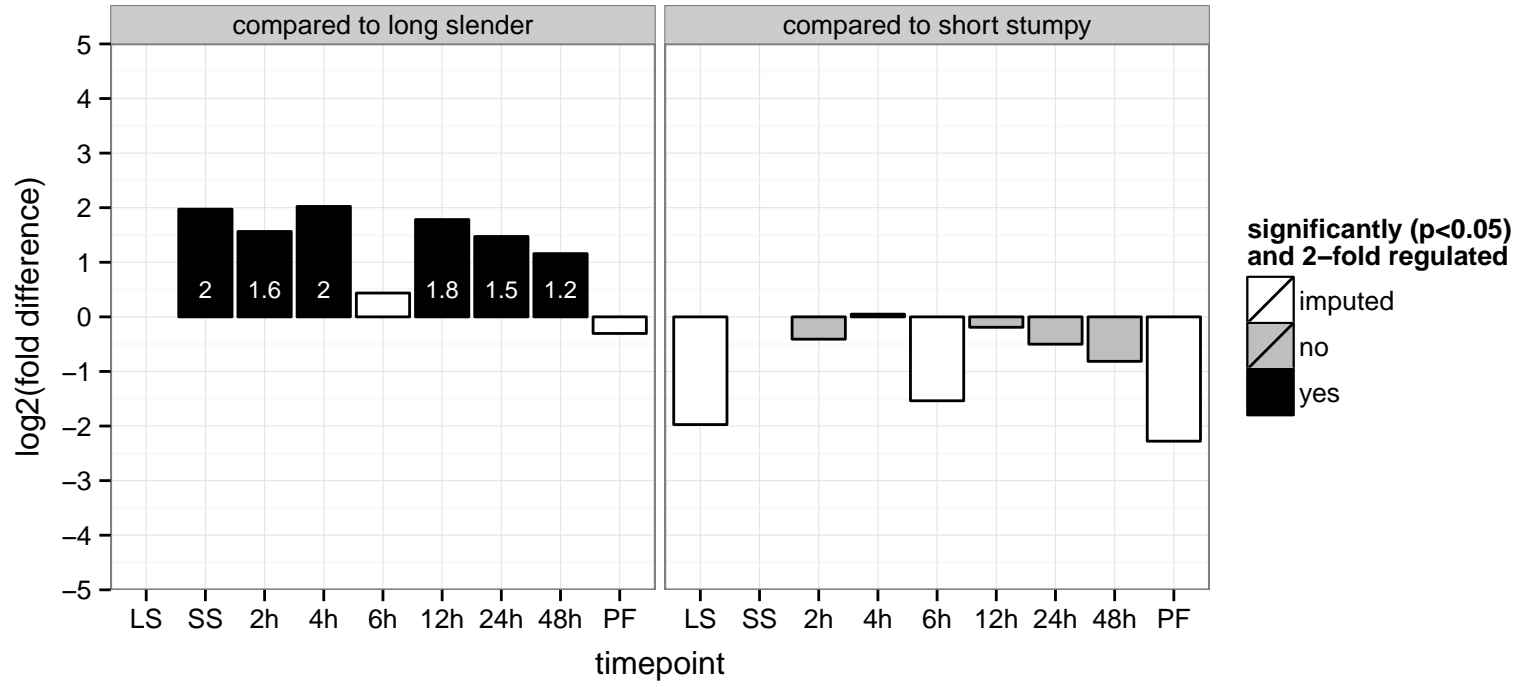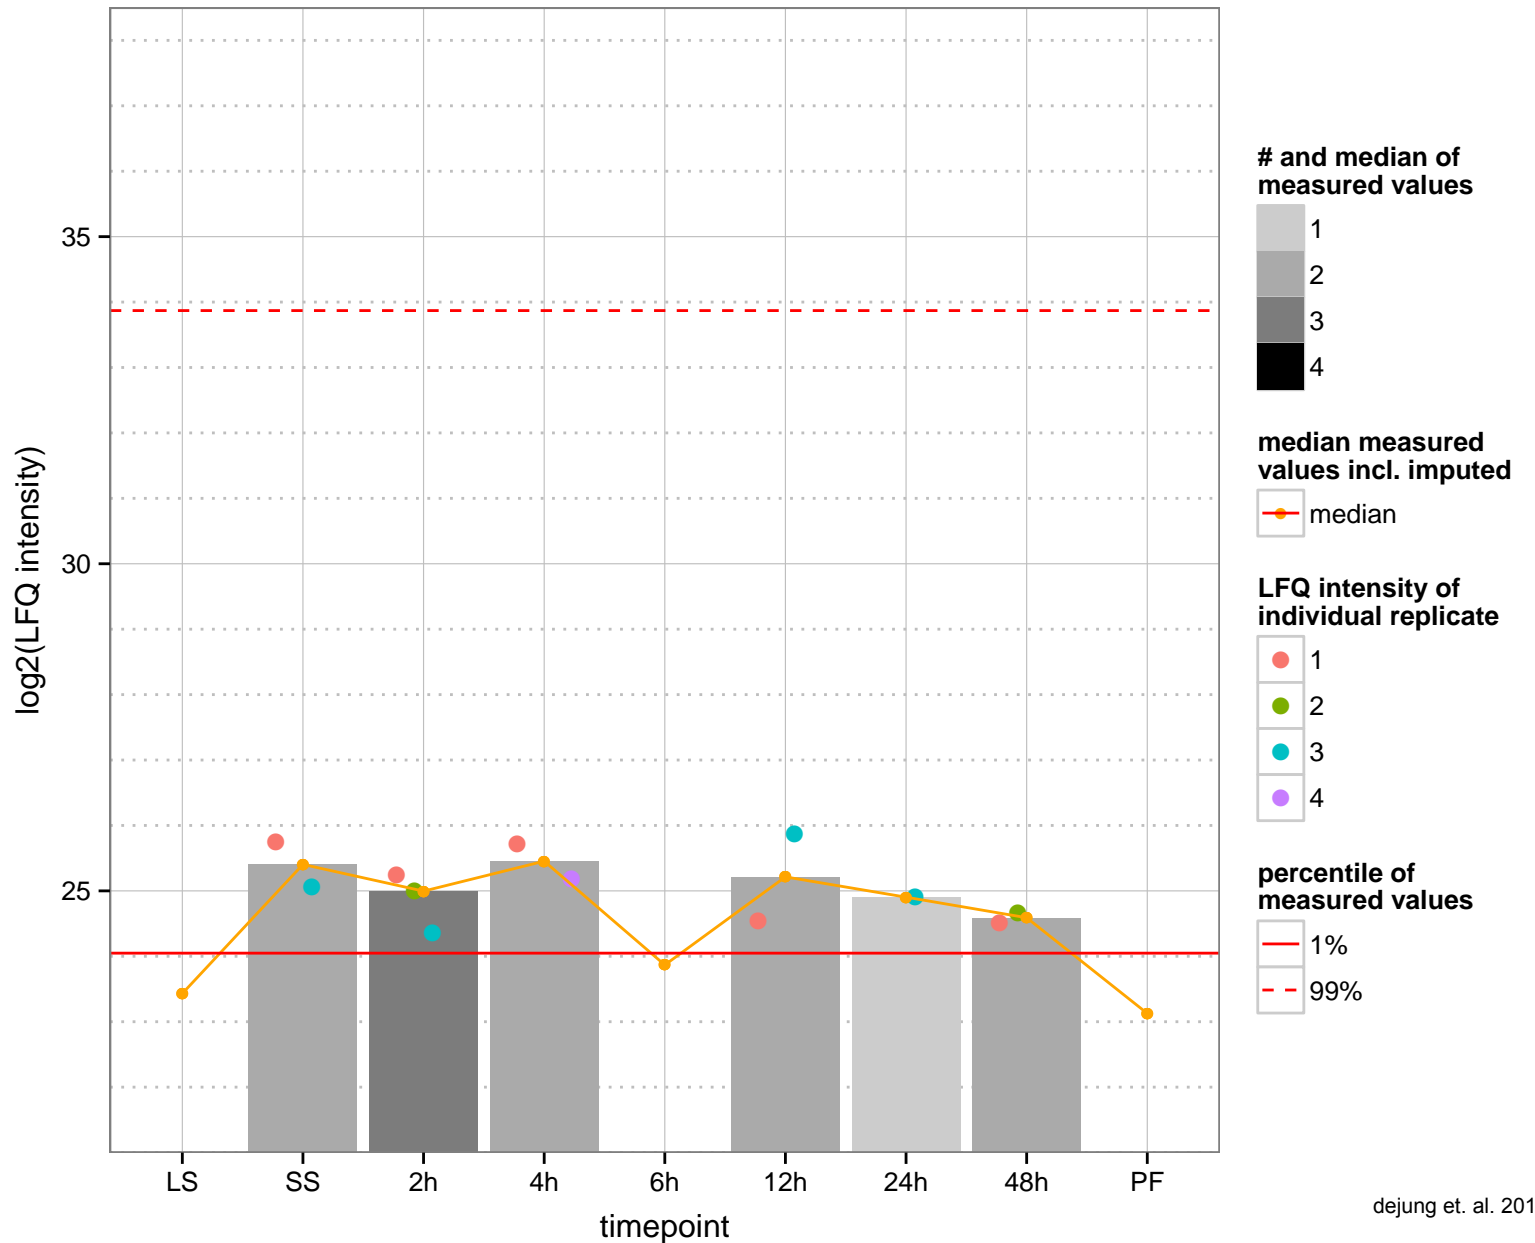

vesicle-associated membrane protein, putative, synaptobrevin  
 Tb927.2.5120  
 AGOF: null  
 AGOC: integral to membrane  
 AGOP: membrane fusion, vesicle-mediated transport  
 PGO: null  
 PGO: integral to membrane  
 PGO: transport, vesicle-mediated transport

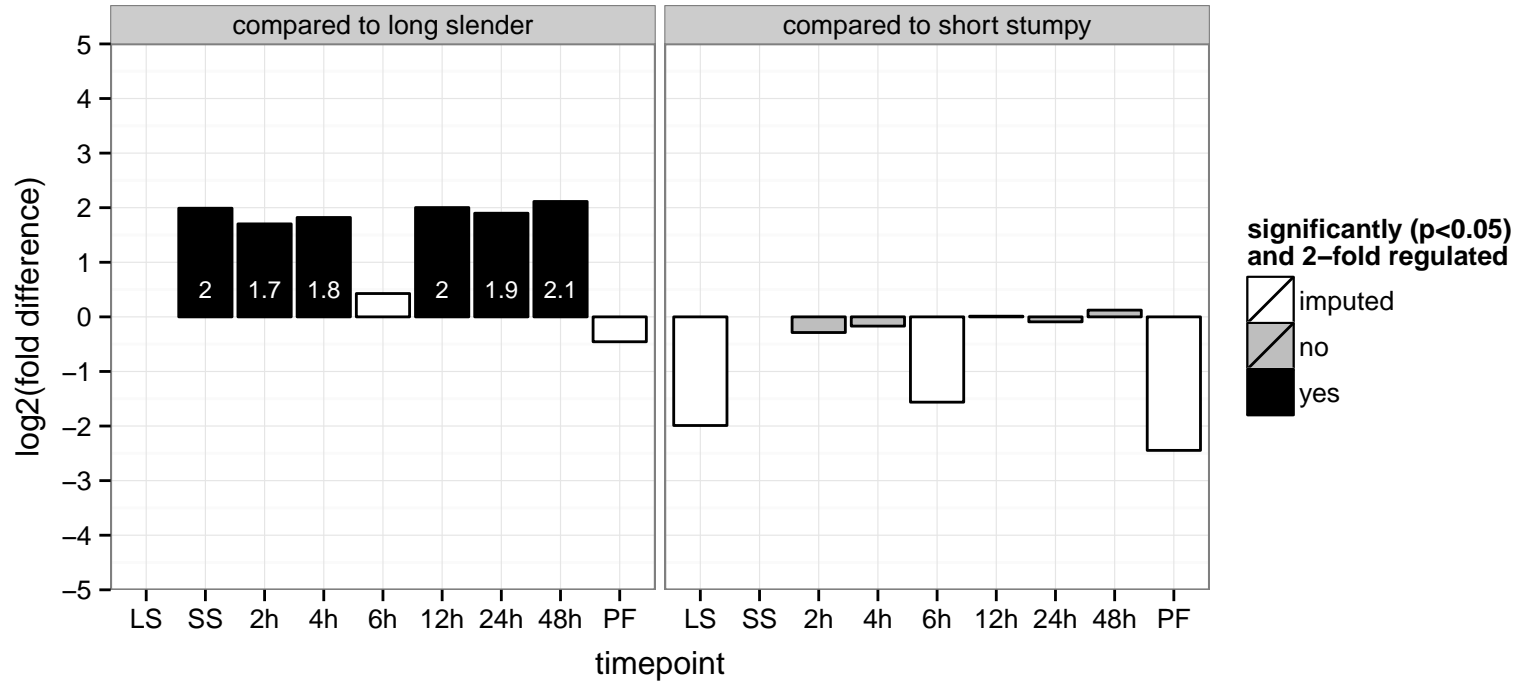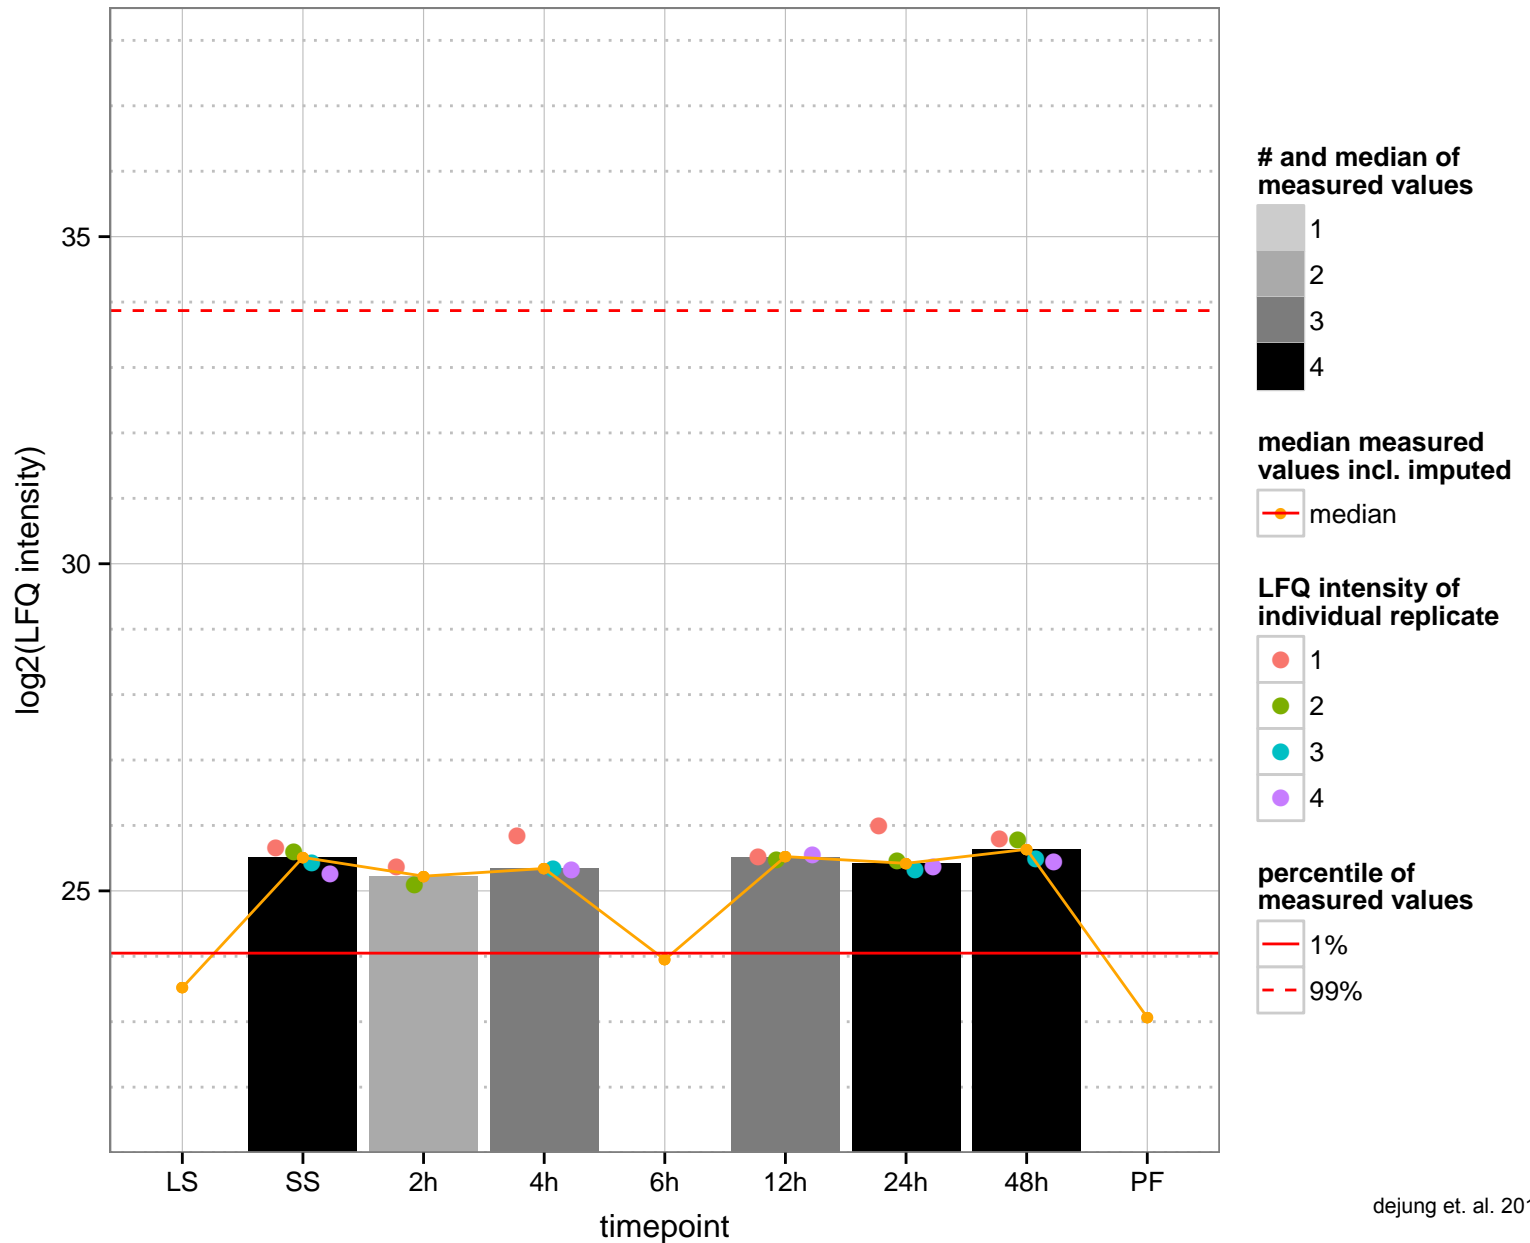

casein kinase 1, putative (CK1)

Tb927.3.1630

AGOF: ATP binding, protein kinase activity, protein serine/threonine kinase activity, protein tyrosine kinase activity

AGOC: cytoplasm, cytoskeleton, integral to membrane, nucleus

AGOP: protein phosphorylation

PGOF: ATP binding, protein kinase activity, transferase activity, transferring phosphorus-containing groups

PGOC: null

PGOP: protein phosphorylation

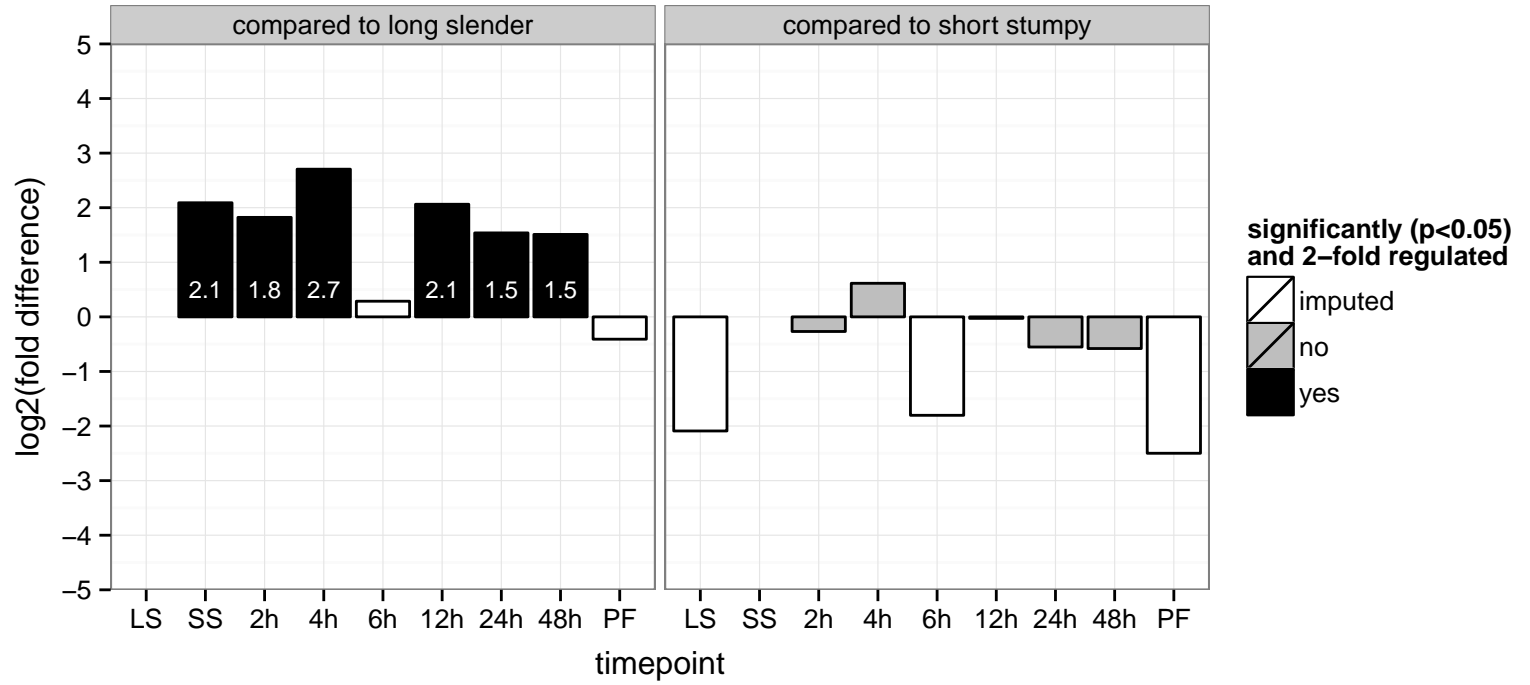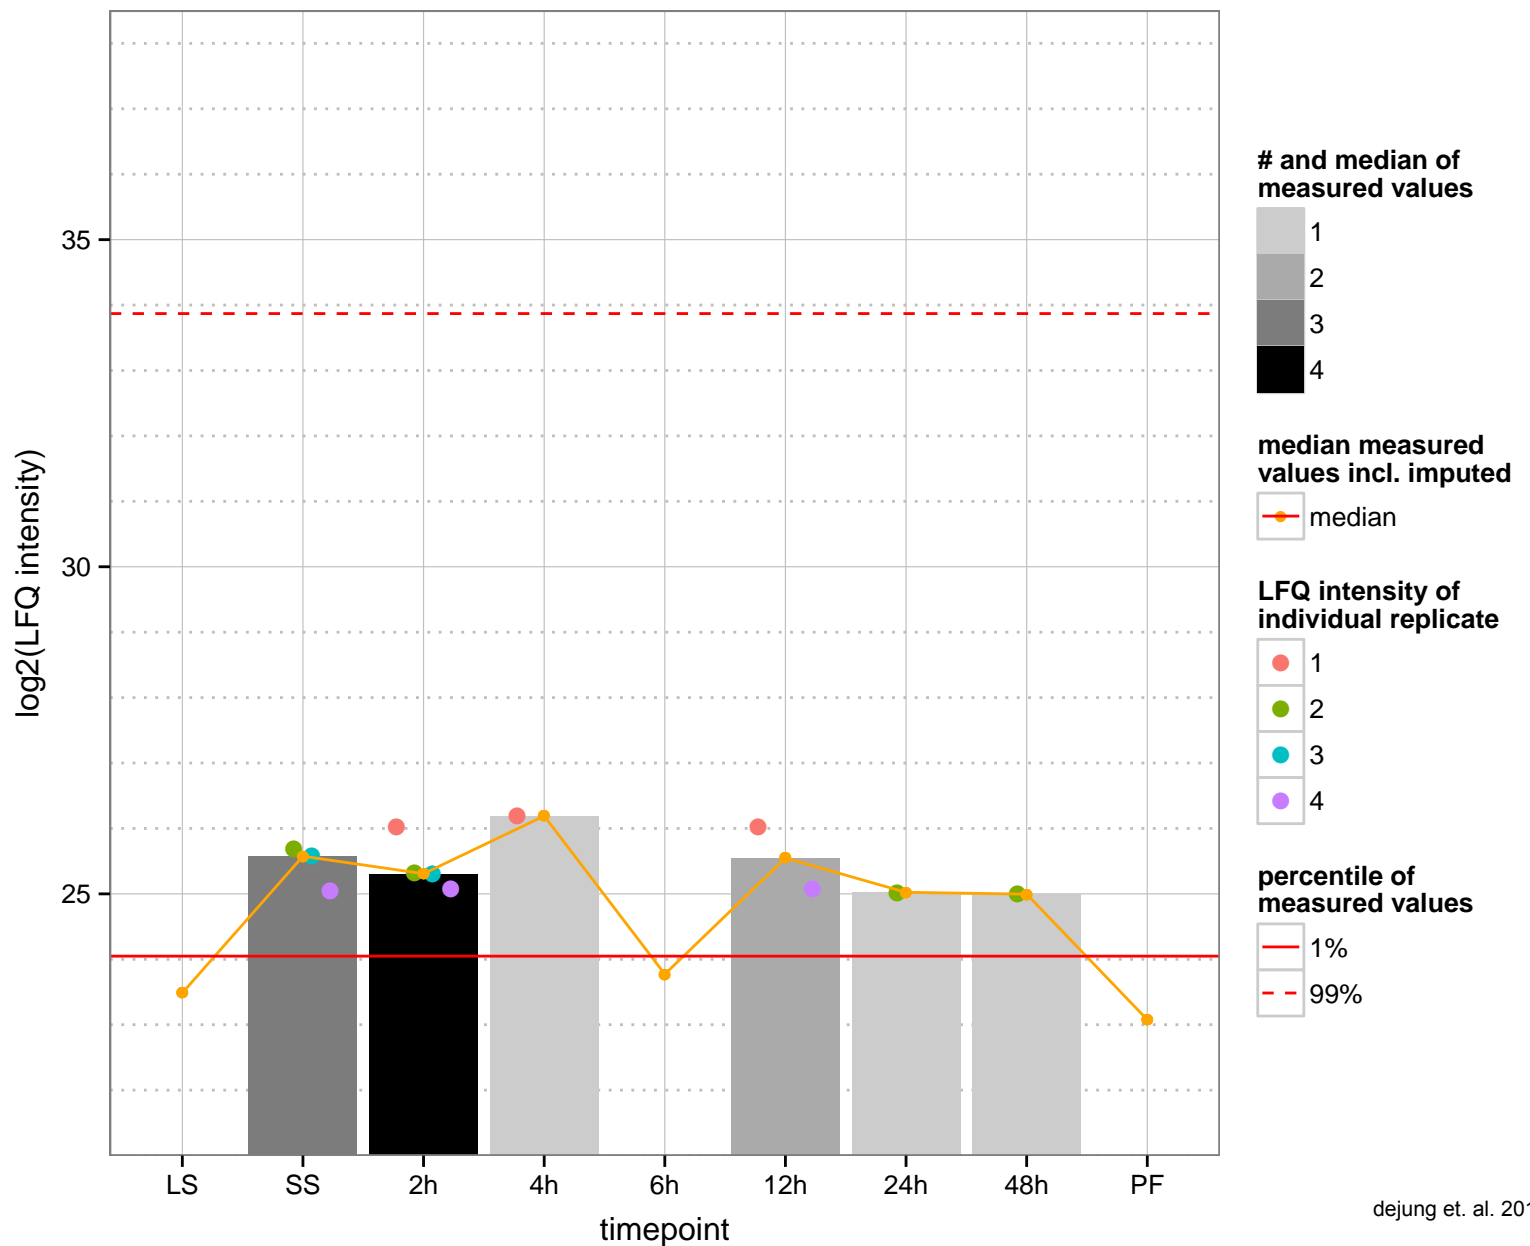

hypothetical protein, conserved  
 Tb927.3.4070  
 AGOF: null  
 AGOC: null  
 AGOP: null  
 PGO: null  
 PGOC: null  
 PGOP: null

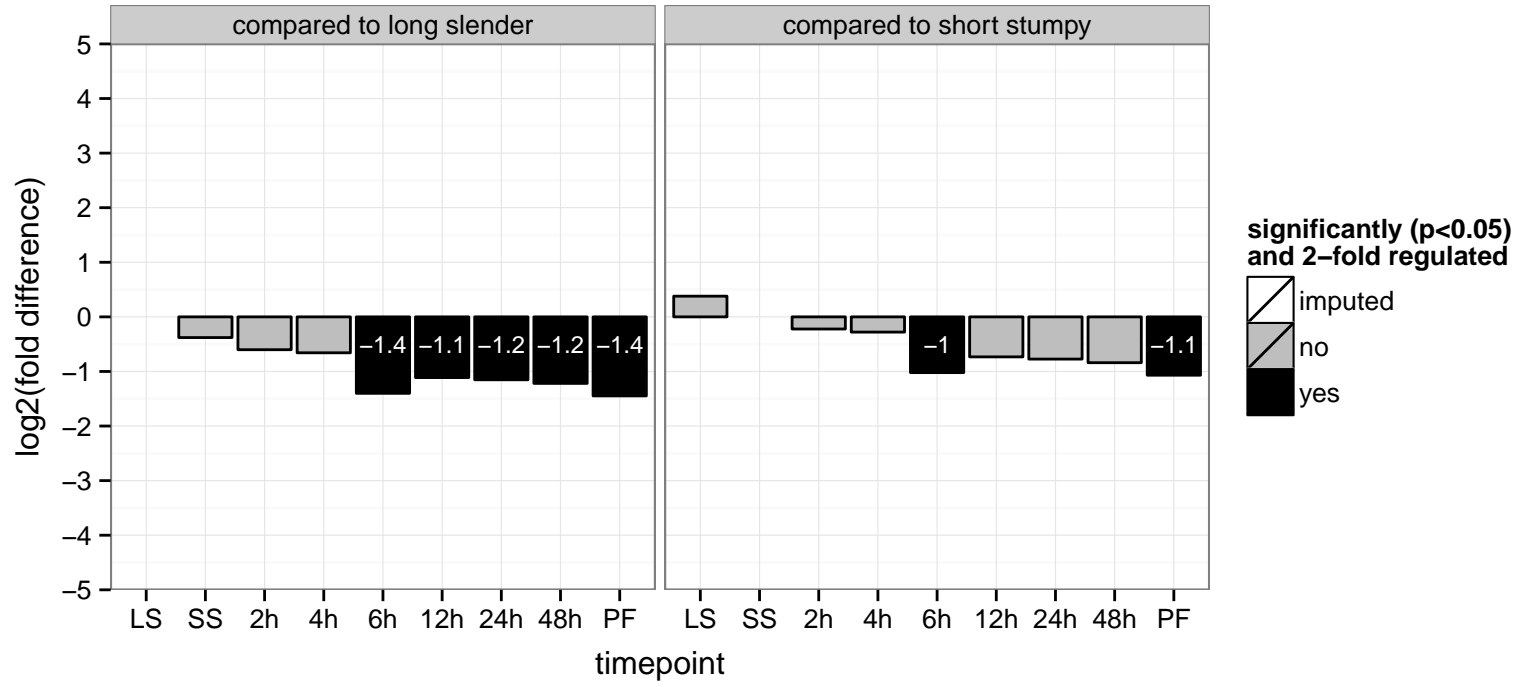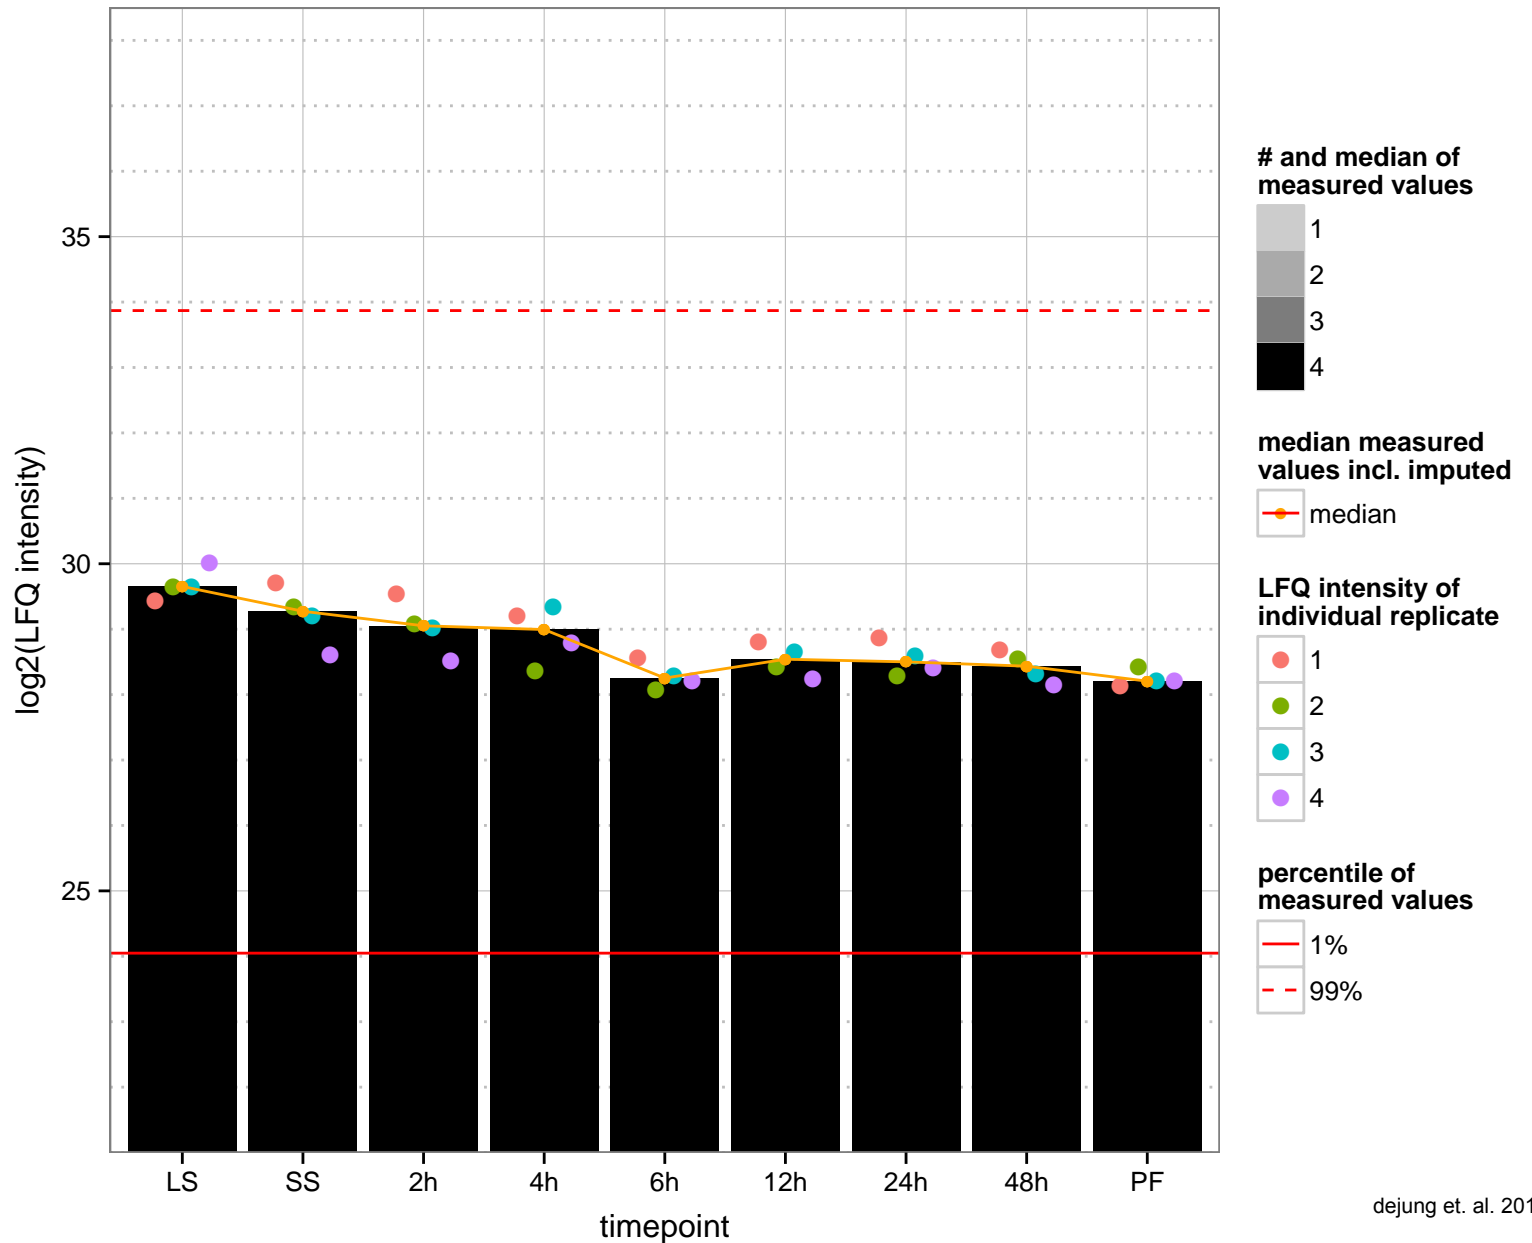



hypothetical protein, conserved  
 Tb927.4.3310  
 AGOF: null  
 AGOC: null  
 AGOP: null  
 PGO: protein binding  
 PGOC: null  
 PGOP: null

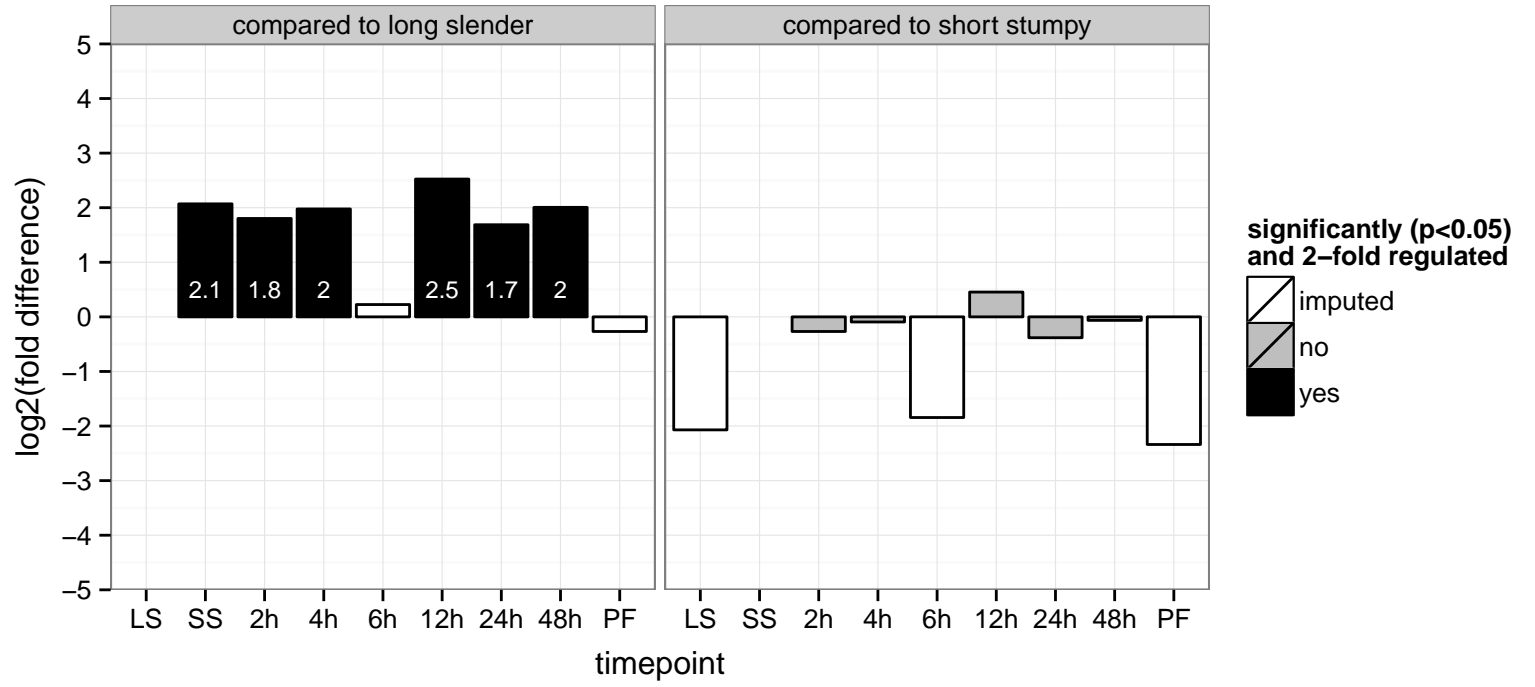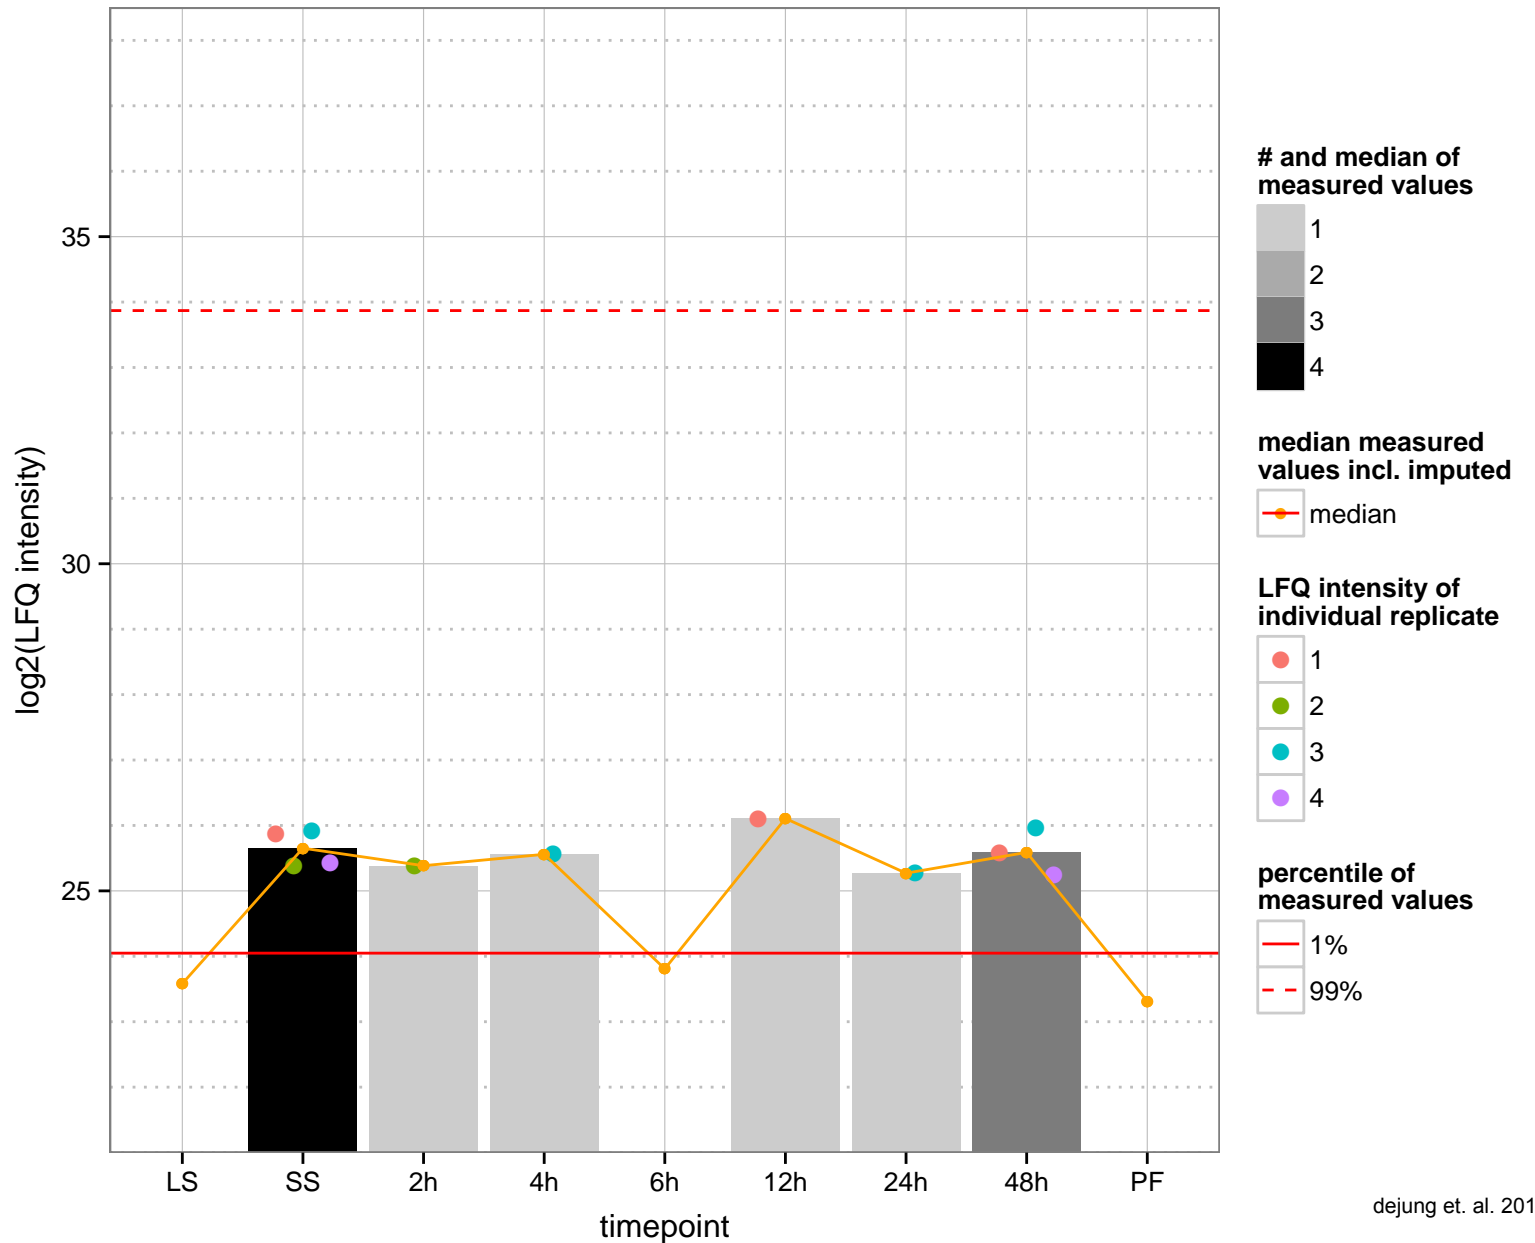

hypothetical protein, conserved  
 Tb927.5.3550  
 AGOF: null  
 AGOC: null  
 AGOP: null  
 PGO: null  
 PGOC: null  
 PGOP: null

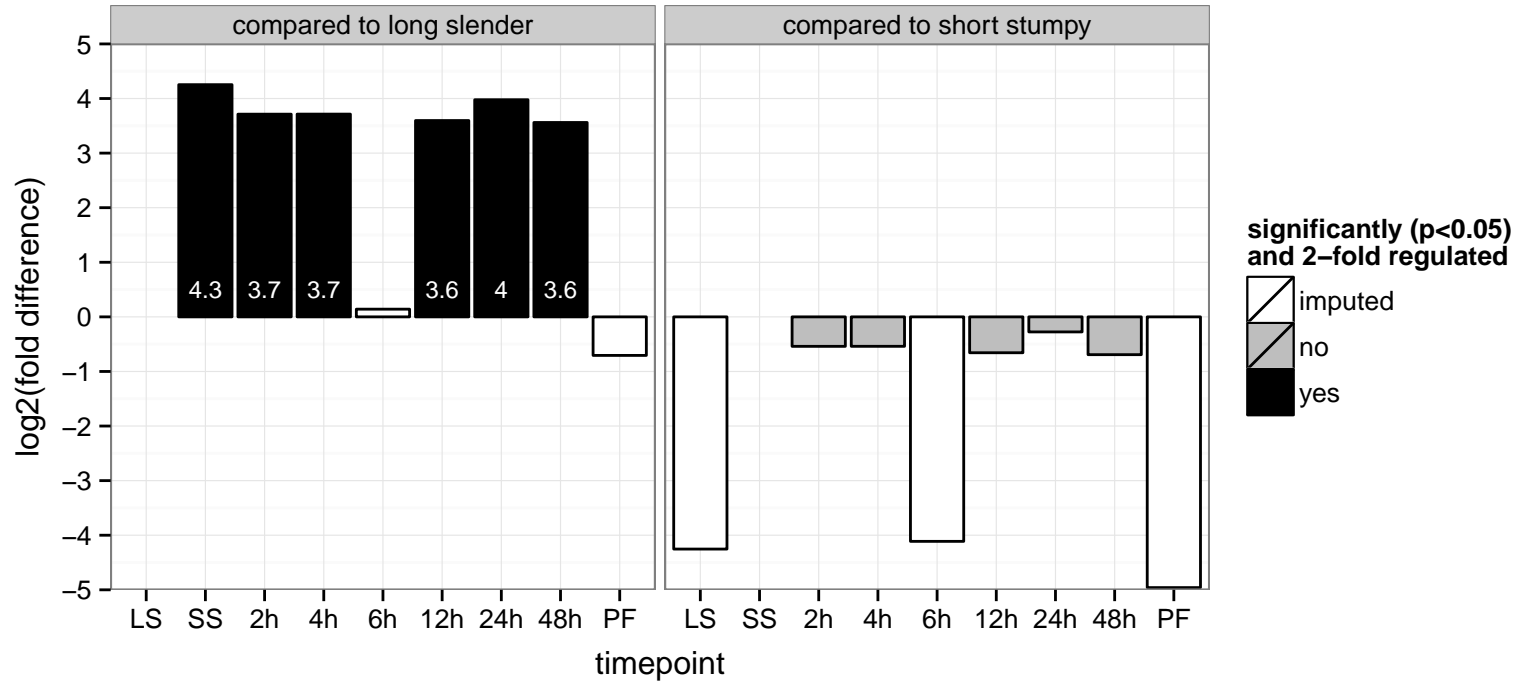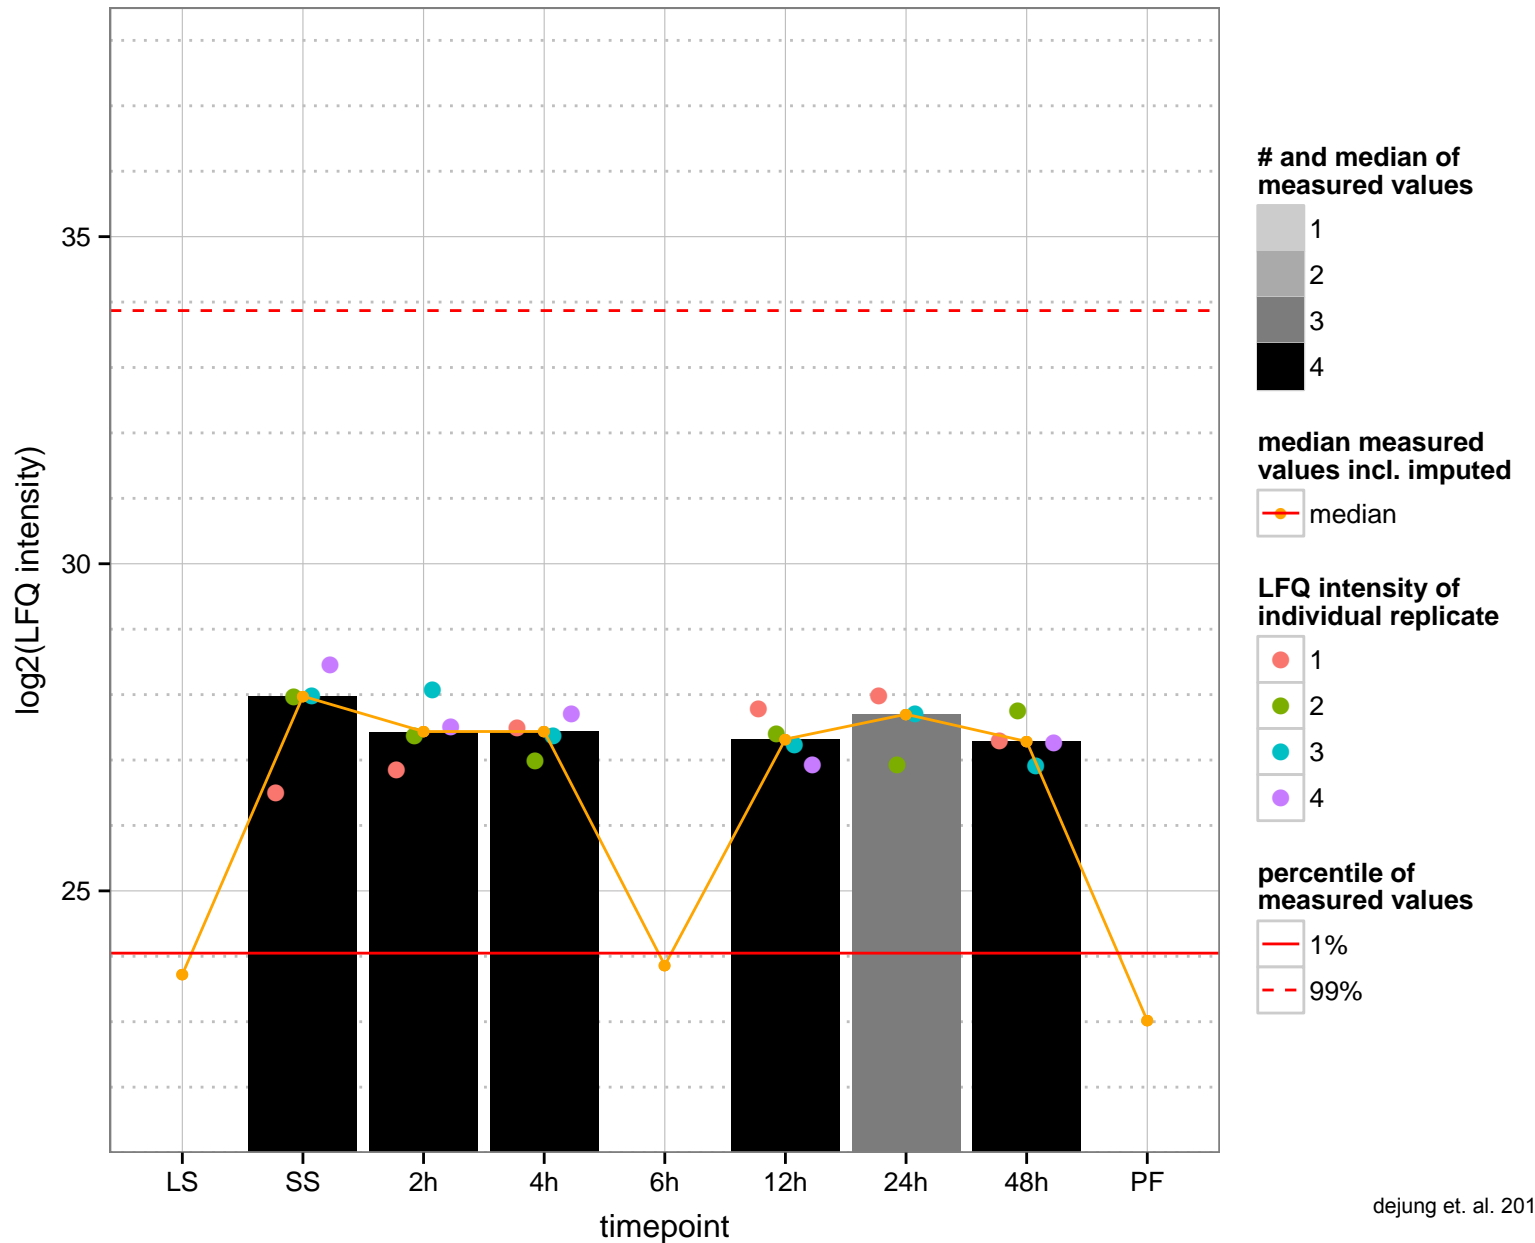

hypothetical protein, conserved  
 Tb927.6.1270  
 AGOF: null  
 AGOC: null  
 AGOP: null  
 PGOF: null  
 PGO: null  
 PGOP: null

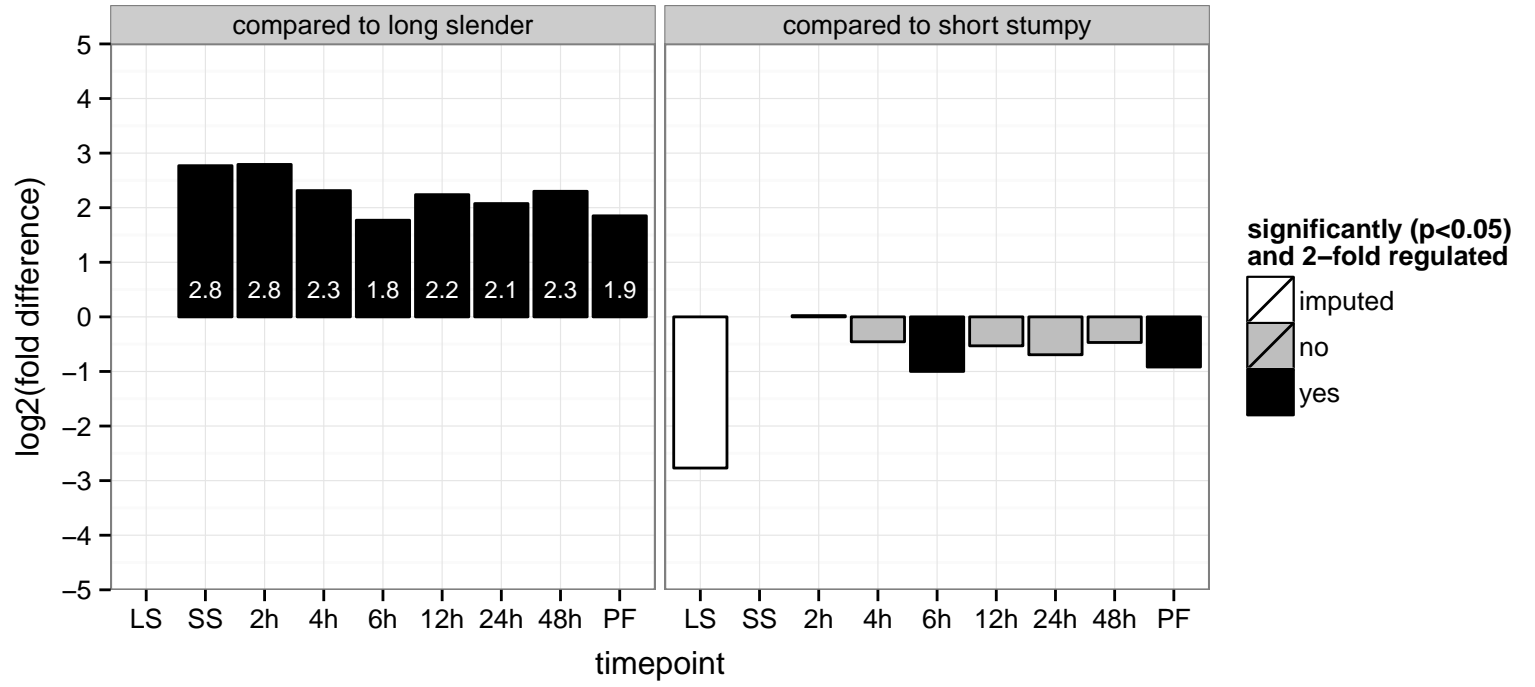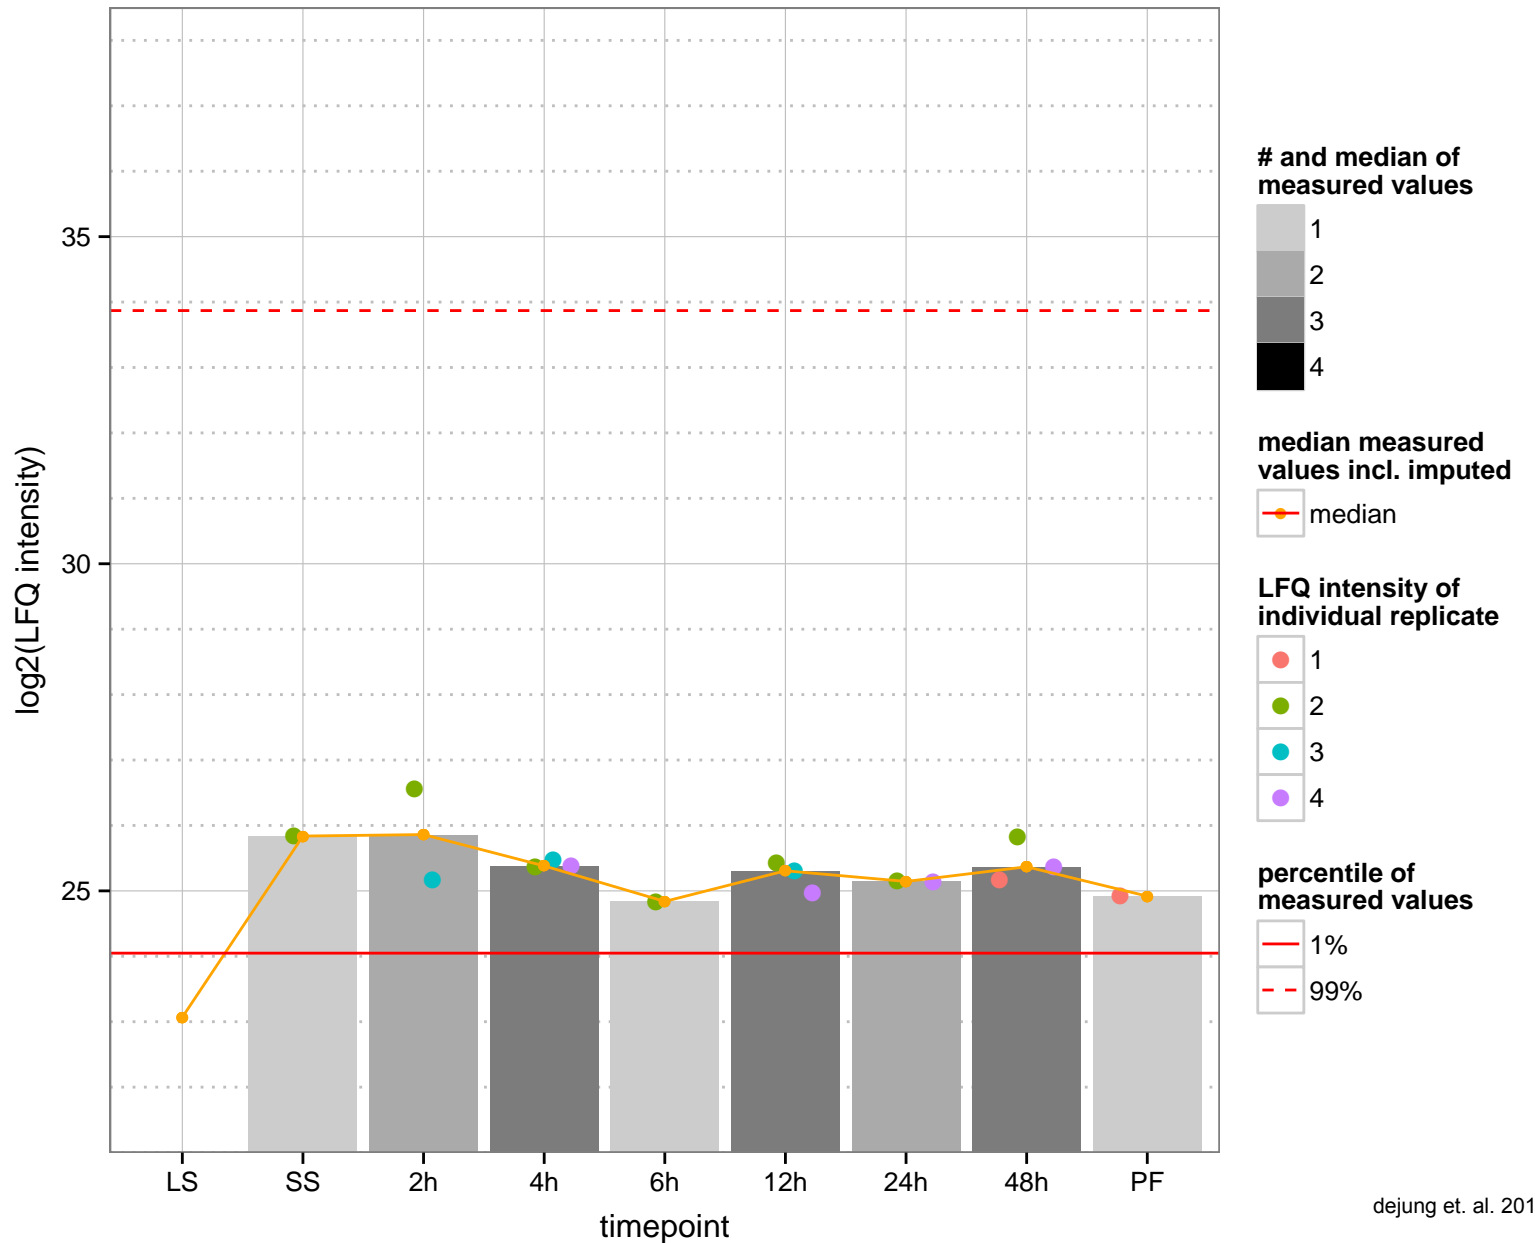

hypothetical protein, conserved  
 Tb927.6.1930  
 AGOF: null  
 AGOC: null  
 AGOP: null  
 PGOF: protein binding  
 PGO: null  
 PGOP: null

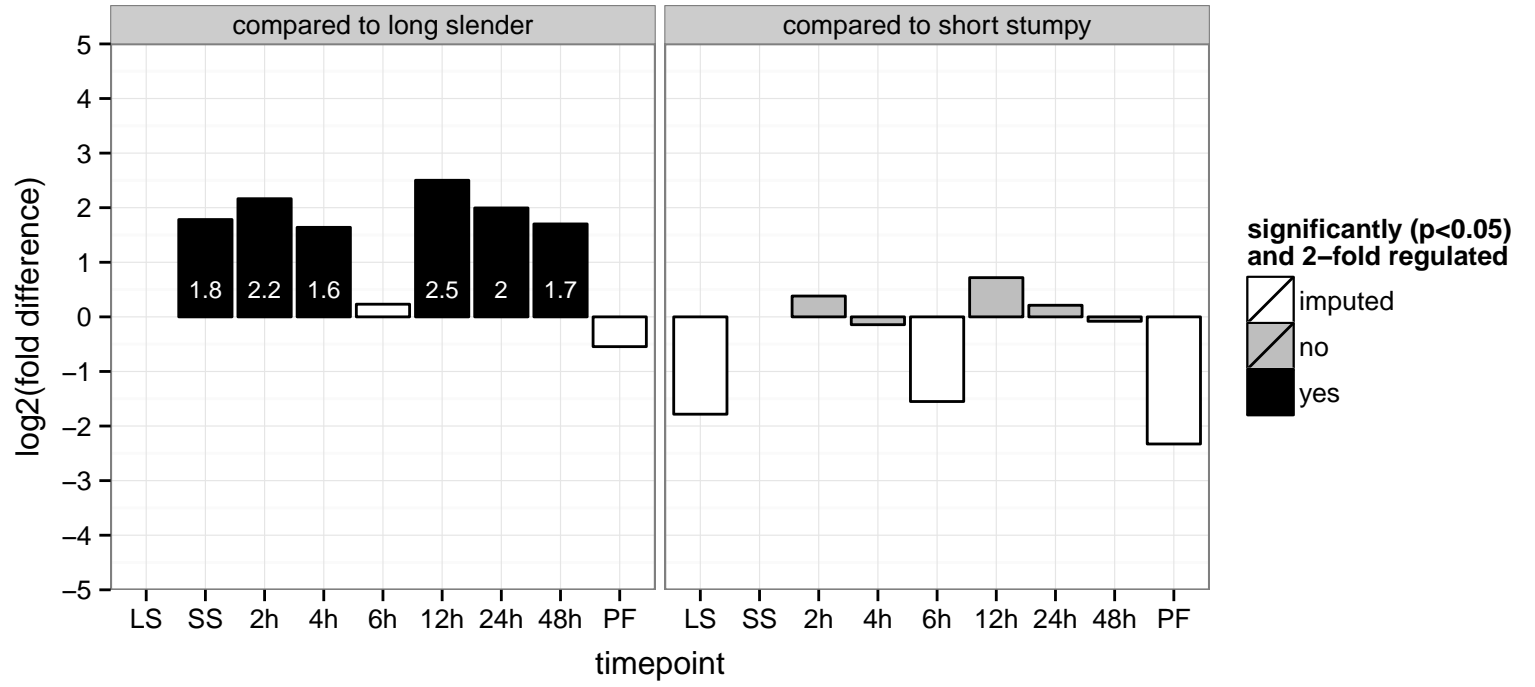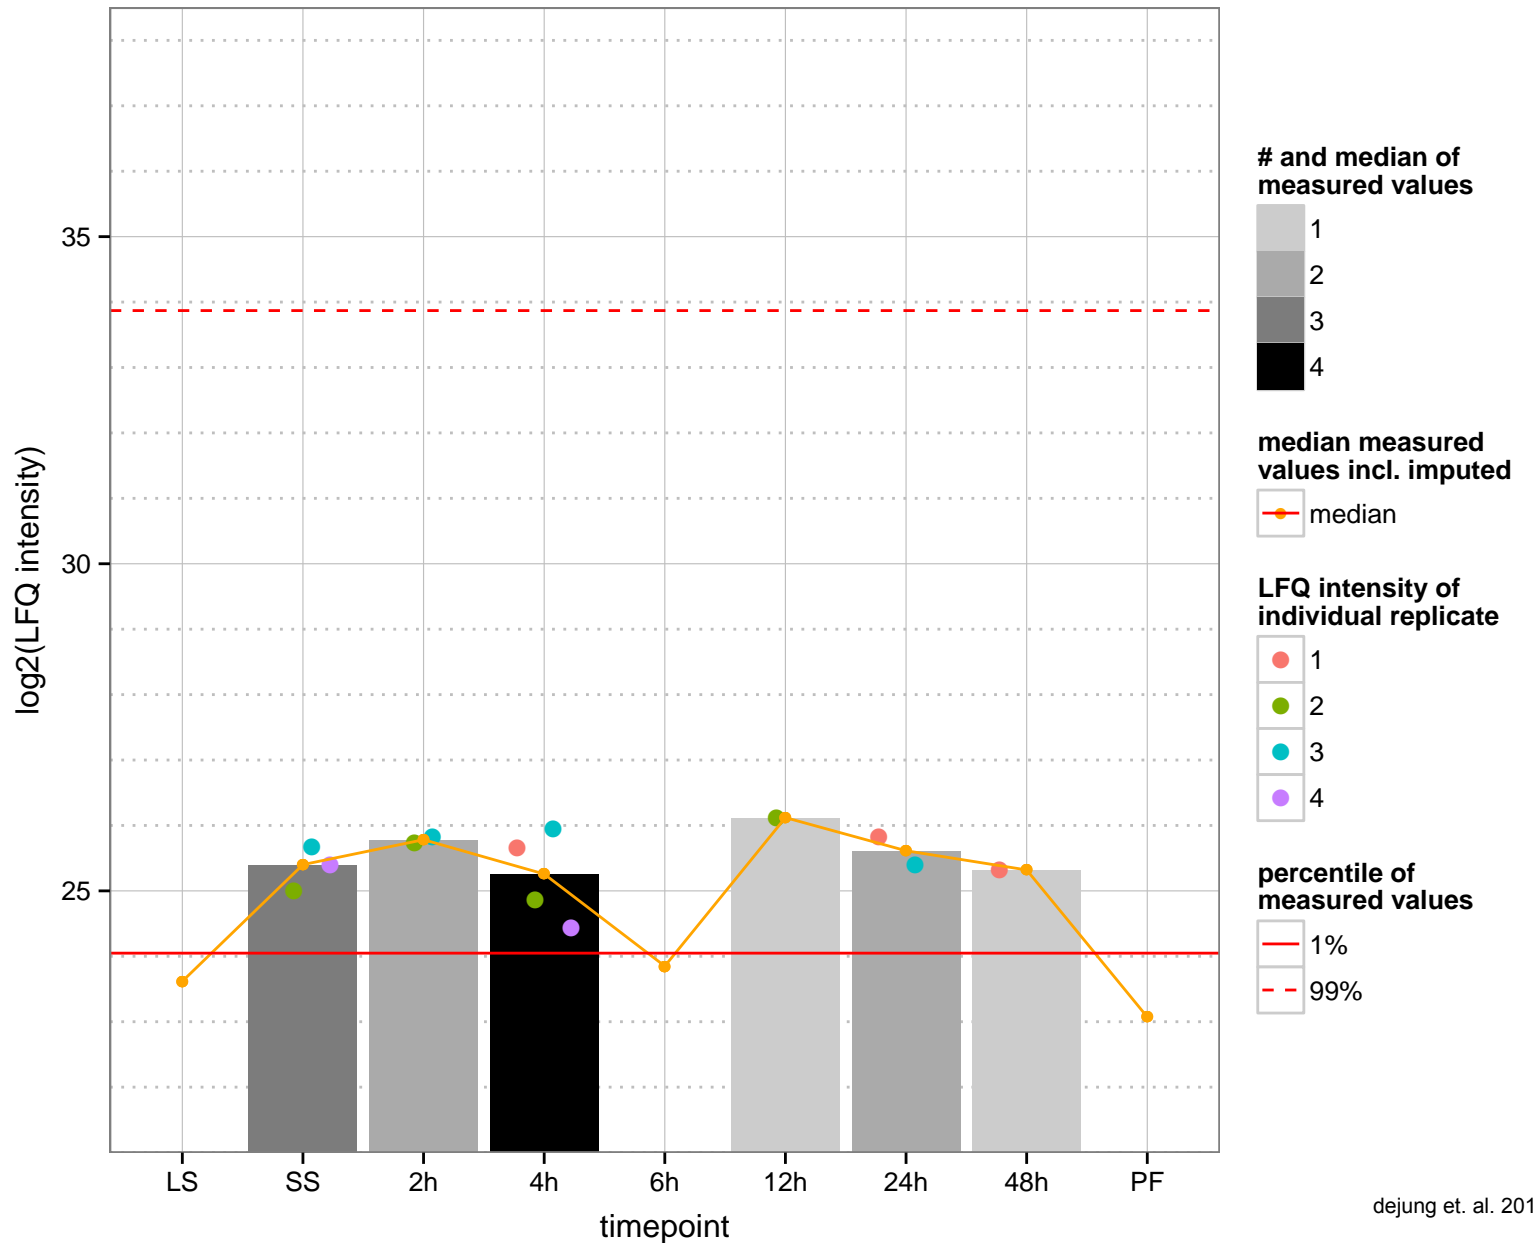

acetyltransferase, putative, Elongator-like Protein 3b (ELP3b)

Tb927.8.3310;Tb11.v5.0520

AGOF: null, N-acetyltransferase activity, iron-sulfur cluster binding

AGOC: null, nucleolus

AGOP: null, histone acetylation, maintenance of rDNA, negative regulation of DNA-dependent transcription, elongation

PGOF: N-acetyltransferase activity, catalytic activity, iron-sulfur cluster binding

PGOC: null

PGOP: null

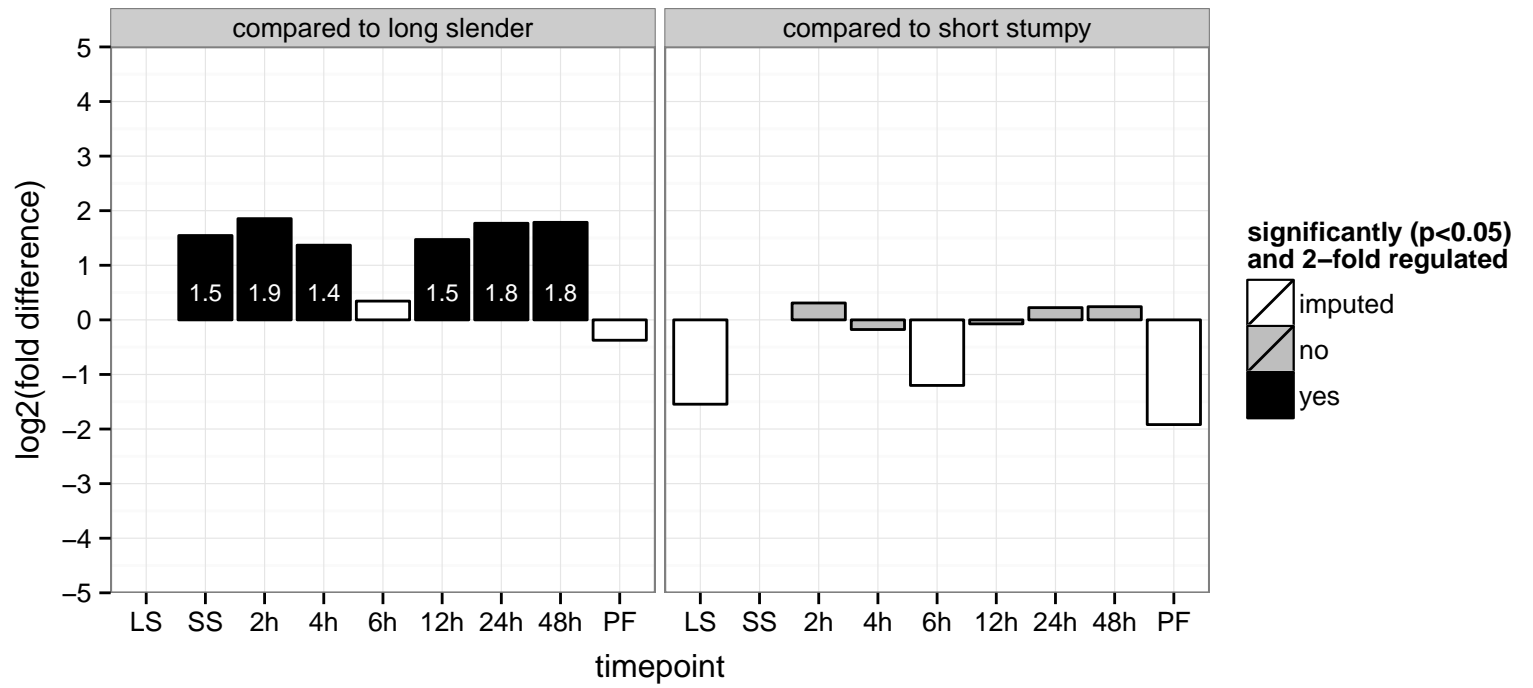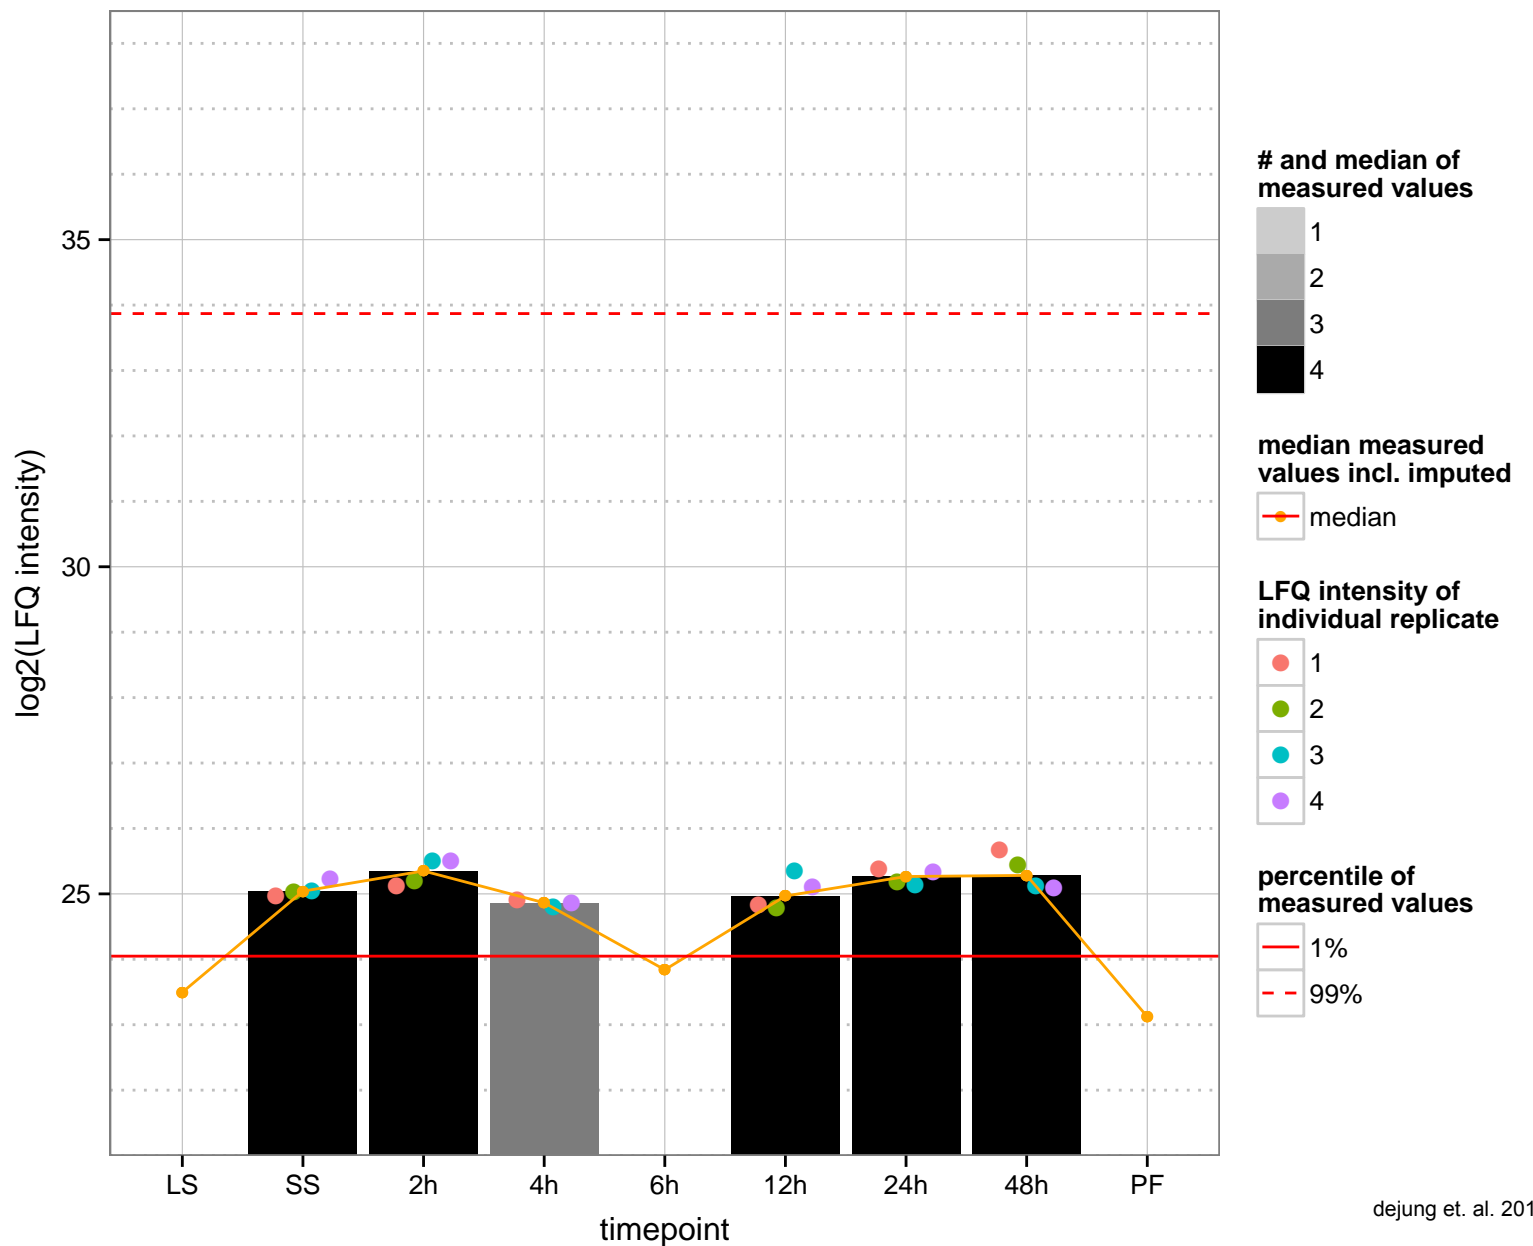

hypothetical protein, conserved  
 Tb927.8.4480  
 AGOF: null  
 AGOC: null  
 AGOP: null  
 PGOF: null  
 PGOC: null  
 PGOP: null

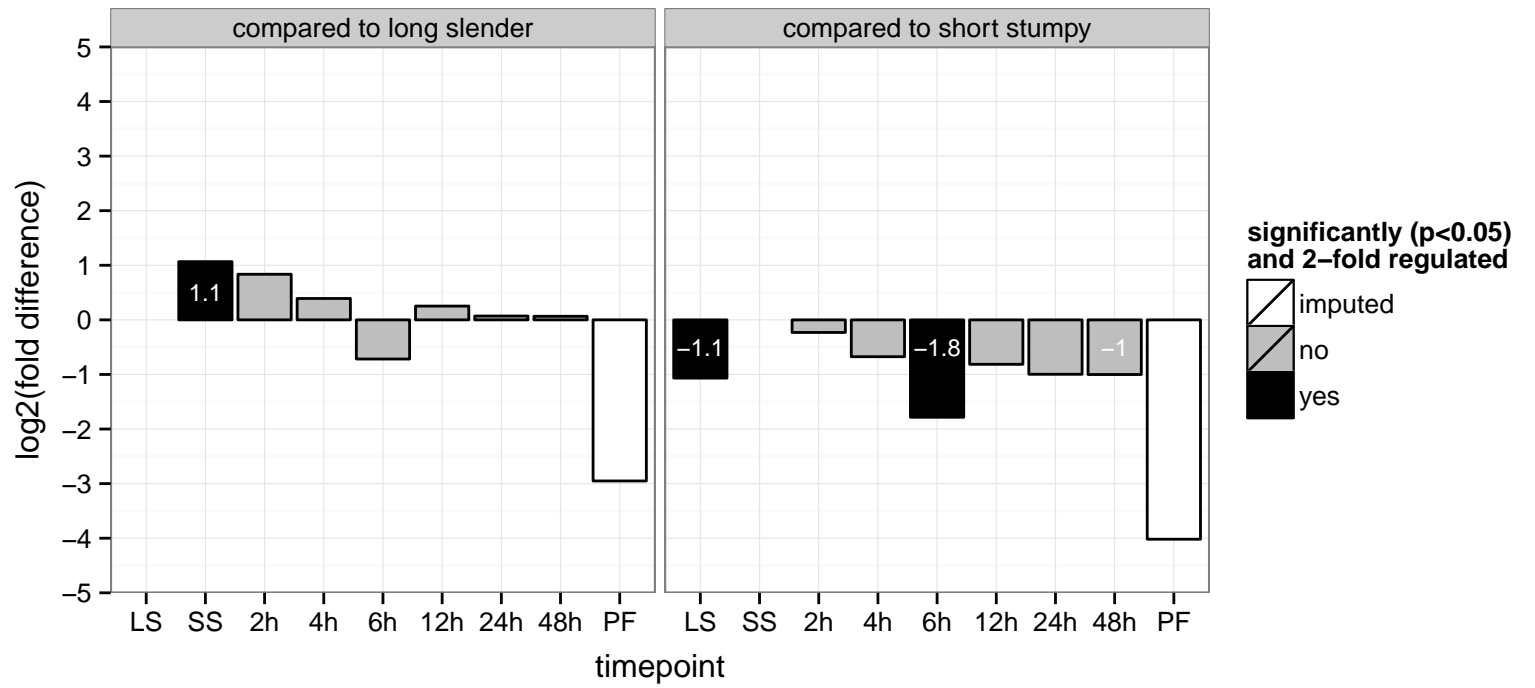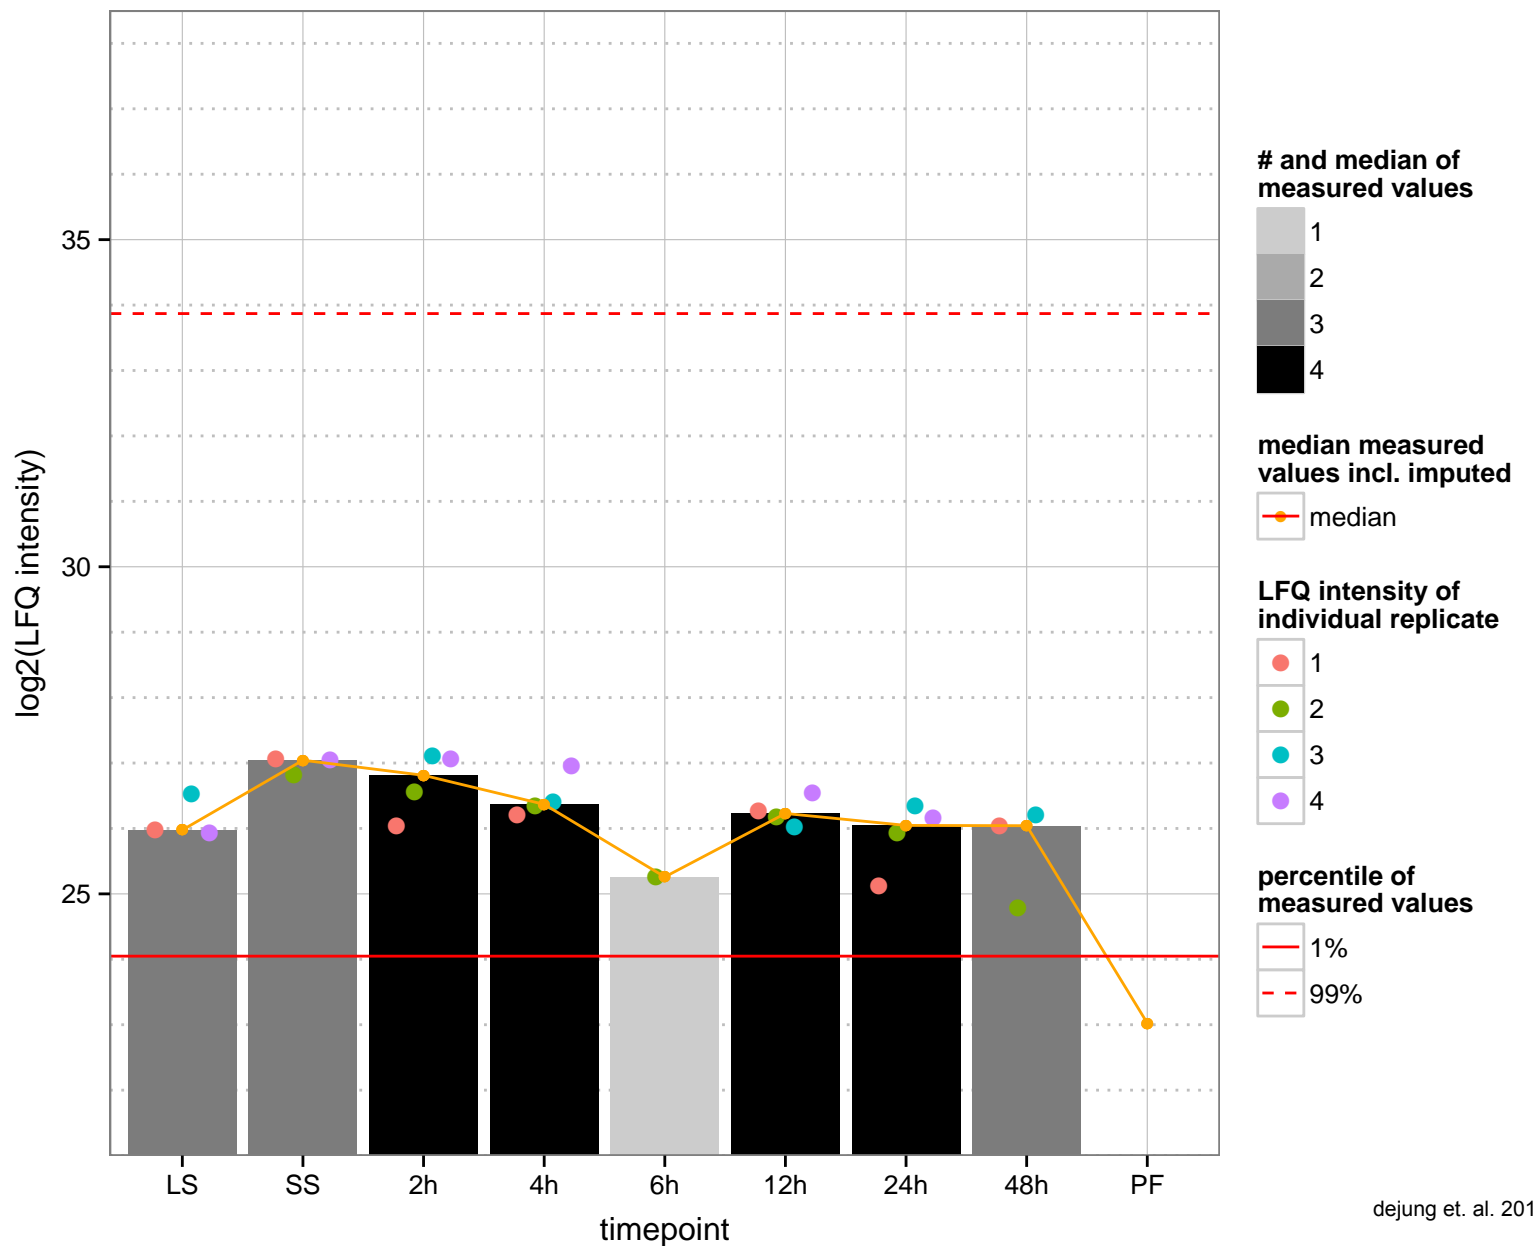

60S ribosomal protein L38, putative  
 Tb927.9.2020  
 AGOF: structural constituent of ribosome  
 AGOC: intracellular, ribosome  
 AGOP: translation  
 PGOF: structural constituent of ribosome  
 PGO: intracellular, ribosome  
 PGOP: translation

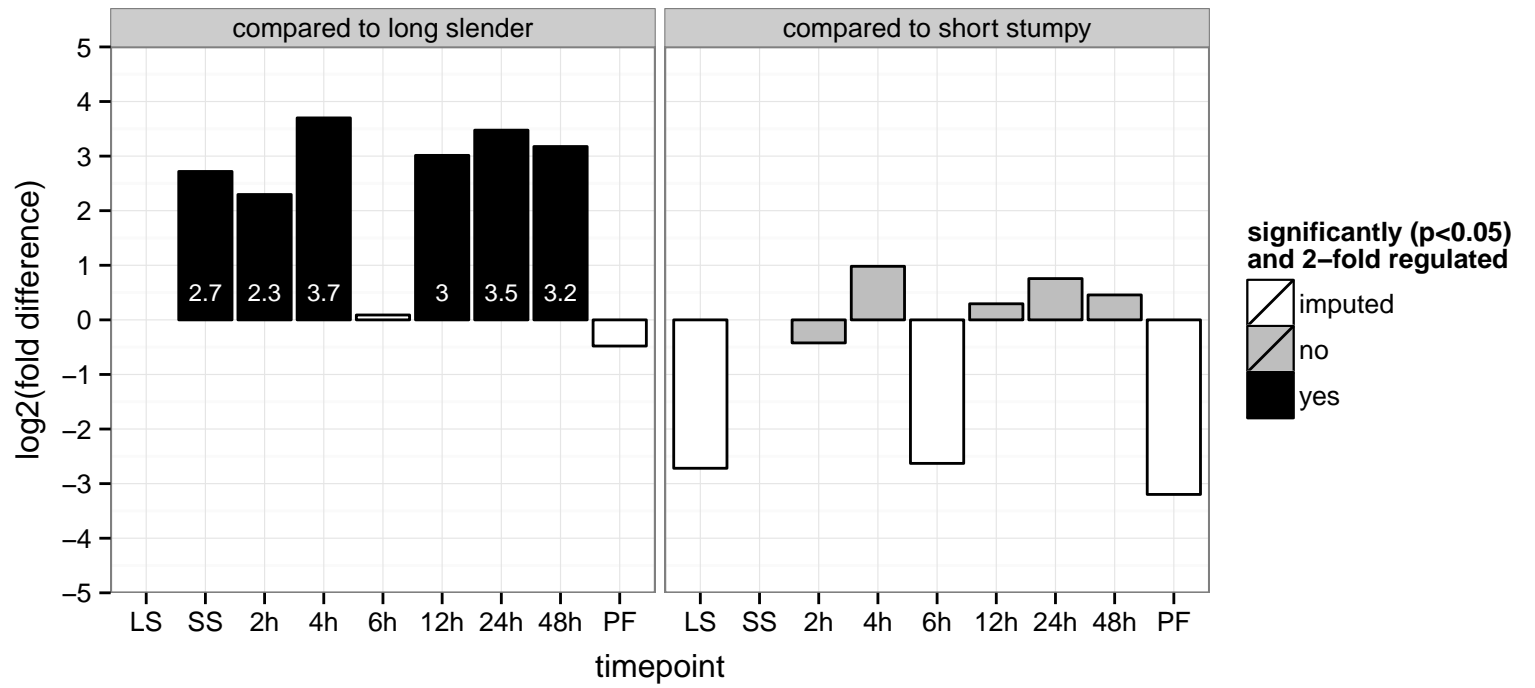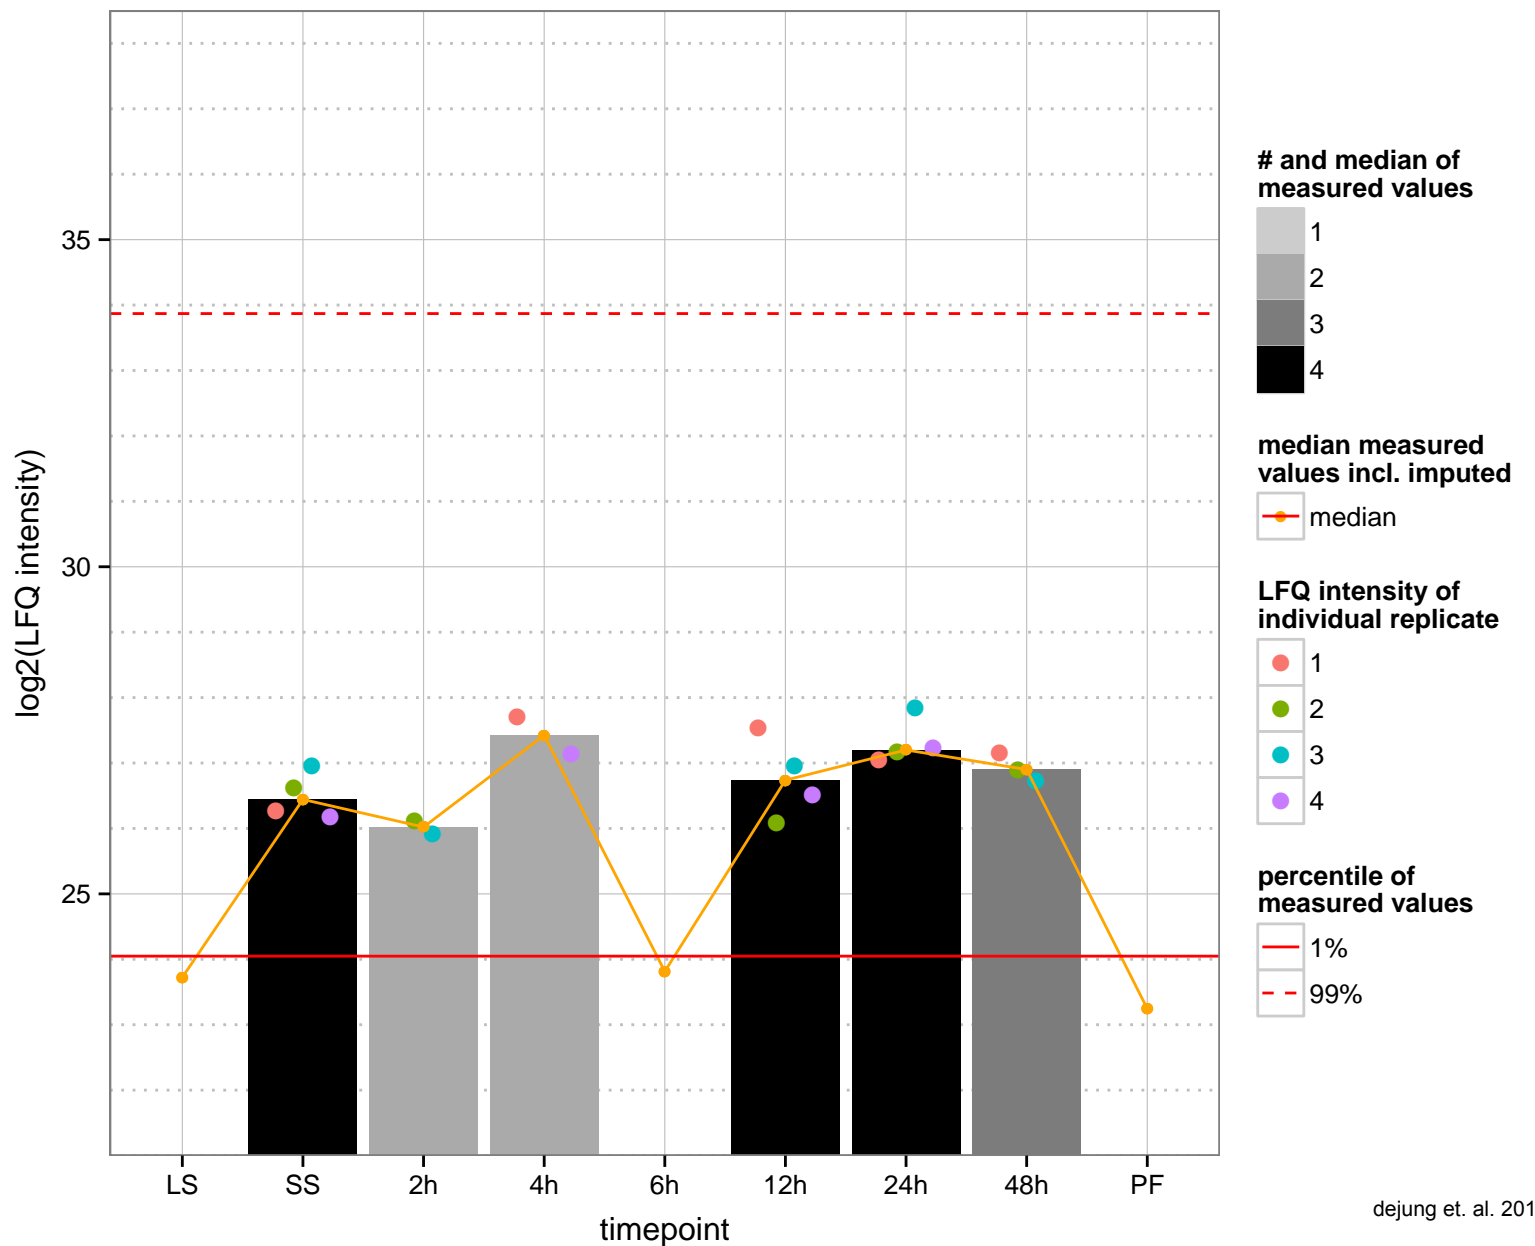

hypothetical protein, conserved  
 Tb927.9.9090  
 AGOF: null  
 AGOC: null  
 AGOP: null  
 PGOF: protein binding  
 PGO: null  
 PGOP: null

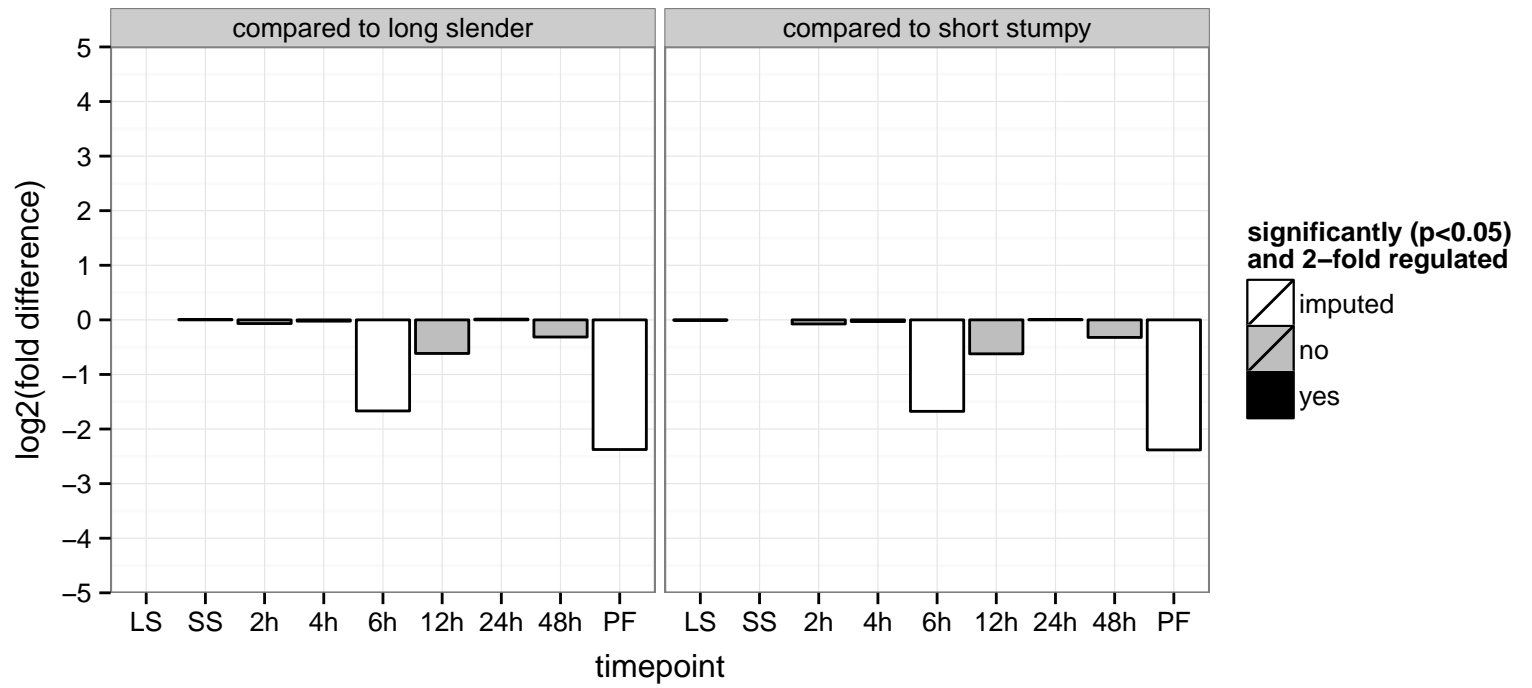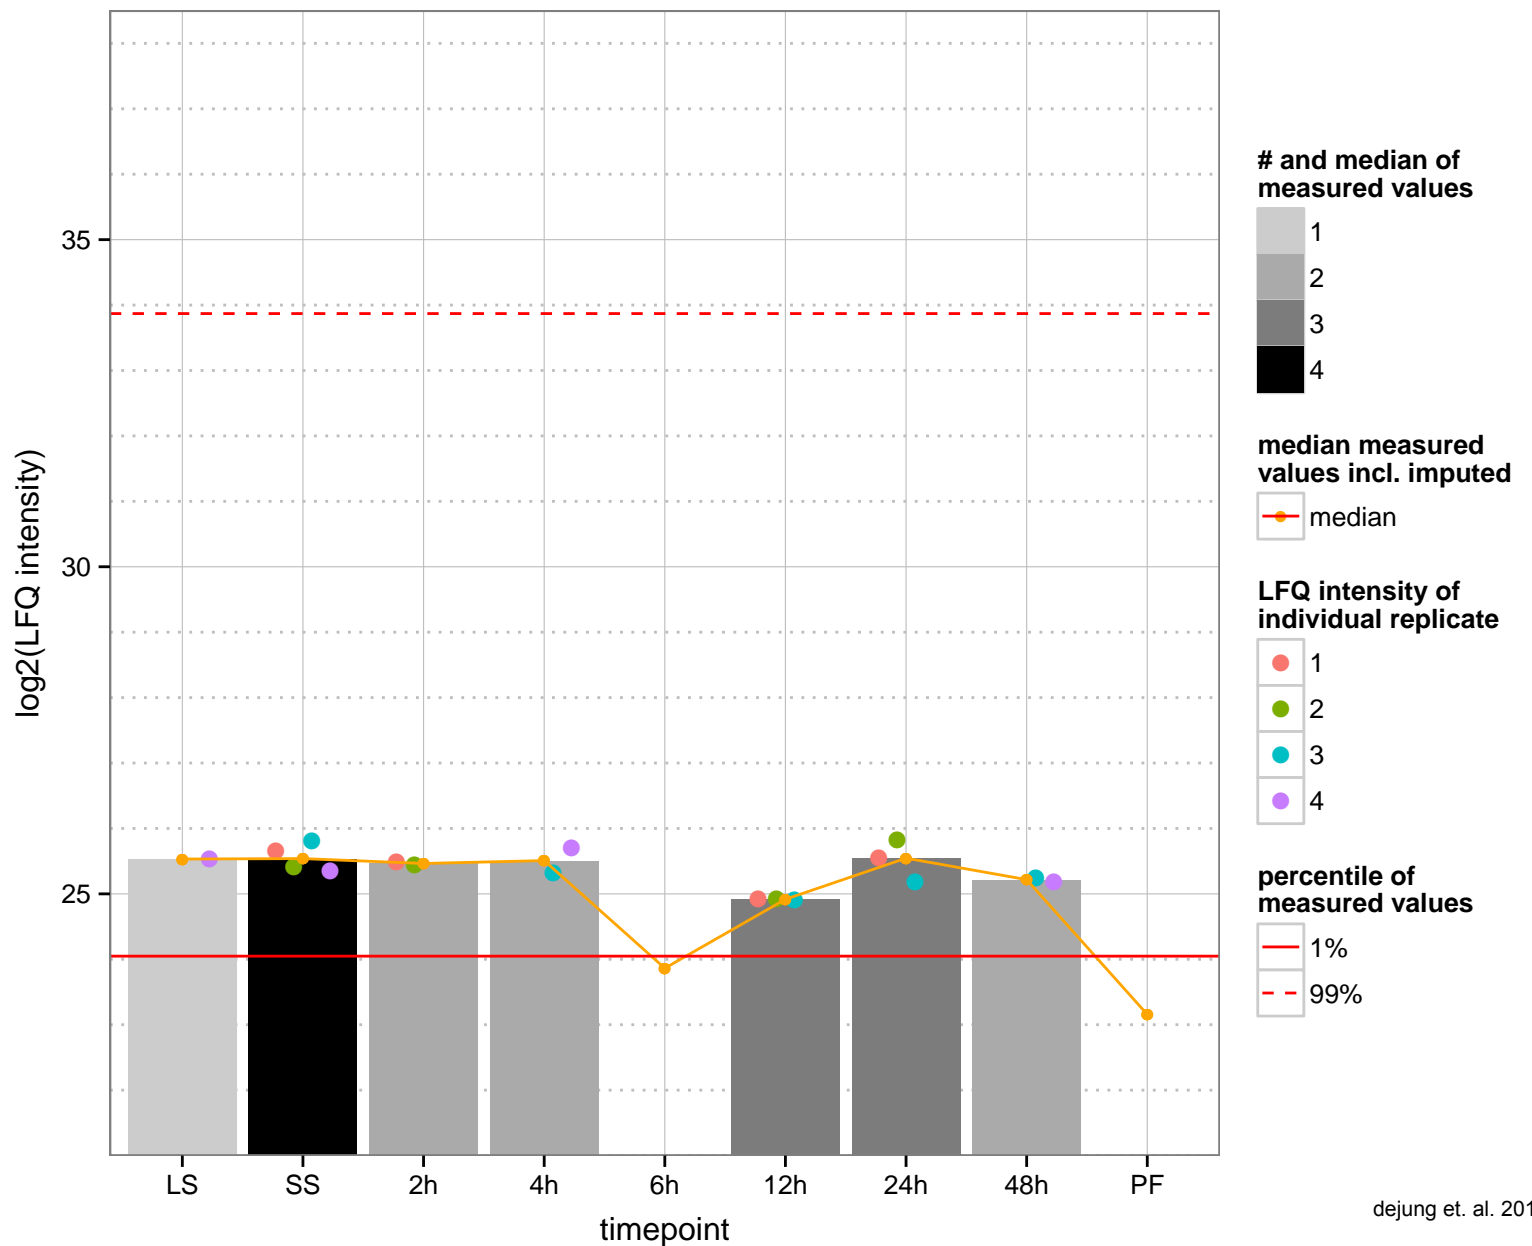



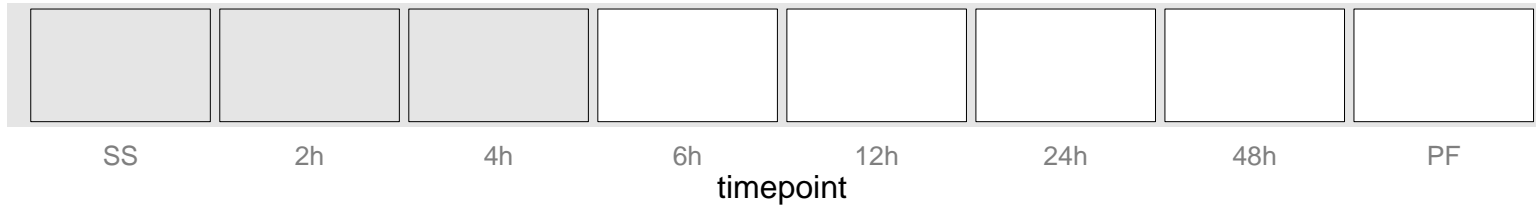

**regulated**  **not regulated**  **significant down**  **significant up**

hypothetical protein, conserved, BAC from homologous region on chr5  
 Tb927.5.4390;Tb05.5K5.40  
 AGOF: null  
 AGOC: null  
 AGOP: null  
 PGOF: null  
 PGOE: null  
 PGOP: null

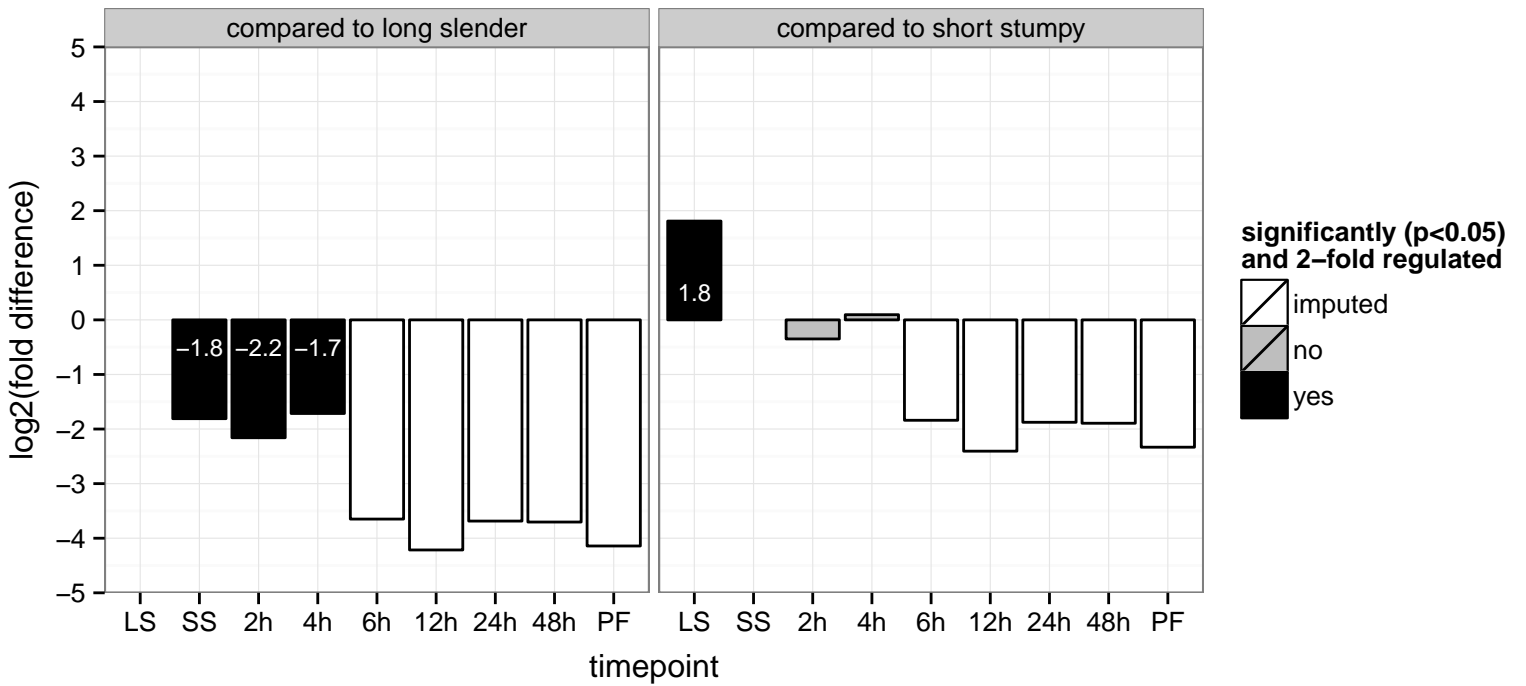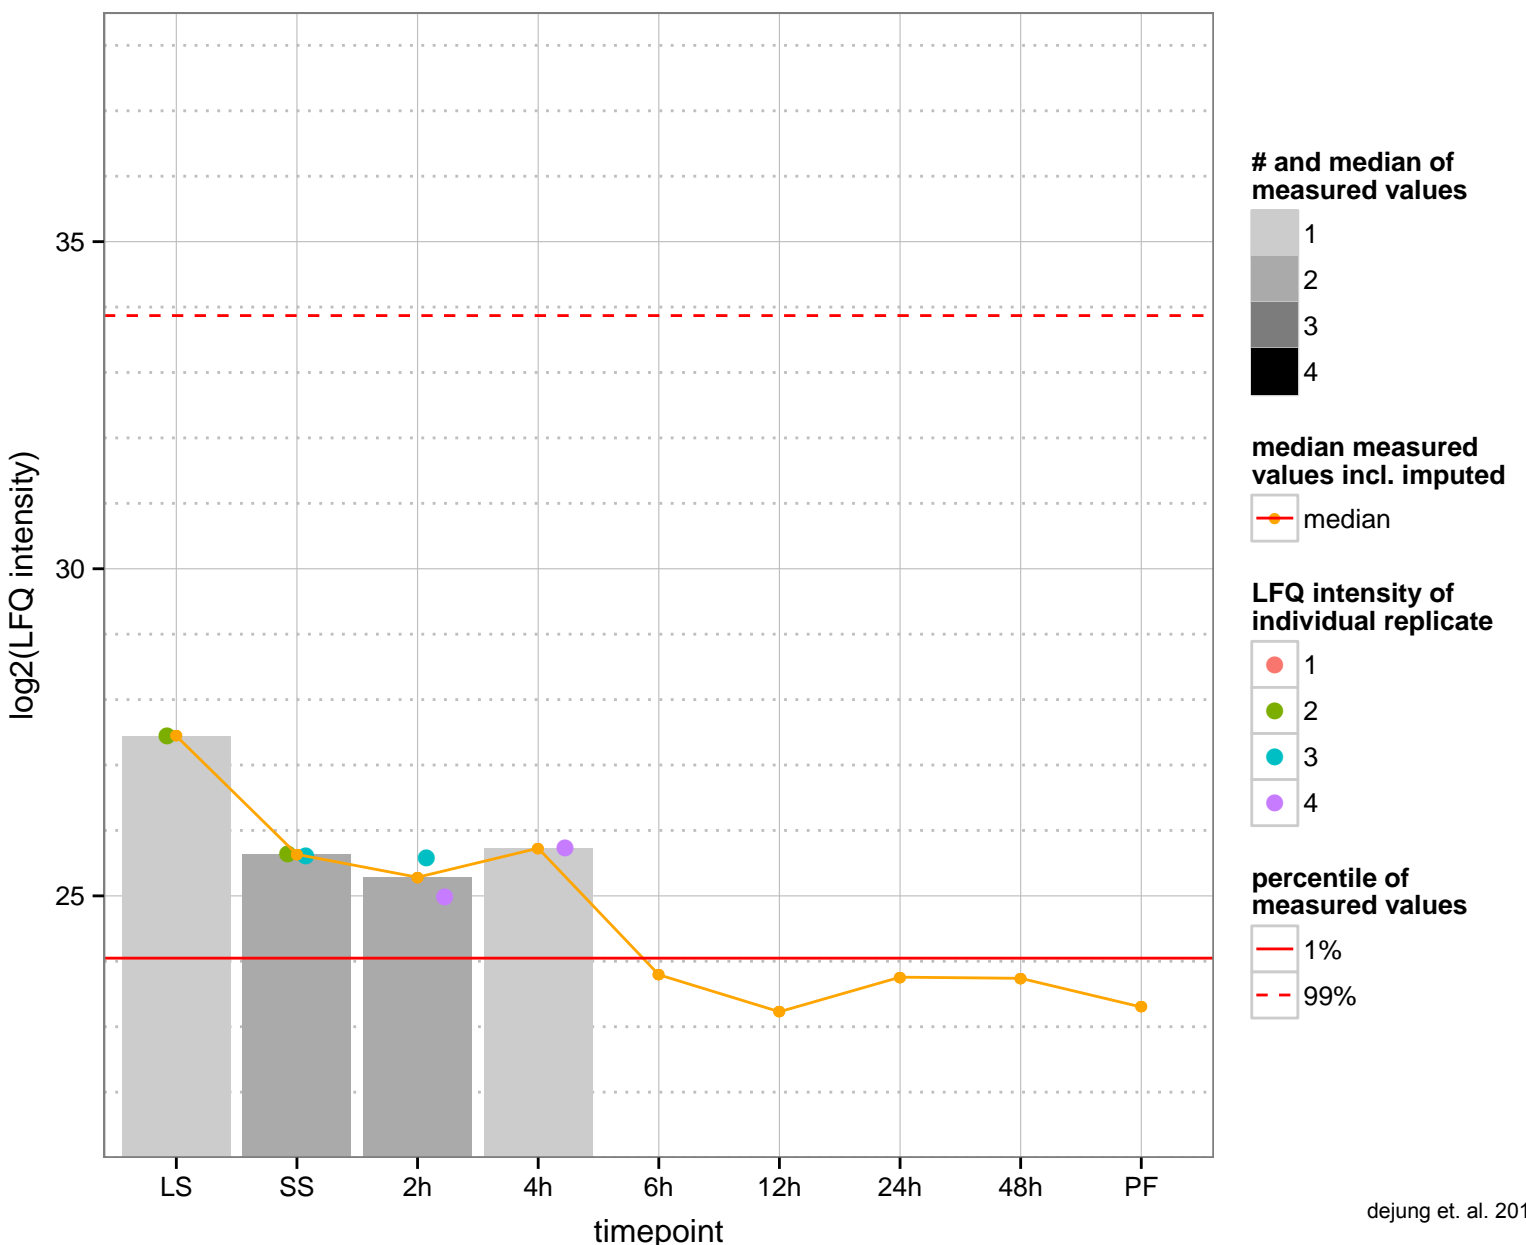

retrotransposon hot spot protein (RHS, pseudogene), putative, retrotransposon hot spot protein 4 (RHS4, chrXI additional, un  
 Tb11.0820;Tb11.v5.0295  
 AGOF: null  
 AGOC: null  
 AGOP: null  
 PGO: null  
 PGOC: null  
 PGOP: null

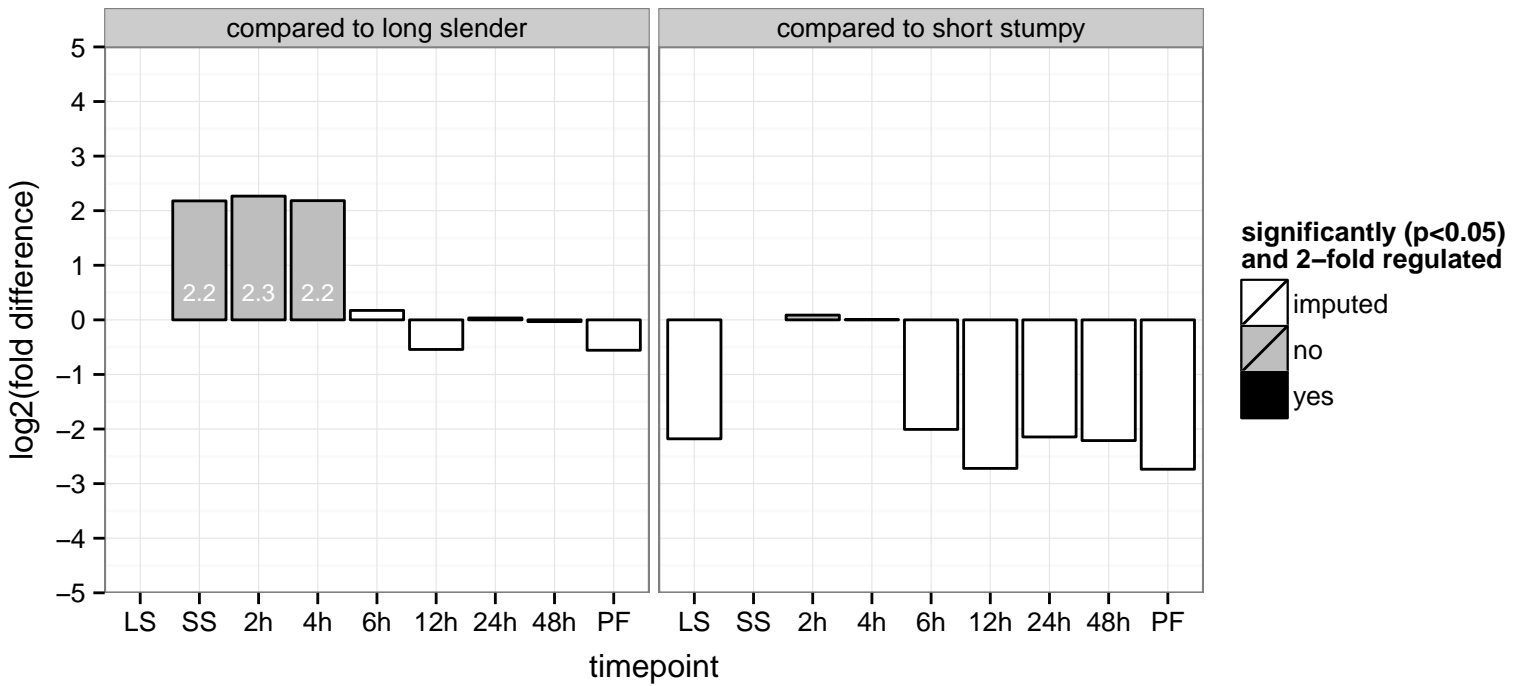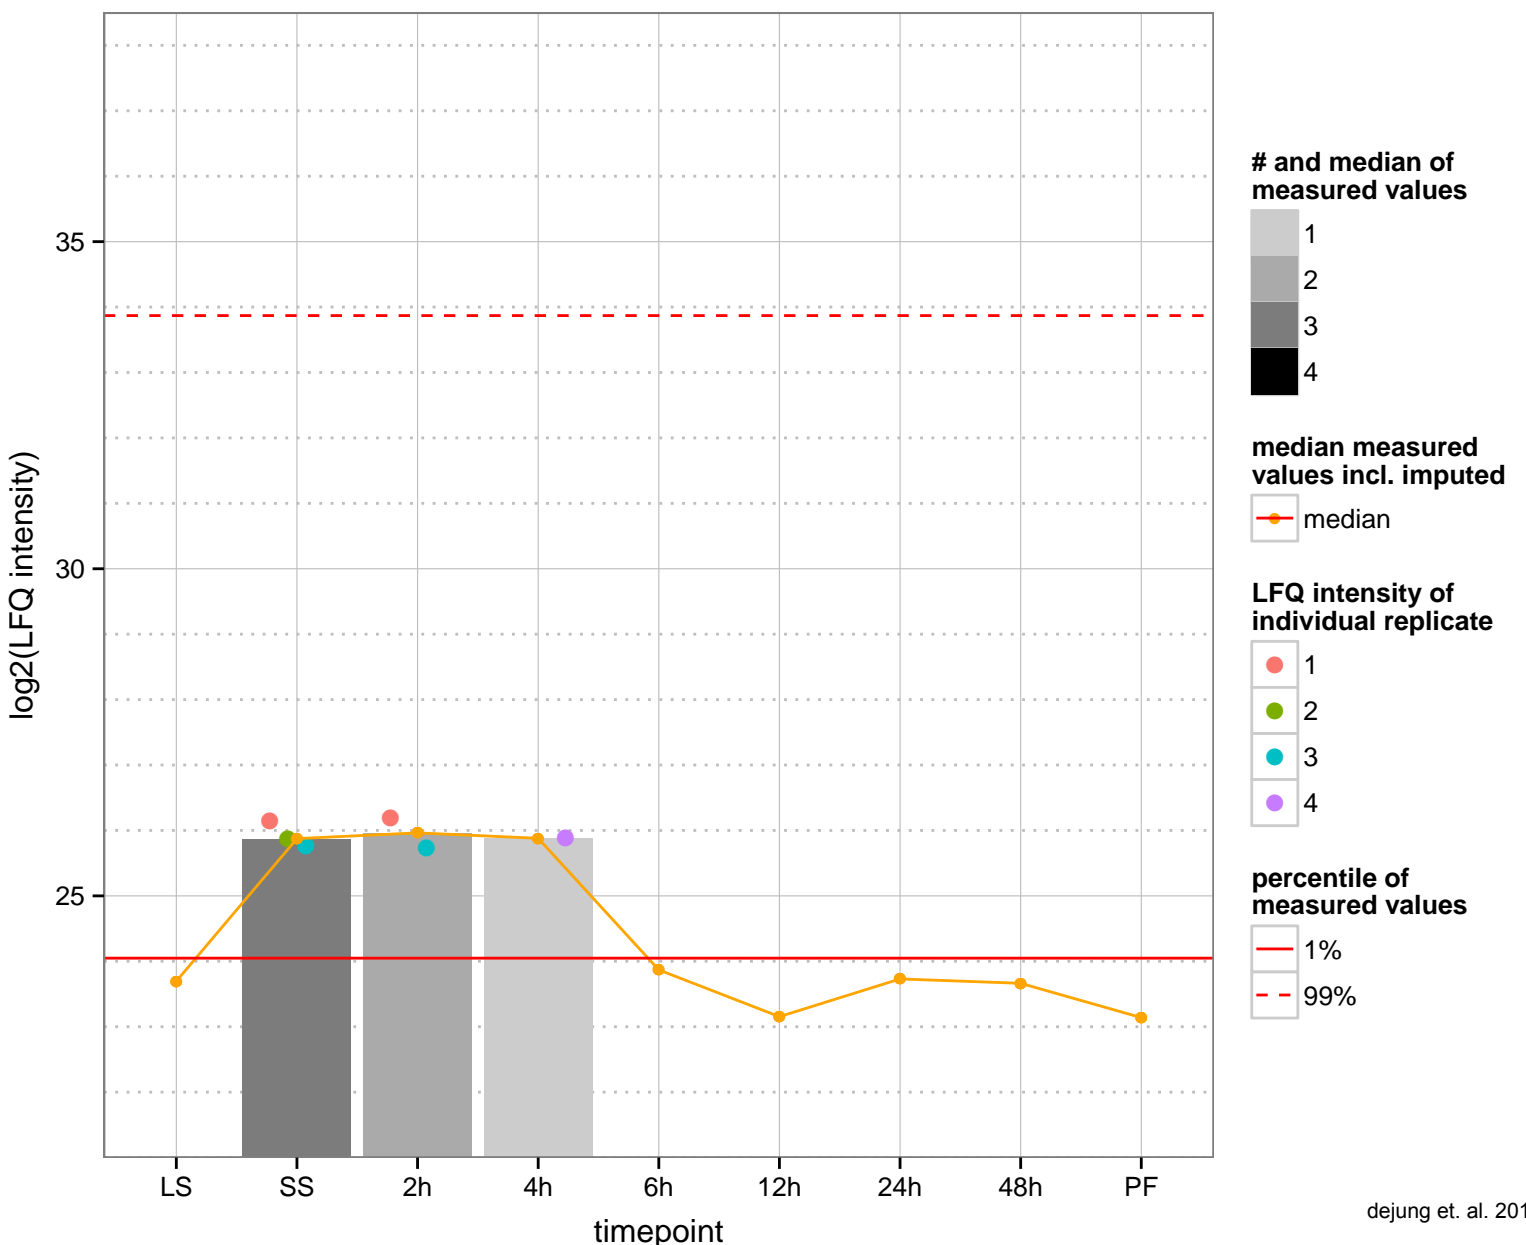

BarP protein, putative, hypothetical protein  
 Tb927.7.4690;Tb11.v5.0153  
 AGOF: null  
 AGOC: null  
 AGOP: null  
 PGO: null  
 PGOC: null  
 PGOP: null

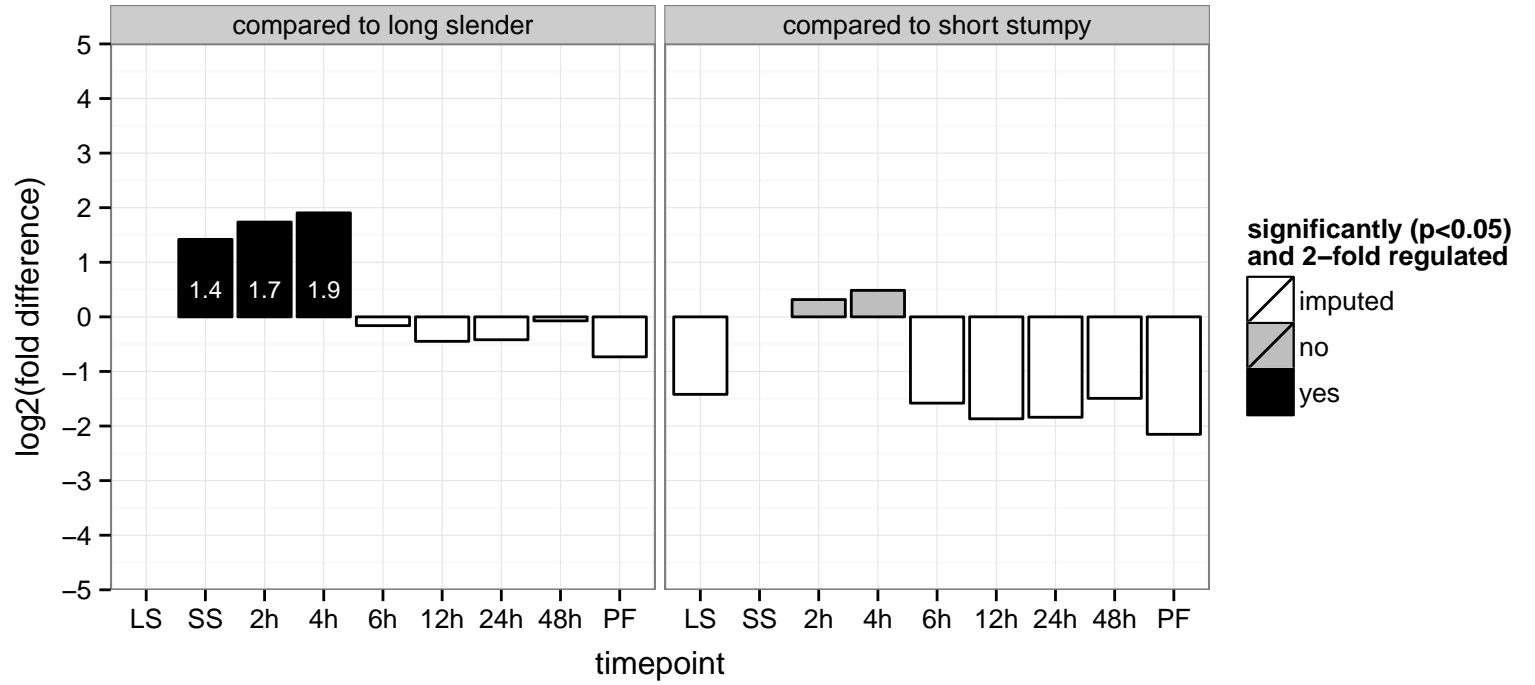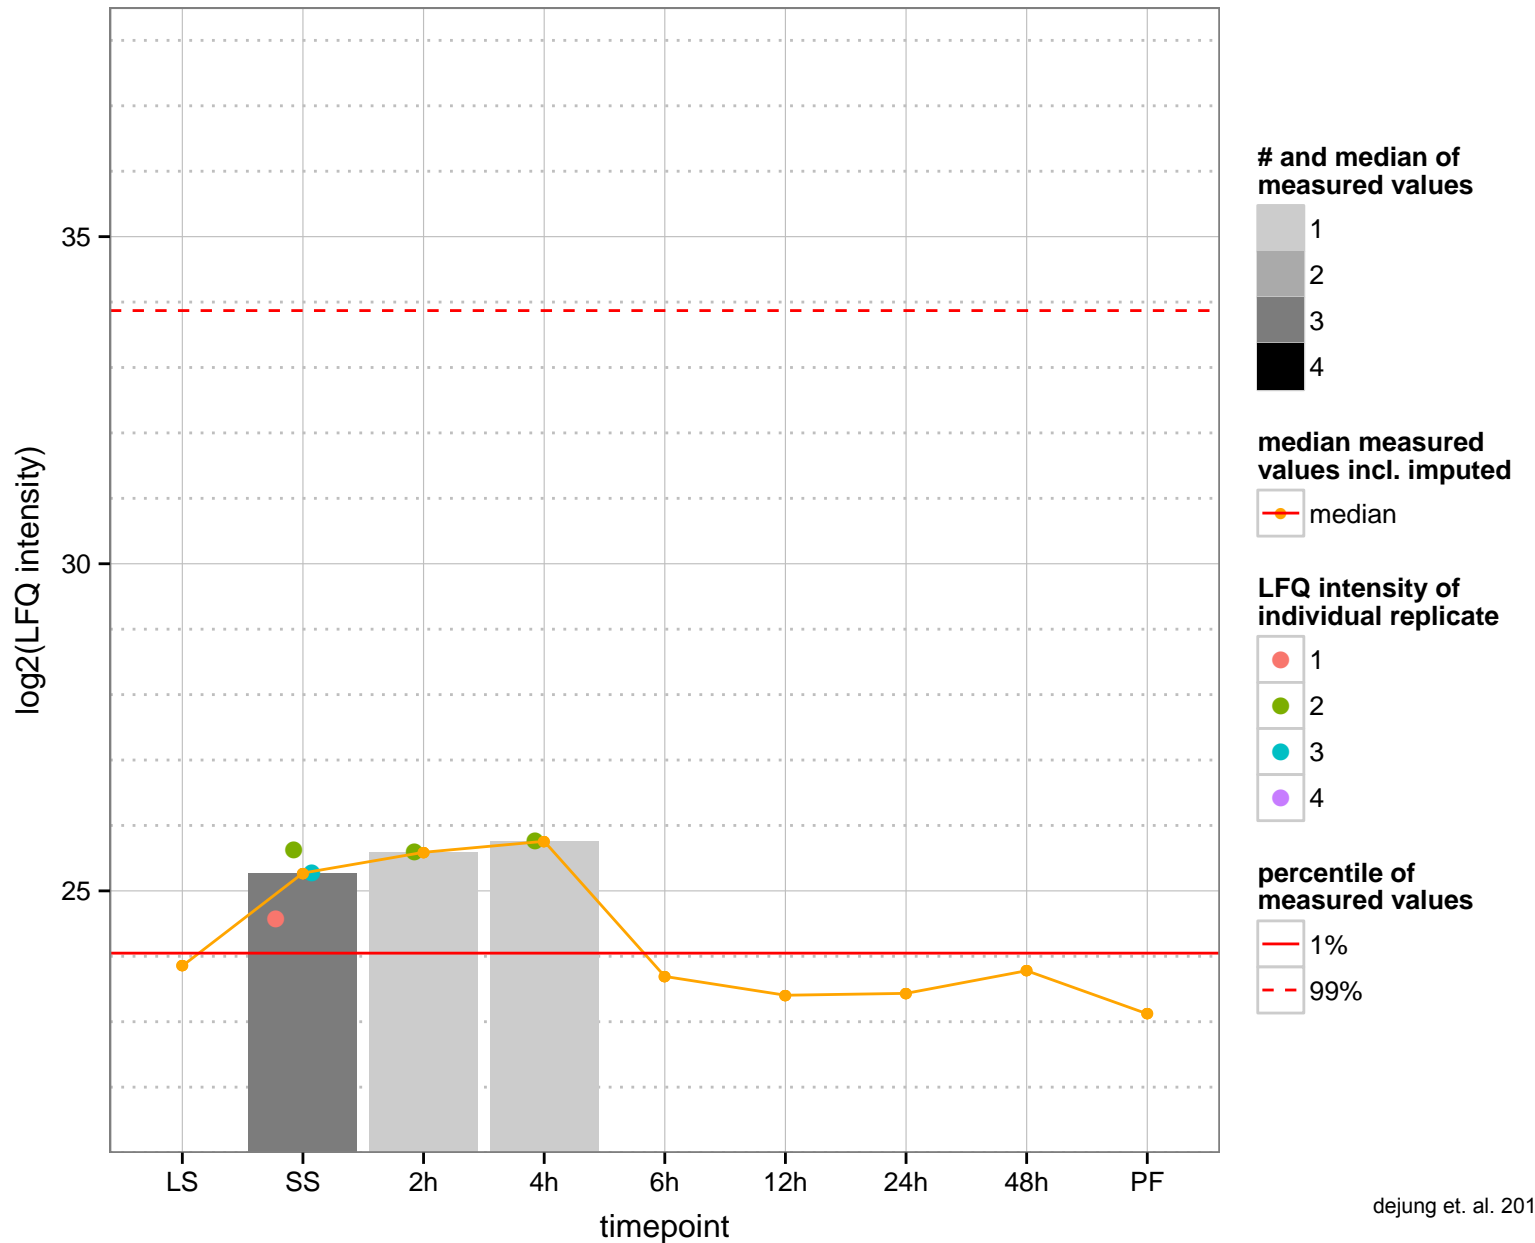

75 kDa invariant surface glycoprotein, putative, putative (ISG75)  
 Tb927.5.370;Tb11.v5.0230  
 AGOF: null  
 AGOC: null, plasma membrane  
 AGOP: null  
 PGO: null  
 PGOC: null  
 PGOP: null

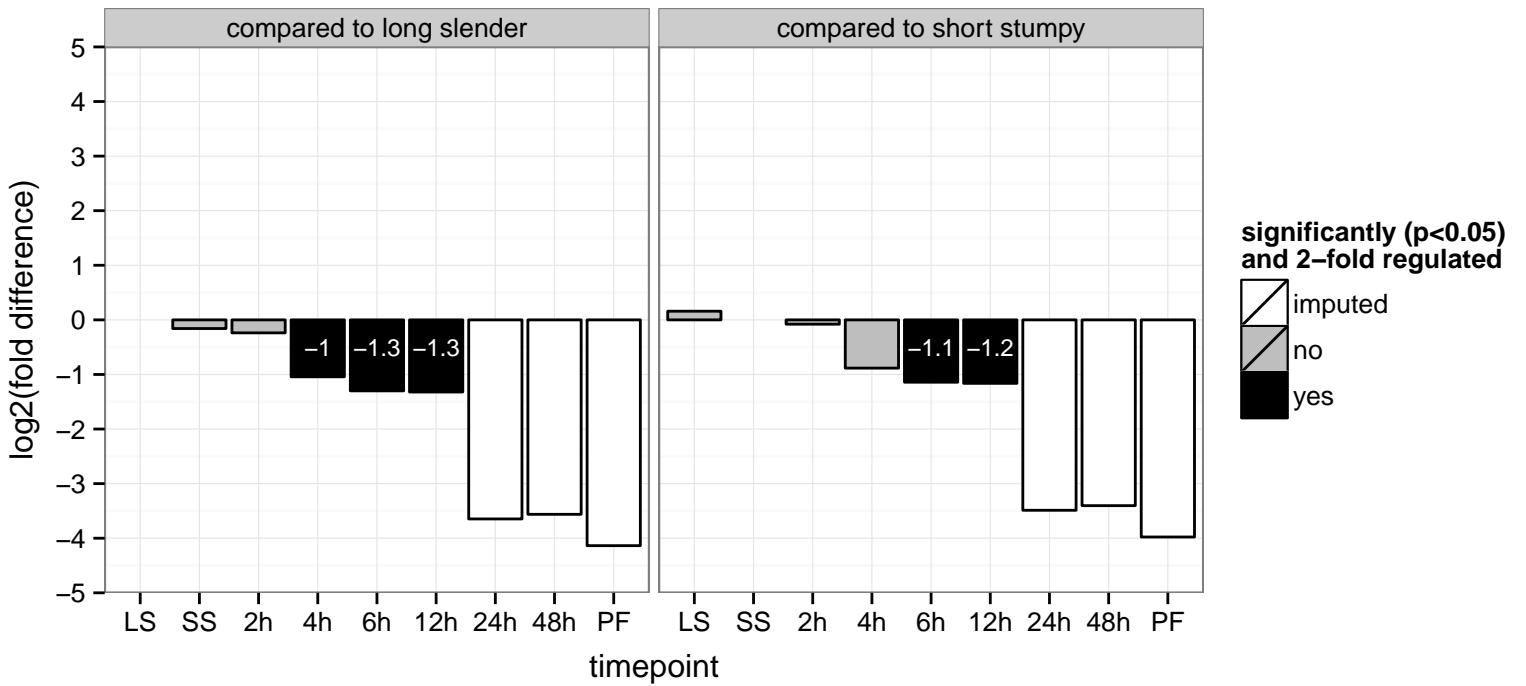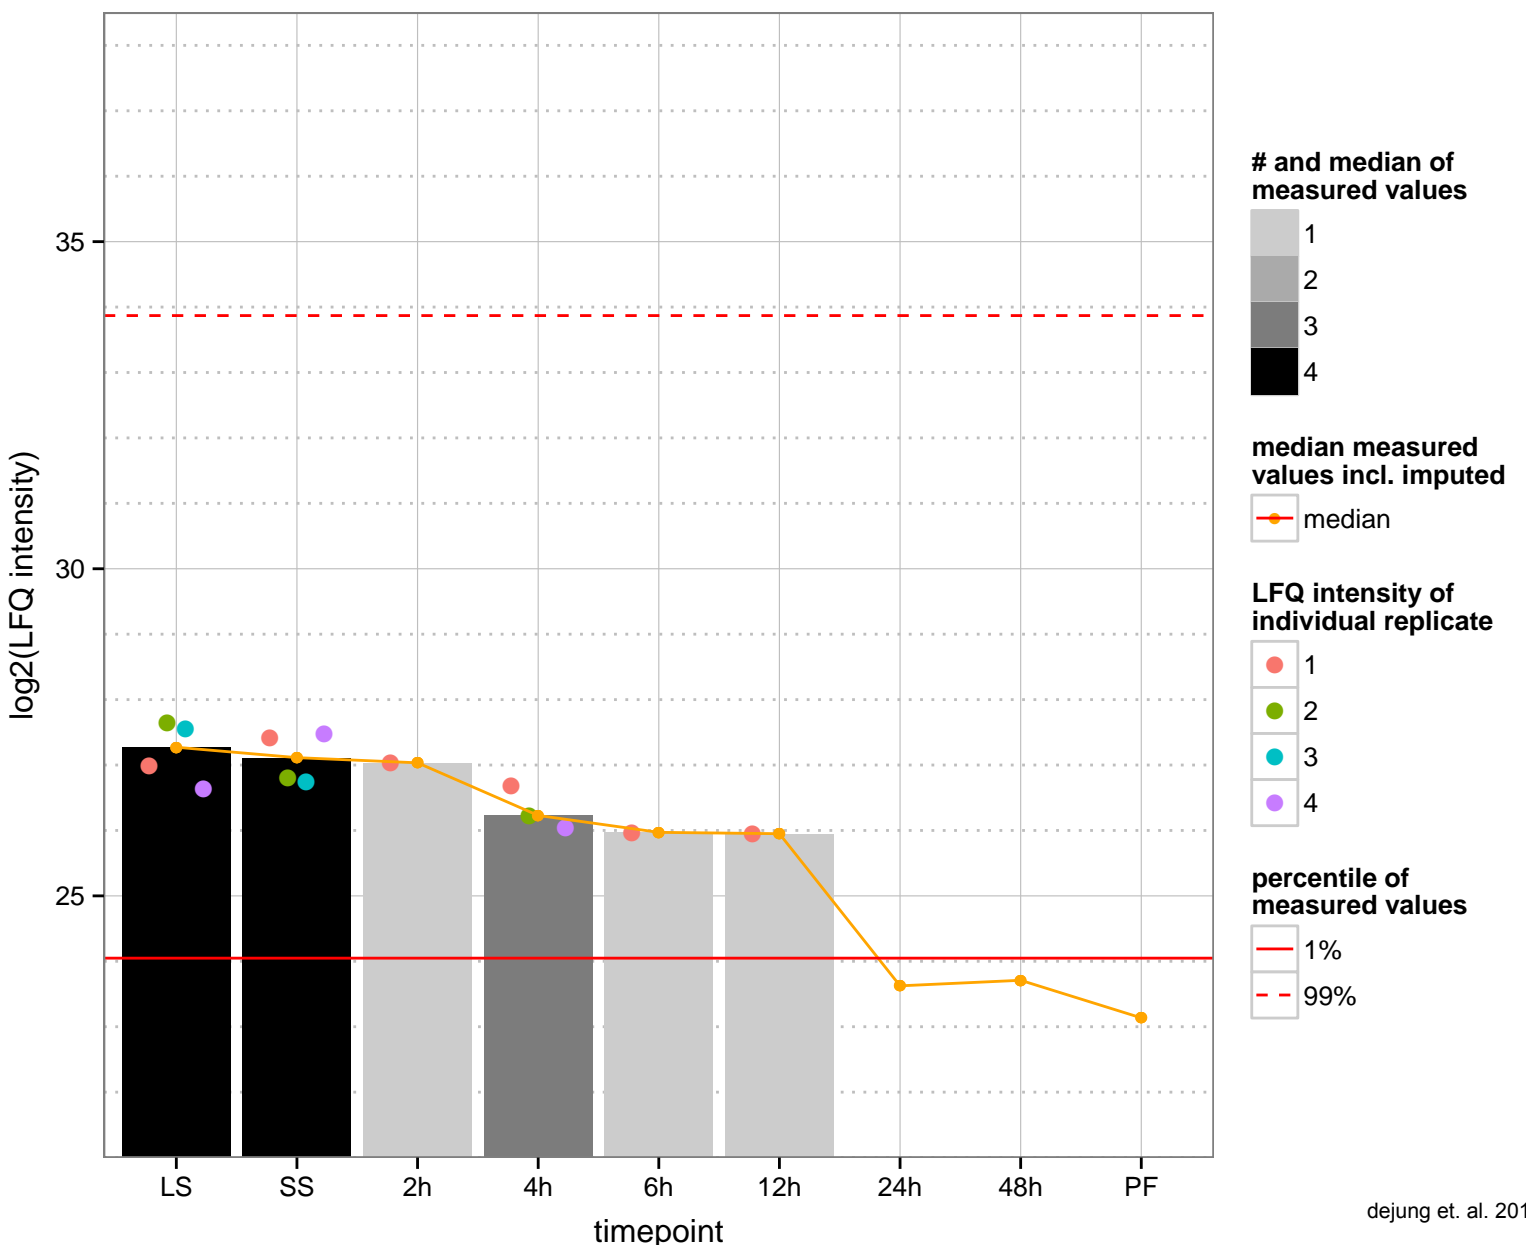

hypothetical protein, conserved  
 Tb11.v5.0365  
 AGOF: null  
 AGOC: null  
 AGOP: null  
 PGO: null  
 PGOC: null  
 PGOP: null

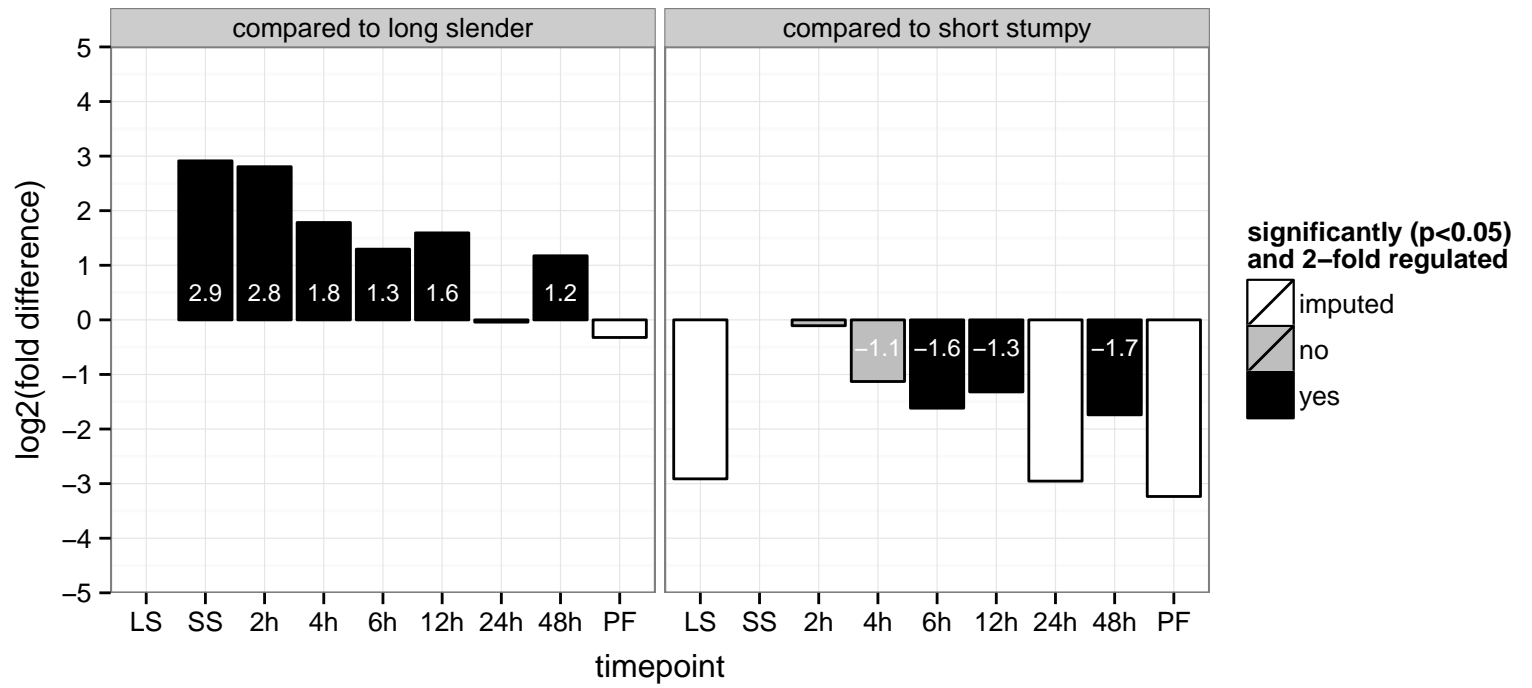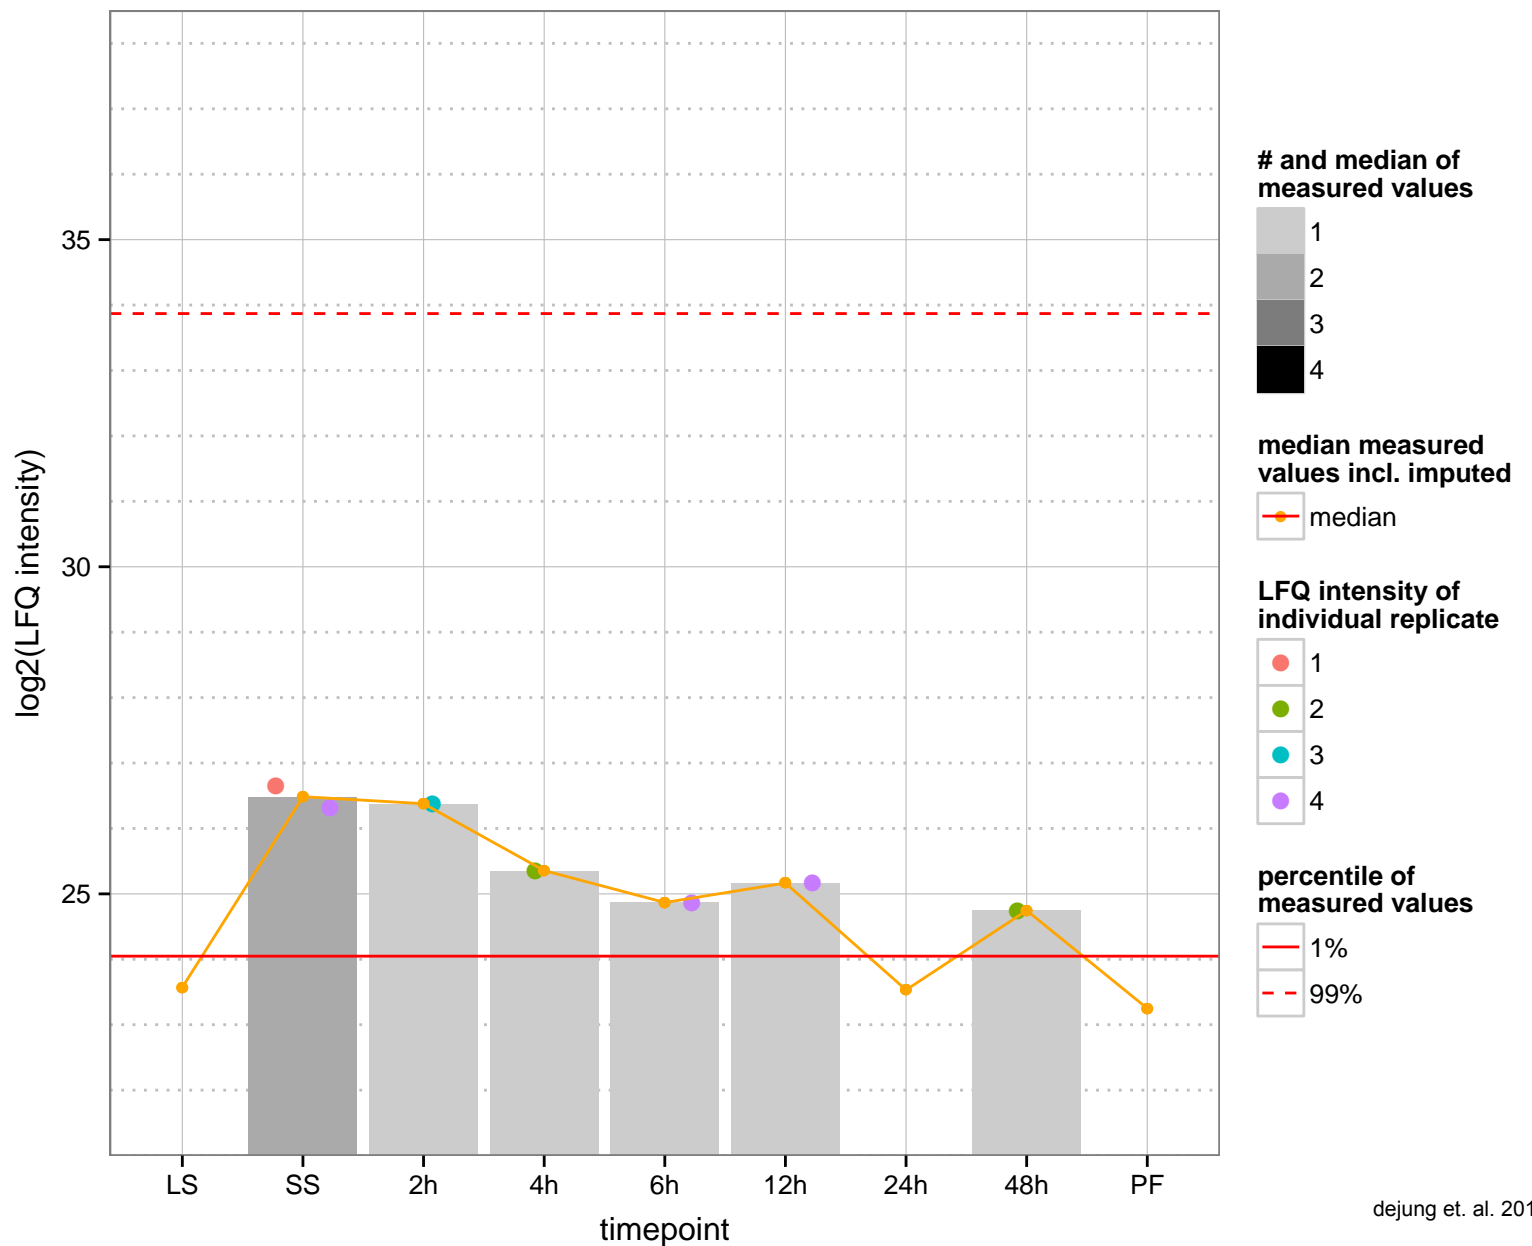

65 kDa invariant surface glycoprotein, putative  
 Tb11.v5.0731  
 AGOF: null  
 AGOC: null  
 AGOP: null  
 PGOF: null  
 PGO C: null  
 PGO P: null

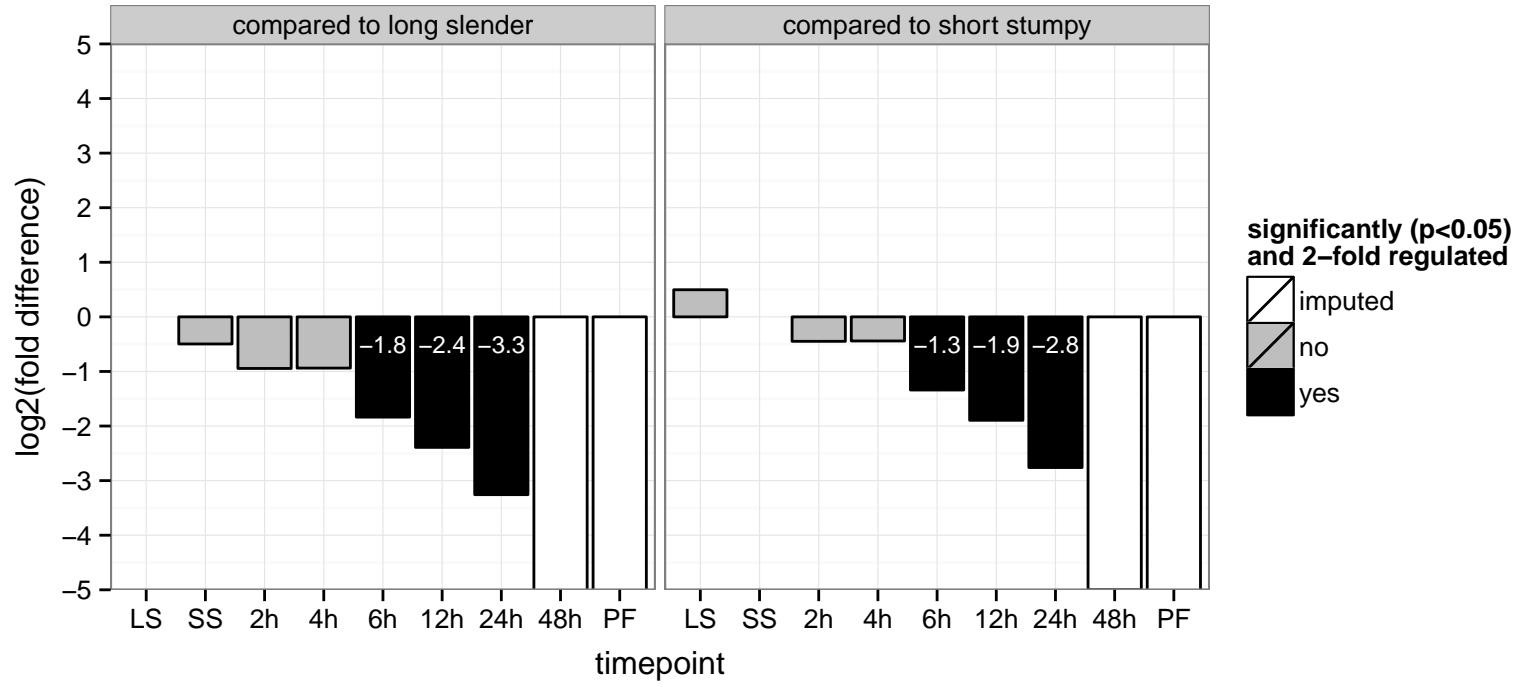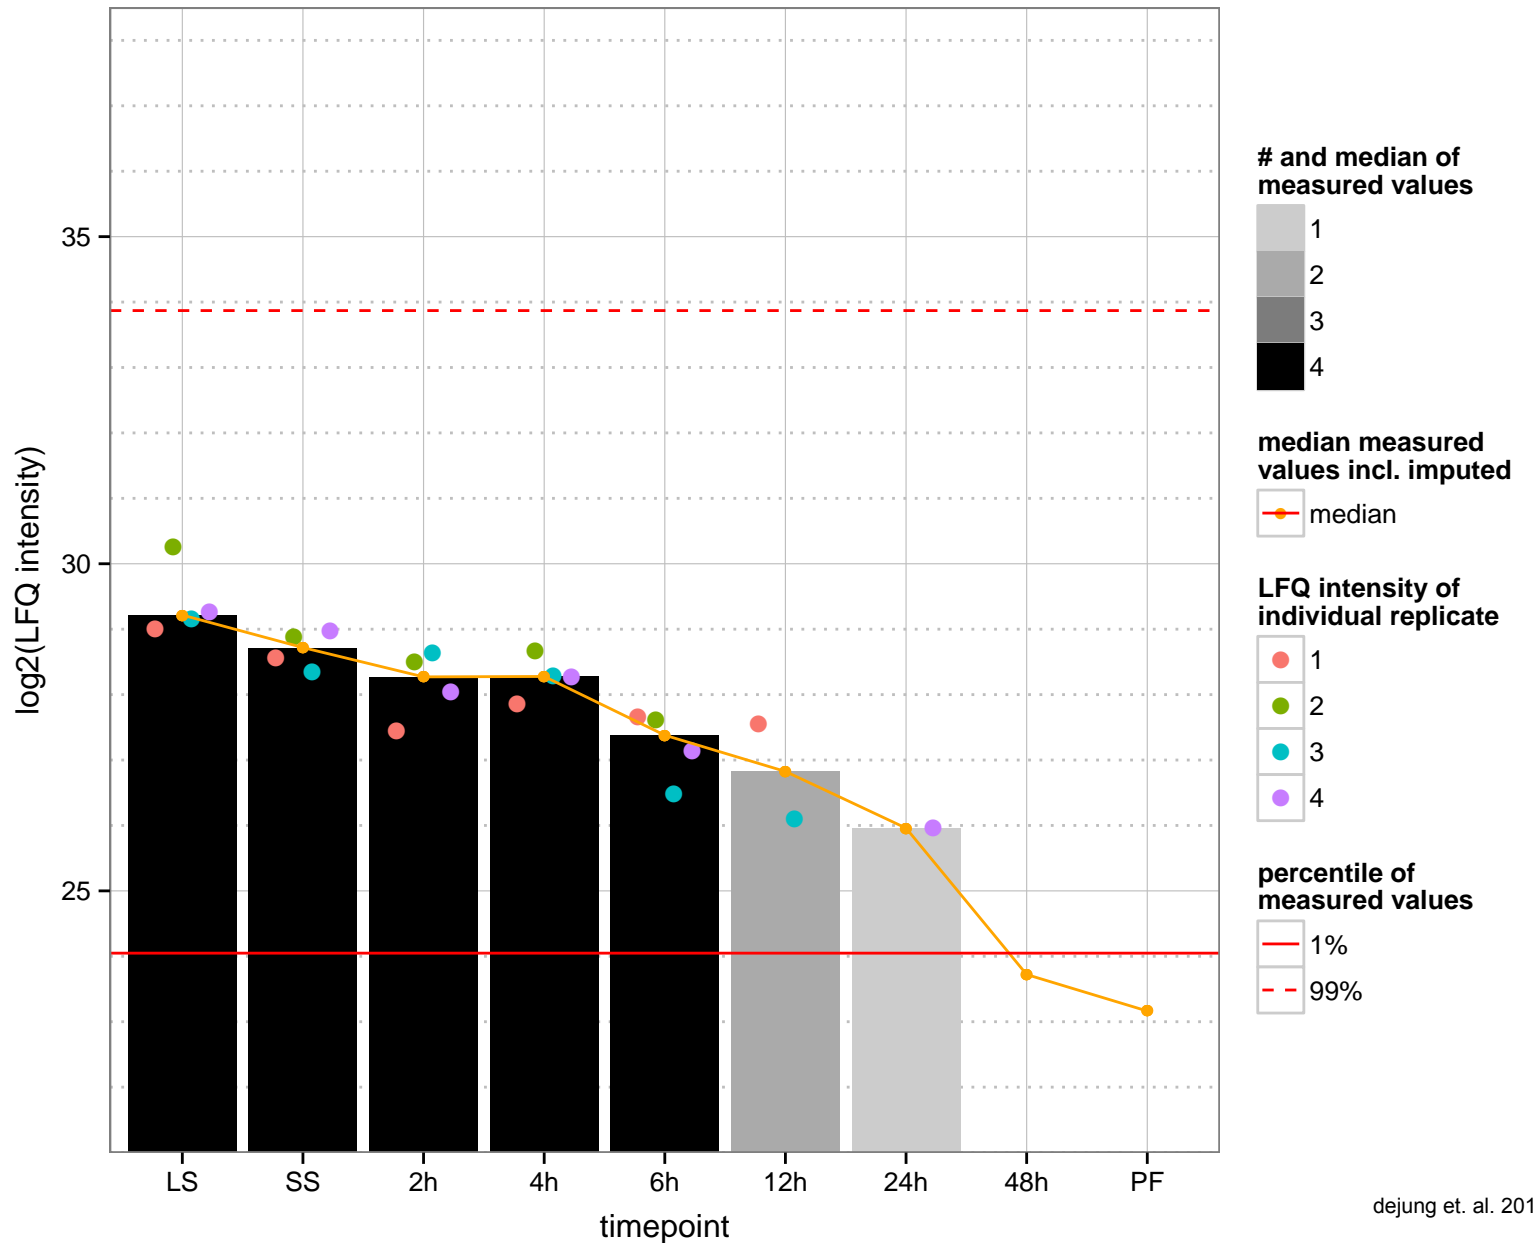

Sarcalumenin, putative, sarcoplasmic reticulum glycoprotein  
 Tb927.10.14910  
 AGOF: GTP binding, calcium ion binding  
 AGOC: intracellular, sarcoplasmic reticulum  
 AGOP: endosomal transport  
 PGO: GTP binding, GTPase activity  
 PGOC: null  
 PGO: null

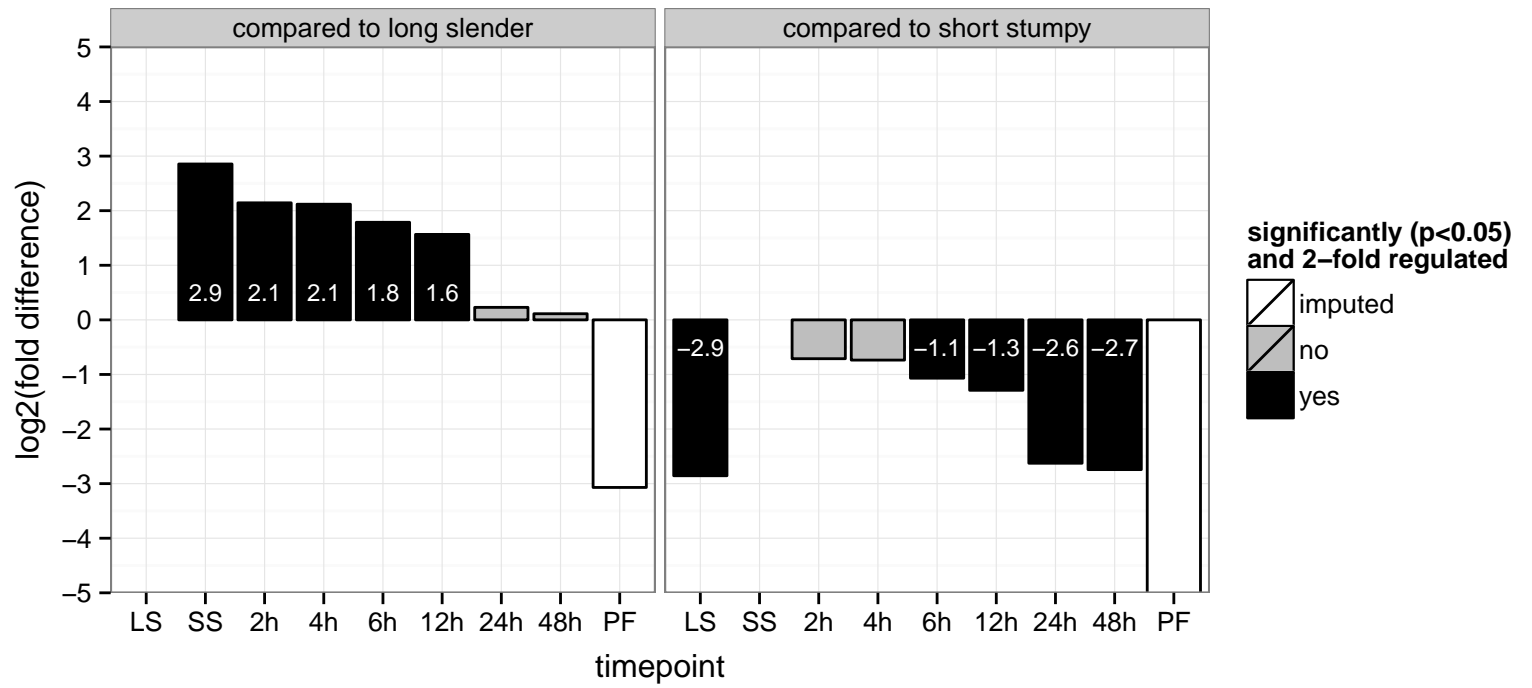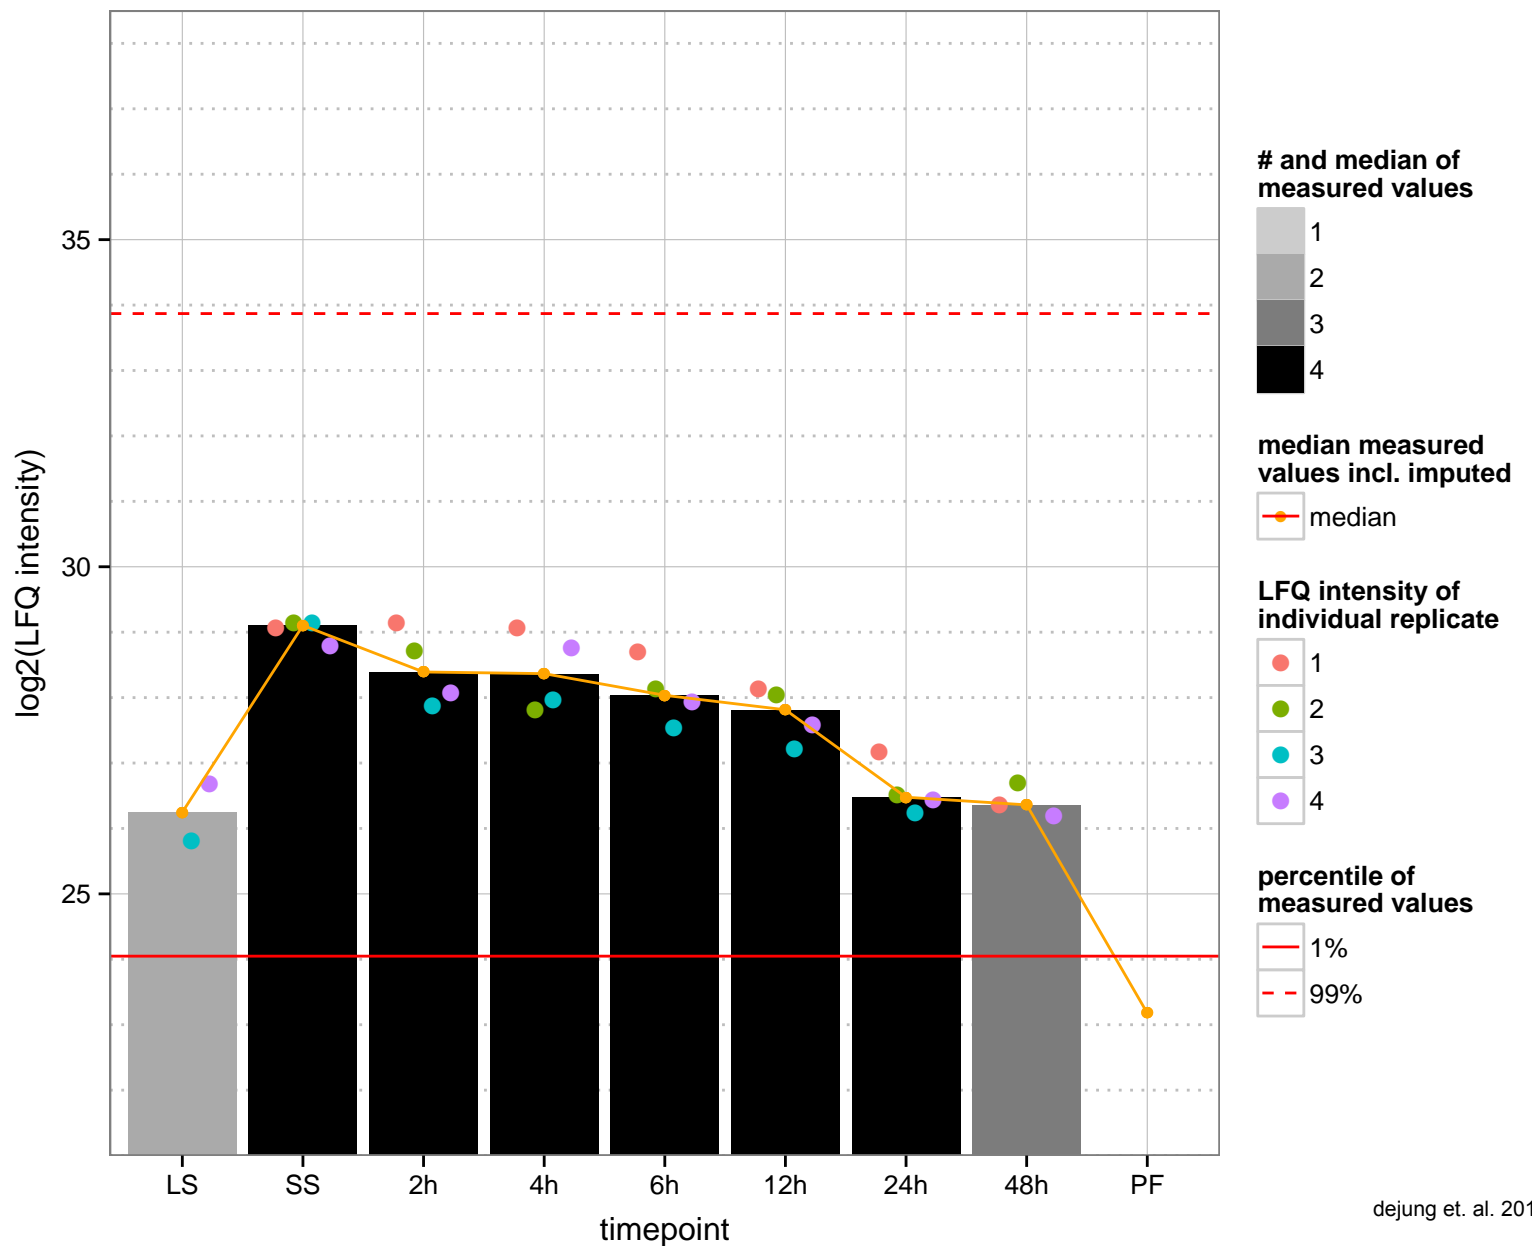



protein-L-isoaspartate, putative  
 Tb927.10.7850  
 AGOF: protein-L-isoaspartate (D-aspartate) O-methyltransferase activity  
 AGOC: null  
 AGOP: cellular protein modification process  
 PGOF: protein-L-isoaspartate (D-aspartate) O-methyltransferase activity  
 PGOC: null  
 PGOP: cellular protein modification process

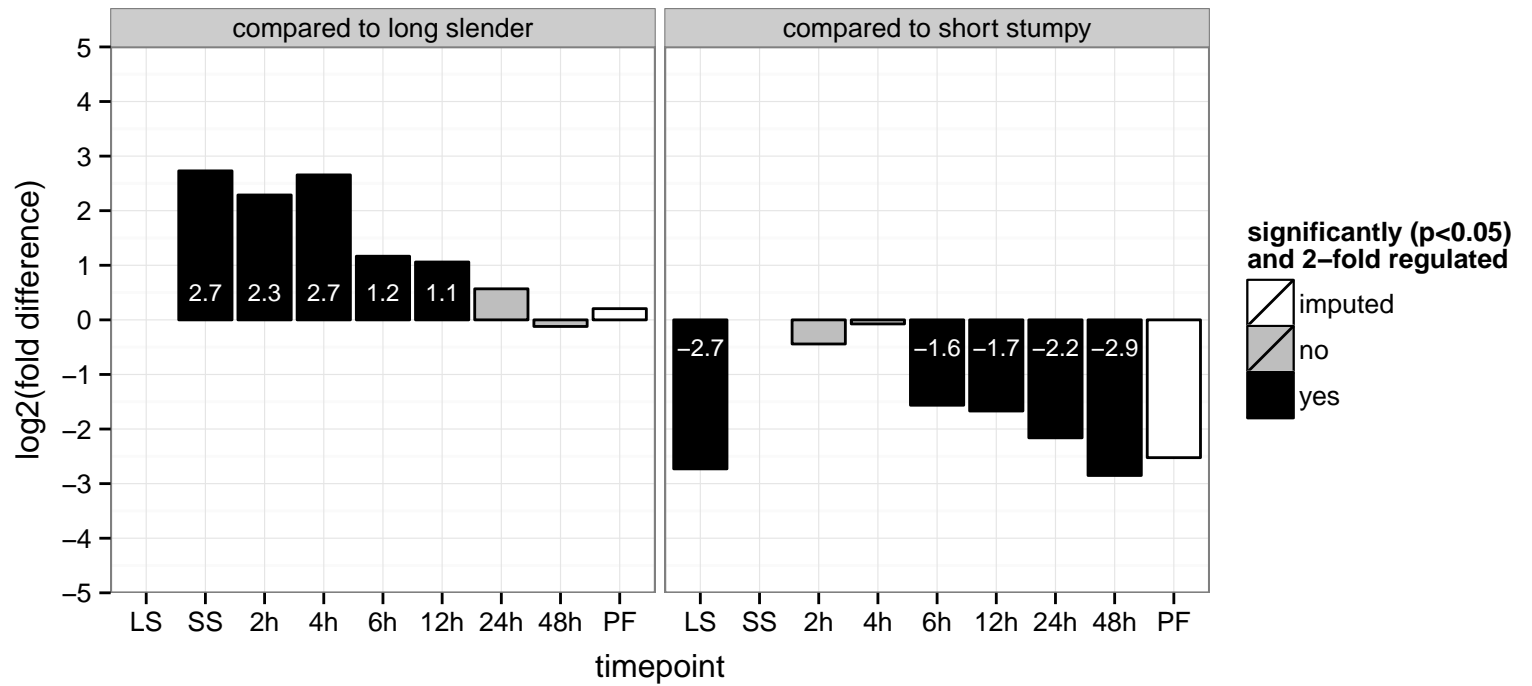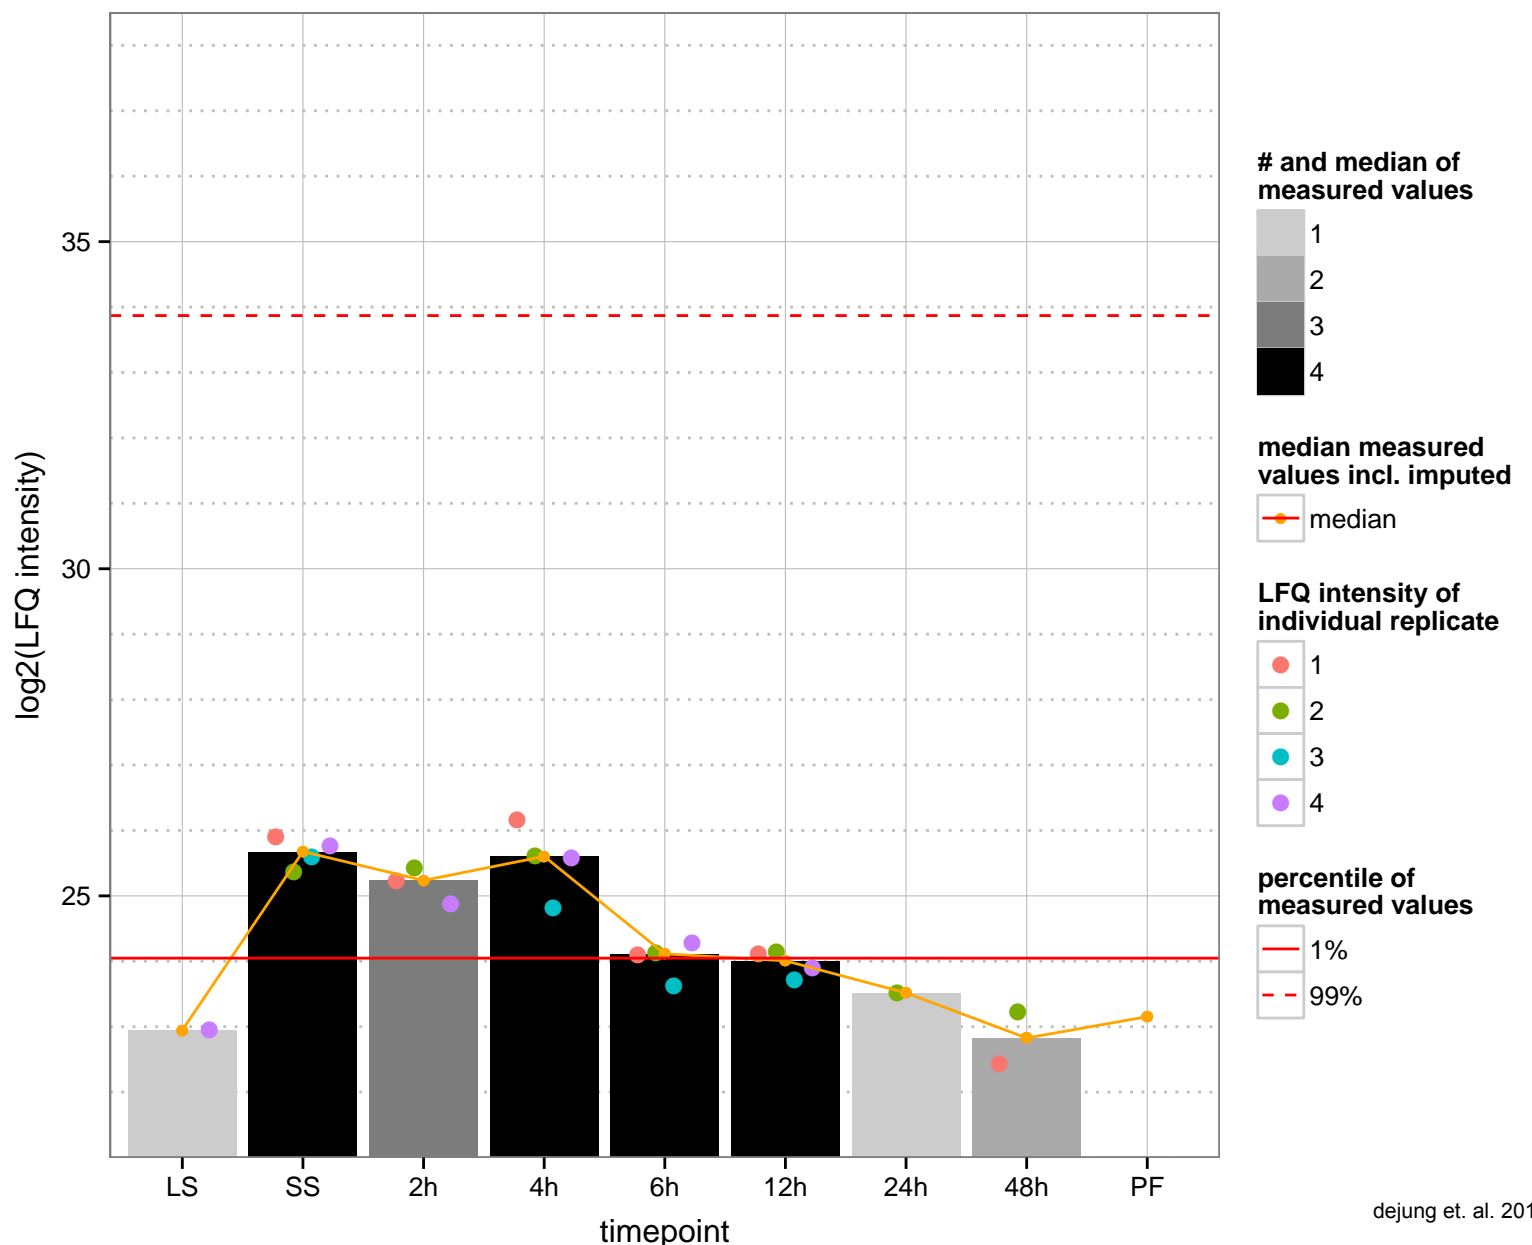

hypothetical protein, conserved  
 Tb927.11.7550  
 AGOF: null  
 AGOC: null  
 AGOP: null  
 PGO: null  
 PGOC: null  
 PGOP: null

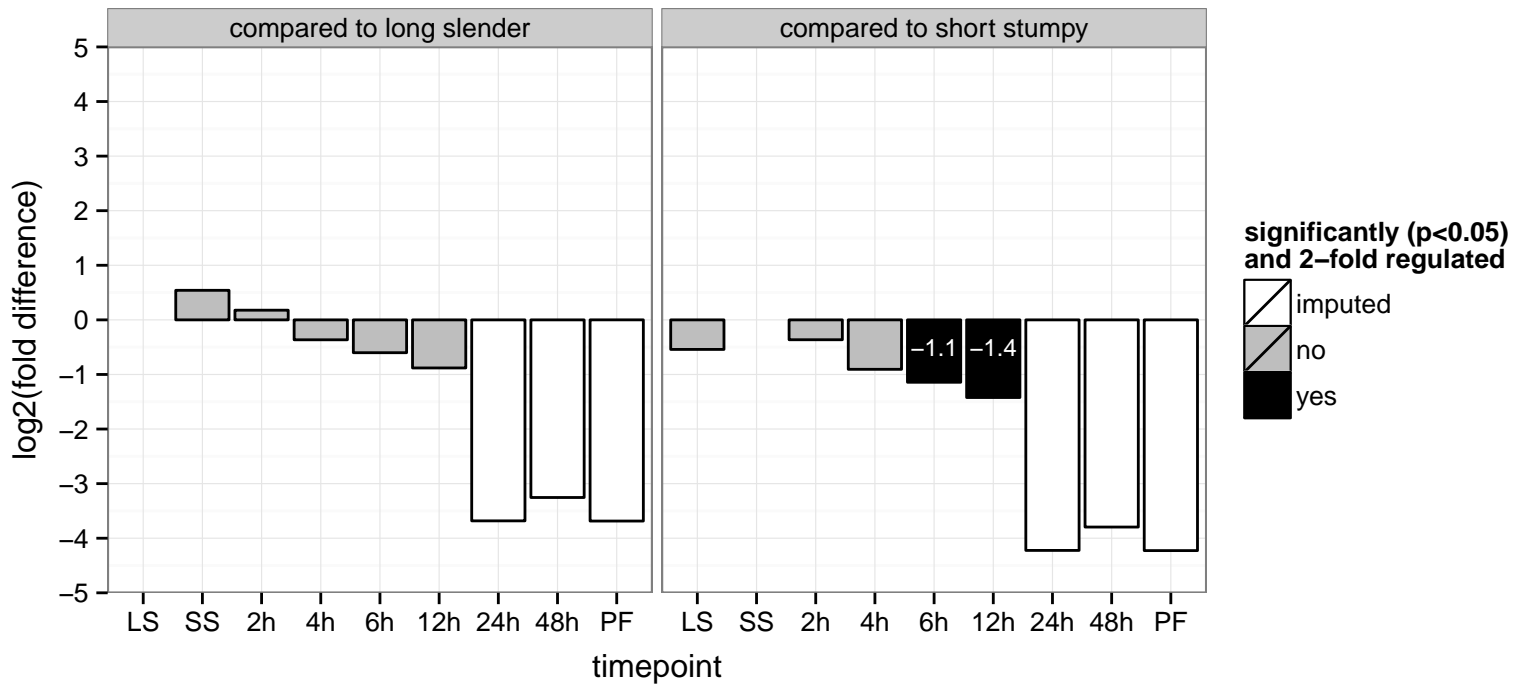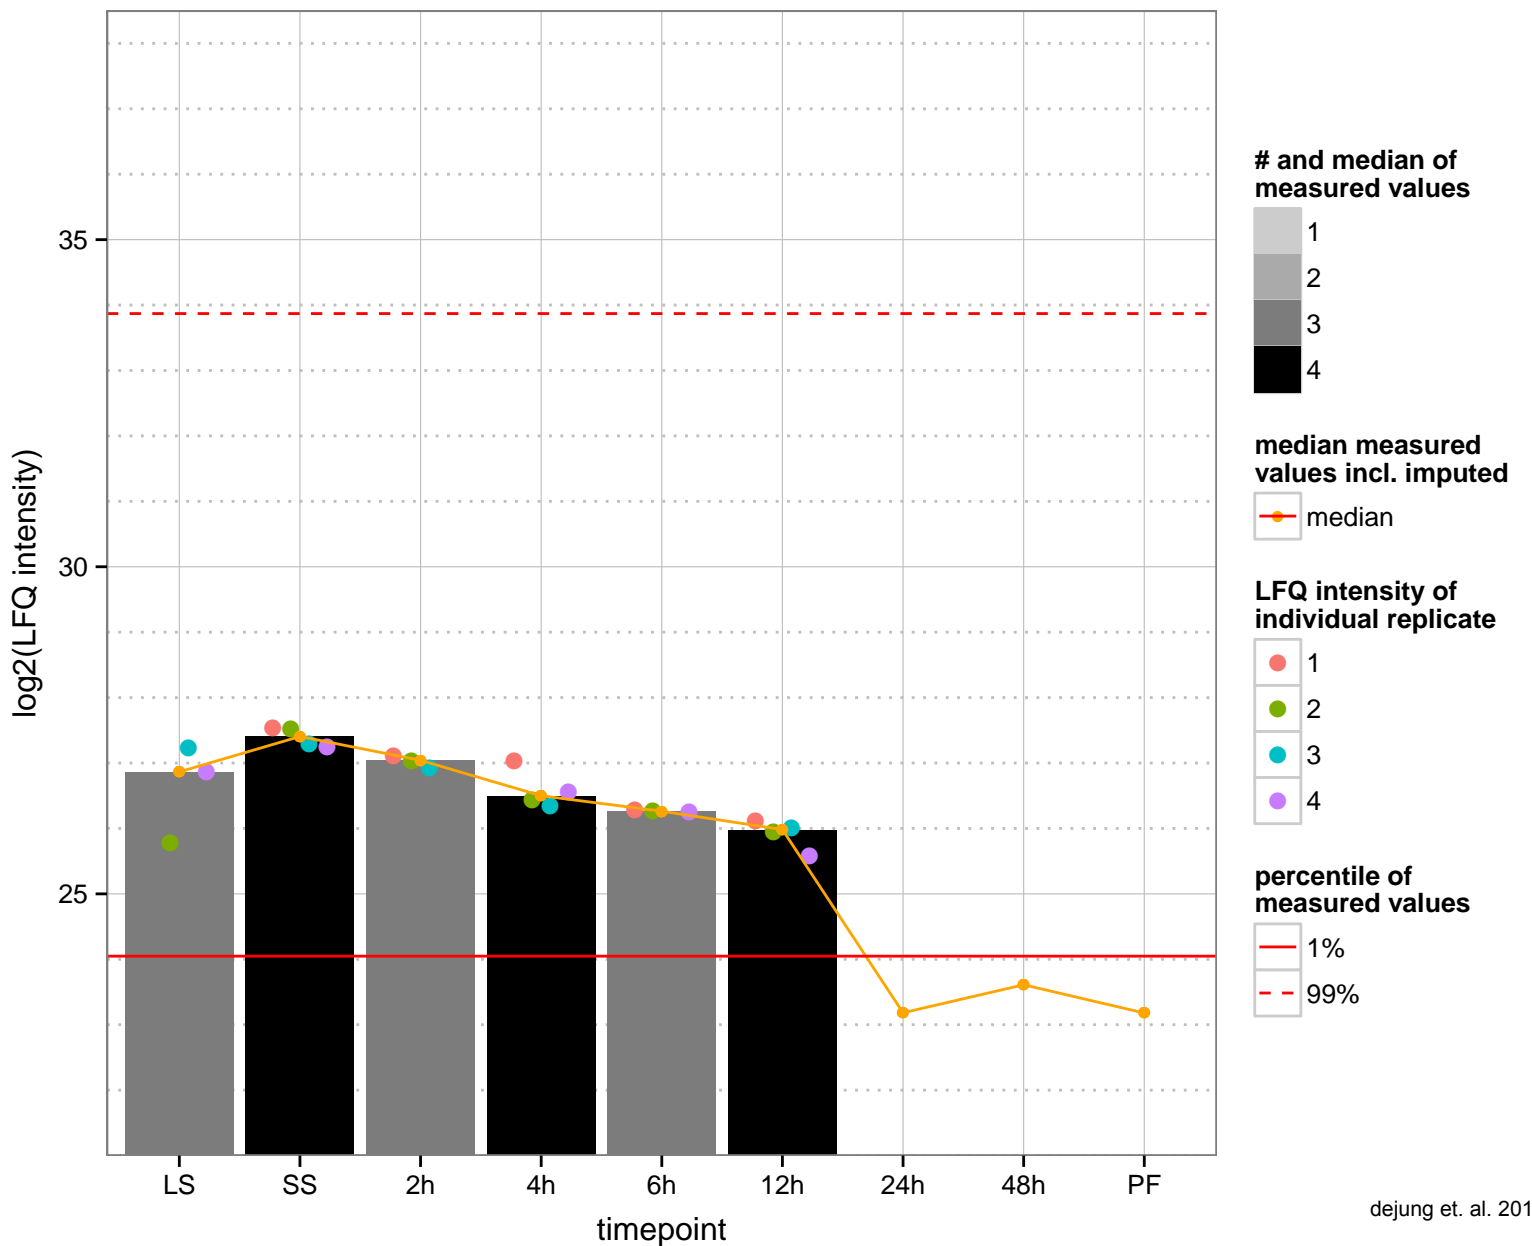

hypothetical protein, conserved  
 Tb927.11.9150  
 AGOF: null  
 AGOC: mitochondrion  
 AGOP: null  
 PGO: null  
 PGO: null  
 PGO: null

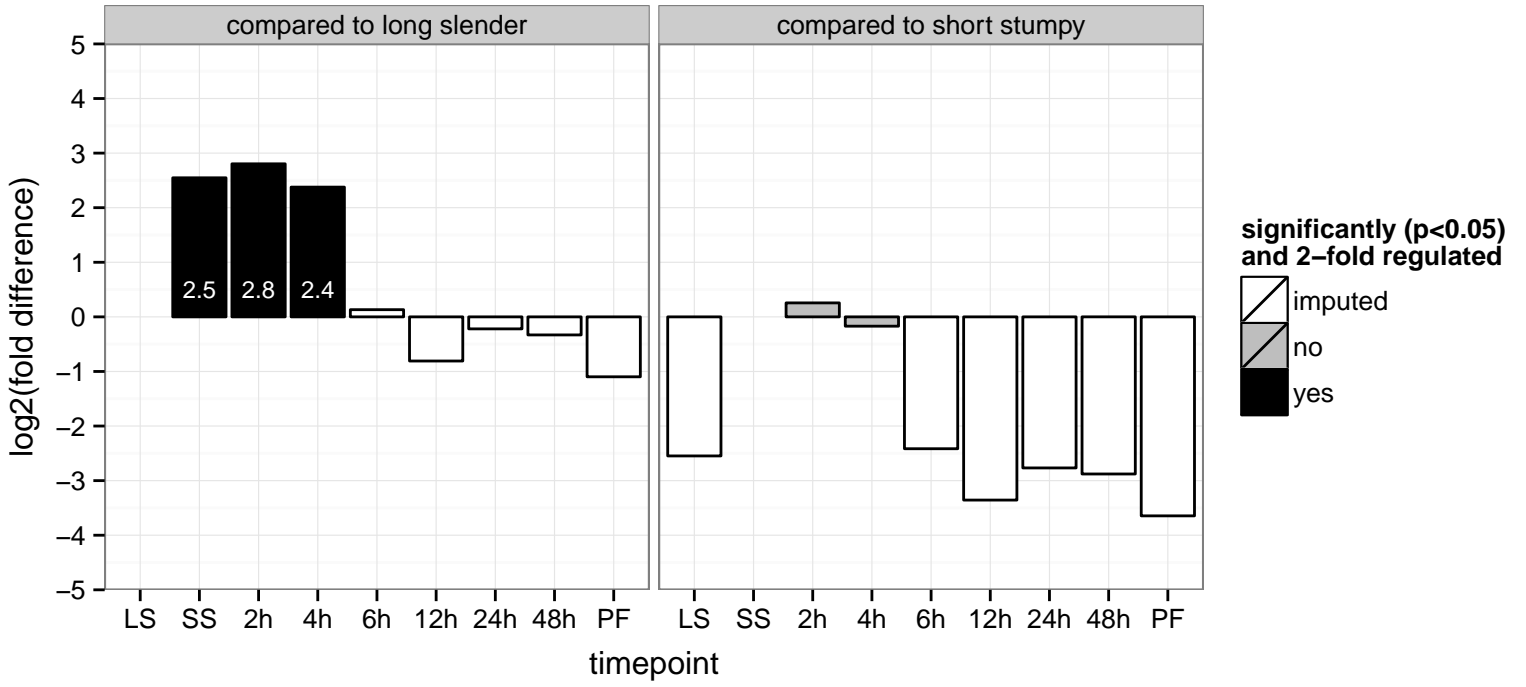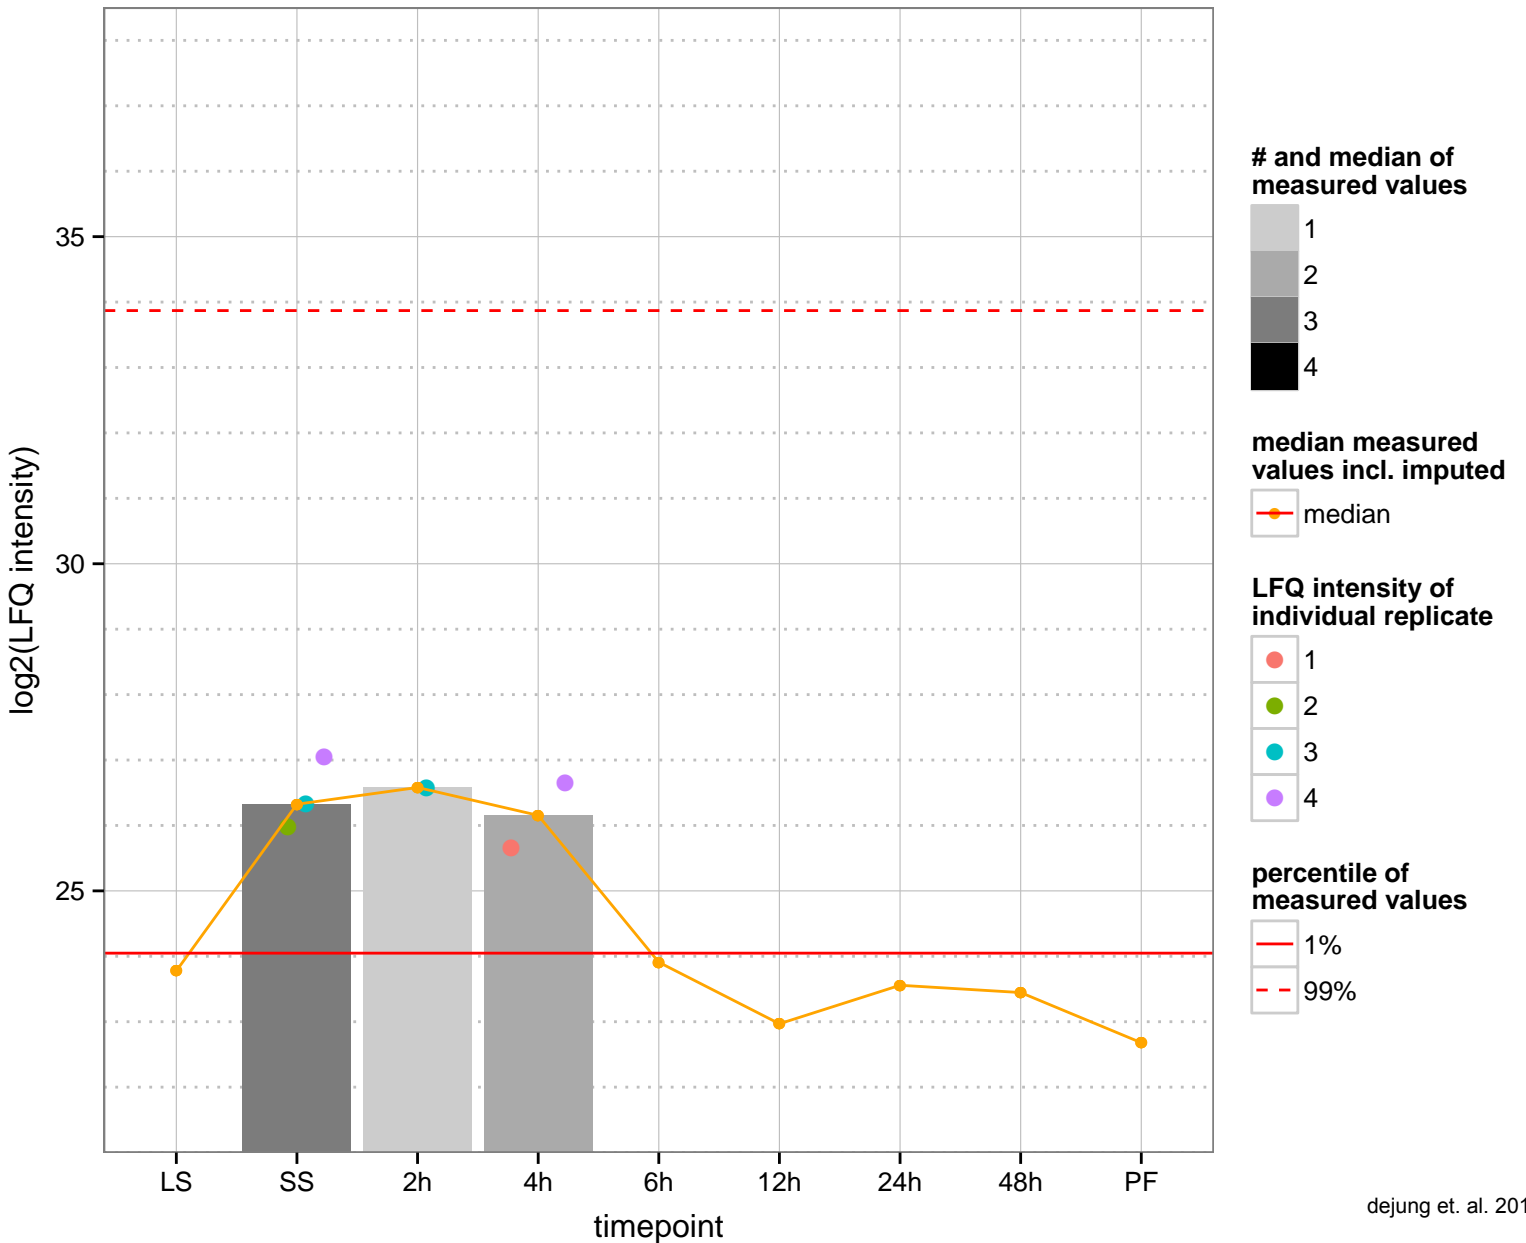

65 kDa invariant surface glycoprotein  
 Tb927.2.3320  
 AGOF: null  
 AGOC: plasma membrane  
 AGOP: plasma membrane organization  
 PGO: null  
 PGOC: null  
 PGOP: null

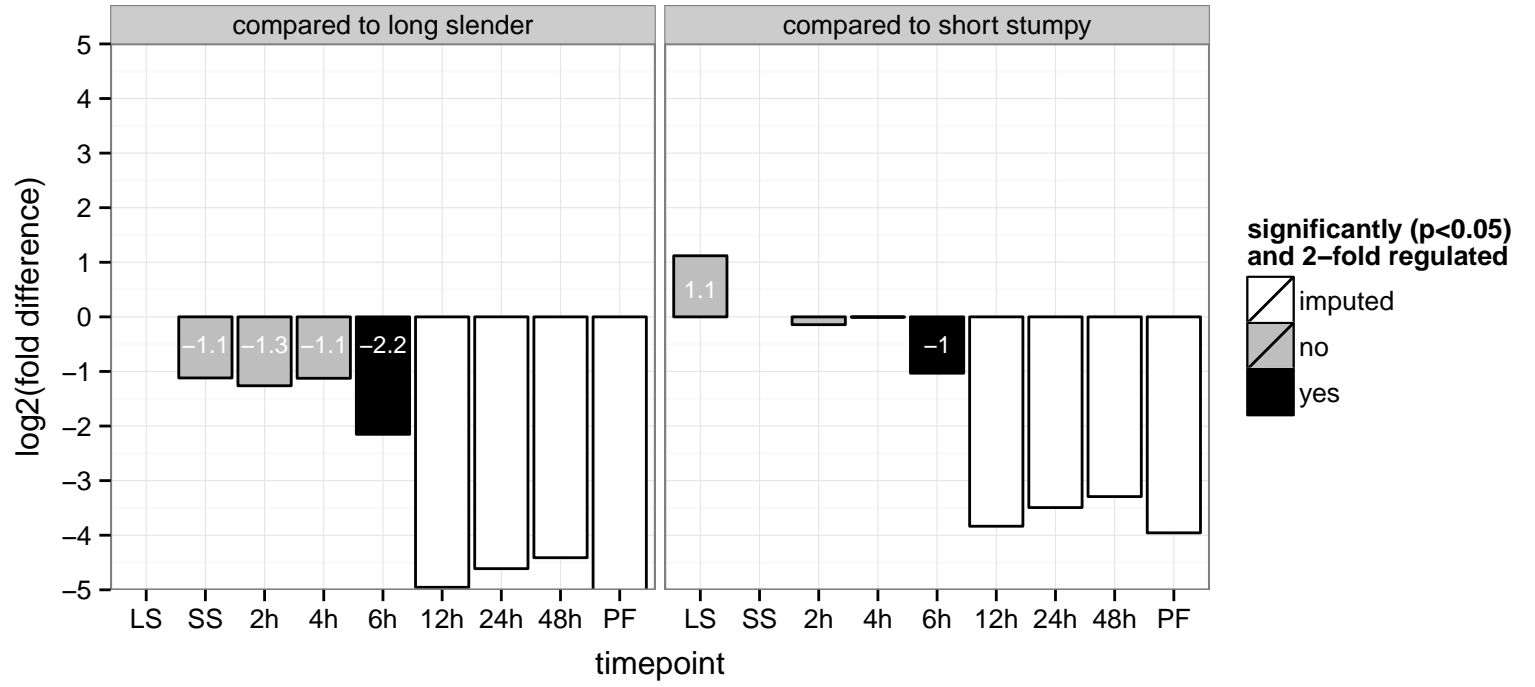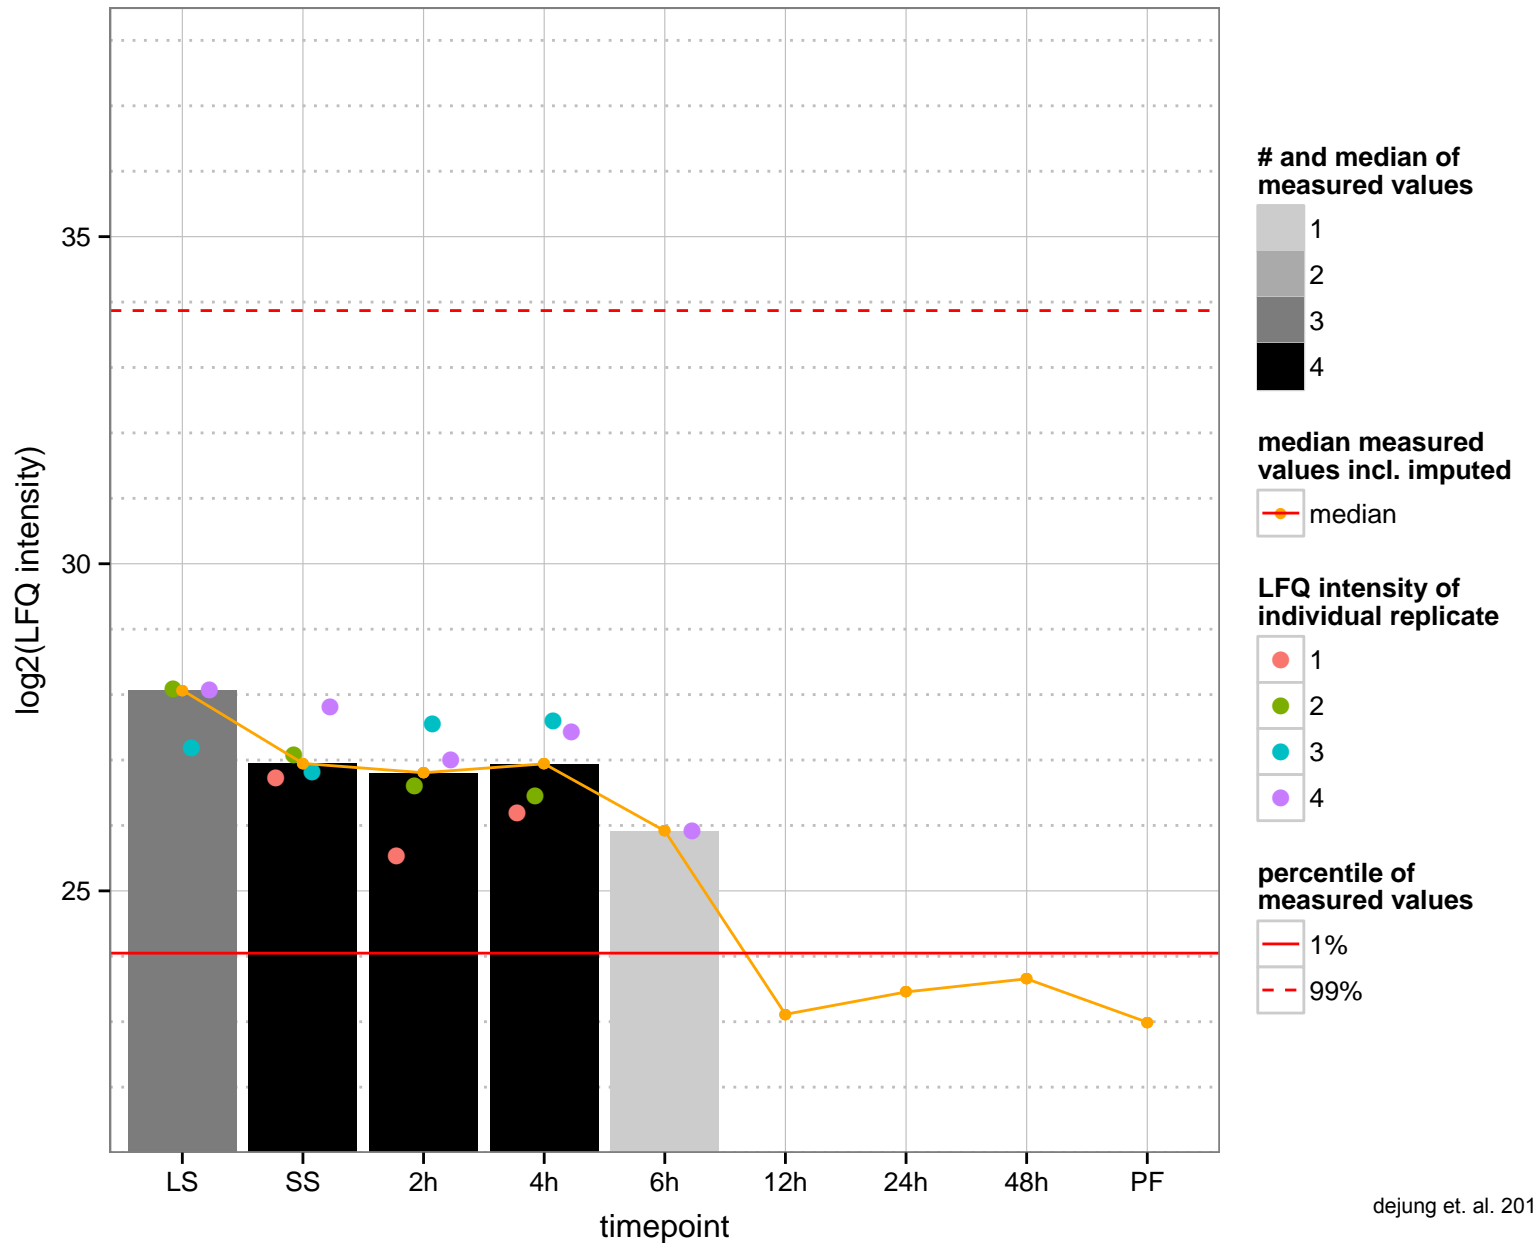

hypothetical protein, conserved  
 Tb927.2.5200  
 AGOF: null  
 AGOC: null  
 AGOP: null  
 PGO: null  
 PGOC: null  
 PGOP: null

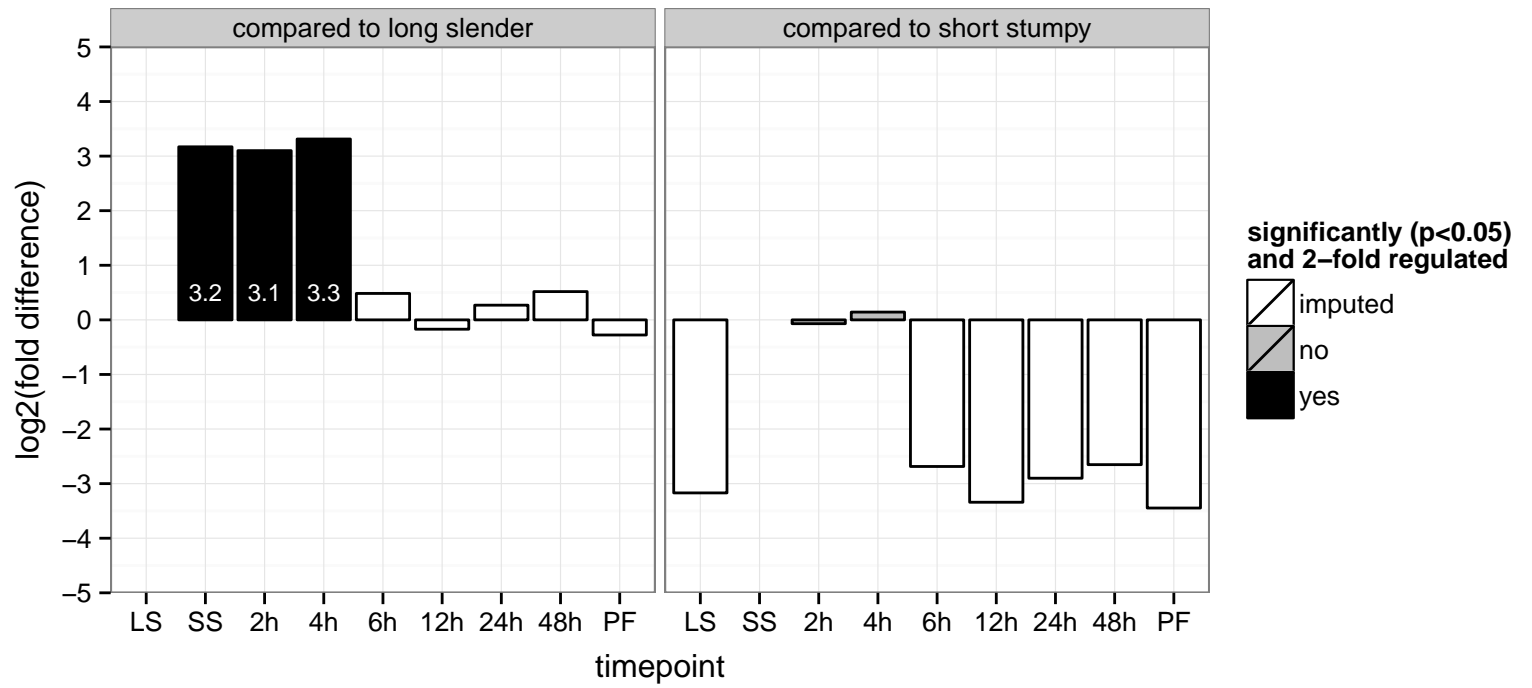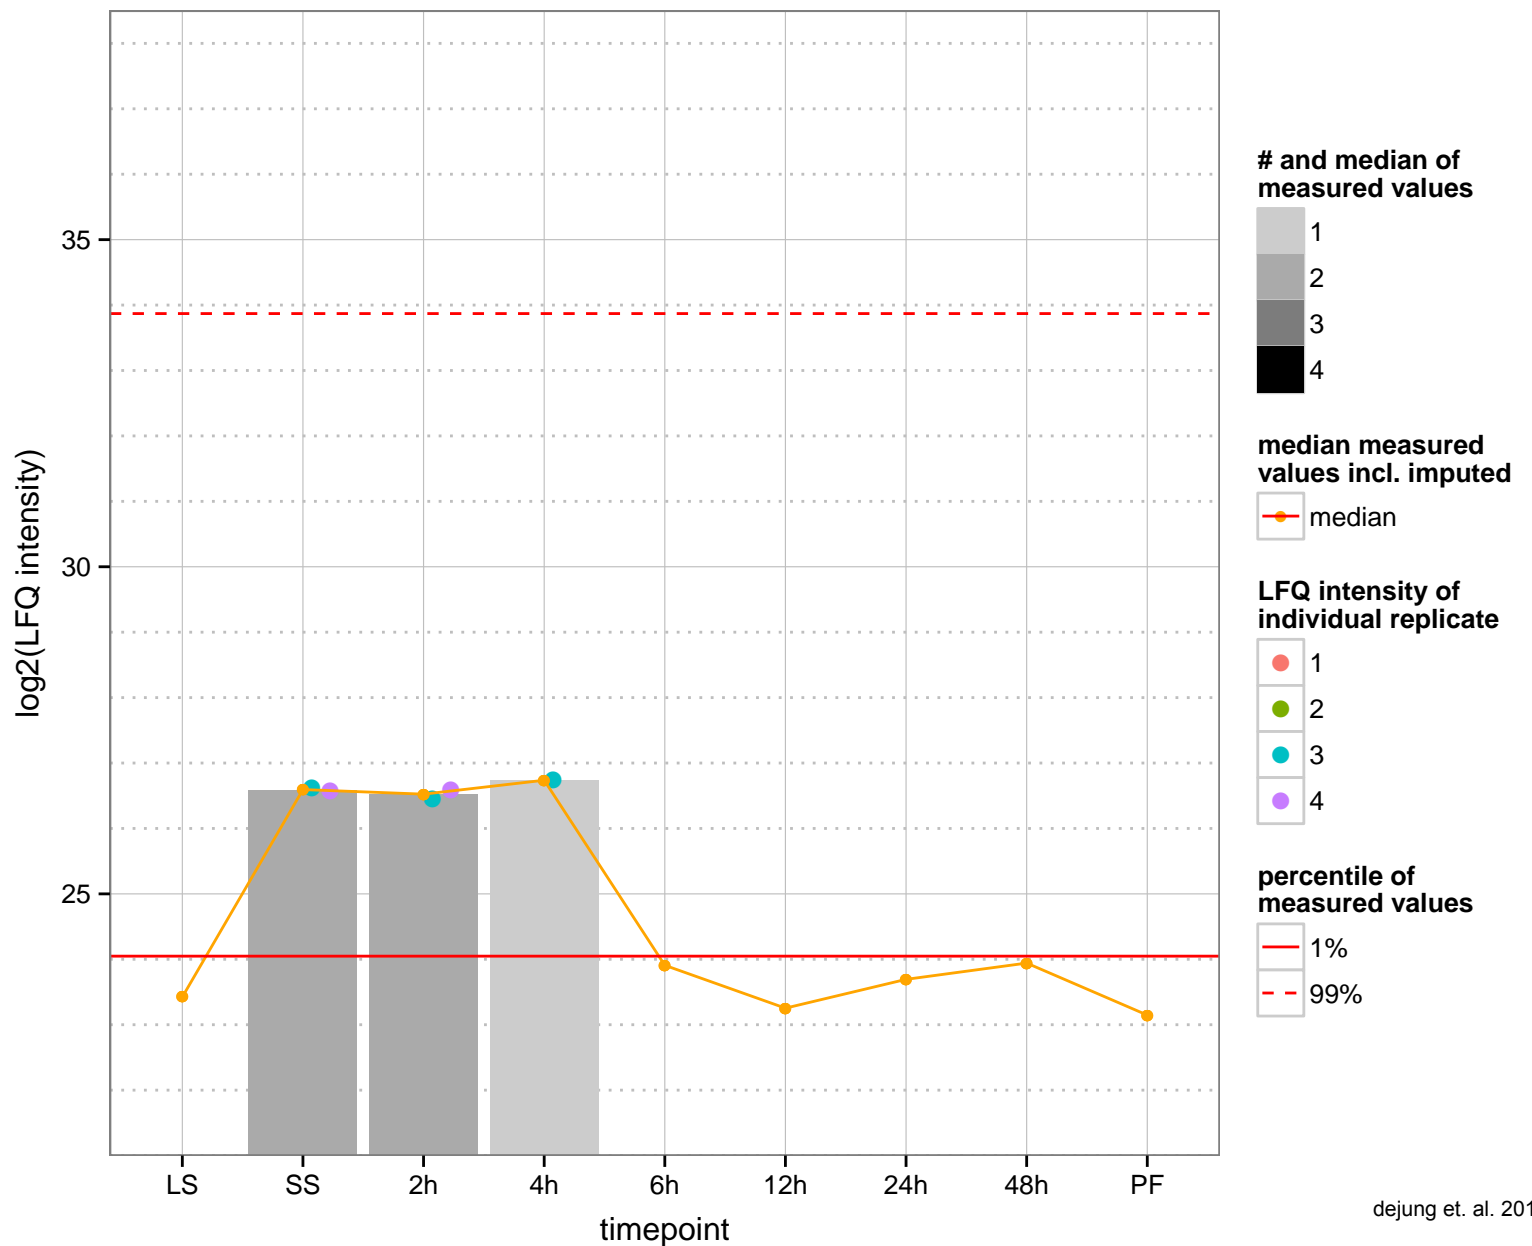

zinc finger protein family member, putative (ZC3H20)  
 Tb927.7.2660  
 AGOF: RNA binding  
 AGOC: null  
 AGOP: null  
 PGO: nucleic acid binding, zinc ion binding  
 PGOC: null  
 PGOP: null

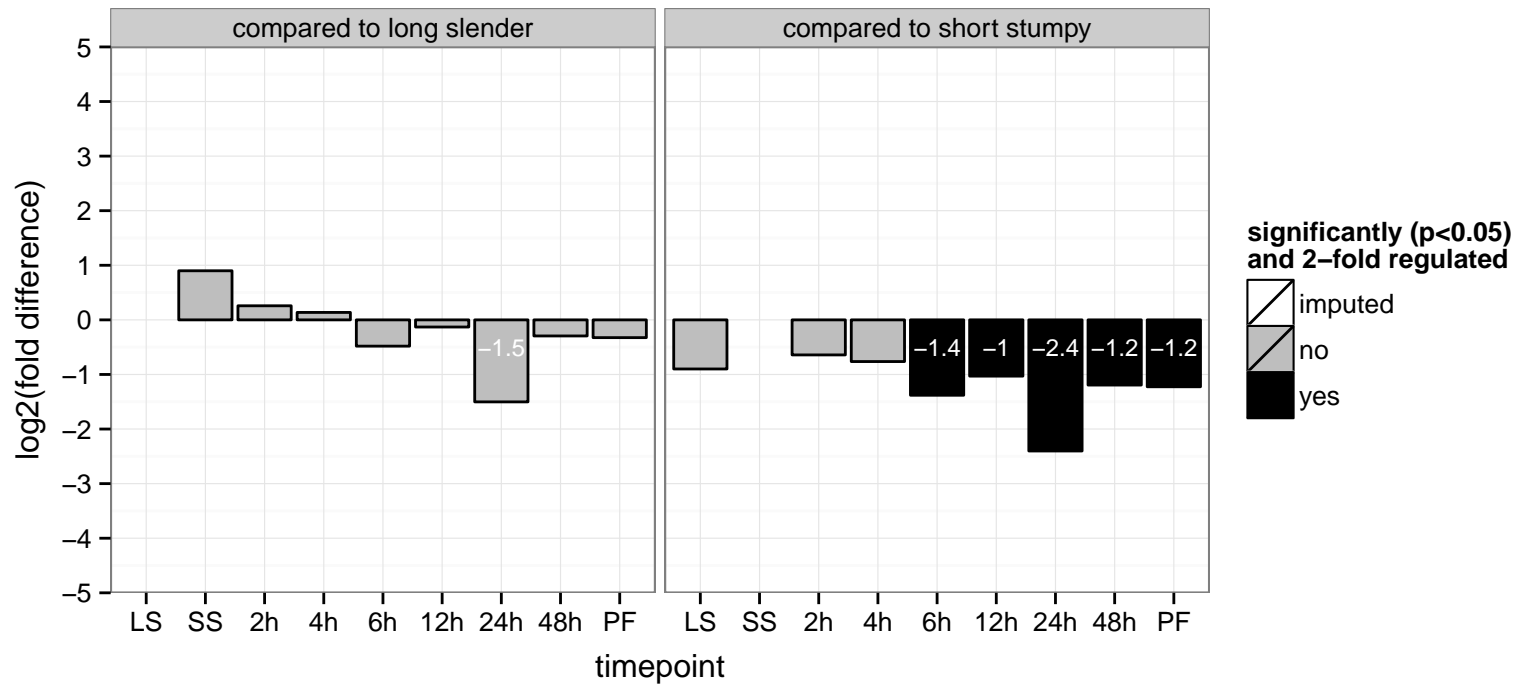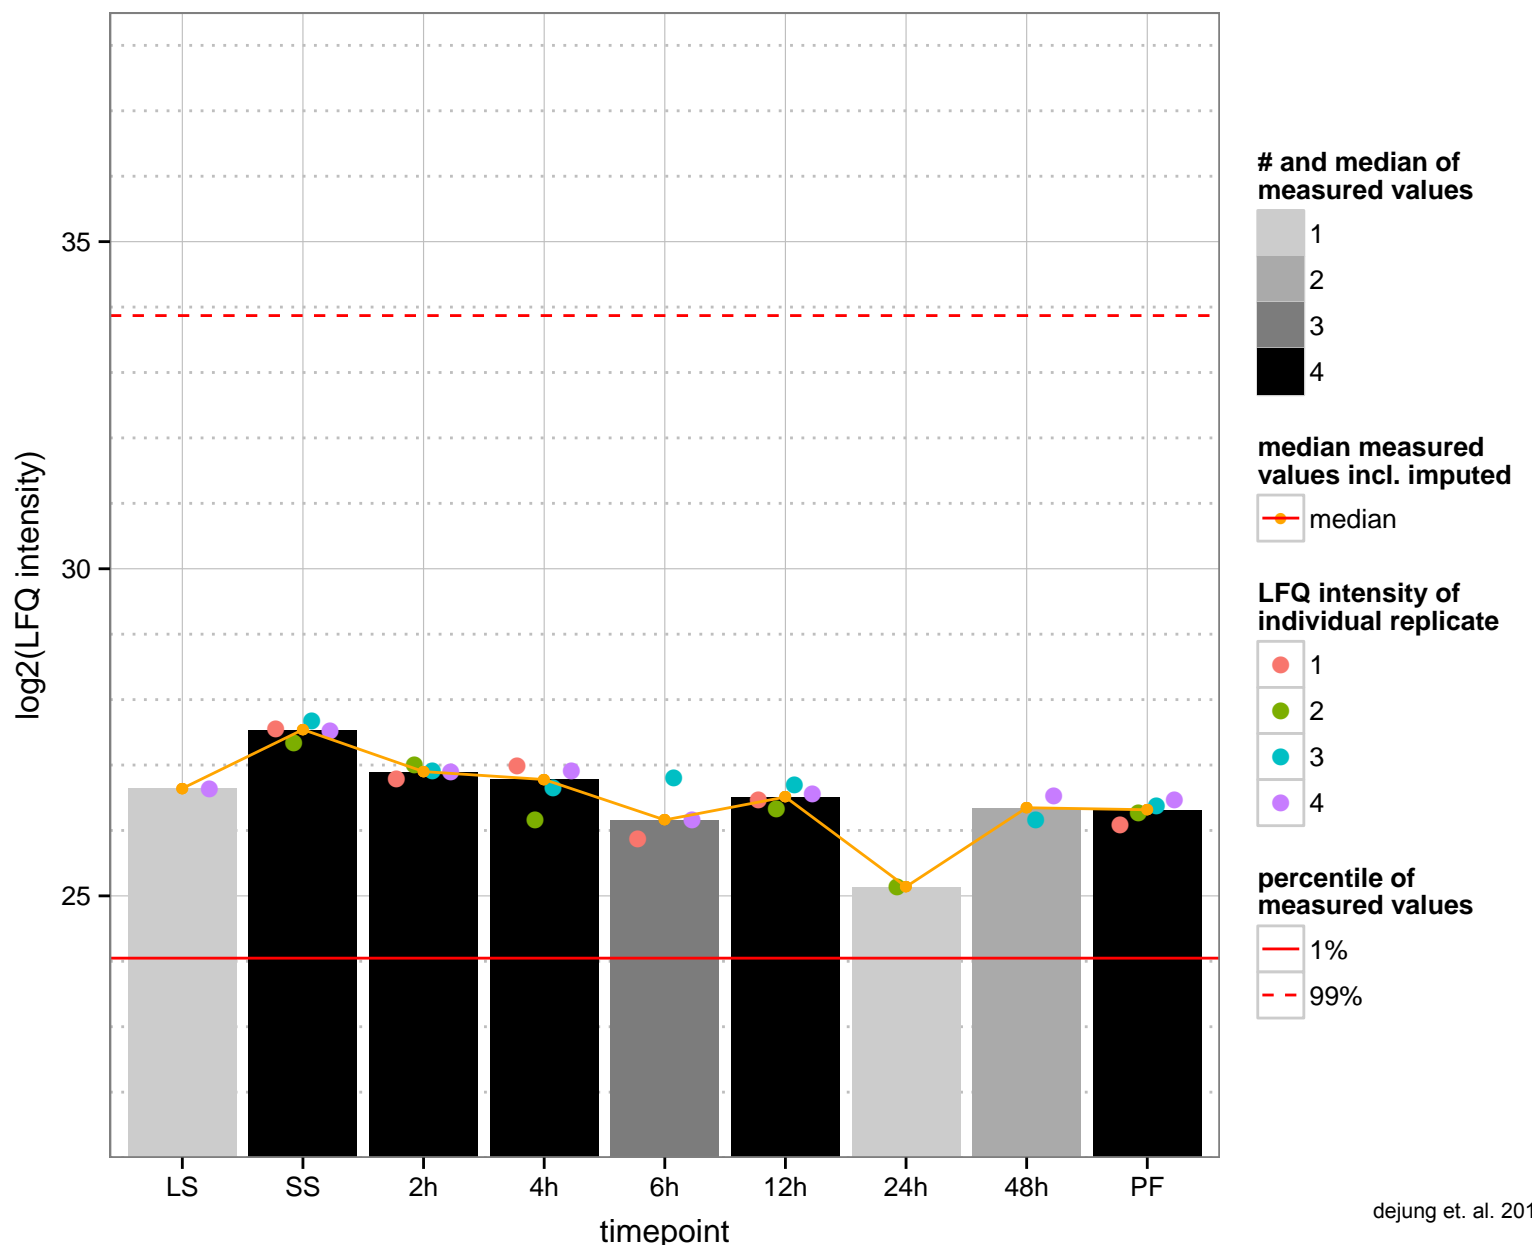

ras-like small GTPase, putative (TbFRP)

Tb927.7.3790

AGOF: GTP binding, zinc ion binding

AGOC: intracellular

AGOP: protein transport, small GTPase mediated signal transduction

PGOF: GTP binding, metal ion binding, protein binding

PGOC: null

PGOP: protein transport, small GTPase mediated signal transduction

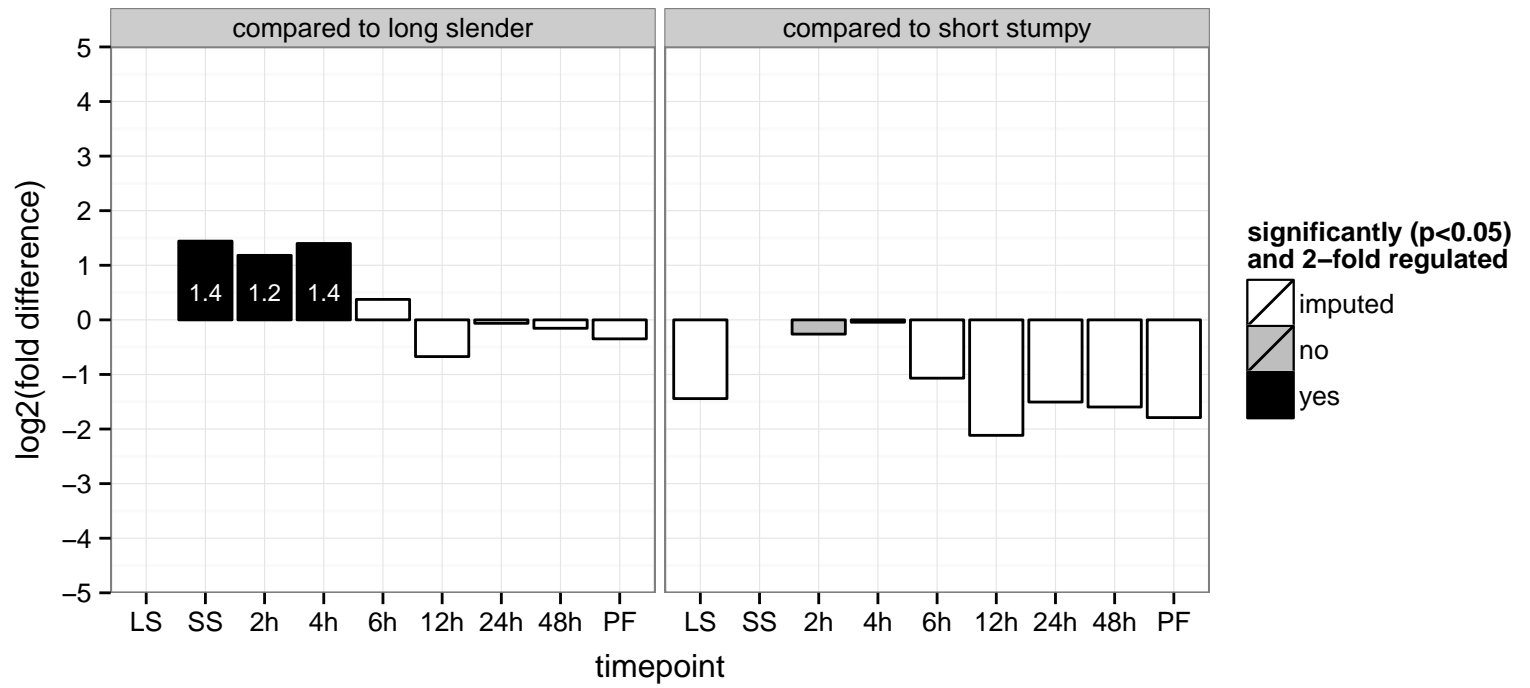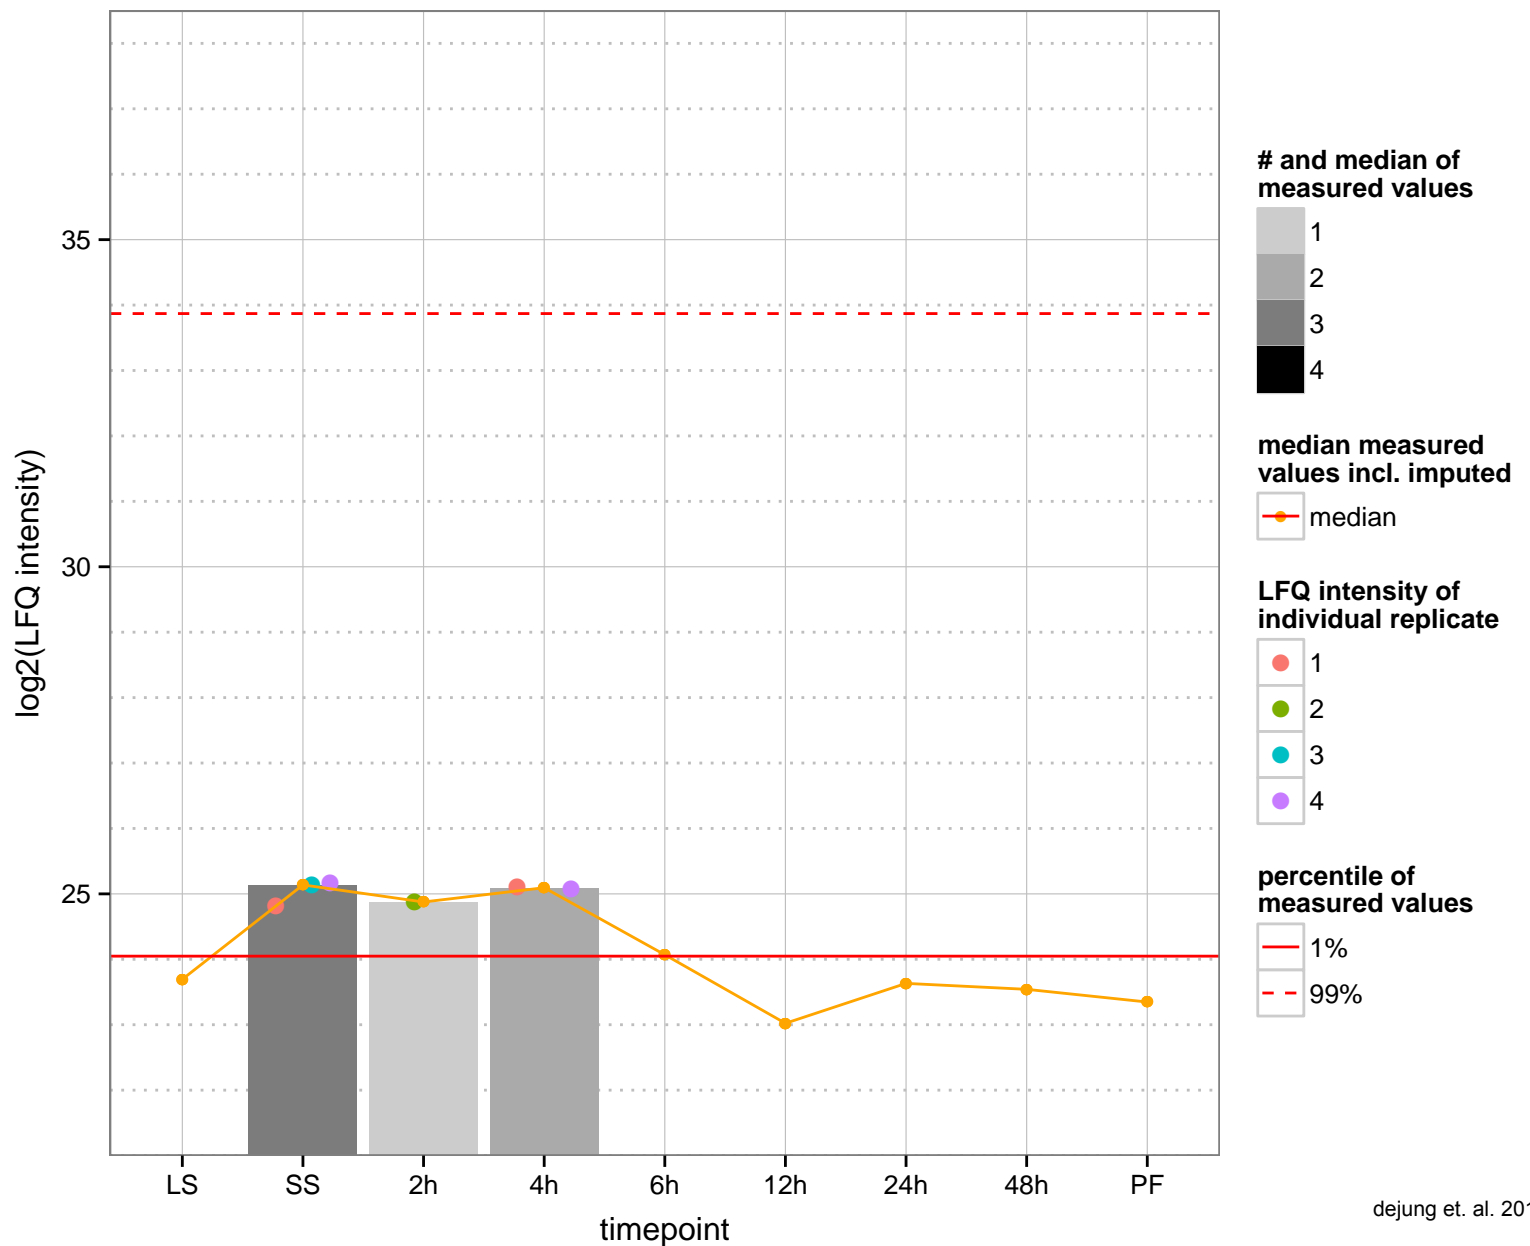

hypothetical protein, conserved  
 Tb927.7.4410  
 AGOF: null  
 AGOC: null  
 AGOP: null  
 PGO: null  
 PGO: null  
 PGO: null

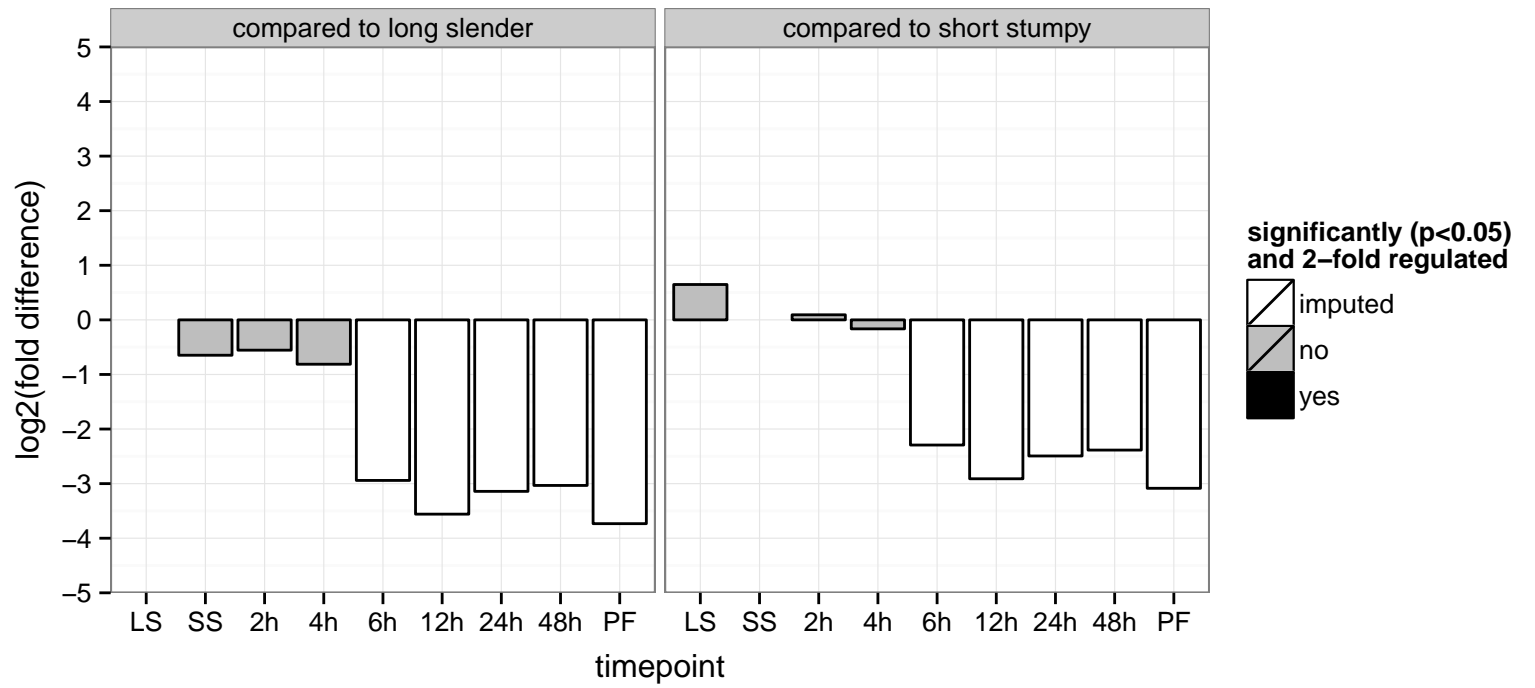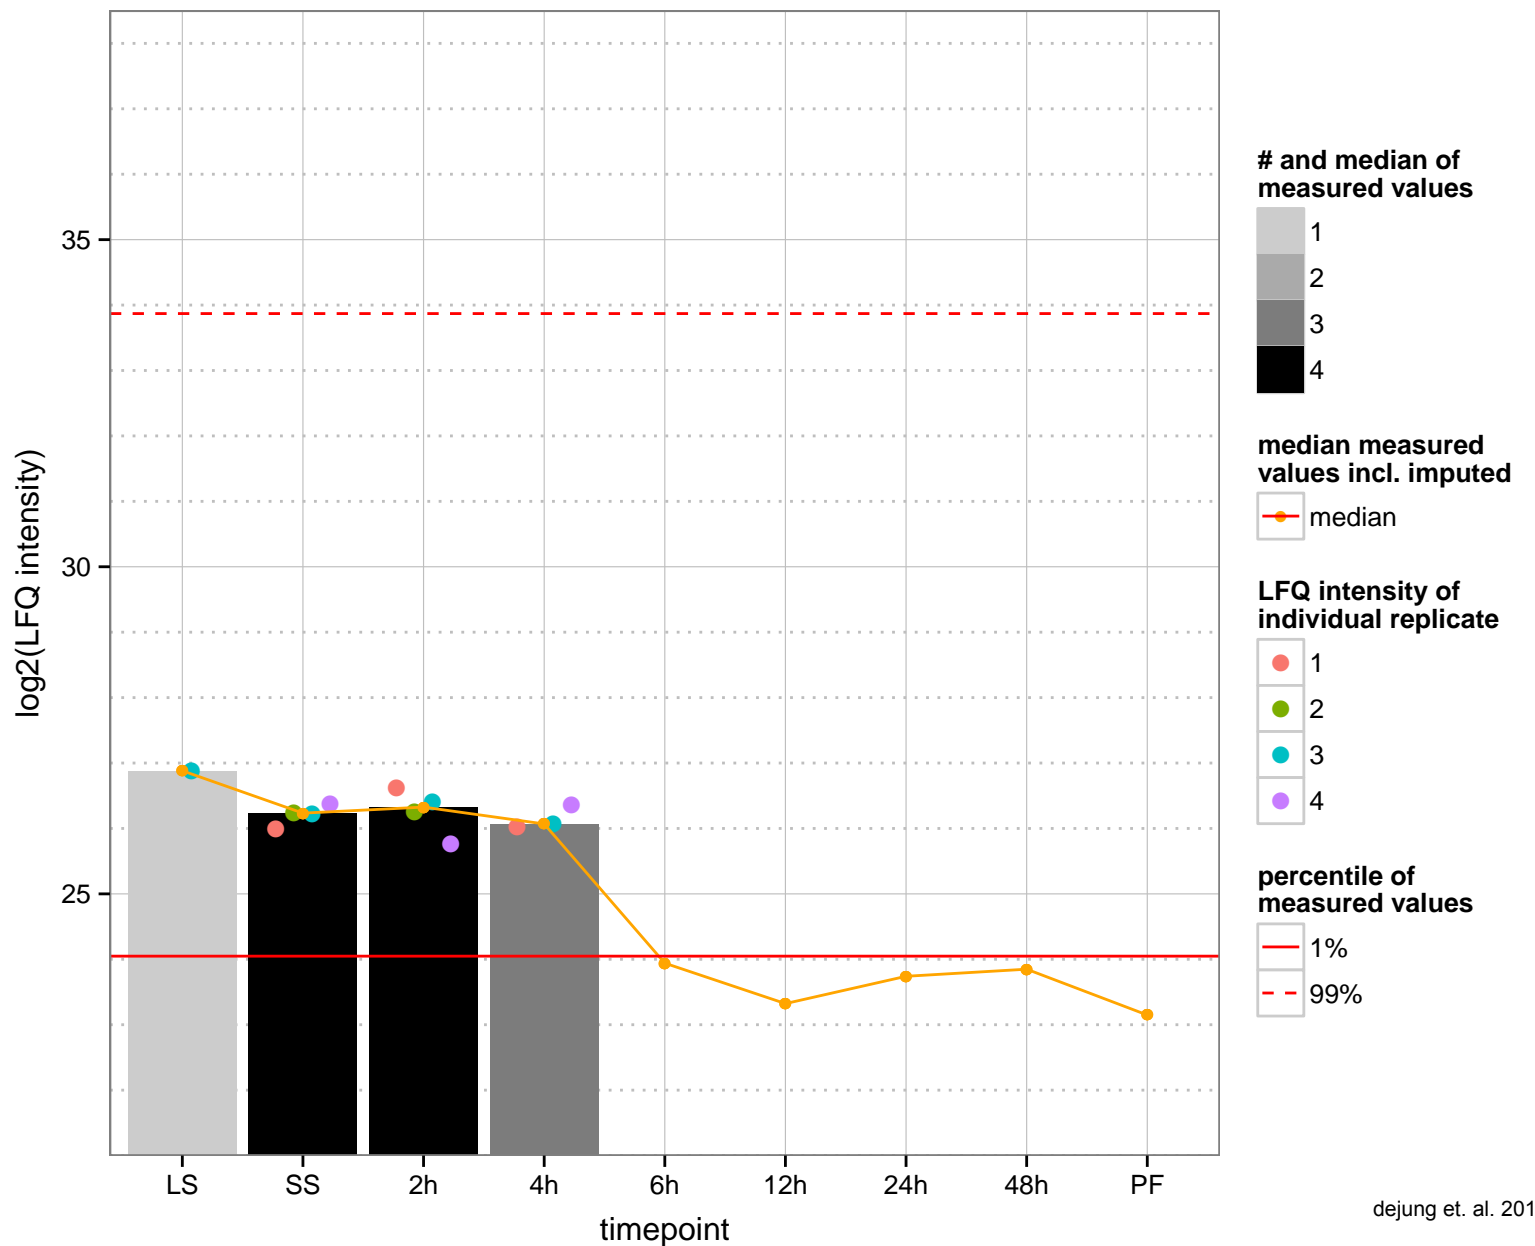



hypothetical protein  
 Tb927.7.470  
 AGOF: null  
 AGOC: null  
 AGOP: null  
 PGO: null  
 PGO: null  
 PGO: null

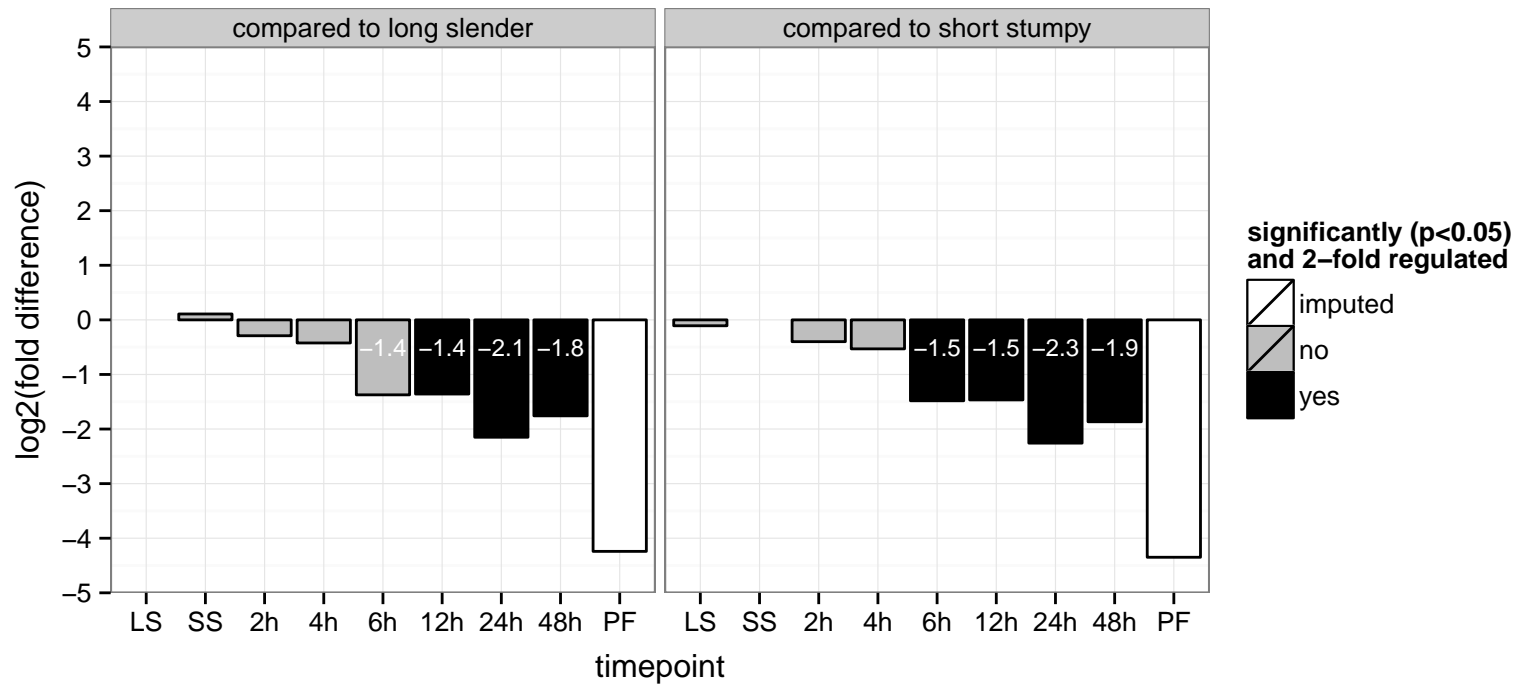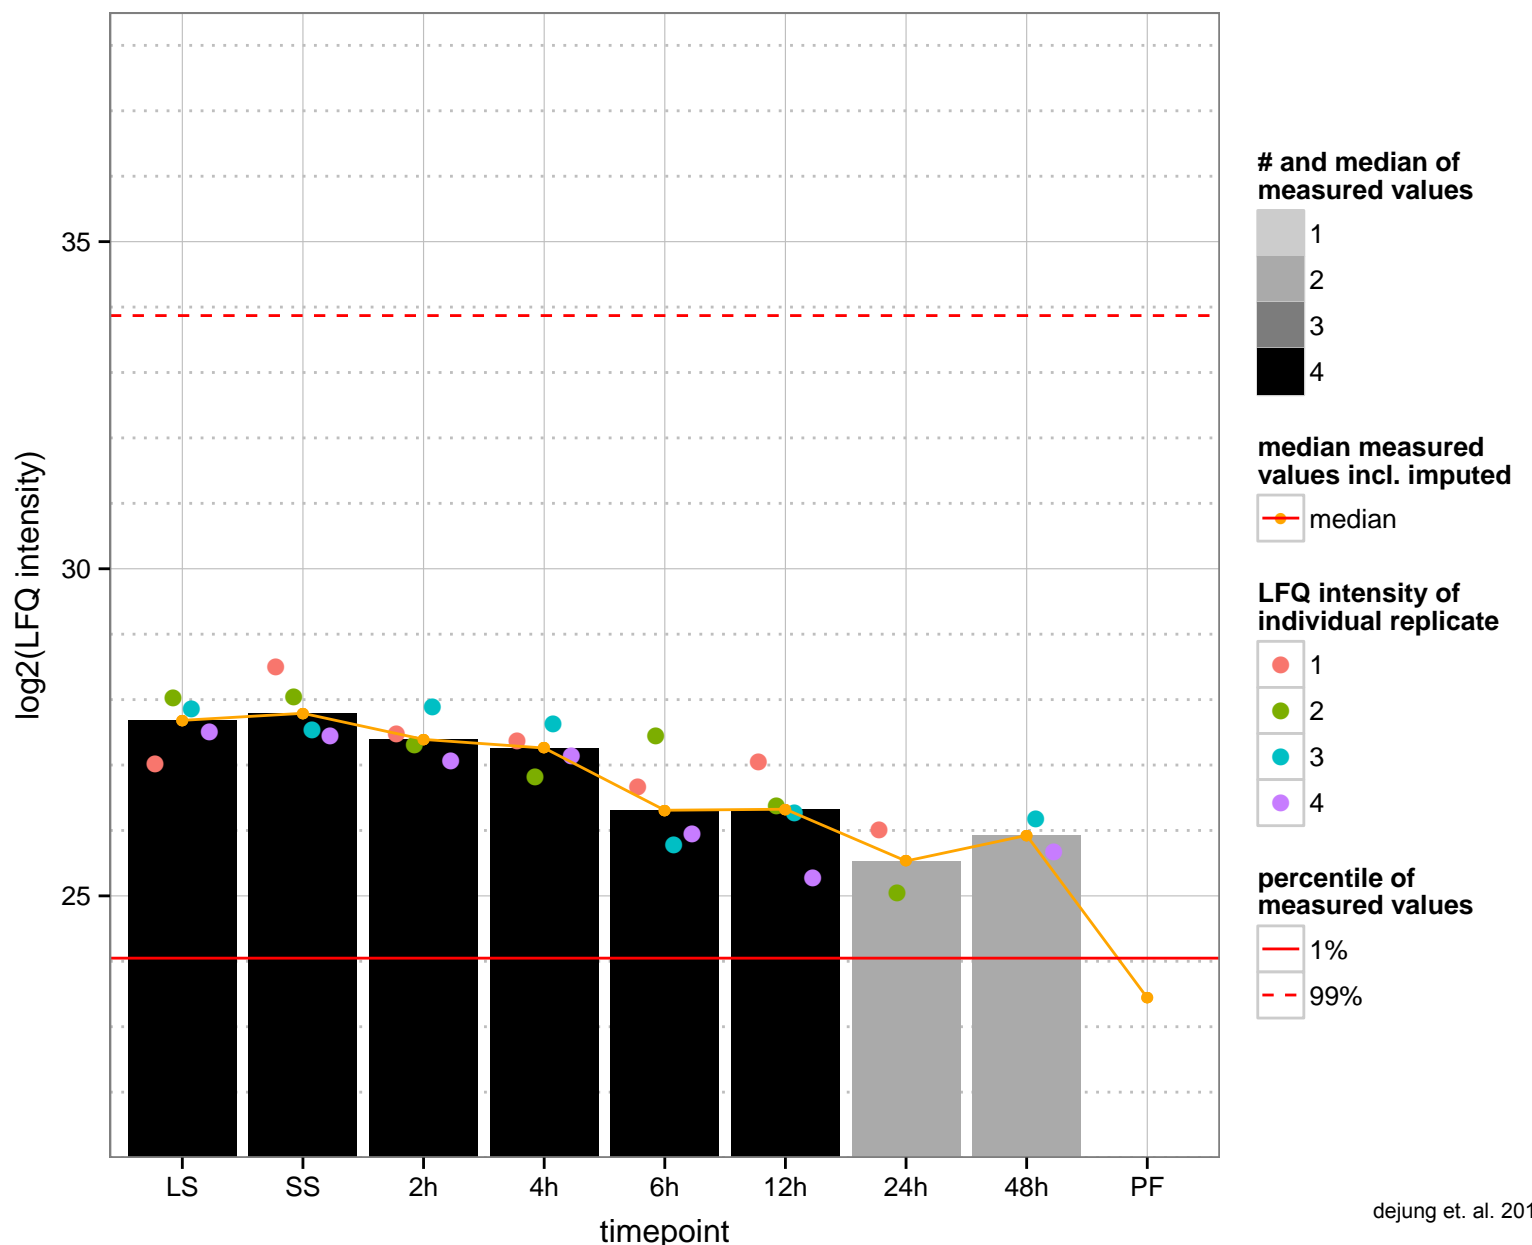

hypothetical protein, conserved  
 Tb927.7.7000  
 AGOF: null  
 AGOC: null  
 AGOP: null  
 PGOF: null  
 PGO: null  
 PGOP: null

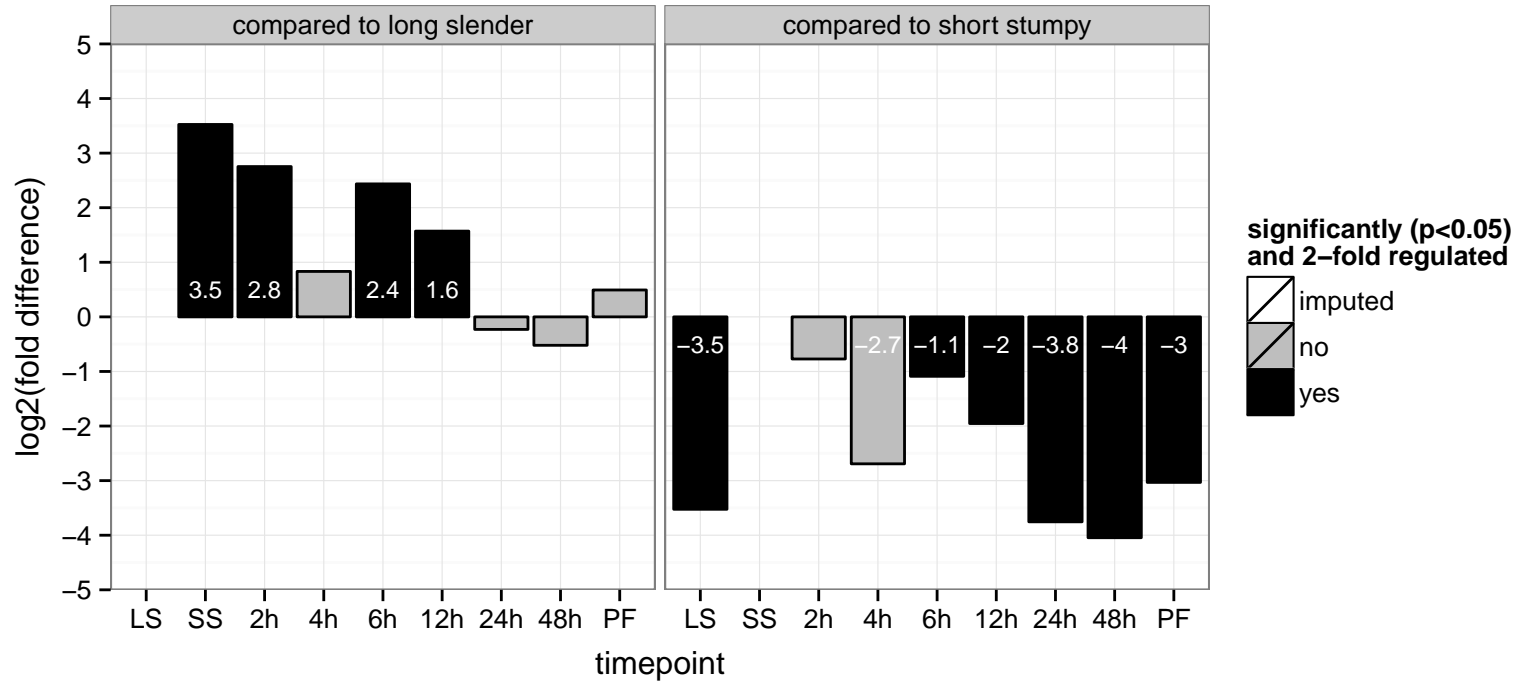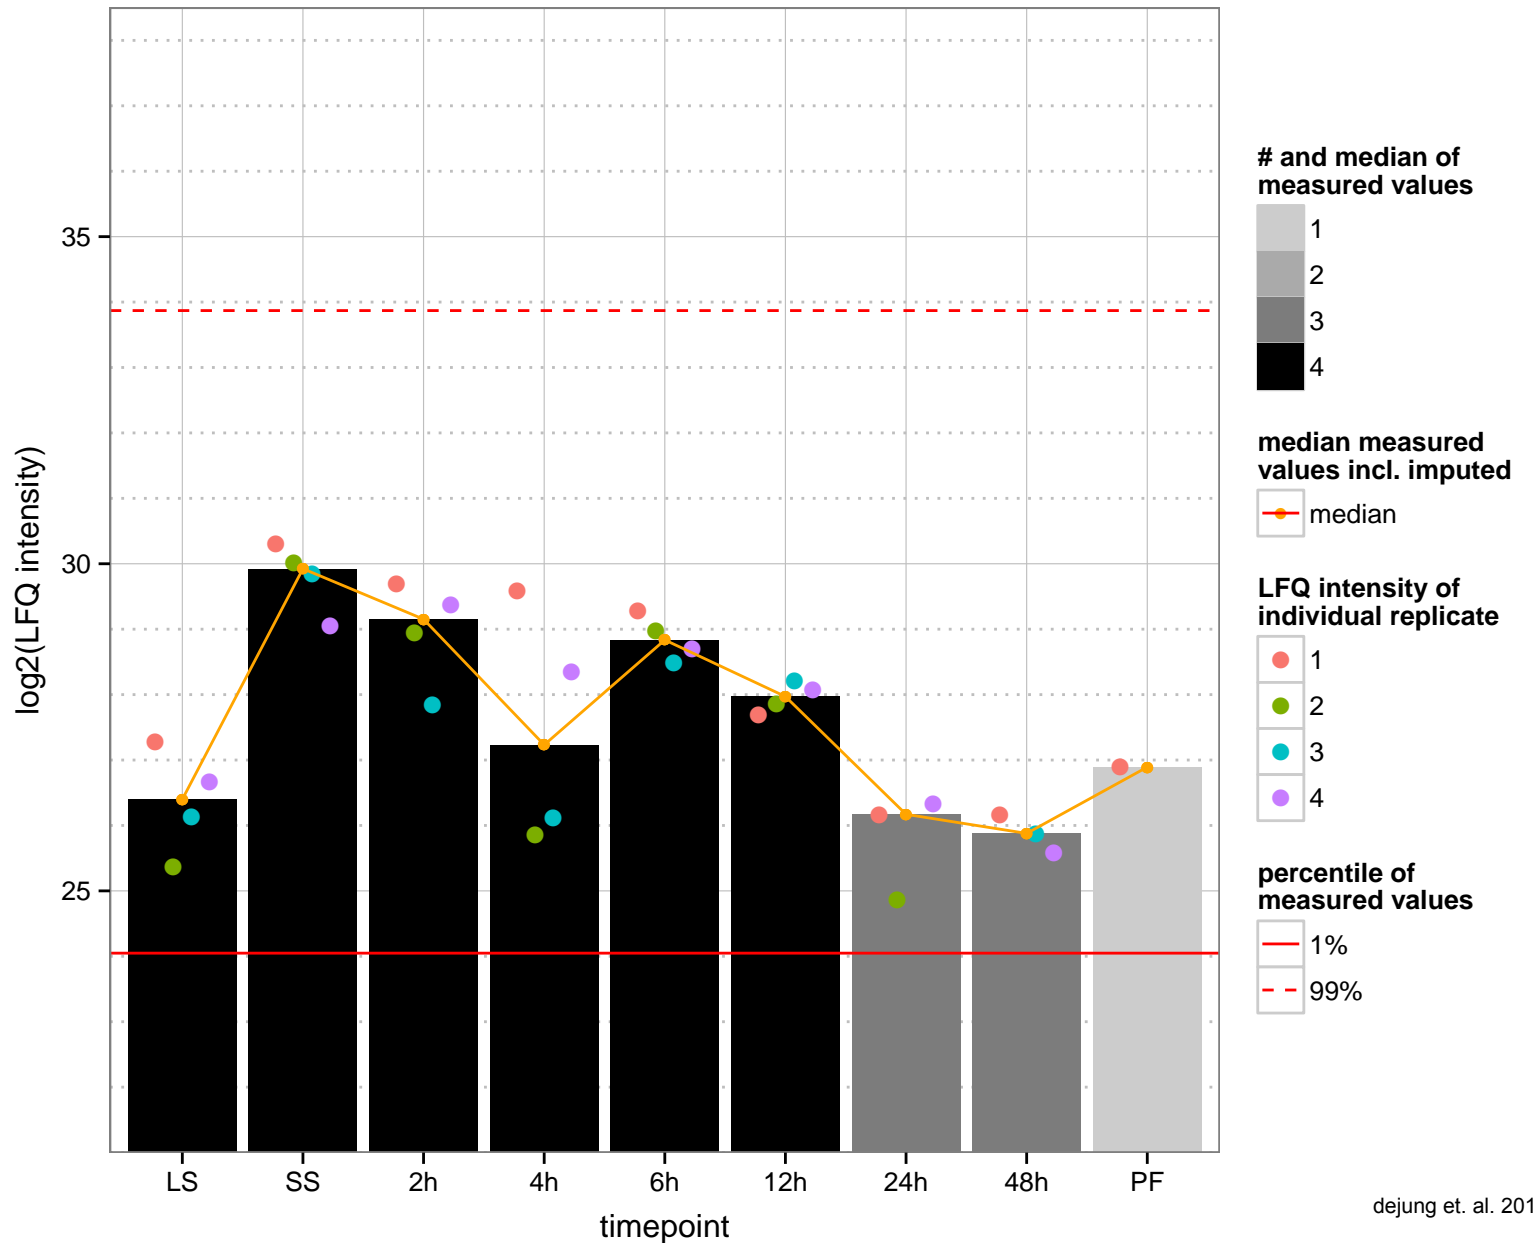

hypothetical protein, conserved  
 Tb927.9.11480  
 AGOF: null  
 AGOC: null  
 AGOP: null  
 PGO: null  
 PGO: null  
 PGO: null

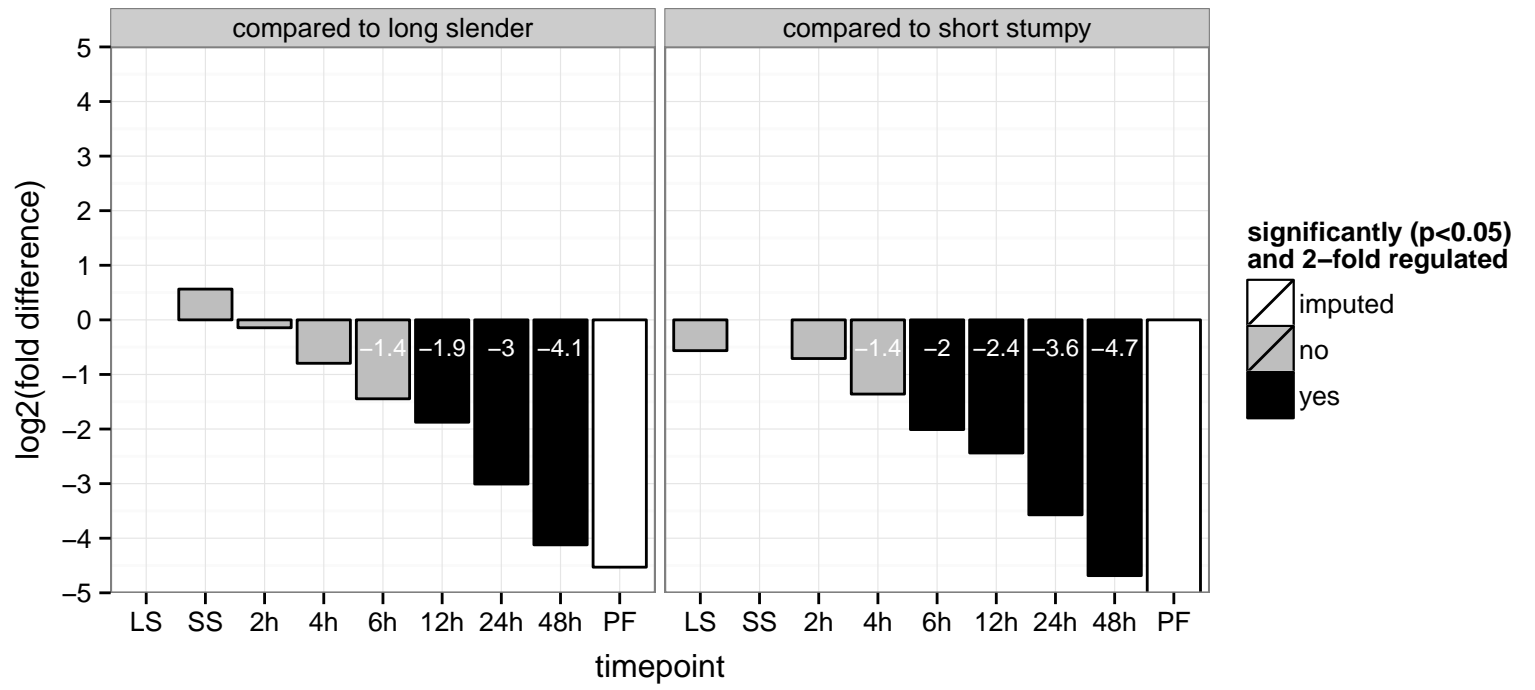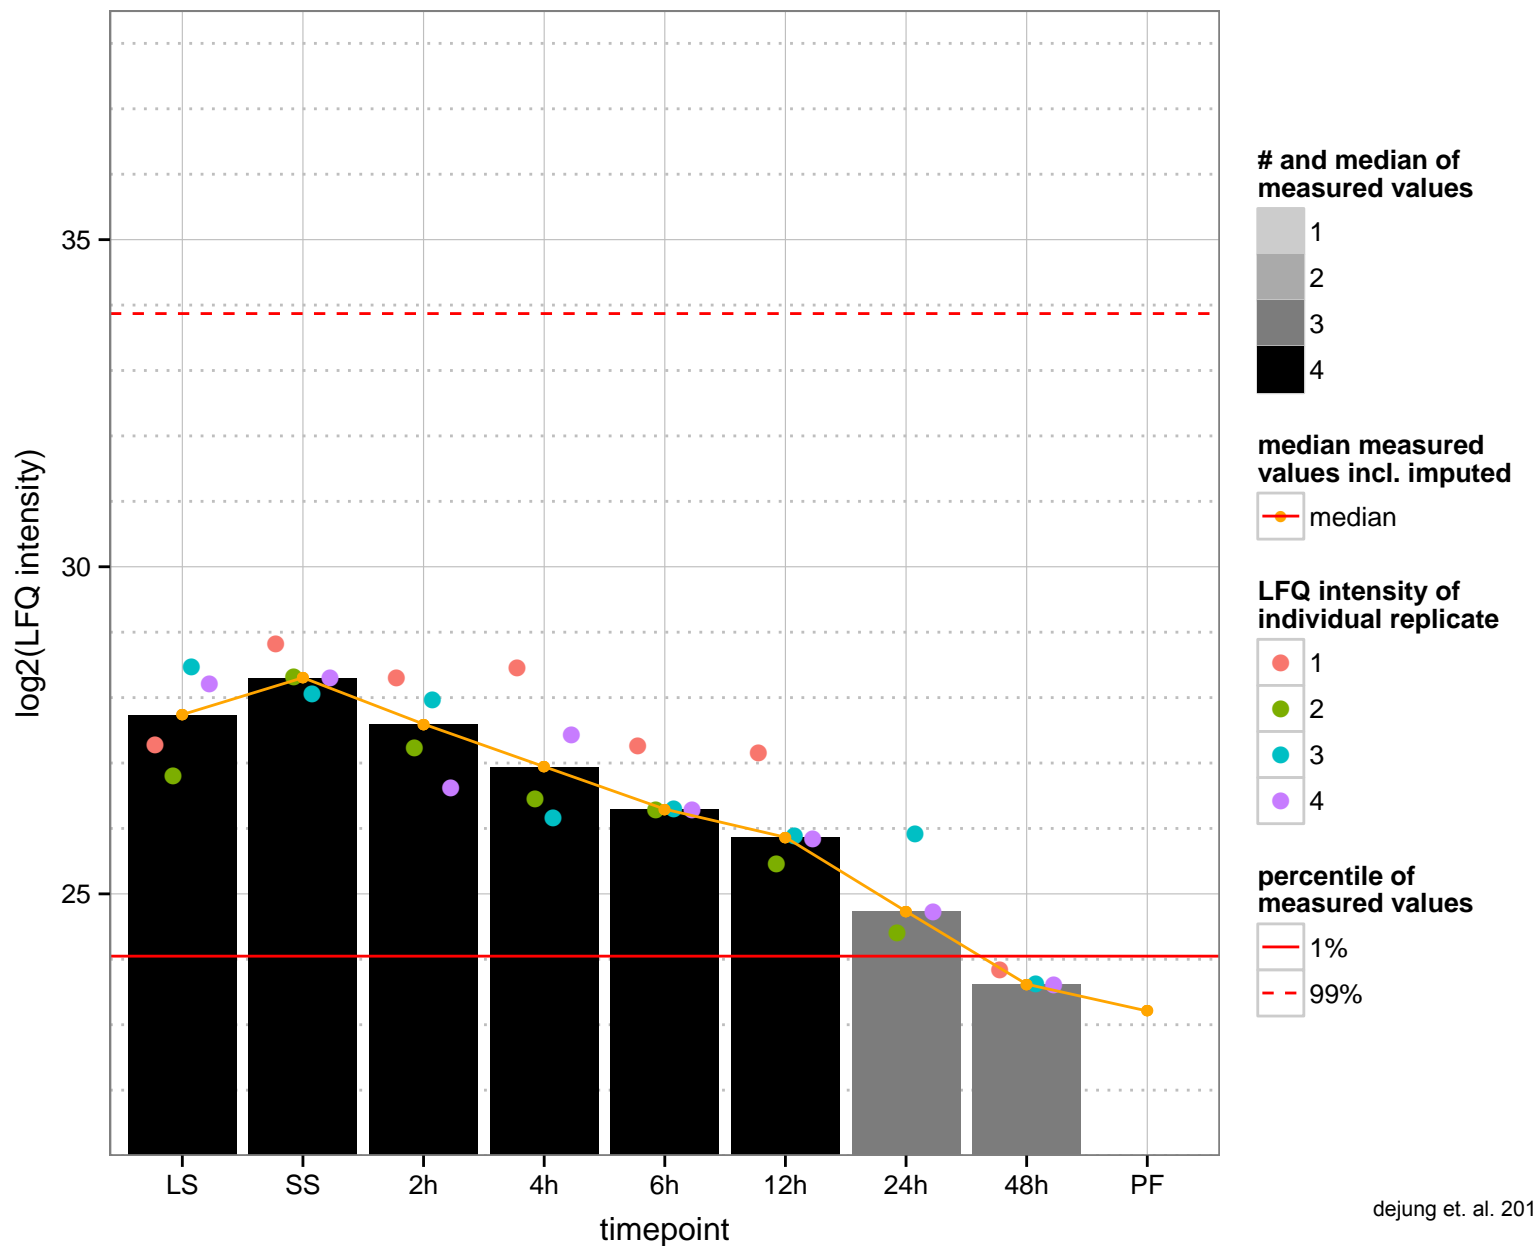

hypothetical protein, conserved  
 Tb927.9.3130  
 AGOF: null  
 AGOC: null  
 AGOP: null  
 PGOF: null  
 PGOE: null  
 PGOP: null

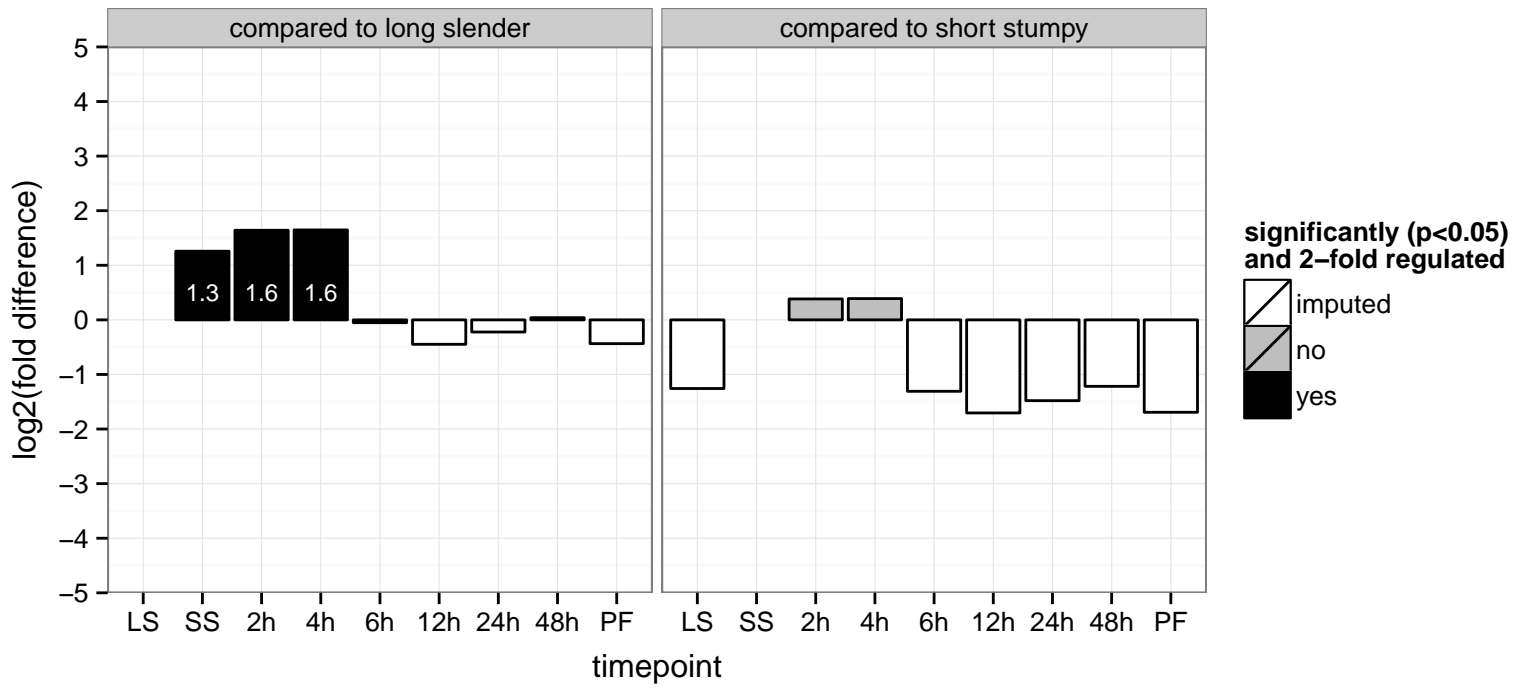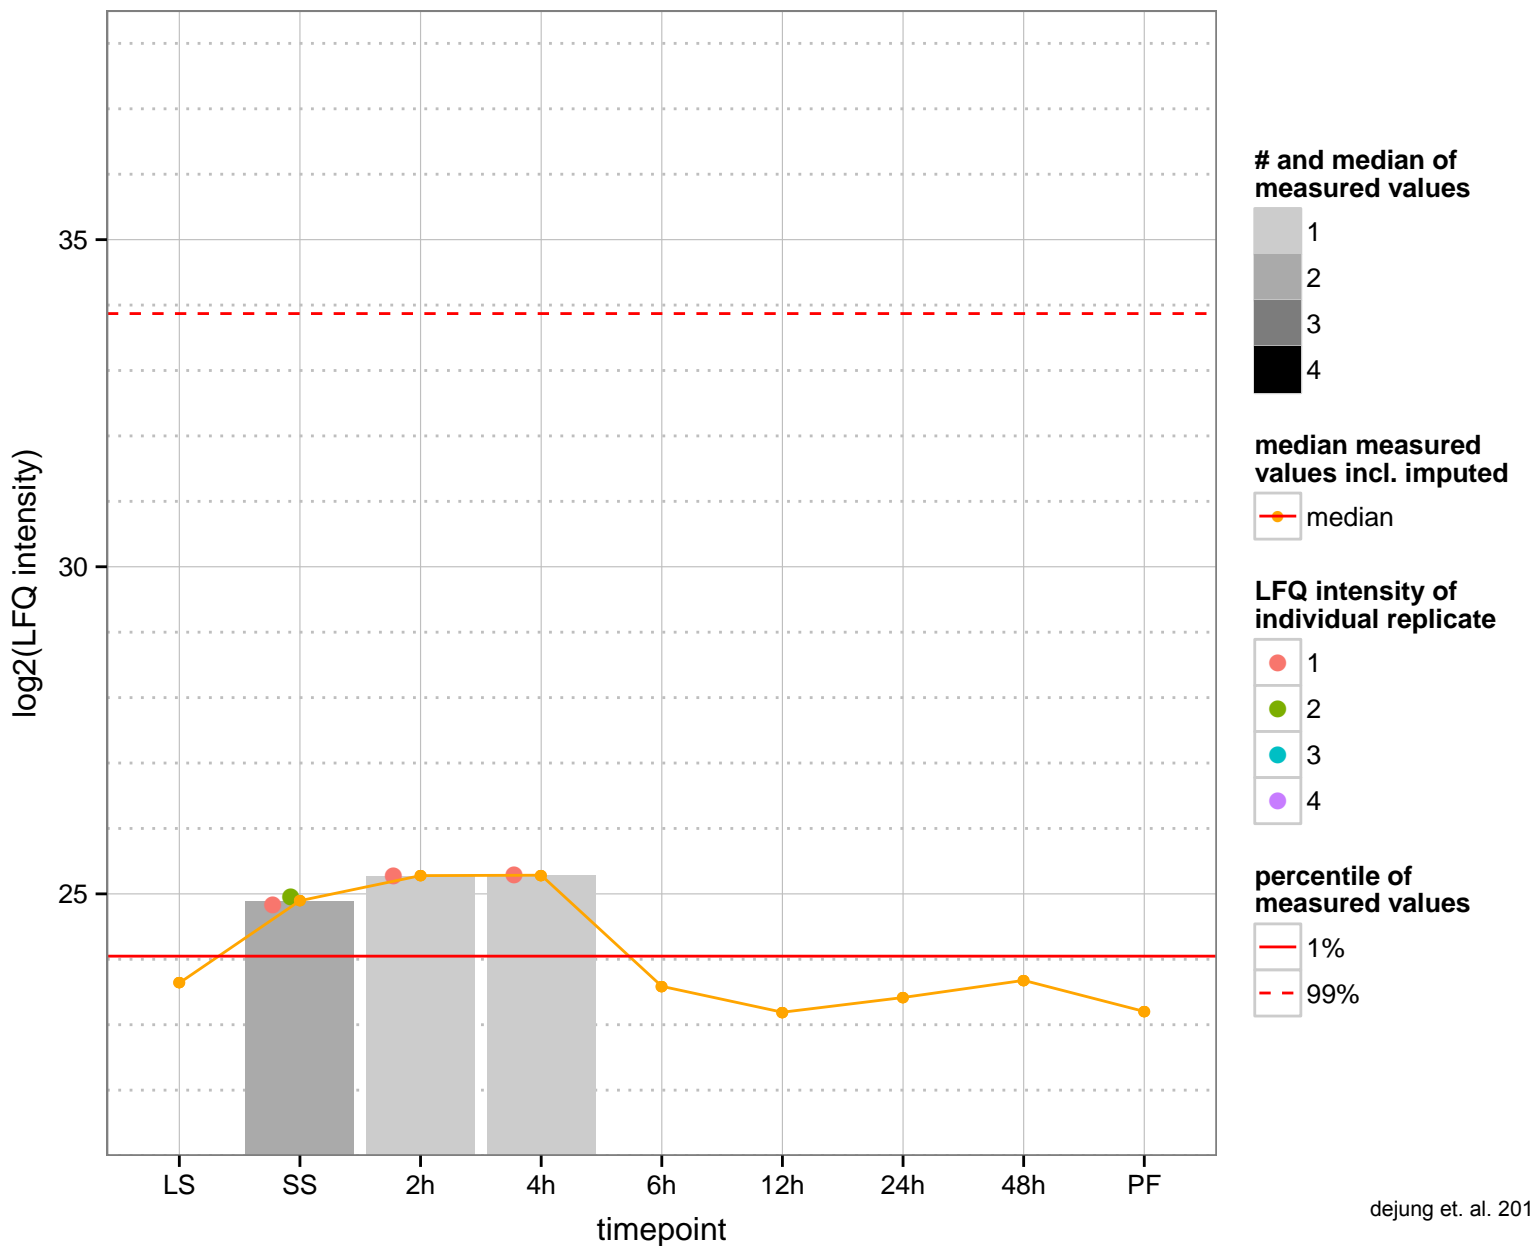

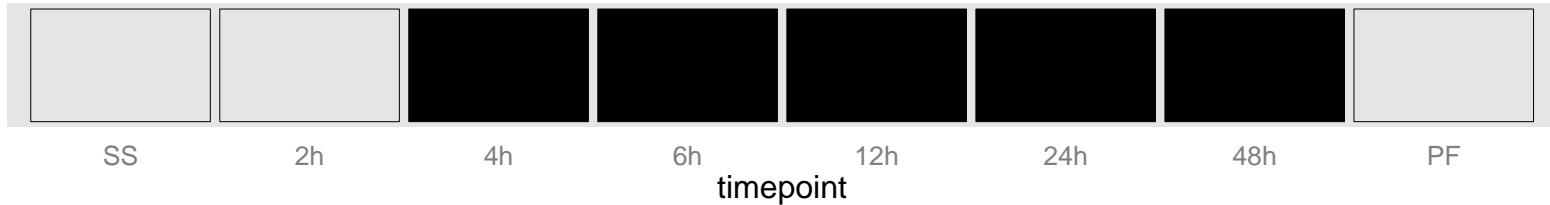

**regulated**  **not regulated**  **significant down**  **significant up**

hypothetical protein, conserved  
 Tb927.7.4740;Tb11.v5.0157  
 AGOF: null  
 AGOC: null  
 AGOP: null  
 PGO: null  
 PGOC: null  
 PGOP: null

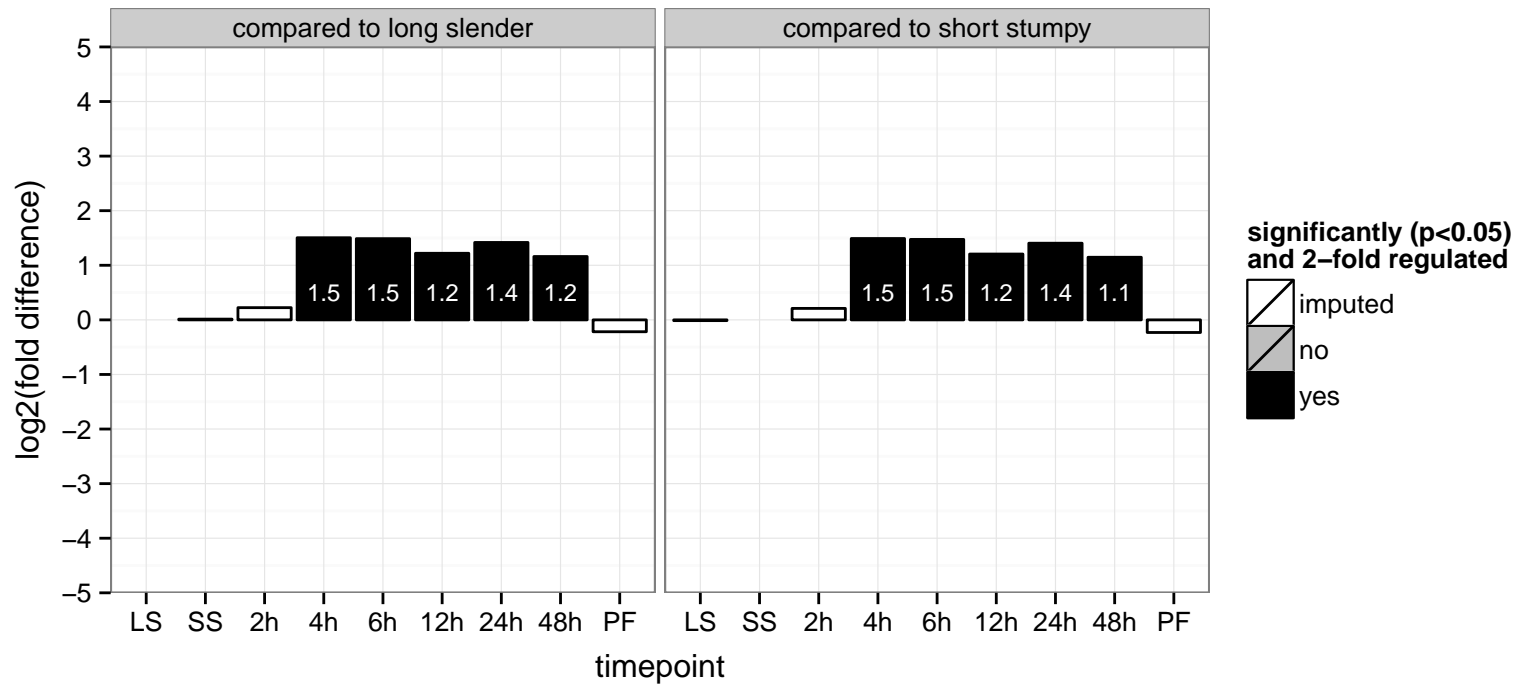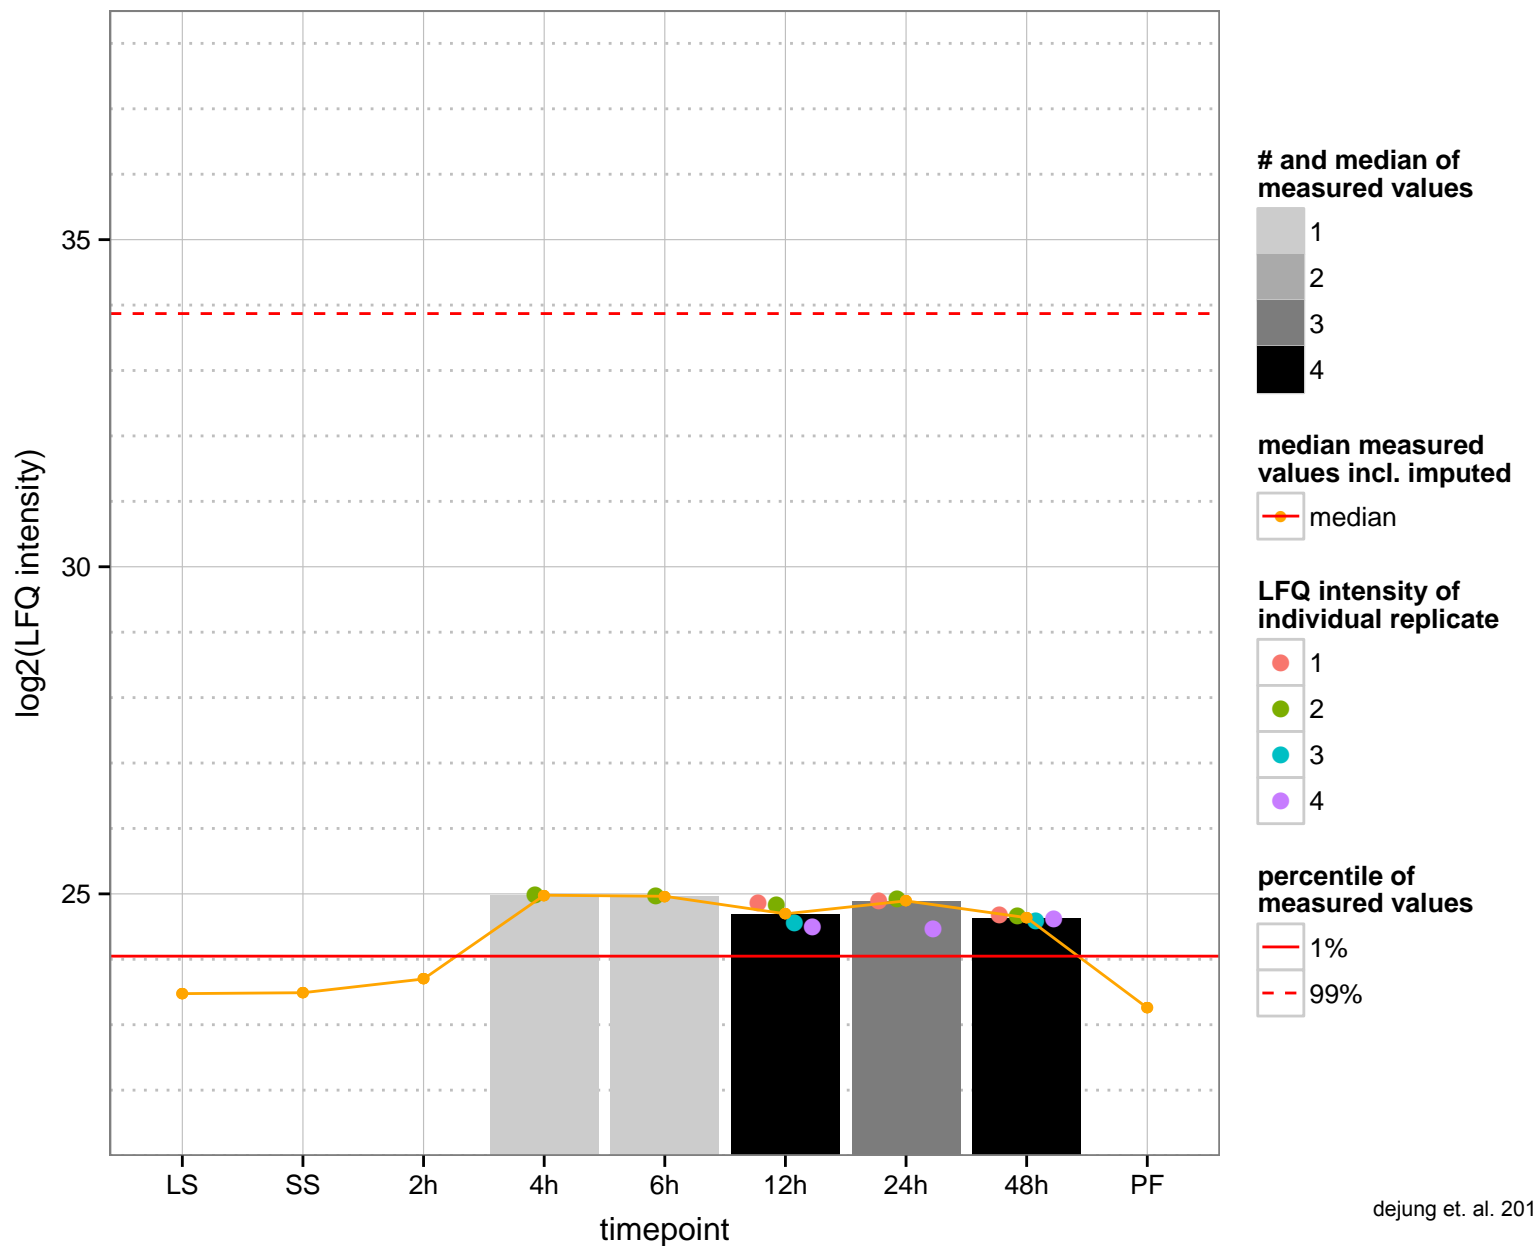

protein kinase, putative

Tb927.10.3230

AGOF: ATP binding, protein serine/threonine kinase activity, protein tyrosine kinase activity

AGOC: null

AGOP: protein phosphorylation

PGOF: ATP binding, protein kinase activity, transferase activity, transferring phosphorus-containing groups

PGOC: null

PGOP: protein phosphorylation

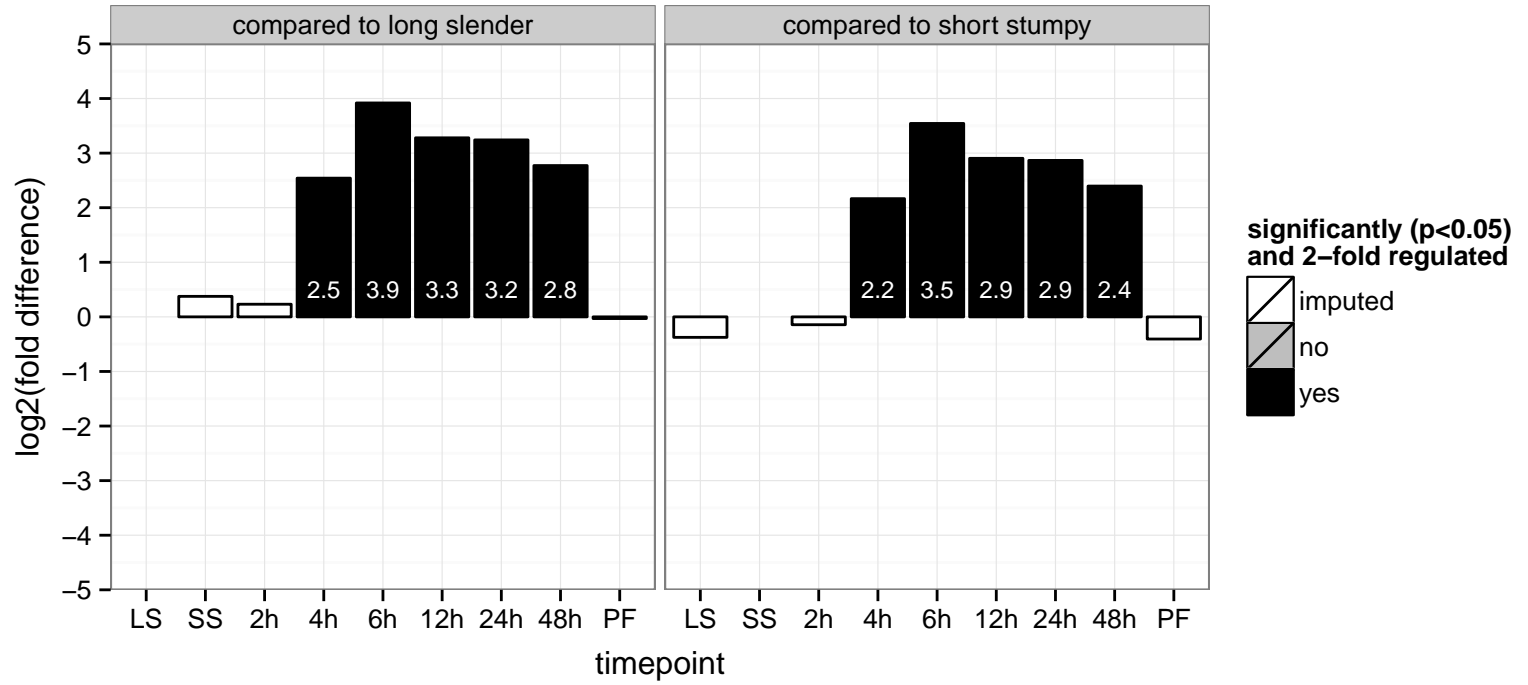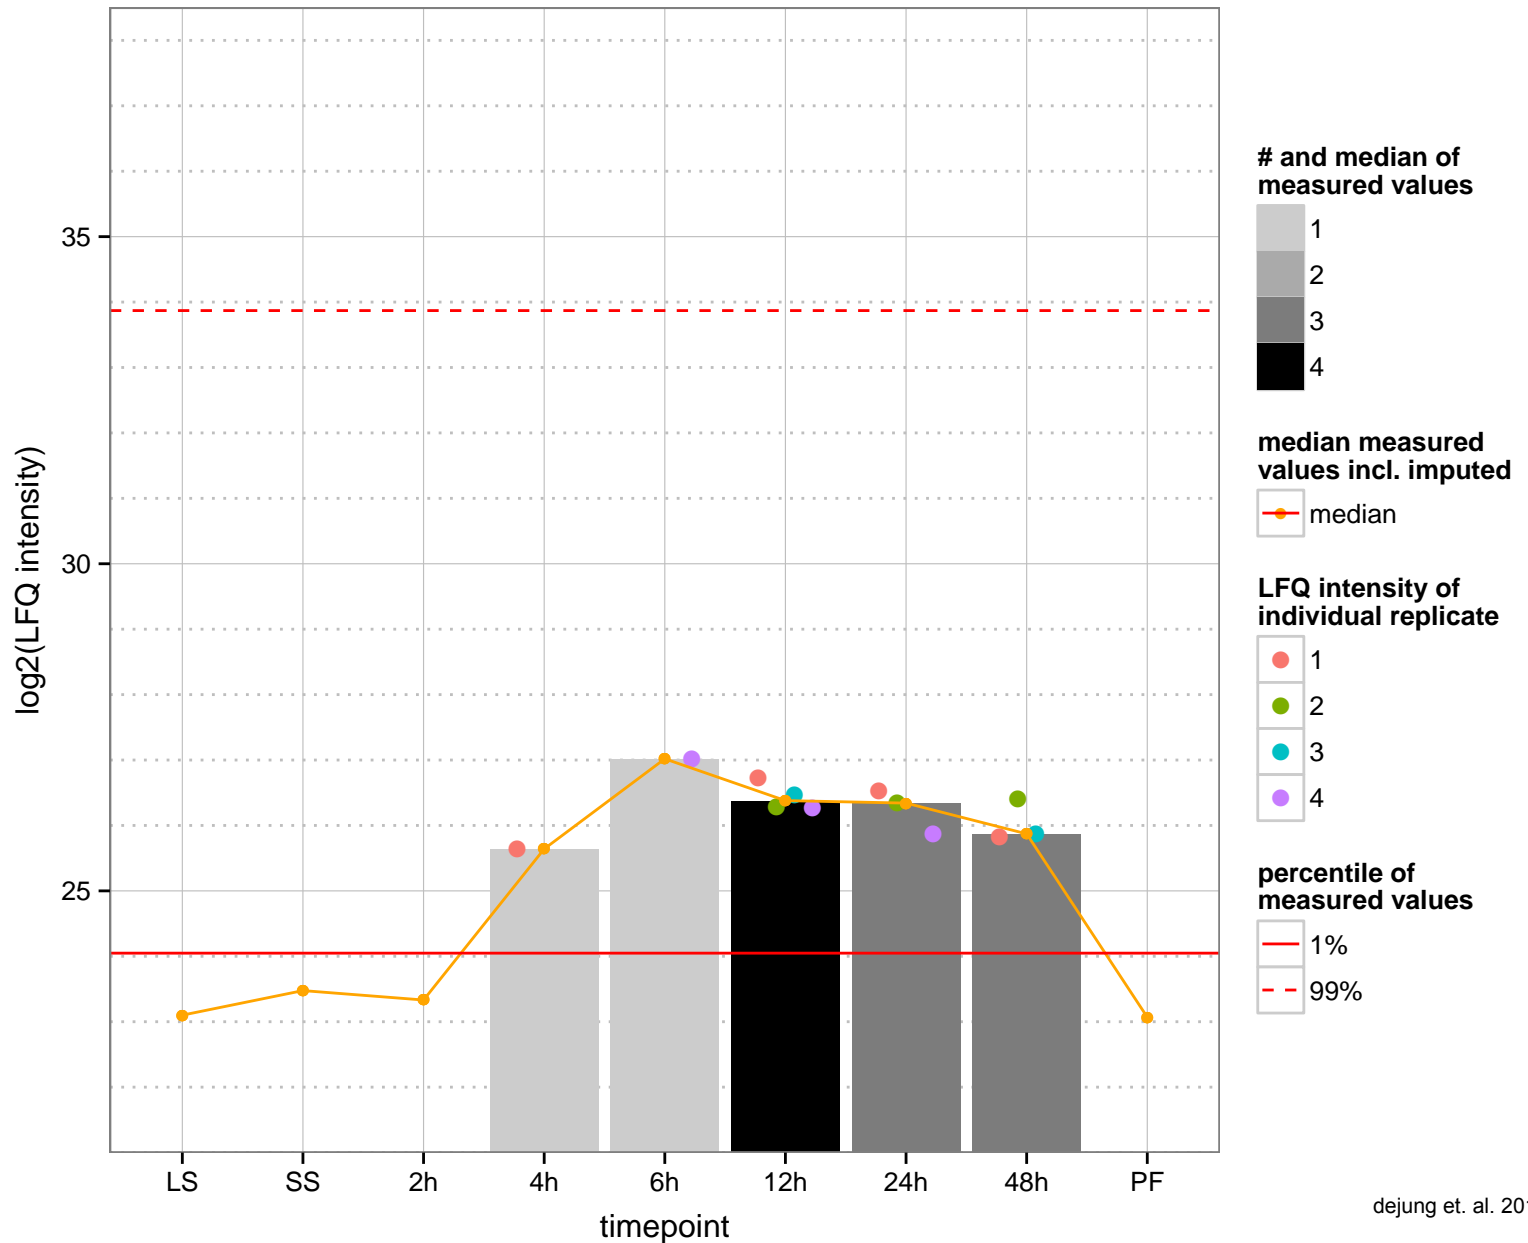

hypothetical protein, conserved  
 Tb927.10.7910  
 AGOF: null  
 AGOC: mitochondrion  
 AGOP: null  
 PGO: null  
 PGO: null  
 PGO: null

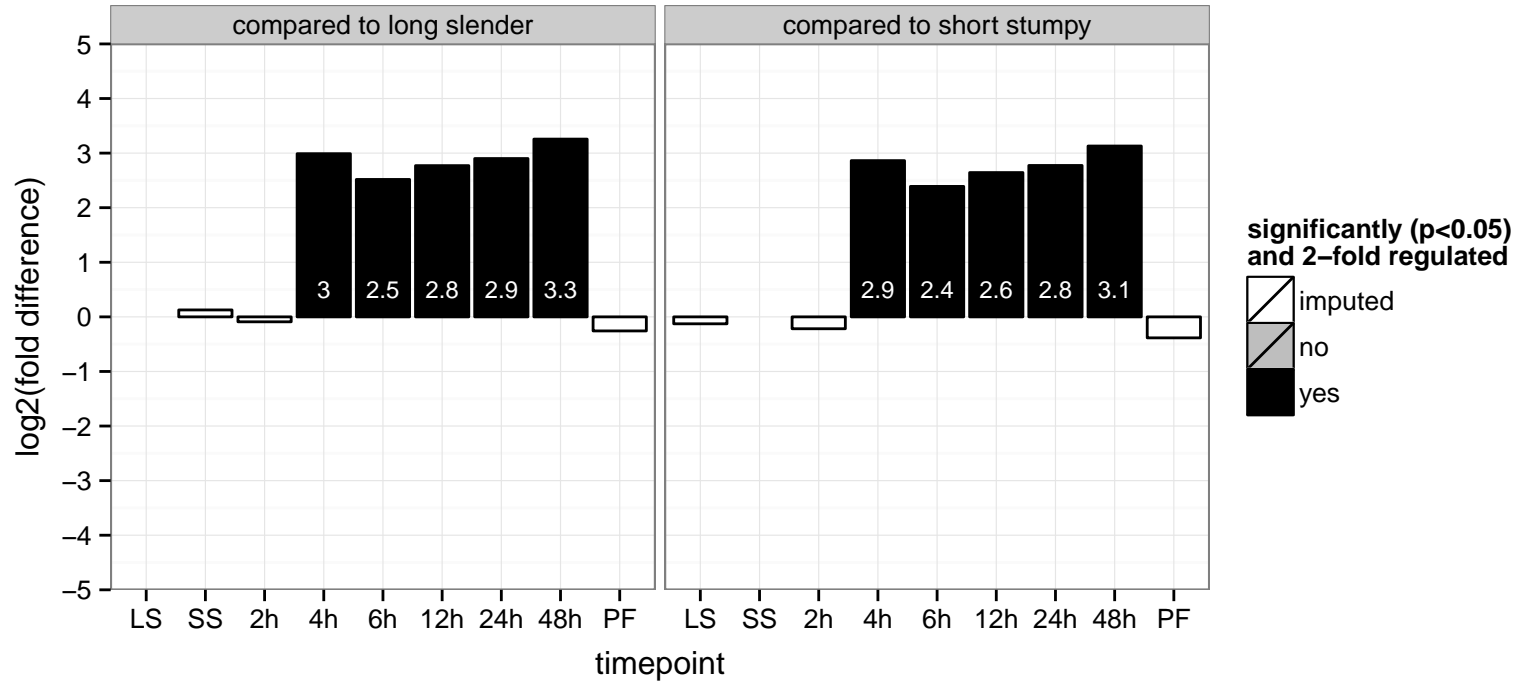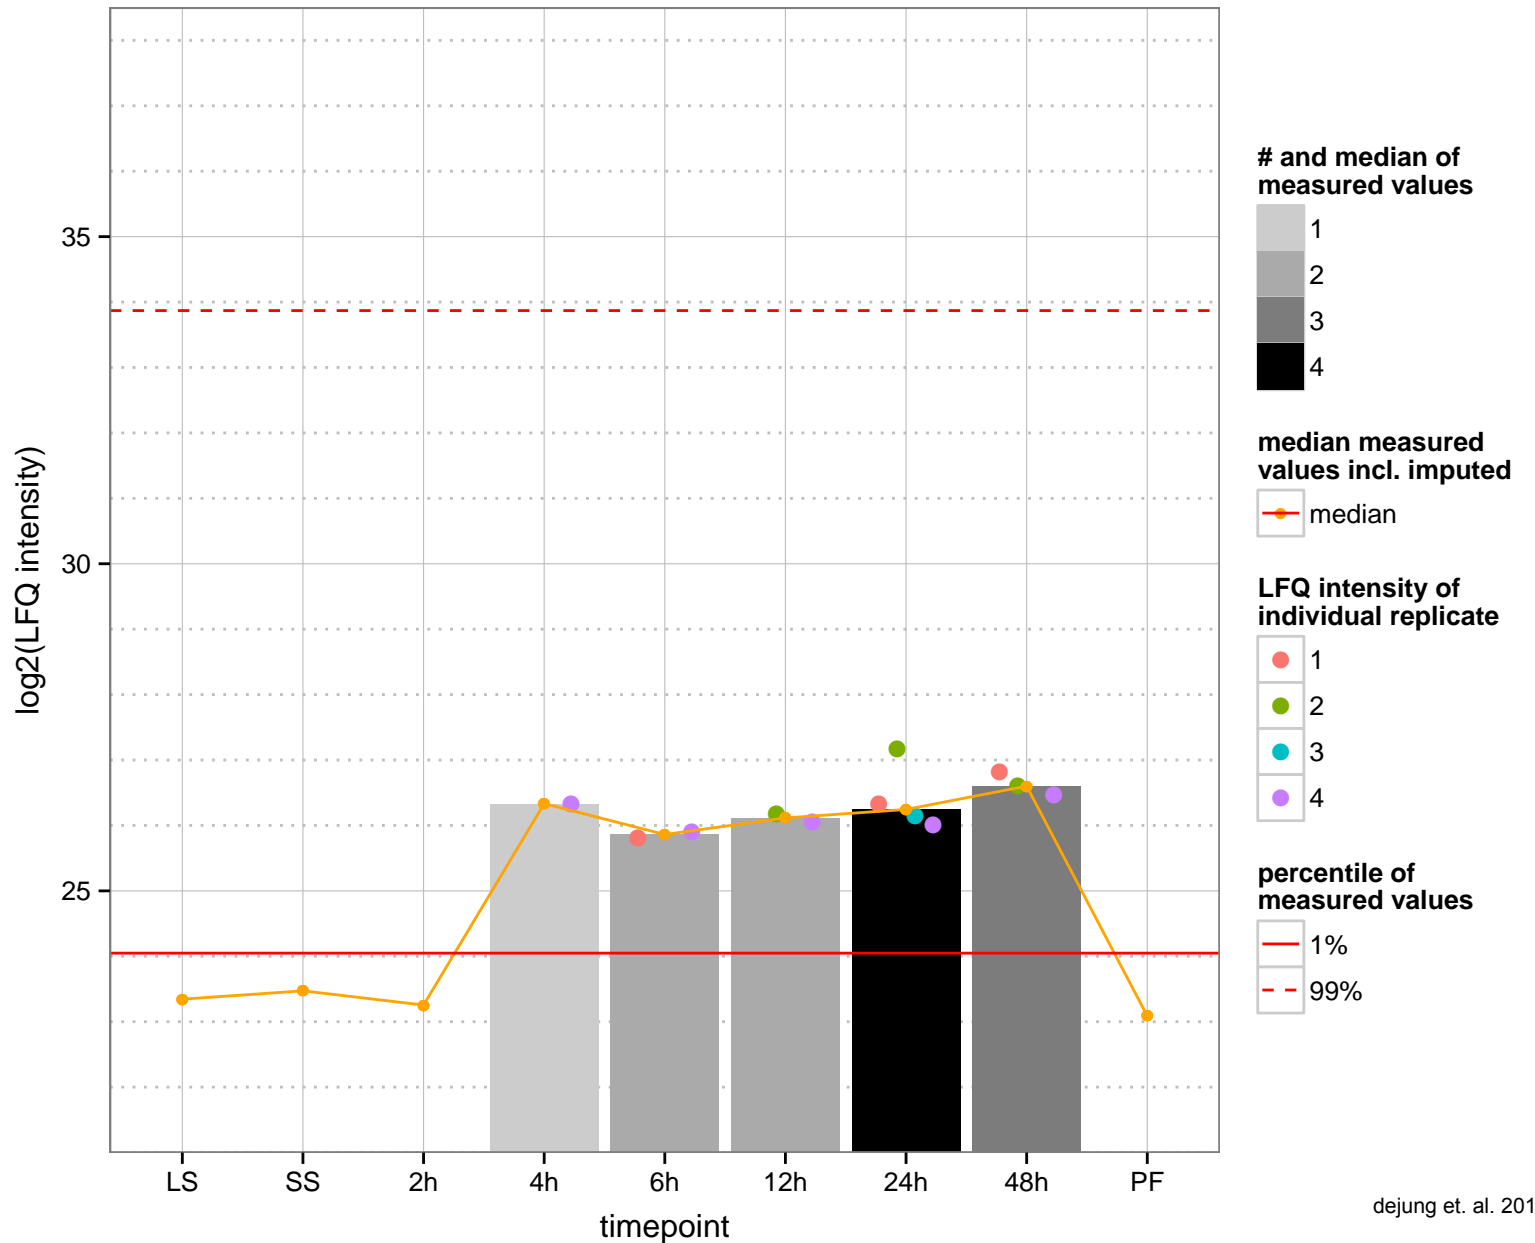



hypothetical protein, conserved  
 Tb927.11.12320  
 AGOF: null  
 AGOC: null  
 AGOP: null  
 PGO: null  
 PGOC: null  
 PGOP: null

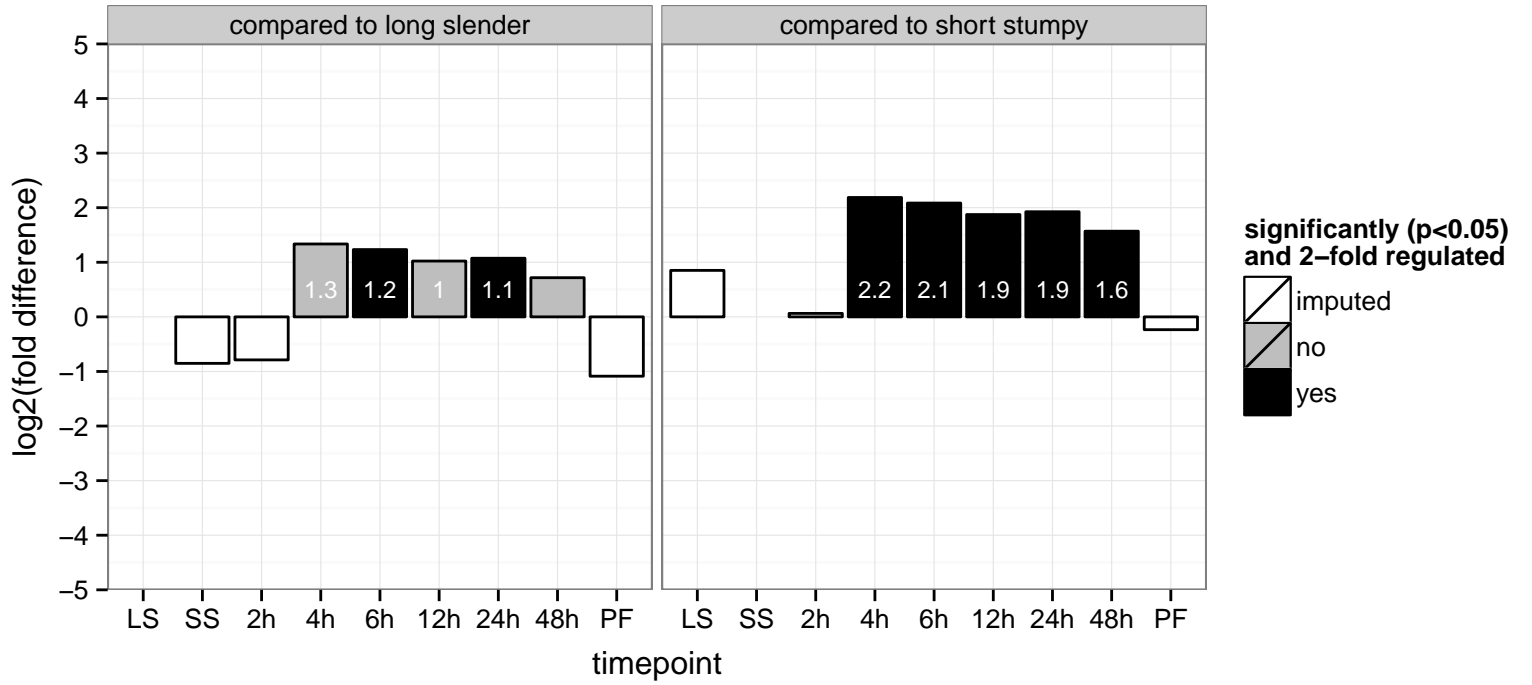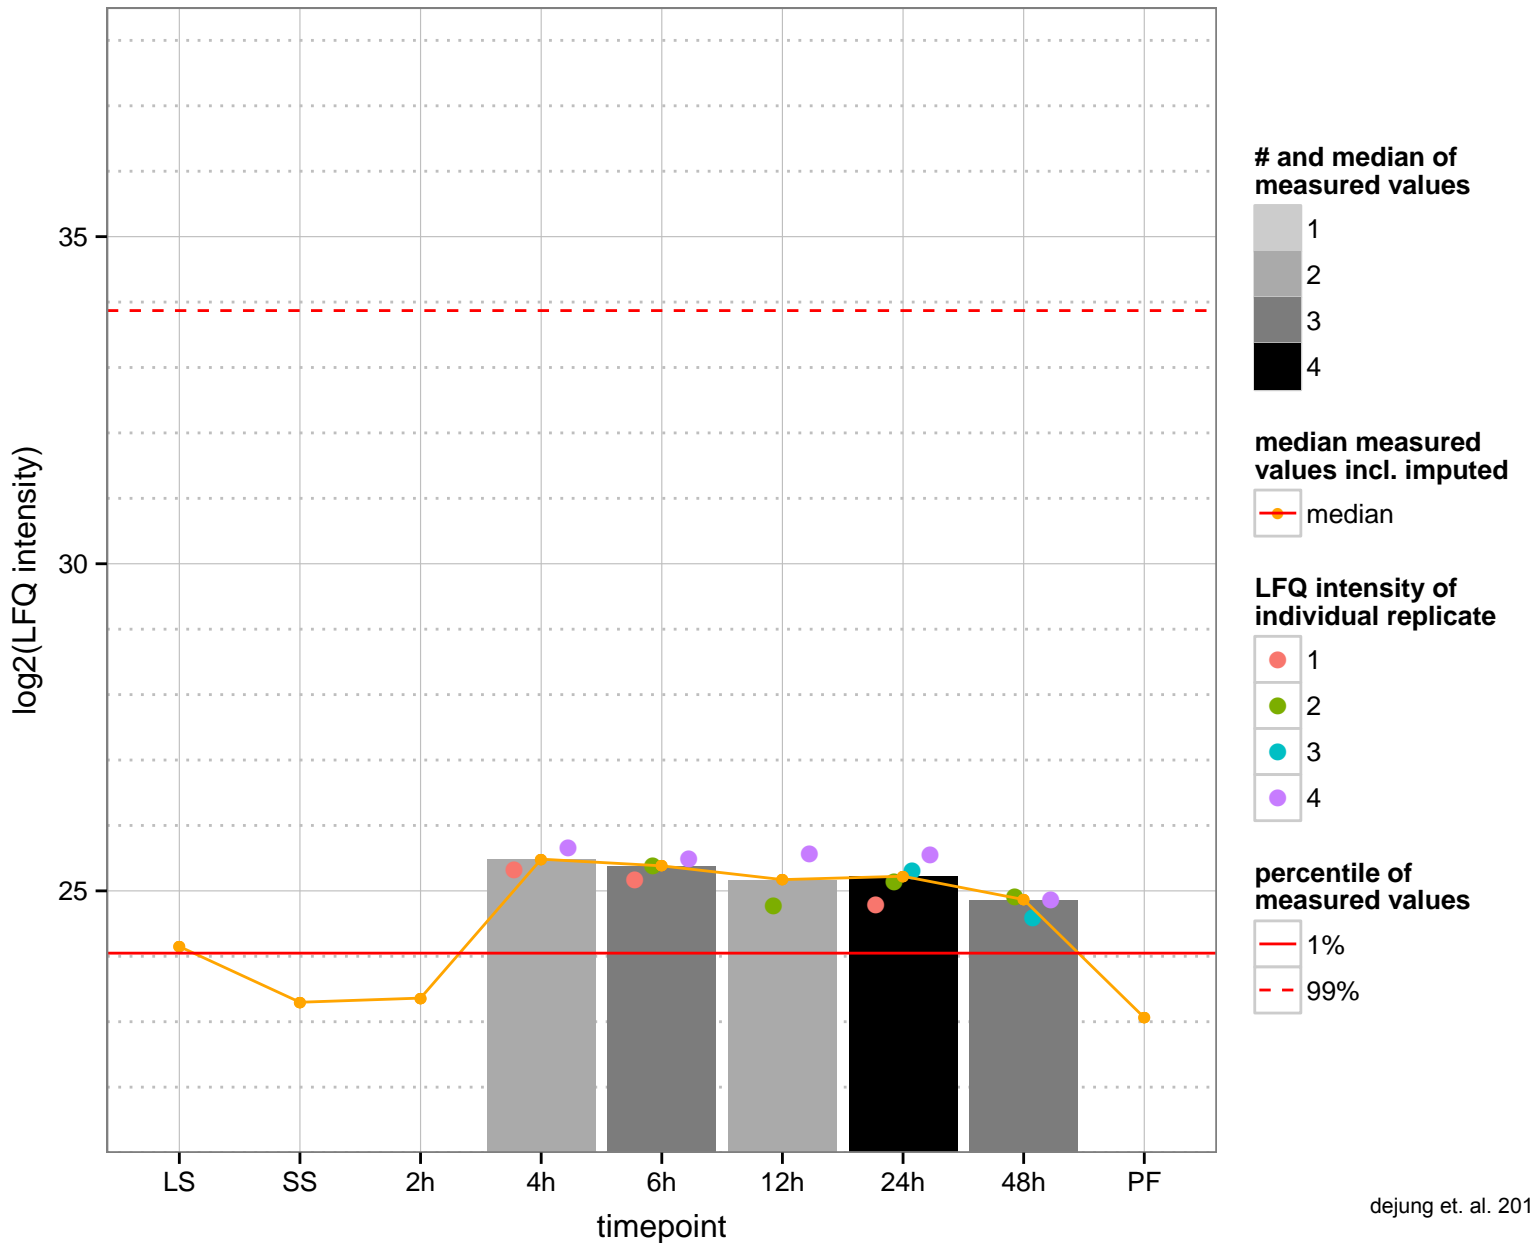

hypothetical protein, conserved  
 Tb927.11.2590  
 AGOF: null  
 AGOC: null  
 AGOP: null  
 PGO: null  
 PGOC: null  
 PGOP: null

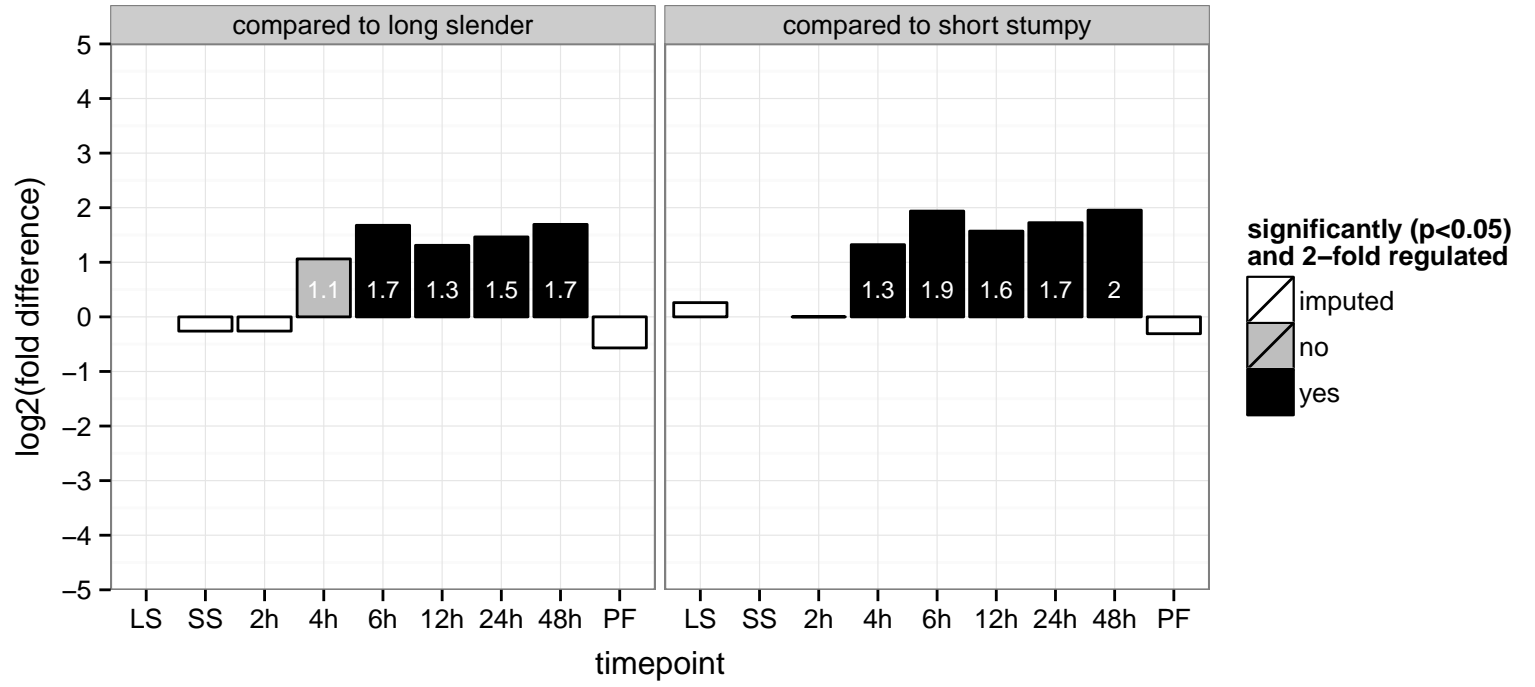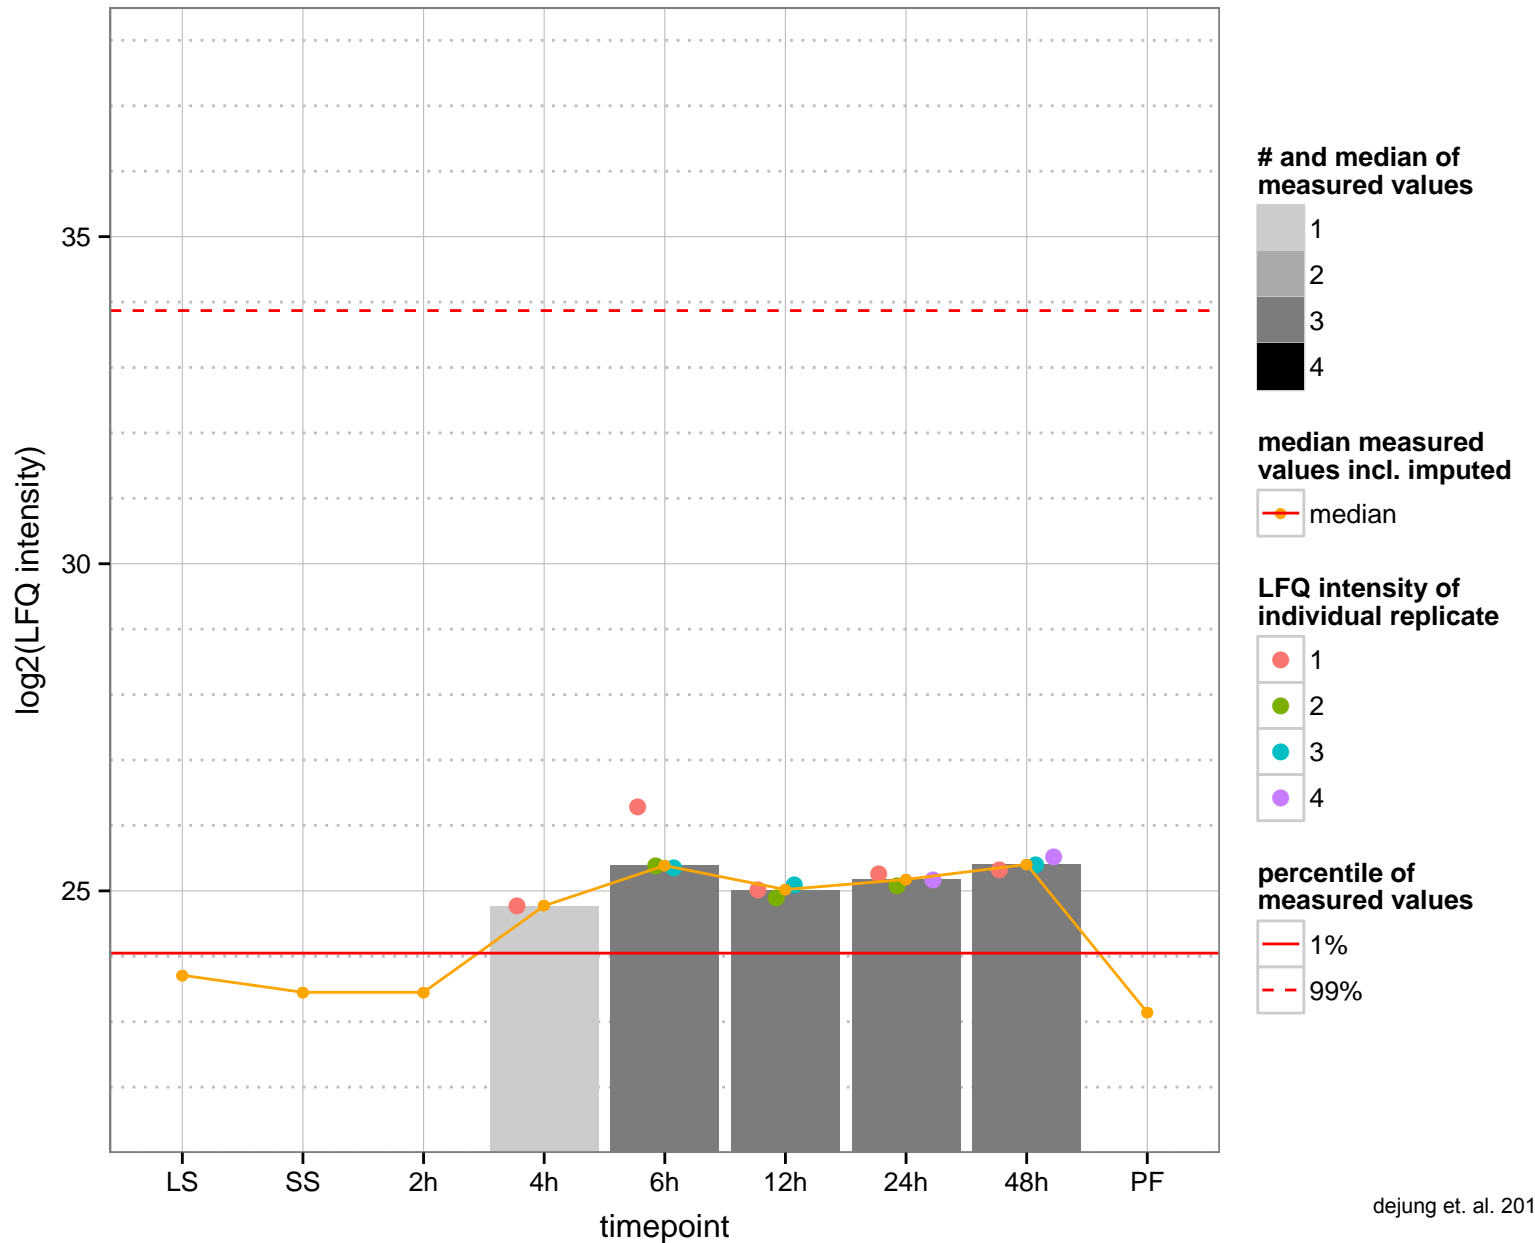

hypothetical protein, conserved  
 Tb927.11.7500;Tb927.11.7490  
 AGOF: null  
 AGOC: integral to membrane  
 AGOP: null  
 PGO: null  
 PGO: null  
 PGO: null

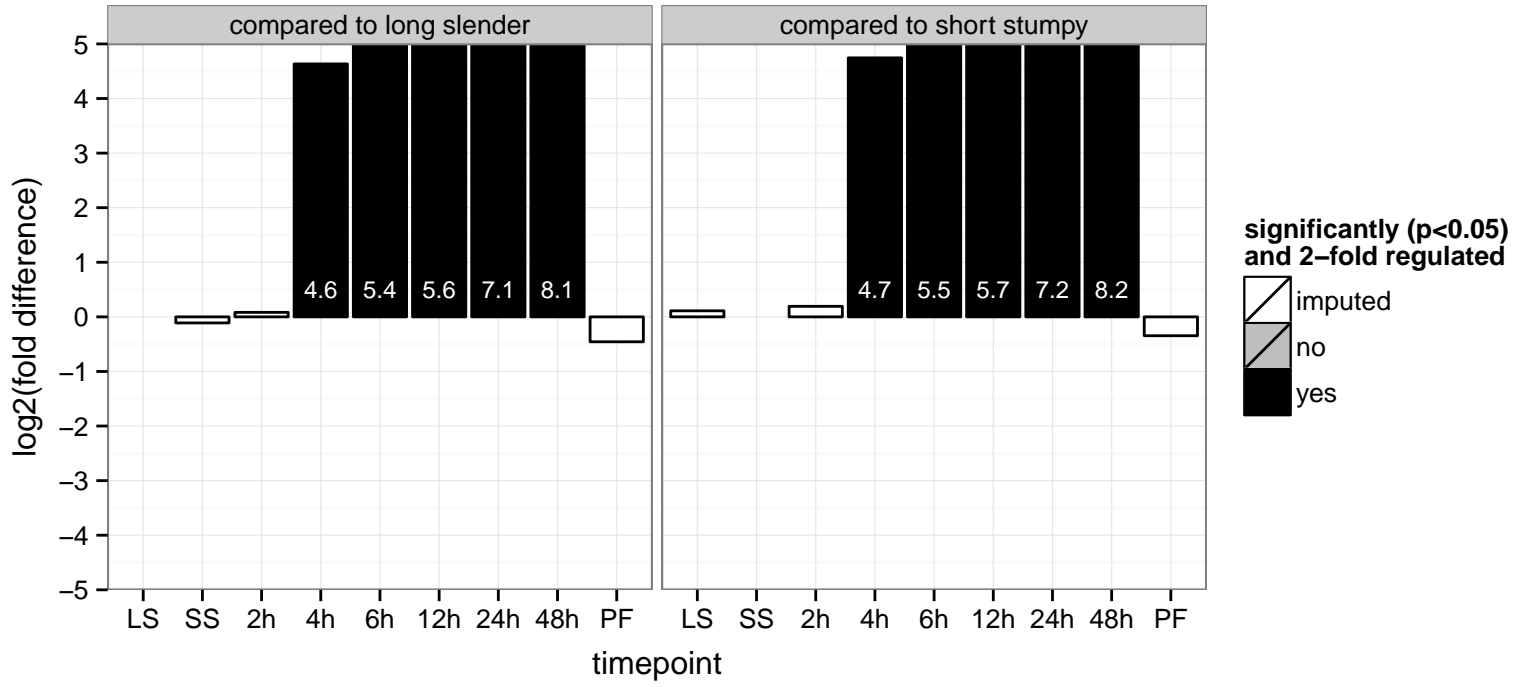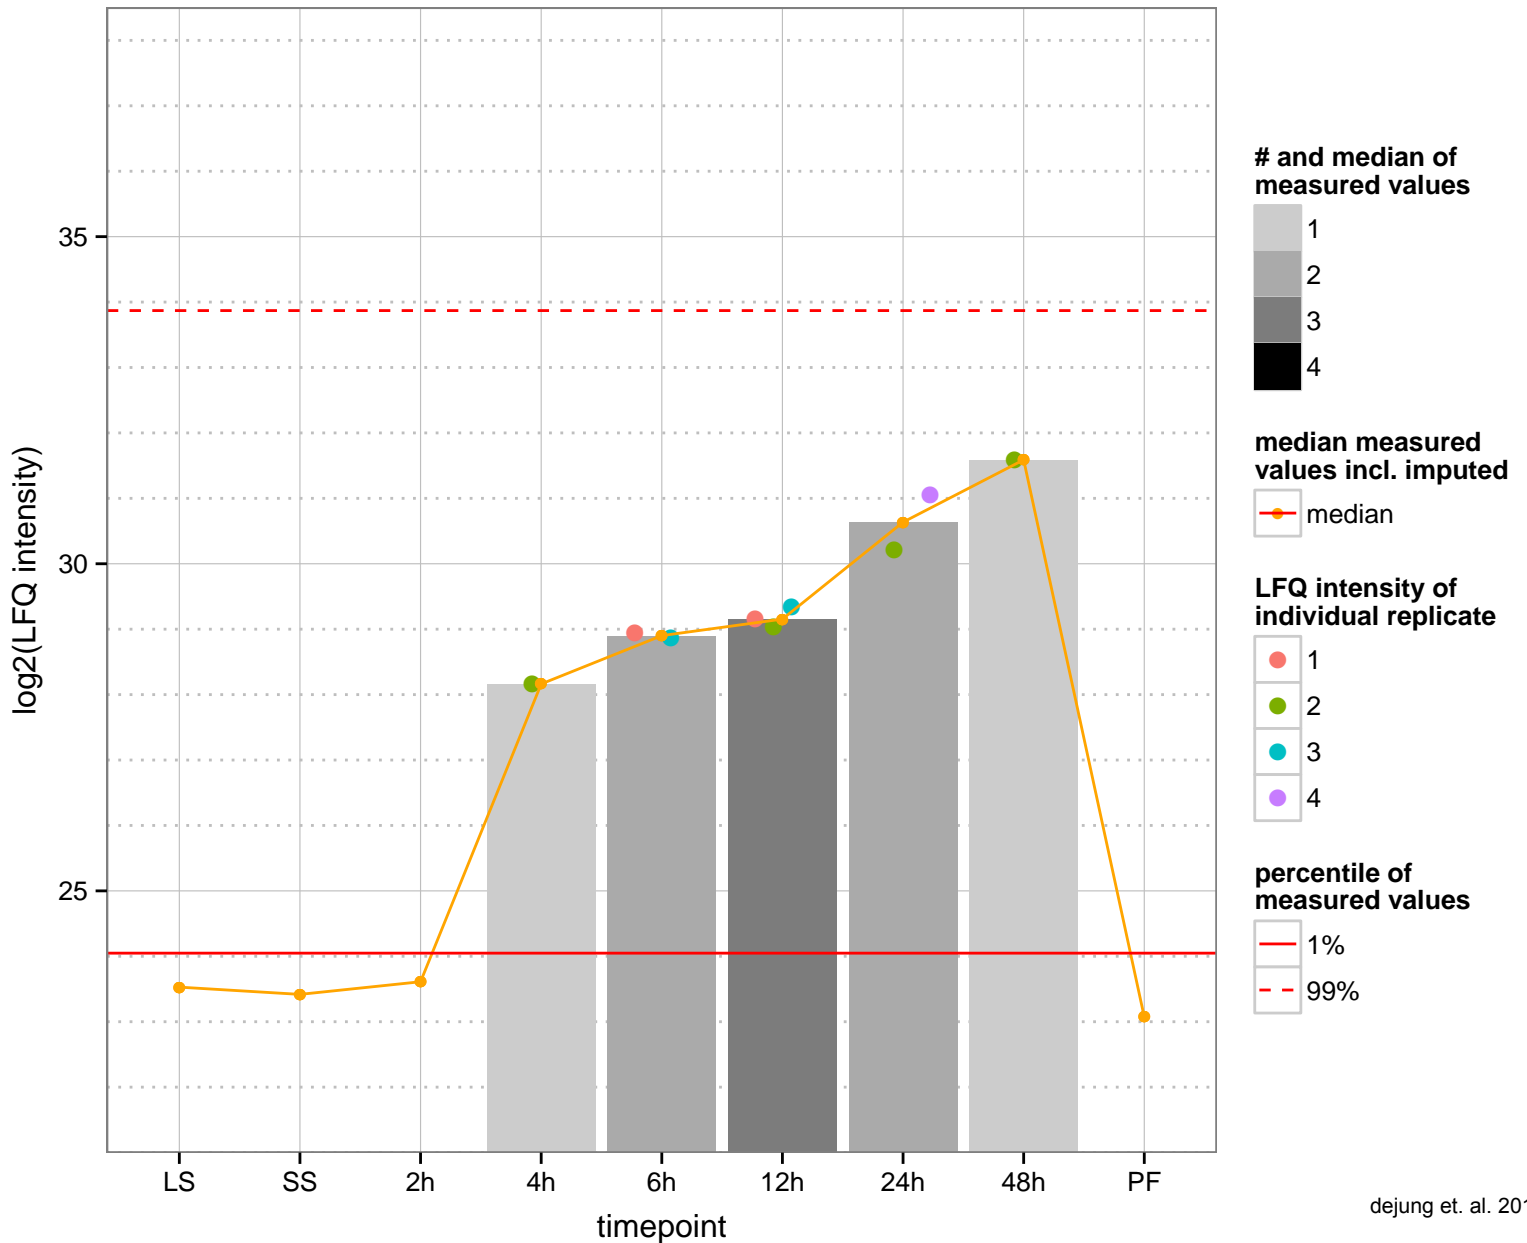

calmodulin, putative  
 Tb927.11.7940  
 AGOF: calcium ion binding  
 AGOC: null  
 AGOP: null  
 PGO: null  
 PGO: null  
 PGO: null

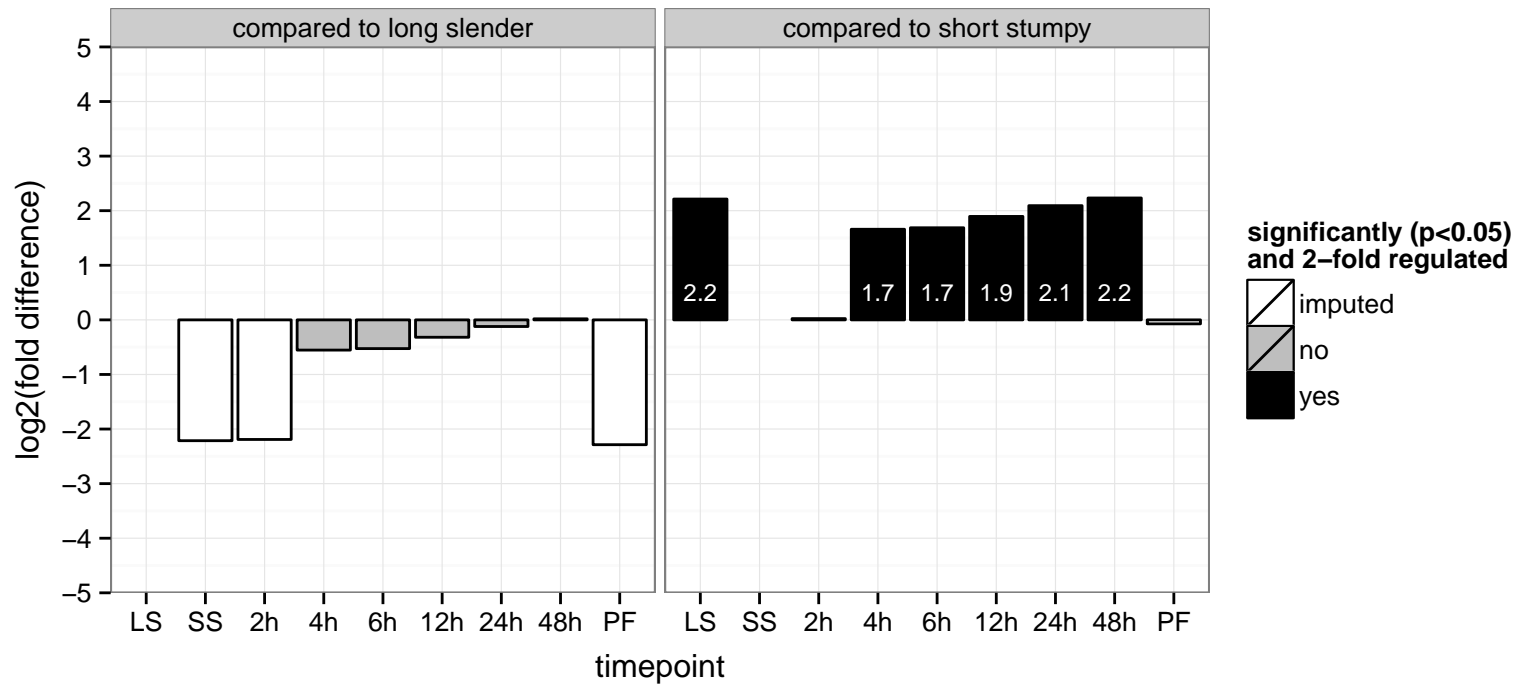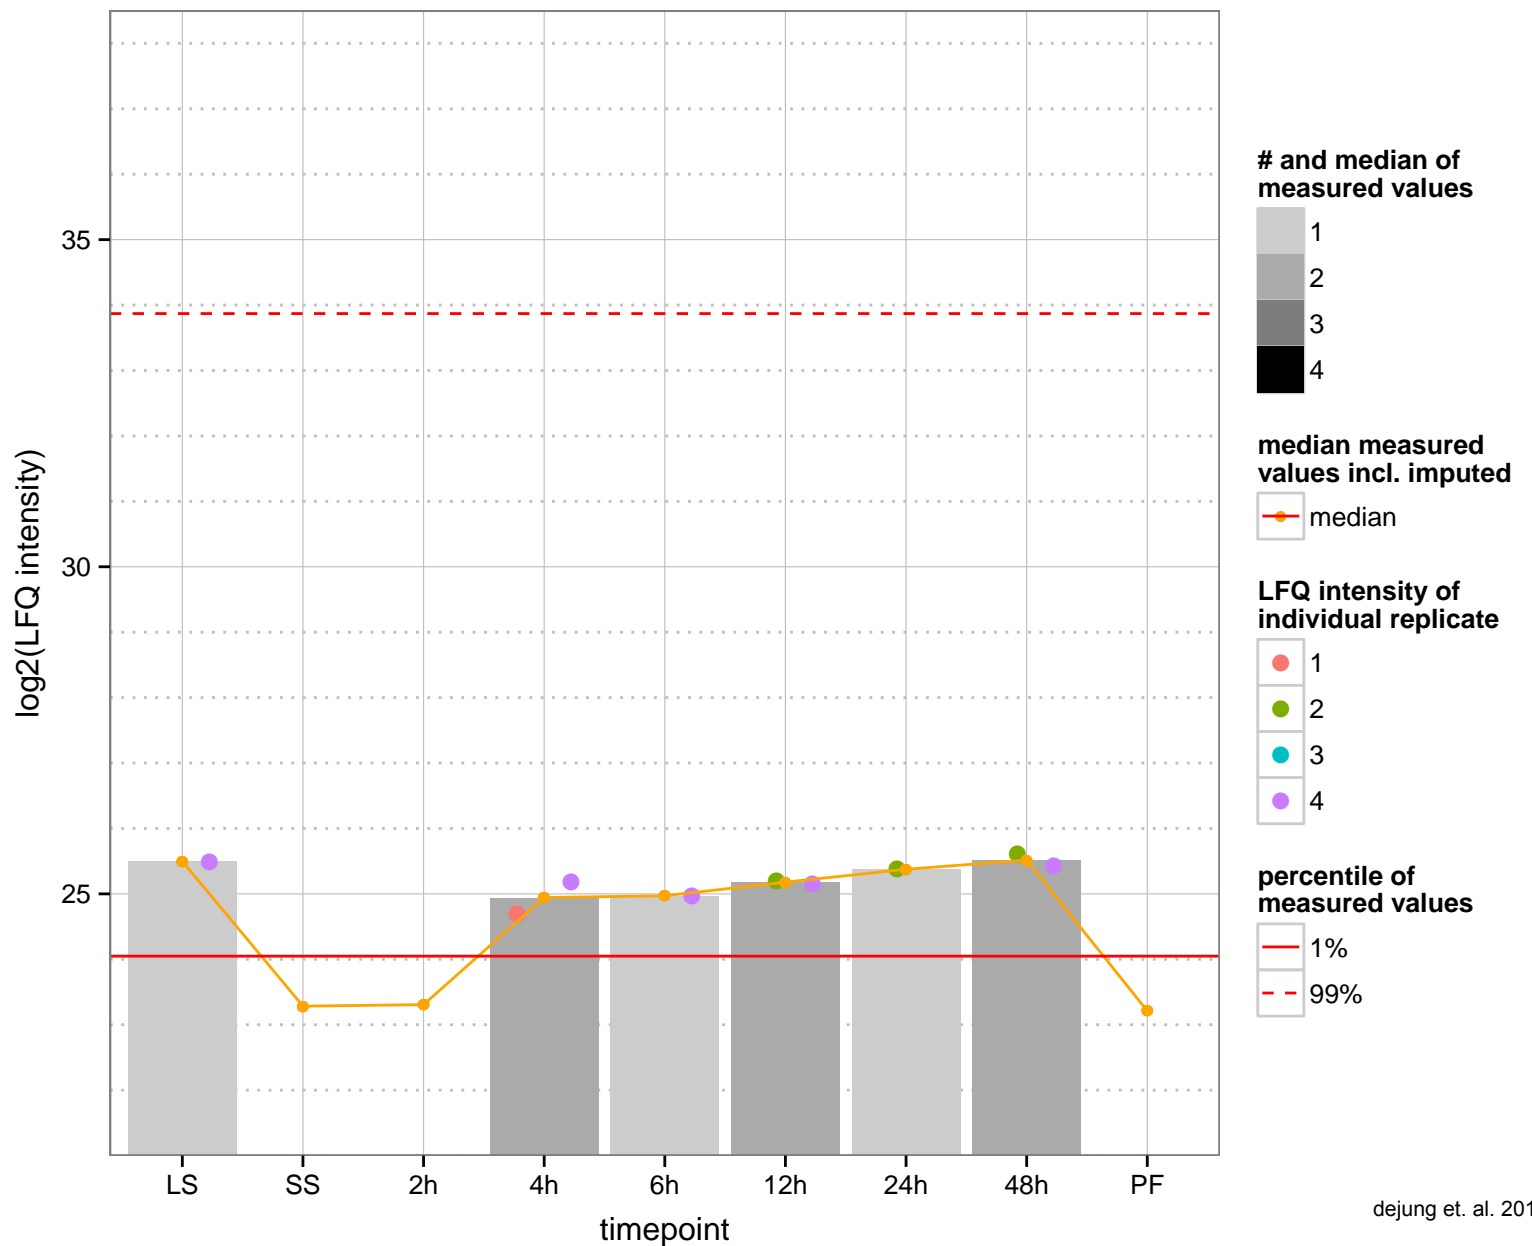

hypothetical protein, conserved  
 Tb927.11.9320  
 AGOF: null  
 AGOC: null  
 AGOP: null  
 PGO: null  
 PGOC: null  
 PGOP: null

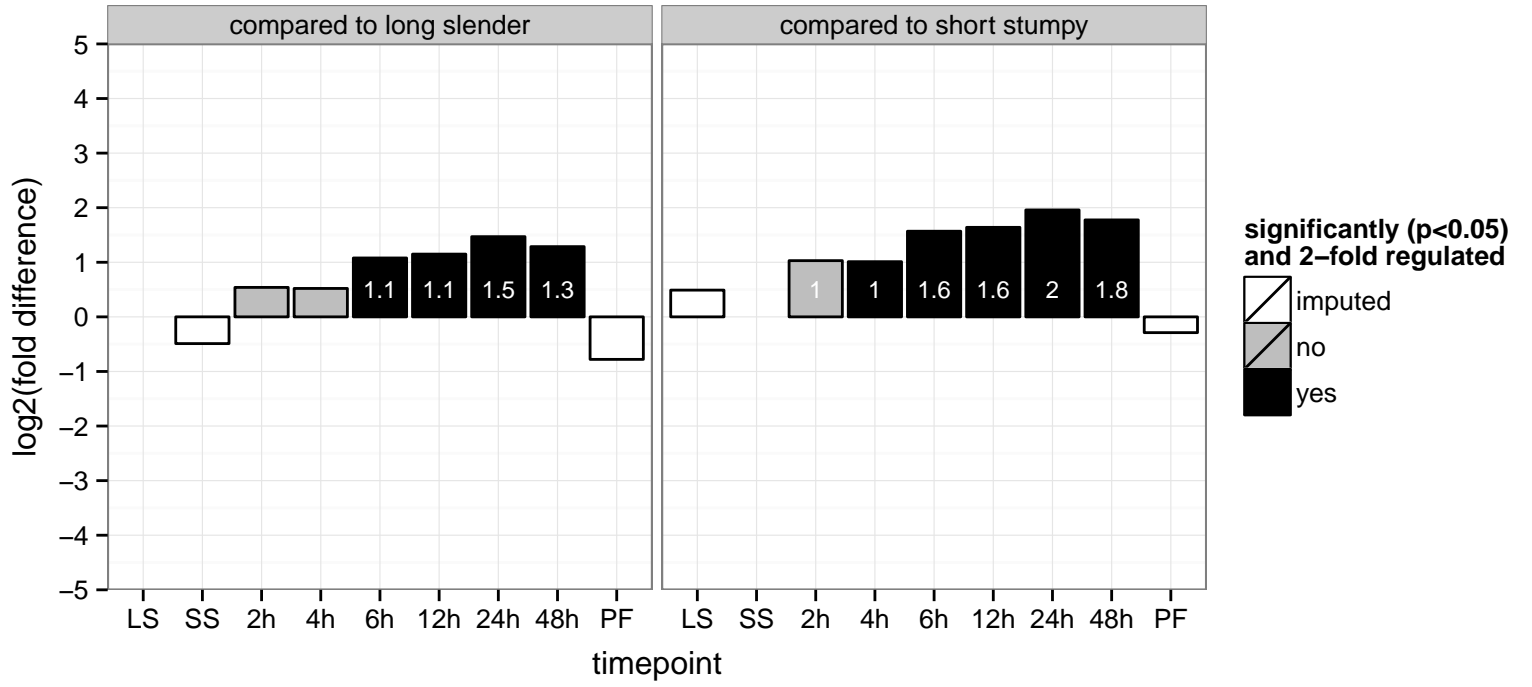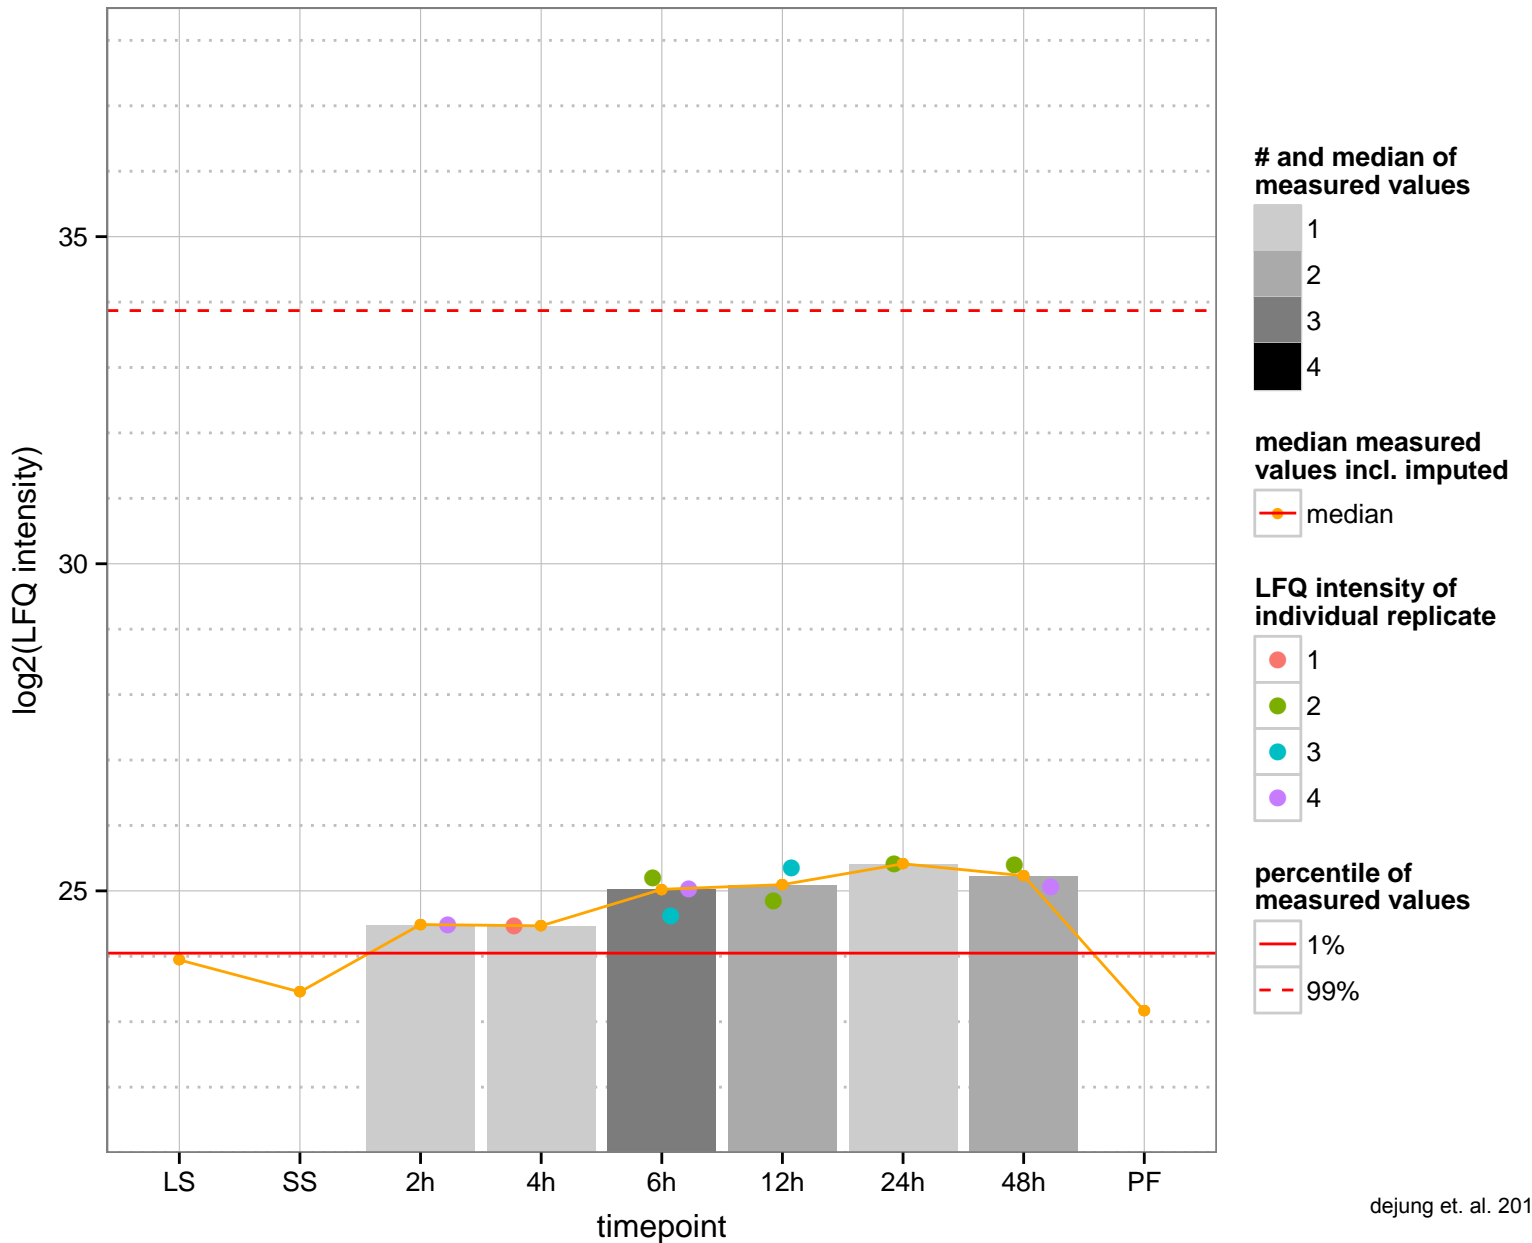

calreticulin, putative  
 Tb927.4.5010  
 AGOF: calcium ion binding, unfolded protein binding  
 AGOC: endoplasmic reticulum  
 AGOP: protein folding  
 PGOF: calcium ion binding, unfolded protein binding  
 PGO: endoplasmic reticulum  
 PGOP: protein folding

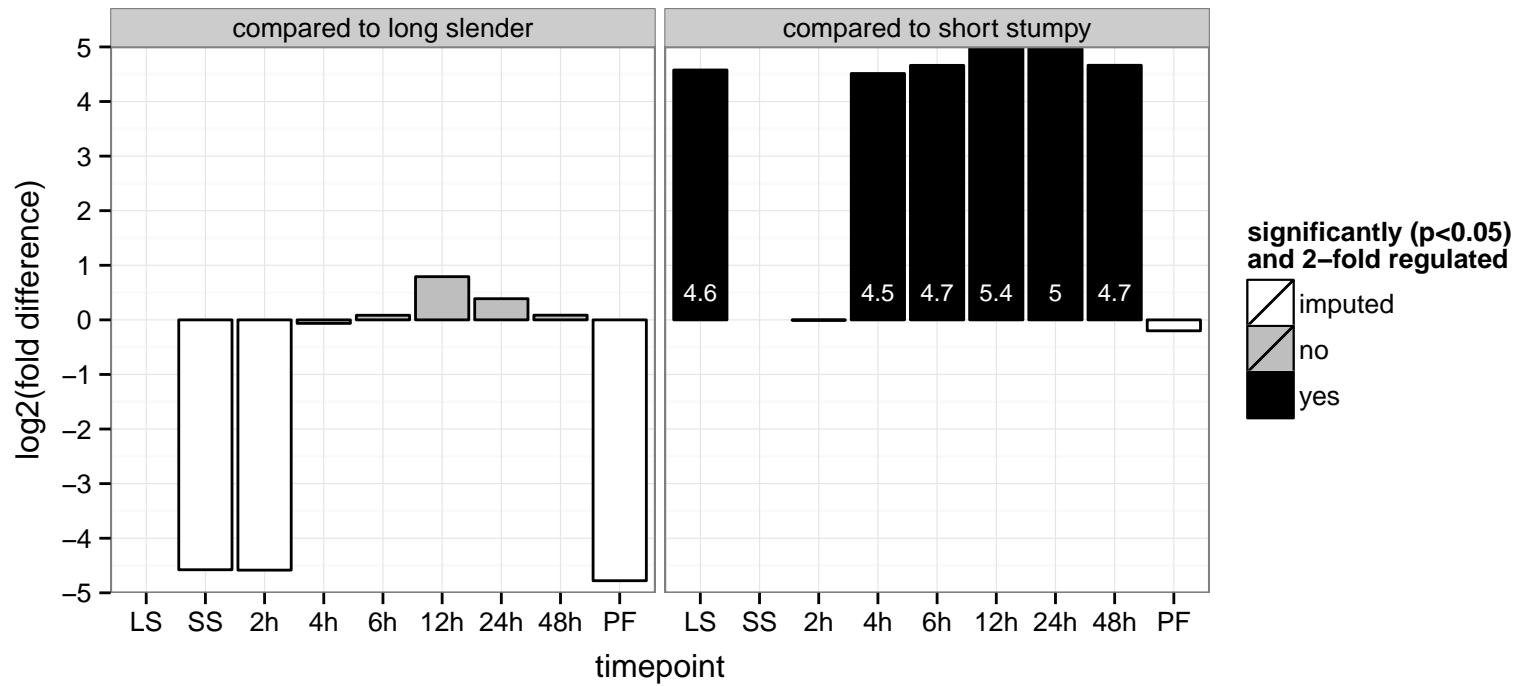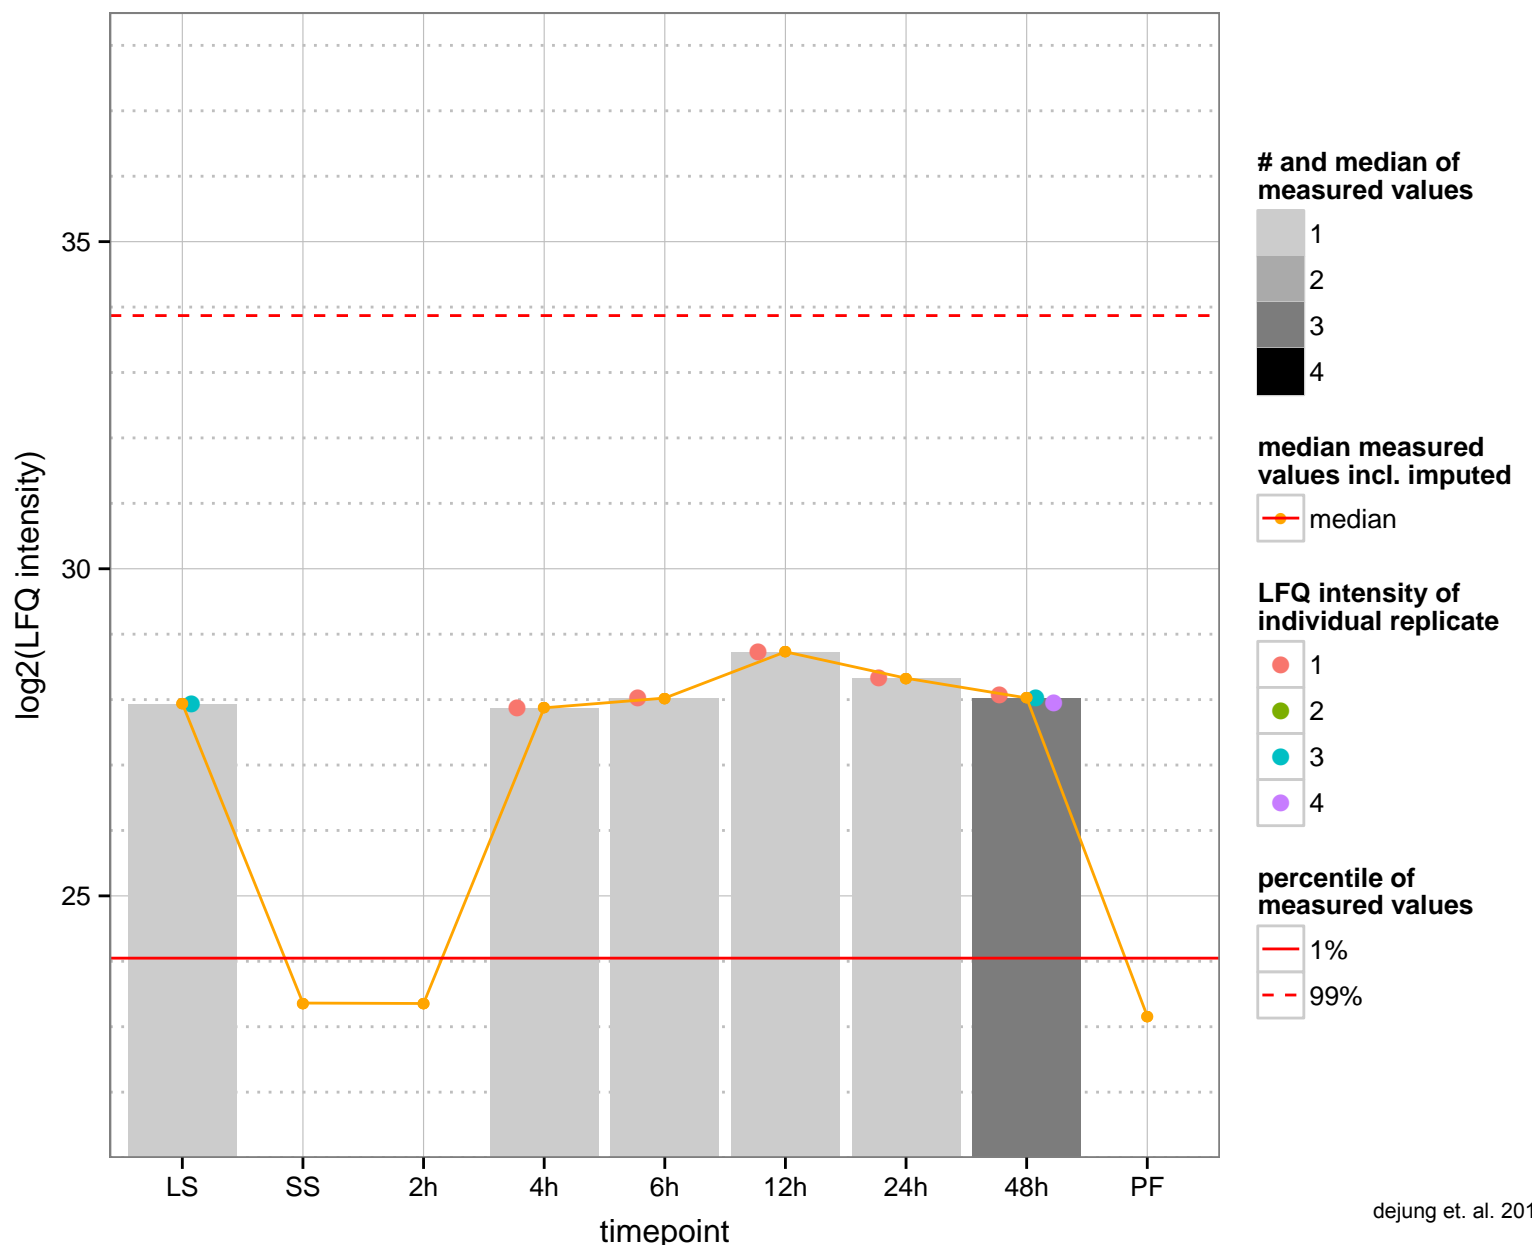

hypothetical protein, conserved  
 Tb927.5.840  
 AGOF: null  
 AGOC: null  
 AGOP: null  
 PGO: null  
 PGOC: null  
 PGOP: null

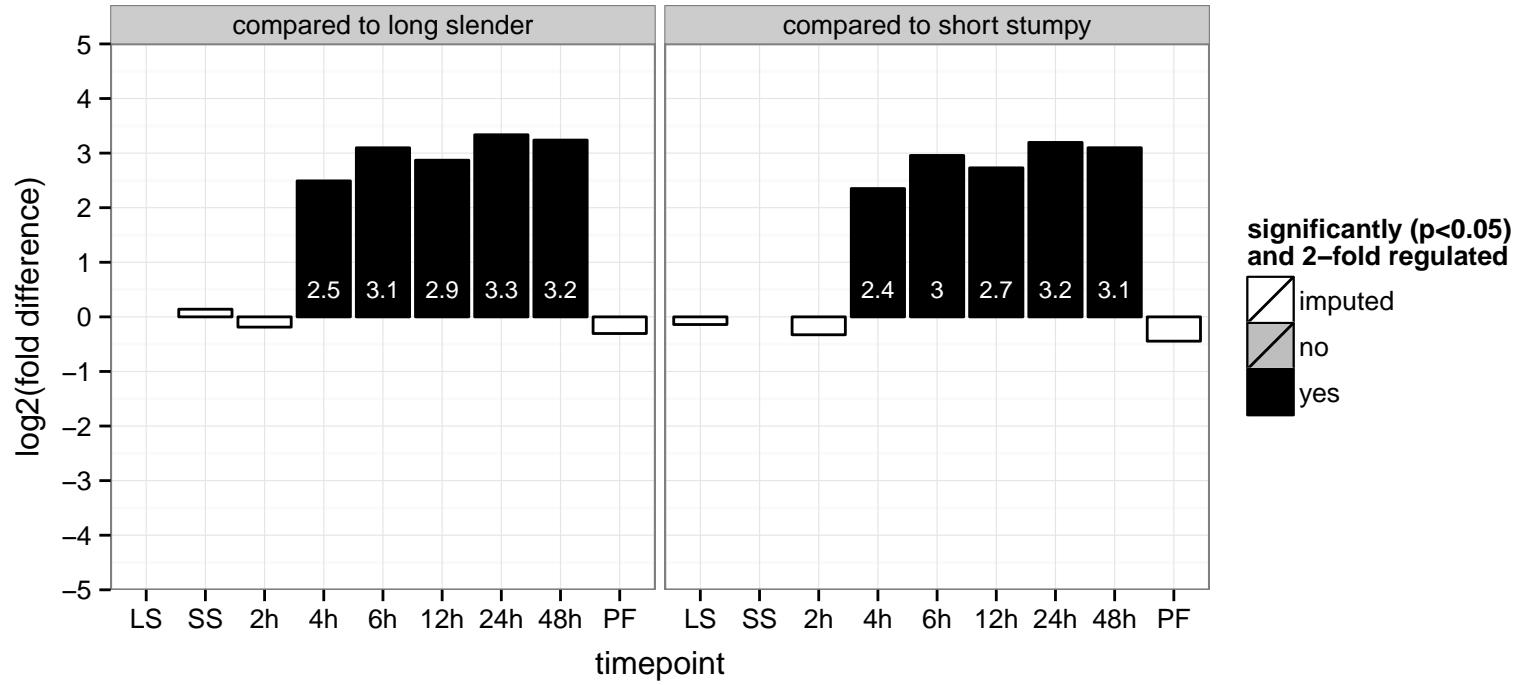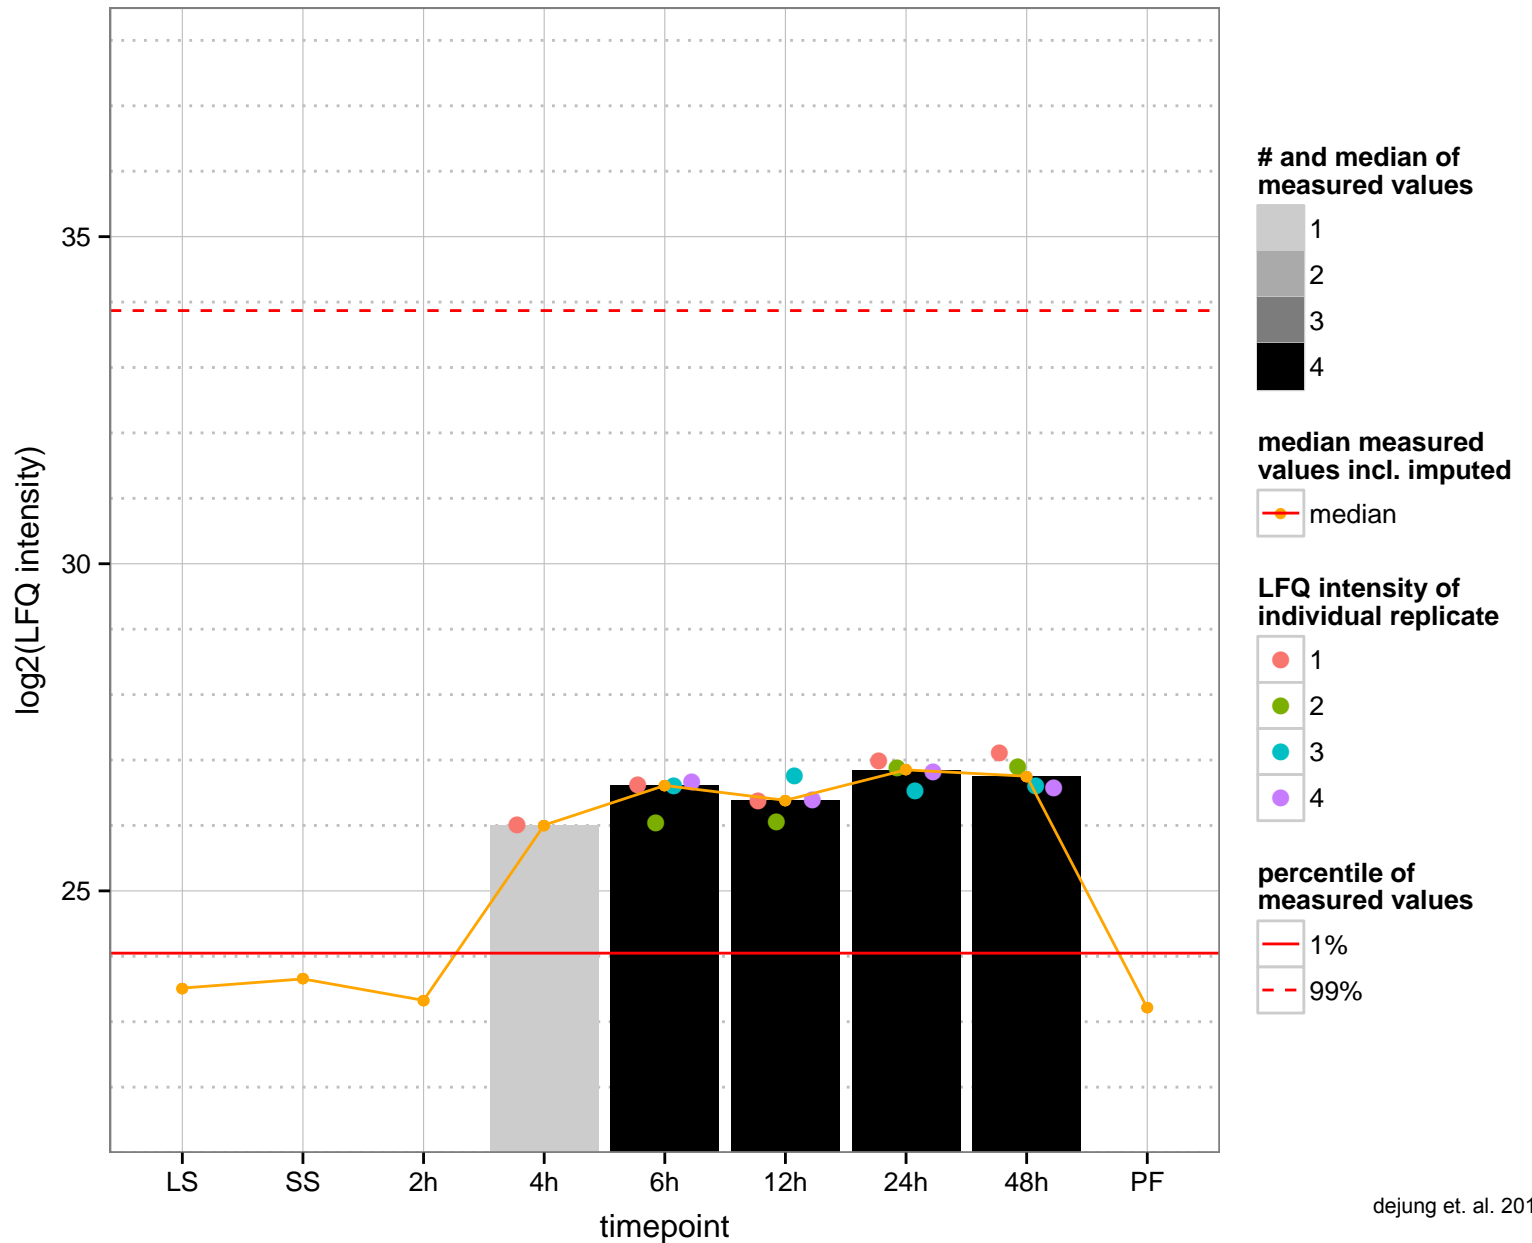

leucine-rich repeat protein (LRRP), putative  
 Tb927.6.1940  
 AGOF: null  
 AGOC: null  
 AGOP: null  
 PGOF: null  
 PGO: null  
 PGOP: null

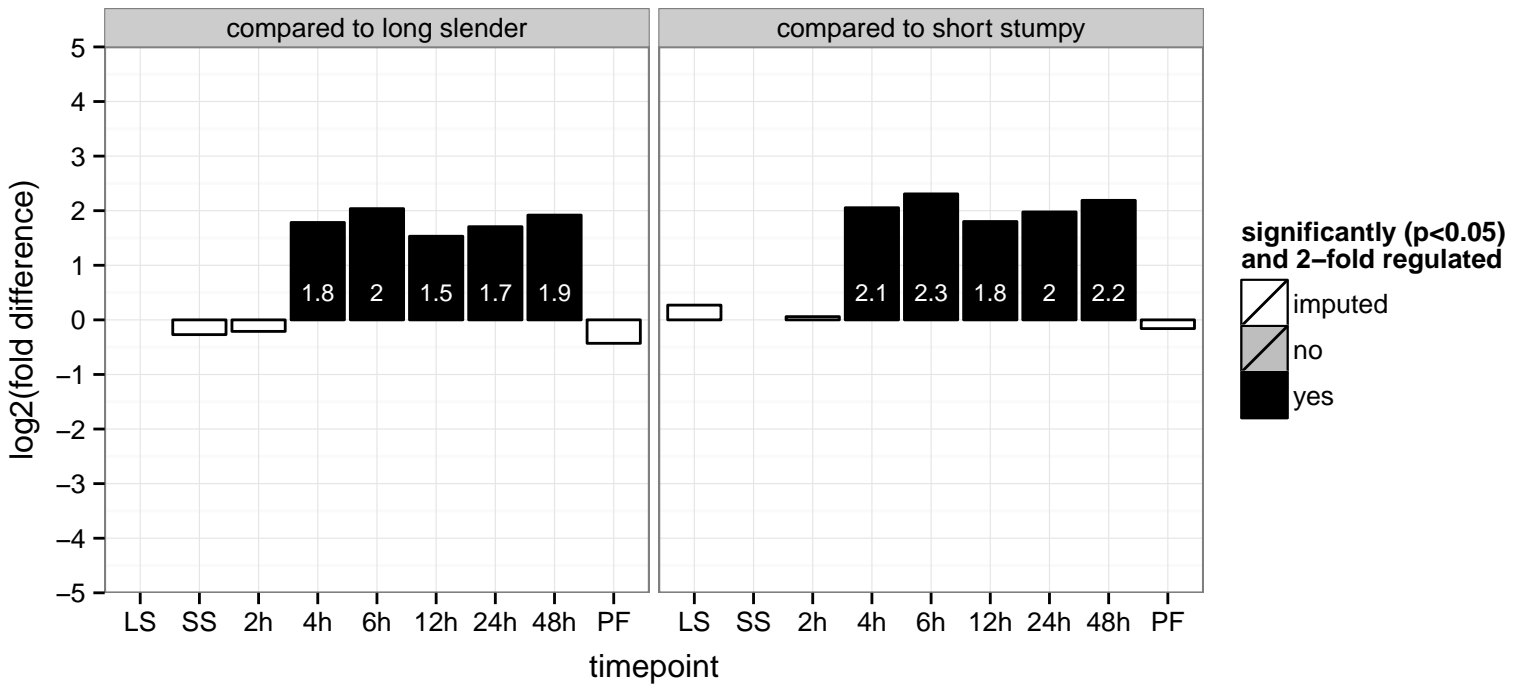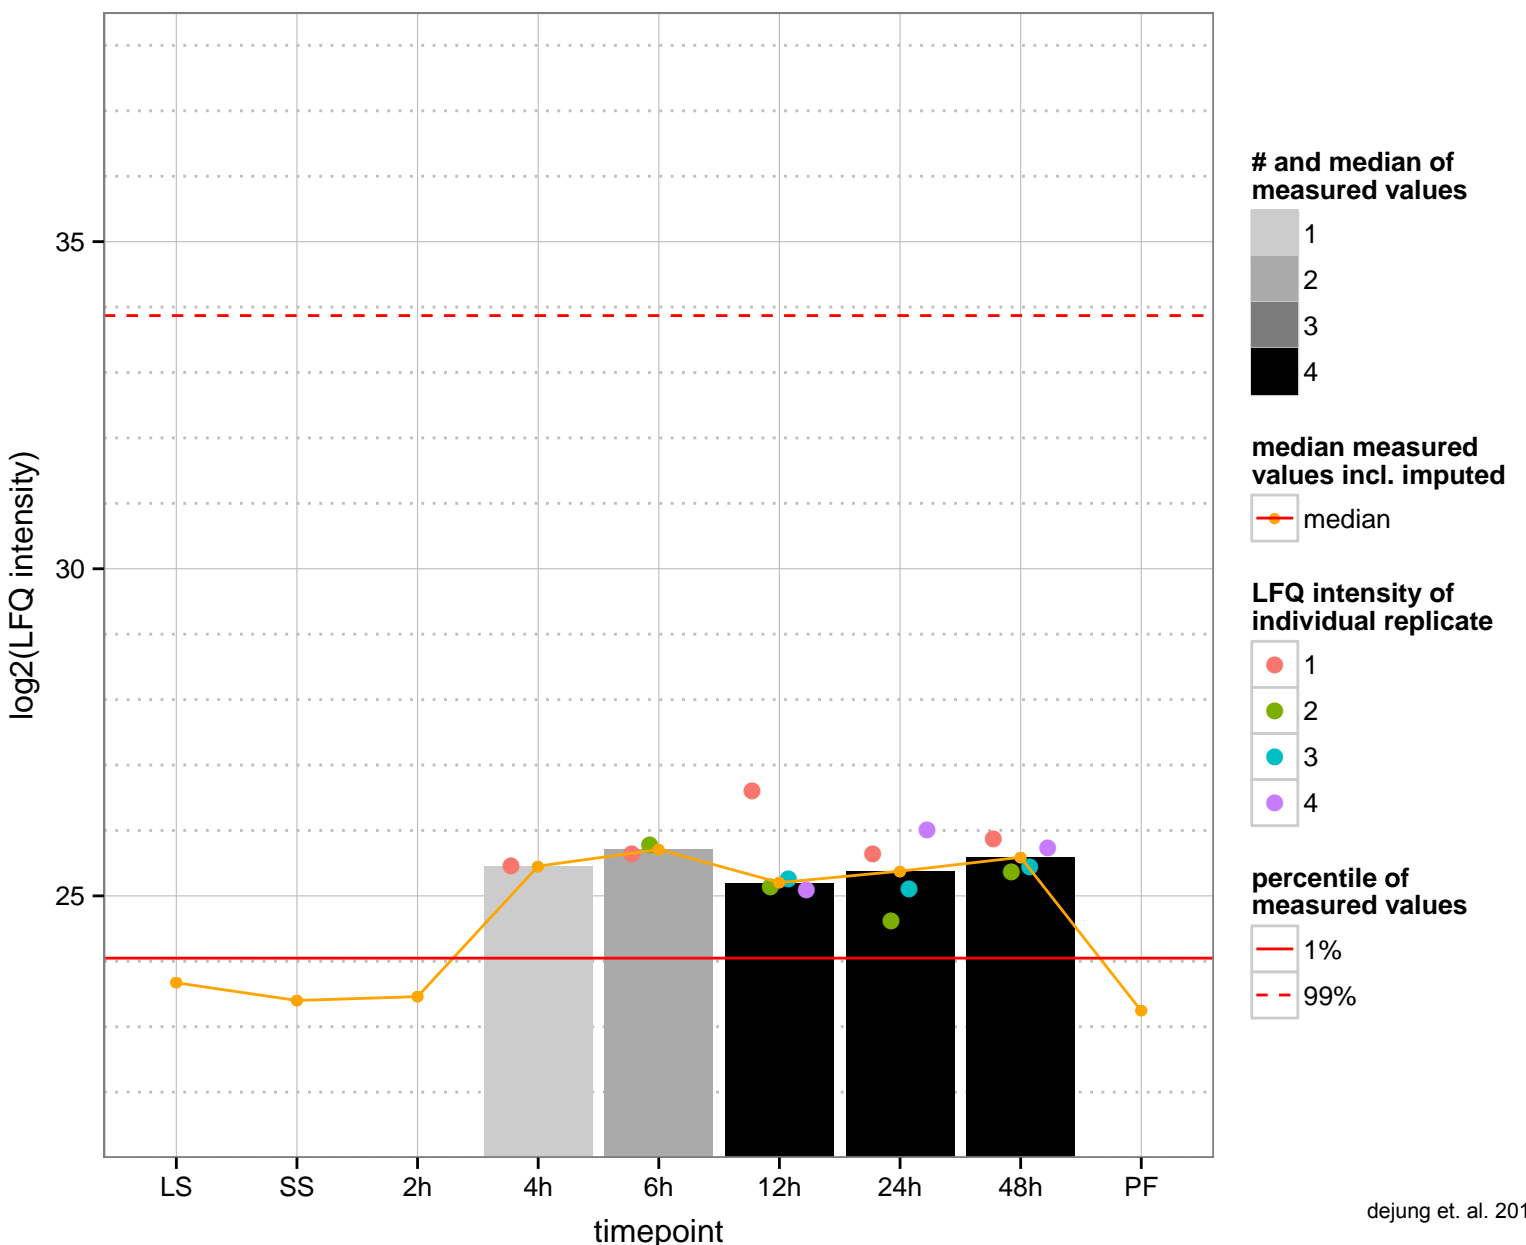



hypothetical protein, conserved (YCF45)  
 Tb927.6.3350  
 AGOF: nucleoside-triphosphatase activity, nucleotide binding  
 AGOC: mitochondrion  
 AGOP: null  
 PGOF: nucleoside-triphosphatase activity, nucleotide binding  
 PGO: null  
 PGOP: null

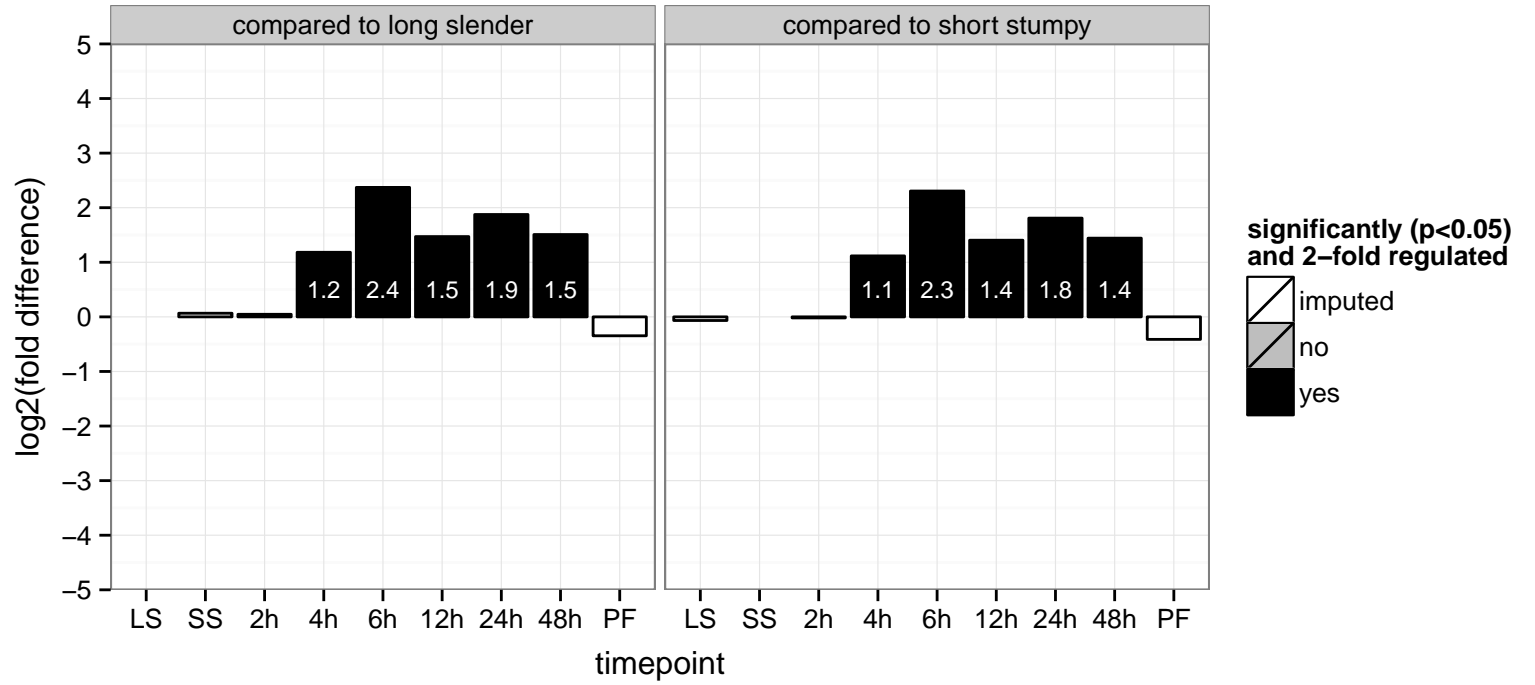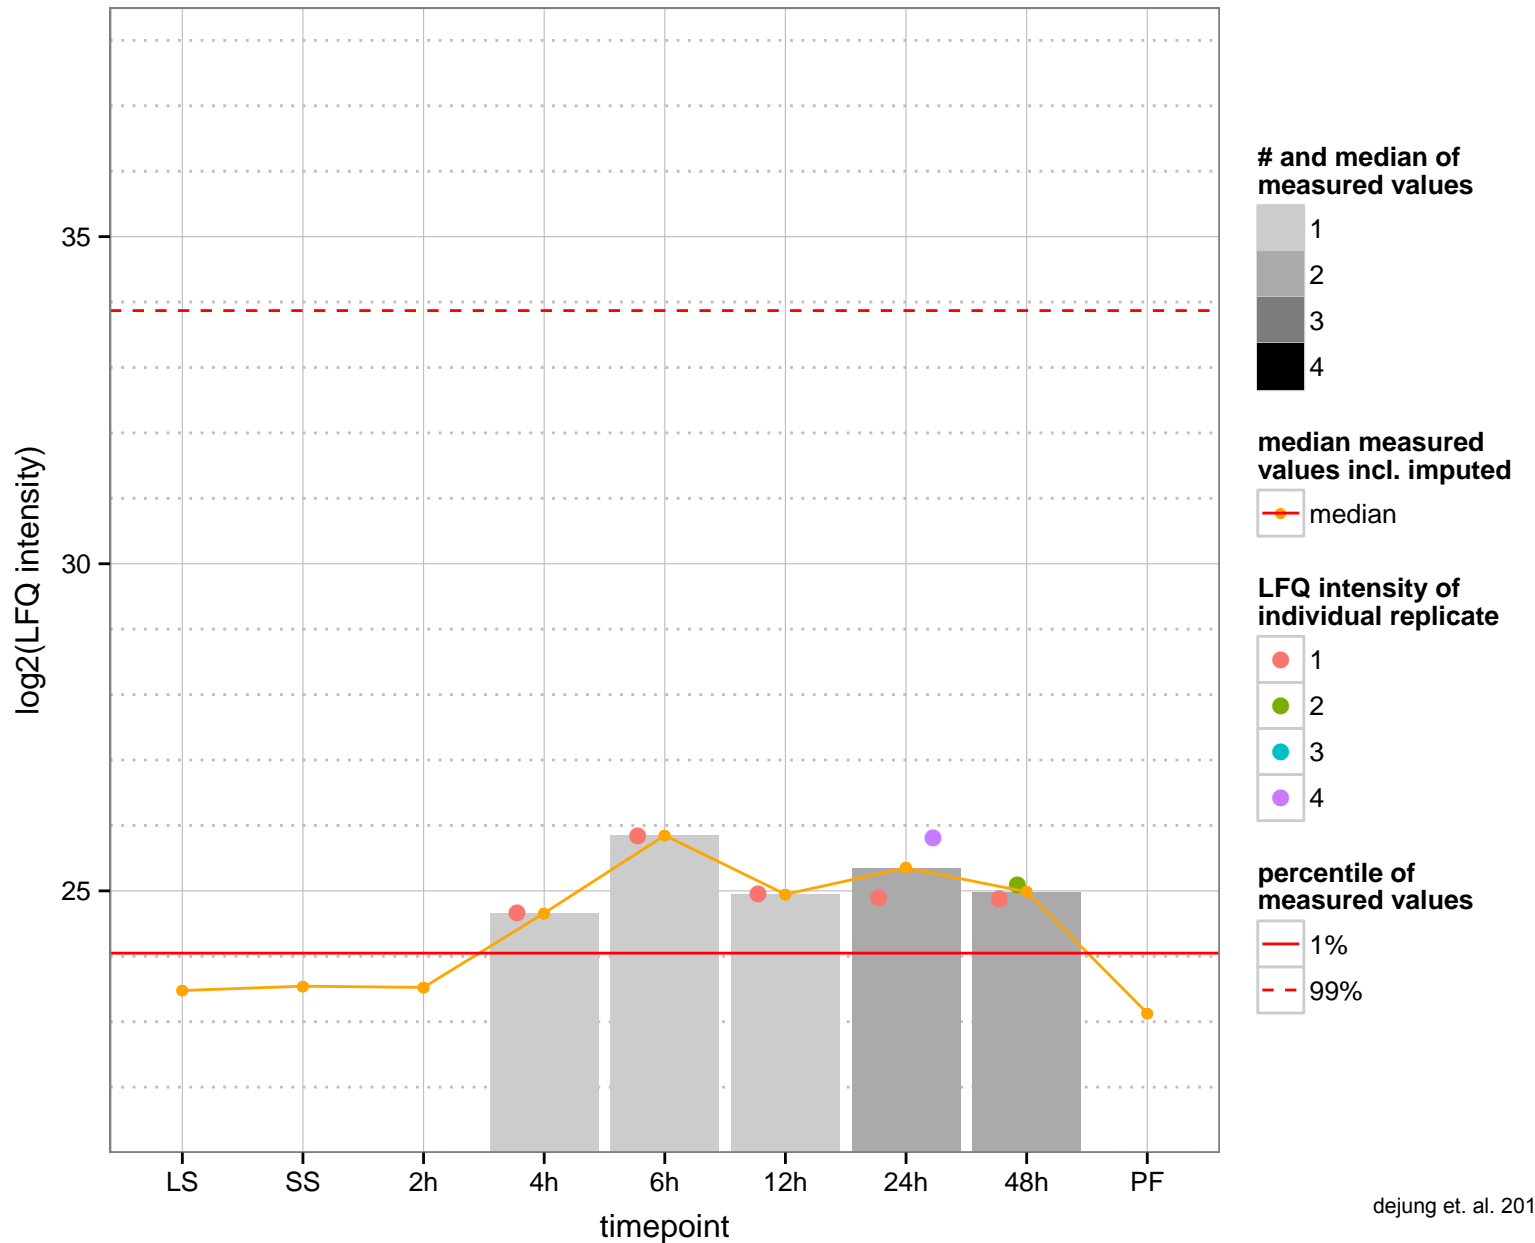

hypothetical protein, conserved  
 Tb927.7.5240  
 AGOF: null  
 AGOC: null  
 AGOP: null  
 PGOF: null  
 PGO: null  
 PGOP: null

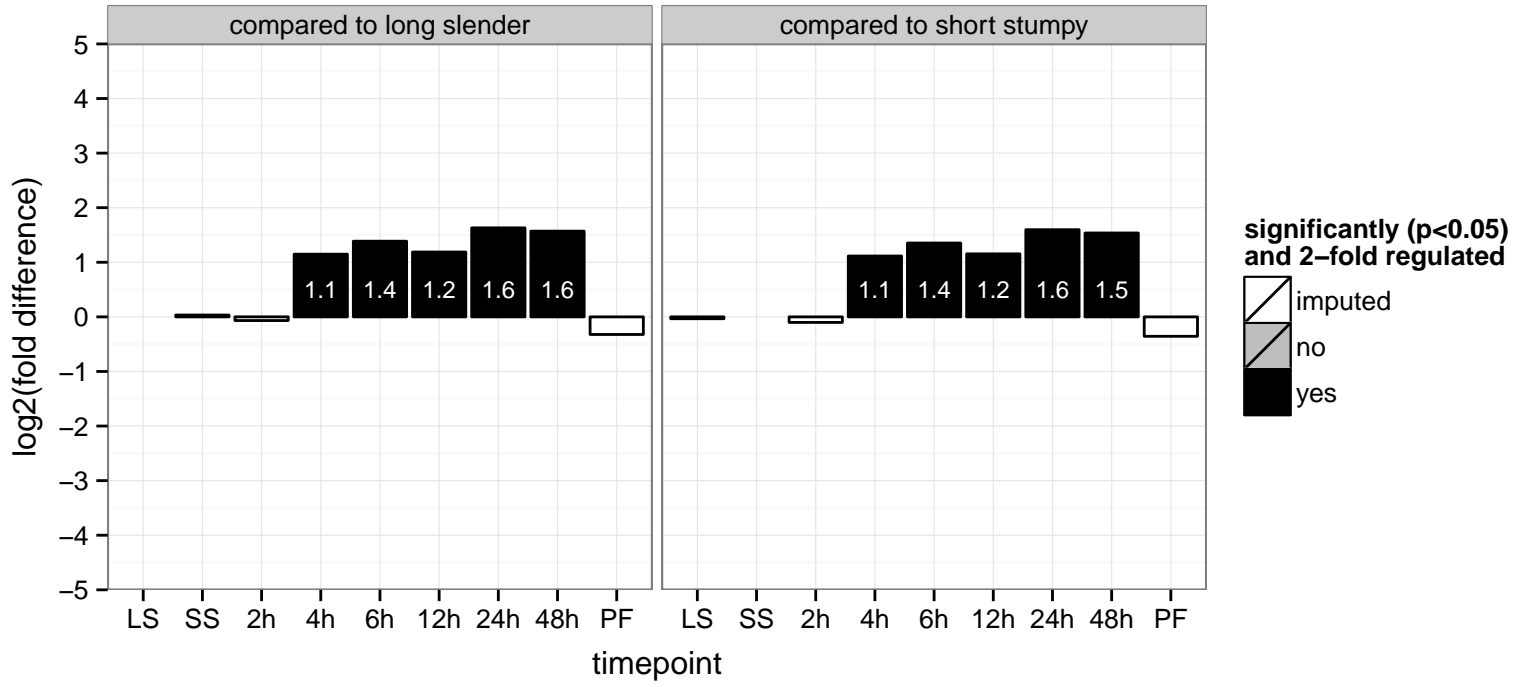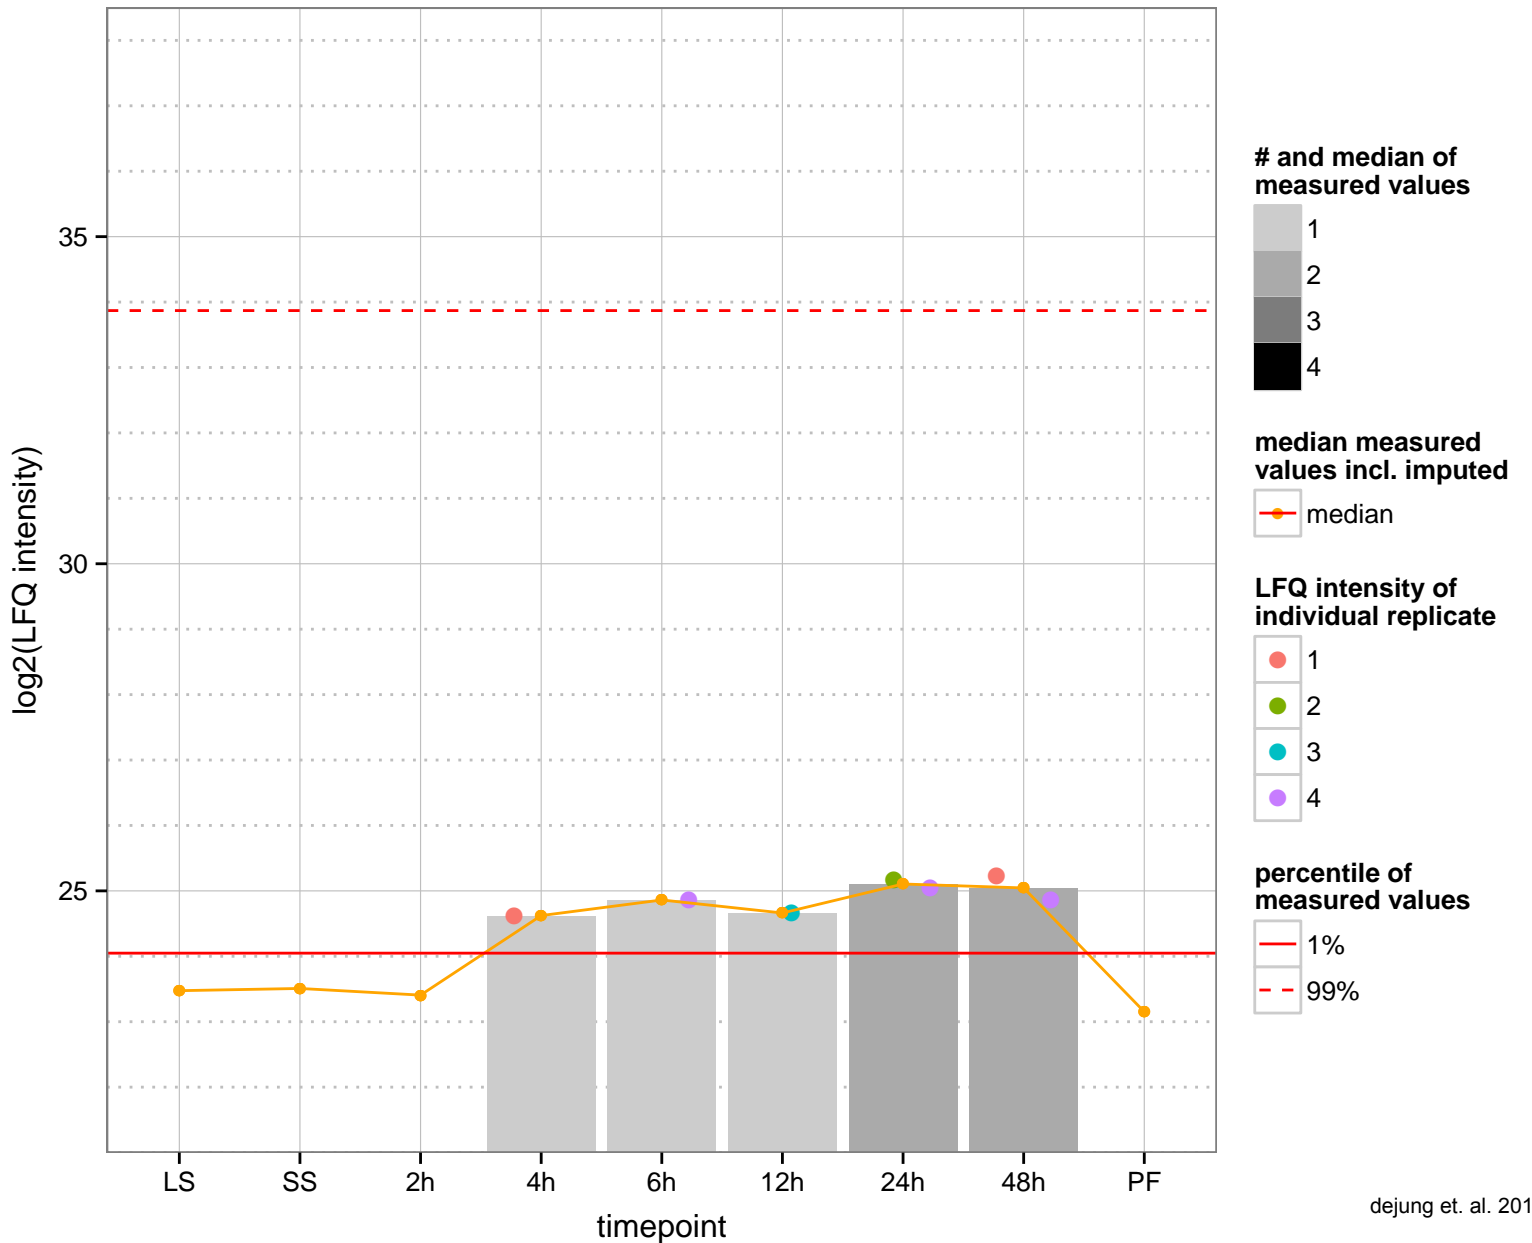

hypothetical protein, conserved  
 Tb927.8.1120  
 AGOF: null  
 AGOC: null  
 AGOP: null  
 PGO: null  
 PGOC: null  
 PGOP: null

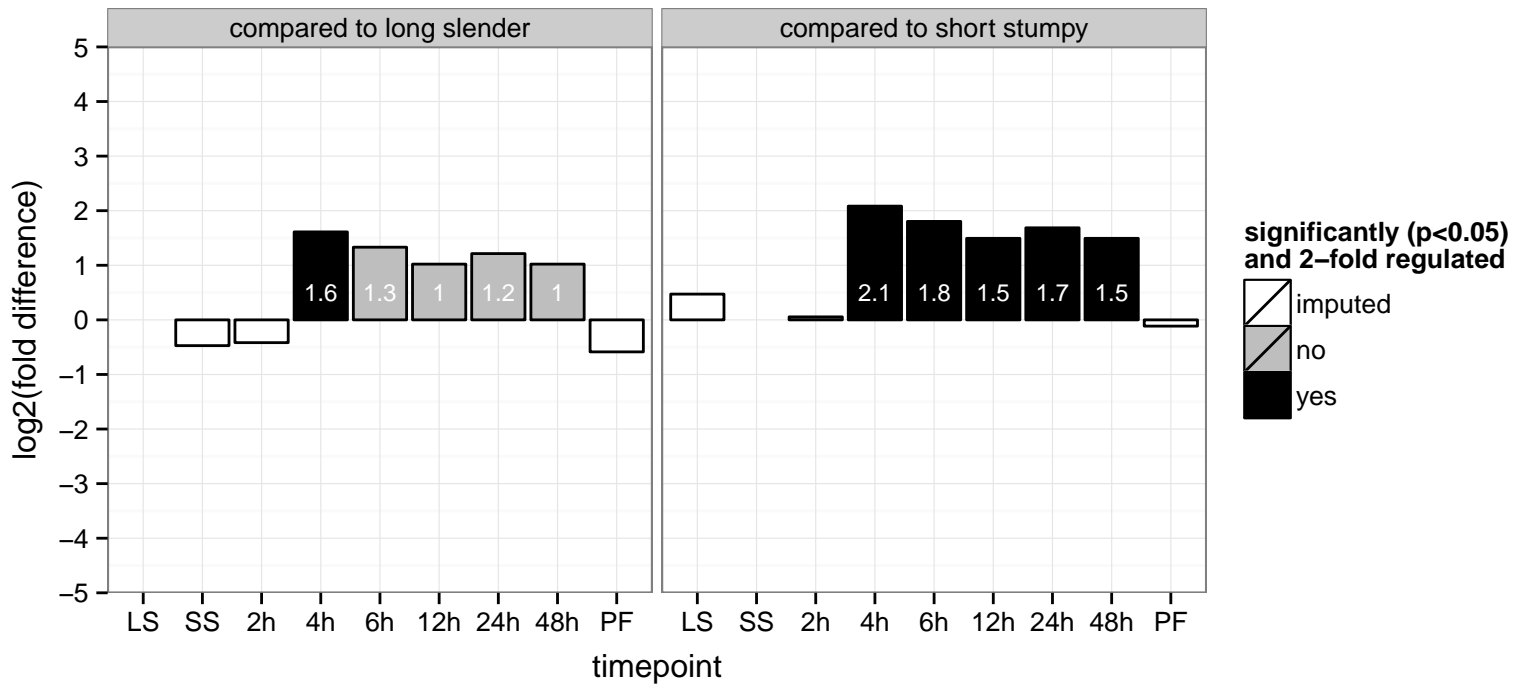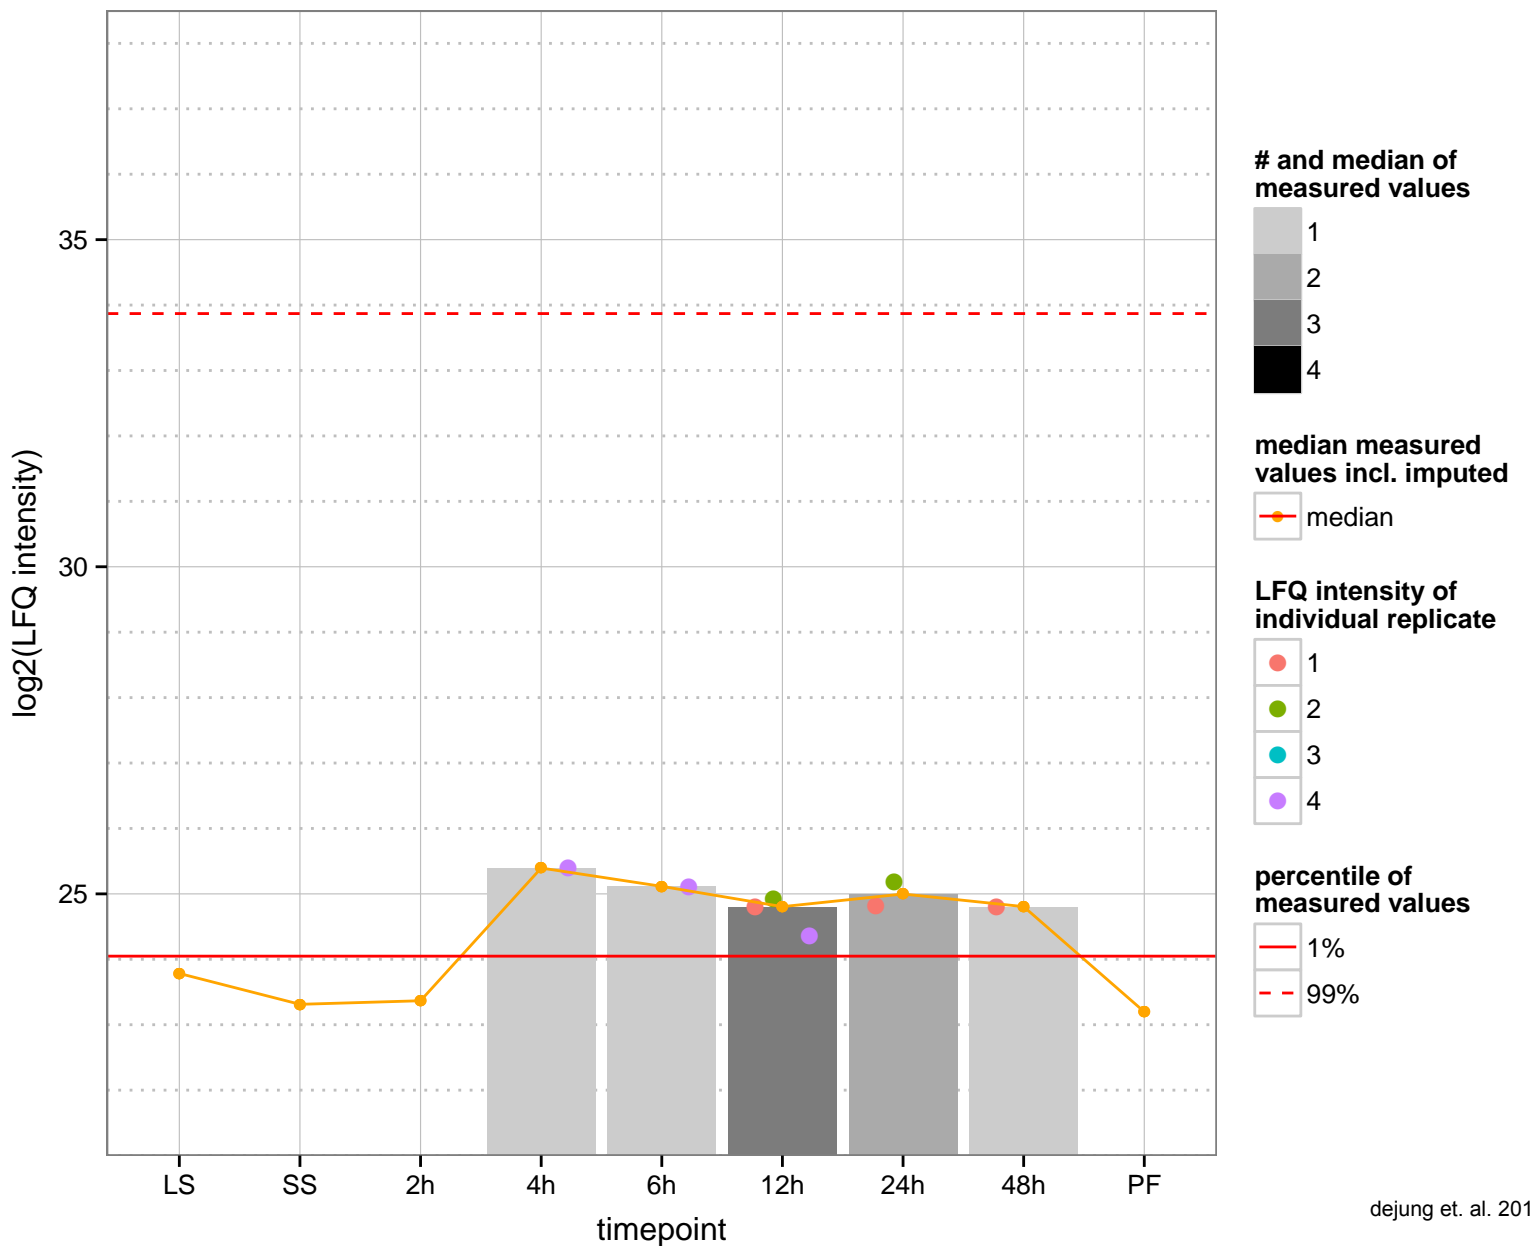

hypothetical protein, conserved  
 Tb927.9.12890  
 AGOF: null  
 AGOC: null  
 AGOP: null  
 PGOF: null  
 PGOC: null  
 PGOP: null

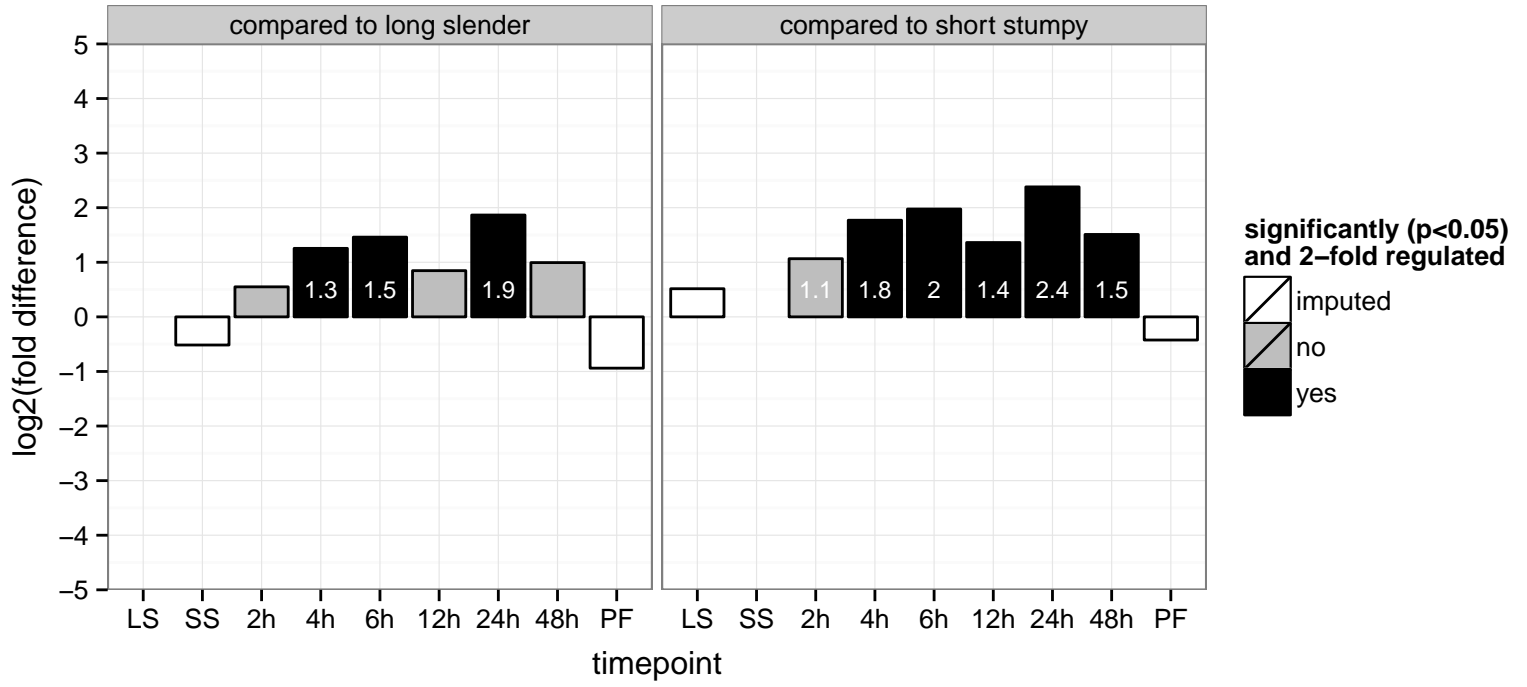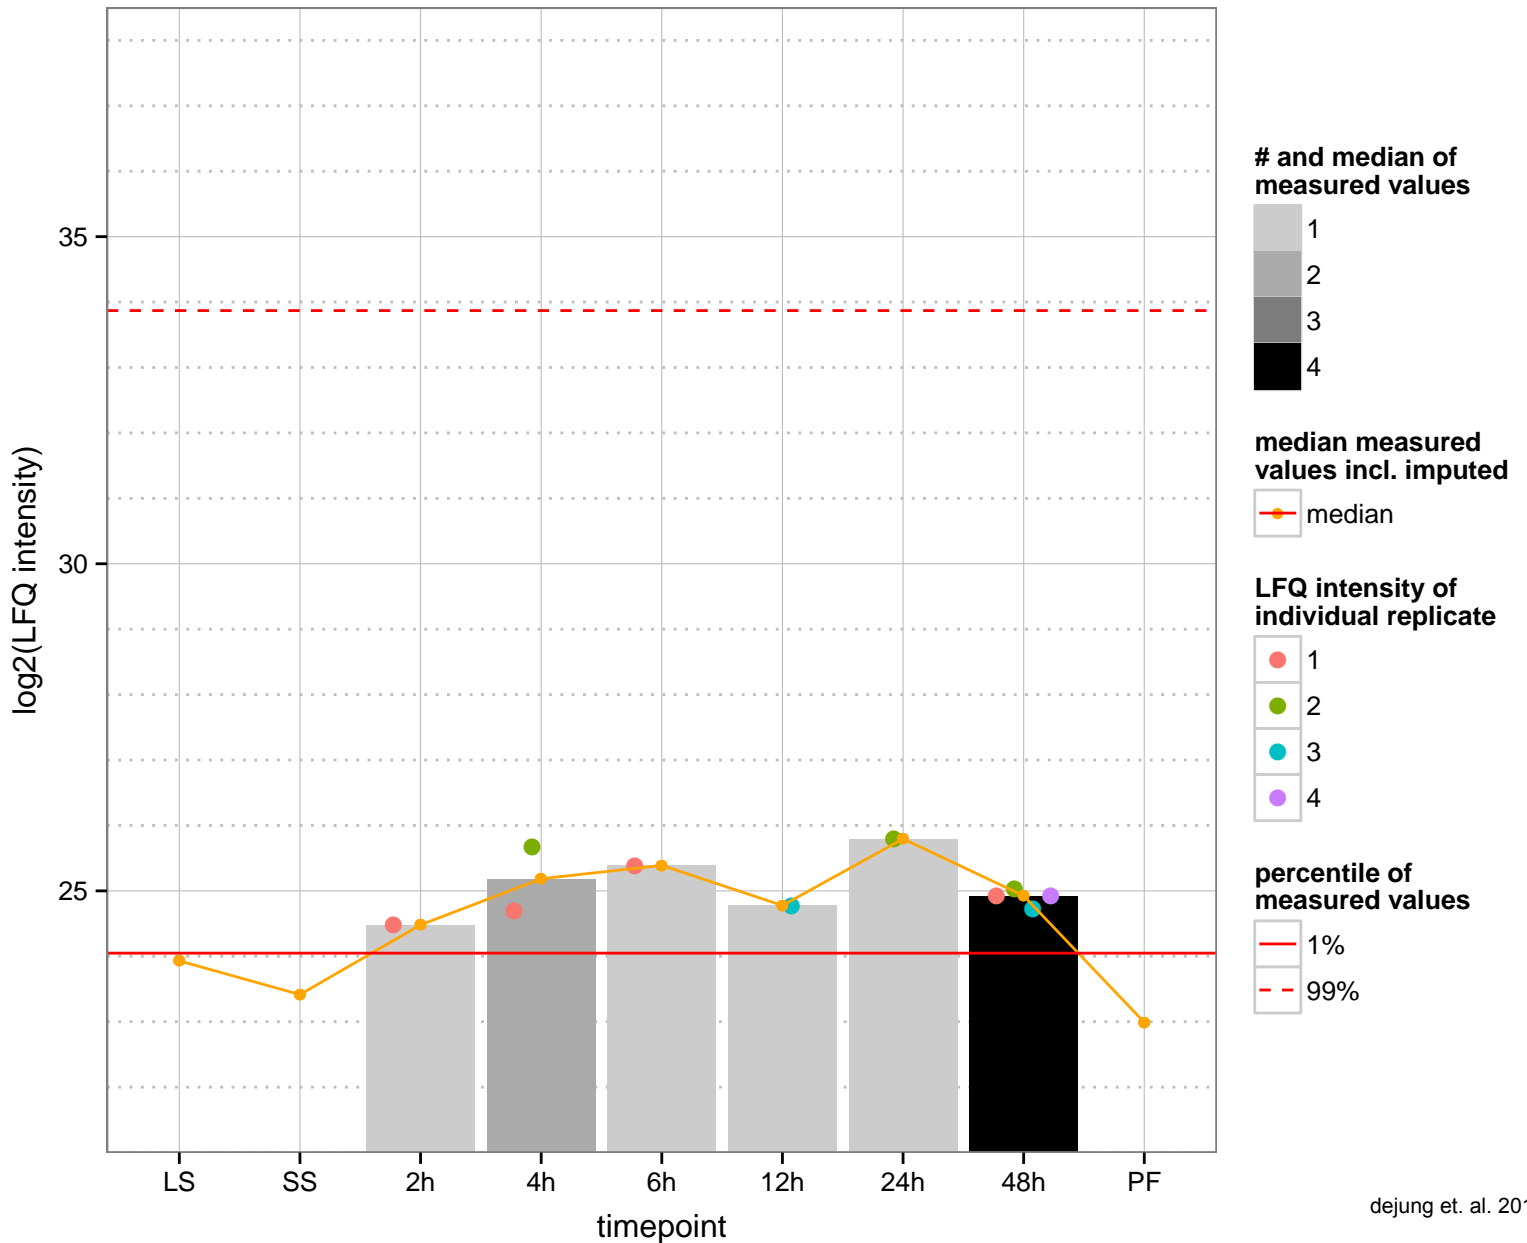

hypothetical protein, conserved  
 Tb927.9.2160  
 AGOF: null  
 AGOC: null  
 AGOP: null  
 PGO: null  
 PGOC: null  
 PGOP: null

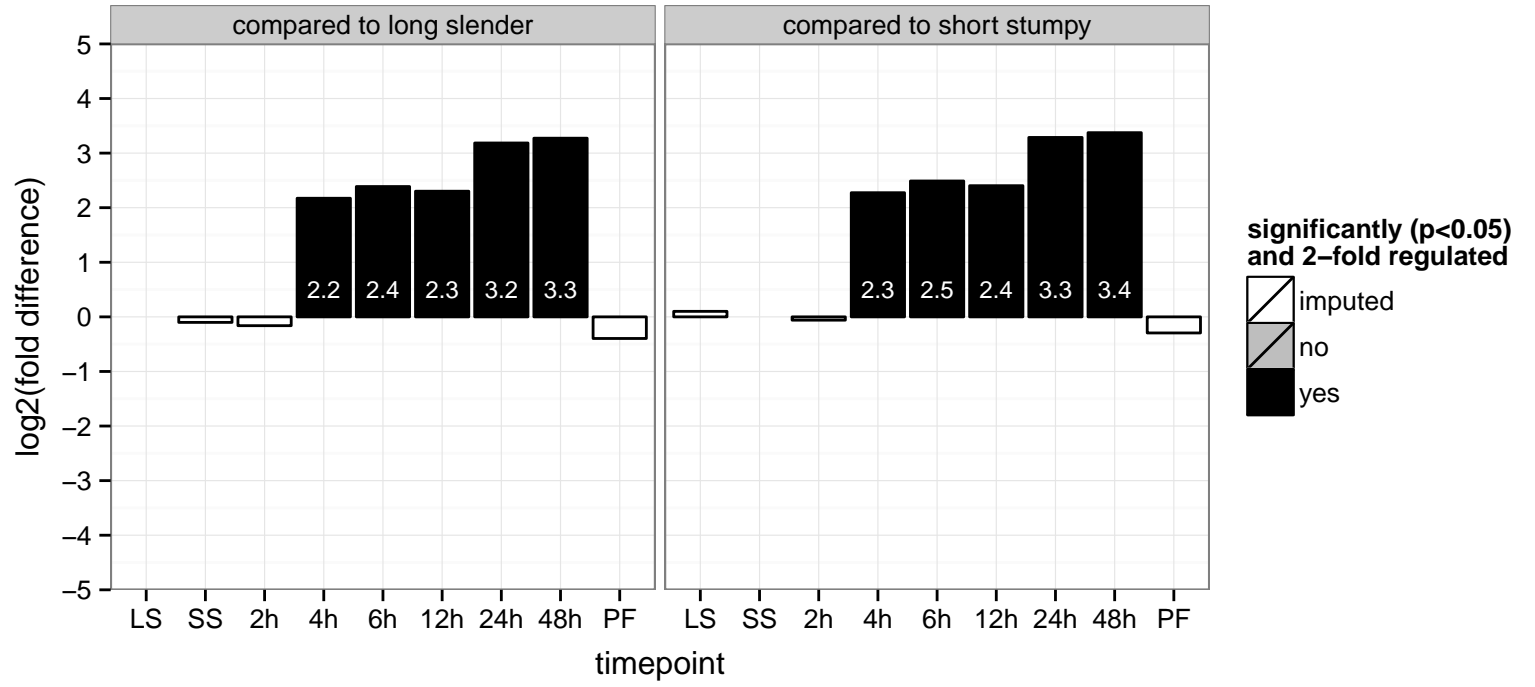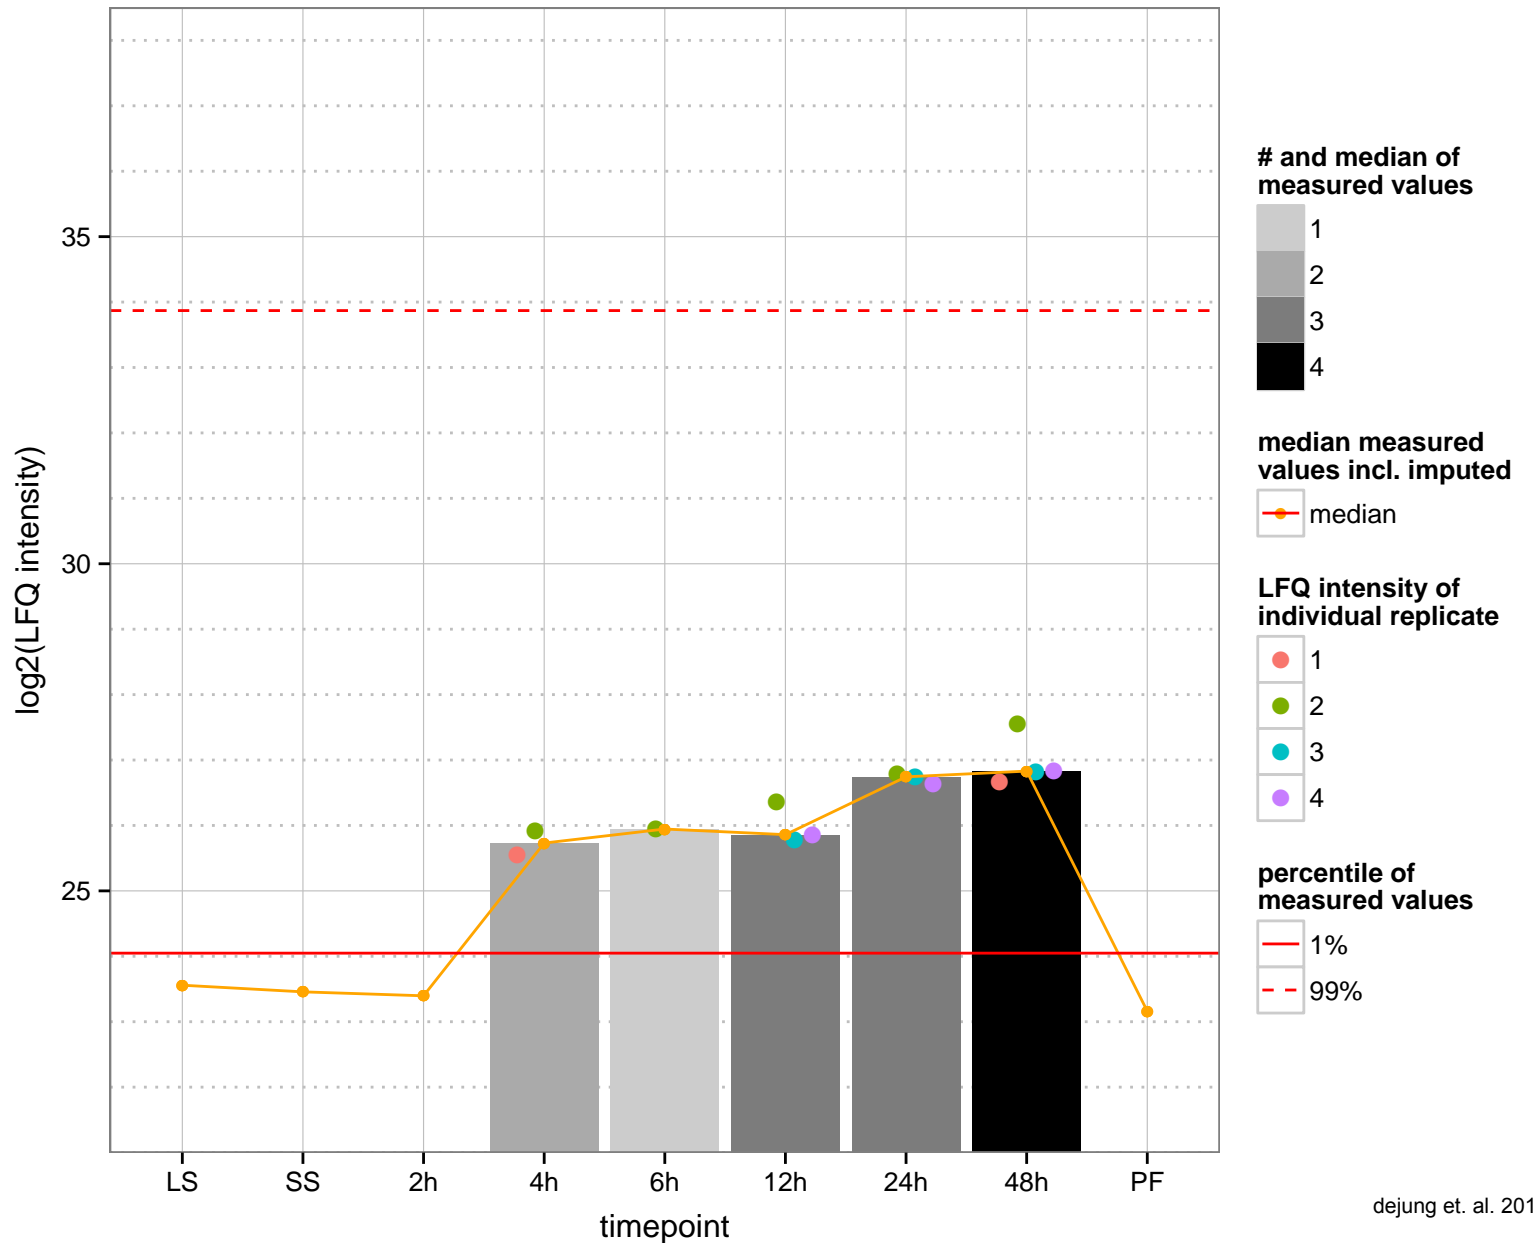

thioredoxin (trx)  
 Tb927.9.3370  
 AGOF: disulfide oxidoreductase activity, protein disulfide isomerase activity  
 AGOC: null  
 AGOP: cell redox homeostasis  
 PGO: electron carrier activity, protein disulfide oxidoreductase activity  
 PGOC: null  
 PGO: cell redox homeostasis, glycerol ether metabolic process

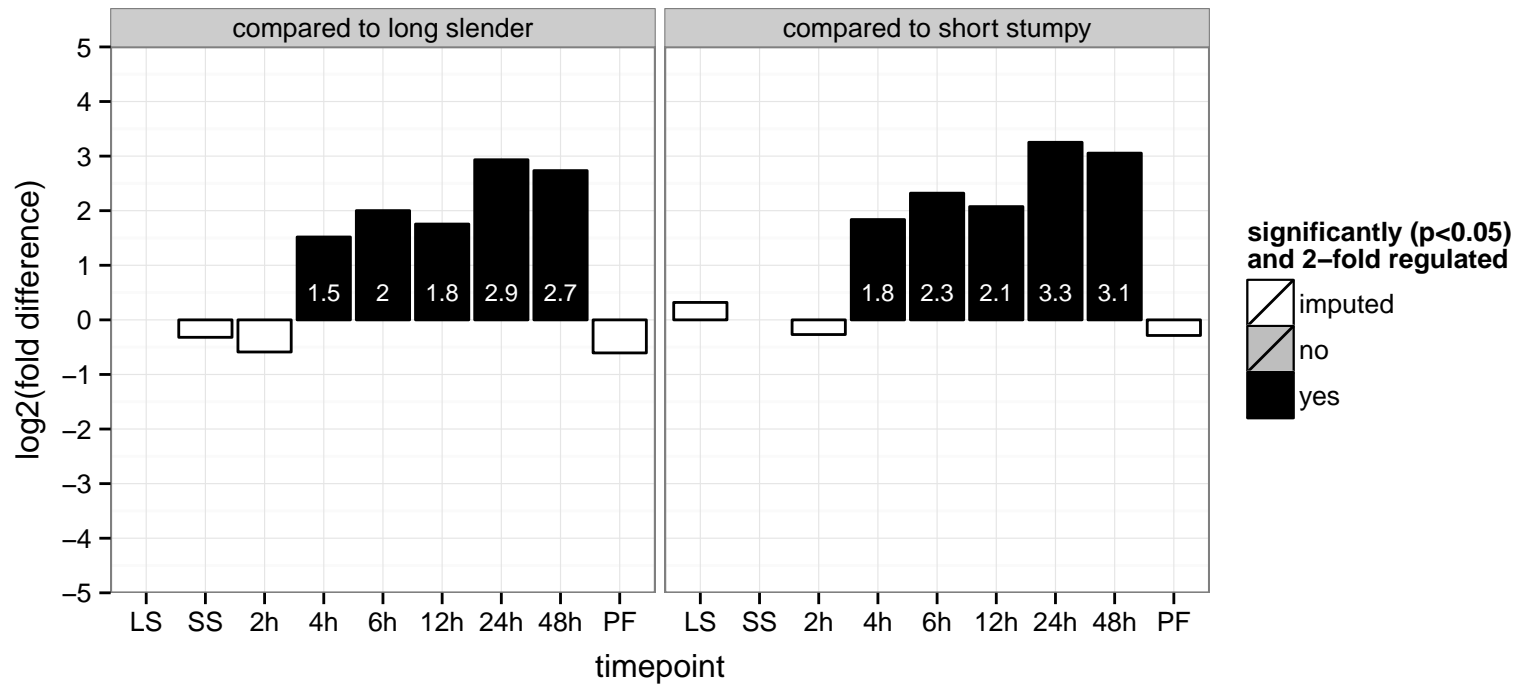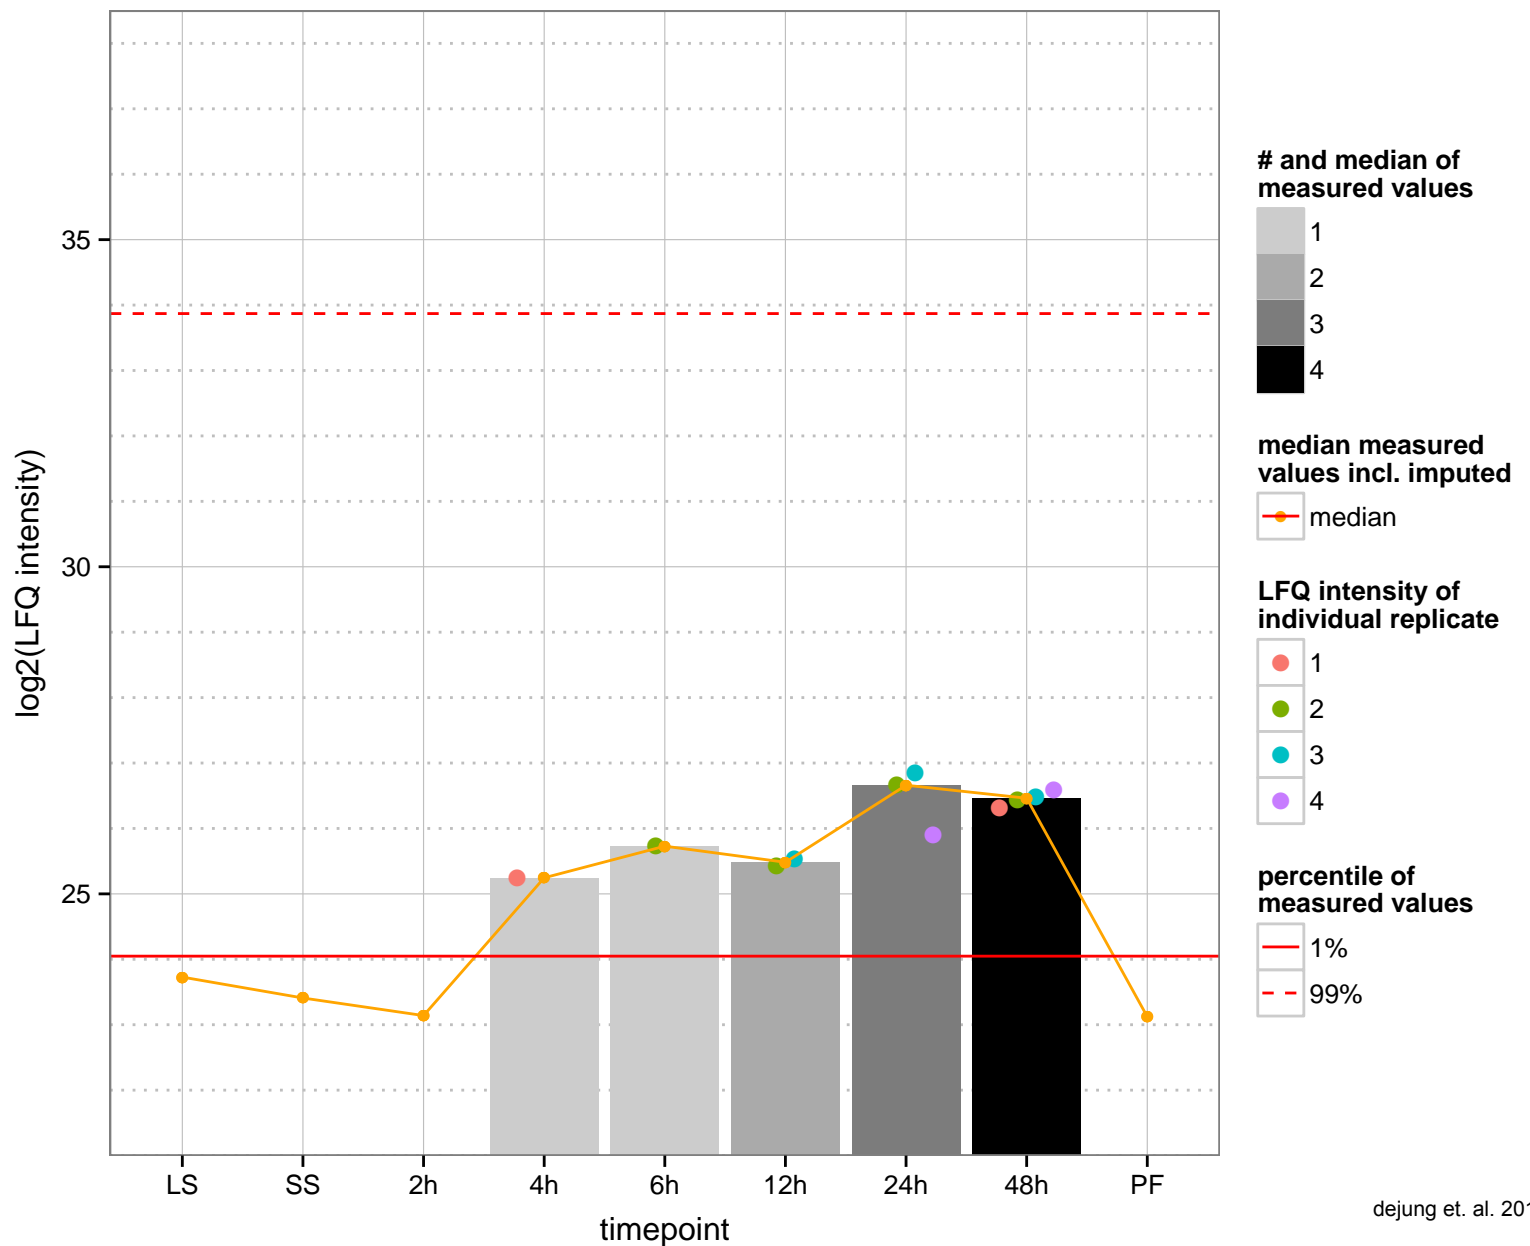

hypothetical protein, conserved  
 Tb927.9.4350  
 AGOF: null  
 AGOC: null  
 AGOP: null  
 PGO: protein binding  
 PGOC: null  
 PGOP: null

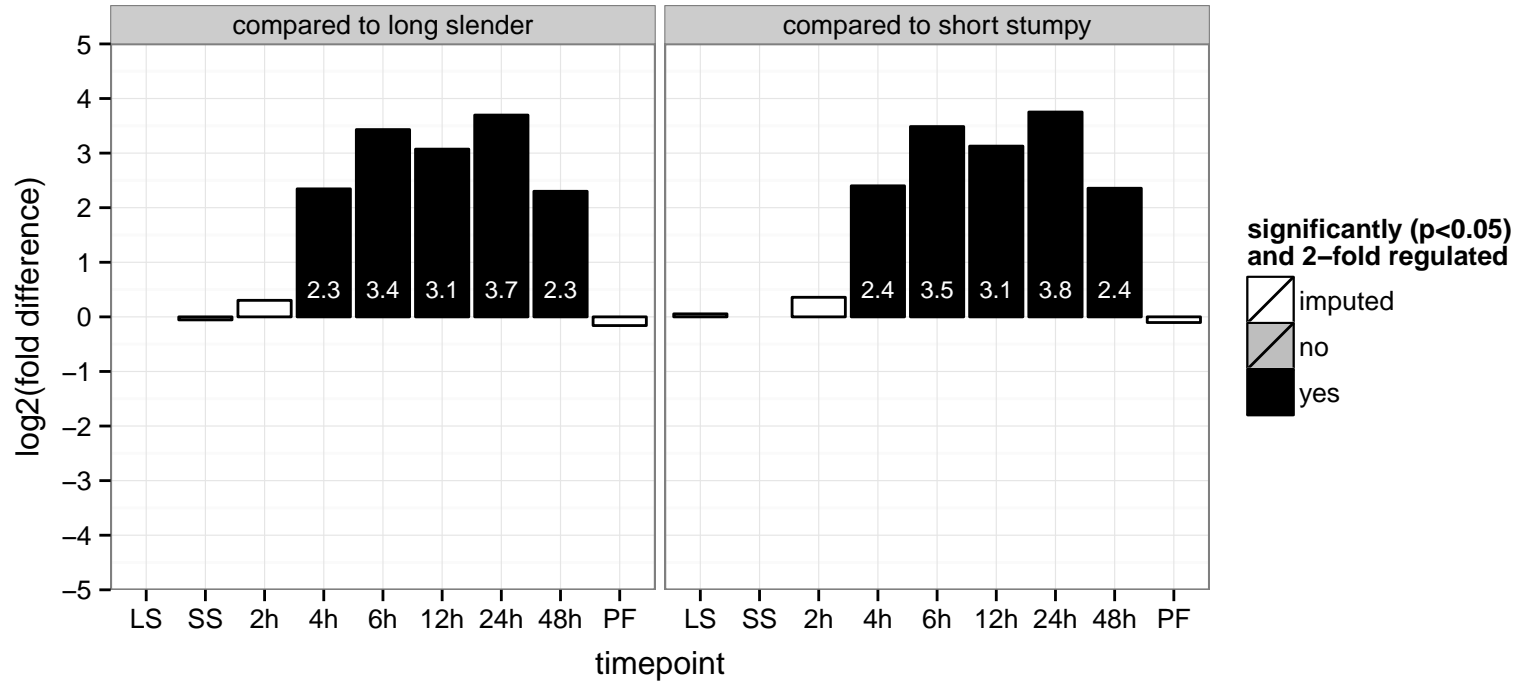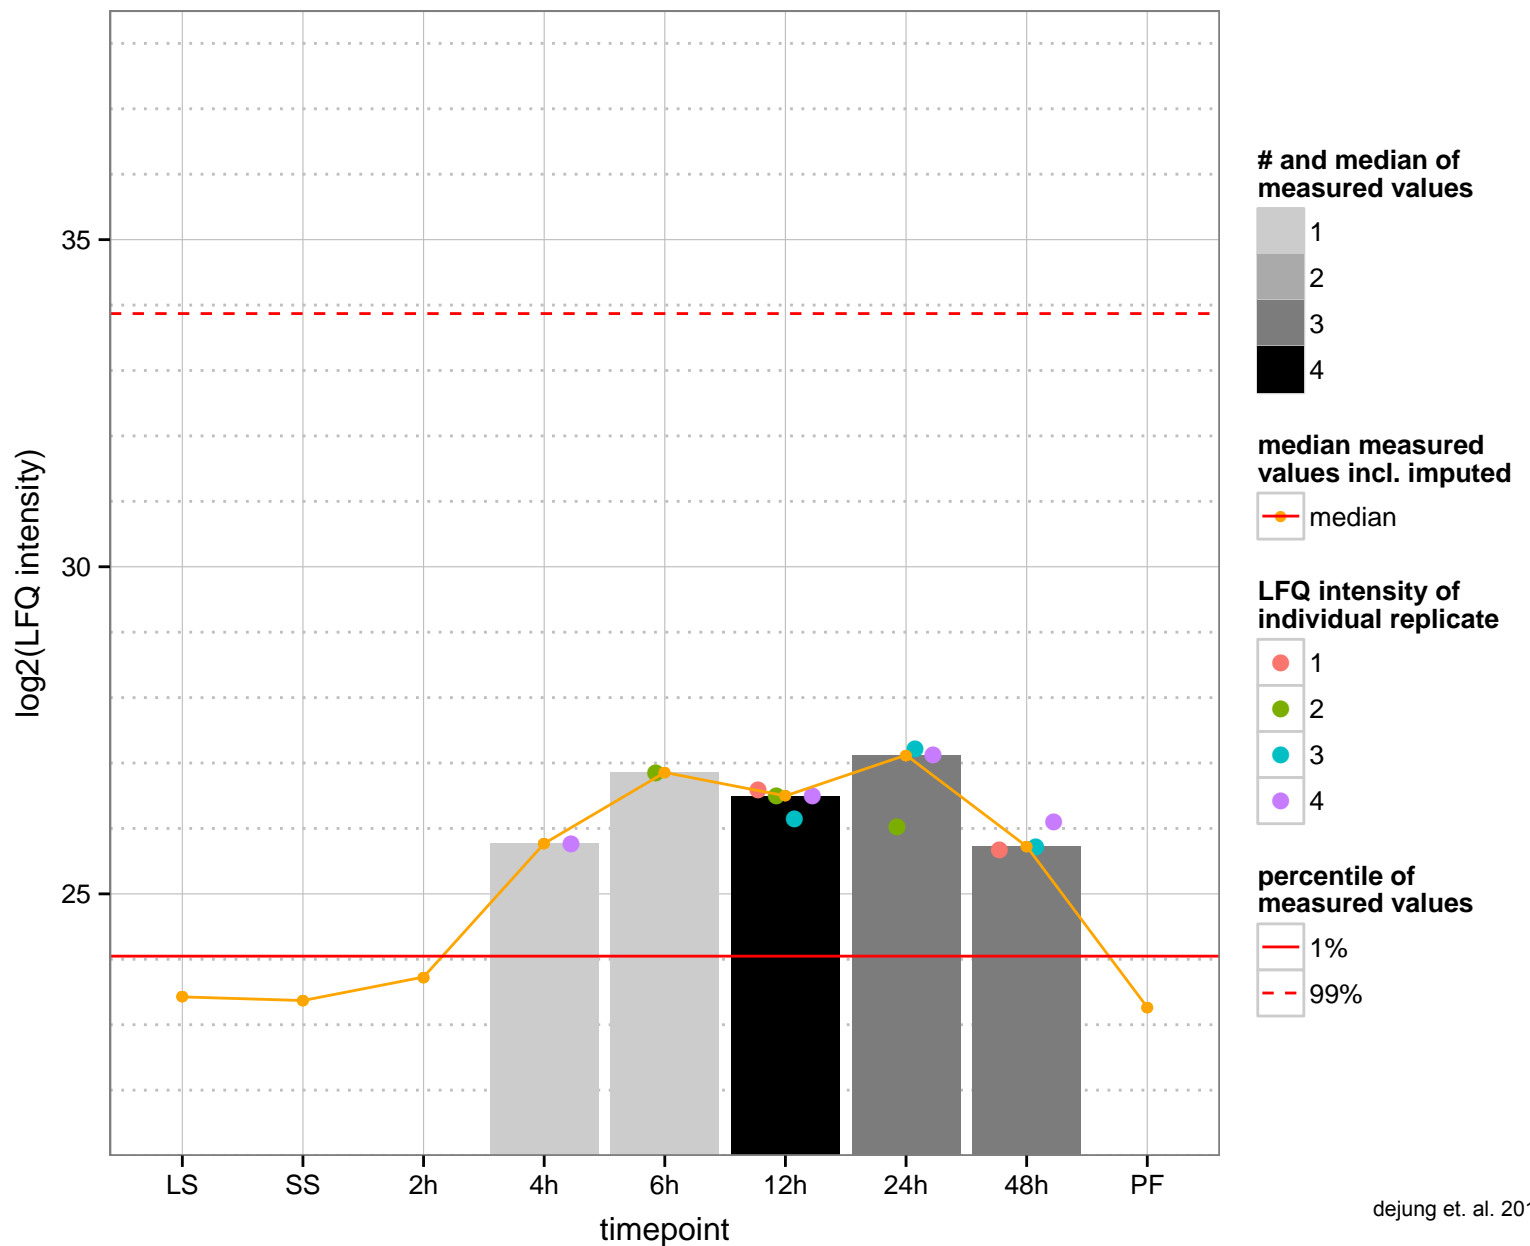

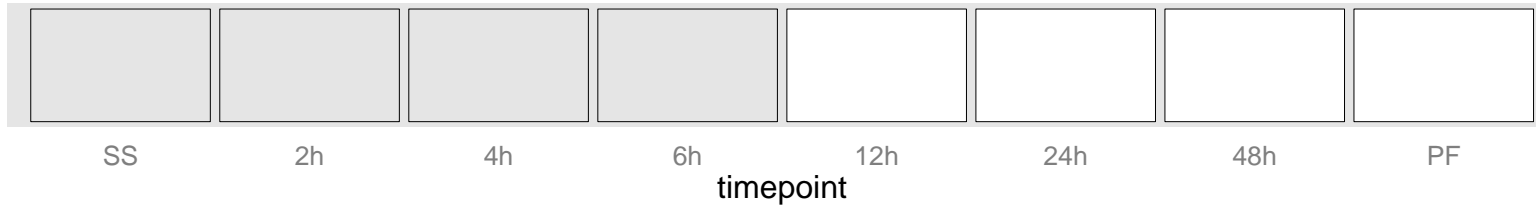

**regulated**  **not regulated**  **significant down**  **significant up**



MSP-A, putative, chrXI additional, unordered contigs, Gp63-1 surface protease homolog  
 Tb927.11.7640;Tb11.0360;Tb927.11.7620  
 AGOF: metalloendopeptidase activity, zinc ion binding  
 AGOC: membrane  
 AGOP: cell adhesion, proteolysis  
 PGO: metalloendopeptidase activity, zinc ion binding  
 PGO: membrane  
 PGO: cell adhesion, proteolysis

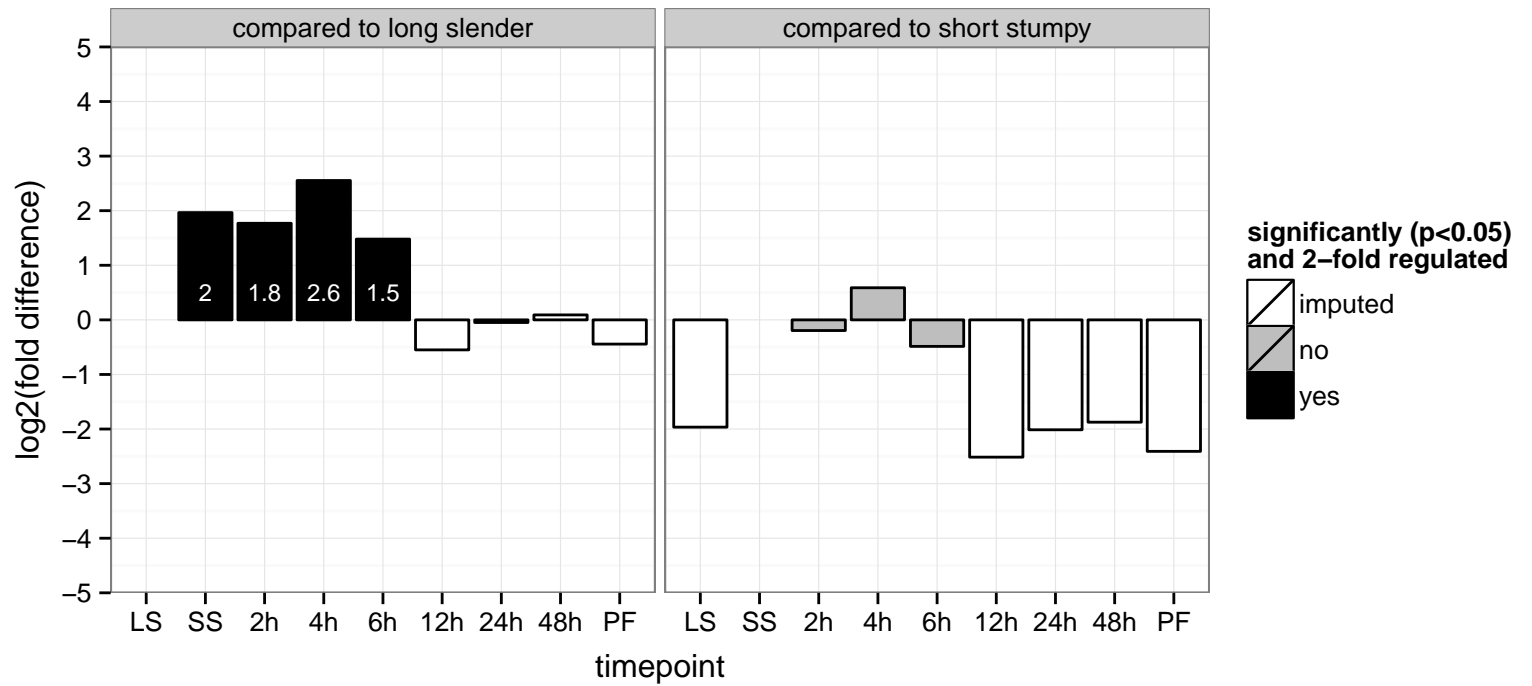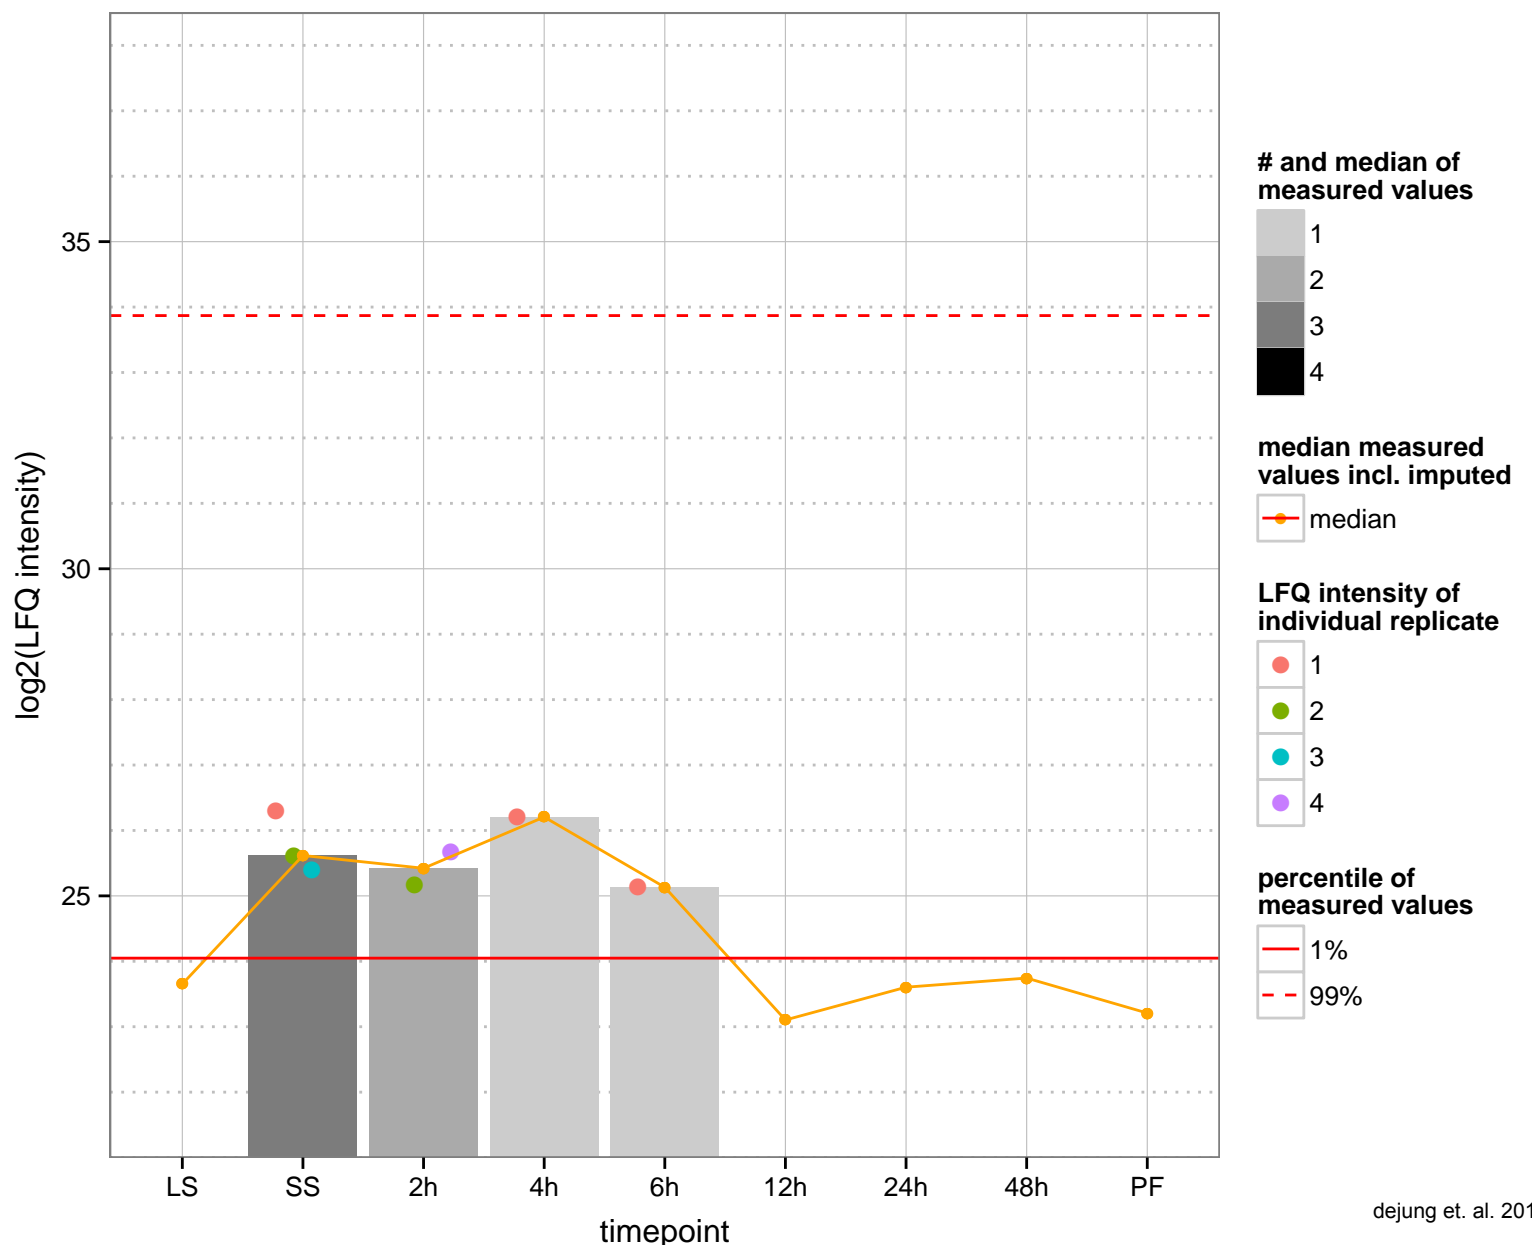

variant surface glycoprotein (VSG, pseudogene), putative, chrXI additional, unordered contigs, variant surface protein (VSG)  
 Tb11.1690;Tb11.v5.0142  
 AGOF: null  
 AGOC: null  
 AGOP: evasion or tolerance of host immune response, null  
 PGO: null  
 PGOC: null  
 PGOP: null

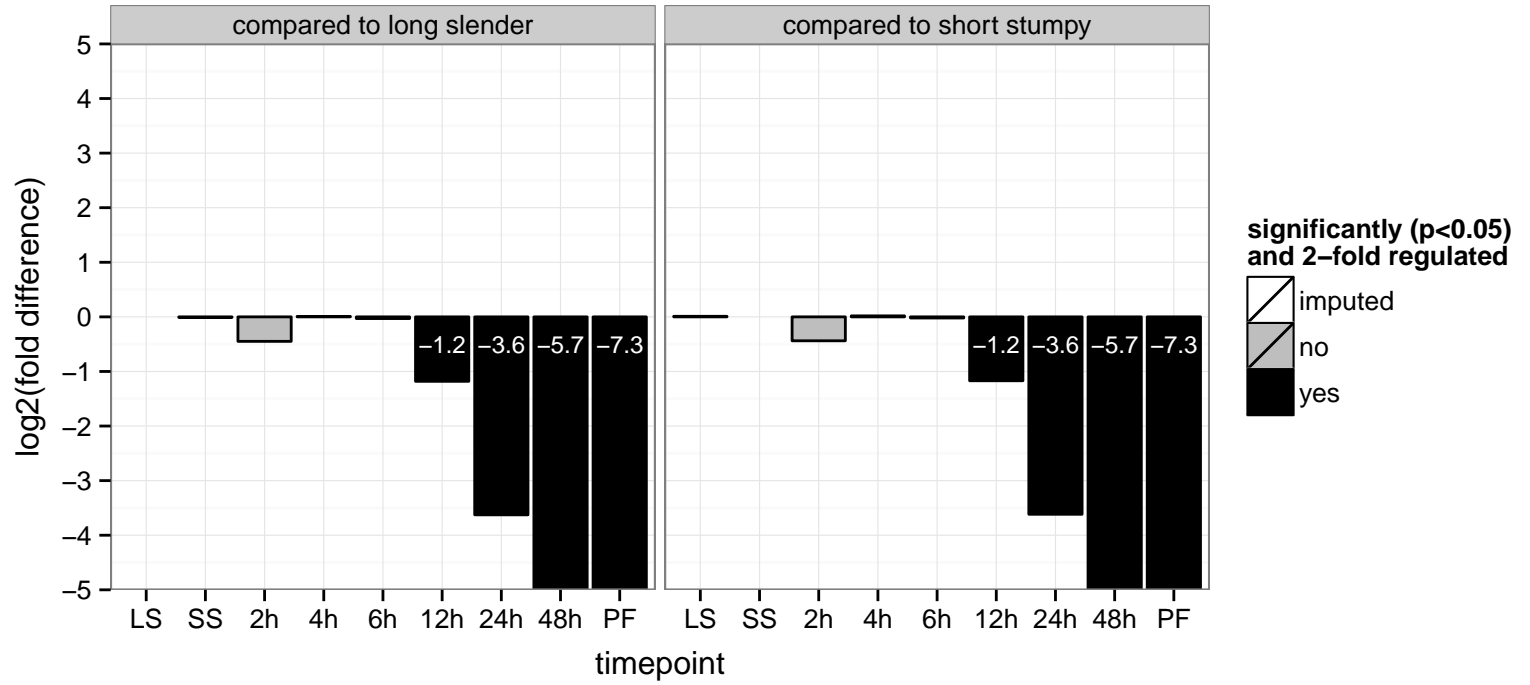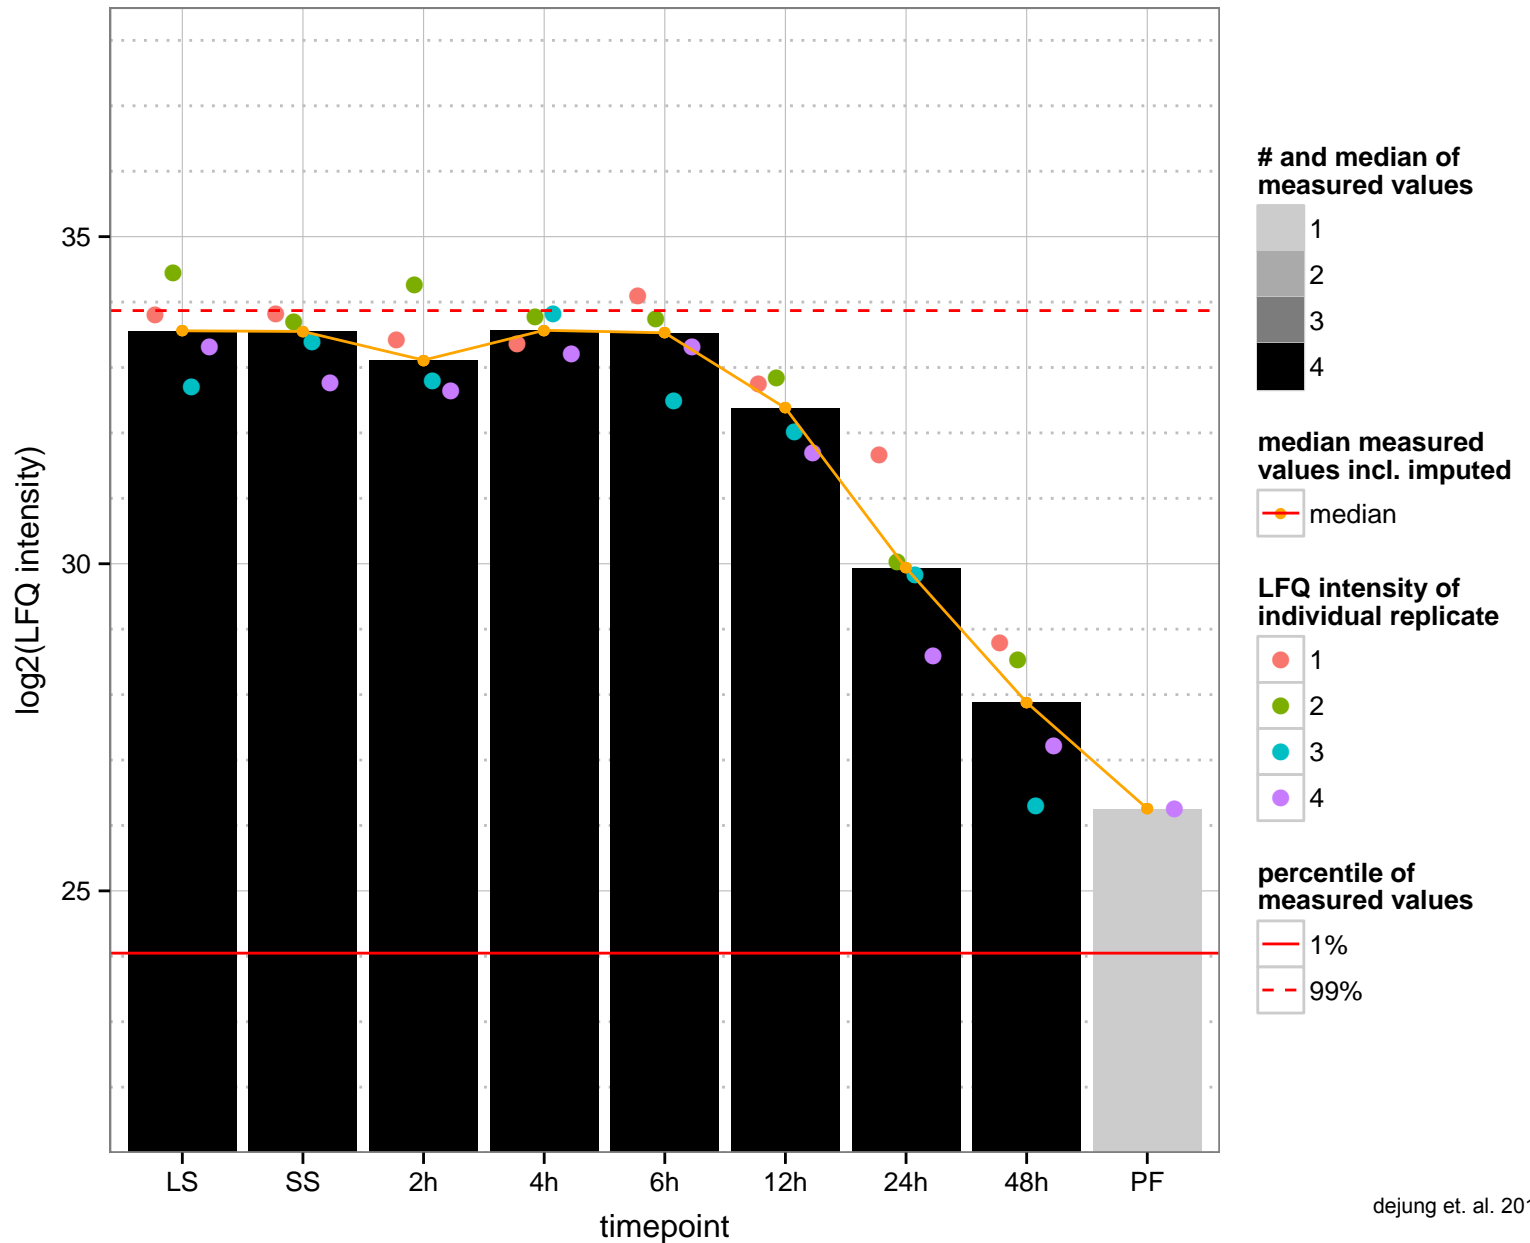

75 kDa invariant surface glycoprotein, putative, 75 kDa invariant surface glycoprotein (ISG75)  
 Tb927.5.360;Tb11.v5.0231  
 AGOF: null  
 AGOC: null, plasma membrane  
 AGOP: null  
 PGO: null  
 PGOC: null  
 PGOP: null

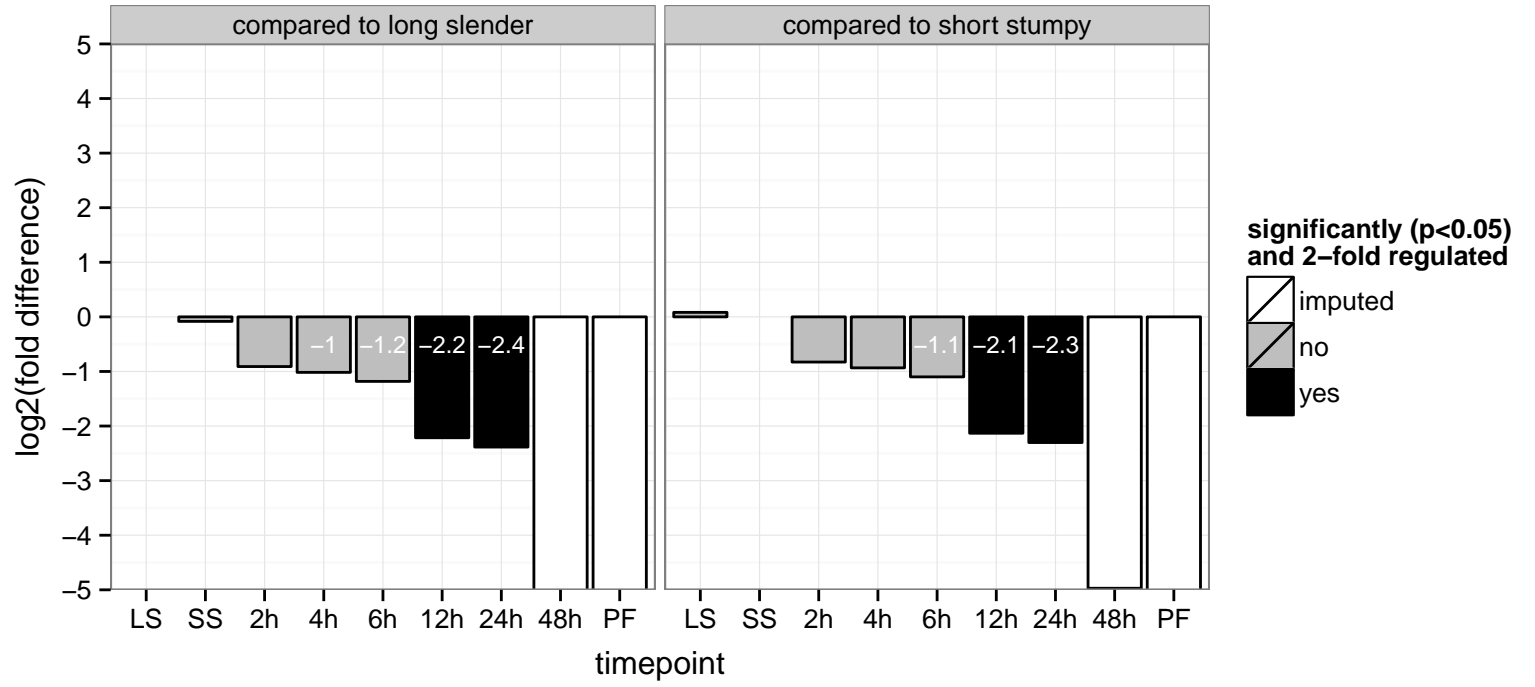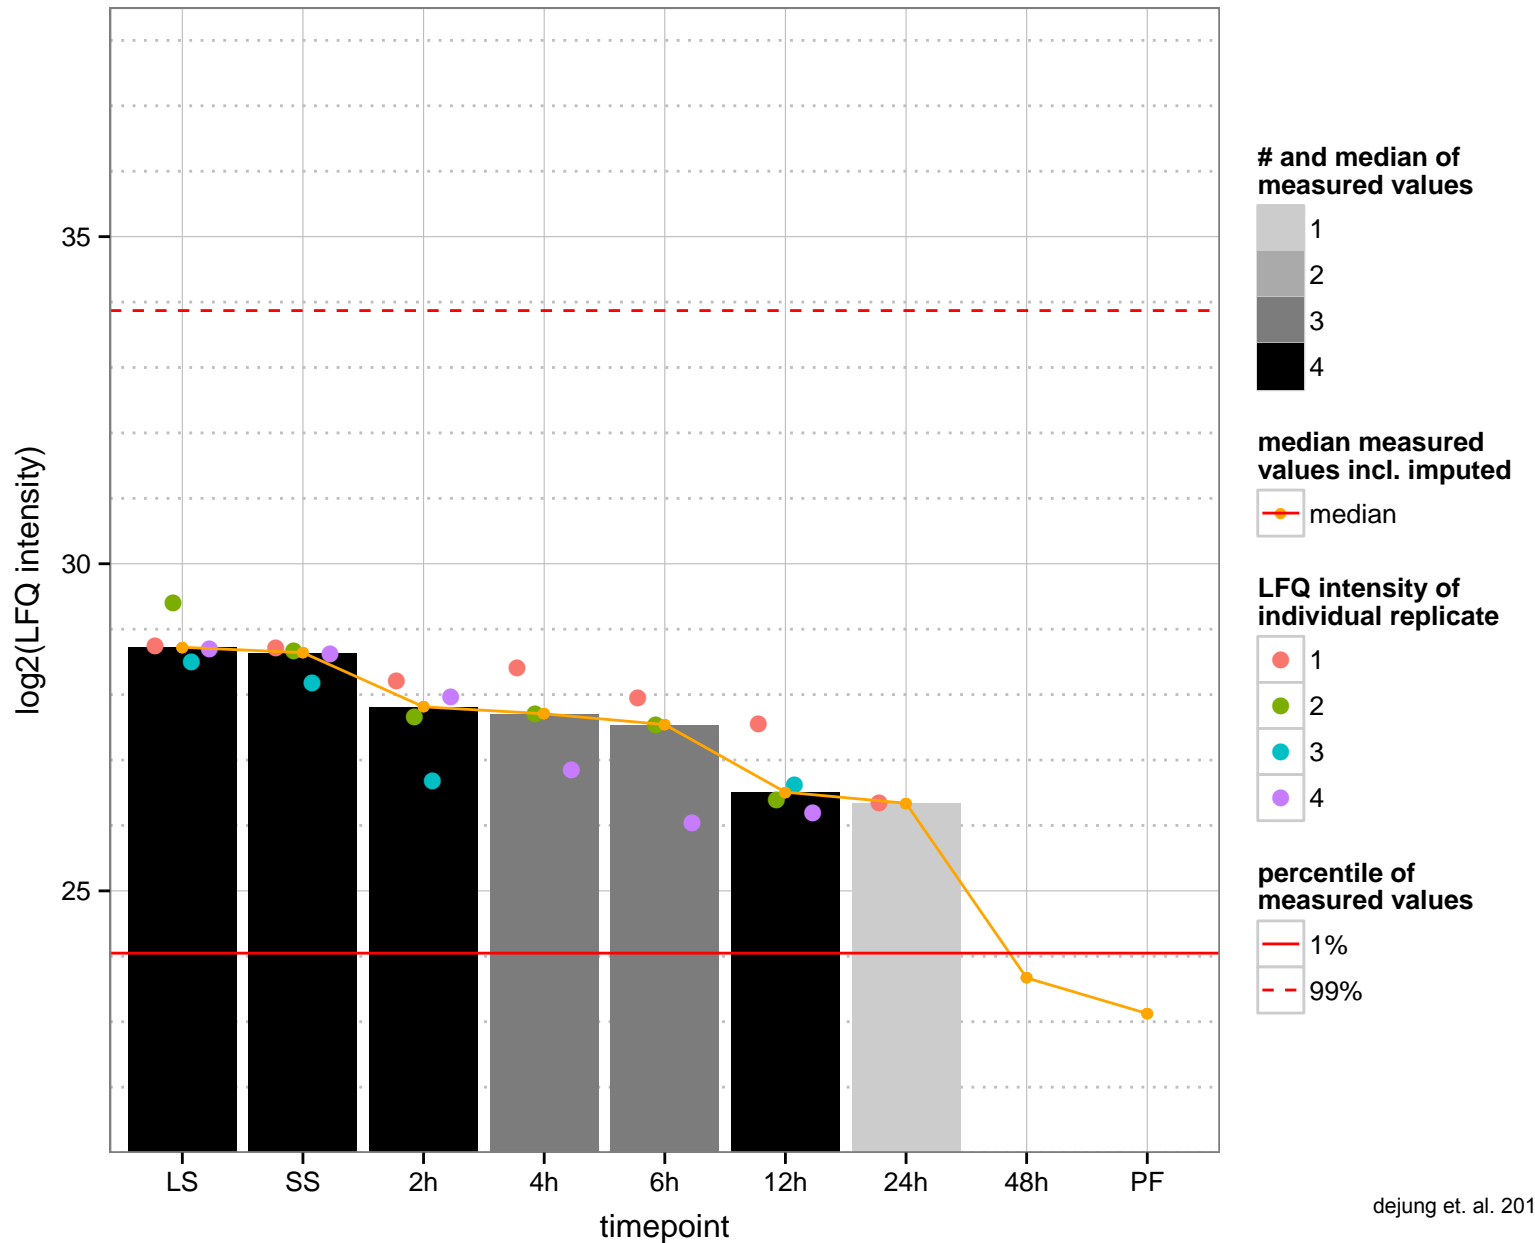

variant surface glycoprotein (VSG), putative  
 Tb927.1.05  
 AGOF: null  
 AGOC: integral to membrane  
 AGOP: antigenic variation  
 PGO: null  
 PGOC: null  
 PGOP: null

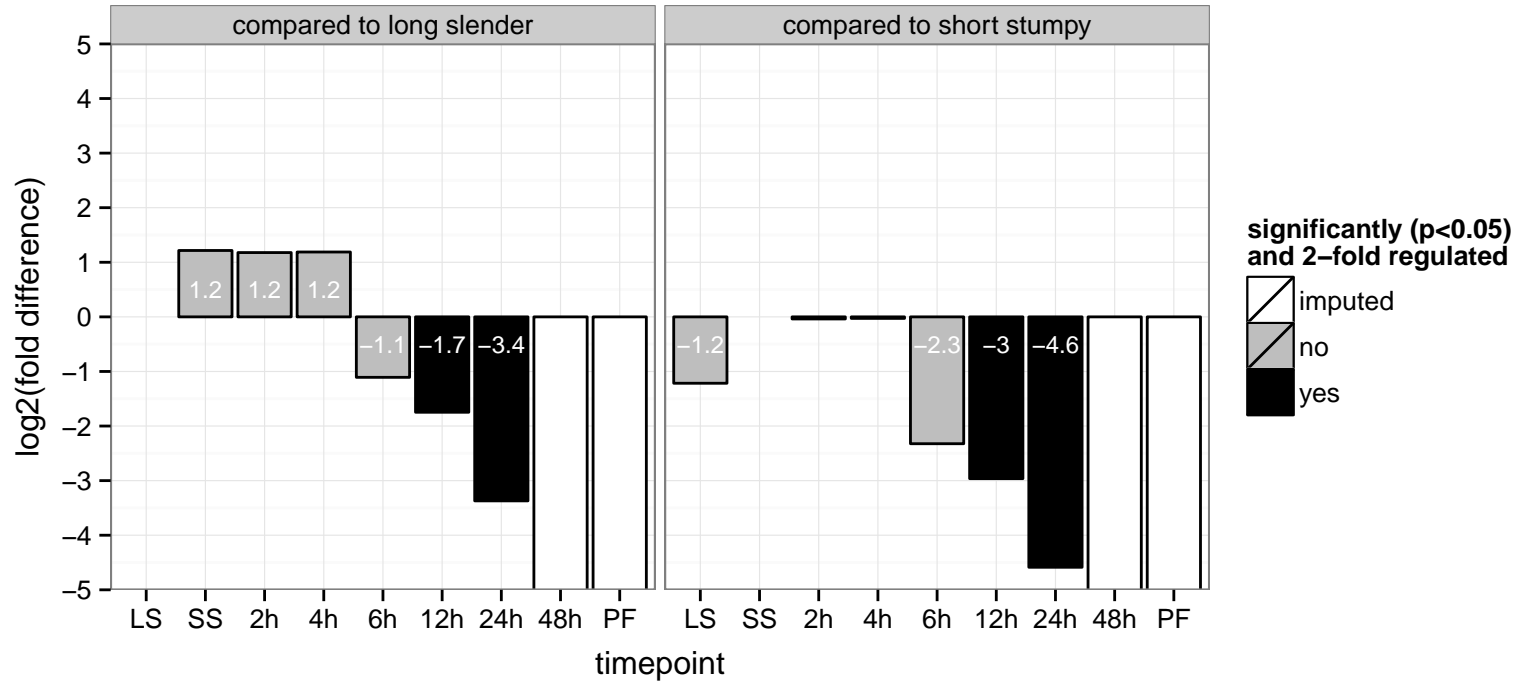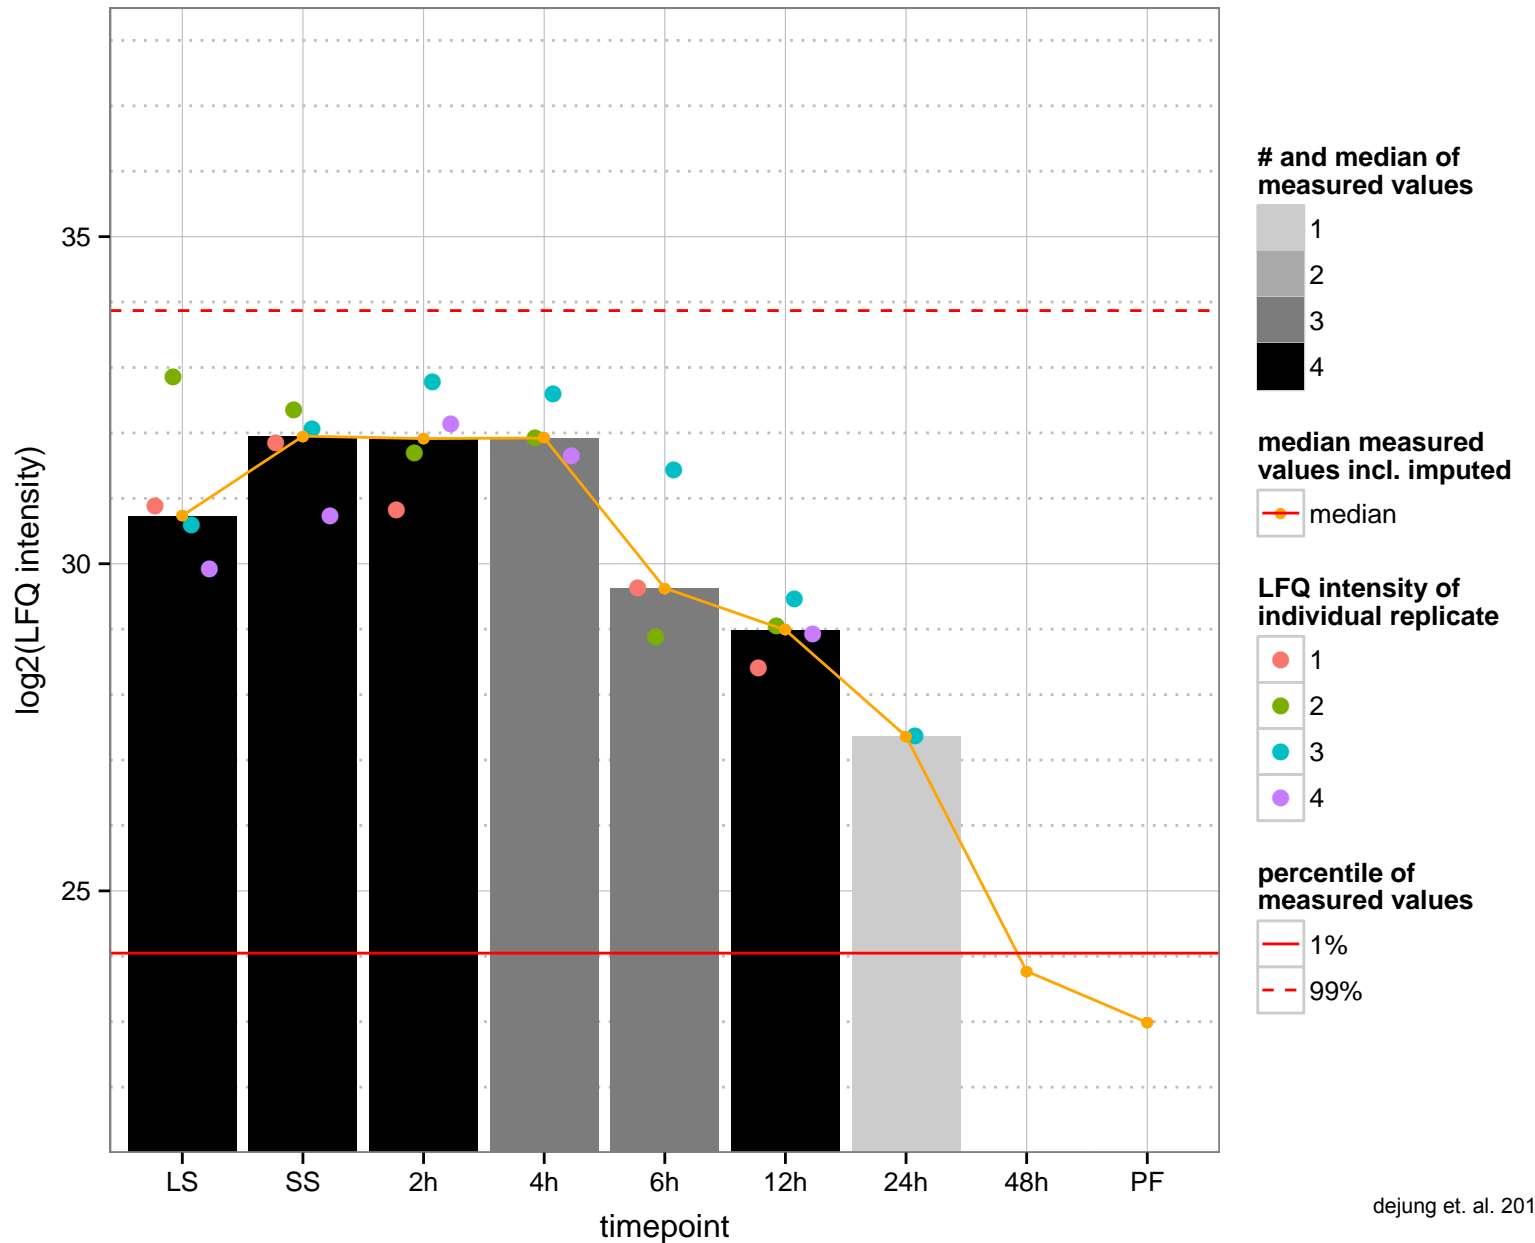

actin related protein 2, putative  
 Tb927.10.15800  
 AGOF: structural constituent of cytoskeleton  
 AGOC: actin cytoskeleton  
 AGOP: cytoskeleton organization  
 PGO: null  
 PGOC: null  
 PGOP: null

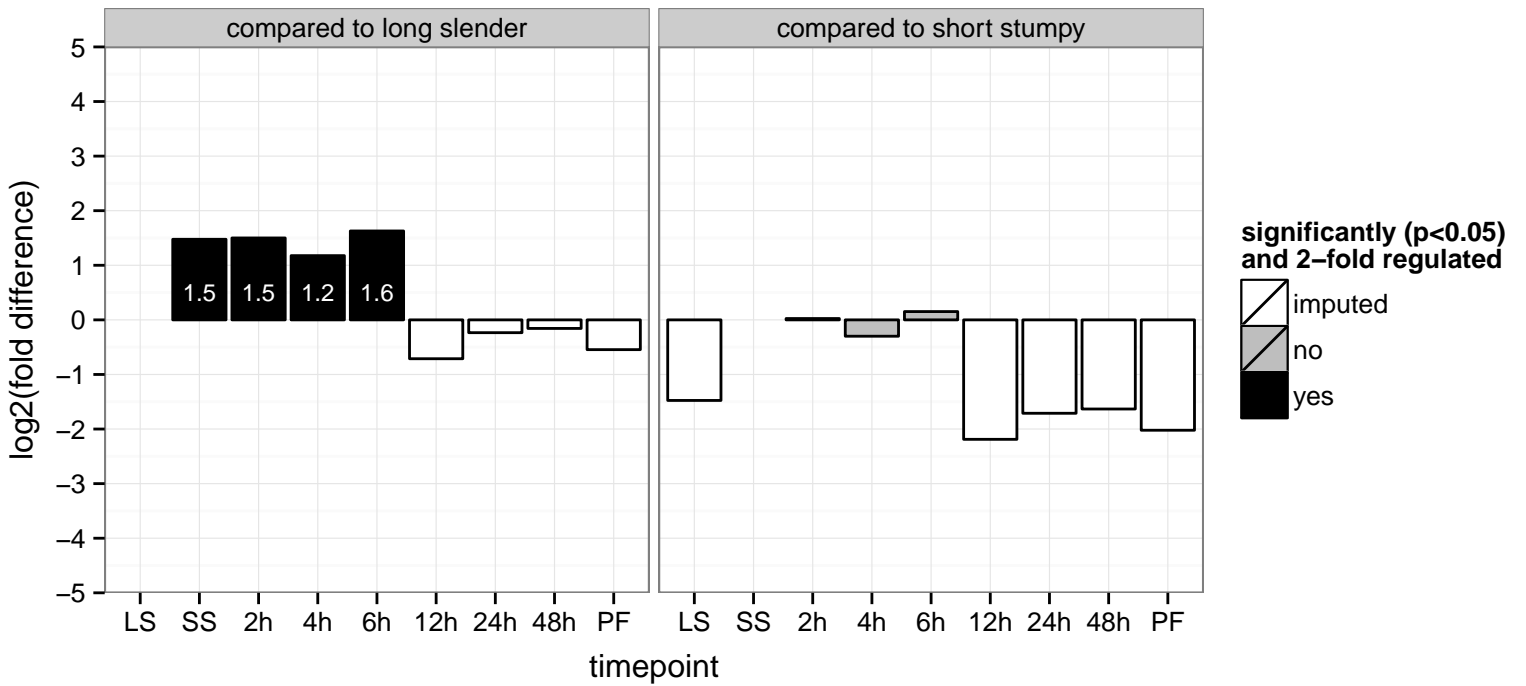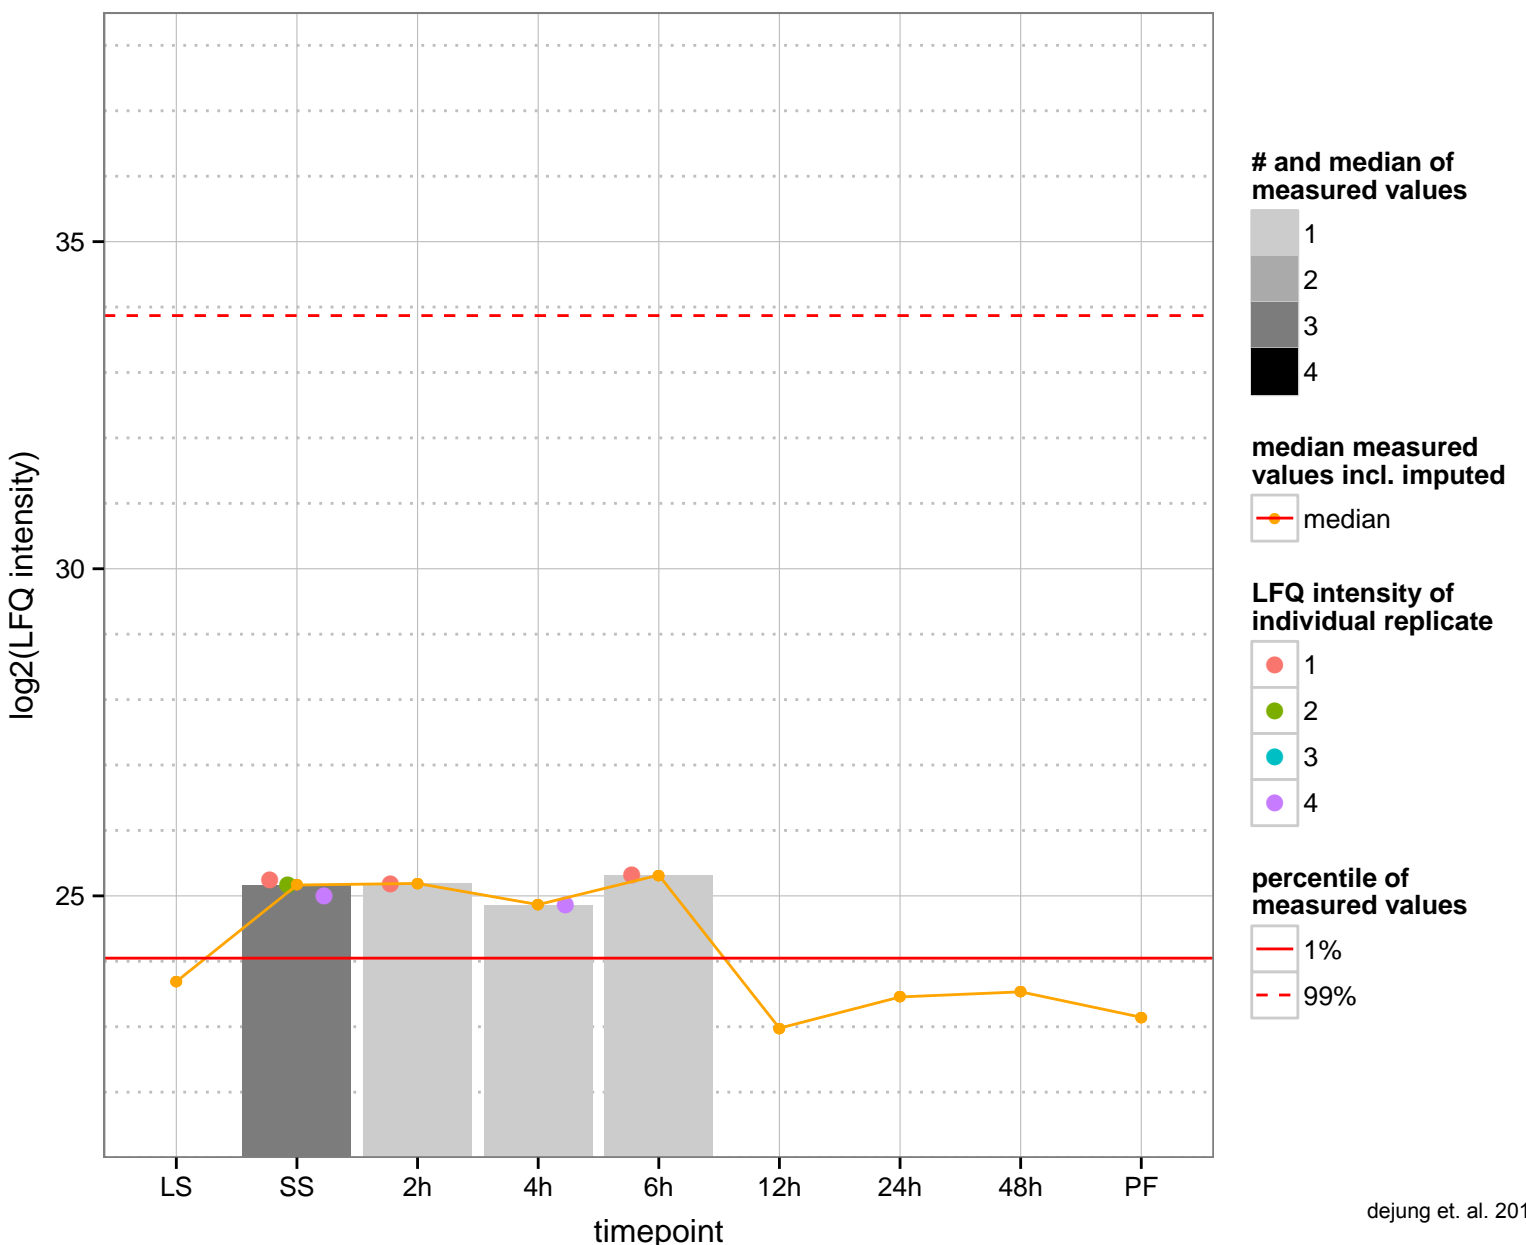

ribosomal RNA processing protein 41B, RNase PH-like protein, putative, exosome complex exonuclease 1, putative (RRP41E)  
 Tb927.2.2180  
 AGOF: 3'-5' exonuclease activity, 3'-5'-exoribonuclease activity, RNA binding  
 AGOC: cellular\_component  
 AGOP: RNA processing, rRNA metabolic process  
 PGO: null  
 PGOC: null  
 PGOP: null

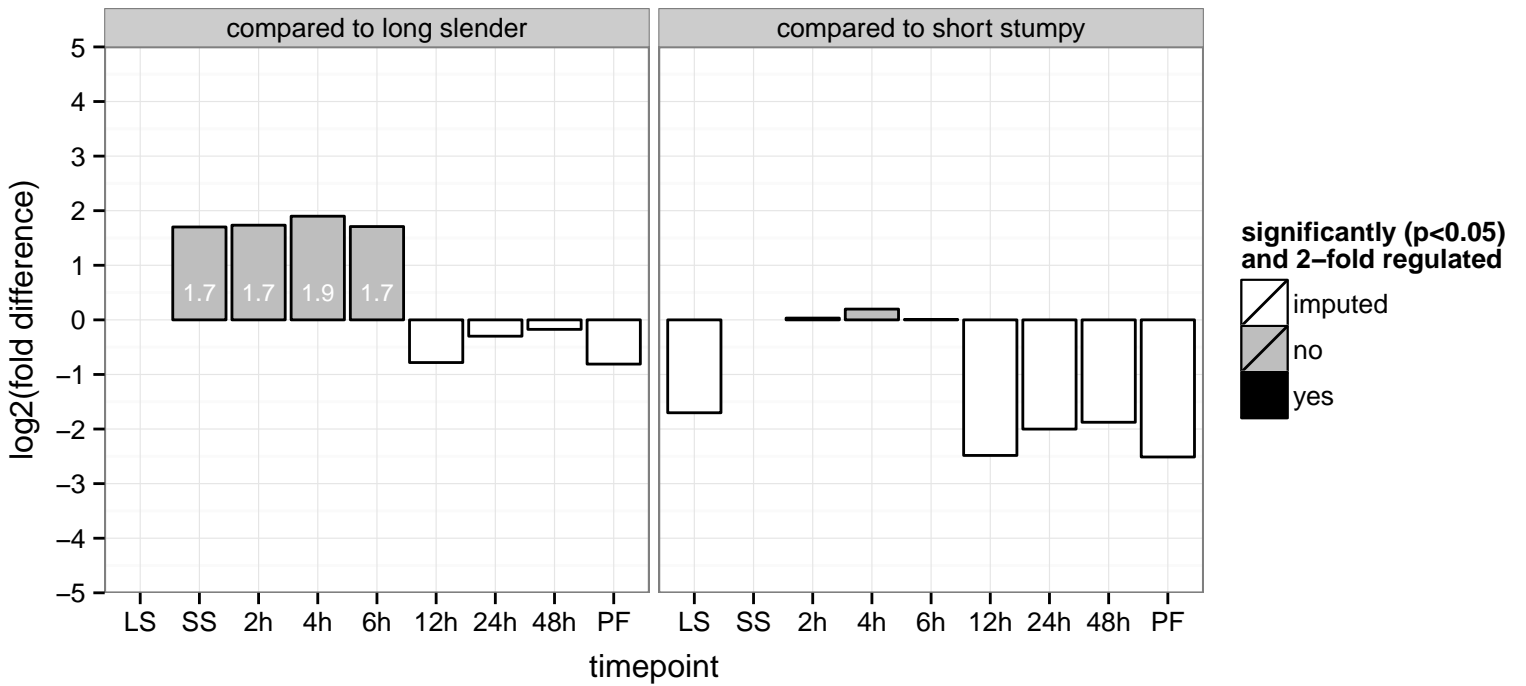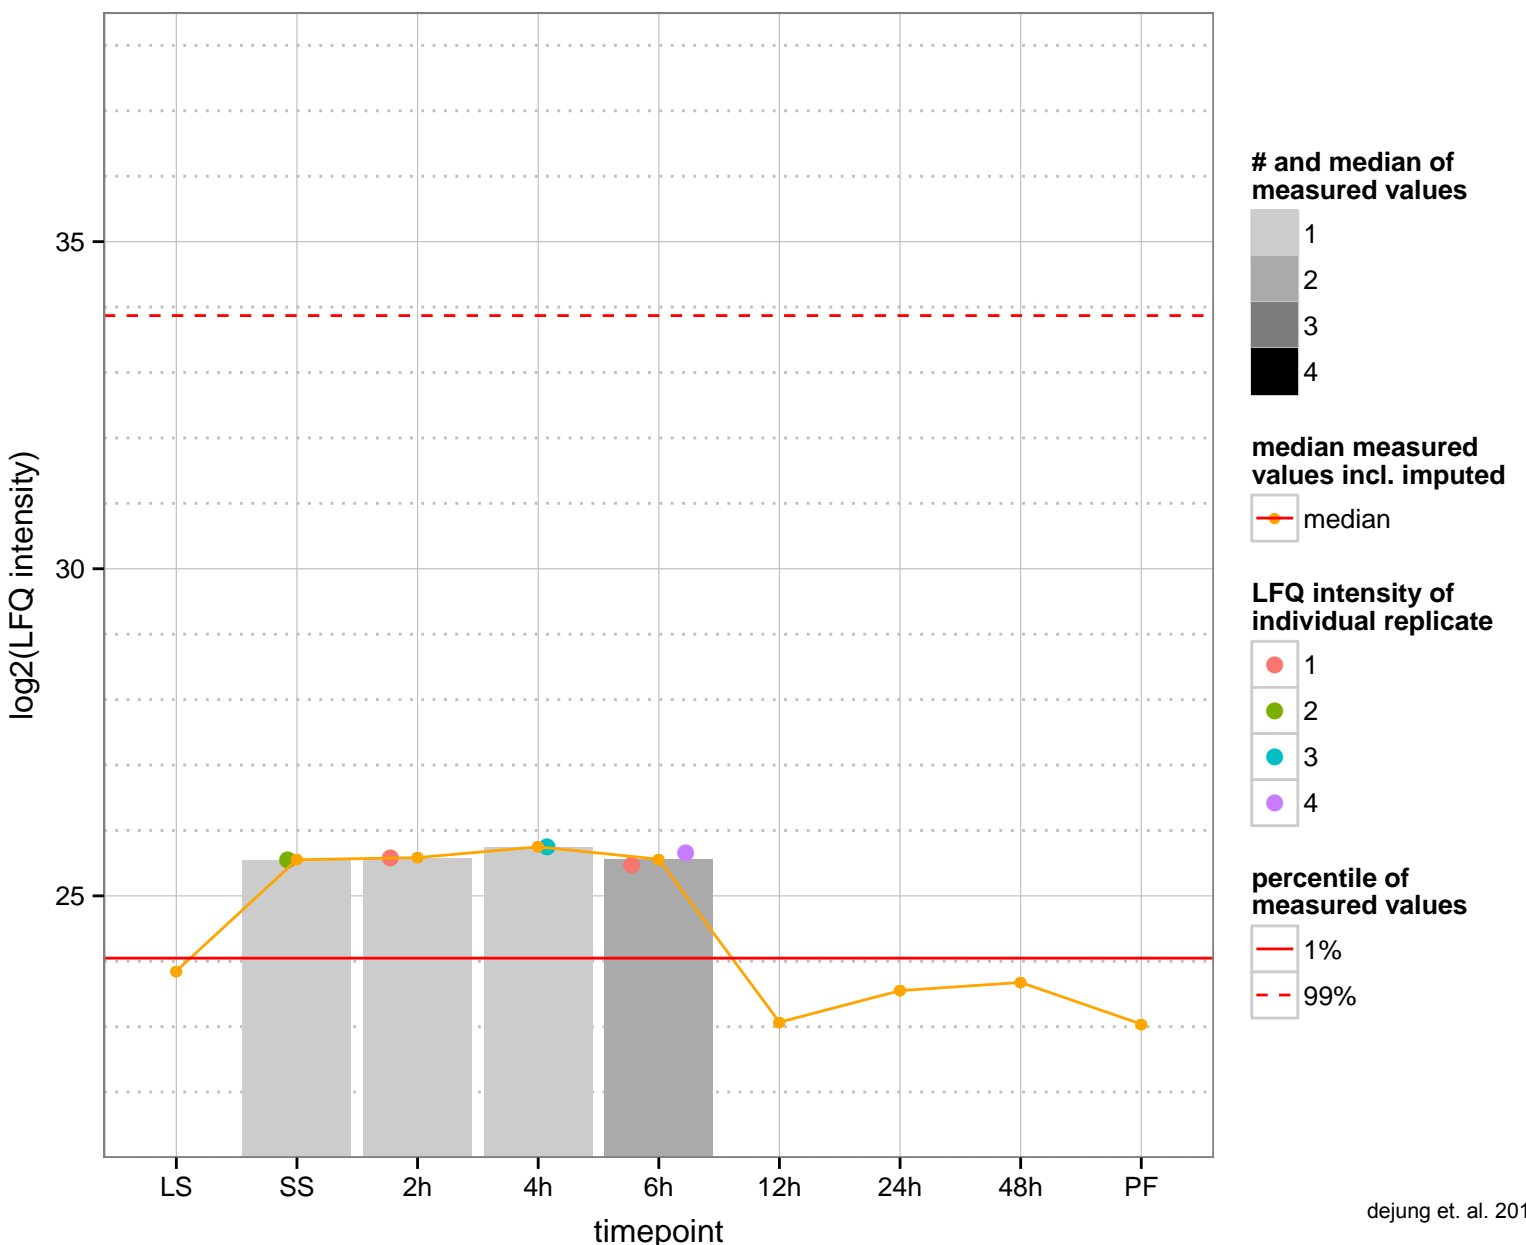

kinesin, putative  
 Tb927.3.3390;Tb927.3.3400  
 AGOF: ATP binding, microtubule motor activity, motor activity  
 AGOC: microtubule associated complex  
 AGOP: microtubule-based movement  
 PGOF: ATP binding, microtubule motor activity  
 PGO: null  
 PGO: null  
 PGO: null

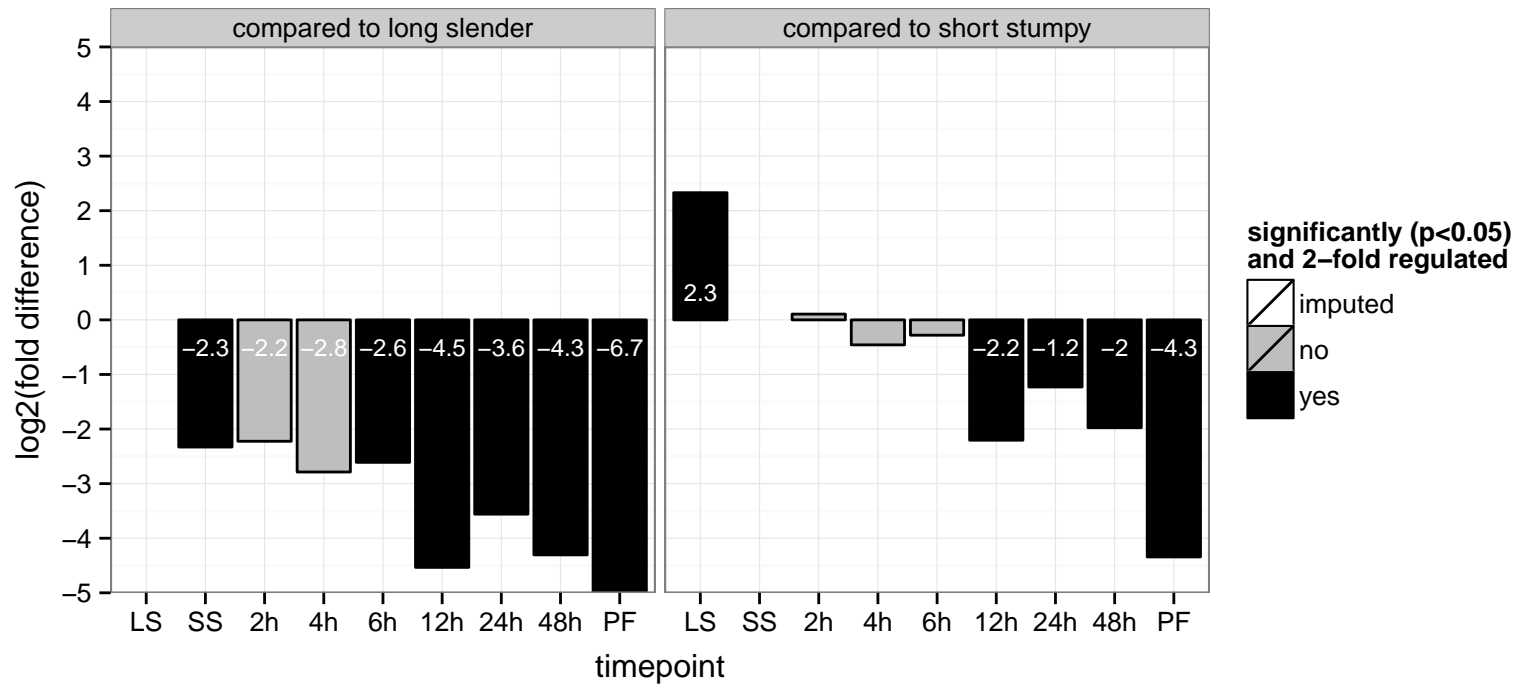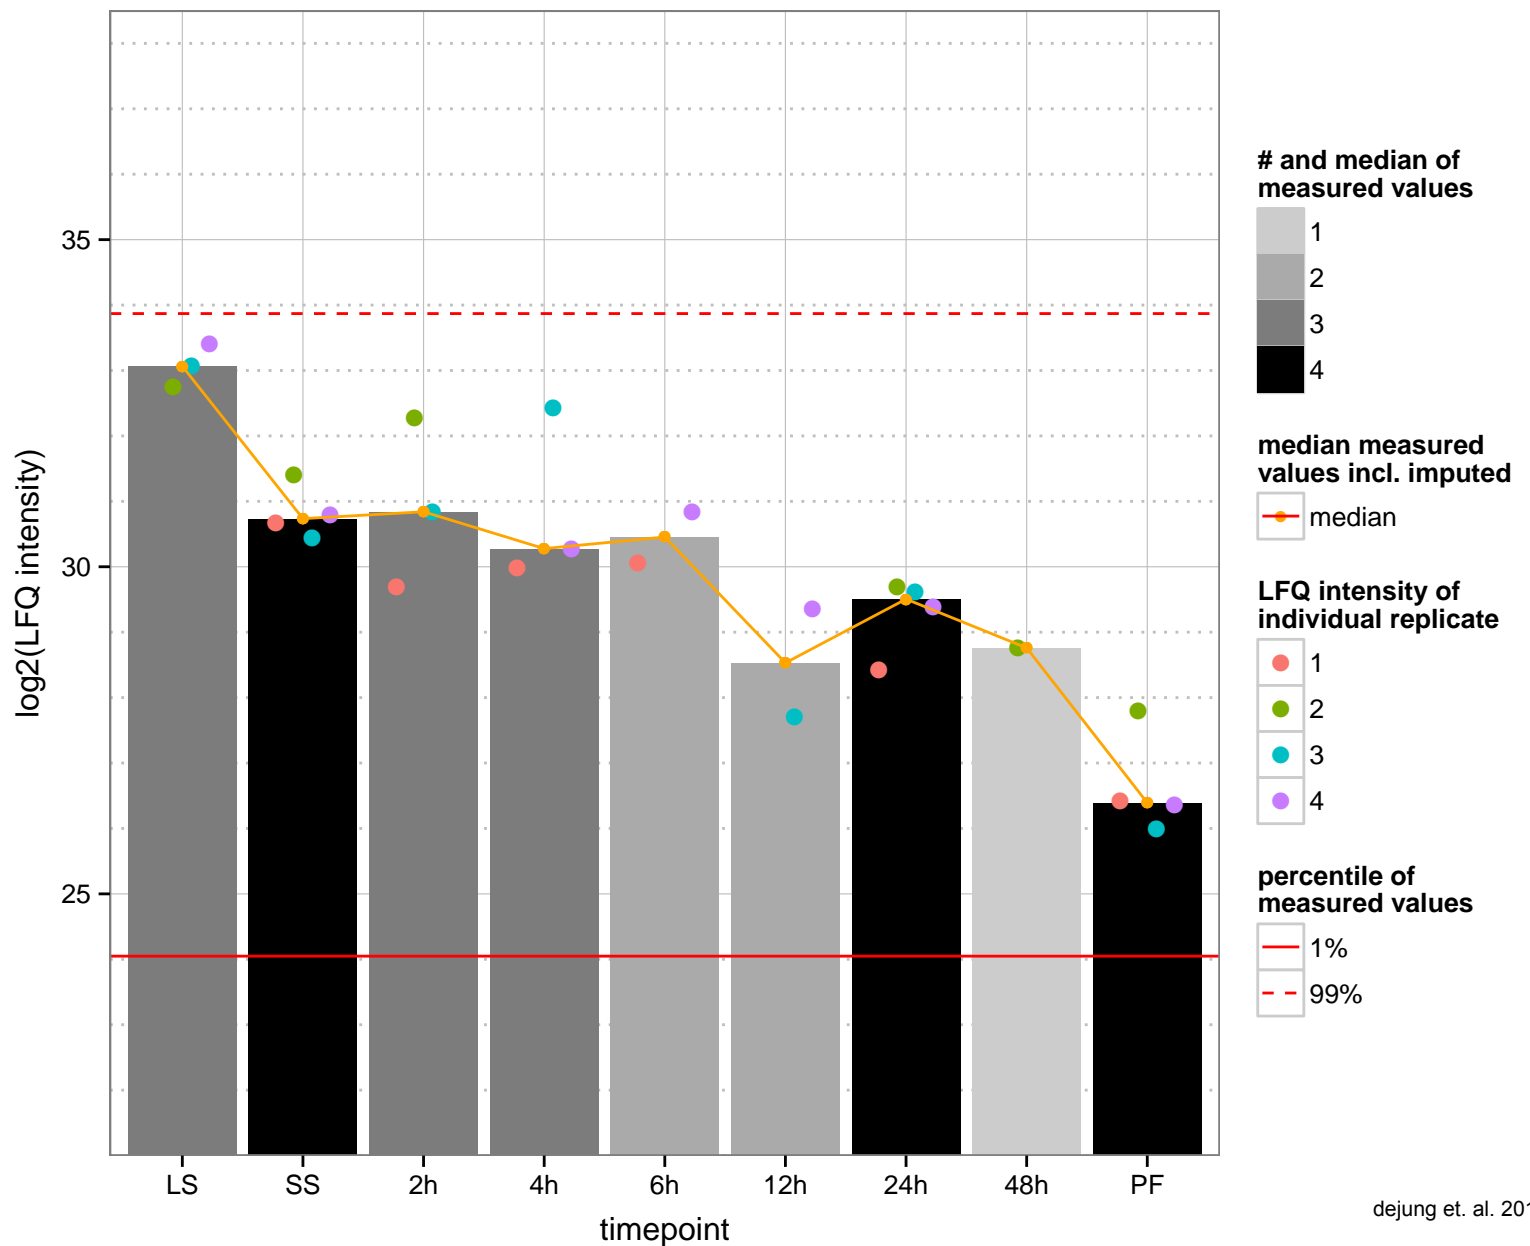

protein phosphatase 2C, putative  
 Tb927.4.3680  
 AGOF: catalytic activity  
 AGOC: mitochondrion  
 AGOP: null  
 PGO: catalytic activity  
 PGO: null  
 PGOP: null

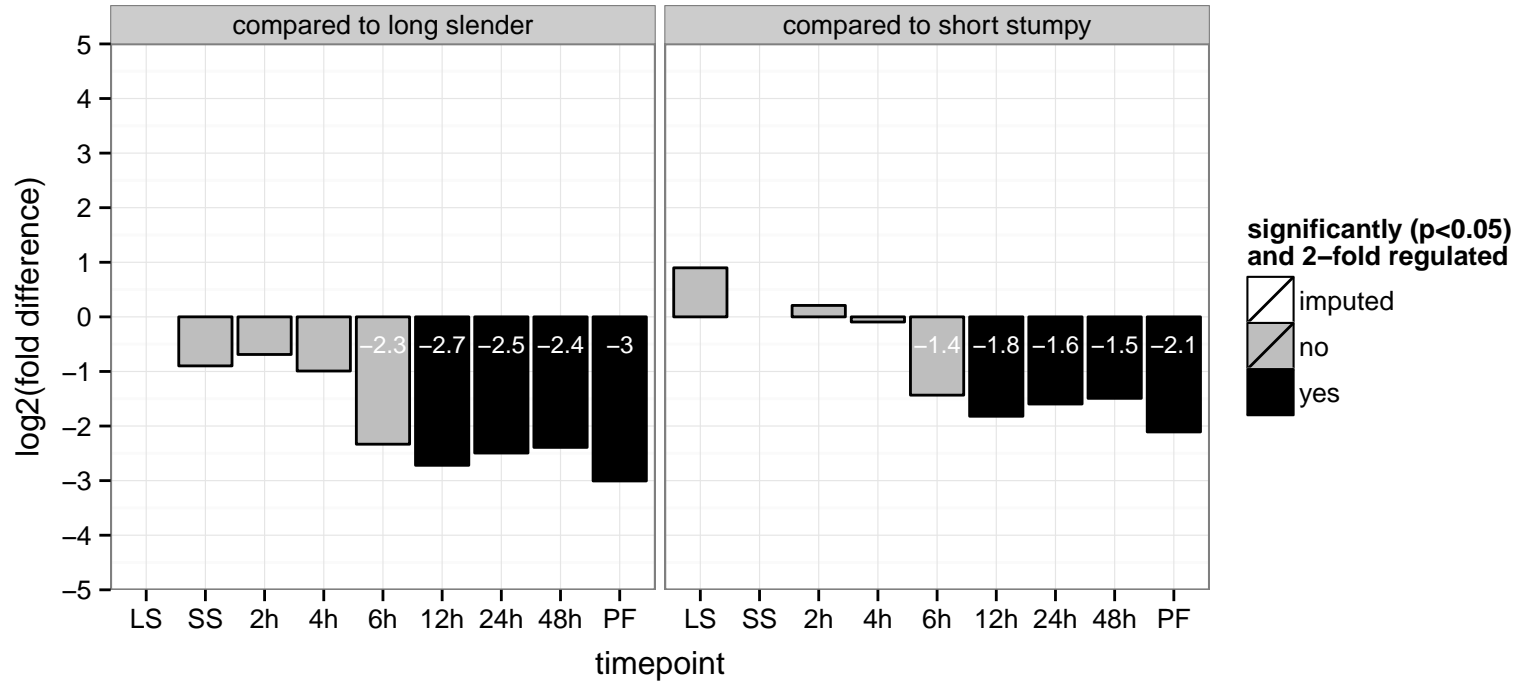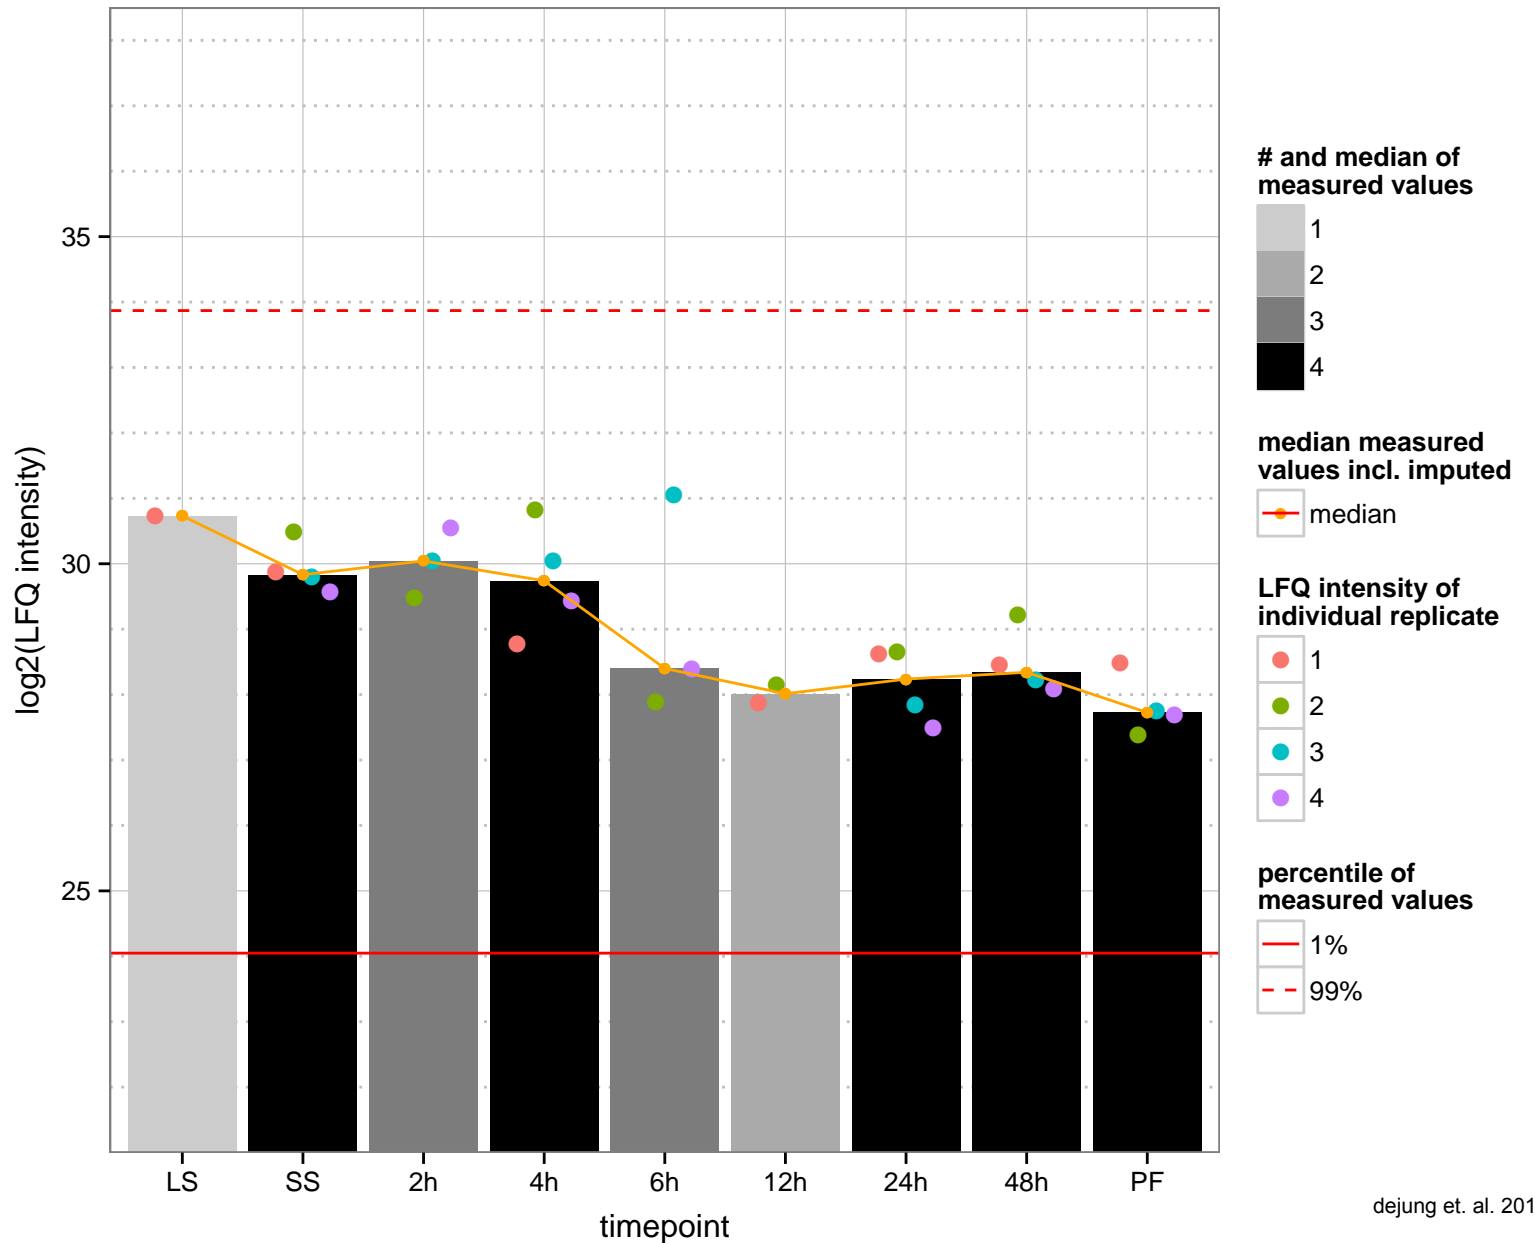



64 kDa invariant surface glycoprotein (ISG64)  
 Tb927.5.1430  
 AGOF: null  
 AGOC: null  
 AGOP: null  
 PGOF: null  
 PGO C: null  
 PGOP: null

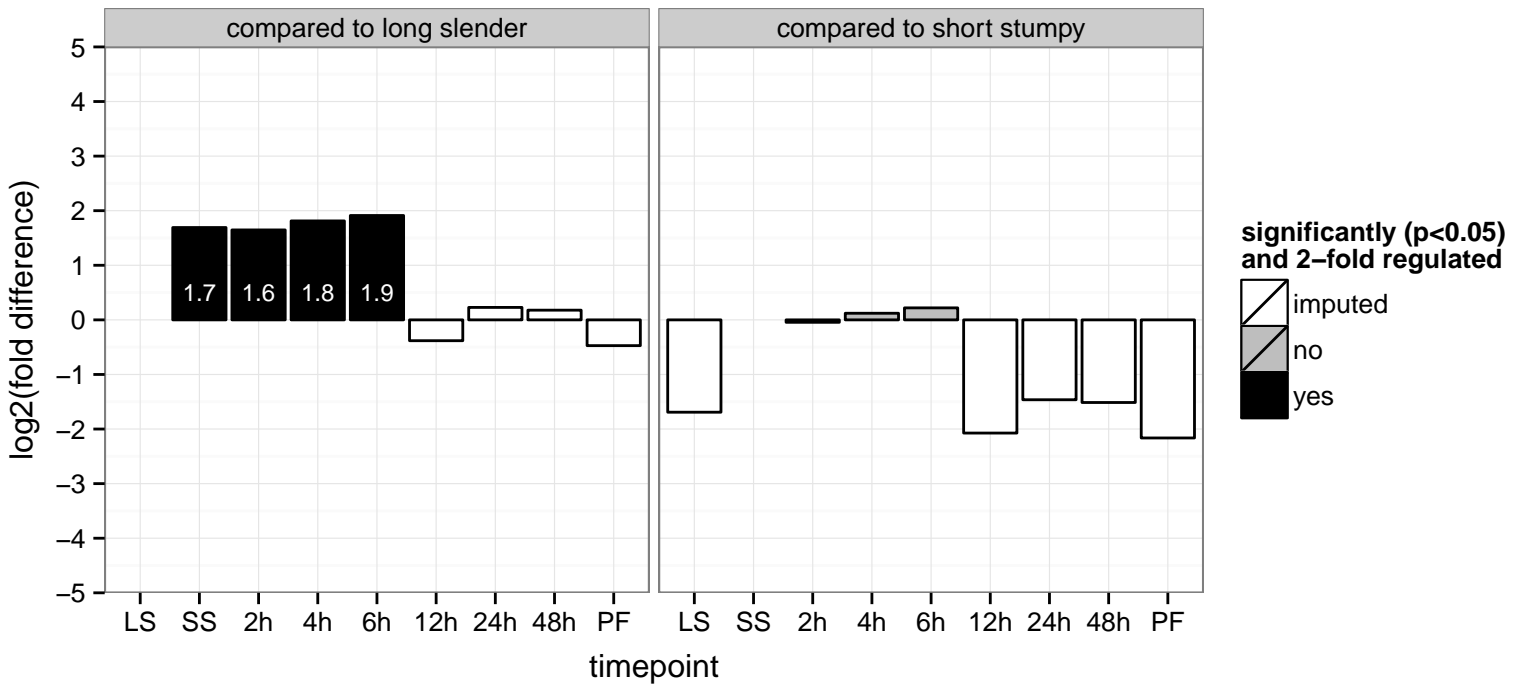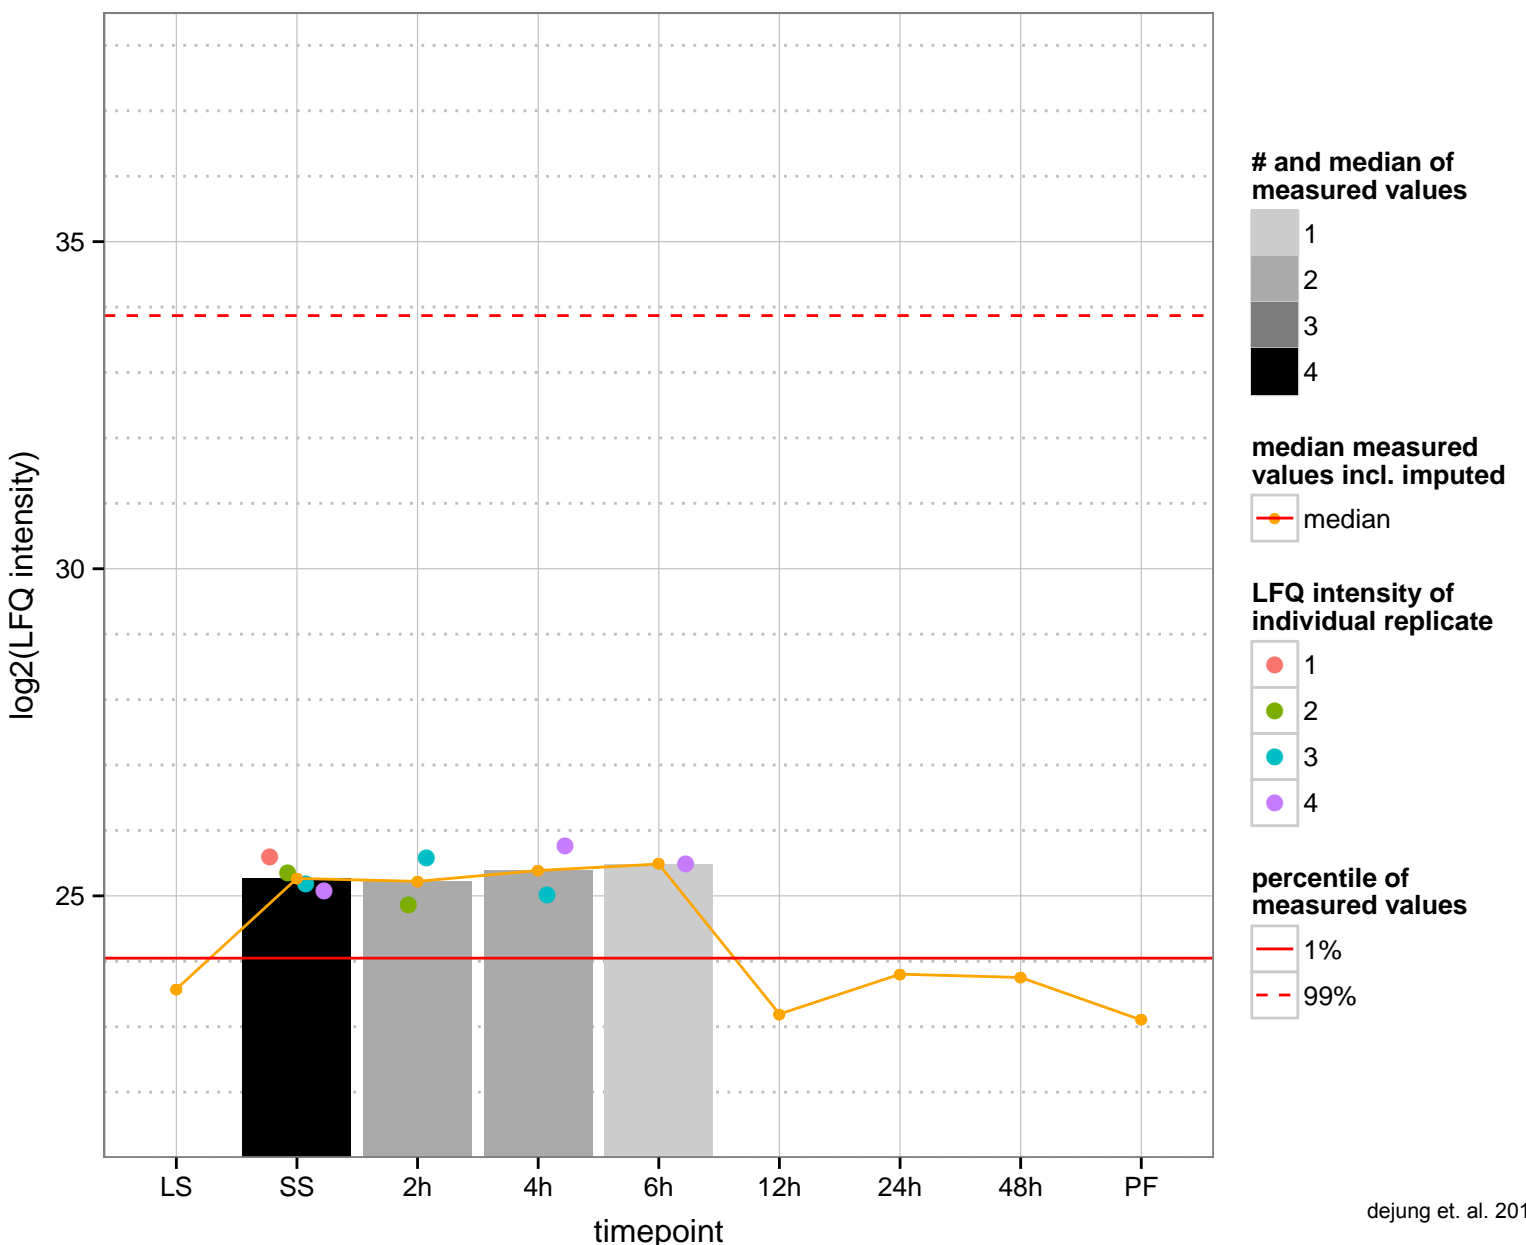

hypothetical protein  
 Tb927.5.3100  
 AGOF: null  
 AGOC: null  
 AGOP: null  
 PGOF: null  
 PGOC: null  
 PGOP: null

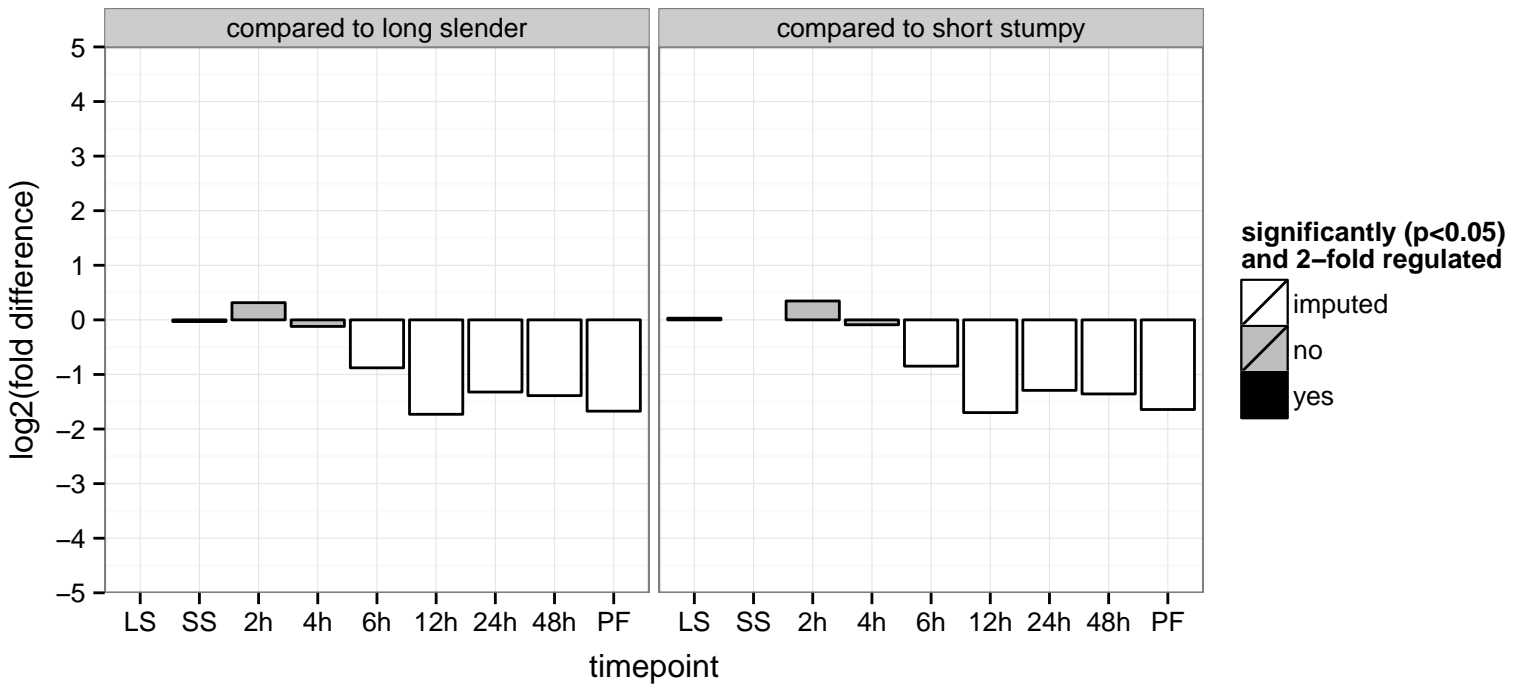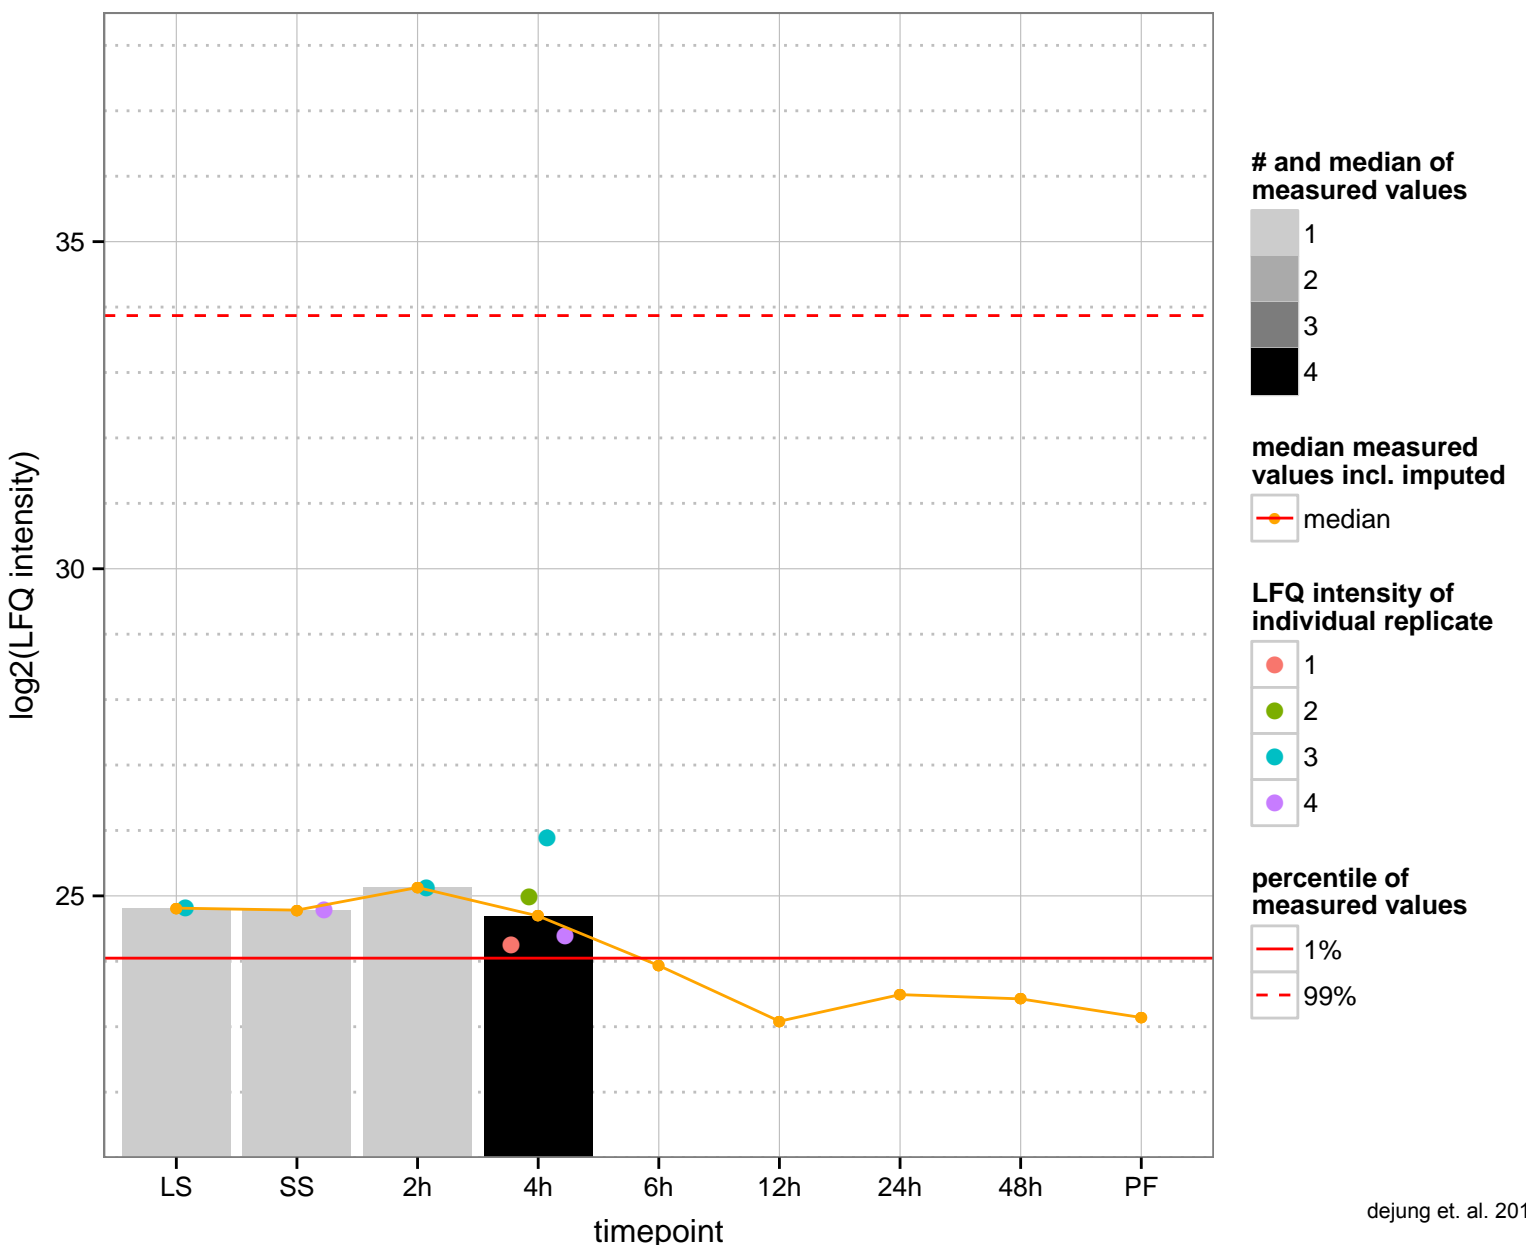

hypothetical protein, conserved  
 Tb927.6.1750  
 AGOF: Rab GTPase activator activity  
 AGOC: intracellular  
 AGOP: regulation of Rab GTPase activity  
 PGOF: Rab GTPase activator activity  
 PGO: intracellular  
 PGOP: regulation of Rab GTPase activity

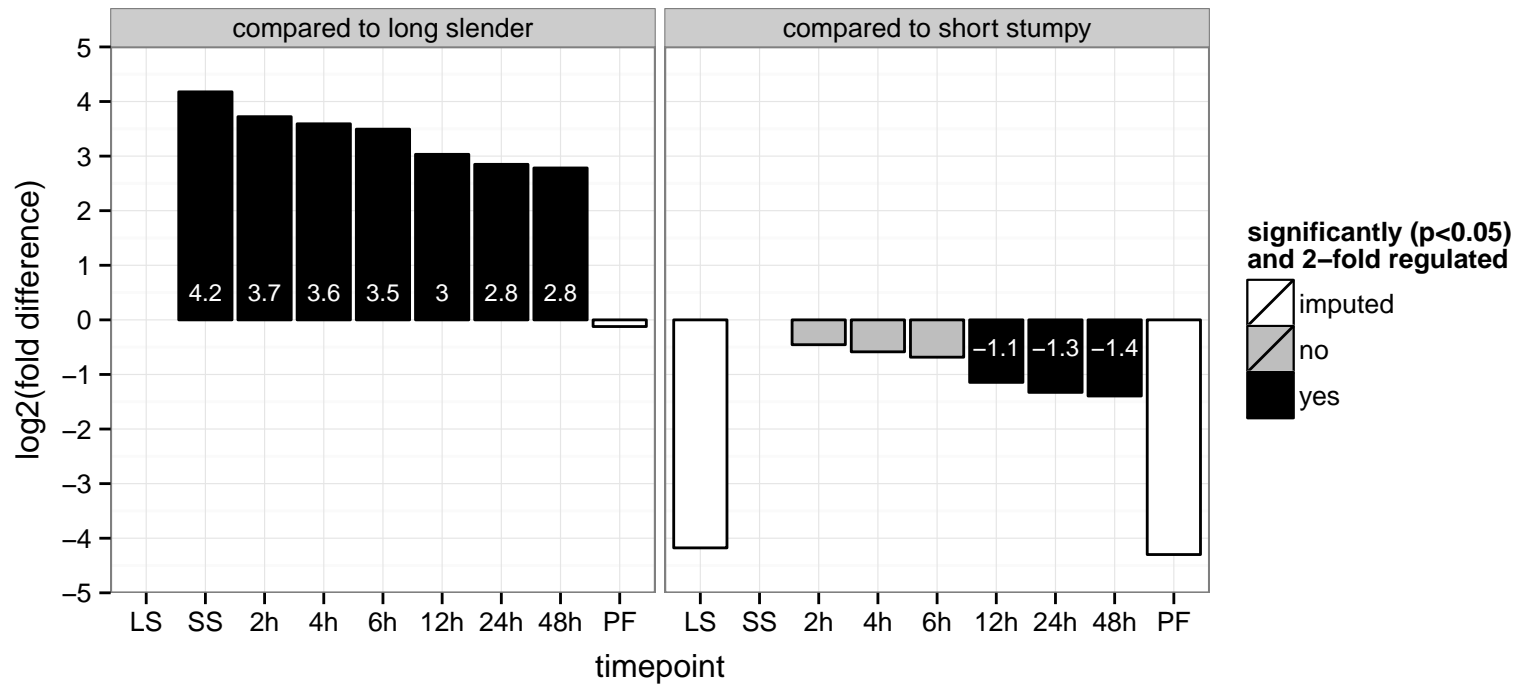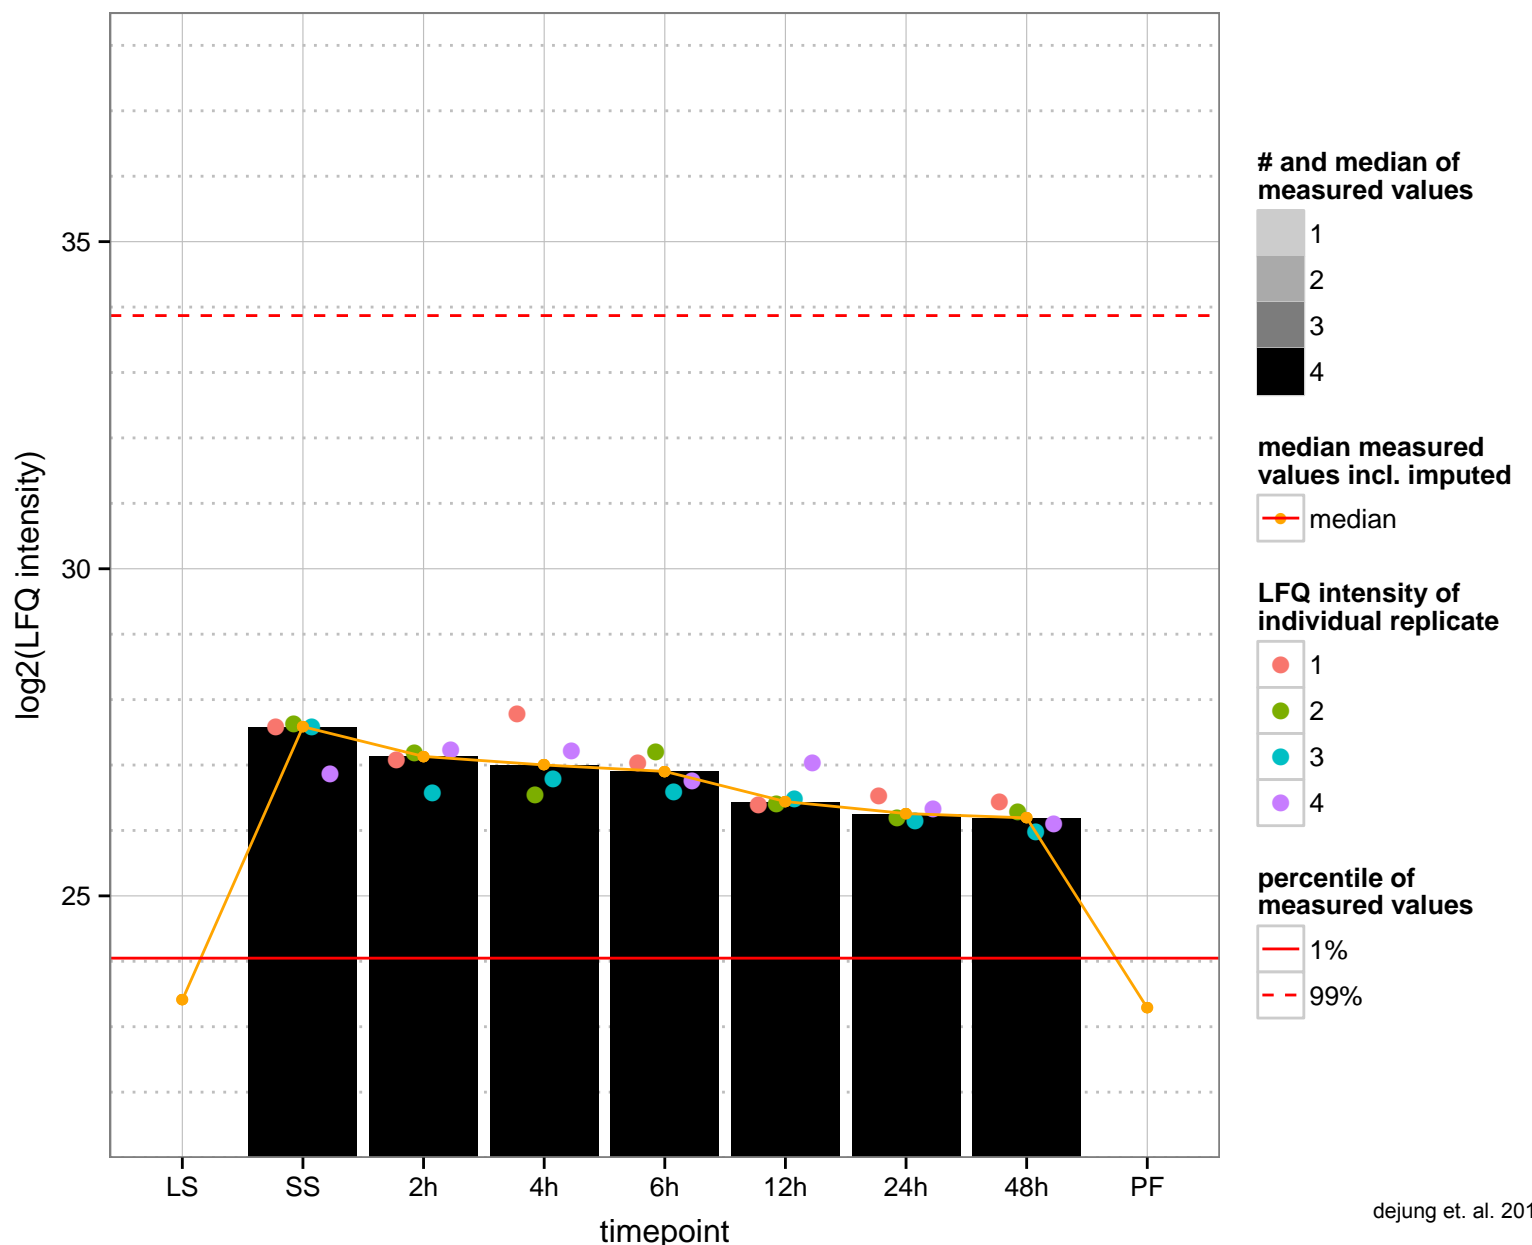

hypothetical protein, conserved  
 Tb927.6.1980  
 AGOF: null  
 AGOC: null  
 AGOP: null  
 PGO: null  
 PGOC: null  
 PGOP: null

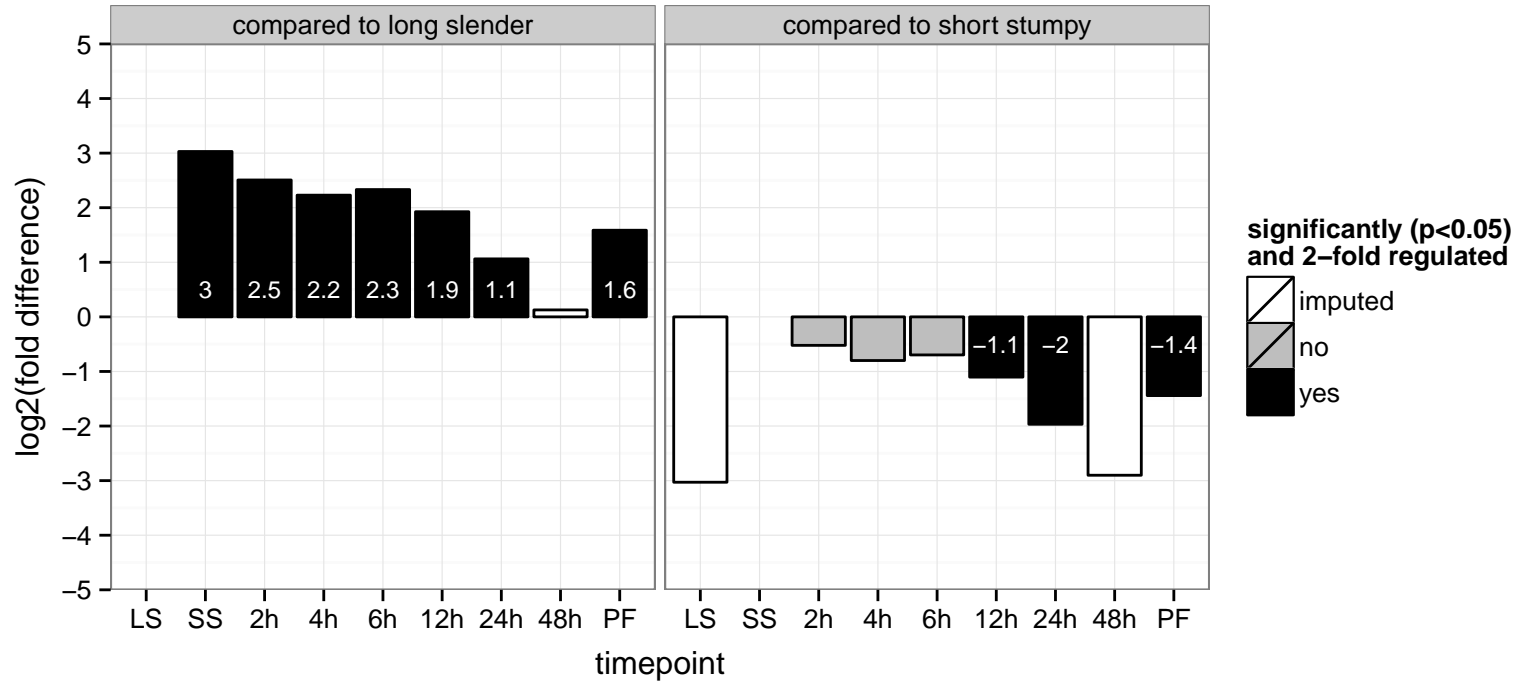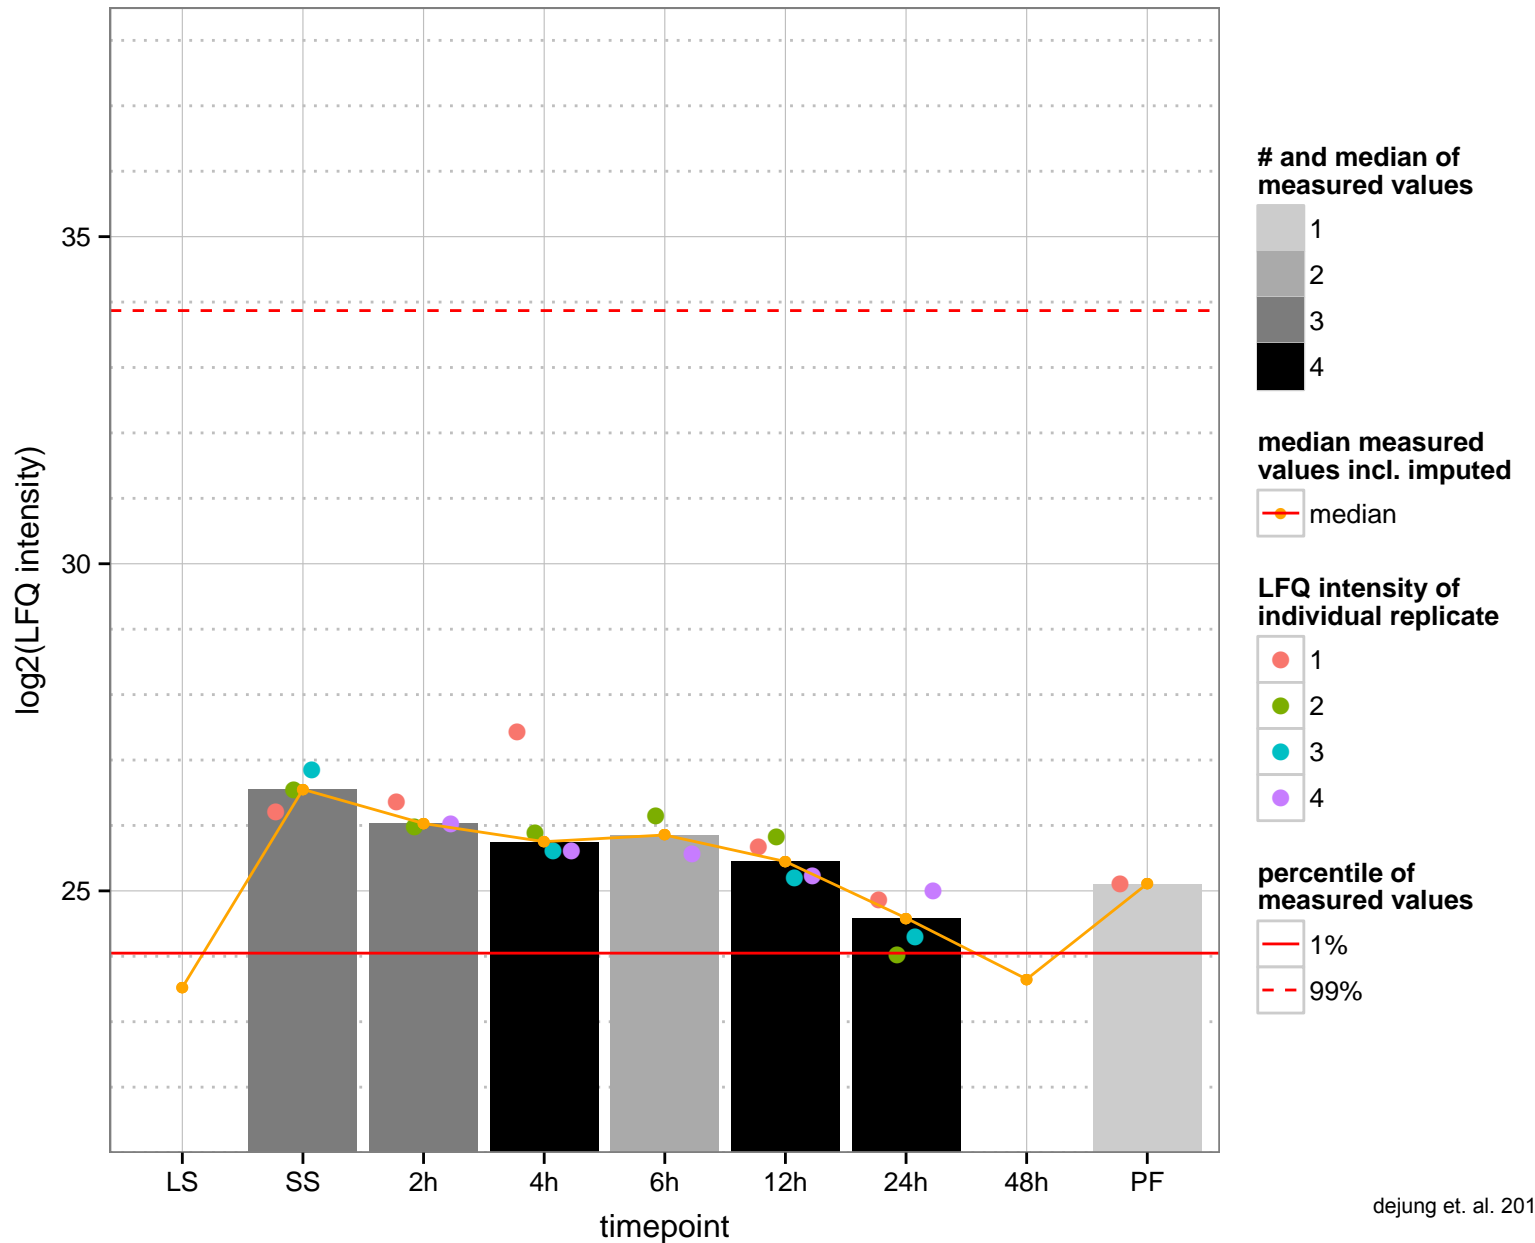

palmitoyl acyltransferase 11, putative  
 Tb927.7.3350  
 AGOF: zinc ion binding  
 AGOC: integral to membrane  
 AGOP: endocytosis, protein palmitoylation, transport  
 PGOF: zinc ion binding  
 PGO: null  
 PGOP: null

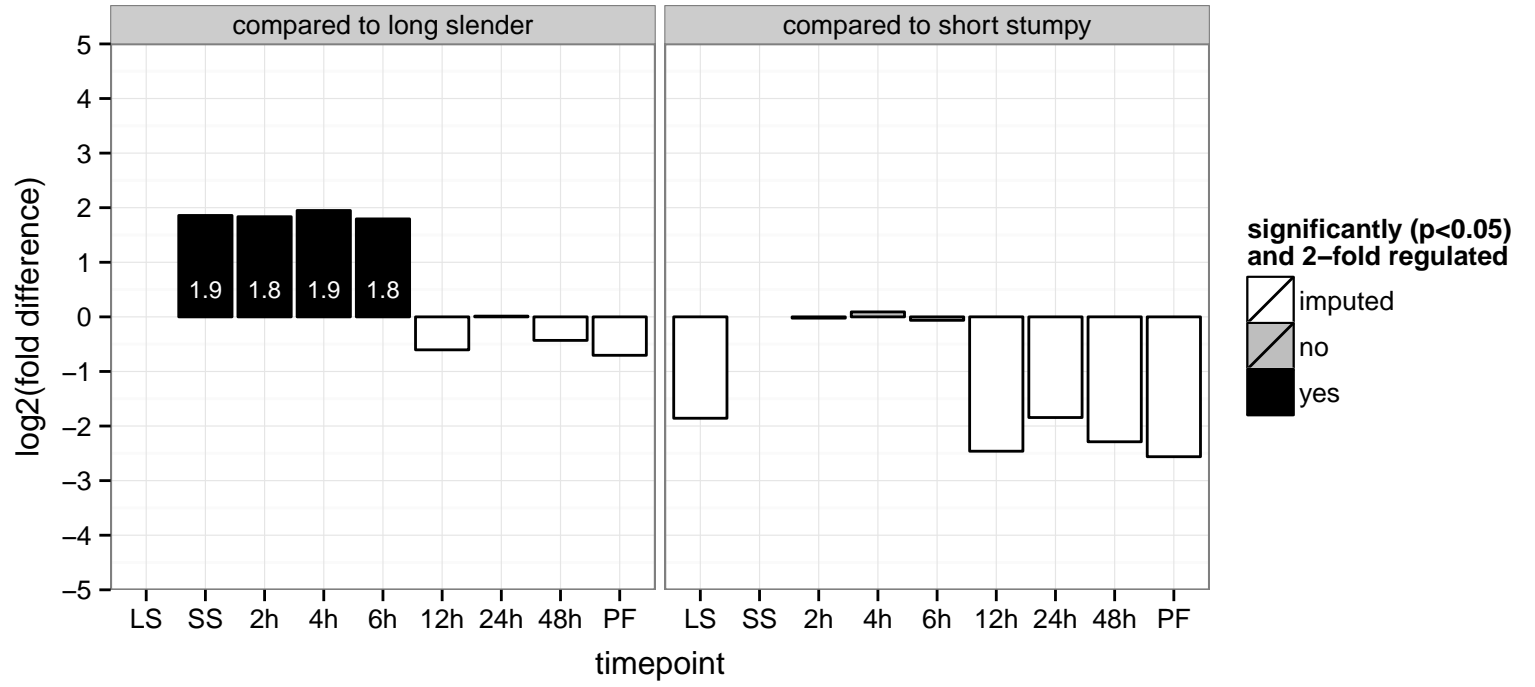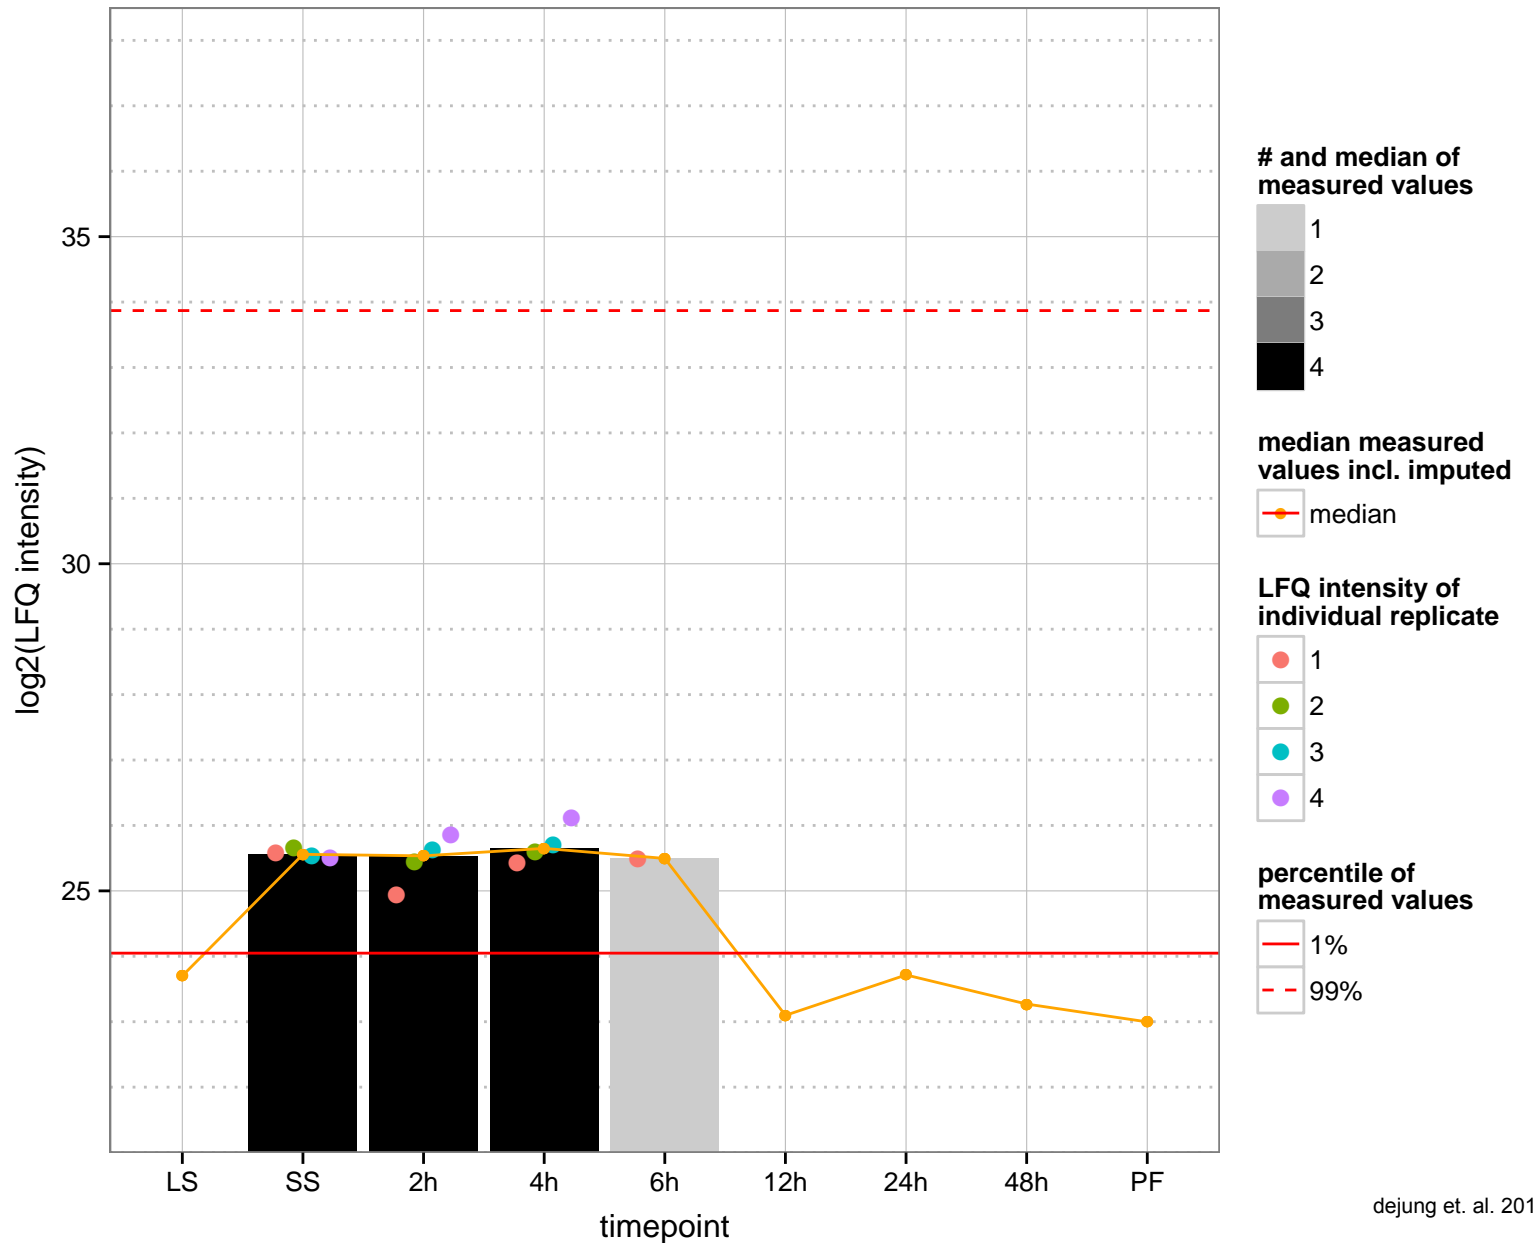

hypothetical protein, conserved  
 Tb927.7.3970  
 AGOF: null  
 AGOC: mitochondrion  
 AGOP: null  
 PGO: null  
 PGOC: null  
 PGOP: null

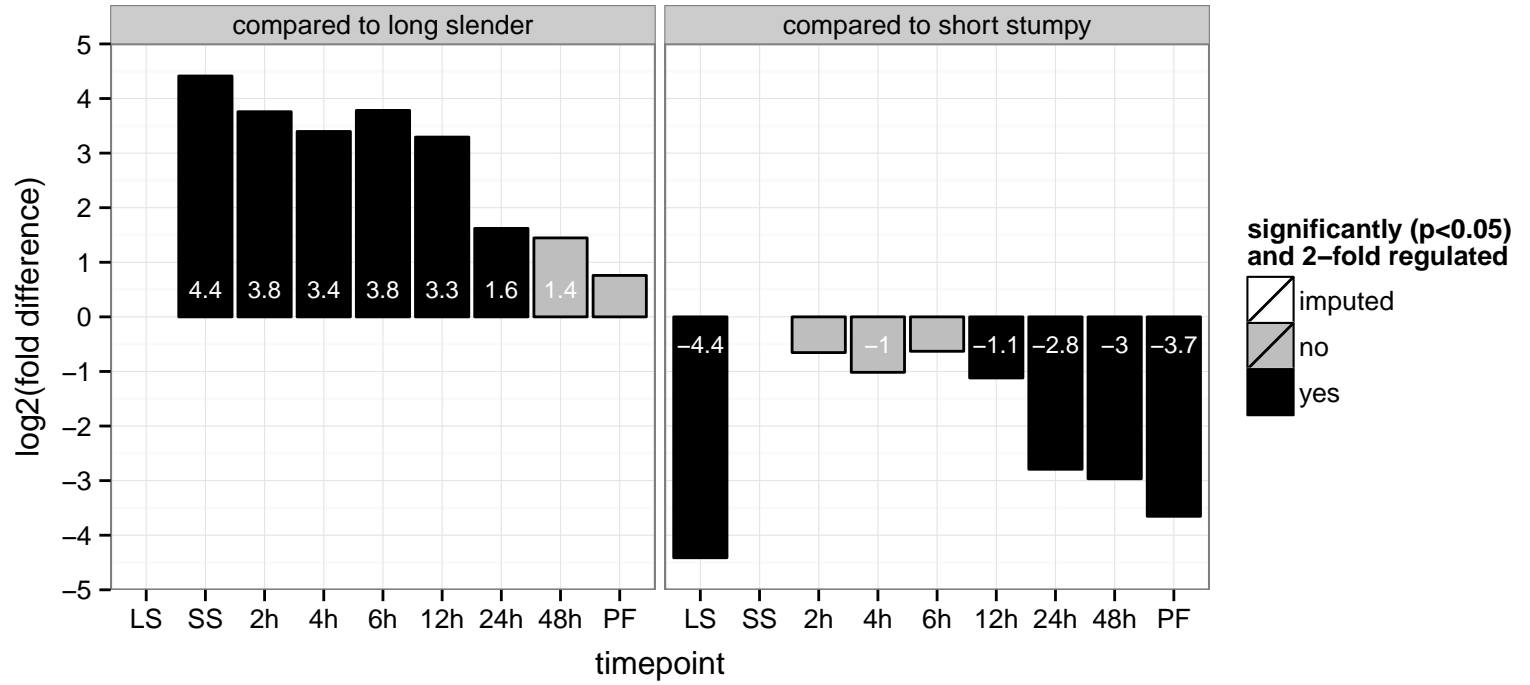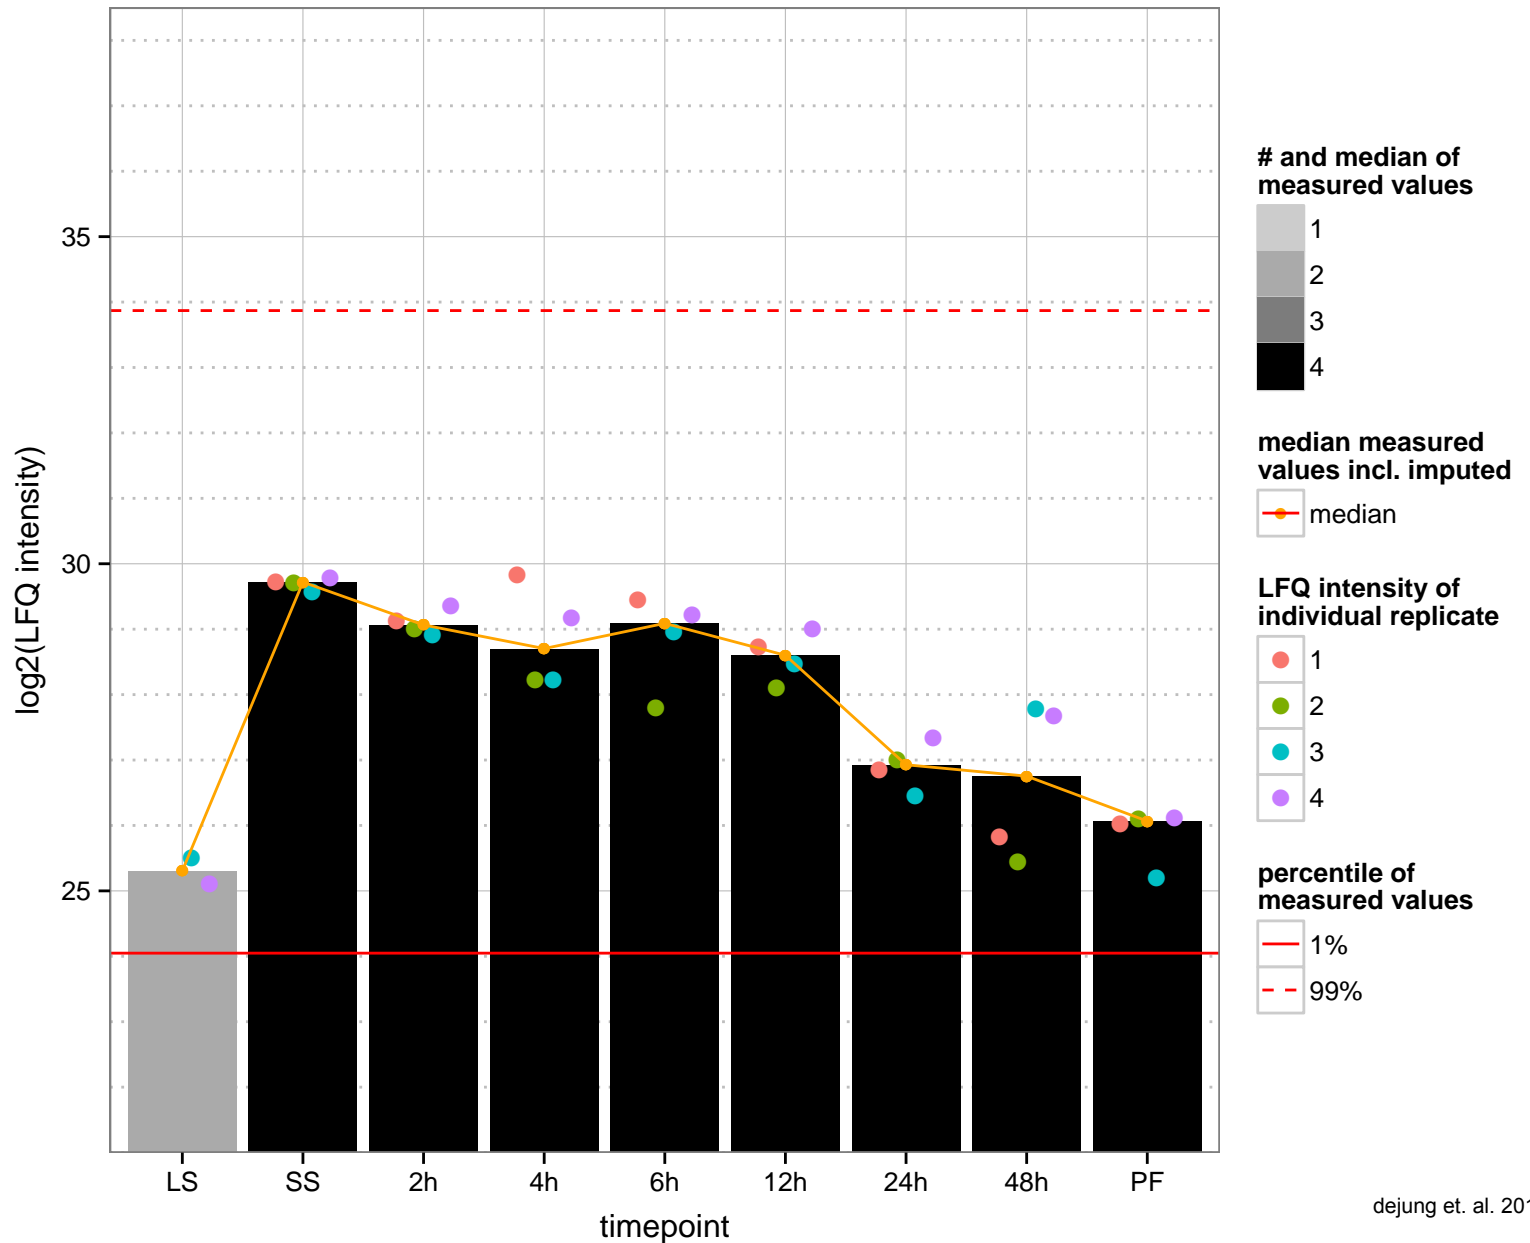

hypothetical protein, conserved  
 Tb927.7.520  
 AGOF: heme binding  
 AGOC: null  
 AGOP: null  
 PGOF: heme binding  
 PGO: null  
 PGOP: null

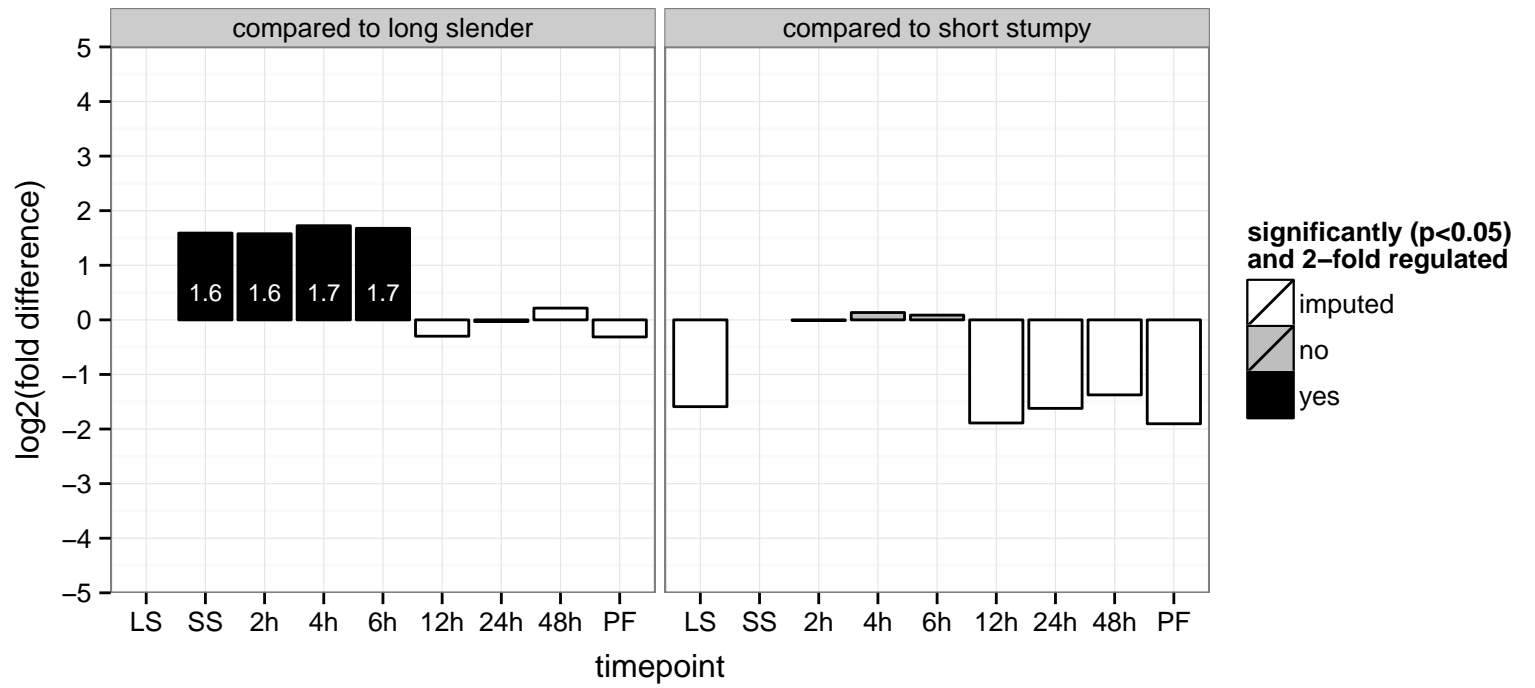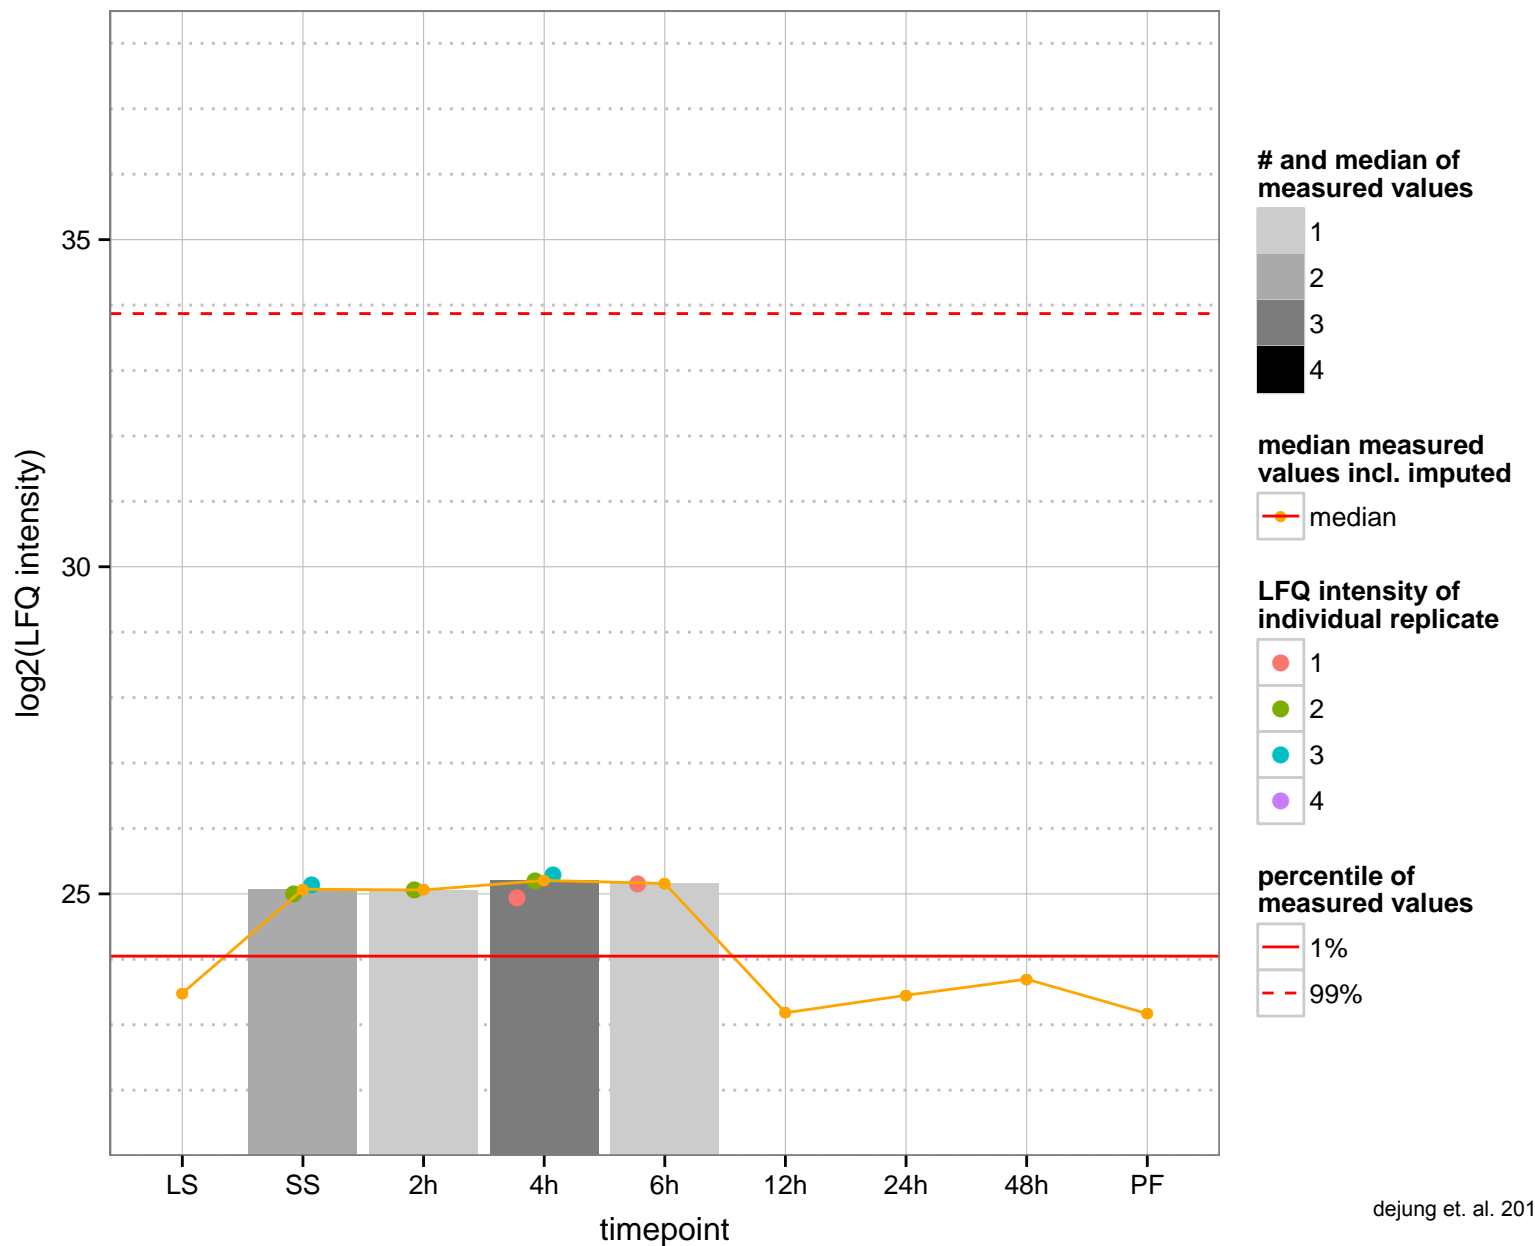

lipin, putative  
 Tb927.7.5450  
 AGOF: null  
 AGOC: null  
 AGOP: null  
 PGO: null  
 PGOC: null  
 PGOP: null

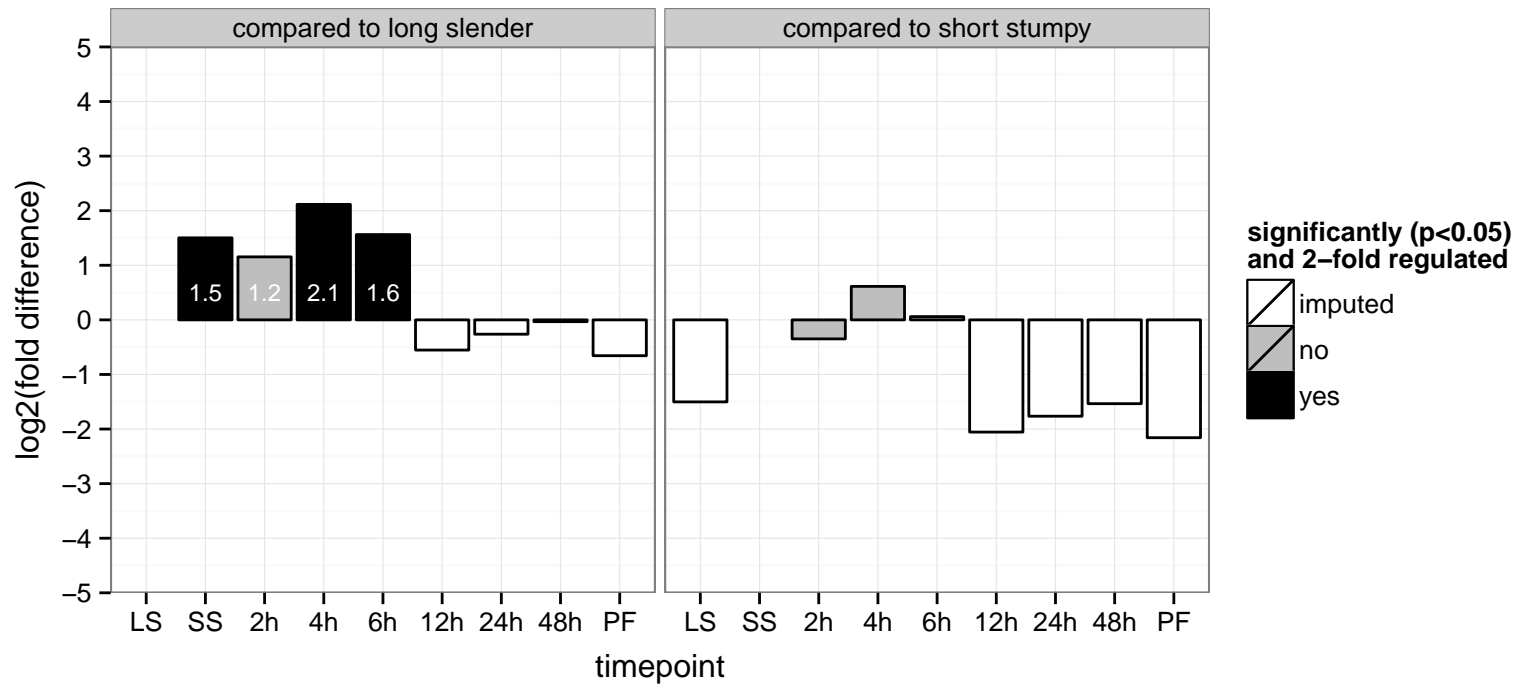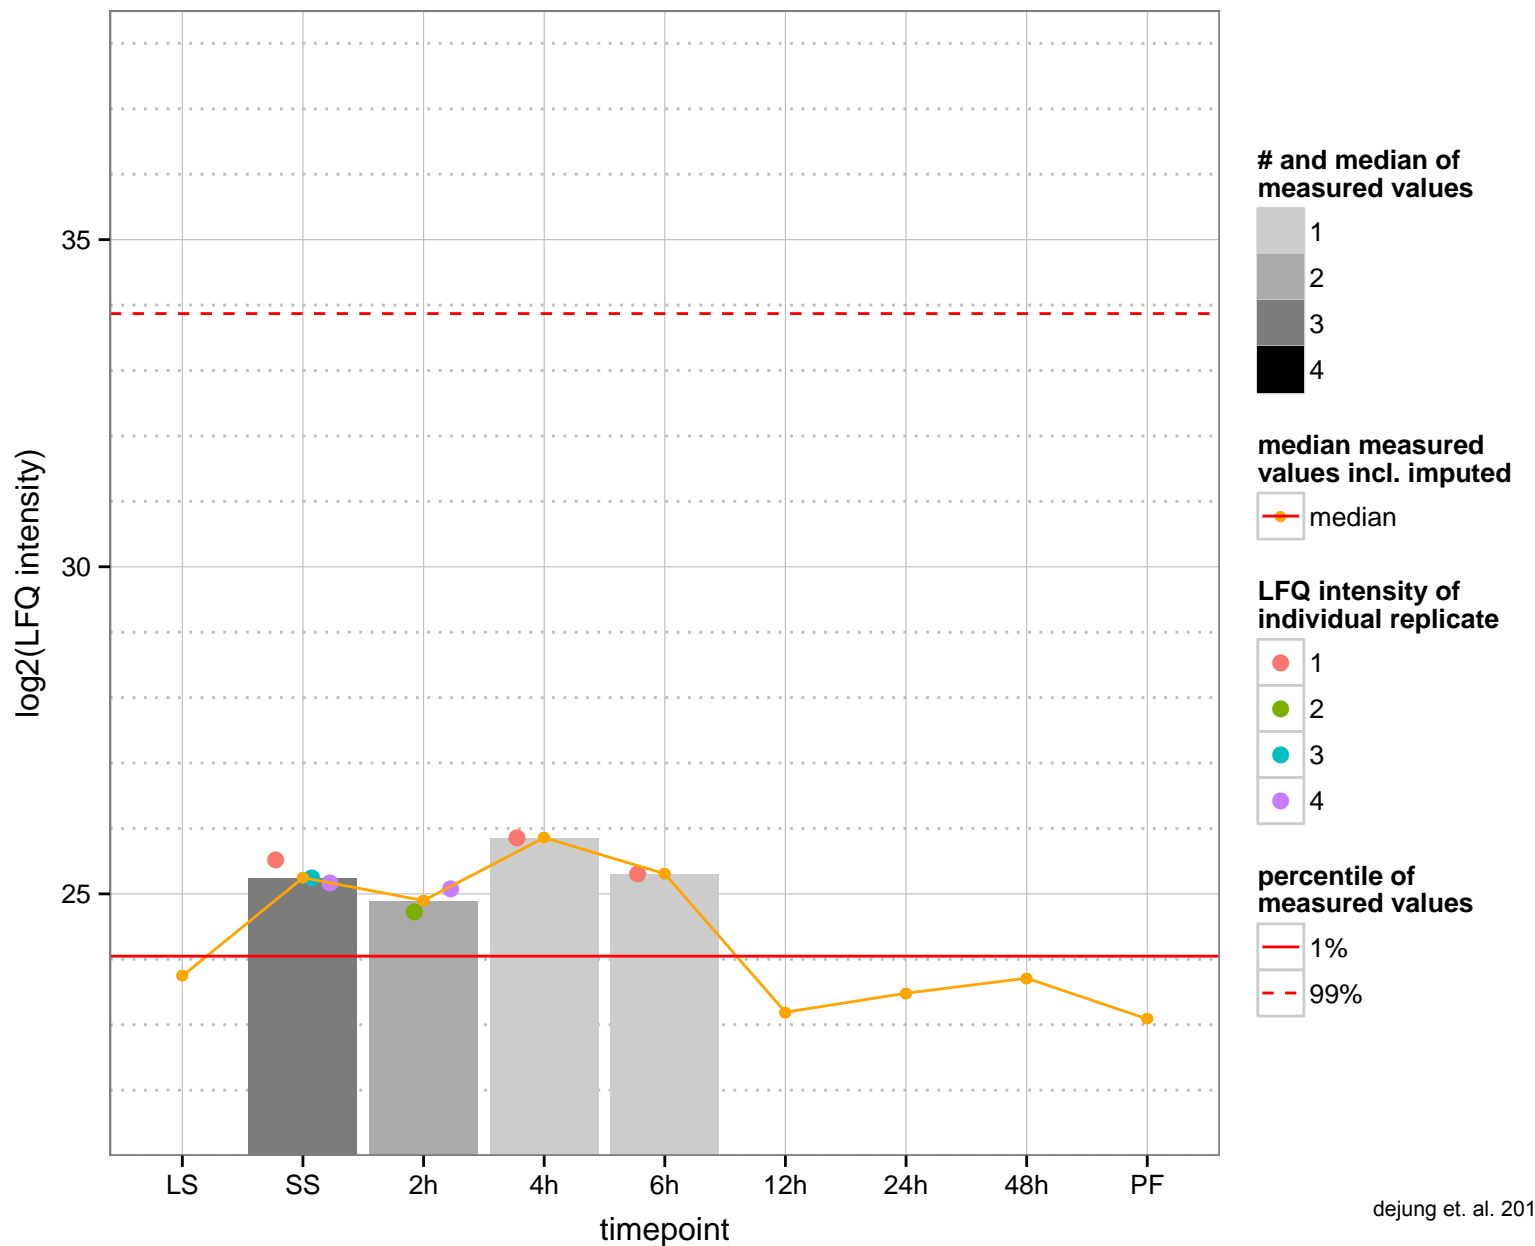



hypothetical protein, conserved  
 Tb927.7.6600  
 AGOF: null  
 AGOC: null  
 AGOP: null  
 PGO: null  
 PGOC: null  
 PGOP: null

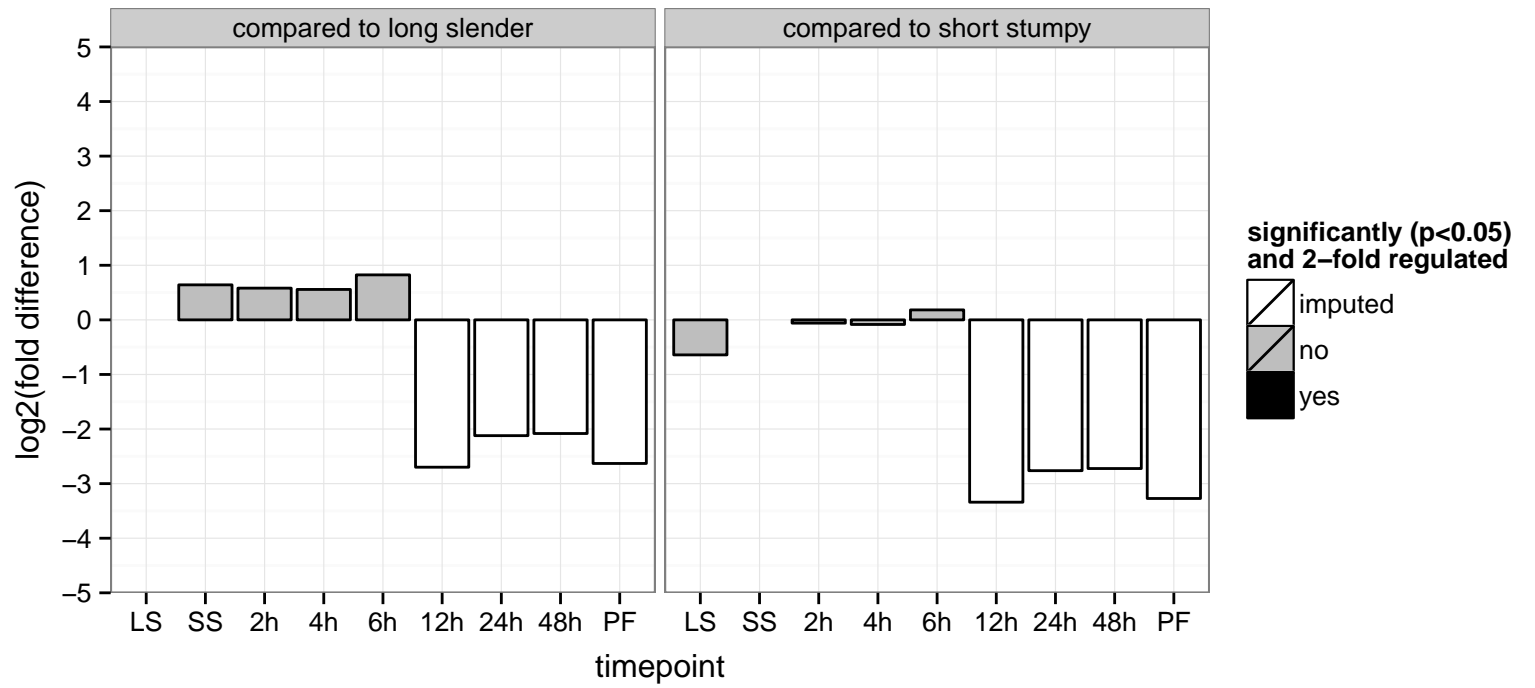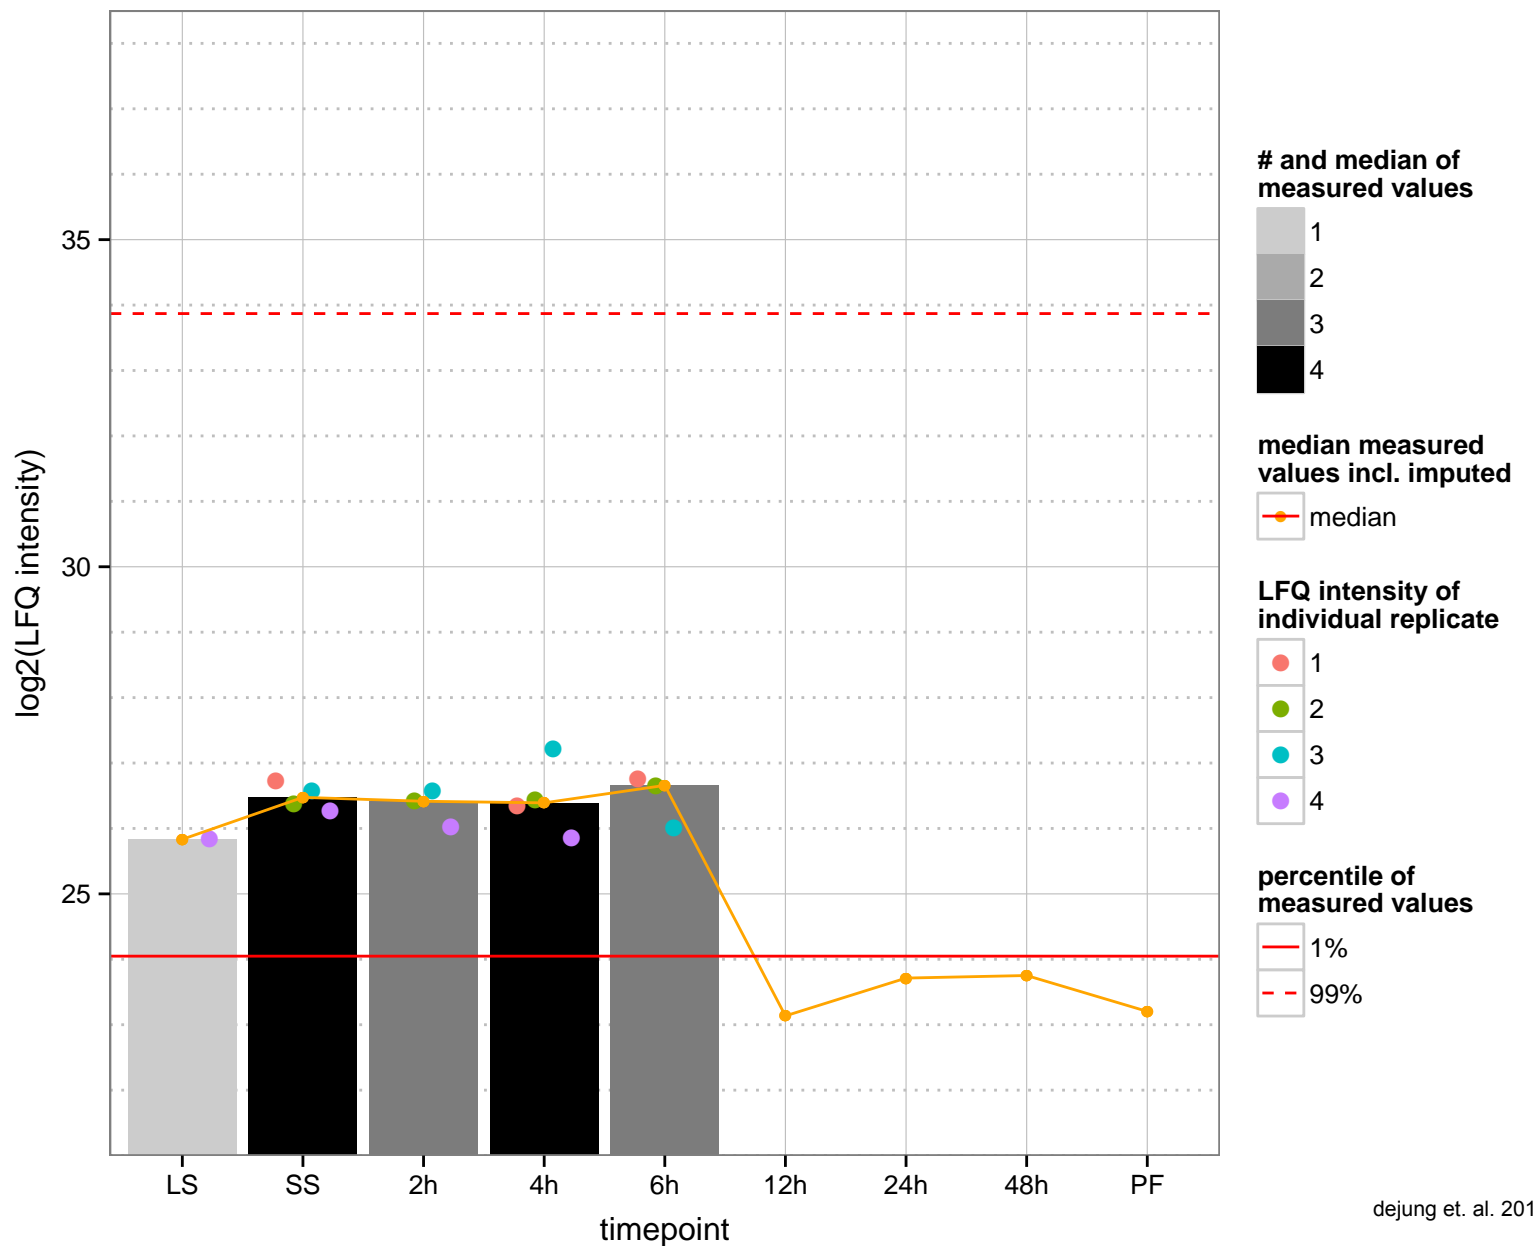

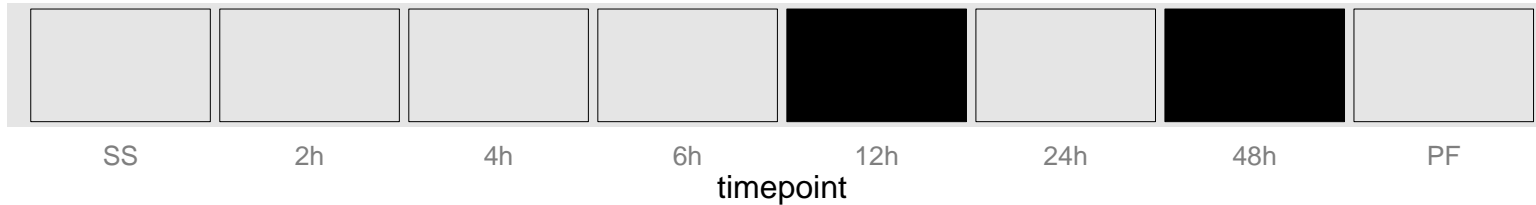

**regulated**  **not regulated**  **significant down**  **significant up**

retrotransposon hot spot protein (RHS, pseudogene), putative, chrXI additional, unordered contigs, retrotransposon hot spot p  
 Tb11.v5.0442;Tb11.1800  
 AGOF: null  
 AGOC: null  
 AGOP: null  
 PGO: null  
 PGOC: null  
 PGOP: null

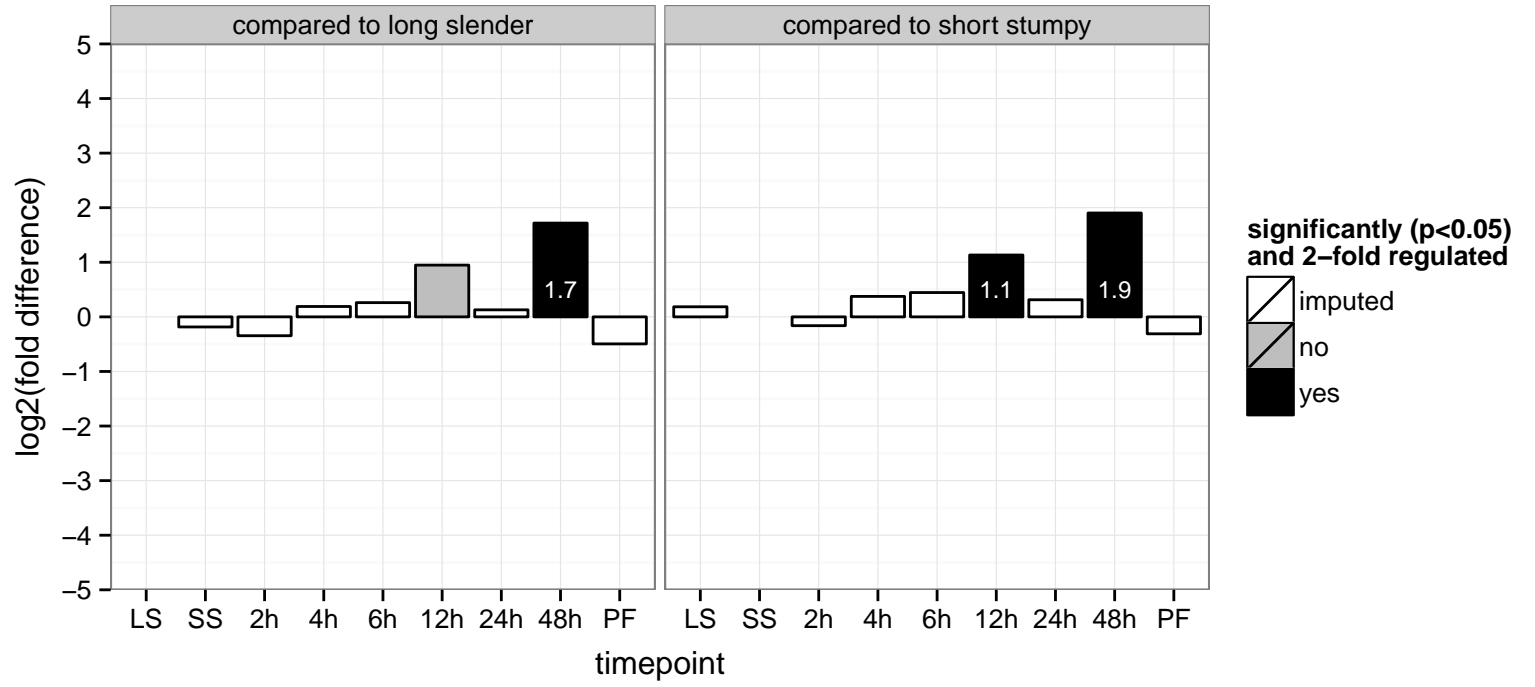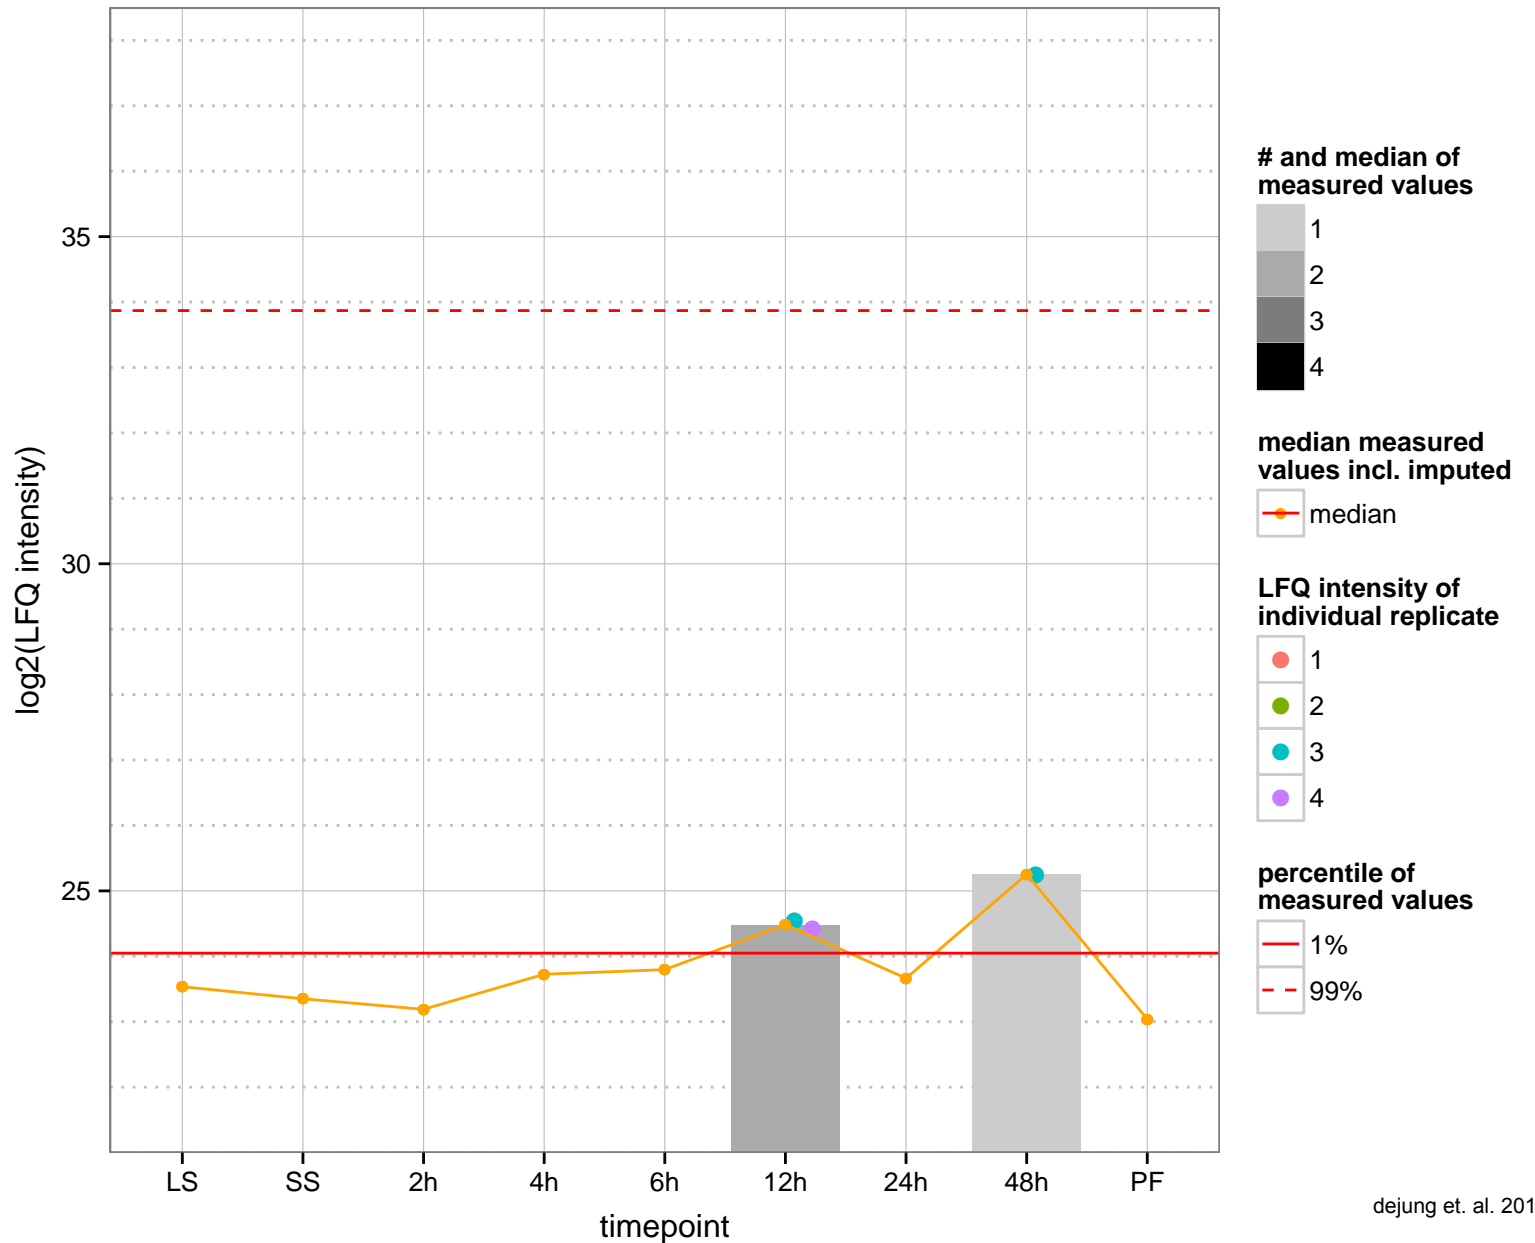

hypothetical protein, conserved  
 Tb927.7.4510;Tb11.v5.0264  
 AGOF: null  
 AGOC: null  
 AGOP: null  
 PGOF: null  
 PGOC: null  
 PGOP: null

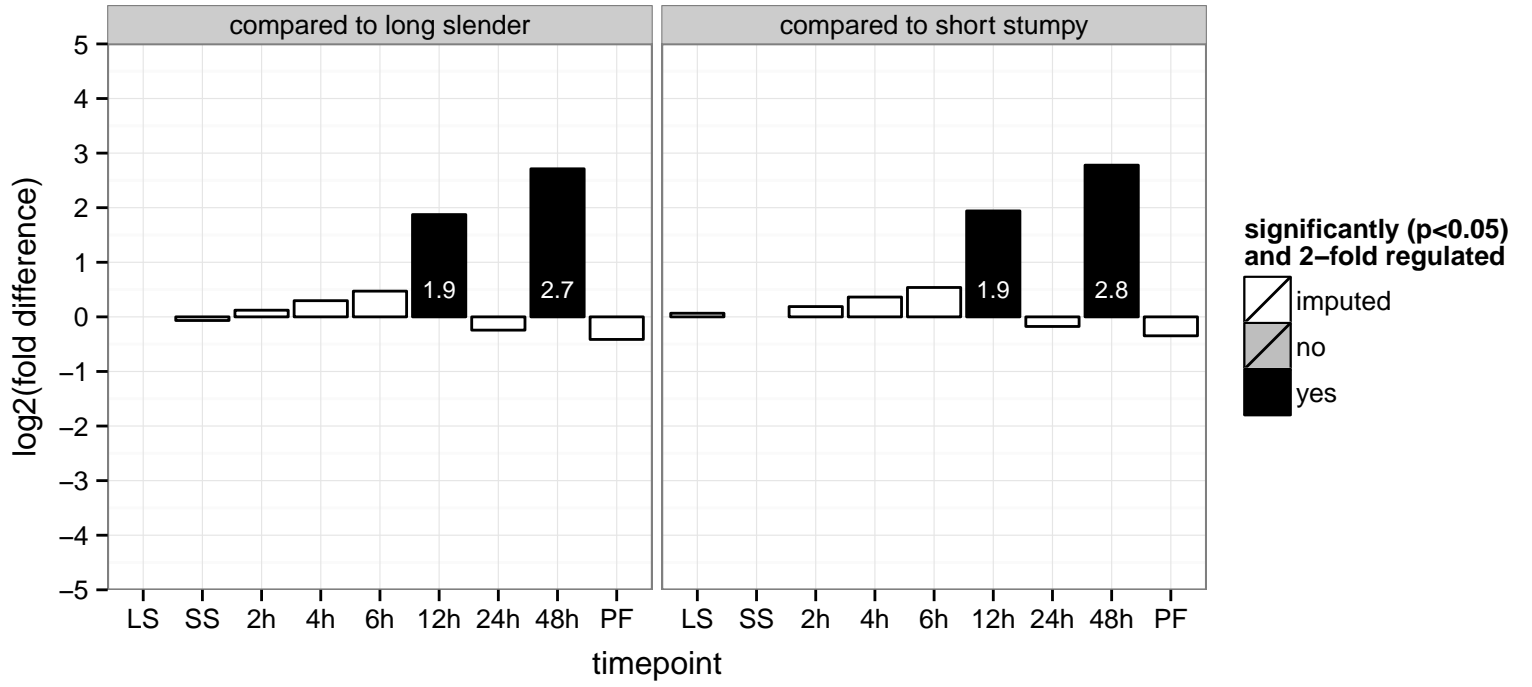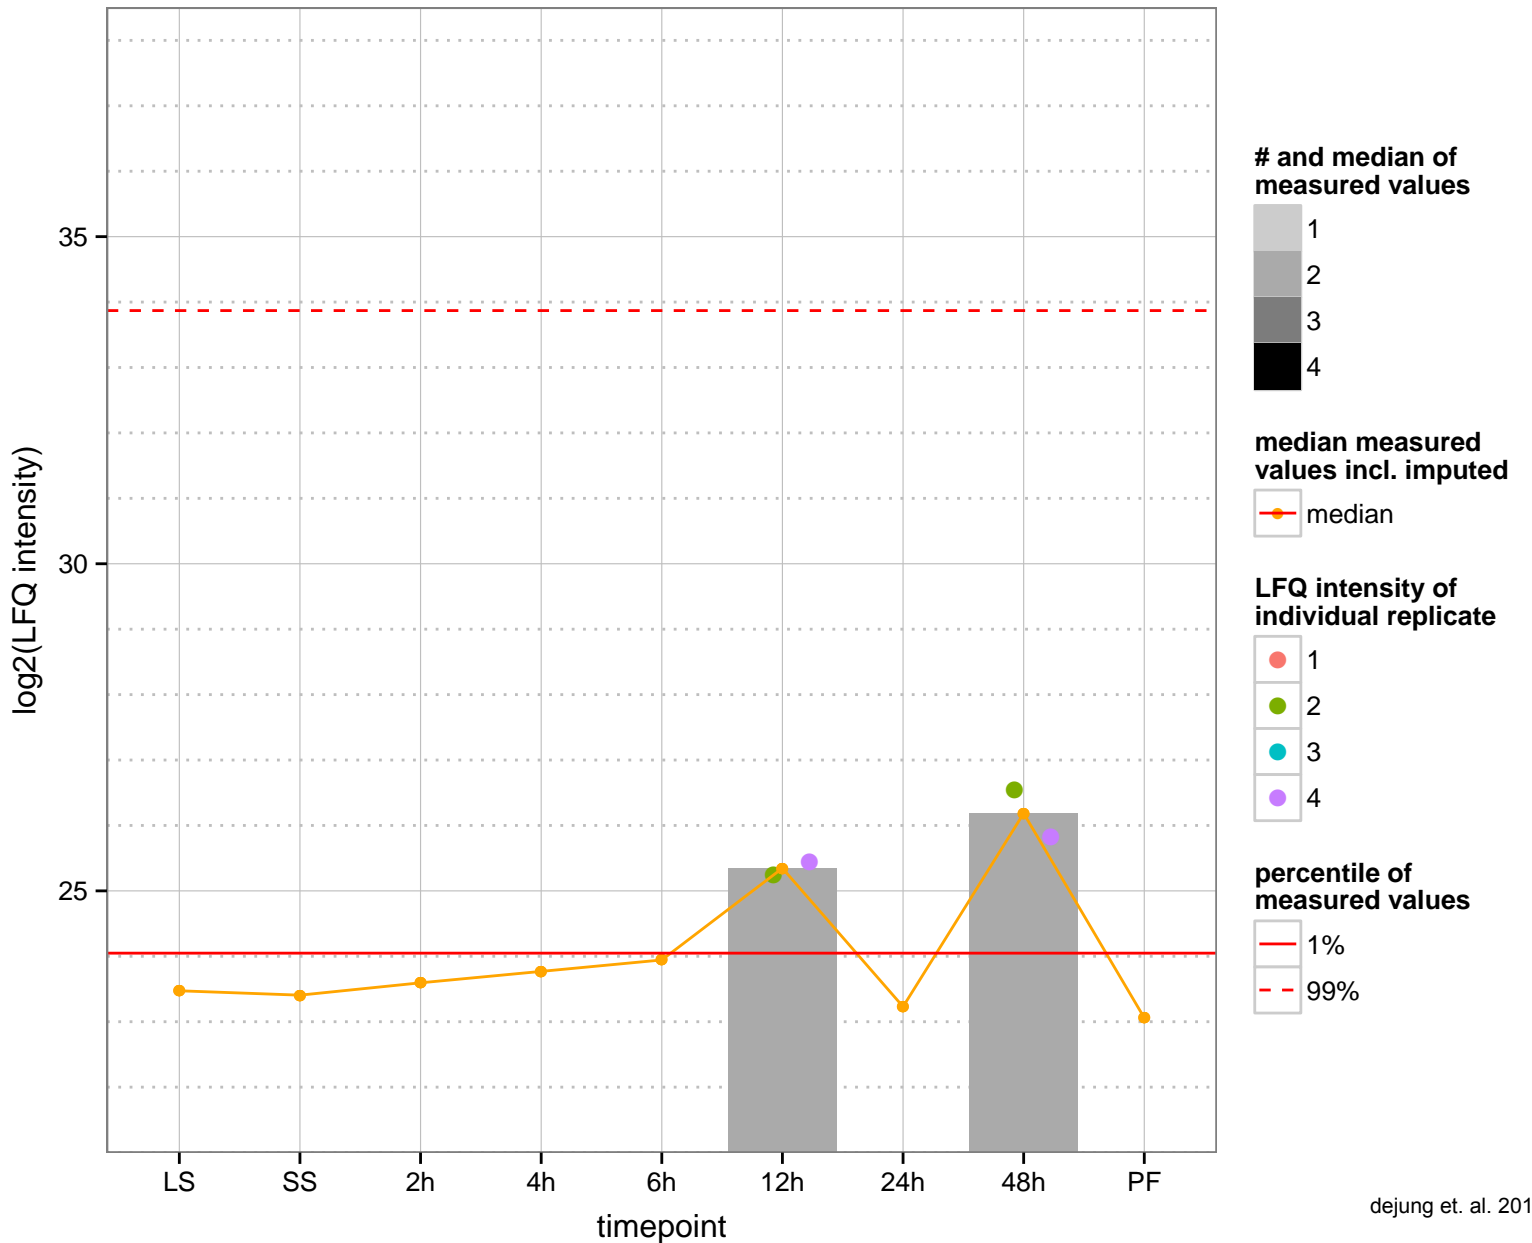

hypothetical protein, conserved  
 Tb927.1.4220  
 AGOF: null  
 AGOC: nucleus  
 AGOP: null  
 PGO: null  
 PGOC: nucleus  
 PGOP: null

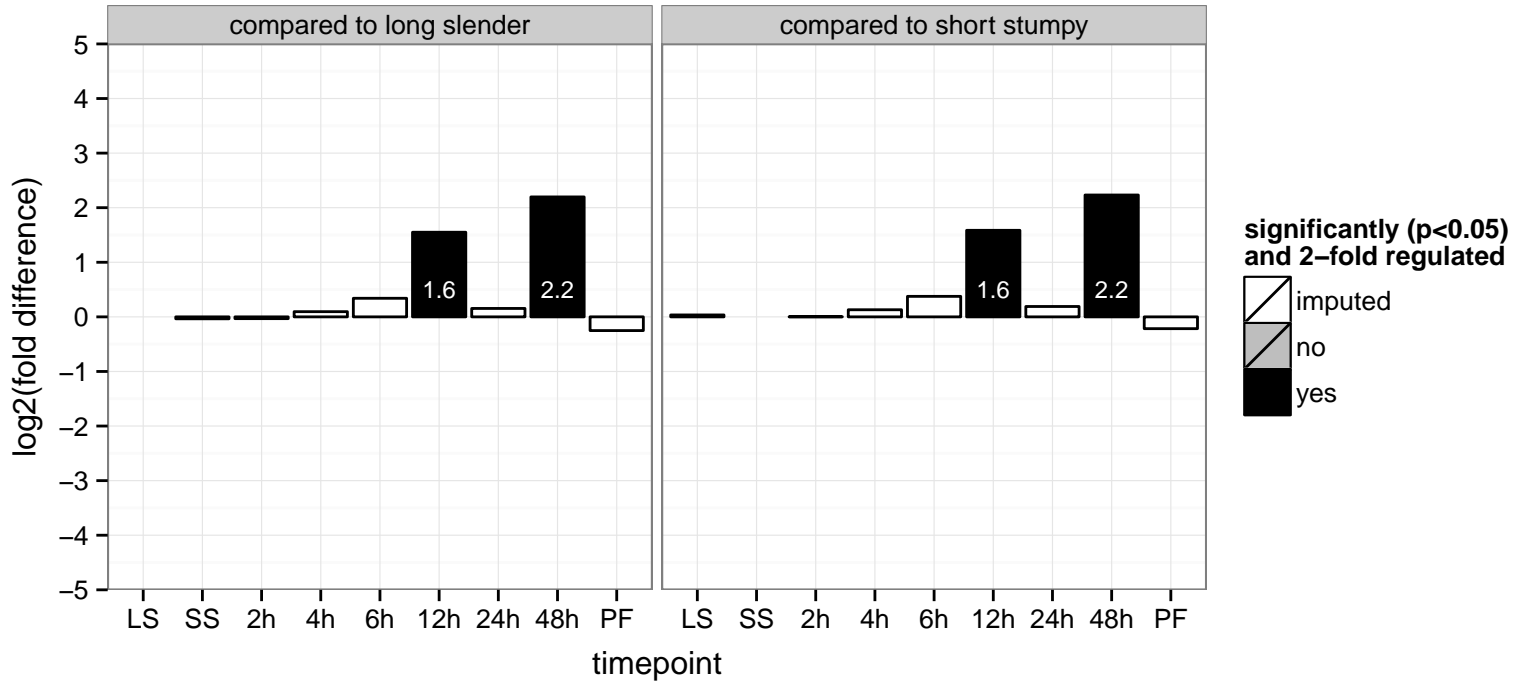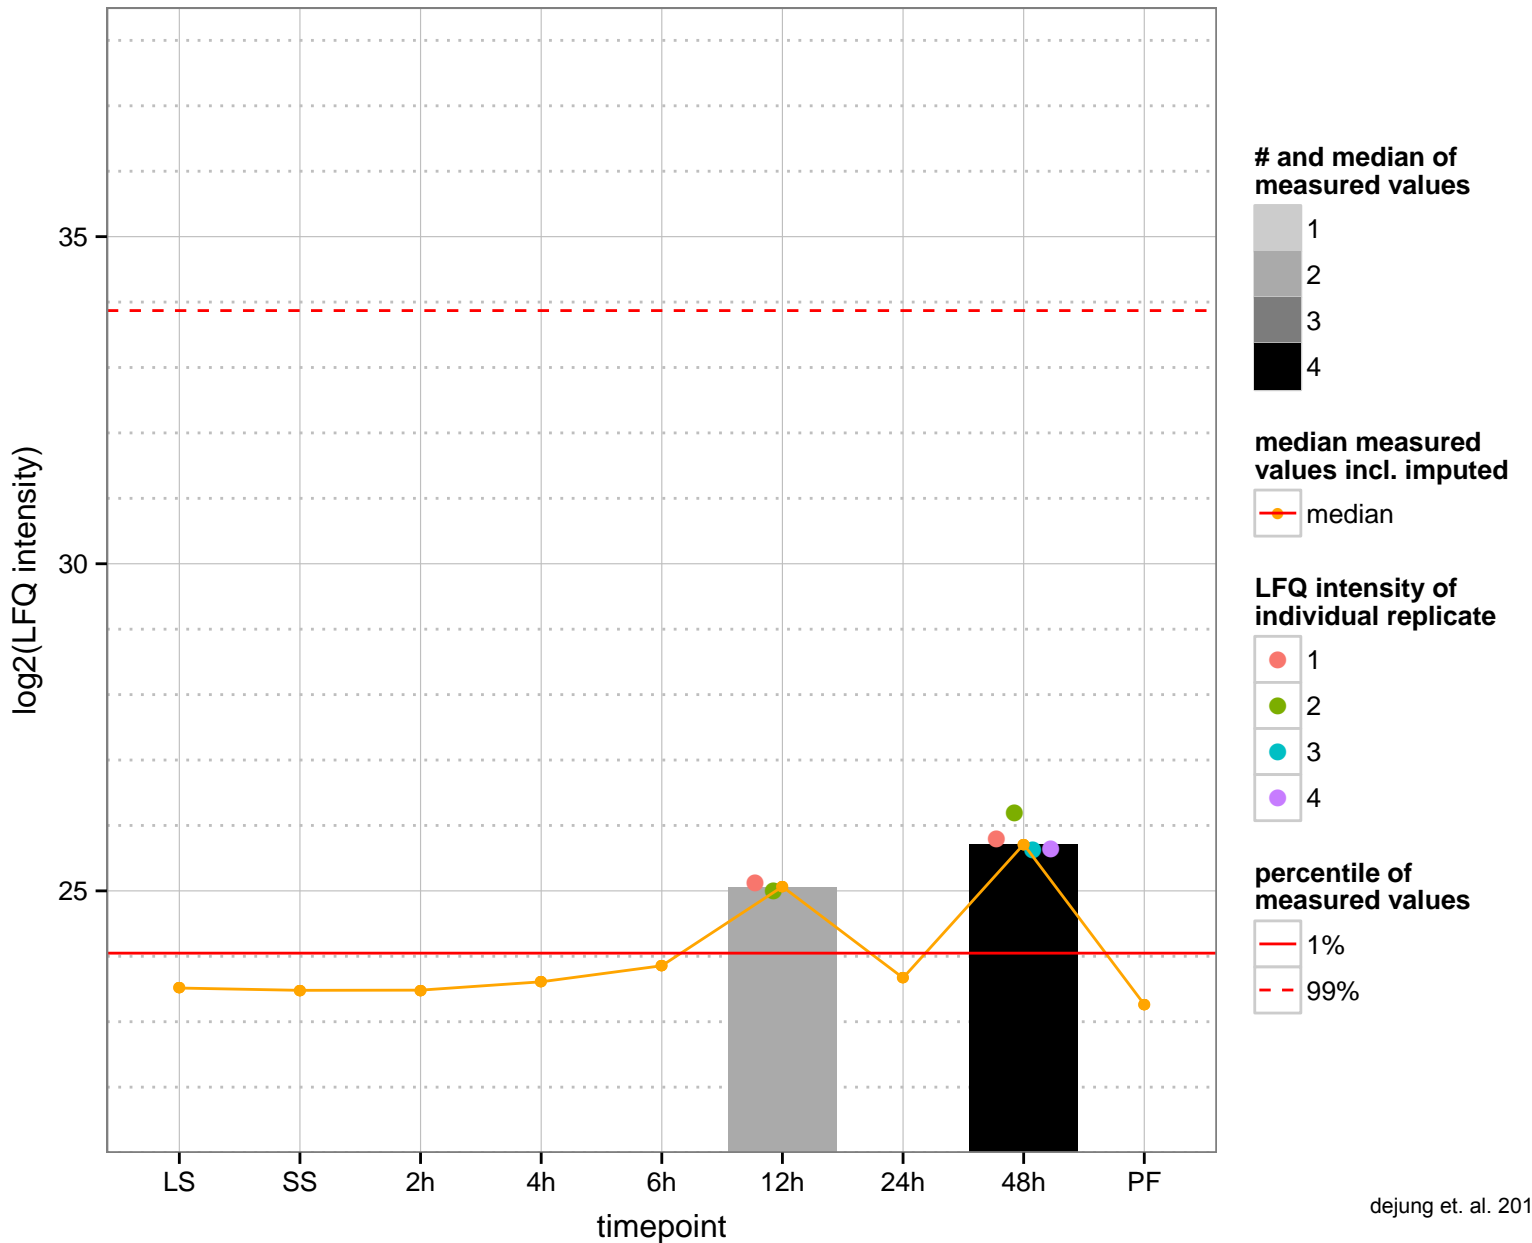

Zinc finger CCCH domain-containing protein 35 (ZC3H35)  
 Tb927.10.12740  
 AGOF: RNA binding, nucleic acid binding, zinc ion binding  
 AGOC: null  
 AGOP: null  
 PGOF: nucleic acid binding, zinc ion binding  
 PGOC: null  
 PGOP: null

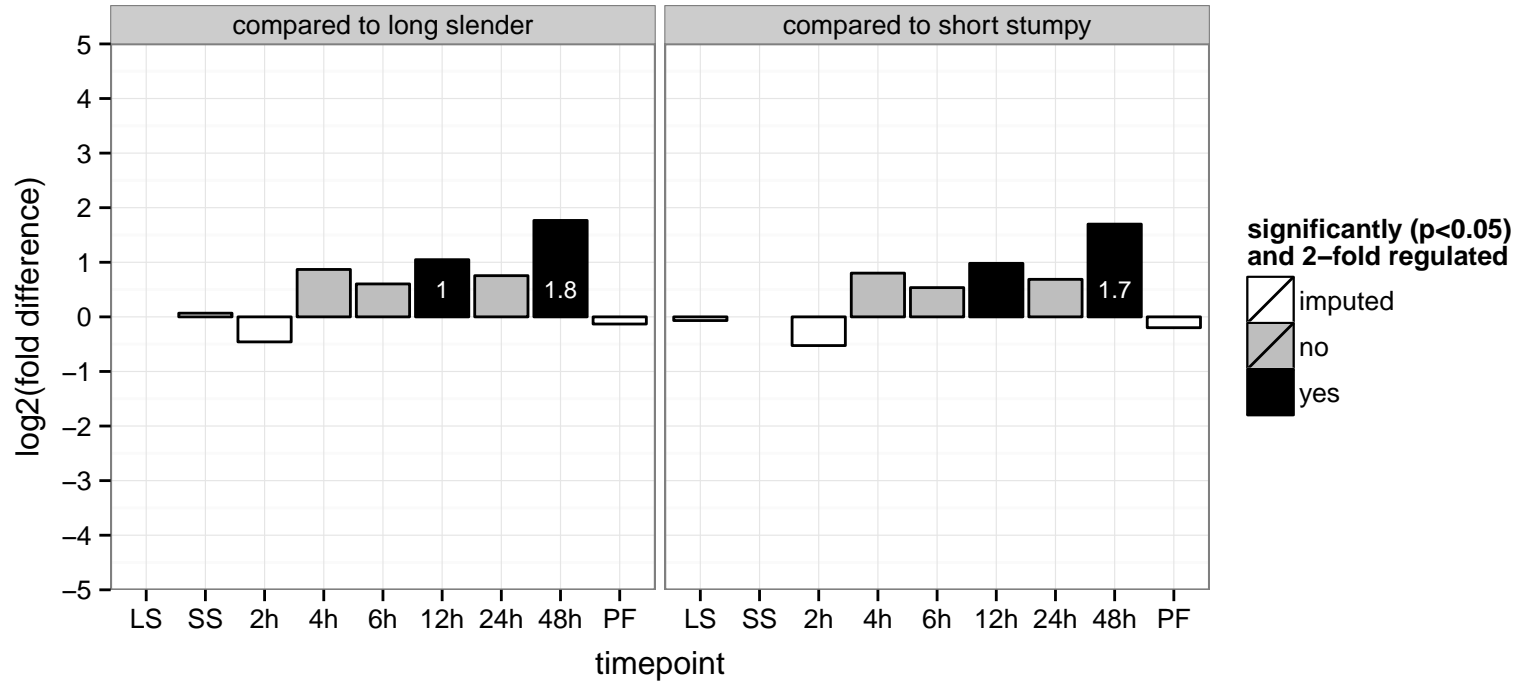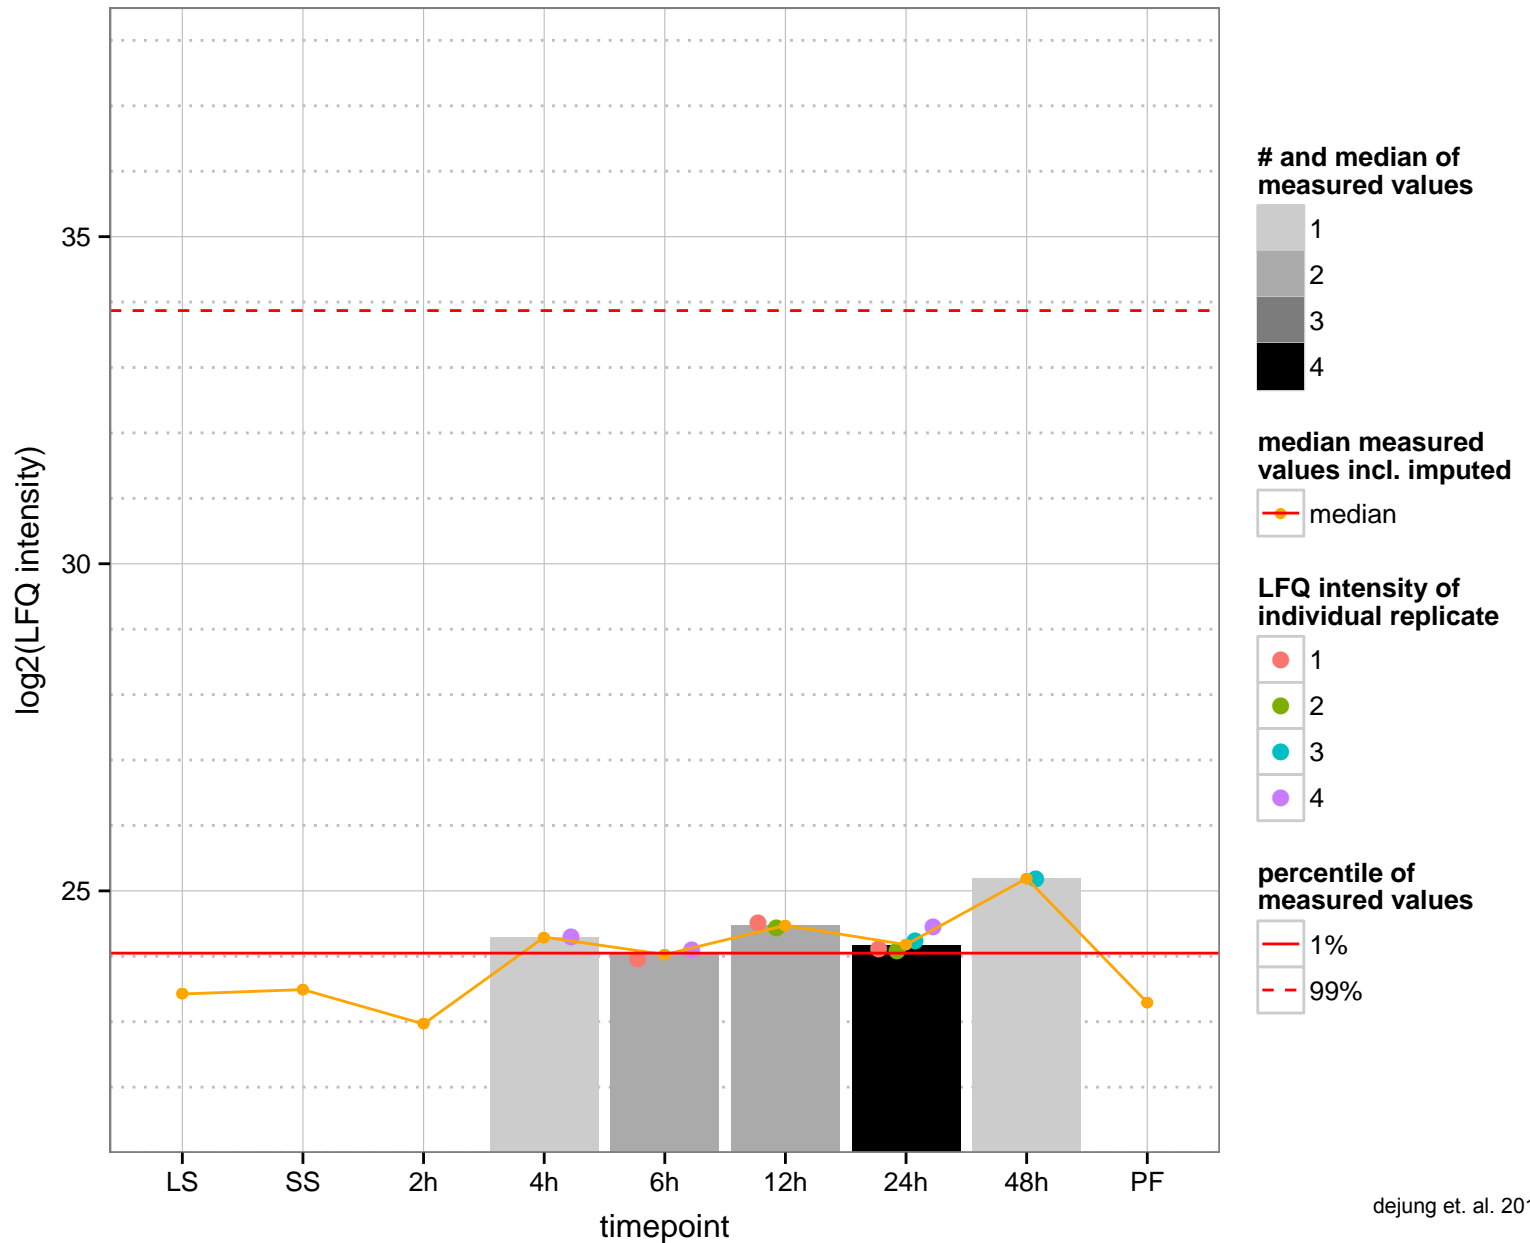

sjogren s syndrome nuclear autoantigen 1, putative  
 Tb927.10.14110  
 AGOF: null  
 AGOC: null  
 AGOP: null  
 PGO: null  
 PGOC: null  
 PGOP: null

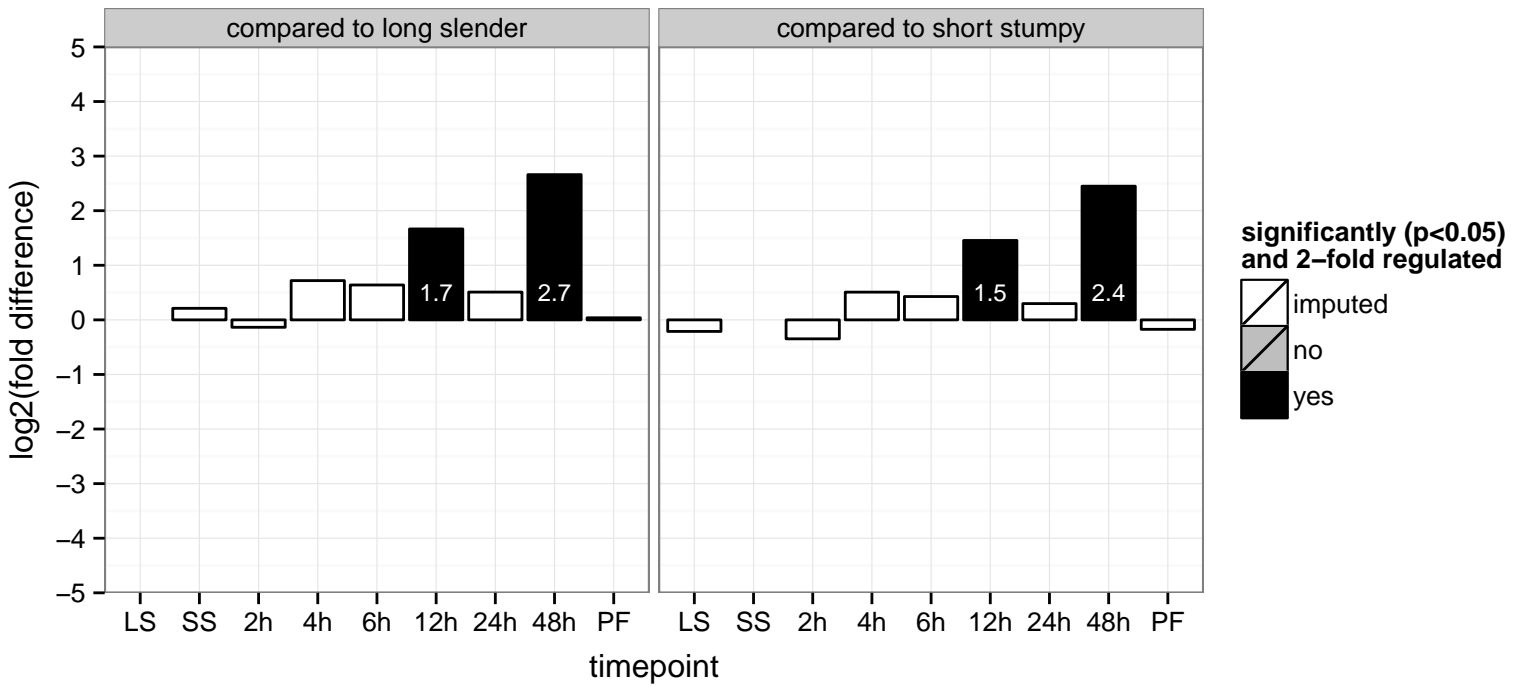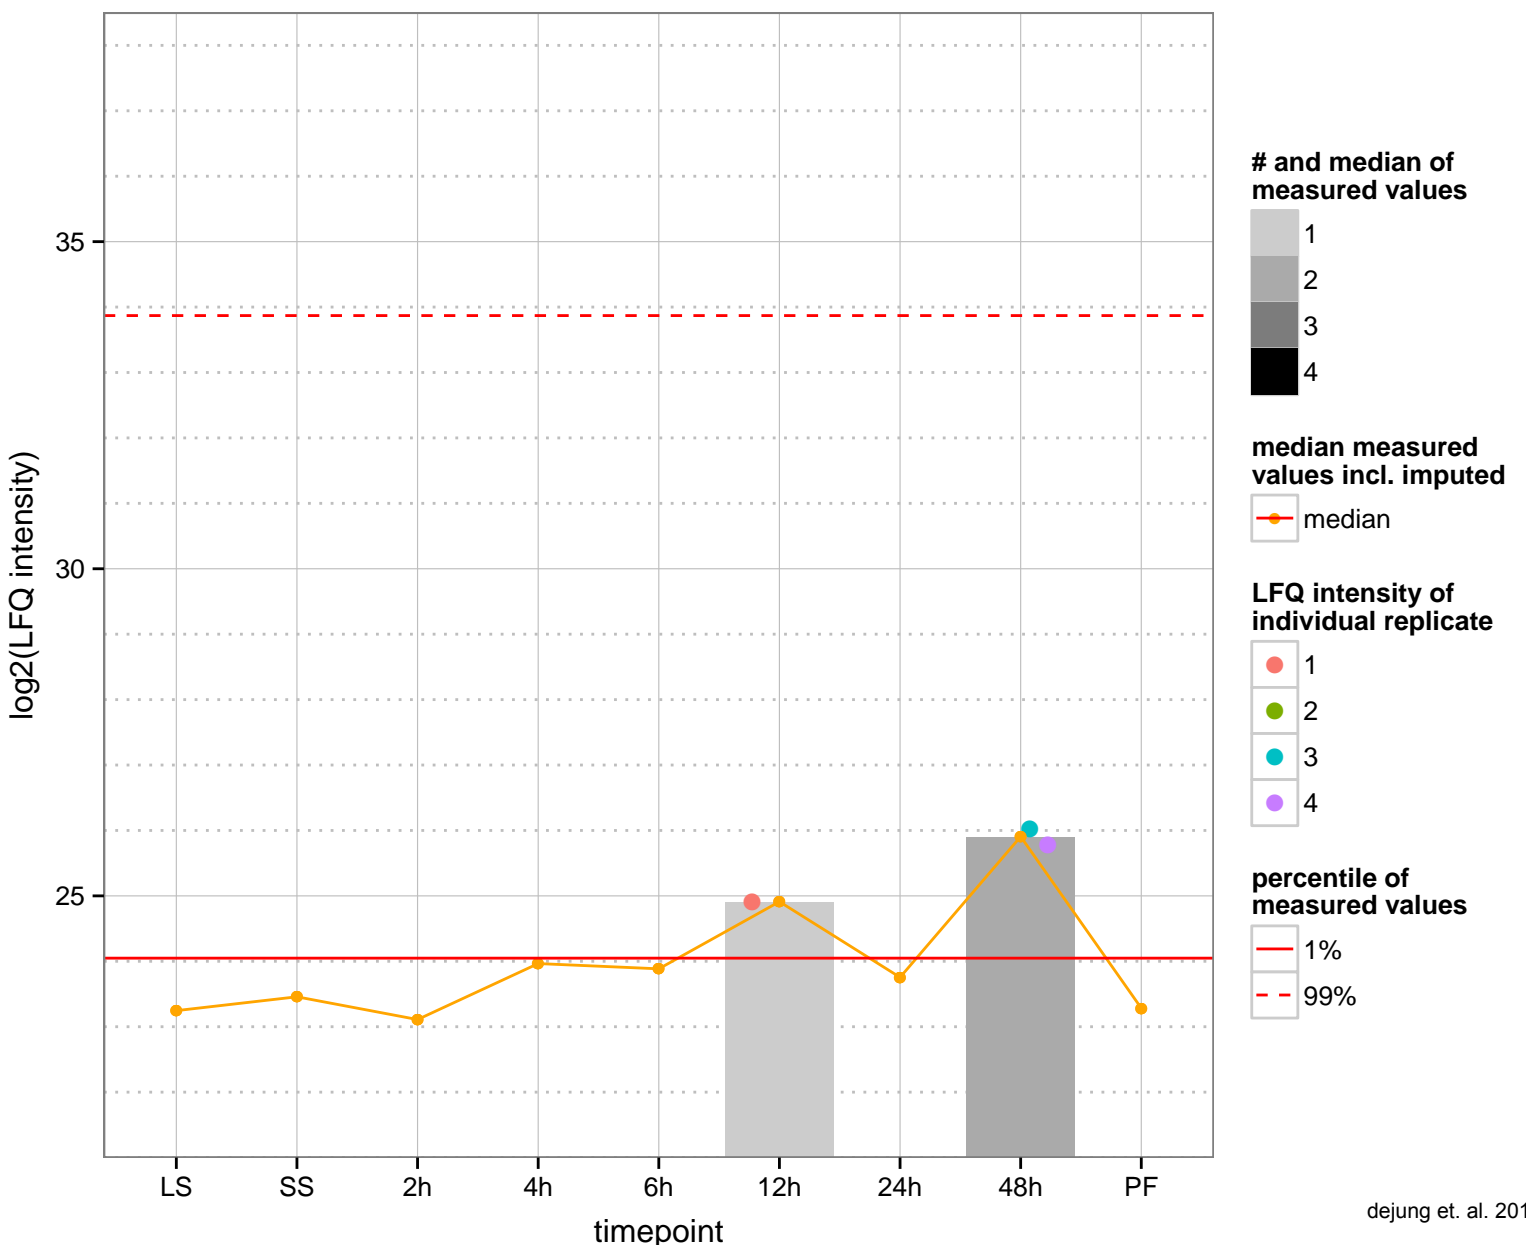

hypothetical protein, conserved  
 Tb927.11.11790  
 AGOF: nucleic acid binding  
 AGOC: null  
 AGOP: null  
 PGOF: nucleic acid binding  
 PGO: null  
 PGOP: null

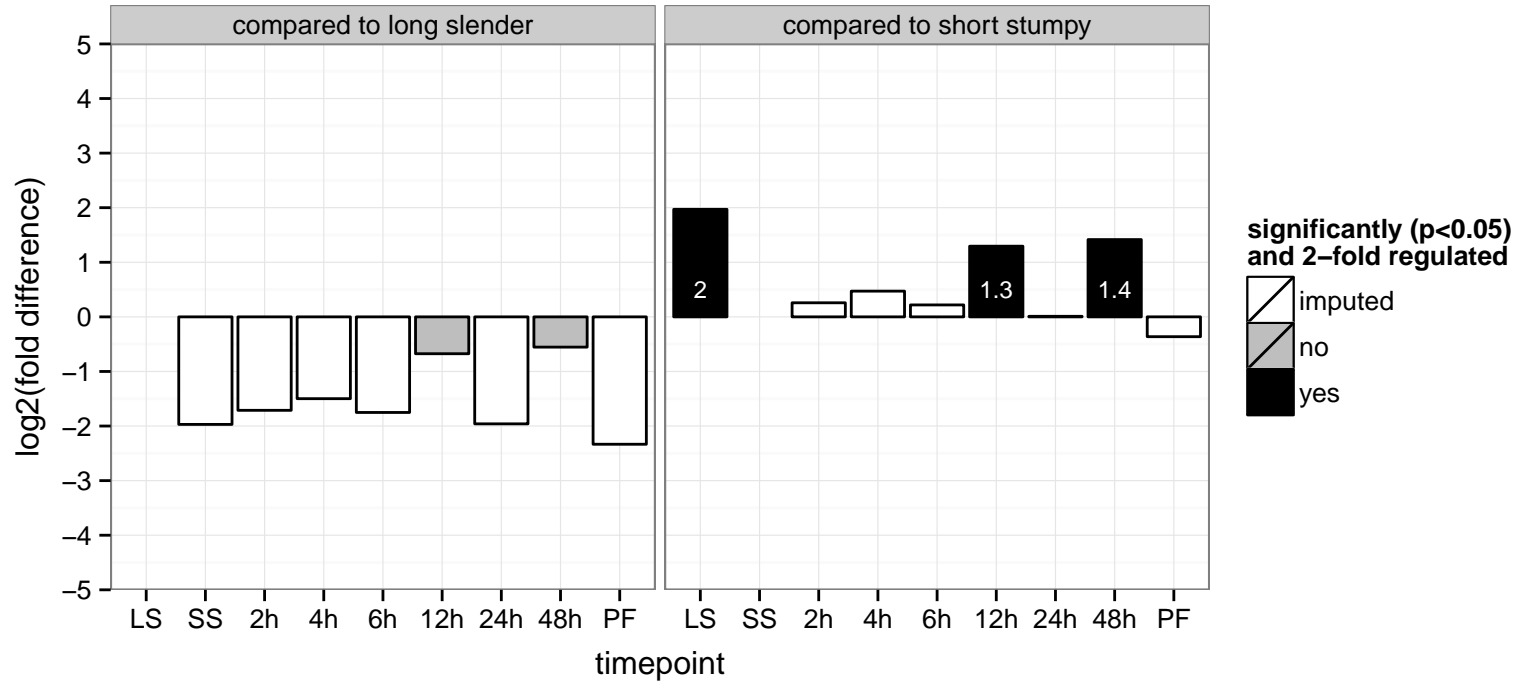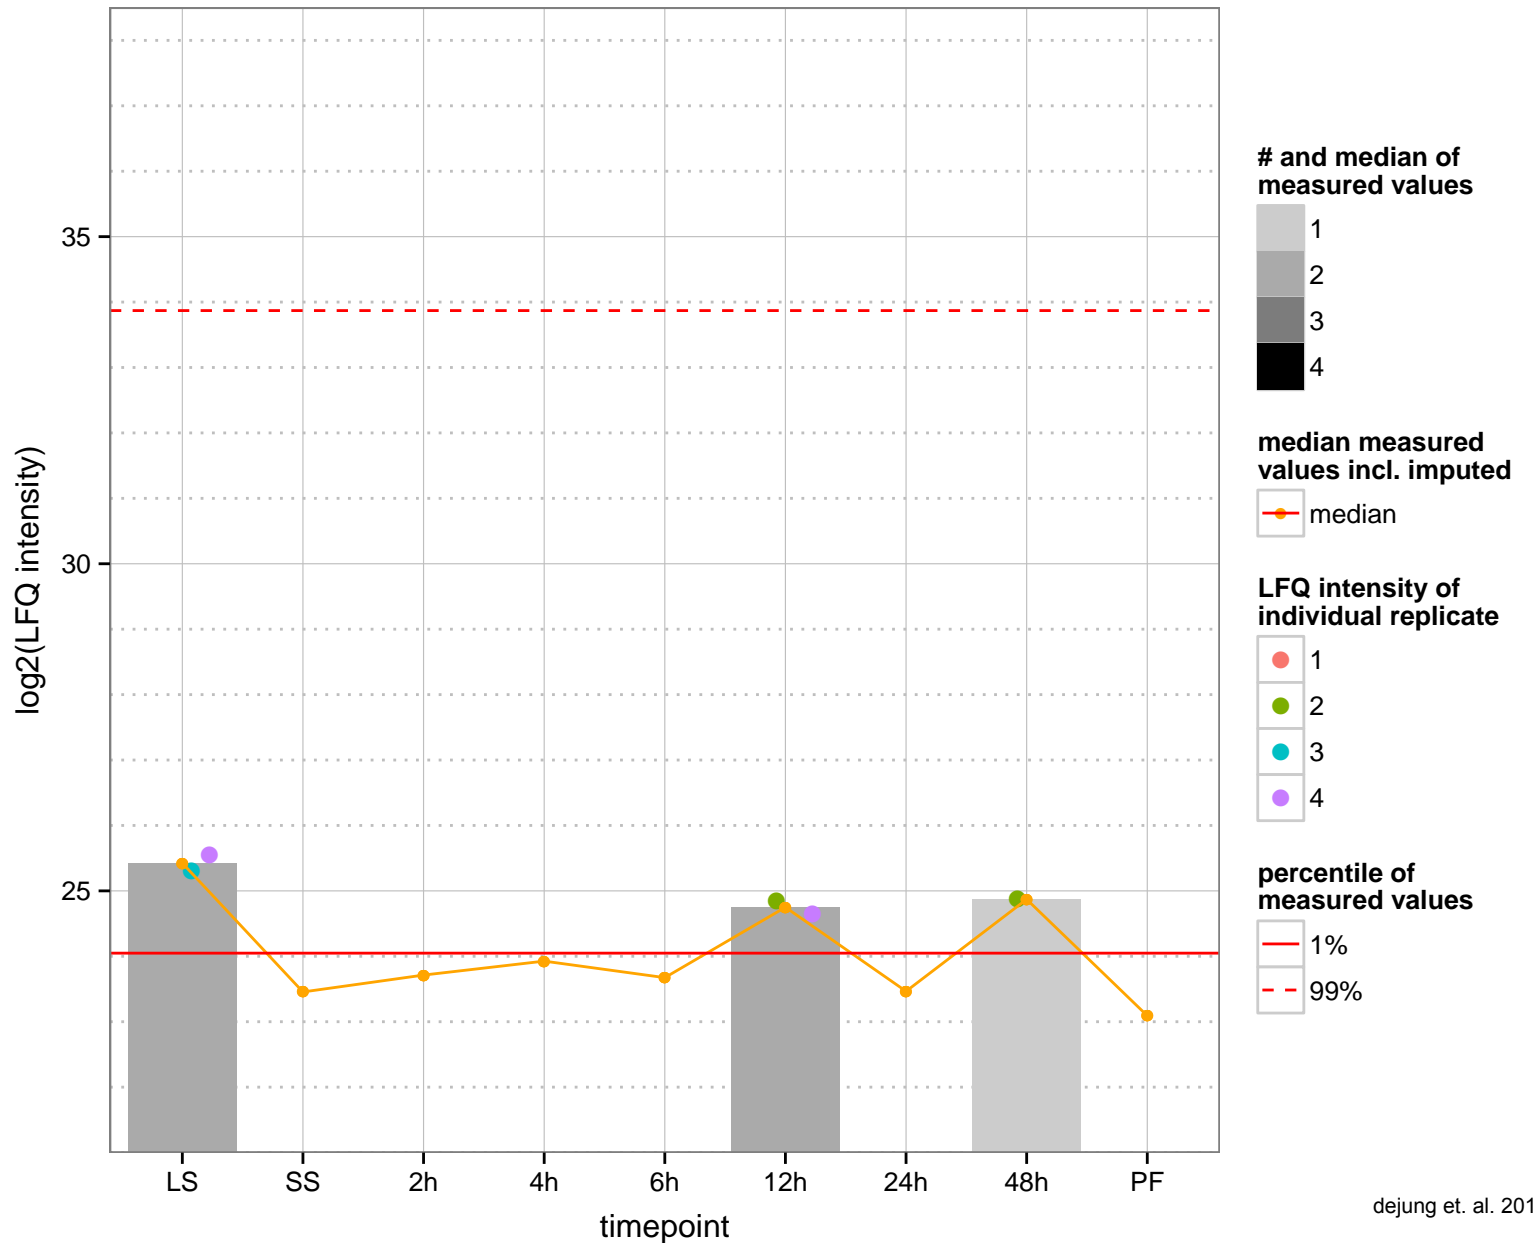



Polypeptide deformylase 1

Tb927.11.14520

AGOF: formylmethionine deformylase activity, iron ion binding, peptide deformylase activity

AGOC: null

AGOP: cellular protein modification process, translation

PGOF: null

PGOC: null

PGOP: null

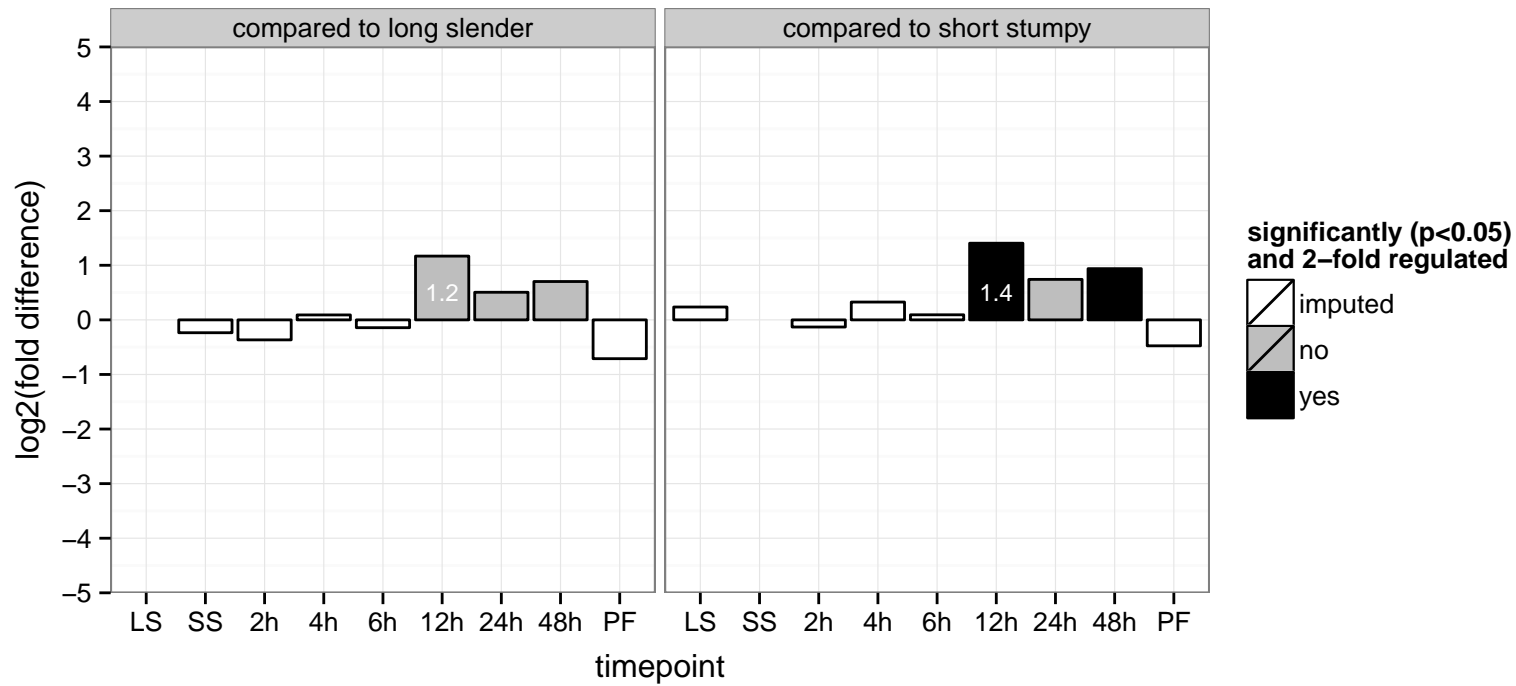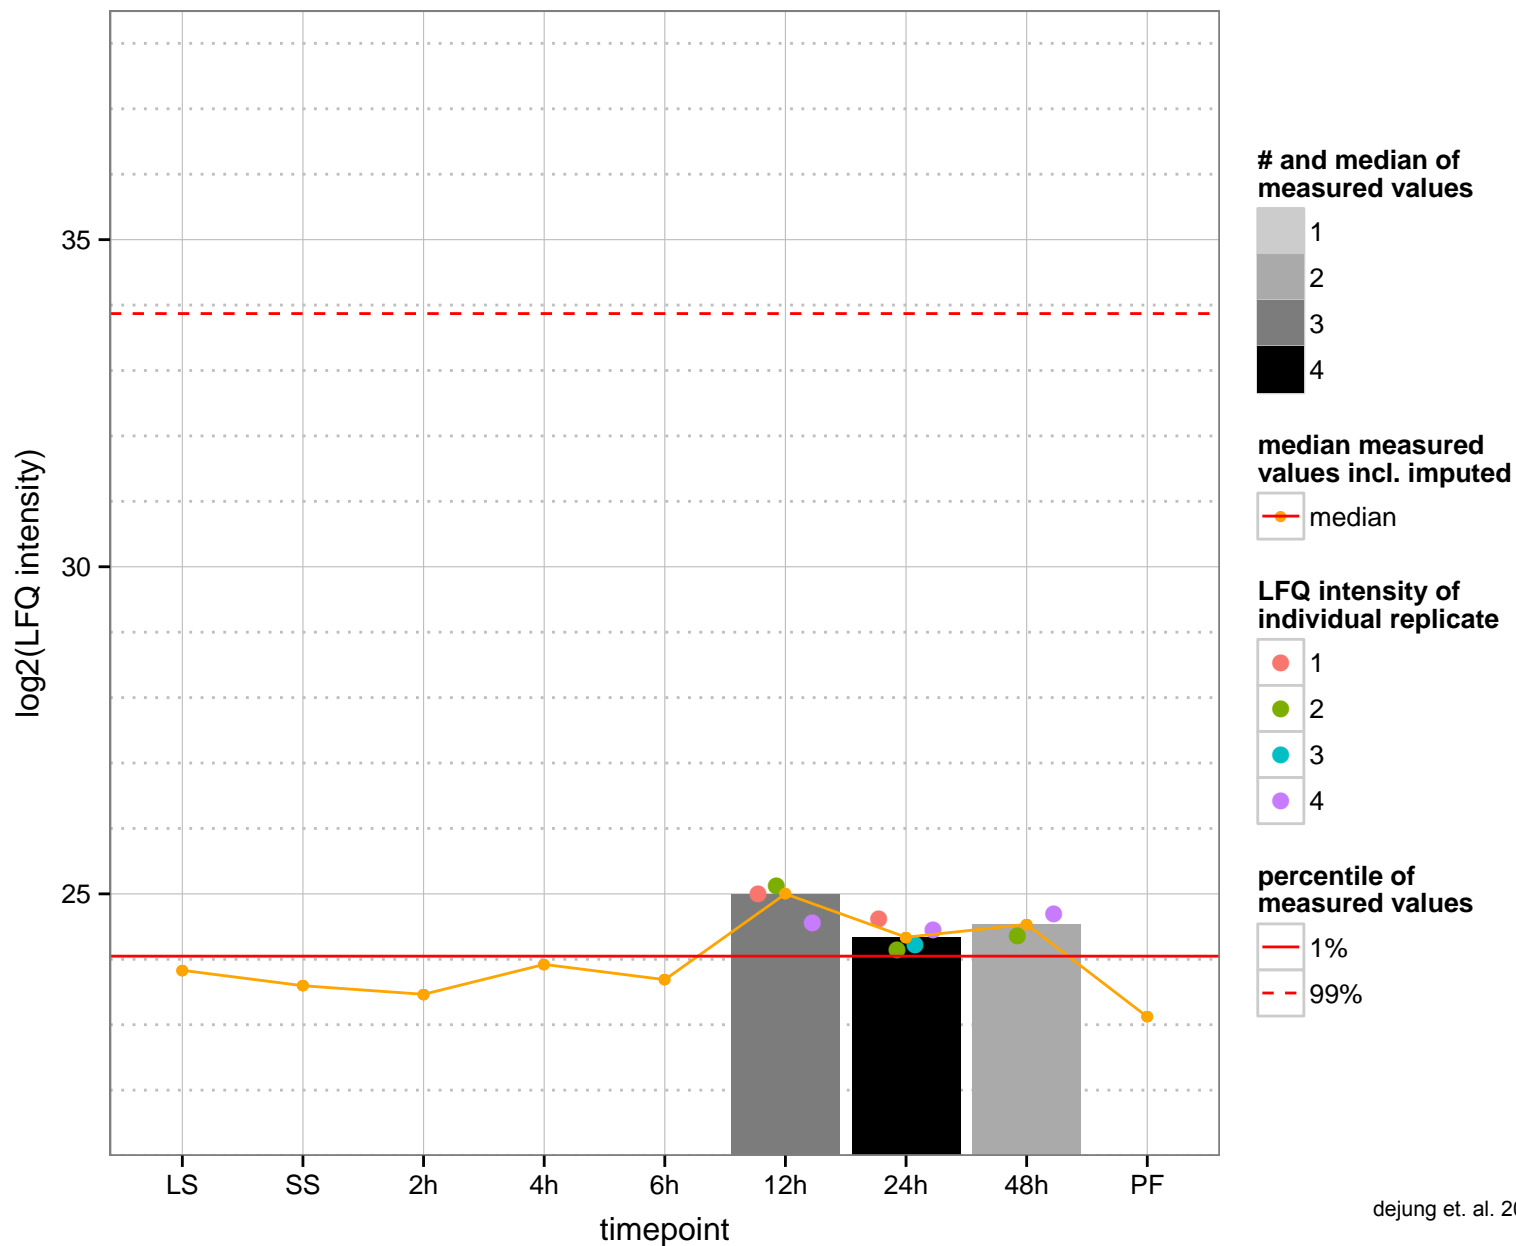

aldo/keto reductase, putative  
 Tb927.11.5360  
 AGOF: aldo-keto reductase (NADP) activity  
 AGOC: cytoplasm, nucleus  
 AGOP: metabolic process, oxidation-reduction process  
 PGO: null  
 PGOC: null  
 PGOP: null

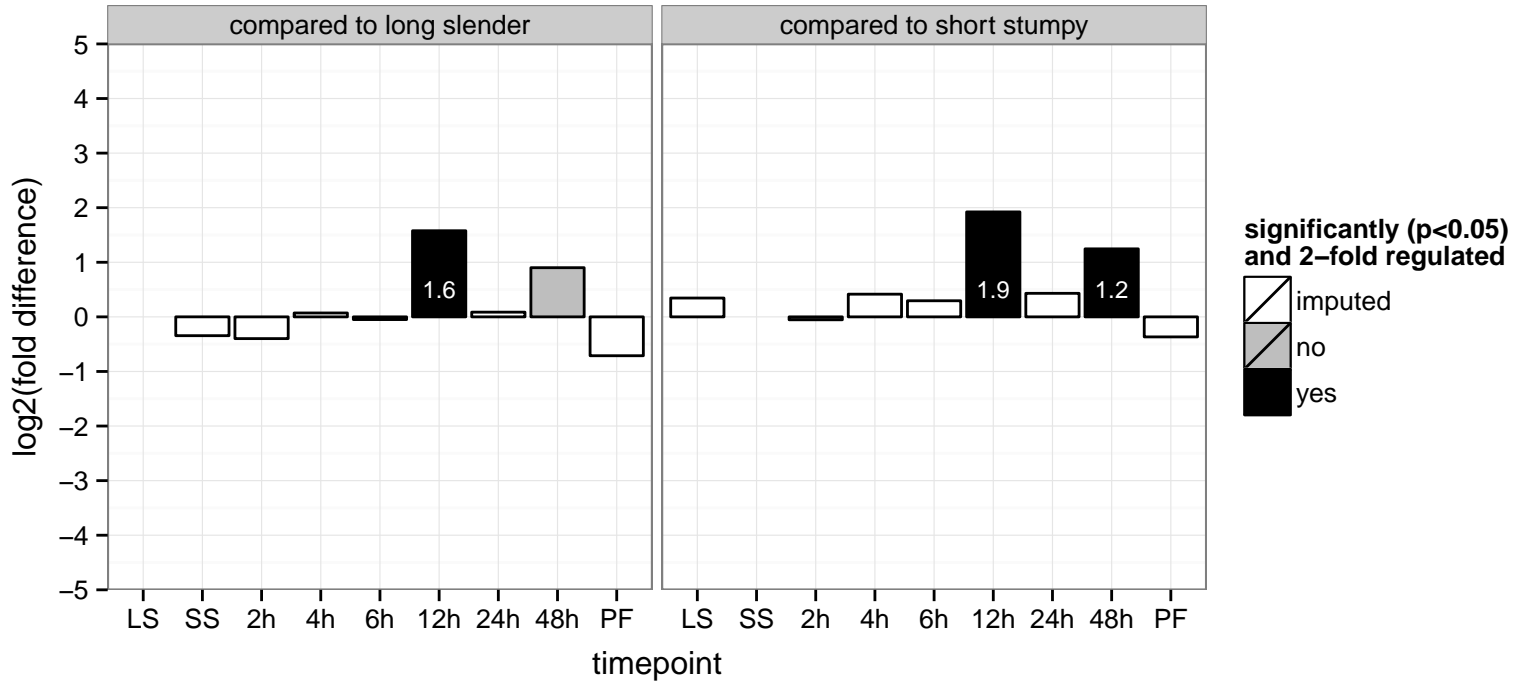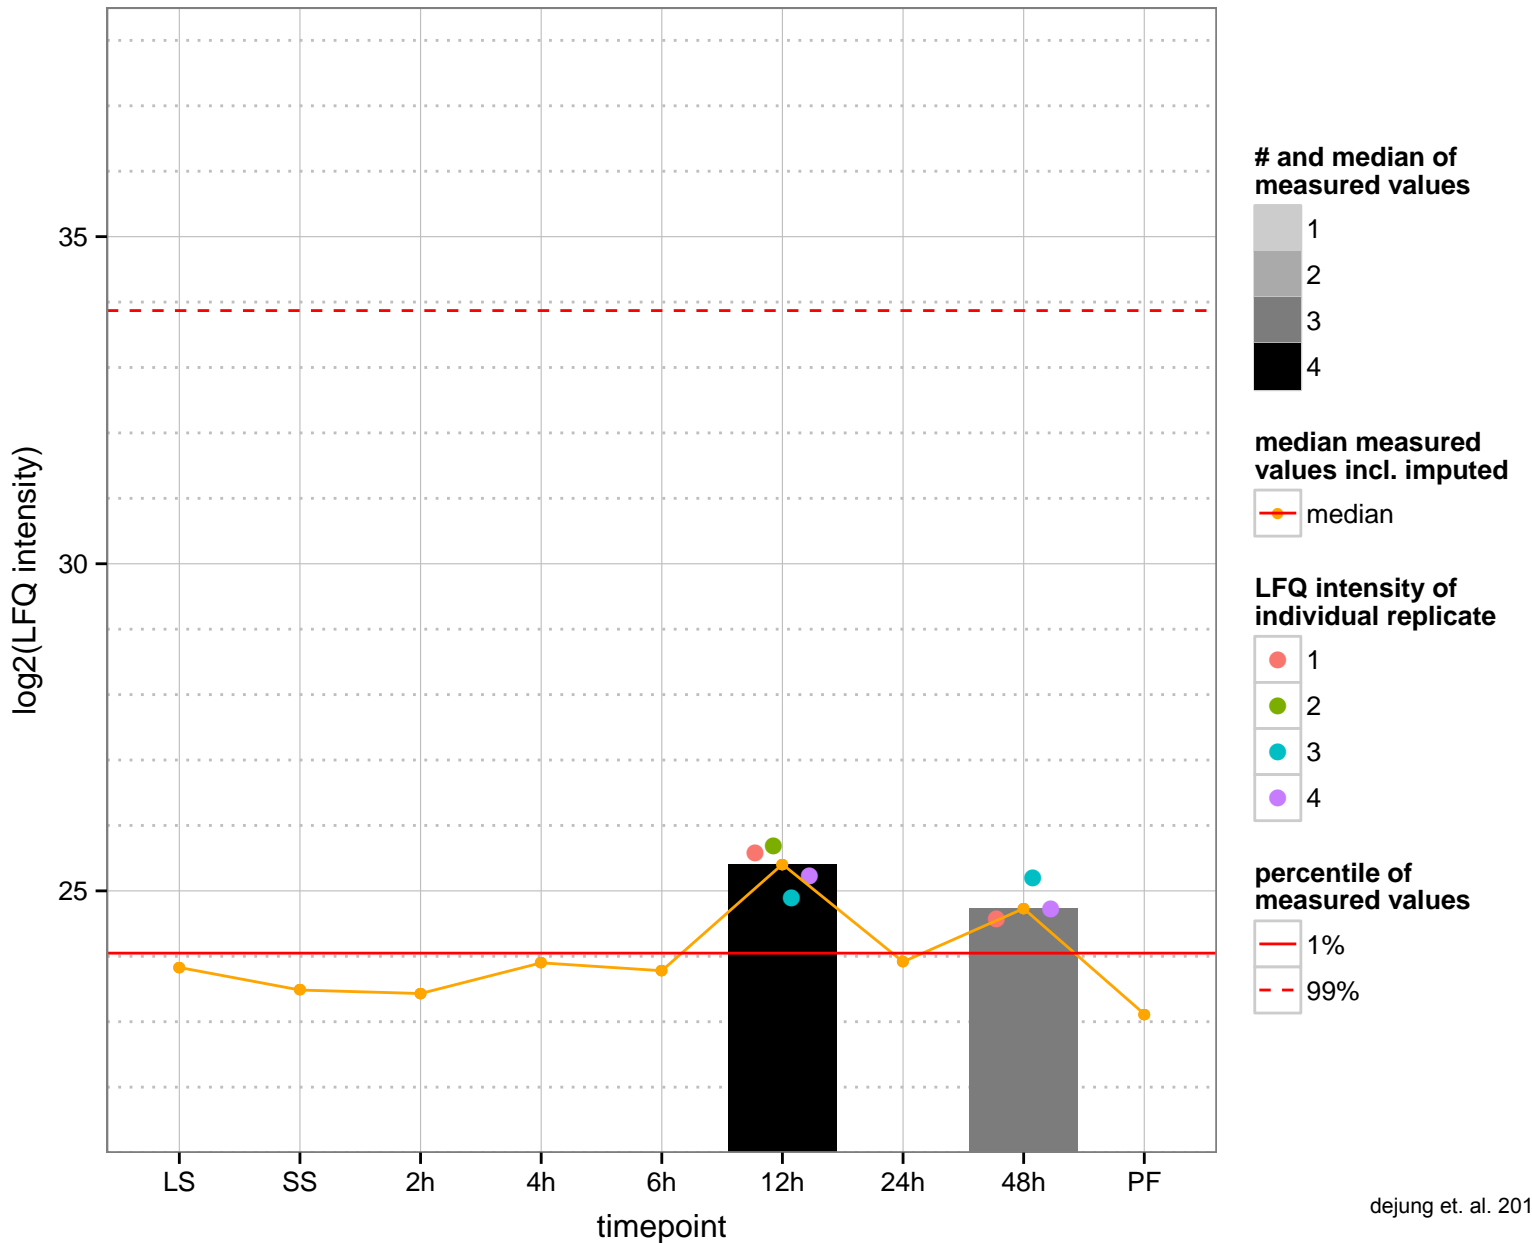

hypothetical protein, conserved  
 Tb927.11.8860  
 AGOF: null  
 AGOC: null  
 AGOP: null  
 PGOF: null  
 PGOC: null  
 PGOP: null

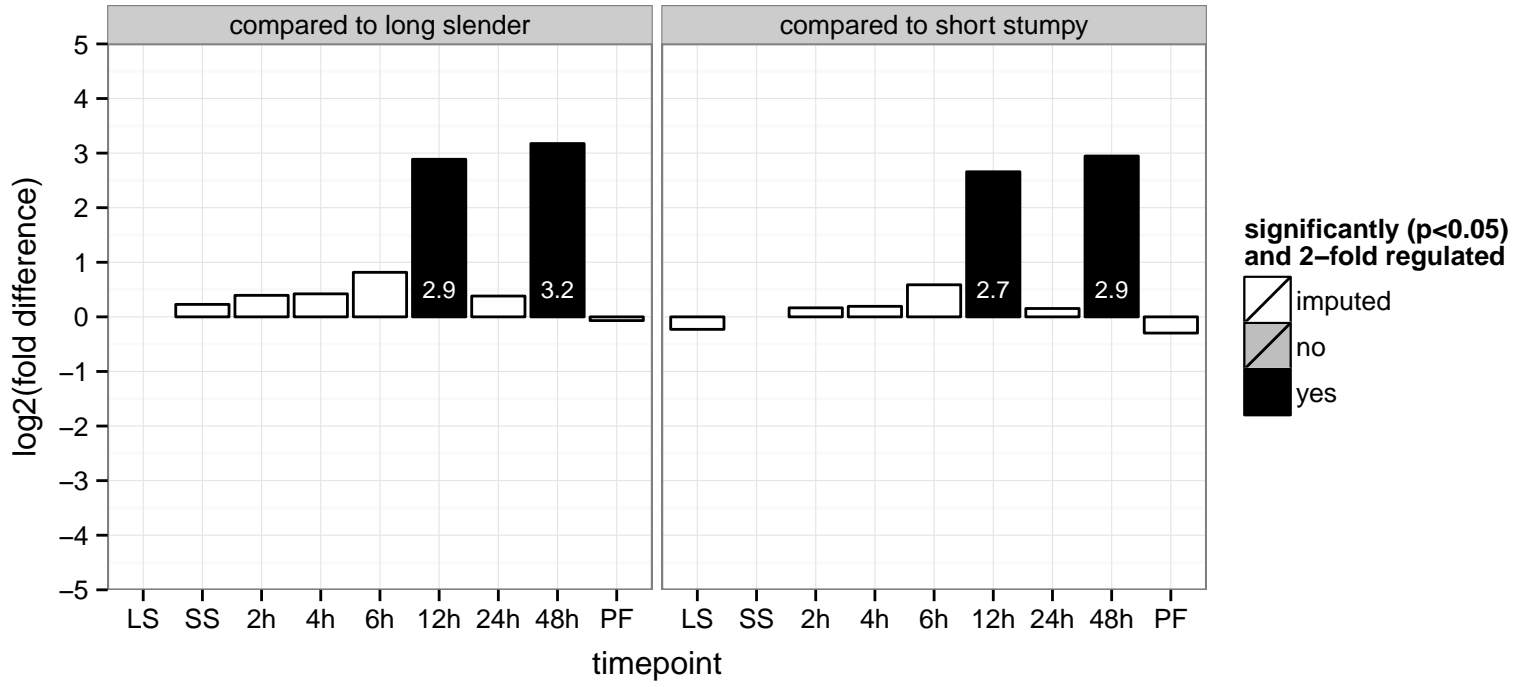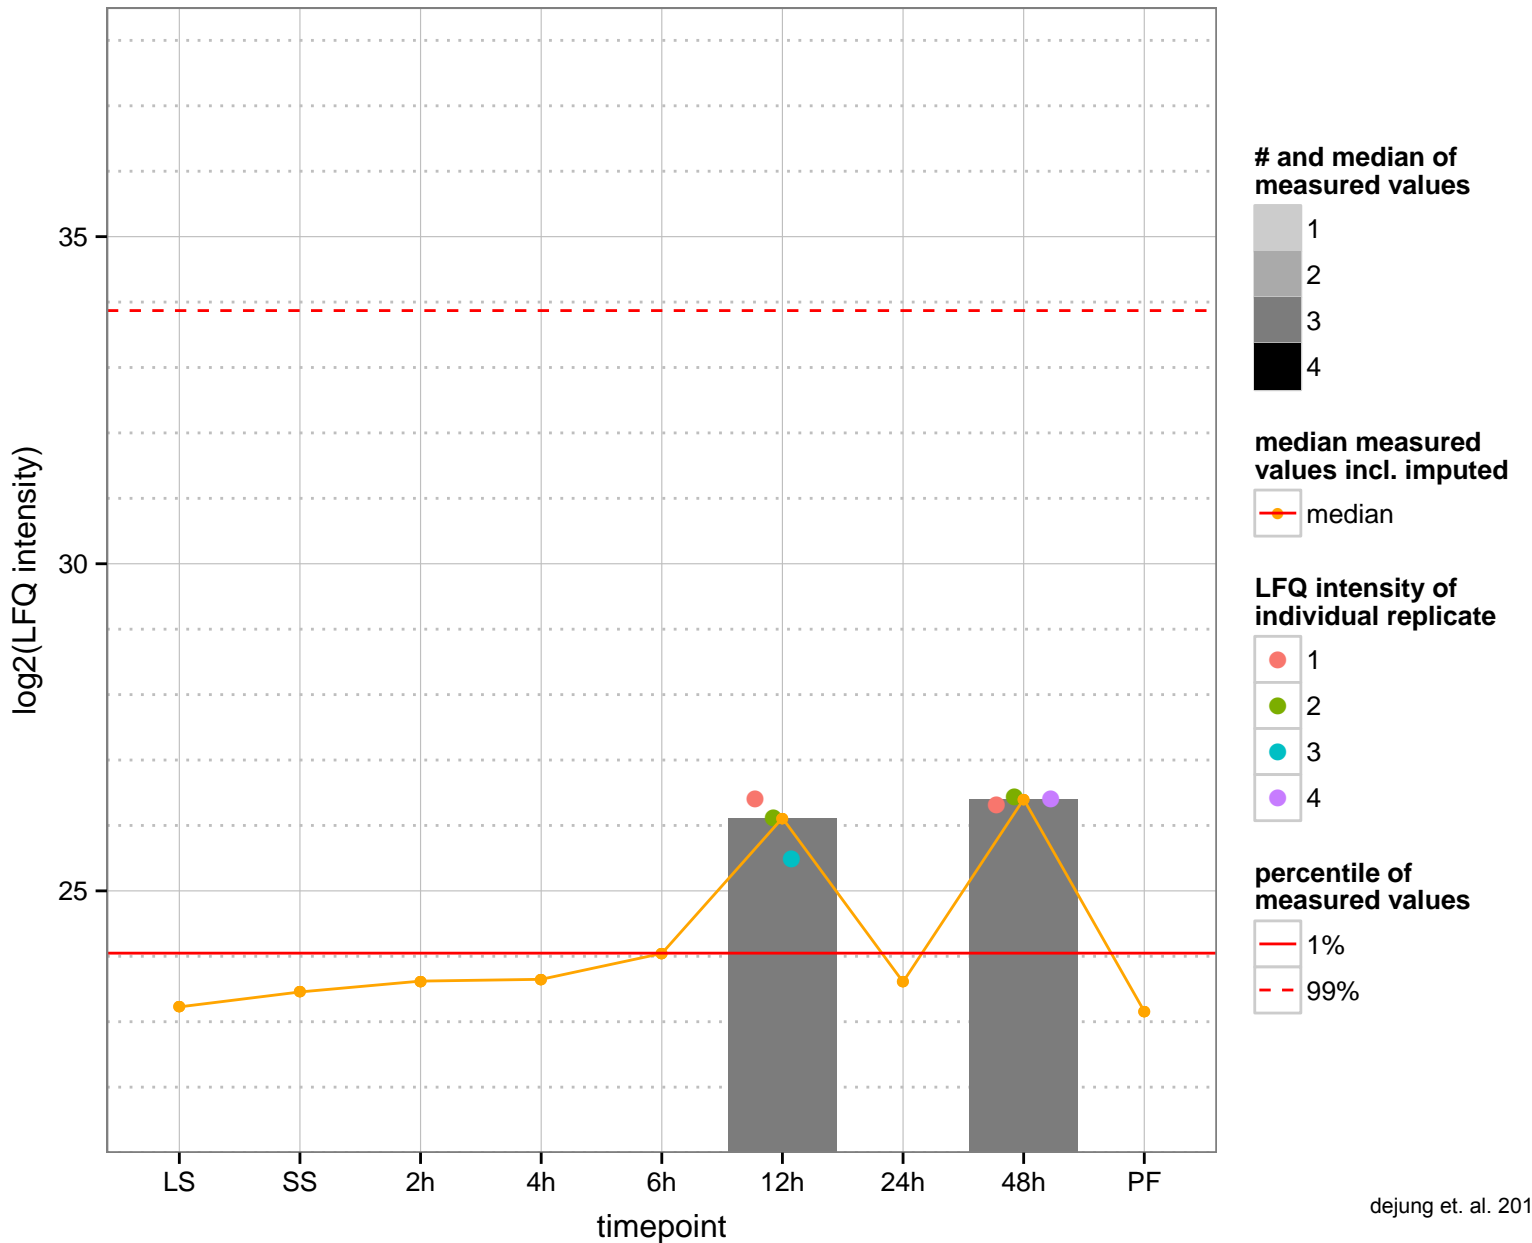

hypothetical protein, conserved  
 Tb927.2.2270  
 AGOF: null  
 AGOC: null  
 AGOP: null  
 PGO: null  
 PGOC: null  
 PGOP: null

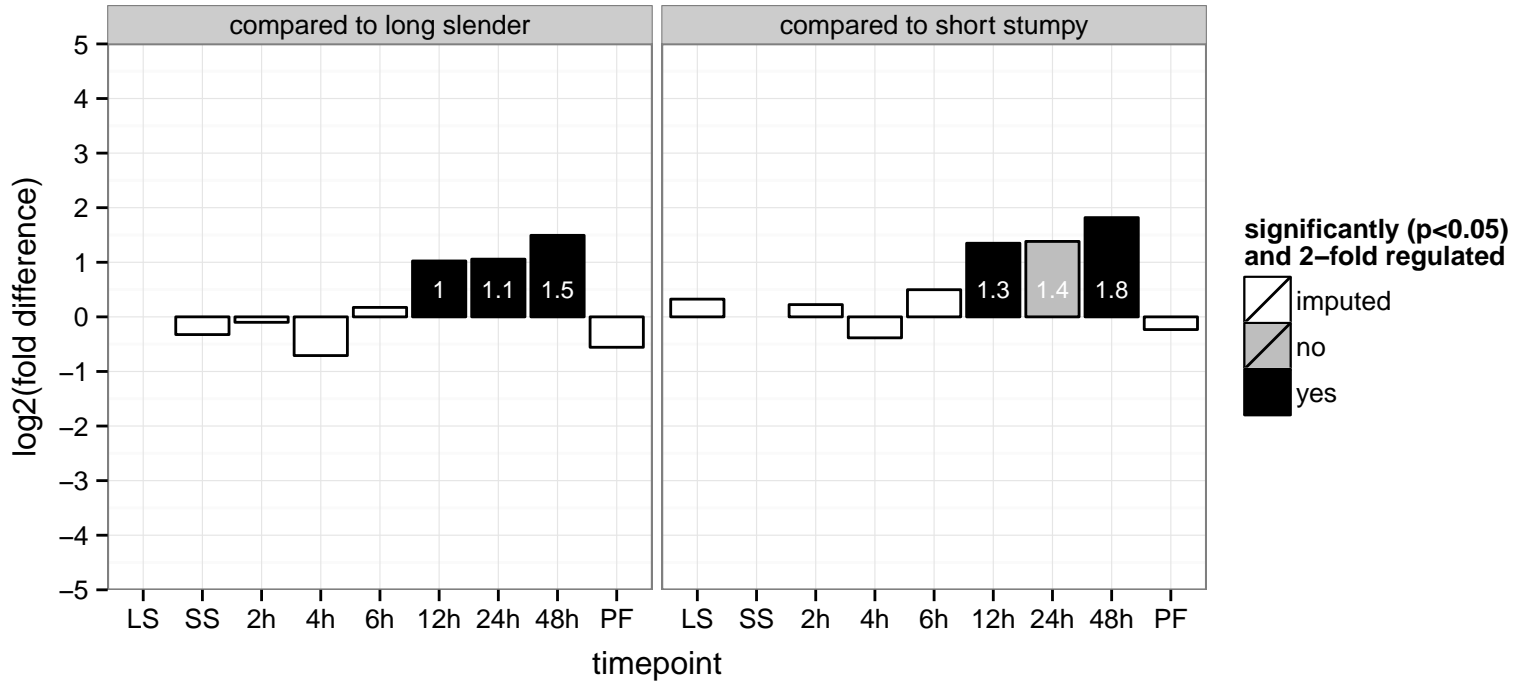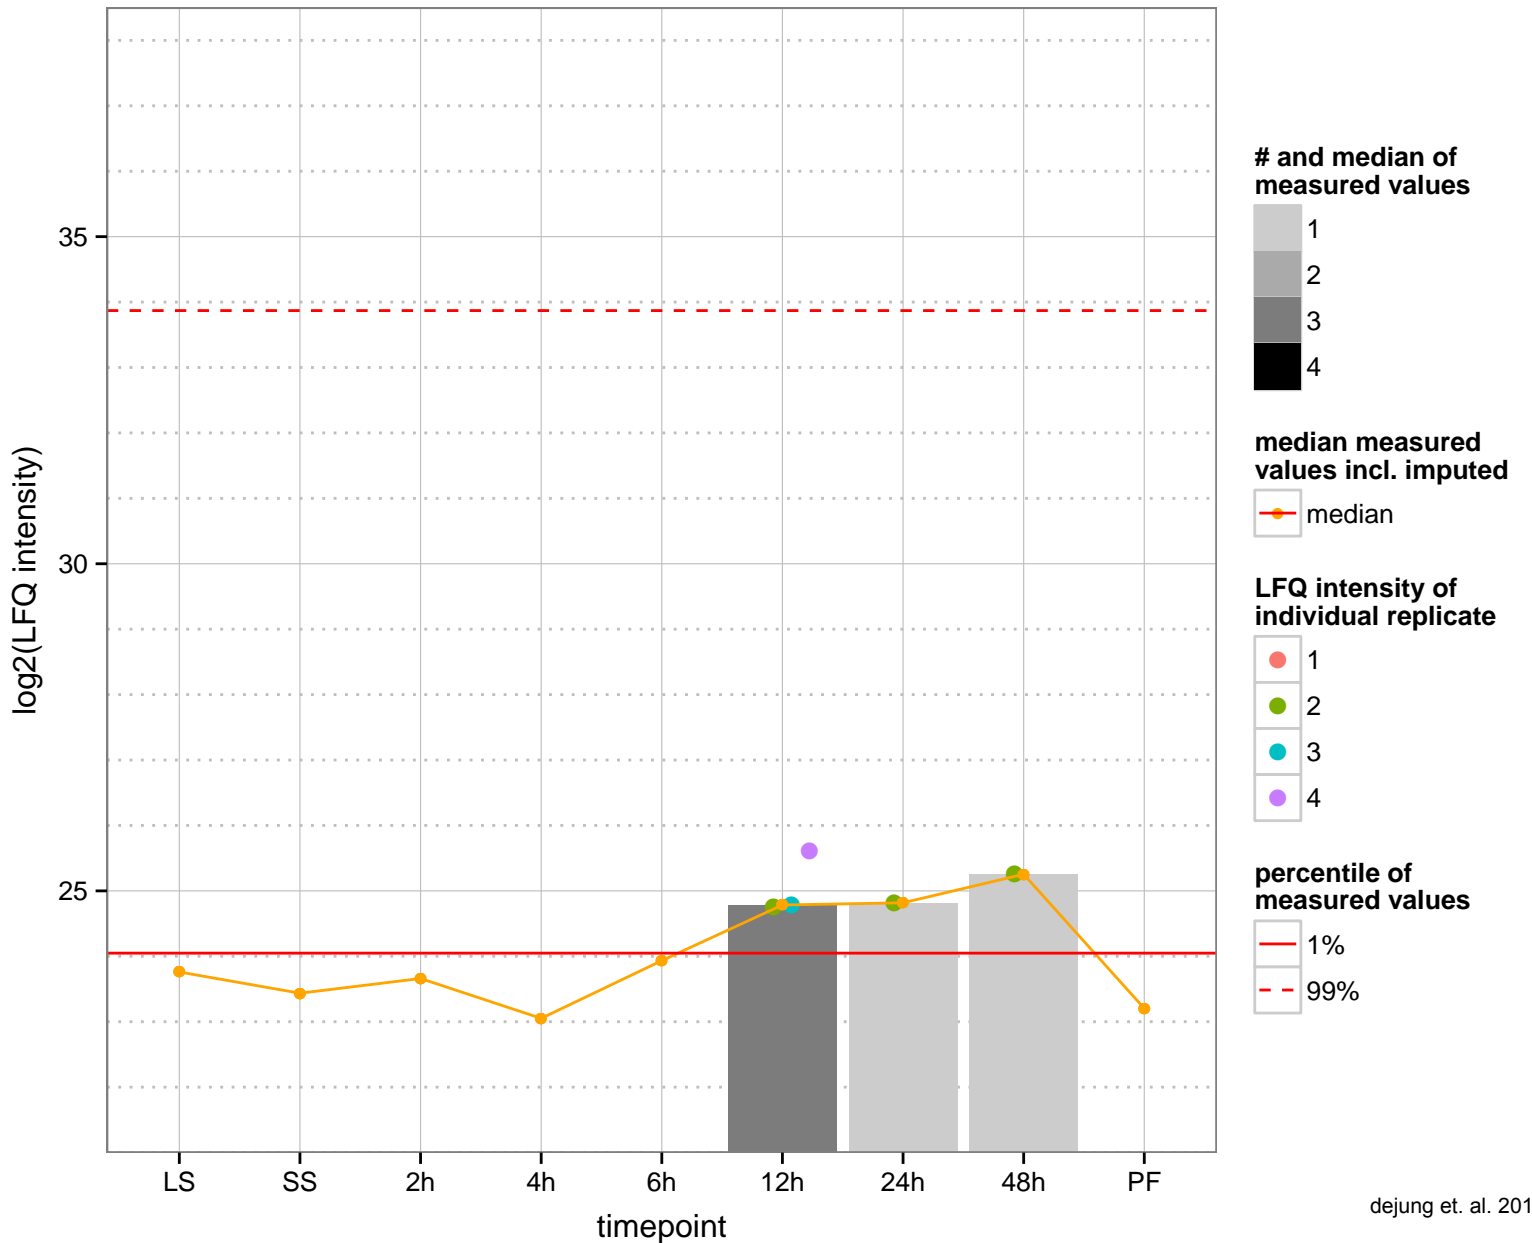

hypothetical protein, conserved  
 Tb927.2.4000  
 AGOF: nucleic acid binding, zinc ion binding  
 AGOC: null  
 AGOP: null  
 PGOF: nucleic acid binding, zinc ion binding  
 PGOC: null  
 PGOP: null

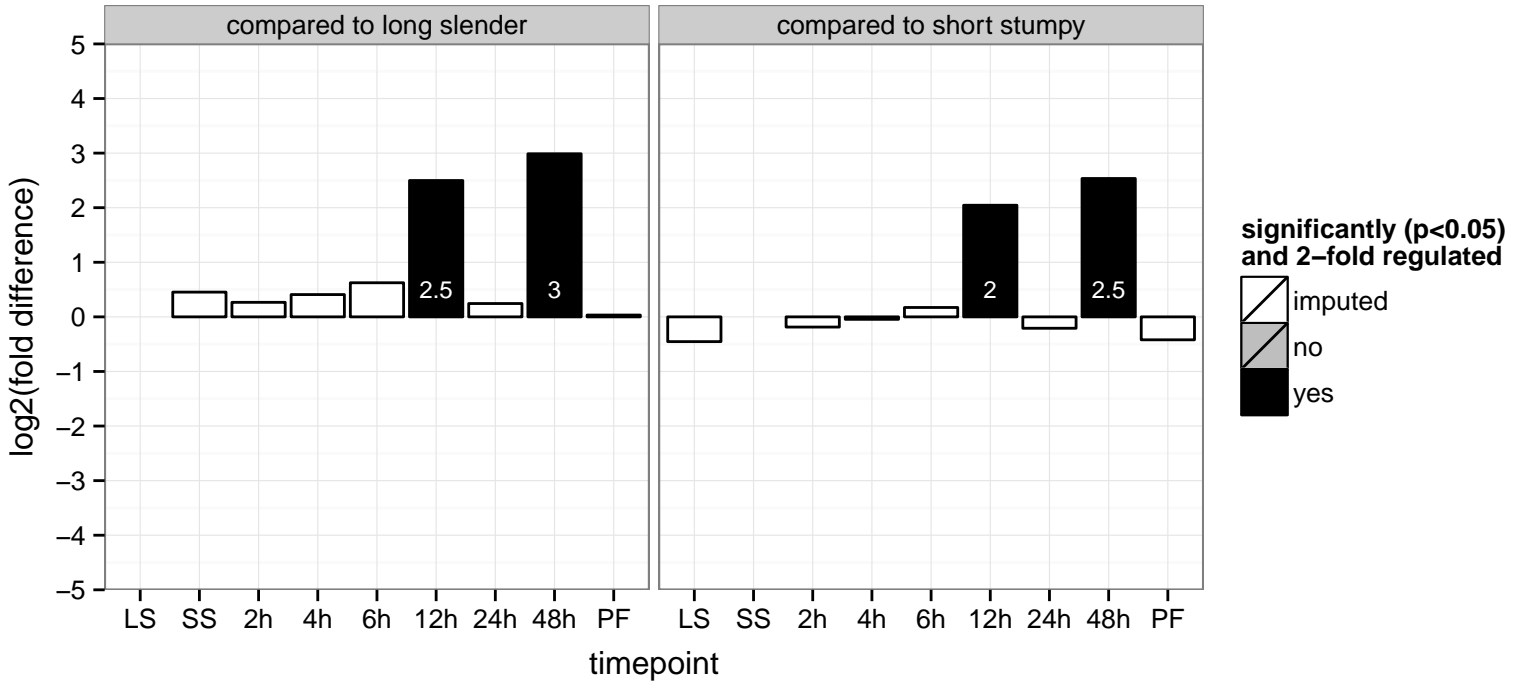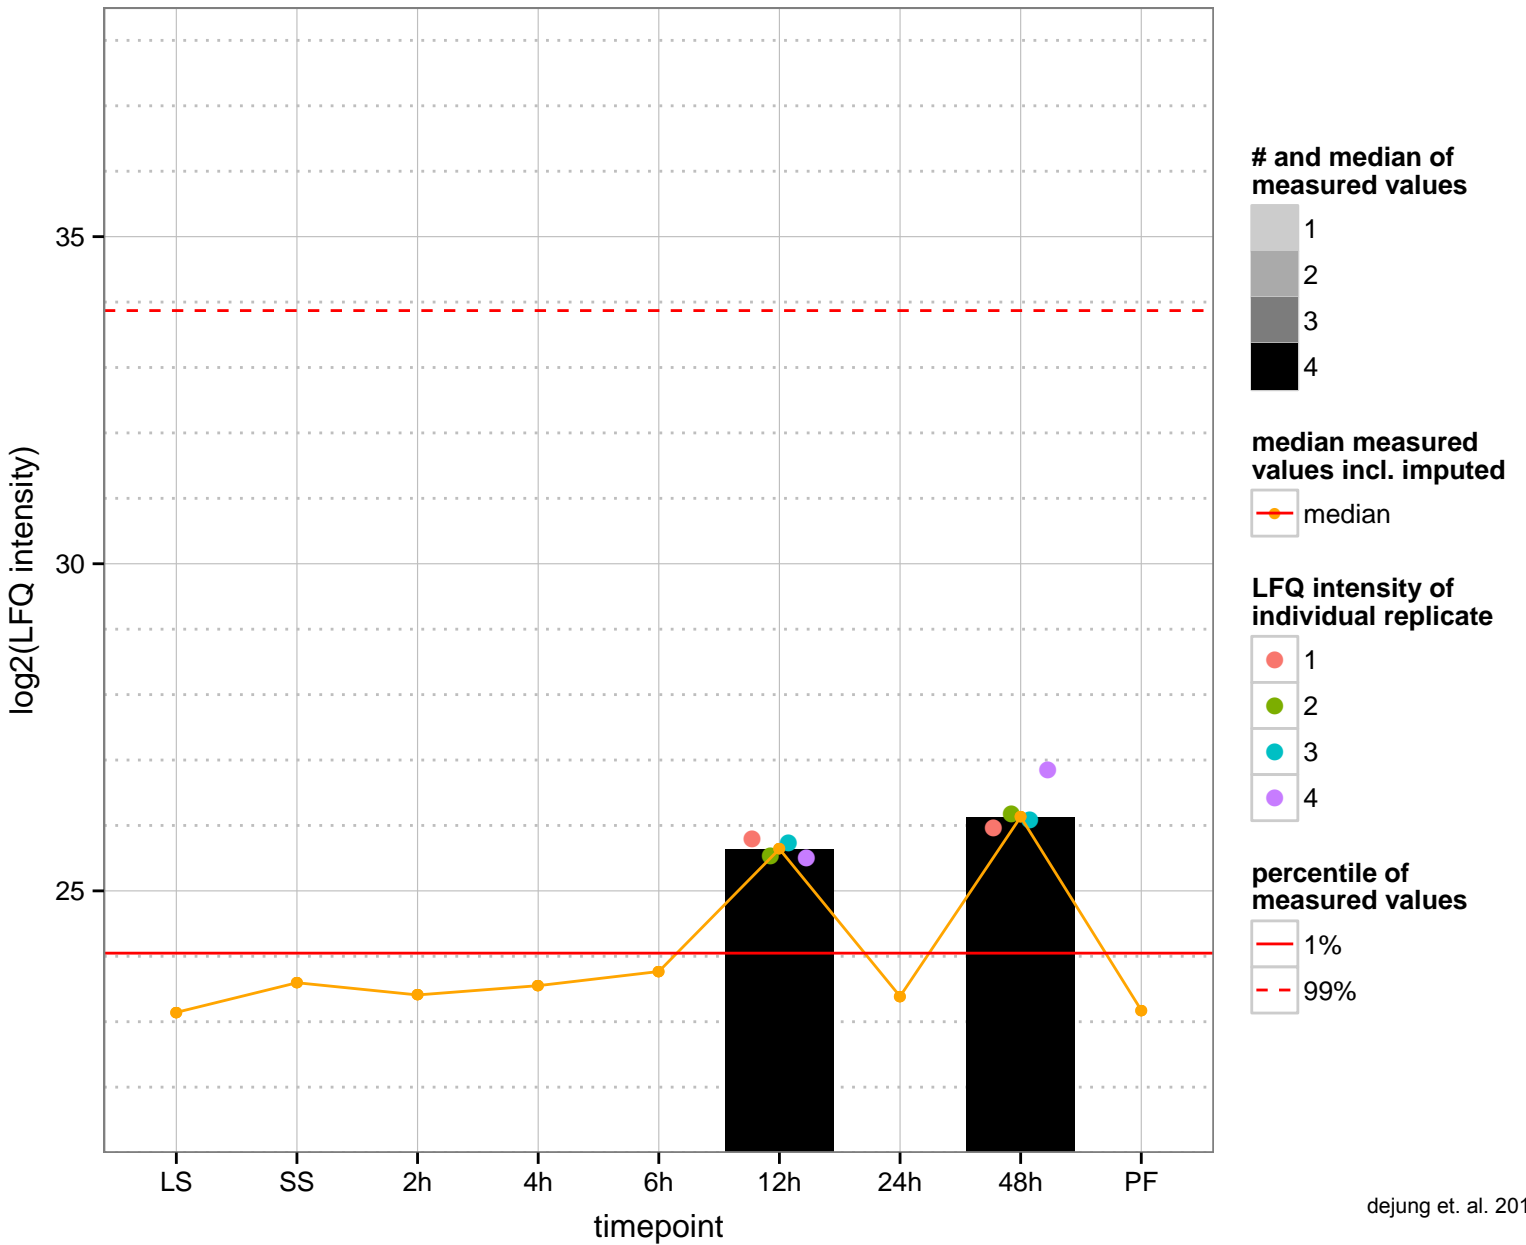

DNA polymerase delta subunit 2, putative  
 Tb927.3.1130  
 AGOF: DNA binding, DNA-directed DNA polymerase activity  
 AGOC: nucleus  
 AGOP: DNA replication  
 PGO: DNA binding, DNA-directed DNA polymerase activity  
 PGOC: null  
 PGOP: DNA replication

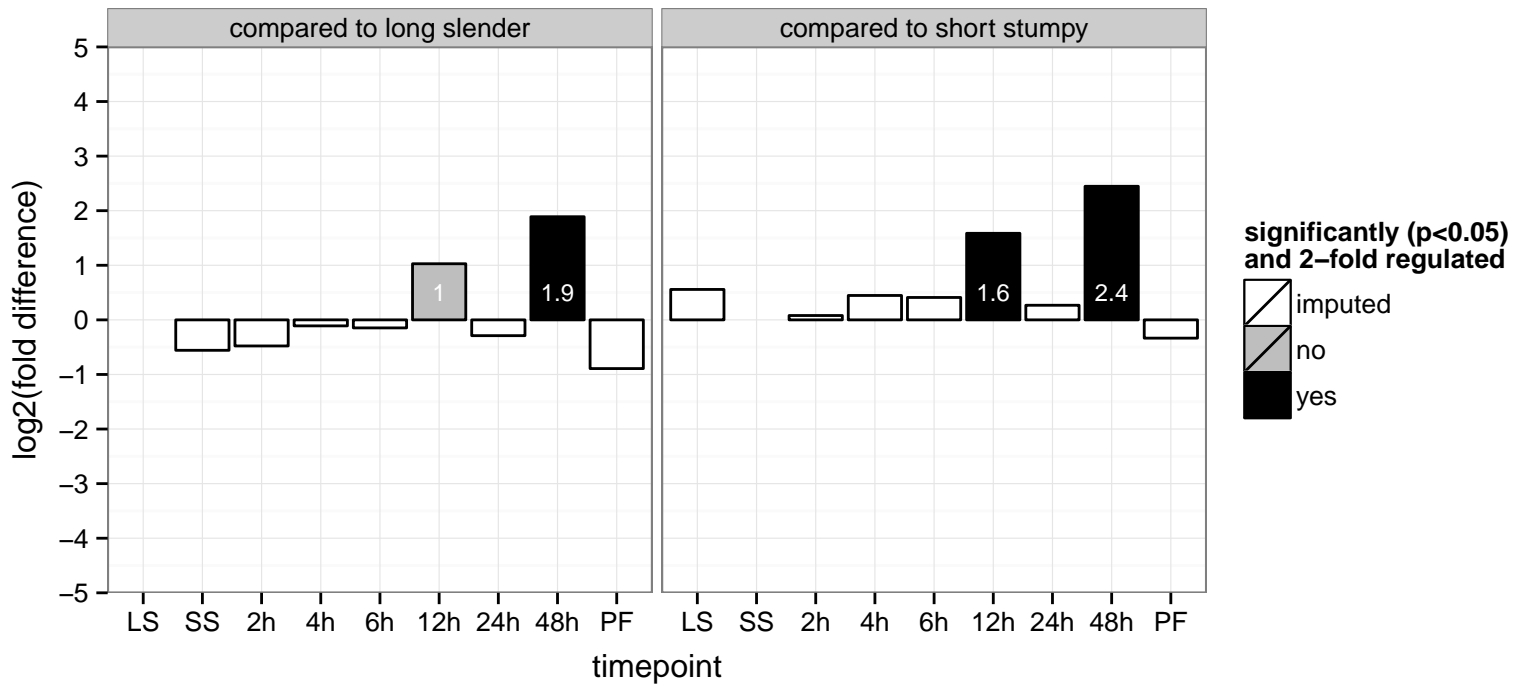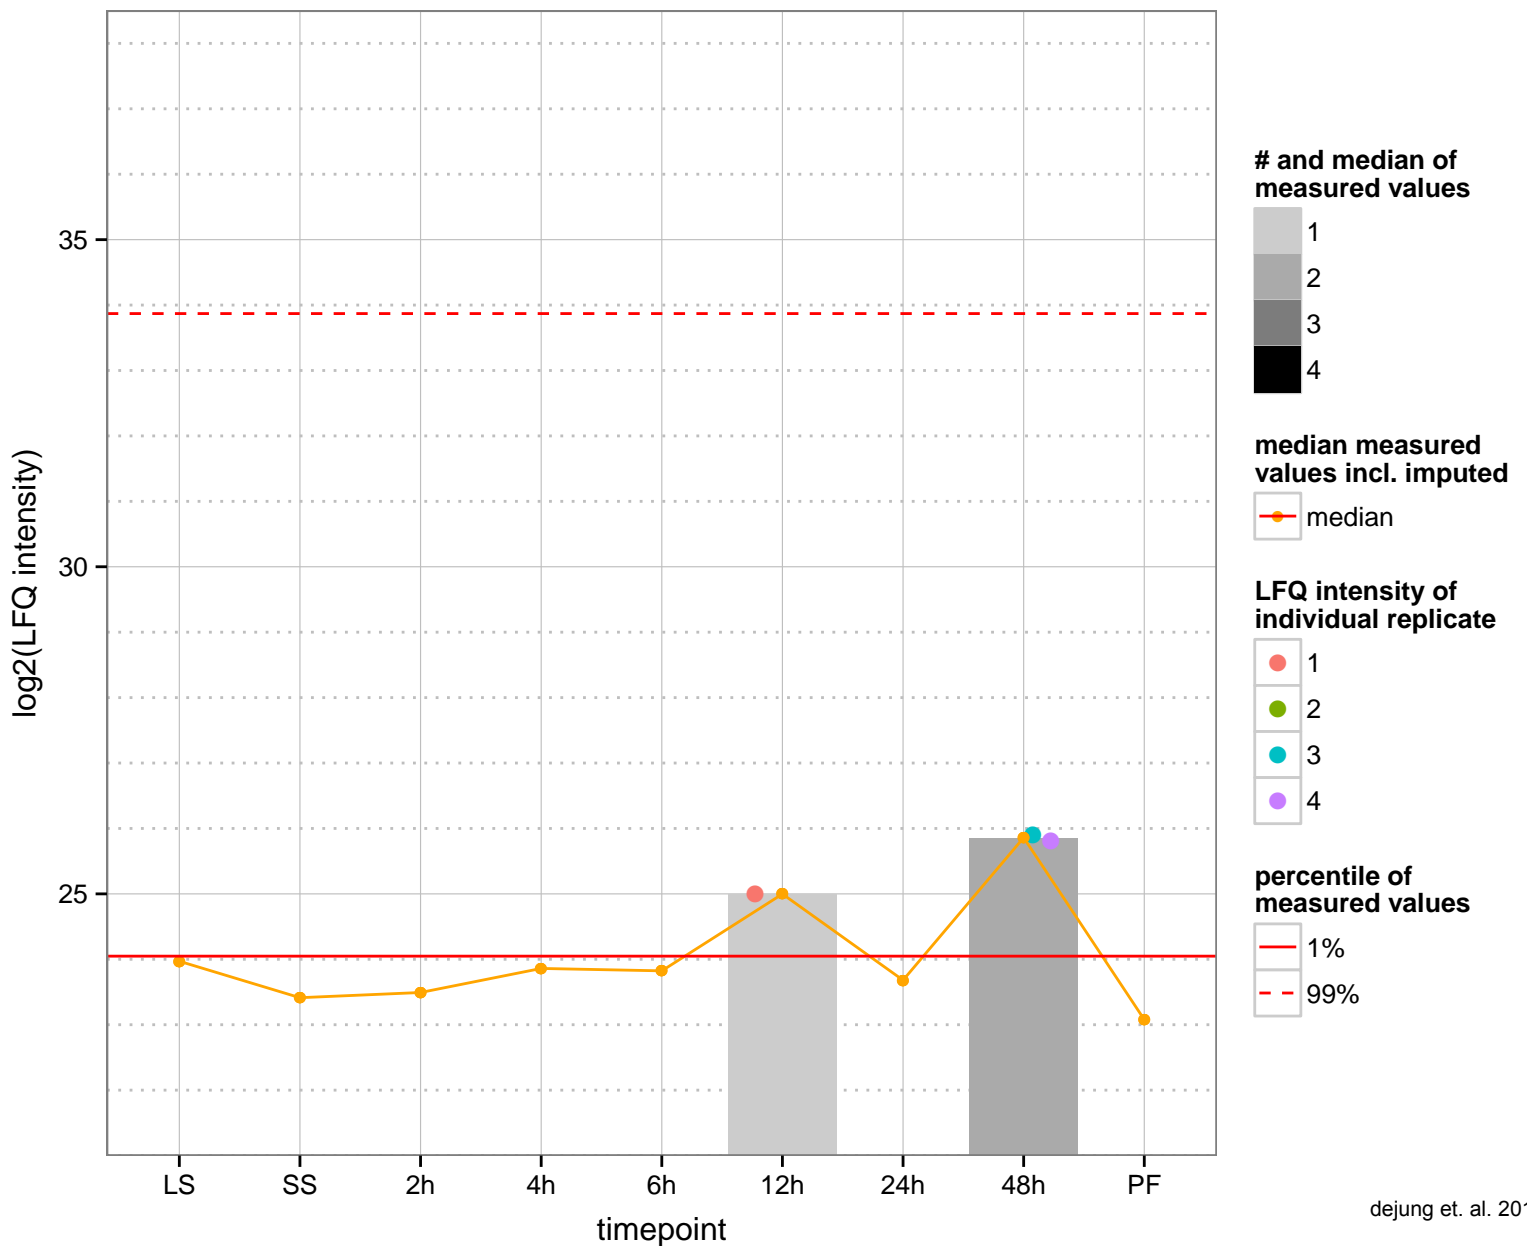

hypothetical protein, conserved  
 Tb927.3.4060  
 AGOF: asparagine synthase (glutamine–hydrolyzing) activity  
 AGOC: null  
 AGOP: asparagine biosynthetic process  
 PGOF: asparagine synthase (glutamine–hydrolyzing) activity  
 PGOC: null  
 PGOP: asparagine biosynthetic process

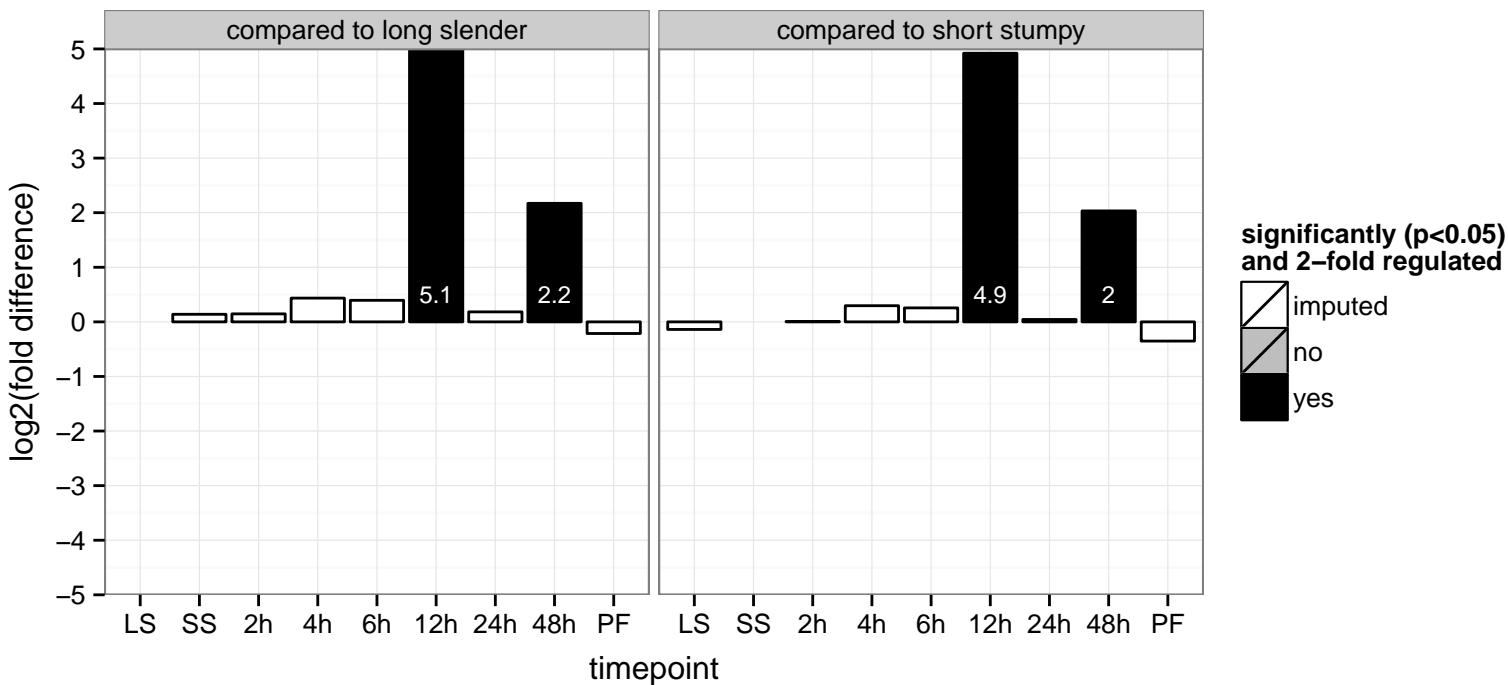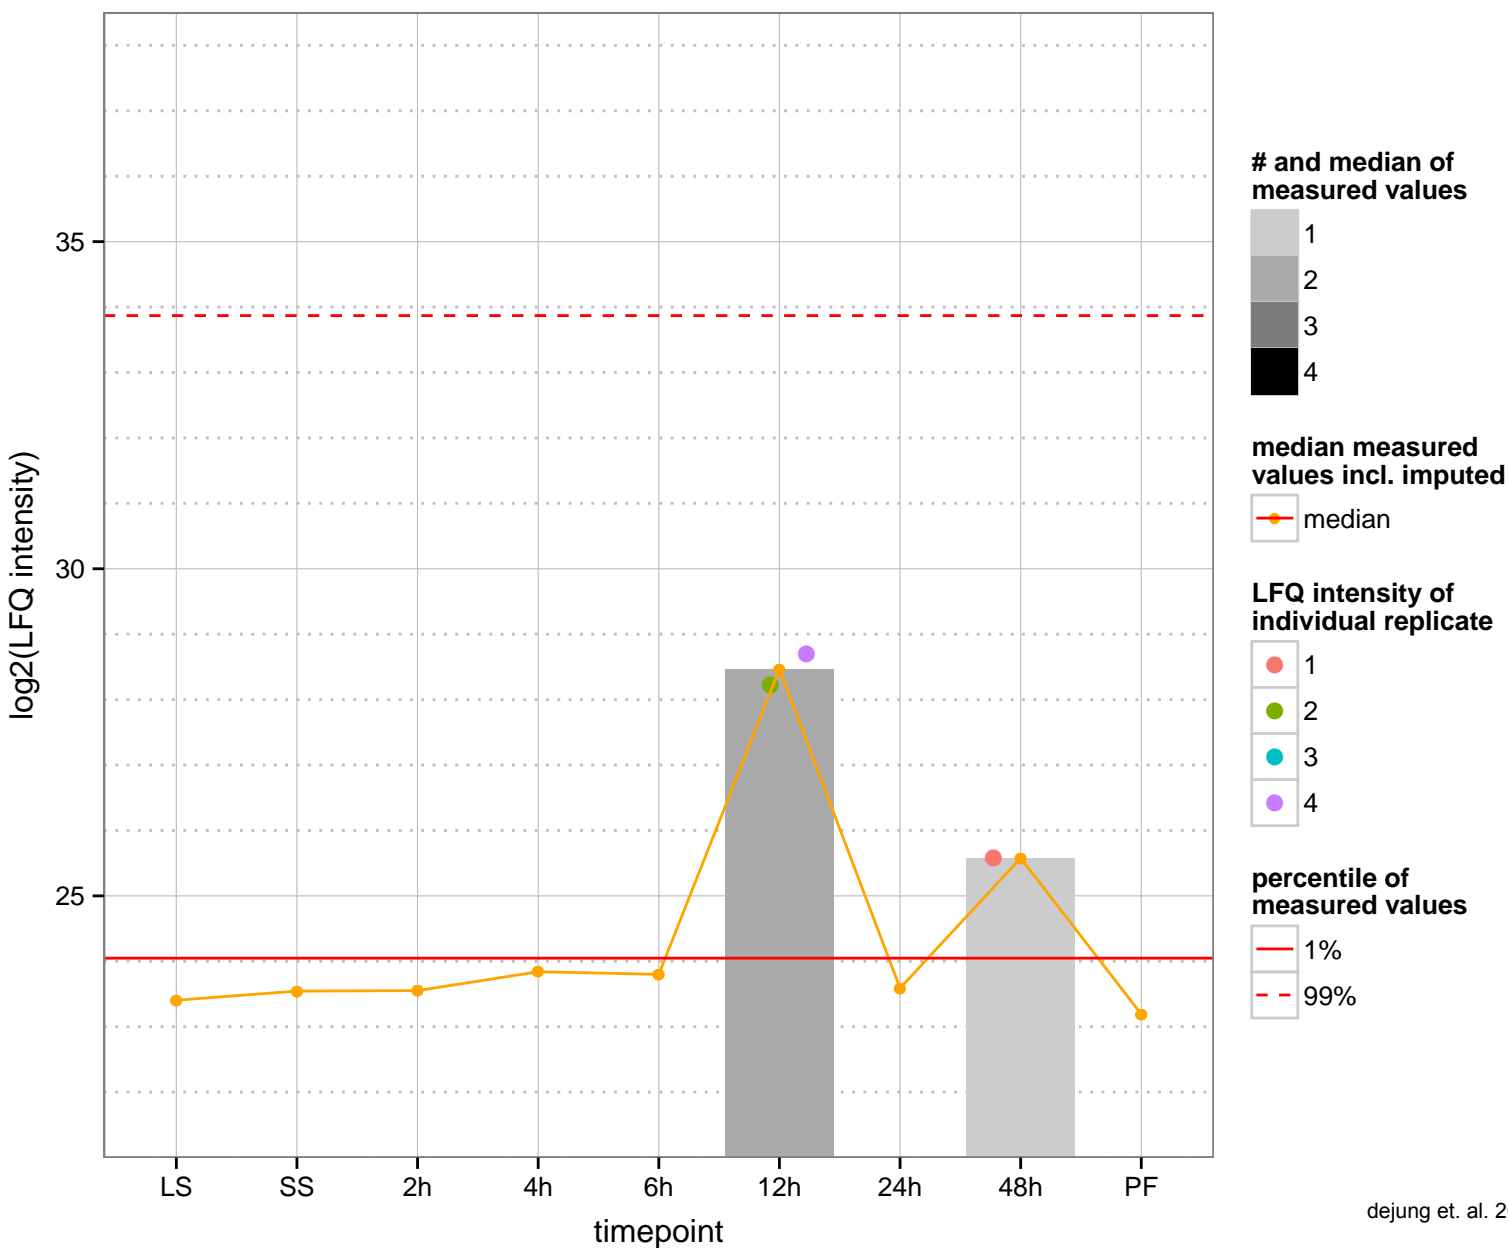

hypothetical protein, conserved  
 Tb927.4.2280  
 AGOF: null  
 AGOC: null  
 AGOP: null  
 PGO: null  
 PGOC: null  
 PGOP: null

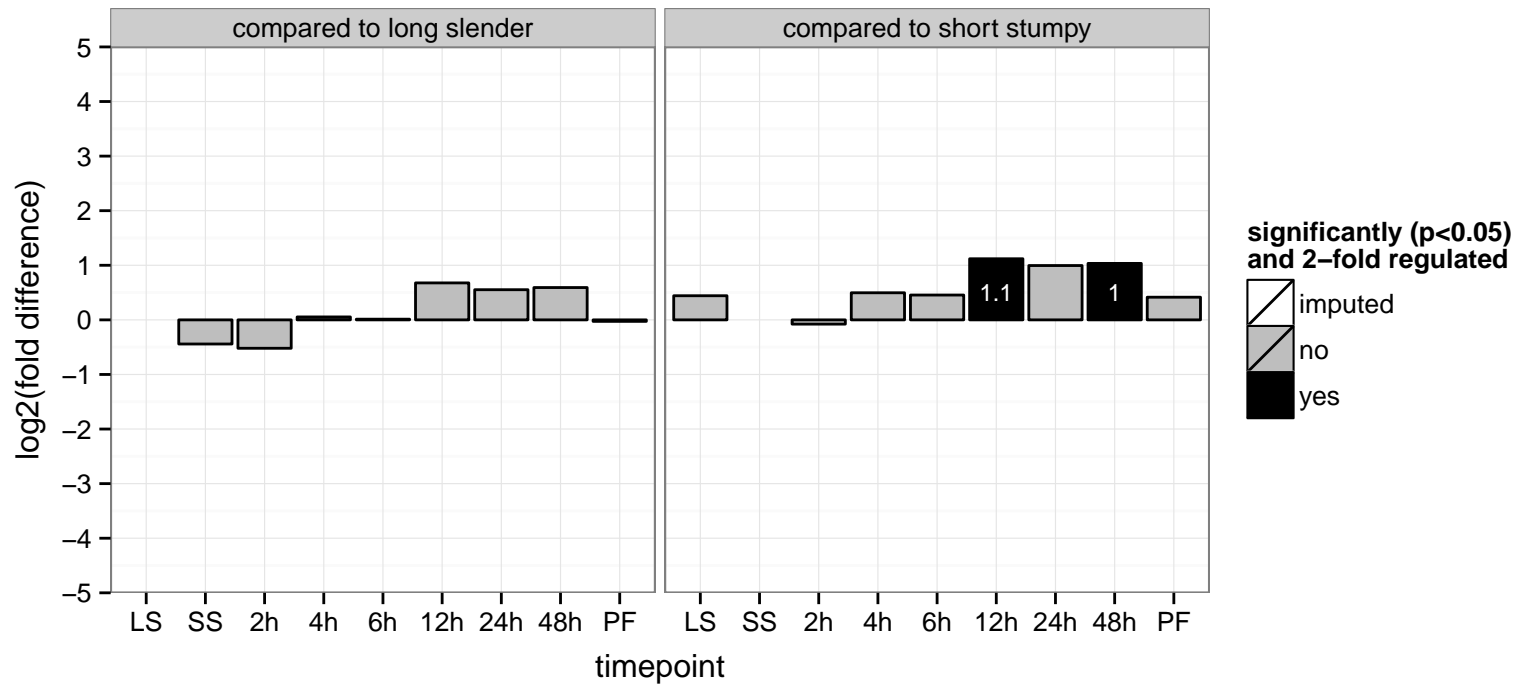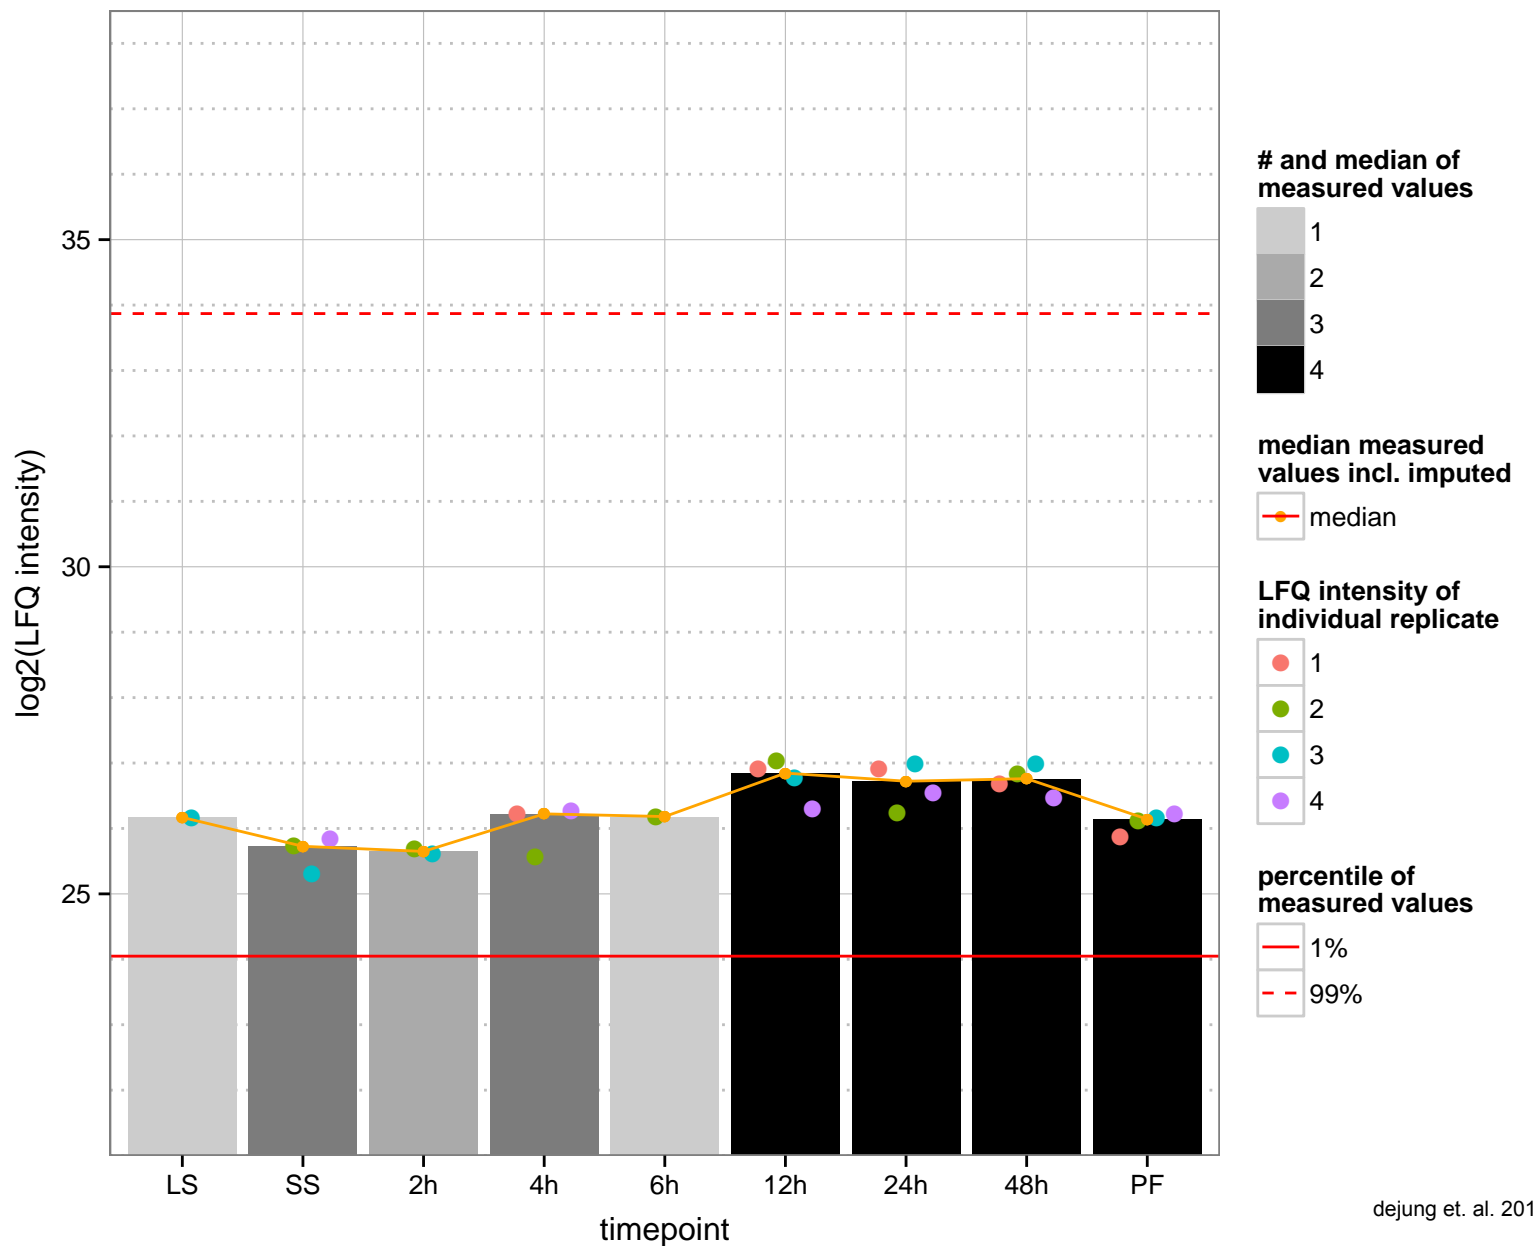



hypothetical protein, conserved  
 Tb927.6.2390  
 AGOF: null  
 AGOC: null  
 AGOP: null  
 PGO: null  
 PGOC: null  
 PGOP: null

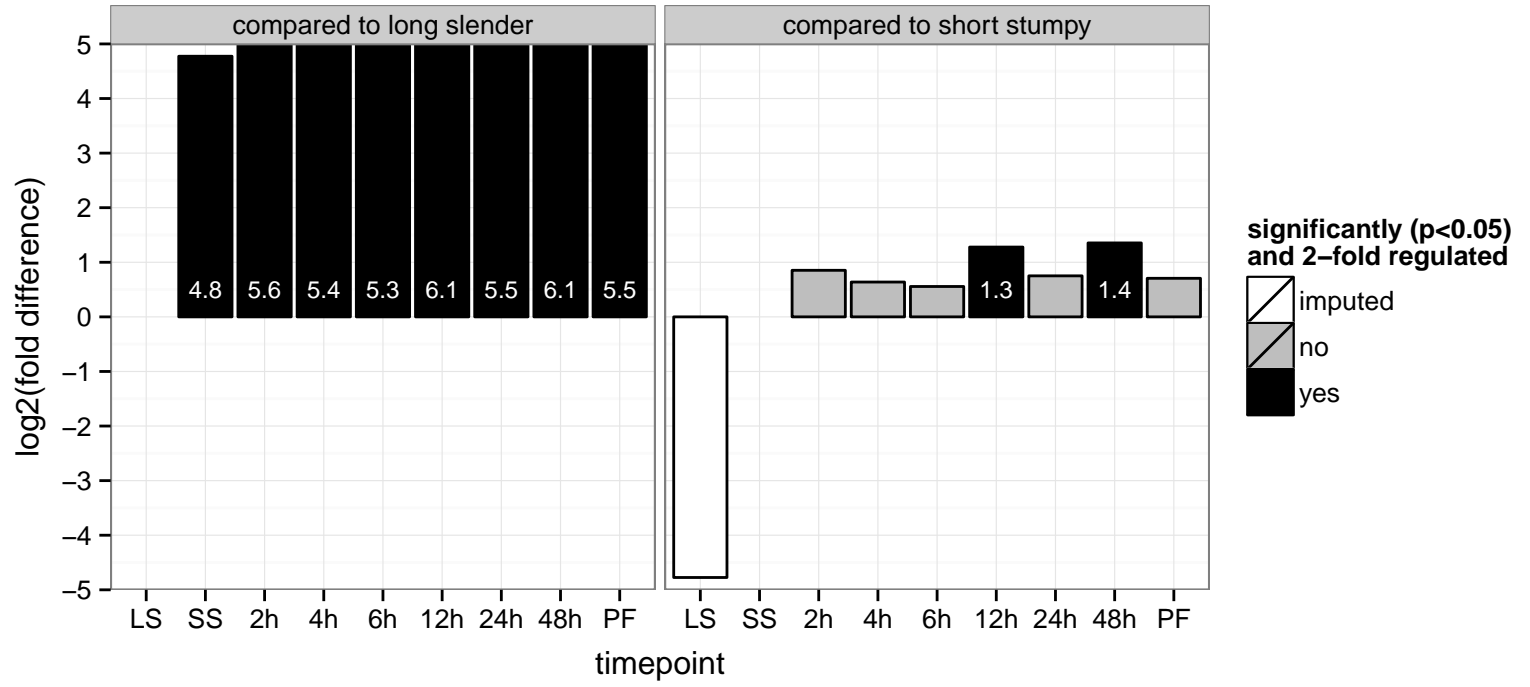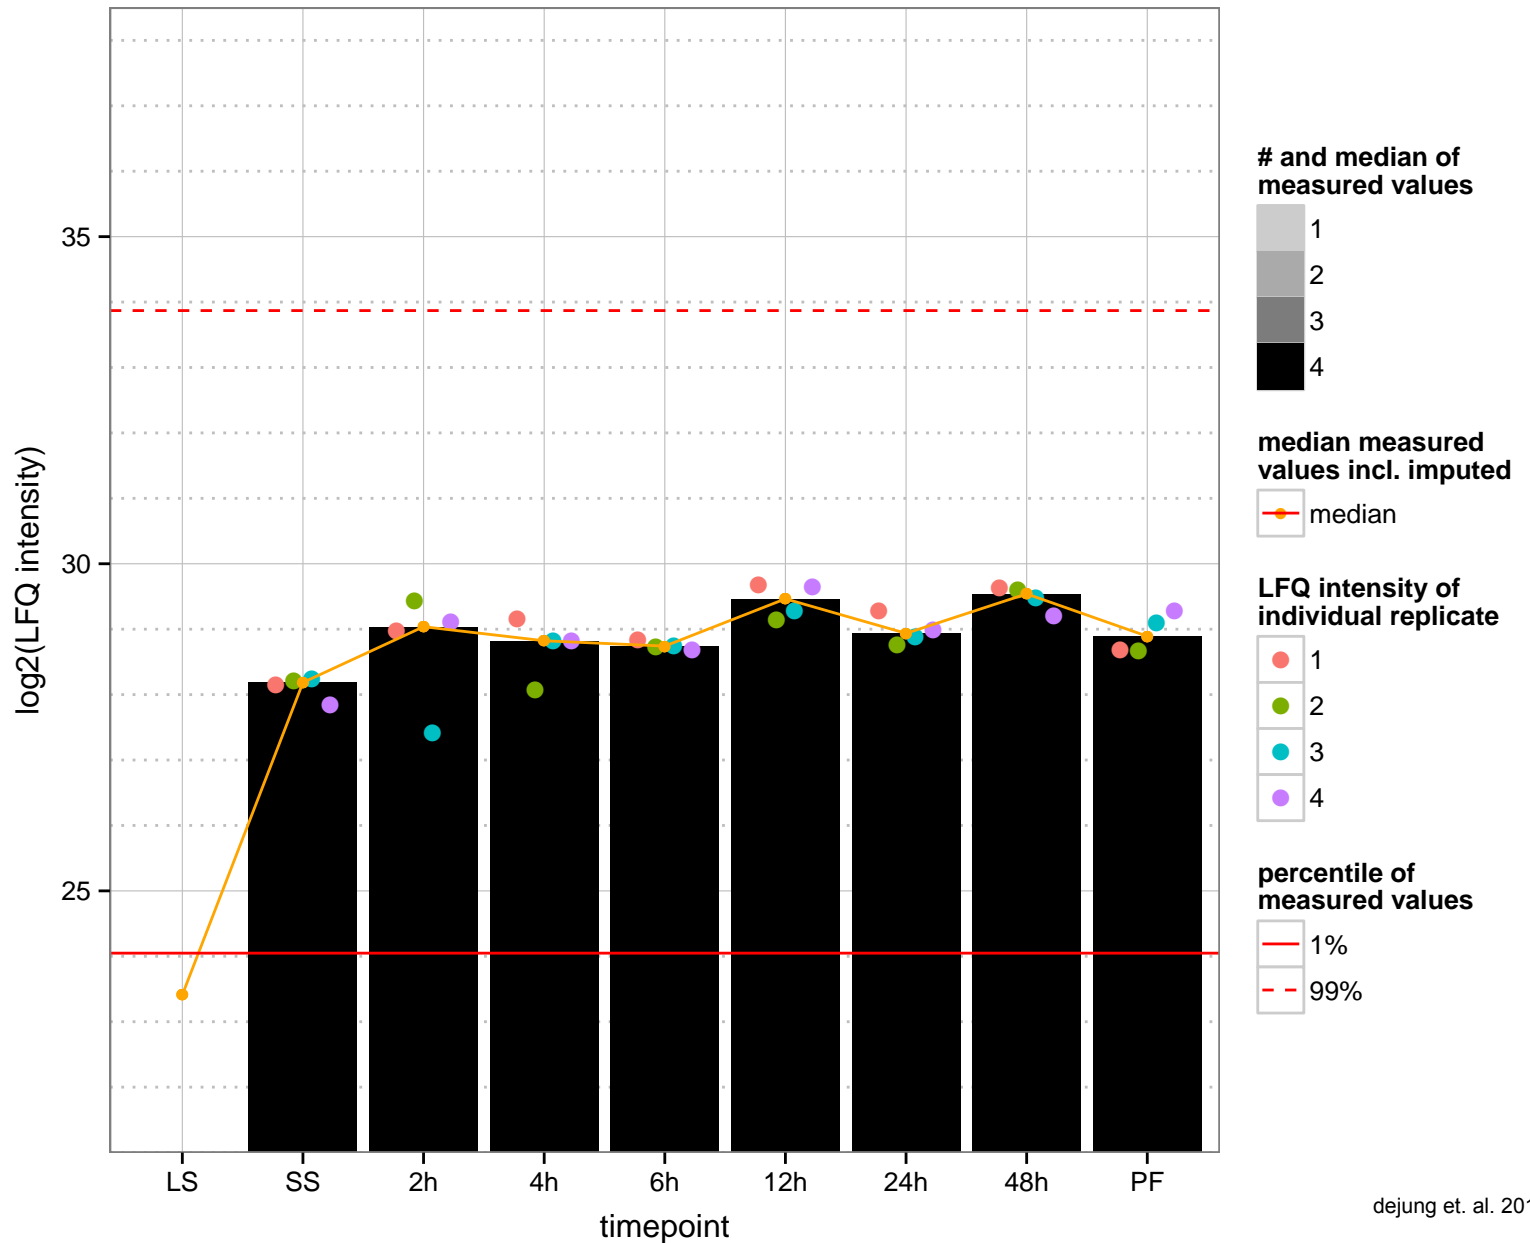

hypothetical protein, conserved  
 Tb927.7.6180  
 AGOF: null  
 AGOC: null  
 AGOP: null  
 PGO: null  
 PGOC: null  
 PGOP: null

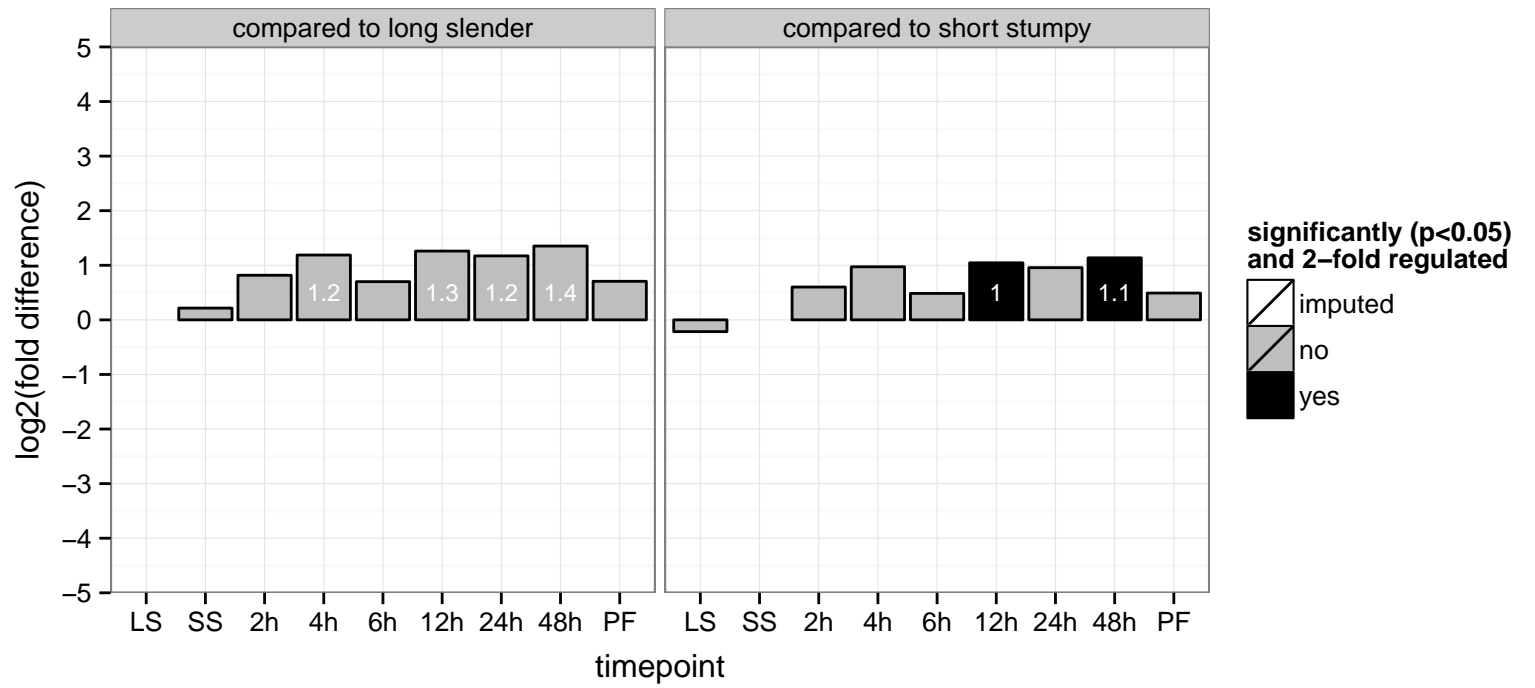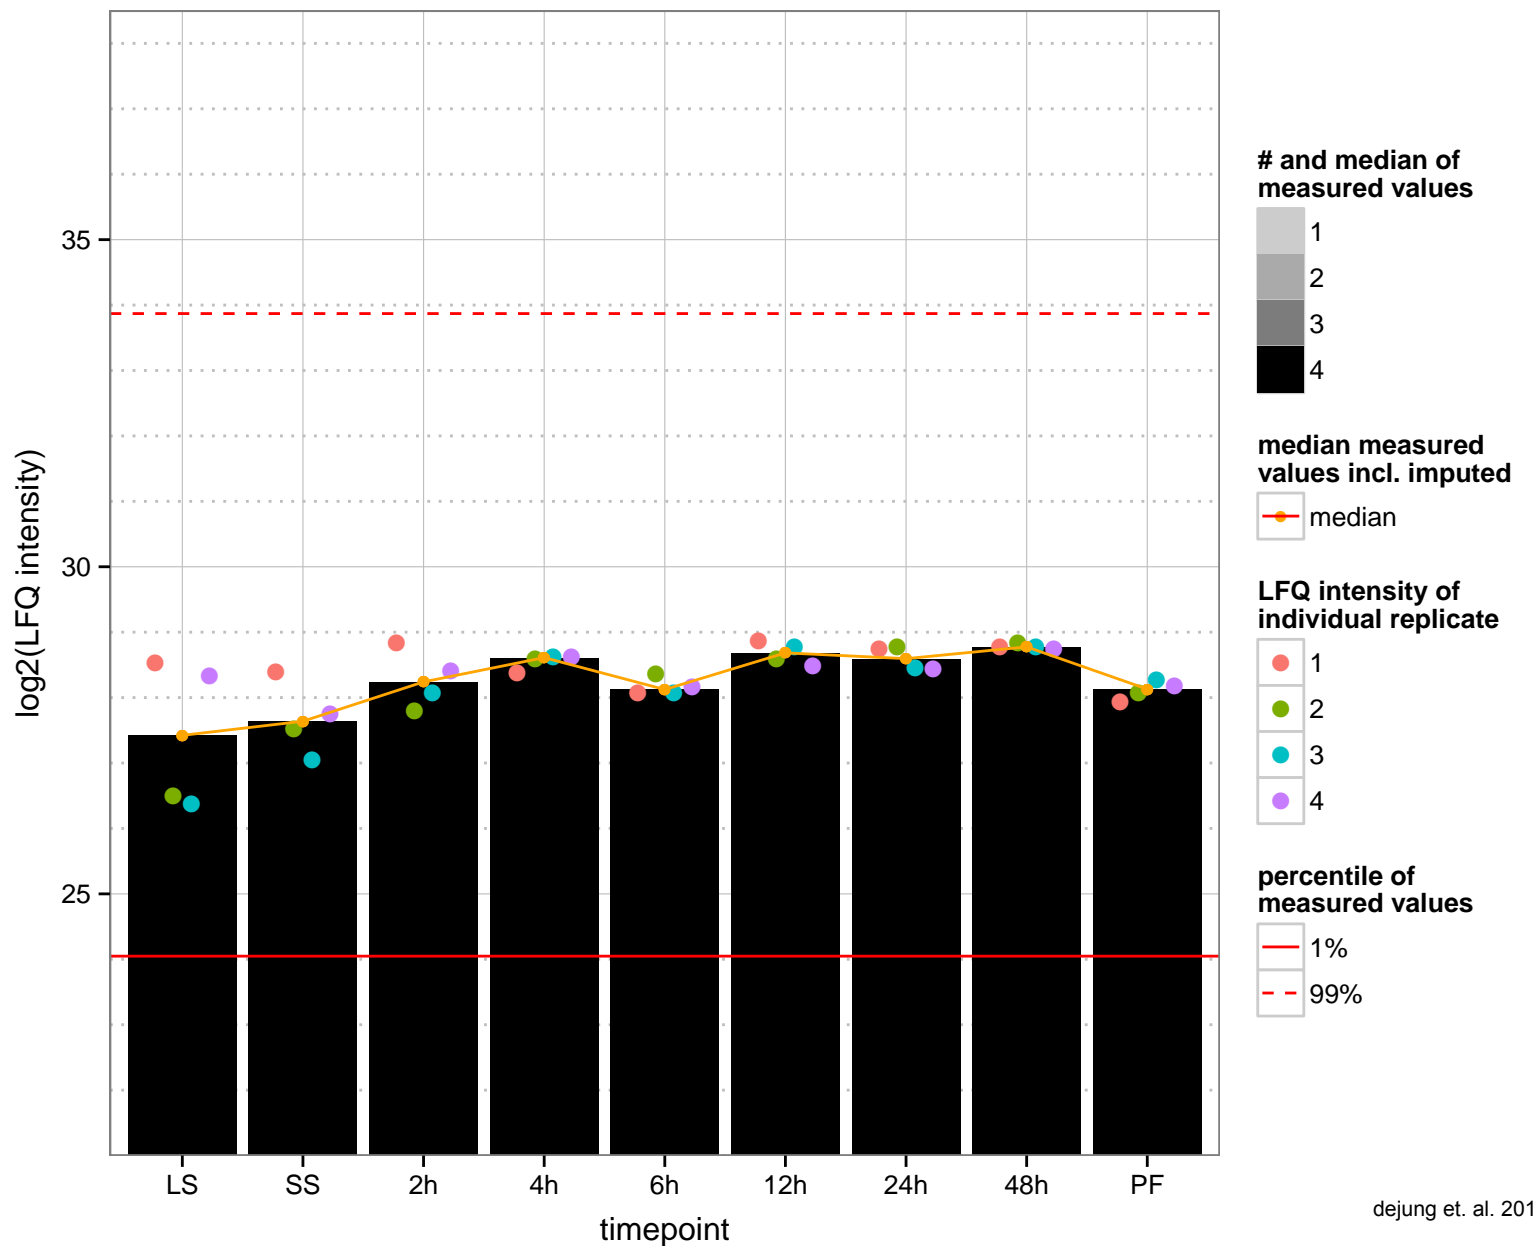

hypothetical protein, conserved  
 Tb927.8.8200  
 AGOF: null  
 AGOC: null  
 AGOP: null  
 PGO: null  
 PGOC: null  
 PGOP: null

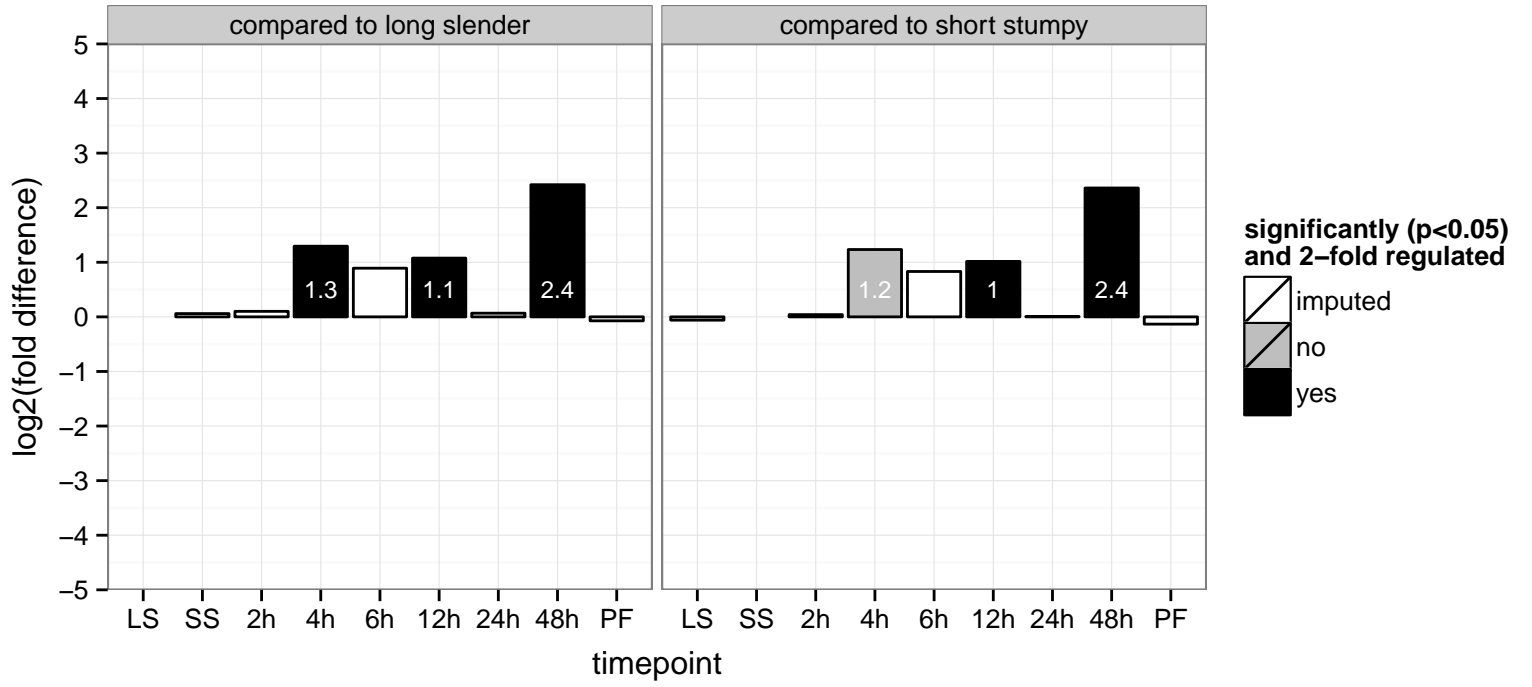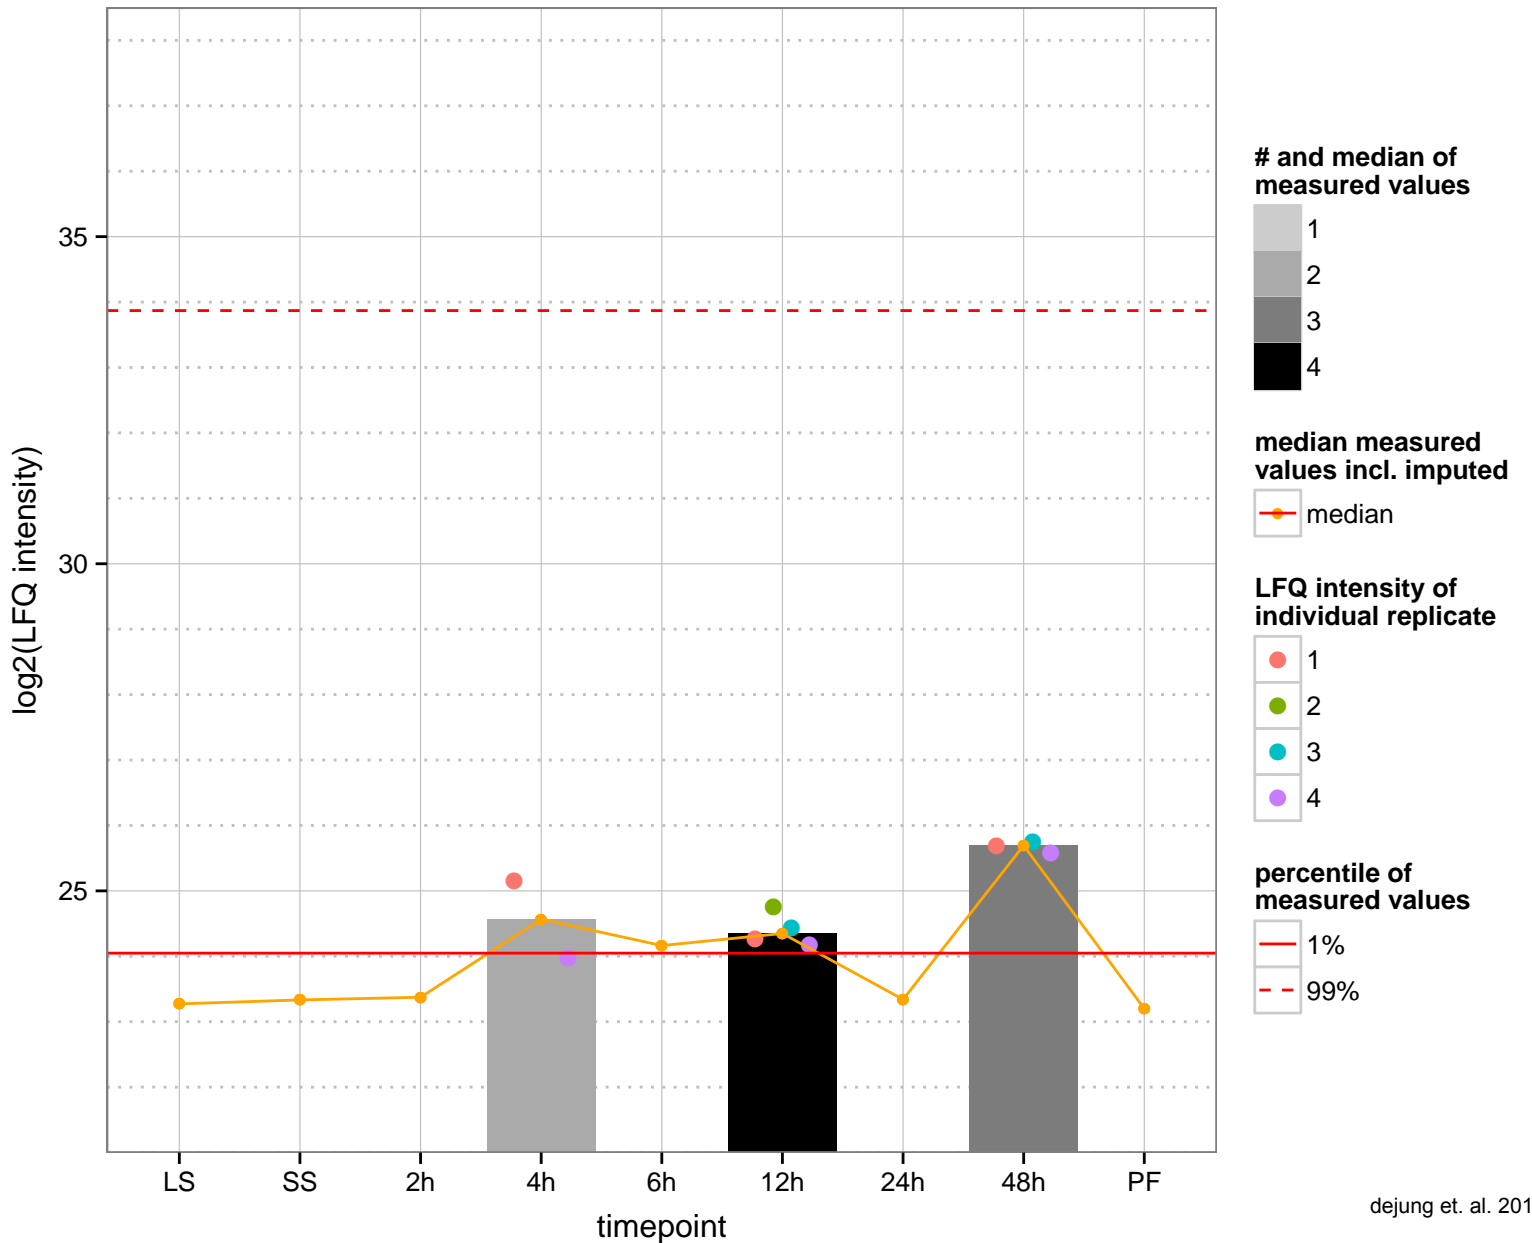

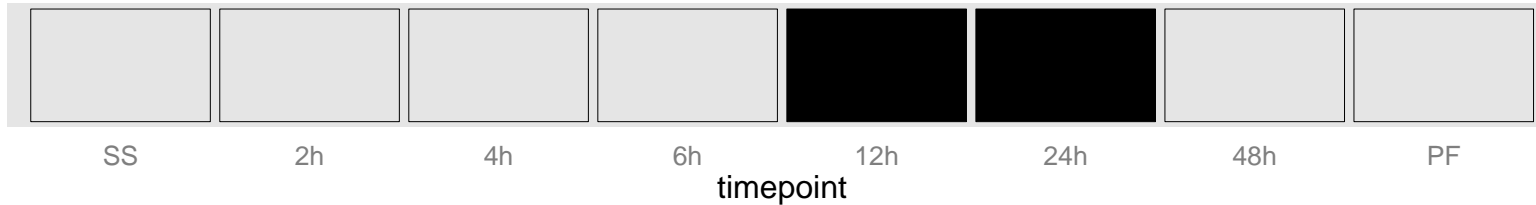

**regulated**  not regulated  significant down  significant up

hypothetical protein, conserved  
 Tb11.v5.0581;Tb927.10.570  
 AGOF: null  
 AGOC: null  
 AGOP: null  
 PGOF: null  
 PGOC: exocyst  
 PGOP: protein transport, vesicle docking involved in exocytosis

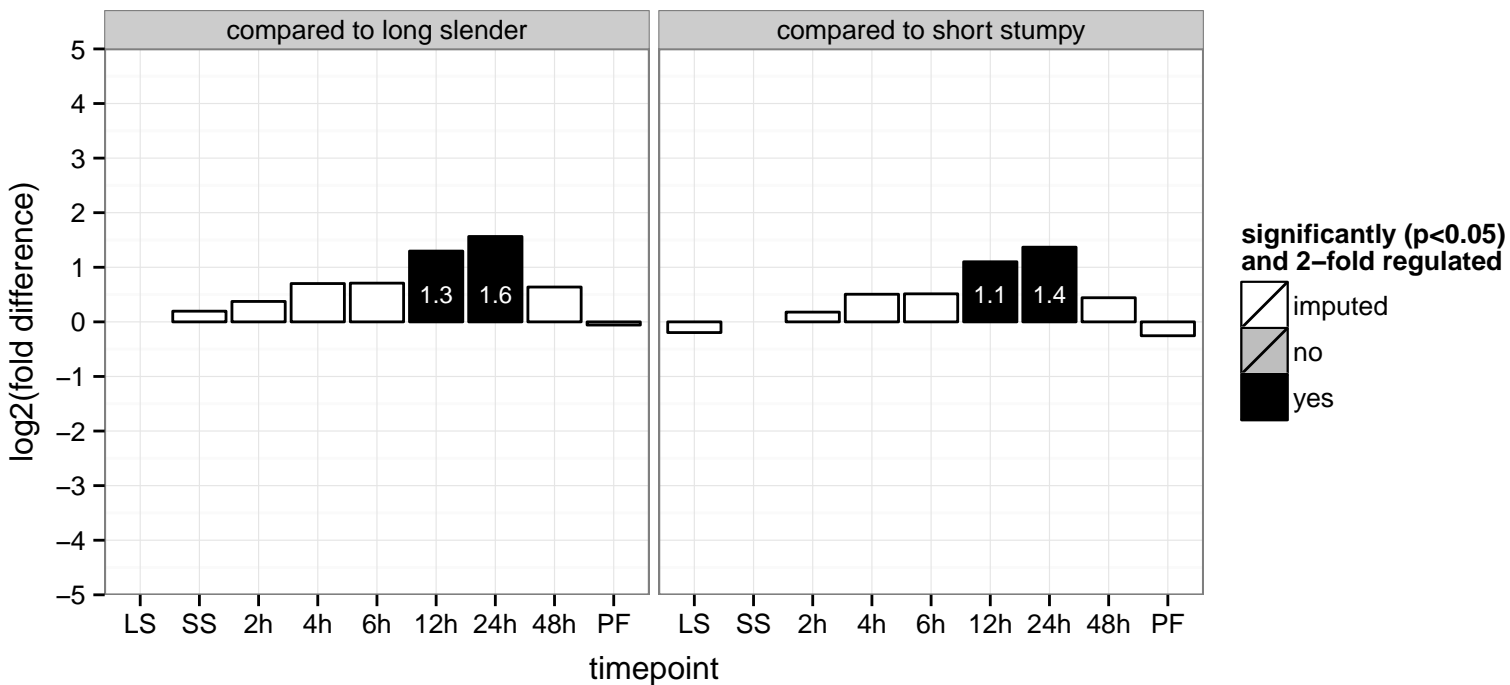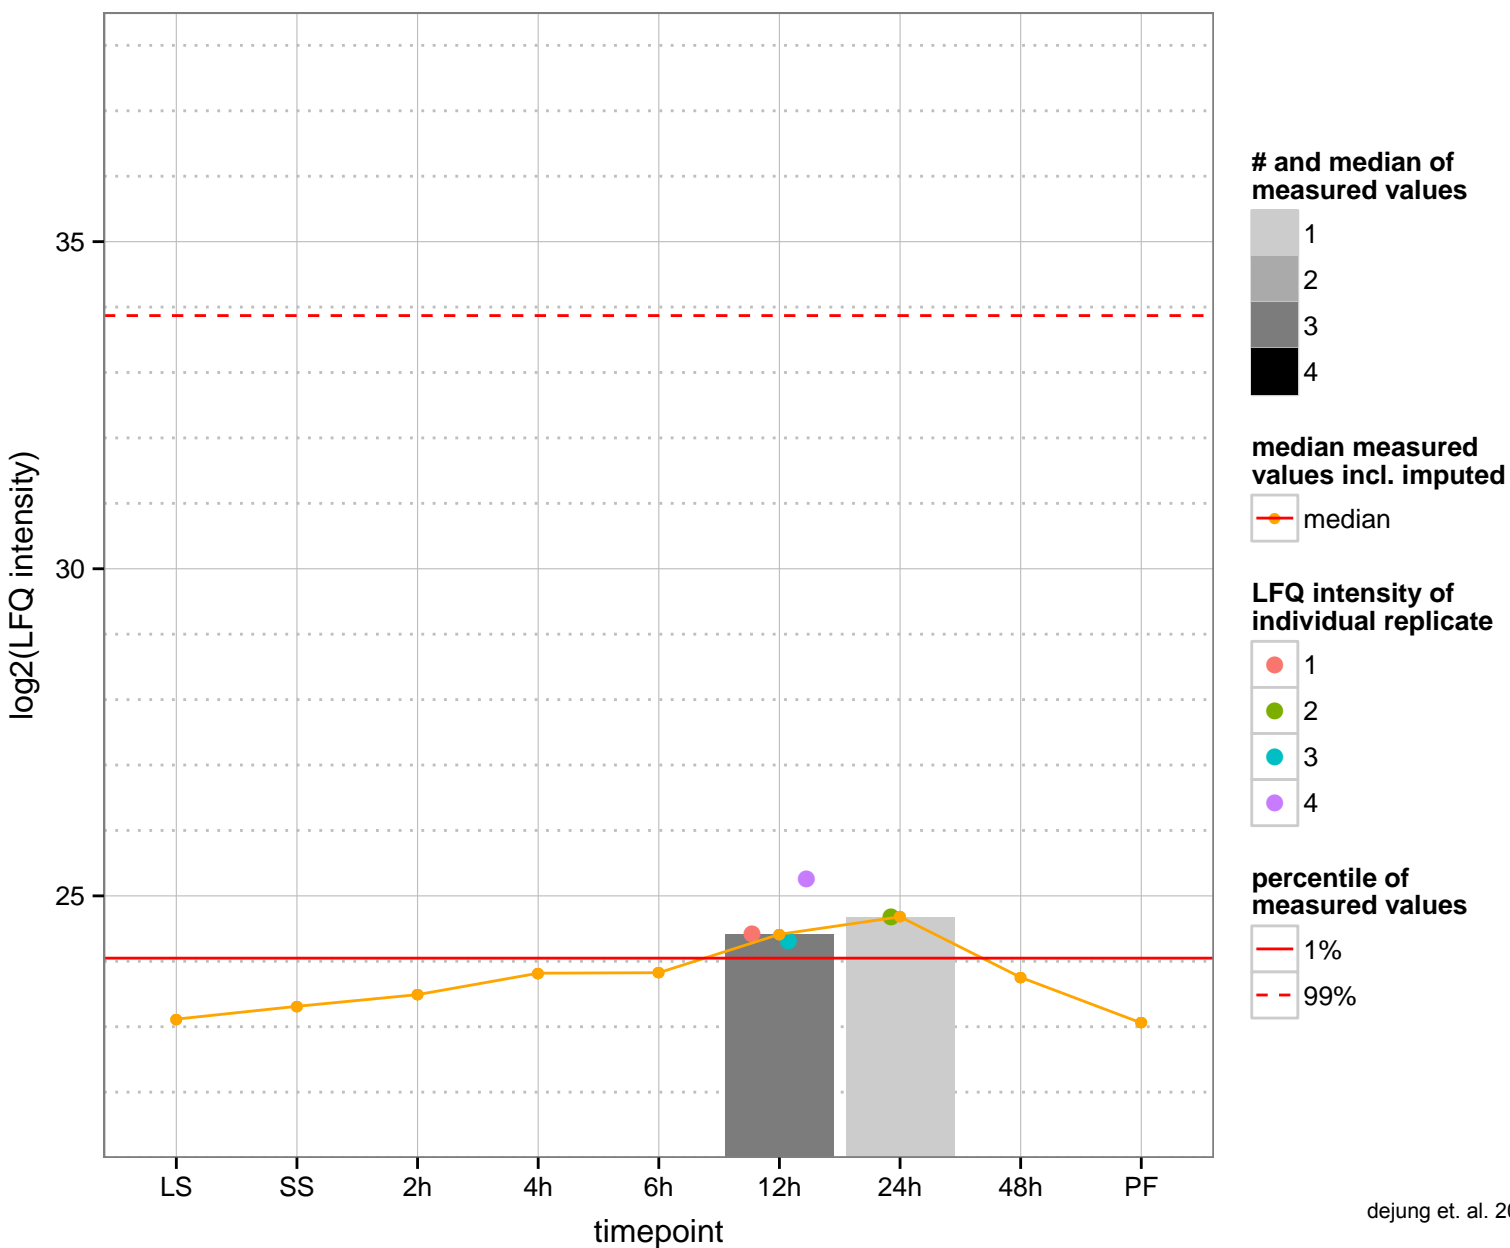

hypothetical protein, conserved  
 Tb927.11.10860  
 AGOF: null  
 AGOC: null  
 AGOP: null  
 PGOF: null  
 PGO: null  
 PGOP: null

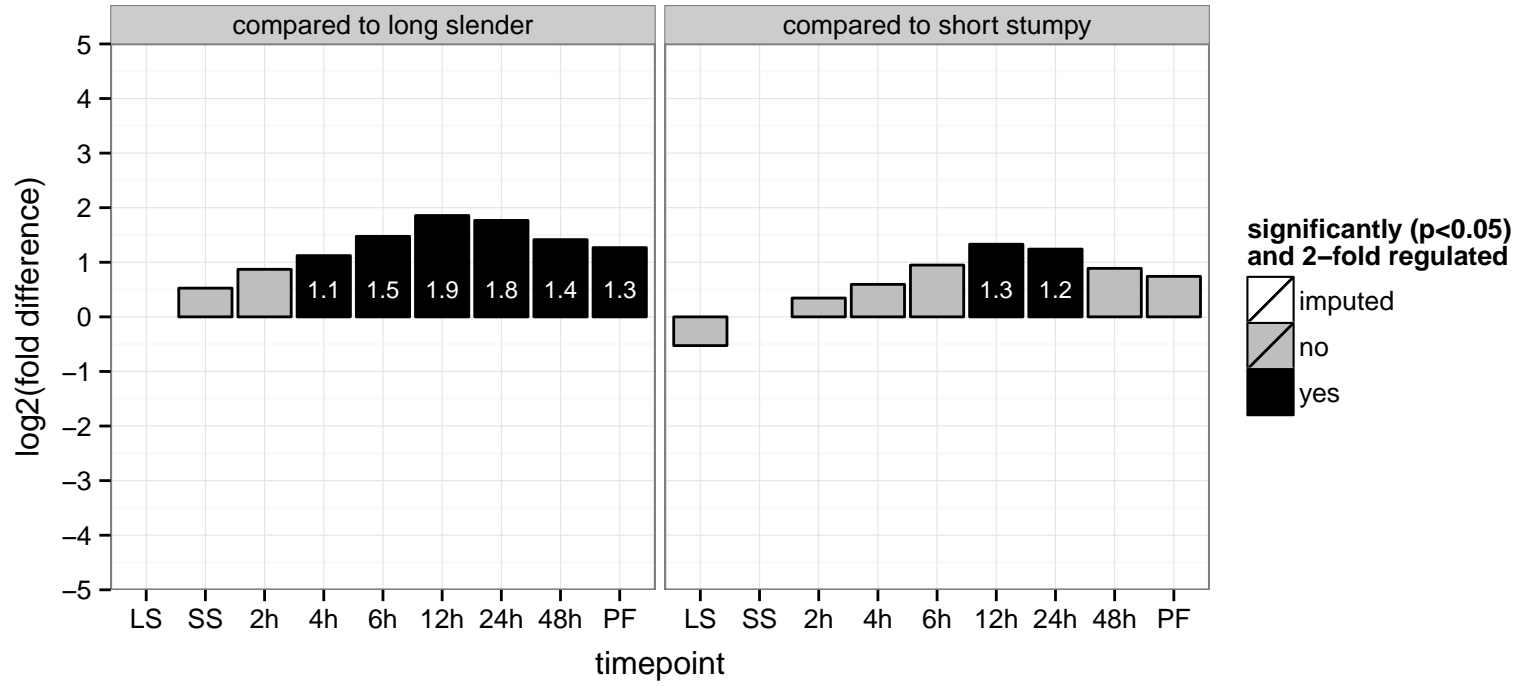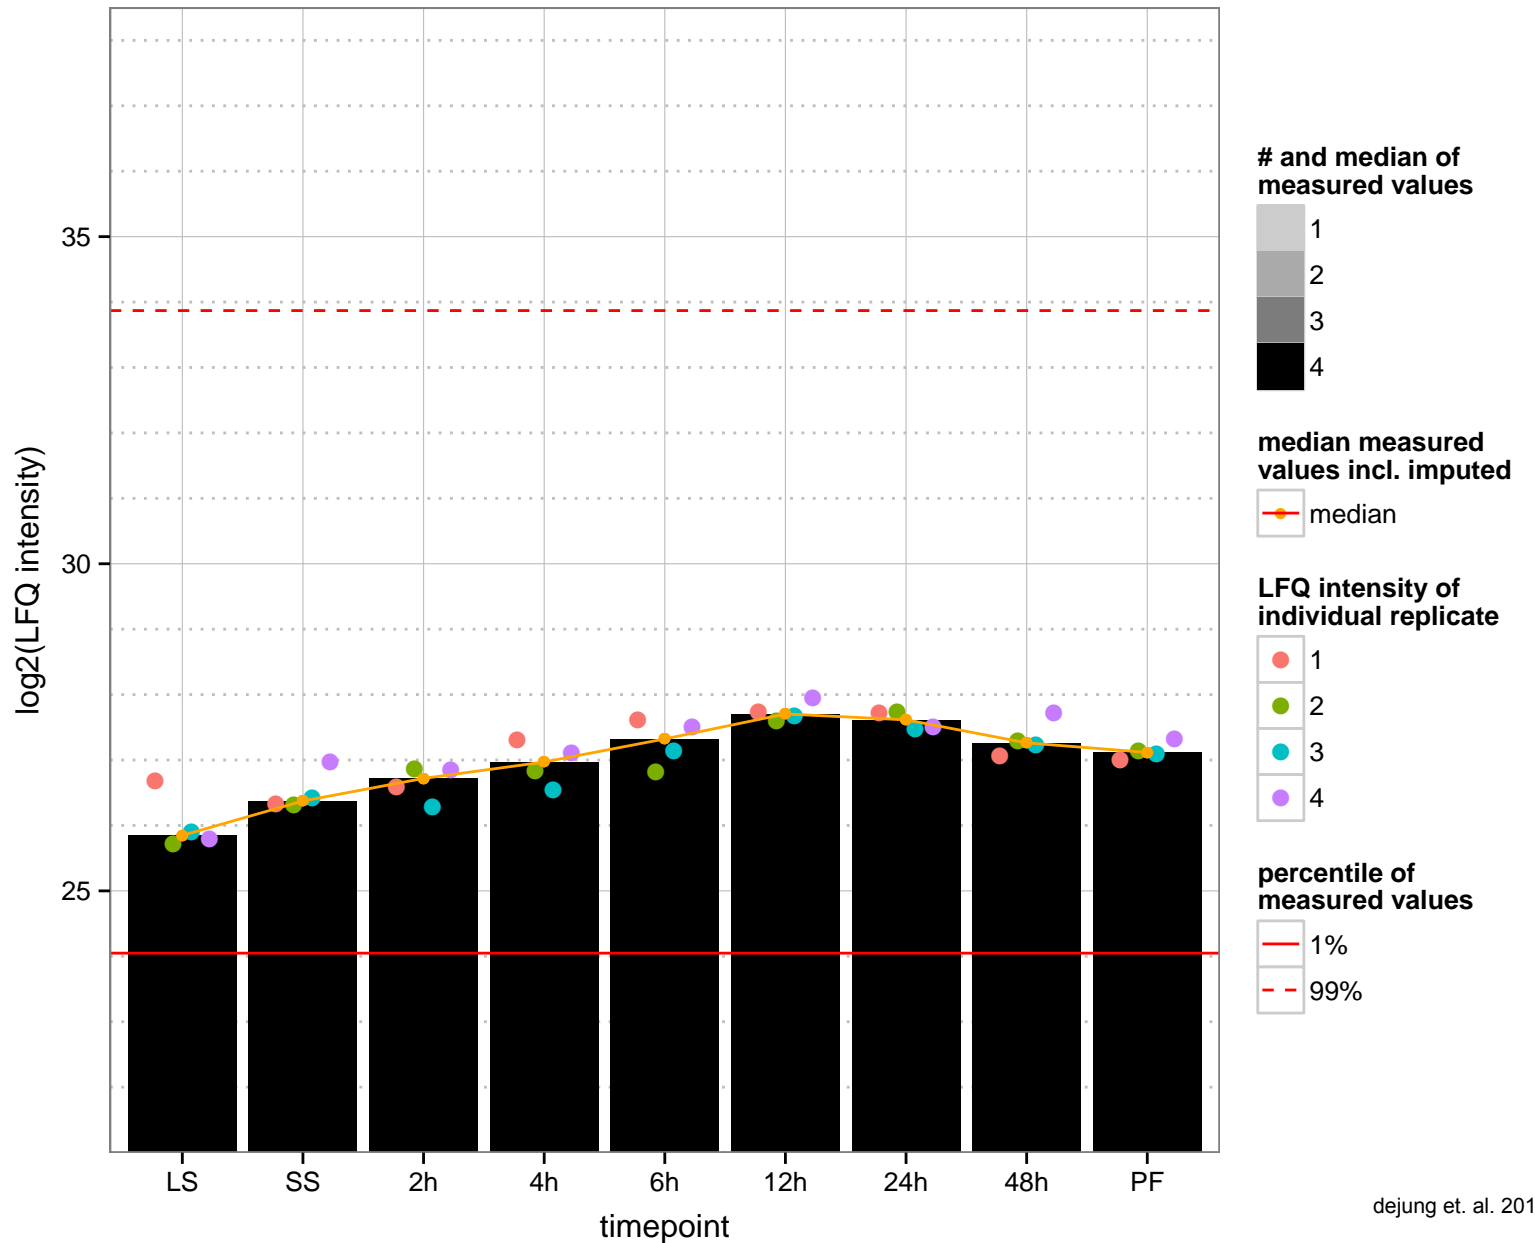

hypothetical protein, conserved  
 Tb927.11.13590  
 AGOF: null  
 AGOC: mitochondrion  
 AGOP: null  
 PGO: null  
 PGOC: null  
 PGOP: null

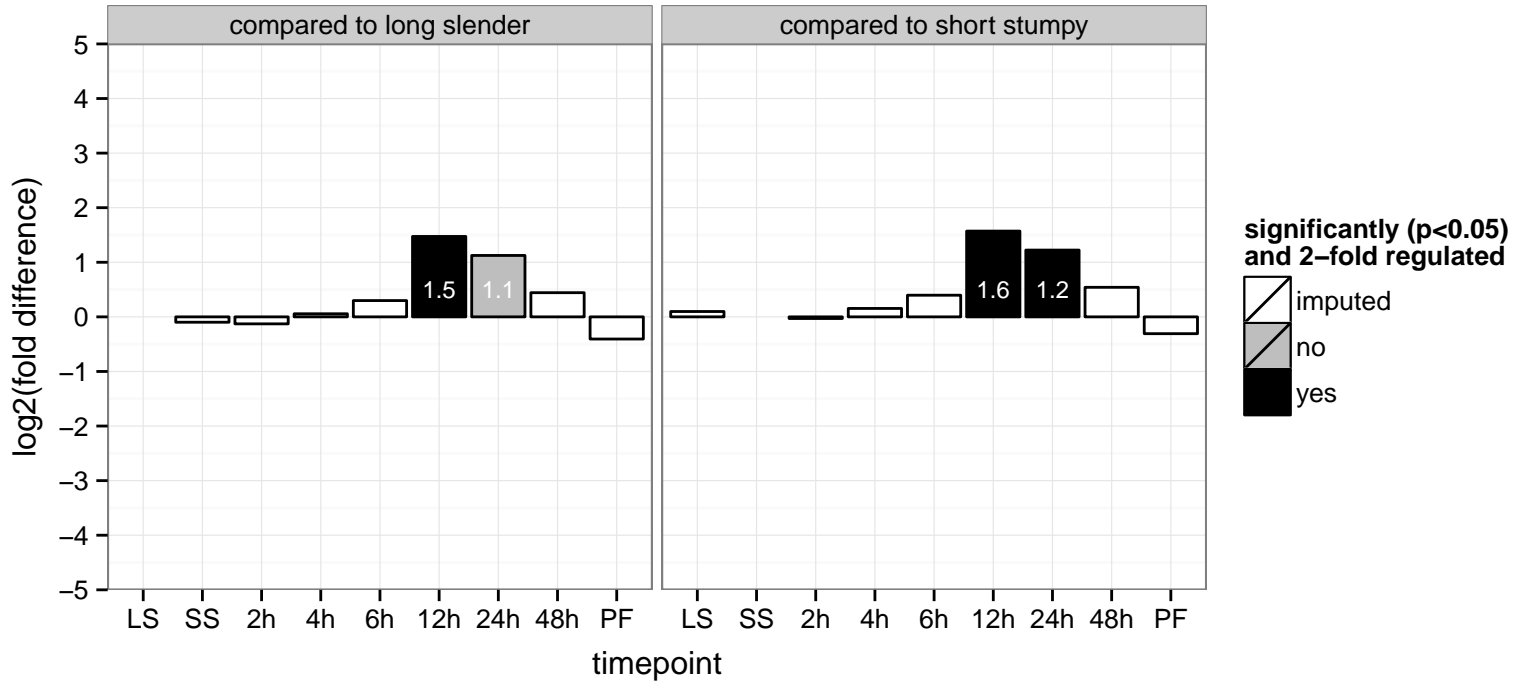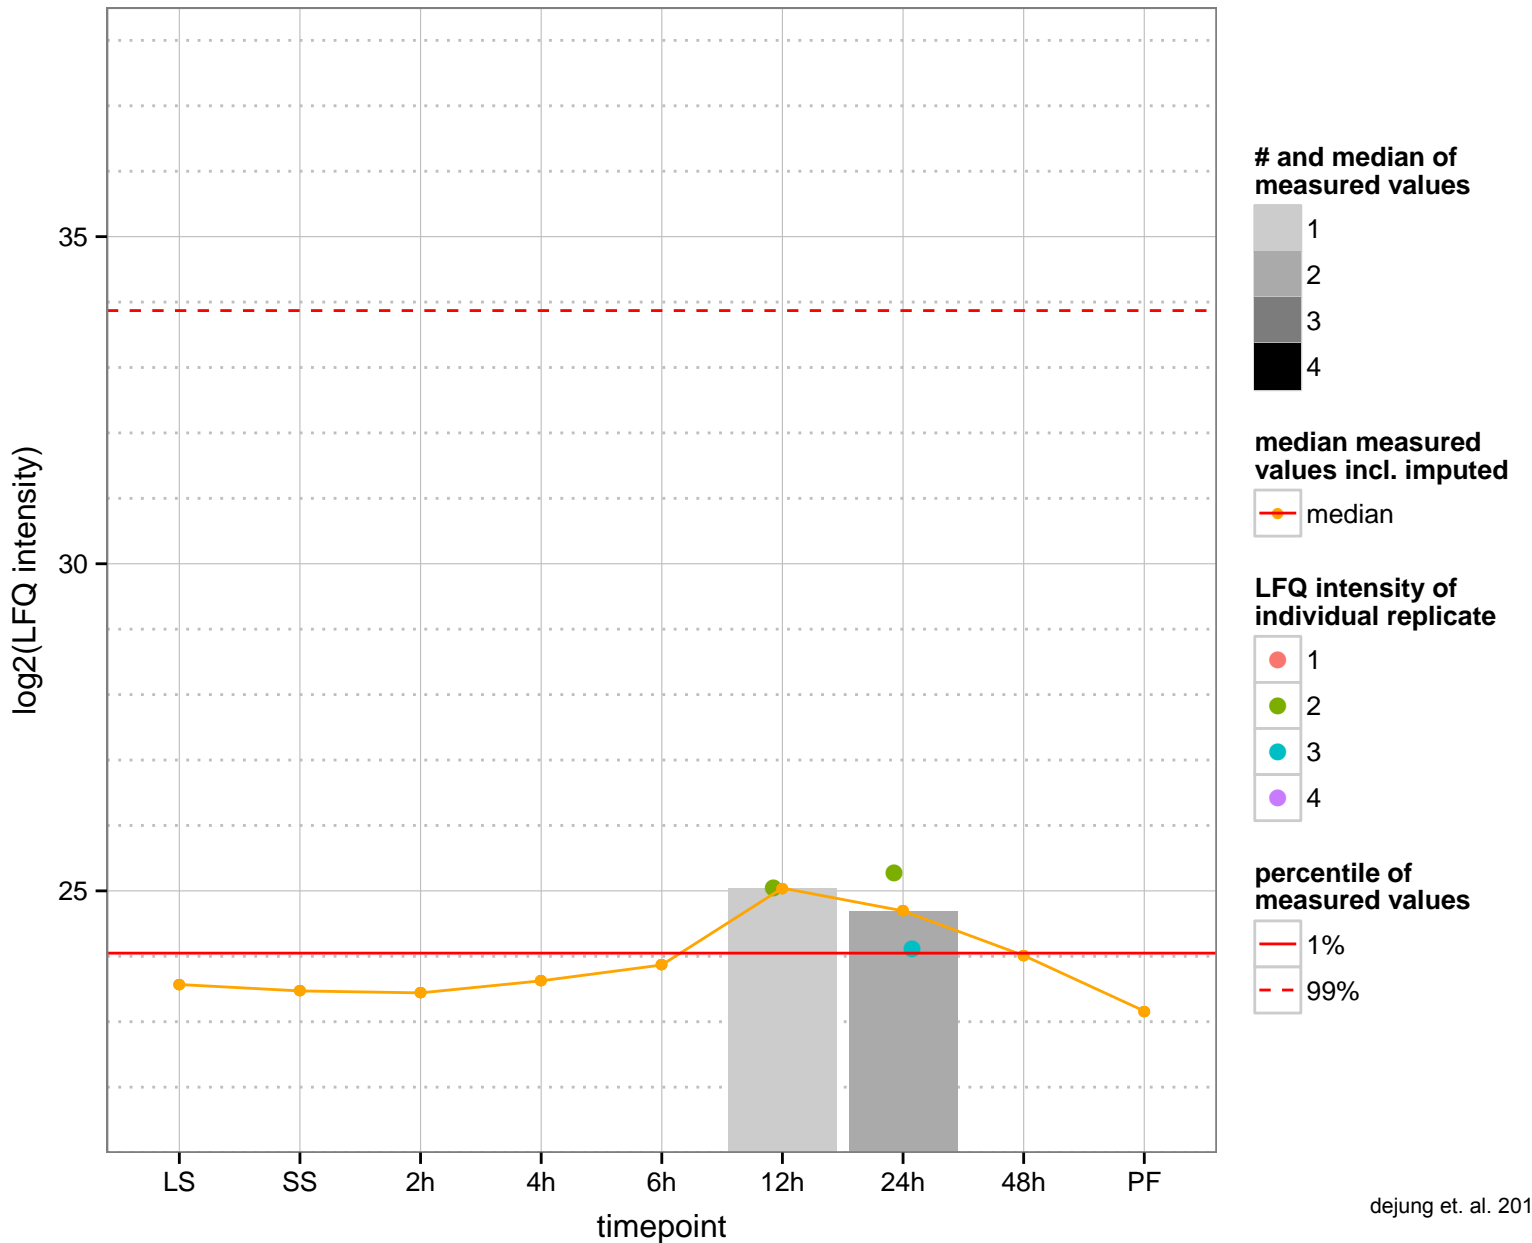

hypothetical protein, conserved  
 Tb927.11.5760  
 AGOF: null  
 AGOC: mitochondrion  
 AGOP: null  
 PGO: null  
 PGOC: null  
 PGOP: null

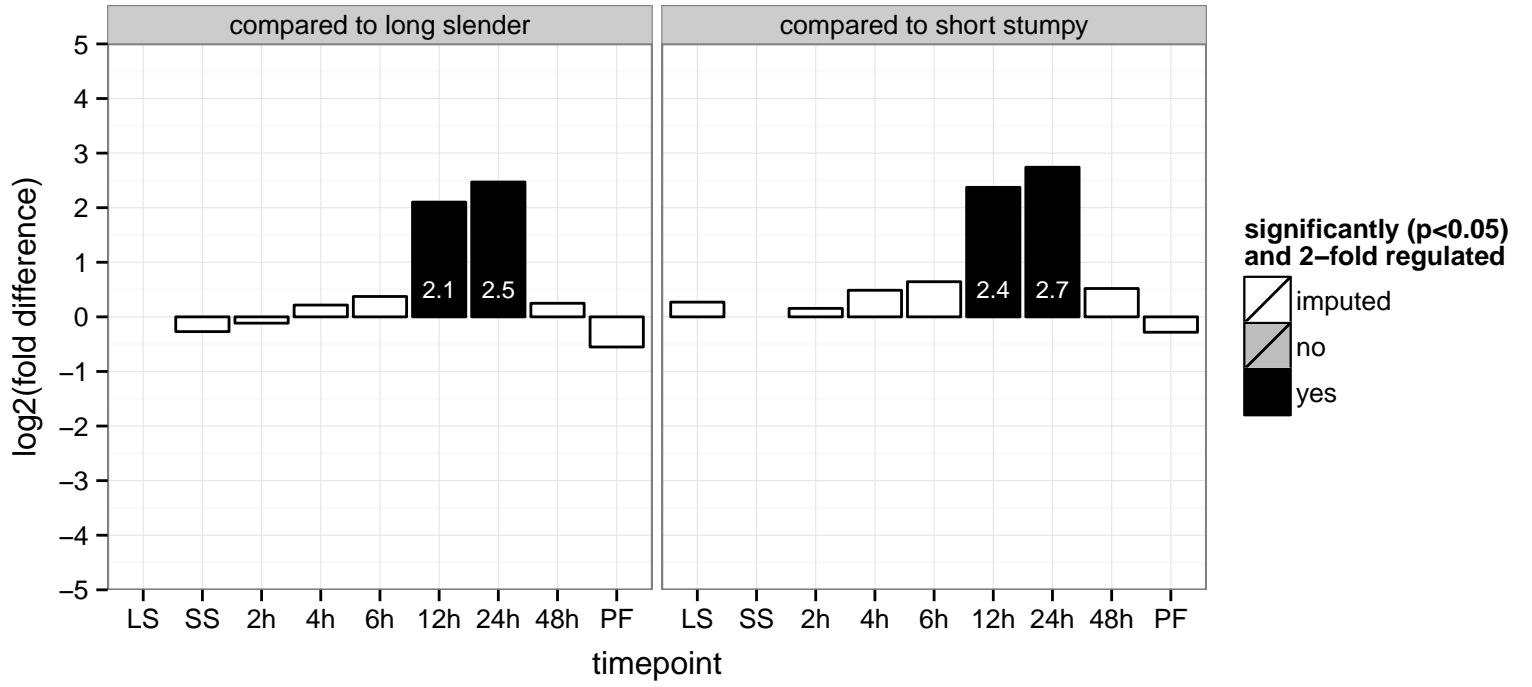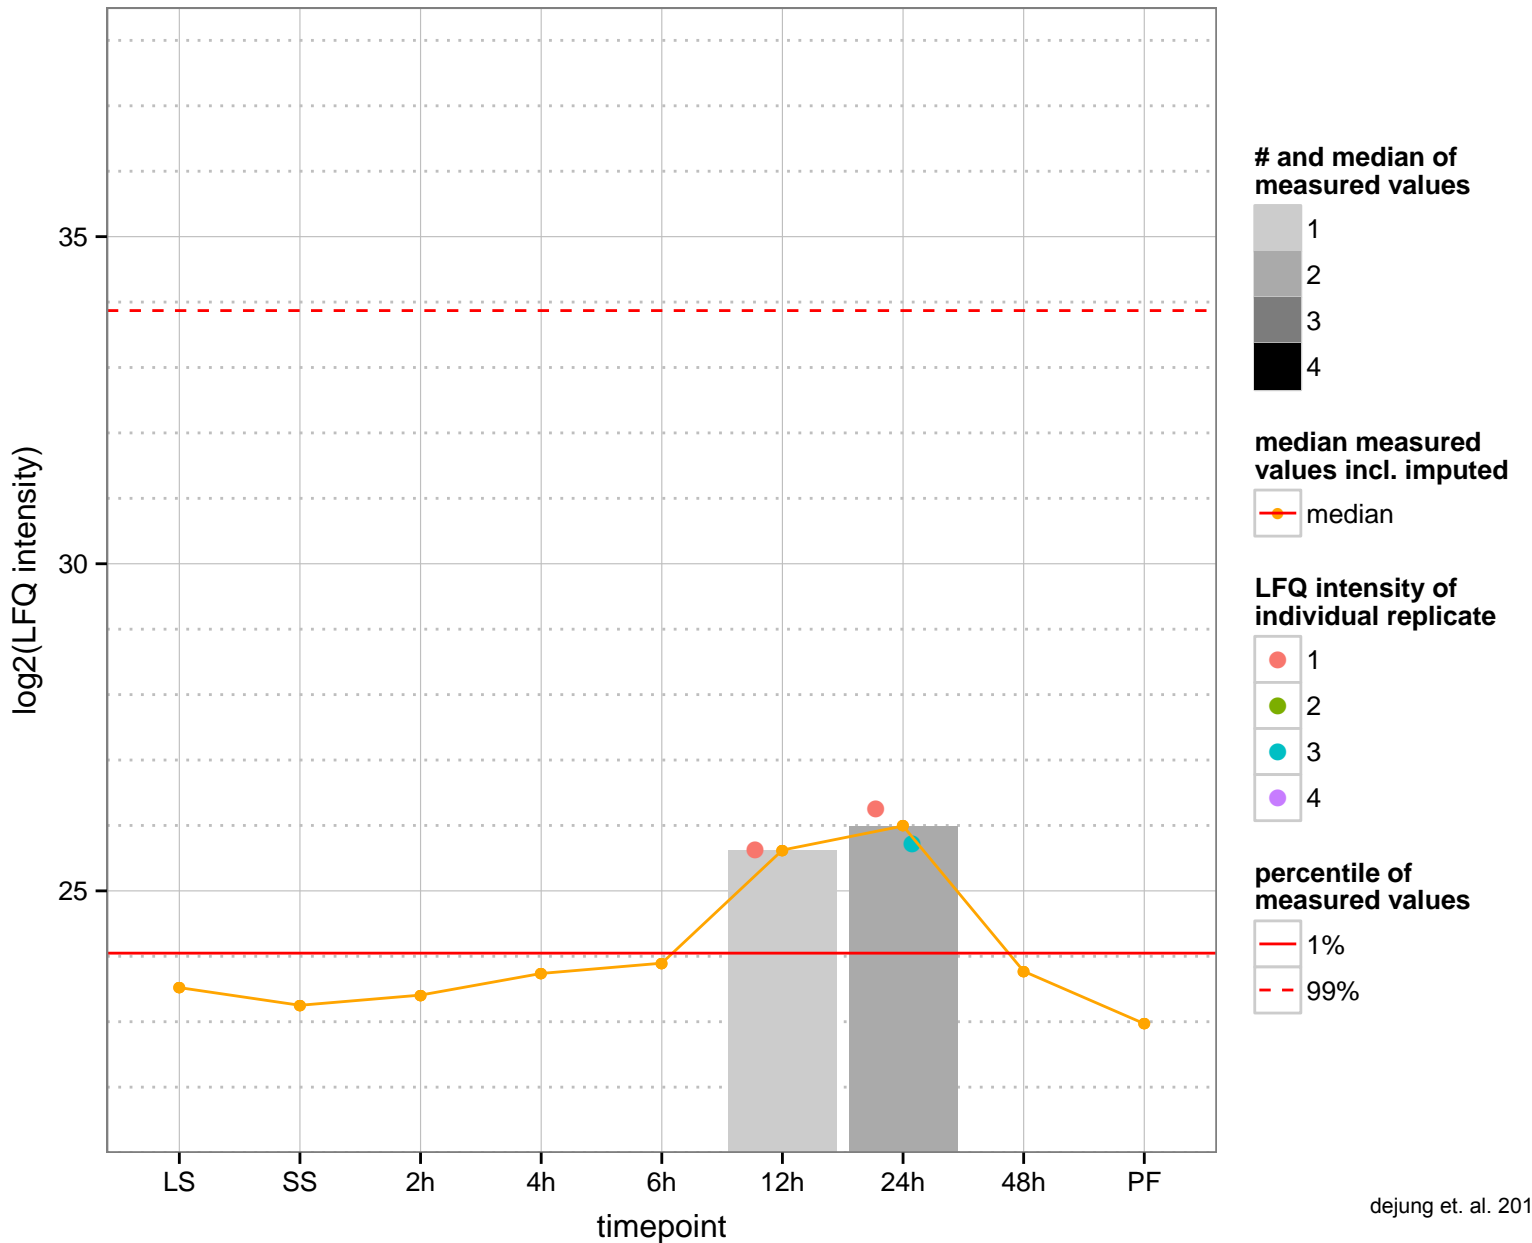



hypothetical protein, conserved  
 Tb927.2.4900;Tb927.2.4750  
 AGOF: null  
 AGOC: null  
 AGOP: null  
 PGOF: null  
 PGOC: null  
 PGOP: null

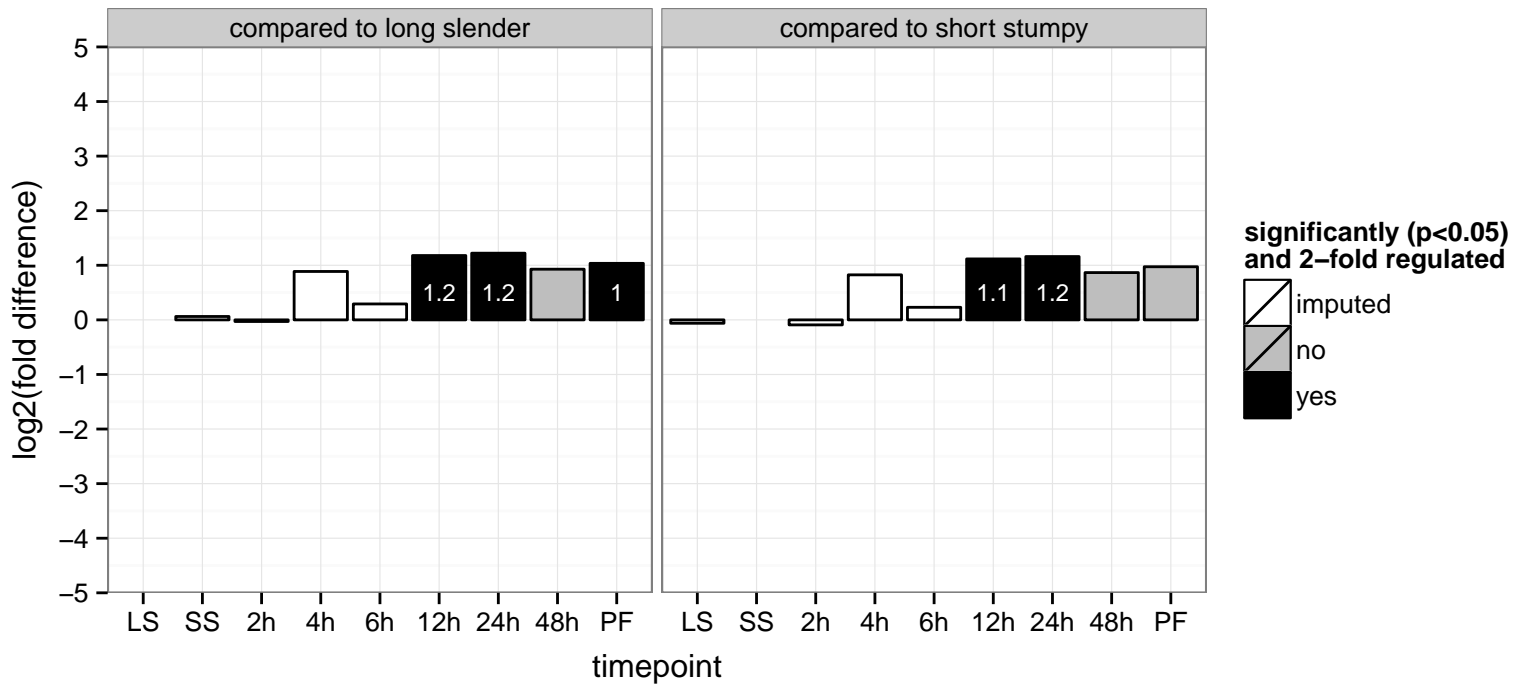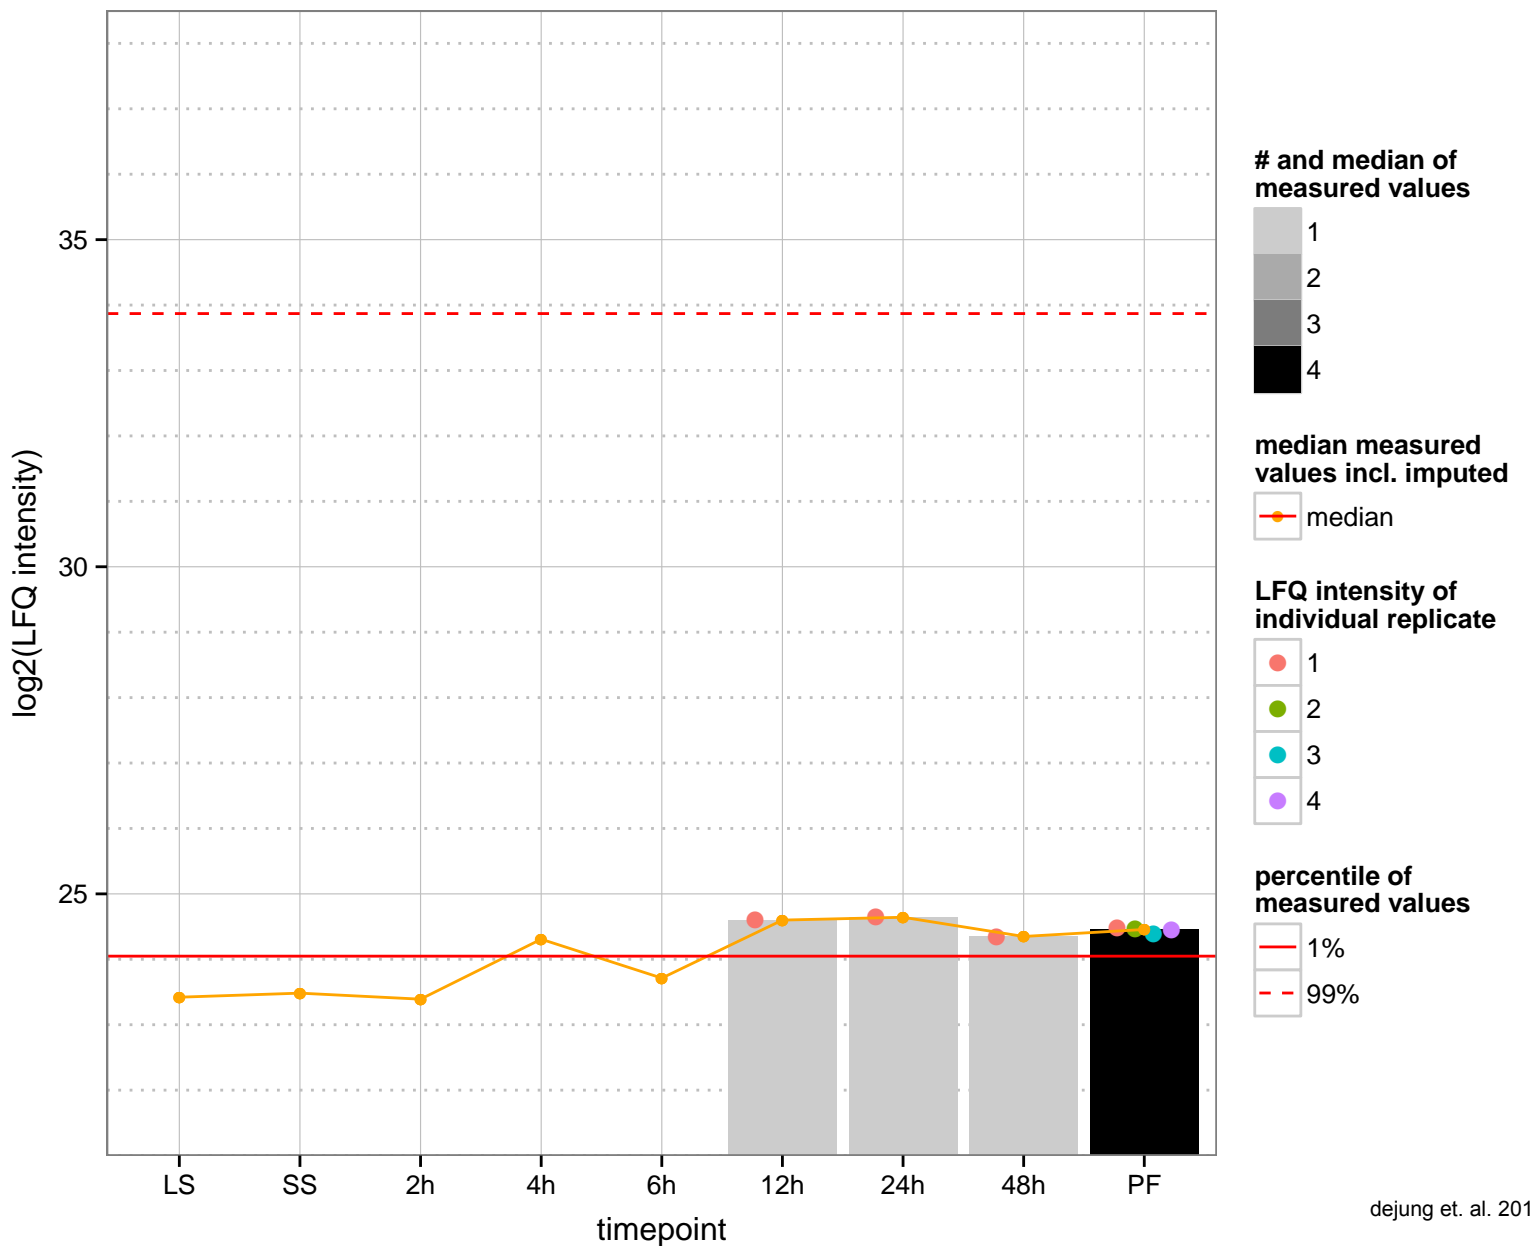

hypothetical protein, conserved  
 Tb927.3.1260  
 AGOF: null  
 AGOC: null  
 AGOP: null  
 PGO: null  
 PGOC: null  
 PGOP: null

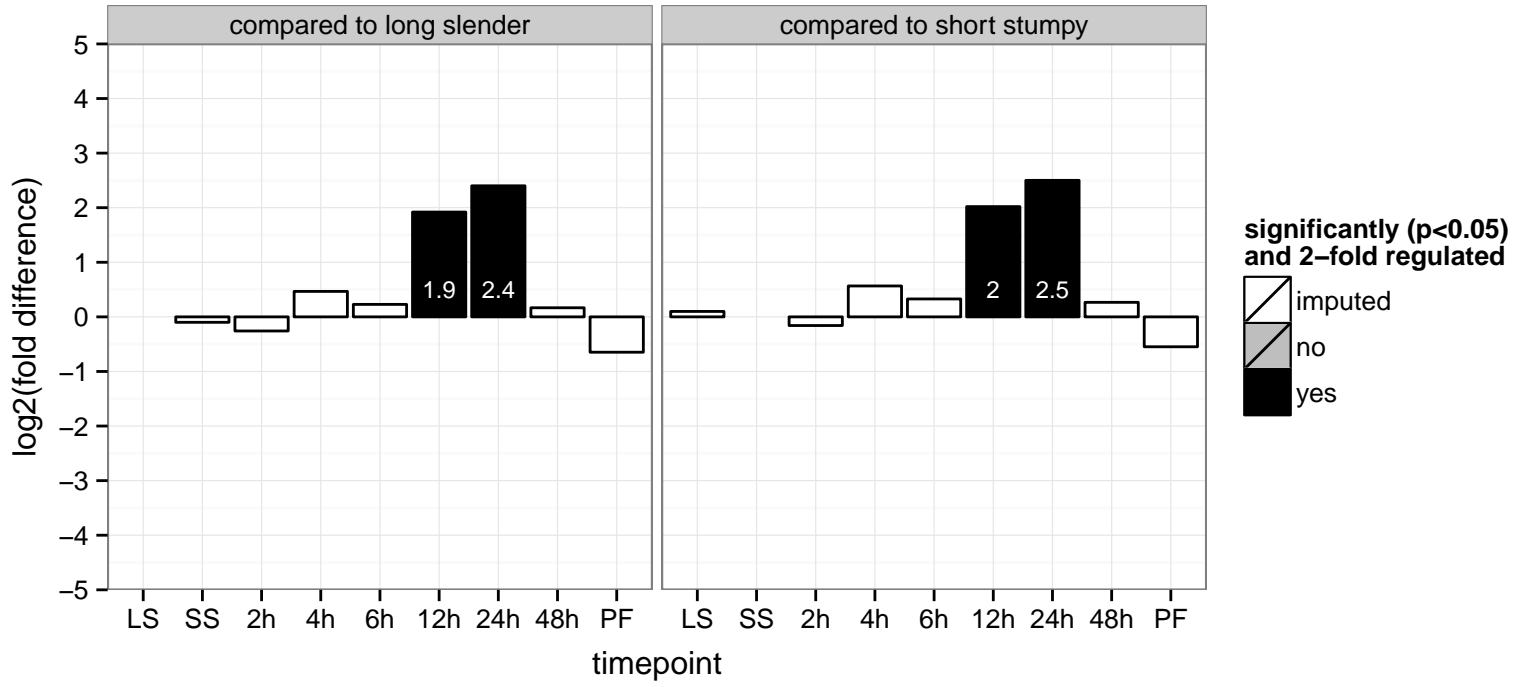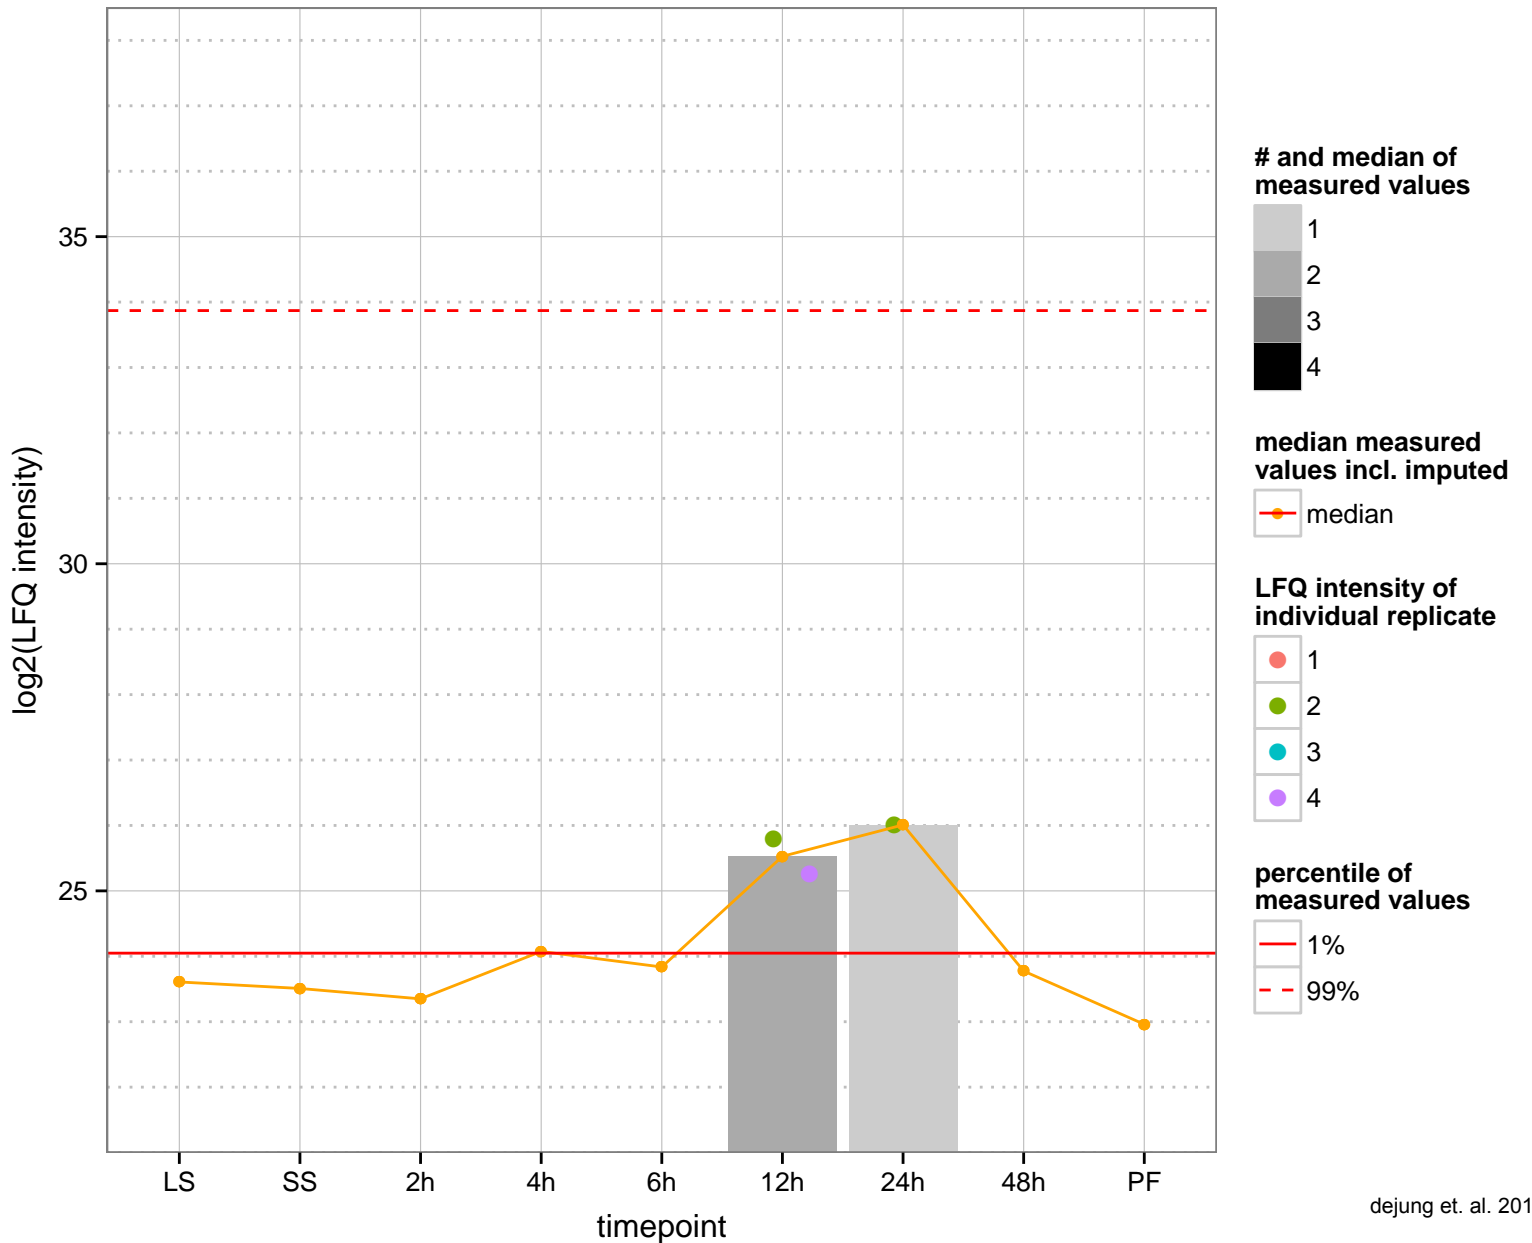

hypothetical protein, conserved

Tb927.3.1600

AGOF: null

AGOC: null

AGOP: null

PGOF: null

PGOC: mitochondrial intermembrane space protein transporter complex

PGOP: protein import into mitochondrial inner membrane, protein targeting to mitochondrion

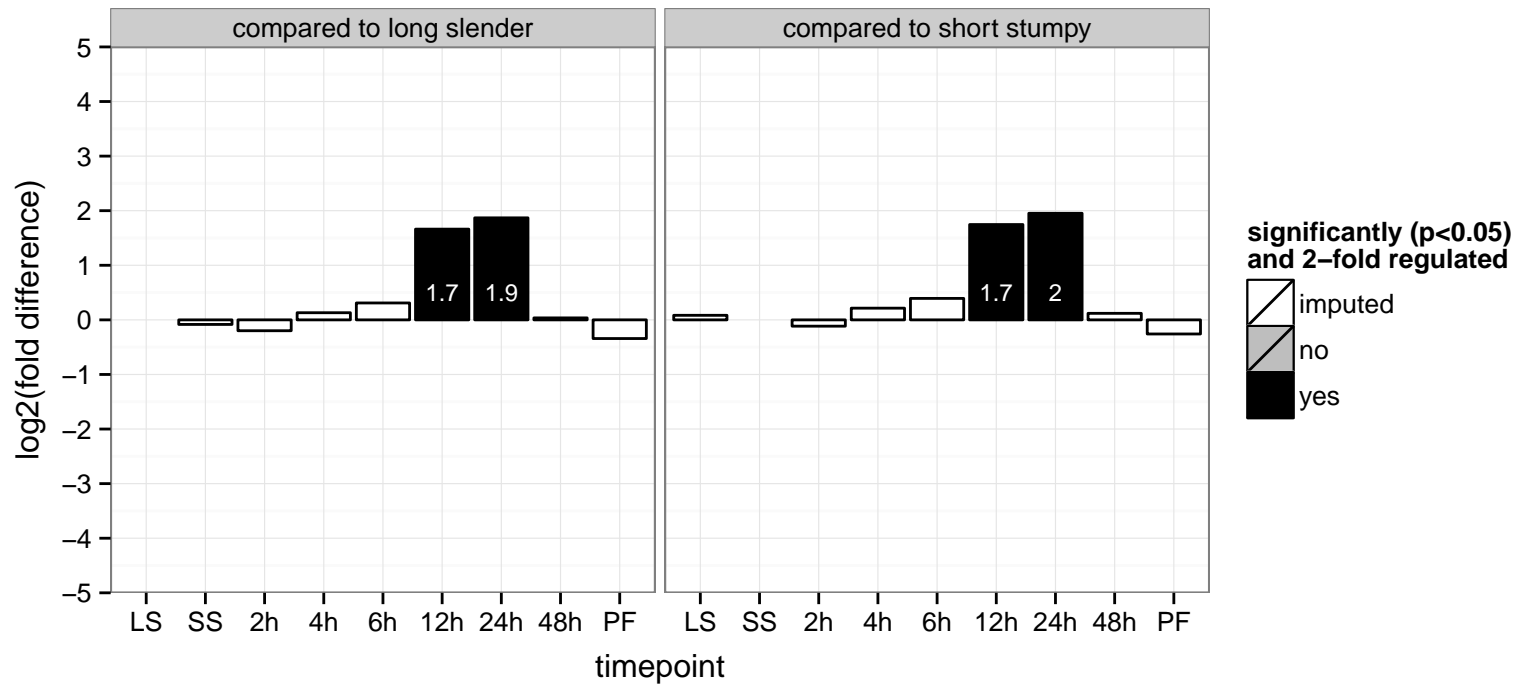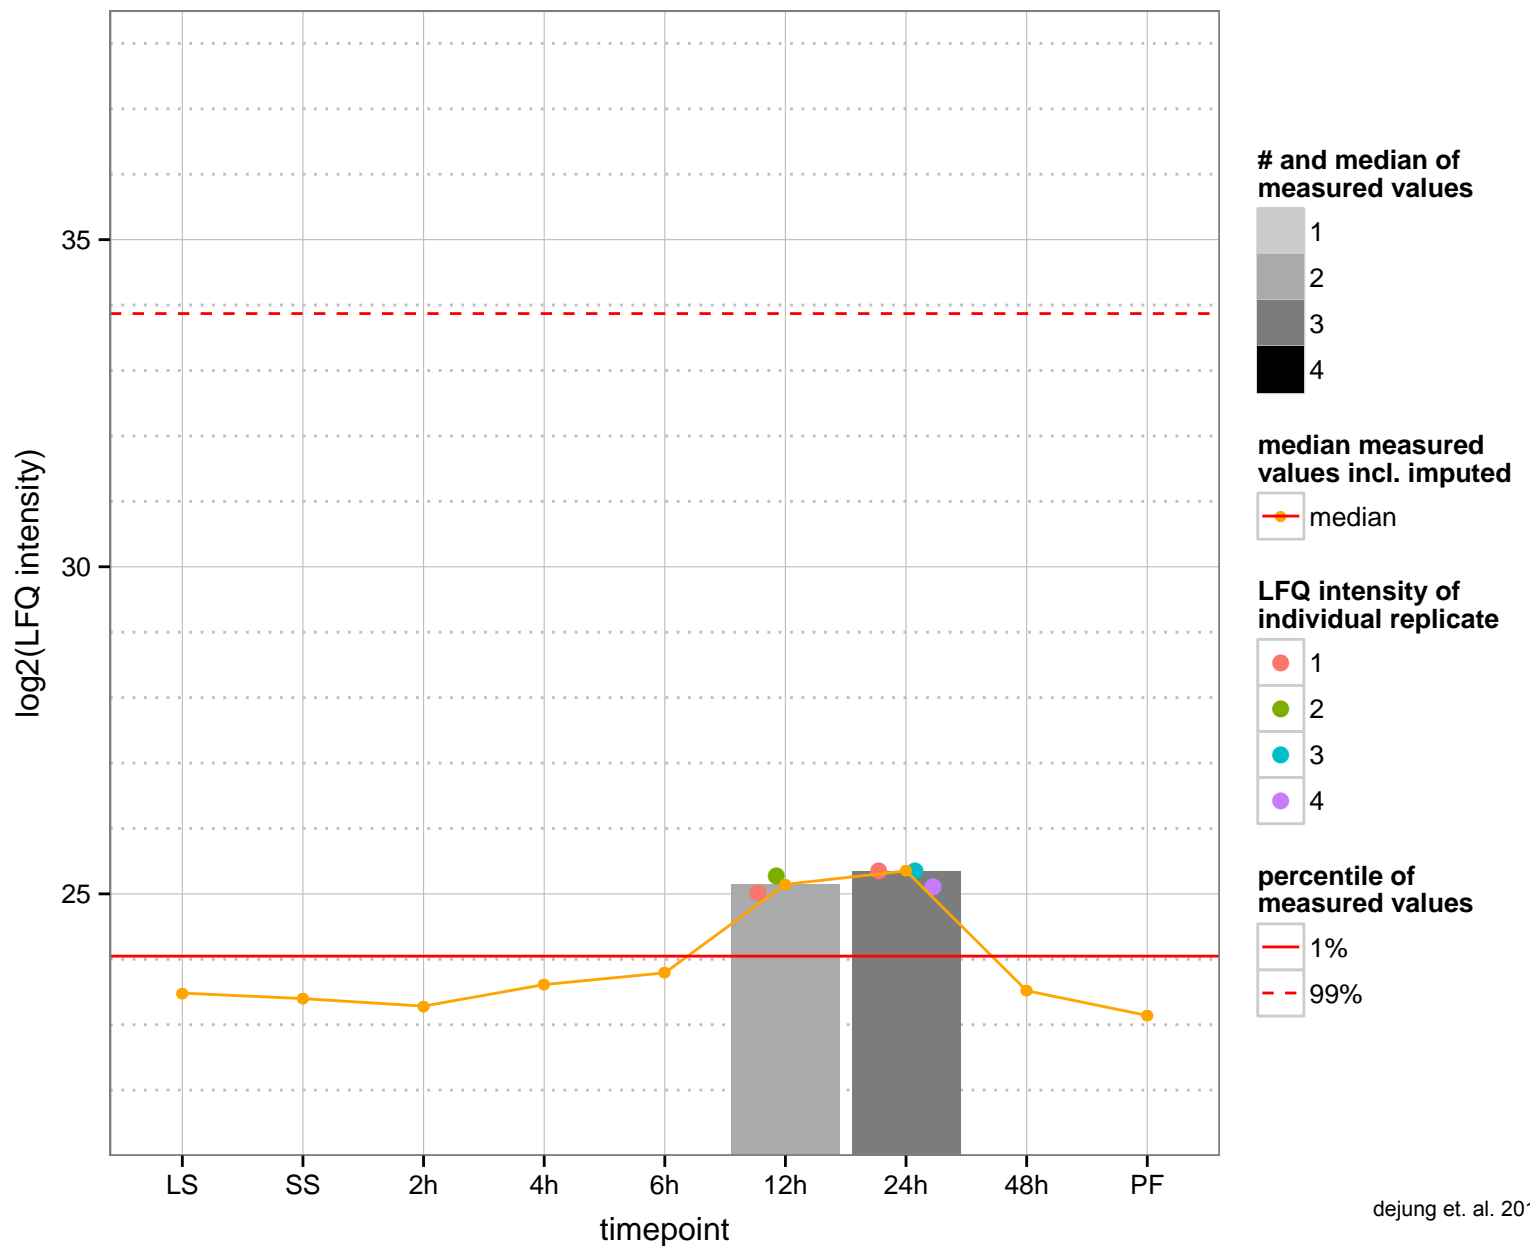

hypothetical protein, conserved  
 Tb927.4.1120  
 AGOF: null  
 AGOC: null  
 AGOP: null  
 PGO: null  
 PGOC: null  
 PGOP: null

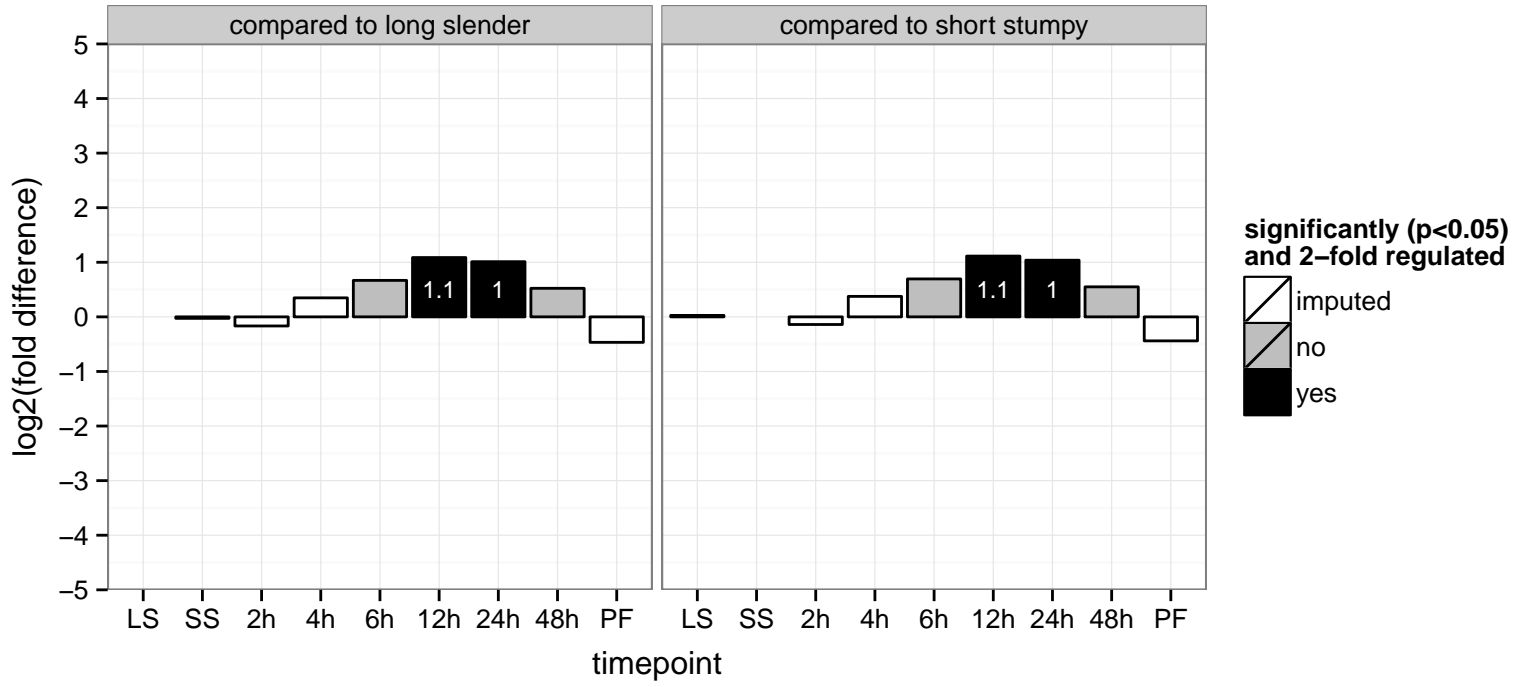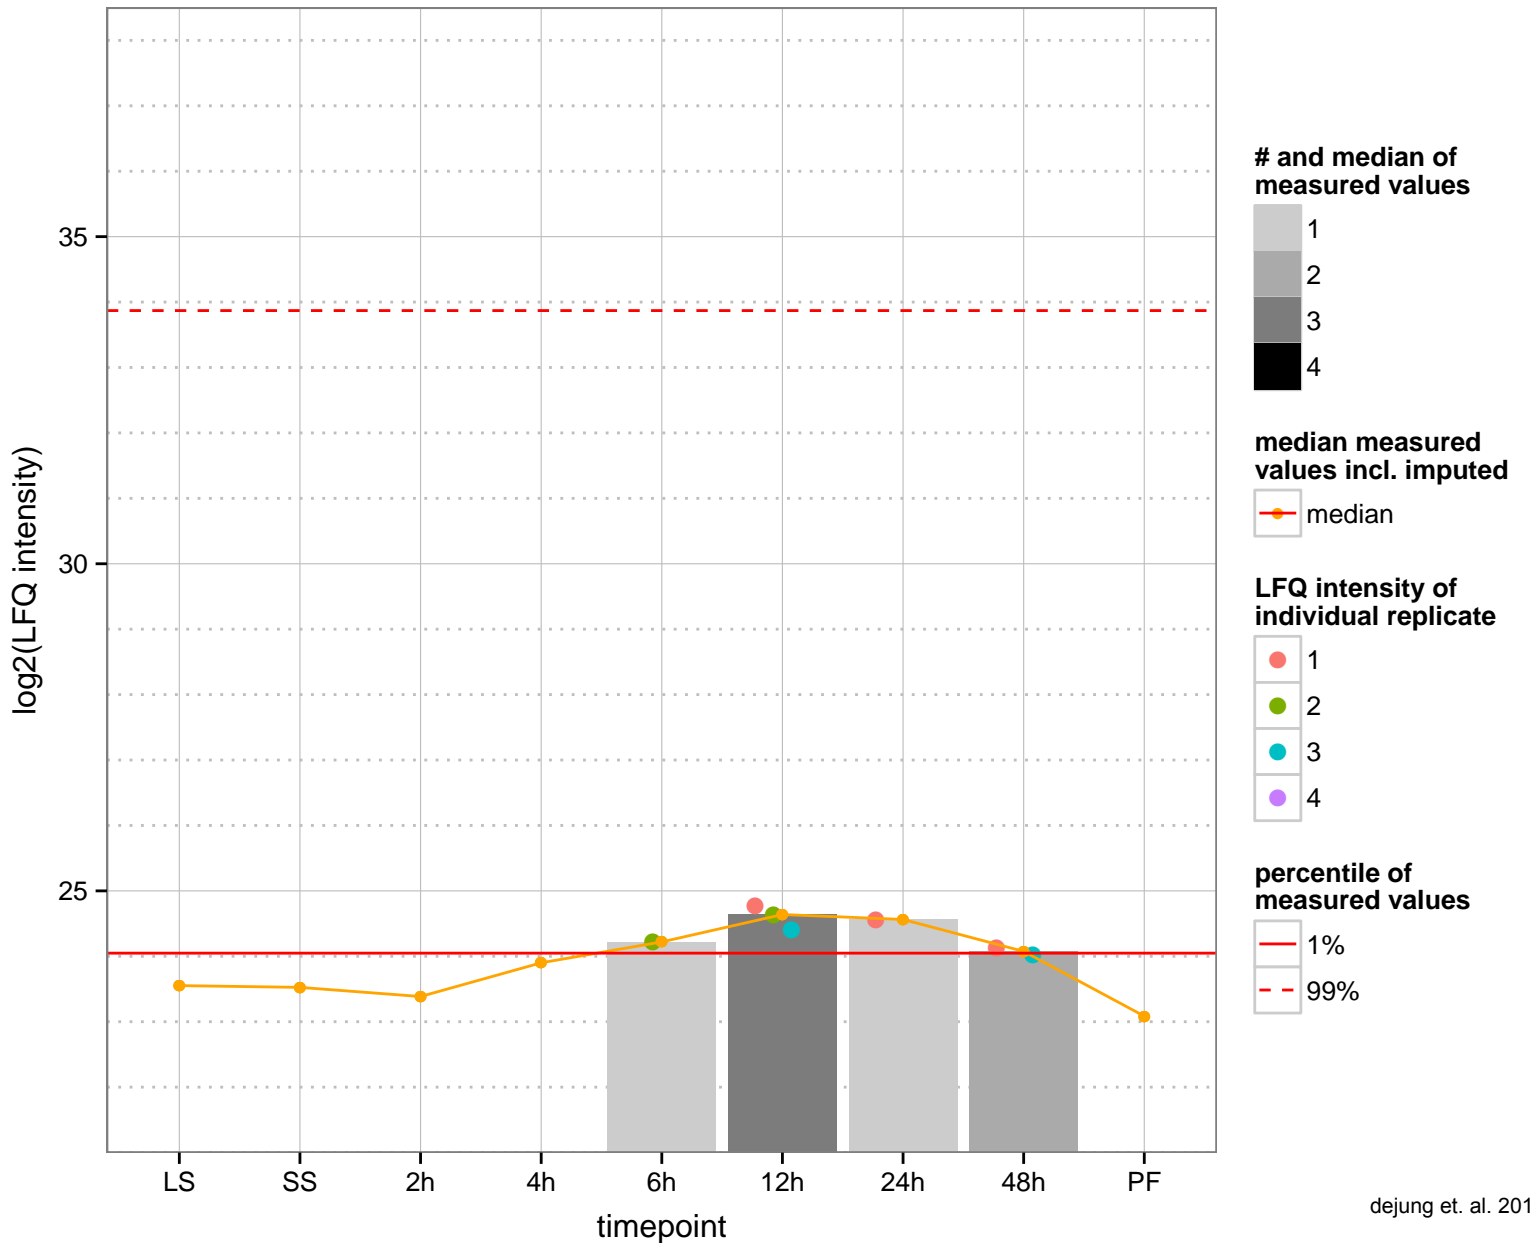

ubiquitin, putative  
 Tb927.4.2540  
 AGOF: null  
 AGOC: null  
 AGOP: null  
 PGO: protein binding  
 PGOC: null  
 PGOP: null

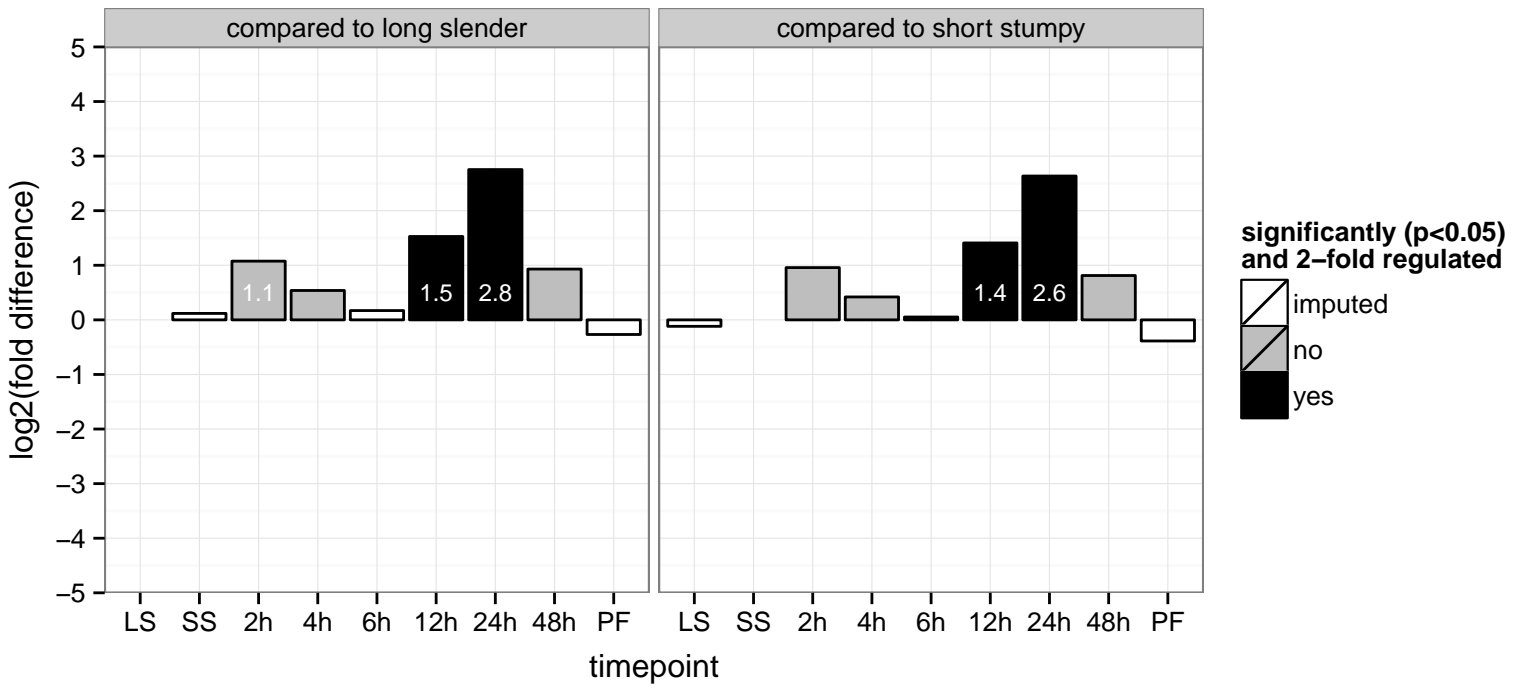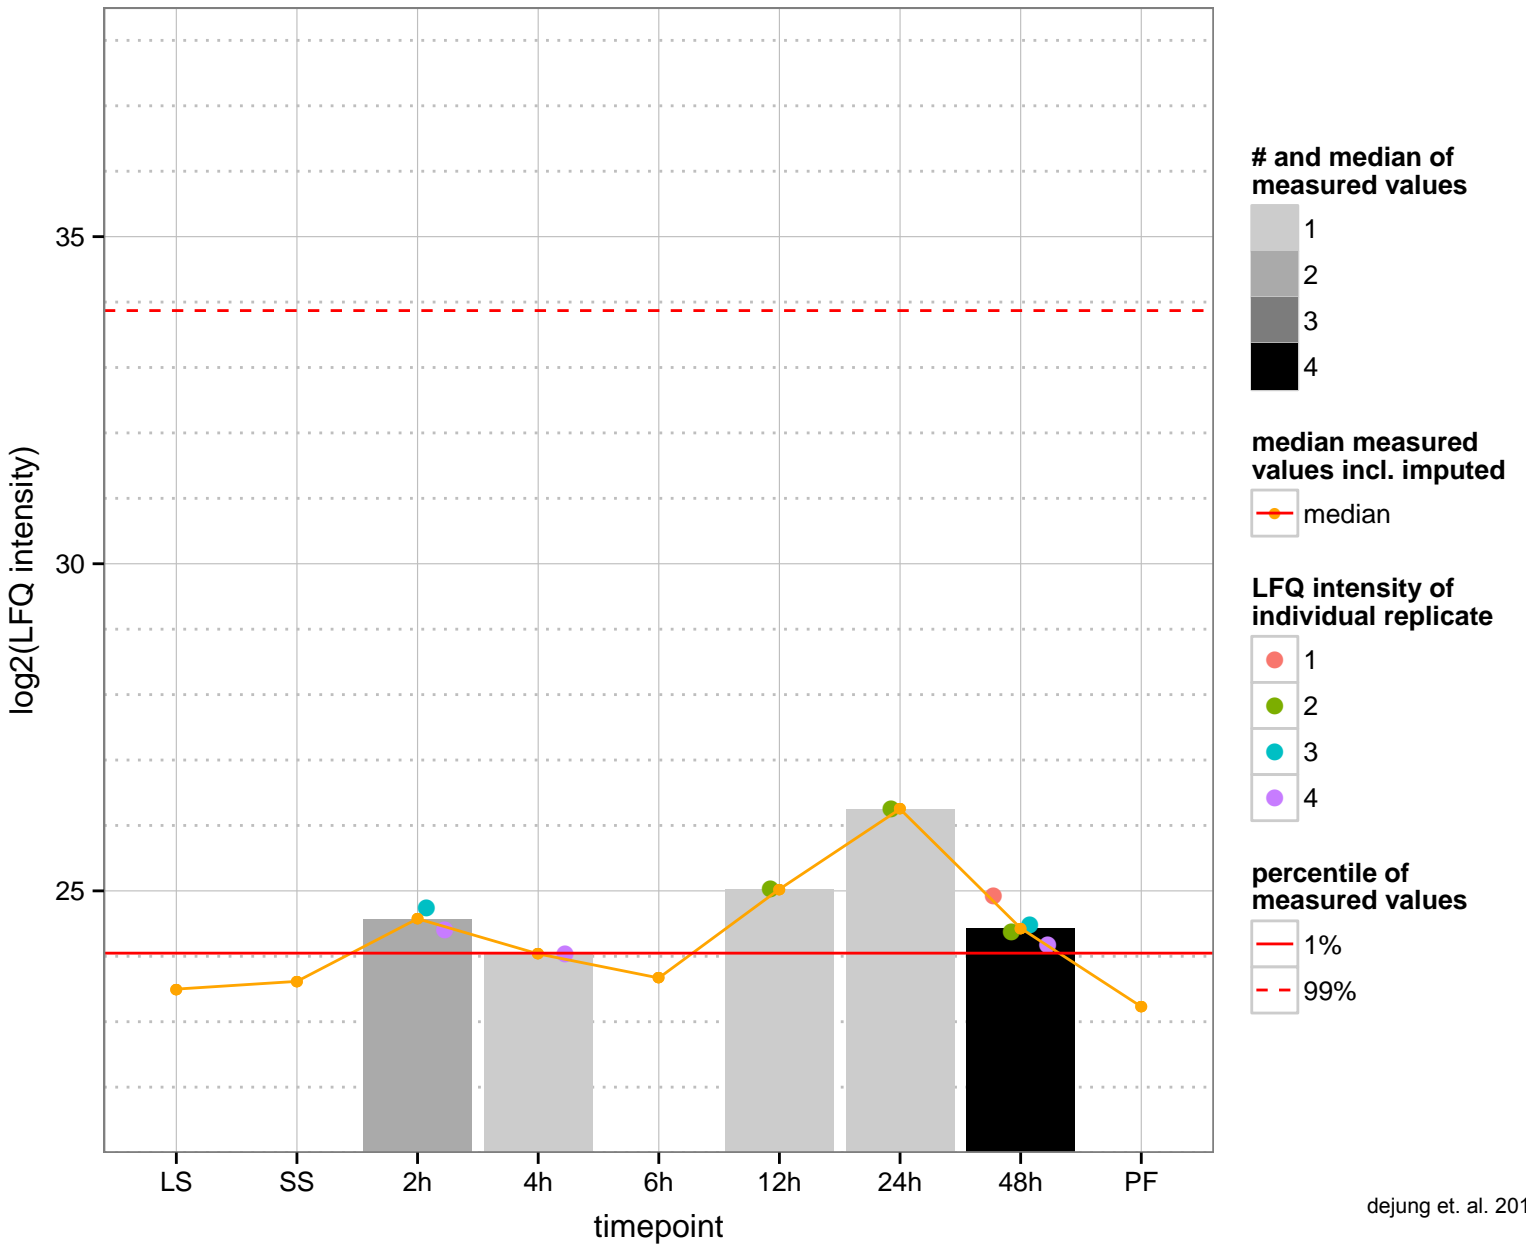

hypothetical protein, conserved  
 Tb927.4.3430  
 AGOF: null  
 AGOC: null  
 AGOP: null  
 PGOF: null  
 PGO: null  
 PGOP: null

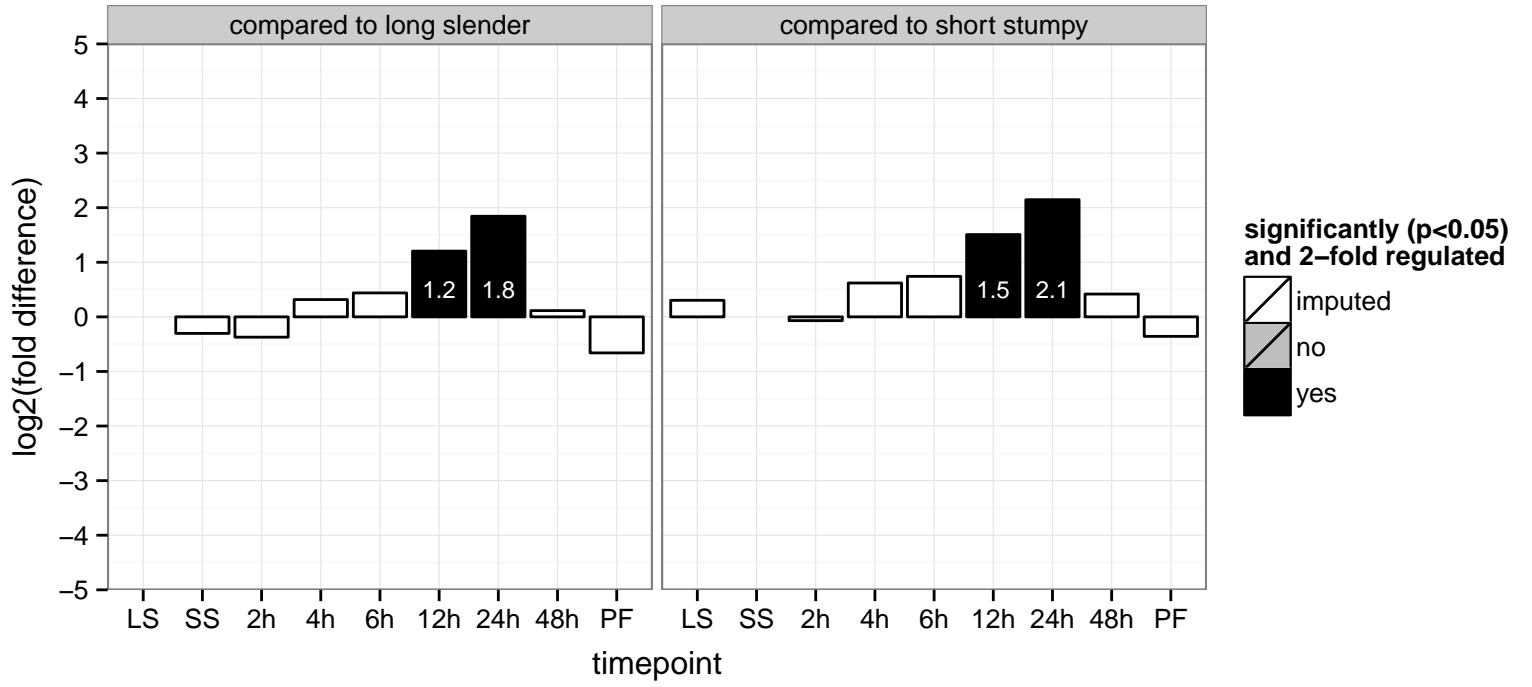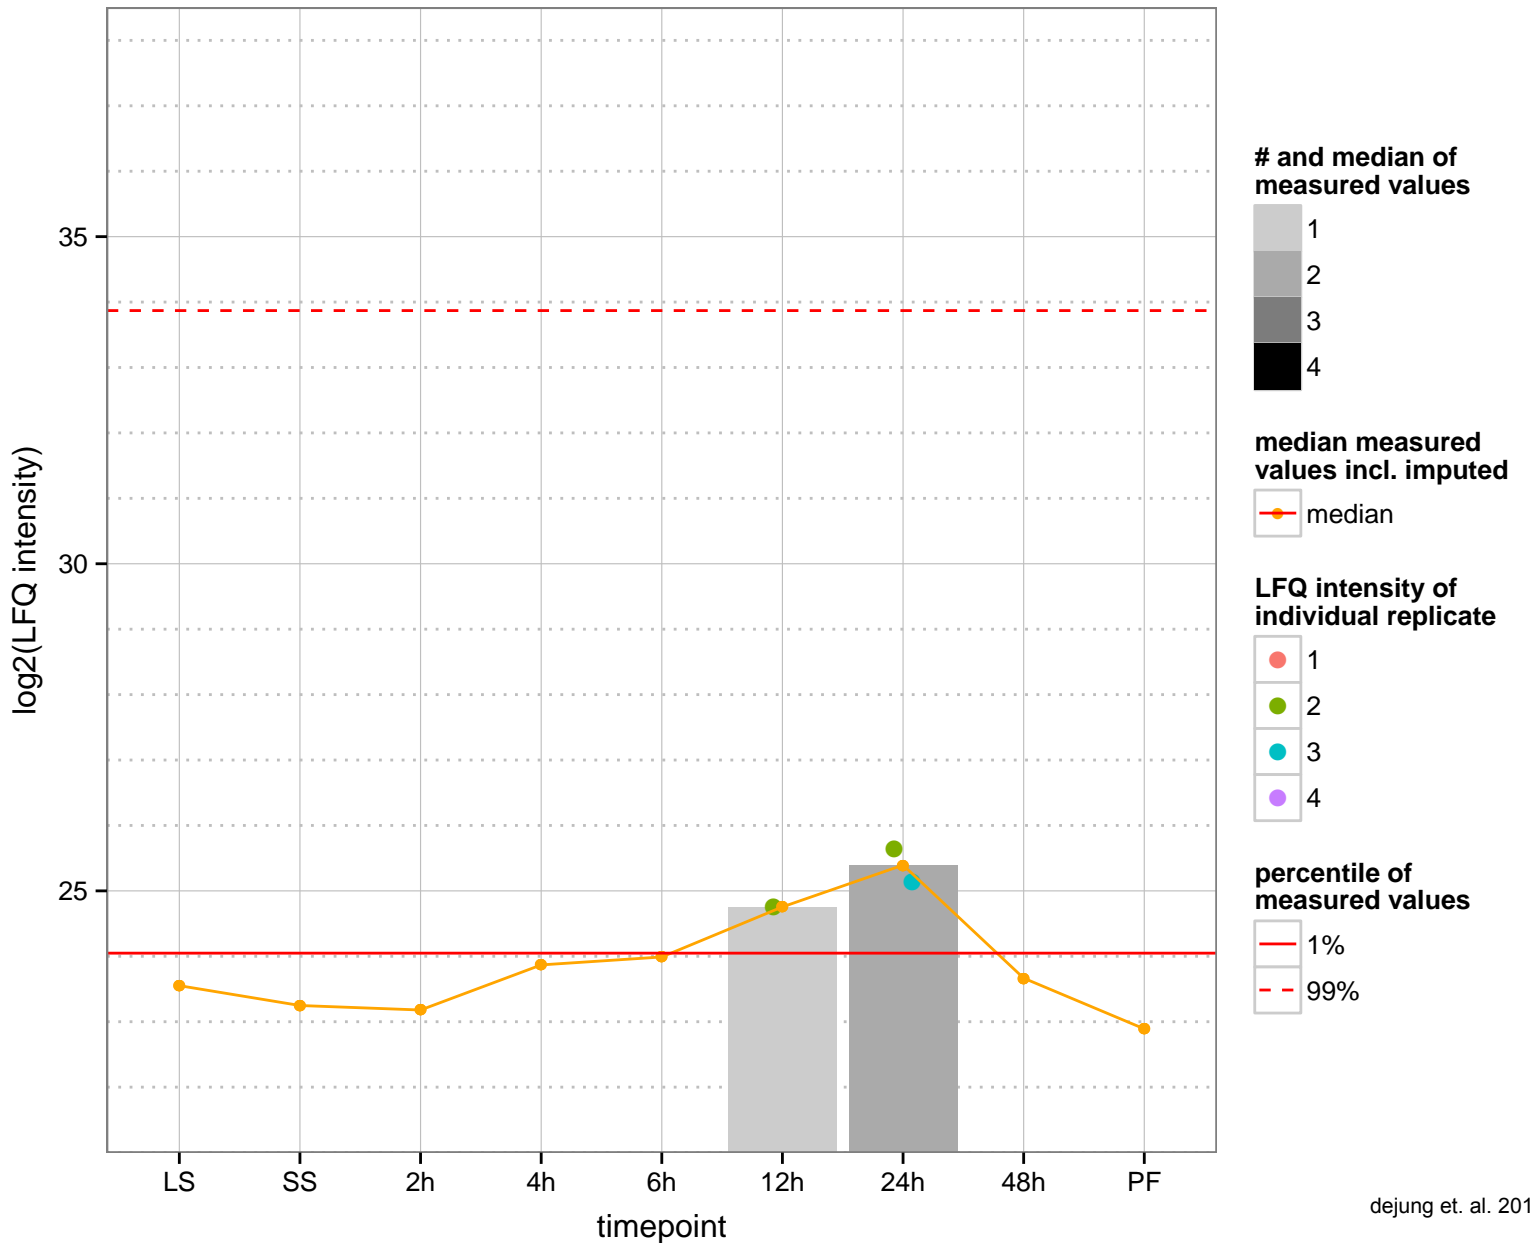

phosphoglycerate mutase protein, putative  
 Tb927.5.3580  
 AGOF: catalytic activity  
 AGOC: null  
 AGOP: metabolic process, purine ribonucleotide biosynthetic process  
 PGO: null  
 PGOC: null  
 PGOP: null

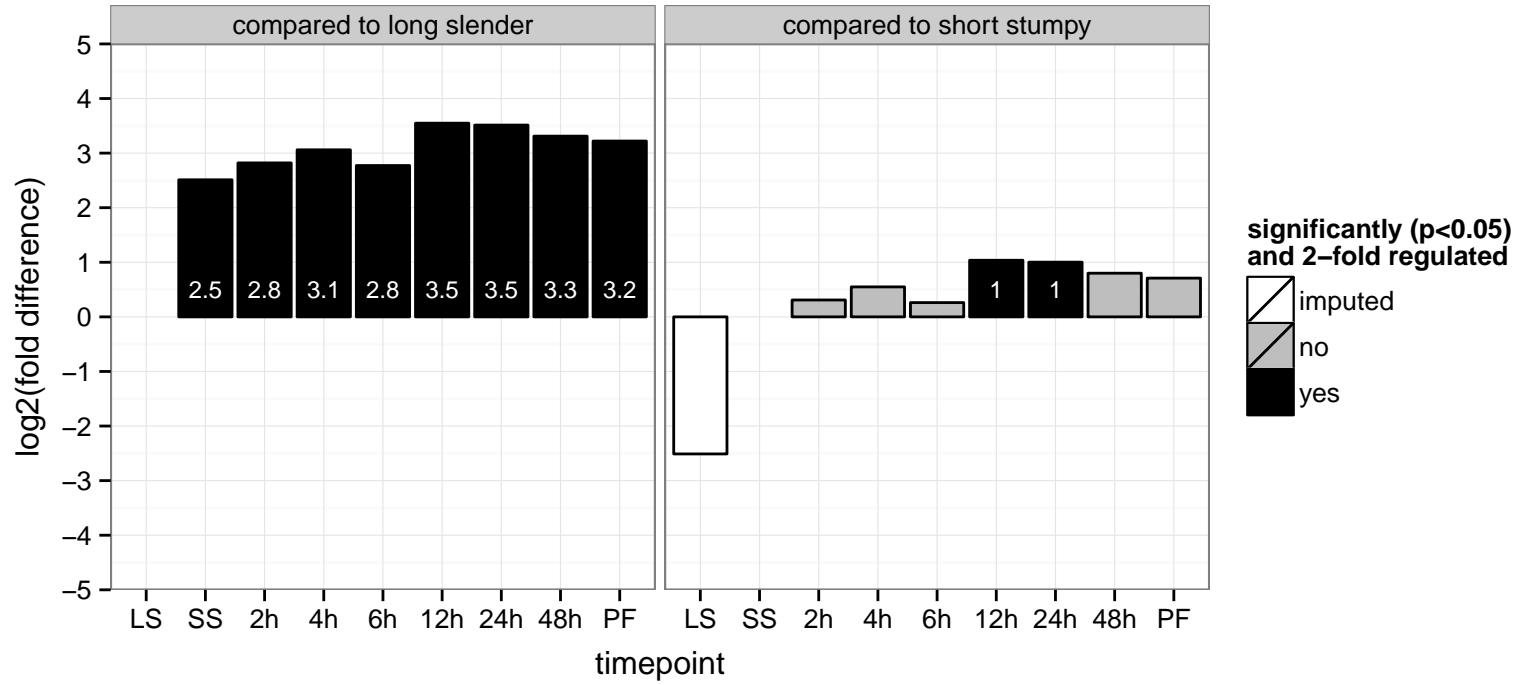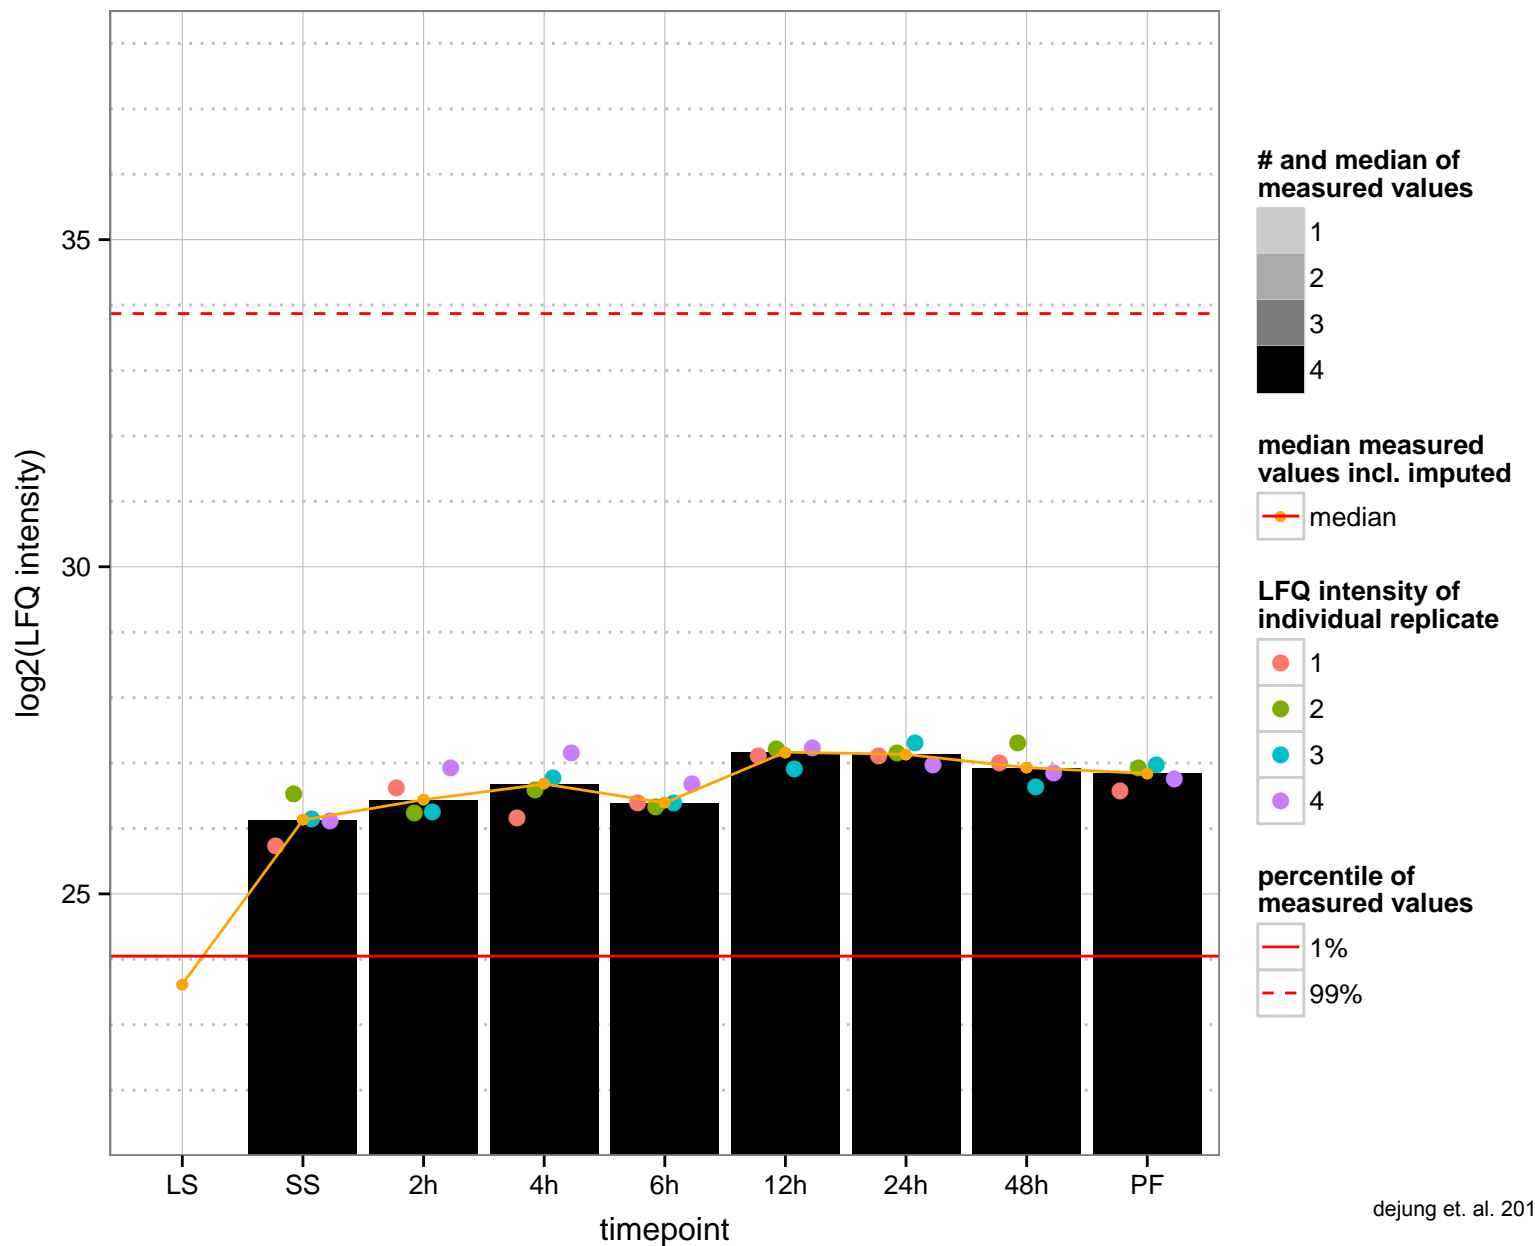

hypothetical protein, conserved  
 Tb927.7.2160  
 AGOF: null  
 AGOC: null  
 AGOP: null  
 PGOF: null  
 PGO: null  
 PGOP: null

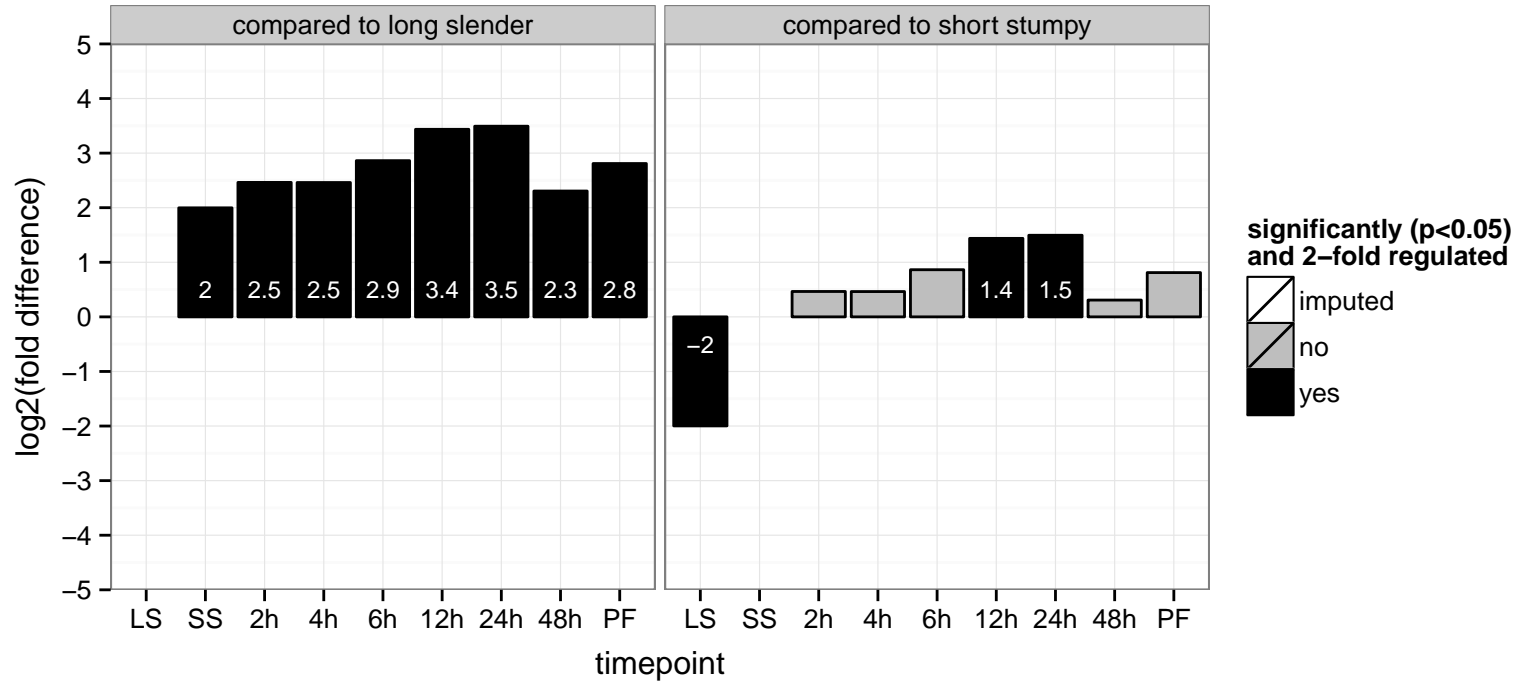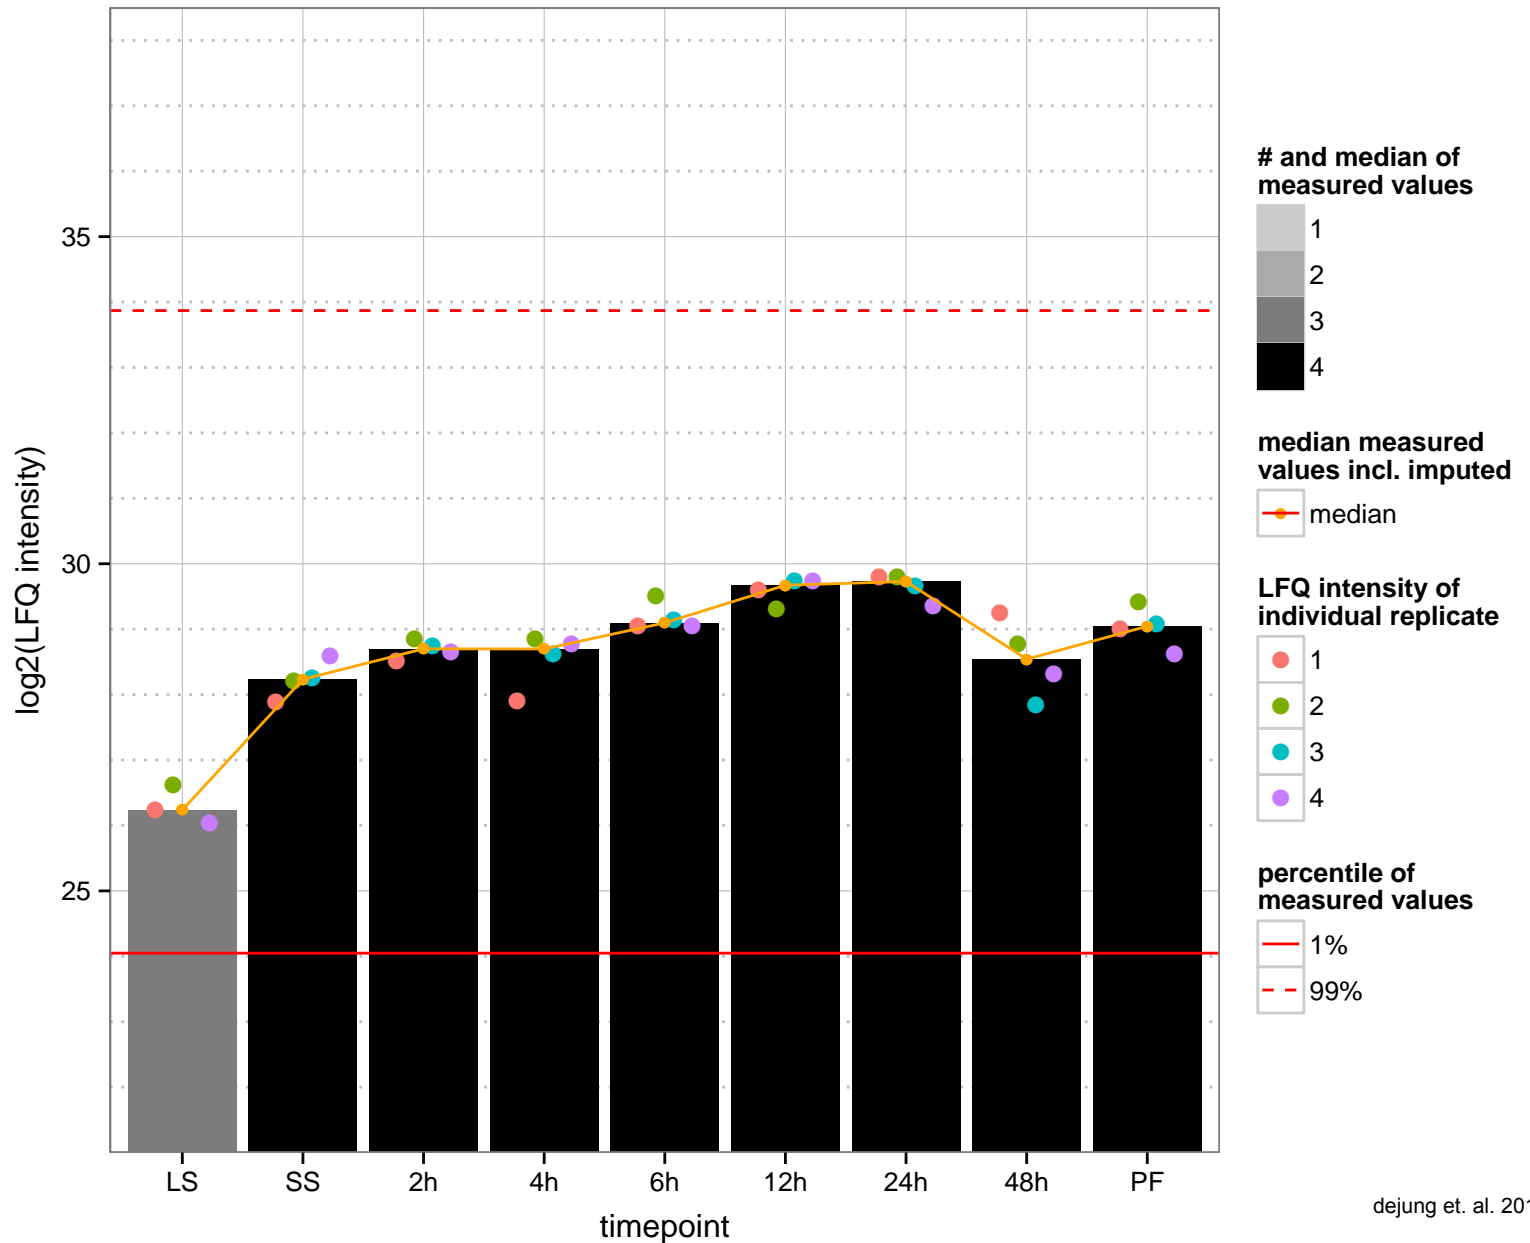



hypothetical protein, conserved  
 Tb927.7.6110;Tb927.7.6170;Tb927.7.6150;Tb927.7.6130  
 AGOF: null  
 AGOC: null  
 AGOP: null  
 PGO: null  
 PGOC: null  
 PGOP: null

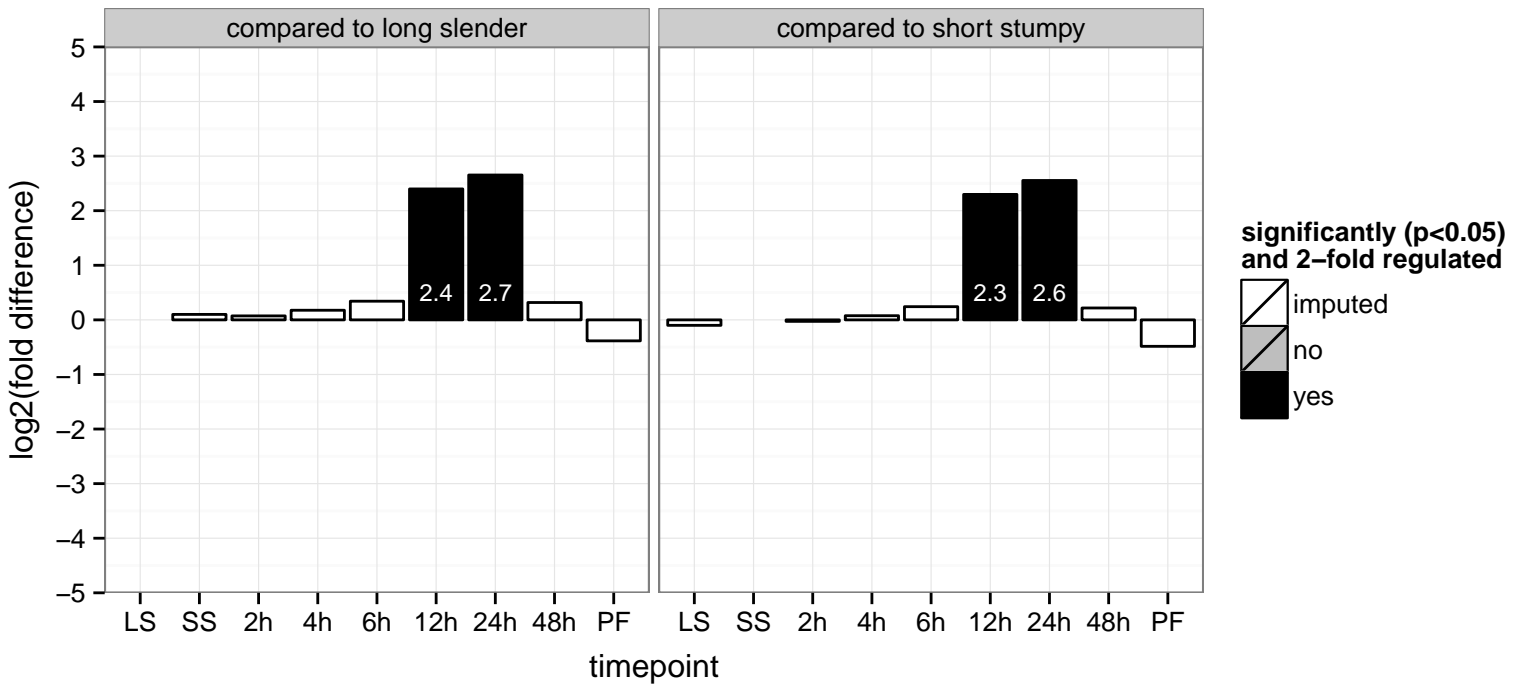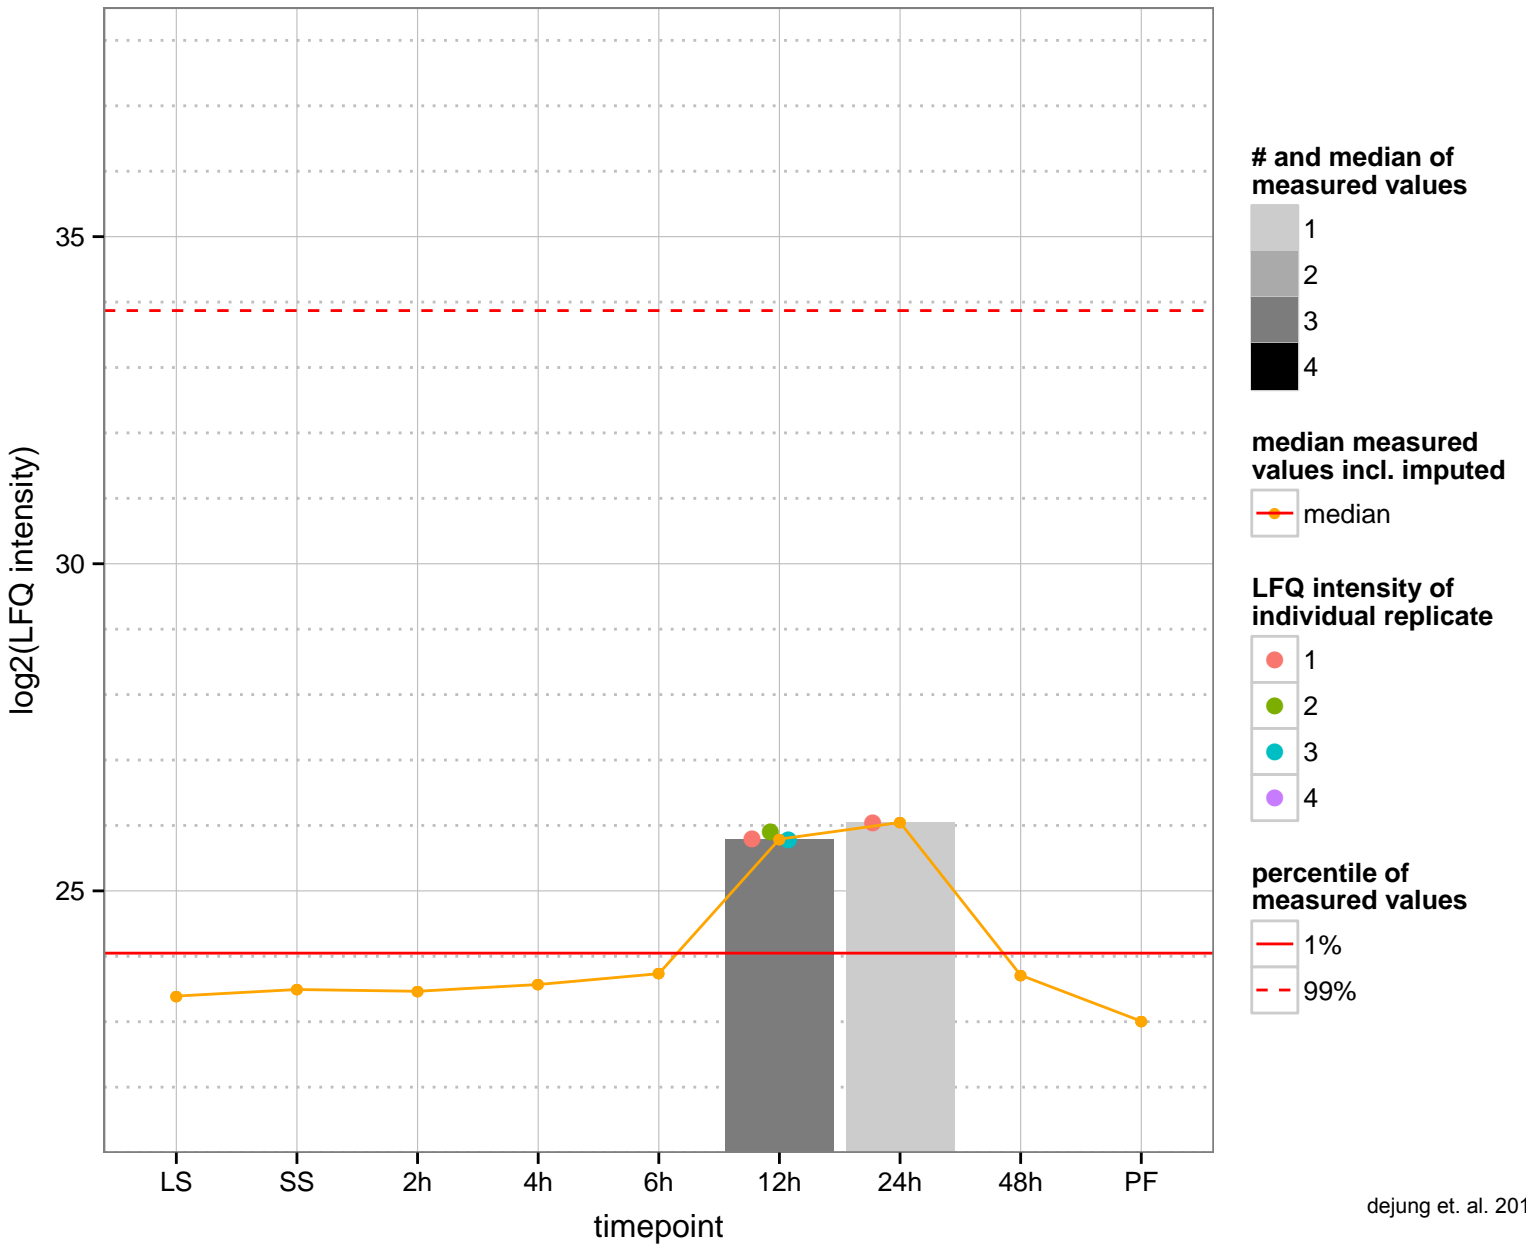

hypothetical protein, conserved  
 Tb927.8.1250  
 AGOF: null  
 AGOC: null  
 AGOP: null  
 PGO: null  
 PGOC: null  
 PGOP: null

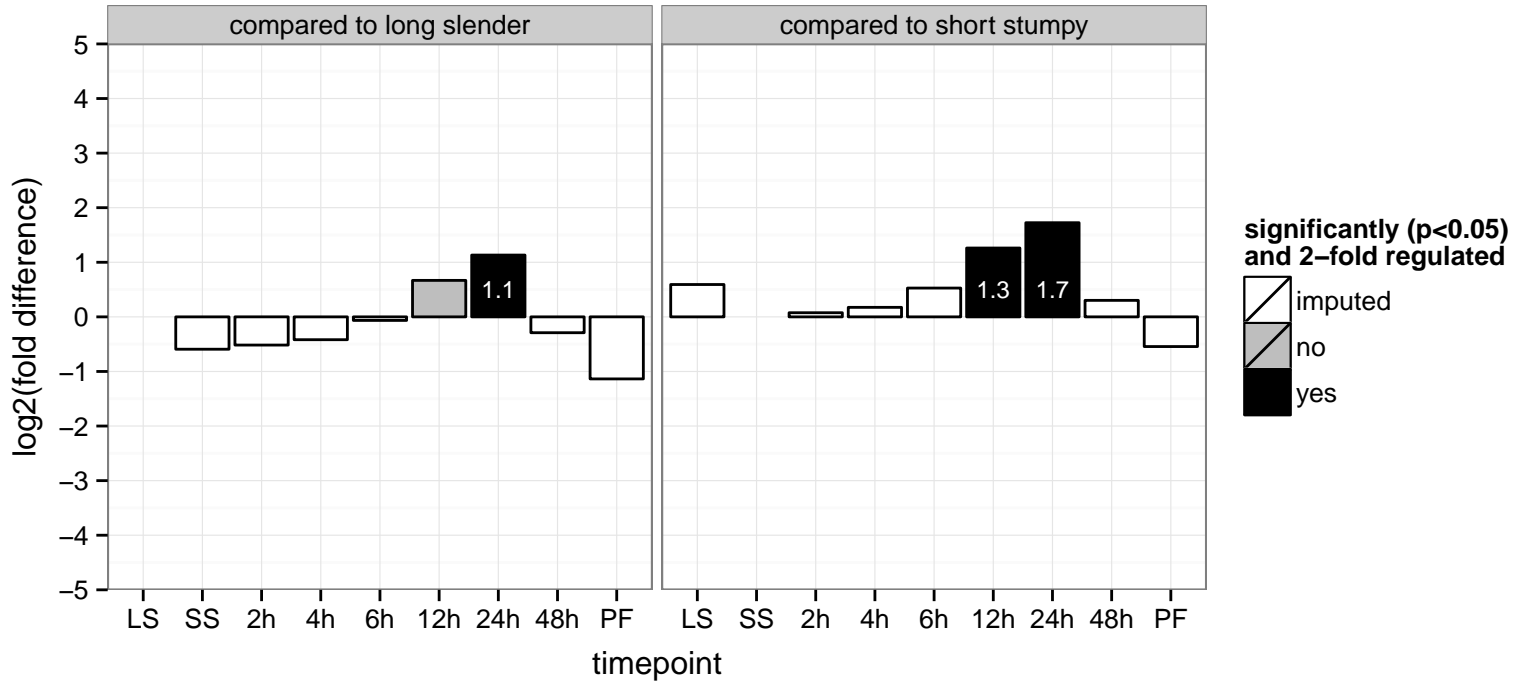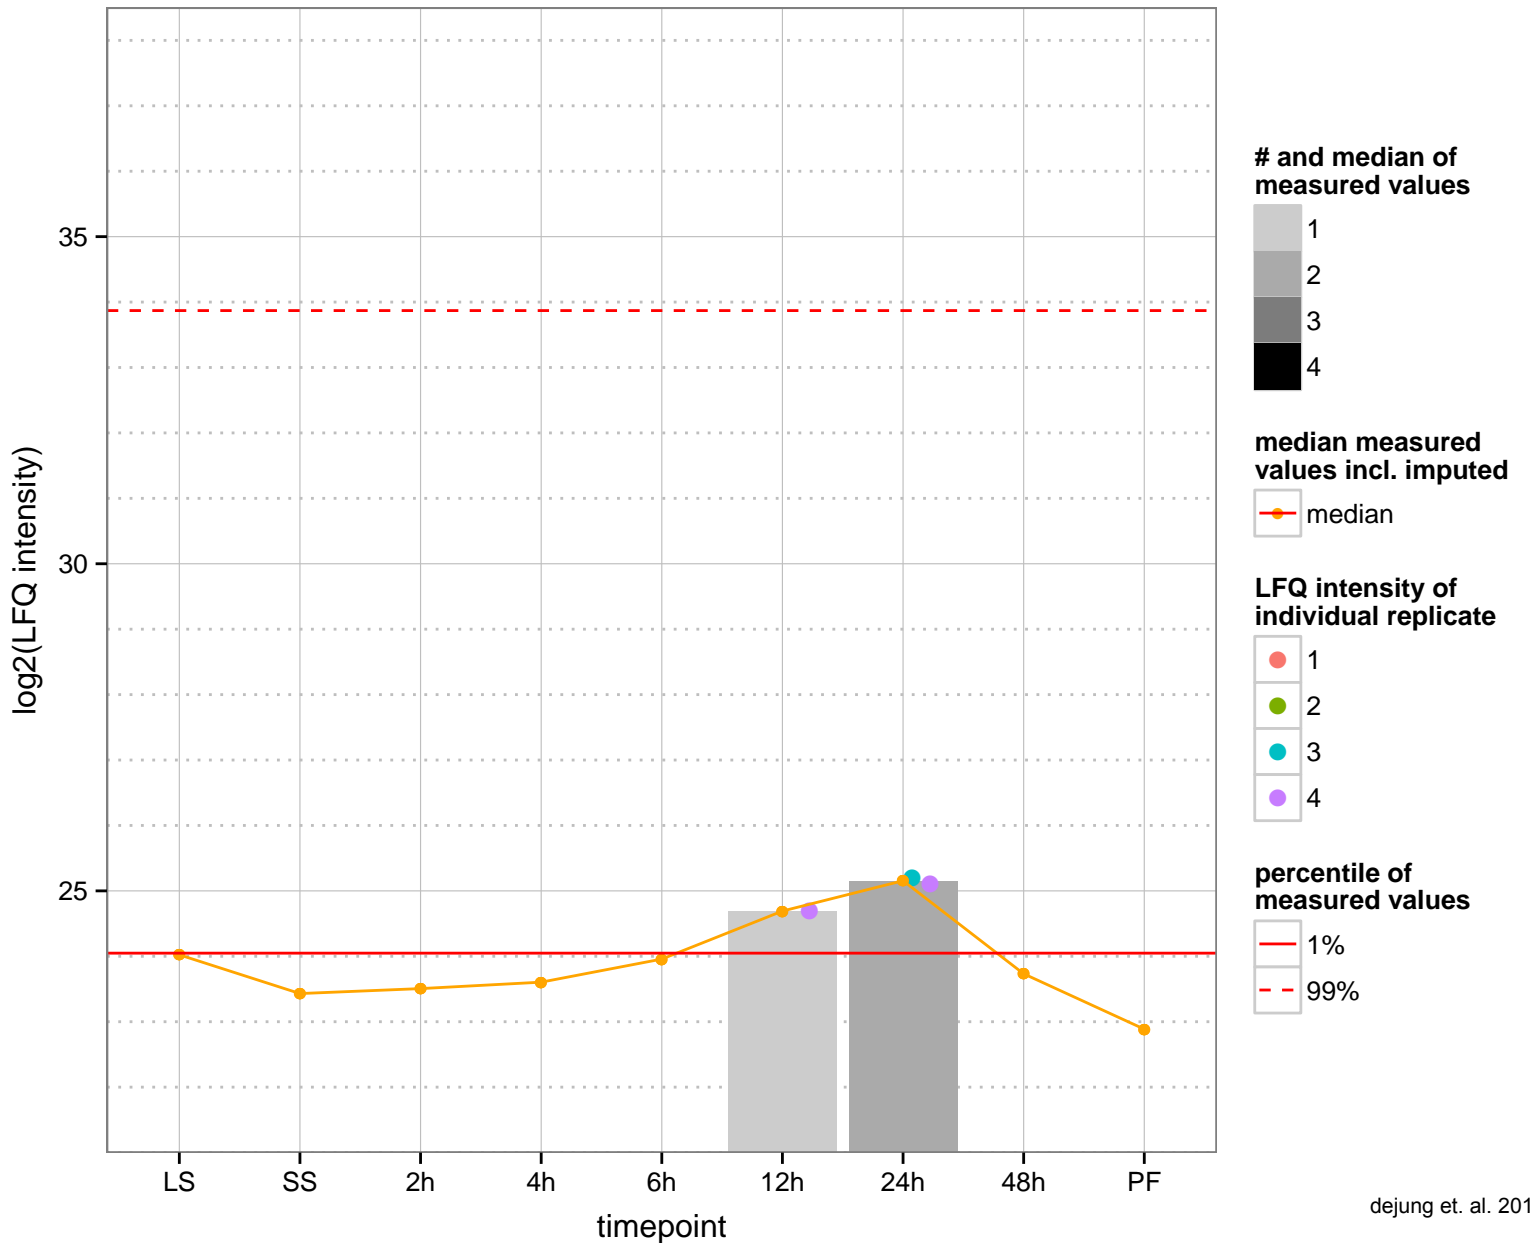

metal-ion transporter, putative  
 Tb927.8.7460;Tb927.4.4960;Tb11.v5.0836  
 AGOF: null, cation transmembrane transporter activity, metal ion transmembrane transporter activity  
 AGOC: null, membrane, acidocalcisome, integral to membrane, membrane  
 AGOP: null, cation transport, response to metal ion  
 PGO: cation transmembrane transporter activity  
 PGOC: integral to membrane  
 PGOP: cation transport, transmembrane transport

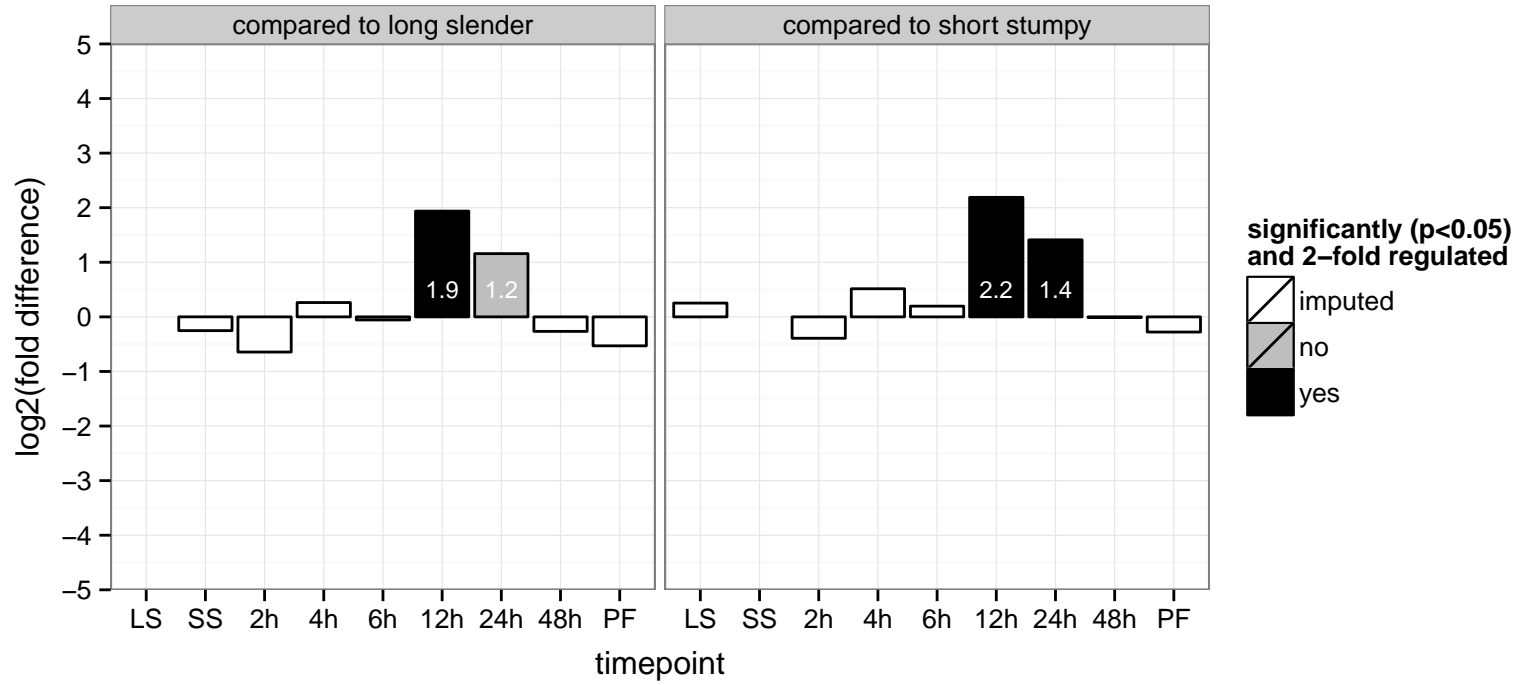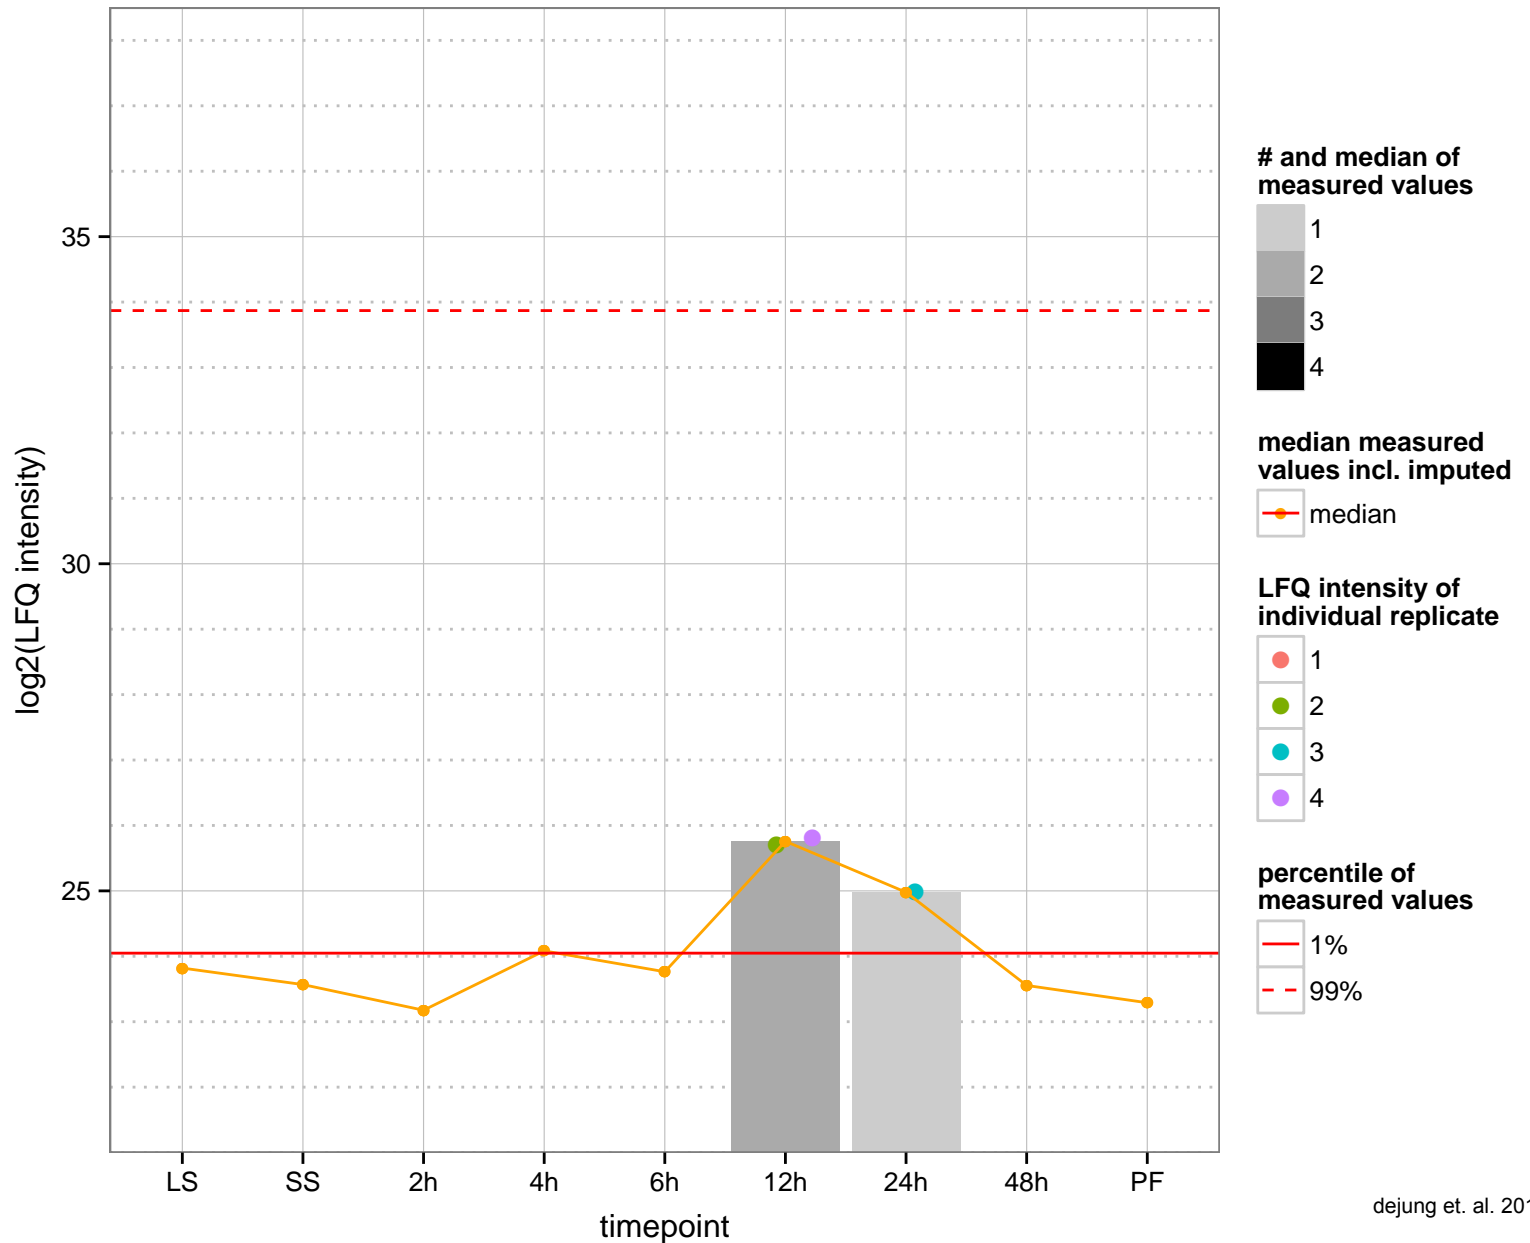

hypothetical protein, conserved  
 Tb927.9.12330  
 AGOF: null  
 AGOC: null  
 AGOP: null  
 PGO: null  
 PGOC: null  
 PGOP: cell redox homeostasis

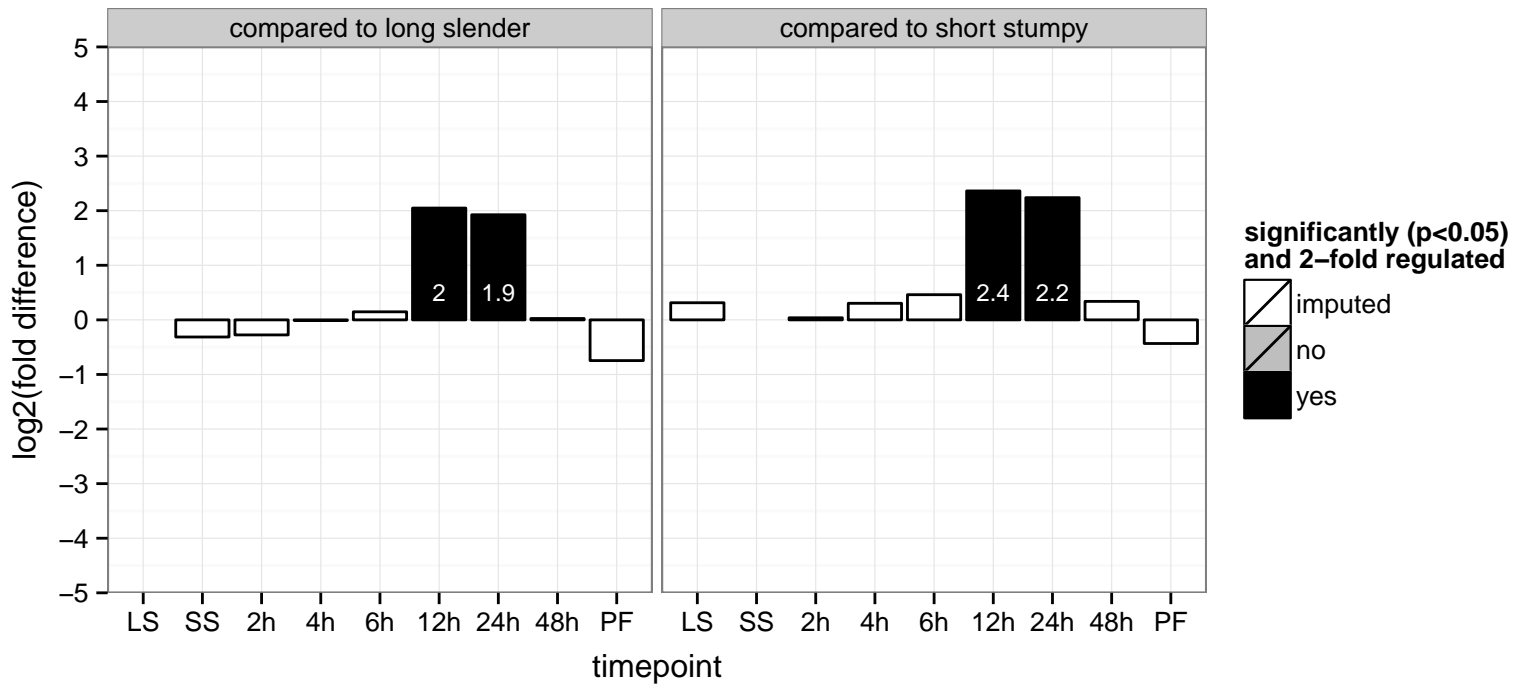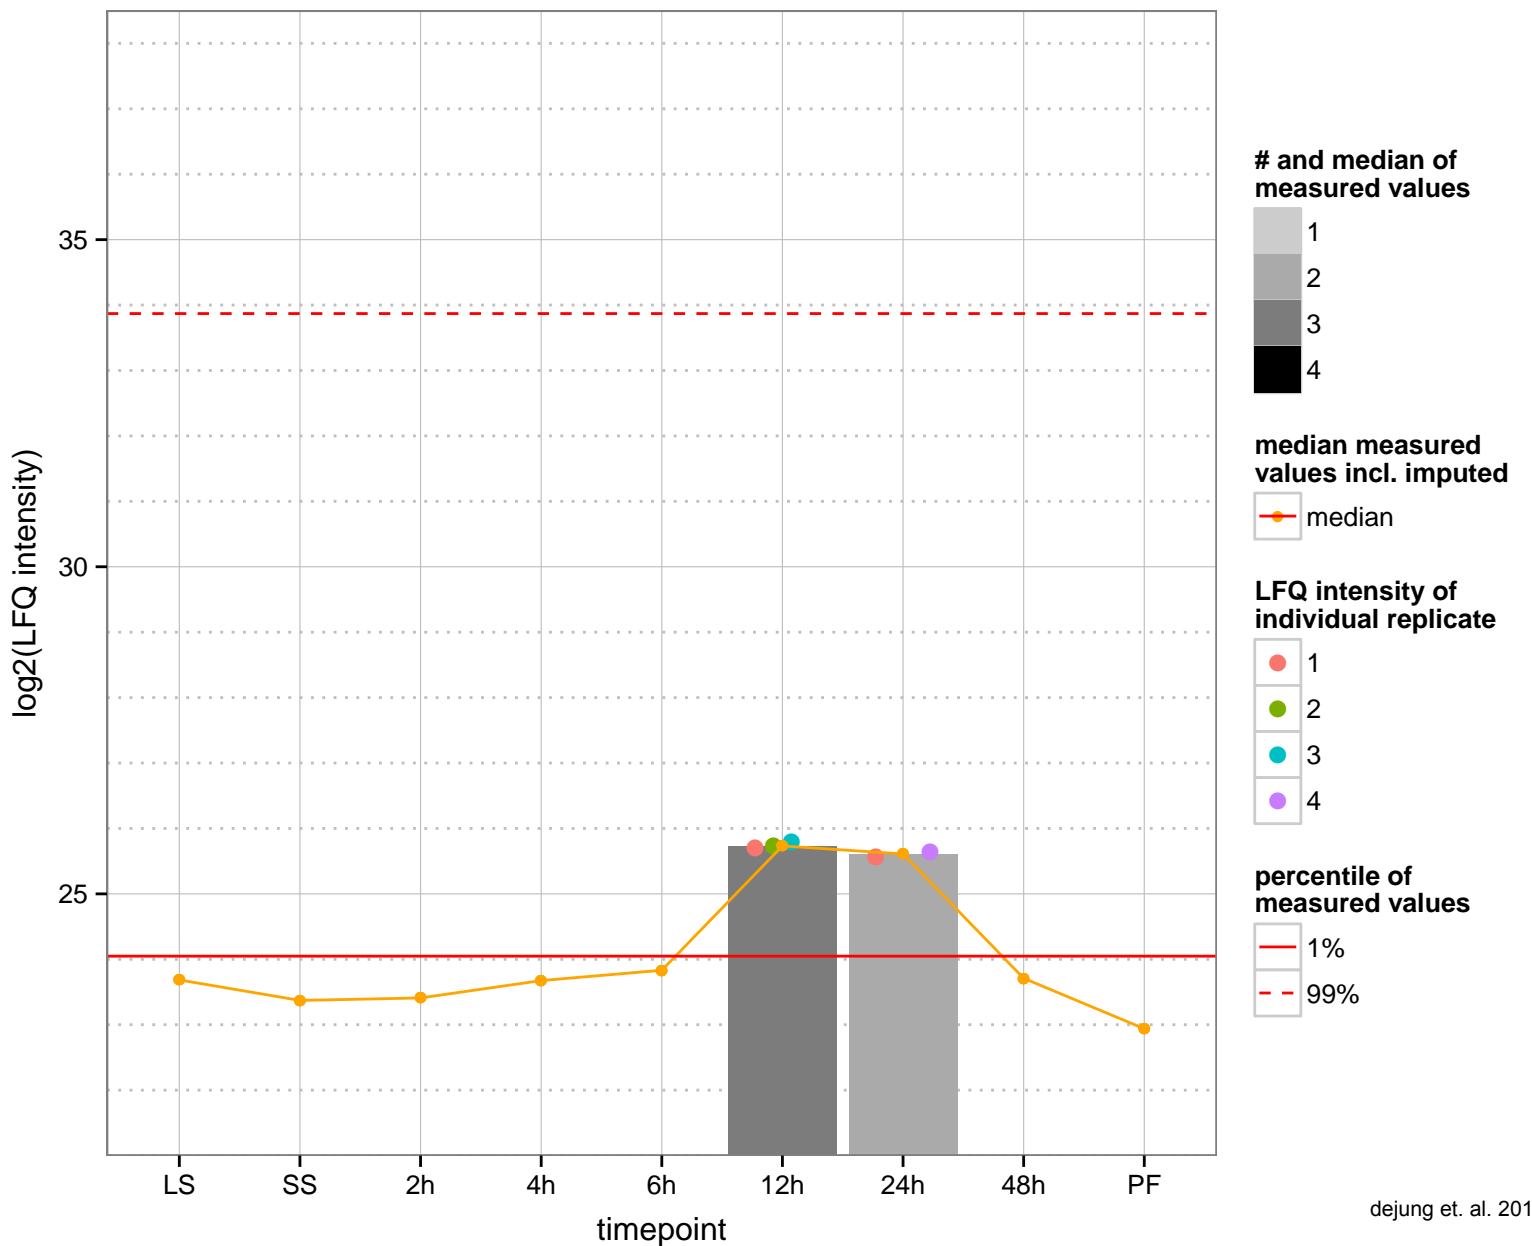

hypothetical protein, conserved  
 Tb927.9.3780  
 AGOF: null  
 AGOC: mitochondrion  
 AGOP: null  
 PGO: null  
 PGOC: null  
 PGOP: null

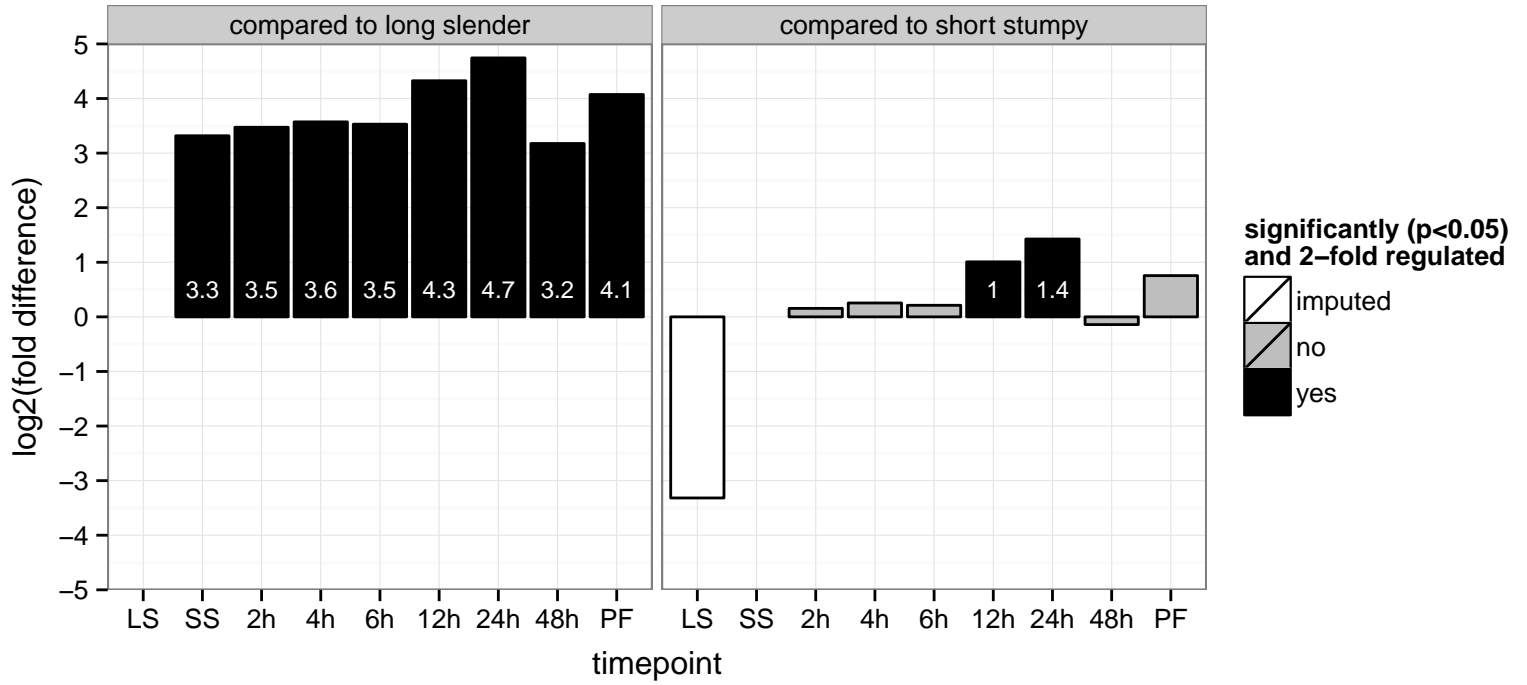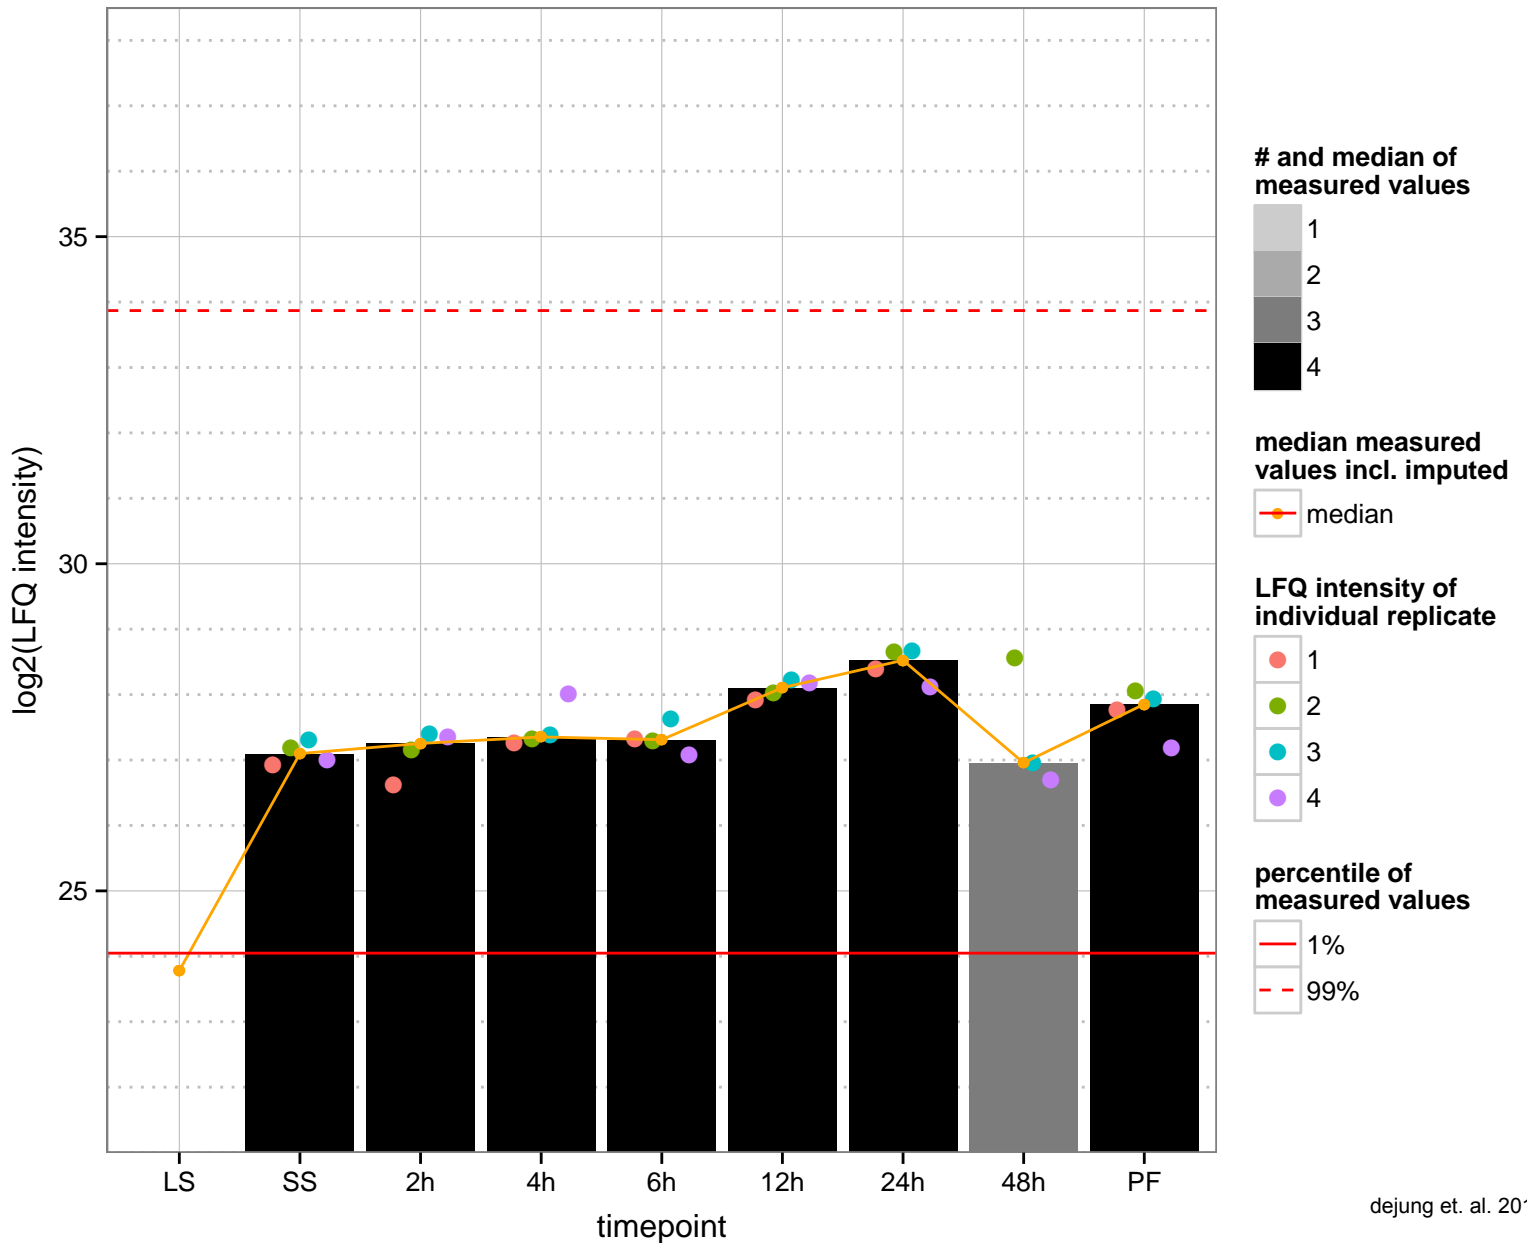

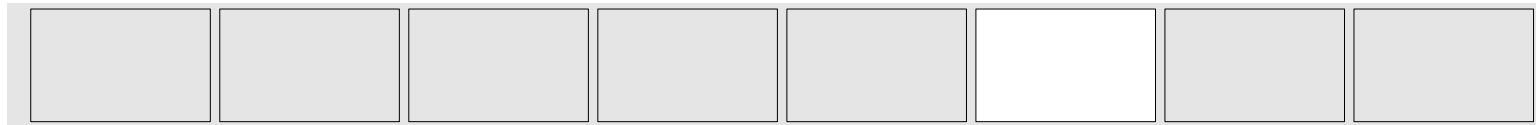

SS

2h

4h

6h

12h

24h

48h

PF

timepoint

**regulated**



not regulated



significant down



significant up

leucine-rich repeat protein (LRRP), putative  
 Tb927.1.4180  
 AGOF: null  
 AGOC: null  
 AGOP: null  
 PGOF: null  
 PGO: null  
 PGOP: null

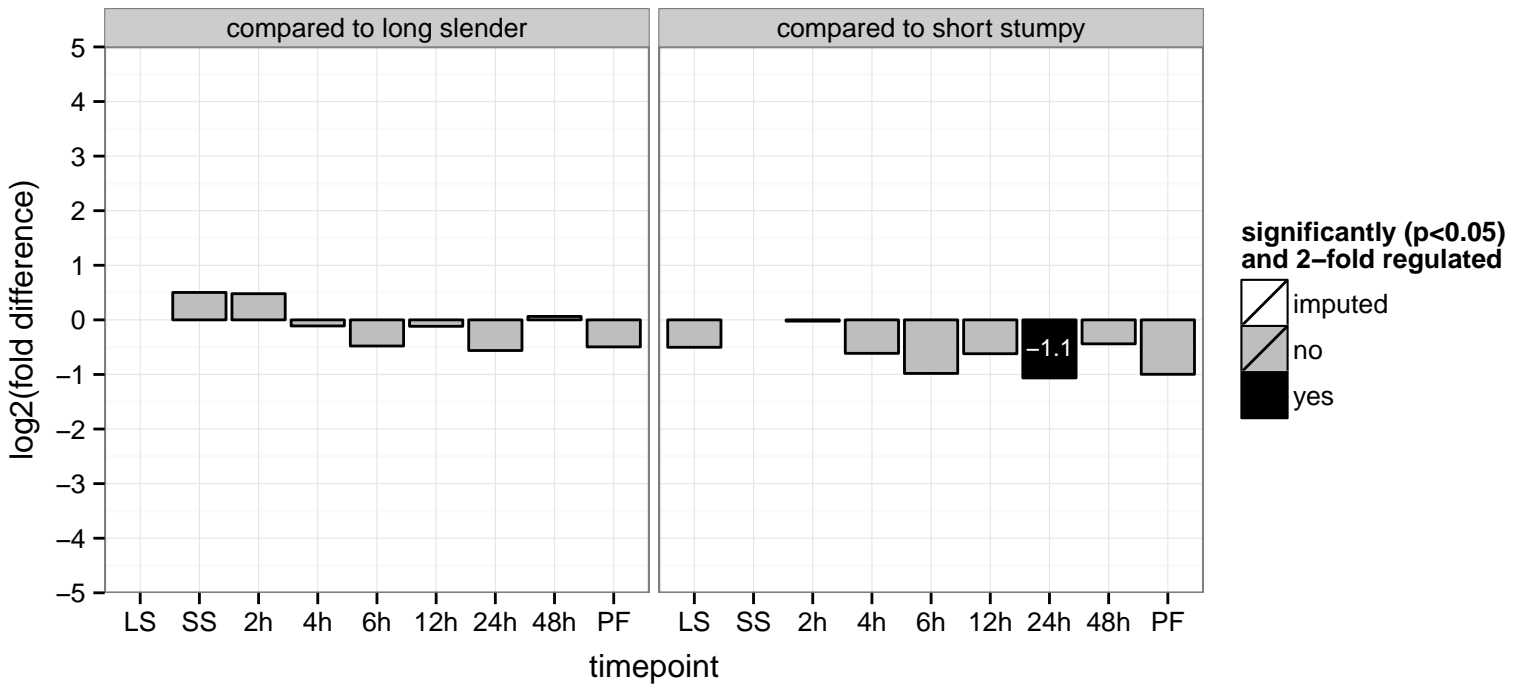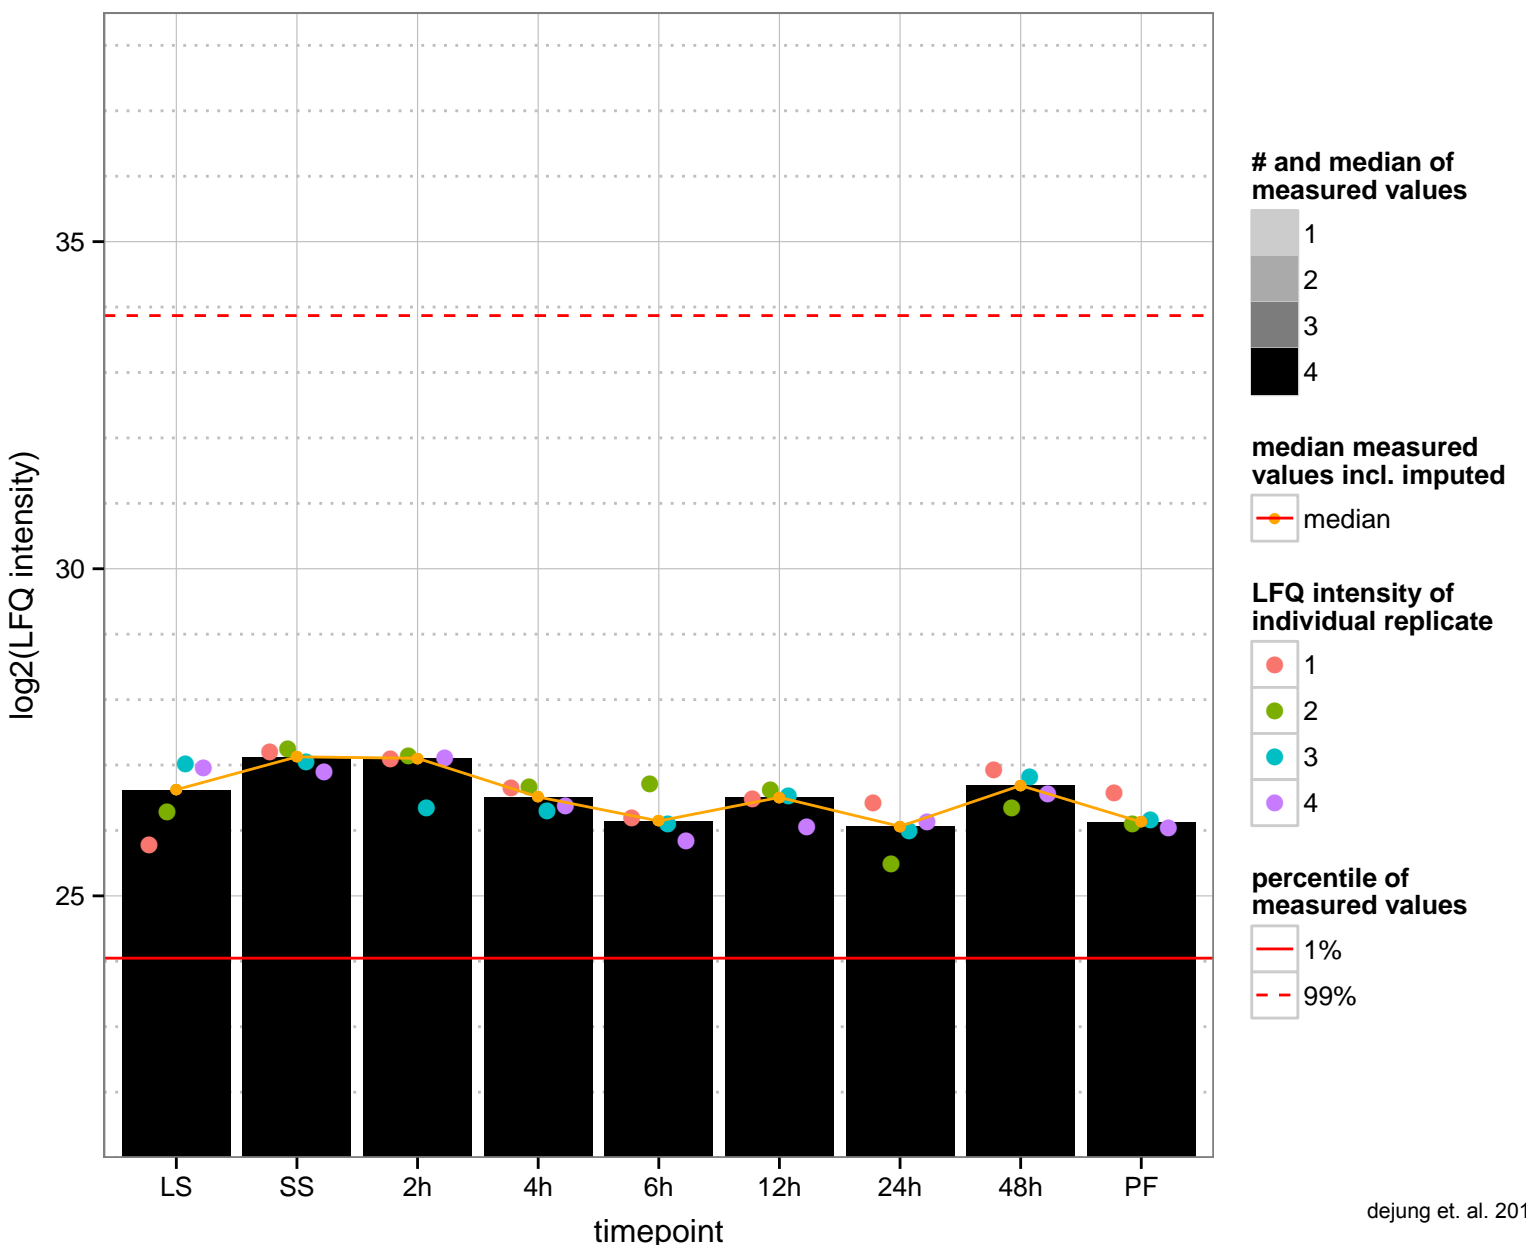

GPI transamidase component GAA1 (TbGAA1)  
 Tb927.10.210  
 AGOF: GPI-anchor transamidase activity  
 AGOC: GPI-anchor transamidase complex, anchored to plasma membrane  
 AGOP: GPI anchor biosynthetic process  
 PGOF: null  
 PGOC: GPI-anchor transamidase complex, integral to membrane  
 PGOP: null

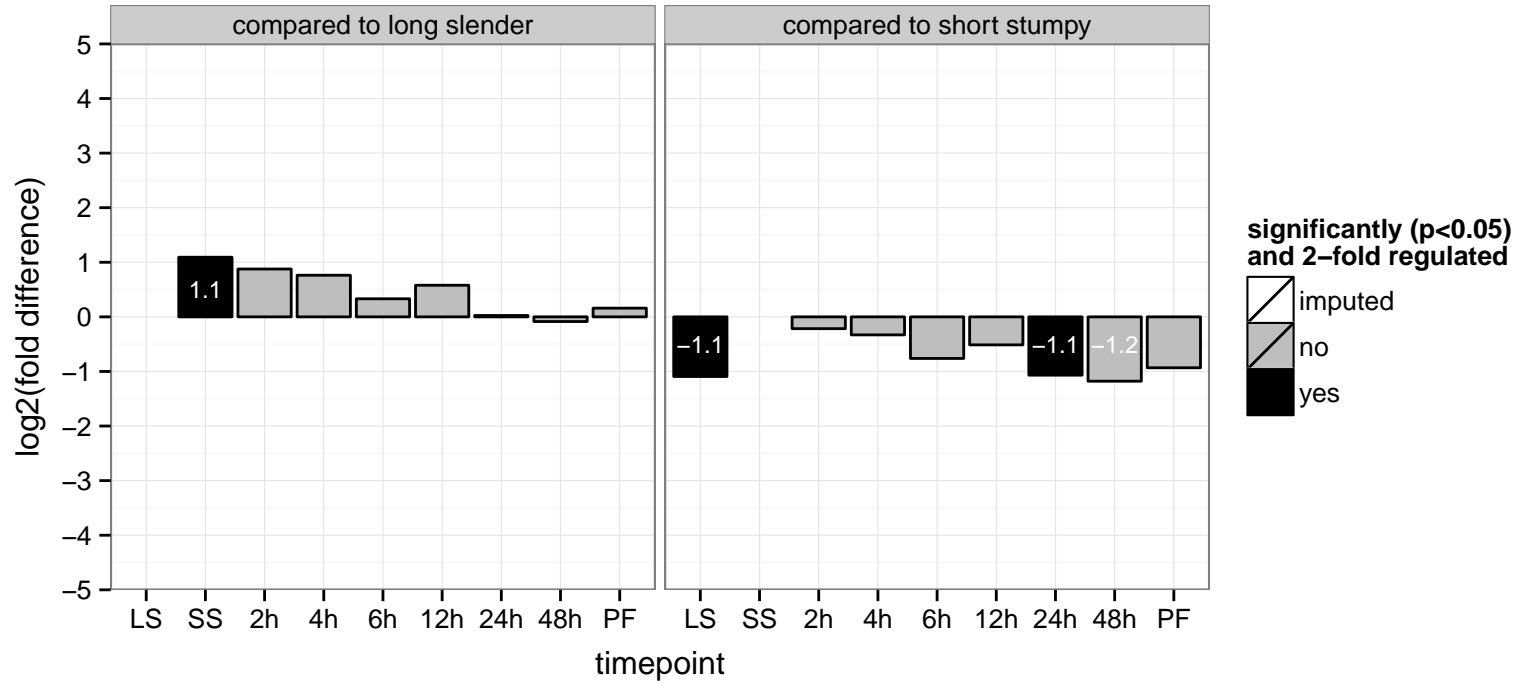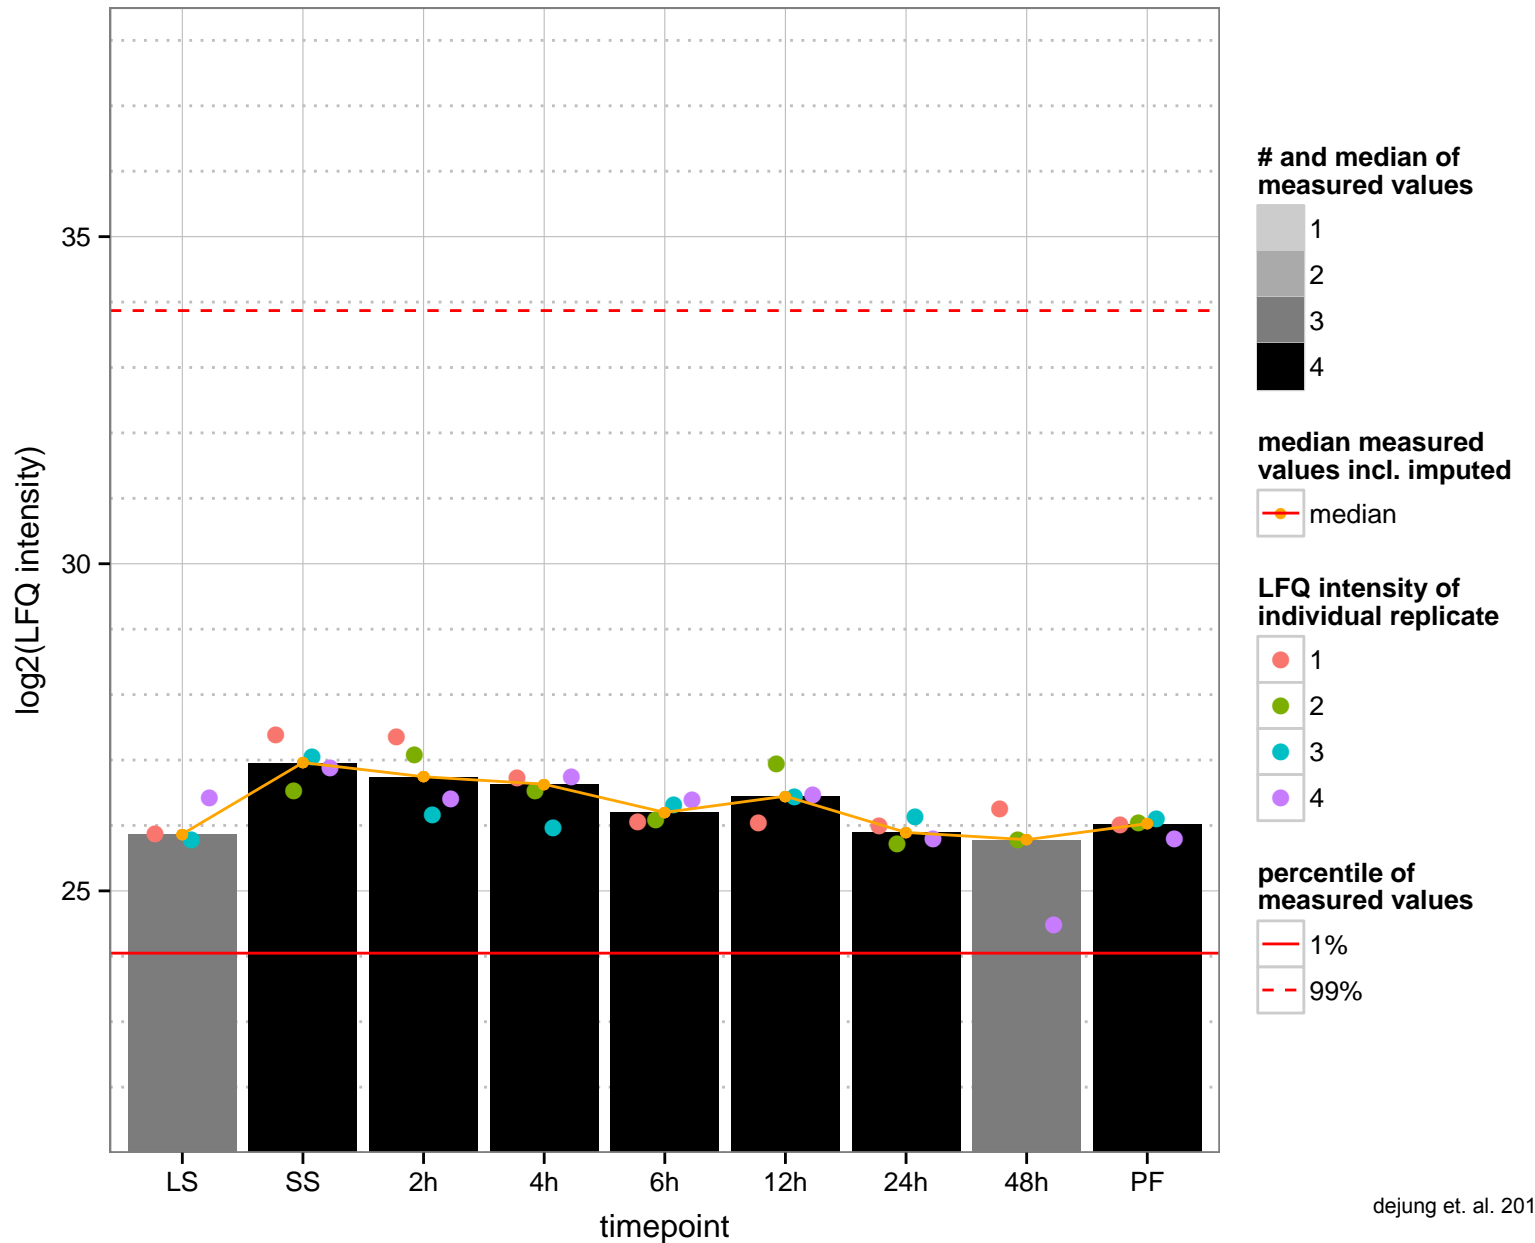



hypothetical protein, conserved  
 Tb927.10.3310  
 AGOF: null  
 AGOC: null  
 AGOP: ciliary or flagellar motility  
 PGO: null  
 PGOC: null  
 PGOP: null

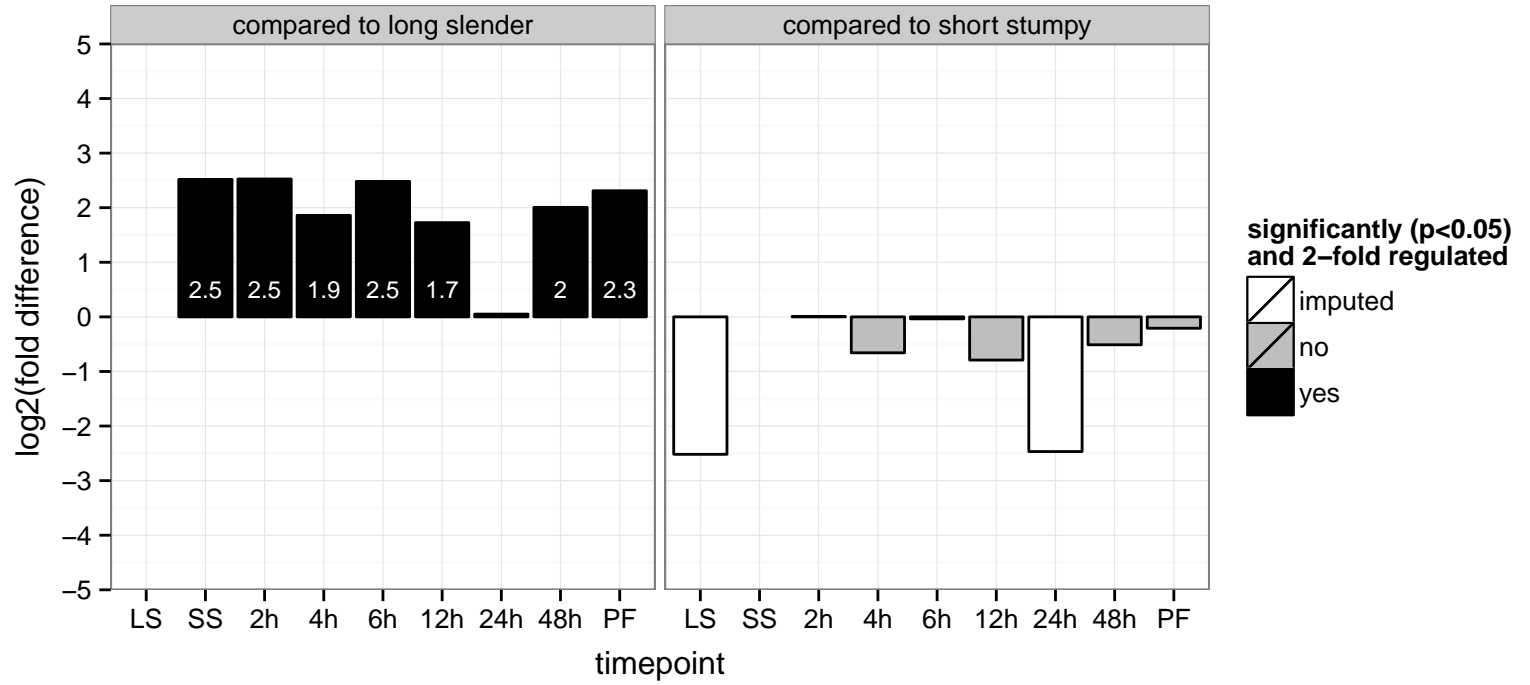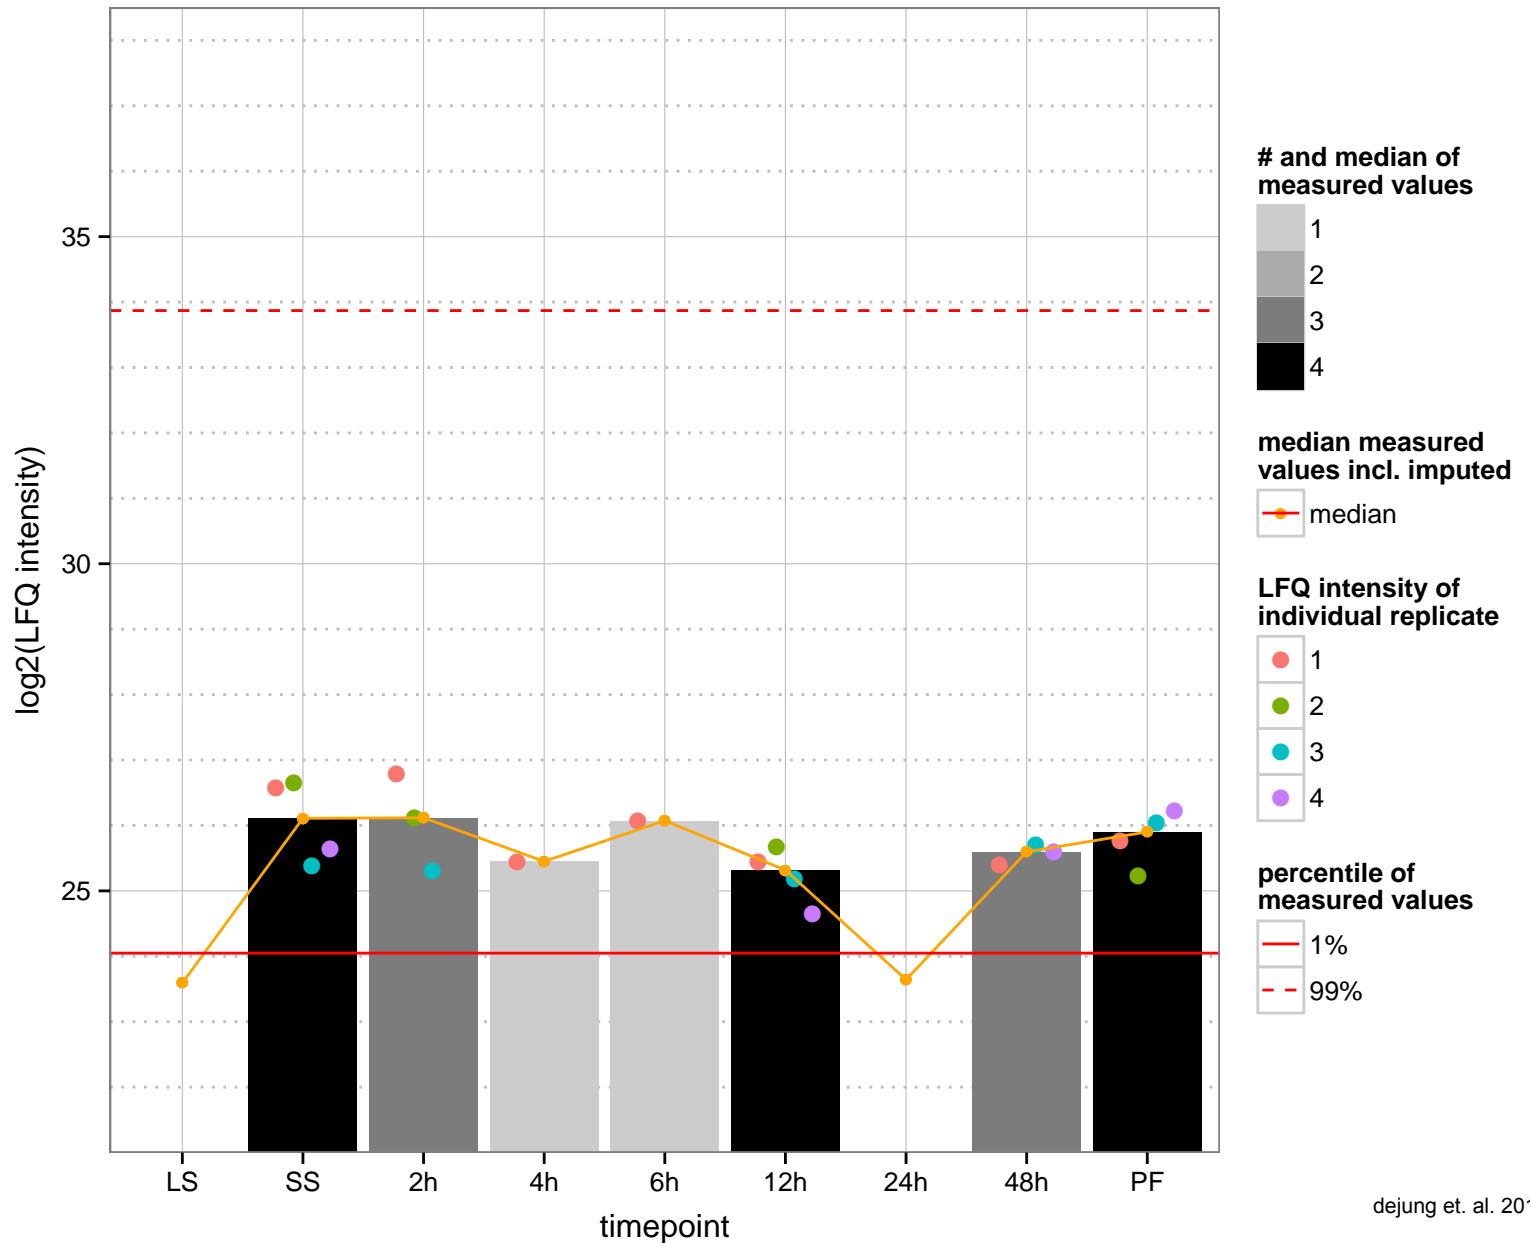

paraflagellar rod component, putative (PFC17)  
 Tb927.11.11210  
 AGOF: null  
 AGOC: null  
 AGOP: null  
 PGOF: null  
 PGO: null  
 PGOP: null

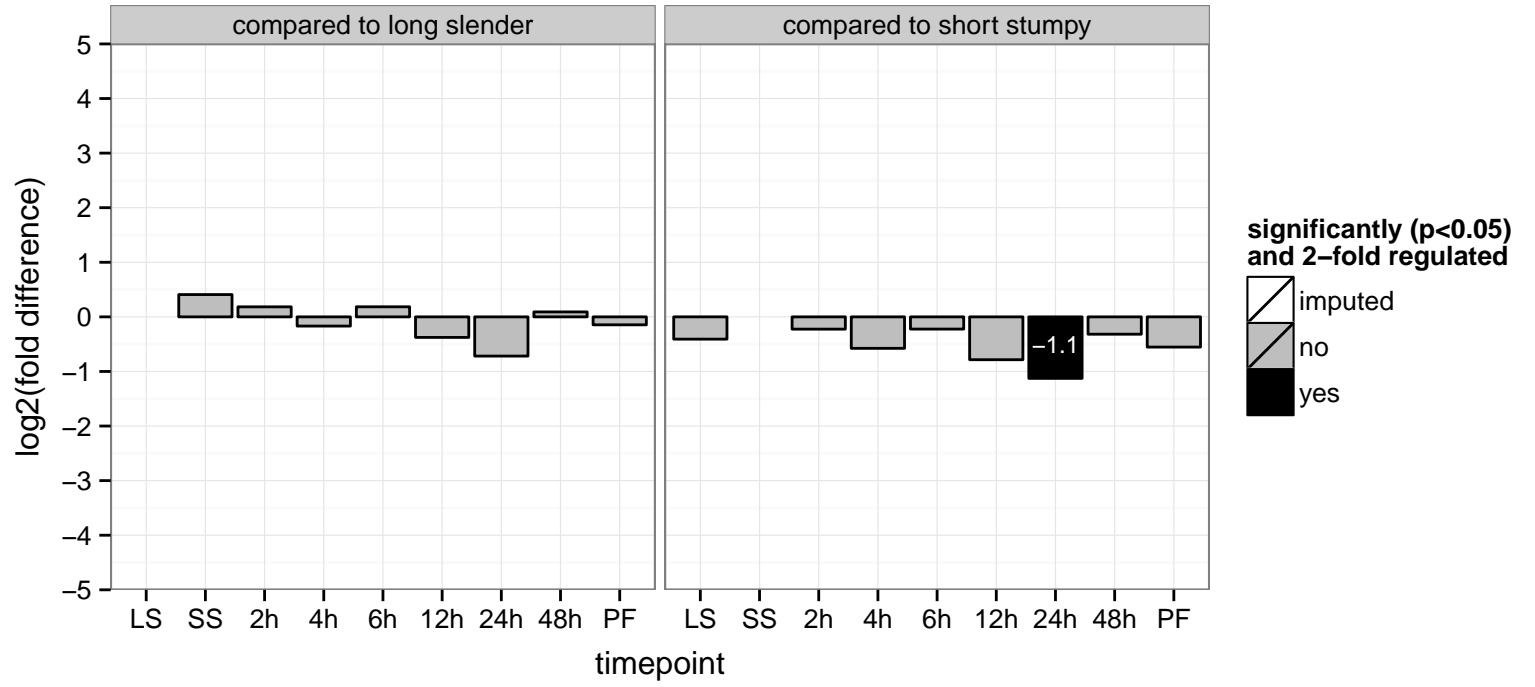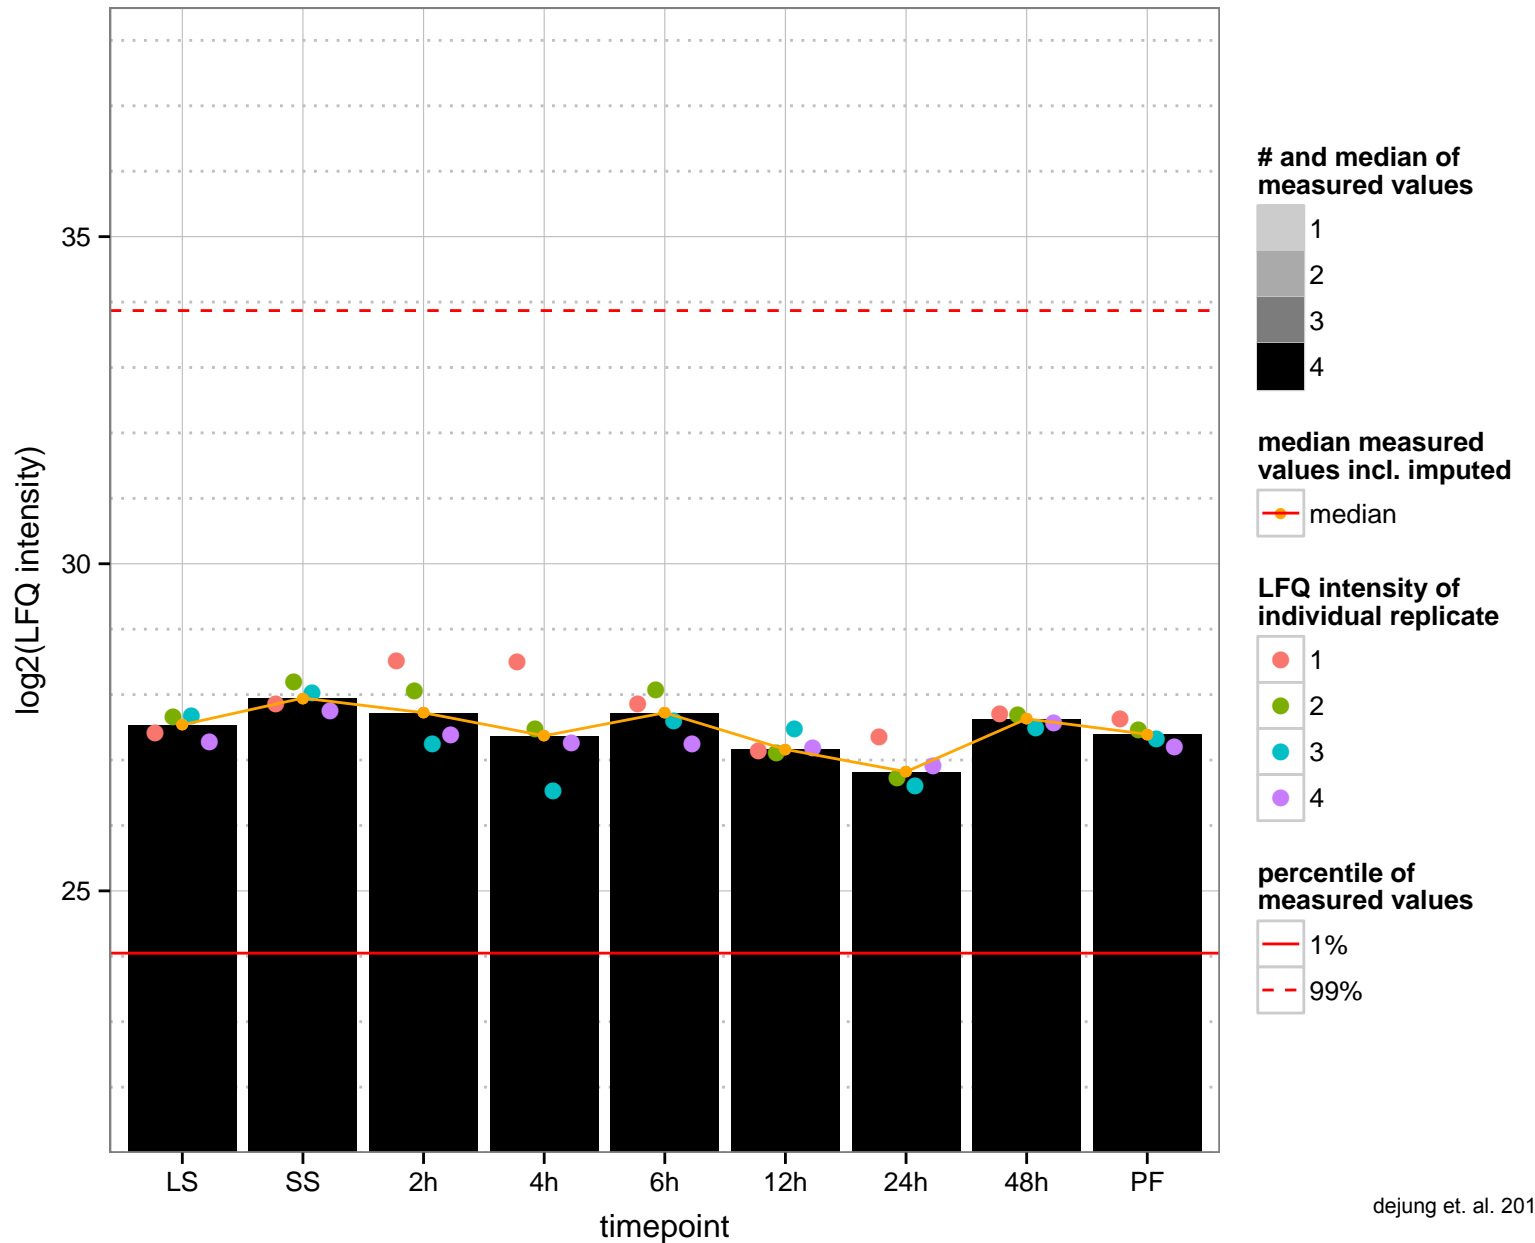

hypothetical protein, conserved  
 Tb927.11.11260  
 AGOF: null  
 AGOC: null  
 AGOP: null  
 PGO: null  
 PGOC: null  
 PGOP: null

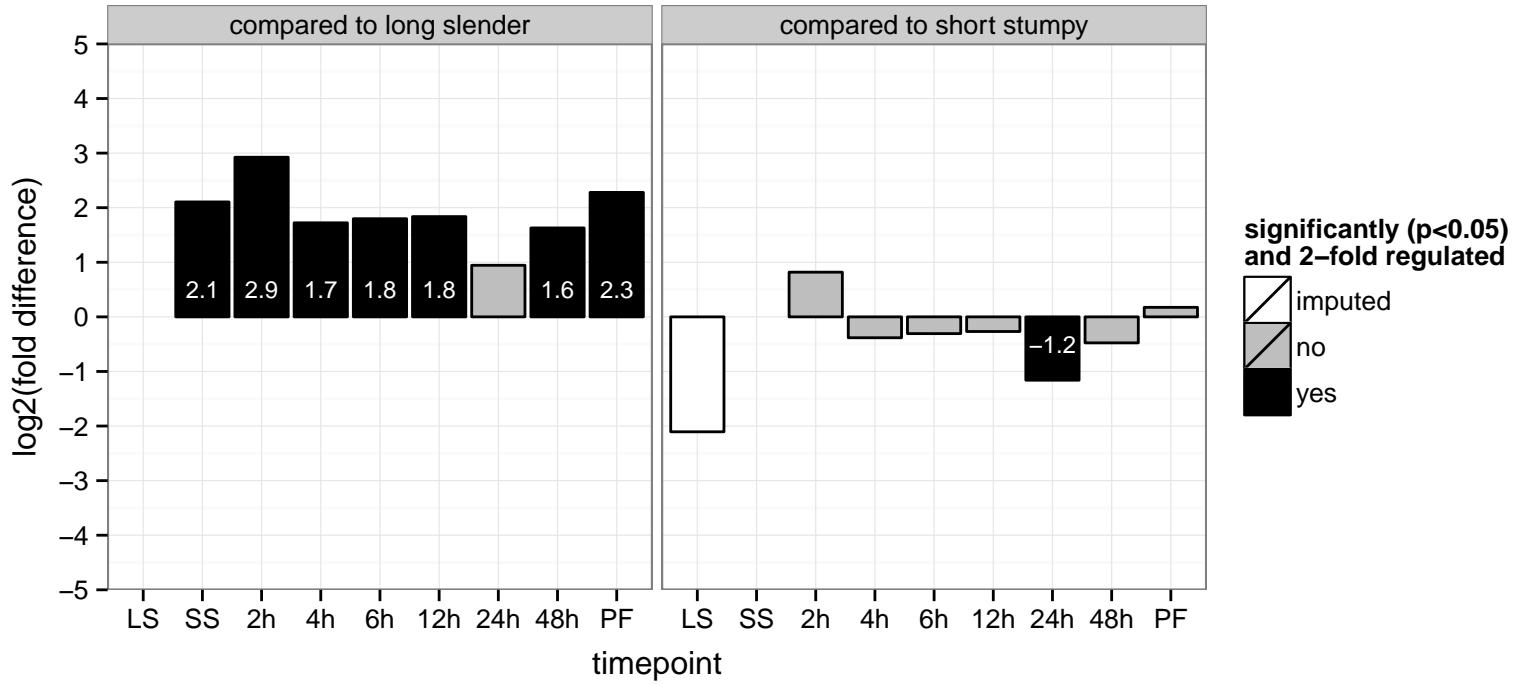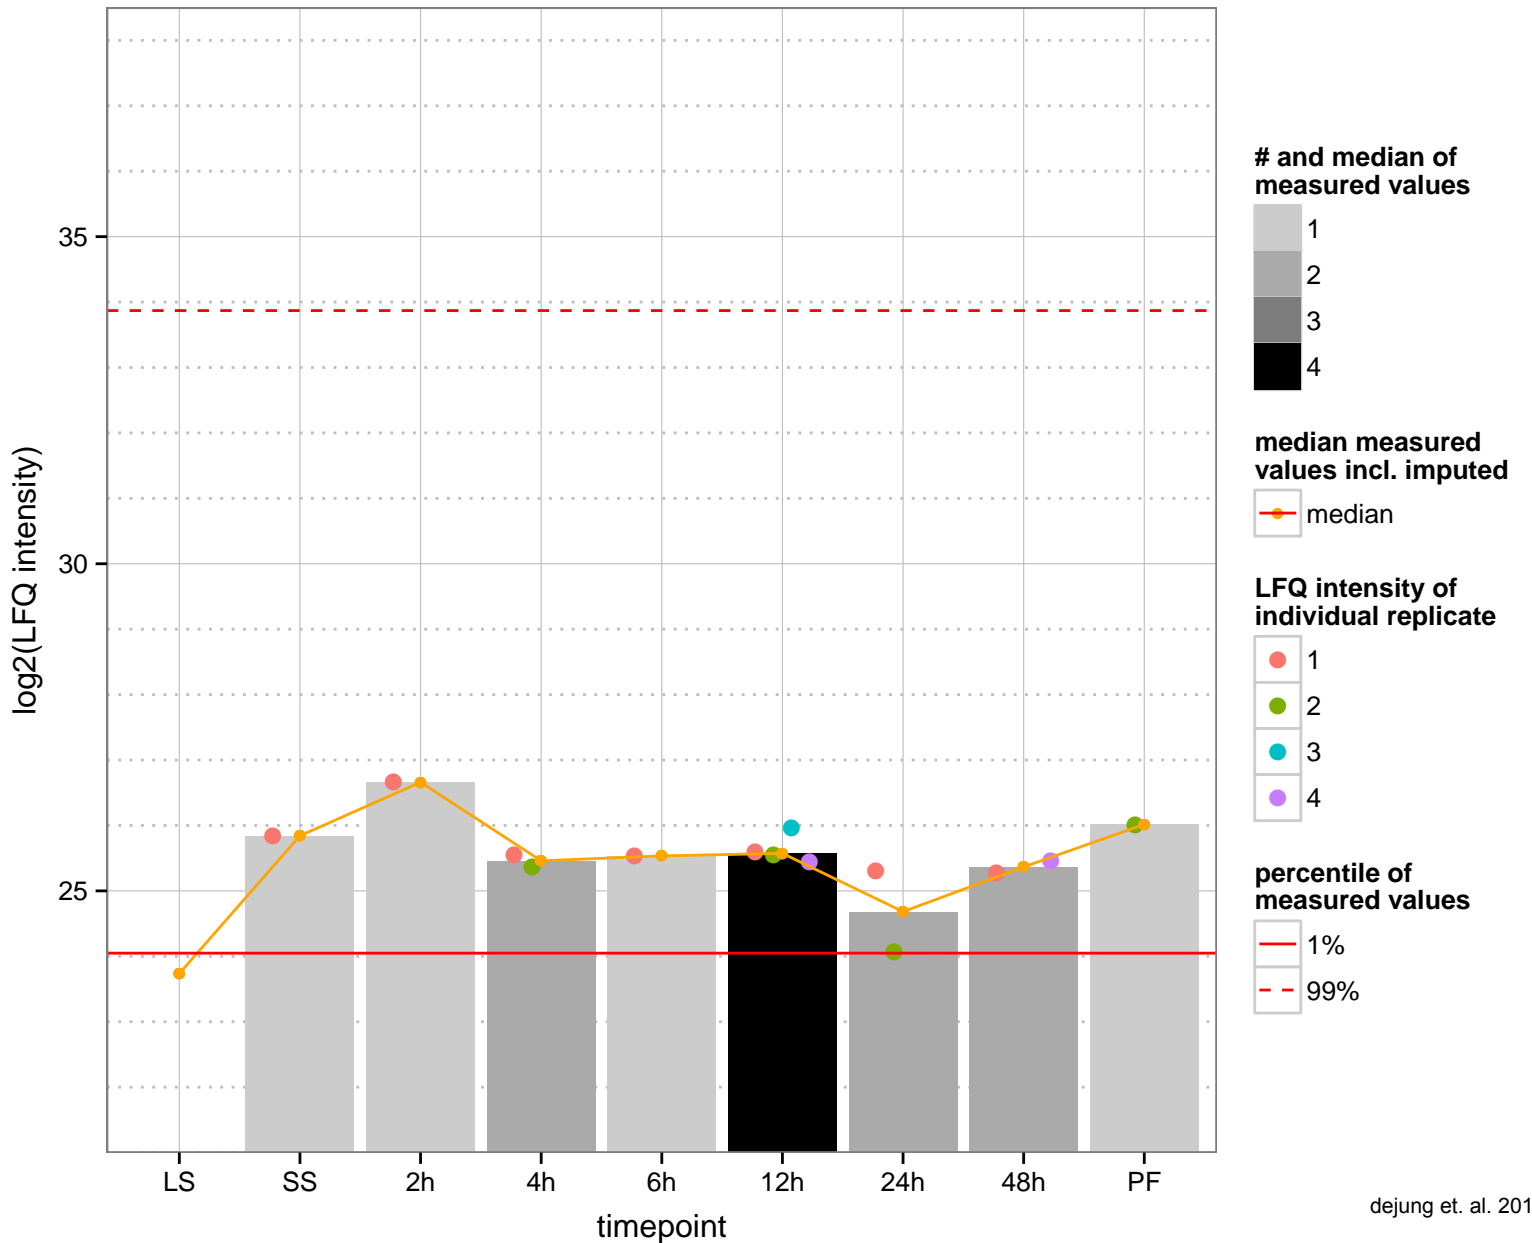

hypothetical protein, conserved  
 Tb927.3.1200  
 AGOF: null  
 AGOC: null  
 AGOP: null  
 PGO: null  
 PGOC: null  
 PGOP: null

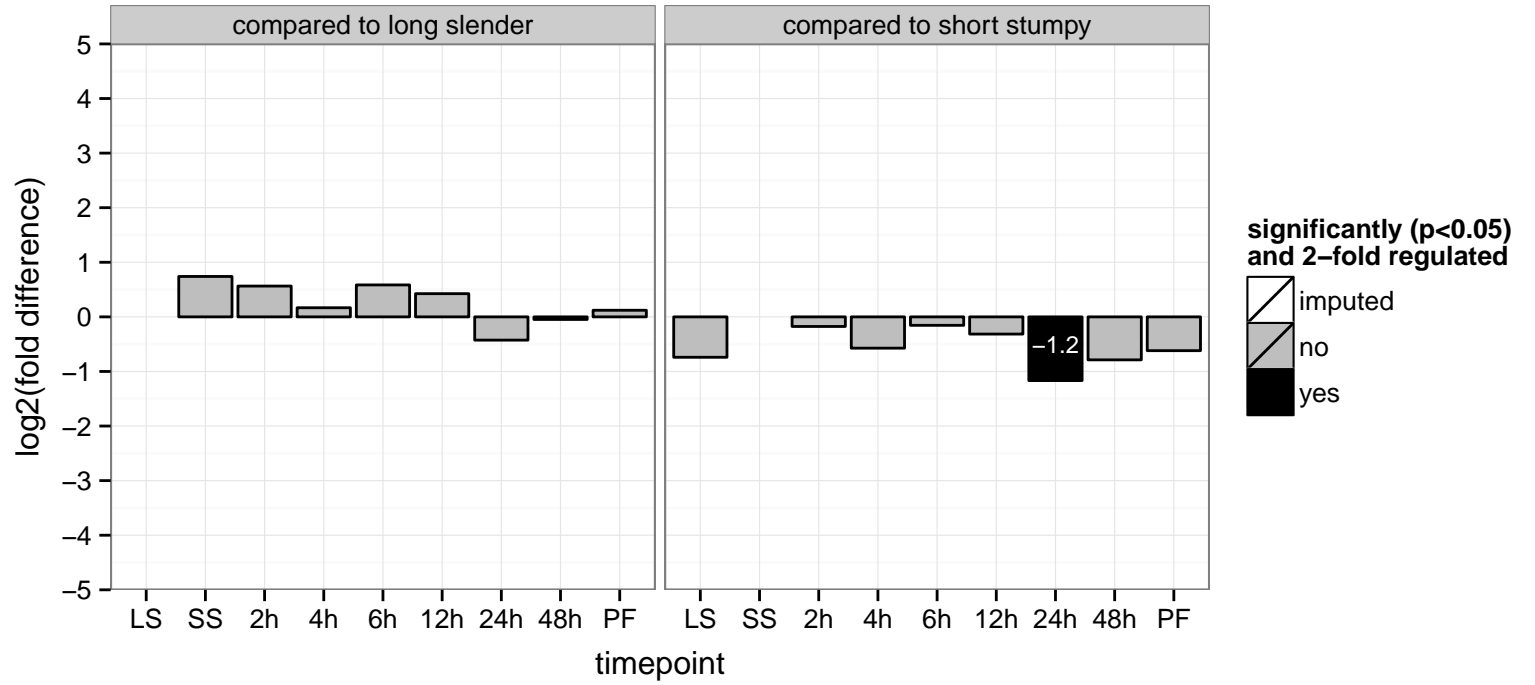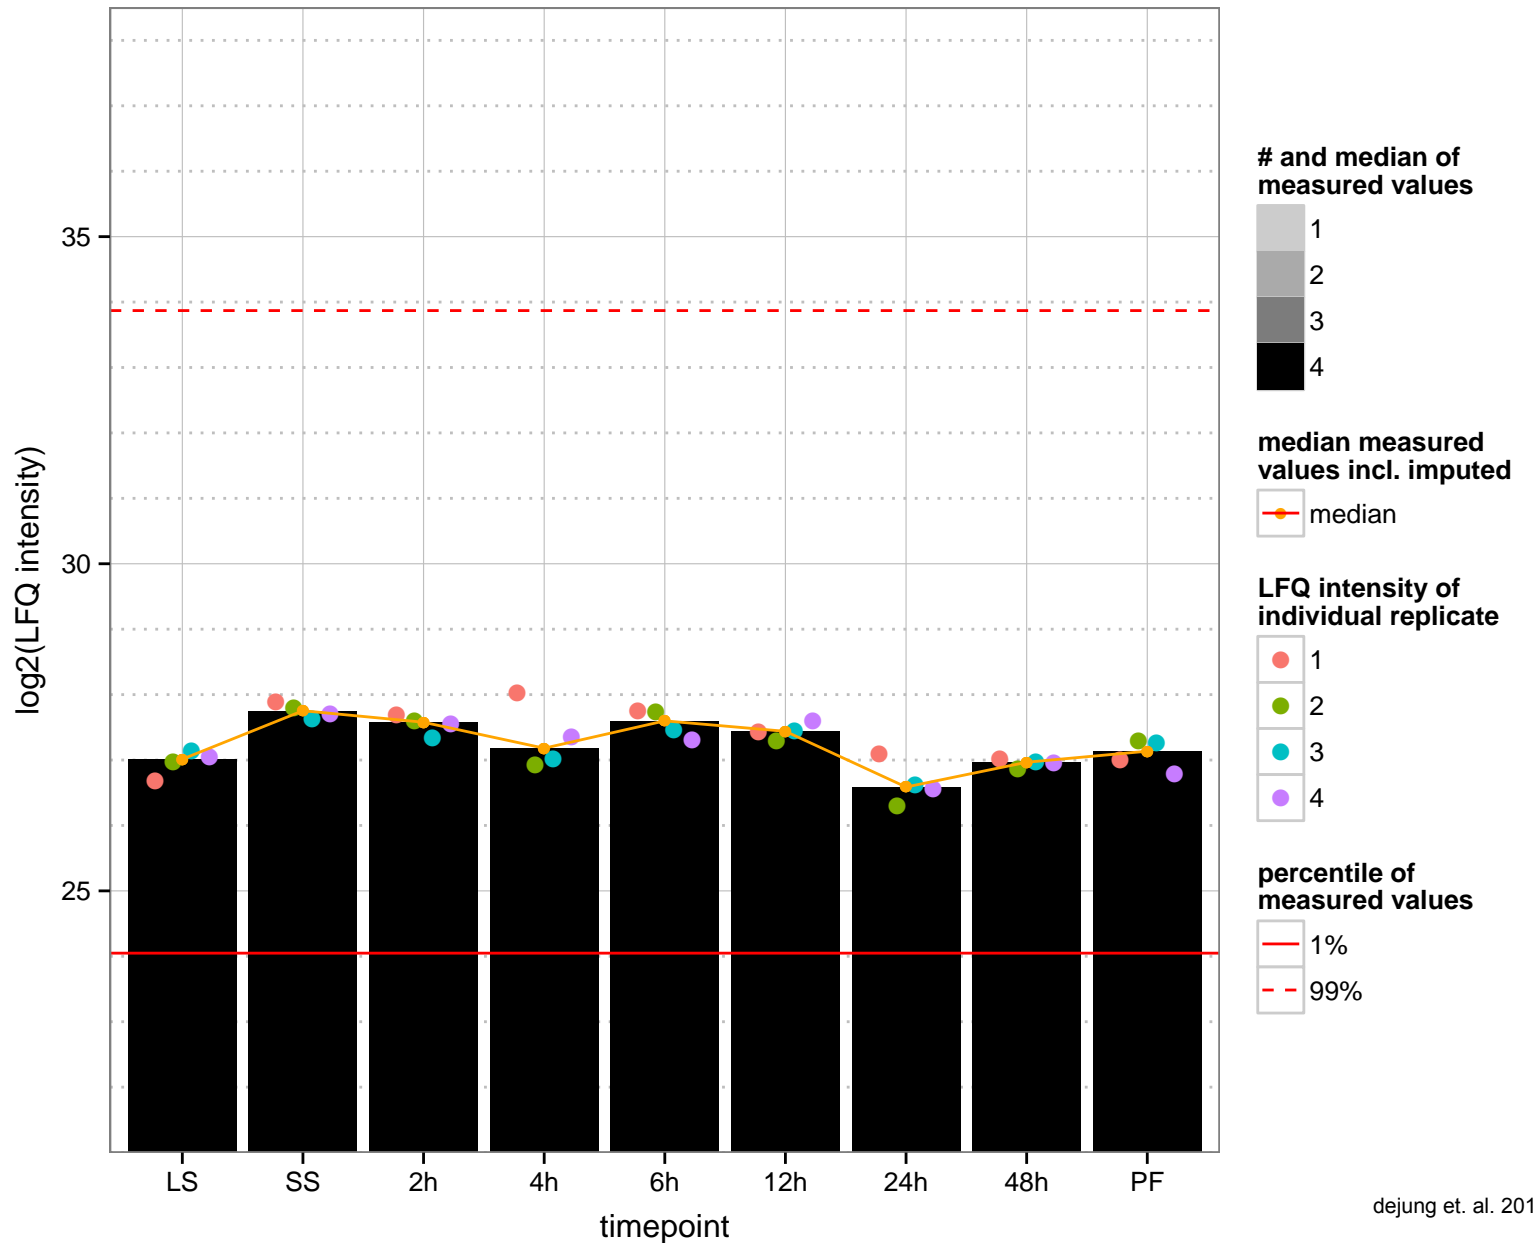

hypothetical protein, conserved  
 Tb927.3.4270  
 AGOF: null  
 AGOC: null  
 AGOP: null  
 PGO: null  
 PGOC: null  
 PGOP: null

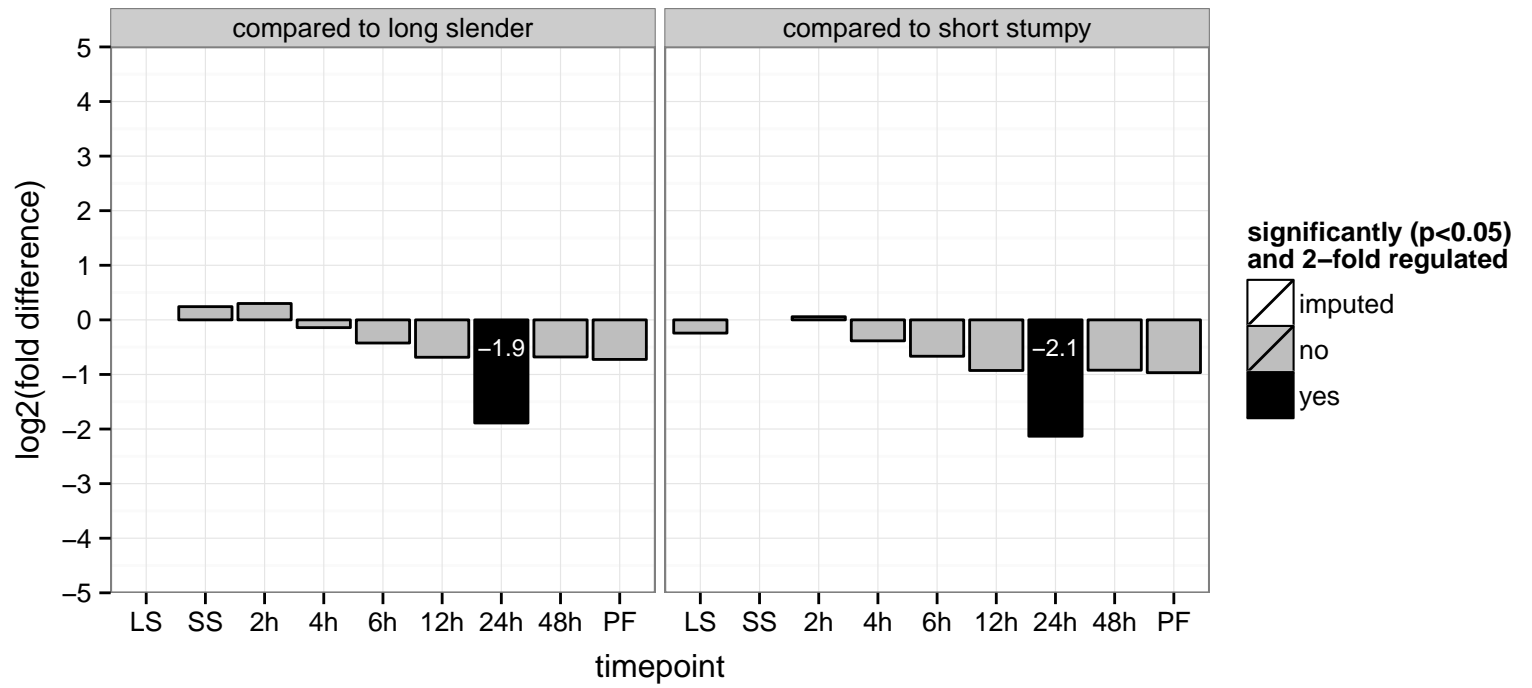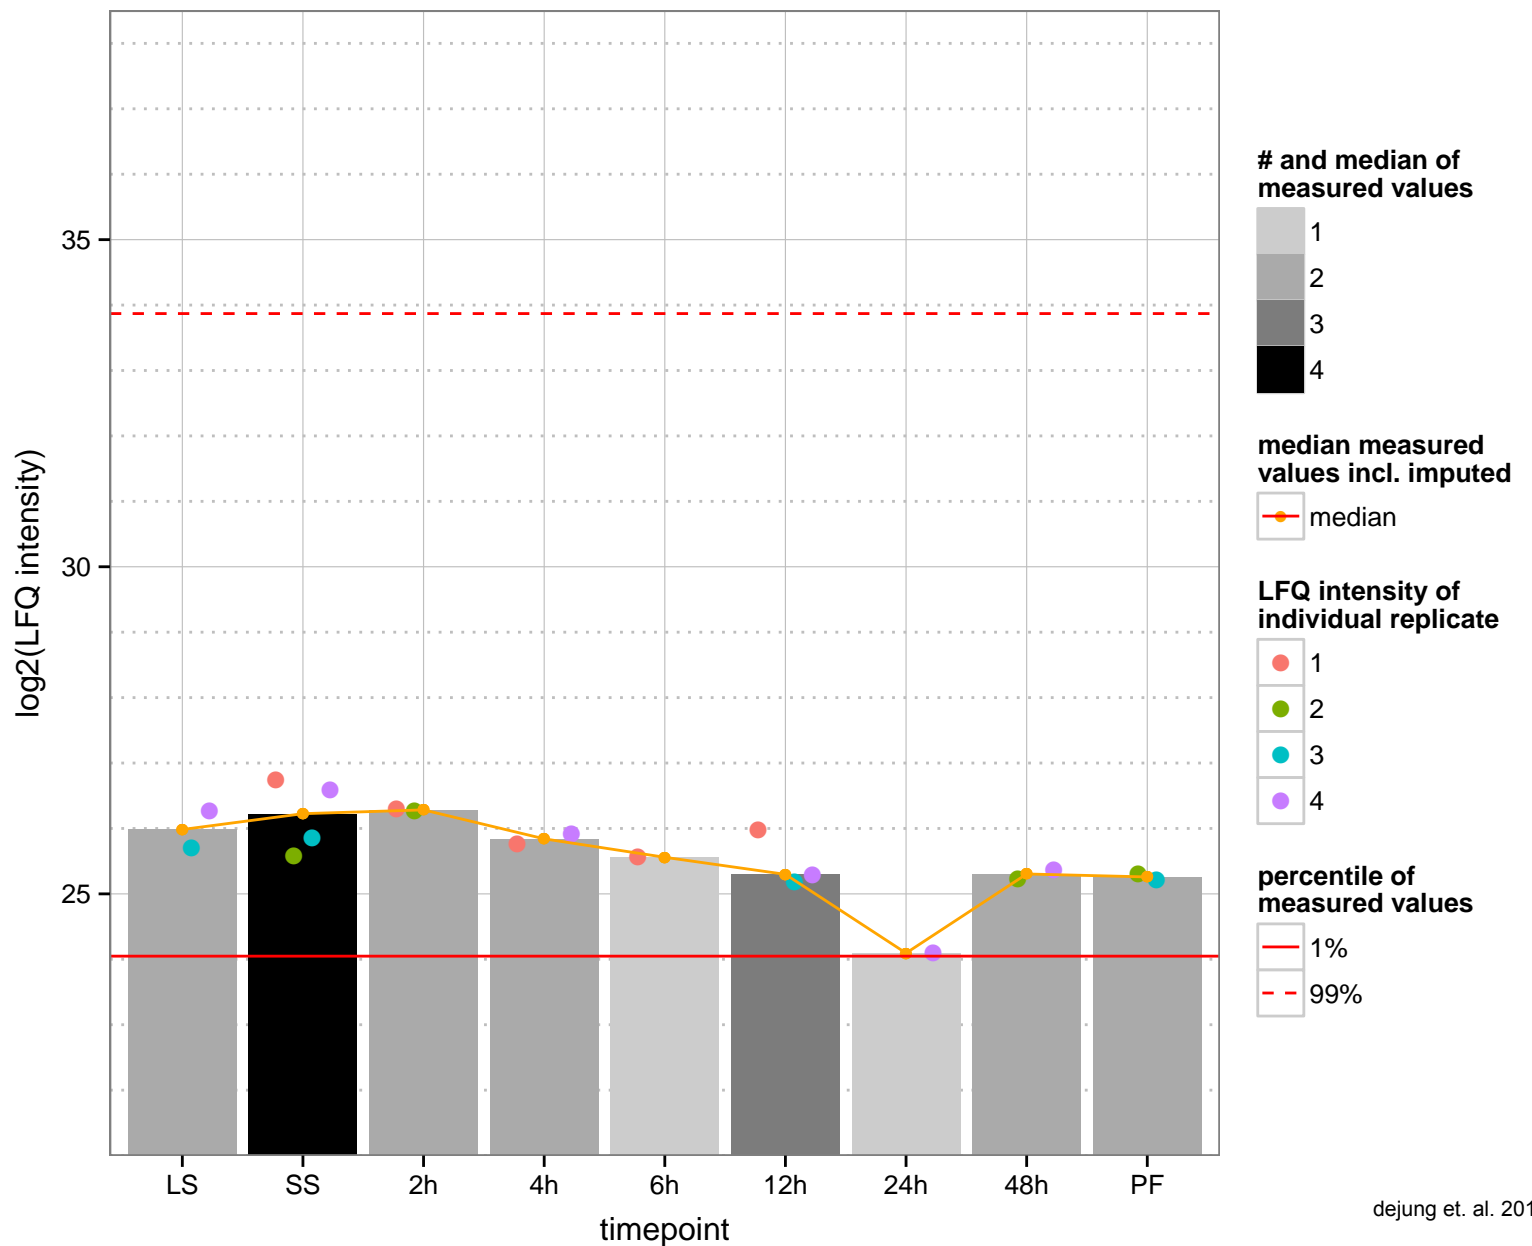

kinesin, putative  
 Tb927.6.2880  
 AGOF: ATP binding, microtubule motor activity, motor activity  
 AGOC: microtubule associated complex  
 AGOP: microtubule-based movement  
 PGOF: ATP binding, microtubule motor activity  
 PGO: null  
 PGOP: microtubule-based movement

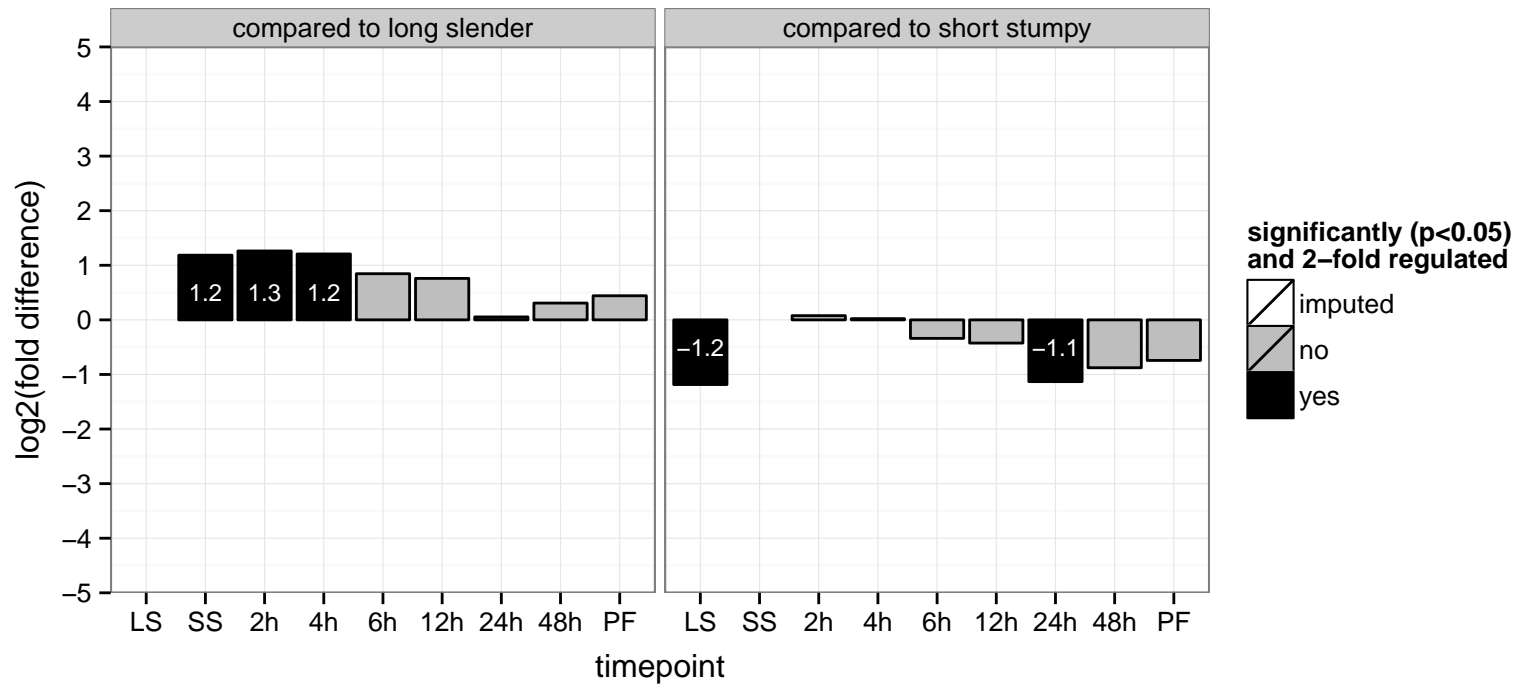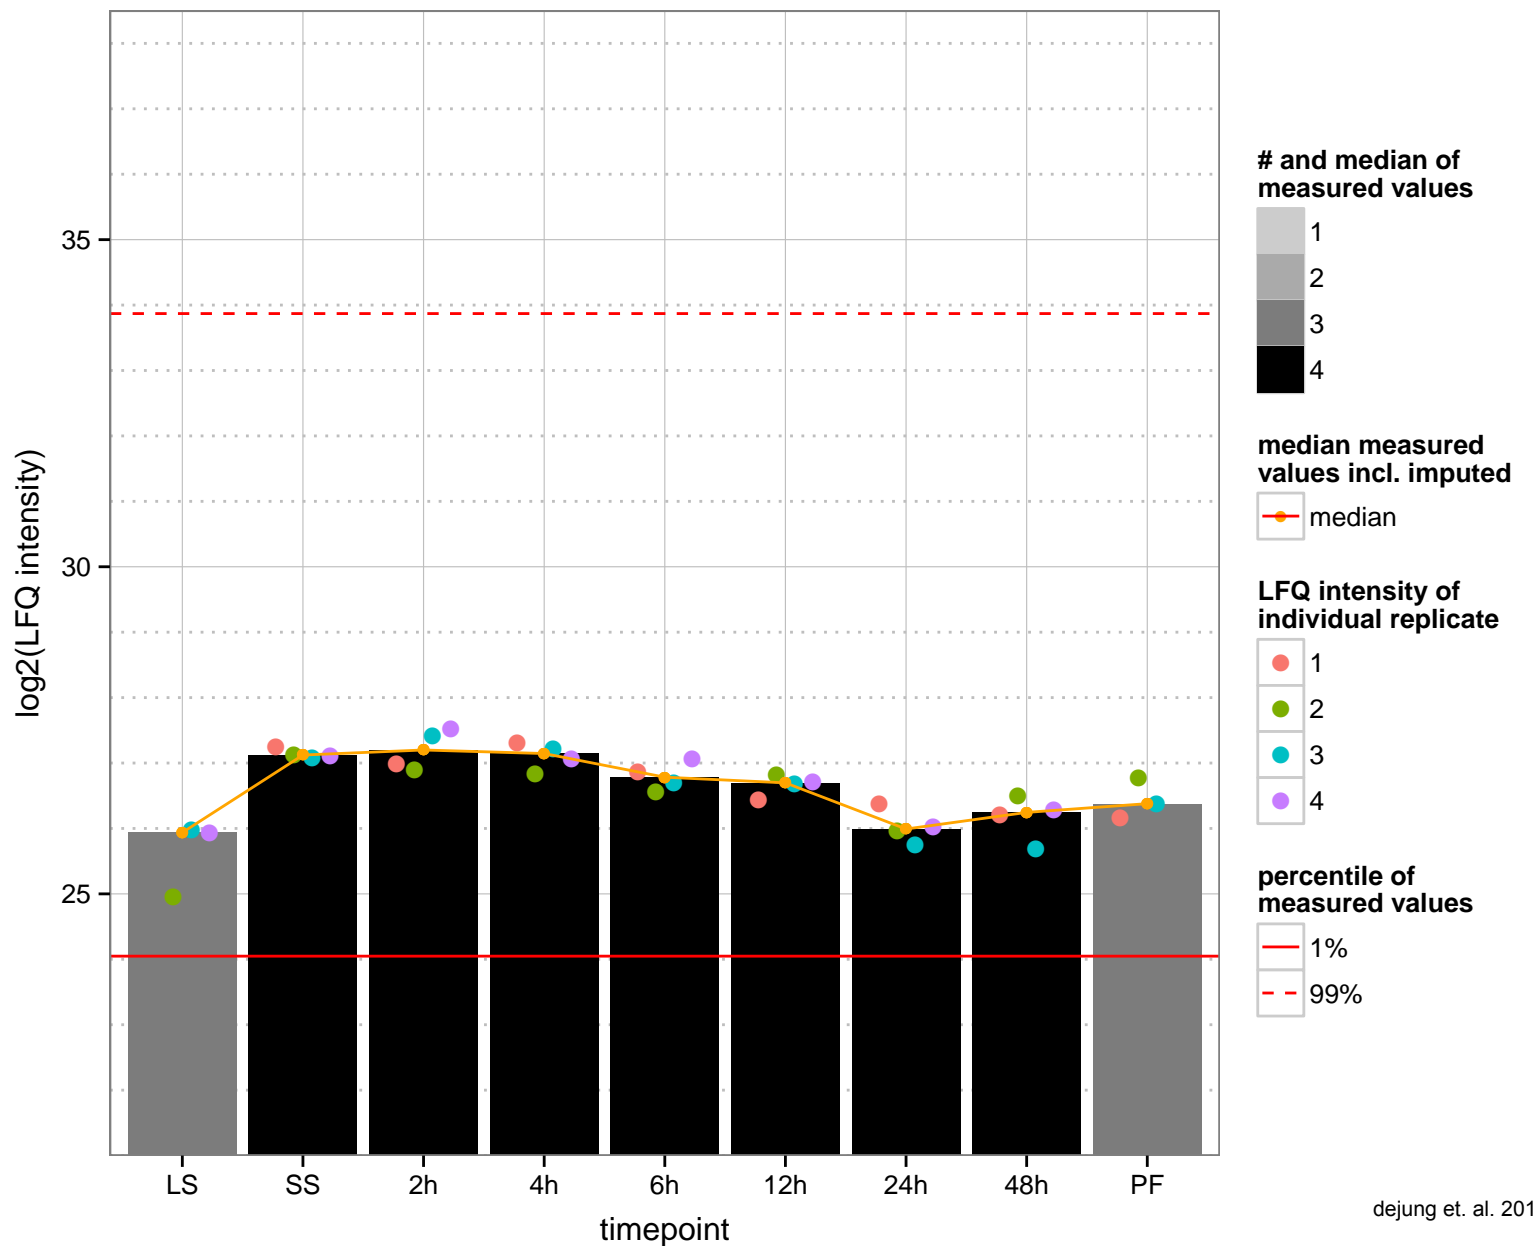

RING finger protein, putative

Tb927.6.3780

AGOF: nucleic acid binding, ubiquitin-protein ligase activity, zinc ion binding

AGOC: null

AGOP: histone ubiquitination

PGOF: protein binding, zinc ion binding

PGOC: null

PGOP: null

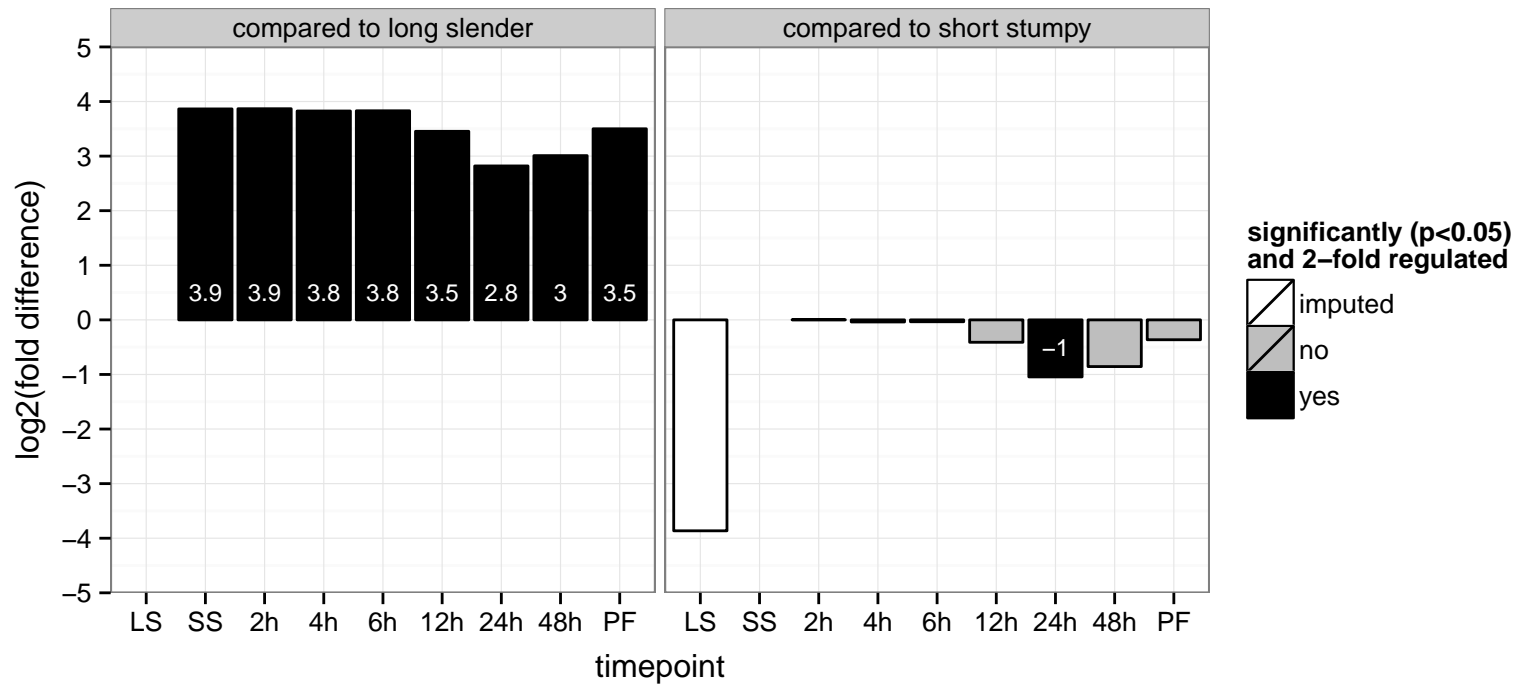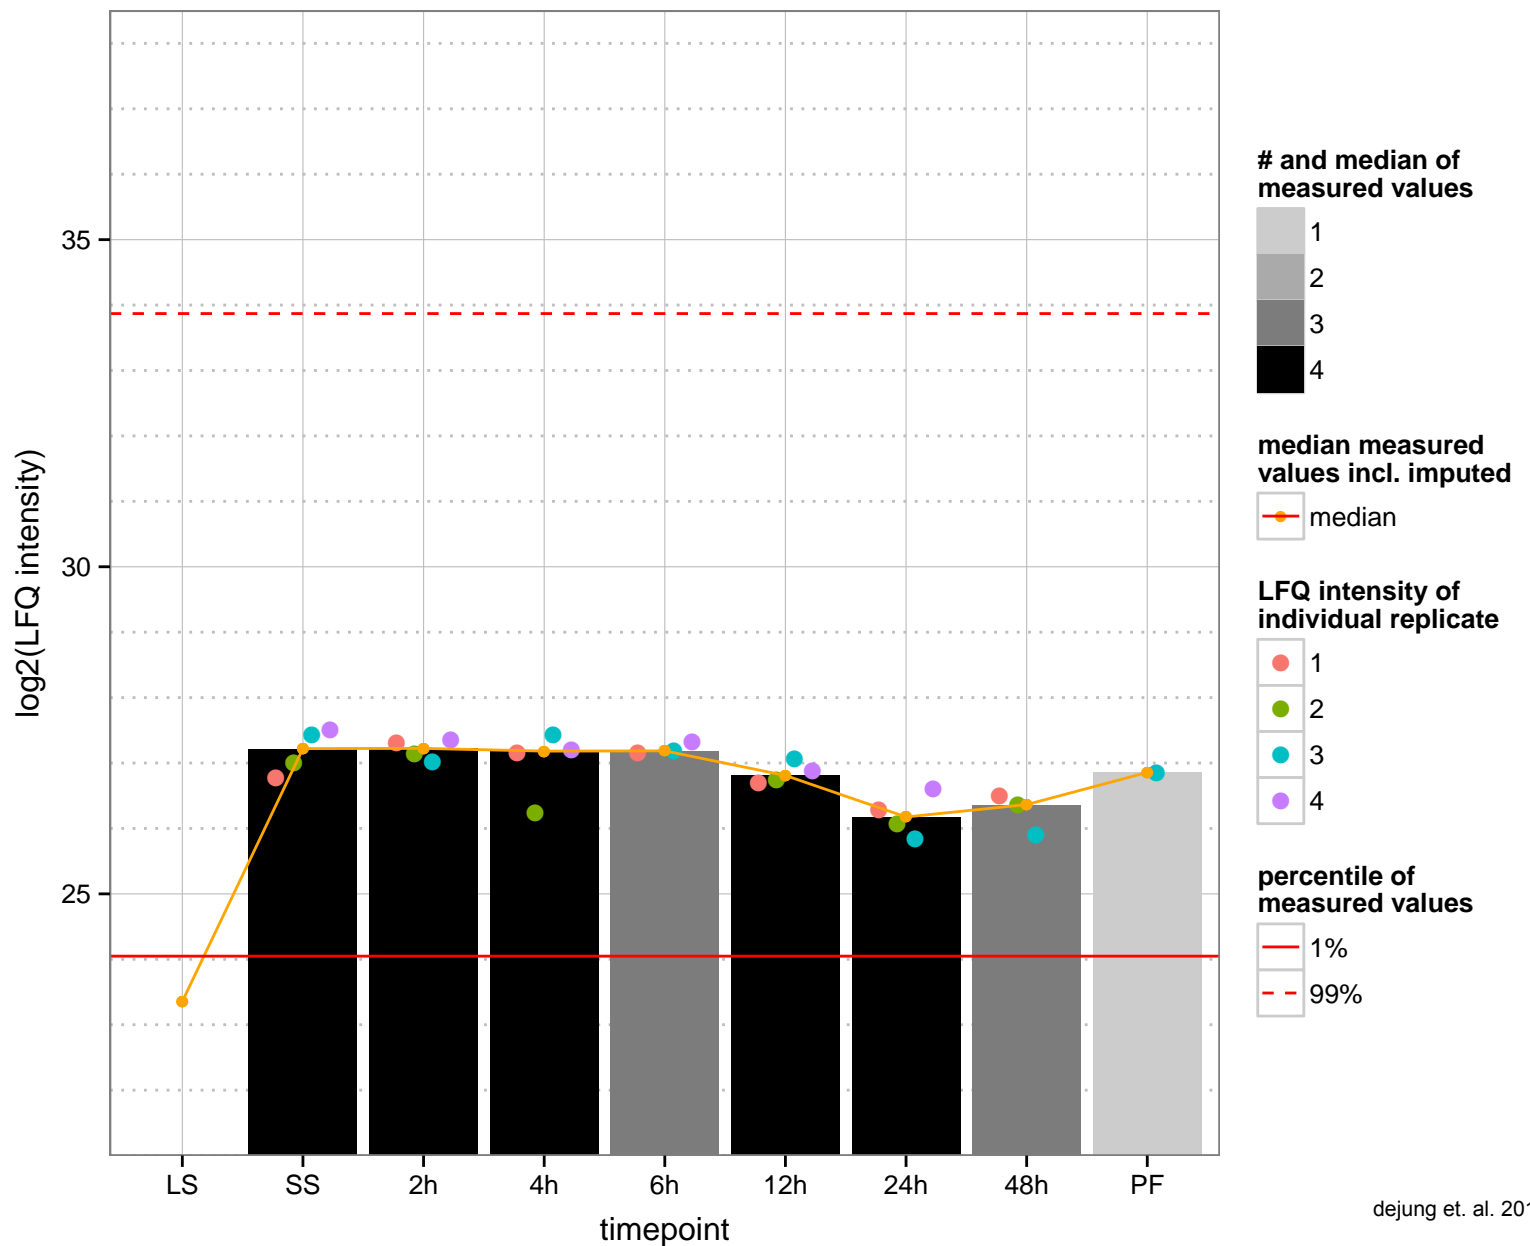

hypothetical protein, conserved  
 Tb927.6.840  
 AGOF: null  
 AGOC: null  
 AGOP: null  
 PGOF: protein binding  
 PGO: null  
 PGOP: null

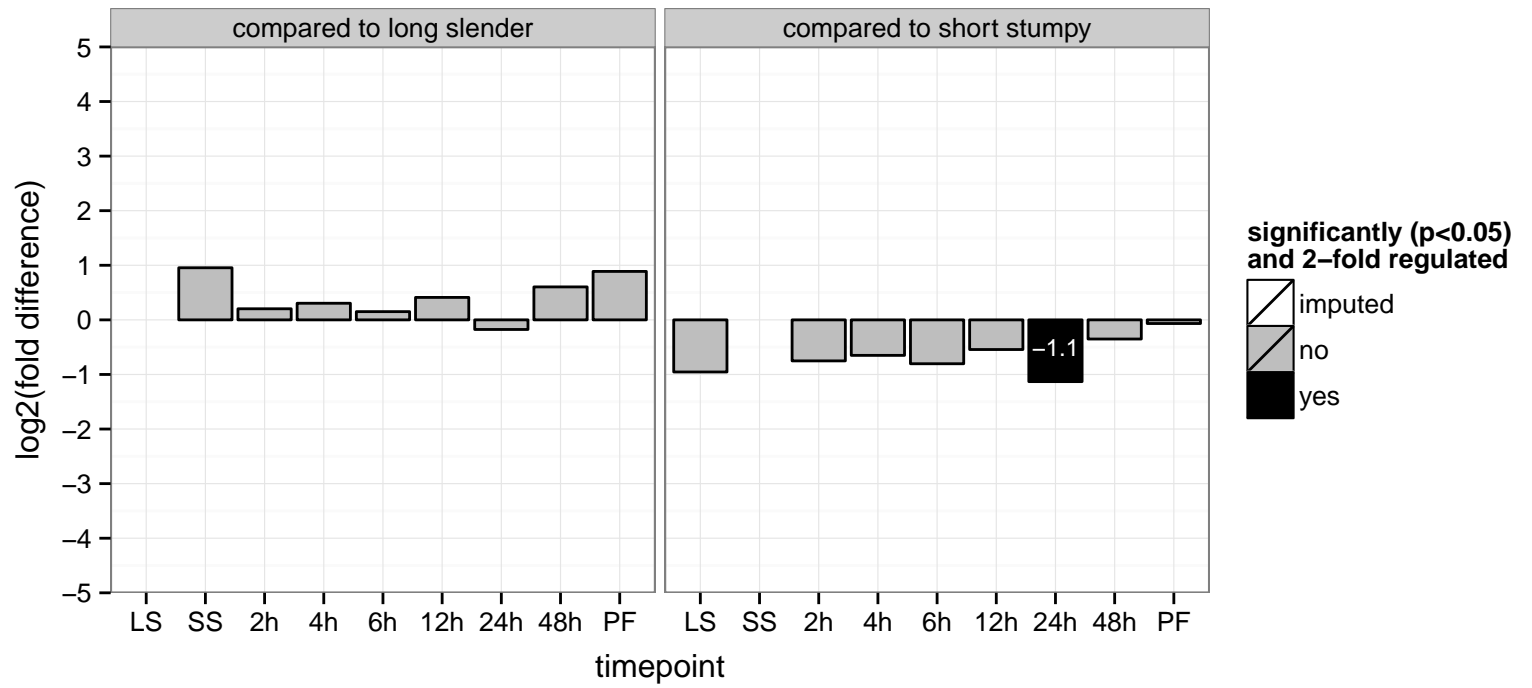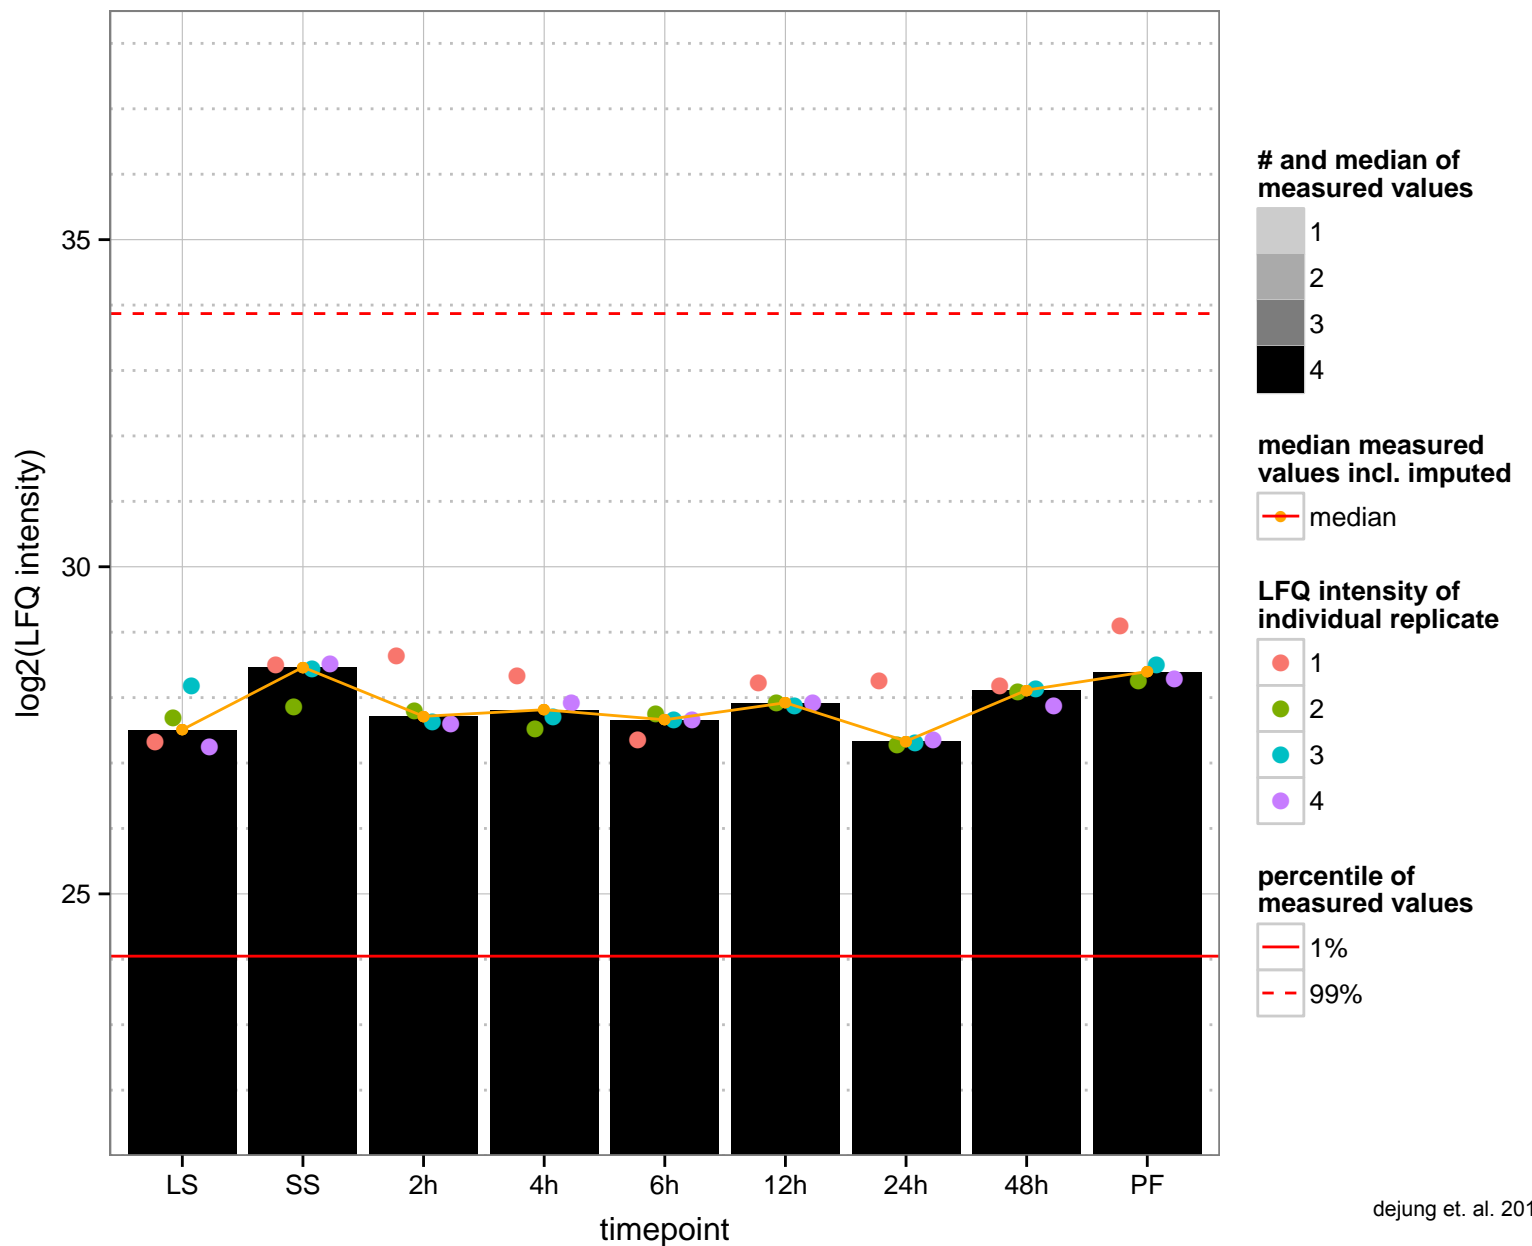



hypothetical protein, conserved  
 Tb927.7.1200  
 AGOF: null  
 AGOC: null  
 AGOP: null  
 PGOF: null  
 PGOE: null  
 PGOP: null

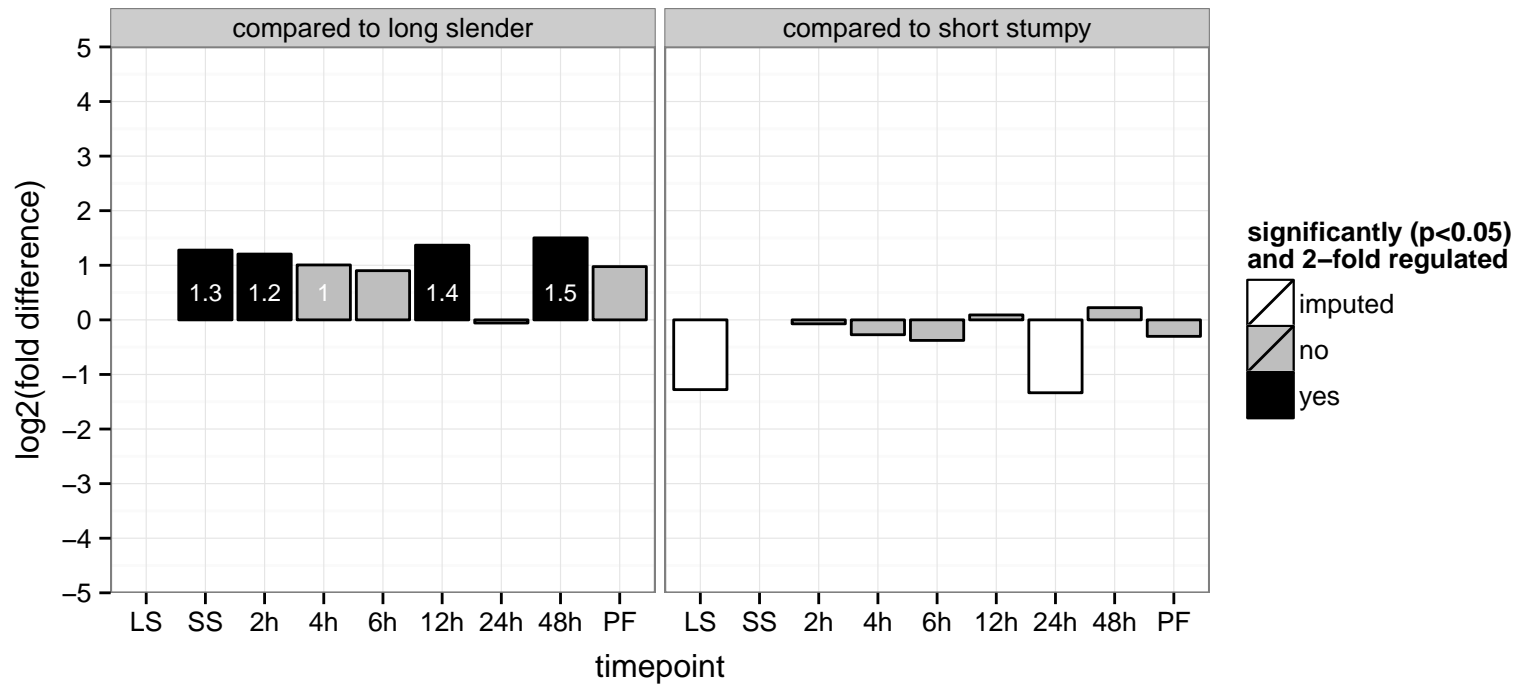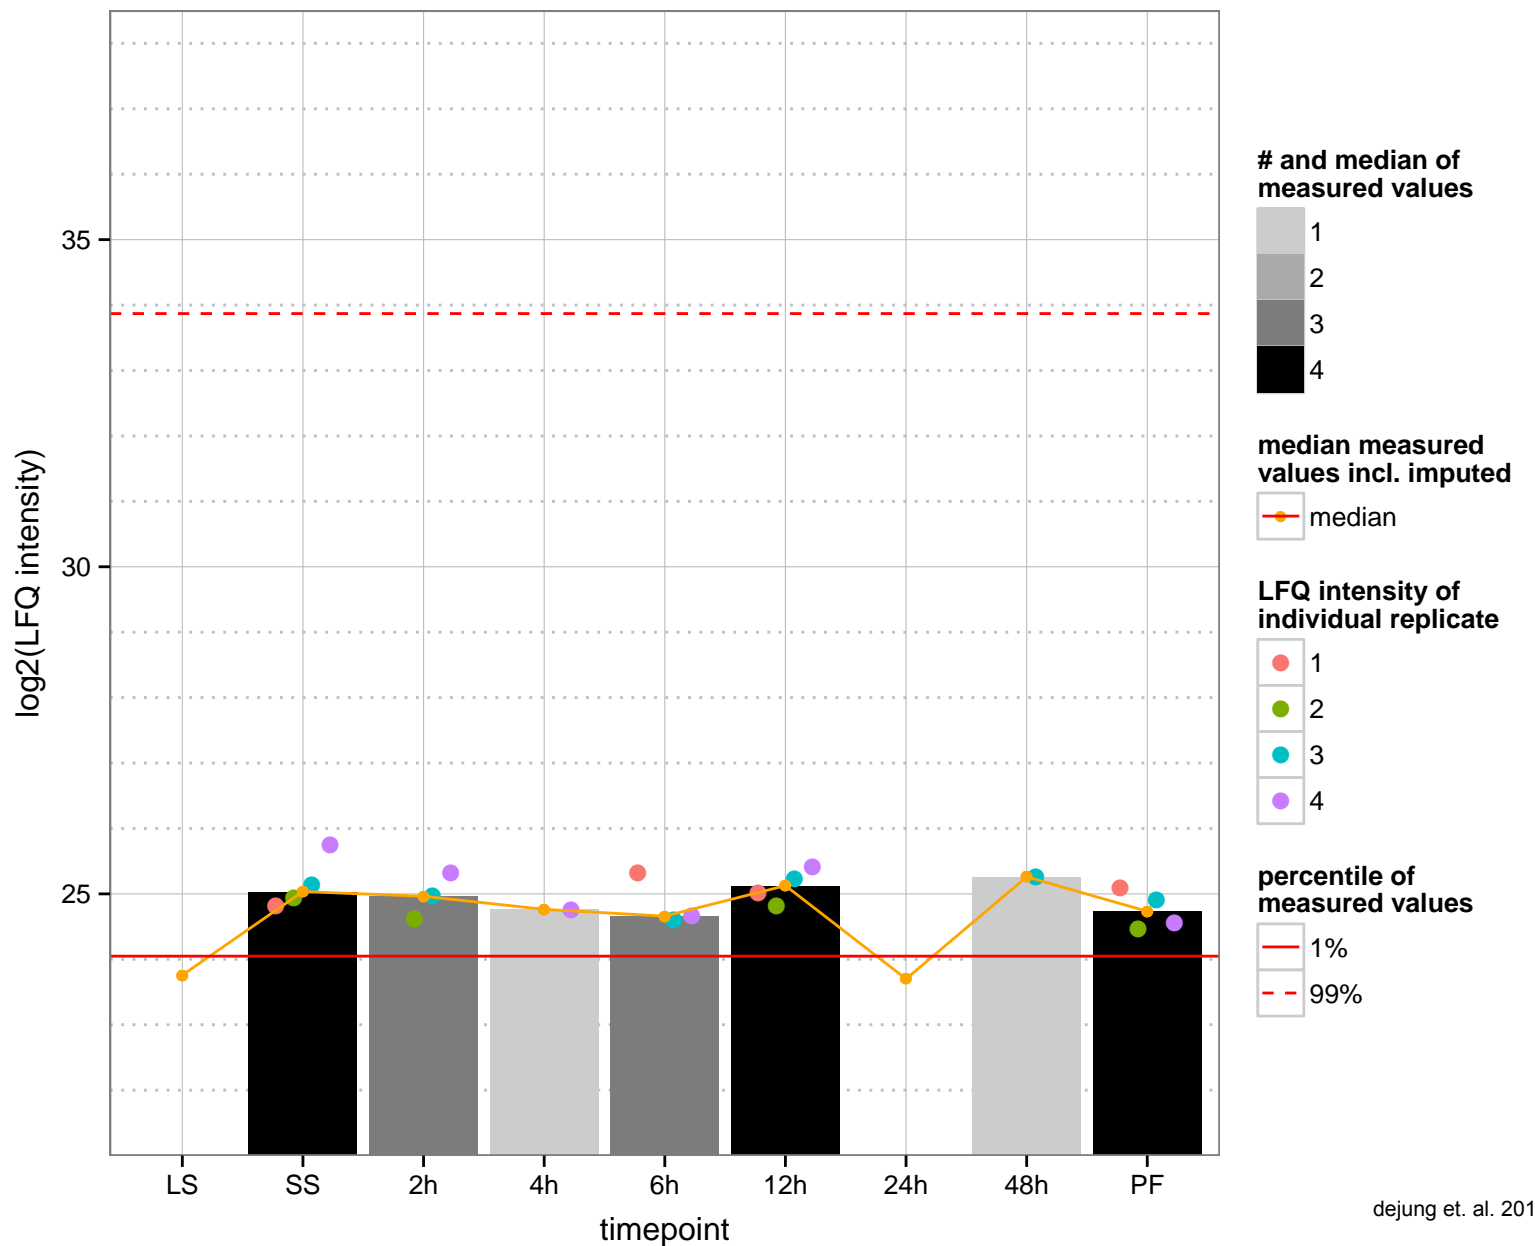

hypothetical protein, conserved  
 Tb927.7.3910  
 AGOF: null  
 AGOC: mitochondrion  
 AGOP: null  
 PGO: null  
 PGOC: null  
 PGOP: null

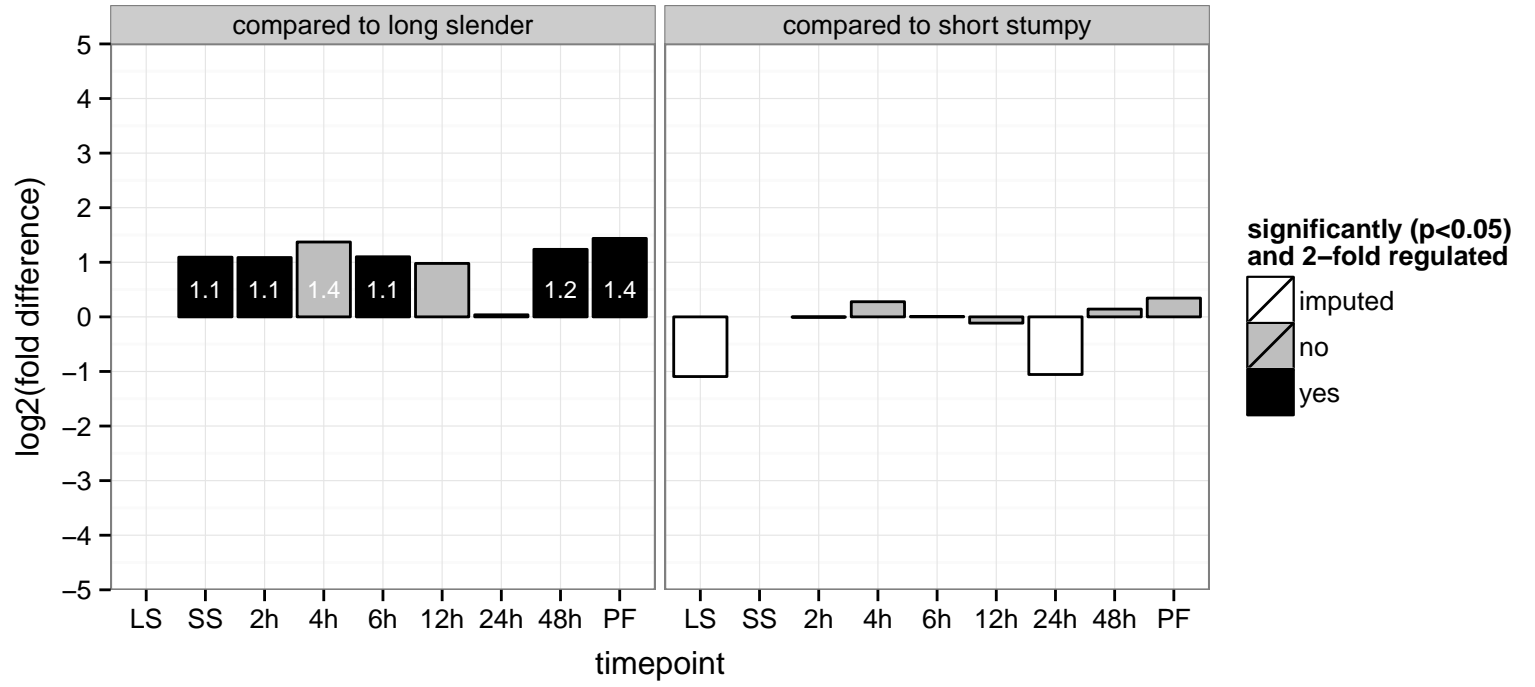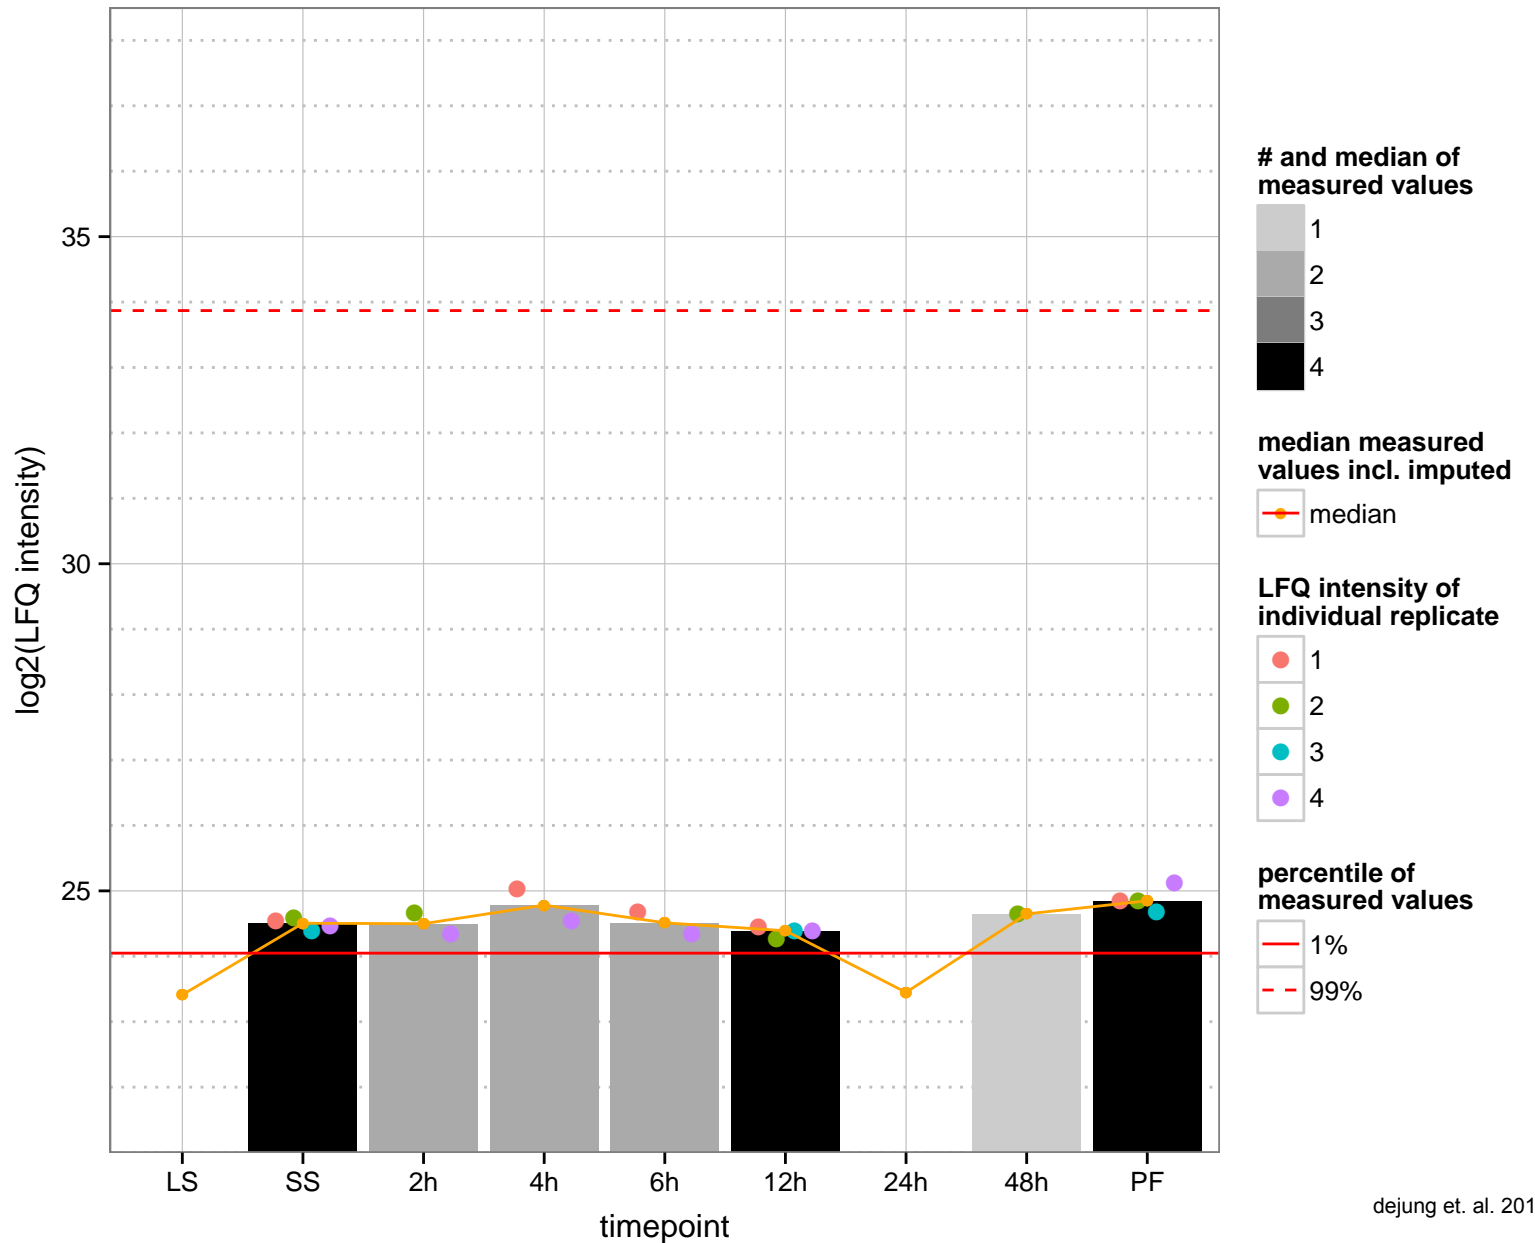

NADH-ubiquinone oxidoreductase, mitochondrial, putative  
 Tb927.7.6350  
 AGOF: NAD binding, electron carrier activity, oxidoreductase activity  
 AGOC: mitochondrion  
 AGOP: null  
 PGOF: NAD binding, oxidoreductase activity  
 PGO: null  
 PGOP: oxidation-reduction process

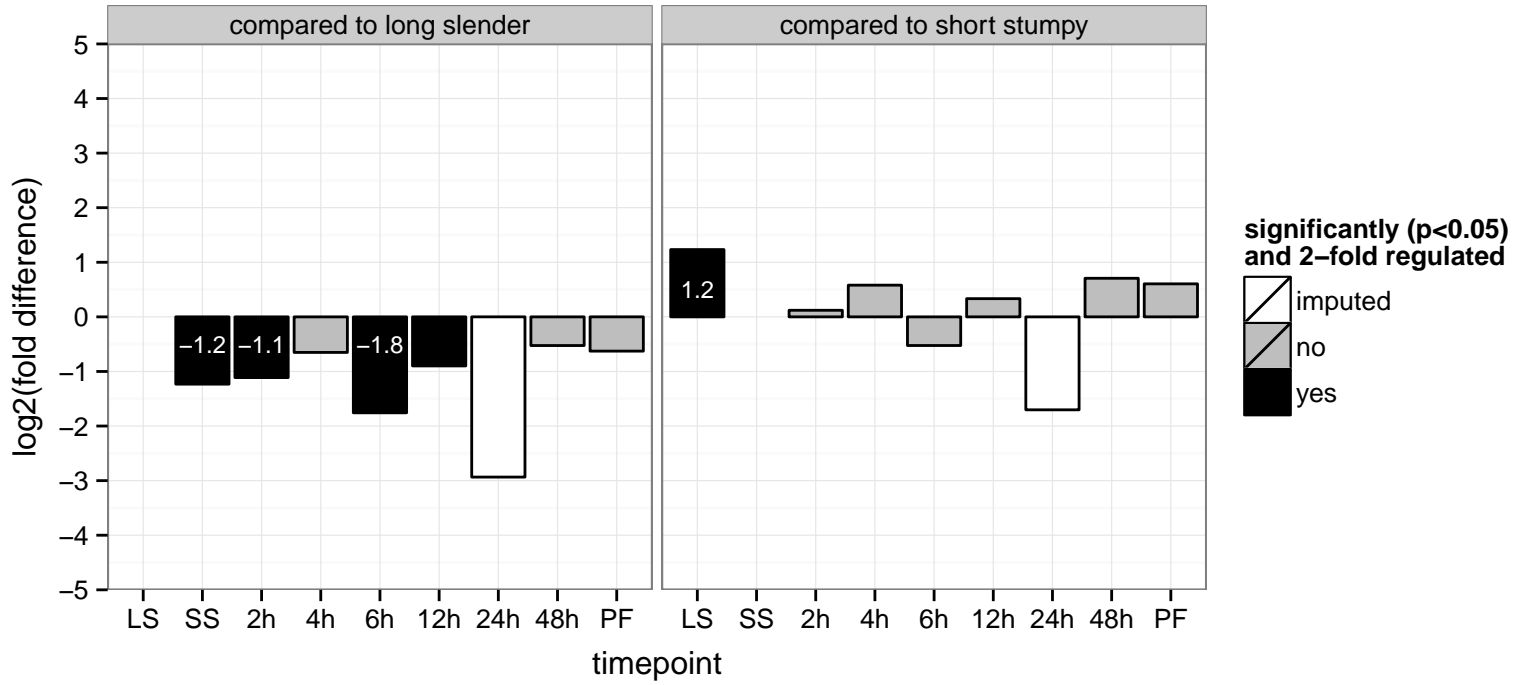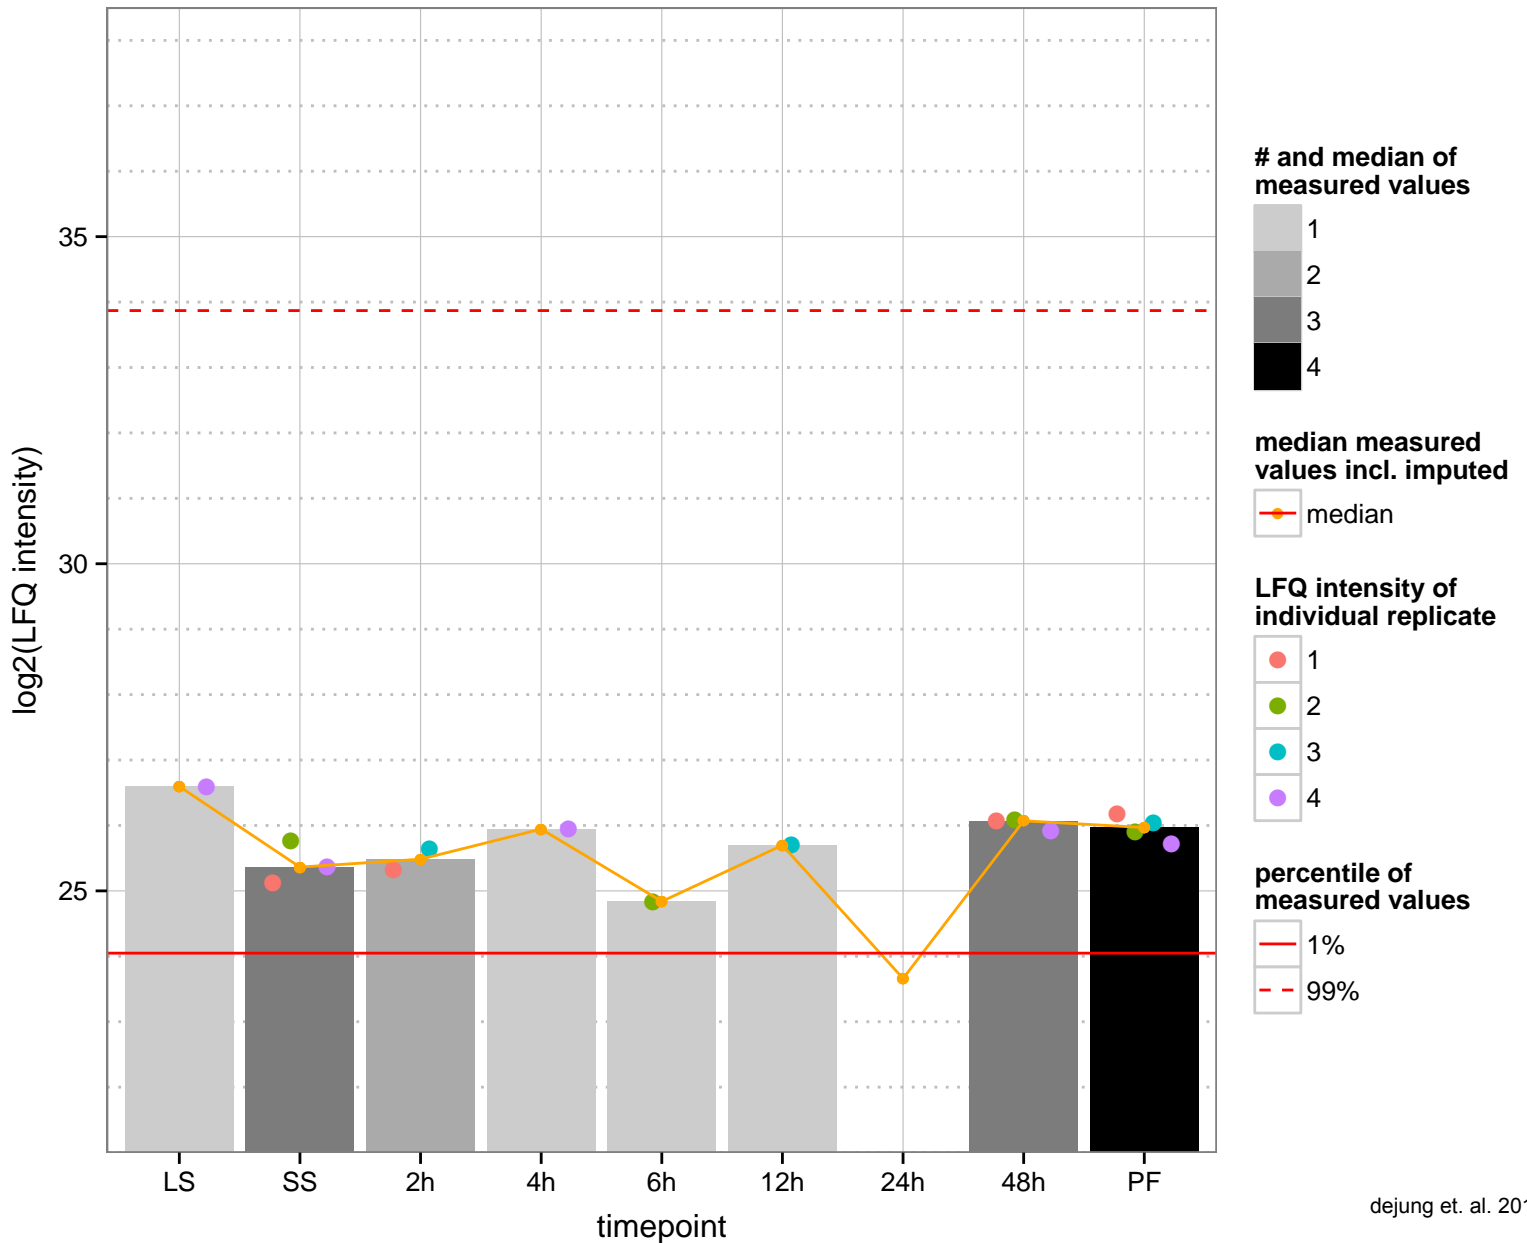

actin, putative  
 Tb927.9.5440  
 AGOF: structural constituent of cytoskeleton  
 AGOC: actin cytoskeleton  
 AGOP: cytoskeleton organization  
 PGO: null  
 PGOC: null  
 PGOP: null

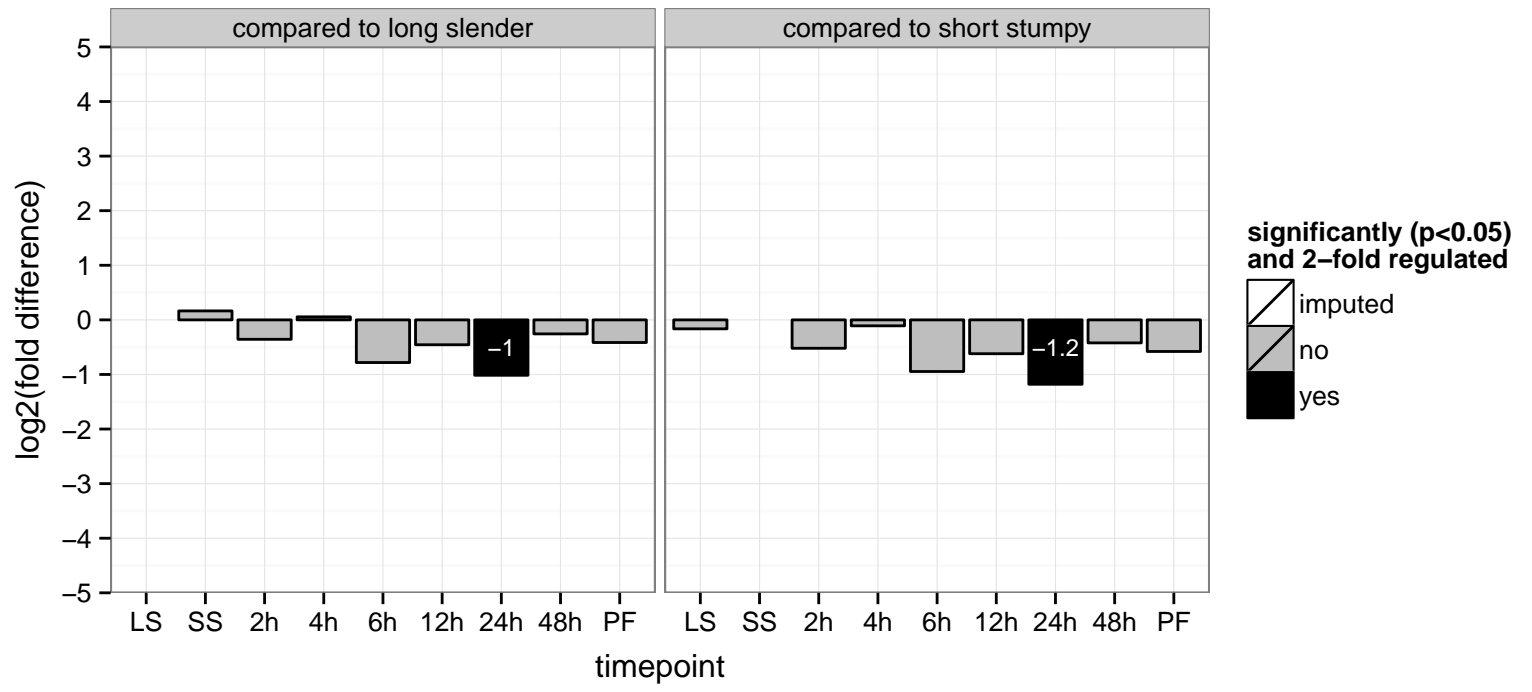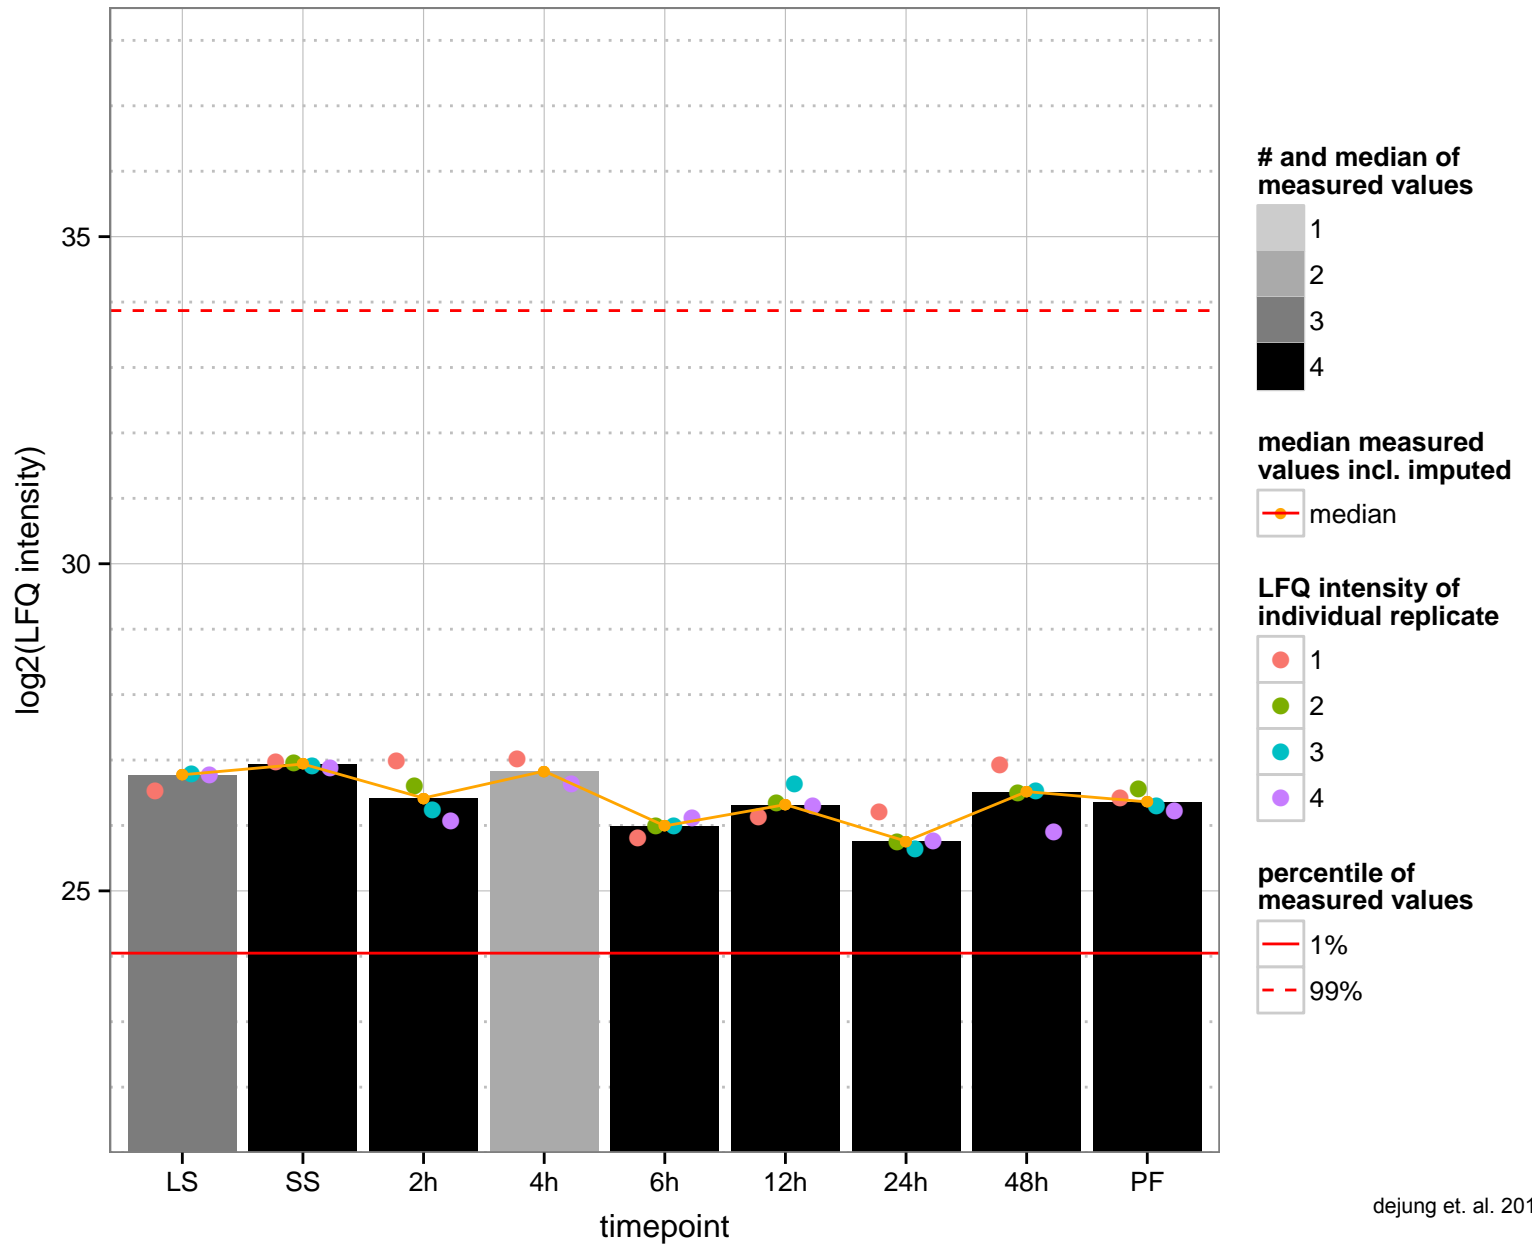

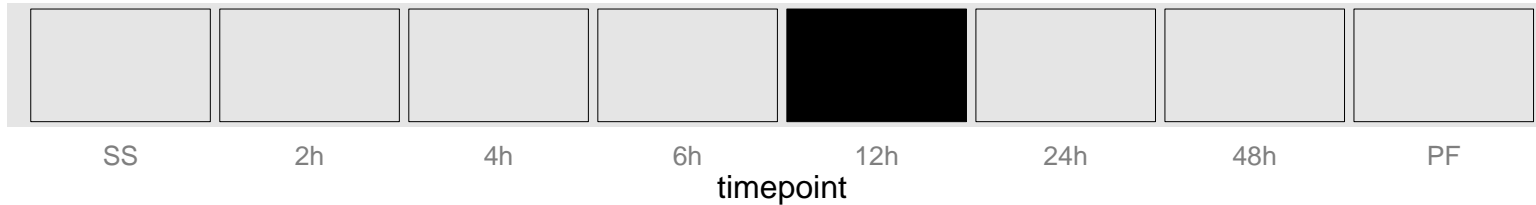

**regulated**  not regulated  significant down  significant up

hypothetical PIN domain-containing protein, conserved  
 Tb927.1.1790  
 AGOF: RNA binding  
 AGOC: null  
 AGOP: null  
 PGO: null  
 PGOC: null  
 PGOP: null

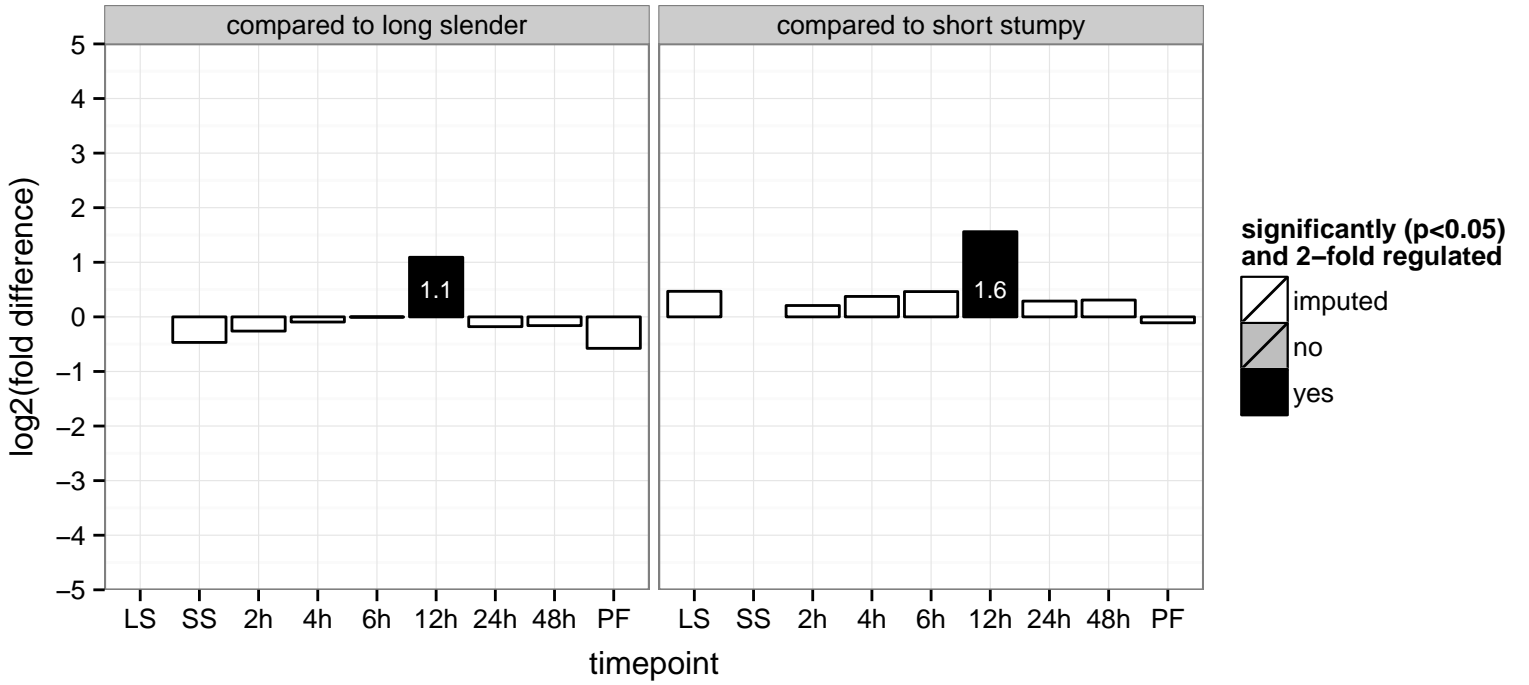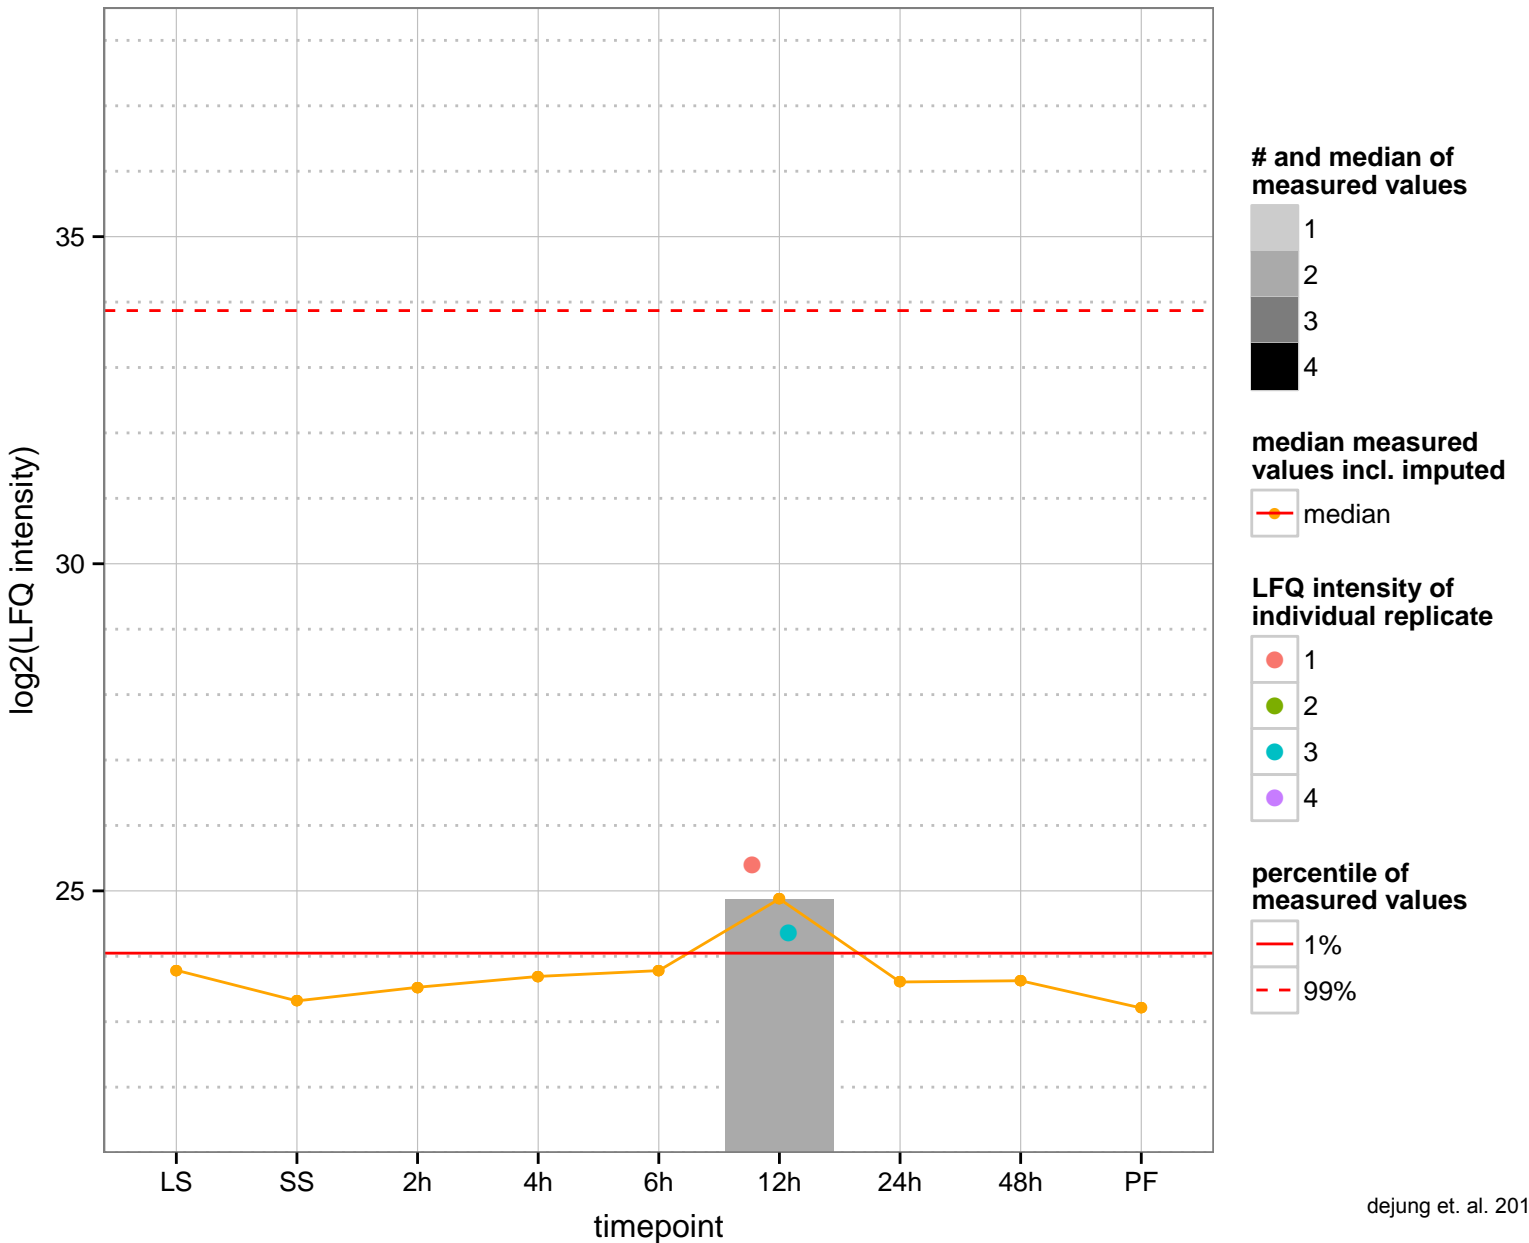

hypothetical protein, conserved  
 Tb927.1.2190  
 AGOF: null  
 AGOC: null  
 AGOP: null  
 PGO: protein binding  
 PGOC: null  
 PGOP: null

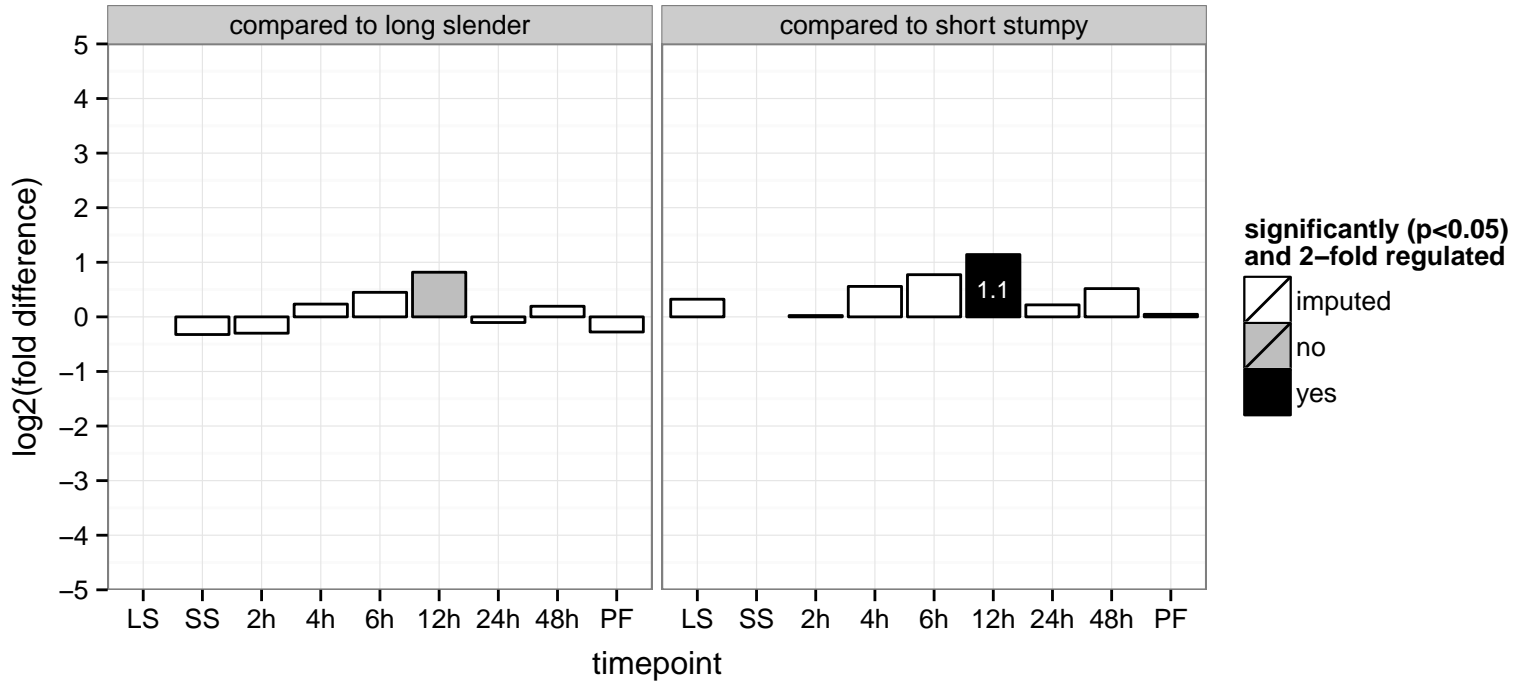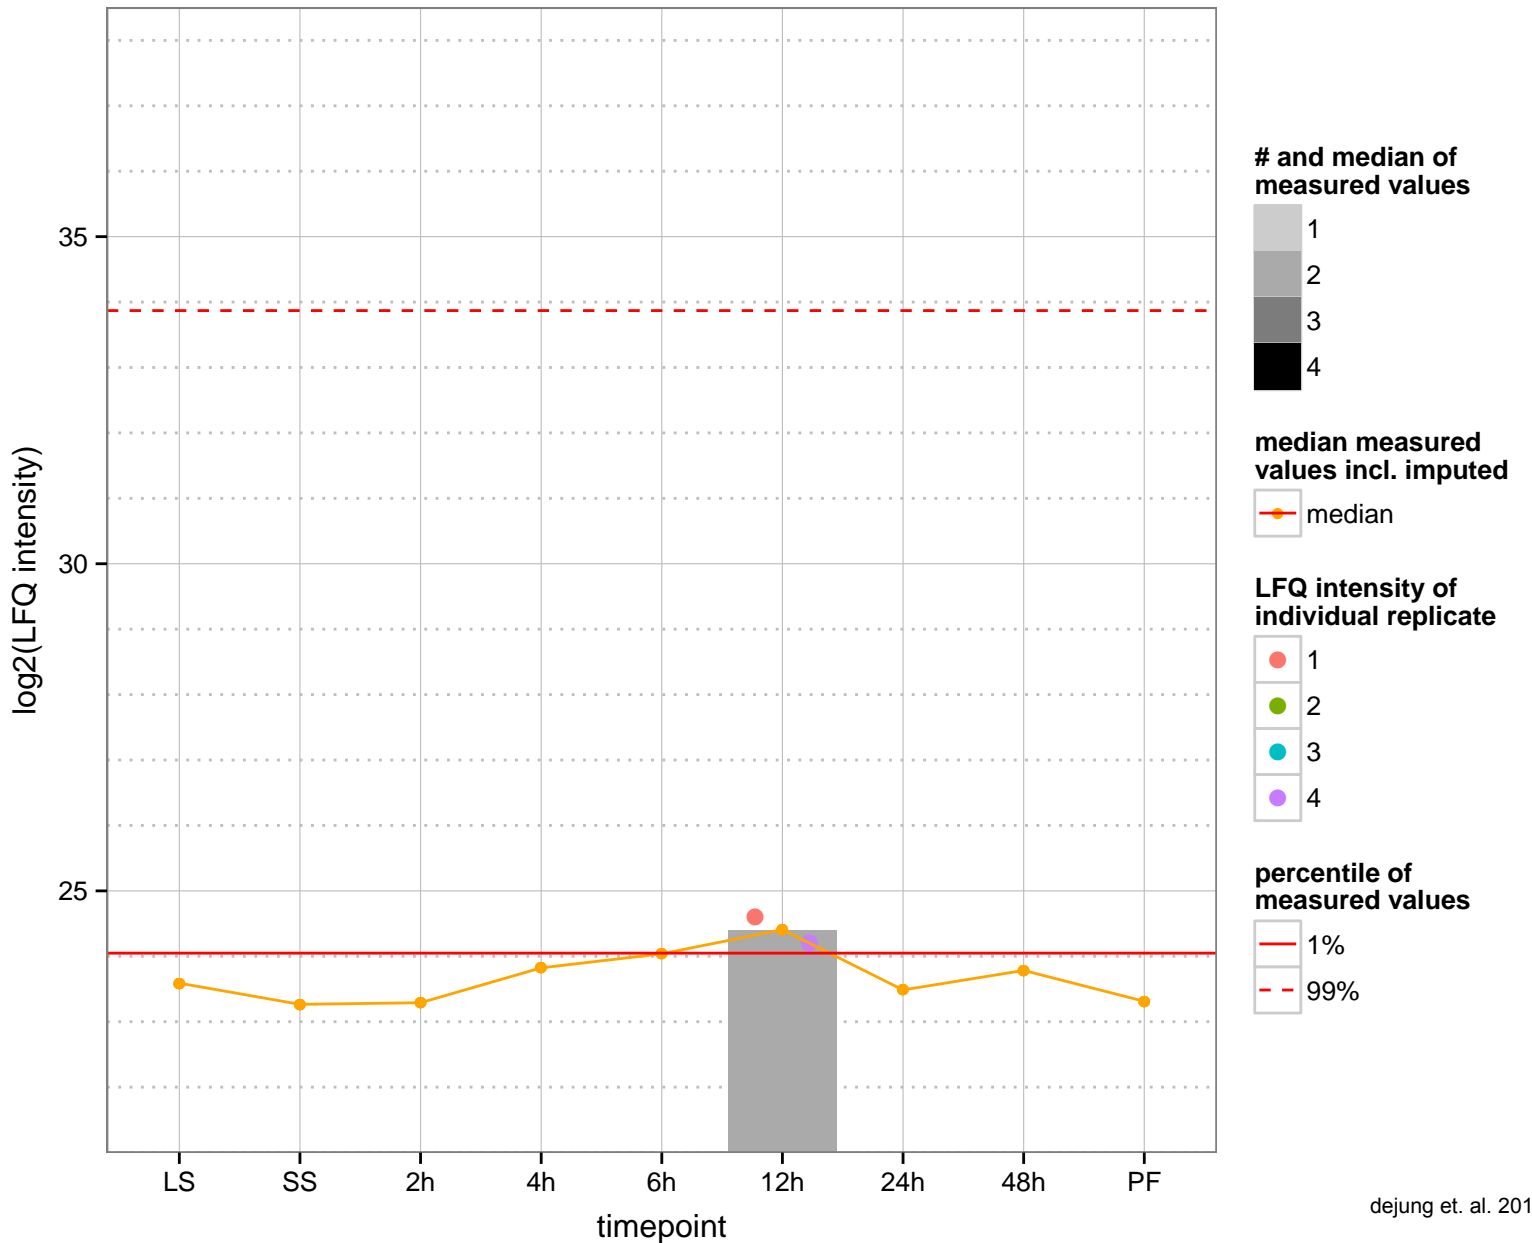

Histone-lysine N-methyltransferase, H3 lysine-76 specific, Histone H3-K76 methyltransferase (DOT1B)  
 Tb927.1.570  
 AGOF: histone-lysine N-methyltransferase activity  
 AGOC: null  
 AGOP: antigenic variation, regulation of cell cycle  
 PGOF: histone-lysine N-methyltransferase activity  
 PGOC: null  
 PGOP: null

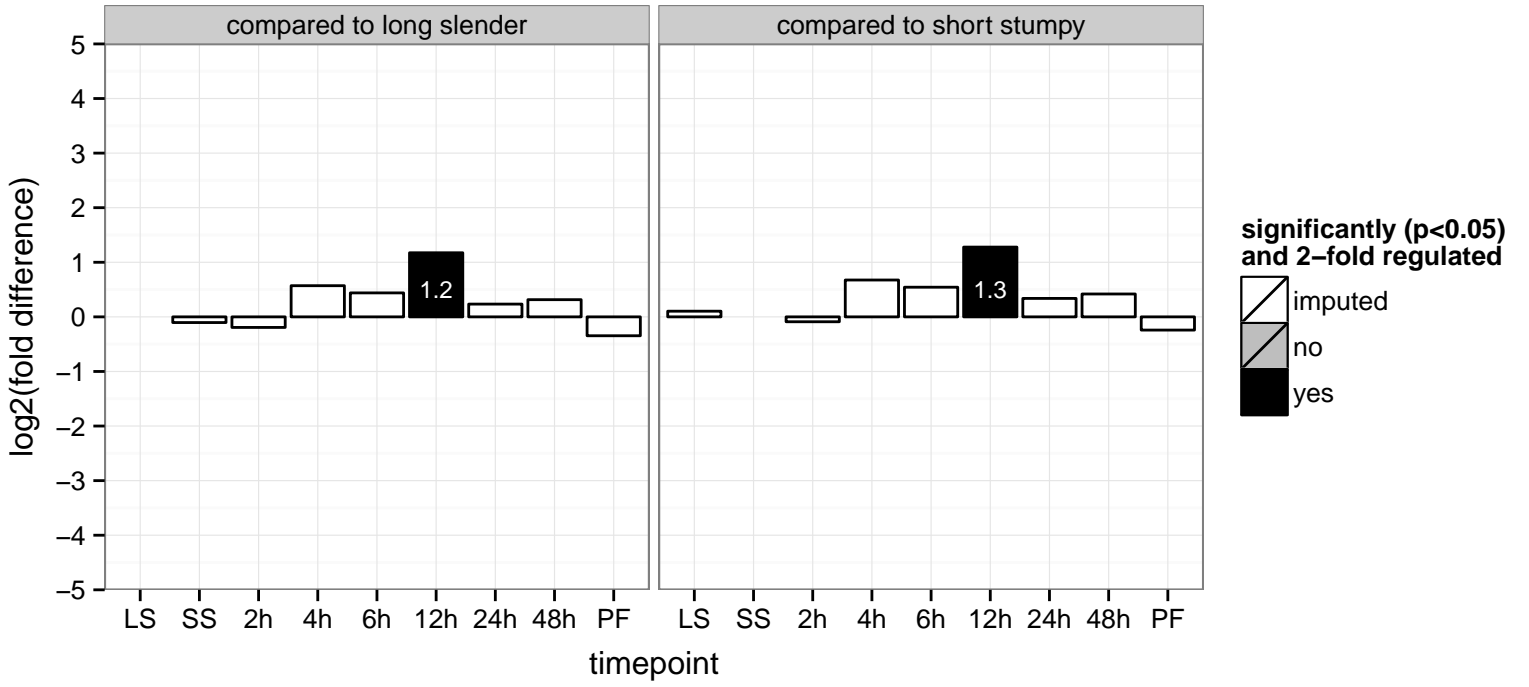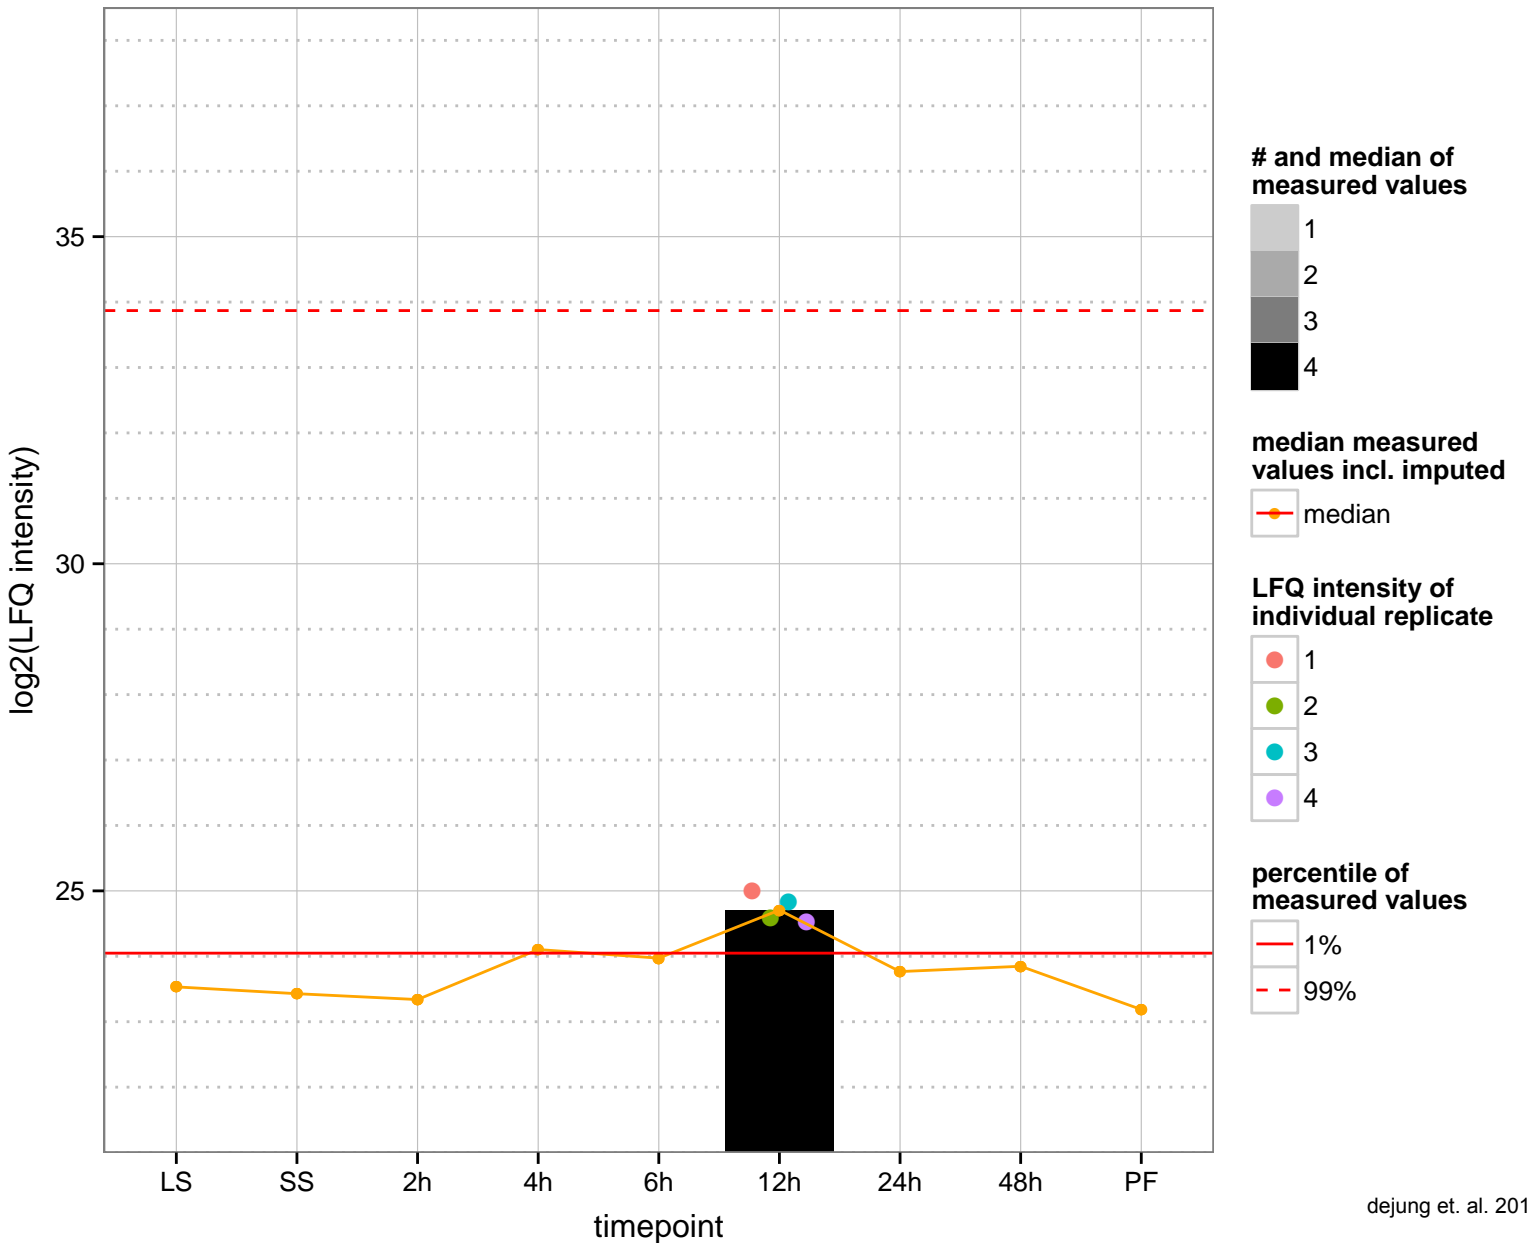



hypothetical protein, conserved  
 Tb927.10.14650  
 AGOF: null  
 AGOC: null  
 AGOP: null  
 PGOF: null  
 PGO C: null  
 PGOP: null

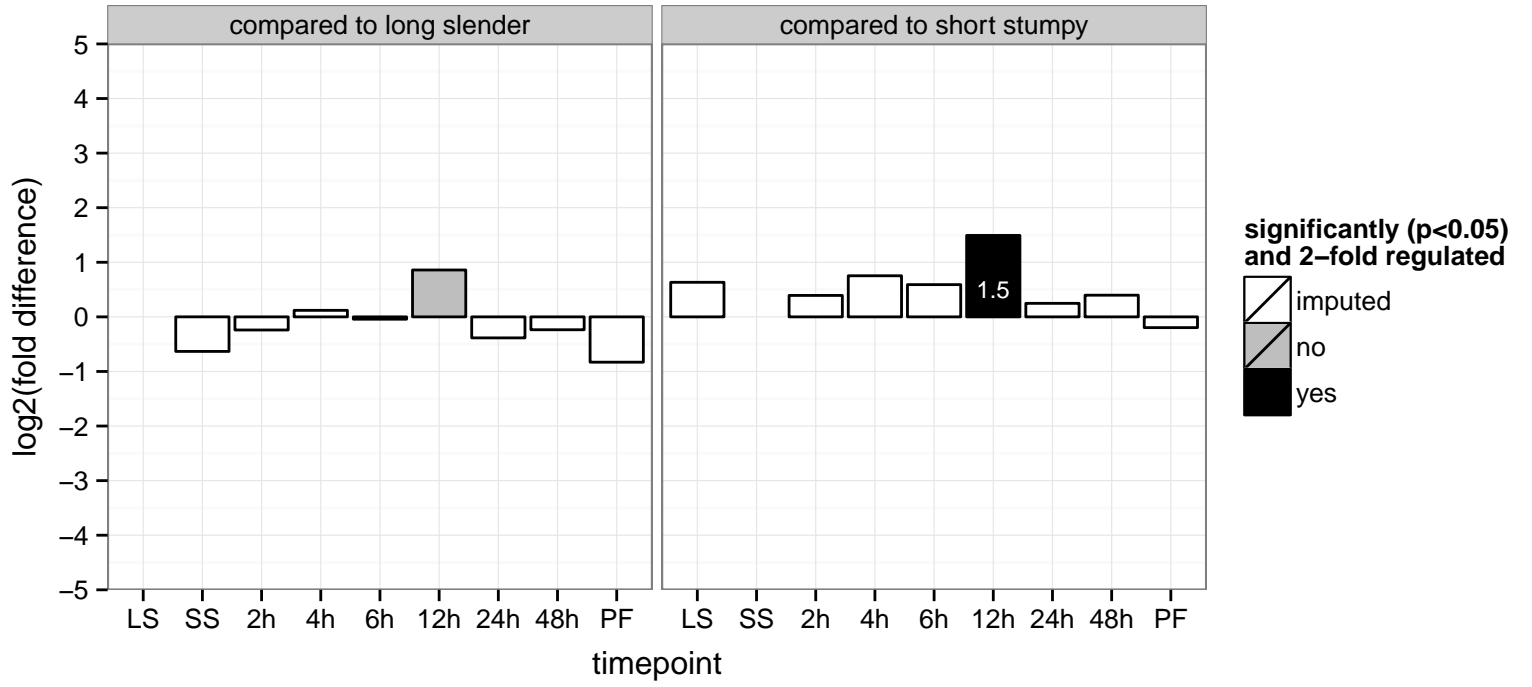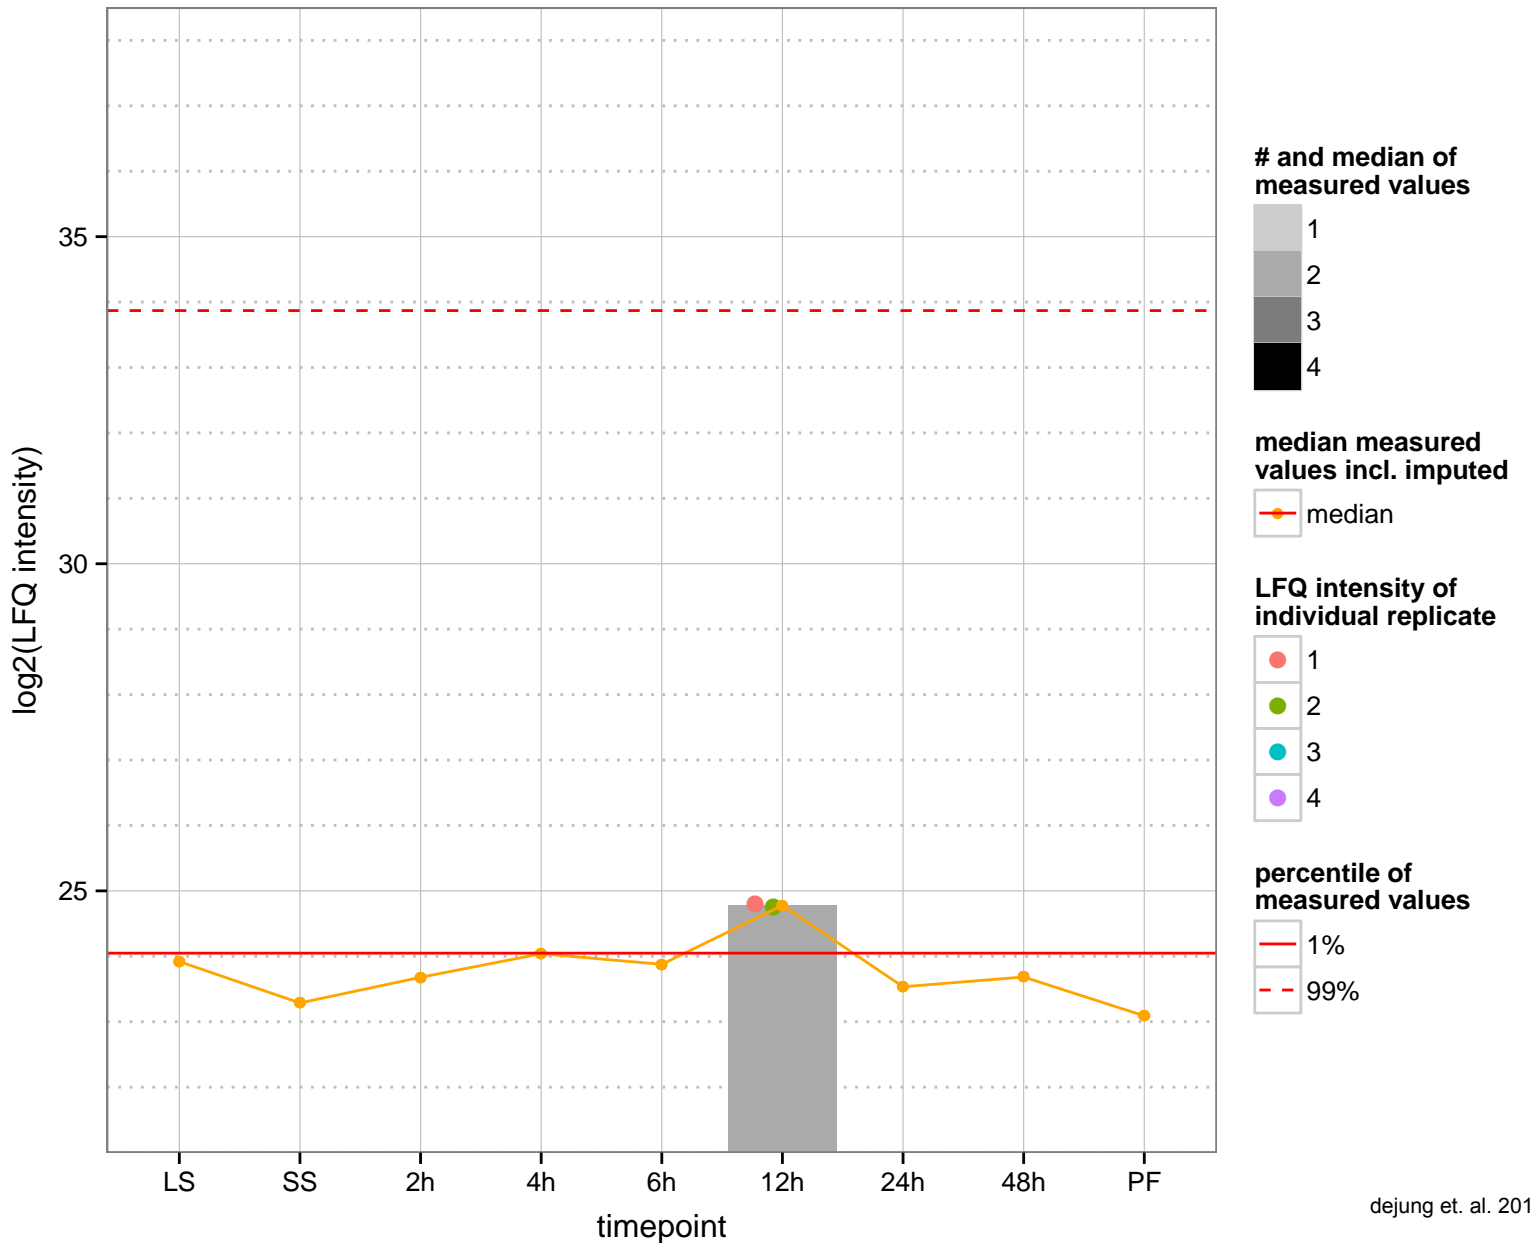

calcineurin B subunit, putative  
 Tb927.10.370  
 AGOF: calcium ion binding  
 AGOC: null  
 AGOP: null  
 PGOF: calcium ion binding  
 PGOC: null  
 PGOP: null

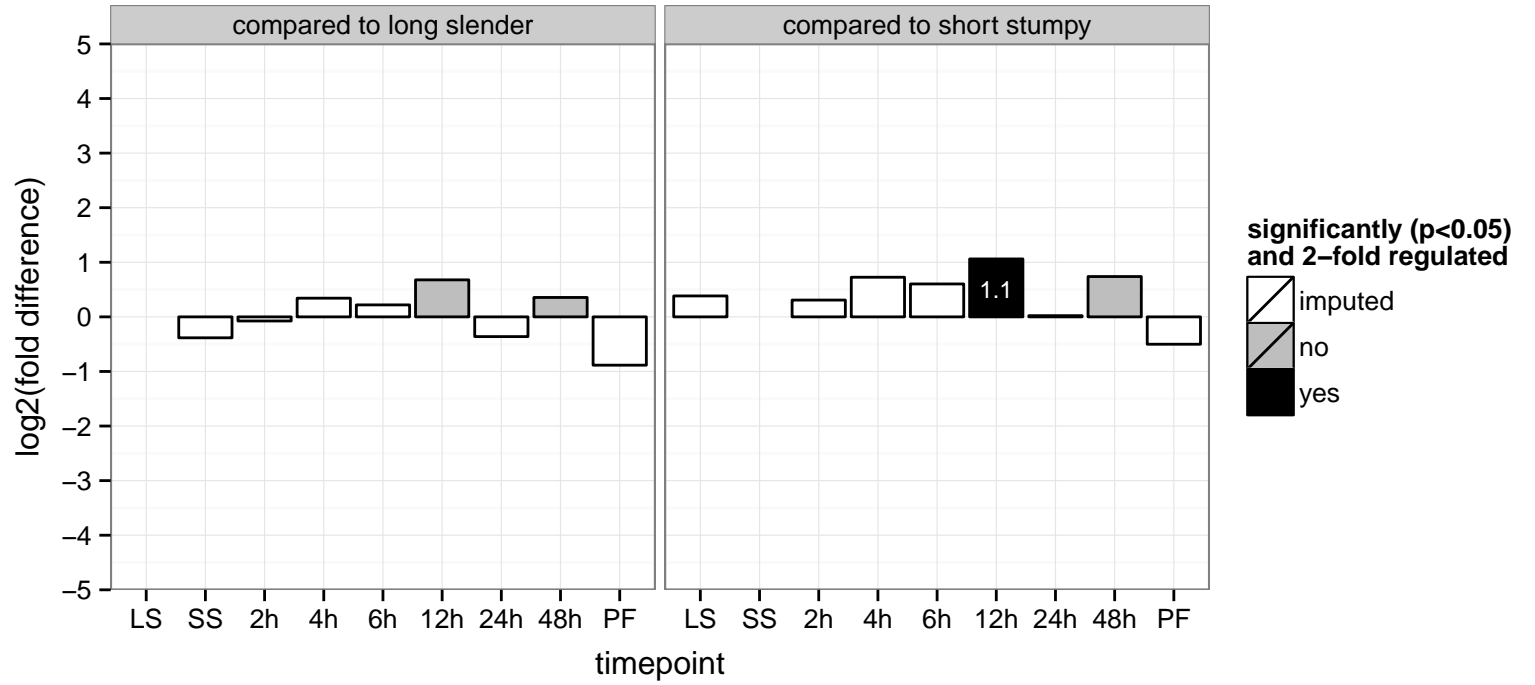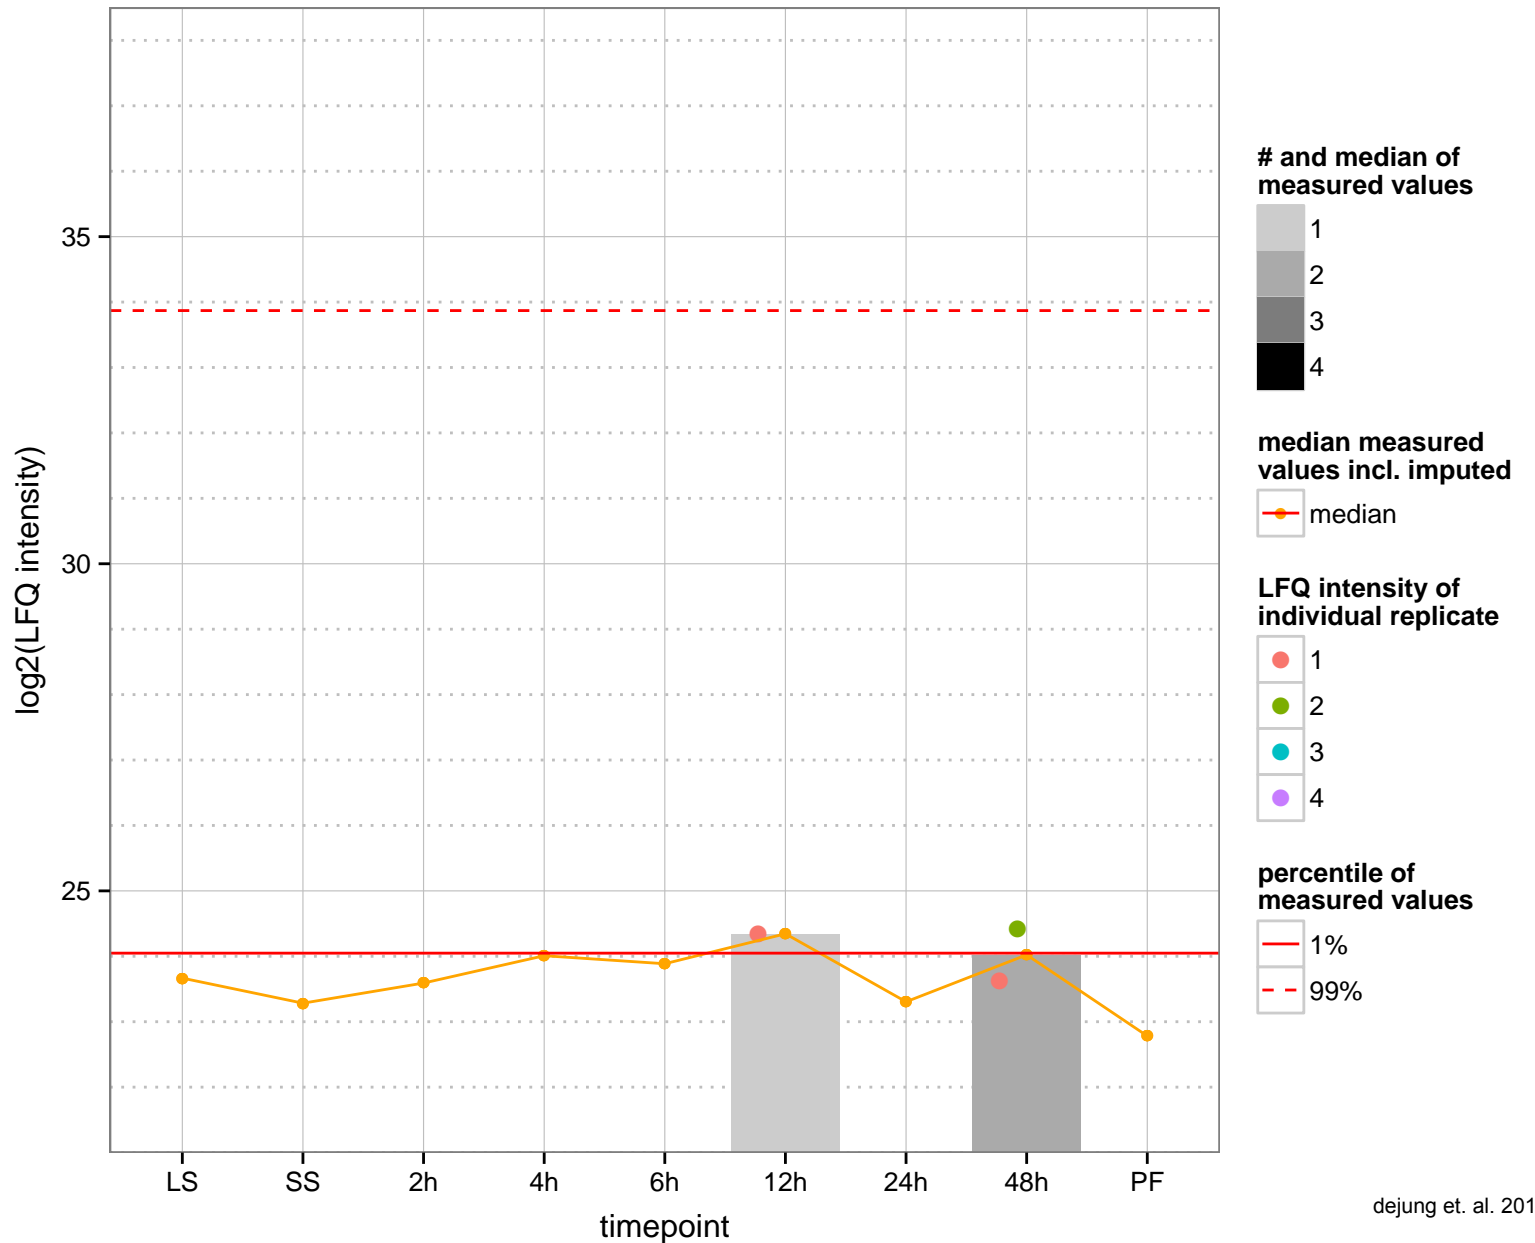

hypothetical protein, conserved  
 Tb927.10.4830  
 AGOF: null  
 AGOC: null  
 AGOP: null  
 PGO: null  
 PGOC: null  
 PGOP: null

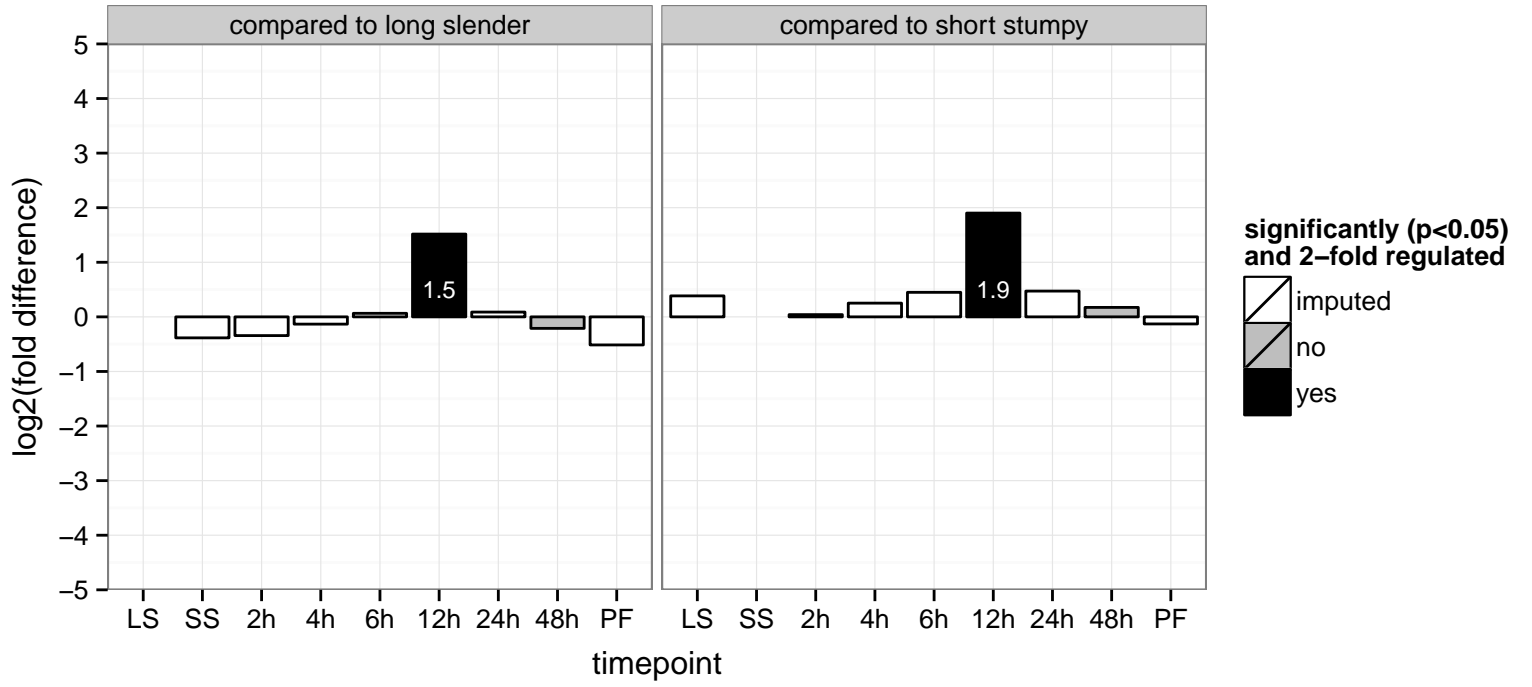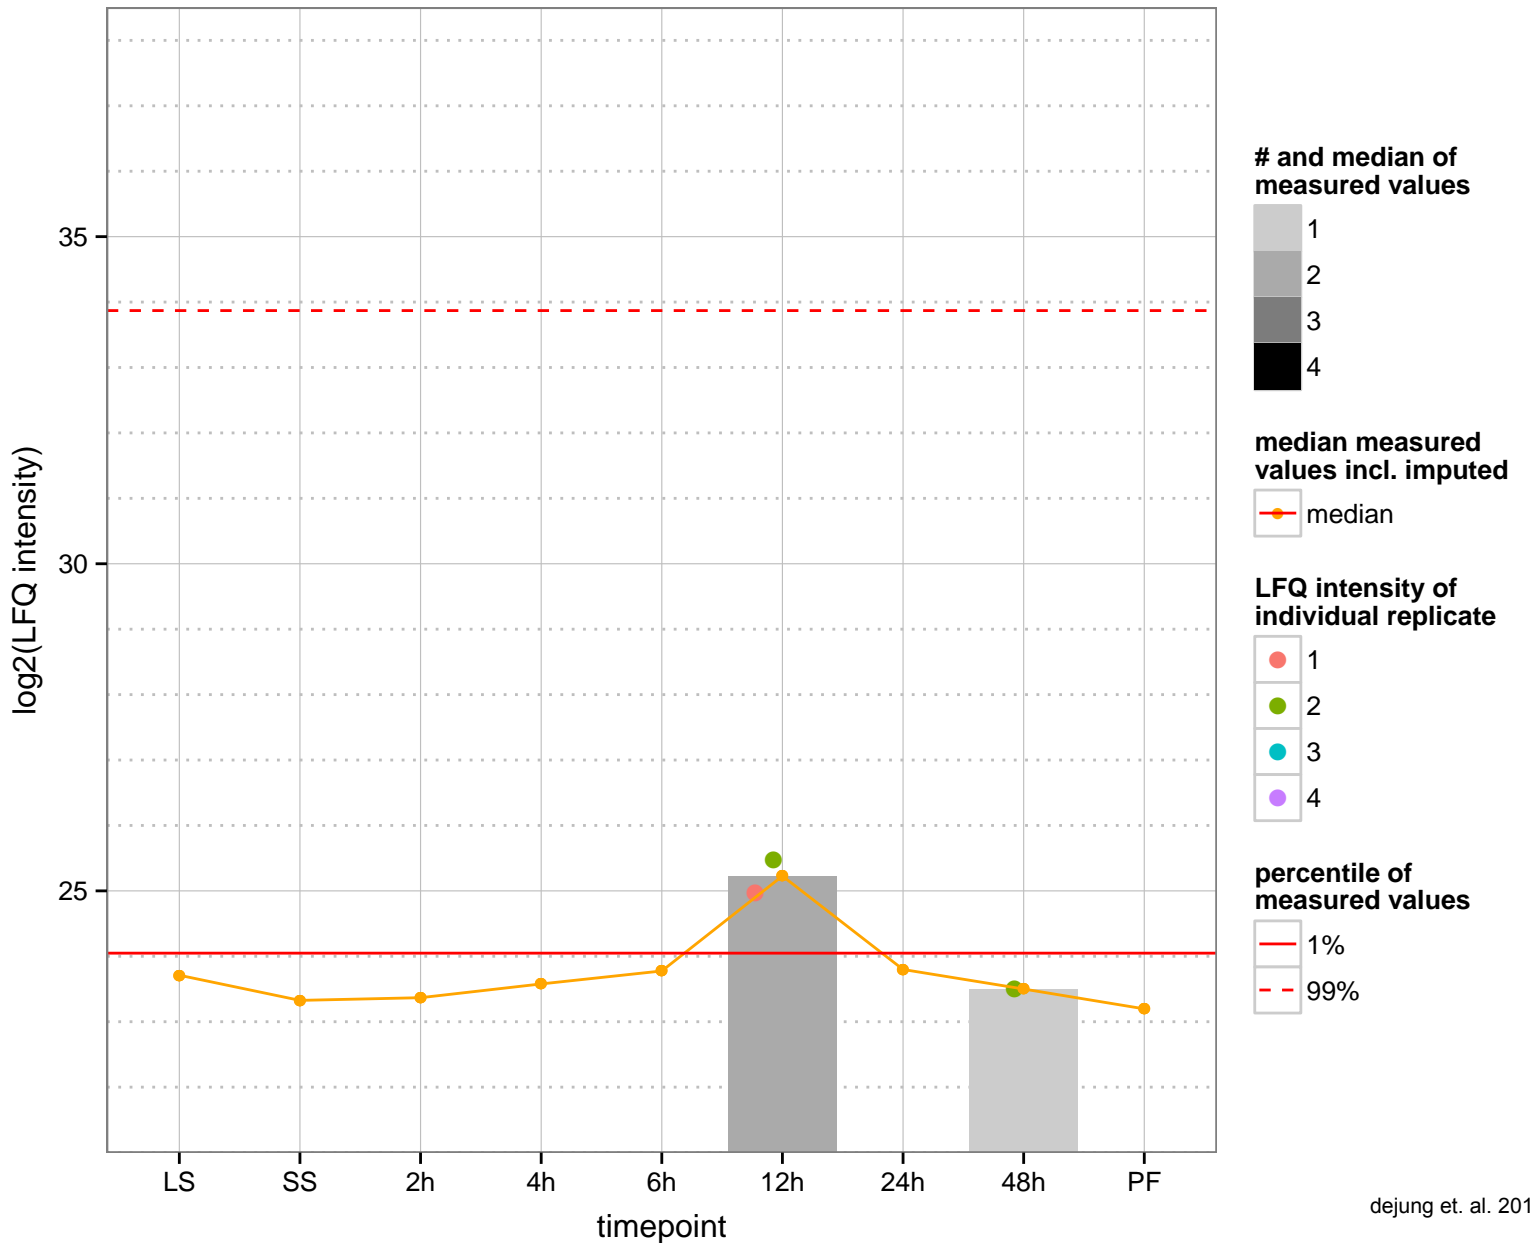

amino acid transporter, putative  
 Tb927.10.5780  
 AGOF: null  
 AGOC: membrane  
 AGOP: amino acid transport  
 PGO: null  
 PGOC: null  
 PGOP: null

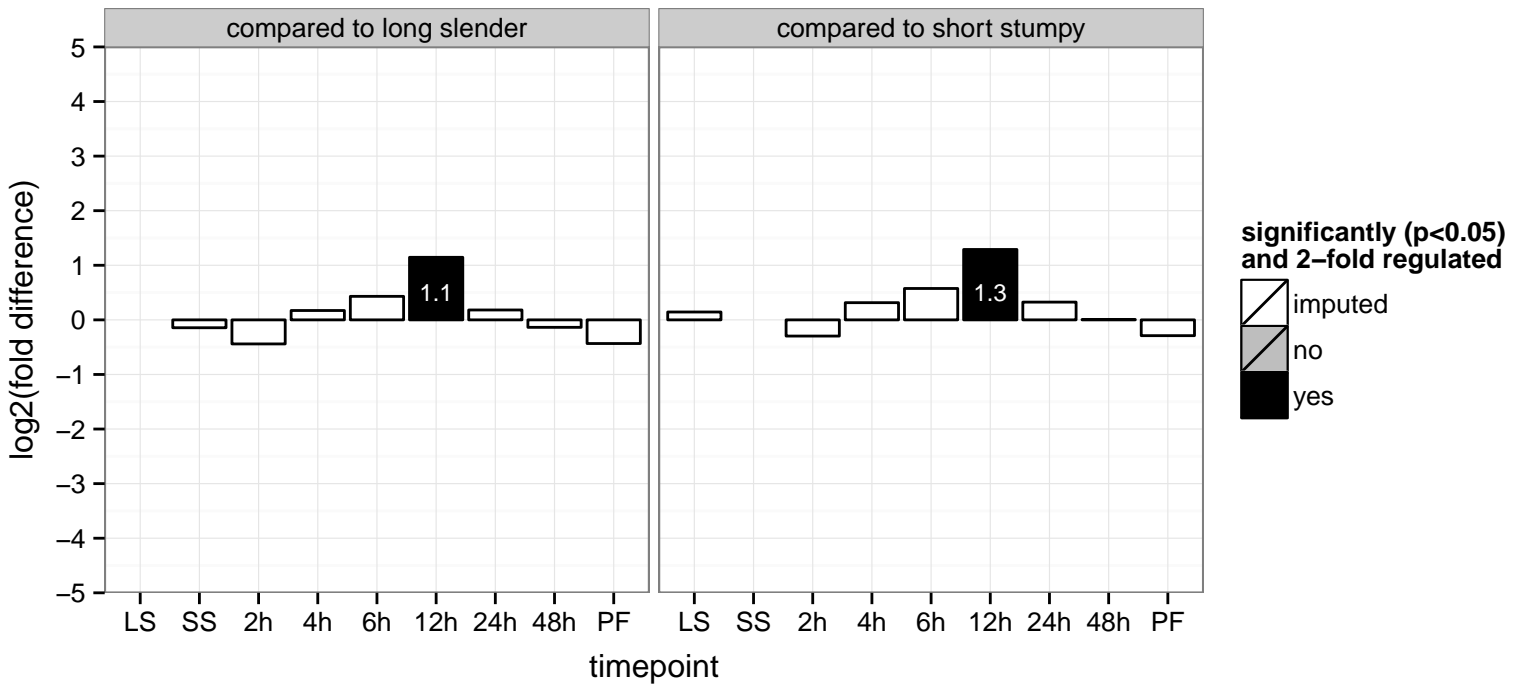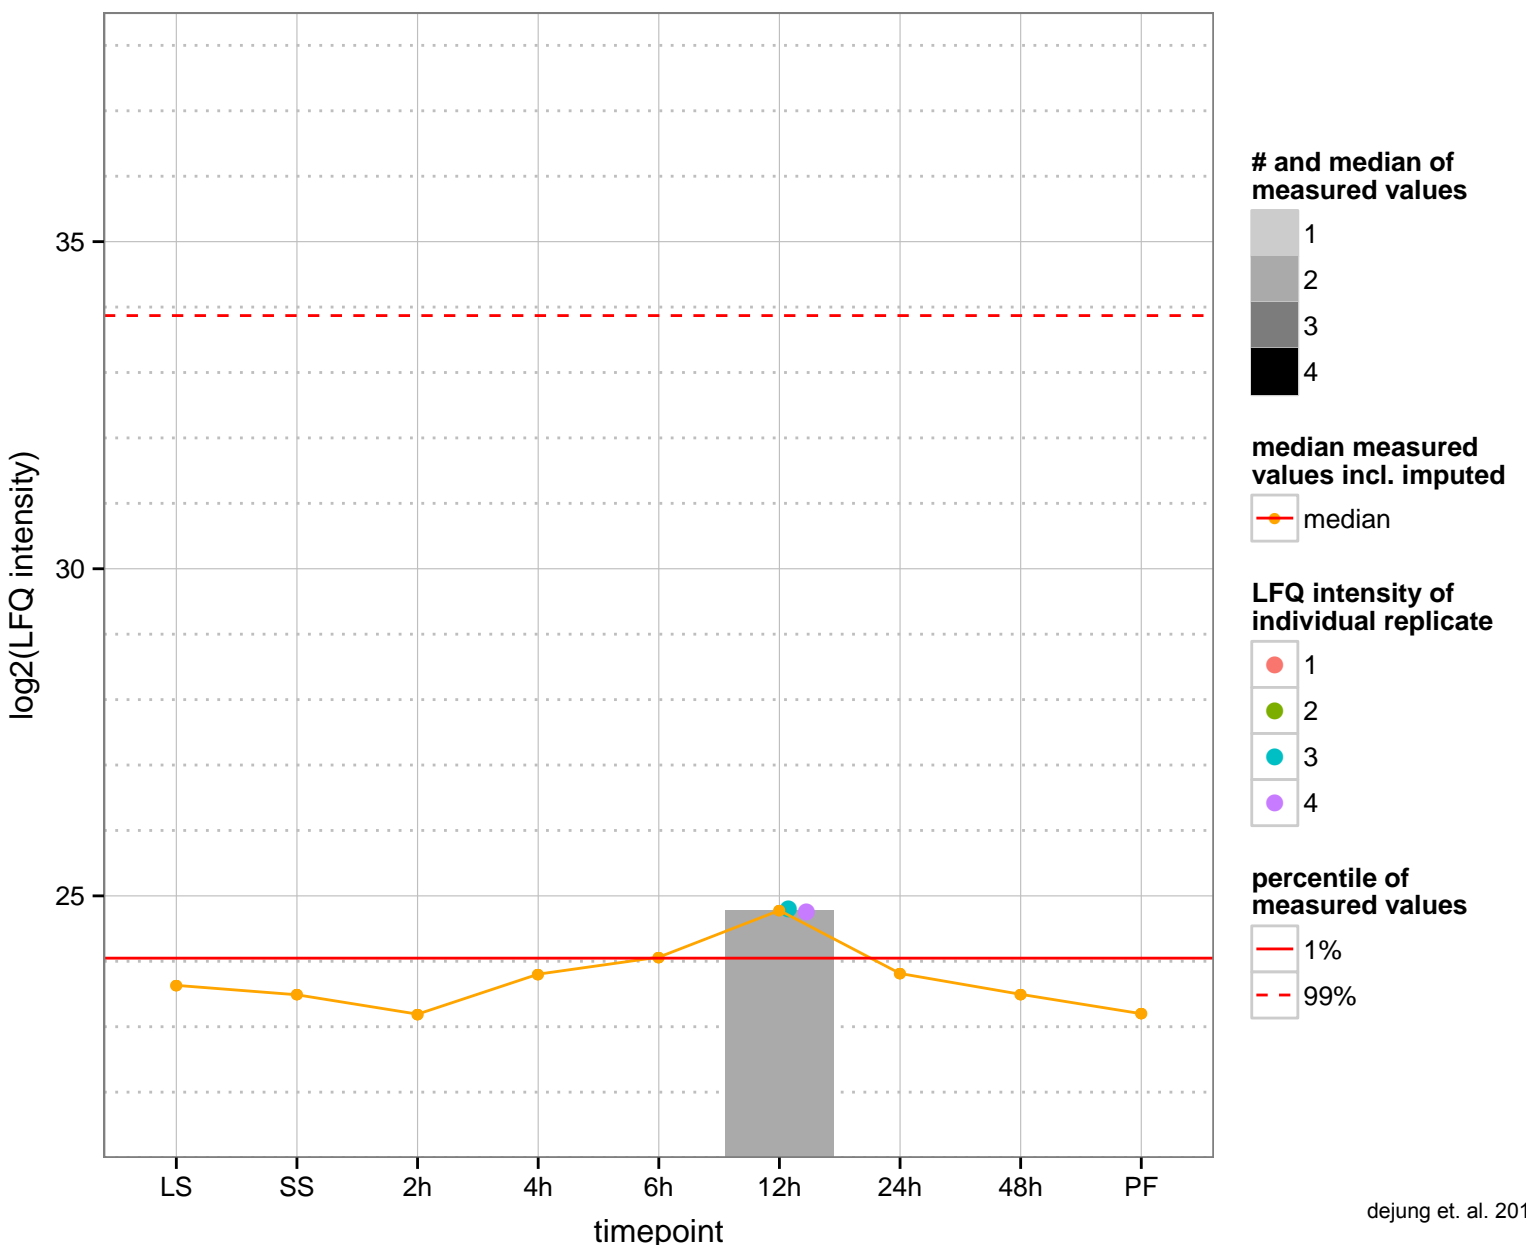

hypothetical protein, conserved  
 Tb927.11.1750  
 AGOF: null  
 AGOC: null  
 AGOP: null  
 PGO: null  
 PGOC: null  
 PGOP: null

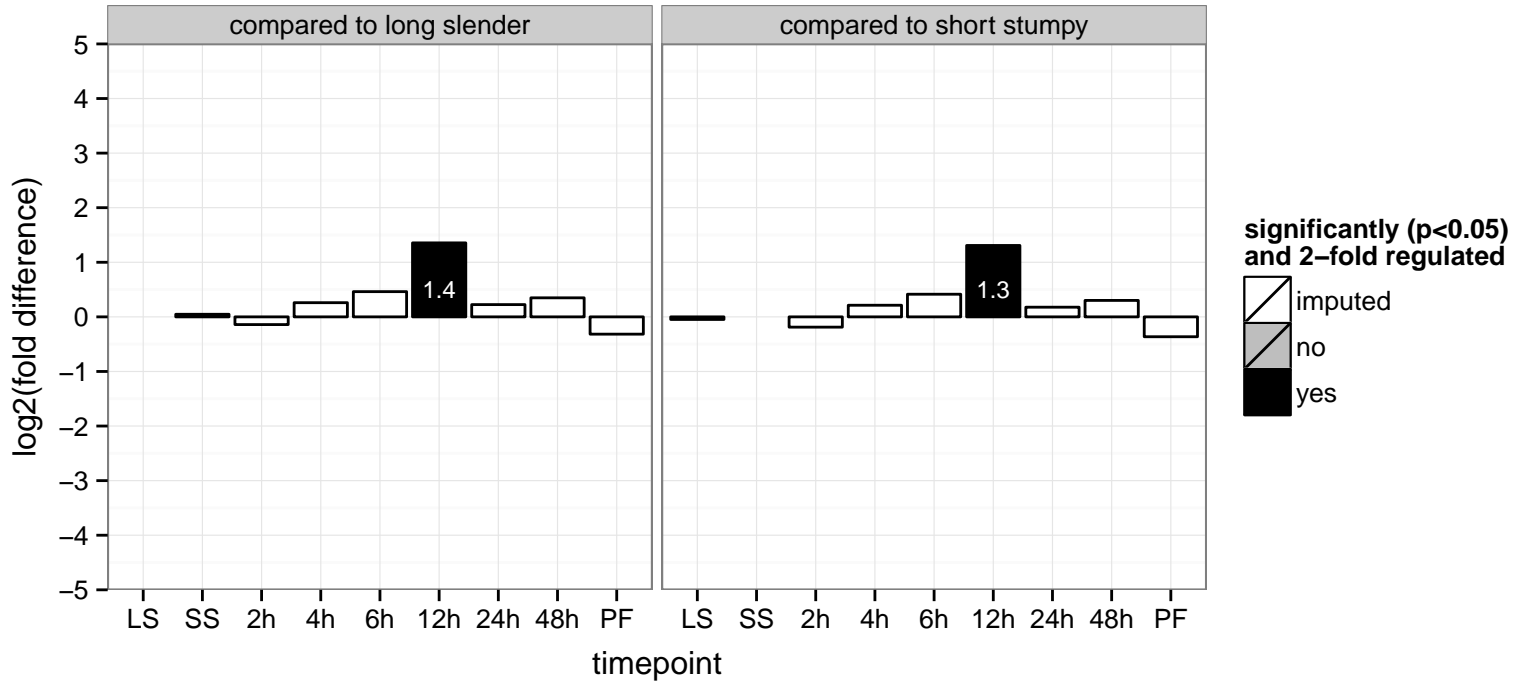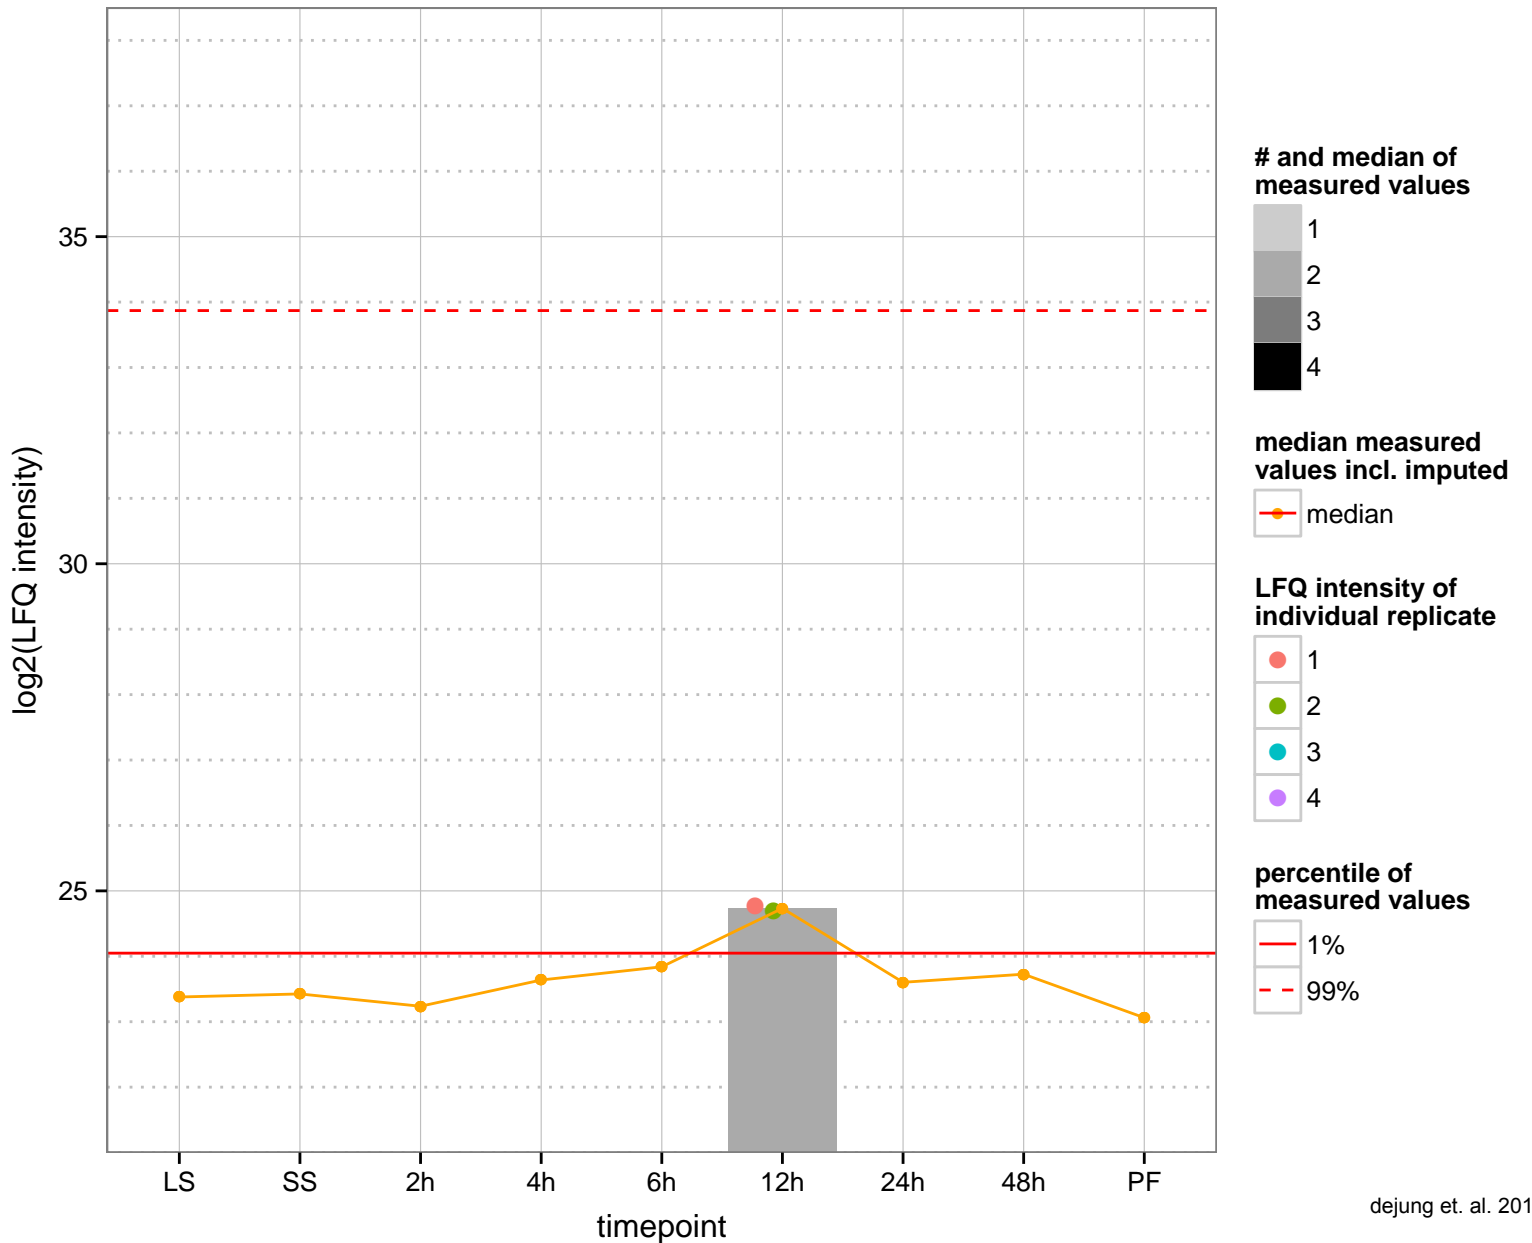

hypothetical protein, conserved  
 Tb927.2.5930  
 AGOF: null  
 AGOC: mitochondrion  
 AGOP: null  
 PGO: null  
 PGOC: null  
 PGOP: null

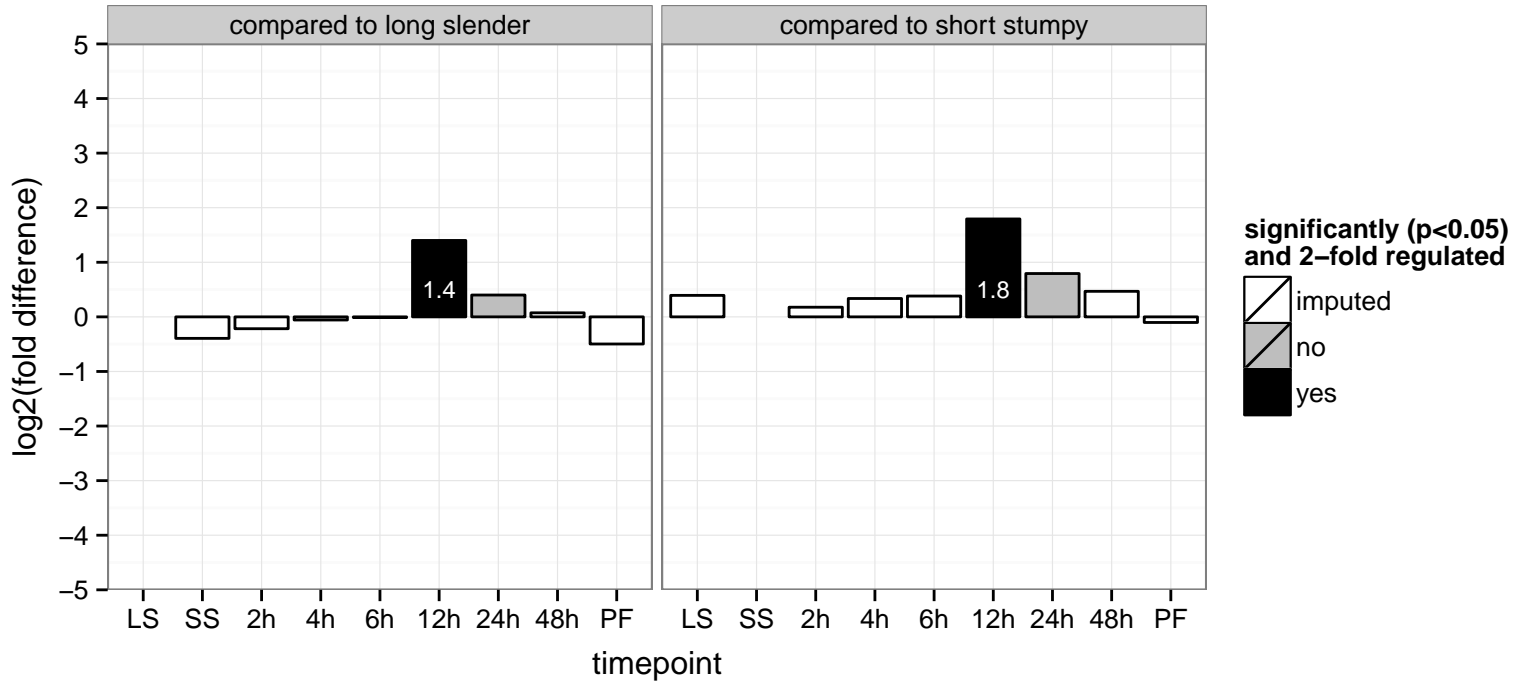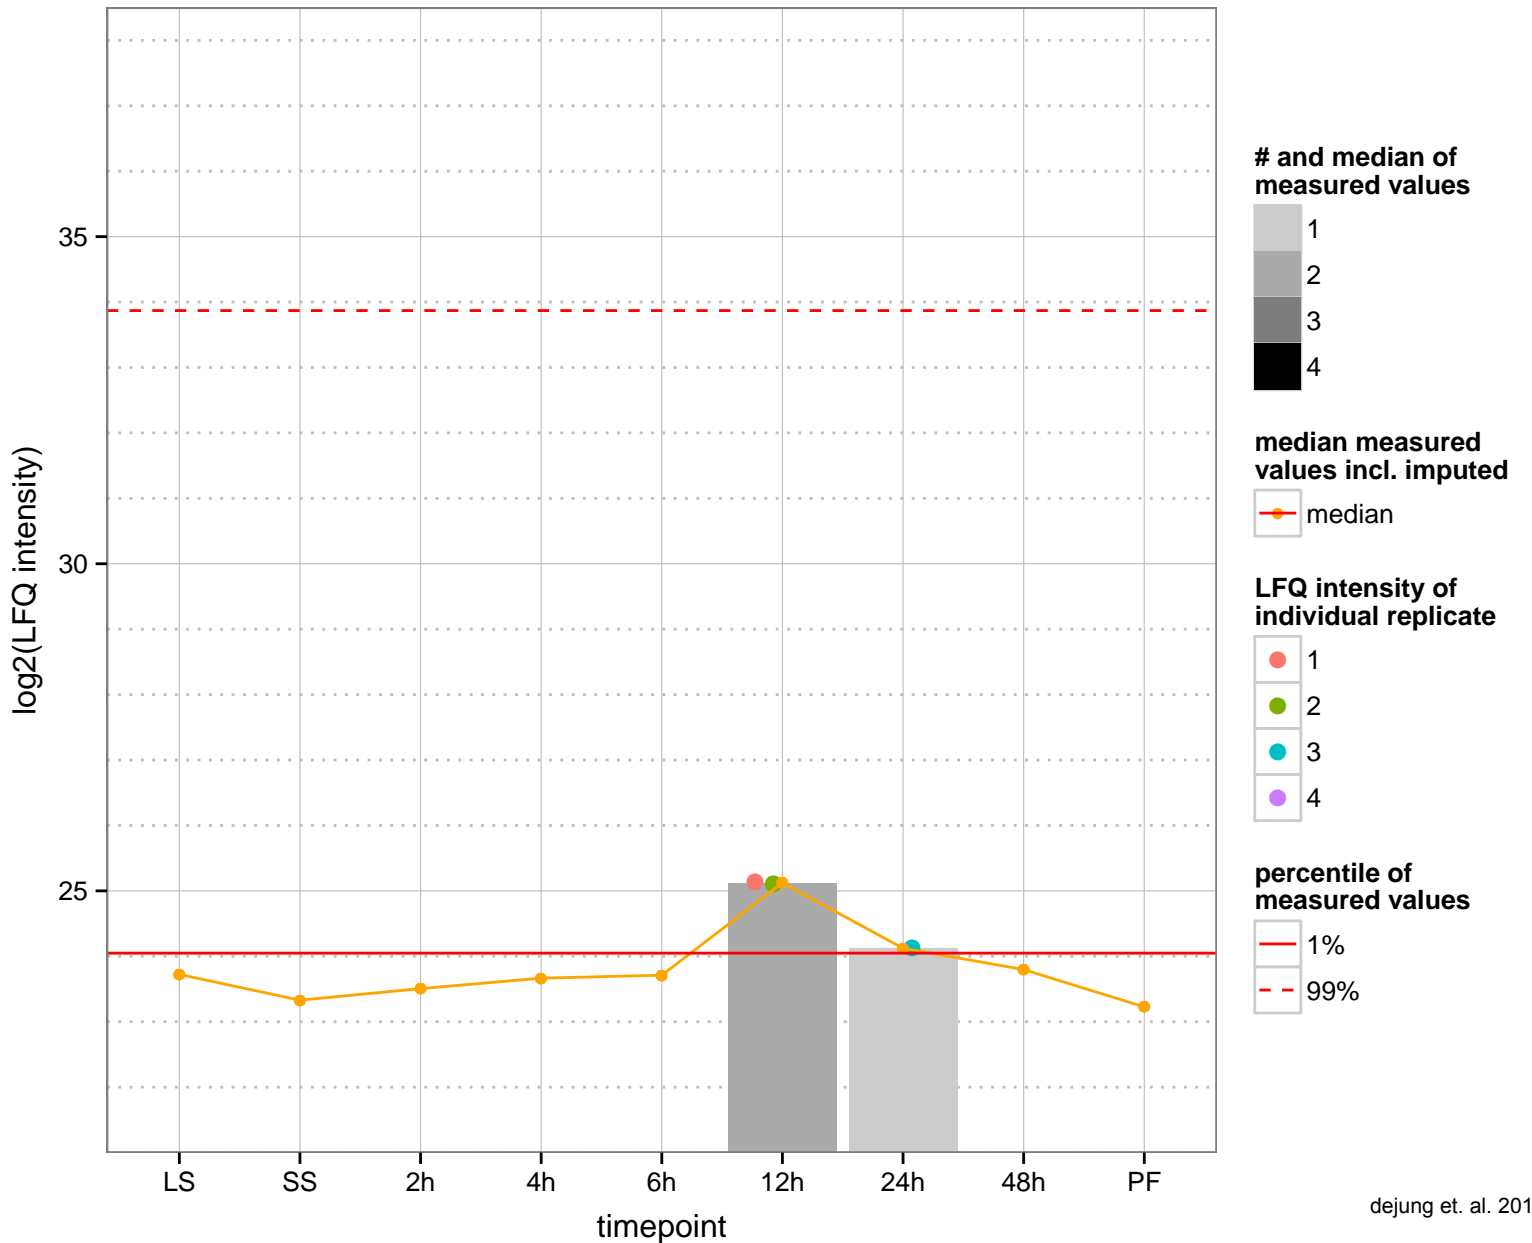

metalloprotease, putative  
 Tb927.5.1870  
 AGOF: ATP binding, nucleoside-triphosphatase activity  
 AGOC: null  
 AGOP: null  
 PGOF: ATP binding, nucleoside-triphosphatase activity, nucleotide binding  
 PGOC: null  
 PGOP: null

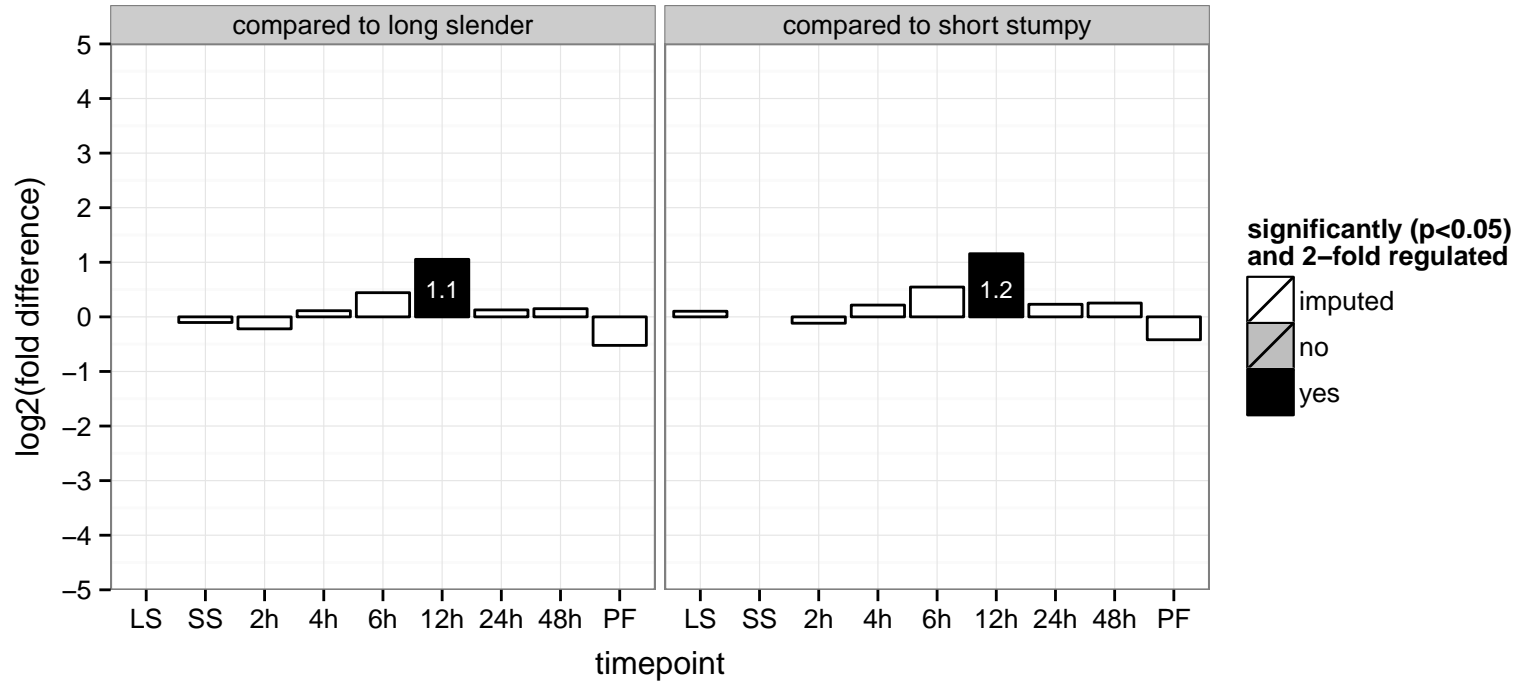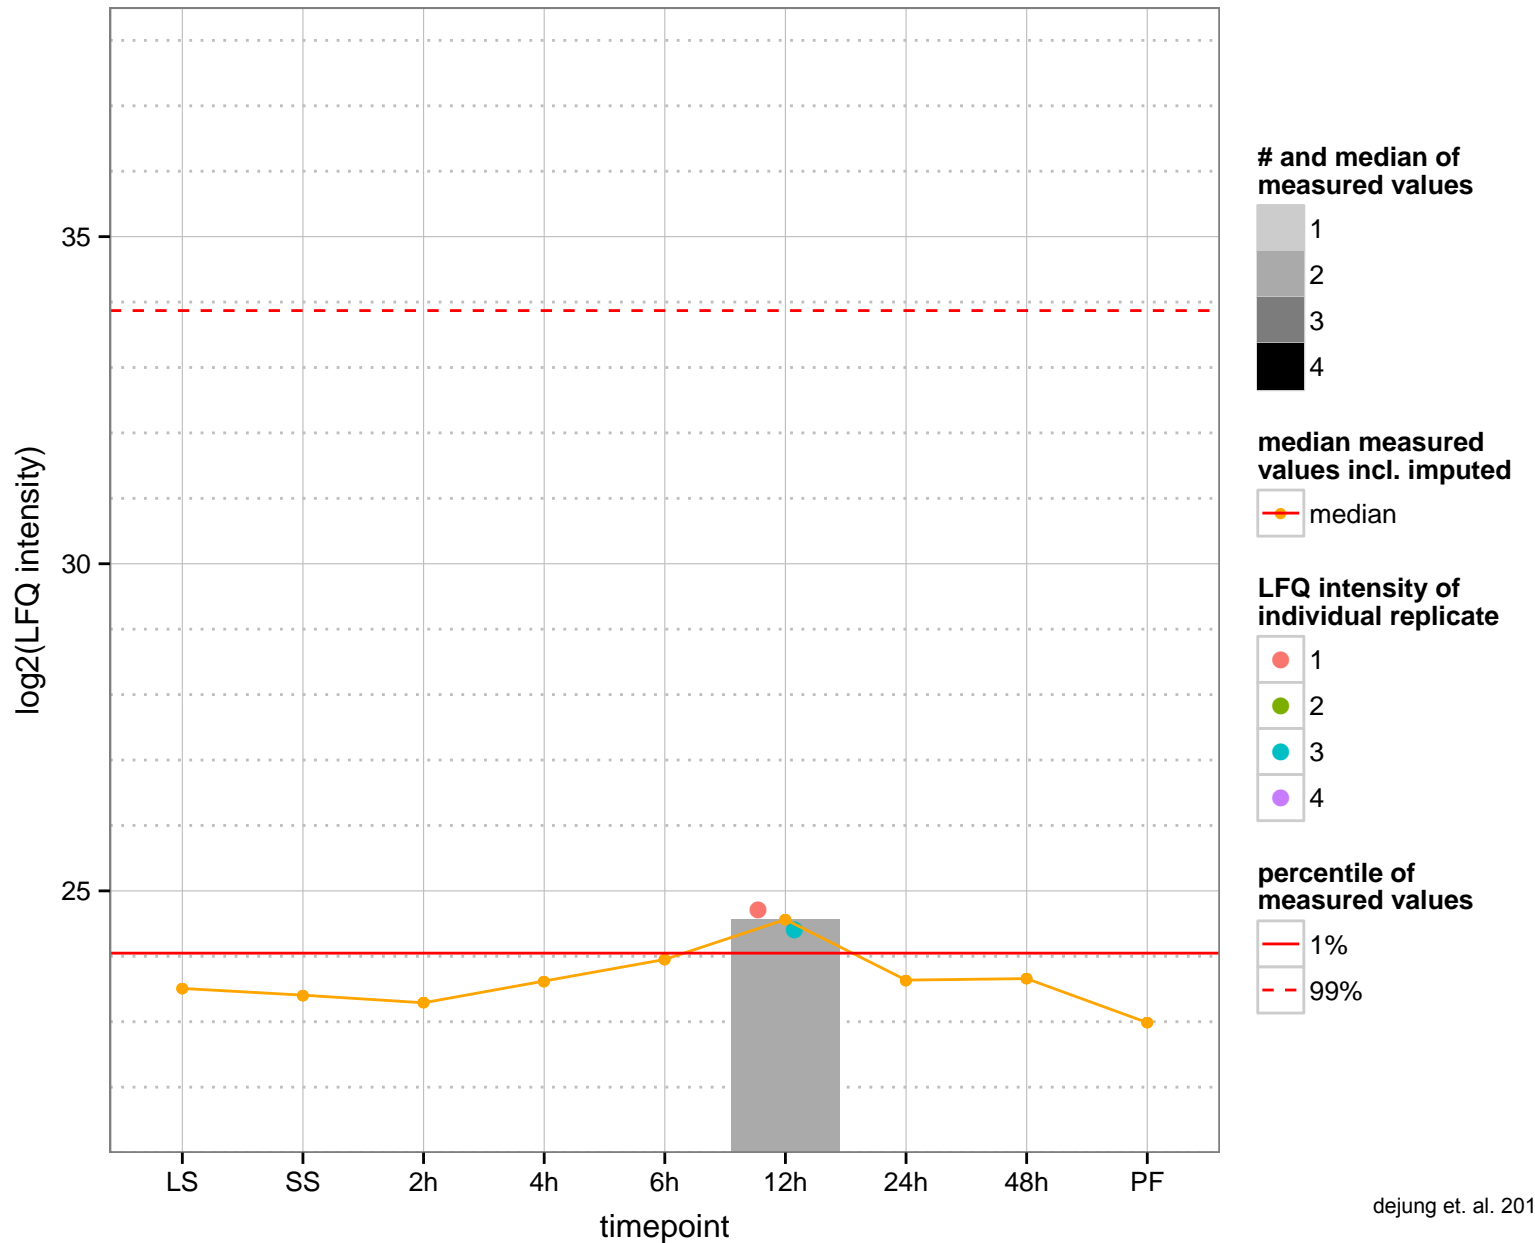

hypothetical protein, conserved  
 Tb927.5.2620  
 AGOF: null  
 AGOC: null  
 AGOP: null  
 PGO: null  
 PGOC: null  
 PGOP: null

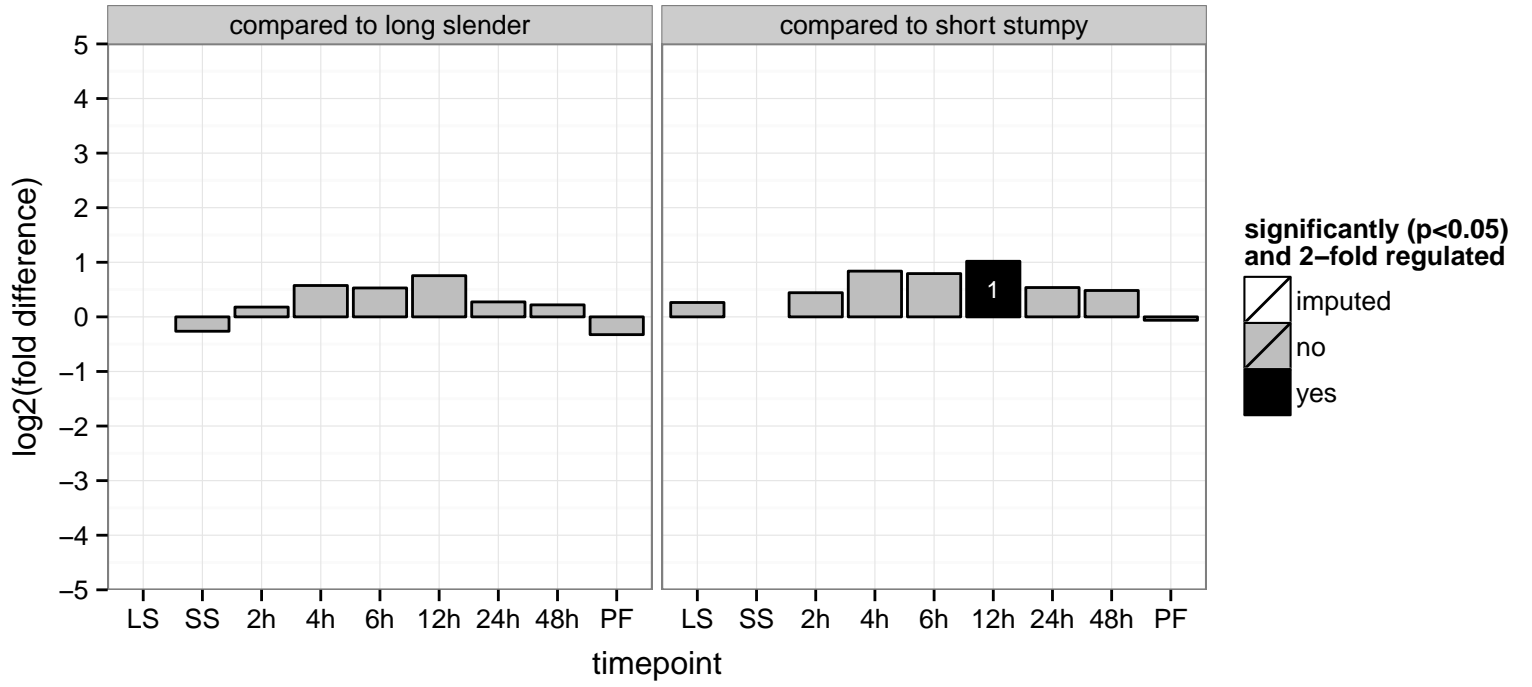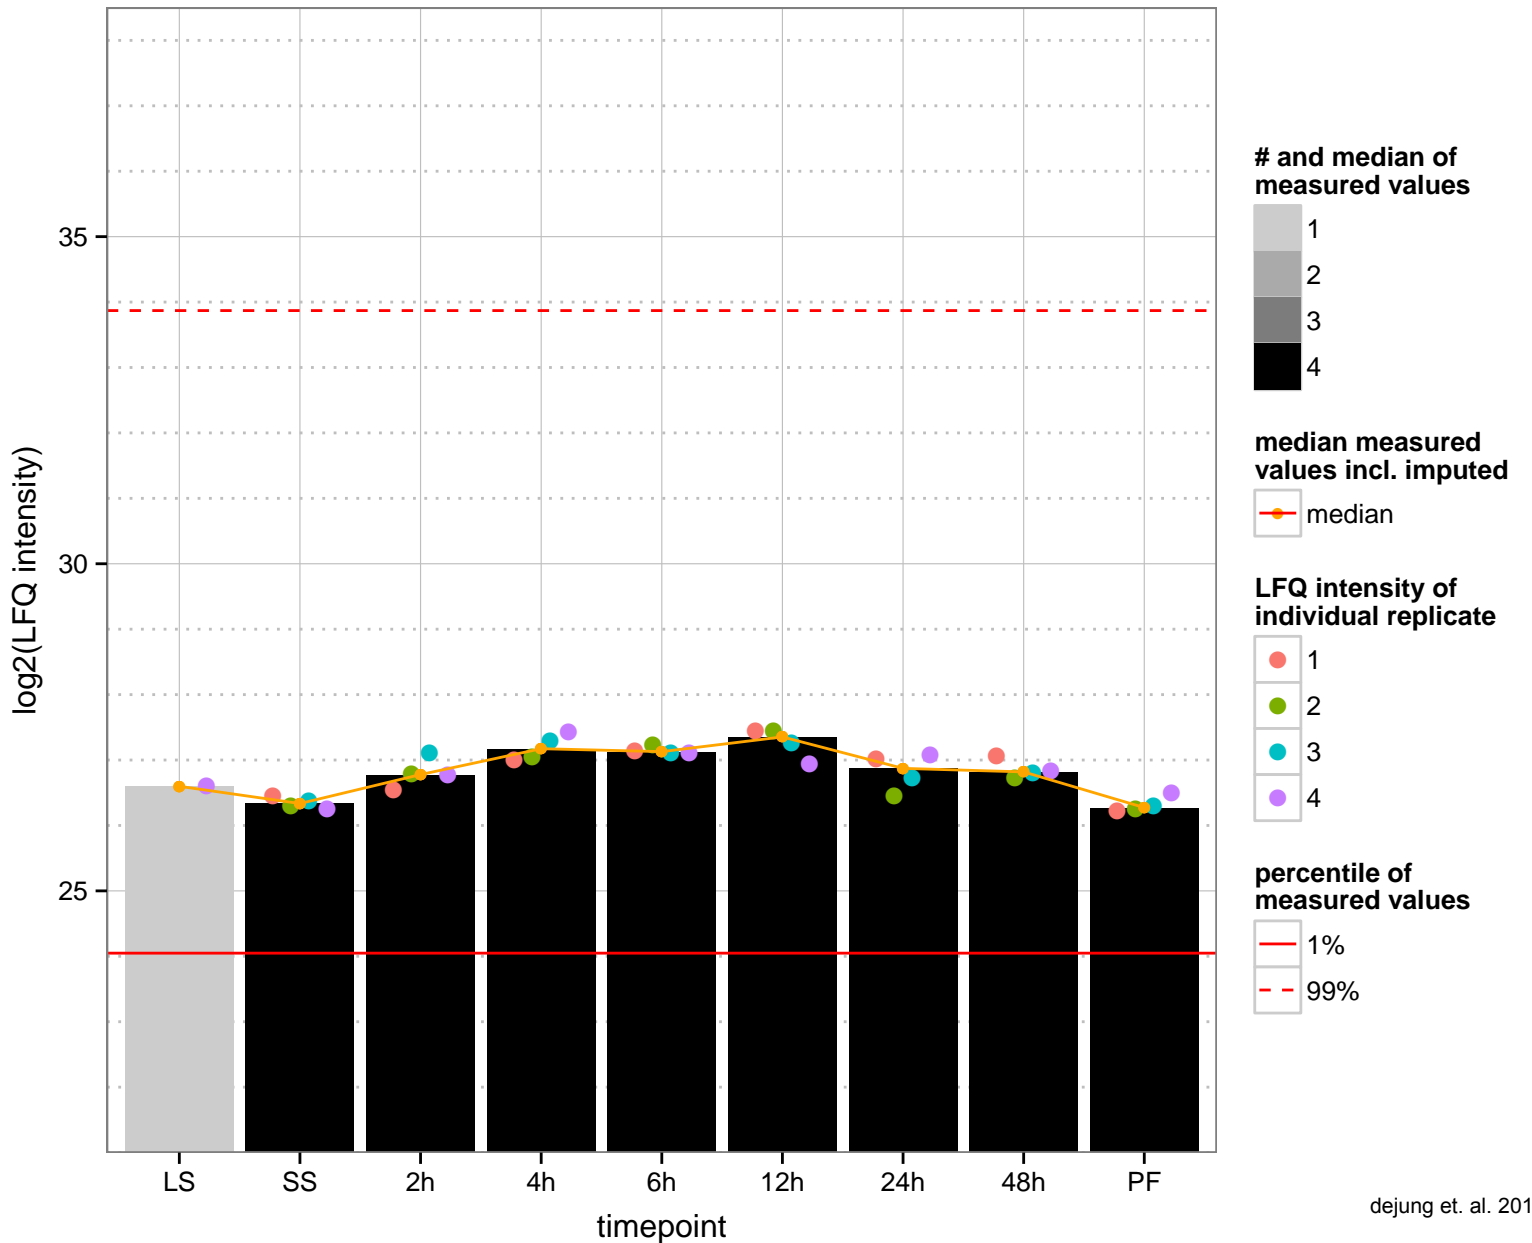



hypothetical protein, conserved  
 Tb927.5.3190  
 AGOF: null  
 AGOC: null  
 AGOP: null  
 PGO: null  
 PGOC: null  
 PGOP: null

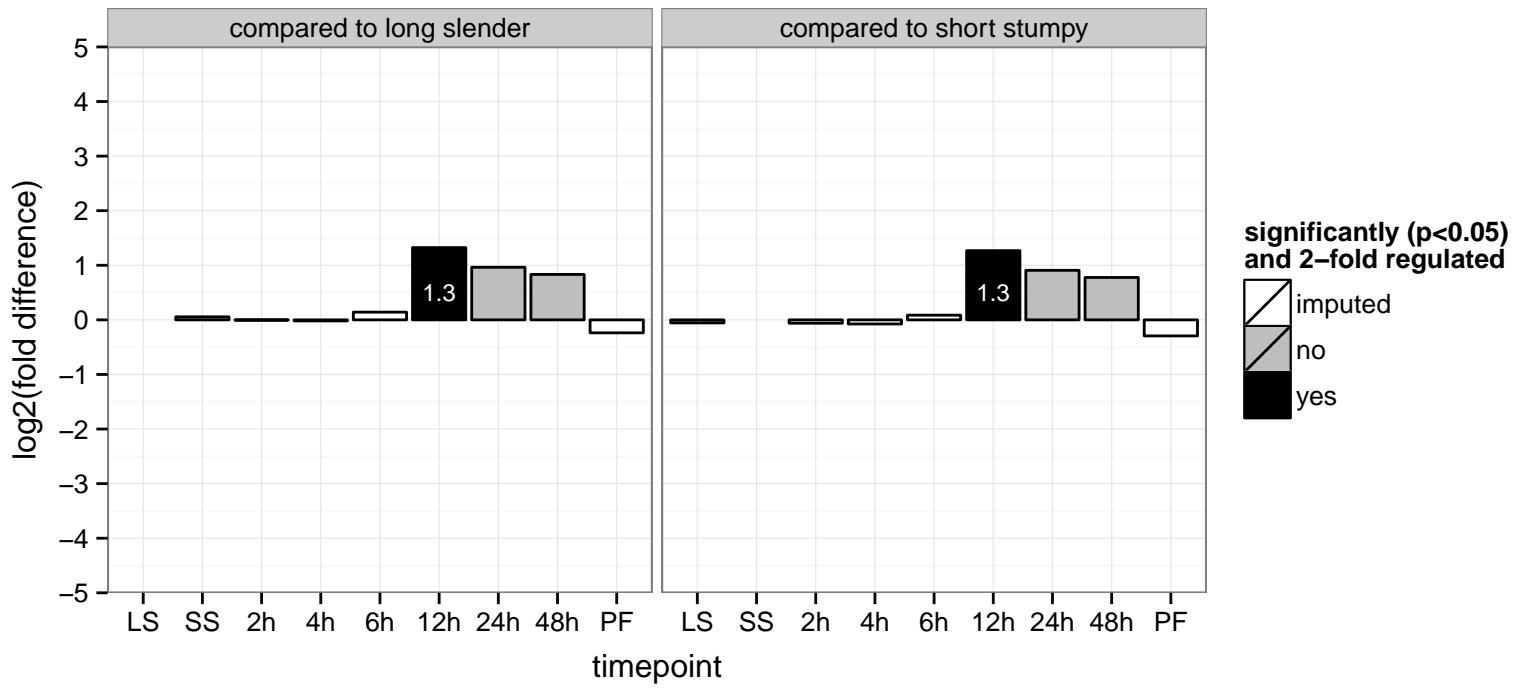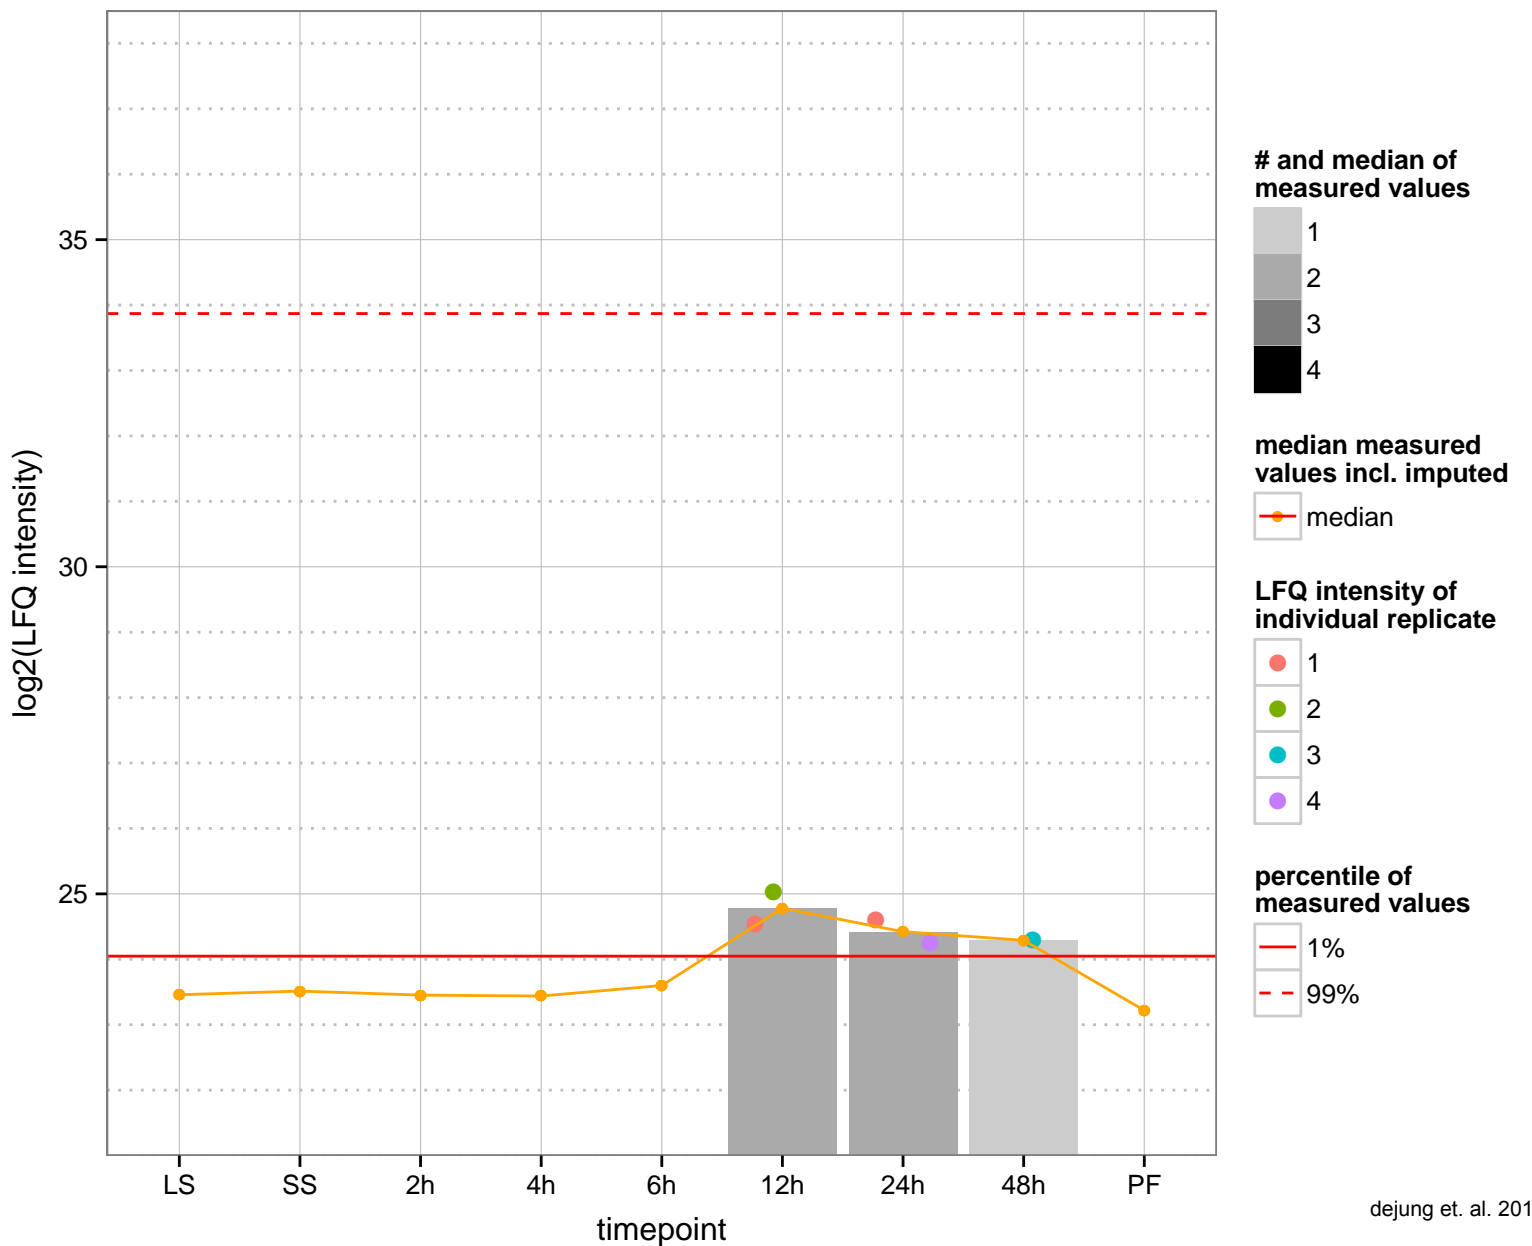

hypothetical protein, conserved  
 Tb927.7.1680  
 AGOF: null  
 AGOC: null  
 AGOP: null  
 PGOF: null  
 PGOC: null  
 PGOP: null

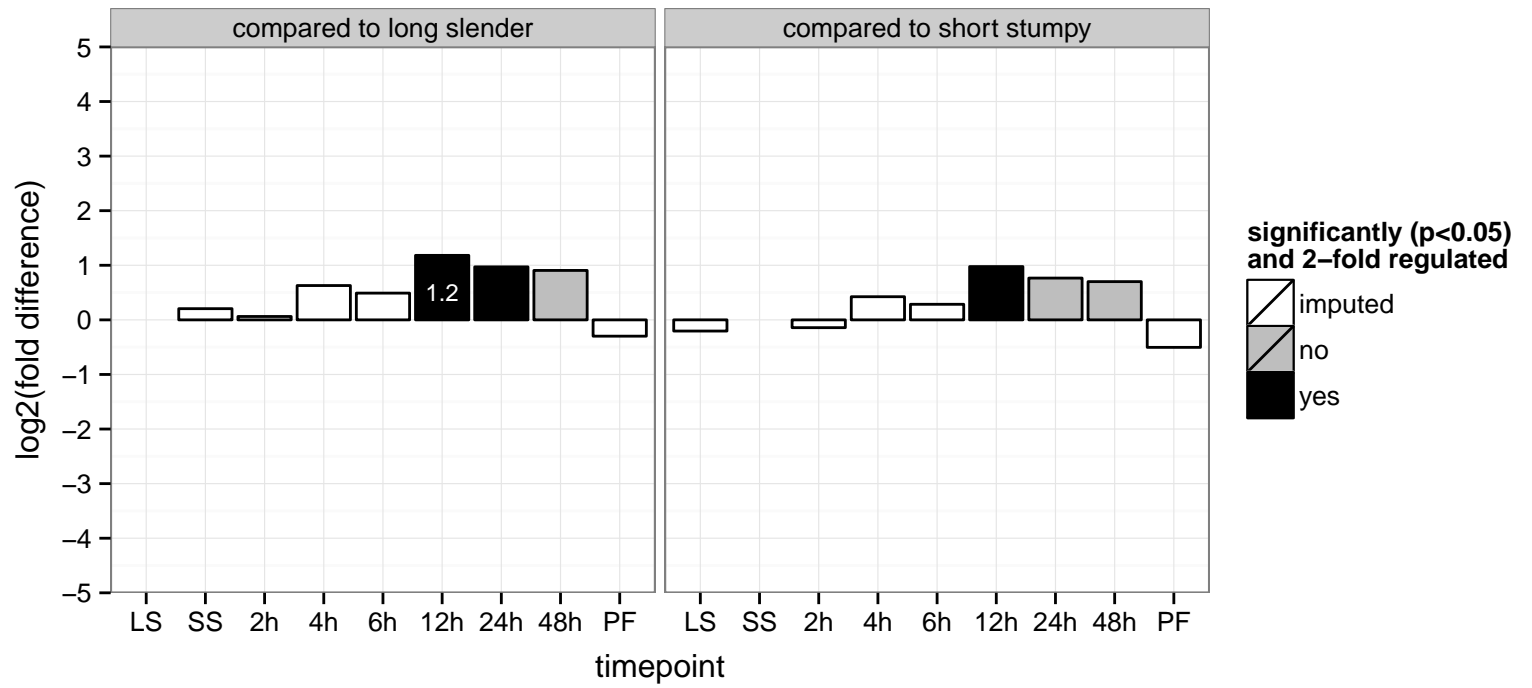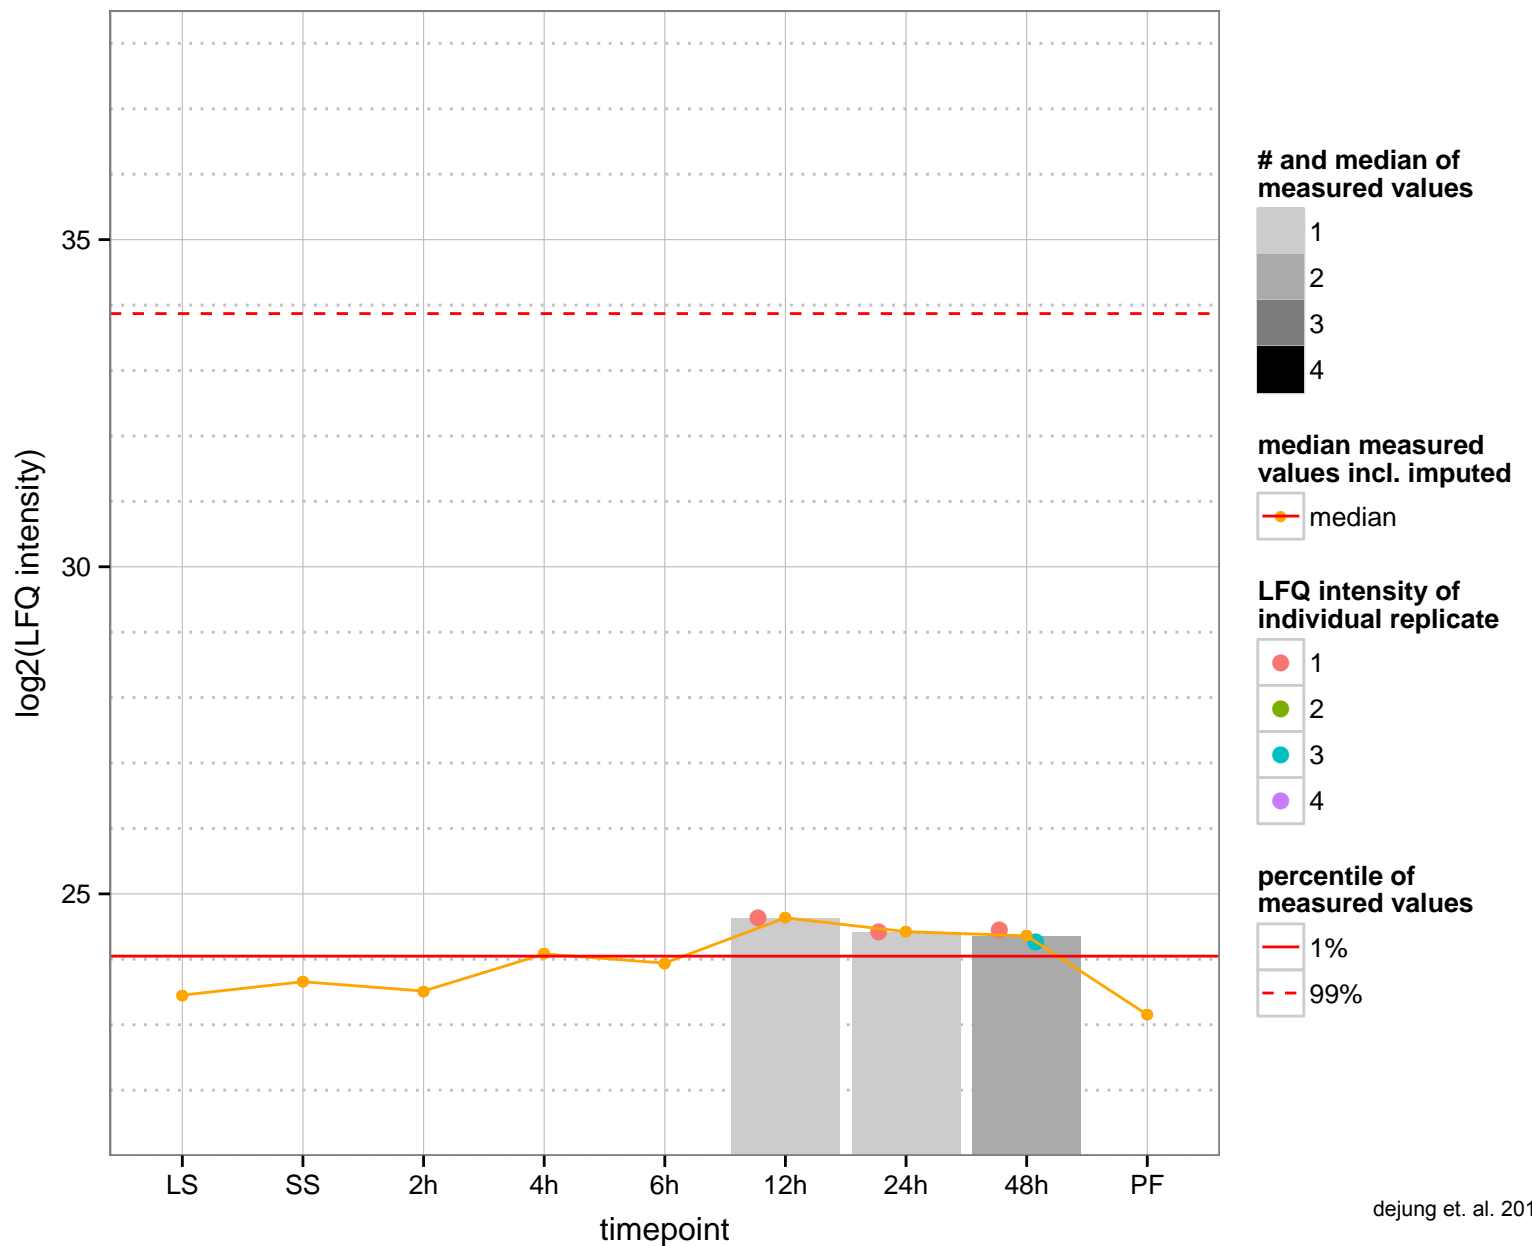

hypothetical protein, conserved, unspecified product  
 Tb927.9.4000;Tb927.9.3930  
 AGOF: null  
 AGOC: null  
 AGOP: null  
 PGO: null  
 PGO: null  
 PGO: null

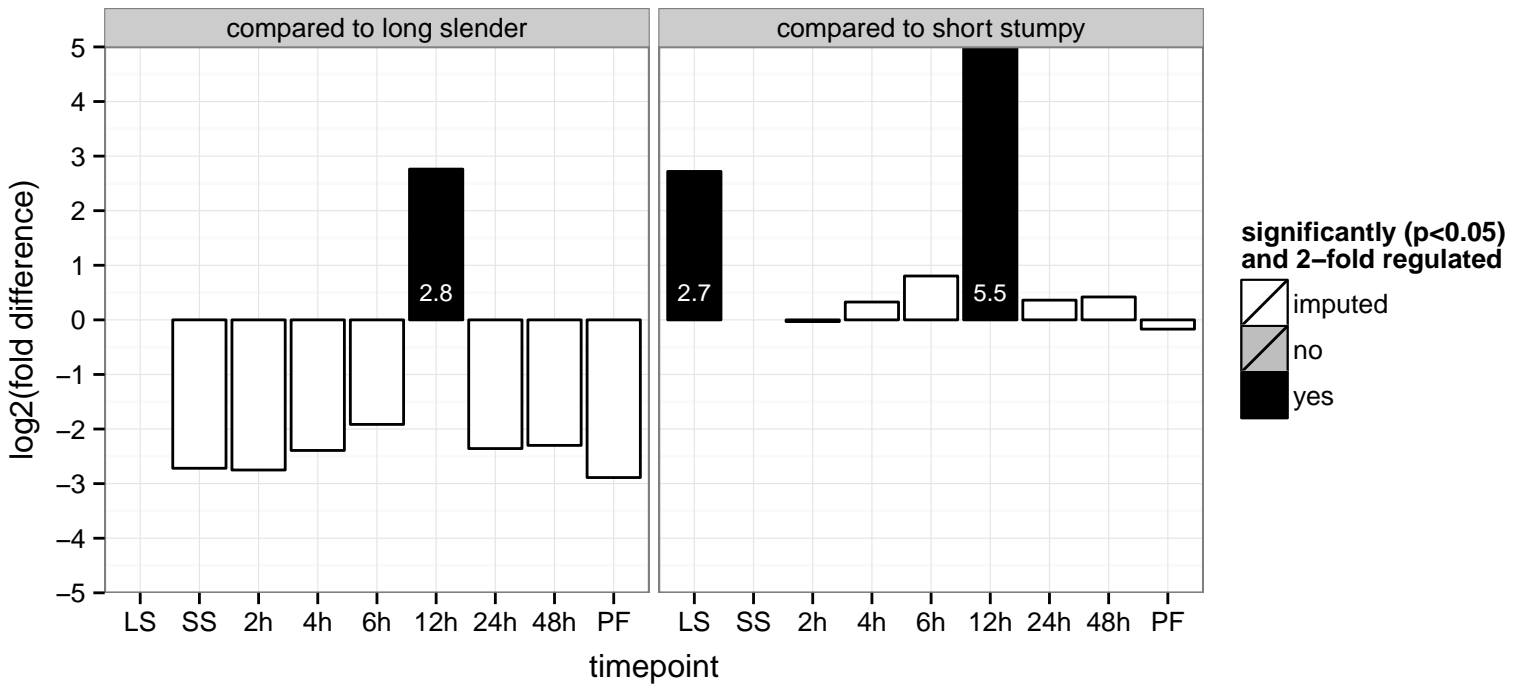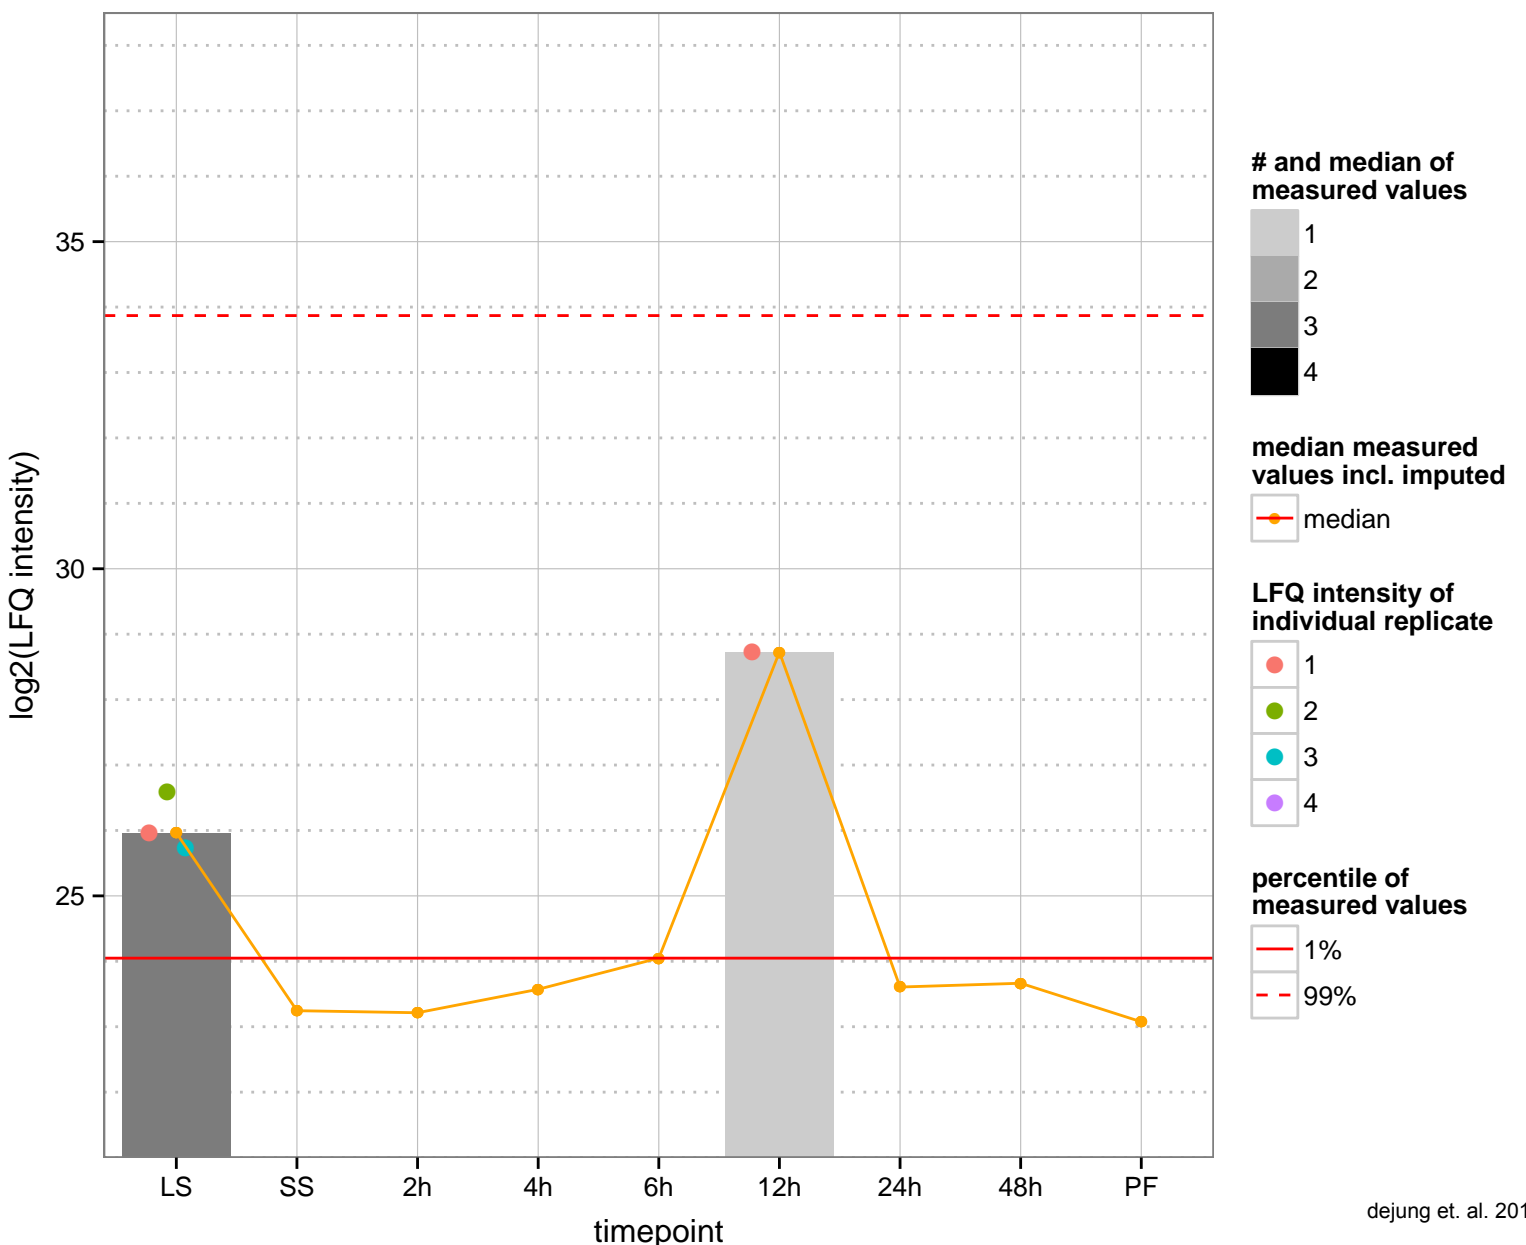

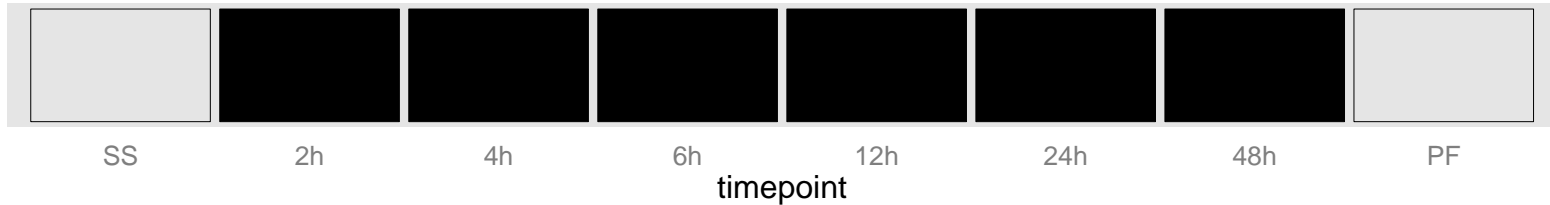

**regulated**  not regulated  significant down  significant up

expression site-associated gene (ESAG) protein, putative, expression site-associated gene 5 (ESAG5) protein  
 Tb927.5.340;Tb11.v5.0282  
 AGOF: null, lipid binding  
 AGOC: null  
 AGOP: null  
 PGOF: lipid binding  
 PGO: null  
 PGOP: null

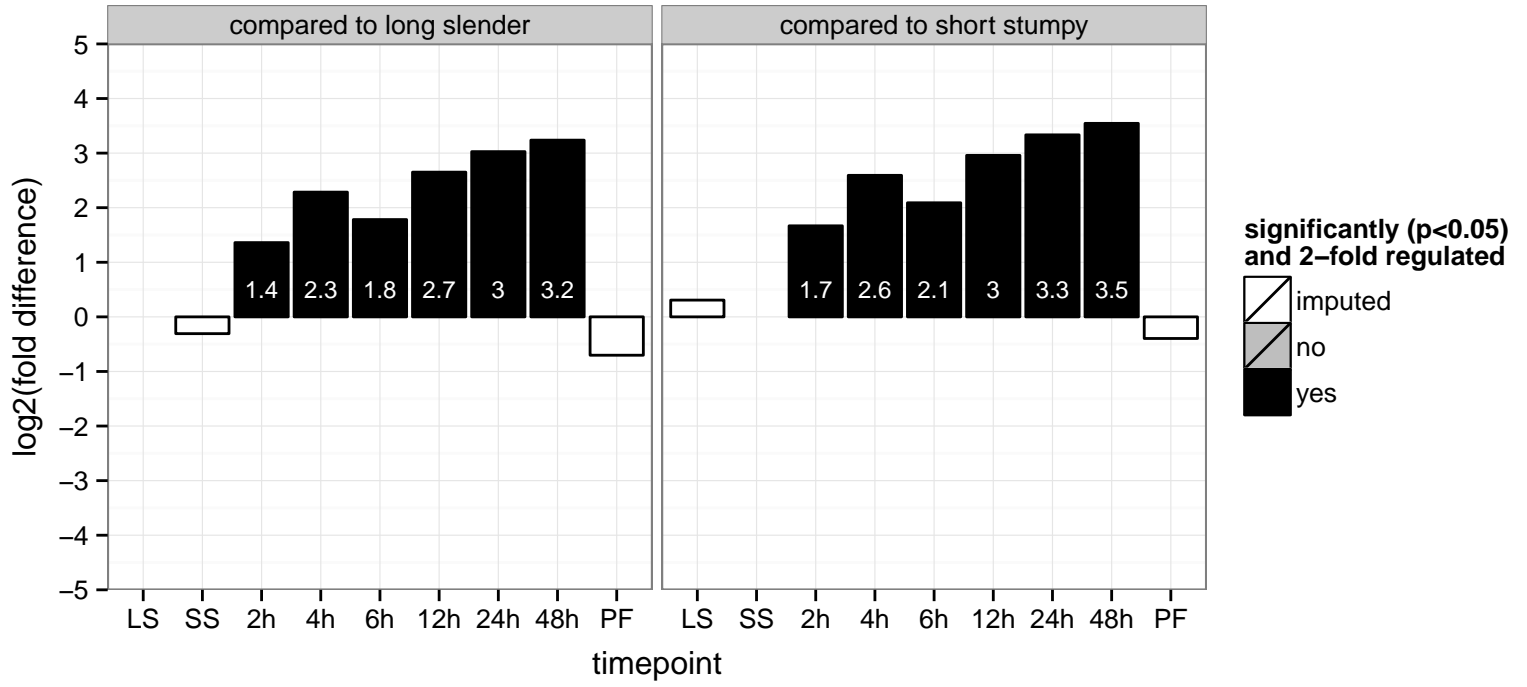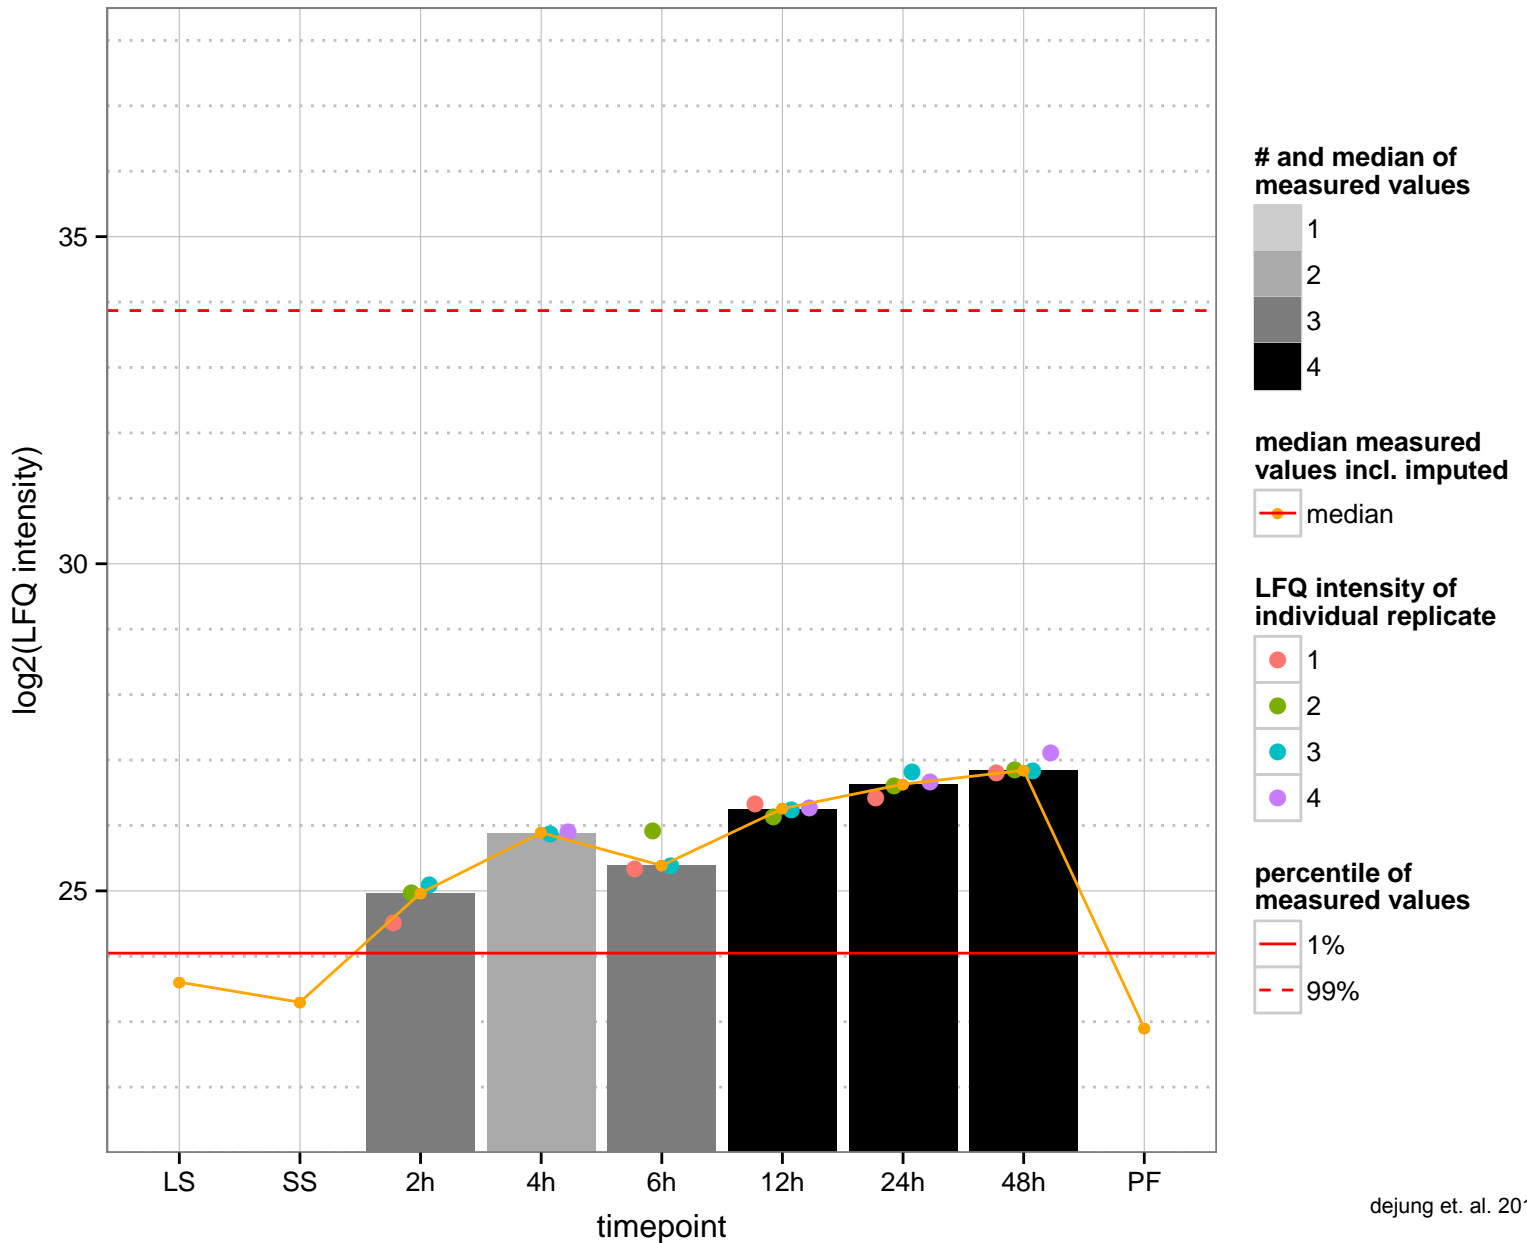

hypothetical protein, conserved  
 Tb927.10.2790  
 AGOF: null  
 AGOC: null  
 AGOP: null  
 PGO: protein binding  
 PGOC: Golgi transport complex  
 PGOP: intra-Golgi vesicle-mediated transport

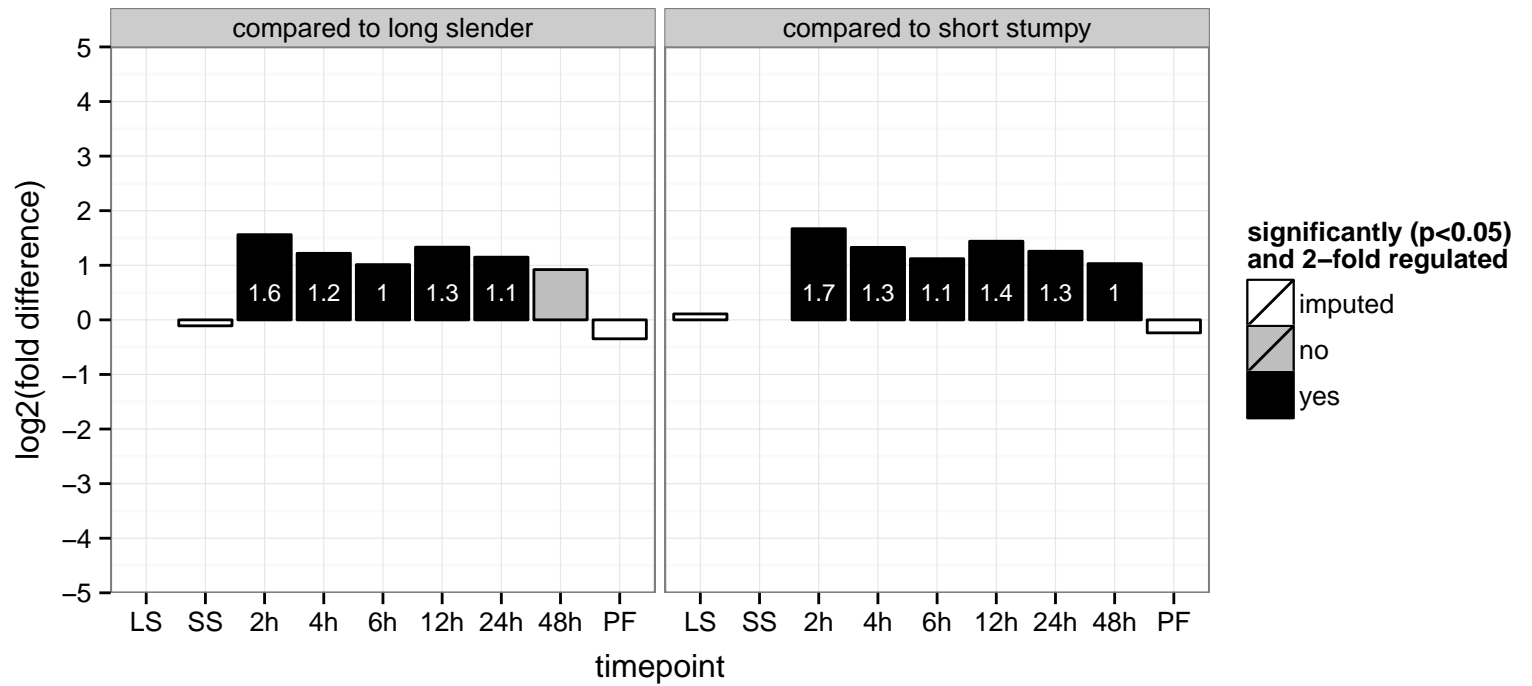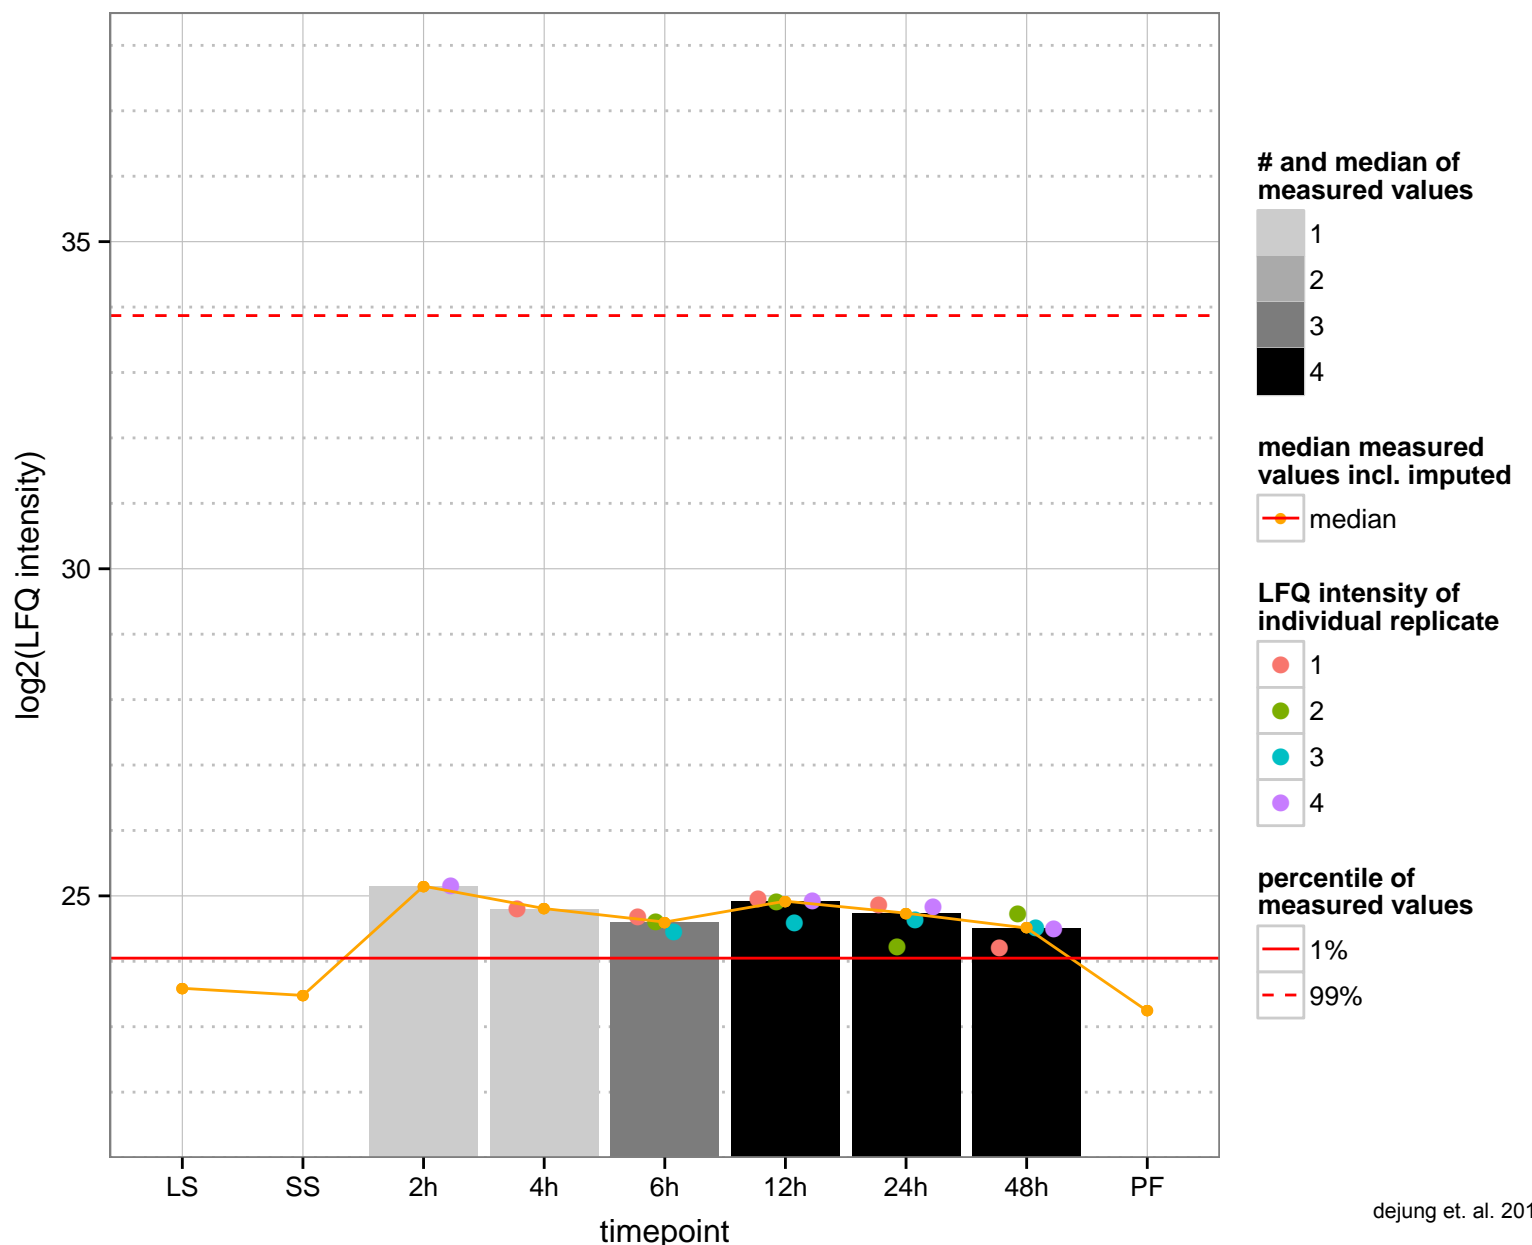

small GTPase, putative (RAB23)

Tb927.10.8560

AGOF: GTP binding, GTPase activity

AGOC: intracellular

AGOP: intracellular protein transport, nucleocytoplasmic transport, small GTPase mediated signal transduction

PGOF: GTP binding, GTPase activity

PGOC: intracellular, membrane

PGOP: GTP catabolic process, intracellular protein transport, nucleocytoplasmic transport, protein transport, signal transduction

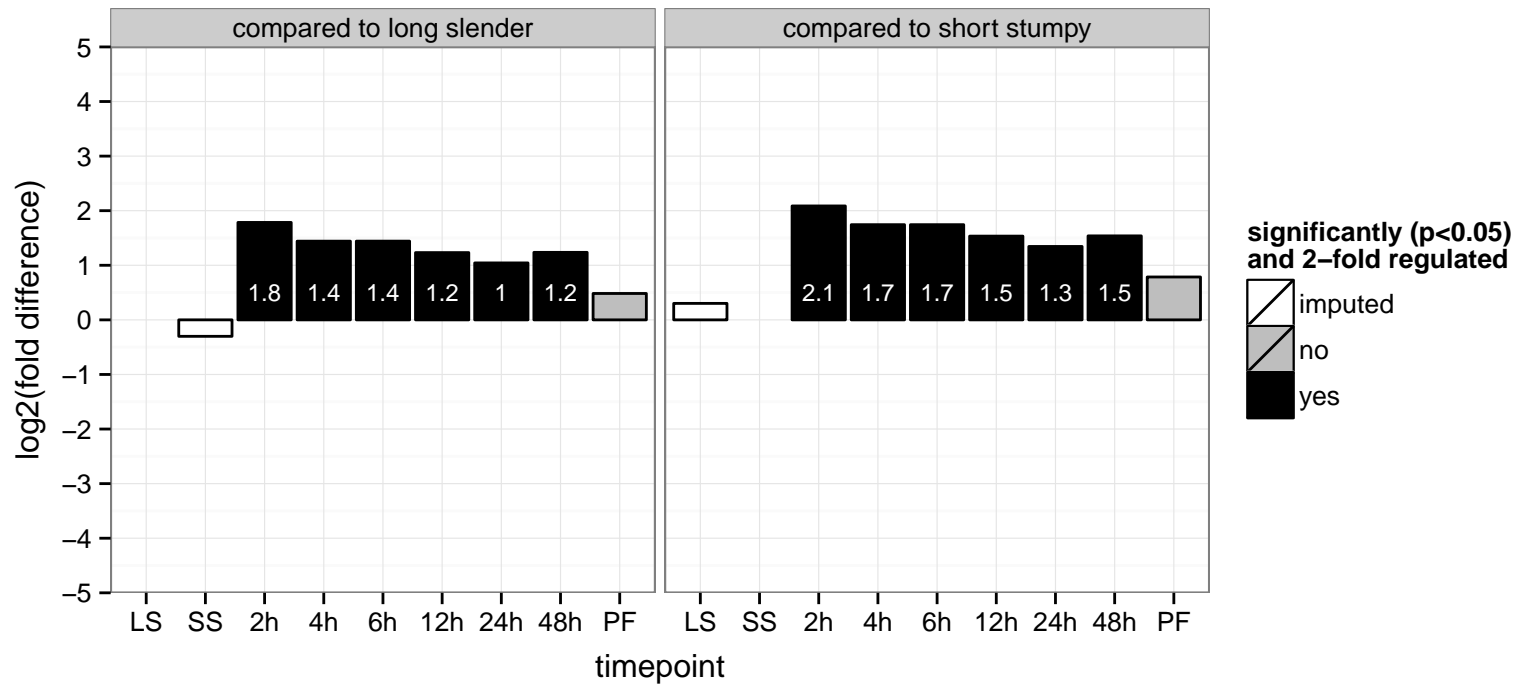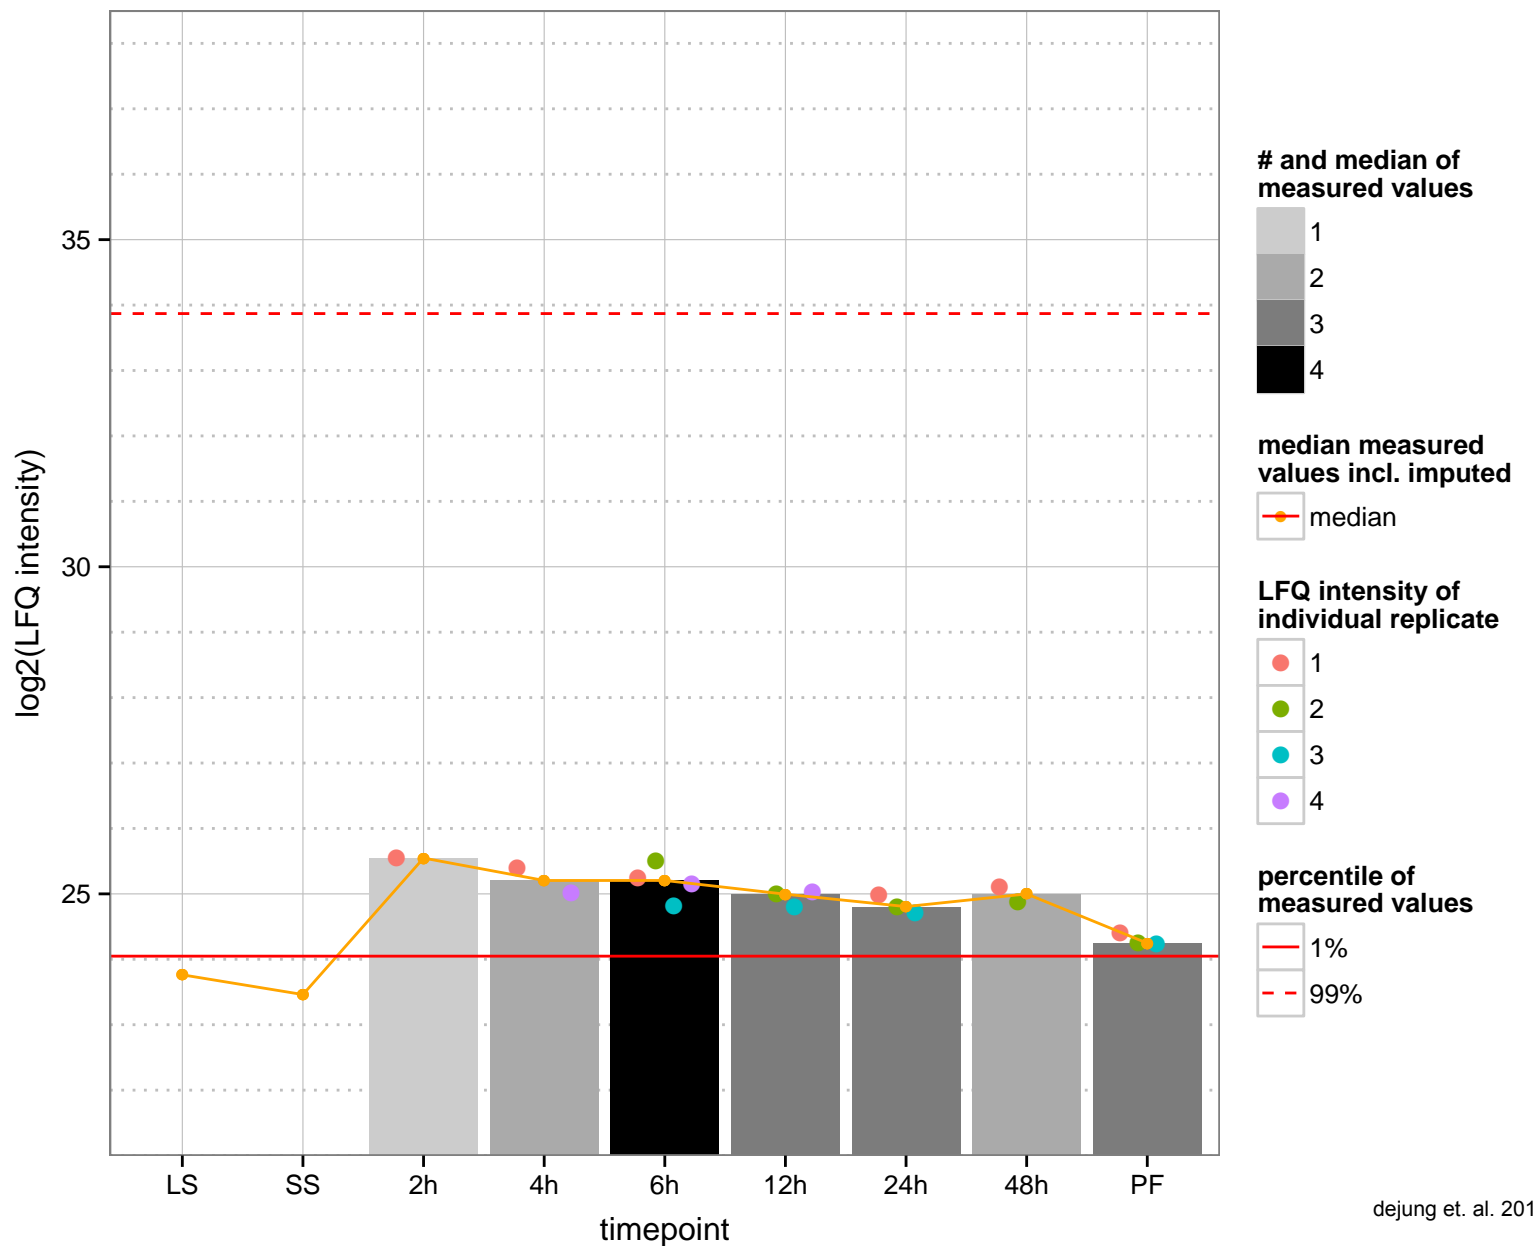

expression site-associated gene 4 (ESAG4) protein, putative, receptor-type adenylate cyclase GRESAG 4  
 Tb927.11.150;Tb11.v5.1015  
 AGOF: null, adenylate cyclase activity  
 AGOC: null, integral to membrane  
 AGOP: null, cyclic nucleotide biosynthetic process, intracellular signal transduction  
 PGO: phosphorus-oxygen lyase activity  
 PGOC: null  
 PGOP: cyclic nucleotide biosynthetic process, intracellular signal transduction

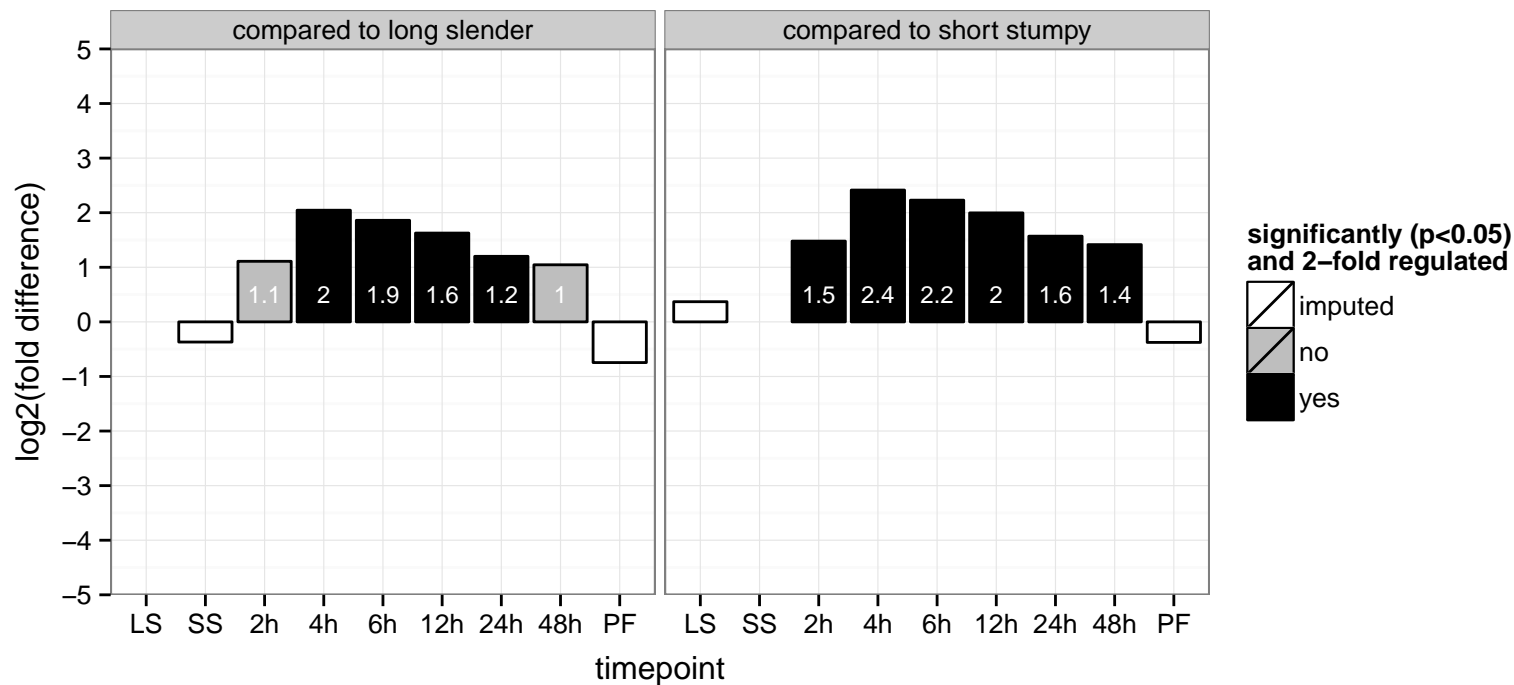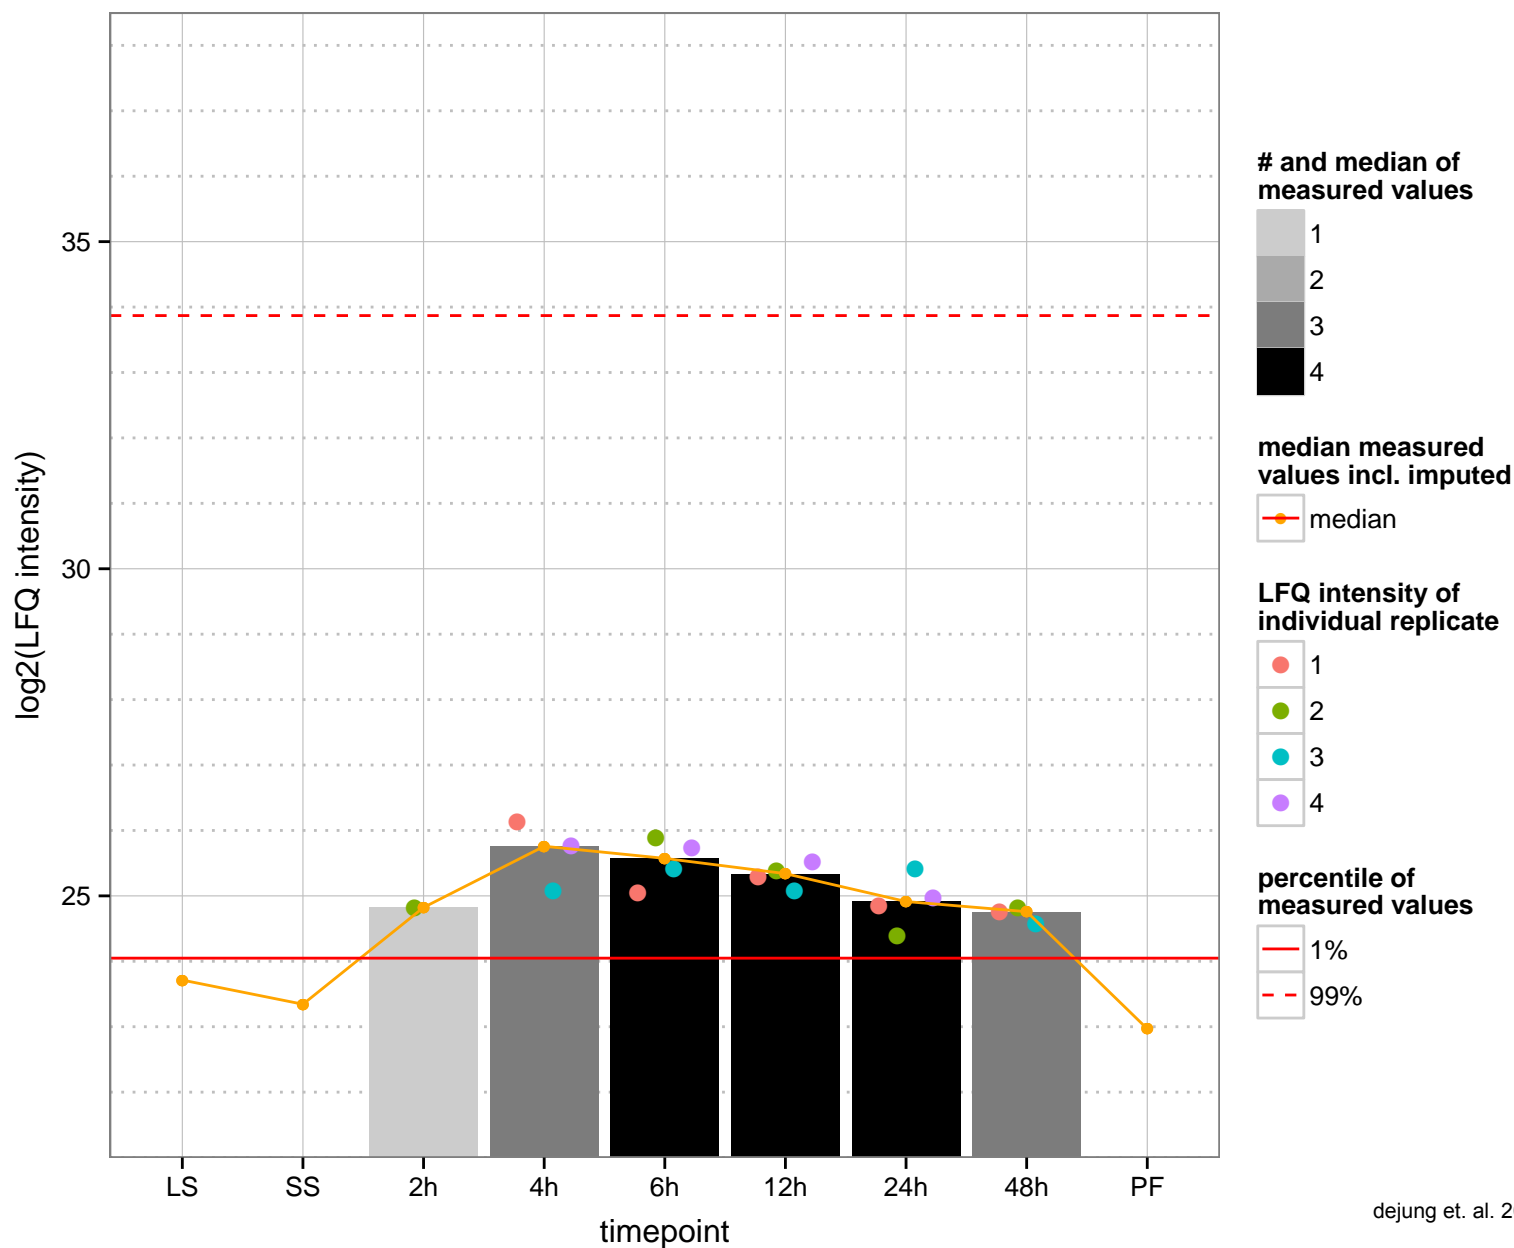



hypothetical protein, conserved  
 Tb927.11.6100  
 AGOF: null  
 AGOC: mitochondrion  
 AGOP: null  
 PGO: null  
 PGO: null  
 PGO: null

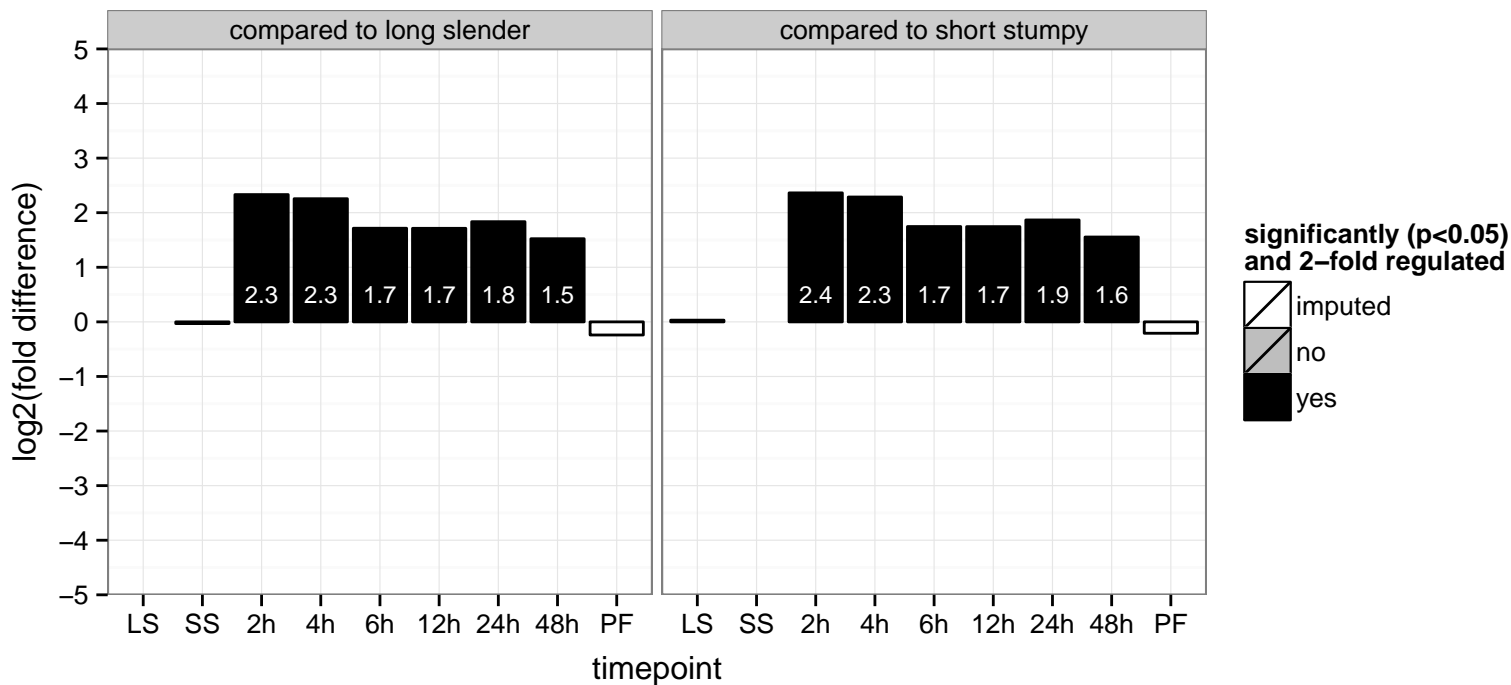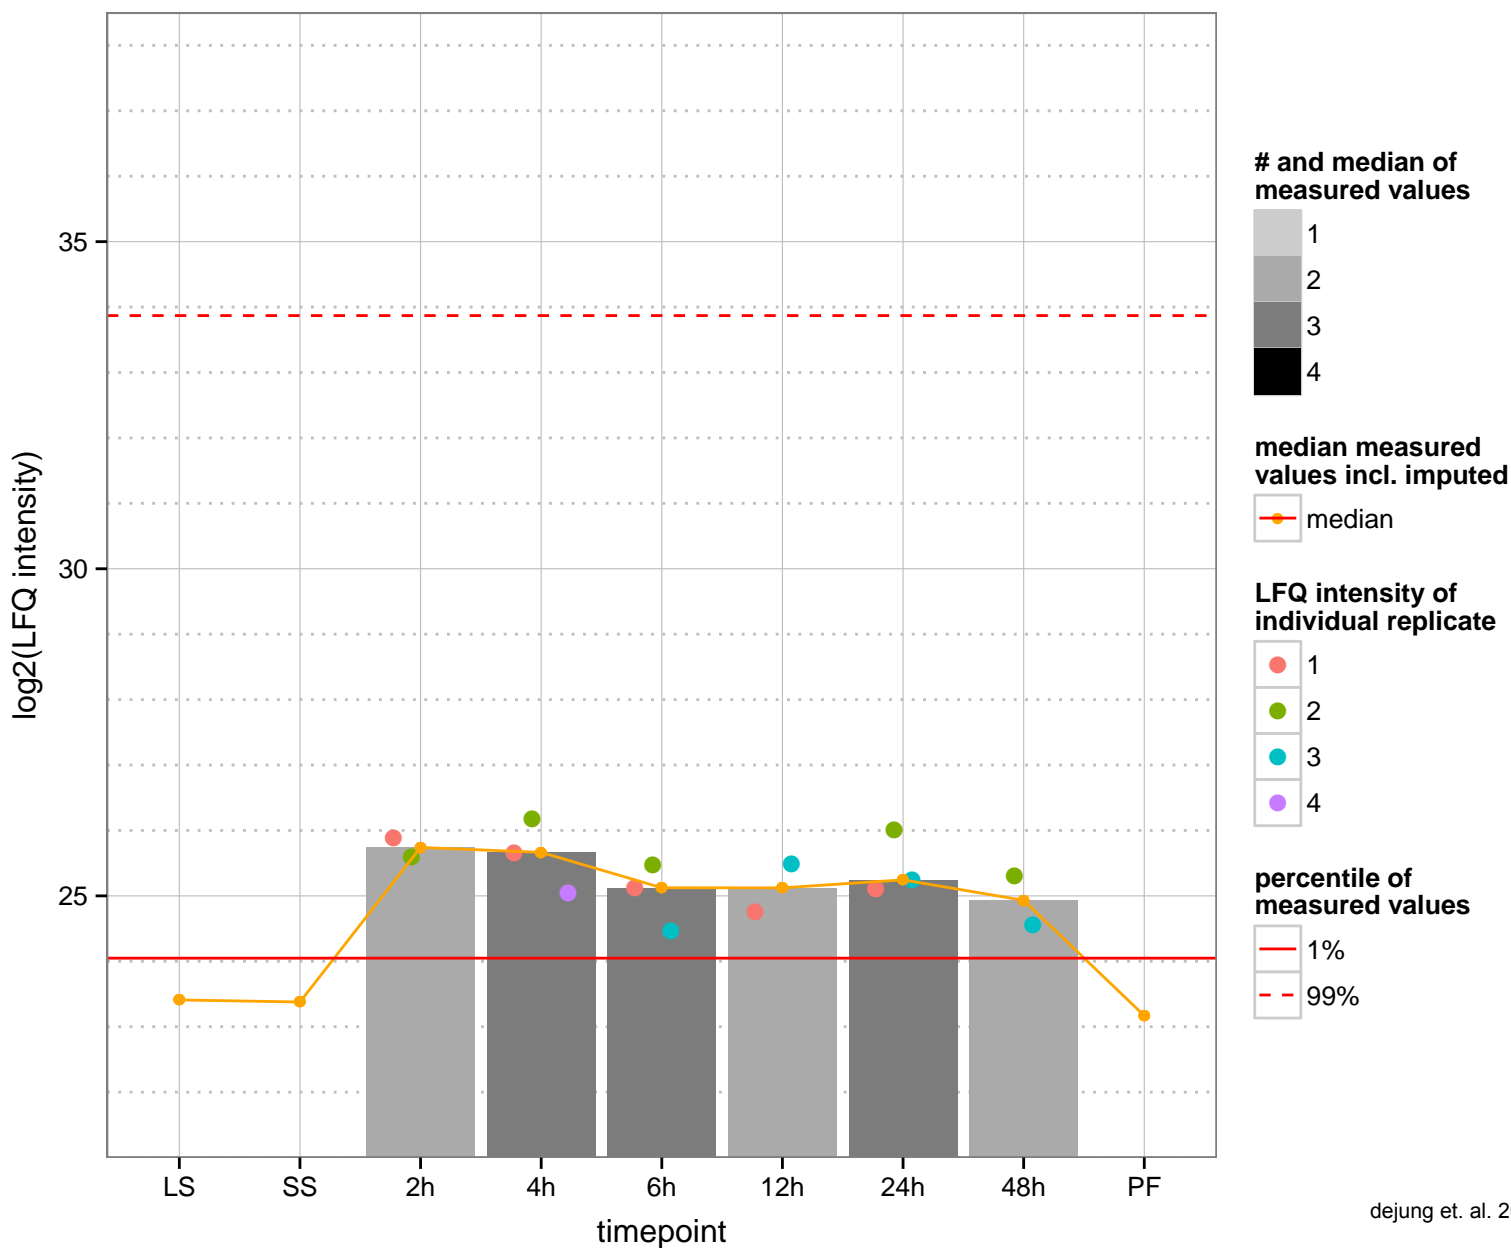

hypothetical protein, conserved  
 Tb927.3.2350  
 AGOF: null  
 AGOC: null  
 AGOP: null  
 PGO: null  
 PGOC: null  
 PGOP: null

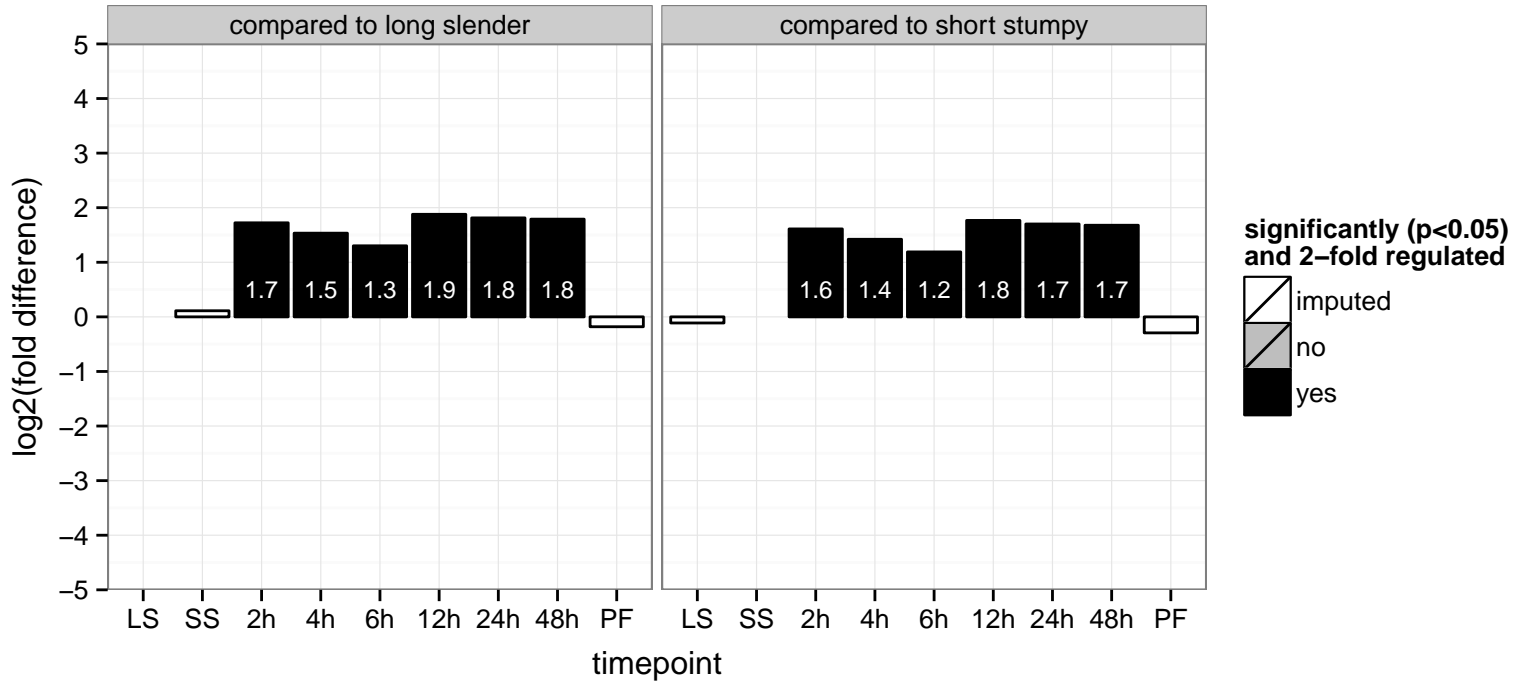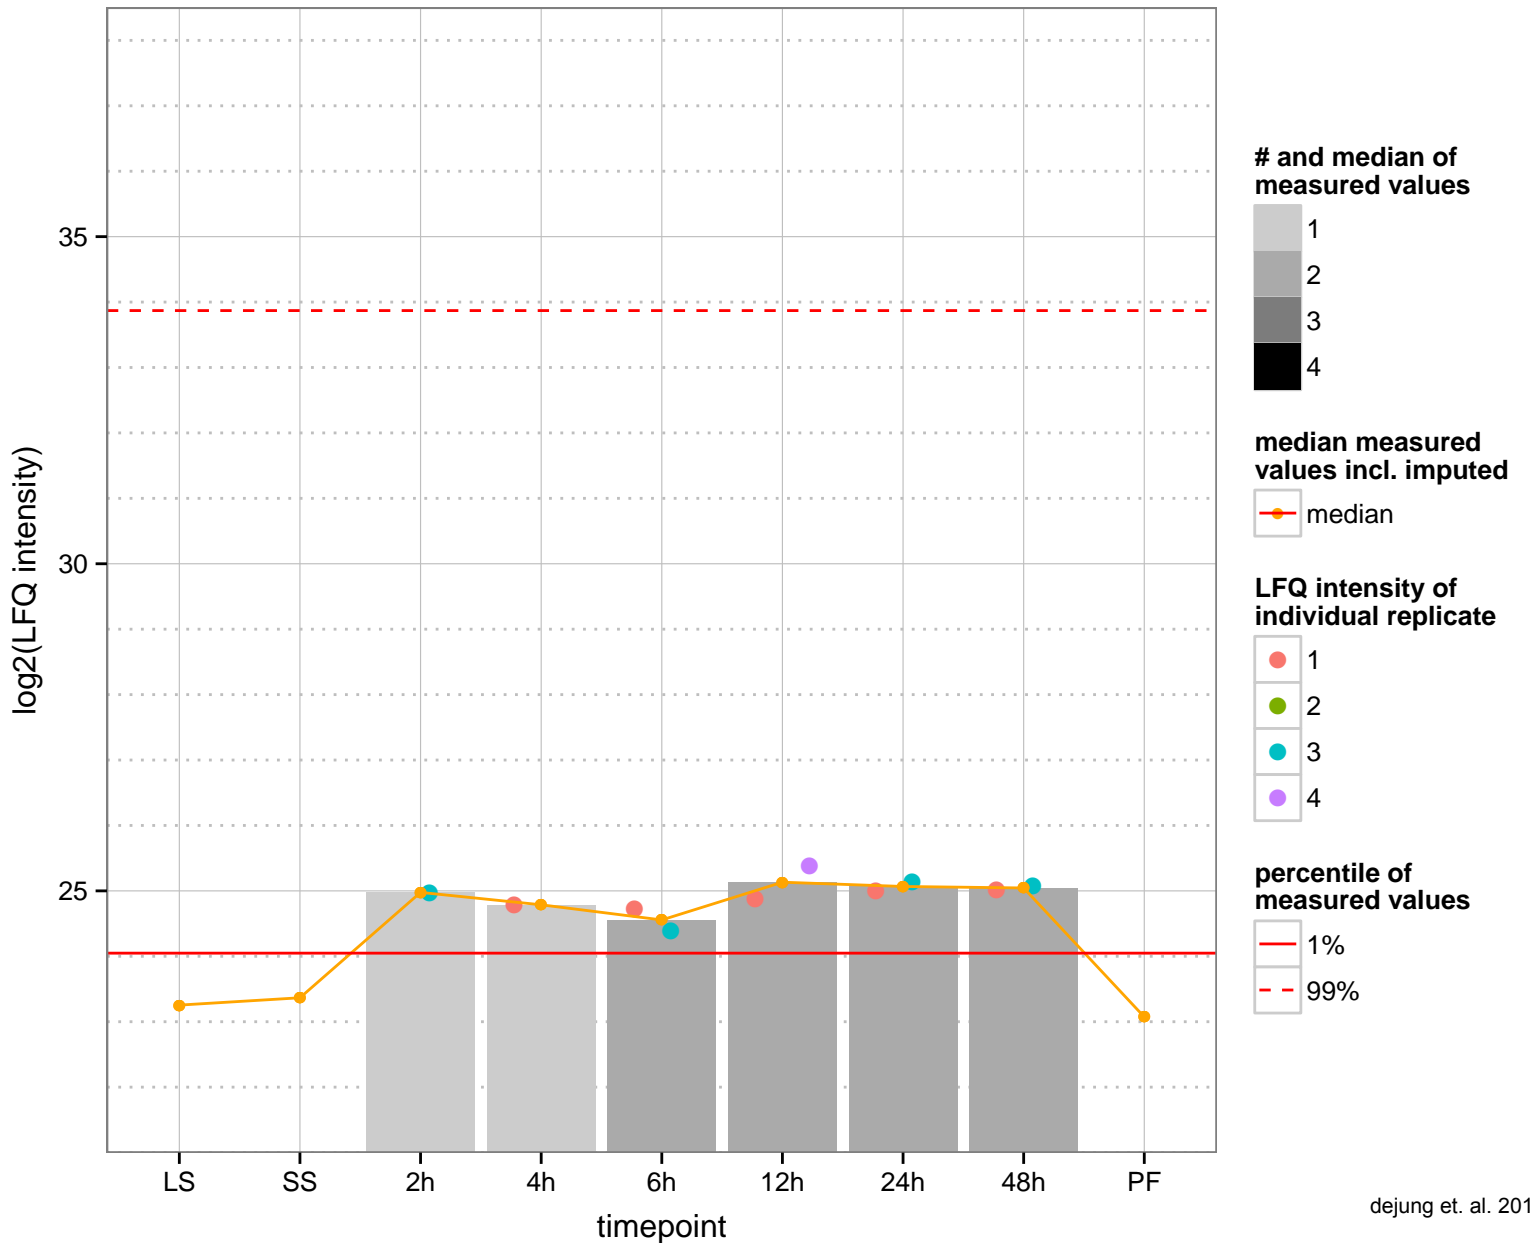

hypothetical protein, conserved  
 Tb927.3.4580  
 AGOF: null  
 AGOC: null  
 AGOP: null  
 PGO: null  
 PGO: null  
 PGO: null

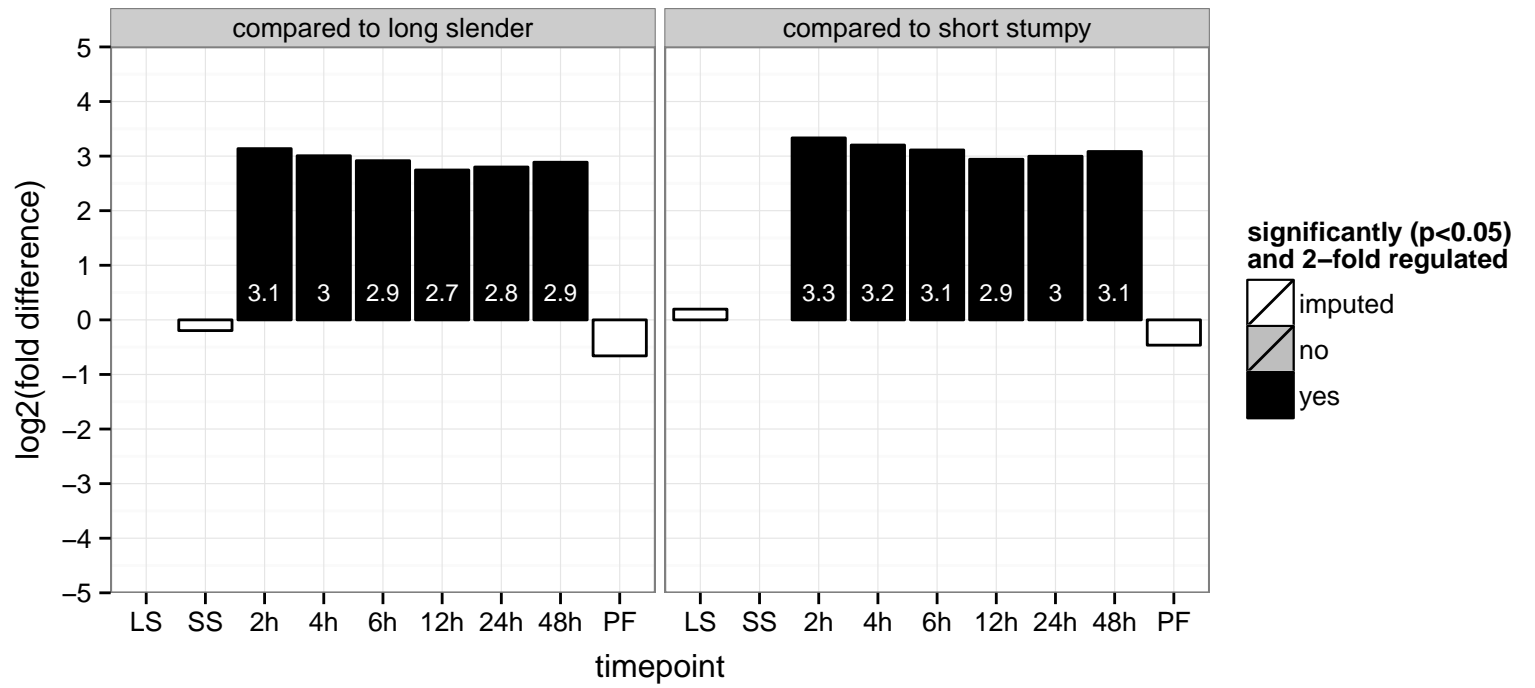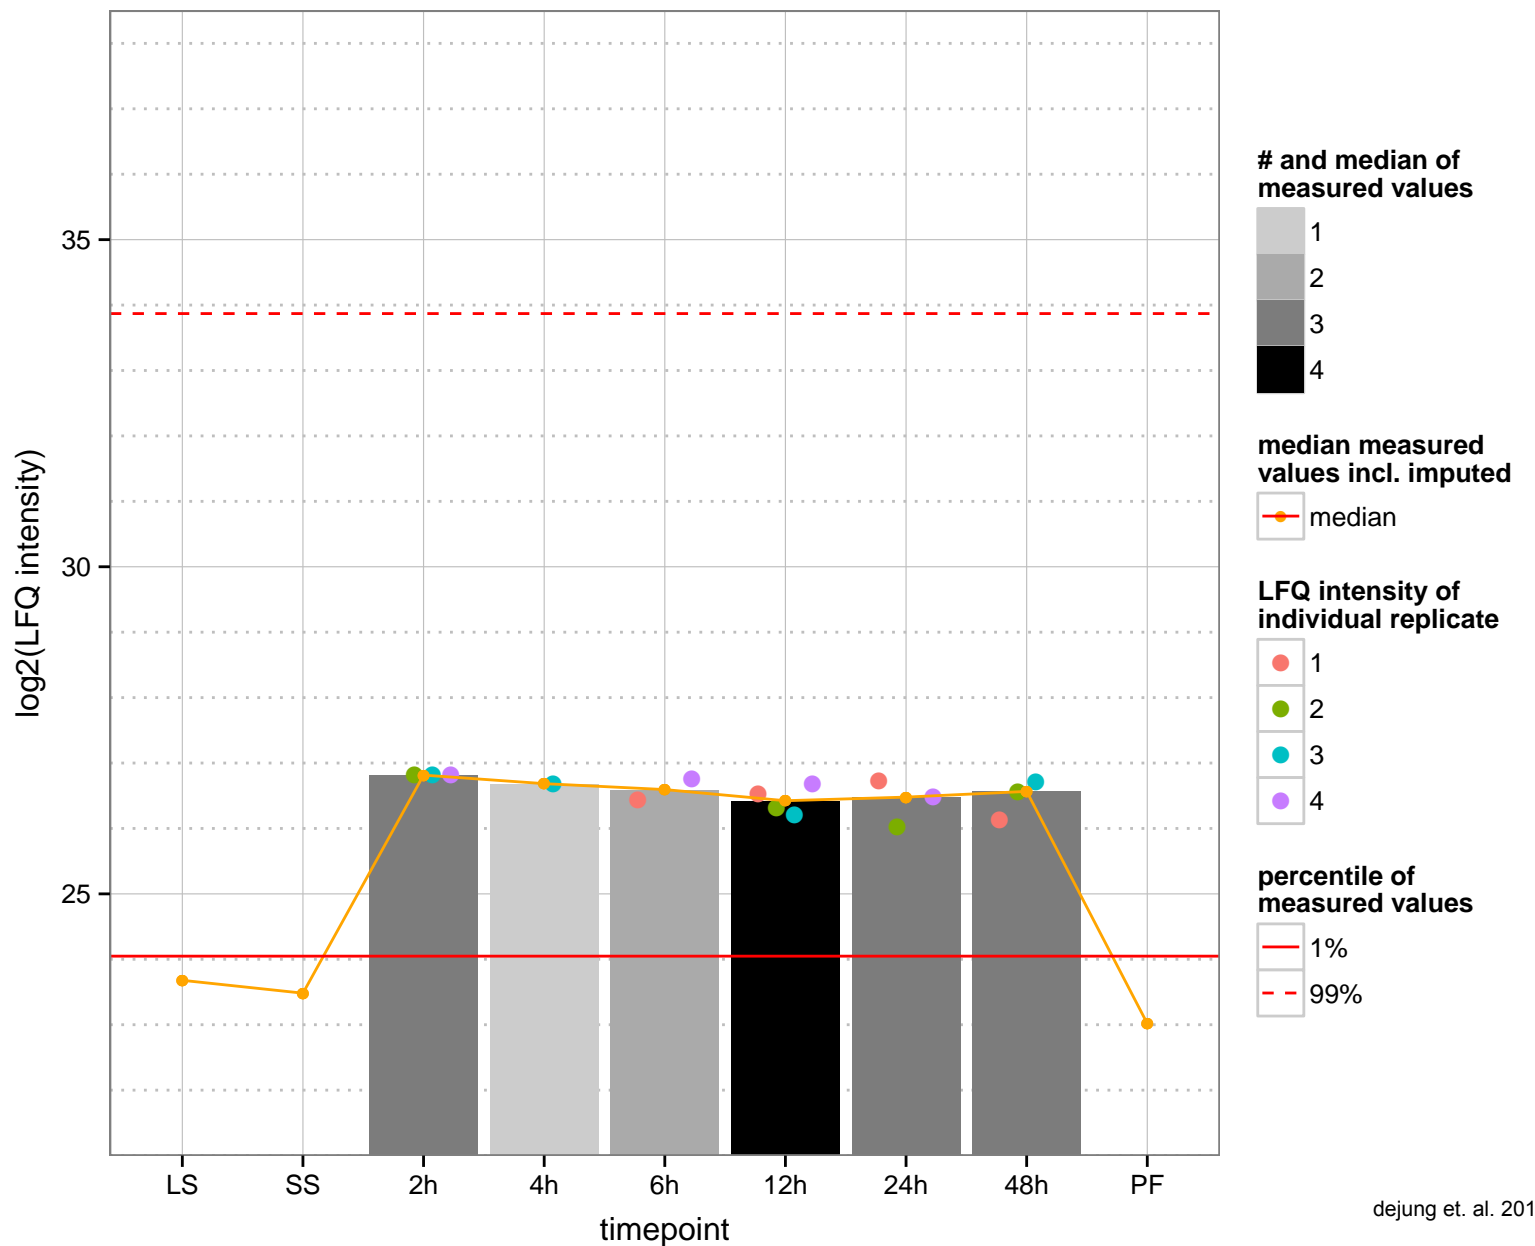

protein kinase, putative, eukaryotic translation initiation factor 2- $\alpha$  kinase precursor

Tb927.4.2500

AGOF: ATP binding, elongation factor-2 kinase activity, protein serine/threonine kinase activity, protein tyrosine kinase activity

AGOC: integral to membrane

AGOP: protein phosphorylation

PGOF: ATP binding, protein kinase activity, transferase activity, transferring phosphorus-containing groups

PGOC: null

PGOP: protein phosphorylation

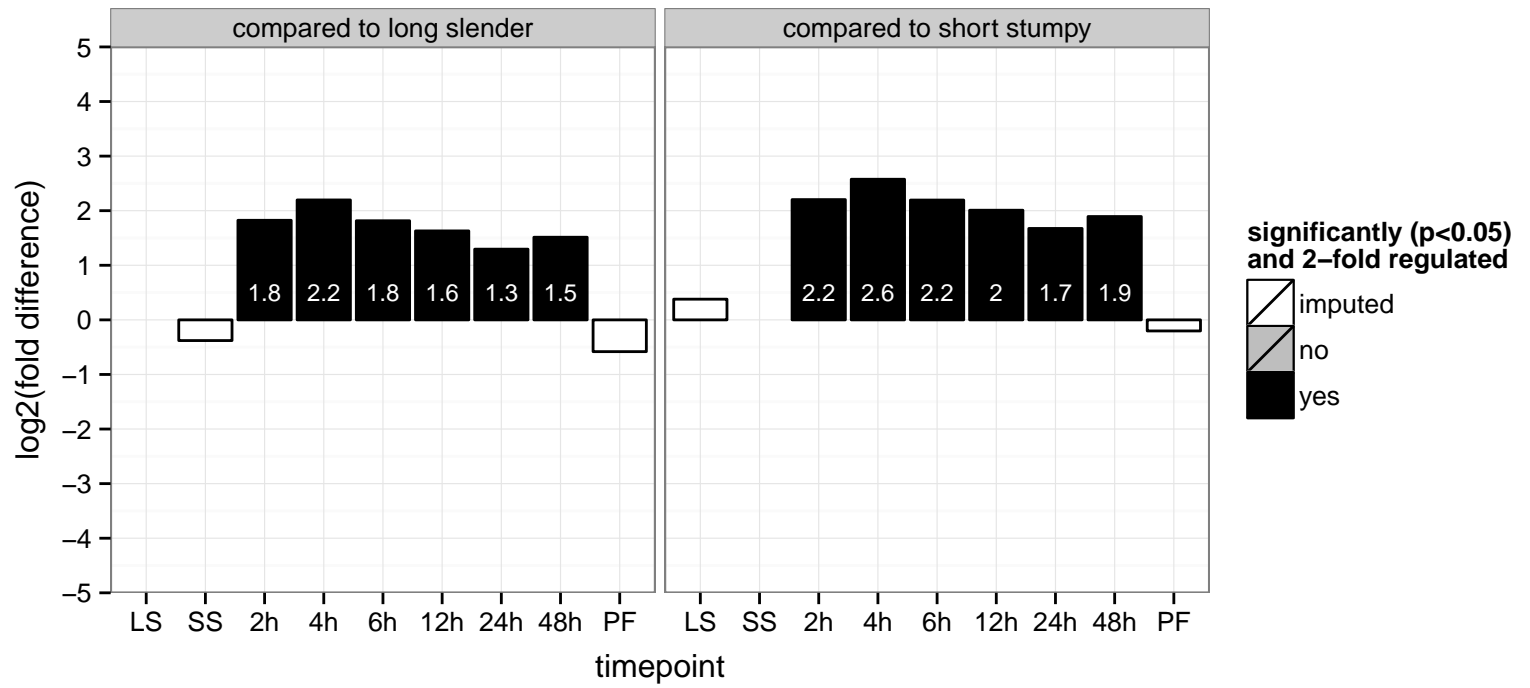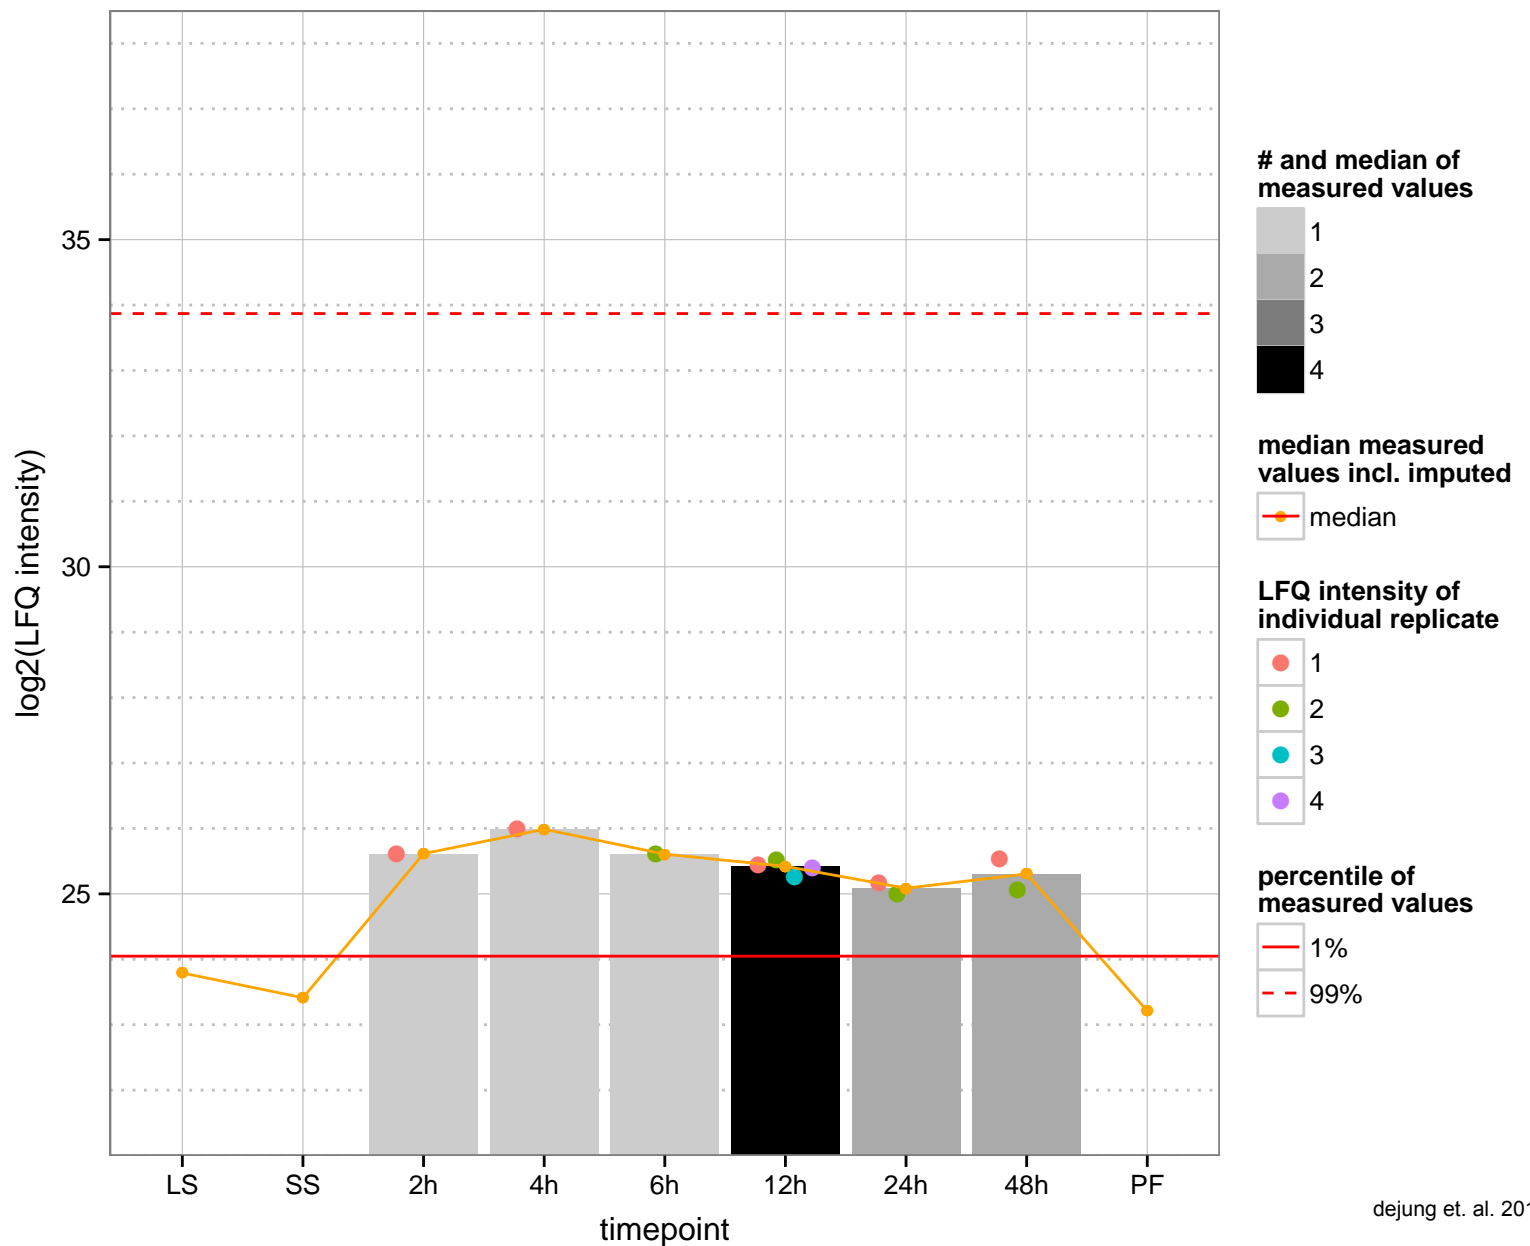

hypothetical protein, conserved  
 Tb927.4.2750  
 AGOF: null  
 AGOC: null  
 AGOP: null  
 PGO: null  
 PGO: null  
 PGO: null

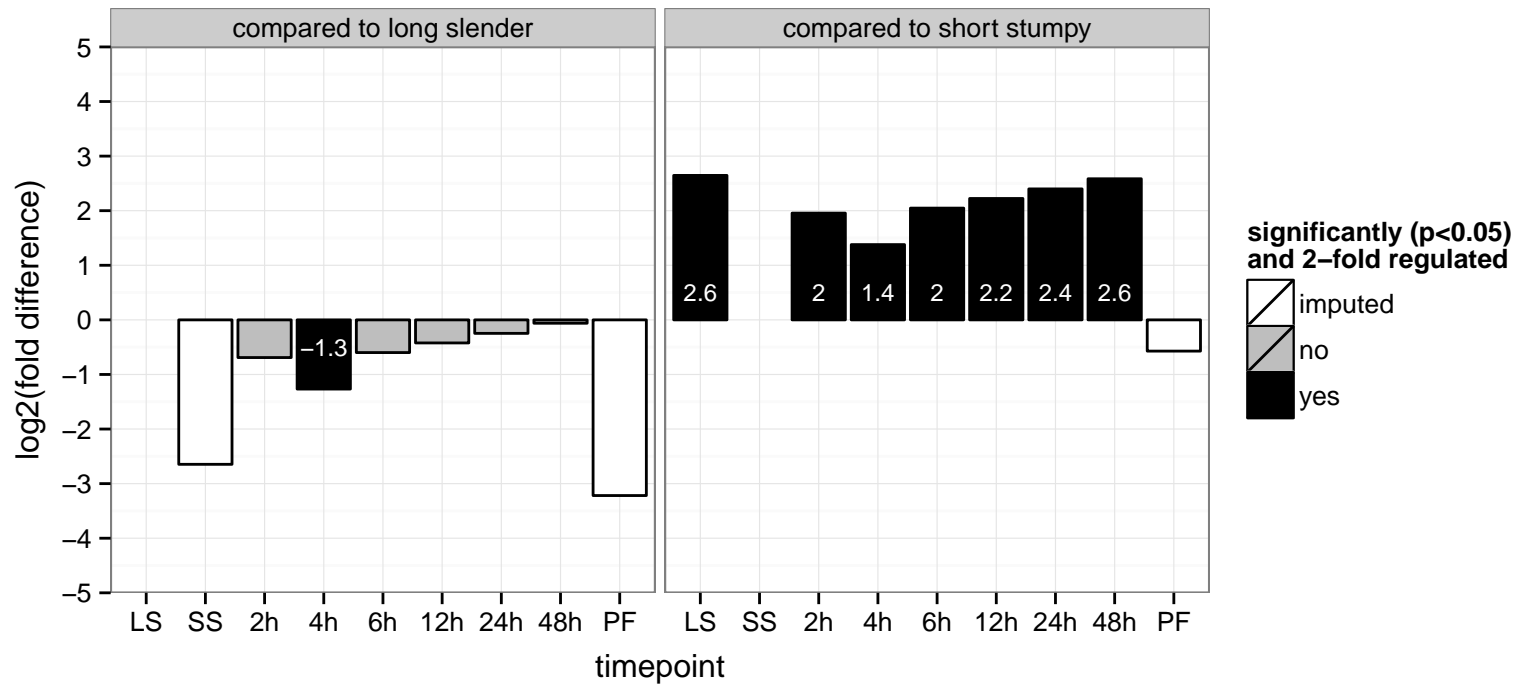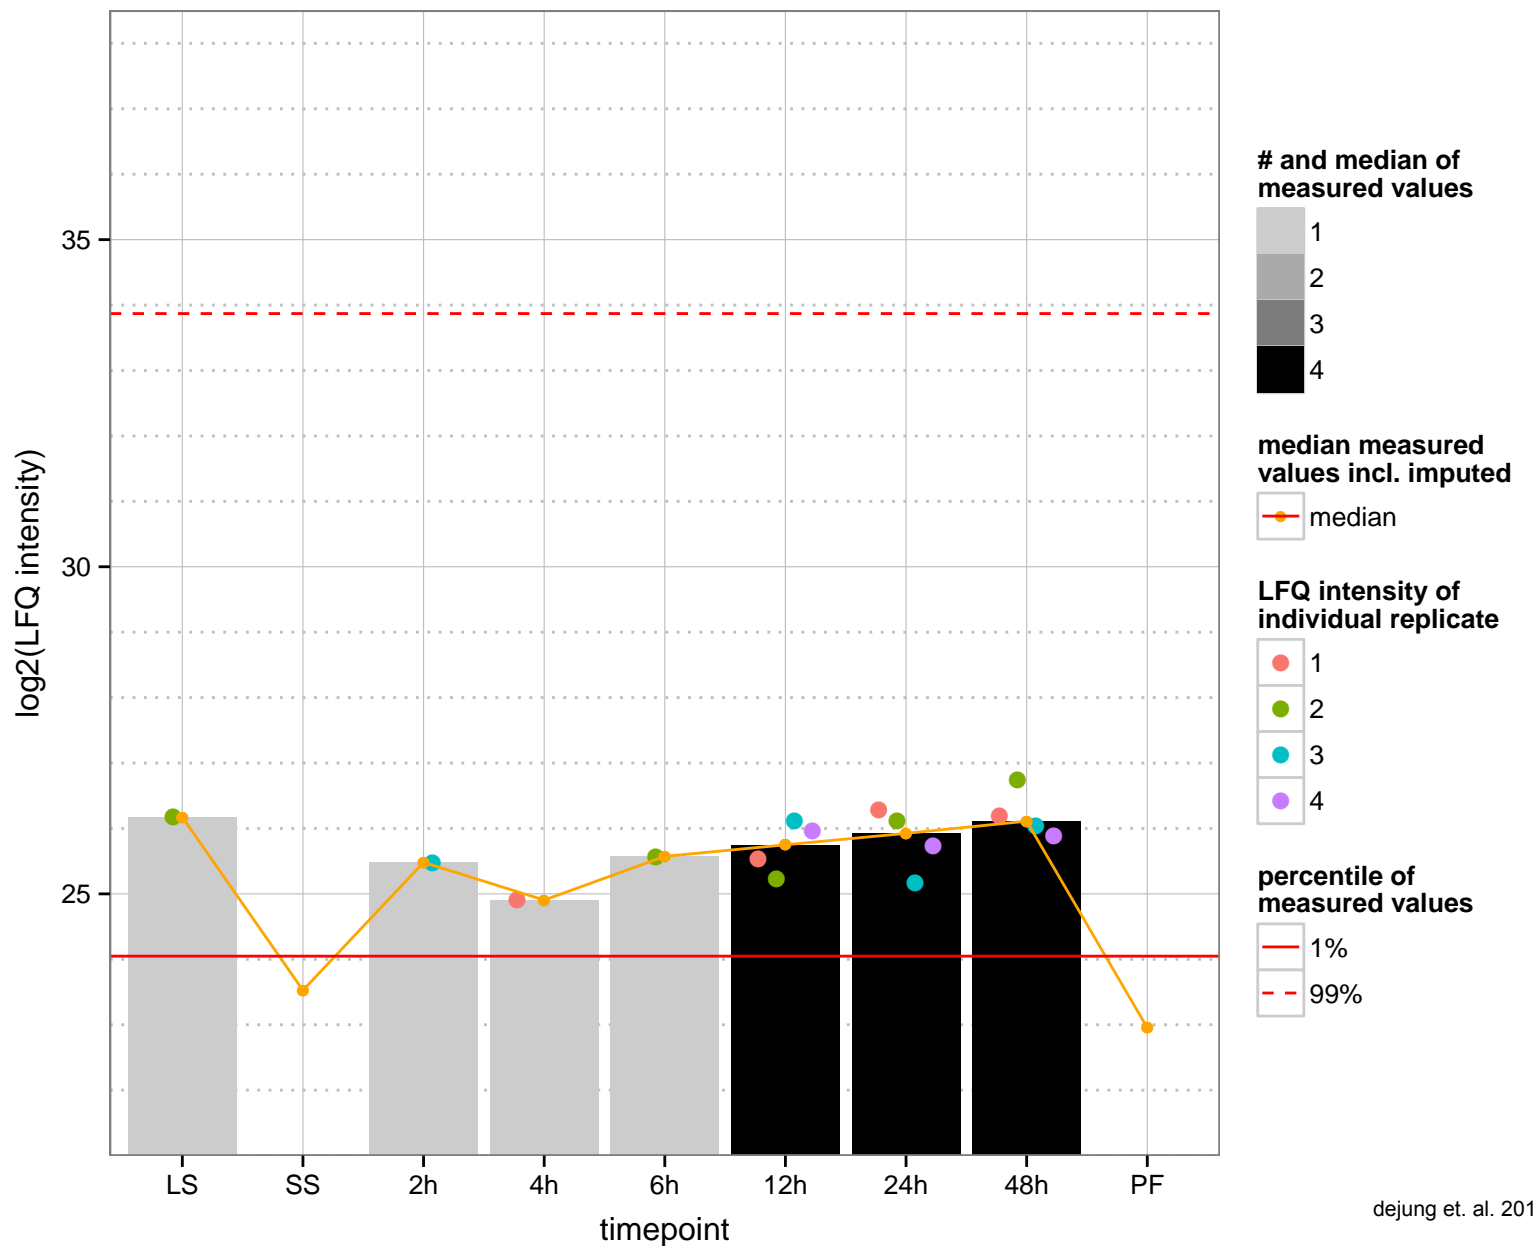

amino acid transporter, putative  
 Tb927.4.3930  
 AGOF: amine transmembrane transporter activity  
 AGOC: integral to membrane  
 AGOP: amino acid transport  
 PGO: null  
 PGOC: null  
 PGOP: null

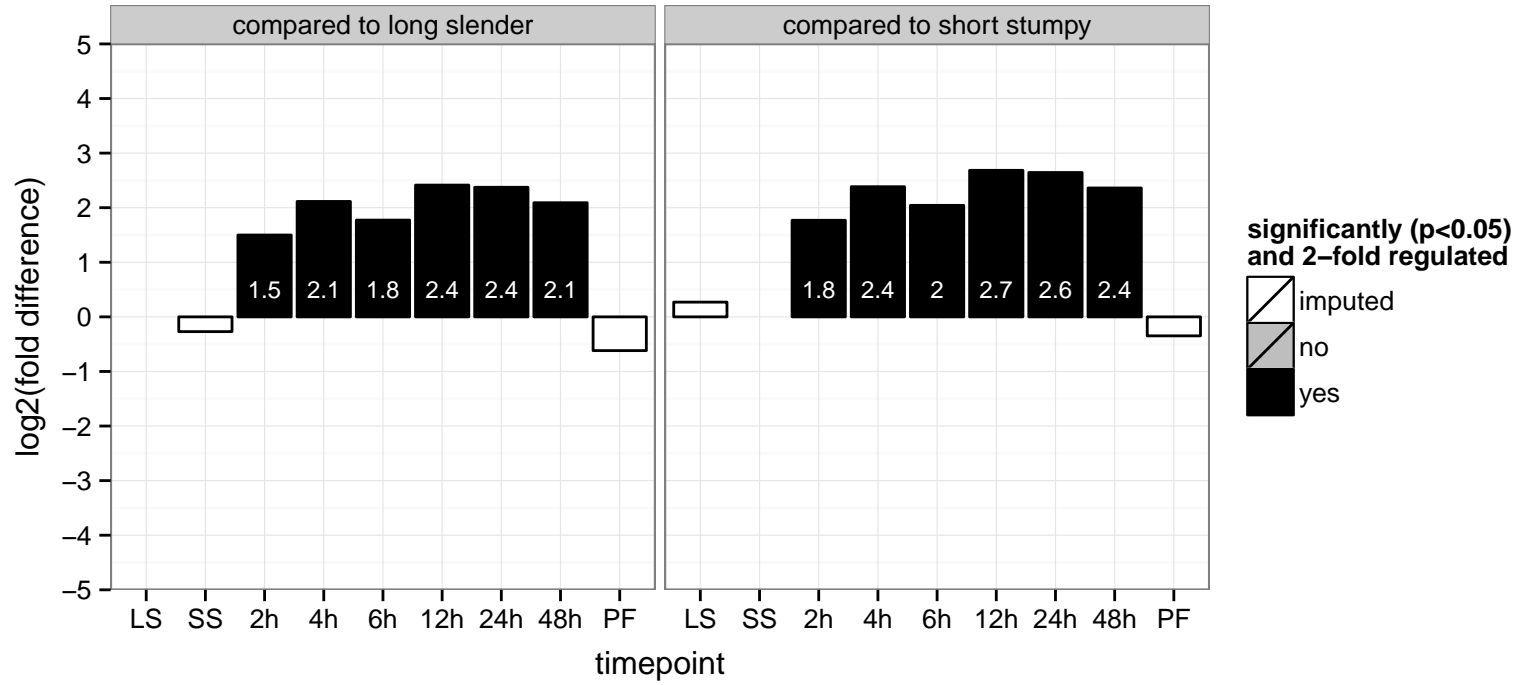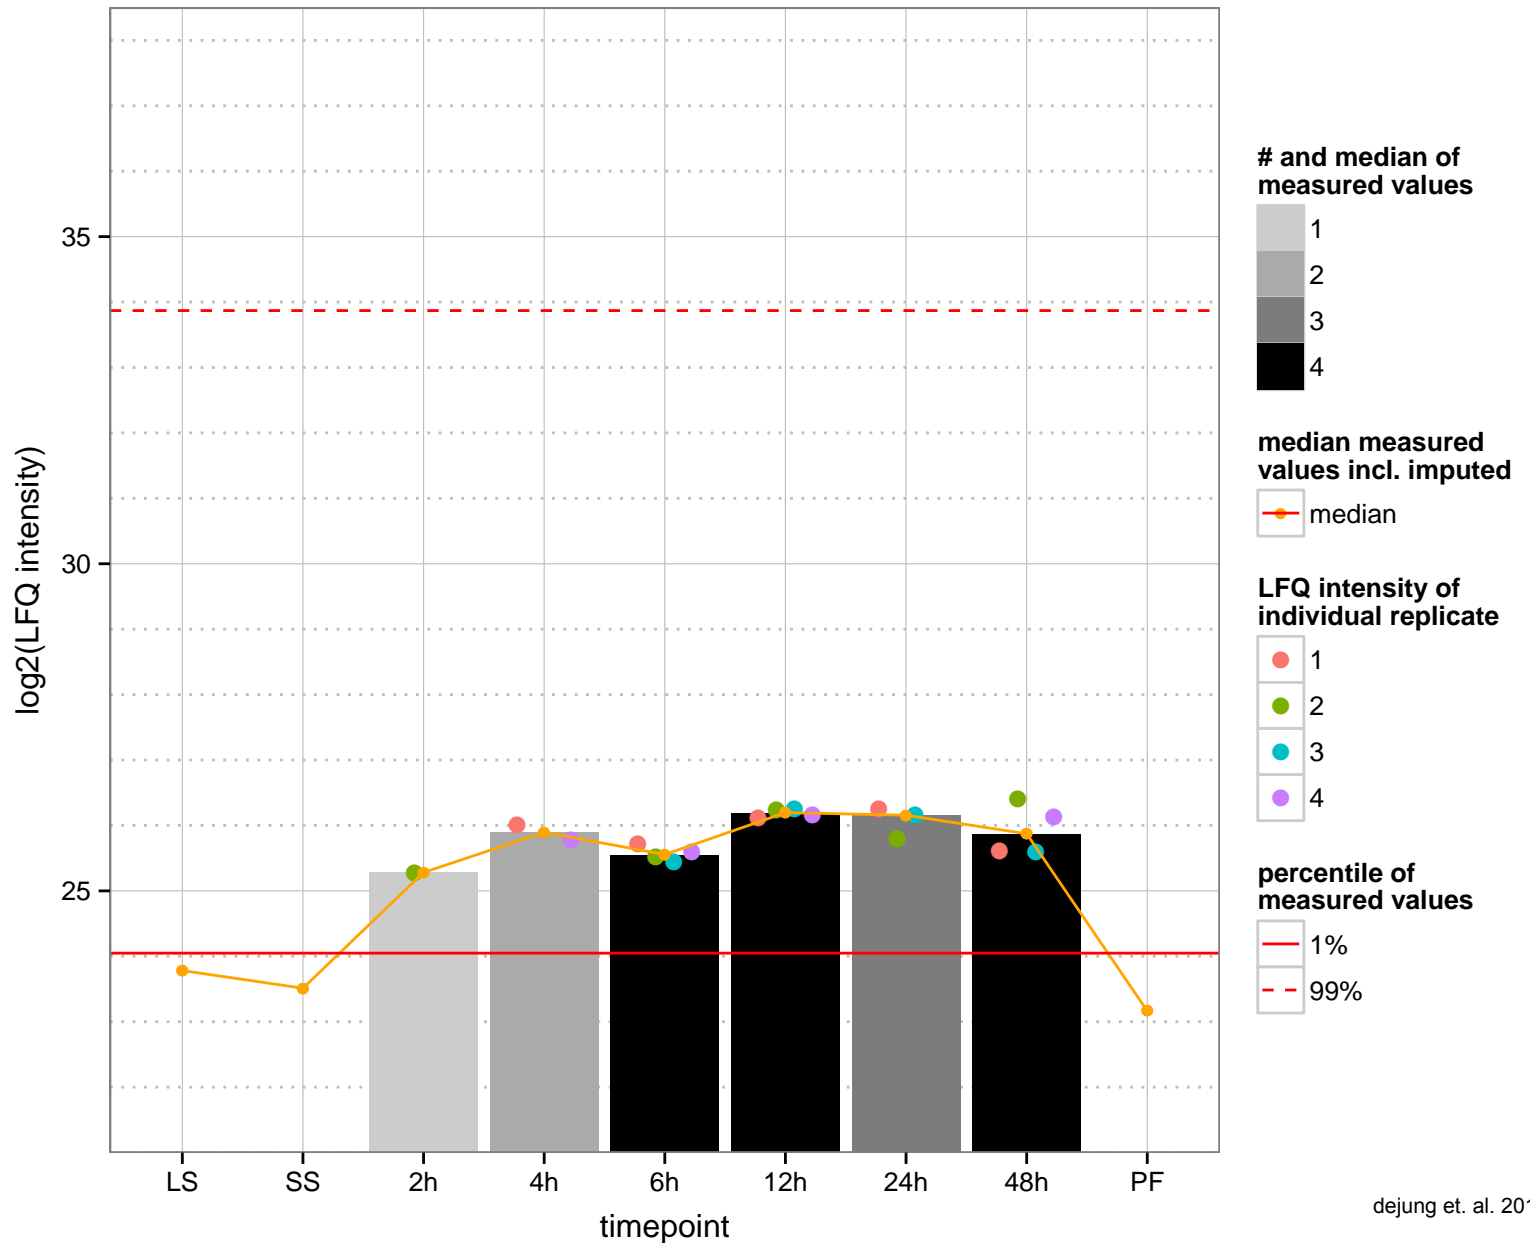

centrin, putative, caltractin  
 Tb927.8.1080  
 AGOF: calcium ion binding  
 AGOC: centrosome  
 AGOP: null  
 PGOF: calcium ion binding  
 PGOC: null  
 PGOP: null

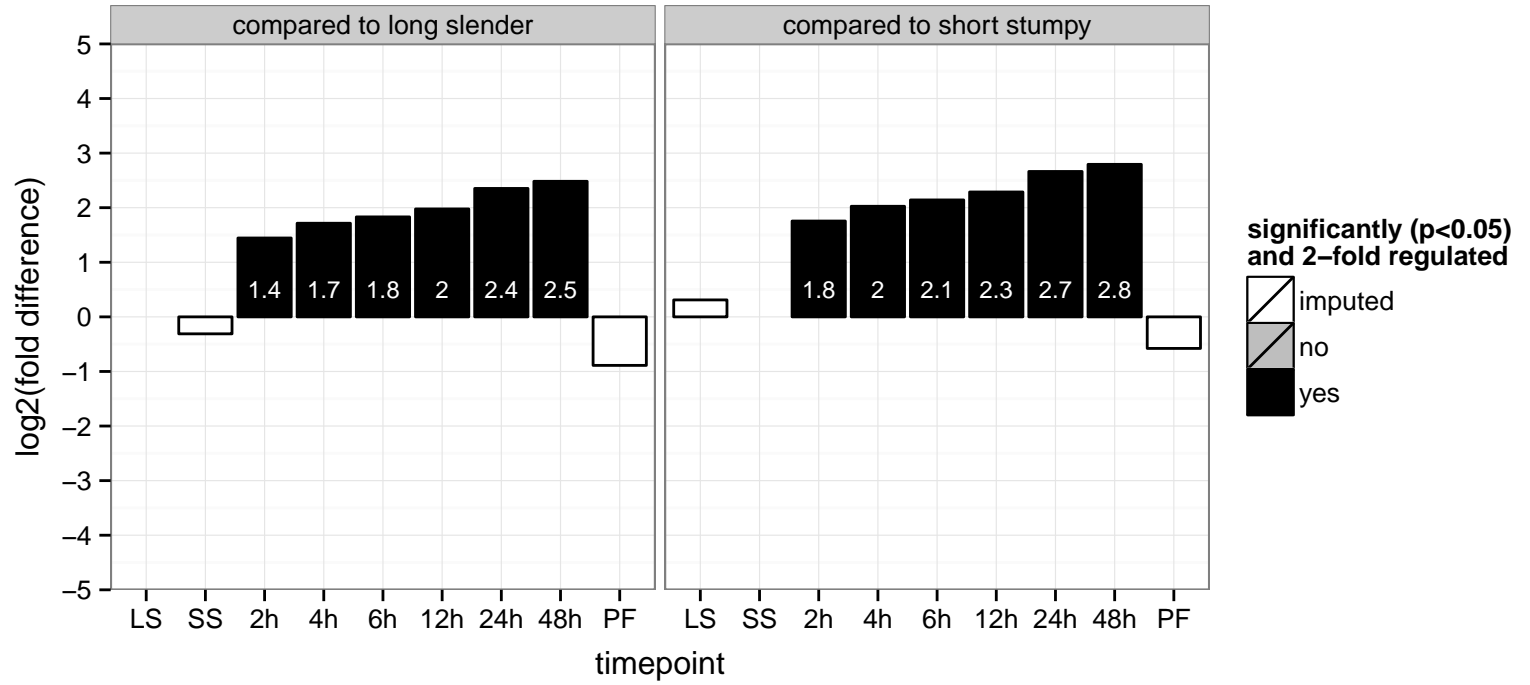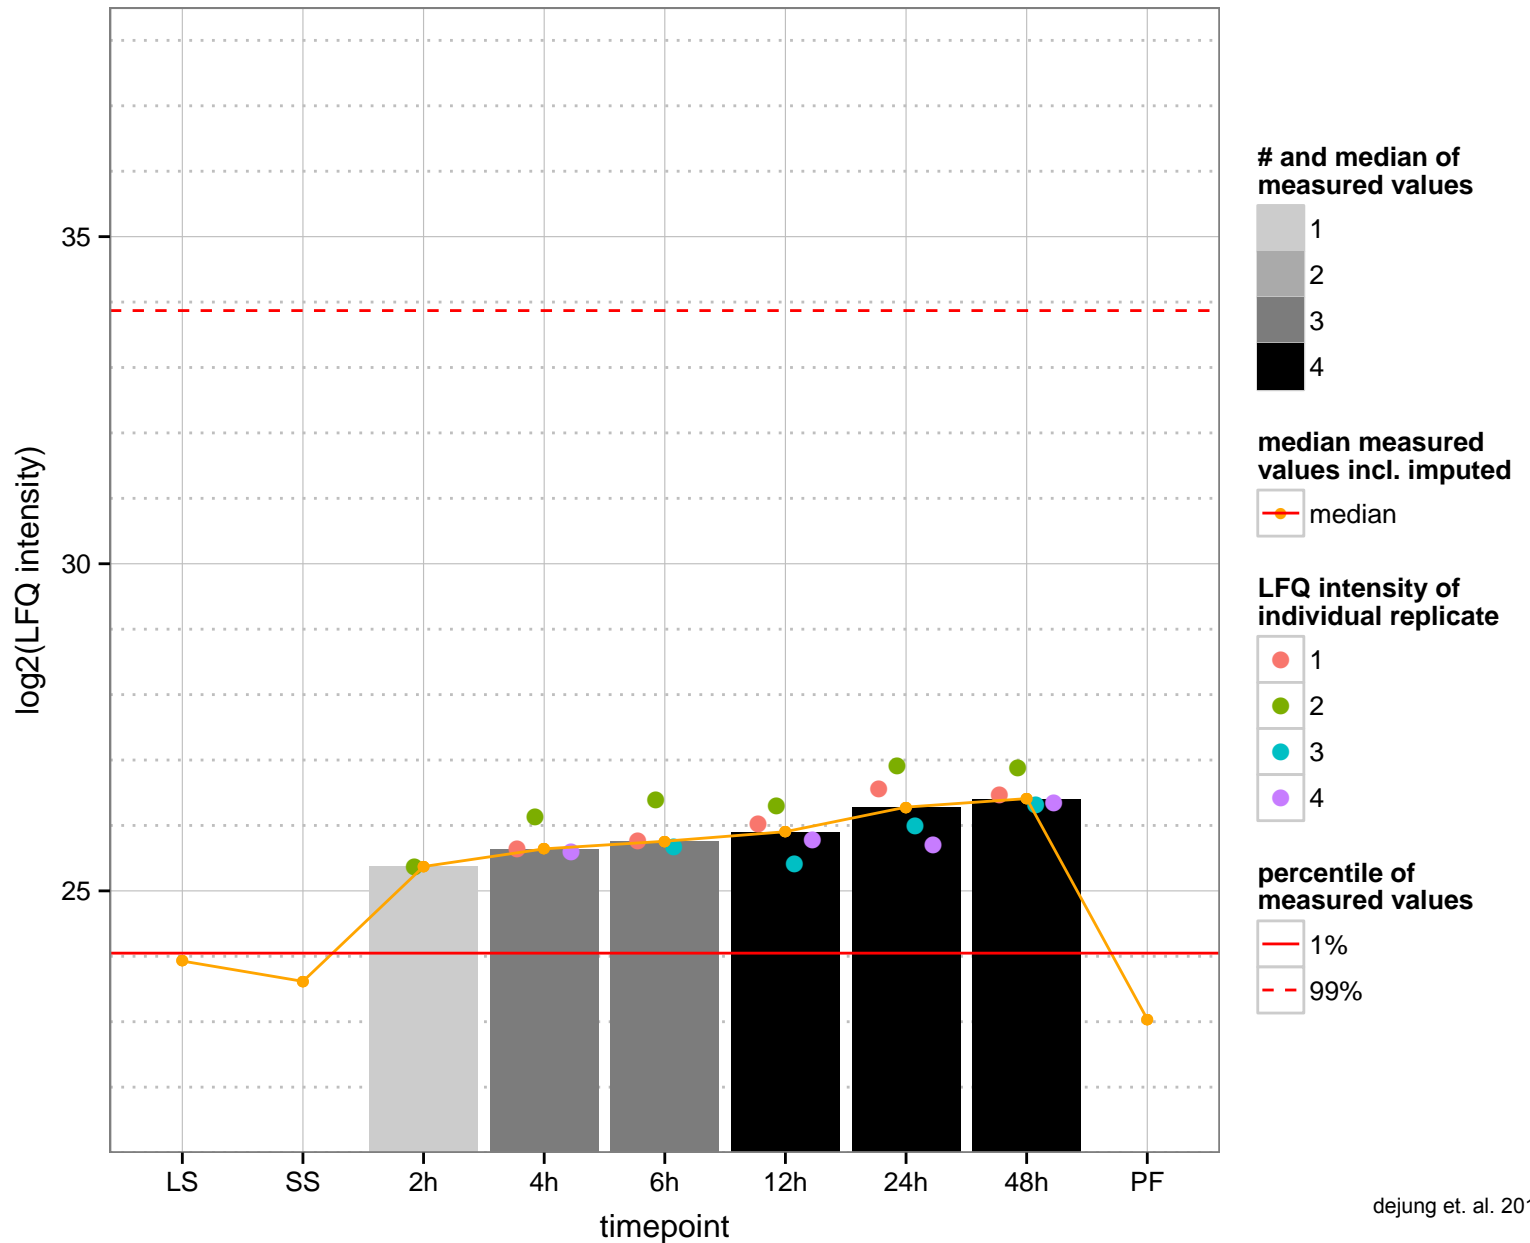

hypothetical protein, conserved  
 Tb927.8.3070  
 AGOF: null  
 AGOC: mitochondrion  
 AGOP: null  
 PGO: null  
 PGO: null  
 PGO: null

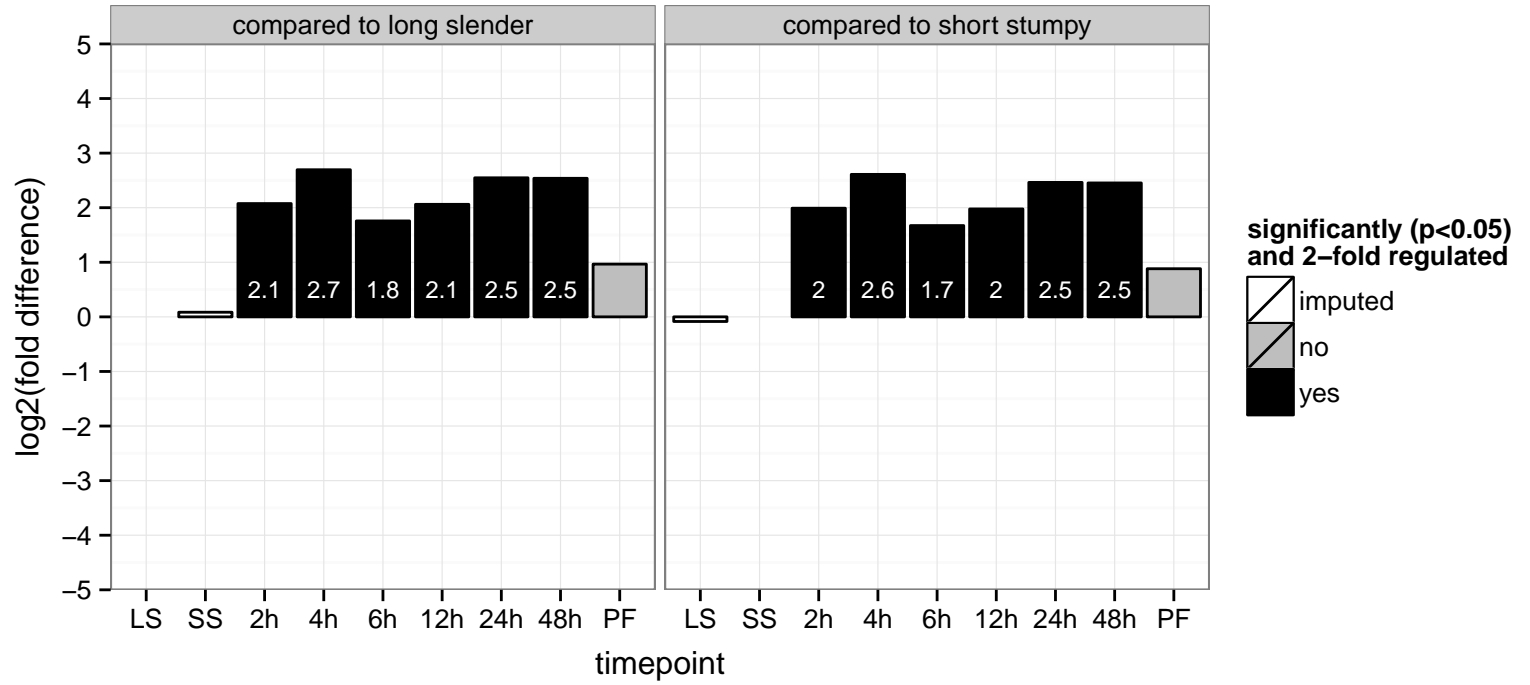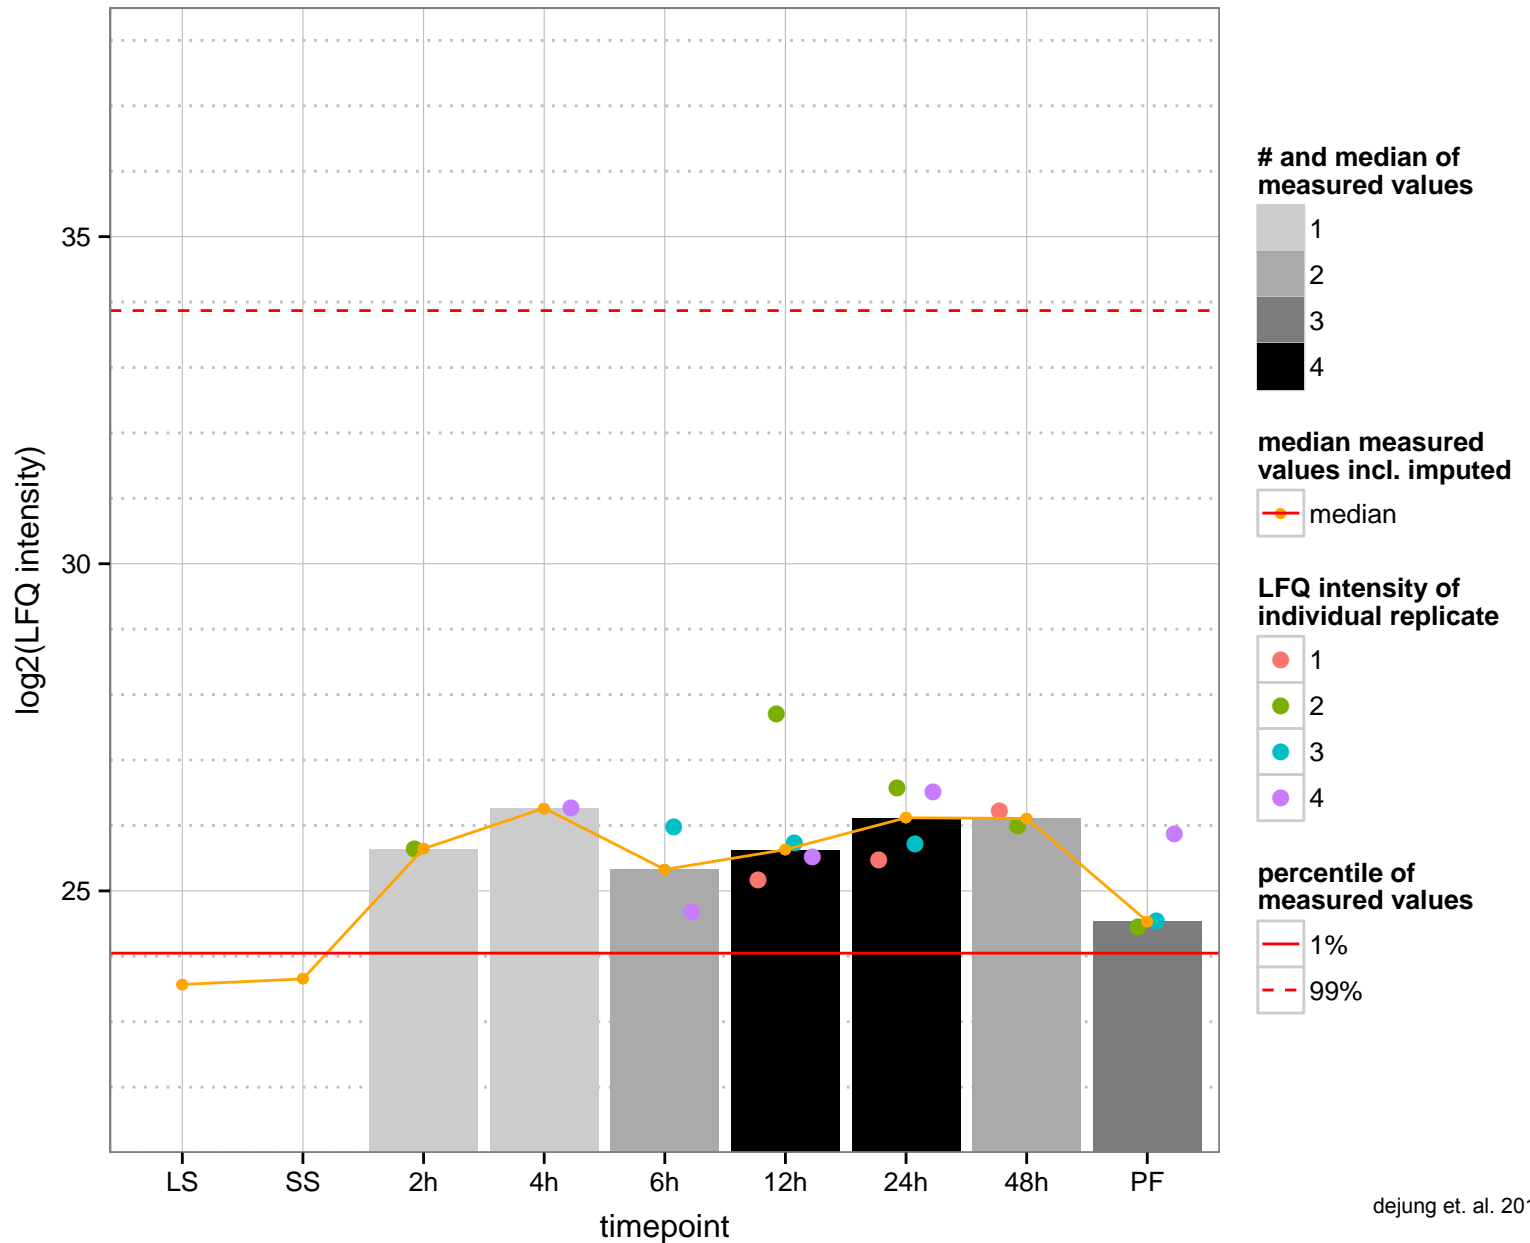



cyclophilin type peptidyl-prolyl cis-trans isomerase, putative (PPIase)  
 Tb927.9.11740  
 AGOF: peptidyl-prolyl cis-trans isomerase activity  
 AGOC: null  
 AGOP: protein folding  
 PGOF: peptidyl-prolyl cis-trans isomerase activity  
 PGOC: null  
 PGOP: protein folding

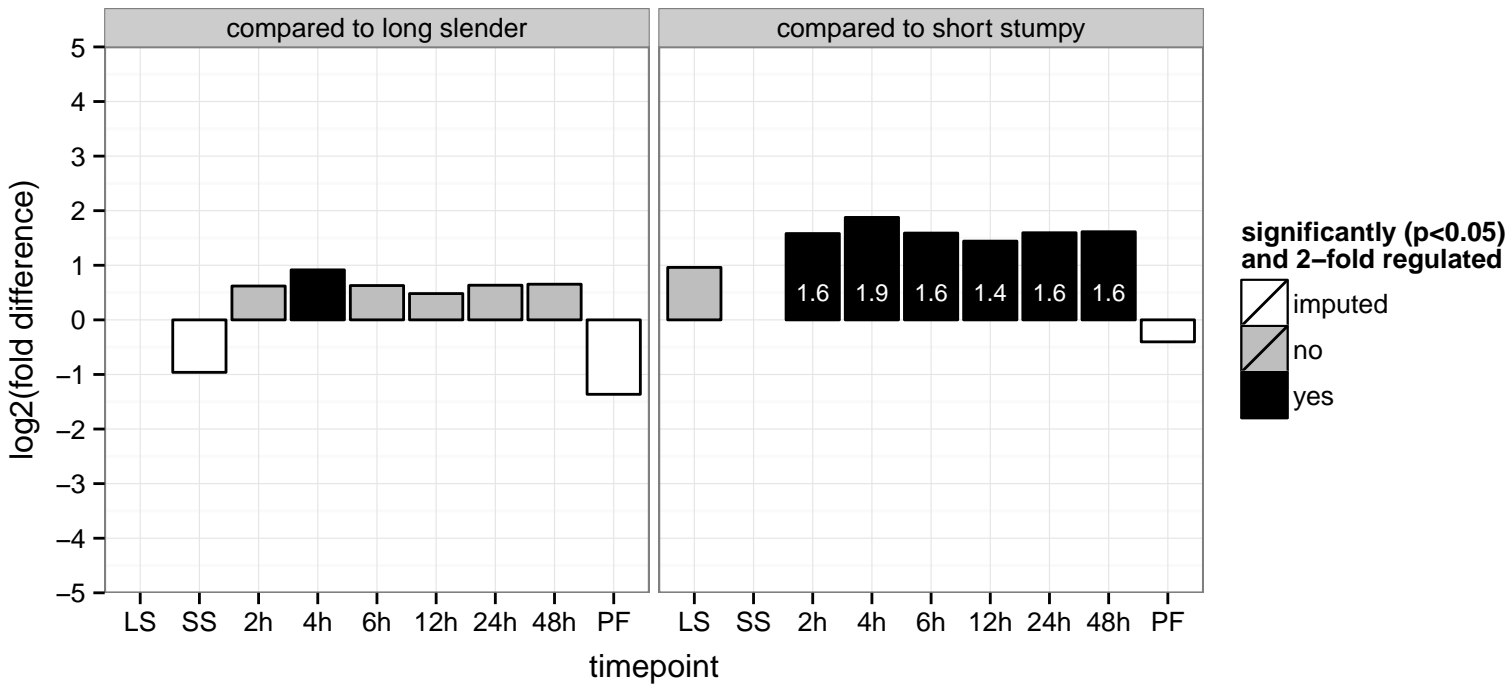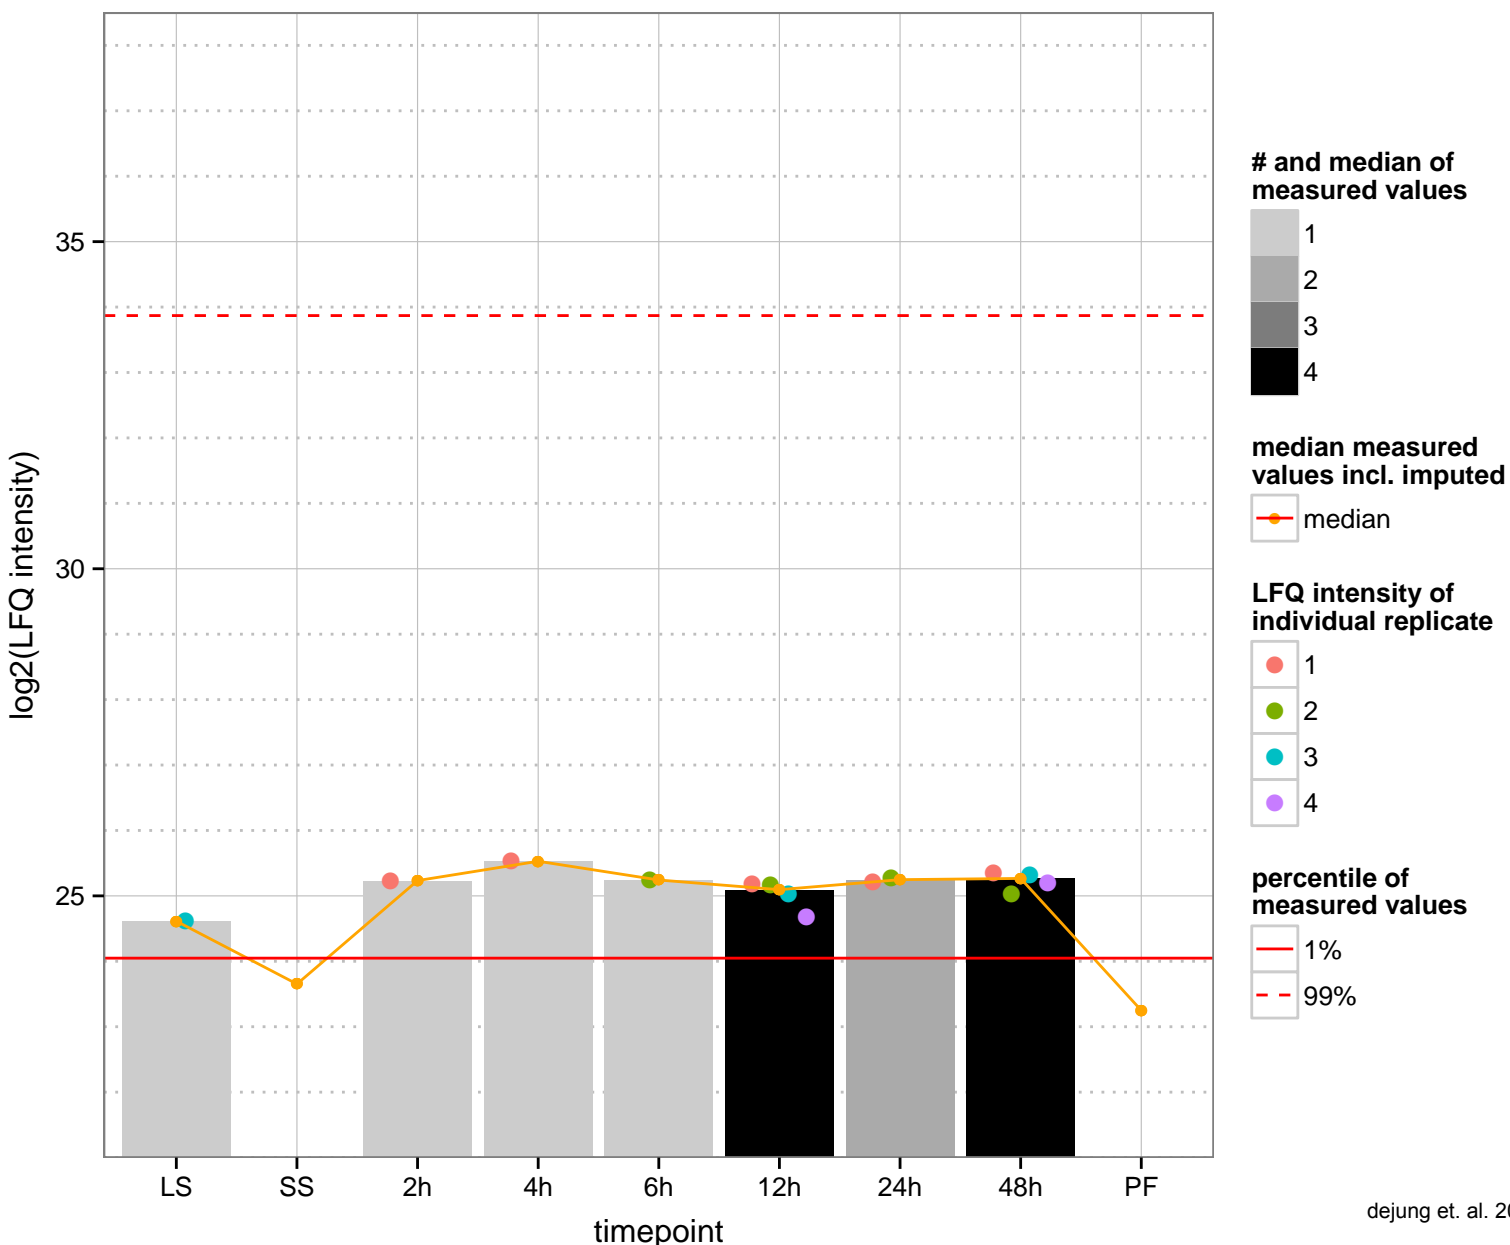

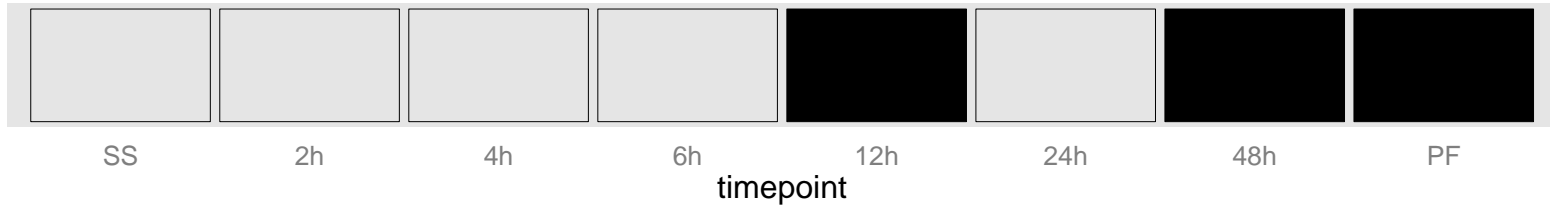

**regulated**  **not regulated**  **significant down**  **significant up**

hypothetical protein, conserved  
 Tb927.10.1200;Tb11.v5.0487  
 AGOF: null  
 AGOC: null, cytoplasm  
 AGOP: null  
 PGO: null  
 PGO: null  
 PGOC: cytoplasm  
 PGOP: null

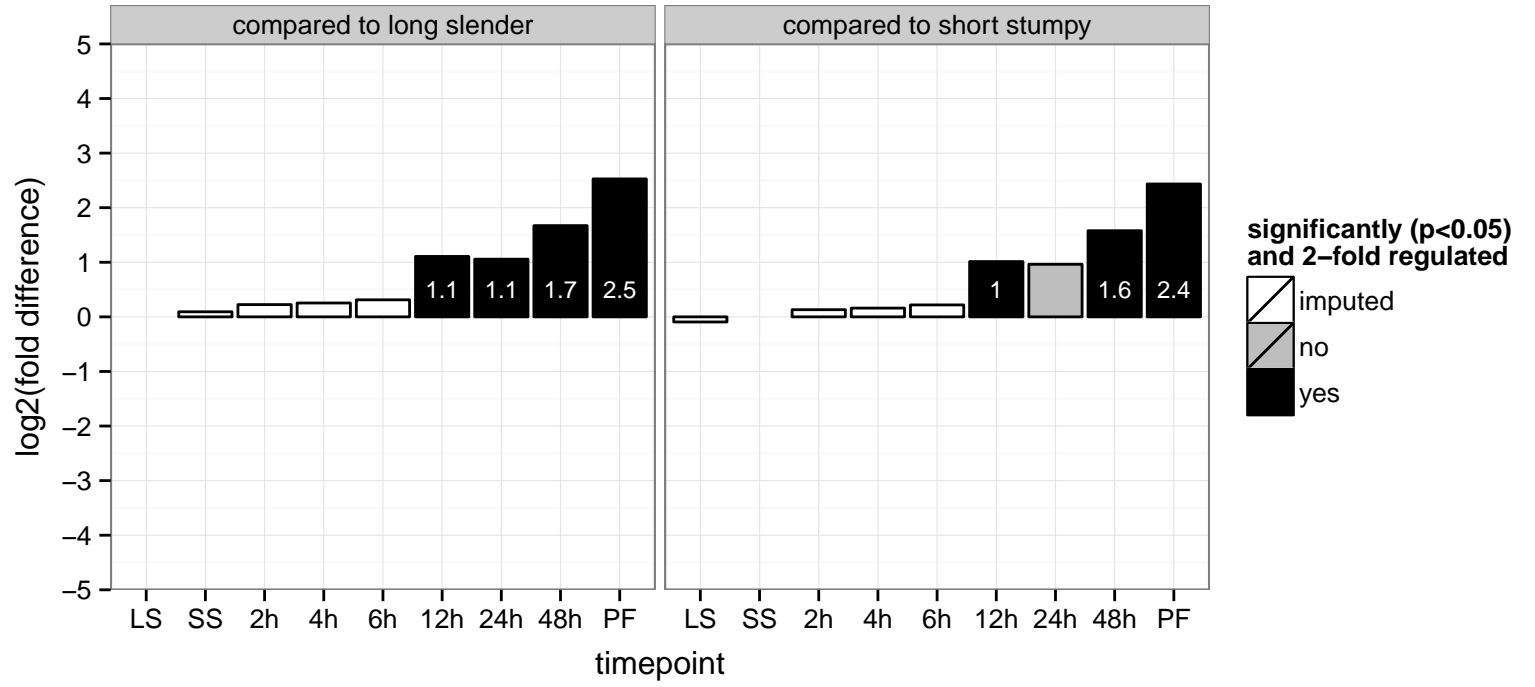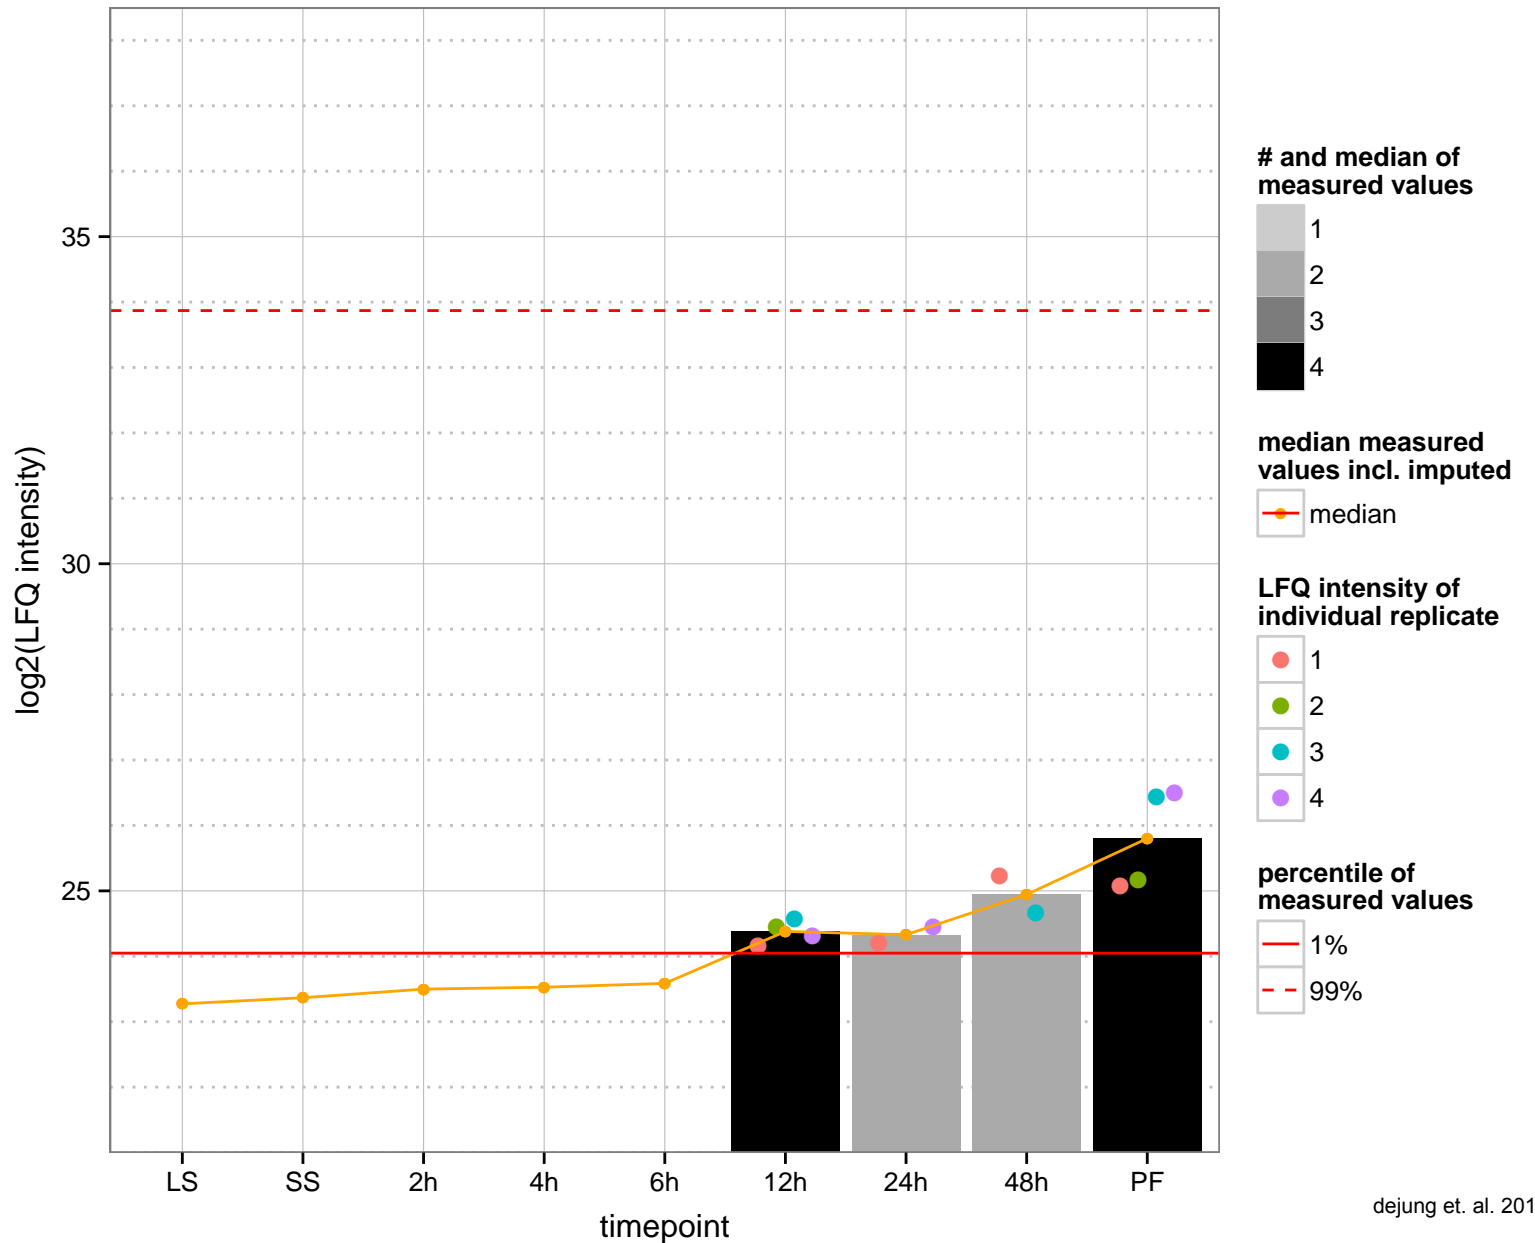

ubiquitin hydrolase, putative  
 Tb11.v5.0553  
 AGOF: null  
 AGOC: null  
 AGOP: null  
 PGOF: exonuclease activity, nucleic acid binding  
 PGO: intracellular  
 PGOP: null

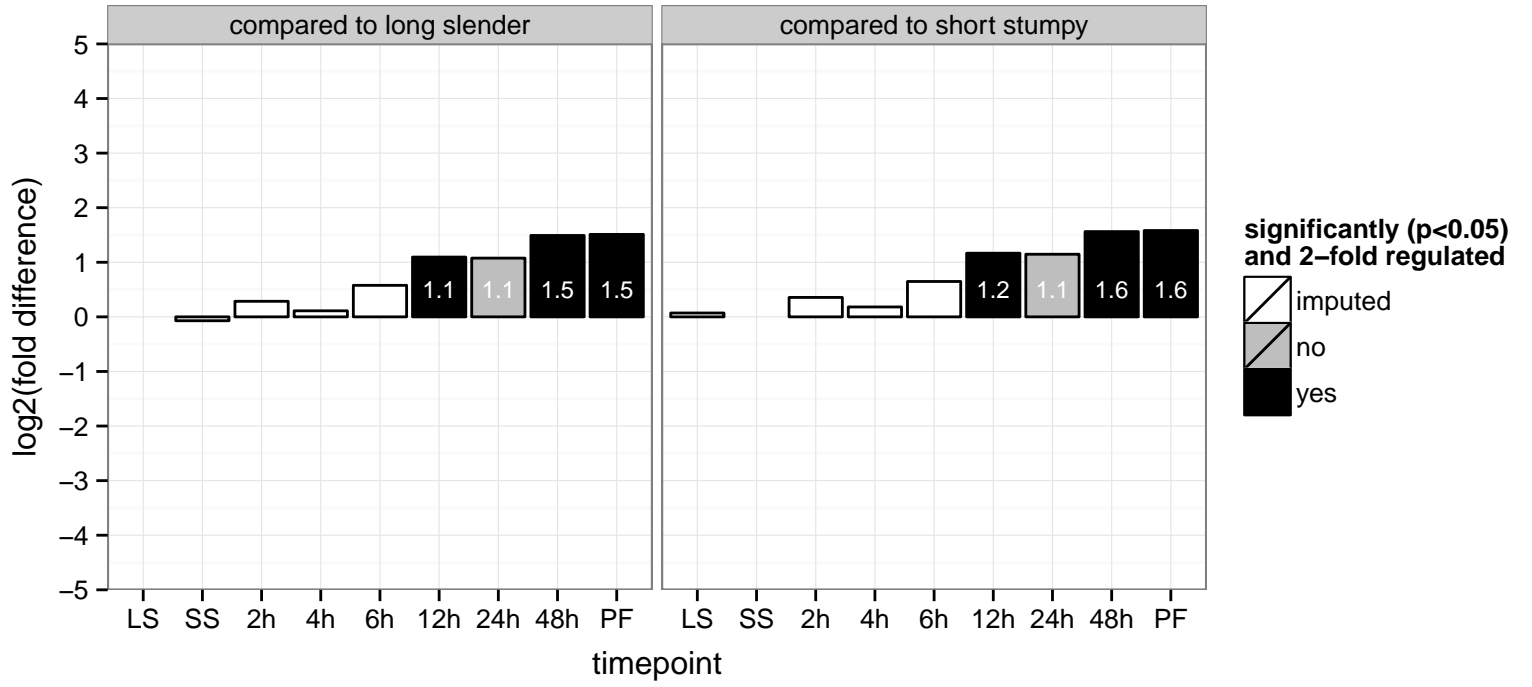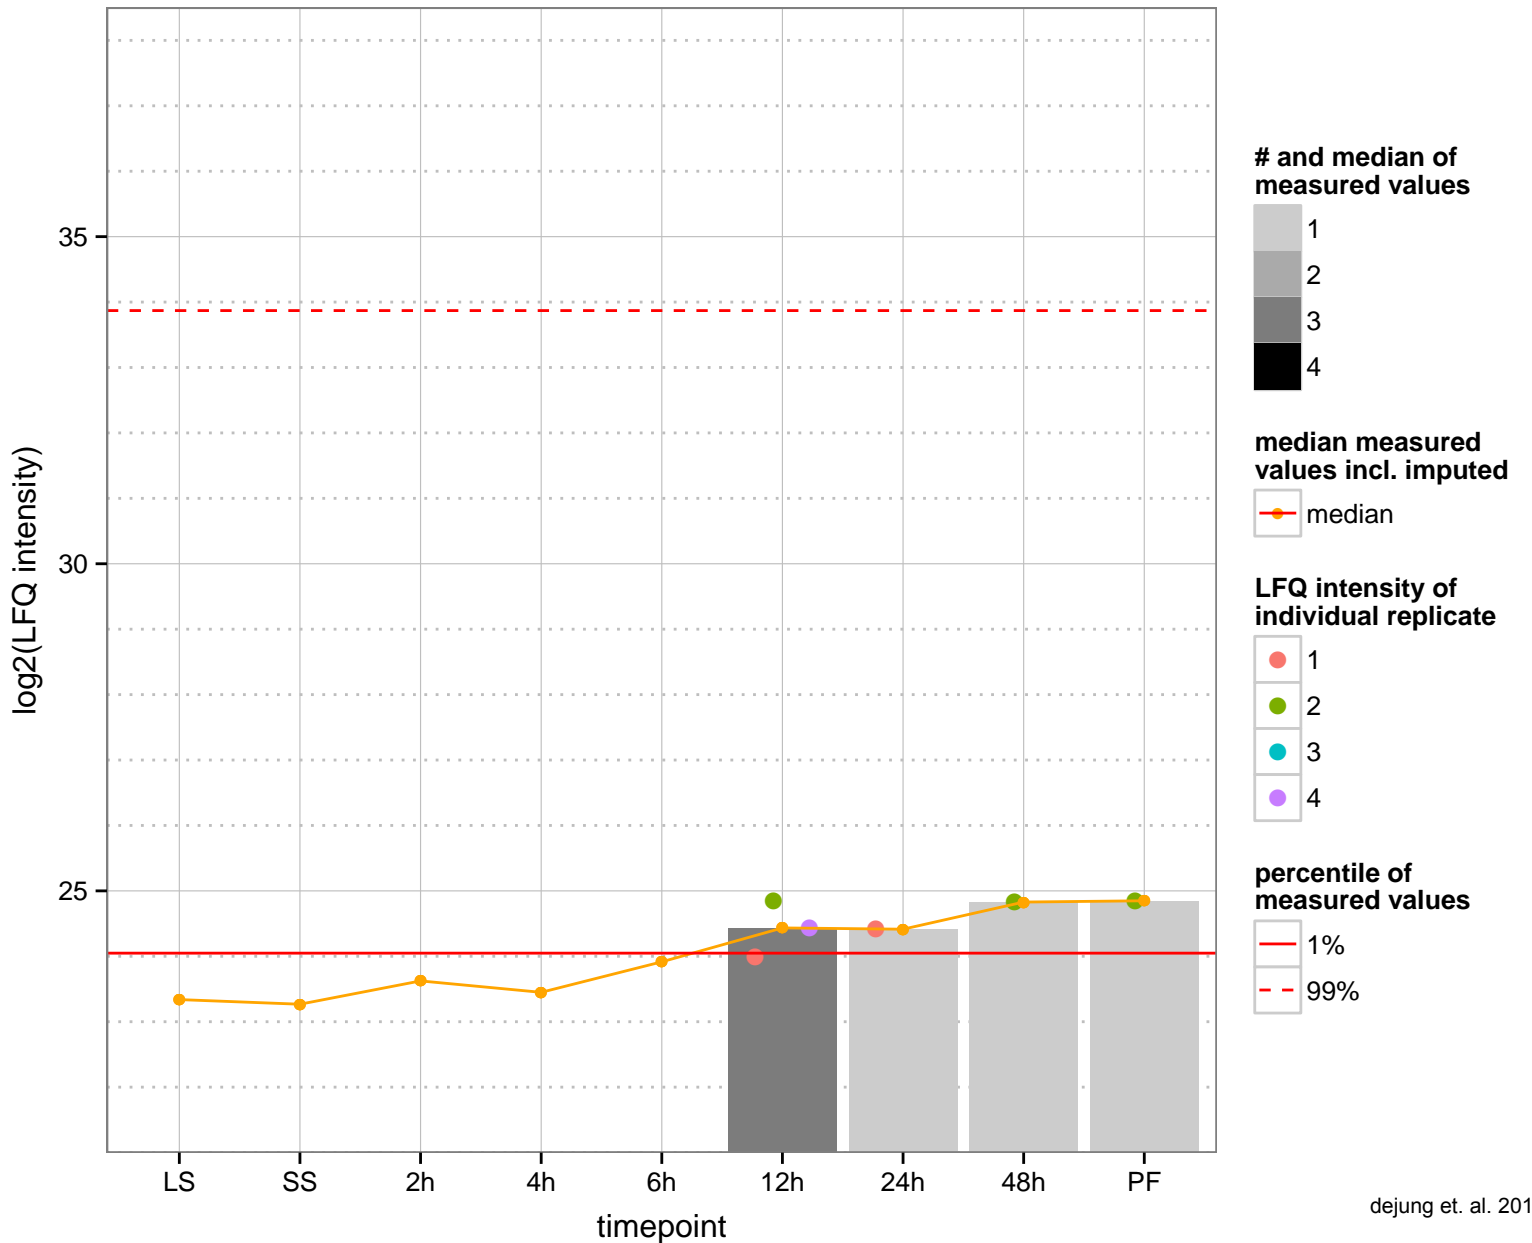

hypothetical protein, conserved  
 Tb927.10.11400  
 AGOF: null  
 AGOC: null  
 AGOP: null  
 PGO: protein binding  
 PGOC: null  
 PGOP: null

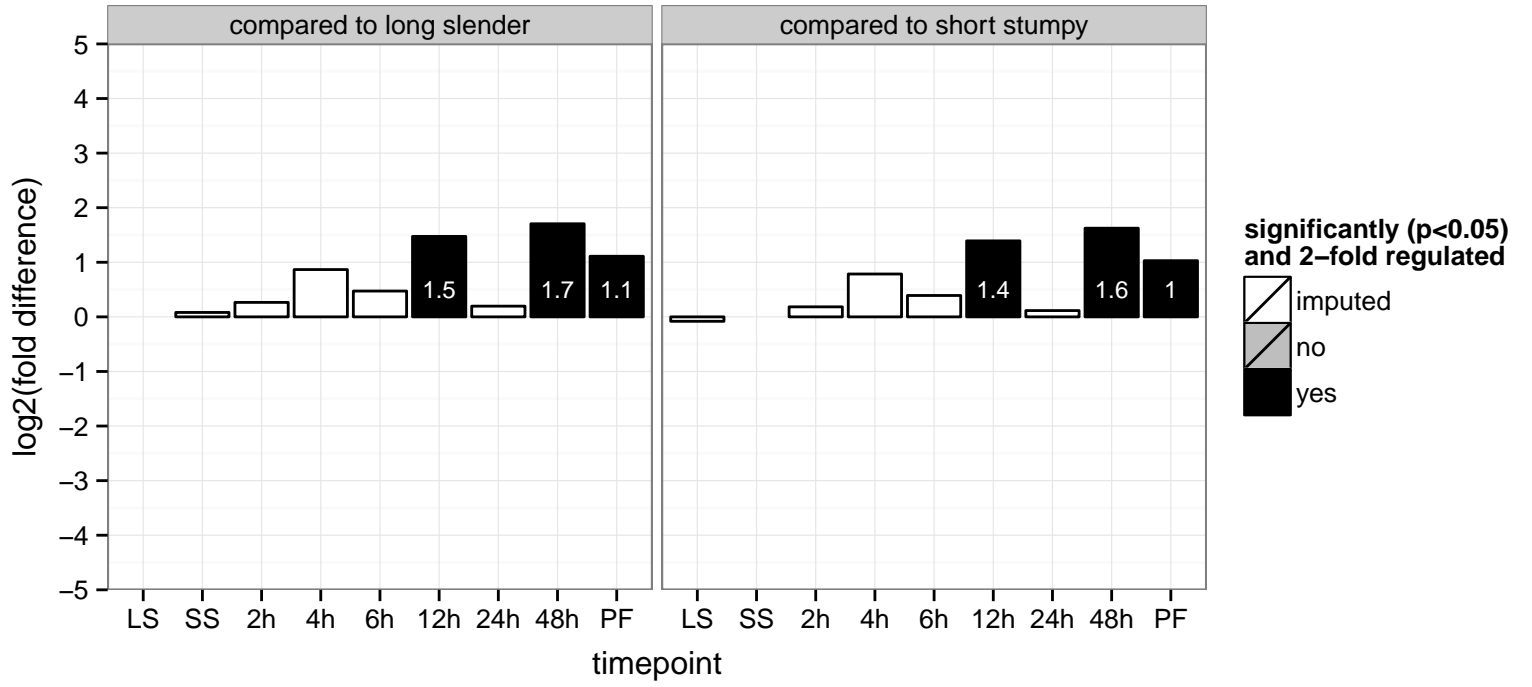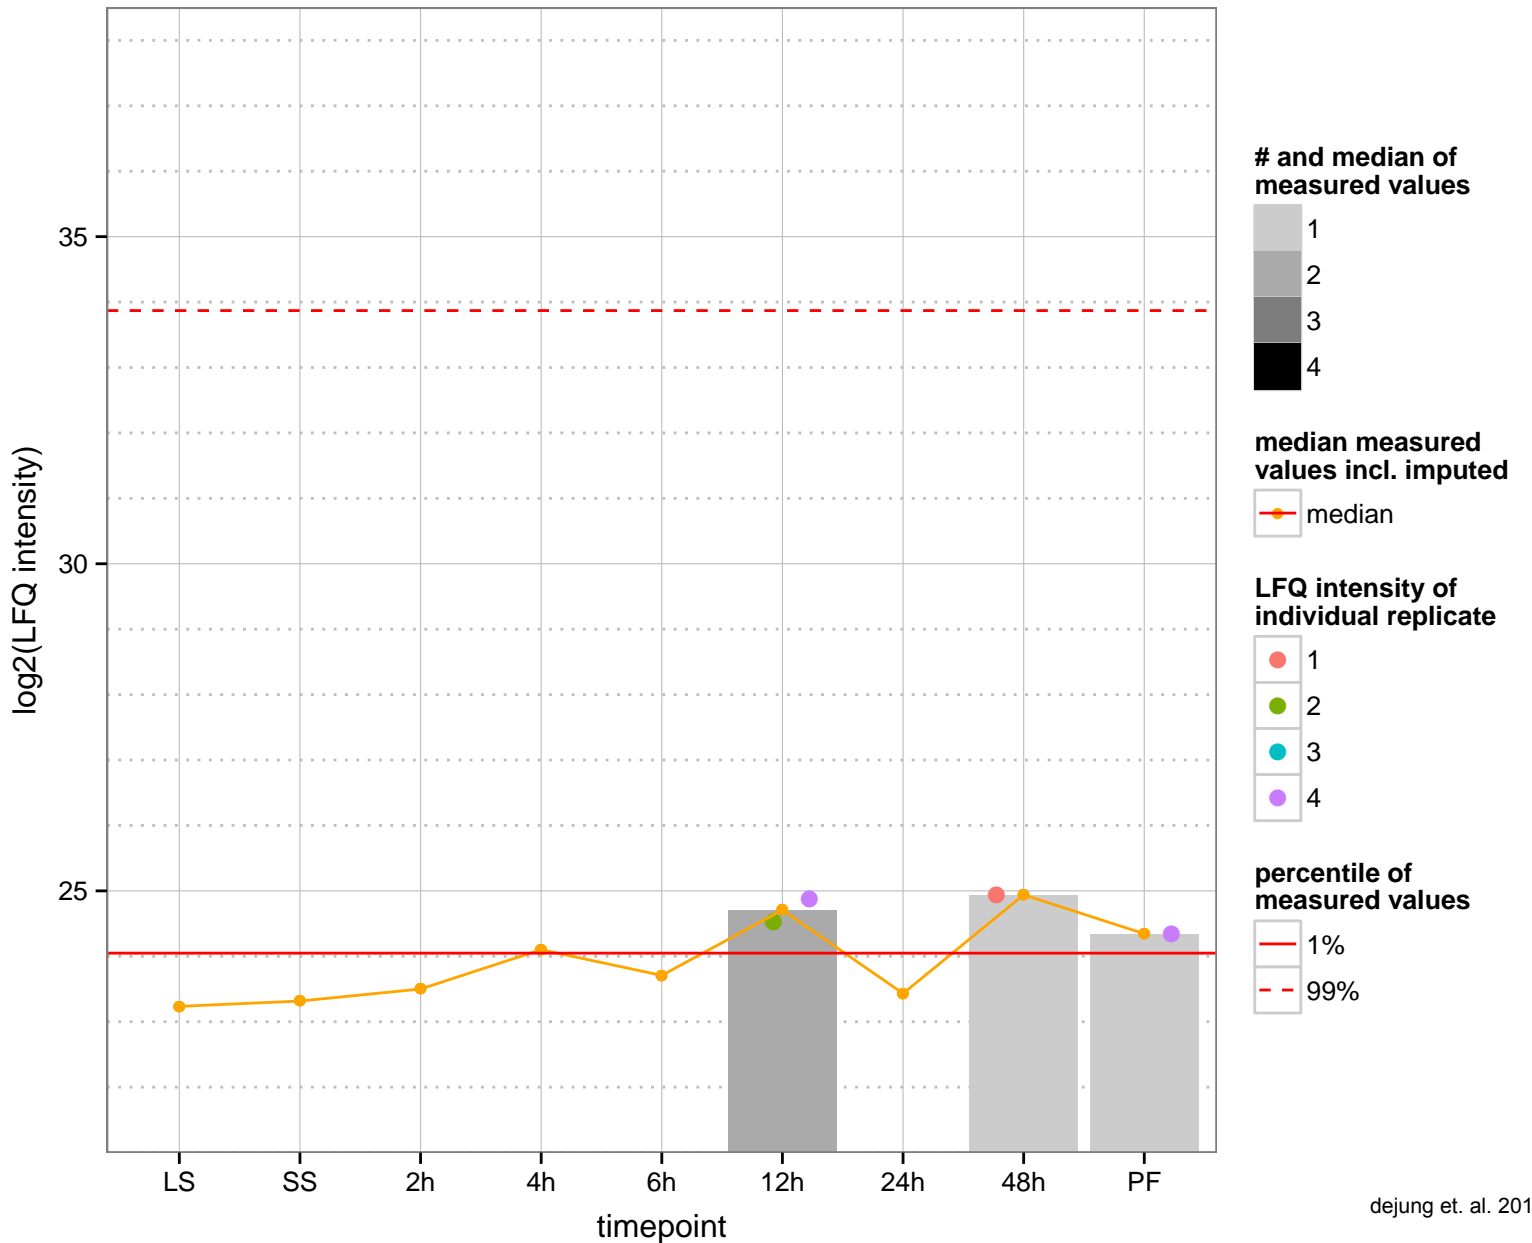

U3 small nucleolar ribonucleoprotein protein IMP3, putative  
 Tb927.11.13930  
 AGOF: RNA binding, rRNA binding  
 AGOC: intracellular, nucleus  
 AGOP: maturation of SSU-rRNA  
 PGO: RNA binding  
 PGOC: null  
 PGOP: null

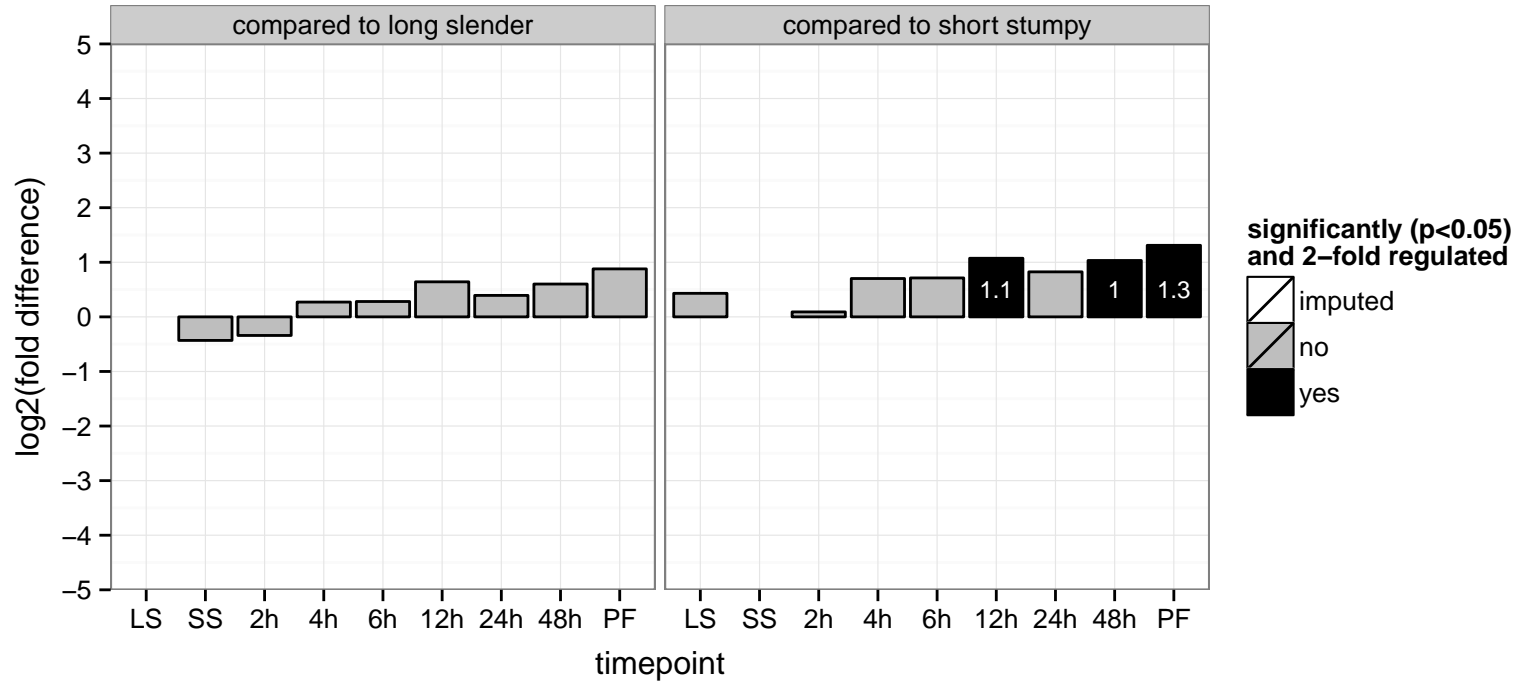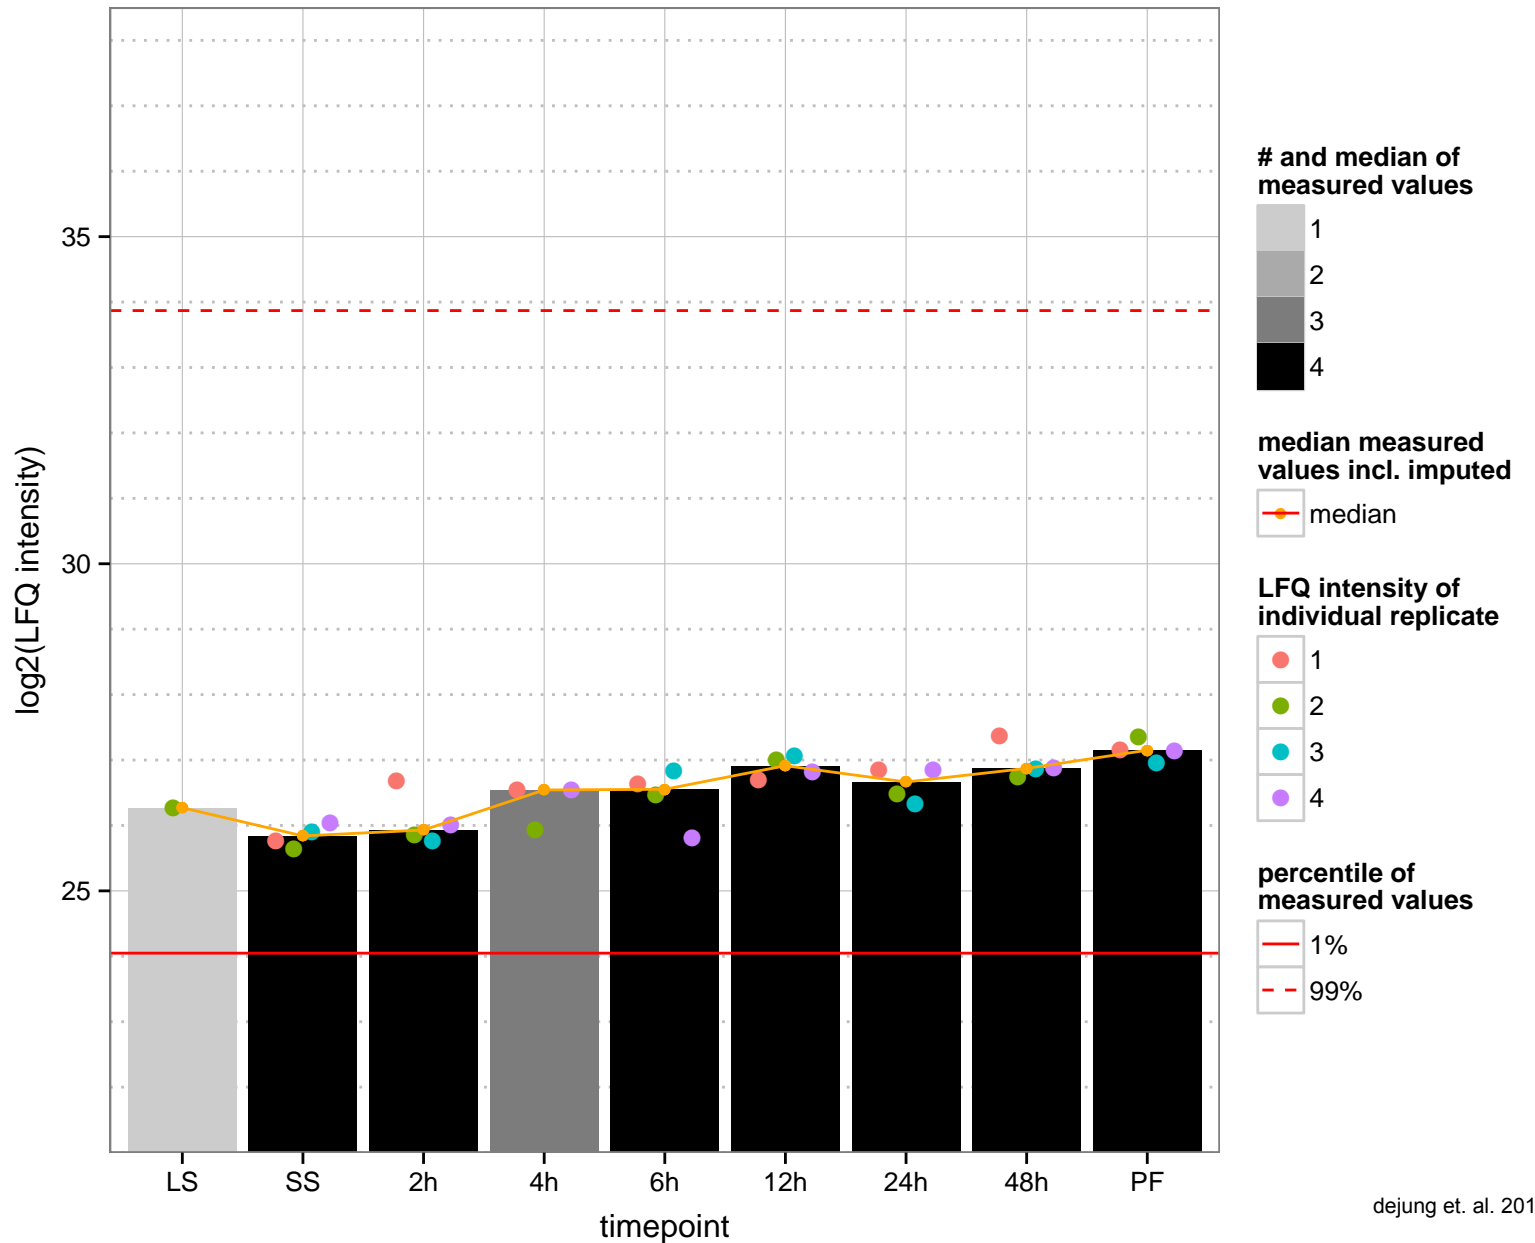

paraflagellar rod component, putative (PFC9)  
 Tb927.11.14880  
 AGOF: null  
 AGOC: null  
 AGOP: null  
 PGOF: null  
 PGO: null  
 PGOP: null

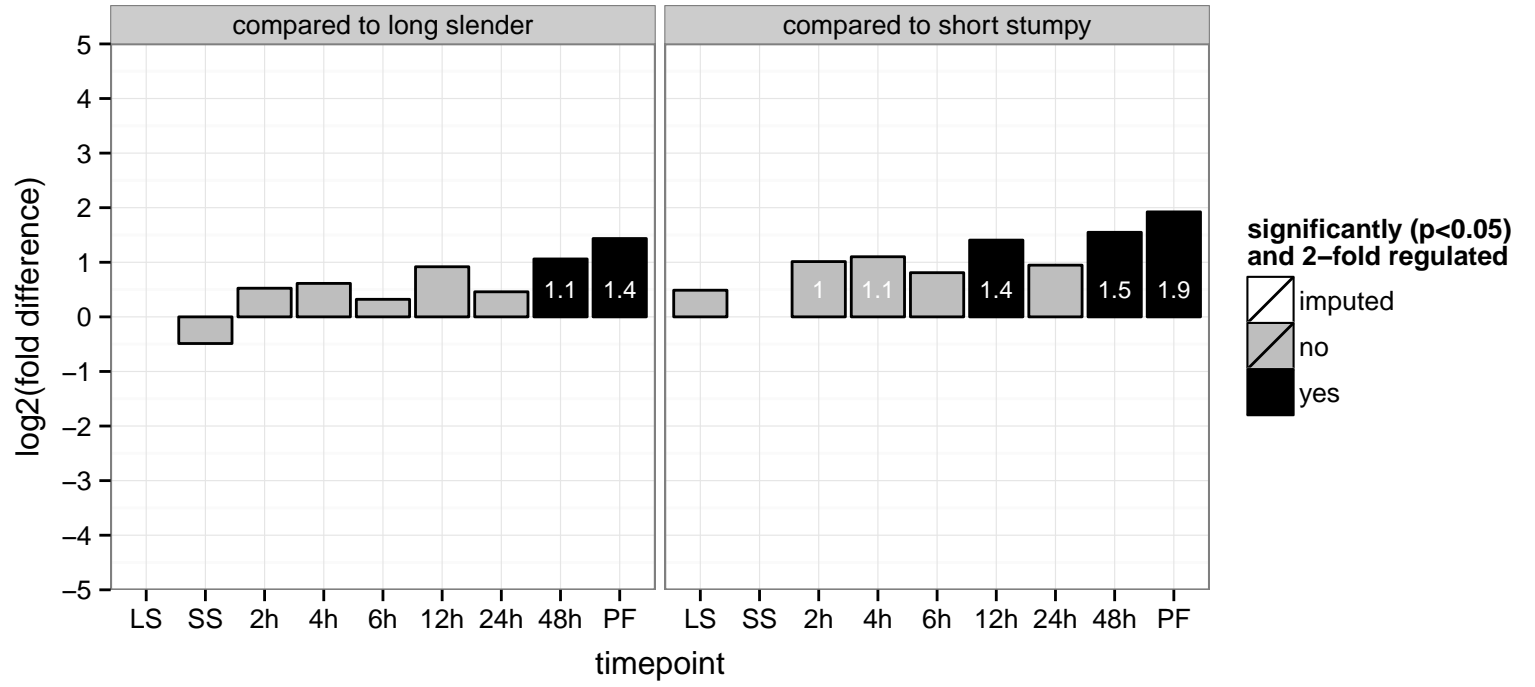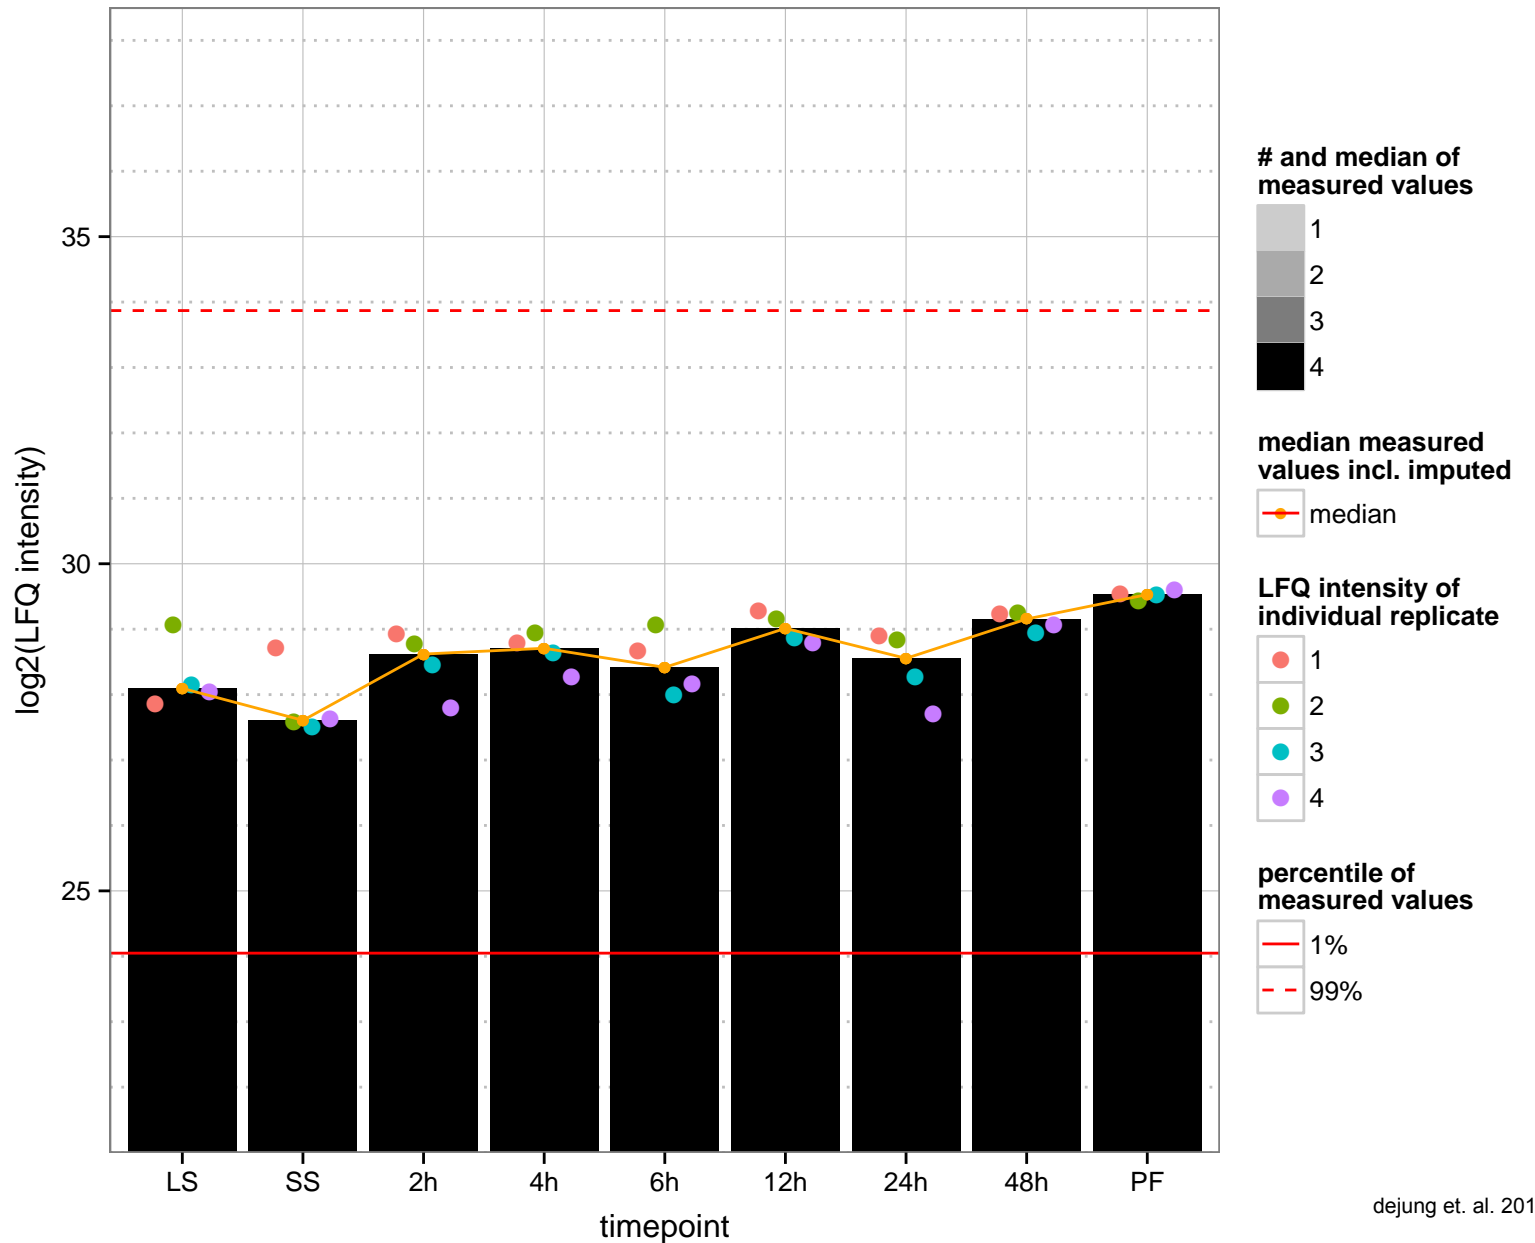

hypothetical protein, conserved  
 Tb927.11.1630  
 AGOF: null  
 AGOC: mitochondrion  
 AGOP: null  
 PGO: null  
 PGOC: null  
 PGOP: null

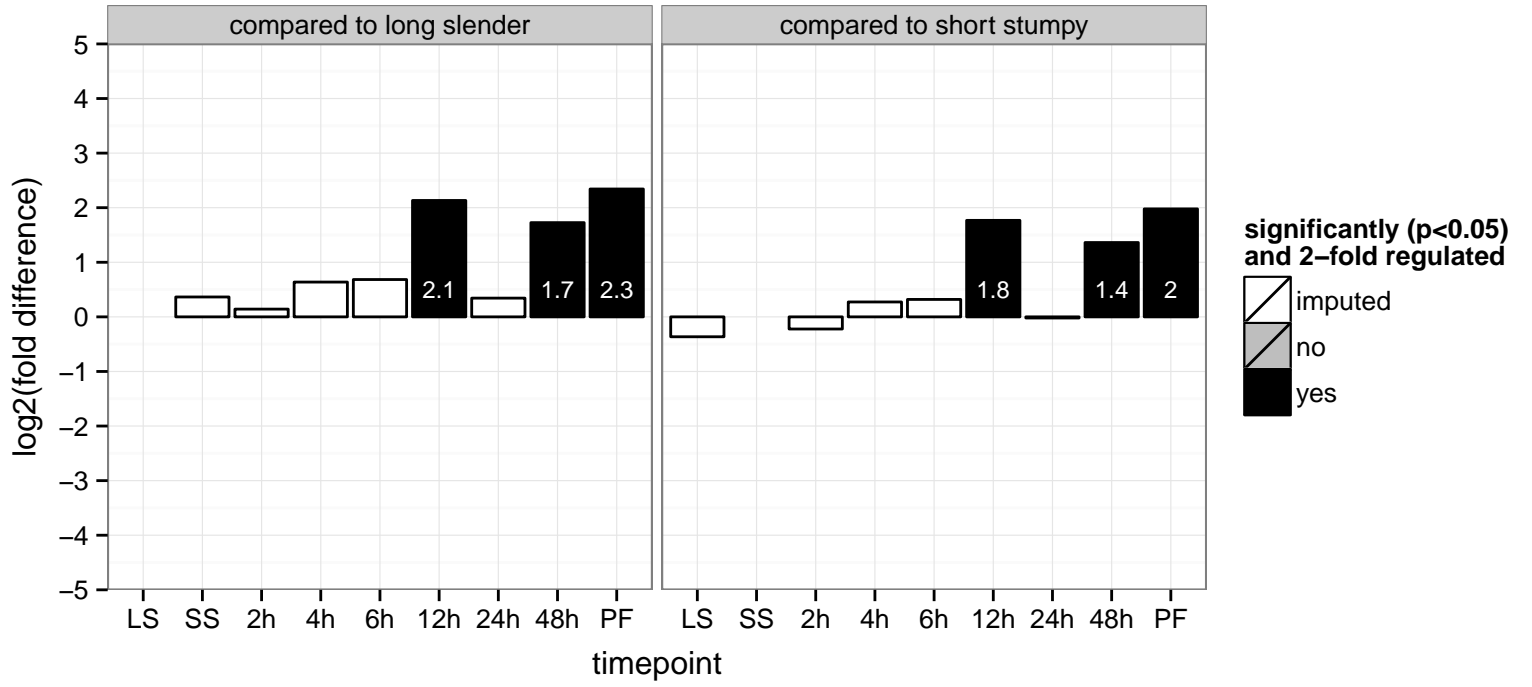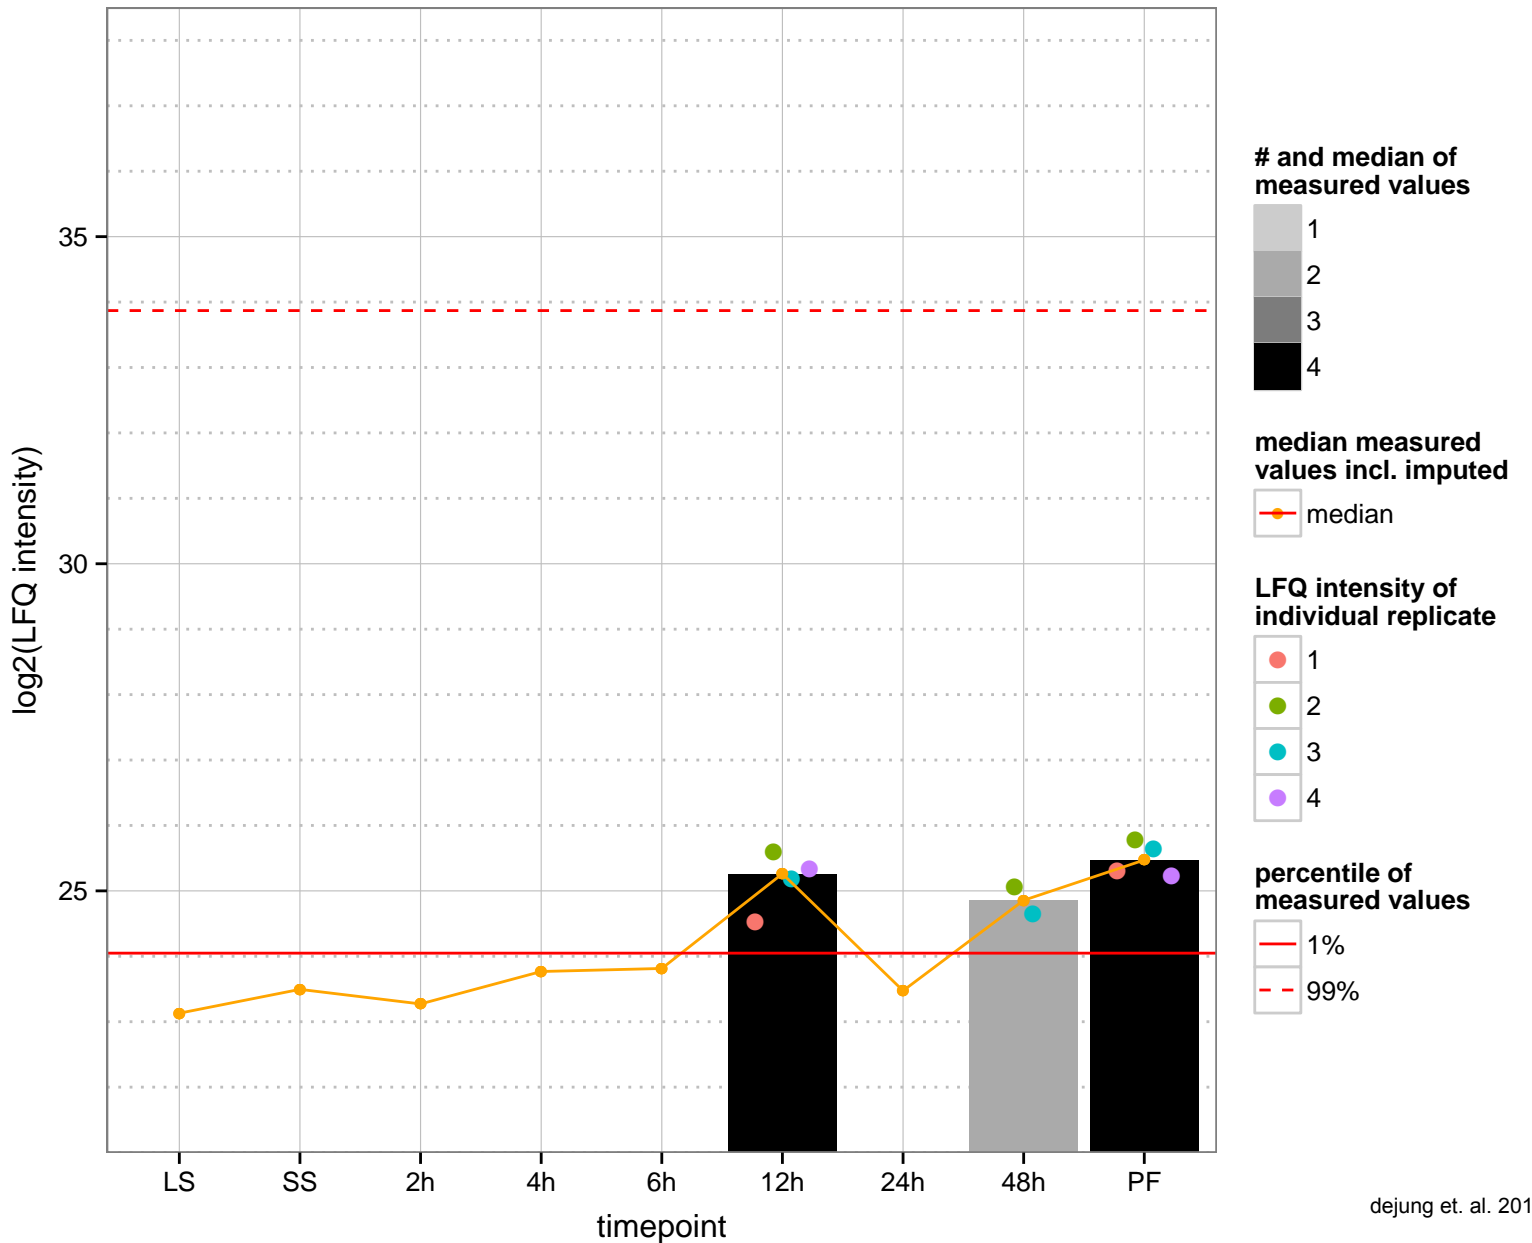



hypothetical protein, conserved  
 Tb927.11.8040  
 AGOF: null  
 AGOC: mitochondrion  
 AGOP: null  
 PGO: null  
 PGOC: null  
 PGOP: null

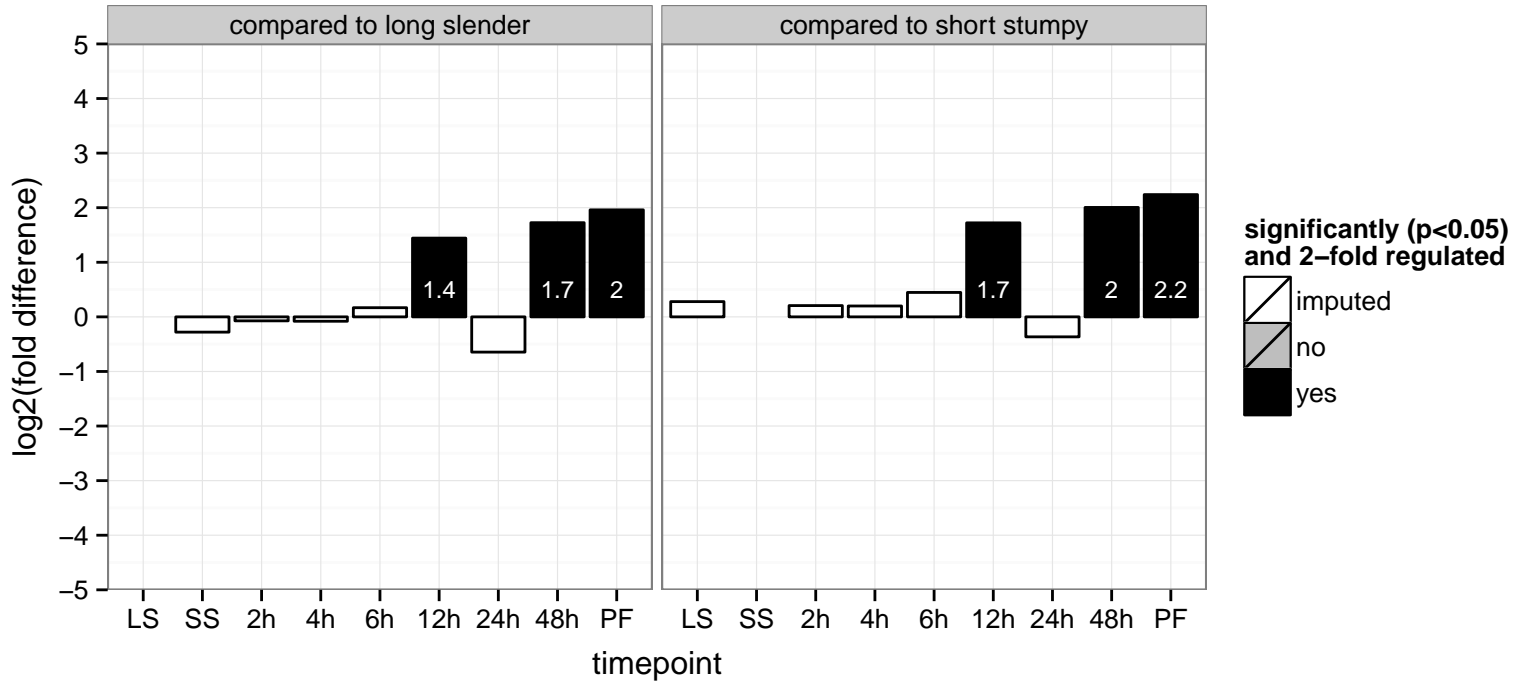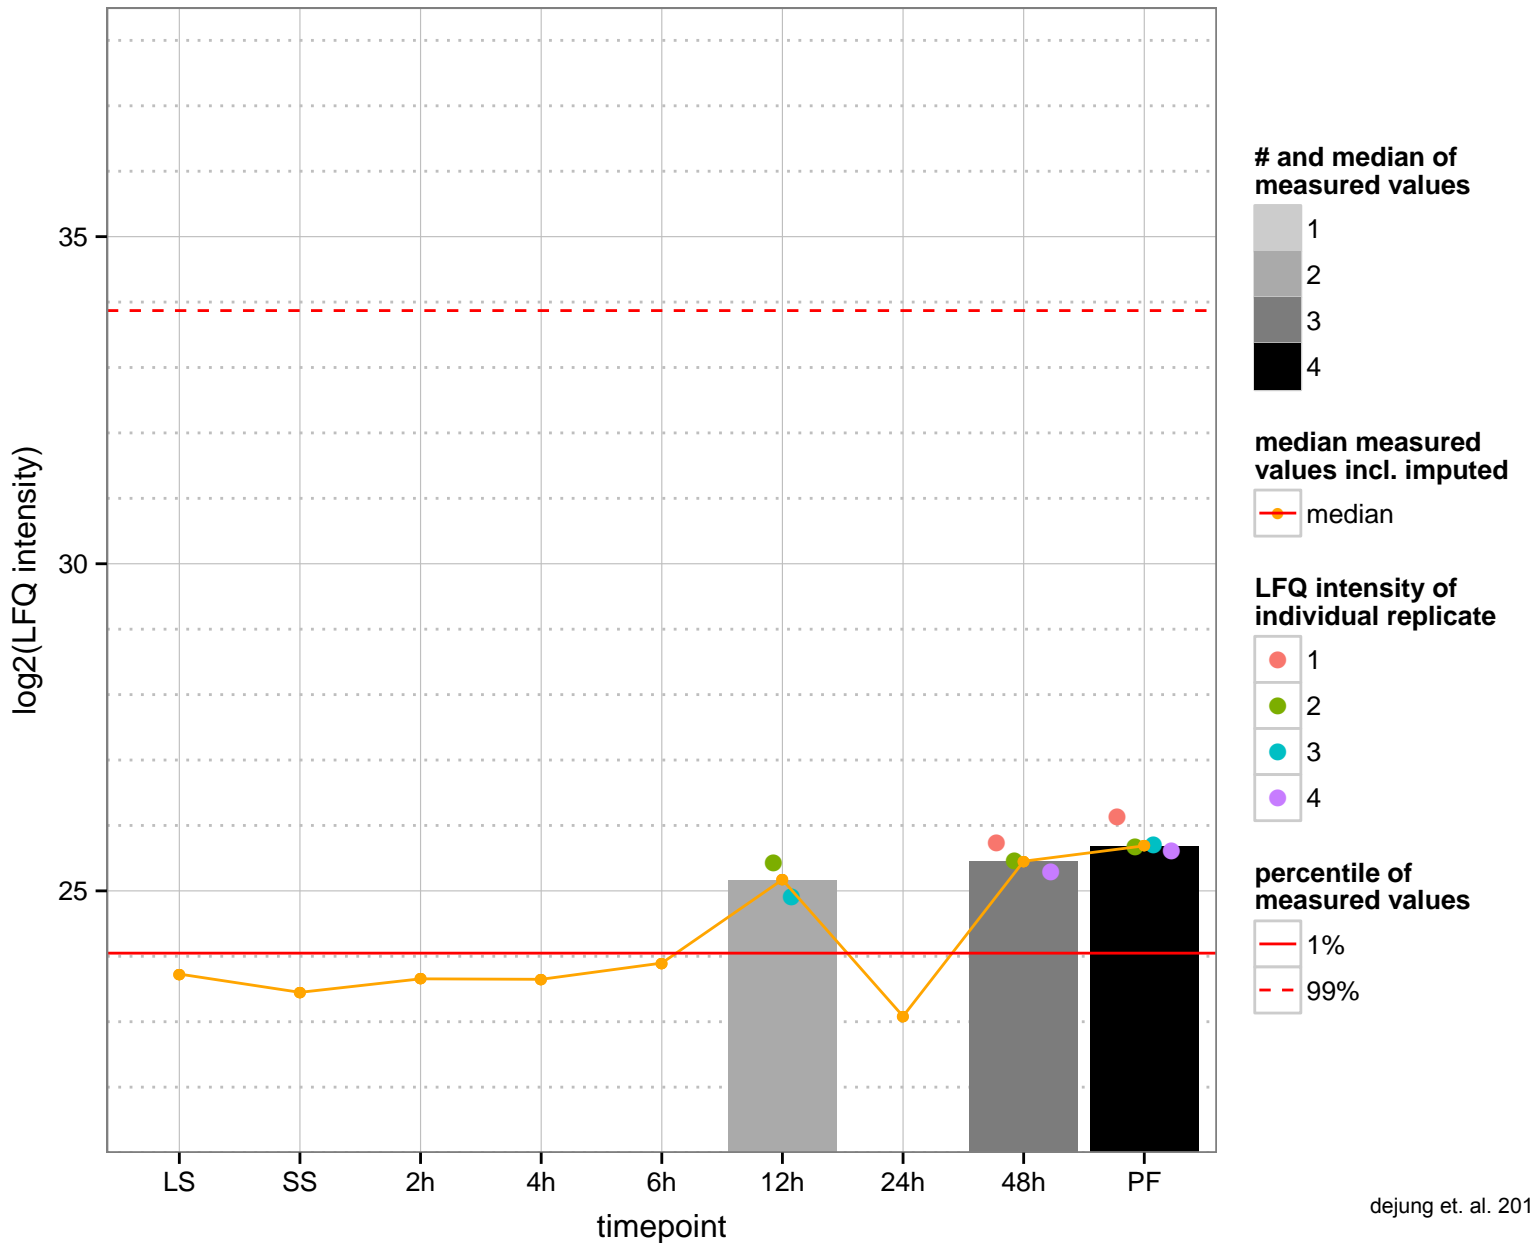

hypothetical protein, conserved  
 Tb927.3.700  
 AGOF: null  
 AGOC: null  
 AGOP: null  
 PGO: null  
 PGOC: null  
 PGOP: null

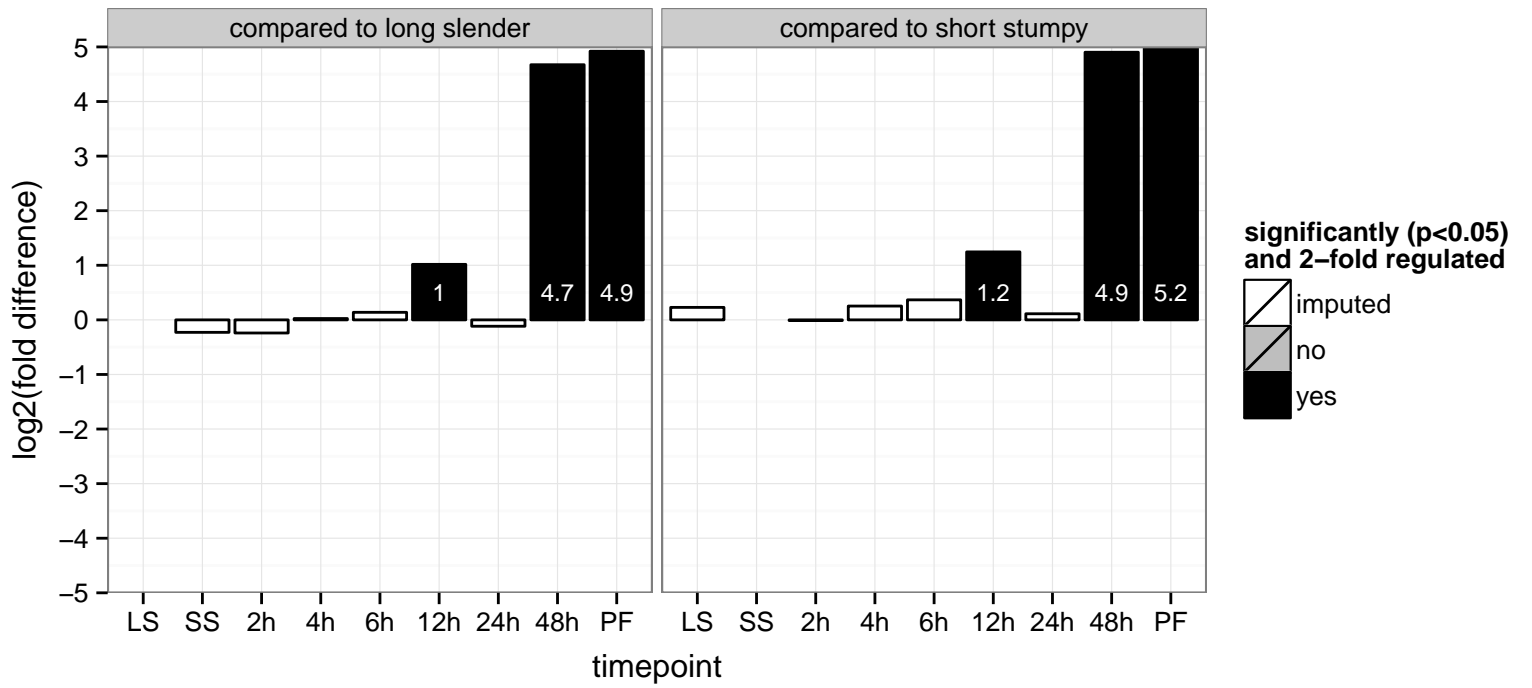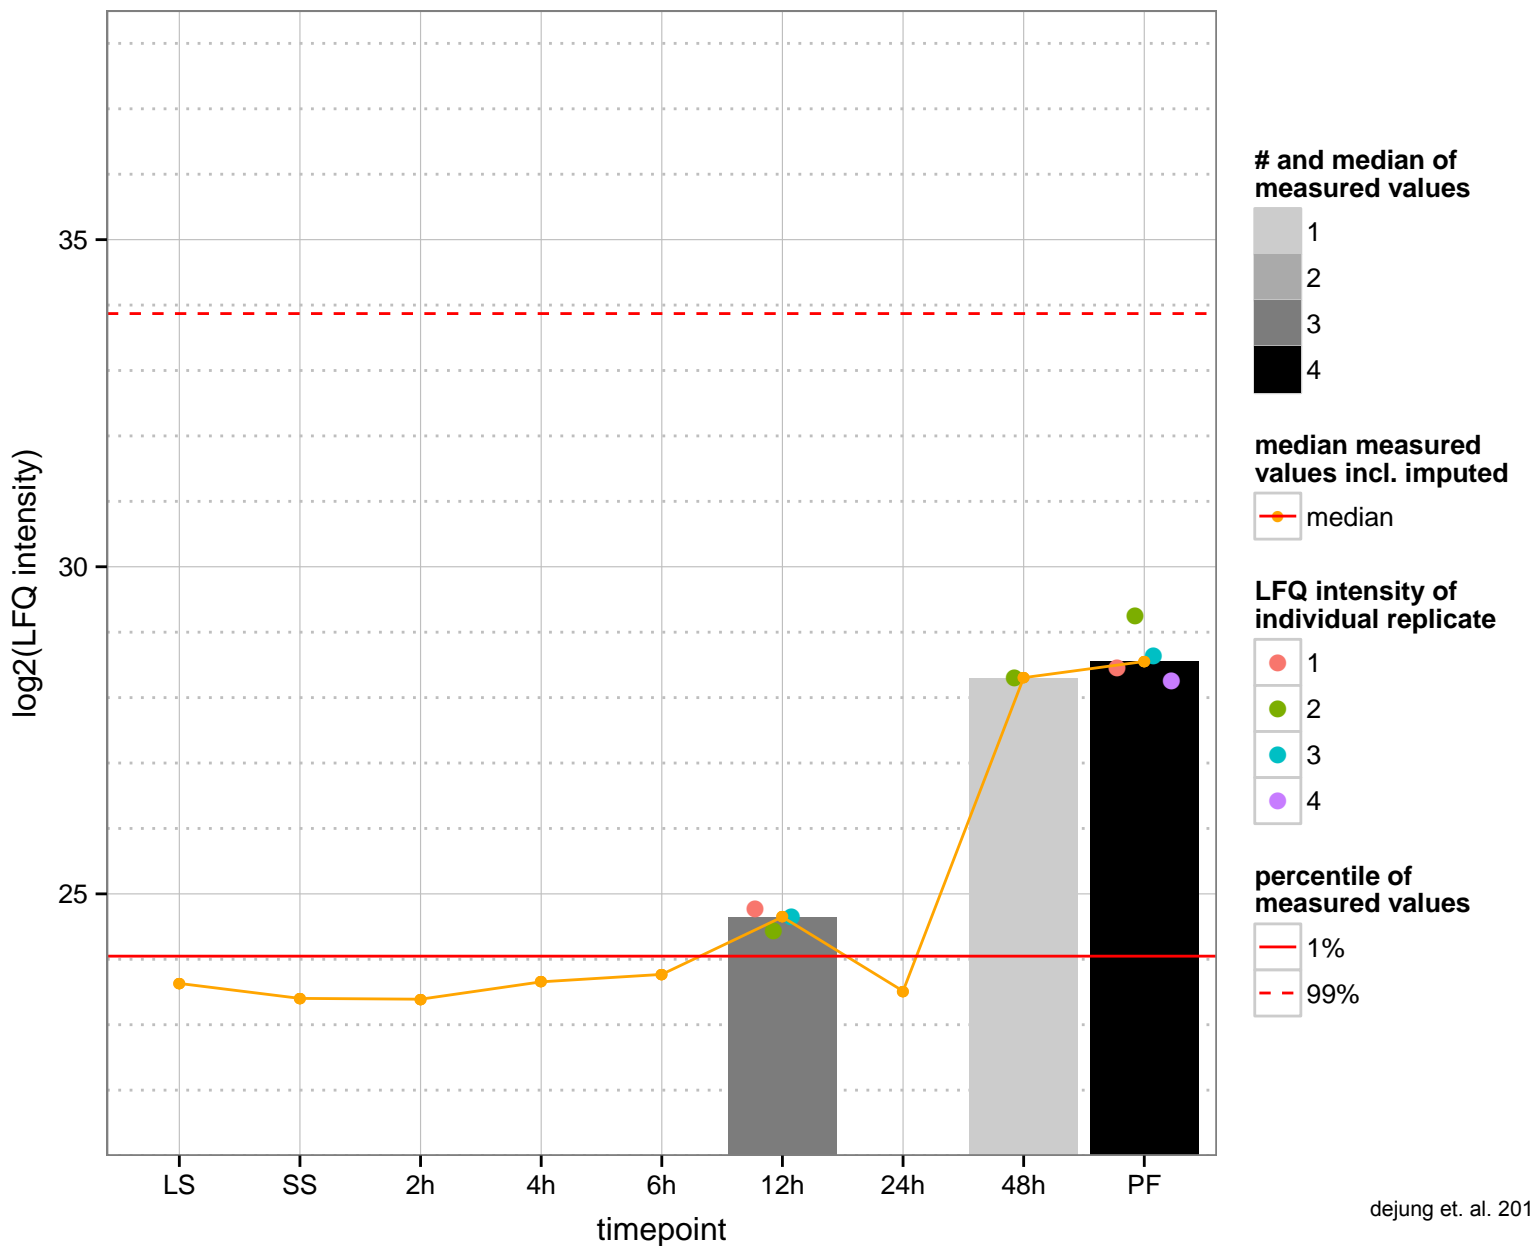

hypothetical protein, conserved  
 Tb927.5.2810  
 AGOF: null  
 AGOC: mitochondrion  
 AGOP: null  
 PGO: null  
 PGOC: null  
 PGOP: null

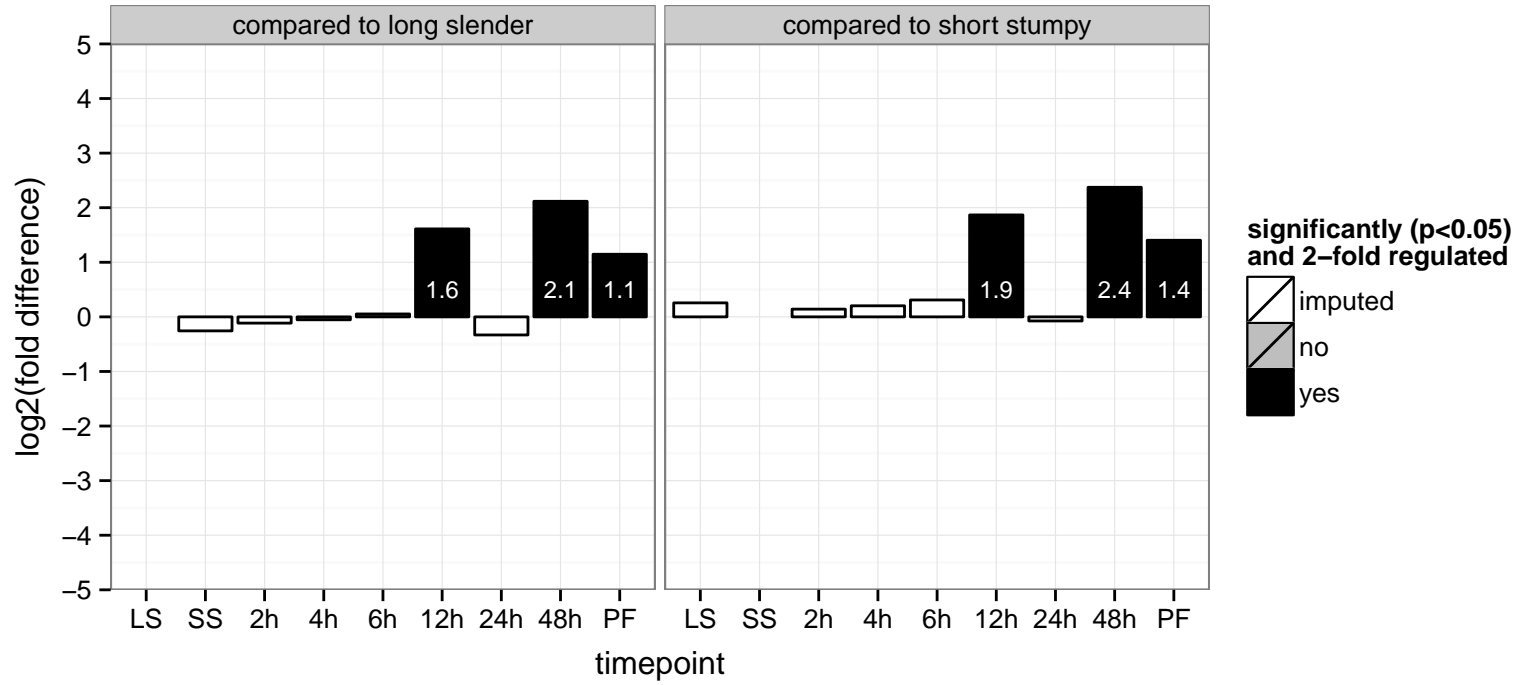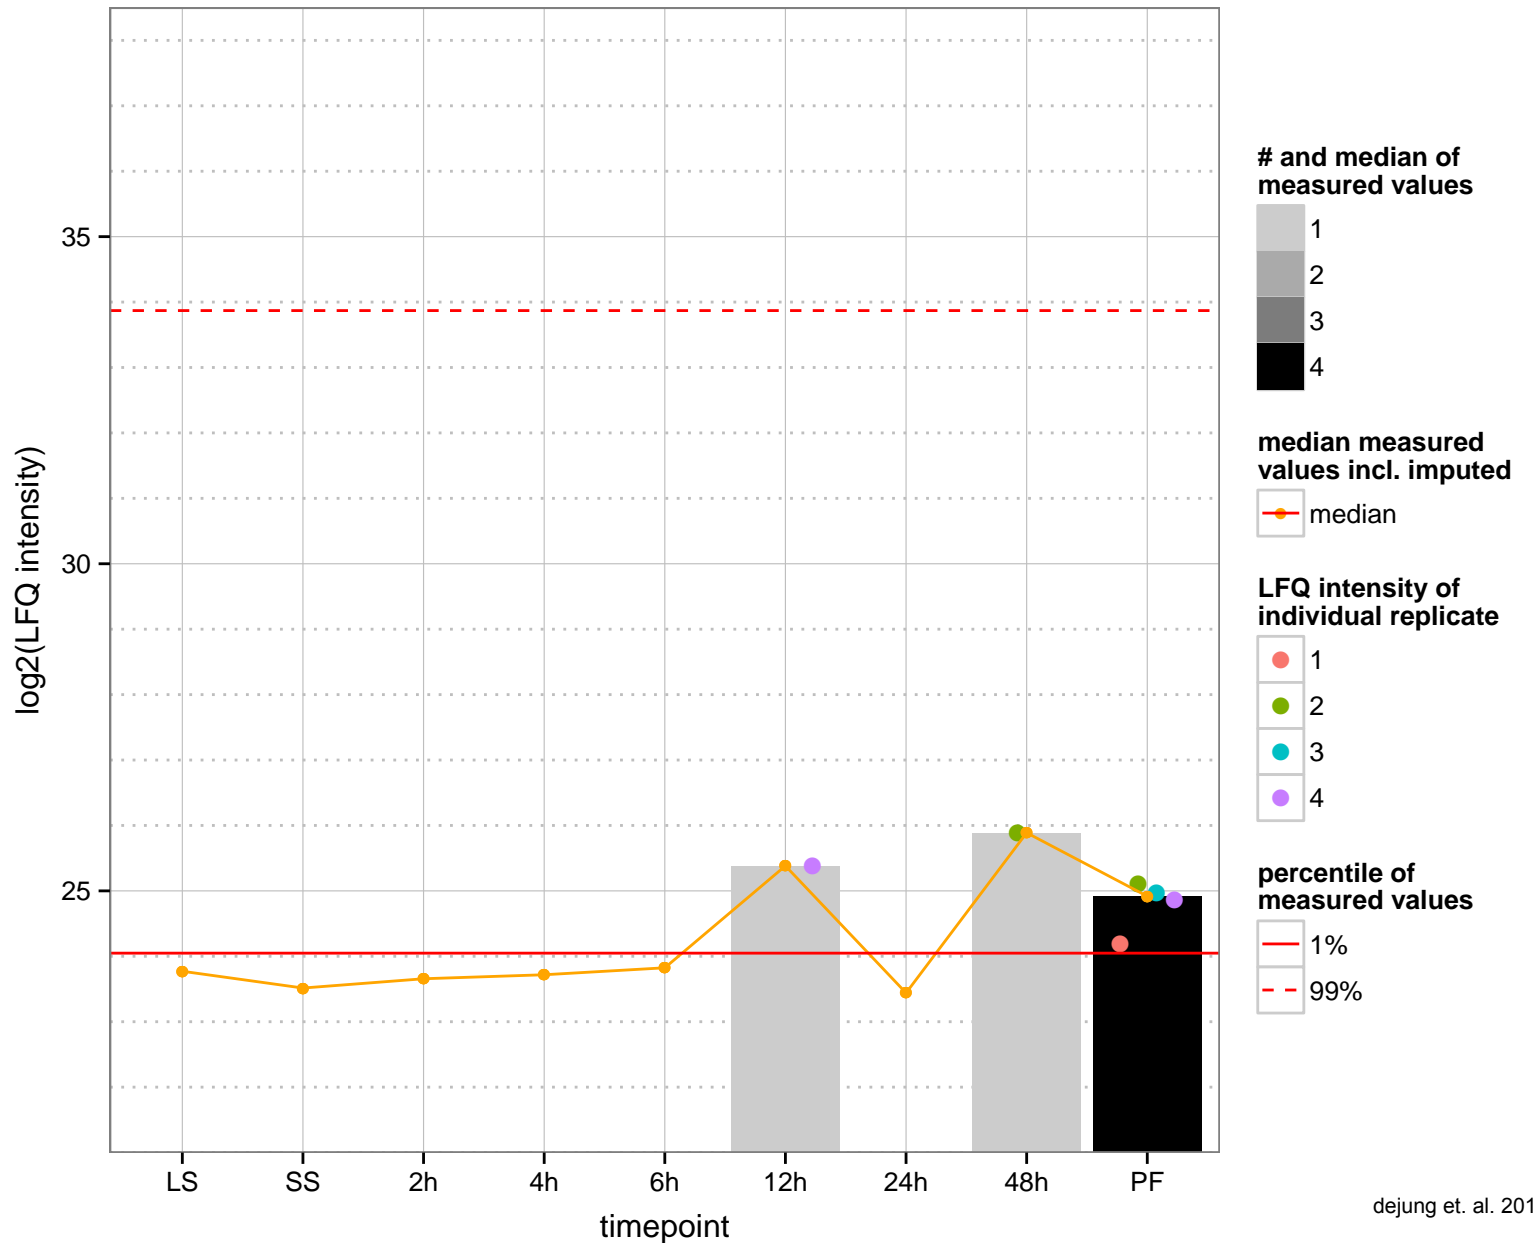

hypothetical protein, conserved  
 Tb927.6.630  
 AGOF: null  
 AGOC: null  
 AGOP: null  
 PGO: null  
 PGOC: null  
 PGOP: null

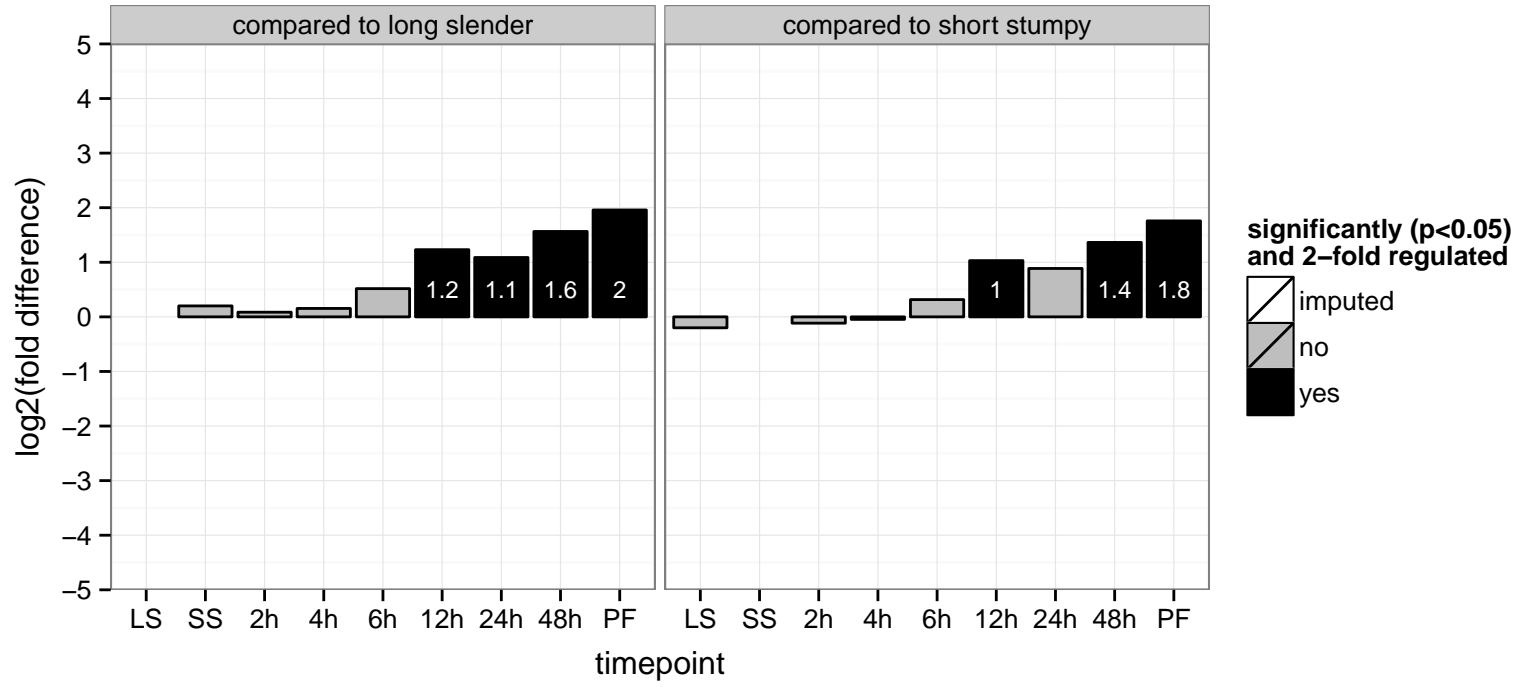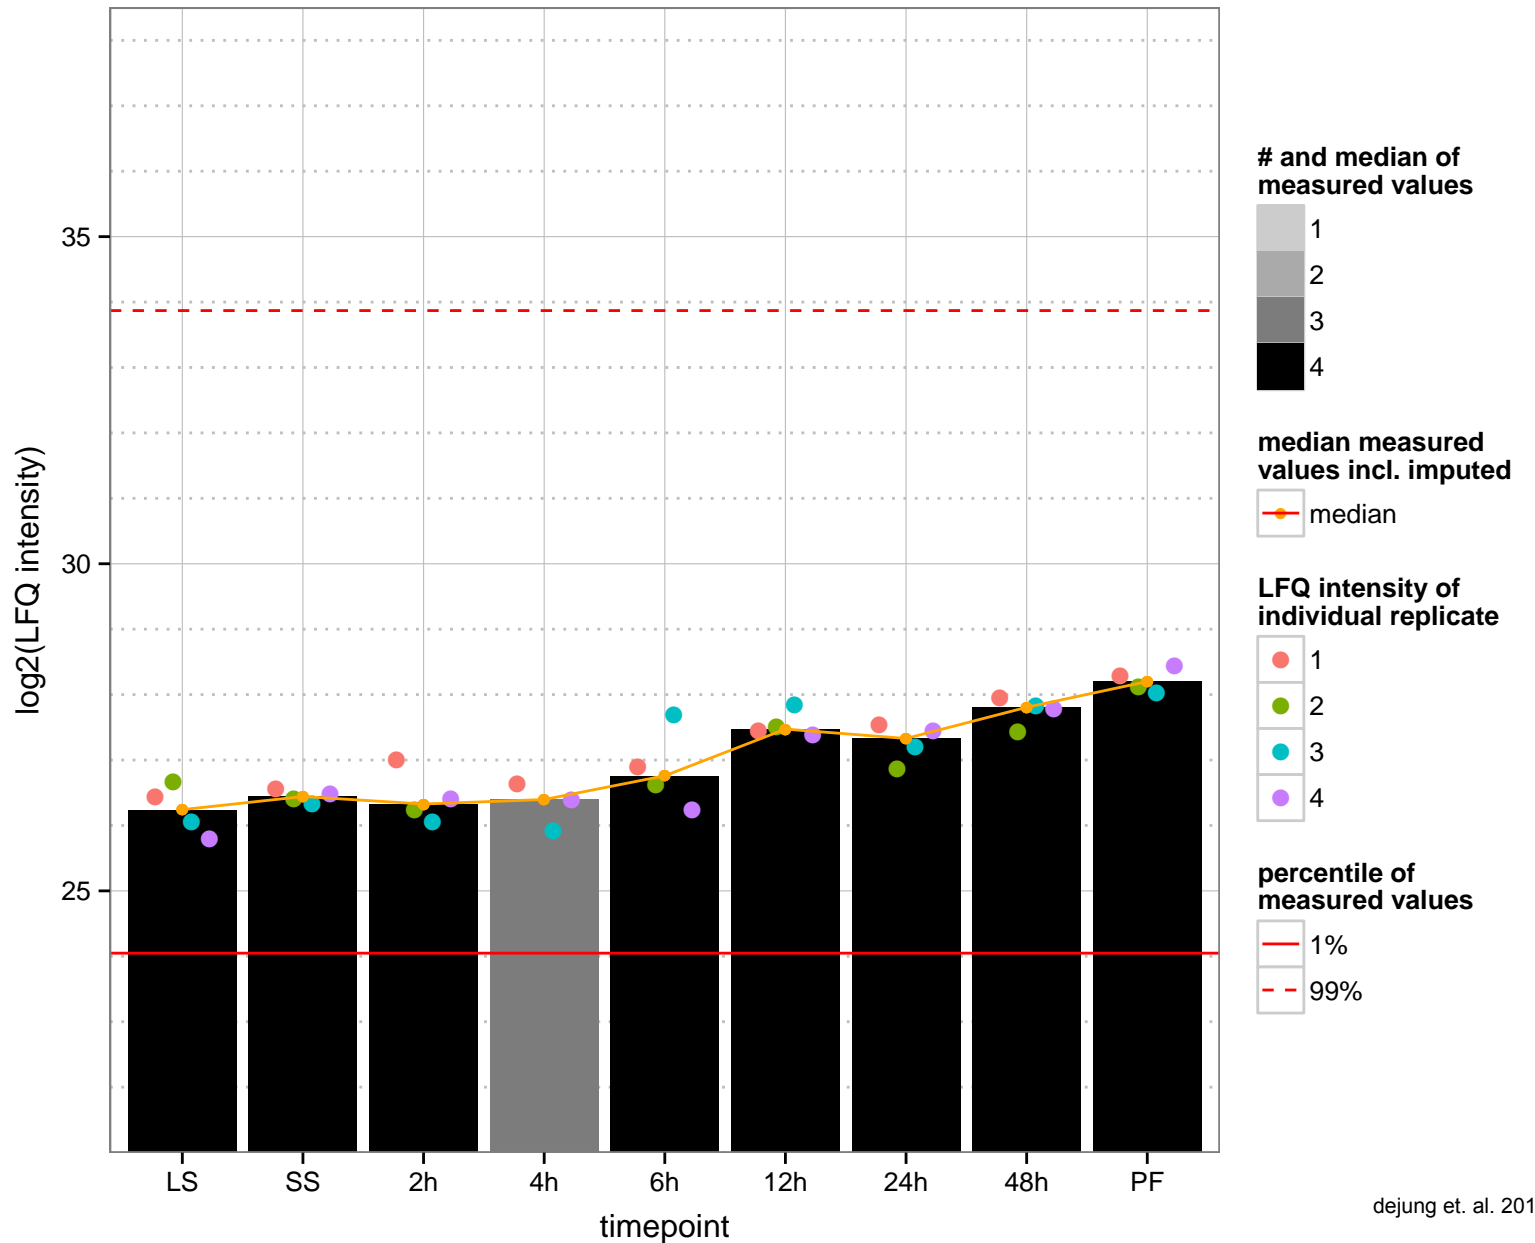

clathrin assembly sigma-adaptin protein 3, putative  
 Tb927.8.6680  
 AGOF: protein transporter activity  
 AGOC: AP-3 adaptor complex, clathrin vesicle coat  
 AGOP: intracellular protein transport, vesicle-mediated transport  
 PGO: protein transporter activity  
 PGO: null  
 PGO: protein transport, transport

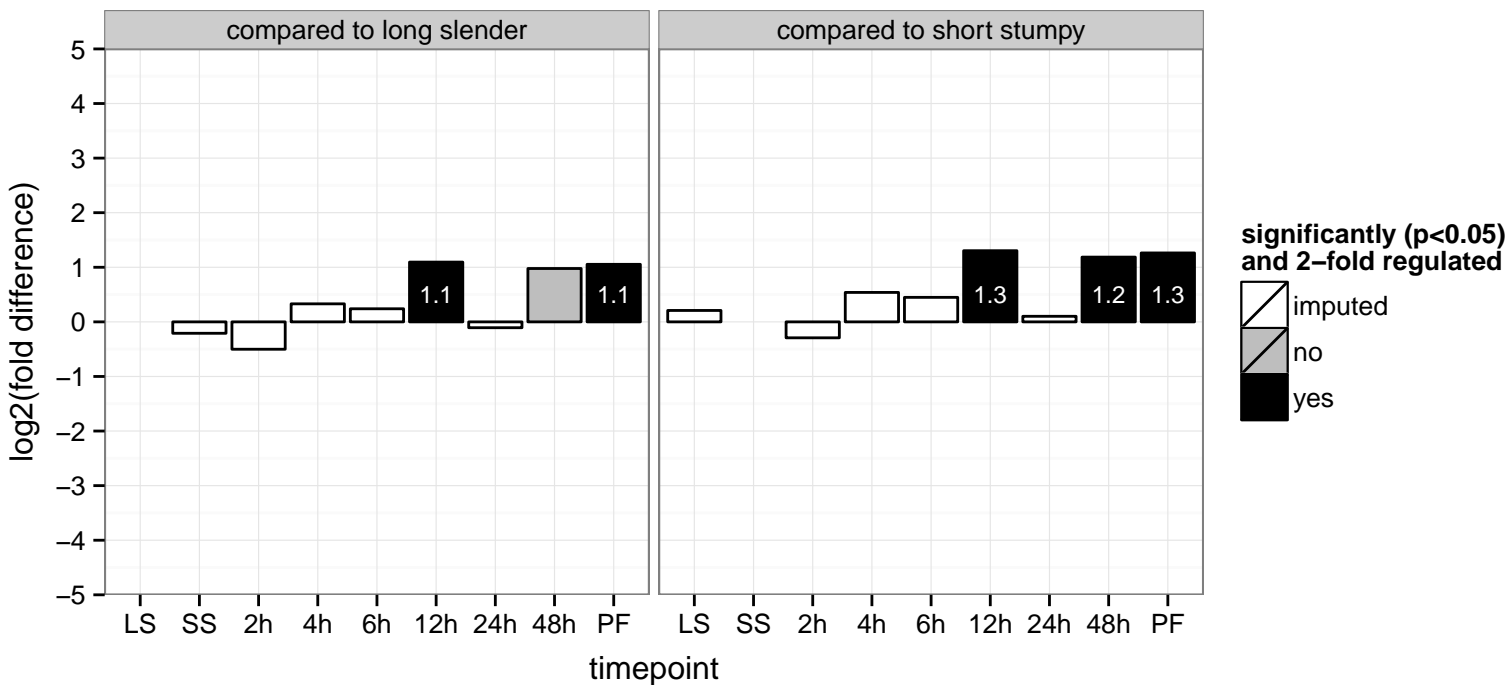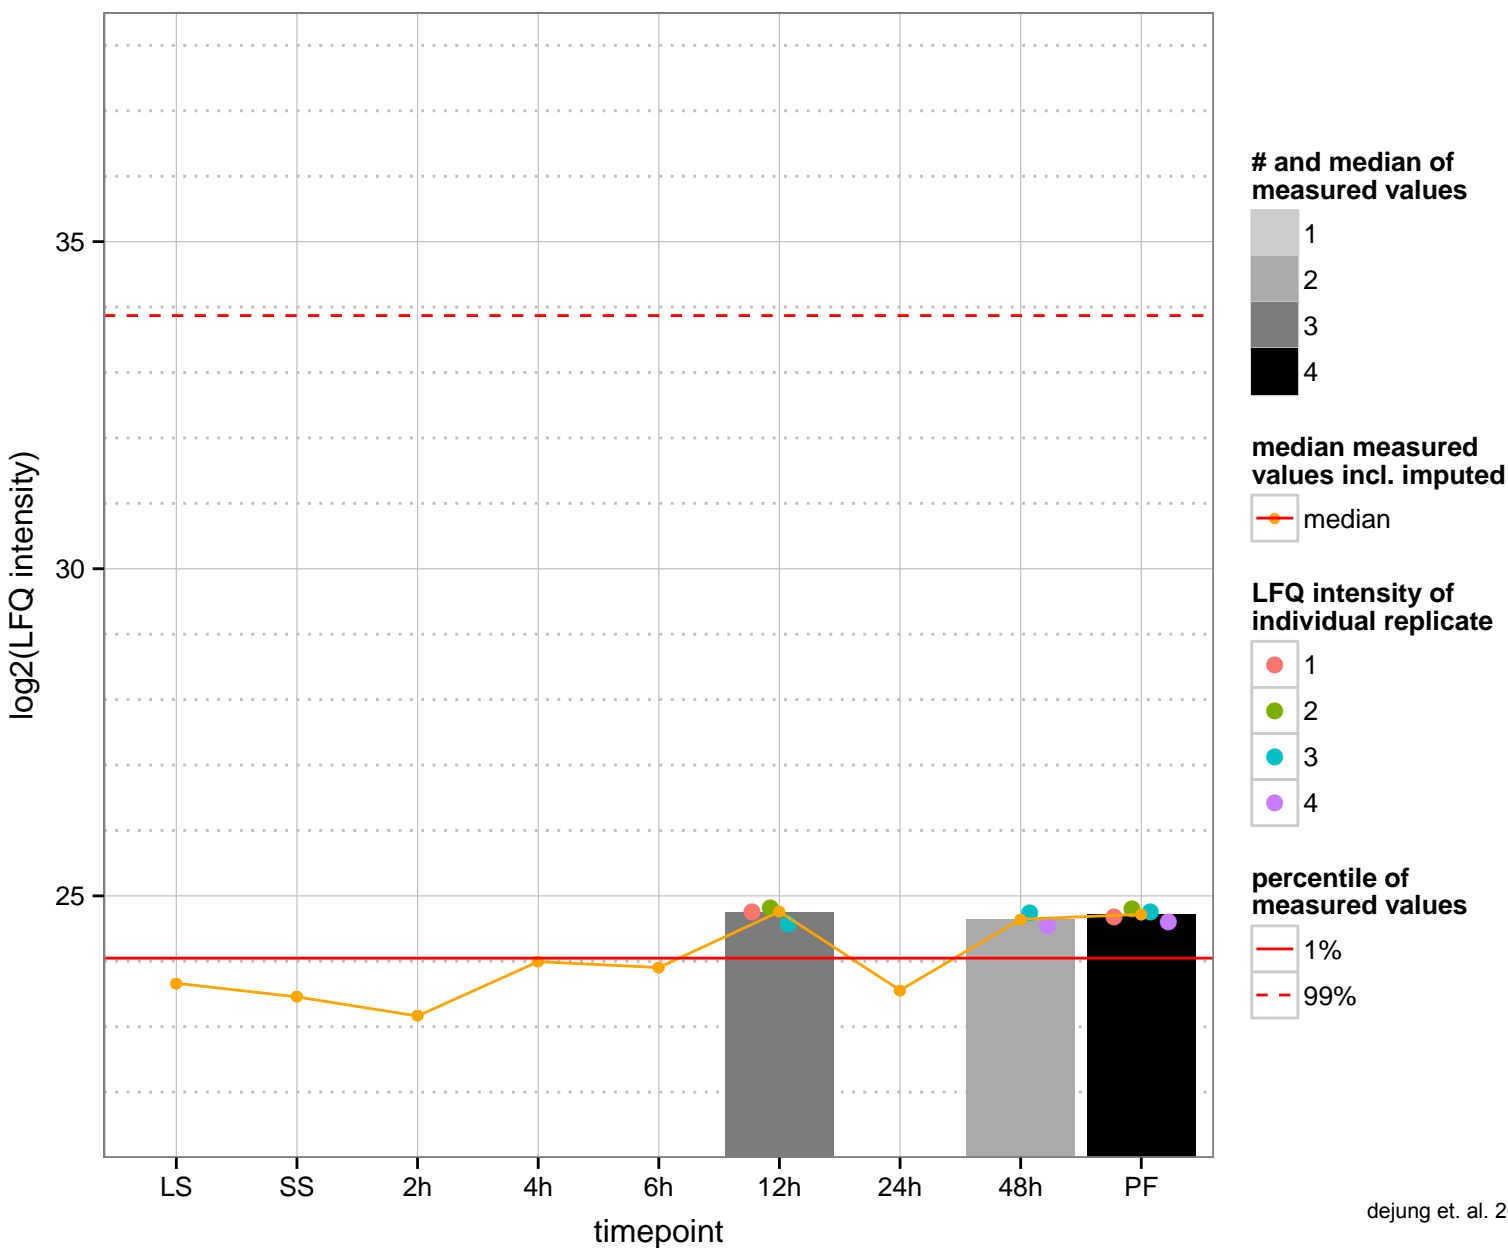

hypothetical protein, conserved  
 Tb927.9.9220  
 AGOF: antiporter activity, drug transmembrane transporter activity  
 AGOC: membrane  
 AGOP: drug transmembrane transport  
 PGO: null  
 PGO: null  
 PGO: null

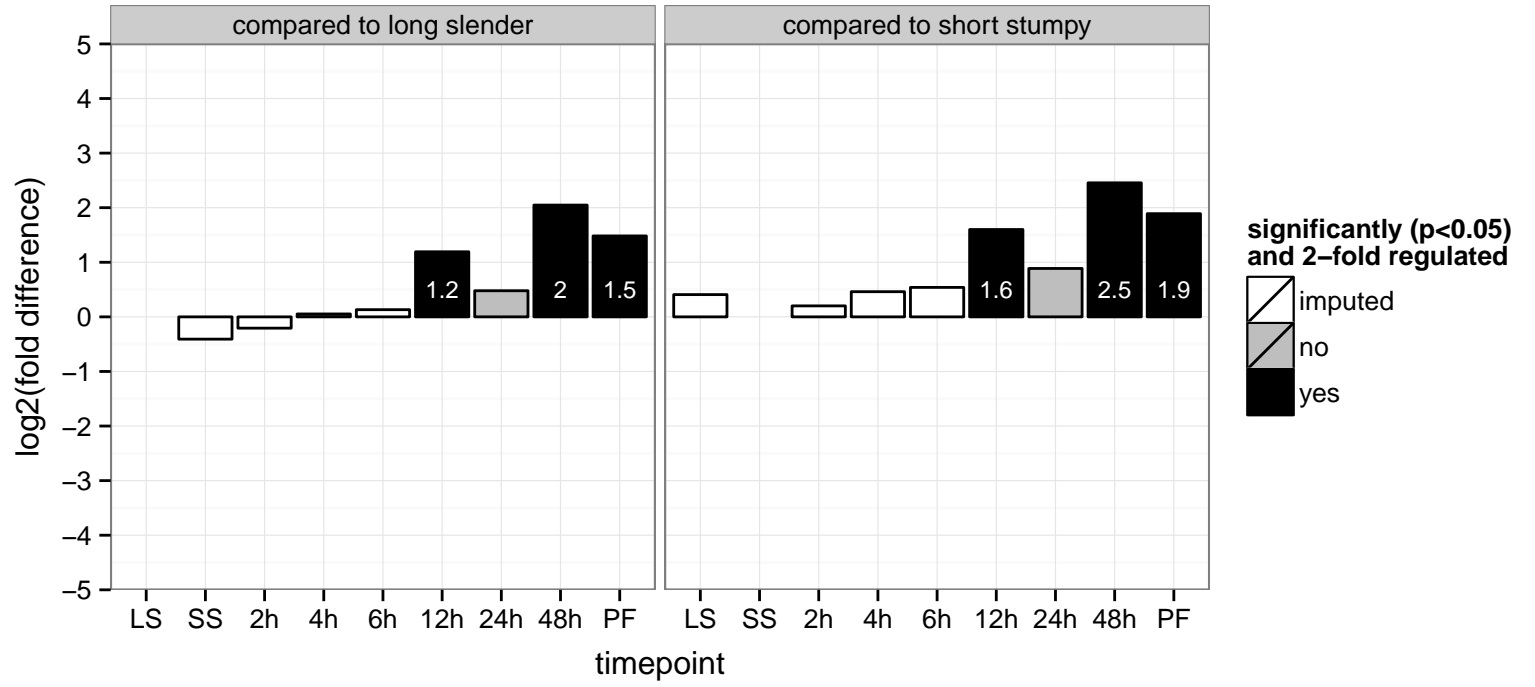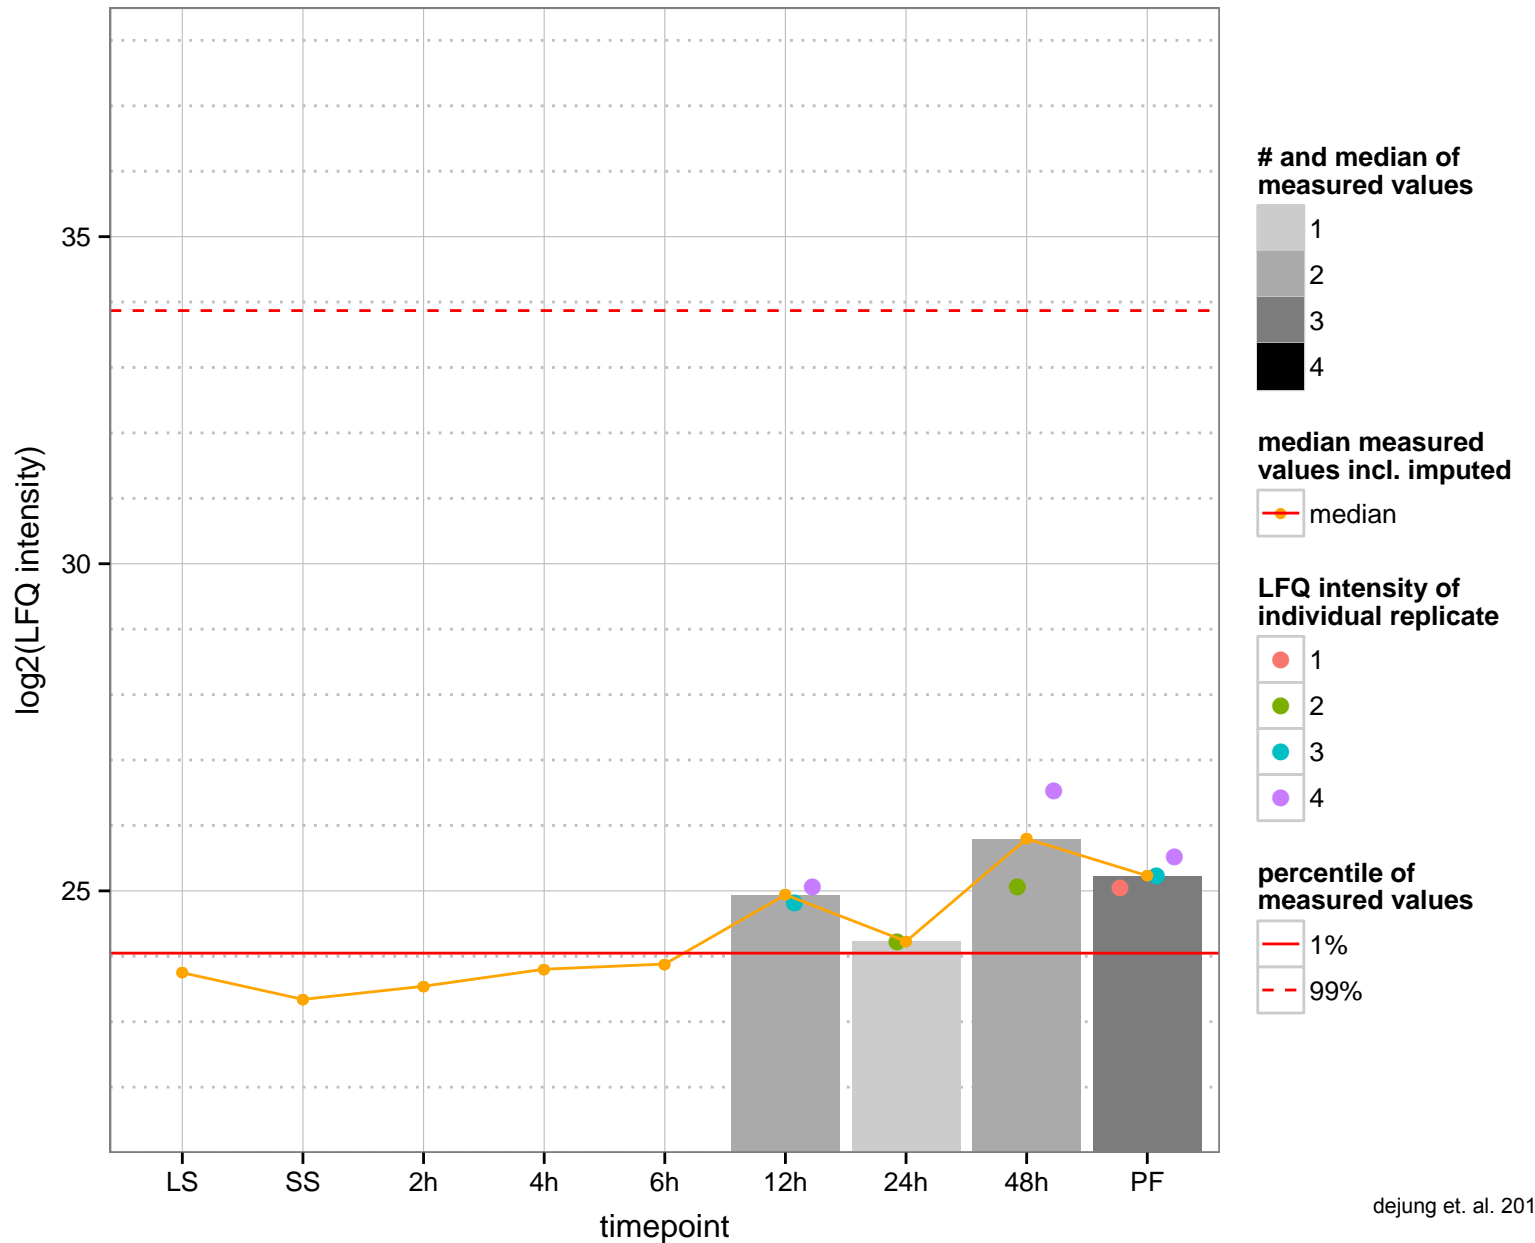

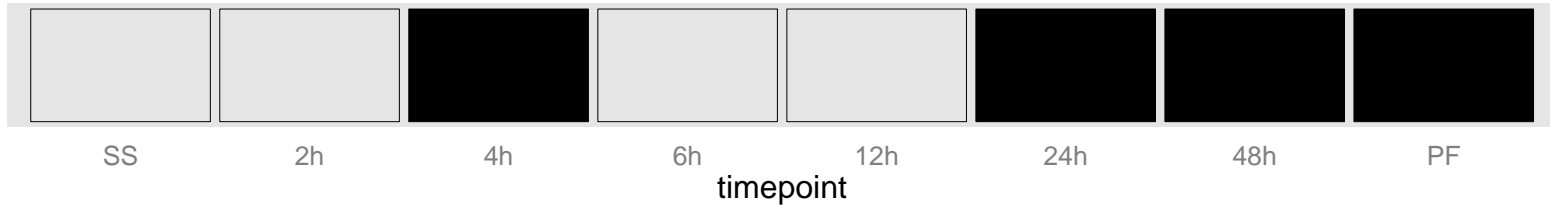

**regulated**  not regulated  significant down  significant up

SSU ribosomal protein, mitochondrial (MRPS15)  
 Tb927.1.1200  
 AGOF: null  
 AGOC: mitochondrial small ribosomal subunit, mitochondrion  
 AGOP: null  
 PGO: null  
 PGOC: null  
 PGOP: null

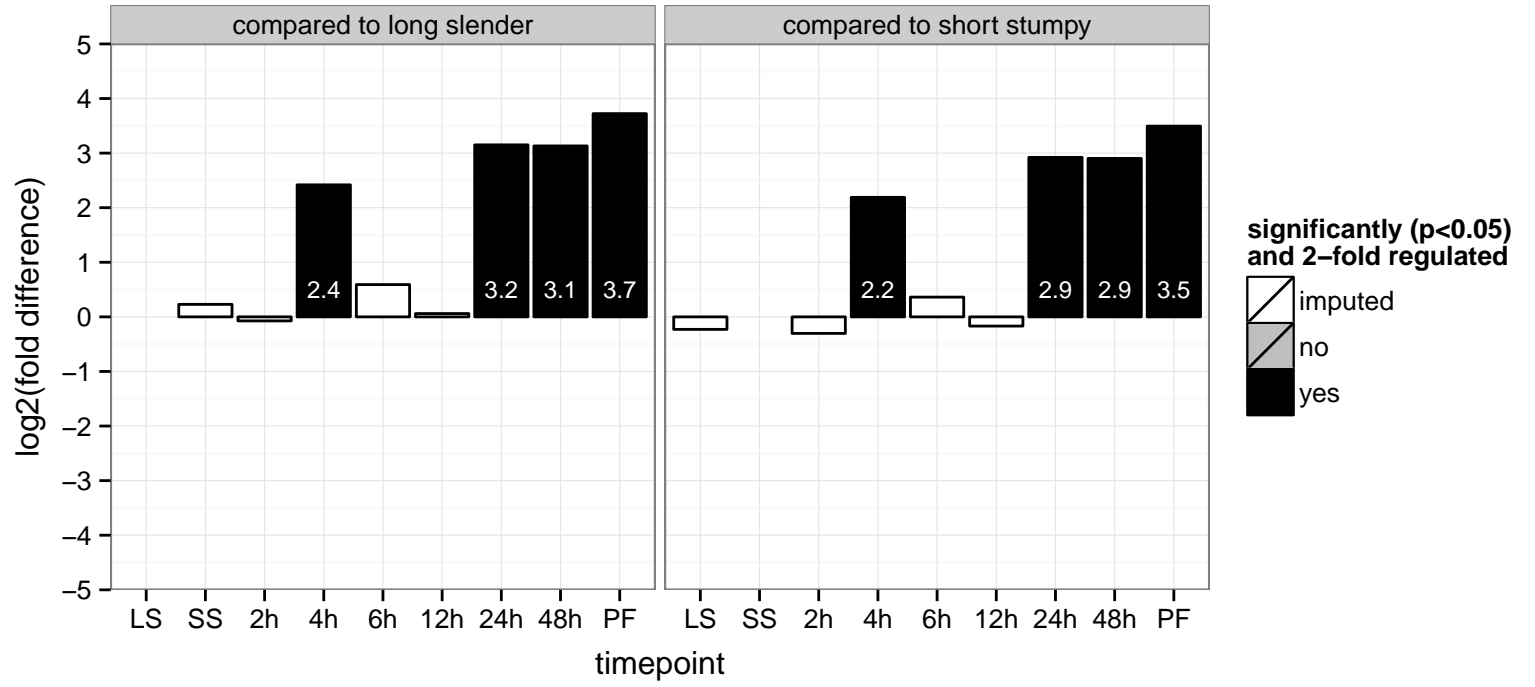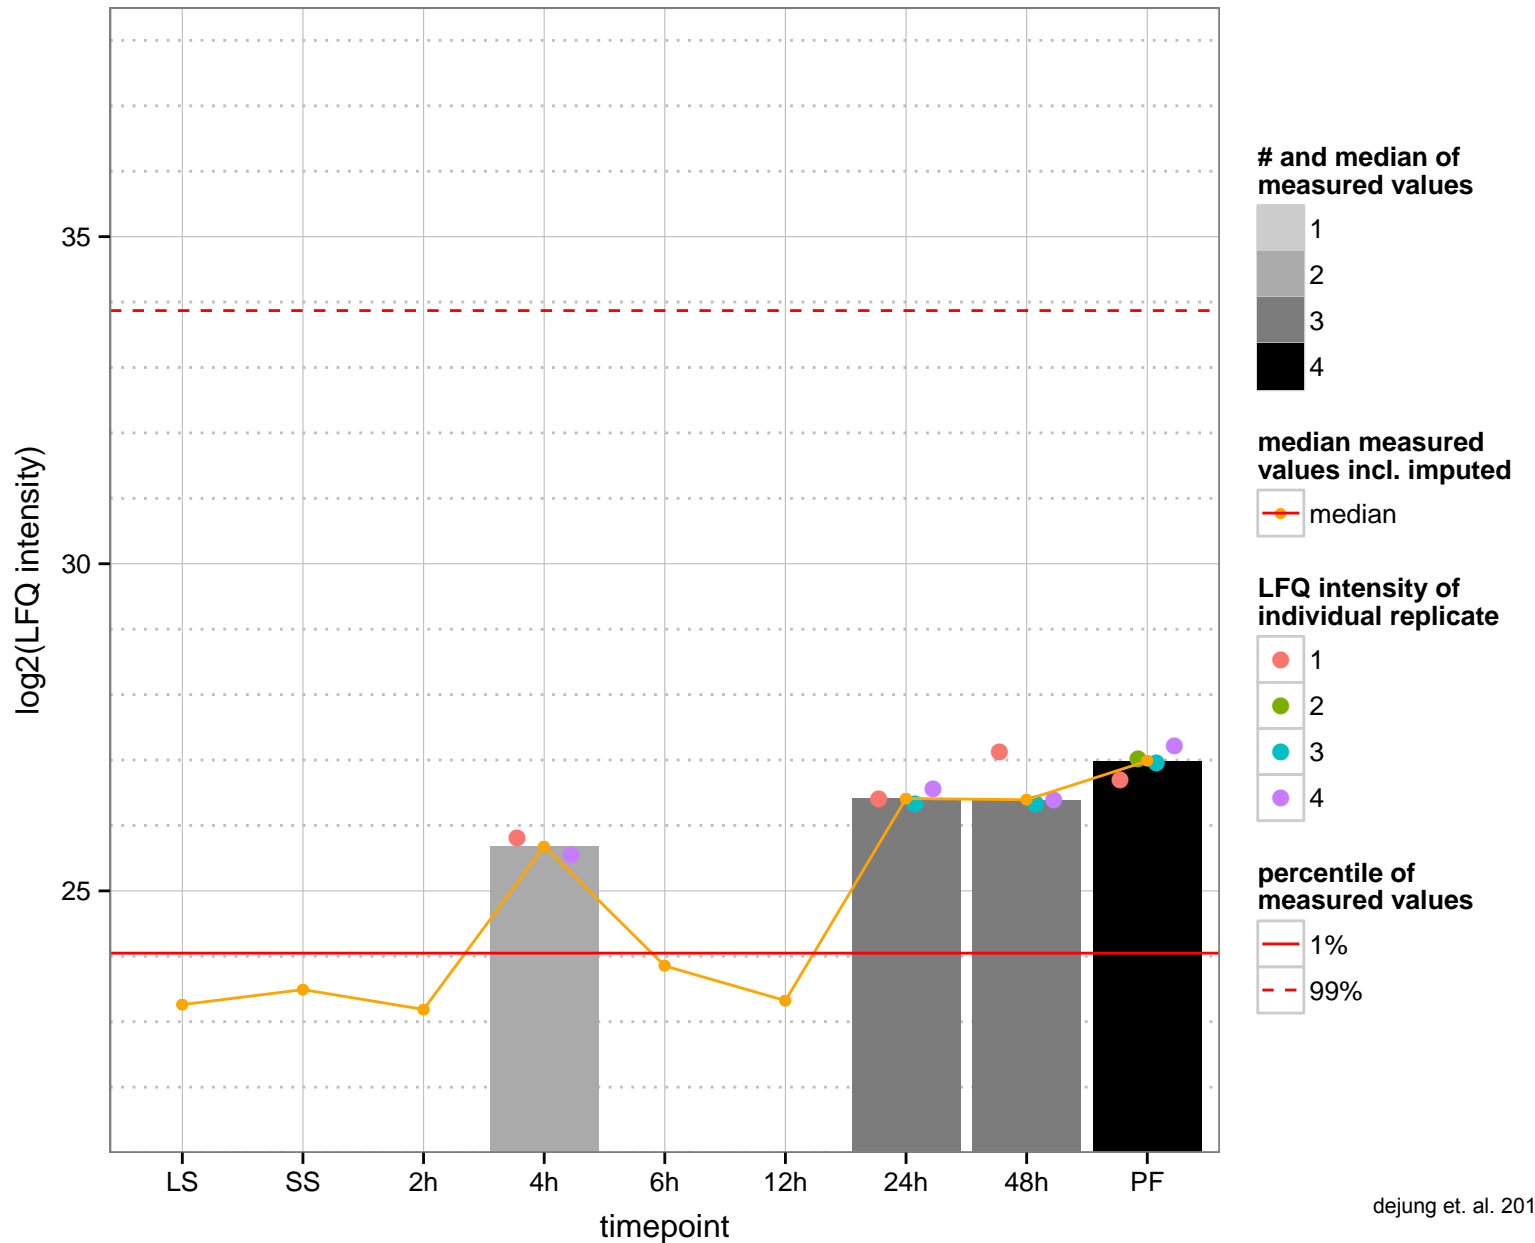



glutaredoxin, putative

Tb927.1.1770

AGOF: disulfide oxidoreductase activity, electron carrier activity, protein disulfide isomerase activity, protein disulfide oxidoreductase activity

AGOC: null

AGOP: cell redox homeostasis

PGOF: electron carrier activity, protein disulfide oxidoreductase activity

PGOC: null

PGOP: cell redox homeostasis

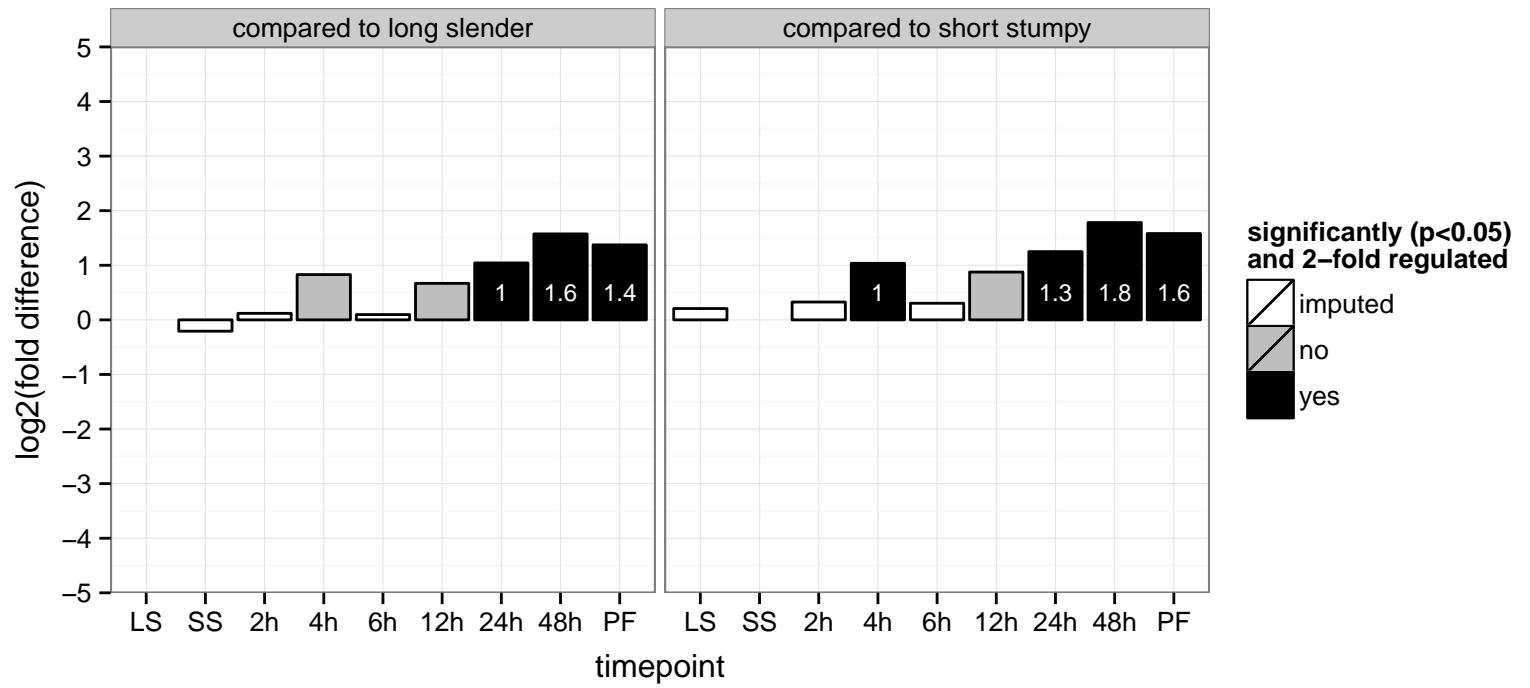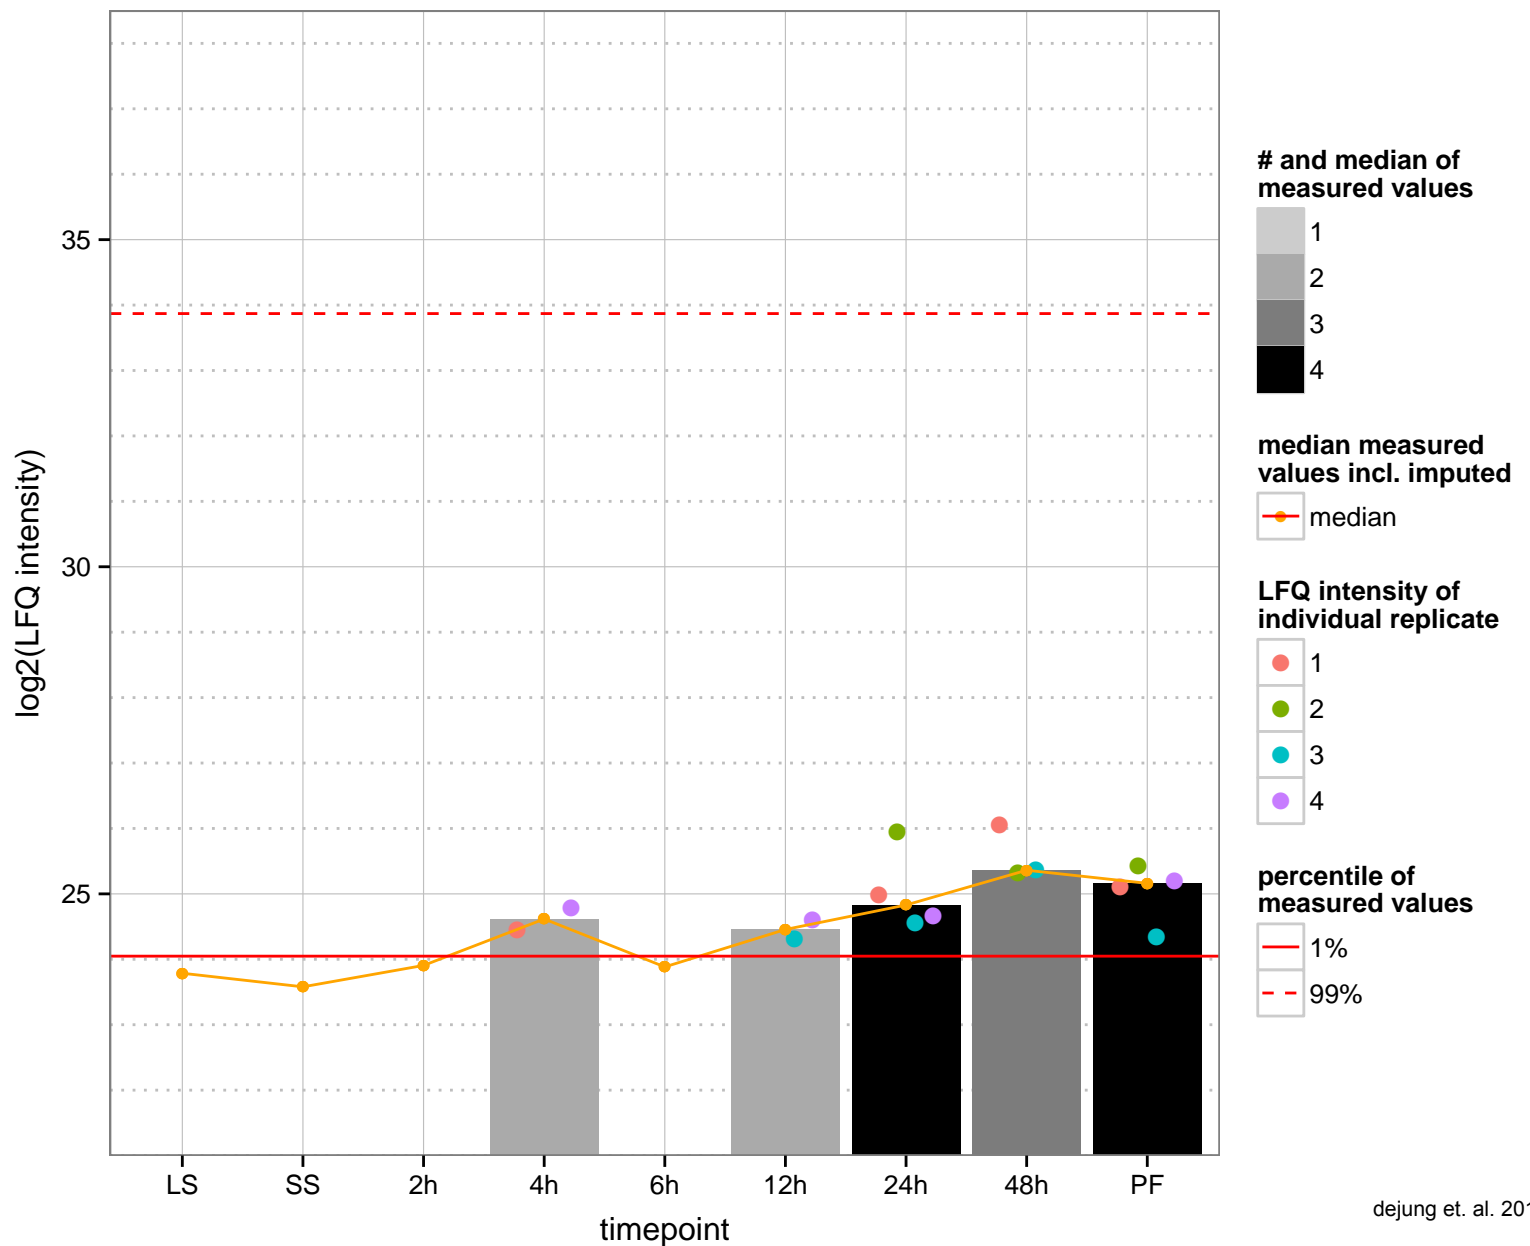

hypothetical protein, conserved  
 Tb927.10.9920  
 AGOF: null  
 AGOC: null  
 AGOP: null  
 PGO: protein binding  
 PGO: null  
 PGO: null

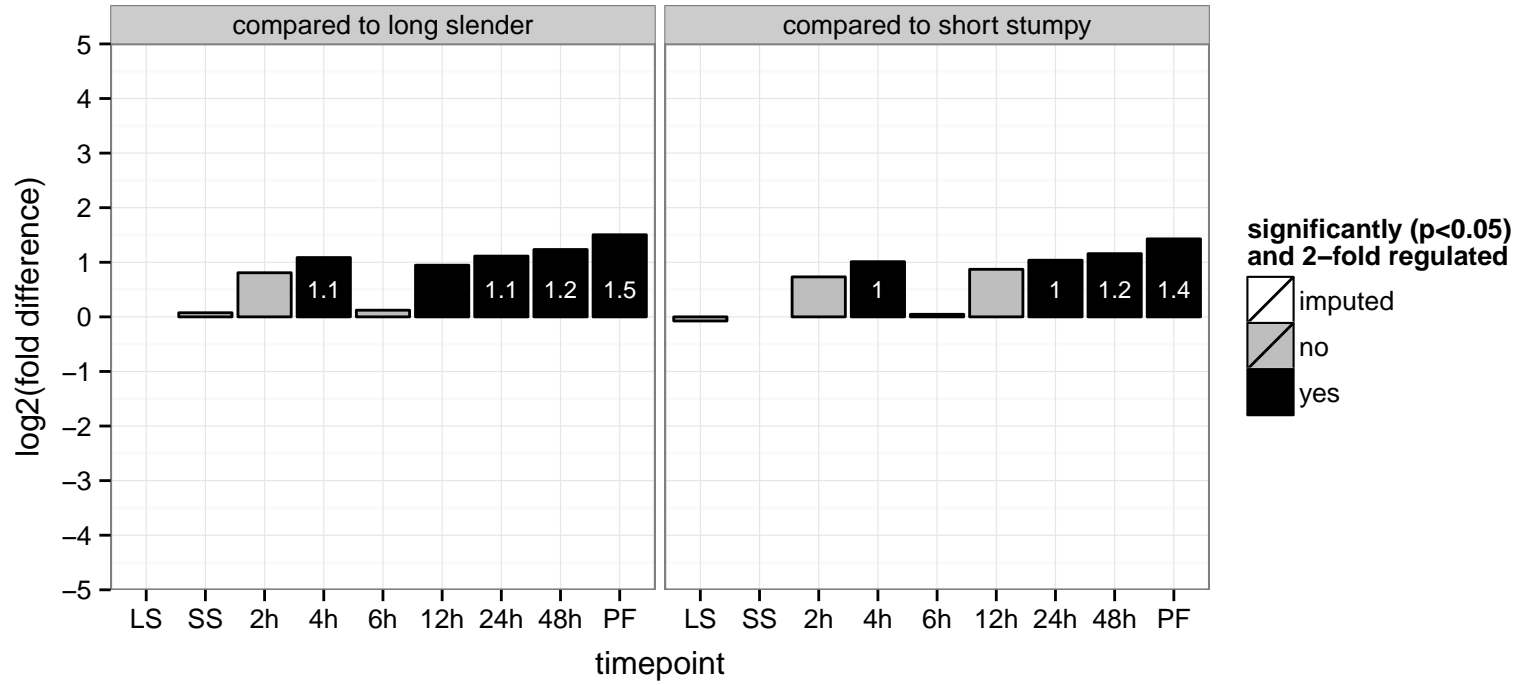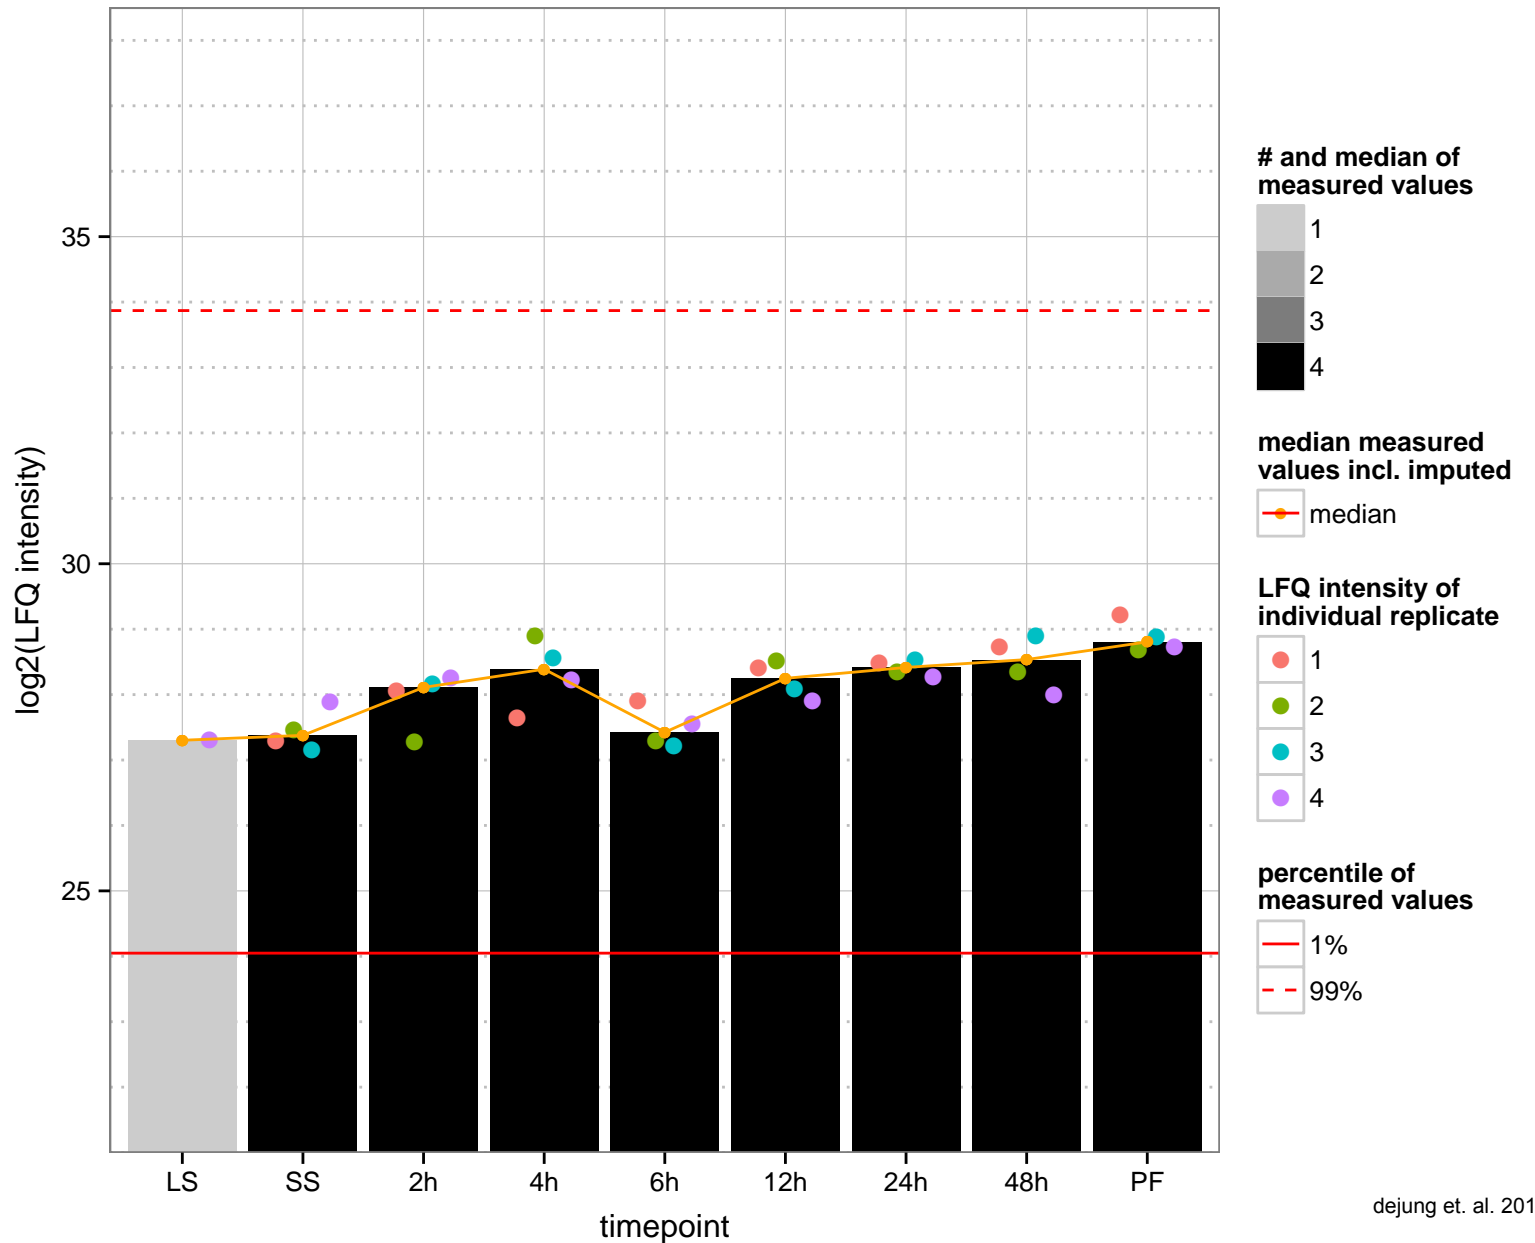

hypothetical protein, conserved  
 Tb927.11.11310  
 AGOF: null  
 AGOC: null  
 AGOP: null  
 PGOF: null  
 PGO: null  
 PGOP: null

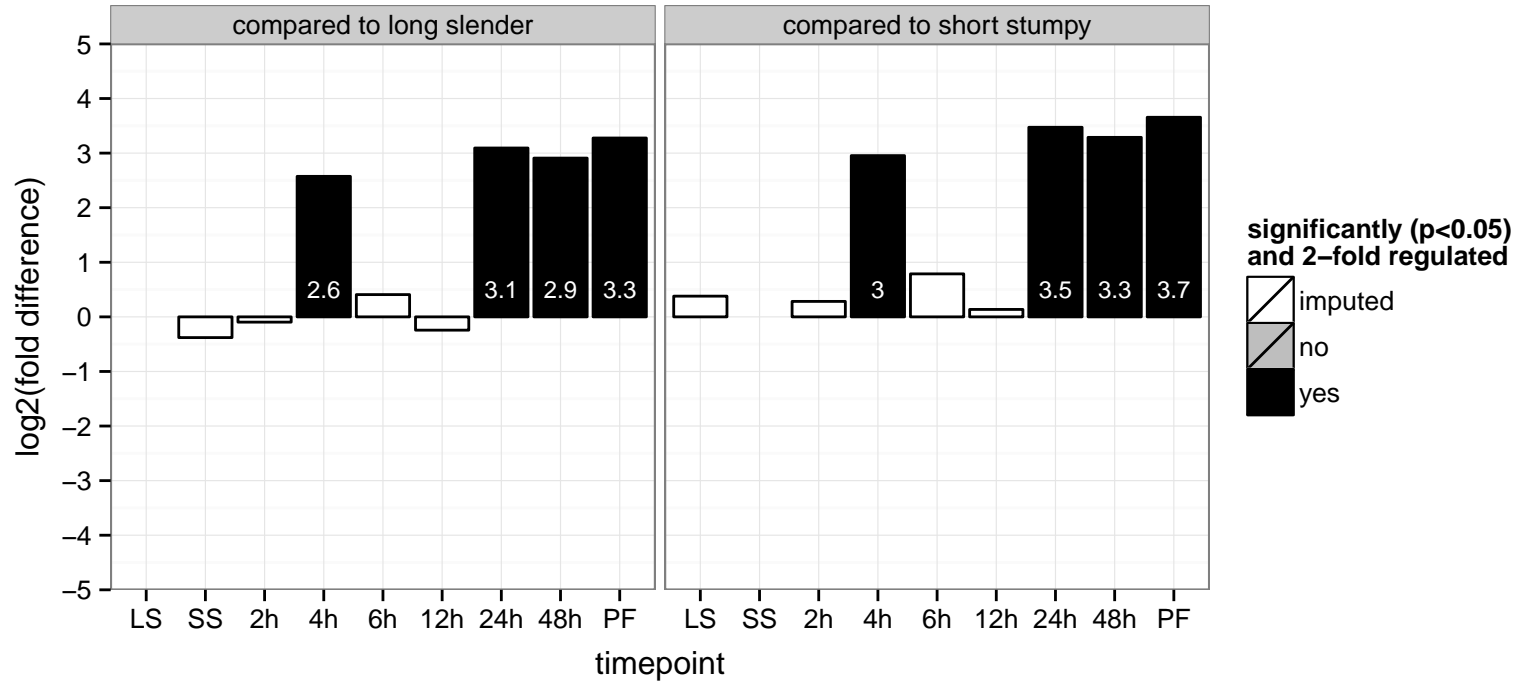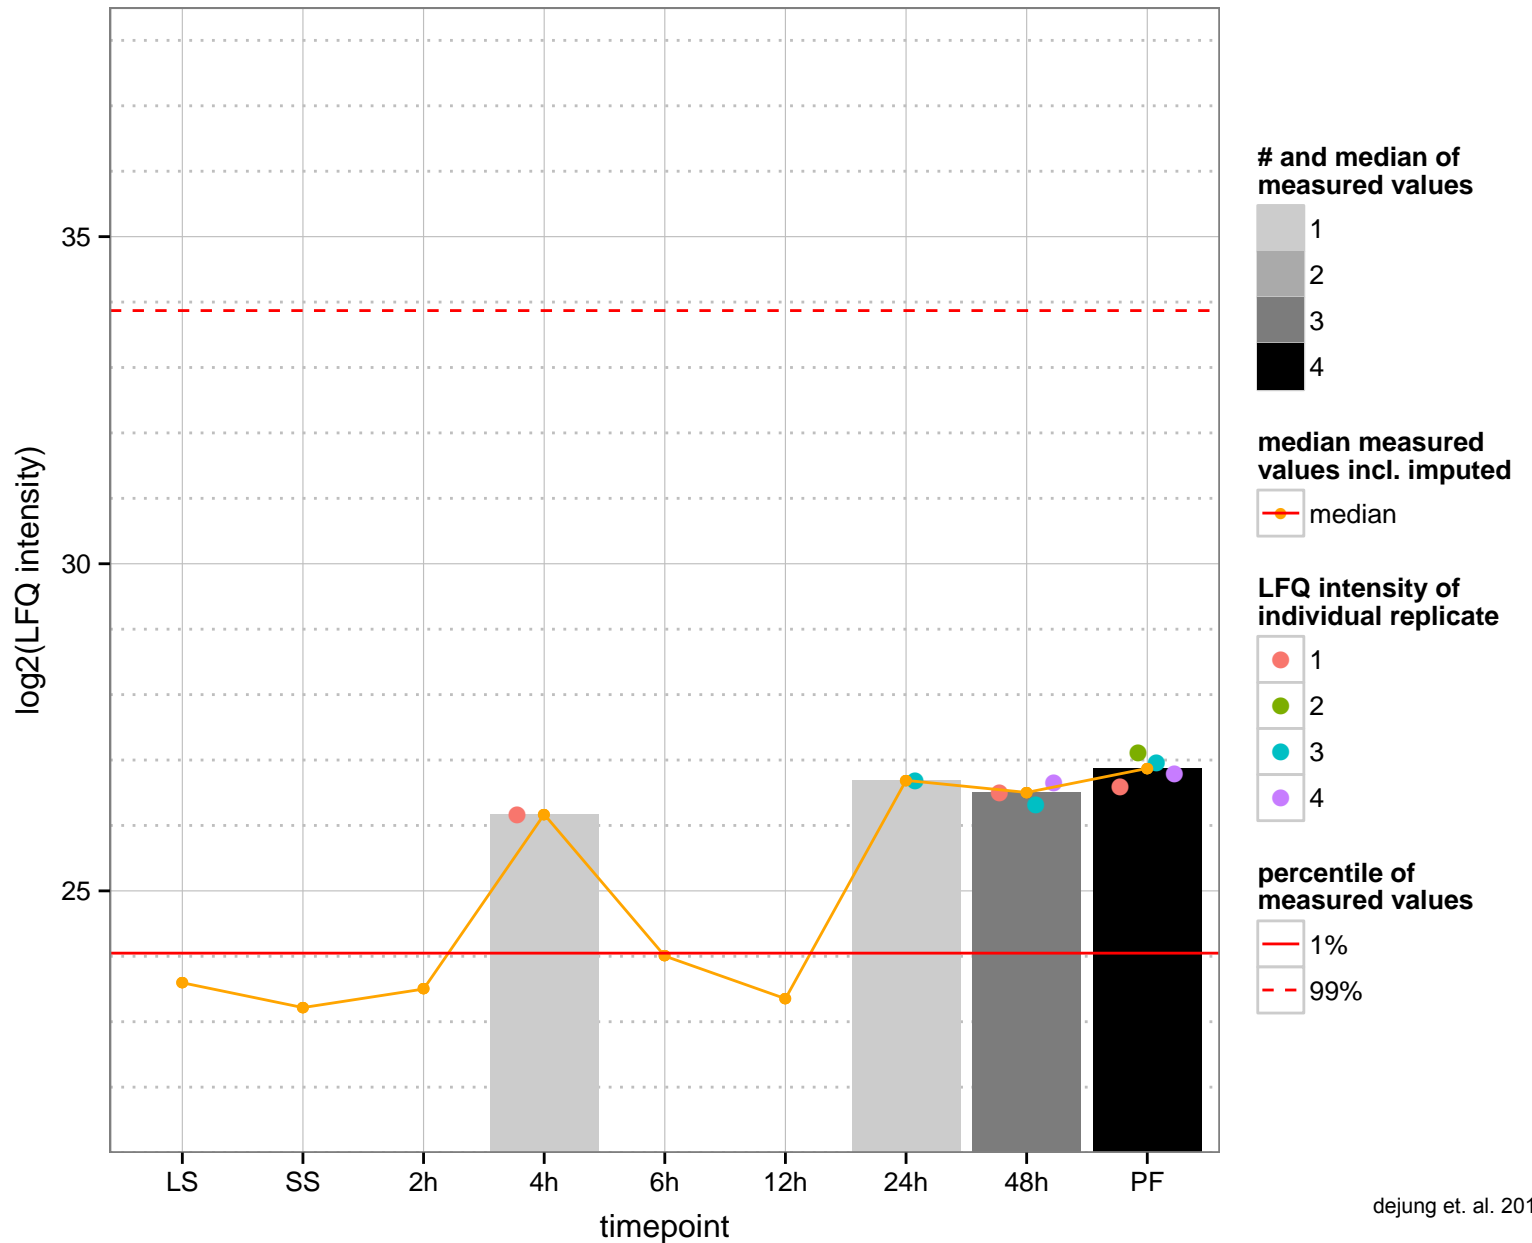

hypothetical protein, conserved  
 Tb927.11.12300  
 AGOF: null  
 AGOC: null  
 AGOP: null  
 PGO: null  
 PGOC: null  
 PGOP: null

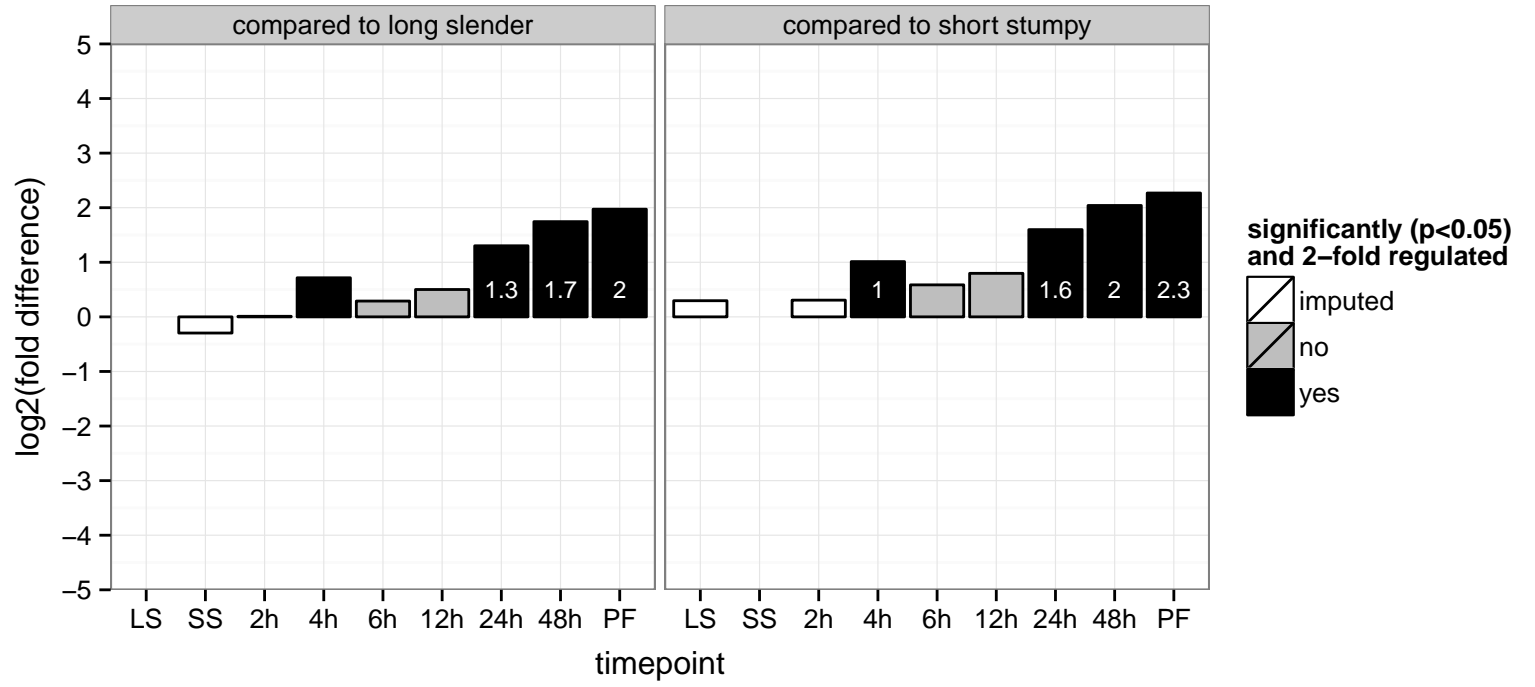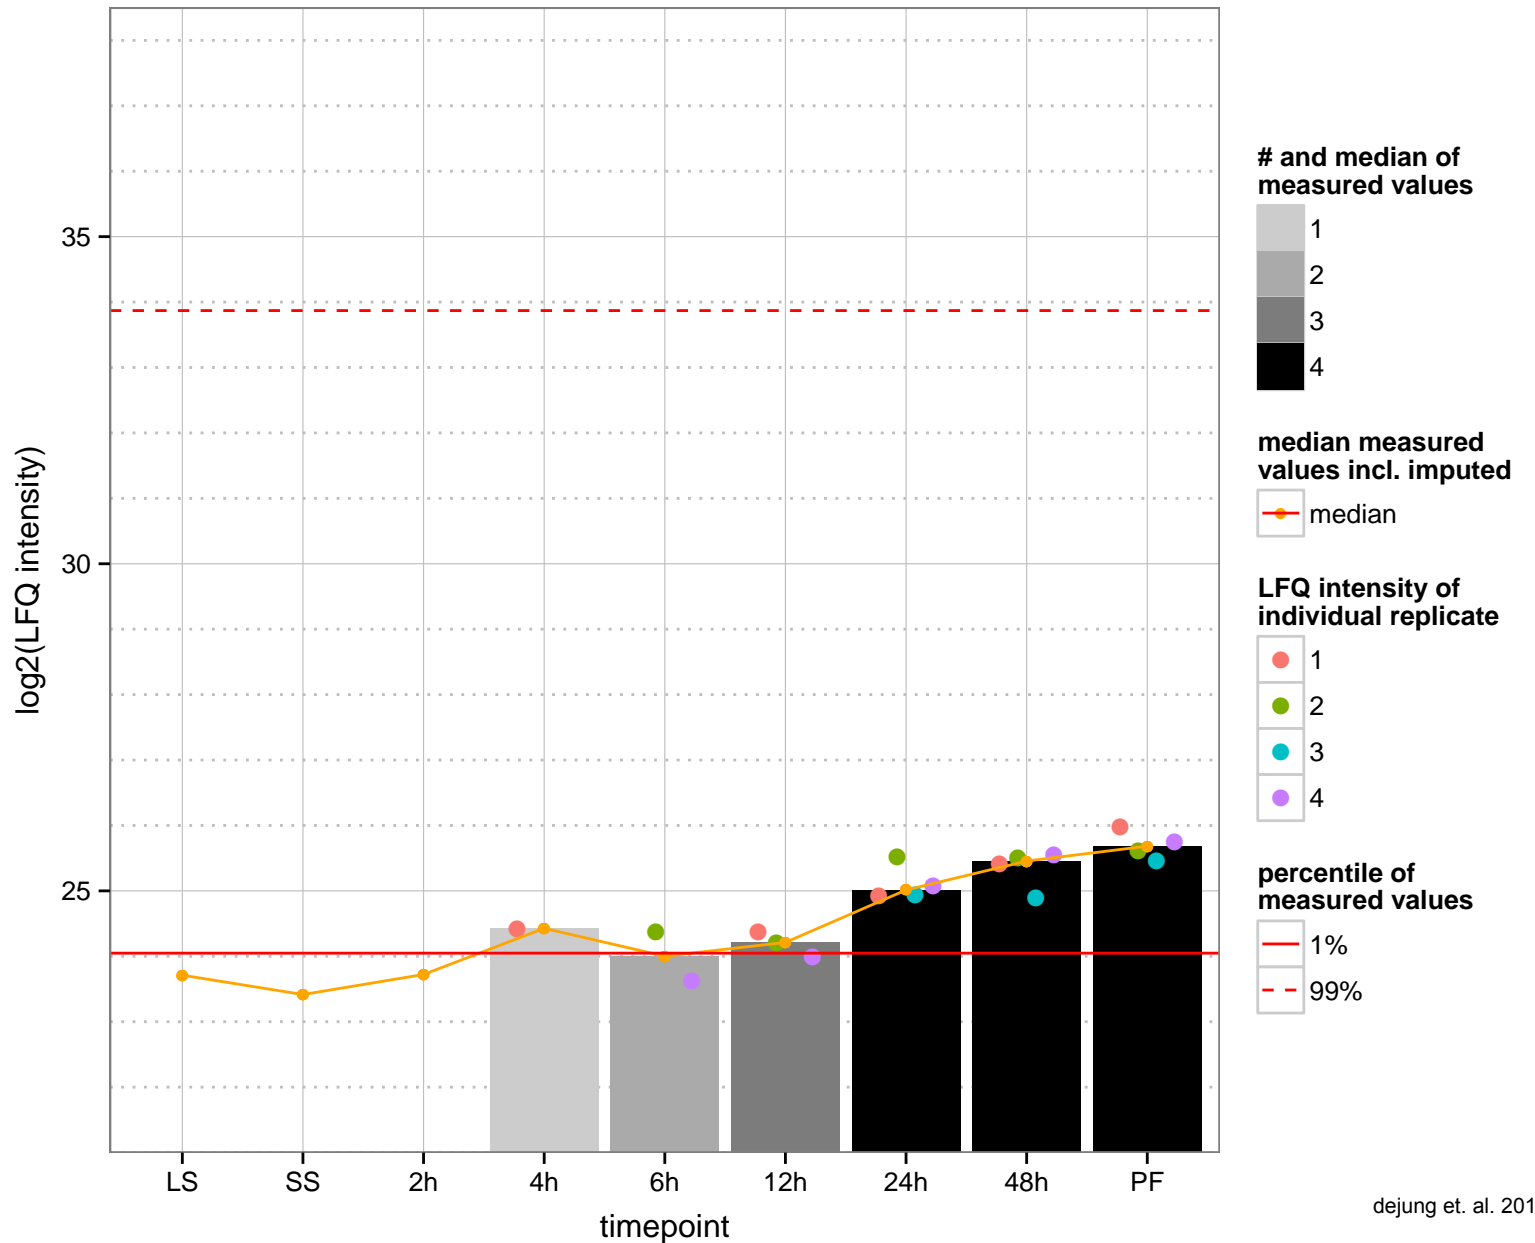

leucine-rich repeat protein 1 (LRRP1), putative, leucine-rich repeat protein (LRRP), (fragment), leucine rich repeat protein, le  
 Tb927.11.1500  
 AGOF: null  
 AGOC: null  
 AGOP: null  
 PGO: null, protein binding  
 PGOC: null  
 PGOP: null

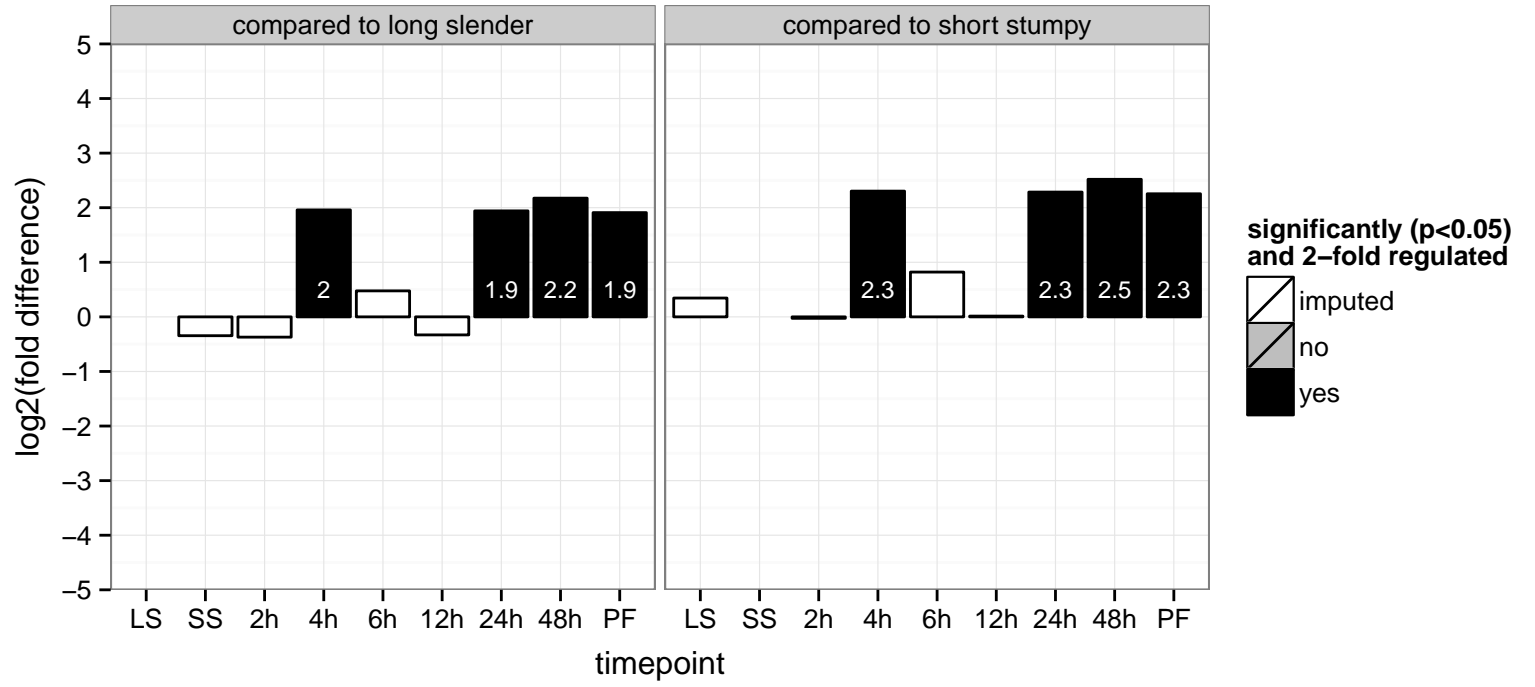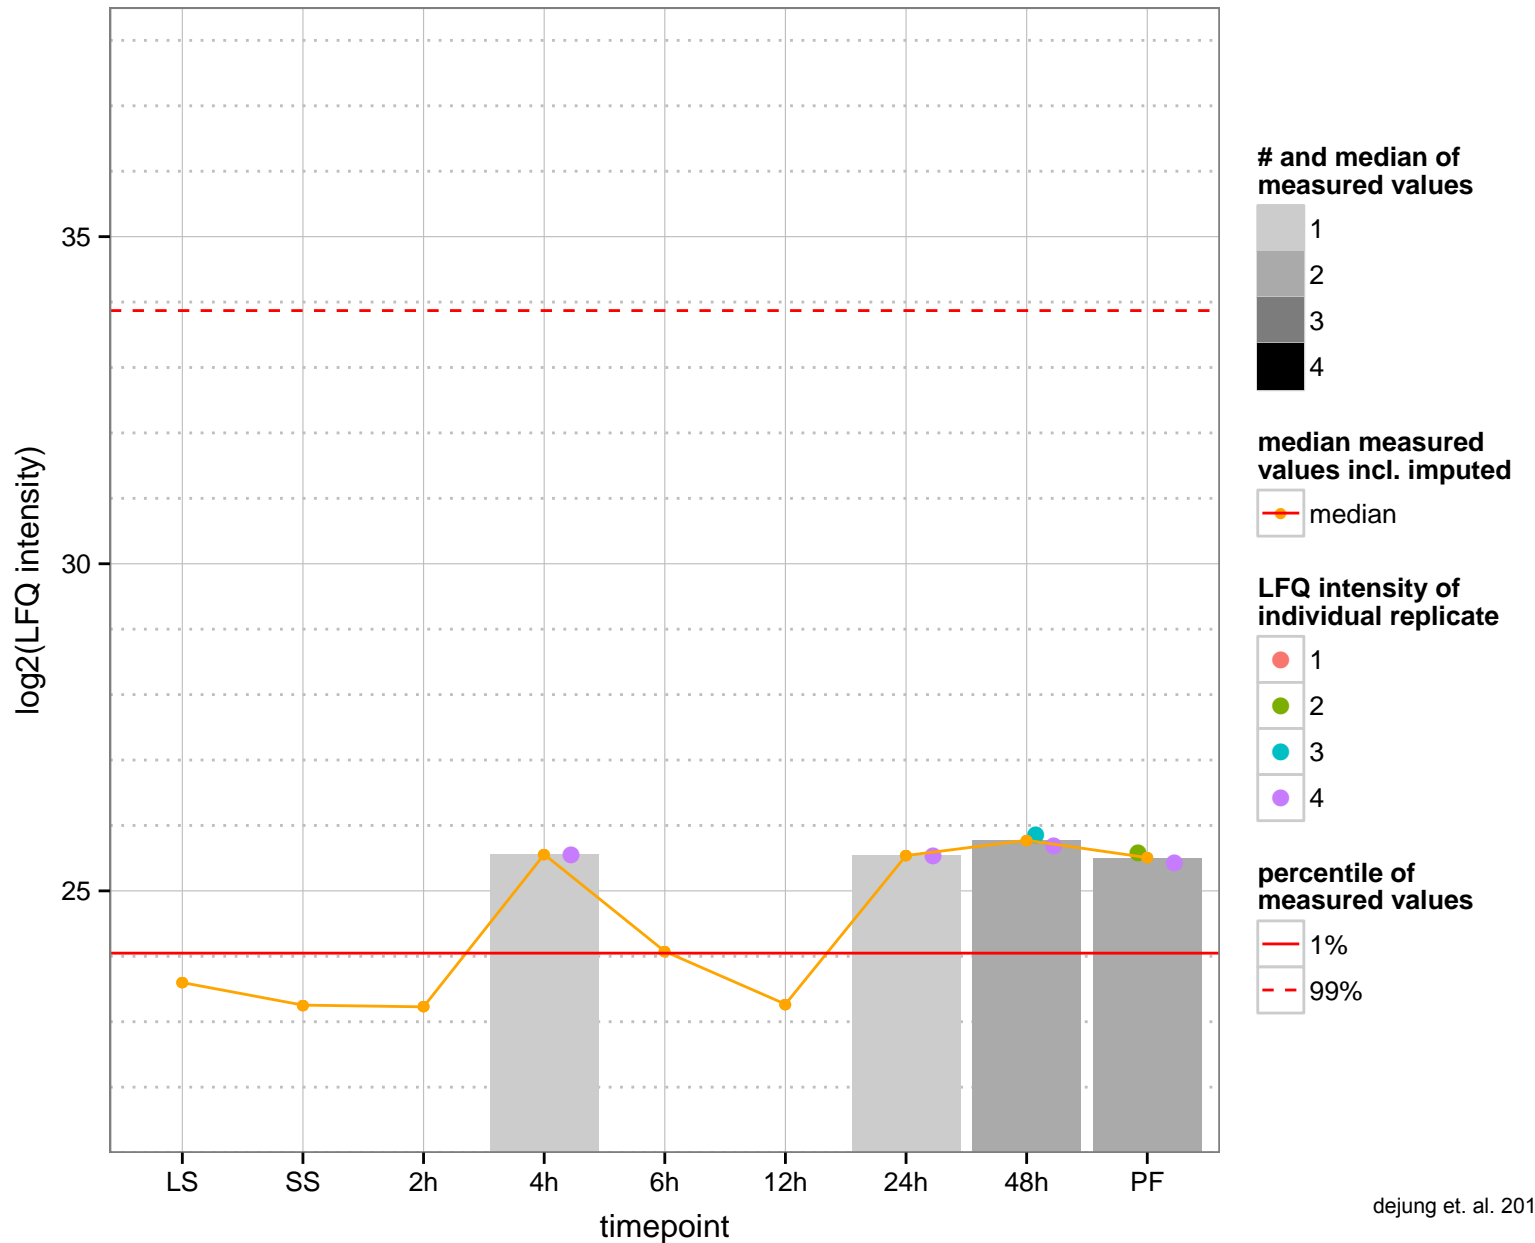

RNA-binding protein (RBP28)  
 Tb927.3.1030  
 AGOF: nucleic acid binding  
 AGOC: null  
 AGOP: null  
 PGO: nucleic acid binding  
 PGOC: null  
 PGOP: null

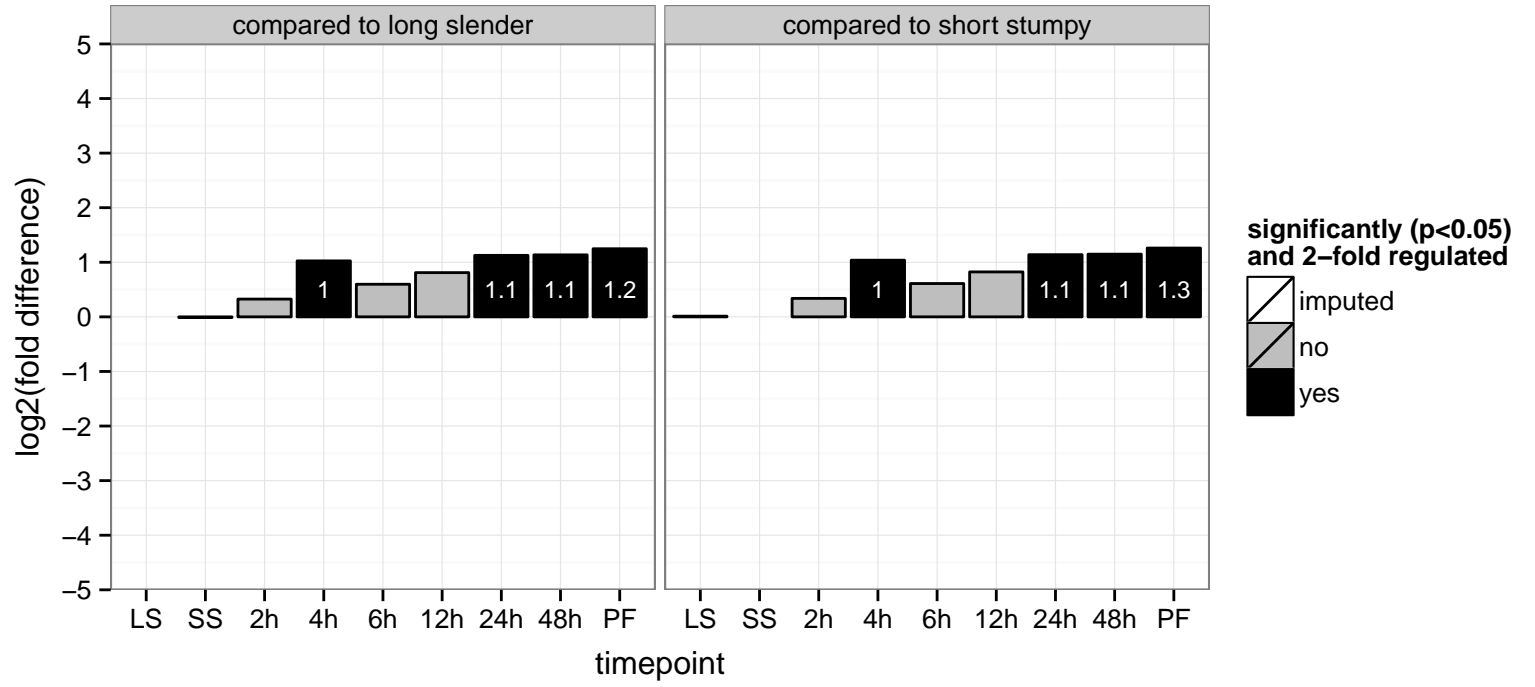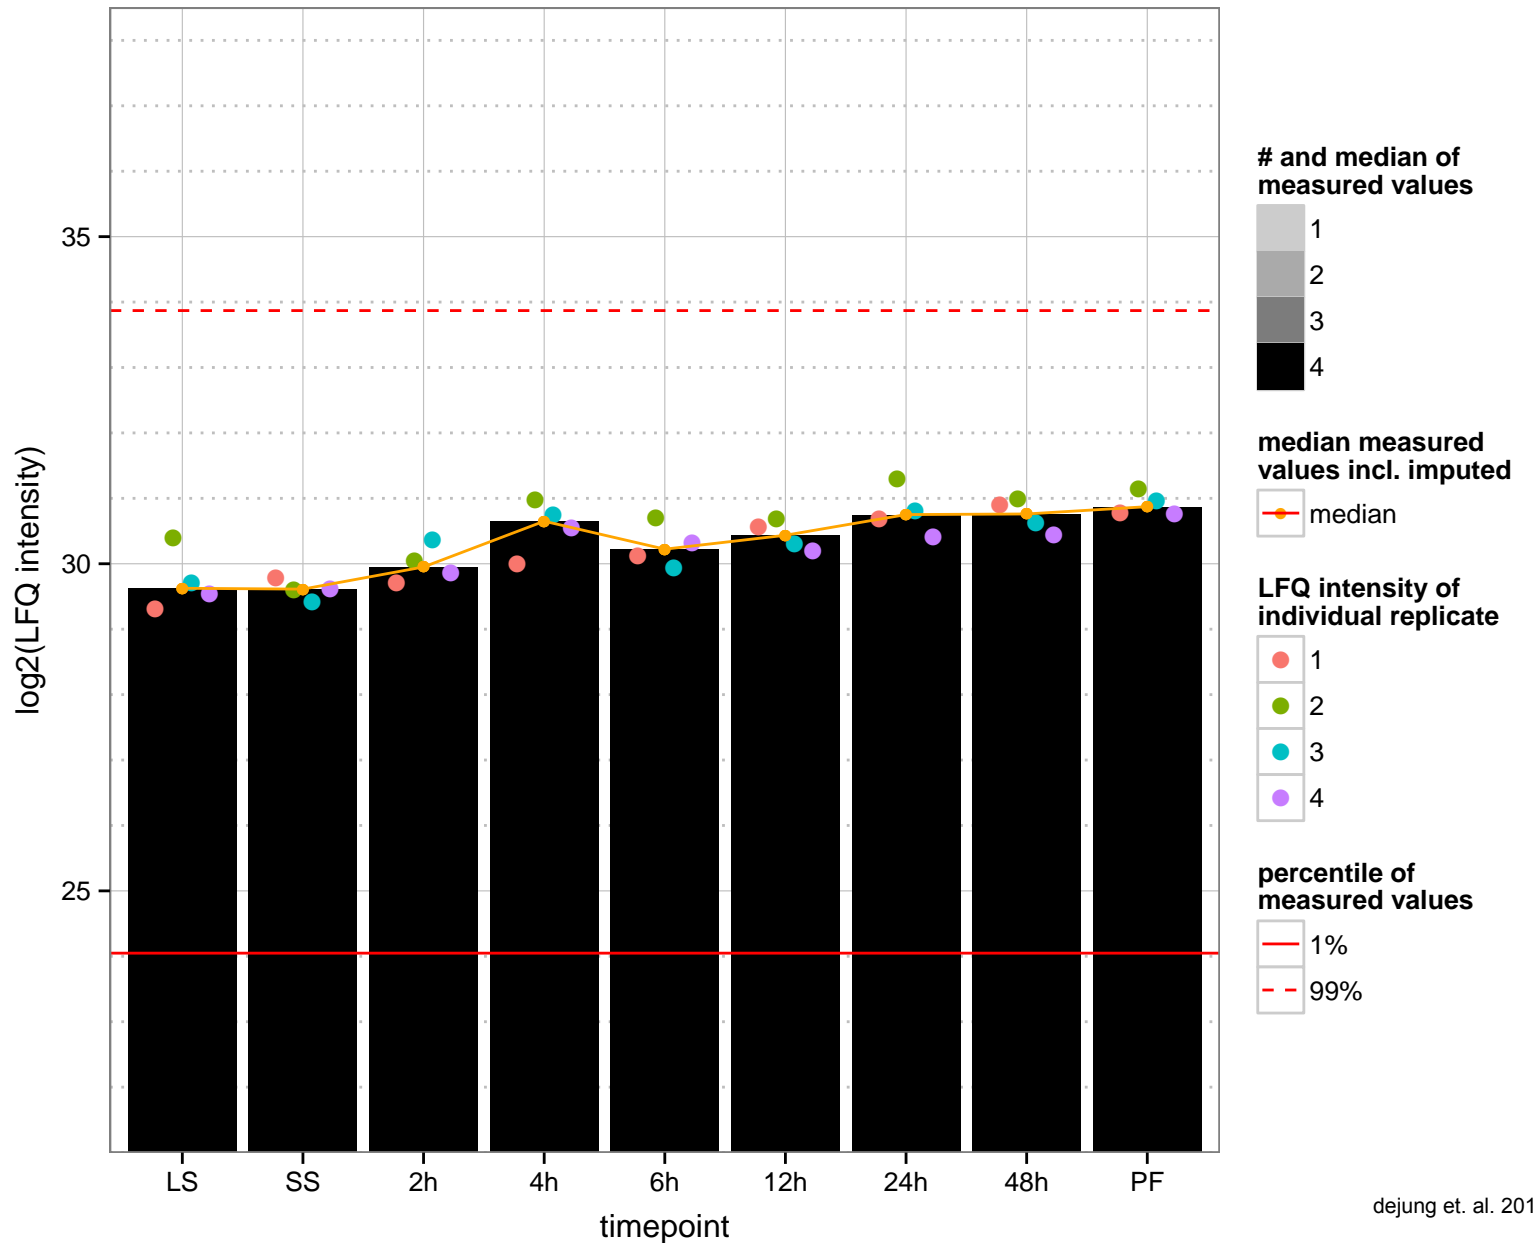

hypothetical protein, conserved  
 Tb927.3.3440  
 AGOF: null  
 AGOC: null  
 AGOP: null  
 PGO: null  
 PGOC: null  
 PGOP: null

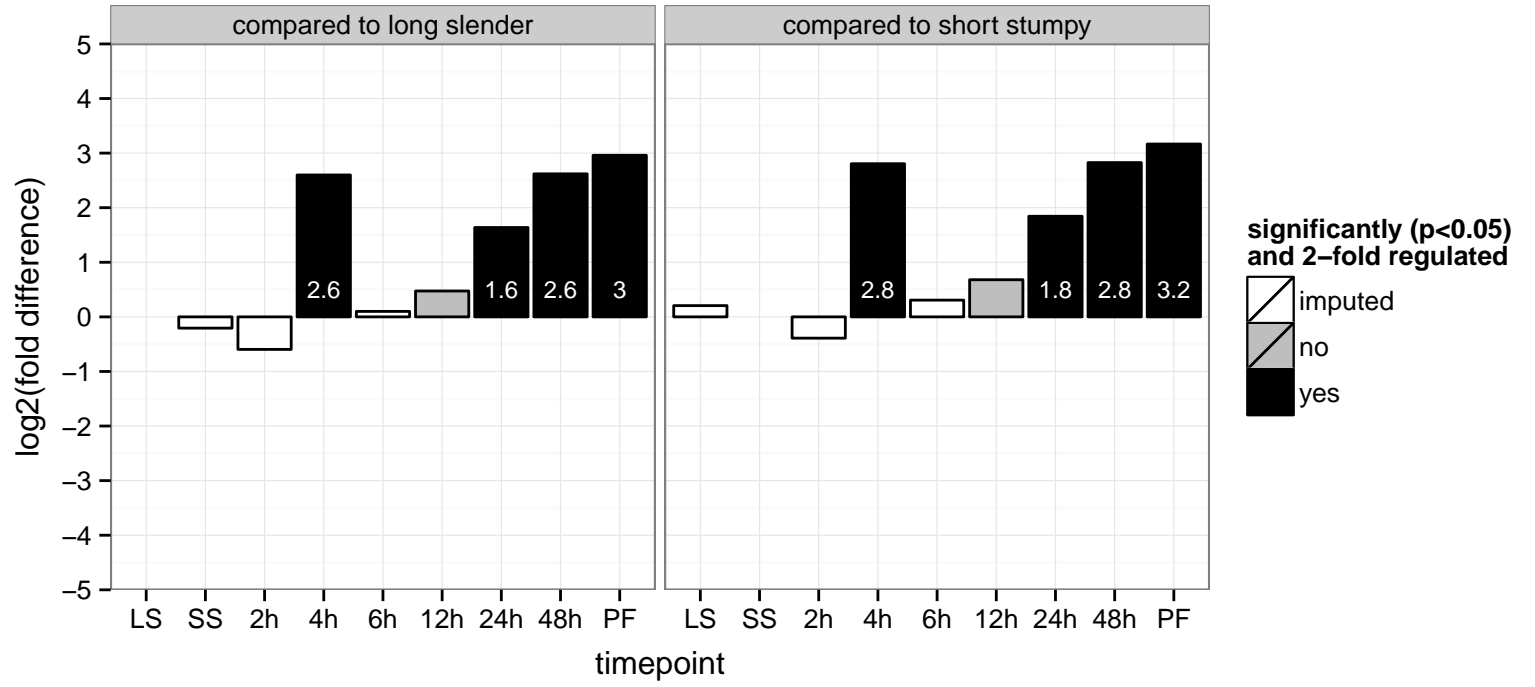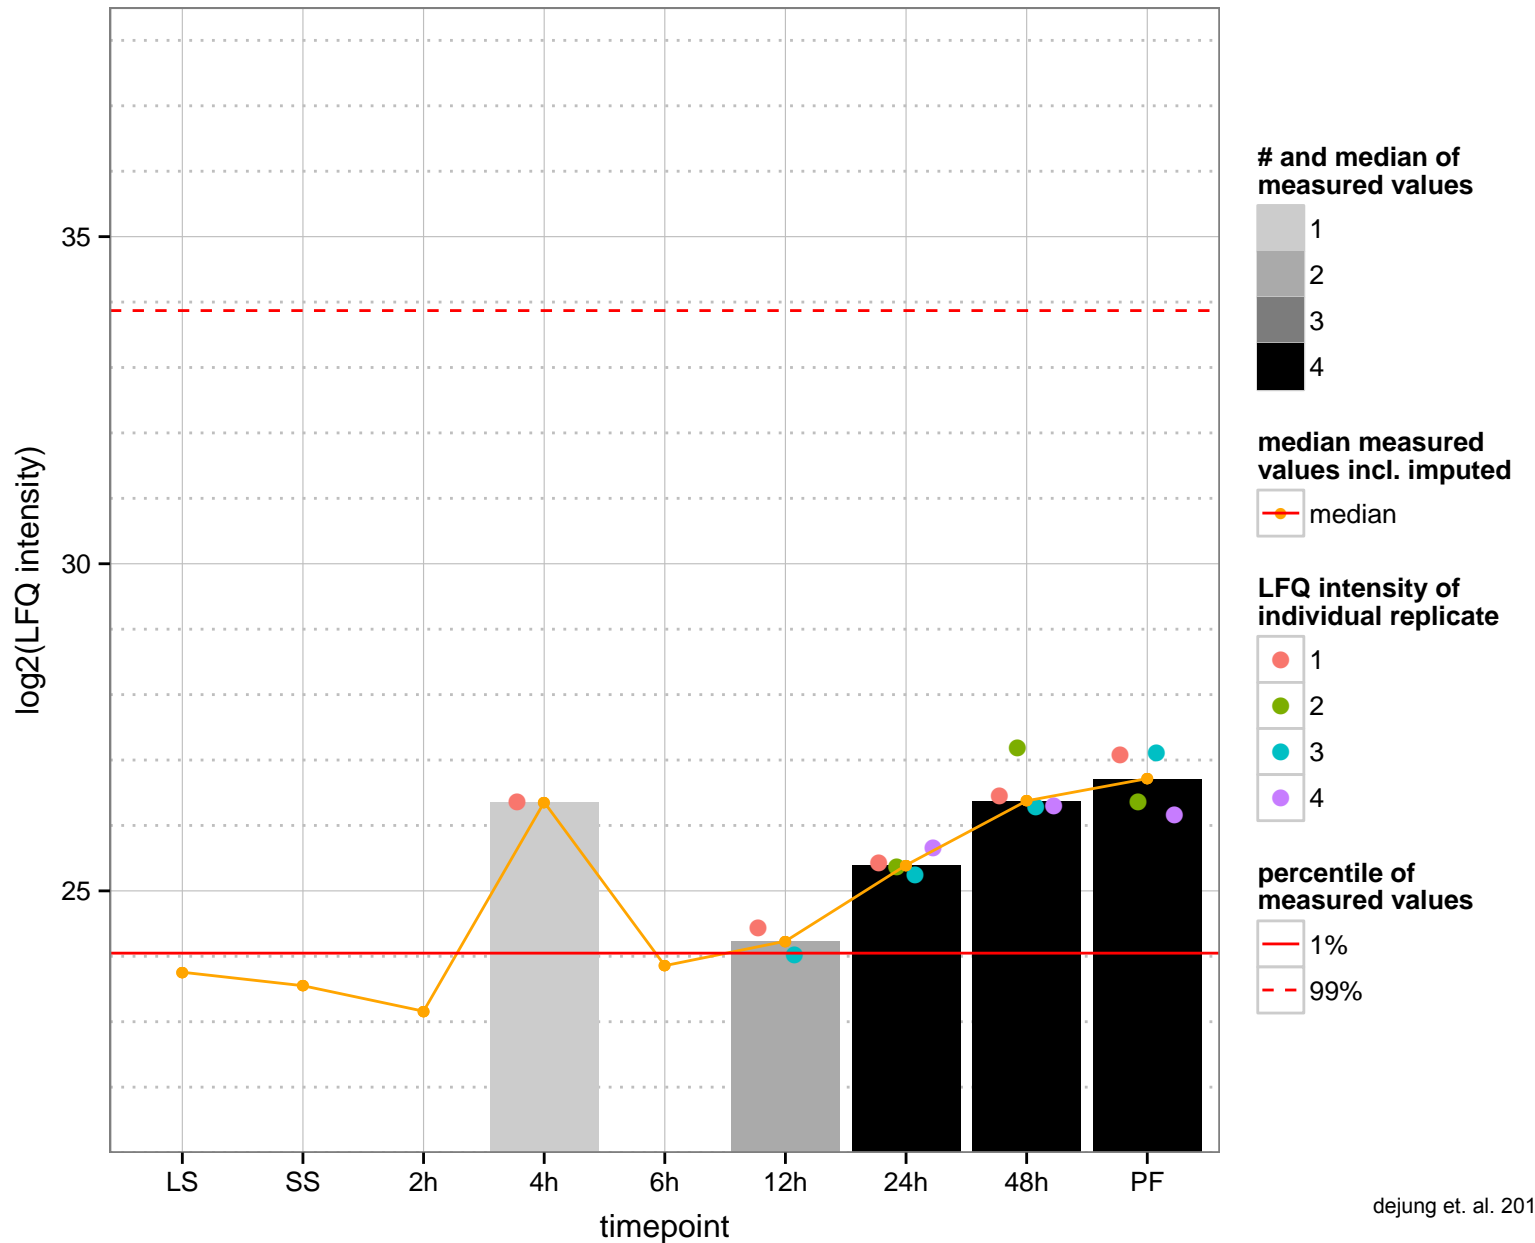

RNA-binding protein, putative (EIF3D)  
 Tb927.4.1930  
 AGOF: RNA binding  
 AGOC: null  
 AGOP: RNA processing  
 PGO: nucleic acid binding  
 PGO: null  
 PGOP: null

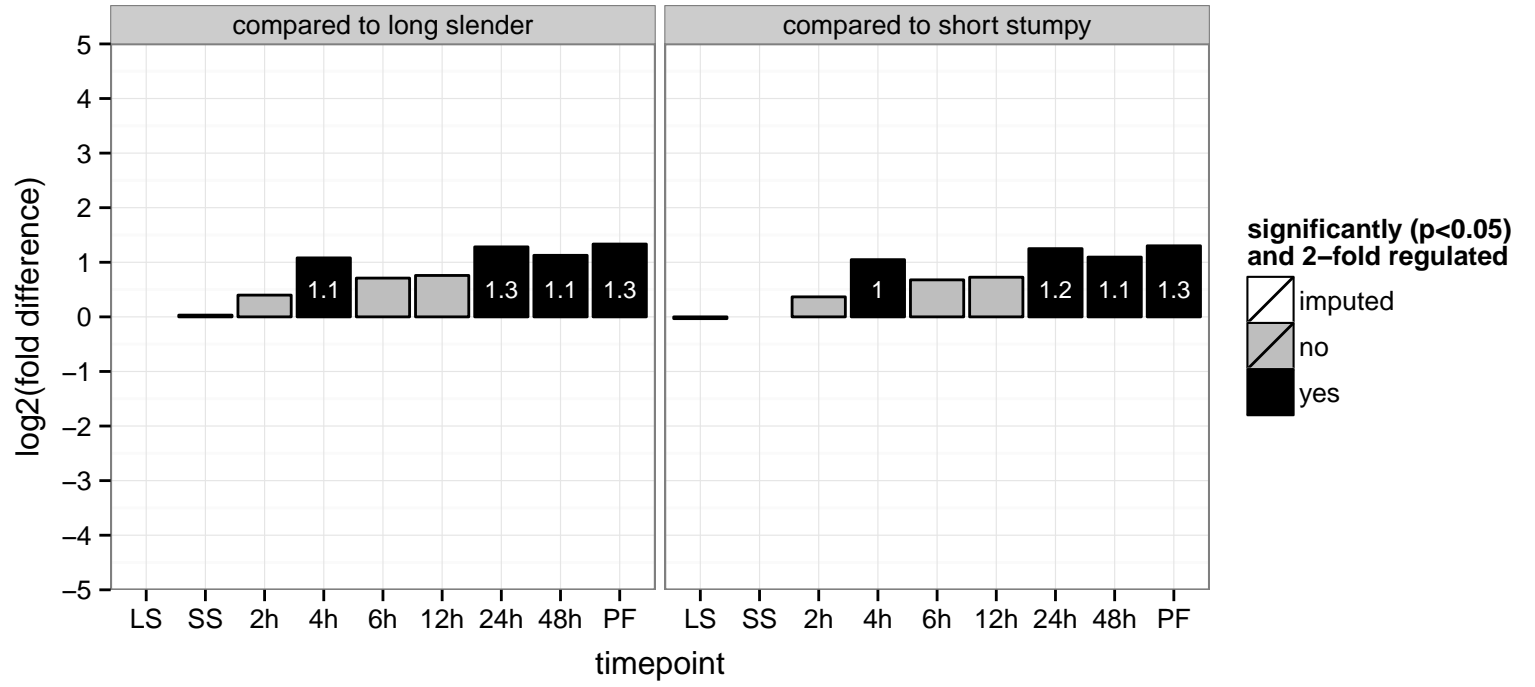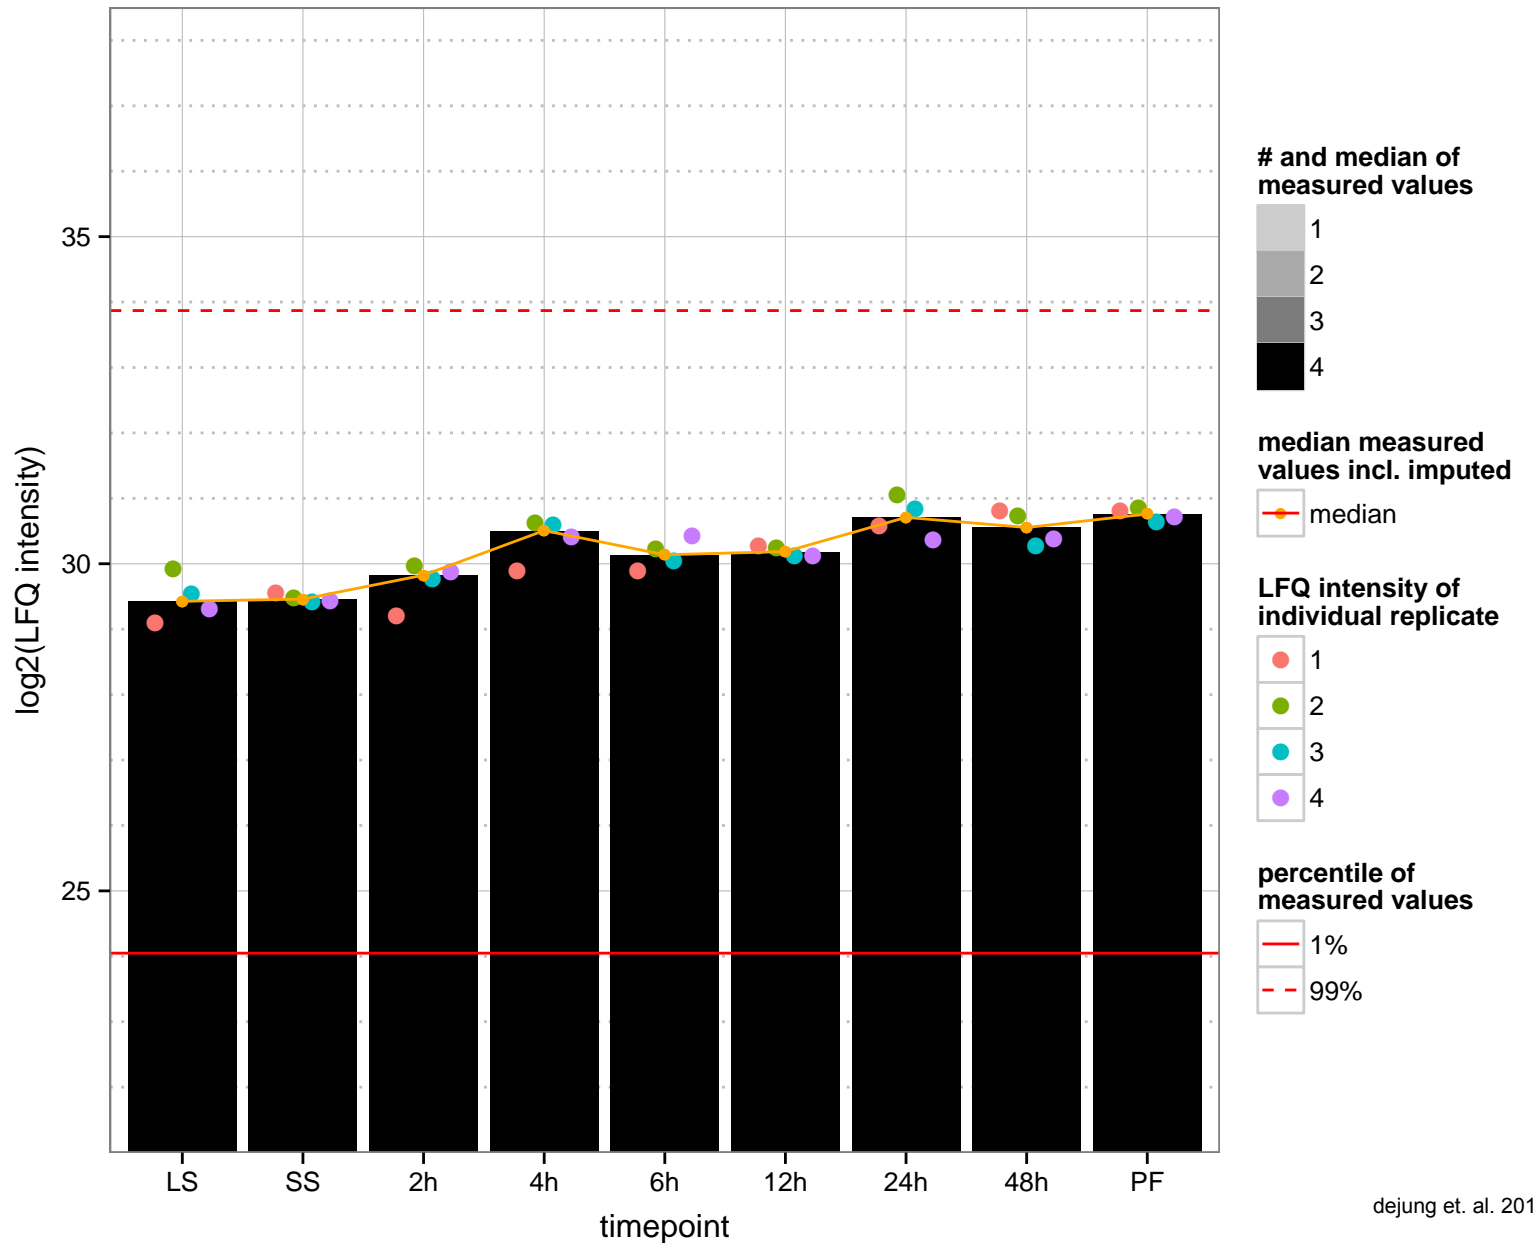



ATP synthase, epsilon chain, putative

Tb927.6.4990

AGOF: hydrogen ion transporting ATP synthase activity, rotational mechanism, proton-transporting ATPase activity

AGOC: mitochondrion, proton-transporting ATP synthase complex, catalytic core F(1)

AGOP: ATP synthesis coupled proton transport

PGOF: hydrogen ion transporting ATP synthase activity, rotational mechanism, proton-transporting ATPase activity

PGOC: proton-transporting ATP synthase complex, catalytic core F(1)

PGOP: ATP synthesis coupled proton transport

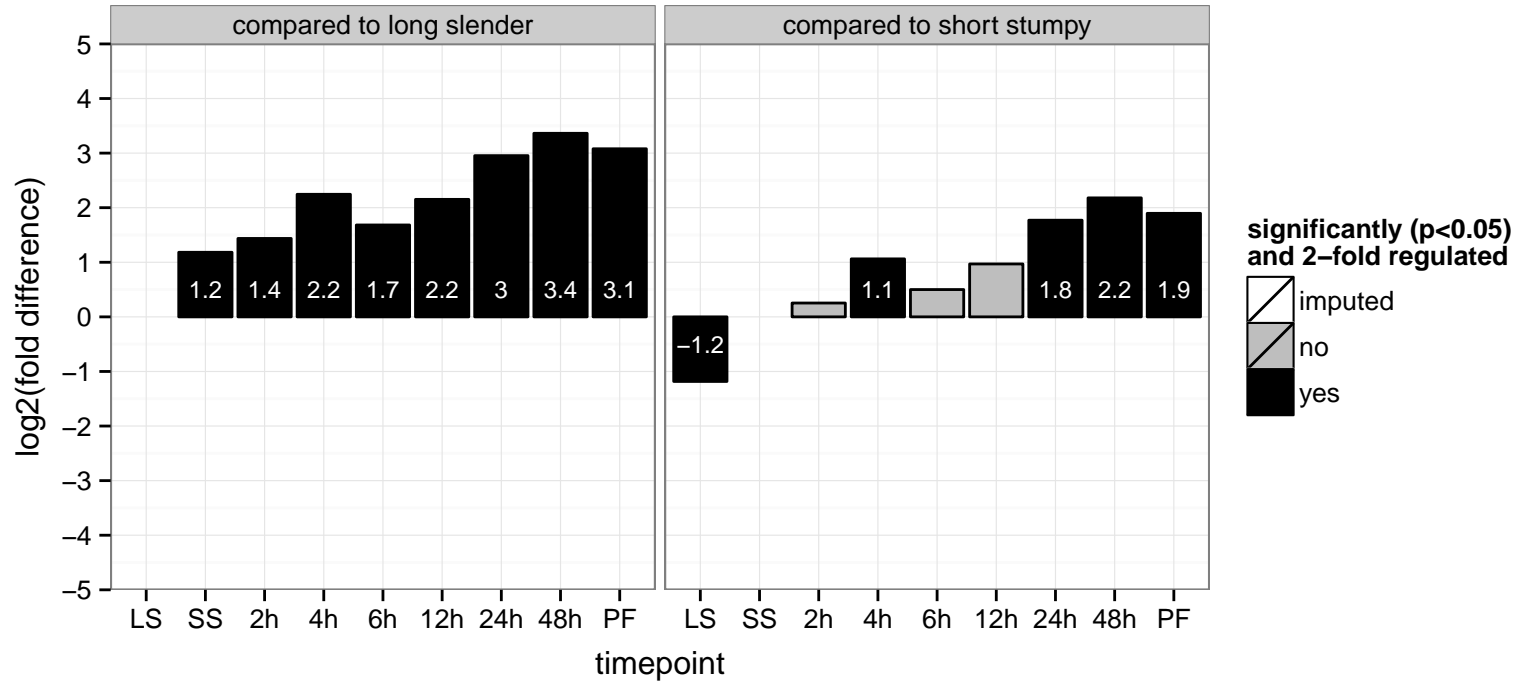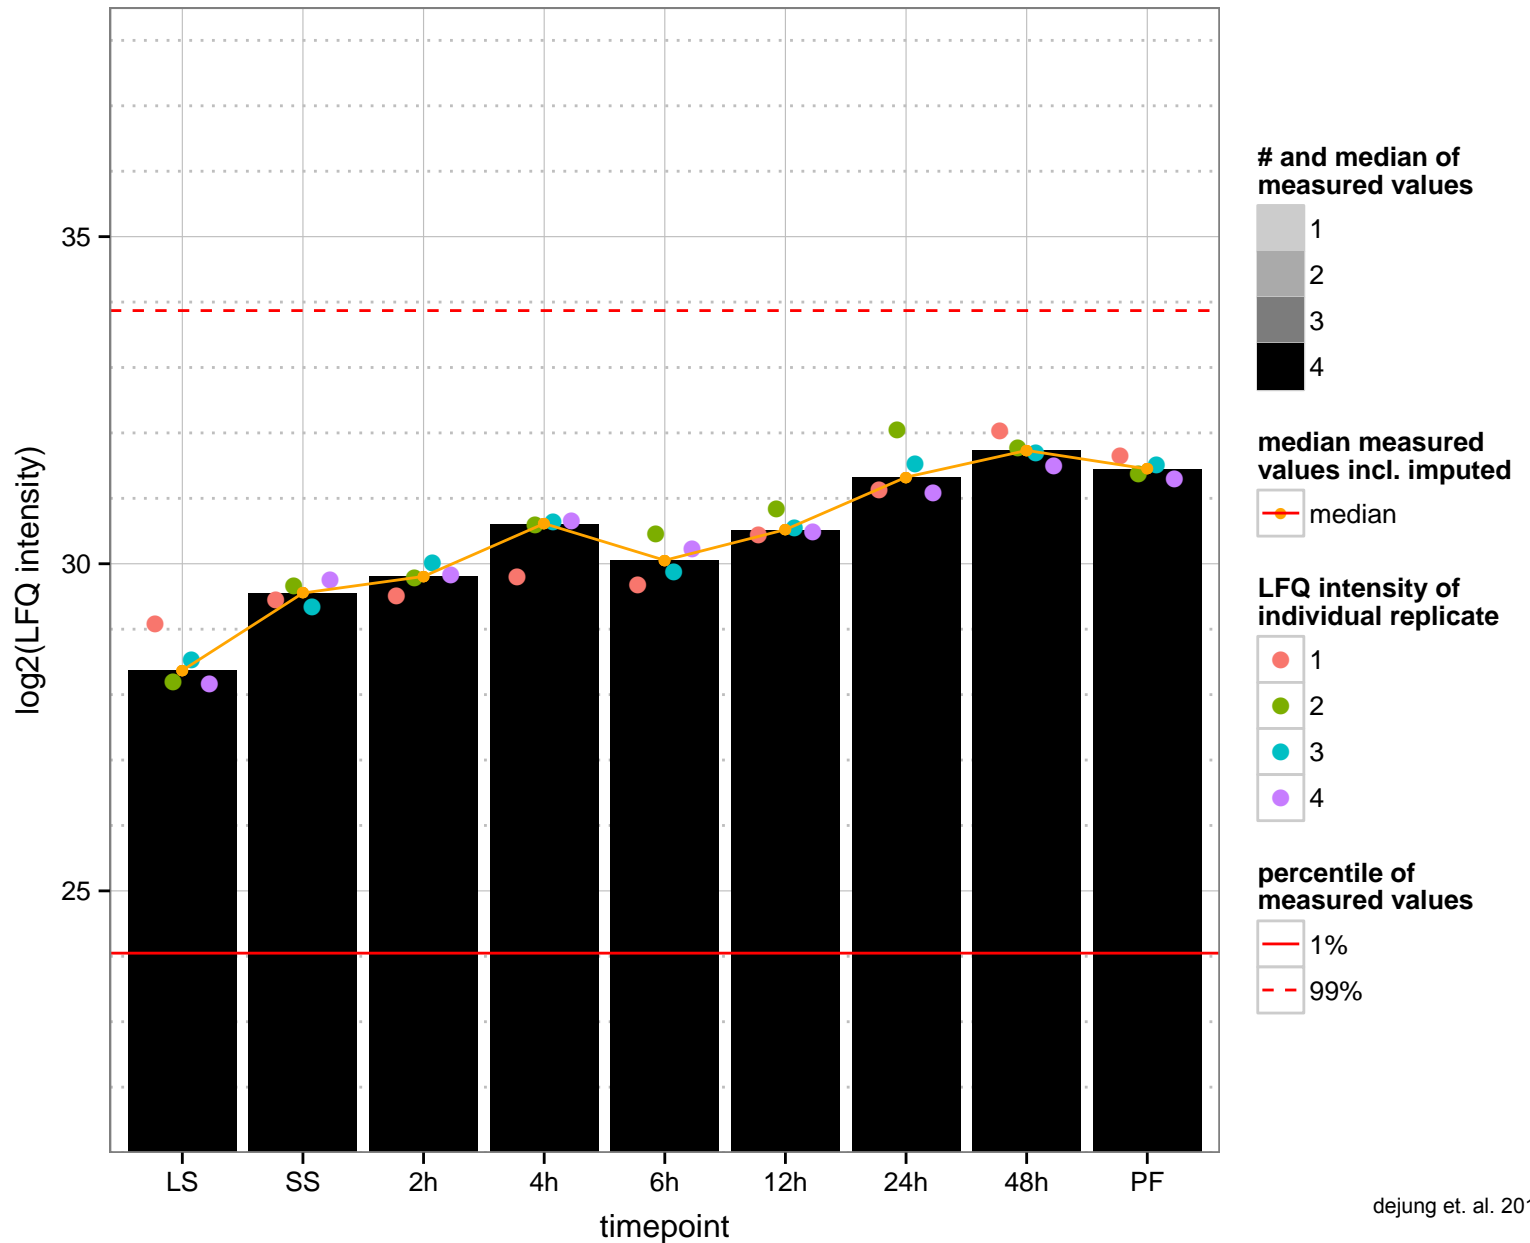

hypothetical protein, conserved  
 Tb927.8.1950  
 AGOF: null  
 AGOC: null  
 AGOP: null  
 PGO: null  
 PGO: null  
 PGO: null

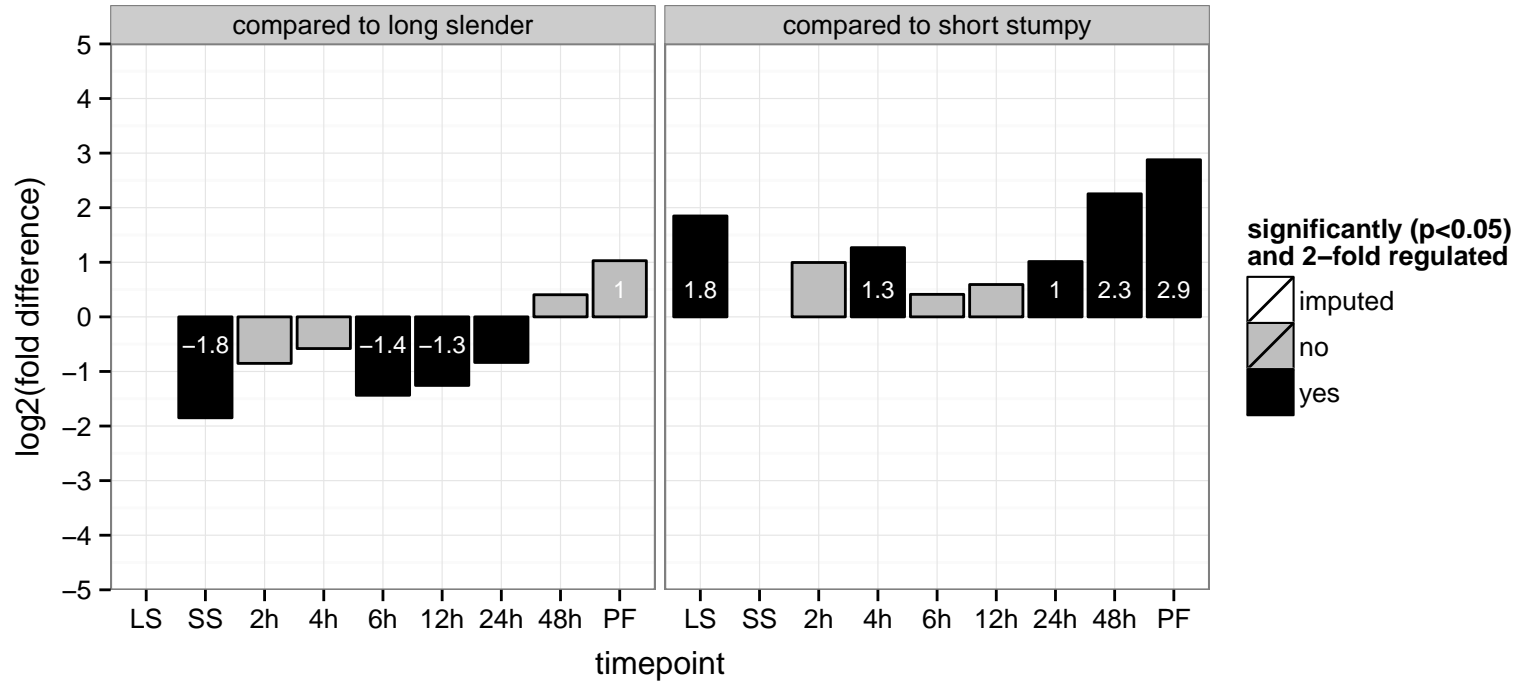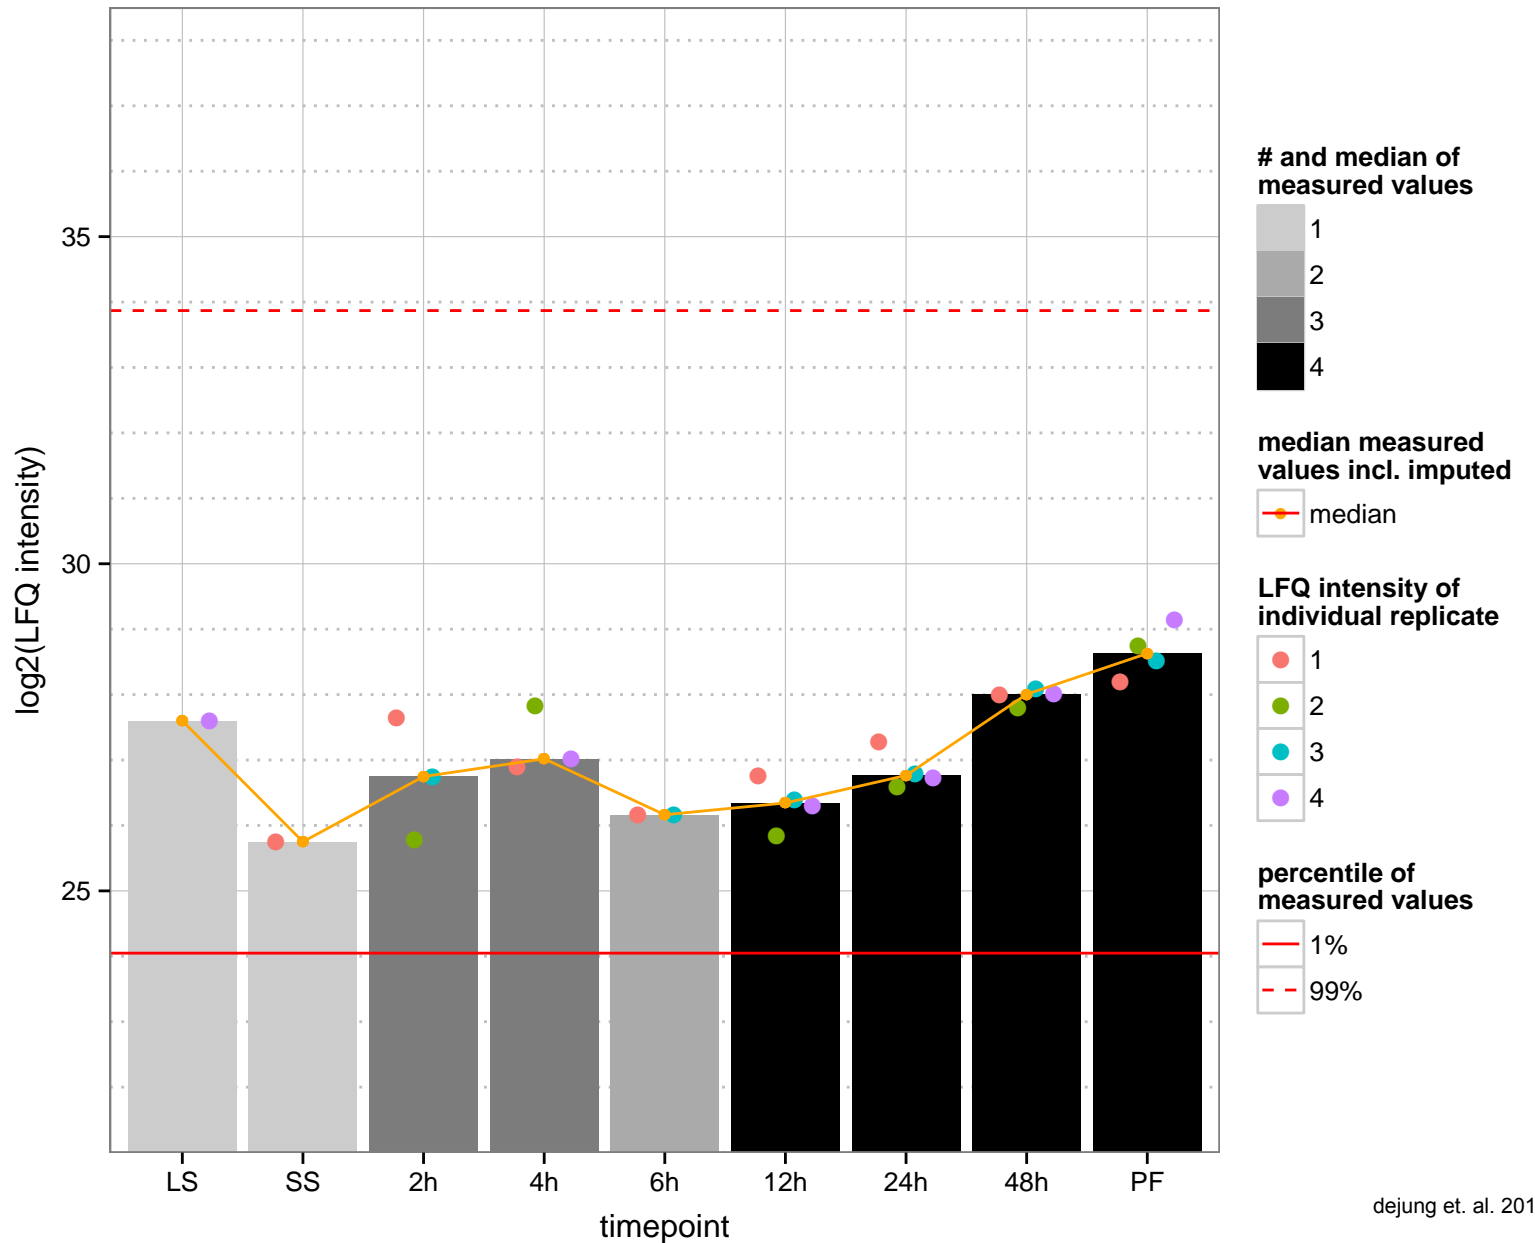

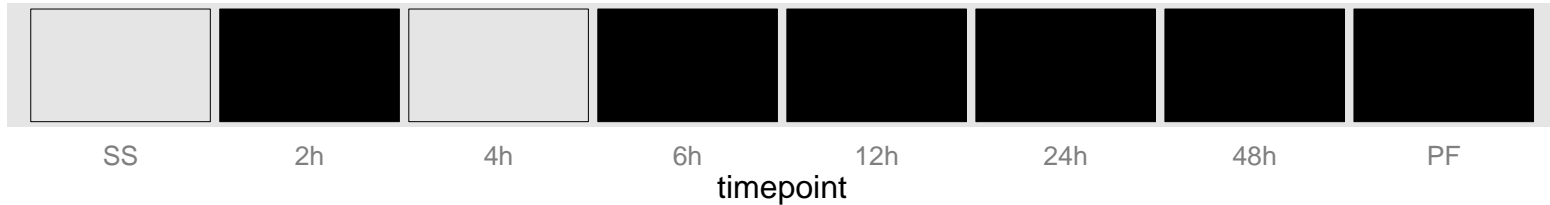

**regulated**  **not regulated**  **significant down**  **significant up**

cytochrome oxidase subunit VI (COXVI)  
 Tb927.10.280  
 AGOF: cytochrome-c oxidase activity  
 AGOC: mitochondrion  
 AGOP: oxidation-reduction process  
 PGO: cytochrome-c oxidase activity  
 PGO: mitochondrion  
 PGO: null

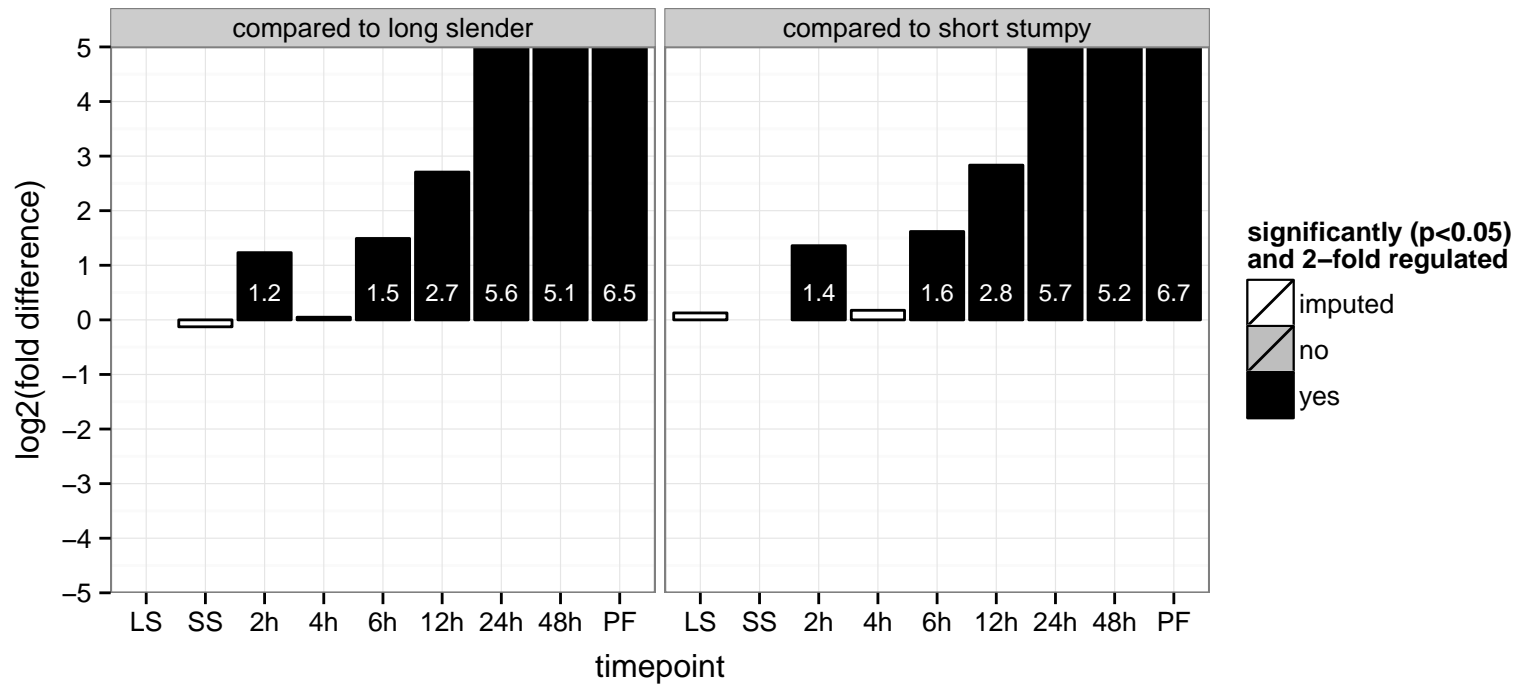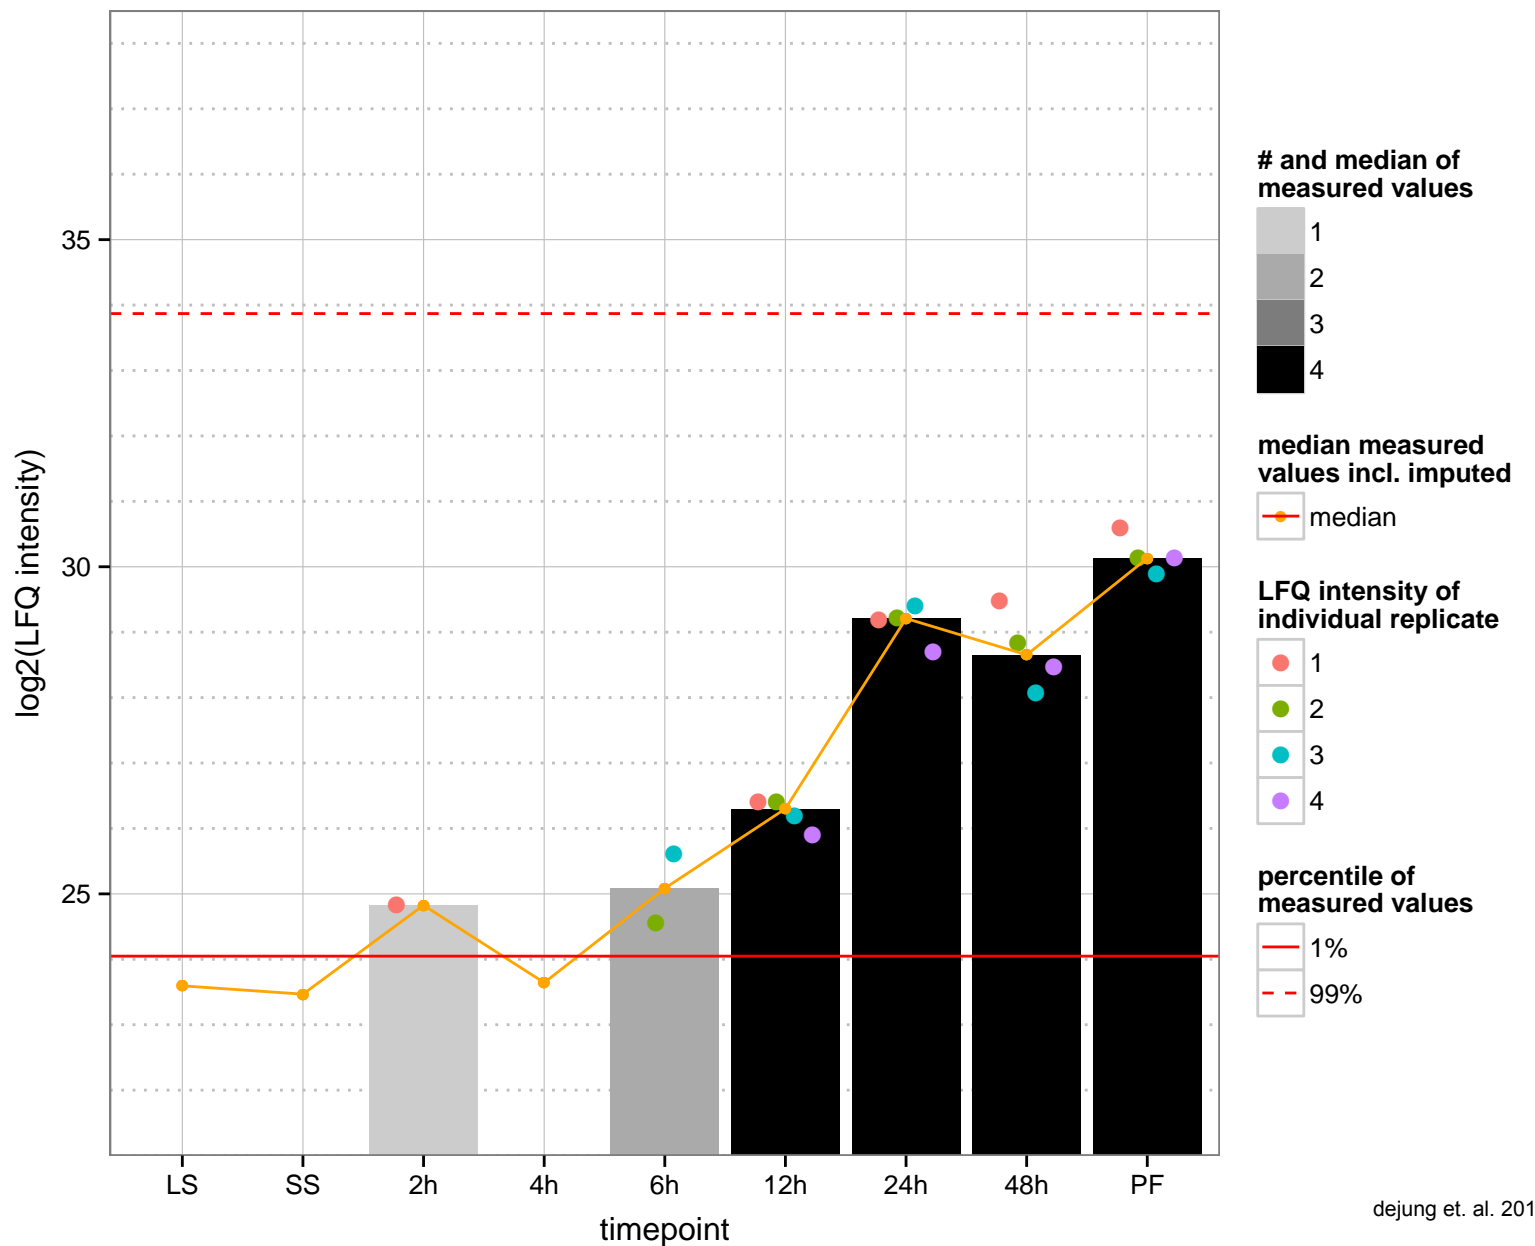

peptidyl-prolyl cis-trans isomerase, putative (PPIase)  
 Tb927.10.4620  
 AGOF: FK506 binding, peptidyl-prolyl cis-trans isomerase activity  
 AGOC: null  
 AGOP: protein folding  
 PGO: null  
 PGO: null  
 PGO: null  
 PGO: protein folding

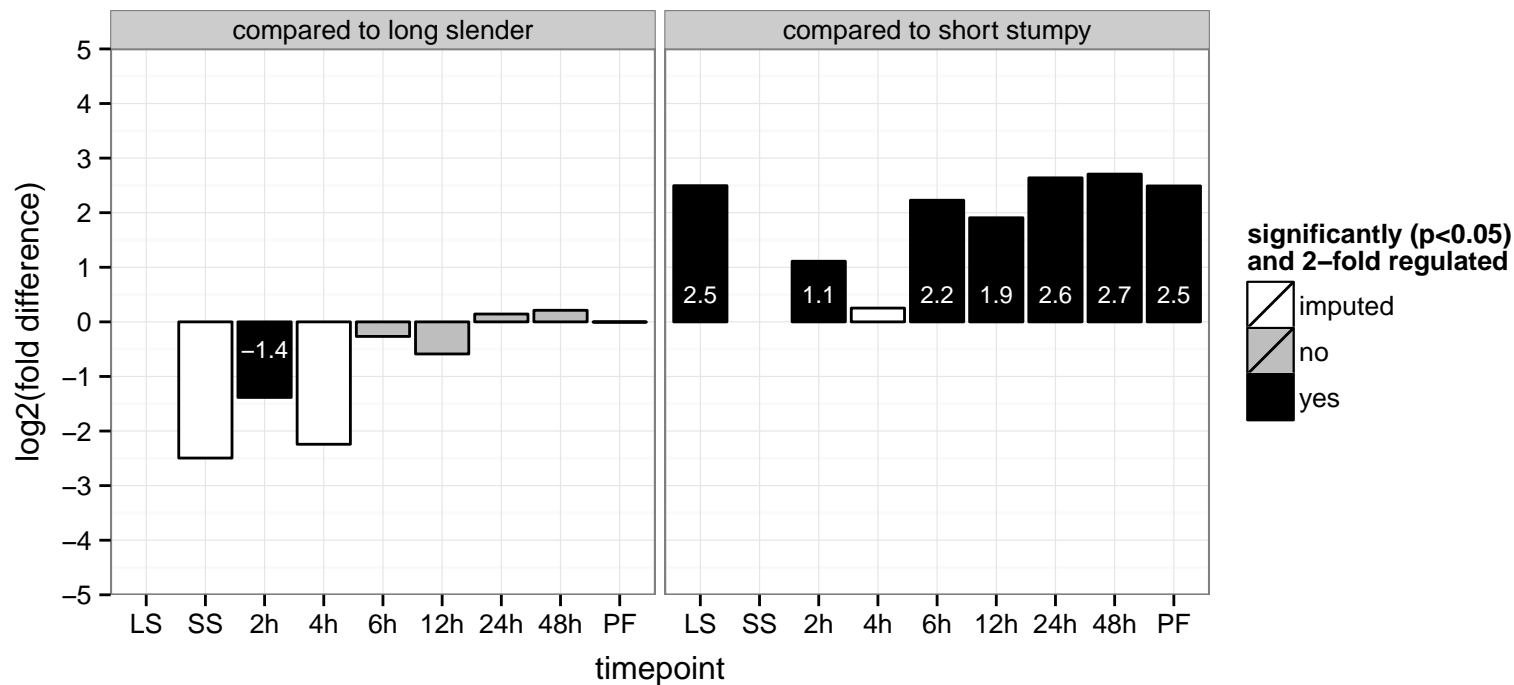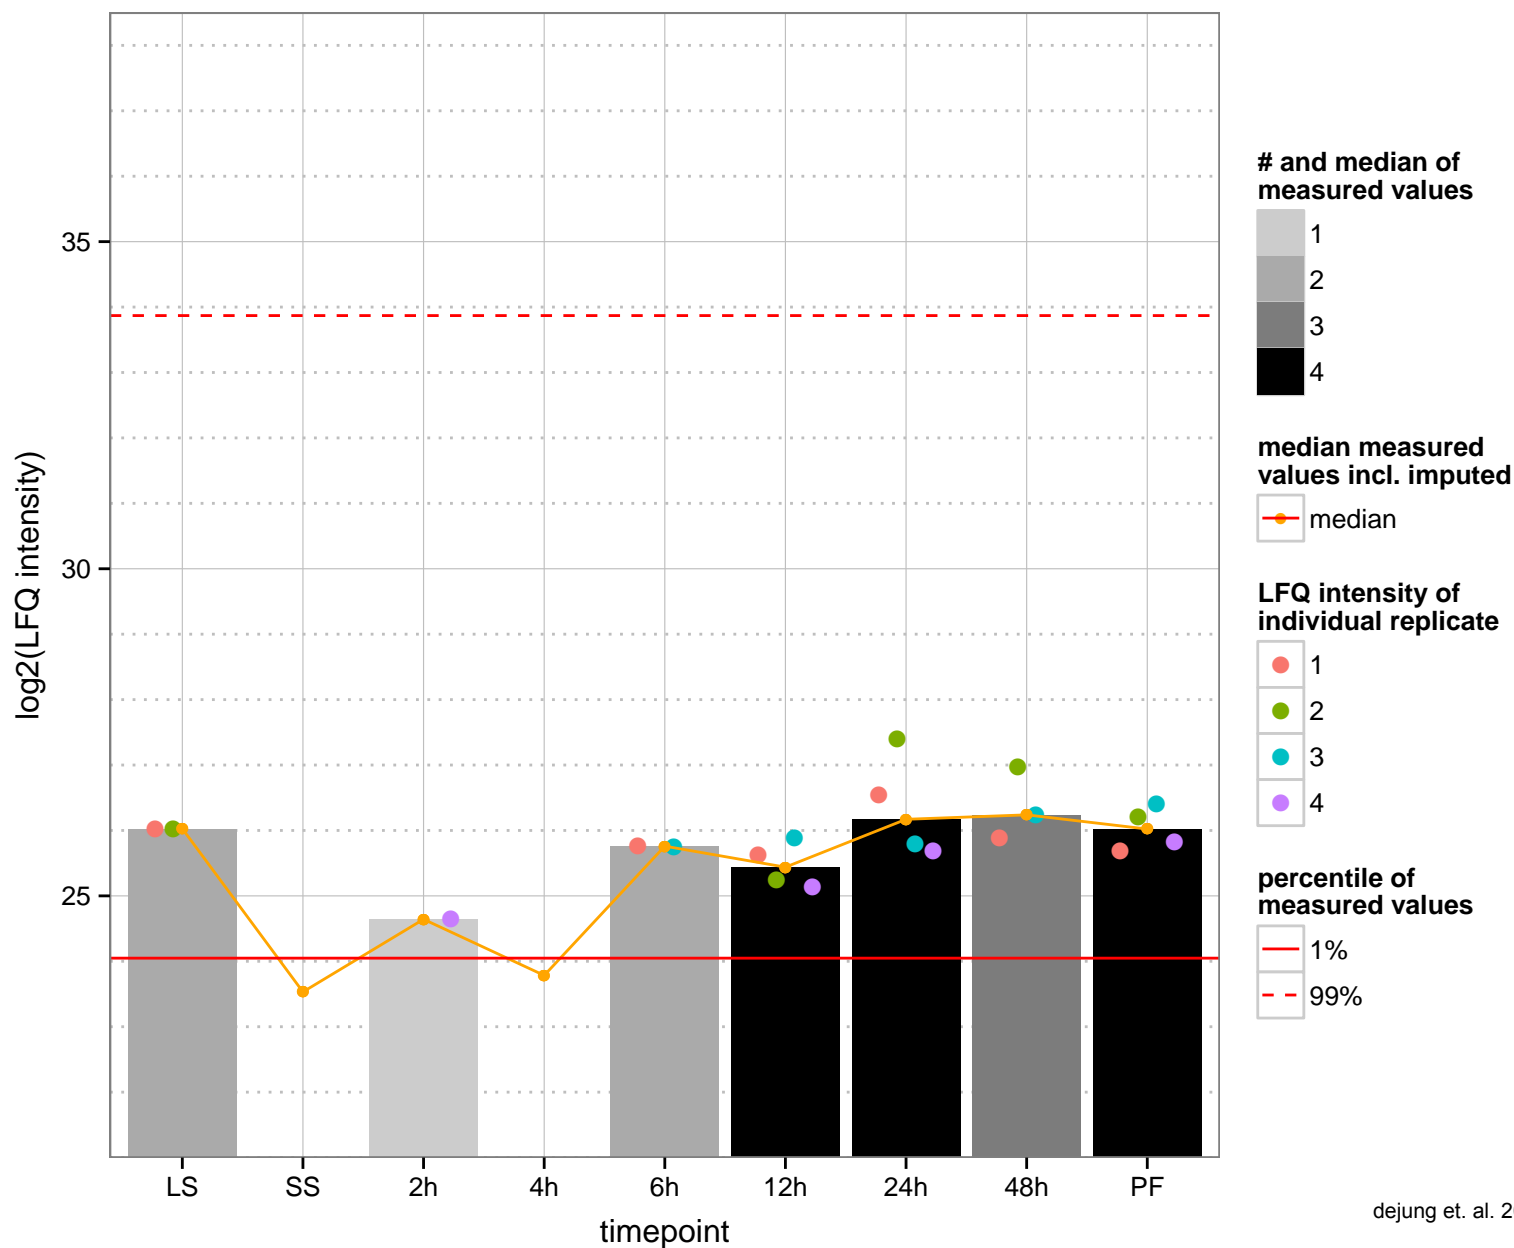

hypothetical protein, conserved  
 Tb927.10.7730  
 AGOF: null  
 AGOC: null  
 AGOP: null  
 PGOF: null  
 PGOC: null  
 PGOP: null

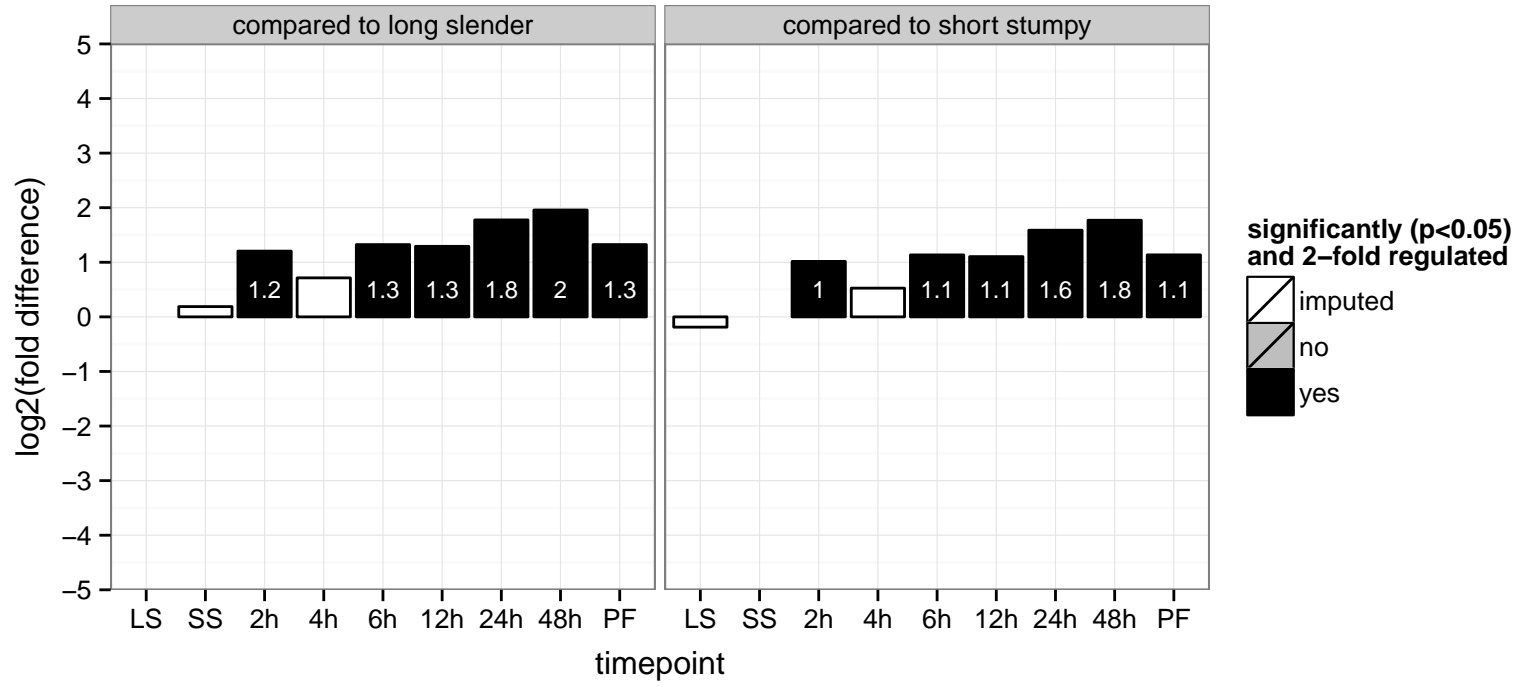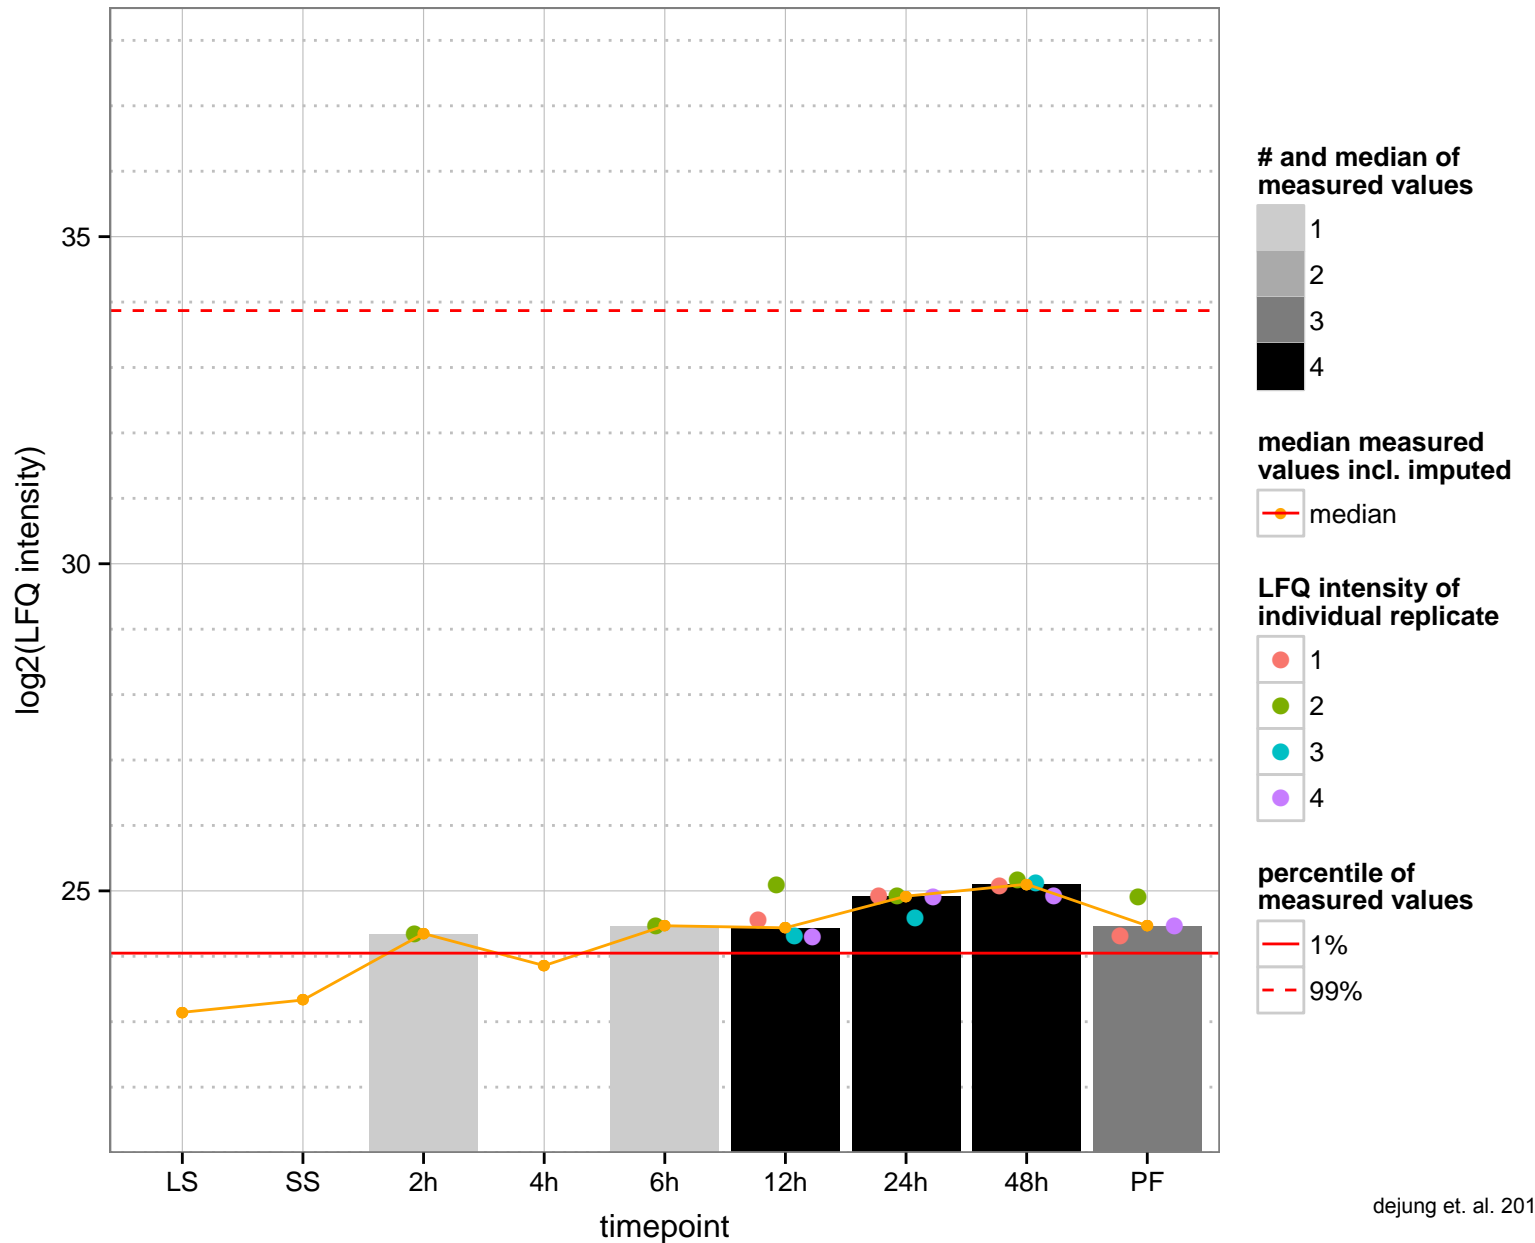

hypothetical protein, conserved

Tb927.11.11470

AGOF: null

AGOC: mitochondrion

AGOP: modulation of development of symbiont involved in interaction with host, quorum sensing involved in interaction with host

PGOF: null

PGOC: null

PGOP: null

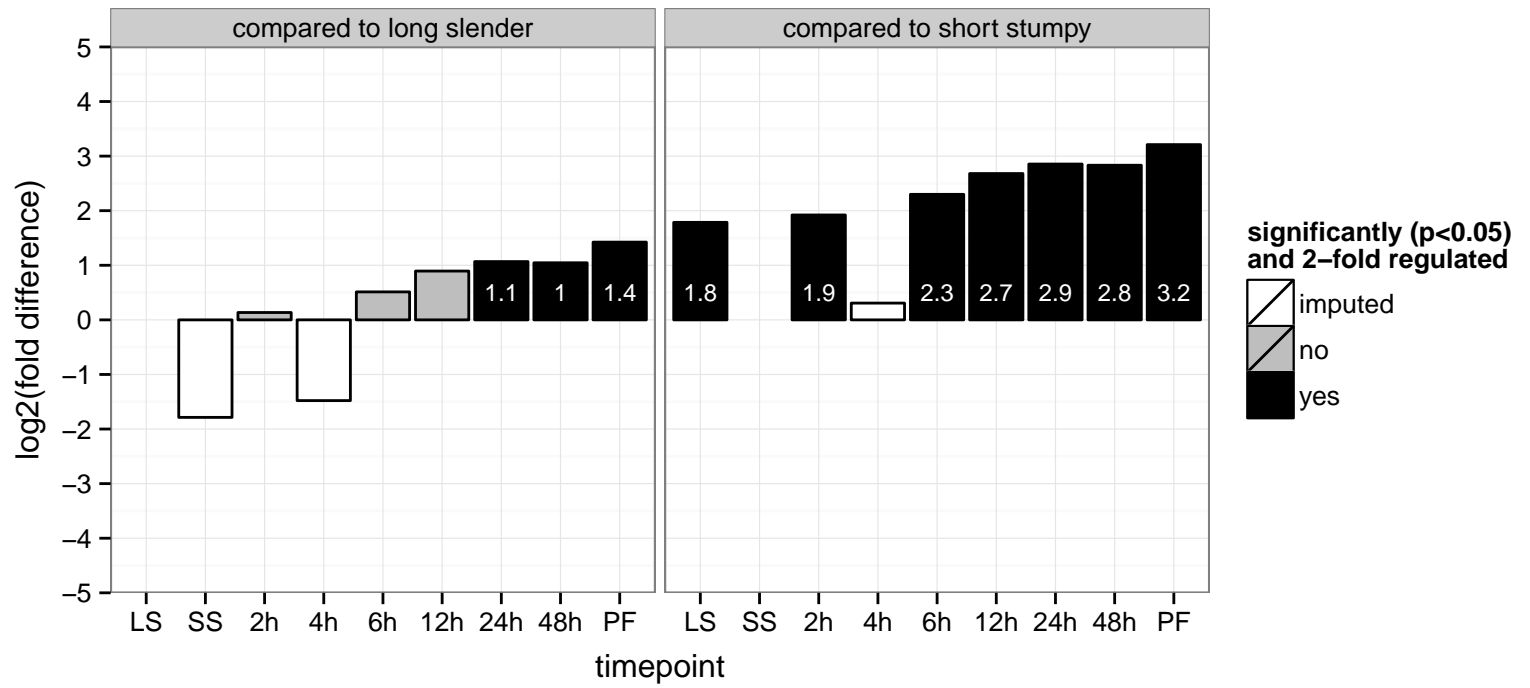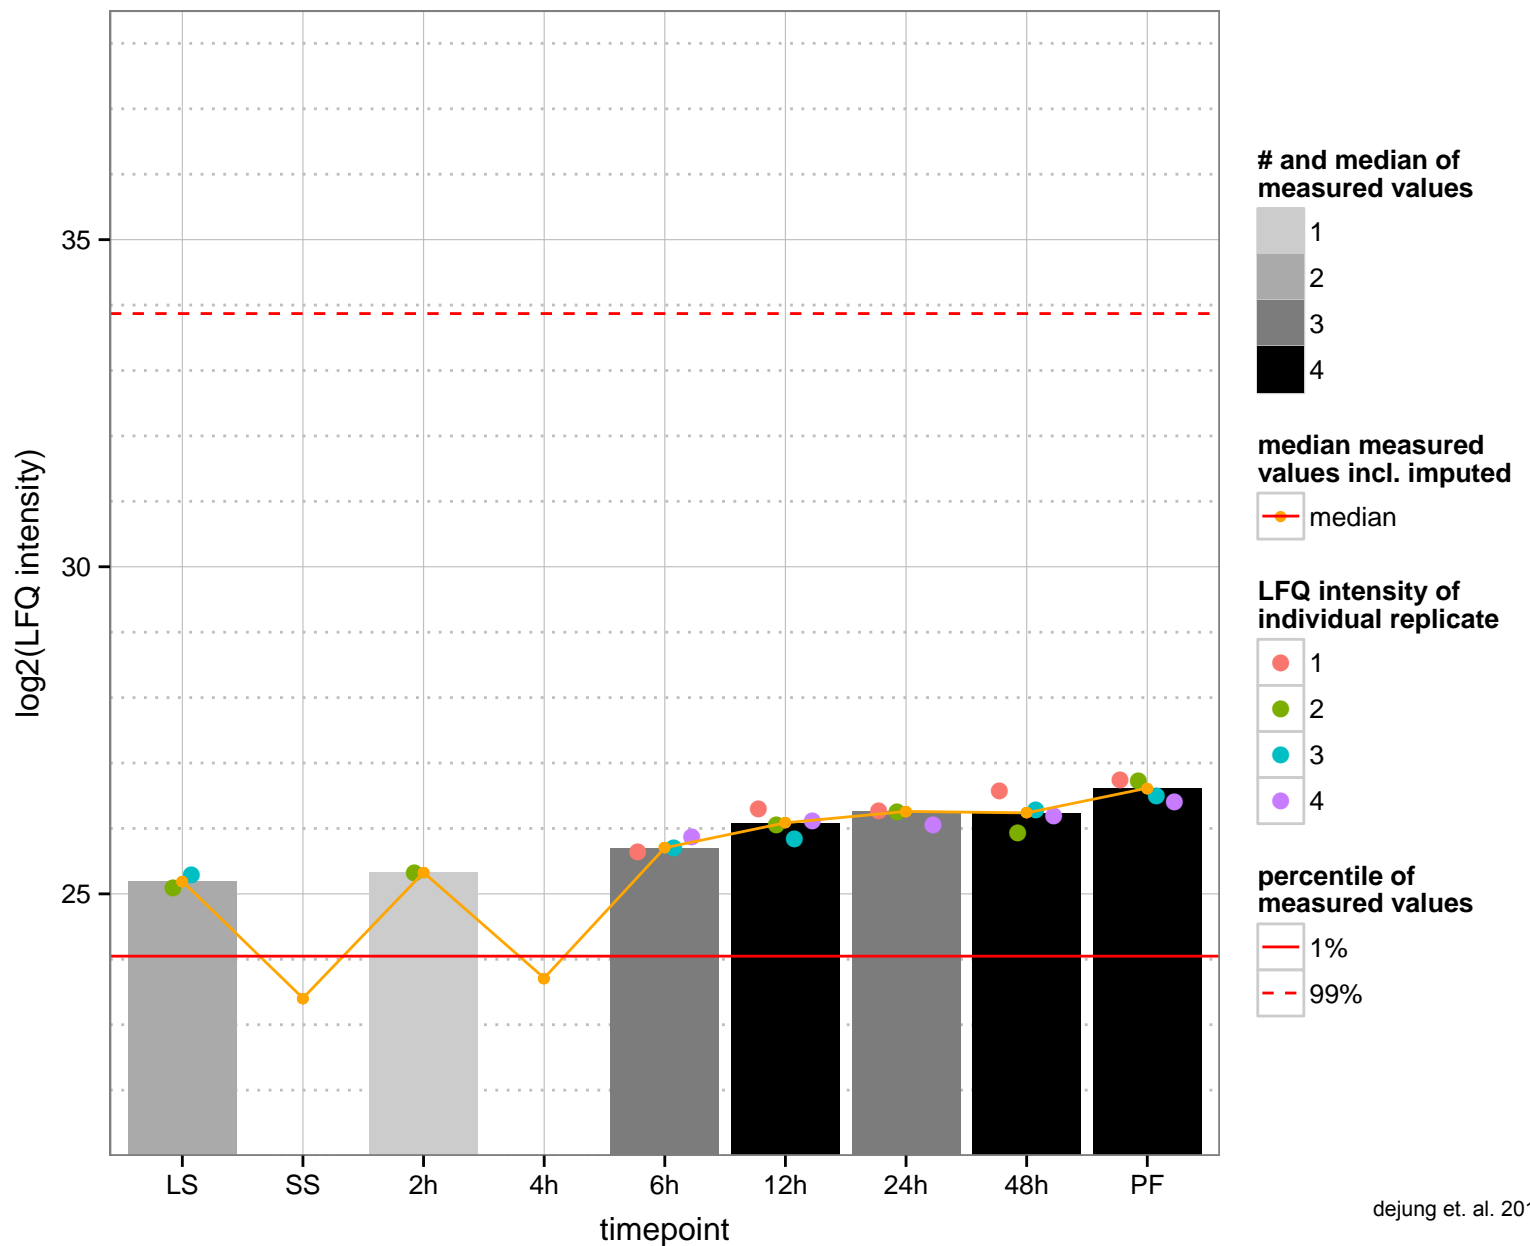

NADH-cytochrome b5 reductase, putative (B5R)  
 Tb927.11.3750  
 AGOF: cytochrome-b5 reductase activity, electron carrier activity  
 AGOC: integral to membrane  
 AGOP: oxidation-reduction process  
 PGO: oxidation-reductase activity  
 PGOC: null  
 PGOP: oxidation-reduction process

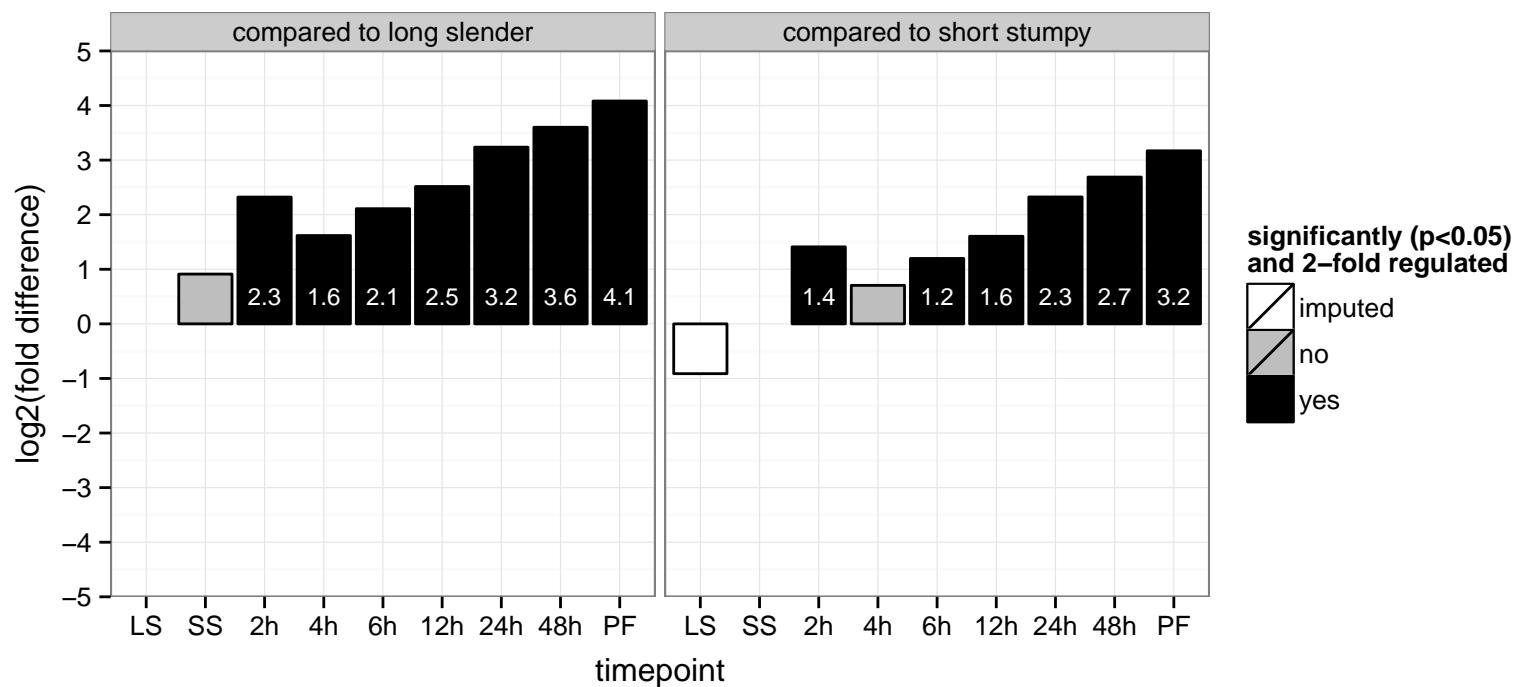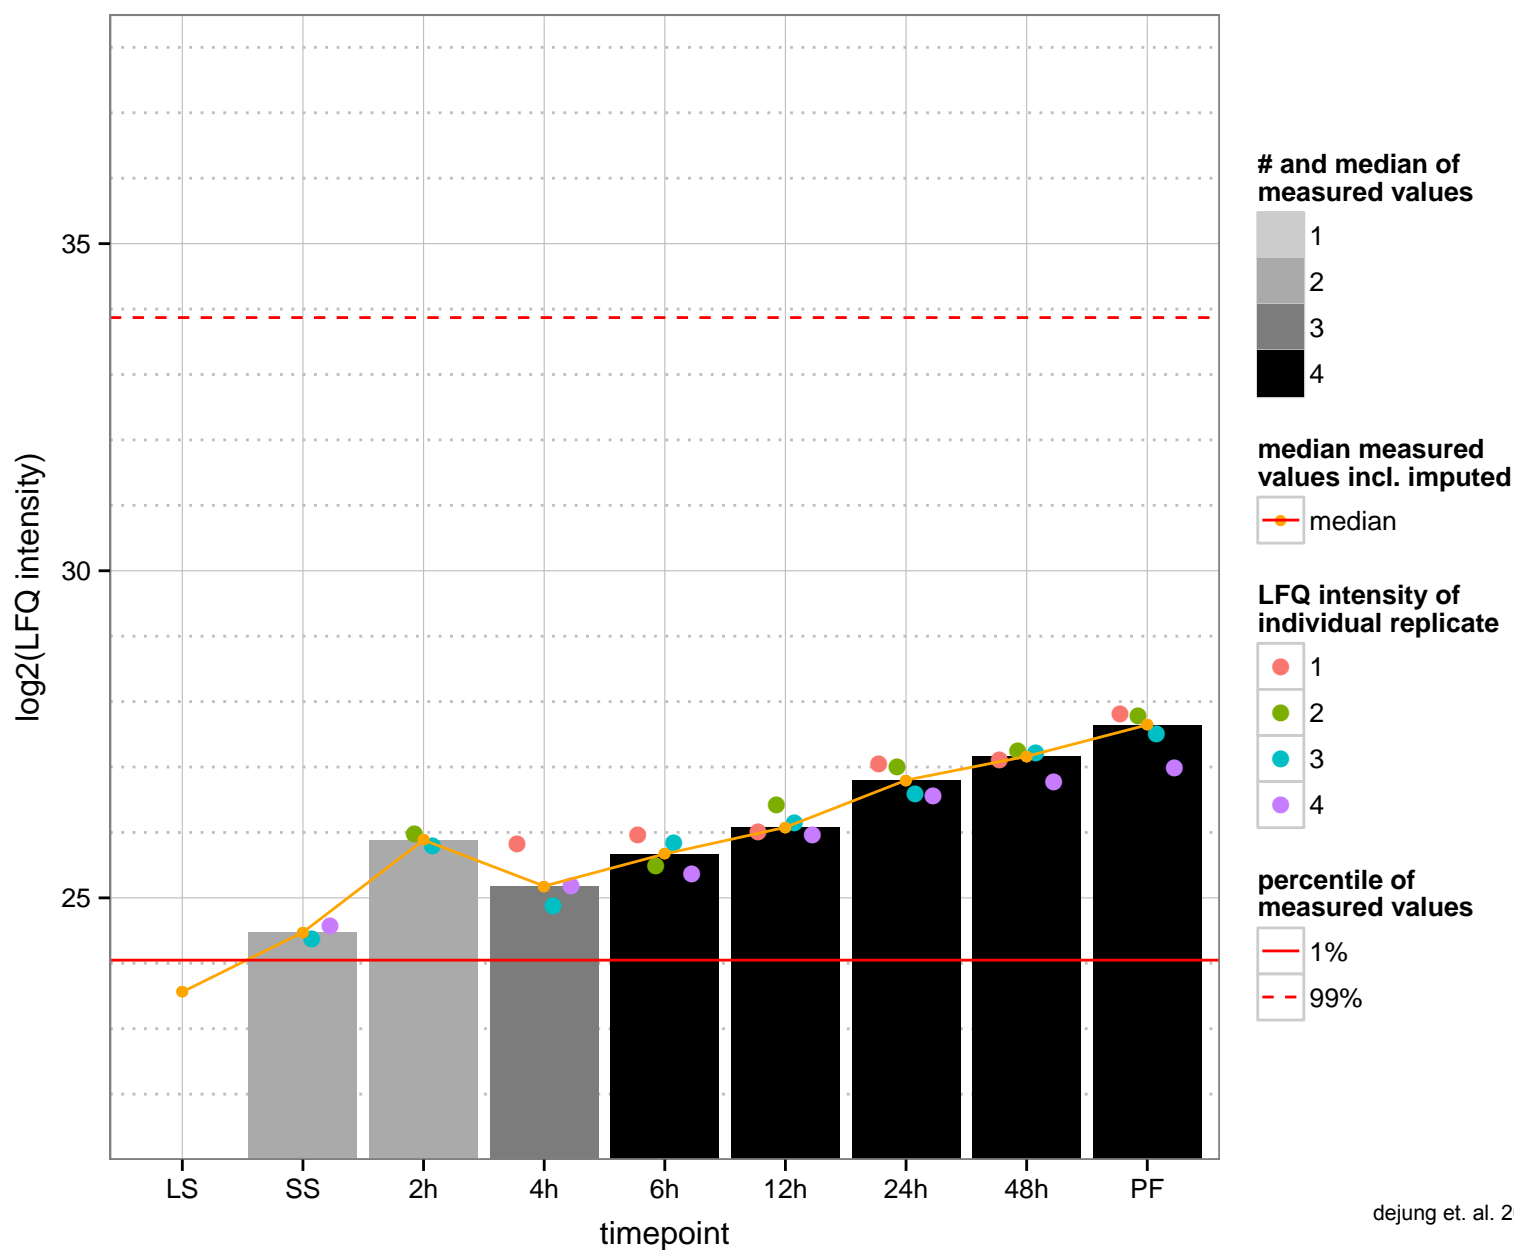



mitochondrial DNA-directed RNA polymerase (MTRNAP)  
 Tb927.11.5780  
 AGOF: DNA binding, DNA-directed RNA polymerase activity  
 AGOC: mitochondrion  
 AGOP: transcription, DNA-dependent  
 PGOF: DNA binding, DNA-directed RNA polymerase activity  
 PGO: null  
 PGOP: transcription, DNA-dependent

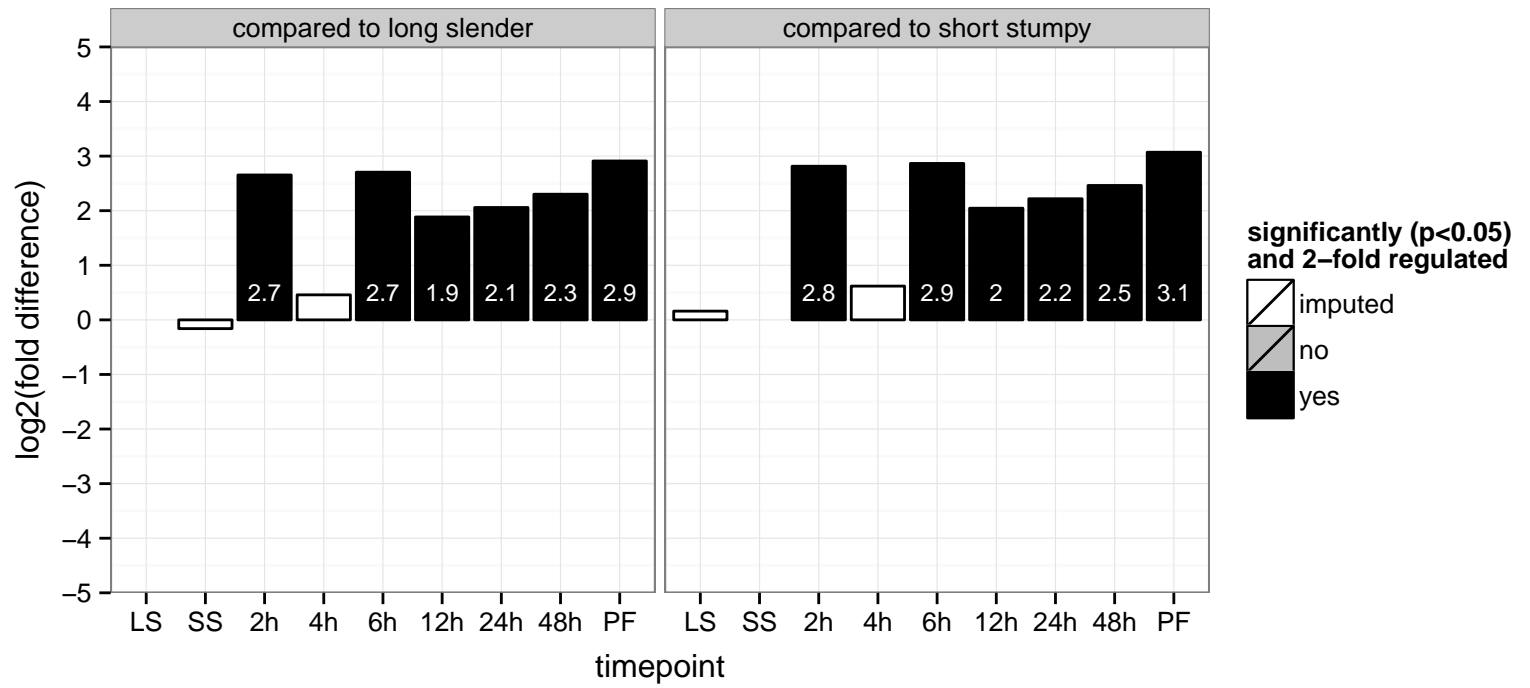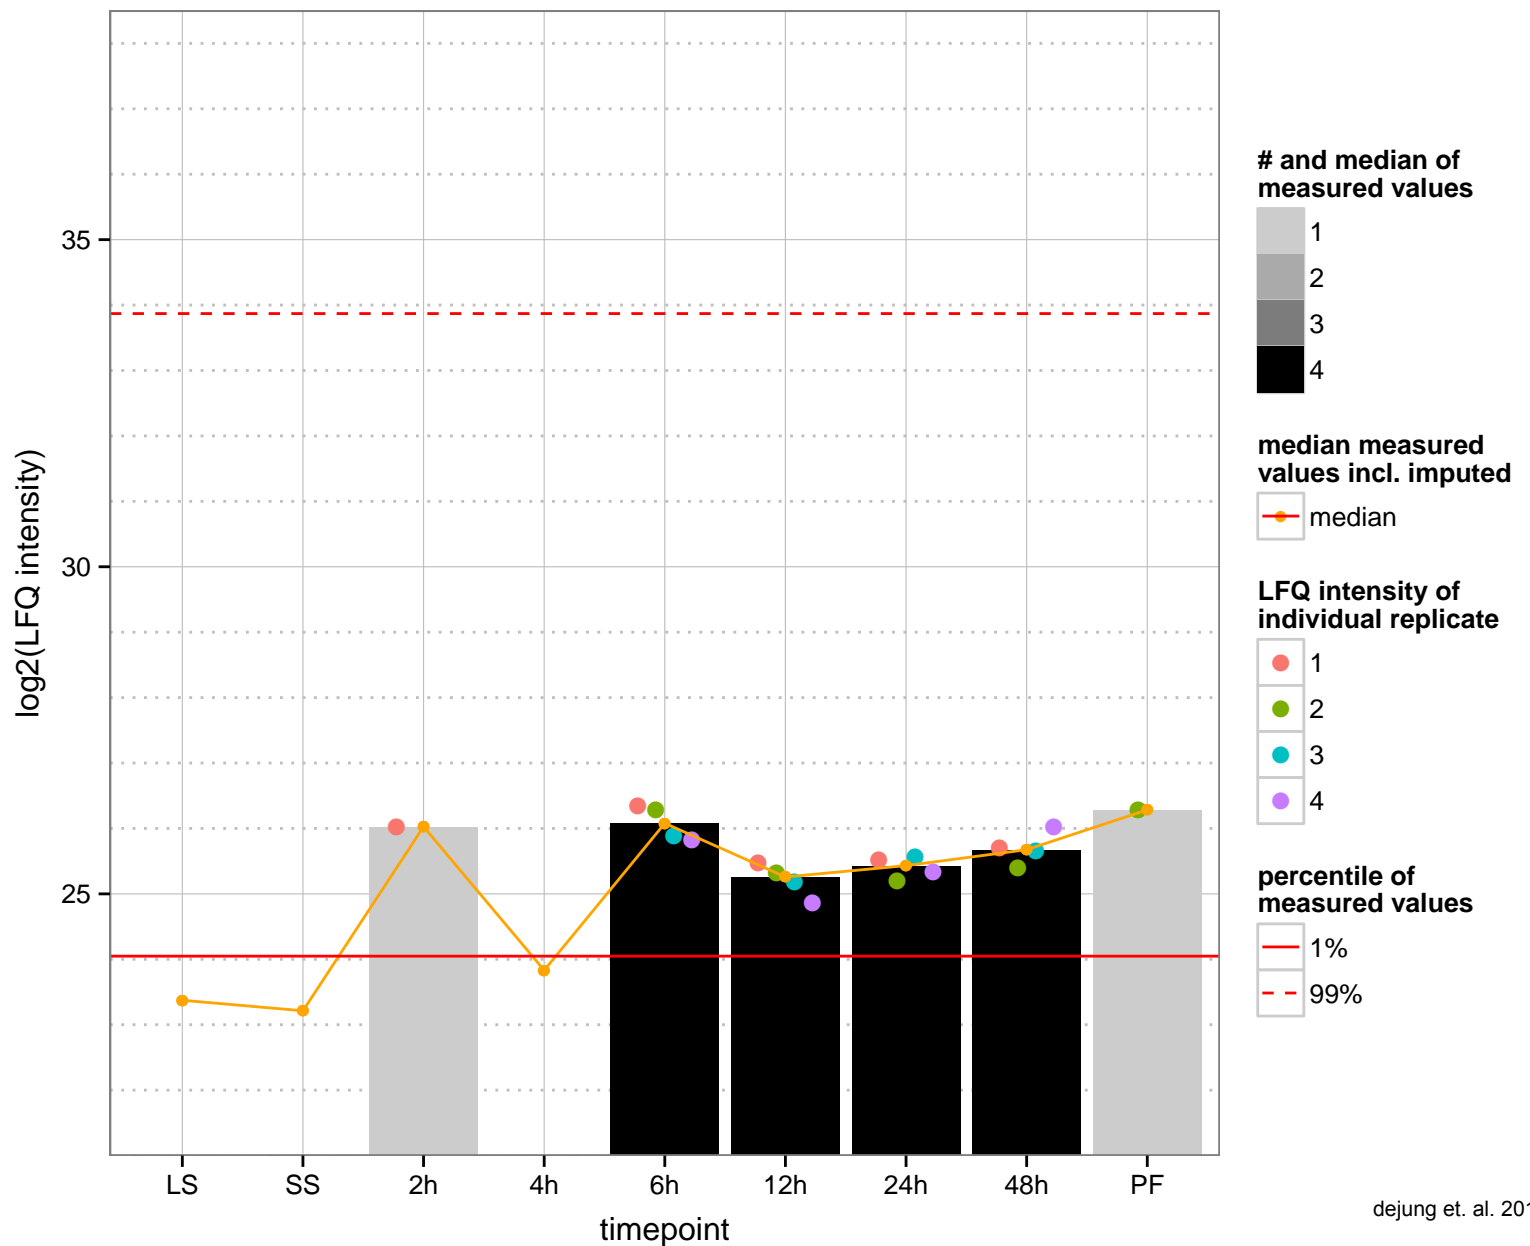

hypothetical protein, conserved

Tb927.2.2340

AGOF: glycerophosphodiester phosphodiesterase activity, phospholipase C activity

AGOC: null

AGOP: glycerol metabolic process, intracellular signal transduction, lipid metabolic process

PGOF: glycerophosphodiester phosphodiesterase activity, phospholipase C activity, phosphoric diester hydrolase activity

PGOC: null

PGOP: glycerol metabolic process, intracellular signal transduction, lipid metabolic process

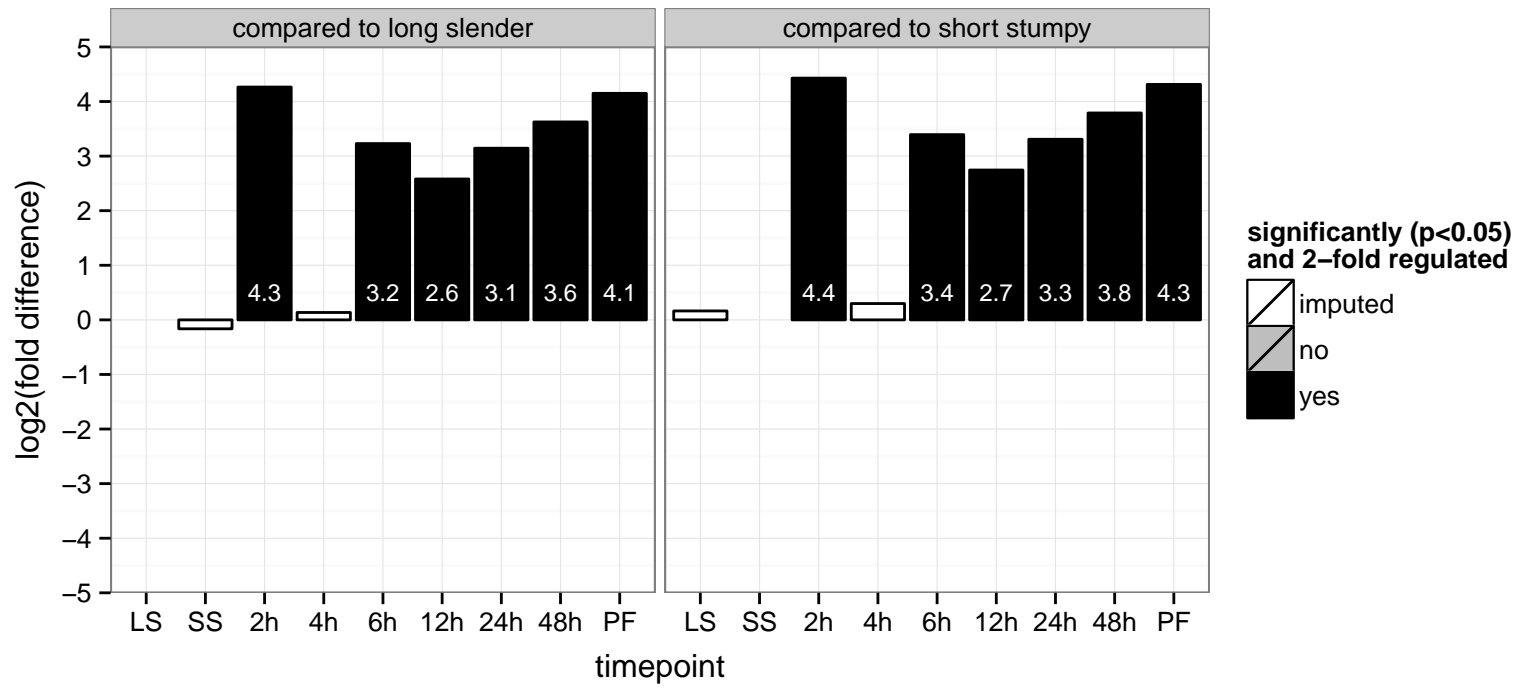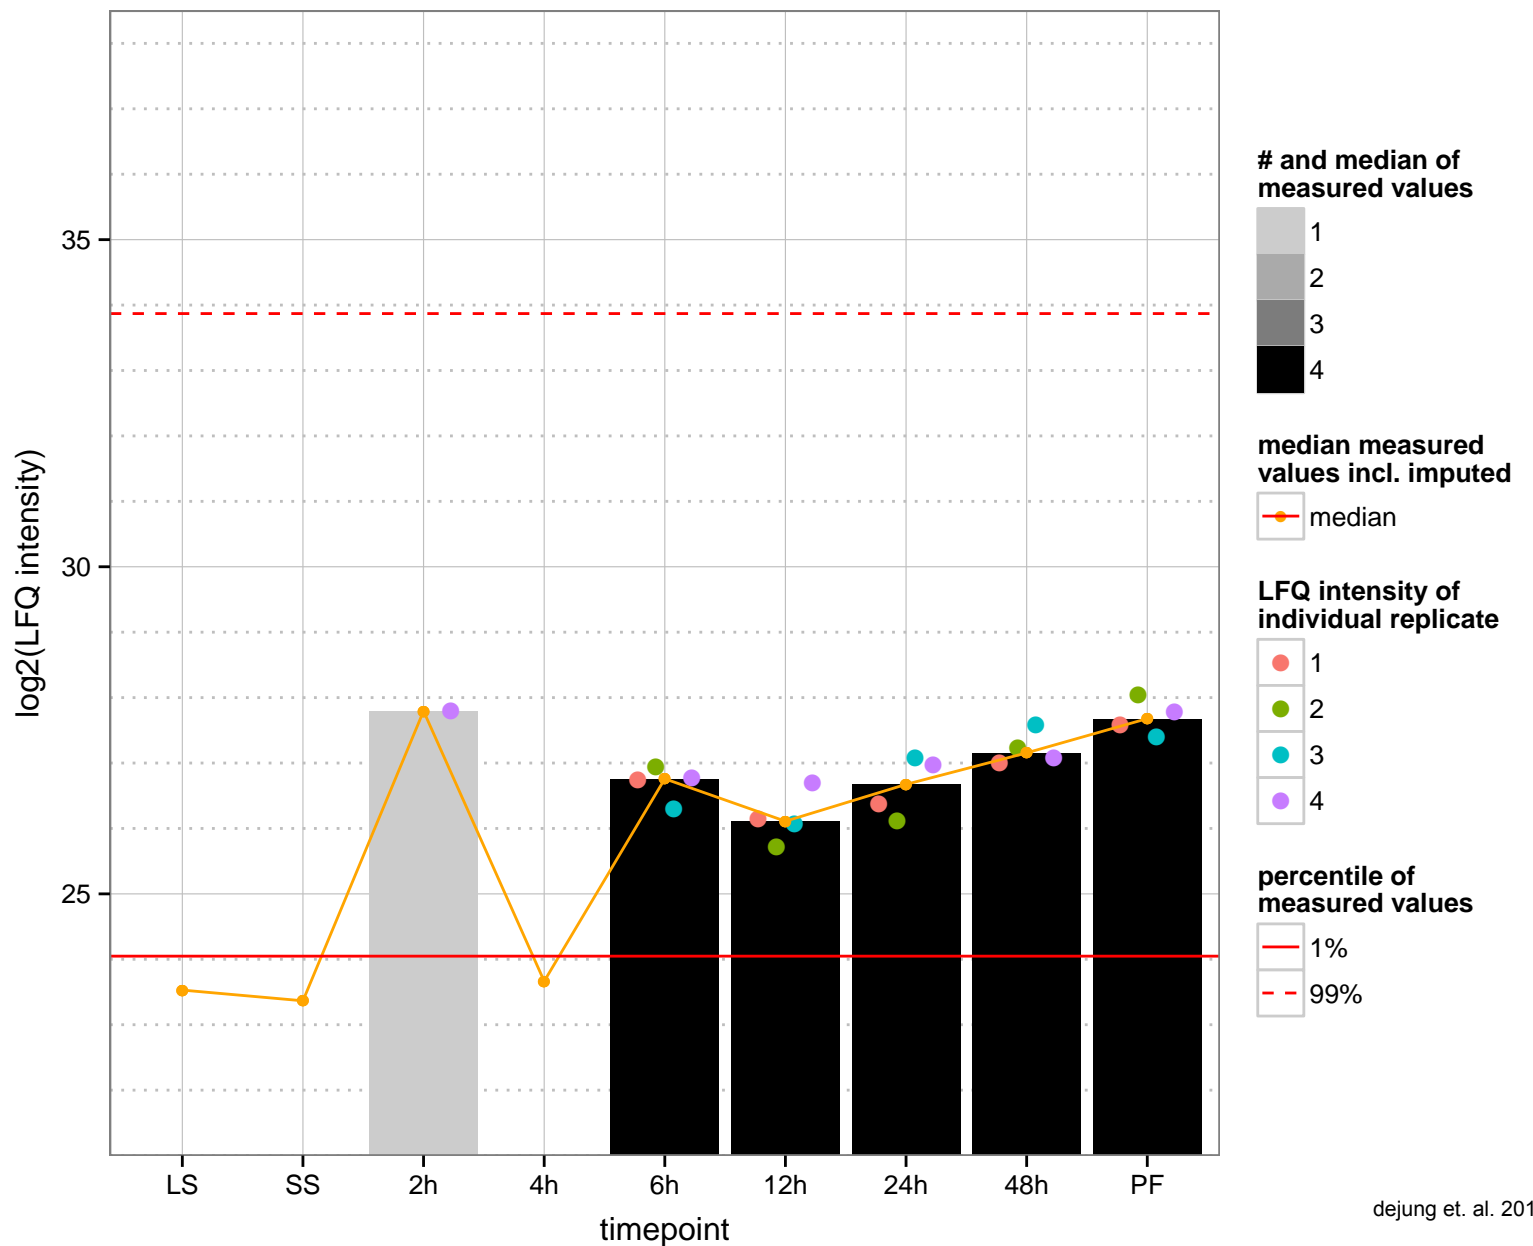

hypothetical protein, conserved  
 Tb927.4.3140  
 AGOF: null  
 AGOC: null  
 AGOP: null  
 PGO: null  
 PGOC: null  
 PGOP: ribosome biogenesis

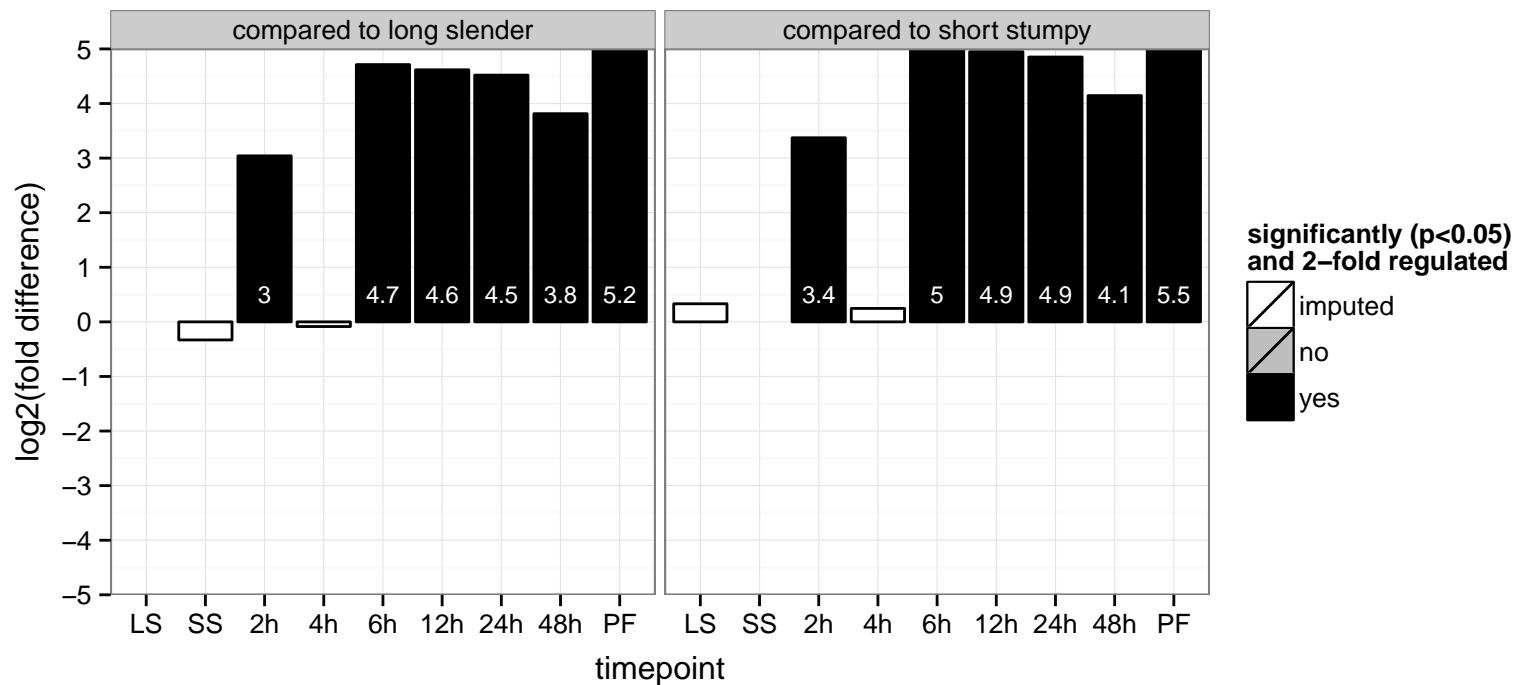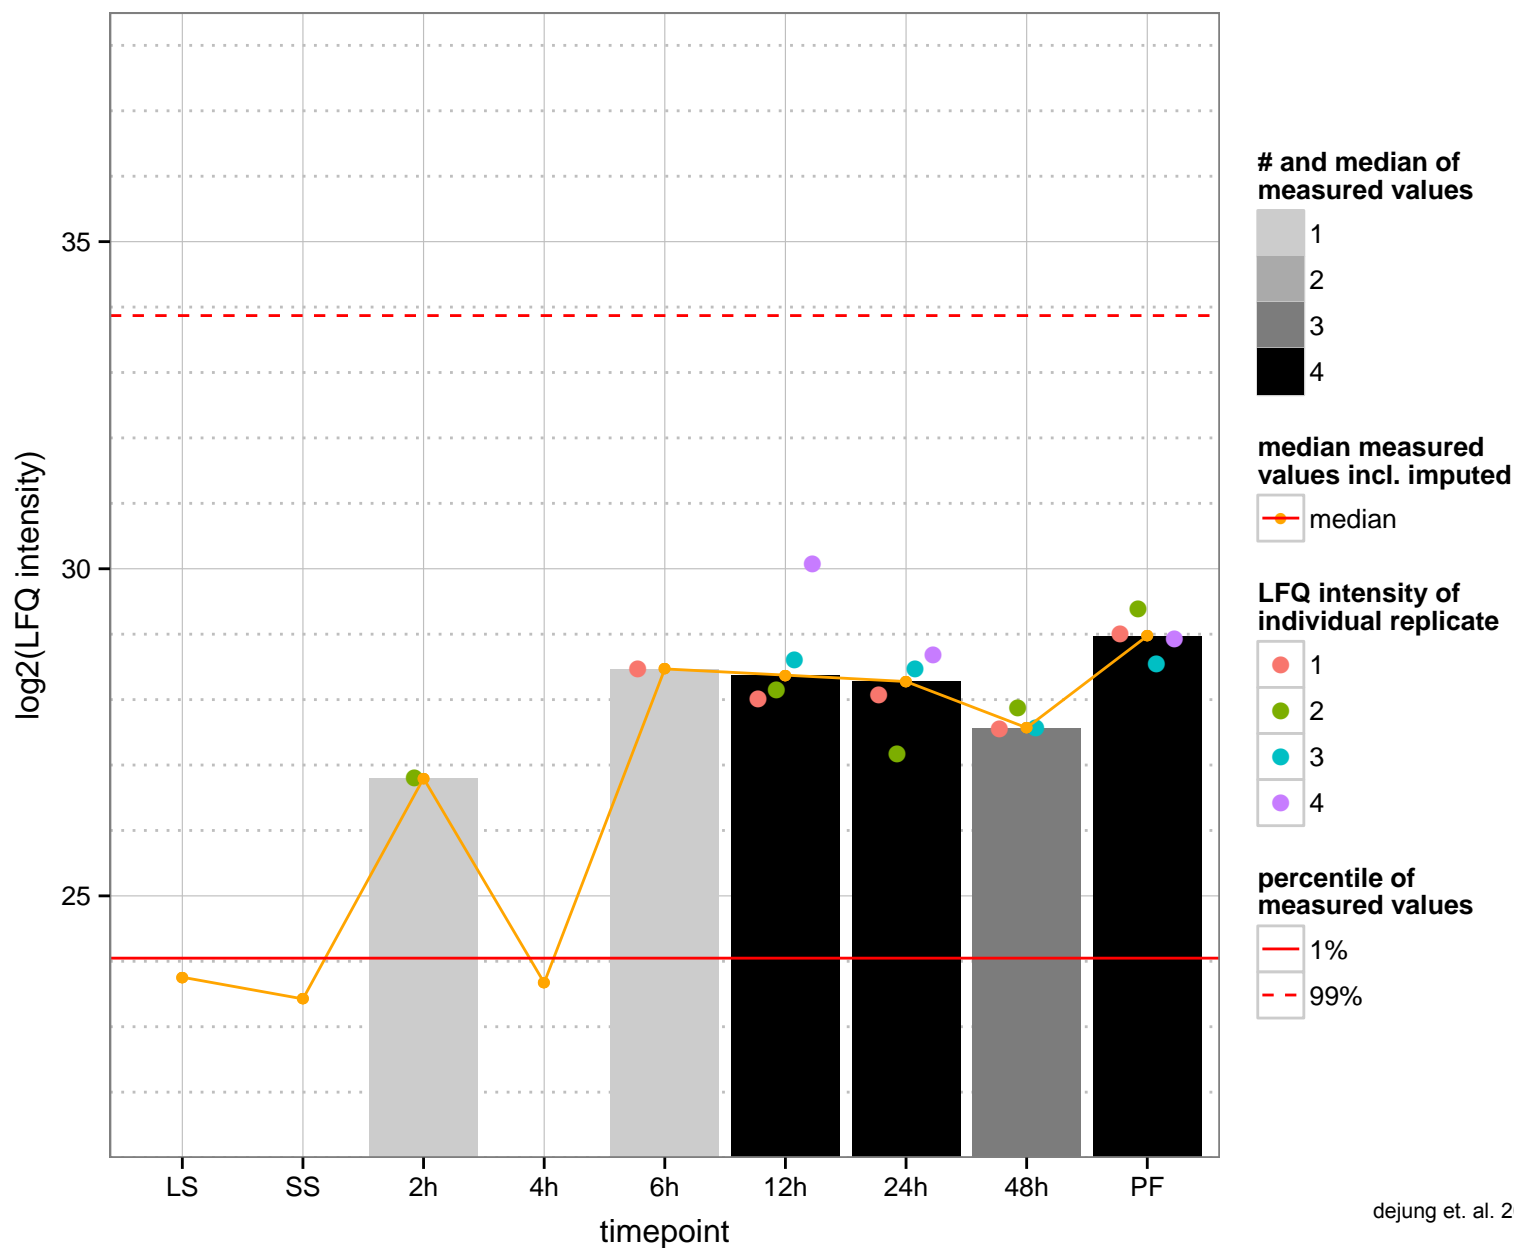

hypothetical protein, conserved, inositol 1, 4, 5-trisphosphate receptor (IP3R)  
 Tb927.8.2770  
 AGOF: null  
 AGOC: null, membrane  
 AGOP: null, ion transport  
 PGO: binding, calcium channel activity, calcium channel activity, ion channel activity  
 PGOC: membrane  
 PGOP: calcium ion transmembrane transport, ion transport, transmembrane transport

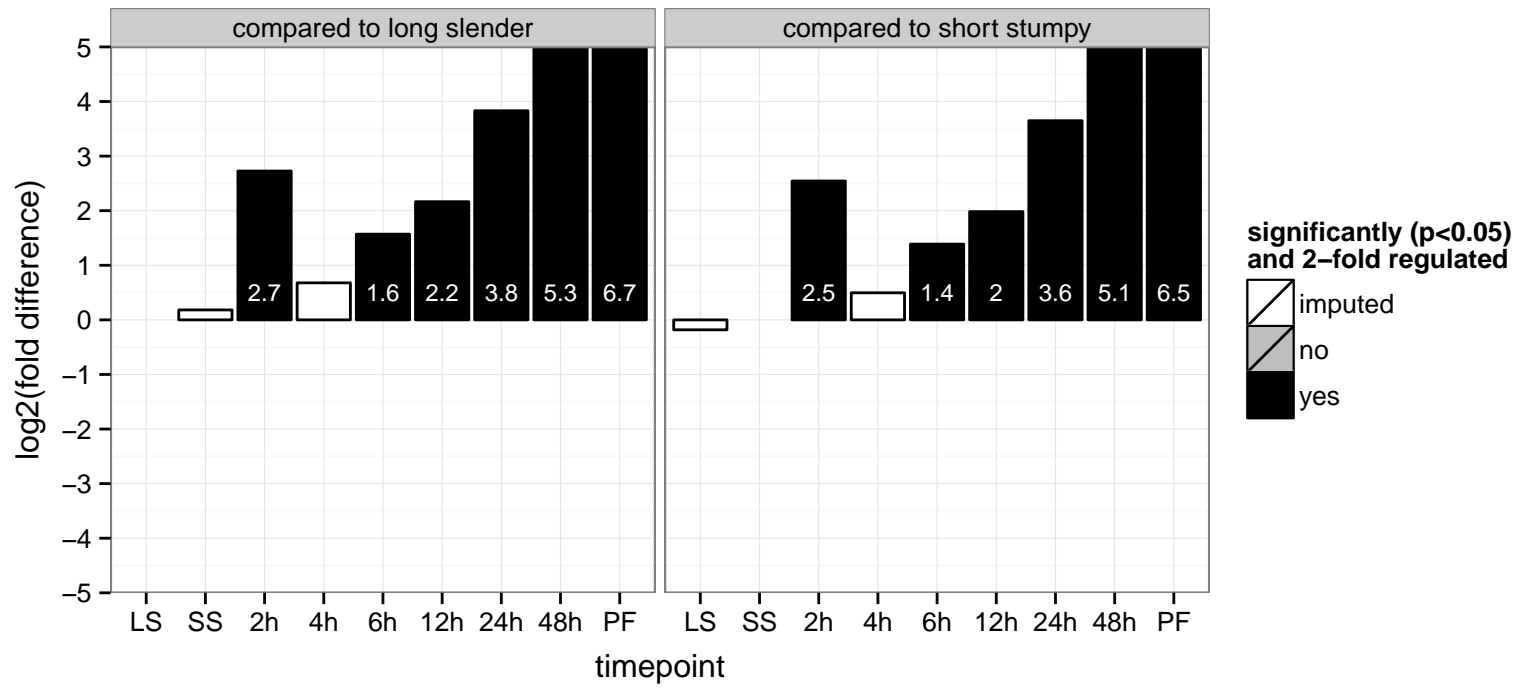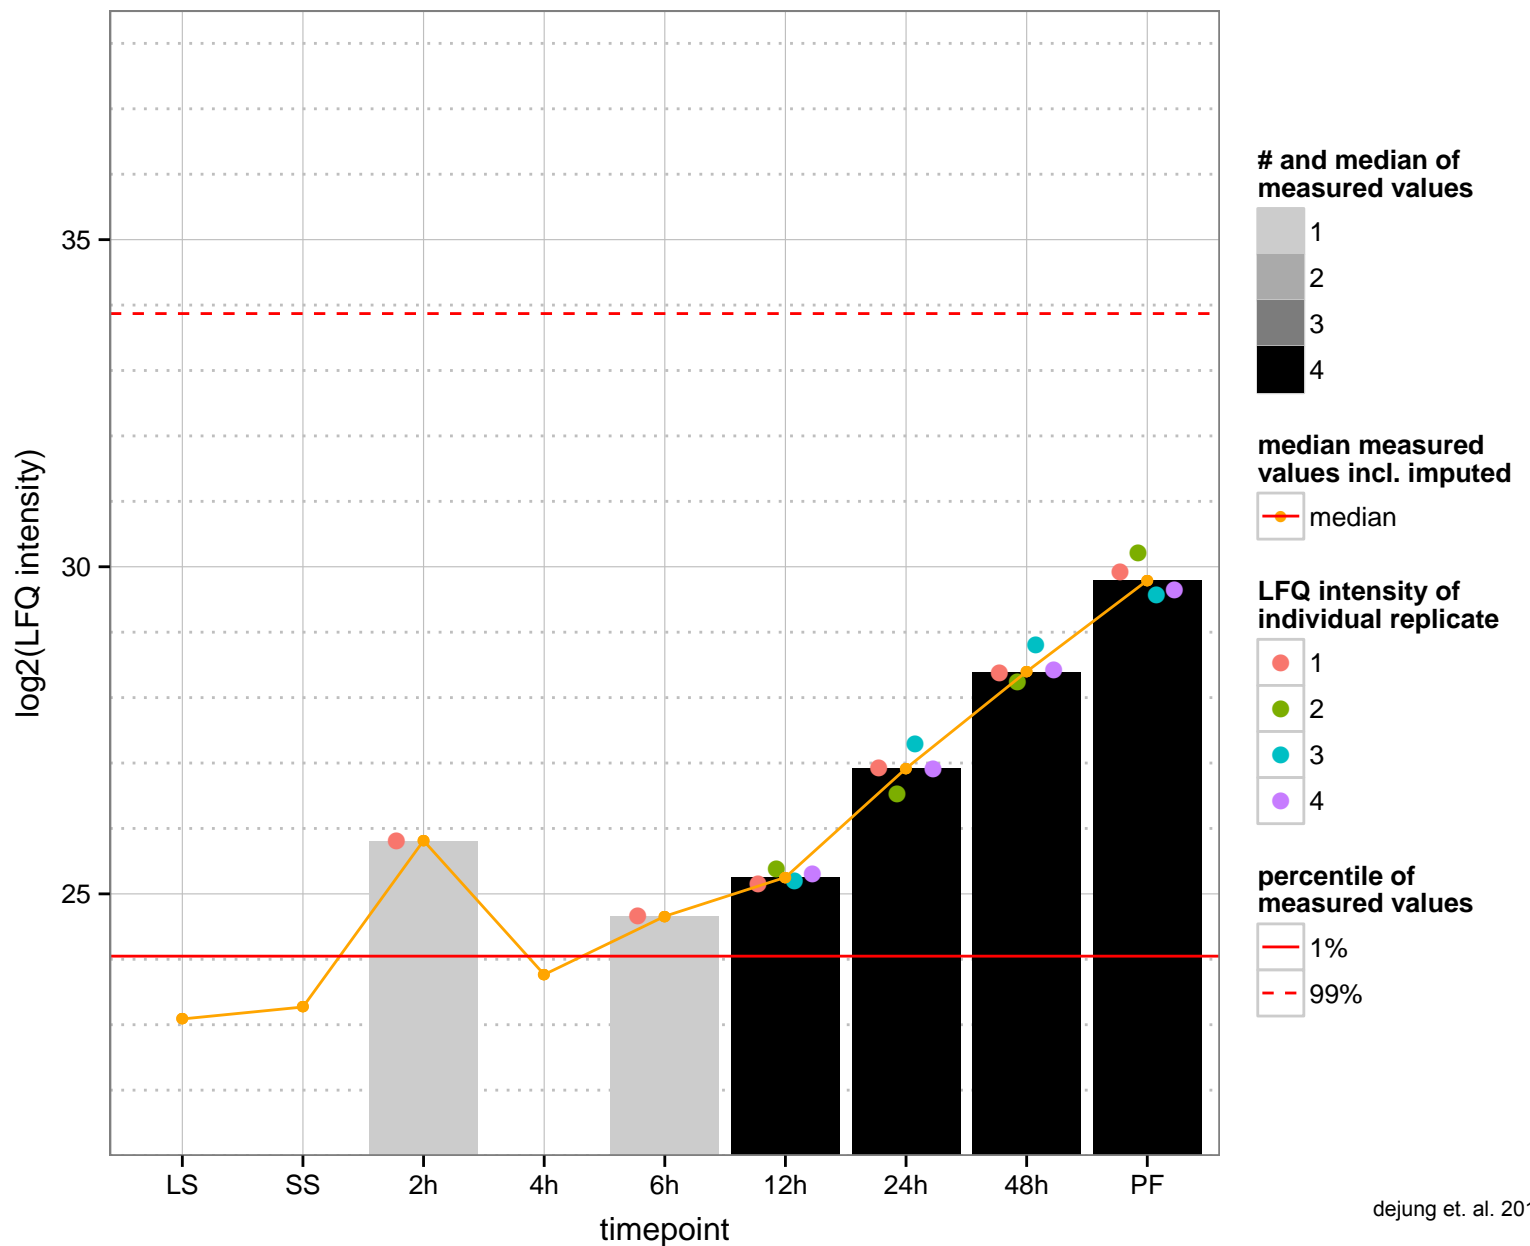

small nuclear ribonucleoprotein Sm-F (Sm-F)  
 Tb927.9.10250  
 AGOF: null  
 AGOC: nucleus, small nucleolar ribonucleoprotein complex  
 AGOP: mRNA processing, nuclear mRNA trans splicing, SL addition  
 PGOF: null  
 PGO: null  
 PGOP: null

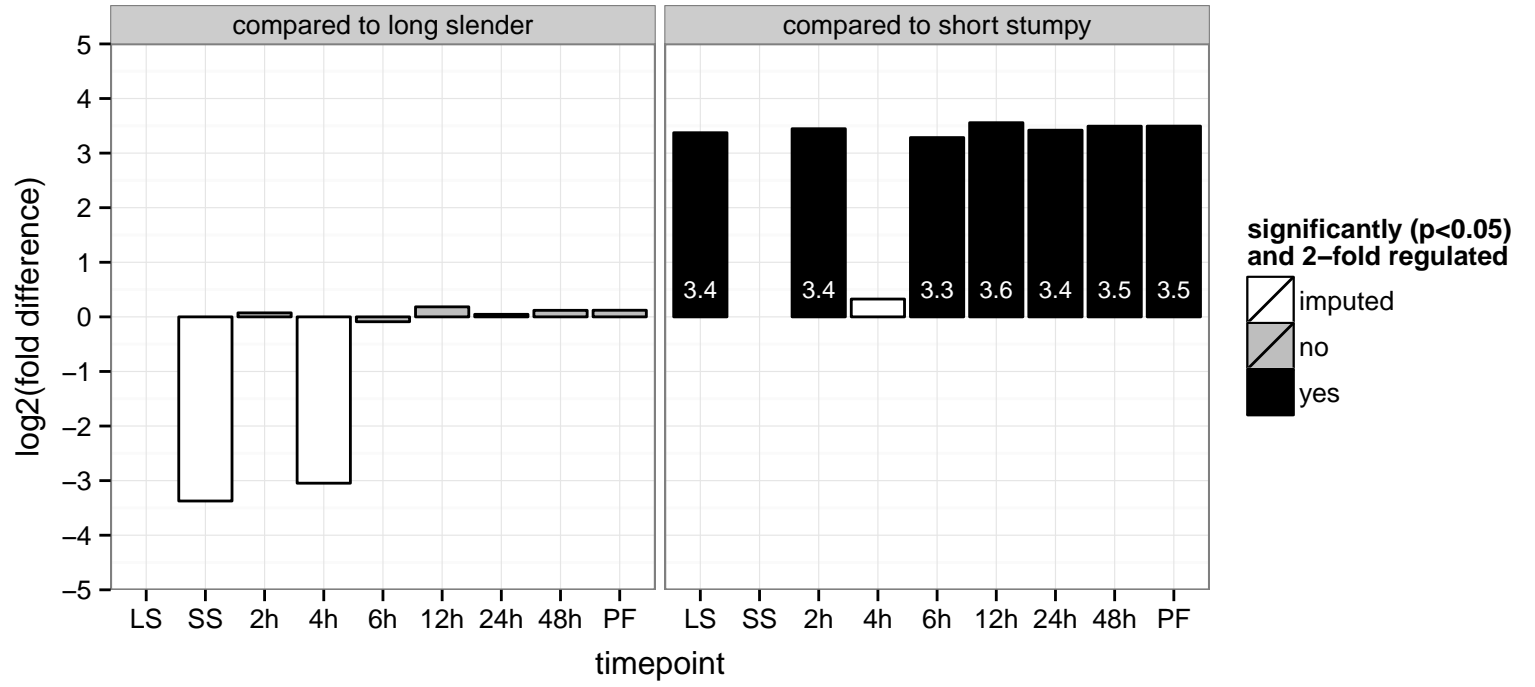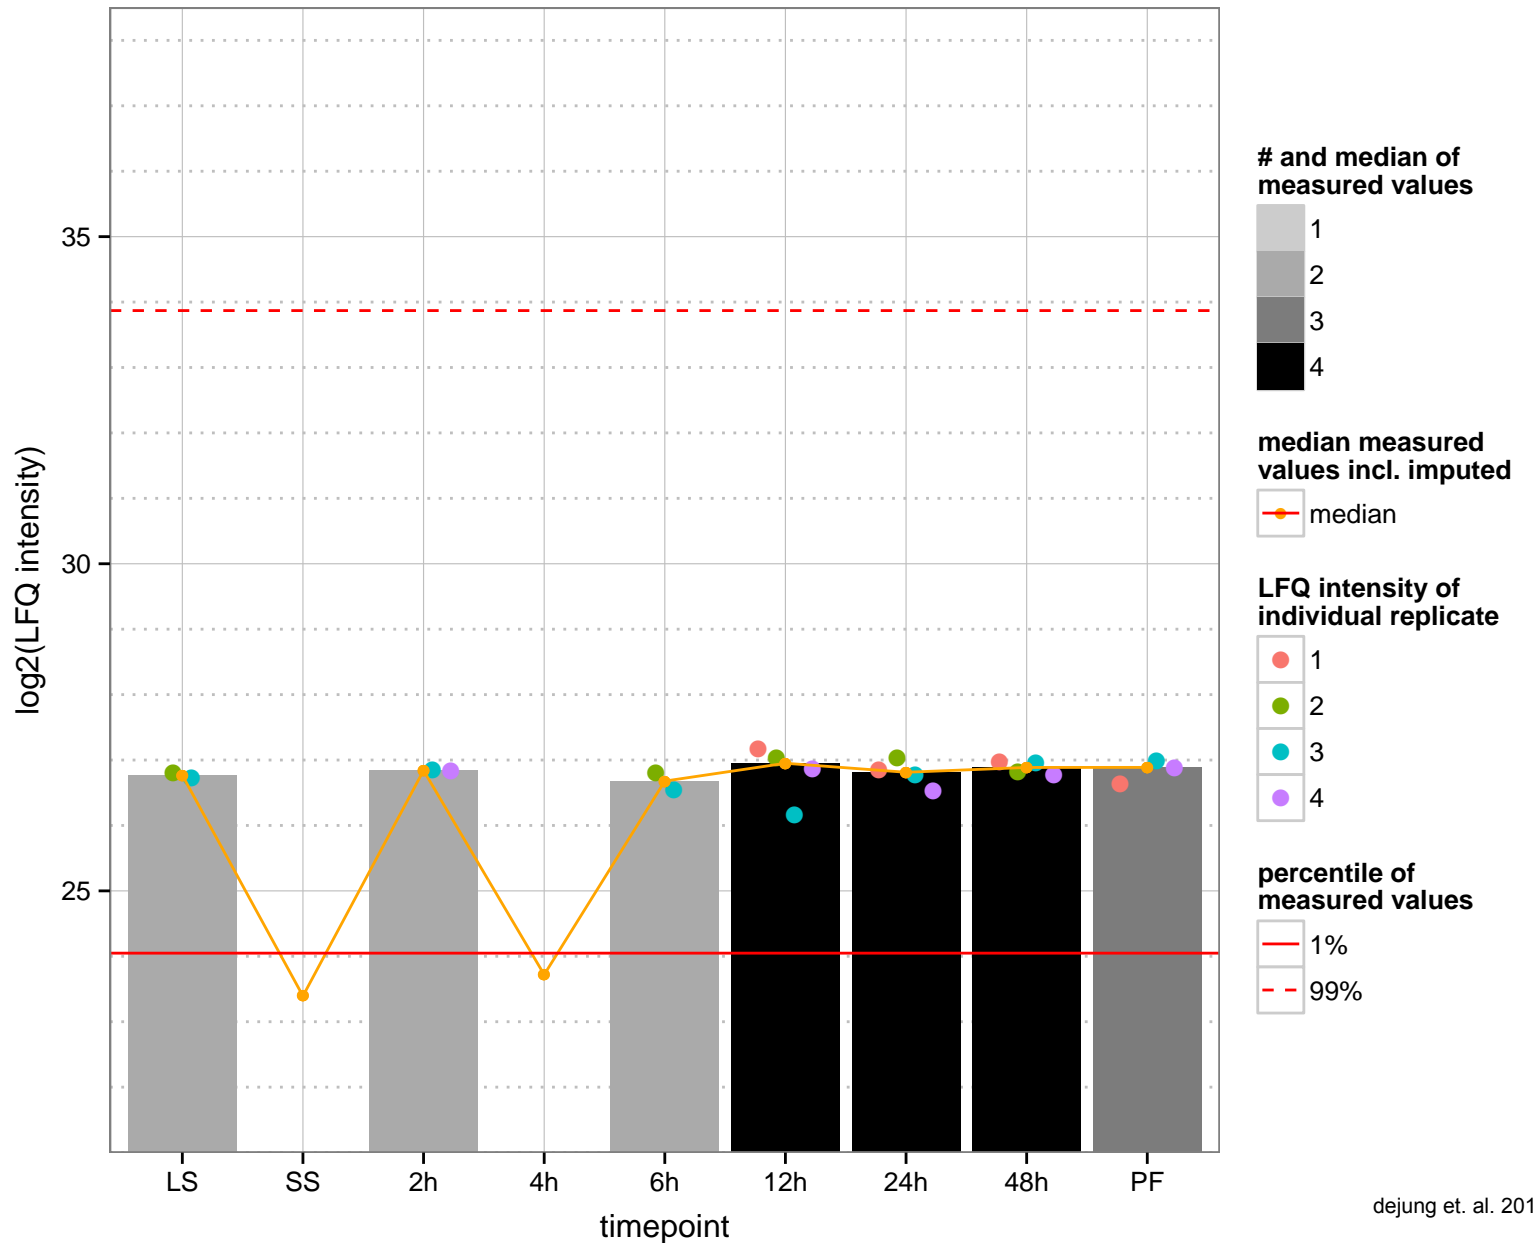

hypothetical protein, conserved  
 Tb927.9.10560  
 AGOF: null  
 AGOC: mitochondrion  
 AGOP: null  
 PGO: null  
 PGO: null  
 PGO: null

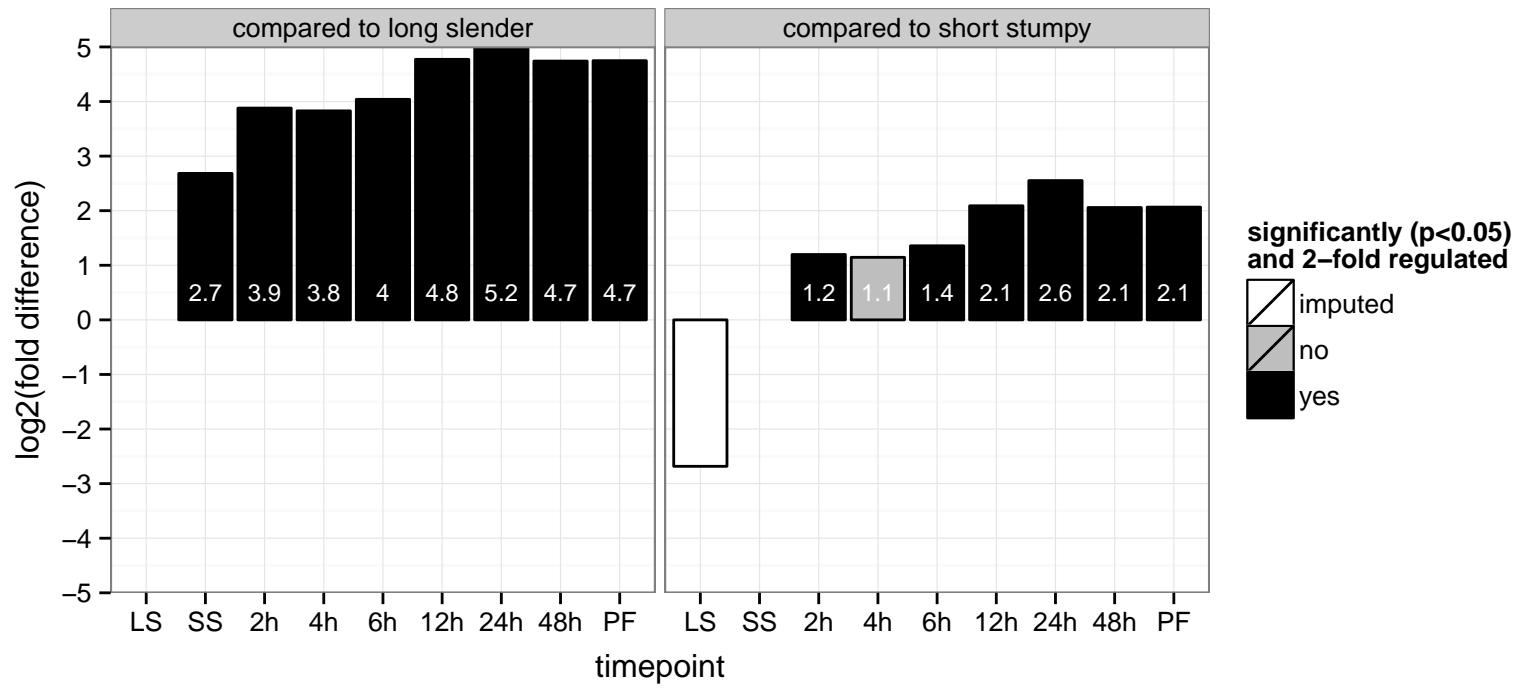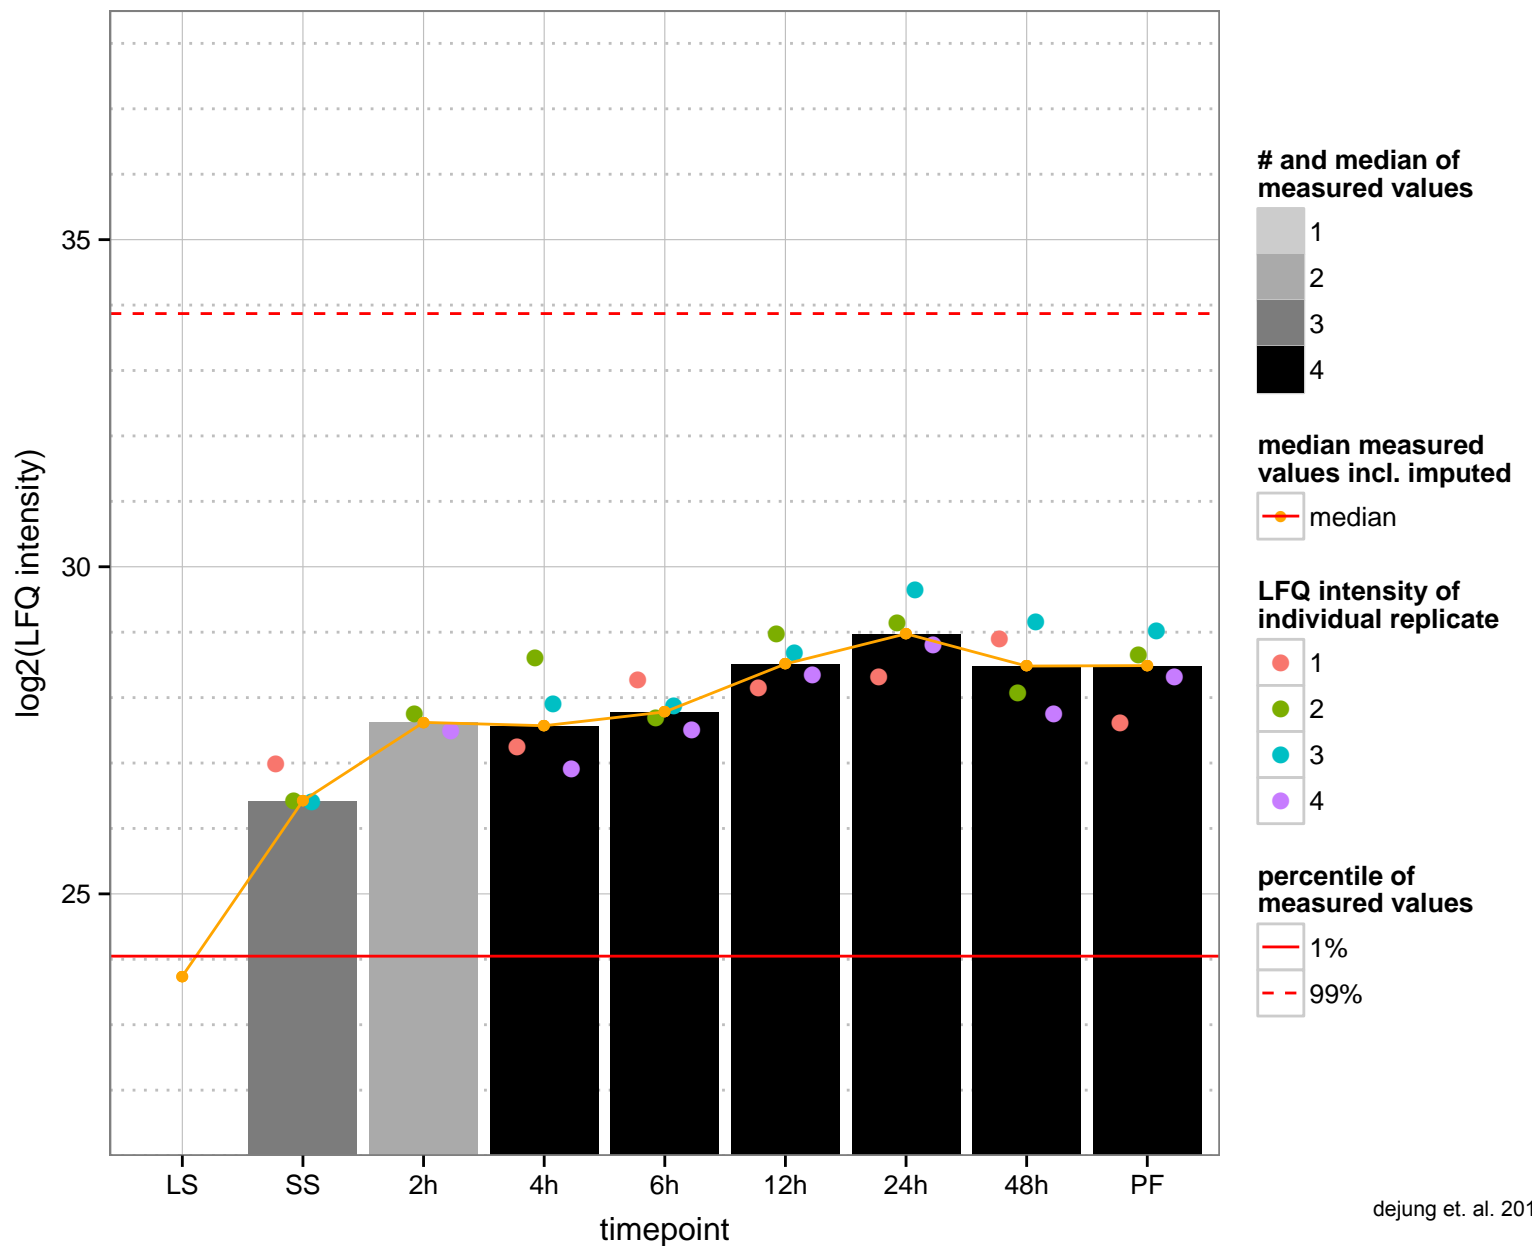

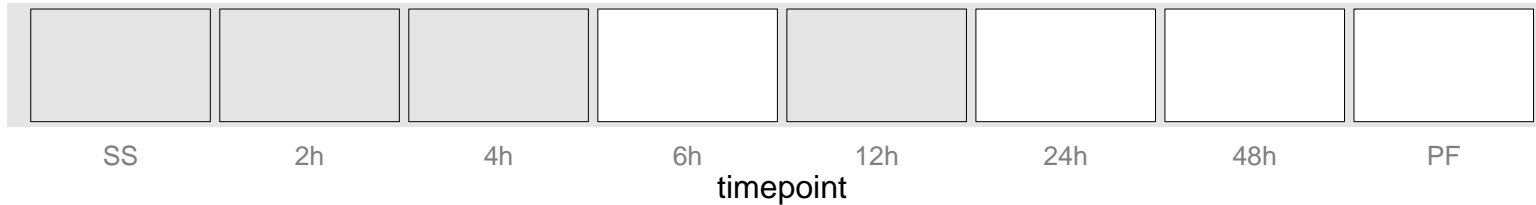

**regulated**  **not regulated**  **significant down**  **significant up**

hypothetical protein, conserved  
 Tb927.5.309b;Tb11.v5.0216  
 AGOF: null  
 AGOC: null  
 AGOP: null  
 PGO: null  
 PGO: null  
 PGO: null

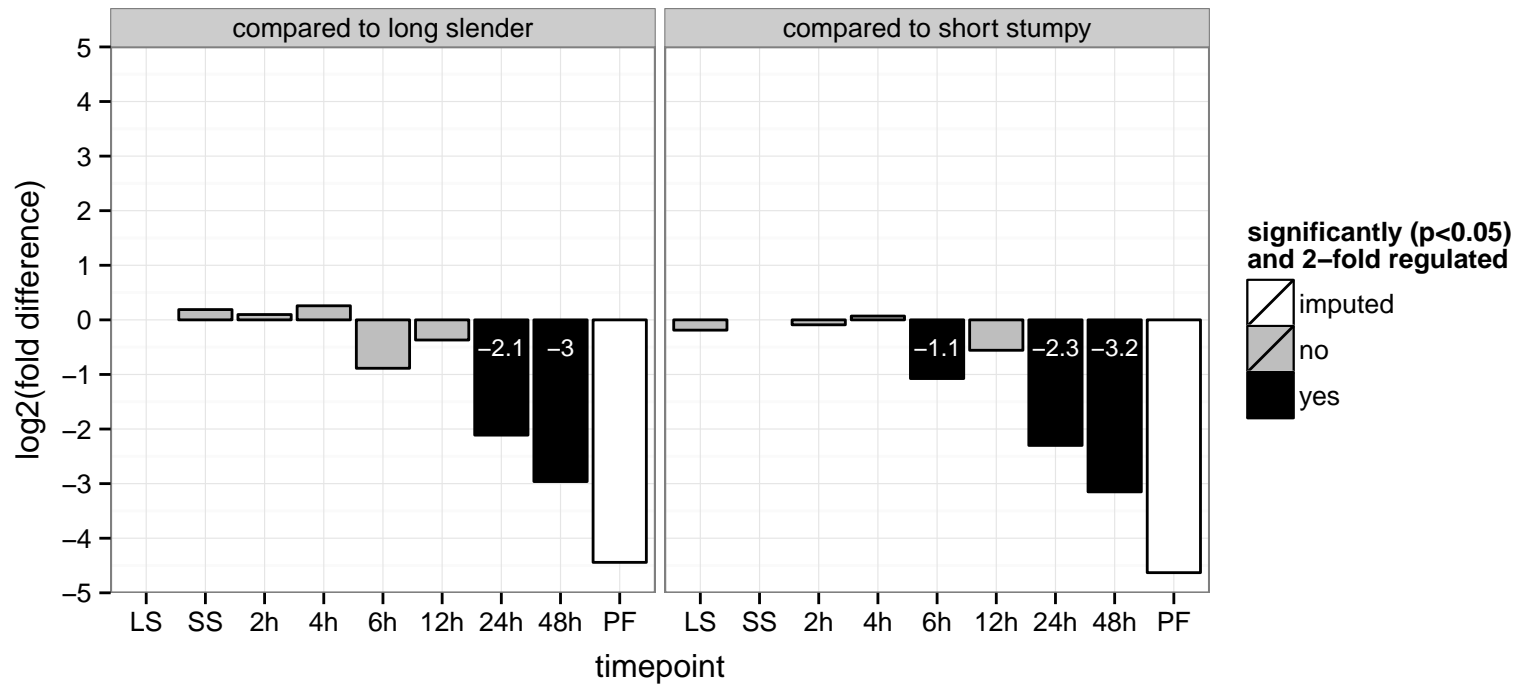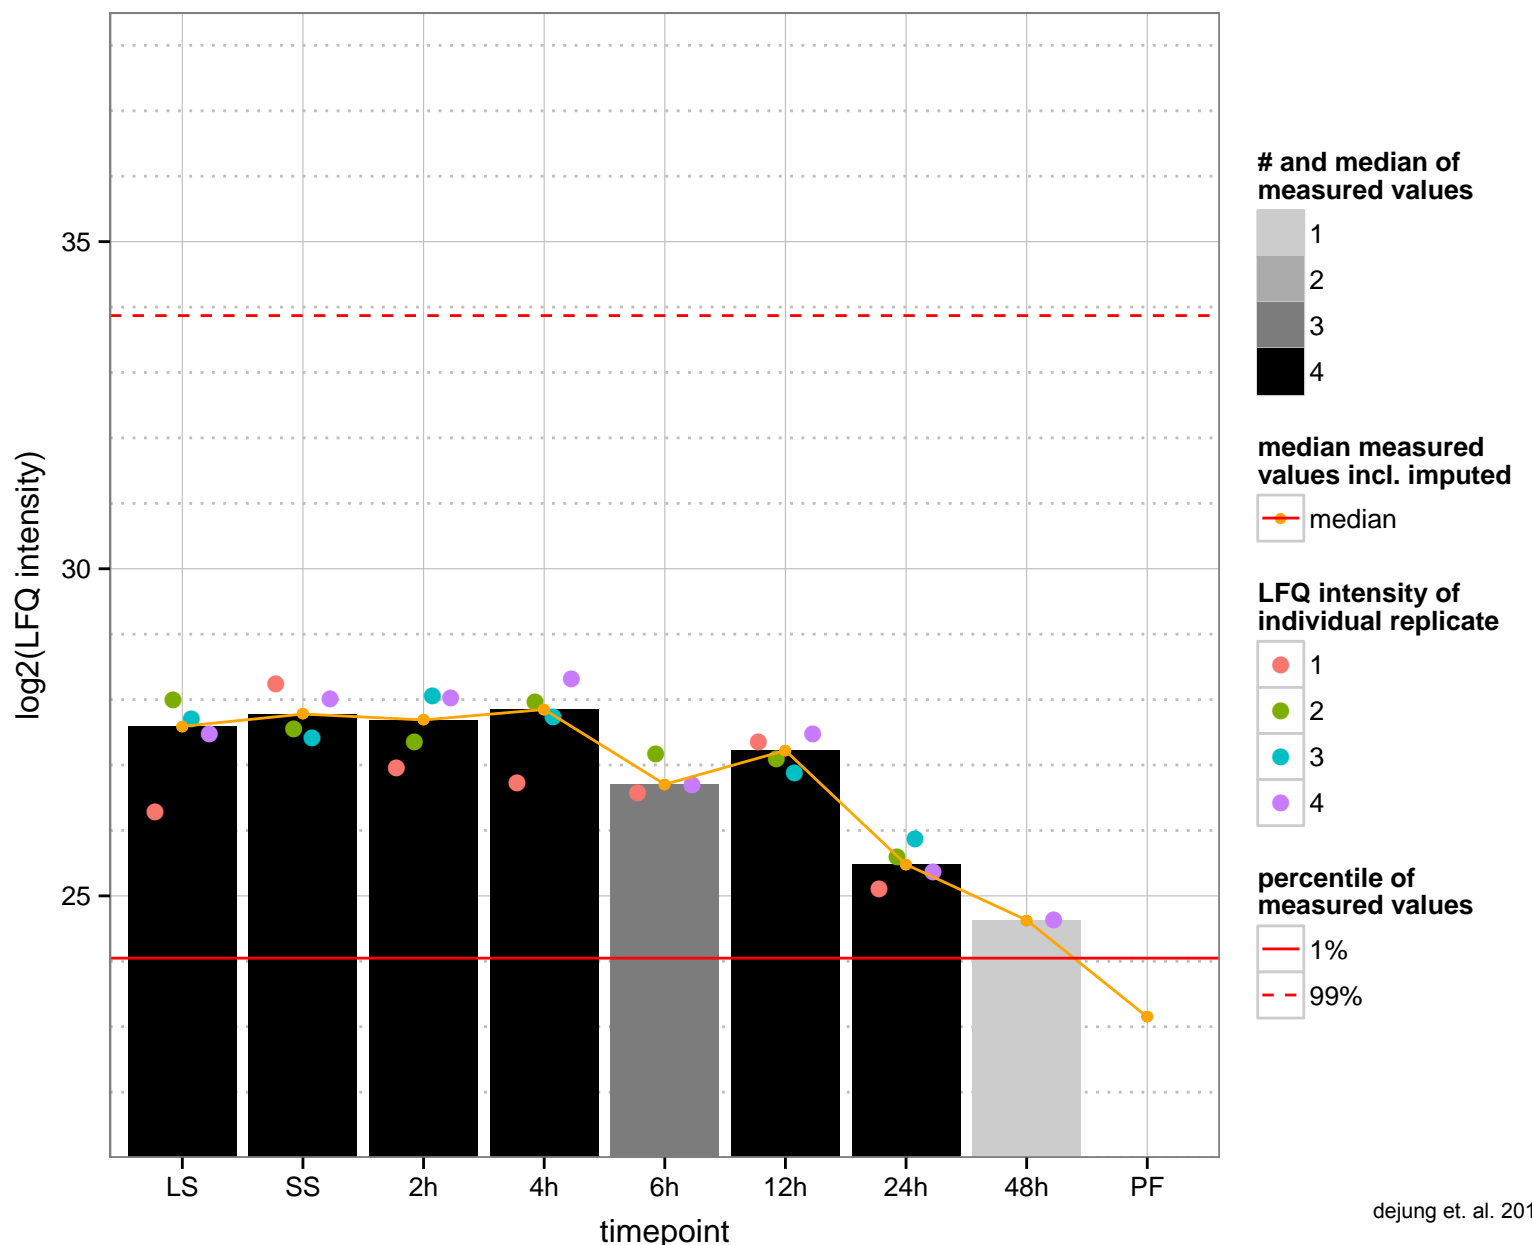



hypothetical protein, conserved  
 Tb927.10.10840  
 AGOF: null  
 AGOC: membrane  
 AGOP: null  
 PGO: null  
 PGO: null  
 PGO: null

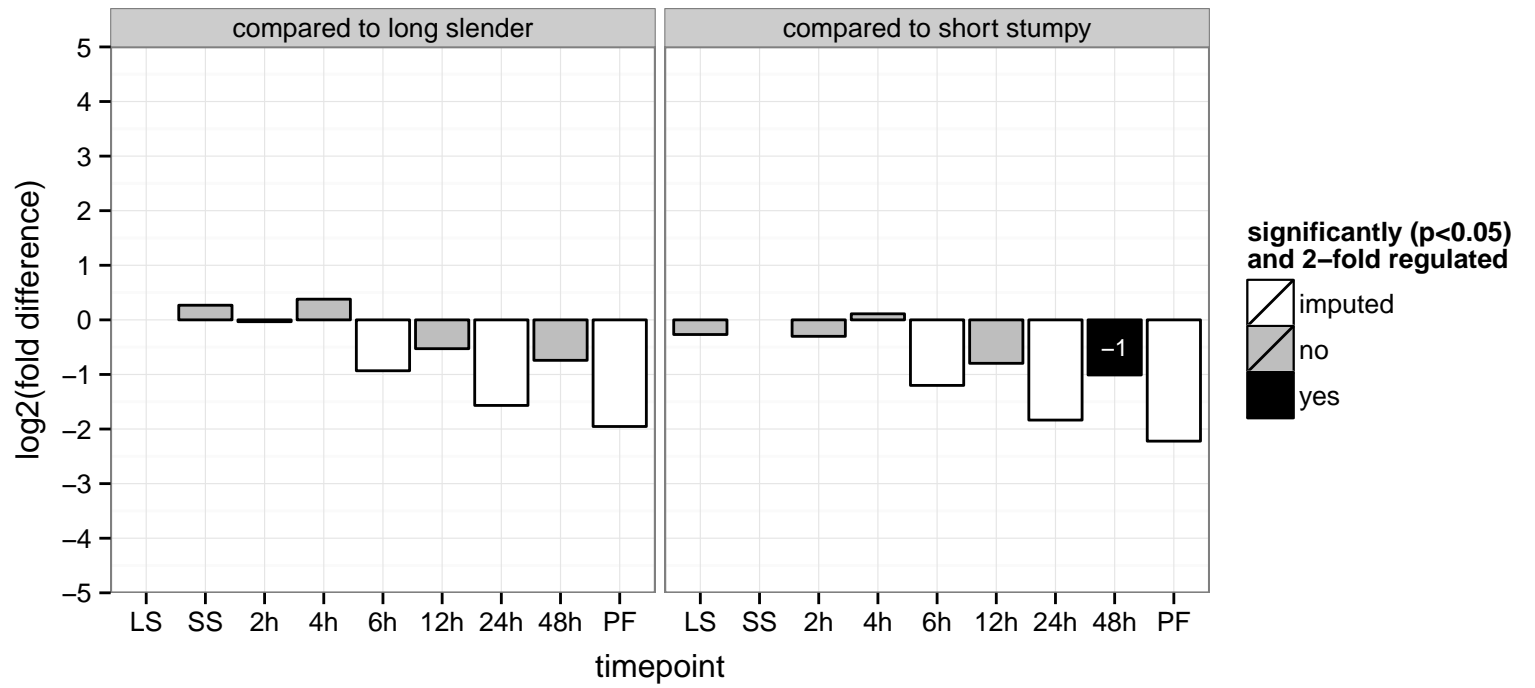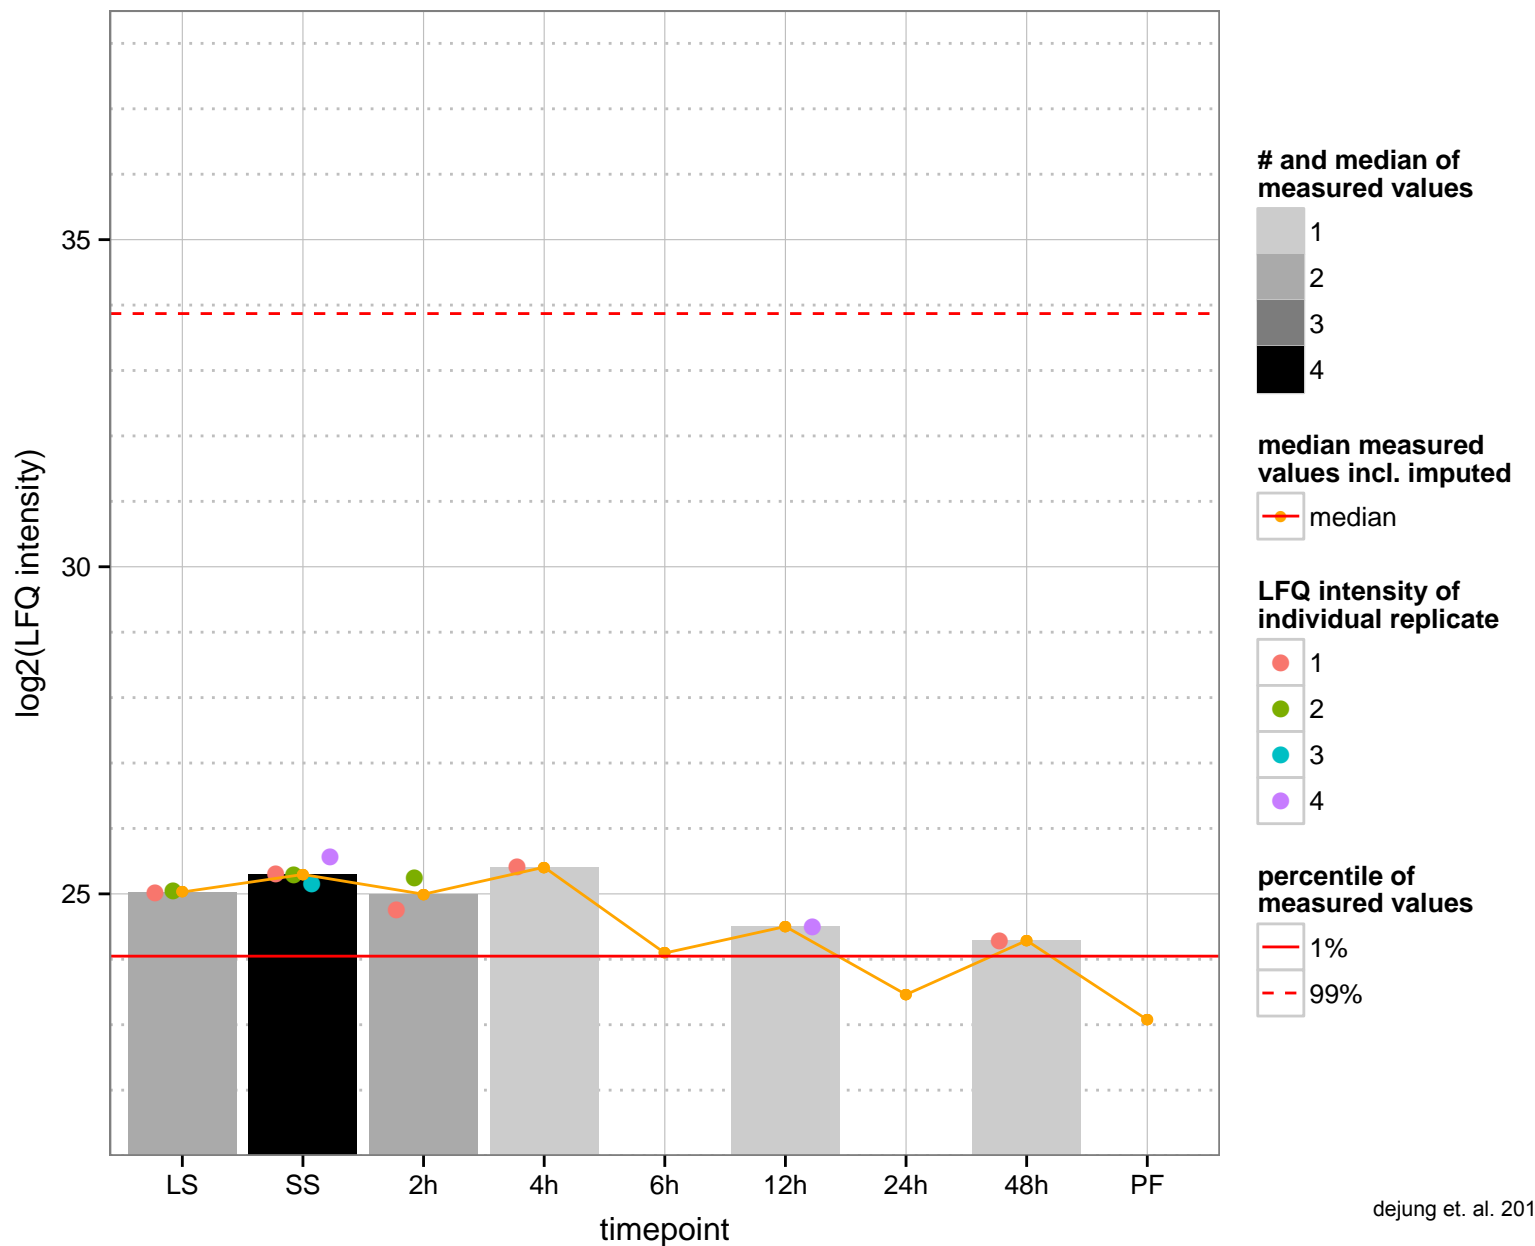

hypothetical protein, conserved  
 Tb927.10.3750  
 AGOF: null  
 AGOC: null  
 AGOP: null  
 PGO: null  
 PGOC: null  
 PGOP: null

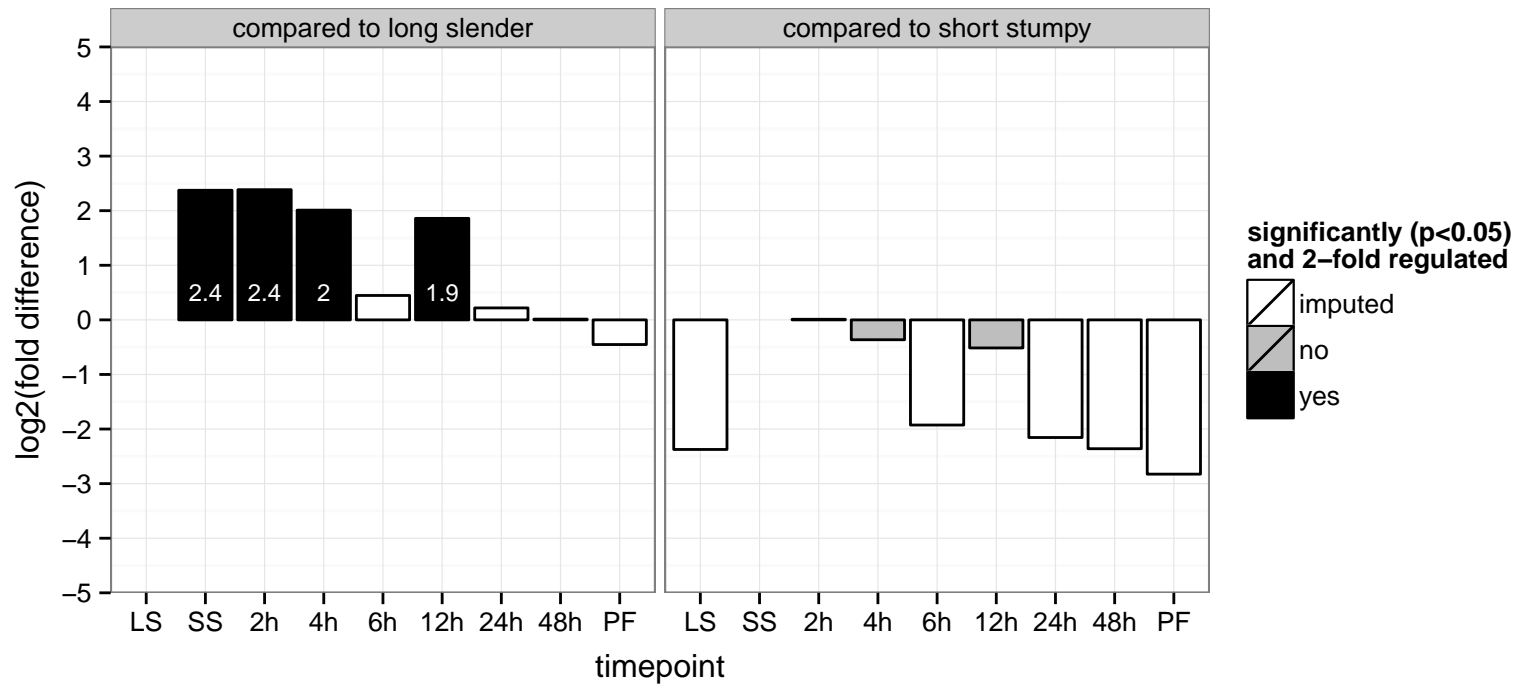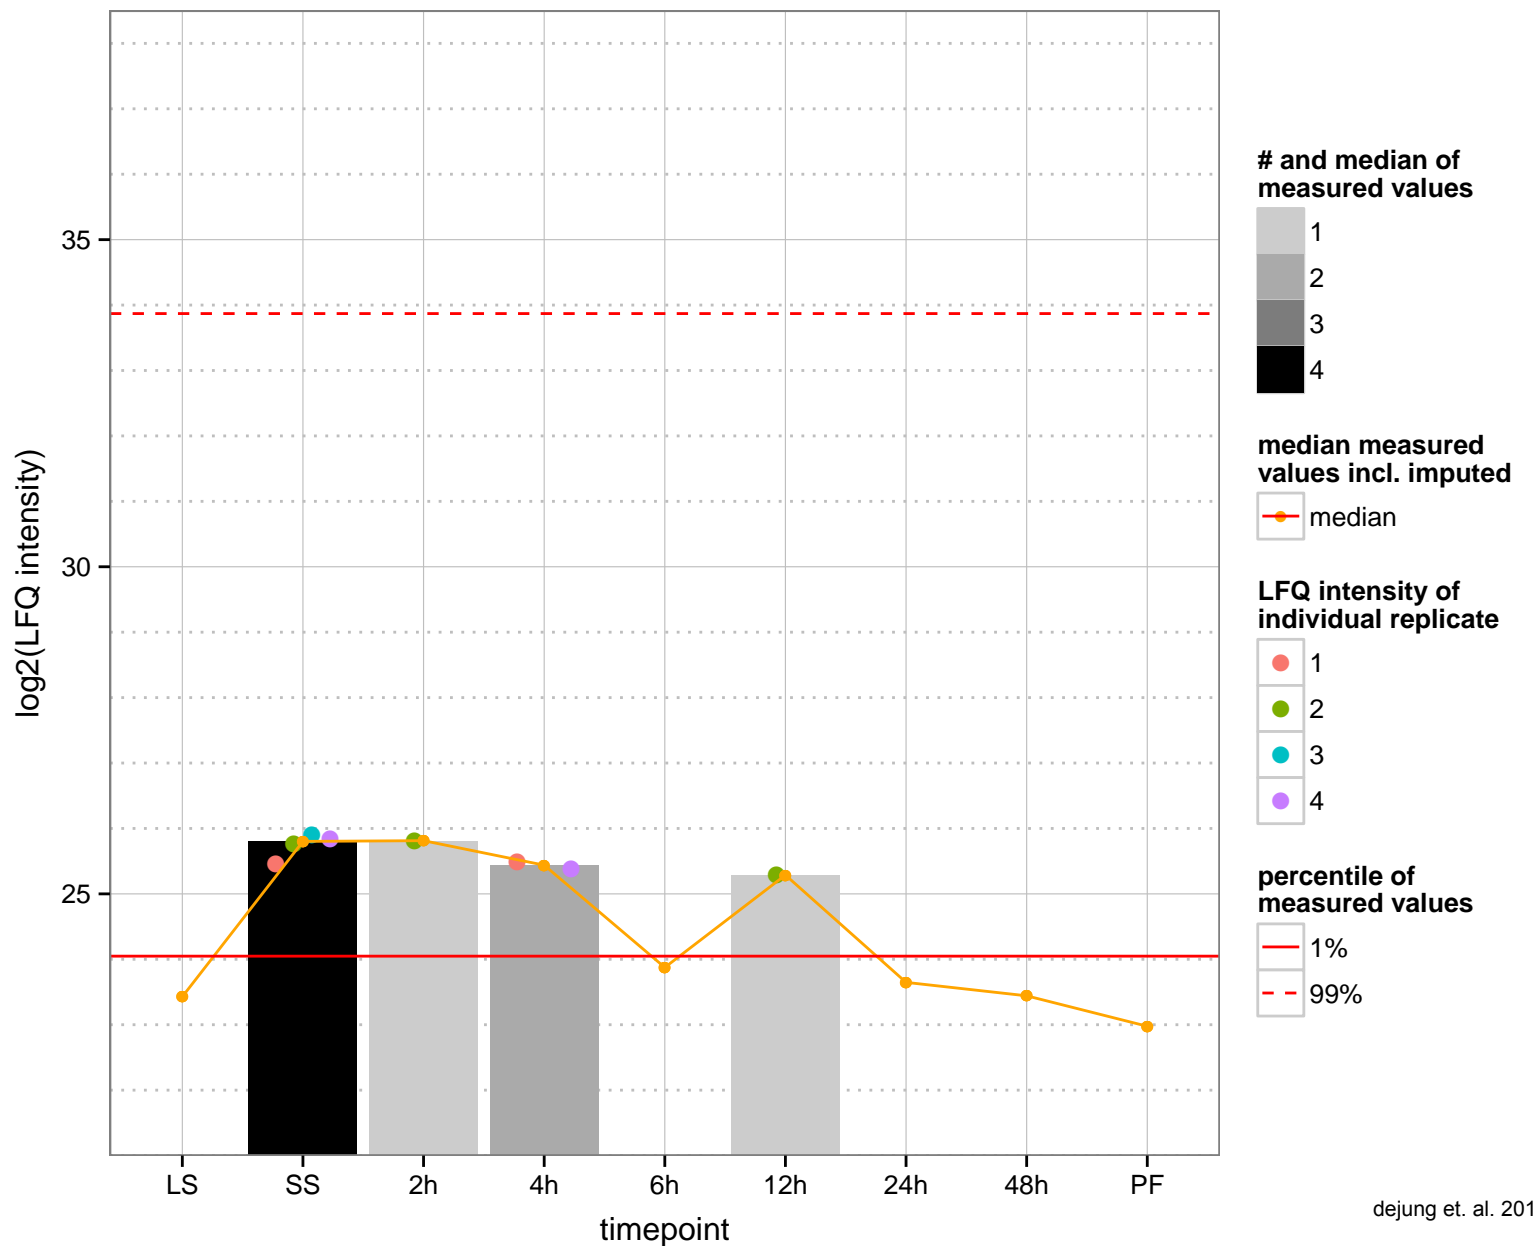

ras-like small GTPase, putative (TbRLJ)

Tb927.11.12950

AGOF: GTP binding, GTPase activity

AGOC: intracellular

AGOP: protein transport, small GTPase mediated signal transduction

PGOF: GTP binding, GTPase activity

PGOC: intracellular, membrane

PGOP: GTP catabolic process, protein transport, signal transduction, small GTPase mediated signal transduction

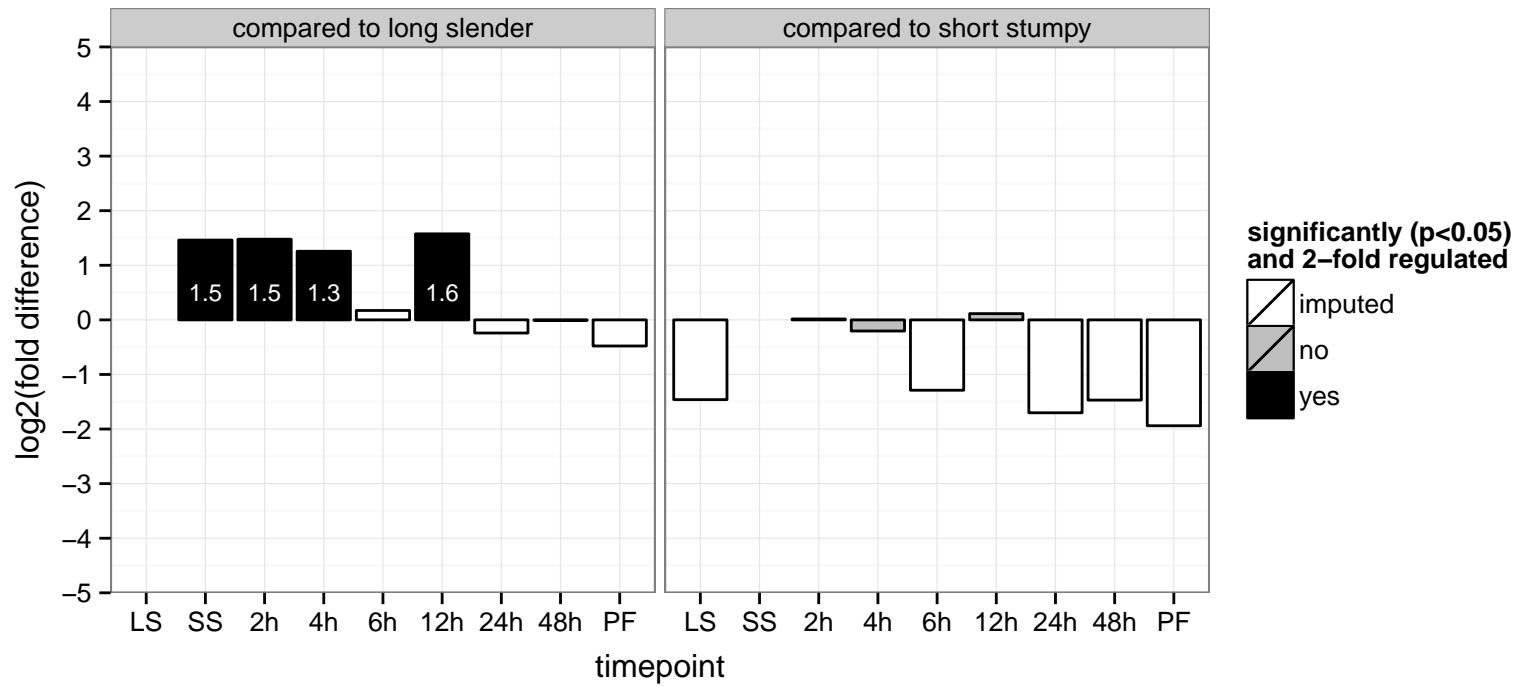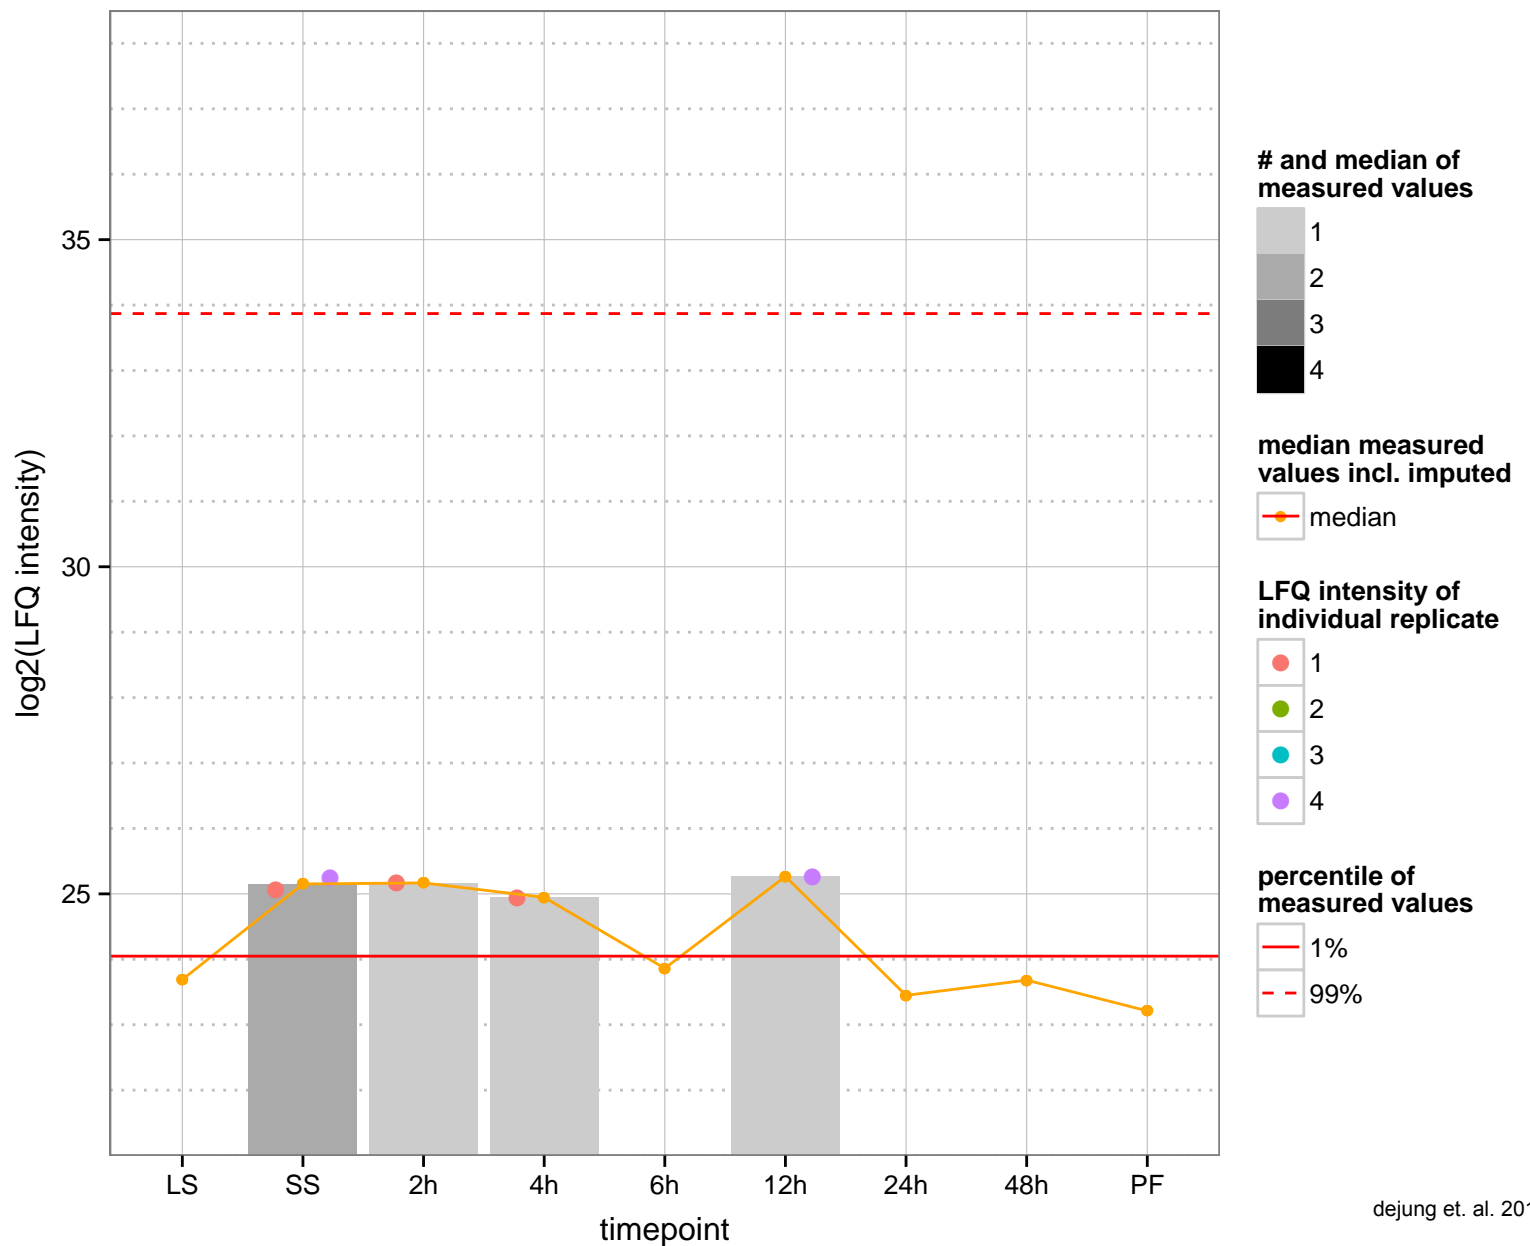

glutathionylspermidine synthetase, putative  
 Tb927.11.8820  
 AGOF: glutathionylspermidine synthase activity  
 AGOC: integral to membrane  
 AGOP: cellular biogenic amine metabolic process  
 PGO: null  
 PGOC: null  
 PGOP: null

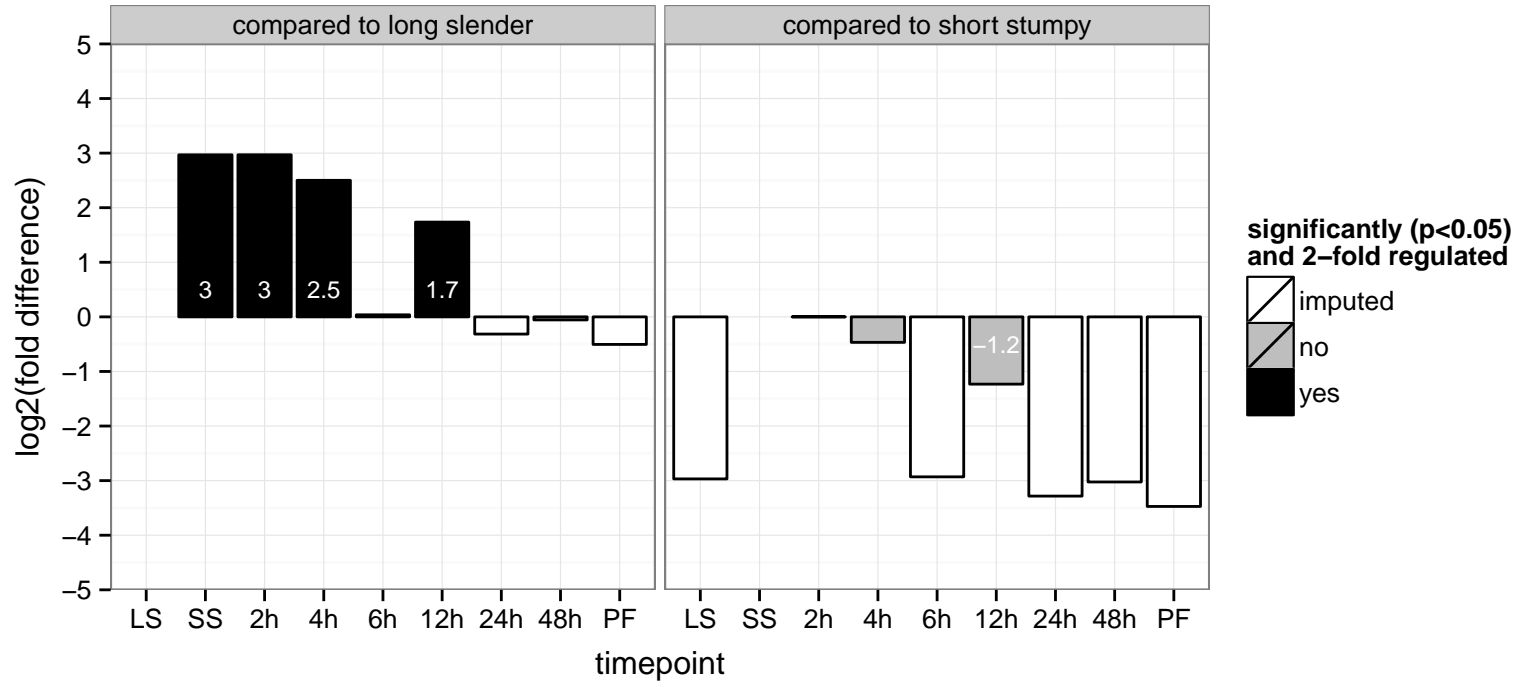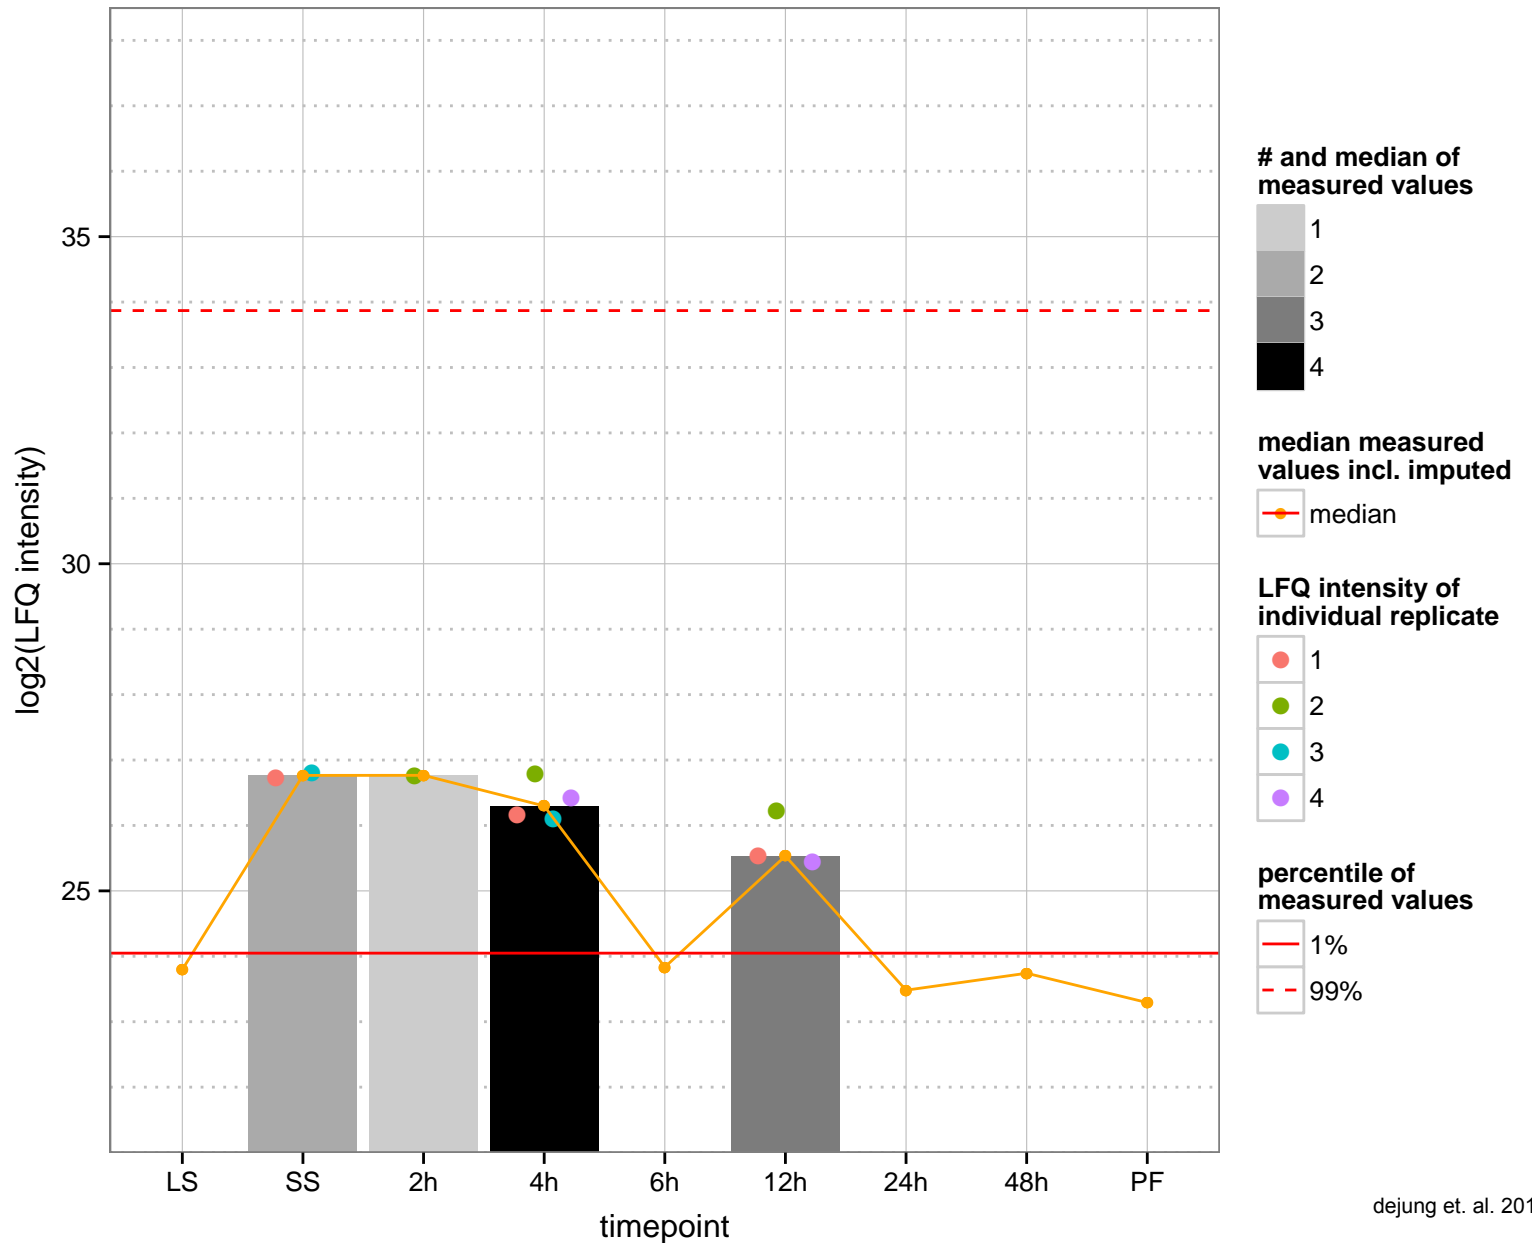

acylphosphatase, putative  
 Tb927.3.2030  
 AGOF: acylphosphatase activity  
 AGOC: null  
 AGOP: null  
 PGO: null  
 PGOC: null  
 PGOP: null

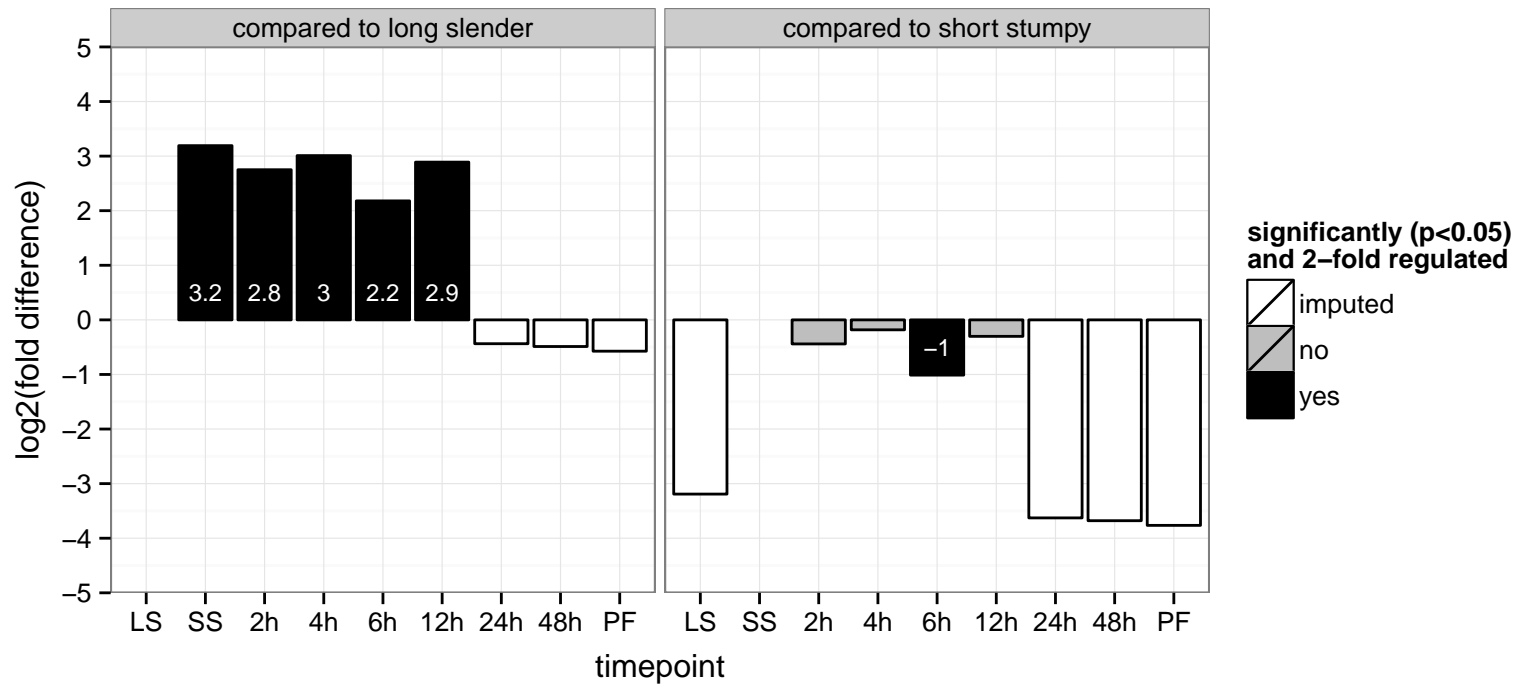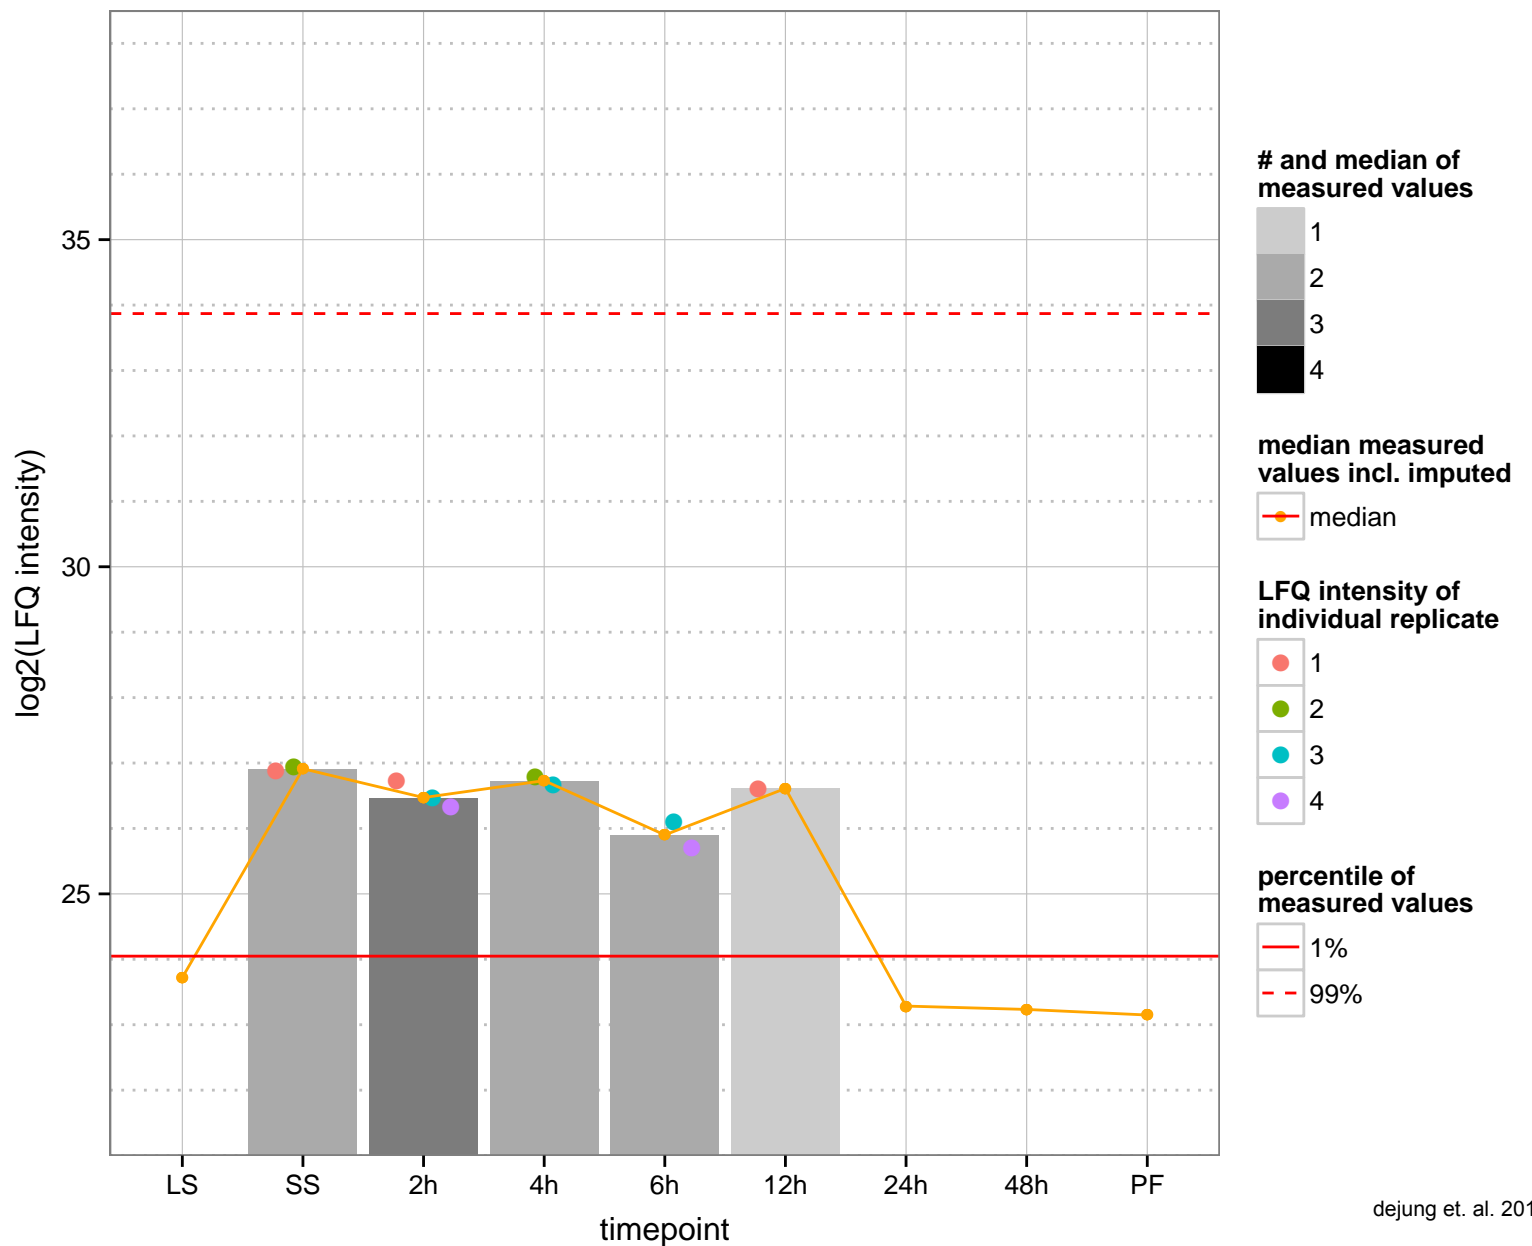

DNA-directed RNA polymerase III subunit, putative, DNA-directed rna polymerase II subunit, putative (RPB6), DNA-directed  
 Tb927.4.3510;Tb927.4.3490  
 AGOF: DNA binding, DNA-directed RNA polymerase activity  
 AGOC: null  
 AGOP: transcription, DNA-dependent  
 PGOF: DNA binding, DNA-directed RNA polymerase activity  
 PGO: null  
 PGOP: transcription, DNA-dependent

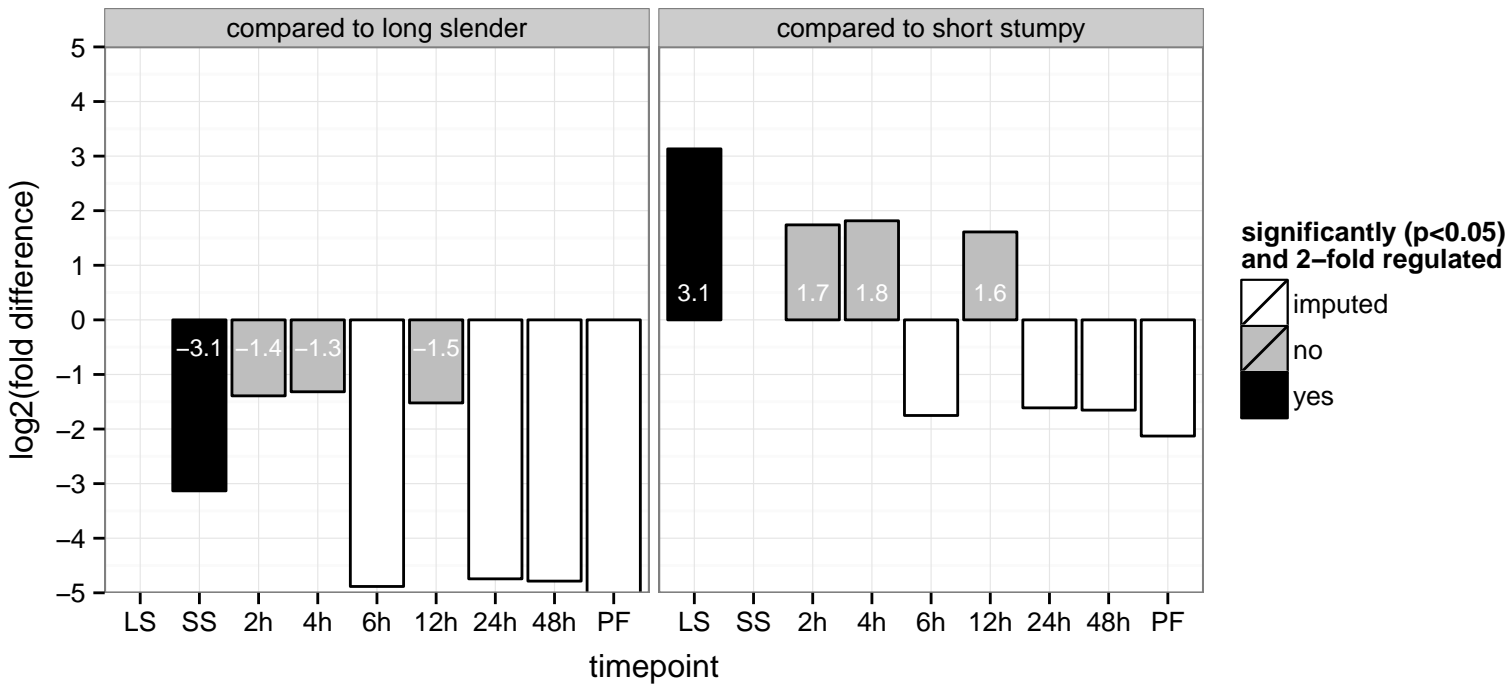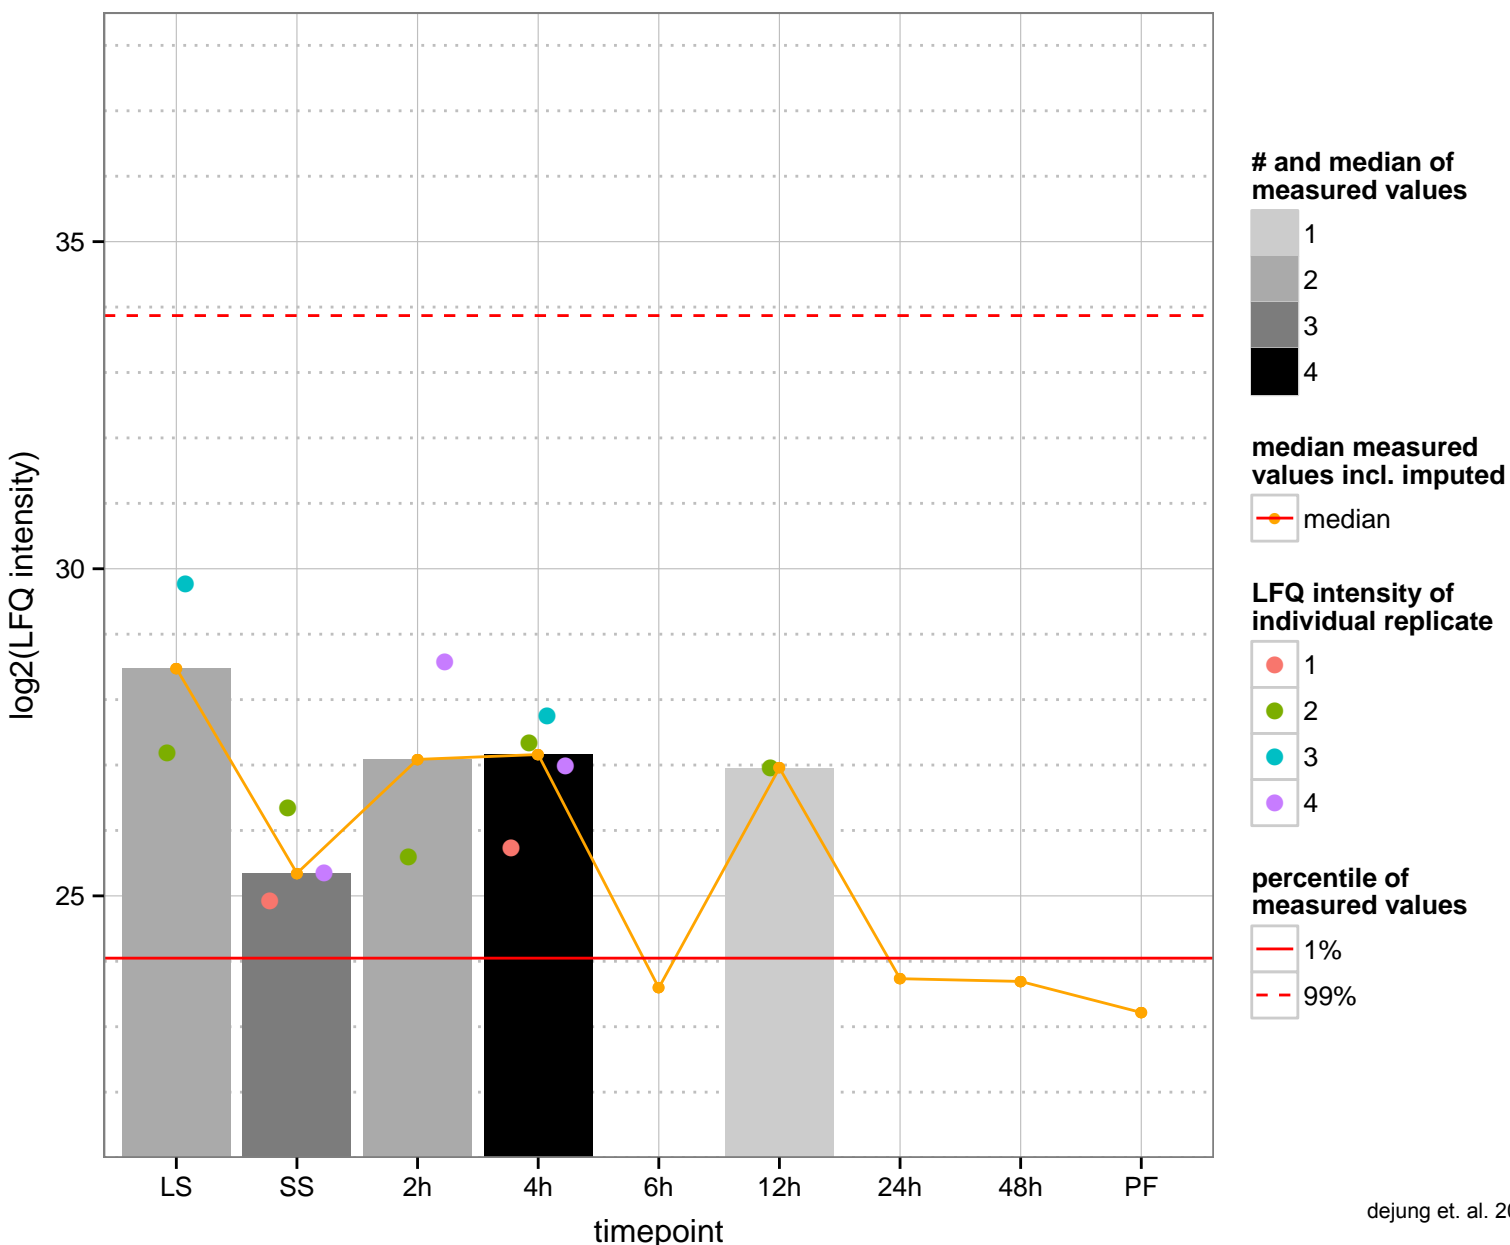

hypothetical protein, conserved  
 Tb927.6.3940  
 AGOF: null  
 AGOC: null  
 AGOP: null  
 PGO: null  
 PGOC: null  
 PGOP: null

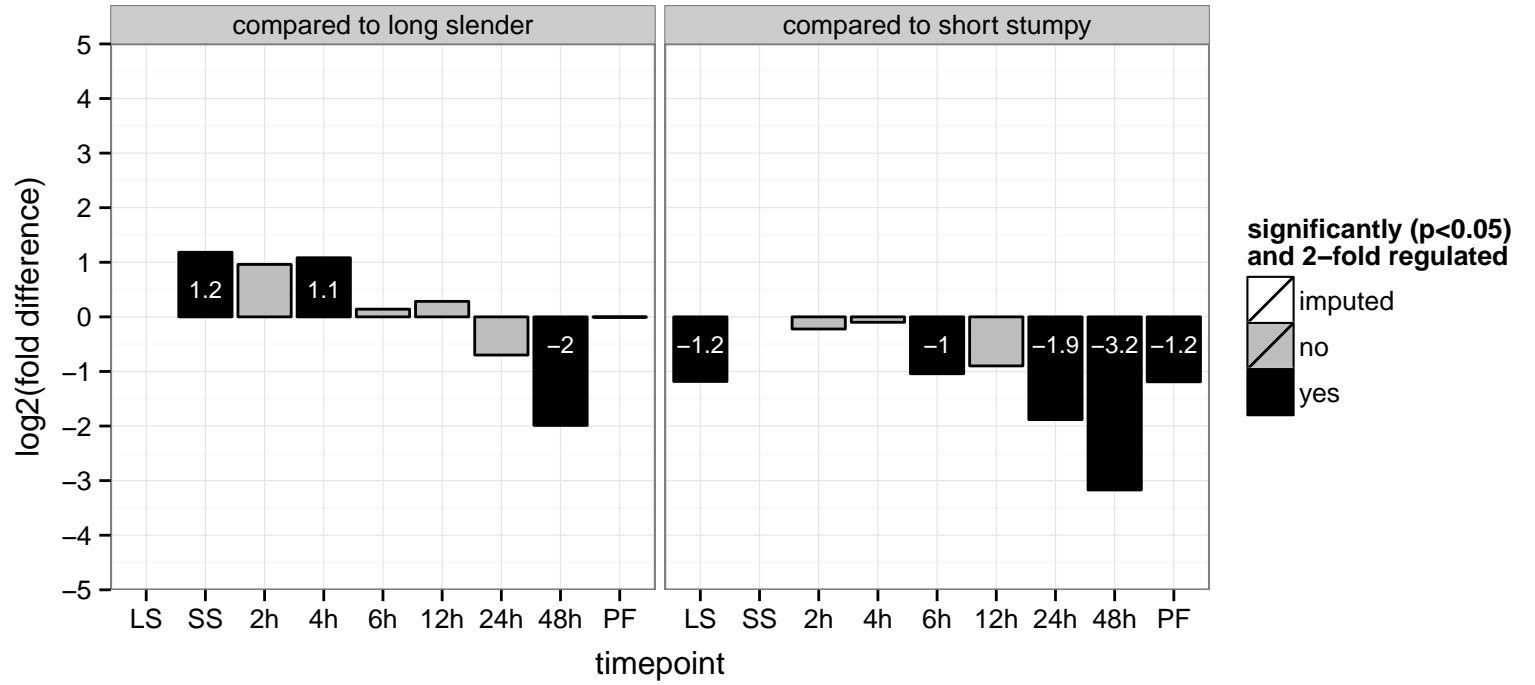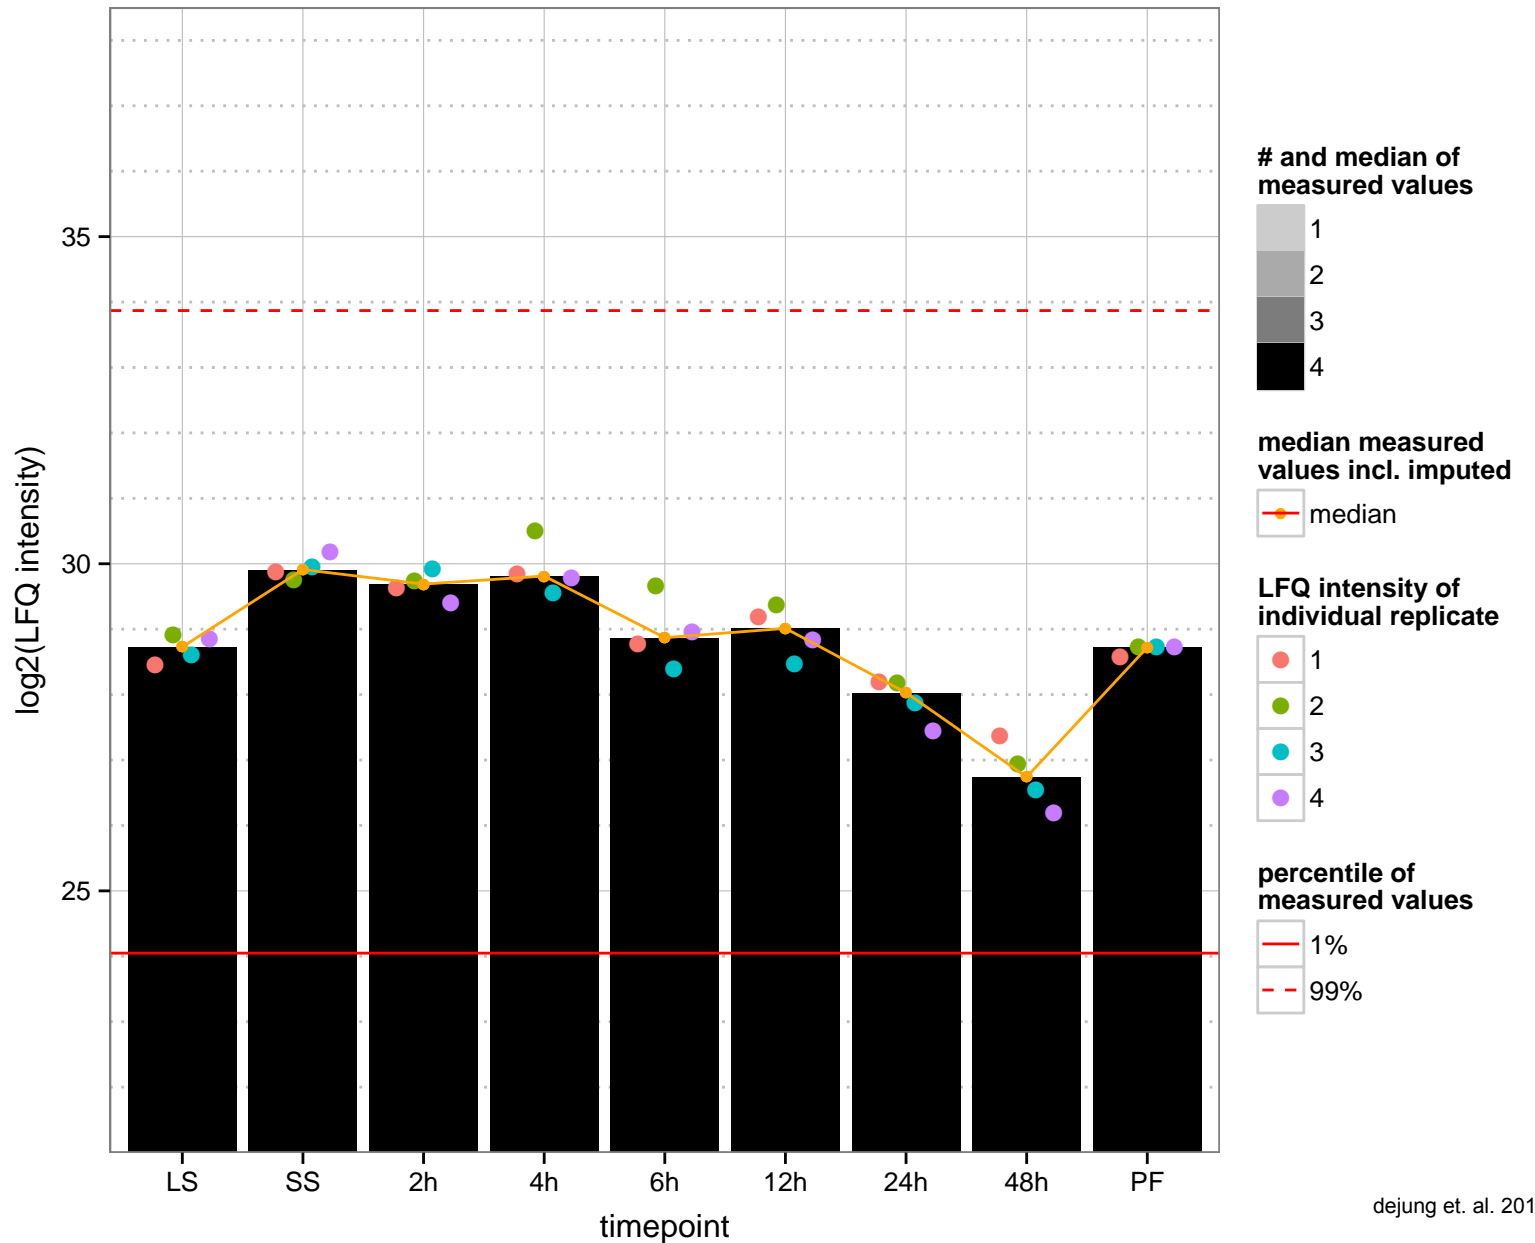

diacylglycerol kinase, putative

Tb927.8.5140

AGOF: diacylglycerol kinase activity

AGOC: cytosol, mitochondrion

AGOP: fatty acid oxidation, protein kinase C-activating G-protein coupled receptor signaling pathway

PGOF: NAD+ kinase activity, diacylglycerol kinase activity

PGOC: null

PGOP: metabolic process, protein kinase C-activating G-protein coupled receptor signaling pathway

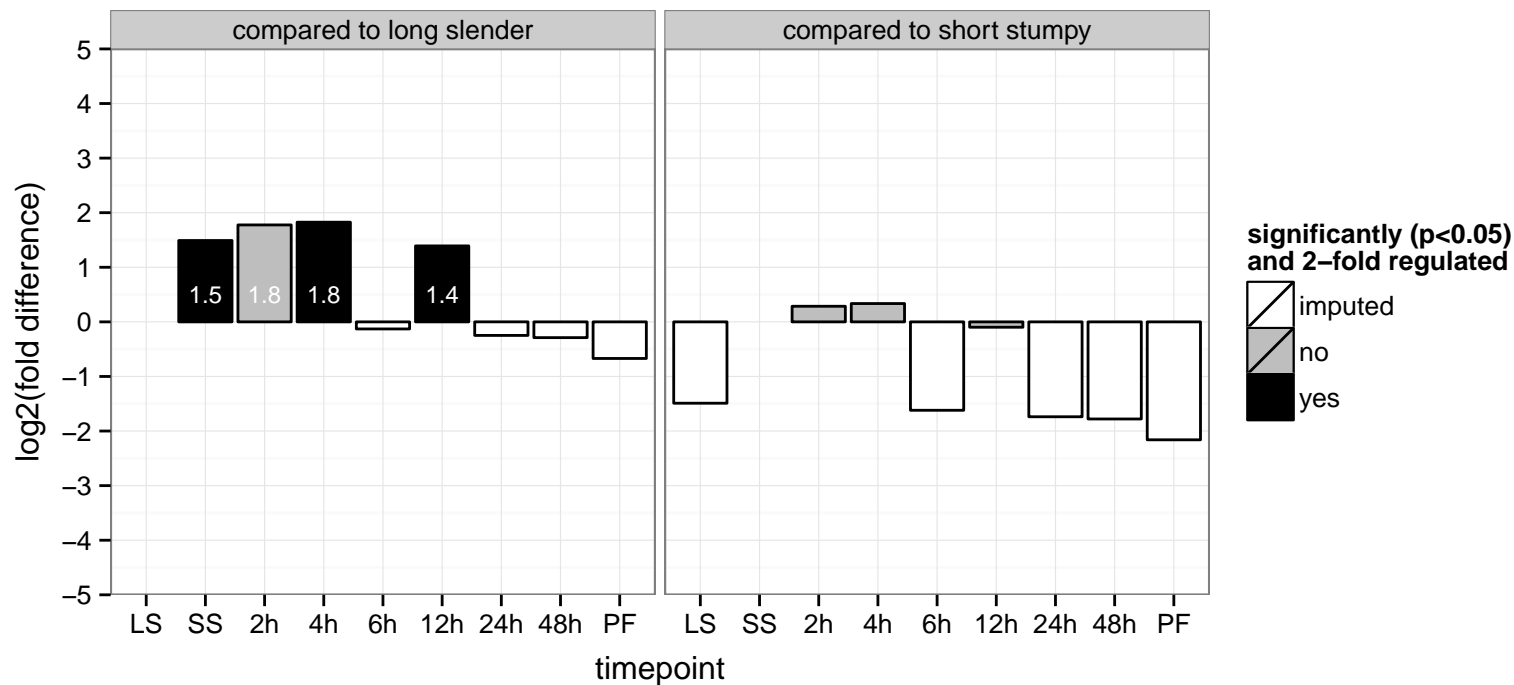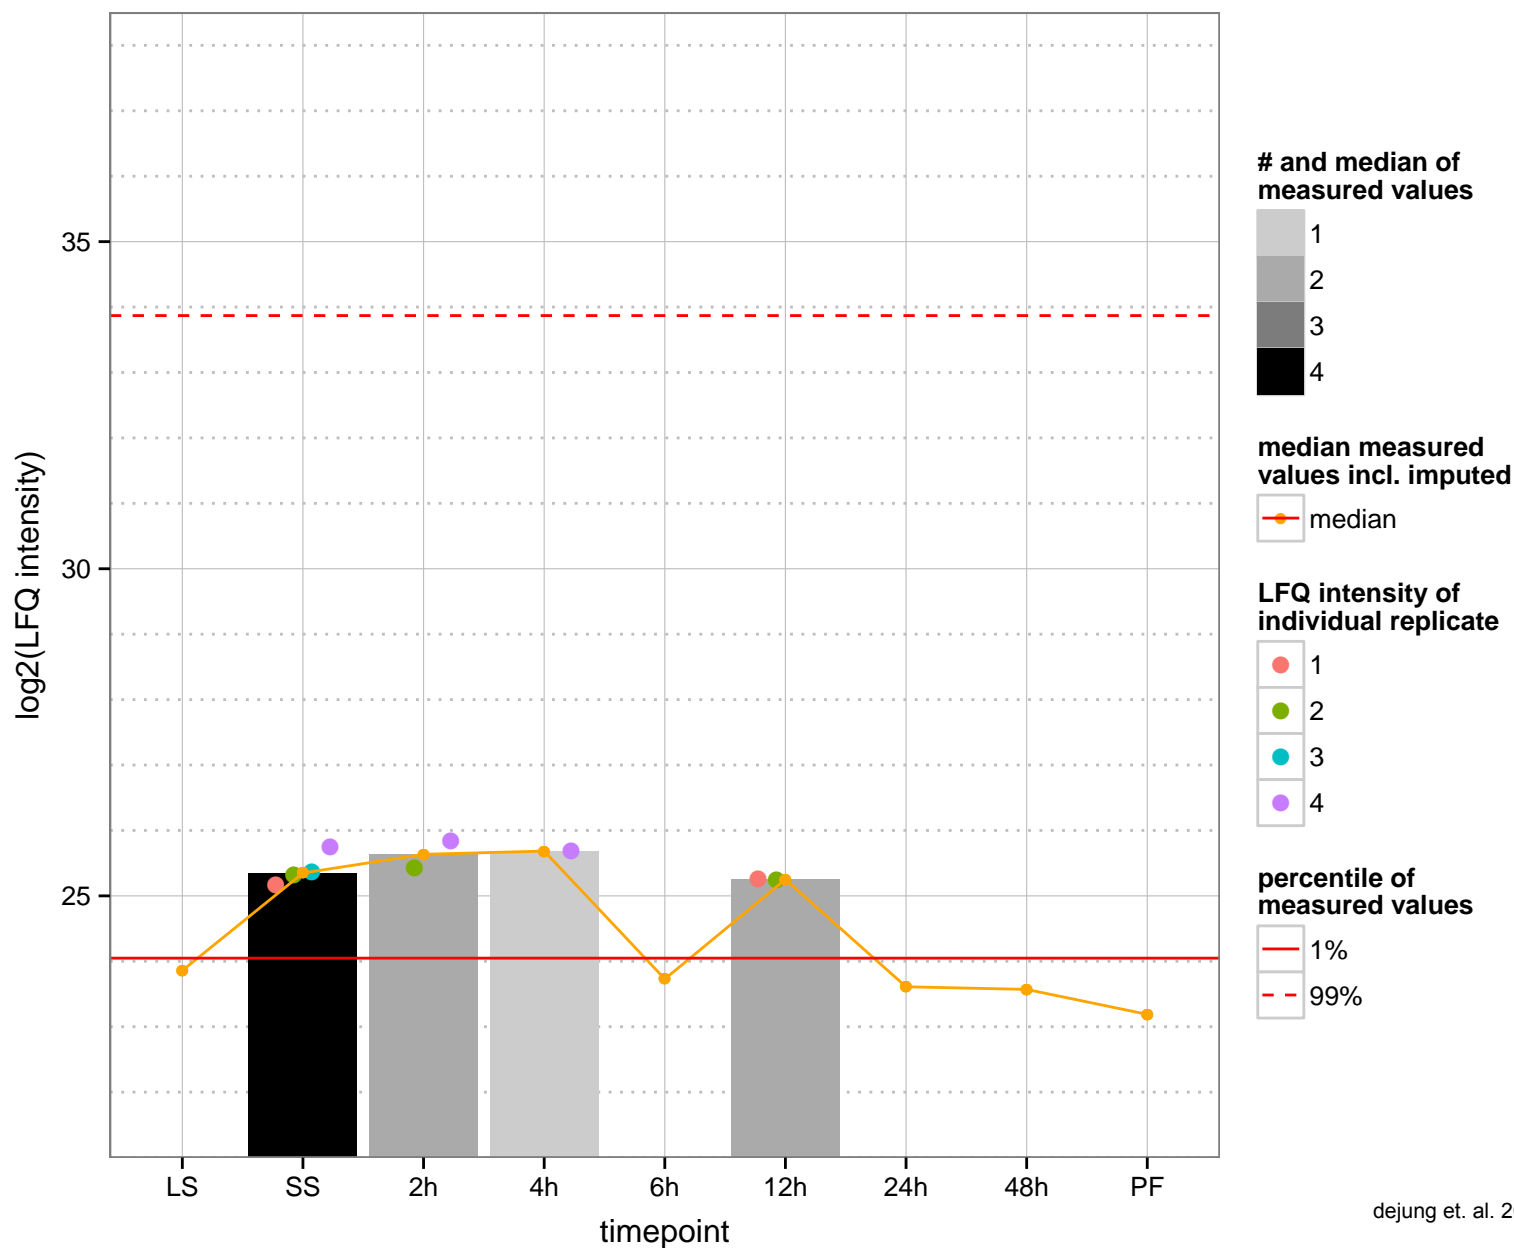



hypothetical protein, conserved  
 Tb927.9.12380  
 AGOF: ATP binding, catalytic activity  
 AGOC: null  
 AGOP: fructose 2, 6-bisphosphate metabolic process  
 PGO: null  
 PGOC: null  
 PGOP: null

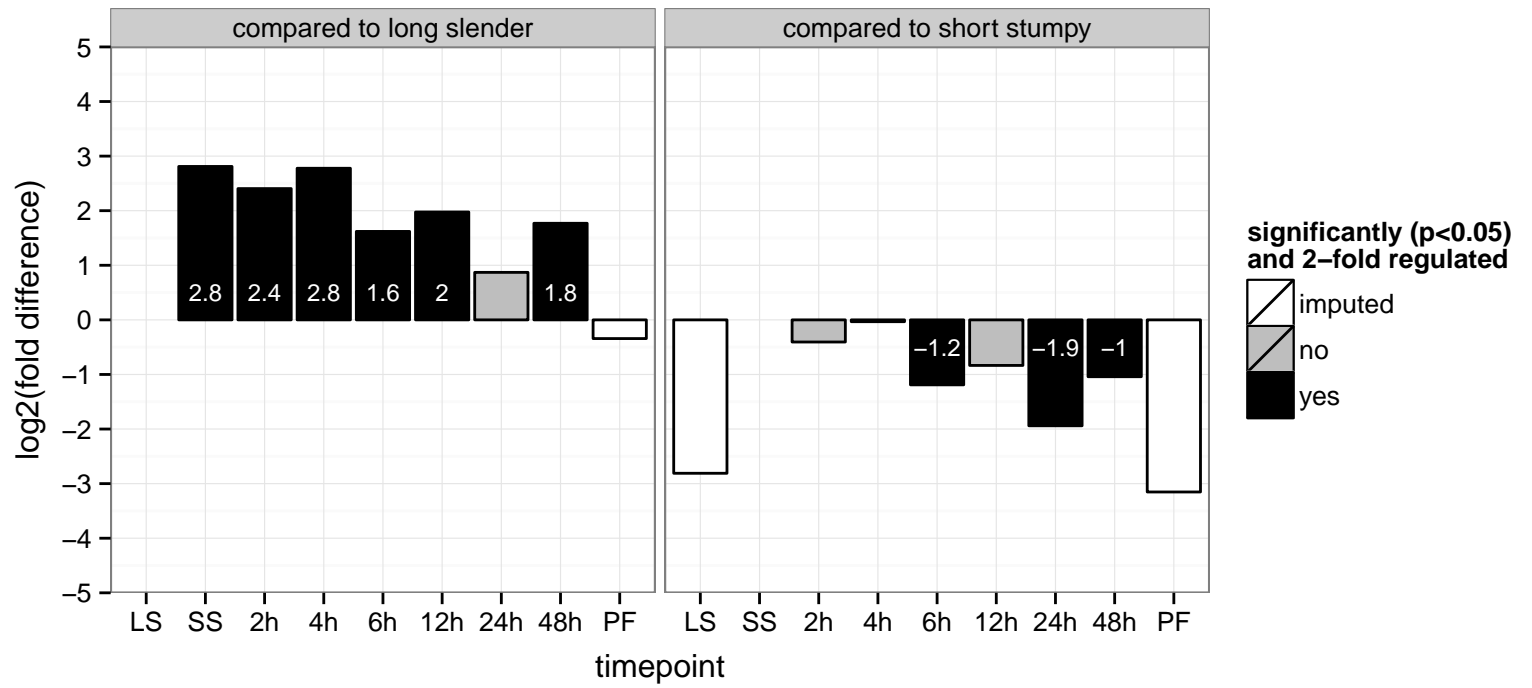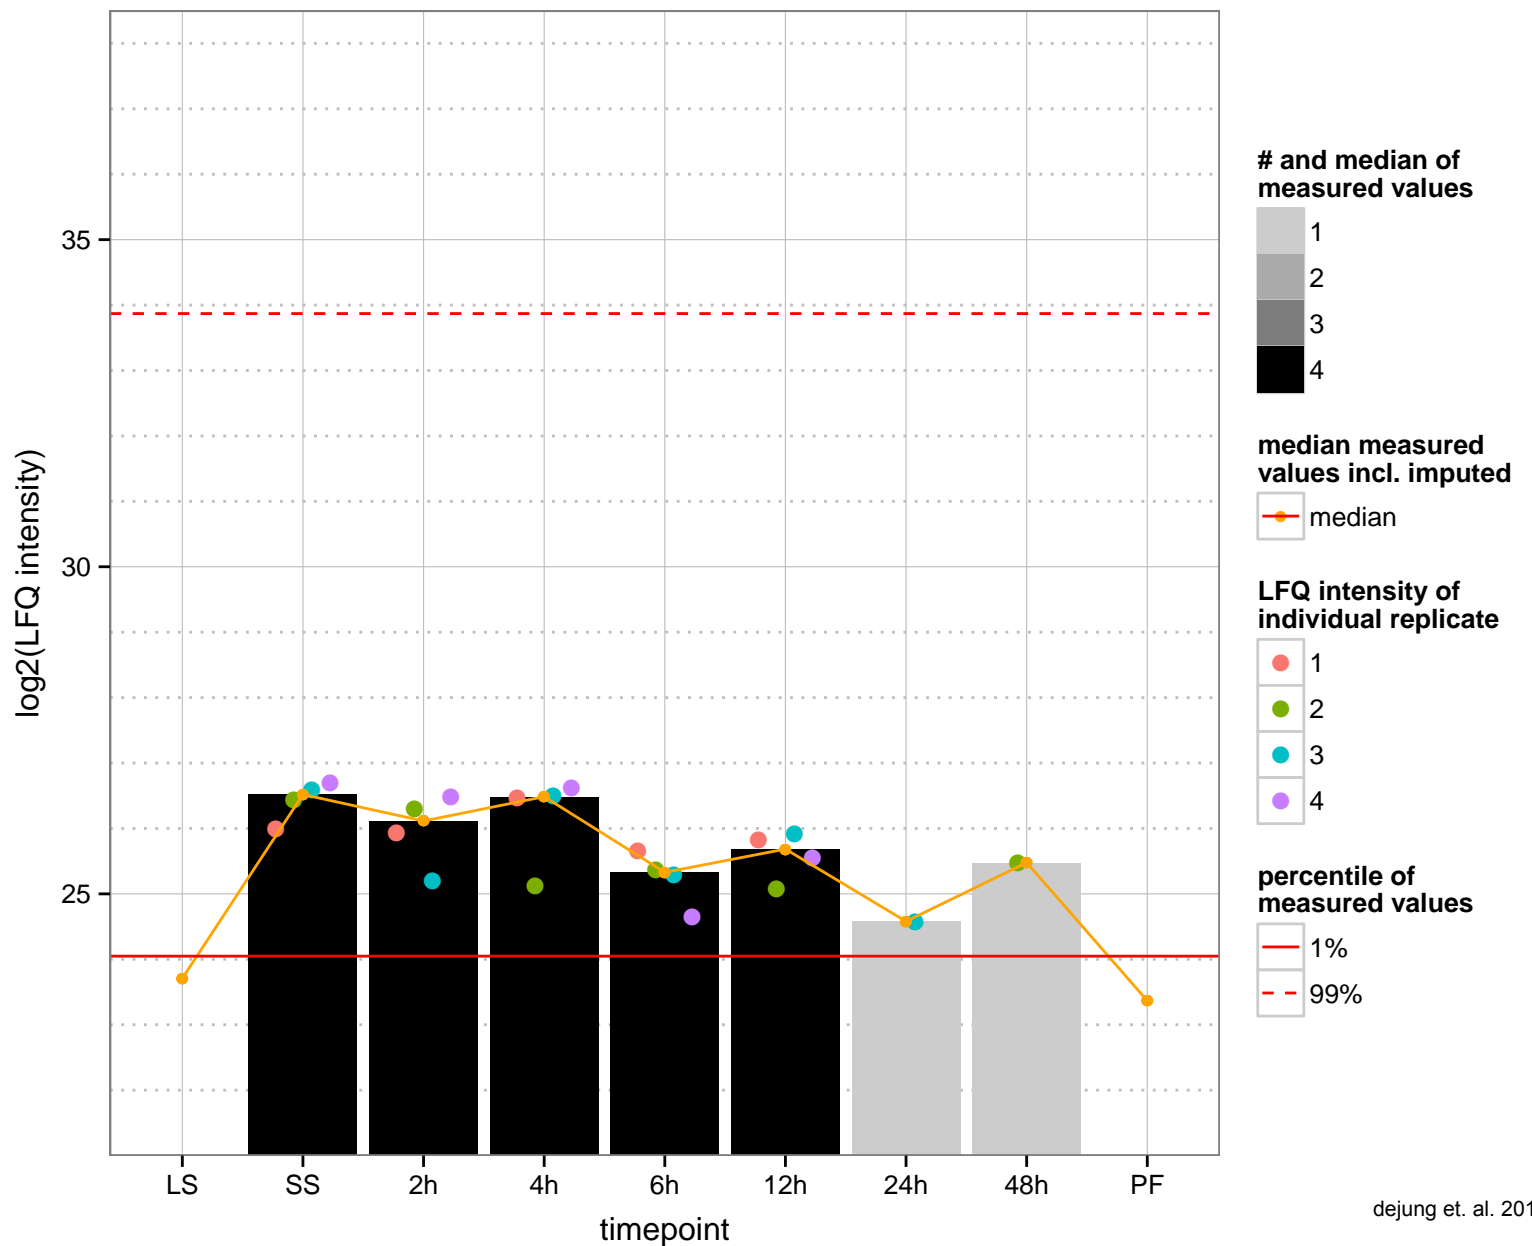

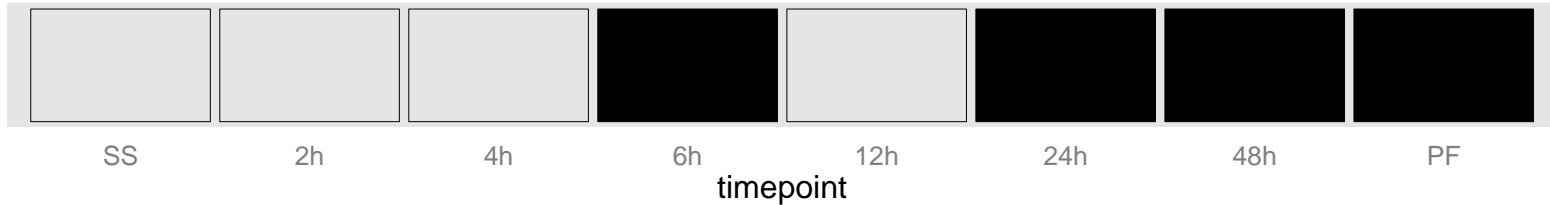

**regulated**  not regulated  significant down  significant up

hypothetical protein, conserved  
 Tb927.10.11720  
 AGOF: zinc ion binding  
 AGOC: null  
 AGOP: null  
 PGOF: zinc ion binding  
 PGOC: null  
 PGOP: null

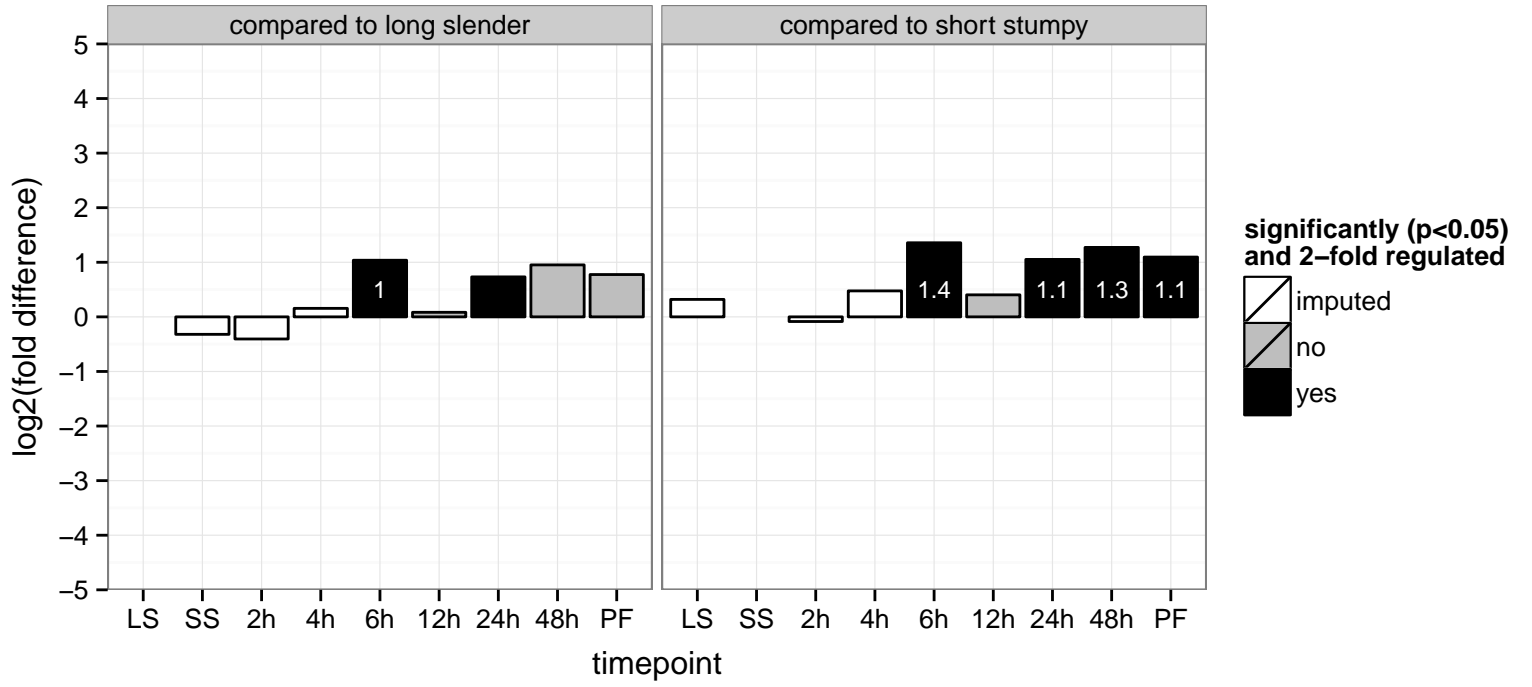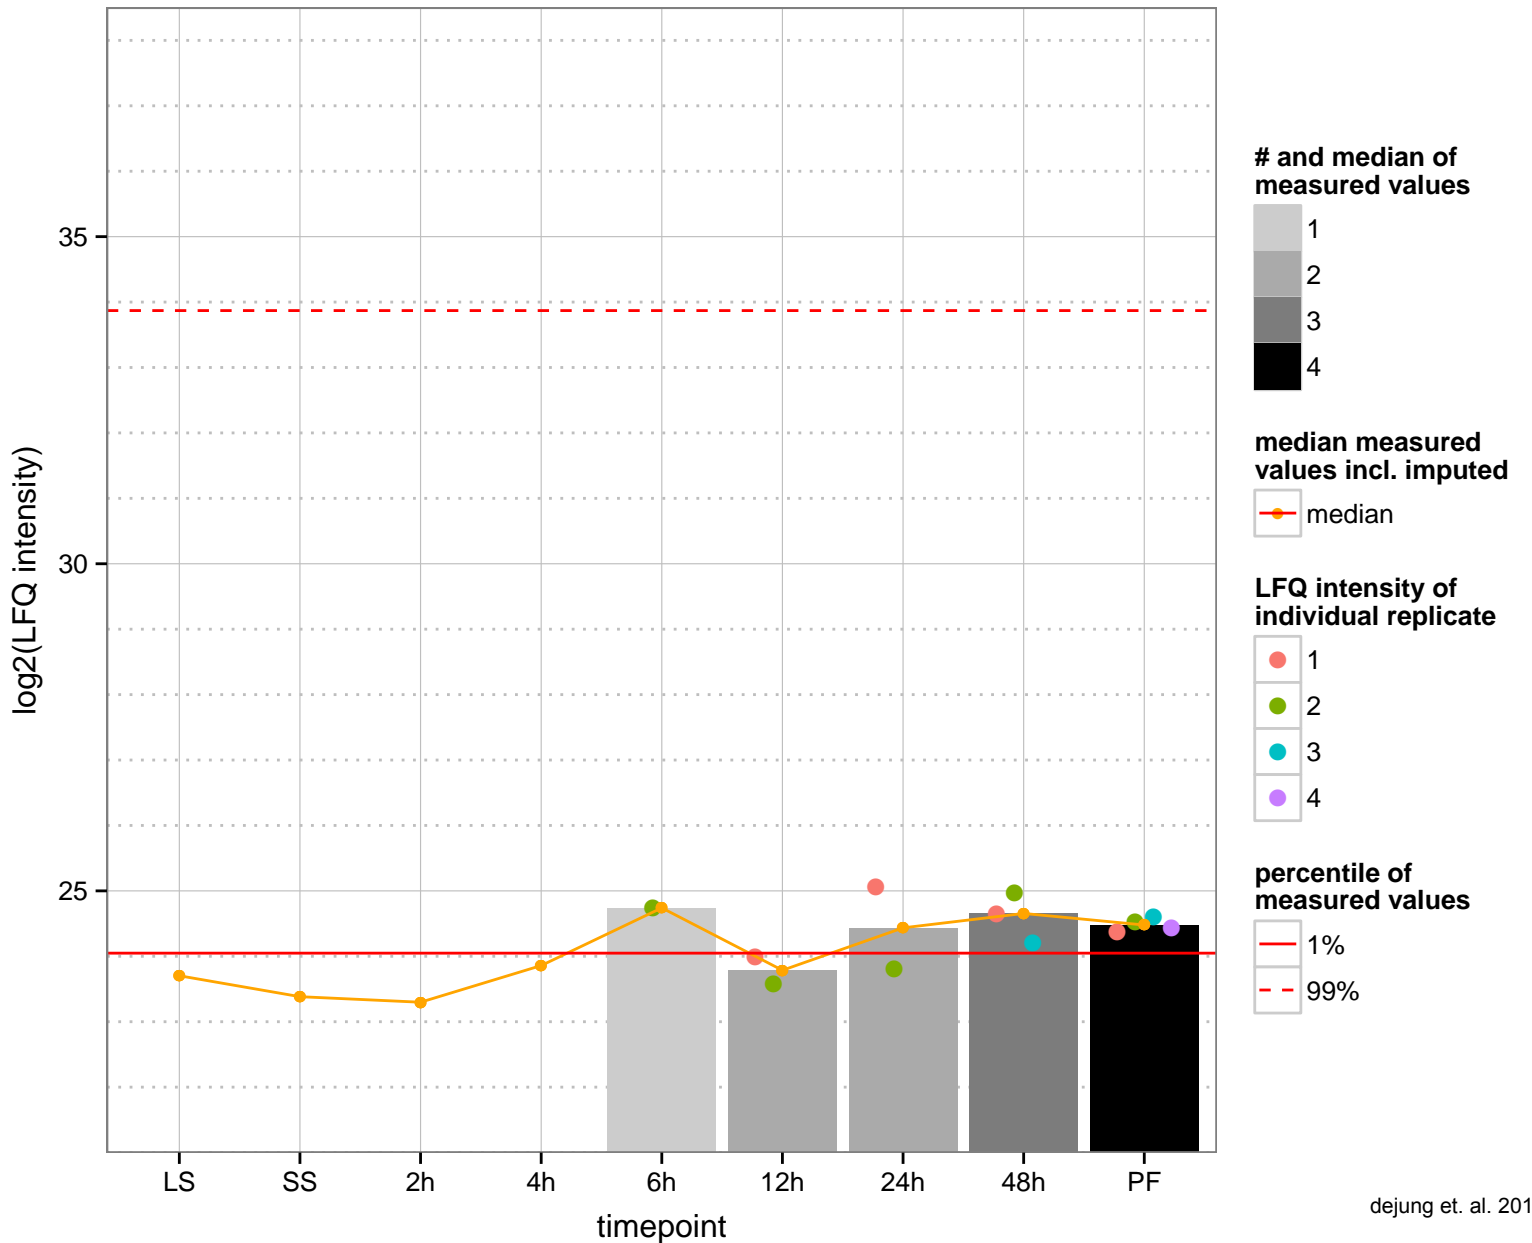

hypothetical protein, conserved  
 Tb927.10.7670  
 AGOF: null  
 AGOC: null  
 AGOP: null  
 PGOF: null  
 PGOC: null  
 PGOP: null

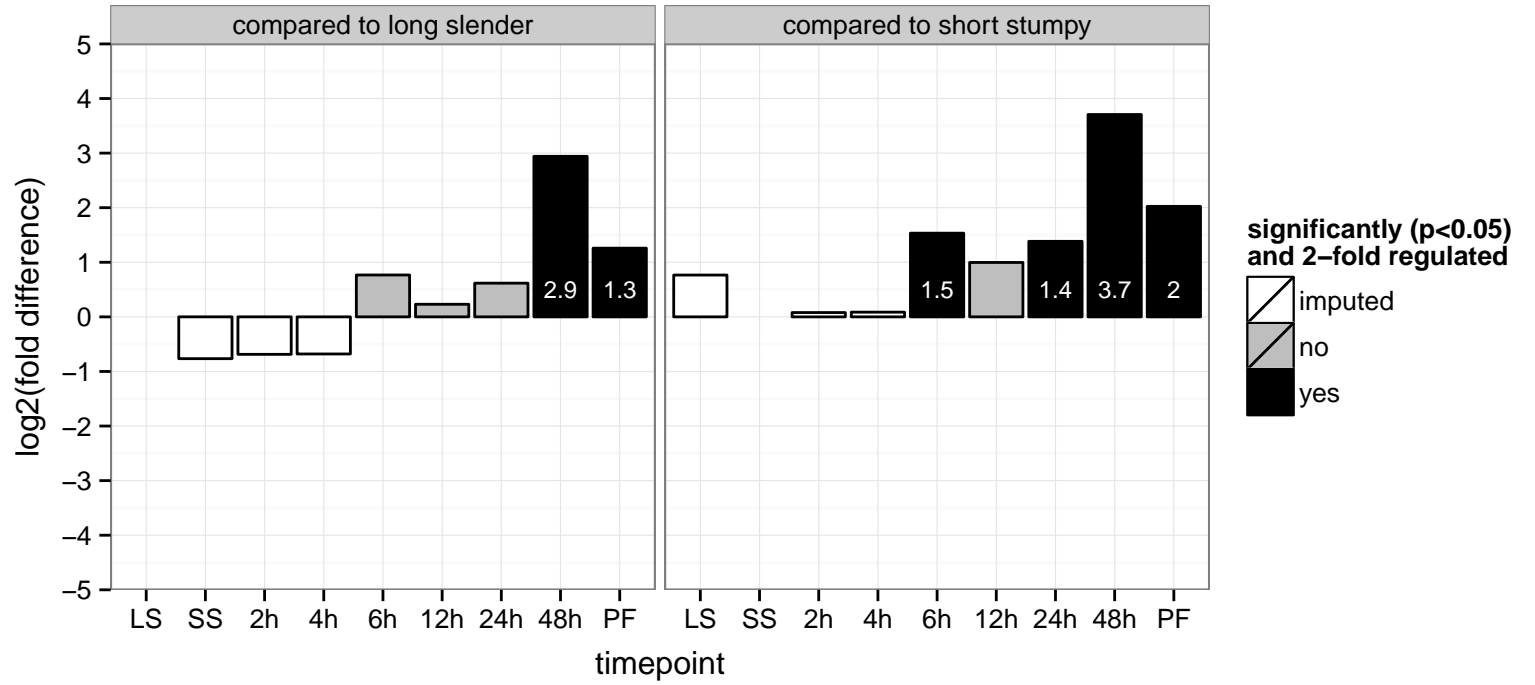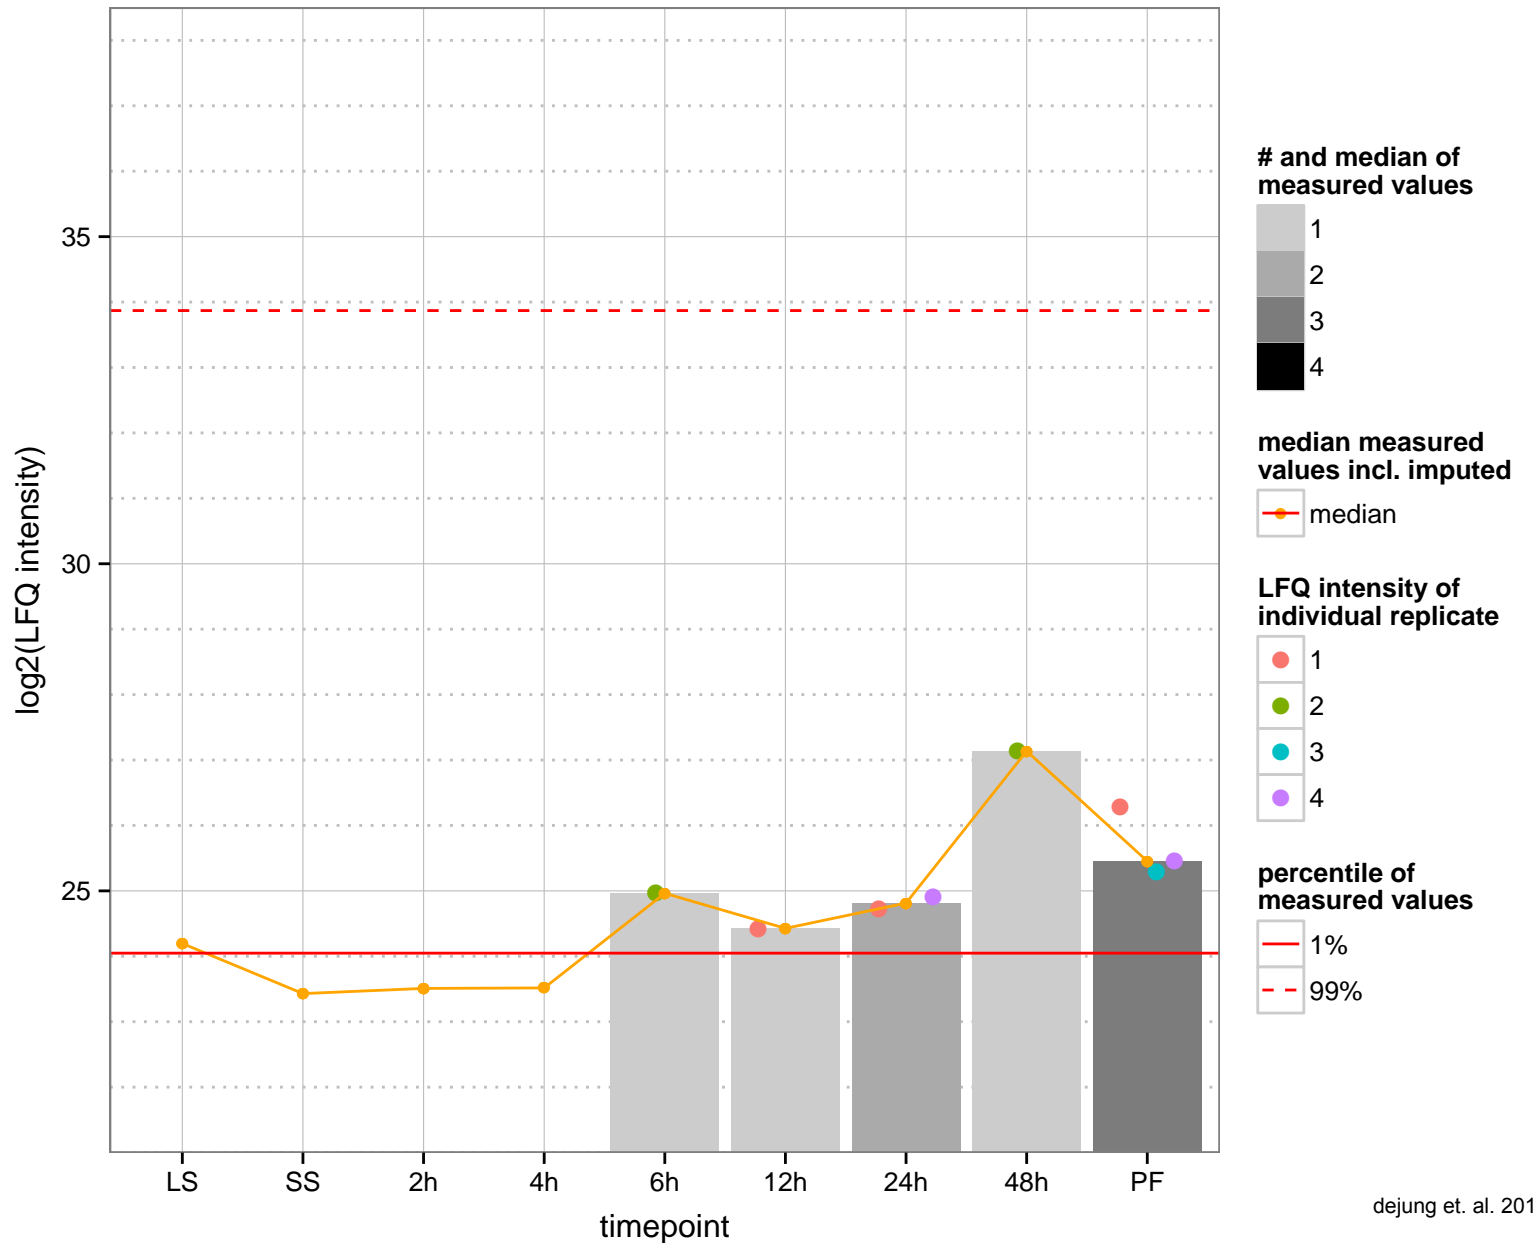

hypothetical protein, conserved  
 Tb927.11.16420  
 AGOF: null  
 AGOC: mitochondrion  
 AGOP: null  
 PGO: null  
 PGOC: null  
 PGOP: null

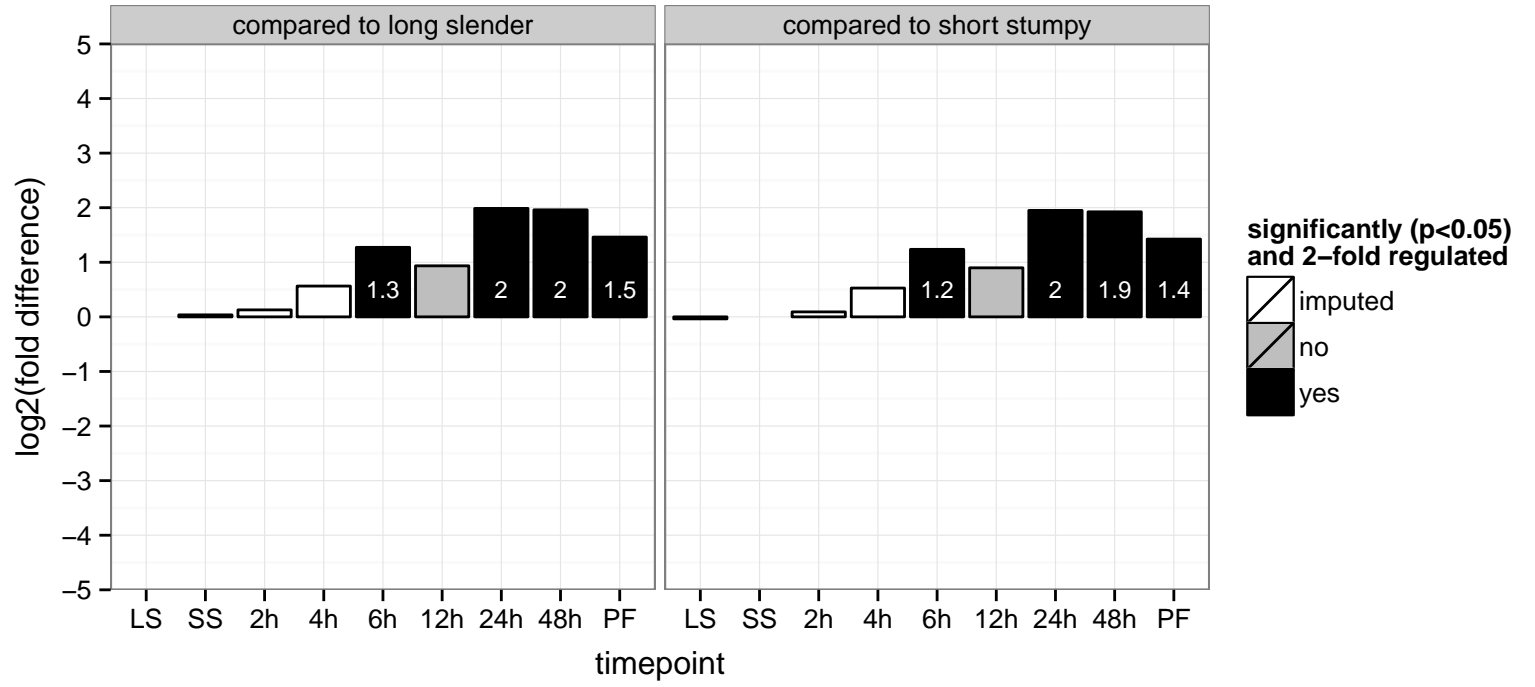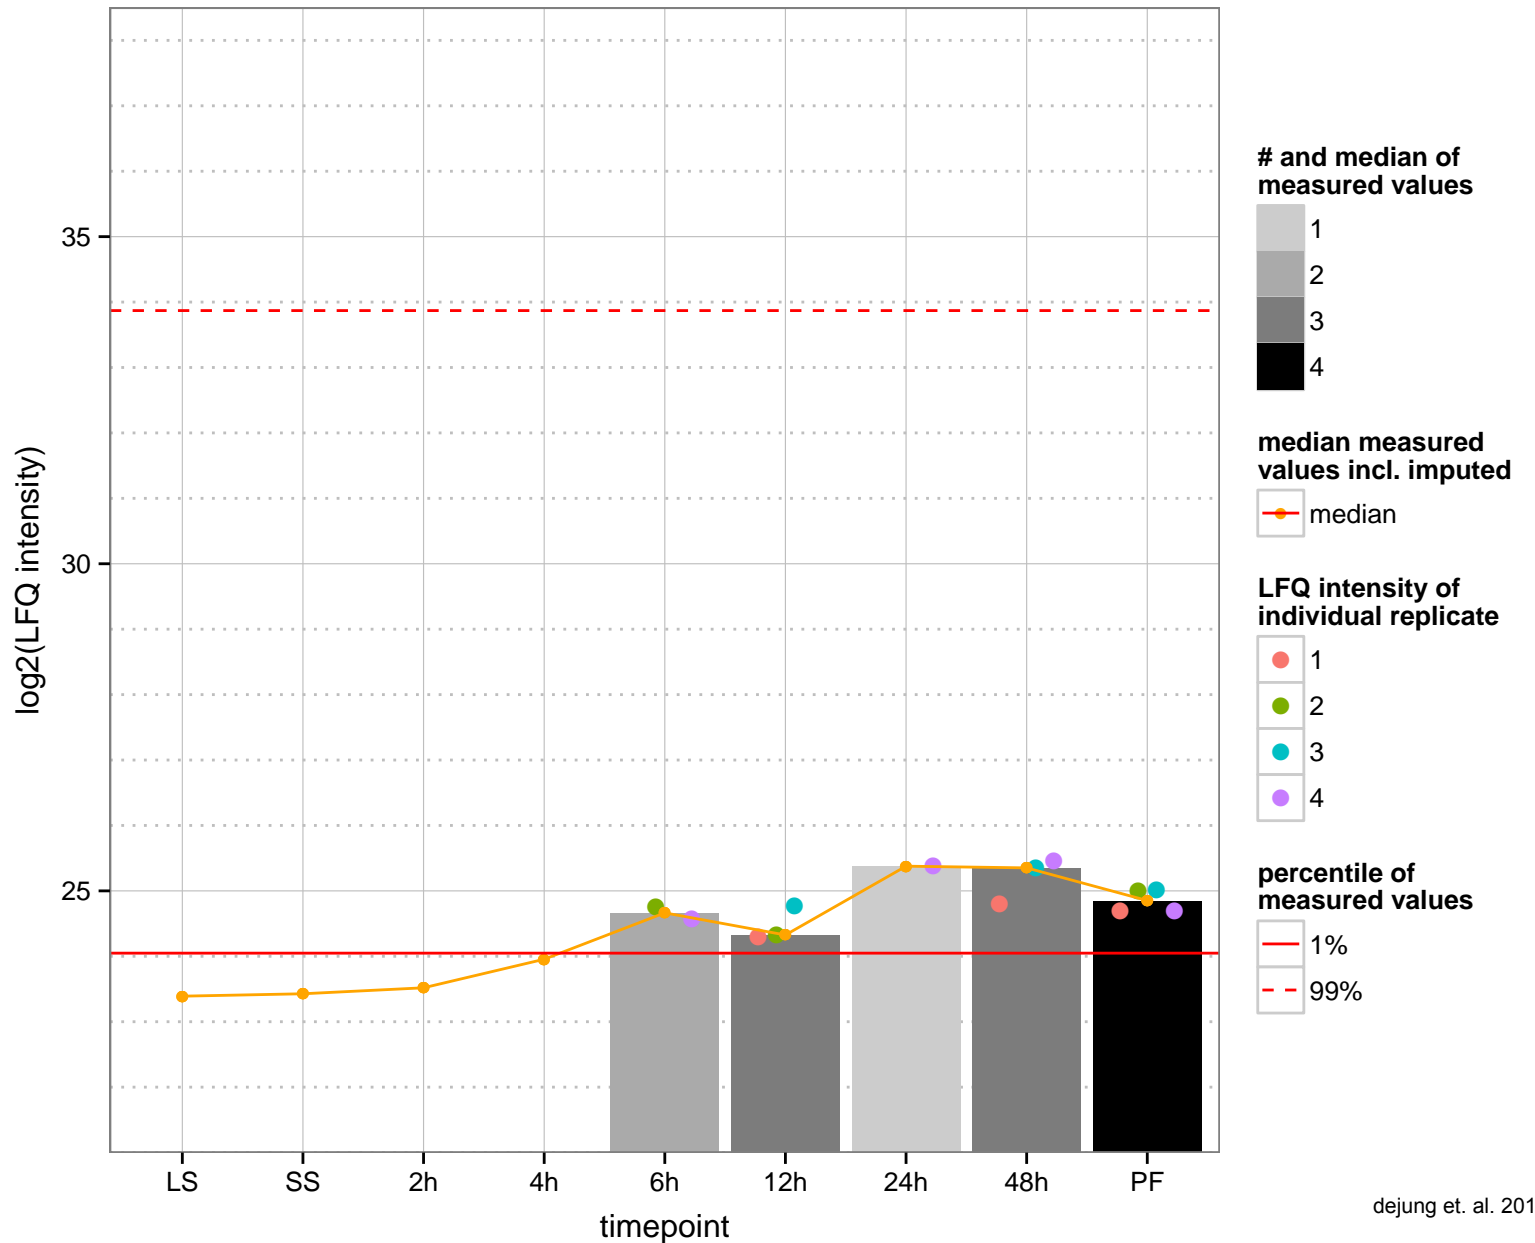

aurora B kinase (AUK1)

Tb927.11.8220

AGOF: ATP binding, protein binding, protein serine/threonine kinase activity, protein tyrosine kinase activity

AGOC: chromosome passenger complex, nucleus, spindle

AGOP: chromosome segregation, cytokinesis, histone H3-S10 phosphorylation, protein phosphorylation, regulation of mitosis

PGOF: ATP binding, protein kinase activity, transferase activity, transferring phosphorus-containing groups

PGOC: null

PGOP: protein phosphorylation

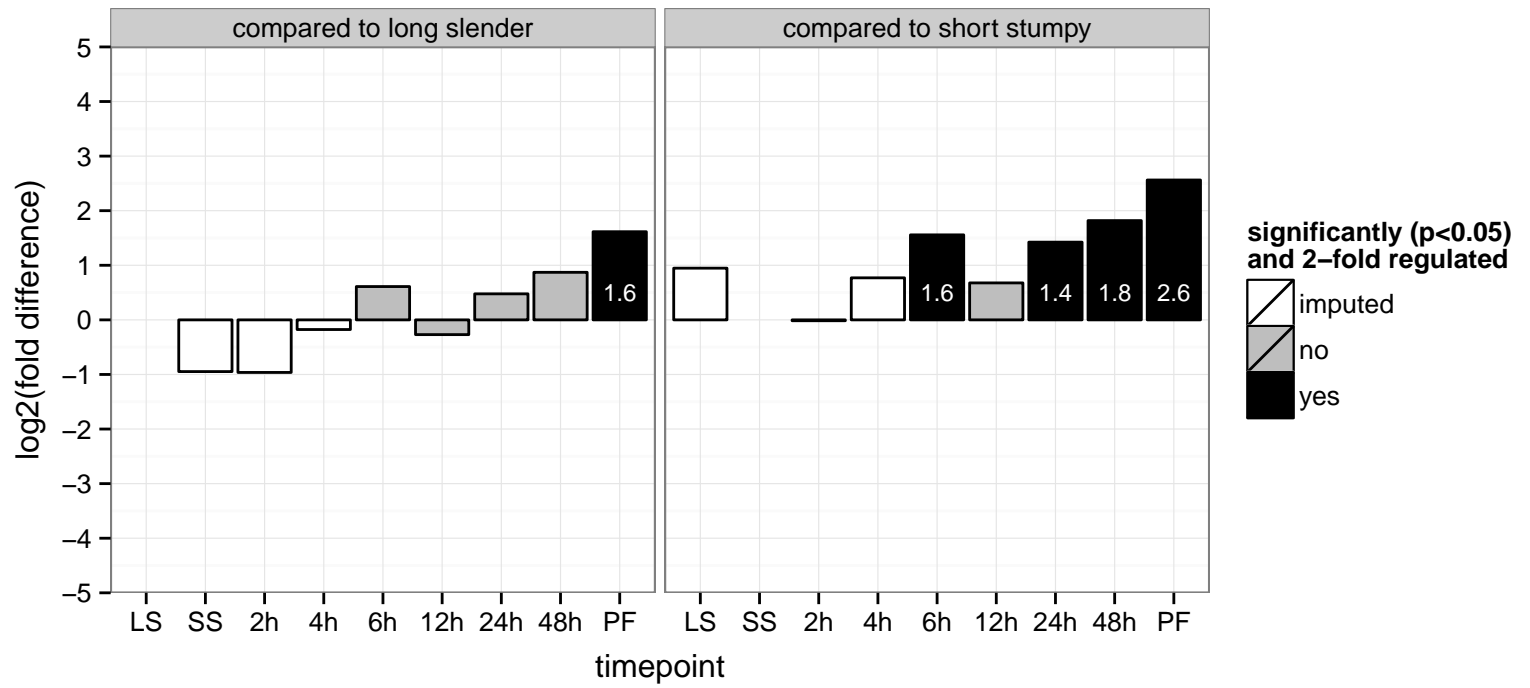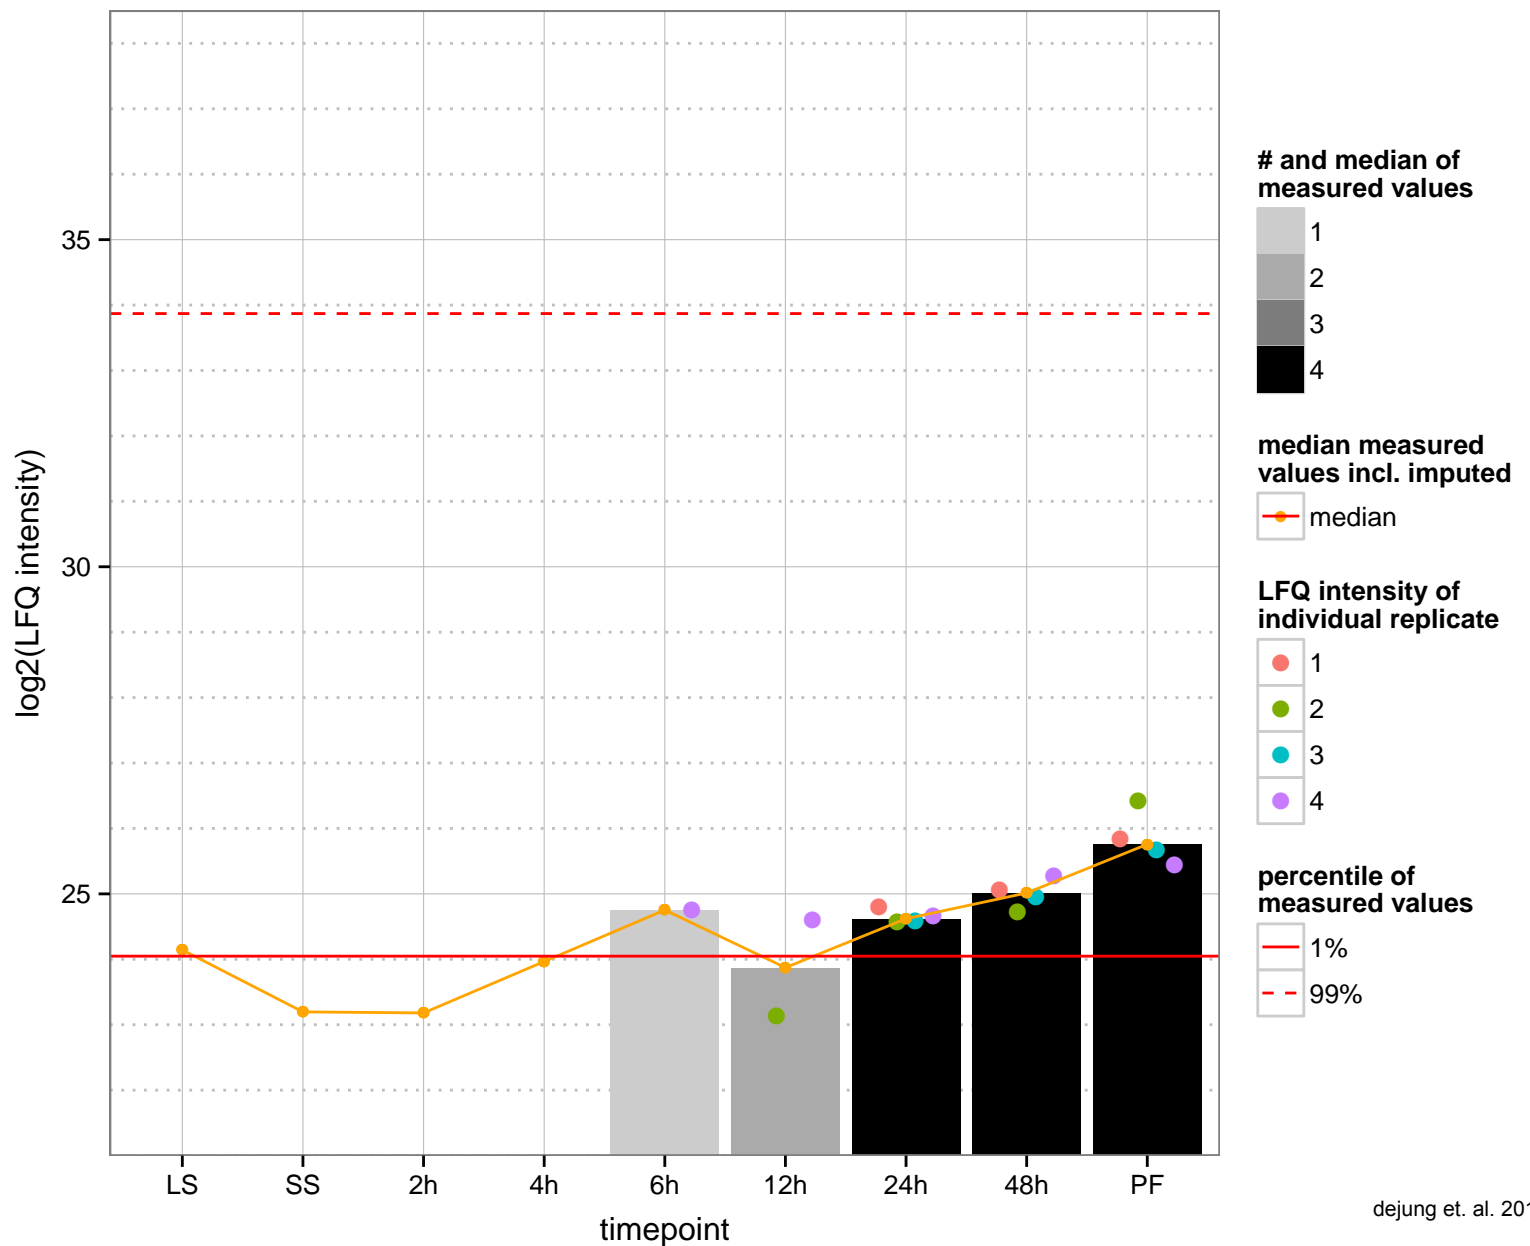

translation elongation factor EF-2, putative  
 Tb927.3.2170  
 AGOF: GTP binding, GTPase activity  
 AGOC: null  
 AGOP: mature ribosome assembly  
 PGOF: GTP binding, GTPase activity  
 PGO: null  
 PGOP: null

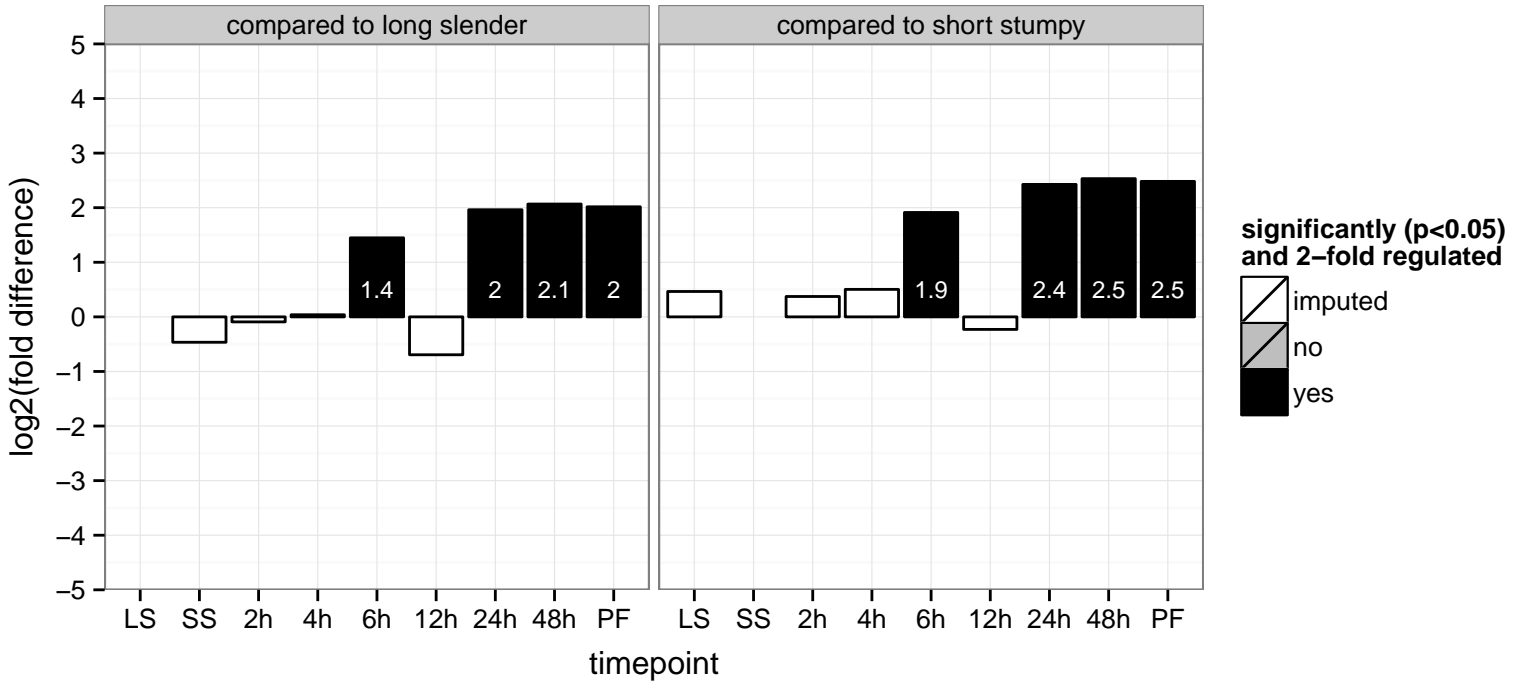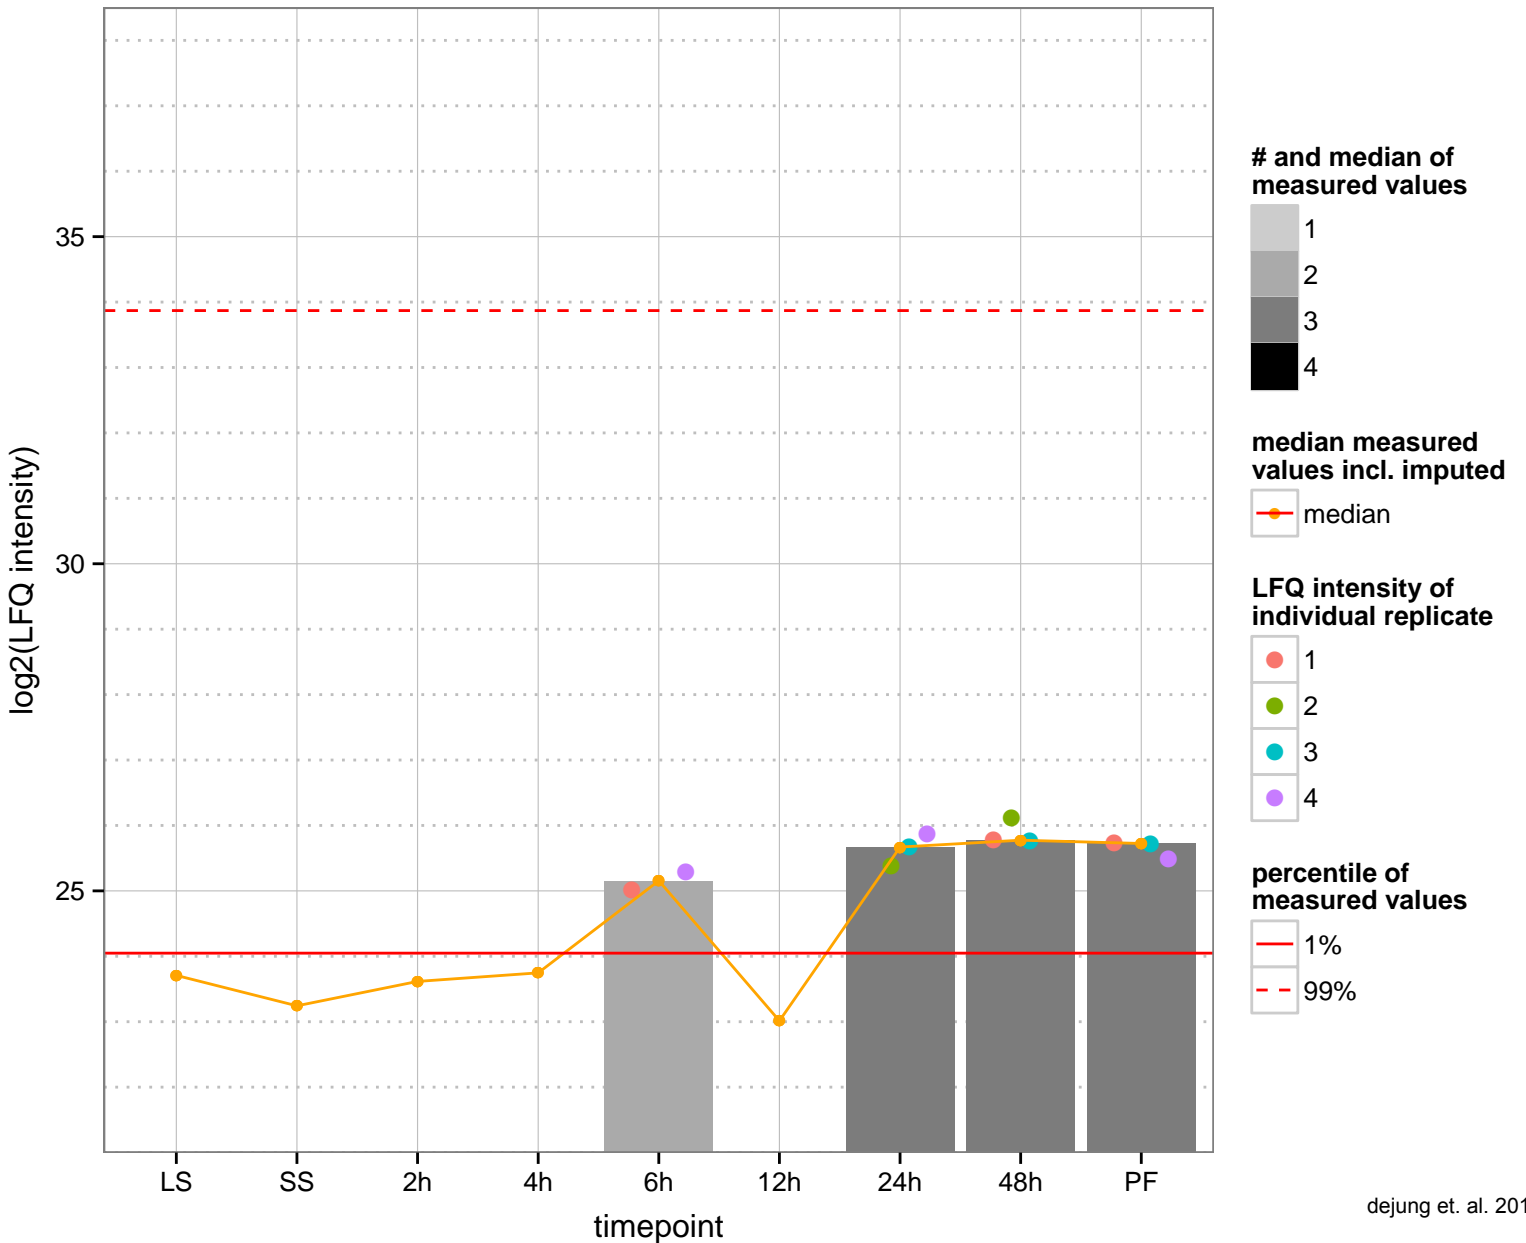

hypothetical protein, conserved  
 Tb927.4.2430  
 AGOF: null  
 AGOC: null  
 AGOP: null  
 PGOF: null  
 PGO: null  
 PGOP: null

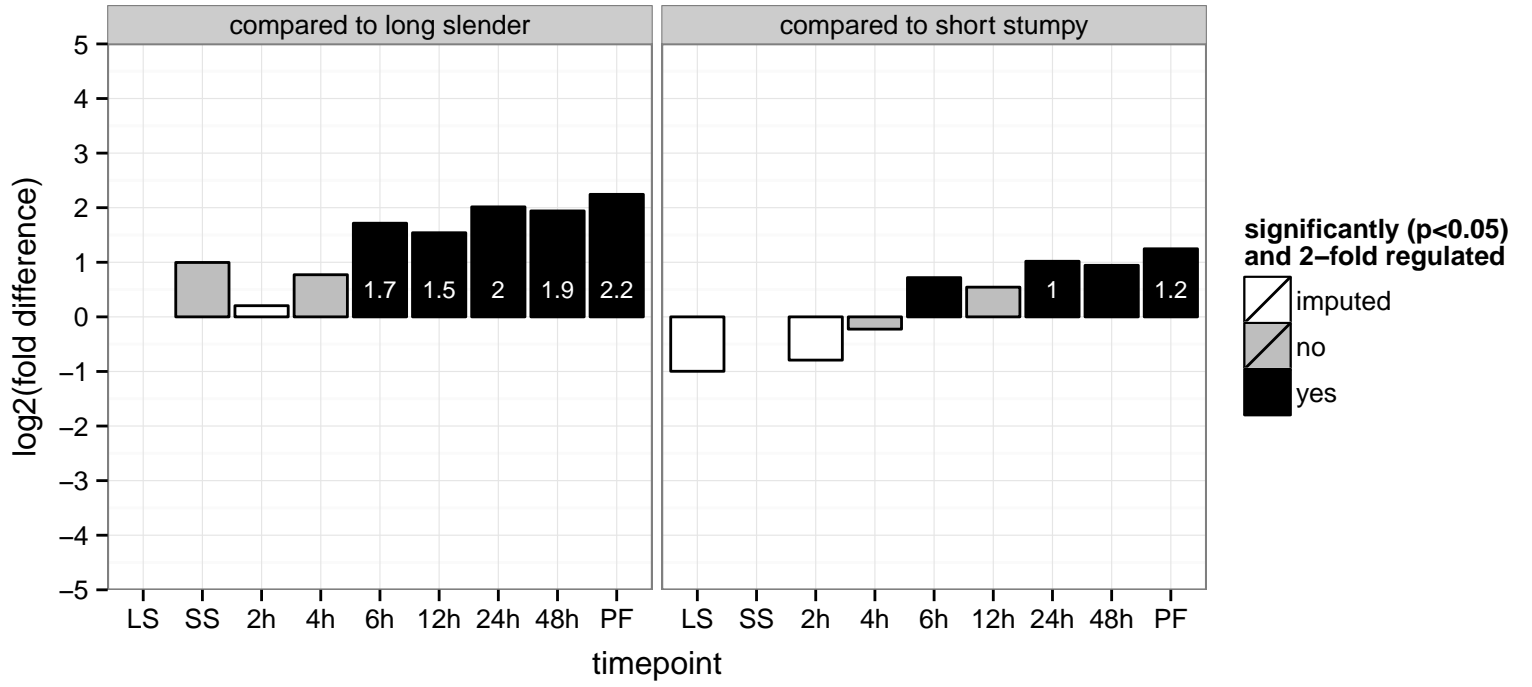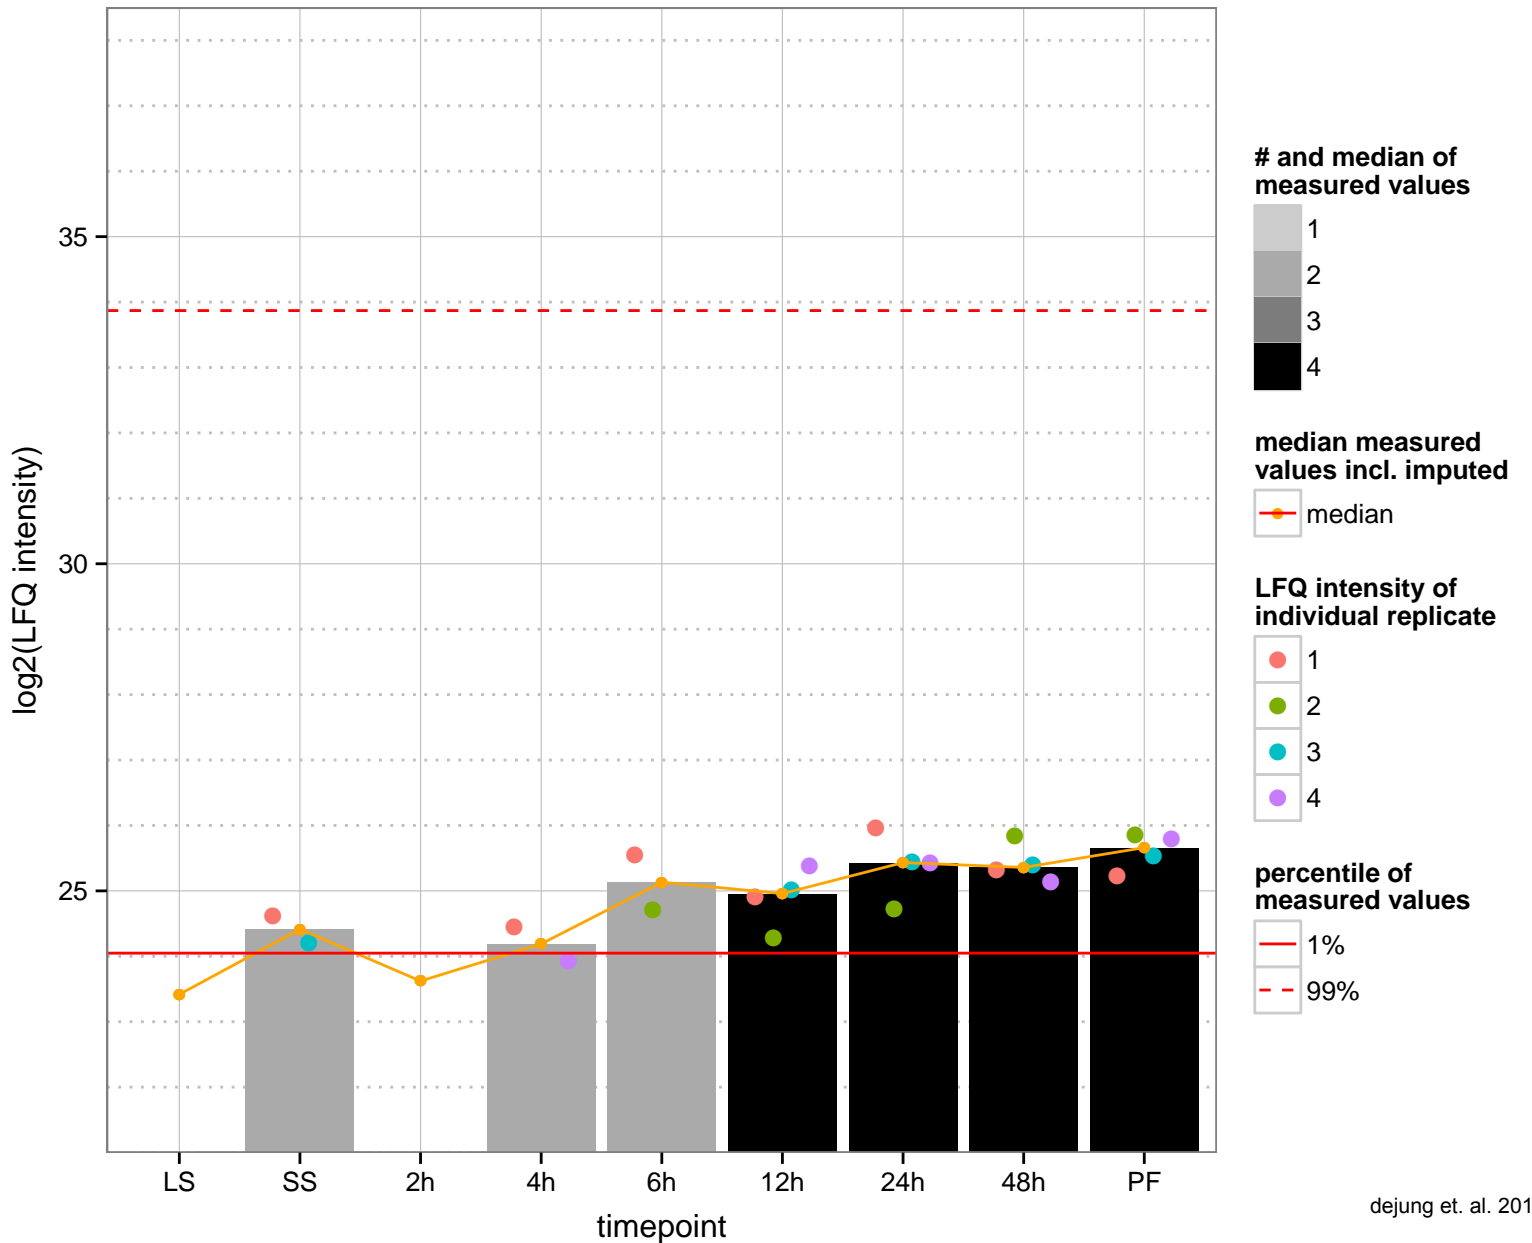



hypothetical protein, conserved  
 Tb927.4.2580  
 AGOF: null  
 AGOC: mitochondrion  
 AGOP: null  
 PGO: null  
 PGOC: null  
 PGOP: null

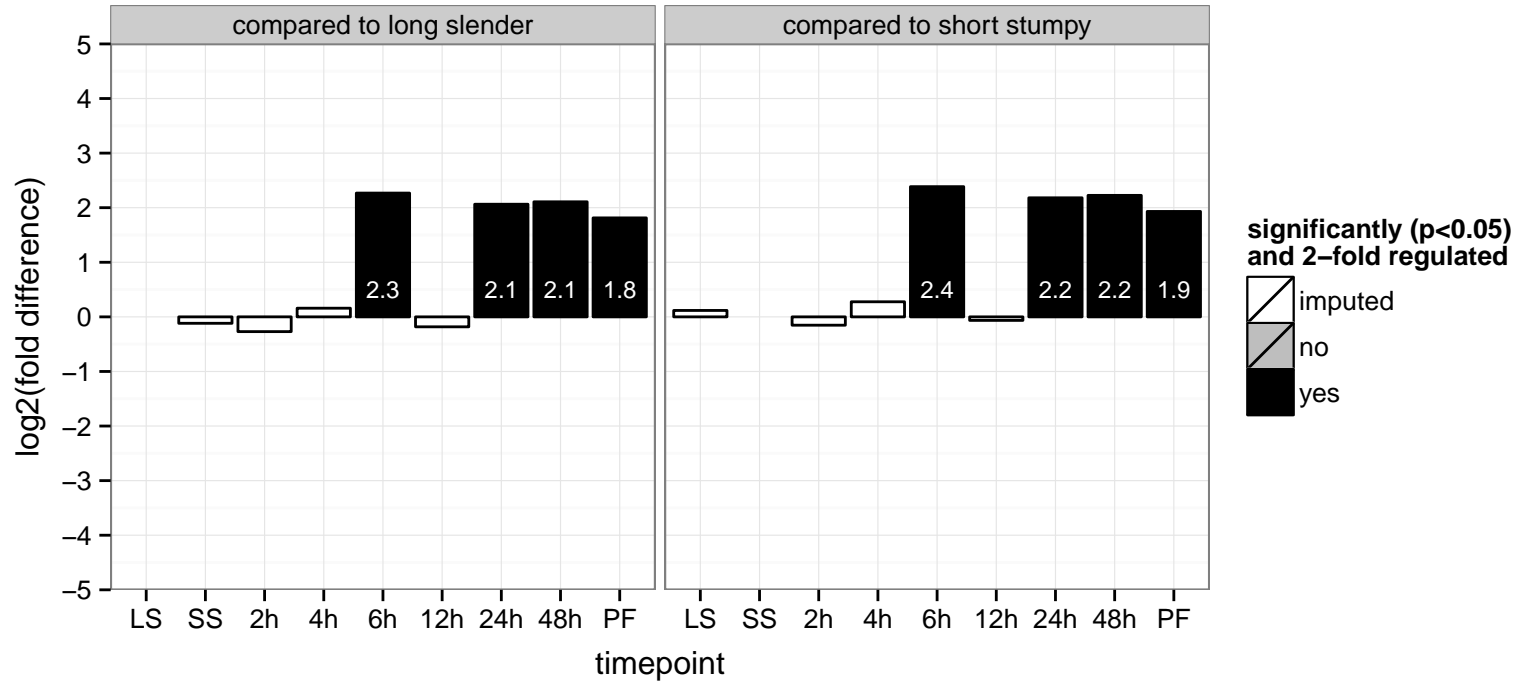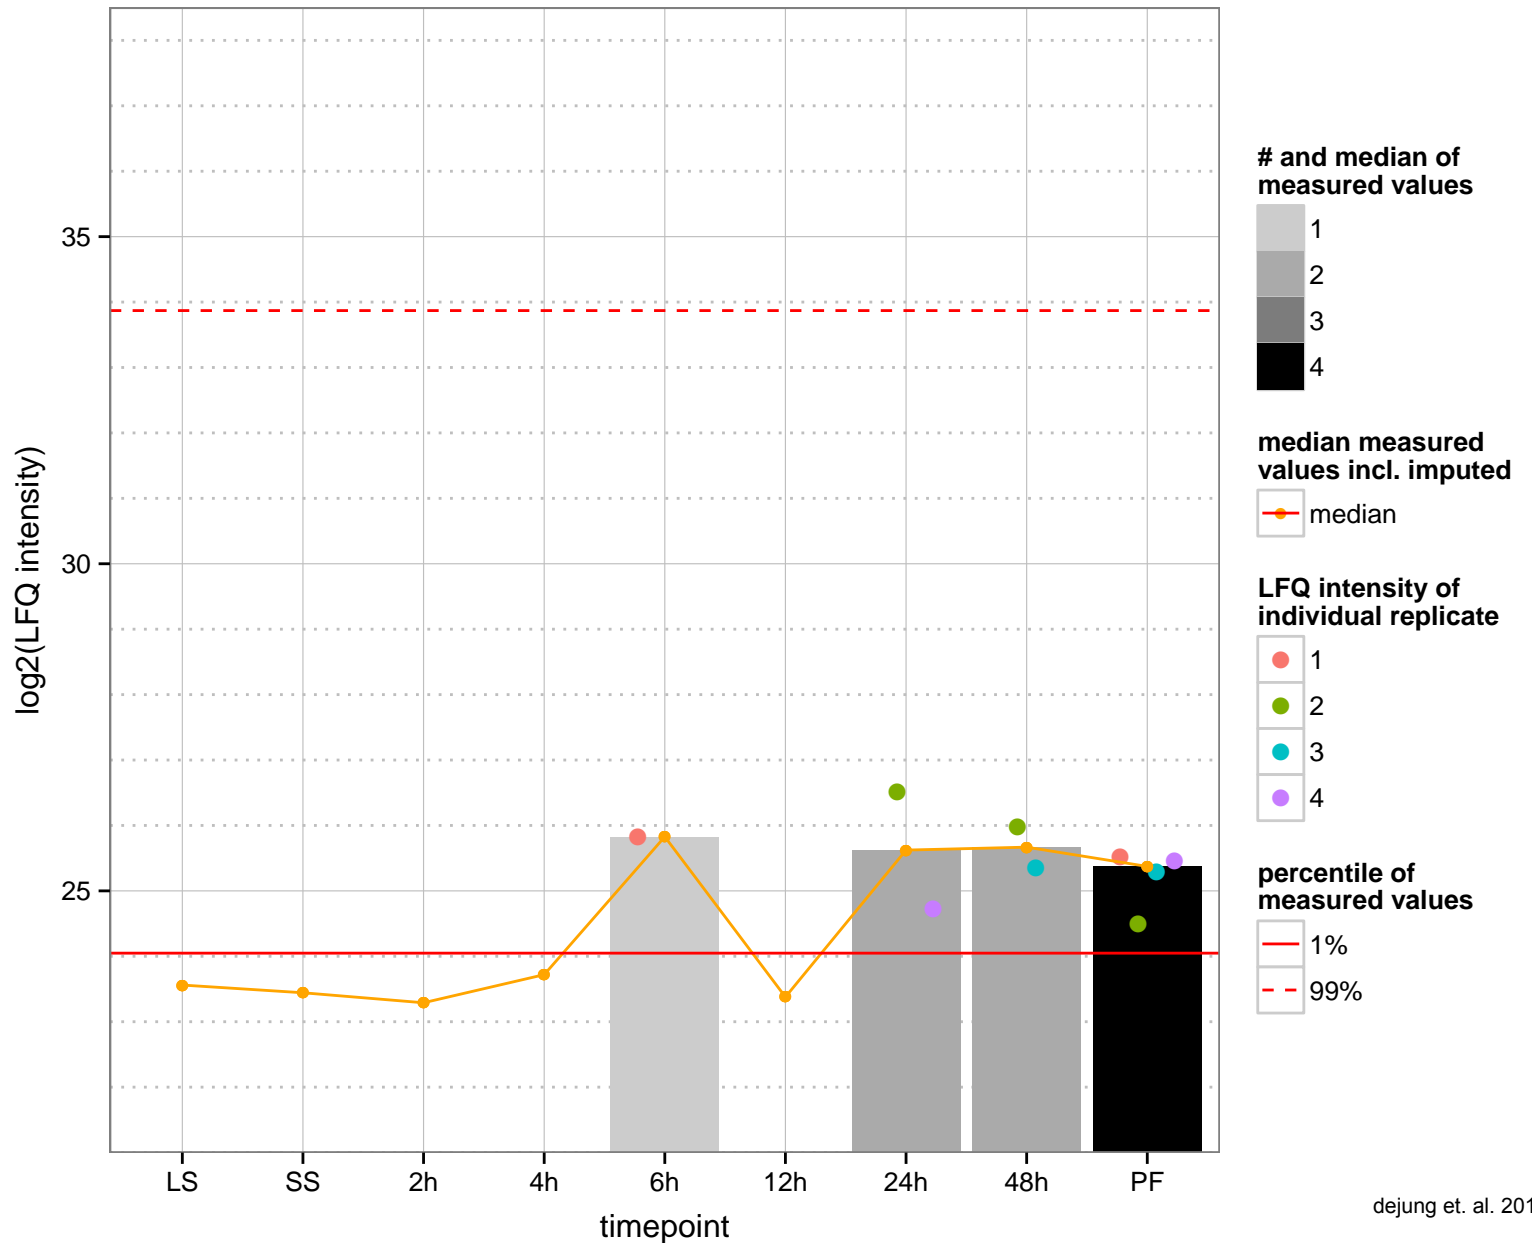

DNA primase small subunit, putative  
 Tb927.7.2310  
 AGOF: DNA primase activity  
 AGOC: null  
 AGOP: DNA replication, synthesis of RNA primer  
 PGO: DNA primase activity  
 PGO: null  
 PGO: DNA replication, synthesis of RNA primer

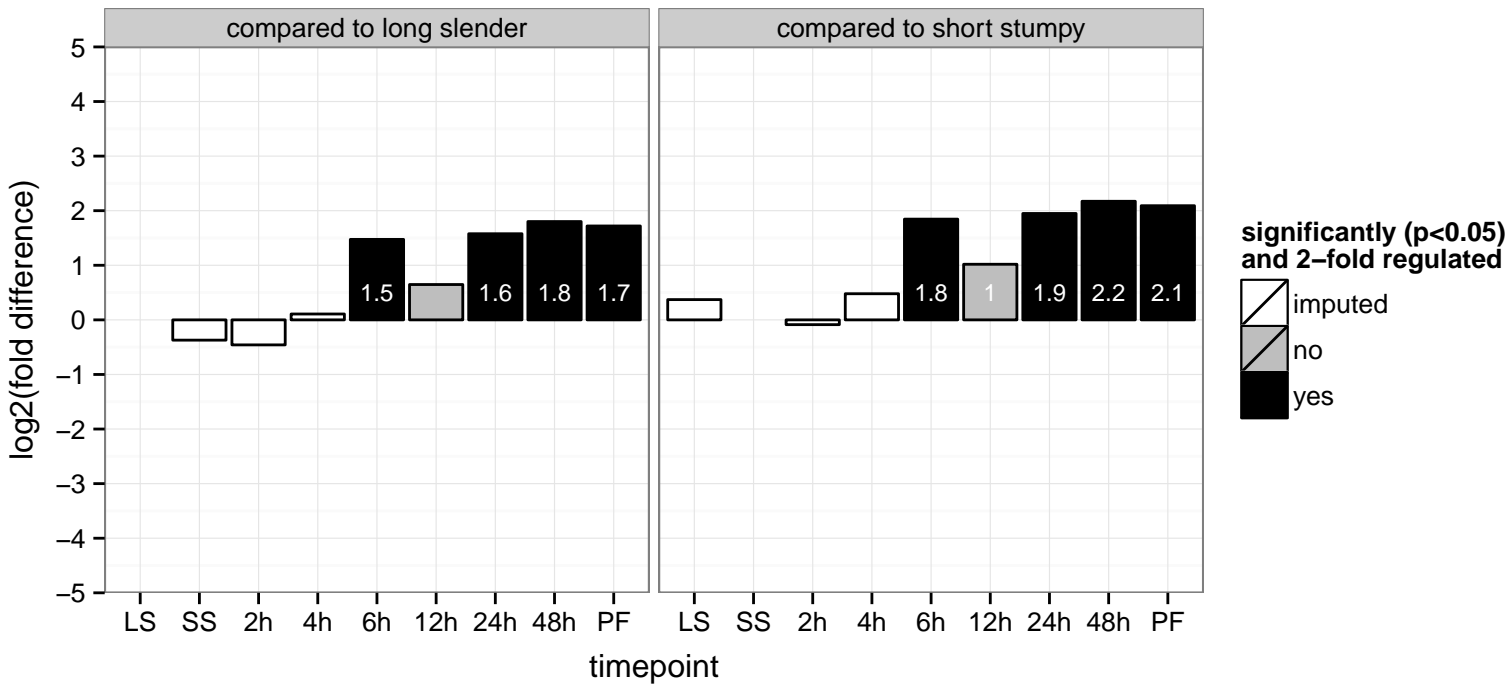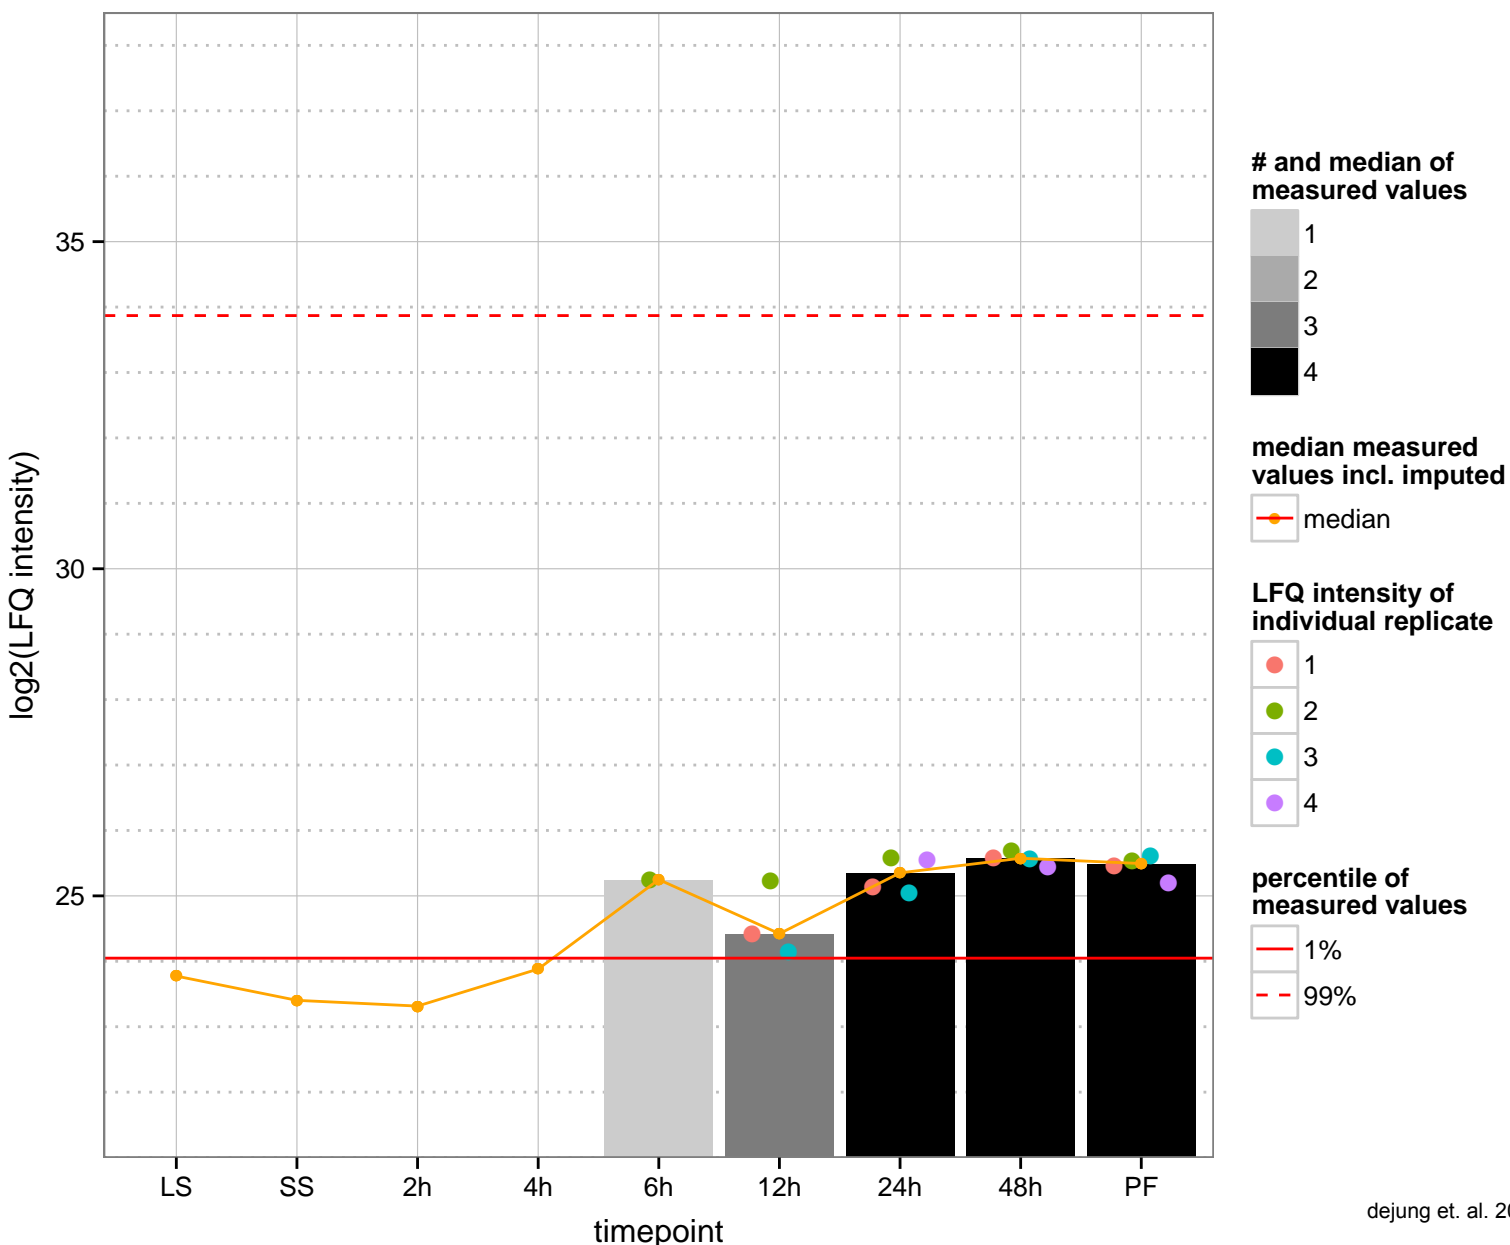

hypothetical protein, conserved  
 Tb927.9.11120  
 AGOF: null  
 AGOC: mitochondrion  
 AGOP: null  
 PGO: null  
 PGOC: null  
 PGOP: null

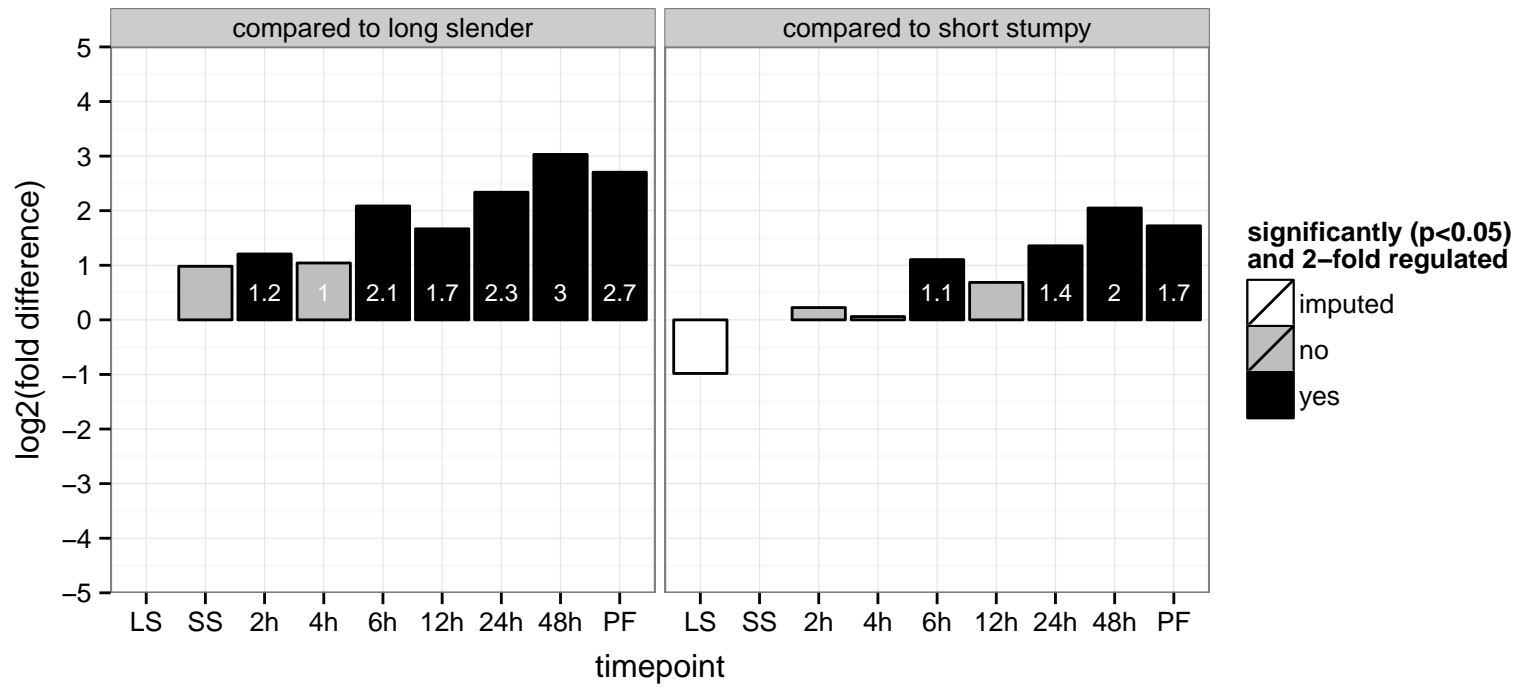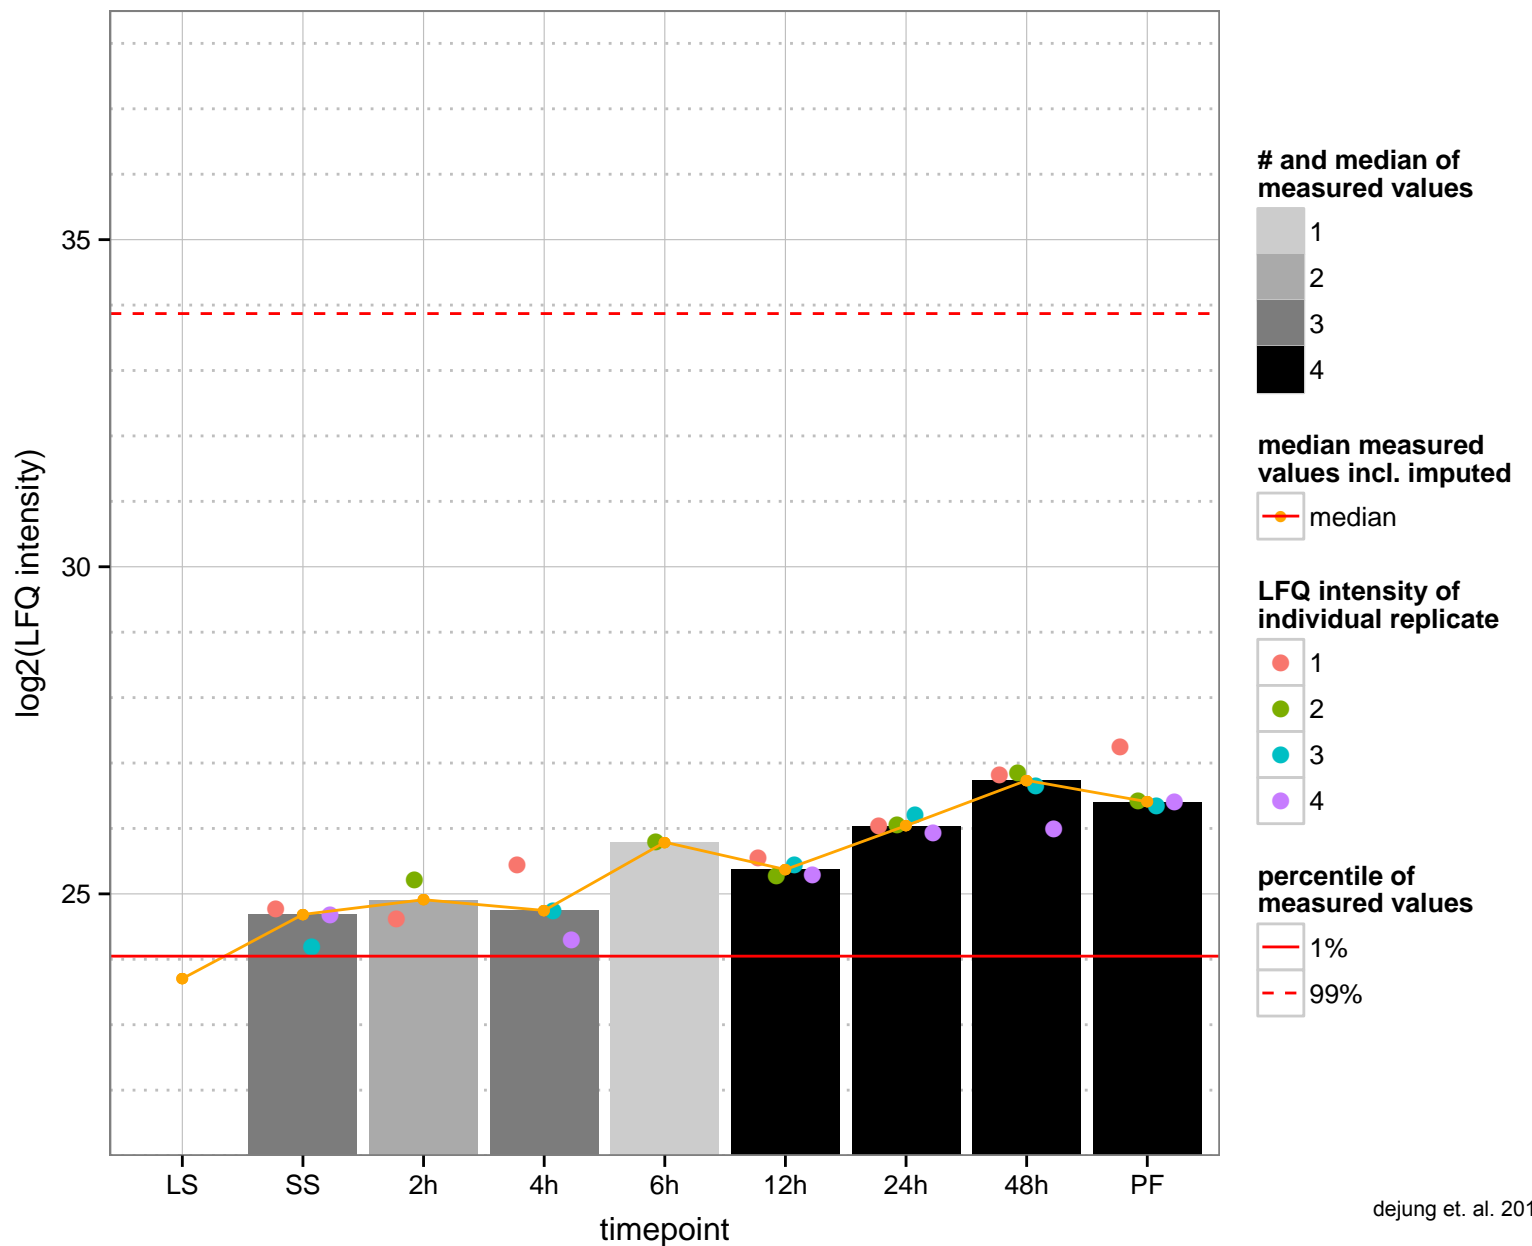

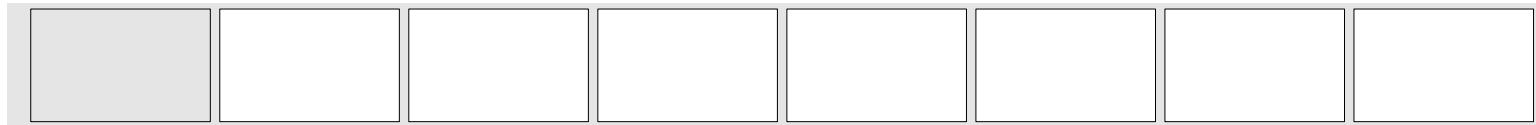

SS

2h

4h

6h

12h

24h

48h

PF

timepoint

**regulated**

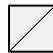

not regulated

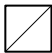

significant down

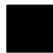

significant up

protein kinase, putative

Tb927.1.1530

AGOF: null, ATP binding, protein kinase activity, protein serine/threonine kinase activity, protein tyrosine kinase activity, signal

AGOC: null

AGOP: null, protein phosphorylation, regulation of transcription, DNA-dependent, signal transduction

PGOF: ATP binding, protein kinase activity, transferase activity, transferring phosphorus-containing groups, signal transducer

PGOC: null

PGOP: protein phosphorylation, regulation of transcription, DNA-dependent, signal transduction

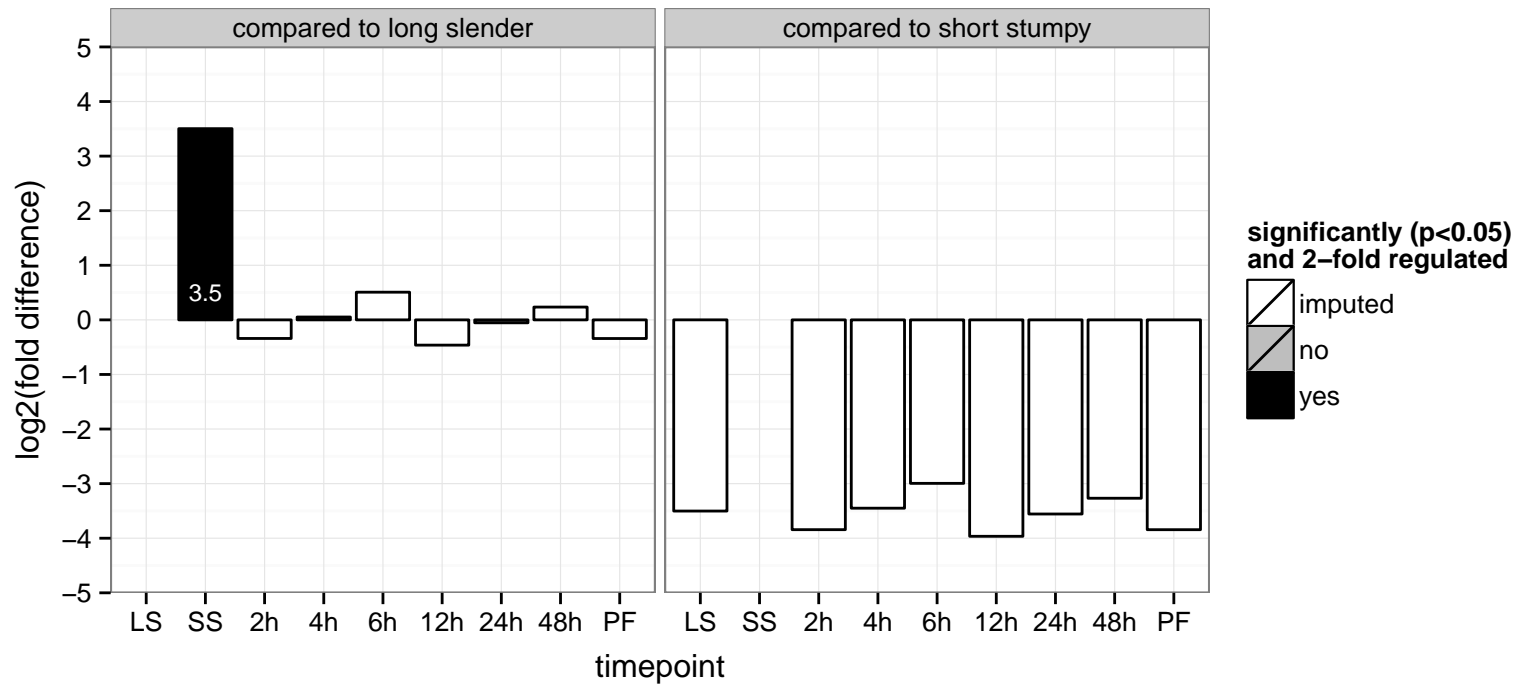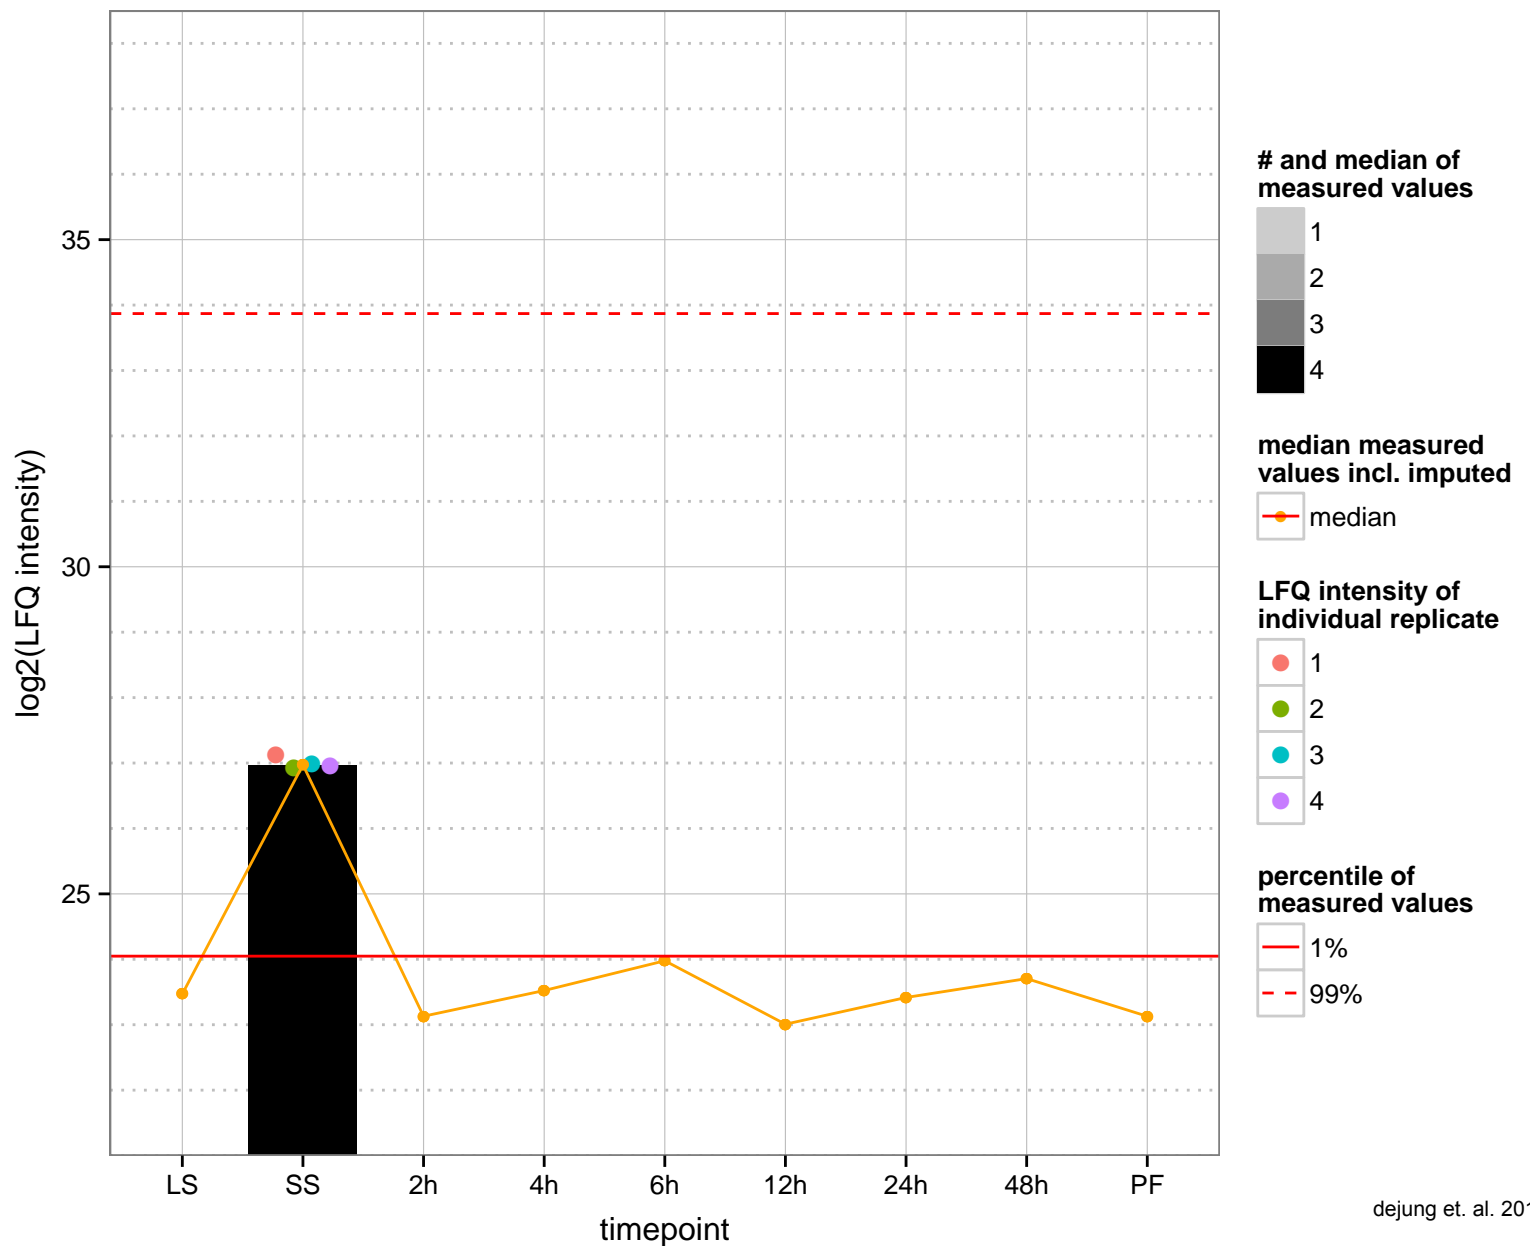

cyclin-like F-box protein 2 (CFB2)  
 Tb927.1.4650  
 AGOF: null  
 AGOC: null  
 AGOP: mitochondrial DNA replication  
 PGO: protein binding  
 PGO: null  
 PGO: null

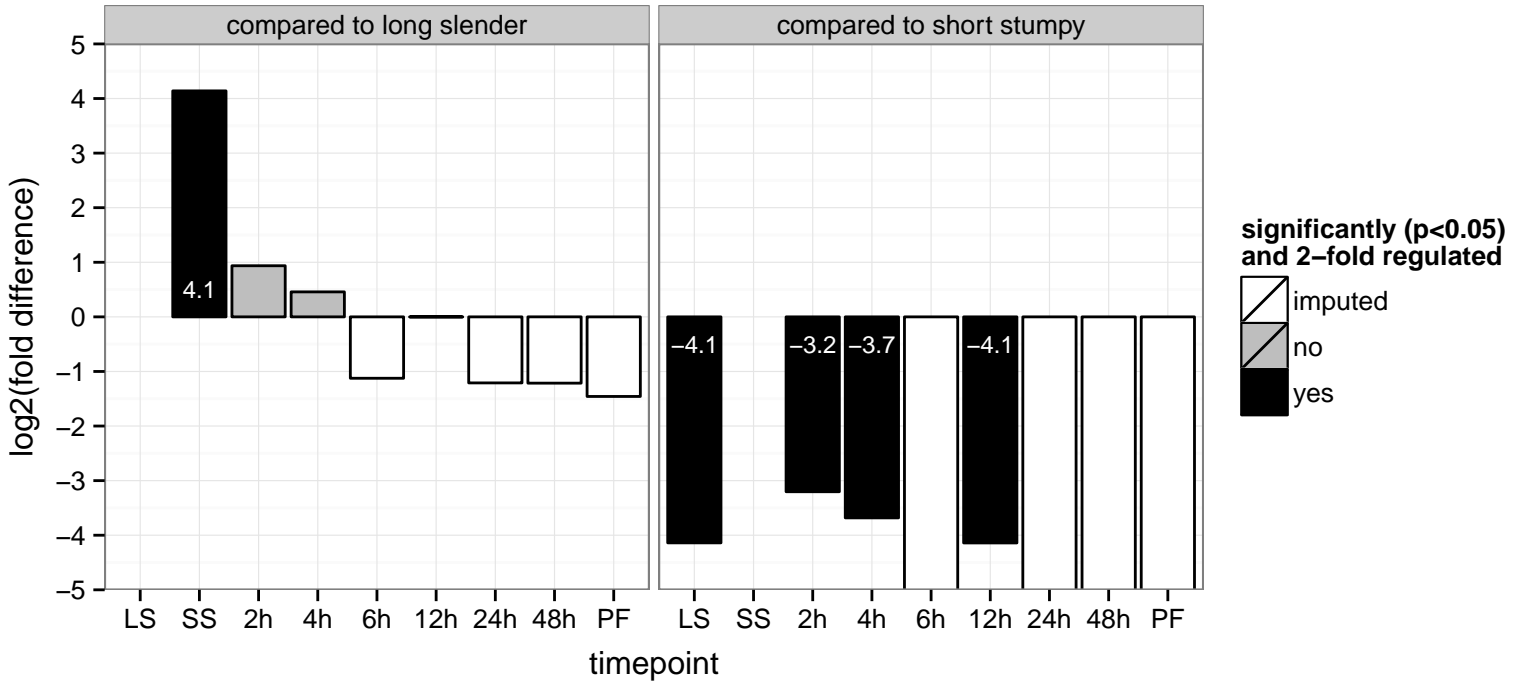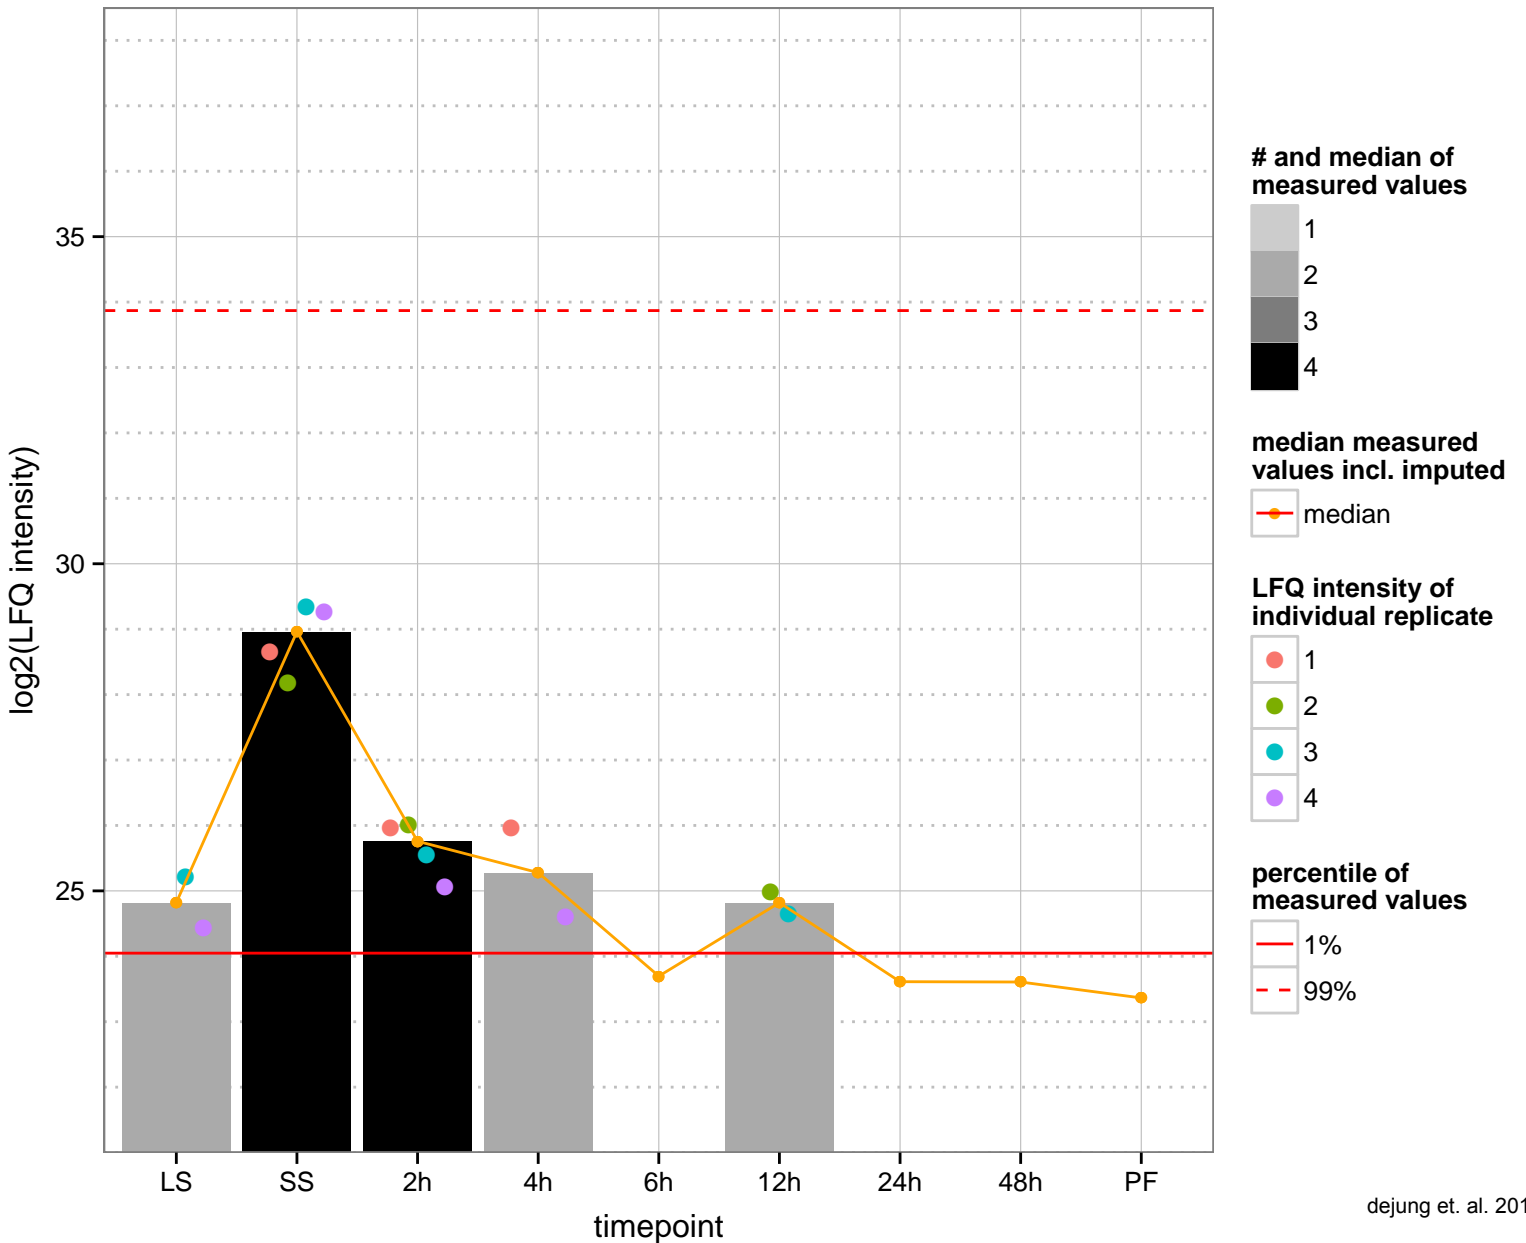

MSP-C, putative (MSP-C)  
 Tb927.10.2410  
 AGOF: metalloendopeptidase activity, zinc ion binding  
 AGOC: membrane  
 AGOP: cell adhesion, proteolysis  
 PGO: metalloendopeptidase activity, zinc ion binding  
 PGO: membrane  
 PGO: cell adhesion, proteolysis

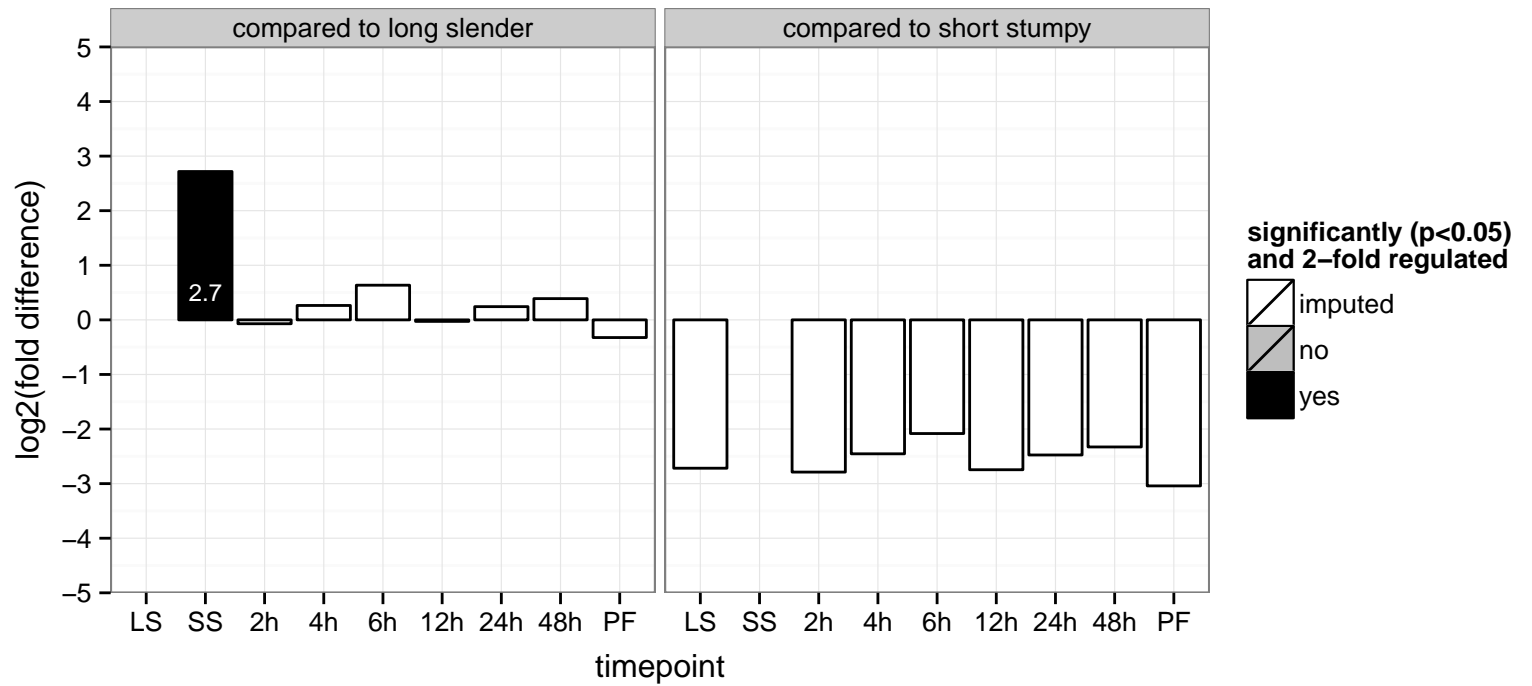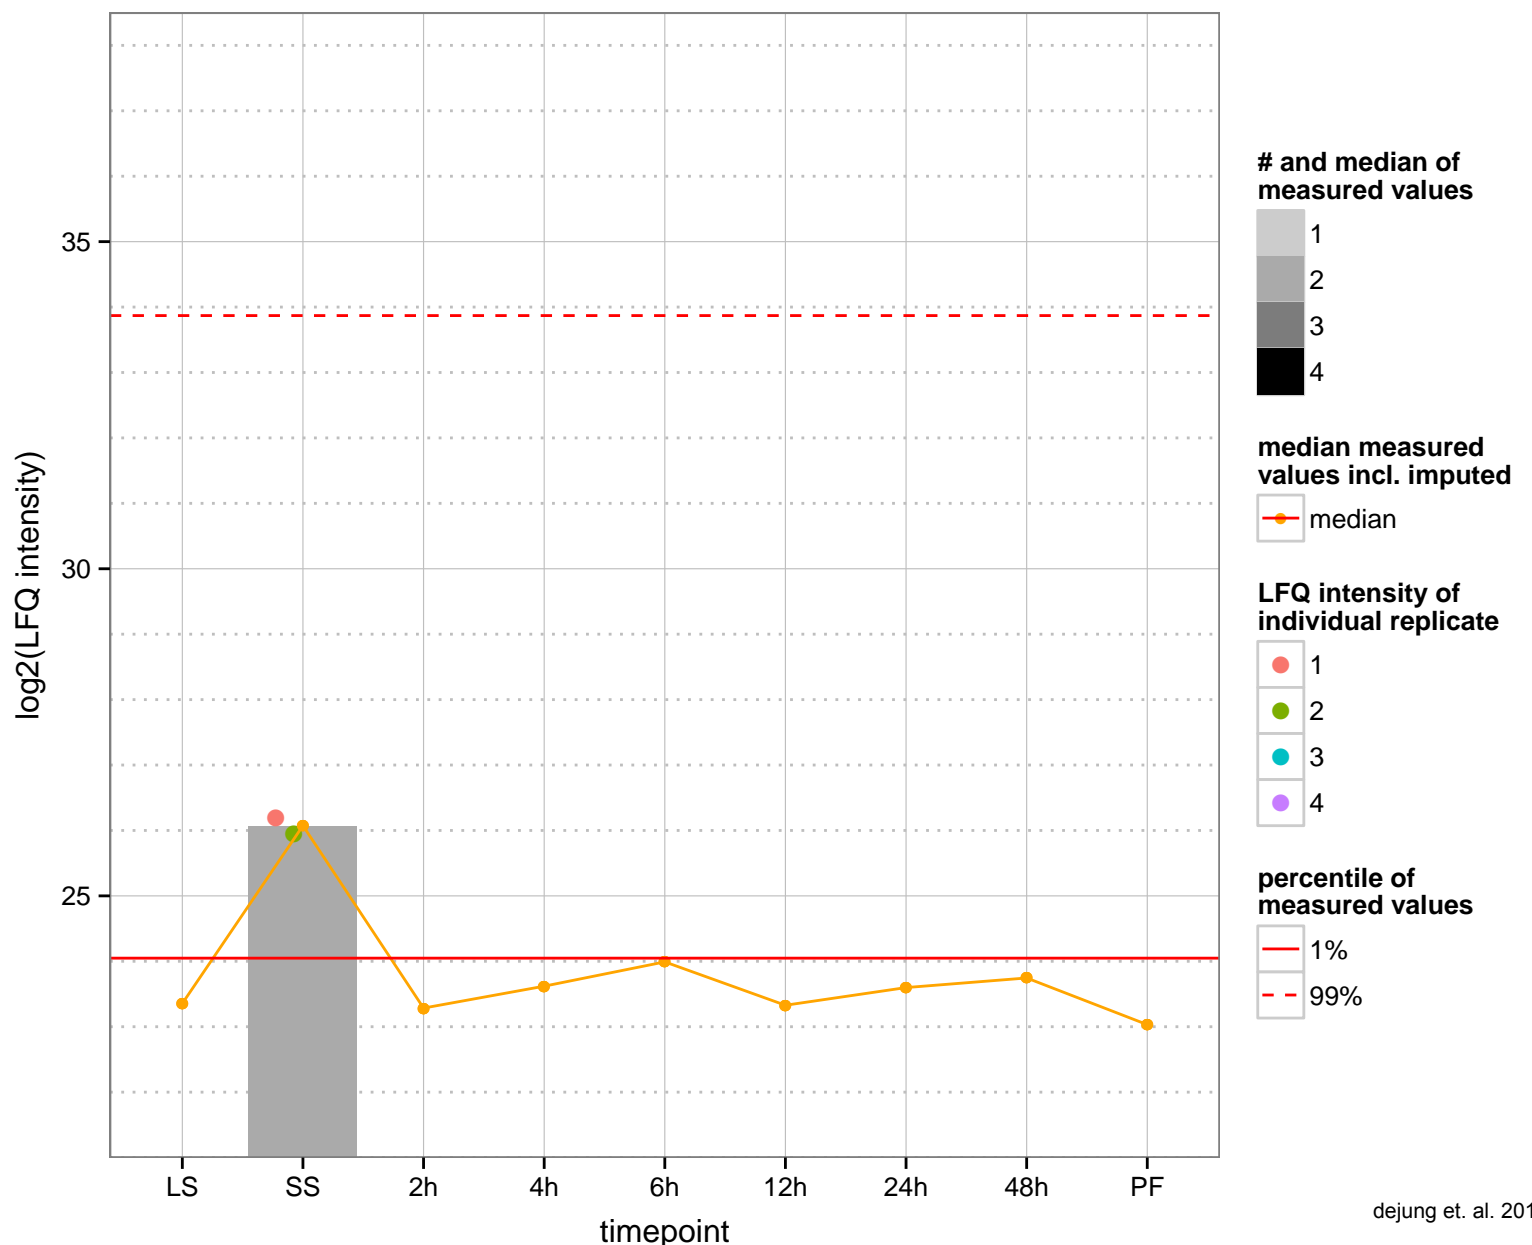

hypothetical protein  
 Tb927.4.1230  
 AGOF: null  
 AGOC: null  
 AGOP: null  
 PGO: null  
 PGOC: null  
 PGOP: null

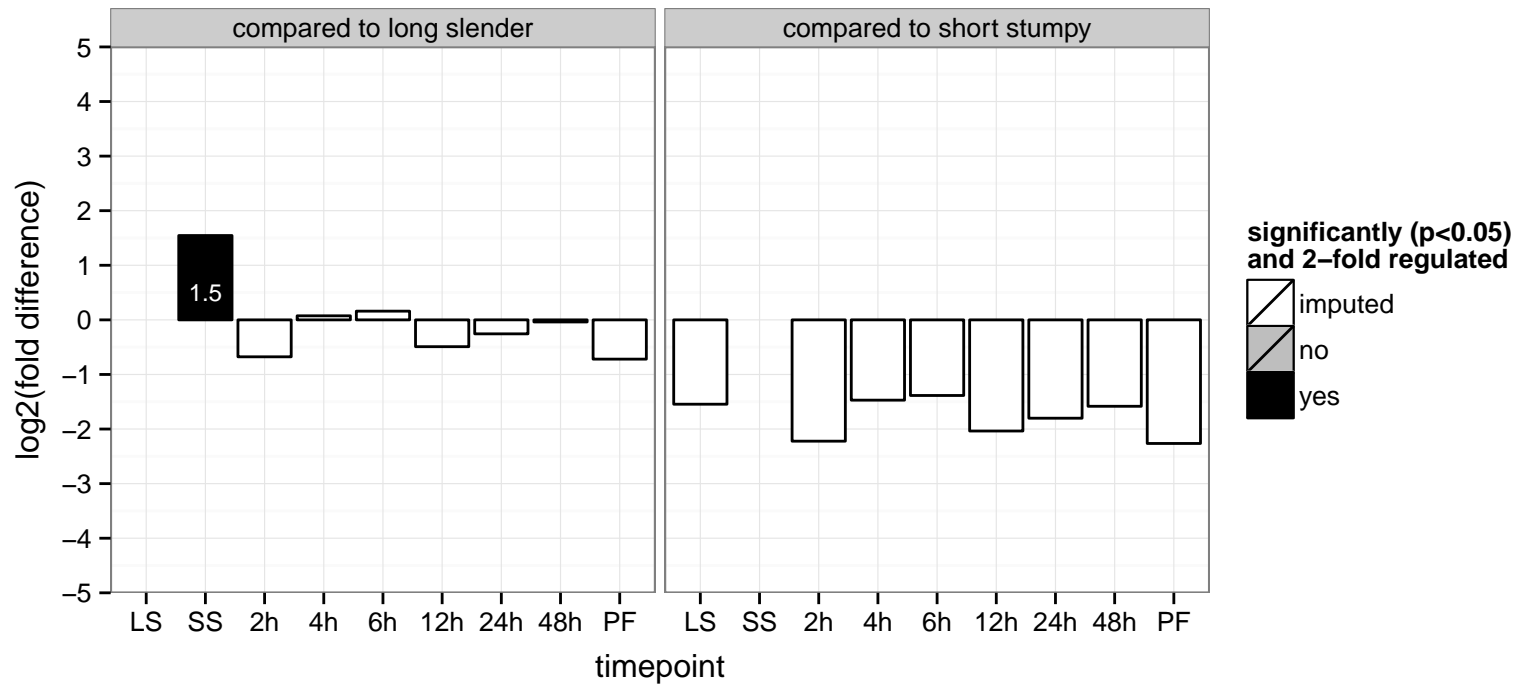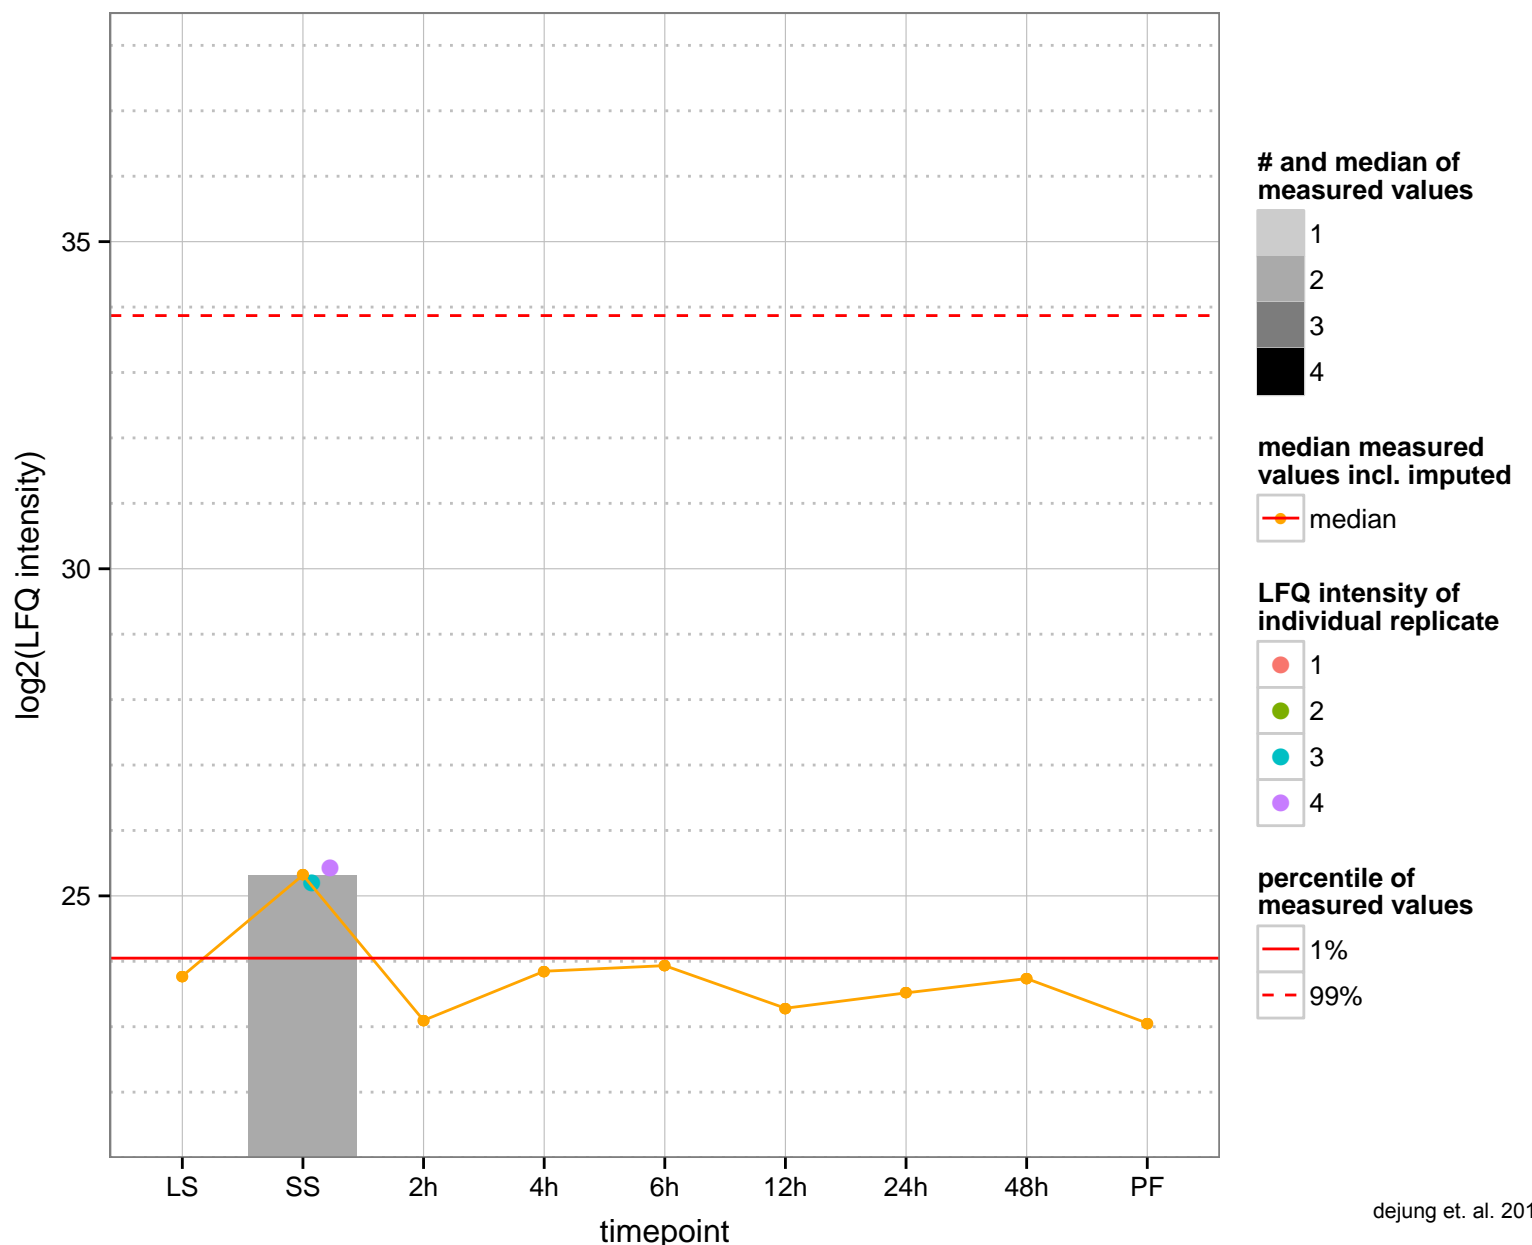



serine threonine-protein phosphatase PP1, putative (PP1-5), putative (PP1-4)

Tb927.4.3640;Tb927.4.3630

AGOF: hydrolase activity, protein serine/threonine phosphatase activity

AGOC: null

AGOP: modulation of development of symbiont involved in interaction with host, protein dephosphorylation, quorum sensing in

PGOF: hydrolase activity

PGOC: null

PGOP: null

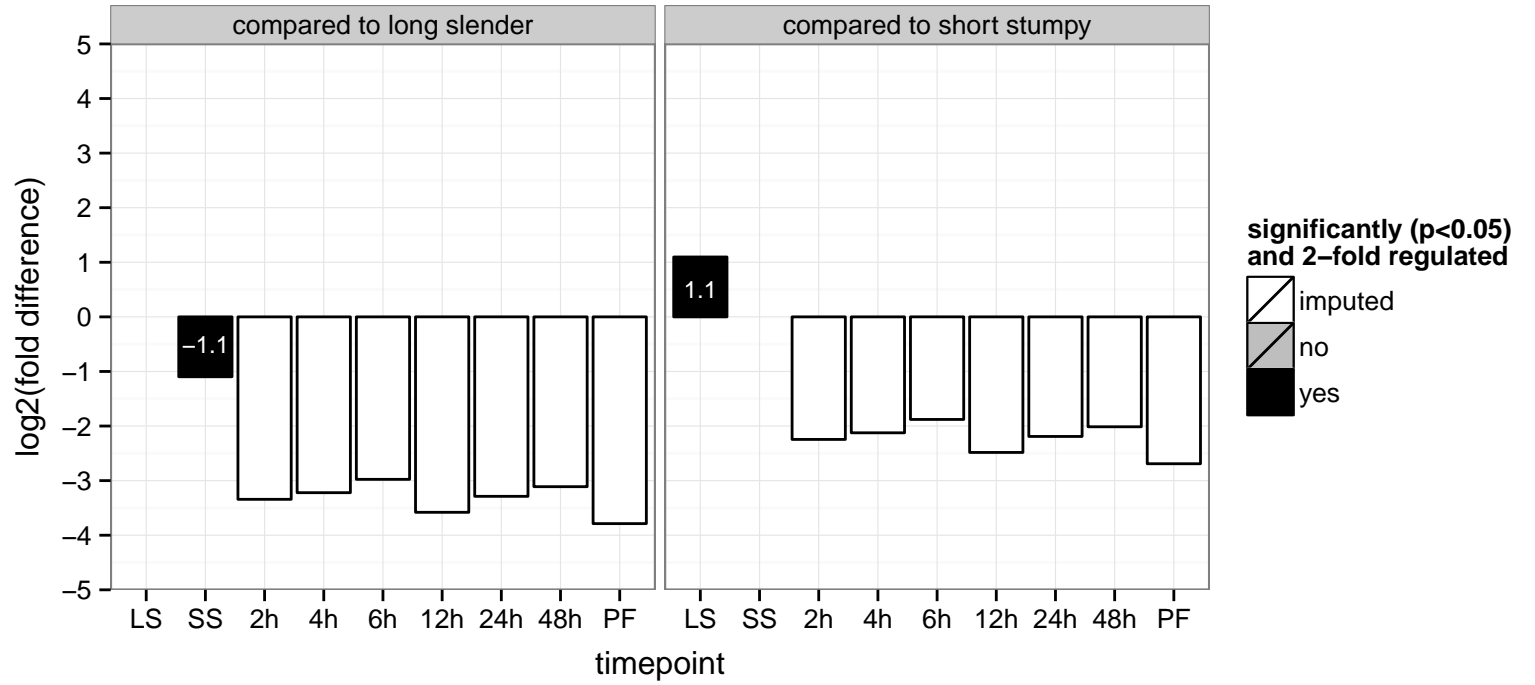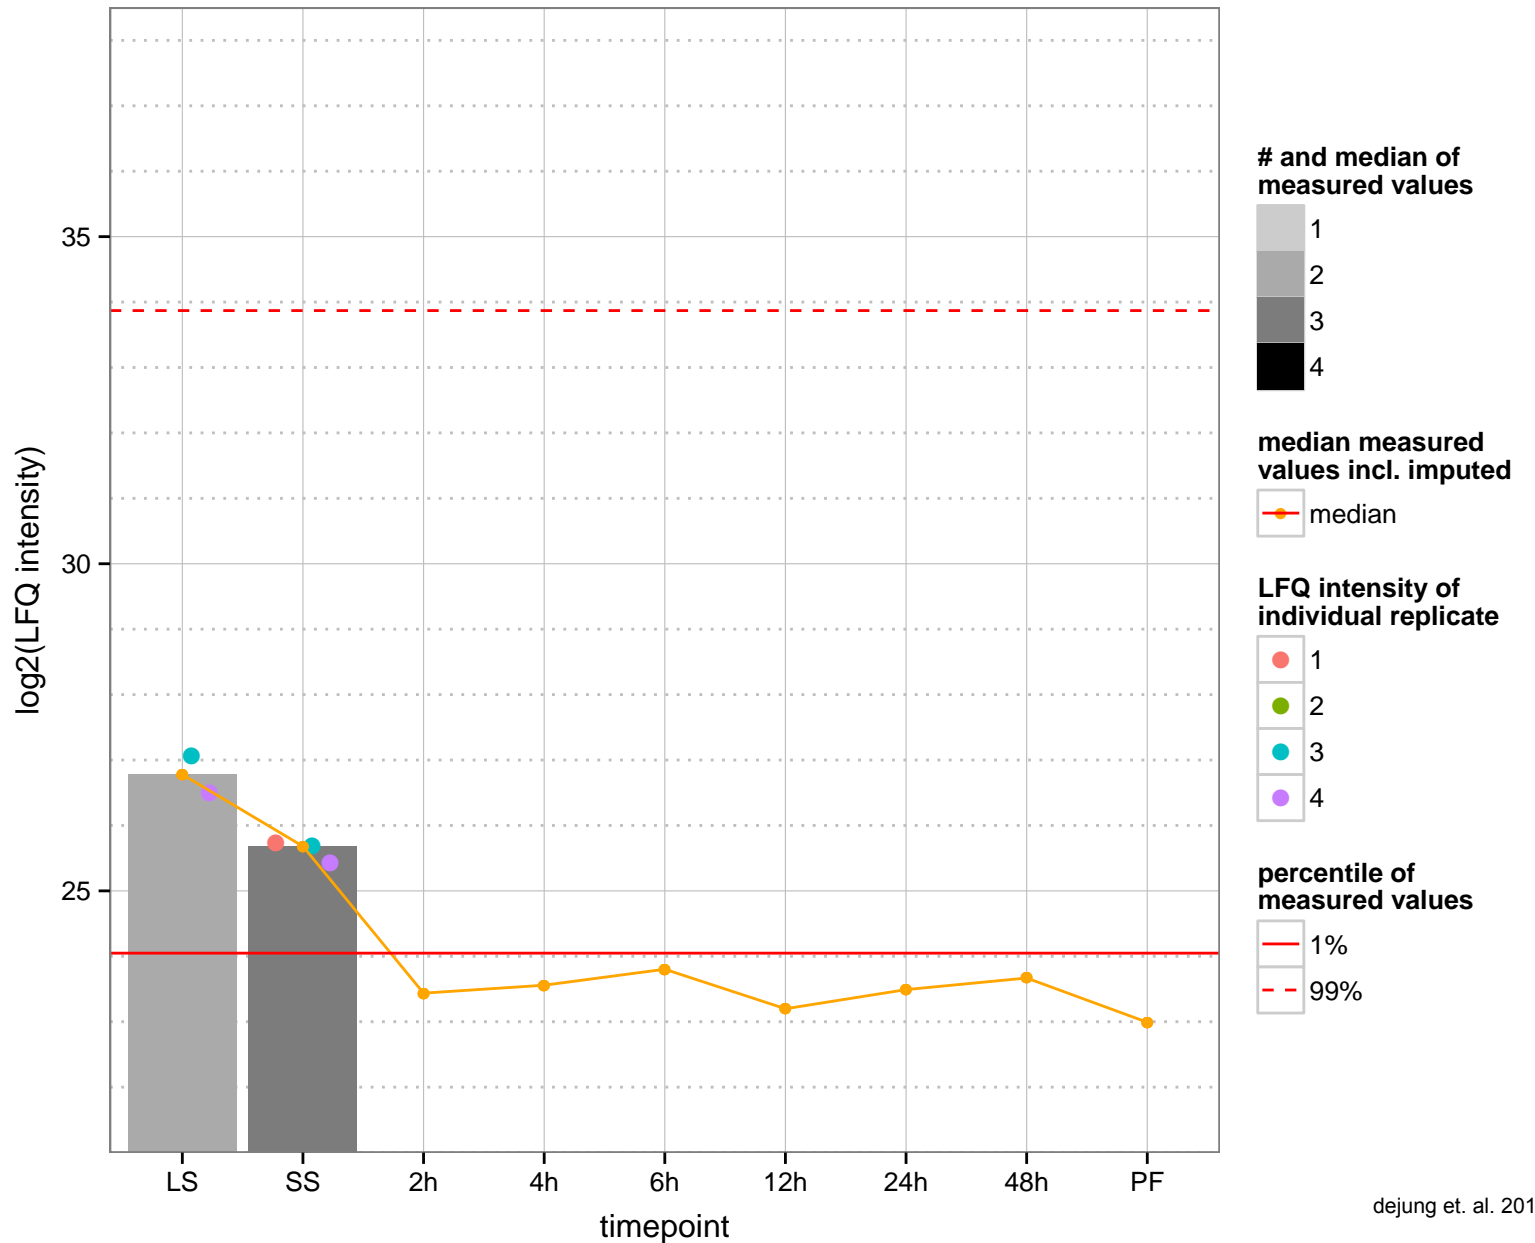

phospholipid-translocating P-type ATPase (flippase), putative

Tb927.6.3550

AGOF: ATP binding, ATPase activity, coupled to transmembrane movement of ions, phosphorylative mechanism, magnesium

AGOC: integral to membrane, membrane

AGOP: ATP biosynthetic process, phospholipid transport

PGOF: ATP binding, ATPase activity, coupled to transmembrane movement of ions, phosphorylative mechanism, hydrolase ac

PGOC: integral to membrane, membrane

PGOP: cation transport, phospholipid transport

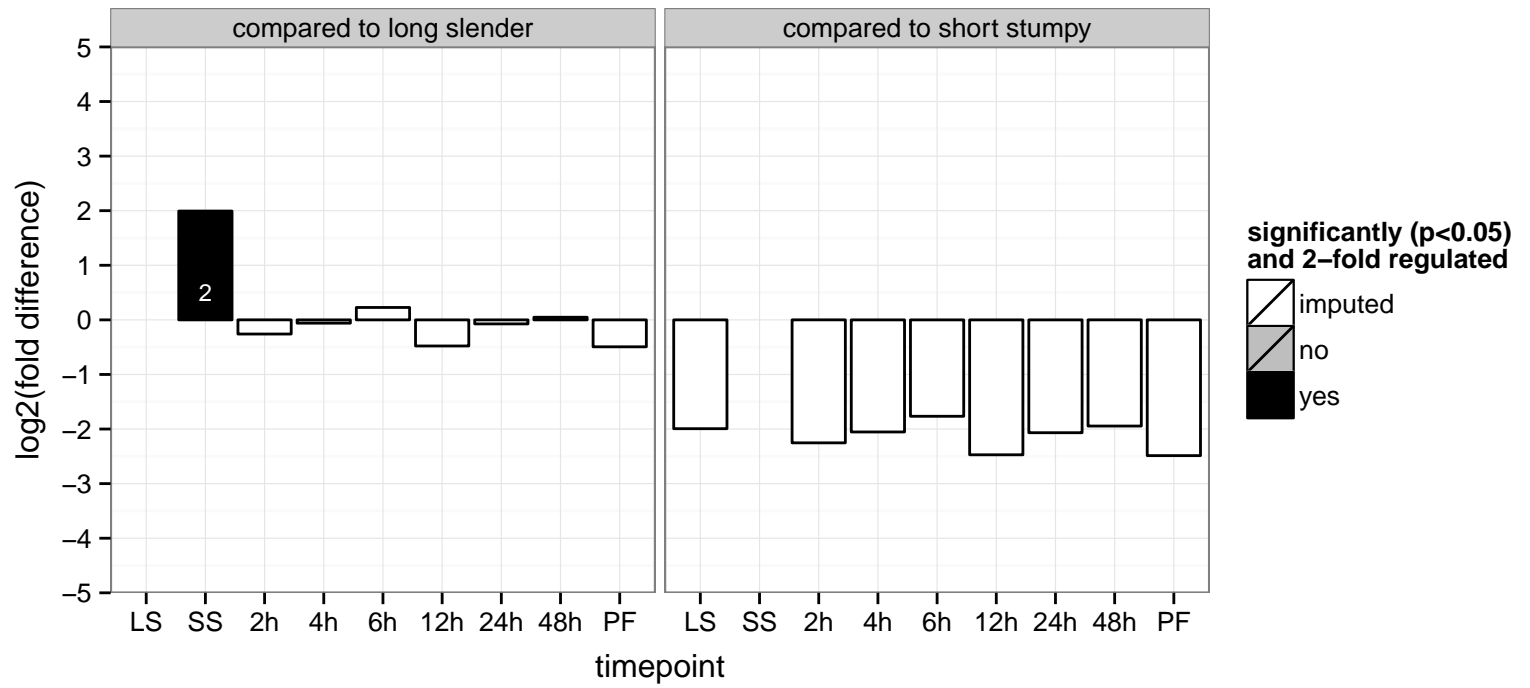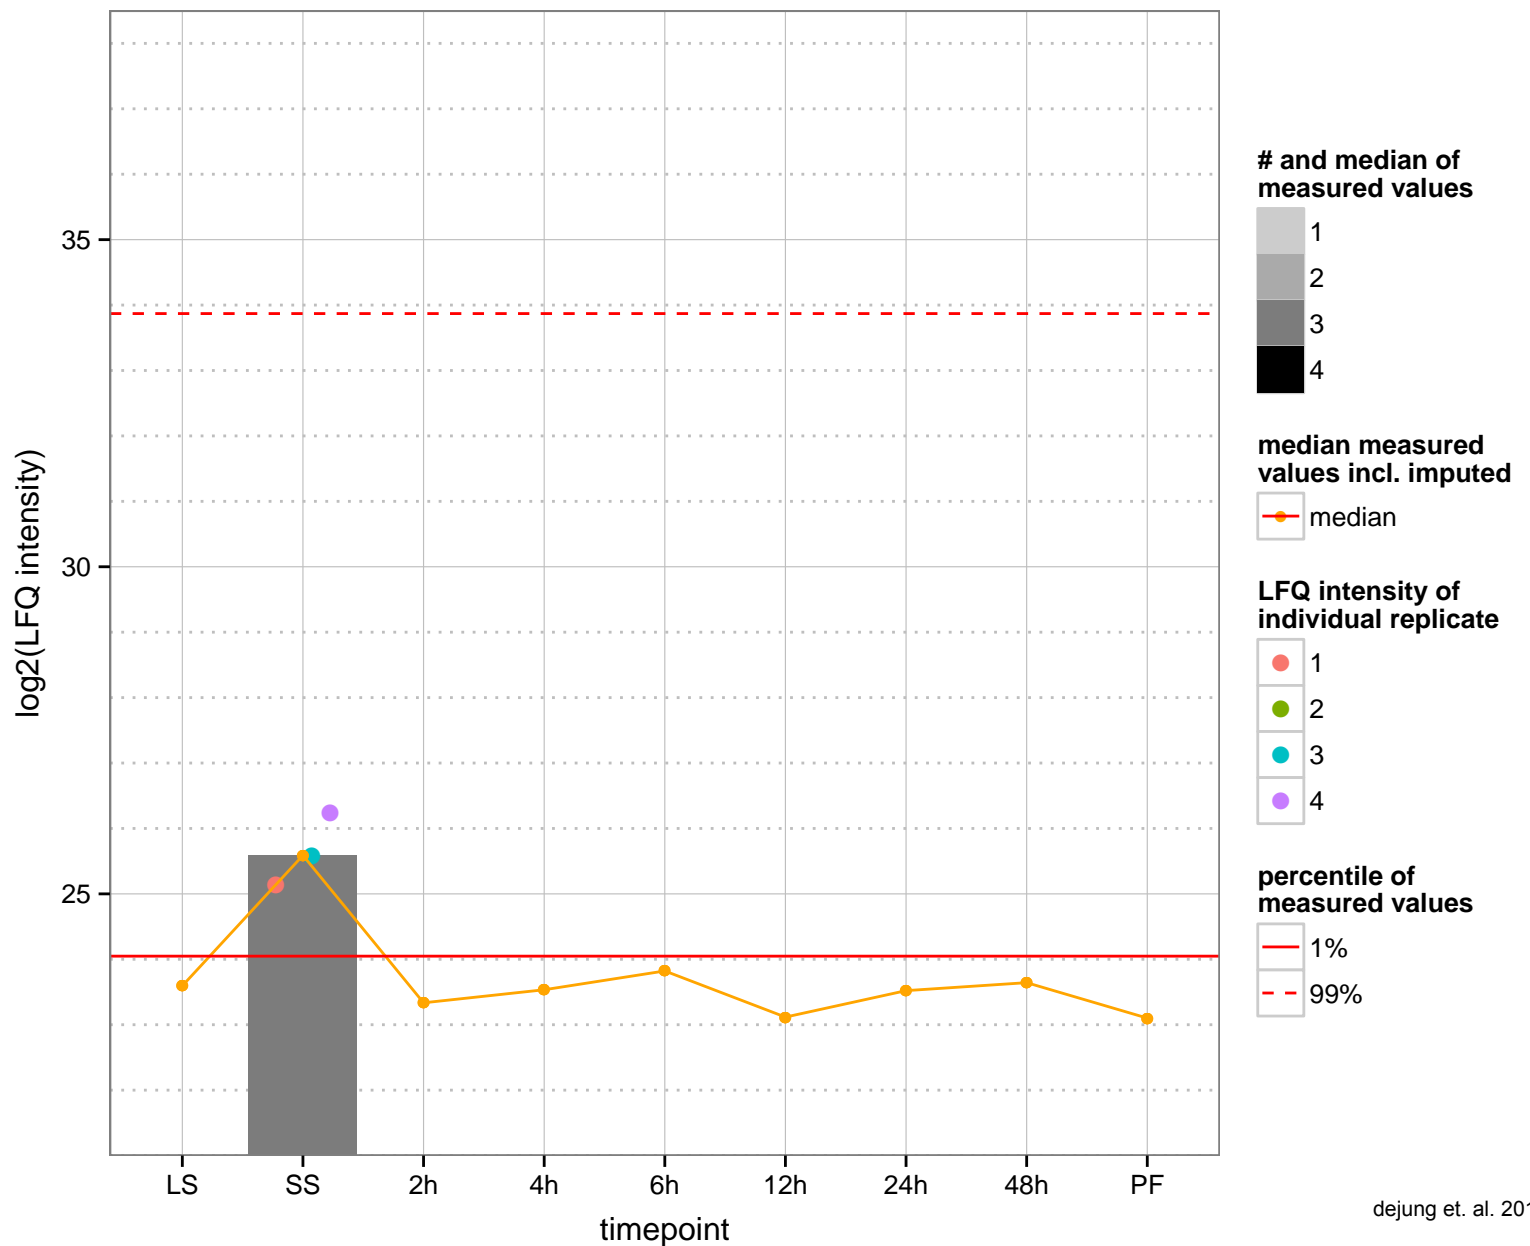

hypothetical protein, conserved  
 Tb927.7.6570  
 AGOF: null  
 AGOC: null  
 AGOP: null  
 PGOF: null  
 PGO: null  
 PGOP: null

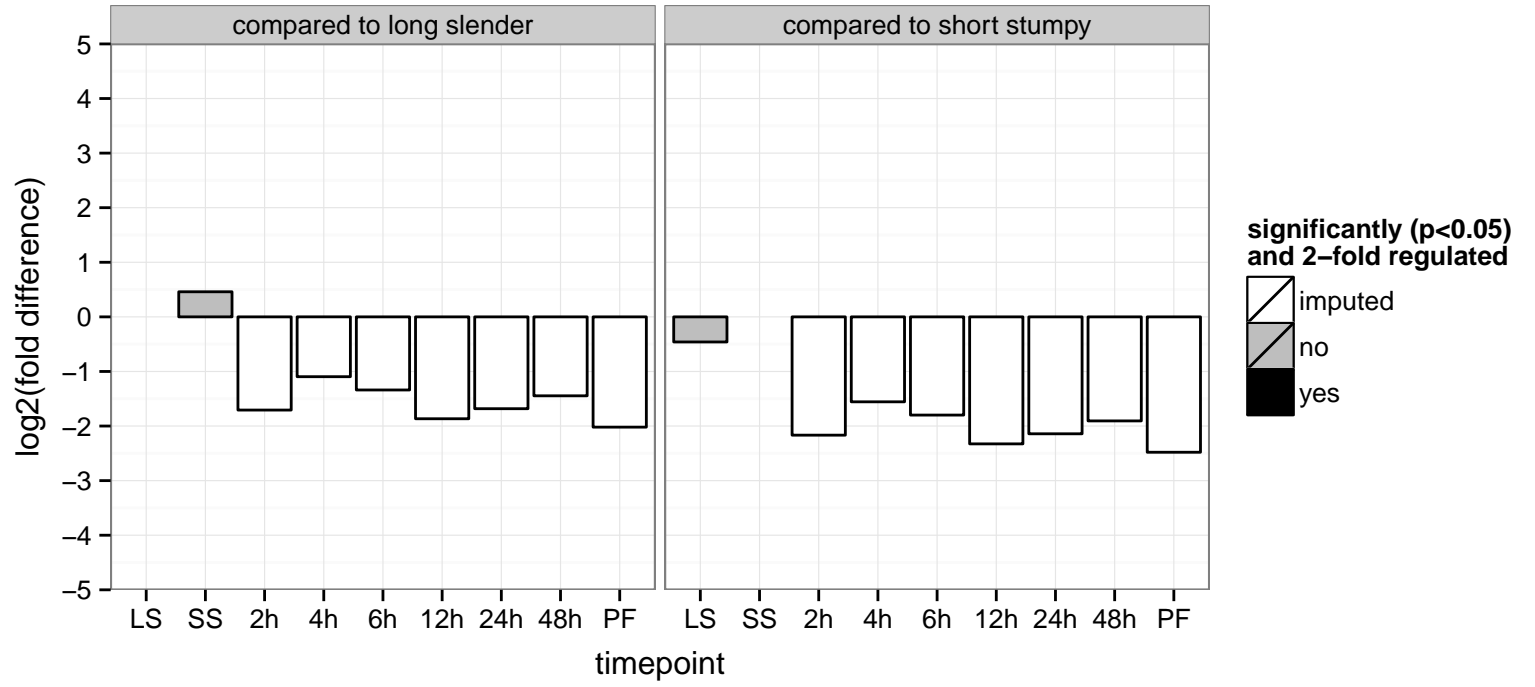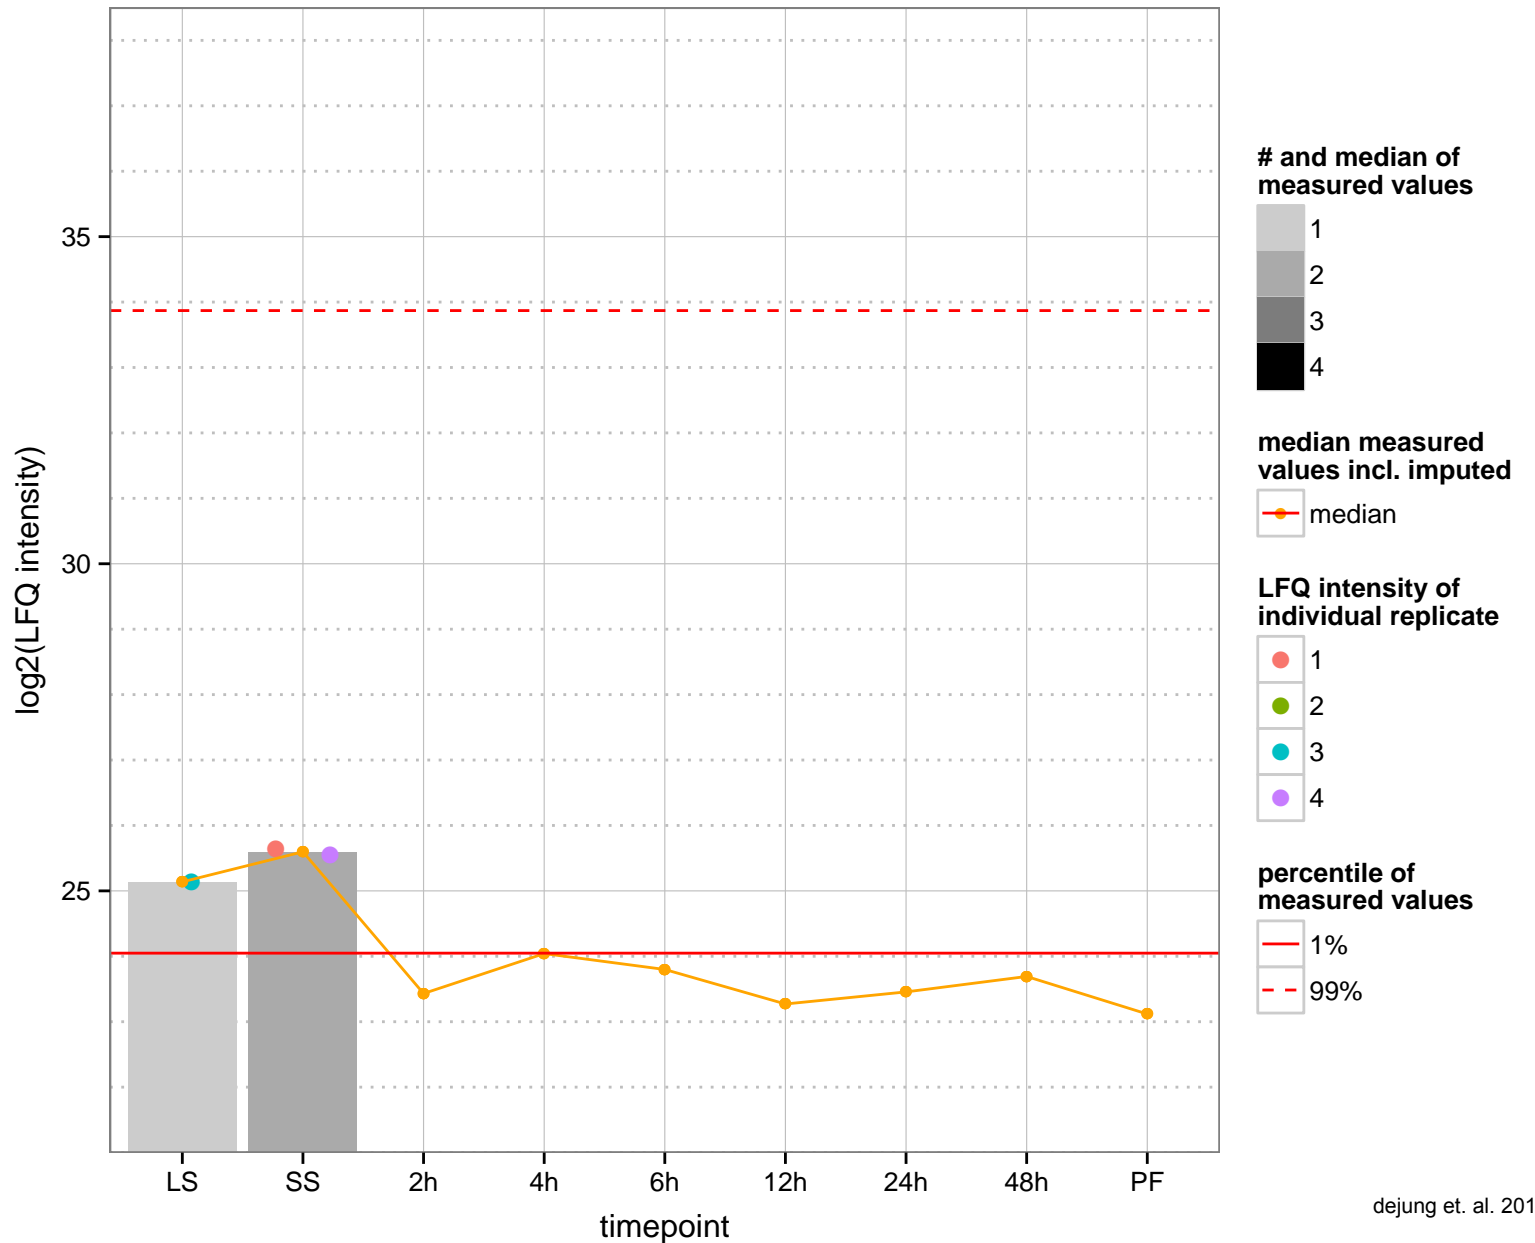

hypothetical protein, conserved  
 Tb927.8.2580  
 AGOF: null  
 AGOC: cytoplasm  
 AGOP: exocytosis, vesicle docking  
 PGO: null  
 PGO: cytoplasm  
 PGO: exocytosis, vesicle docking

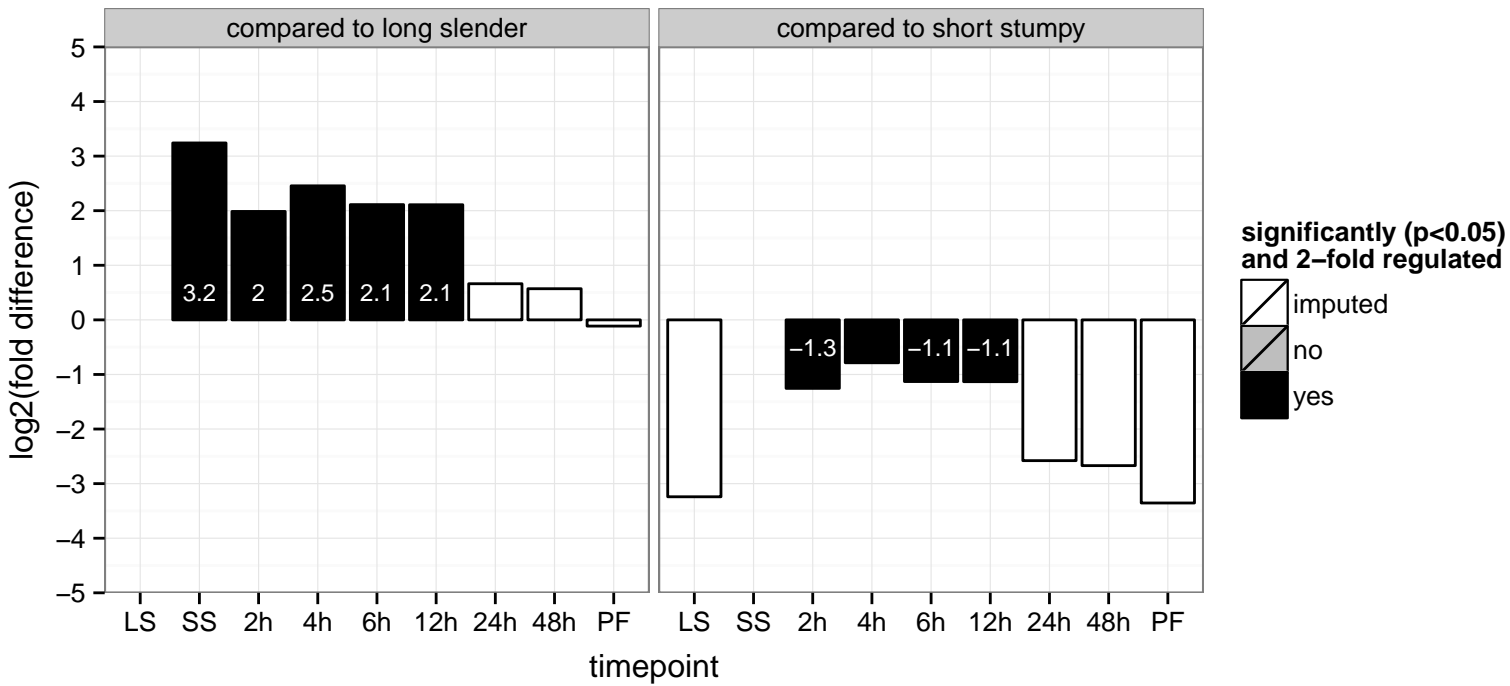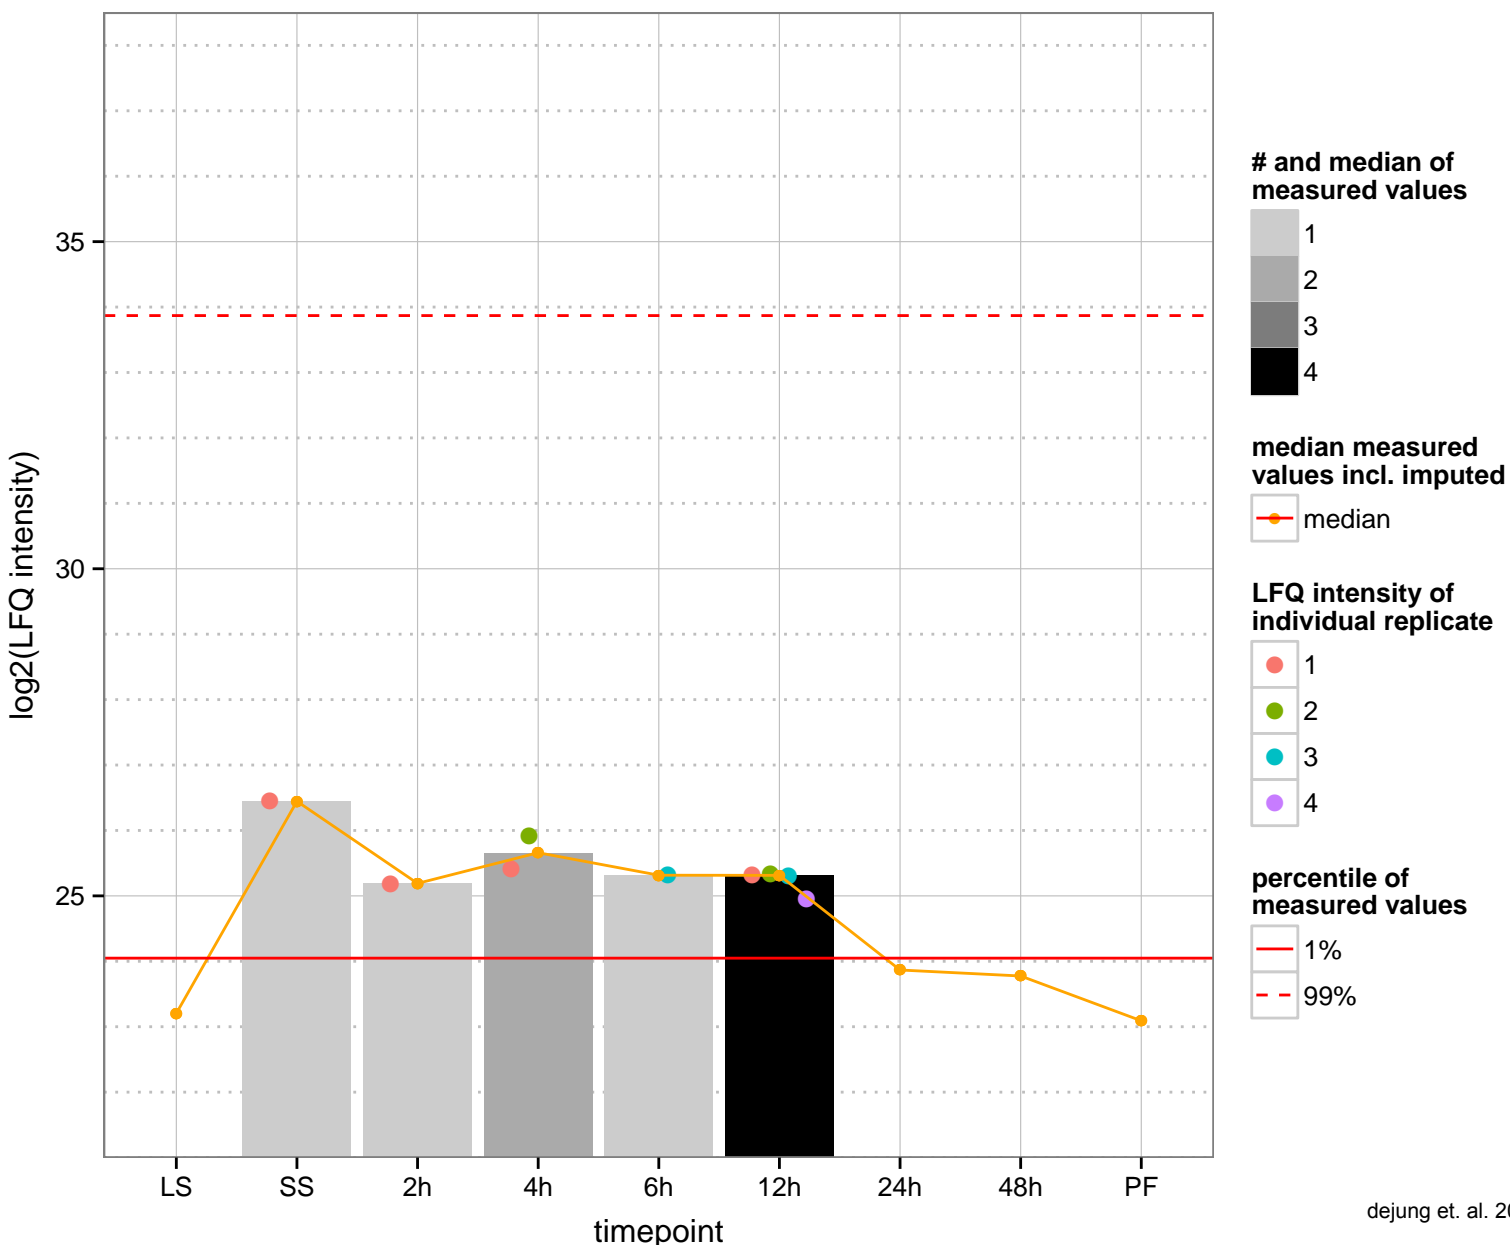

hypothetical protein, conserved  
 Tb927.9.5620  
 AGOF: null  
 AGOC: null  
 AGOP: null  
 PGOF: protein binding  
 PGO: null  
 PGOP: null

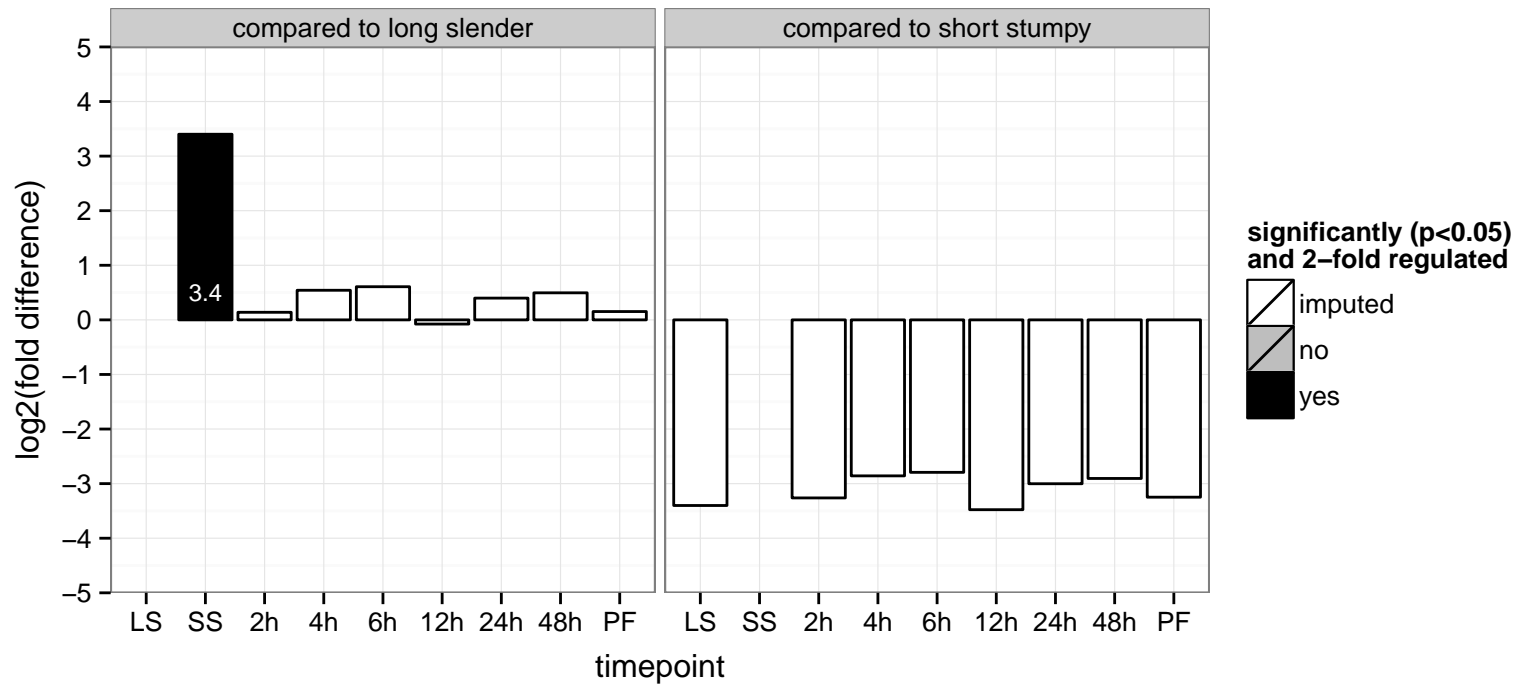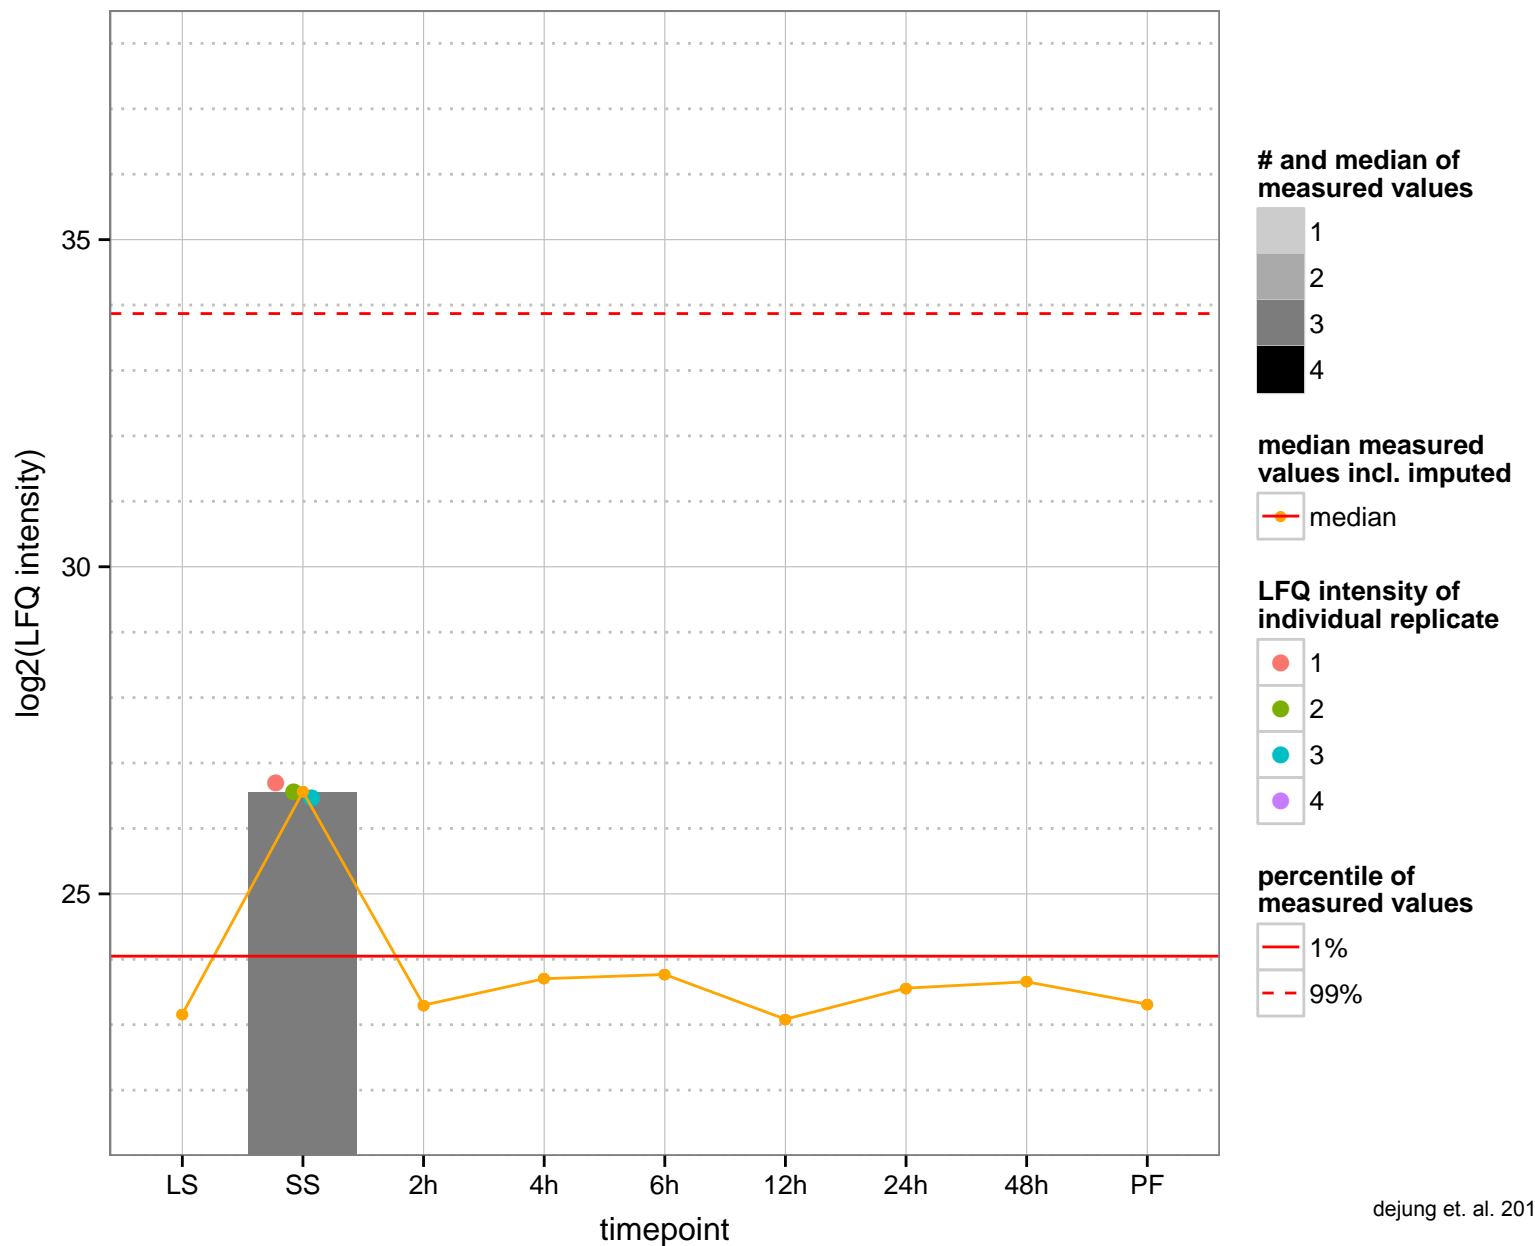

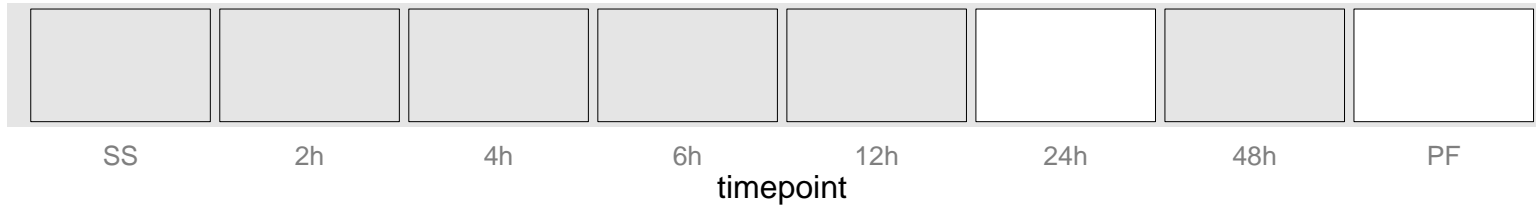

**regulated**  **not regulated**  **significant down**  **significant up**

hypothetical protein, conserved  
 Tb927.10.11600  
 AGOF: null  
 AGOC: null  
 AGOP: null  
 PGO: null  
 PGOC: null  
 PGOP: null

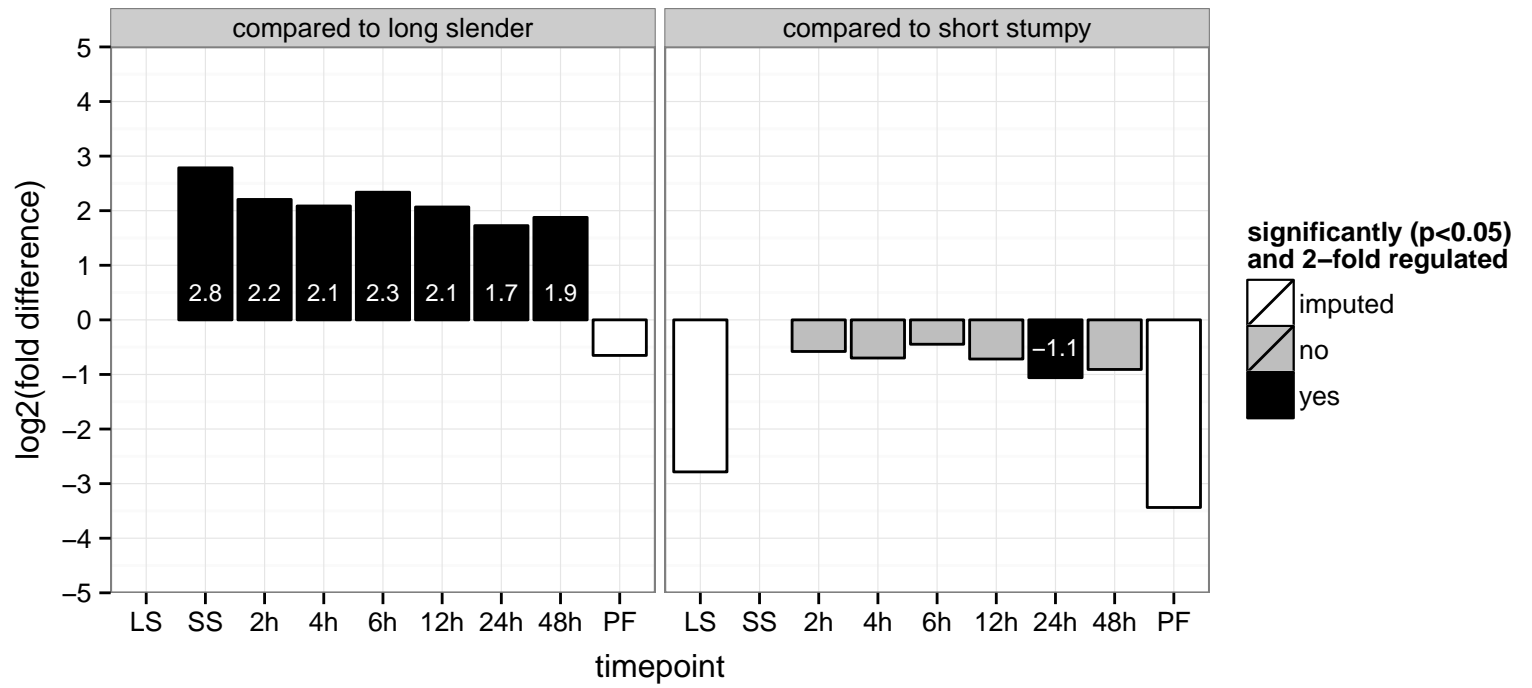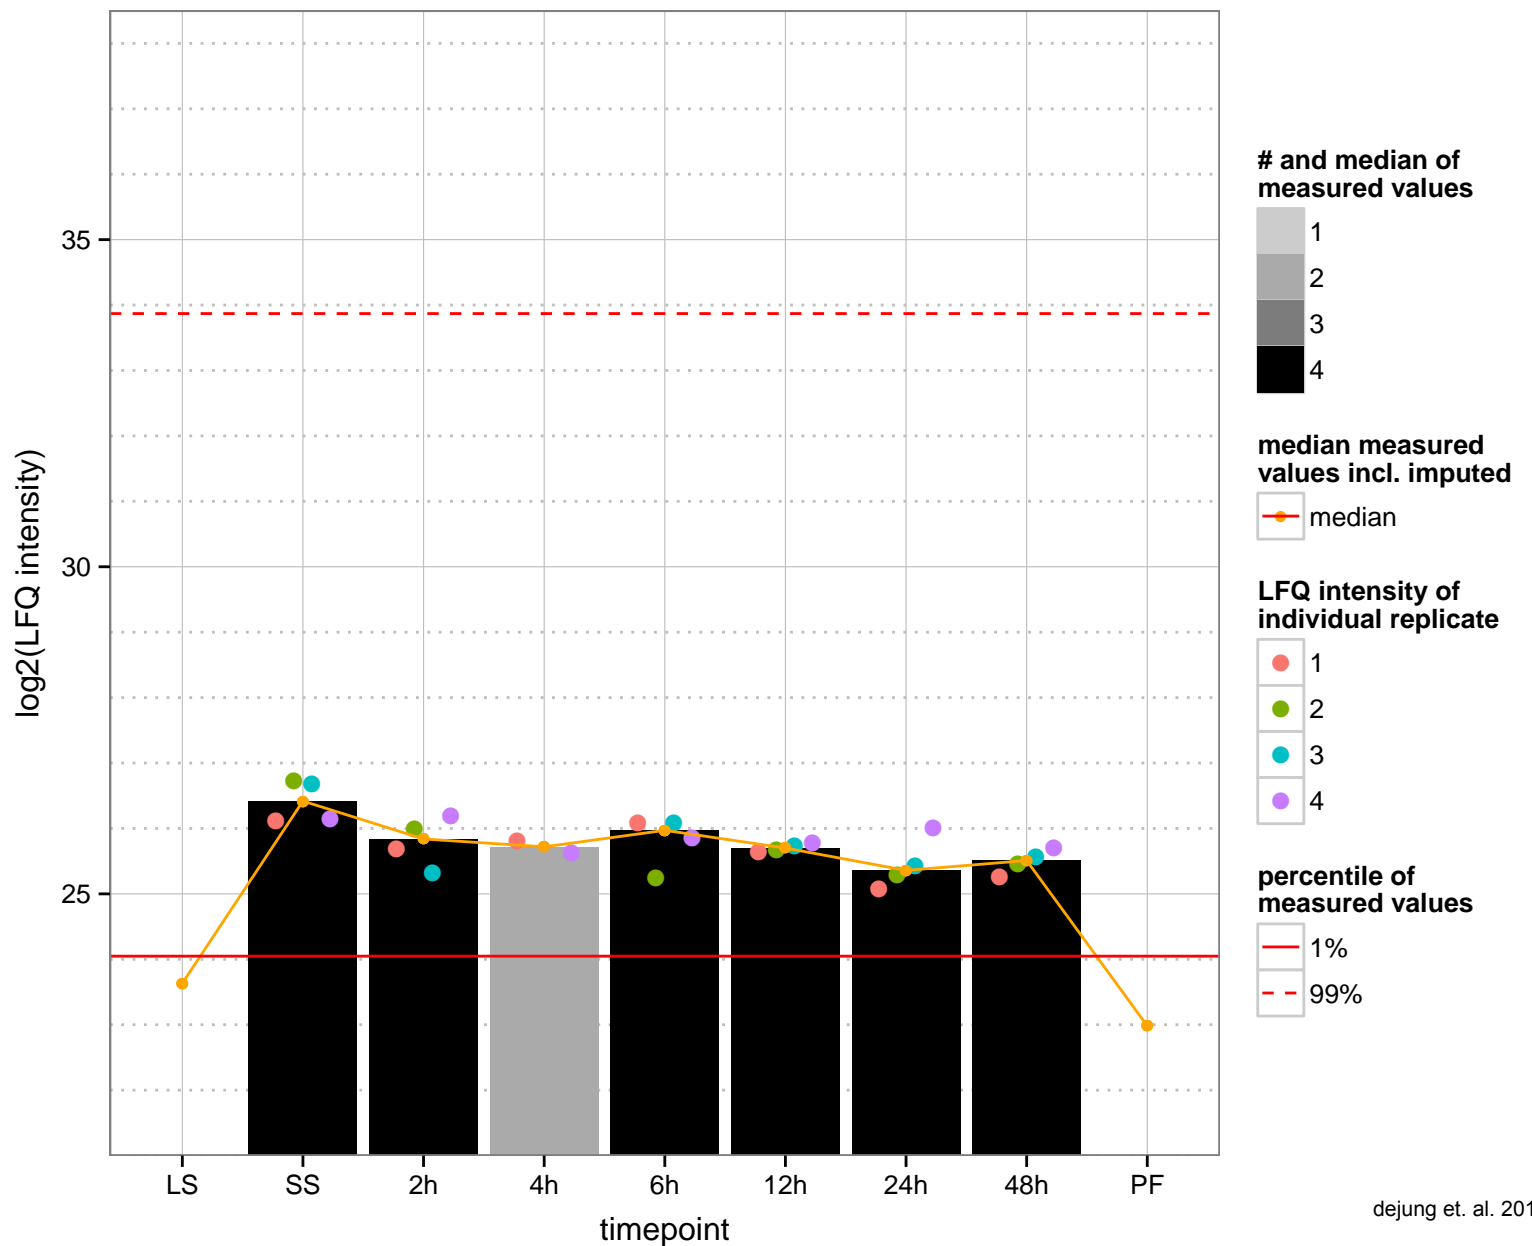

procyclin-associated gene 2 (PAG2) protein, putative  
 Tb927.10.5690  
 AGOF: null  
 AGOC: null  
 AGOP: evasion or tolerance of host immune response  
 PGOF: null  
 PGOE: null  
 PGOP: evasion or tolerance of host immune response

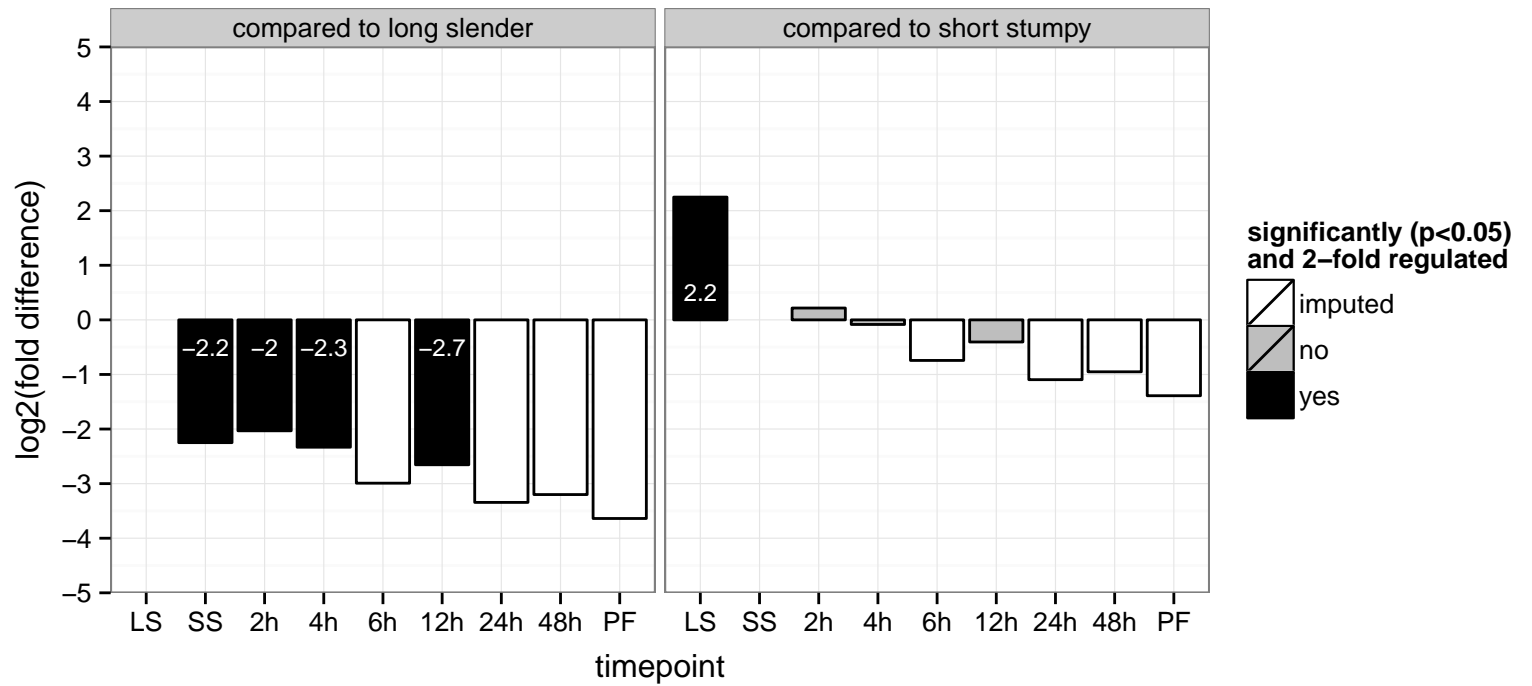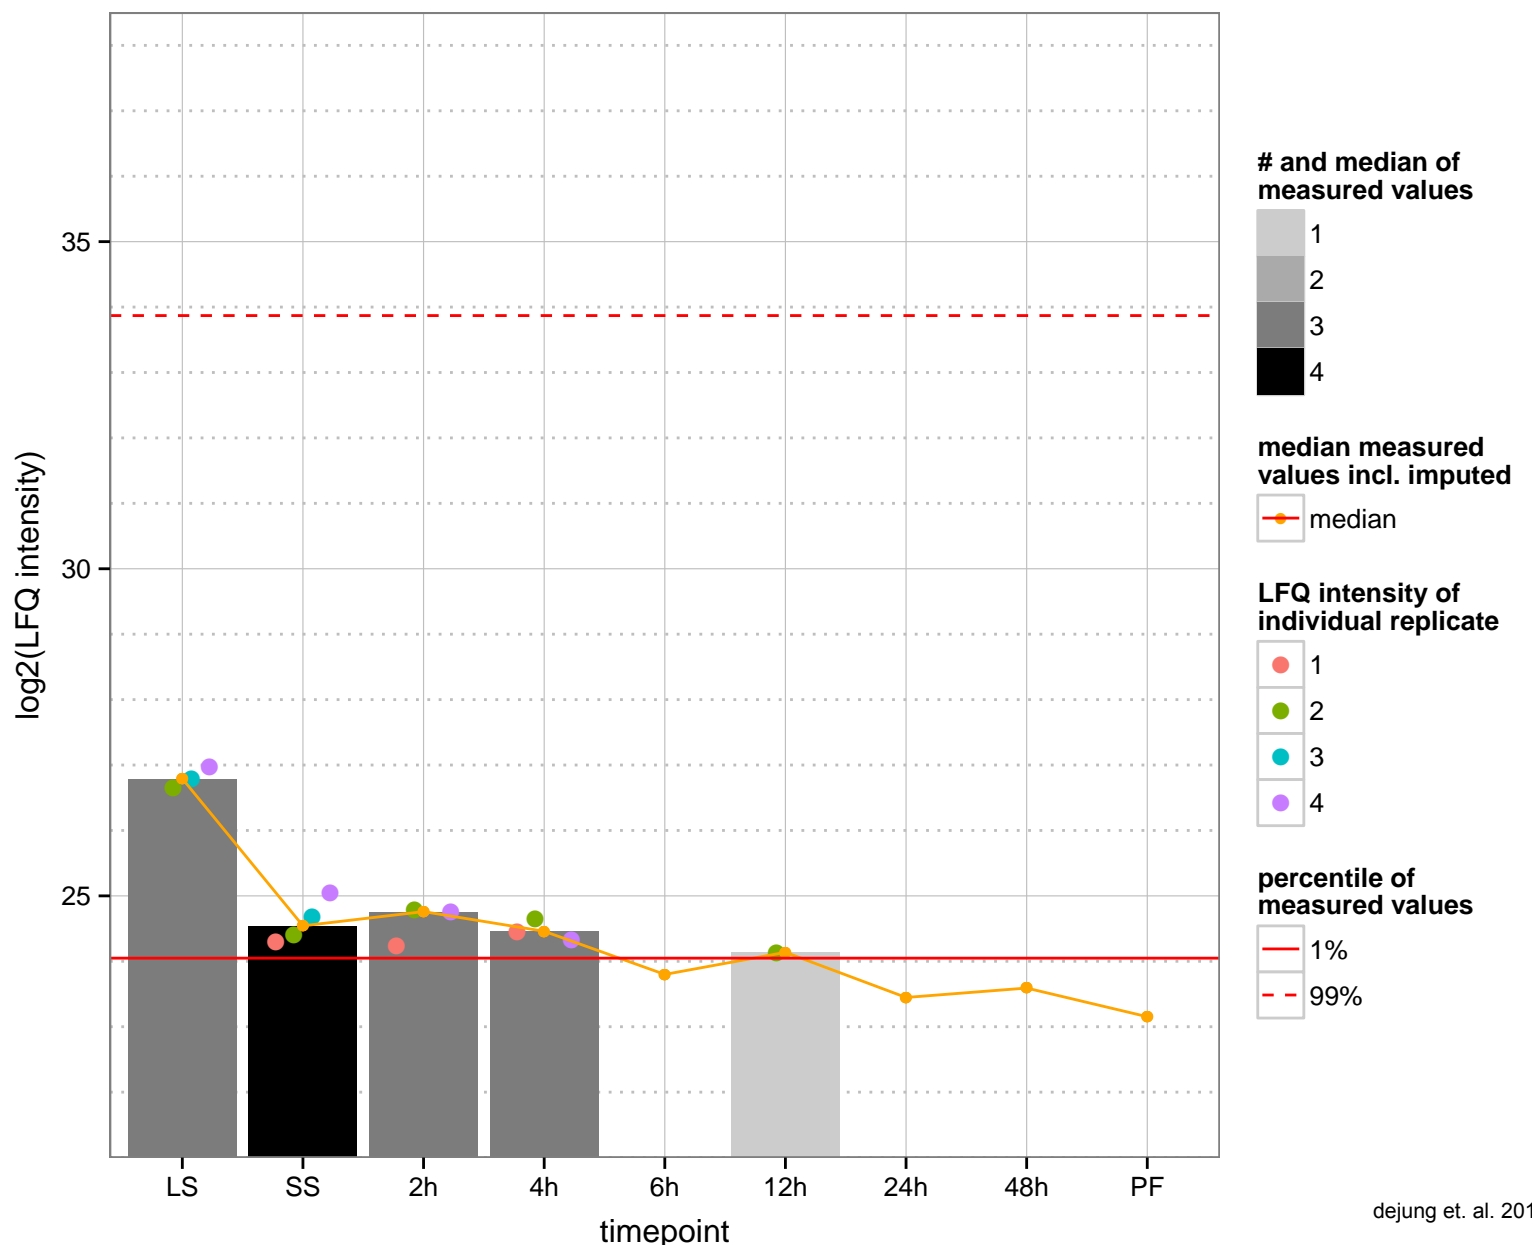



cAMP response protein, putative (CARP2a)  
 Tb927.11.12860.2;Tb927.11.12860.1  
 AGOF: null  
 AGOC: null  
 AGOP: response to drug  
 PGO: null  
 PGOC: null  
 PGOP: null

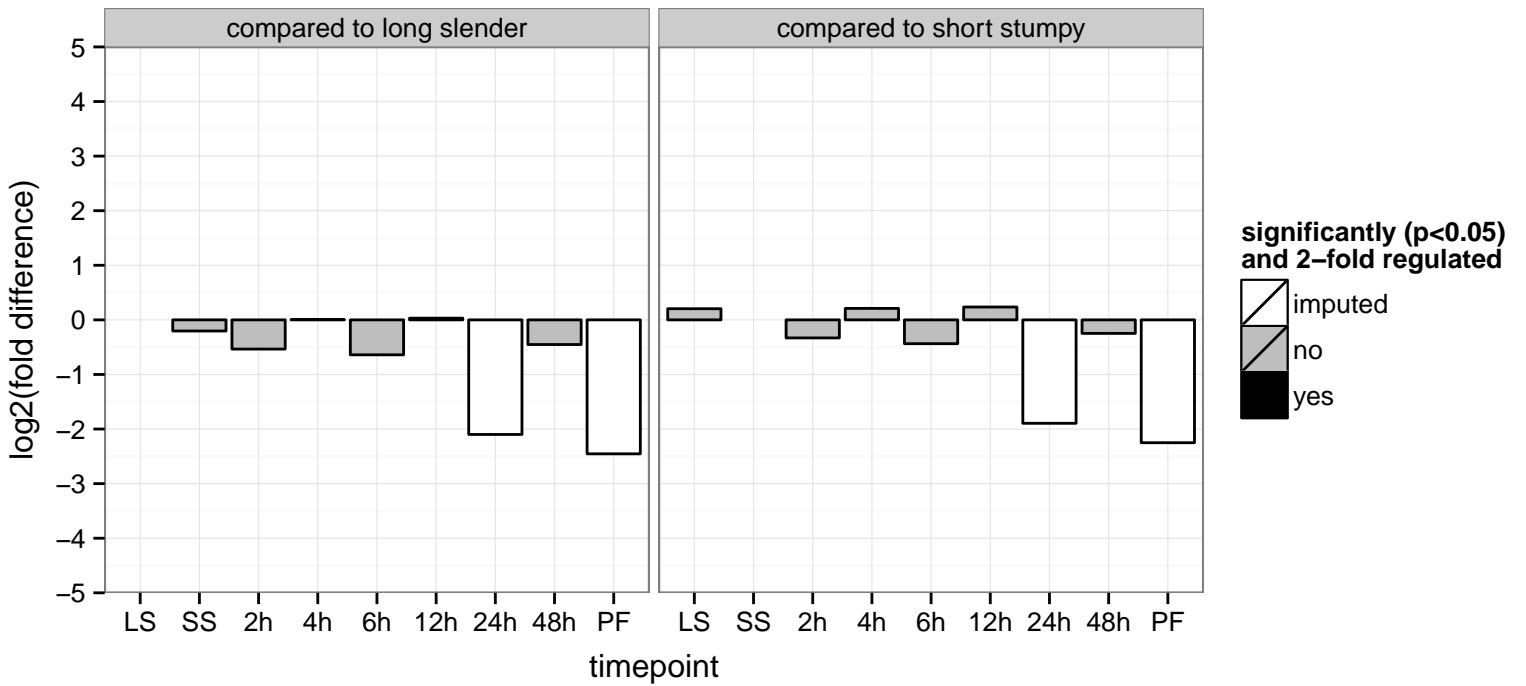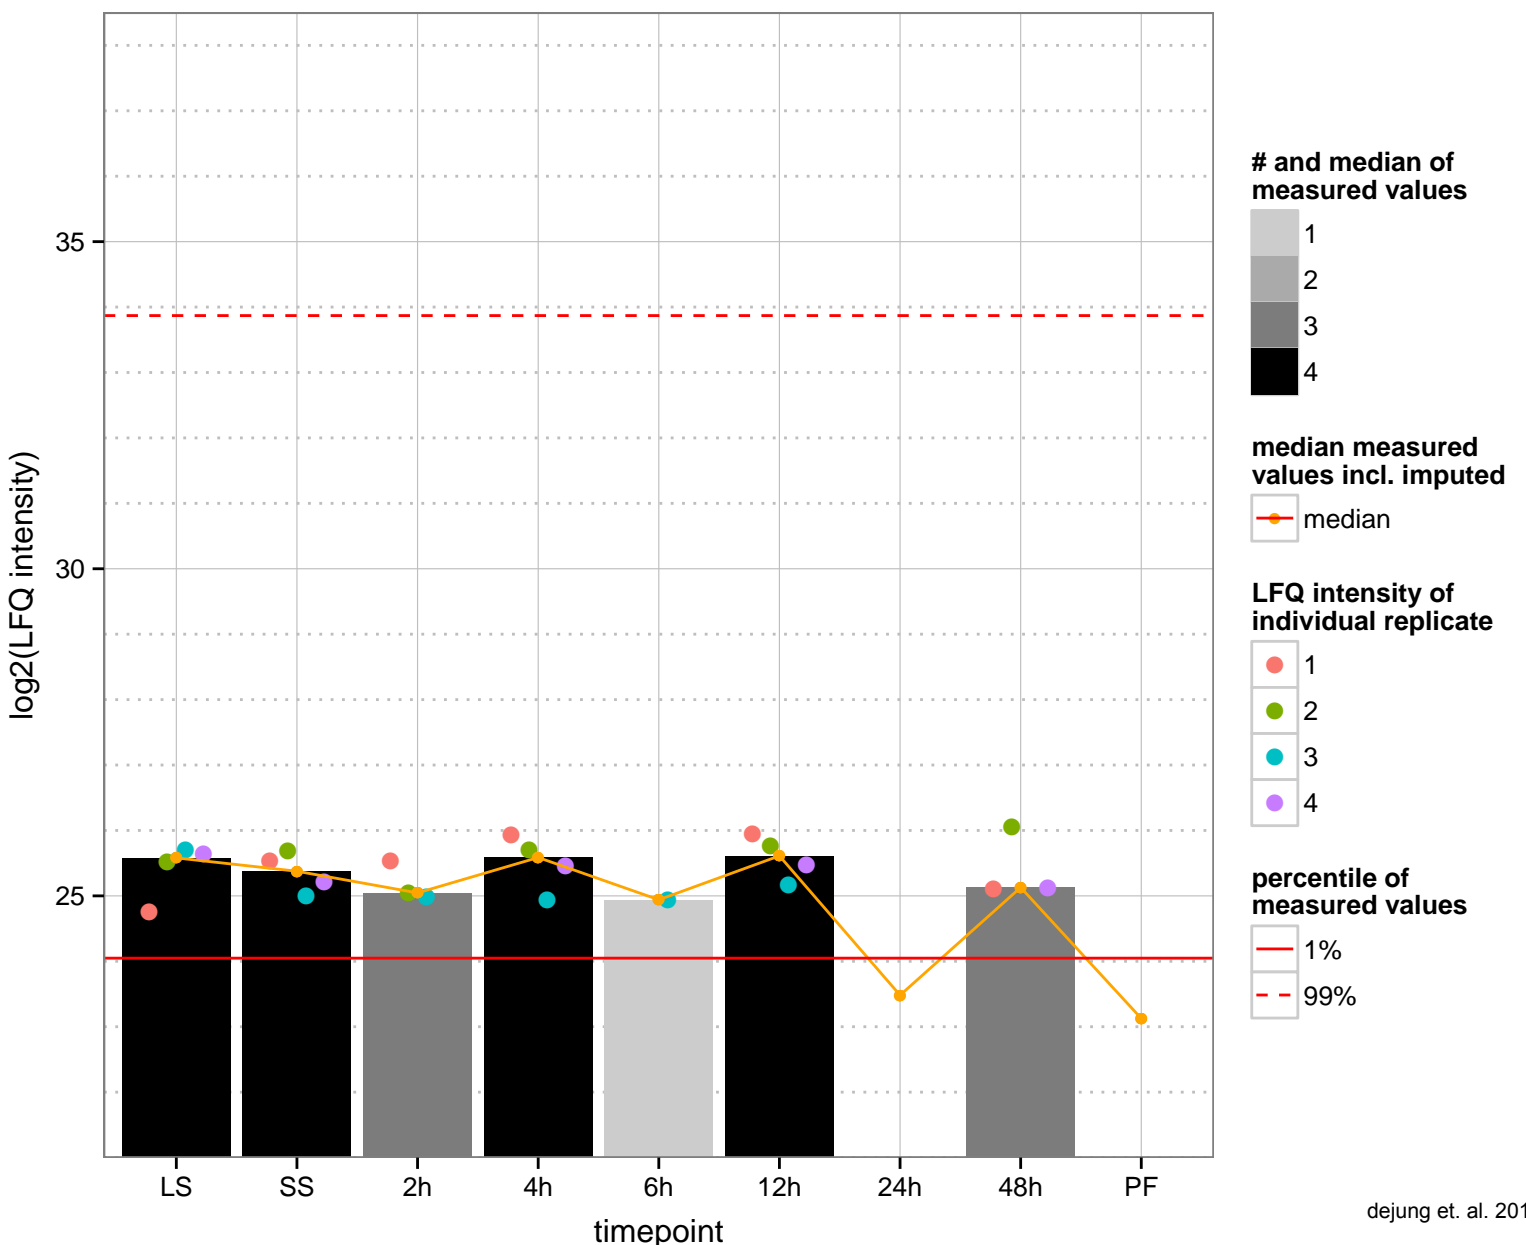

hypothetical protein, conserved  
 Tb927.2.1700  
 AGOF: null  
 AGOC: null  
 AGOP: null  
 PGO: protein binding  
 PGOC: null  
 PGOP: null

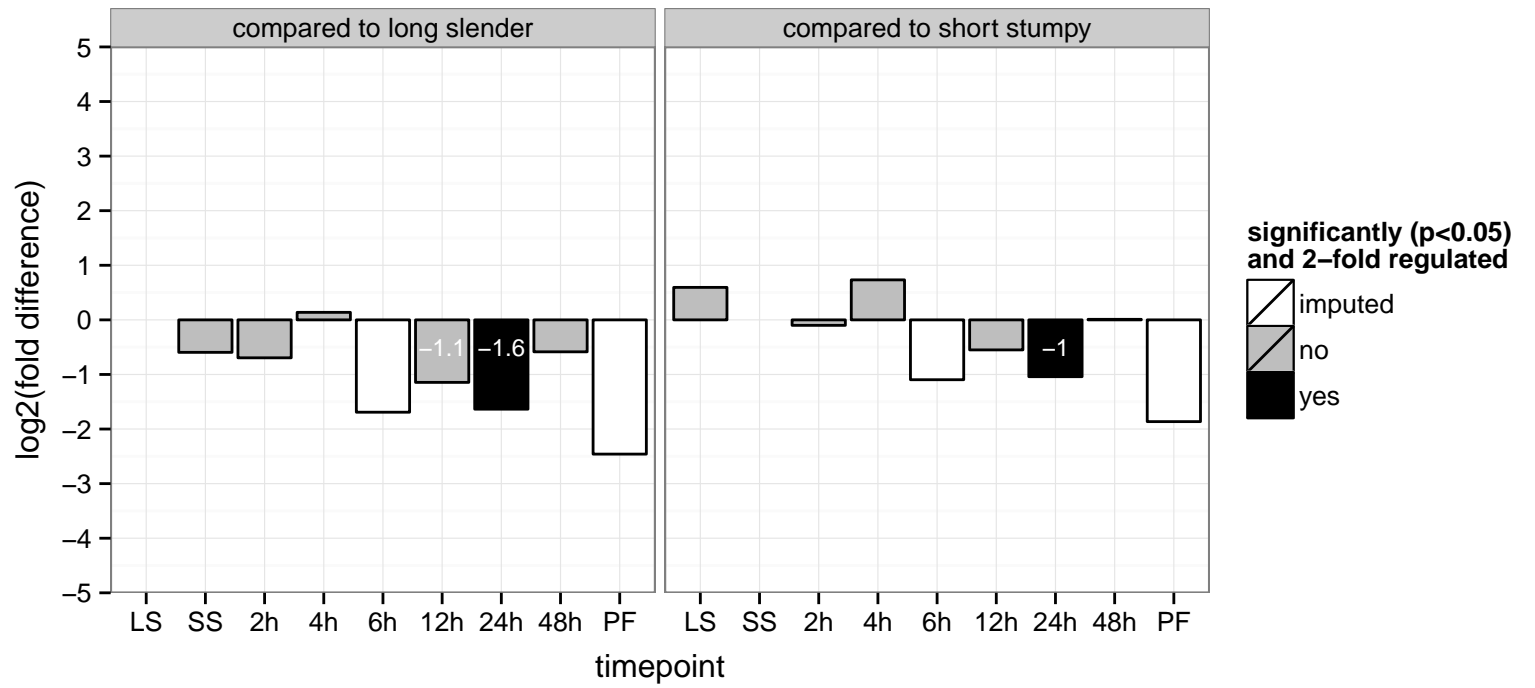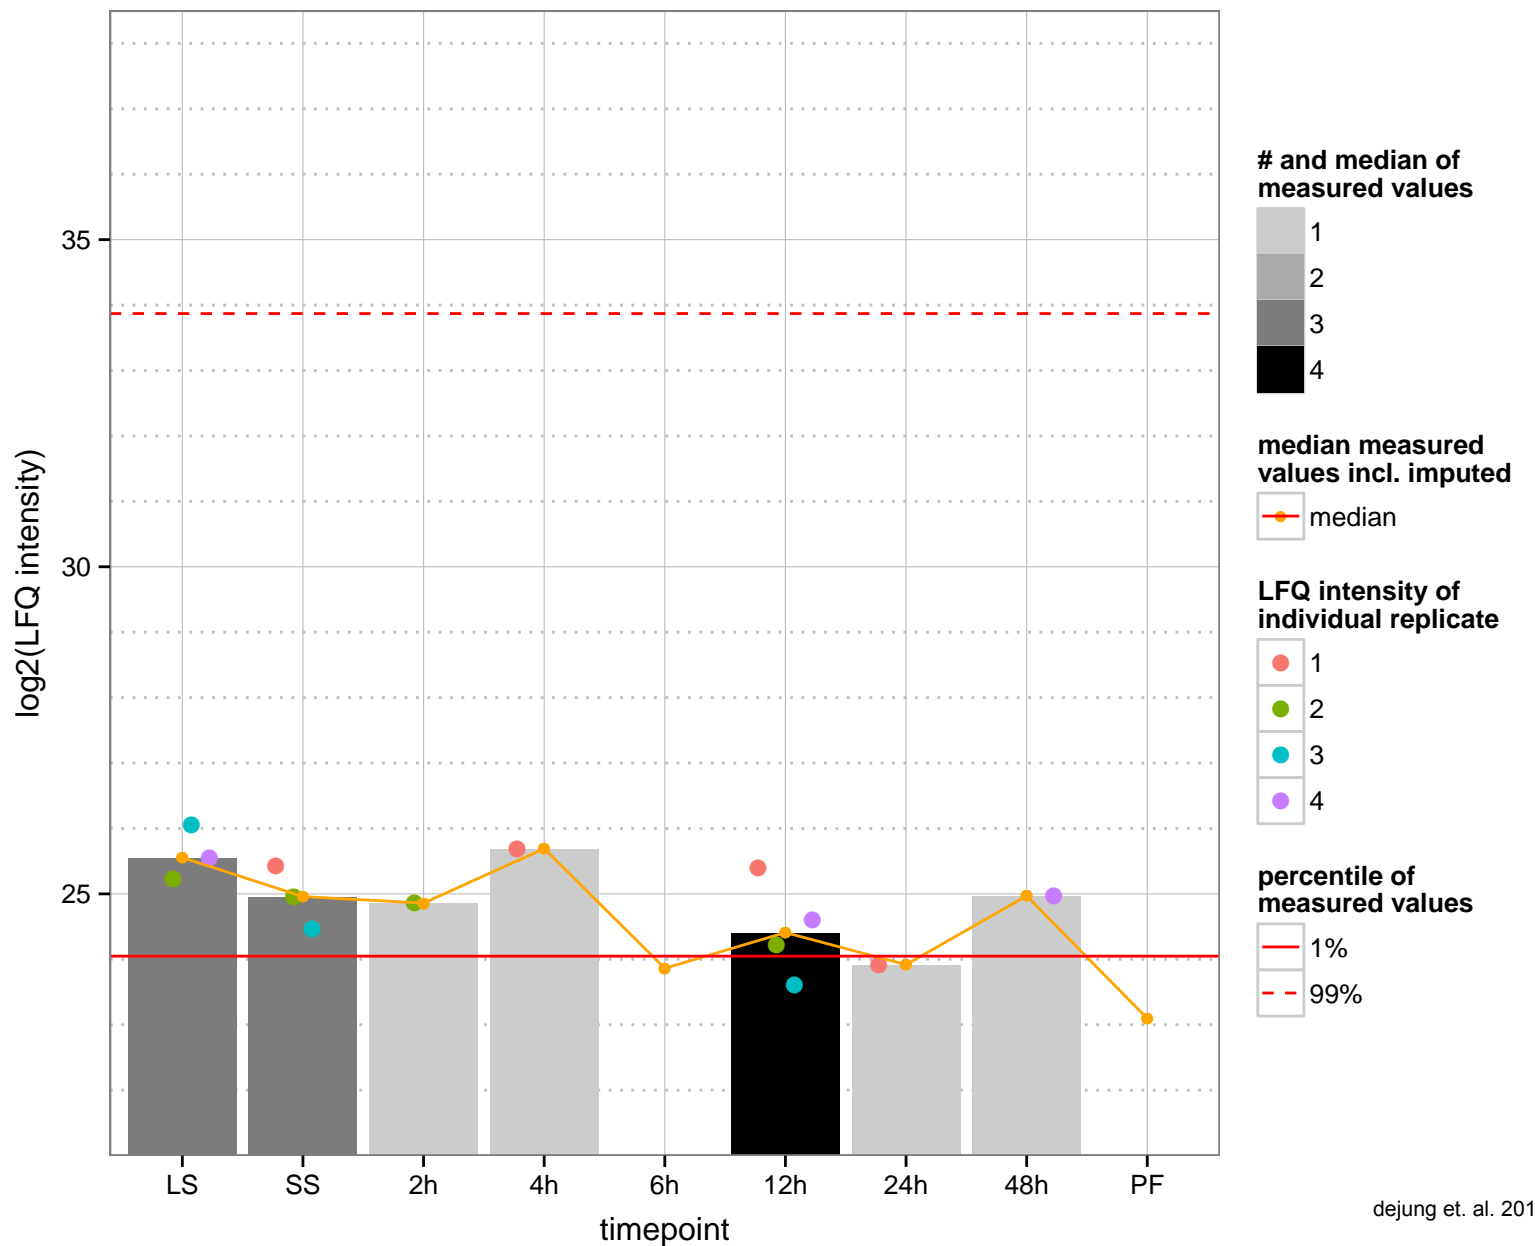

hypothetical protein, conserved  
 Tb927.2.1850  
 AGOF: null  
 AGOC: null  
 AGOP: null  
 PGO: protein binding  
 PGOC: null  
 PGOP: null

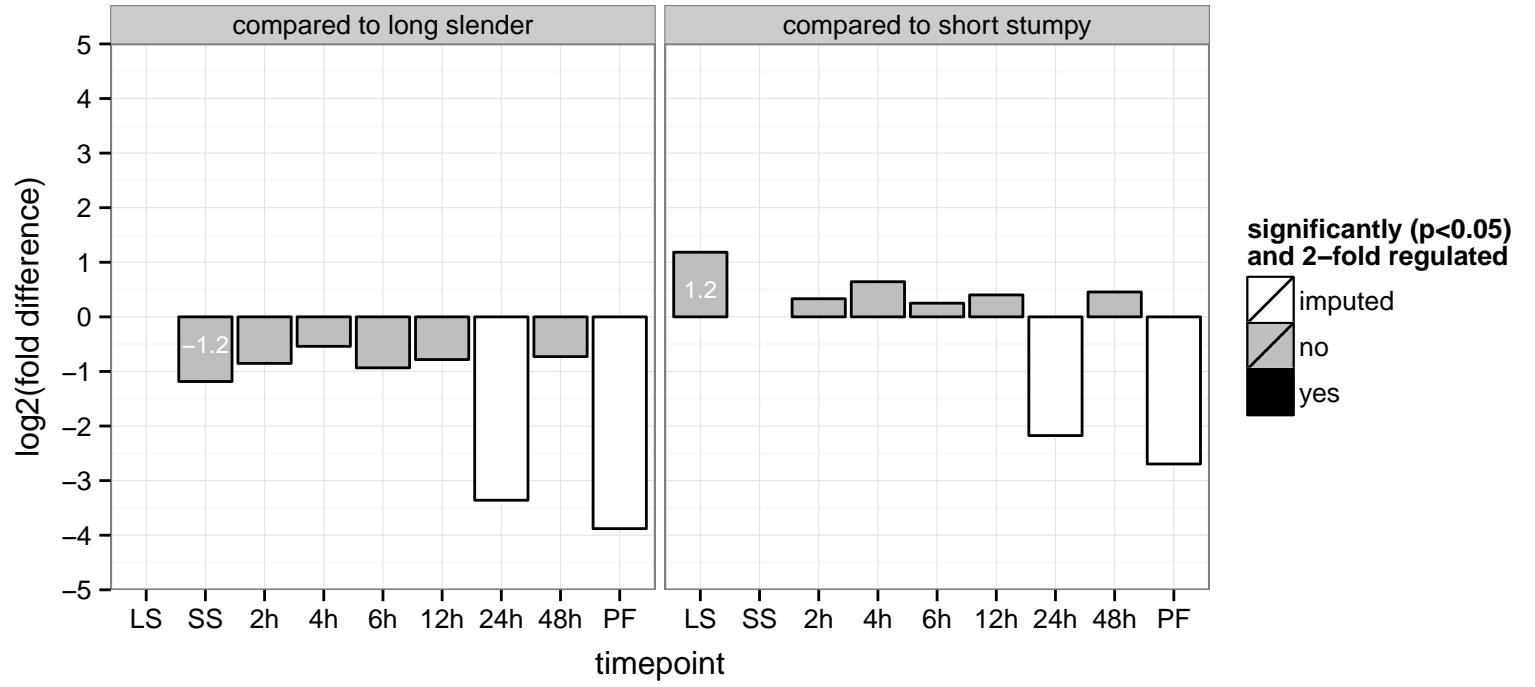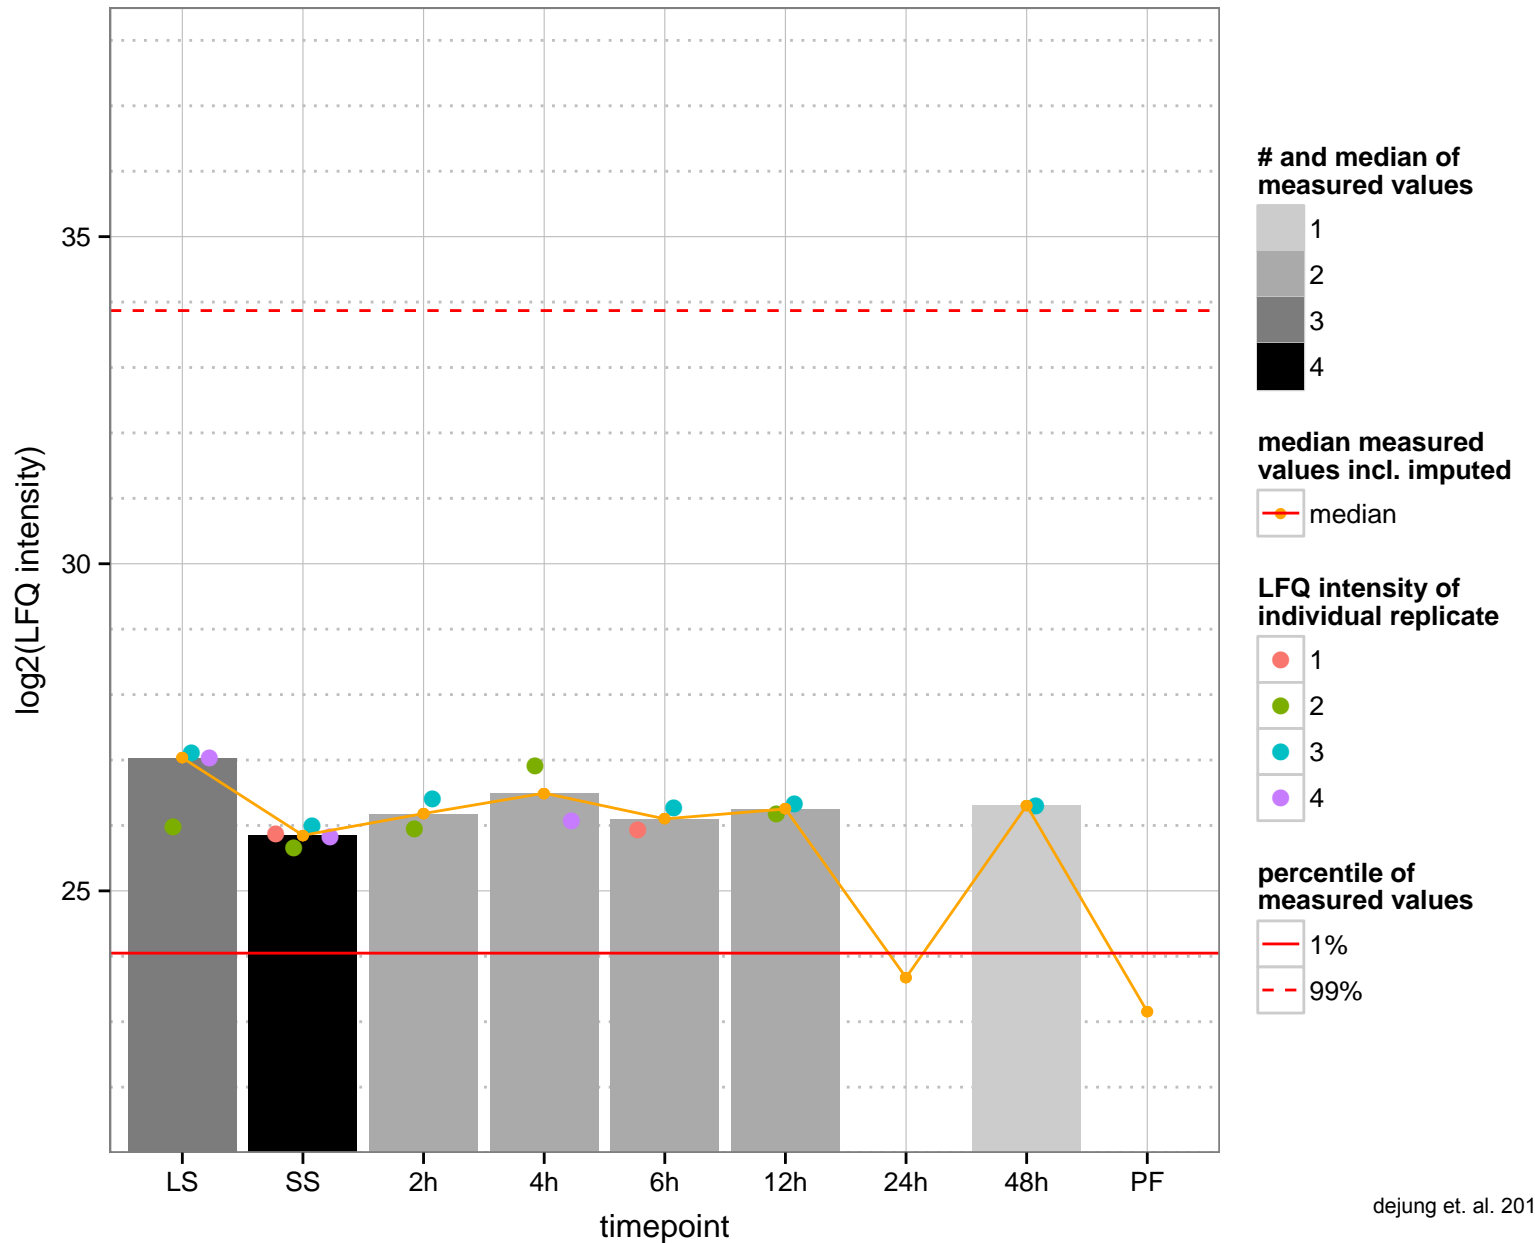

UDP-glucose:glycoprotein glucosyltransferase, putative

Tb927.3.4630

AGOF: UDP-glucose:glycoprotein glucosyltransferase activity

AGOC: endoplasmic reticulum

AGOP: protein glycosylation

PGOF: UDP-glucose:glycoprotein glucosyltransferase activity, transferase activity, transferring glycosyl groups

PGOC: null

PGOP: protein glycosylation

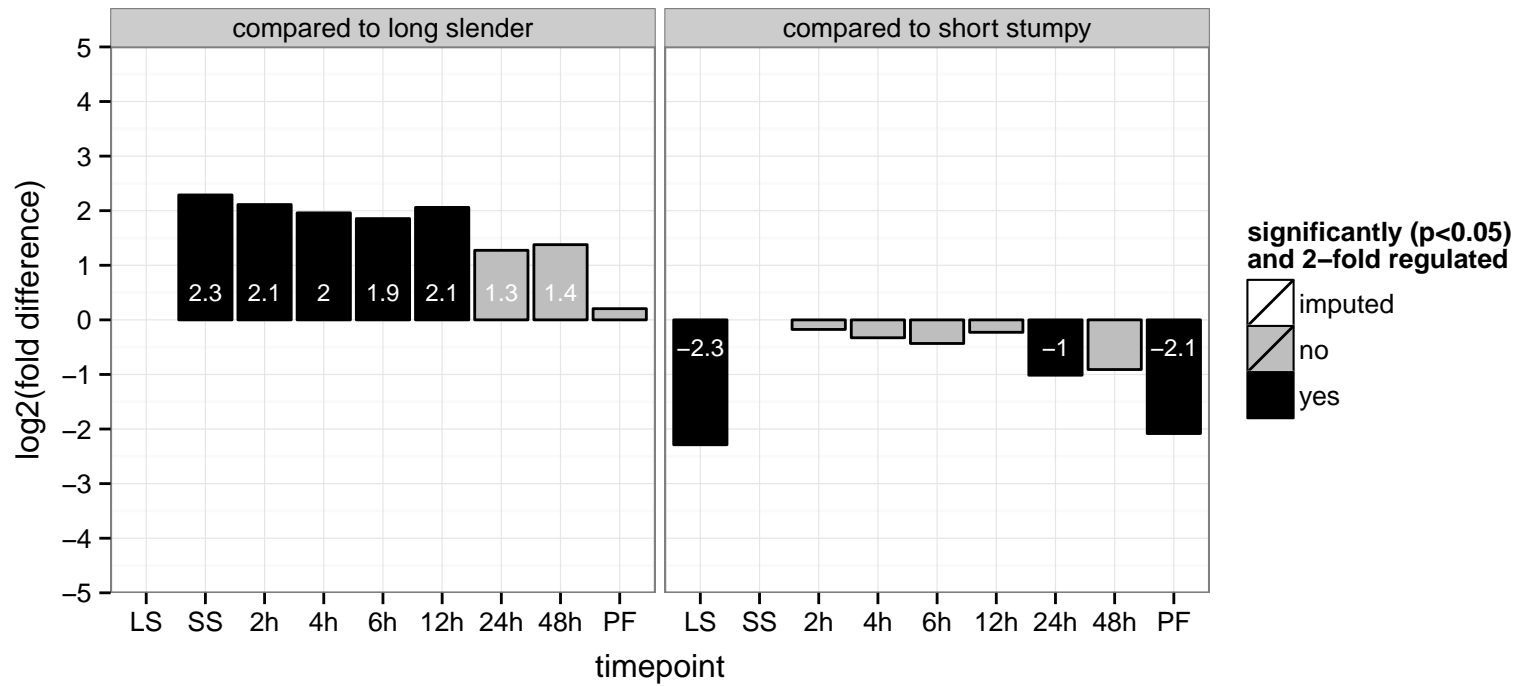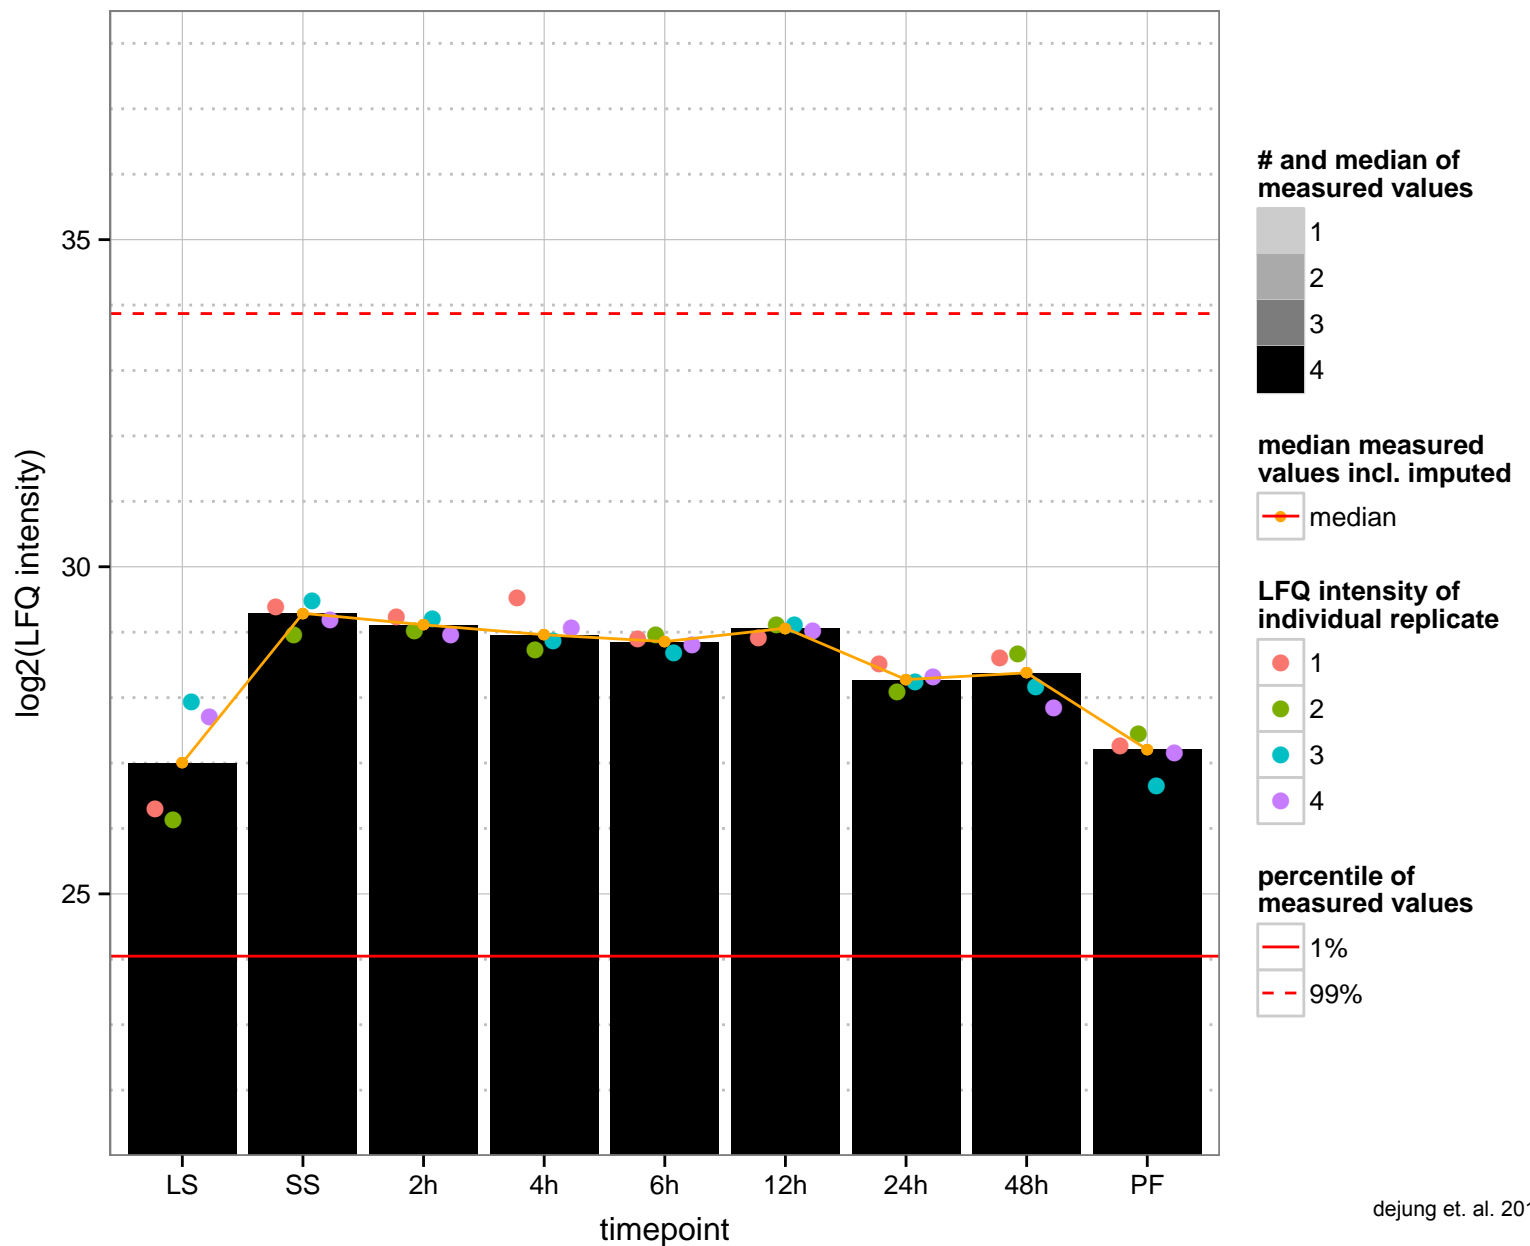

hypothetical protein, conserved  
 Tb927.6.2200  
 AGOF: null  
 AGOC: null  
 AGOP: null  
 PGO: null  
 PGOC: null  
 PGOP: null

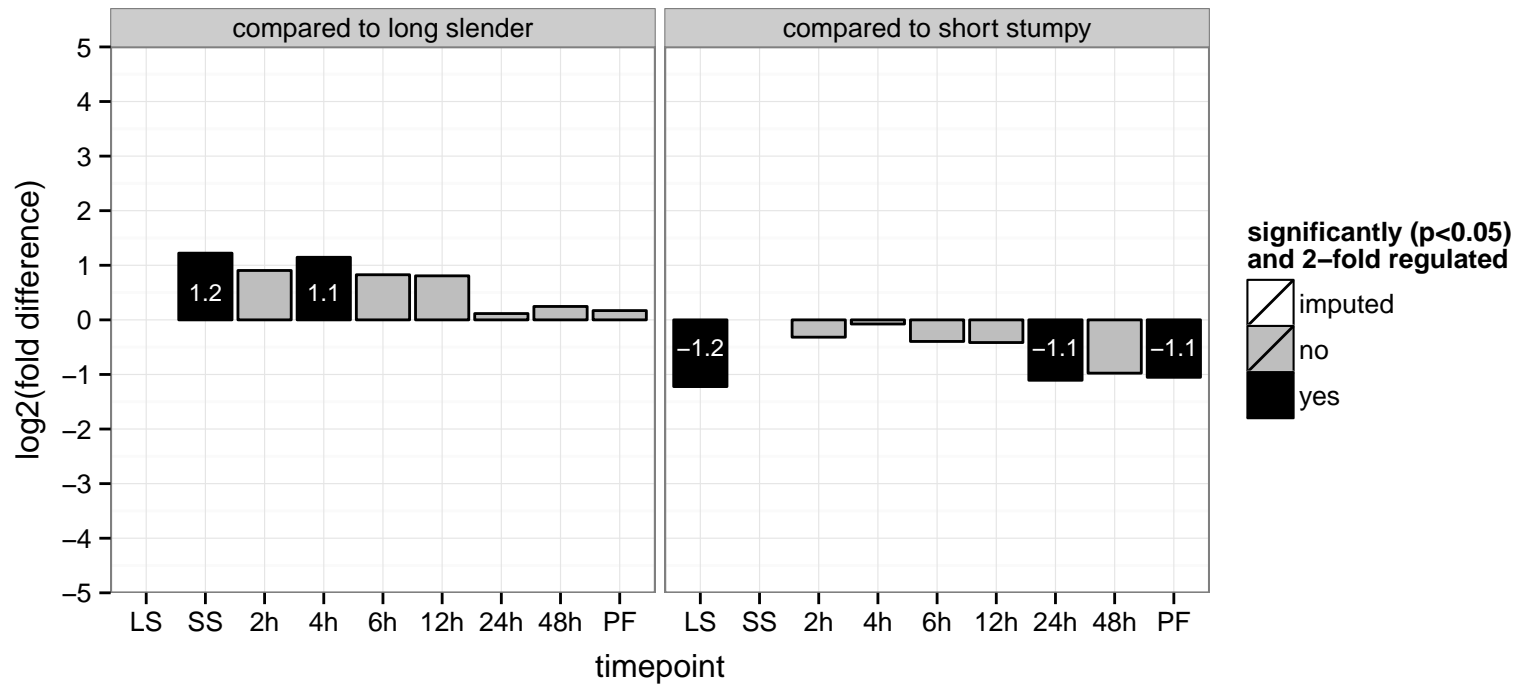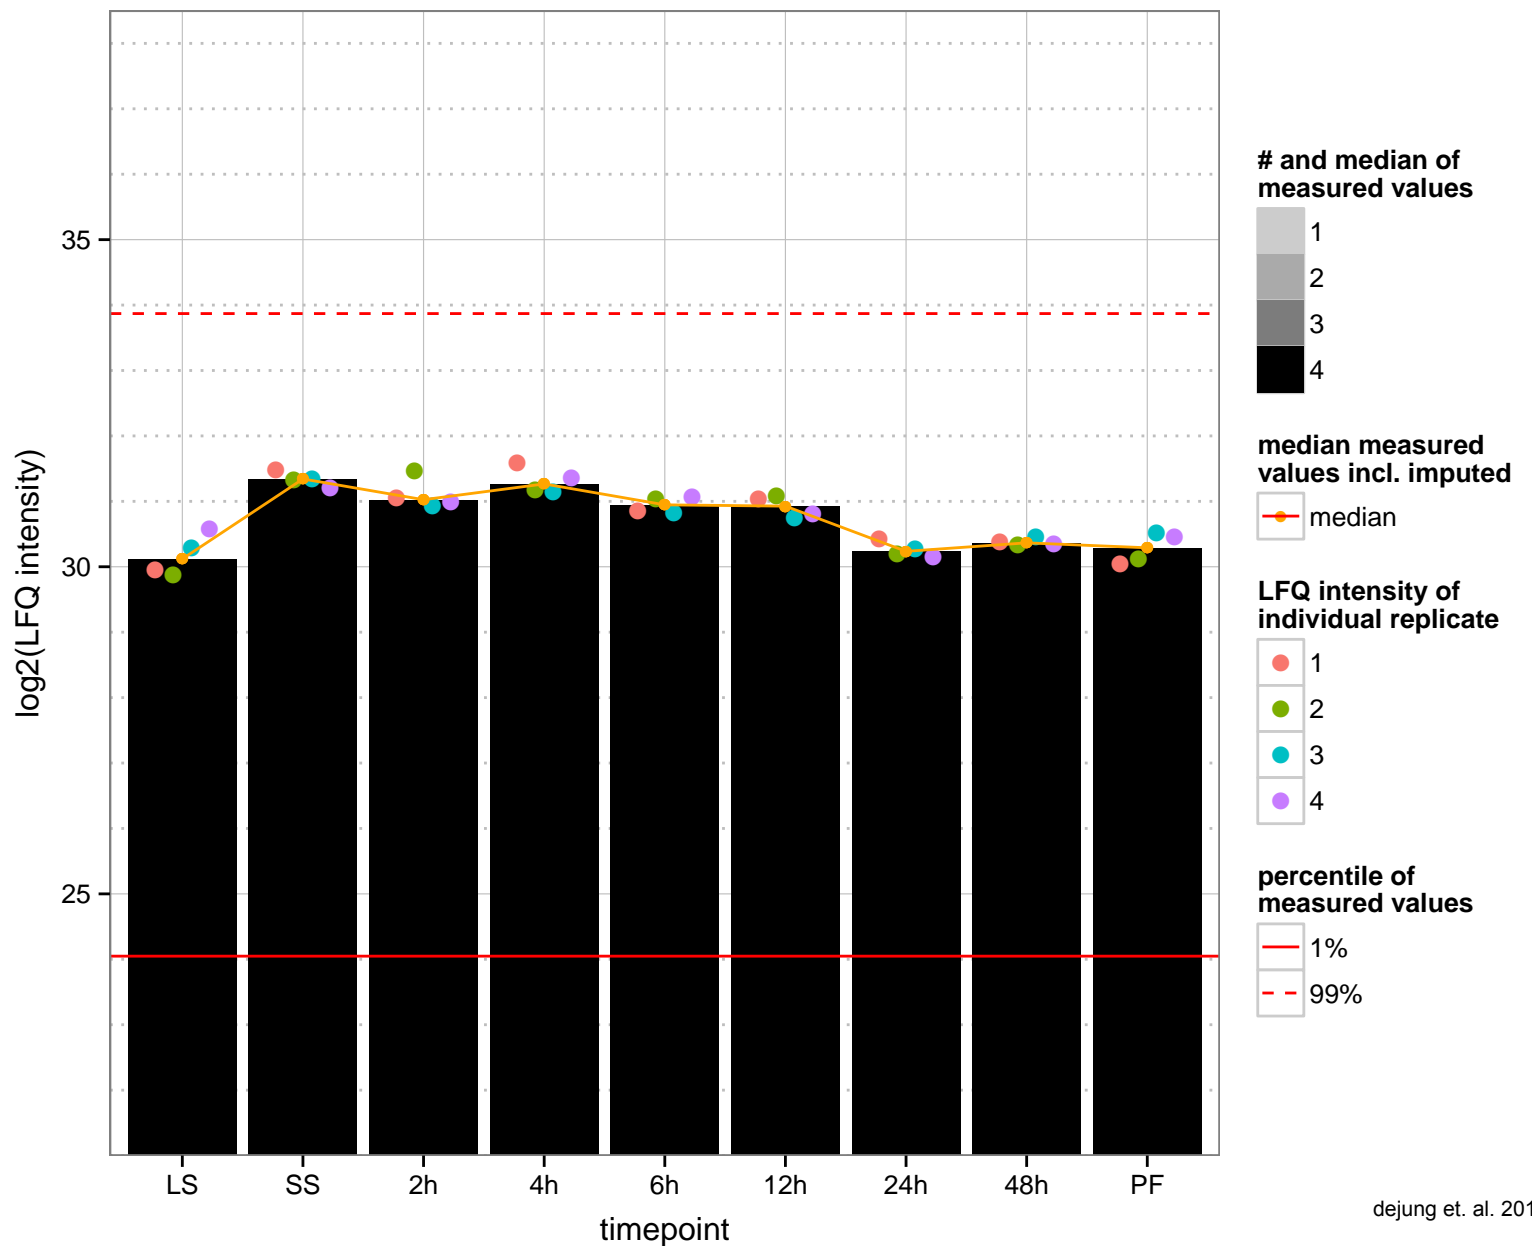

hypothetical protein, conserved  
 Tb927.7.5150  
 AGOF: null  
 AGOC: null  
 AGOP: null  
 PGOF: null  
 PGOE: null  
 PGOP: null

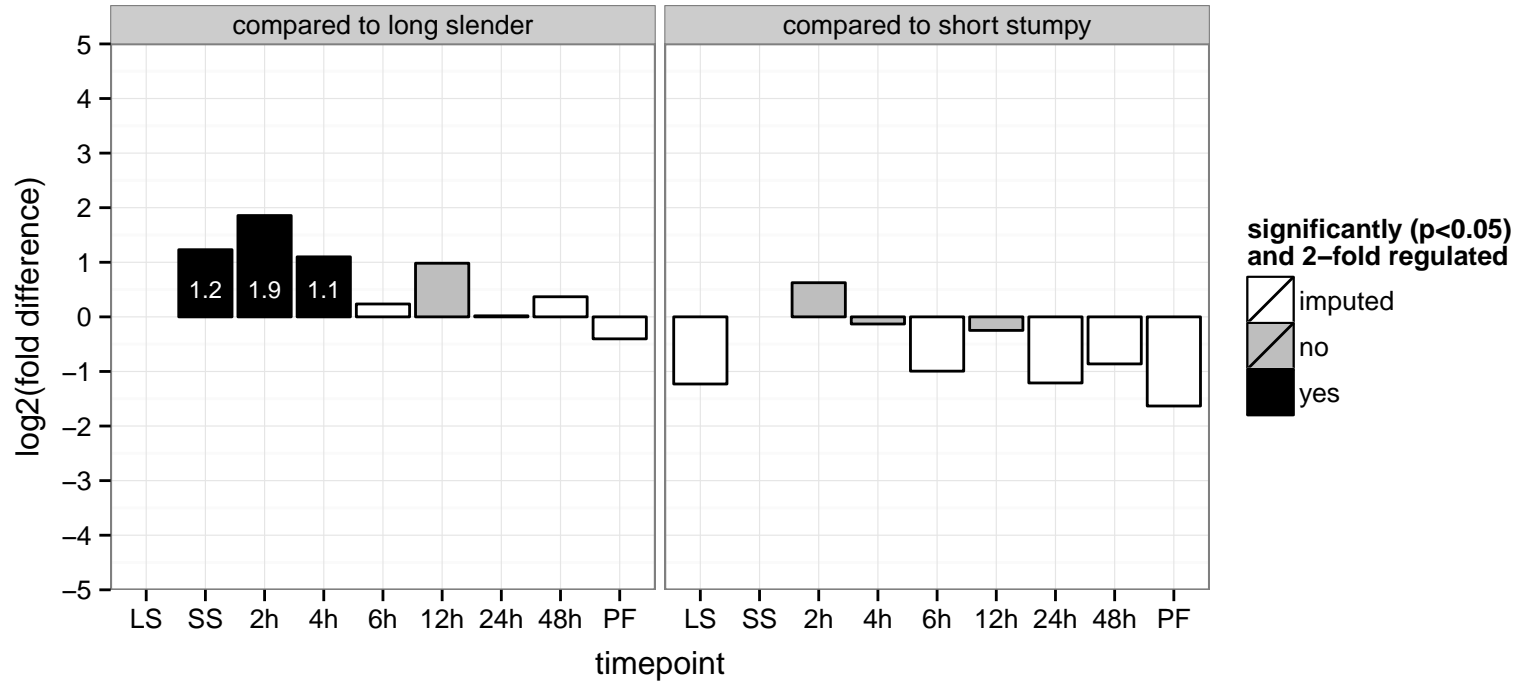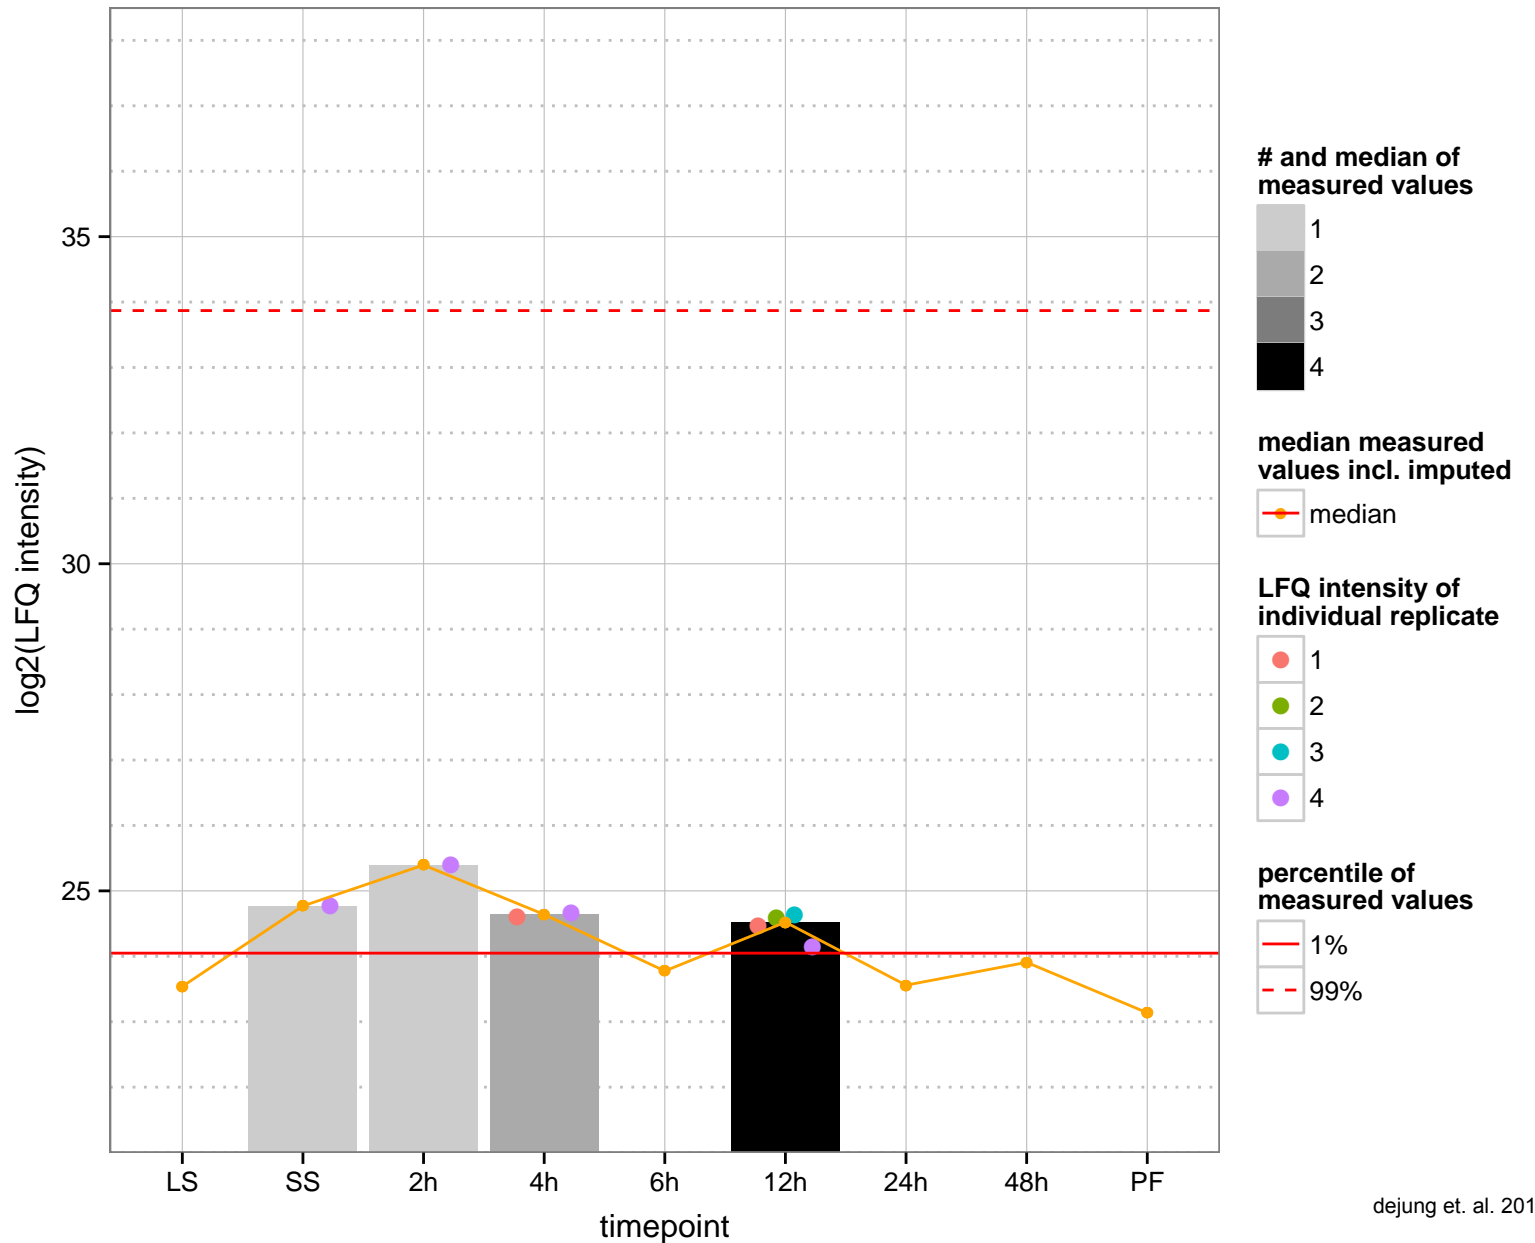

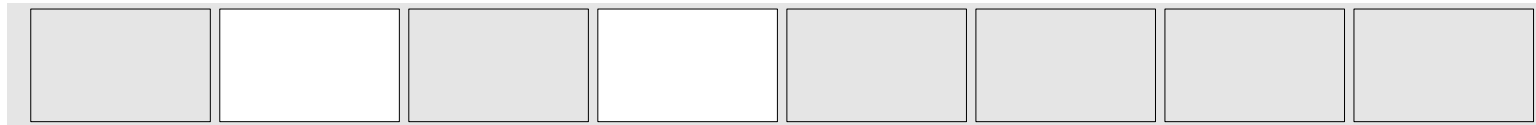

SS

2h

4h

6h

12h

24h

48h

PF

timepoint

**regulated**



not regulated



significant down



significant up

aspartyl-tRNA synthetase, putative

Tb927.10.1260

AGOF: ATP binding, asparagine-tRNA ligase activity, aspartate-tRNA ligase activity, nucleic acid binding

AGOC: cytoplasm, mitochondrion

AGOP: asparaginyl-tRNA aminoacylation, aspartyl-tRNA aminoacylation, translation

PGOF: ATP binding, aminoacyl-tRNA ligase activity, nucleic acid binding, nucleotide binding

PGOC: cytoplasm

PGOP: tRNA aminoacylation for protein translation

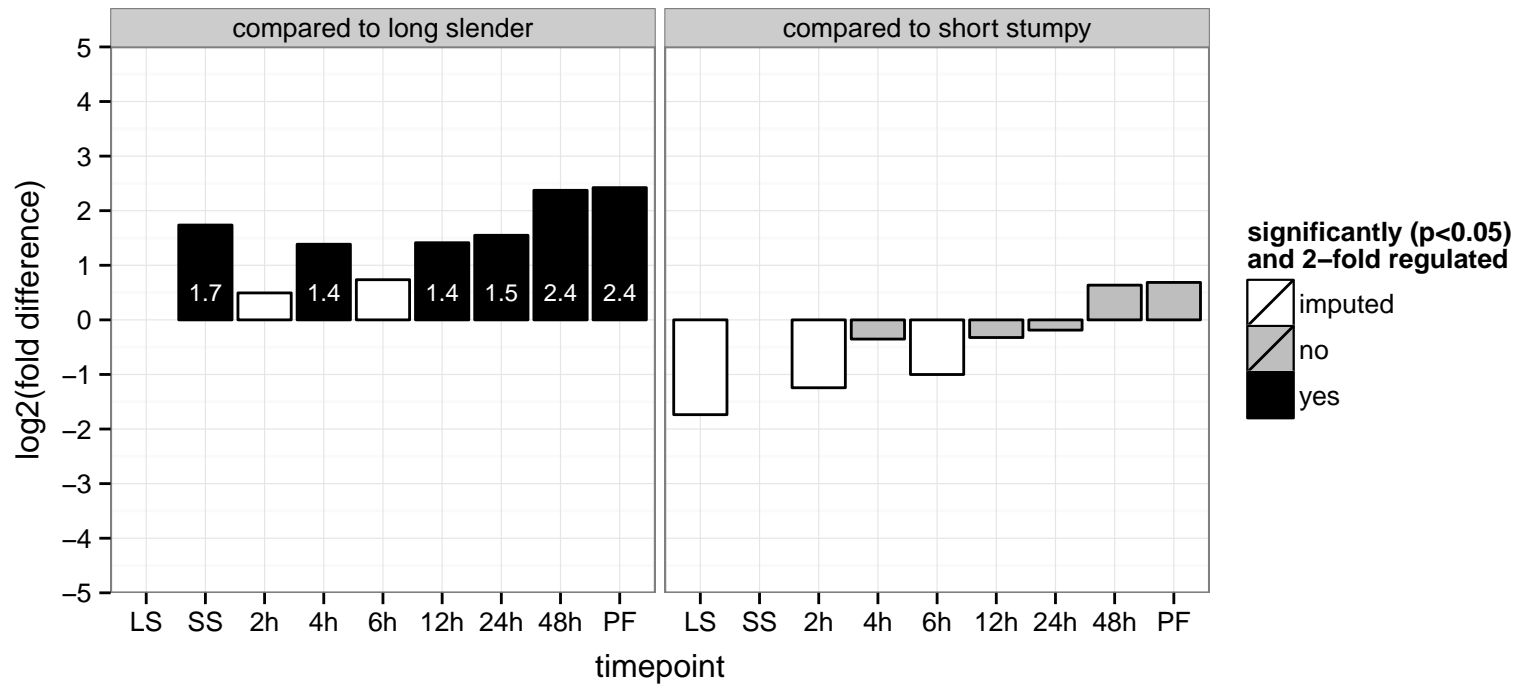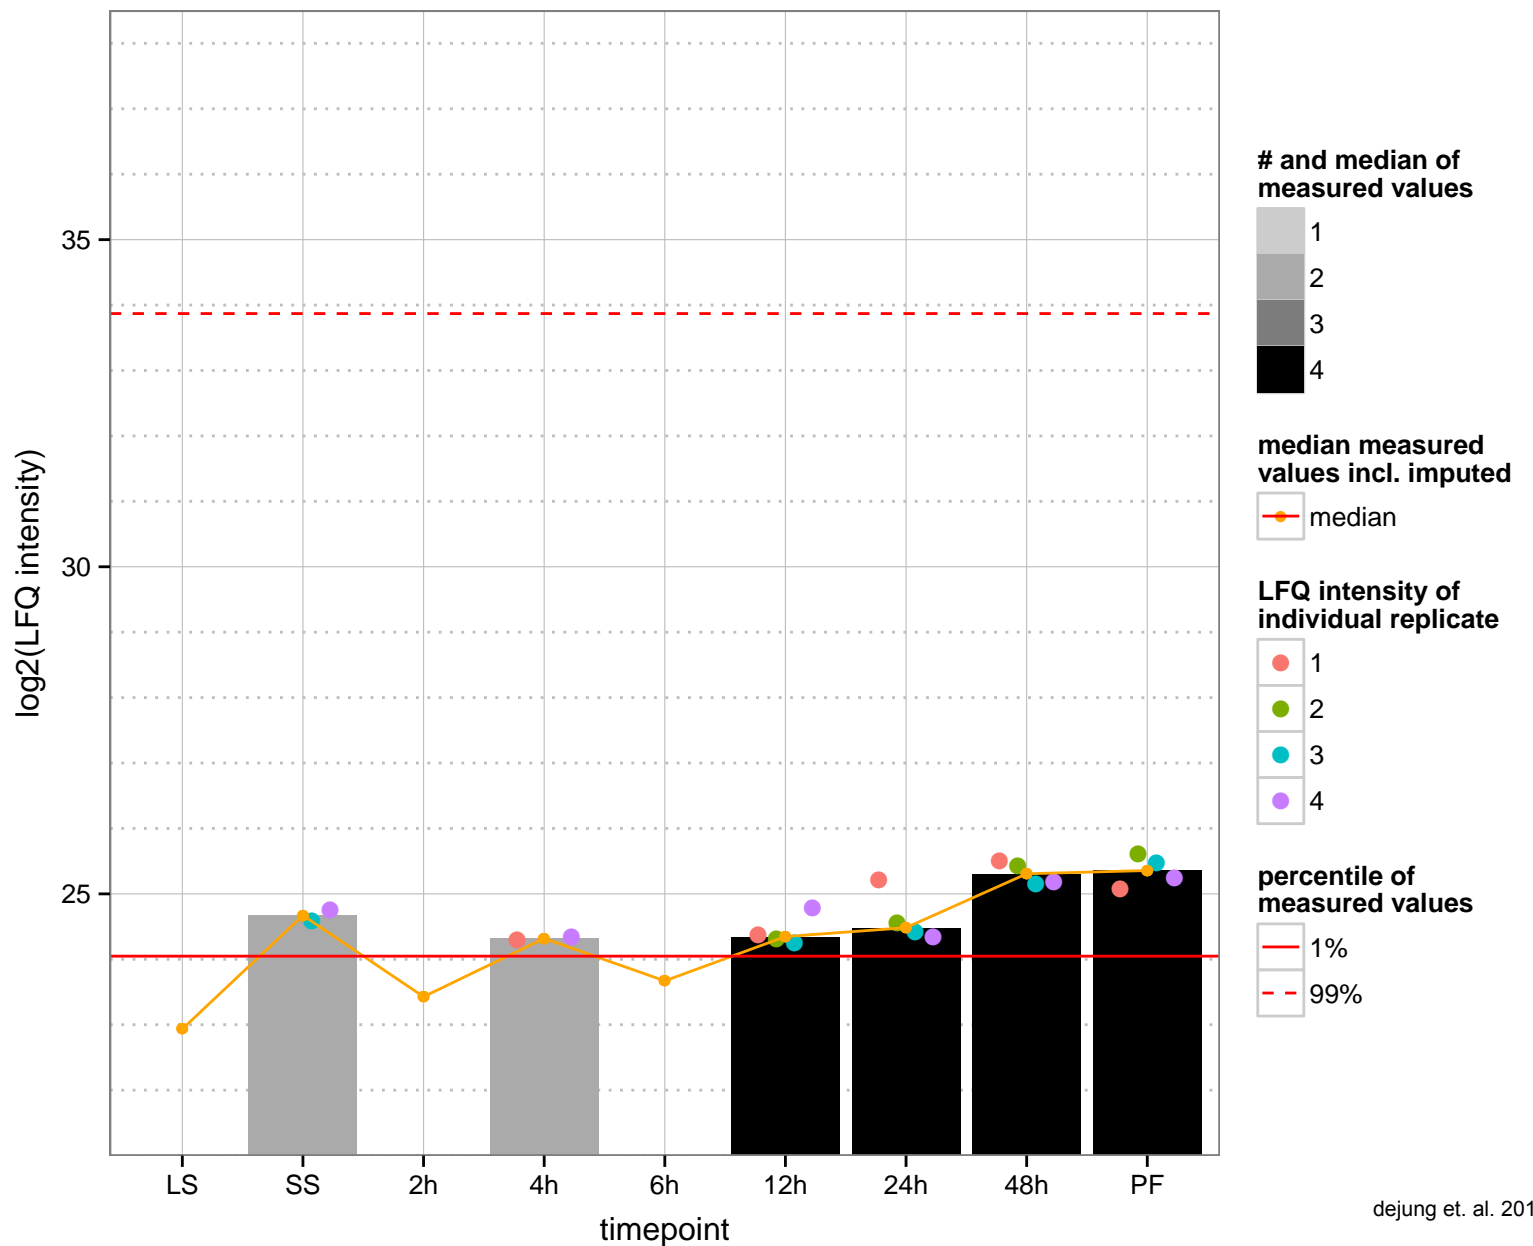



hypothetical protein  
 Tb927.10.8880  
 AGOF: null  
 AGOC: null  
 AGOP: null  
 PGO: null  
 PGOC: null  
 PGOP: null

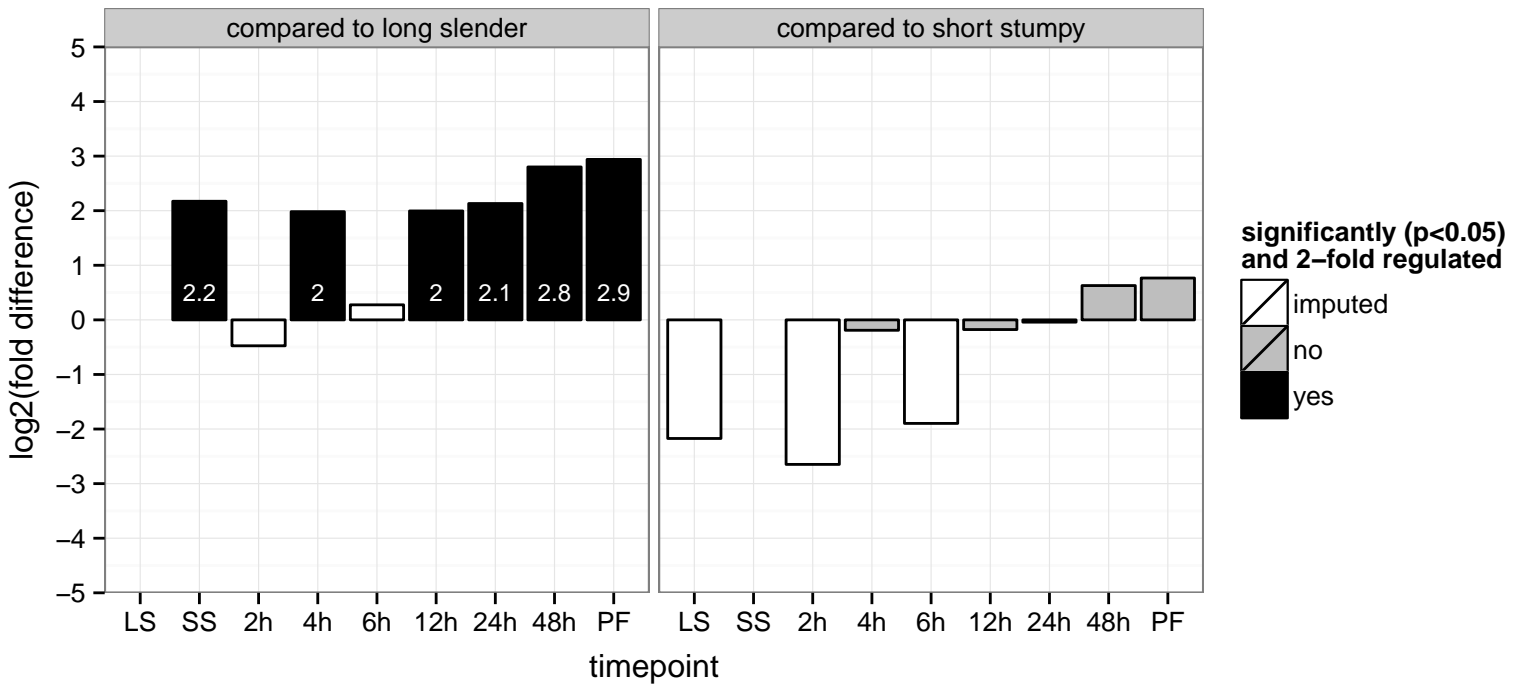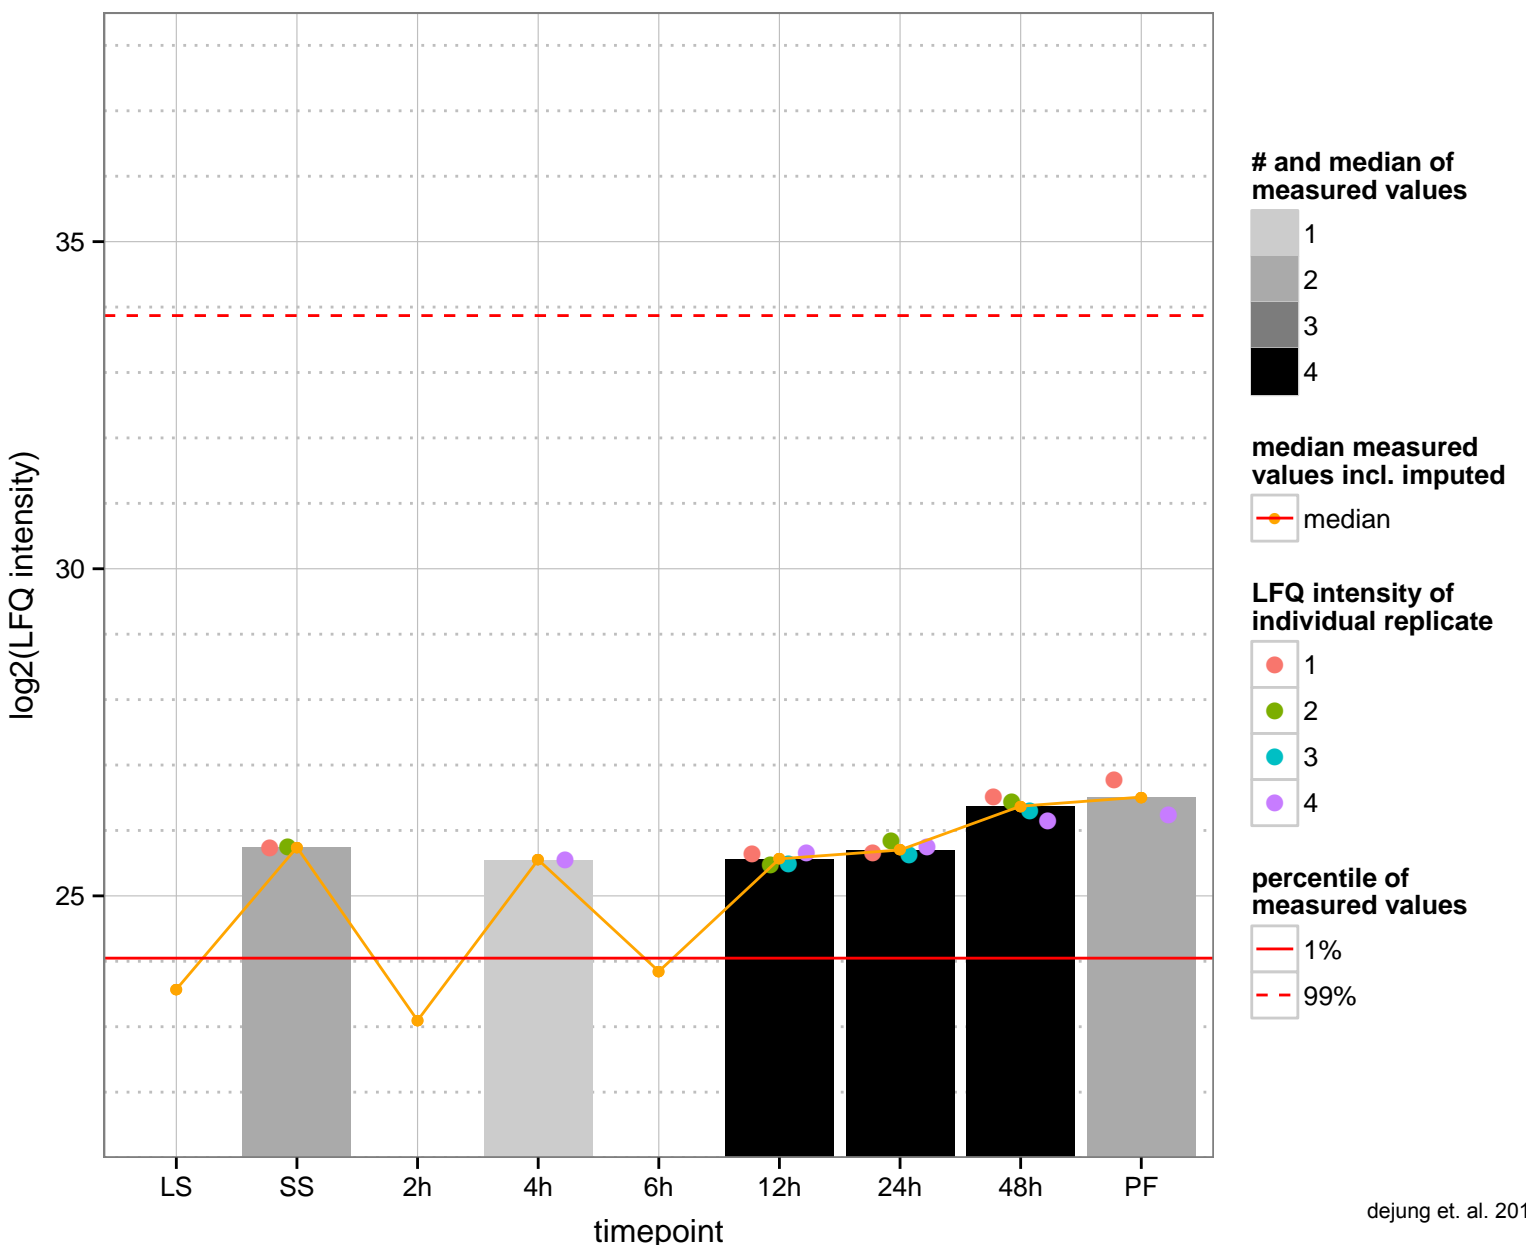

RNA-binding protein, putative  
 Tb927.11.350  
 AGOF: null  
 AGOC: eukaryotic translation initiation factor 4F complex  
 AGOP: null  
 PGO: nucleic acid binding  
 PGOC: null  
 PGOP: null

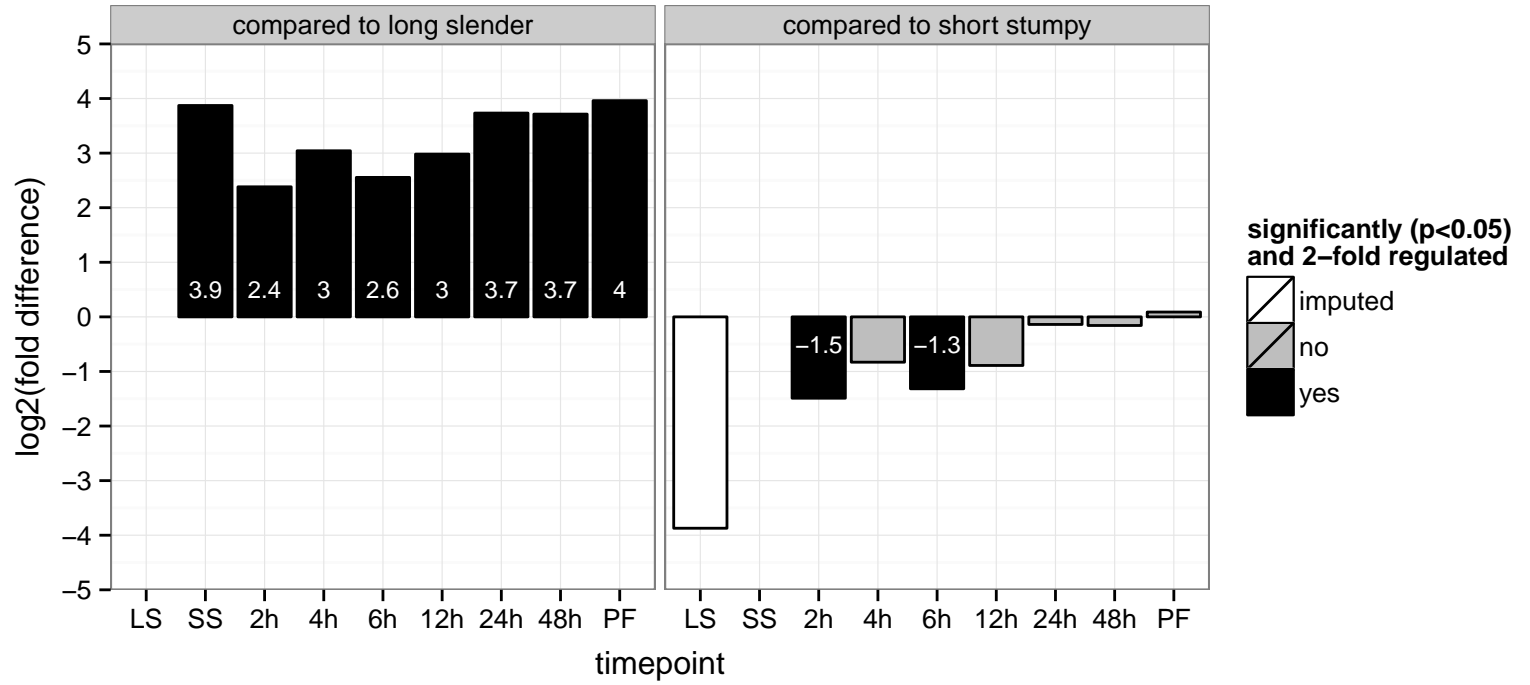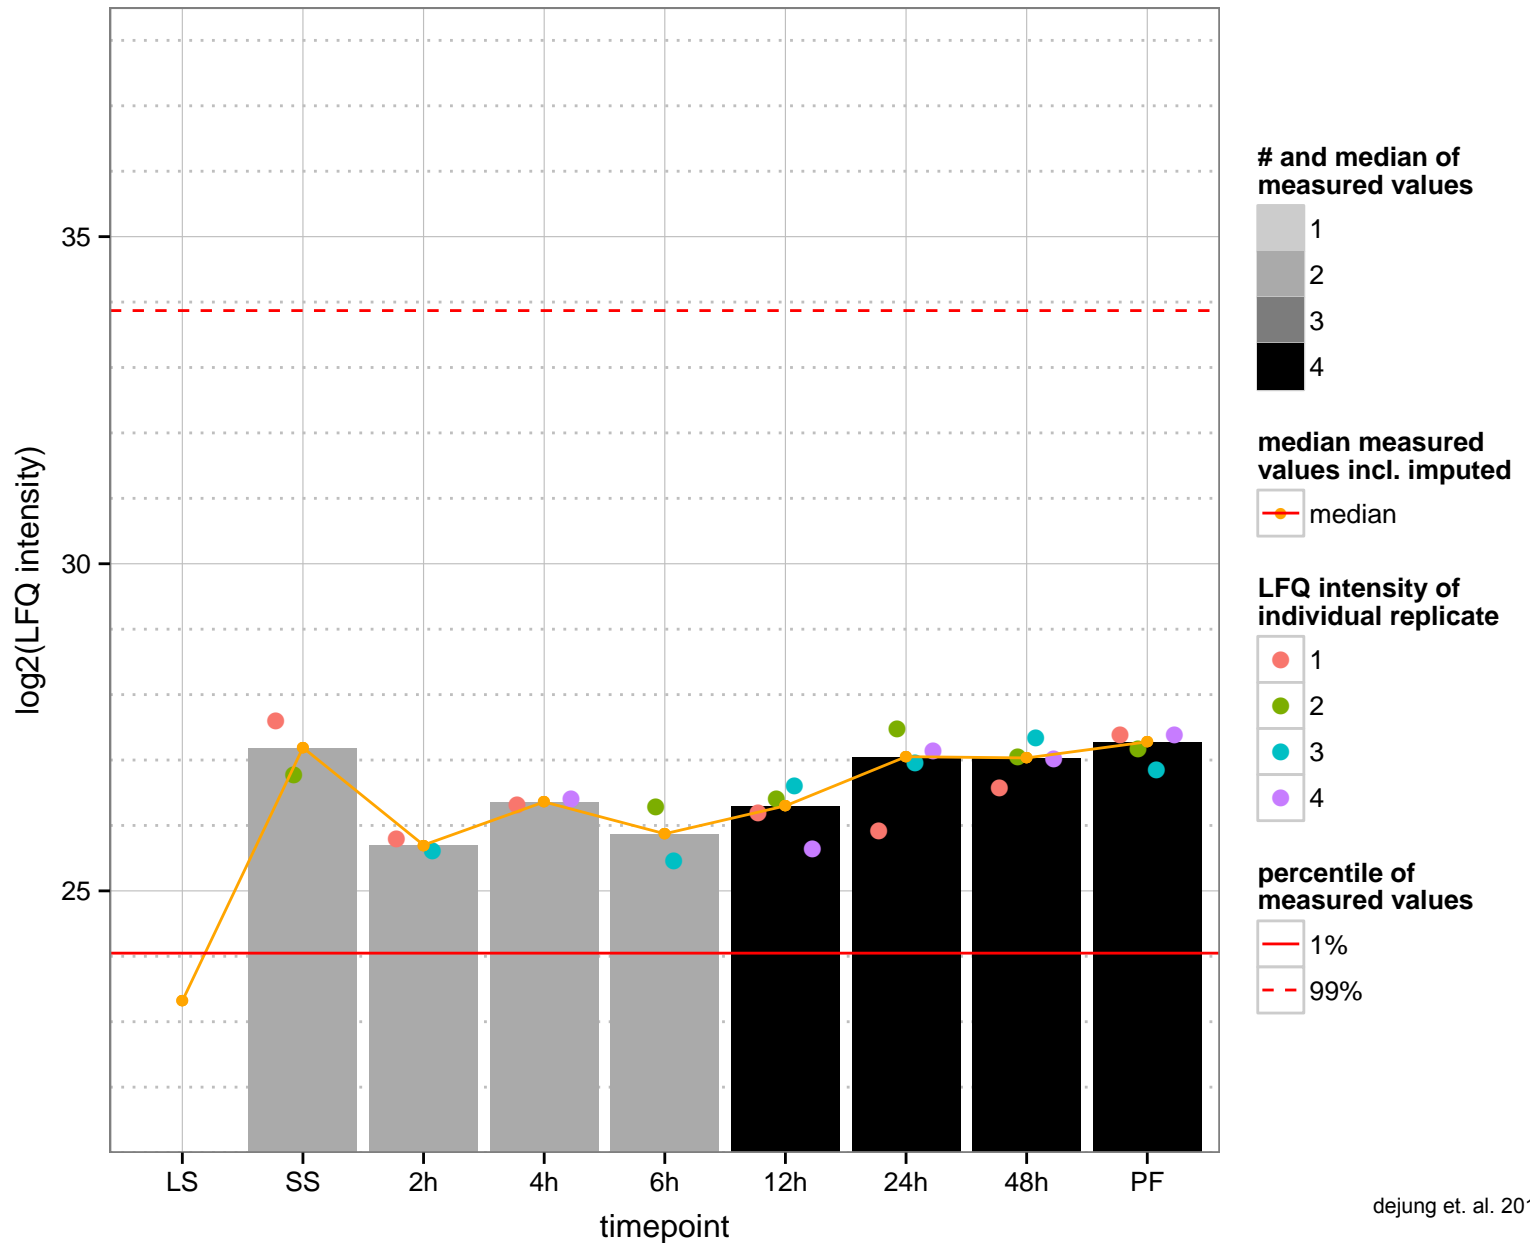

ubiquitin carboxyl-terminal hydrolase, putative, cysteine peptidase, Clan CA, family C19  
 Tb927.11.5270  
 AGOF: cysteine-type endopeptidase activity, ubiquitin thiolesterase activity  
 AGOC: null  
 AGOP: ubiquitin-dependent protein catabolic process  
 PGO: ubiquitin thiolesterase activity  
 PGO: null  
 PGO: null  
 PGO: null

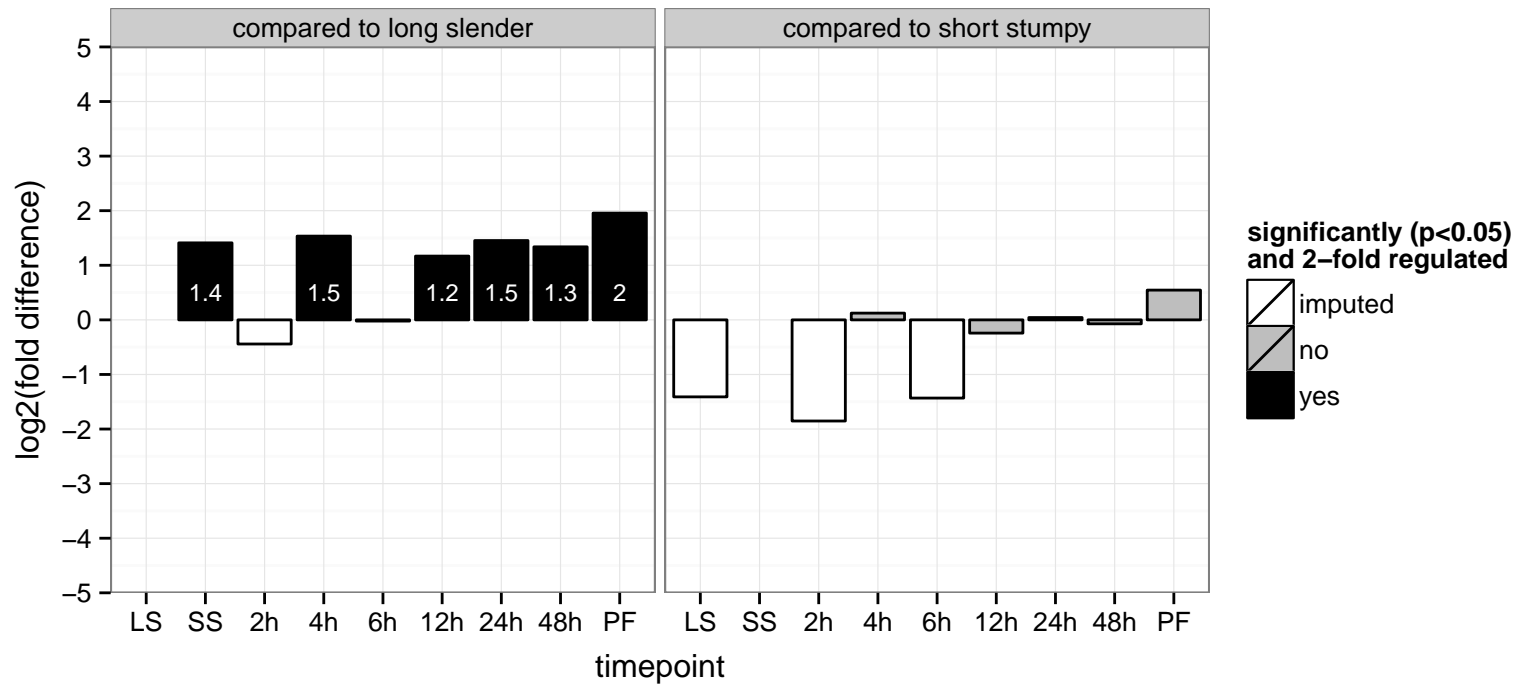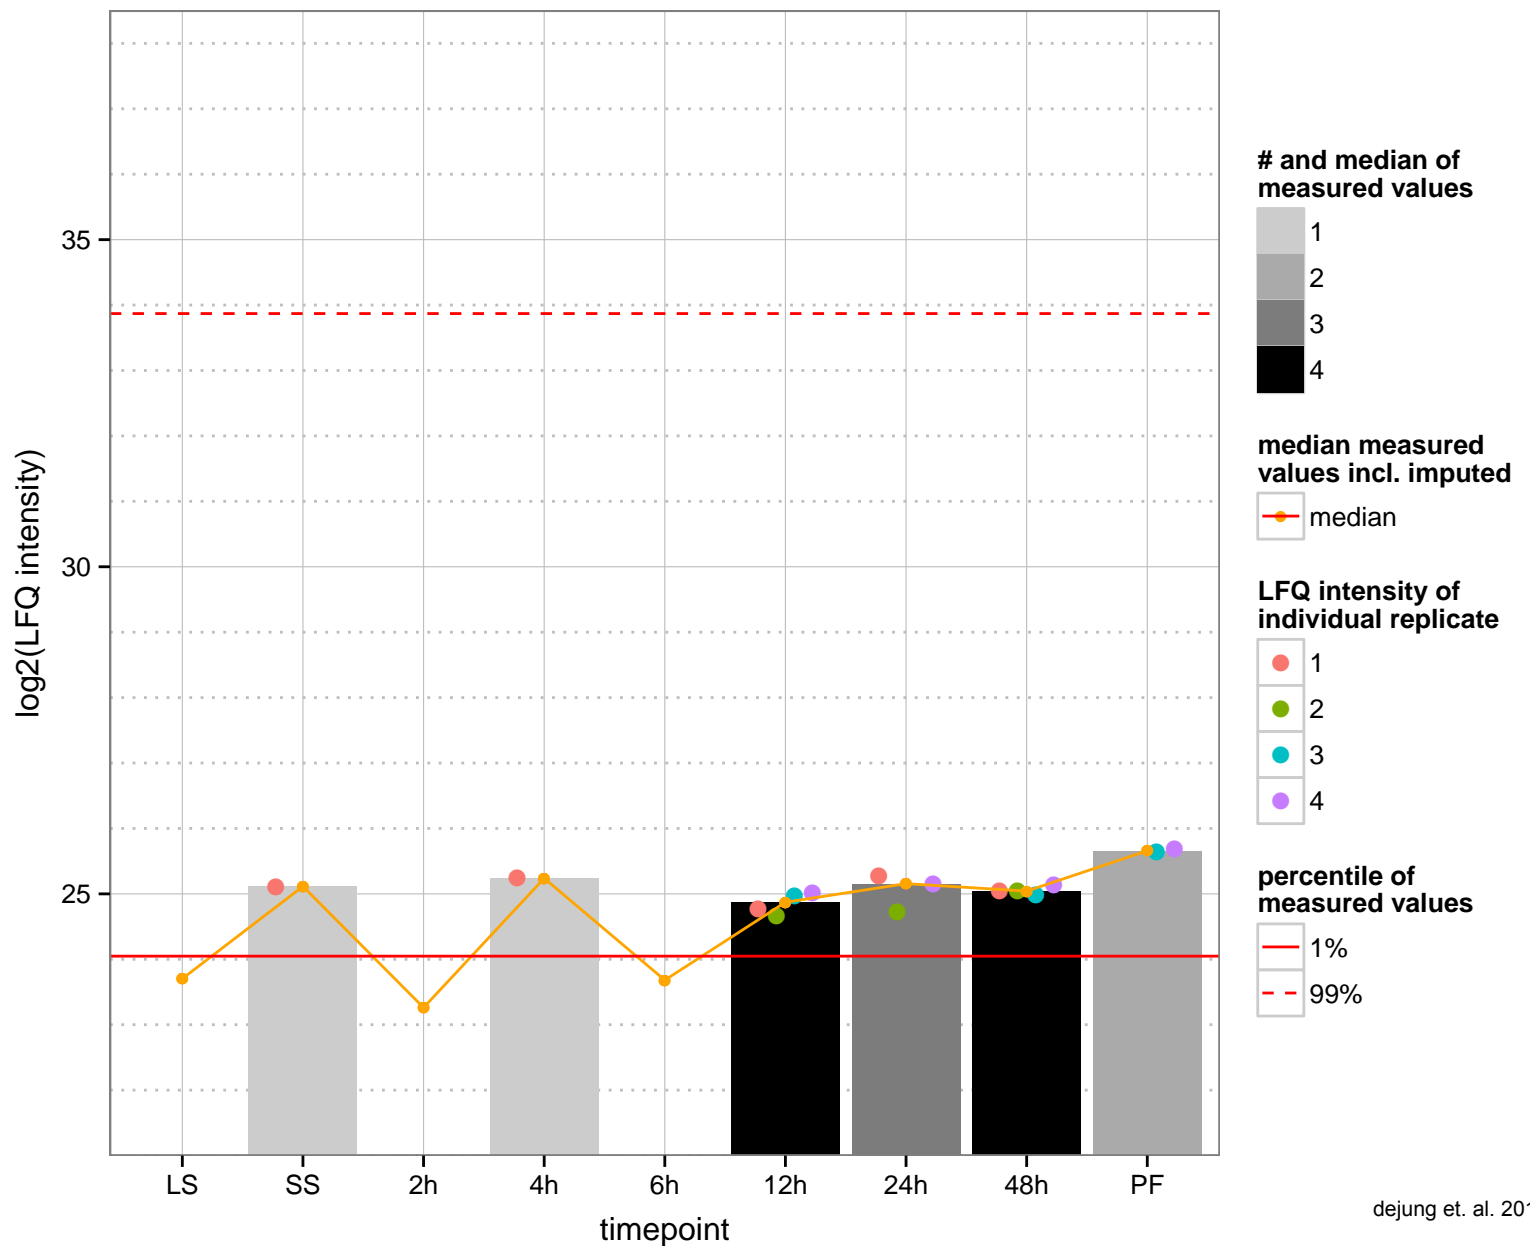

ubiquitin-conjugating enzyme E2, putative

Tb927.2.2460

AGOF: ubiquitin-protein ligase activity

AGOC: nucleus

AGOP: cellular protein modification process, post-translational protein modification, regulation of protein metabolic process

PGOF: acid-amino acid ligase activity

PGOC: null

PGOP: null

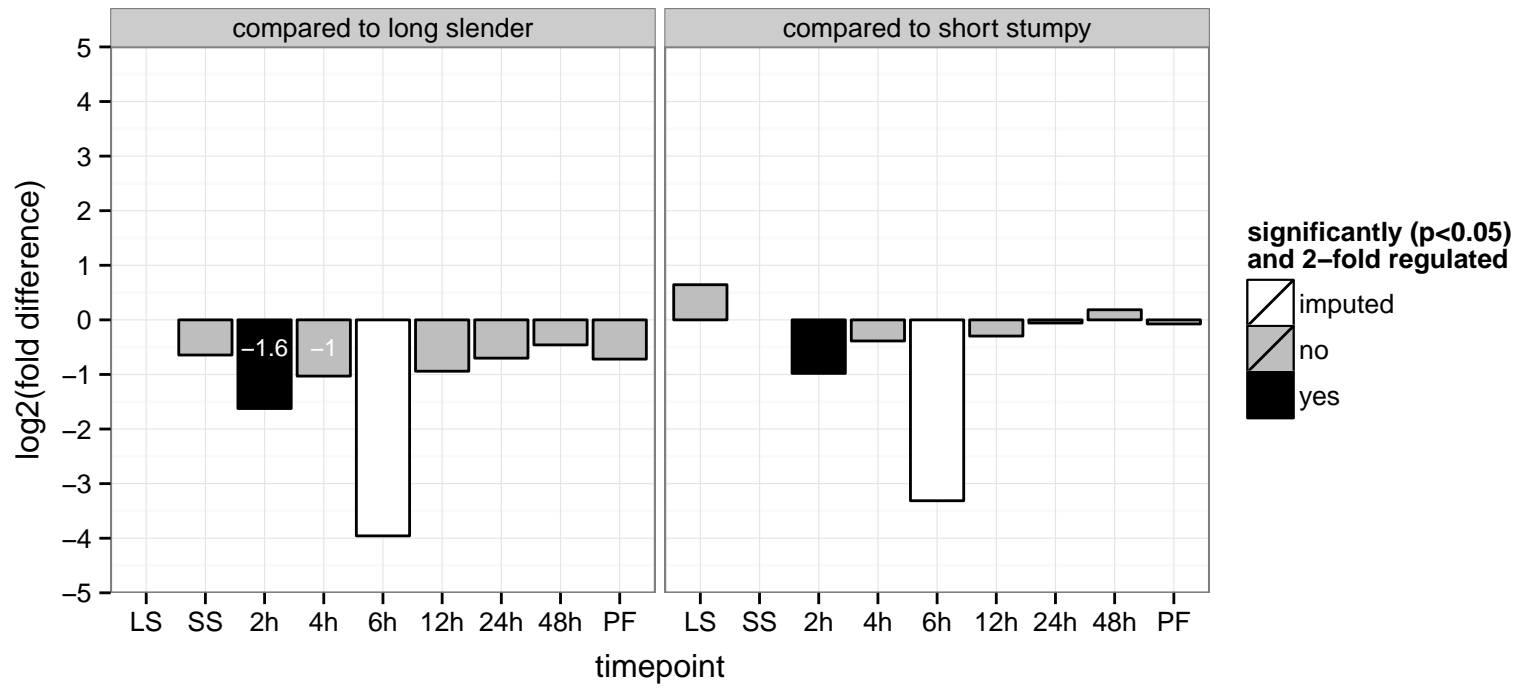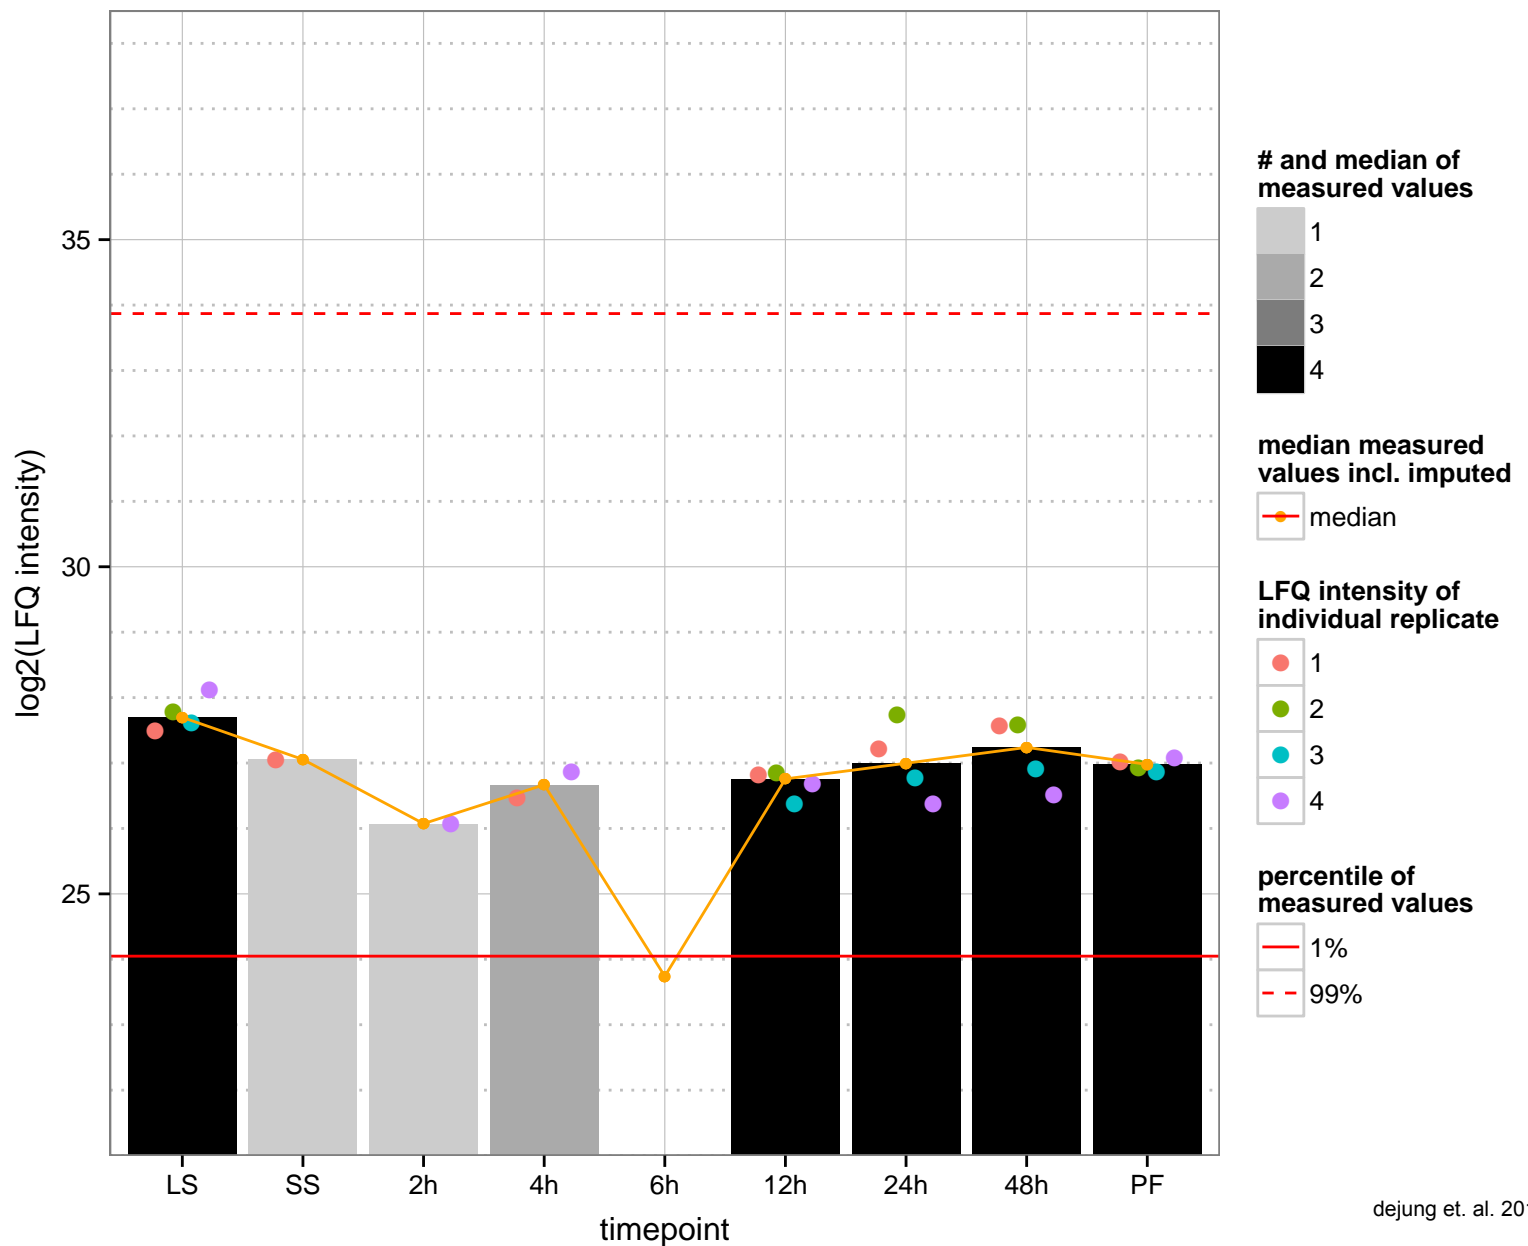

50S ribosomal protein L13, putative  
 Tb927.4.1070  
 AGOF: structural constituent of ribosome  
 AGOC: intracellular, mitochondrion, ribosome  
 AGOP: translation  
 PGO: structural constituent of ribosome  
 PGO: ribosome  
 PGO: translation

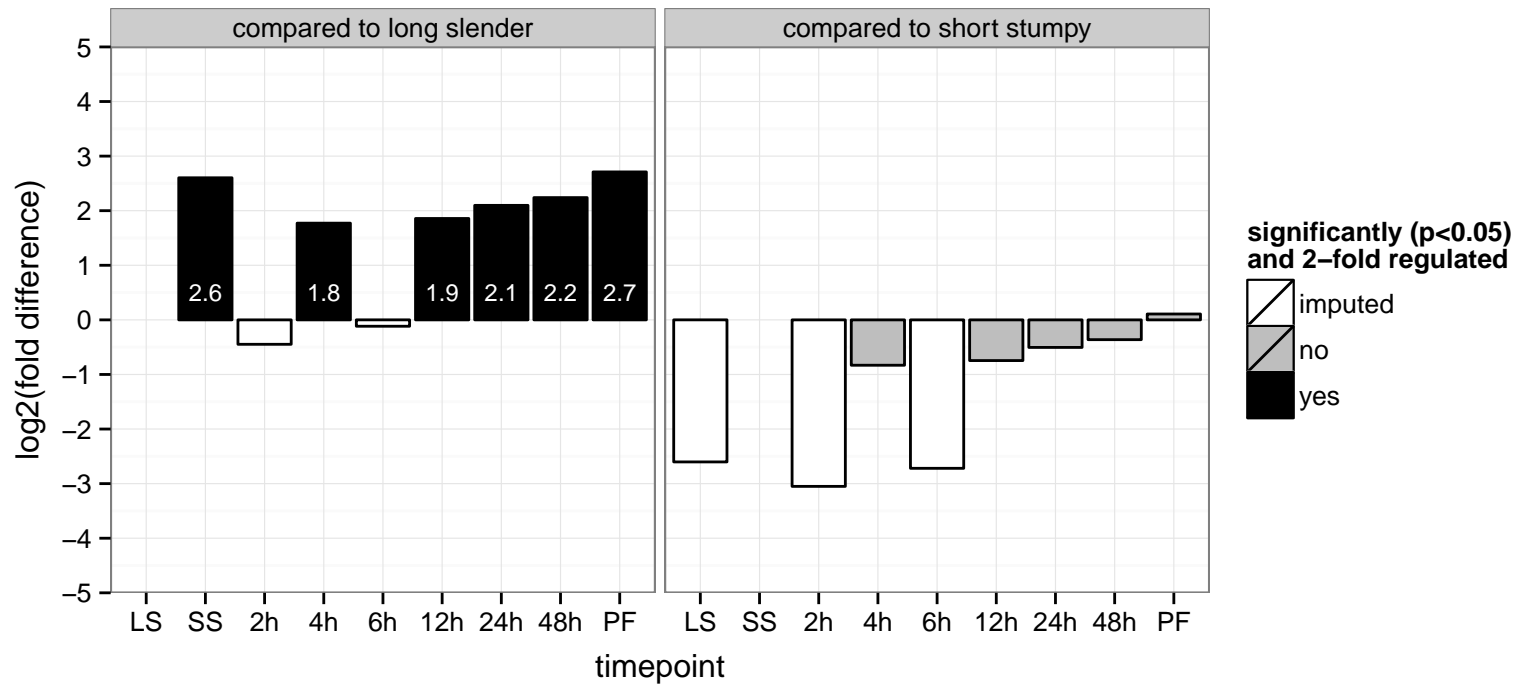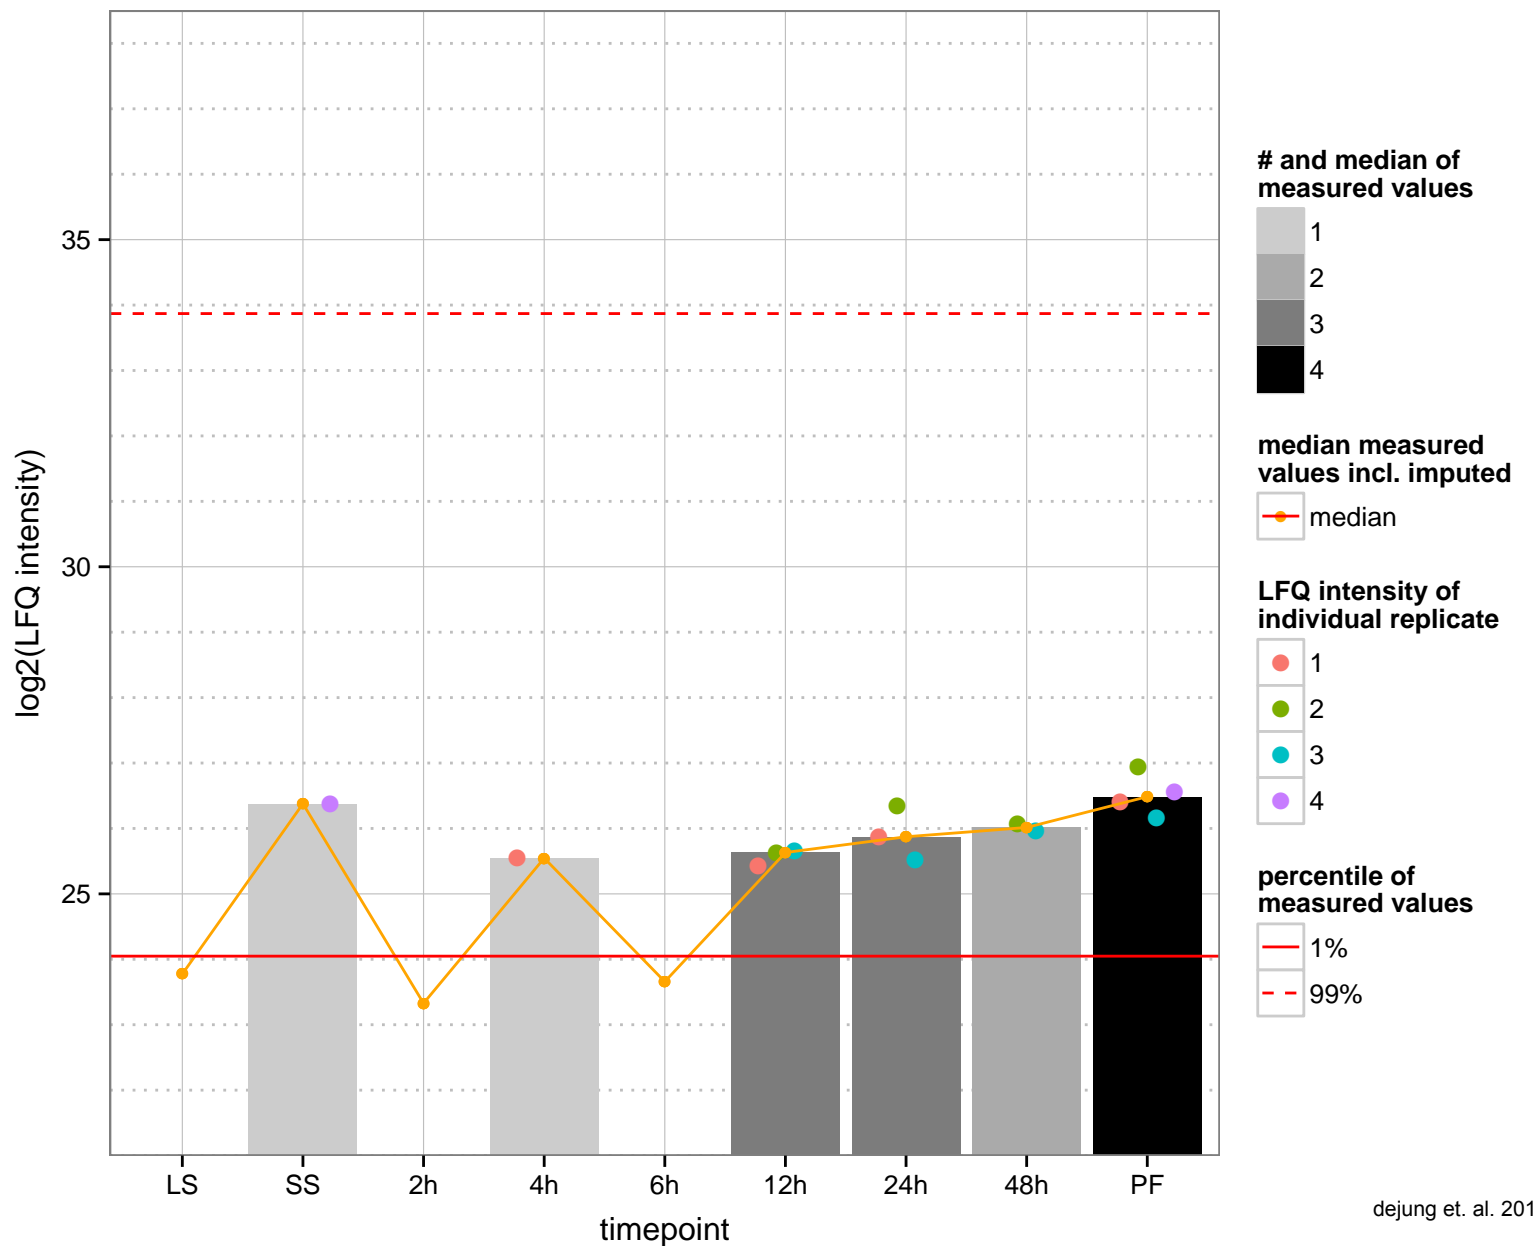

Alkylated DNA repair protein (alkB homolog), putative

Tb927.4.460

AGOF: null

AGOC: null

AGOP: null

PGOF: oxidoreductase activity, oxidoreductase activity, acting on paired donors, with incorporation or reduction of molecular oxygen

PGOC: null

PGOP: oxidation–reduction process

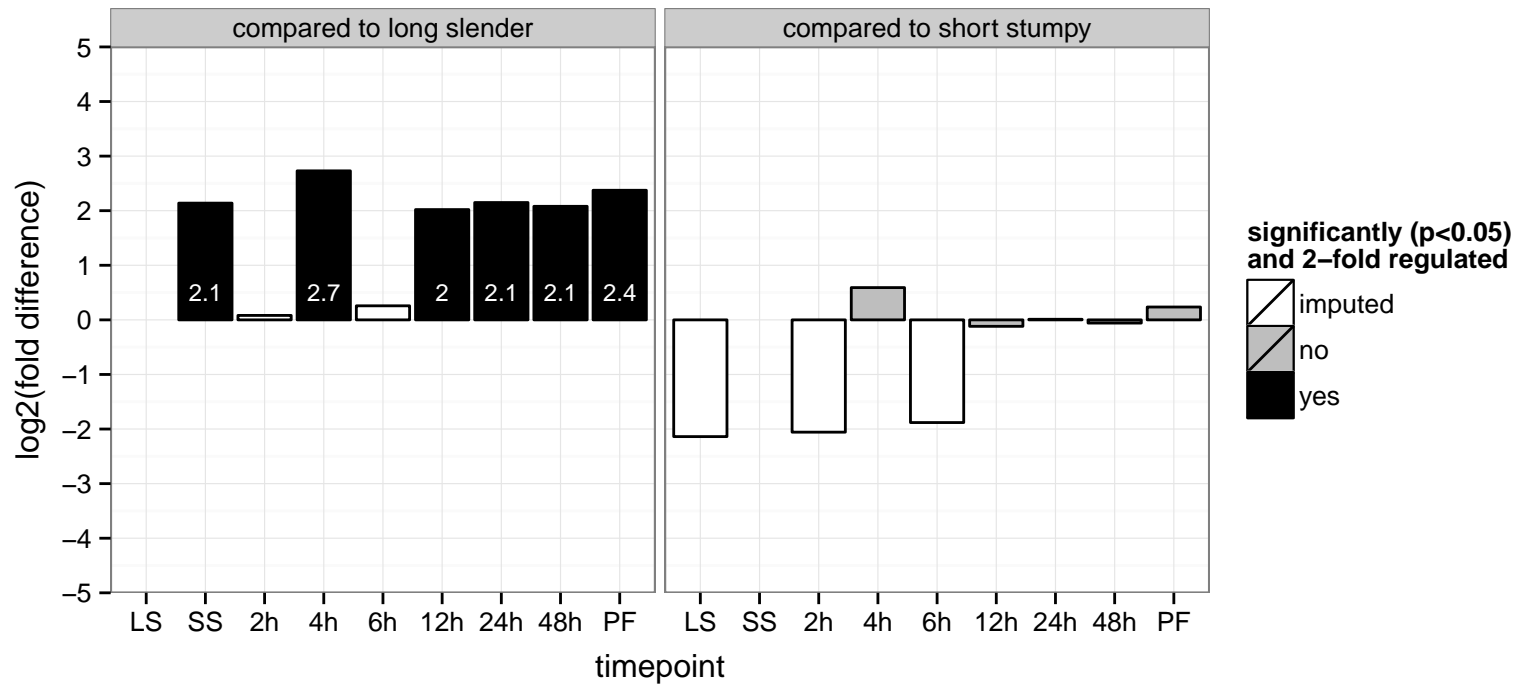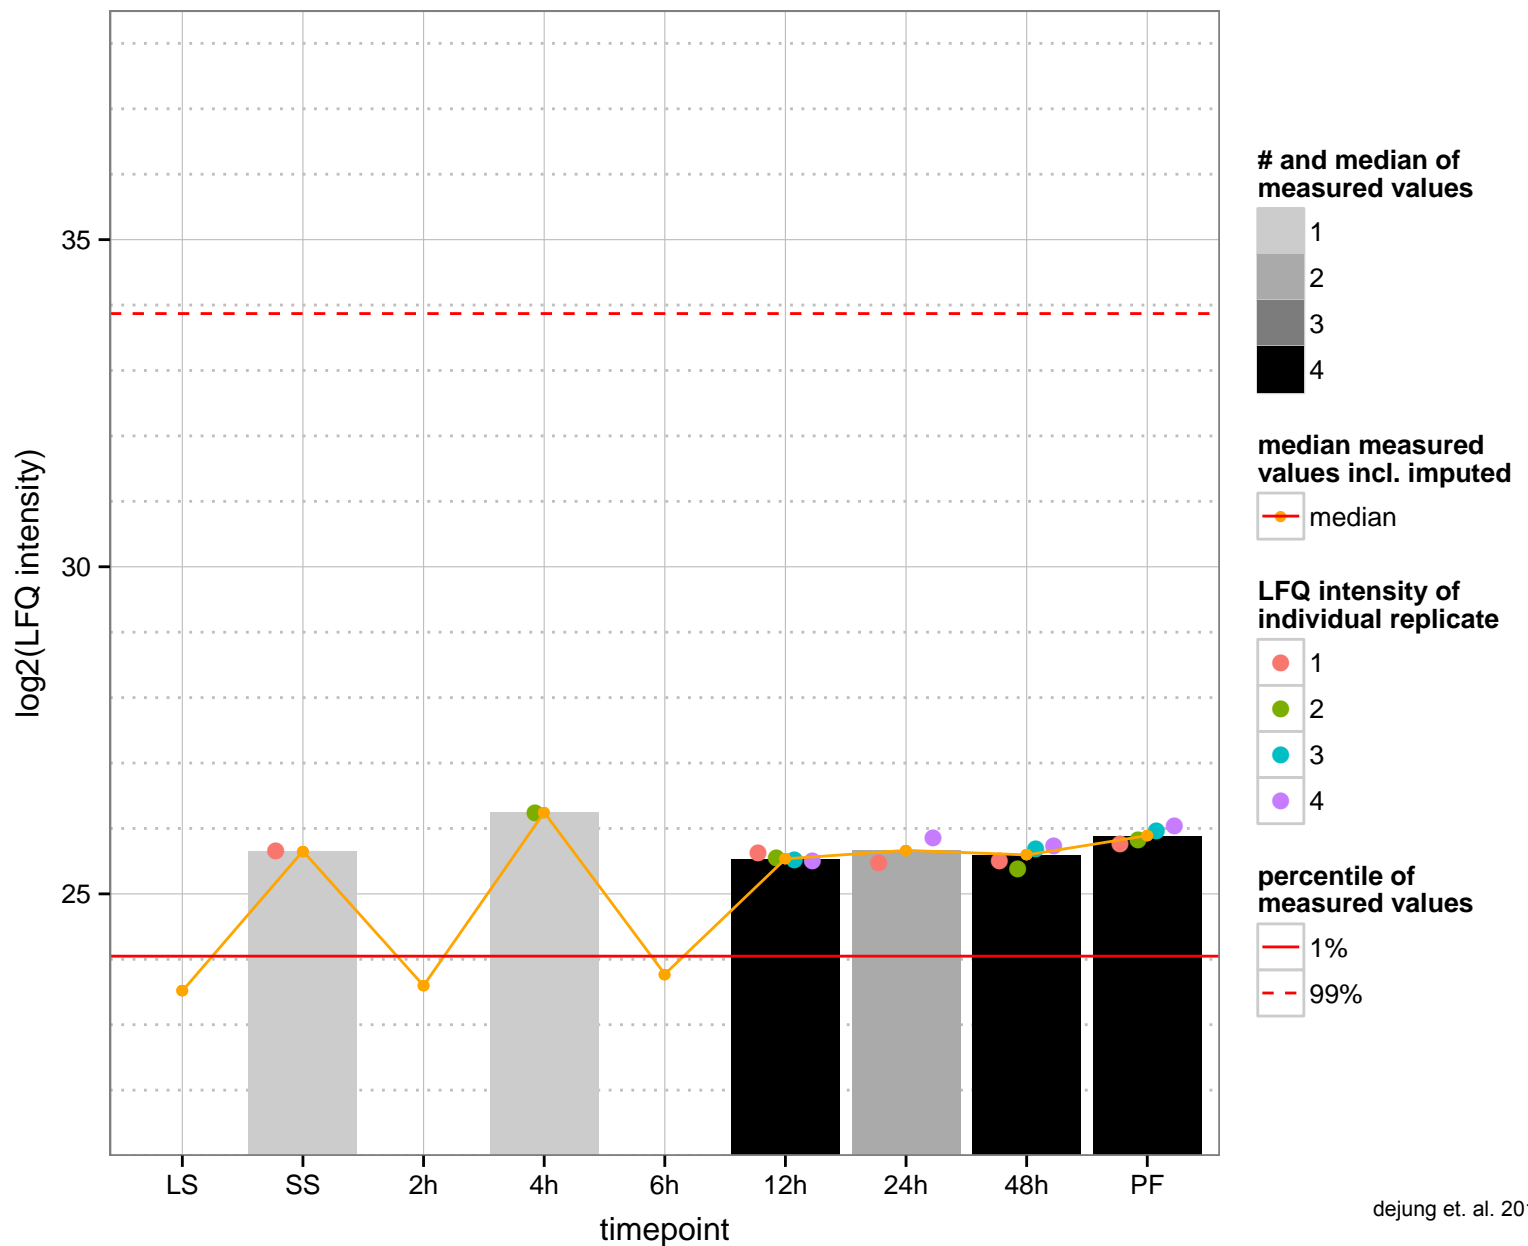

hypothetical protein, conserved  
 Tb927.5.3730  
 AGOF: null  
 AGOC: null  
 AGOP: null  
 PGOF: null  
 PGOE: null  
 PGOP: null

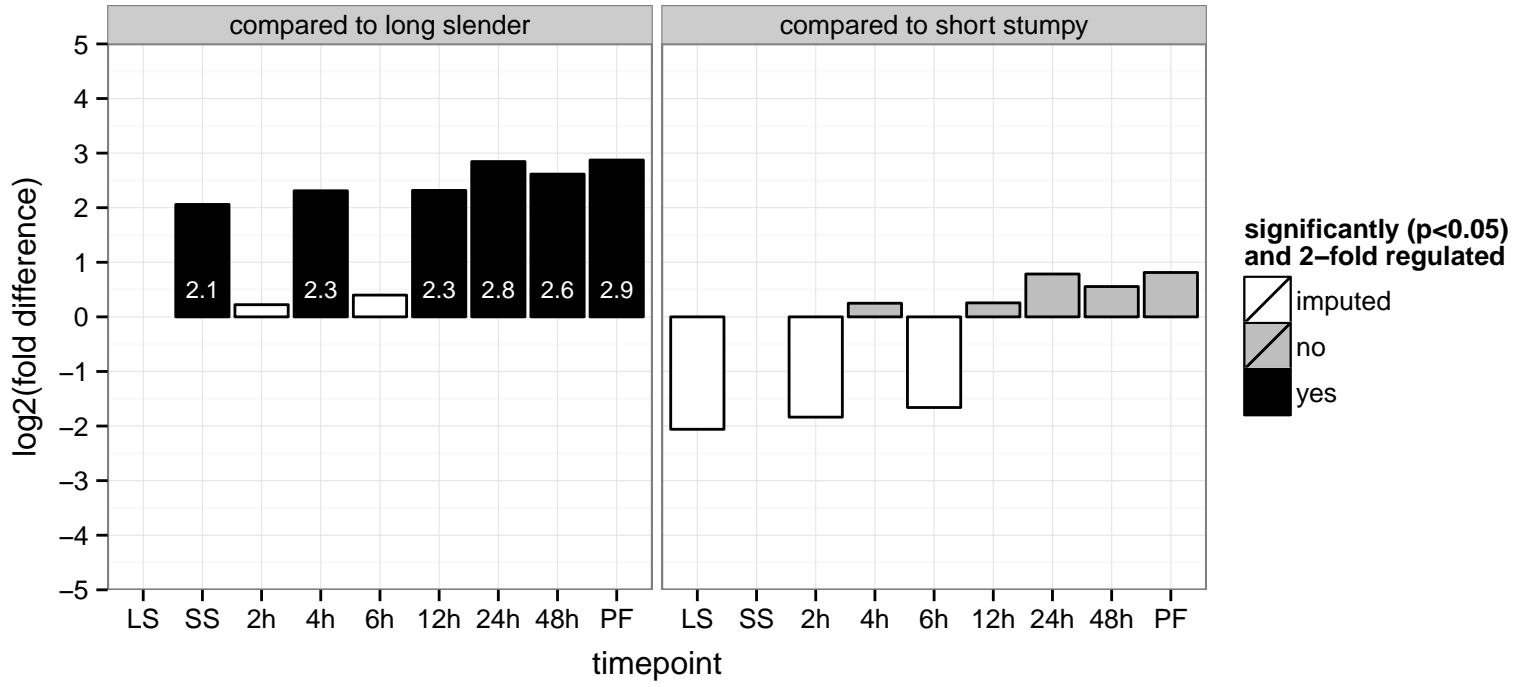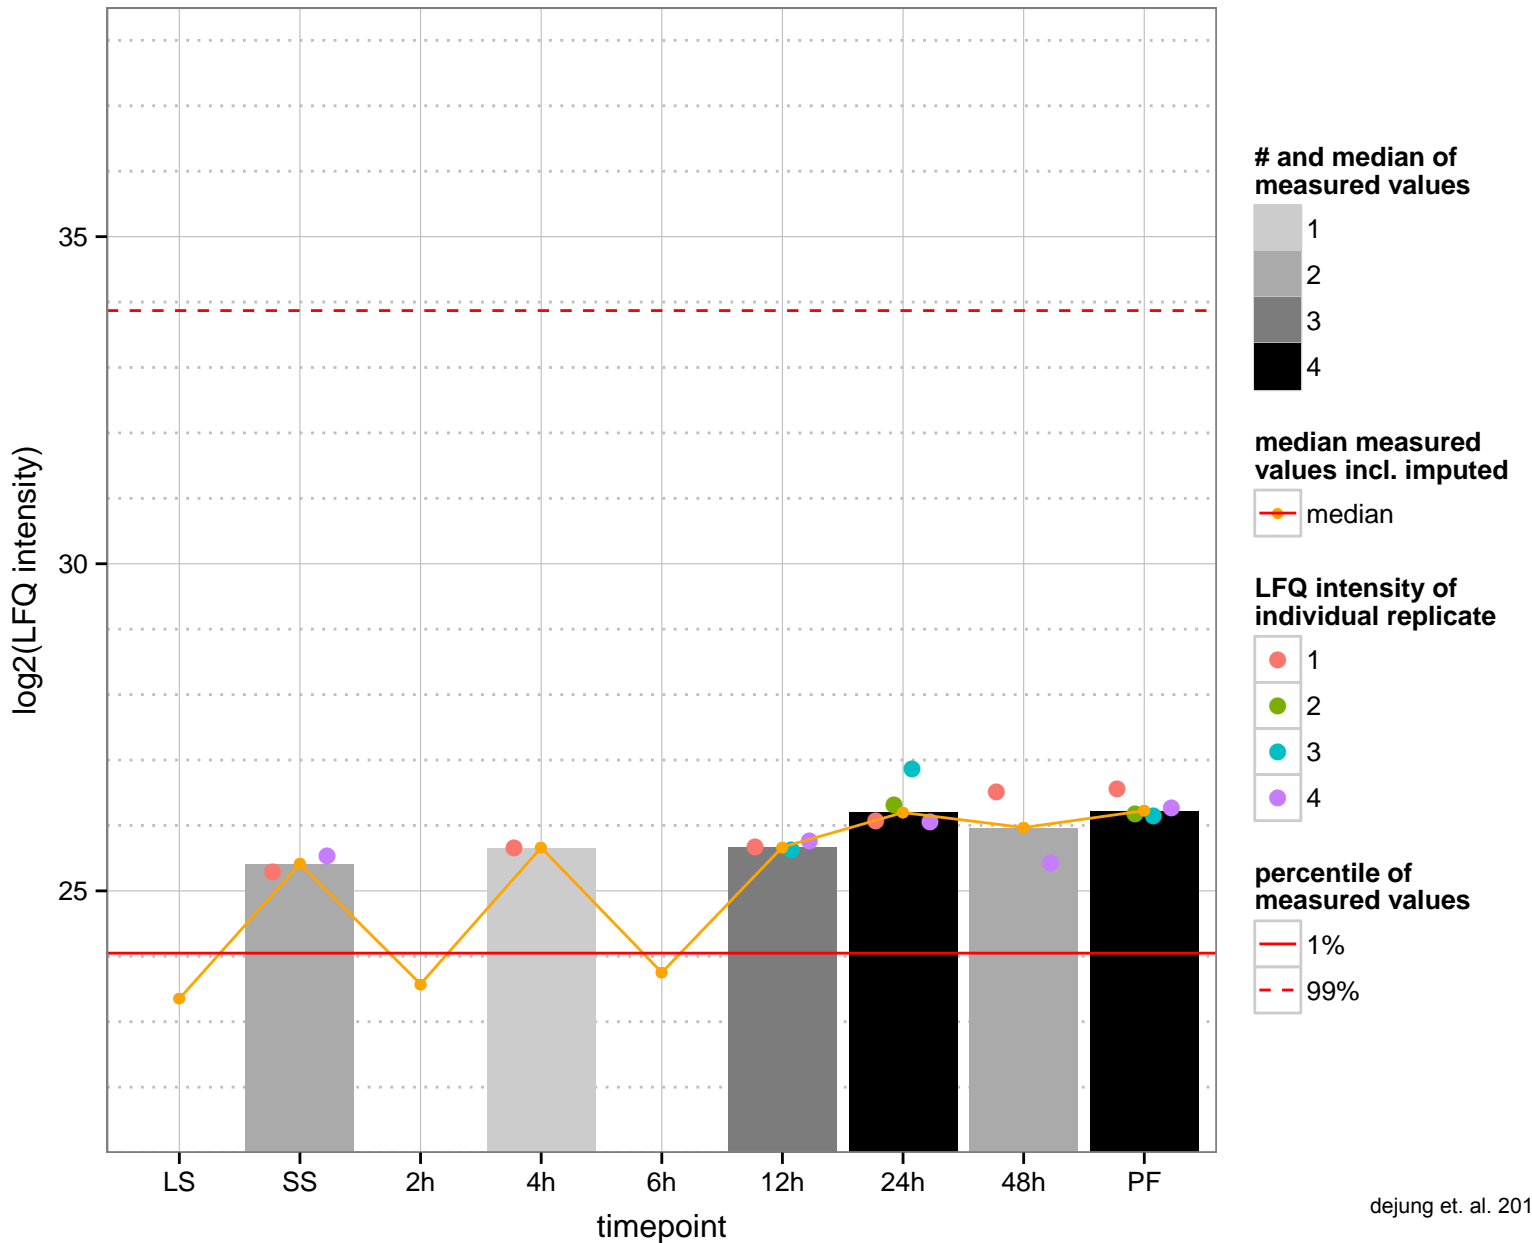

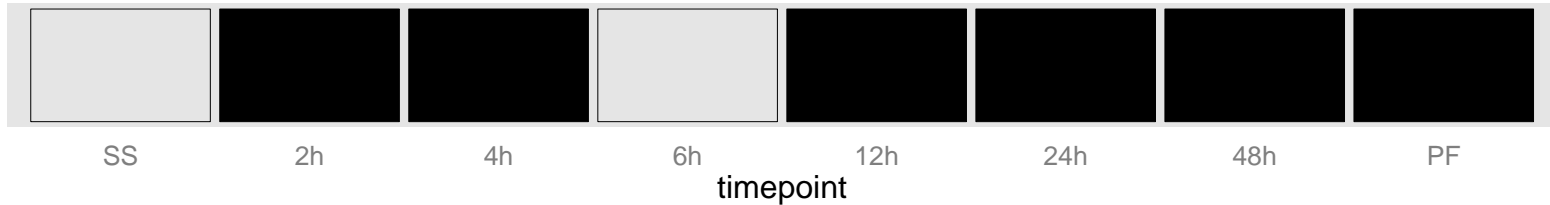

**regulated**  **not regulated**  **significant down**  **significant up**



NADH-ubiquinone oxidoreductase complex I subunit, putative, ferredoxin, putative (NDUFS1)  
 Tb927.10.12540  
 AGOF: electron carrier activity, glutathione-disulfide reductase activity, iron-sulfur cluster binding  
 AGOC: mitochondrion  
 AGOP: oxidation-reduction process  
 PGO: electron carrier activity, iron-sulfur cluster binding, oxidoreductase activity  
 PGO: null  
 PGO: oxidation-reduction process

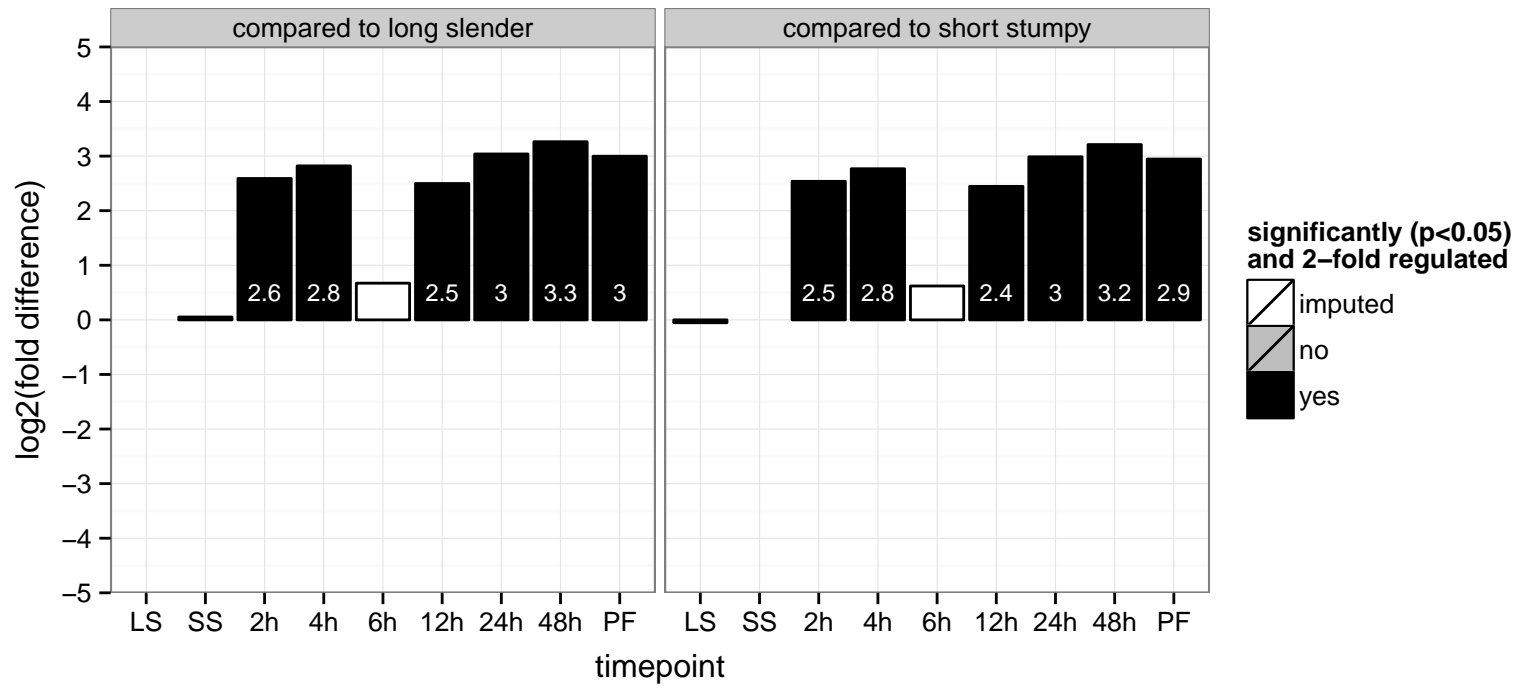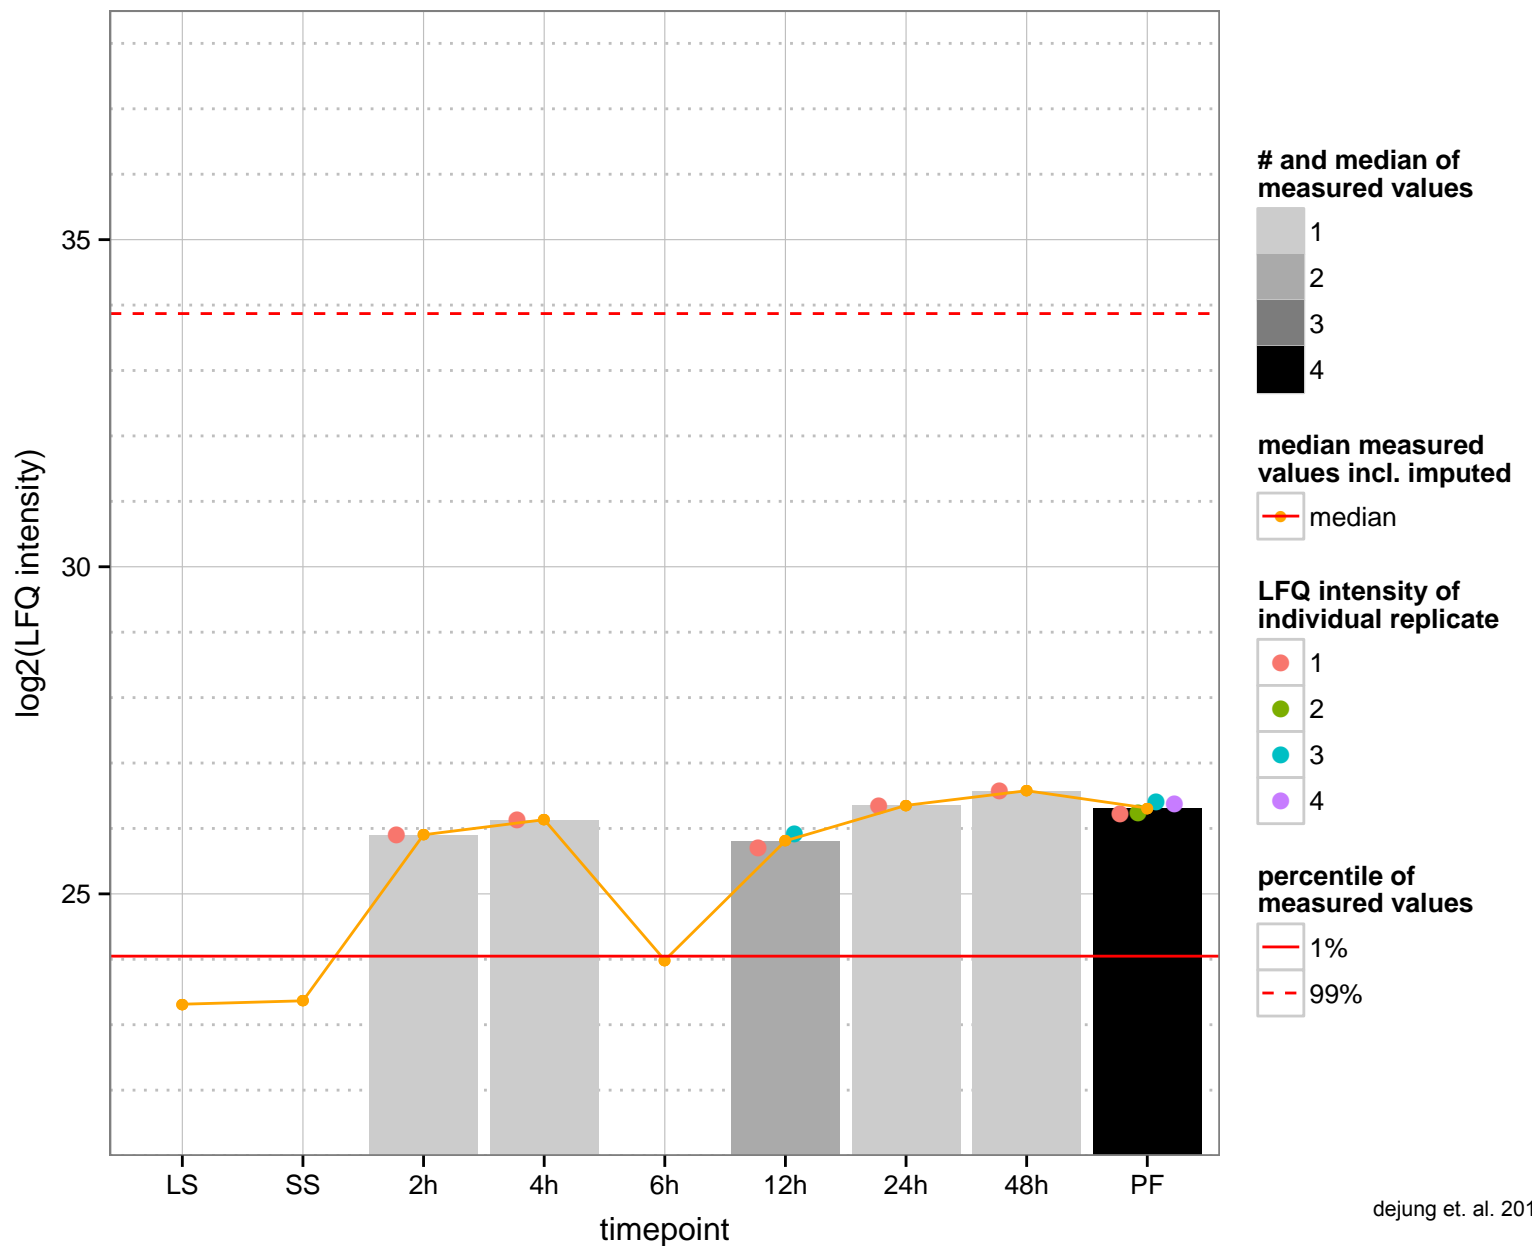

survival of motor neuron (SMN)-like protein (TbSMN)  
 Tb927.11.15000  
 AGOF: null  
 AGOC: nucleus  
 AGOP: null  
 PGO: null  
 PGOC: null  
 PGOP: null

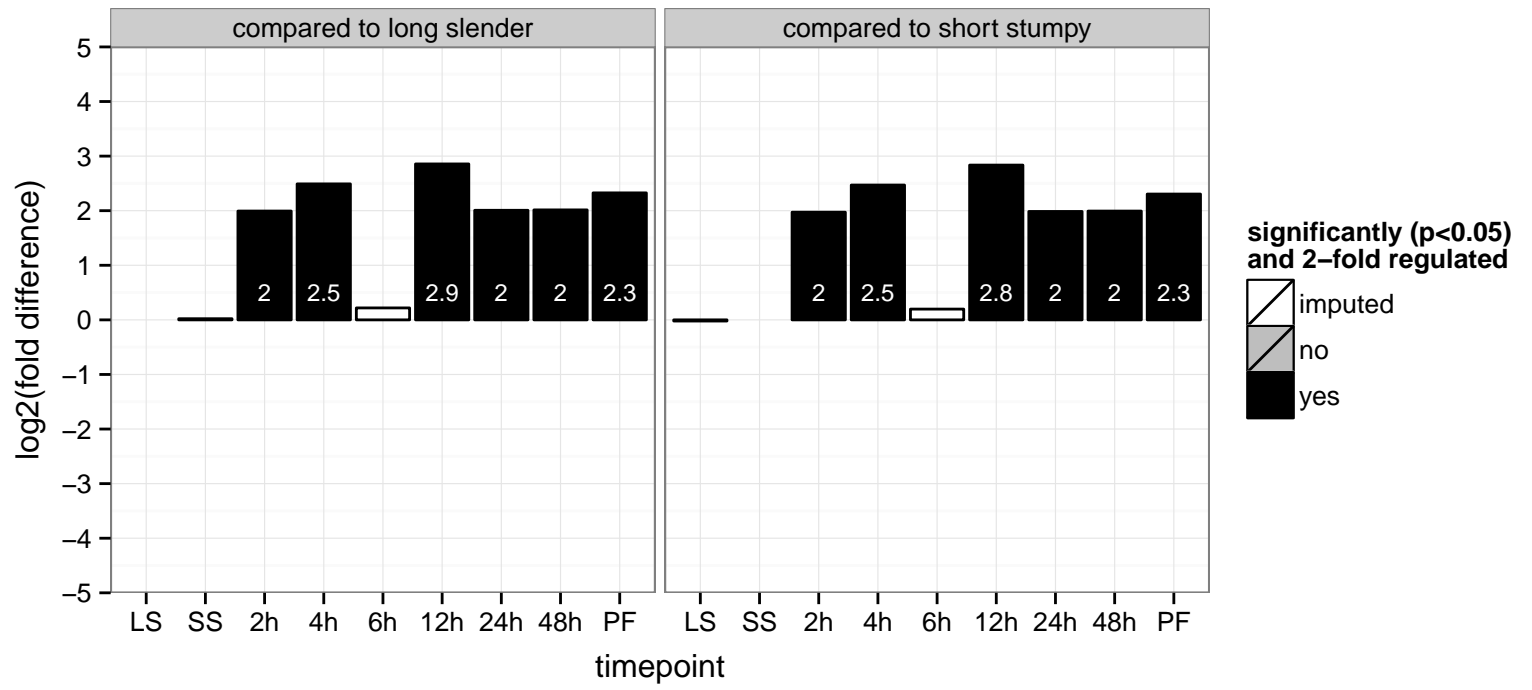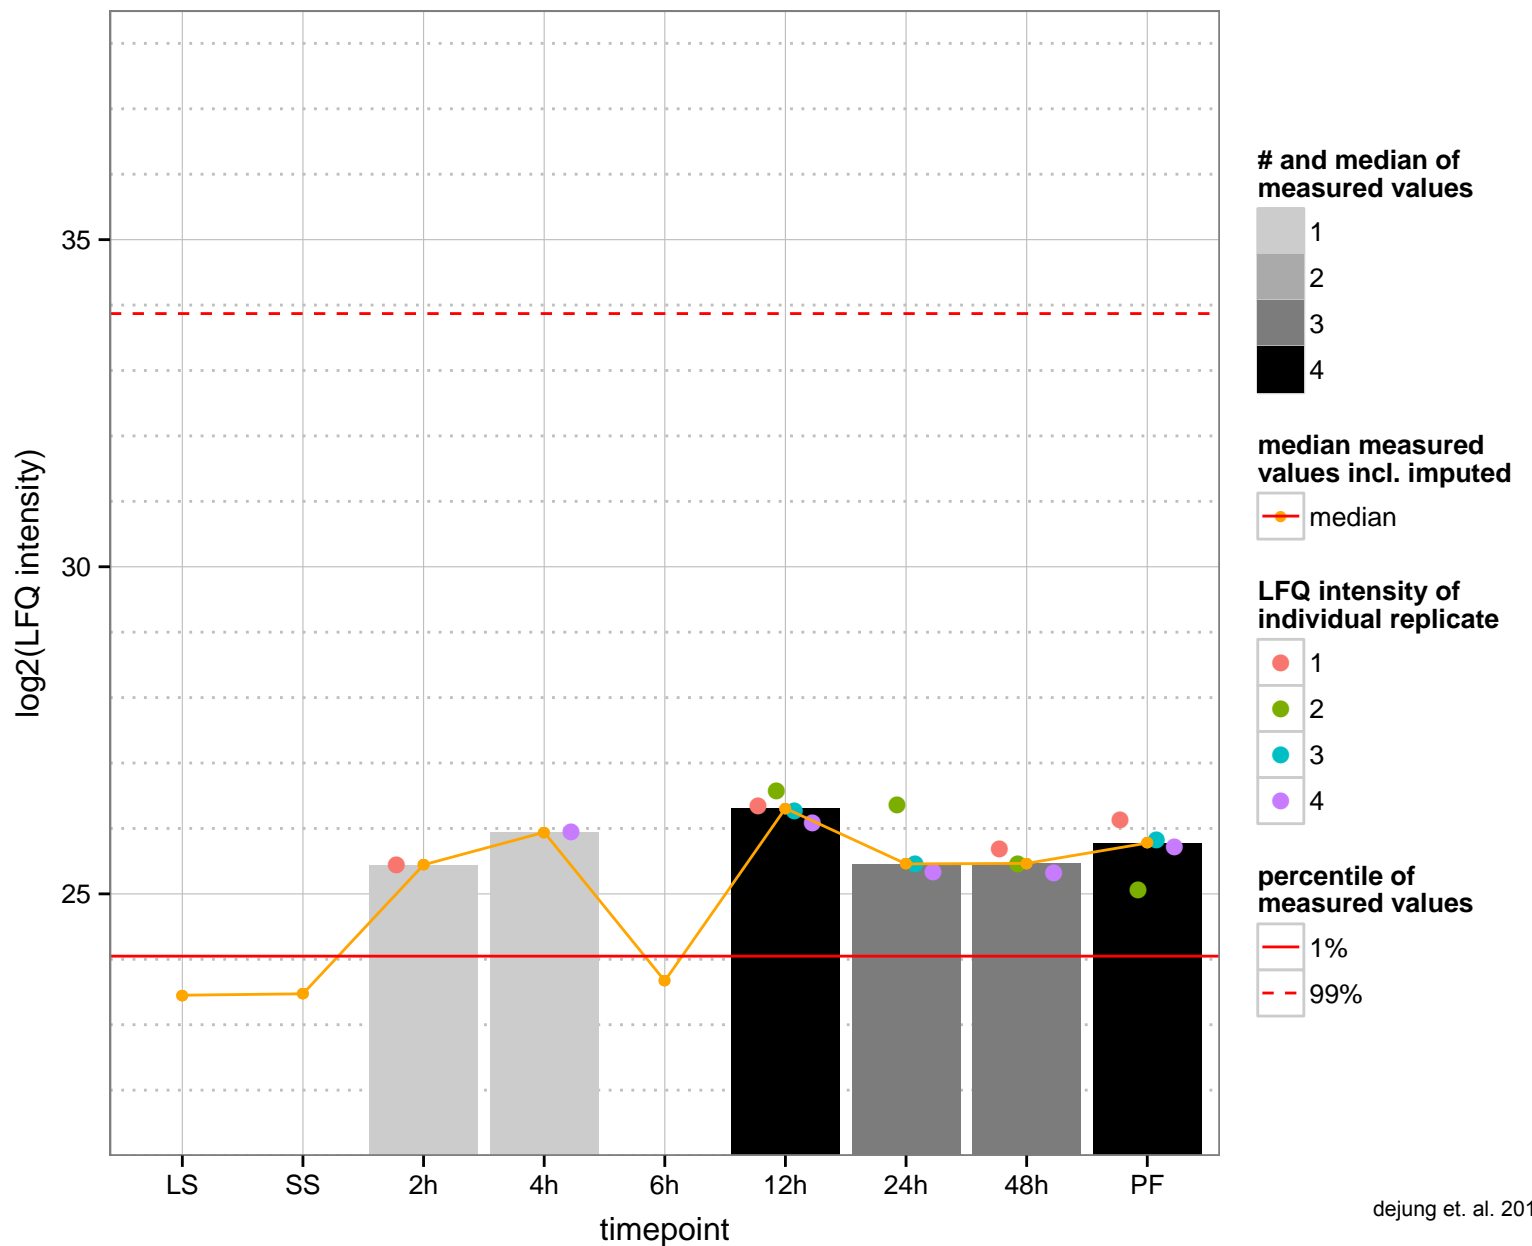

kinteoplast poly(A) polymerase complex 1 subunit  
 Tb927.11.15850  
 AGOF: RNA binding  
 AGOC: mitochondrion  
 AGOP: RNA polyadenylation, mRNA stabilization  
 PGO: null  
 PGOC: null  
 PGOP: null

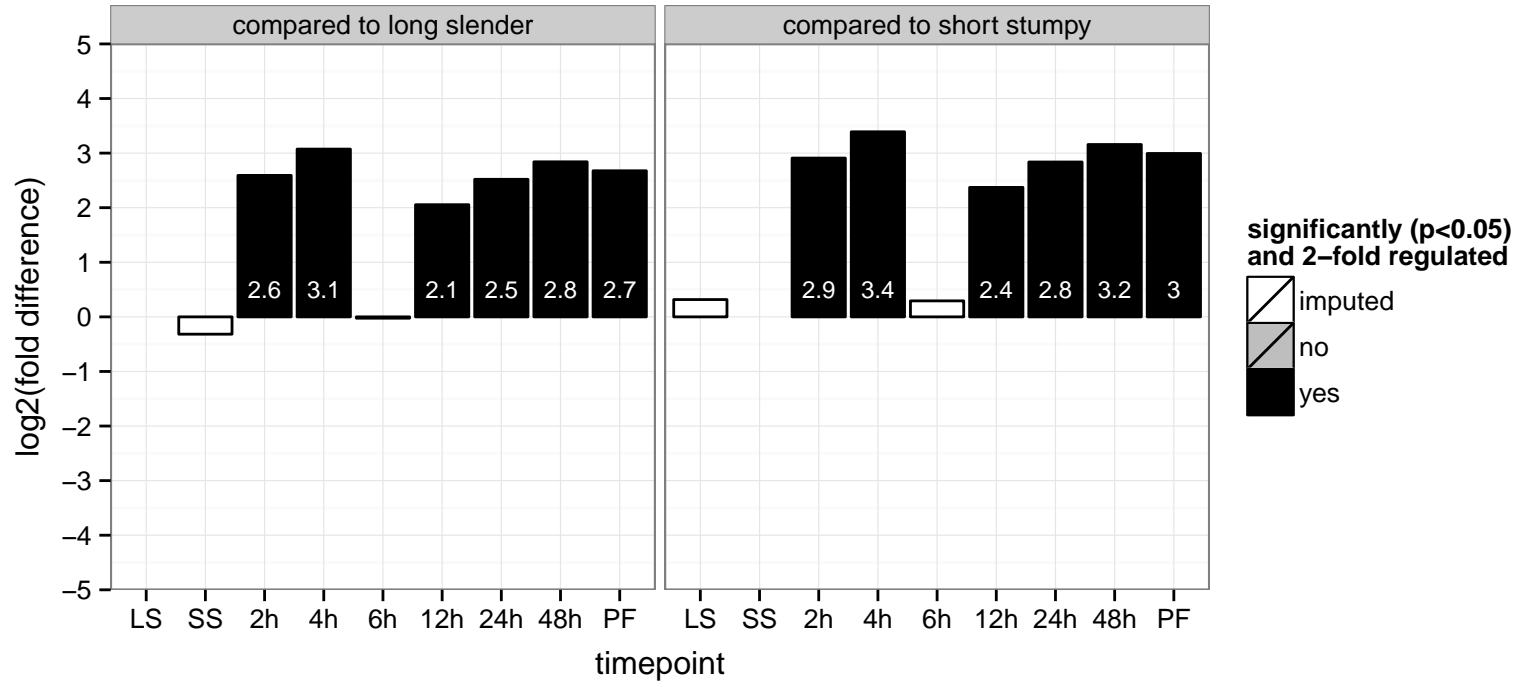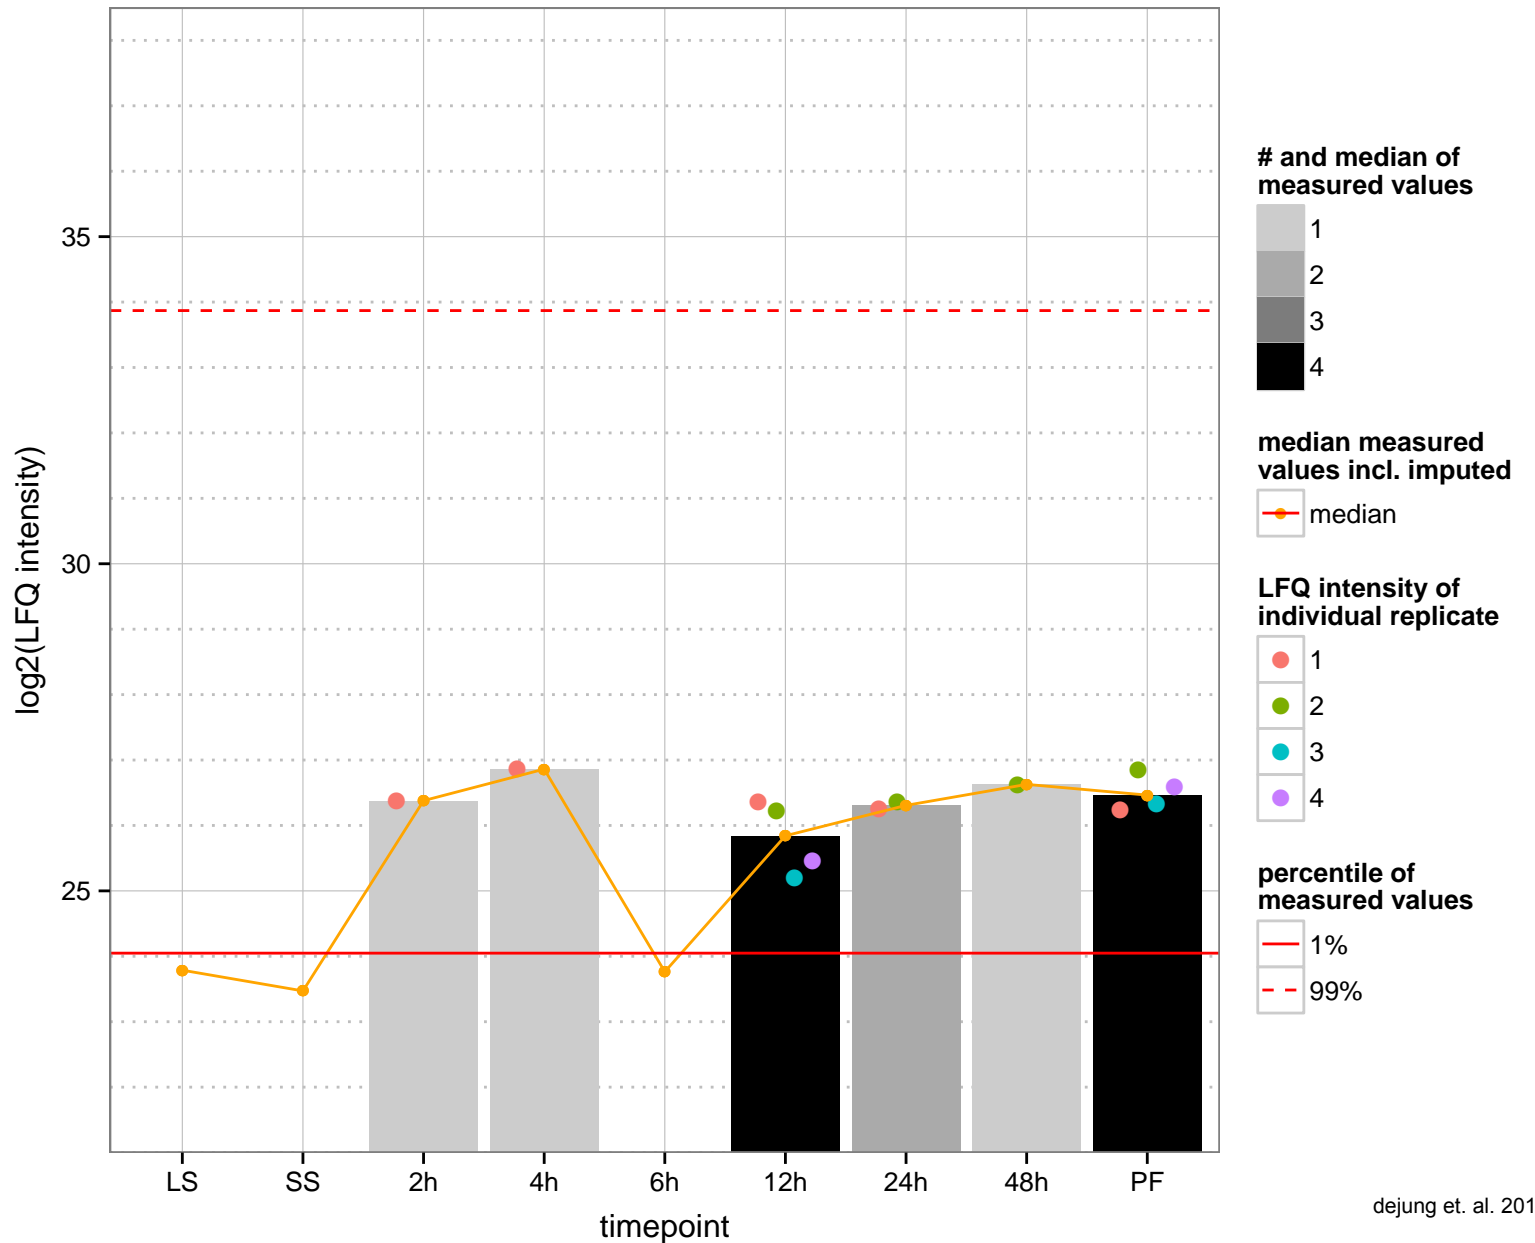

hypothetical protein, conserved  
 Tb927.6.2560  
 AGOF: null  
 AGOC: null  
 AGOP: null  
 PGO: null  
 PGOC: null  
 PGOP: null

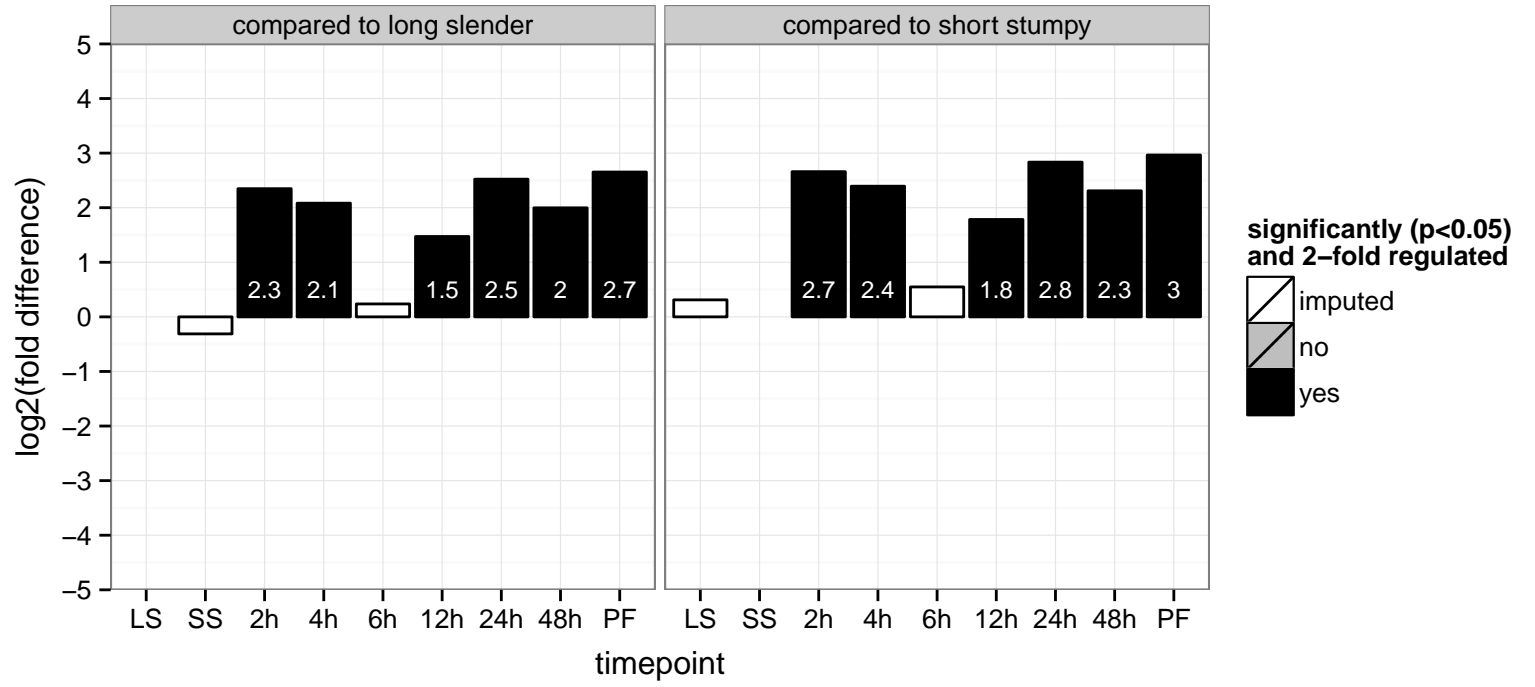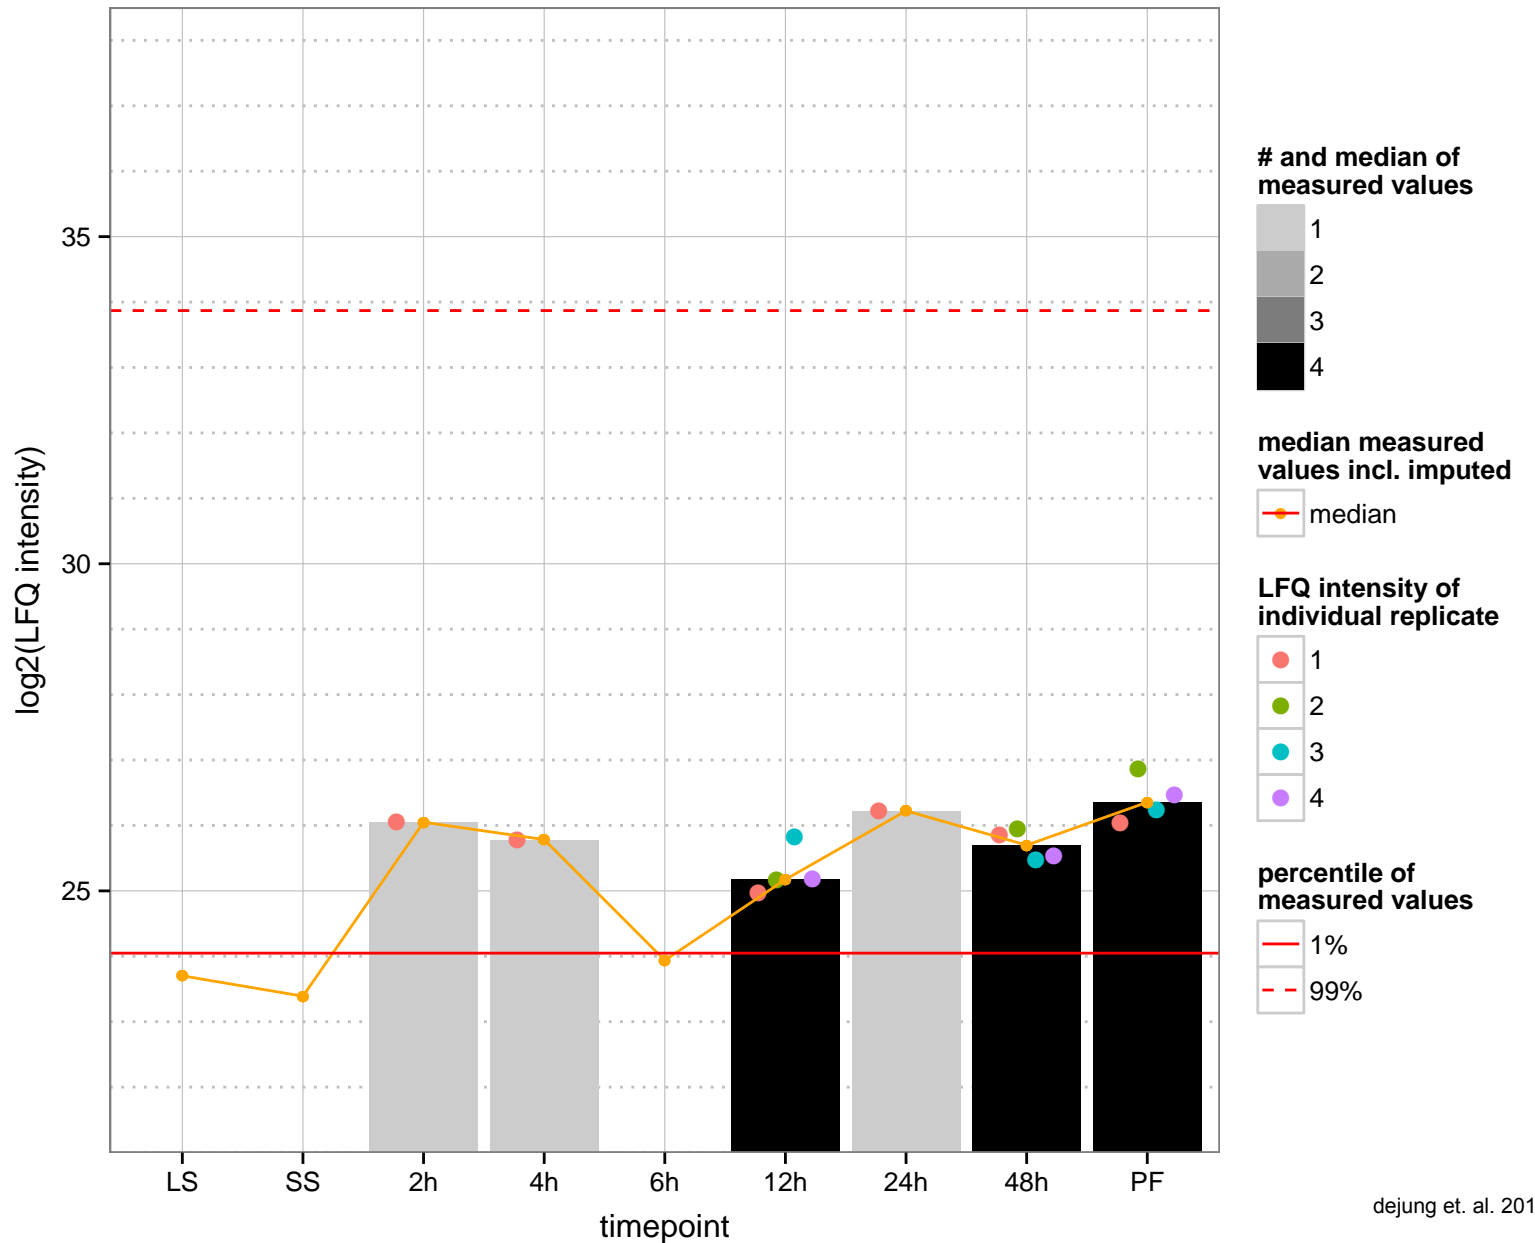

hypothetical protein, conserved  
 Tb927.7.4310  
 AGOF: flavin adenine dinucleotide binding, oxidoreductase activity  
 AGOC: null  
 AGOP: null  
 PGOF: flavin adenine dinucleotide binding, oxidoreductase activity  
 PGOC: null  
 PGOP: oxidation–reduction process

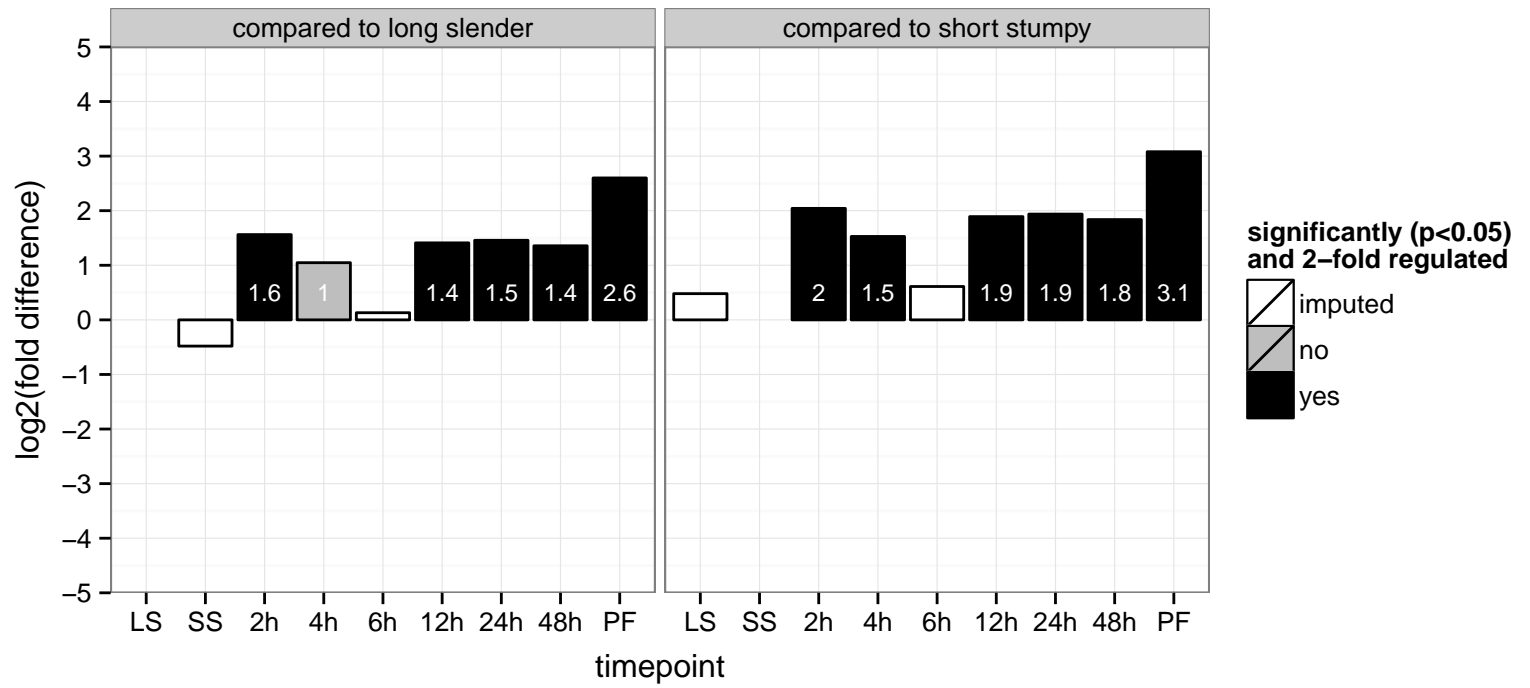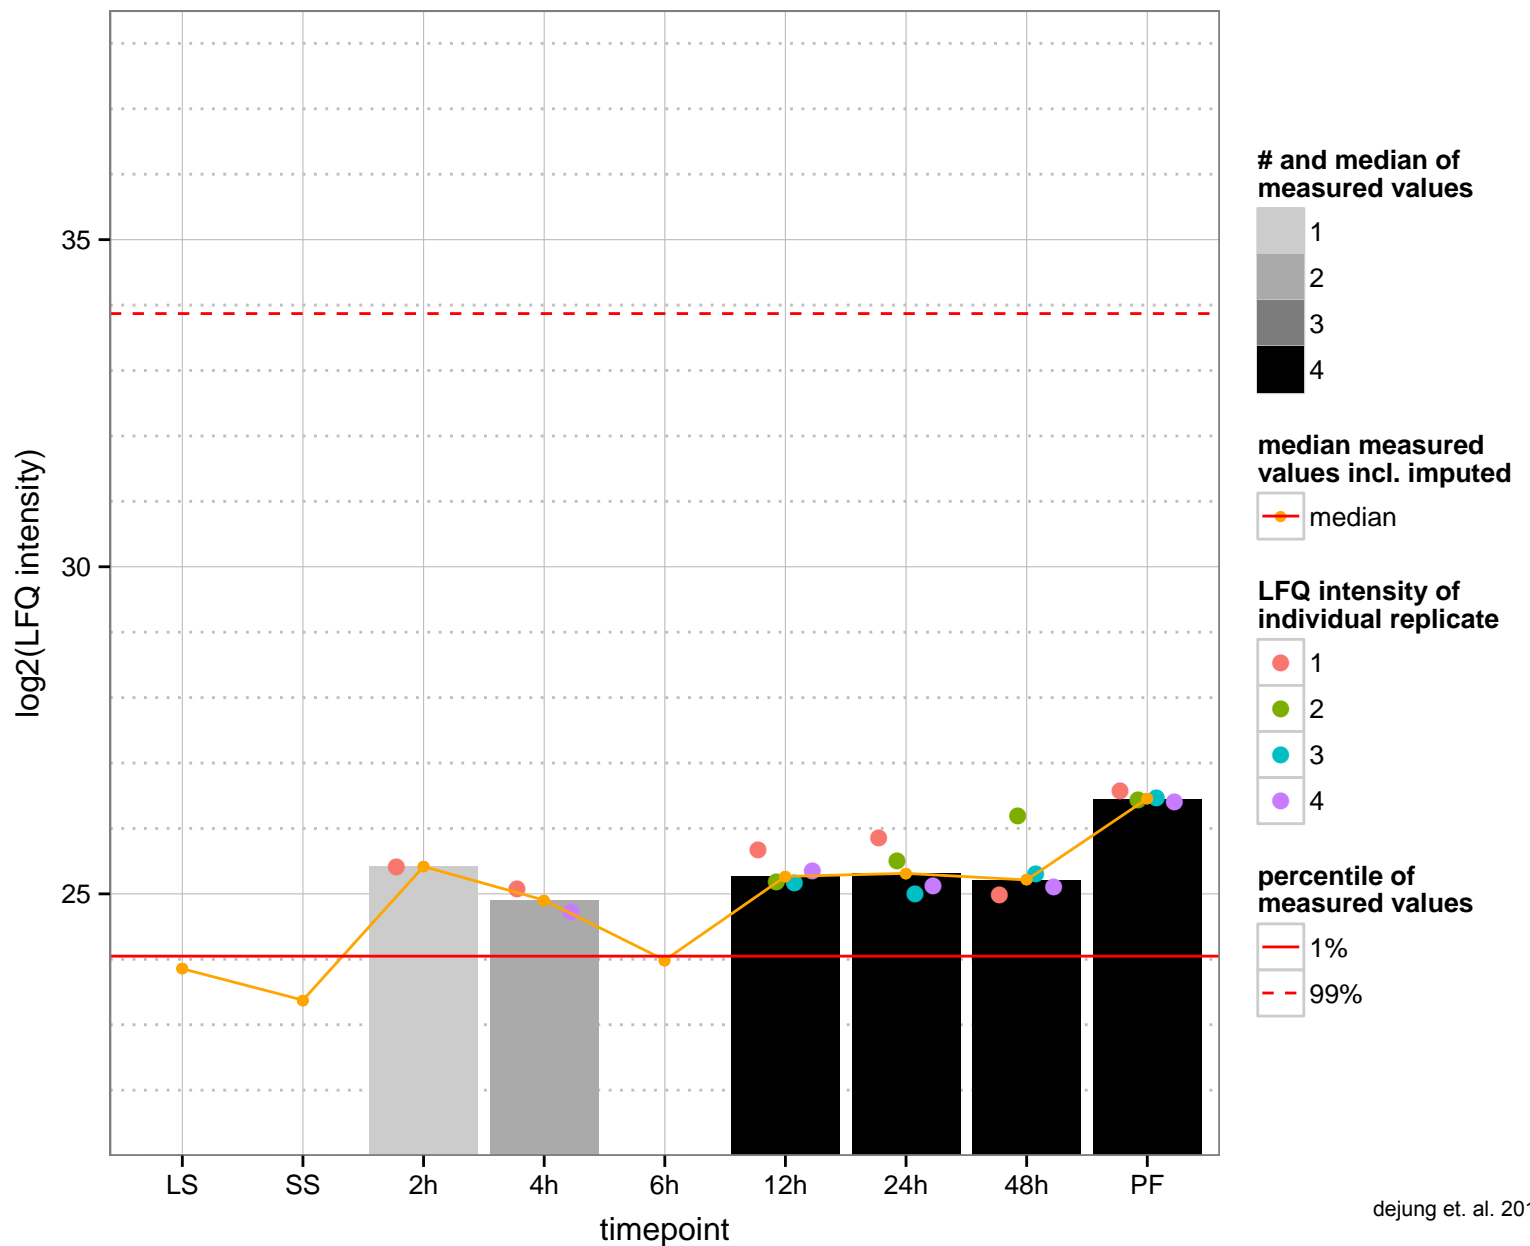

WD-repeat containing protein  
 Tb927.8.3860  
 AGOF: null  
 AGOC: null  
 AGOP: null  
 PGO: protein binding  
 PGOC: null  
 PGOP: null

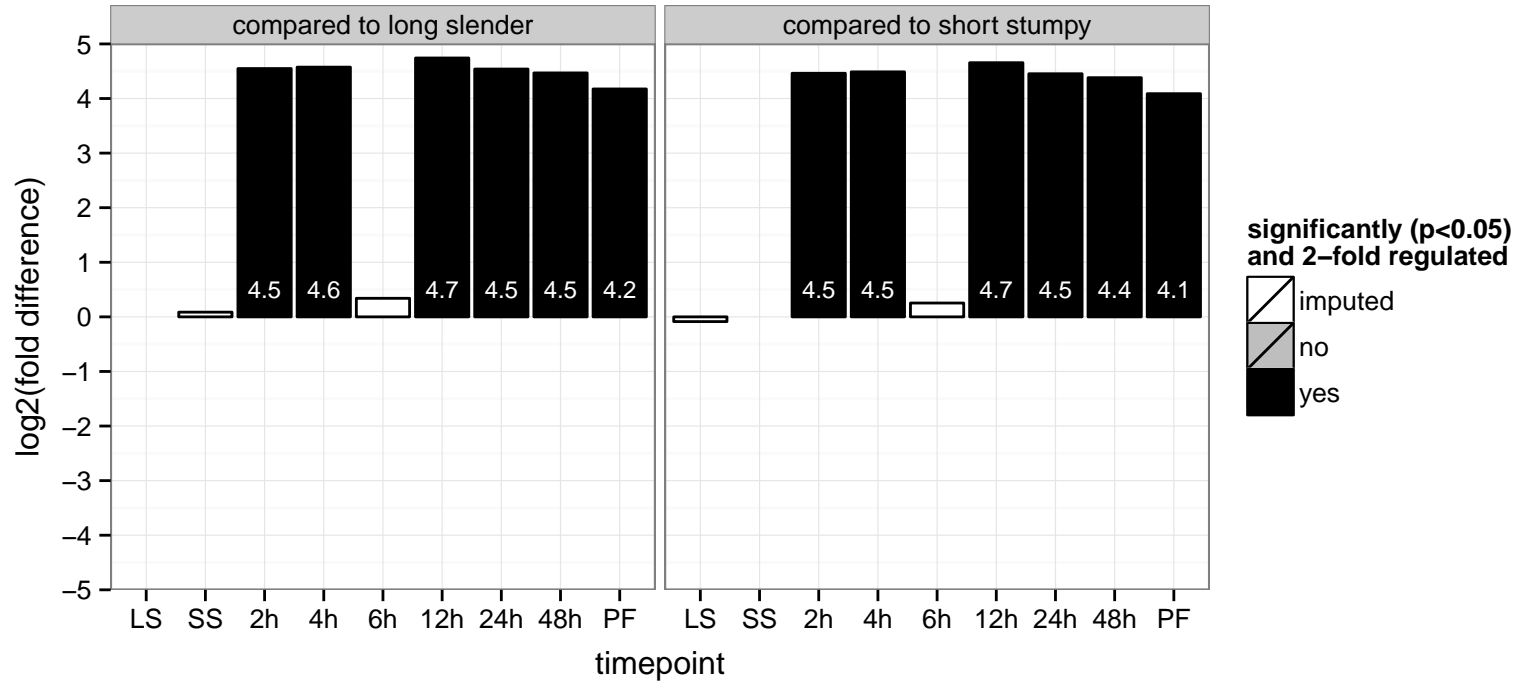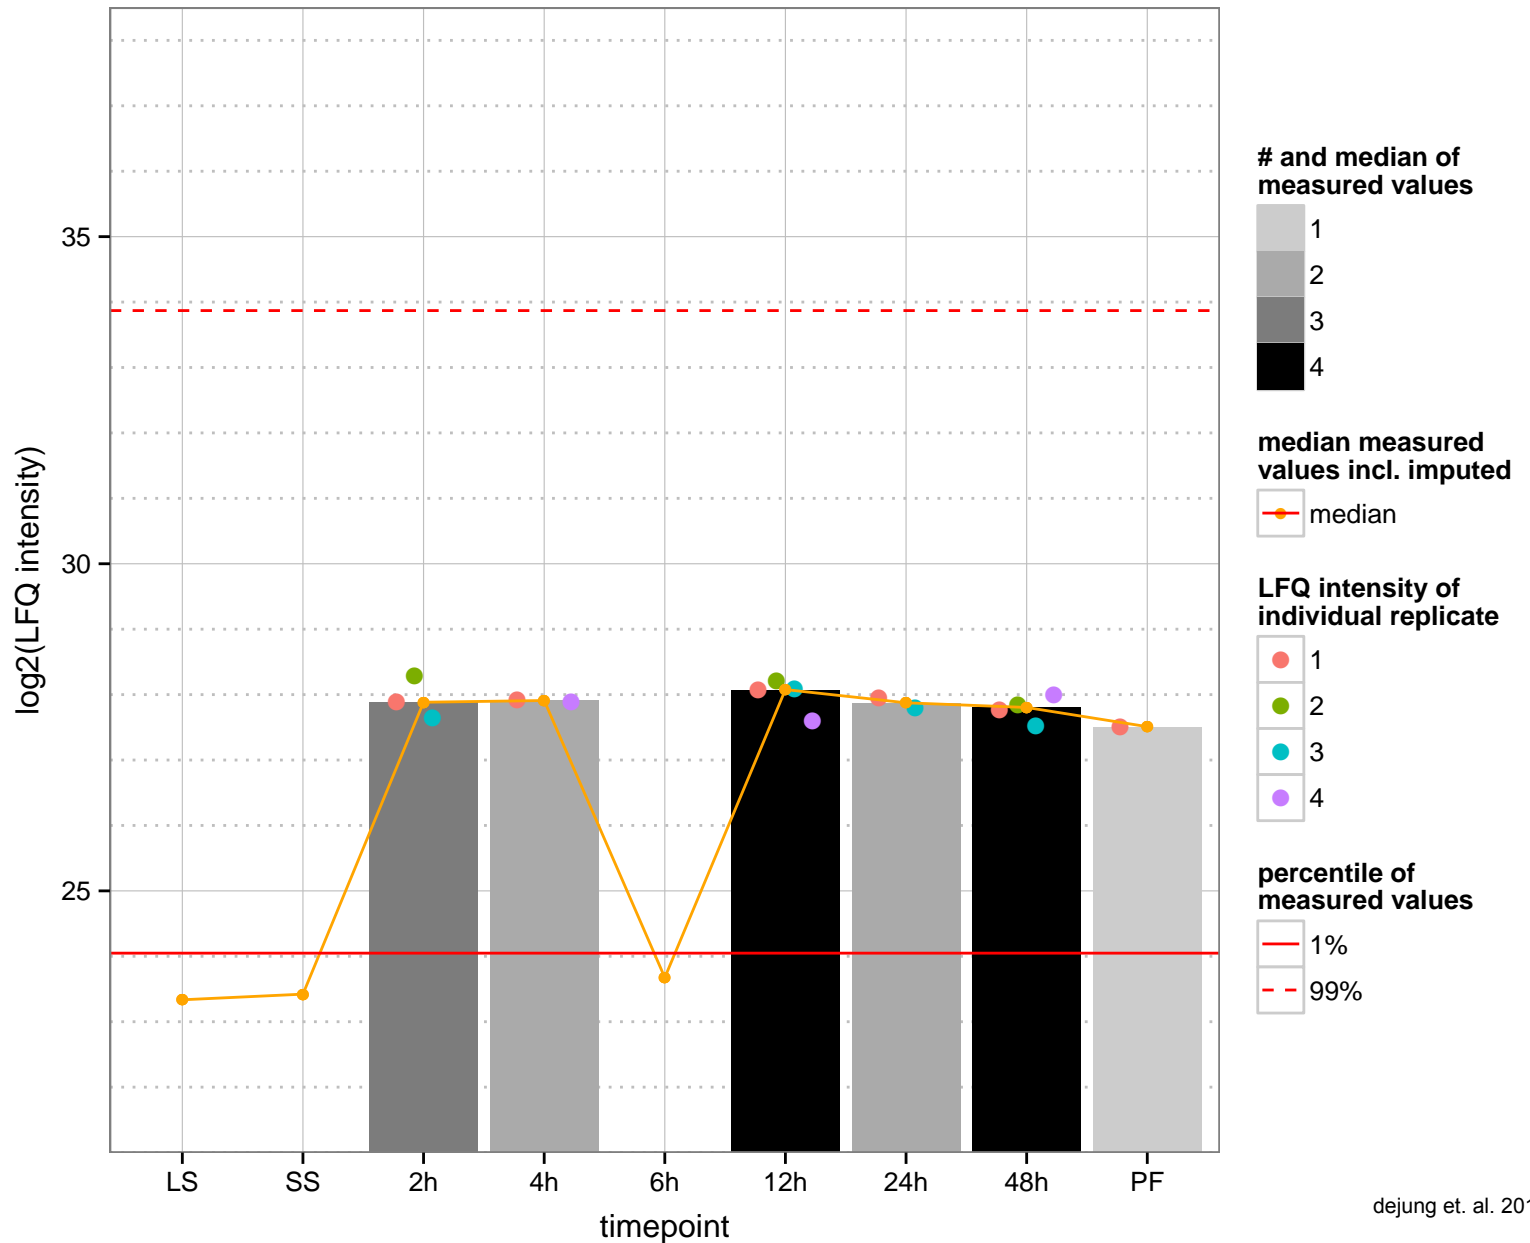

predicted zinc finger protein  
 Tb927.9.11070  
 AGOF: zinc ion binding  
 AGOC: null  
 AGOP: null  
 PGOF: zinc ion binding  
 PGOC: null  
 PGOP: null

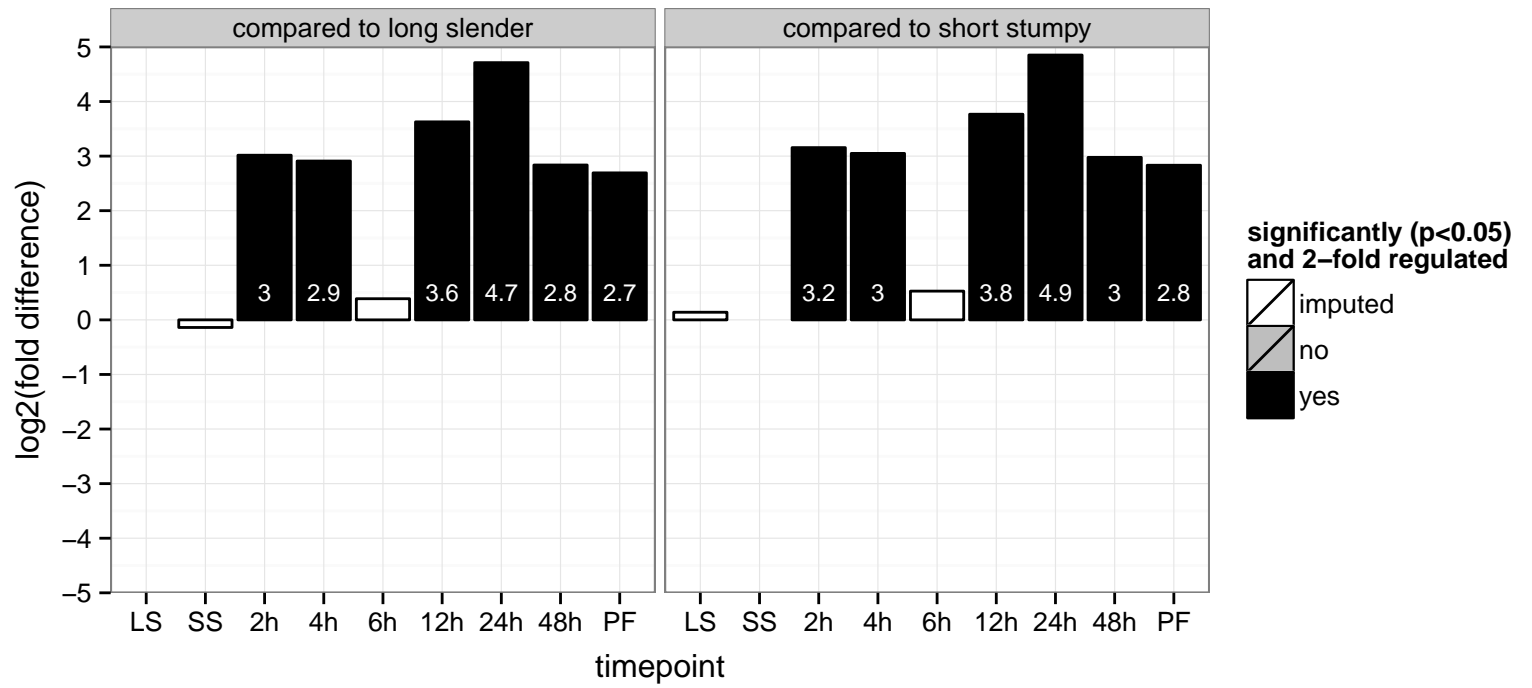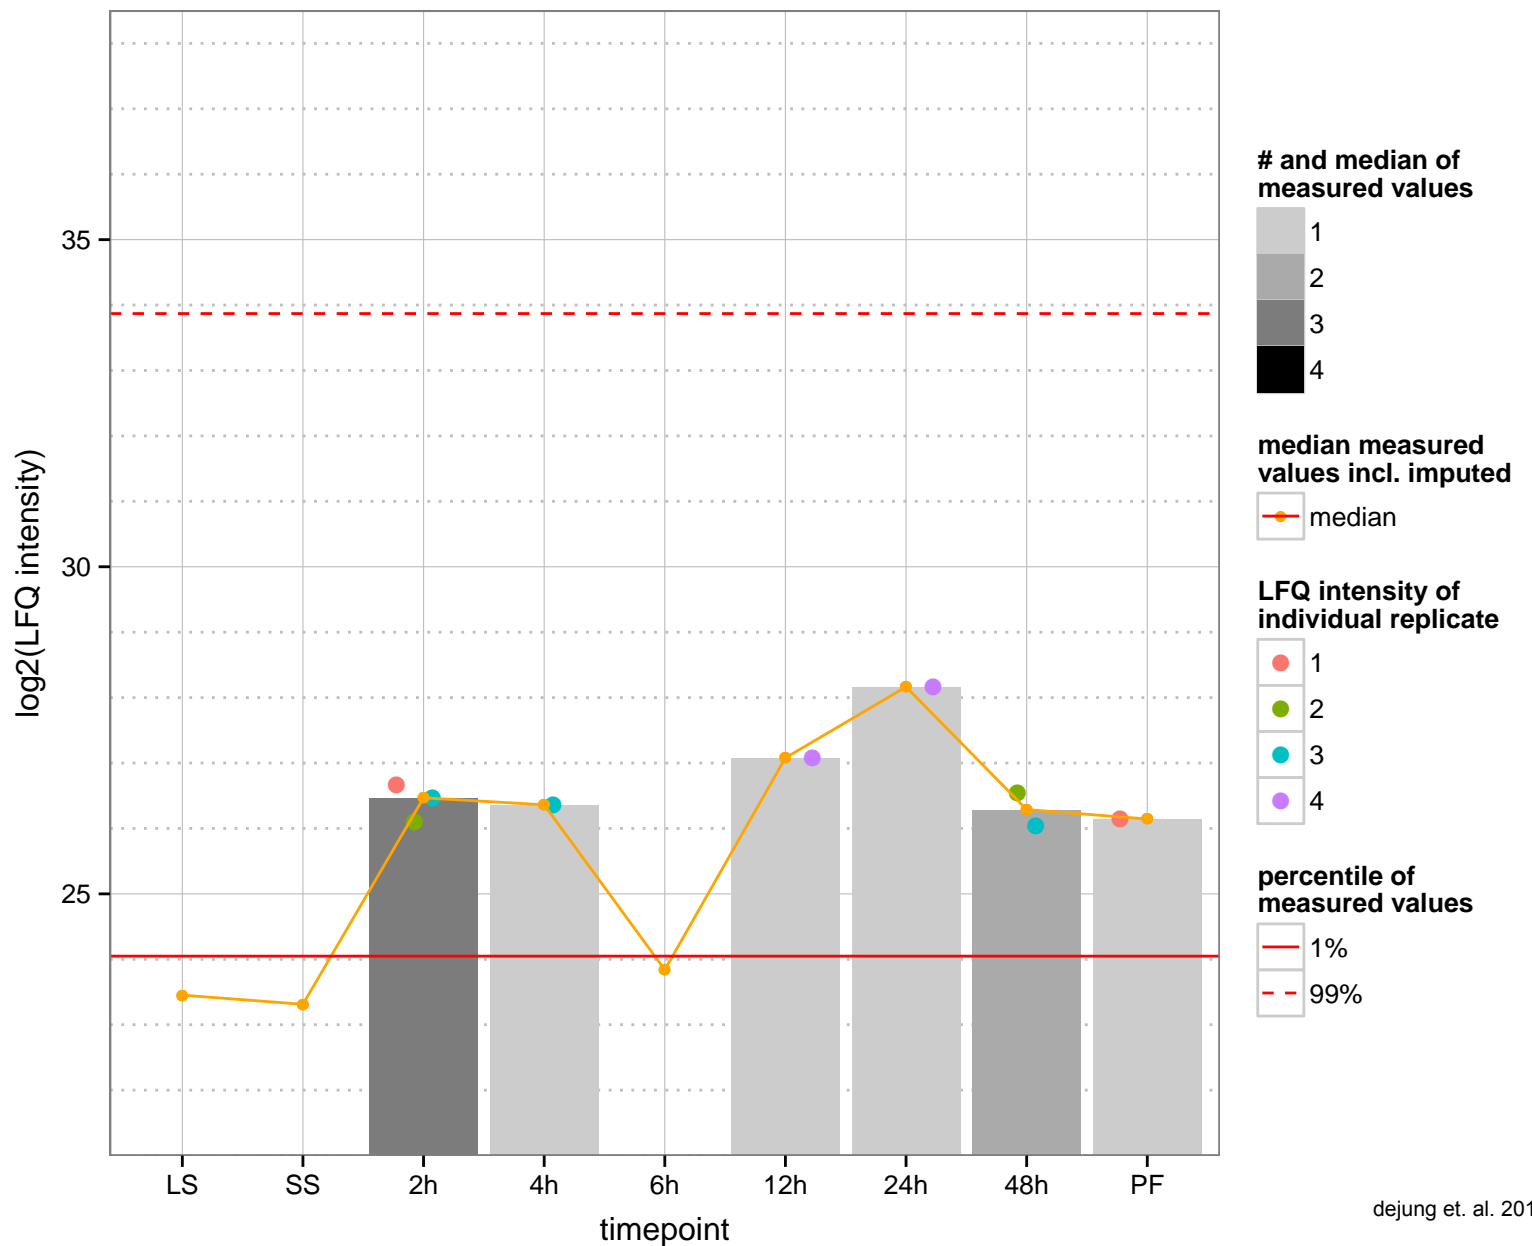

unspecified product  
 Tb927.9.12120  
 AGOF: null  
 AGOC: null  
 AGOP: null  
 PGOF: null  
 PGOc: null  
 PGOP: null

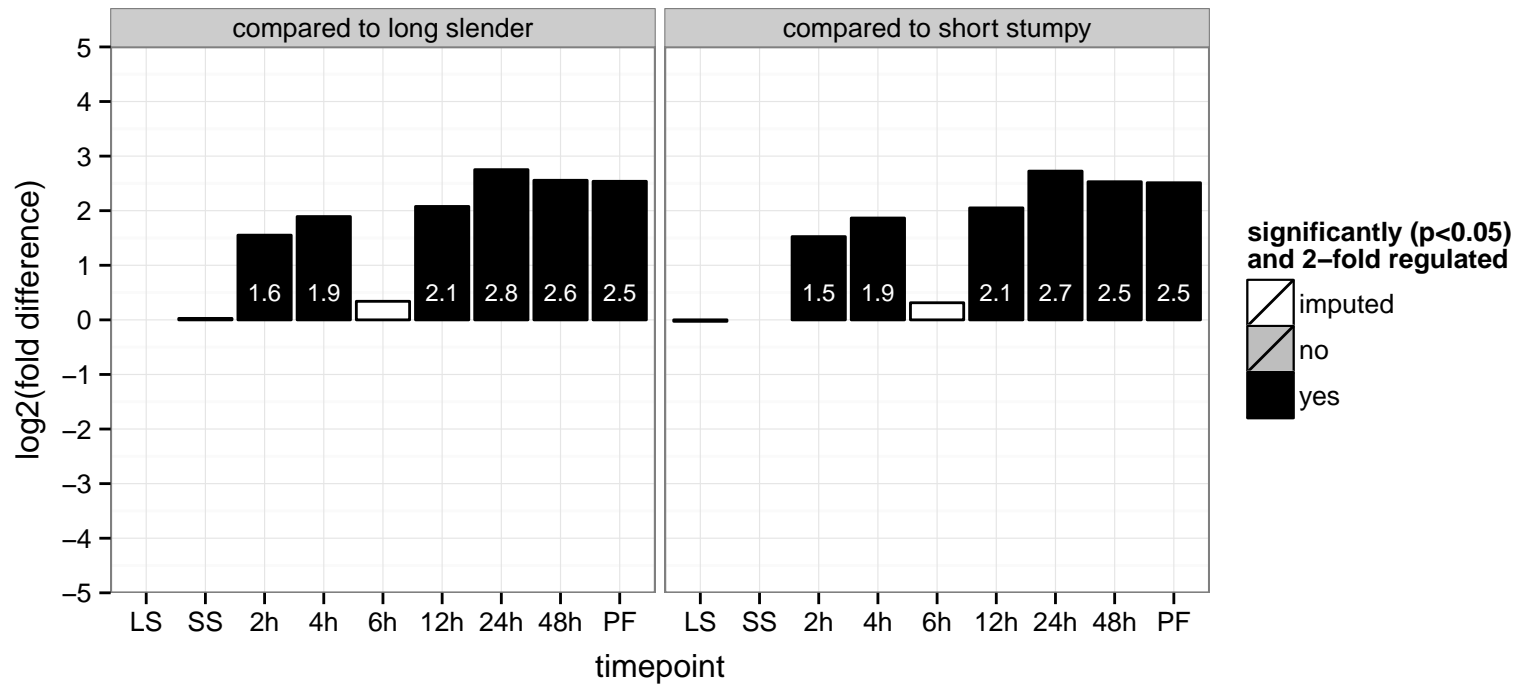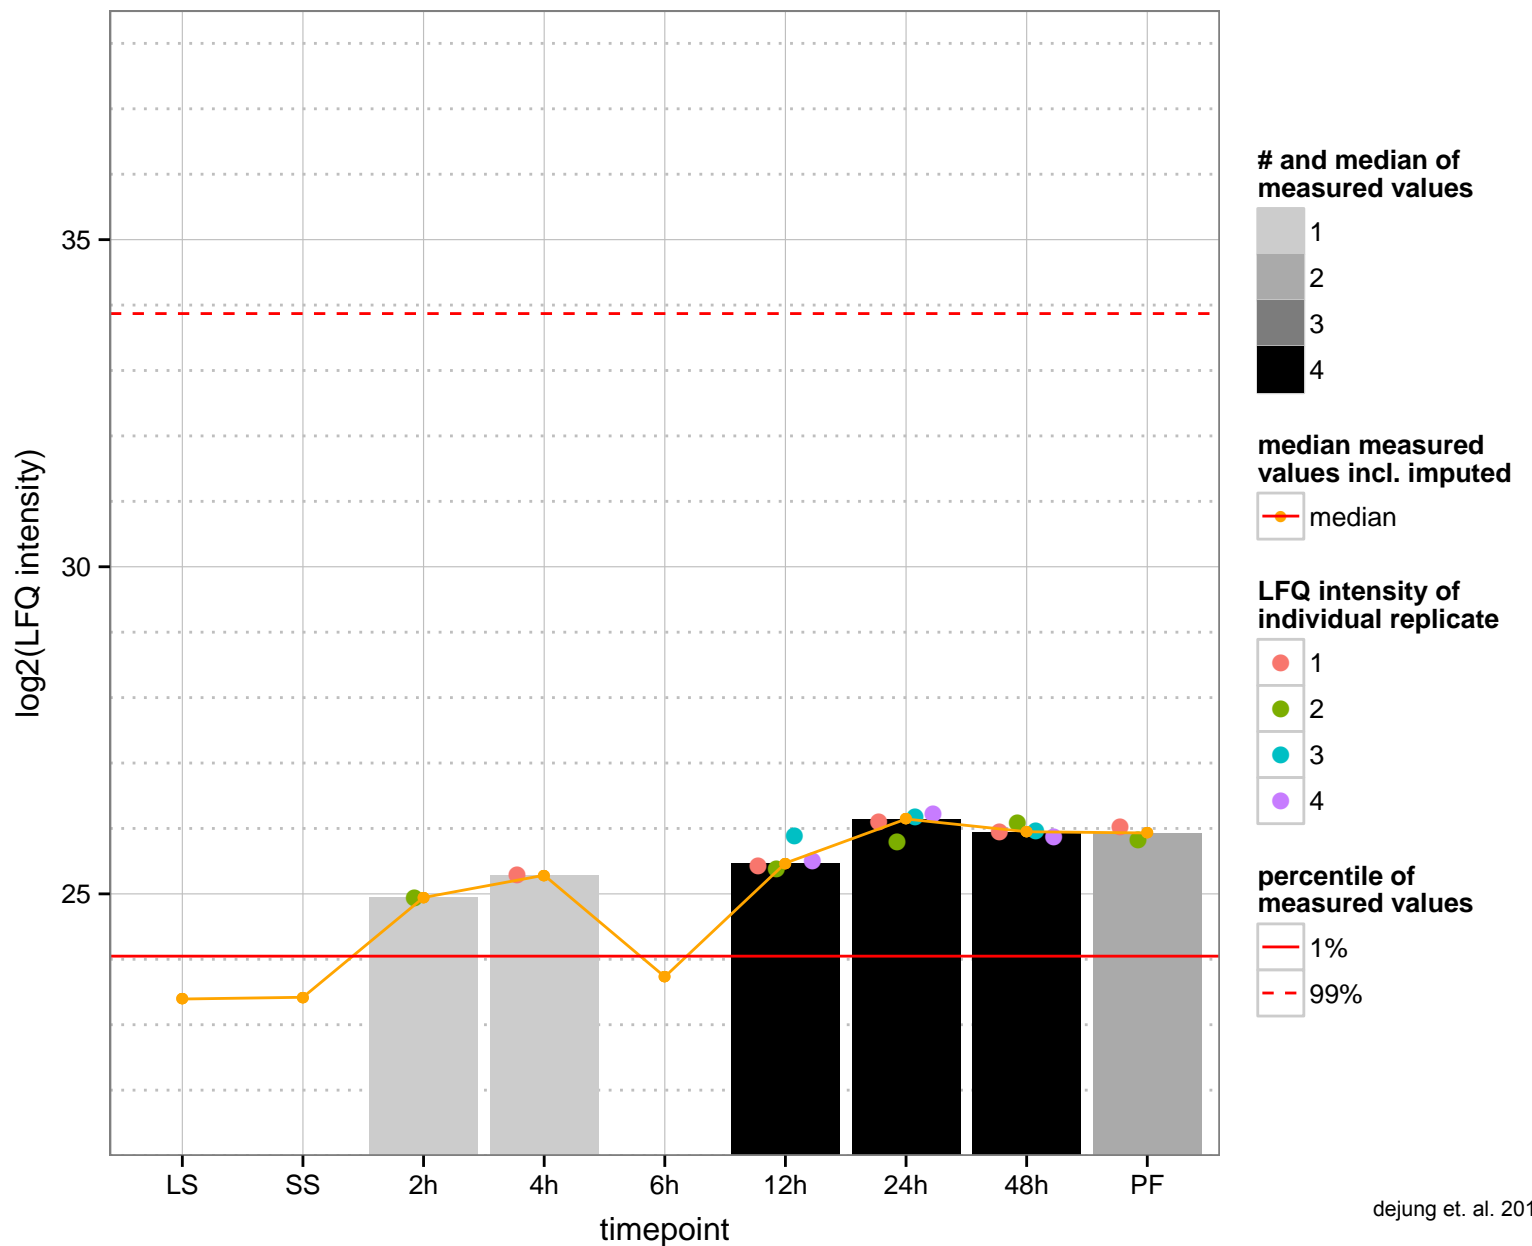



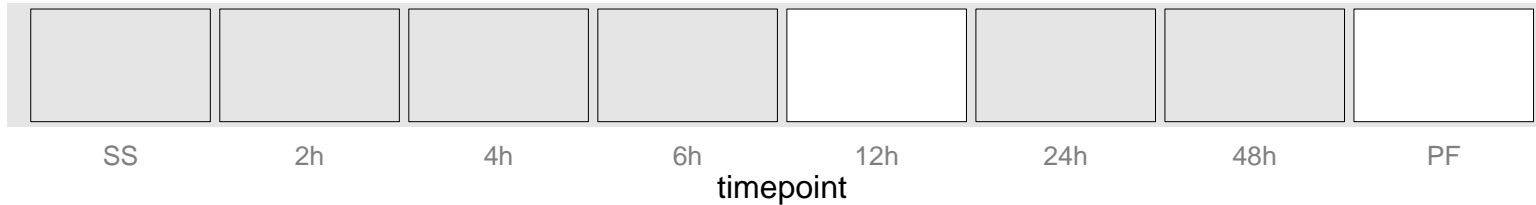

**regulated**  **not regulated**  **significant down**  **significant up**

deoxyhypusine synthase, putative  
 Tb927.10.2750  
 AGOF: deoxyhypusine synthase activity  
 AGOC: cytosol  
 AGOP: peptidyl-lysine modification to hypusine, post-translational protein modification  
 PGOF: null  
 PGOC: null  
 PGOP: peptidyl-lysine modification to hypusine

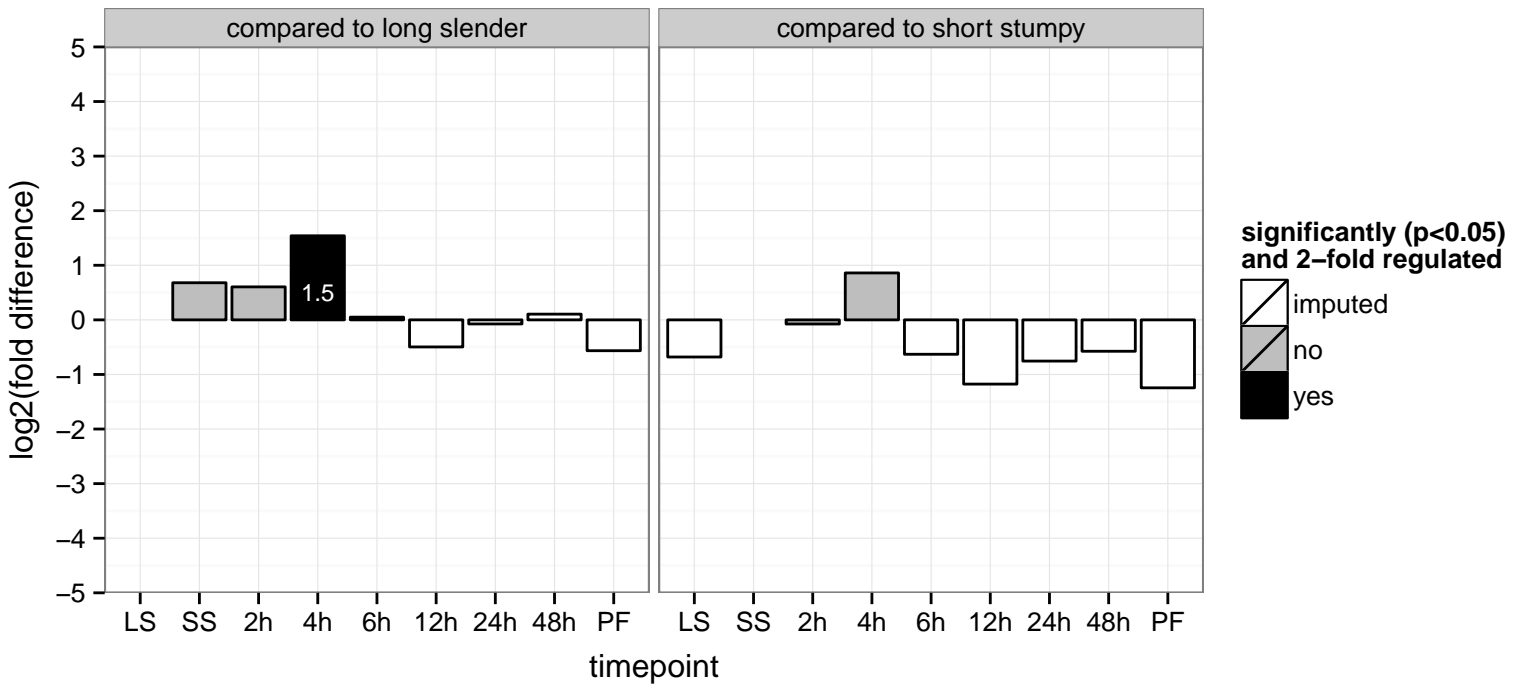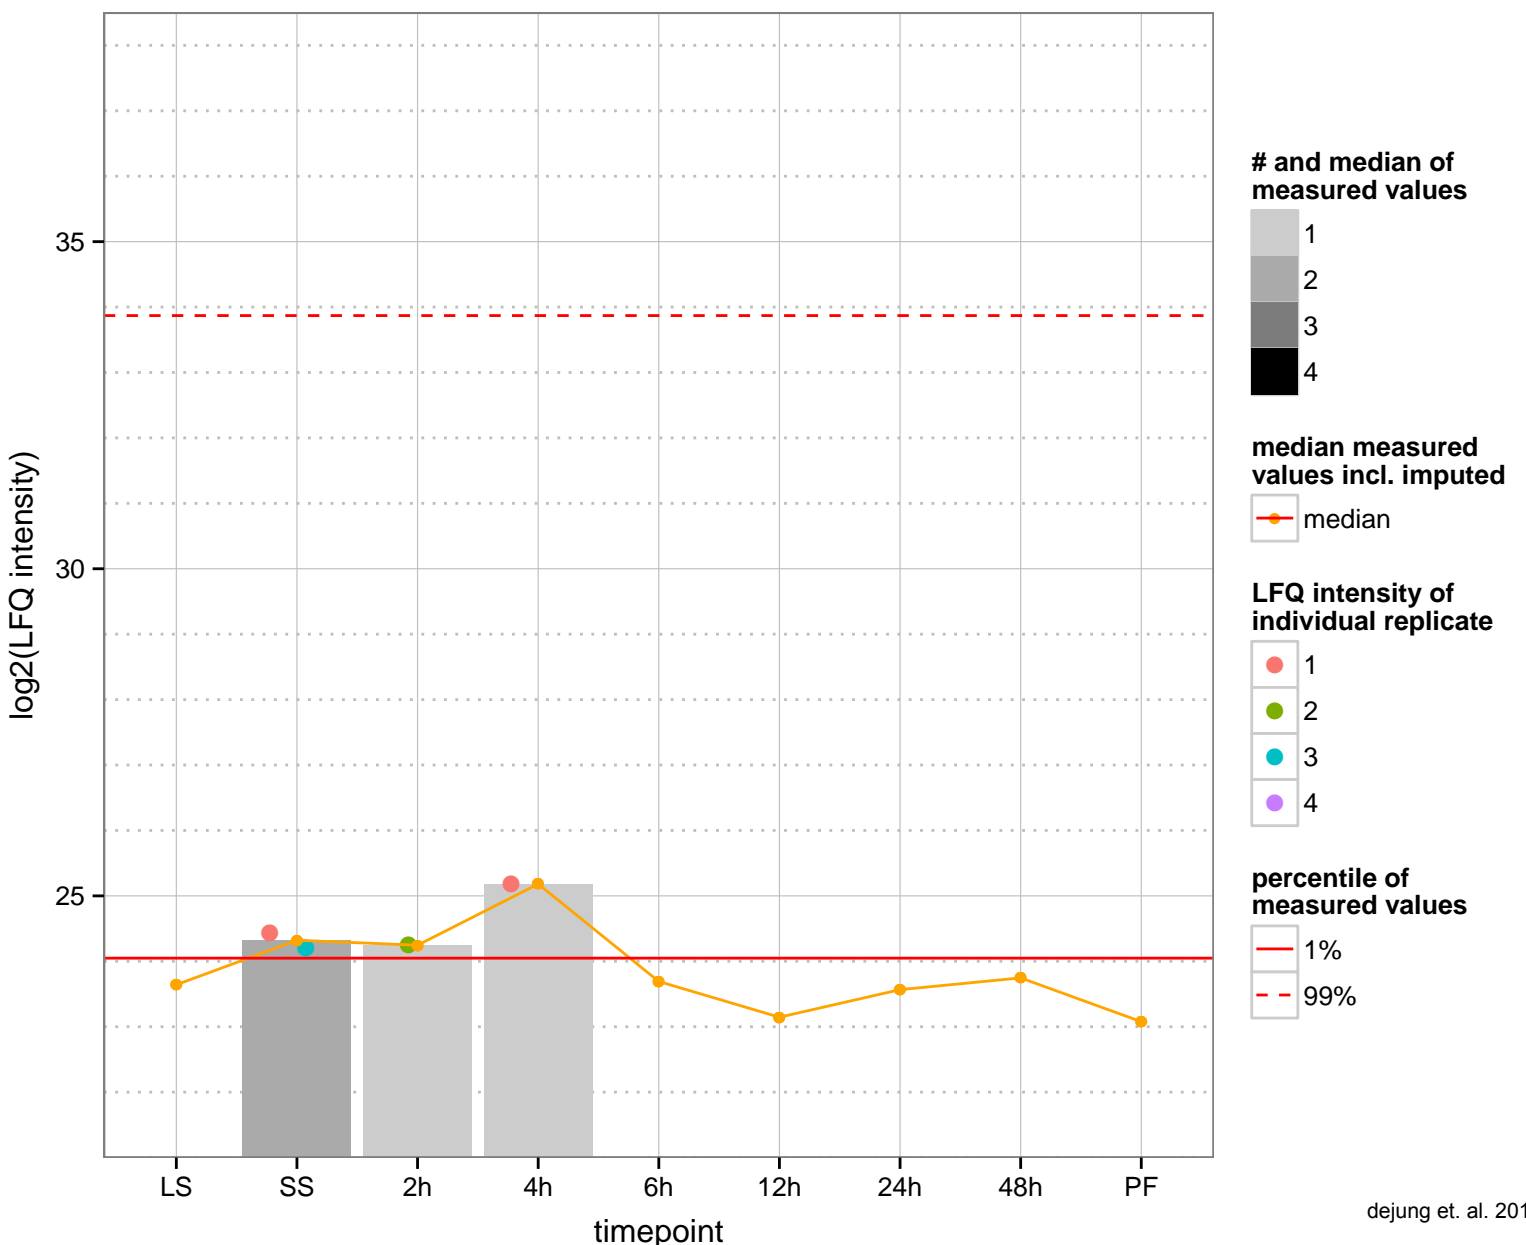

hypothetical protein, conserved  
 Tb927.10.420  
 AGOF: null  
 AGOC: null  
 AGOP: null  
 PGO: protein binding  
 PGOC: null  
 PGOP: null

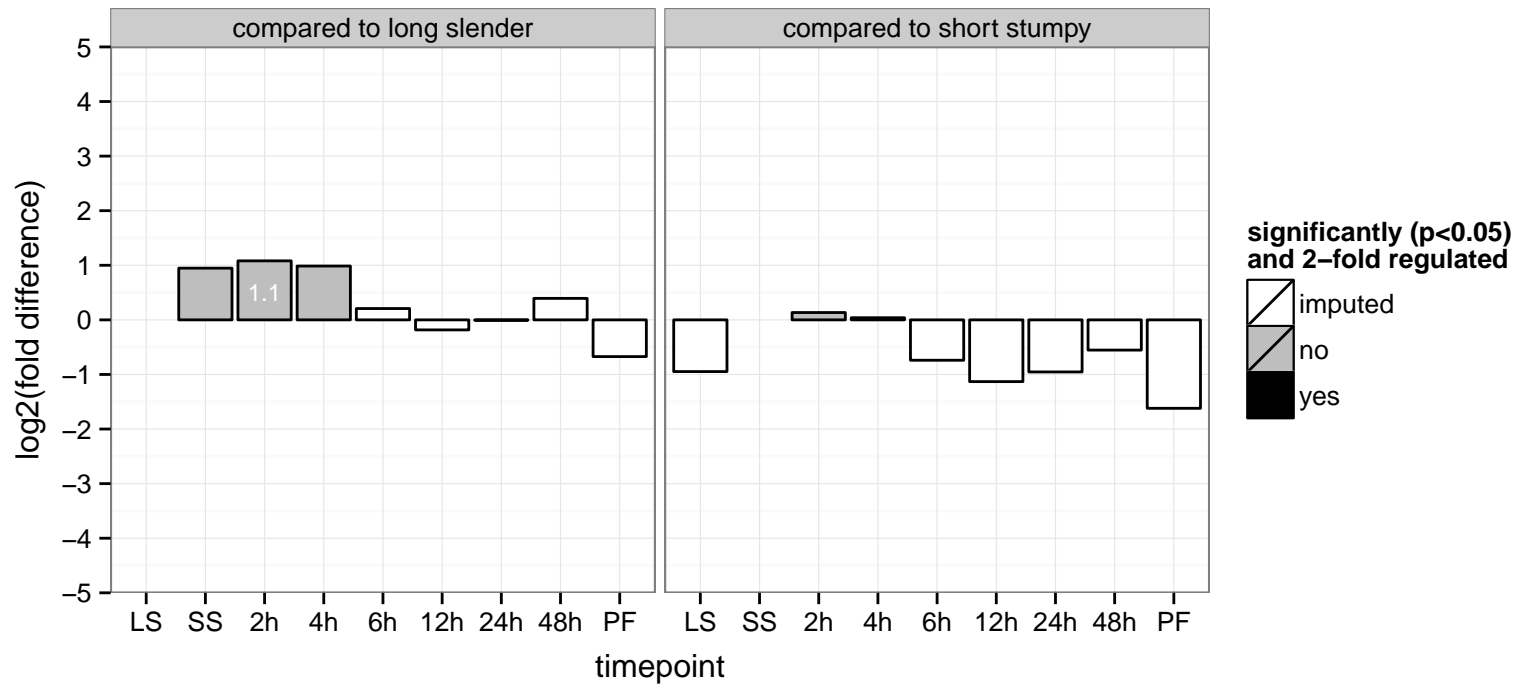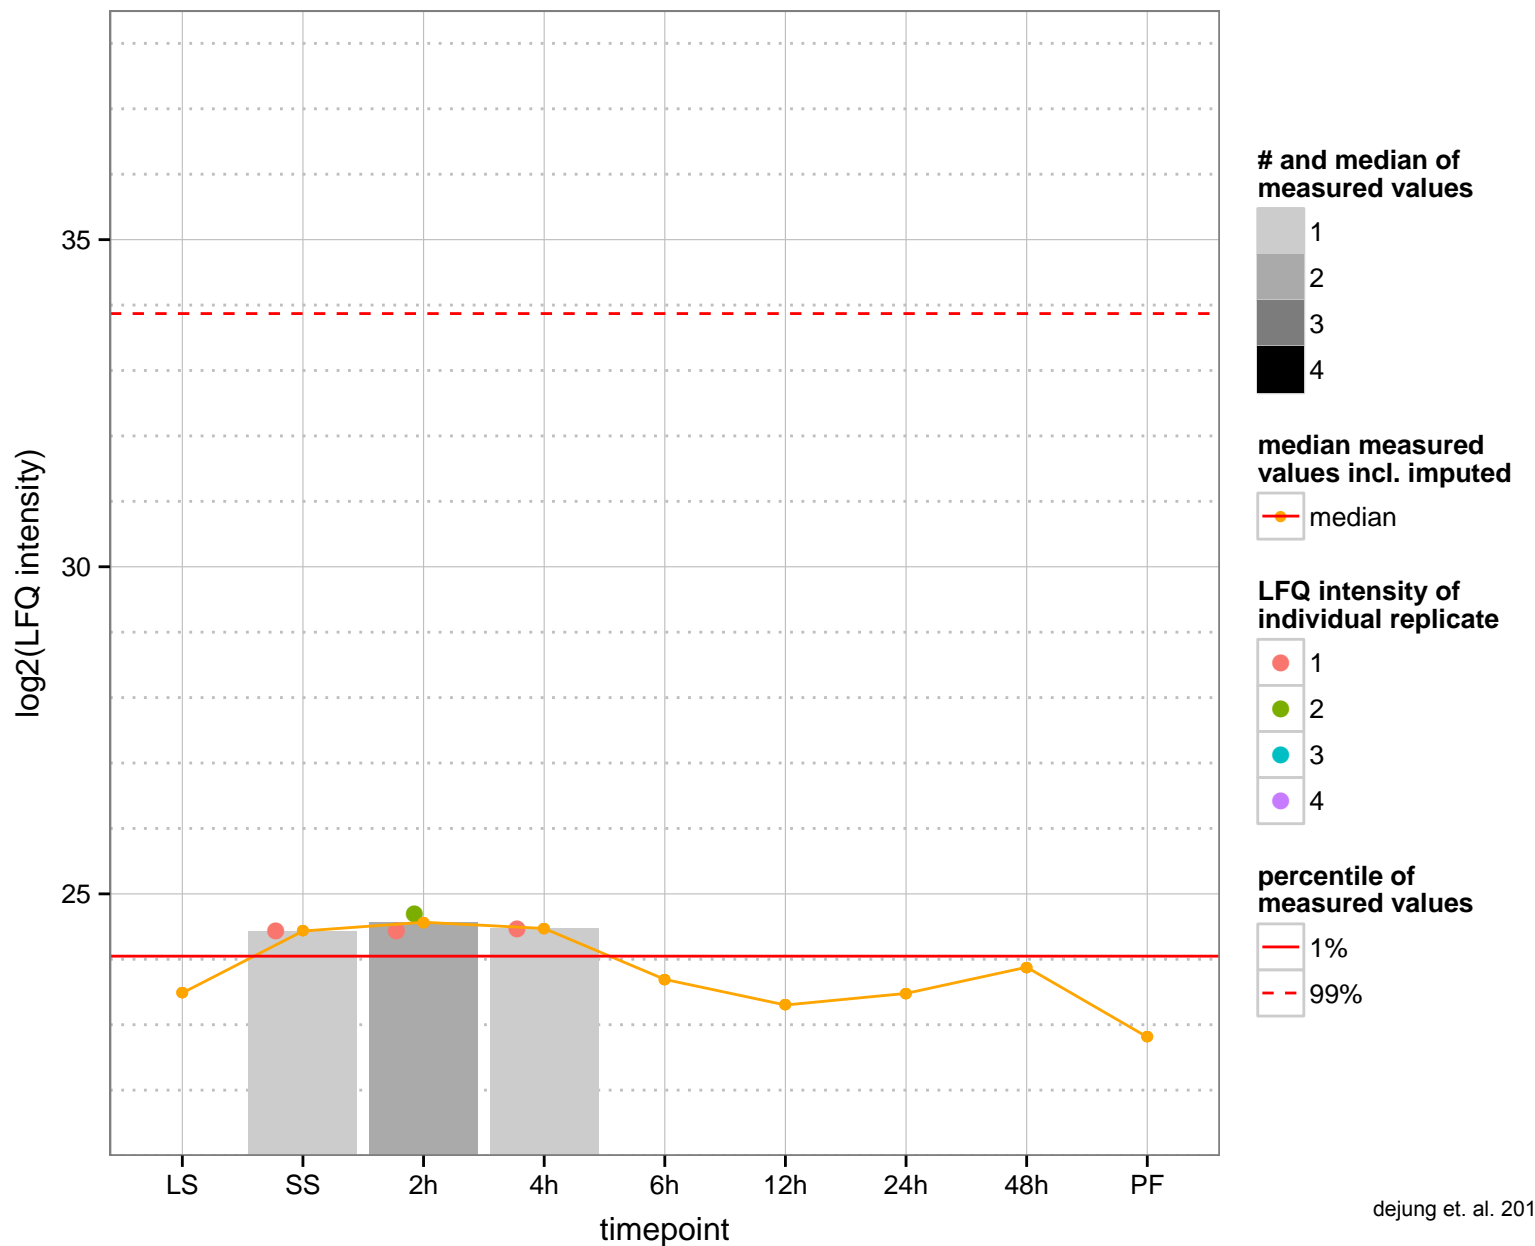

hypothetical protein, conserved  
 Tb927.2.4050  
 AGOF: zinc ion binding  
 AGOC: null  
 AGOP: null  
 PGOF: zinc ion binding  
 PGOC: null  
 PGOP: null

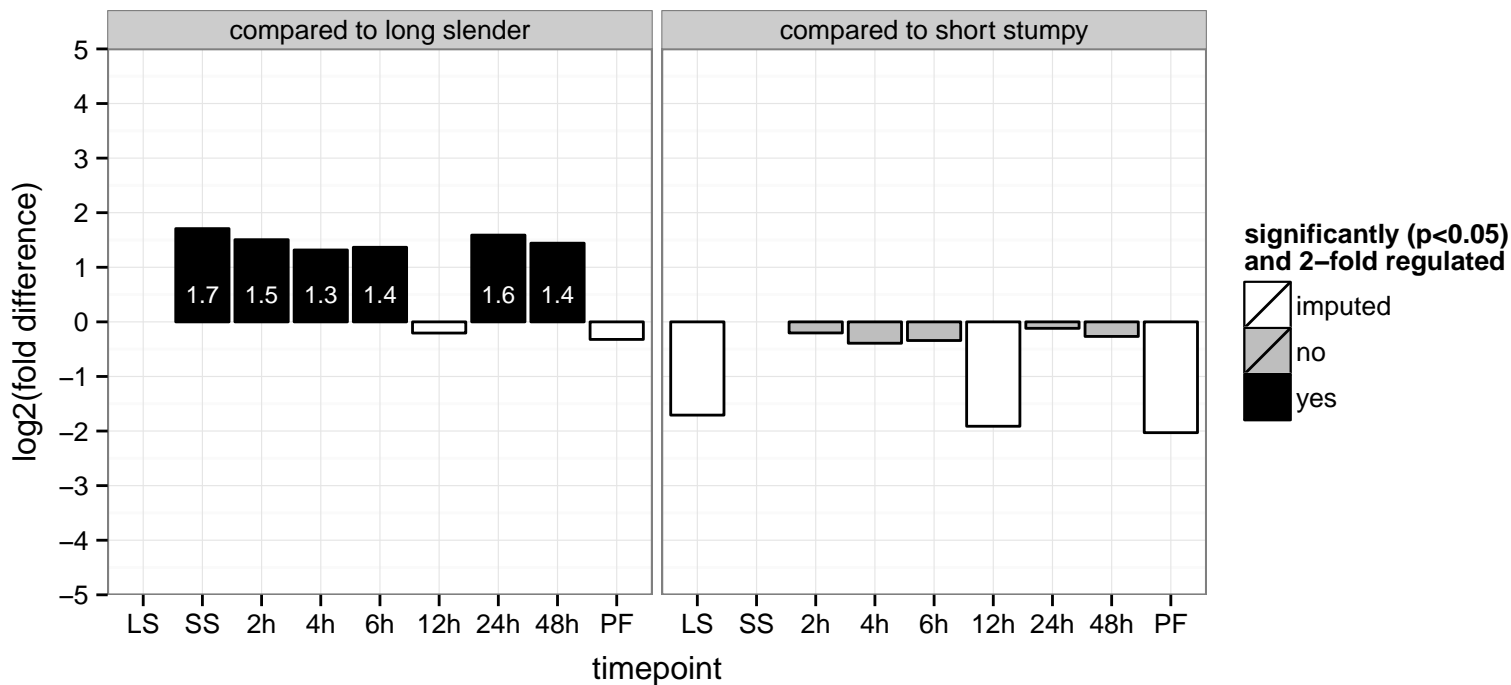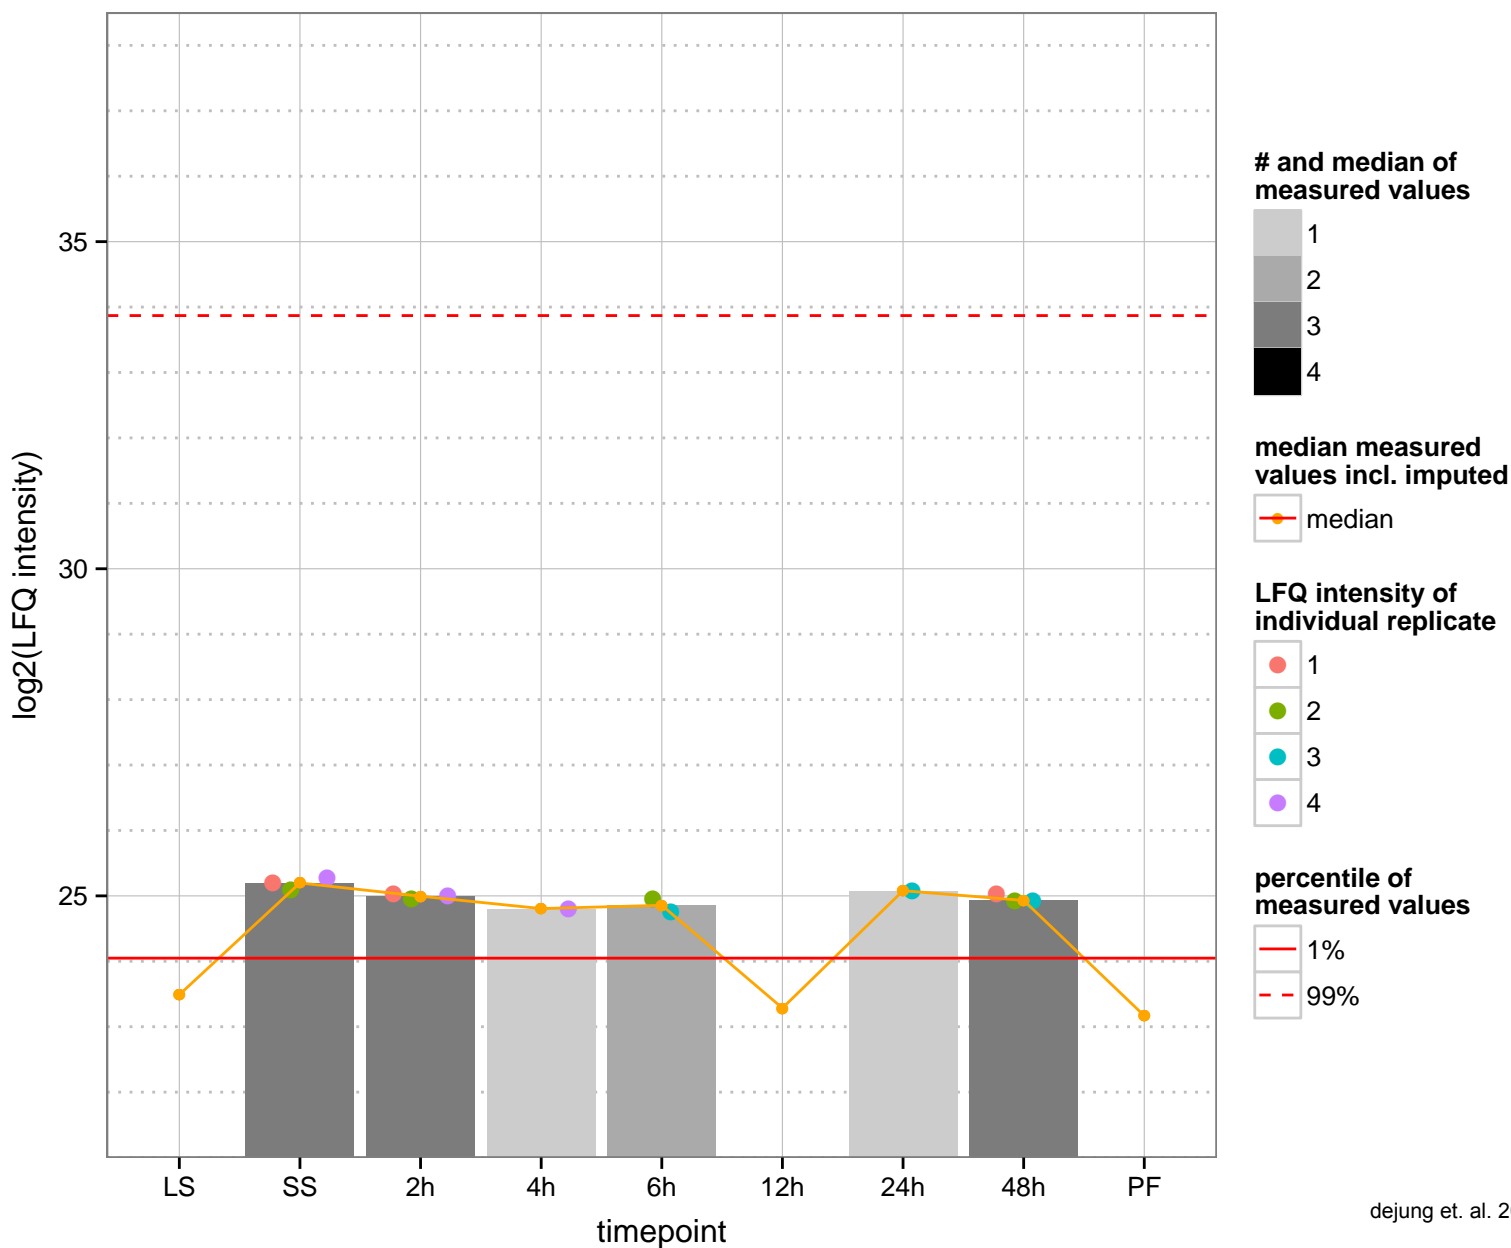

protein kinase, putative

Tb927.7.3580

AGOF: ATP binding, protein serine/threonine kinase activity, protein tyrosine kinase activity

AGOC: null

AGOP: protein phosphorylation

PGOF: ATP binding, protein kinase activity, transferase activity, transferring phosphorus-containing groups

PGOC: null

PGOP: protein phosphorylation

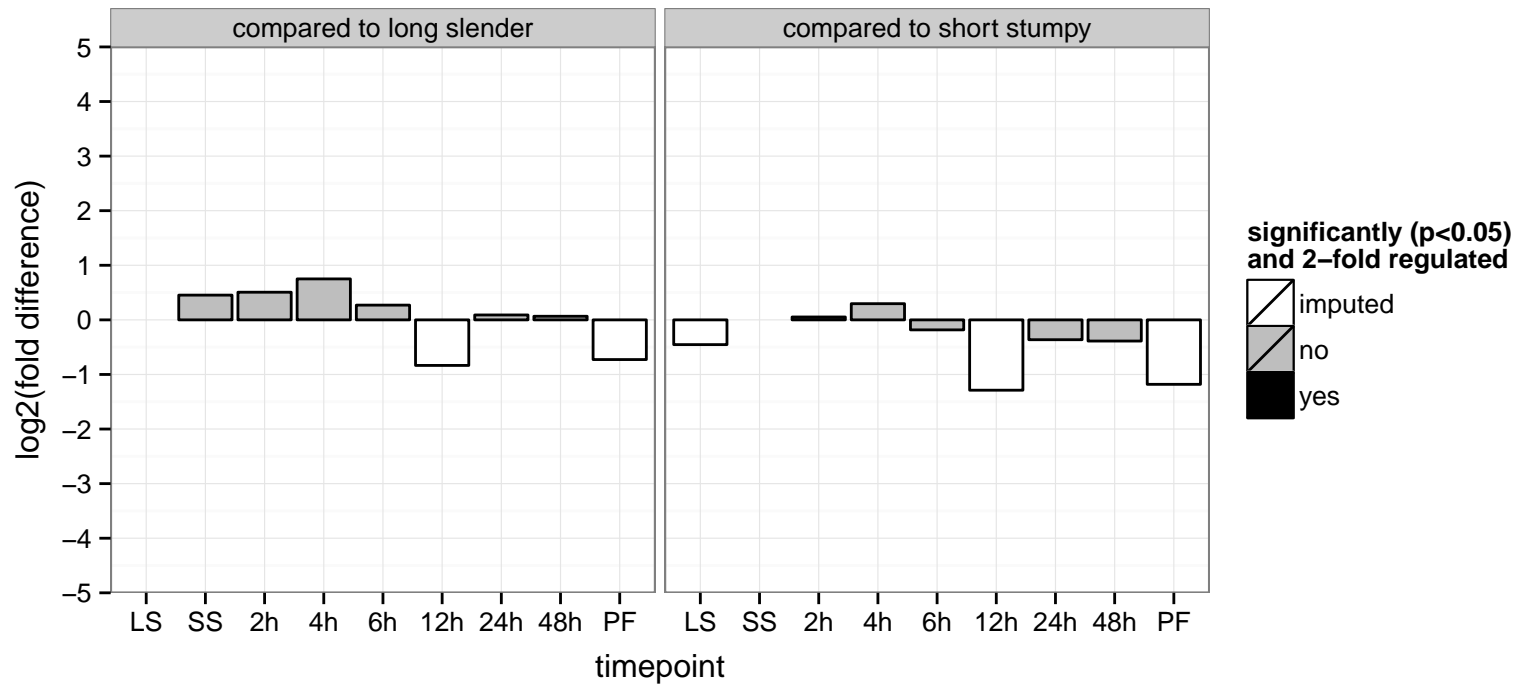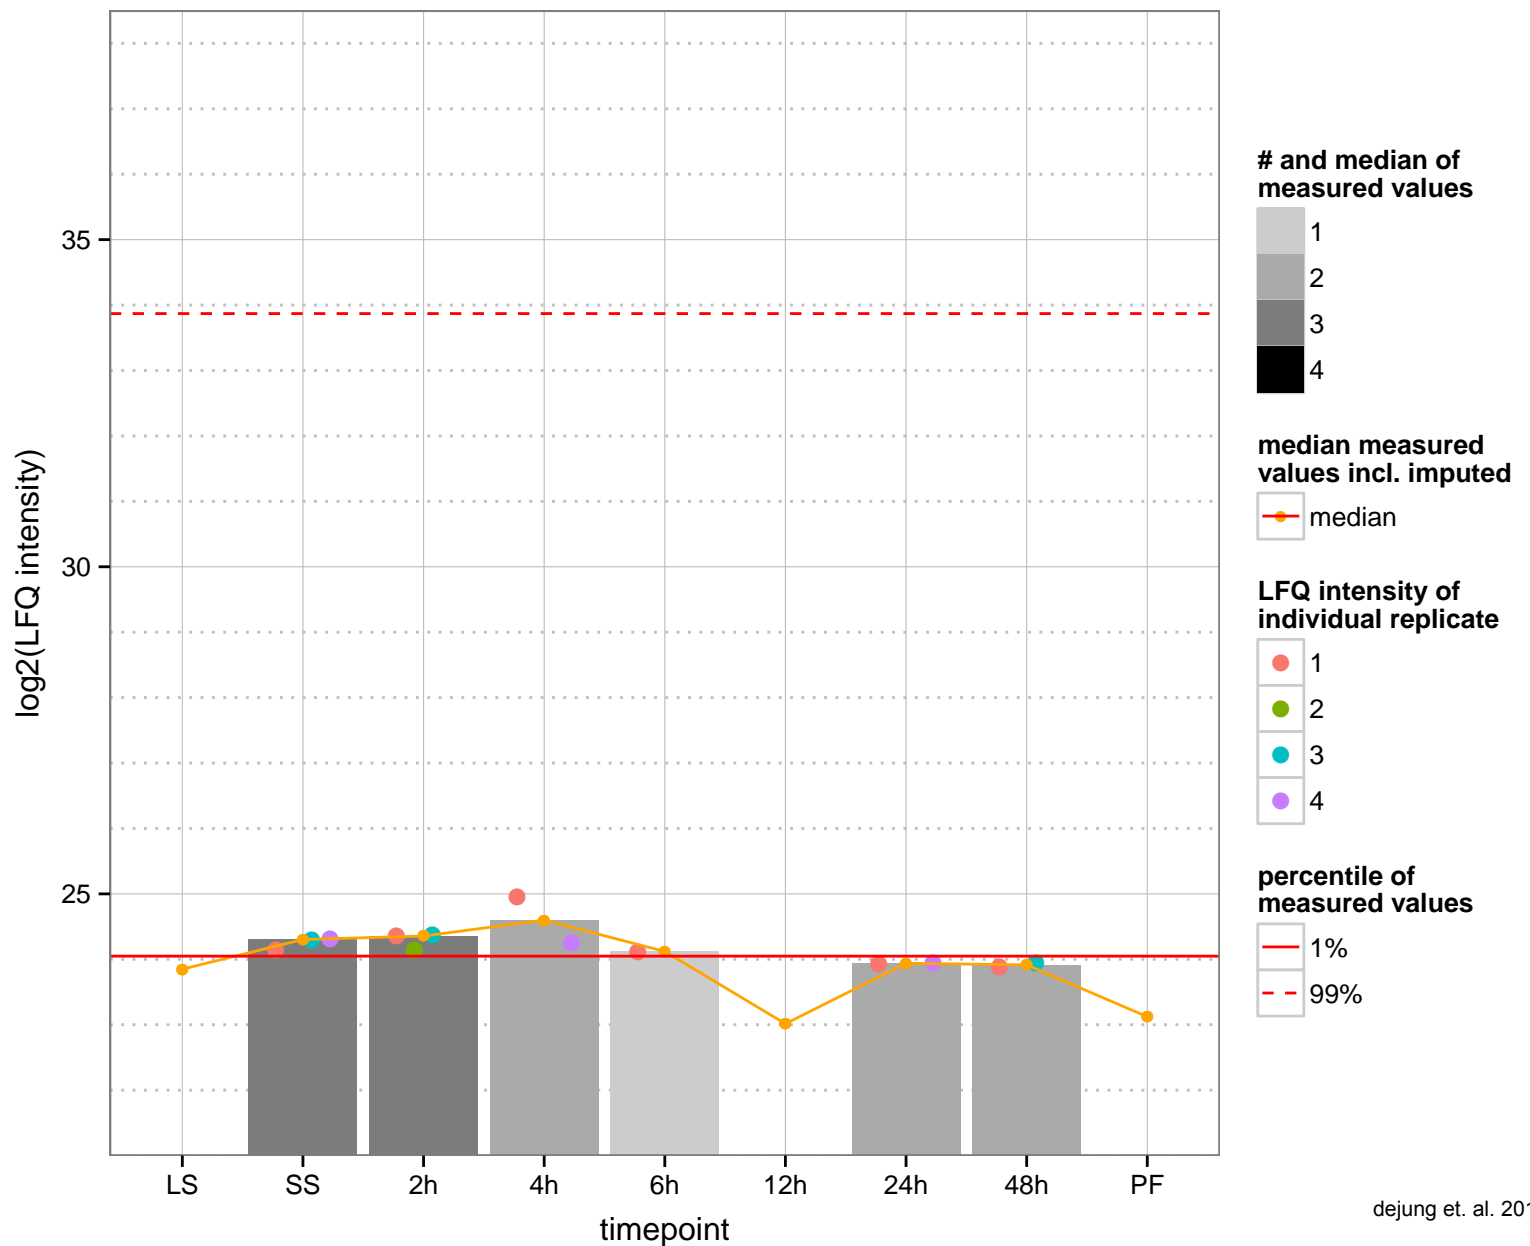

inhibitor of cysteine peptidase (ICP)  
 Tb927.8.6450  
 AGOF: endopeptidase inhibitor activity  
 AGOC: null  
 AGOP: regulation of proteolysis  
 PGO: null  
 PGOC: null  
 PGOP: null

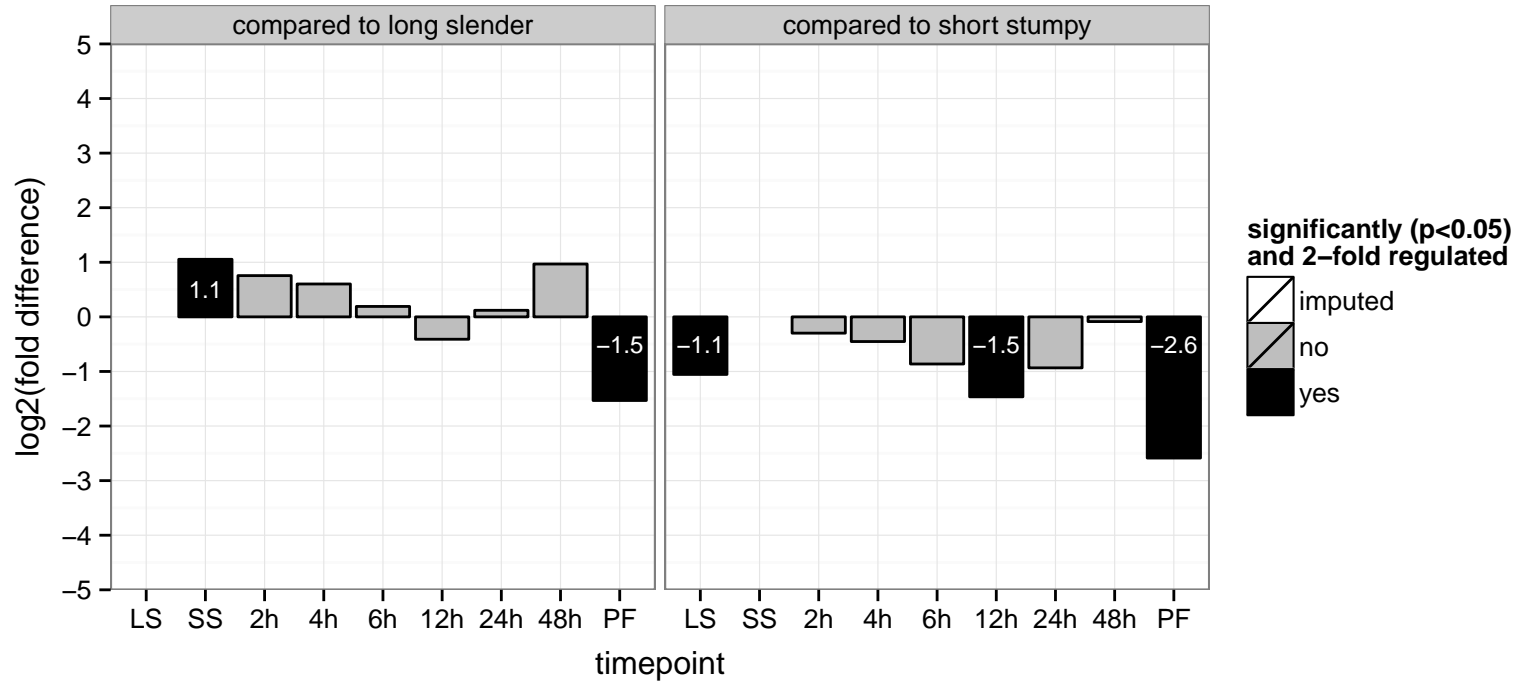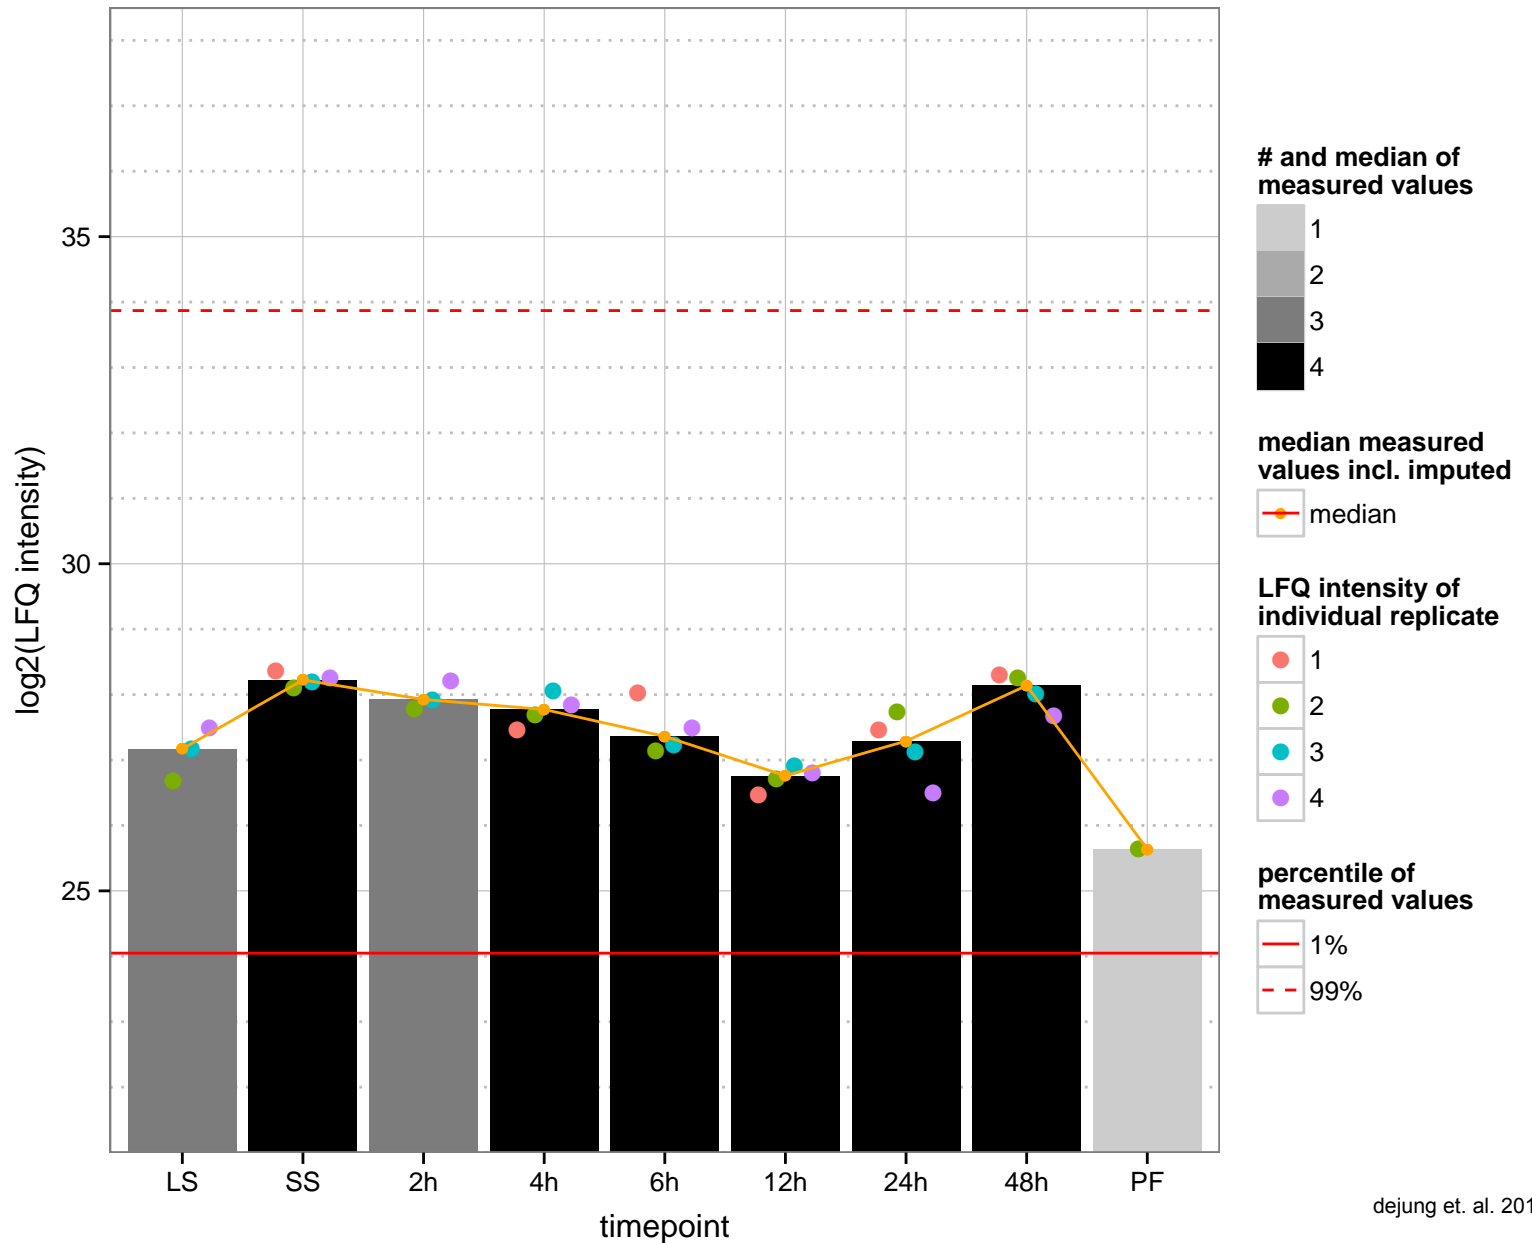

tRNA-dihydrouridine synthase 1, putative

Tb927.8.7570

AGOF: flavin adenine dinucleotide binding, tRNA dihydrouridine synthase activity

AGOC: null

AGOP: oxidation-reduction process, tRNA modification

PGOF: flavin adenine dinucleotide binding, tRNA dihydrouridine synthase activity

PGOC: null

PGOP: oxidation-reduction process, tRNA processing

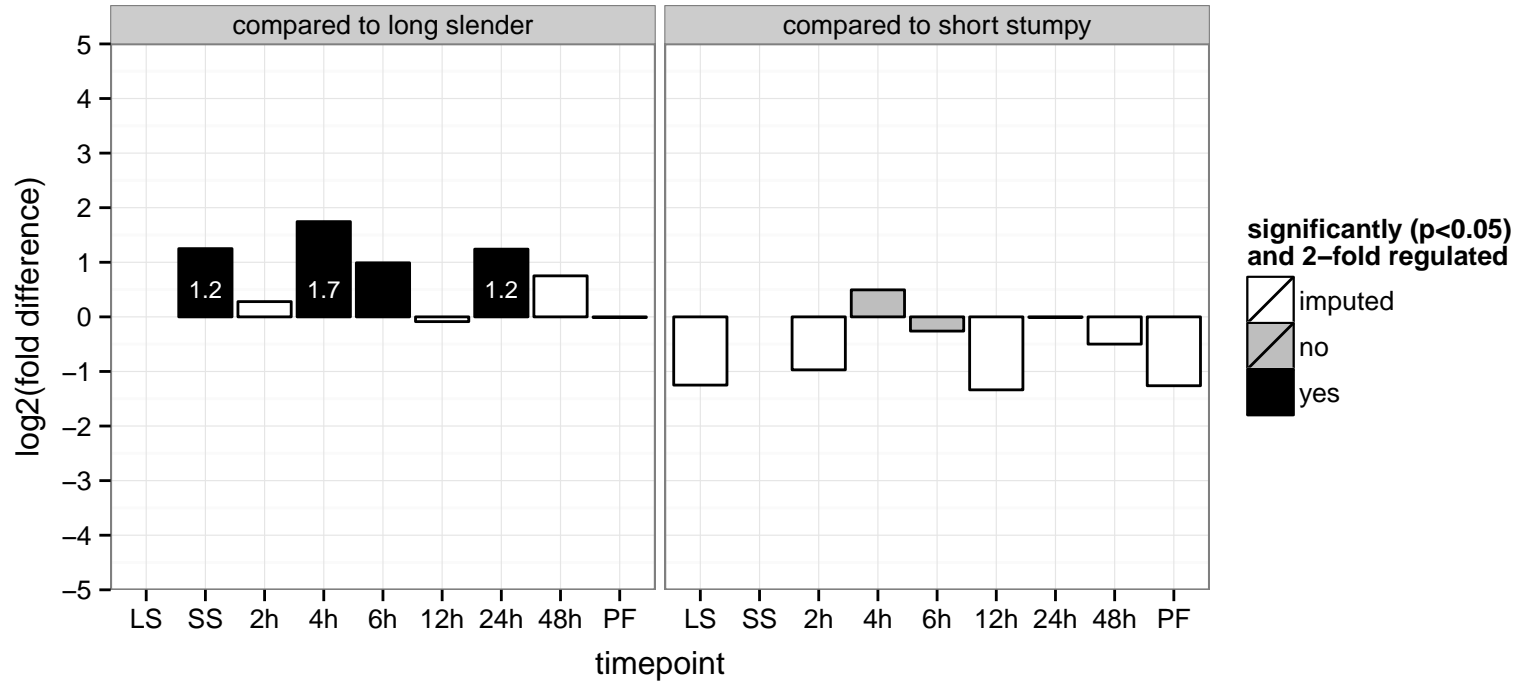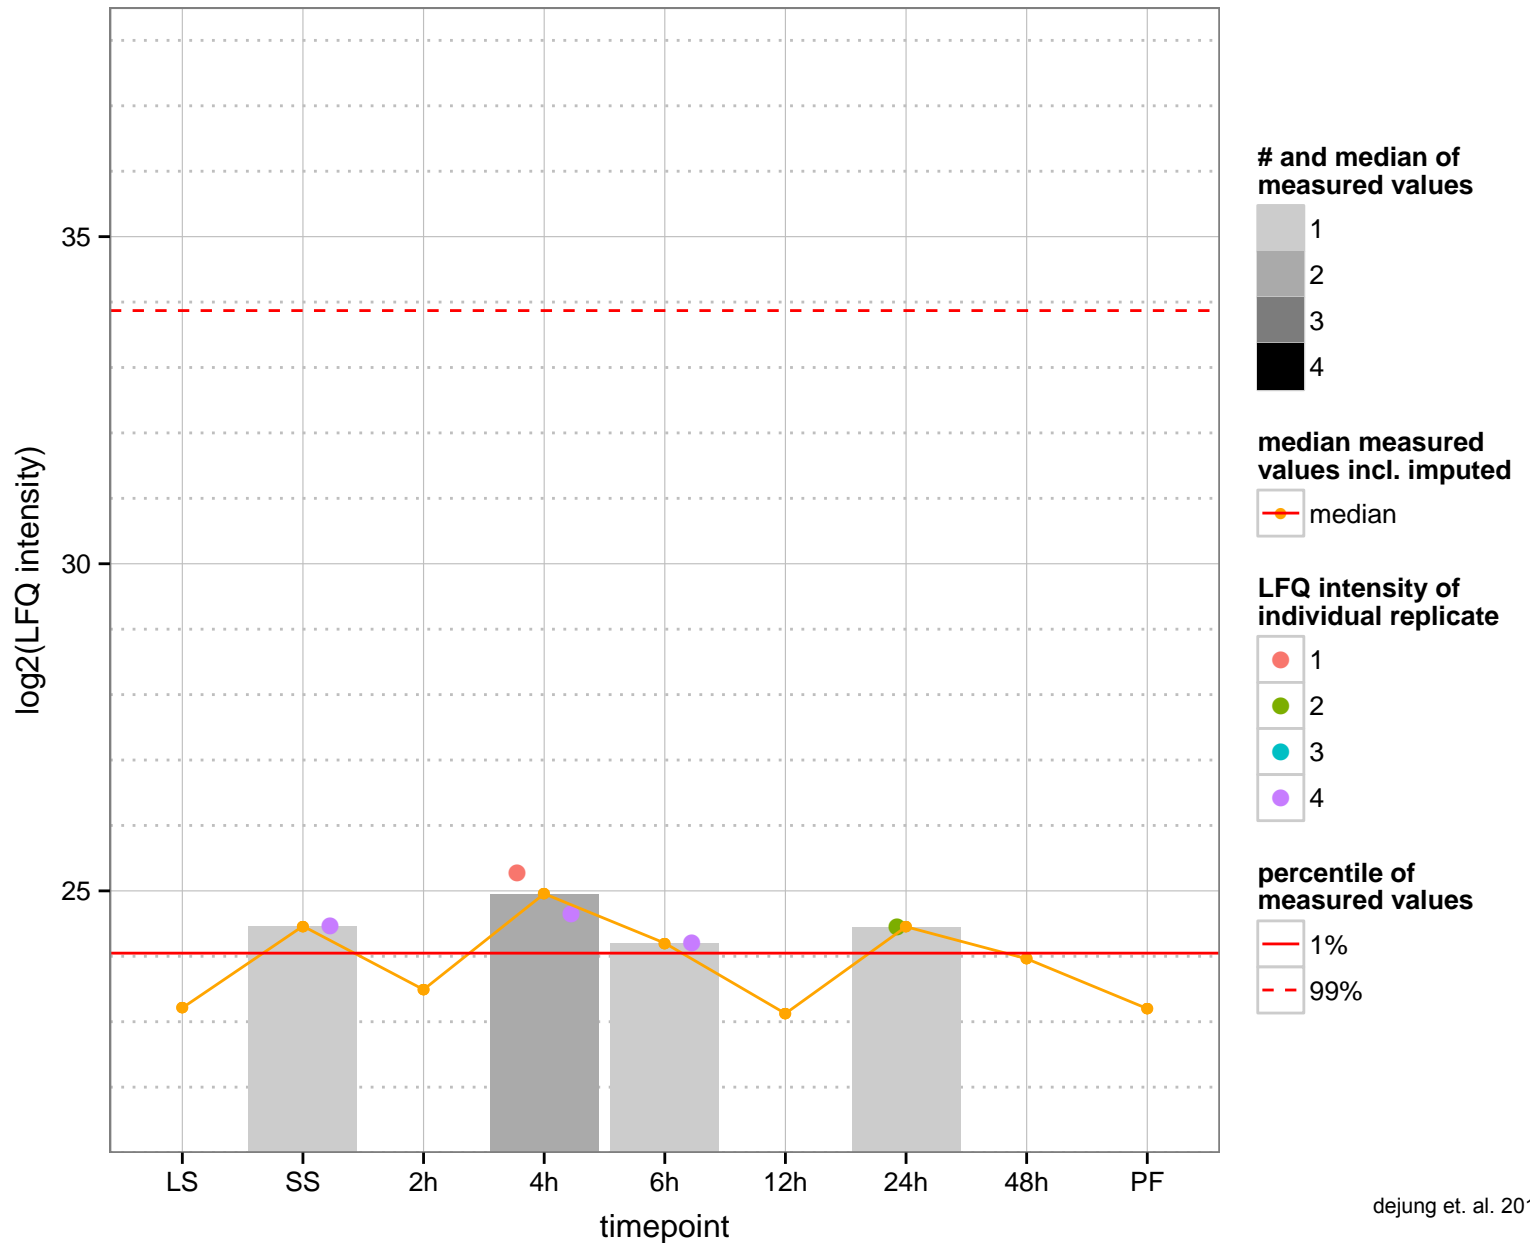

ankyrin-repeat protein, putative  
 Tb927.9.15400  
 AGOF: null  
 AGOC: null  
 AGOP: null  
 PGO: protein binding  
 PGOC: null  
 PGOP: null

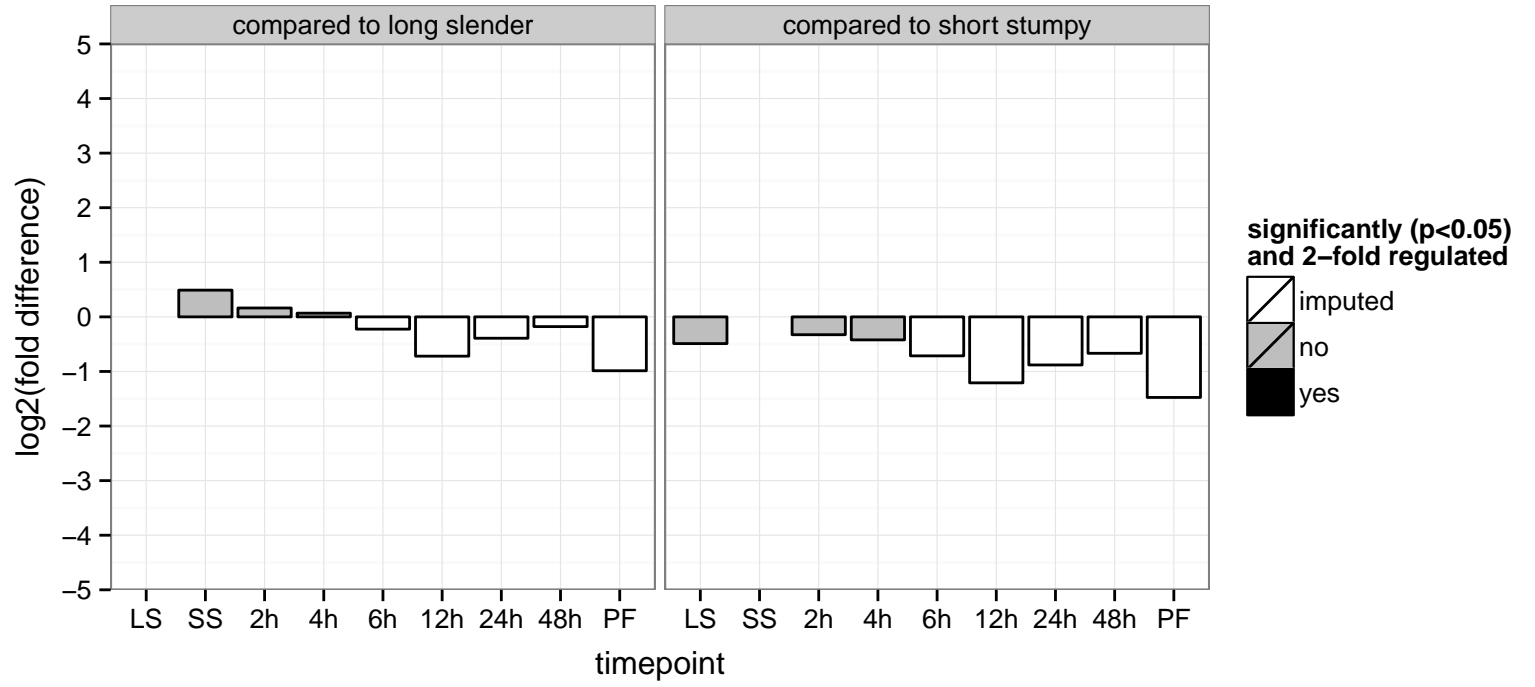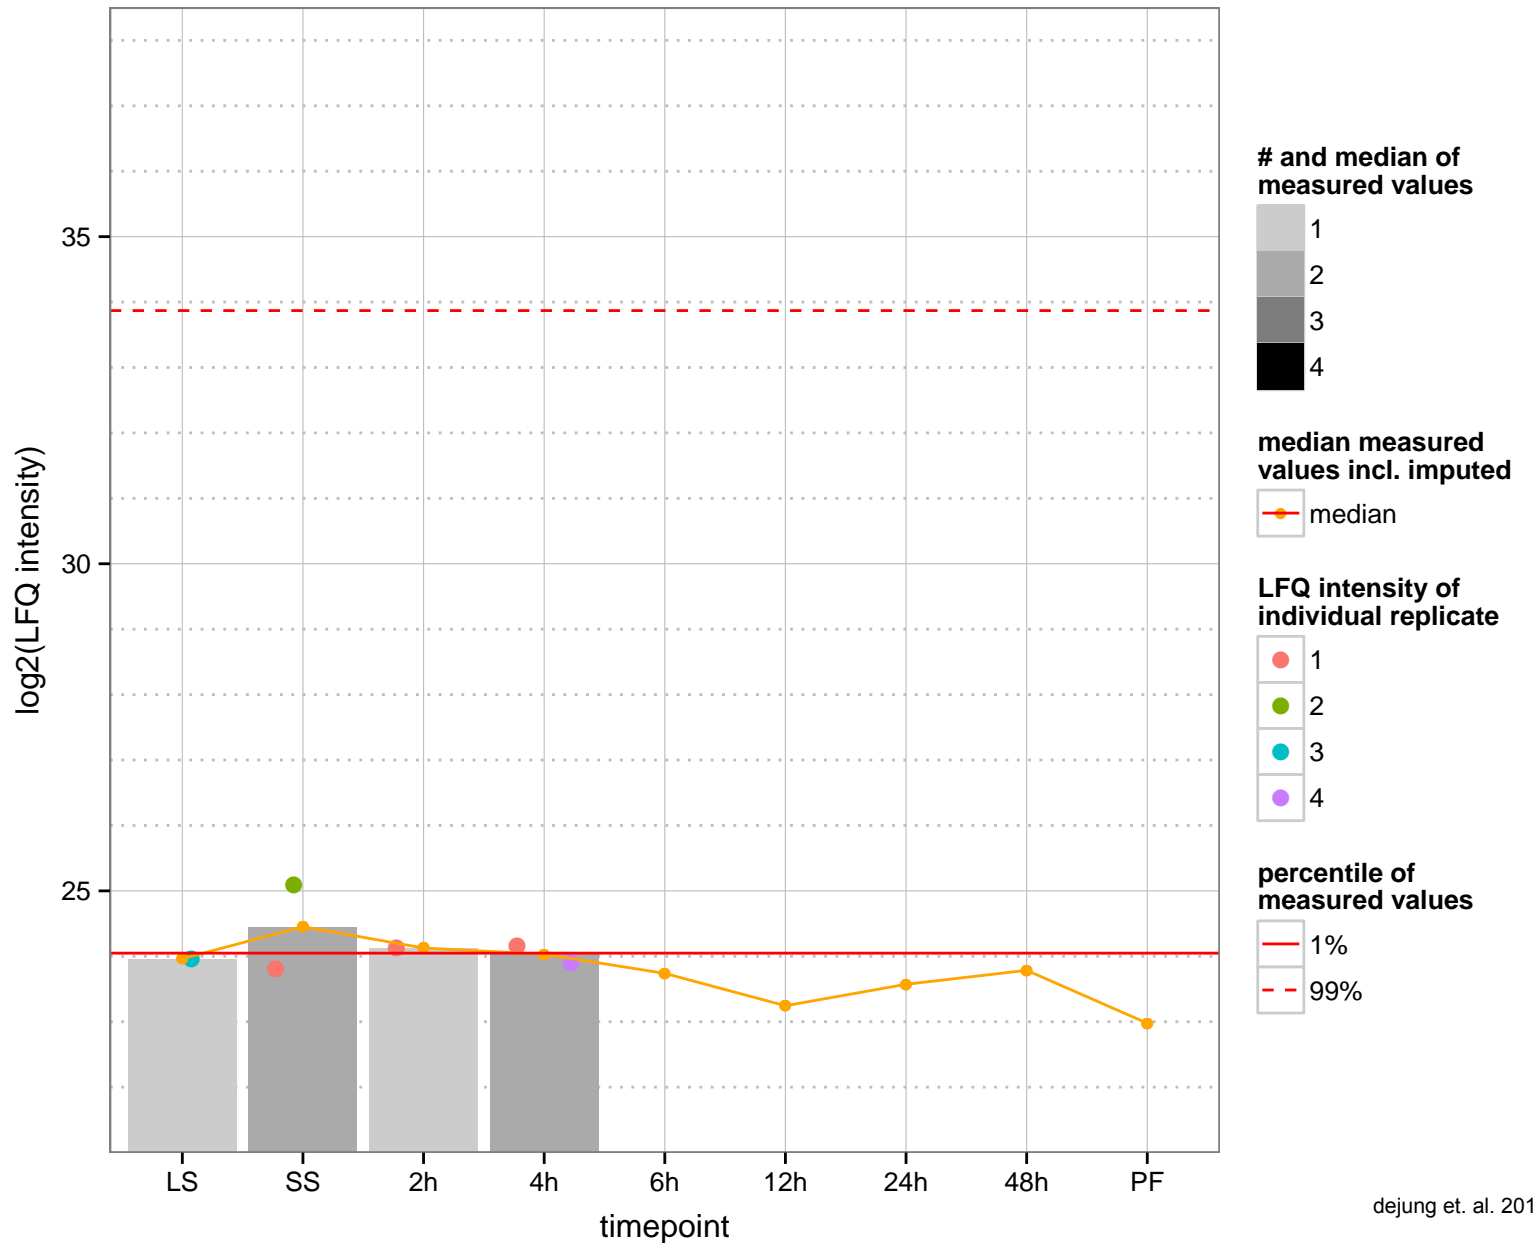



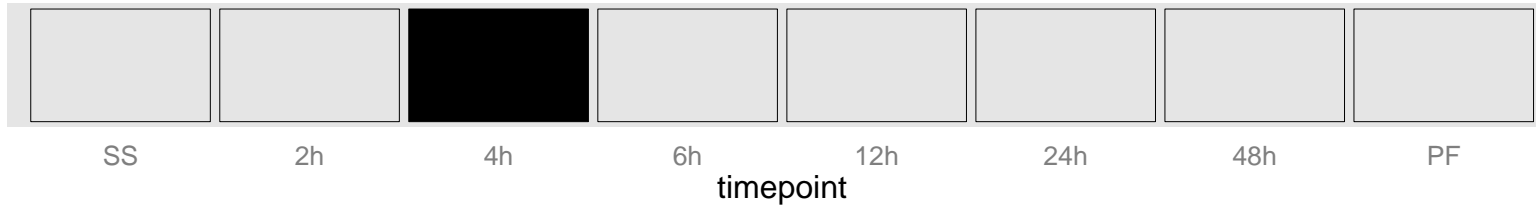

**regulated**  not regulated  significant down  significant up

N(2), N(2)-dimethylguanosine tRNA methyltransferase, putative  
 Tb927.11.3890  
 AGOF: RNA binding, tRNA (guanine-N2-)-methyltransferase activity  
 AGOC: null  
 AGOP: tRNA processing  
 PGO: RNA binding, tRNA (guanine-N2-)-methyltransferase activity  
 PGOC: null  
 PGOP: tRNA processing

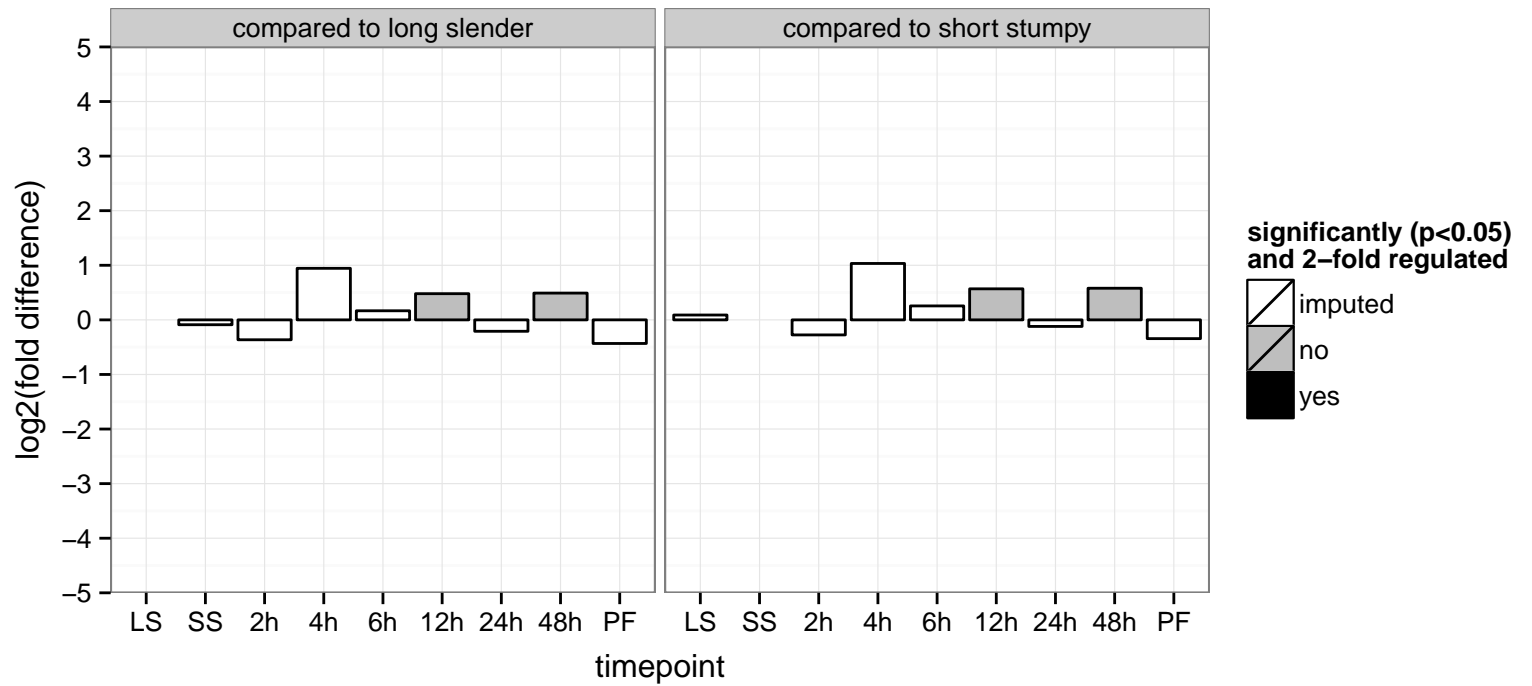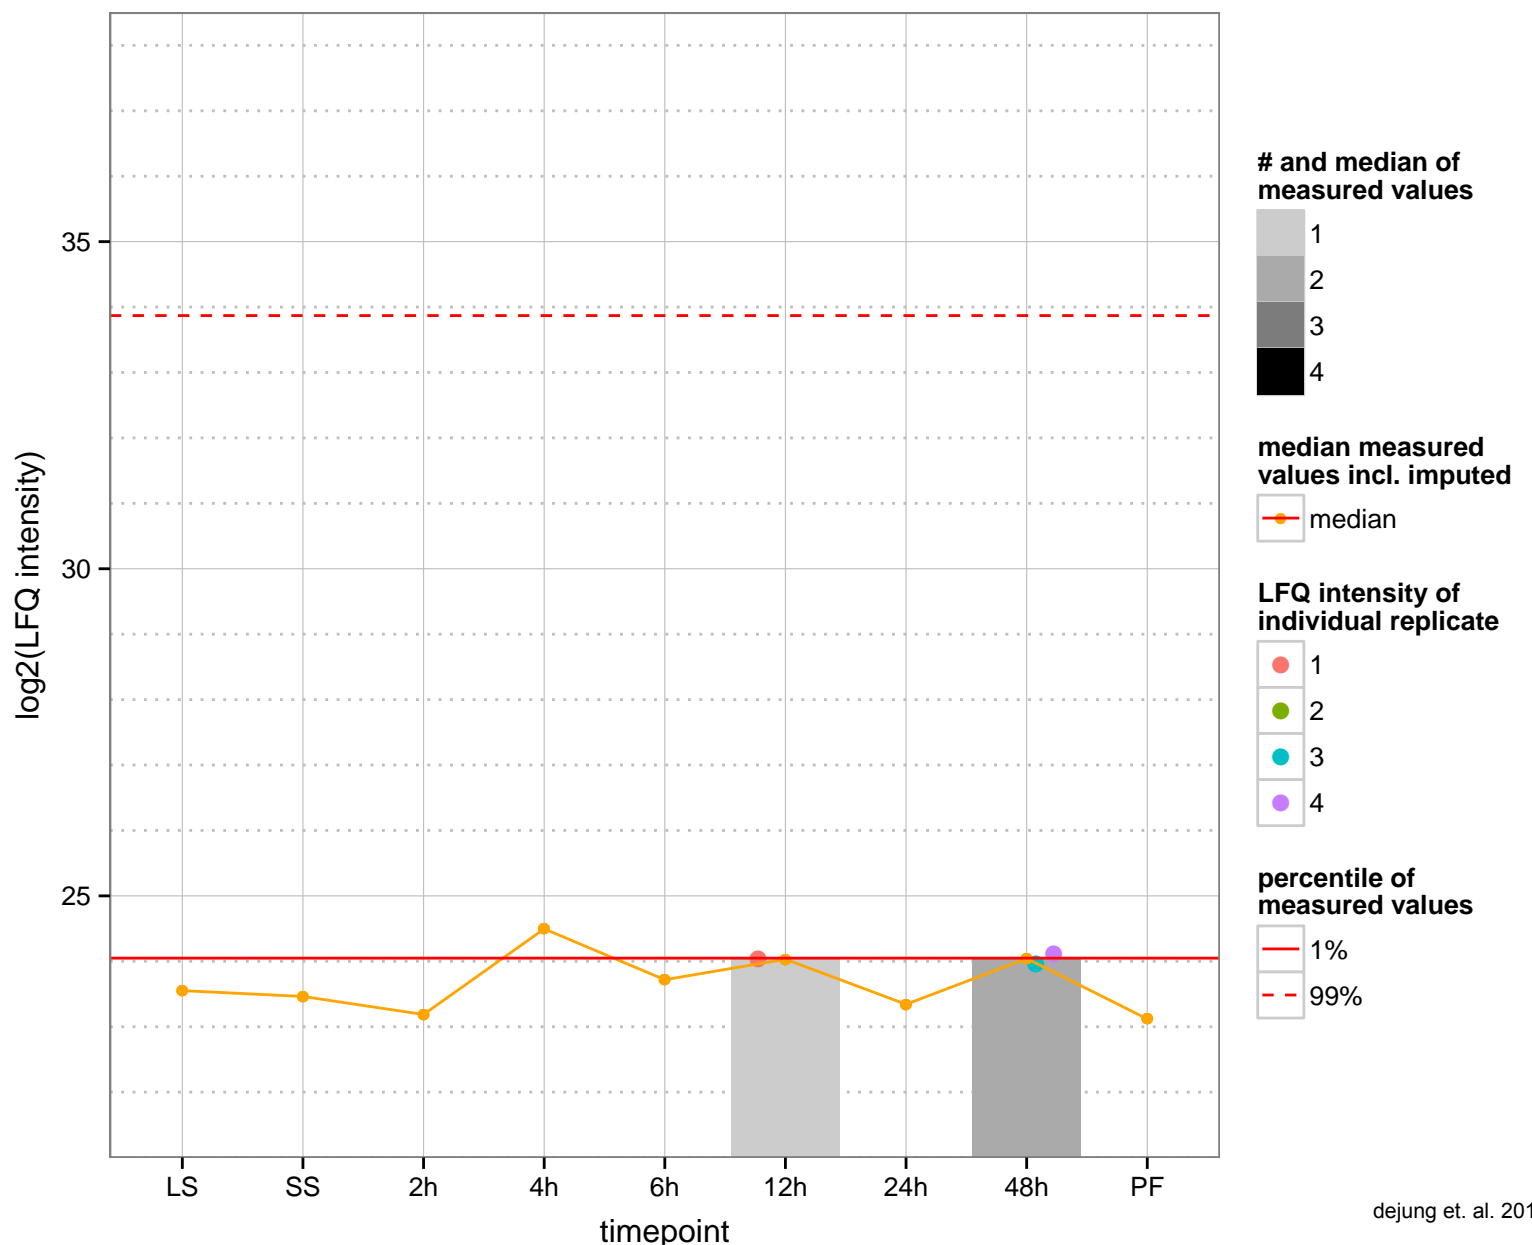

hypothetical protein, conserved  
 Tb927.11.4630  
 AGOF: null  
 AGOC: null  
 AGOP: null  
 PGO: null  
 PGOC: null  
 PGOP: null

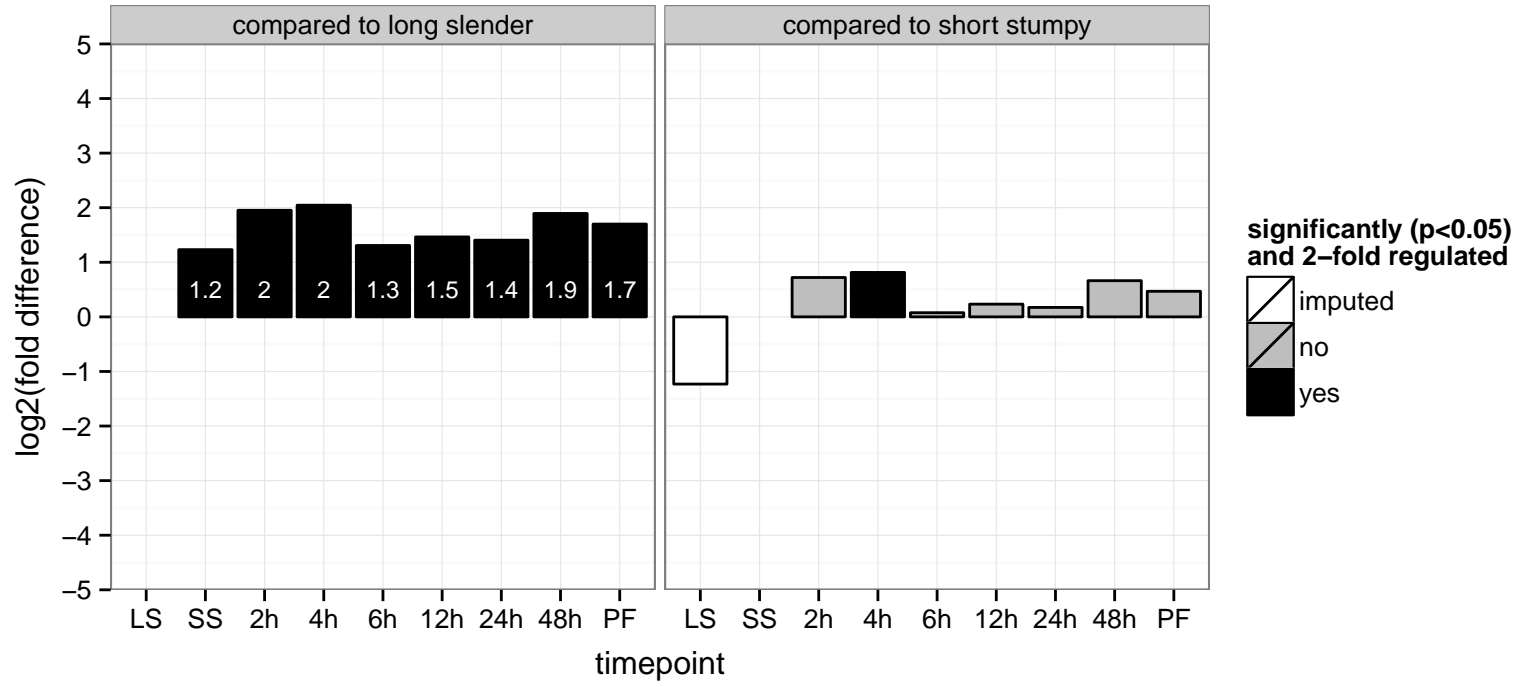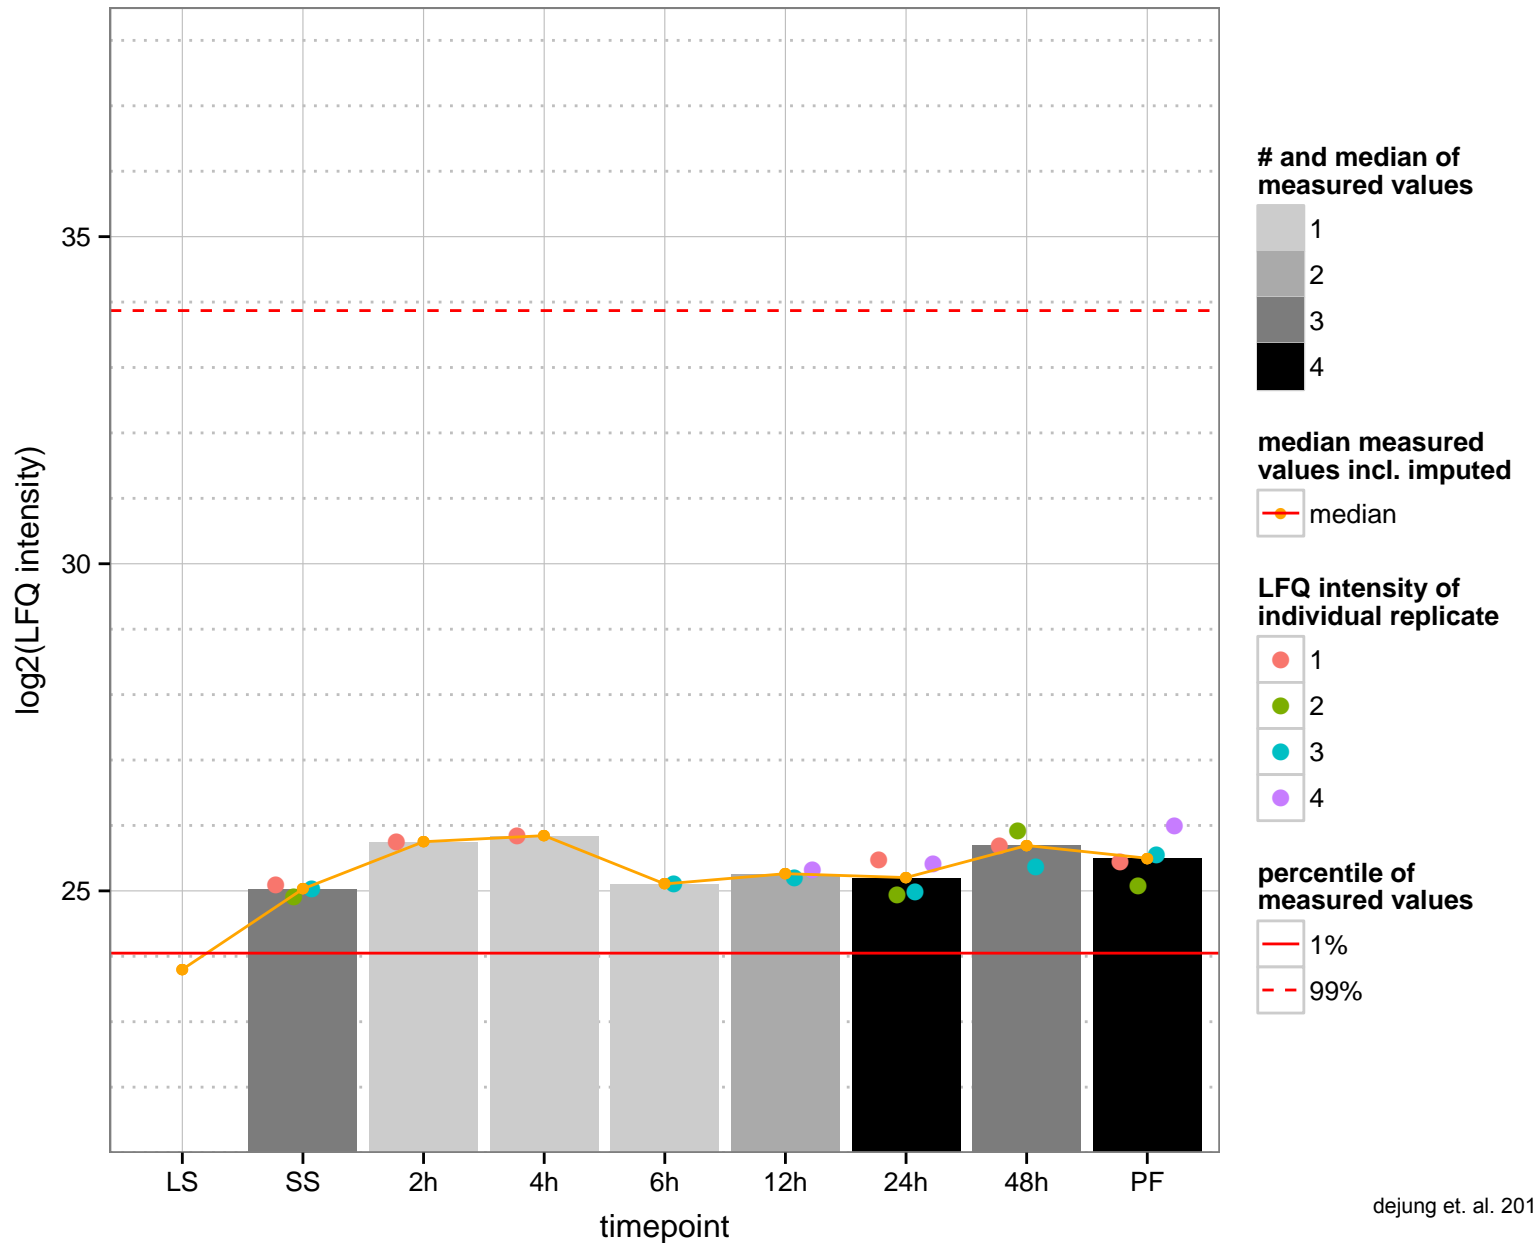

hypothetical protein, conserved

Tb927.3.5470

AGOF: null

AGOC: null

AGOP: null

PGOF: protein phosphatase inhibitor activity

PGOC: null

PGOP: regulation of phosphoprotein phosphatase activity, regulation of signal transduction

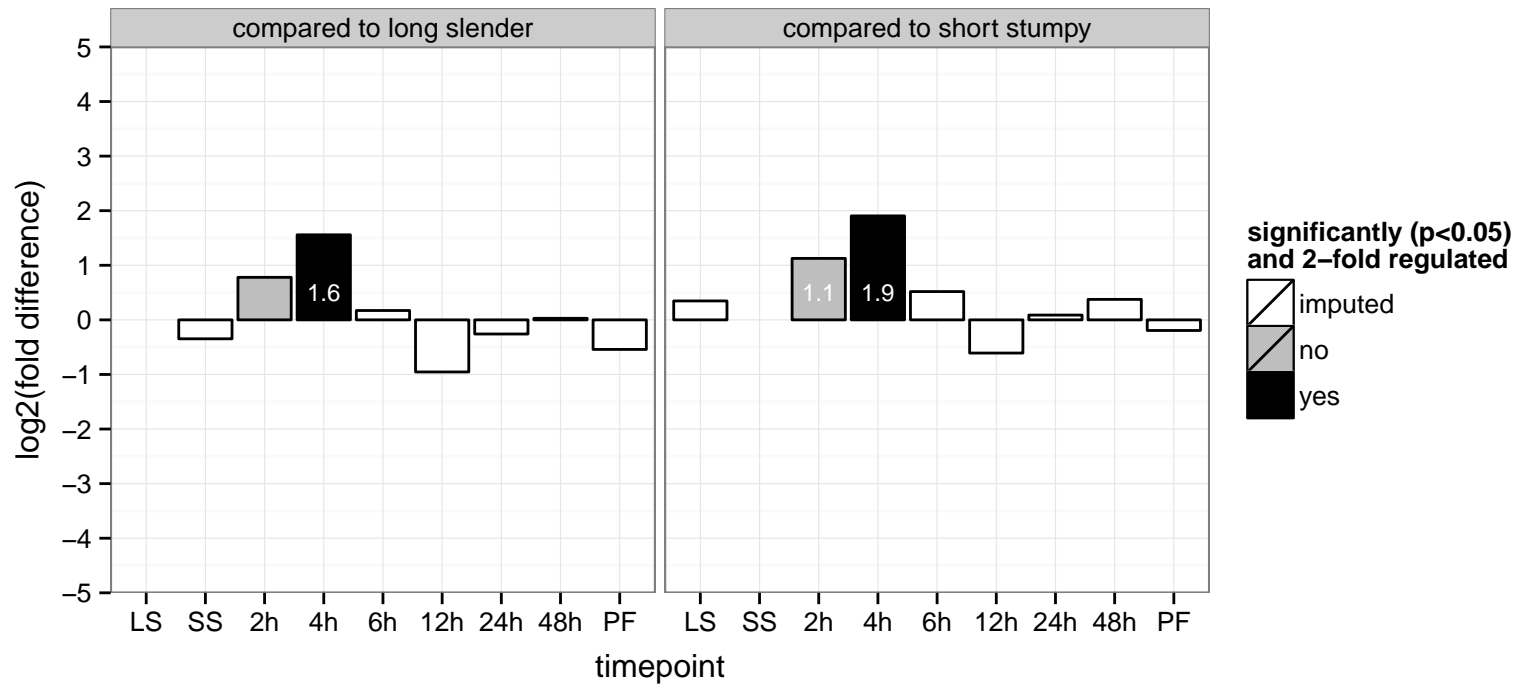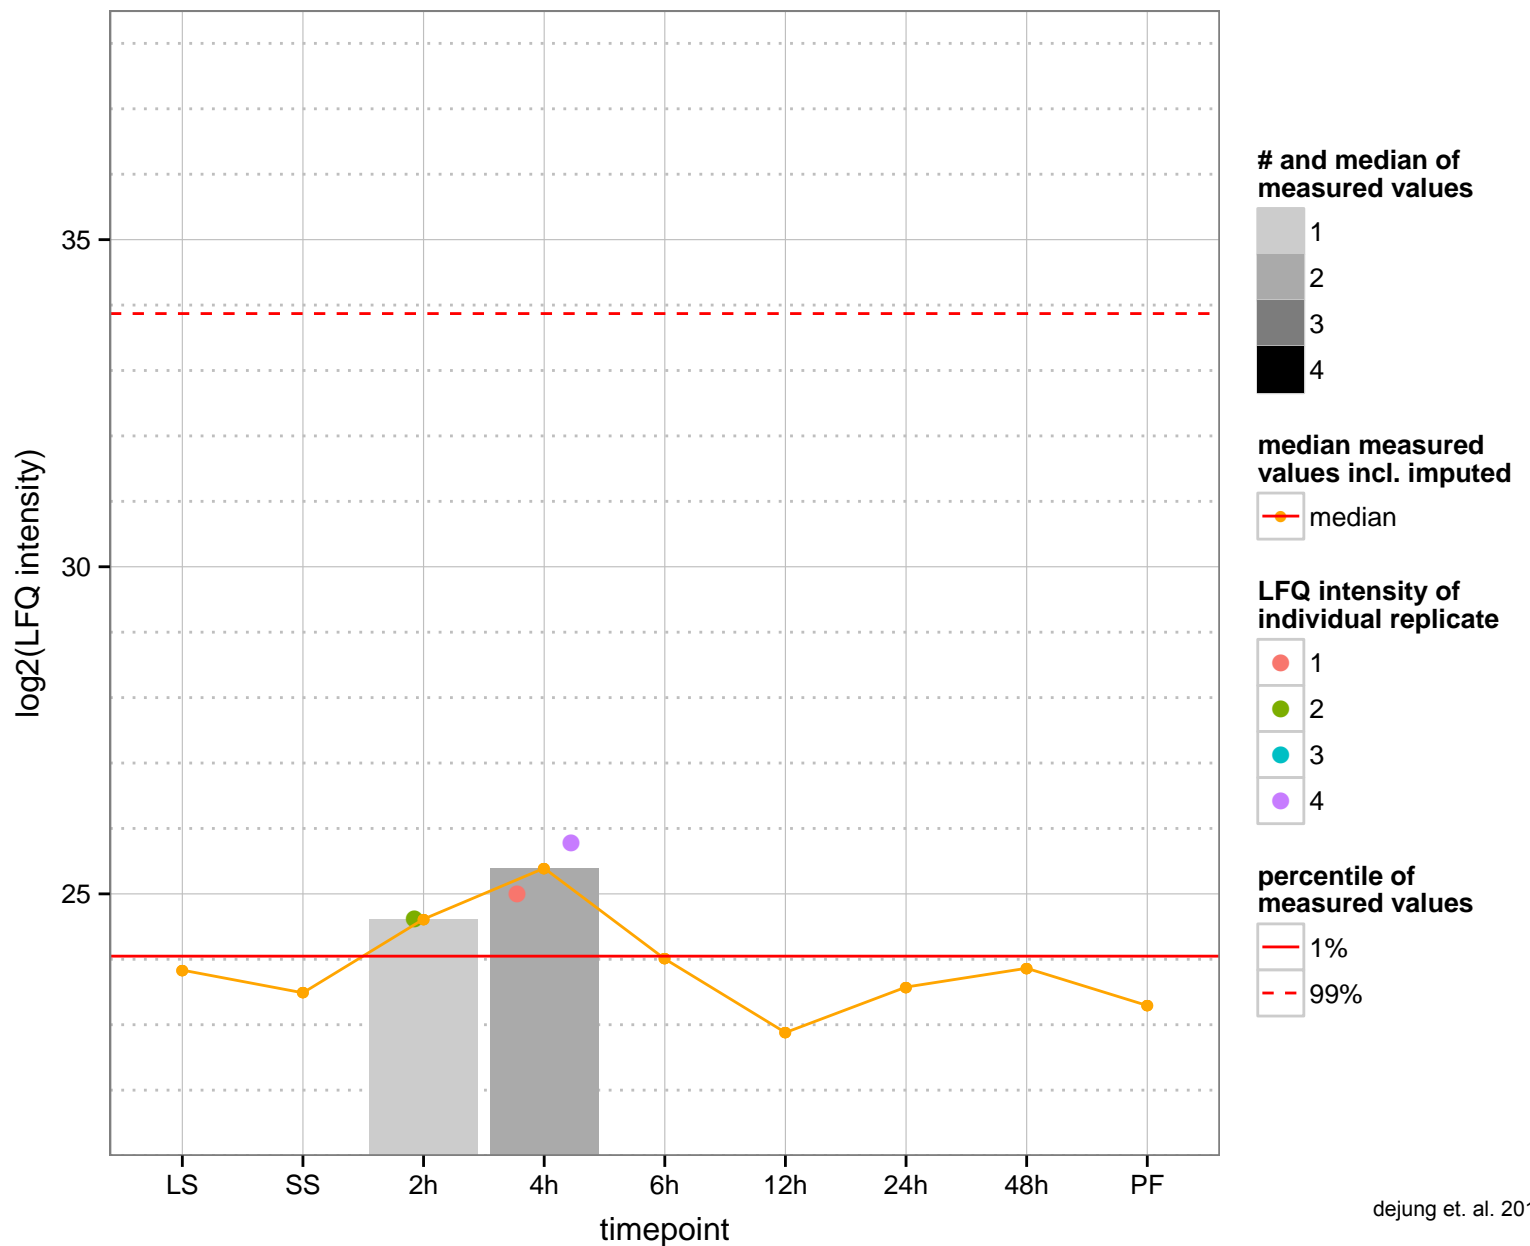

hypothetical protein, conserved  
 Tb927.7.4030  
 AGOF: null  
 AGOC: null  
 AGOP: null  
 PGO: null  
 PGOC: null  
 PGOP: null

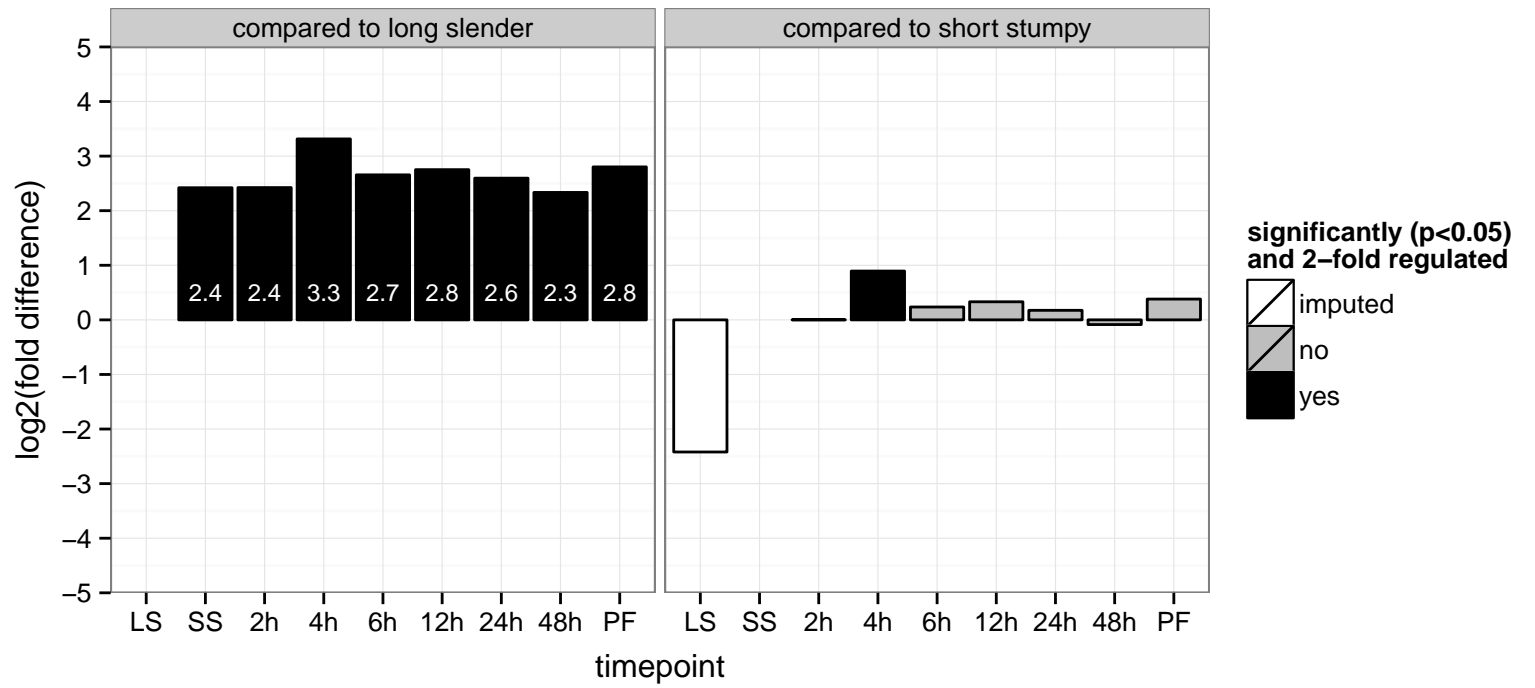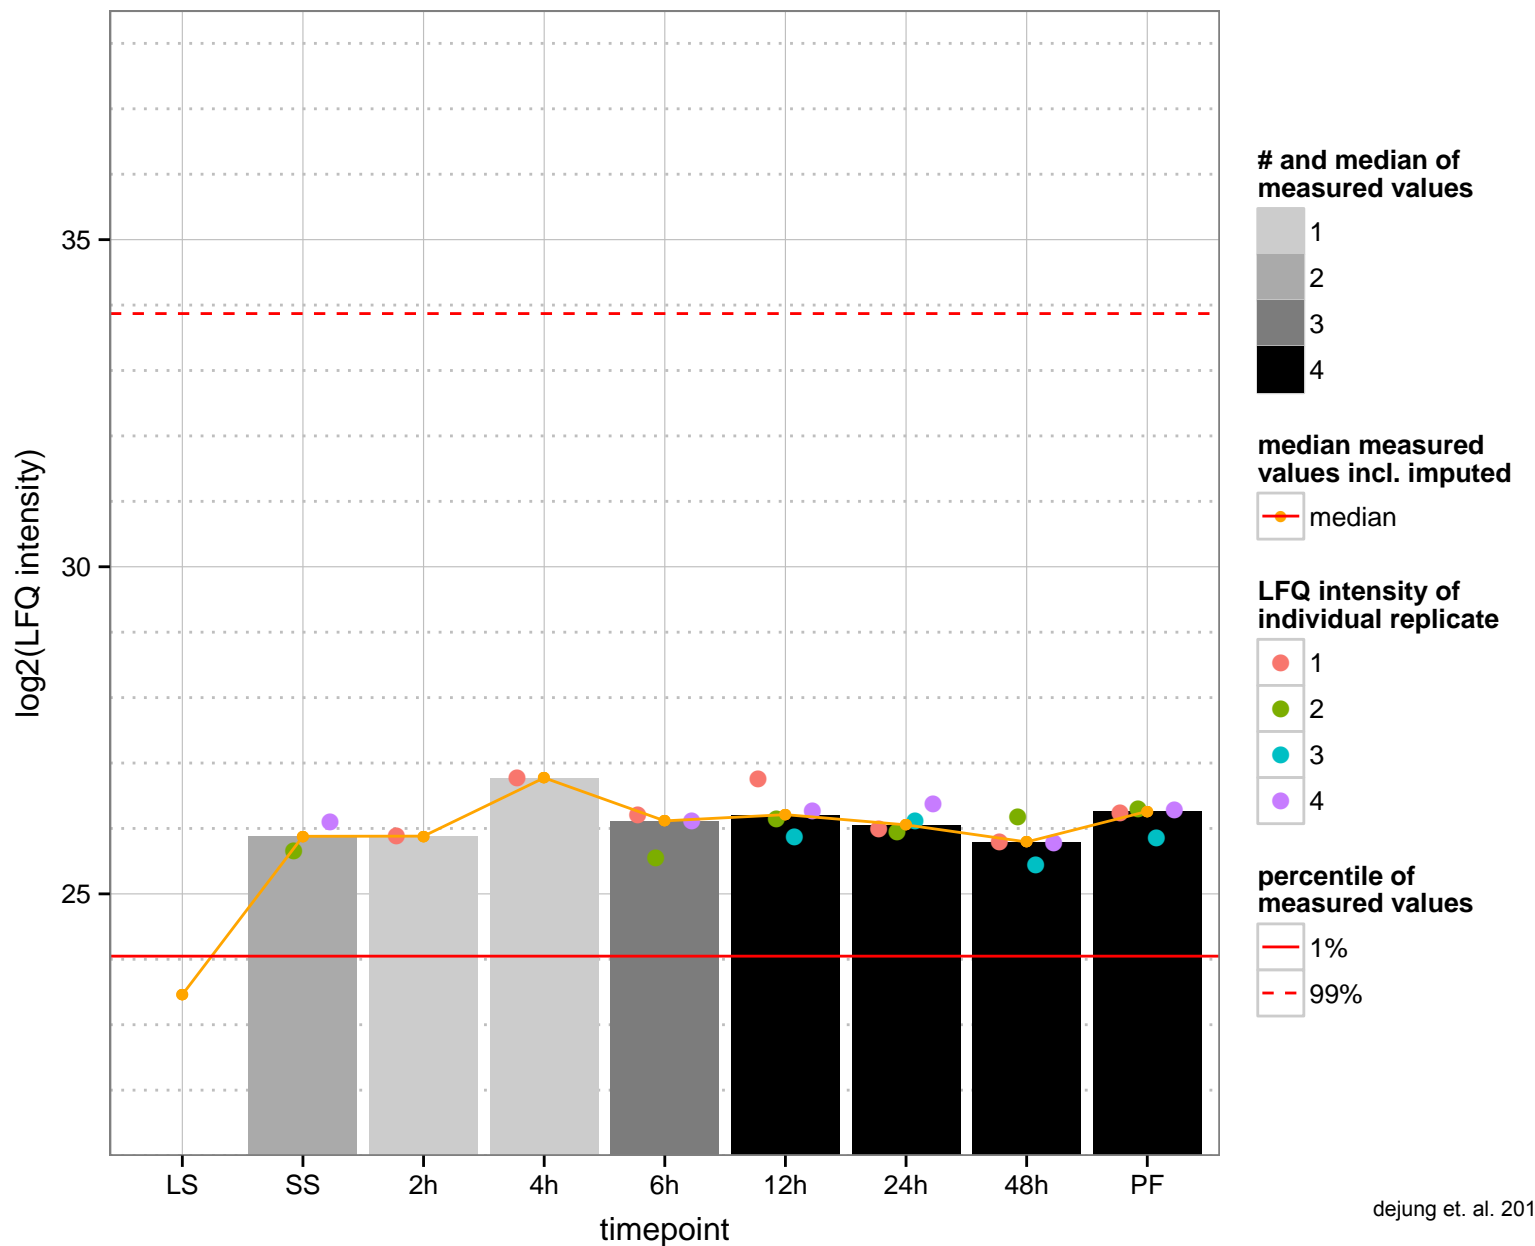

hypothetical protein, conserved  
 Tb927.7.6210  
 AGOF: null  
 AGOC: null  
 AGOP: null  
 PGOF: null  
 PGO: null  
 PGOP: null

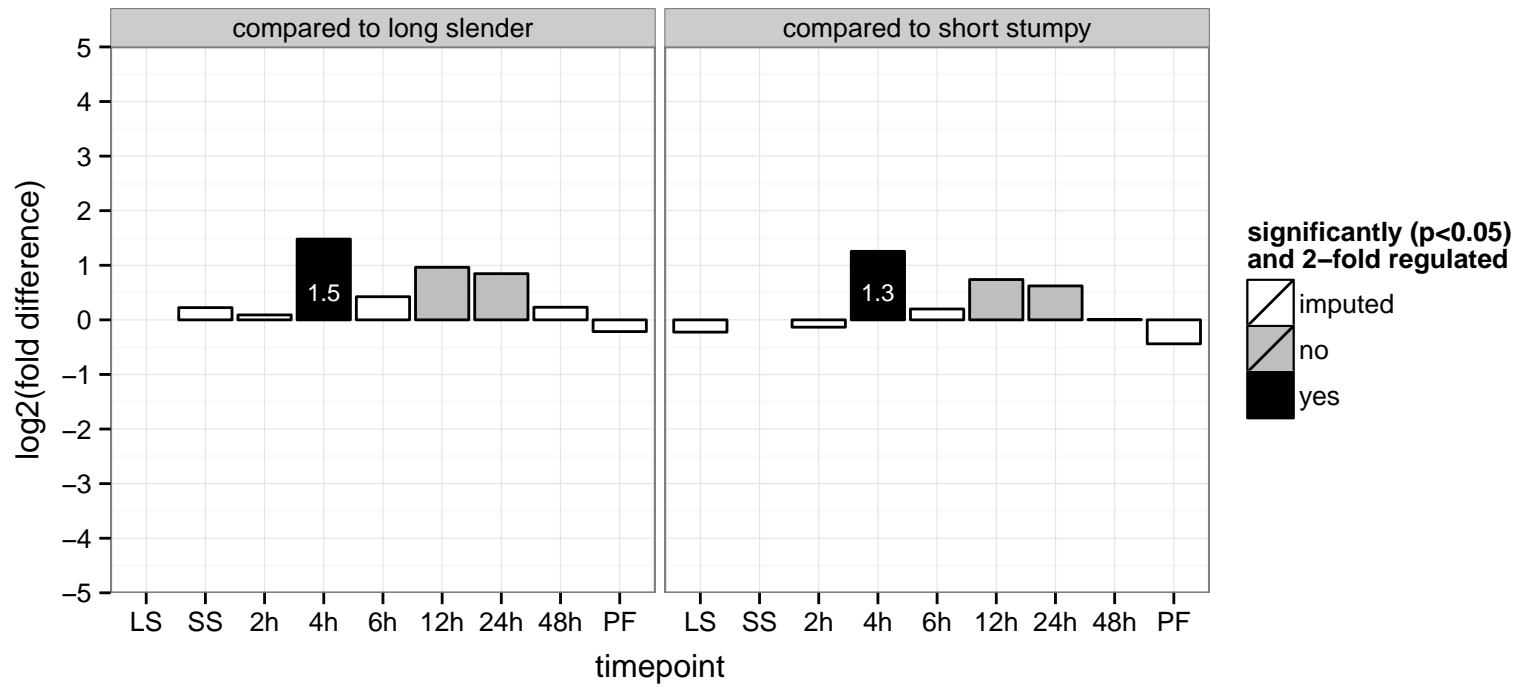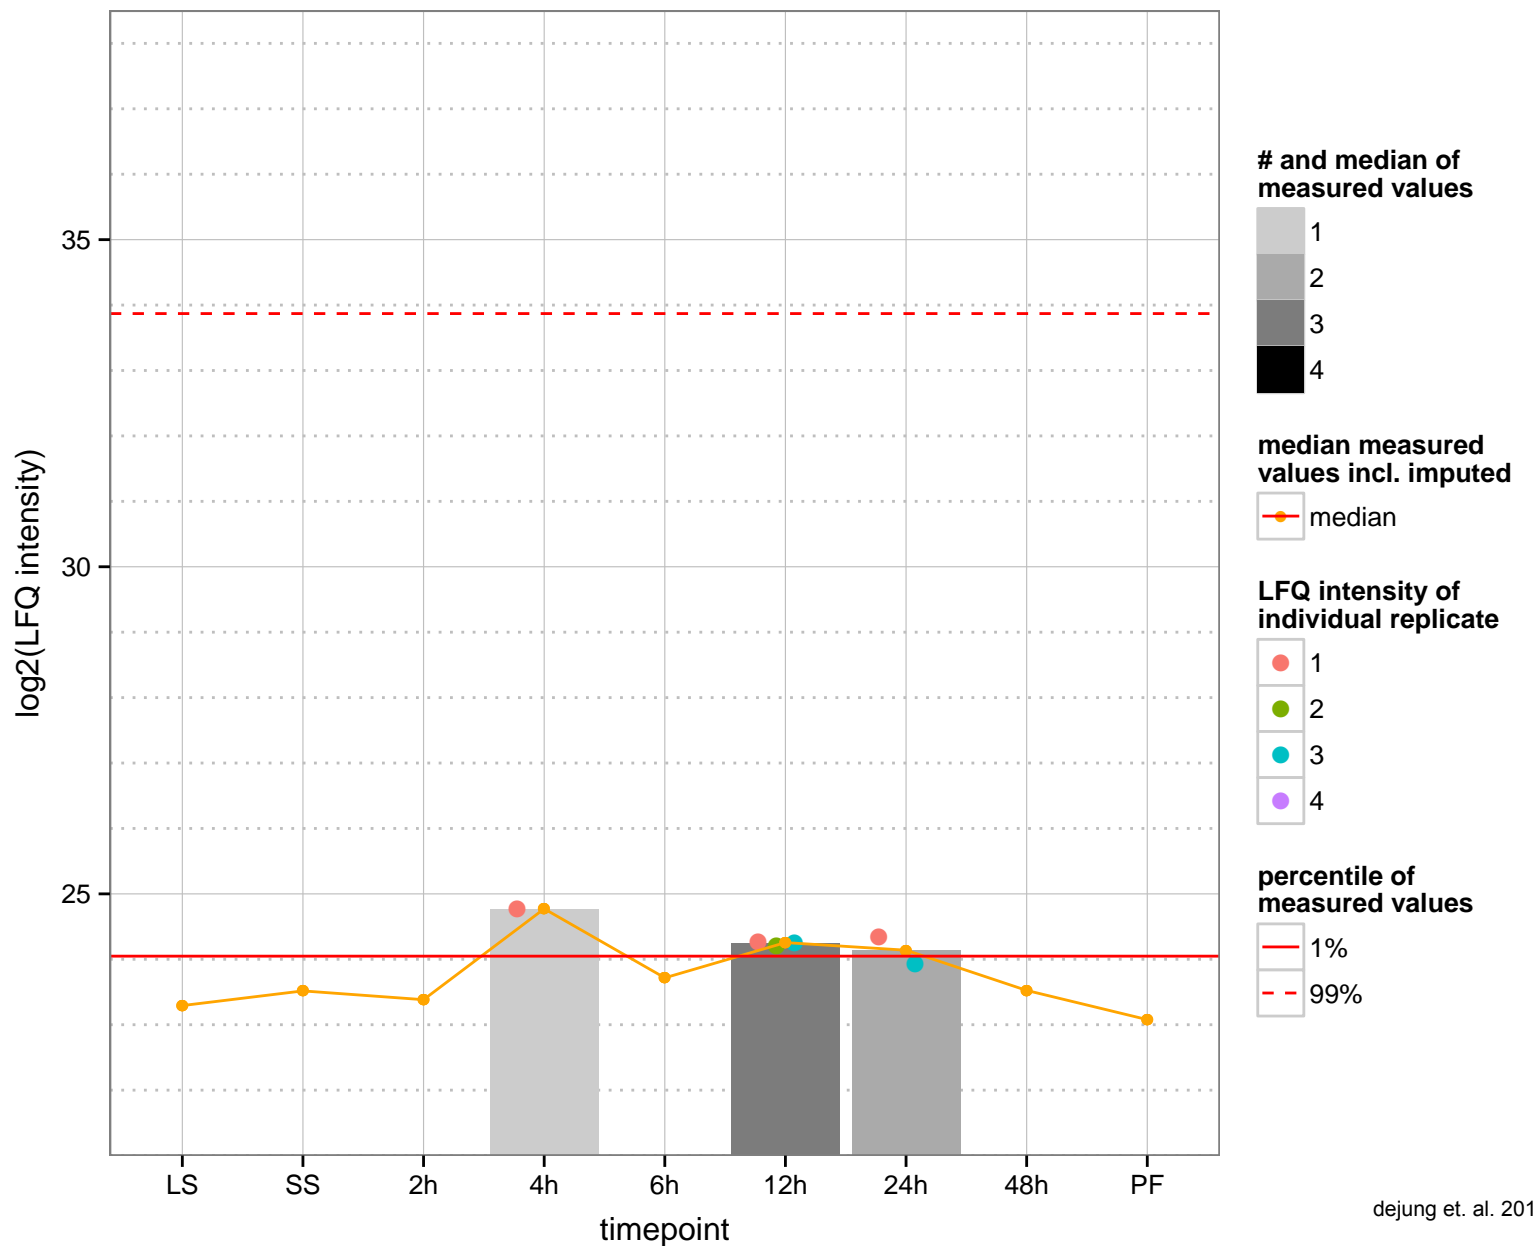

hypothetical protein, conserved  
 Tb927.8.2840  
 AGOF: null  
 AGOC: null  
 AGOP: null  
 PGO: null  
 PGOC: null  
 PGOP: null

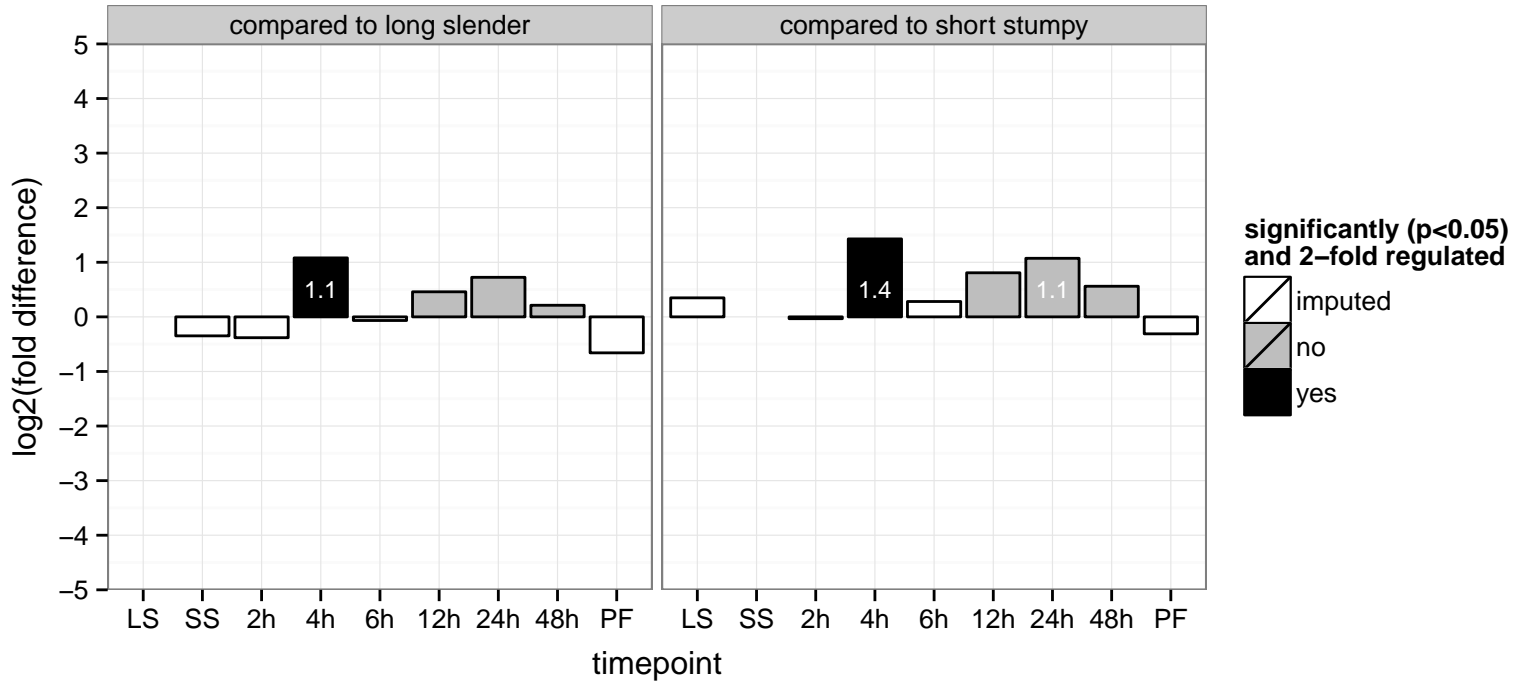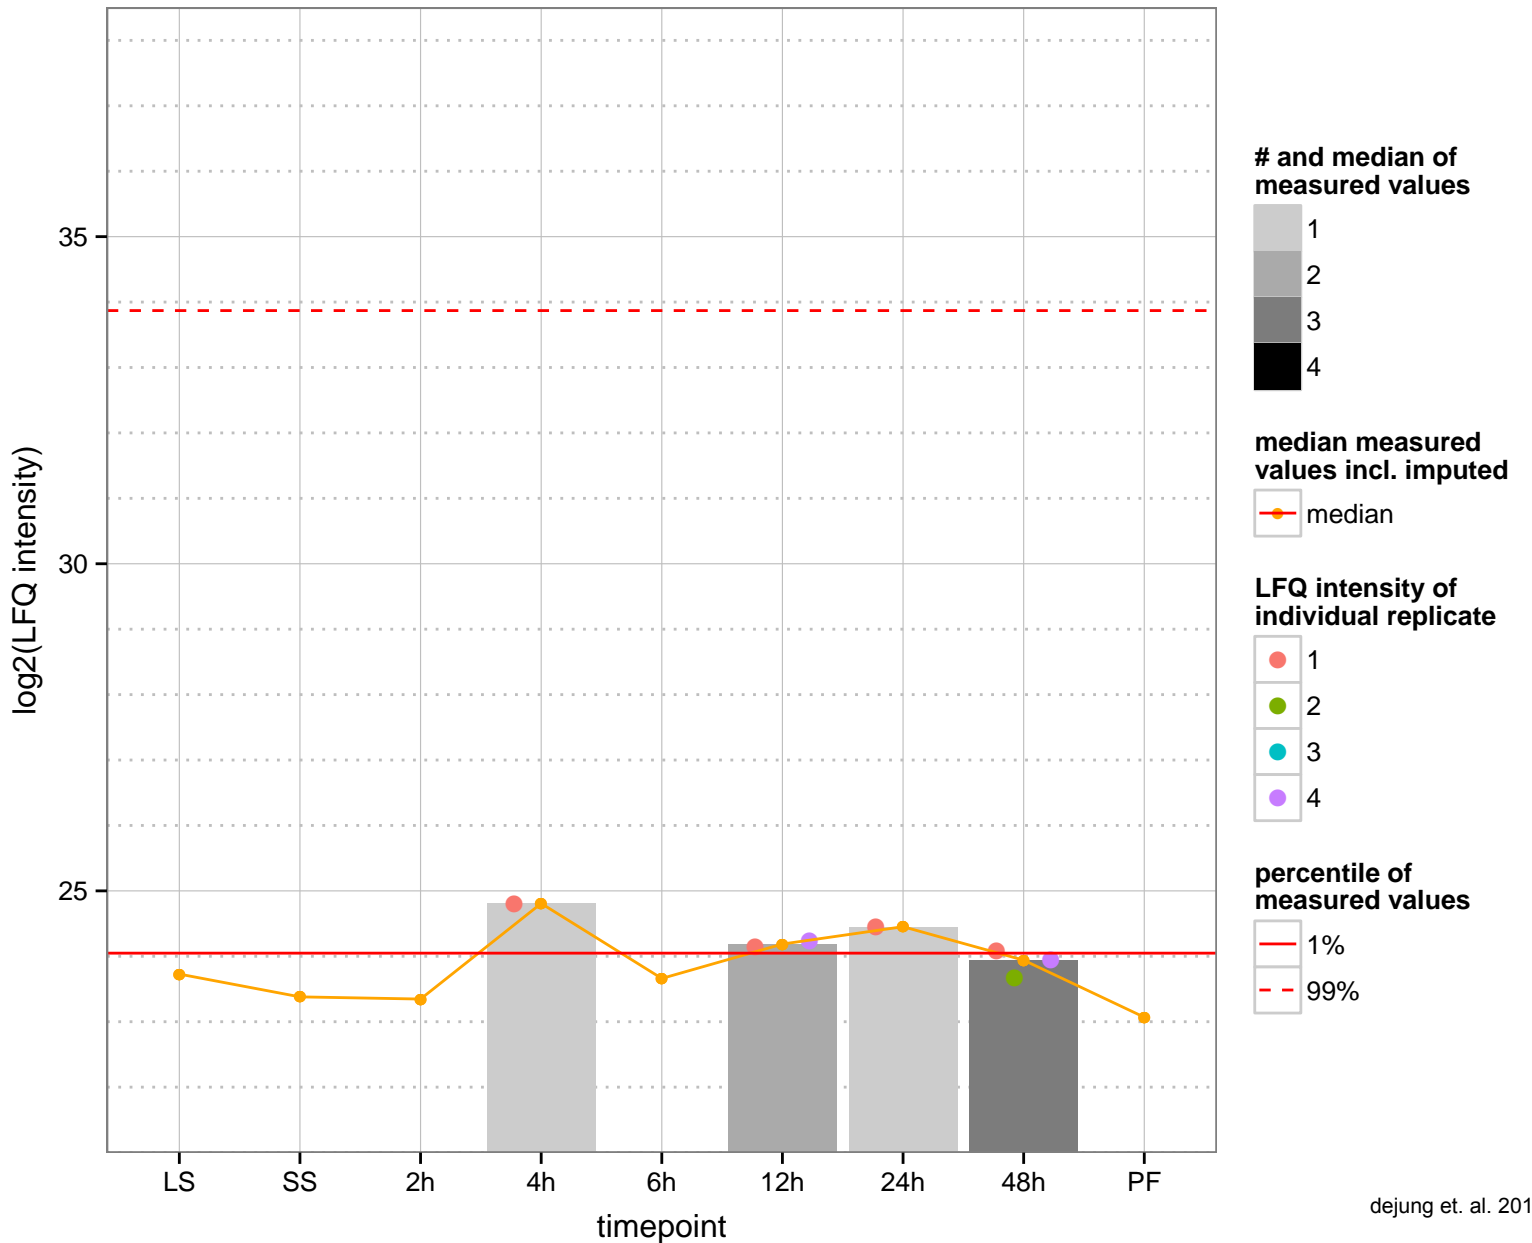

hypothetical protein, conserved  
 Tb927.8.5720  
 AGOF: null  
 AGOC: null  
 AGOP: null  
 PGO: transferase activity  
 PGOC: null  
 PGOP: null

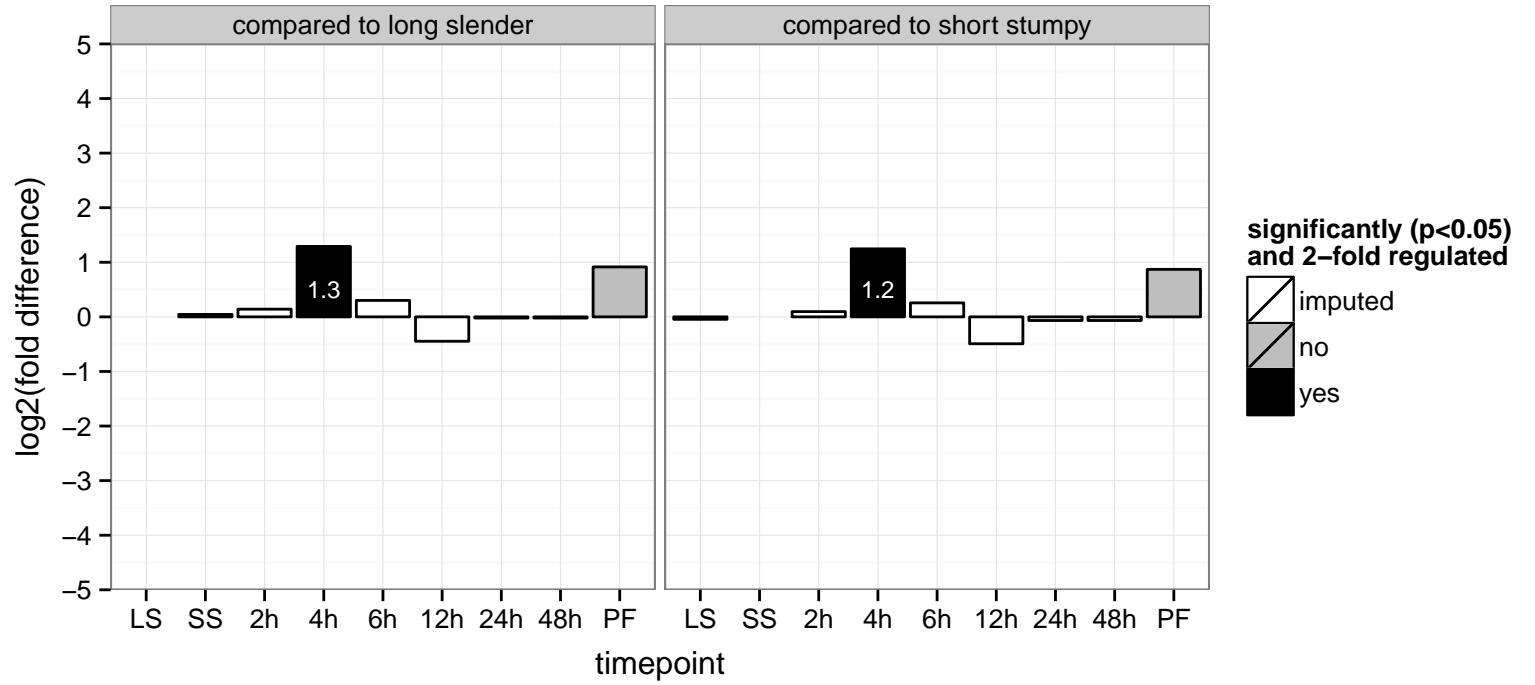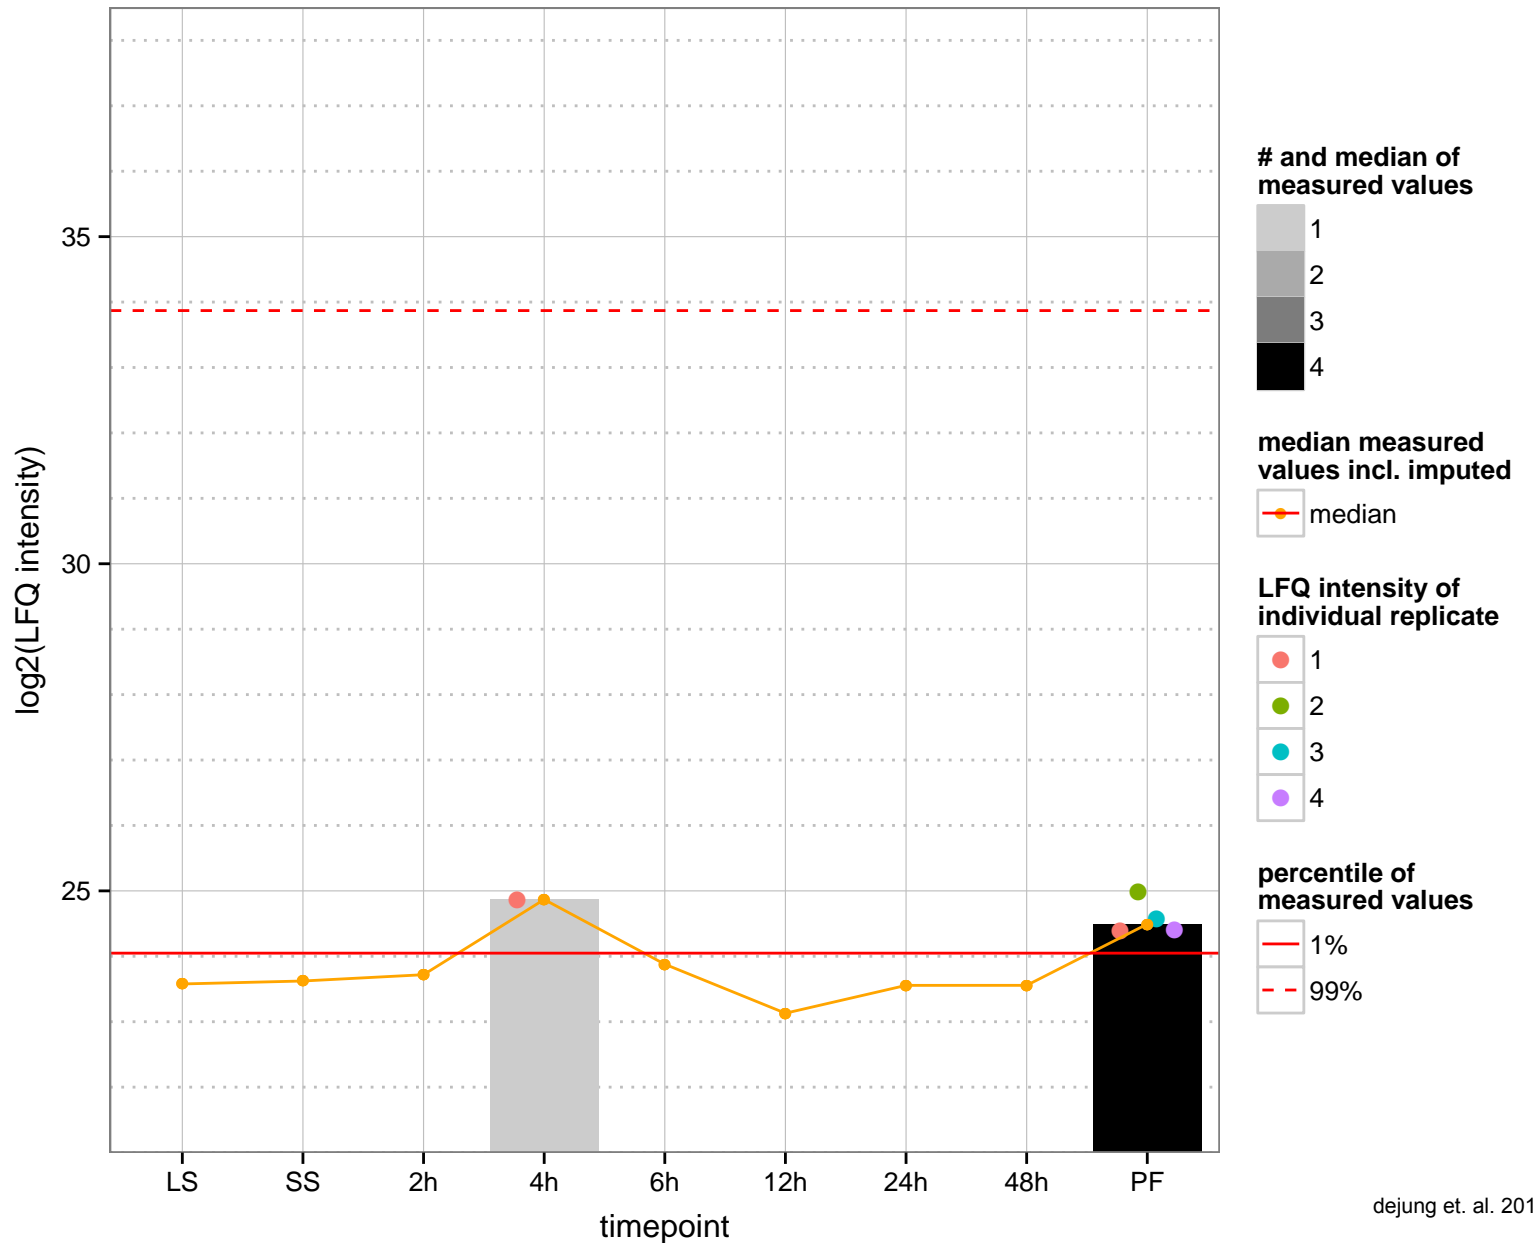



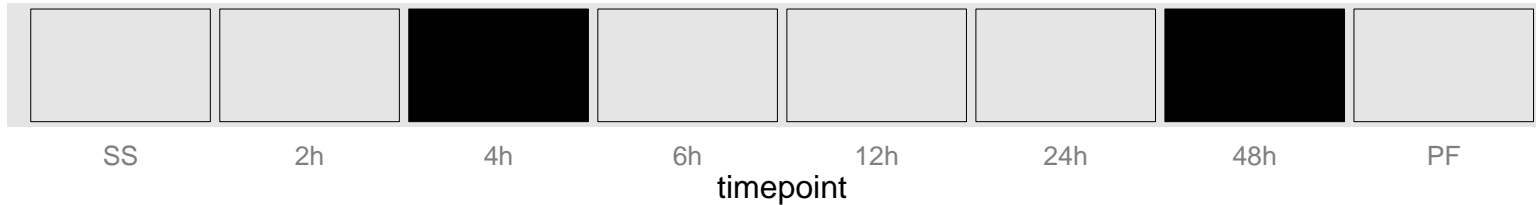

**regulated**  **not regulated**  **significant down**  **significant up**

hypothetical protein, conserved  
 Tb927.1.1390  
 AGOF: null  
 AGOC: null  
 AGOP: null  
 PGO: null  
 PGOC: null  
 PGOP: null

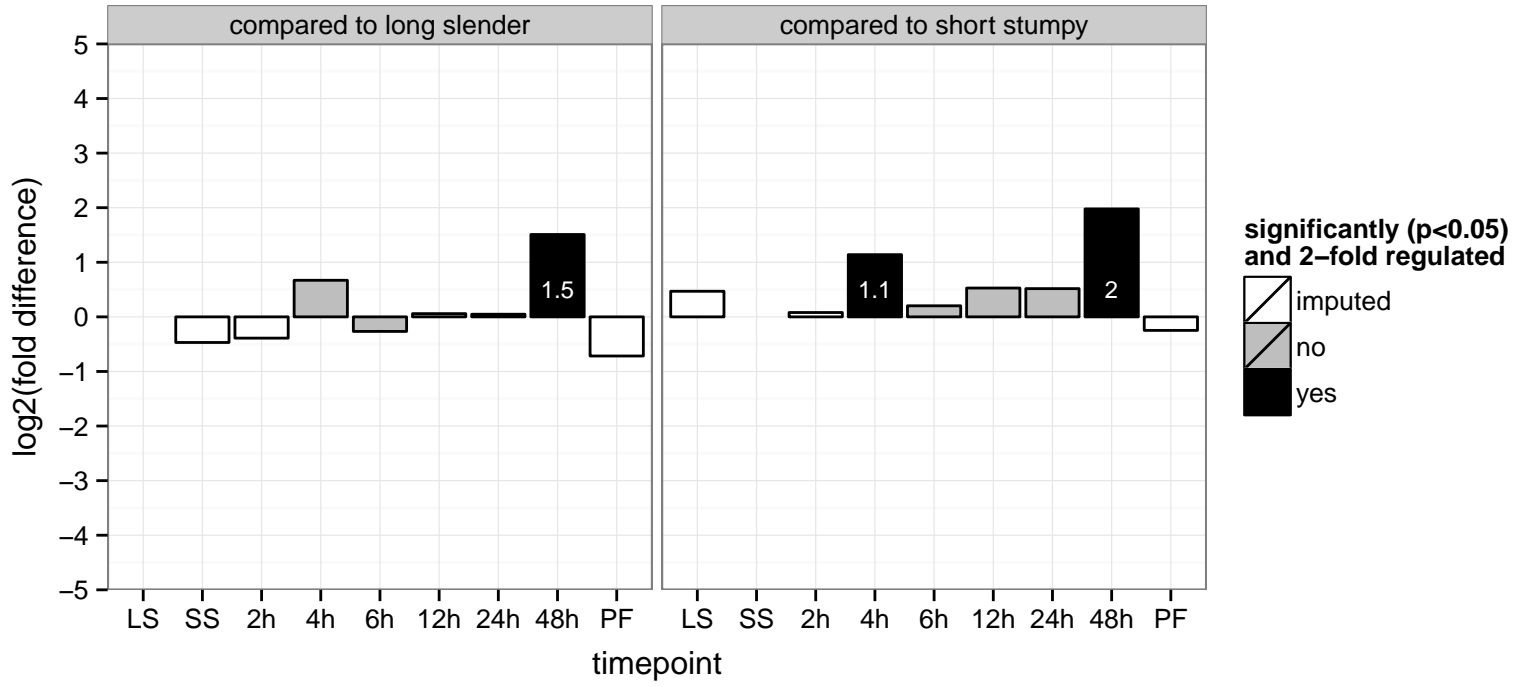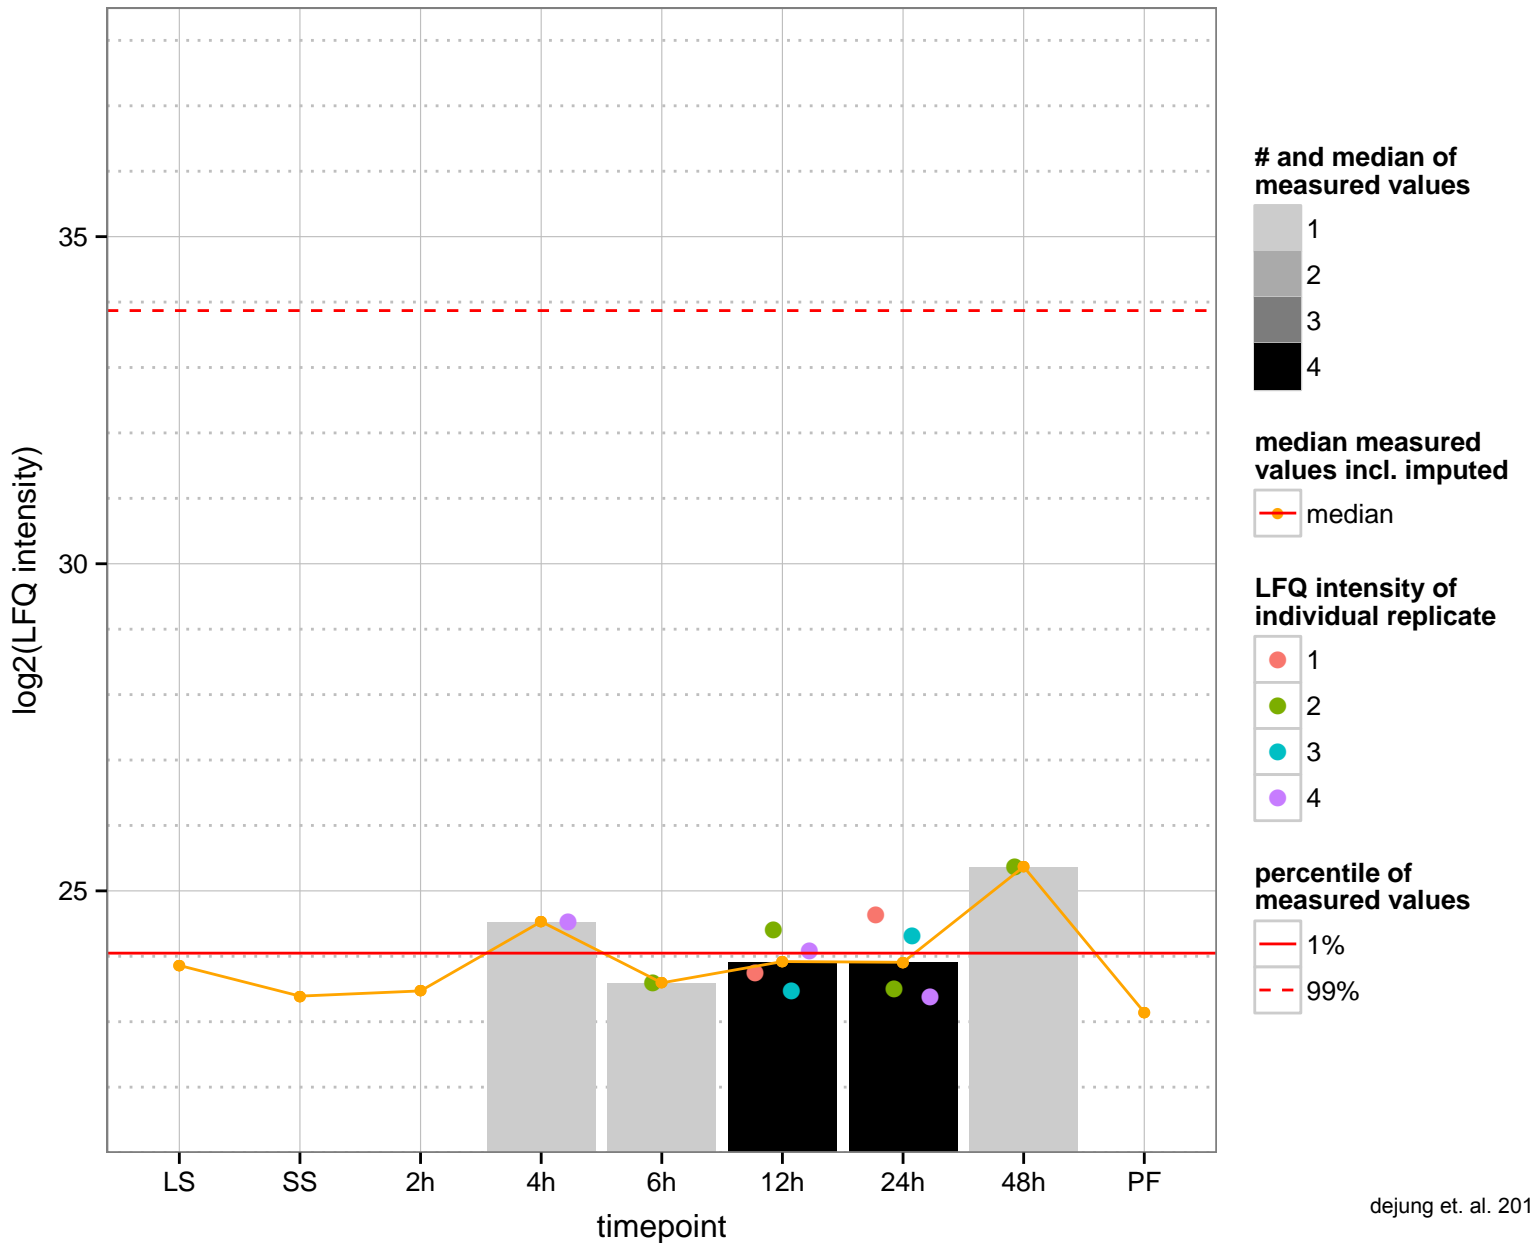

hypothetical protein, conserved  
 Tb927.3.1910  
 AGOF: null  
 AGOC: null  
 AGOP: null  
 PGOF: null  
 PGOC: null  
 PGOP: null

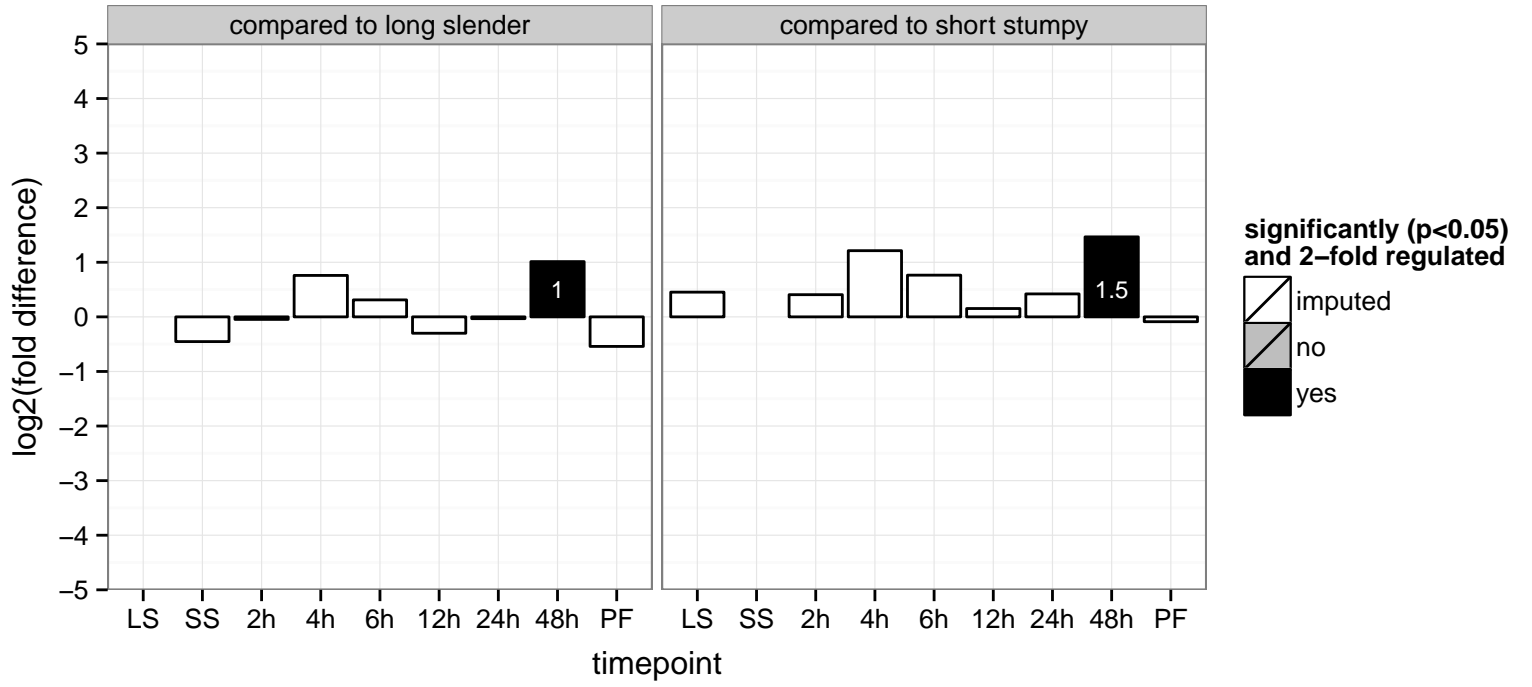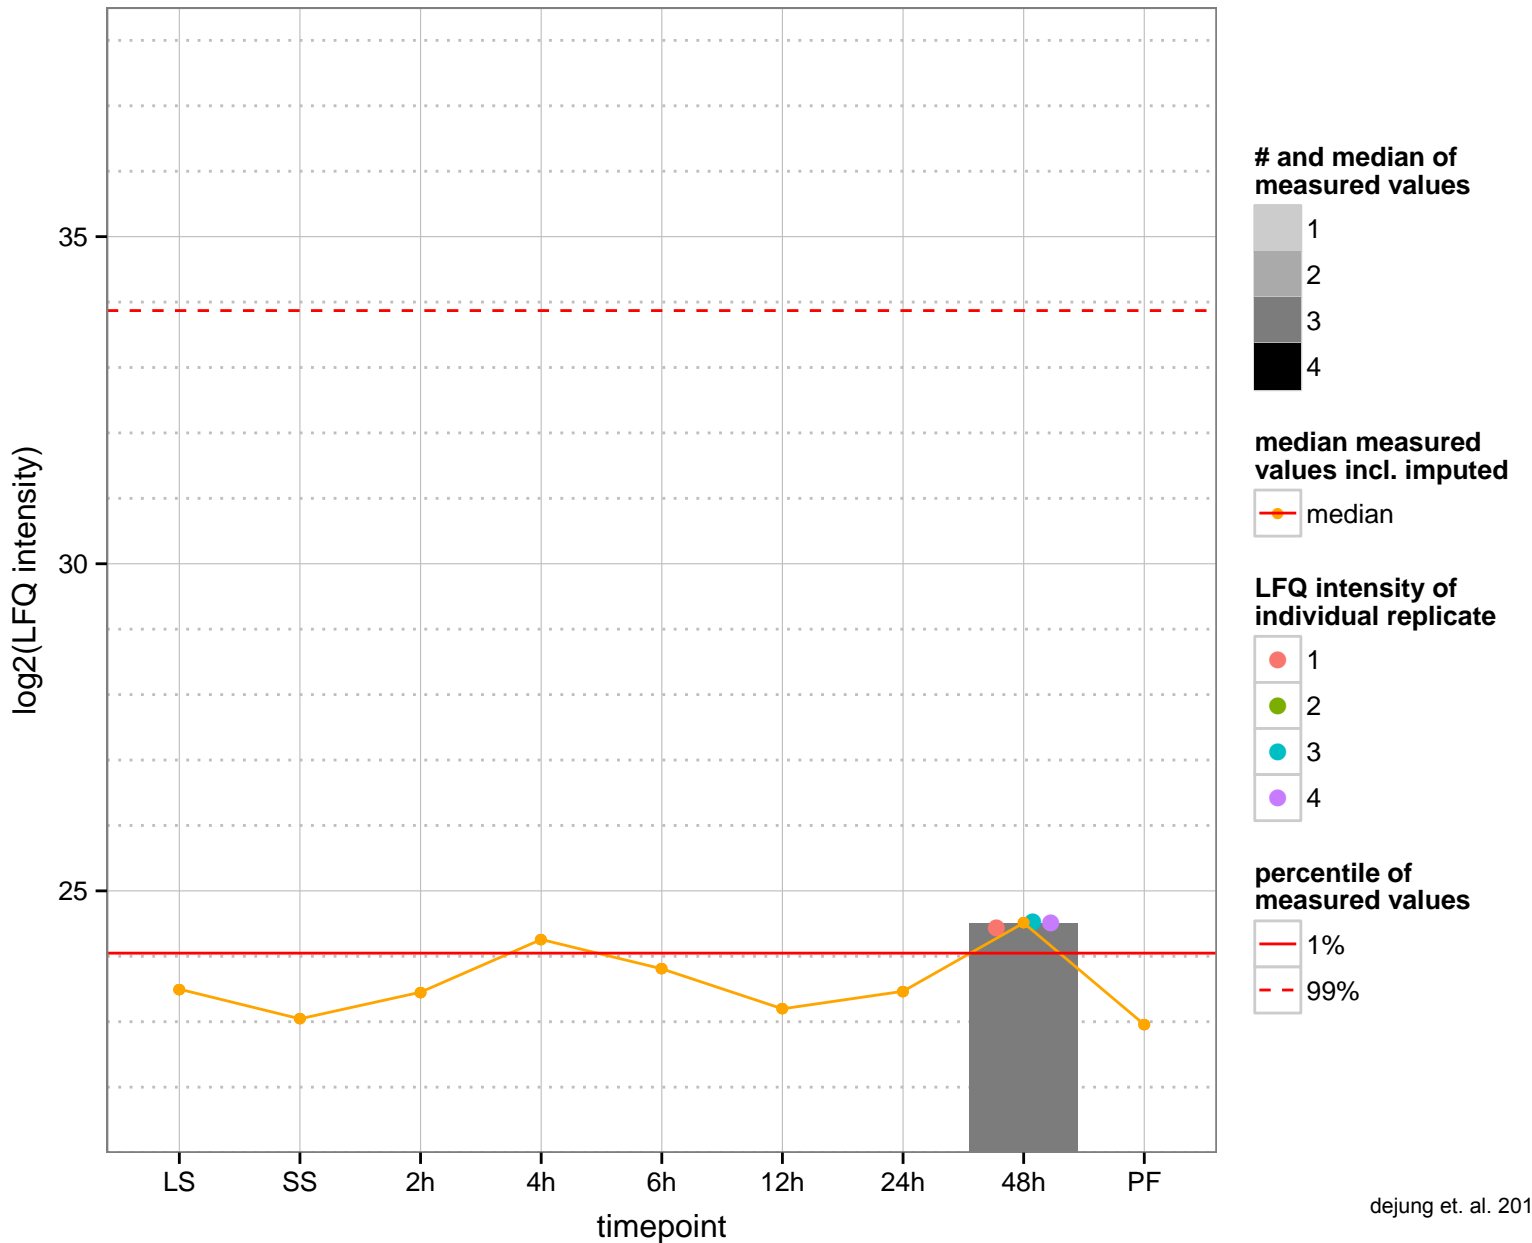

hypothetical protein, conserved  
 Tb927.3.1930  
 AGOF: null  
 AGOC: null  
 AGOP: null  
 PGOF: protein binding  
 PGO: null  
 PGOP: null

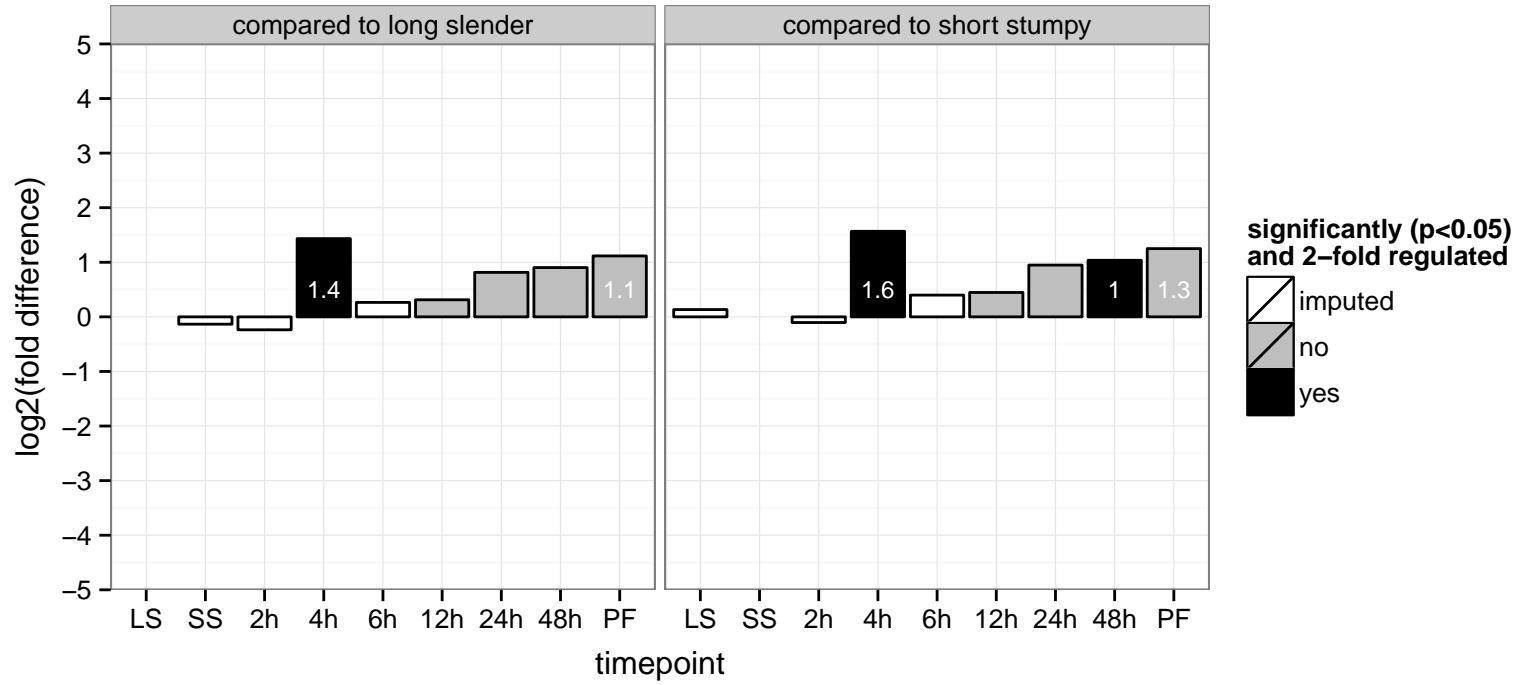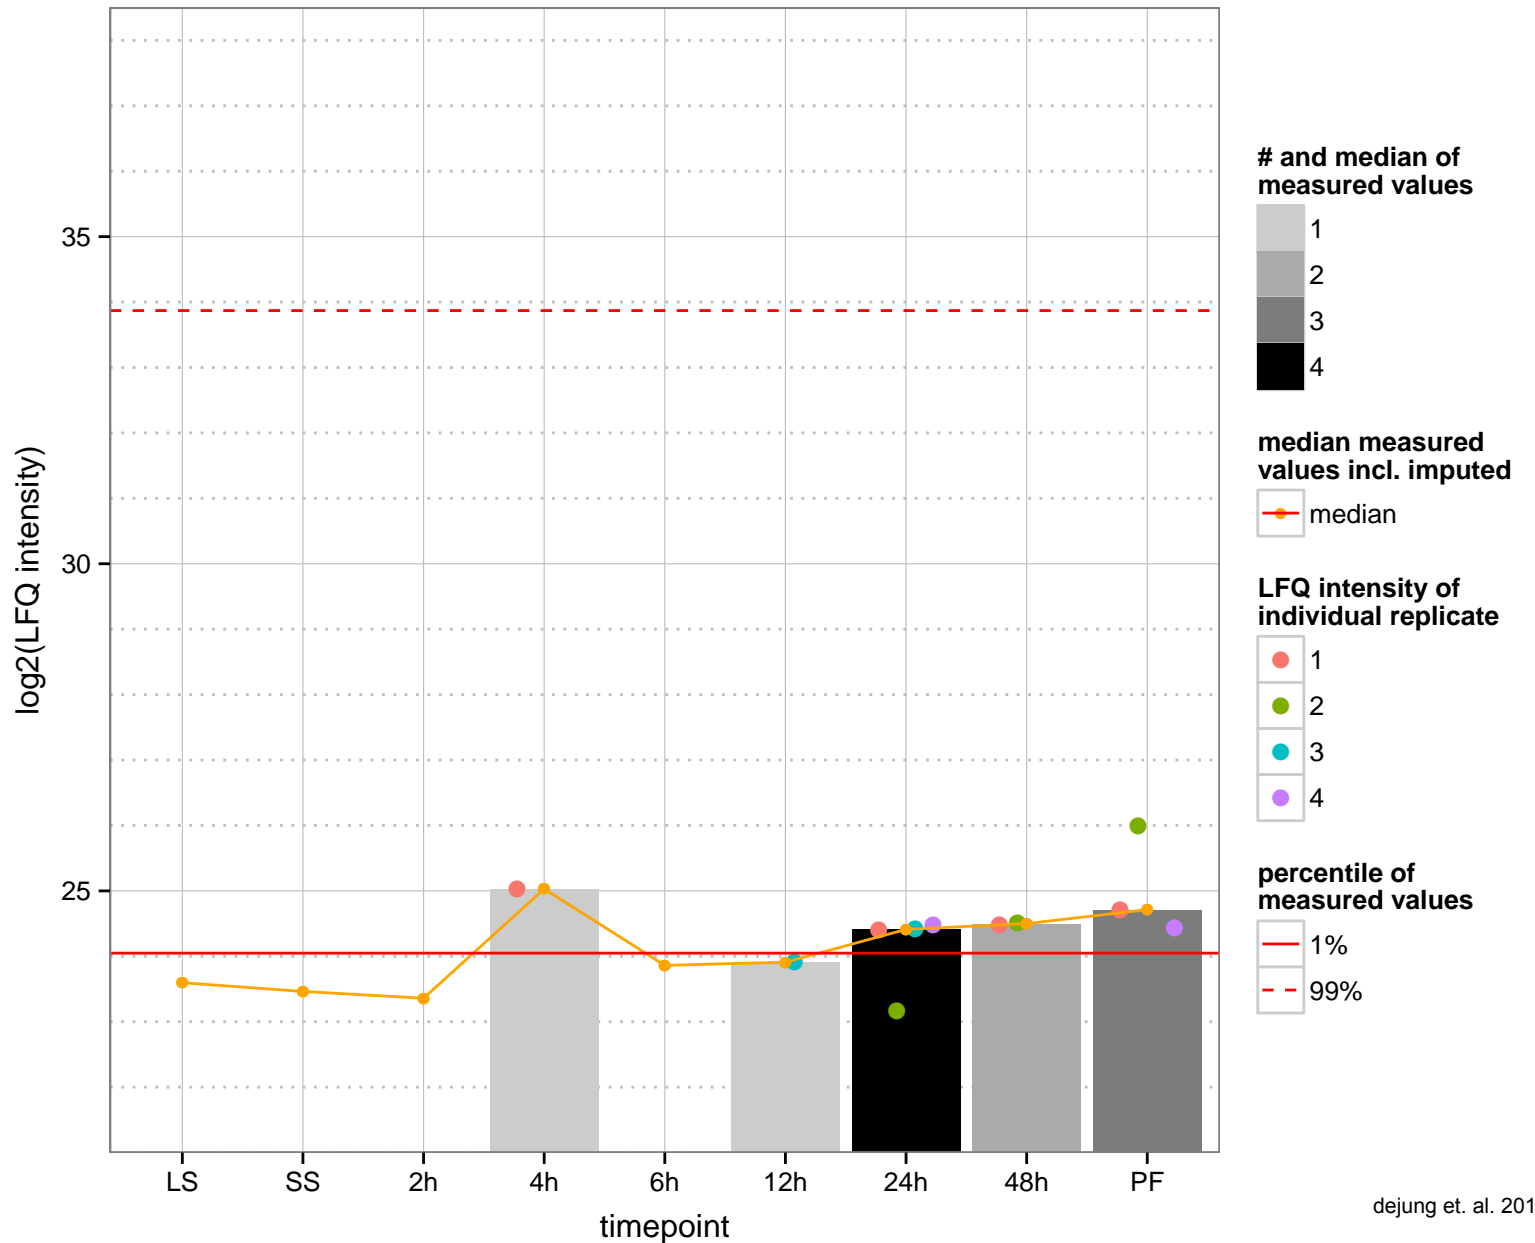

tousled-like kinase I (TLK1), tousled-like kinase II (TLK2)

Tb927.4.5180;Tb927.8.7220

AGOF: ATP binding, protein binding, protein serine/threonine kinase activity, protein tyrosine kinase activity

AGOC: nucleus, spindle pole

AGOP: DNA replication, chromosome segregation, histone H3-S10 phosphorylation, protein phosphorylation, spindle assembly

PGOF: ATP binding, protein kinase activity, transferase activity, transferring phosphorus-containing groups

PGOC: null

PGOP: protein phosphorylation

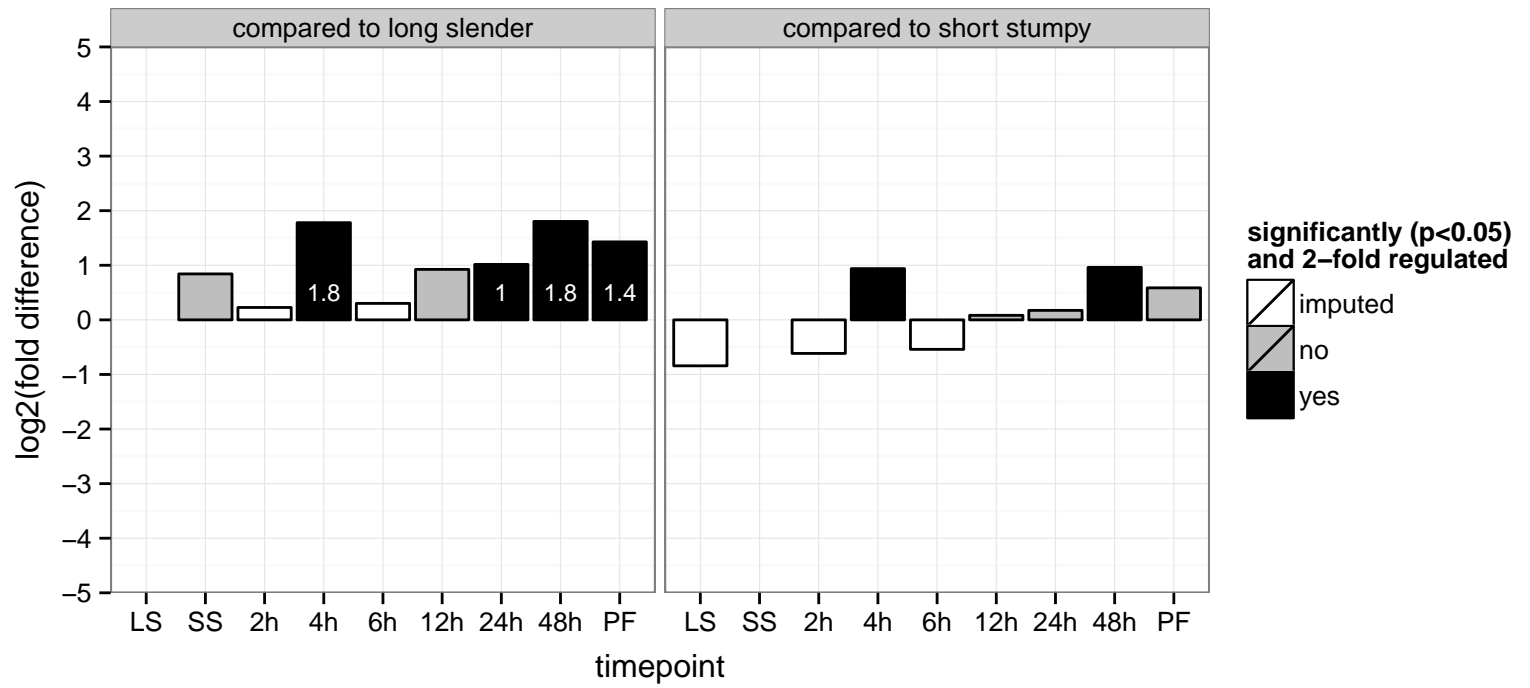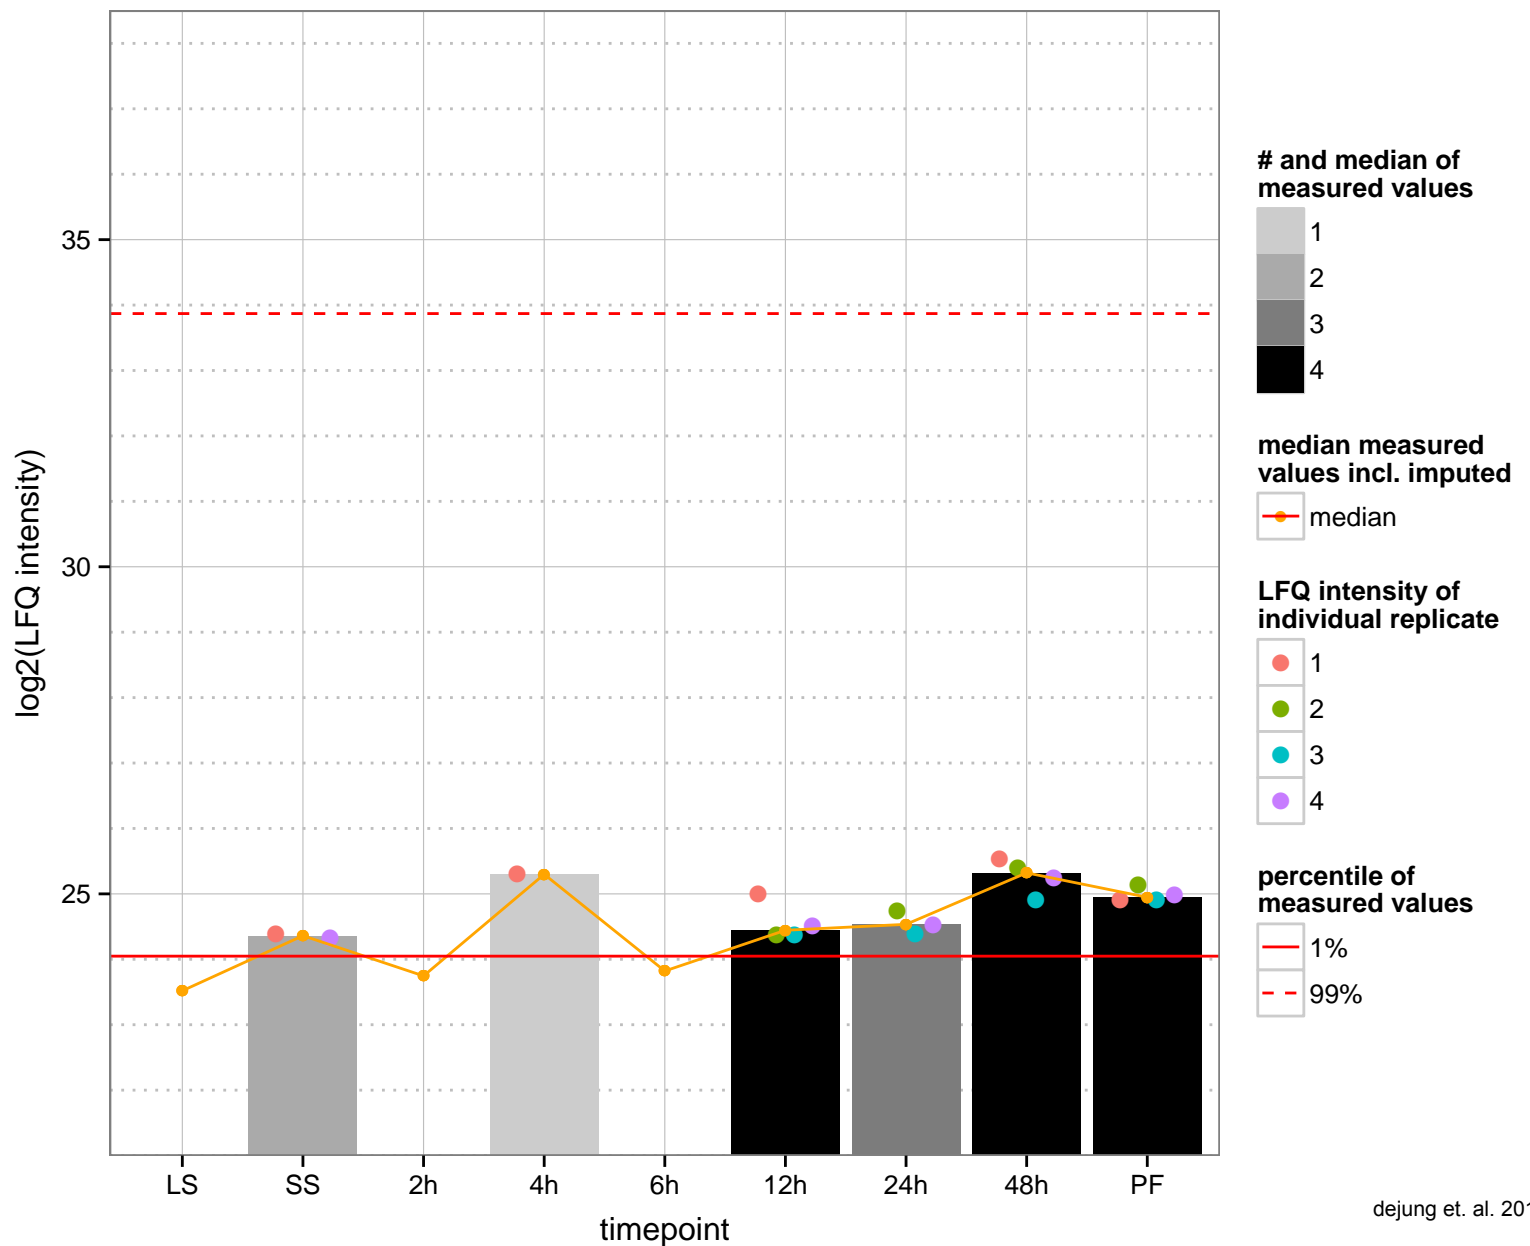

RNA-editing complex protein, RNA-editing 3' terminal uridylyl transferase 1, KRET1 (KRET1)  
 Tb927.7.3950  
 AGOF: RNA uridylyltransferase activity, nucleotide binding, polynucleotide adenylyltransferase activity  
 AGOC: mitochondrion  
 AGOP: null  
 PGO: null  
 PGOC: null  
 PGOP: null

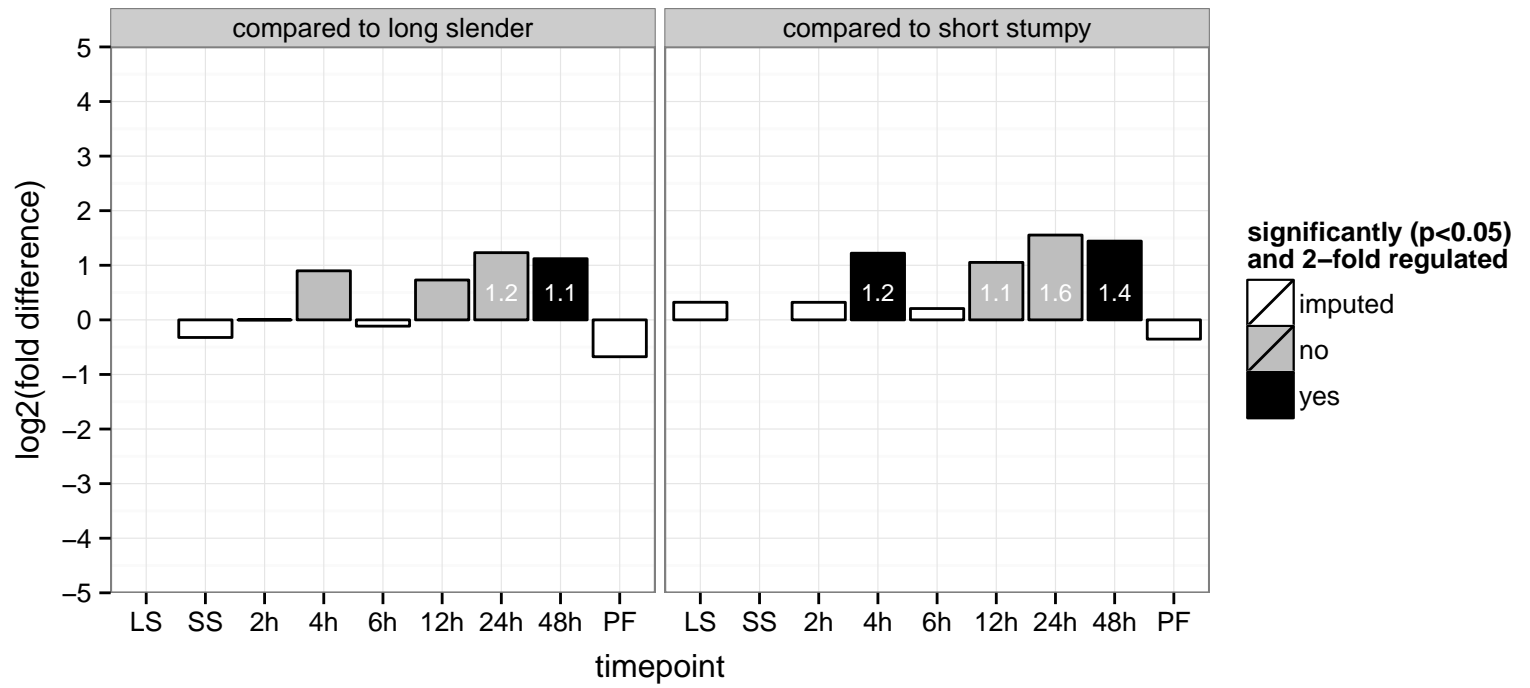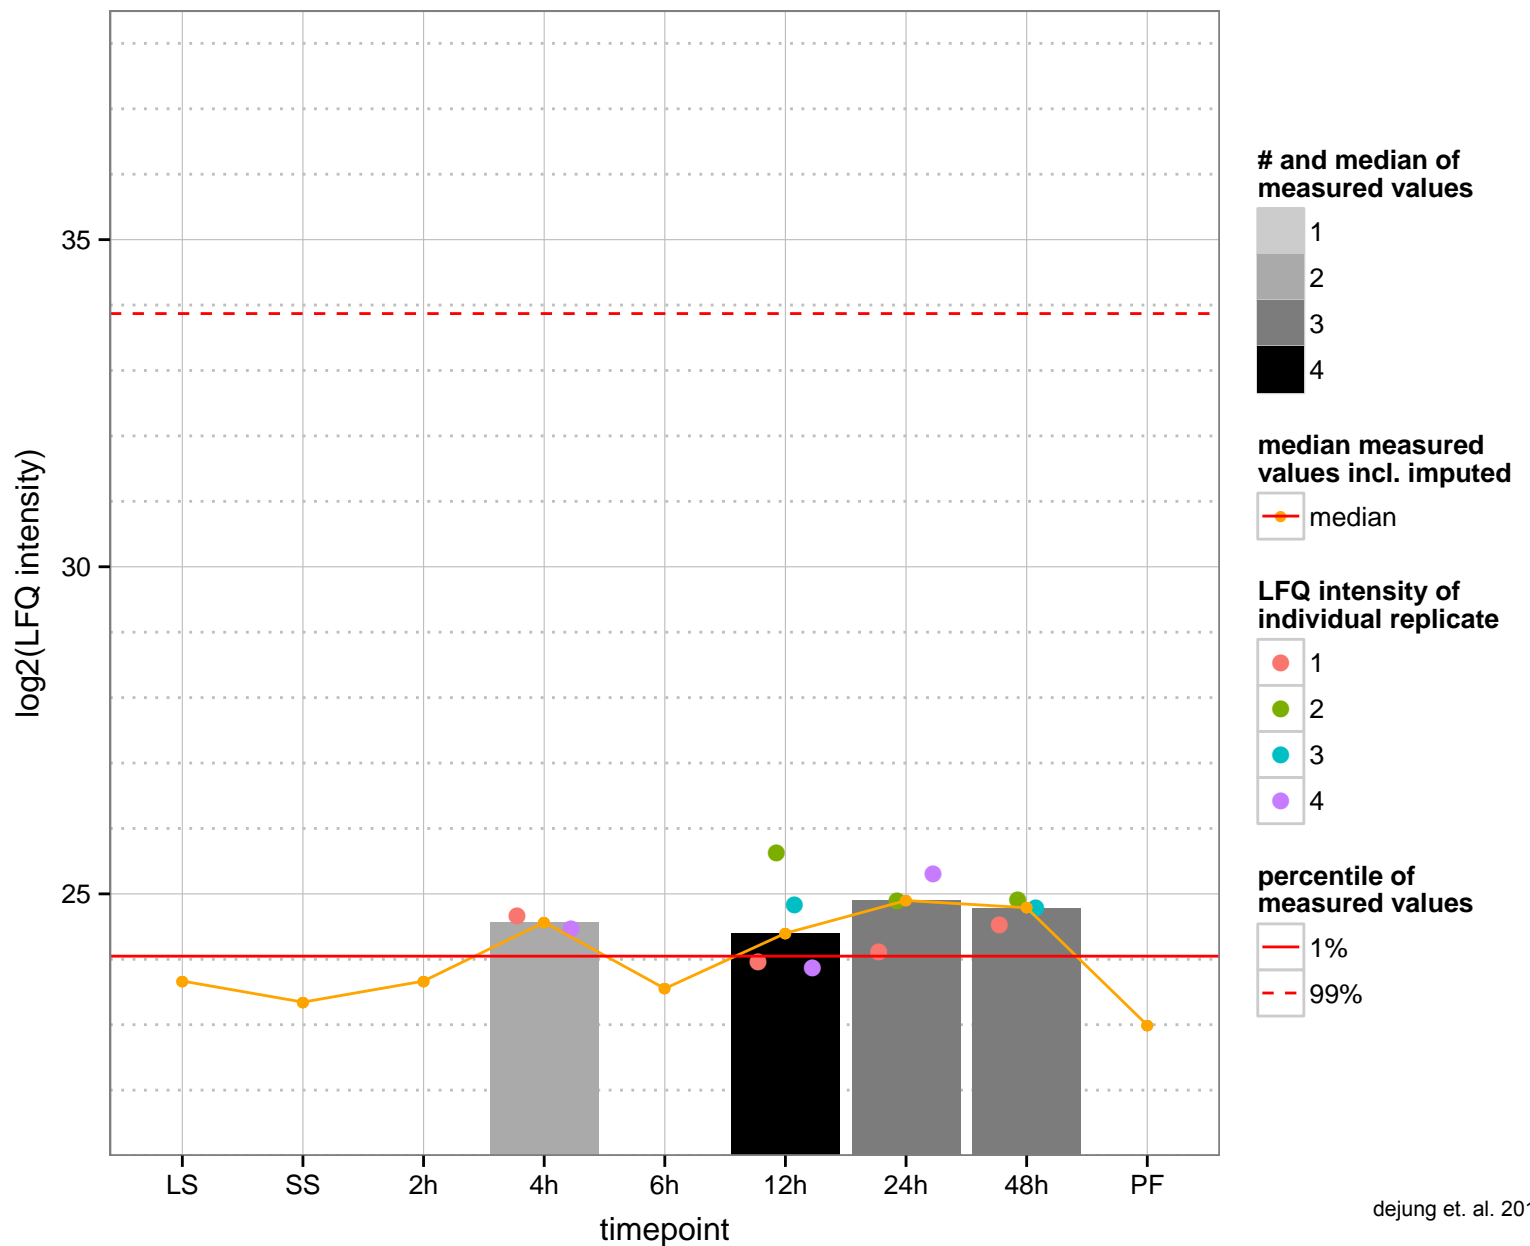

hypothetical protein, conserved  
 Tb927.8.2430  
 AGOF: null  
 AGOC: null  
 AGOP: null  
 PGO: null  
 PGOC: null  
 PGOP: null

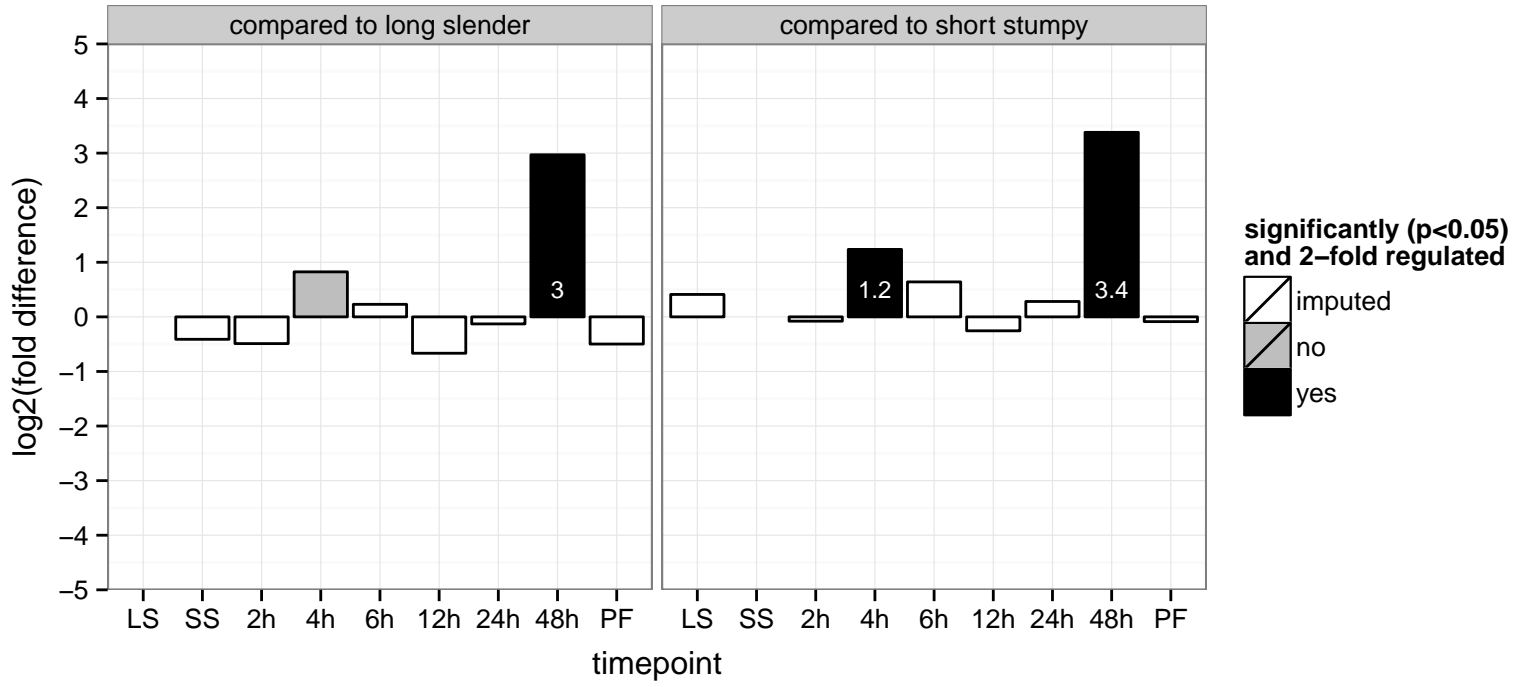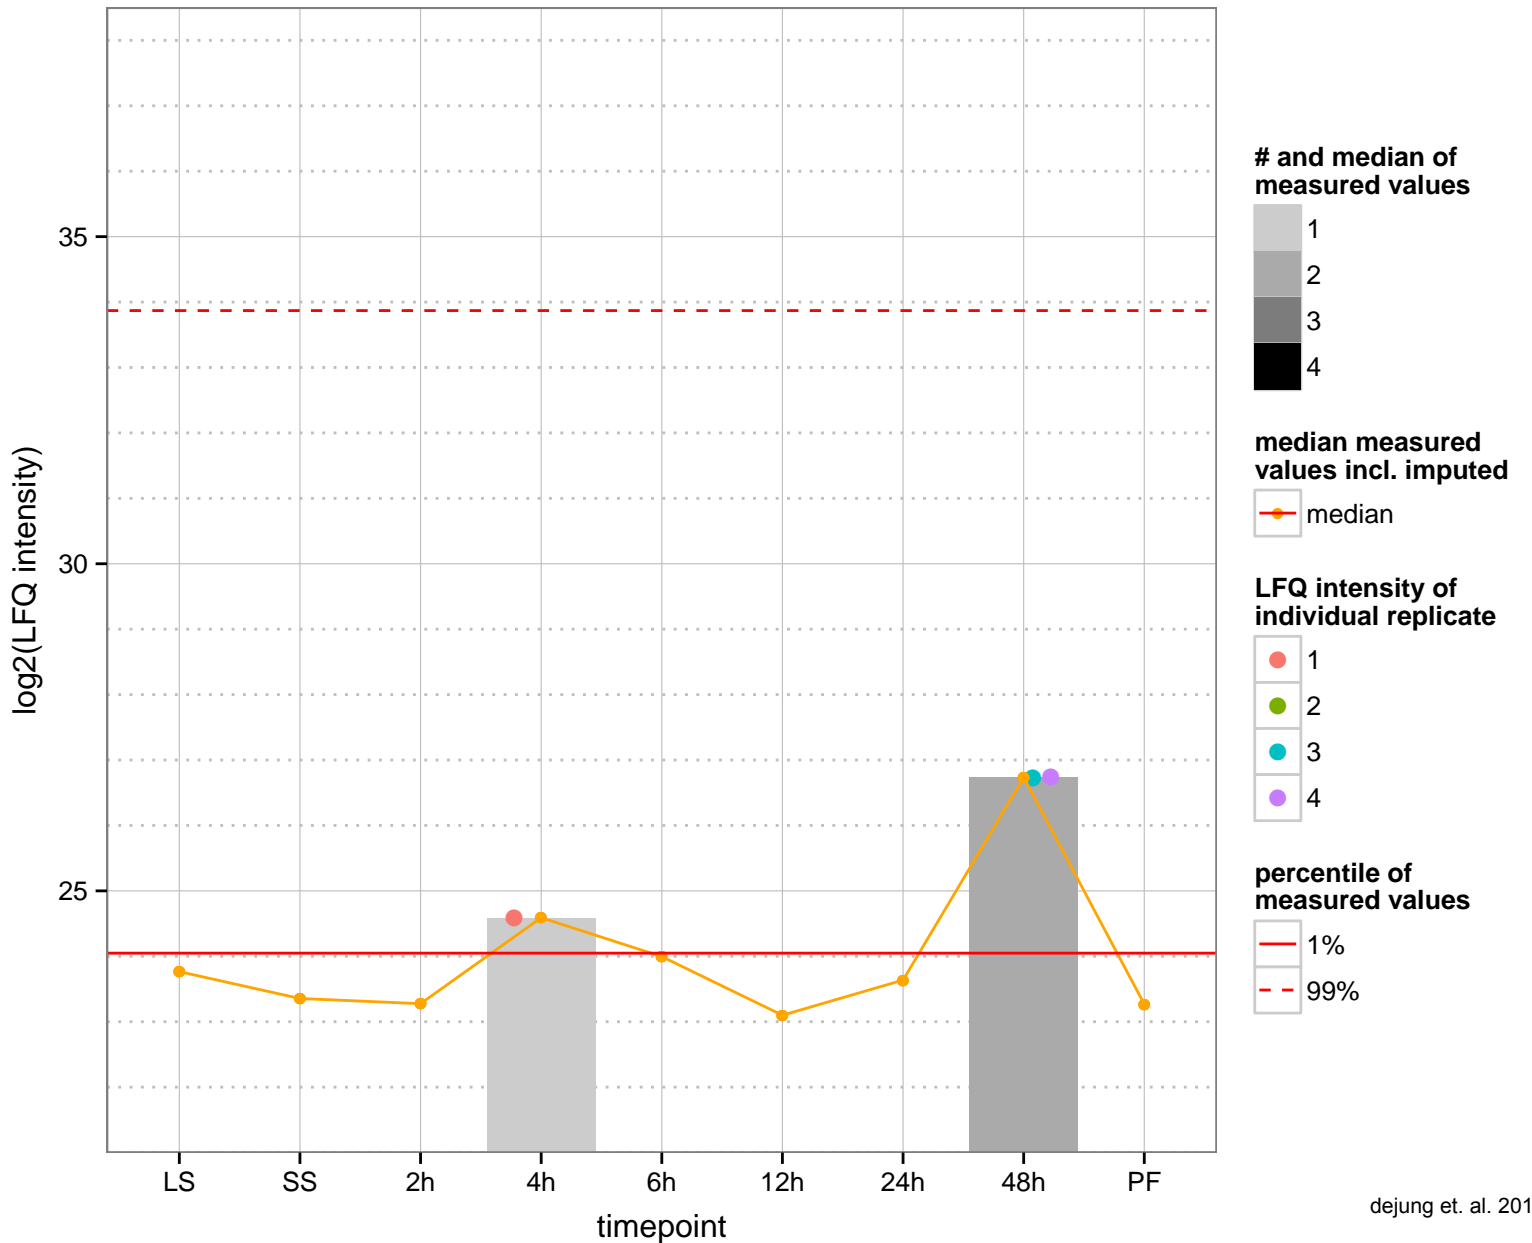

nucleosome assembly protein-like protein  
 Tb927.9.5730  
 AGOF: histone binding  
 AGOC: nucleus  
 AGOP: nucleosome assembly  
 PGO: null  
 PGO: nucleus  
 PGO: nucleosome assembly

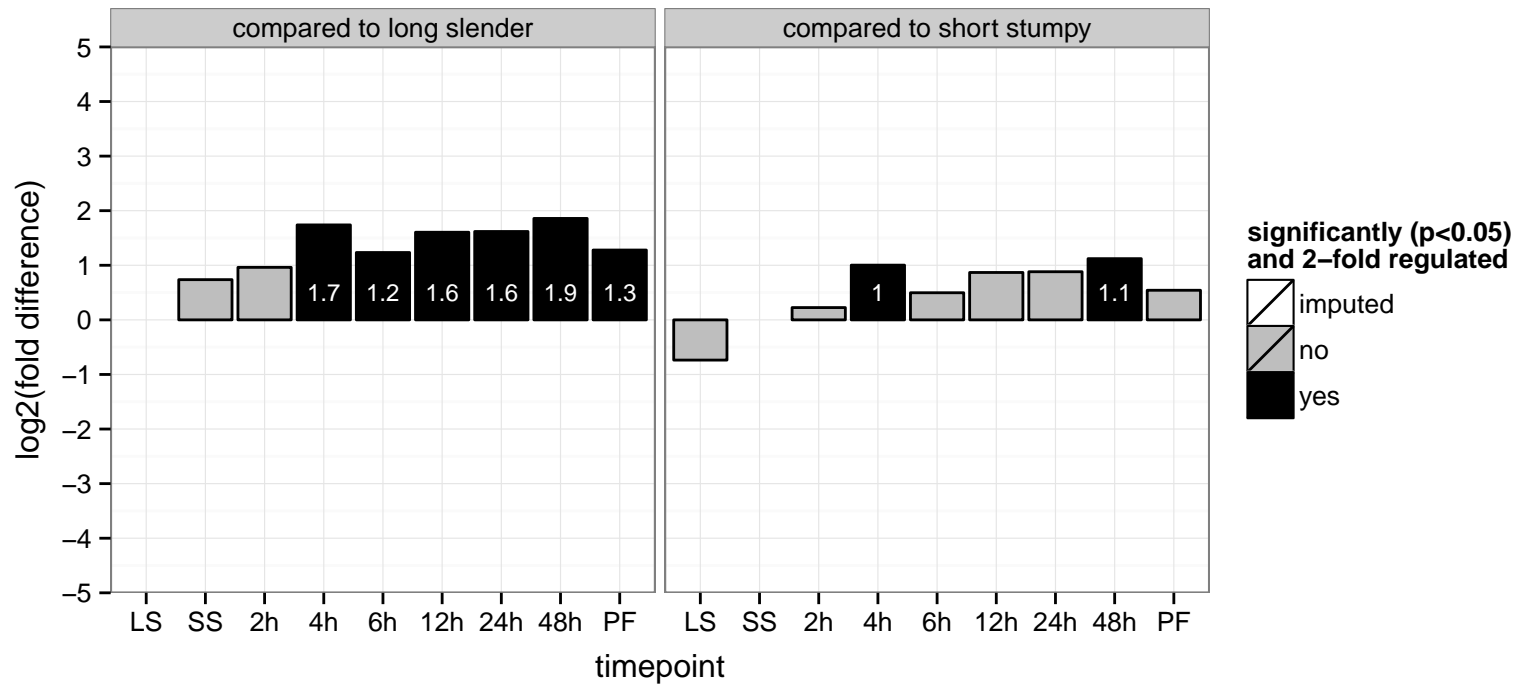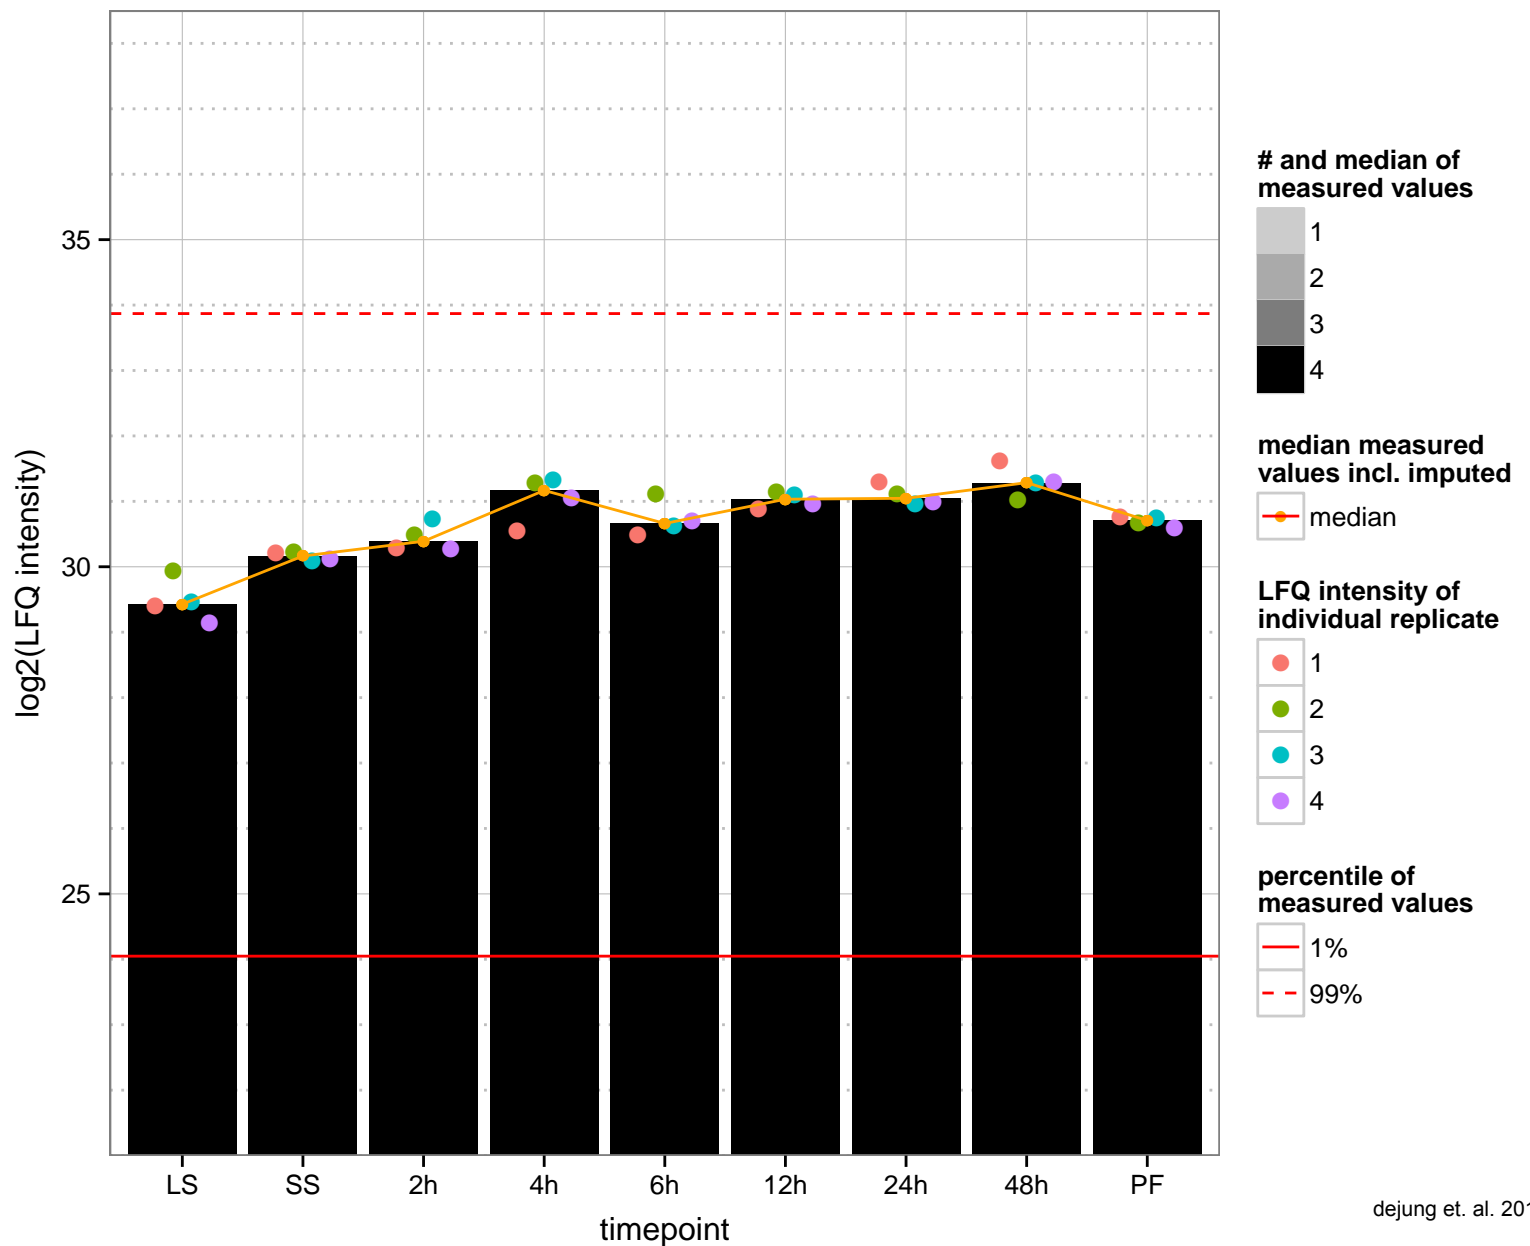



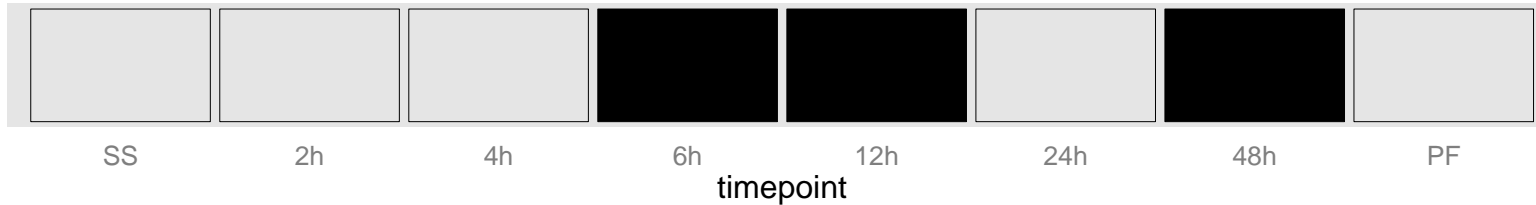

**regulated**  not regulated  significant down  significant up

kinetoplastid kinetochore protein 19, protein kinase, putative (kkt19)

Tb927.11.12420

AGOF: ATP binding, protein serine/threonine kinase activity, protein tyrosine kinase activity

AGOC: null

AGOP: protein phosphorylation

PGOF: ATP binding, protein kinase activity, transferase activity, transferring phosphorus-containing groups

PGOC: null

PGOP: protein phosphorylation

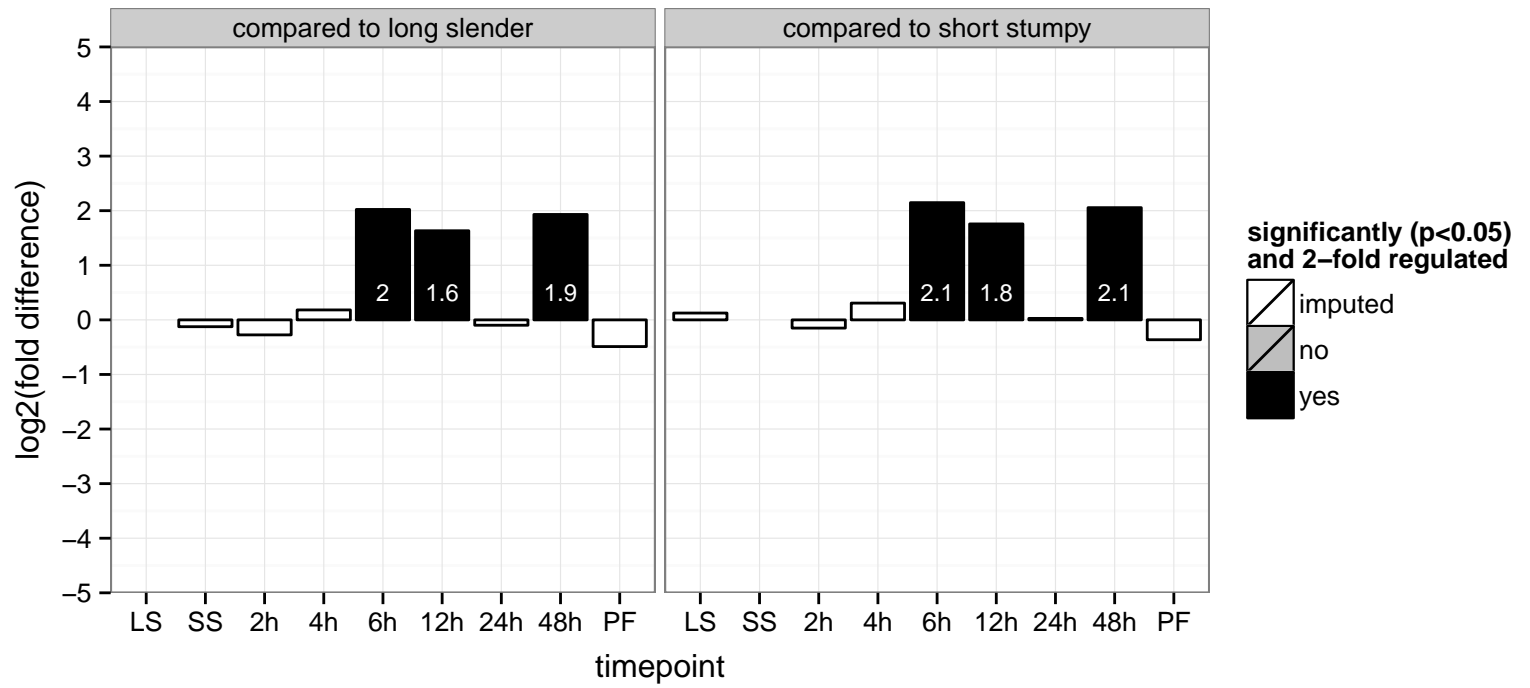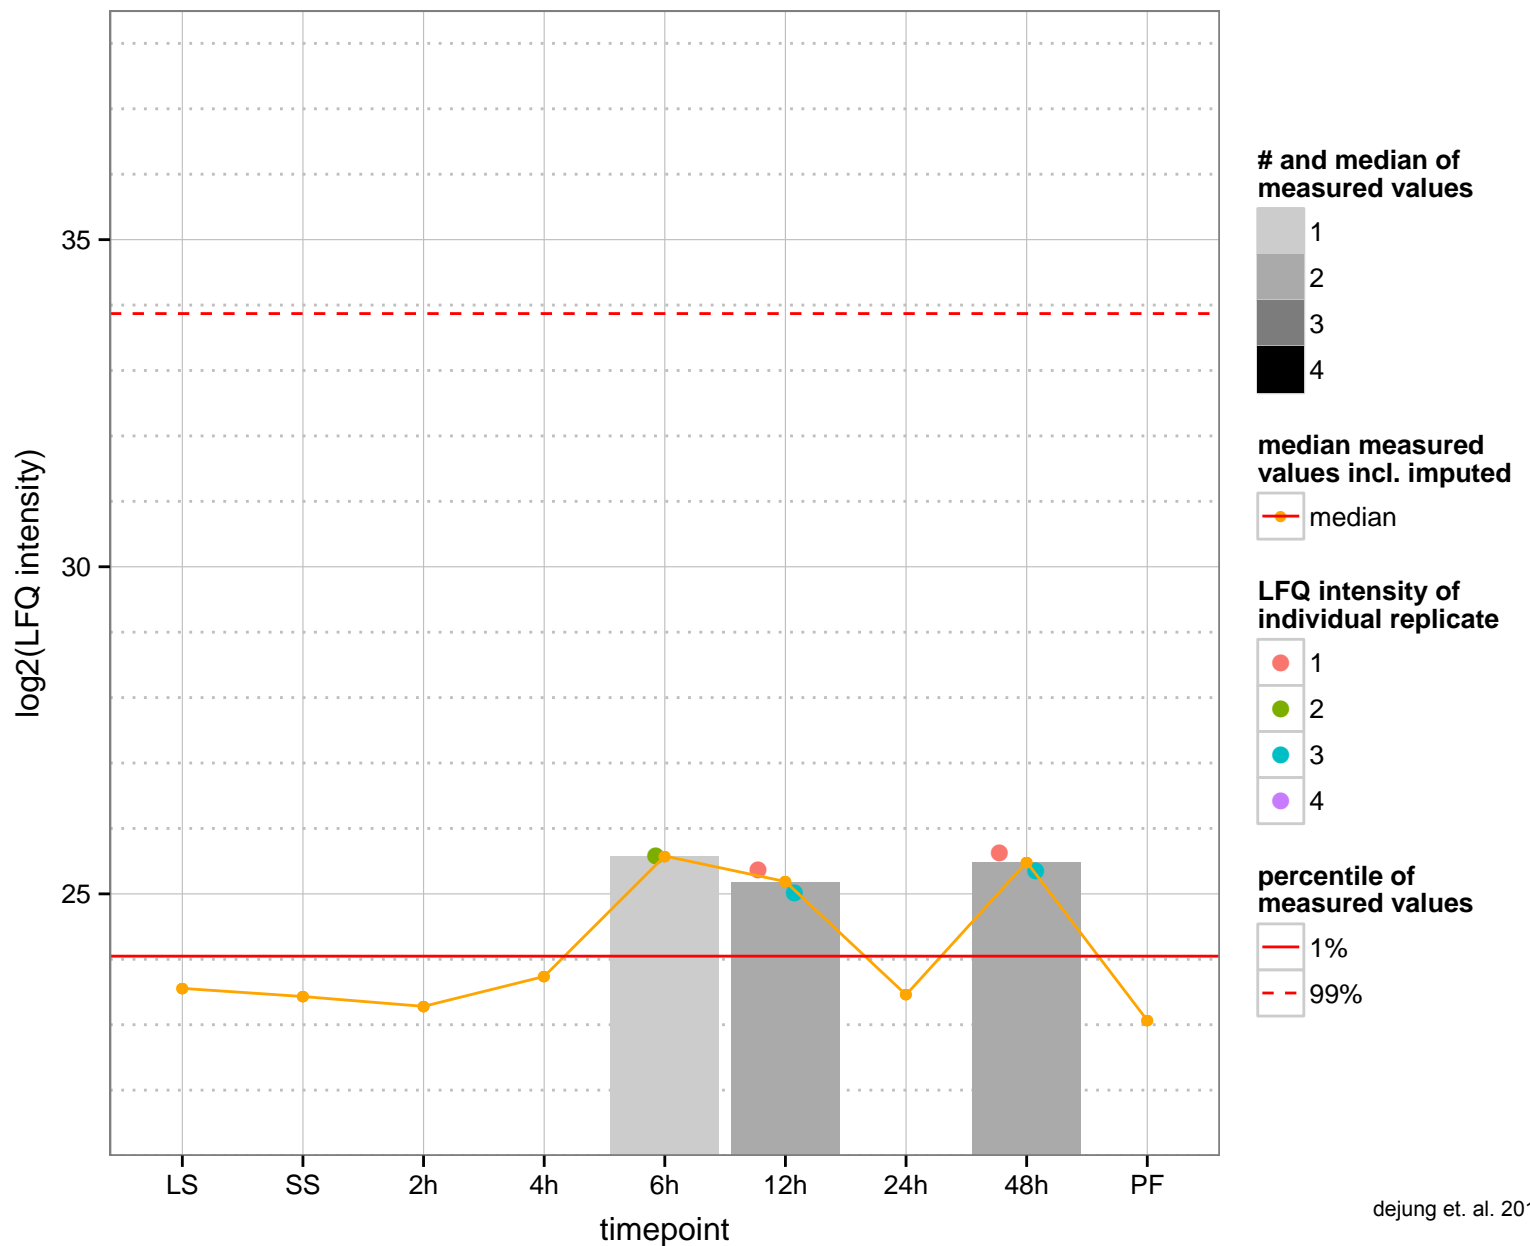

hypothetical protein, conserved  
 Tb927.2.2540  
 AGOF: null  
 AGOC: null  
 AGOP: null  
 PGOF: null  
 PGOC: null  
 PGOP: null

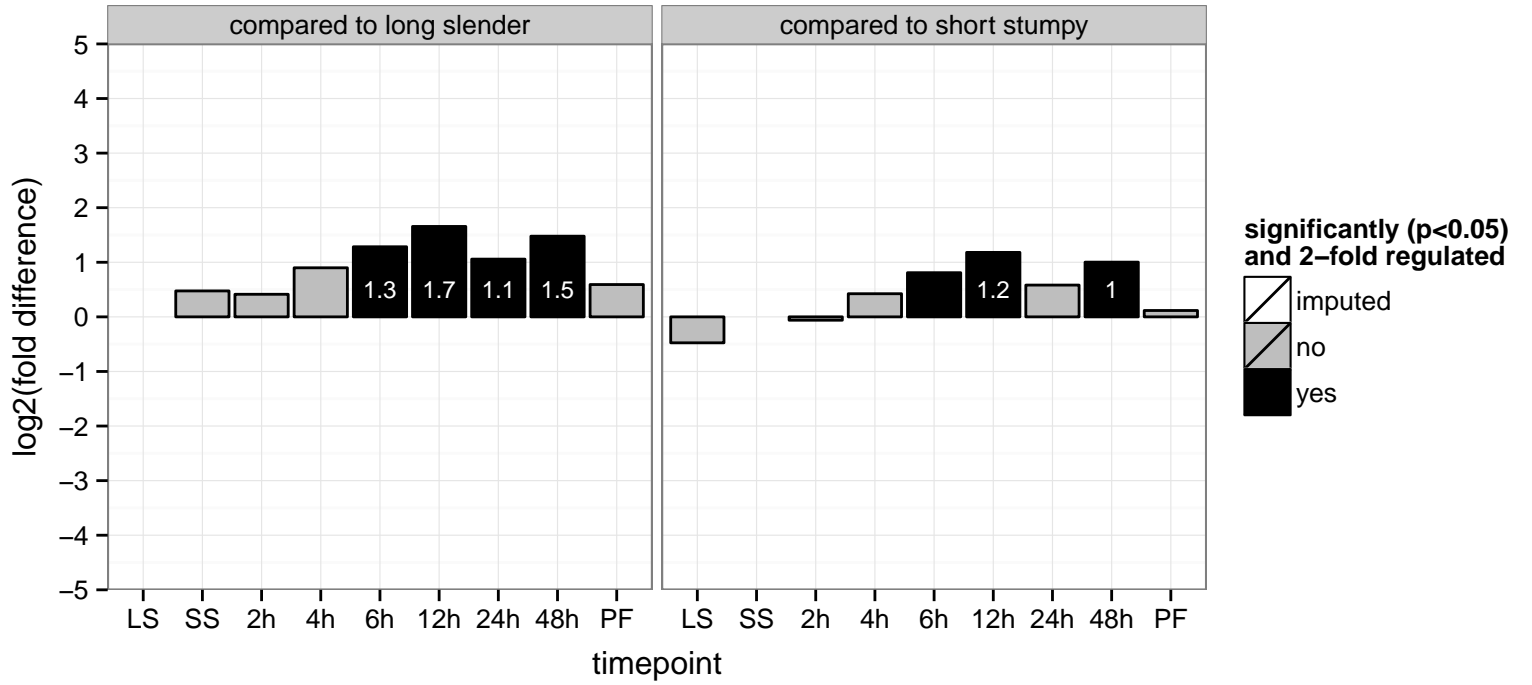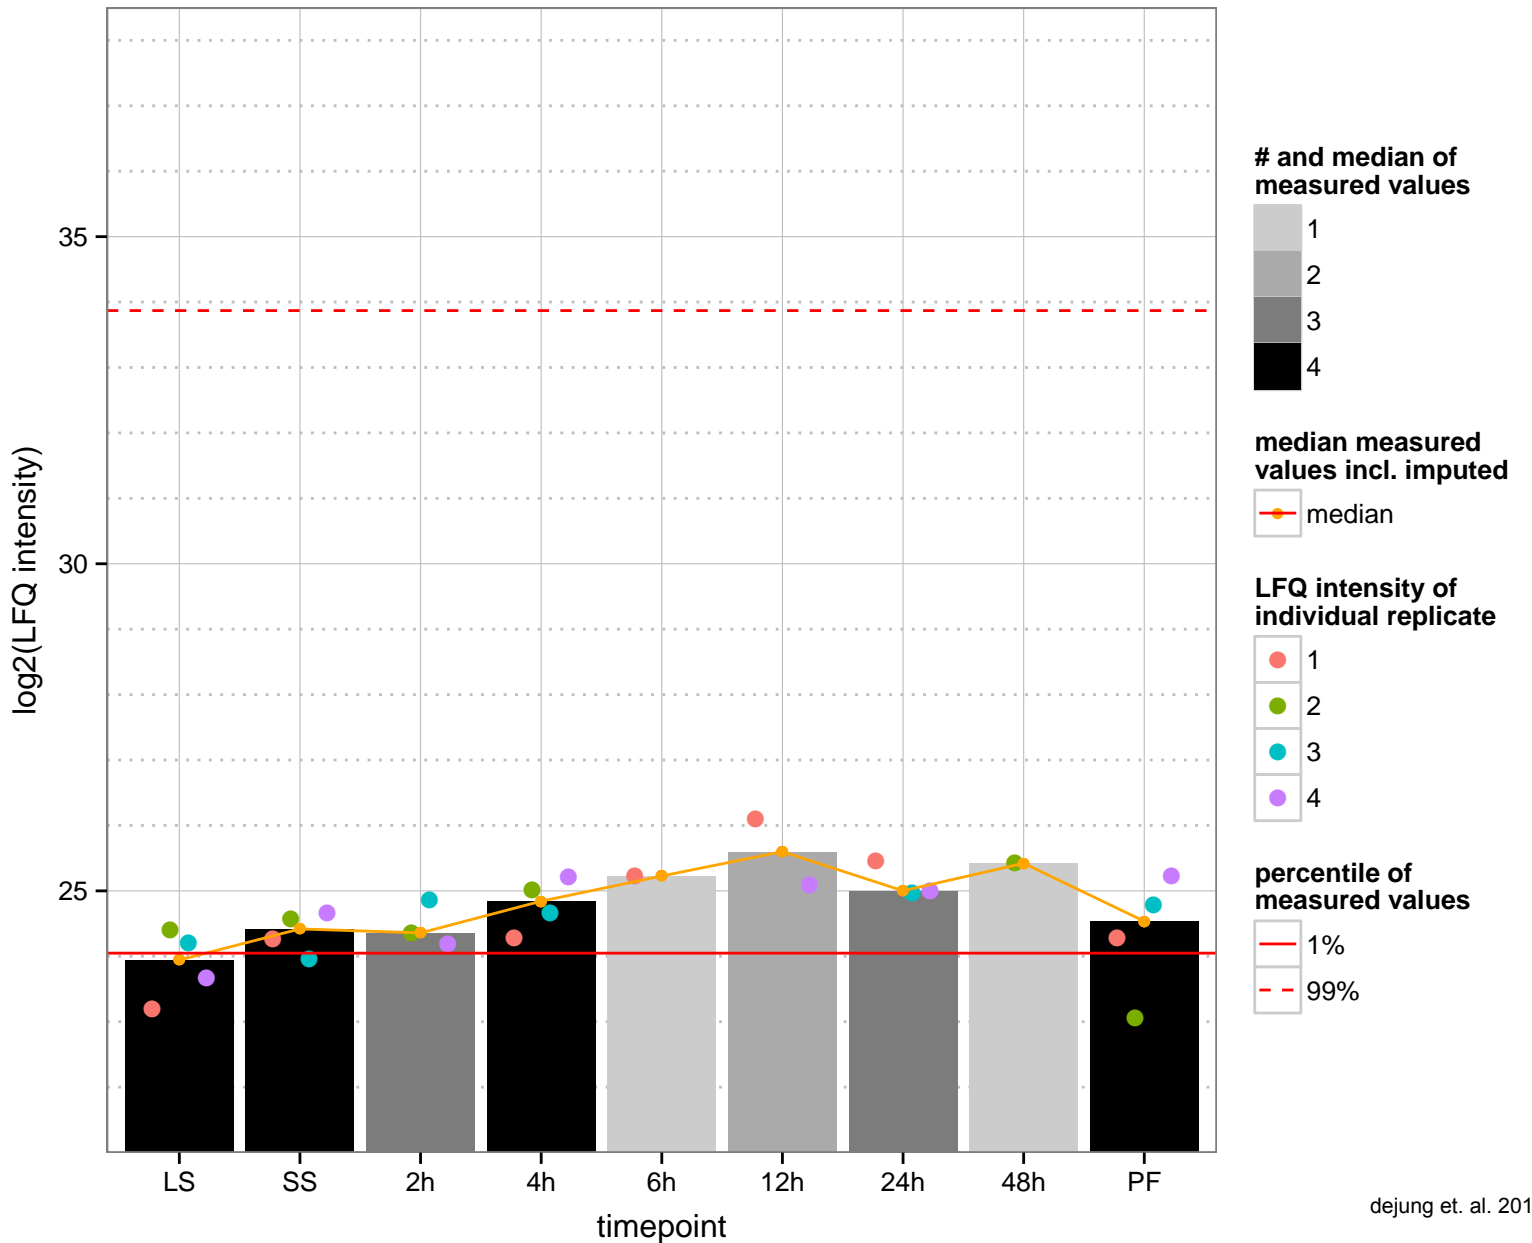

hypothetical protein, conserved  
 Tb927.3.4210  
 AGOF: null  
 AGOC: mitochondrion  
 AGOP: null  
 PGO: null  
 PGO: null  
 PGO: null

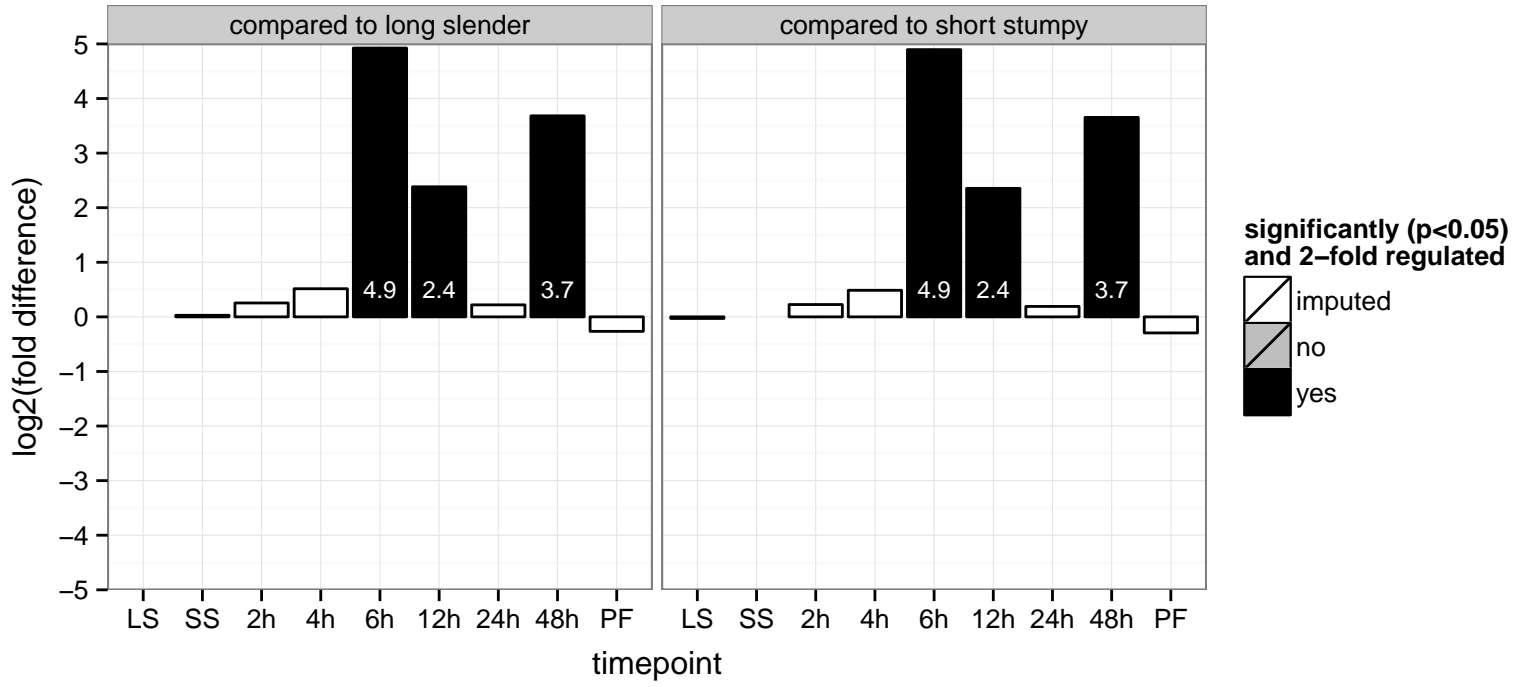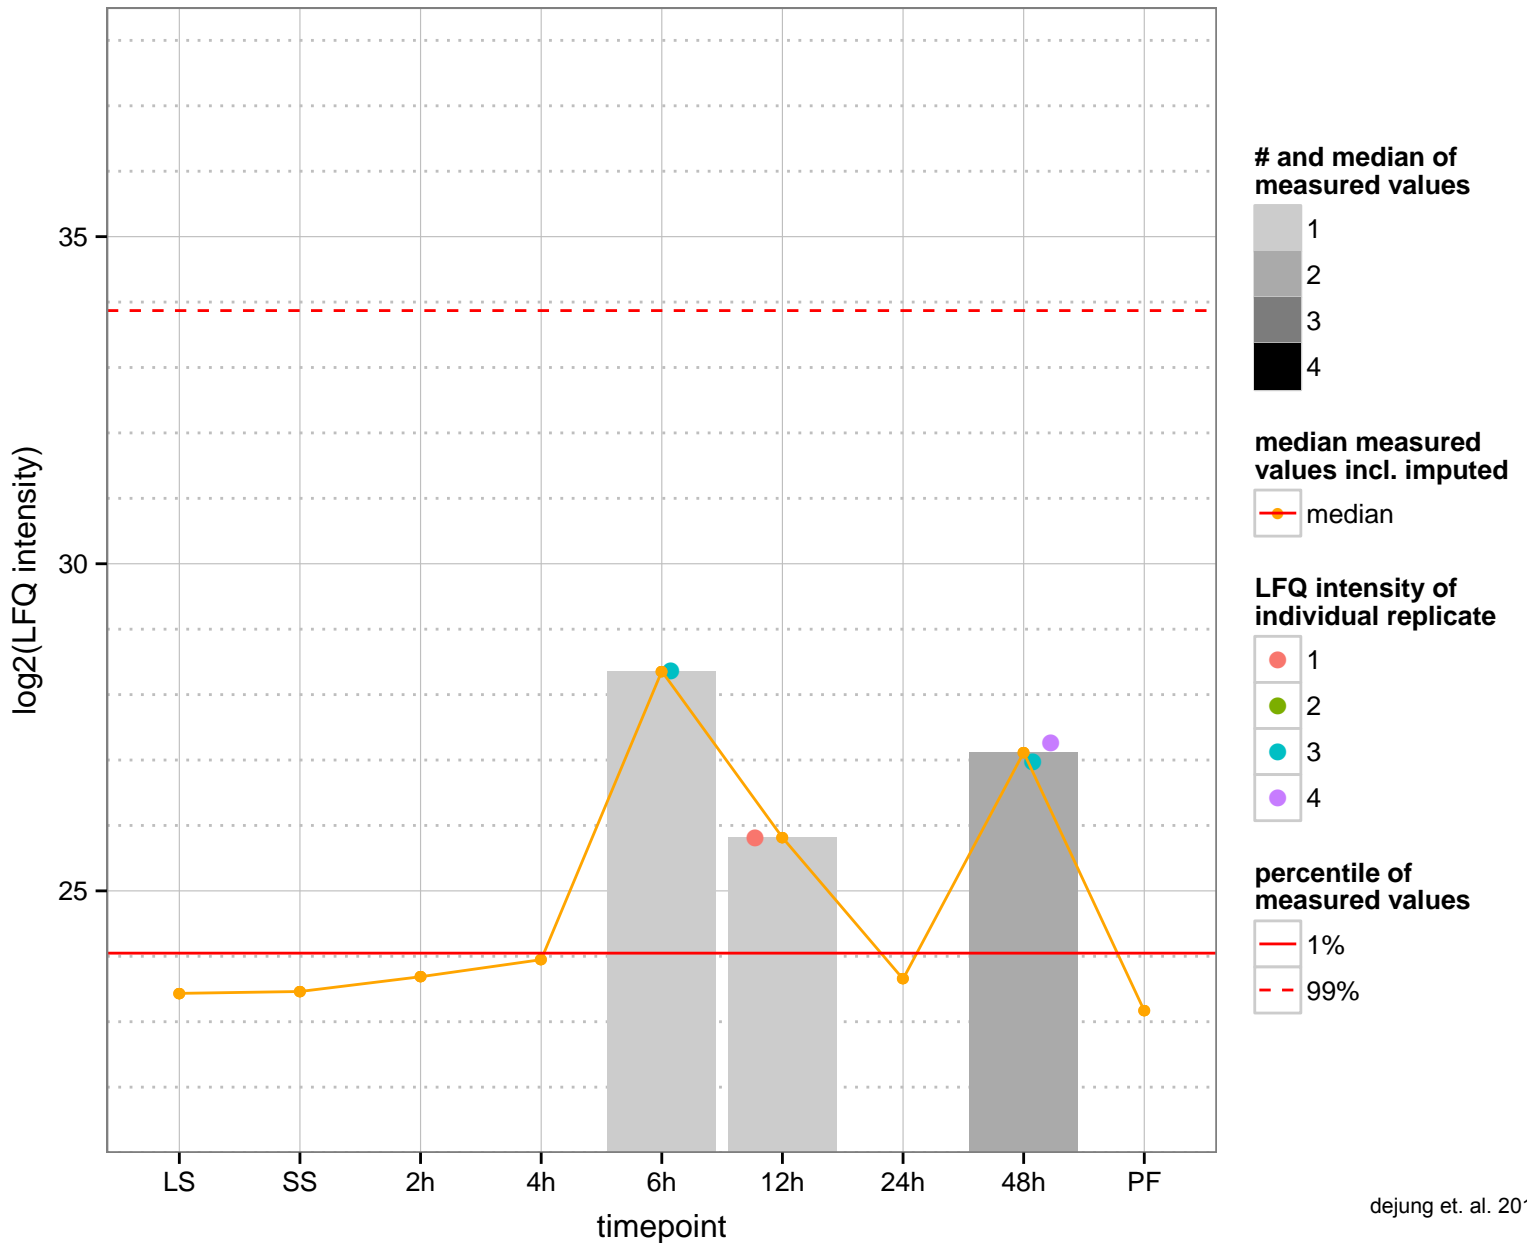

hypothetical protein, conserved  
 Tb927.7.3060  
 AGOF: null  
 AGOC: null  
 AGOP: null  
 PGO: null  
 PGOC: null  
 PGOP: null

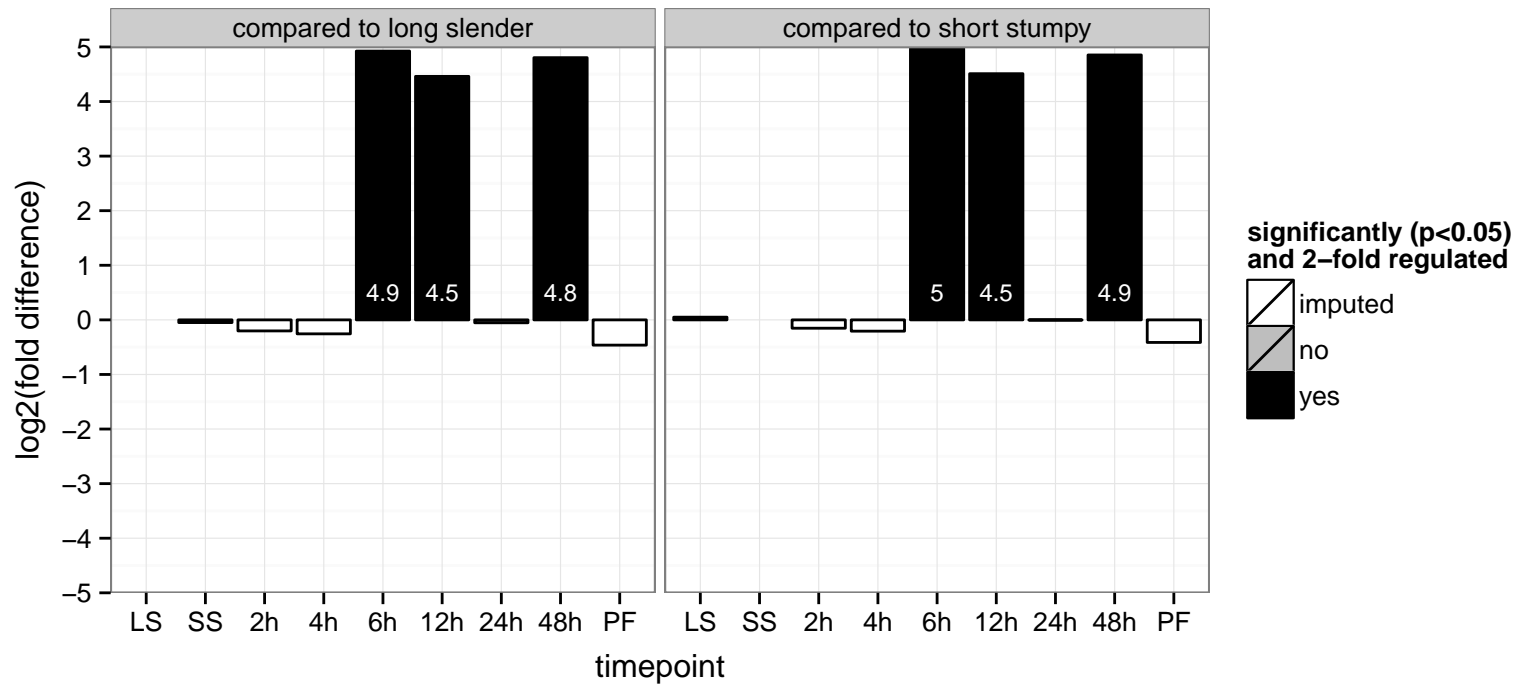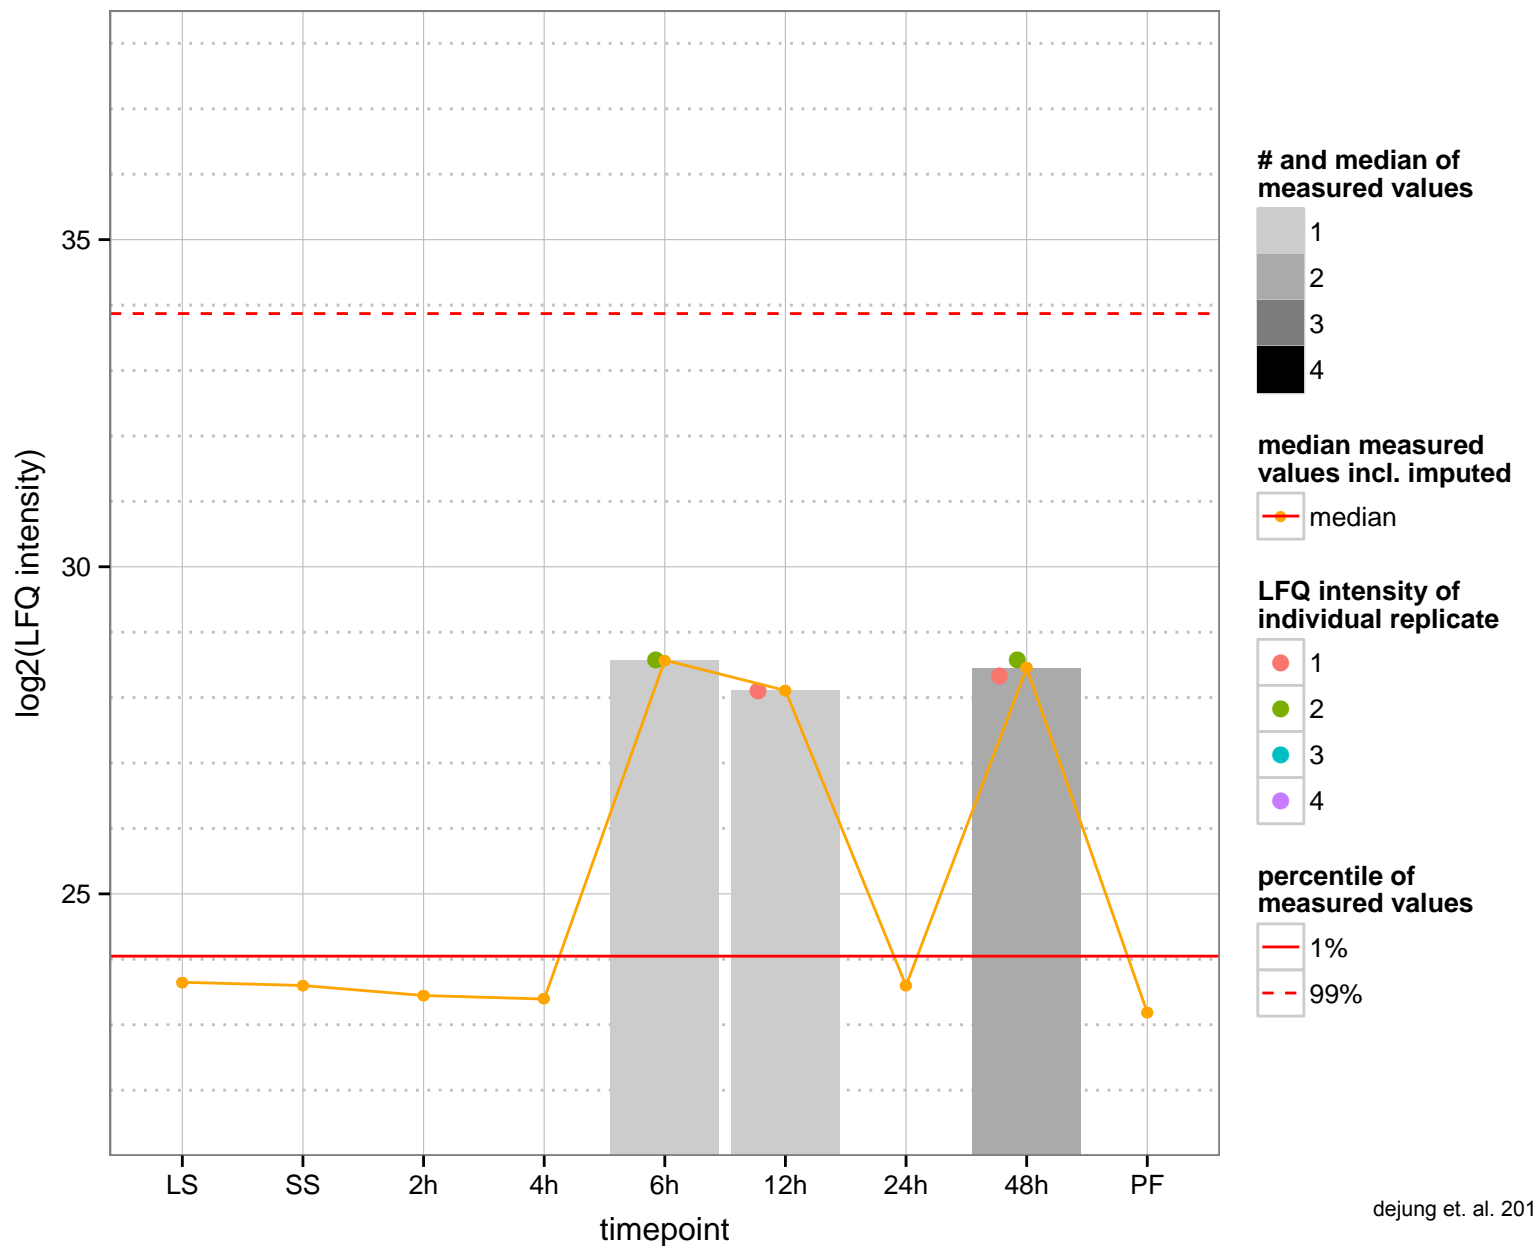

hypothetical protein, conserved  
 Tb927.7.660  
 AGOF: null  
 AGOC: null  
 AGOP: null  
 PGO: protein binding  
 PGOC: null  
 PGOP: null

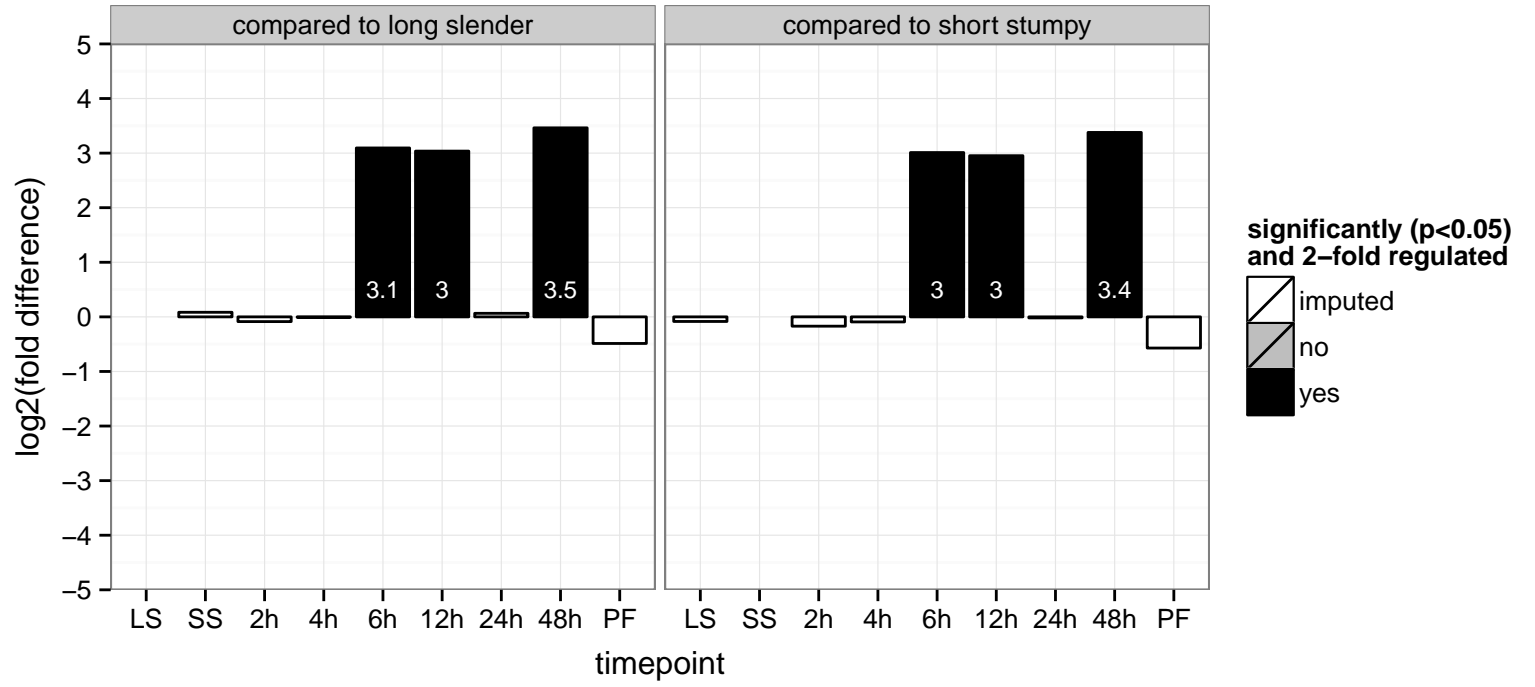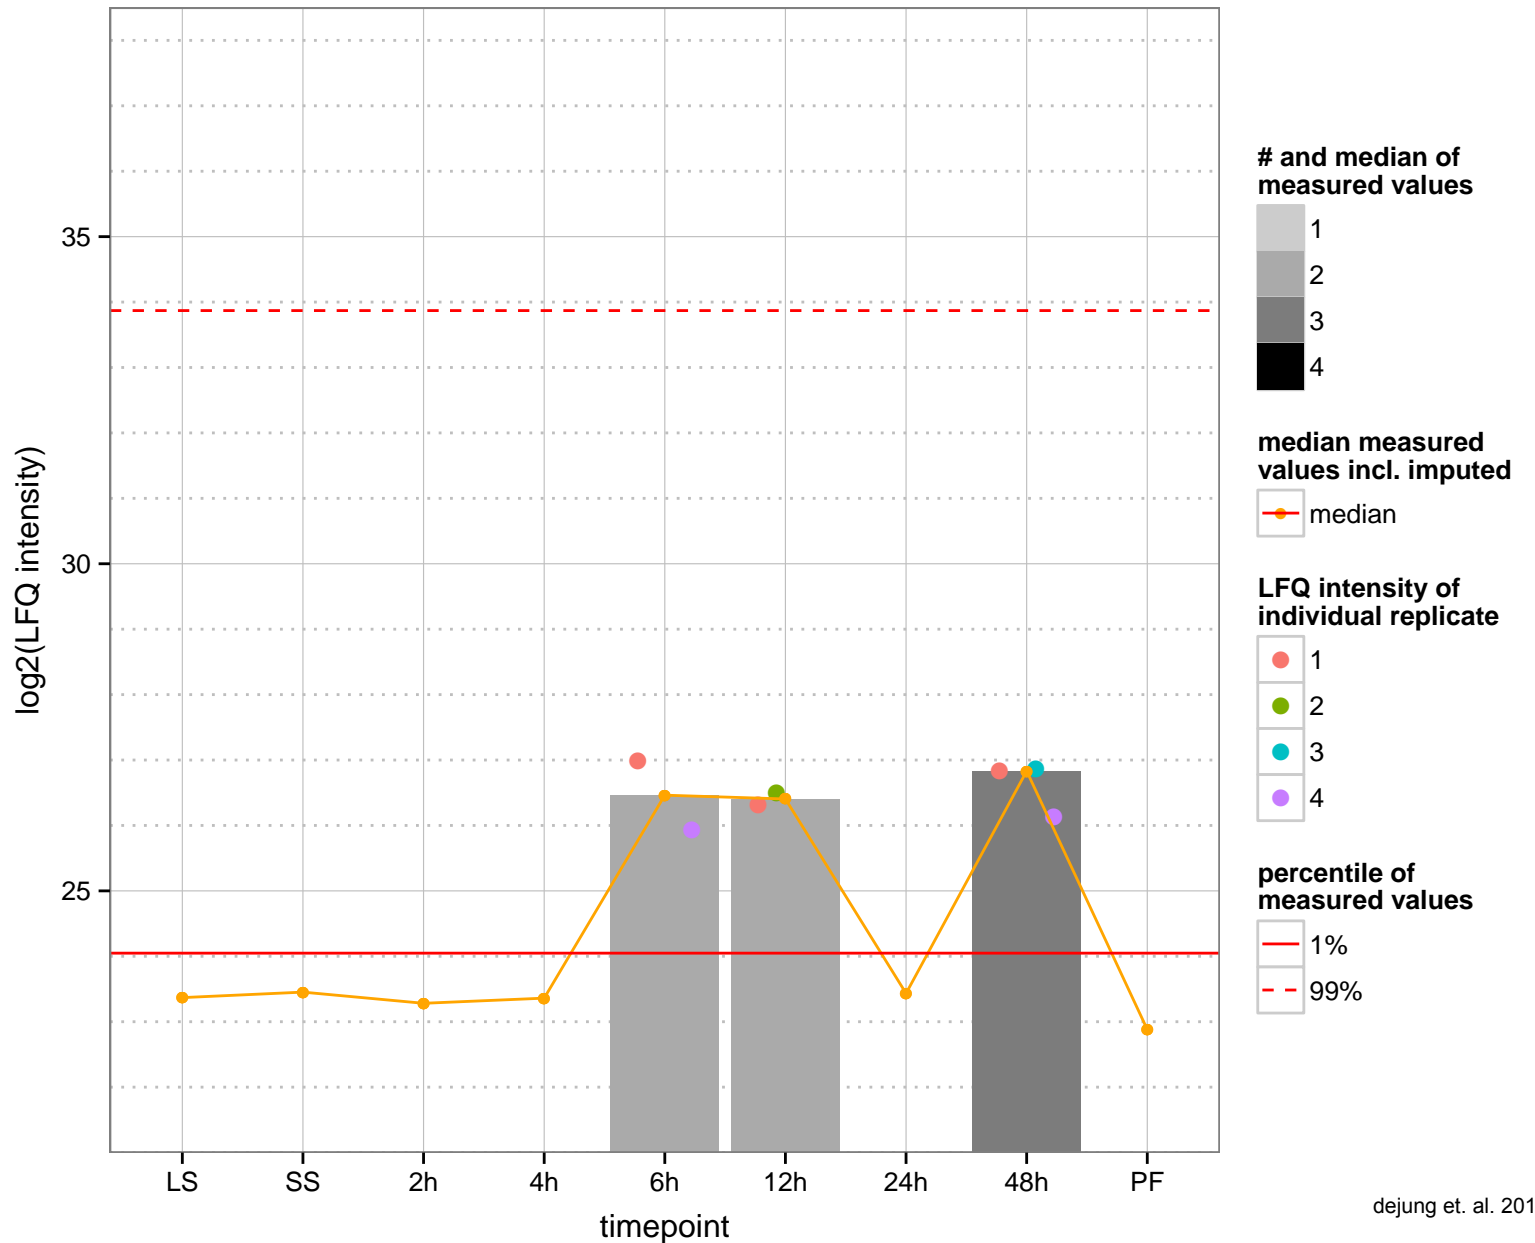

hypothetical protein, conserved  
 Tb927.8.7080  
 AGOF: null  
 AGOC: null  
 AGOP: null  
 PGO: null  
 PGOC: null  
 PGOP: null

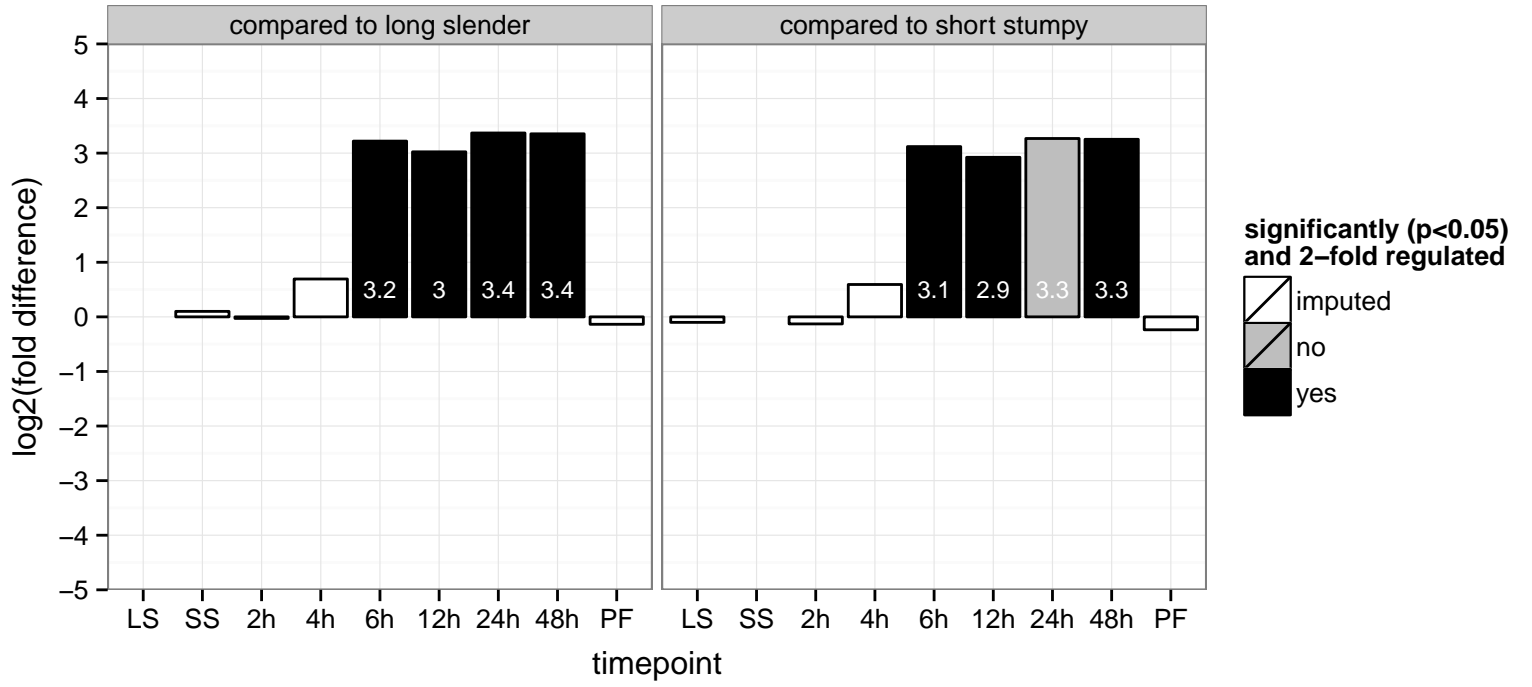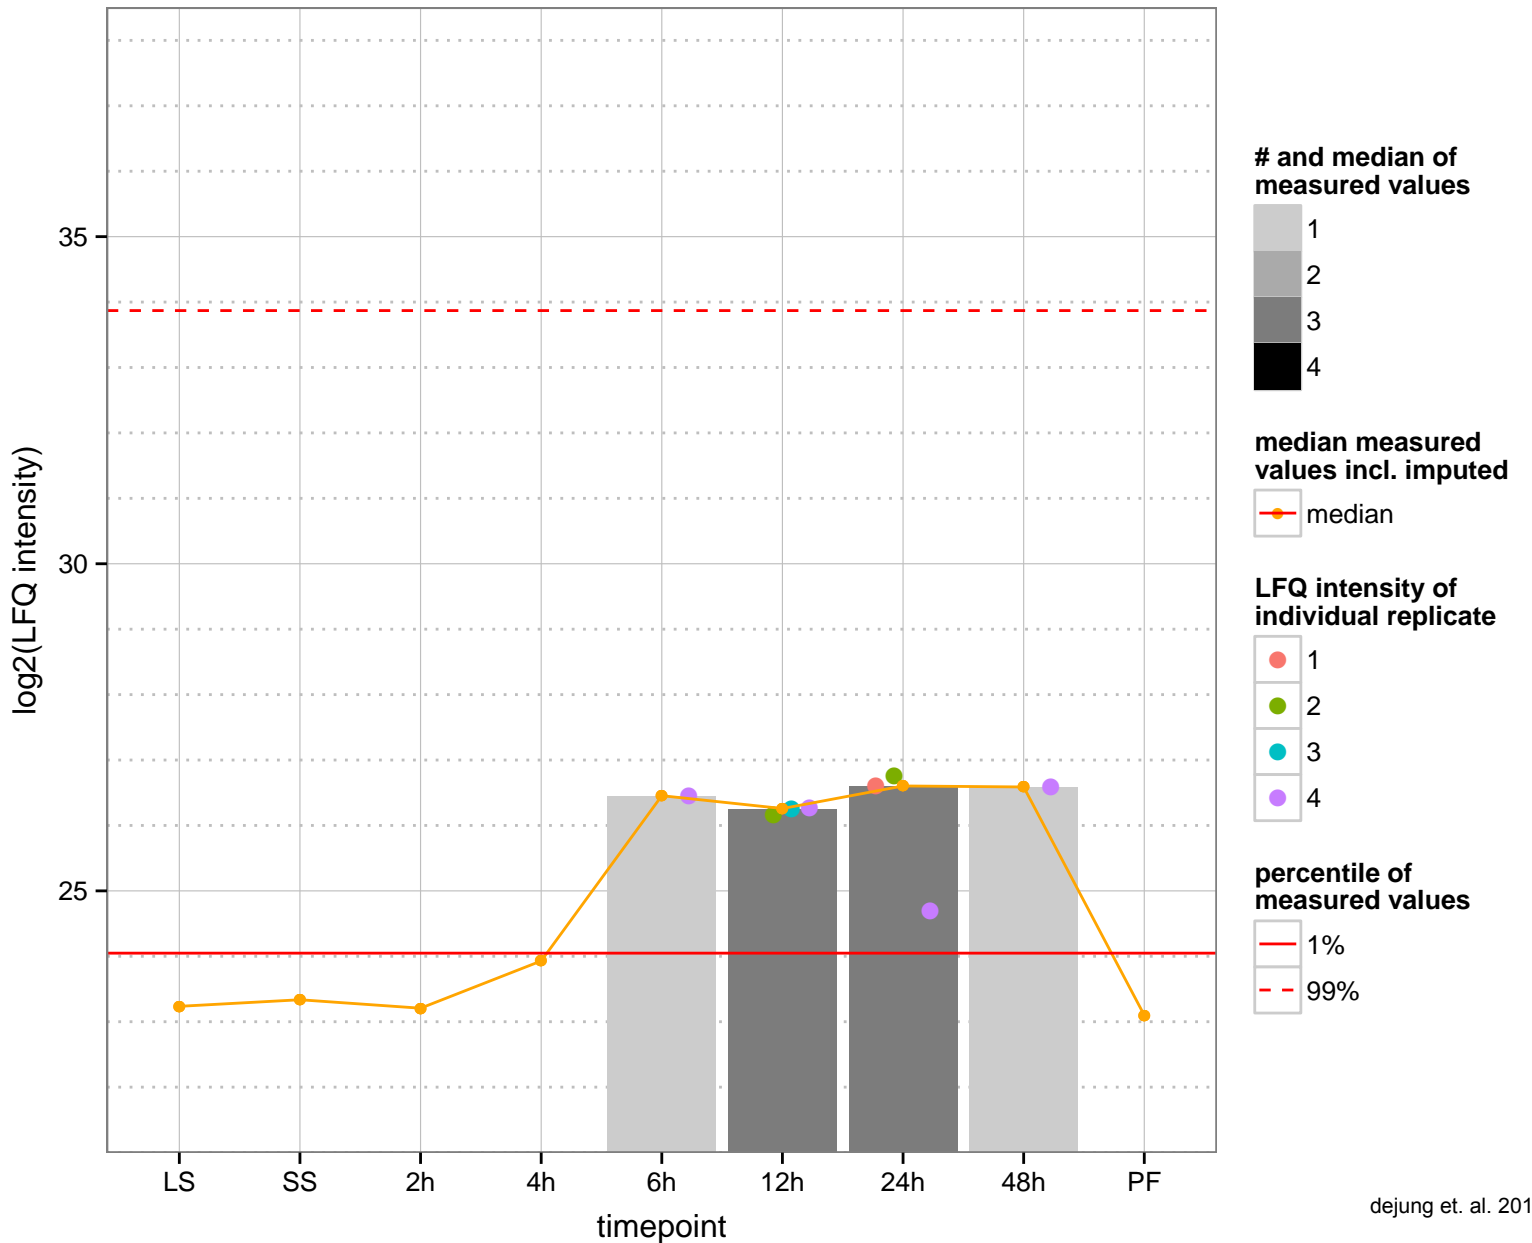

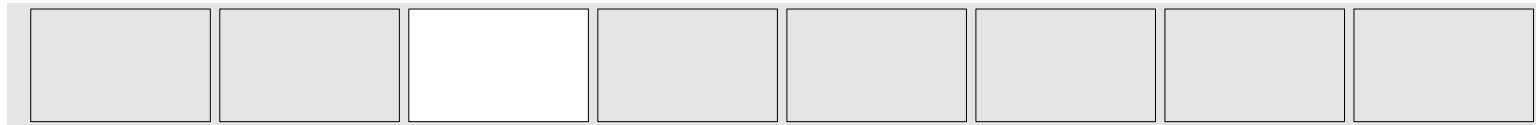

SS

2h

4h

6h

12h

24h

48h

PF

timepoint

**regulated**

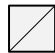

not regulated

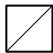

significant down



significant up



protein kinase A catalytic subunit, putative, protein kinase A catalytic subunit (PKAC3)

Tb927.10.13010;Tb11.v5.0671

AGOF: null, ATP binding, protein serine/threonine kinase activity, protein tyrosine kinase activity

AGOC: null

AGOP: null, protein phosphorylation

PGOF: ATP binding, protein kinase activity, protein serine/threonine kinase activity, transferase activity, transferring phosphorus

PGOC: null

PGOP: protein phosphorylation

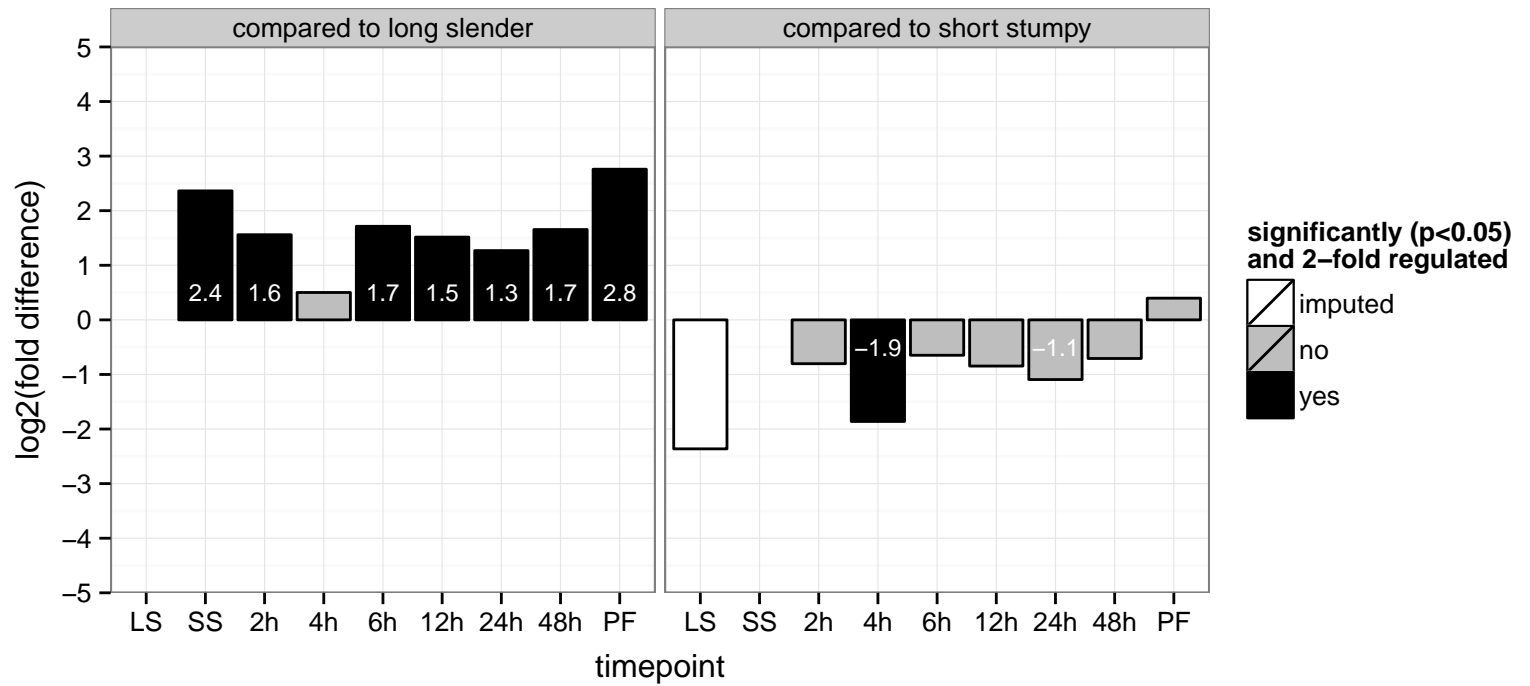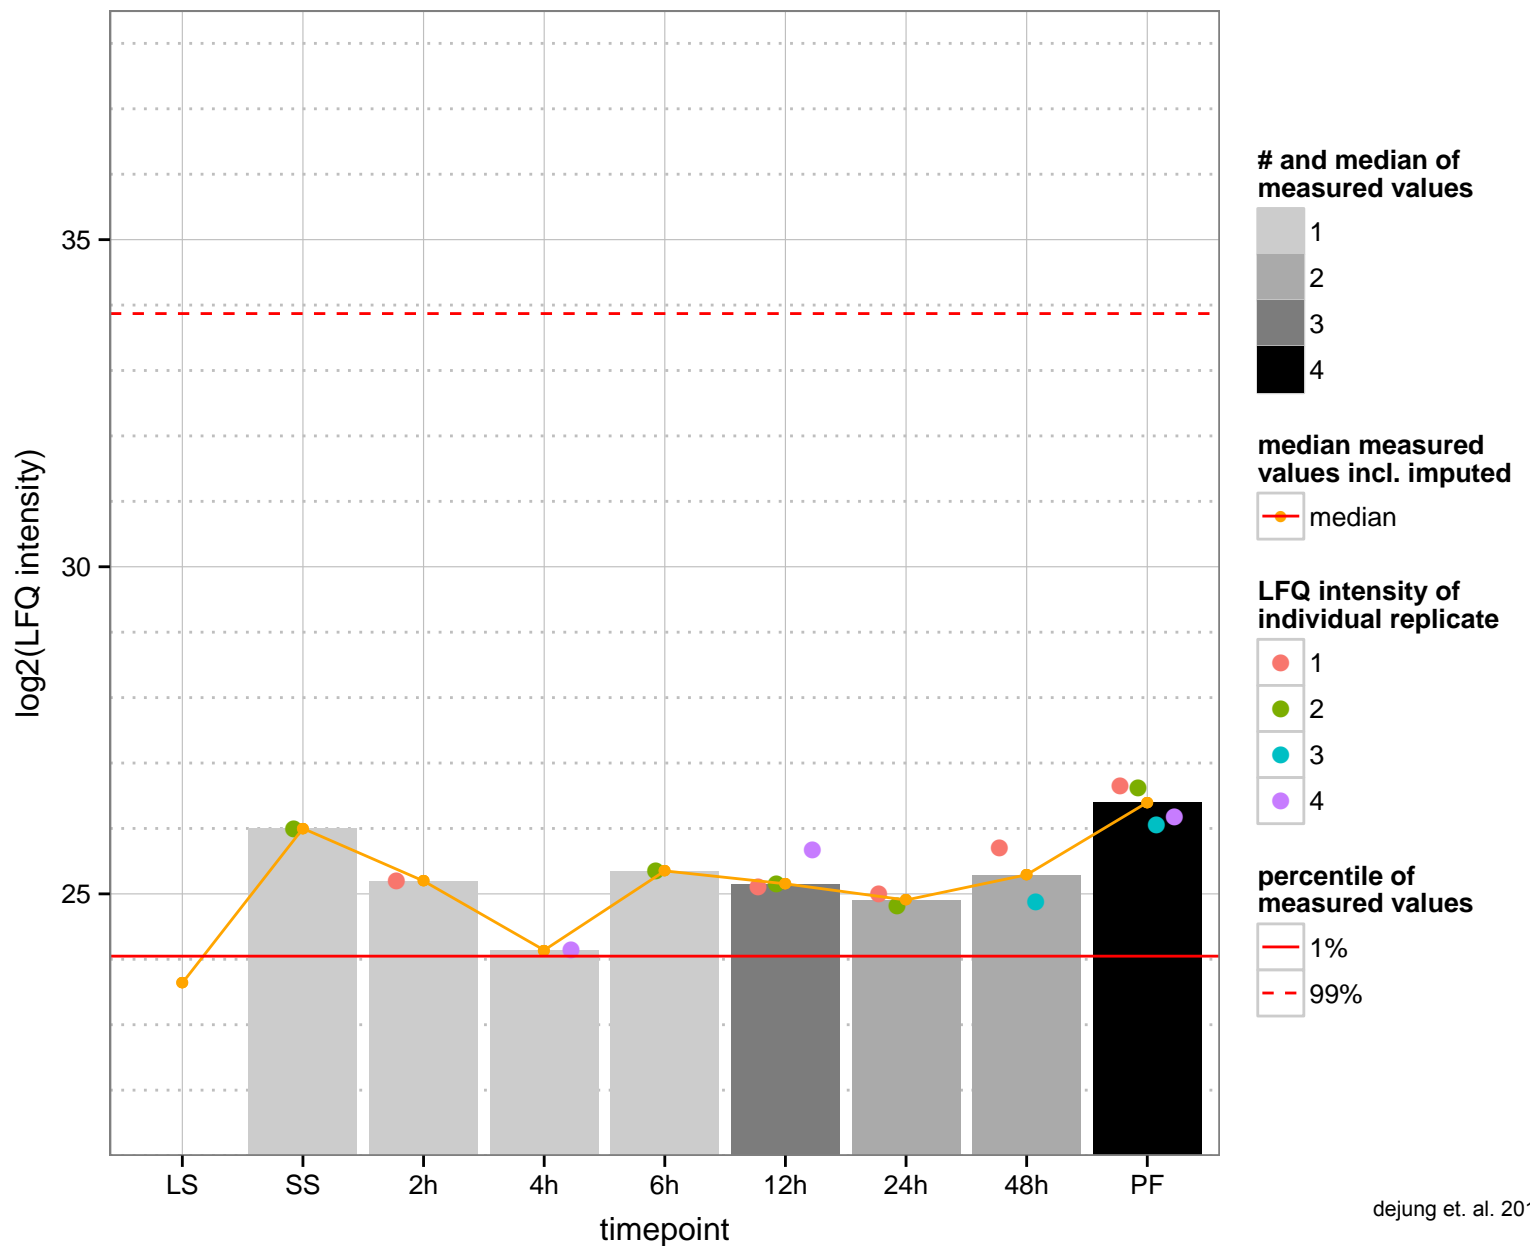

Protein C21orf2 homolog, putative  
 Tb927.10.5130  
 AGOF: null  
 AGOC: mitochondrion  
 AGOP: cilium morphogenesis, cytoskeleton organization, regulation of cell shape  
 PGO: null  
 PGOC: null  
 PGOP: null

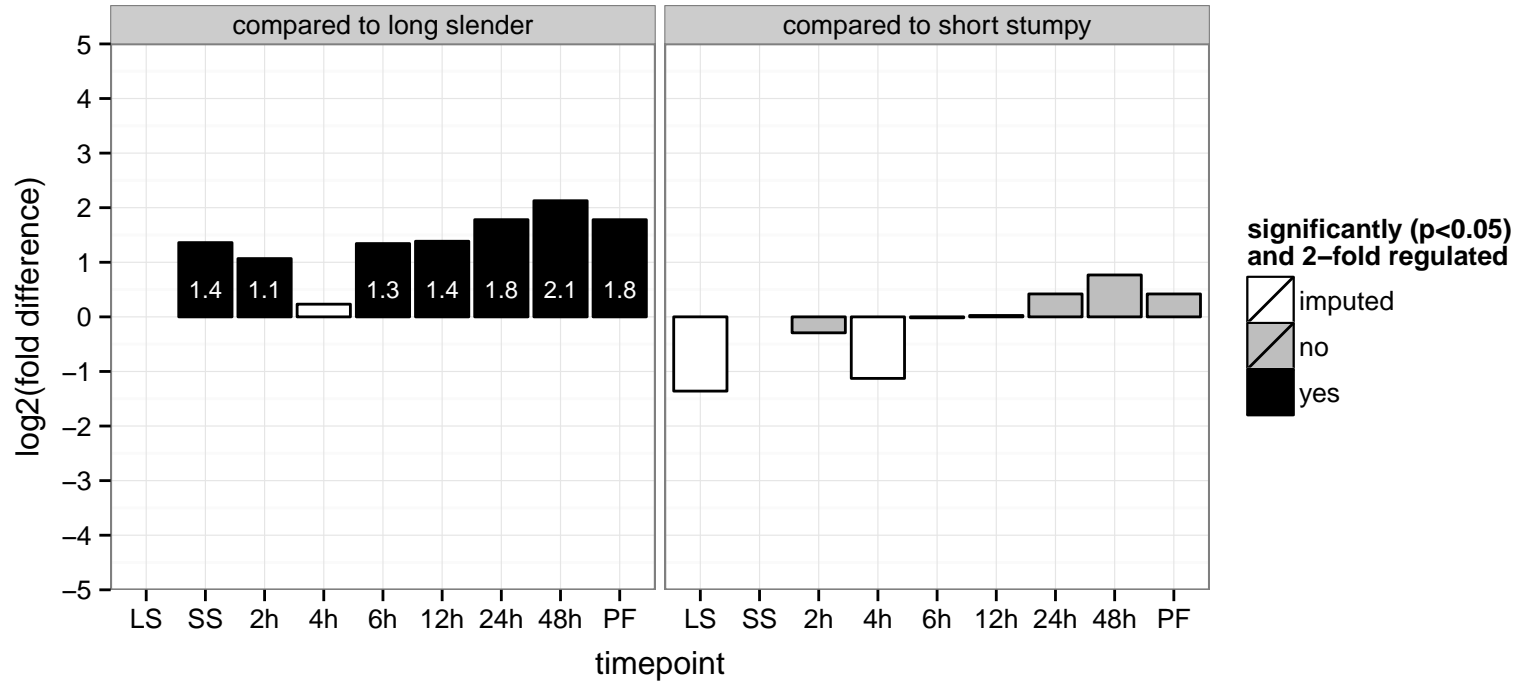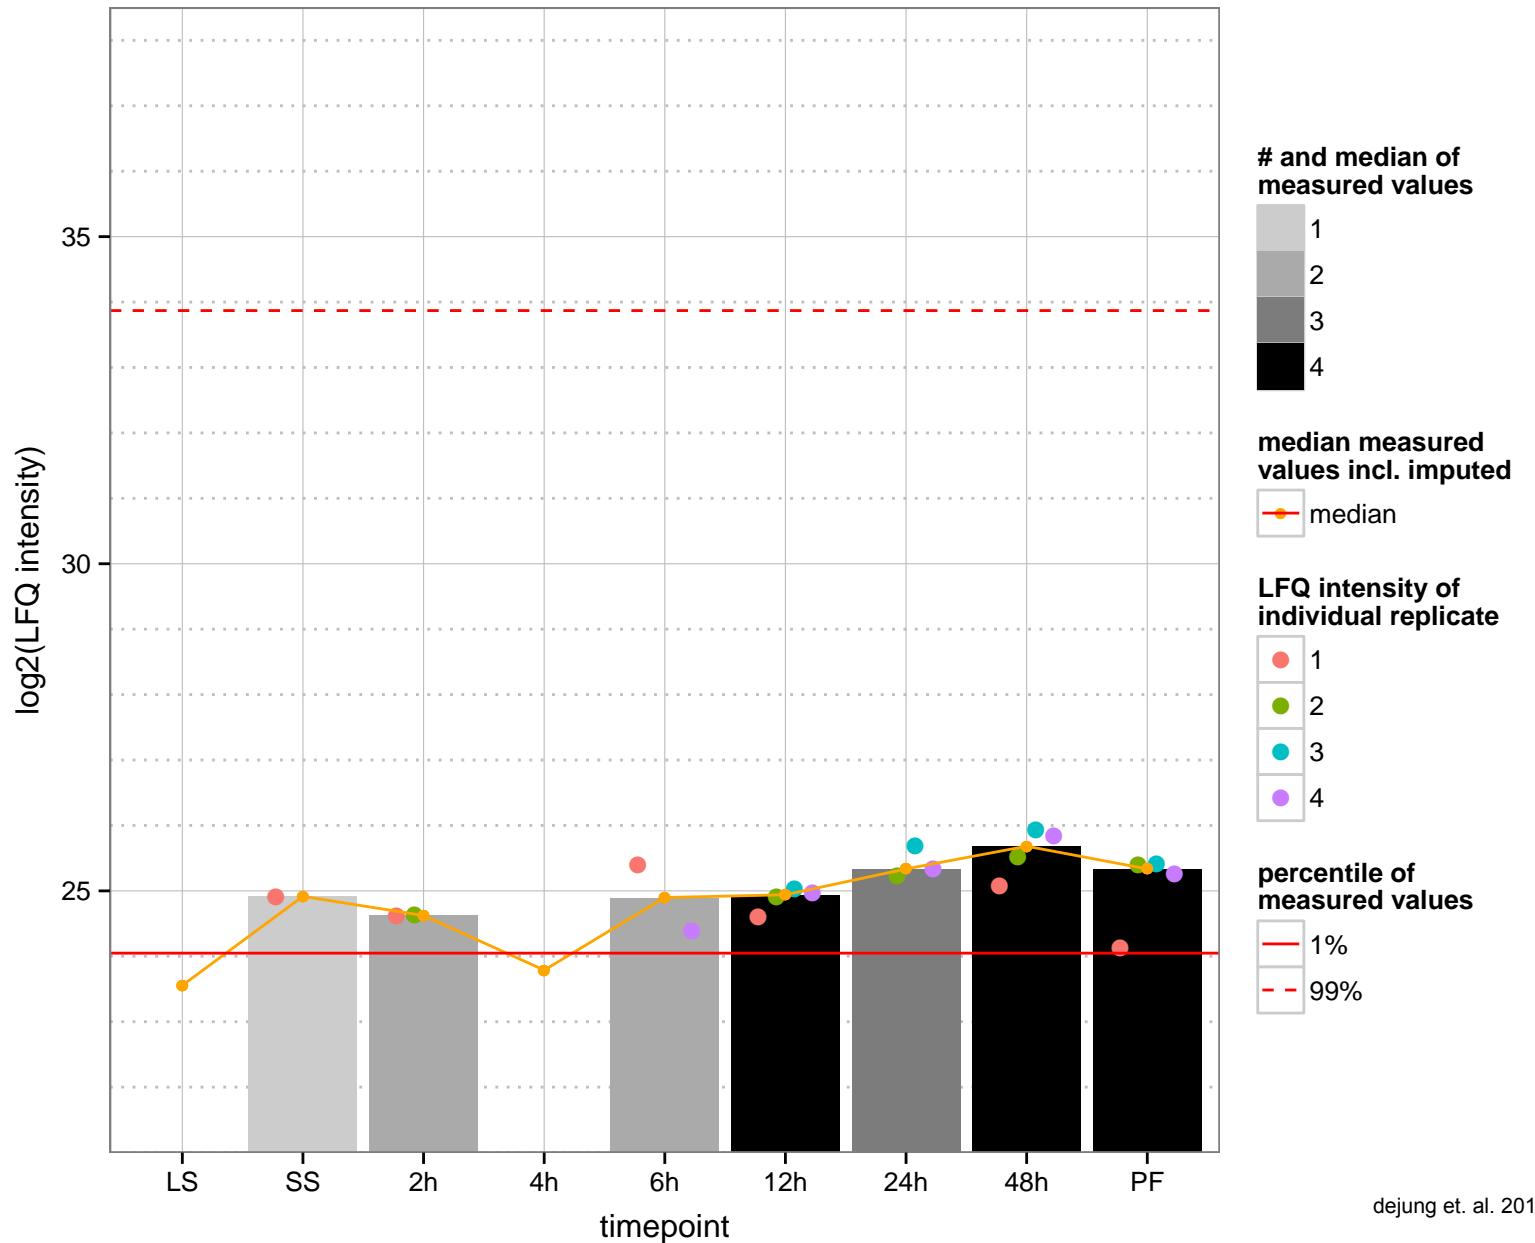

hypothetical protein, conserved  
 Tb927.6.2920  
 AGOF: null  
 AGOC: null  
 AGOP: null  
 PGO: null  
 PGOC: null  
 PGOP: null

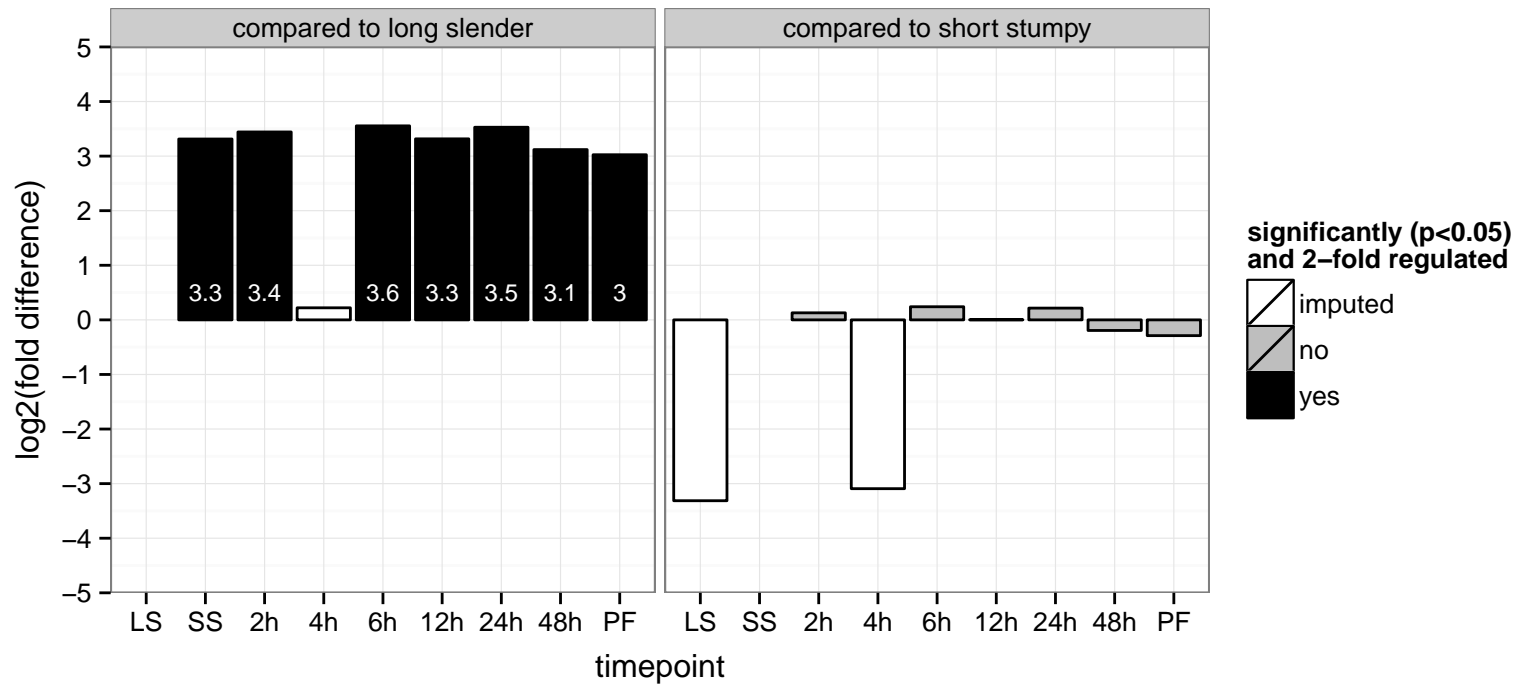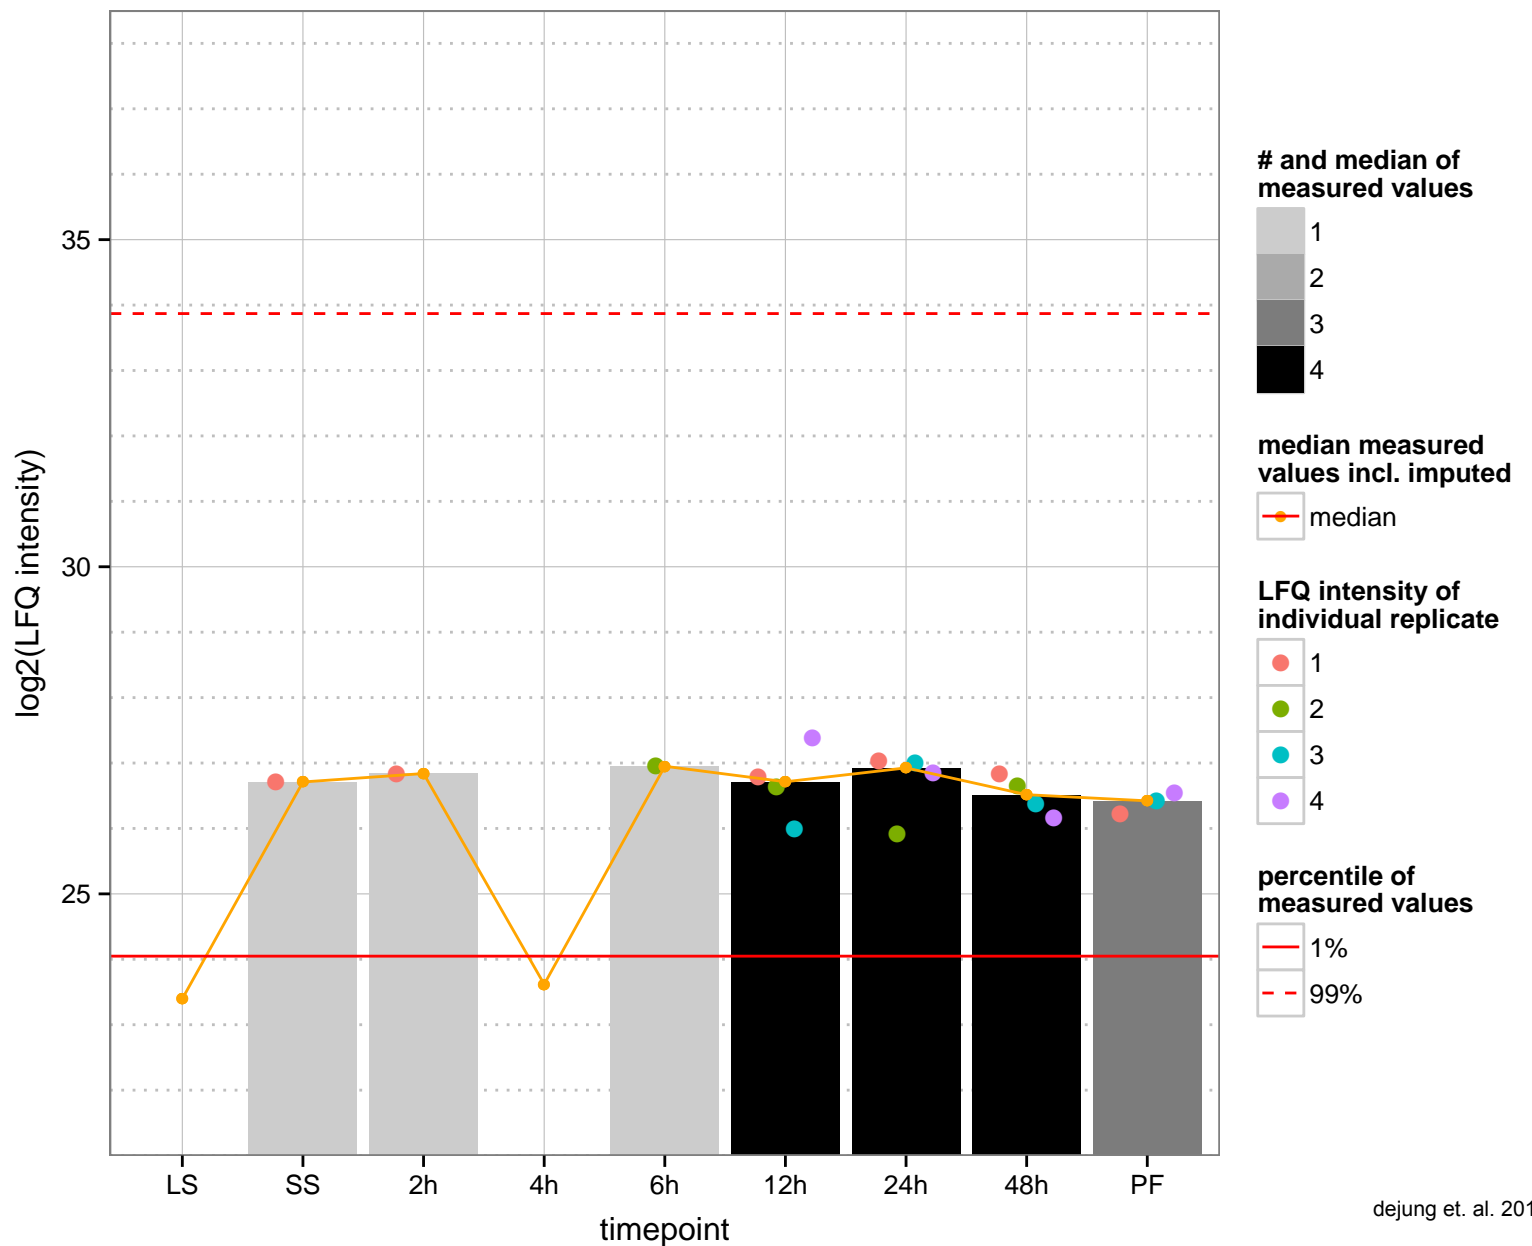

hypothetical protein, conserved  
 Tb927.7.6610  
 AGOF: null  
 AGOC: null  
 AGOP: null  
 PGO: protein binding  
 PGOC: null  
 PGOP: null

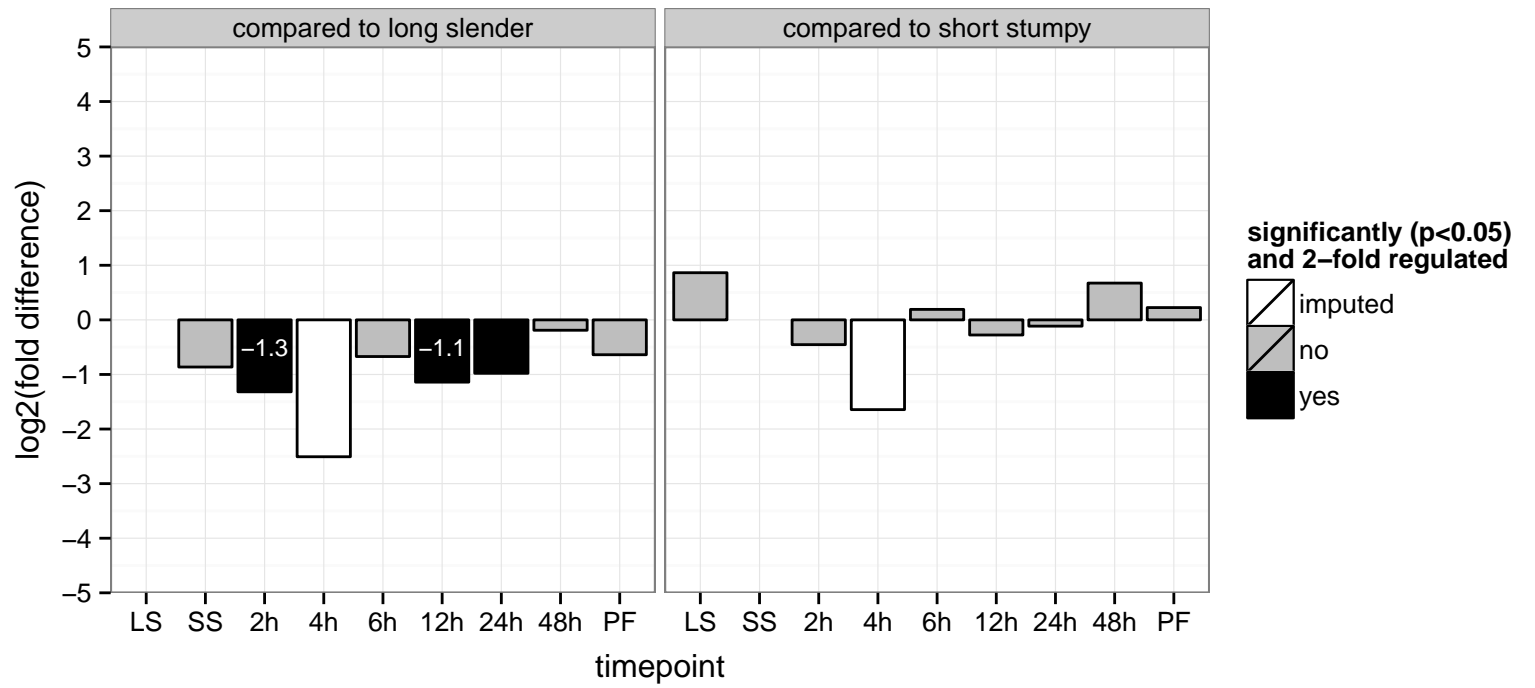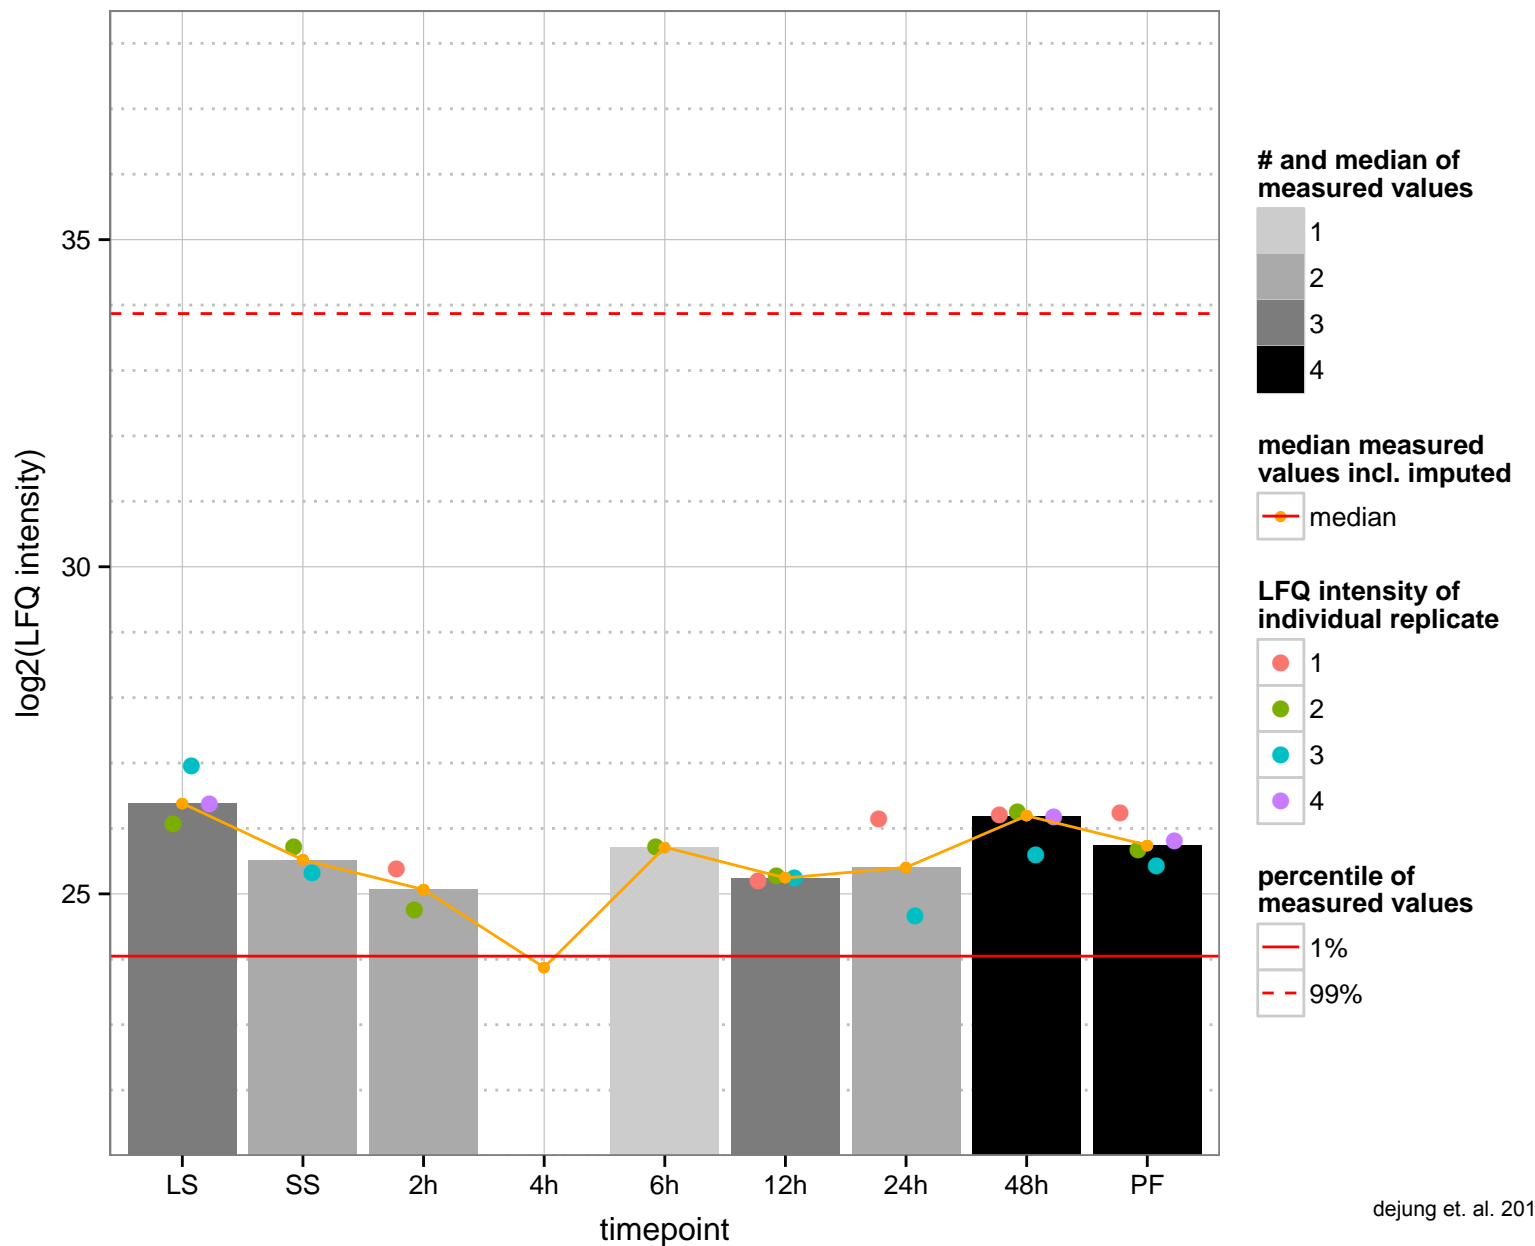

hypothetical protein, conserved  
 Tb927.8.6730  
 AGOF: null  
 AGOC: null  
 AGOP: null  
 PGO: null  
 PGOC: null  
 PGOP: null

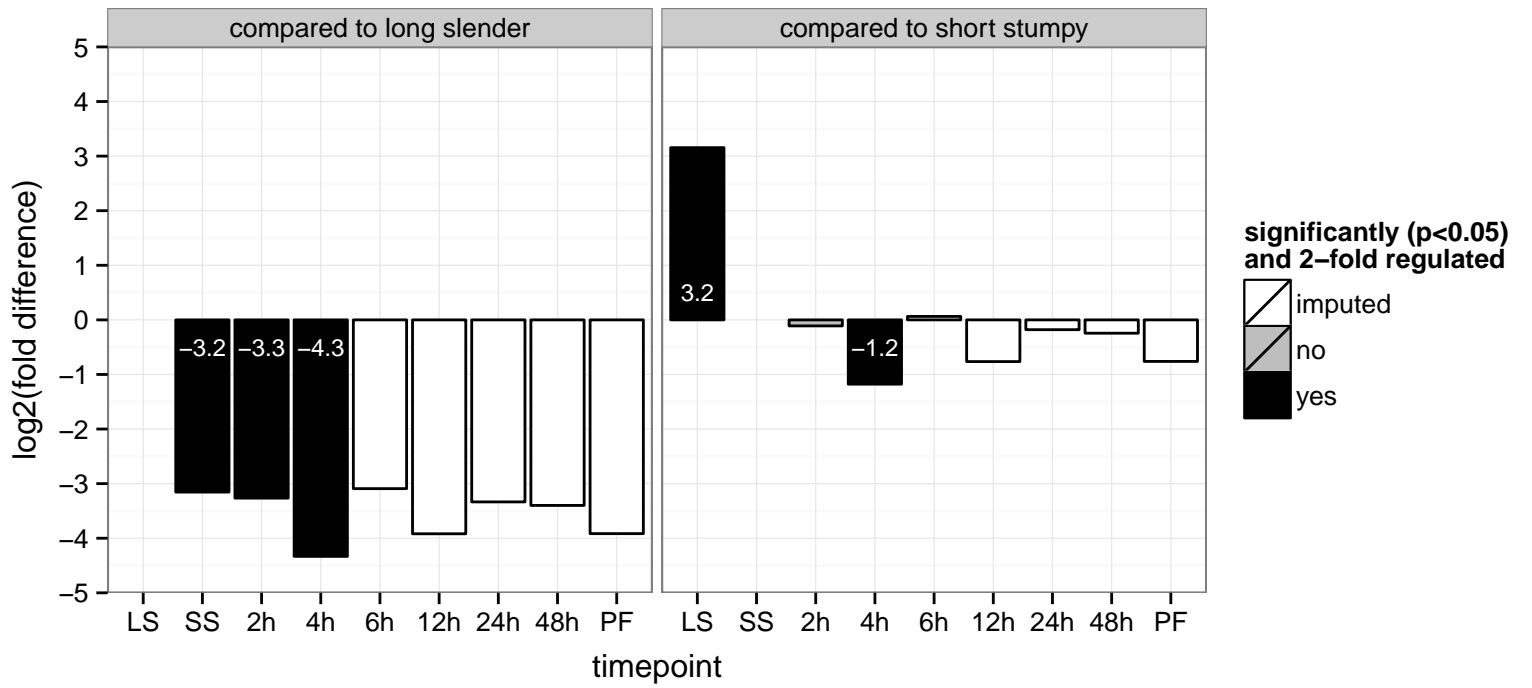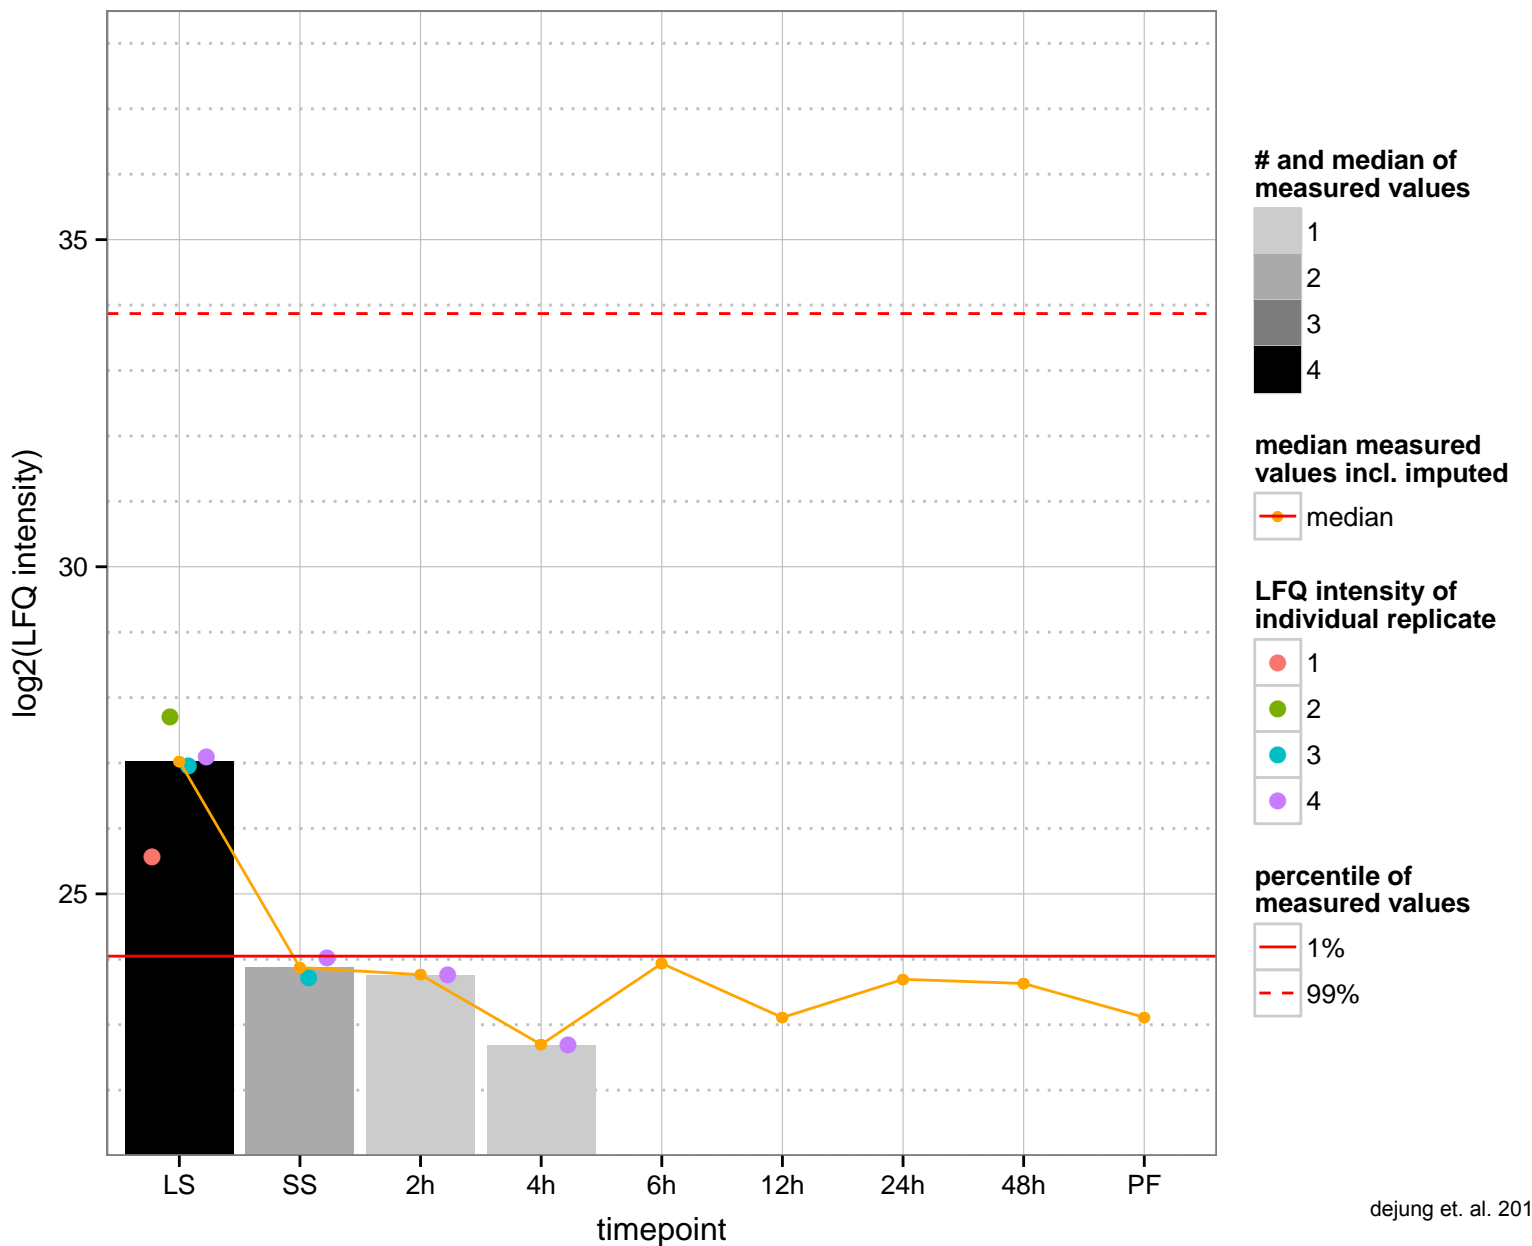

hypothetical protein, conserved  
 Tb927.9.8350  
 AGOF: null  
 AGOC: null  
 AGOP: null  
 PGO: protein binding  
 PGO: null  
 PGO: null

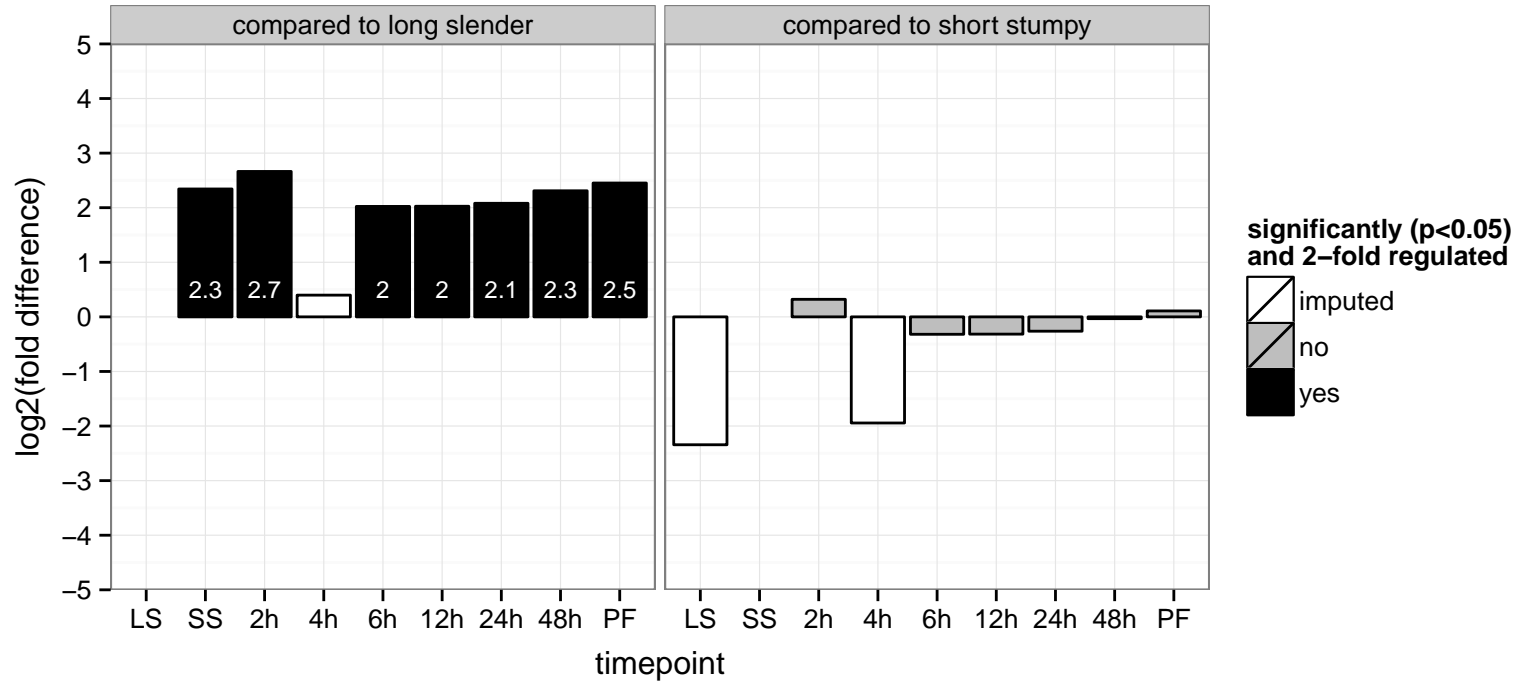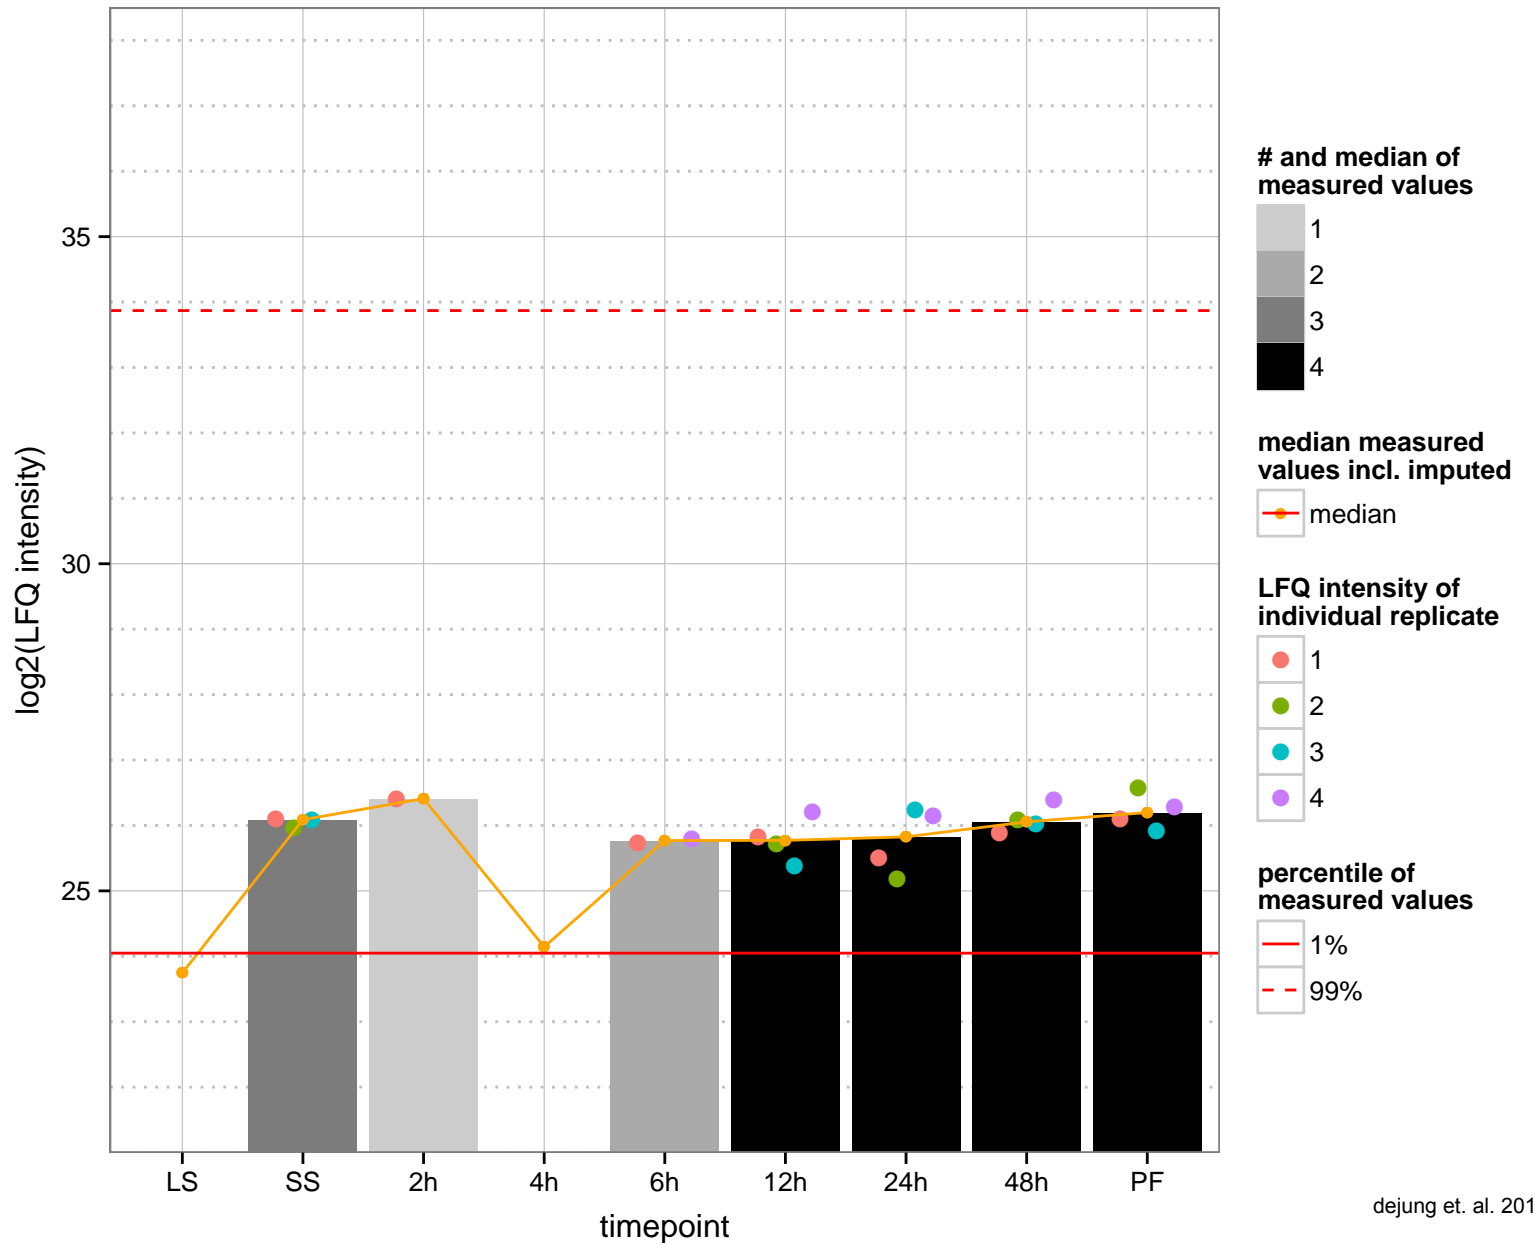

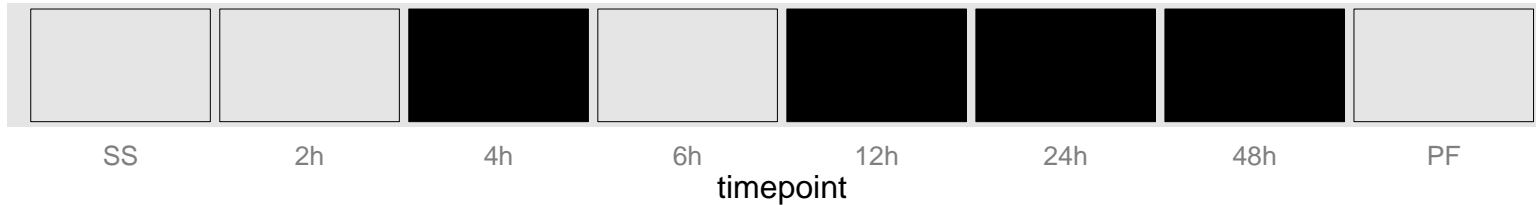

**regulated**  **not regulated**  **significant down**  **significant up**

Cell cycle checkpoint protein RAD1-like, putative  
 Tb927.1.1060  
 AGOF: exodeoxyribonuclease activity  
 AGOC: null  
 AGOP: DNA repair  
 PGOF: damaged DNA binding  
 PGO: nucleus  
 PGO: DNA repair

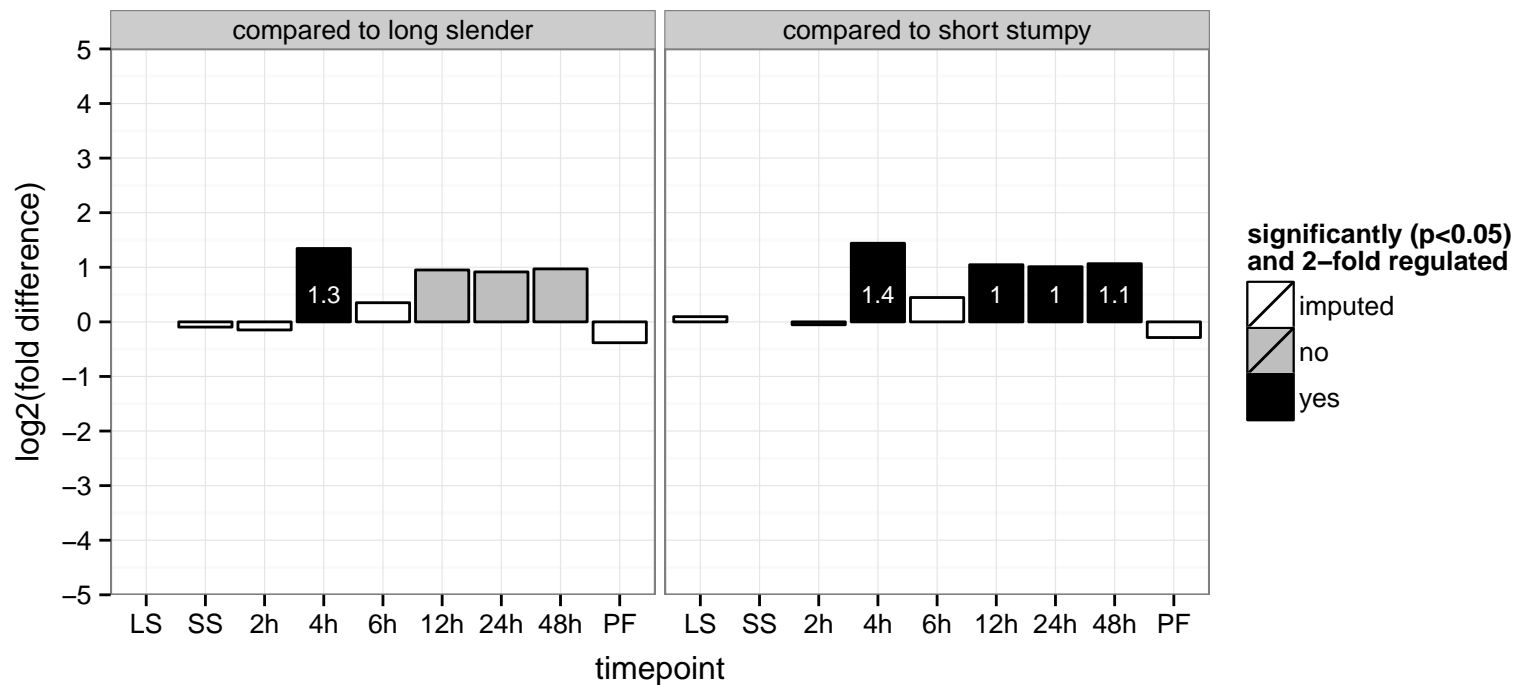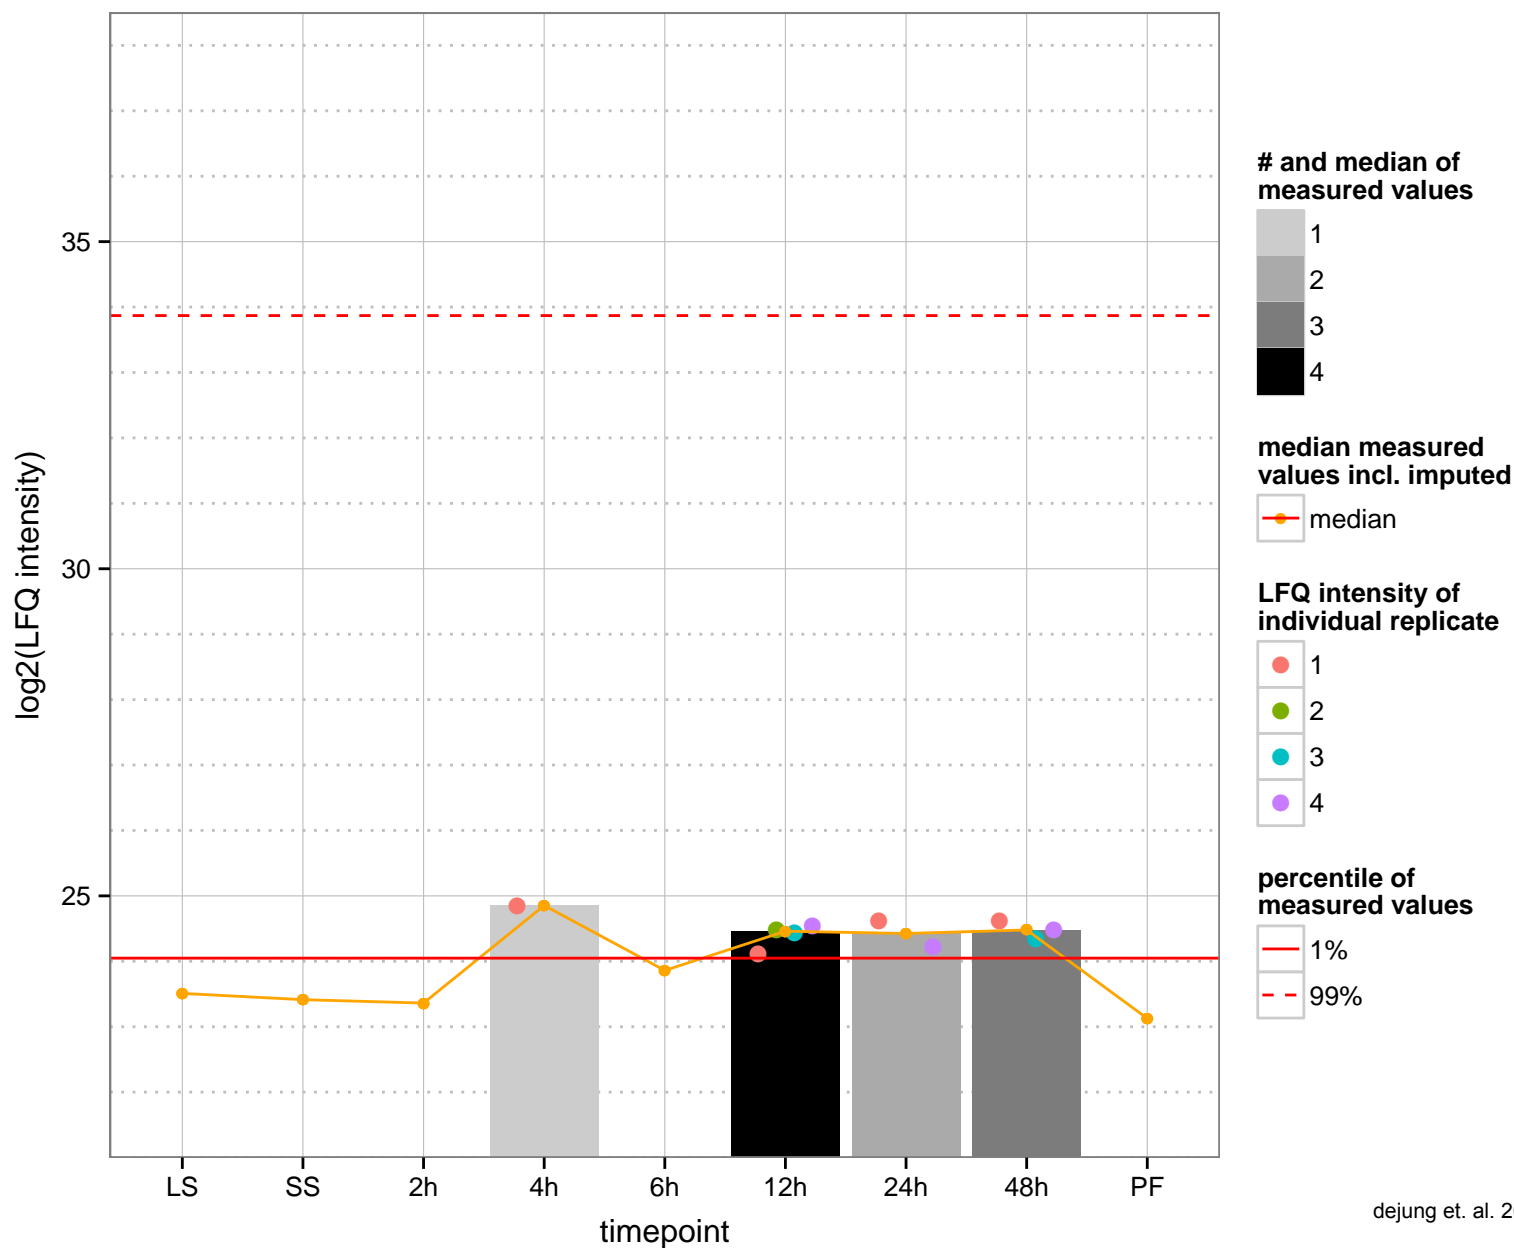



hypothetical protein, conserved  
 Tb927.11.6540  
 AGOF: null  
 AGOC: null  
 AGOP: null  
 PGO: null  
 PGOC: null  
 PGOP: null

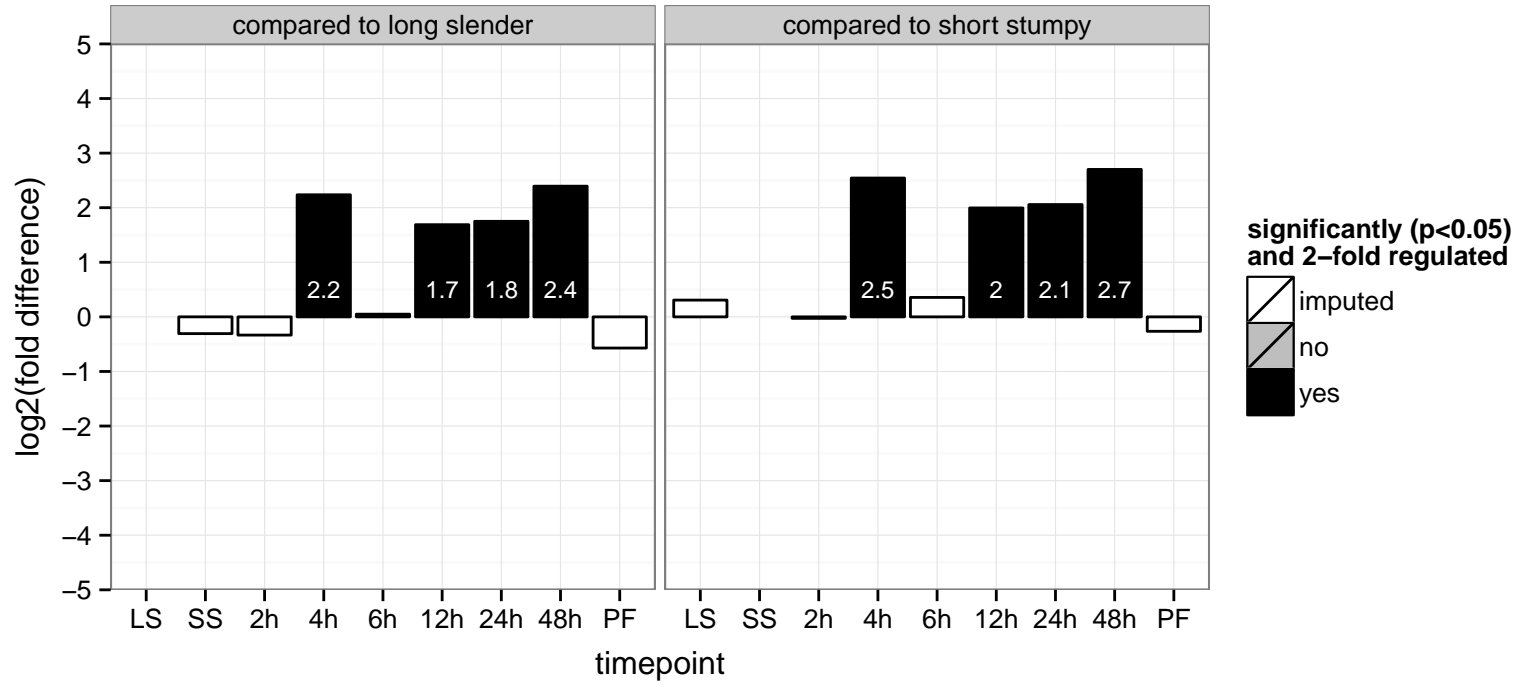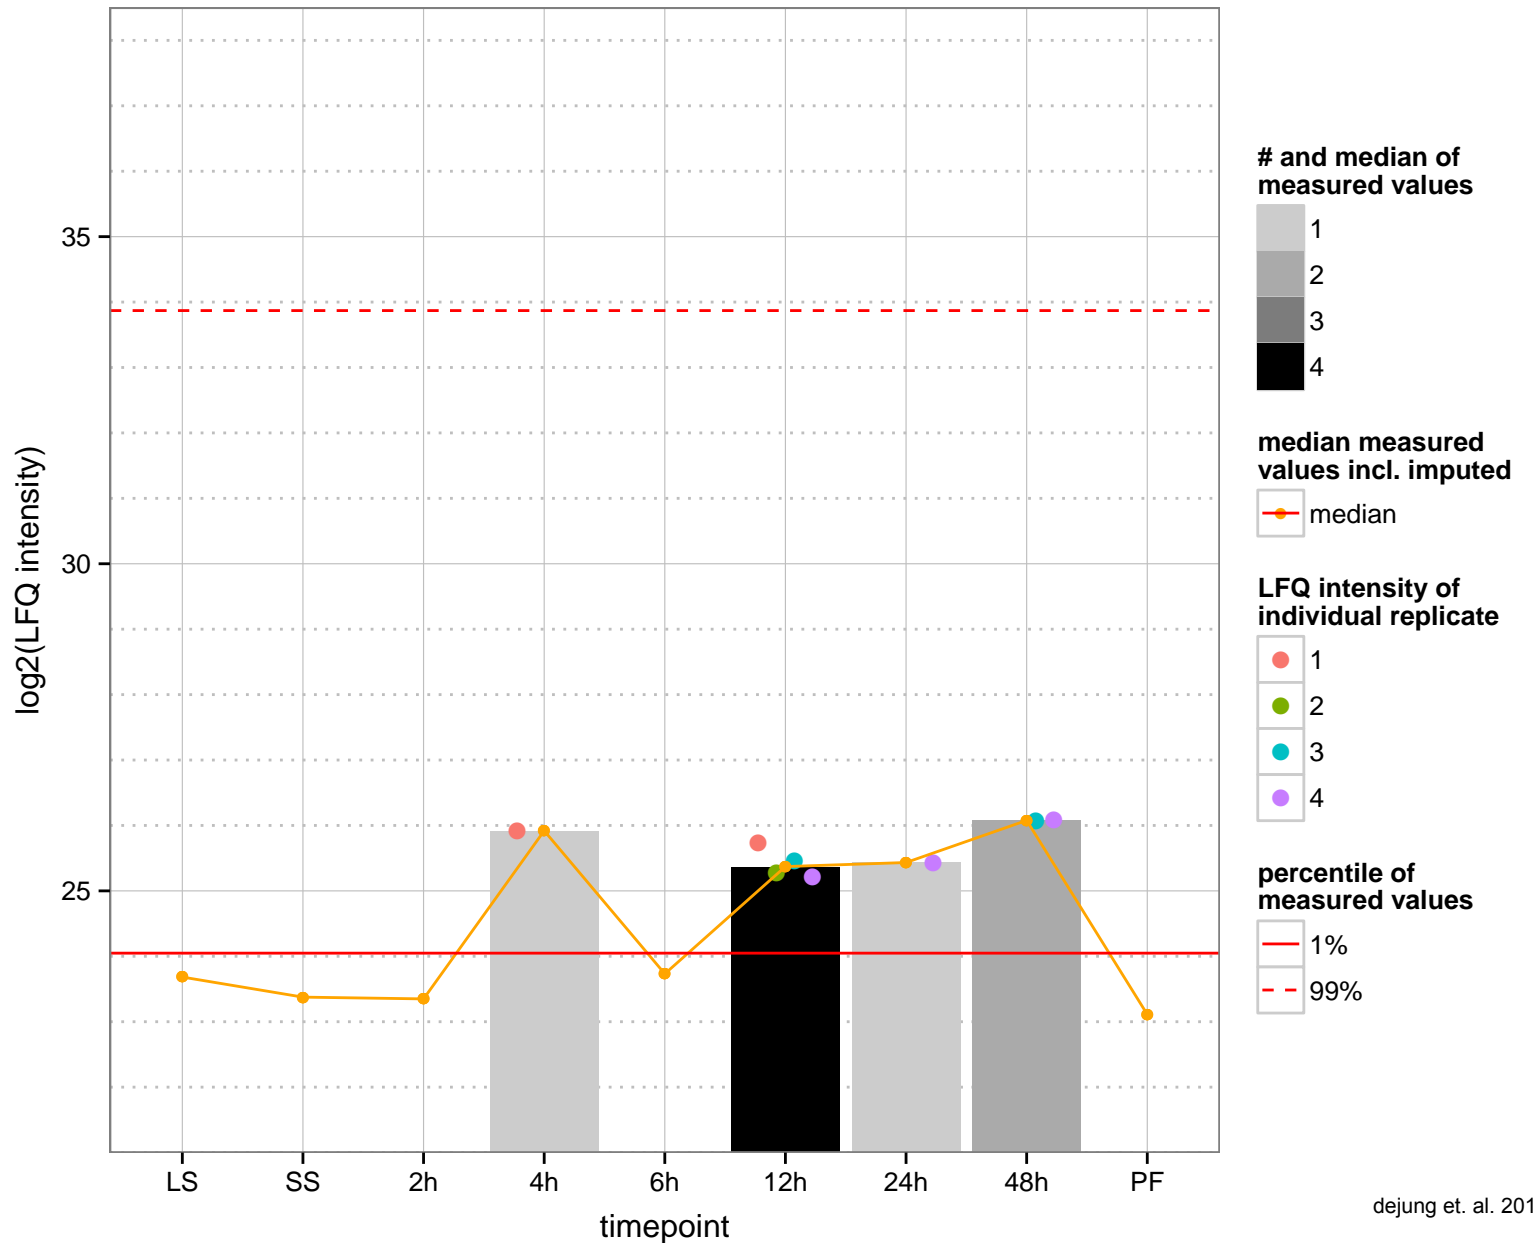

small nuclear RNA (snRNA) U1 (TbU1-24K)  
 Tb927.3.1090  
 AGOF: null  
 AGOC: null  
 AGOP: null  
 PGOF: null  
 PGOC: null  
 PGOP: null

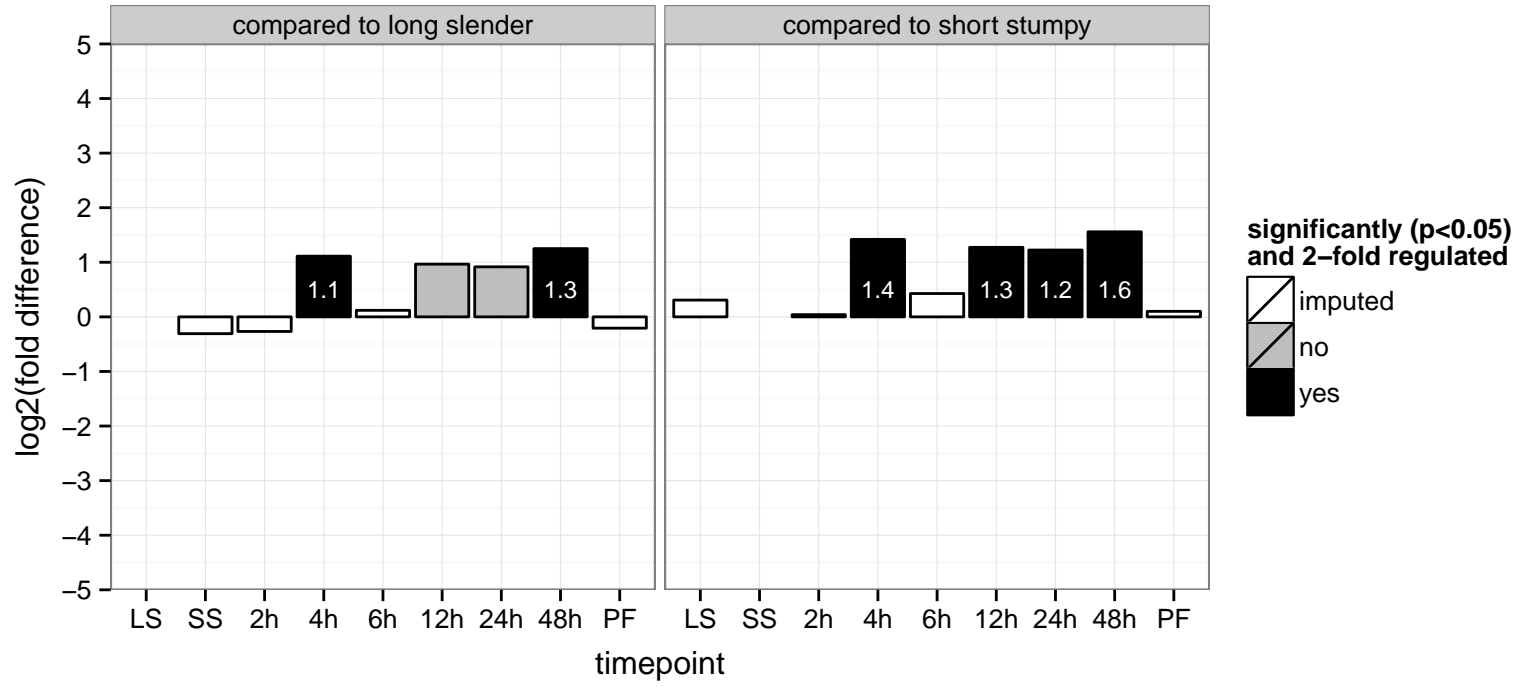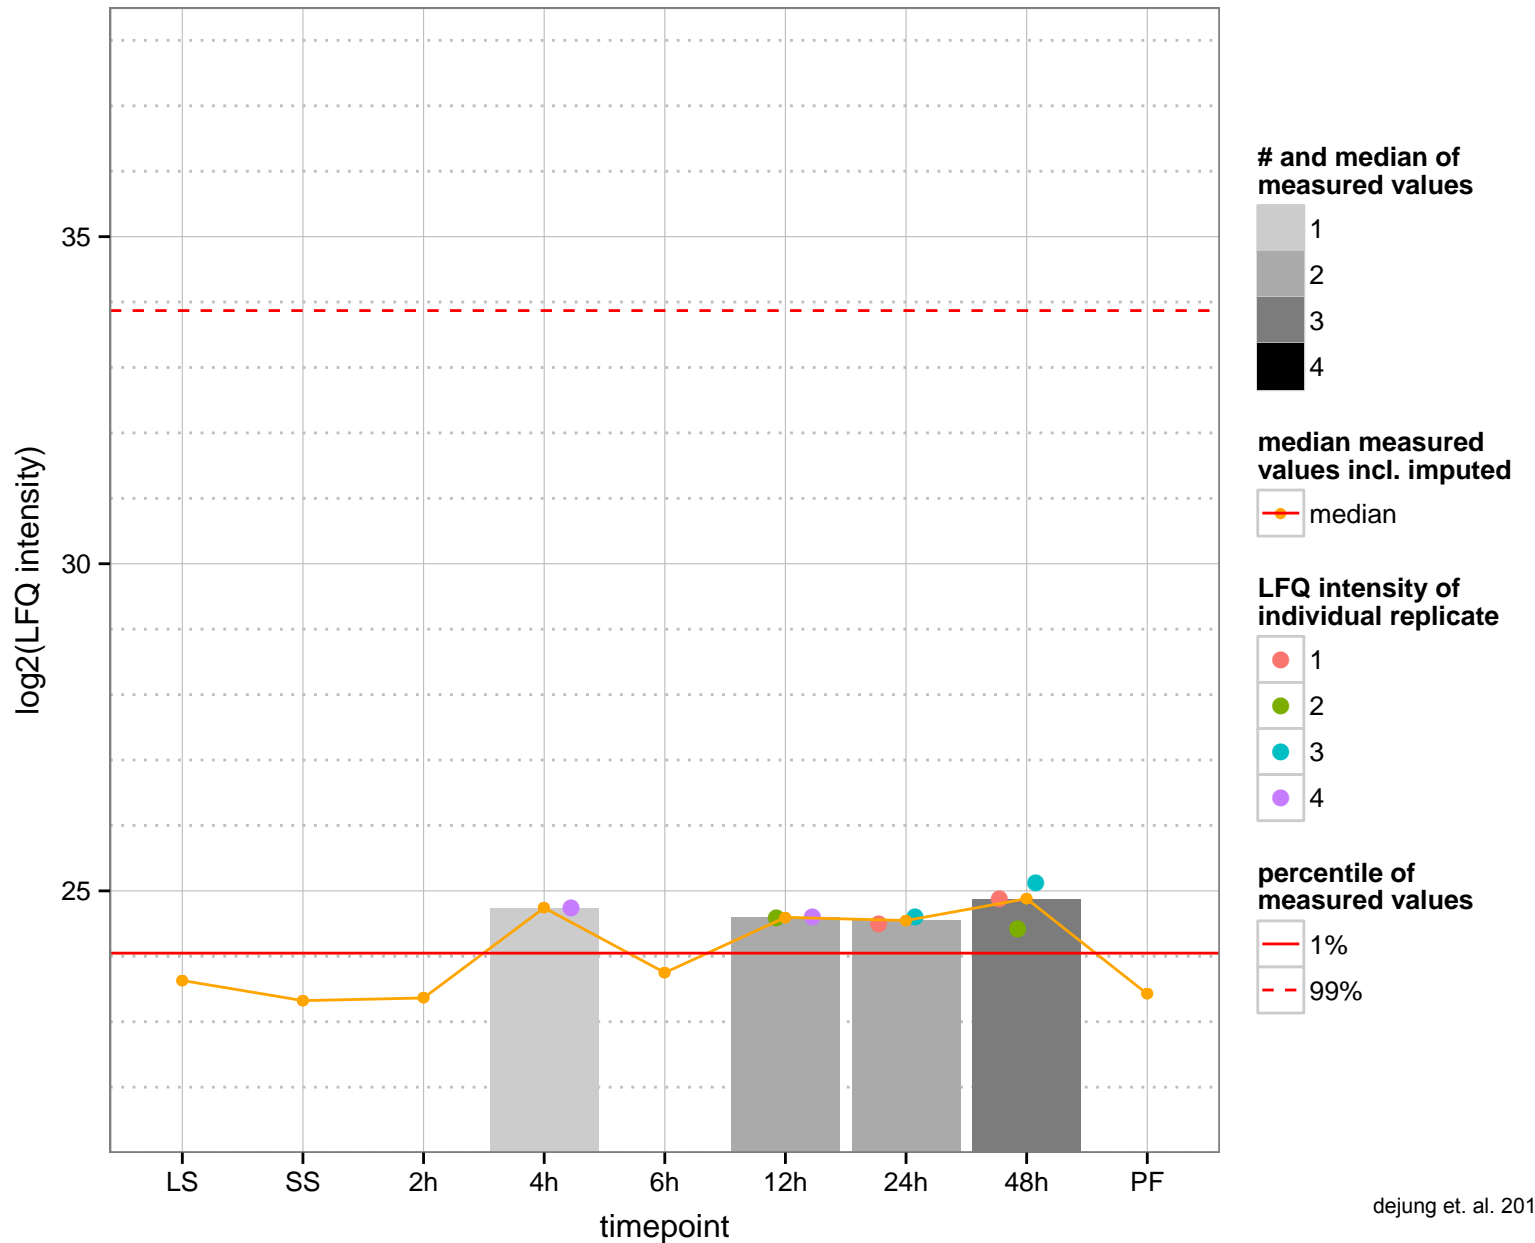

hypothetical protein, conserved  
 Tb927.7.3800  
 AGOF: null  
 AGOC: mitochondrion  
 AGOP: null  
 PGO: null  
 PGOC: null  
 PGOP: null

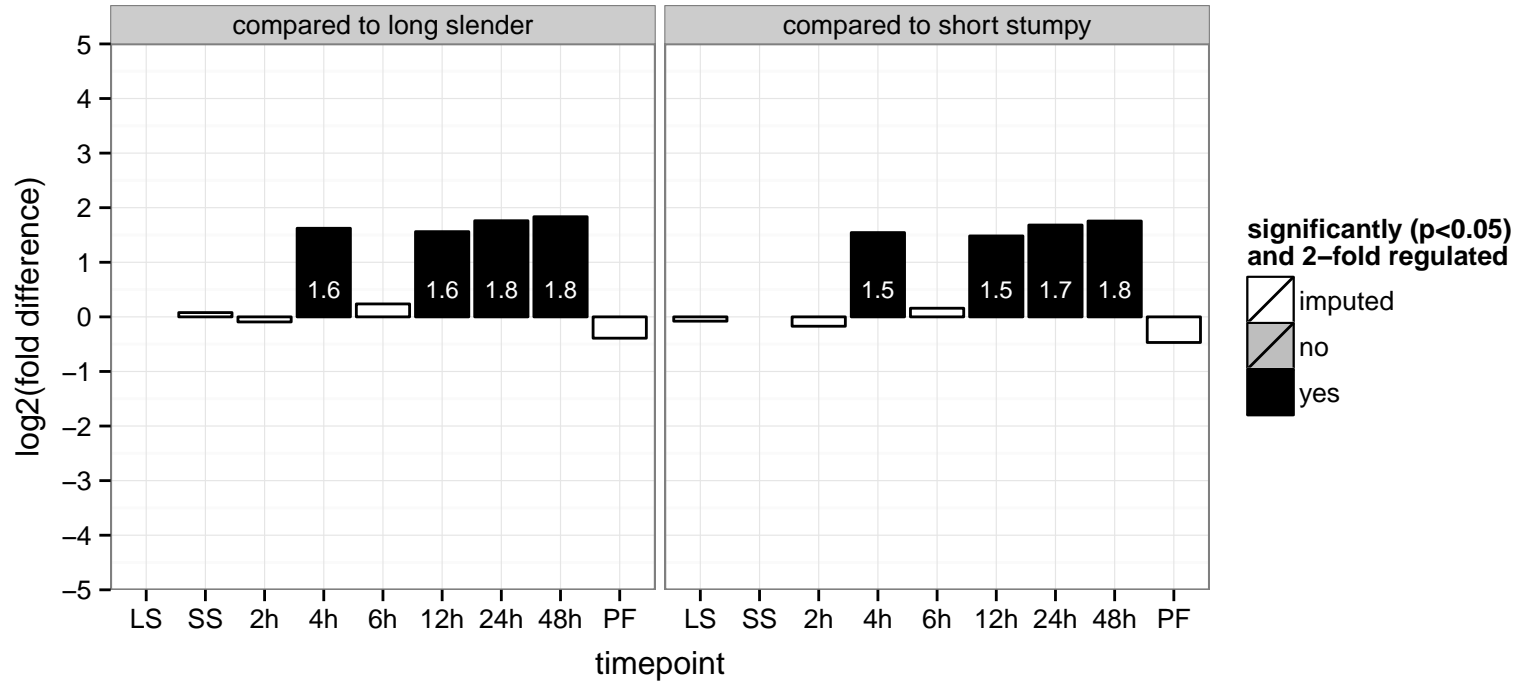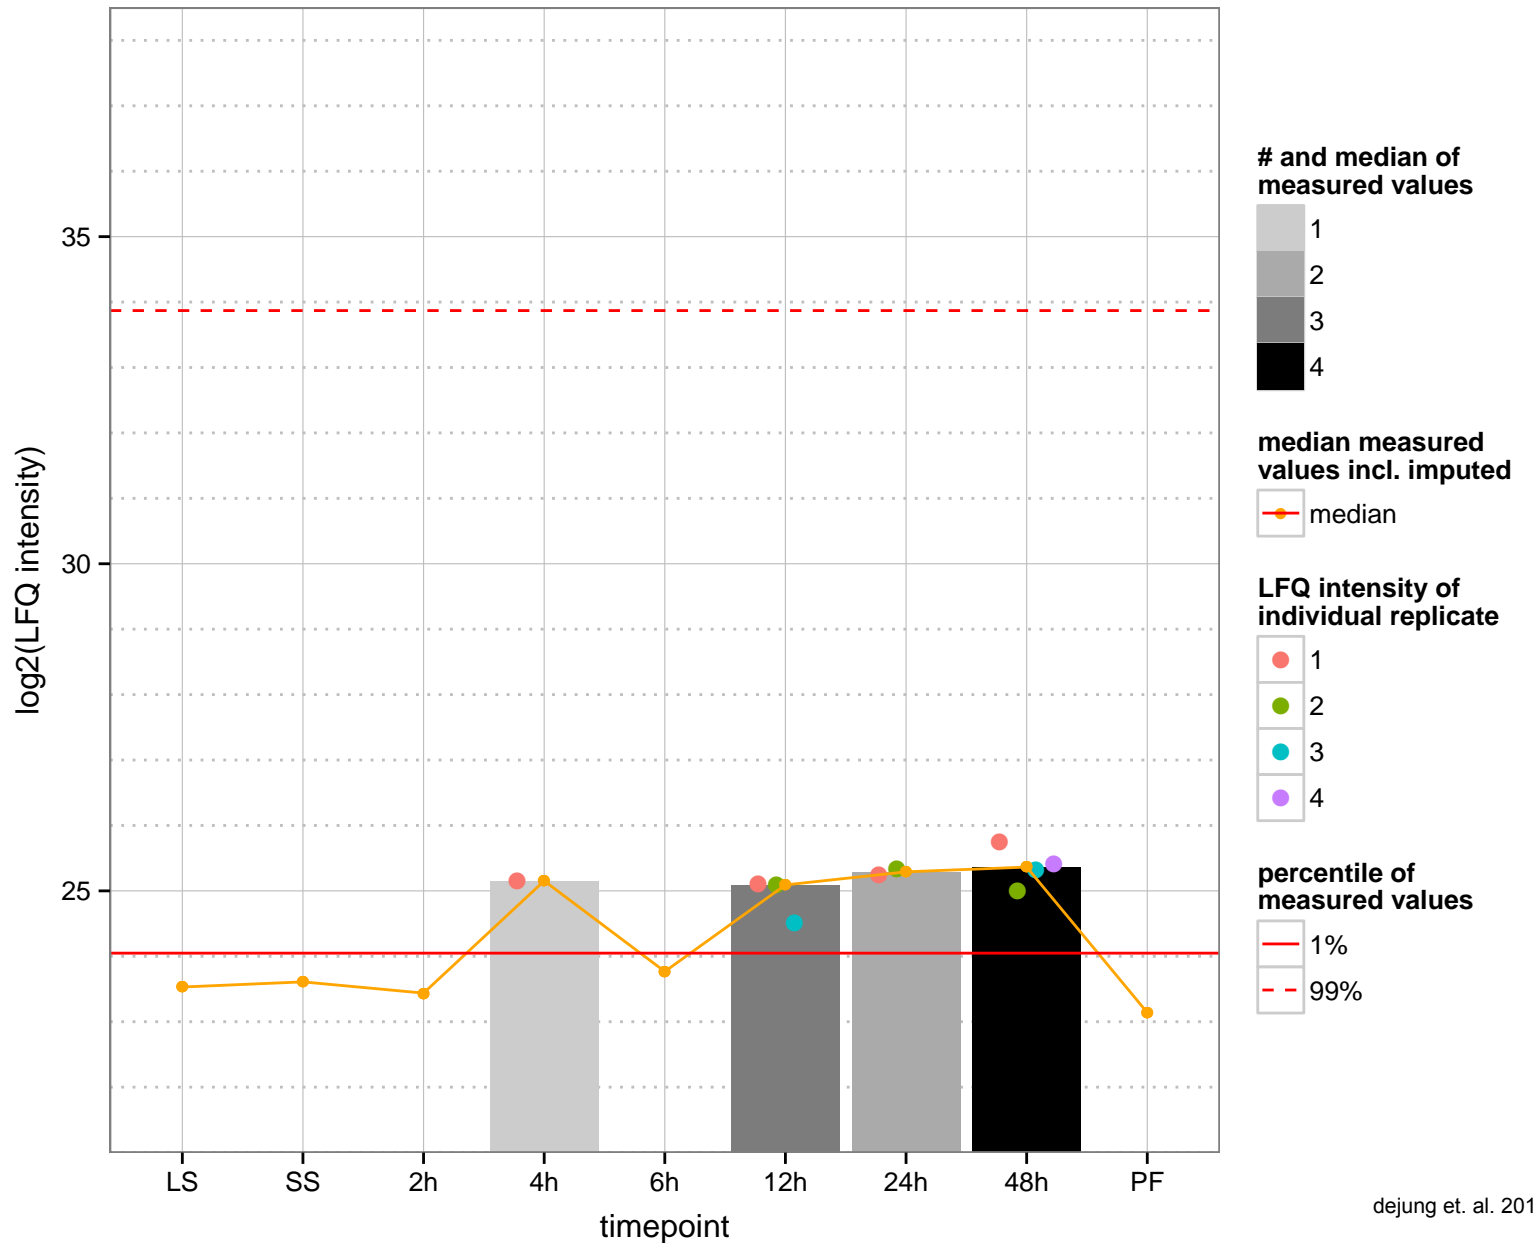

chaperone protein DNAj, putative  
 Tb927.7.6660  
 AGOF: heat shock protein binding, unfolded protein binding  
 AGOC: integral to membrane, mitochondrion  
 AGOP: protein folding  
 PGO: heat shock protein binding  
 PGOC: null  
 PGOP: null

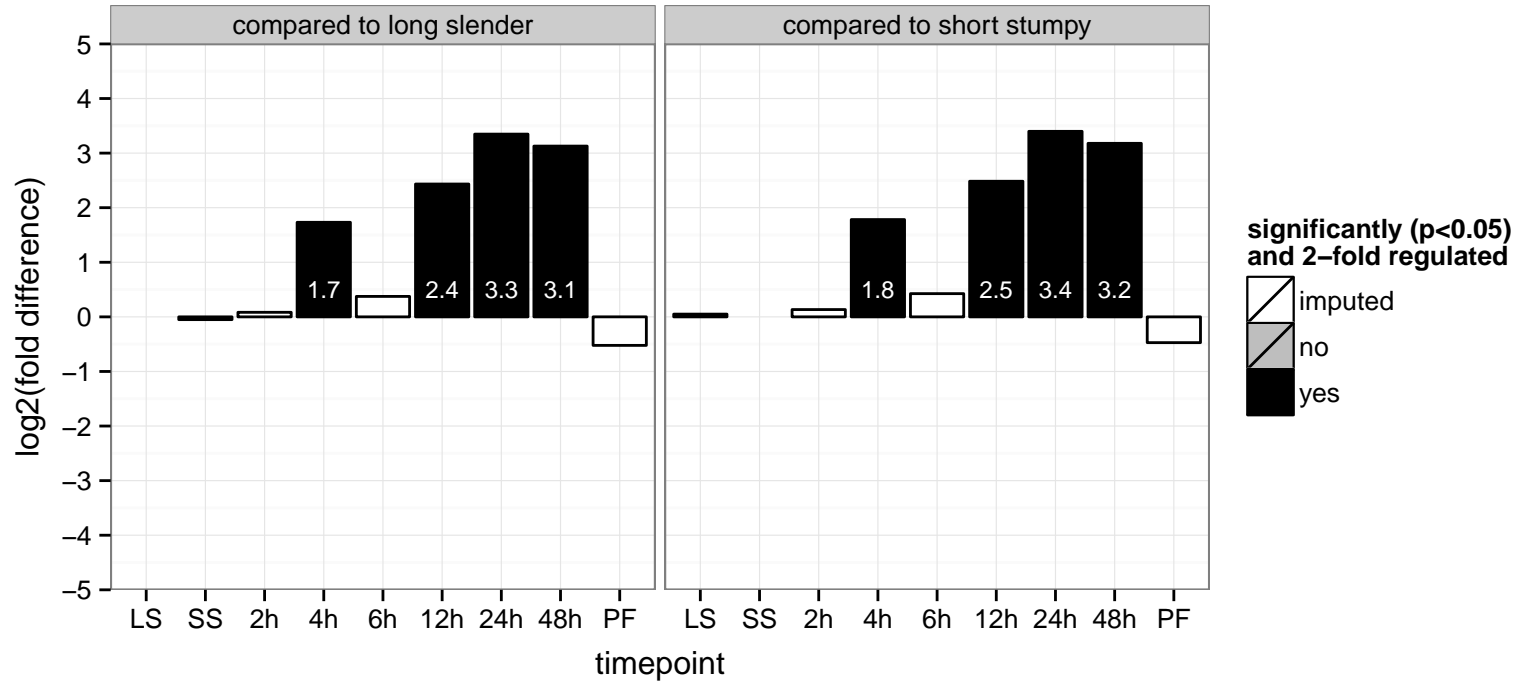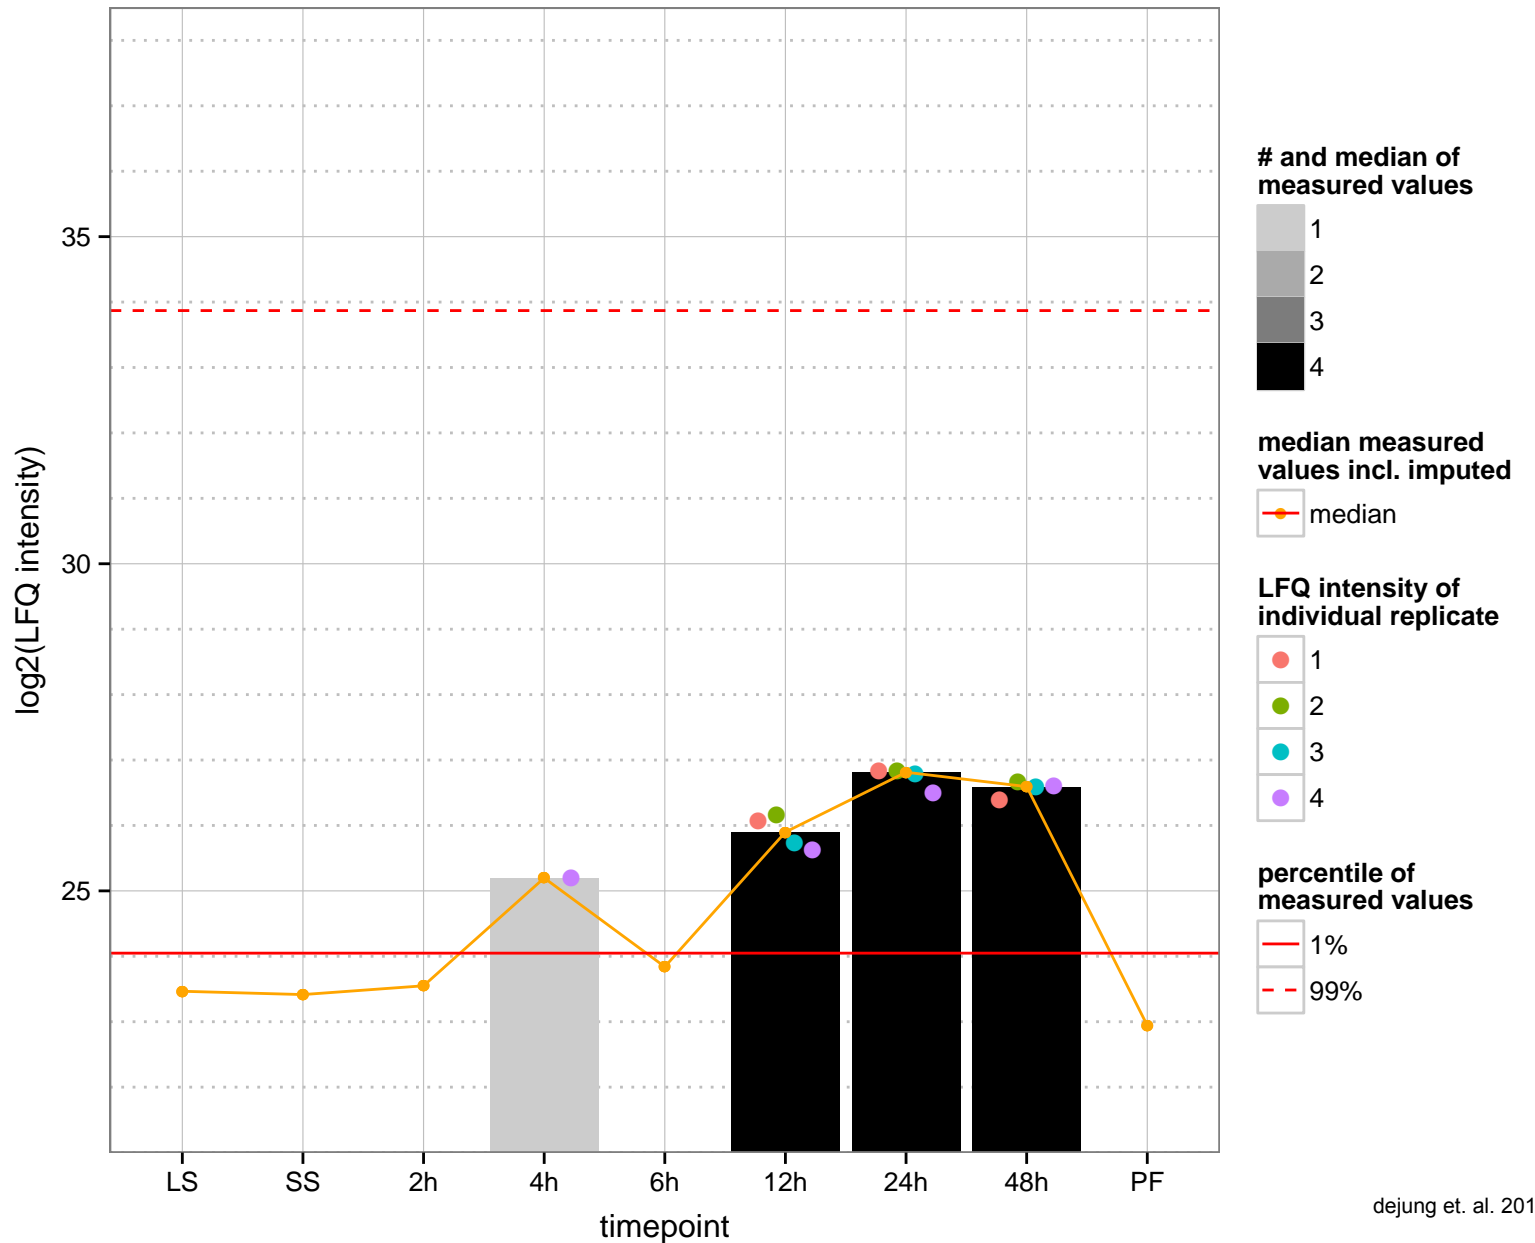

hypothetical protein, conserved  
 Tb927.7.7010  
 AGOF: null  
 AGOC: mitochondrion  
 AGOP: null  
 PGO: null  
 PGOC: null  
 PGOP: null

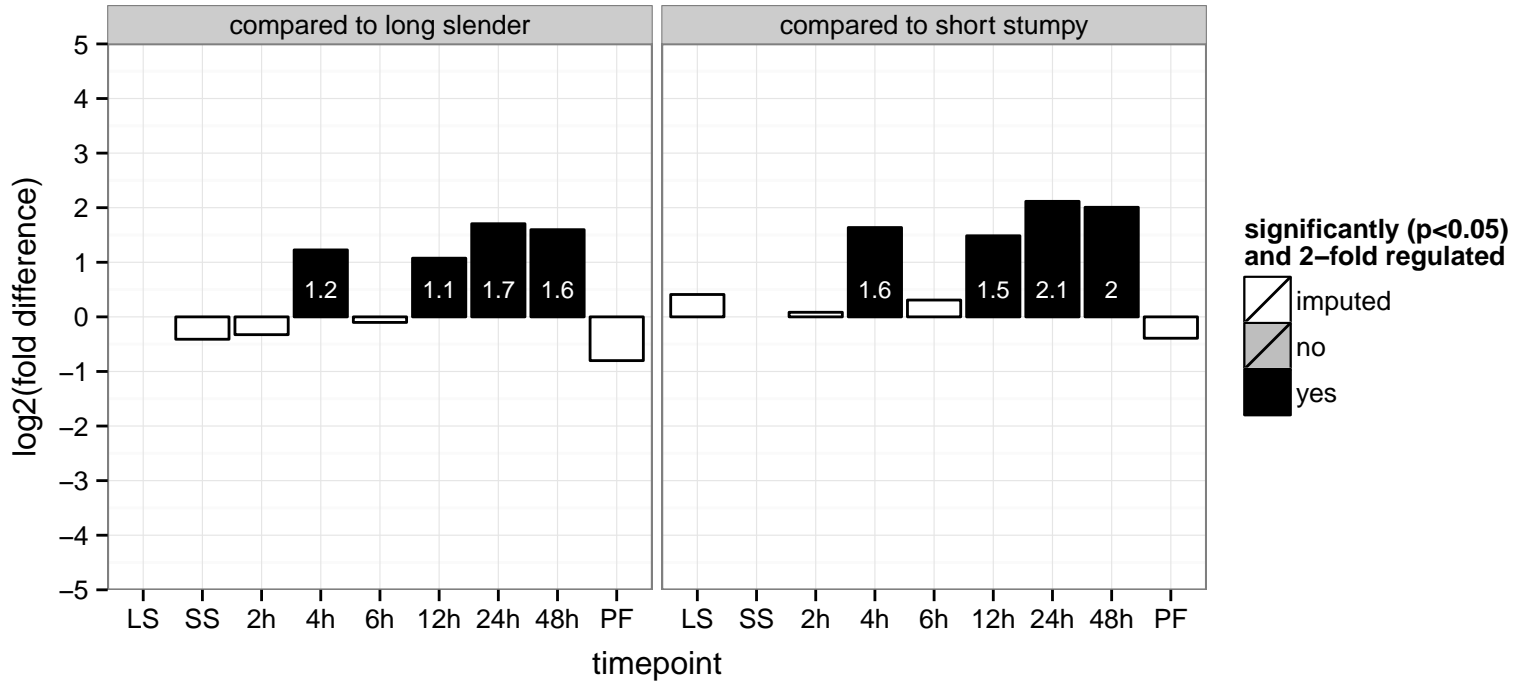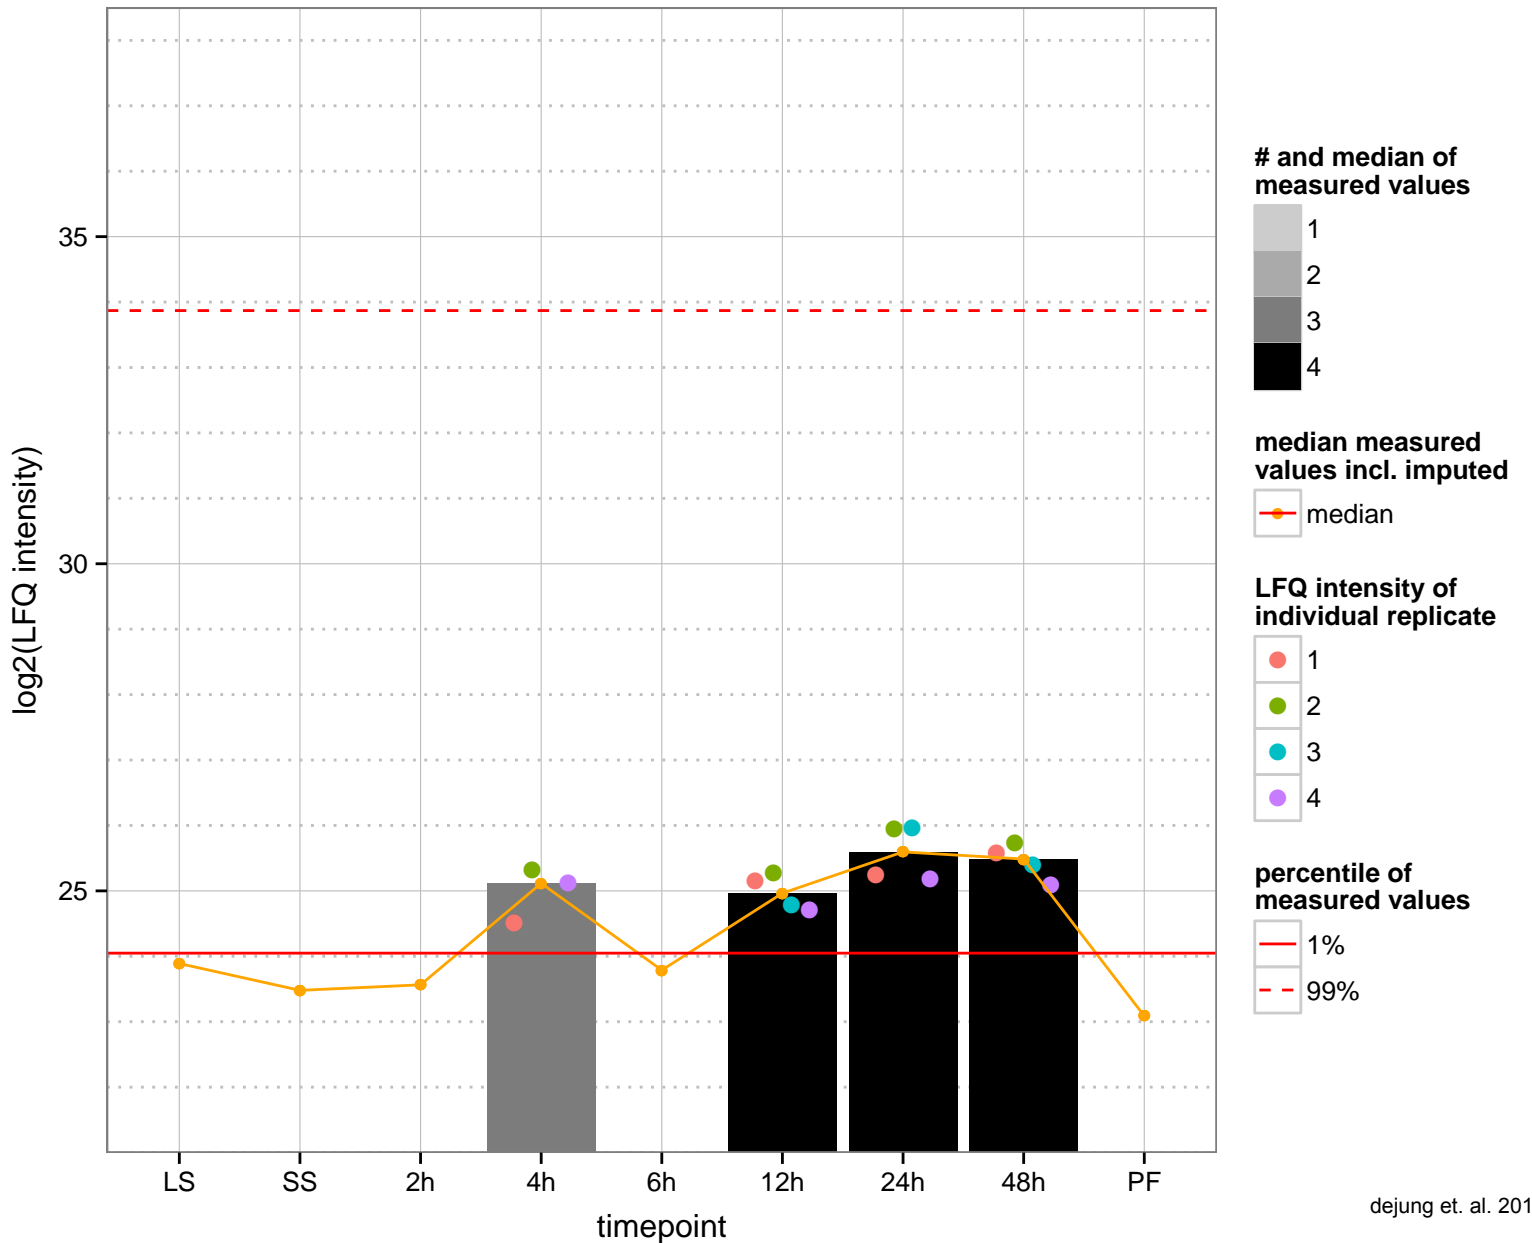

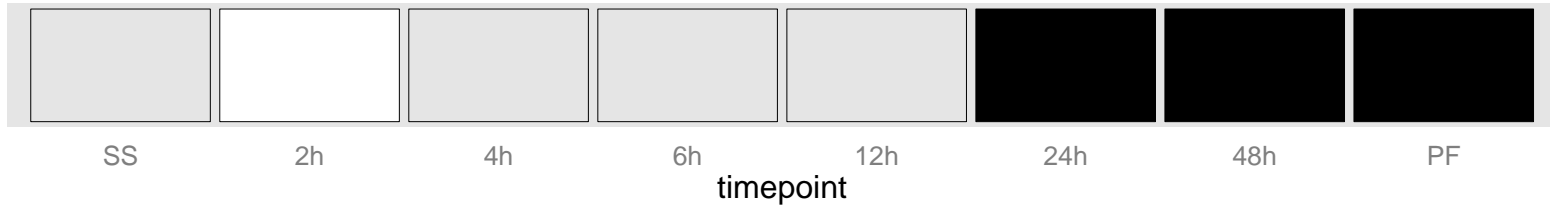

**regulated**  **not regulated**  **significant down**  **significant up**

DNA mismatch repair protein, putative, DNA mismatch repair protein MSH2, MutS protein homolog 2, putative (MSH2)  
 Tb927.10.11020  
 AGOF: null, ATP binding, damaged DNA binding, mismatched DNA binding  
 AGOC: null, MutSalpha complex, MutSbeta complex  
 AGOP: null, DNA metabolic process, mismatch repair  
 PGO: ATP binding, mismatched DNA binding  
 PGO: null, MutSalpha complex, MutSbeta complex  
 PGO: mismatch repair

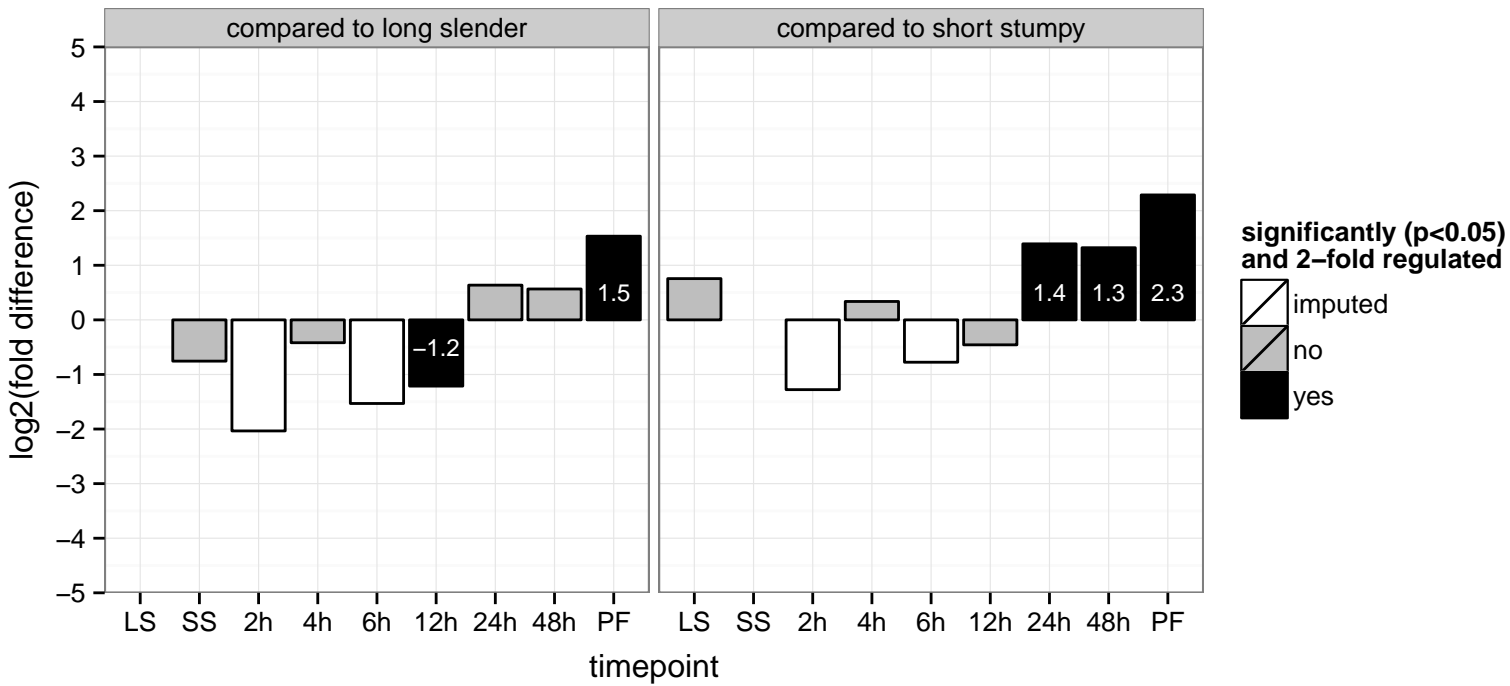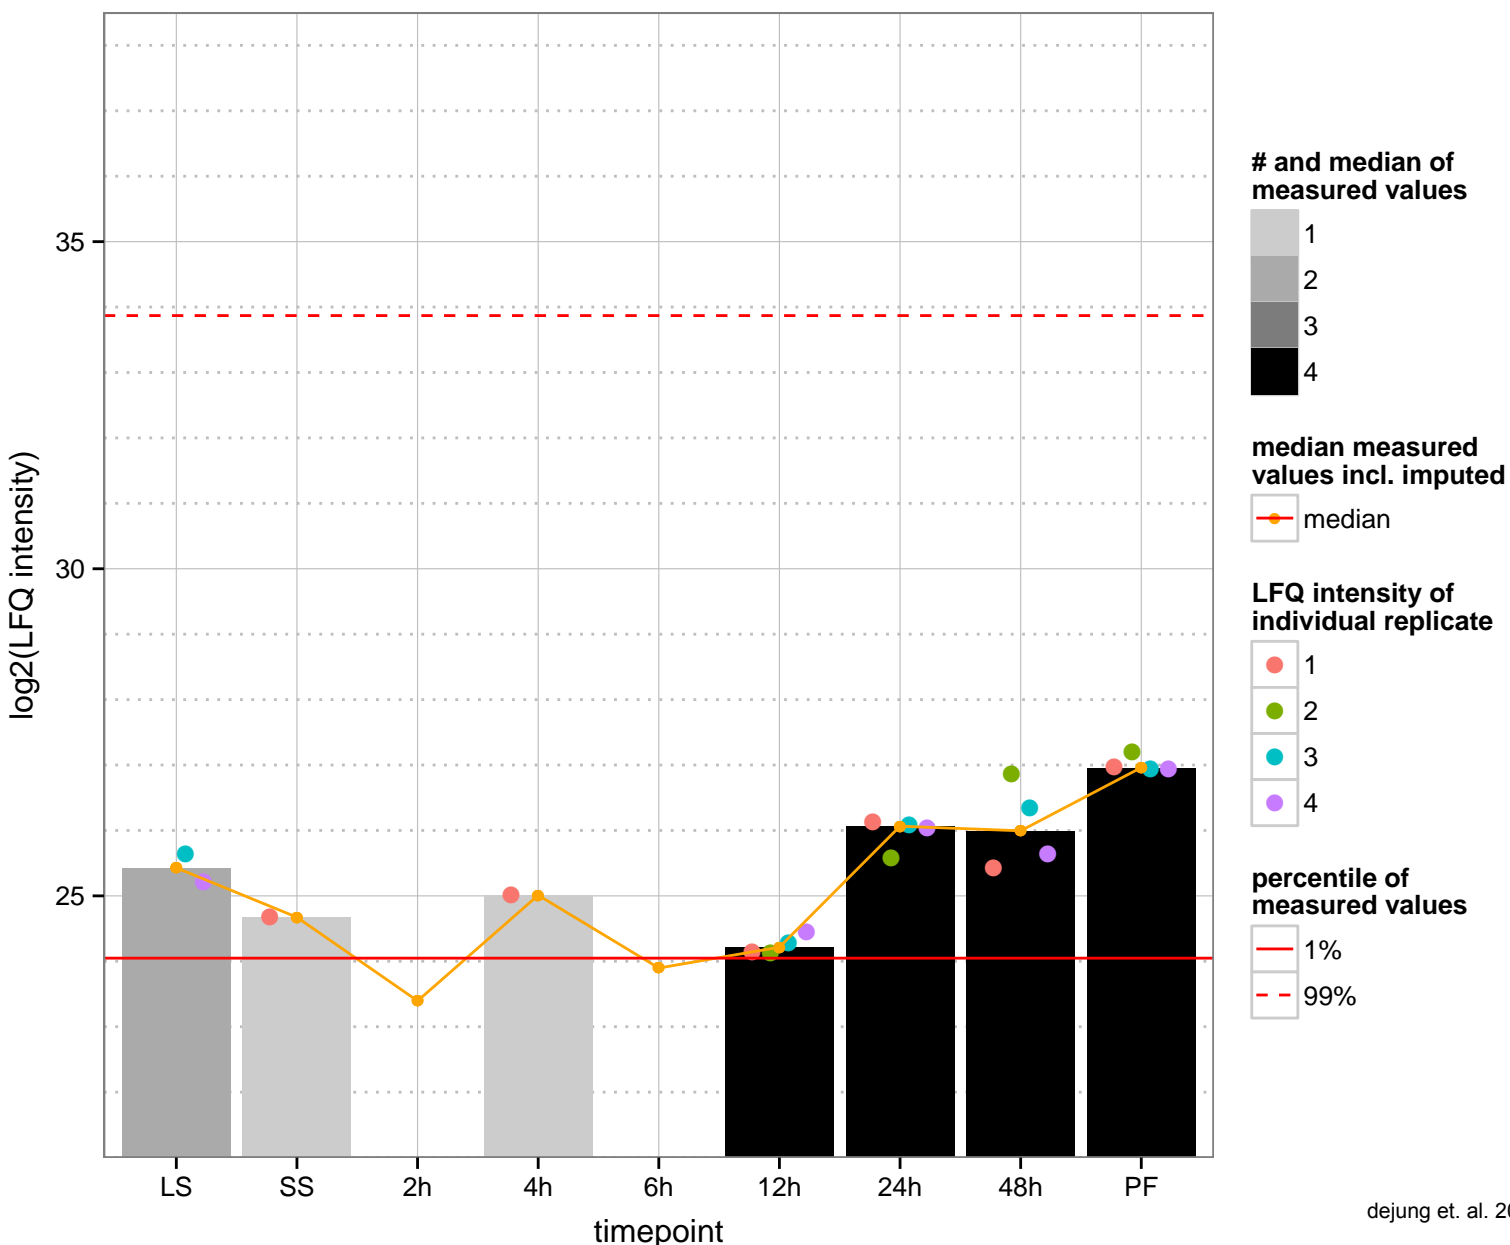

hypothetical protein, conserved  
 Tb927.10.11380  
 AGOF: null  
 AGOC: null  
 AGOP: null  
 PGO: protein binding  
 PGOC: null  
 PGOP: null

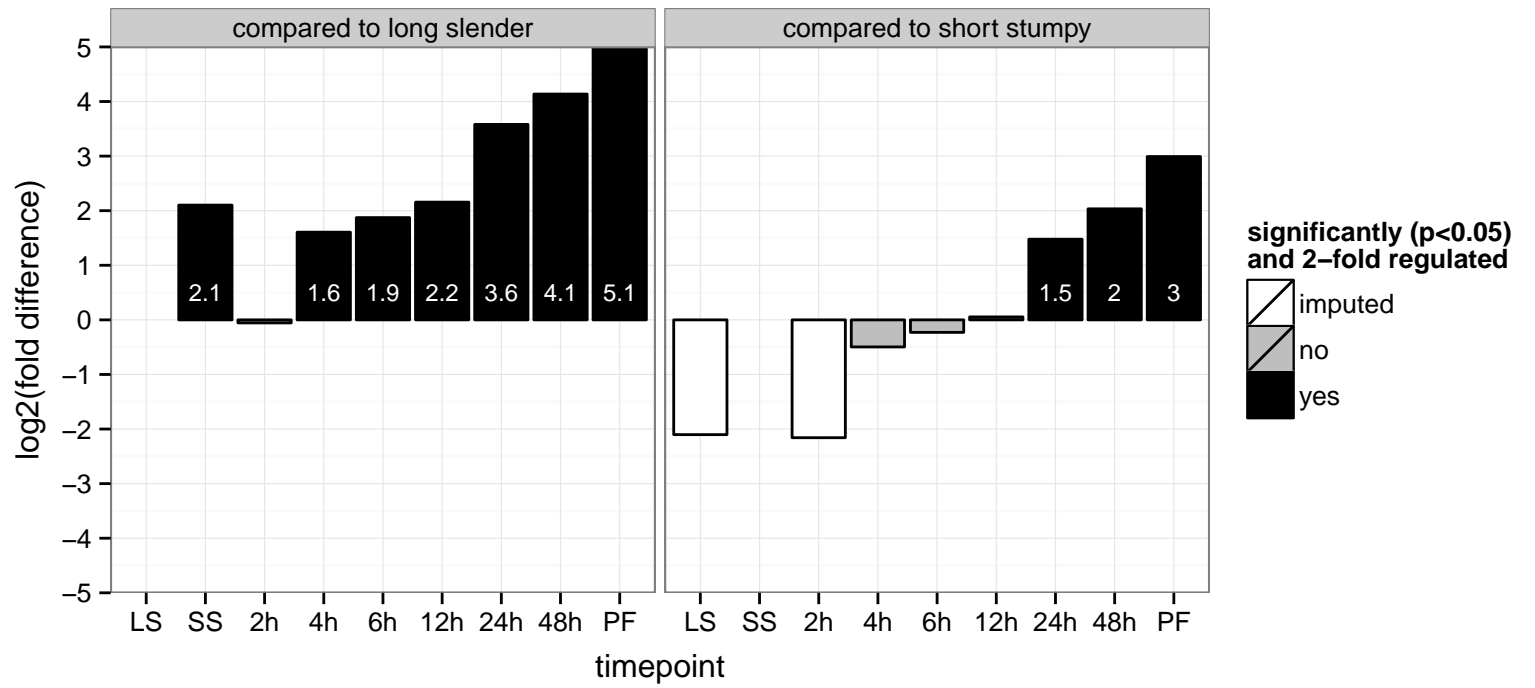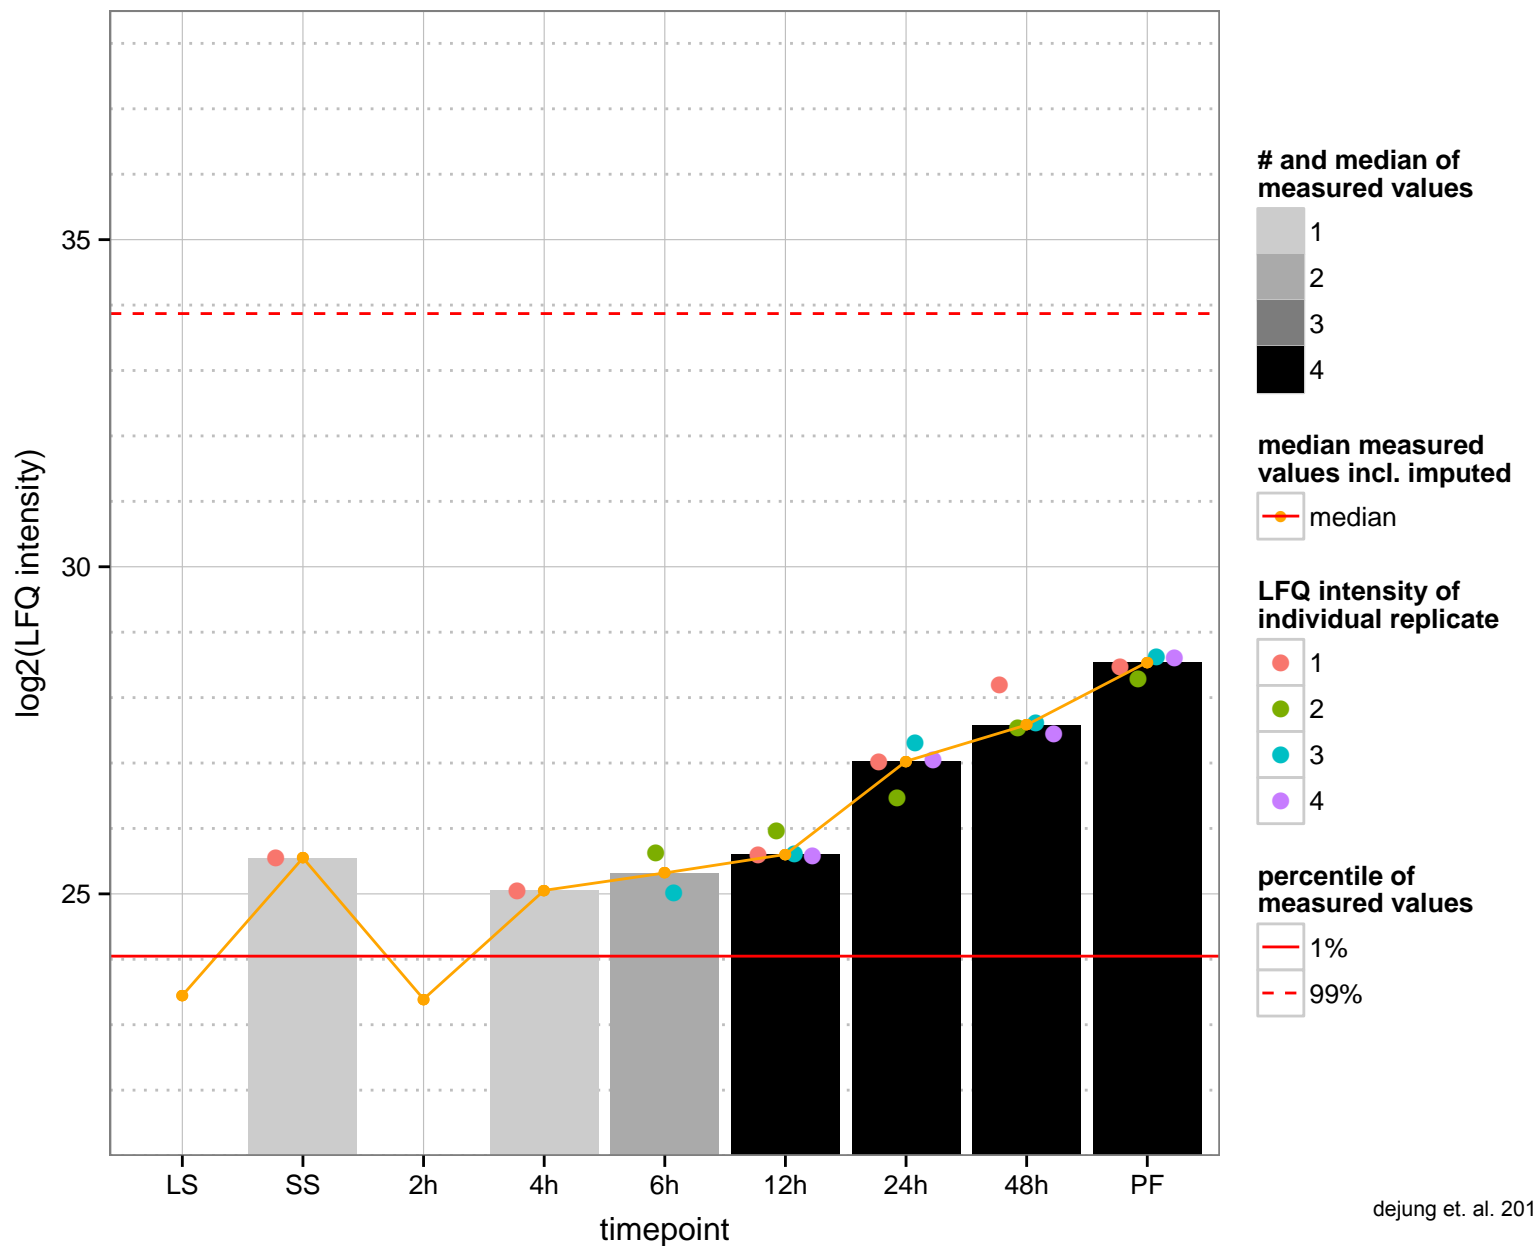



ribosomal protein L11, putative  
 Tb927.2.4890;Tb927.2.4740  
 AGOF: structural constituent of ribosome  
 AGOC: intracellular, mitochondrion, ribosome  
 AGOP: translation  
 PGO: structural constituent of ribosome  
 PGO: ribosome  
 PGO: translation

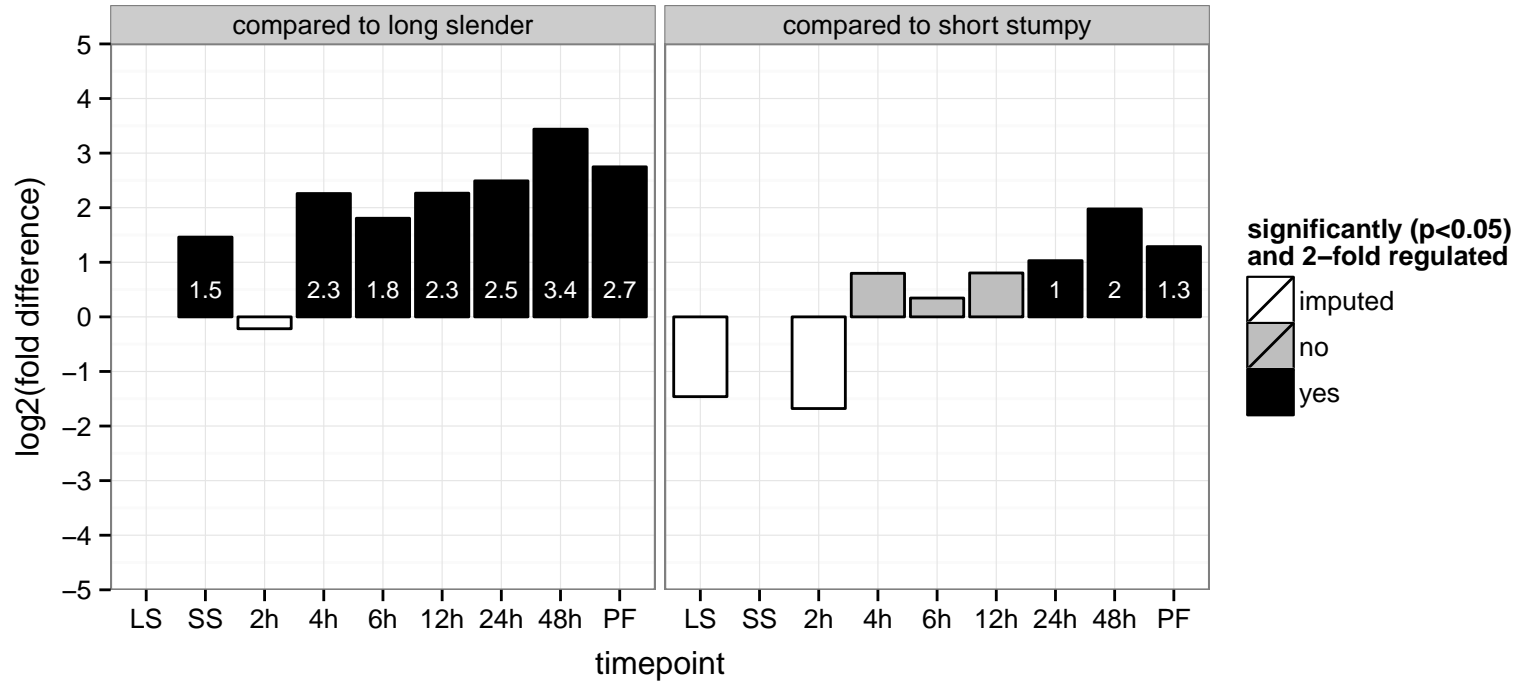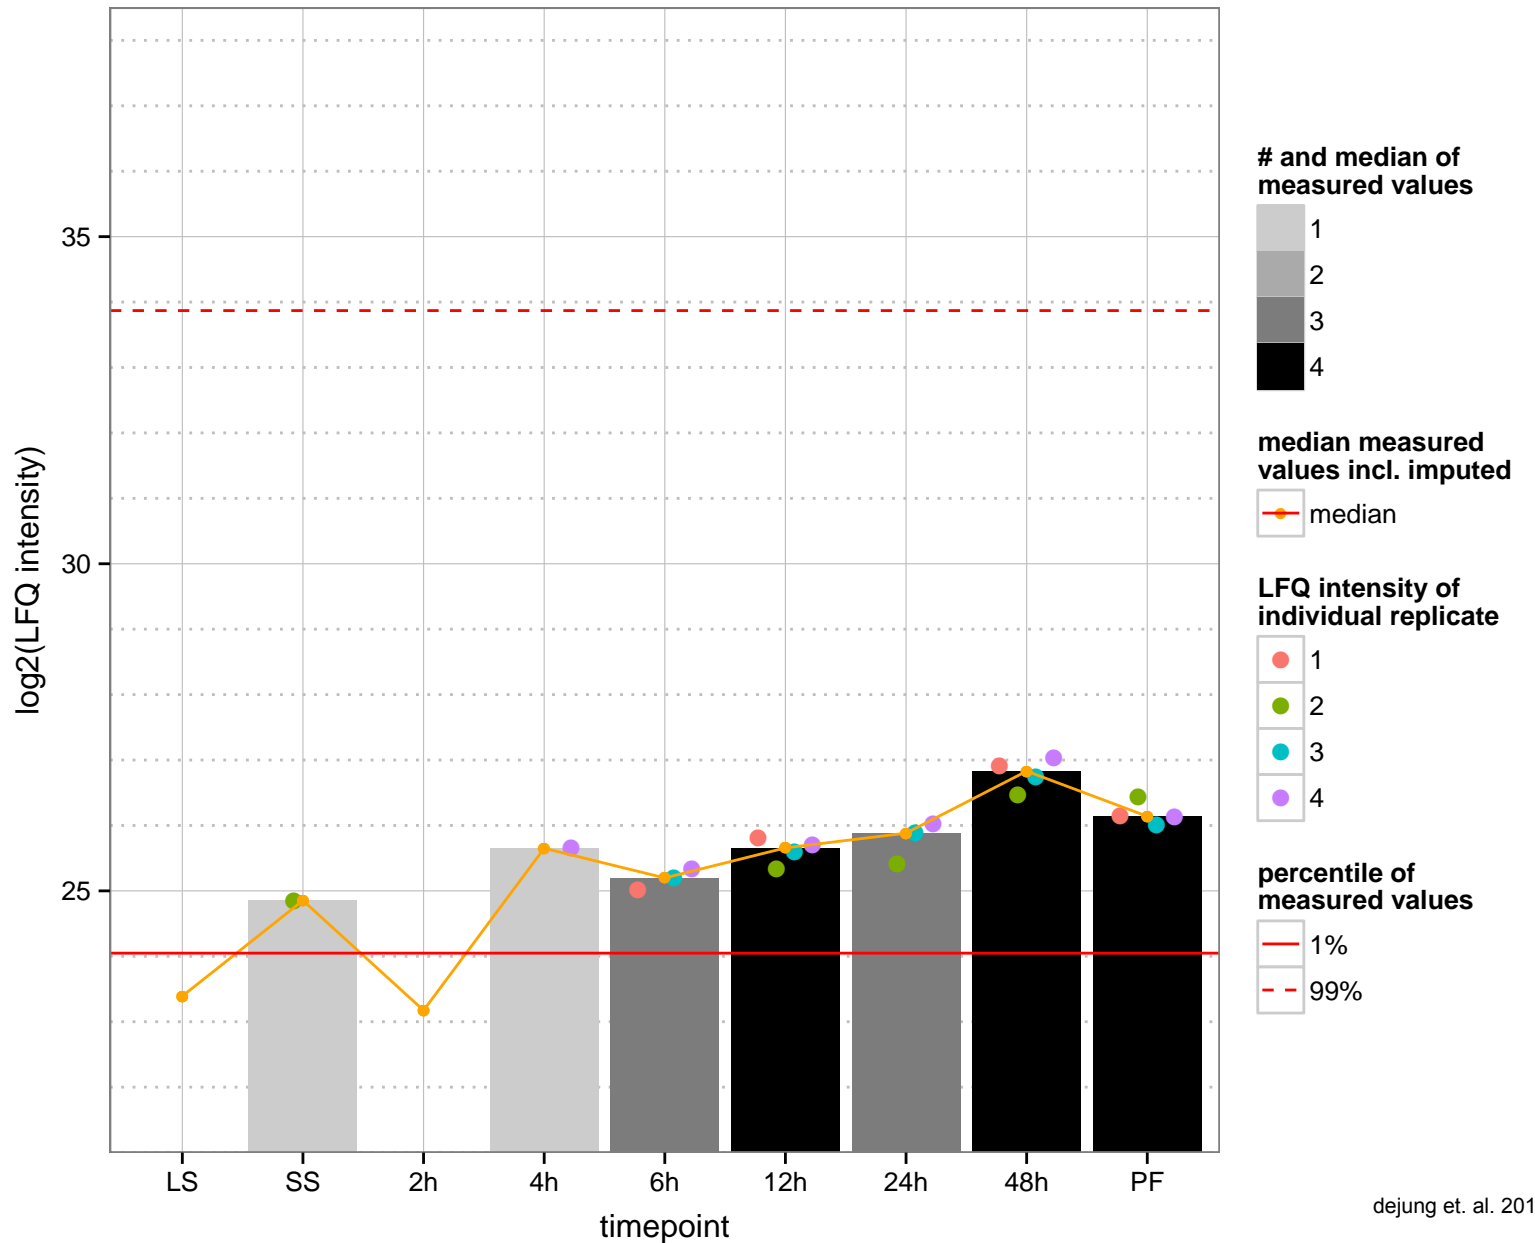

hypothetical protein, conserved  
 Tb927.5.3410  
 AGOF: null  
 AGOC: mitochondrion  
 AGOP: null  
 PGO: null  
 PGO: null  
 PGO: null

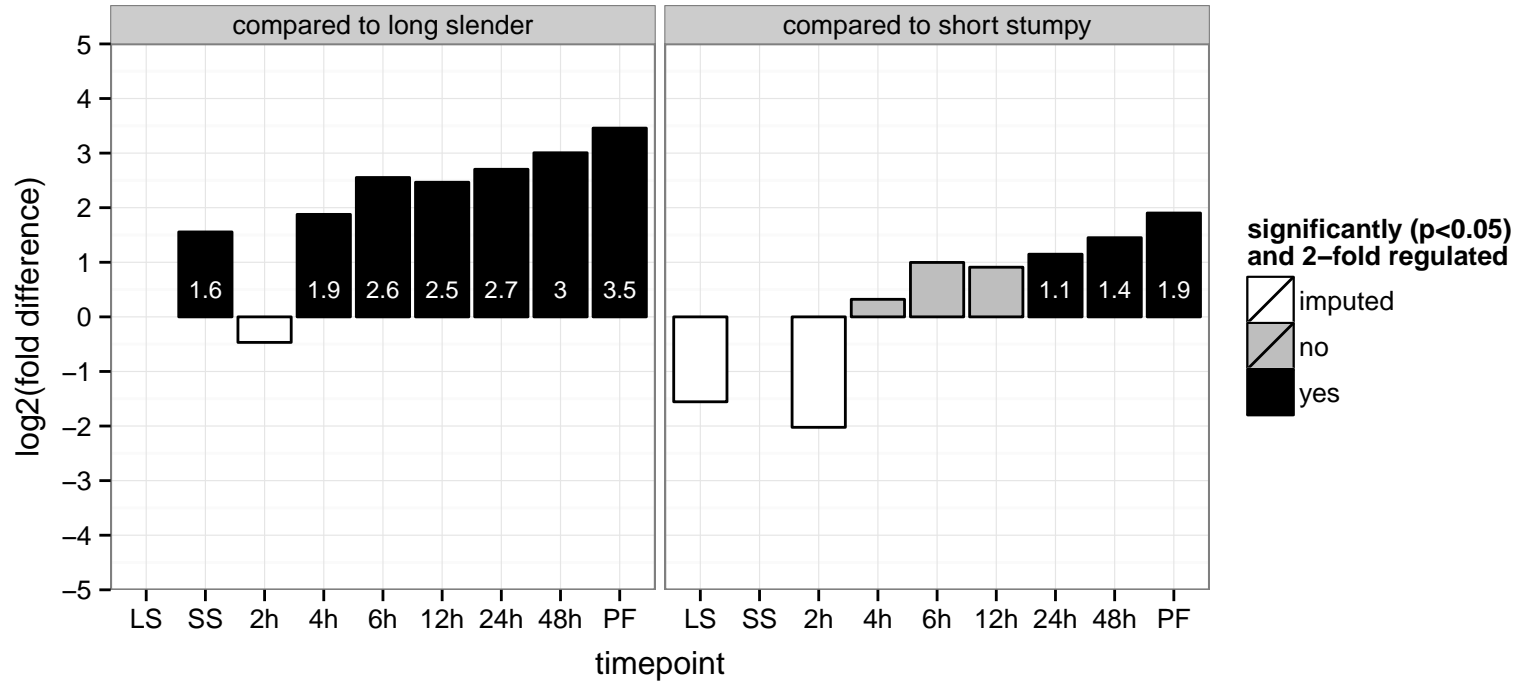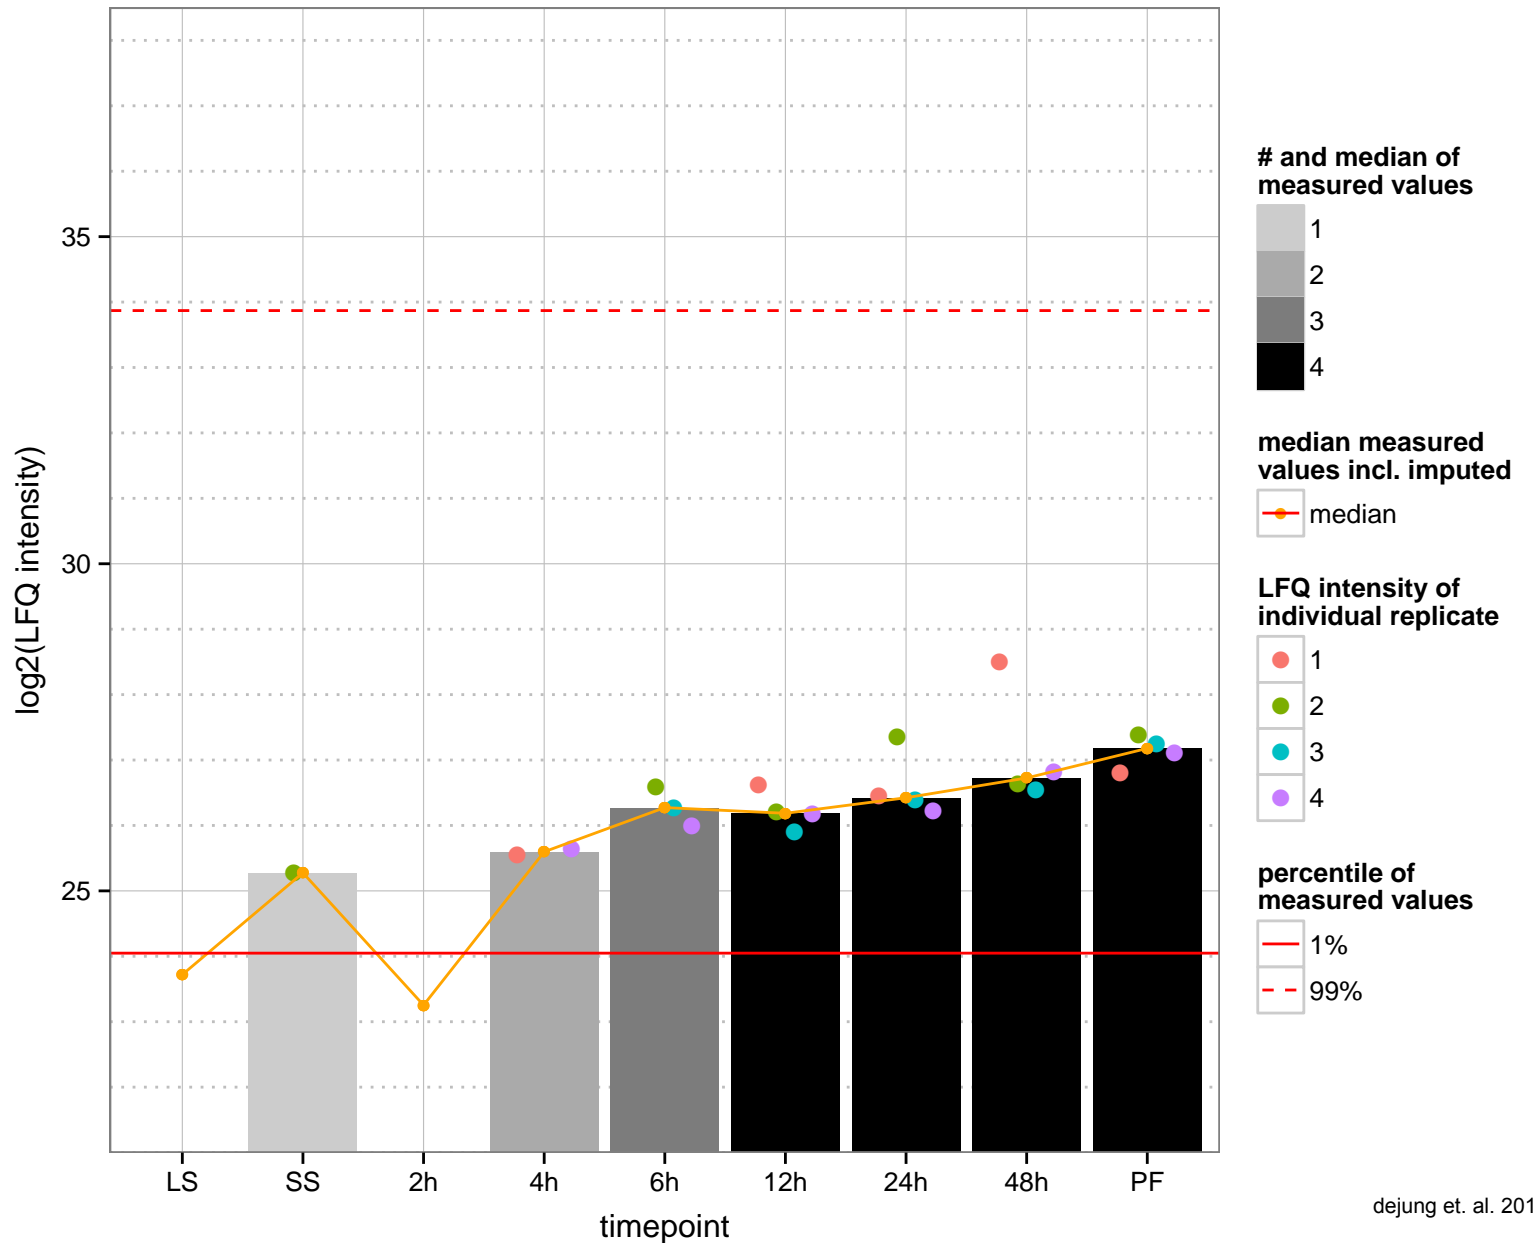

hypothetical protein, conserved  
 Tb927.6.4130  
 AGOF: null  
 AGOC: mitochondrion  
 AGOP: null  
 PGO: null  
 PGO: null  
 PGO: null

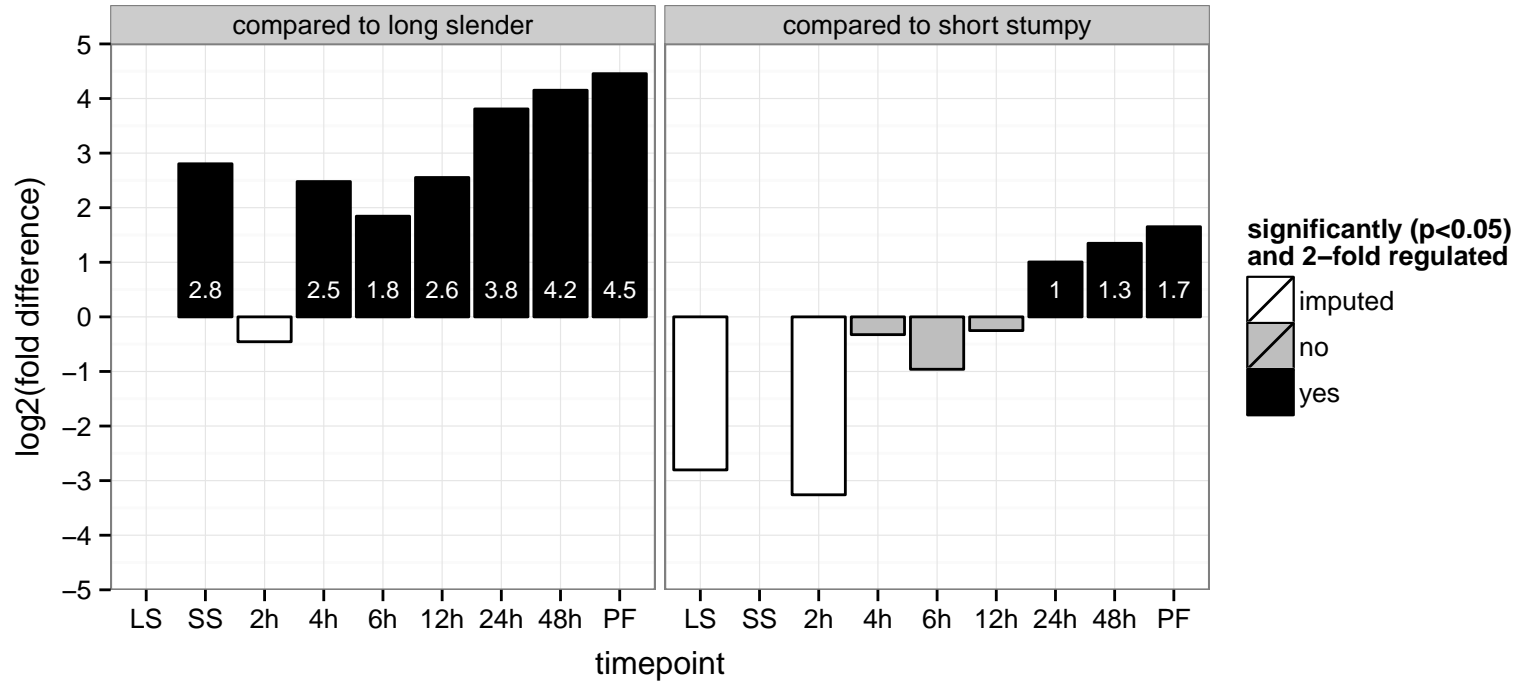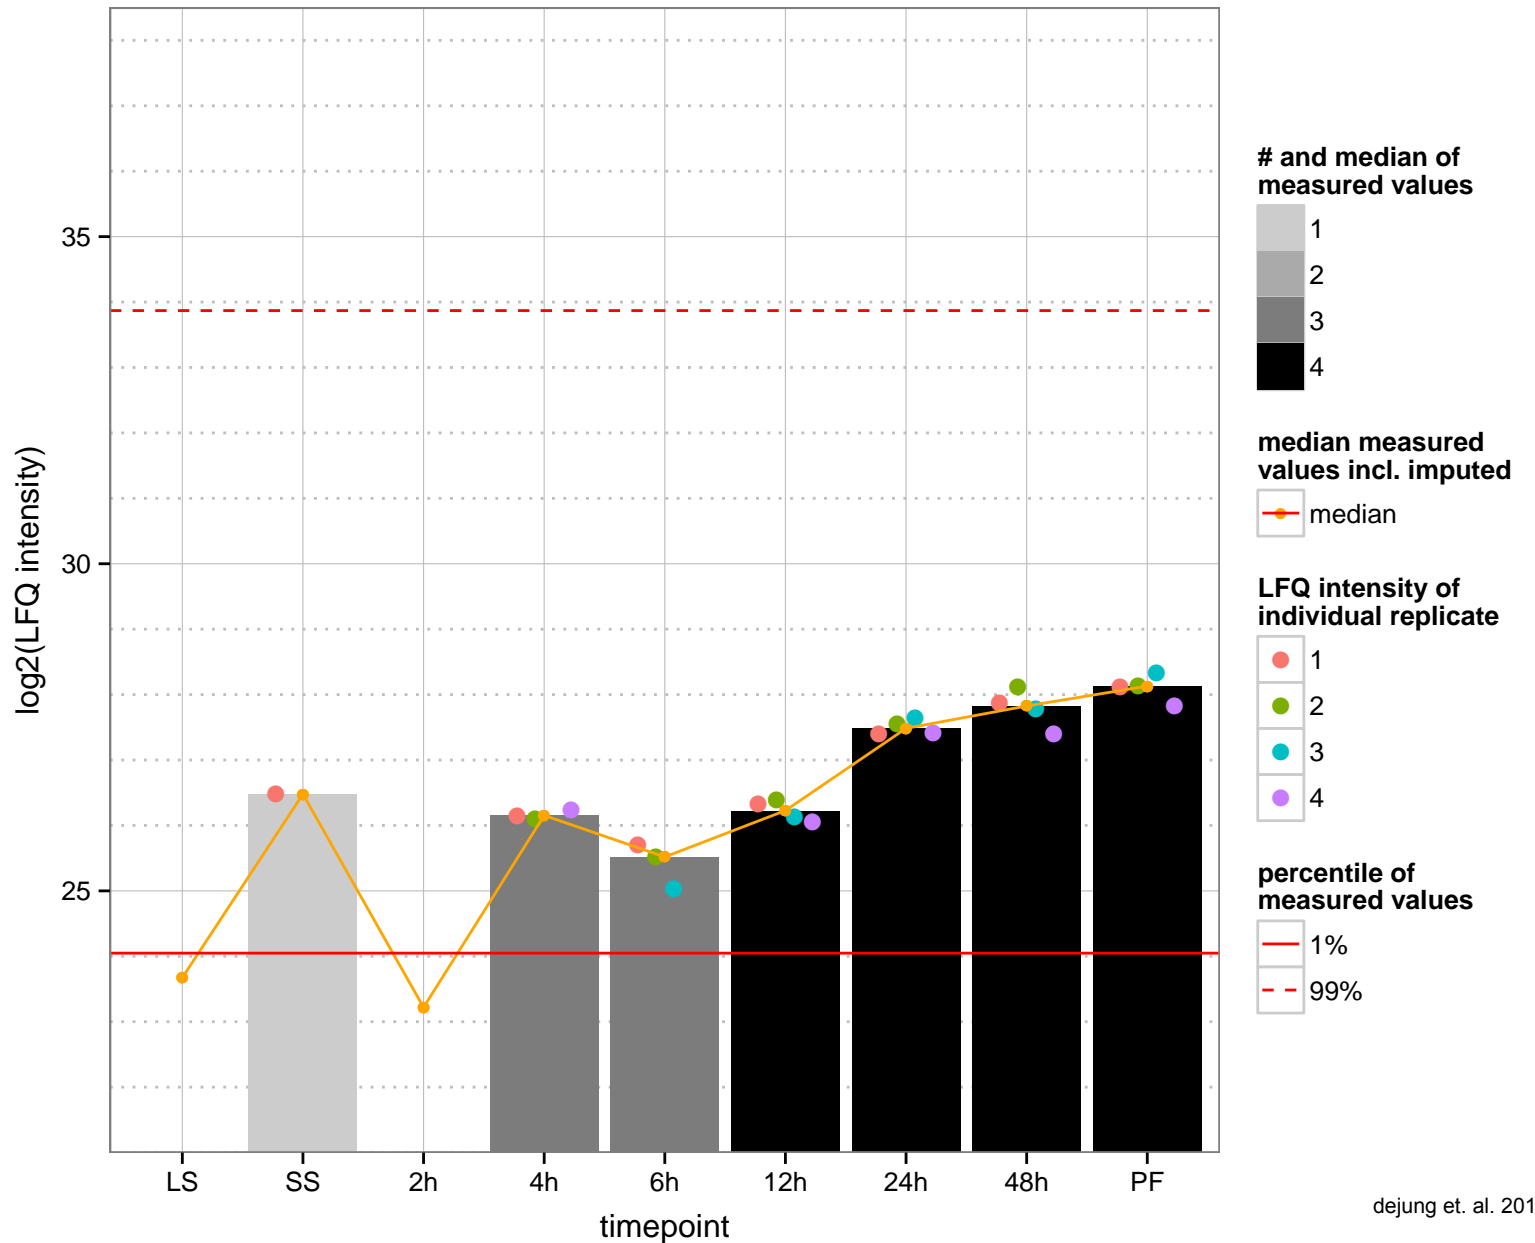

hypothetical protein, conserved  
 Tb927.8.3300  
 AGOF: null  
 AGOC: mitochondrion  
 AGOP: null  
 PGO: null  
 PGO: null  
 PGO: null

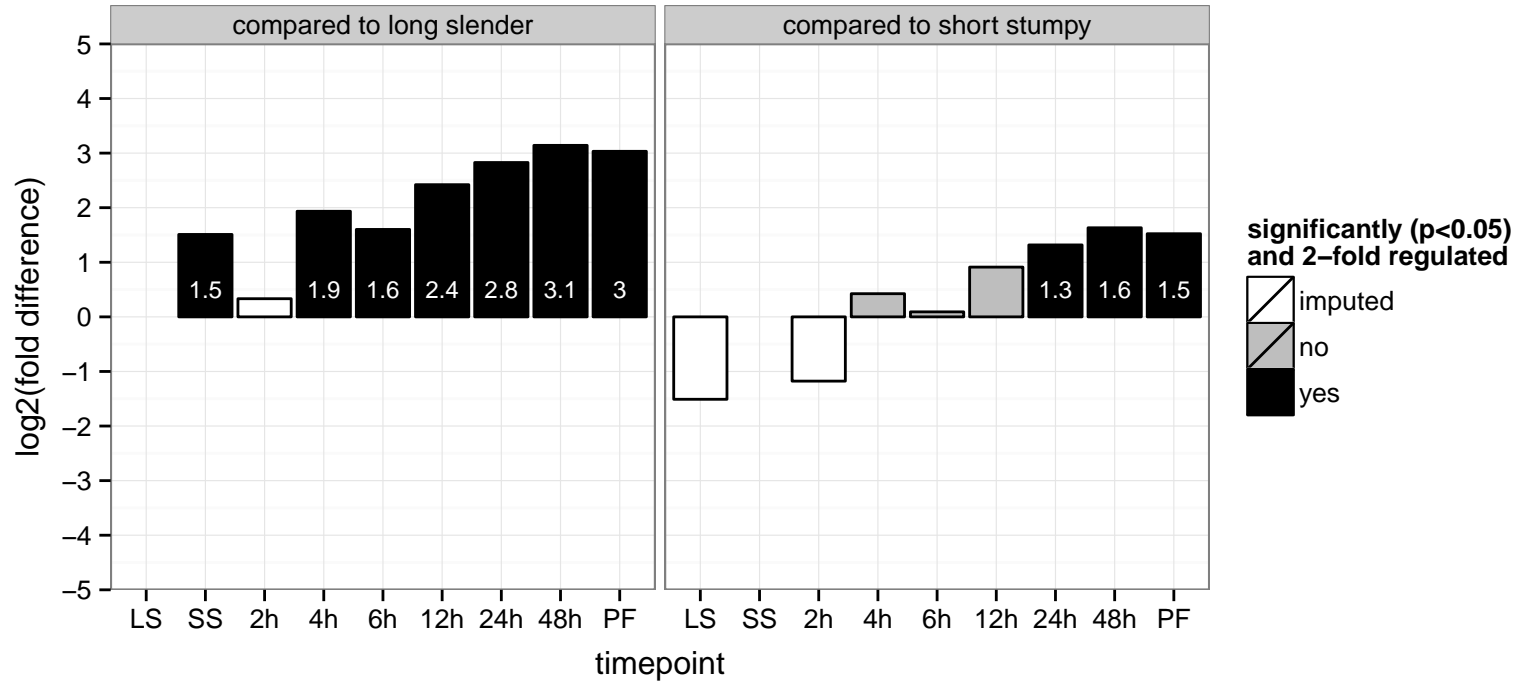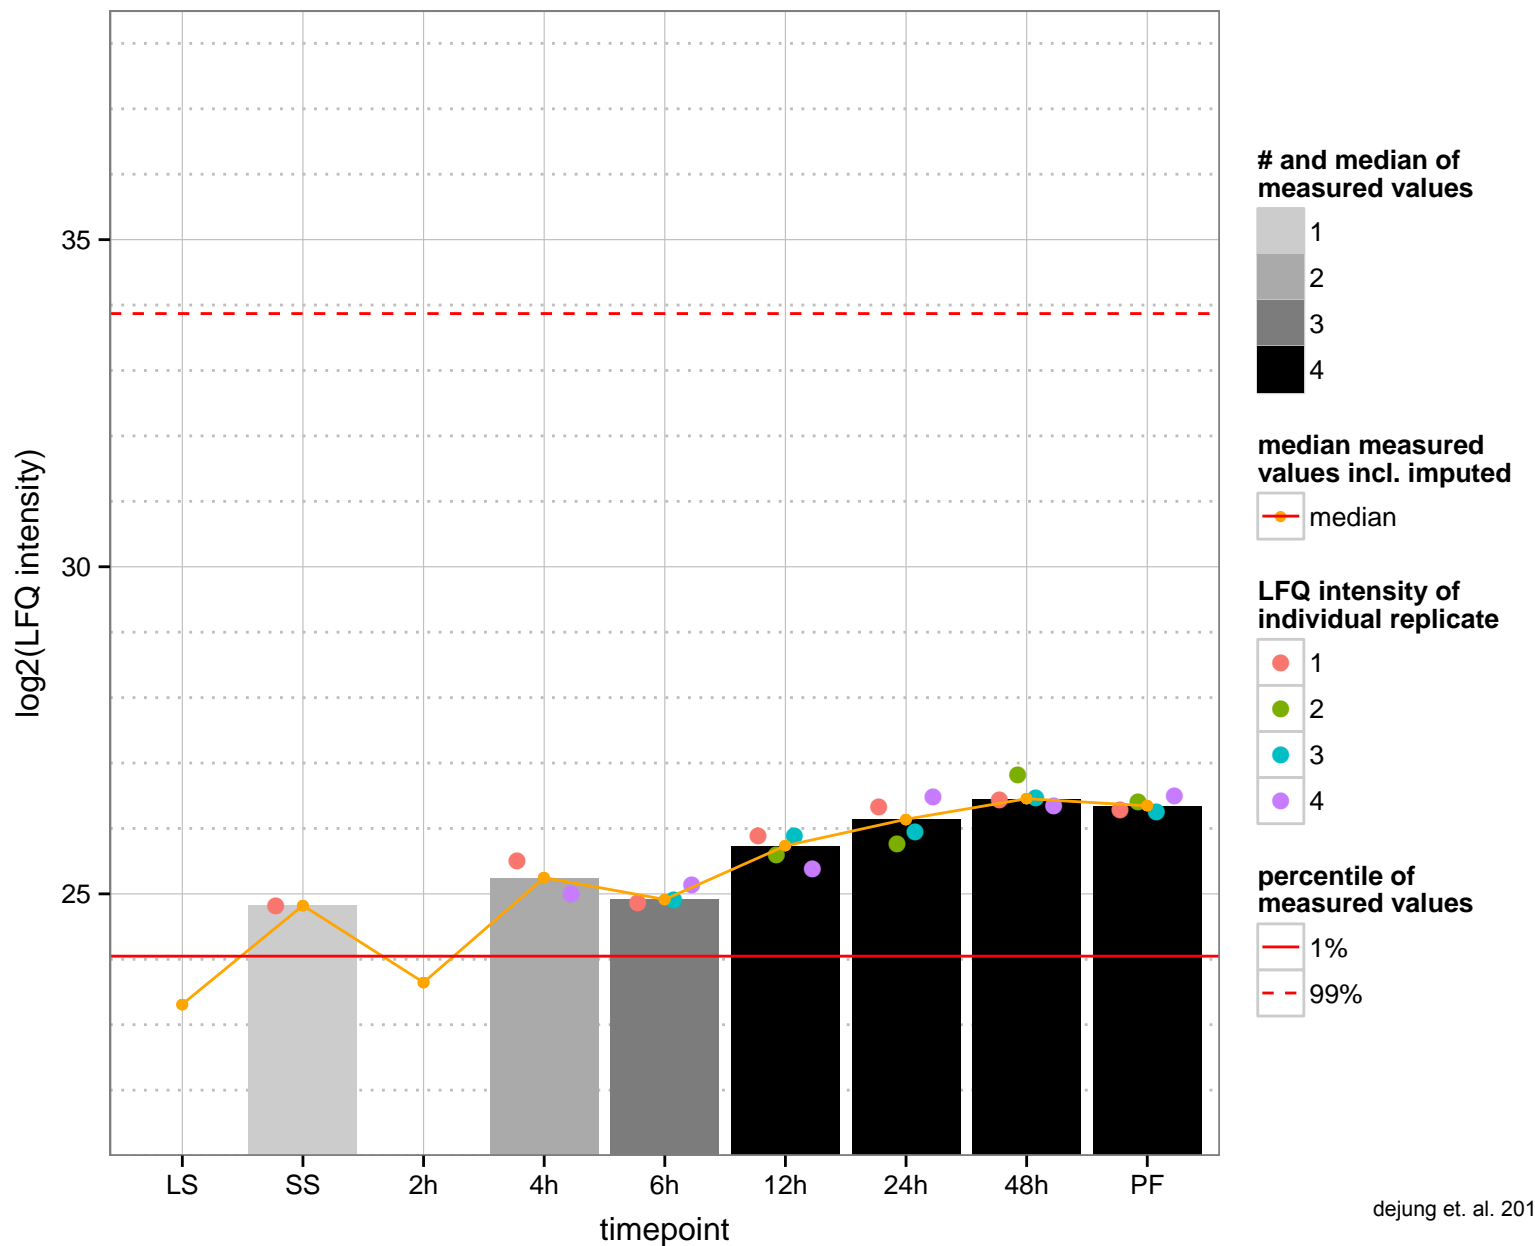

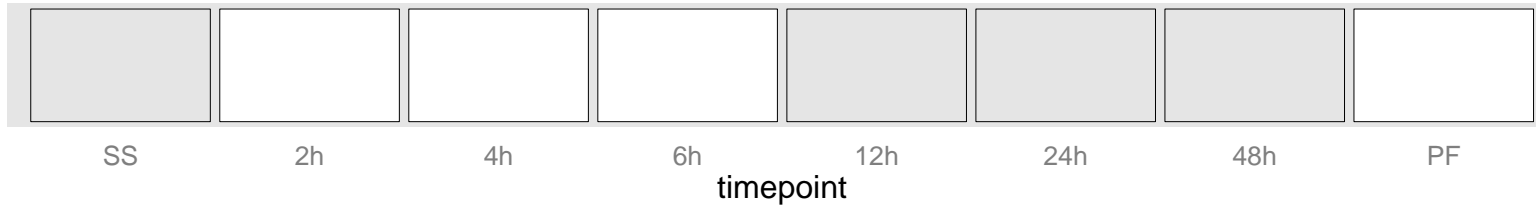

**regulated**  not regulated  significant down  significant up

ATP-dependent DEAH-box RNA helicase, putative

Tb927.4.3020;Tb11.v5.0965

AGOF: null, ATP binding, double-stranded RNA binding, helicase activity

AGOC: null, intracellular

AGOP: null

PGOF: helicase activity, ATP binding, ATP-dependent helicase activity, double-stranded RNA binding, helicase activity, nucle

PGOC: null, intracellular

PGOP: null

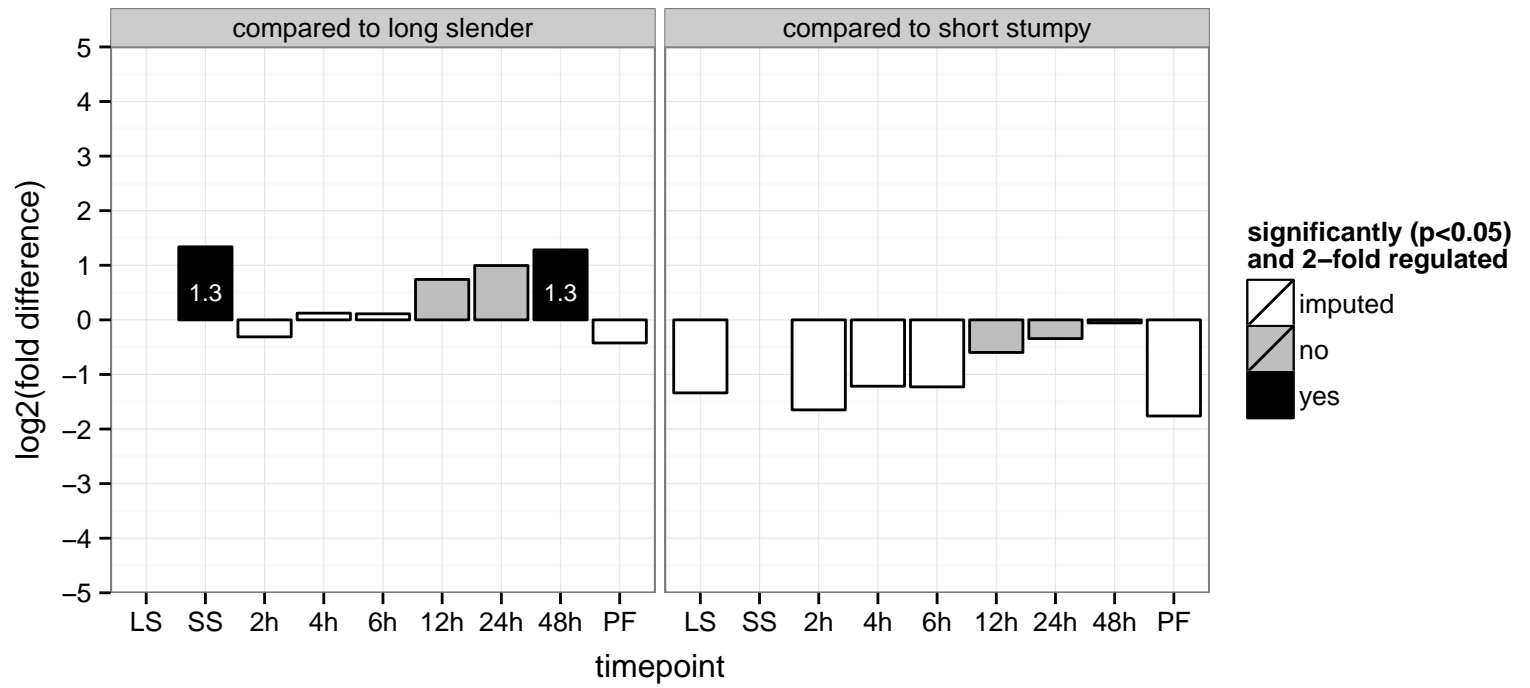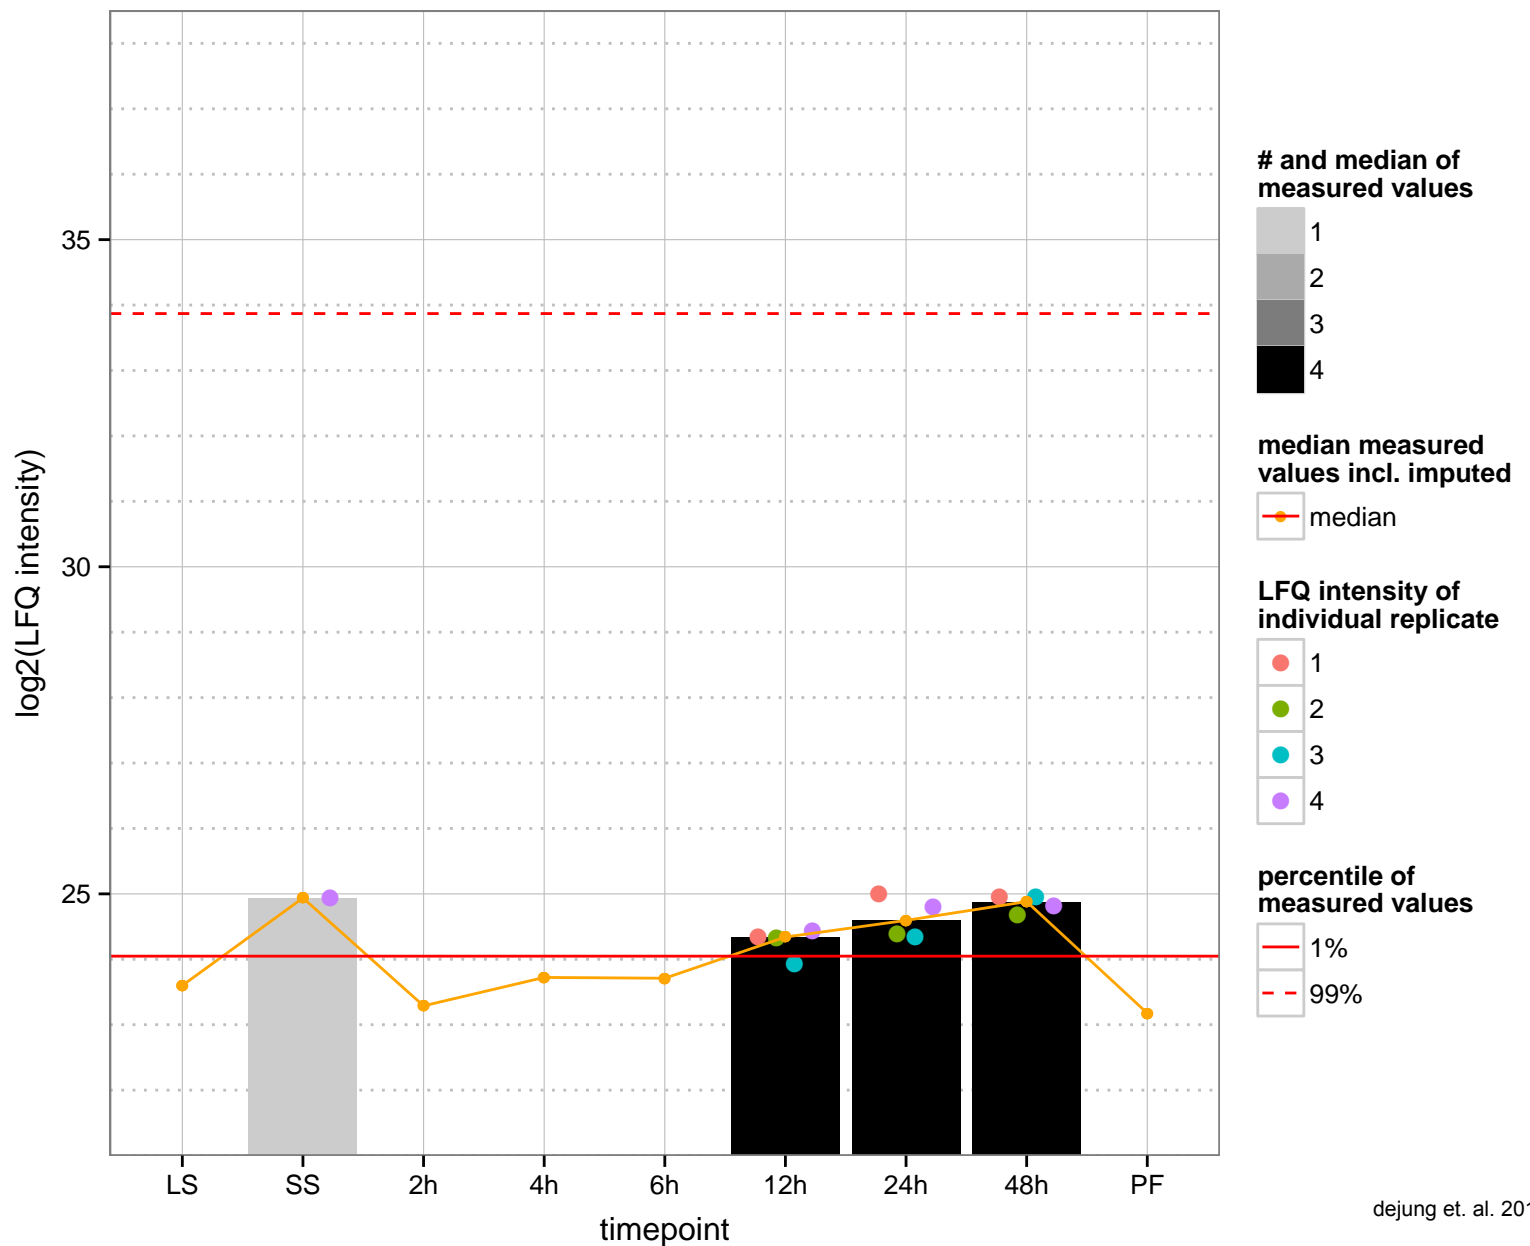

coatomer subunit zeta, putative  
 Tb927.10.4270  
 AGOF: null  
 AGOC: membrane coat  
 AGOP: intracellular protein transport, vesicle-mediated transport  
 PGO: null  
 PGOC: null  
 PGOP: transport

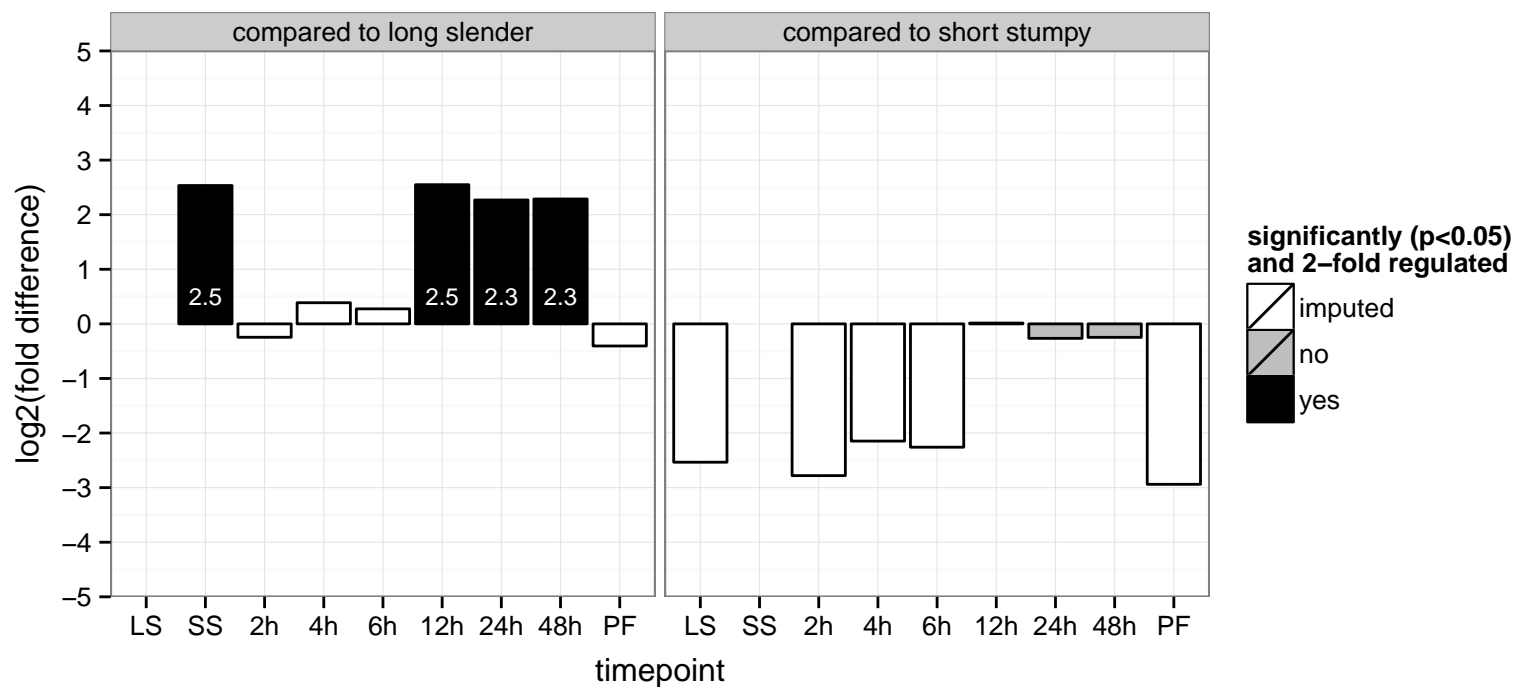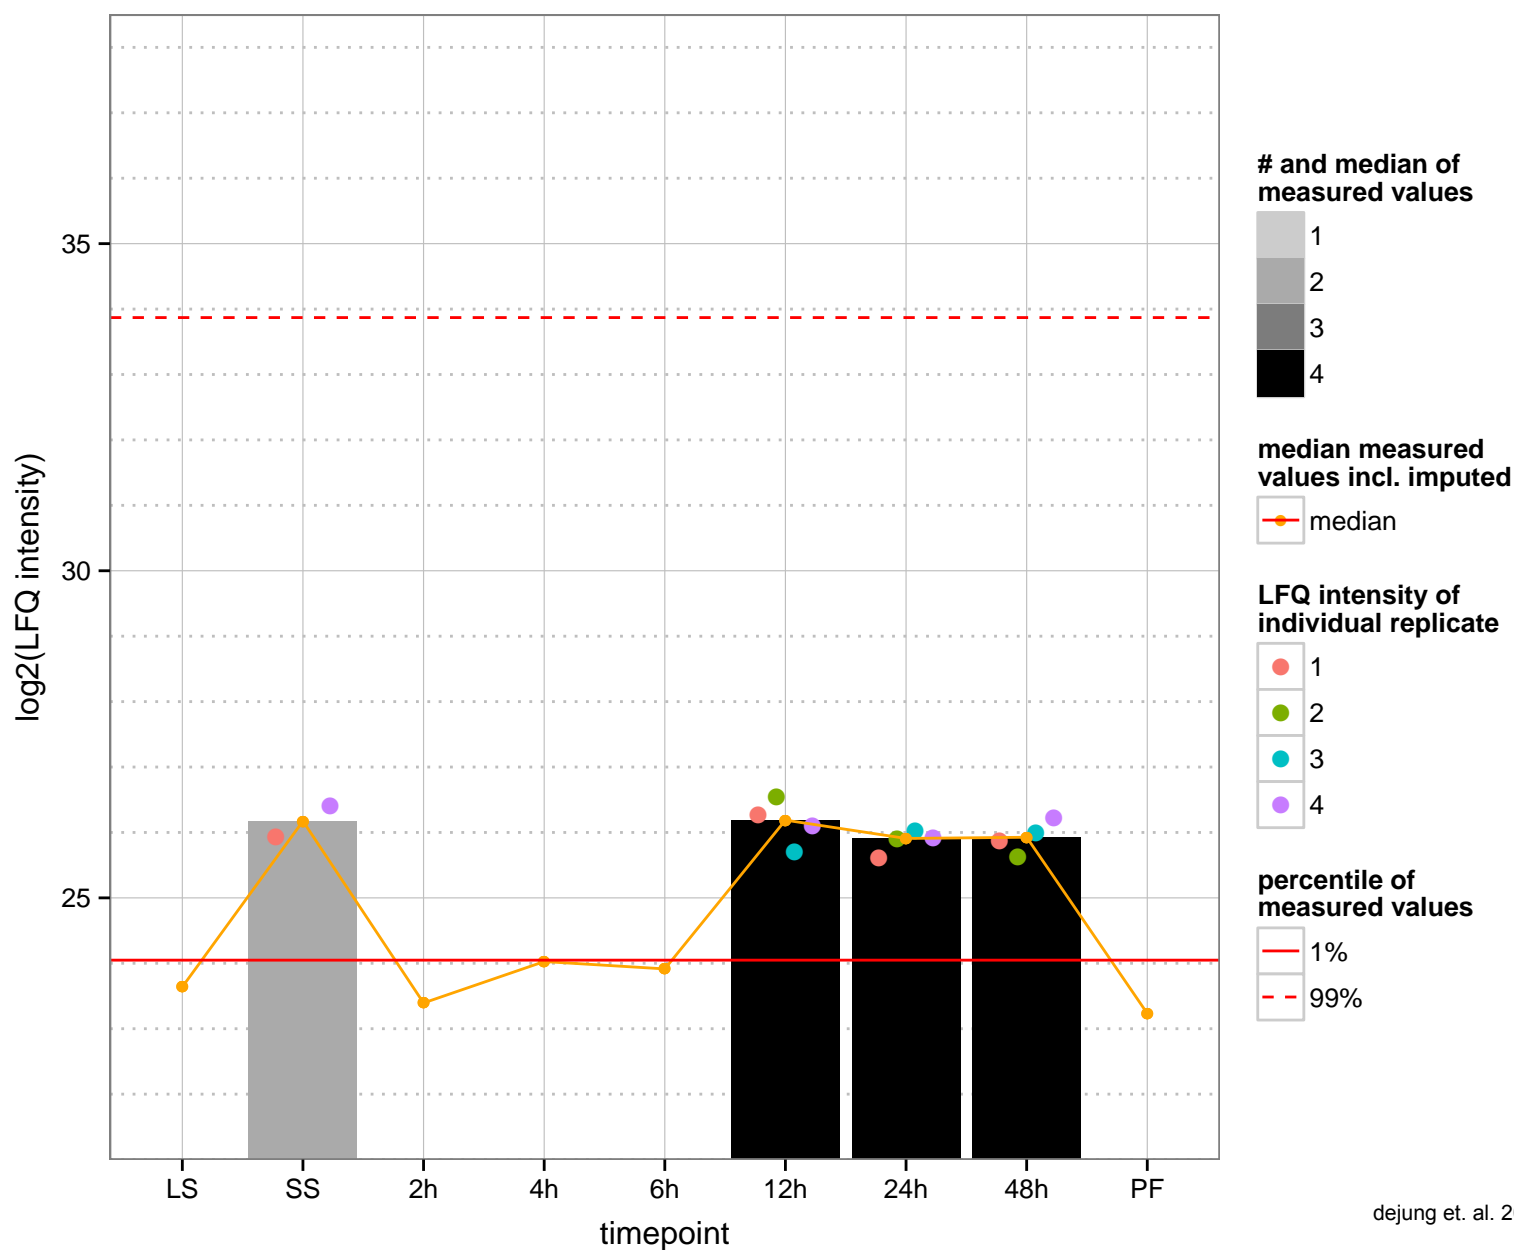

intergrin alpha chain protein, putative, FG-GAP repeat protein  
 Tb927.3.3640  
 AGOF: null  
 AGOC: null  
 AGOP: null  
 PGOF: protein binding  
 PGO: null  
 PGOP: null

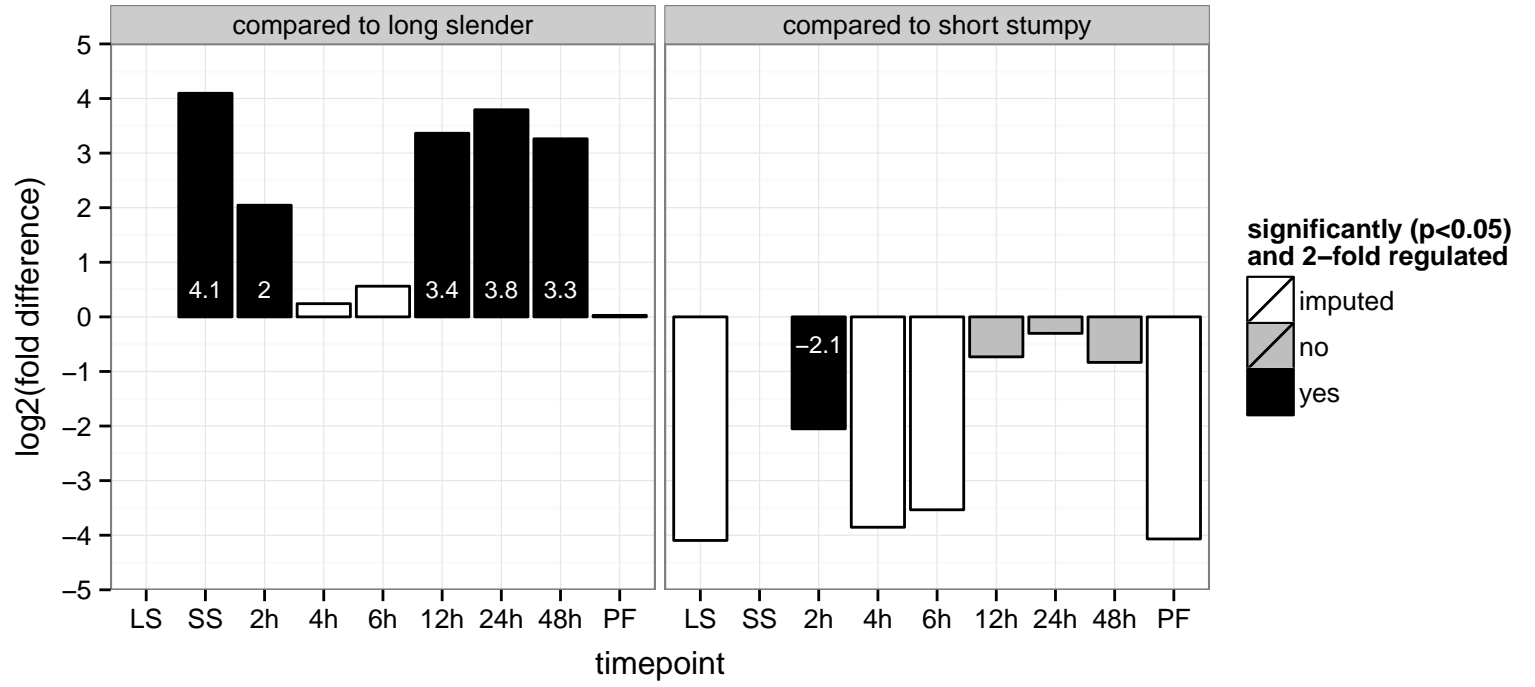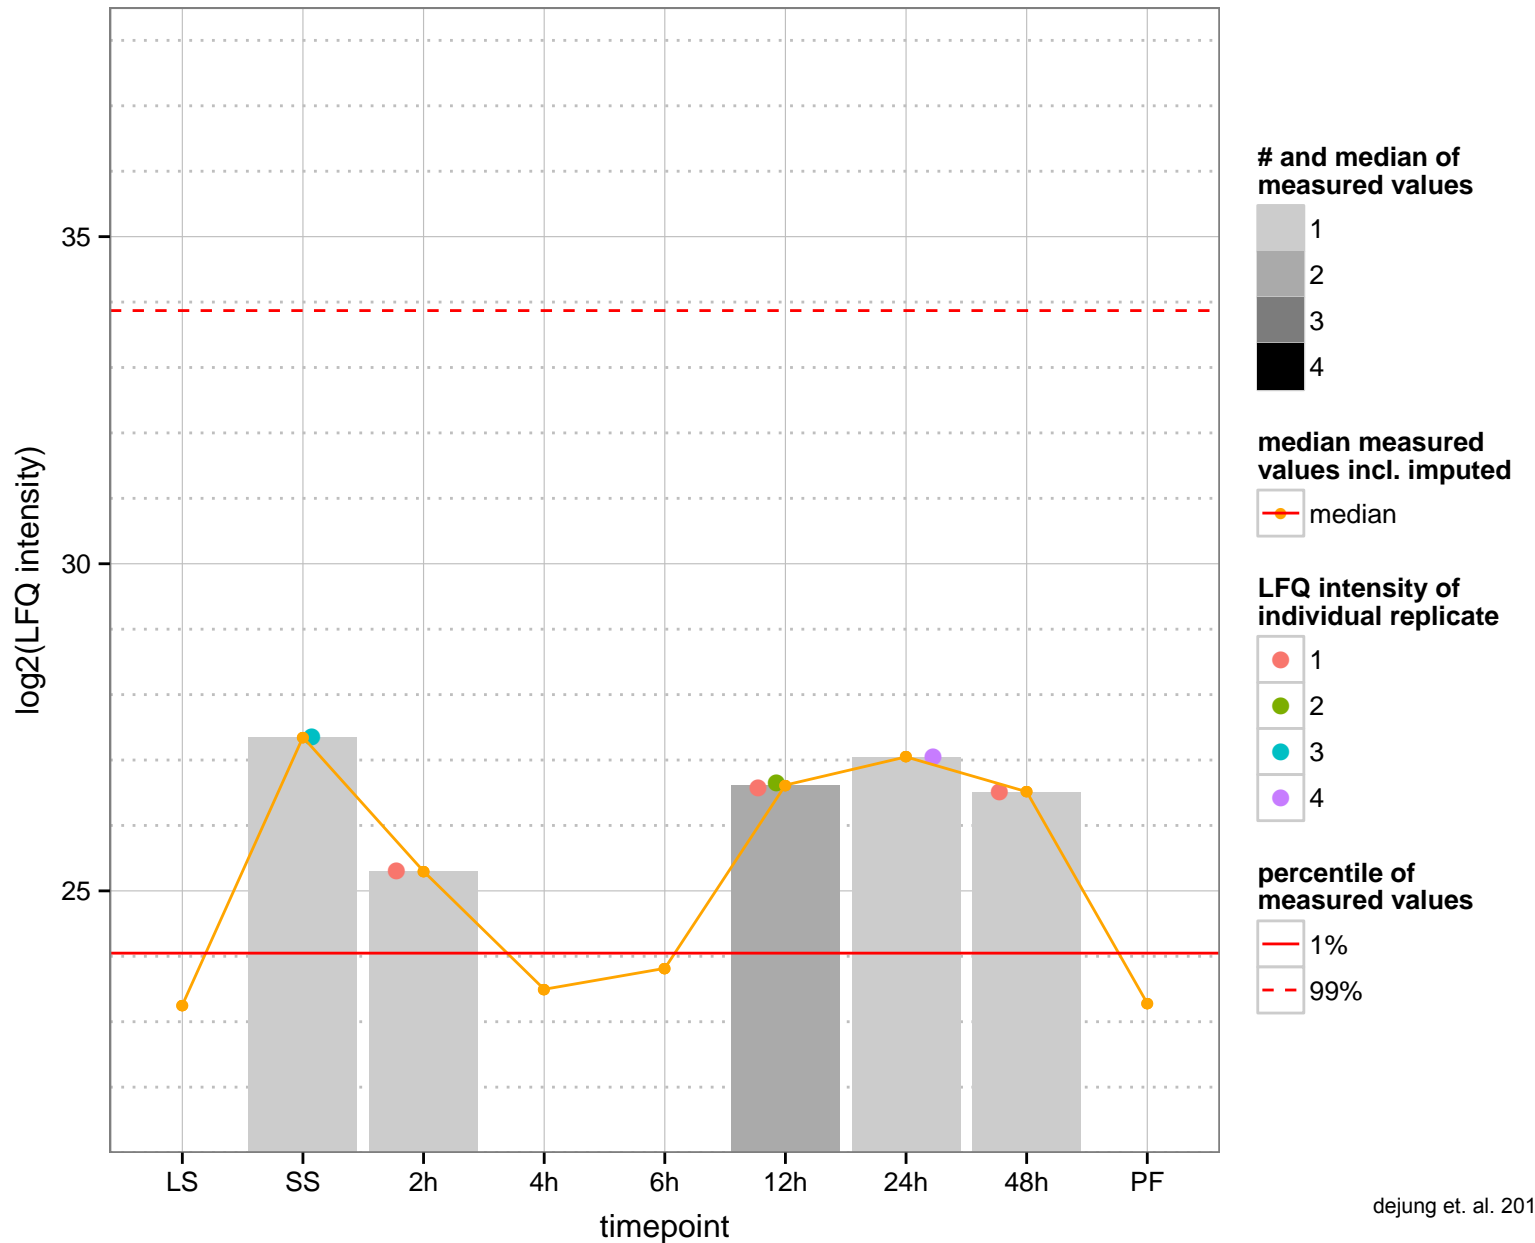



glycosyltransferase family 28 protein, putative

Tb927.6.1960

AGOF: carbohydrate binding, transferase activity, transferring hexosyl groups

AGOC: null

AGOP: carbohydrate metabolic process, lipid glycosylation

PGOF: carbohydrate binding, transferase activity, transferring hexosyl groups

PGOC: null

PGOP: carbohydrate metabolic process, lipid glycosylation

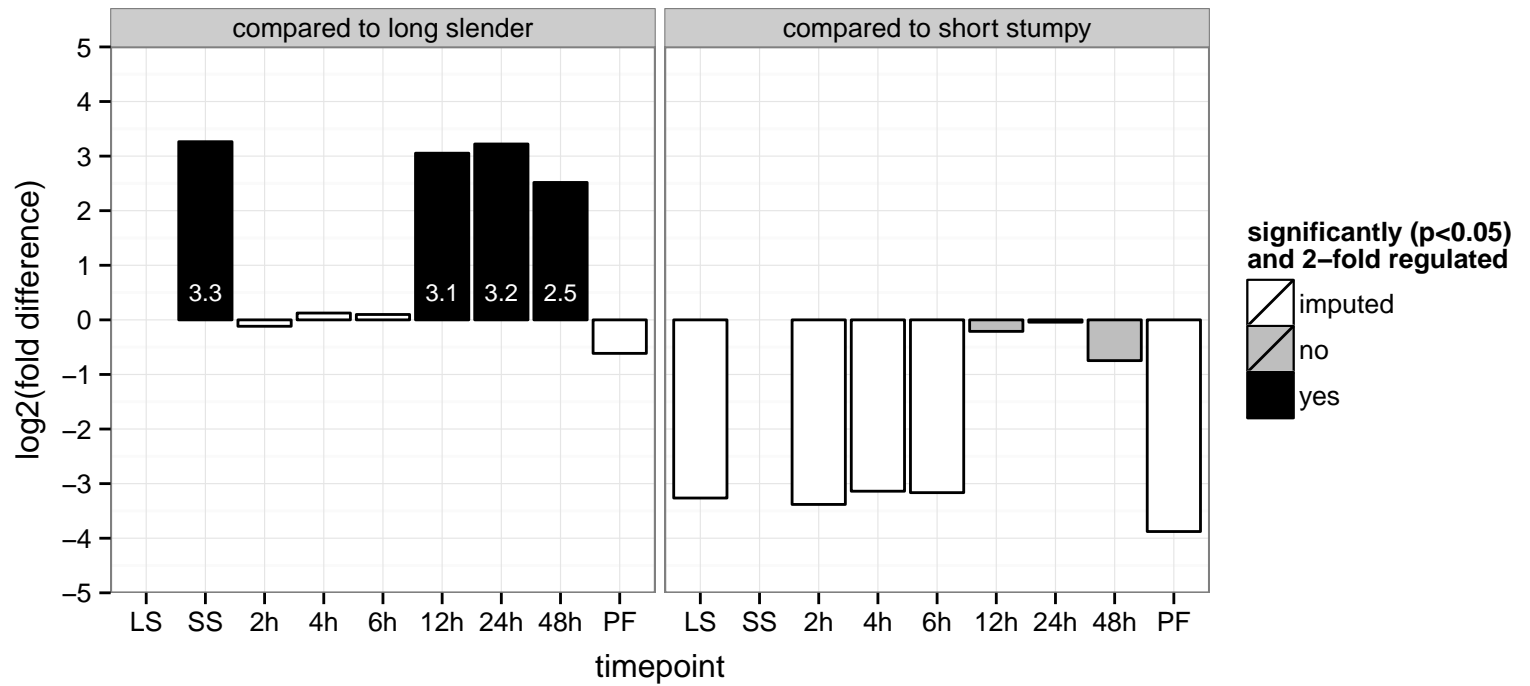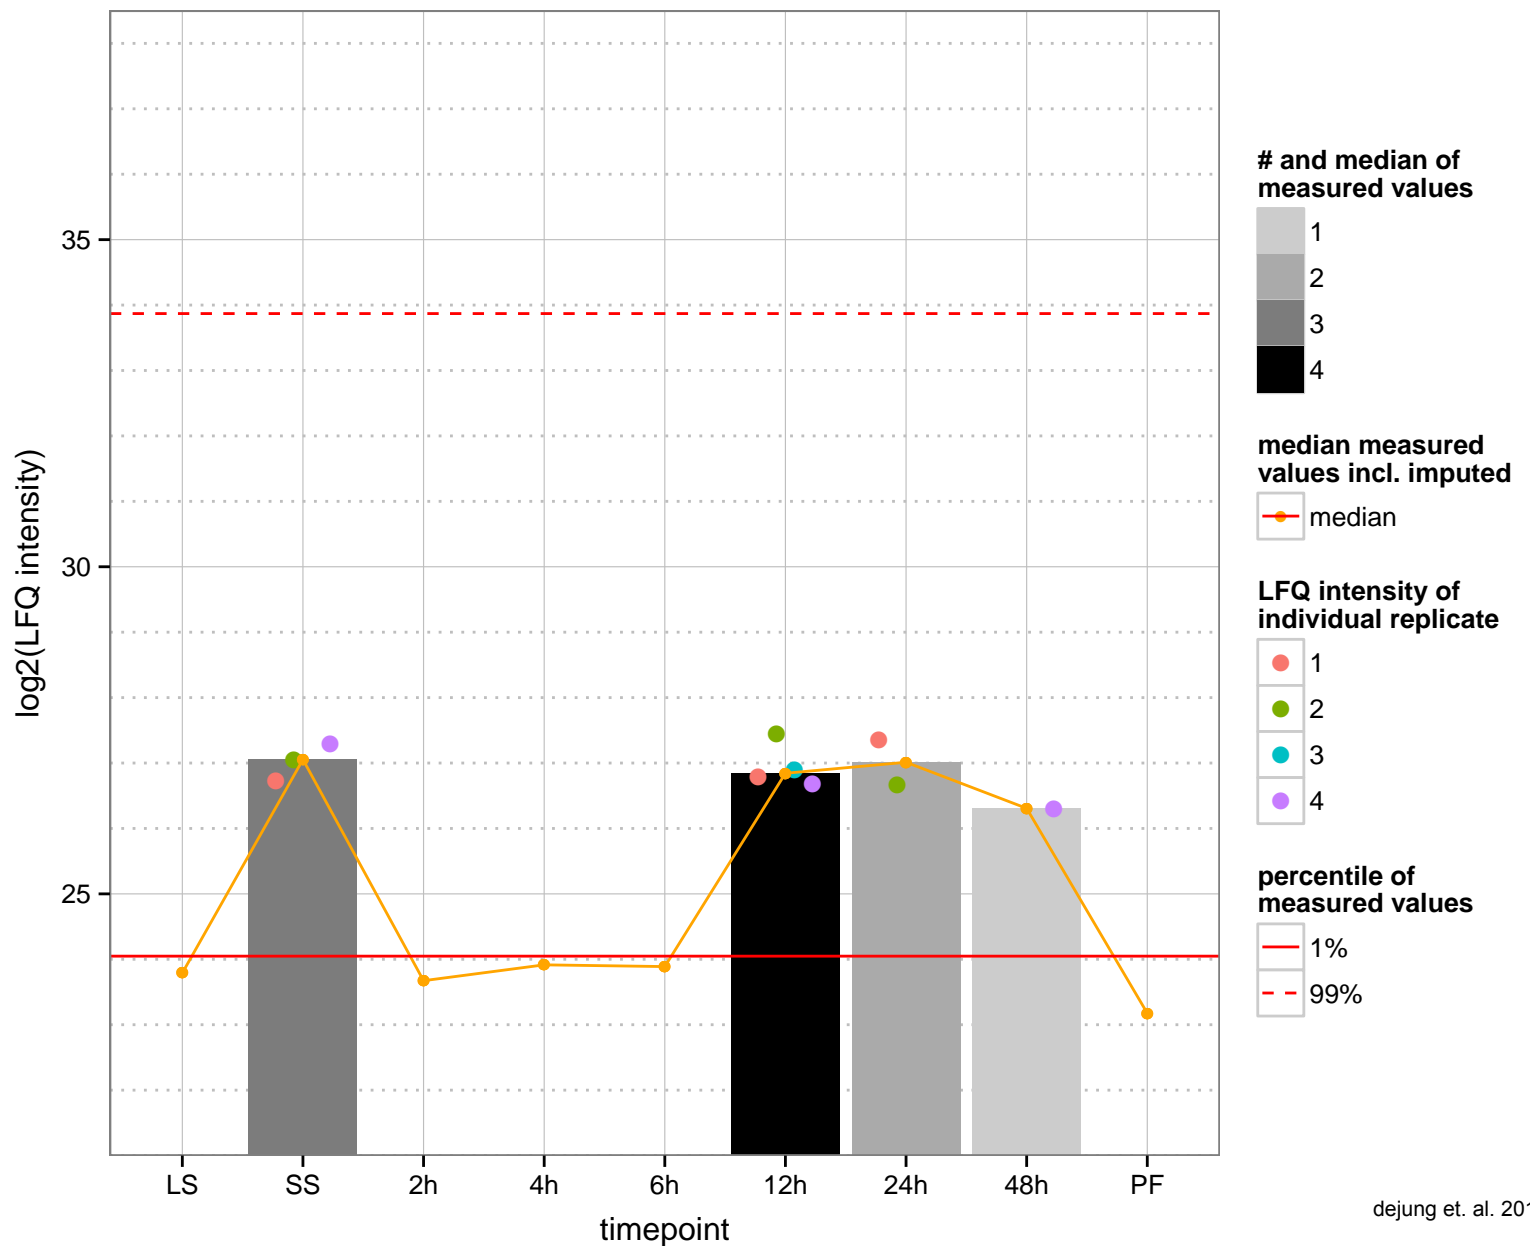

intergrin alpha chain protein, putative, FG-GAP repeat protein  
 Tb927.6.2020  
 AGOF: null  
 AGOC: null  
 AGOP: null  
 PGOF: protein binding  
 PGO: null  
 PGOP: null

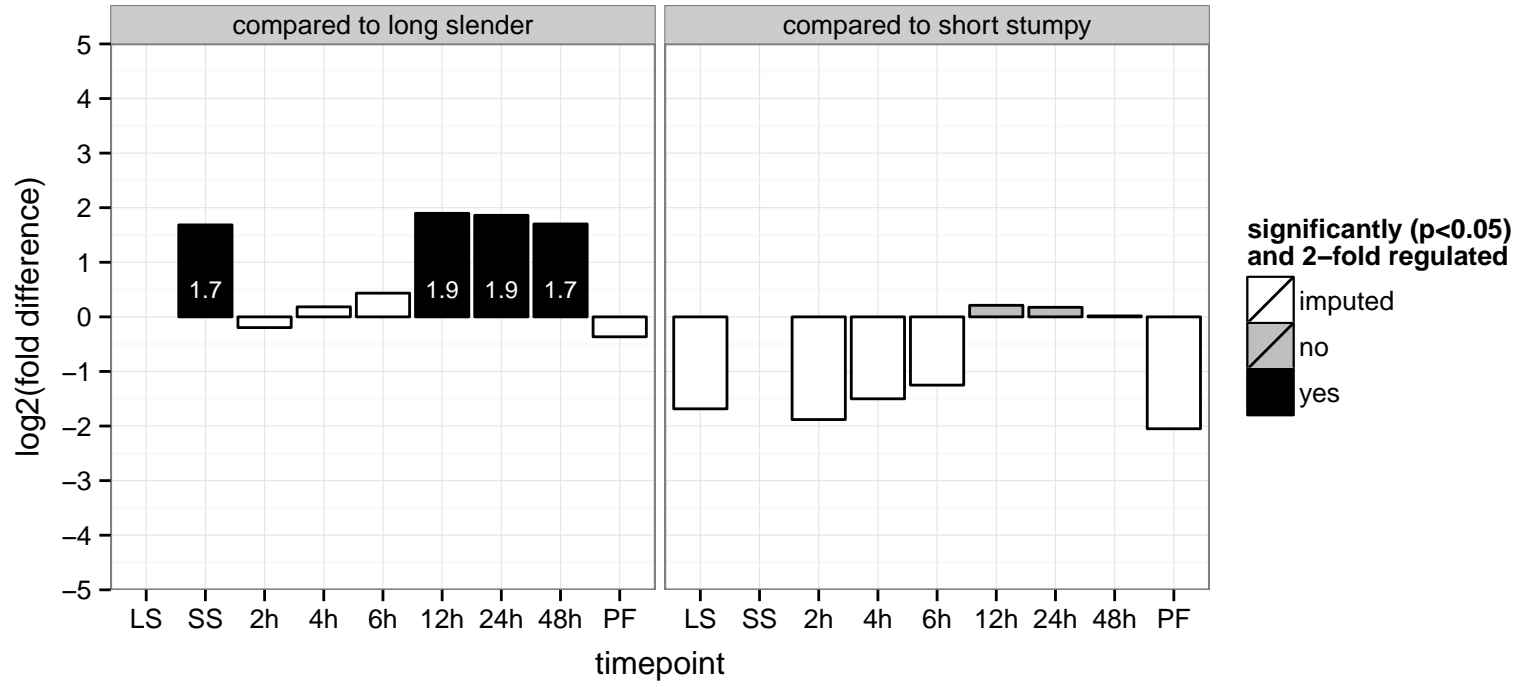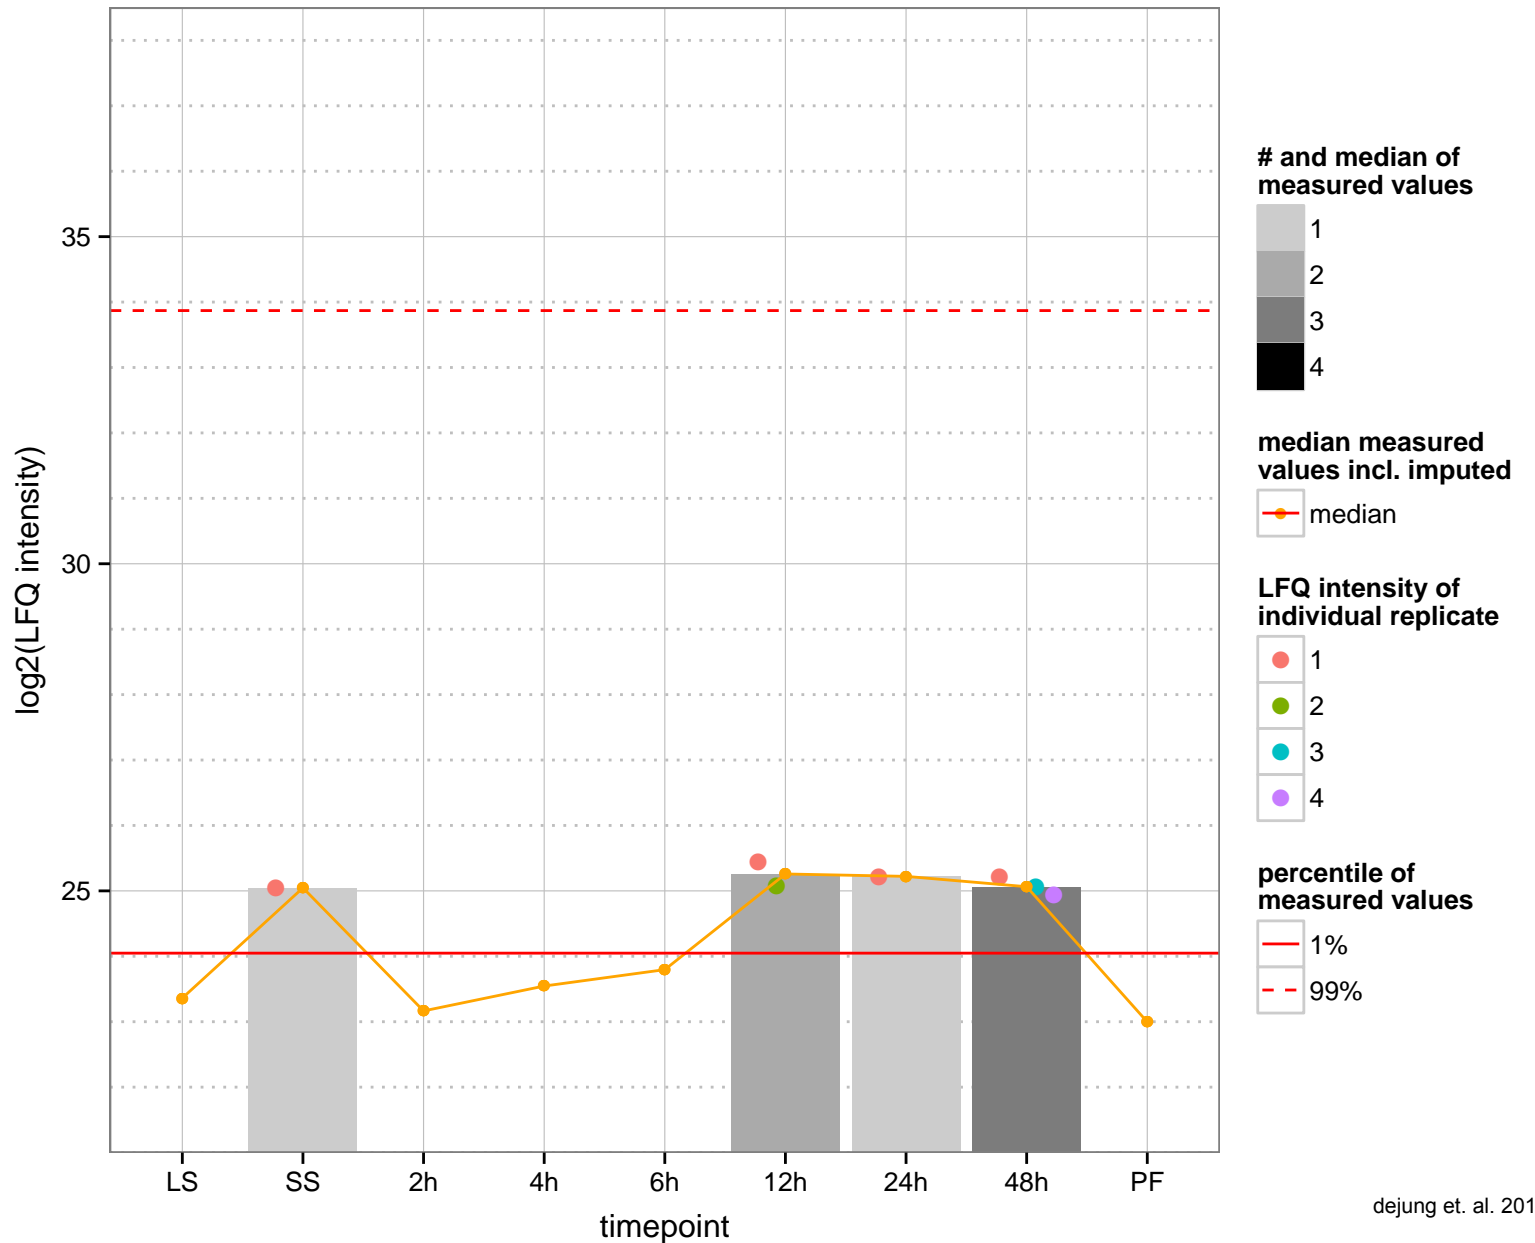

hypothetical protein, conserved  
 Tb927.8.2040  
 AGOF: null  
 AGOC: null  
 AGOP: null  
 PGOF: null  
 PGO: null  
 PGOP: null

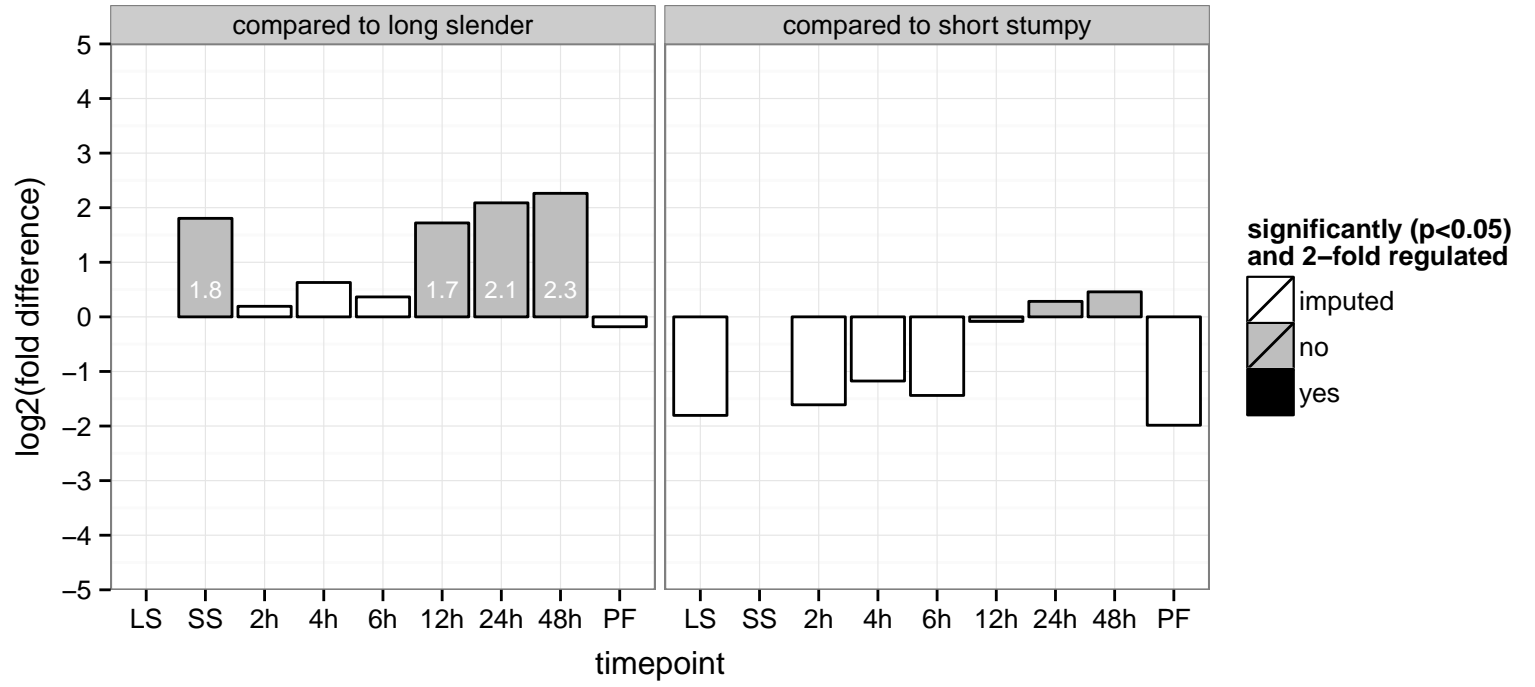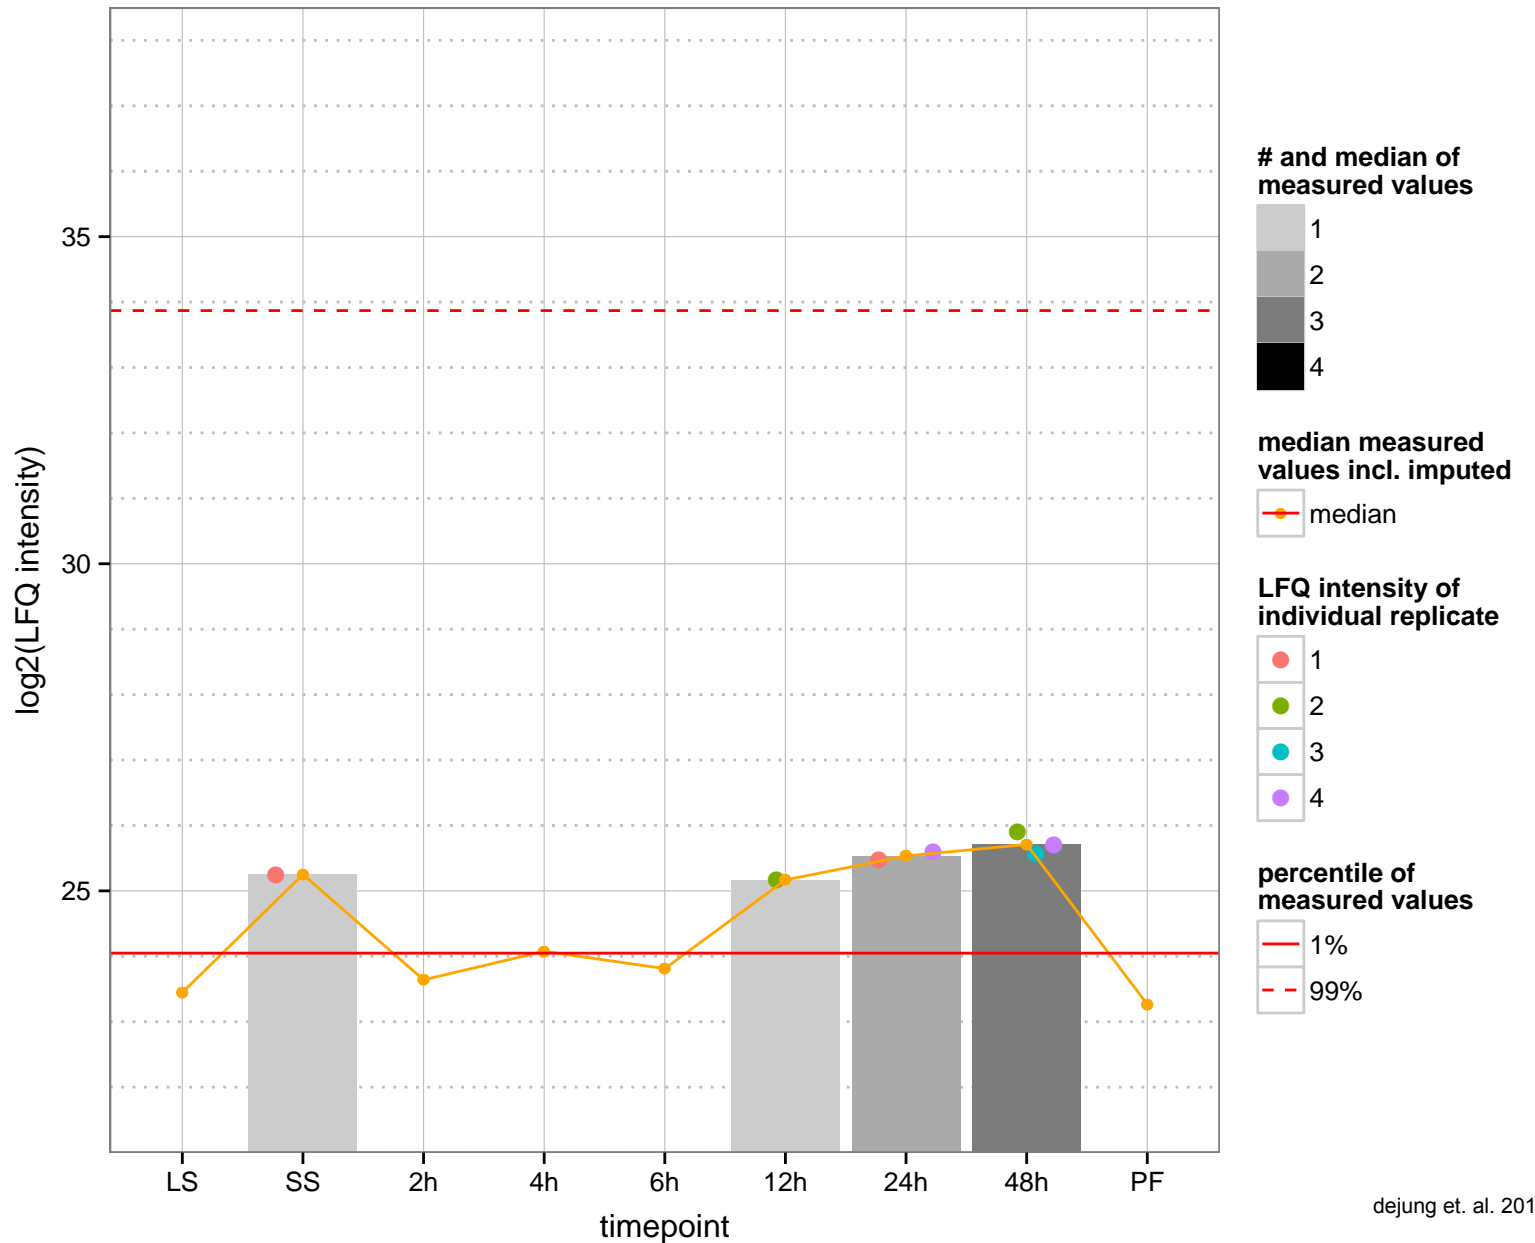

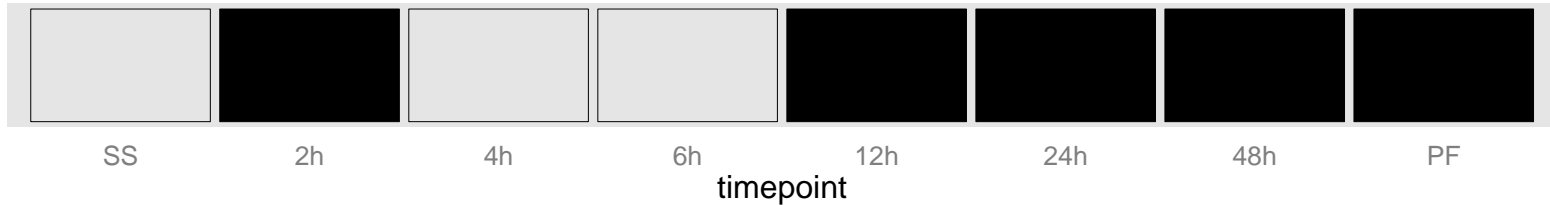

**regulated**  not regulated  significant down  significant up

beta-D-hydroxybutyrate dehydrogenase  
 Tb927.10.11930  
 AGOF: 3-hydroxybutyrate dehydrogenase activity  
 AGOC: mitochondrion  
 AGOP: ketone body biosynthetic process  
 PGO: 3-hydroxybutyrate dehydrogenase activity, oxidoreductase activity  
 PGO: null  
 PGO: metabolic process, oxidation-reduction process

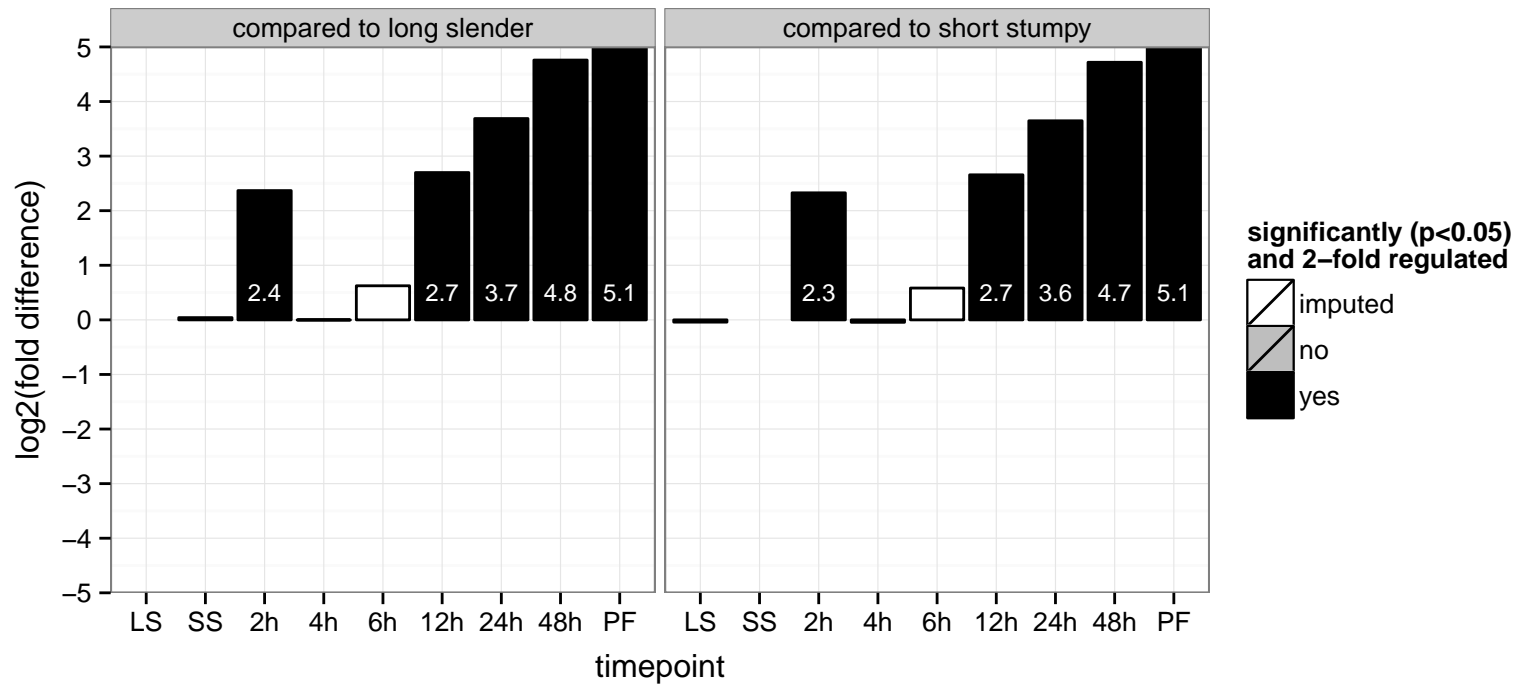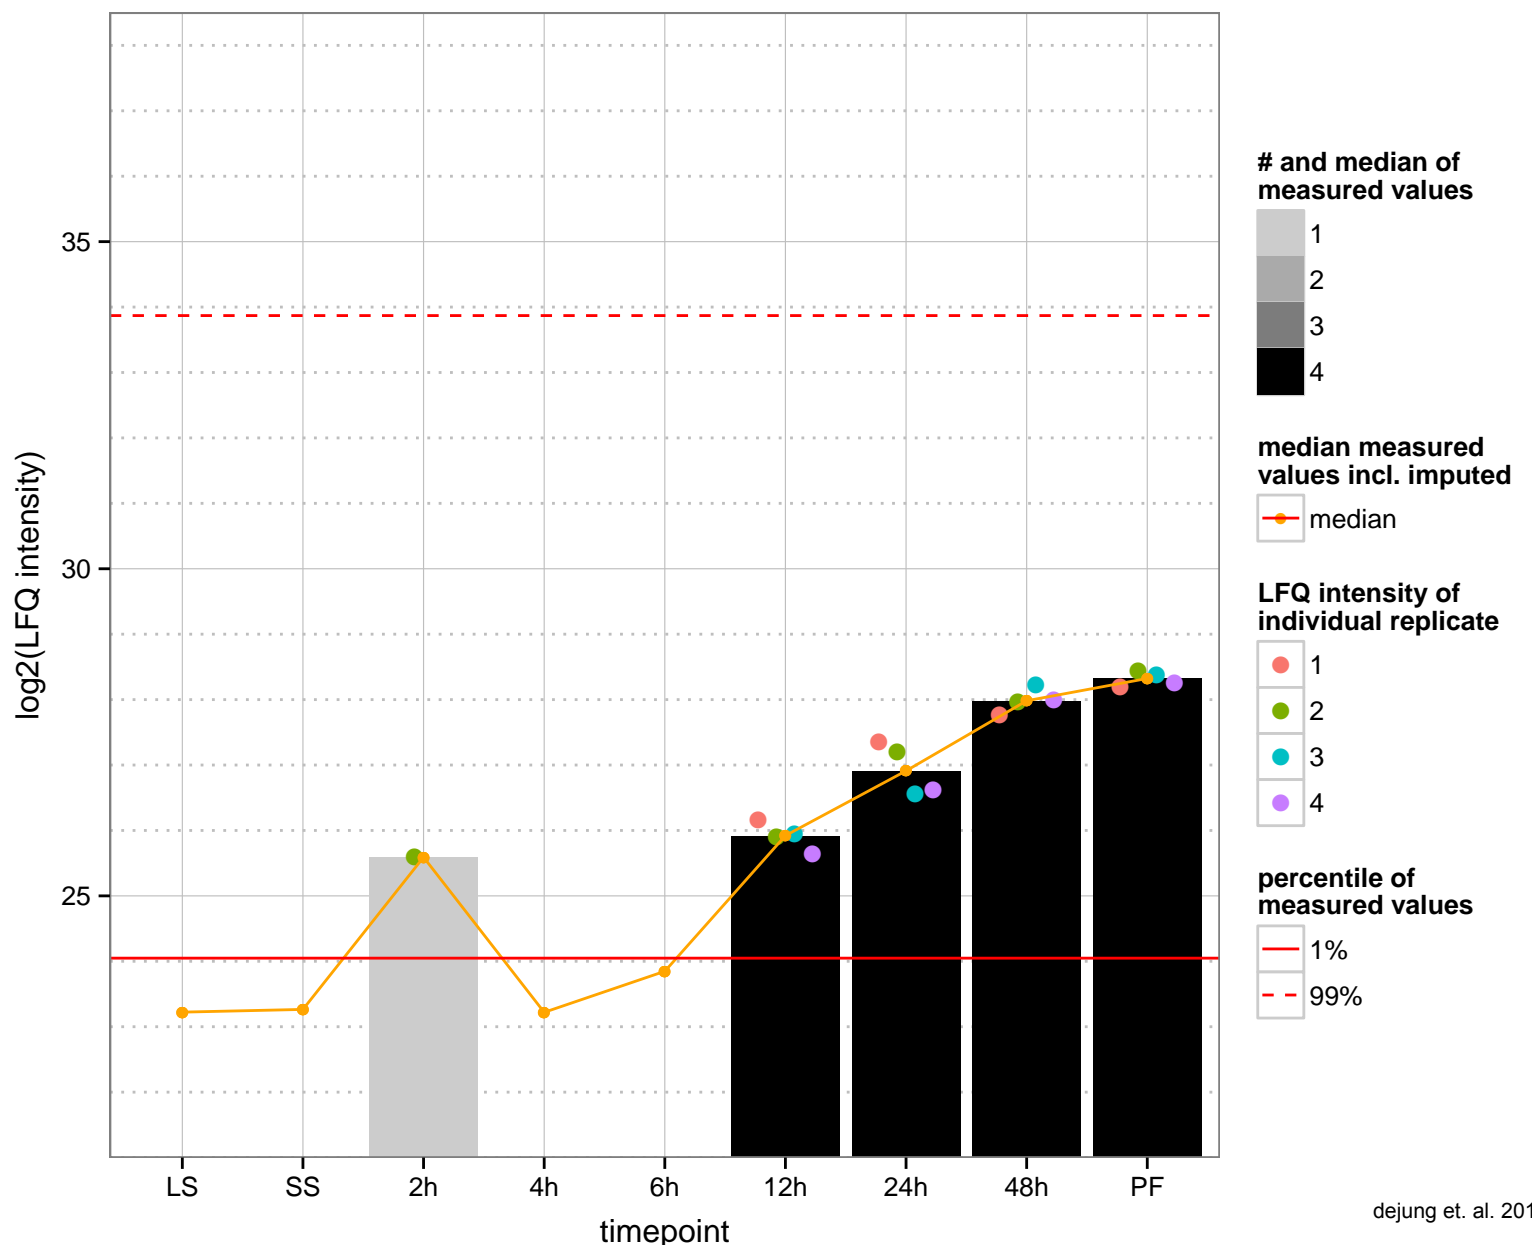

hypothetical protein, conserved  
 Tb927.11.14750  
 AGOF: null  
 AGOC: null  
 AGOP: null  
 PGO: null  
 PGO: null  
 PGO: null

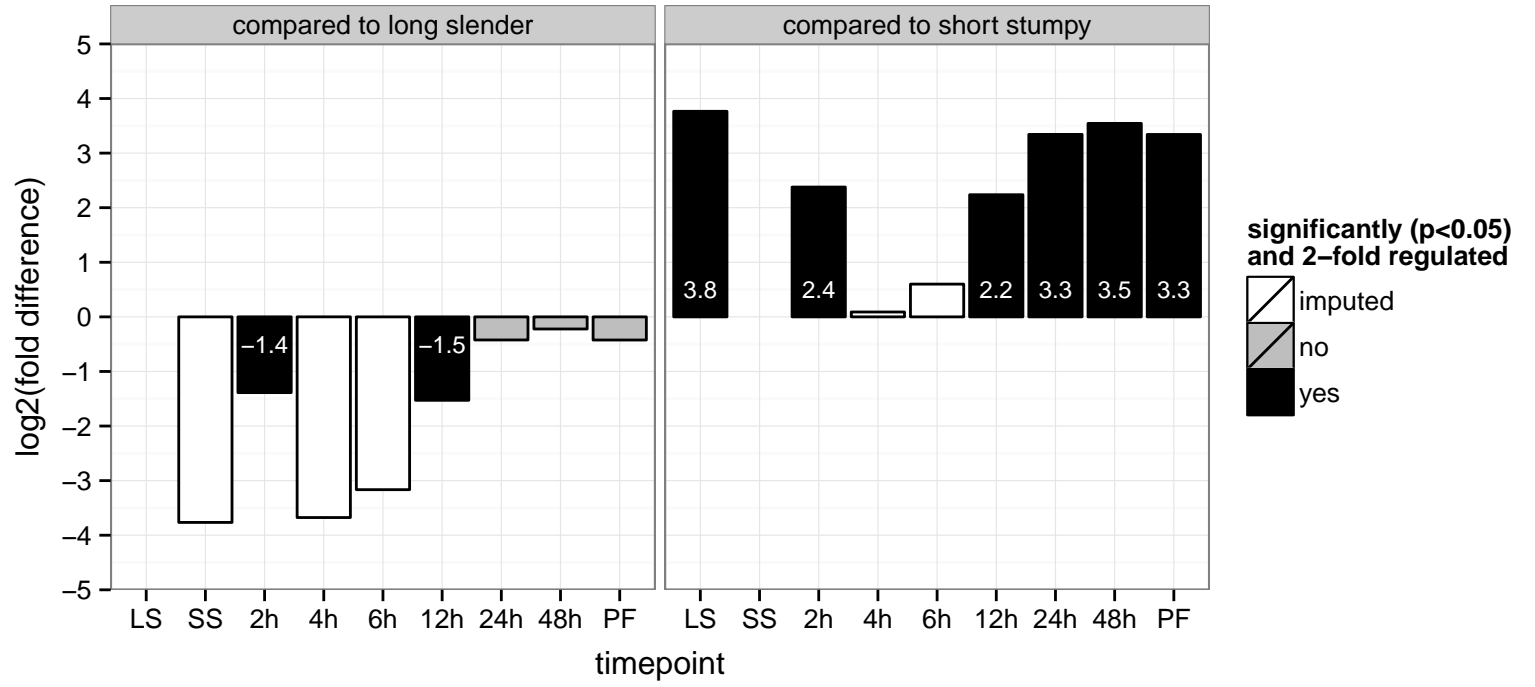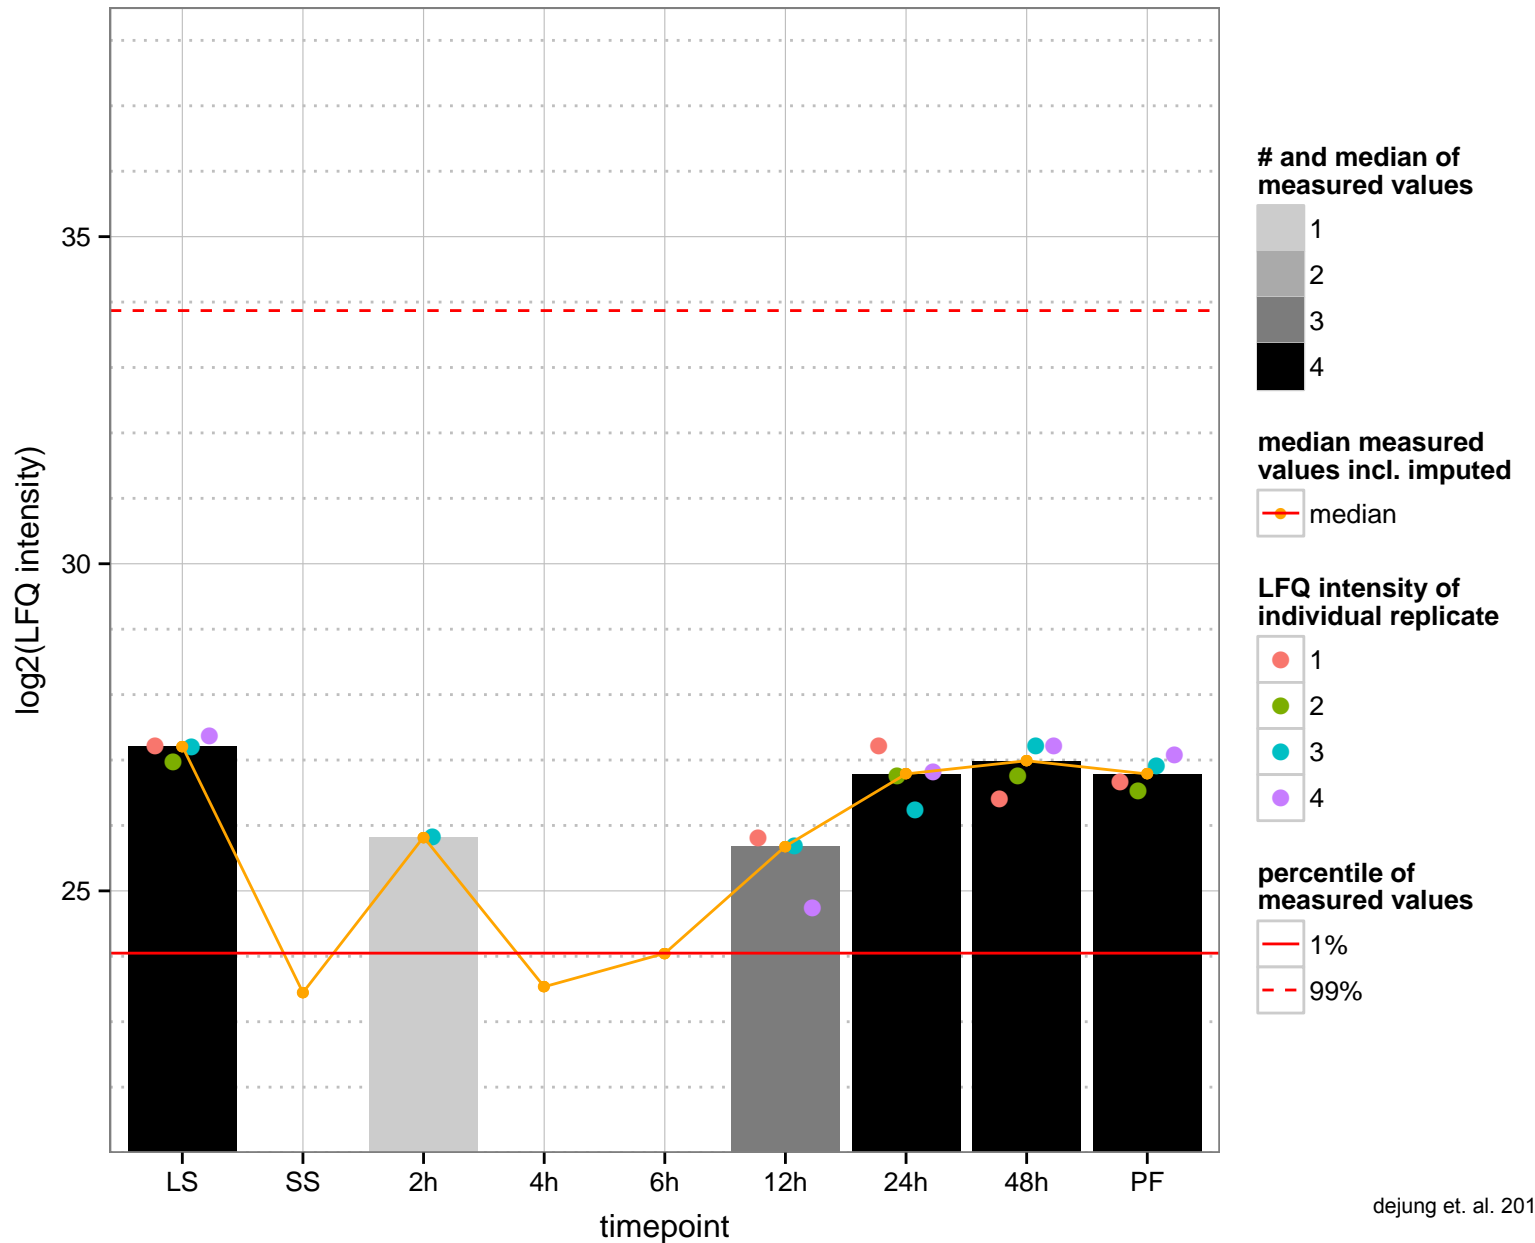

hypothetical protein, conserved  
 Tb927.5.530  
 AGOF: null  
 AGOC: mitochondrion  
 AGOP: null  
 PGO: null  
 PGO: null  
 PGO: null

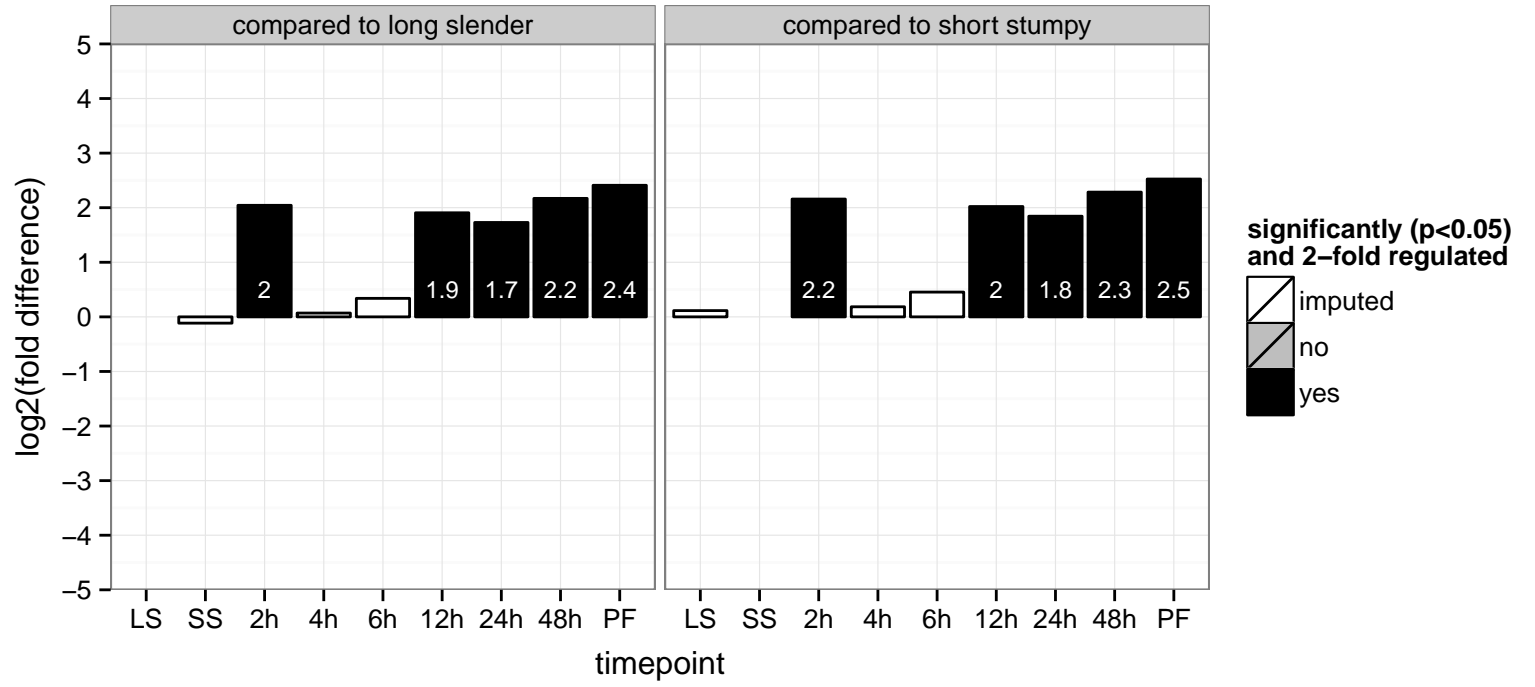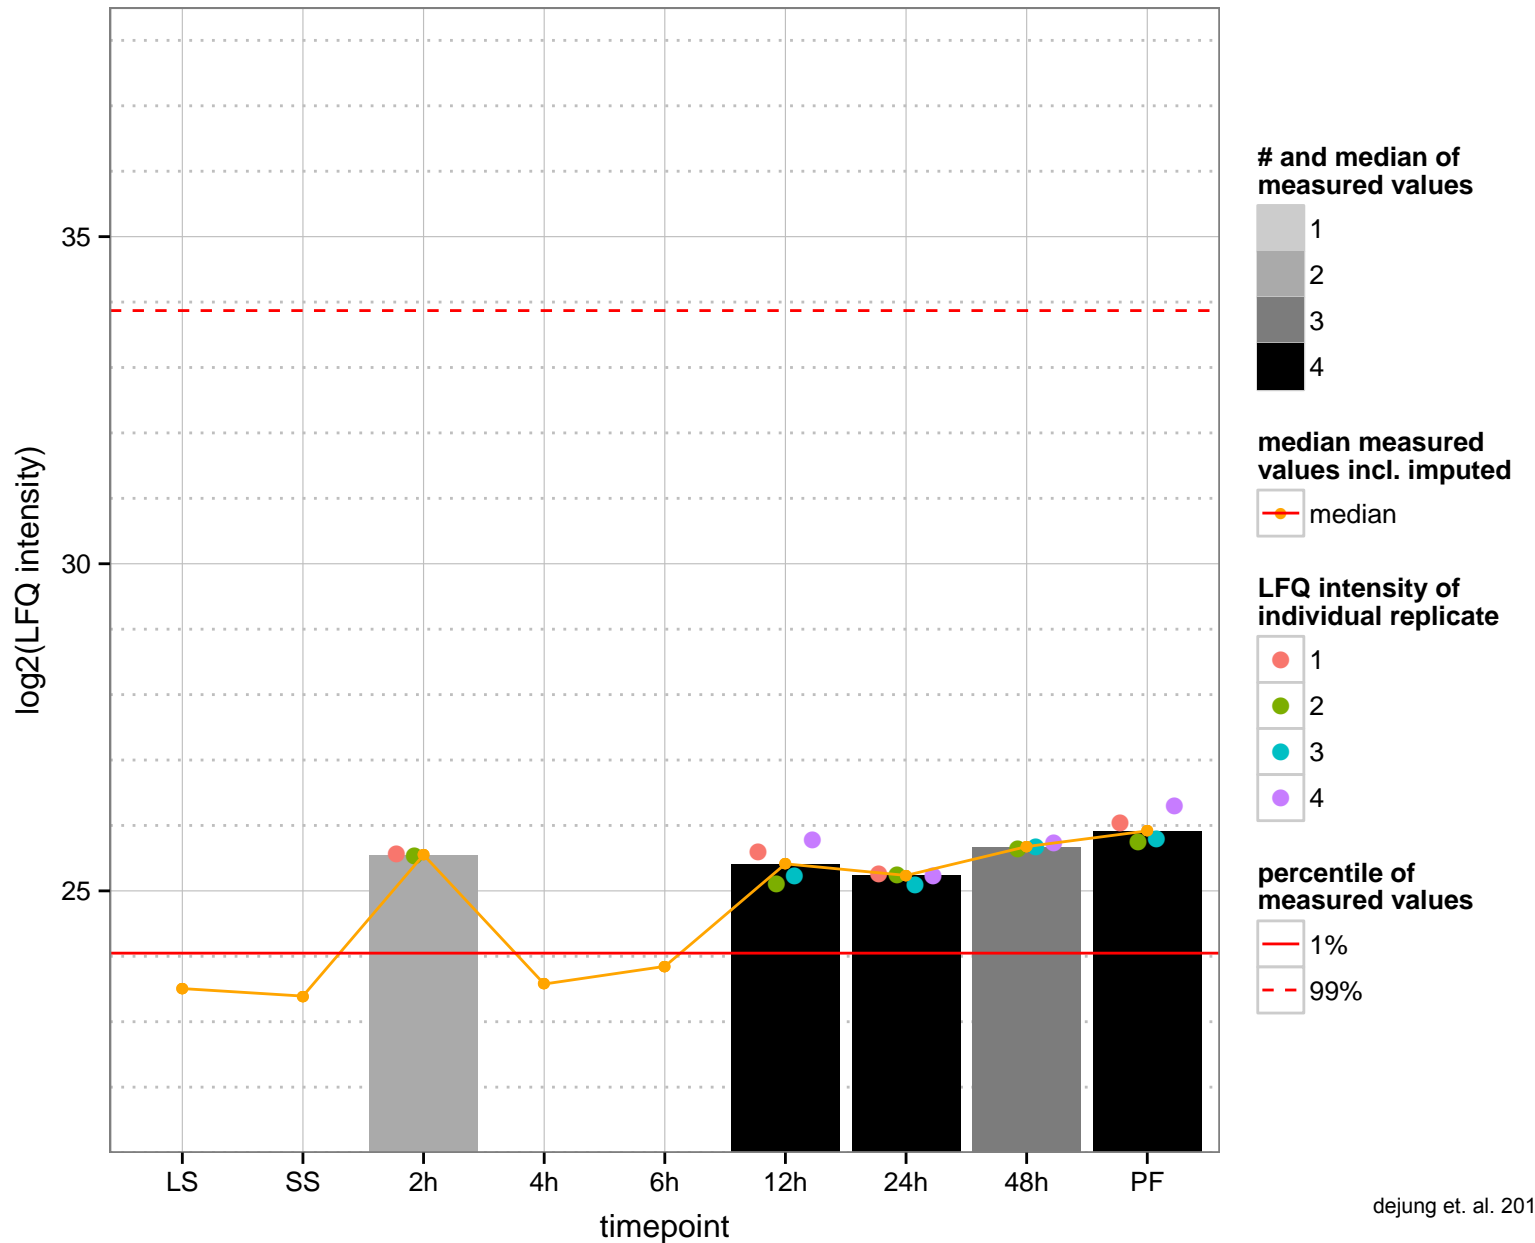

ribosomal RNA adenine dimethylase family protein, conserved

Tb927.6.1610

AGOF: rRNA (adenine-N6, N6-)-dimethyltransferase activity

AGOC: null

AGOP: rRNA modification

PGOF: rRNA (adenine) methyltransferase activity, rRNA (adenine-N6, N6-)-dimethyltransferase activity, rRNA methyltransferase activity

PGOC: null

PGOP: rRNA modification, rRNA processing

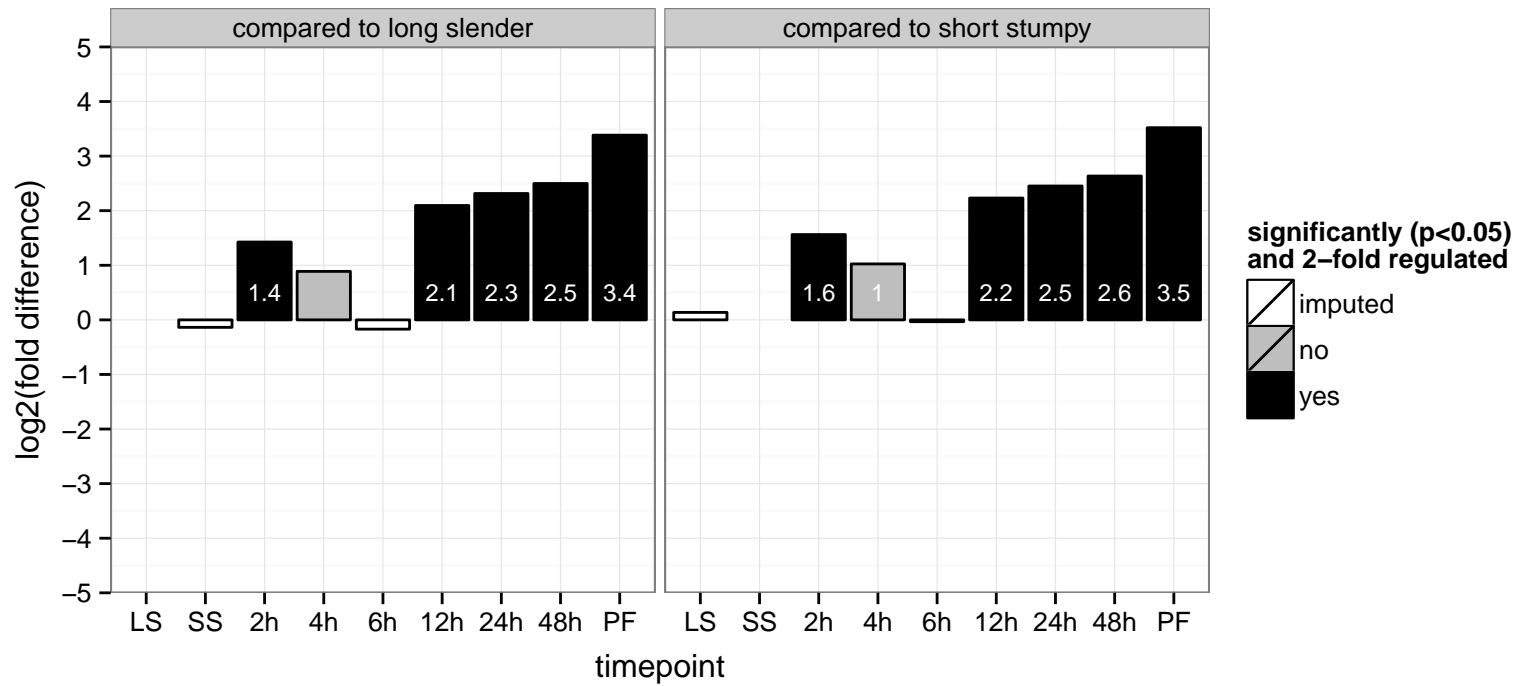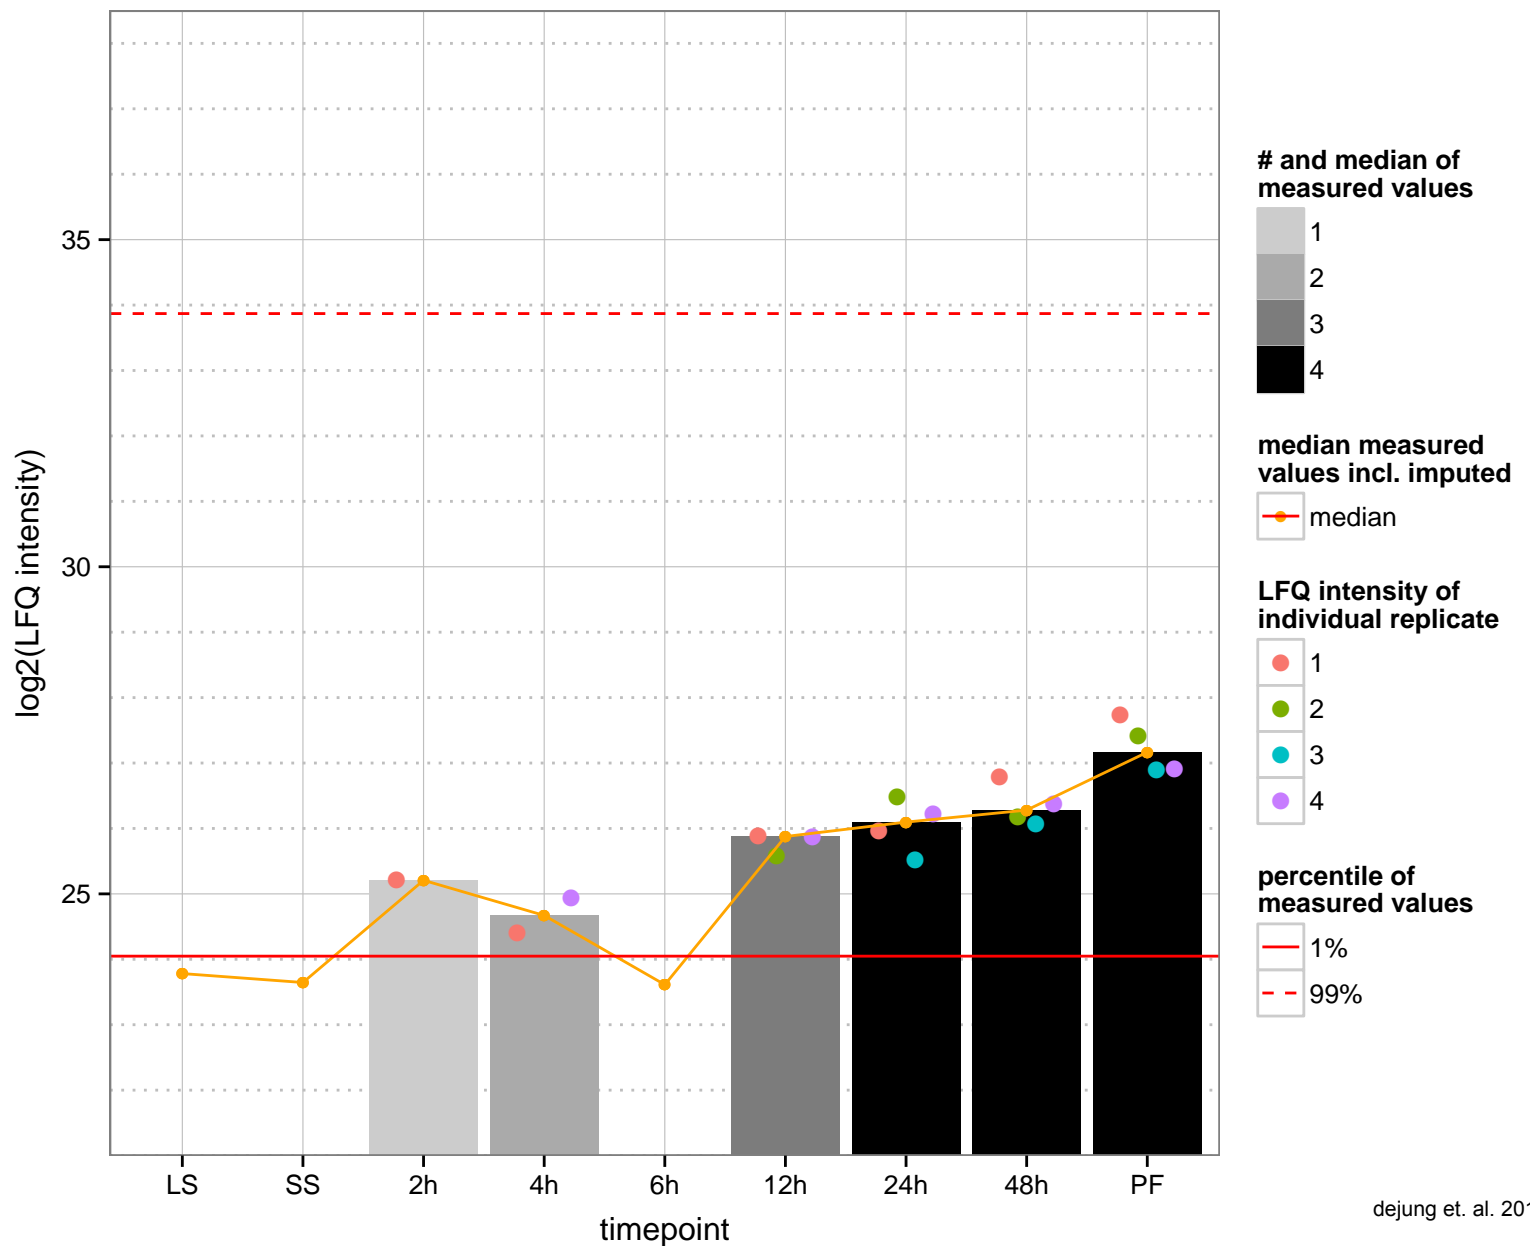



hypothetical protein, conserved  
 Tb927.7.4710  
 AGOF: null  
 AGOC: mitochondrion  
 AGOP: null  
 PGO: hydrolase activity  
 PGO: null  
 PGO: null

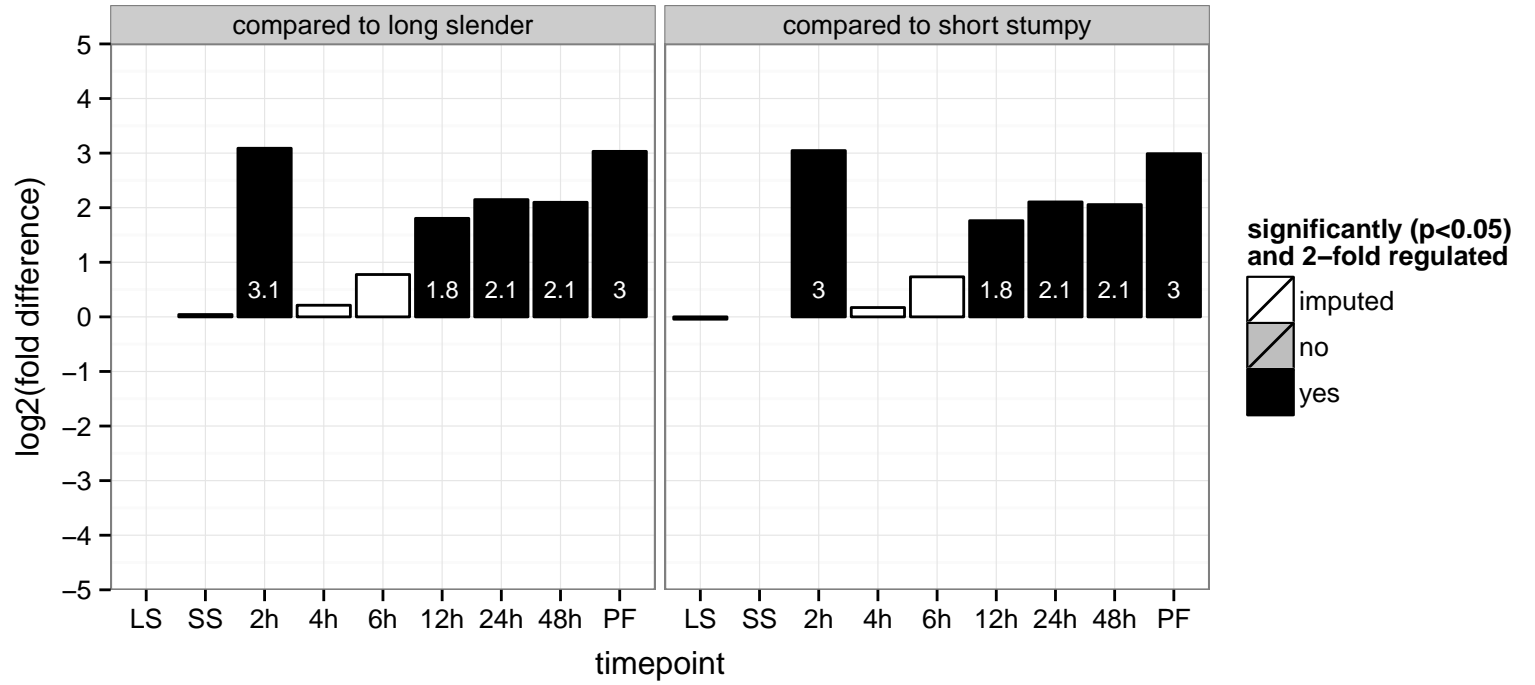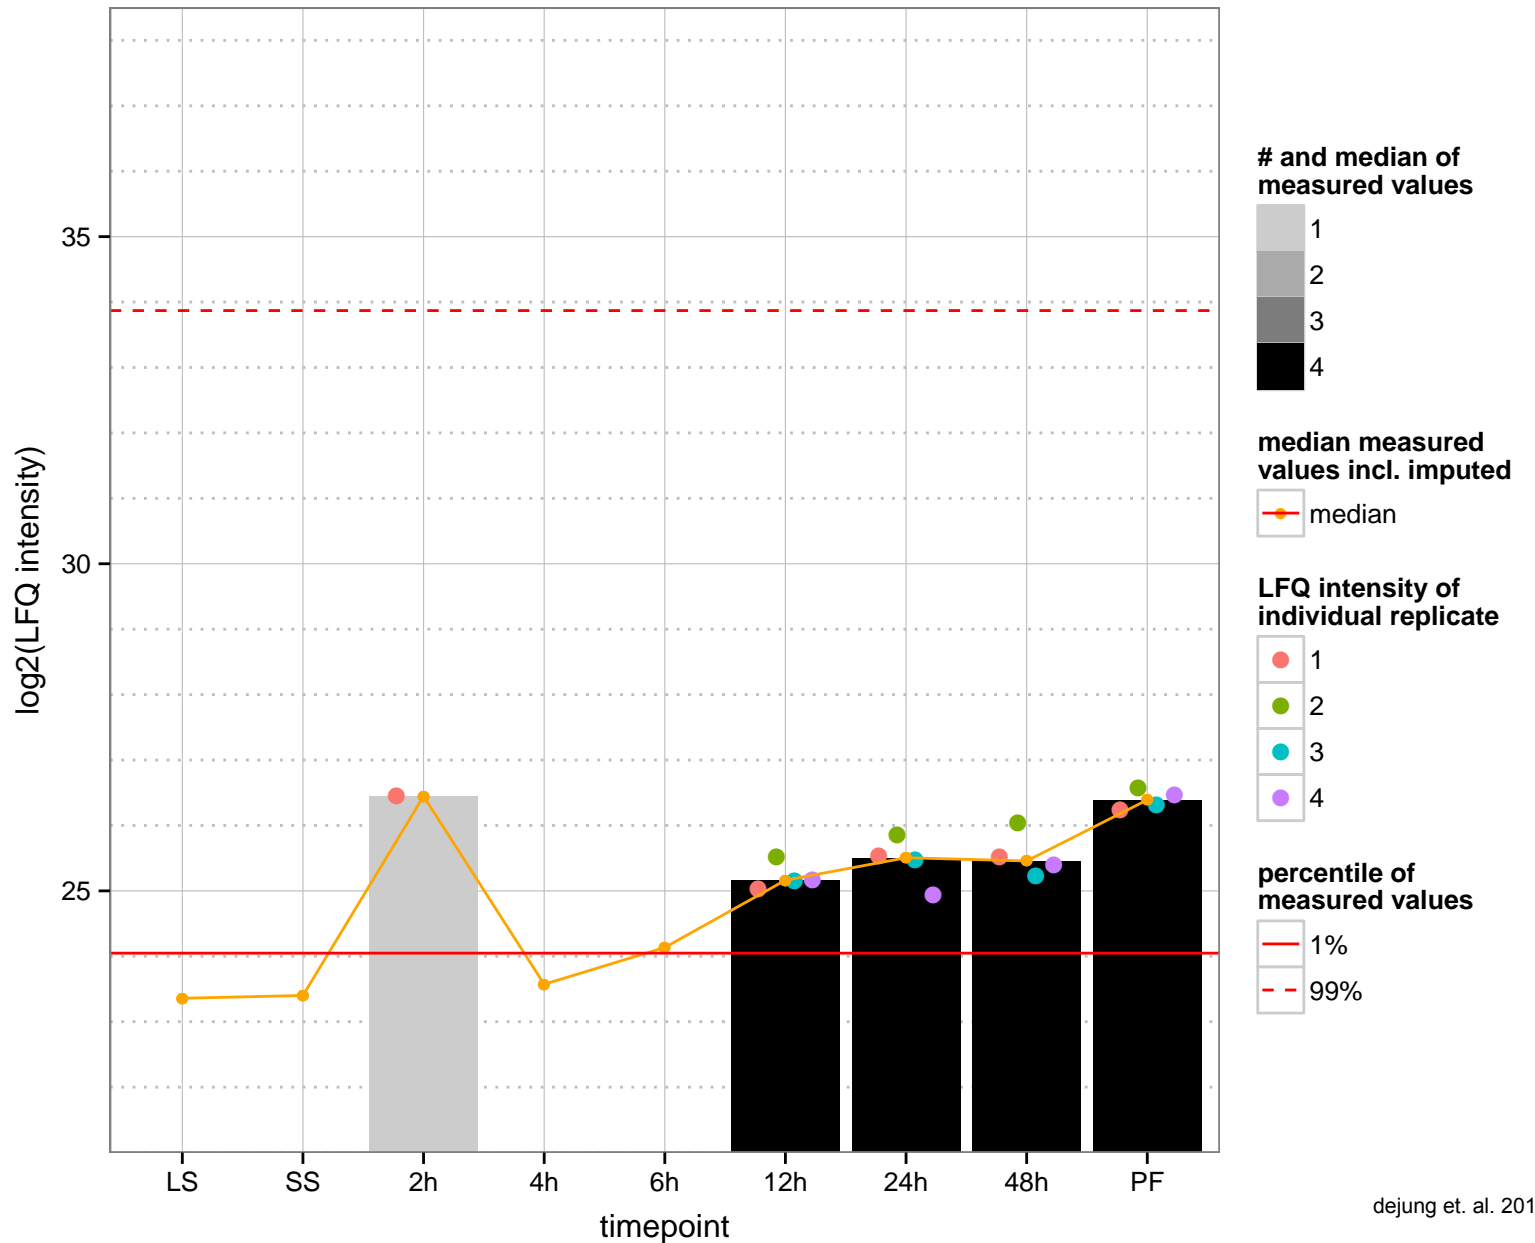

KREPA3, RNA-editing complex protein MP42 (KREPA3)

Tb927.8.620

AGOF: 3'-5'-exoribonuclease activity, endoribonuclease activity, producing 5'-phosphomonoesters, zinc ion binding

AGOC: intracellular, mitochondrial mRNA editing complex, mitochondrion

AGOP: mRNA modification, response to metal ion

PGOF: zinc ion binding

PGOC: intracellular

PGOP: null

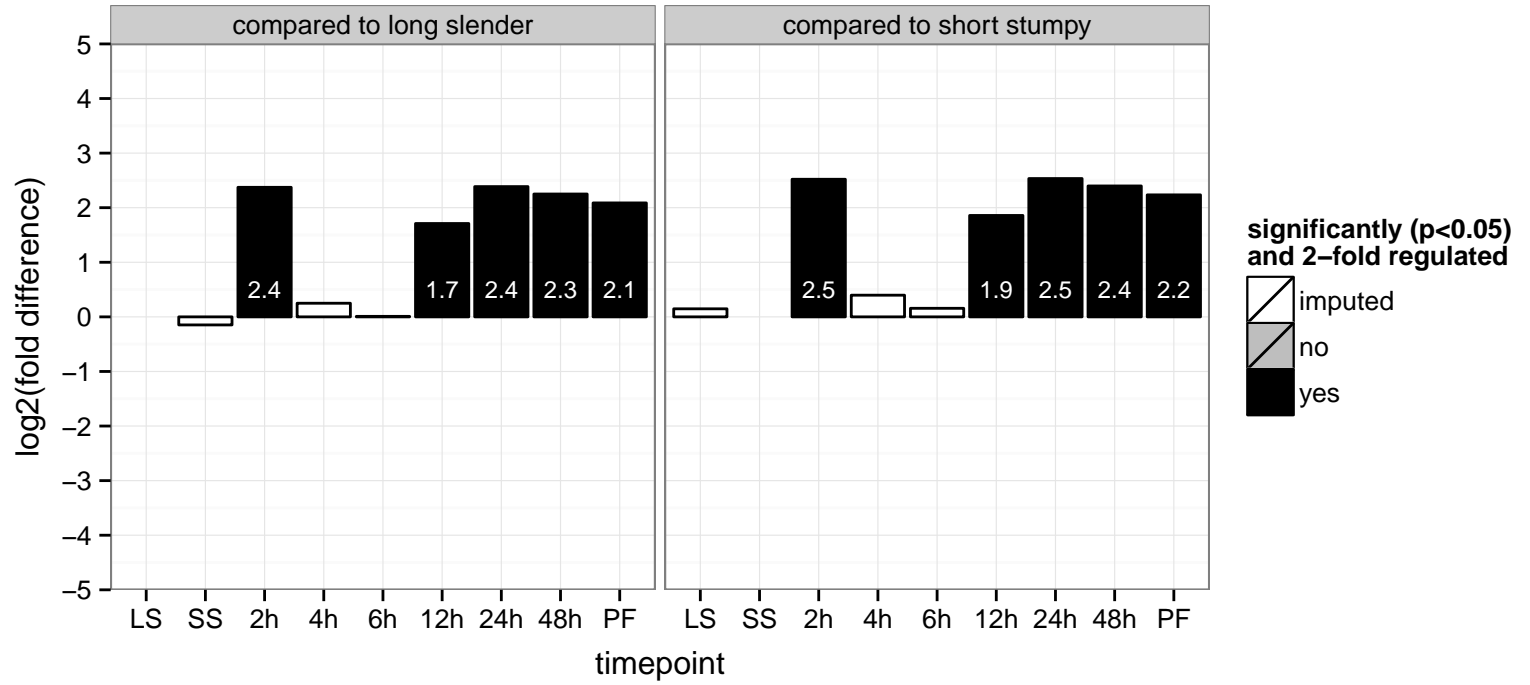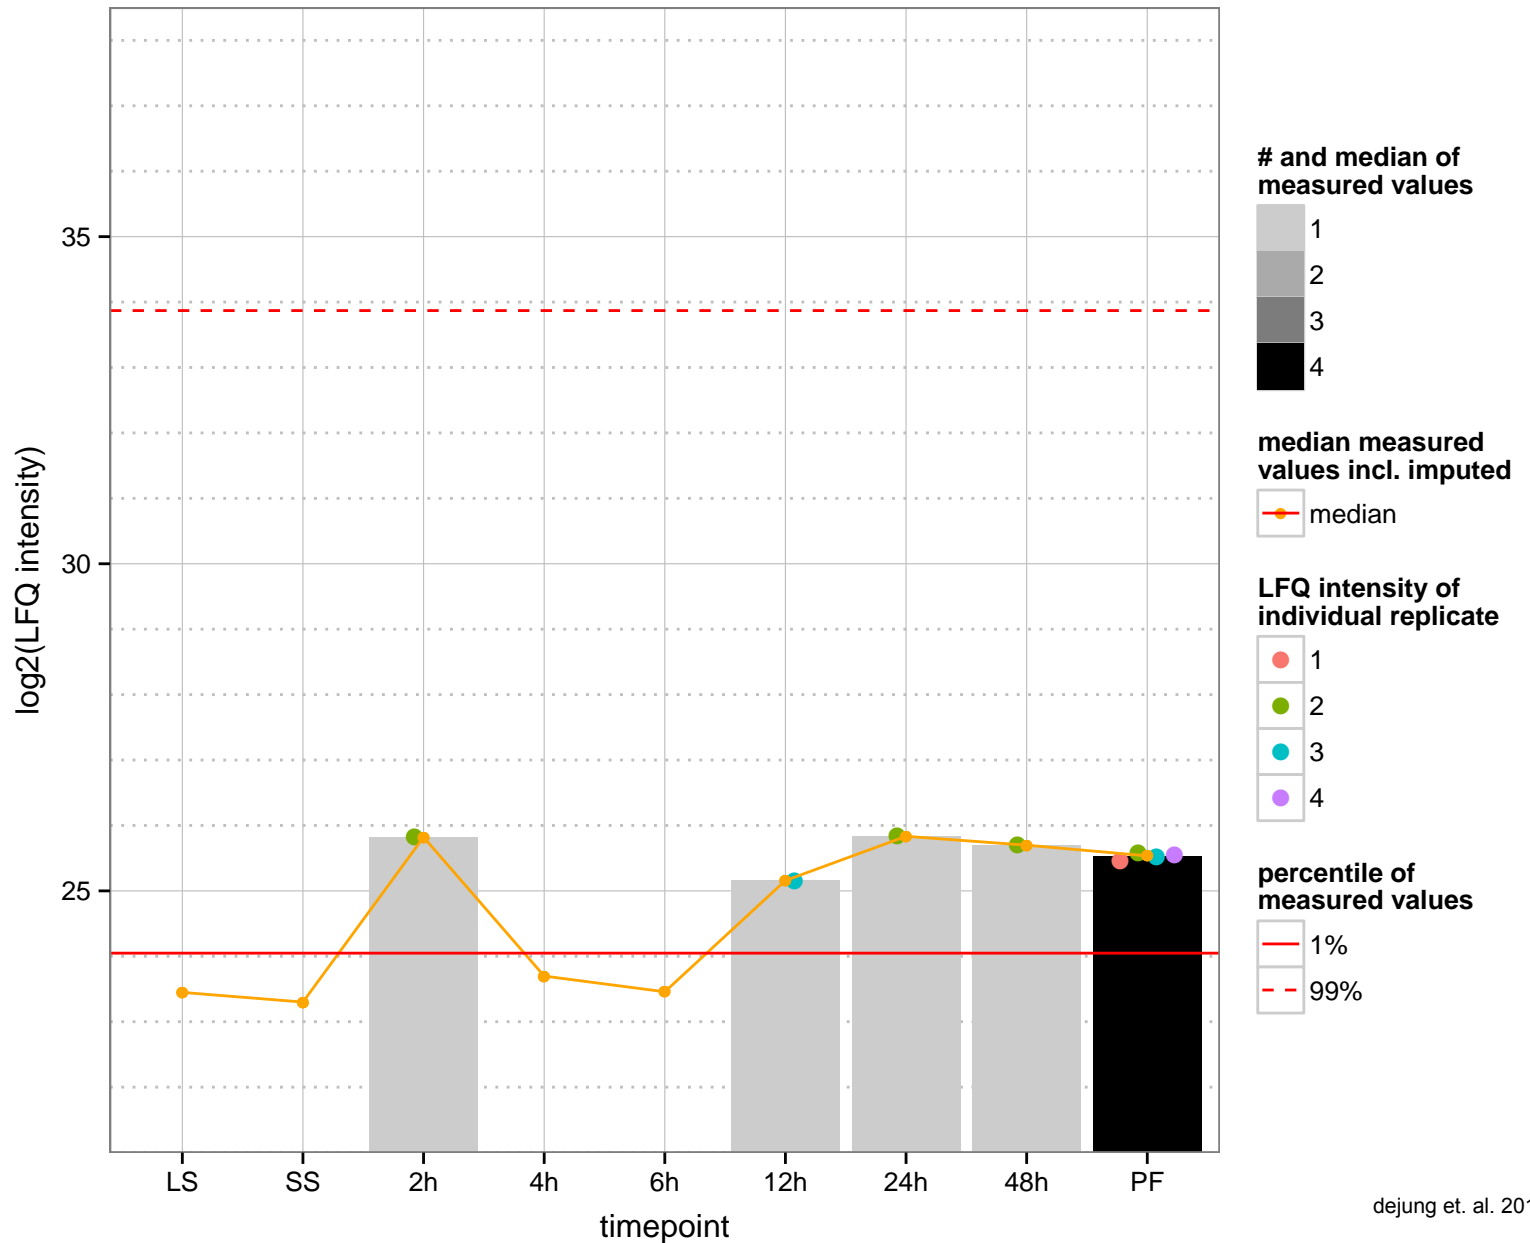

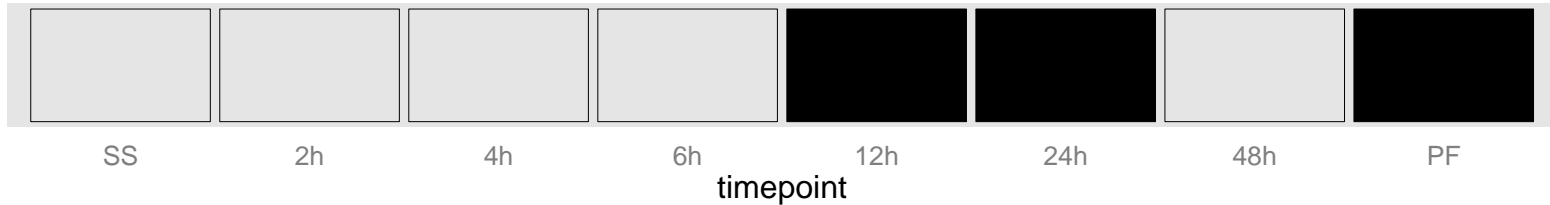

**regulated**  not regulated  significant down  significant up

septum formation protein MAF homologue, putative  
 Tb927.1.3280  
 AGOF: null  
 AGOC: cytoplasm  
 AGOP: null  
 PGO: null  
 PGOC: cytoplasm  
 PGOP: null

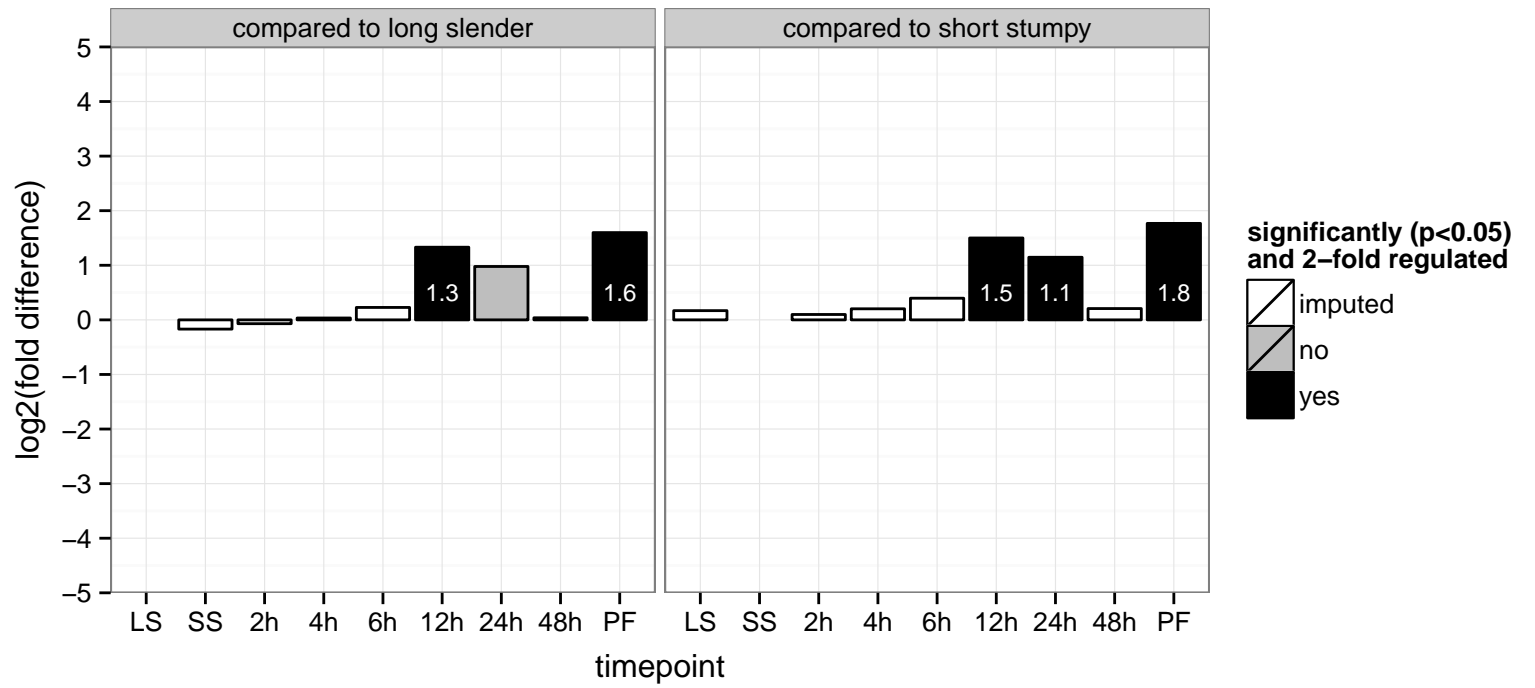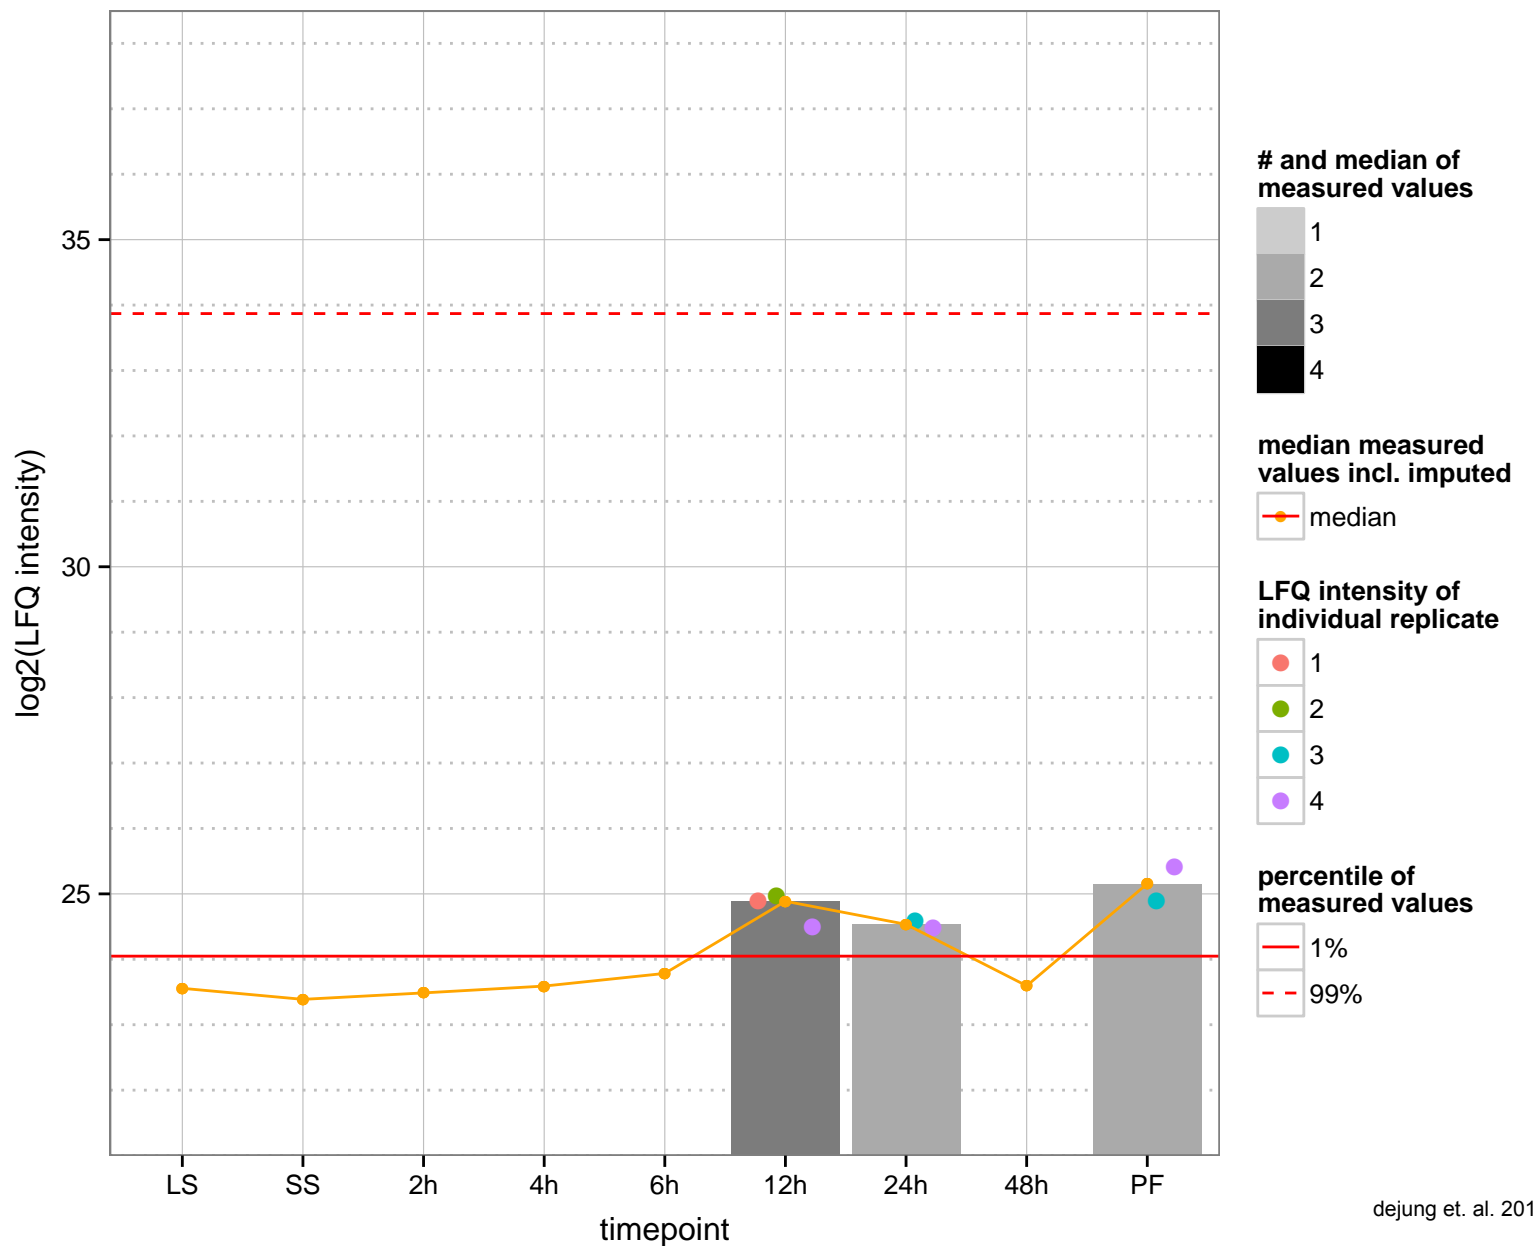

cullin, putative  
 Tb927.10.7490  
 AGOF: ubiquitin protein ligase binding  
 AGOC: cullin-RING ubiquitin ligase complex  
 AGOP: cell cycle, ubiquitin-dependent protein catabolic process  
 PGO: ubiquitin protein ligase binding  
 PGOC: cullin-RING ubiquitin ligase complex  
 PGO: ubiquitin-dependent protein catabolic process

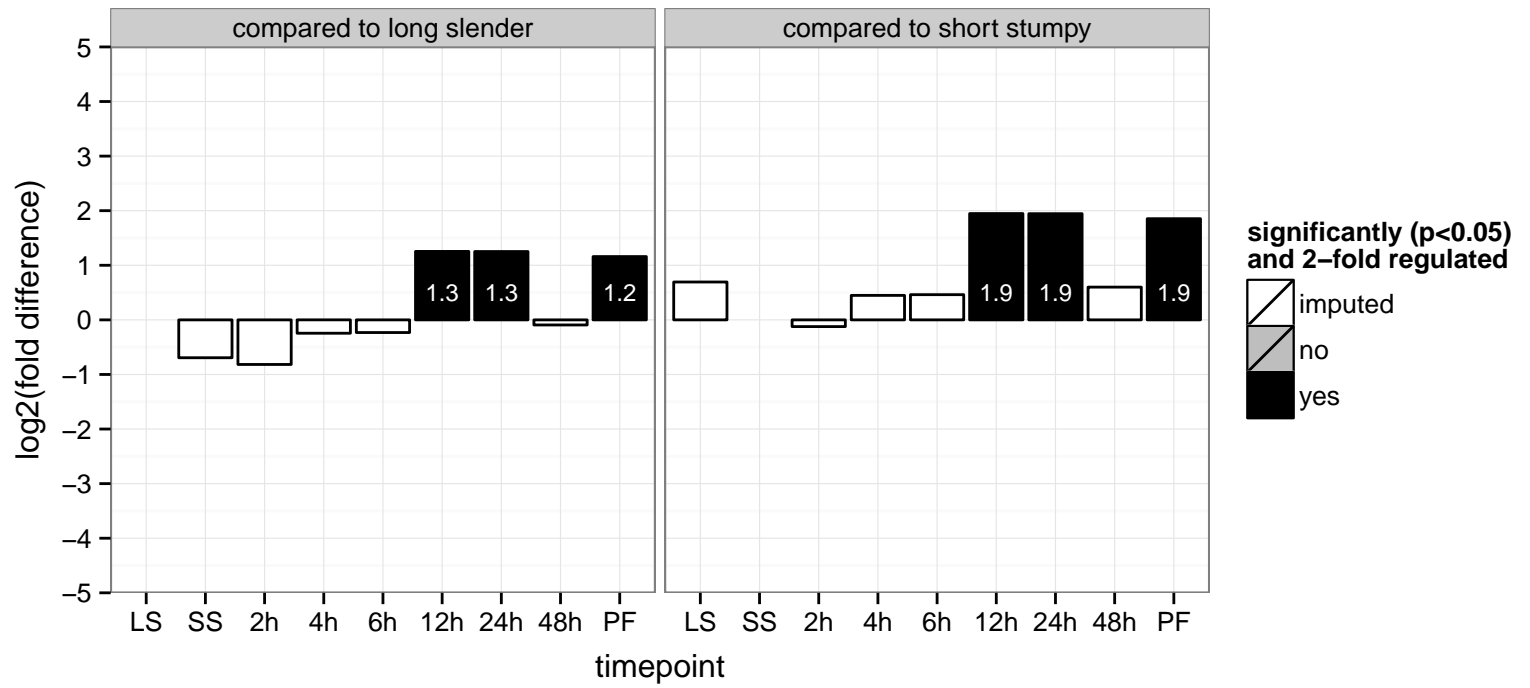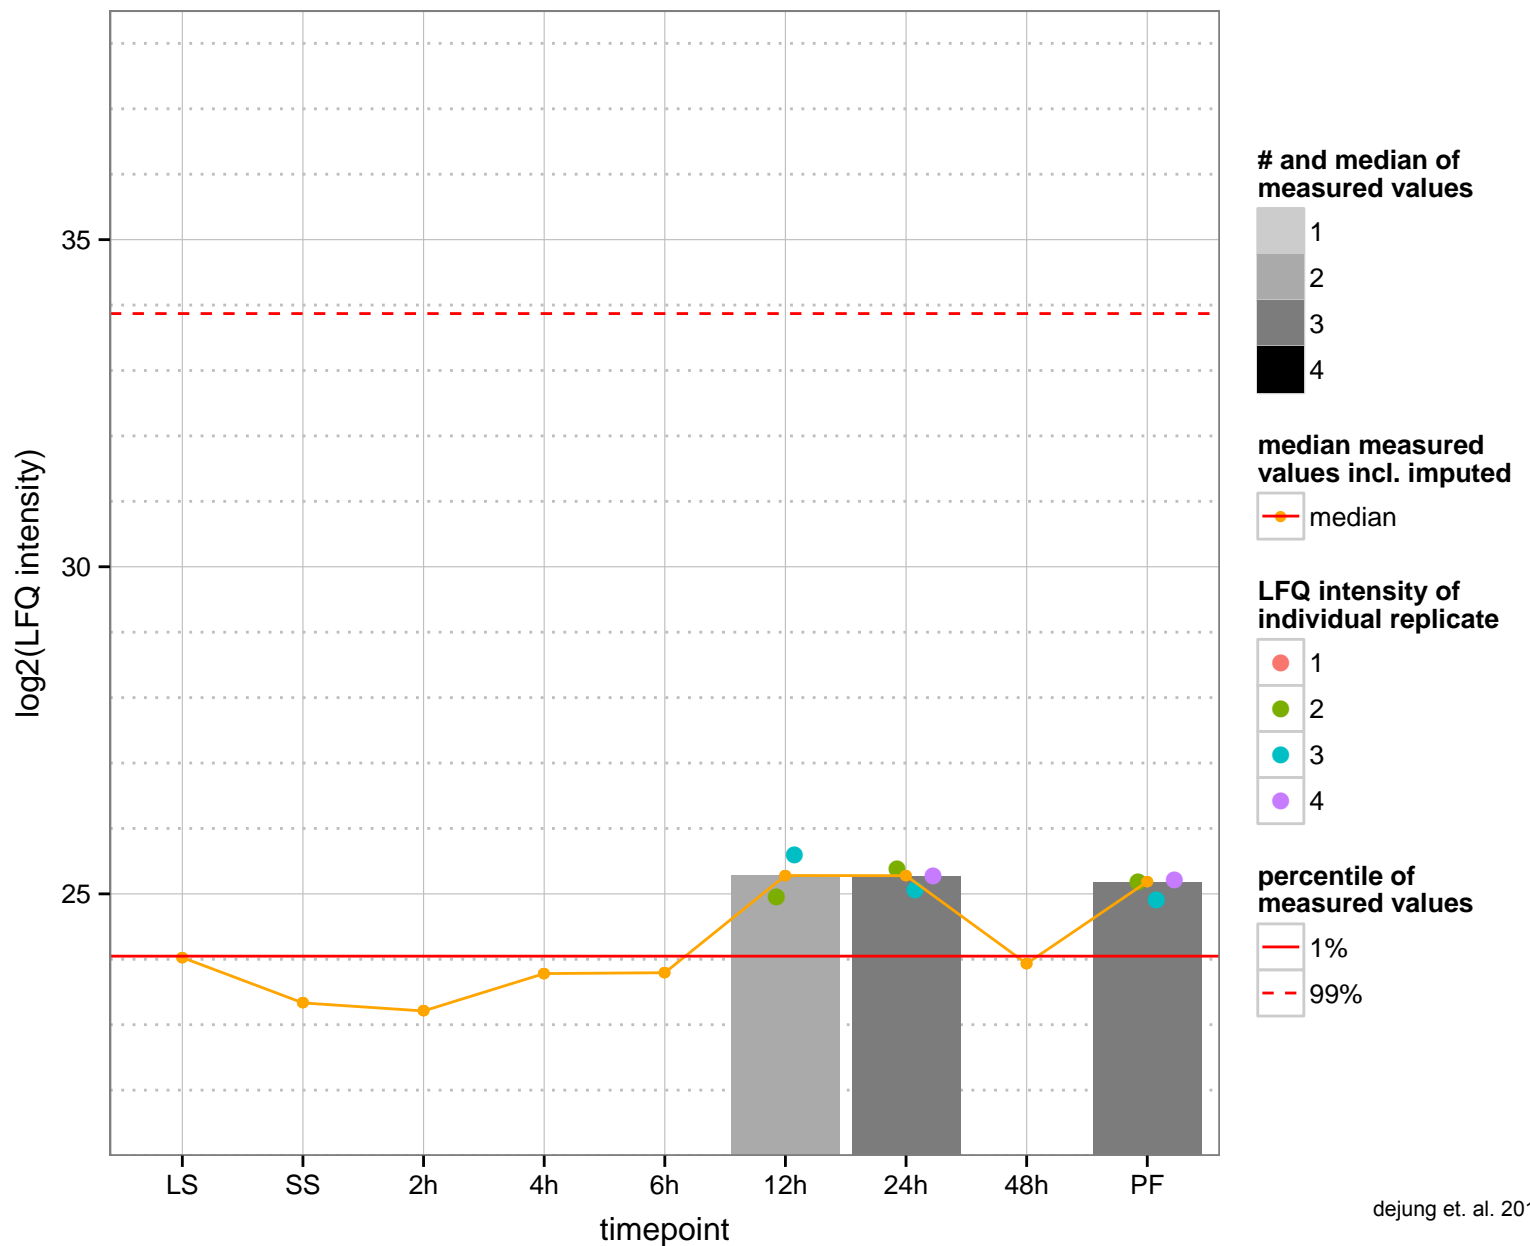

hypothetical protein, conserved  
 Tb927.11.15080  
 AGOF: null  
 AGOC: membrane  
 AGOP: null  
 PGO: null  
 PGO: null  
 PGO: membrane  
 PGO: null

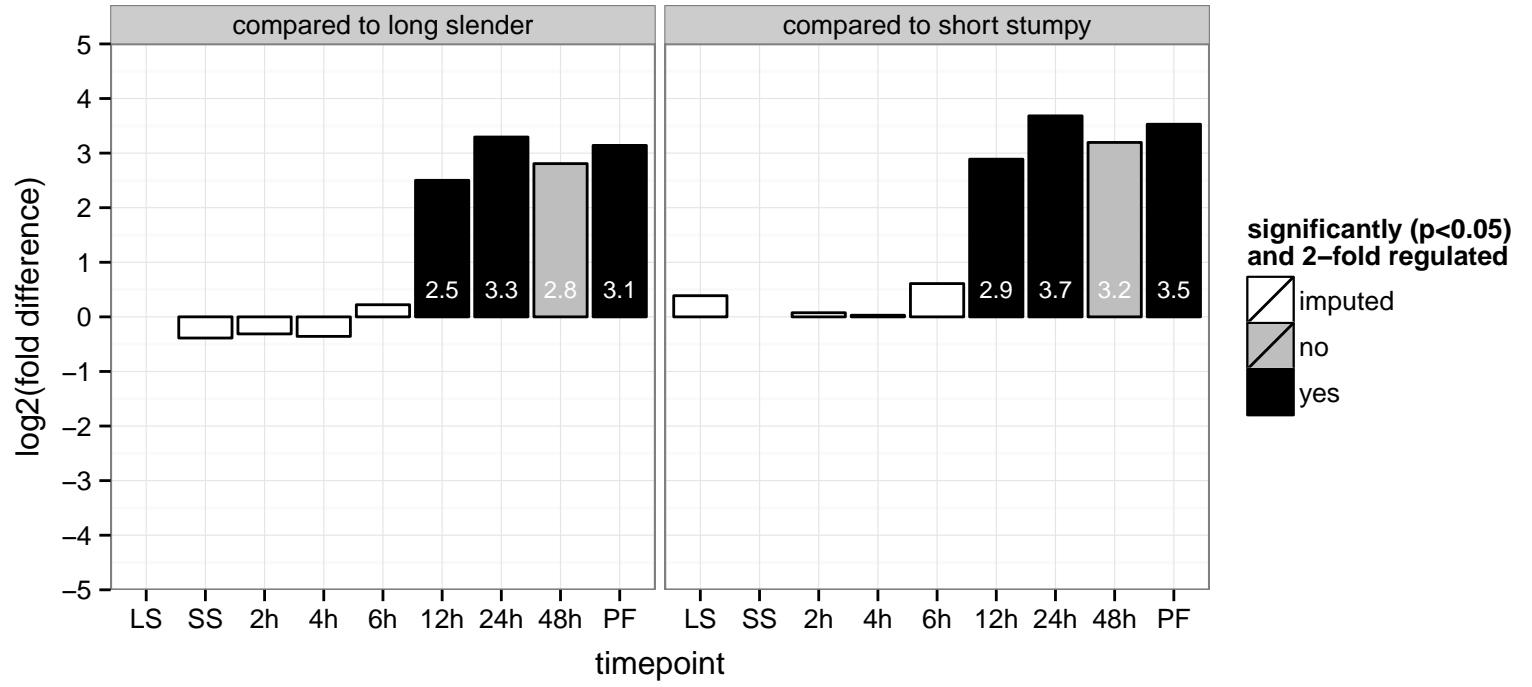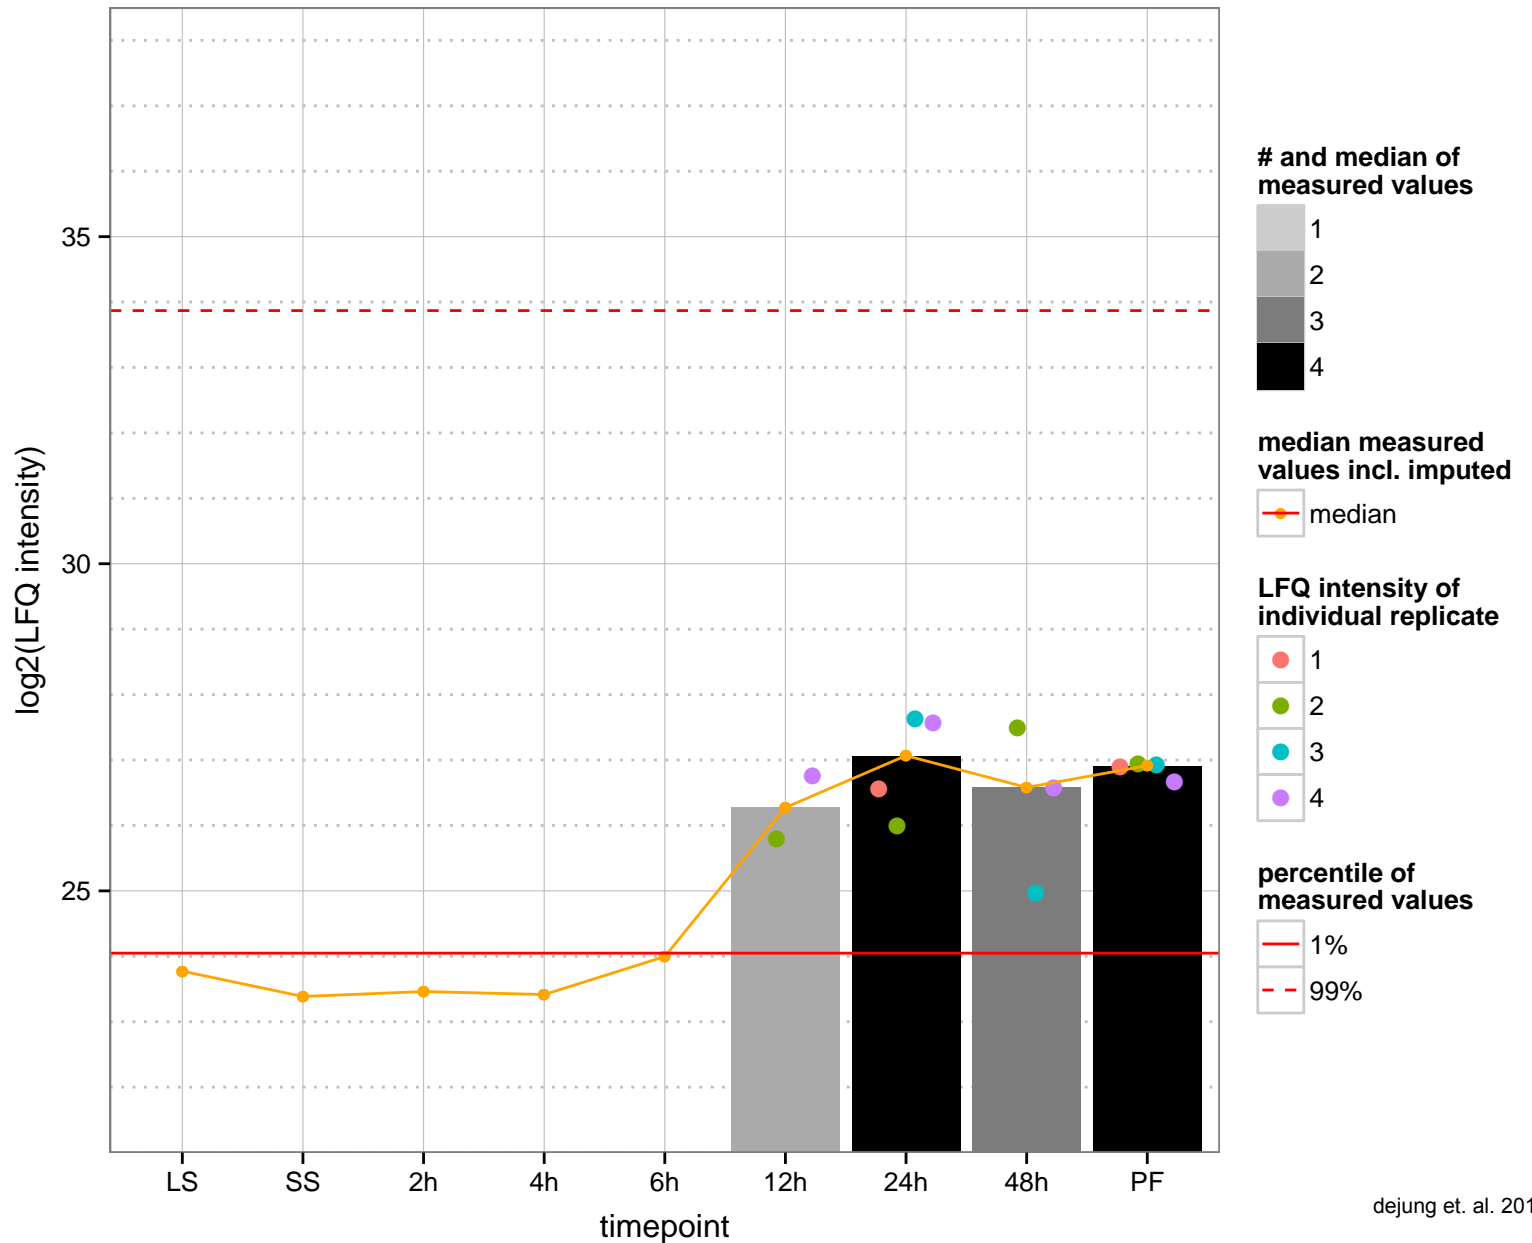

hypothetical protein, conserved  
 Tb927.8.4690  
 AGOF: null  
 AGOC: null  
 AGOP: null  
 PGOF: null  
 PGO: null  
 PGOP: null

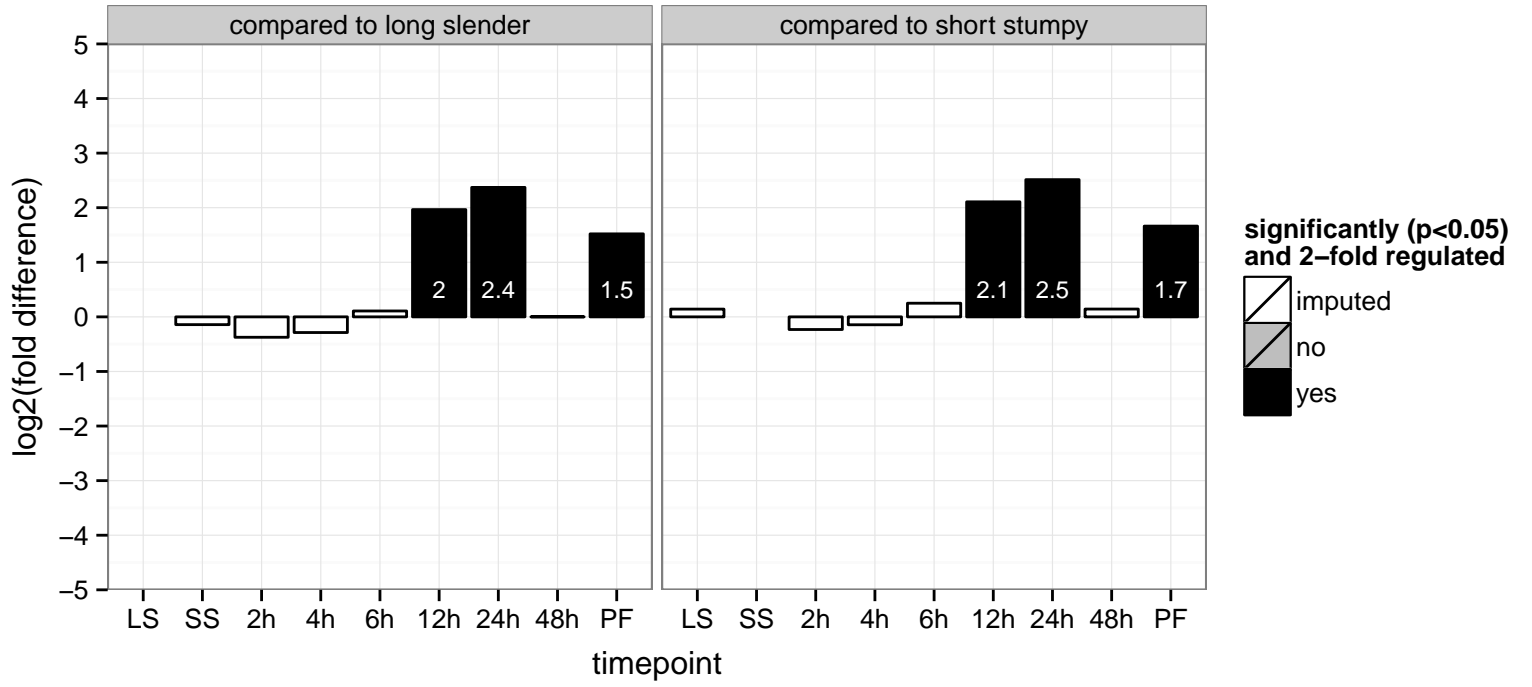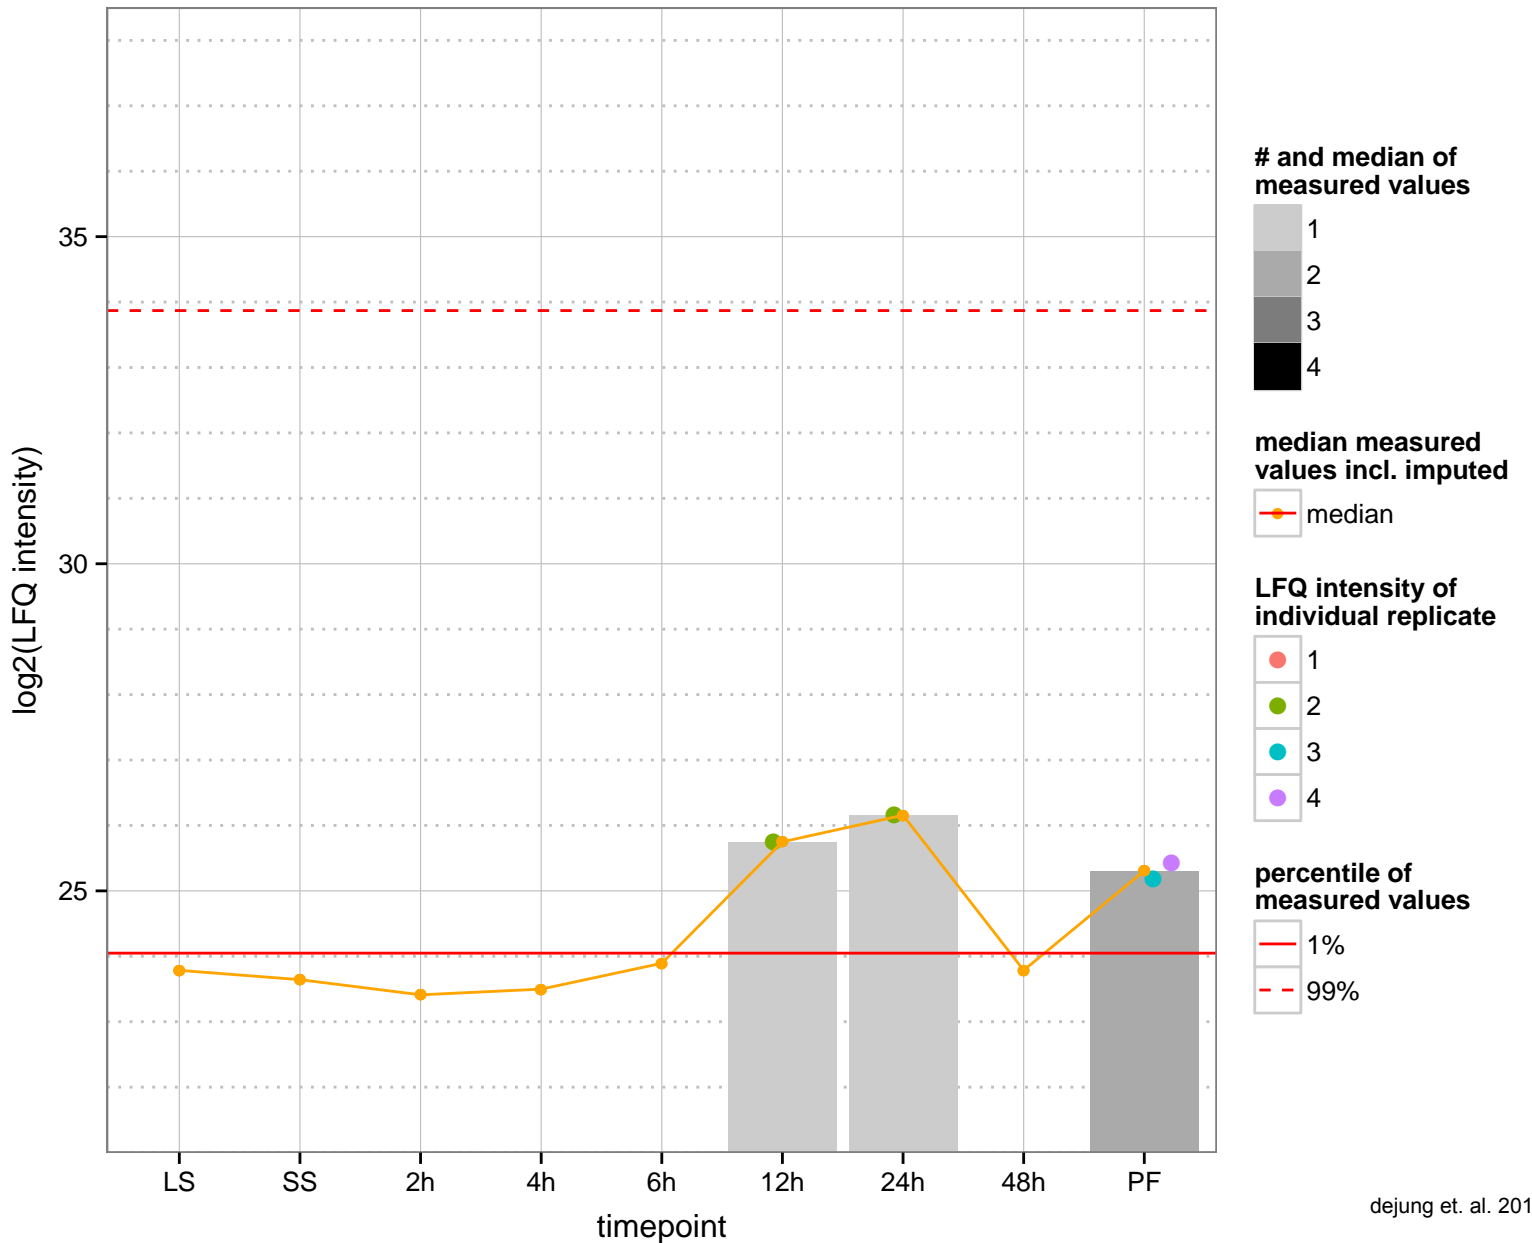

flavoprotein monooxygenase, putative  
 Tb927.9.6710  
 AGOF: monooxygenase activity  
 AGOC: mitochondrion  
 AGOP: cellular aromatic compound metabolic process  
 PGO: null  
 PGOC: null  
 PGOP: null

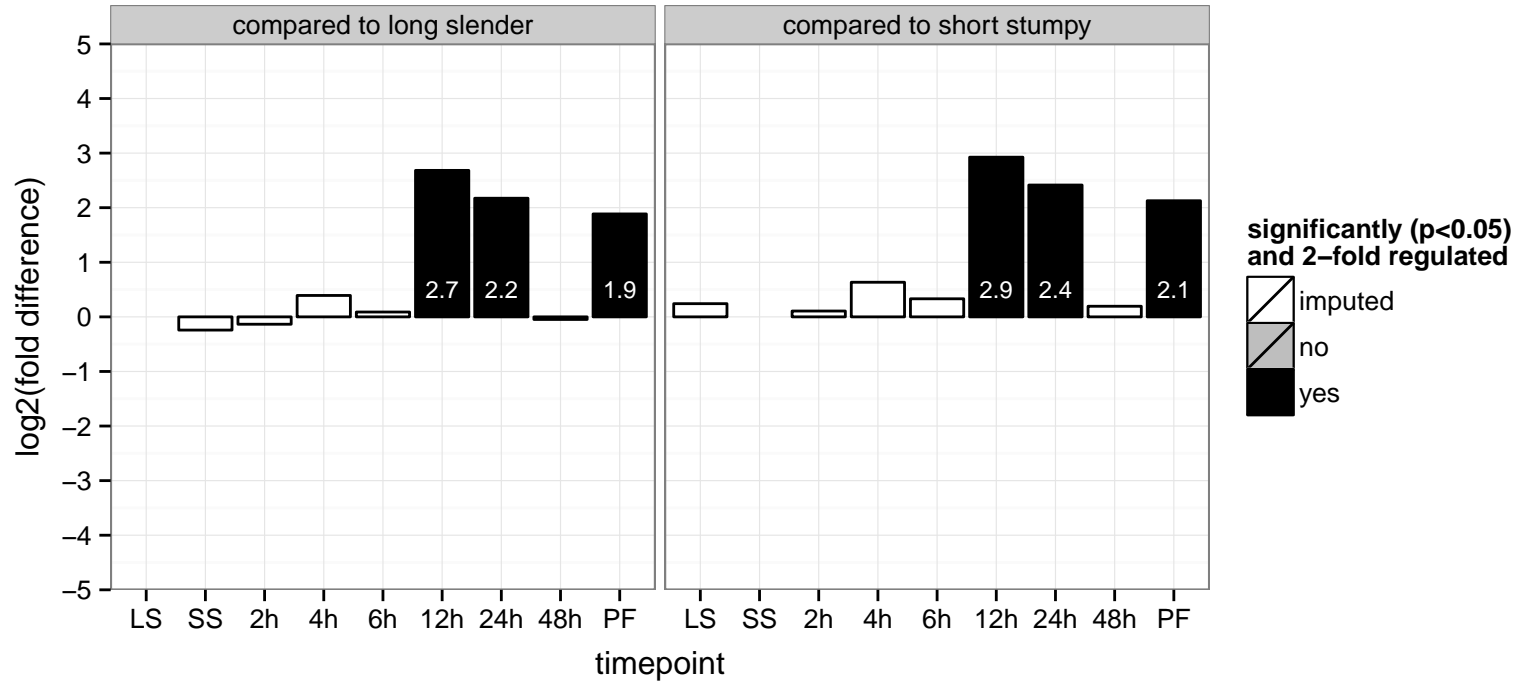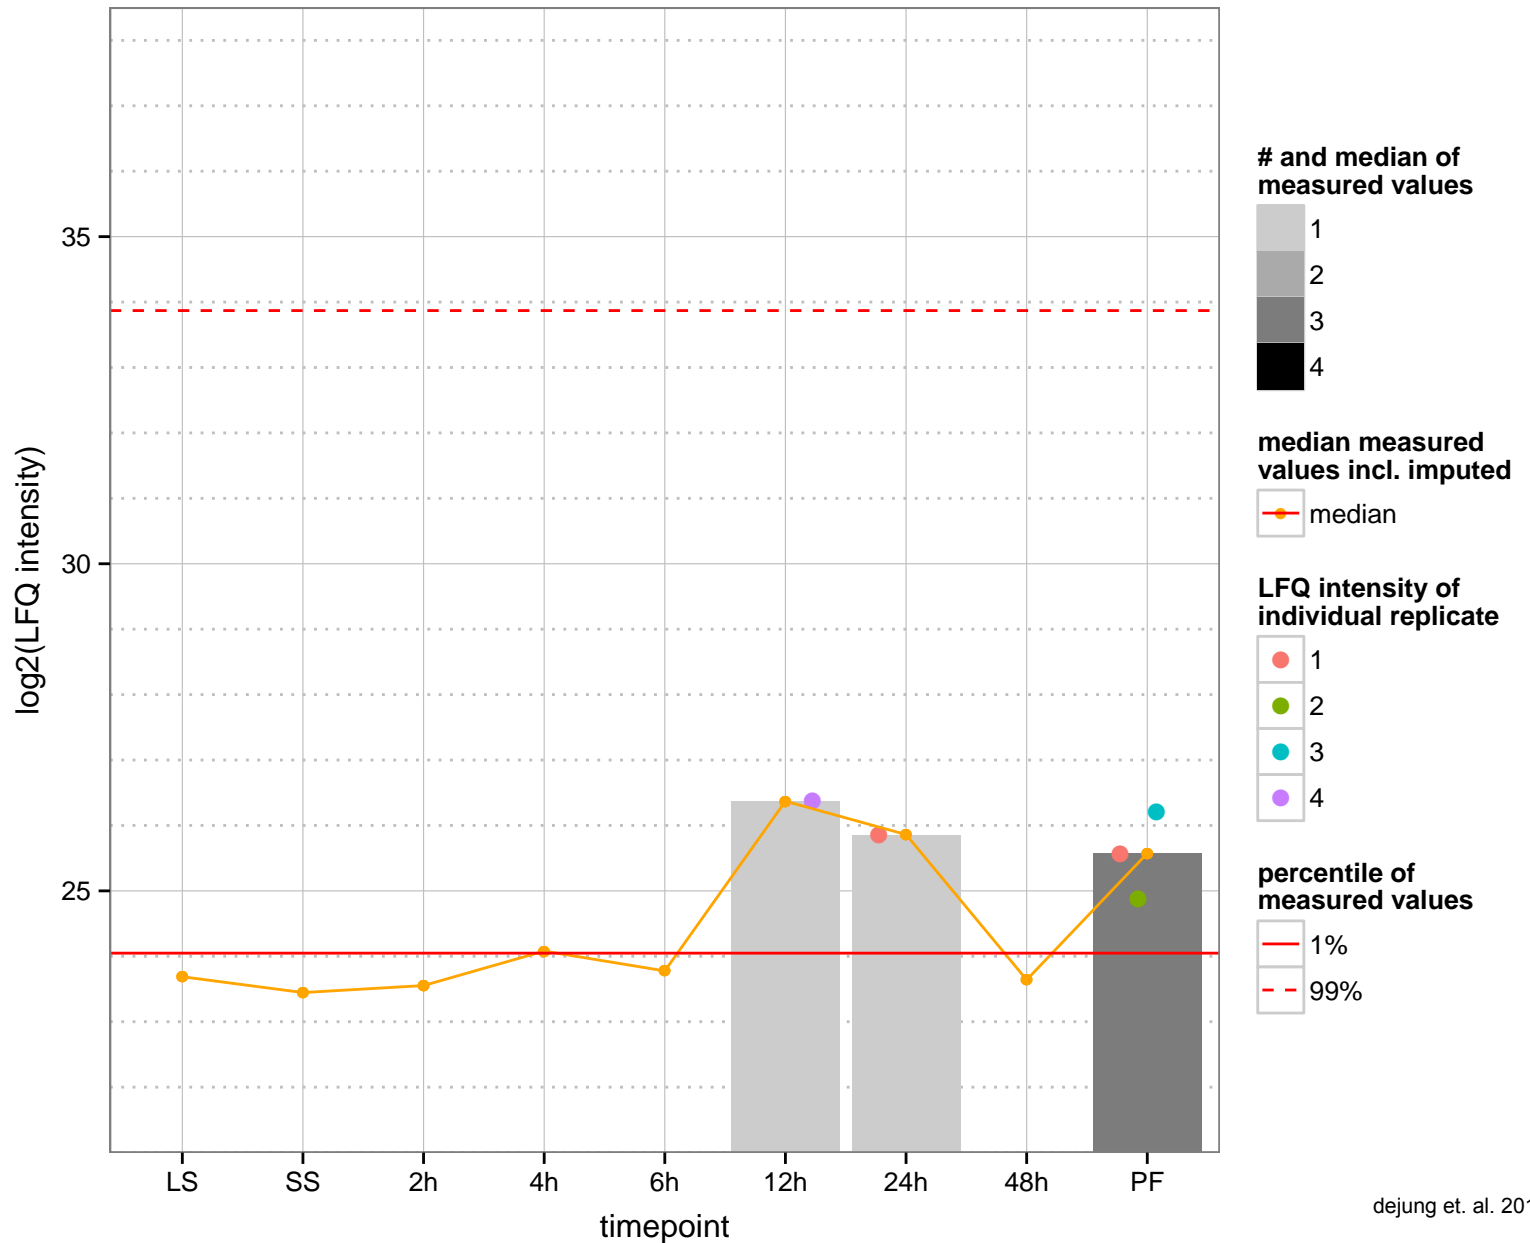



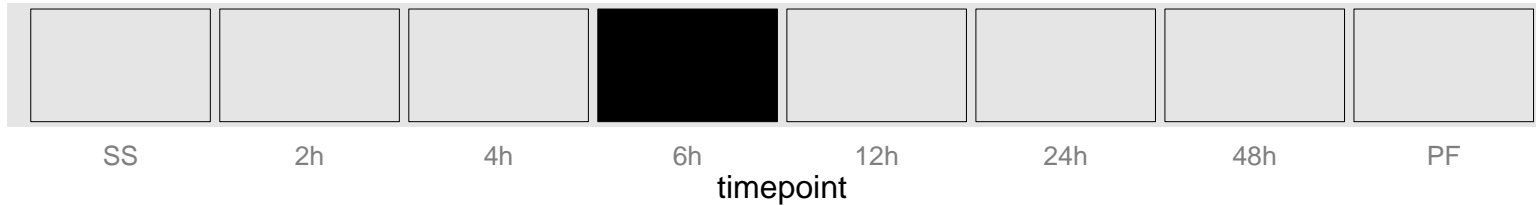

**regulated**  not regulated  significant down  significant up

protein kinase, putative

Tb927.3.3290;Tb11.v5.0474

AGOF: null, ATP binding, protein kinase activity, protein serine/threonine kinase activity, protein tyrosine kinase activity

AGOC: null

AGOP: null, protein phosphorylation

PGOF: ATP binding, protein kinase activity, transferase activity, transferring phosphorus-containing groups

PGOC: null

PGOP: protein phosphorylation

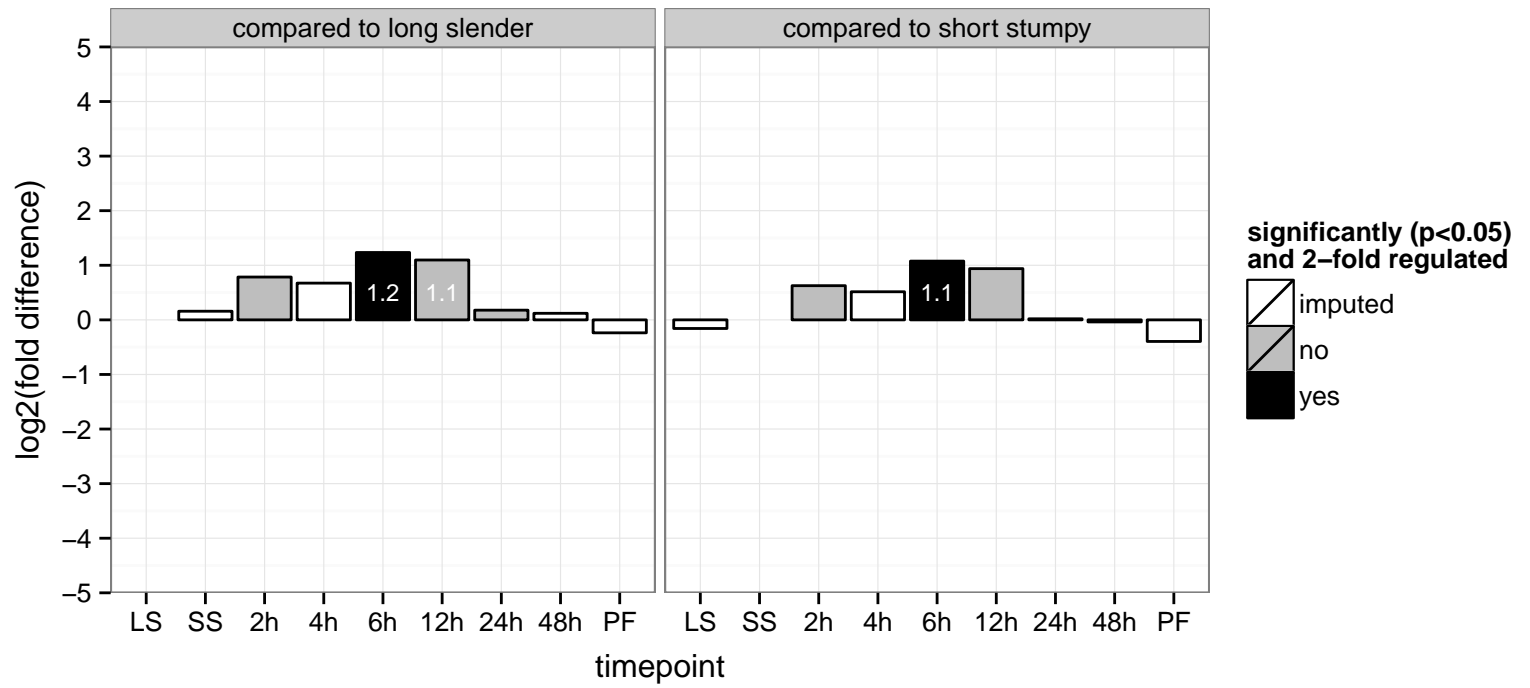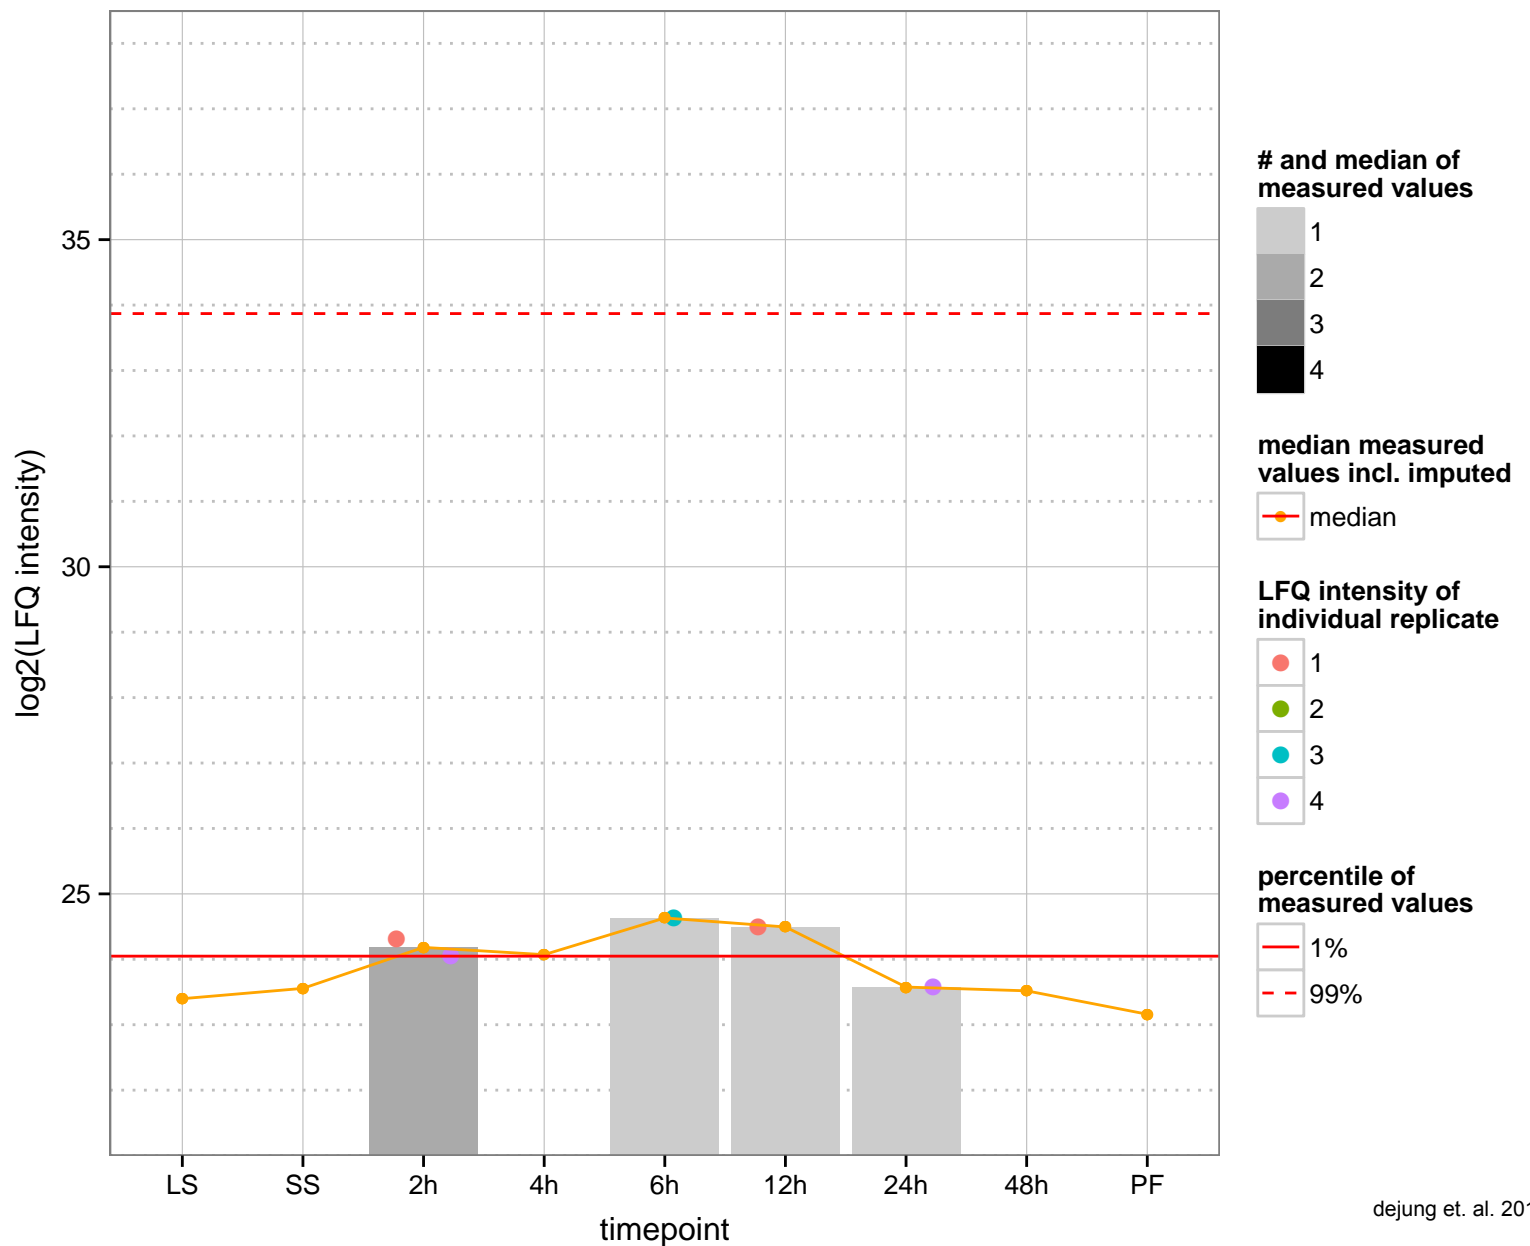

histone deacetylase 4, histone deacetylase-like protein HDO4 (HDAC4)

Tb927.5.2900

AGOF: histone deacetylase activity

AGOC: cytoplasm, nucleus

AGOP: cell cycle, histone deacetylation

PGOF: null

PGOC: null

PGOP: null

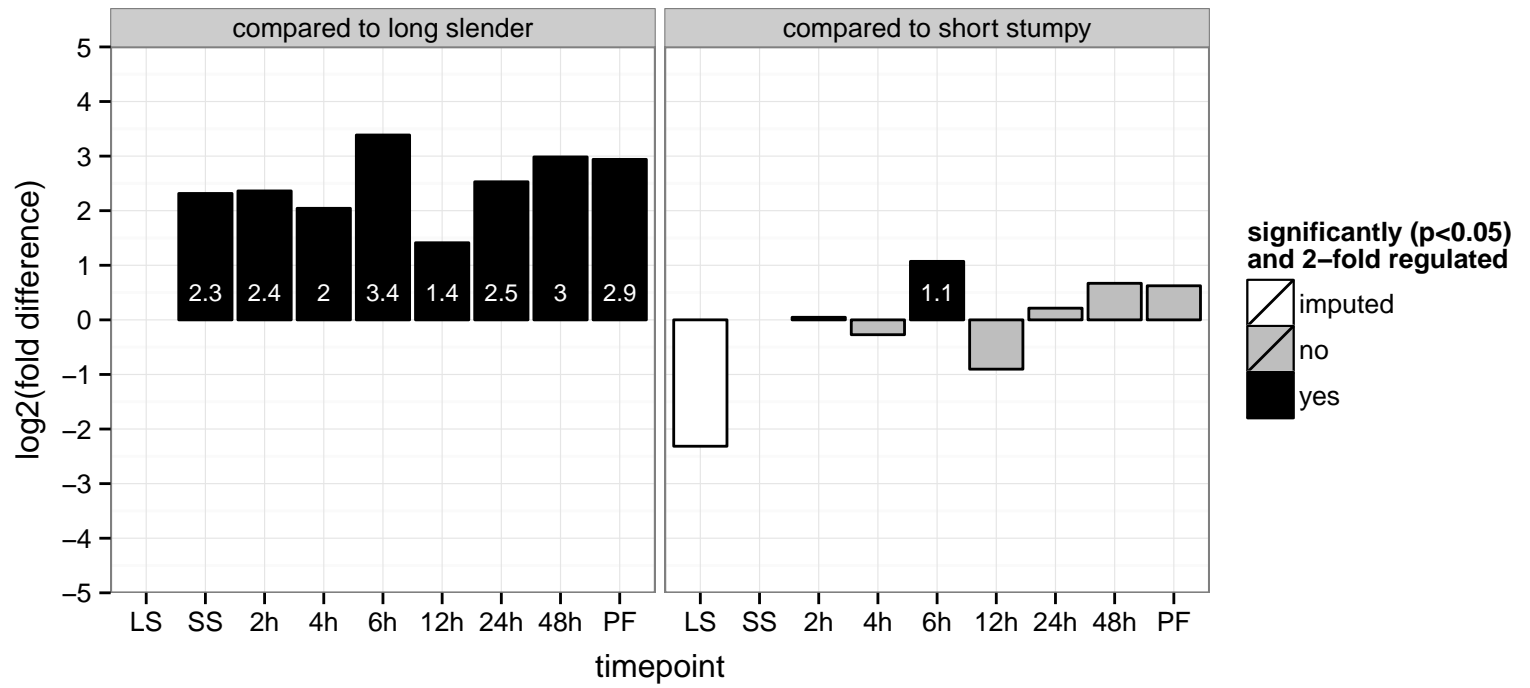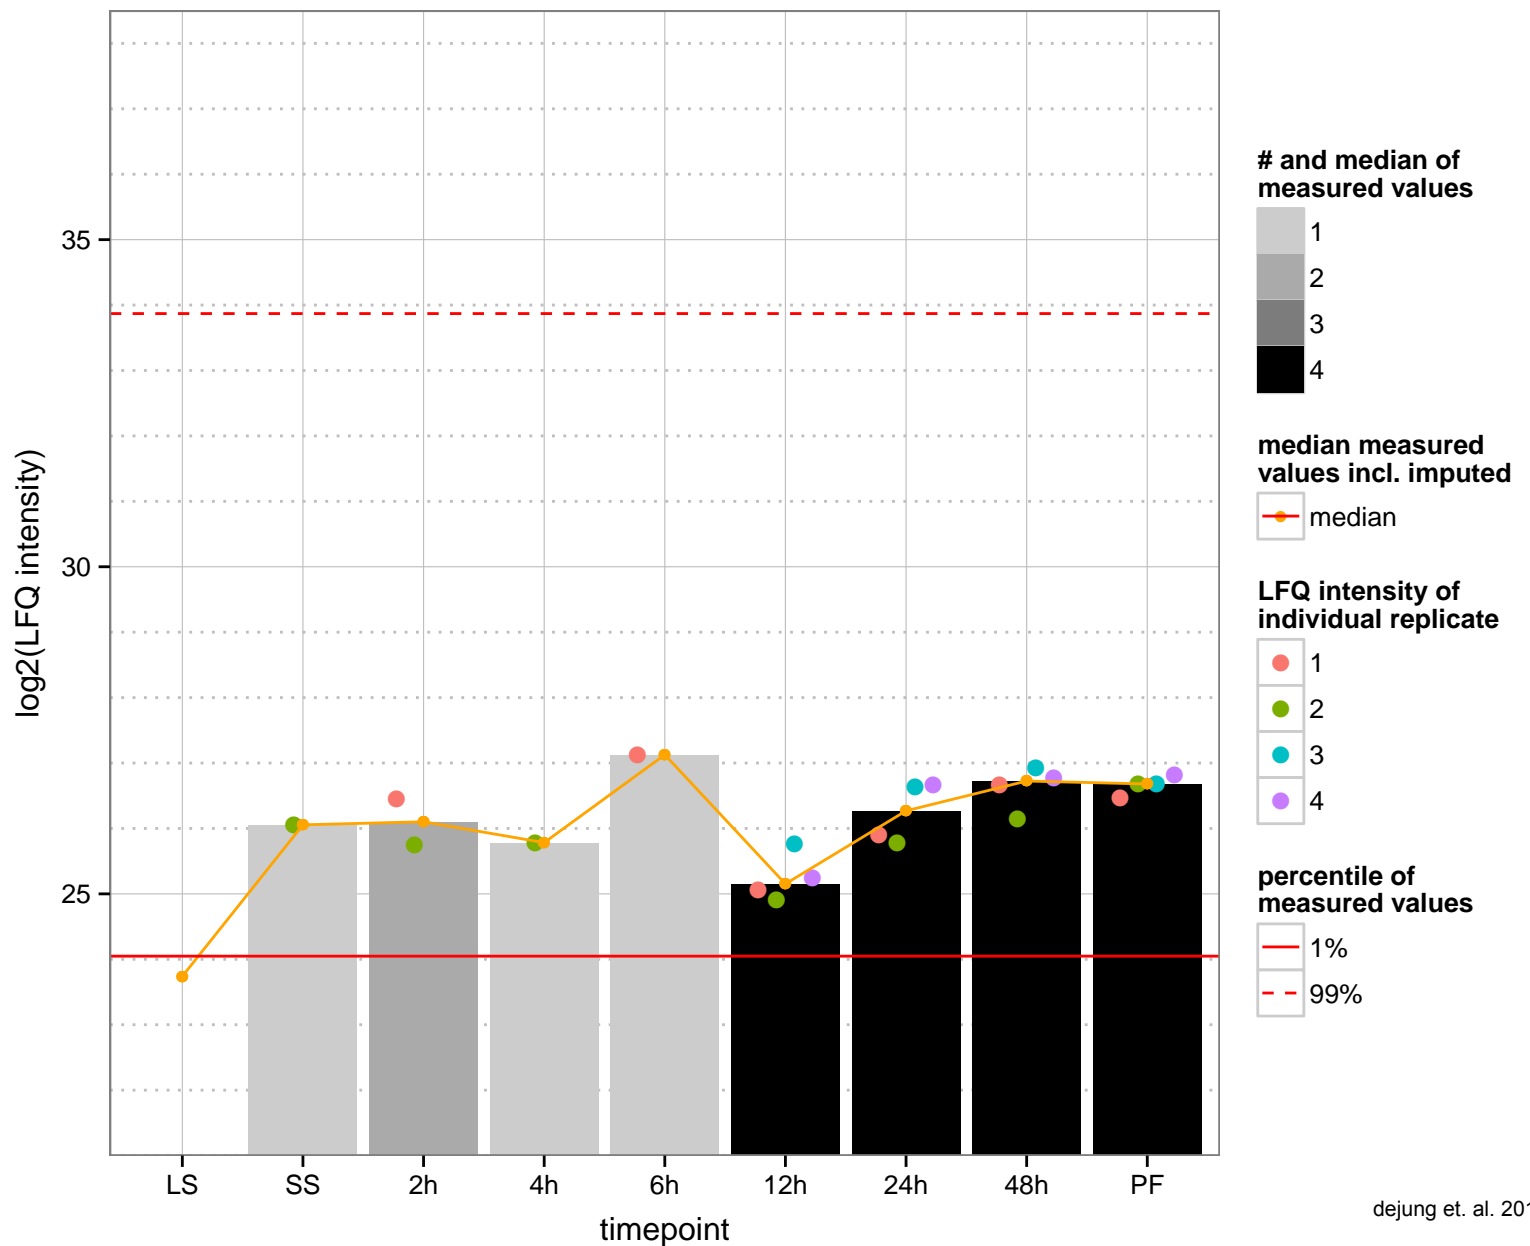

ubiquitin hydrolase, pseudogene, putative, cysteine peptidase, Clan CA, family C19, frameshift, frameshift (PAN2)  
 Tb927.6.1670  
 AGOF: ubiquitin thiolesterase activity  
 AGOC: null  
 AGOP: ubiquitin-dependent protein catabolic process  
 PGO: protein binding  
 PGO: null  
 PGO: null

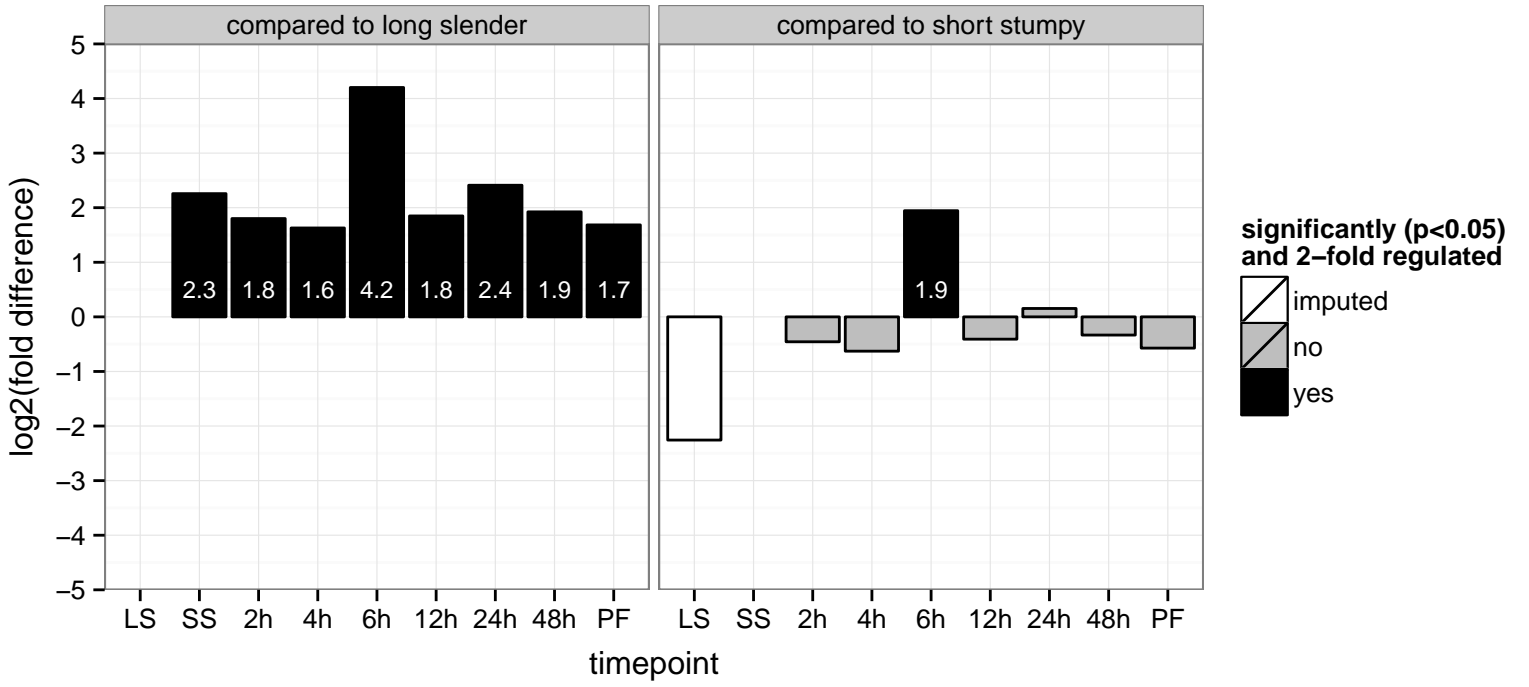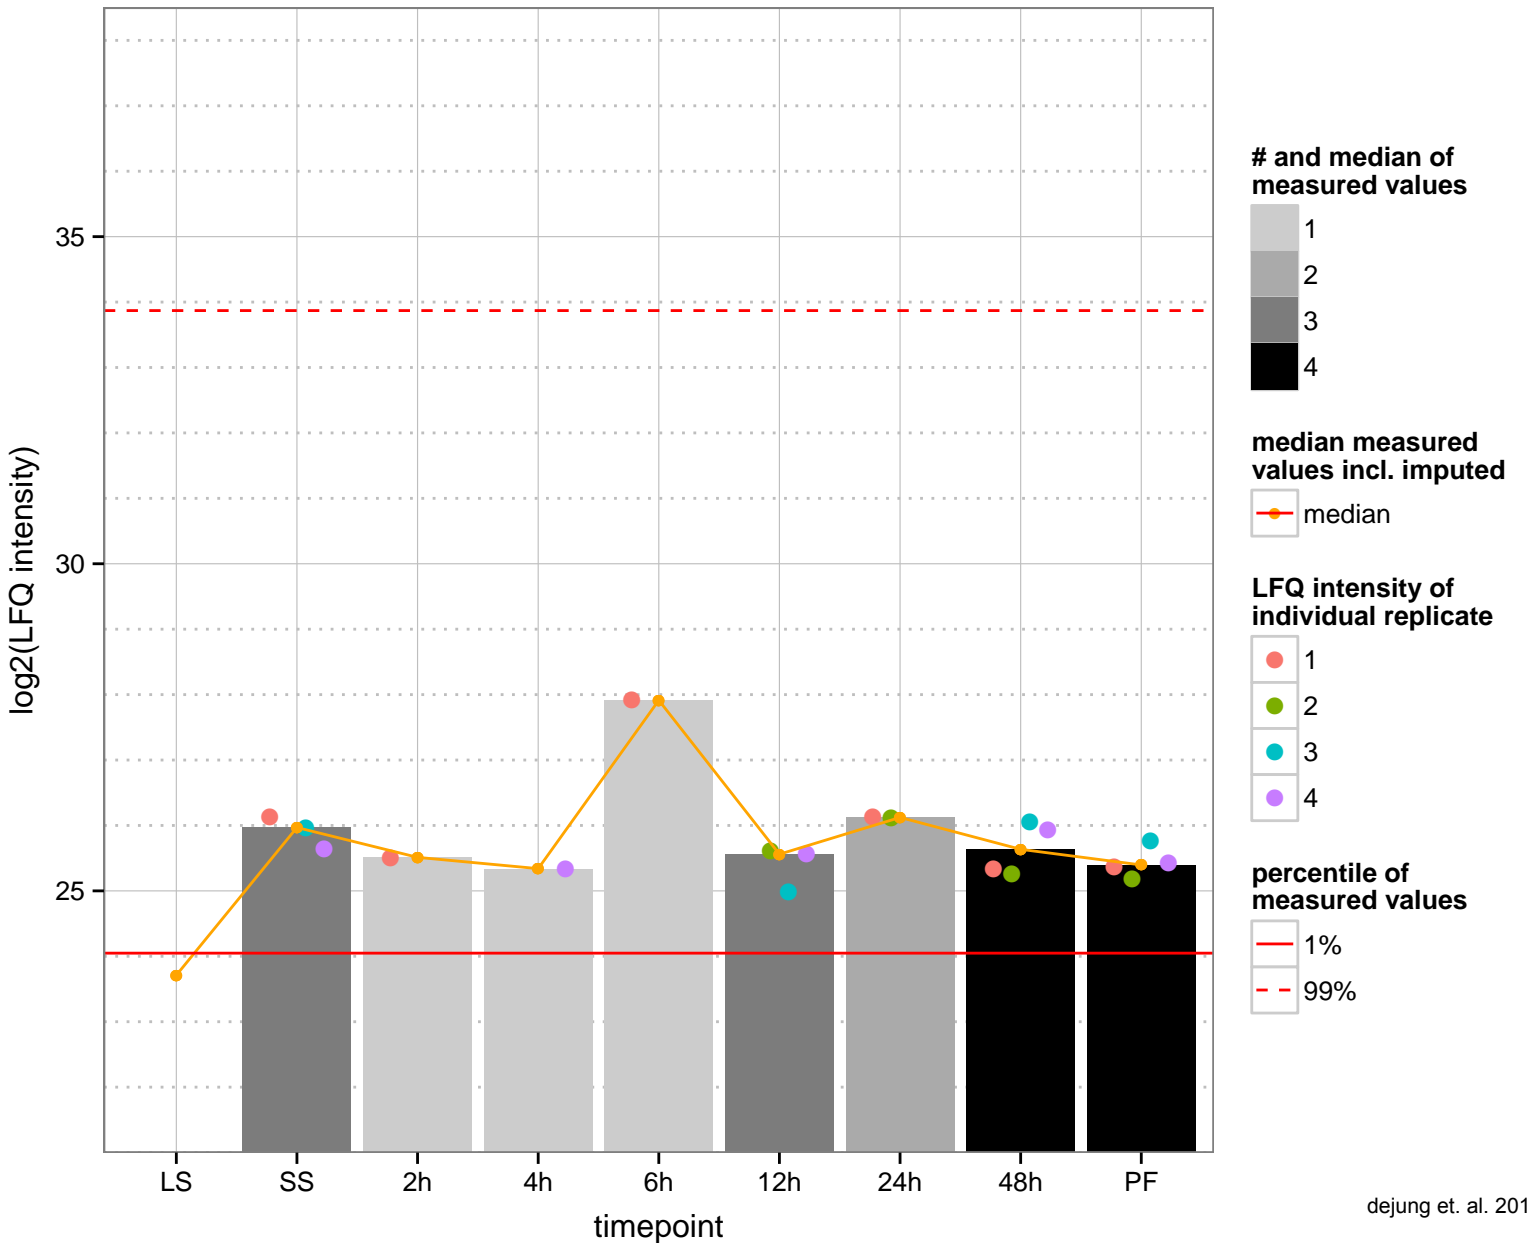

ABC transporter, putative  
 Tb927.6.2810  
 AGOF: ATP binding, ATPase activity  
 AGOC: integral to membrane  
 AGOP: transport  
 PGOF: ATP binding, ATPase activity, nucleoside-triphosphatase activity, nucleotide binding  
 PGO: null  
 PGOP: null

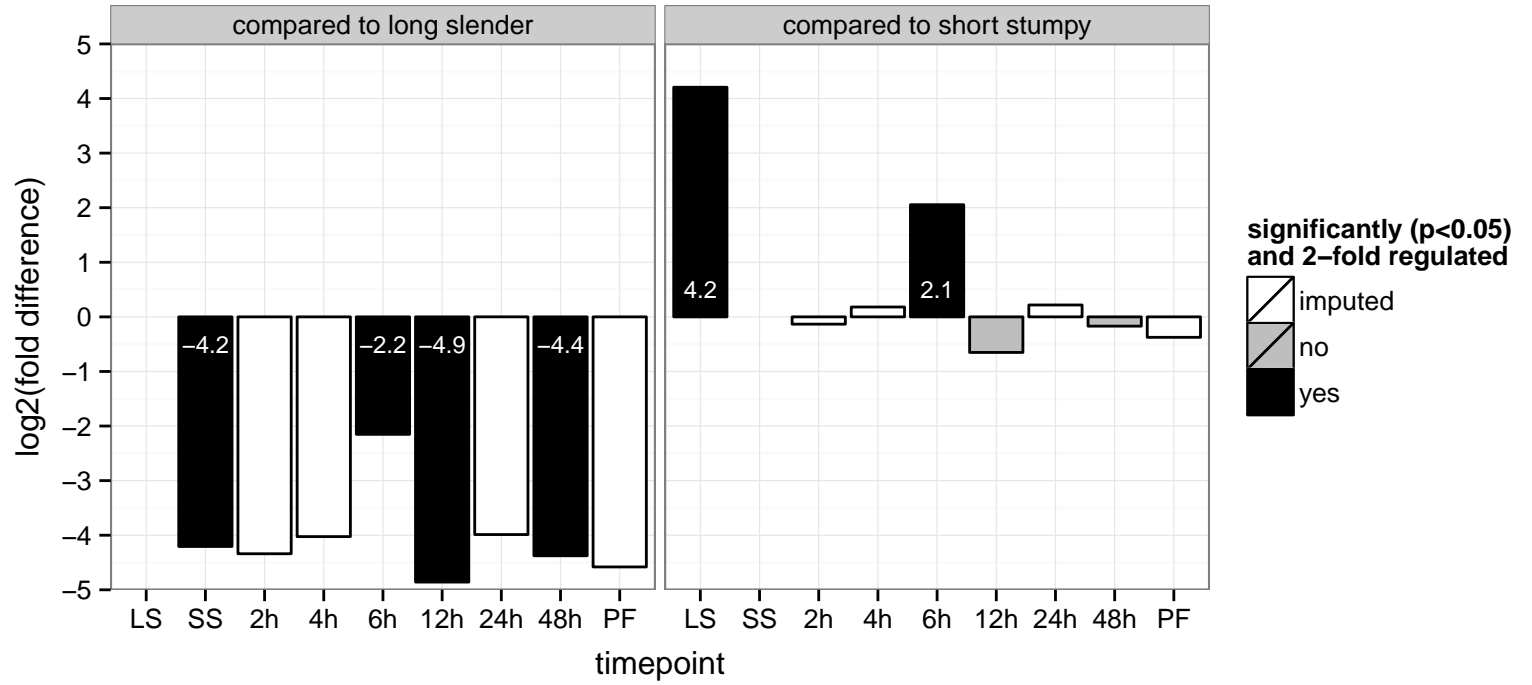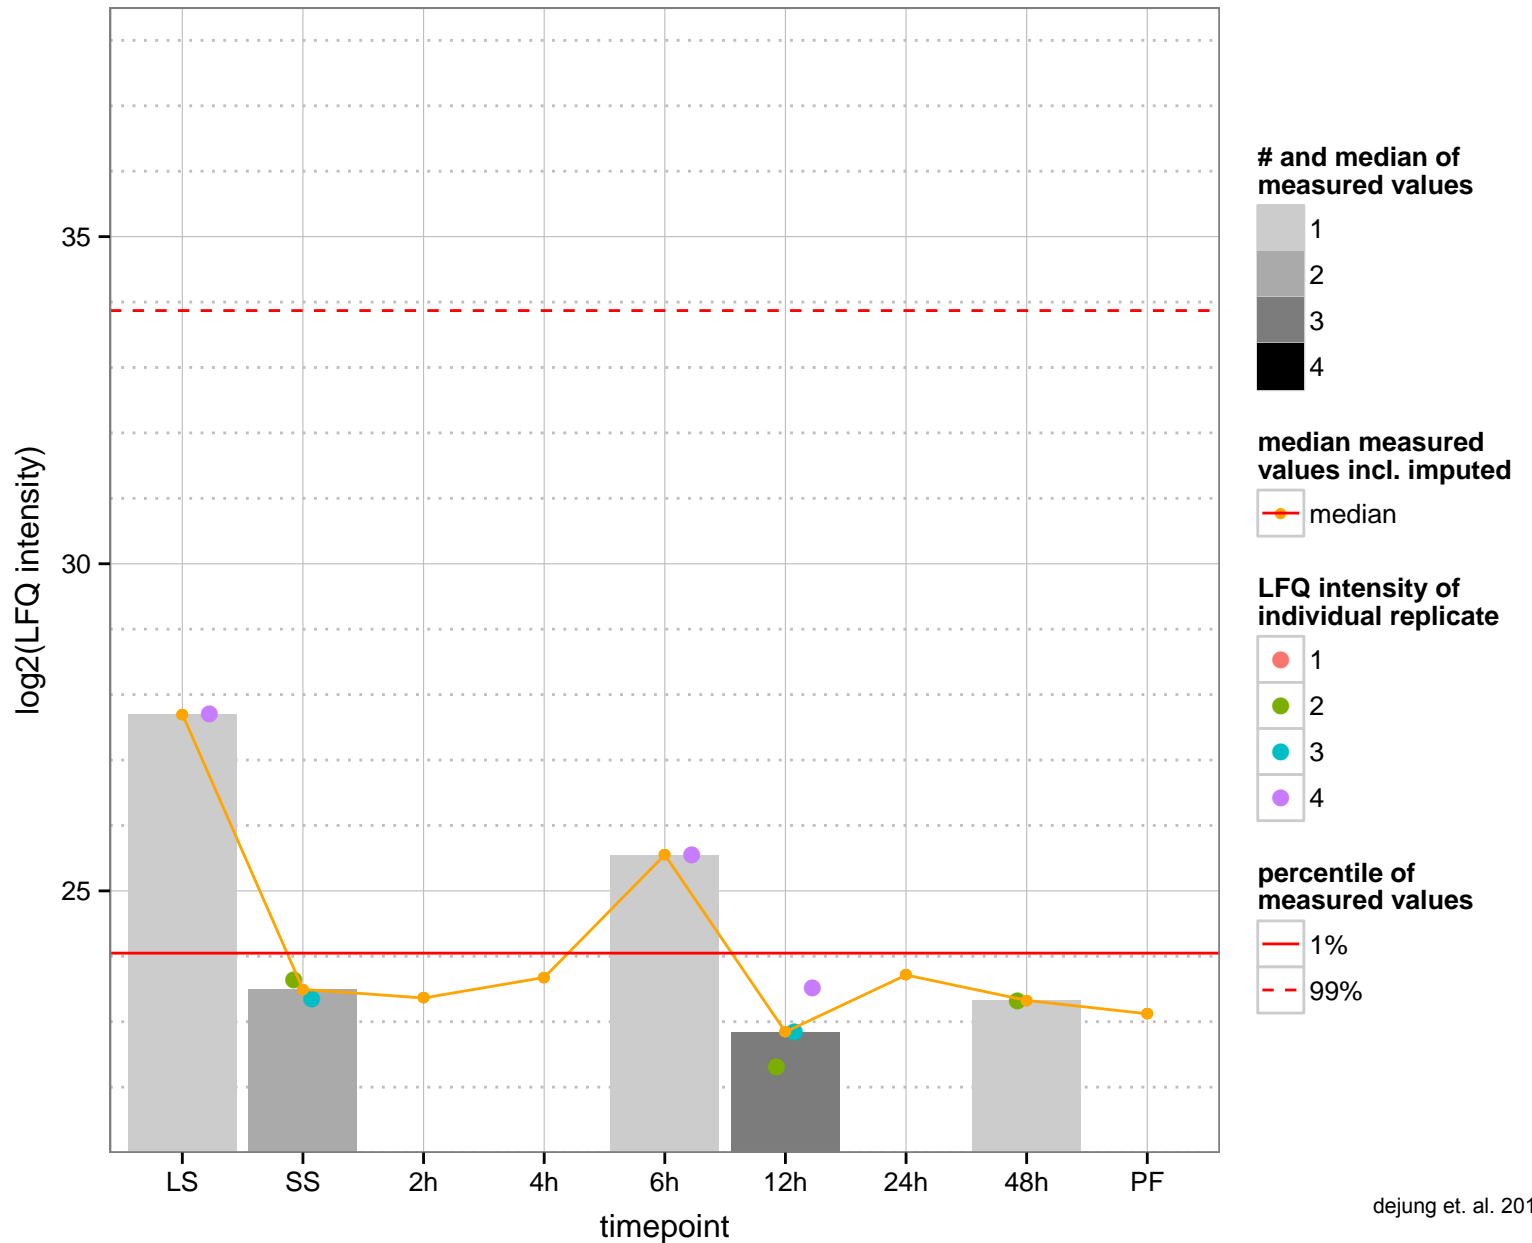

hypothetical protein, conserved  
 Tb927.9.7080  
 AGOF: null  
 AGOC: null  
 AGOP: null  
 PGO: null  
 PGOC: null  
 PGOP: null

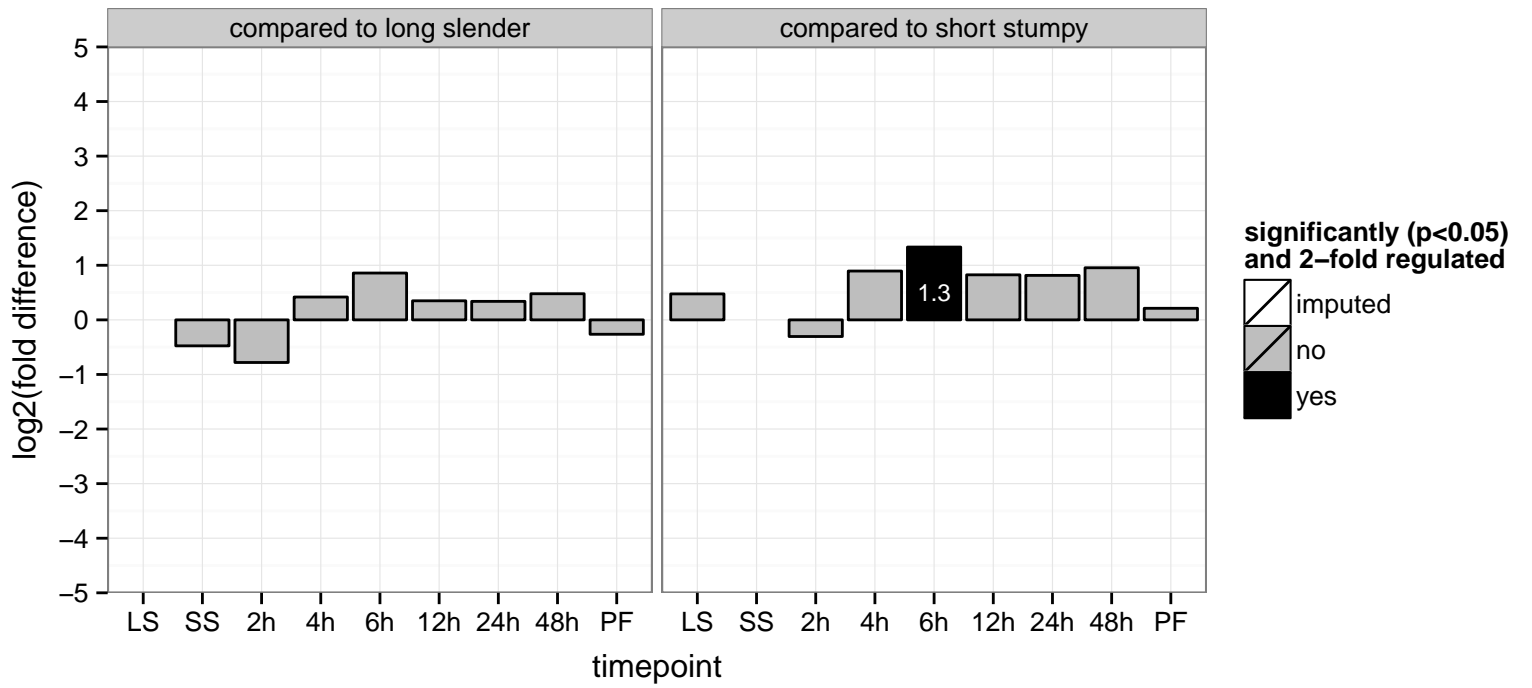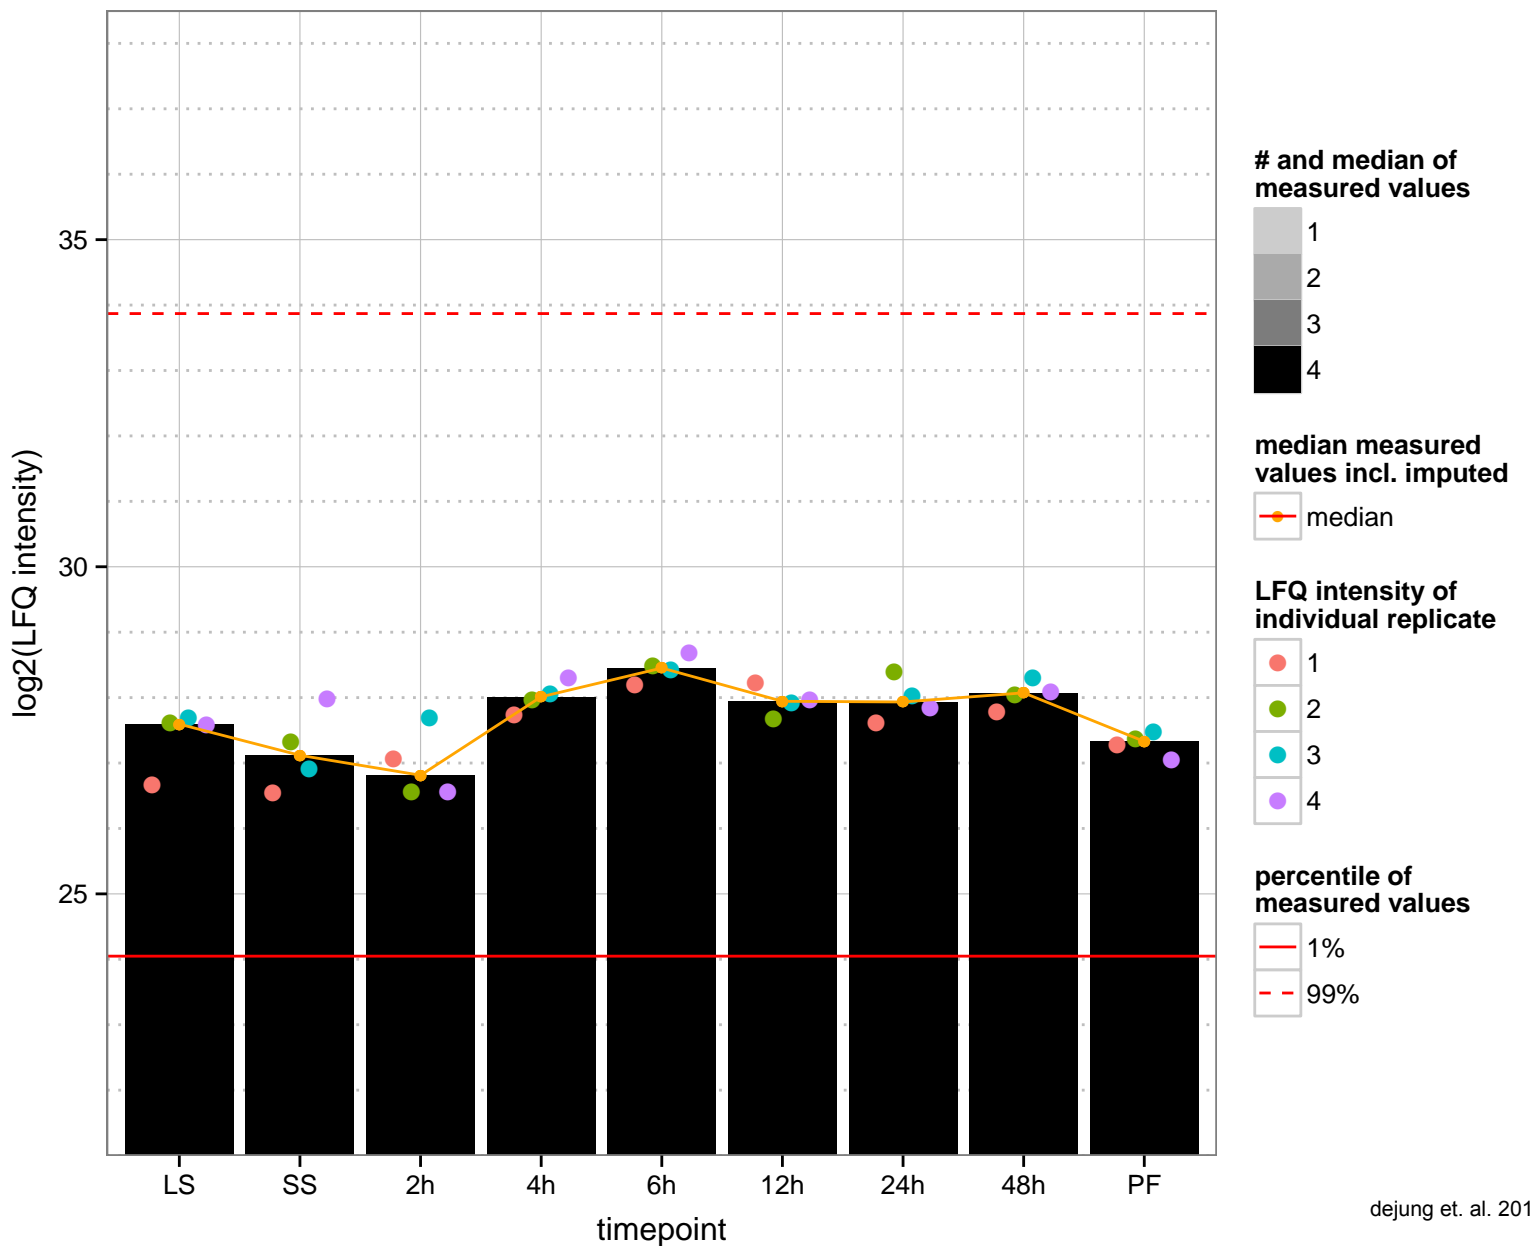

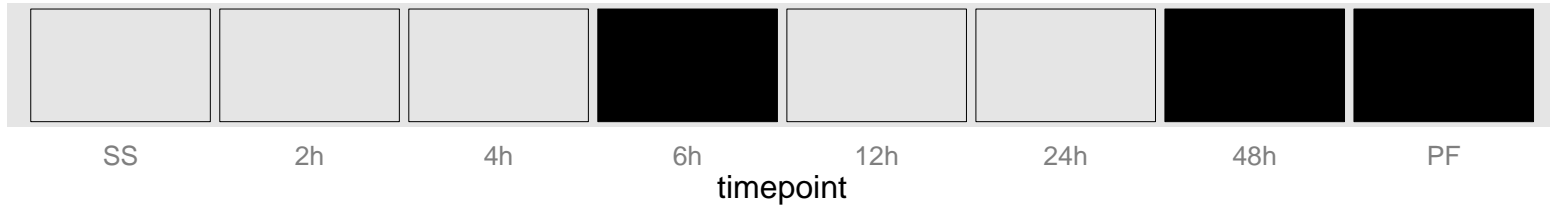

**regulated**  not regulated  significant down  significant up

DNA replication licensing factor MCM4, putative (MCM4)  
 Tb927.11.12250  
 AGOF: ATP binding, DNA binding  
 AGOC: PCNA complex, nucleus  
 AGOP: DNA replication, DNA-dependent DNA replication initiation  
 PGO: ATP binding, DNA binding  
 PGO: null  
 PGO: DNA replication

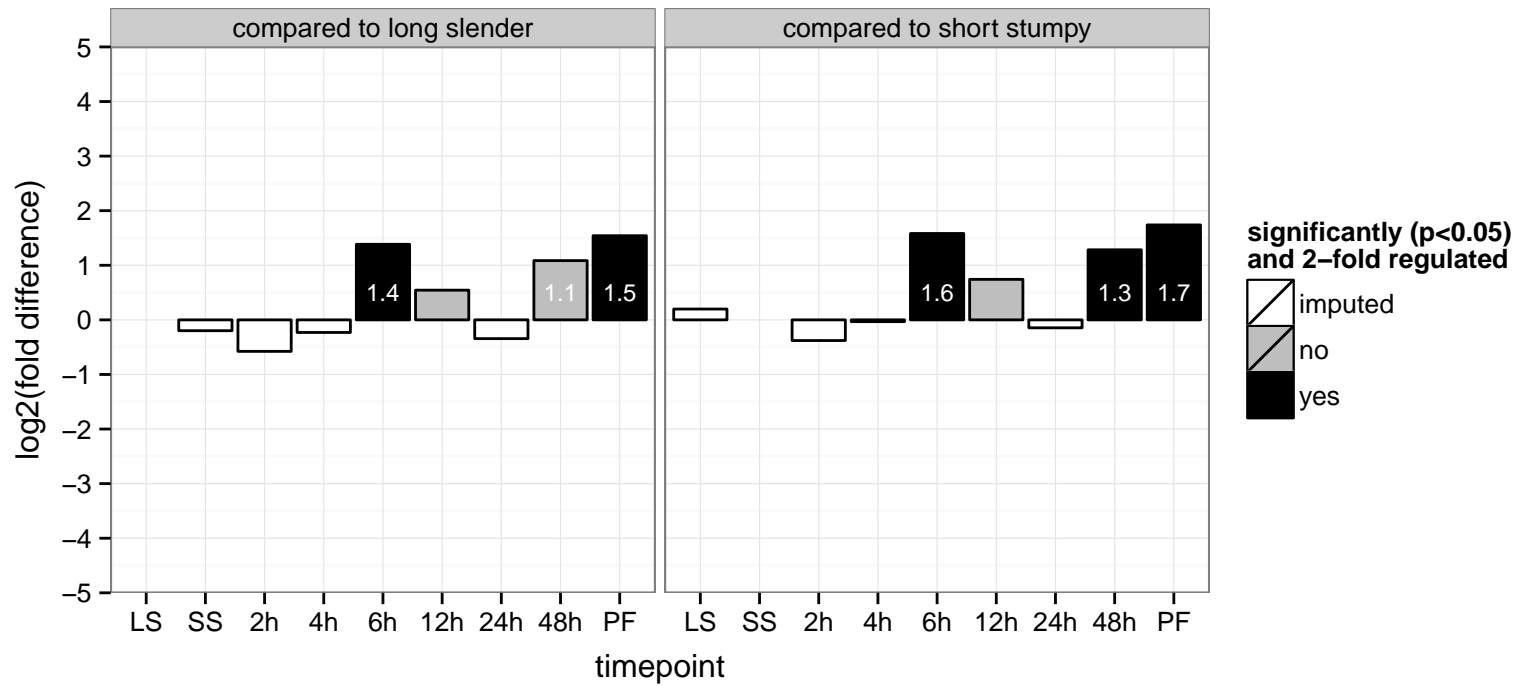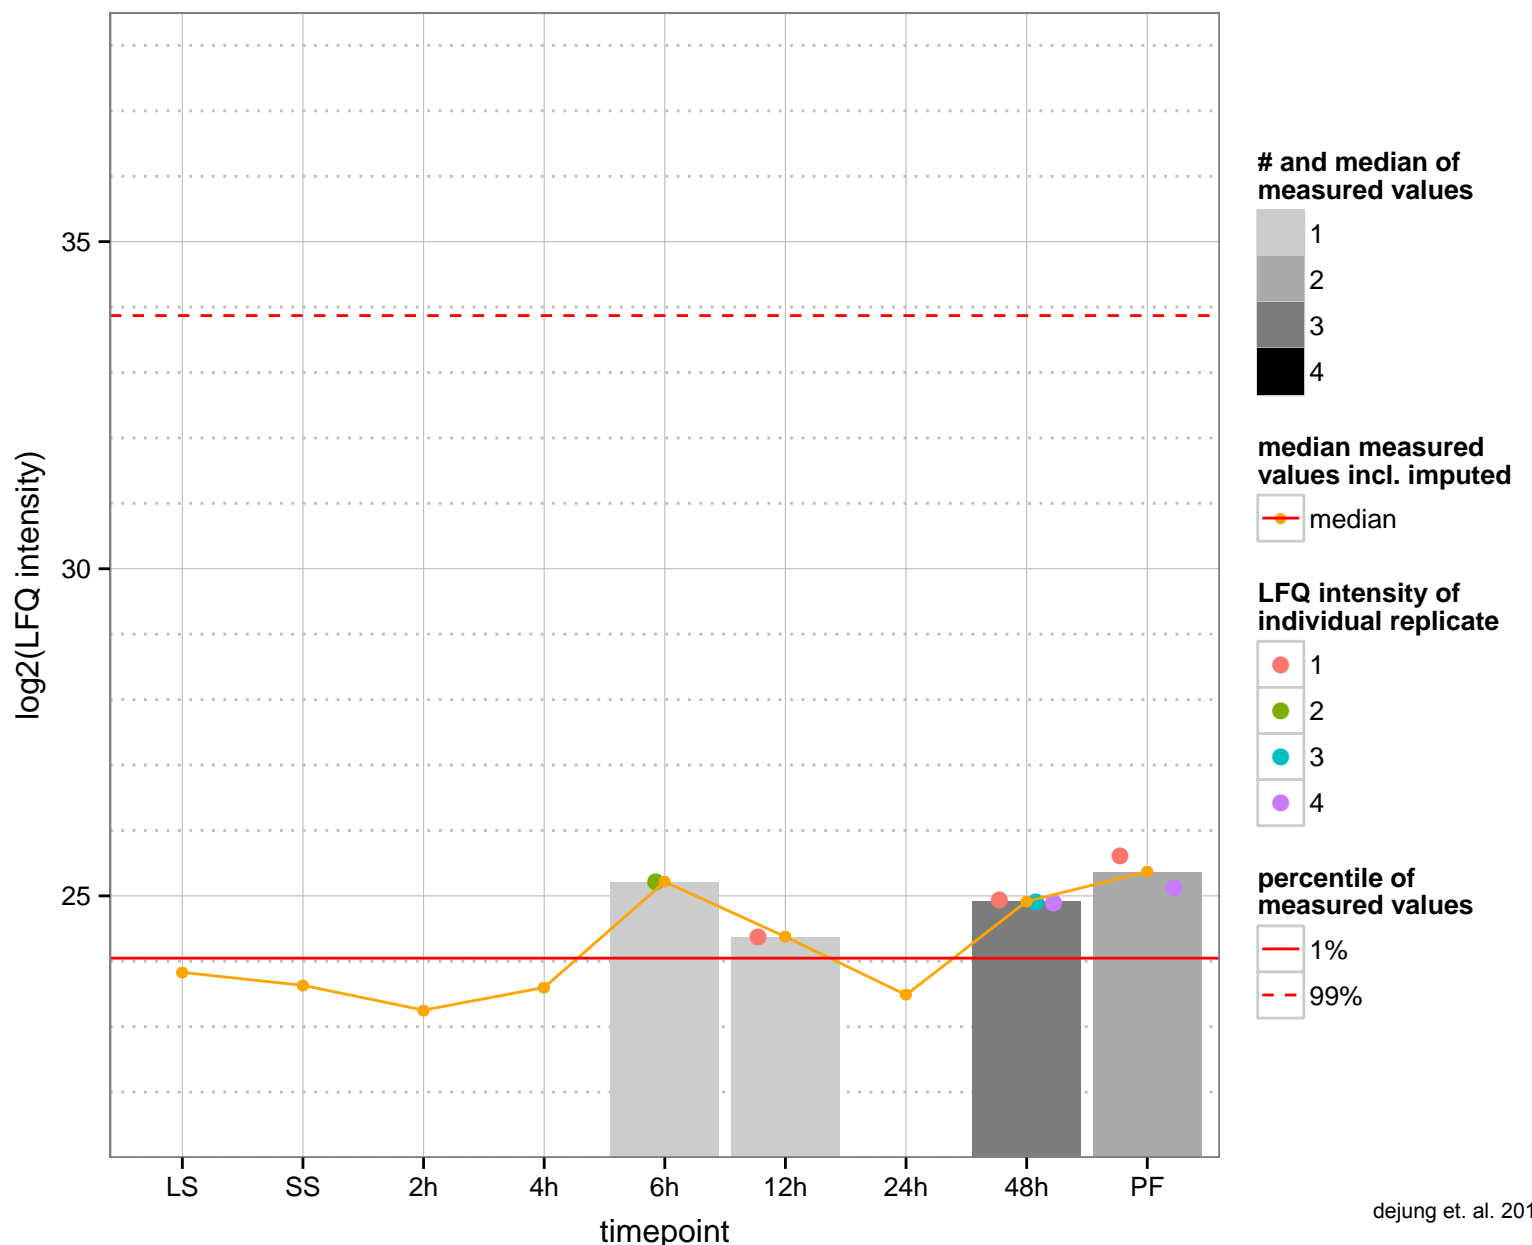



hypothetical protein, conserved  
 Tb927.11.5820  
 AGOF: null  
 AGOC: mitochondrion  
 AGOP: null  
 PGO: null  
 PGOC: null  
 PGOP: null

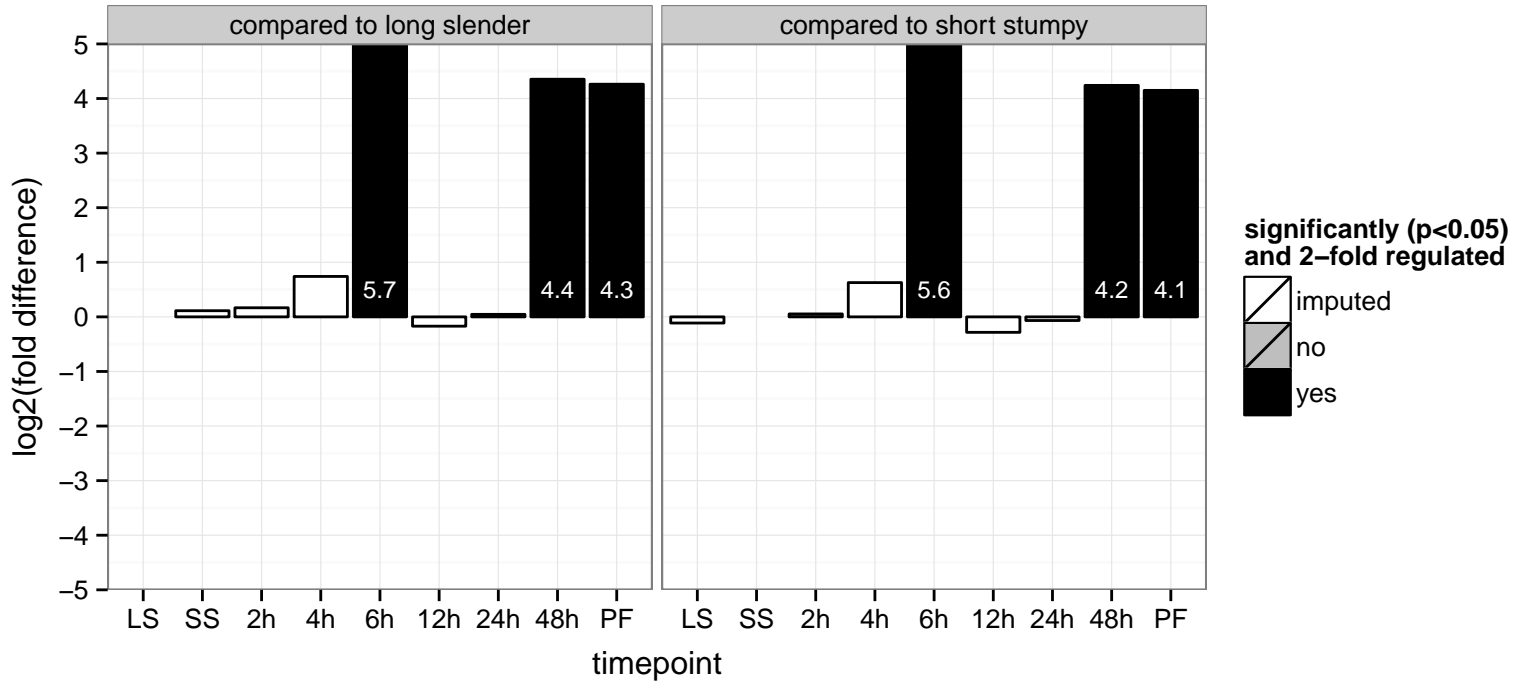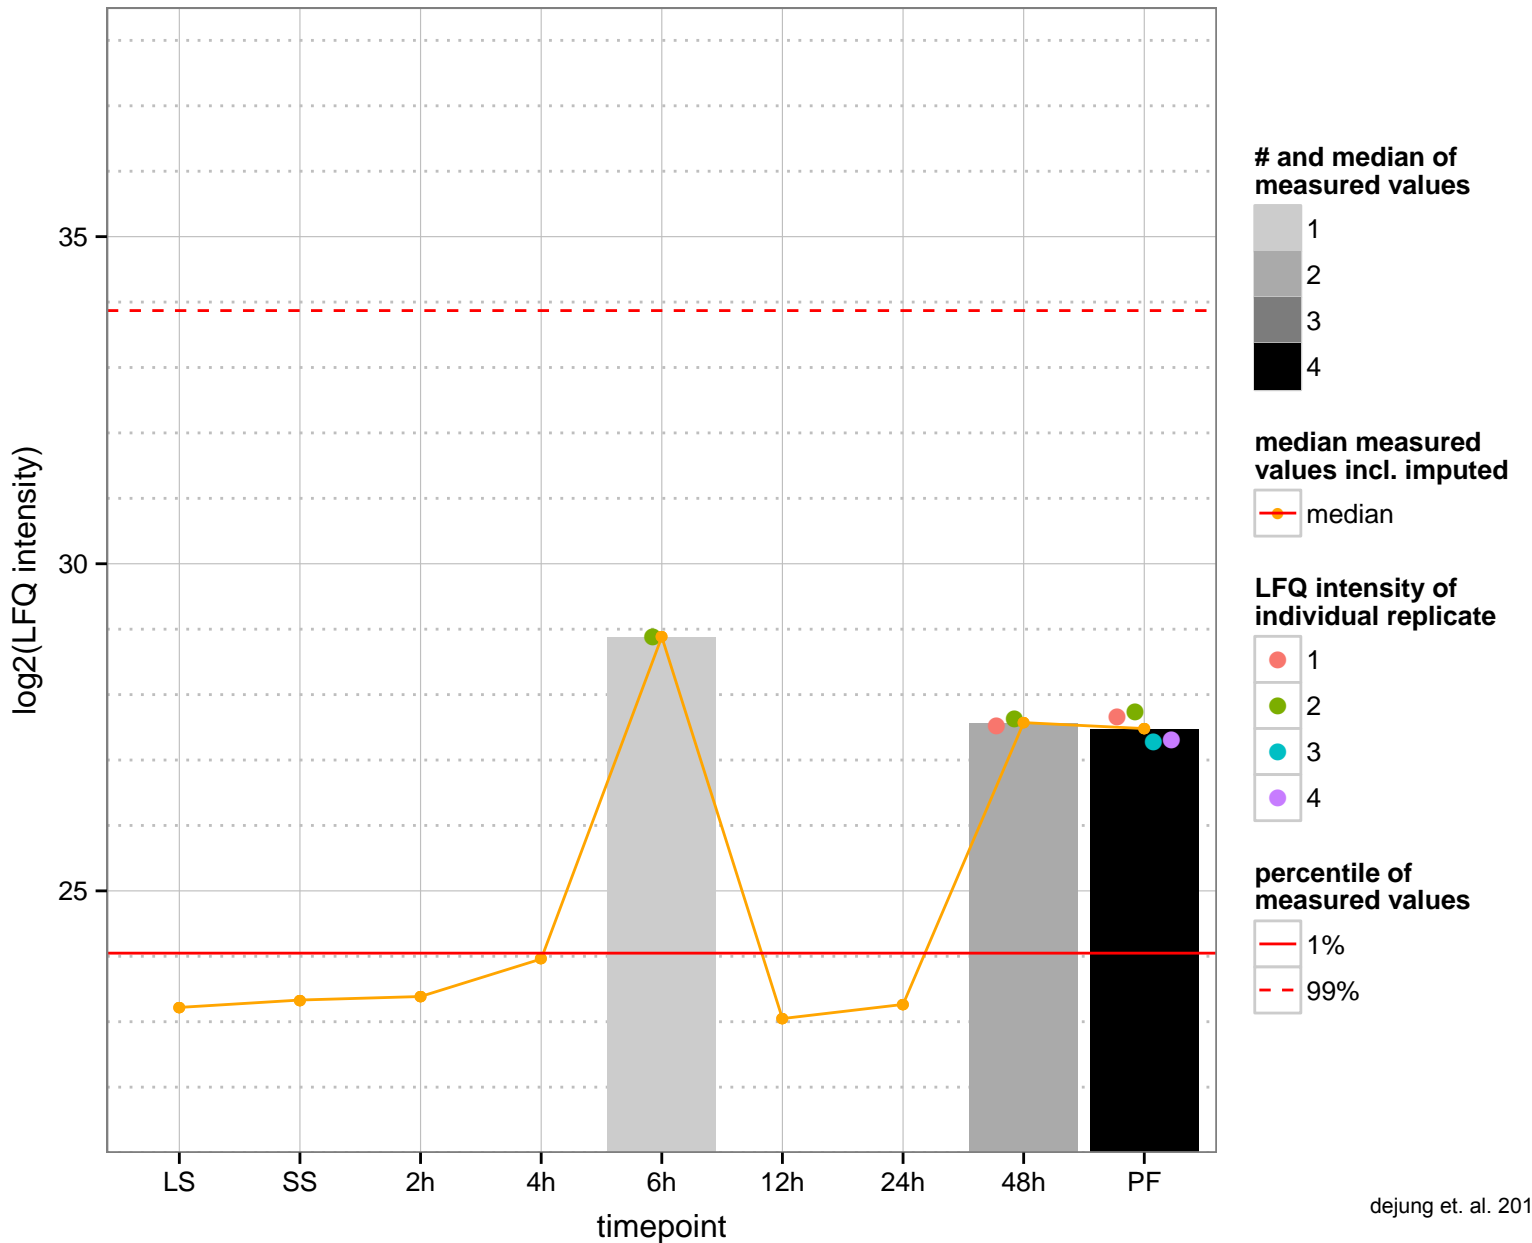

hypothetical protein, conserved  
 Tb927.4.4300  
 AGOF: null  
 AGOC: mitochondrion  
 AGOP: null  
 PGO: protein binding  
 PGOC: null  
 PGOP: null

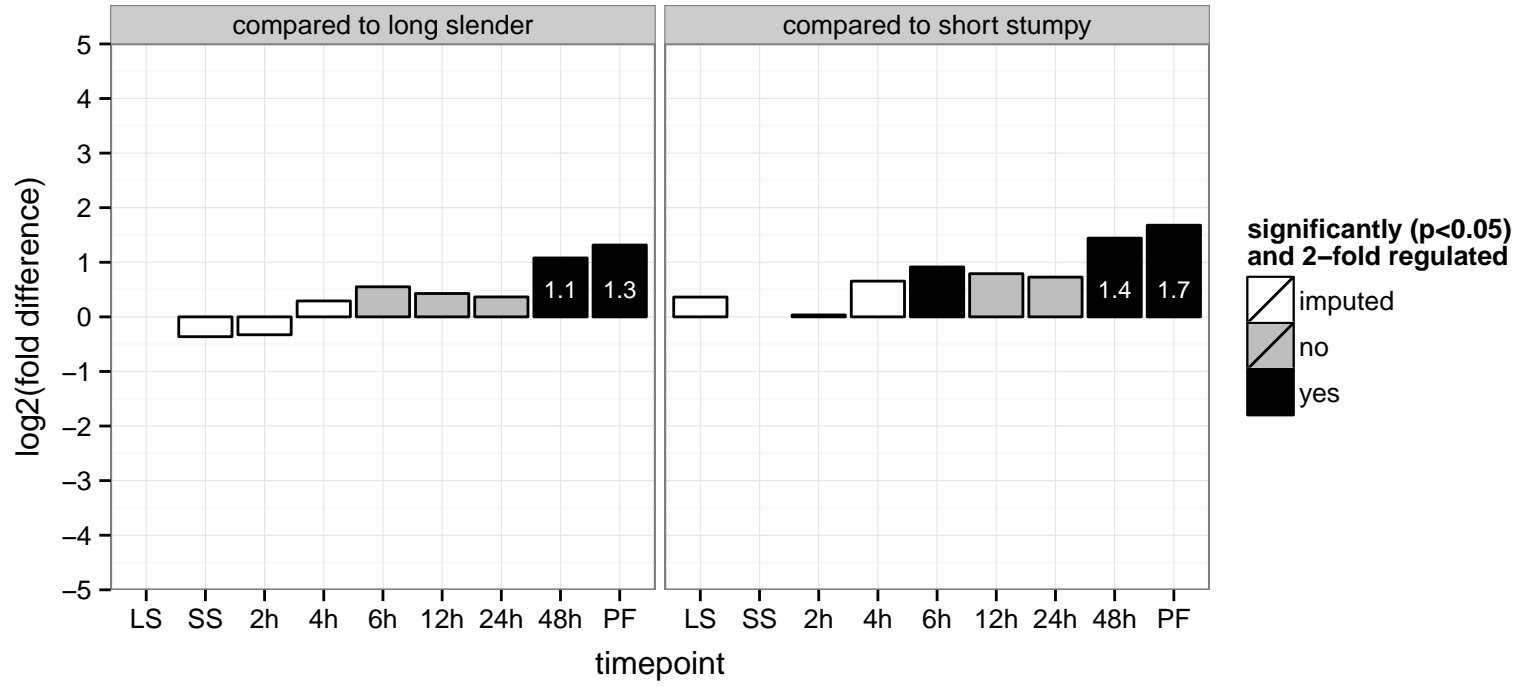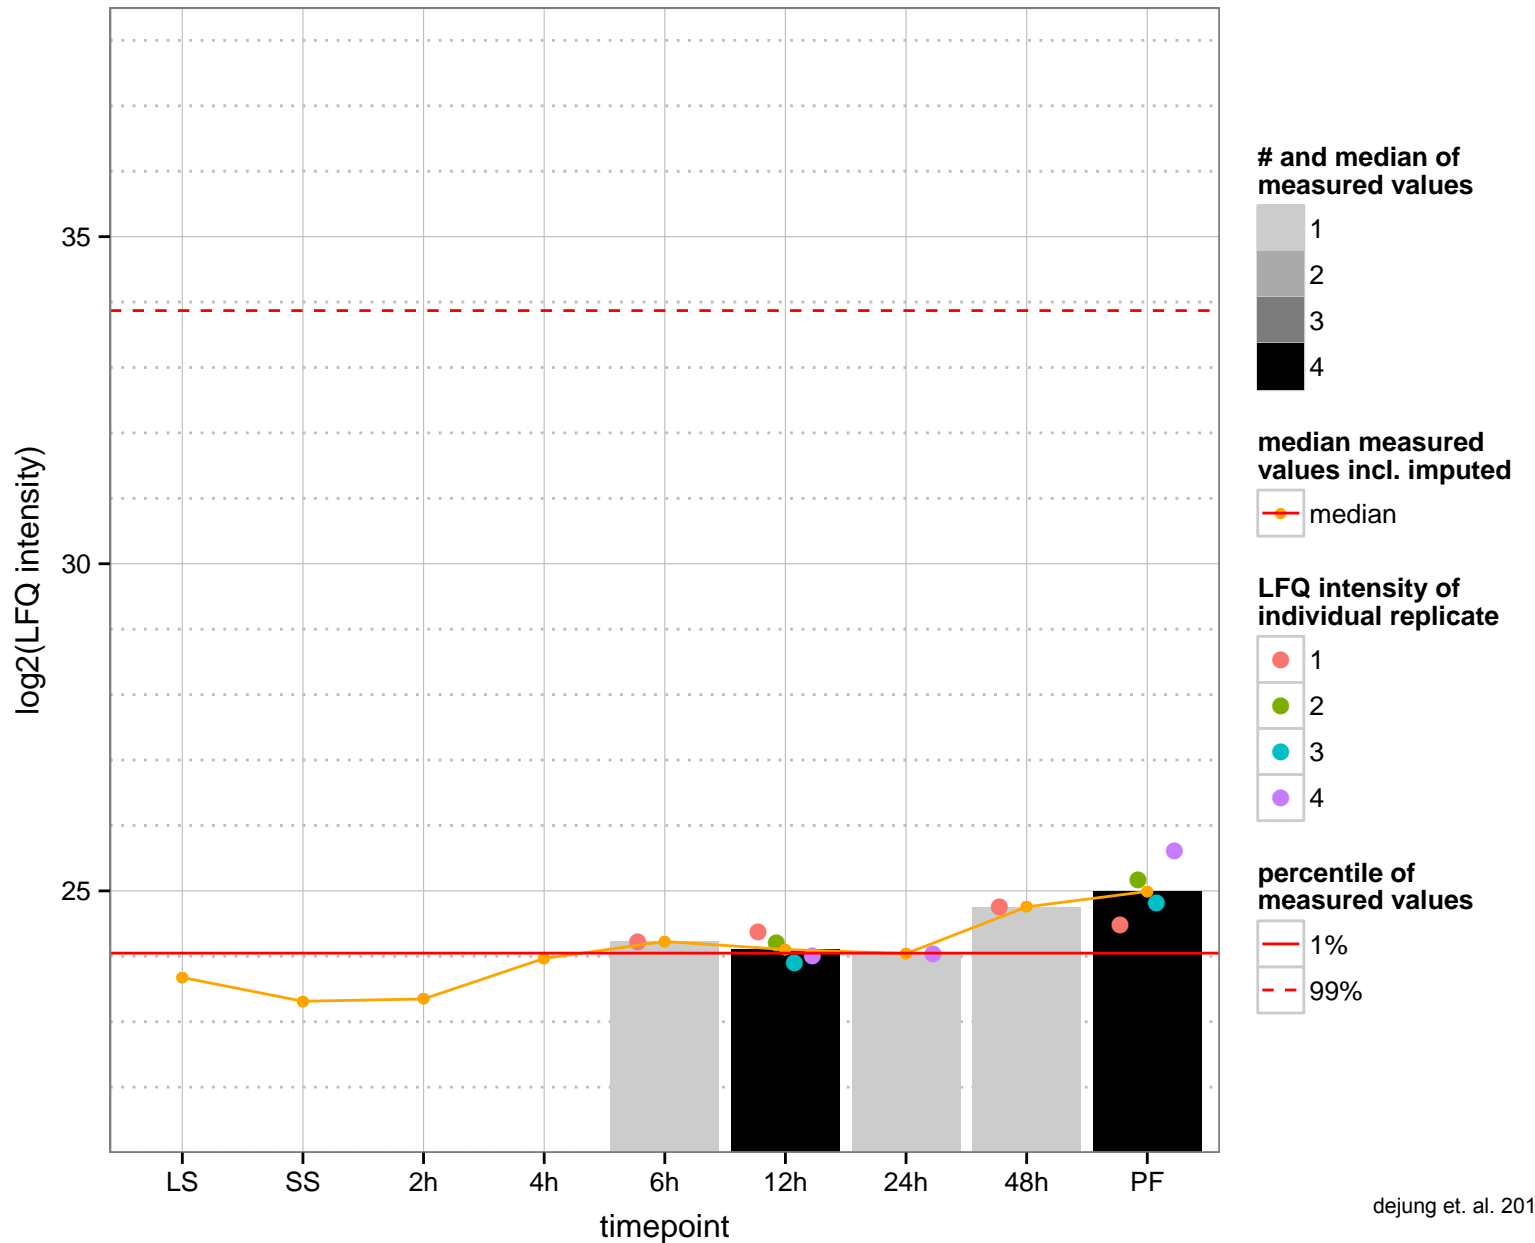

disulfide isomerase, putative  
 Tb927.5.1020  
 AGOF: null  
 AGOC: null  
 AGOP: cell redox homeostasis  
 PGO: null  
 PGO: null  
 PGO: null  
 PGO: cell redox homeostasis

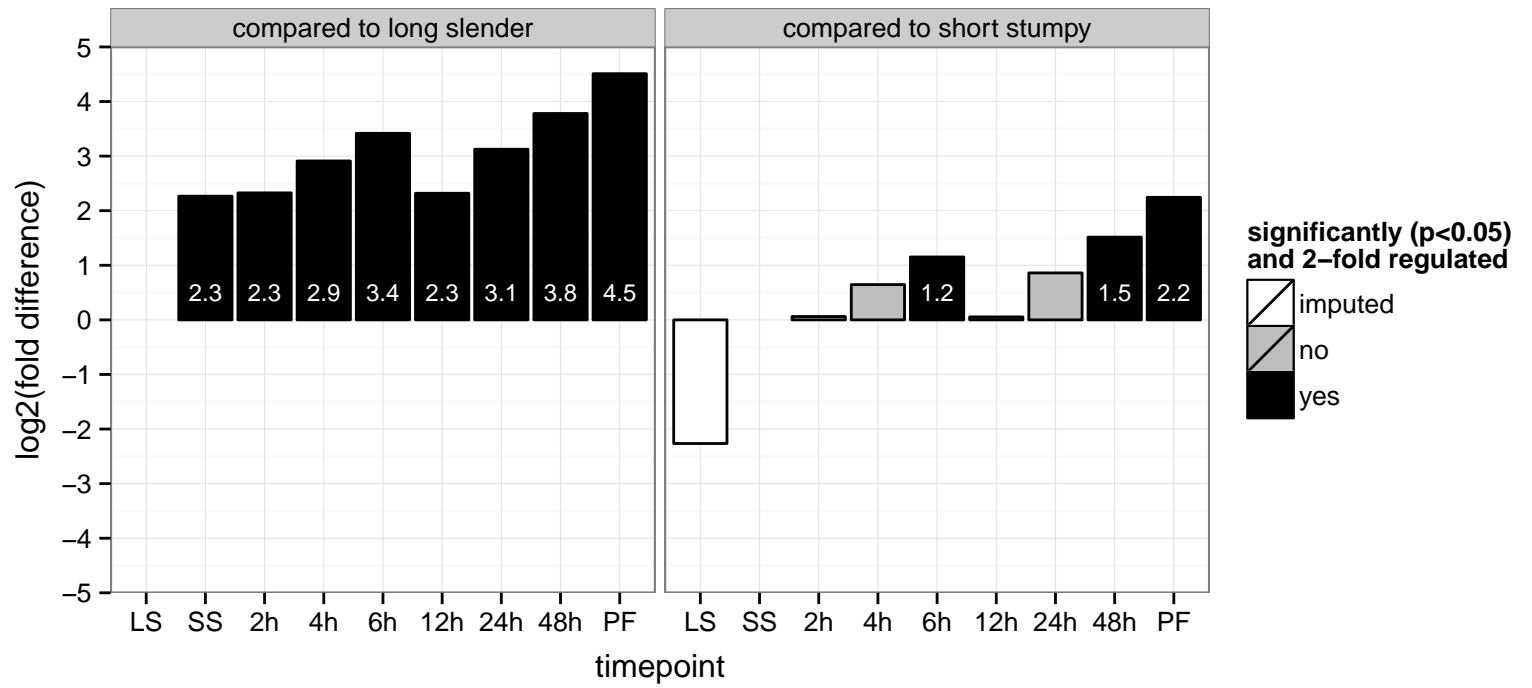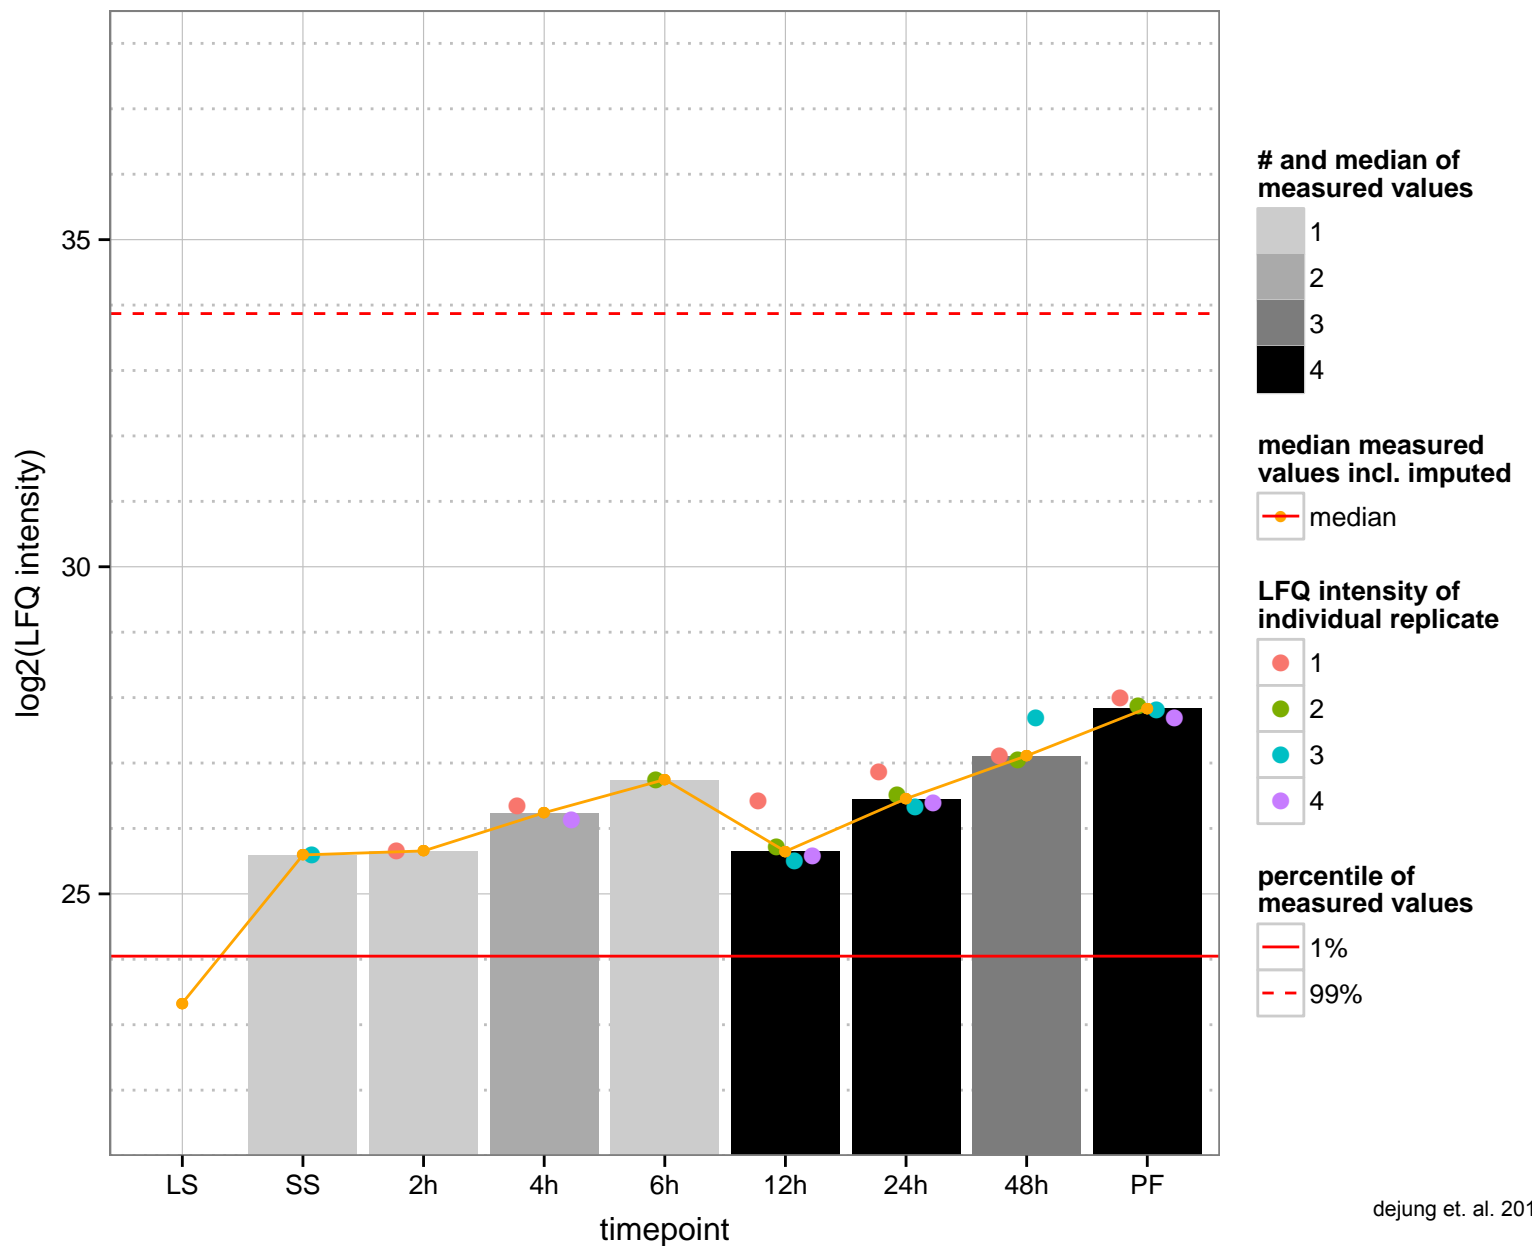

ubiquitin-conjugating enzyme E2, putative, ubiquitin carrier protein, ubiquitin-protein ligase  
Tb927.7.2540

AGOF: ubiquitin-protein ligase activity

AGOC: null

AGOP: cellular protein modification process, post-translational protein modification, regulation of protein metabolic process

PGOF: acid-amino acid ligase activity

PGOC: null

PGOP: null

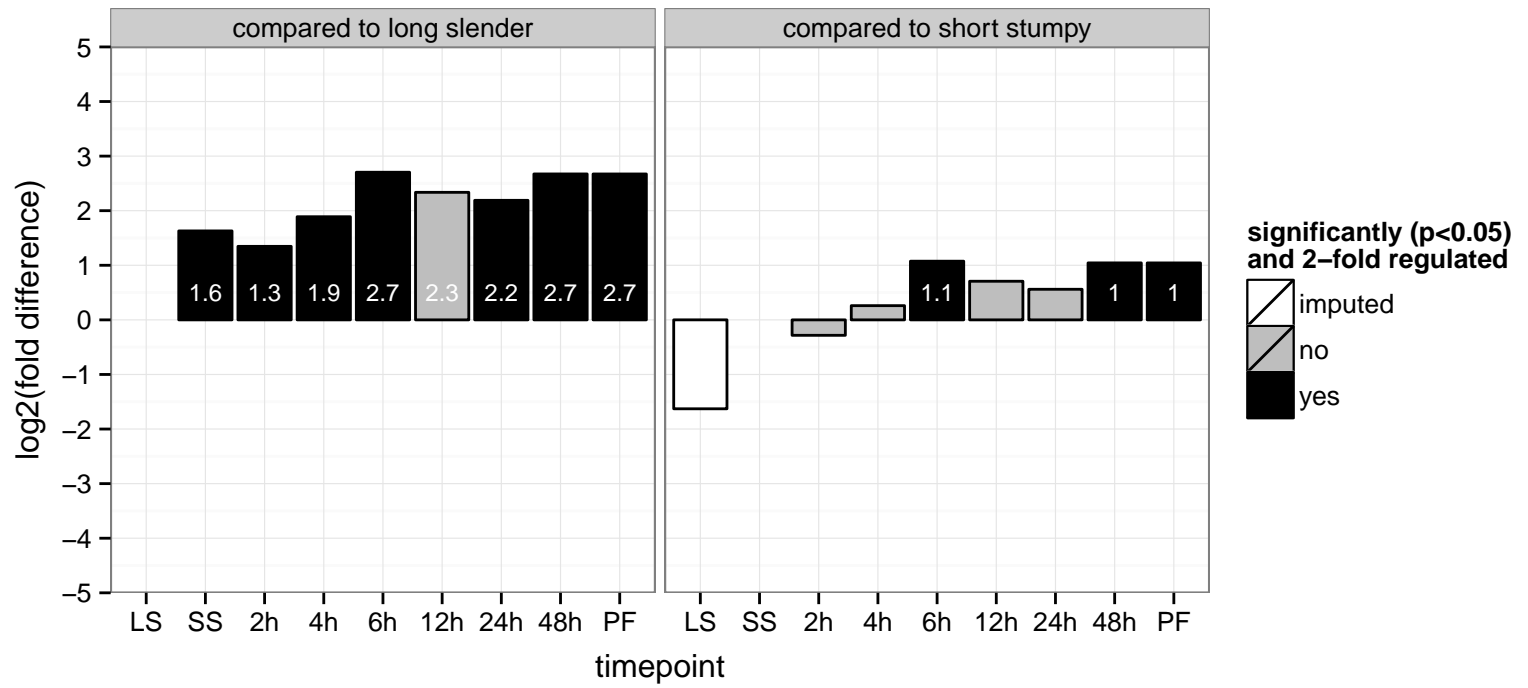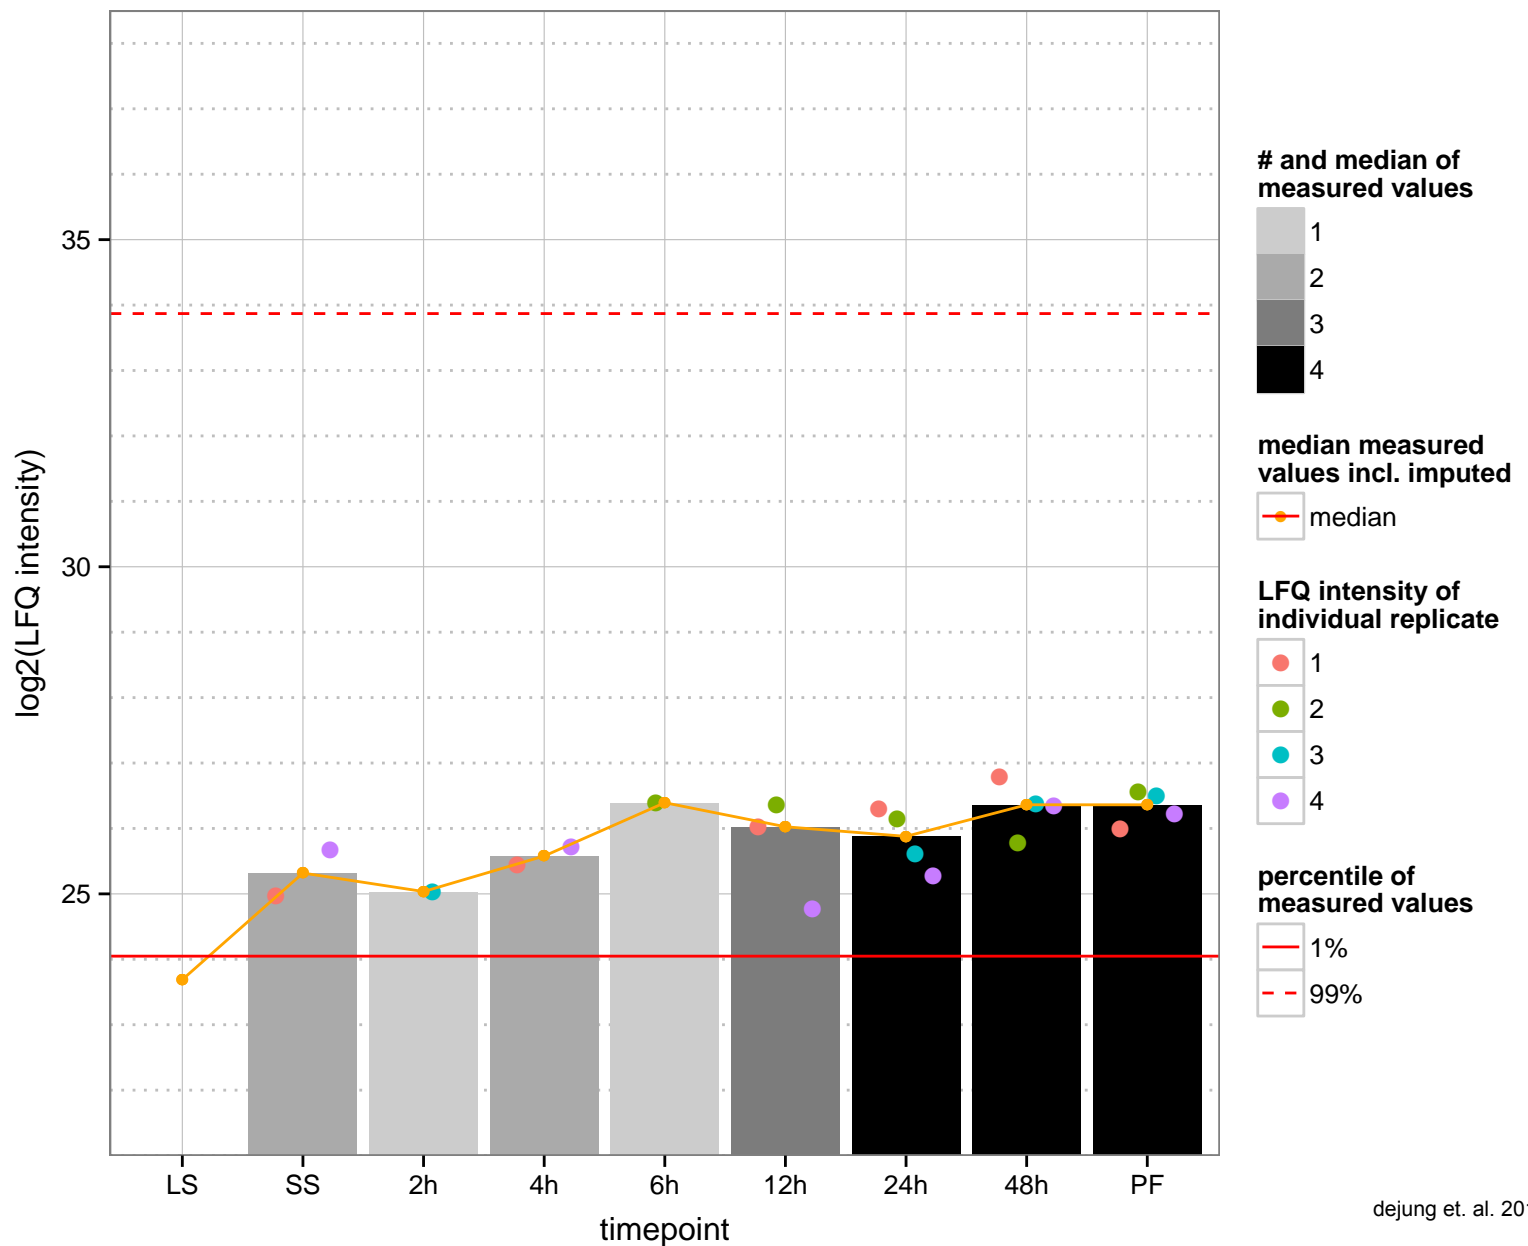

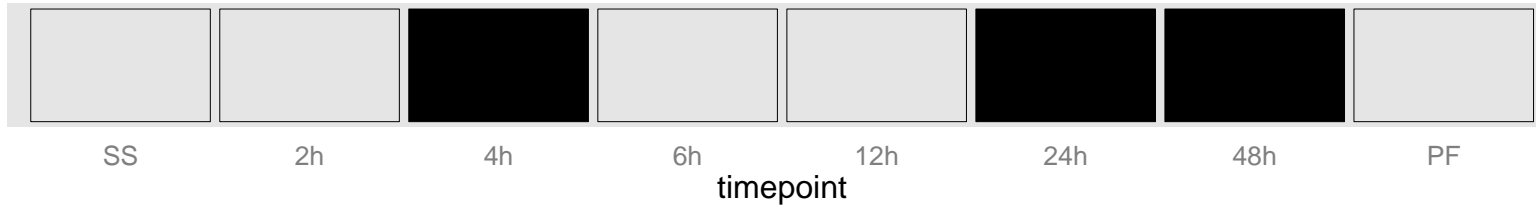

**regulated**  **not regulated**  **significant down**  **significant up**

hypothetical protein, conserved  
 Tb927.11.10950  
 AGOF: heat shock protein binding  
 AGOC: null  
 AGOP: null  
 PGOF: heat shock protein binding  
 PGOC: null  
 PGOP: null

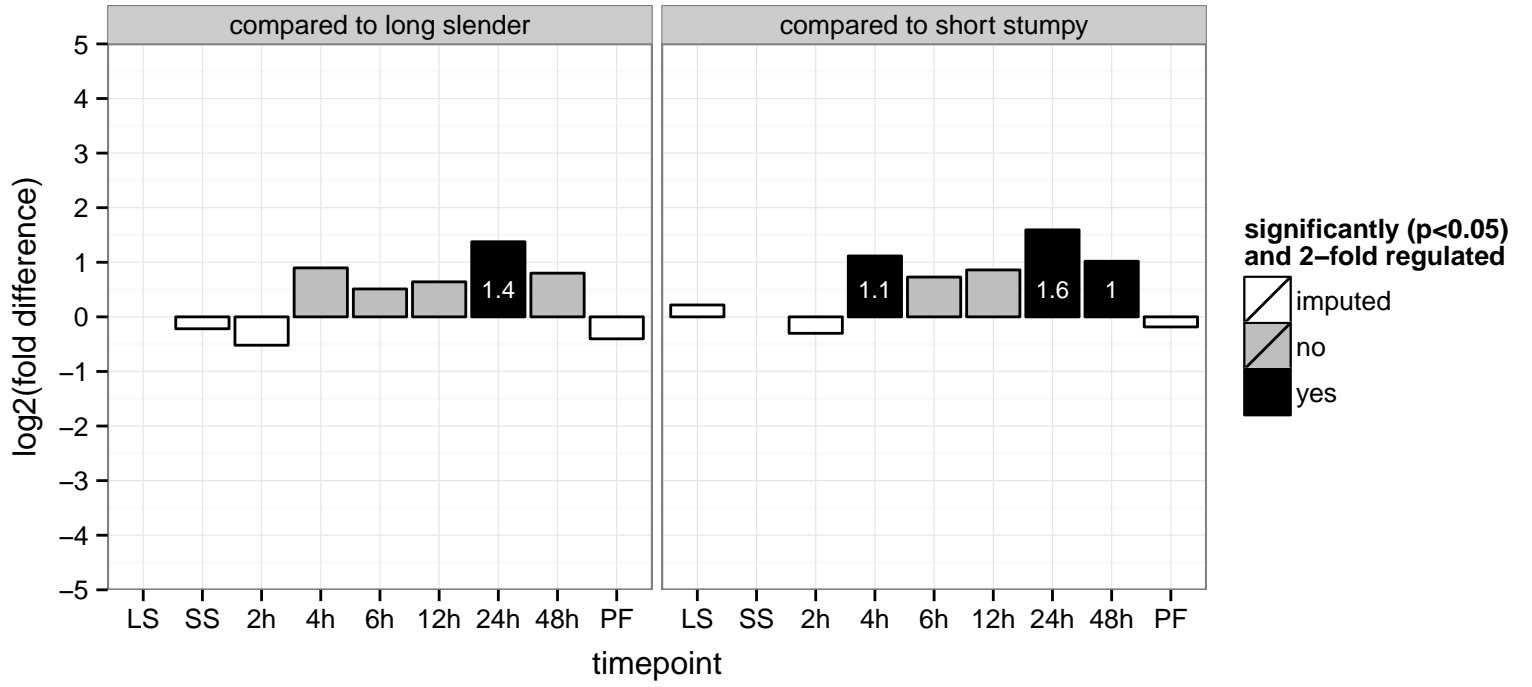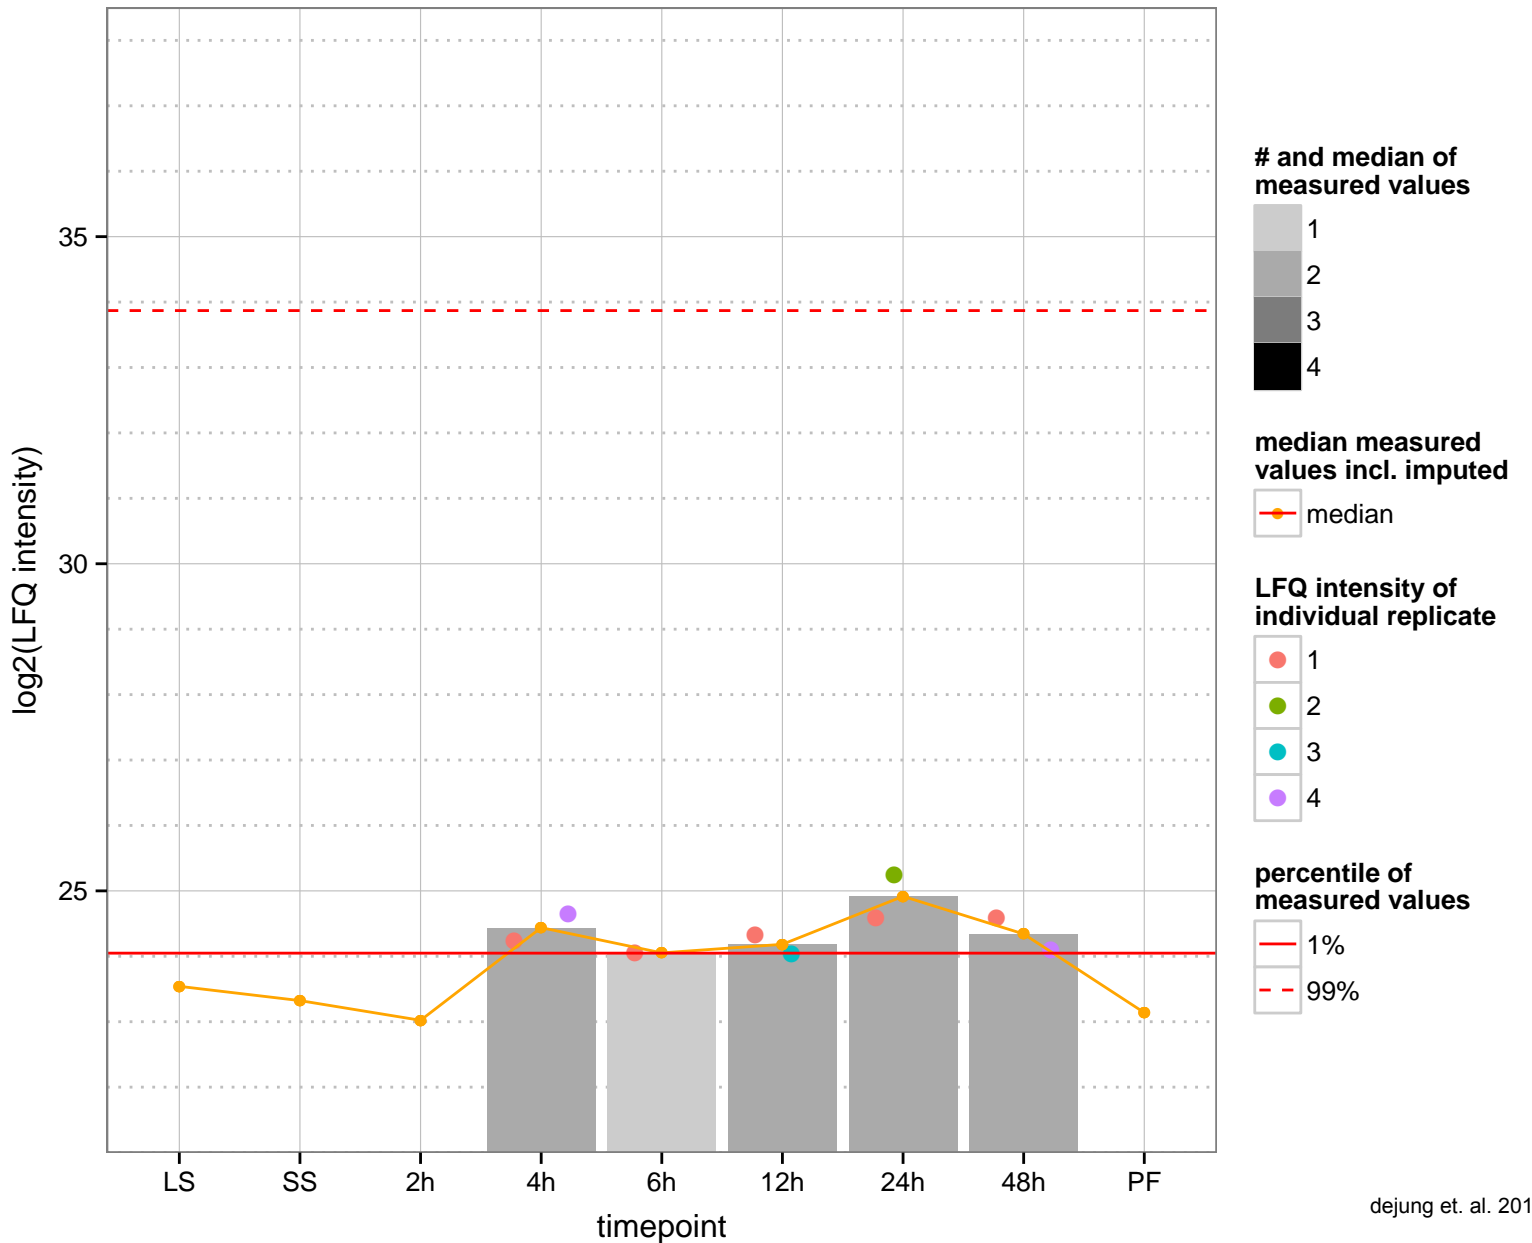

nascent polypeptide associated complex alpha subunit, putative  
 Tb927.11.9700  
 AGOF: sequence-specific DNA binding transcription factor activity  
 AGOC: nascent polypeptide-associated complex  
 AGOP: positive regulation of growth rate  
 PGO: null  
 PGOC: null  
 PGOP: null

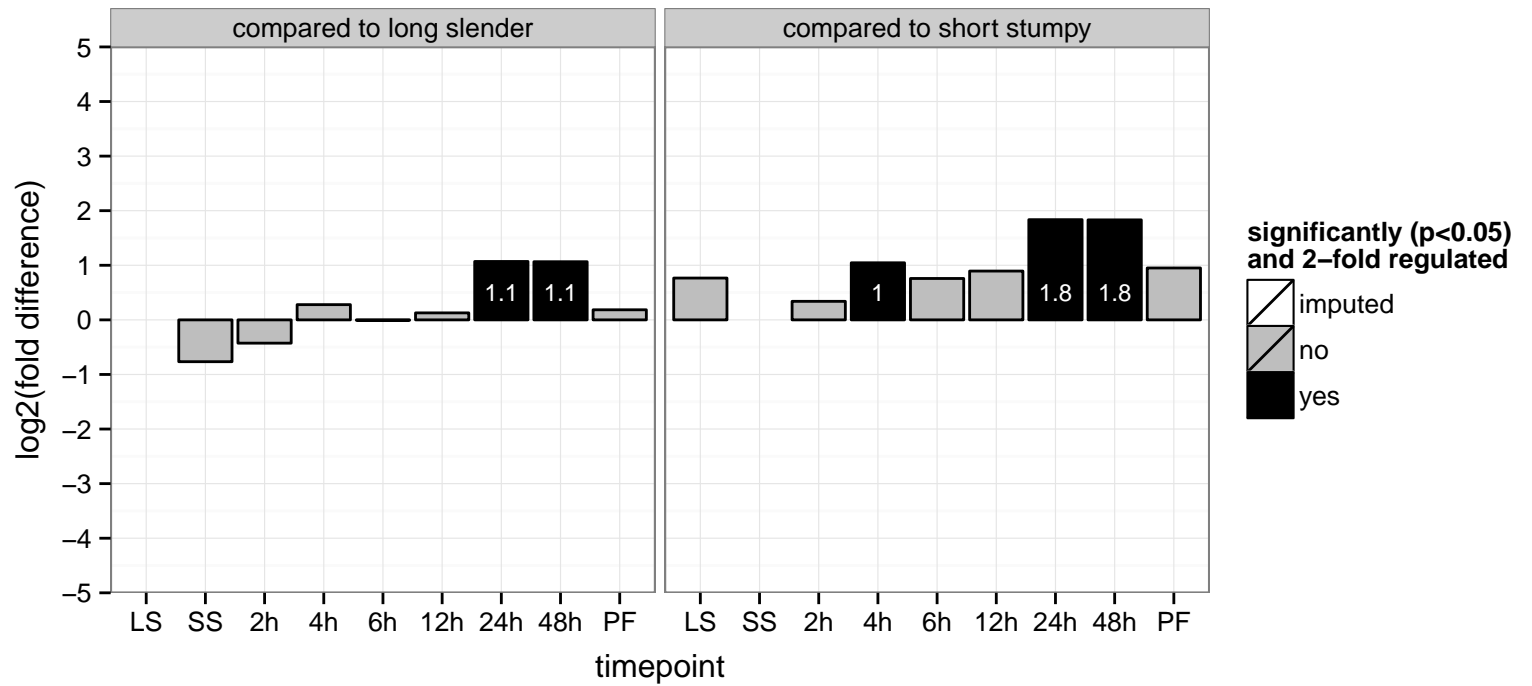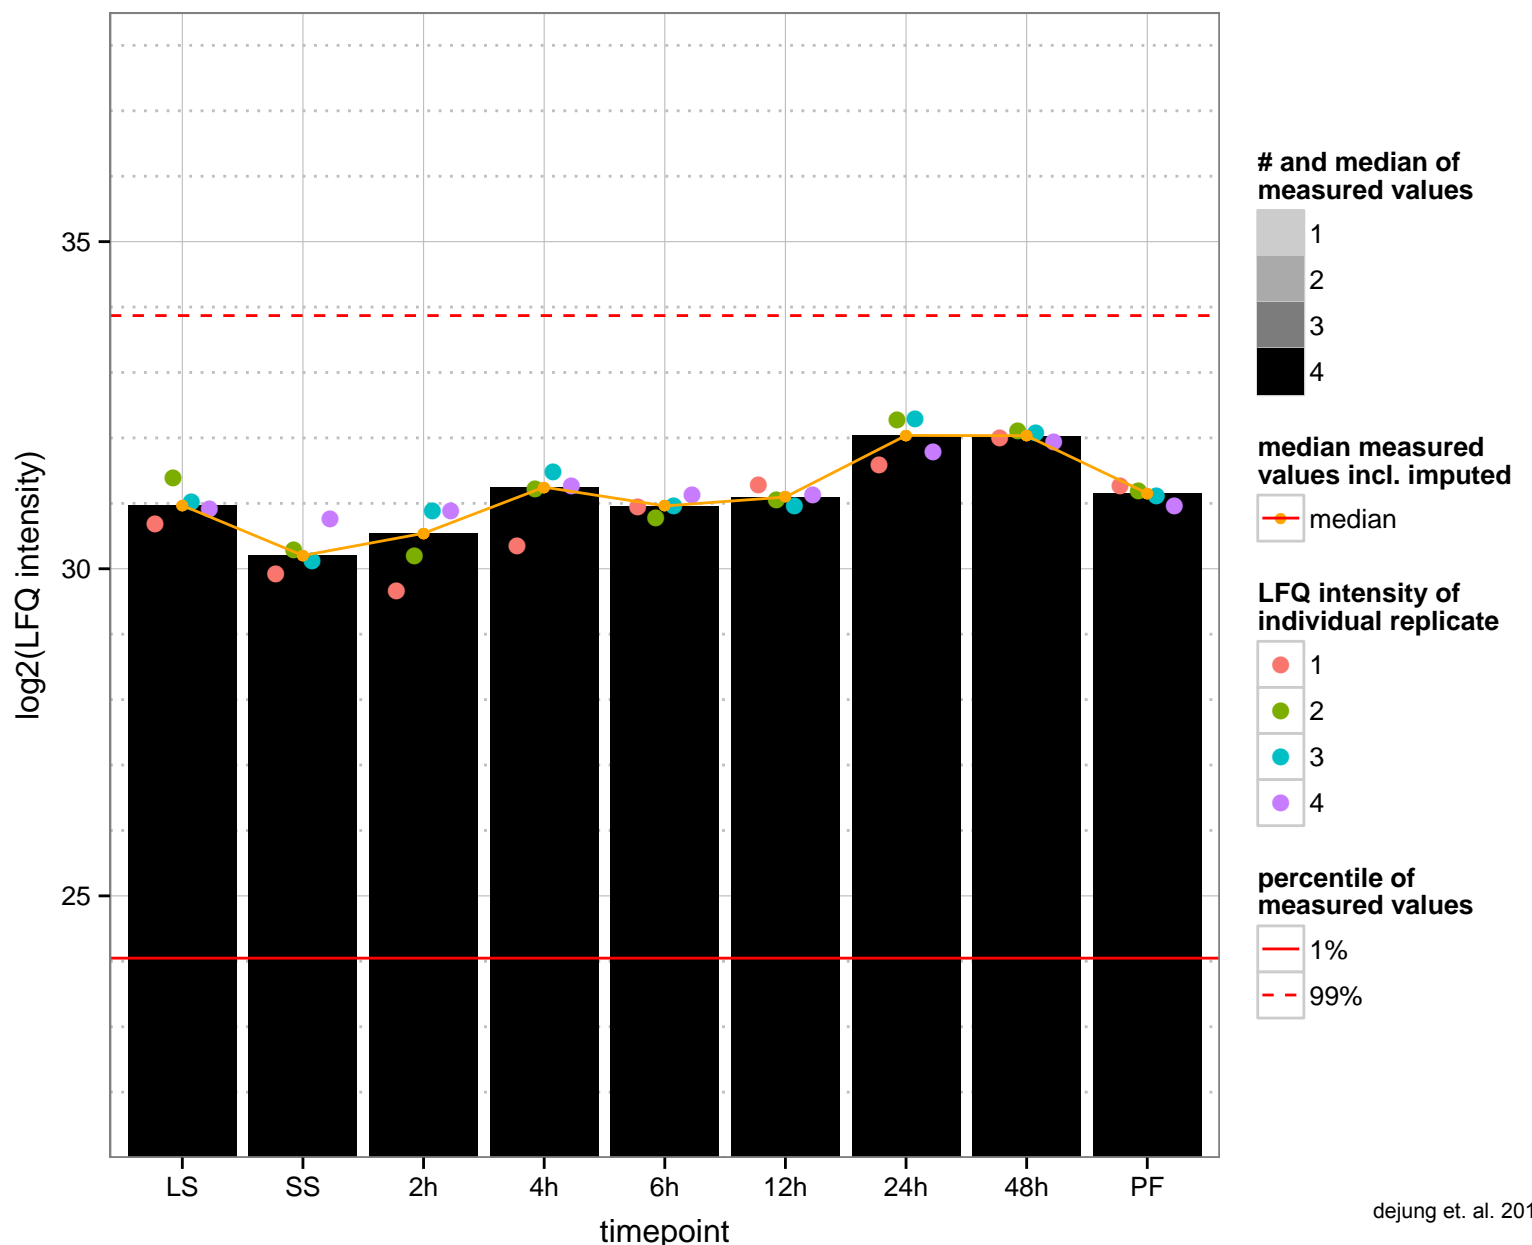

hypothetical protein, conserved  
 Tb927.11.9910  
 AGOF: null  
 AGOC: null  
 AGOP: null  
 PGO: null  
 PGOC: null  
 PGOP: null

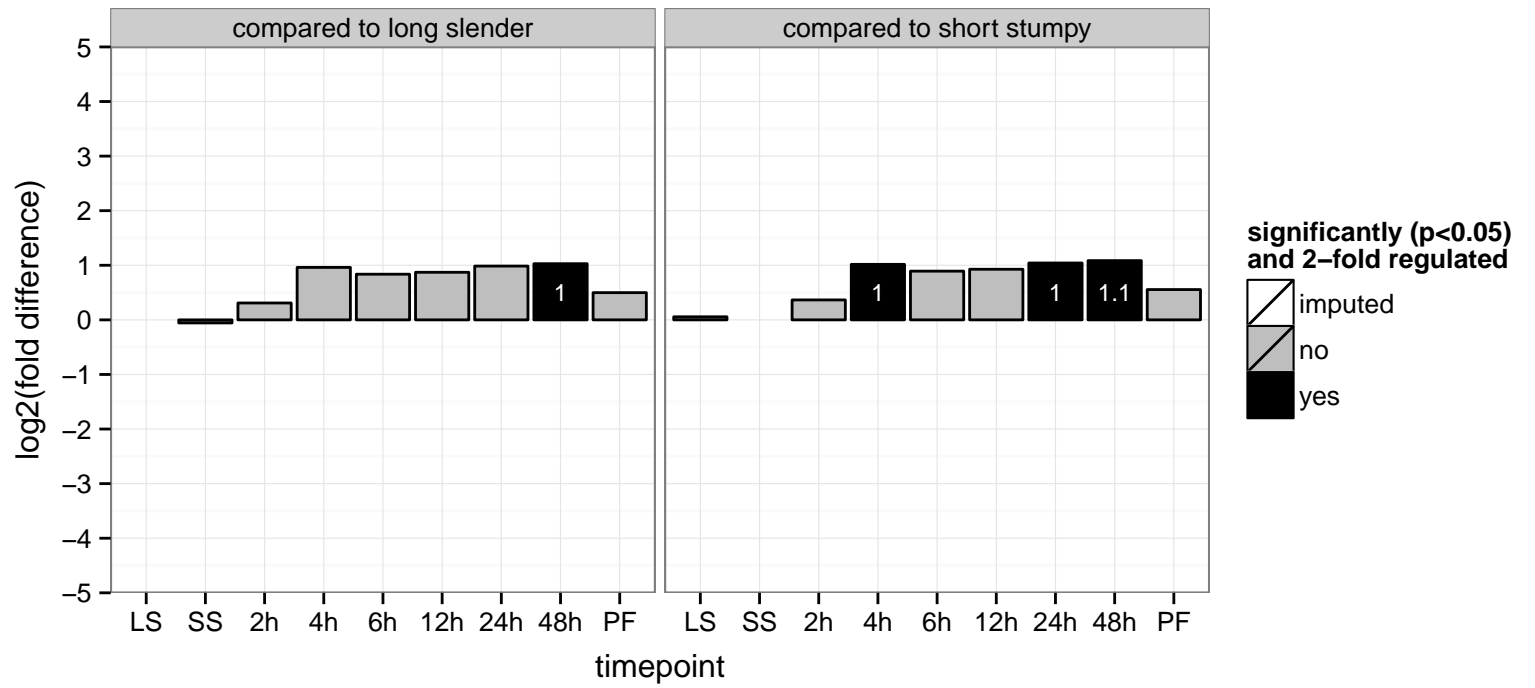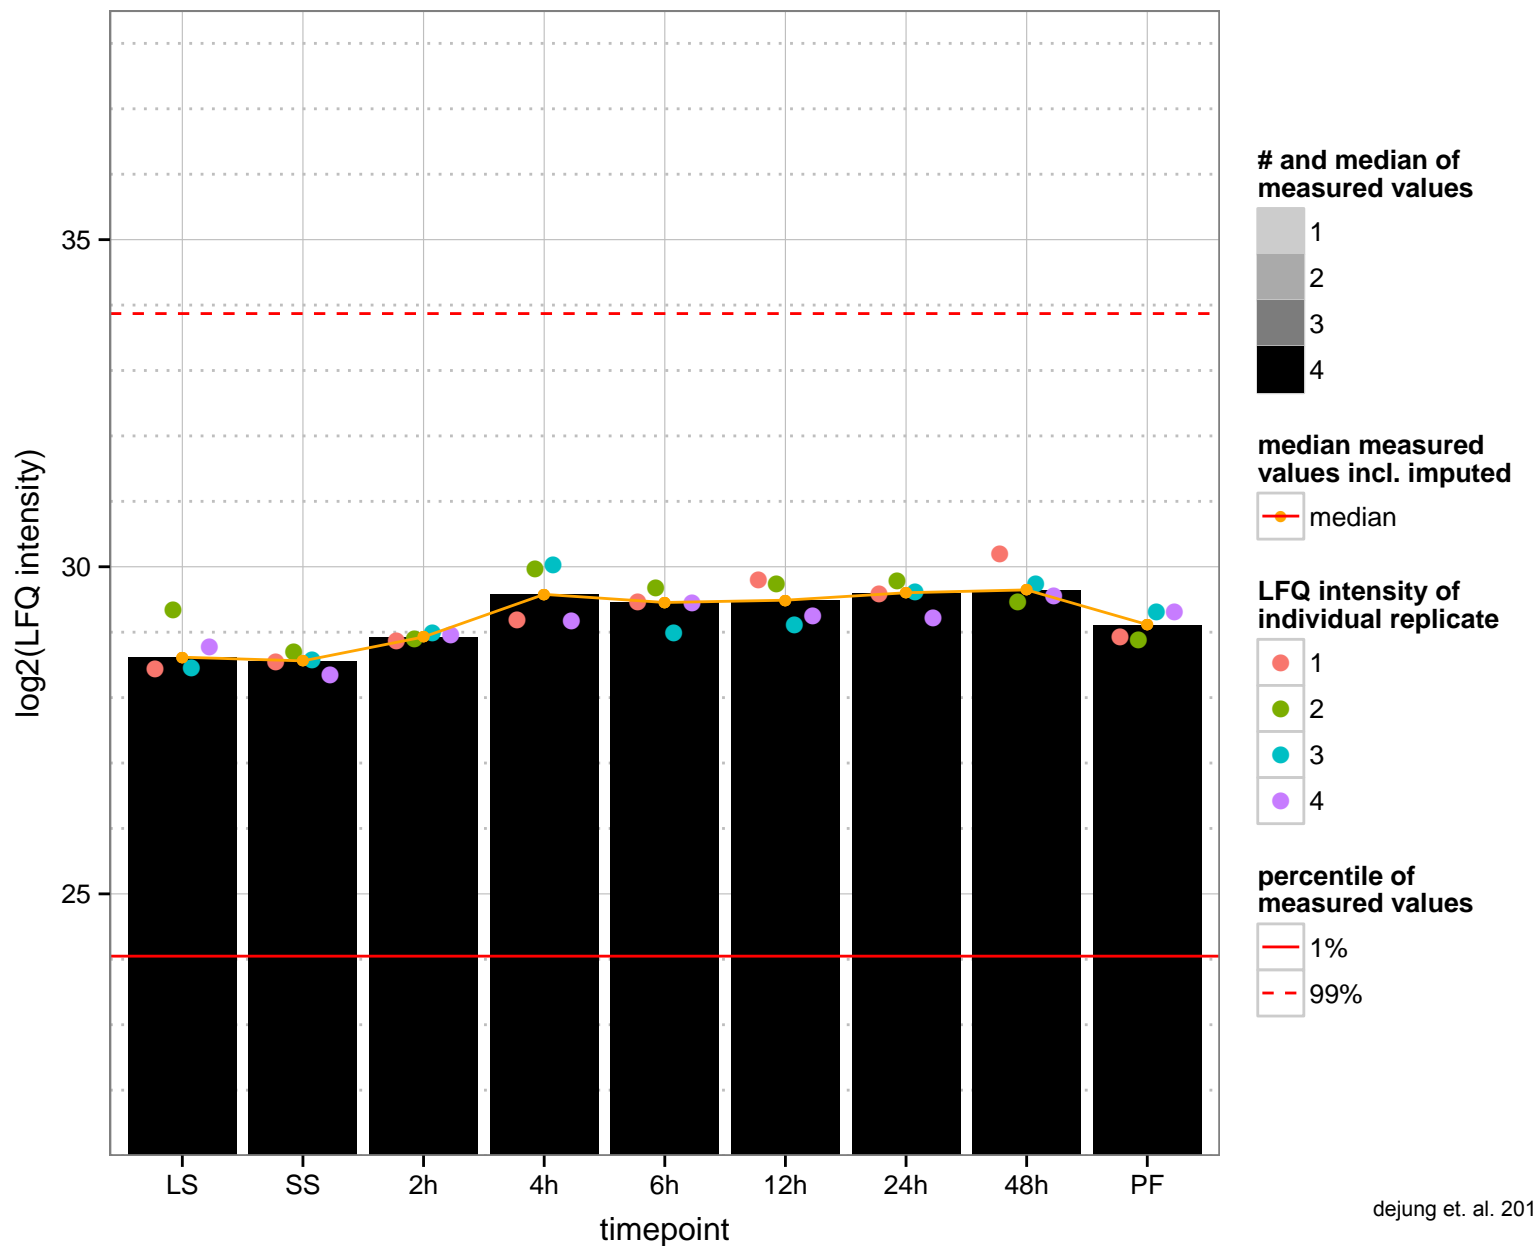



hypothetical protein, conserved  
 Tb927.4.3070  
 AGOF: null  
 AGOC: mitochondrion  
 AGOP: null  
 PGO: null  
 PGOC: null  
 PGOP: null

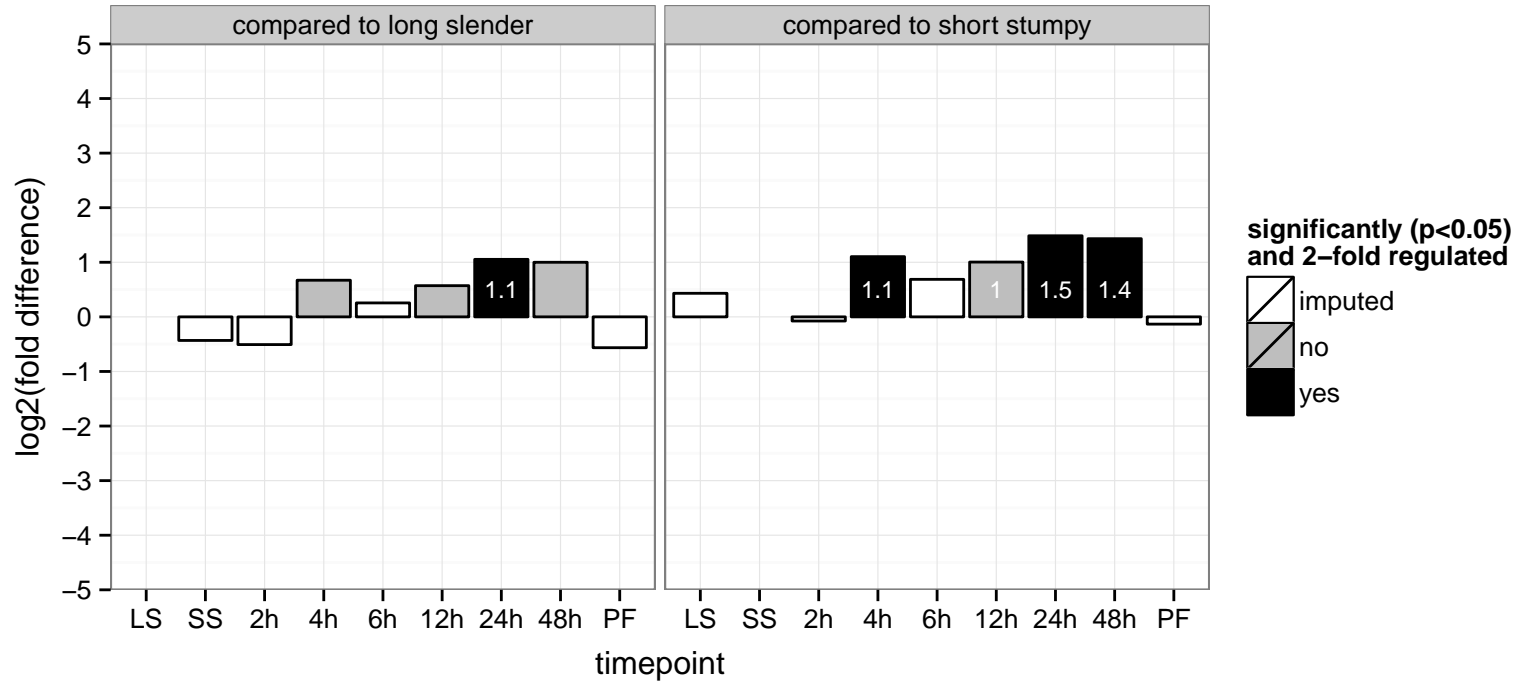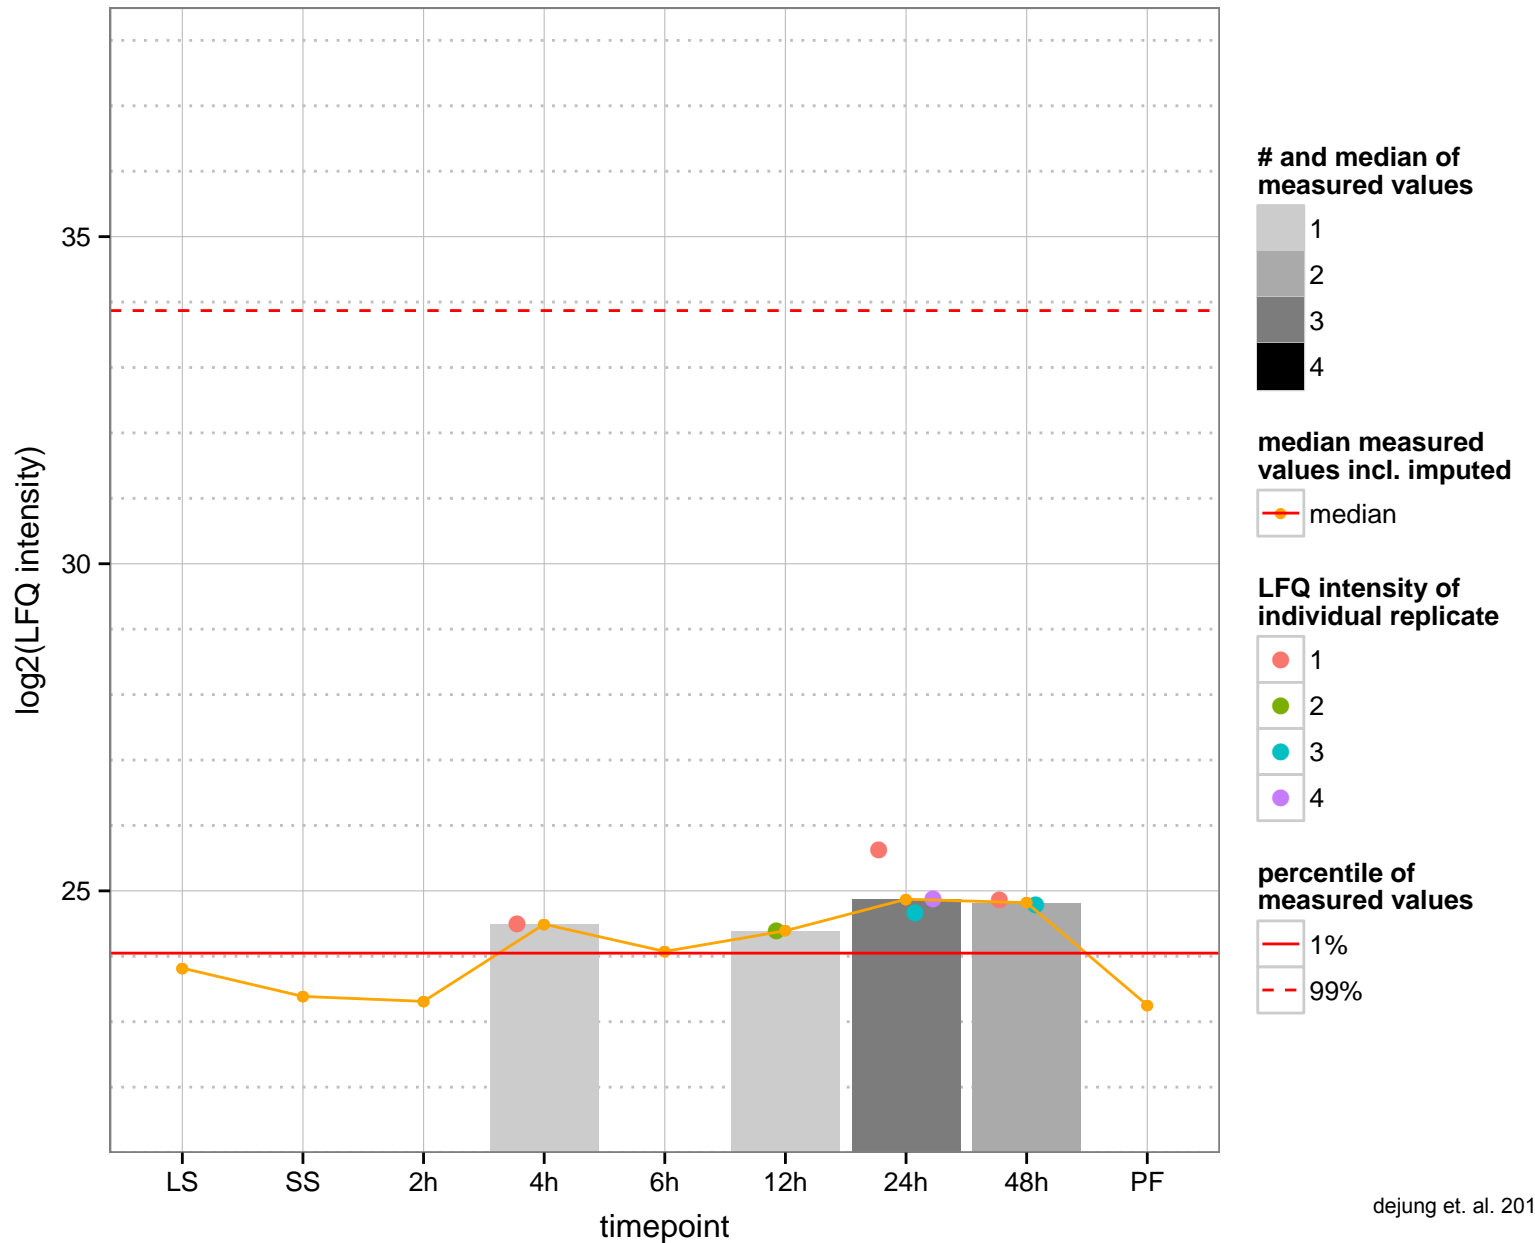

hypothetical protein, conserved

Tb927.7.2200

AGOF: null

AGOC: mitochondrial intermembrane space protein transporter complex, mitochondrion

AGOP: protein import into mitochondrial inner membrane

PGOF: null

PGOC: mitochondrial intermembrane space protein transporter complex

PGOP: protein import into mitochondrial inner membrane, protein targeting to mitochondrion

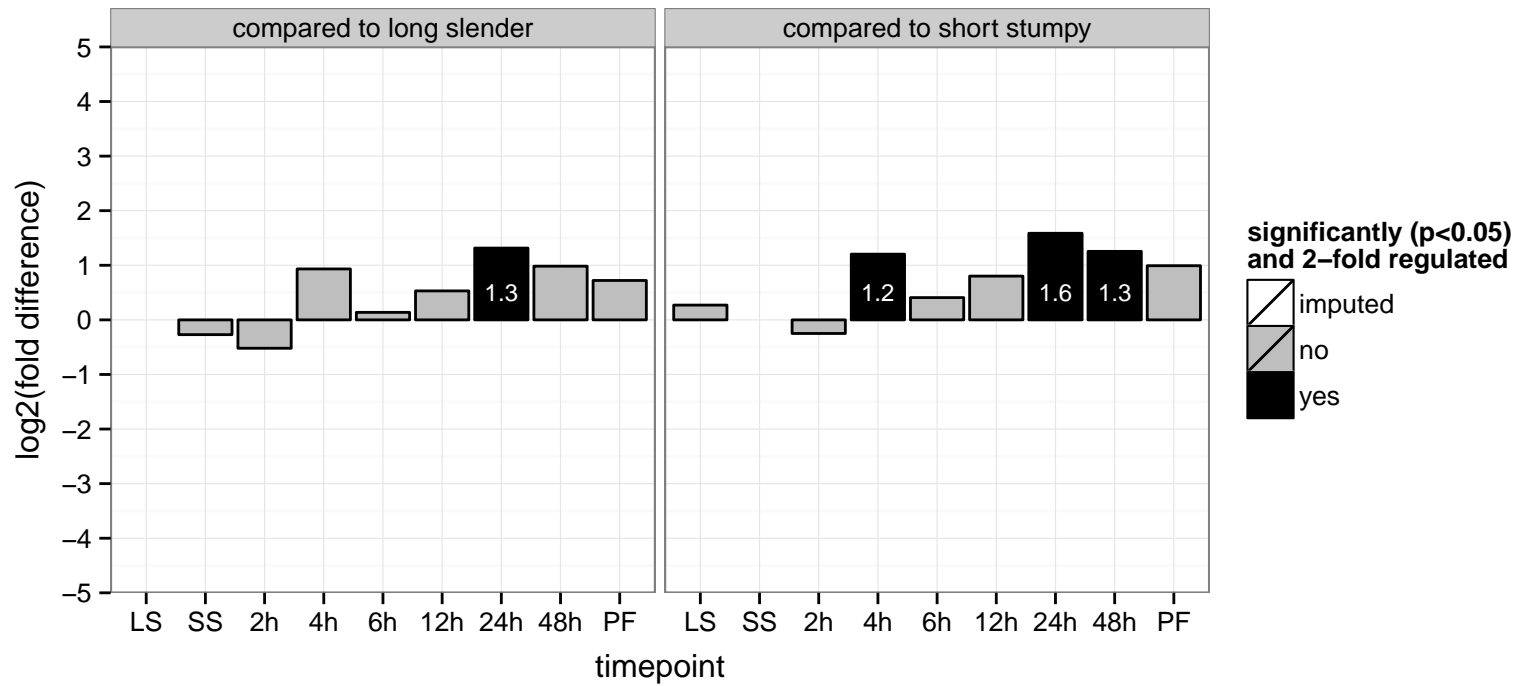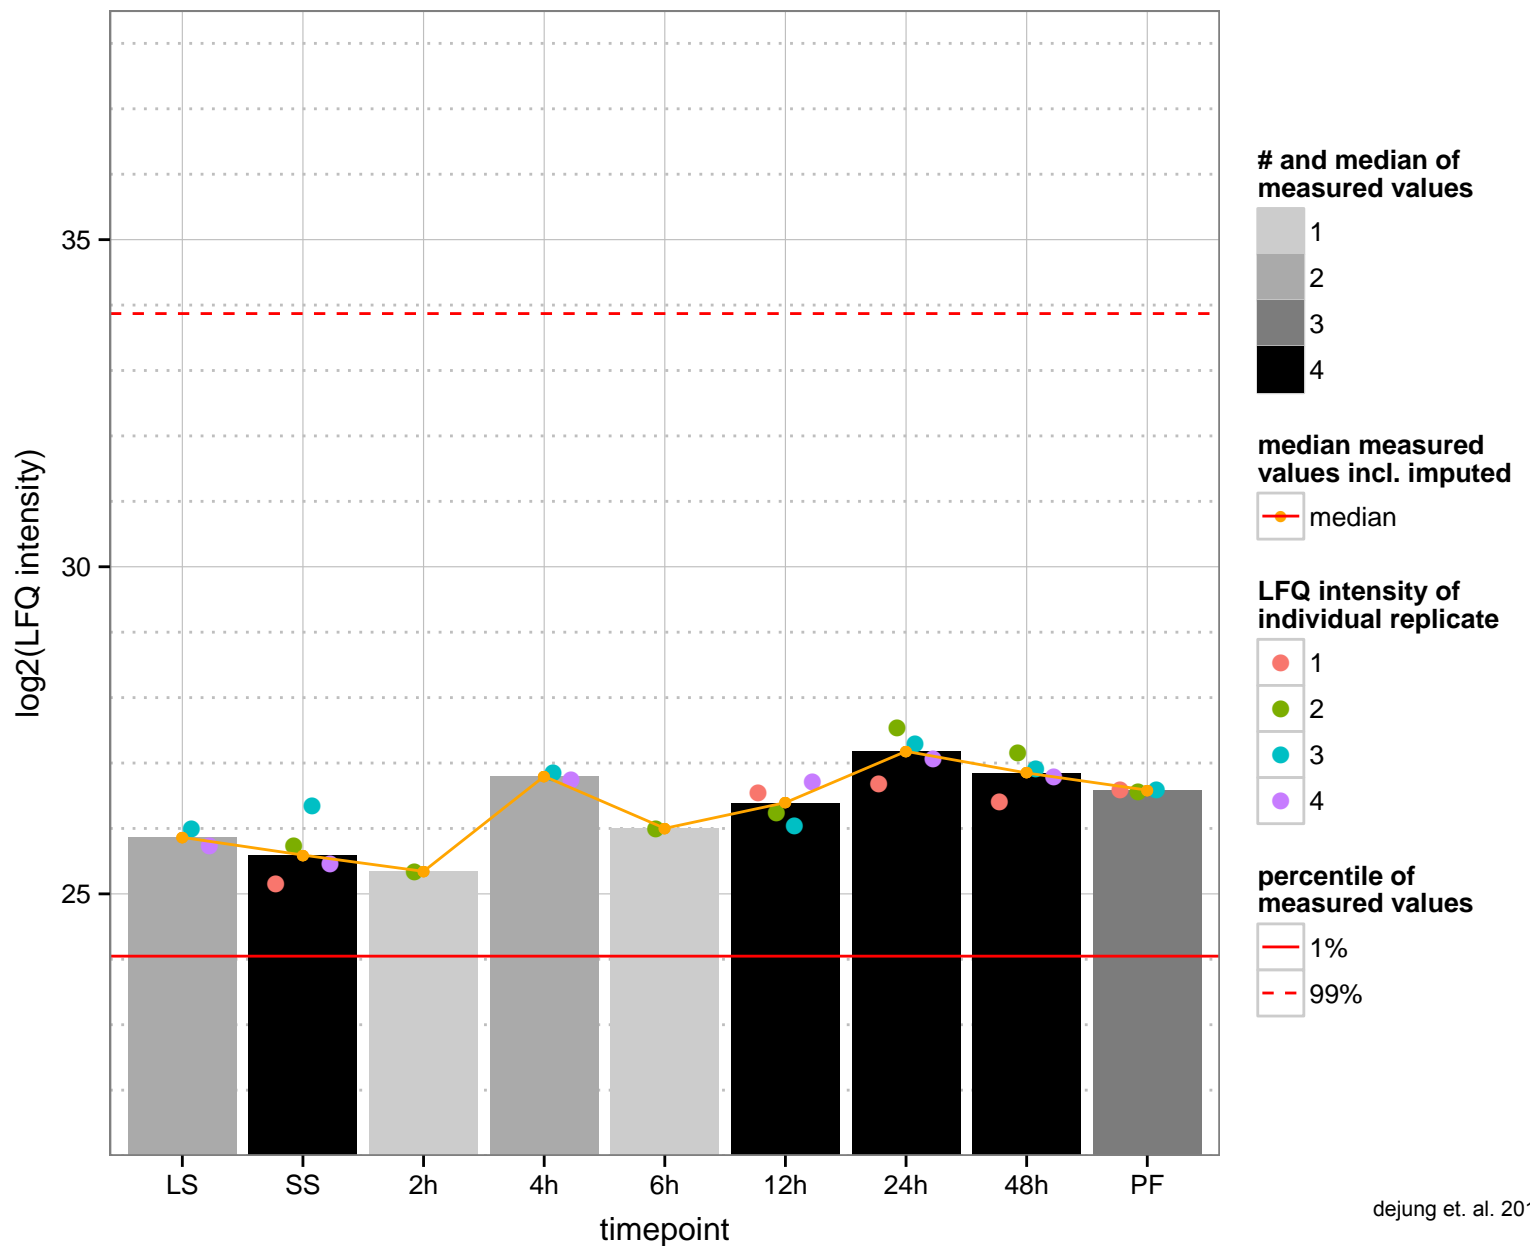

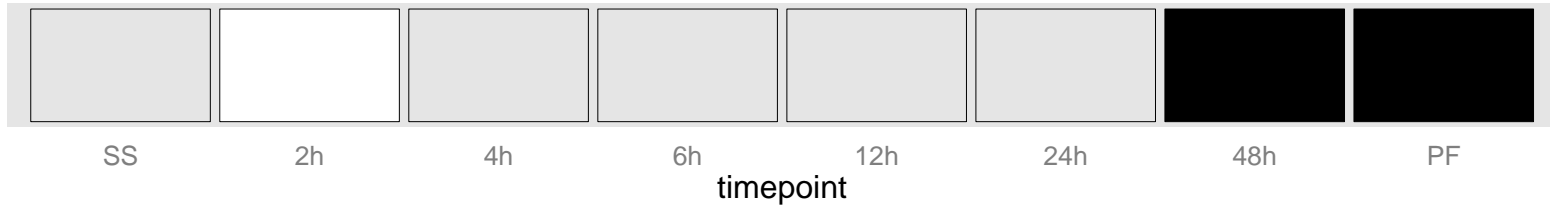

**regulated**  **not regulated**  **significant down**  **significant up**

hypothetical protein, conserved  
 Tb927.10.6300;Tb11.v5.0276  
 AGOF: null, structural constituent of ribosome  
 AGOC: null, intracellular, mitochondrion, ribosome  
 AGOP: null, translation  
 PGO: structural constituent of ribosome  
 PGO: intracellular, ribosome  
 PGO: translation

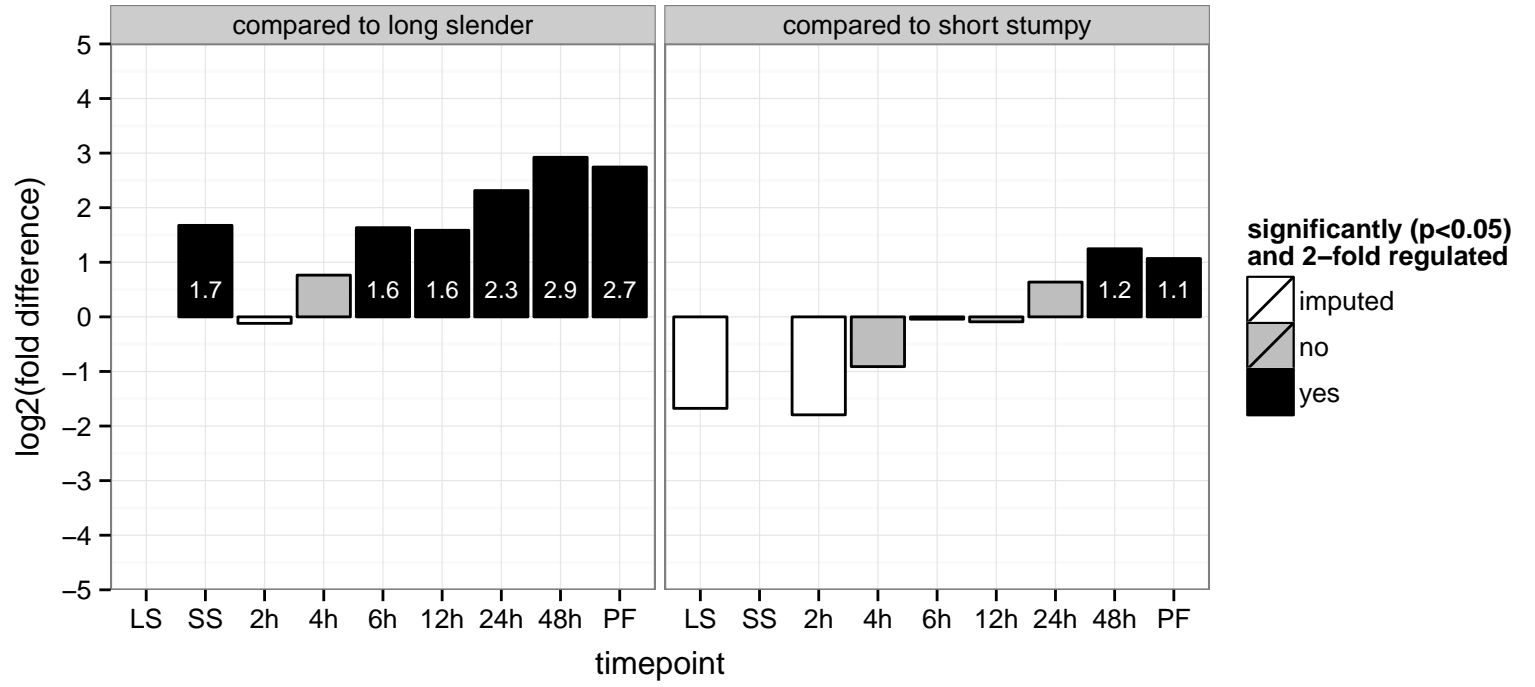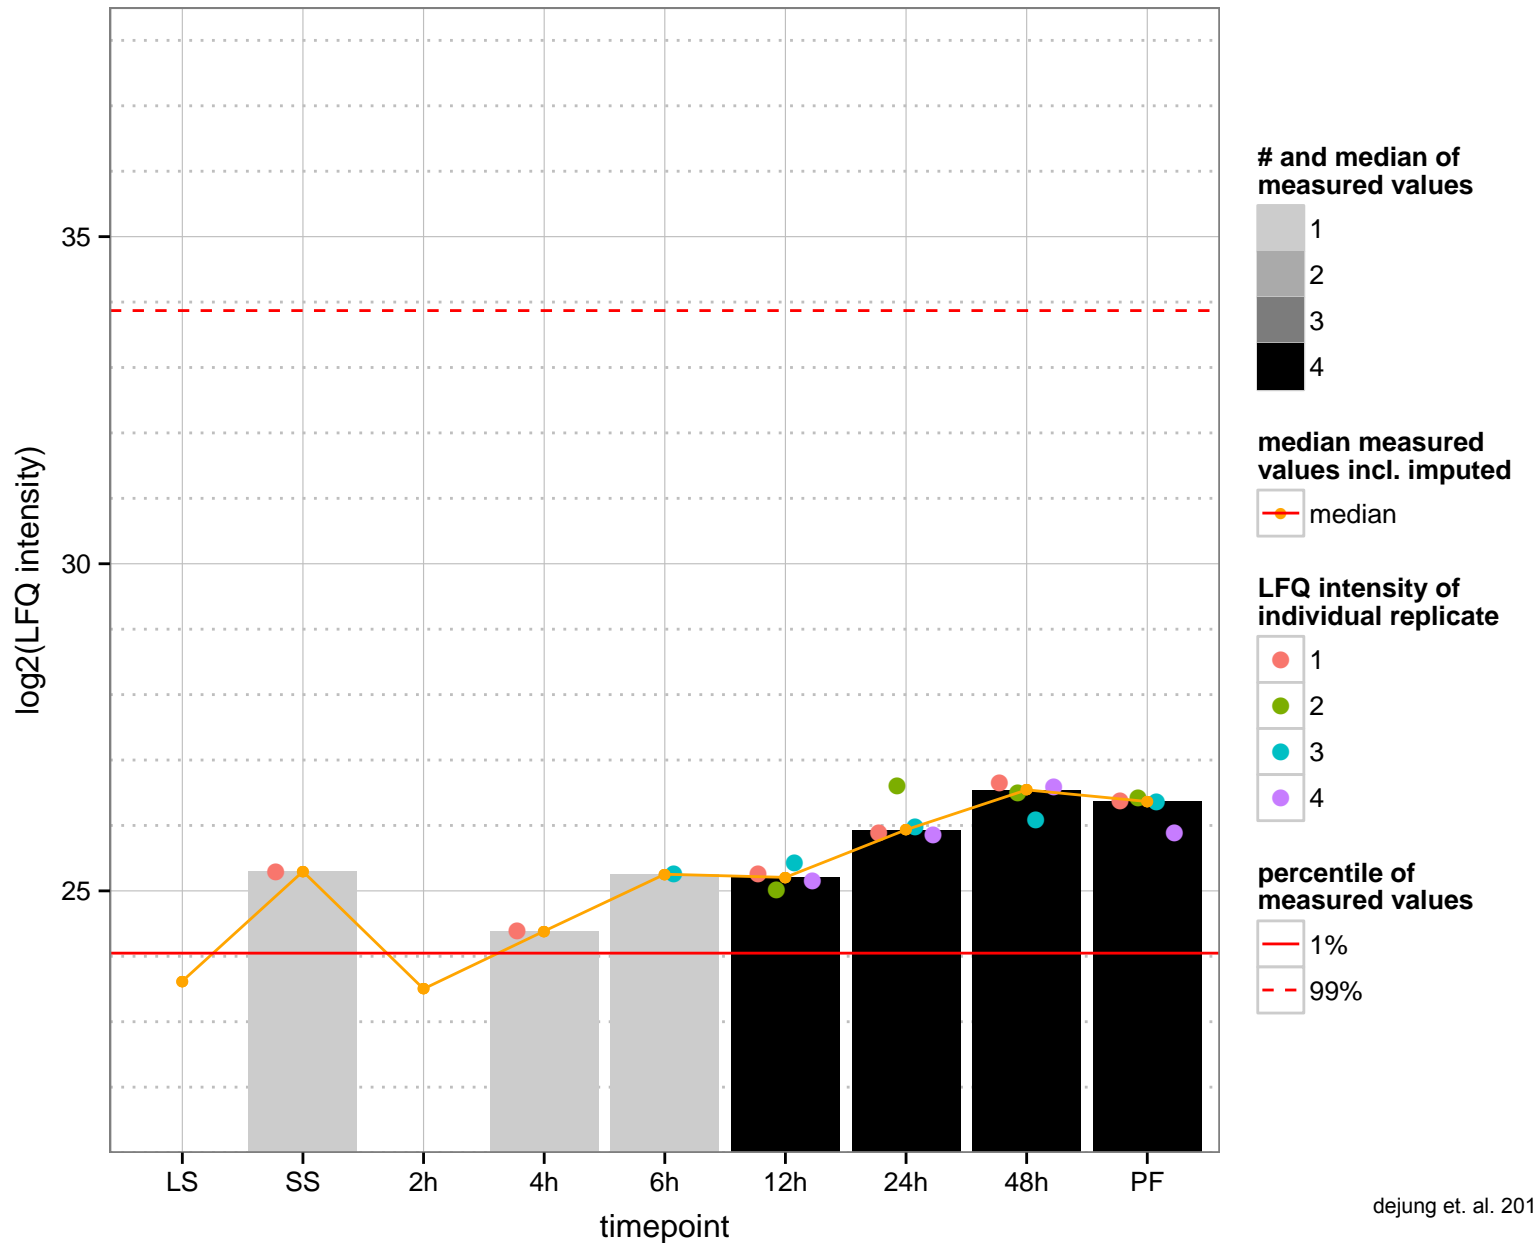

hypothetical protein, conserved  
 Tb927.4.4340  
 AGOF: null  
 AGOC: null  
 AGOP: null  
 PGOF: null  
 PGO: null  
 PGOP: null

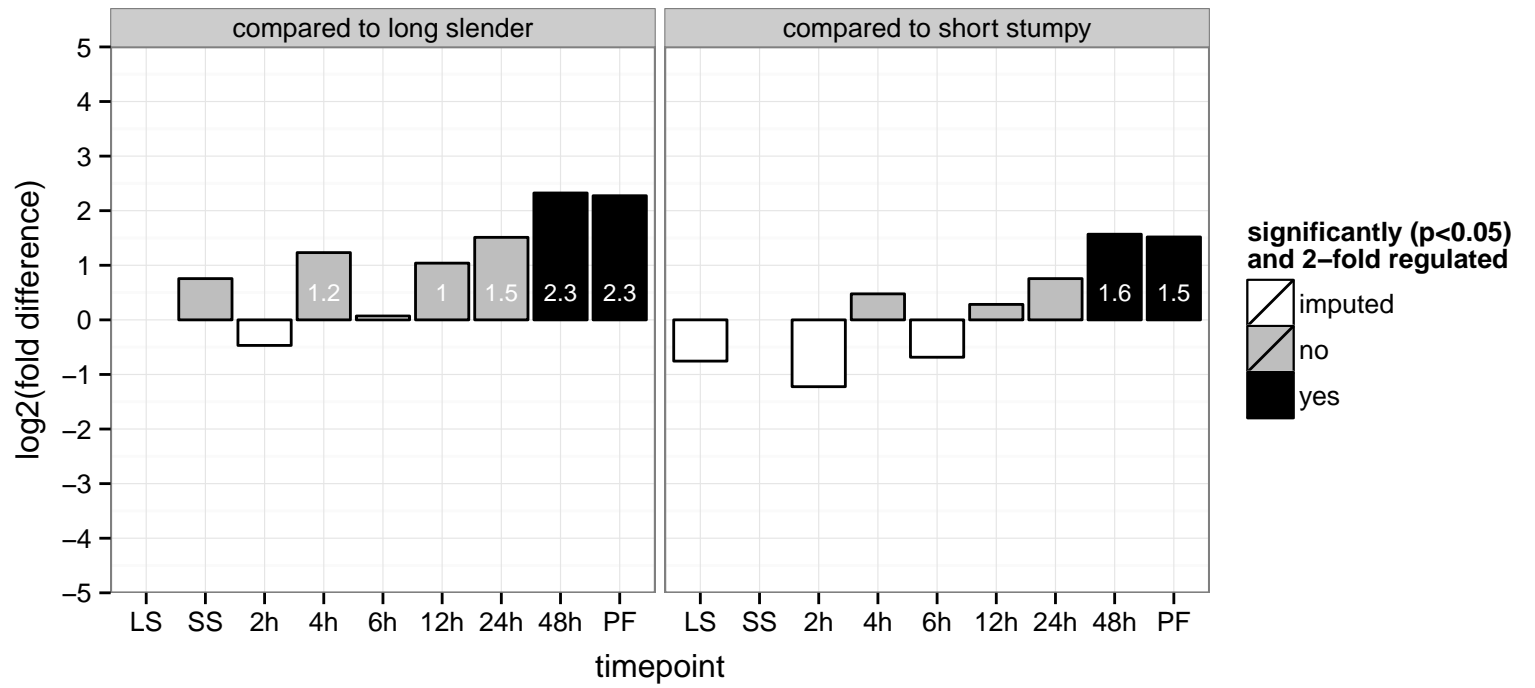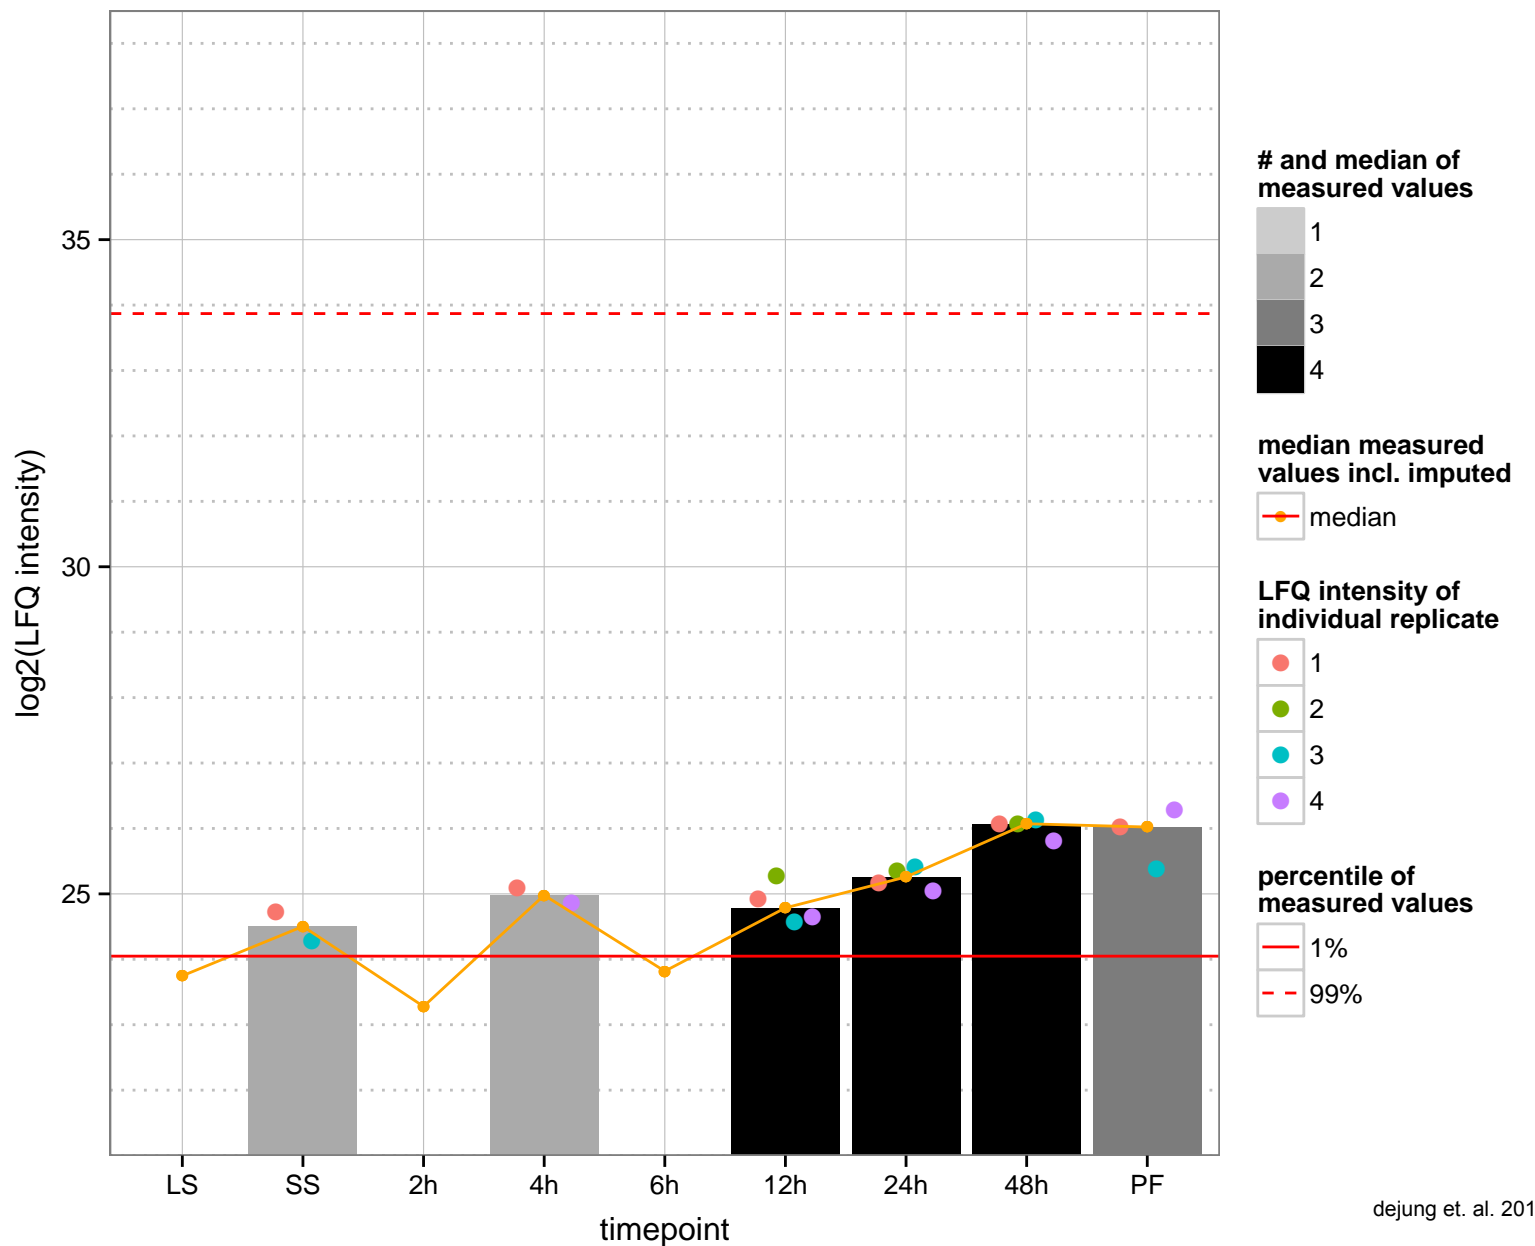

hypothetical protein, conserved, BAC from homologous region on chr5  
 Tb927.5.4360;Tb05.5K5.20  
 AGOF: null  
 AGOC: null  
 AGOP: null  
 PGO: null  
 PGOC: null  
 PGOP: null

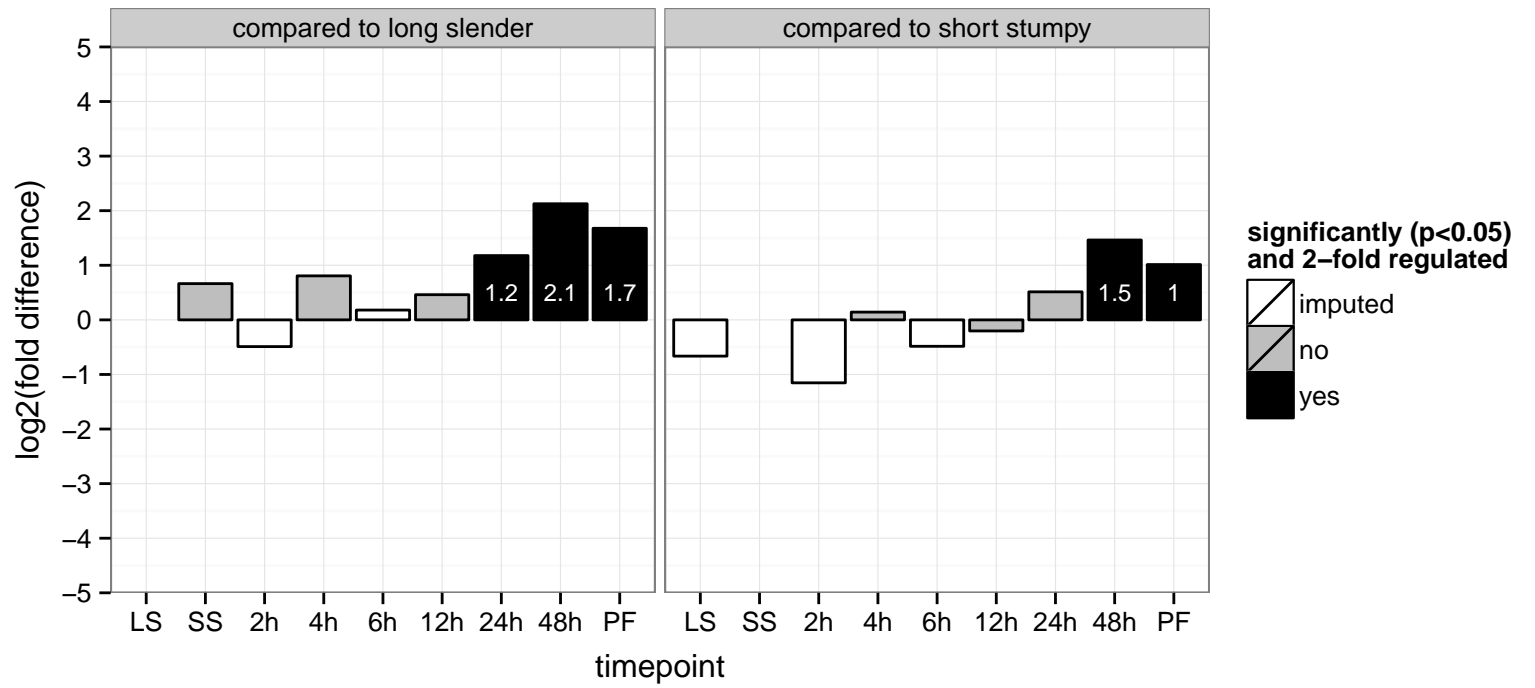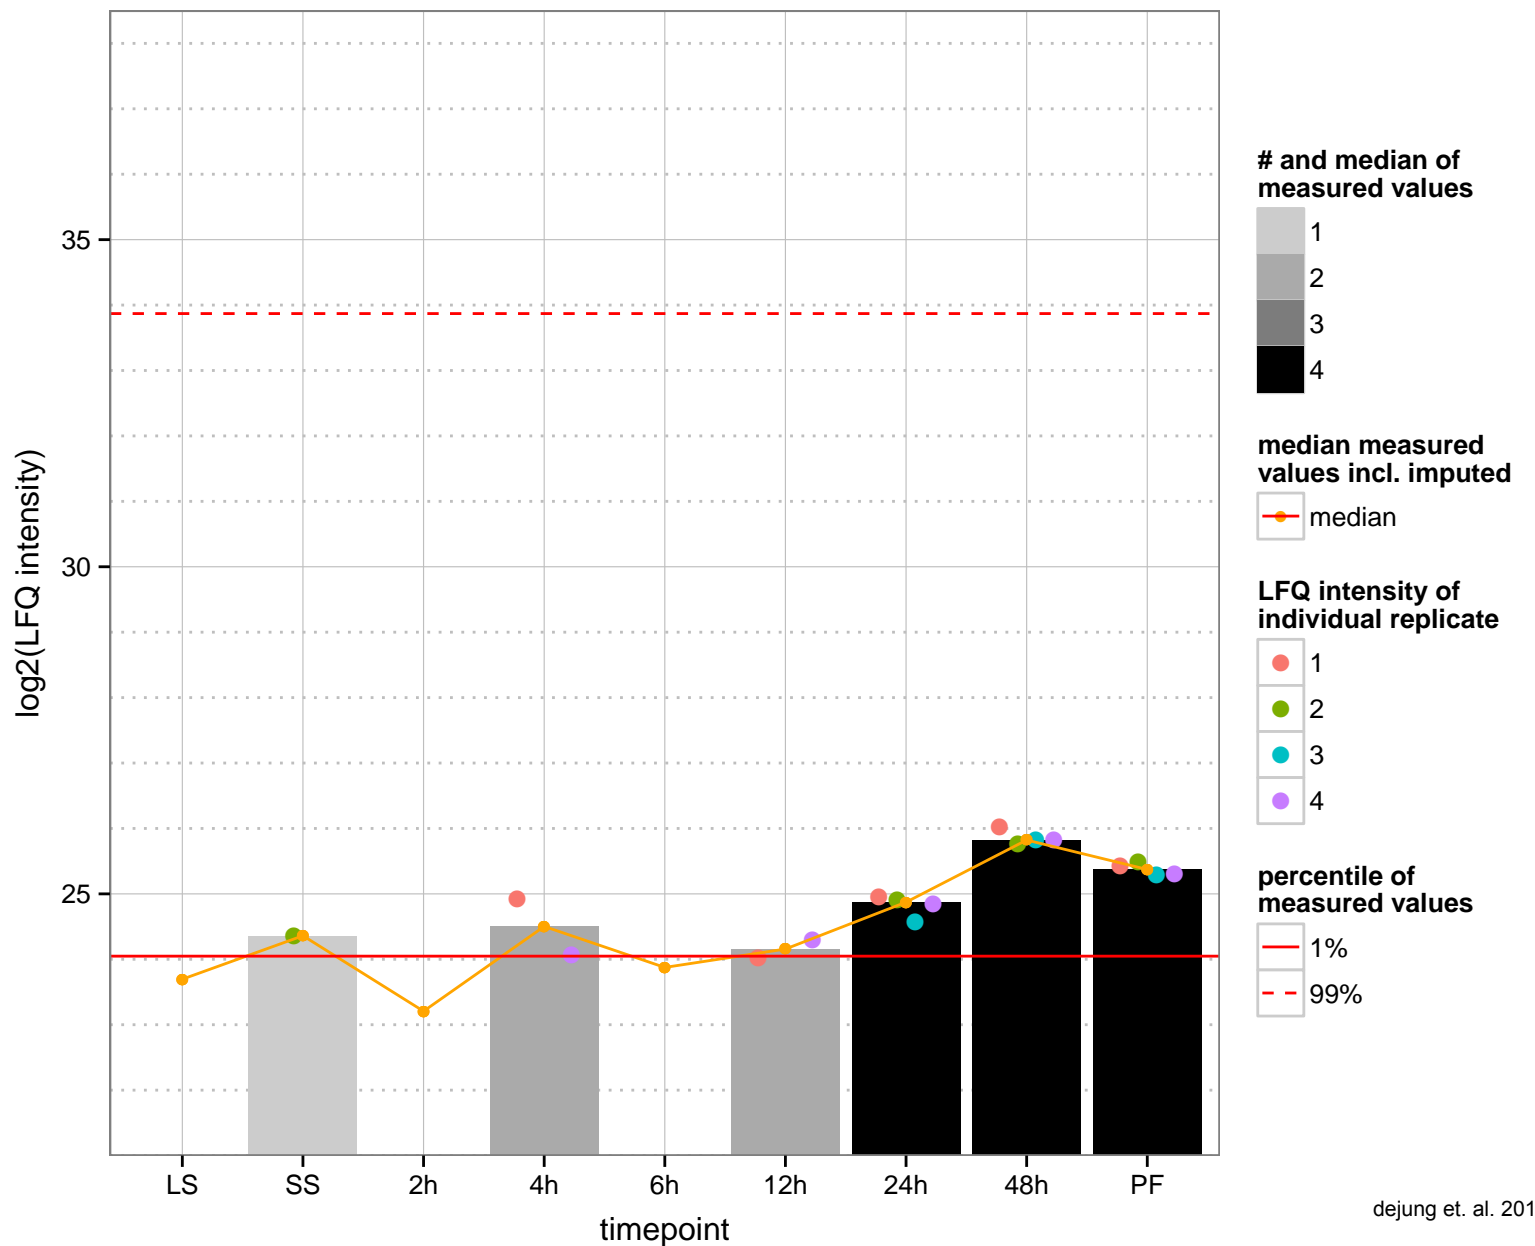

hypothetical protein, conserved  
 Tb927.8.6770  
 AGOF: null  
 AGOC: null  
 AGOP: null  
 PGO: protein binding  
 PGO: null  
 PGO: null

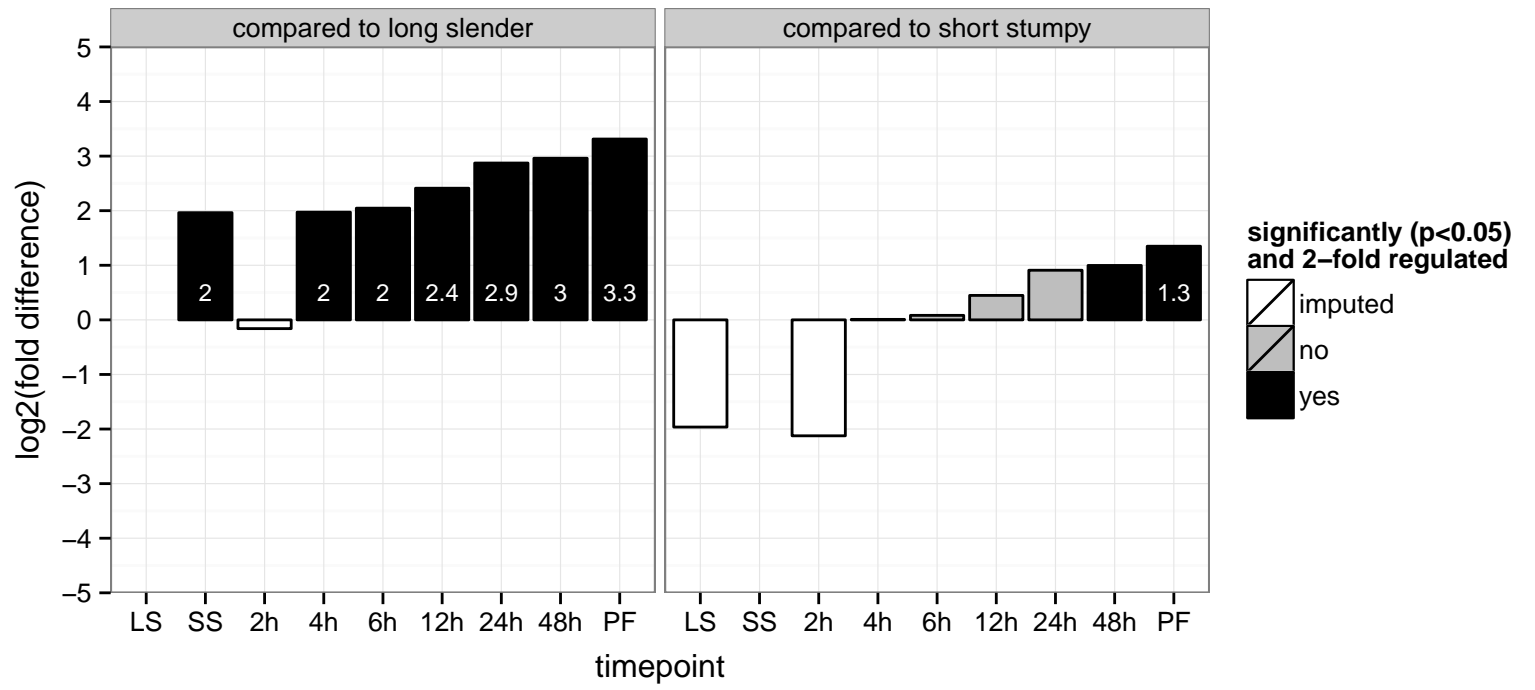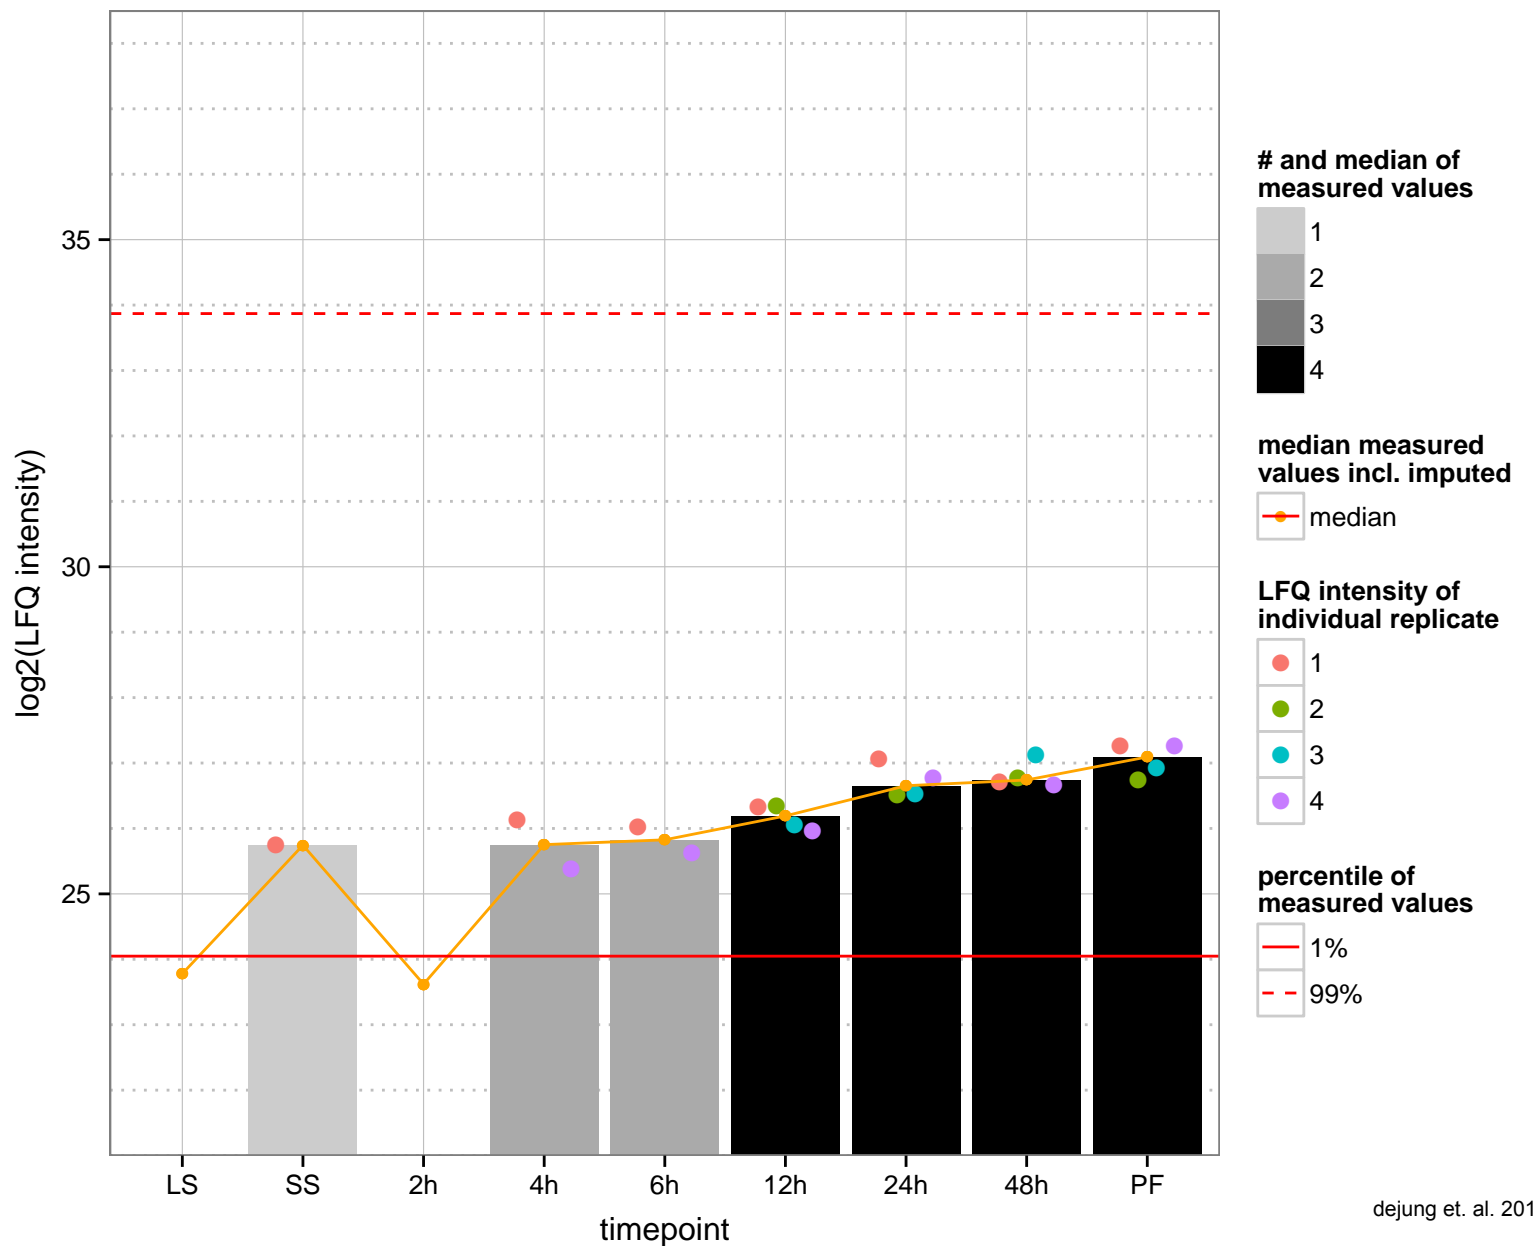

trans-sialidase, putative, neuraminidase  
 Tb927.8.7340  
 AGOF: exo-alpha-sialidase activity  
 AGOC: null  
 AGOP: pathogenesis  
 PGO: null  
 PGOC: null  
 PGOP: null

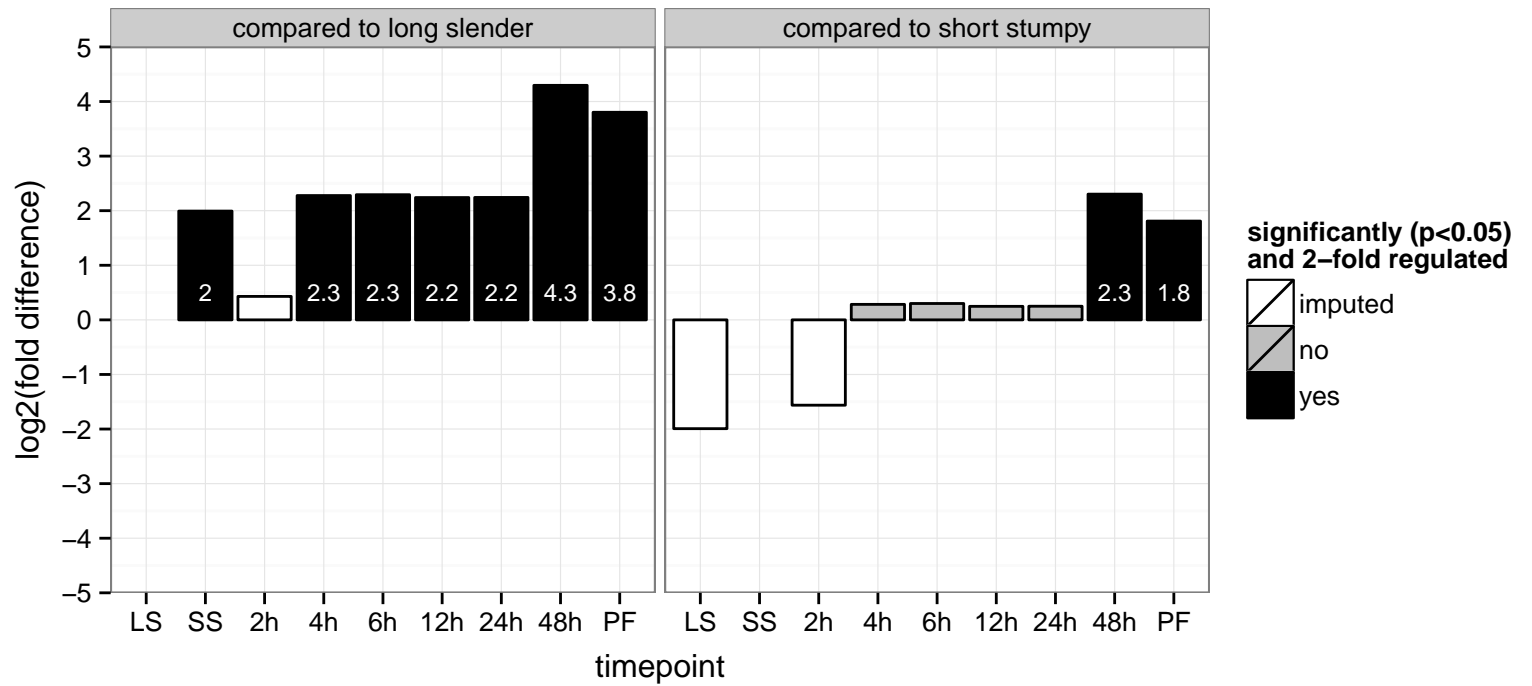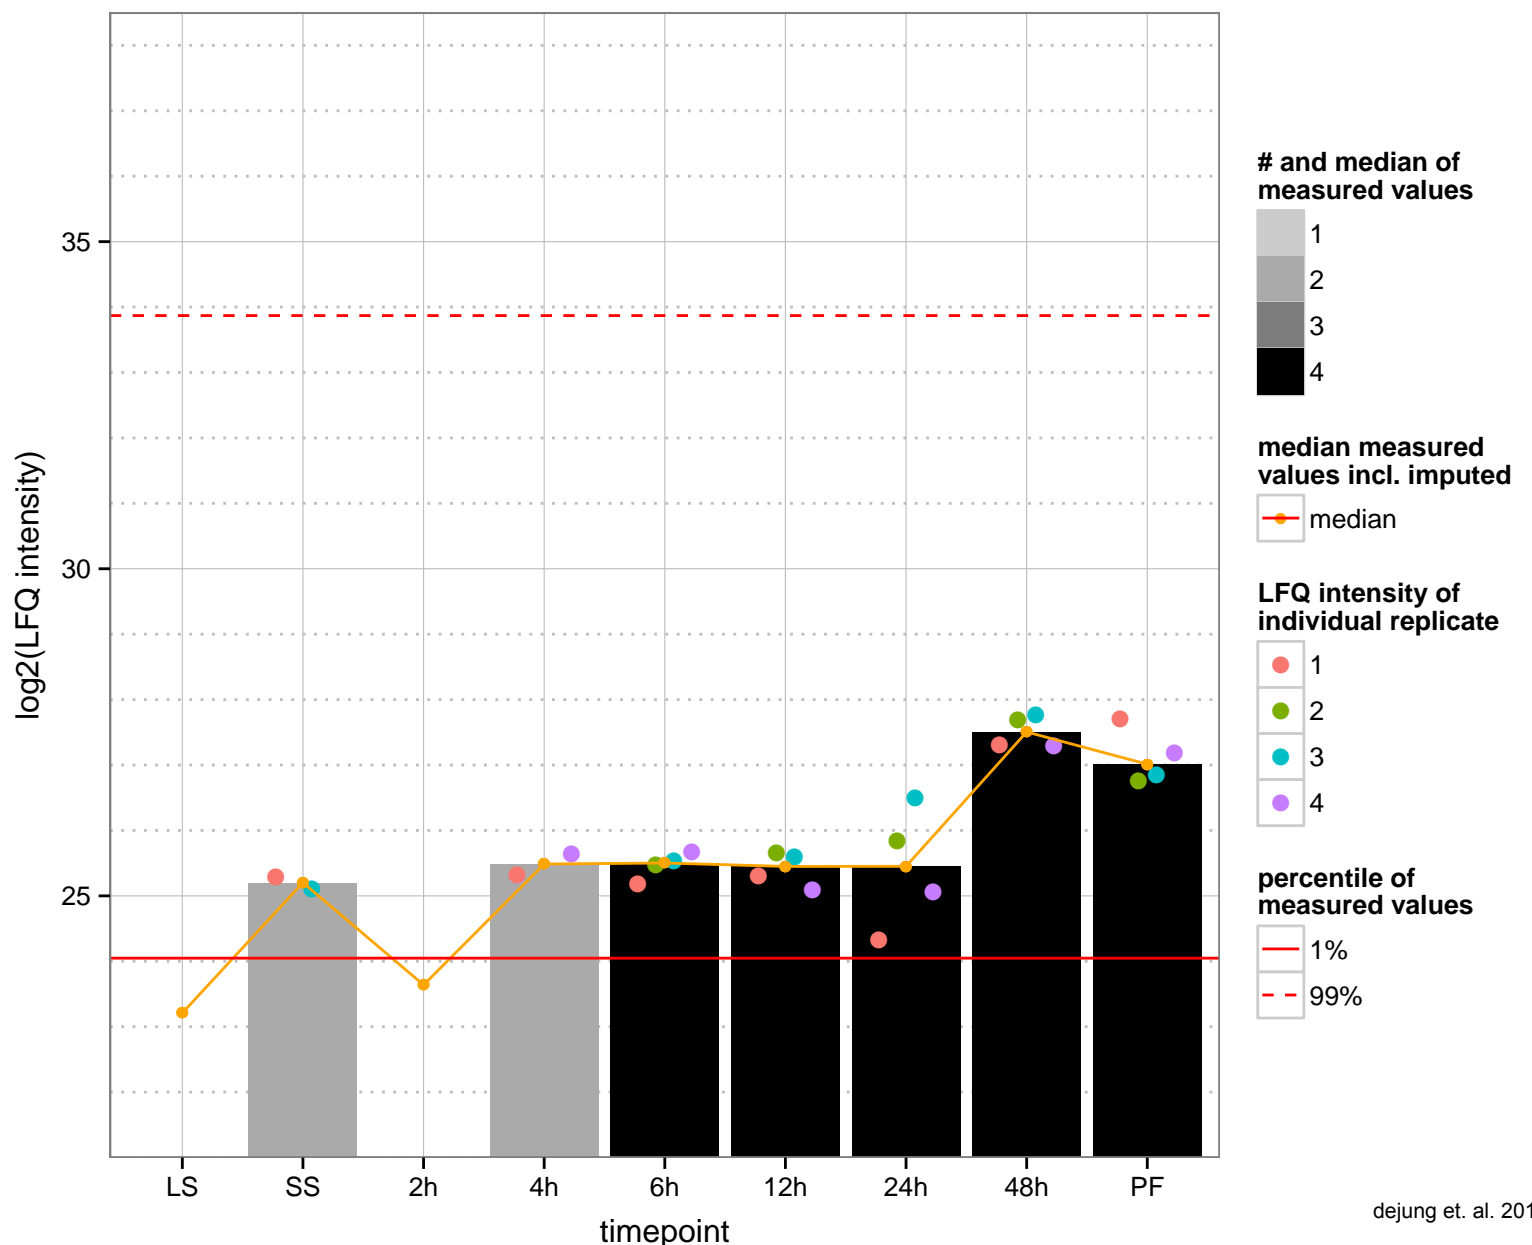



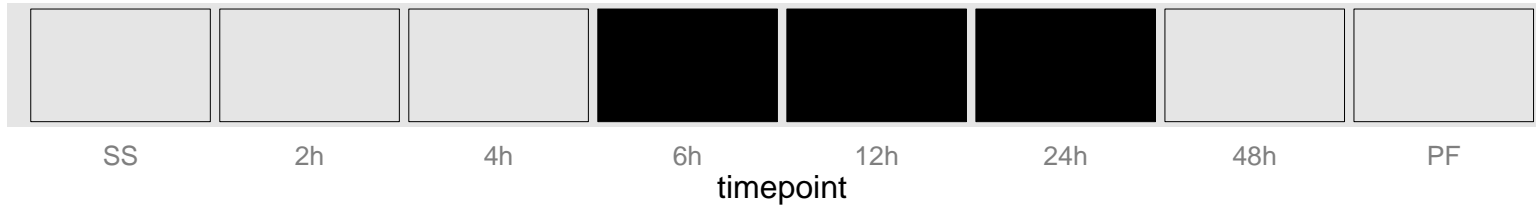

**regulated**  not regulated  significant down  significant up

GPI inositol deacylase precursor (GPIdeAc)  
 Tb927.10.4780  
 AGOF: phosphatidylinositol deacylase activity  
 AGOC: membrane  
 AGOP: GPI anchor biosynthetic process  
 PGO: null  
 PGOC: null  
 PGOP: null

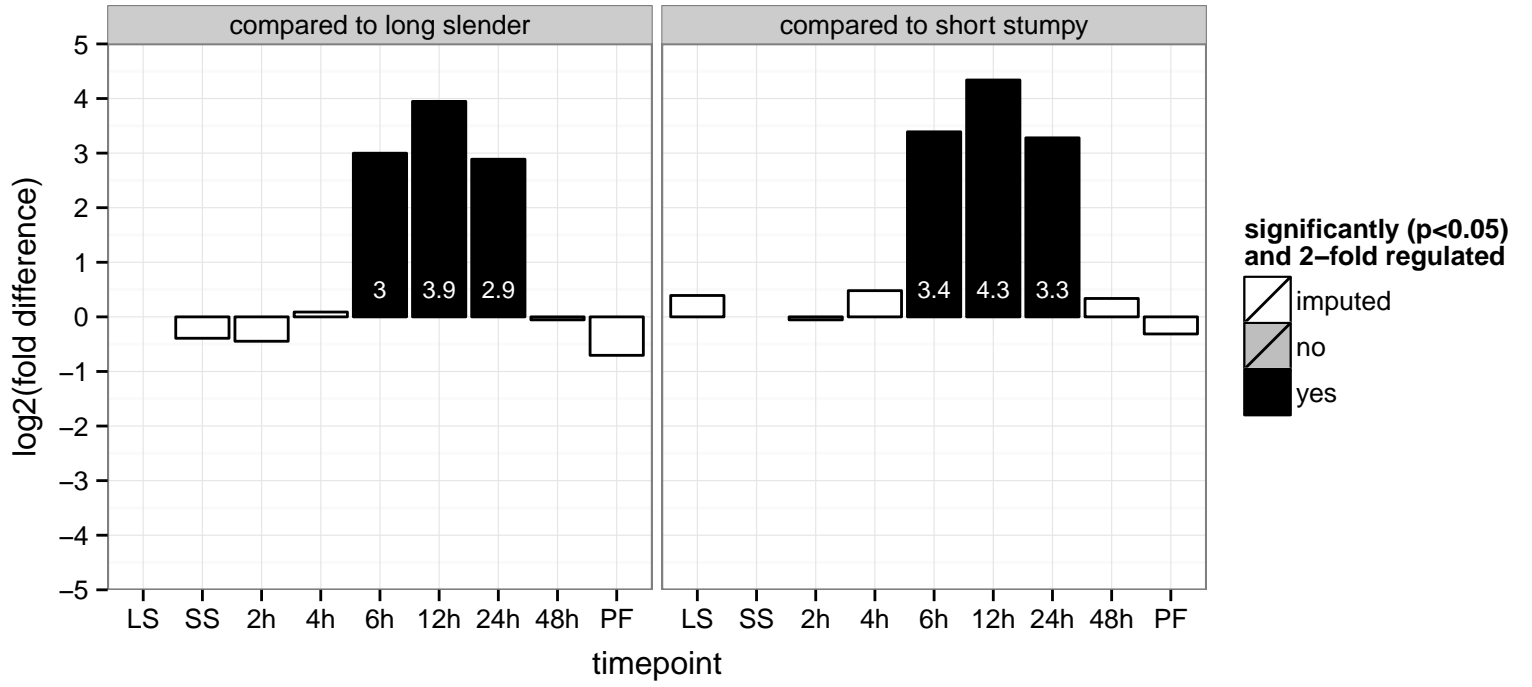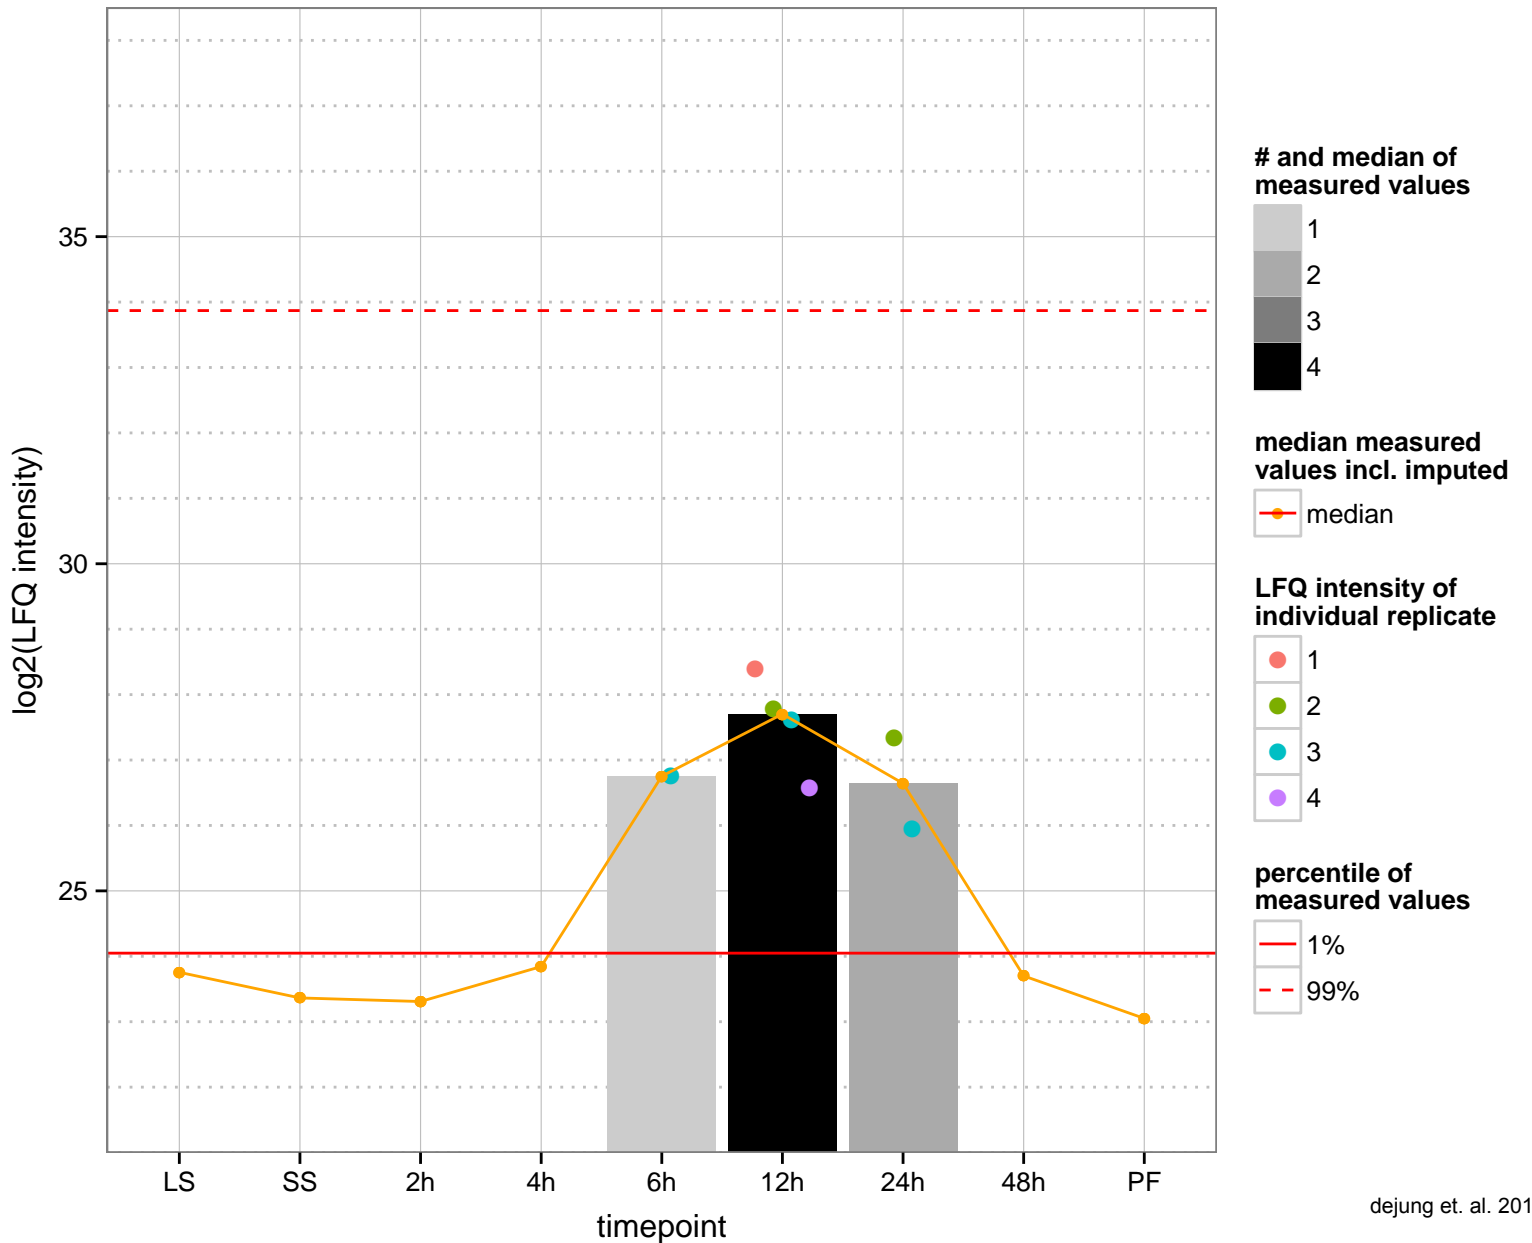

hypothetical protein, conserved  
 Tb927.10.6730  
 AGOF: null  
 AGOC: null  
 AGOP: null  
 PGO: null  
 PGOC: null  
 PGOP: null

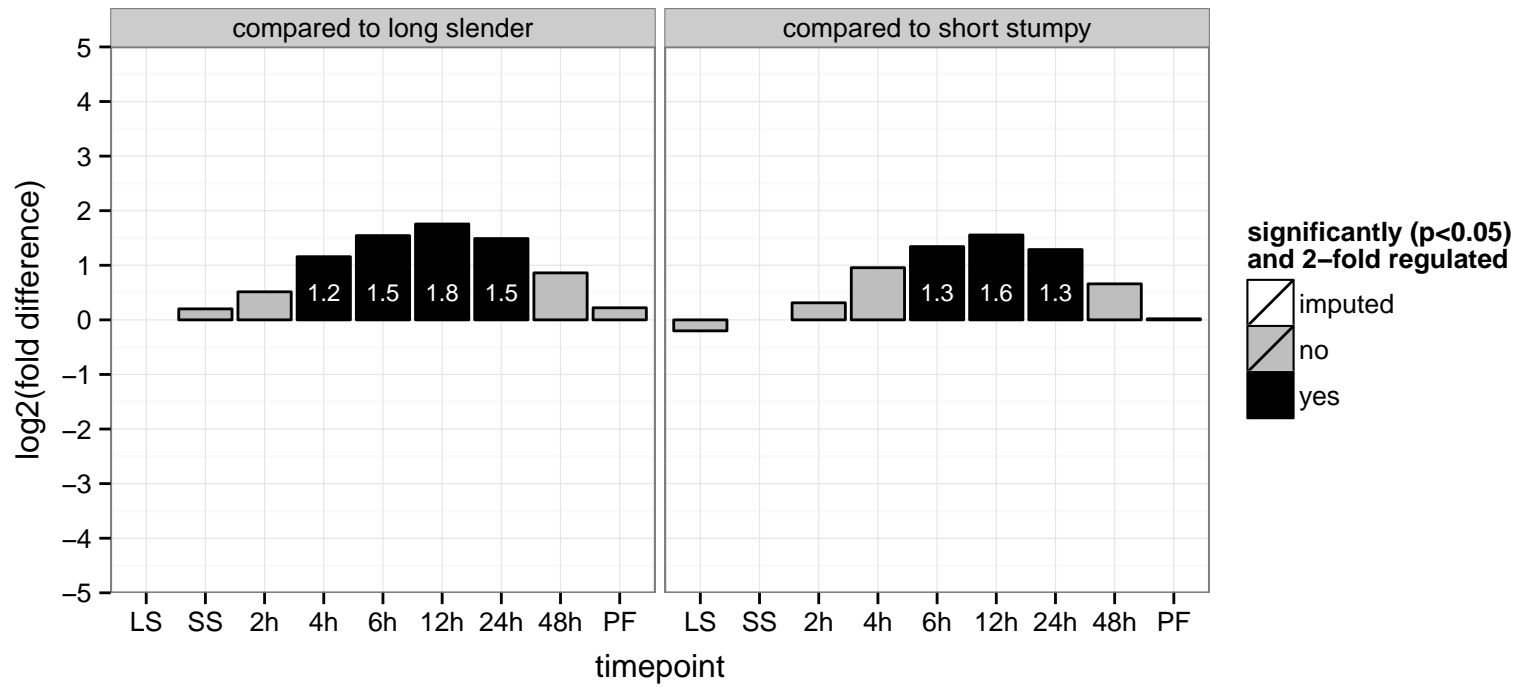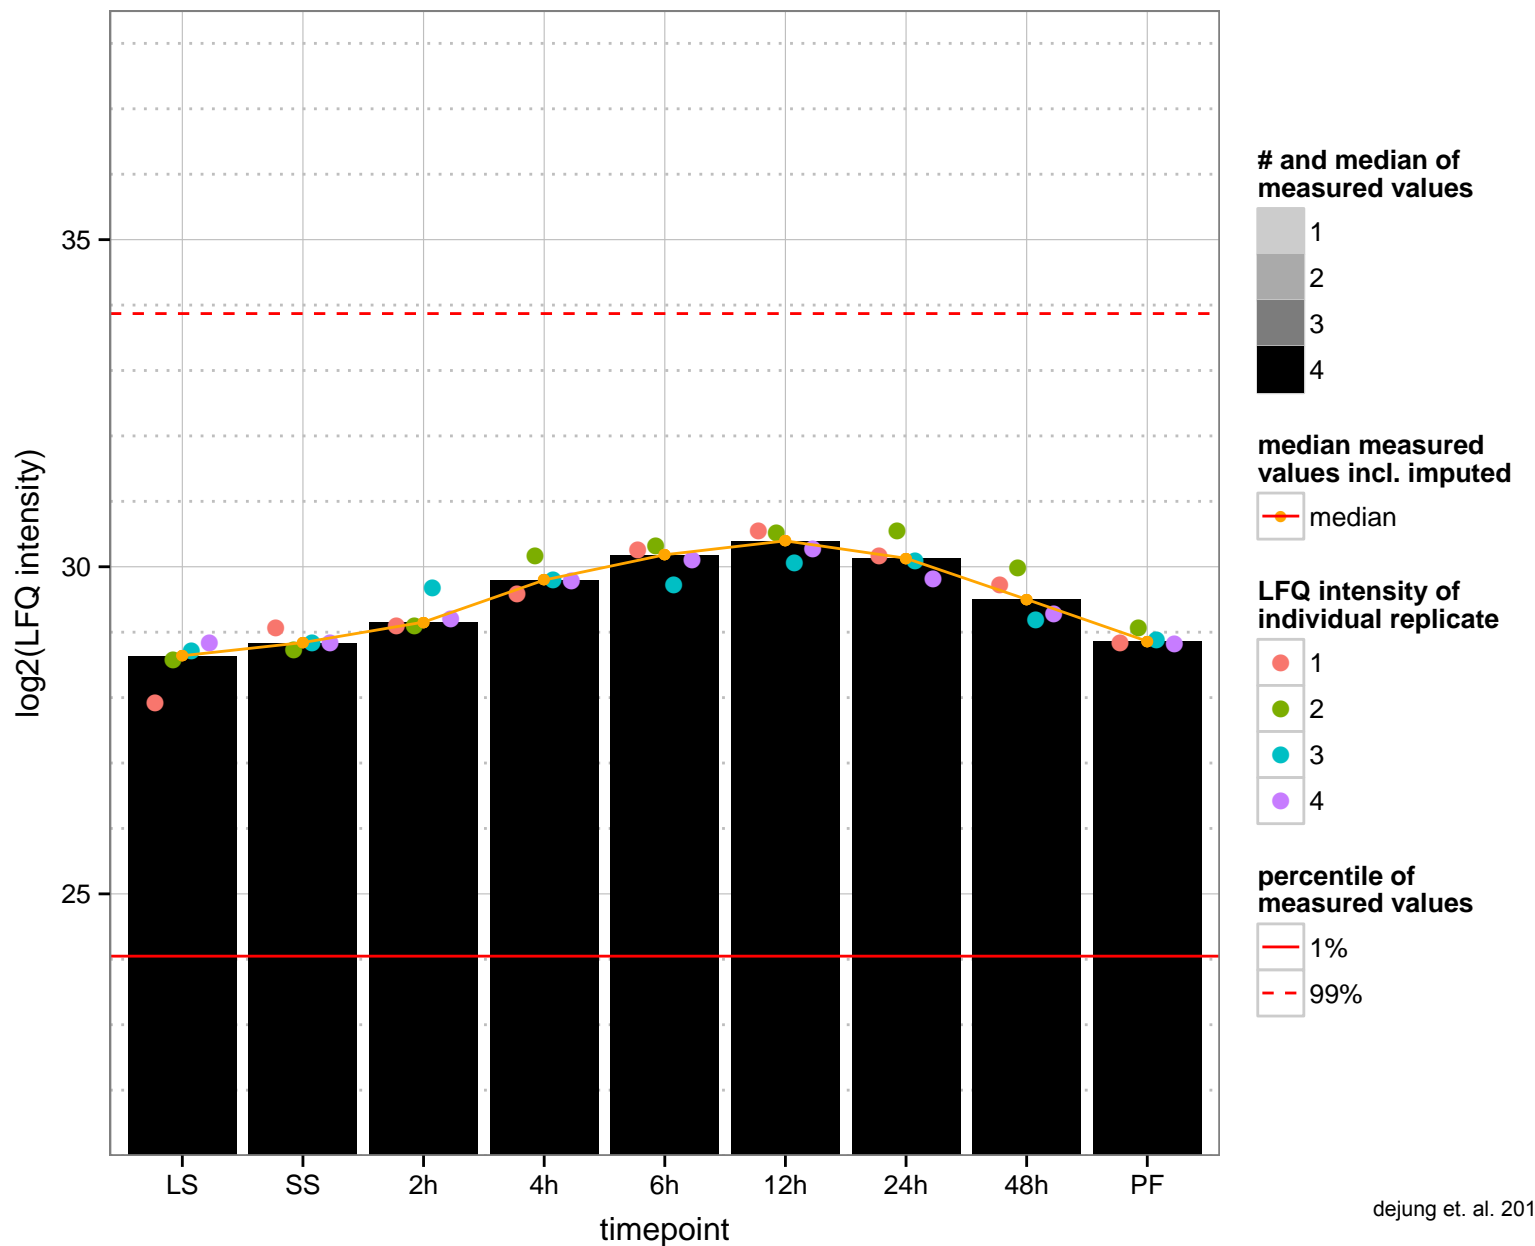

hypothetical protein, conserved  
 Tb927.7.4360  
 AGOF: null  
 AGOC: null  
 AGOP: null  
 PGO: null  
 PGOC: null  
 PGOP: null

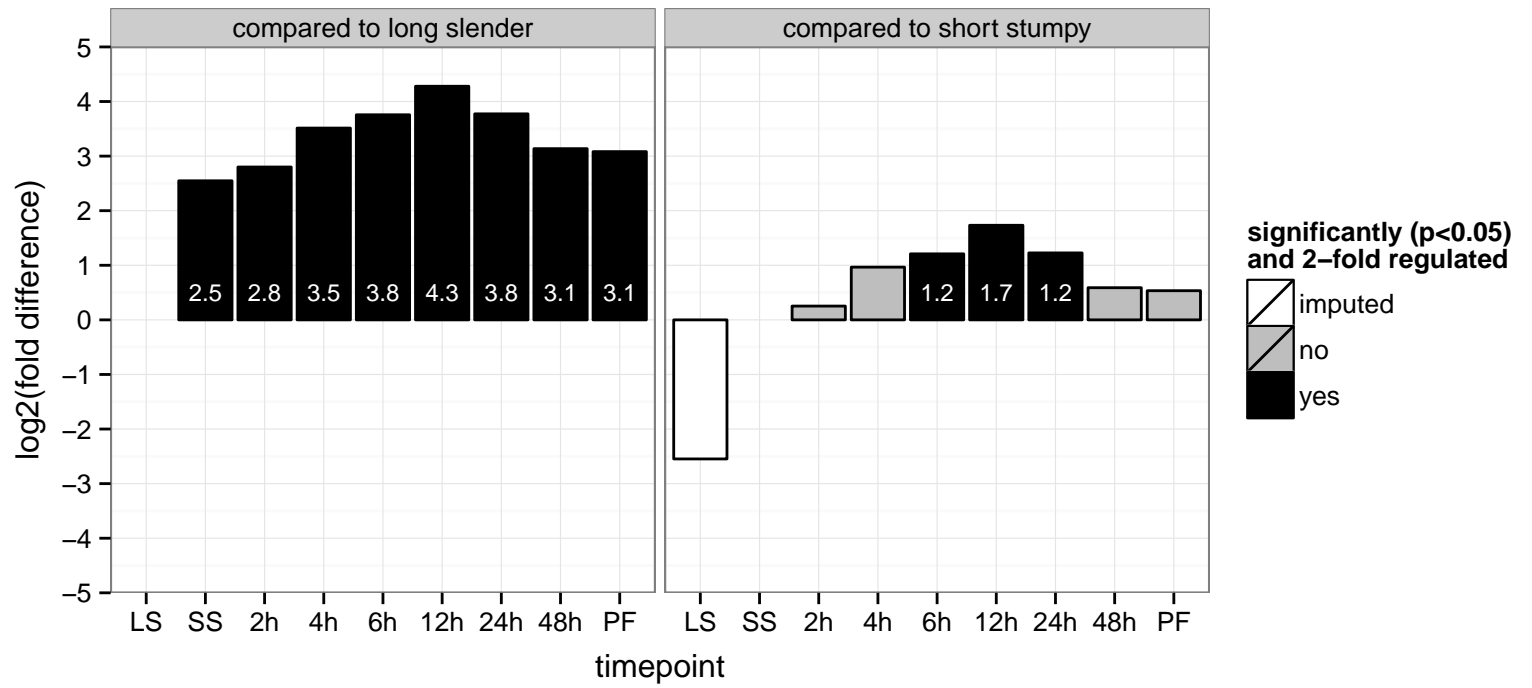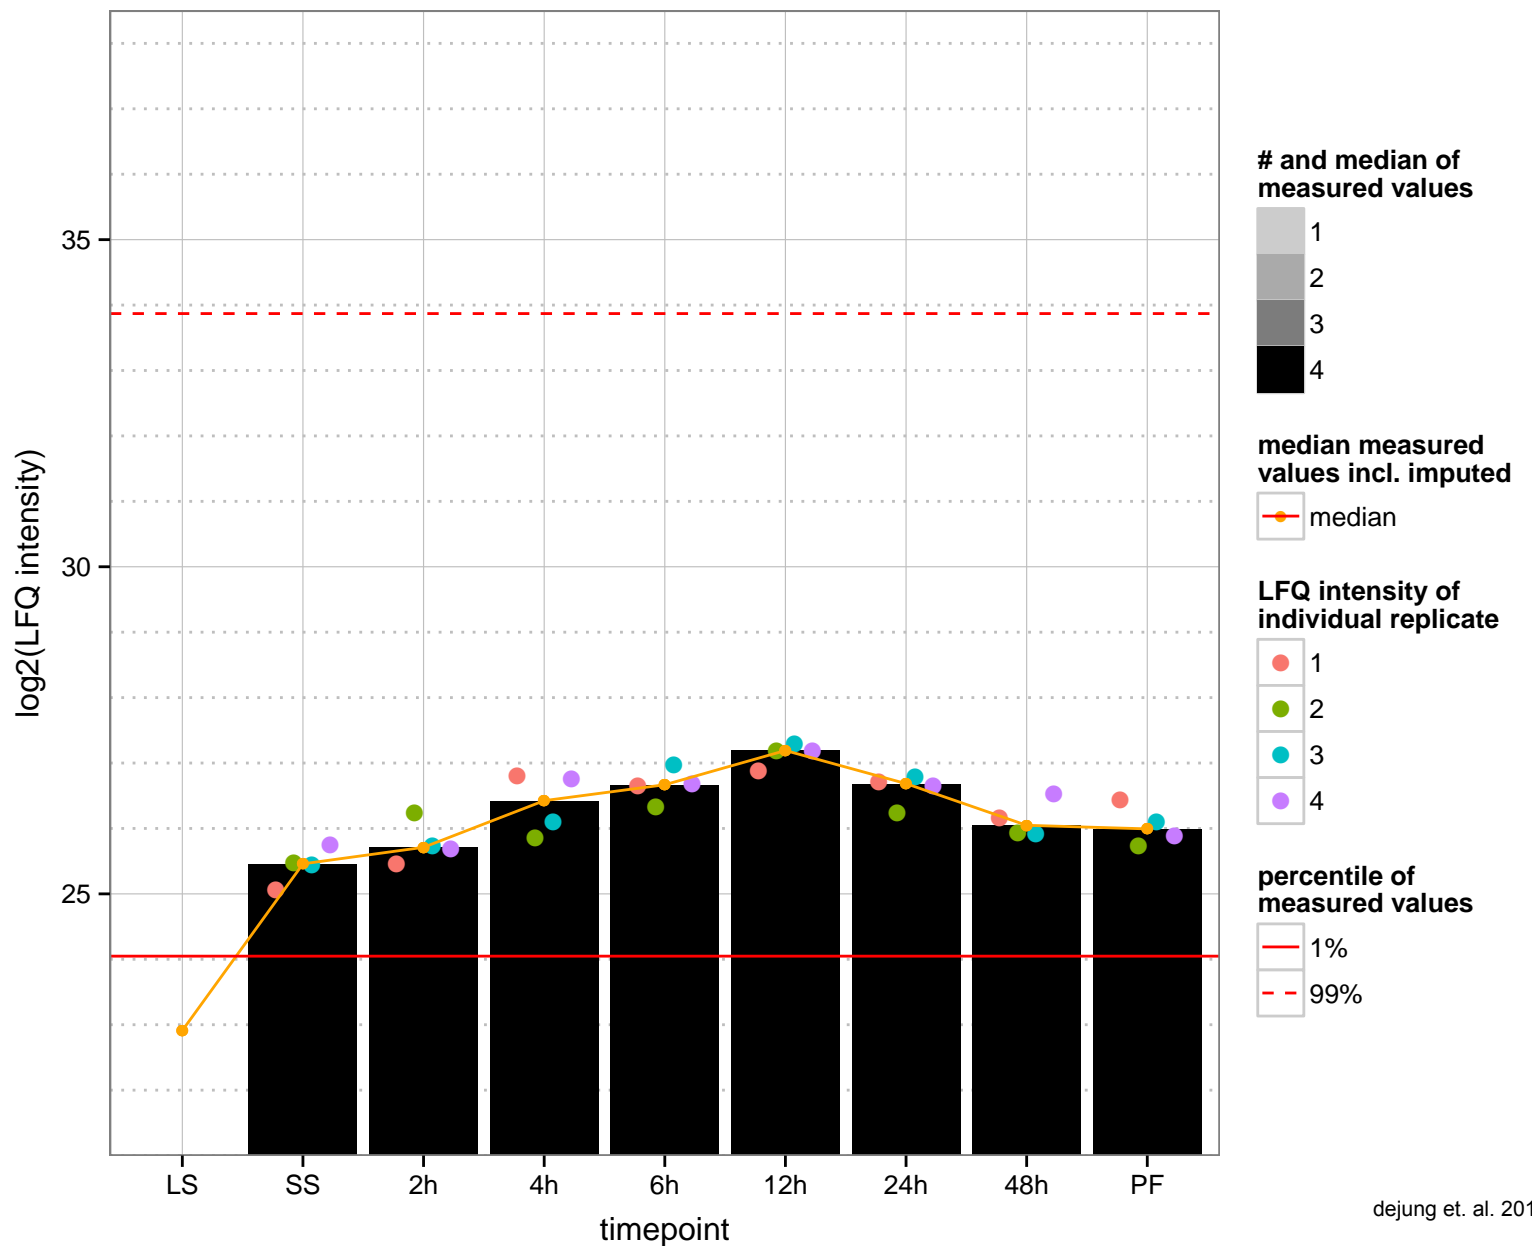

hypothetical protein  
 Tb927.8.6630  
 AGOF: null  
 AGOC: null  
 AGOP: null  
 PGOF: null  
 PGOC: null  
 PGOP: null

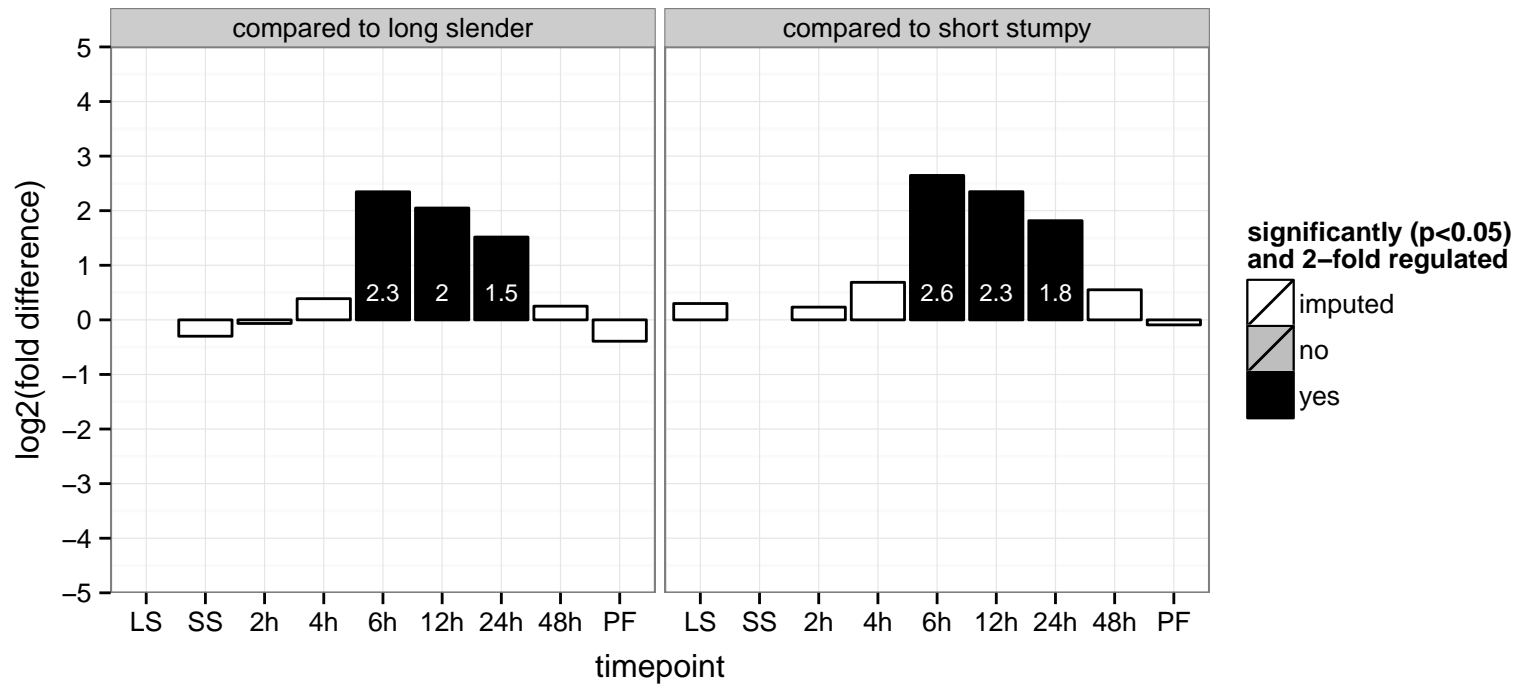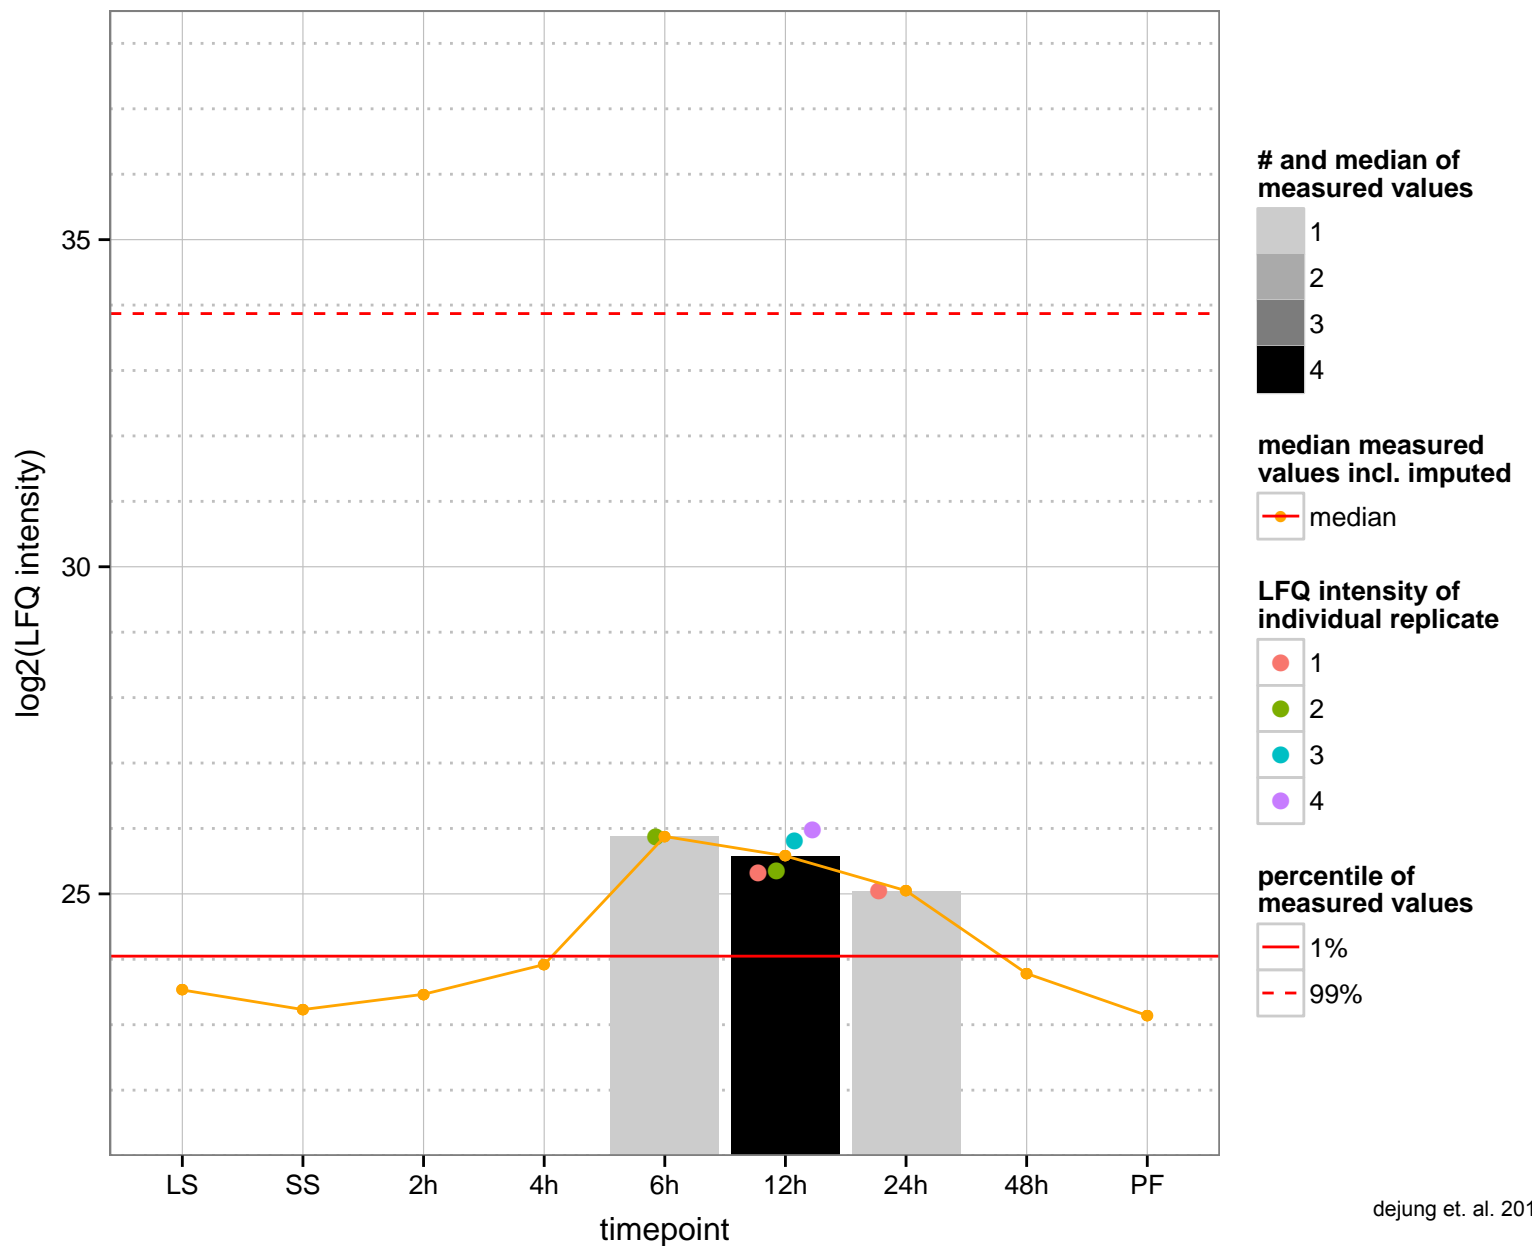

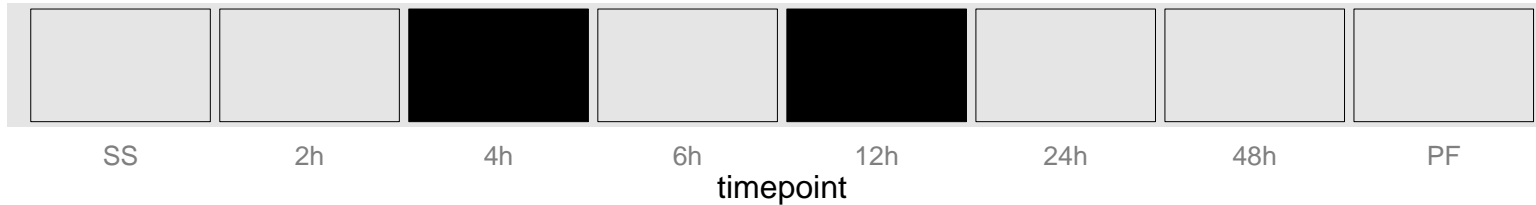

**regulated**  **not regulated**  **significant down**  **significant up**

hypothetical protein, conserved  
 Tb927.11.1380  
 AGOF: null  
 AGOC: null  
 AGOP: null  
 PGO: null  
 PGOC: null  
 PGOP: null

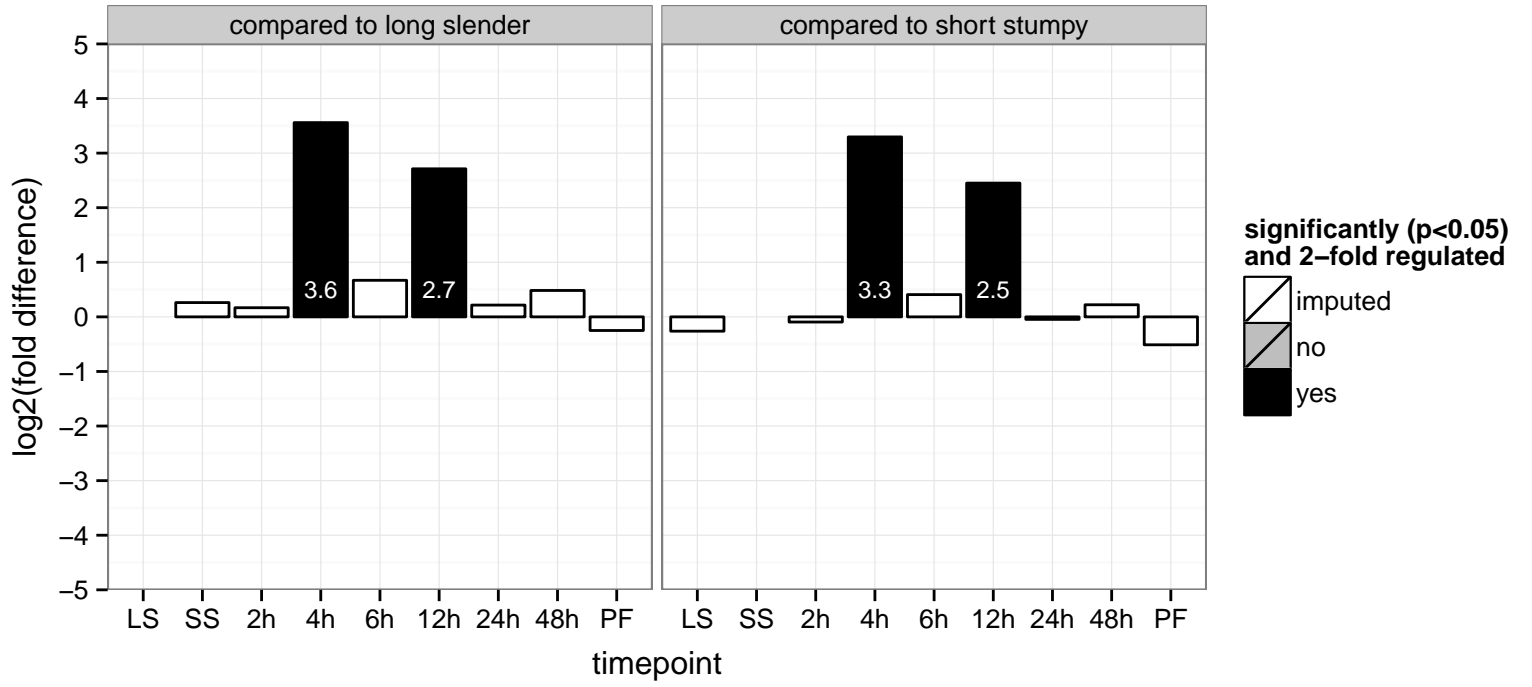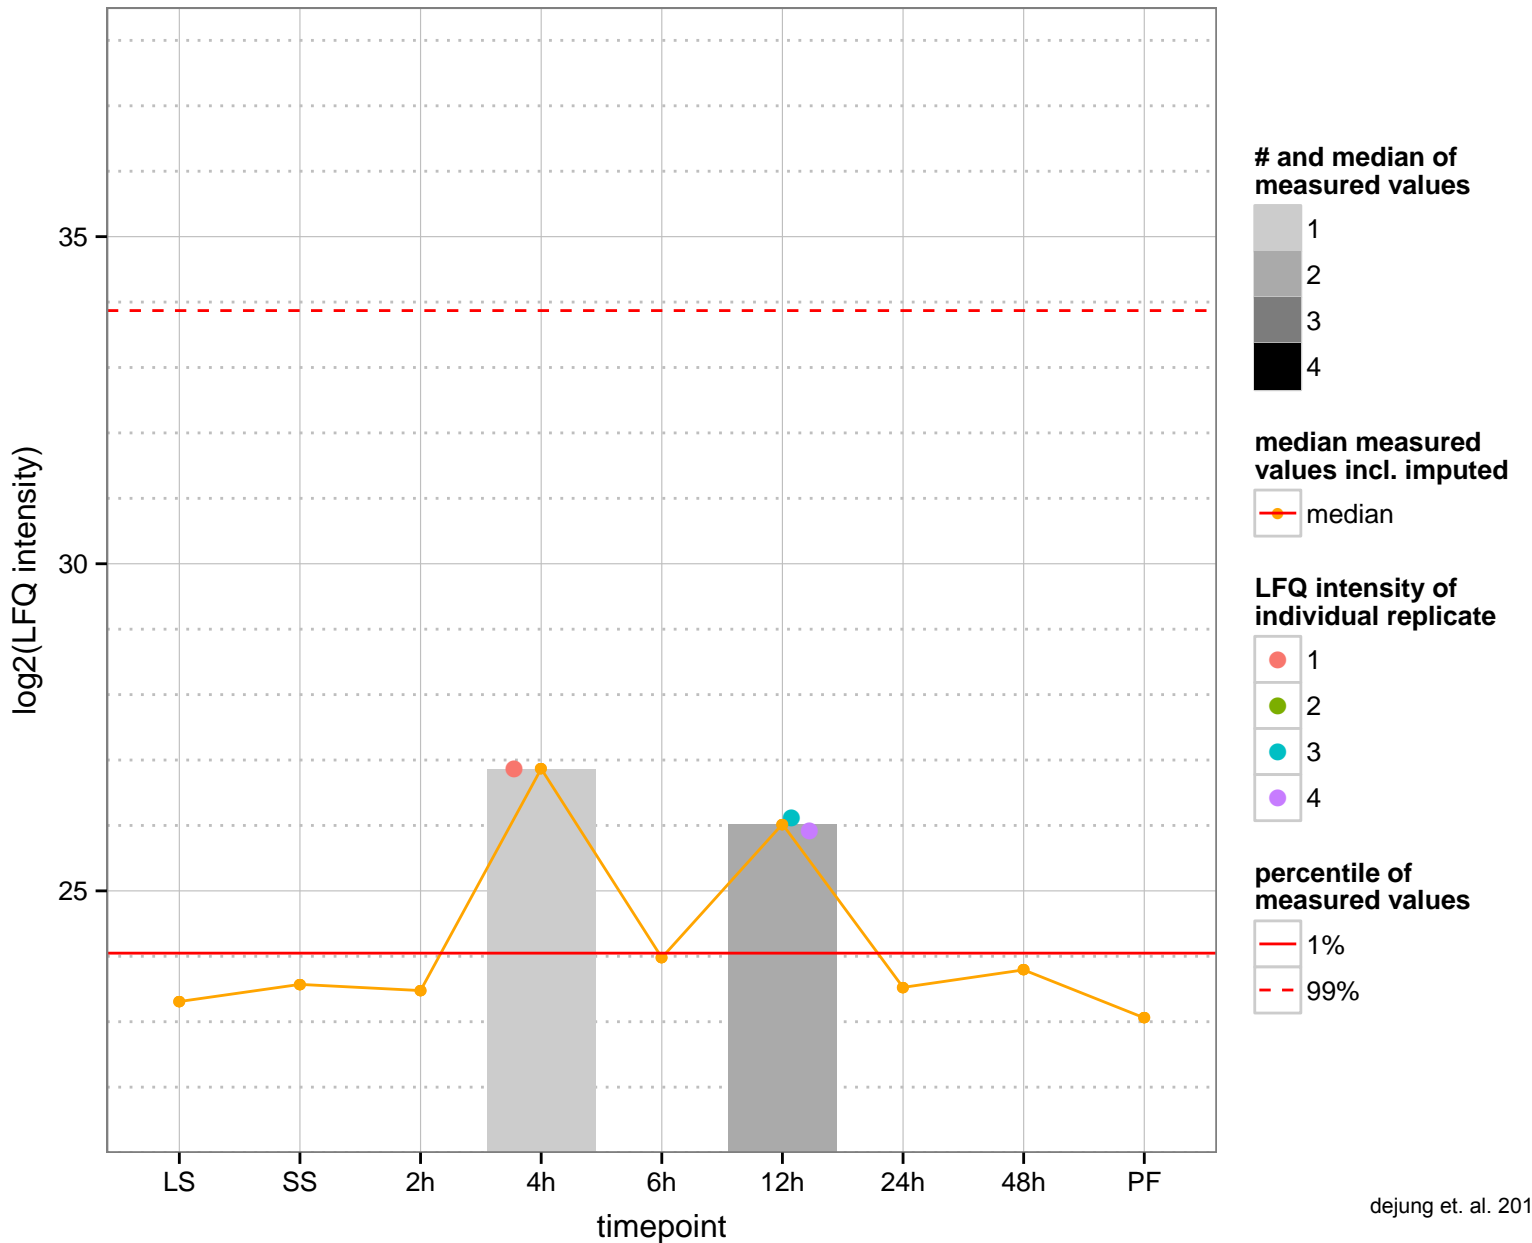

hypothetical protein, conserved  
 Tb927.11.1610  
 AGOF: null  
 AGOC: null  
 AGOP: null  
 PGO: null  
 PGOC: null  
 PGOP: null

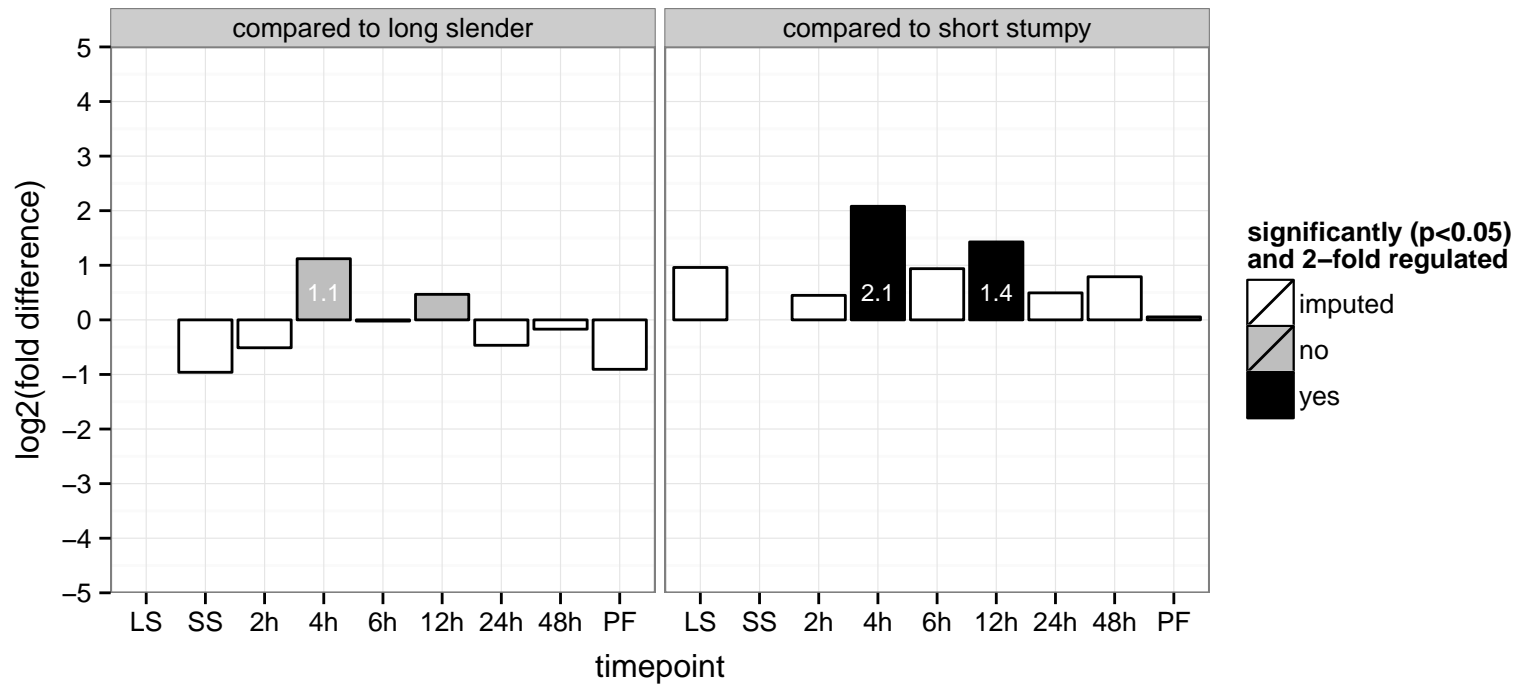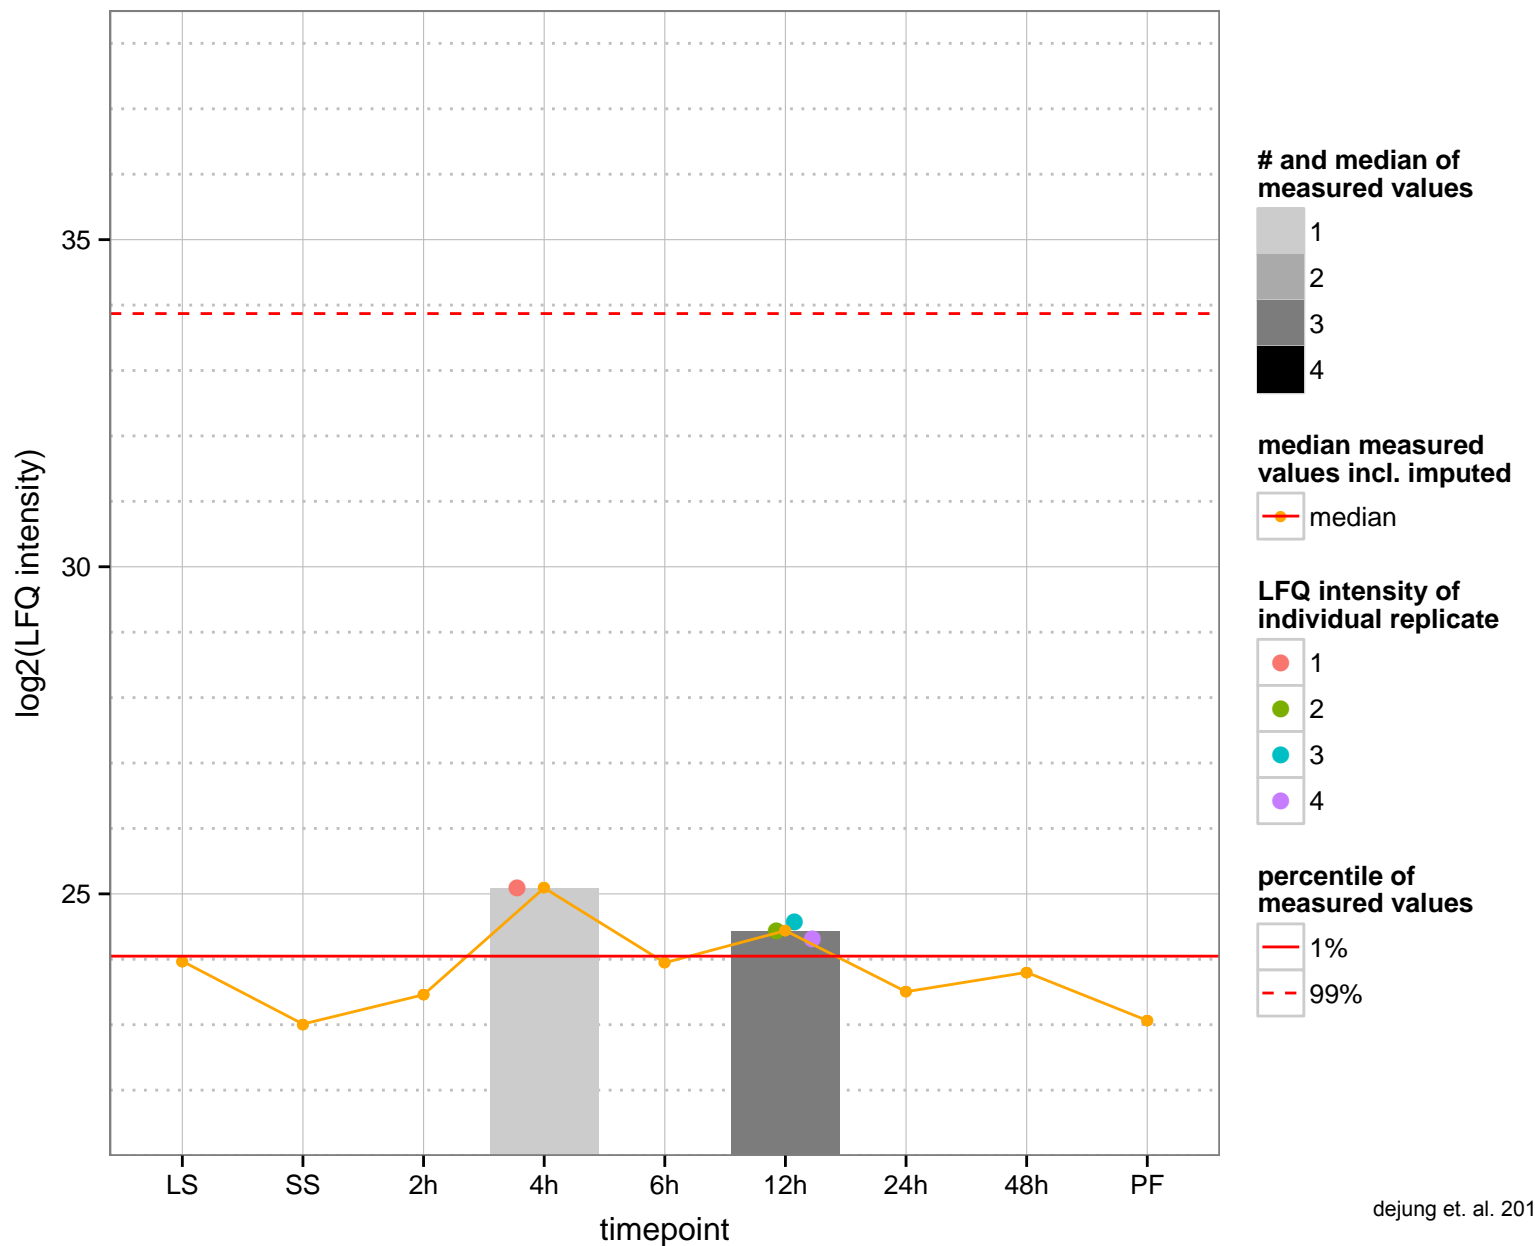



carnitine O-palmitoyltransferase II, putative  
 Tb927.7.2250  
 AGOF: transferase activity, transferring acyl groups  
 AGOC: null  
 AGOP: null  
 PGOF: transferase activity, transferring acyl groups  
 PGOC: null  
 PGOP: null

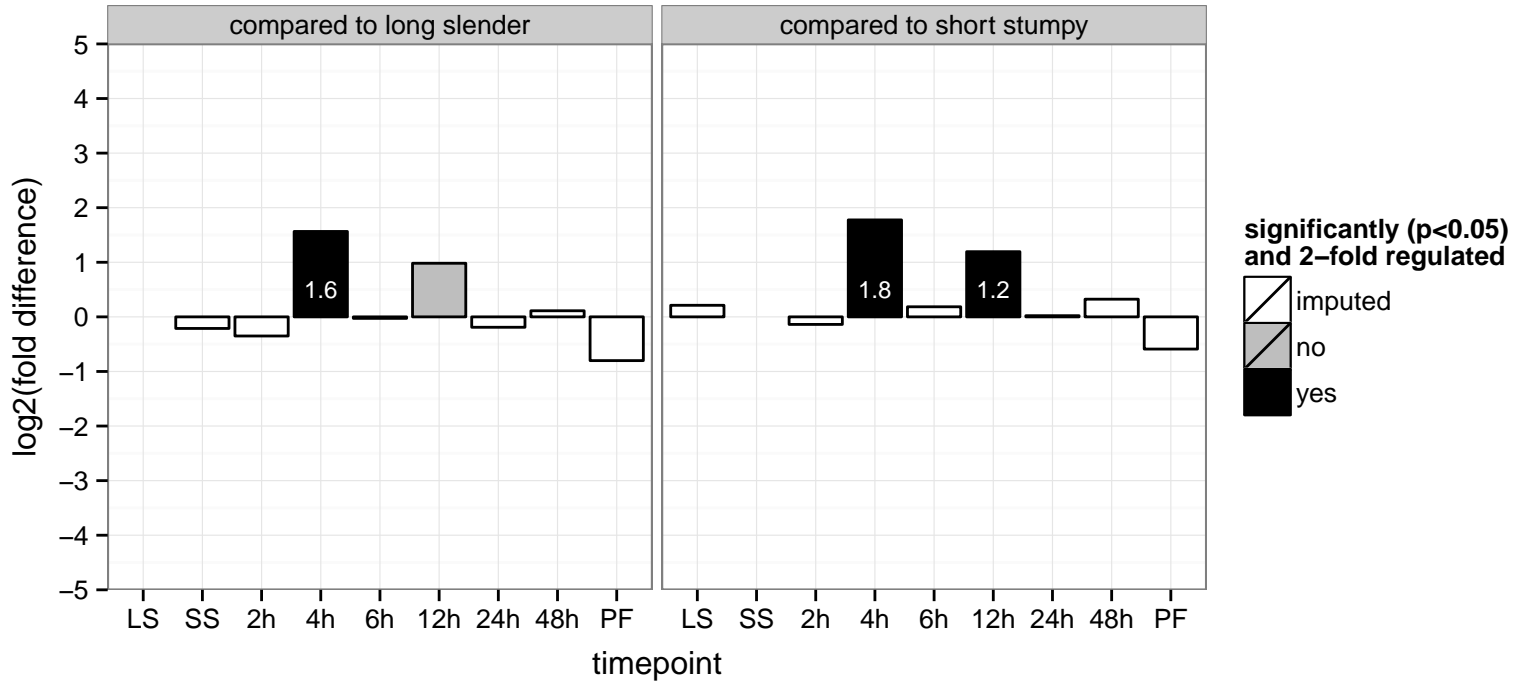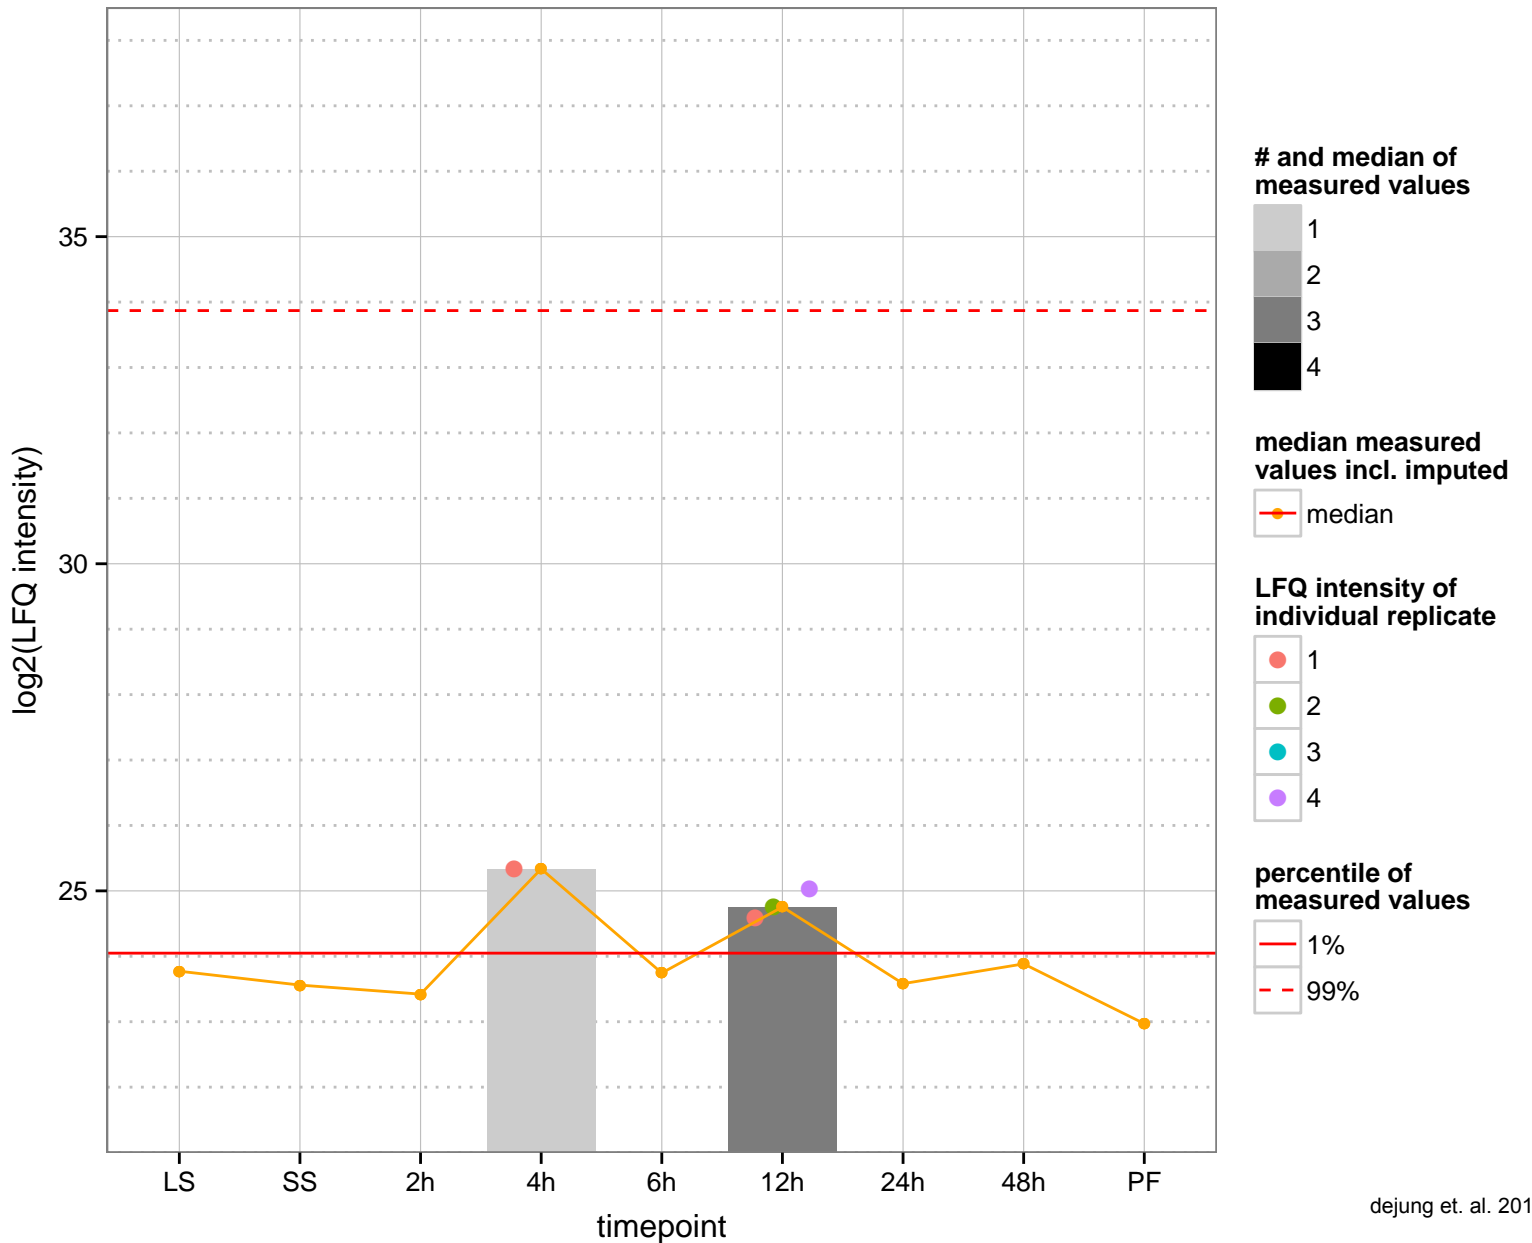

CDP–diacylglycerol–inositol 3–phosphatidyltransferase, putative, phosphatidyltransferase  
Tb927.9.1610

AGOF: CDP–diacylglycerol–inositol 3–phosphatidyltransferase activity, phosphatidylinositol transporter activity

AGOC: Golgi apparatus, endoplasmic reticulum, membrane

AGOP: phospholipid biosynthetic process

PGOF: phosphotransferase activity, for other substituted phosphate groups

PGOC: membrane

PGOP: phospholipid biosynthetic process

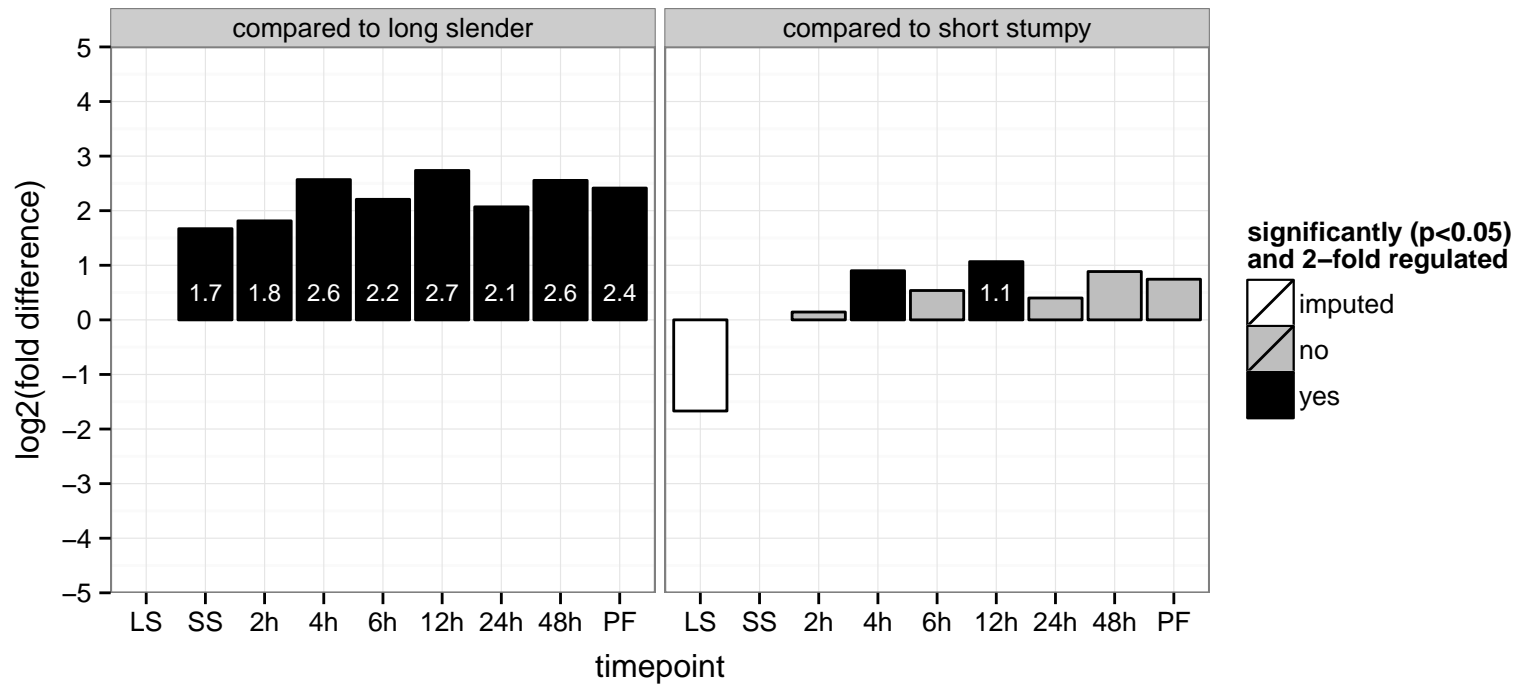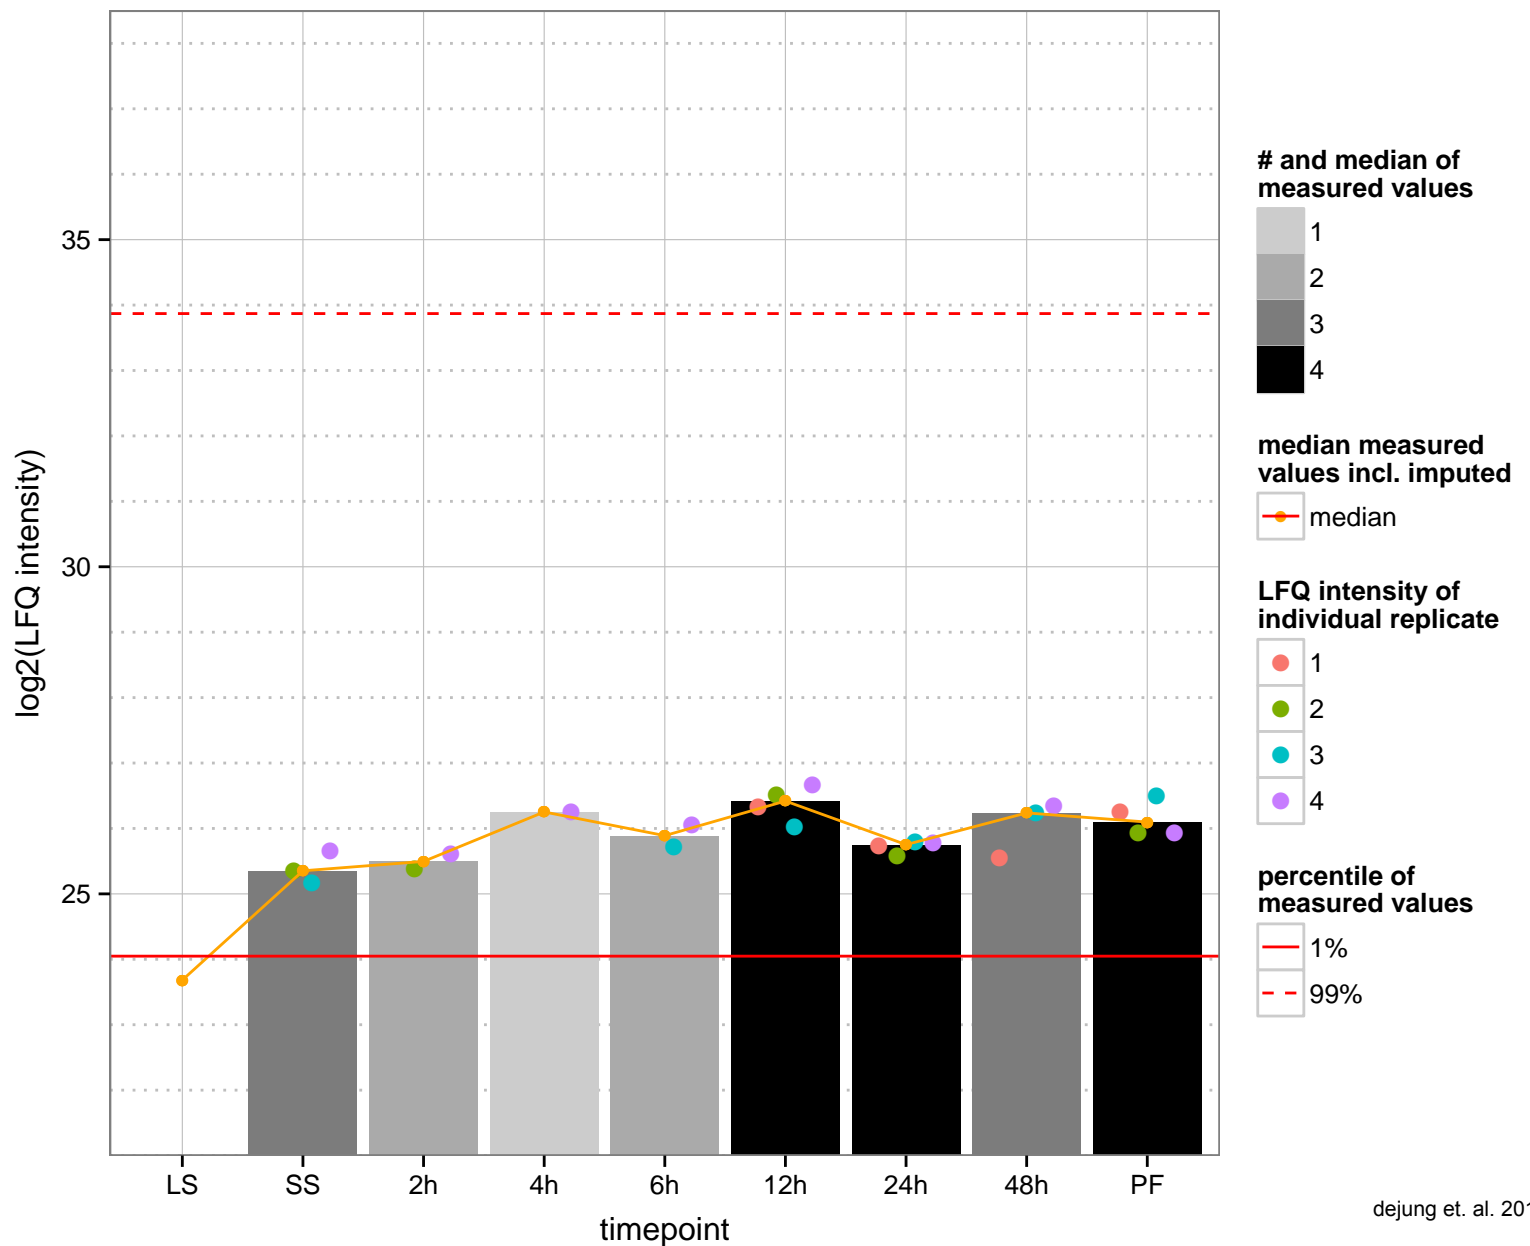

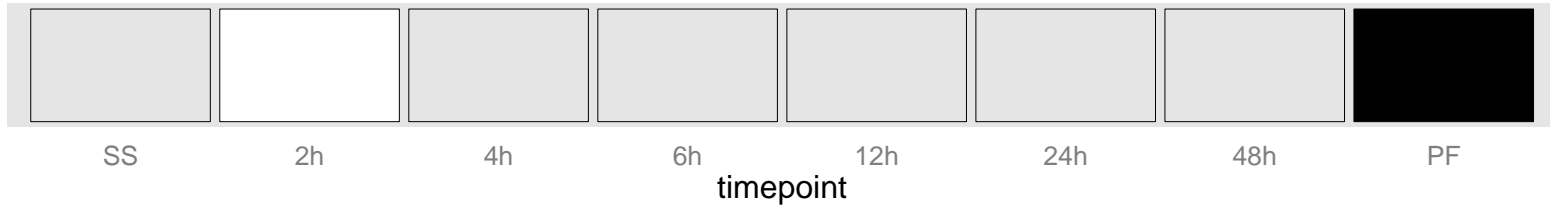

**regulated**  **not regulated**  **significant down**  **significant up**

hypothetical protein, conserved  
 Tb927.10.1660  
 AGOF: null  
 AGOC: mitochondrion  
 AGOP: null  
 PGO: null  
 PGO: null  
 PGO: null

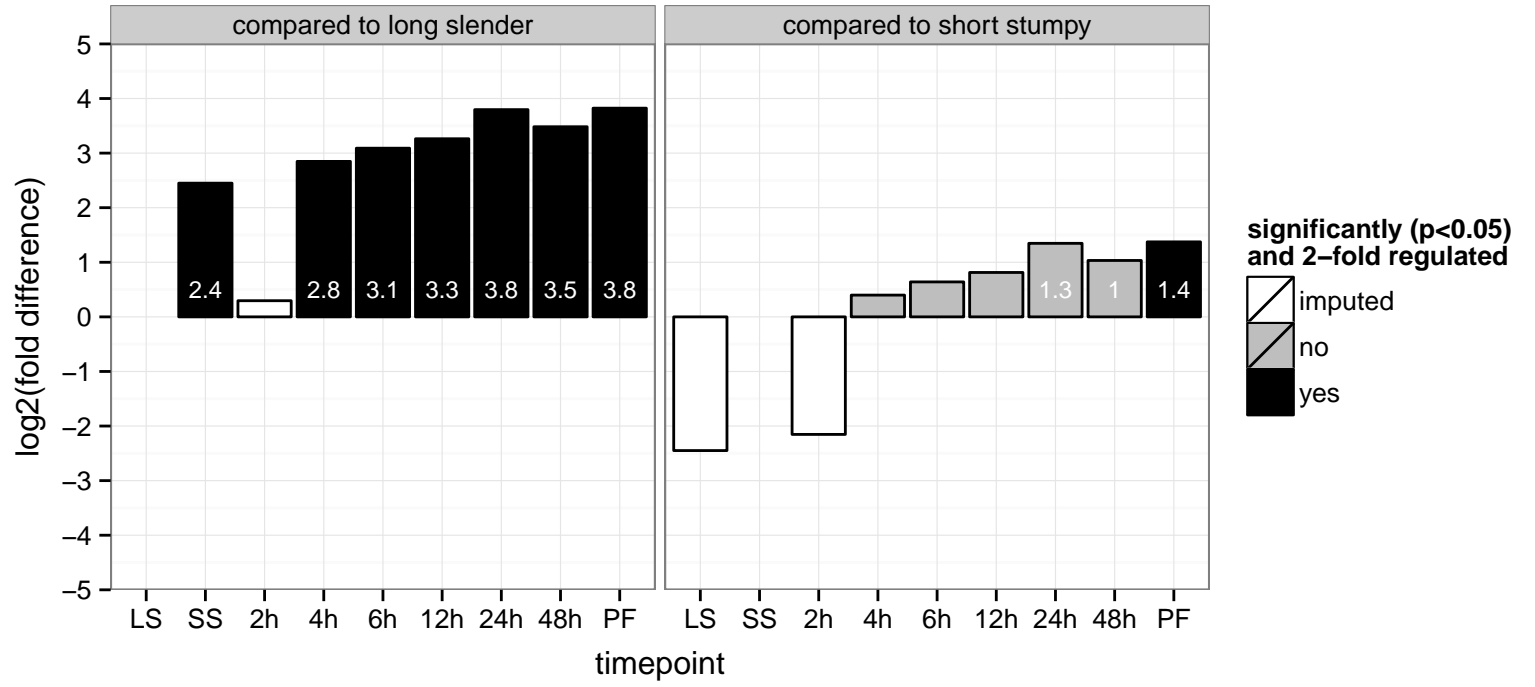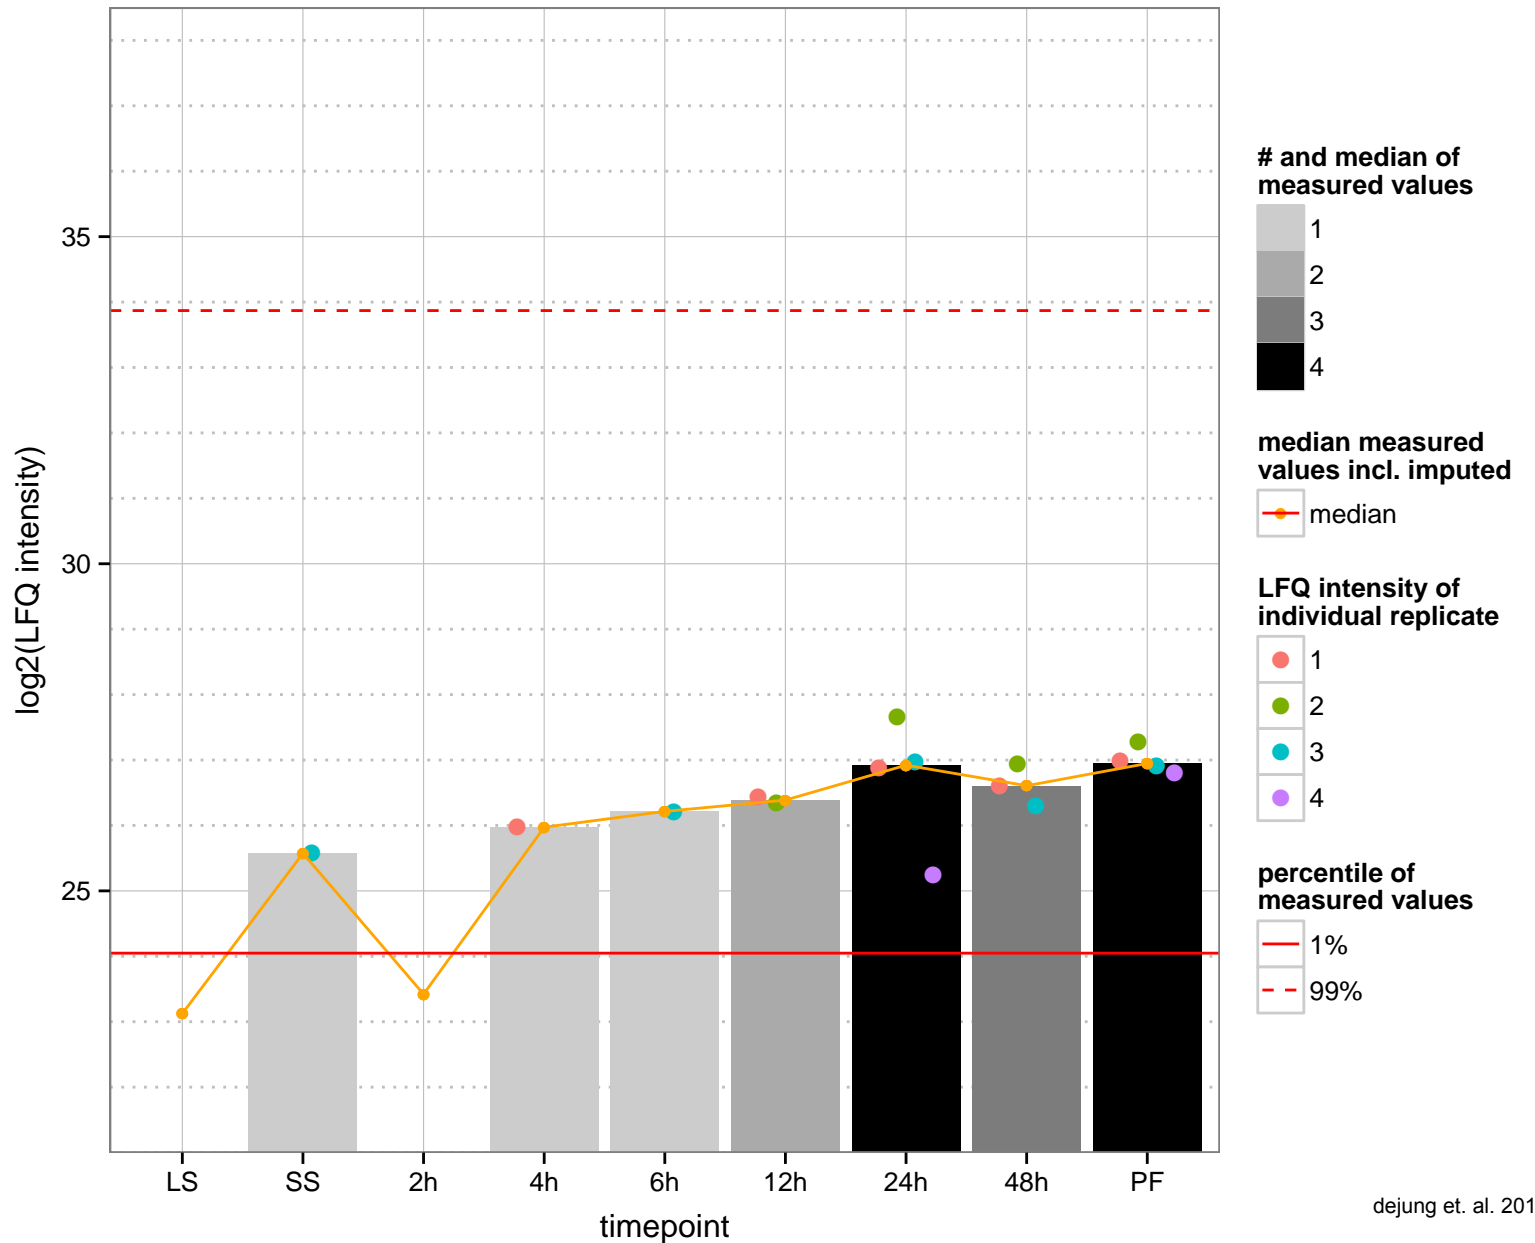

kinetoplastid-specific dual specificity phosphatase, putative  
 Tb927.2.4280  
 AGOF: protein tyrosine/serine/threonine phosphatase activity  
 AGOC: null  
 AGOP: protein dephosphorylation  
 PGO: phosphatase activity, protein tyrosine/serine/threonine phosphatase activity  
 PGOC: null  
 PGO: dephosphorylation, protein dephosphorylation

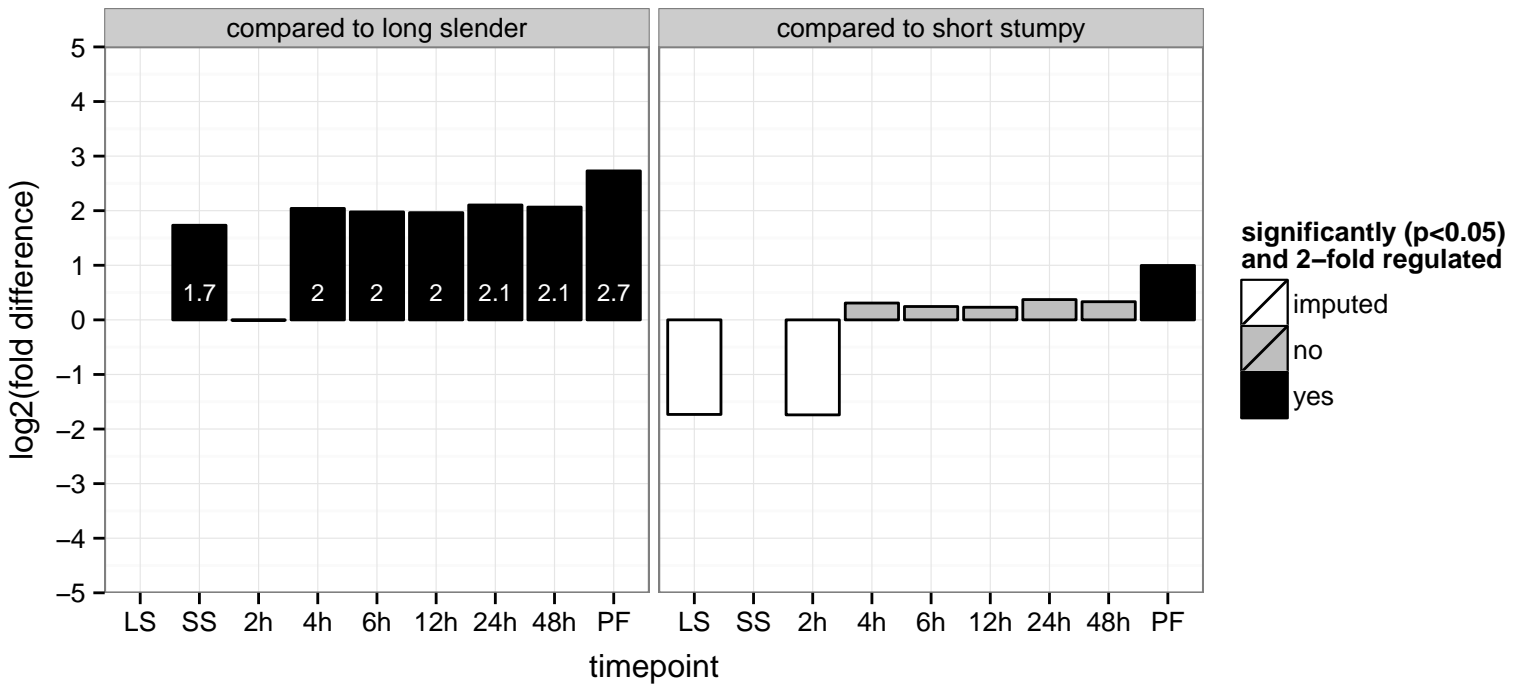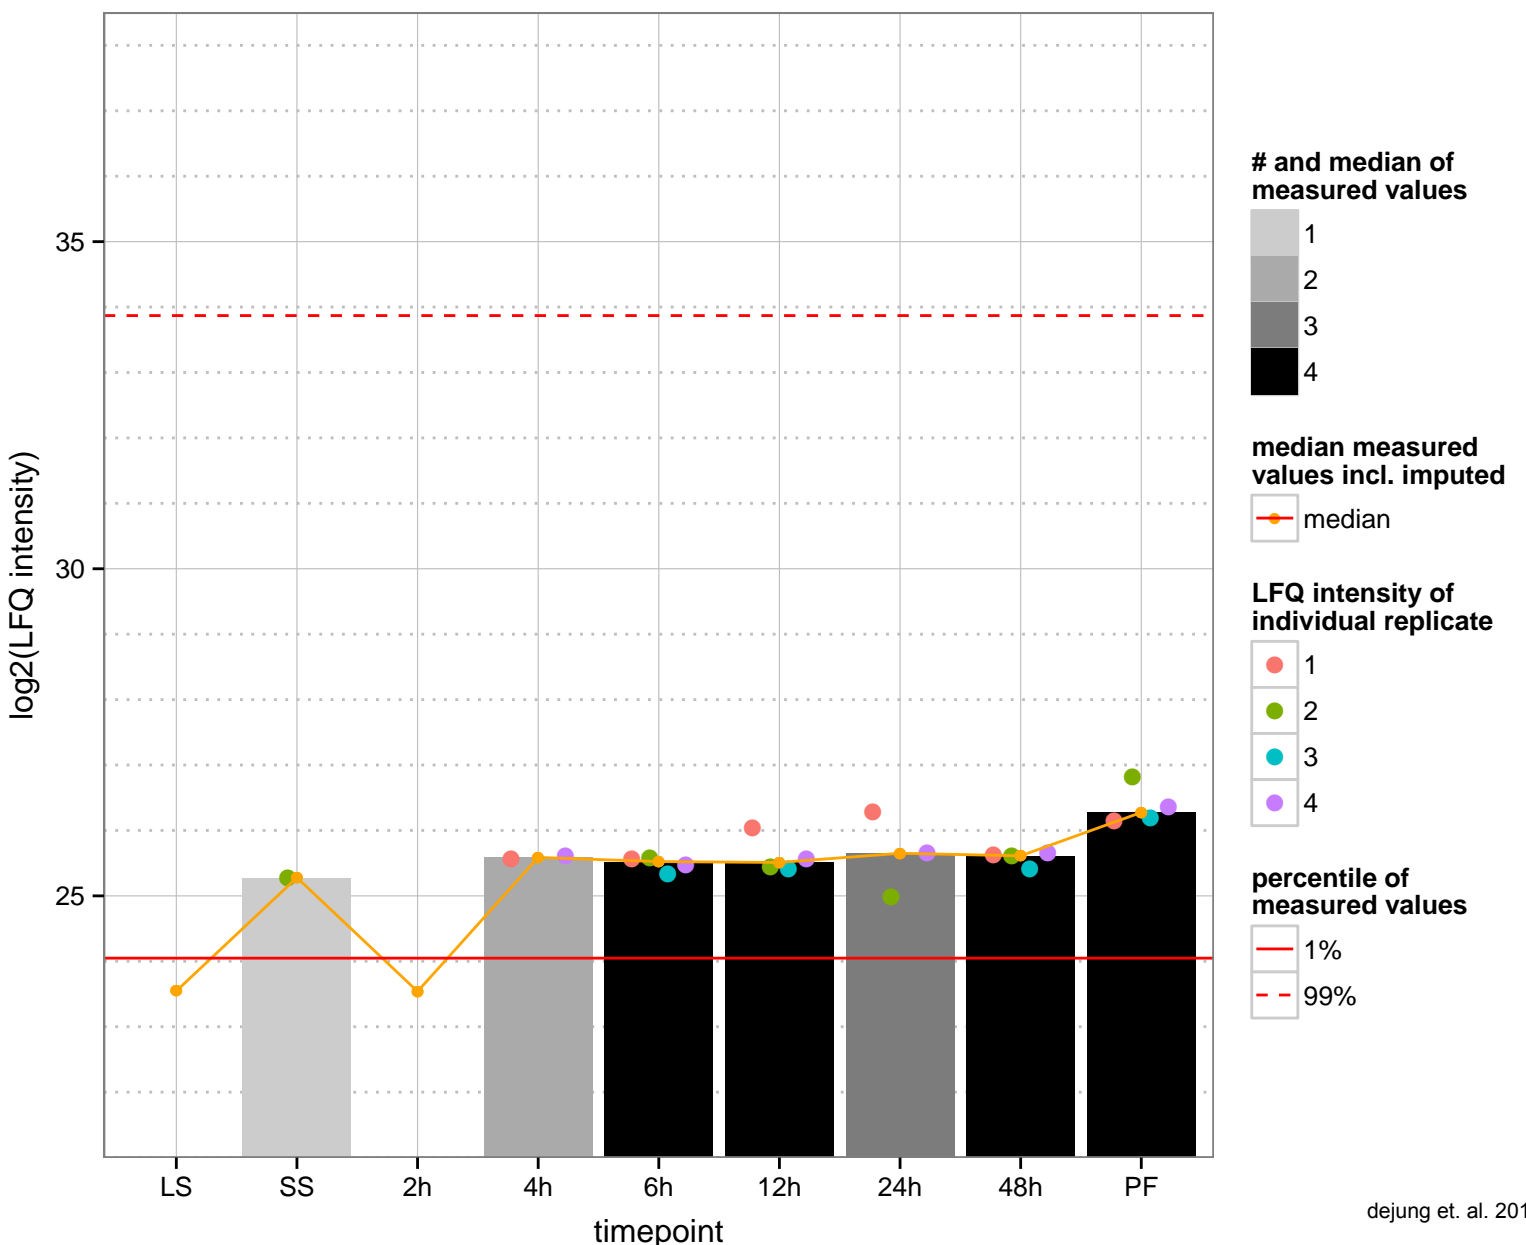

ribosomal protein L3 mitochondrial, putative  
 Tb927.3.5610  
 AGOF: structural constituent of ribosome  
 AGOC: intracellular, mitochondrion, ribosome  
 AGOP: translation  
 PGOF: structural constituent of ribosome  
 PGO: intracellular, ribosome  
 PGOP: translation

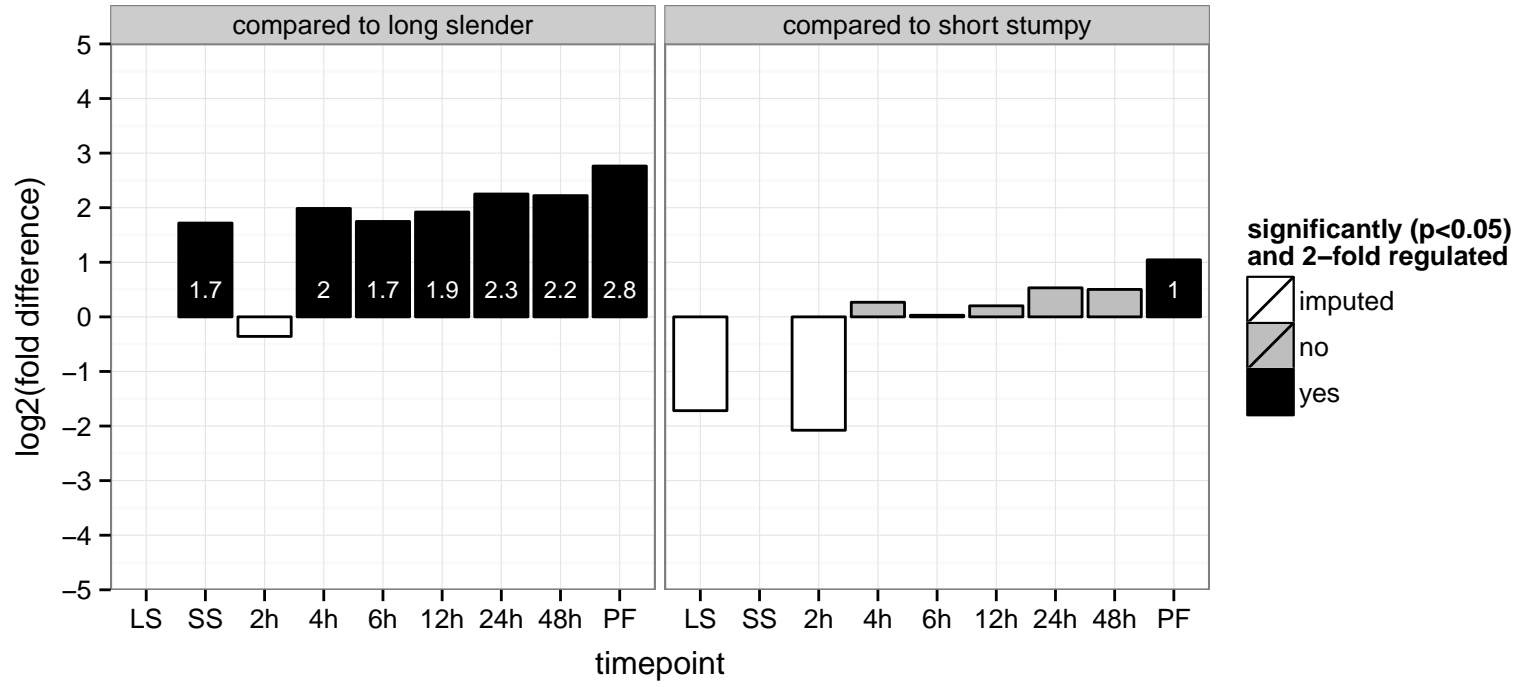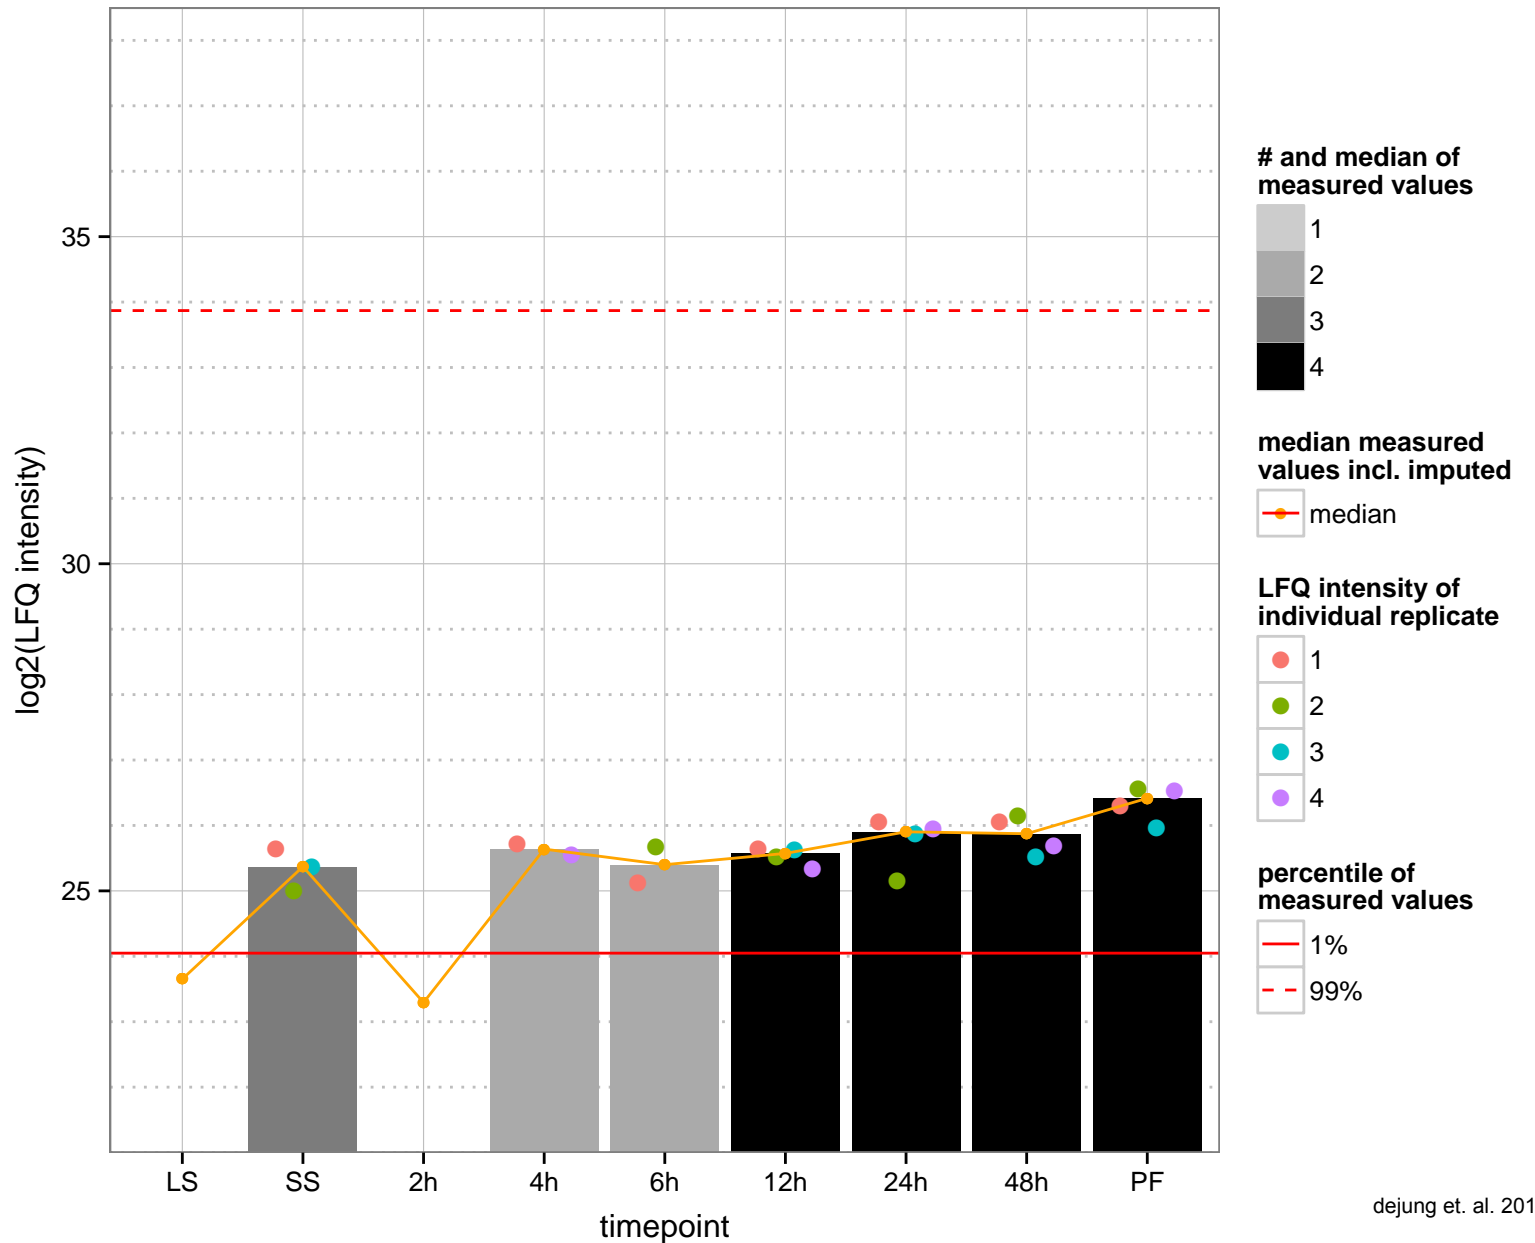

hypothetical protein, conserved  
 Tb927.4.1900  
 AGOF: methyltransferase activity  
 AGOC: null  
 AGOP: metabolic process  
 PGO: null  
 PGOC: null  
 PGOP: null

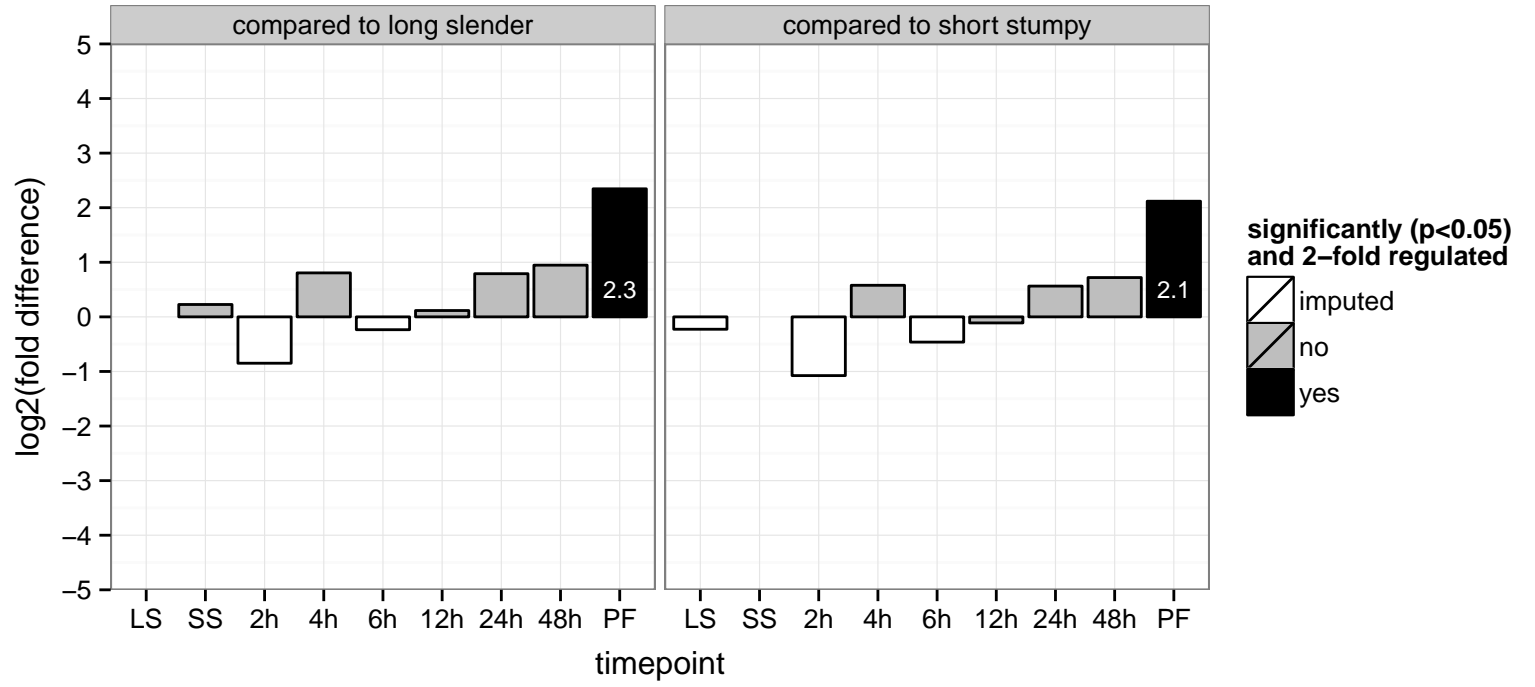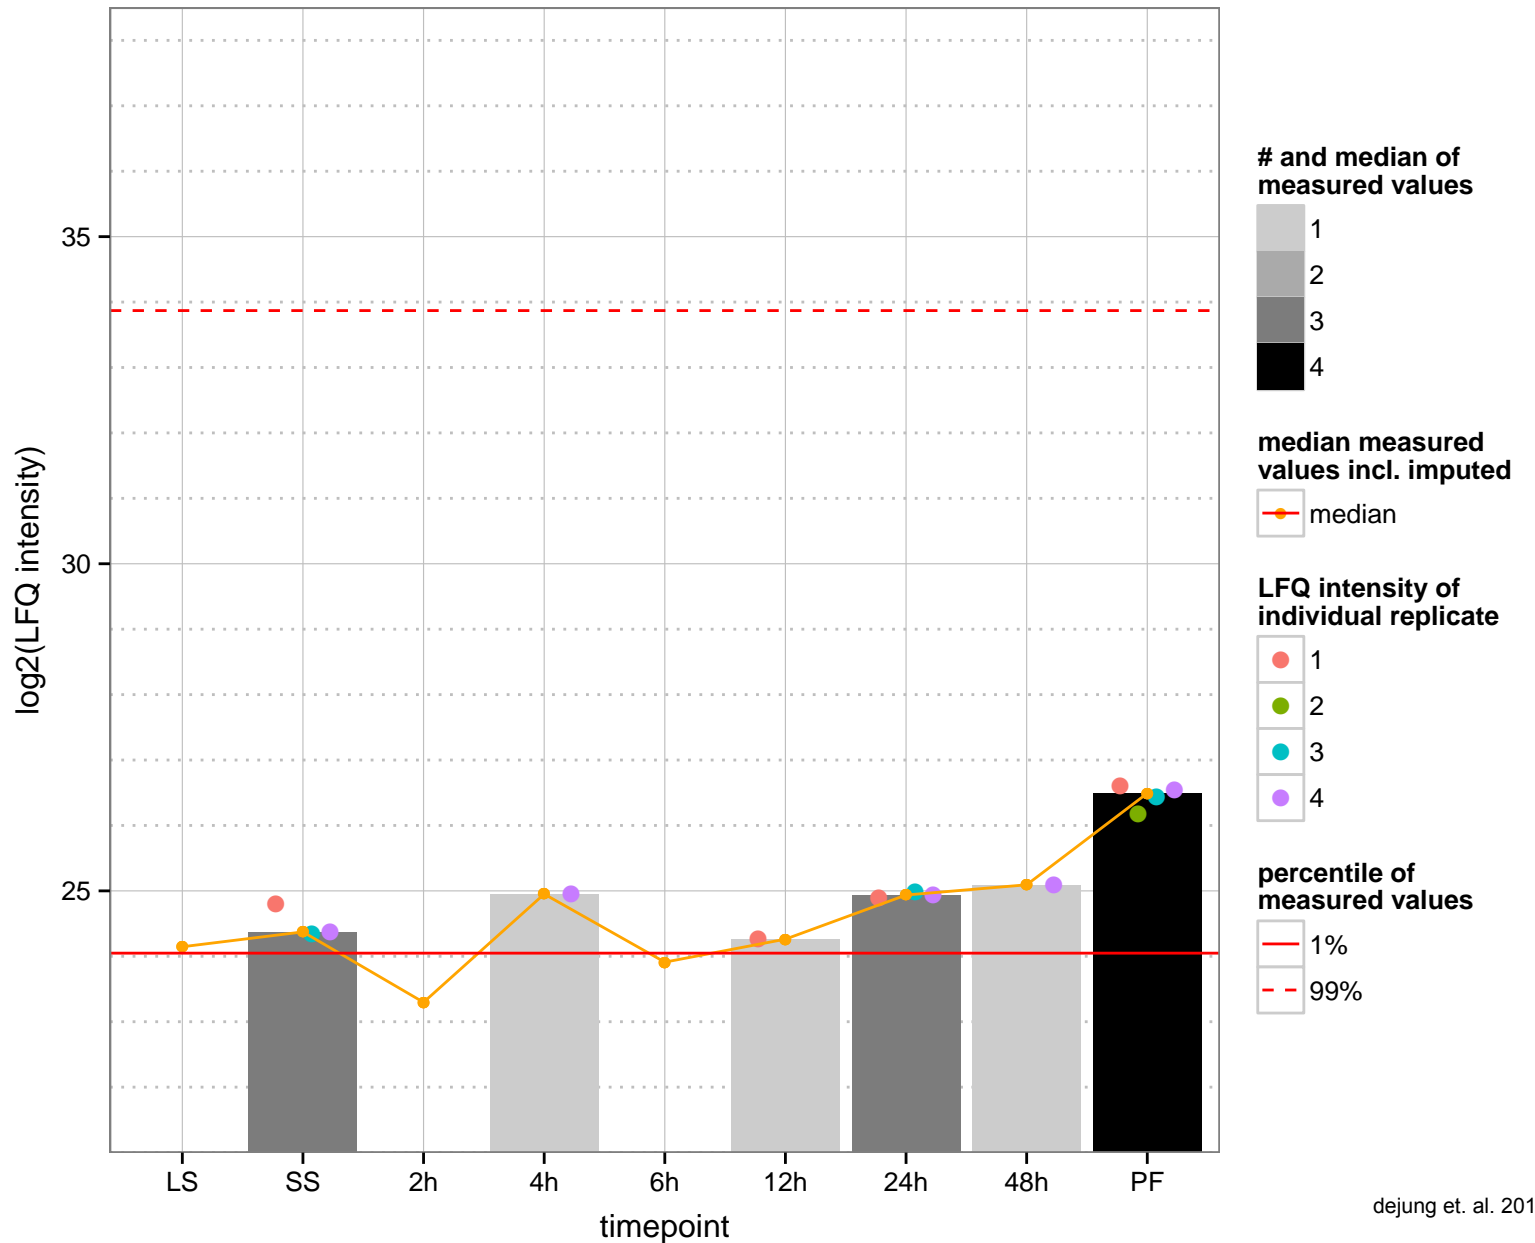

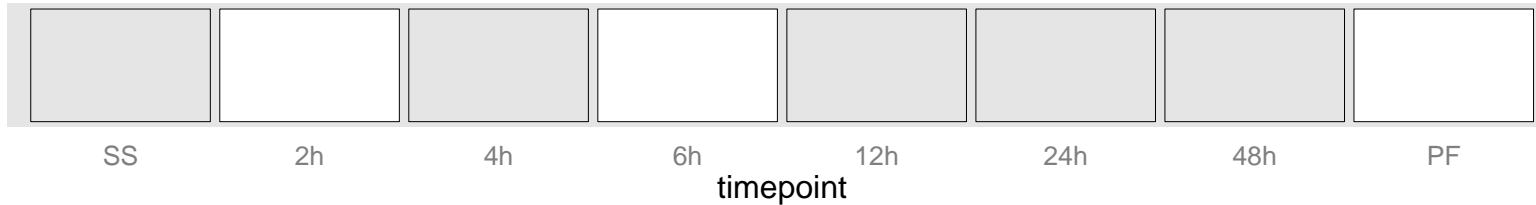

**regulated**  **not regulated**  **significant down**  **significant up**



hypothetical protein, conserved  
 Tb927.10.15730  
 AGOF: null  
 AGOC: null  
 AGOP: null  
 PGO: null, protein binding  
 PGOC: null  
 PGOP: null

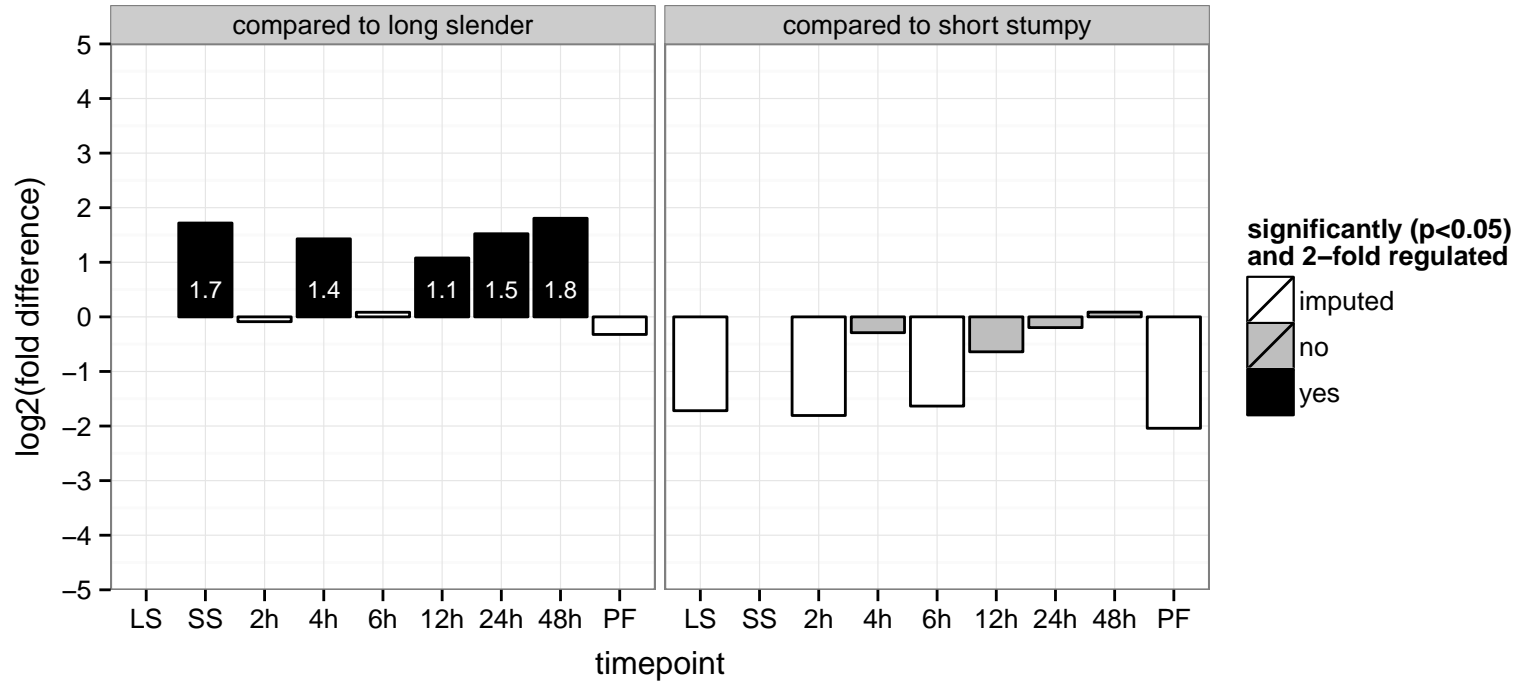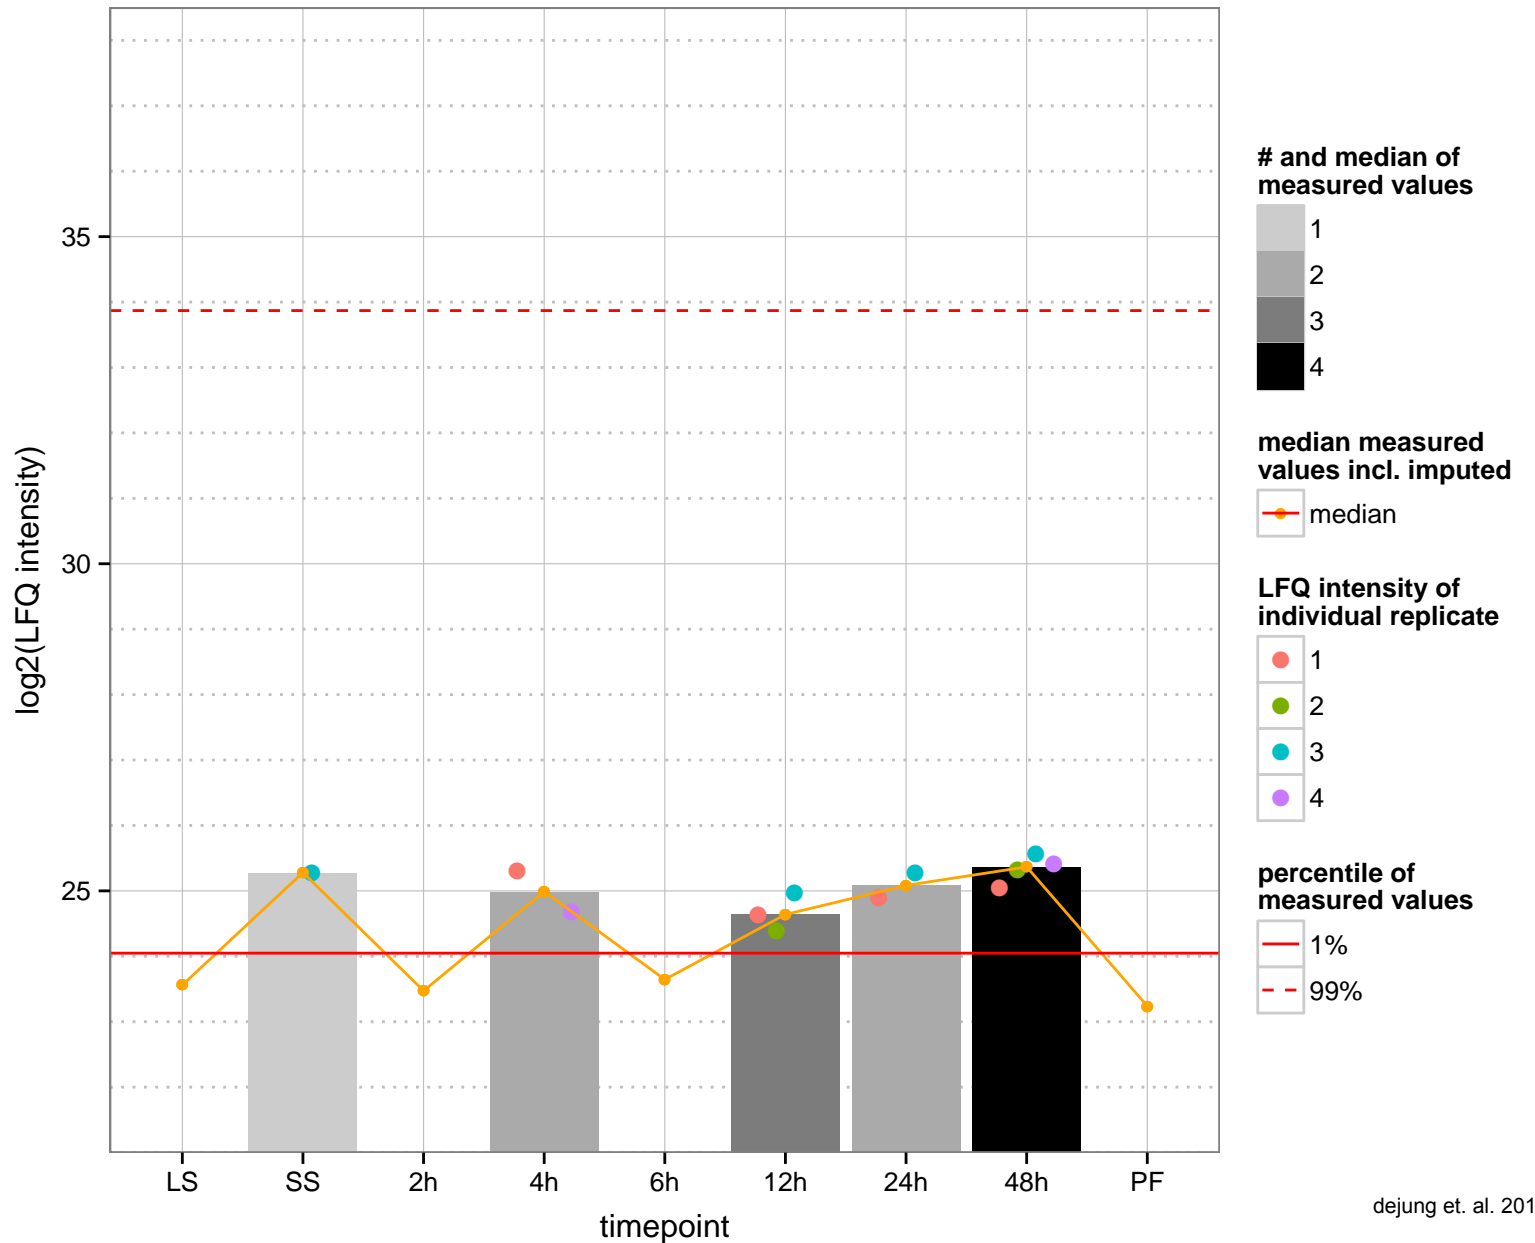

protein phosphatase 2A, putative  
 Tb927.11.11940  
 AGOF: hydrolase activity  
 AGOC: null  
 AGOP: null  
 PGOF: hydrolase activity  
 PGOC: null  
 PGOP: null

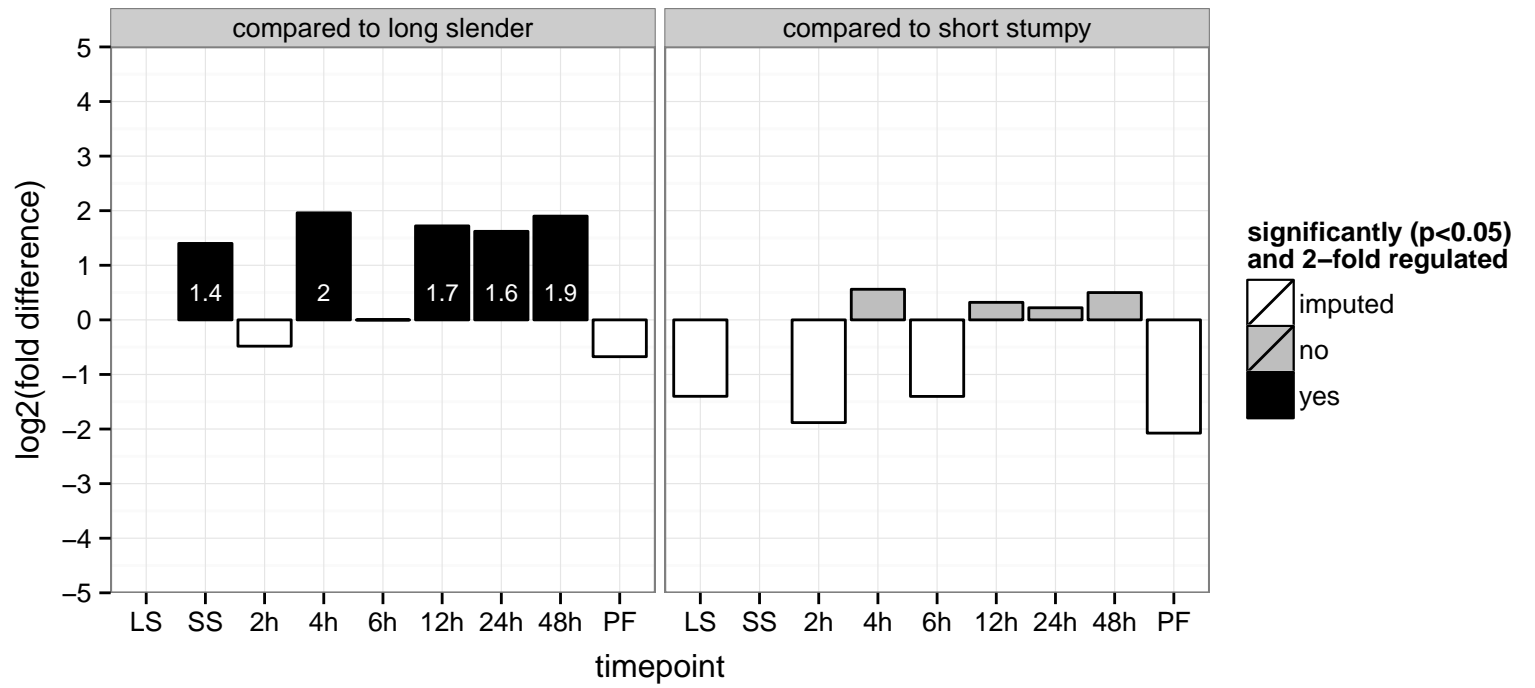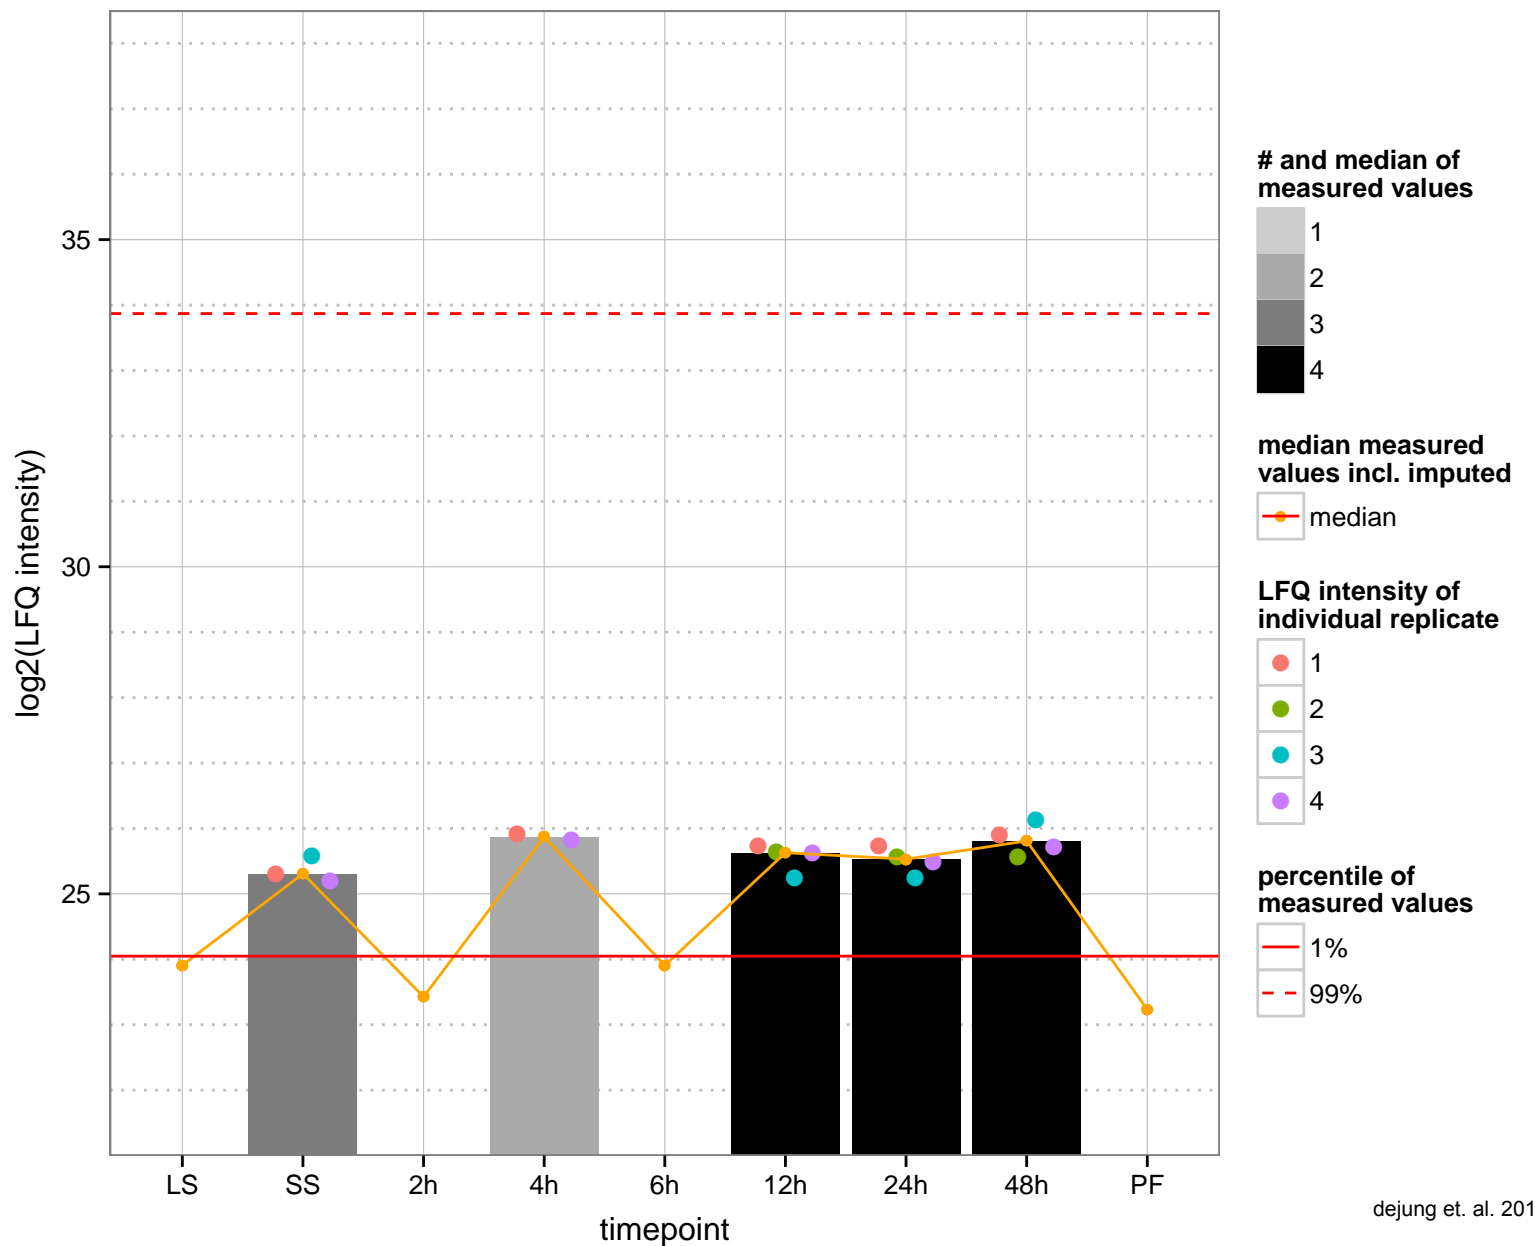

ATP-dependent DEAD/H RNA helicase, putative

Tb927.11.15460

AGOF: ATP binding, ATP-dependent helicase activity, helicase activity, nucleic acid binding

AGOC: null

AGOP: nucleobase-containing compound metabolic process

PGOF: ATP binding, ATP-dependent helicase activity, helicase activity, nucleic acid binding

PGOC: null

PGOP: null

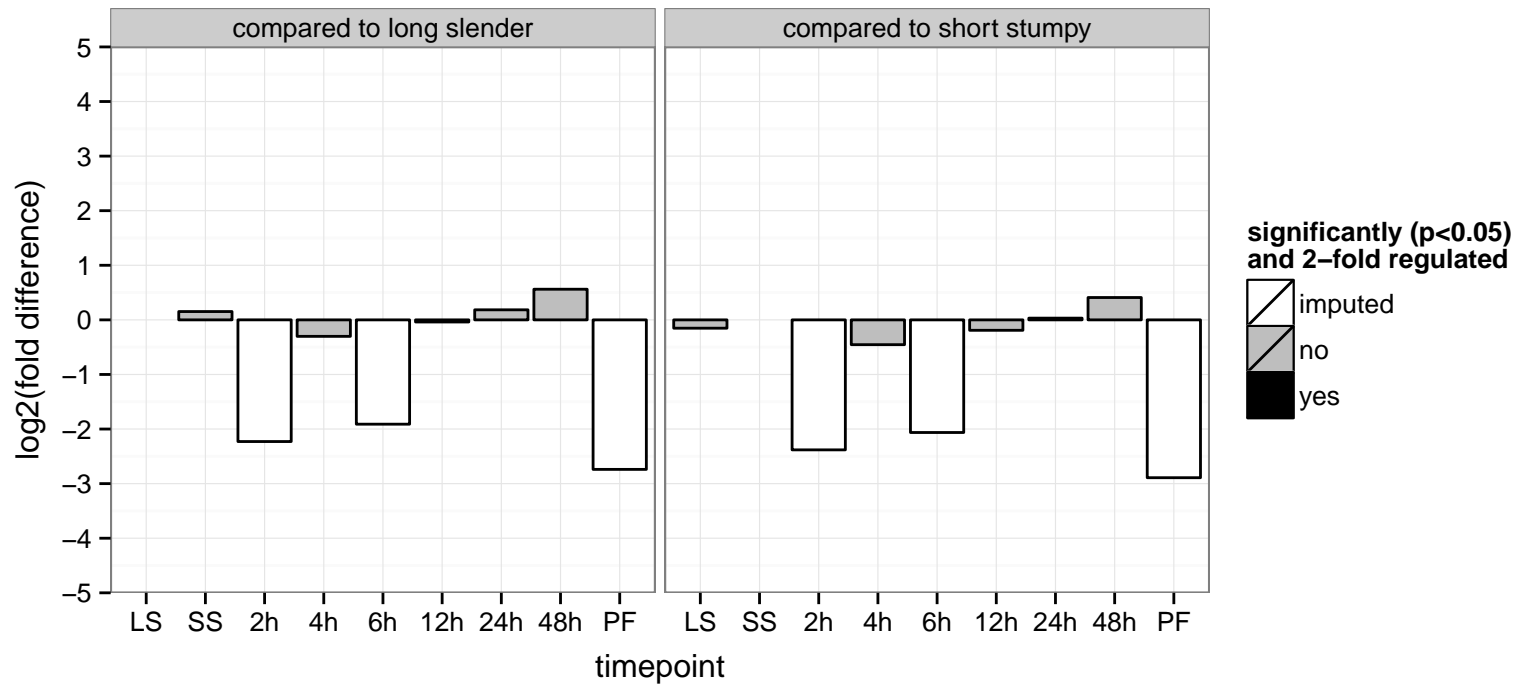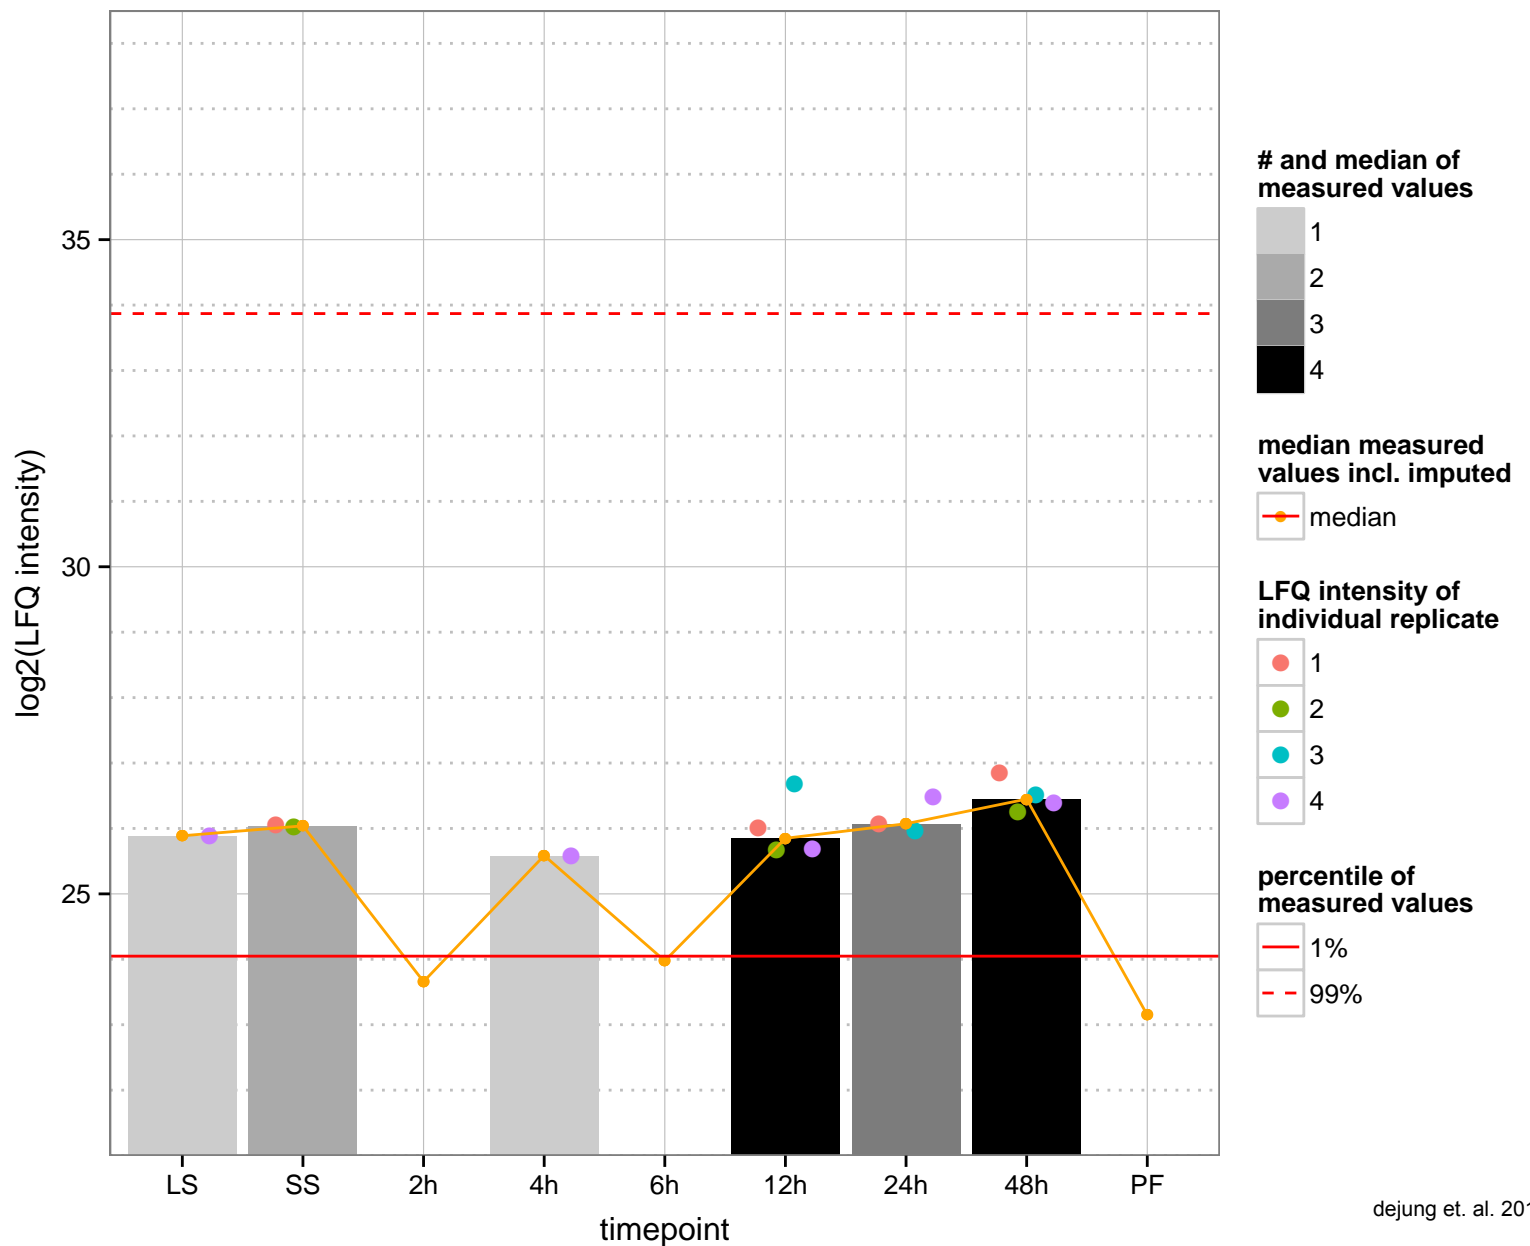

unspecified product  
 Tb927.9.11280  
 AGOF: null  
 AGOC: null  
 AGOP: null  
 PGO: structural constituent of ribosome  
 PGO: intracellular, ribosome  
 PGO: translation

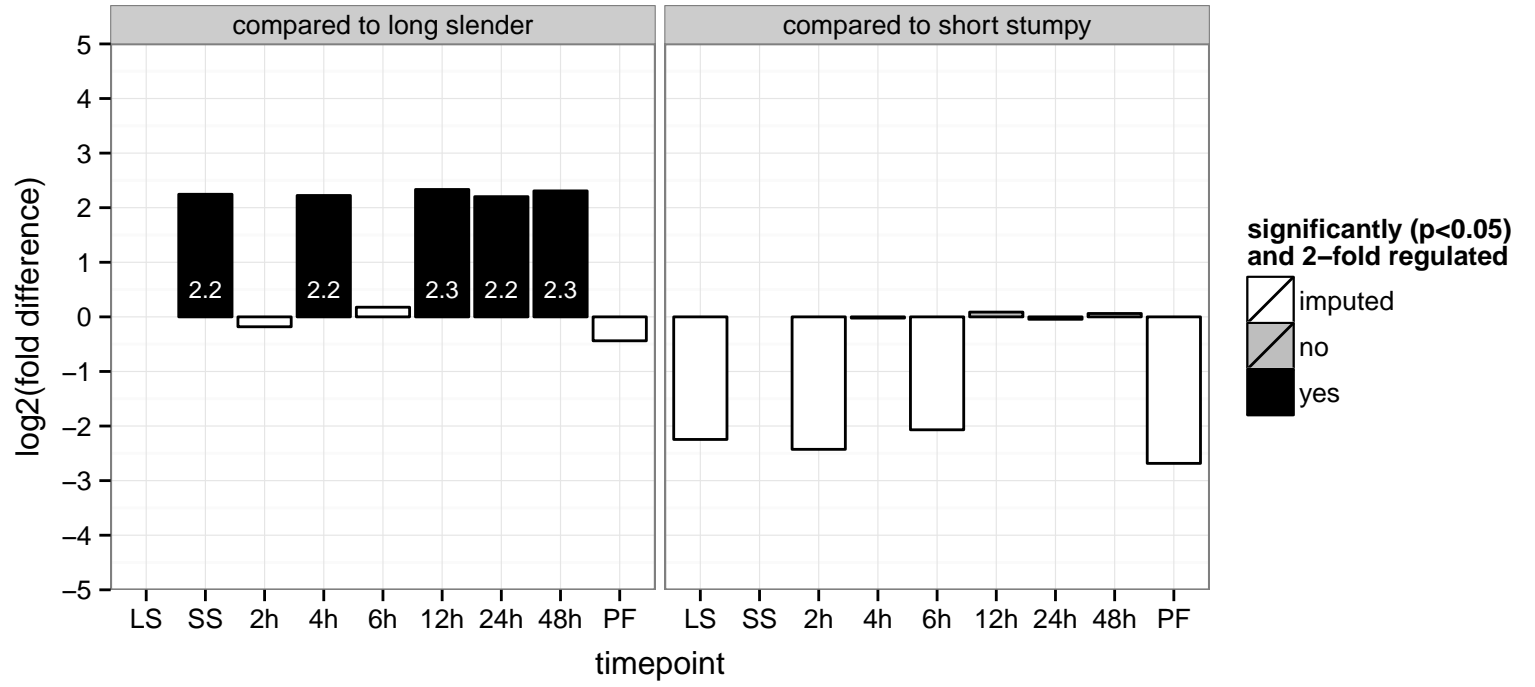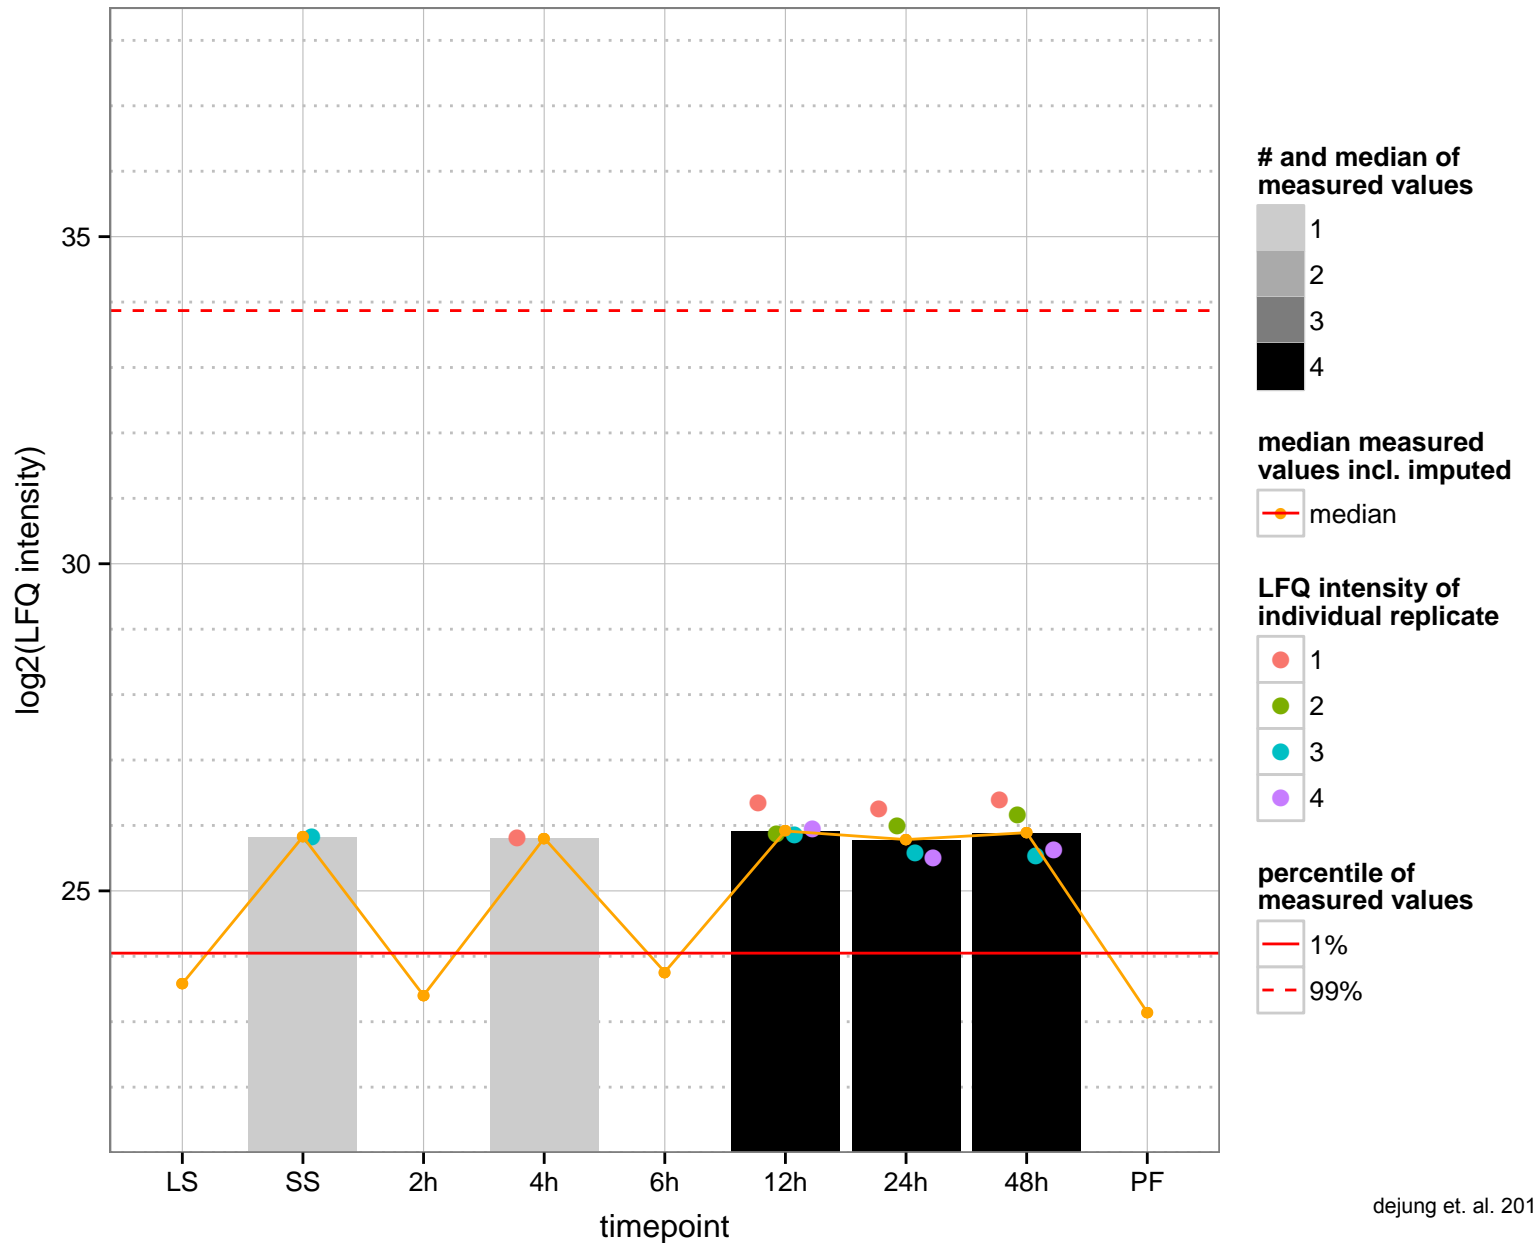

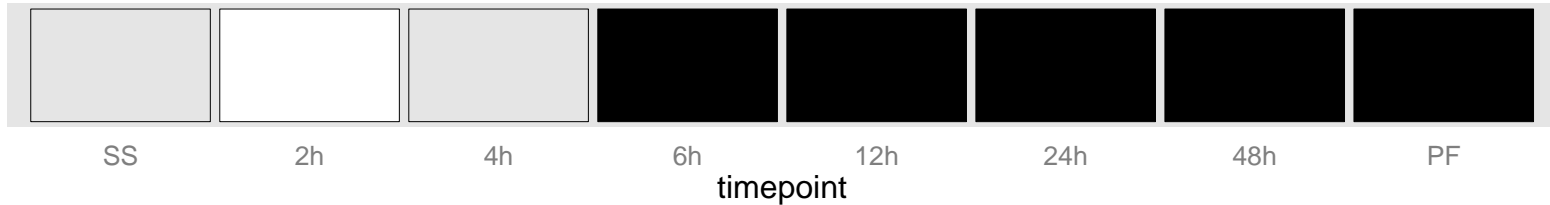

**regulated**  **not regulated**  **significant down**  **significant up** 

hypothetical protein, conserved  
 Tb927.11.240  
 AGOF: null  
 AGOC: mitochondrion  
 AGOP: null  
 PGO: null  
 PGO: null  
 PGO: null

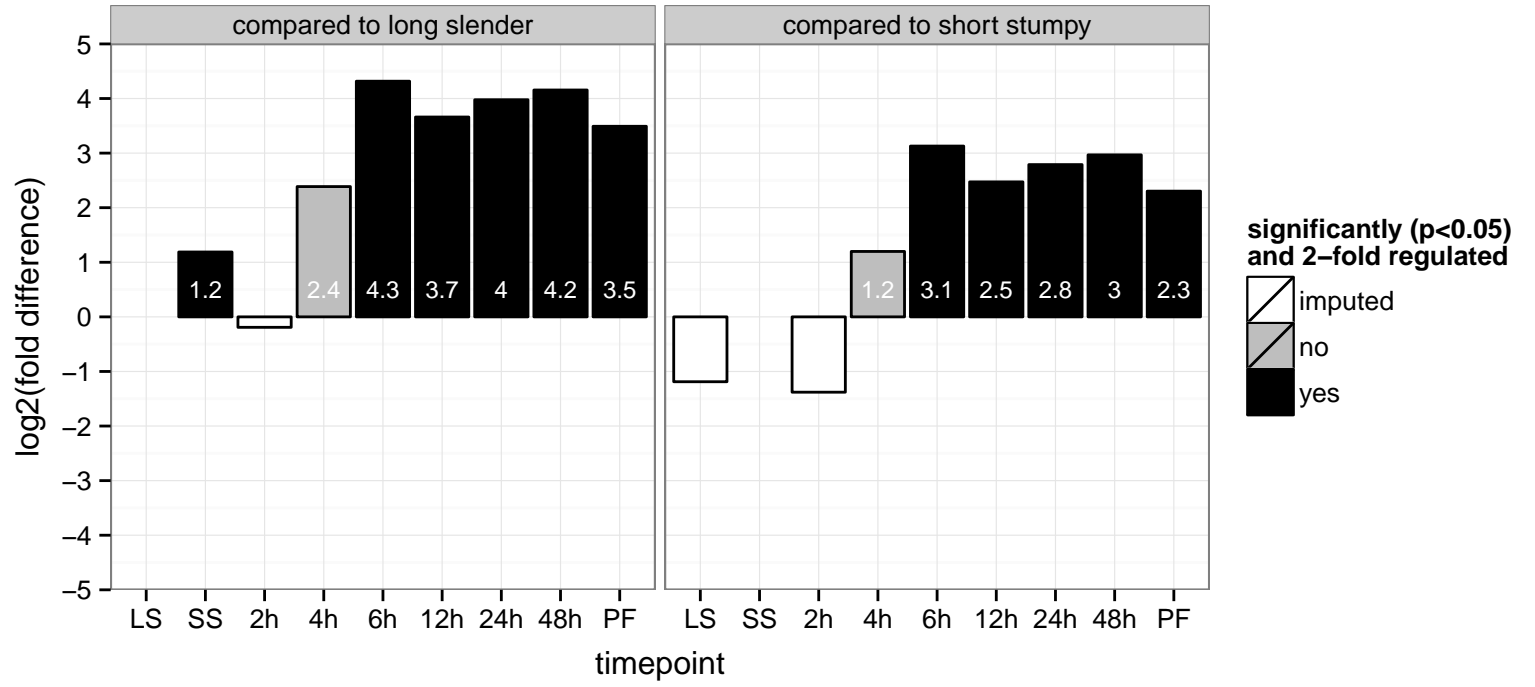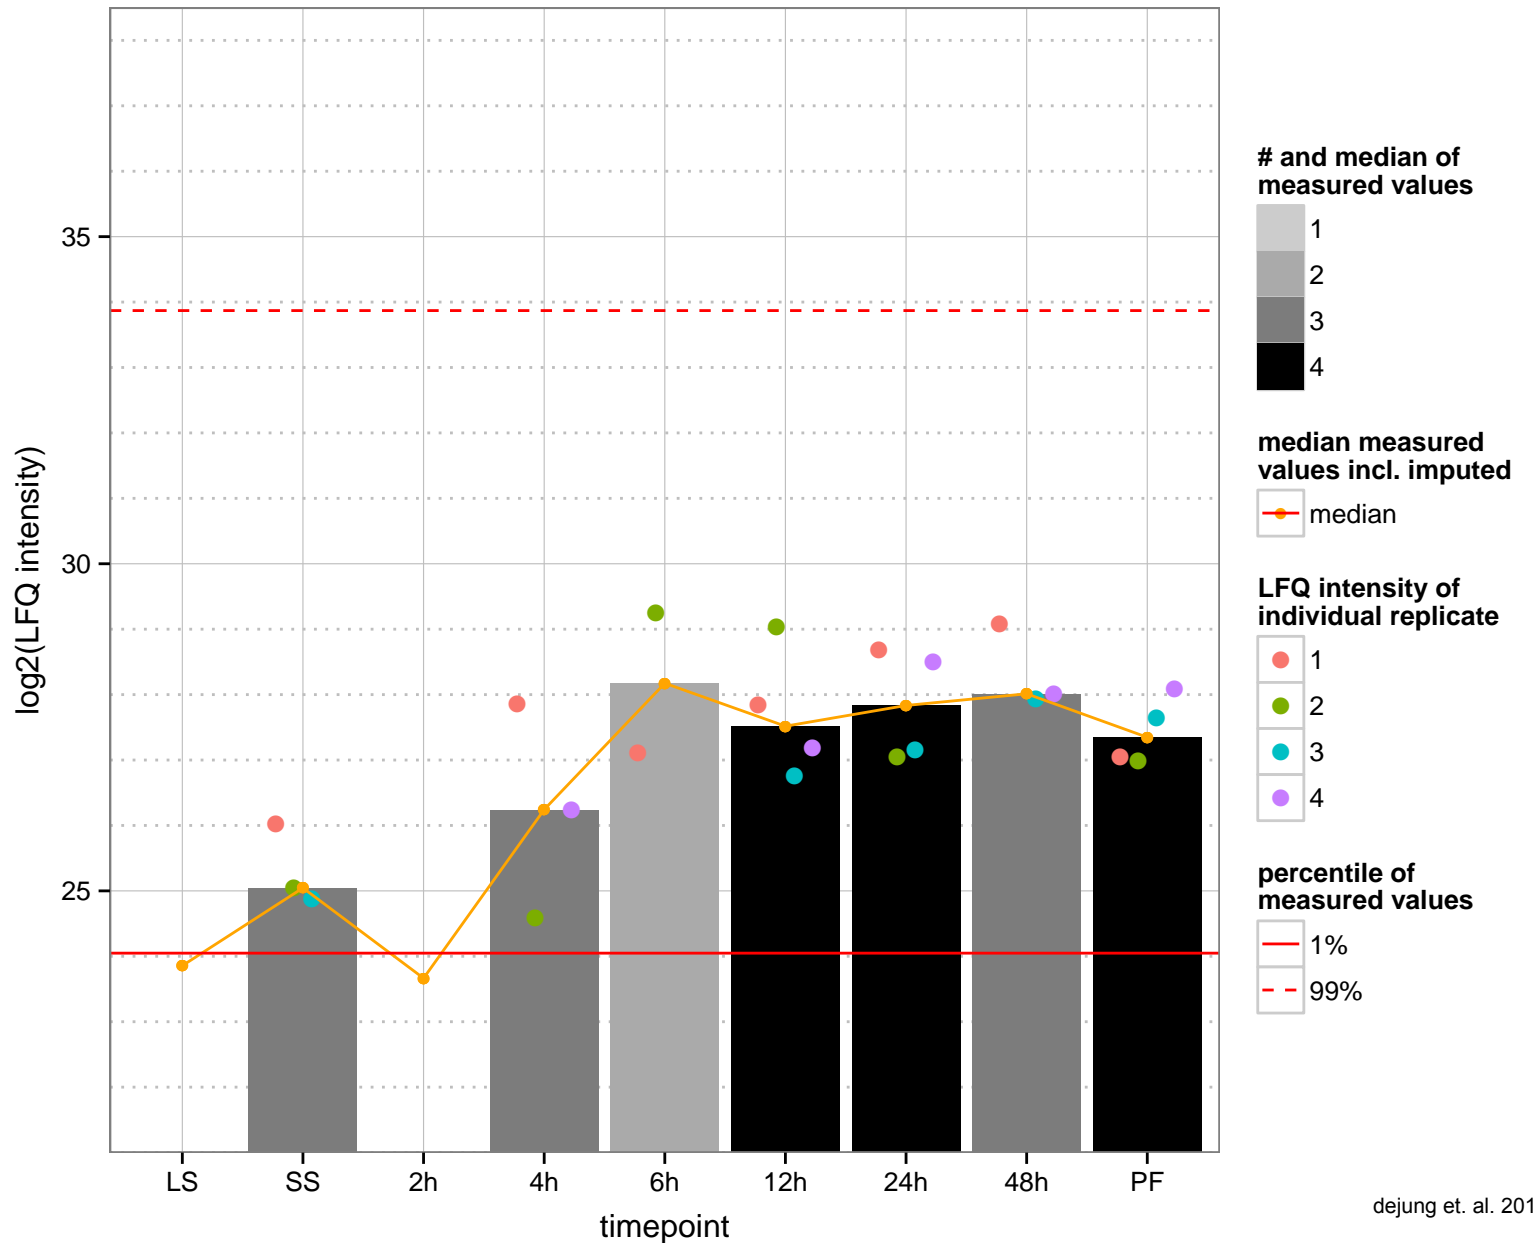

hypothetical protein, conserved  
 Tb927.4.3370  
 AGOF: null  
 AGOC: null  
 AGOP: null  
 PGO: binding  
 PGO: null  
 PGO: null

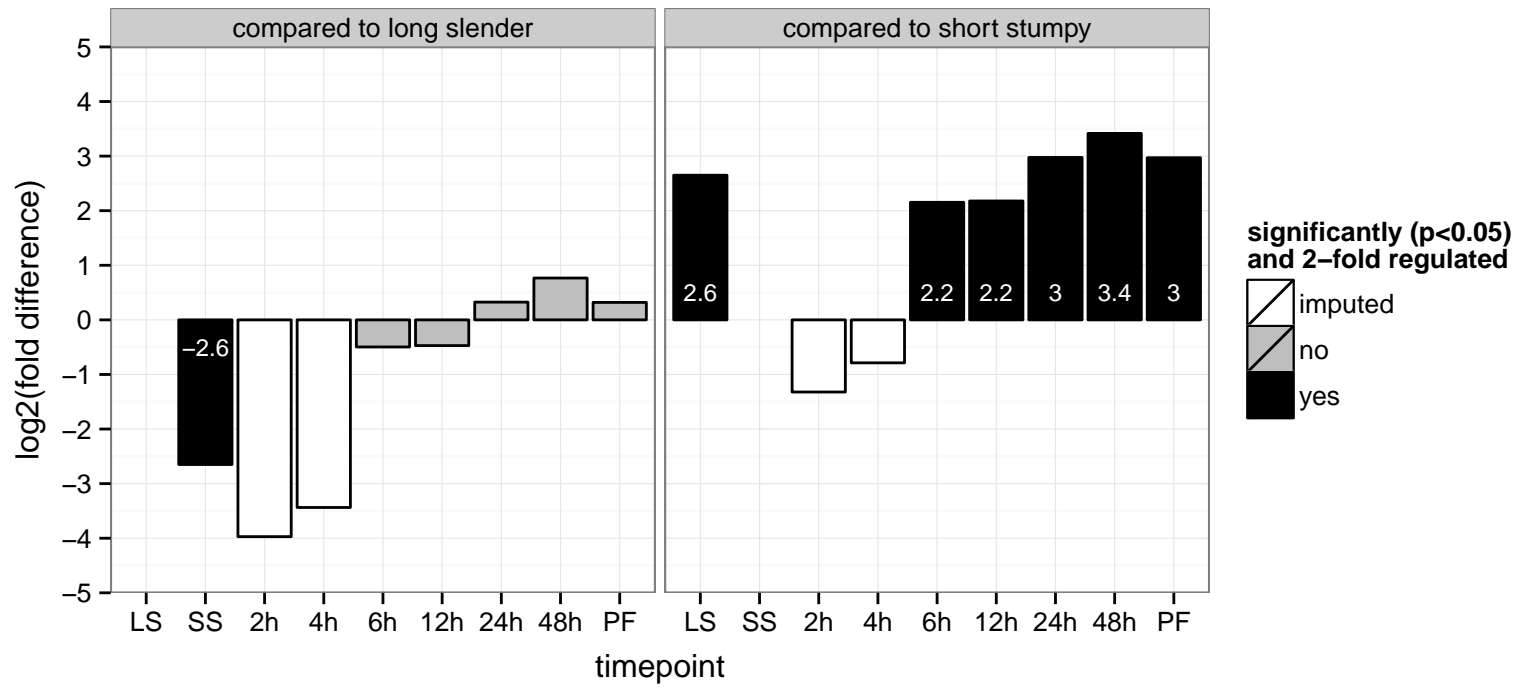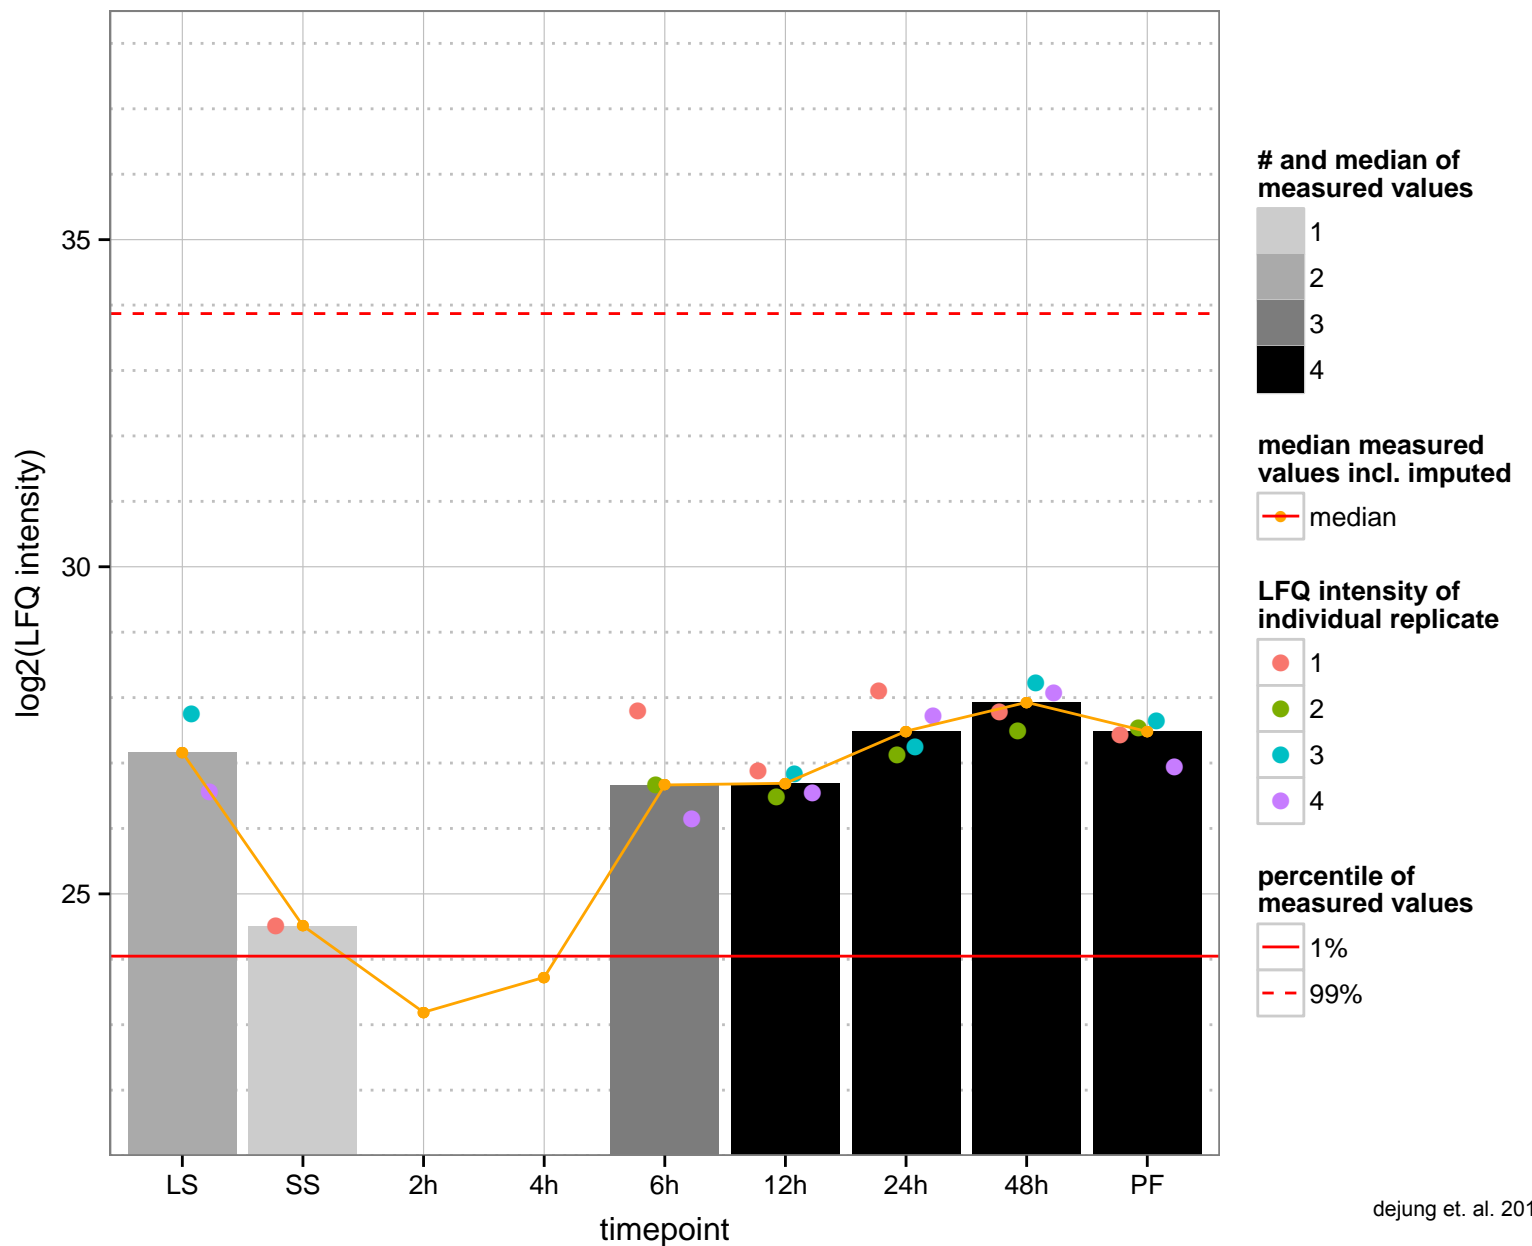

mitochondrial processing peptidase, beta subunit, putative, metallo-peptidase, Clan ME, Family M16

Tb927.5.1060

AGOF: catalytic activity, metalloendopeptidase activity, zinc ion binding

AGOC: mitochondrion

AGOP: proteolysis

PGOF: catalytic activity, metal ion binding, metalloendopeptidase activity, zinc ion binding

PGOC: null

PGOP: proteolysis

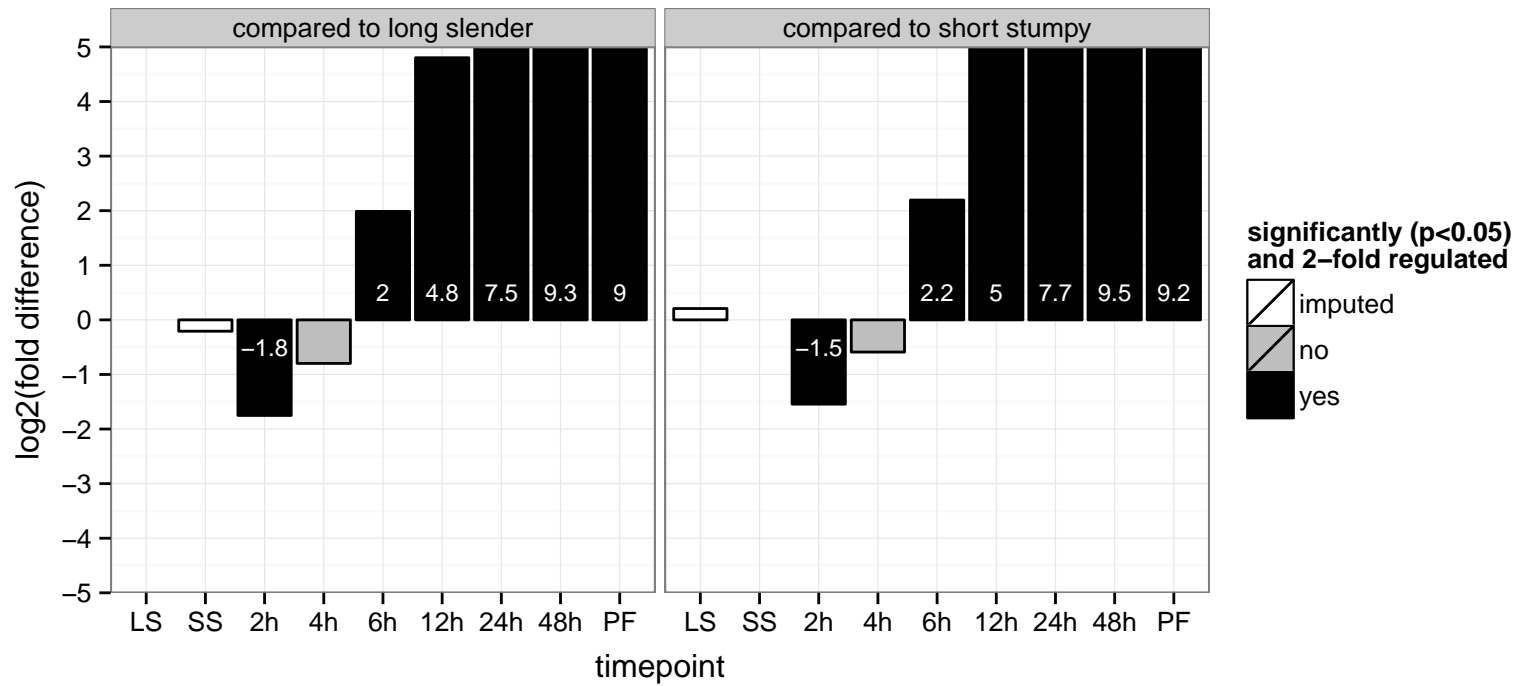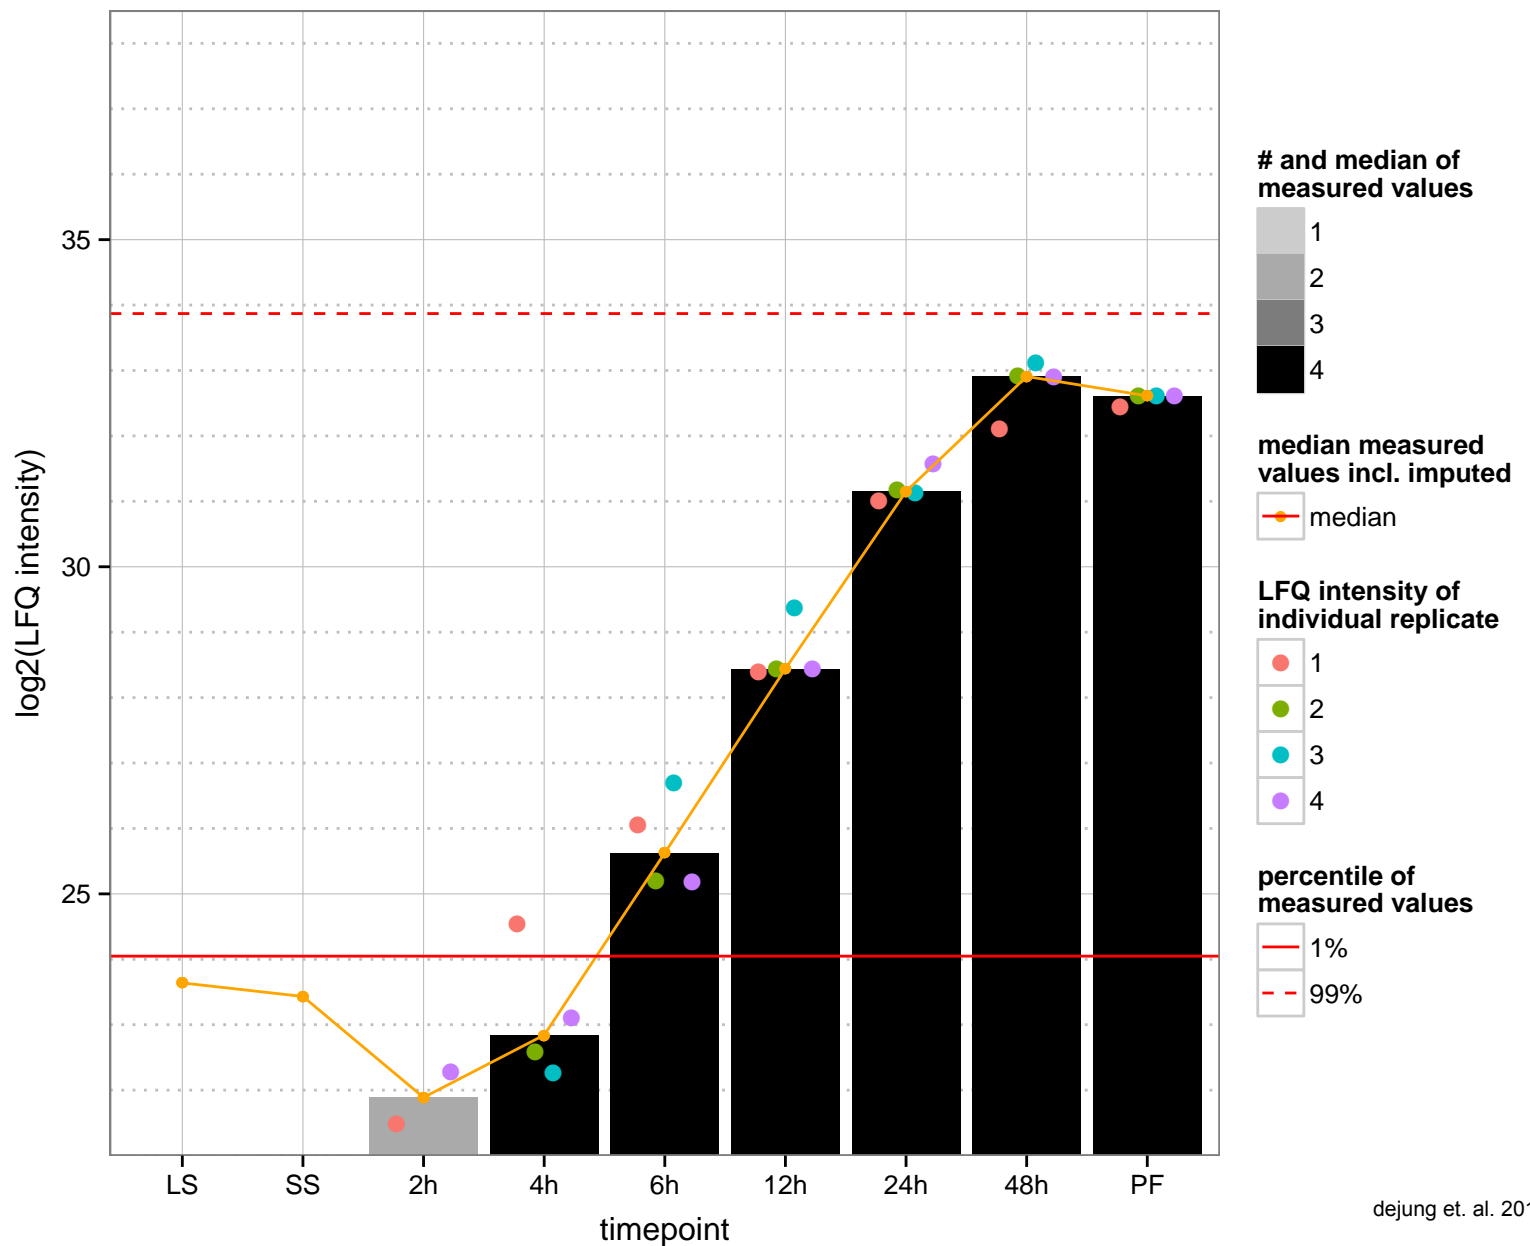



hypothetical protein, conserved  
 Tb927.8.5200  
 AGOF: null  
 AGOC: mitochondrion  
 AGOP: null  
 PGO: null  
 PGO: null  
 PGO: null

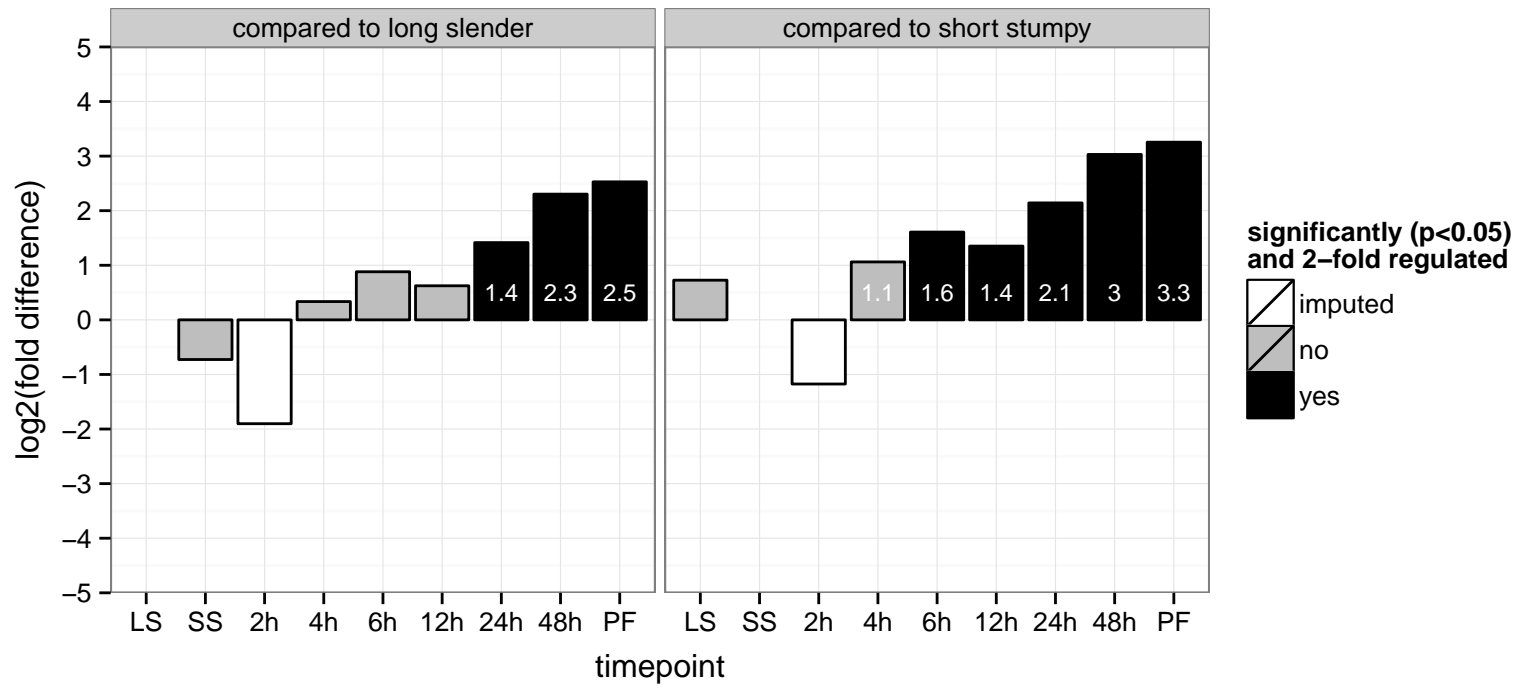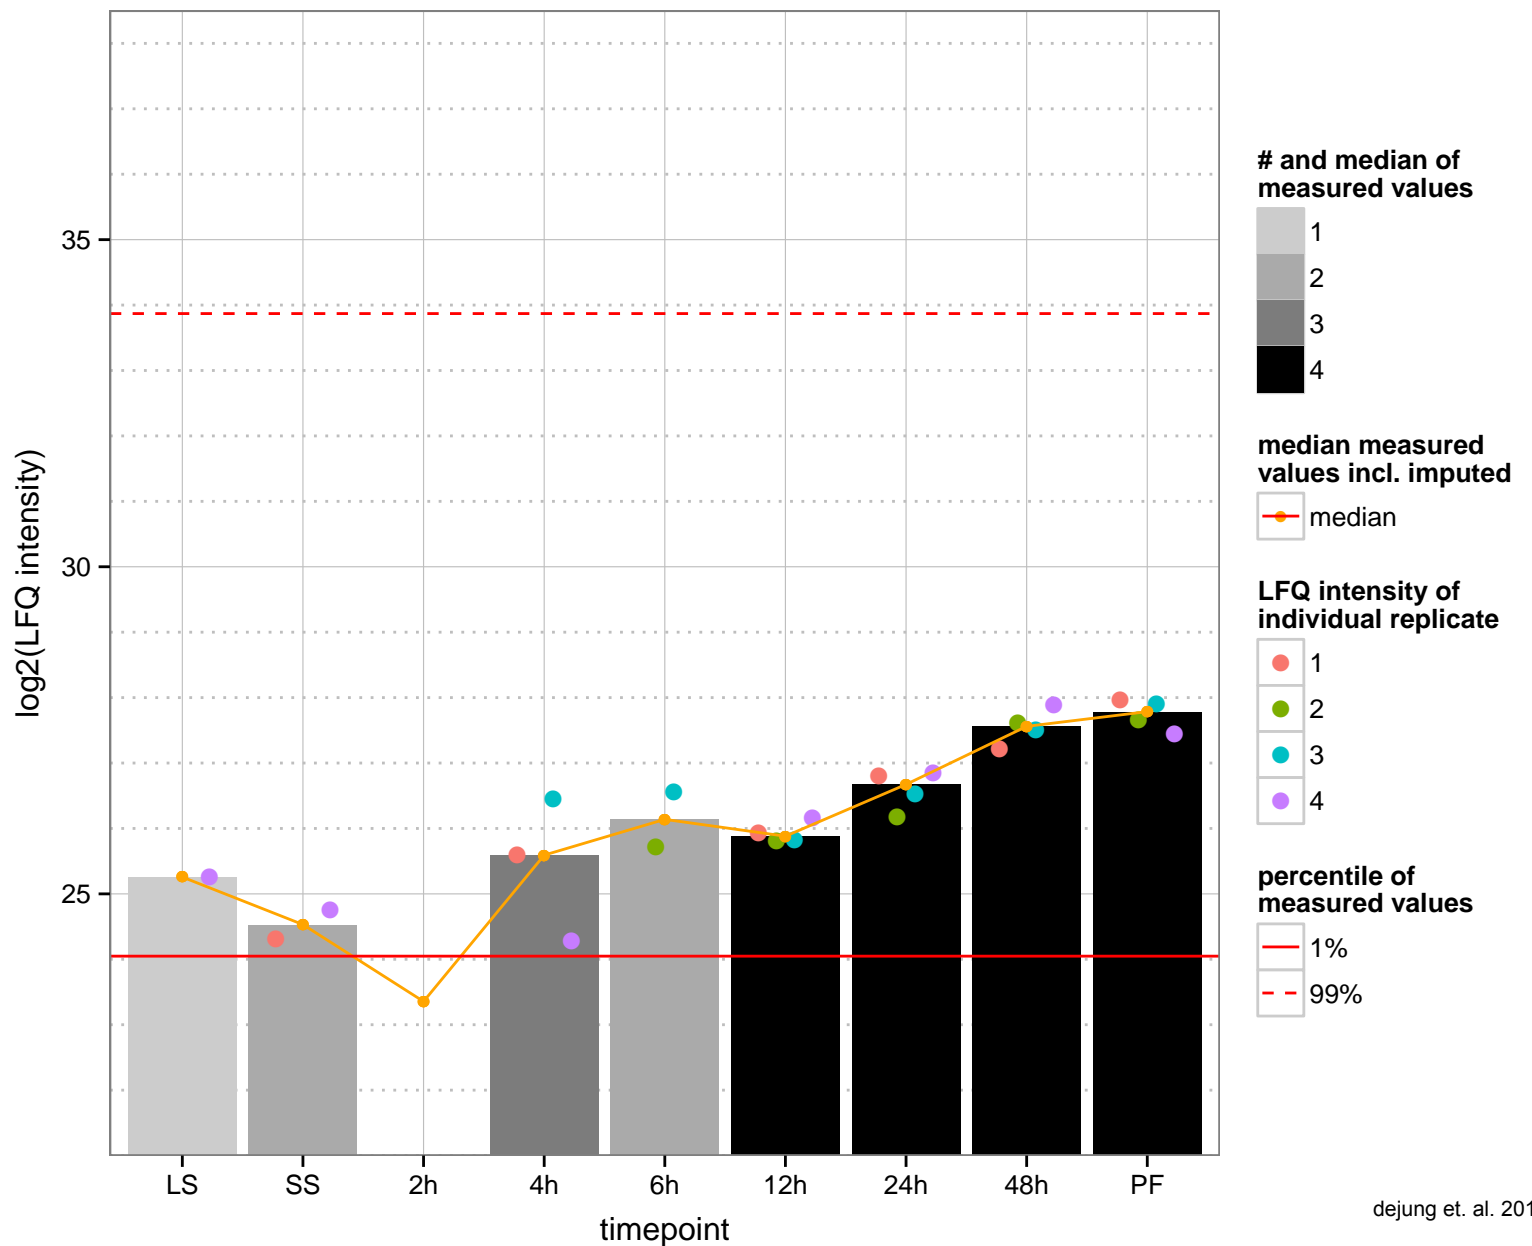

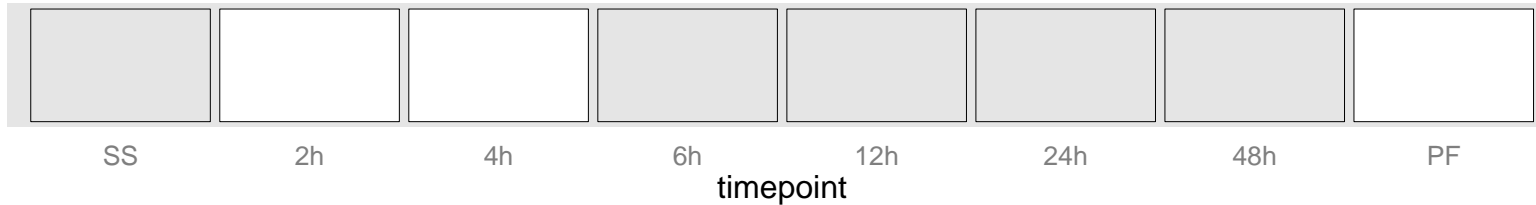

**regulated**  **not regulated**  **significant down**  **significant up**

hypothetical protein, conserved

Tb927.10.14760

AGOF: structural molecule activity

AGOC: clathrin coat of coated pit, clathrin coat of trans-Golgi network vesicle

AGOP: intracellular protein transport, vesicle-mediated transport

PGOF: structural molecule activity

PGOC: clathrin coat of coated pit, clathrin coat of trans-Golgi network vesicle

PGOP: intracellular protein transport, vesicle-mediated transport

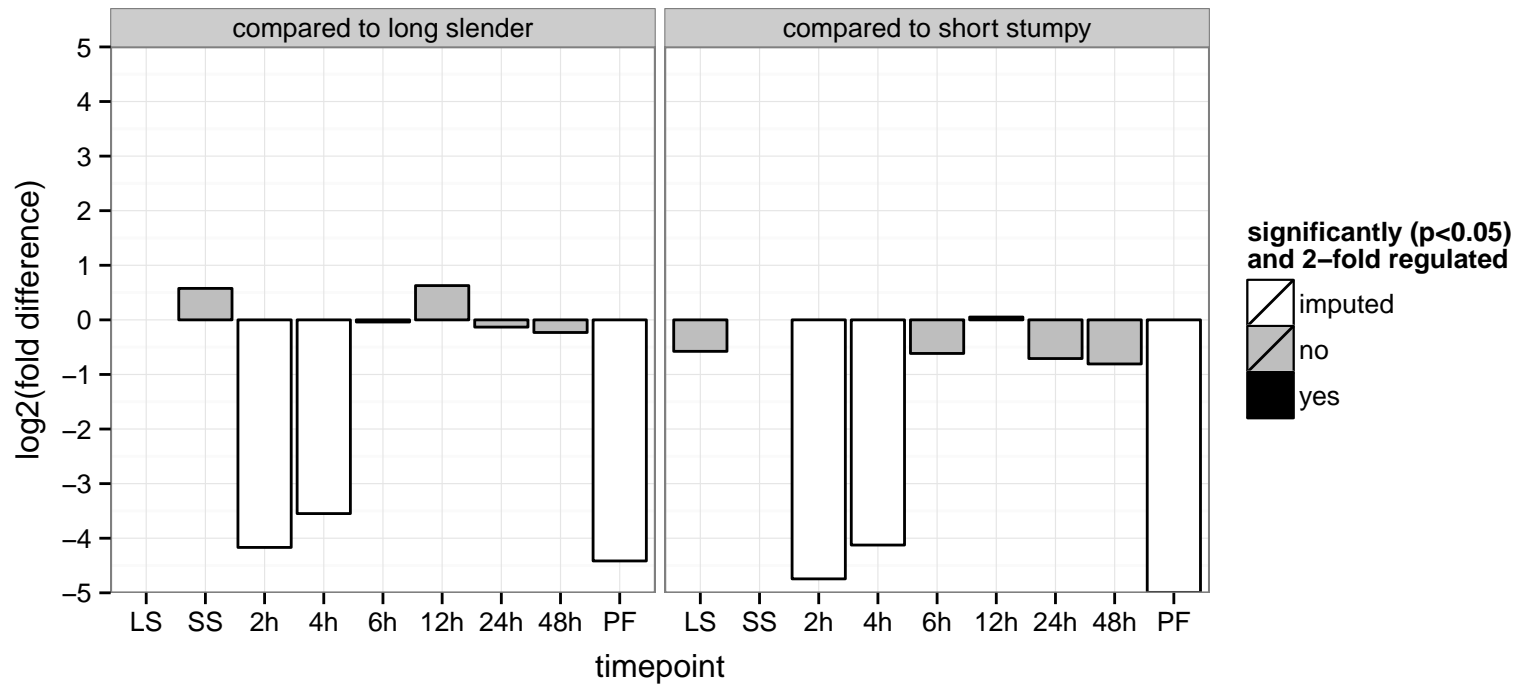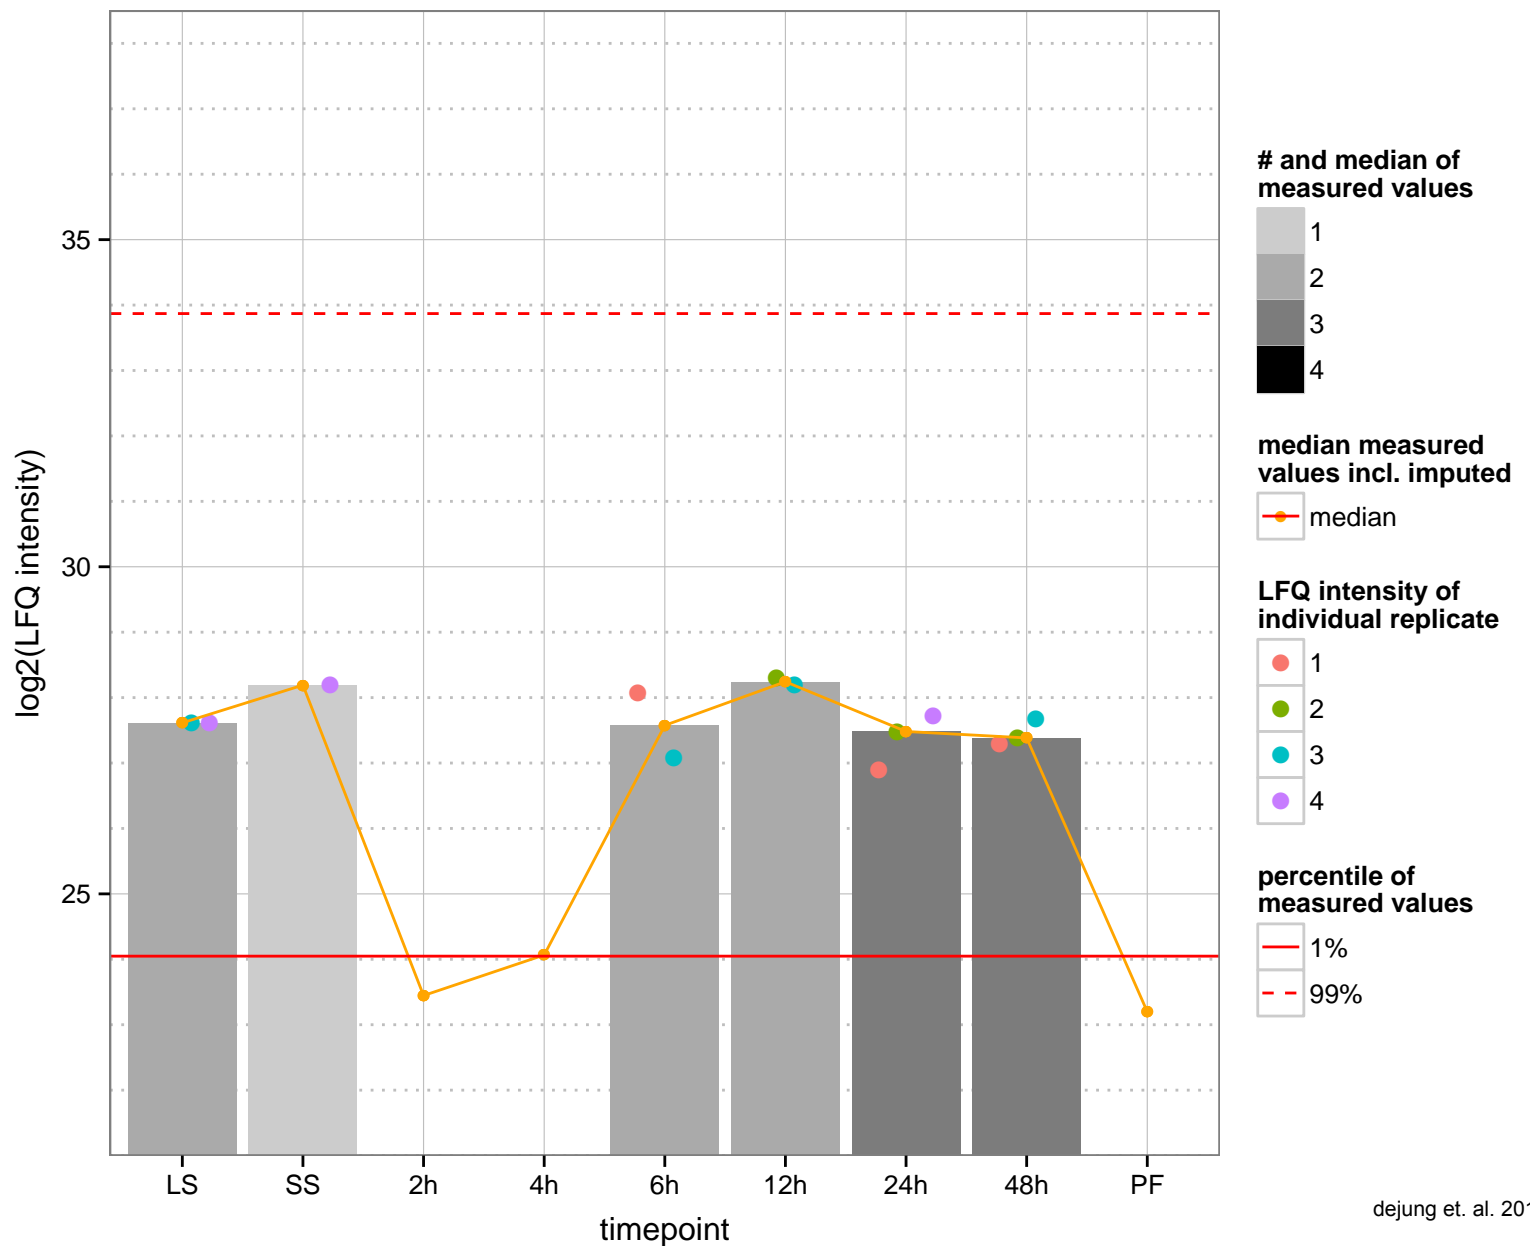

hypothetical protein, conserved  
 Tb927.10.2130  
 AGOF: null  
 AGOC: null  
 AGOP: null  
 PGOF: null  
 PGOC: null  
 PGOP: null

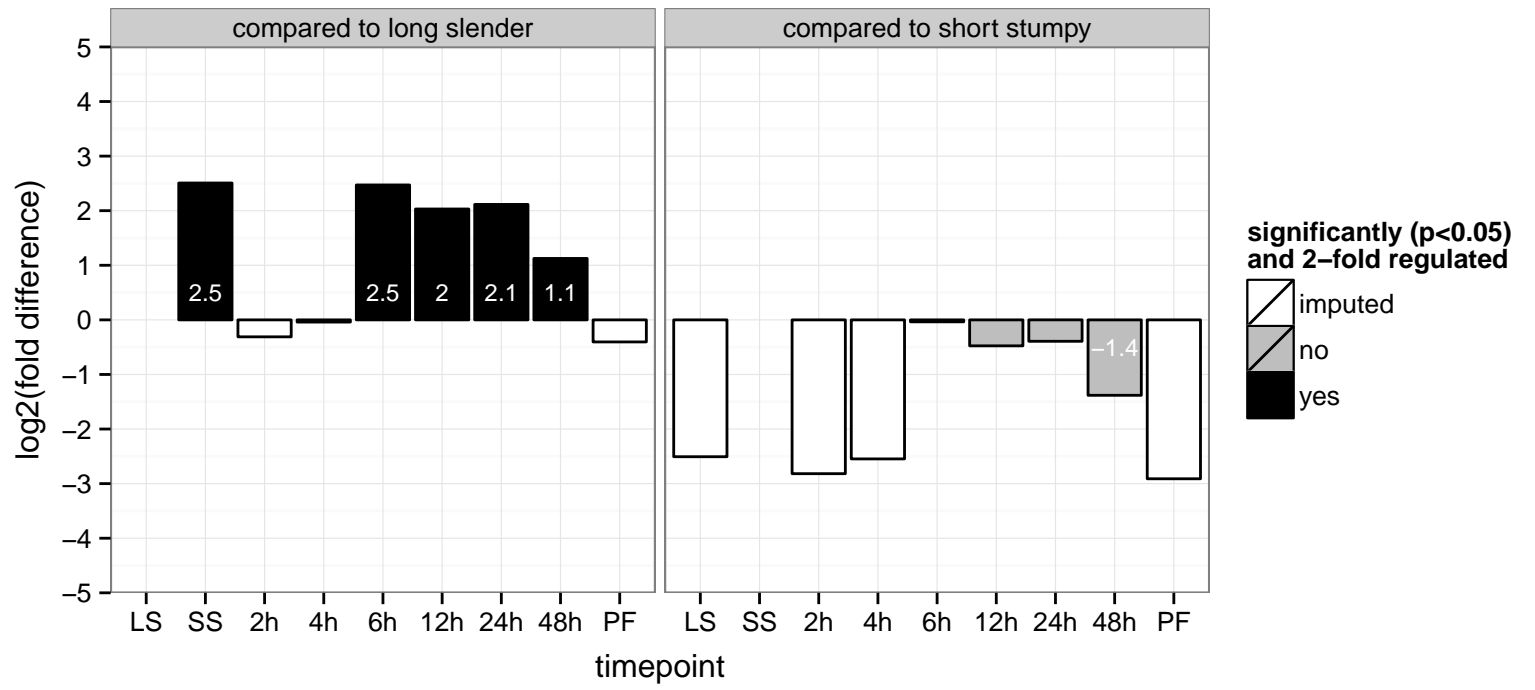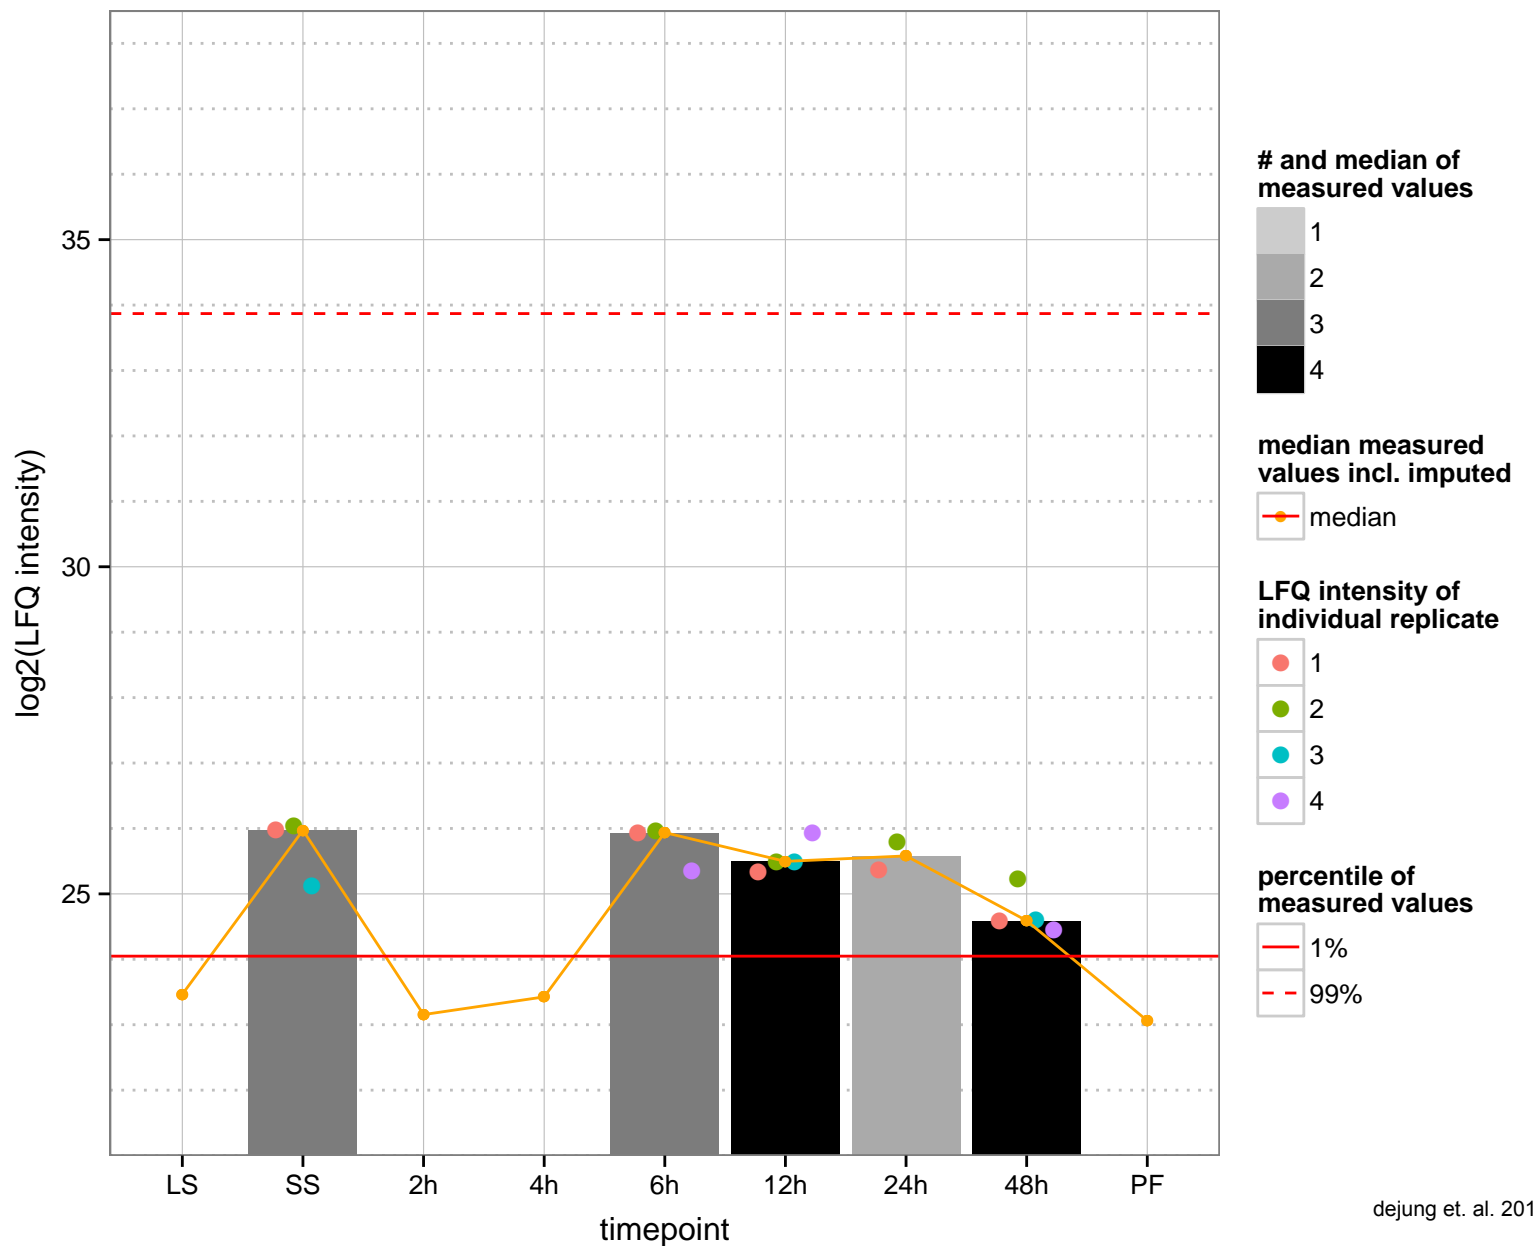

TOR-like 1 (TOR-like 1)

Tb927.4.800

AGOF: phosphotransferase activity, alcohol group as acceptor

AGOC: cytosol

AGOP: cellular response to glucose starvation, regulation of response to osmotic stress

PGOF: binding, phosphotransferase activity, alcohol group as acceptor, protein binding, transferase activity, transferring phospho

PGOC: null

PGOP: null

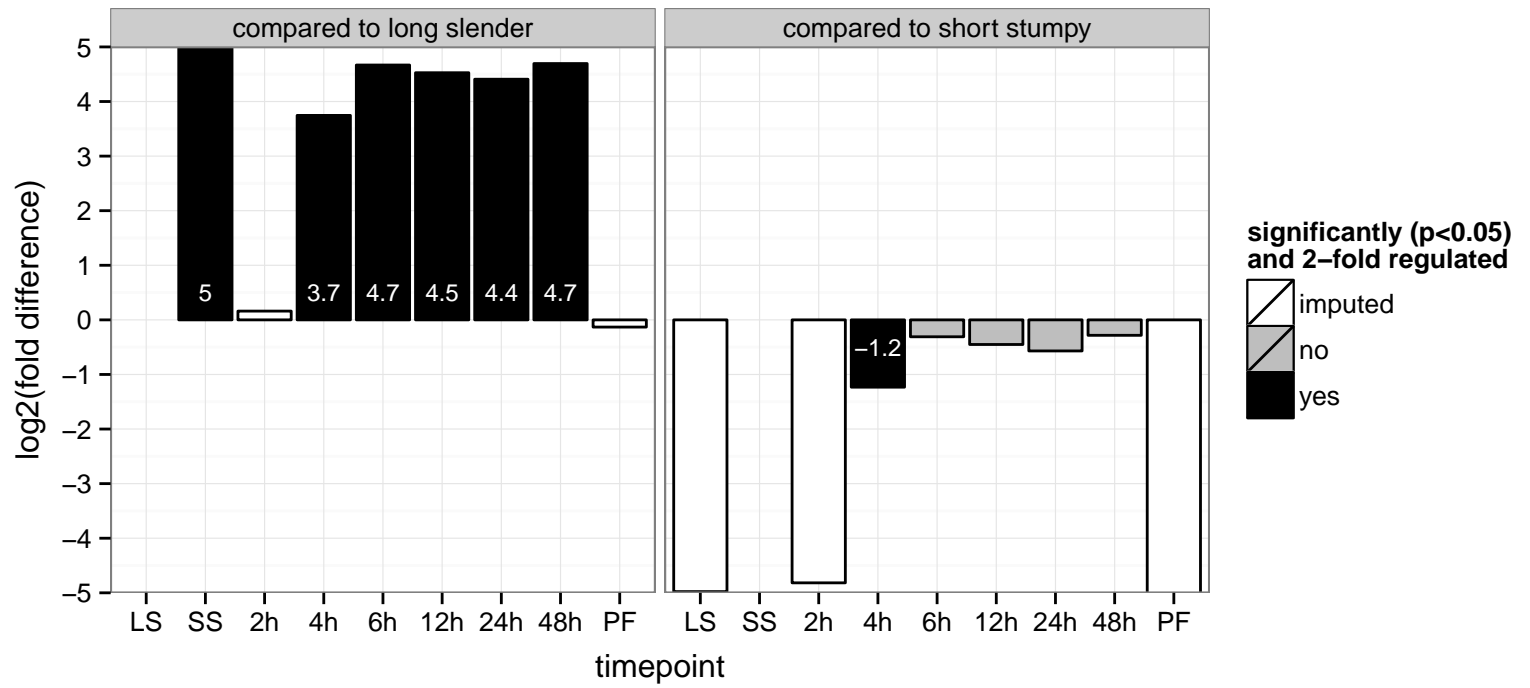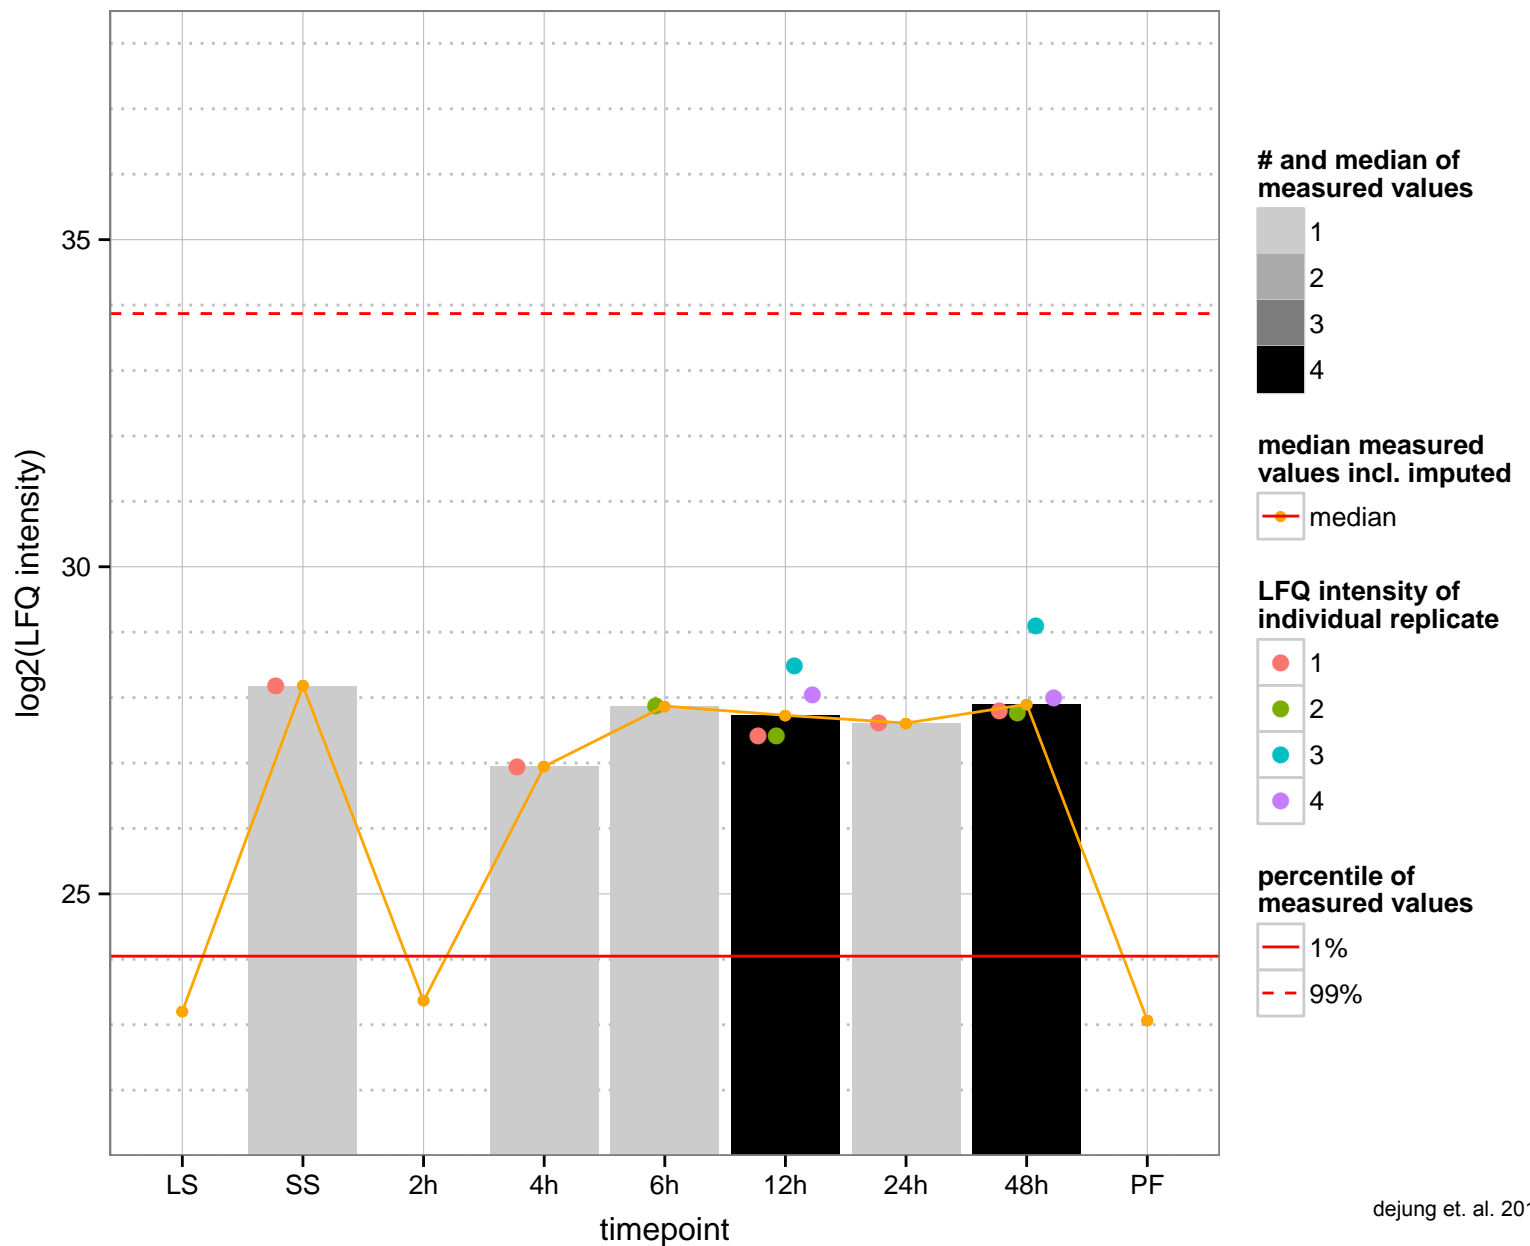

hypothetical protein, conserved  
 Tb927.9.12780  
 AGOF: protein C-terminal carboxyl O-methyltransferase activity  
 AGOC: null  
 AGOP: cellular protein modification process  
 PGOF: methyltransferase activity, protein binding  
 PGO: null  
 PGOP: null

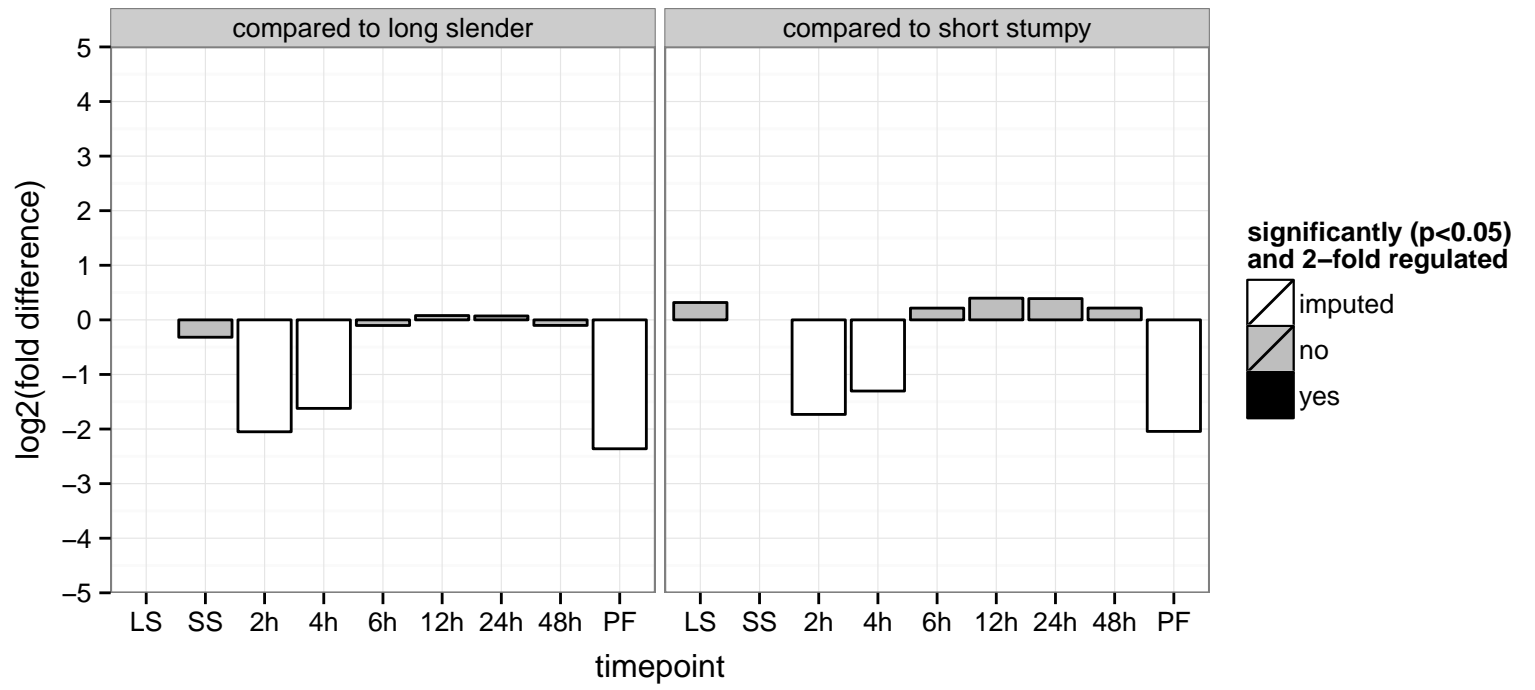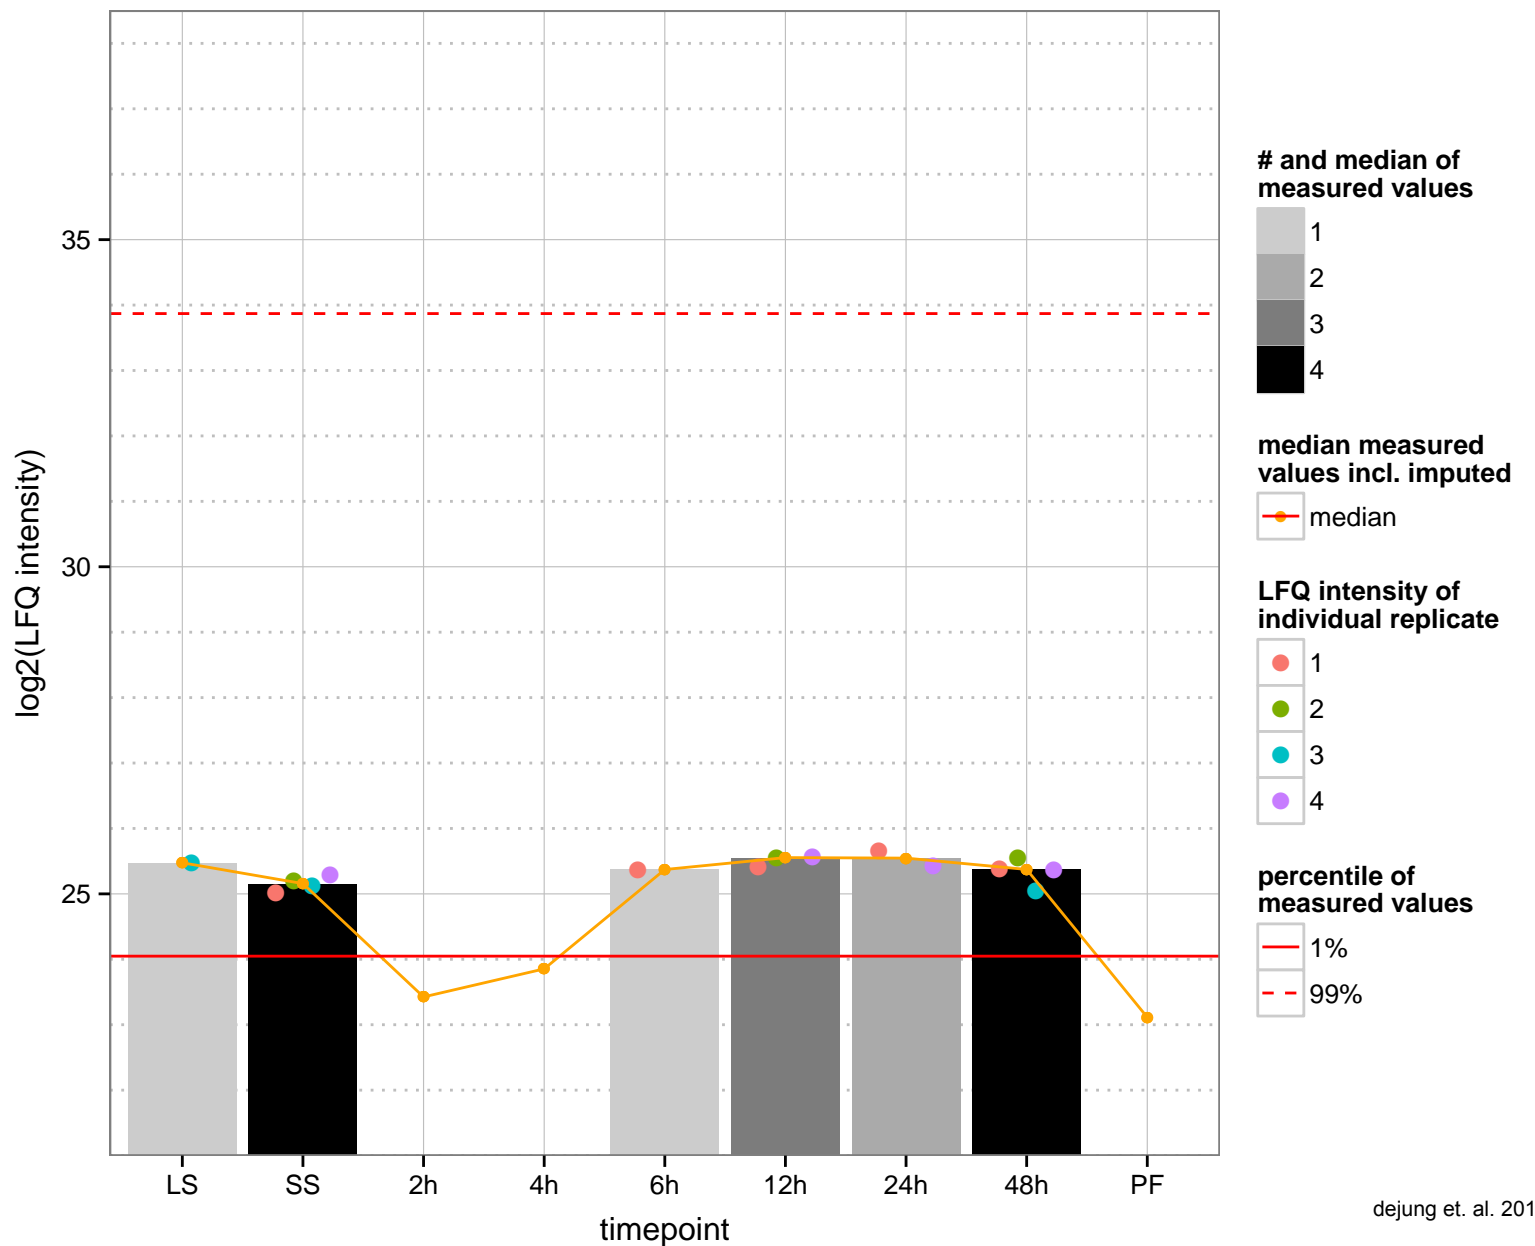

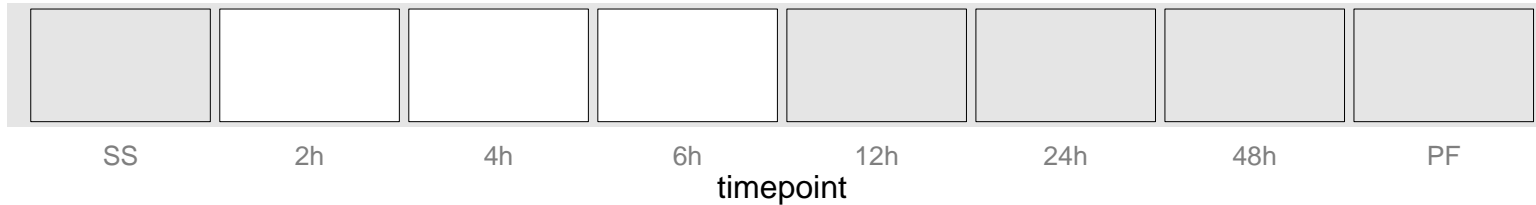

**regulated**  **not regulated**  **significant down**  **significant up**

hypothetical protein, conserved  
 Tb927.3.3680  
 AGOF: null  
 AGOC: mitochondrion  
 AGOP: null  
 PGO: null  
 PGO: null  
 PGO: null

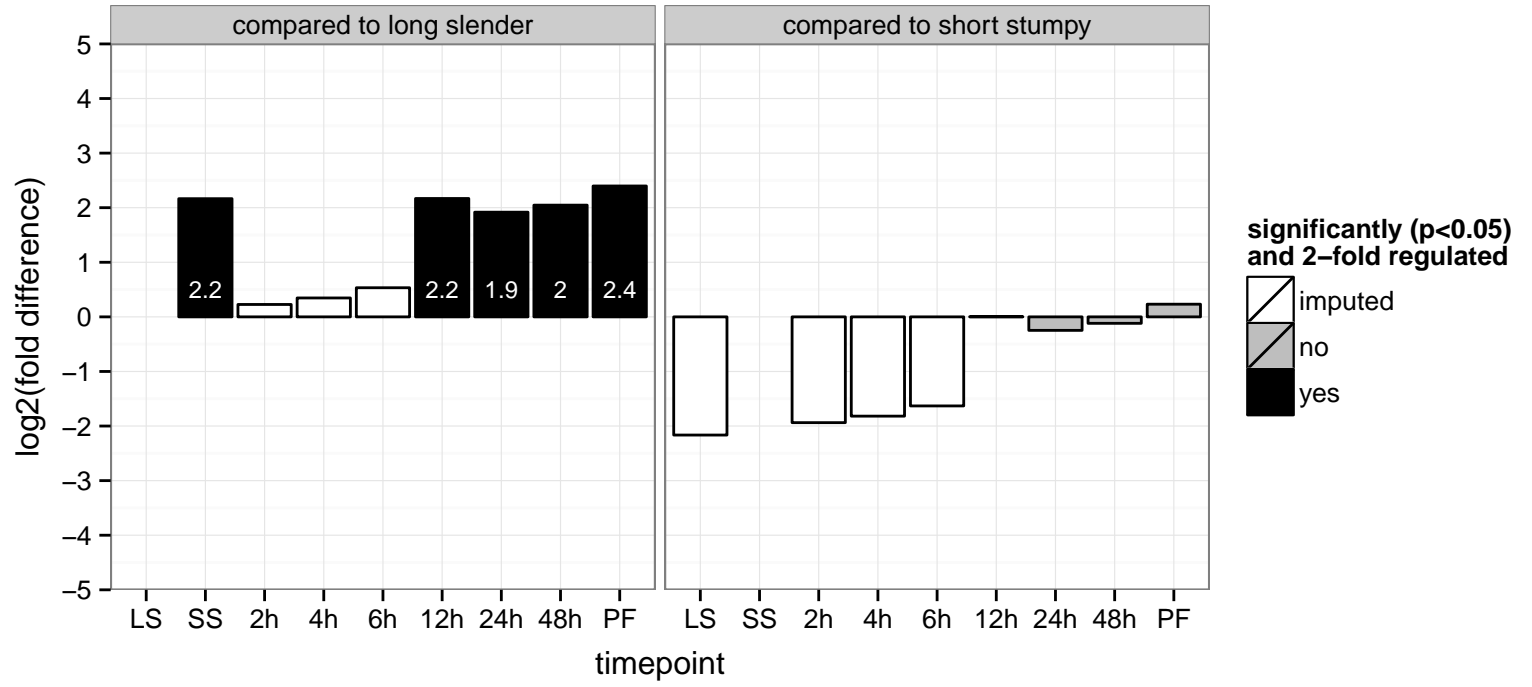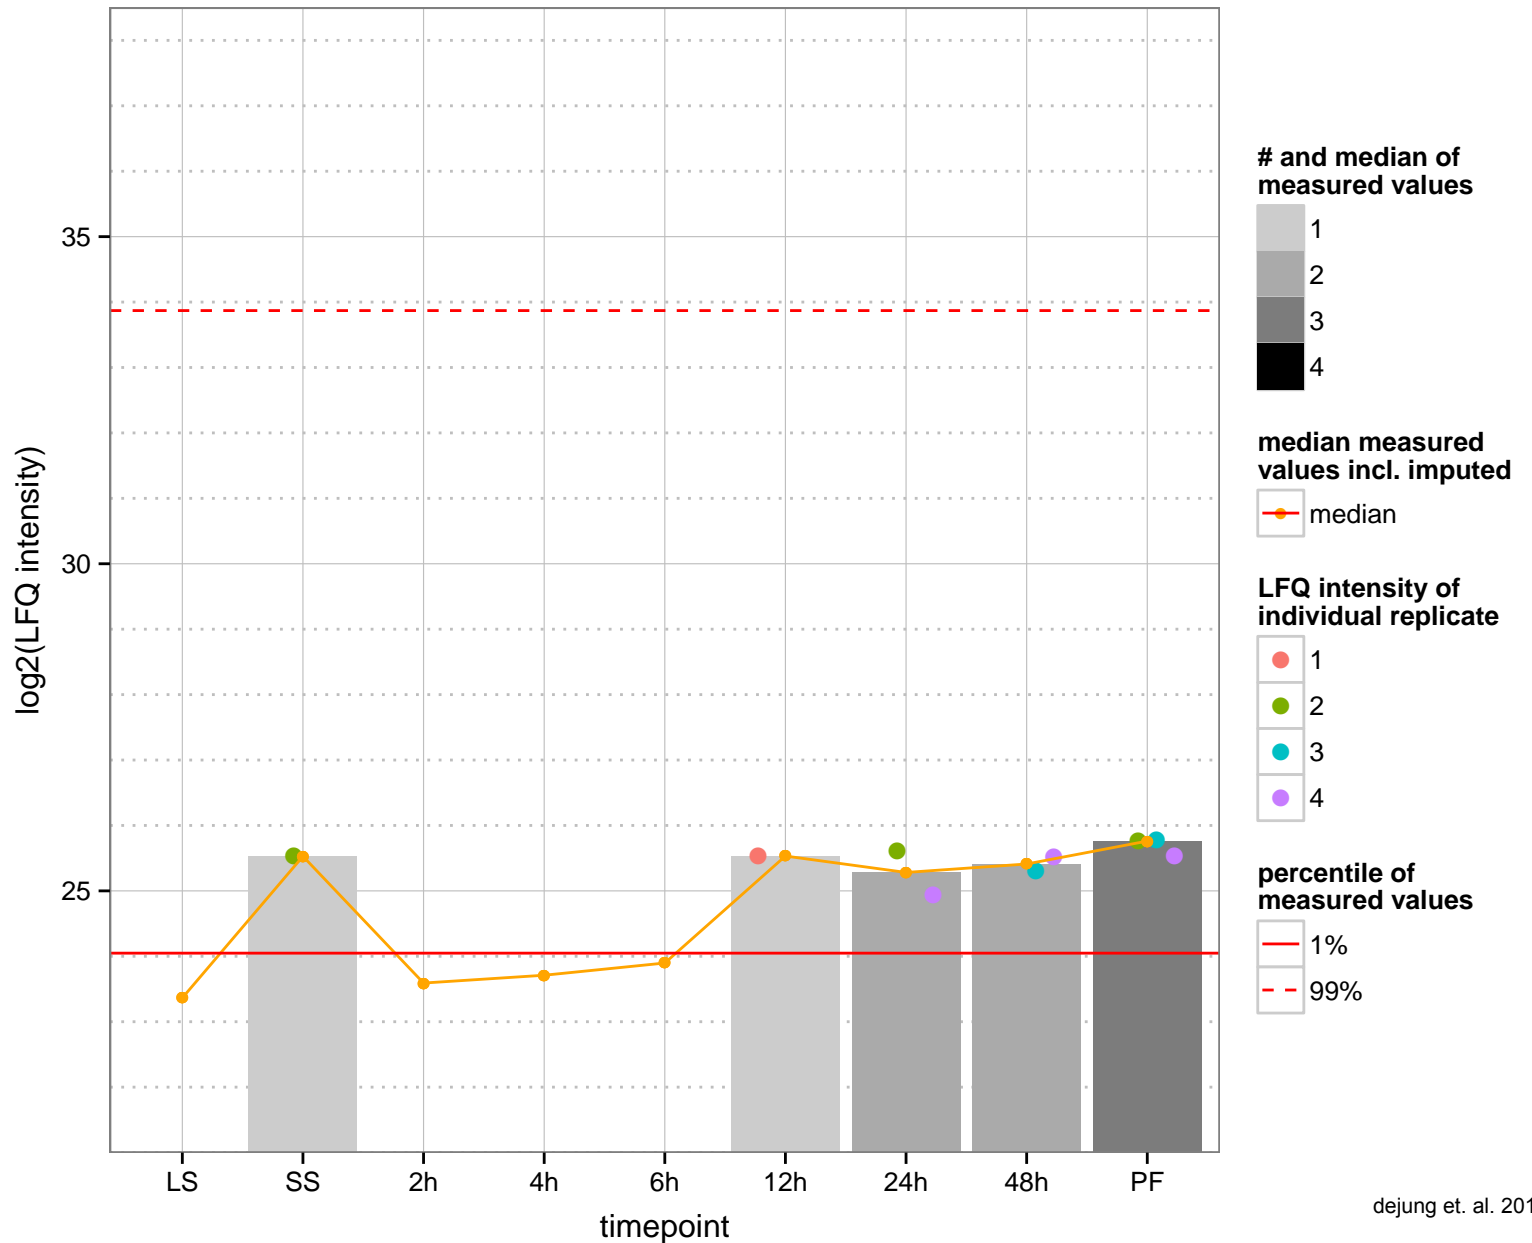



hypothetical protein, conserved  
 Tb927.7.2760  
 AGOF: structural constituent of ribosome  
 AGOC: intracellular, mitochondrion, ribosome  
 AGOP: translation  
 PGOF: structural constituent of ribosome  
 PGO: intracellular, ribosome  
 PGOP: translation

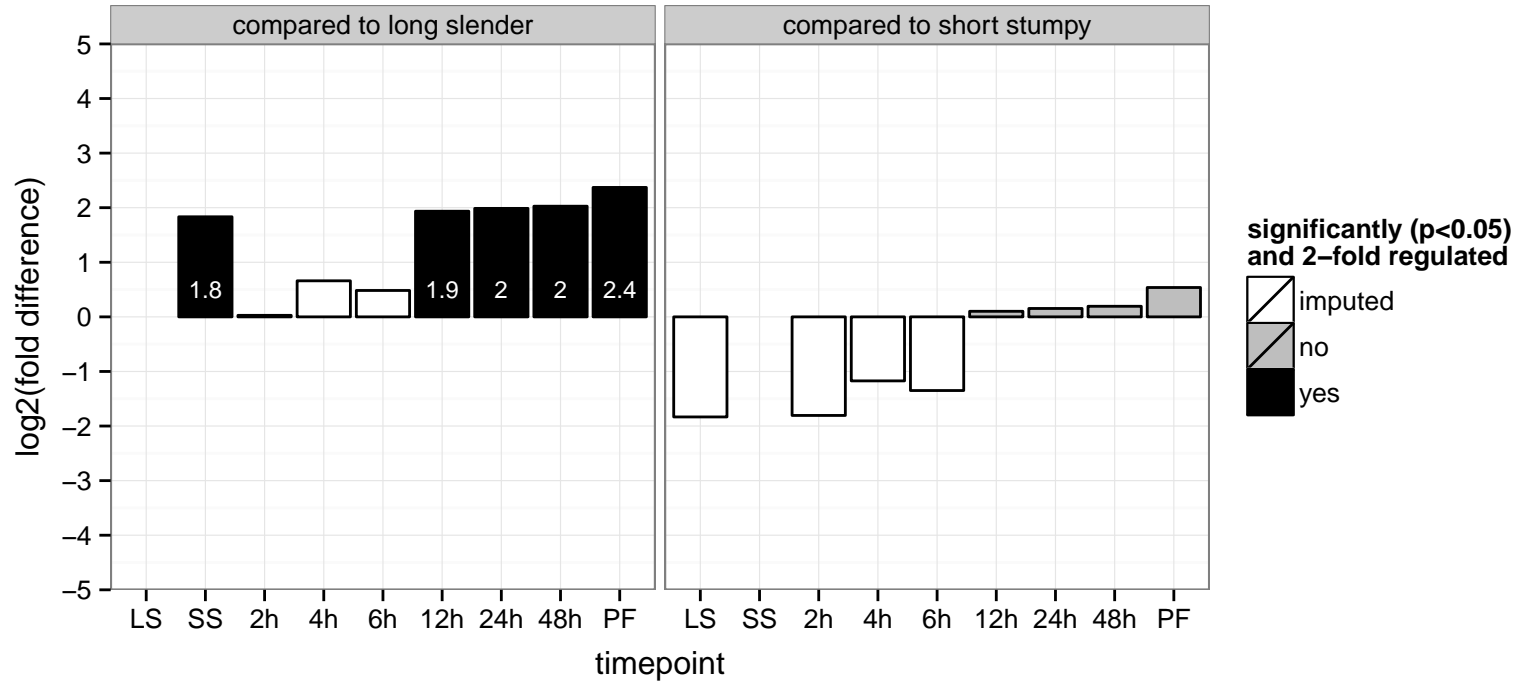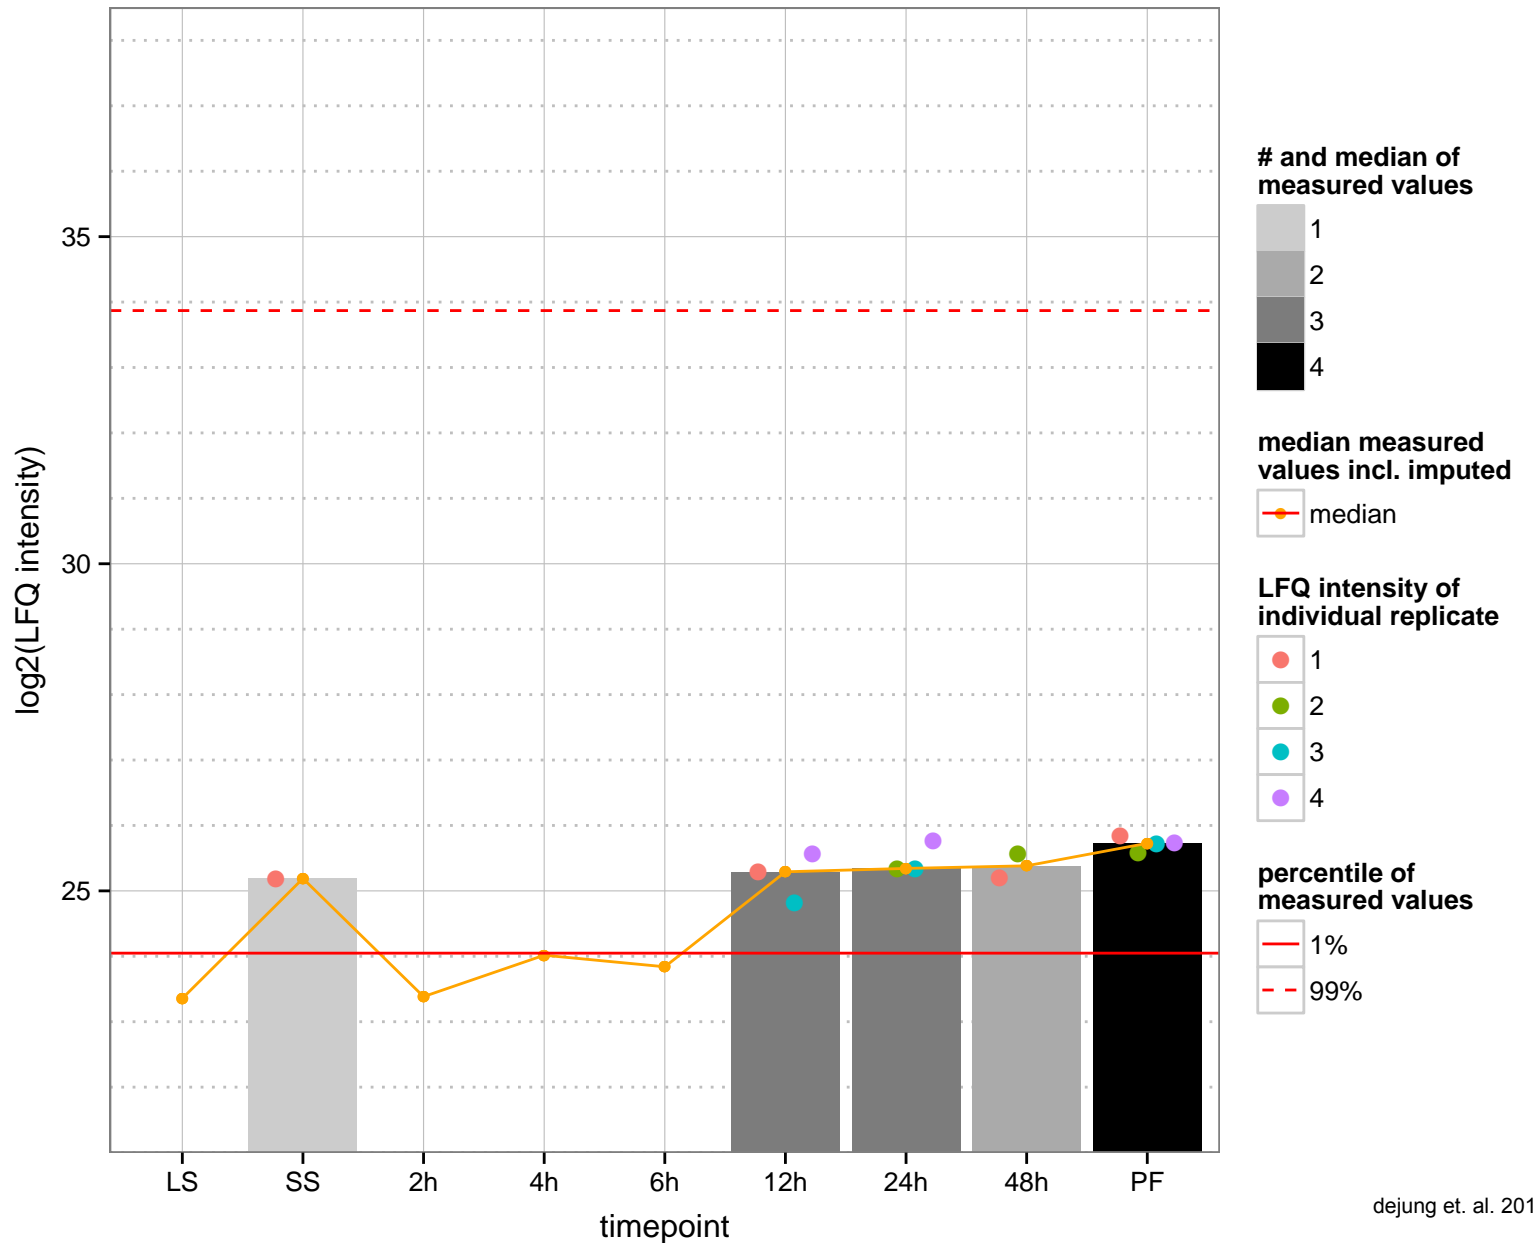

hypothetical protein, conserved  
 Tb927.8.6480  
 AGOF: aminomethyltransferase activity  
 AGOC: cytoplasm, extracellular region  
 AGOP: glycine decarboxylation via glycine cleavage system  
 PGO: aminomethyltransferase activity  
 PGOC: cytoplasm  
 PGOP: glycine catabolic process

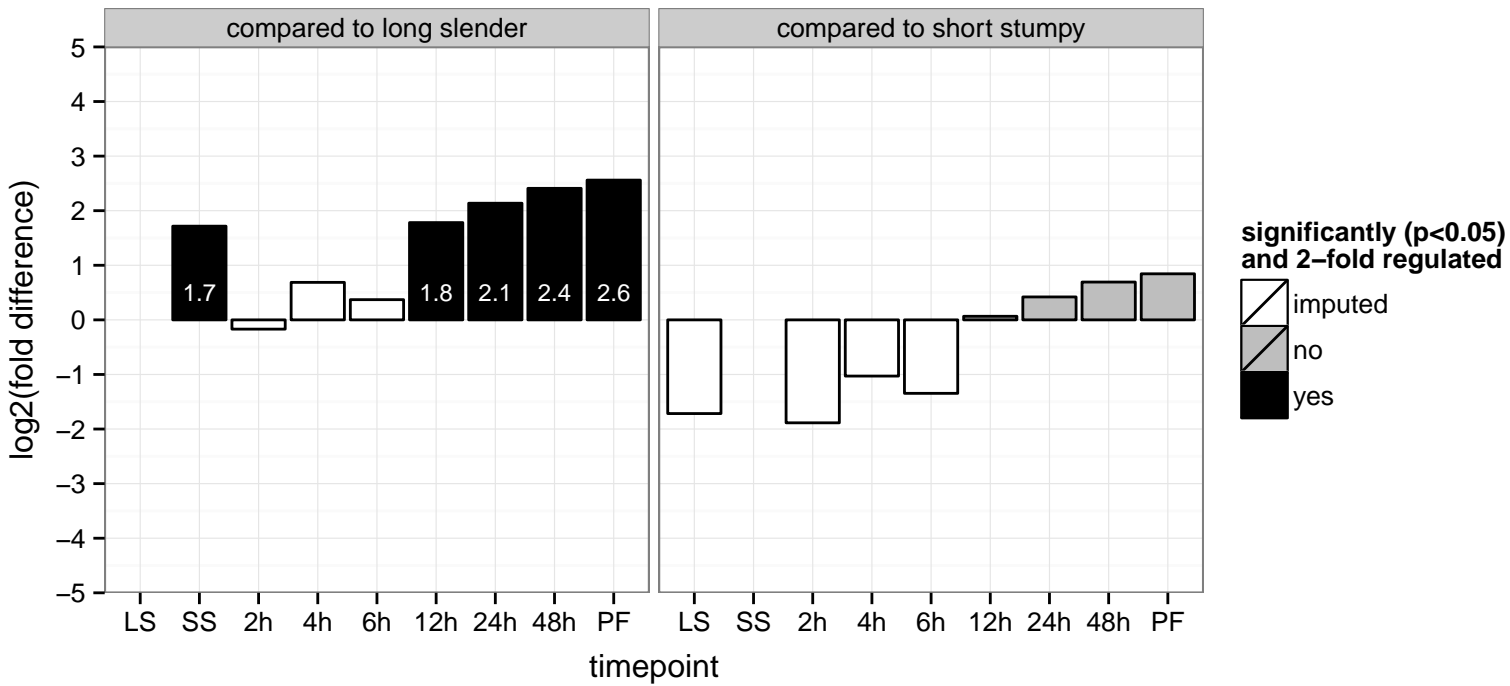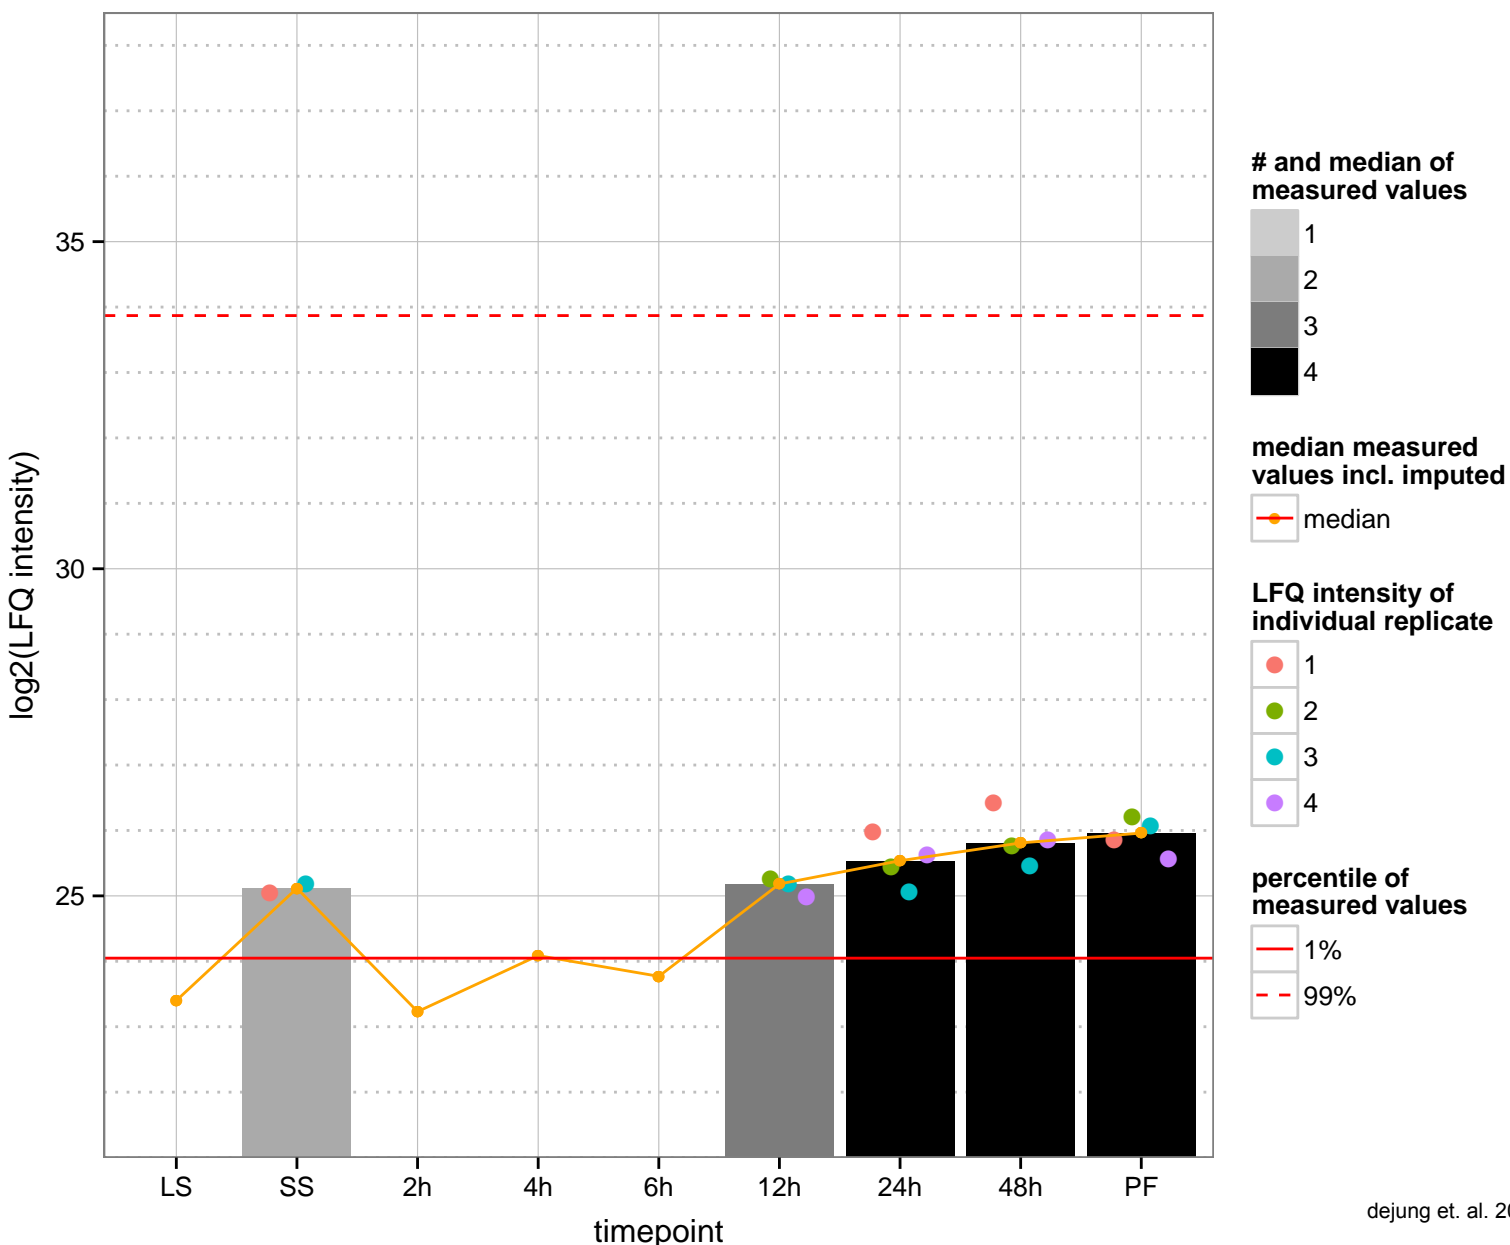

hypothetical protein, conserved  
 Tb927.9.3560  
 AGOF: null  
 AGOC: null  
 AGOP: null  
 PGO: null  
 PGOC: null  
 PGOP: null

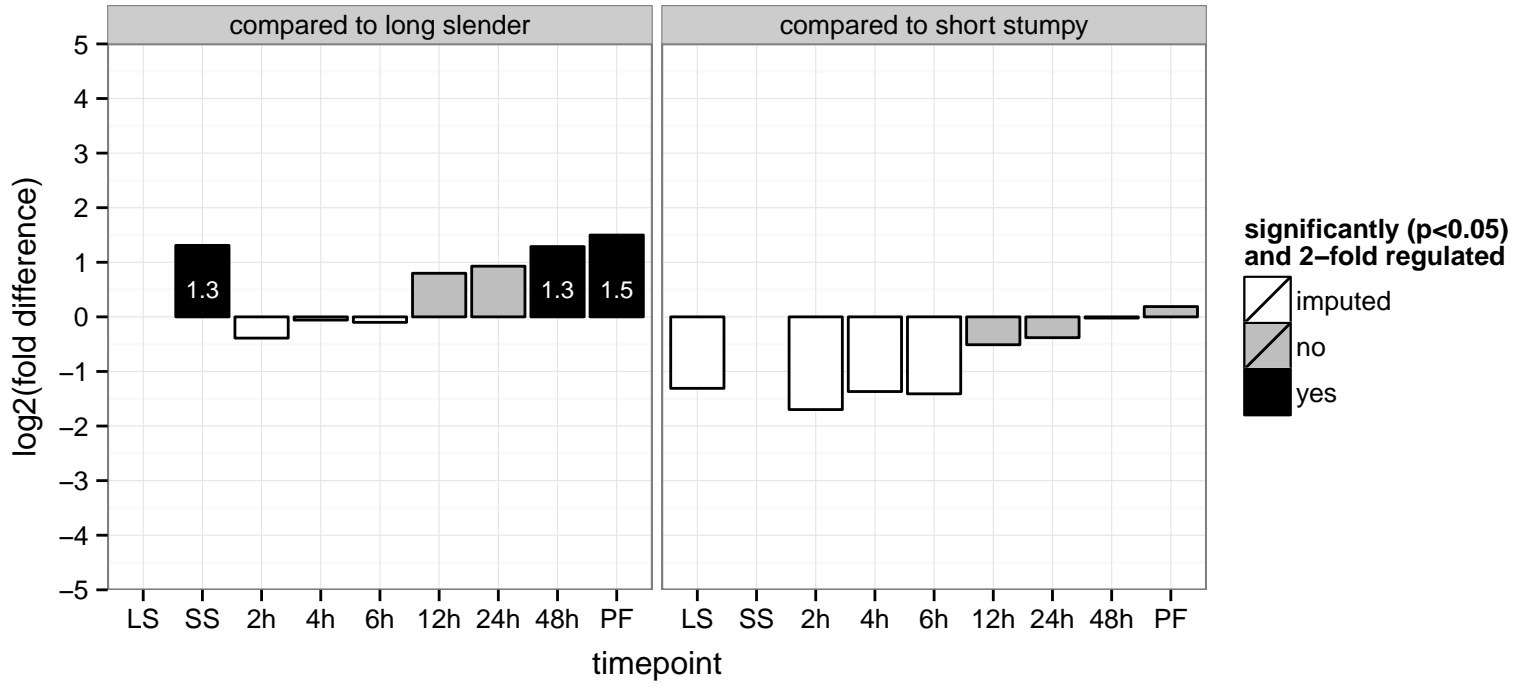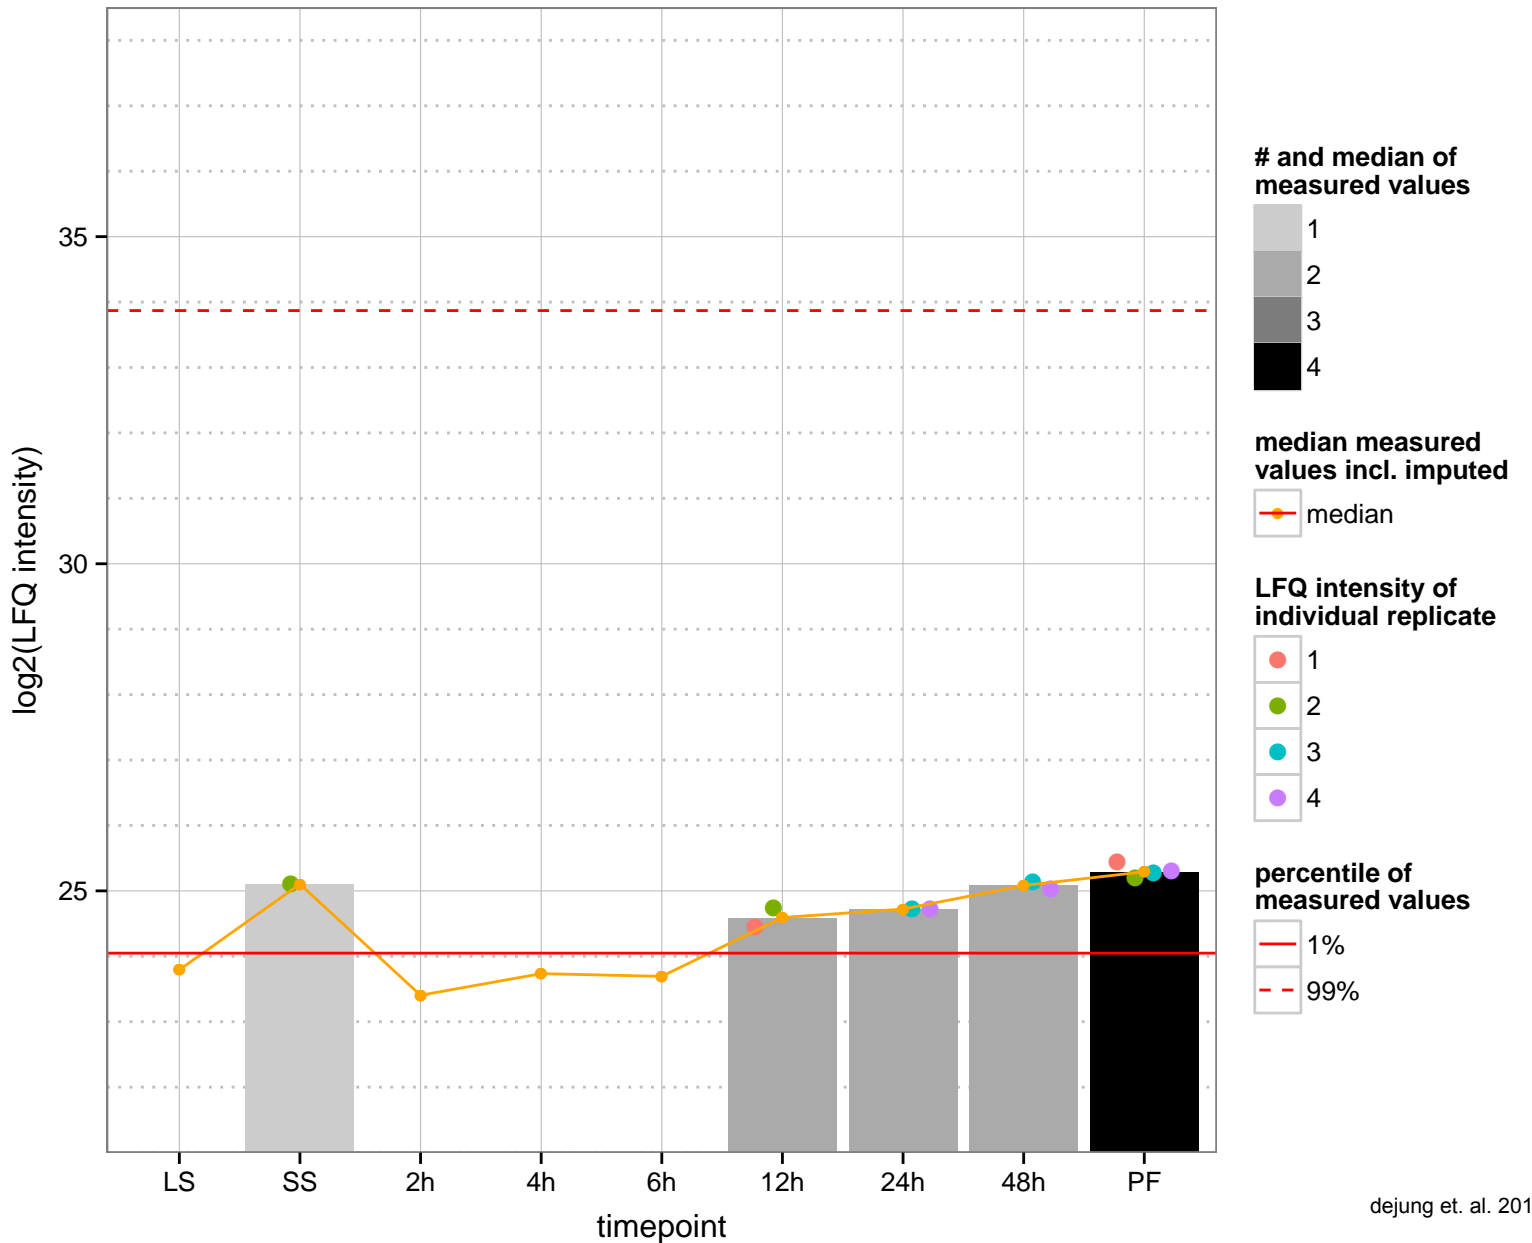

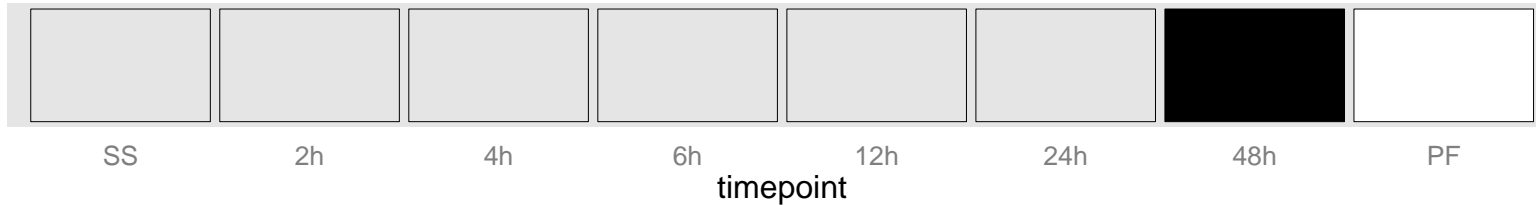

**regulated**  **not regulated**  **significant down**  **significant up**

retrotransposon hot spot (RHS) protein, putative  
 Tb11.v5.0326  
 AGOF: null  
 AGOC: null  
 AGOP: null  
 PGO: null  
 PGOC: null  
 PGOP: null

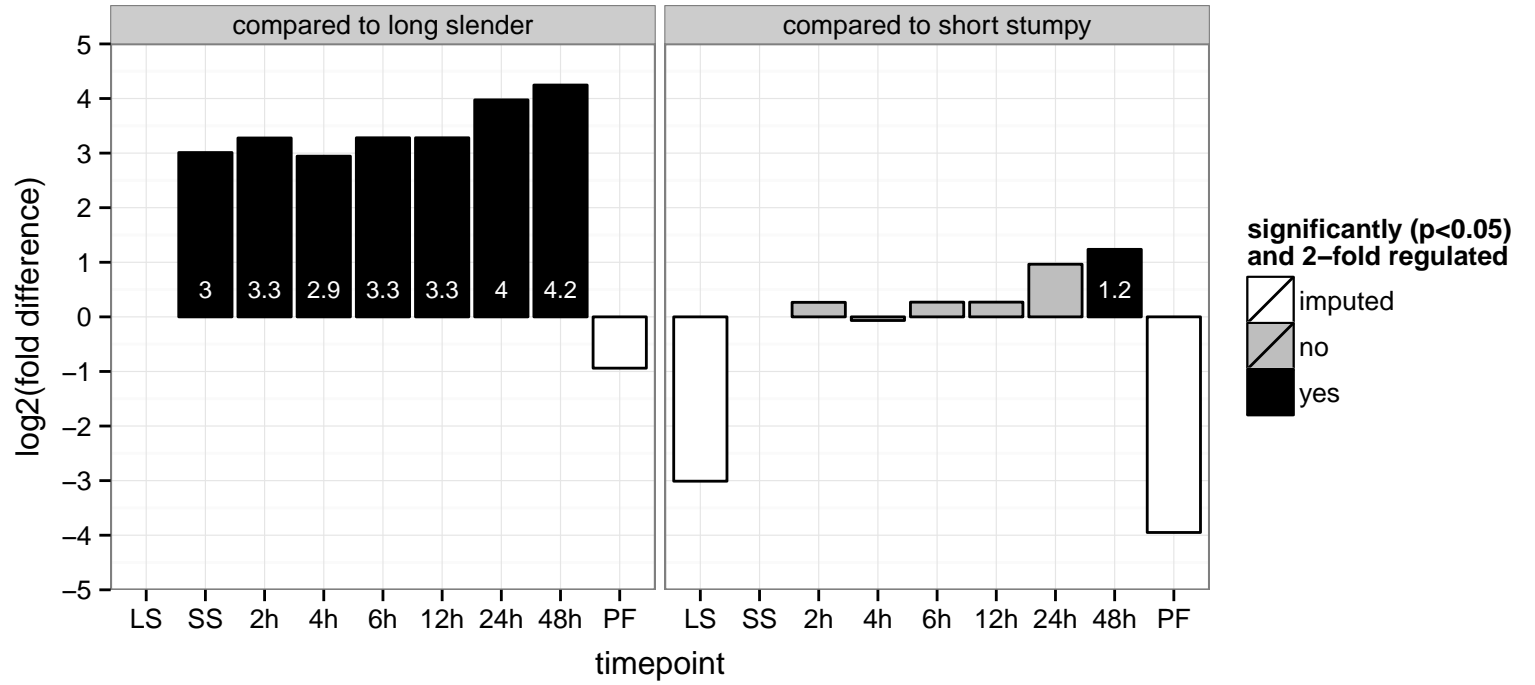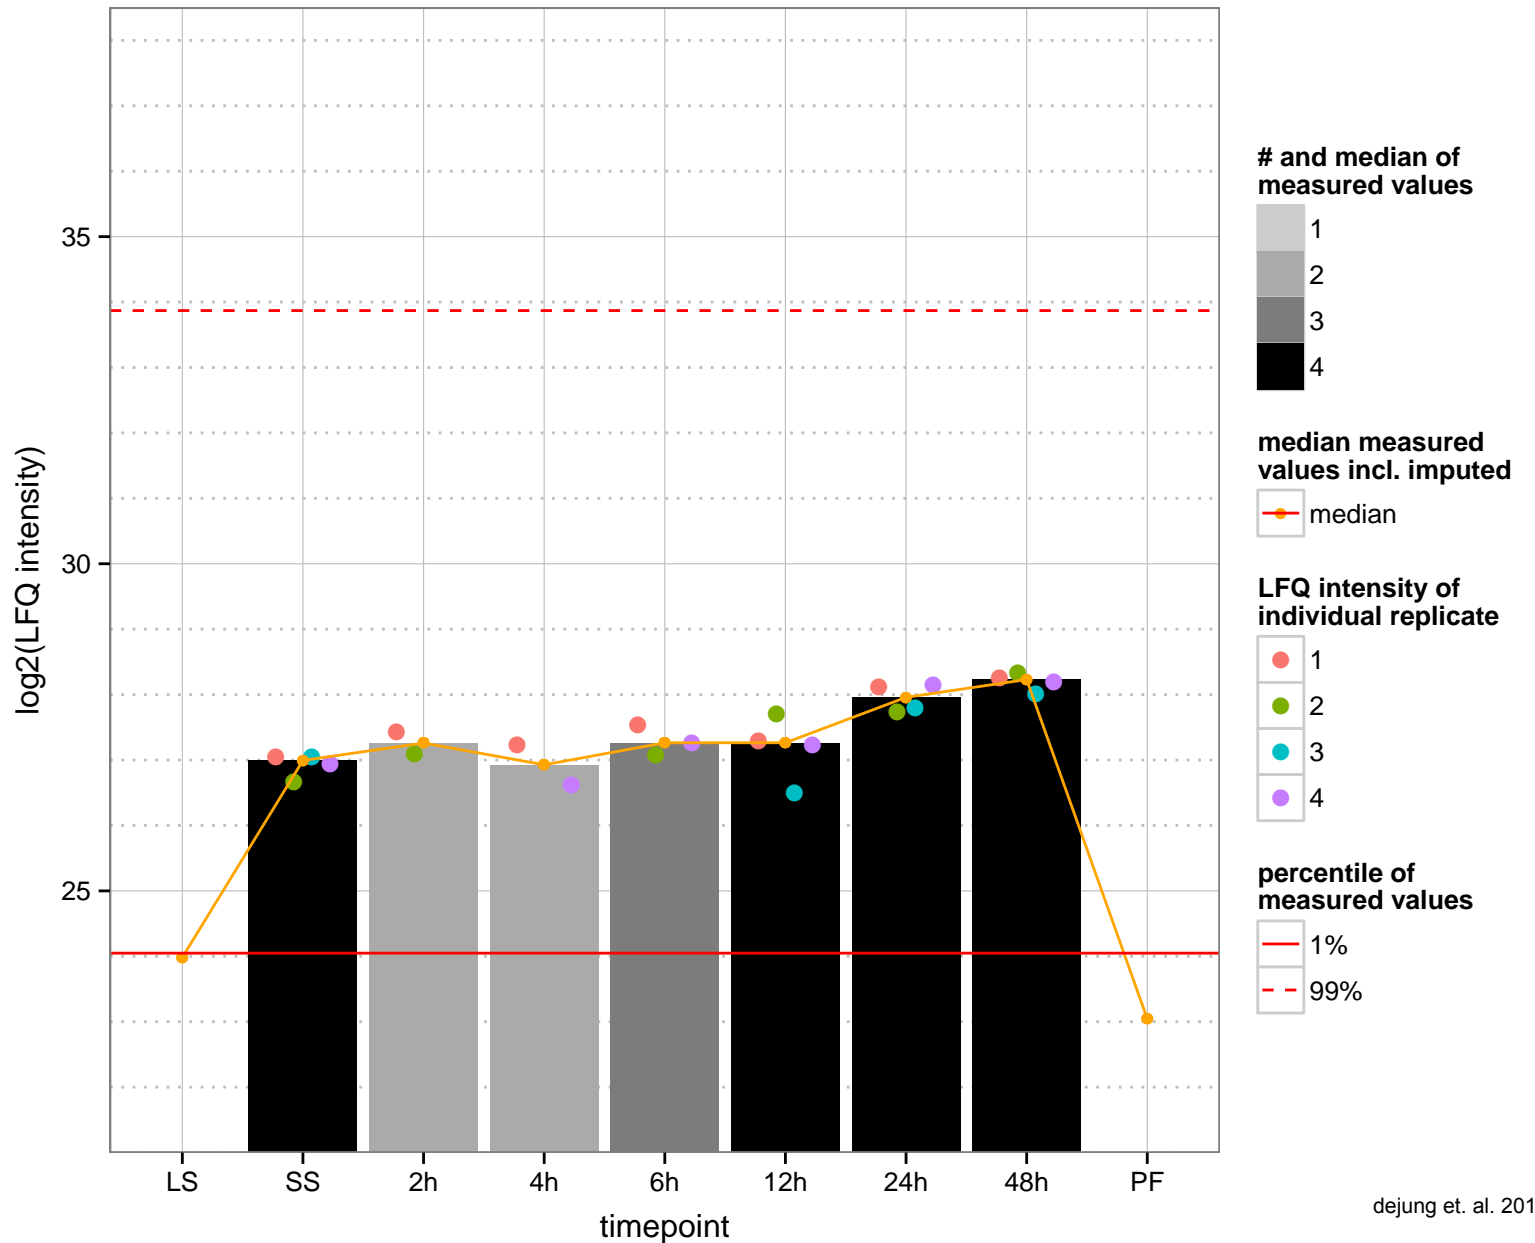

hypothetical protein, conserved  
 Tb927.10.8850  
 AGOF: RNA binding, catalytic activity  
 AGOC: null  
 AGOP: null  
 PGO: catalytic activity  
 PGOC: null  
 PGOP: null

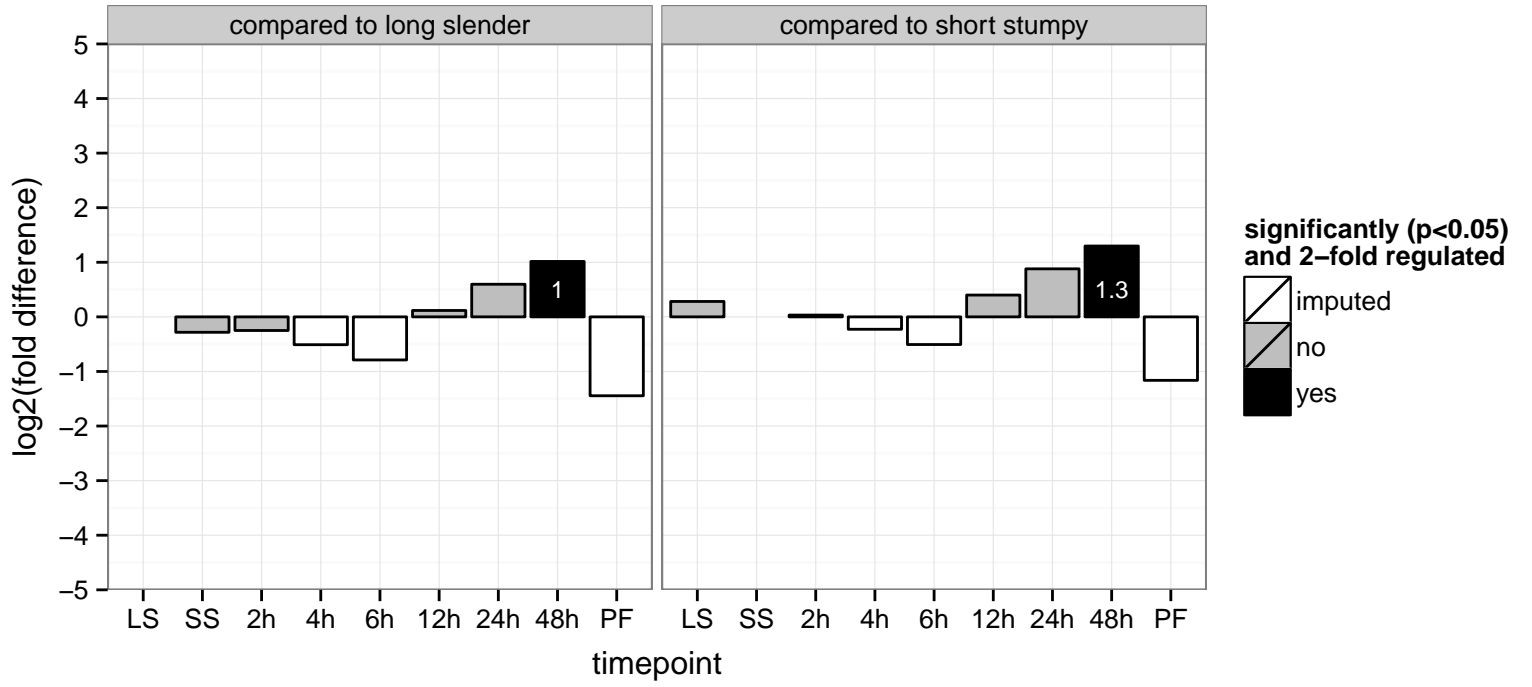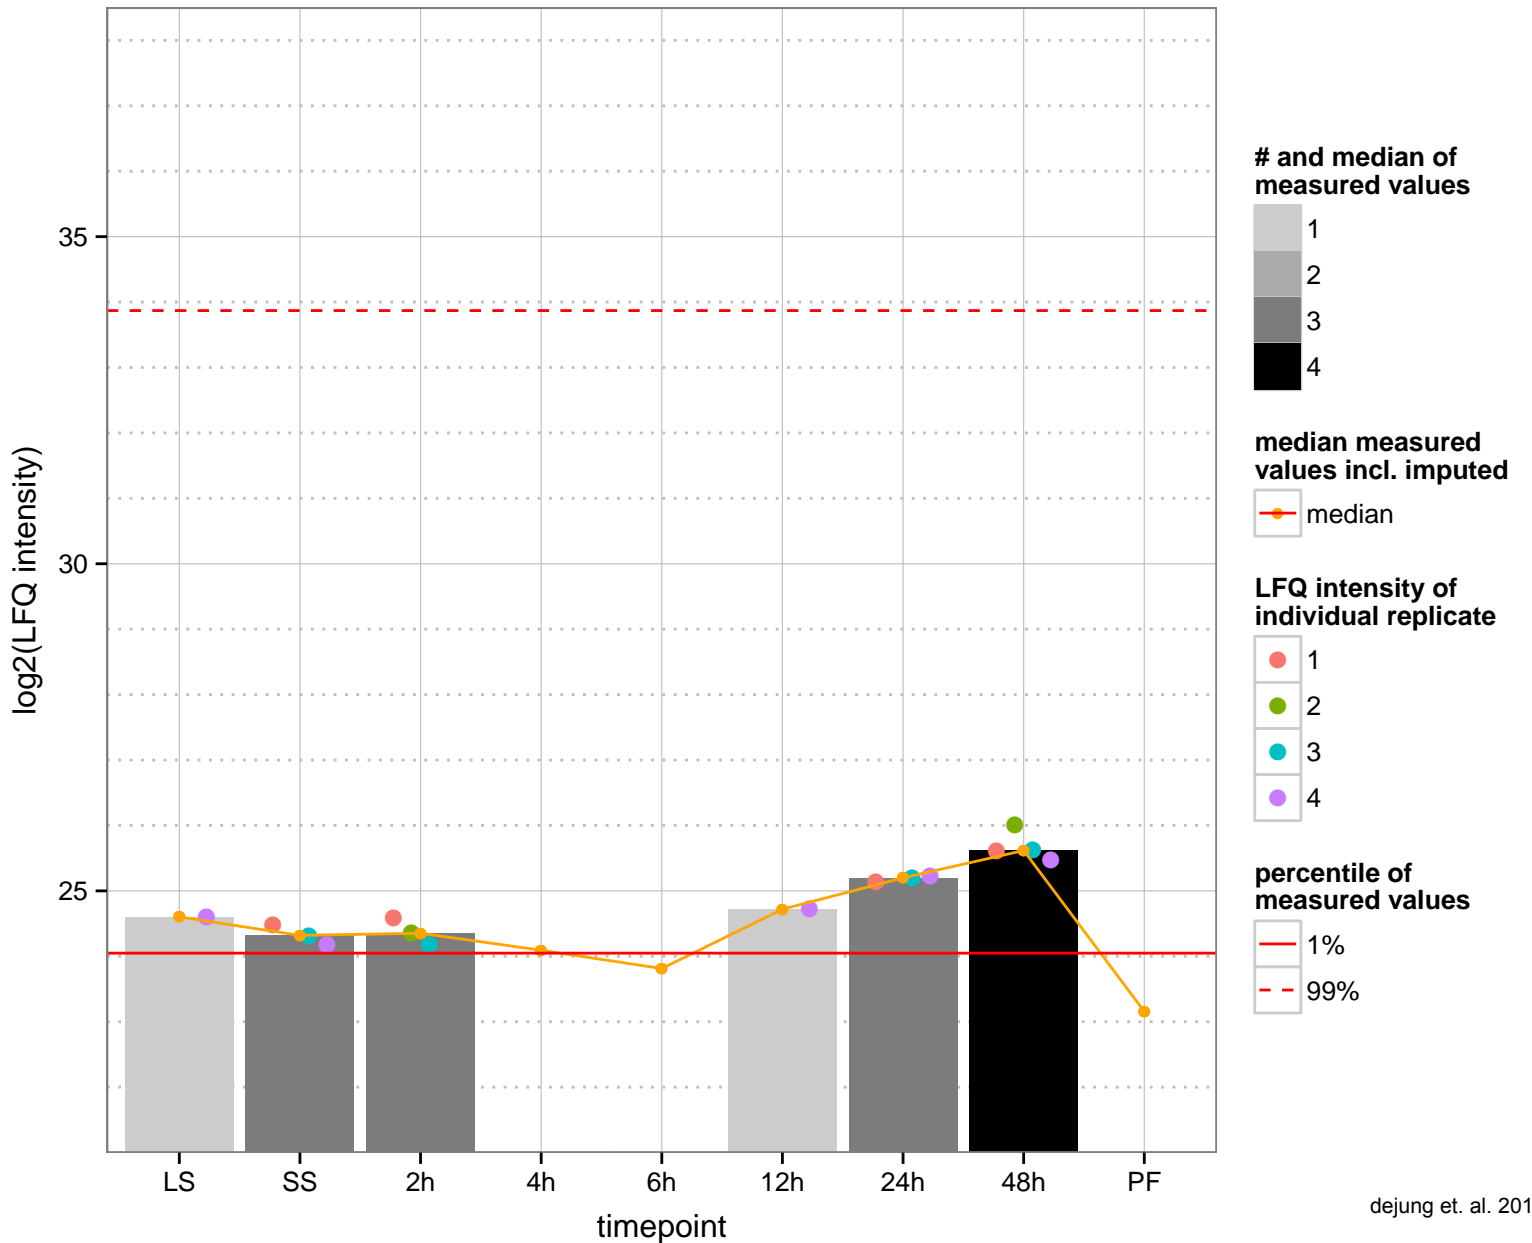

hypothetical protein, conserved  
 Tb927.7.2330  
 AGOF: null  
 AGOC: null  
 AGOP: null  
 PGOF: null  
 PGOC: null  
 PGOP: null

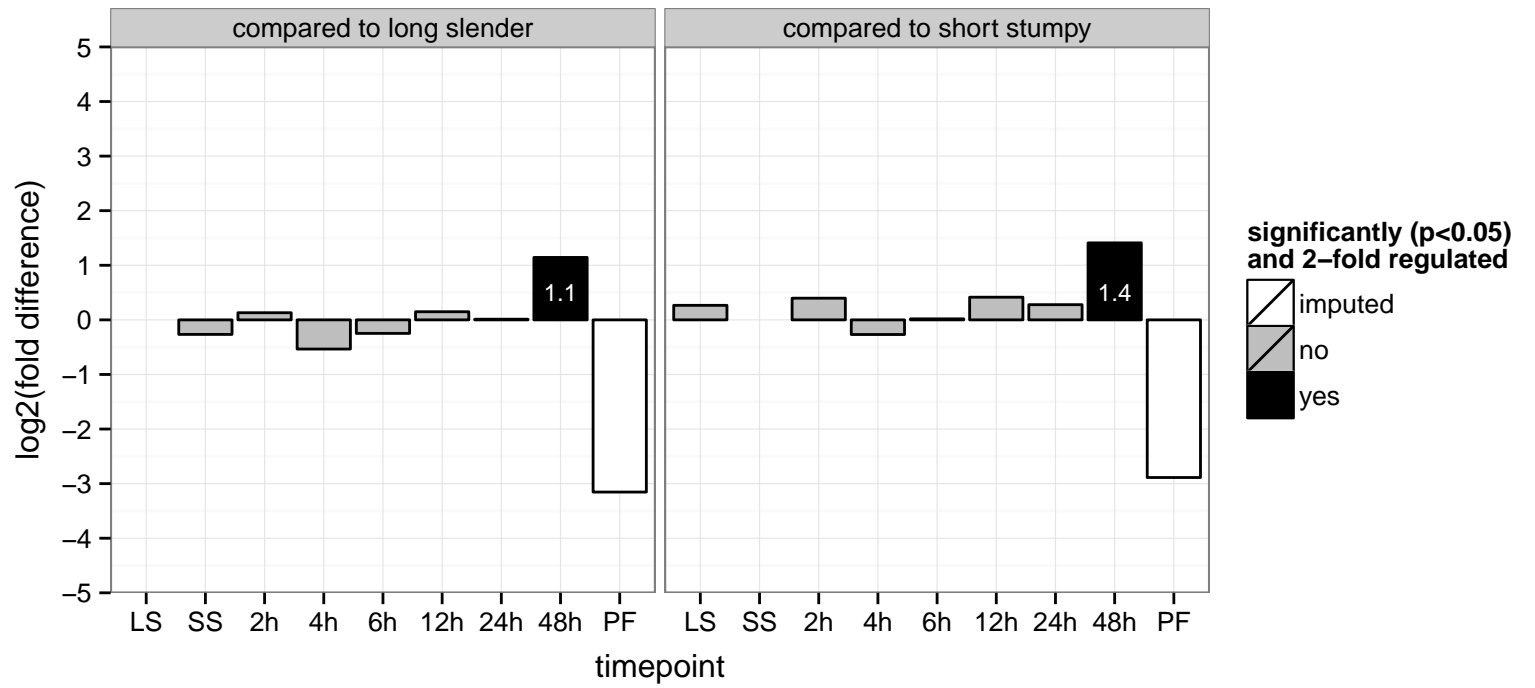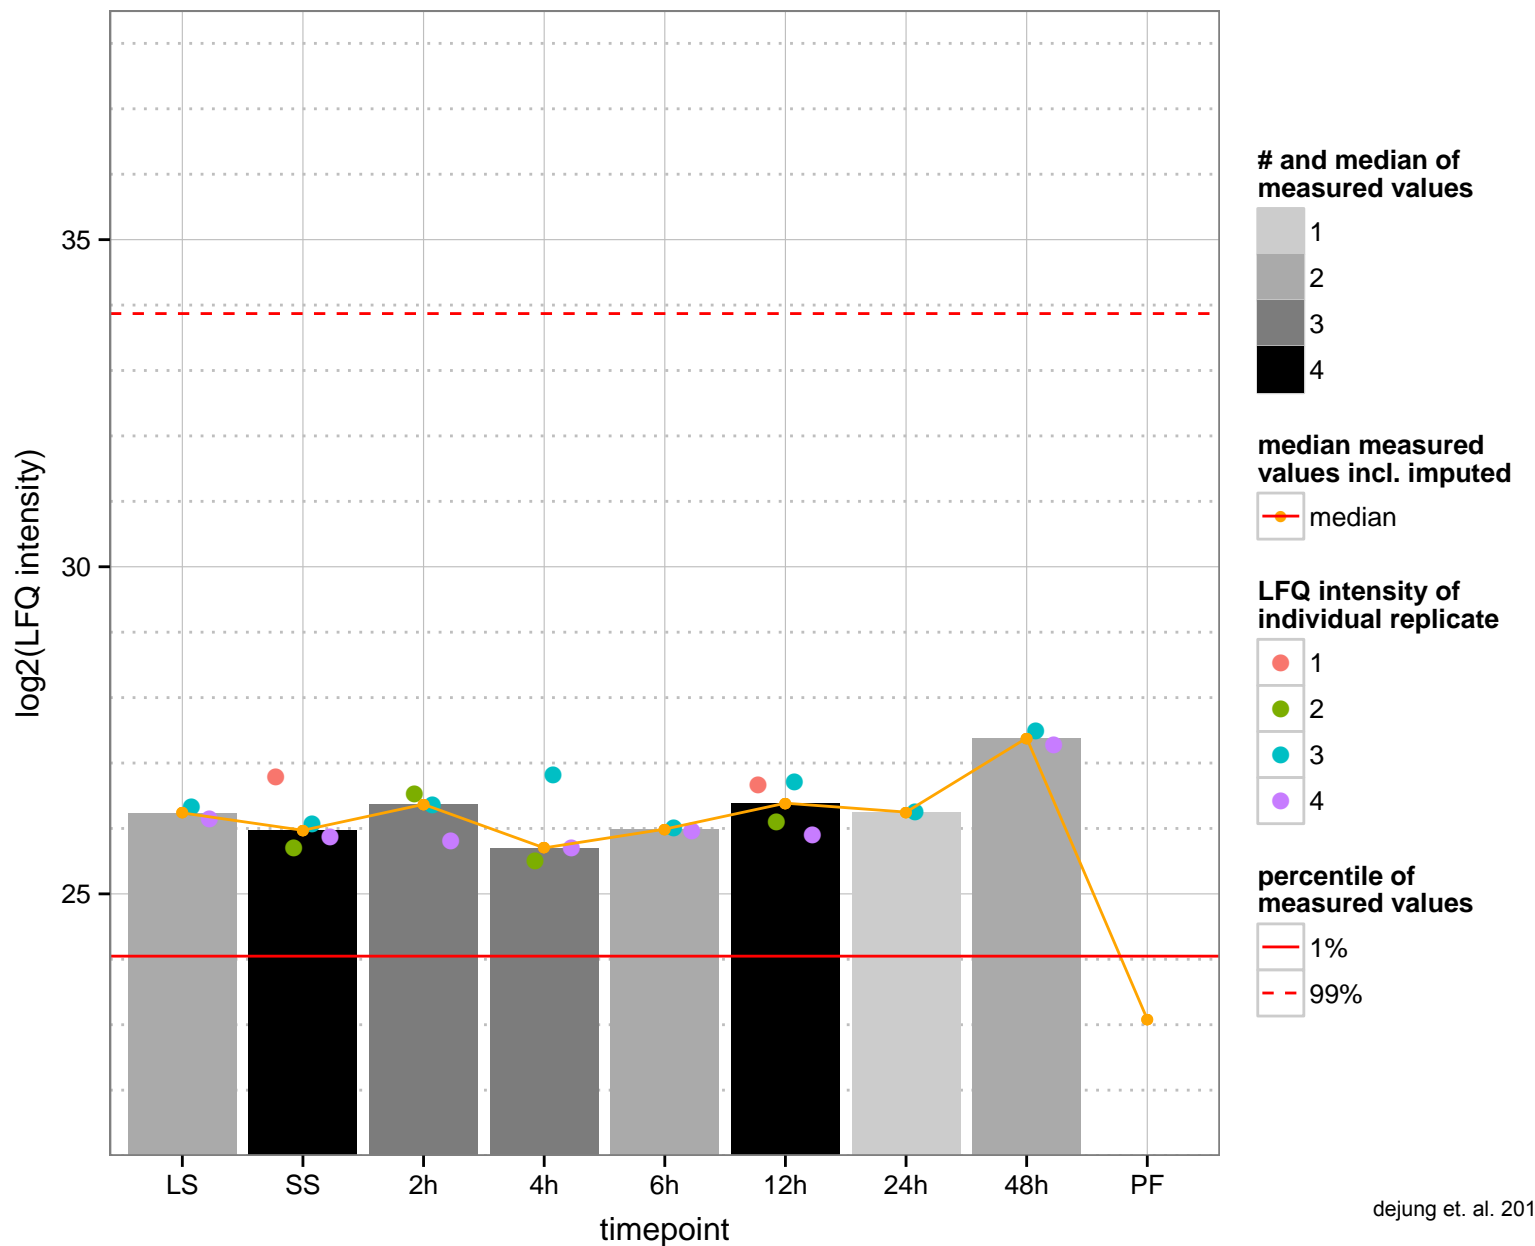

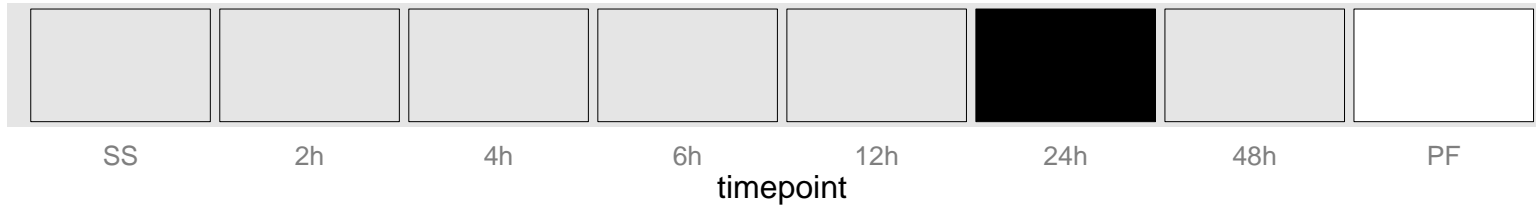

**regulated**  **not regulated**  **significant down**  **significant up**



hypothetical protein, conserved  
 Tb927.10.2580  
 AGOF: null  
 AGOC: null  
 AGOP: null  
 PGO: null  
 PGOC: null  
 PGOP: null

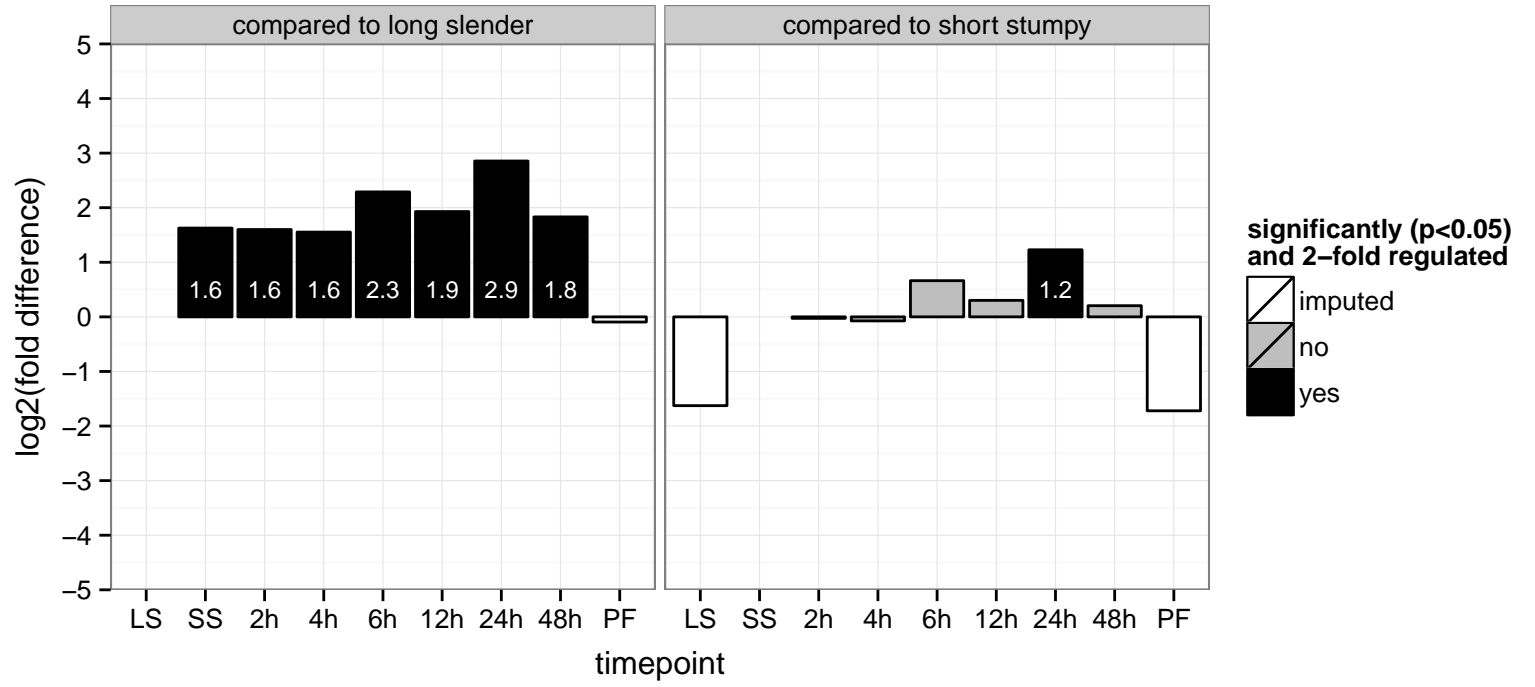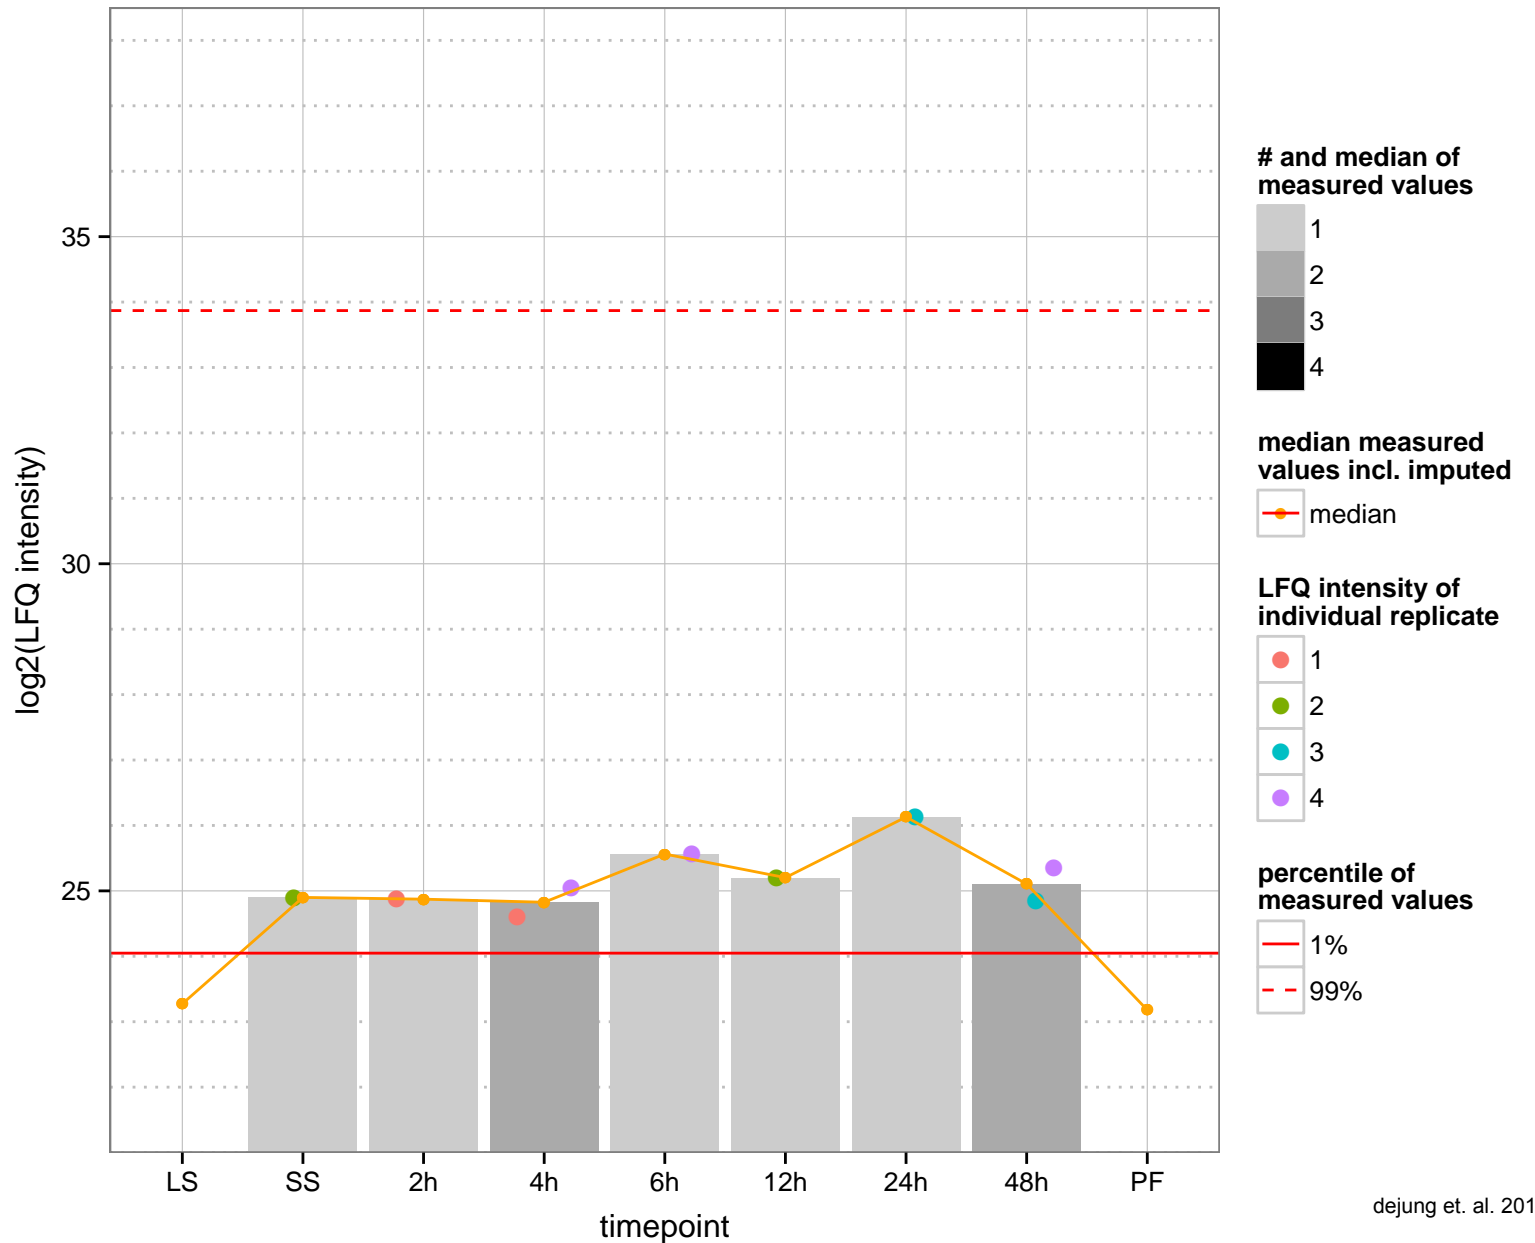

hypothetical protein, conserved  
 Tb927.11.10170  
 AGOF: null  
 AGOC: mitochondrion  
 AGOP: null  
 PGO: null  
 PGOC: null  
 PGOP: null

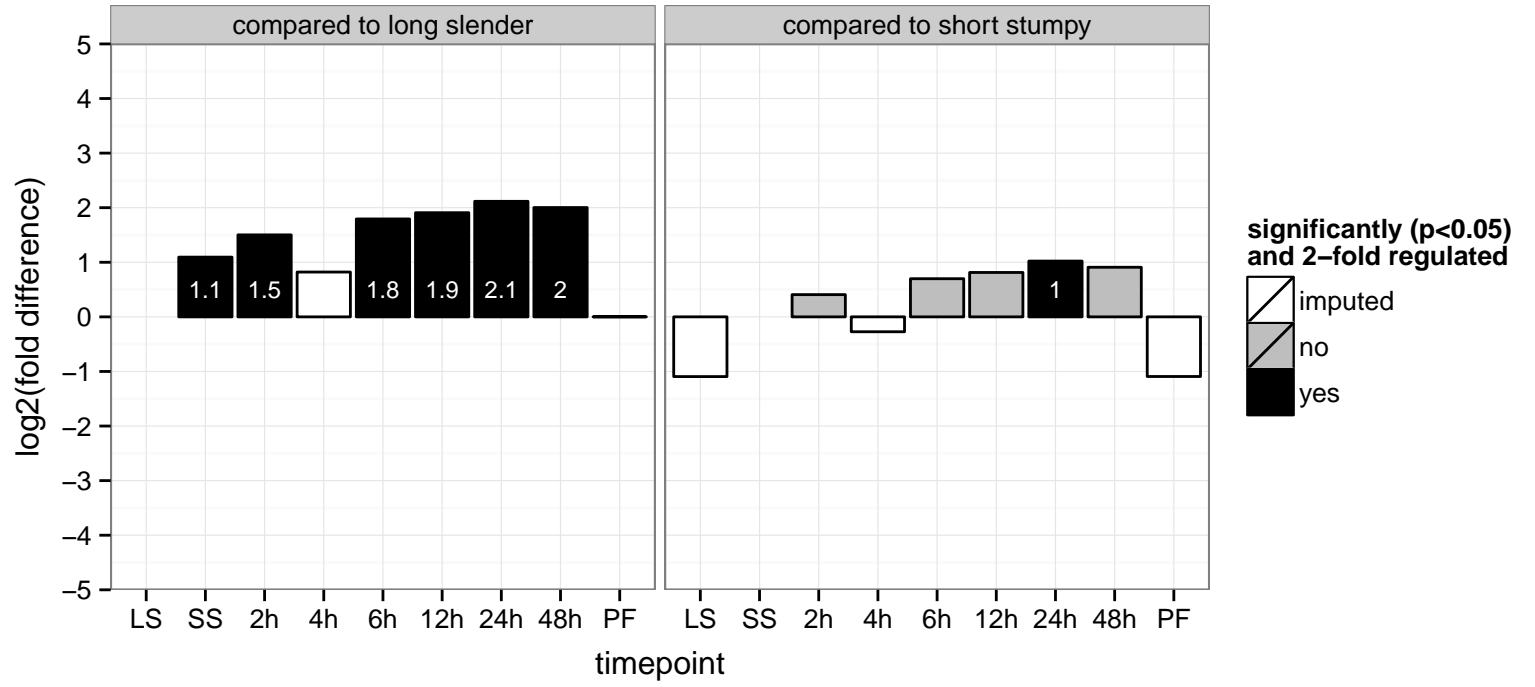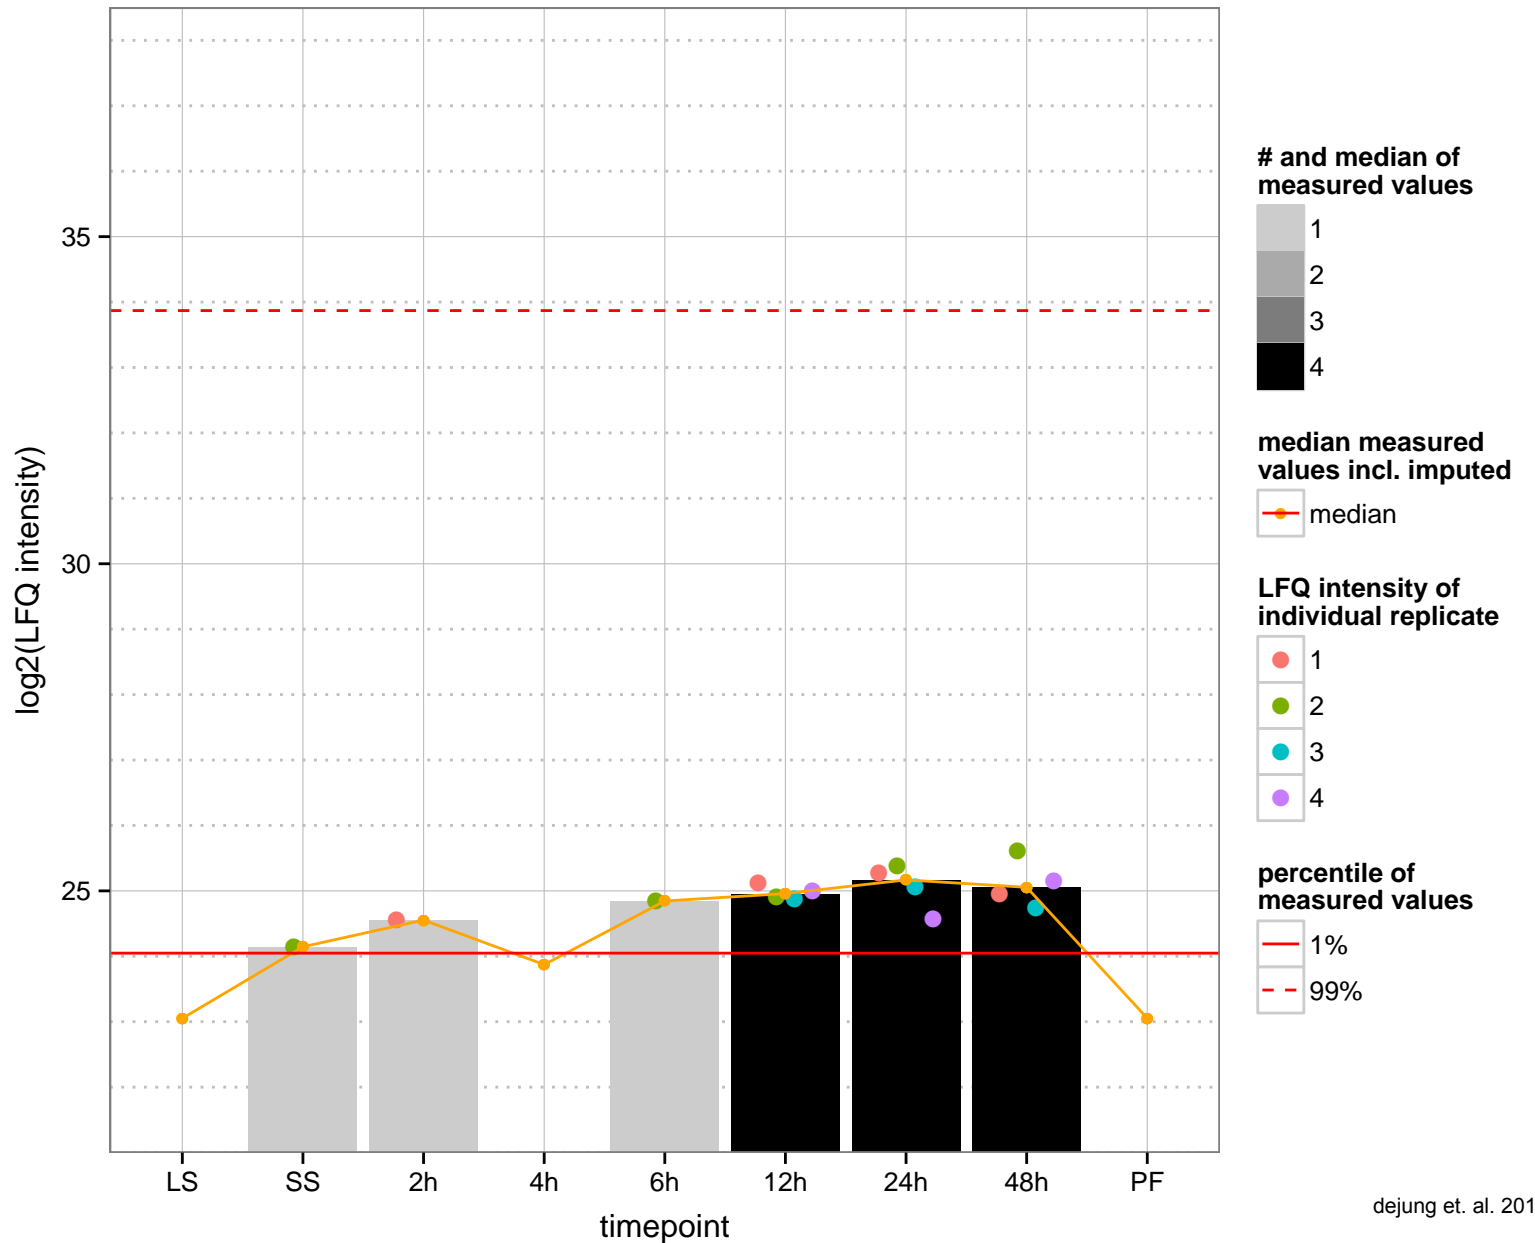

conserved protein  
 Tb927.6.1860  
 AGOF: null  
 AGOC: mitochondrion  
 AGOP: translation  
 PGO: null  
 PGO: null  
 PGO: null

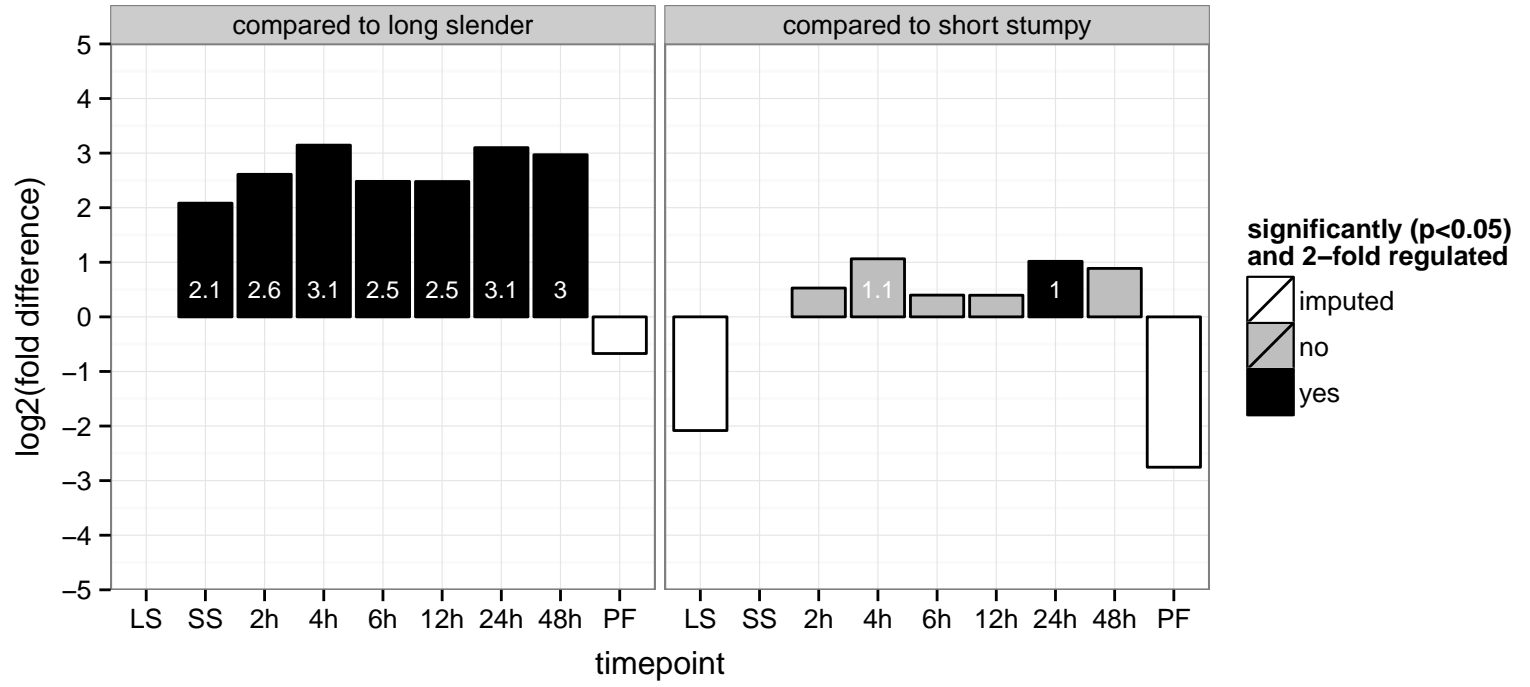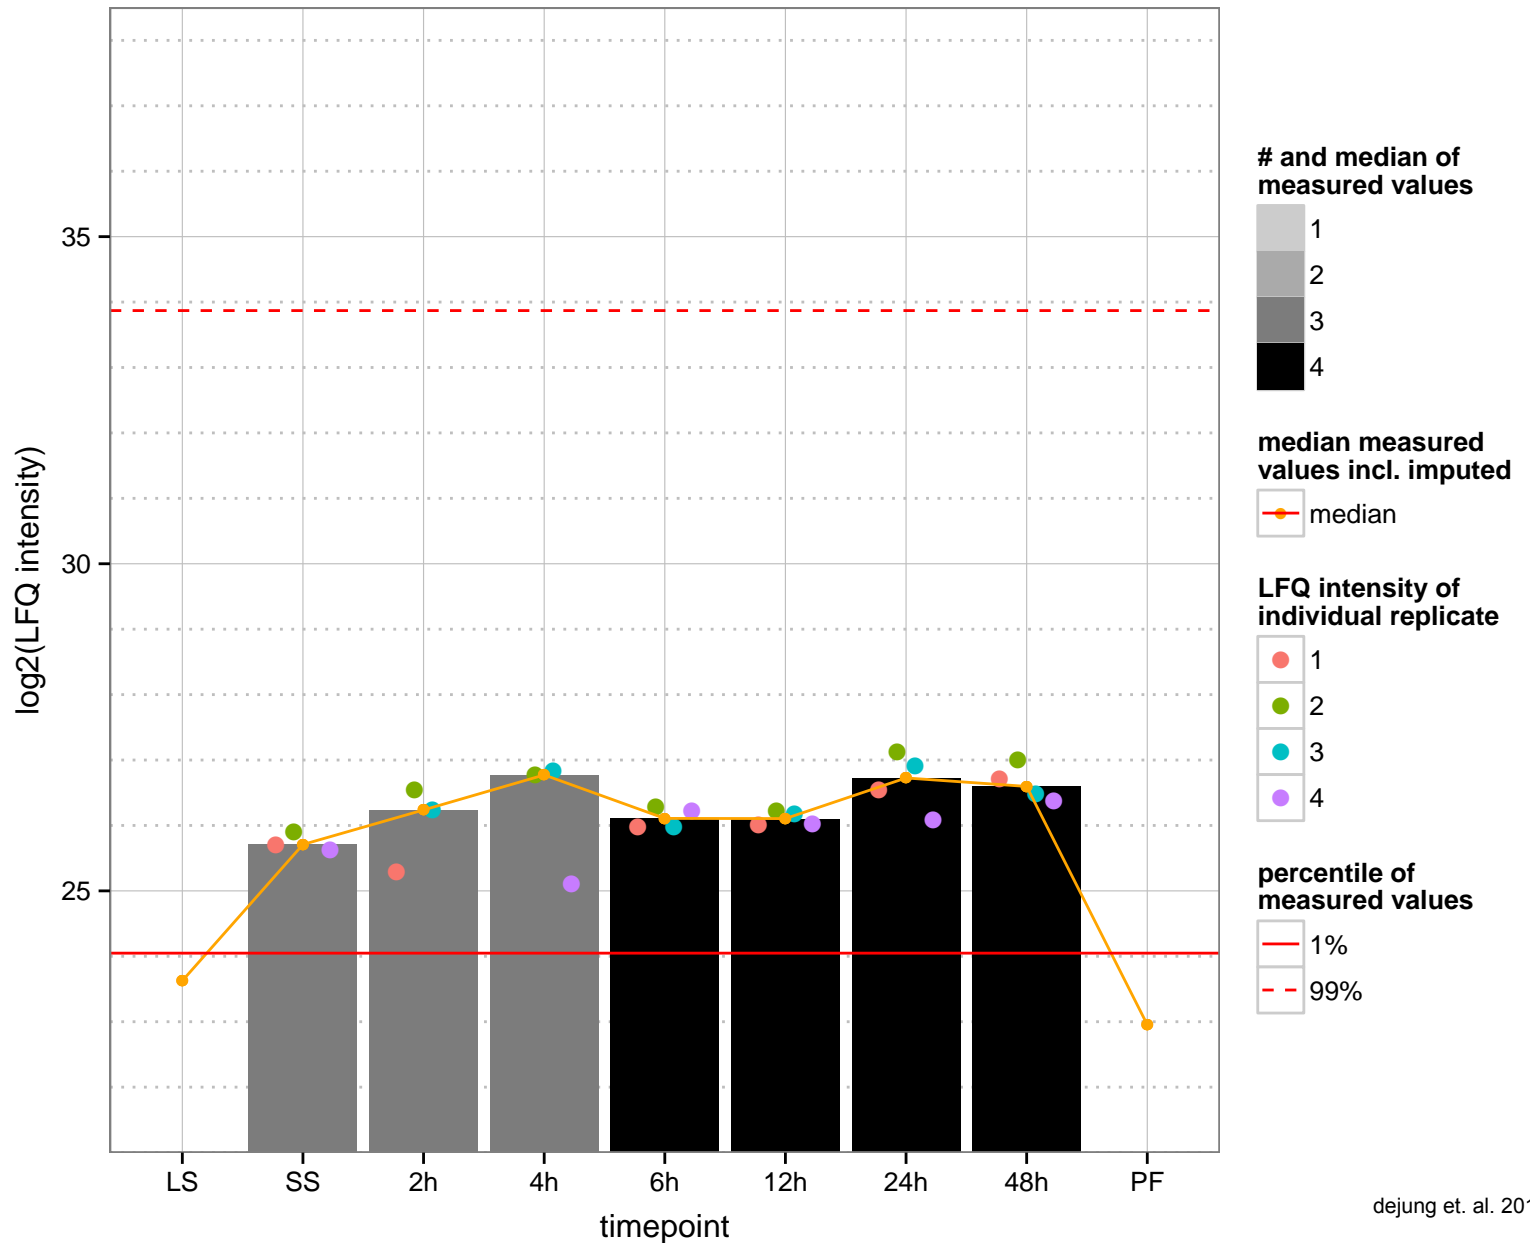

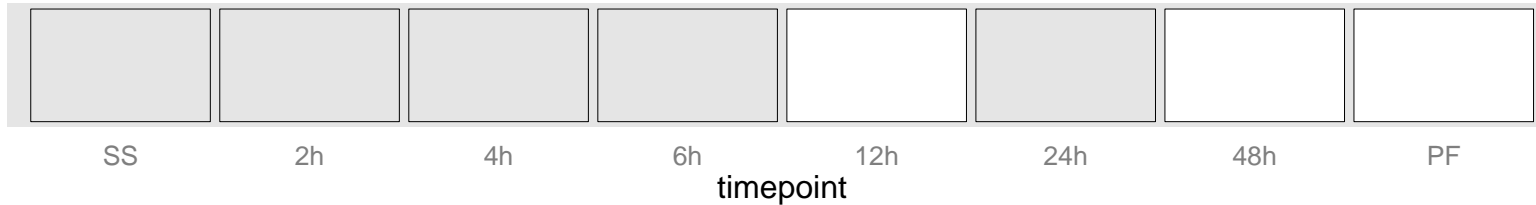

**regulated**  **not regulated**  **significant down**  **significant up**

hypothetical protein, conserved  
 Tb927.2.4410  
 AGOF: null  
 AGOC: integral to membrane  
 AGOP: null  
 PGO: null  
 PGO: null  
 PGO: integral to membrane  
 PGO: null

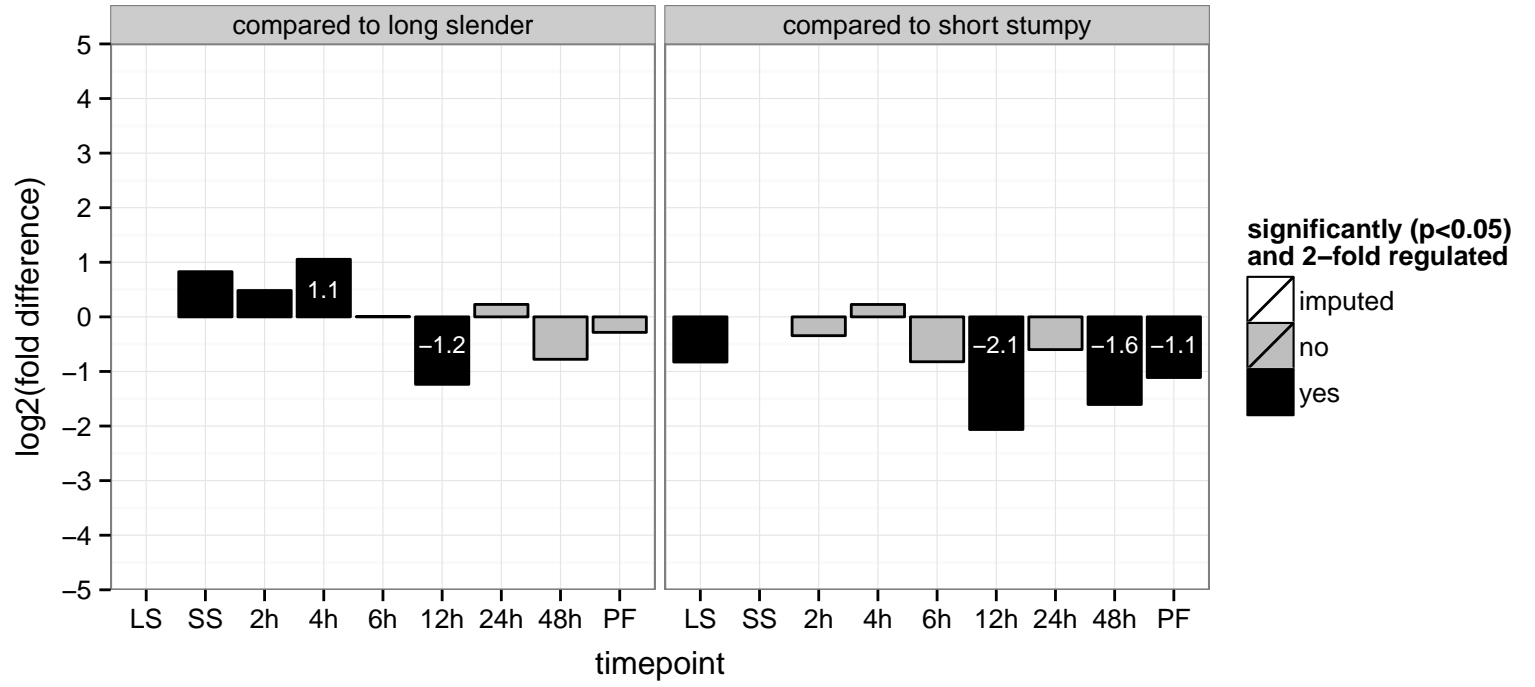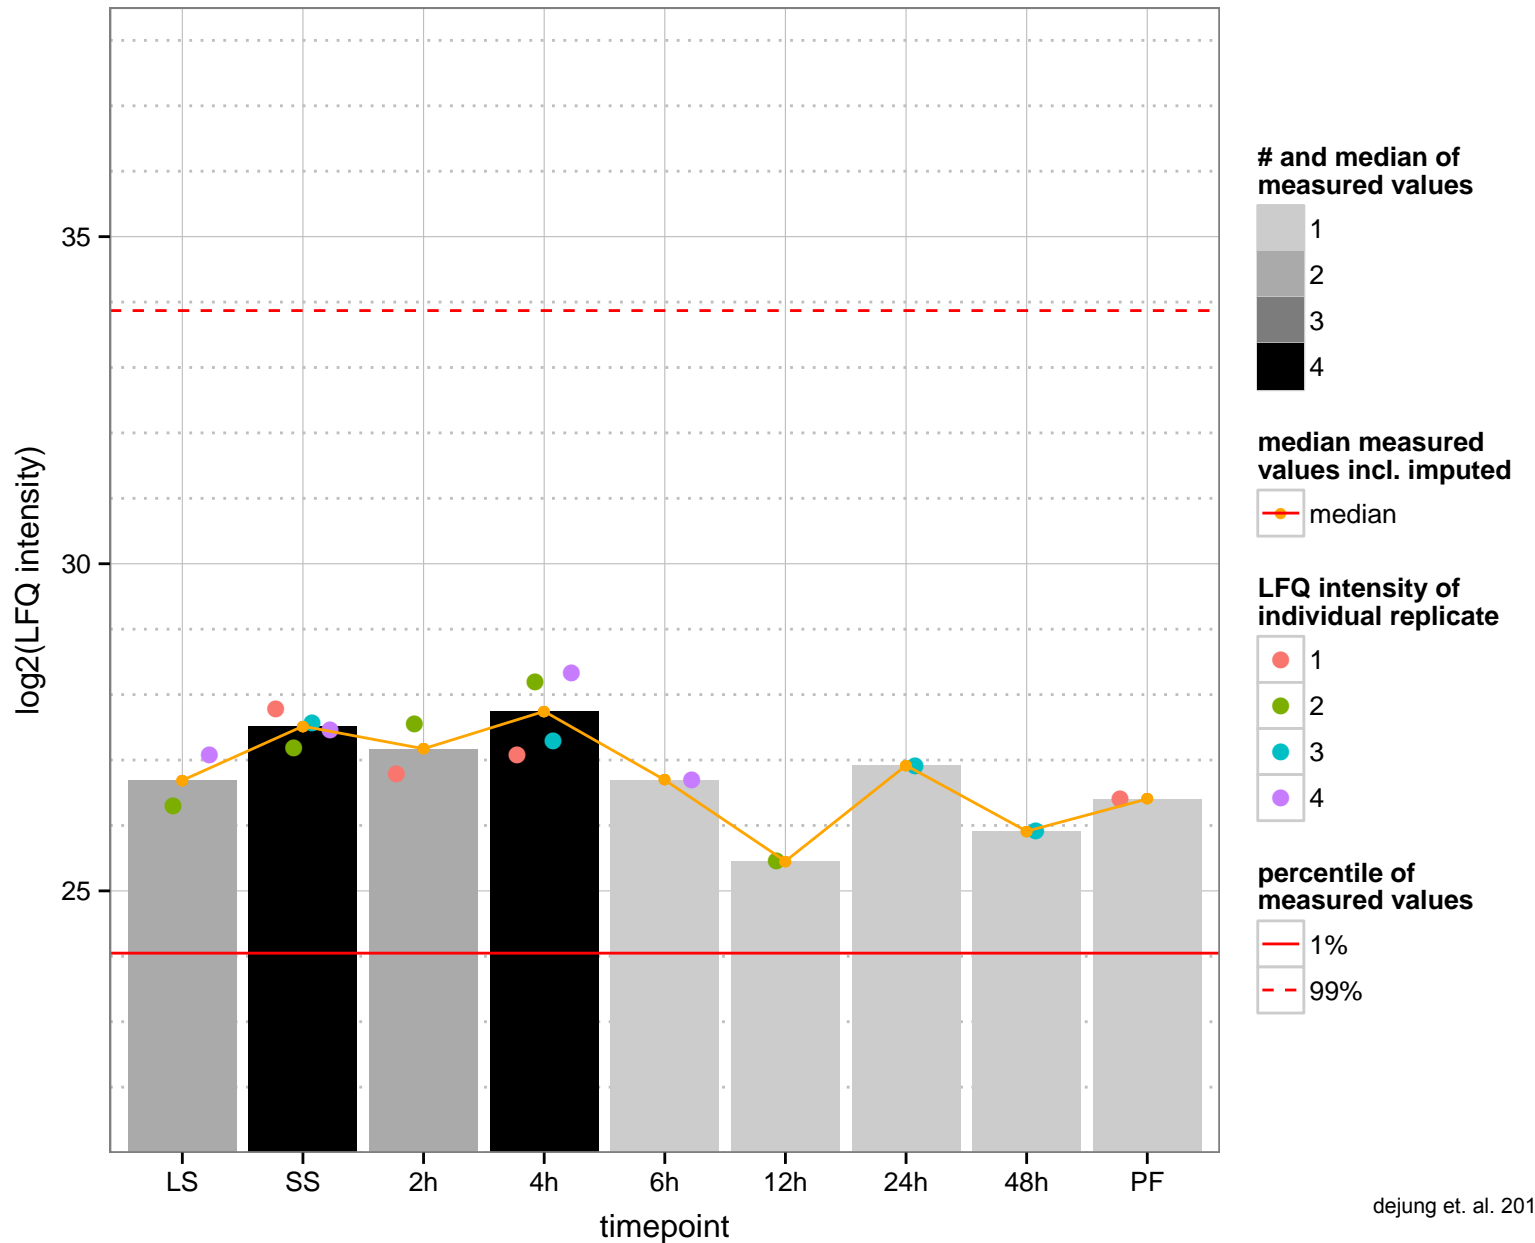

p22 protein precursor, putative  
 Tb927.7.3470  
 AGOF: null  
 AGOC: mitochondrial matrix, mitochondrion  
 AGOP: null  
 PGO: null  
 PGO: null  
 PGO: null  
 PGO: null

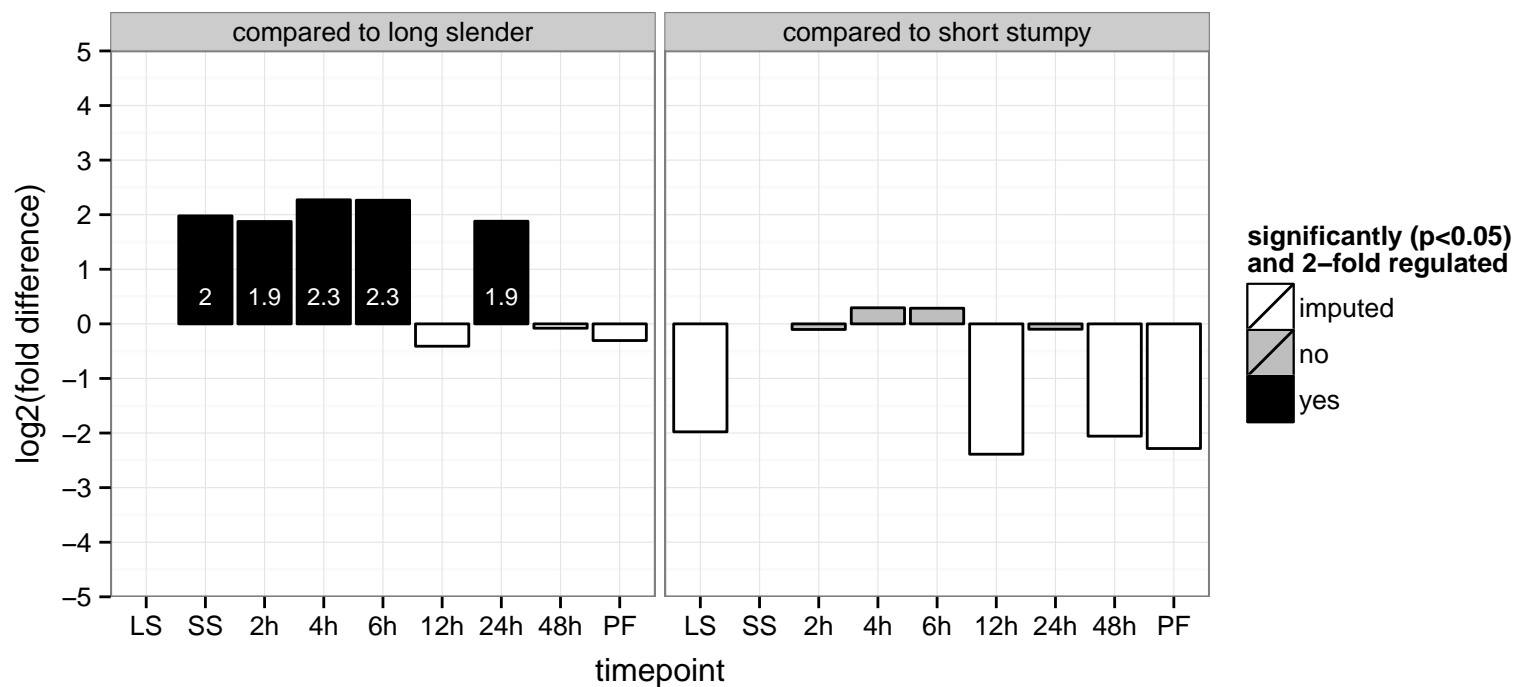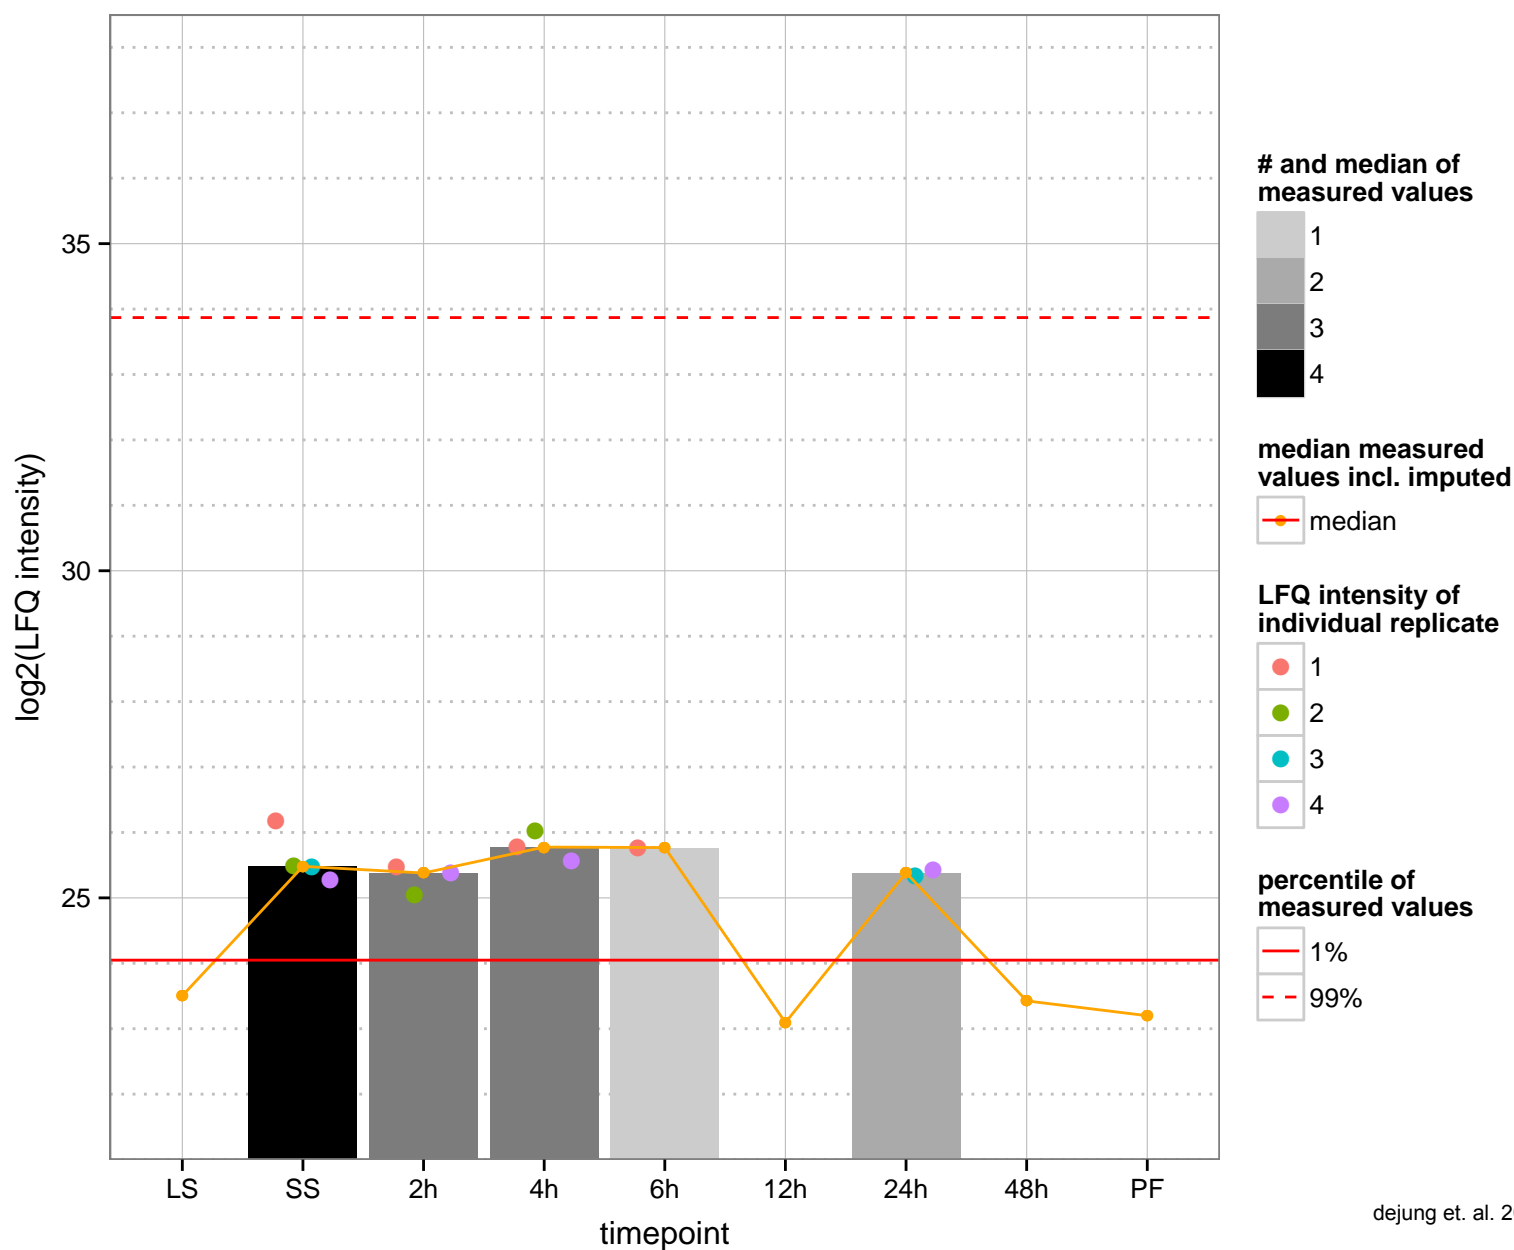

hypothetical protein, conserved  
 Tb927.8.7760  
 AGOF: null  
 AGOC: null  
 AGOP: null  
 PGOF: null  
 PGOC: null  
 PGOP: null

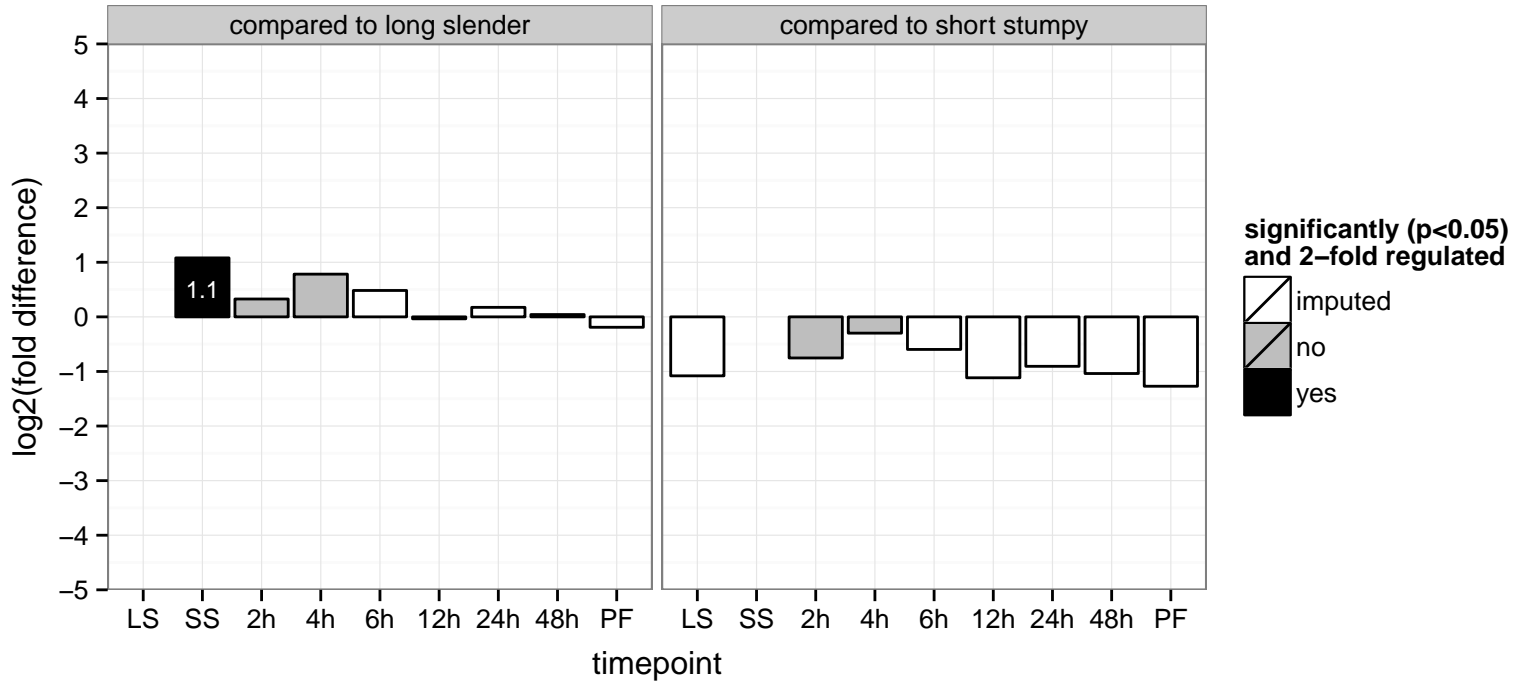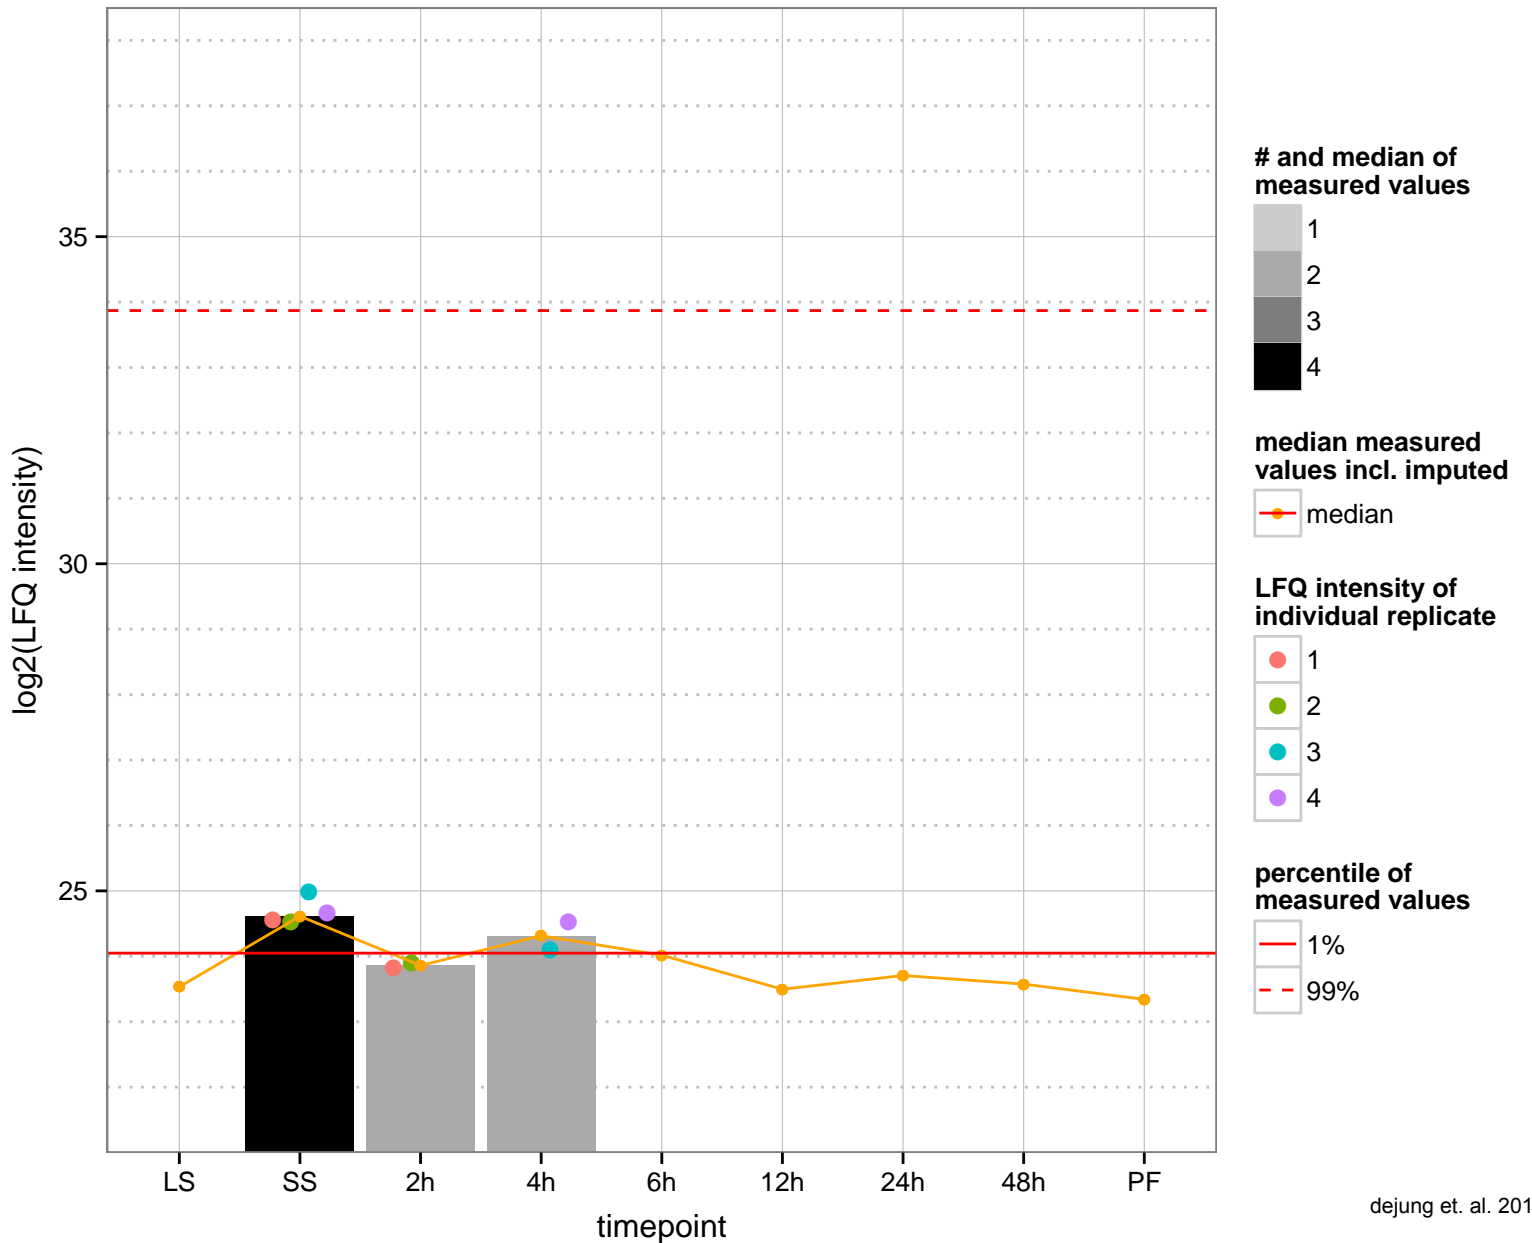

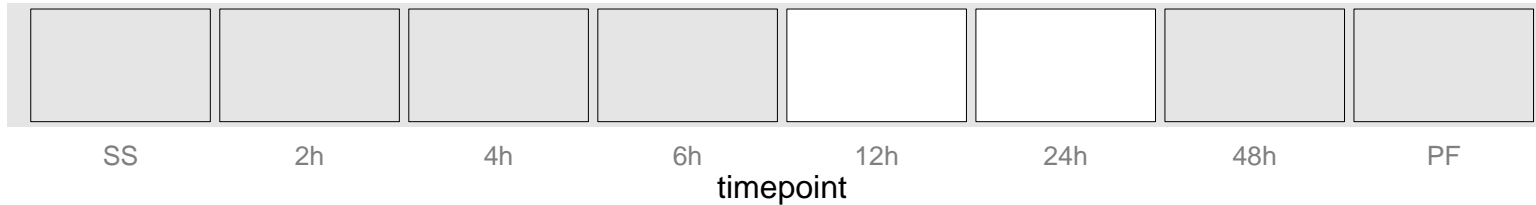

**regulated**  **not regulated**  **significant down**  **significant up**



Dynein light chain Tctex-type, putative  
 Tb927.10.10320  
 AGOF: microtubule motor activity  
 AGOC: microtubule associated complex  
 AGOP: microtubule-based process  
 PGO: null  
 PGOC: null  
 PGOP: null

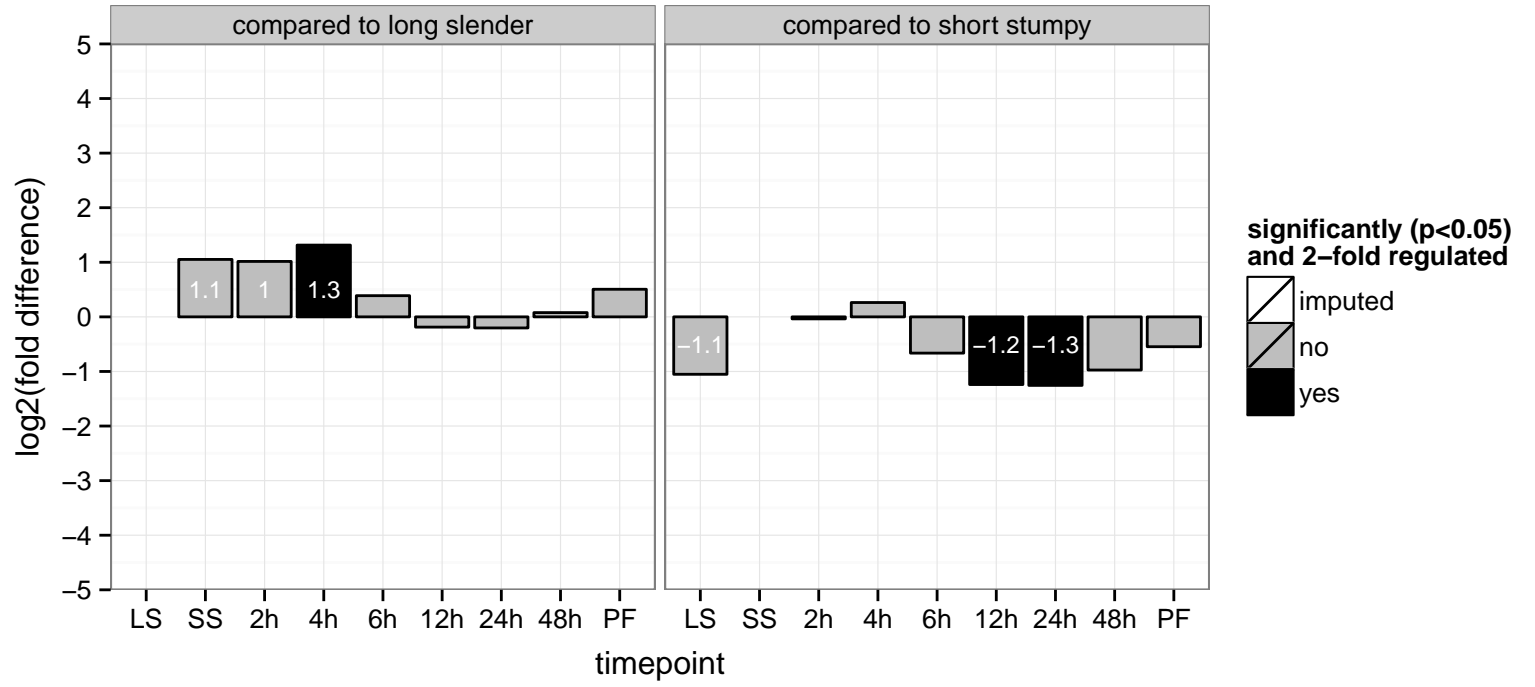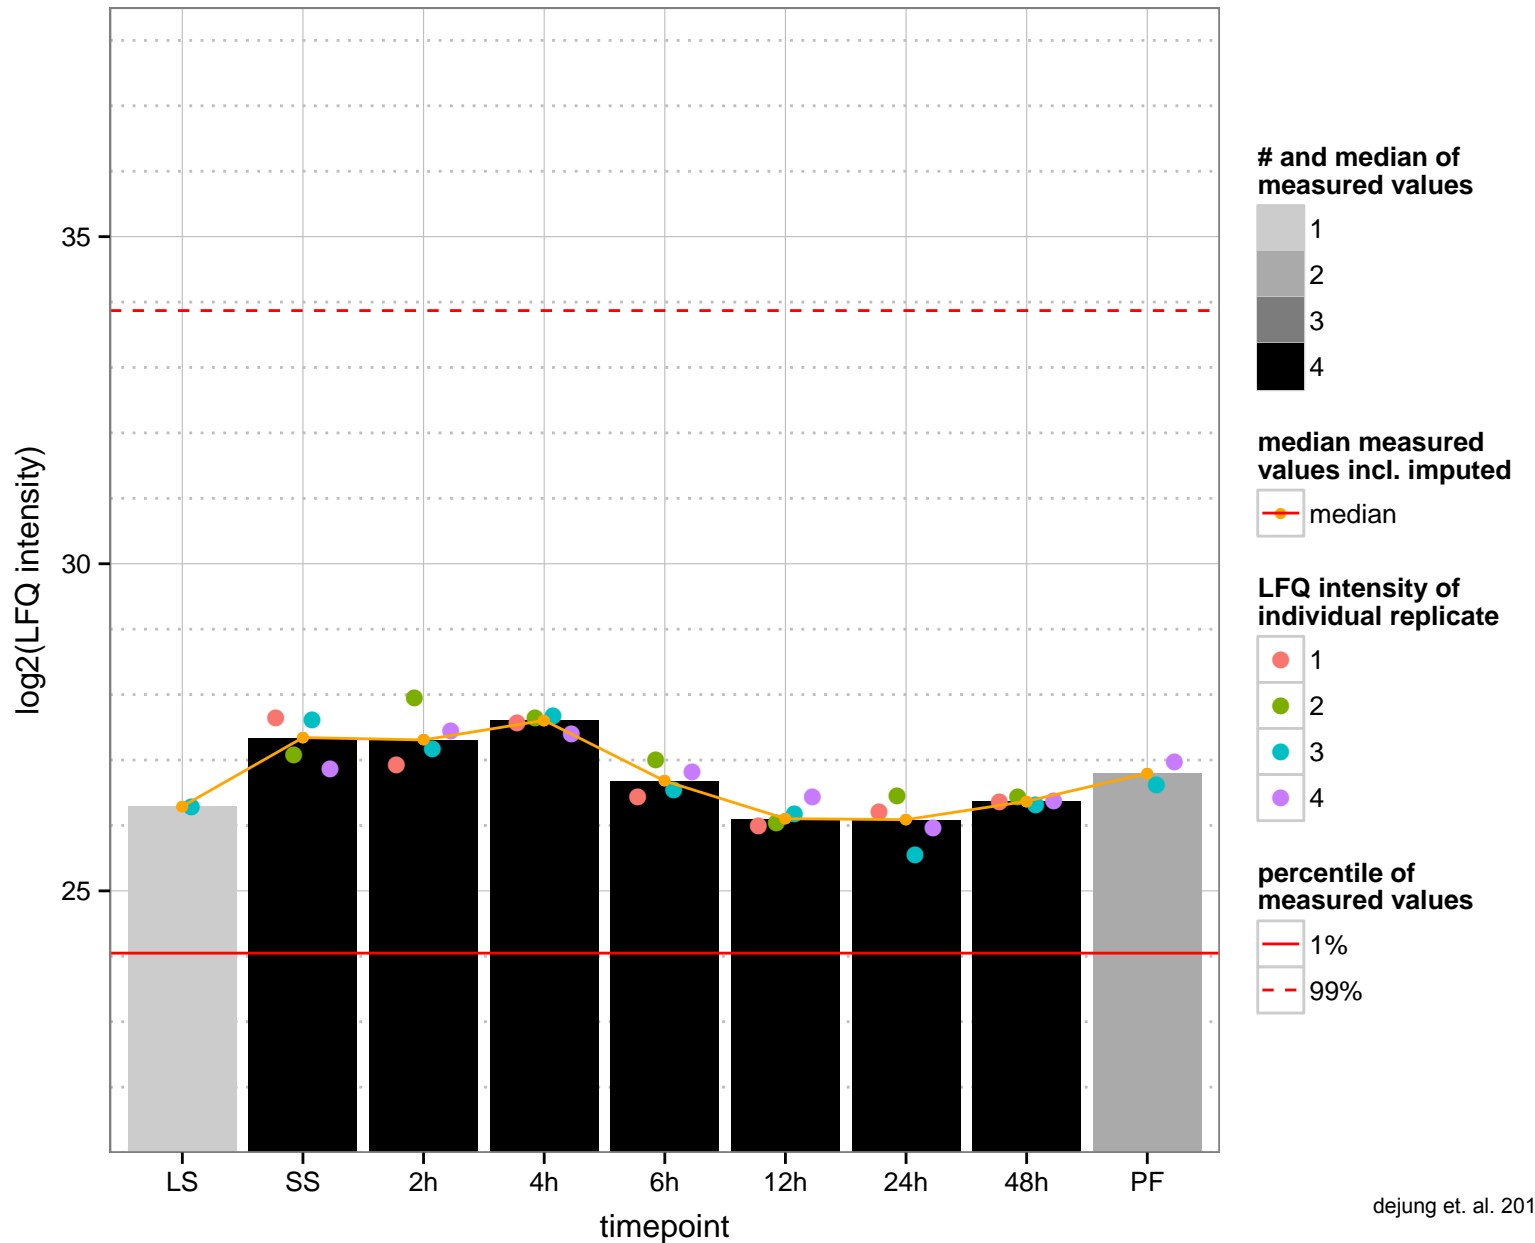

RNA-binding protein, putative (RBP39)  
 Tb927.11.15350  
 AGOF: RNA binding  
 AGOC: null  
 AGOP: null  
 PGO: nucleic acid binding  
 PGOC: null  
 PGOP: null

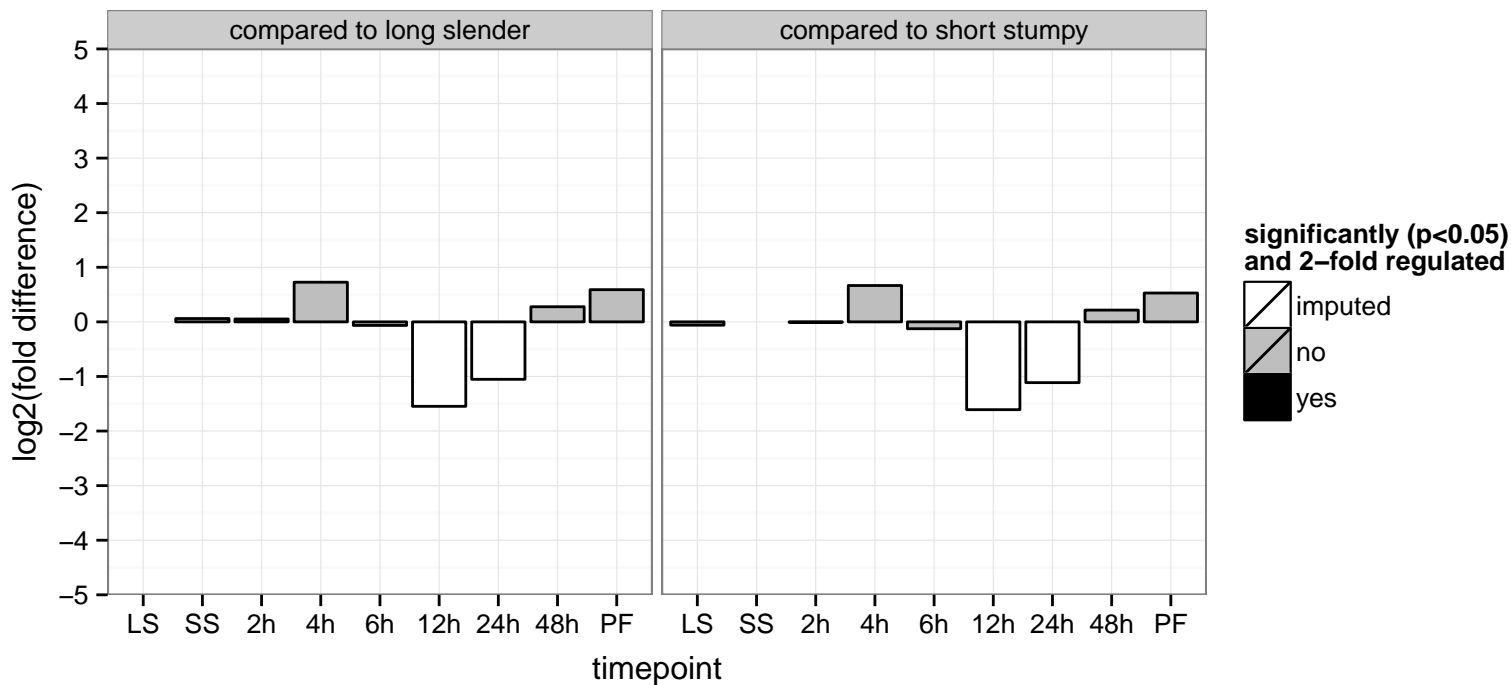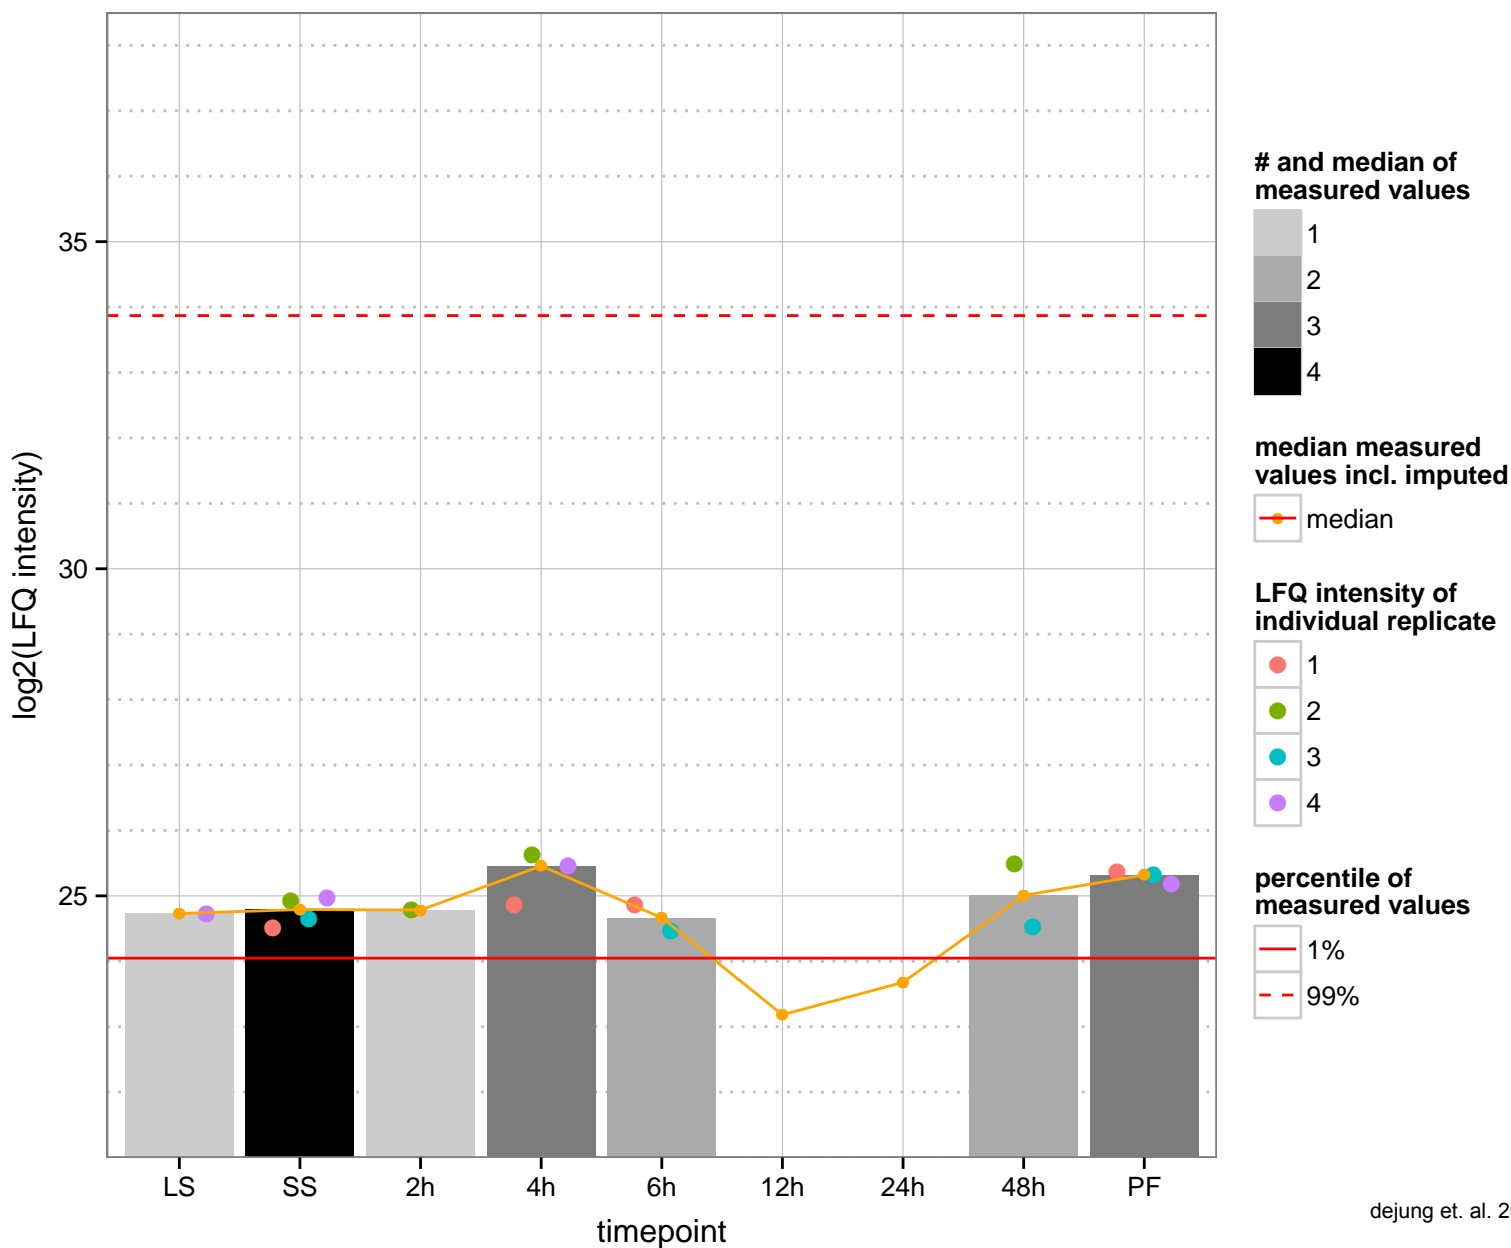

ADP-ribosylation factor GTPase activating protein, putative  
 Tb927.9.15490  
 AGOF: ARF GTPase activator activity, DNA binding, zinc ion binding  
 AGOC: nucleus  
 AGOP: regulation of ARF GTPase activity  
 PGO: ARF GTPase activator activity, zinc ion binding  
 PGO: null  
 PGO: regulation of ARF GTPase activity

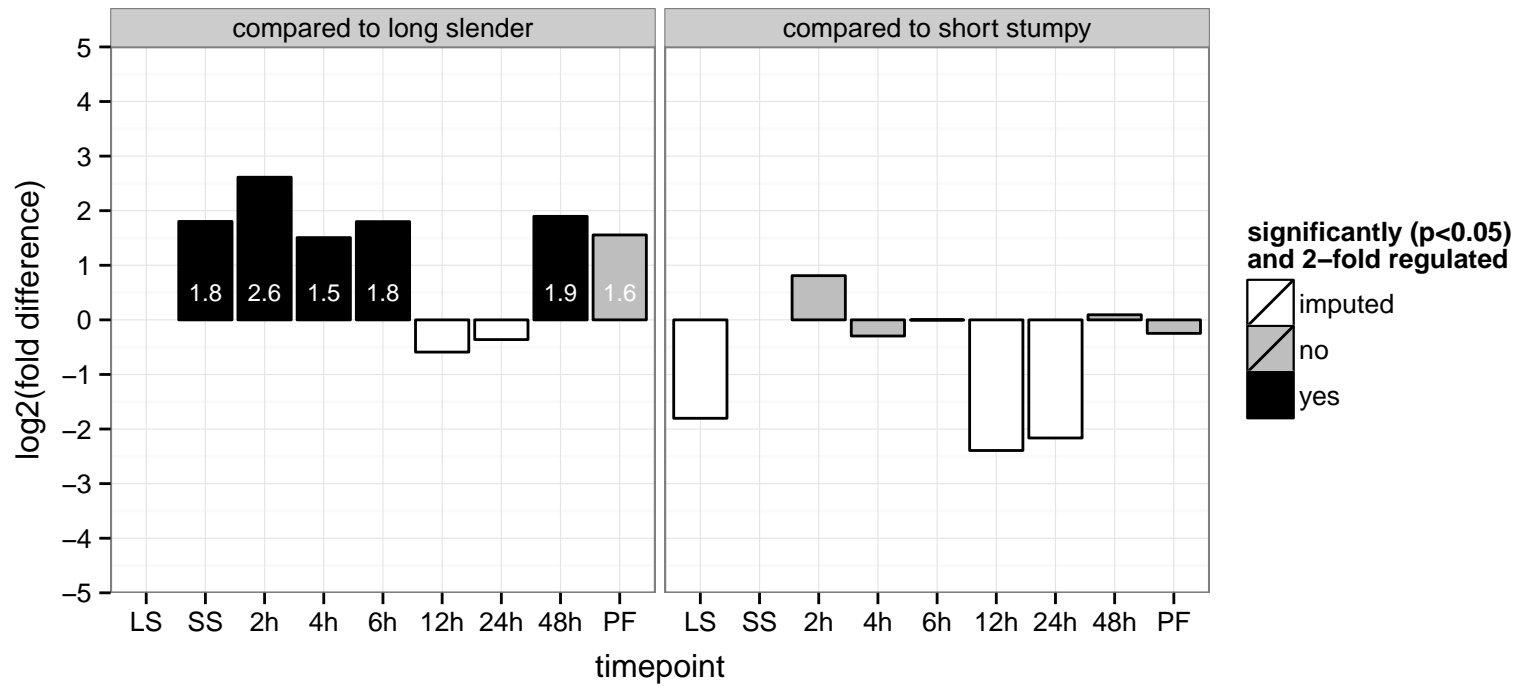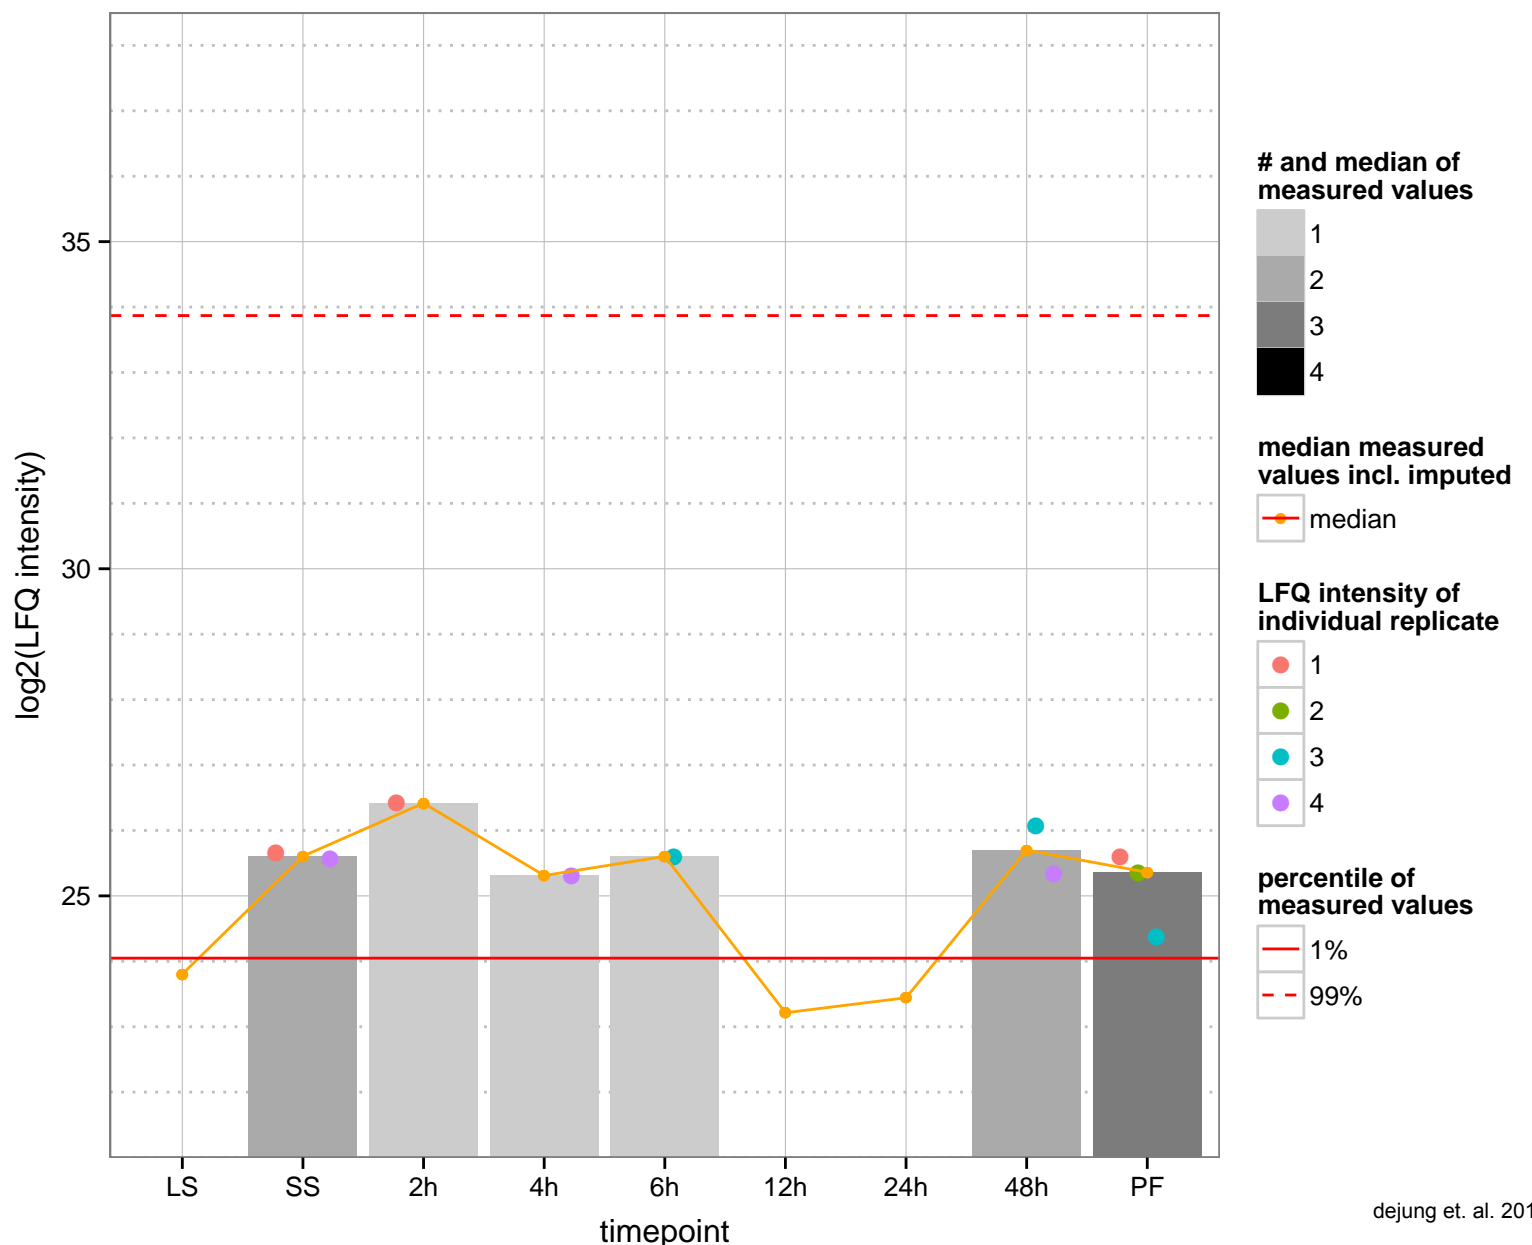

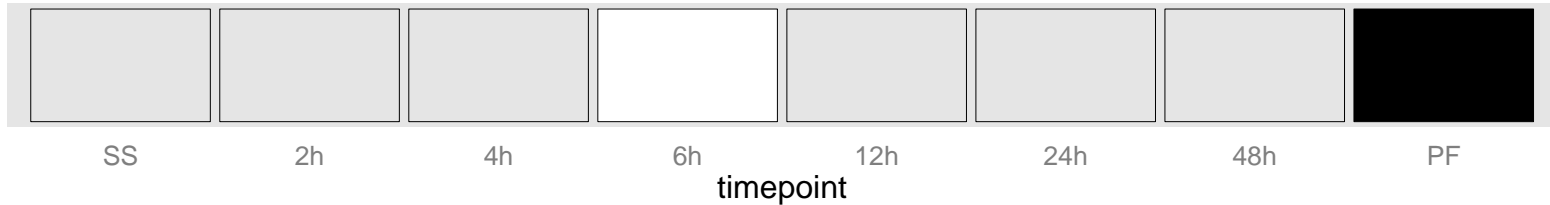

**regulated**  **not regulated**  **significant down**  **significant up**

dihydrolipoamide dehydrogenase, putative (GCVL-1)

Tb927.3.4390

AGOF: dihydrolipoyl dehydrogenase activity, flavin adenine dinucleotide binding

AGOC: cytoplasm

AGOP: cell redox homeostasis

PGOF: flavin adenine dinucleotide binding, oxidoreductase activity

PGOC: cytoplasm

PGOP: cell redox homeostasis, oxidation-reduction process

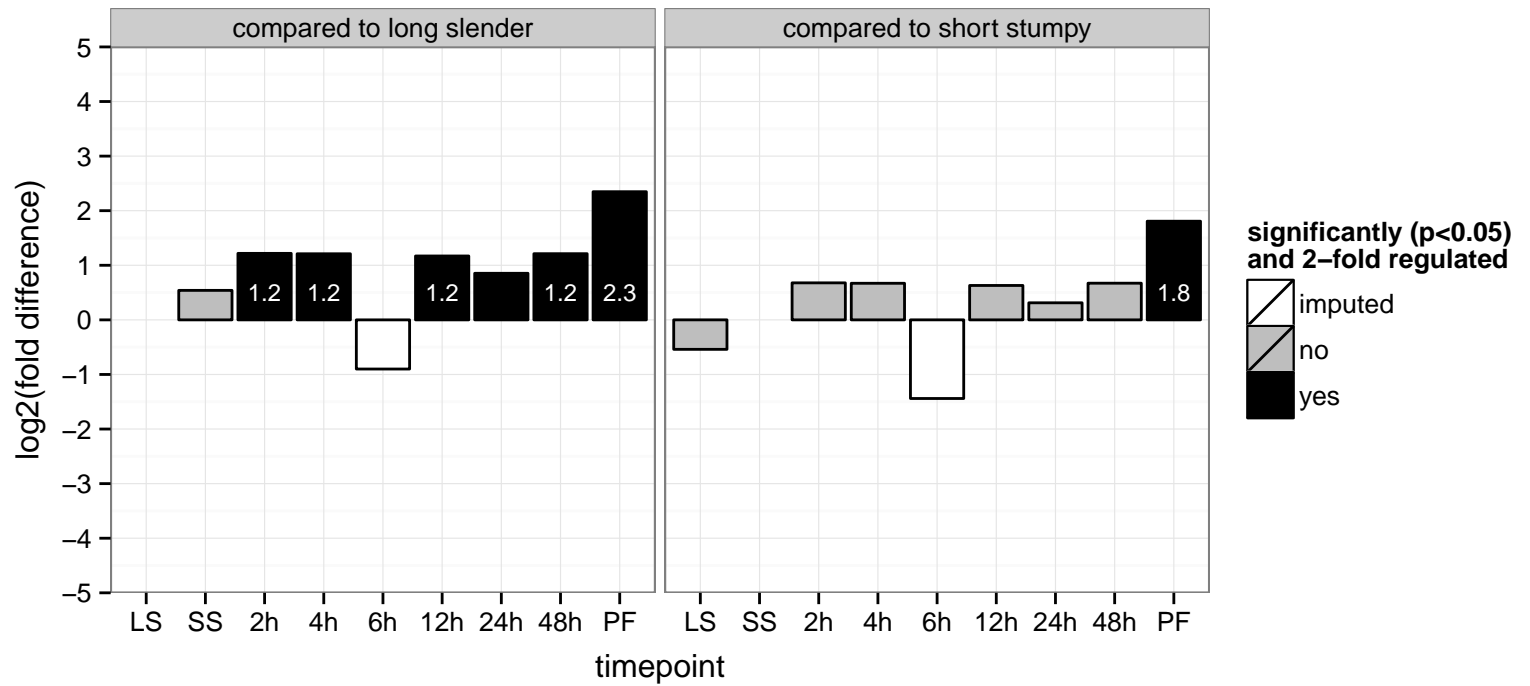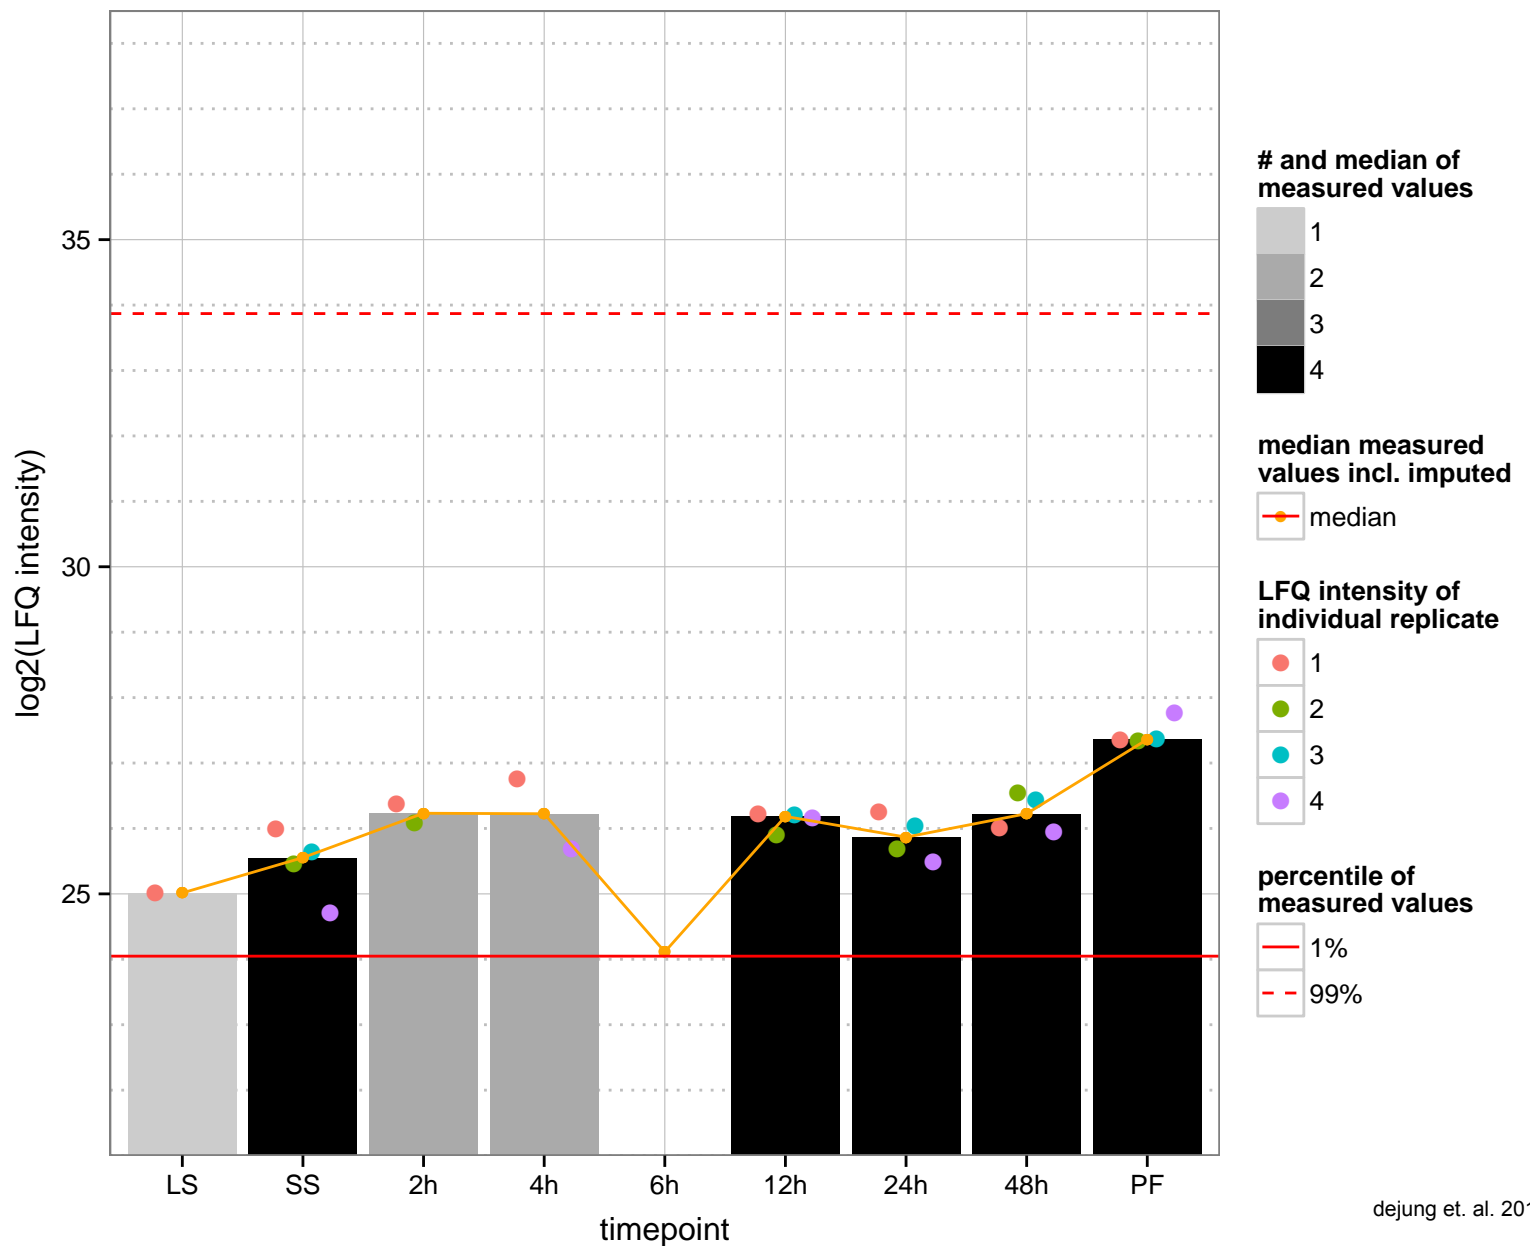

hypothetical protein, conserved  
 Tb927.4.2360  
 AGOF: null  
 AGOC: mitochondrion  
 AGOP: null  
 PGO: null  
 PGO: null  
 PGO: null

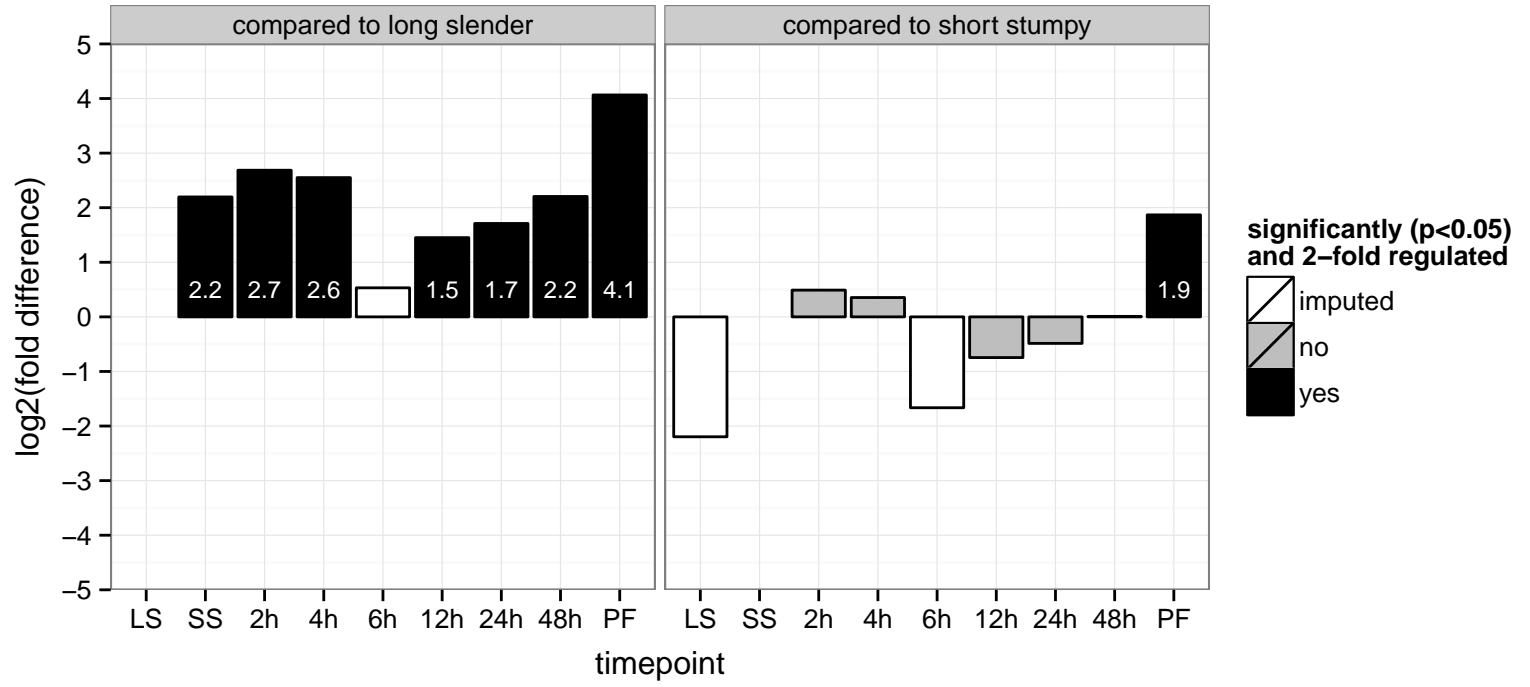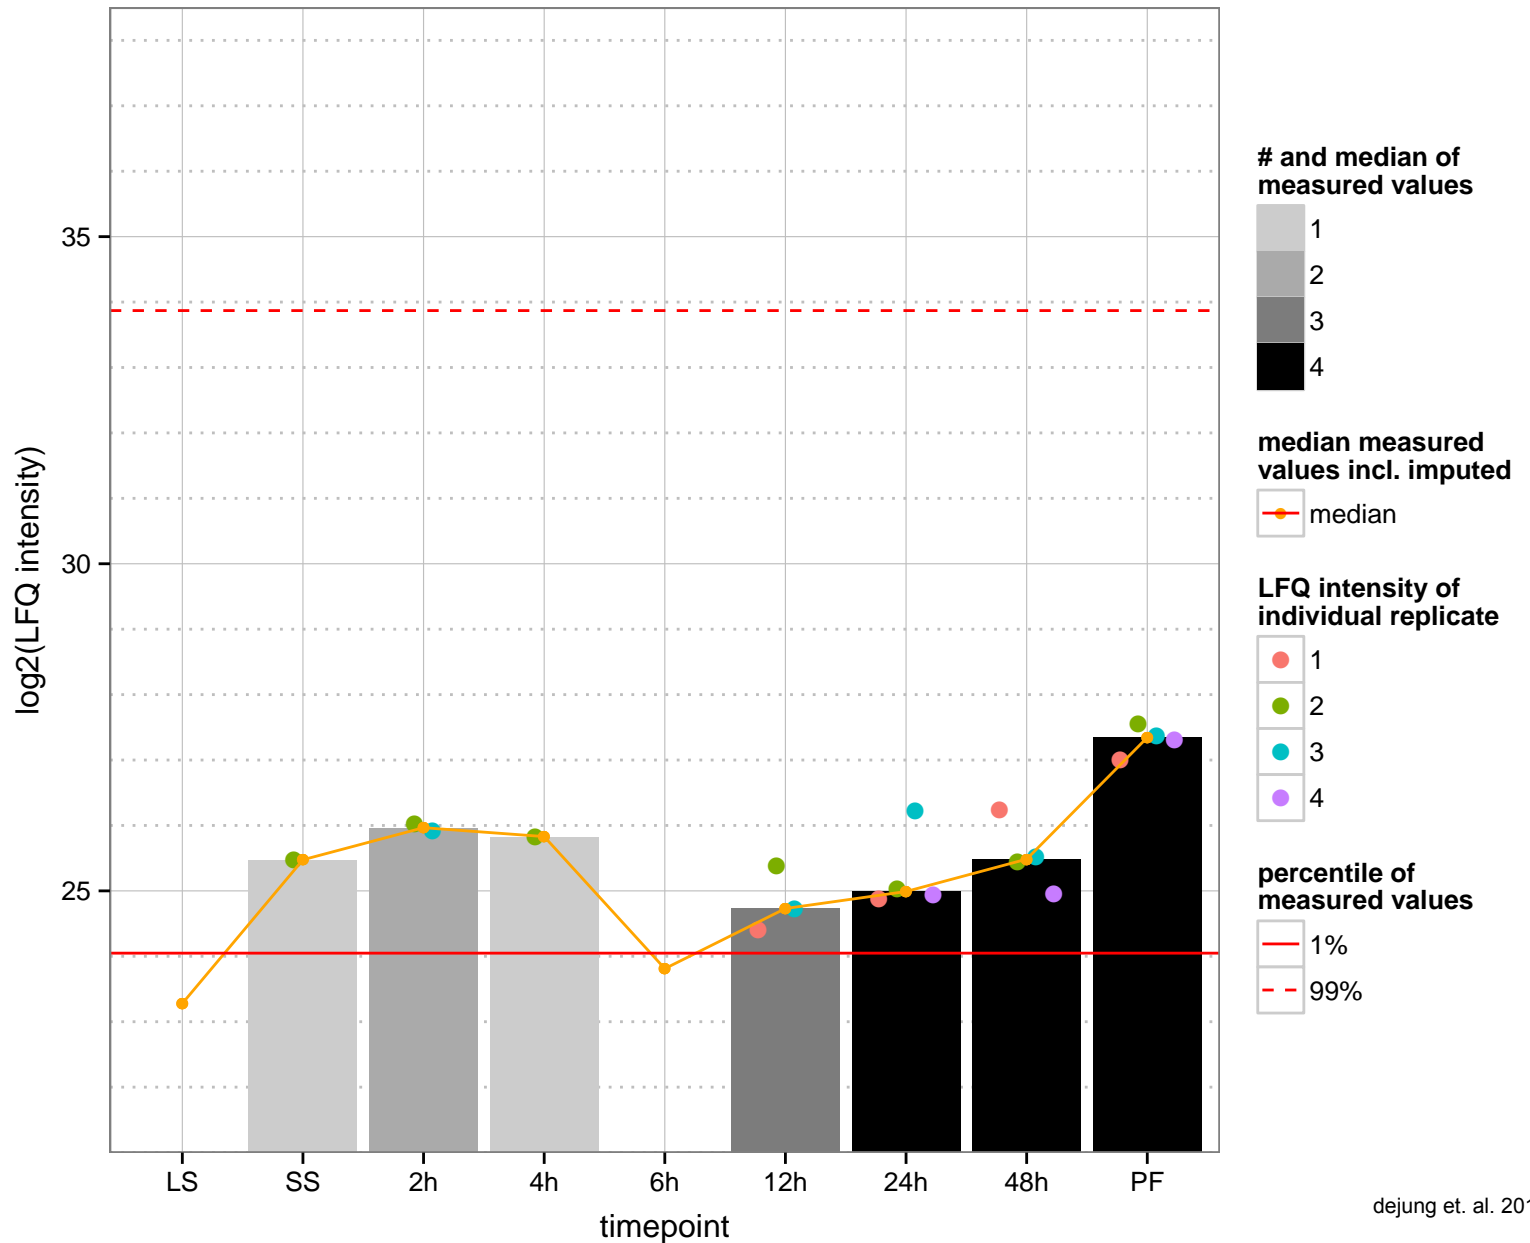

hypothetical protein, conserved  
 Tb927.8.3210  
 AGOF: null  
 AGOC: null  
 AGOP: null  
 PGO: null  
 PGOC: null  
 PGOP: null

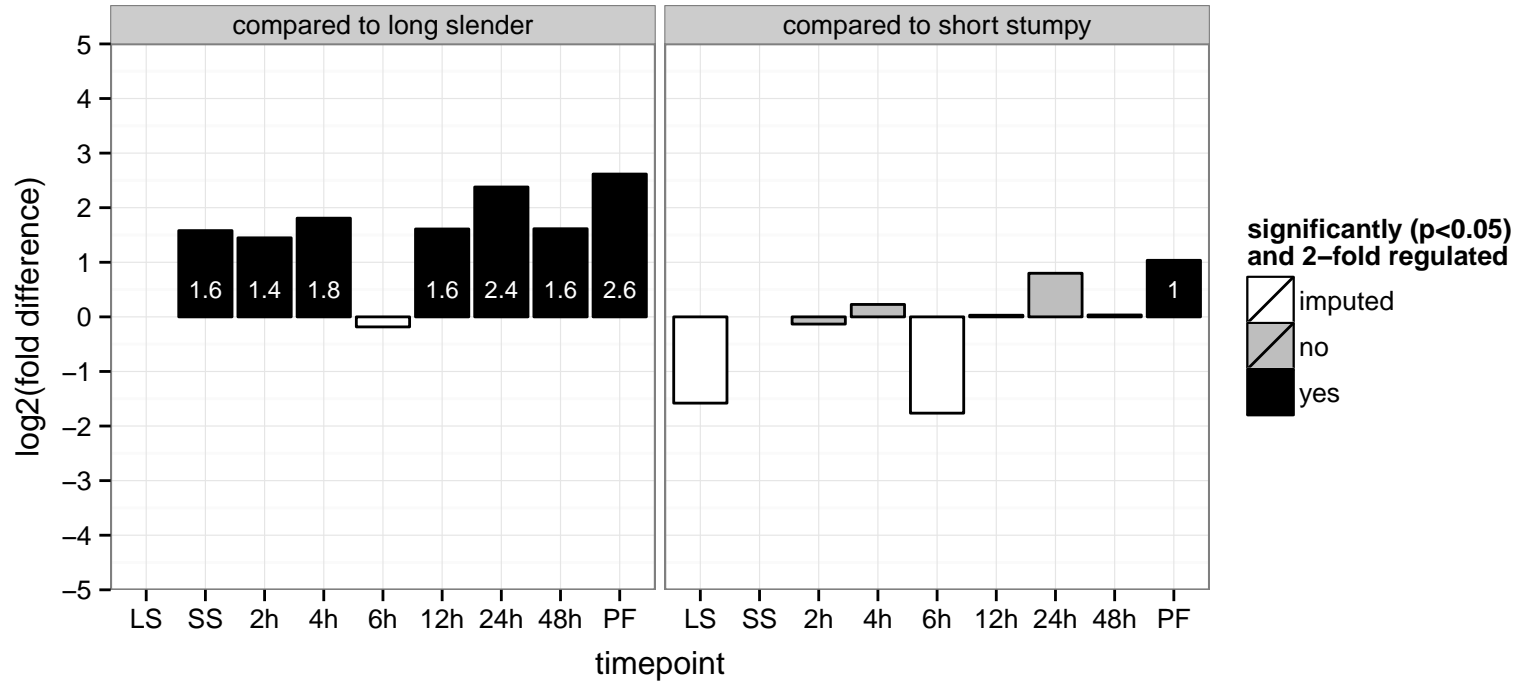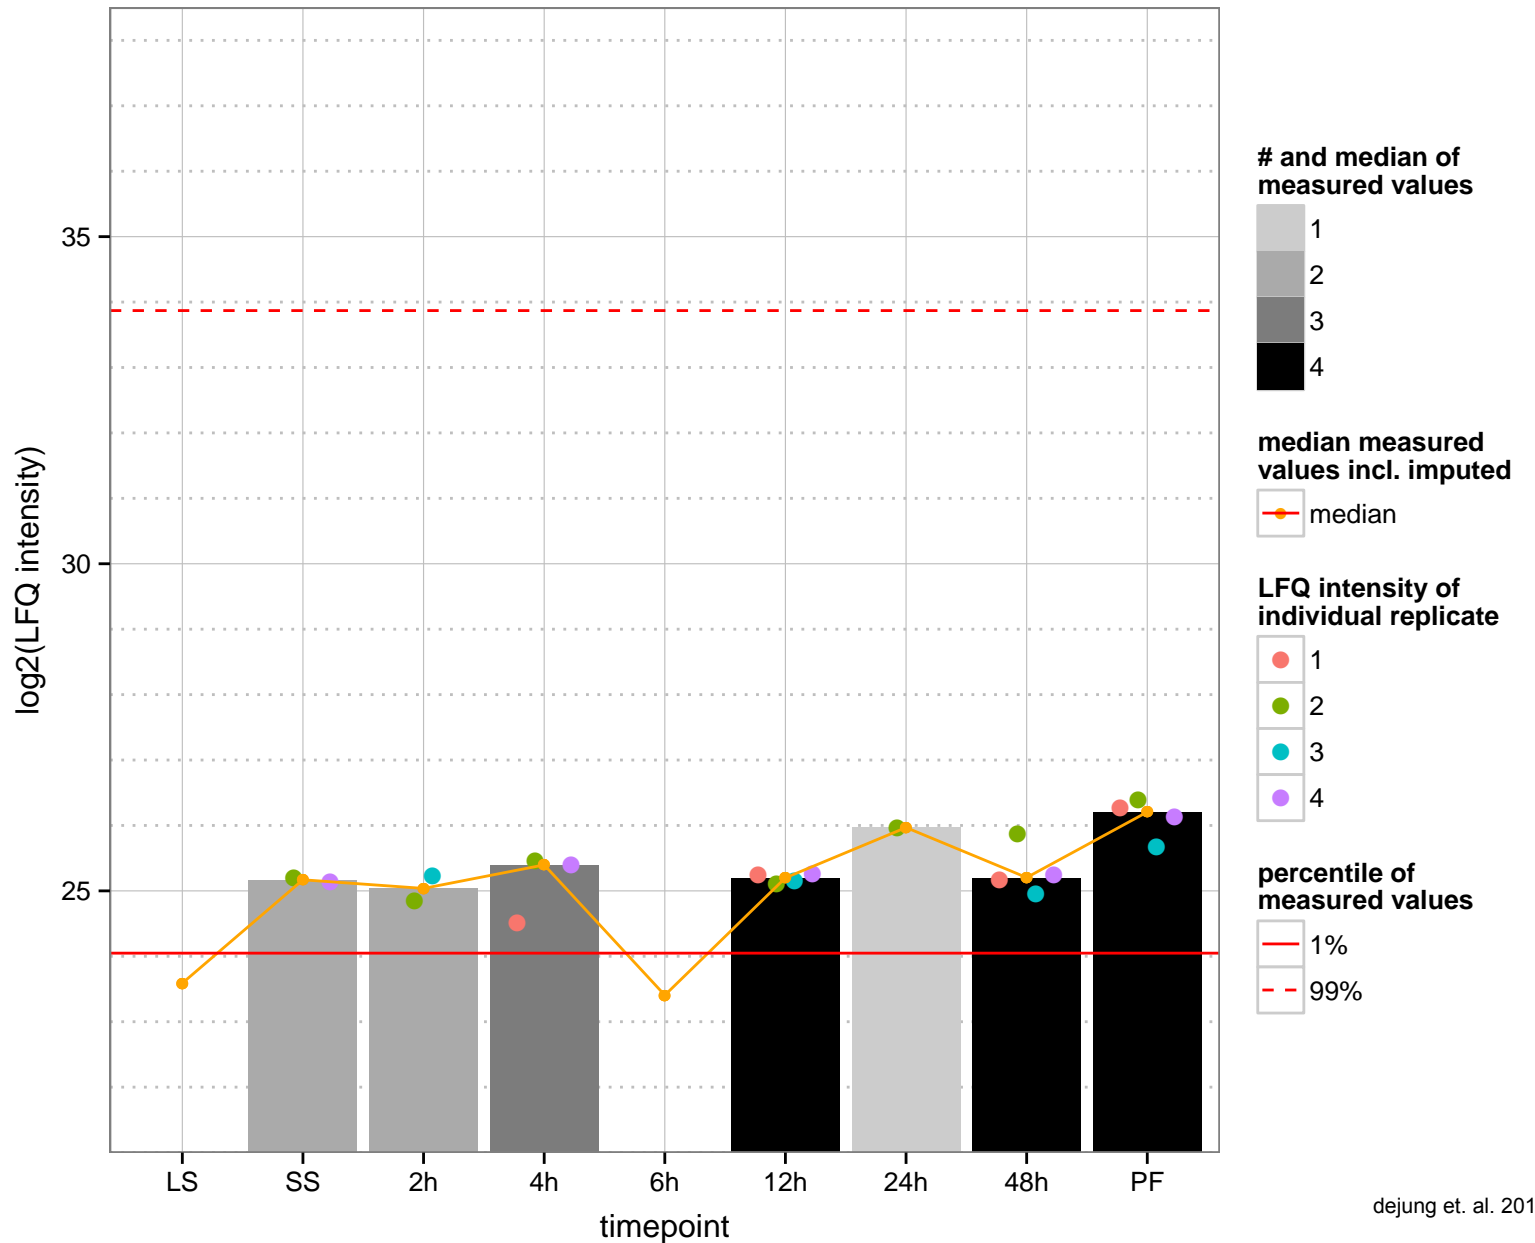

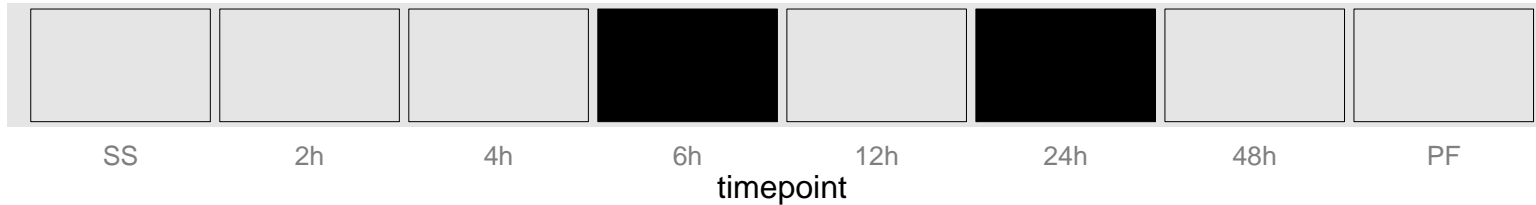

**regulated**  **not regulated**  **significant down**  **significant up**



mitochondrial carrier protein (MCP14)  
 Tb927.10.13120  
 AGOF: null  
 AGOC: membrane, mitochondrial part  
 AGOP: transport  
 PGO: null  
 PGOC: null  
 PGOP: null

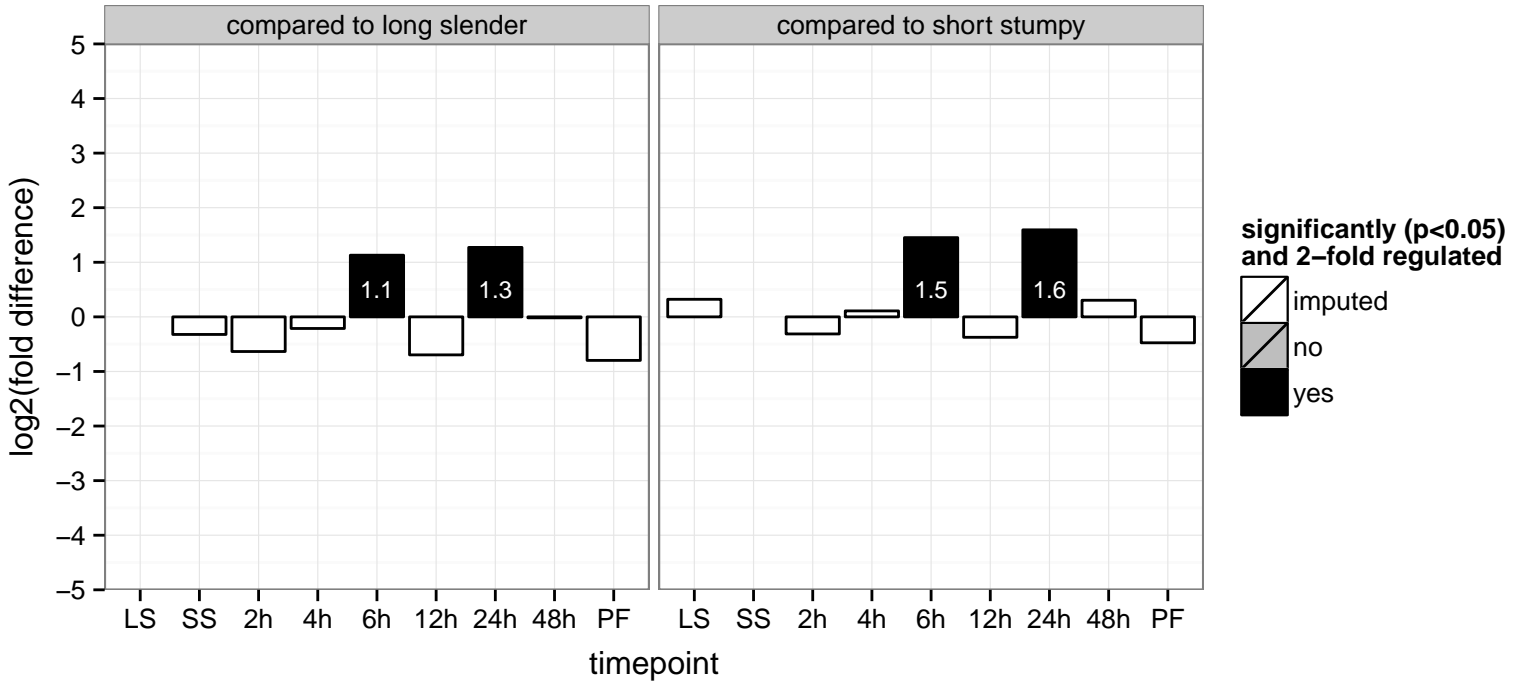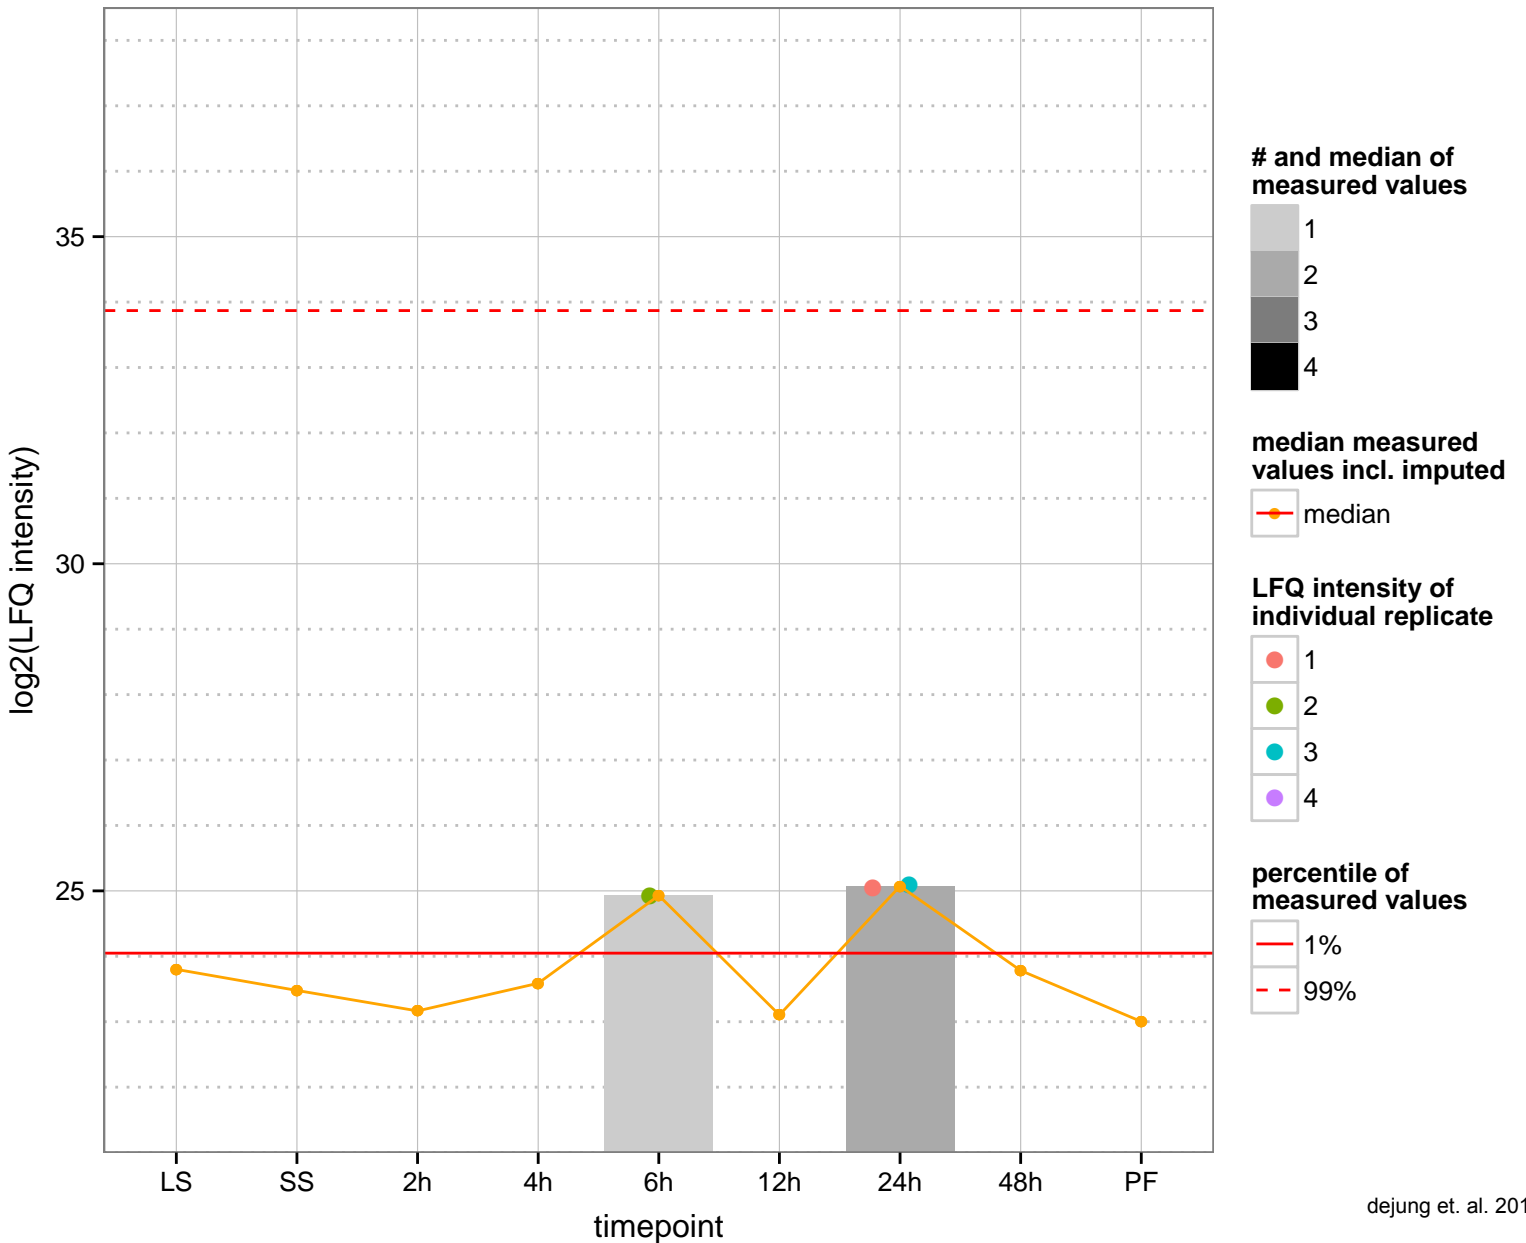

hypothetical protein, conserved  
 Tb927.10.2510;Tb11.v5.0623  
 AGOF: null  
 AGOC: null  
 AGOP: null  
 PGO: null  
 PGOC: null  
 PGOP: null

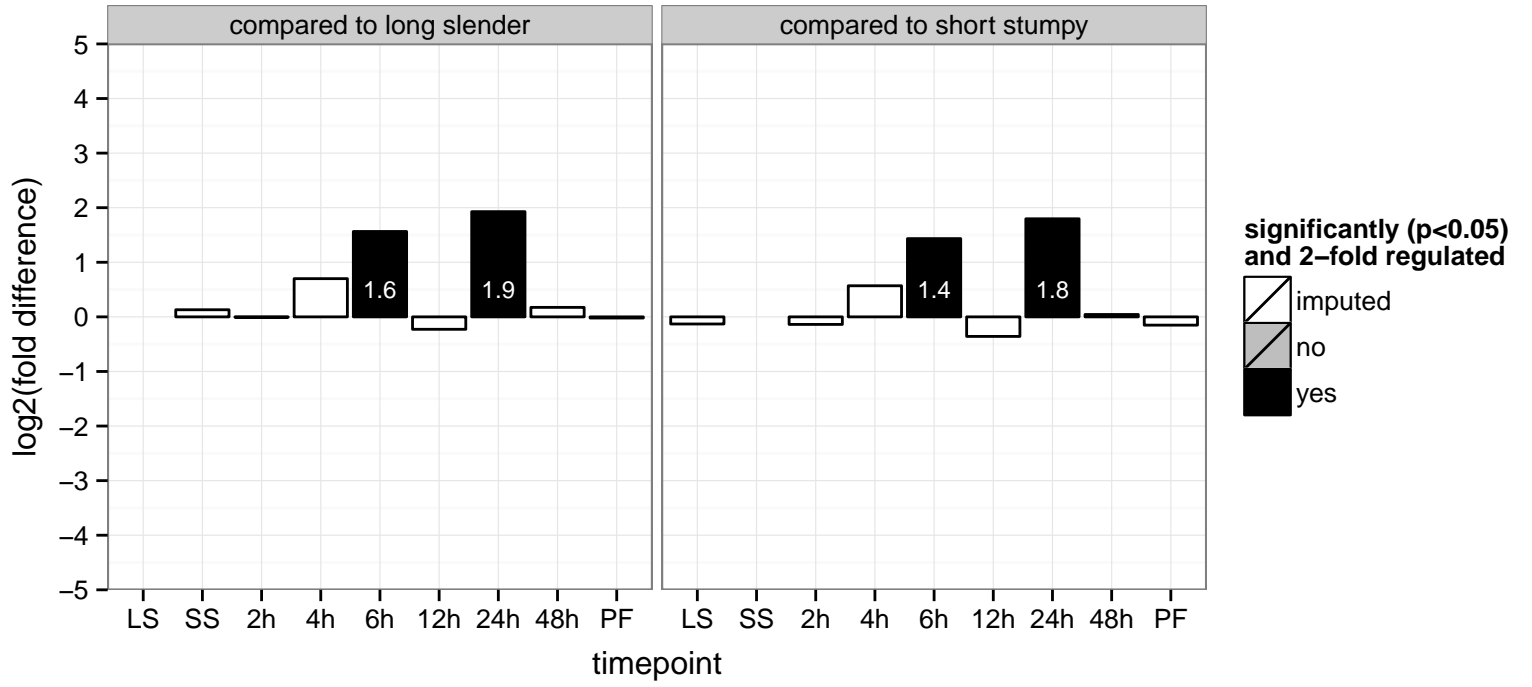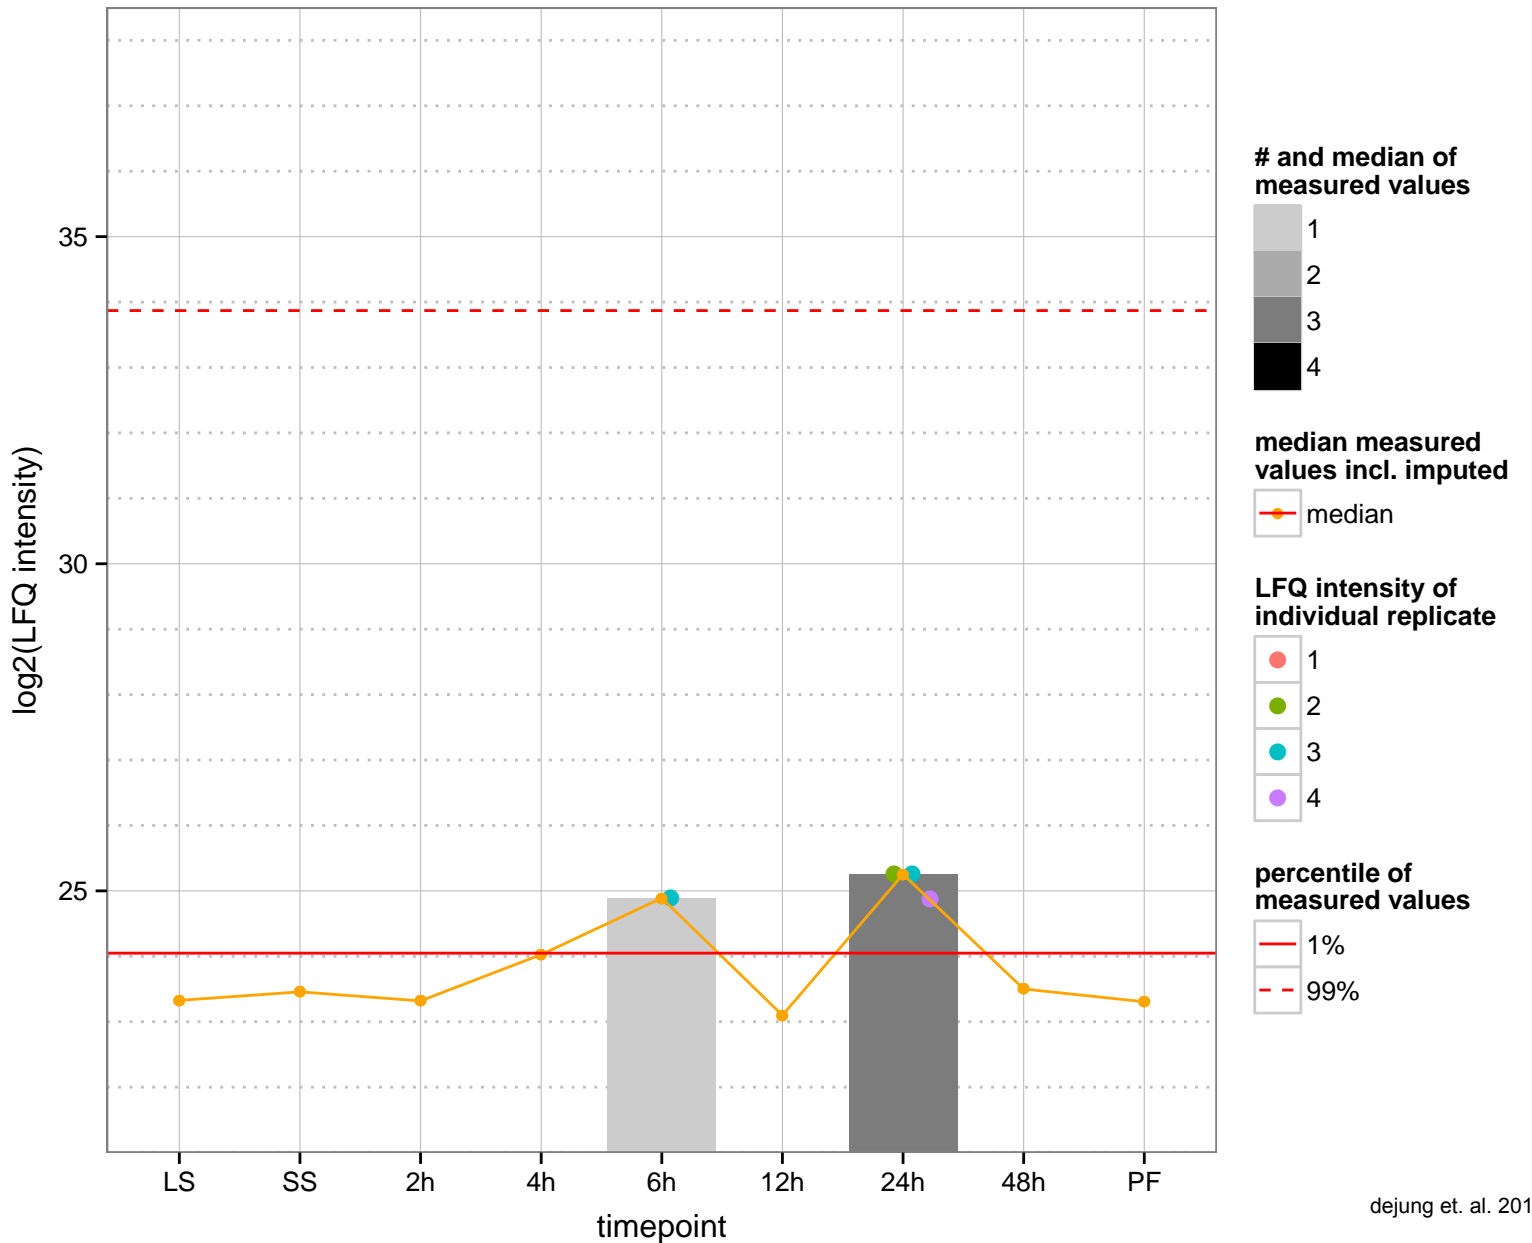

centrin, putative  
 Tb927.10.8710  
 AGOF: calcium ion binding  
 AGOC: null  
 AGOP: null  
 PGOF: calcium ion binding  
 PGOC: null  
 PGOP: null

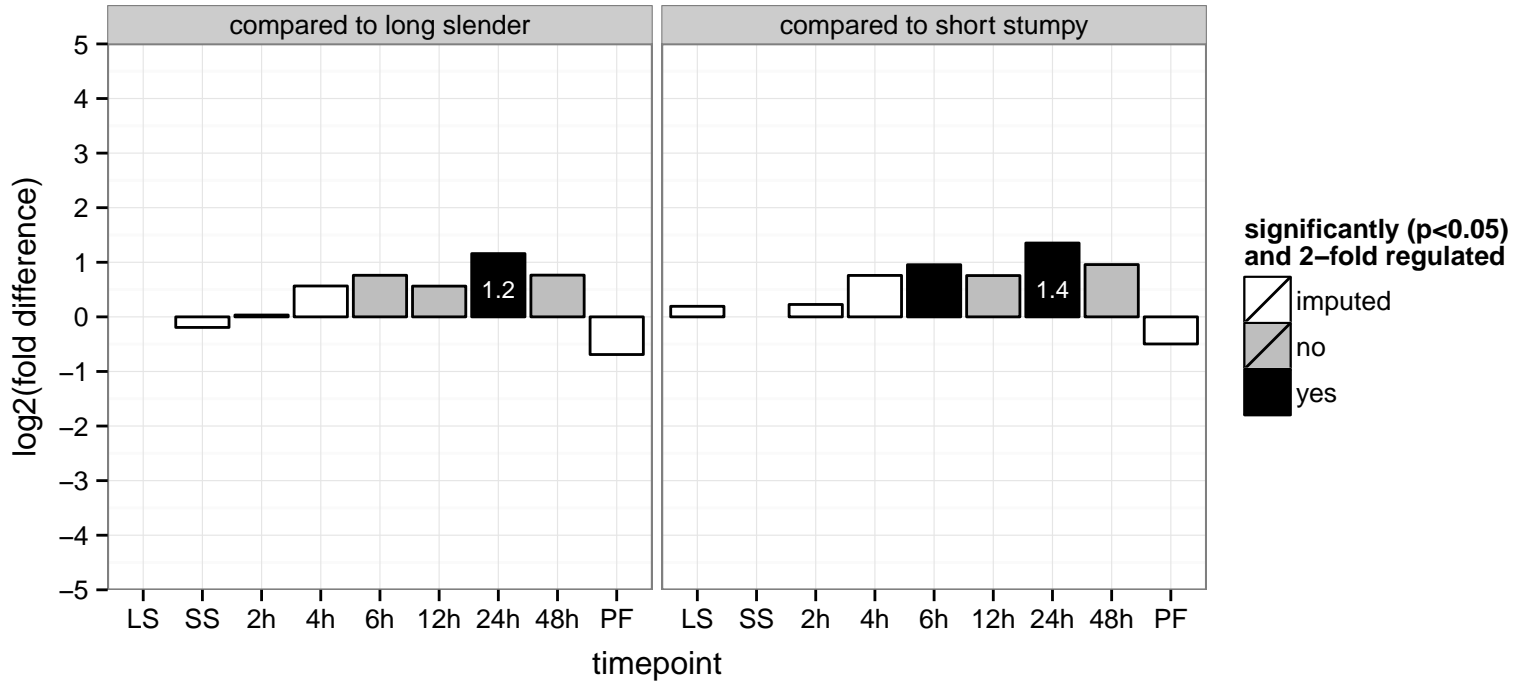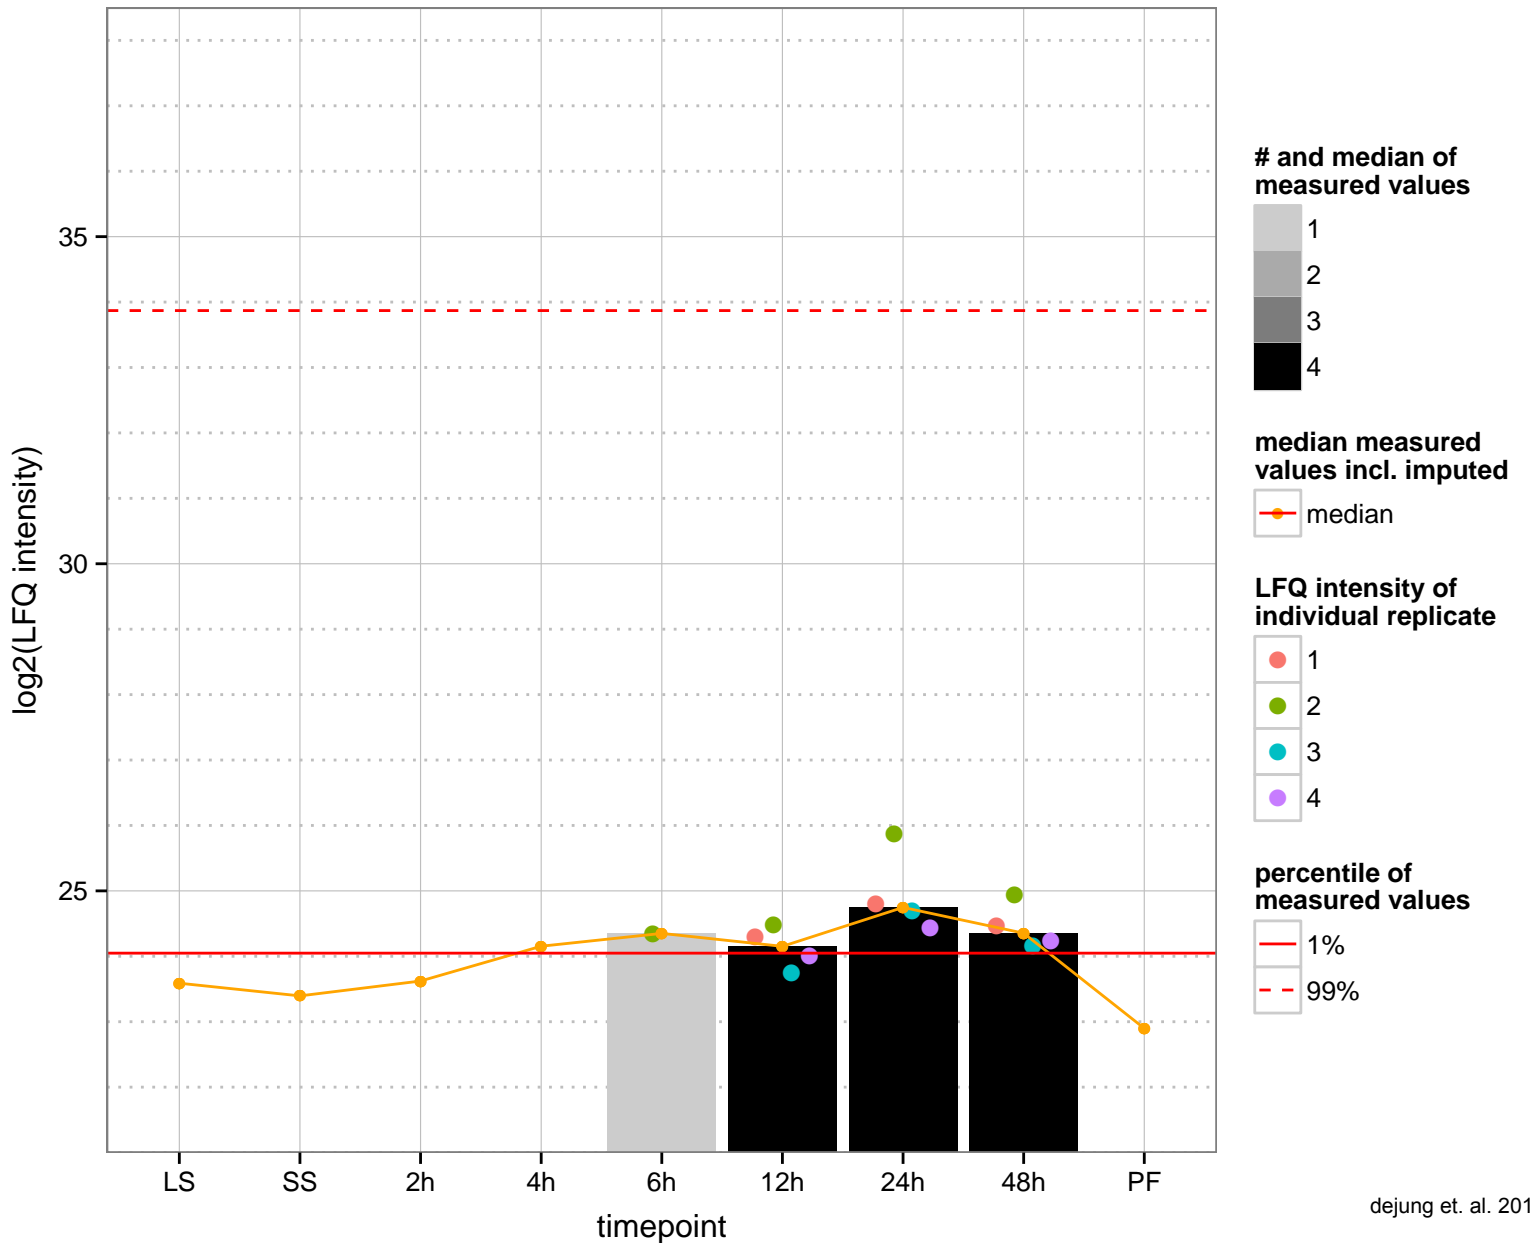

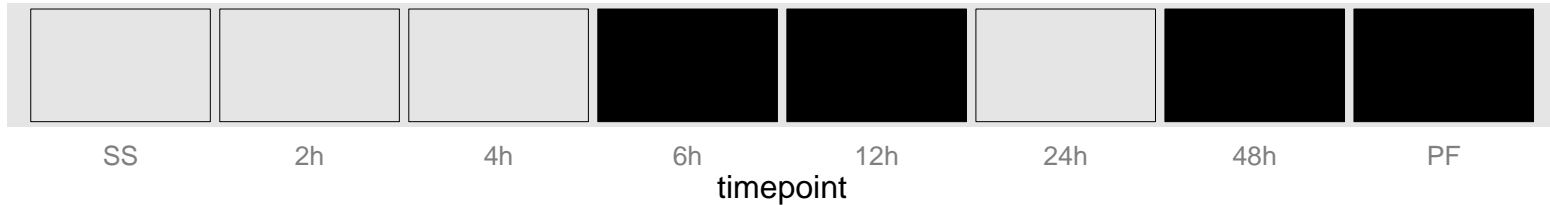

**regulated**  not regulated  significant down  significant up

transmembrane protein, putative  
 Tb927.1.860  
 AGOF: null  
 AGOC: null  
 AGOP: null  
 PGO: null  
 PGOC: null  
 PGOP: null

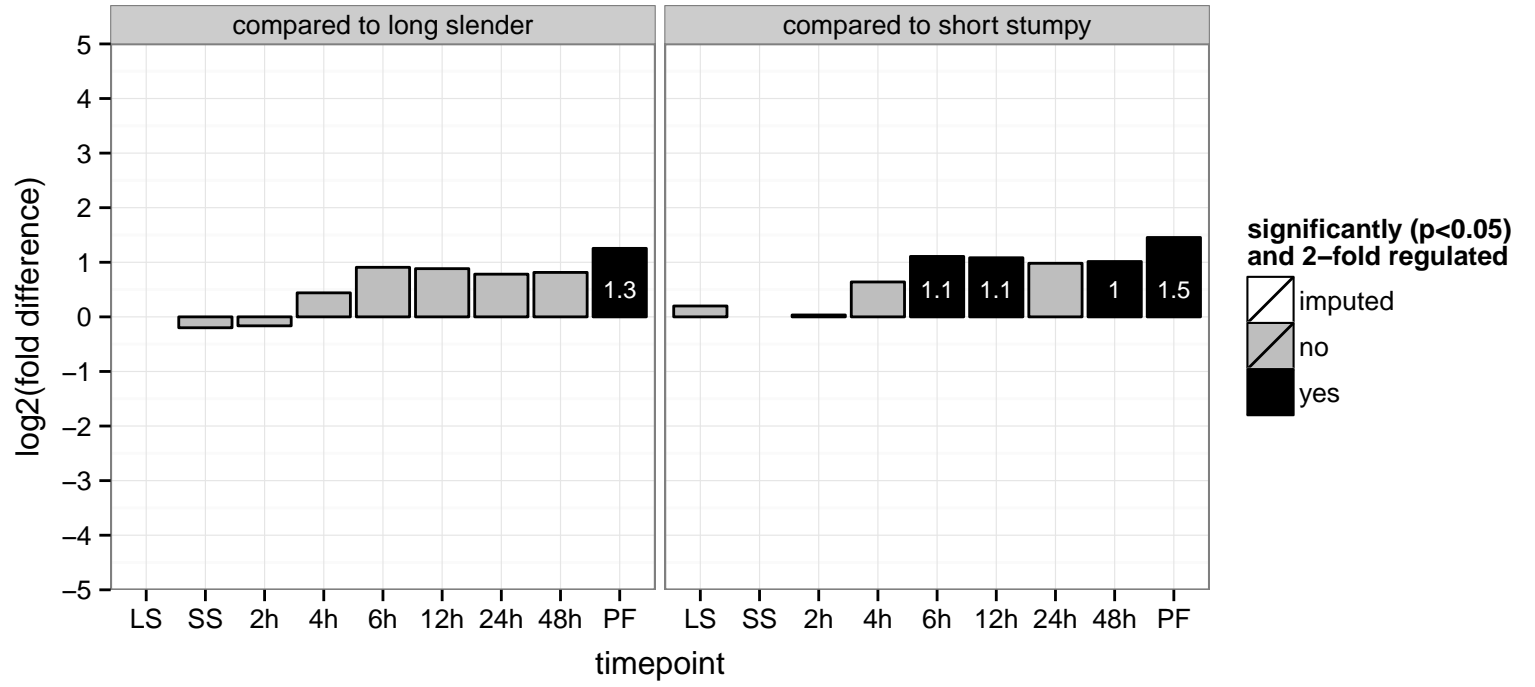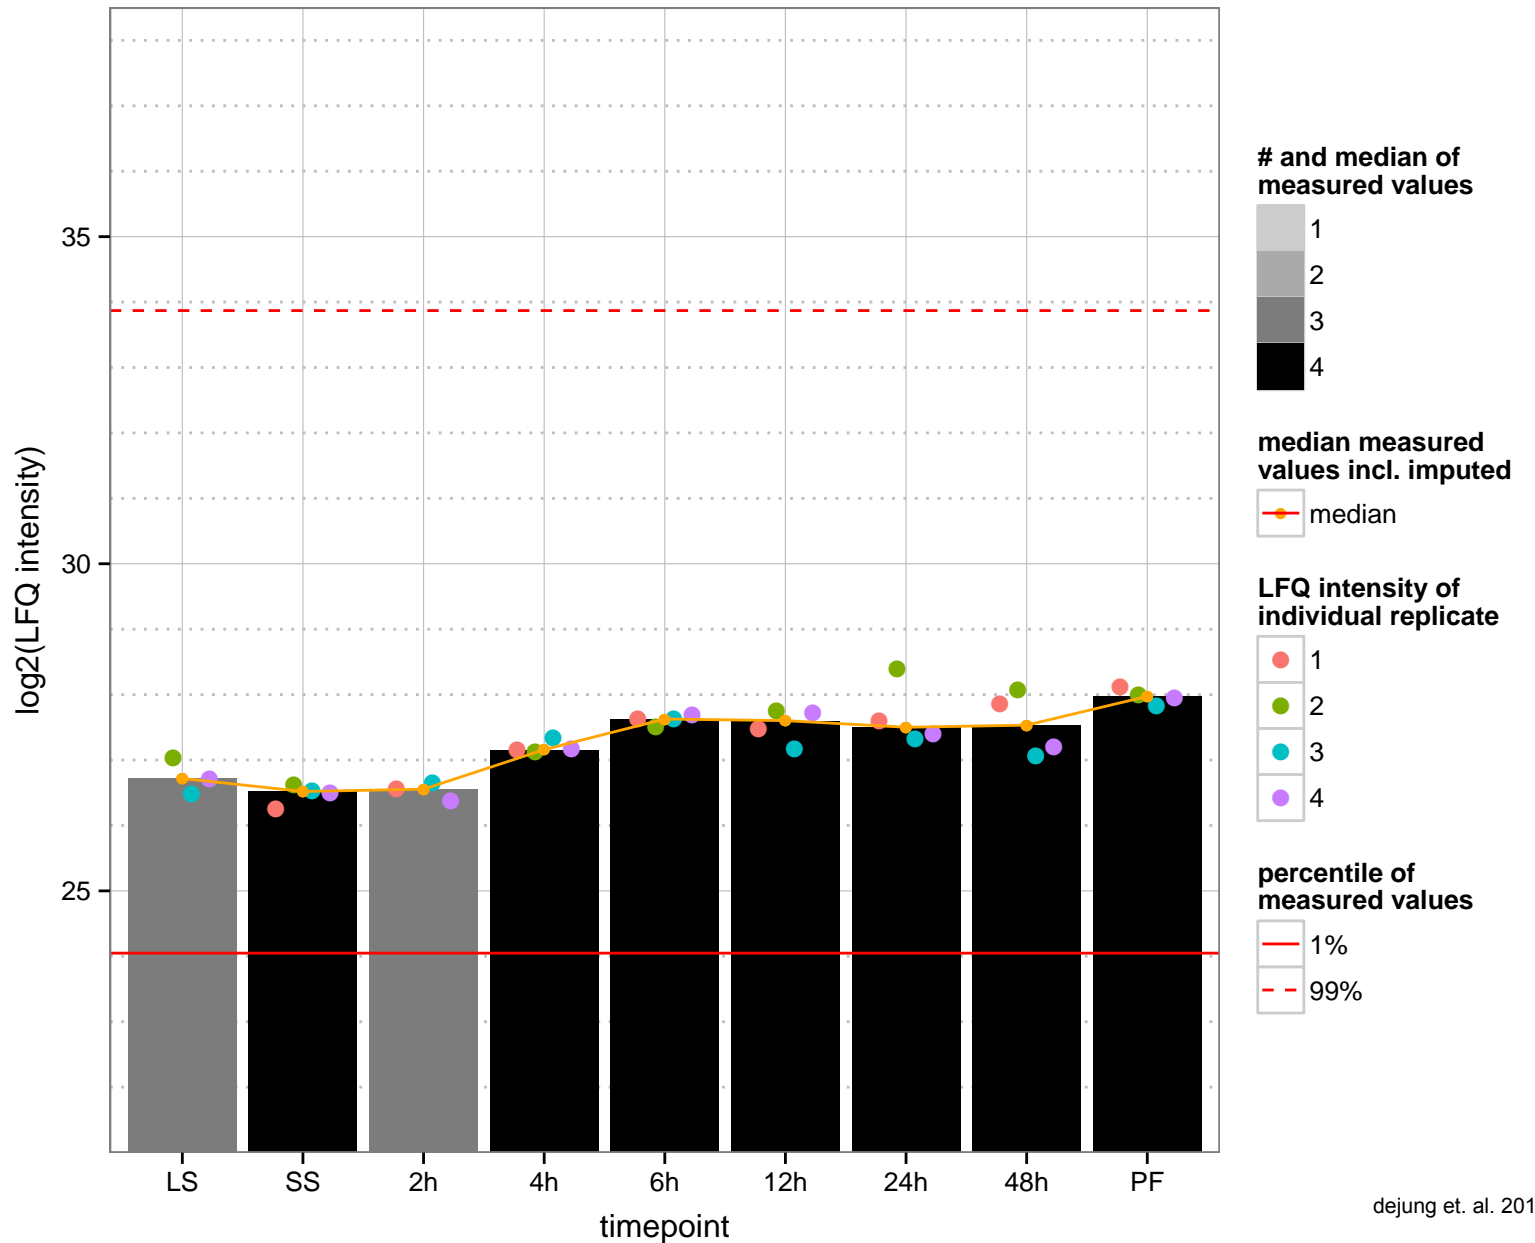

hypothetical protein, conserved  
 Tb927.10.13550  
 AGOF: null  
 AGOC: null  
 AGOP: null  
 PGOF: null  
 PGO: null  
 PGOP: null

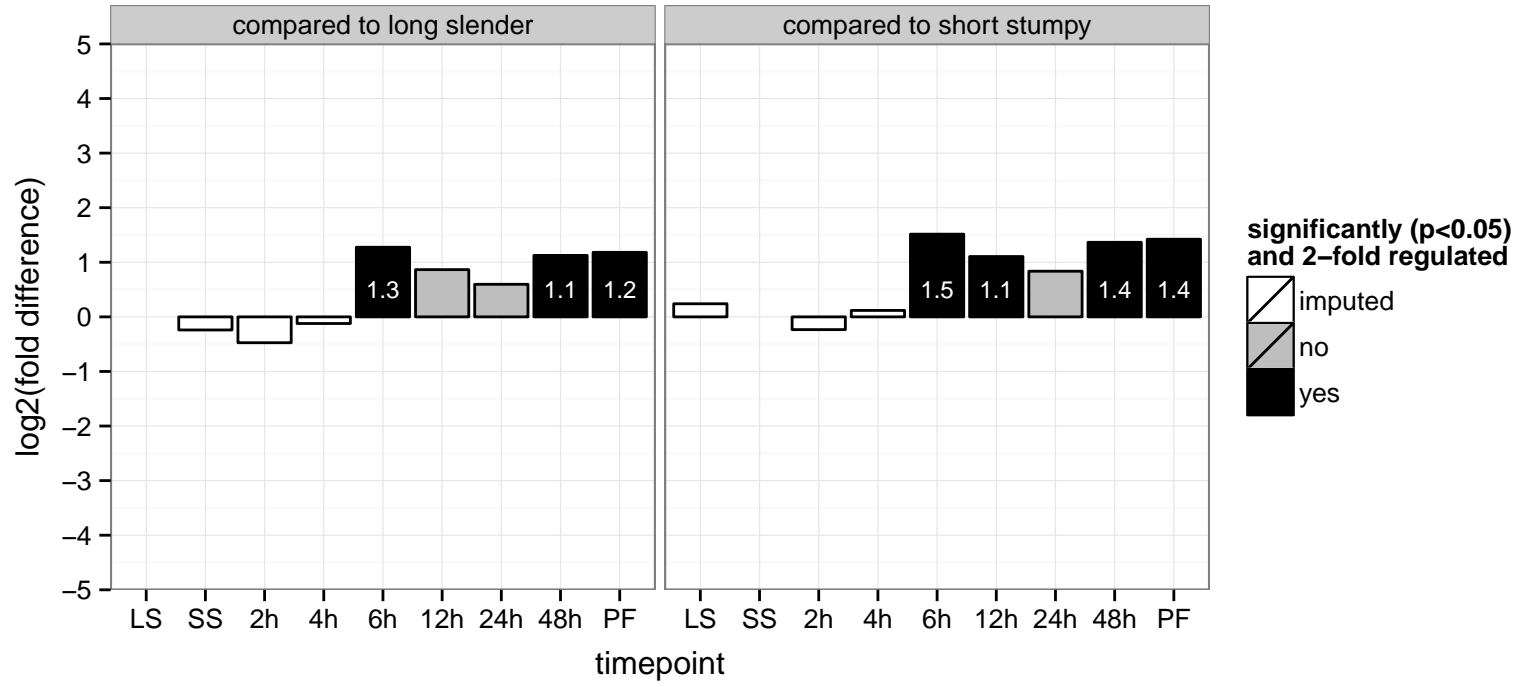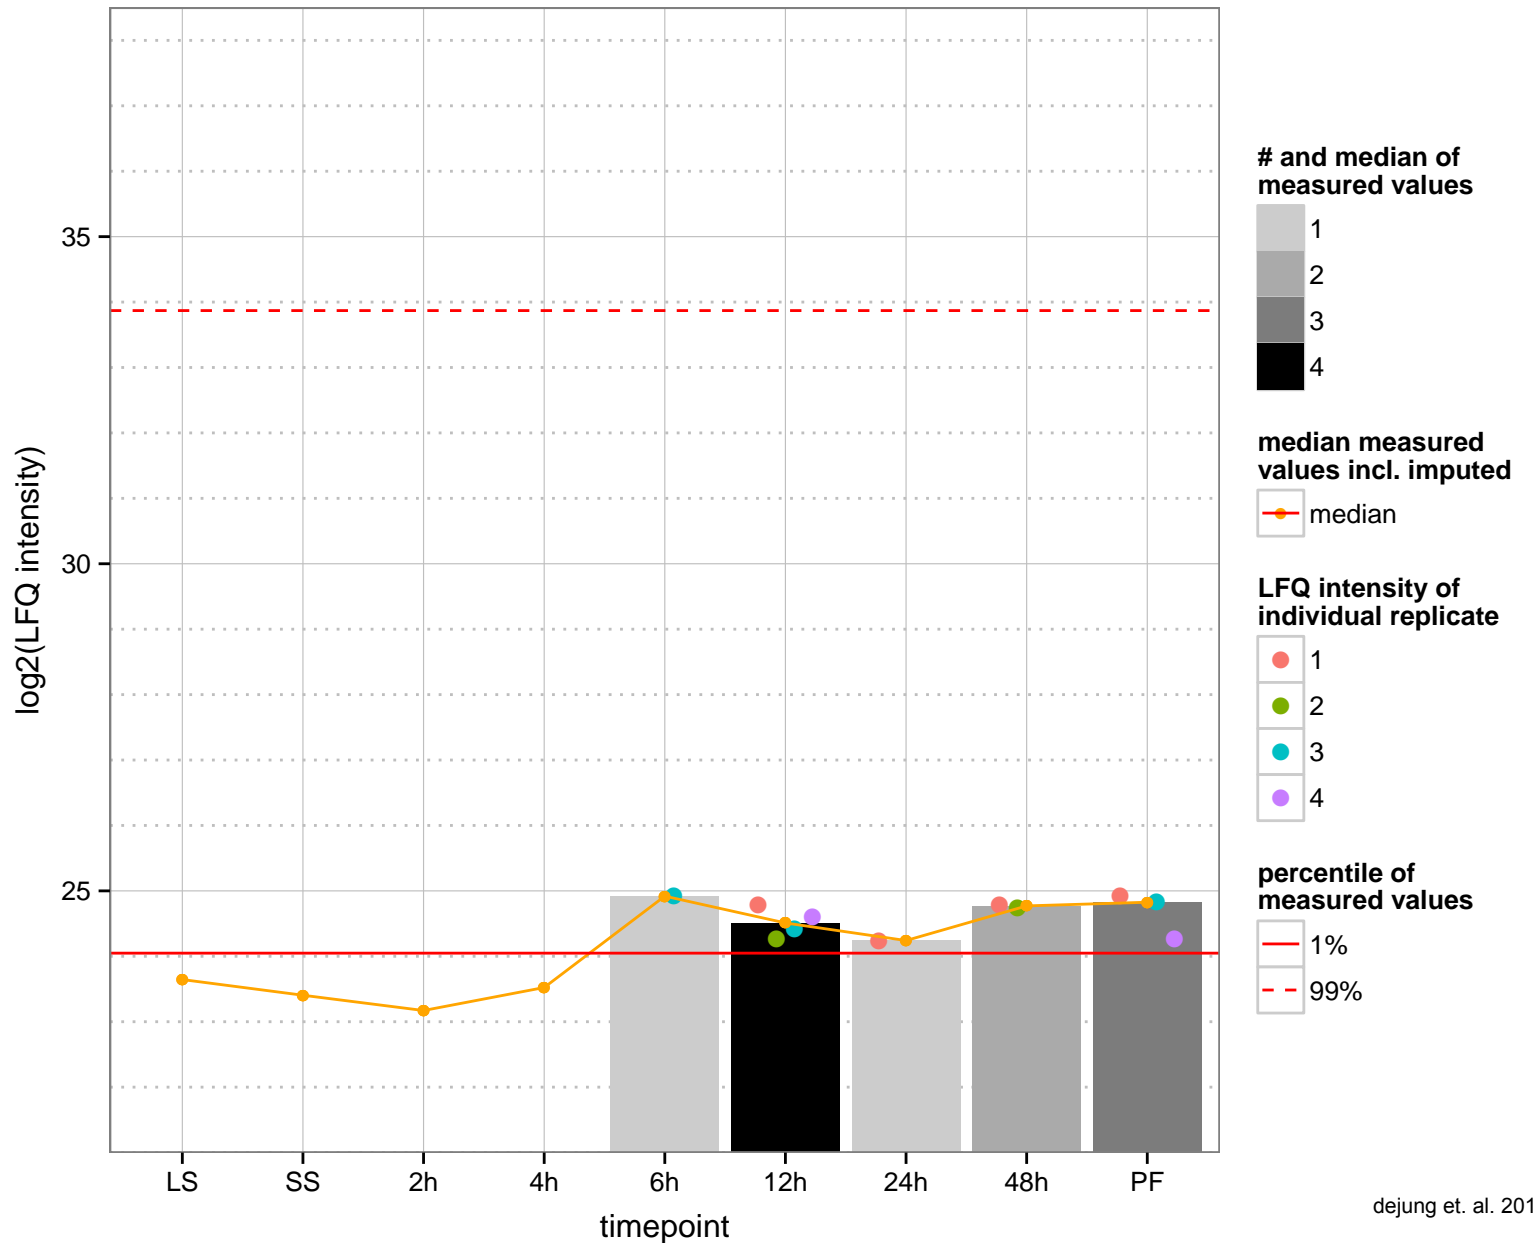

zinc-finger protein, conserved  
 Tb927.6.3540  
 AGOF: zinc ion binding  
 AGOC: intracellular  
 AGOP: null  
 PGO: zinc ion binding  
 PGOC: intracellular  
 PGOP: null

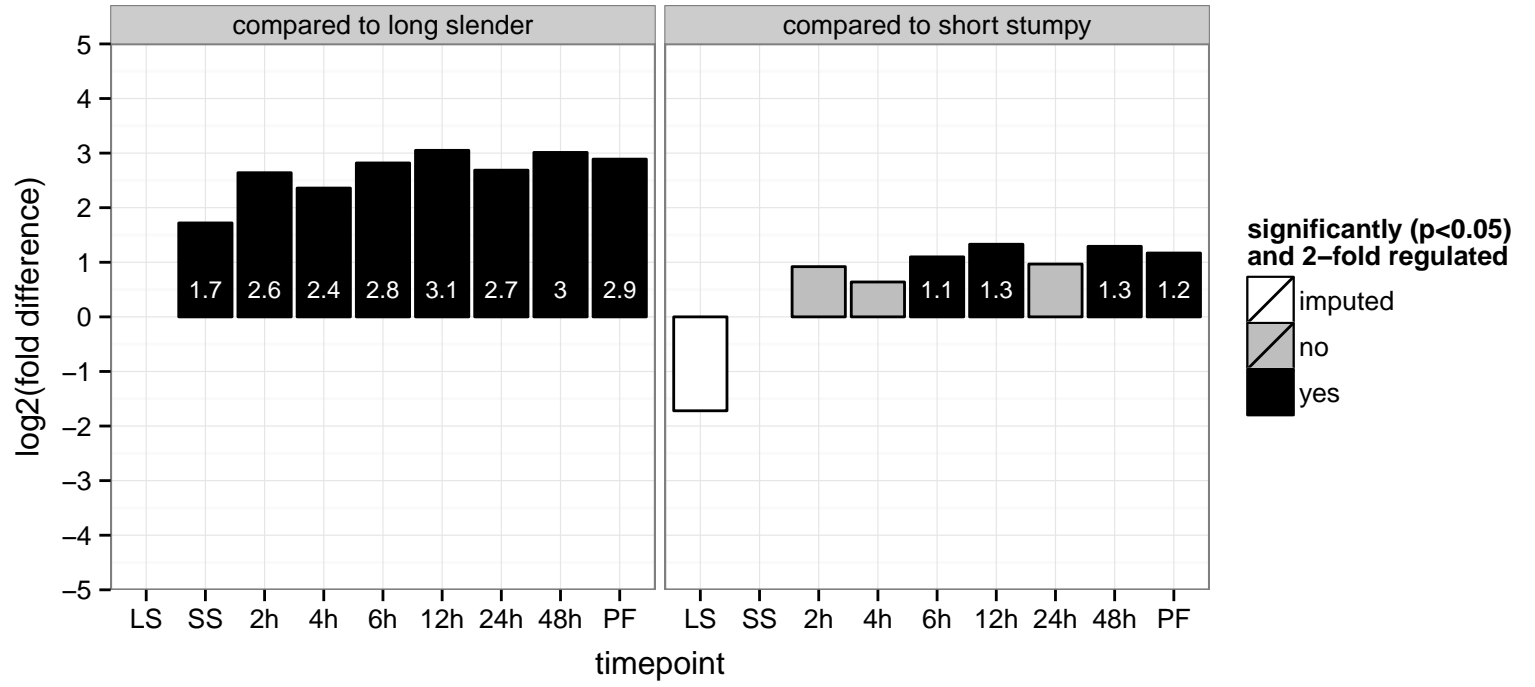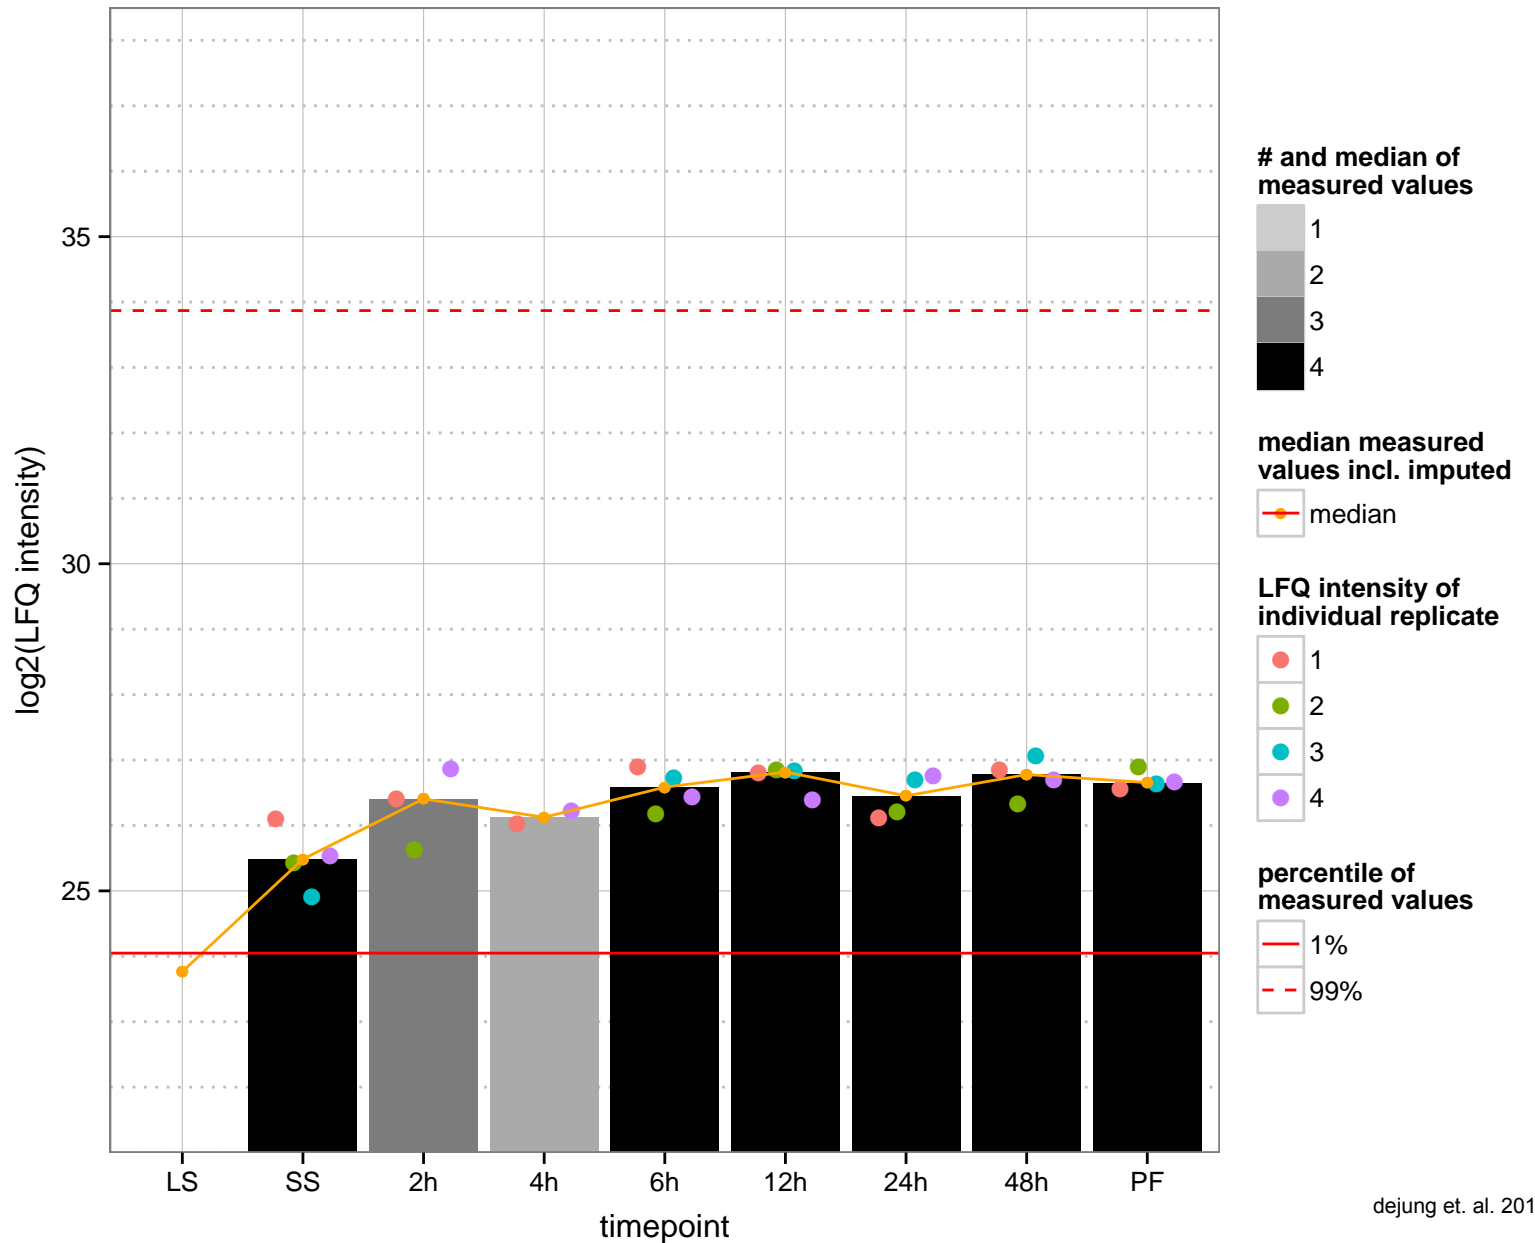

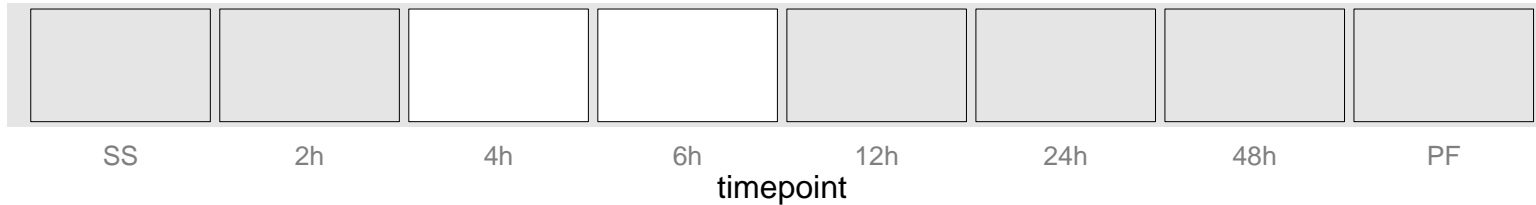

**regulated**  **not regulated**  **significant down**  **significant up**



mitochondrial RNA binding complex 1 subunit (MRB6070)  
 Tb927.2.6070  
 AGOF: RNA binding, zinc ion binding  
 AGOC: intracellular, mitochondrion  
 AGOP: cytidine to uridine editing, mRNA stabilization  
 PGO: zinc ion binding  
 PGO: intracellular  
 PGO: null

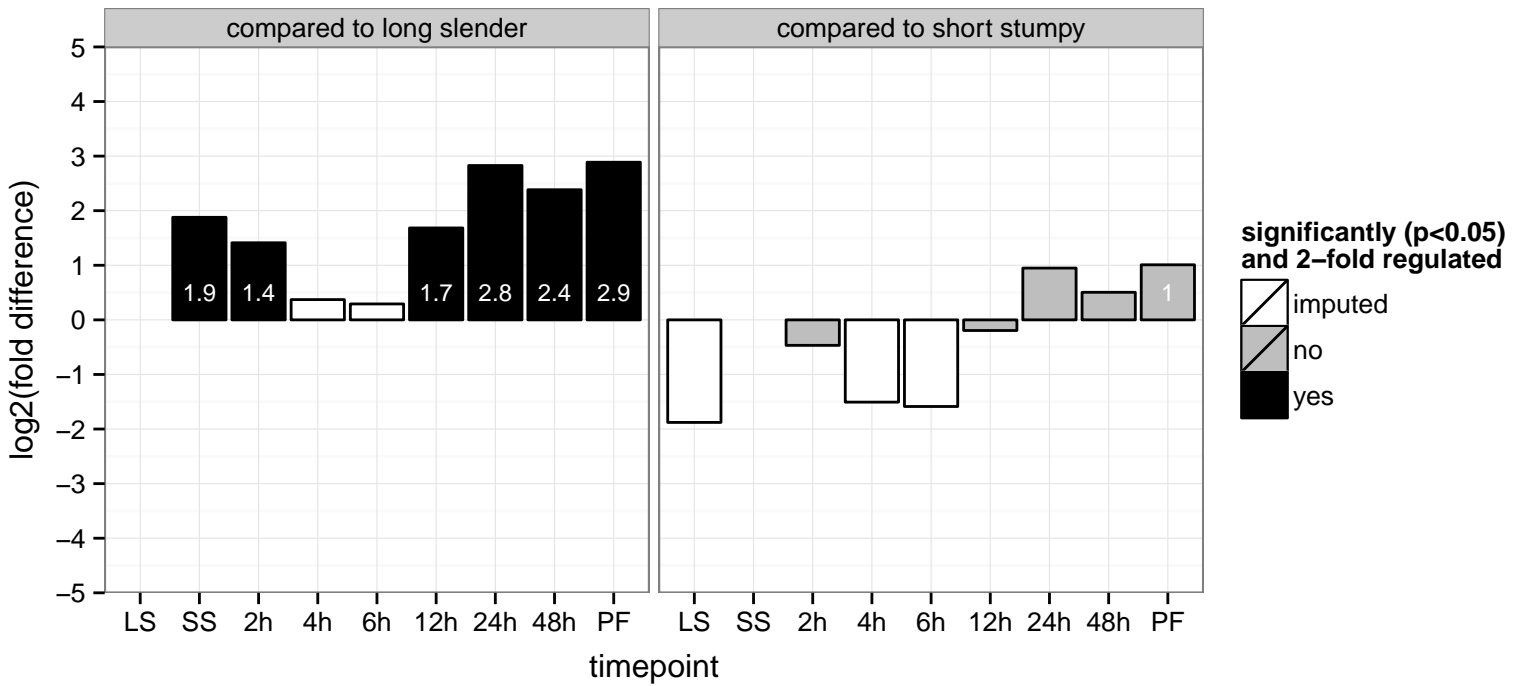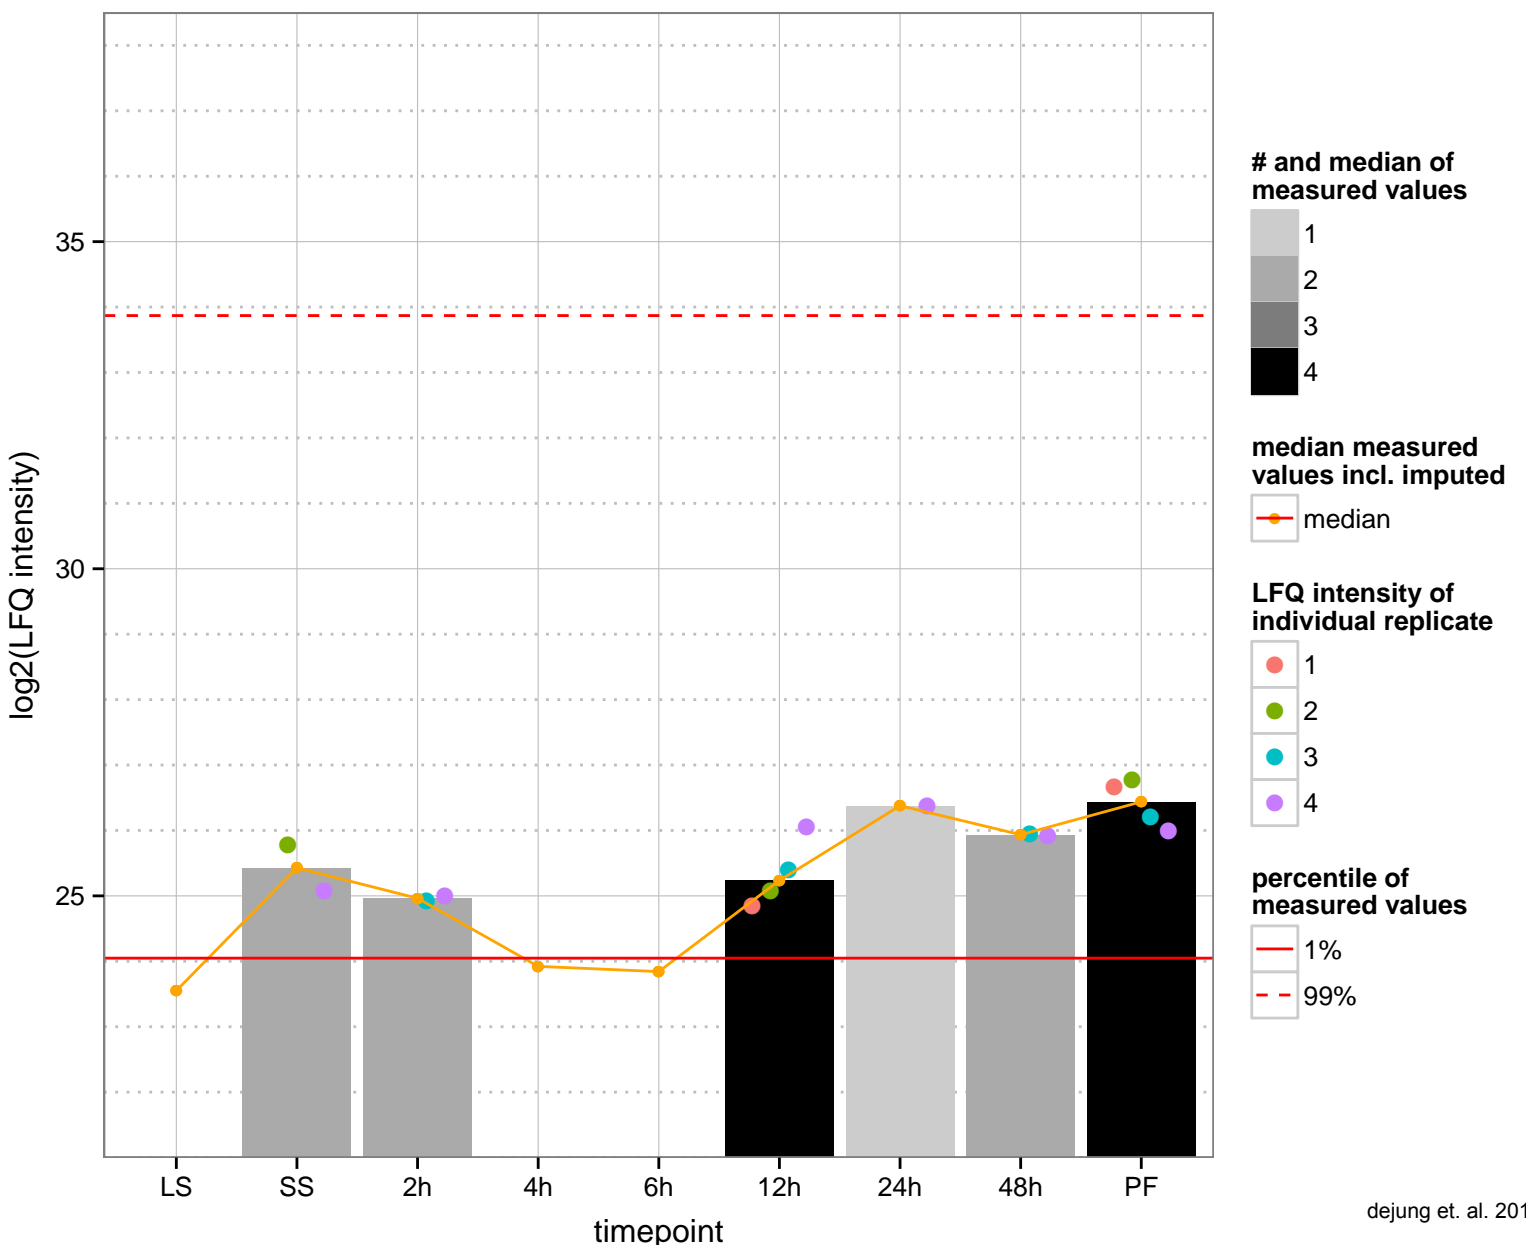

hypothetical protein, conserved  
 Tb927.3.5240  
 AGOF: null  
 AGOC: mitochondrion  
 AGOP: null  
 PGO: null  
 PGO: null  
 PGO: null

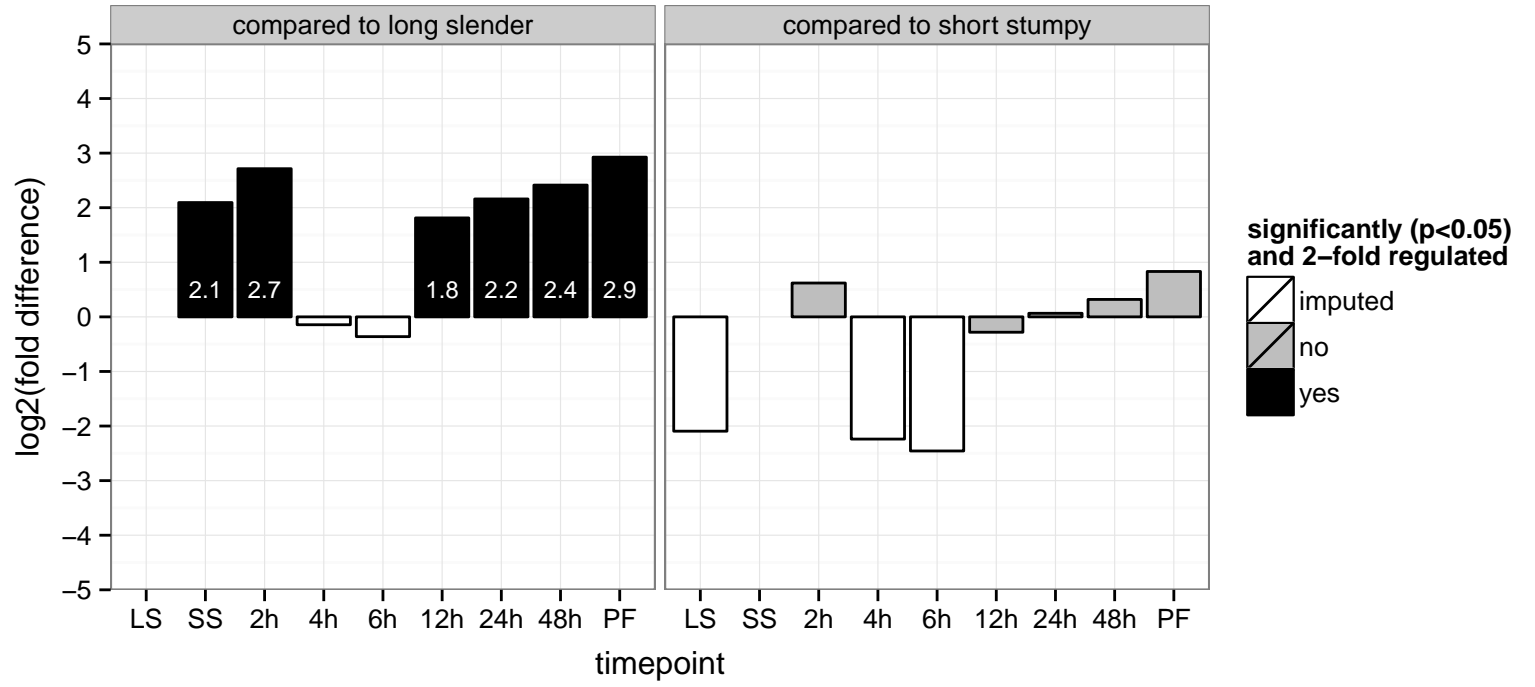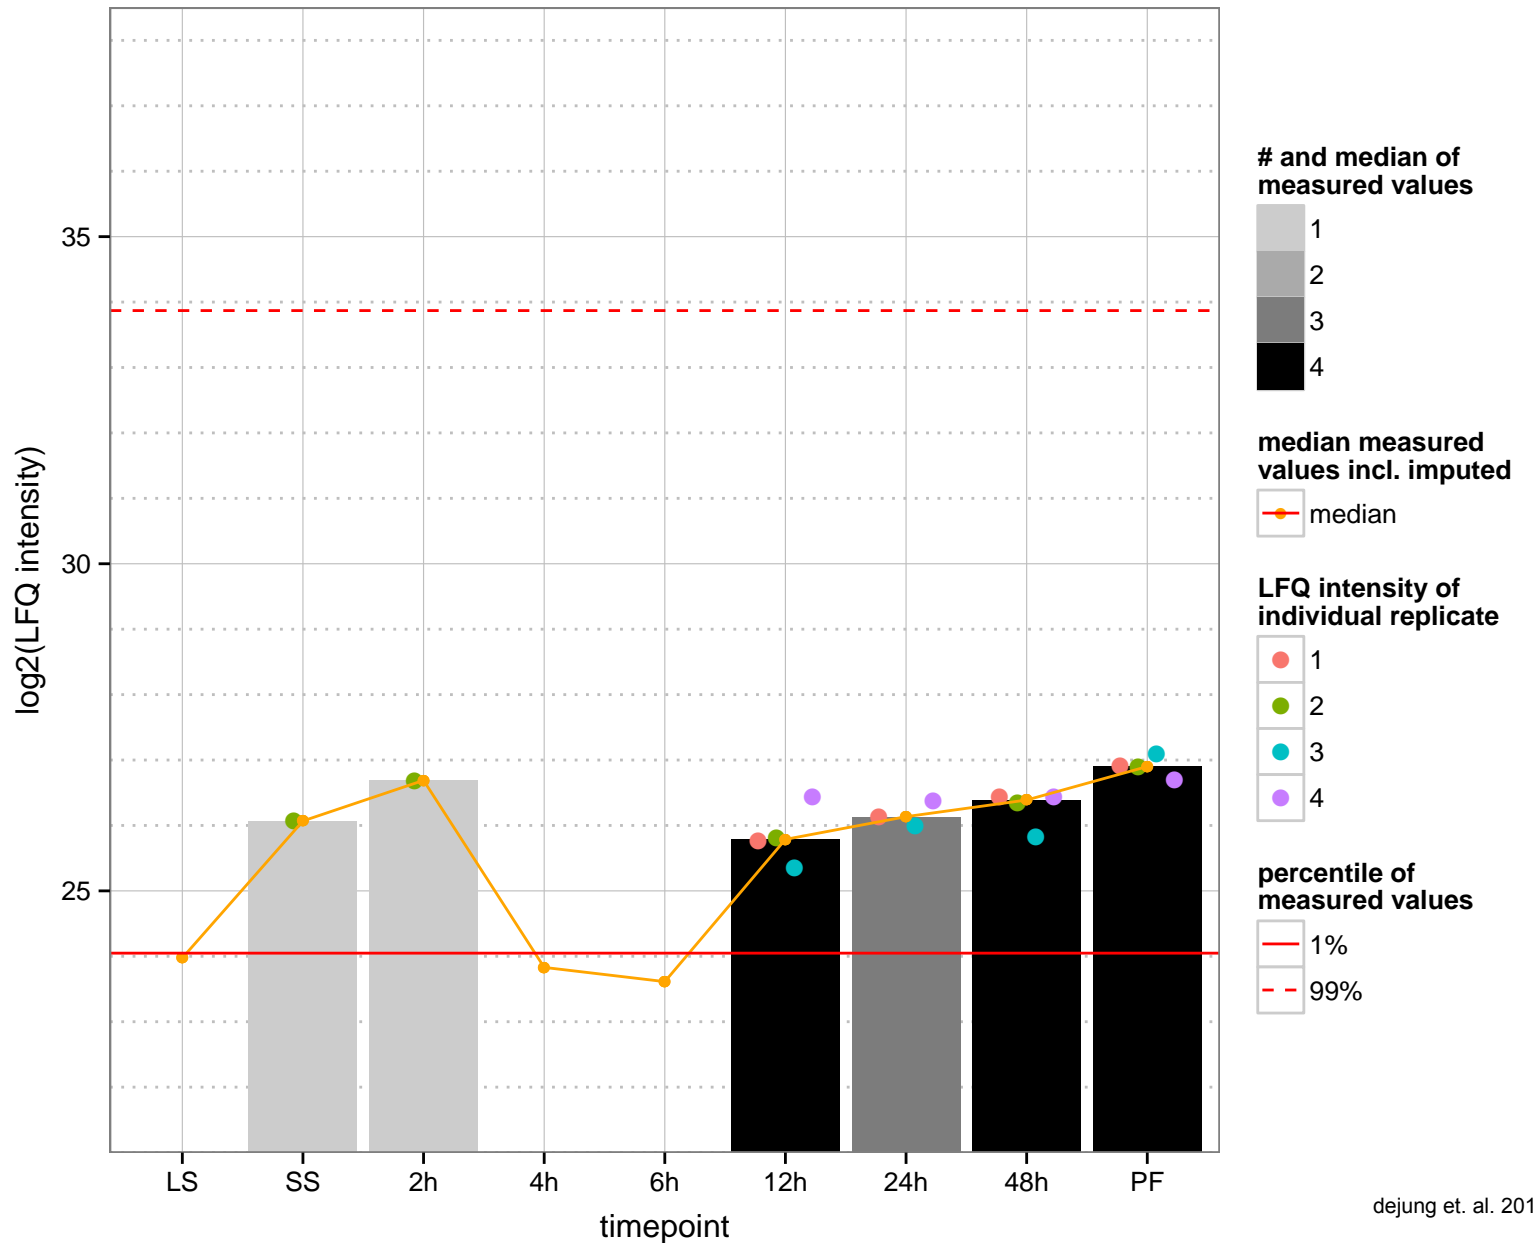

hypothetical protein, conserved  
 Tb927.4.730  
 AGOF: null  
 AGOC: null  
 AGOP: null  
 PGOF: null  
 PGO C: null  
 PGOP: null

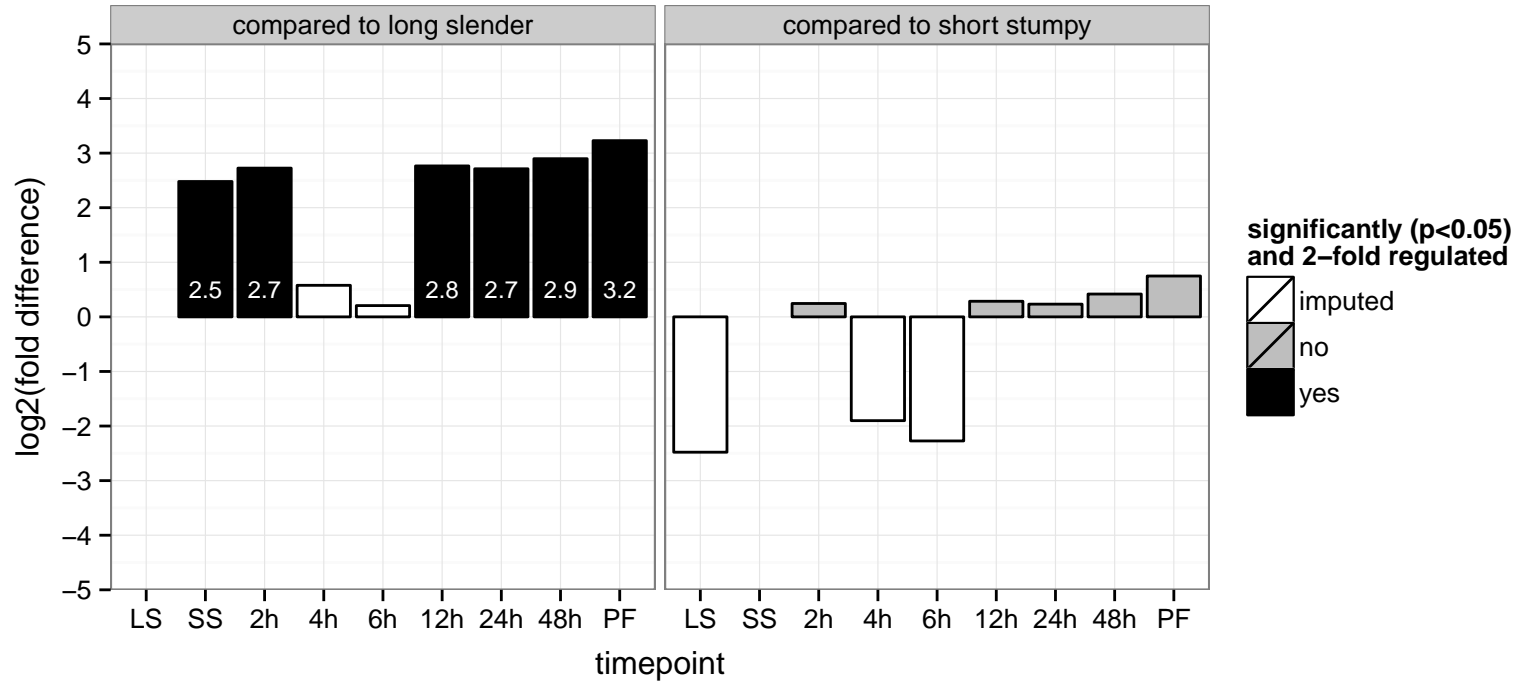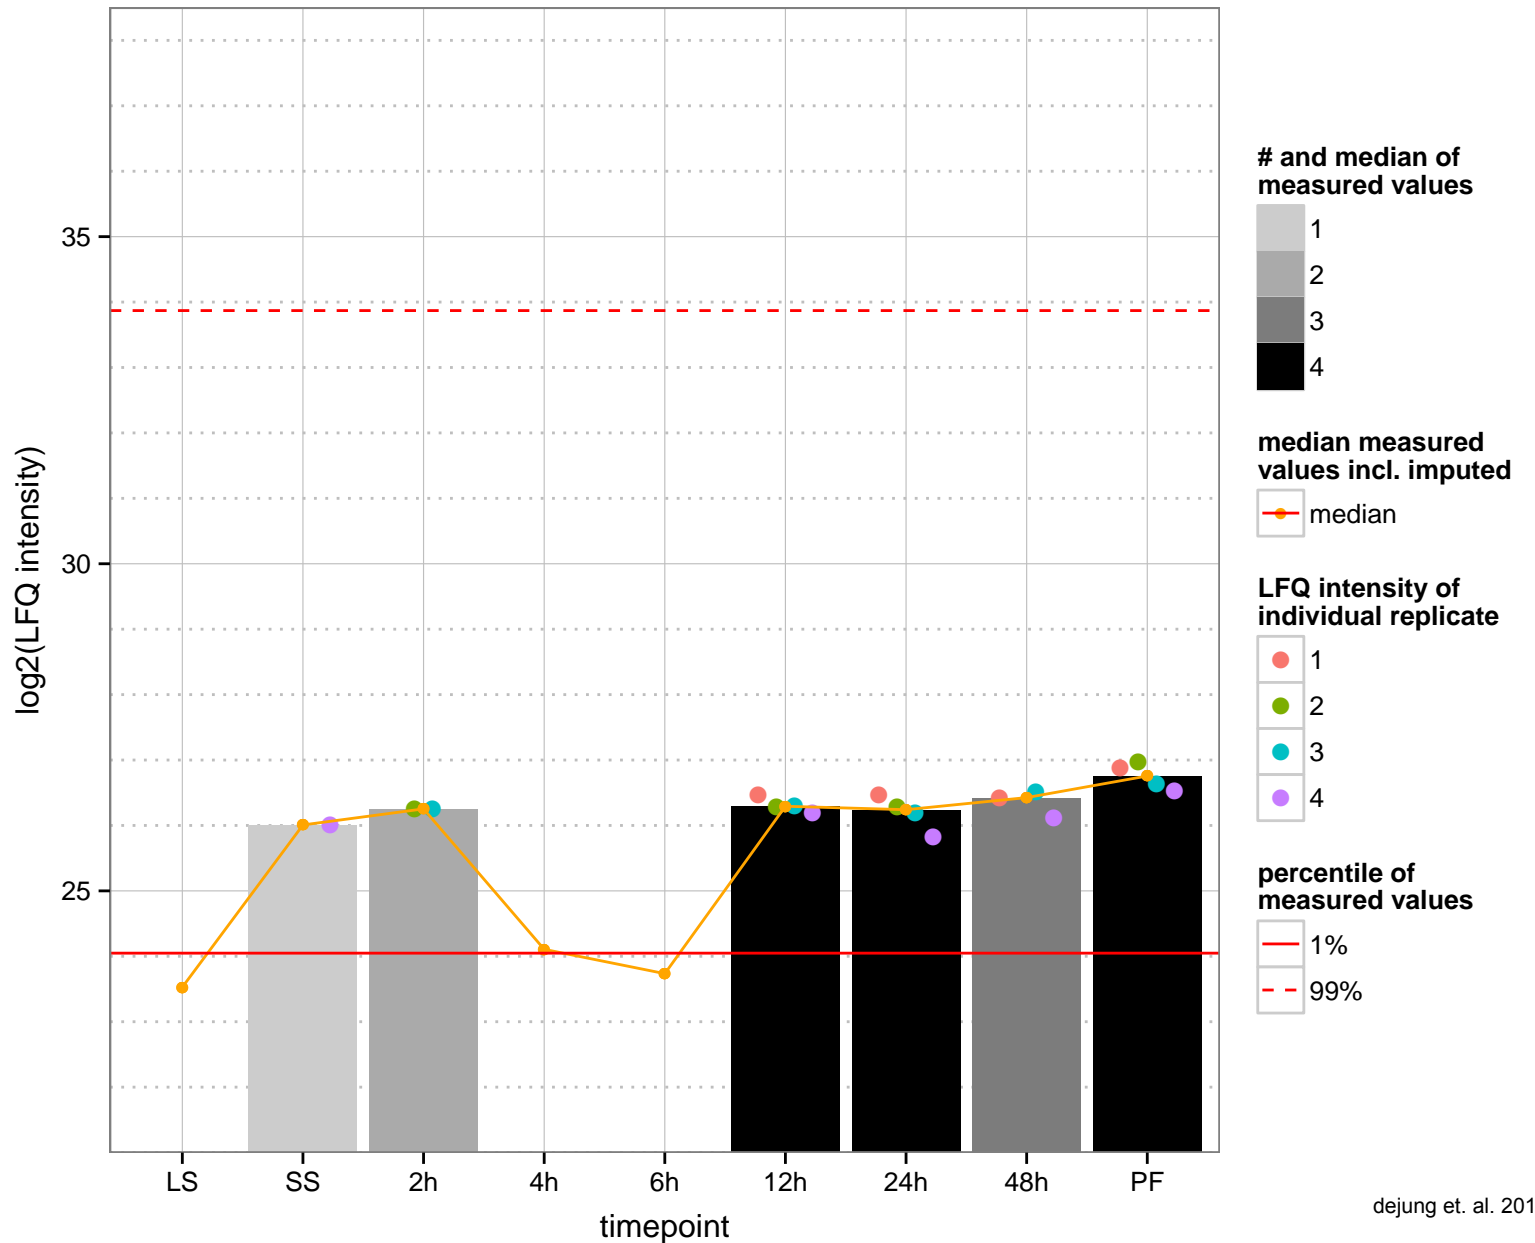

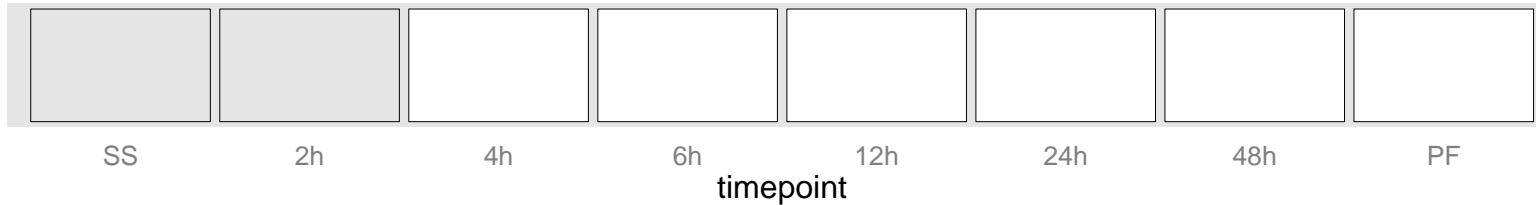

**regulated**  **not regulated**  **significant down**  **significant up**

75 kDa invariant surface glycoprotein, putative  
 Tb927.5.390;Tb11.v5.0228  
 AGOF: null  
 AGOC: null, plasma membrane  
 AGOP: null  
 PGO: null  
 PGOC: null  
 PGOP: null

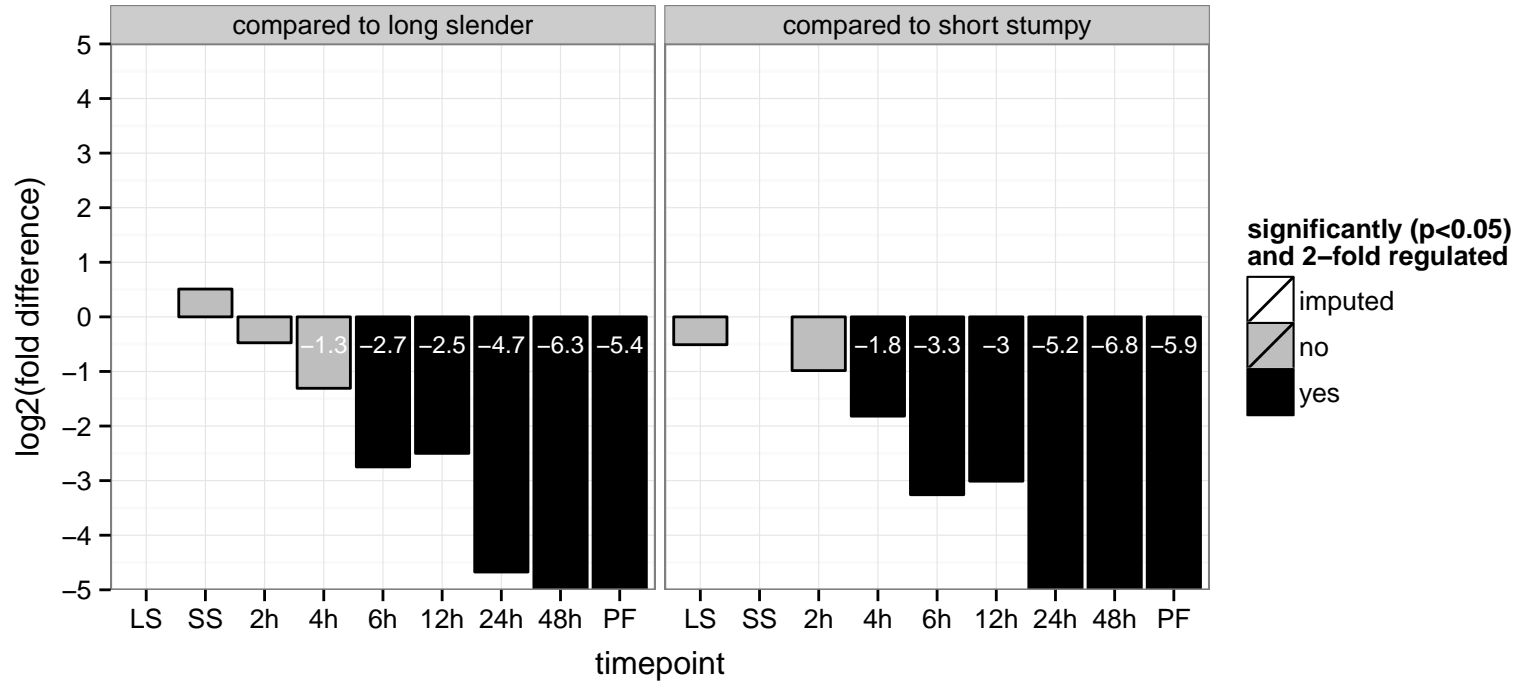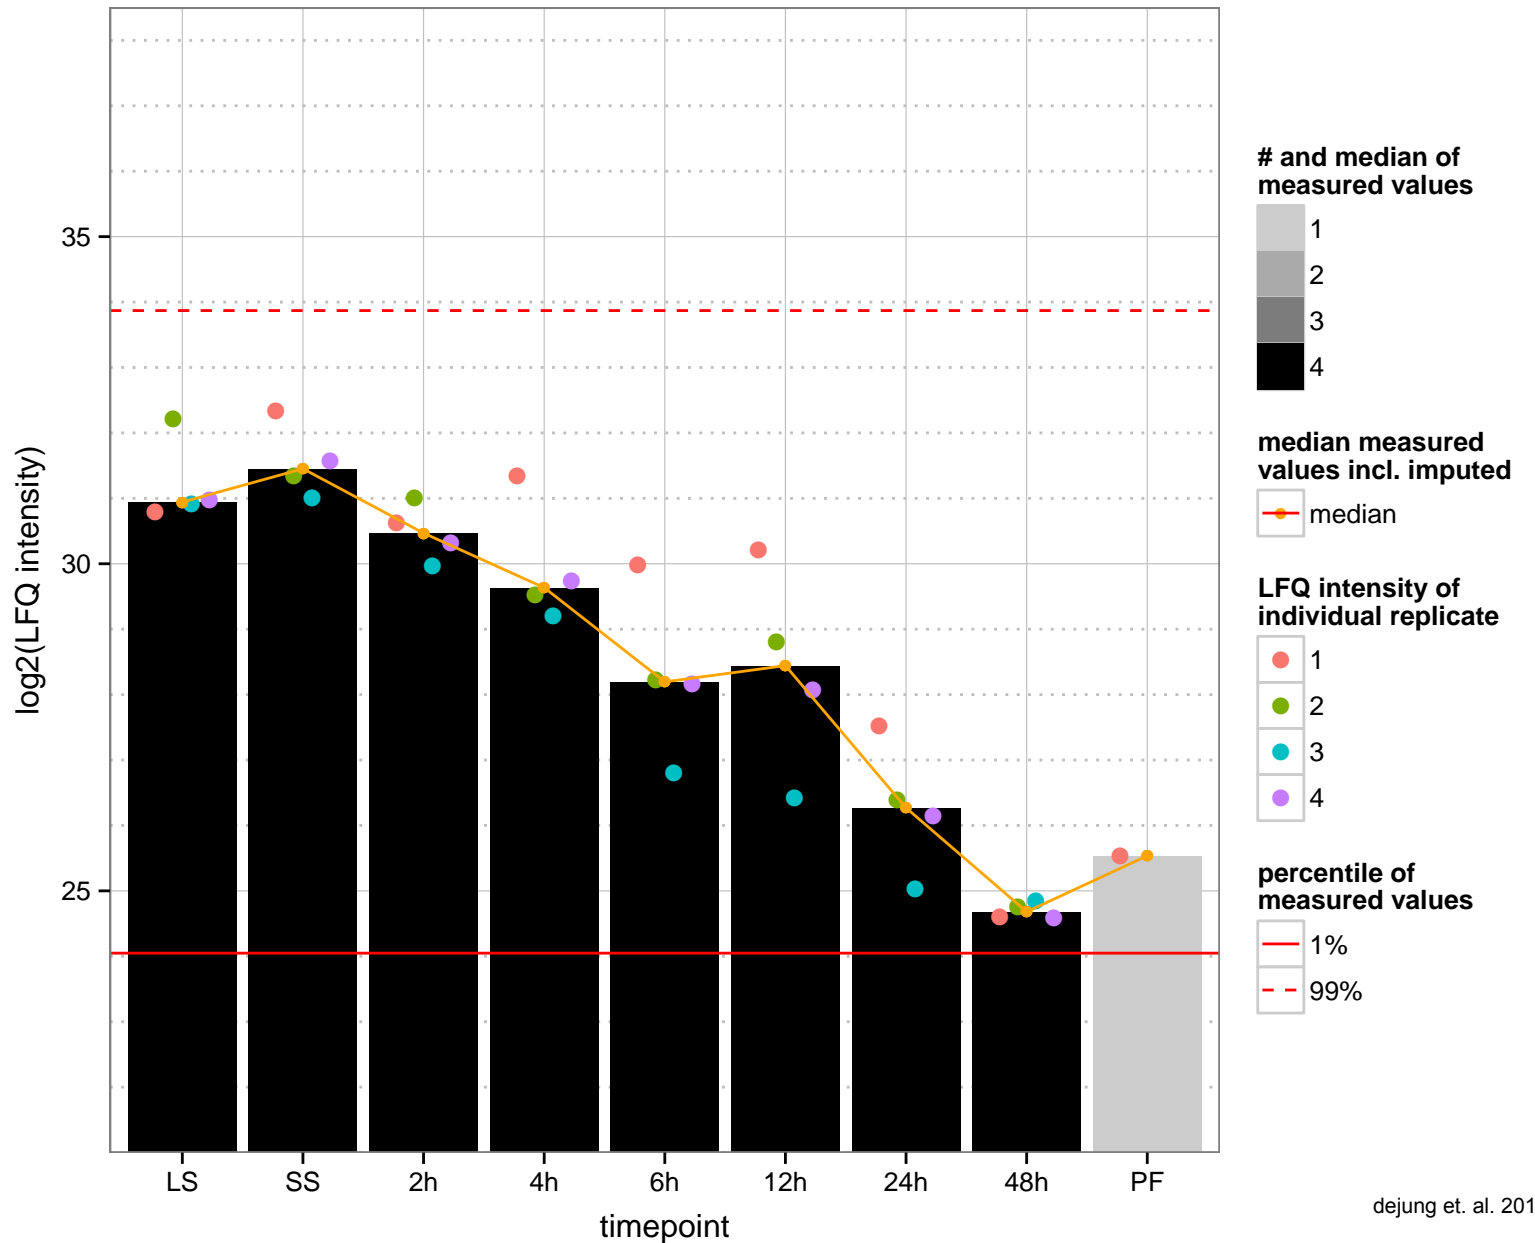

hypothetical protein, conserved  
 Tb927.10.2080  
 AGOF: null  
 AGOC: null  
 AGOP: null  
 PGO: null  
 PGOC: null  
 PGOP: null

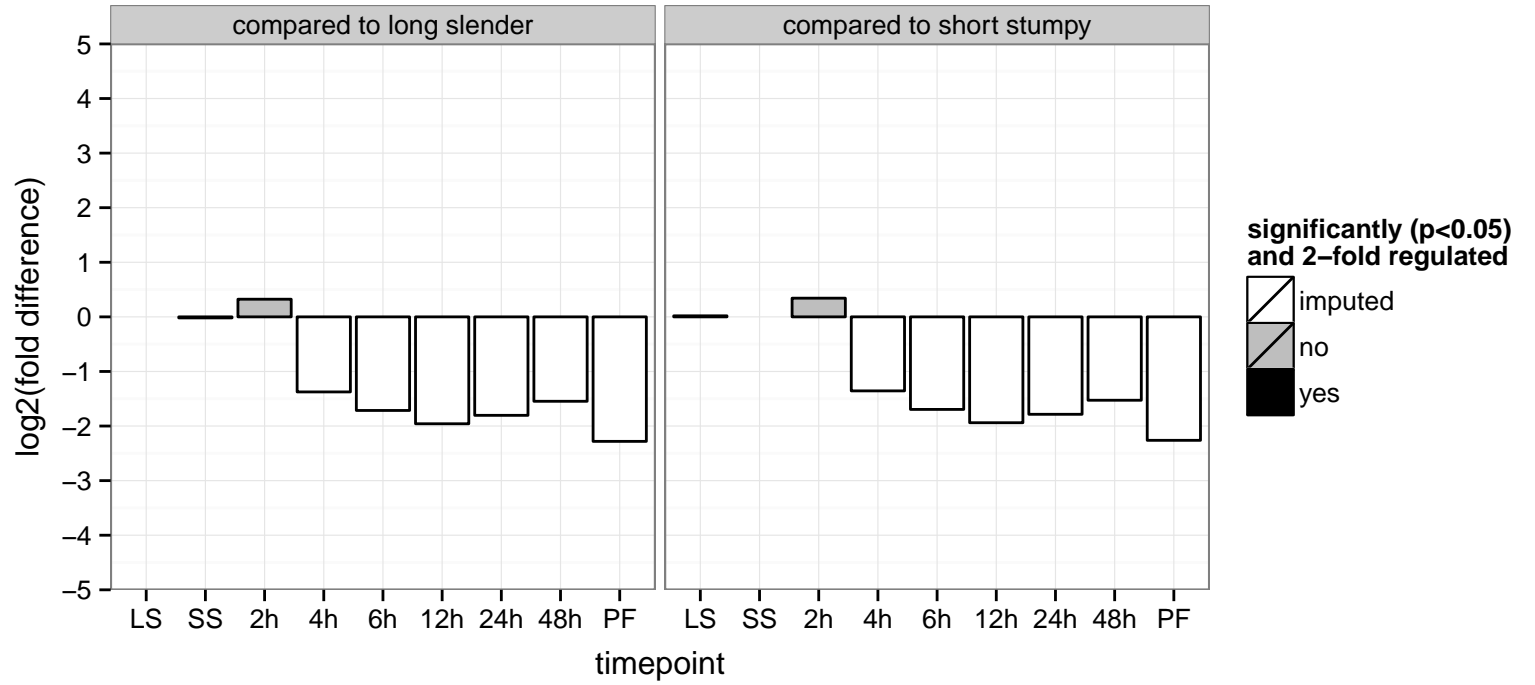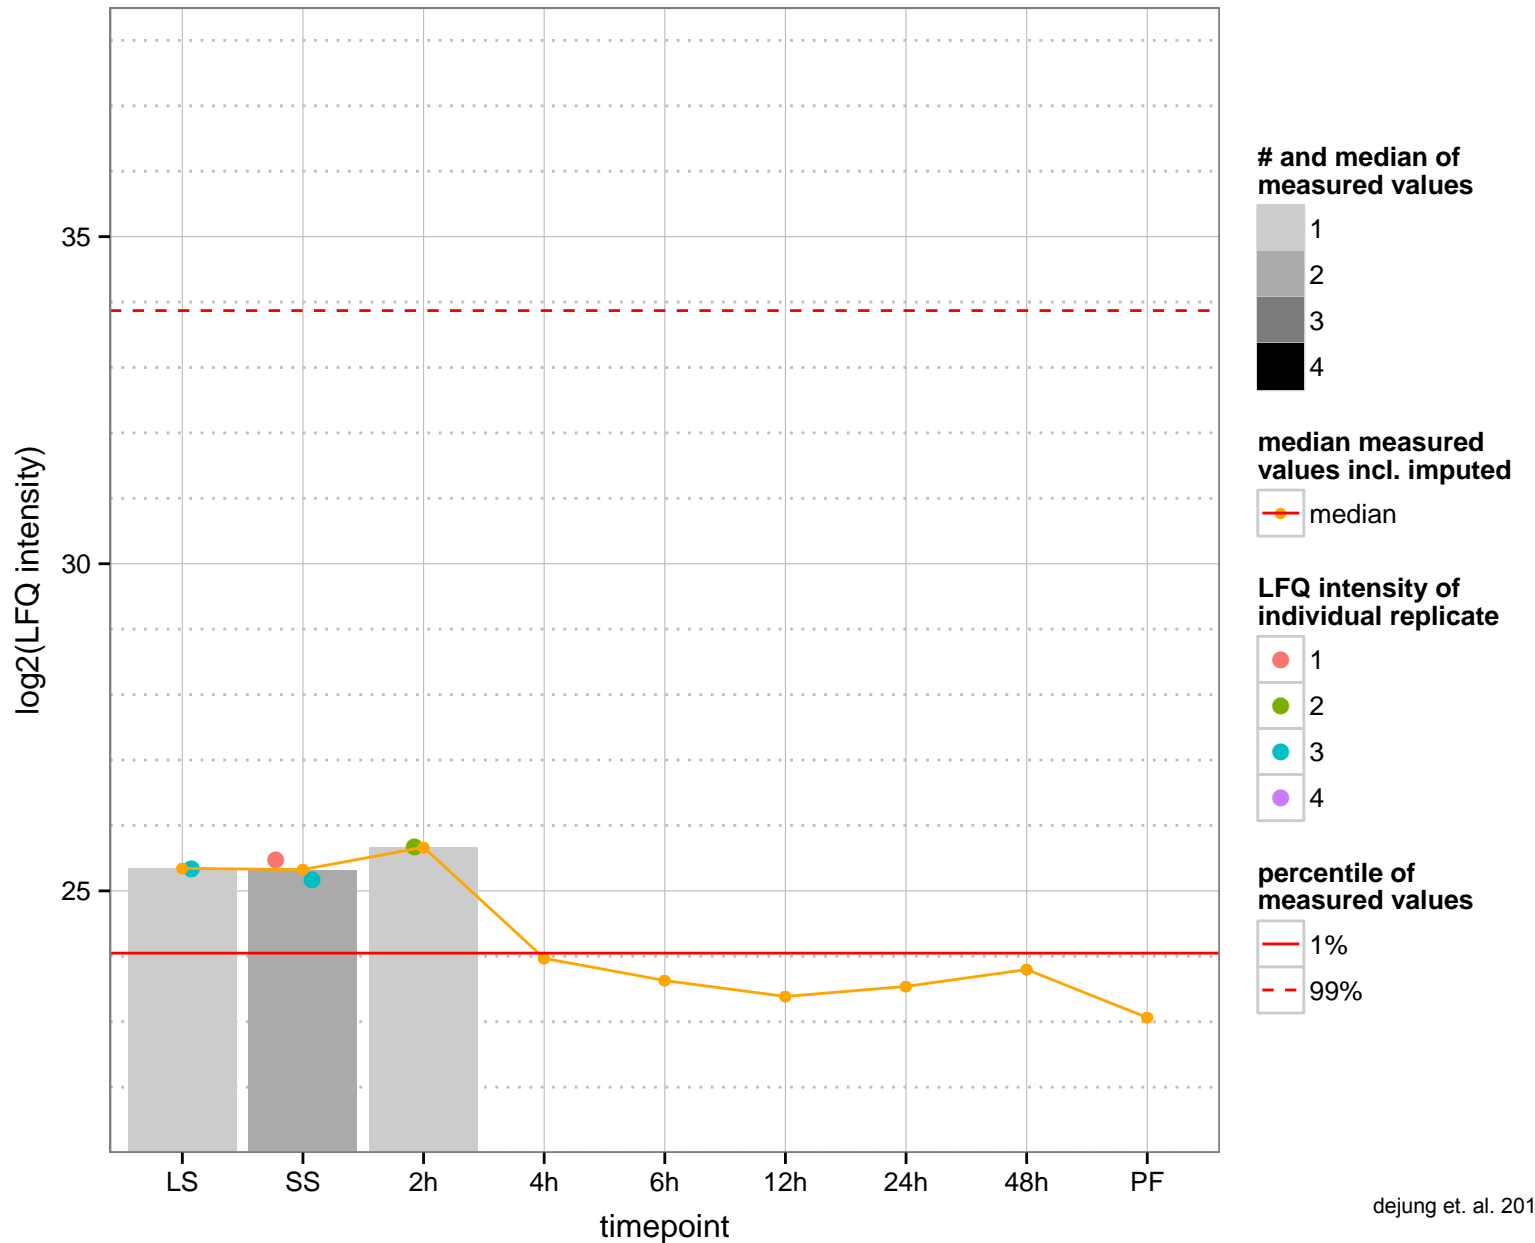

UDP-GlcNAc:alpha3-D-mannoside beta-1, 2-N-acetylglucosaminyltransferase I, N-Acetylglucosaminyltransferase I (GnTI)  
 Tb927.3.5660  
 AGOF: UDP-glycosyltransferase activity, alpha-1, 3-mannosylglycoprotein 2-beta-N-acetylglucosaminyltransferase activity  
 AGOC: Golgi apparatus, integral to membrane  
 AGOP: GPI anchor biosynthetic process, N-glycan processing, cell proliferation, pathogenesis  
 PGO: null  
 PGOC: null  
 PGOP: null

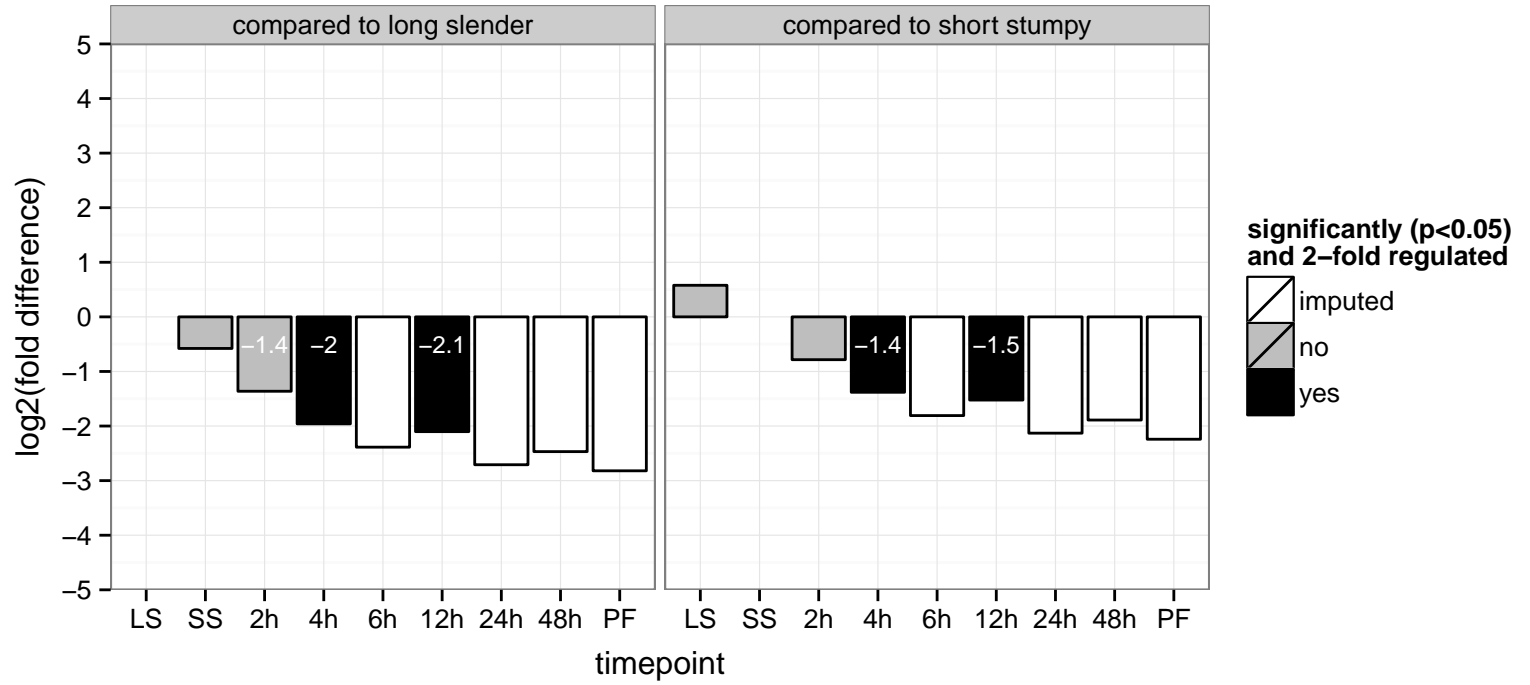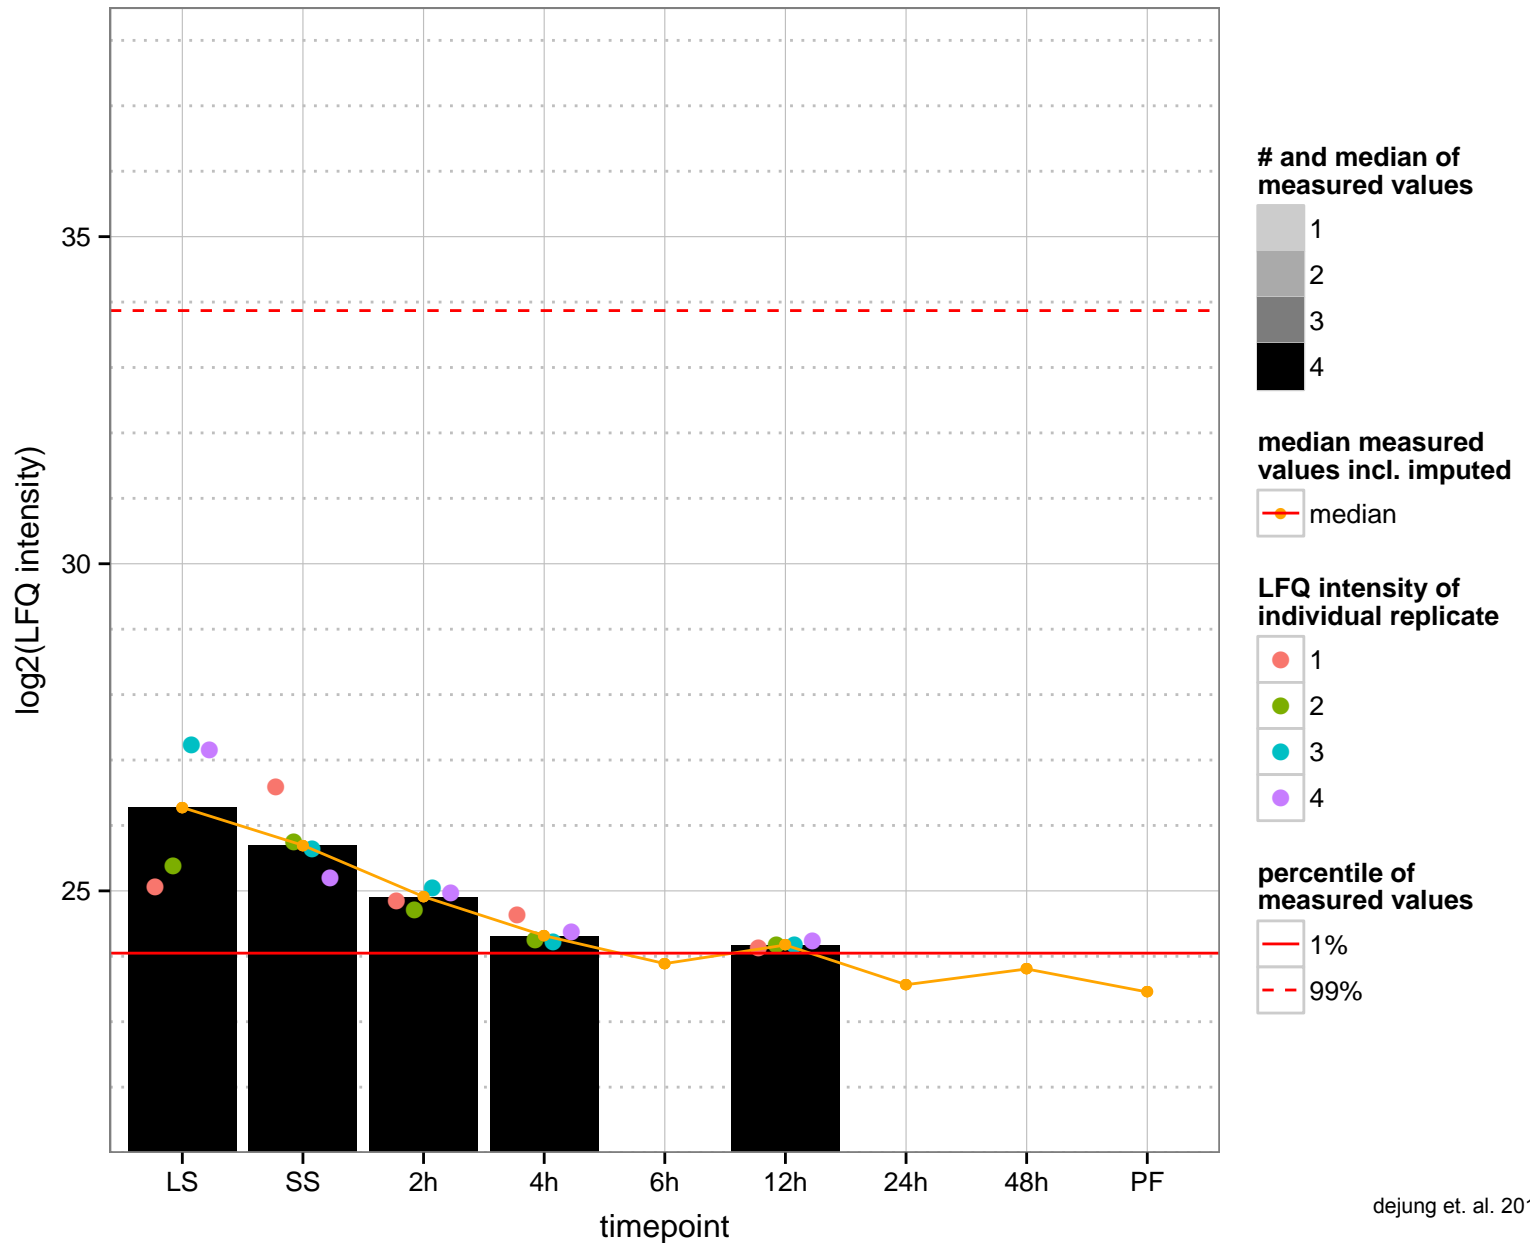

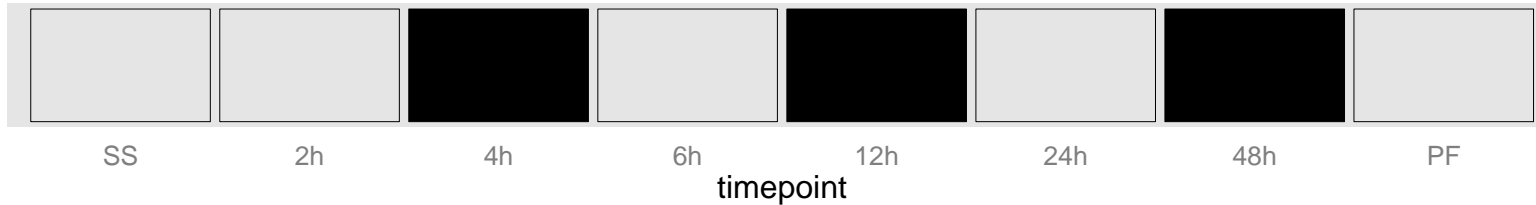

**regulated**  **not regulated**  **significant down**  **significant up**



hypothetical protein, conserved  
 Tb927.11.9630  
 AGOF: null  
 AGOC: null  
 AGOP: protein transport, vesicle-mediated transport  
 PGO: null  
 PGO: null  
 PGO: null  
 PGOP: protein transport

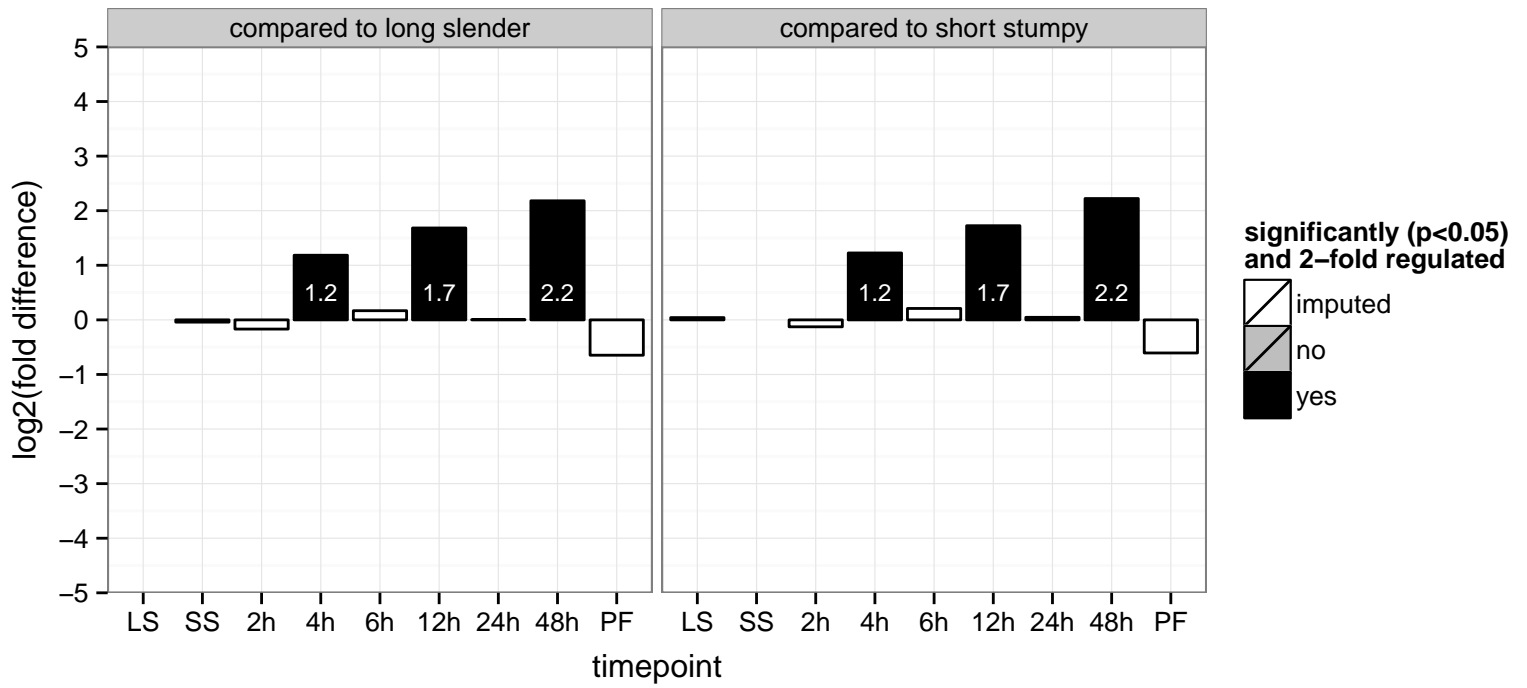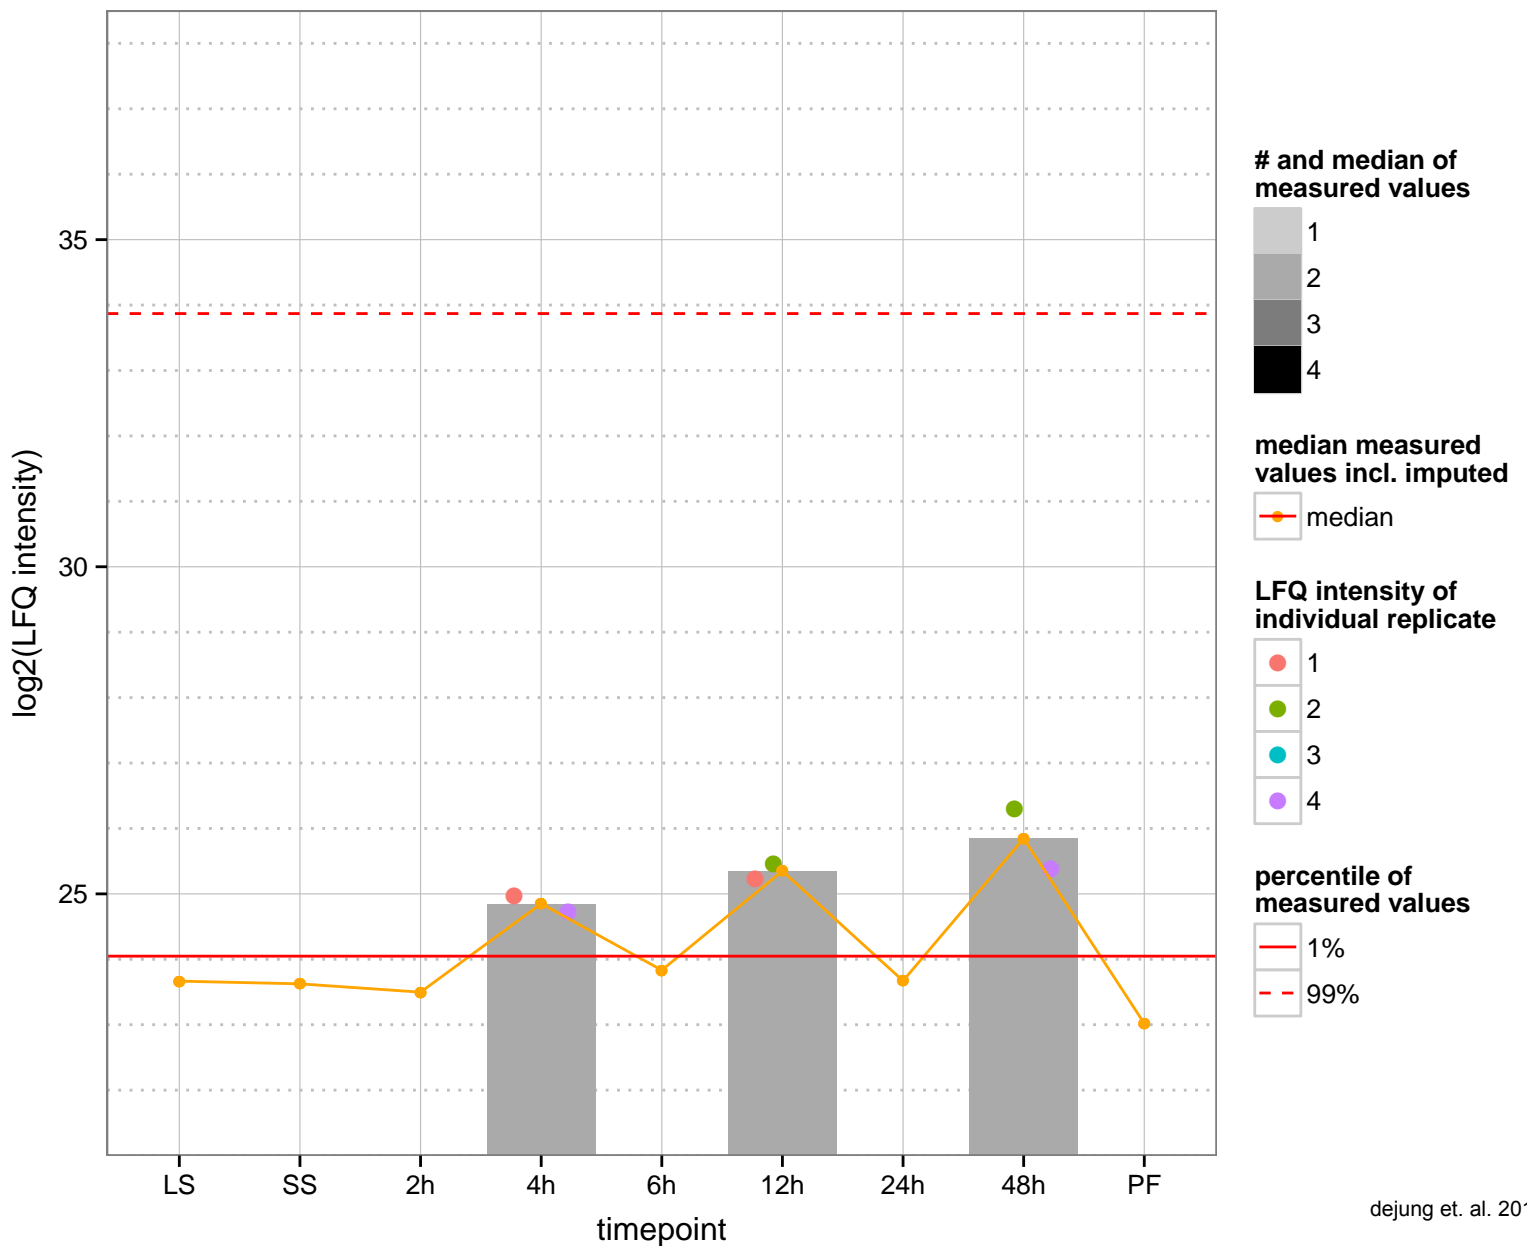

peroxisome assembly protein, putative  
 Tb927.3.2410  
 AGOF: zinc ion binding  
 AGOC: peroxisomal membrane  
 AGOP: peroxisome organization  
 PGO: protein binding, zinc ion binding  
 PGOC: null  
 PGOP: null

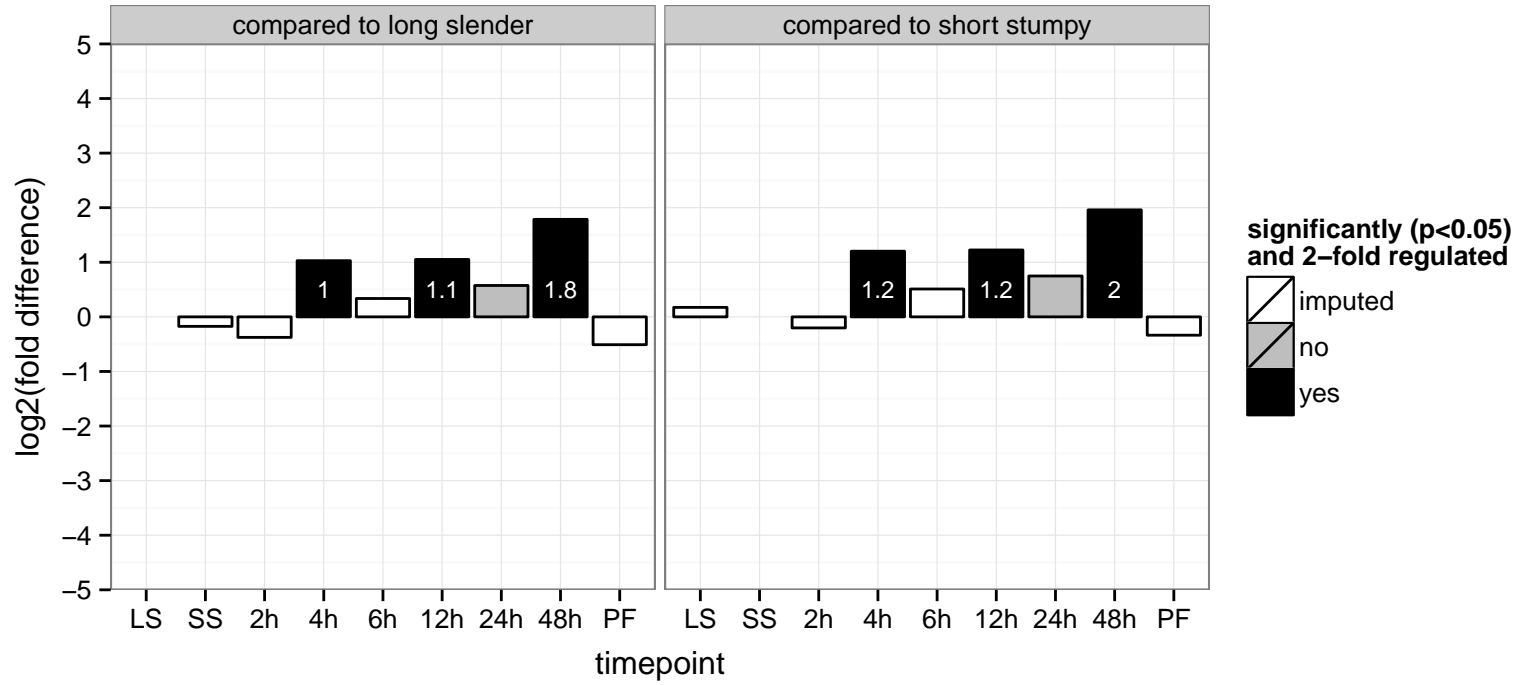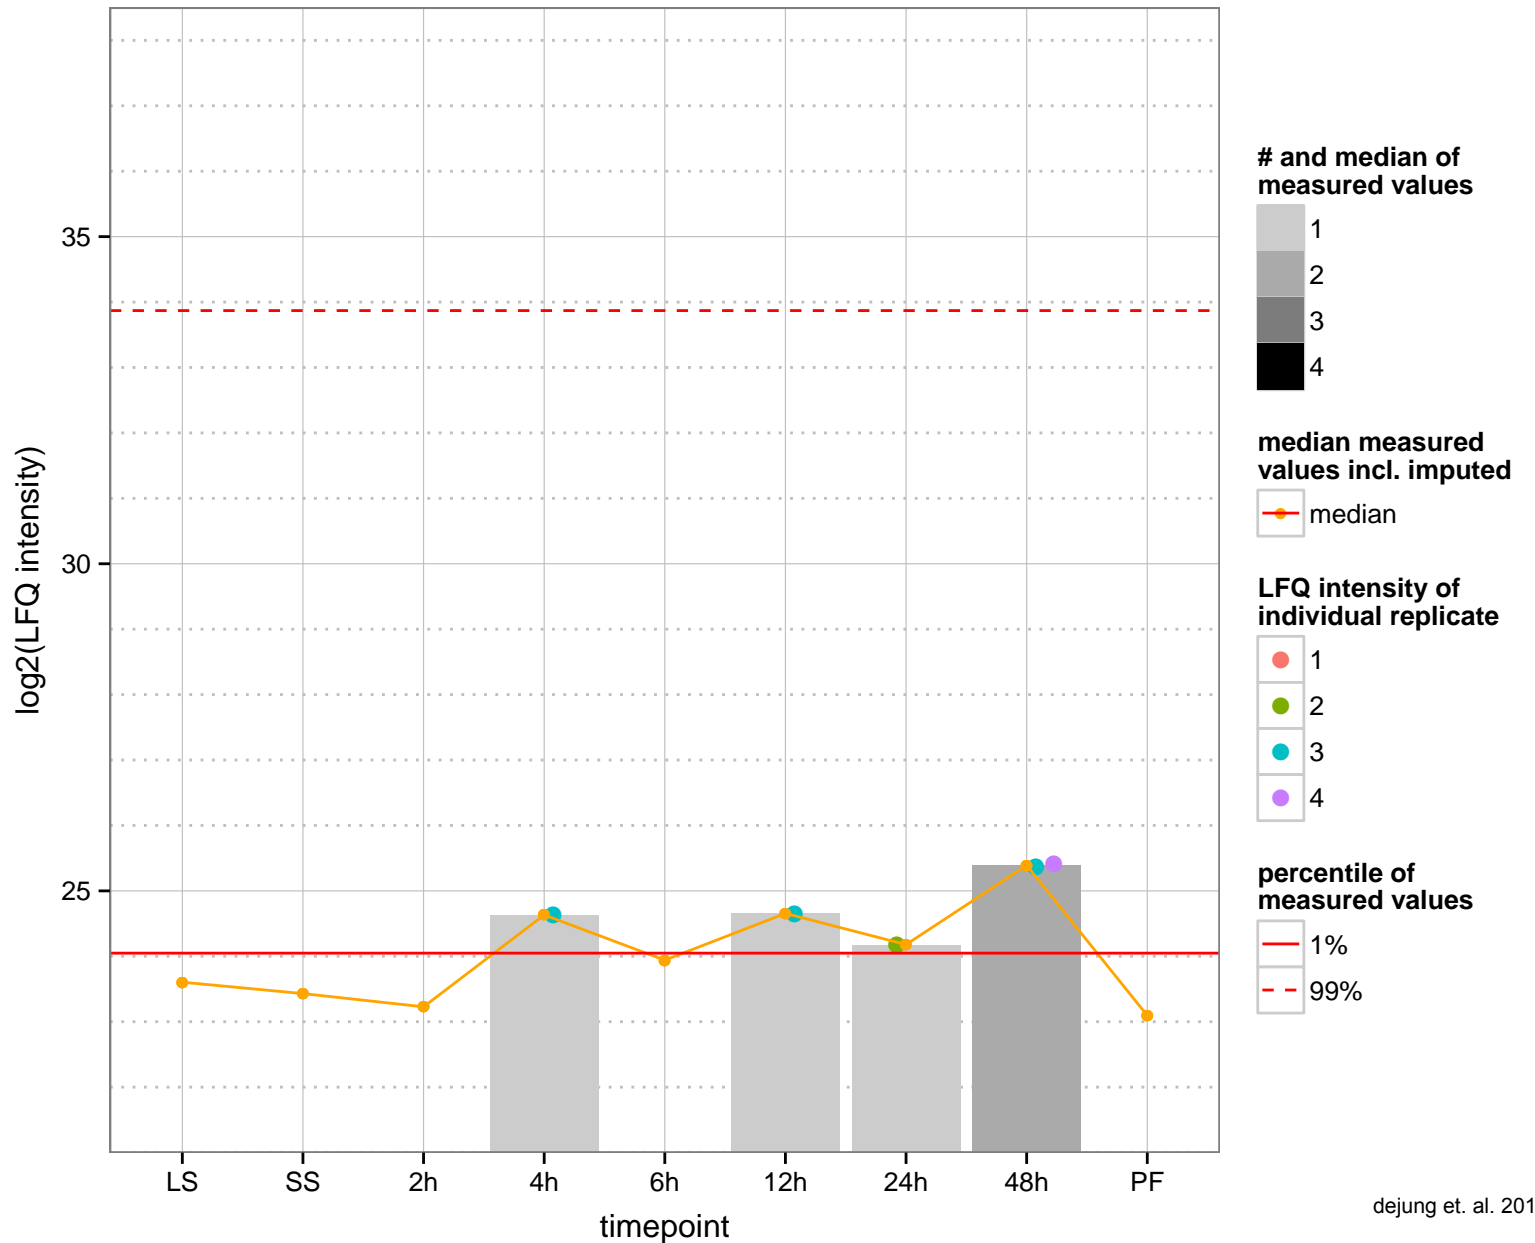

hypothetical protein, conserved

Tb927.9.11660

AGOF: null

AGOC: mitochondrion

AGOP: null

PGOF: NADH dehydrogenase (ubiquinone) activity, NADH dehydrogenase activity

PGOC: mitochondrion

PGOP: null

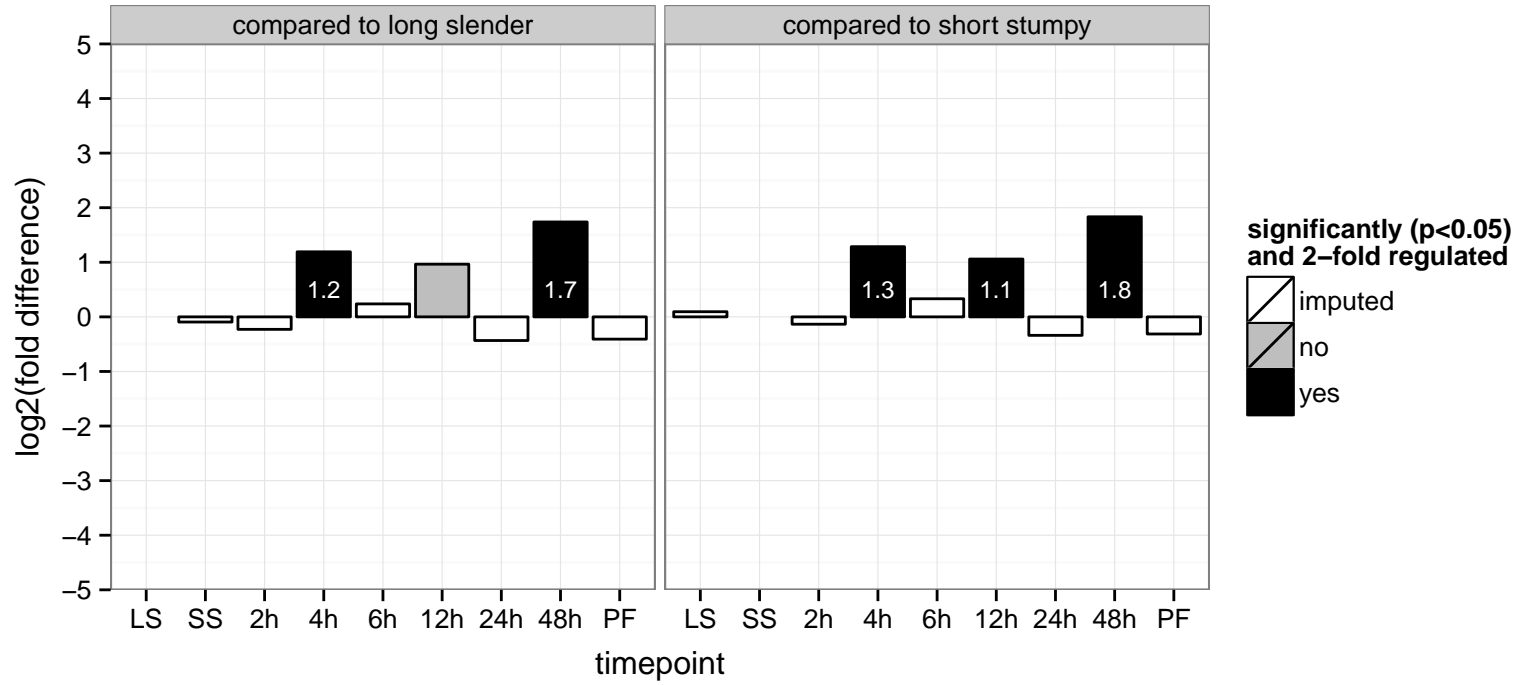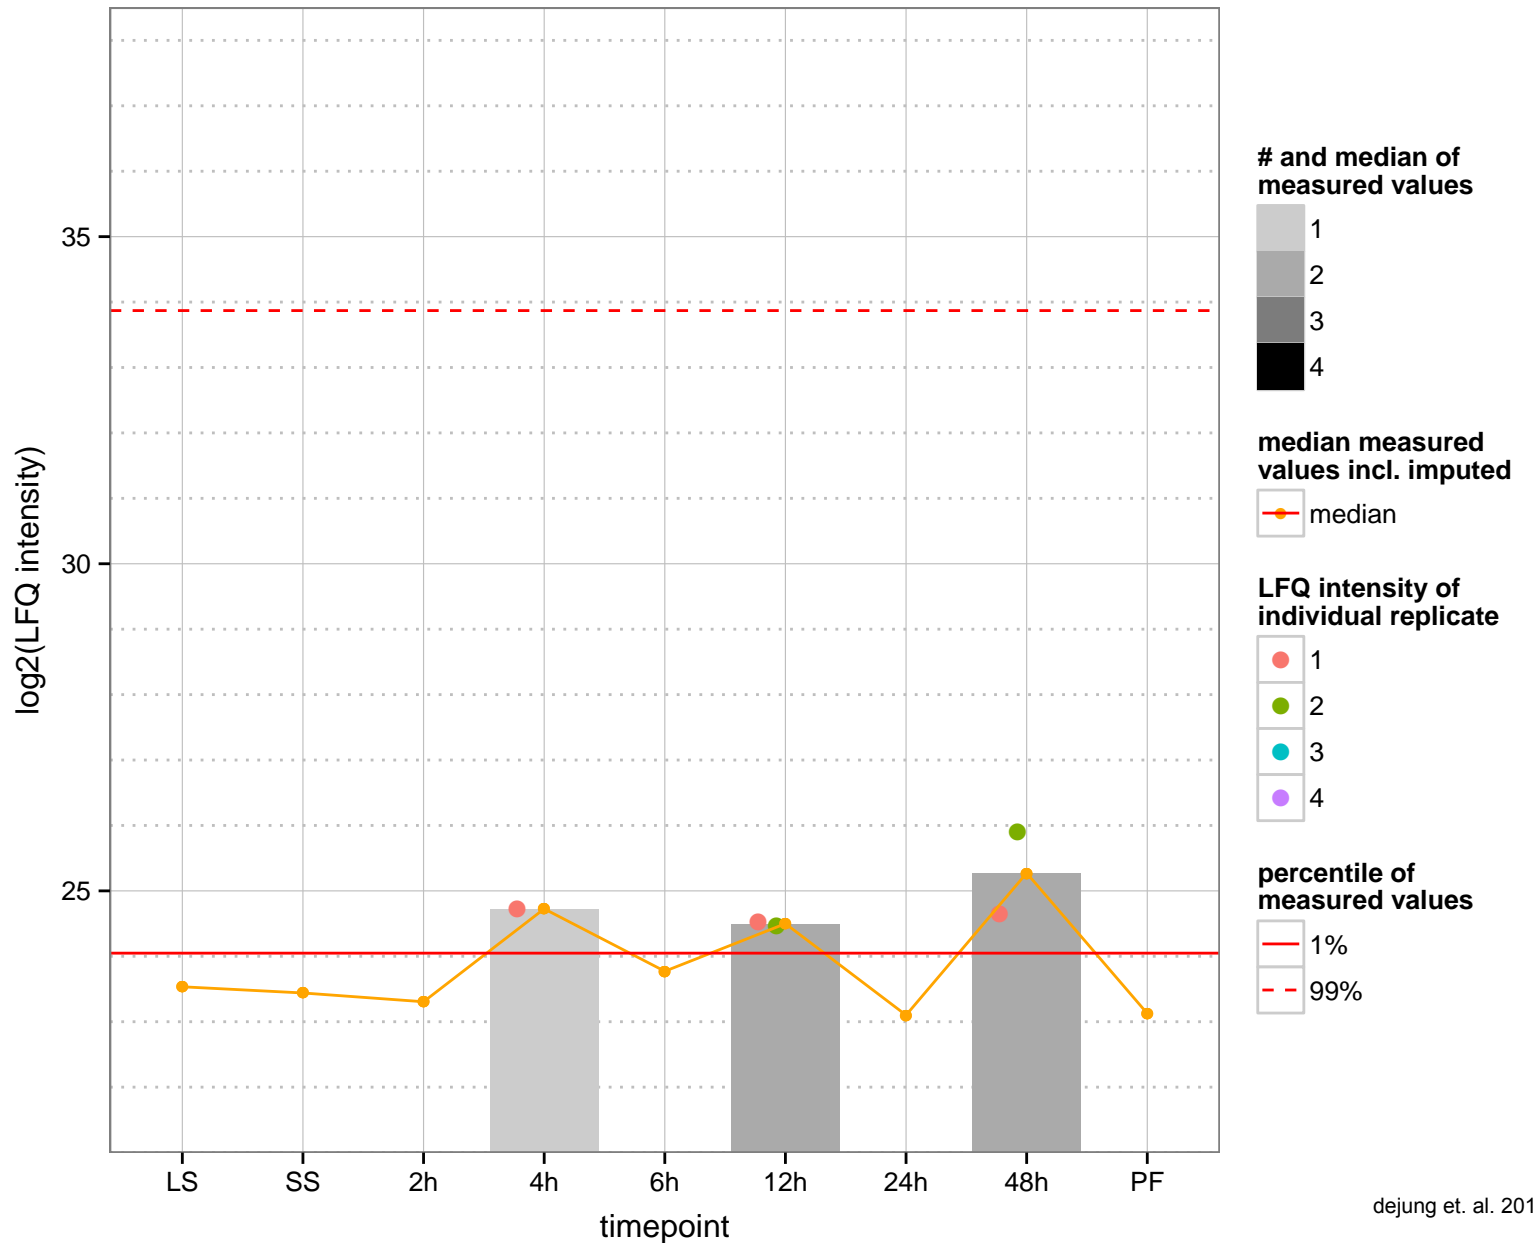

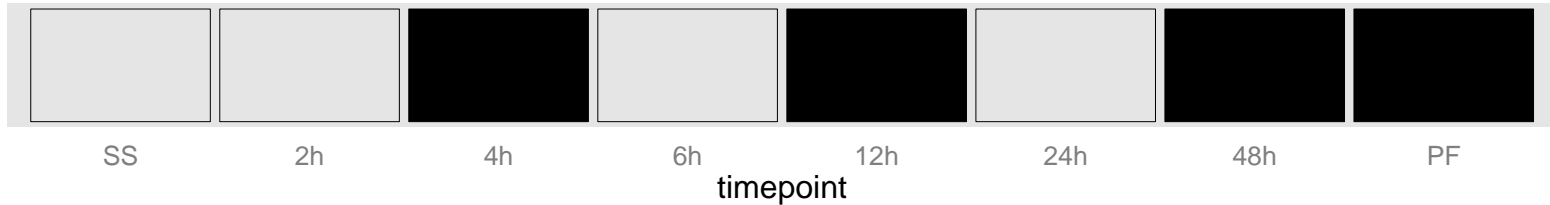

**regulated**  **not regulated**  **significant down**  **significant up**

hypothetical protein, conserved  
 Tb927.10.1980  
 AGOF: null  
 AGOC: null  
 AGOP: null  
 PGO: null  
 PGOC: null  
 PGOP: null

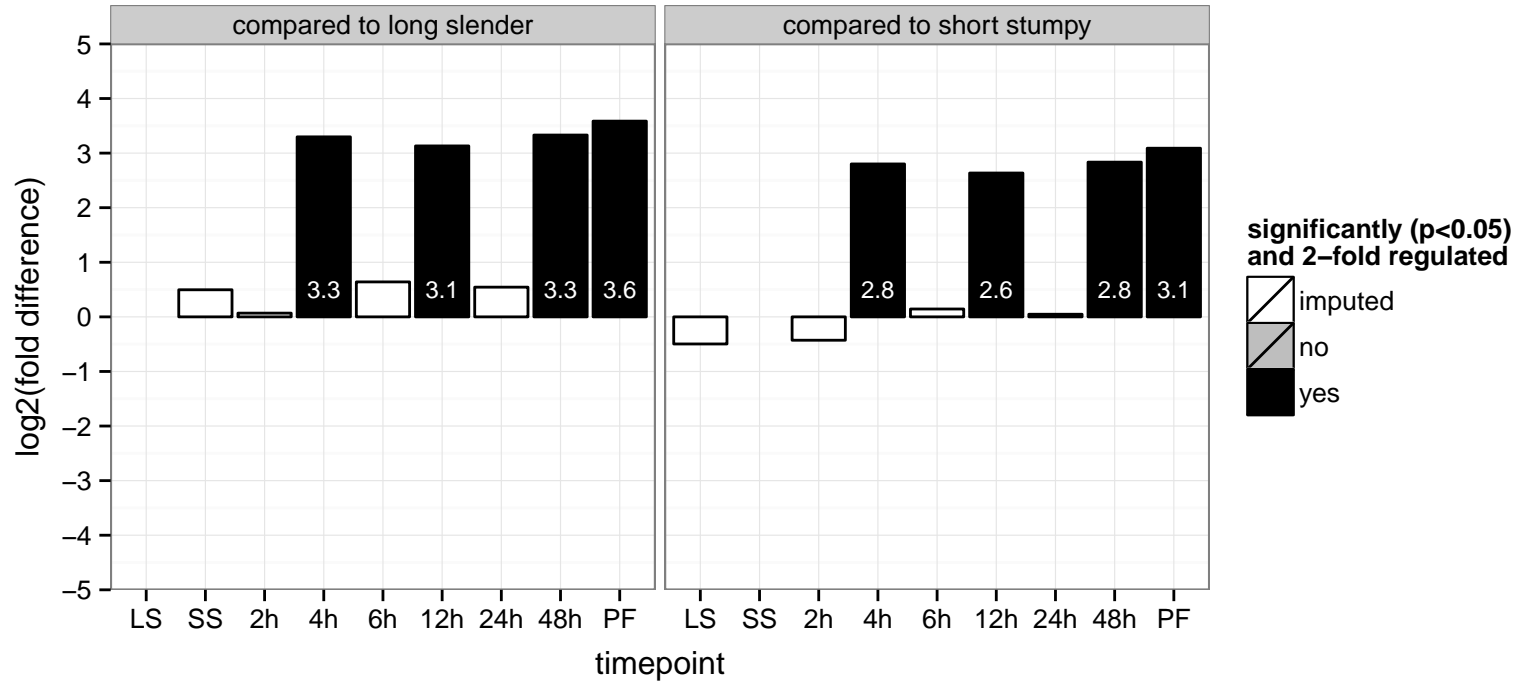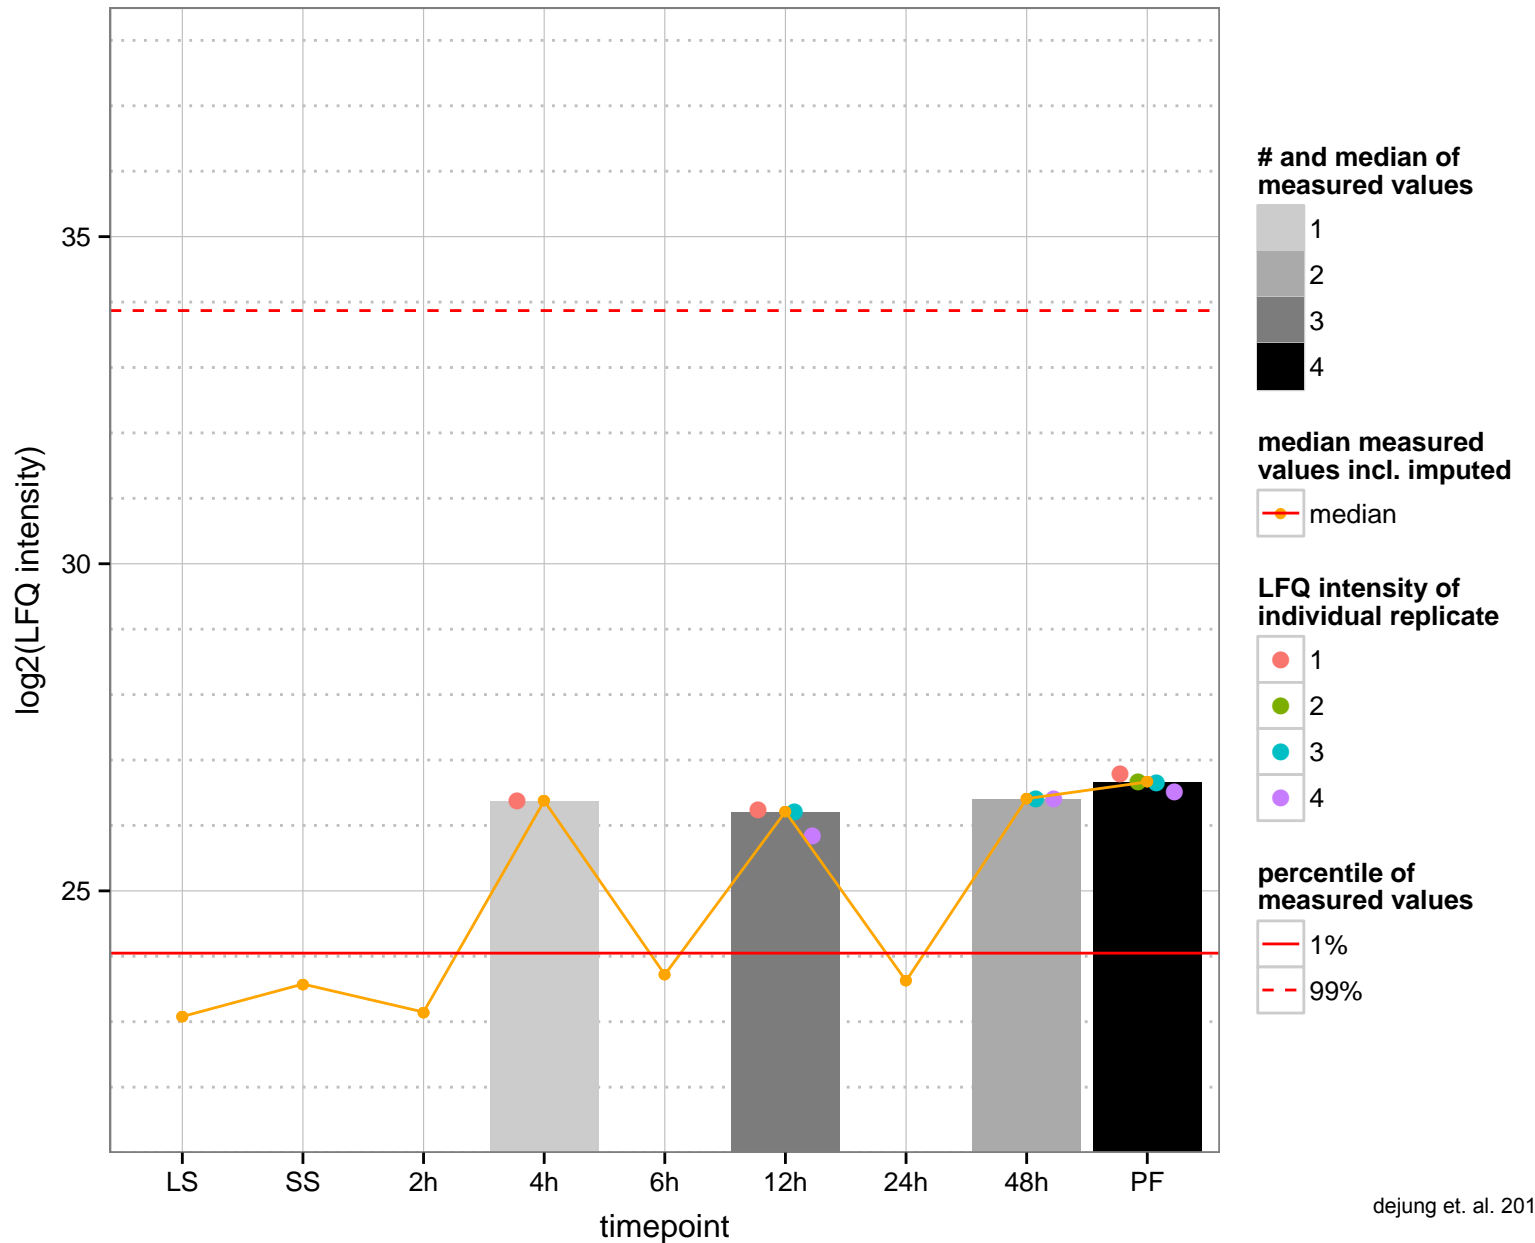

hypothetical protein, conserved  
 Tb927.11.1200  
 AGOF: null  
 AGOC: null  
 AGOP: null  
 PGOF: protein binding  
 PGO: null  
 PGOP: null

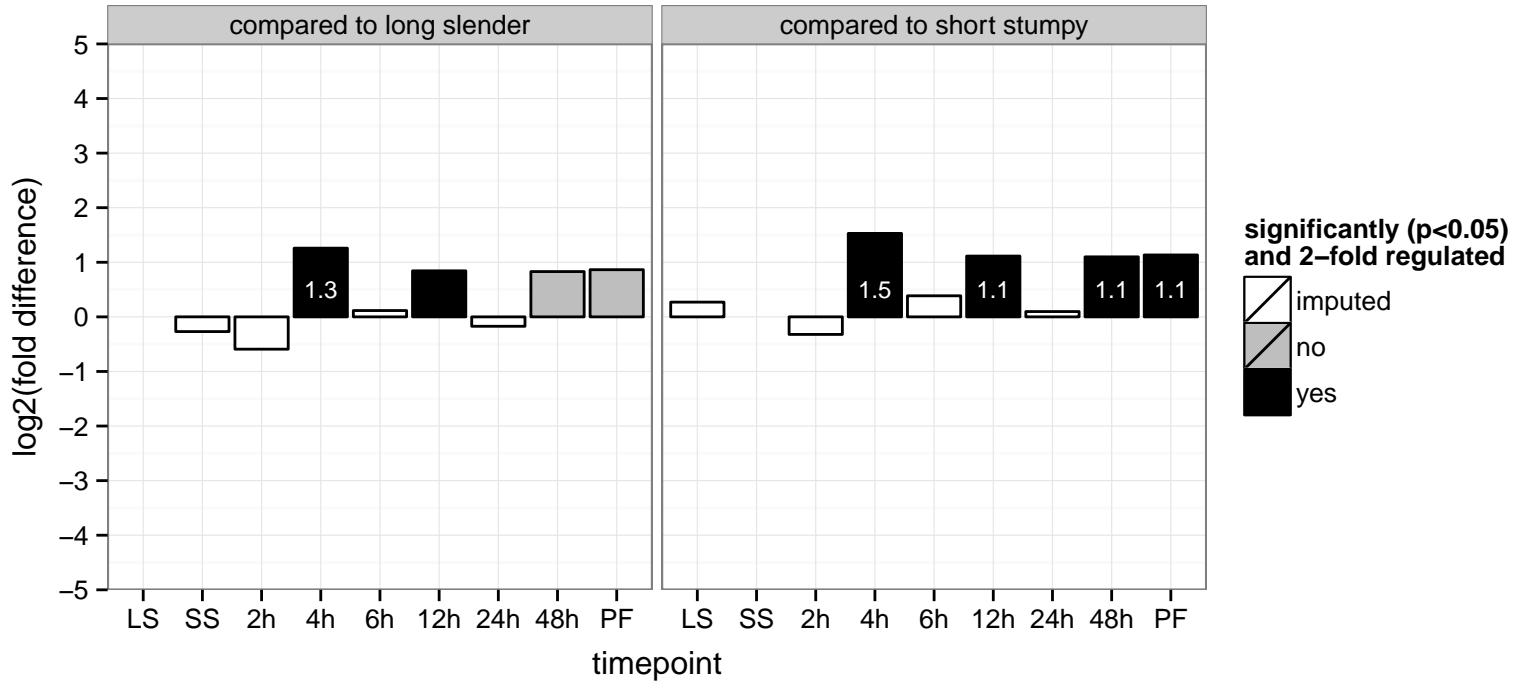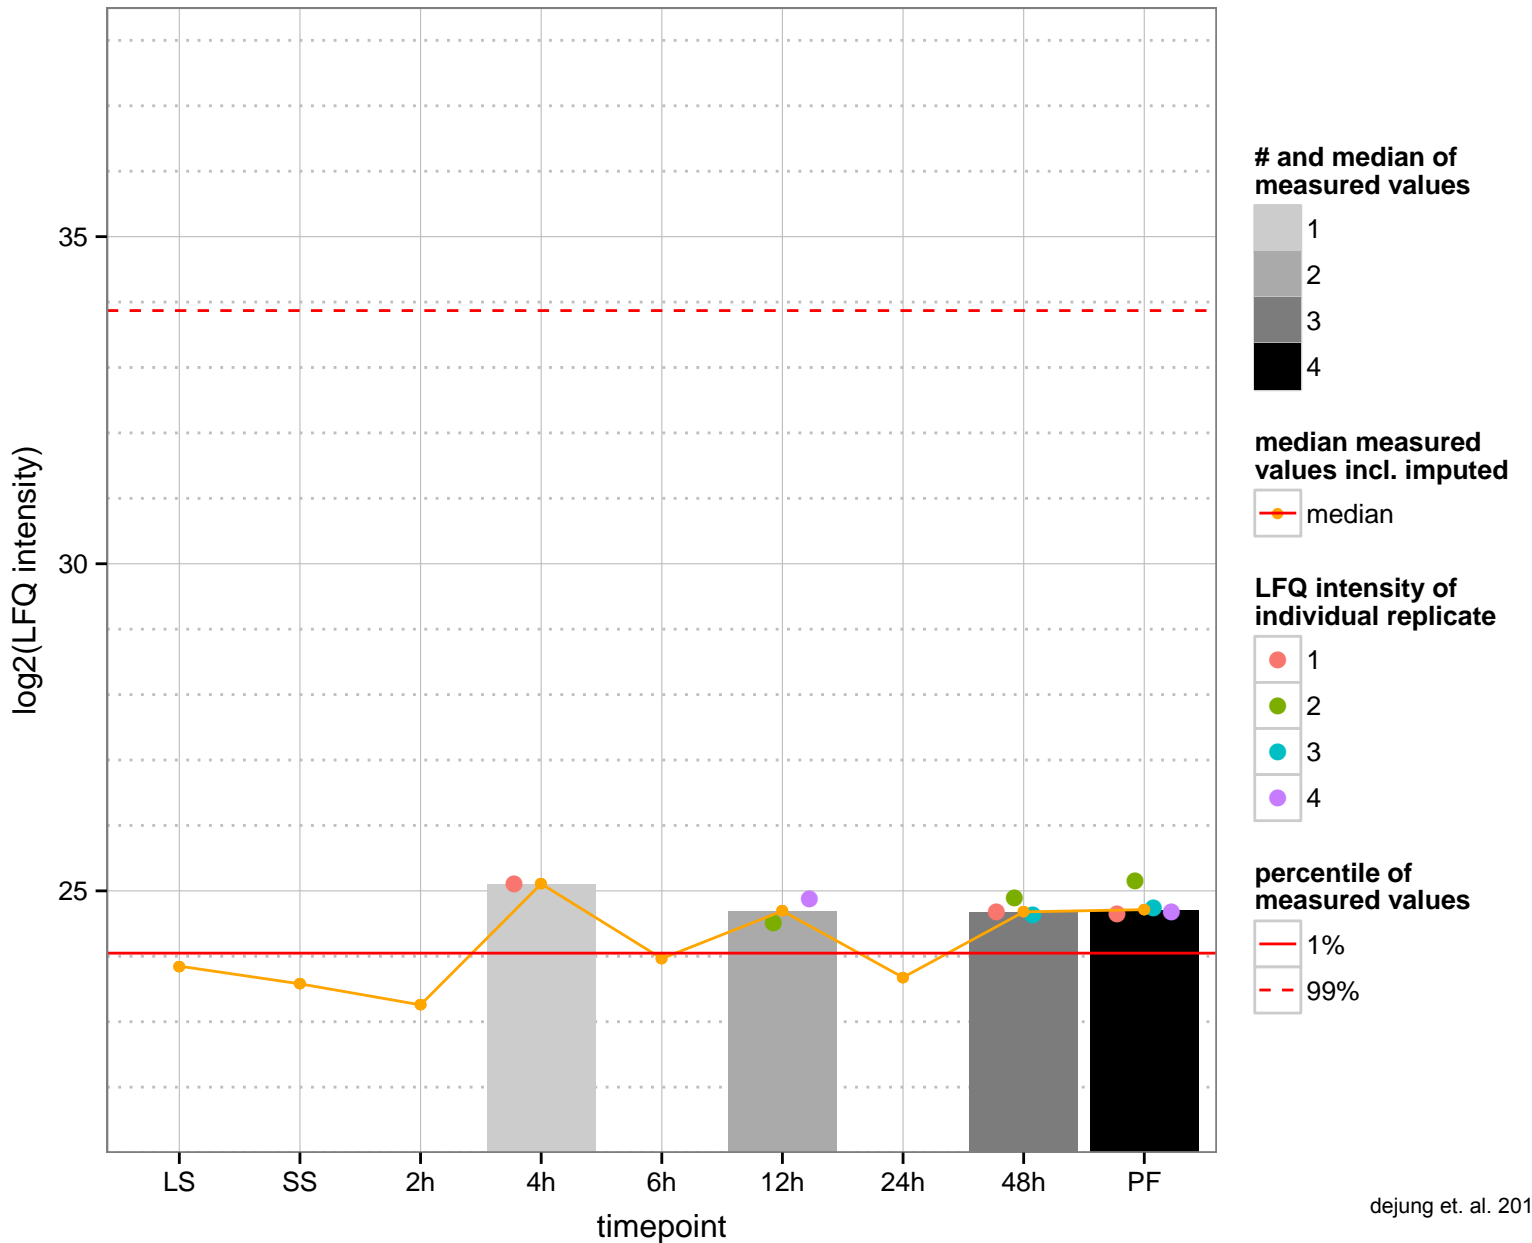

hypothetical protein, conserved  
 Tb927.3.2260  
 AGOF: null  
 AGOC: mitochondrion  
 AGOP: null  
 PGO: protein binding  
 PGOC: null  
 PGOP: null

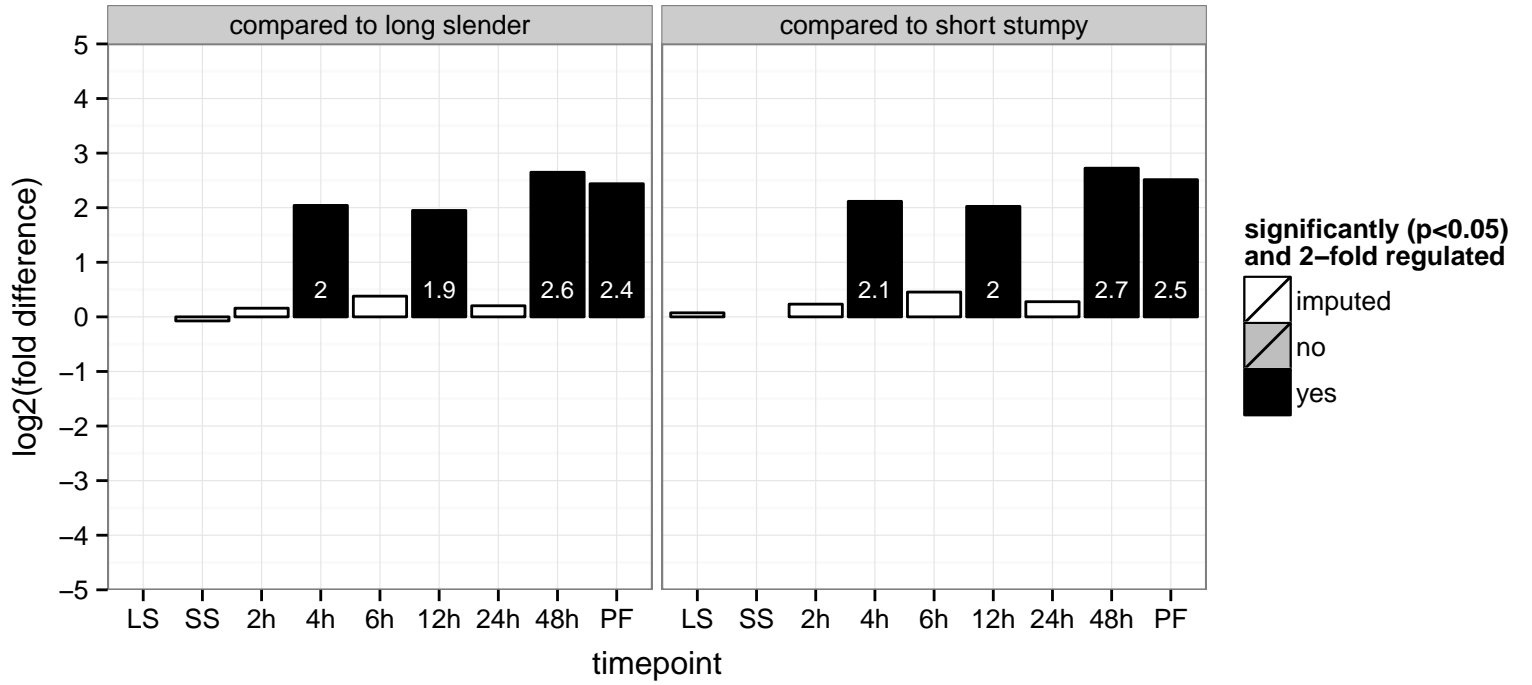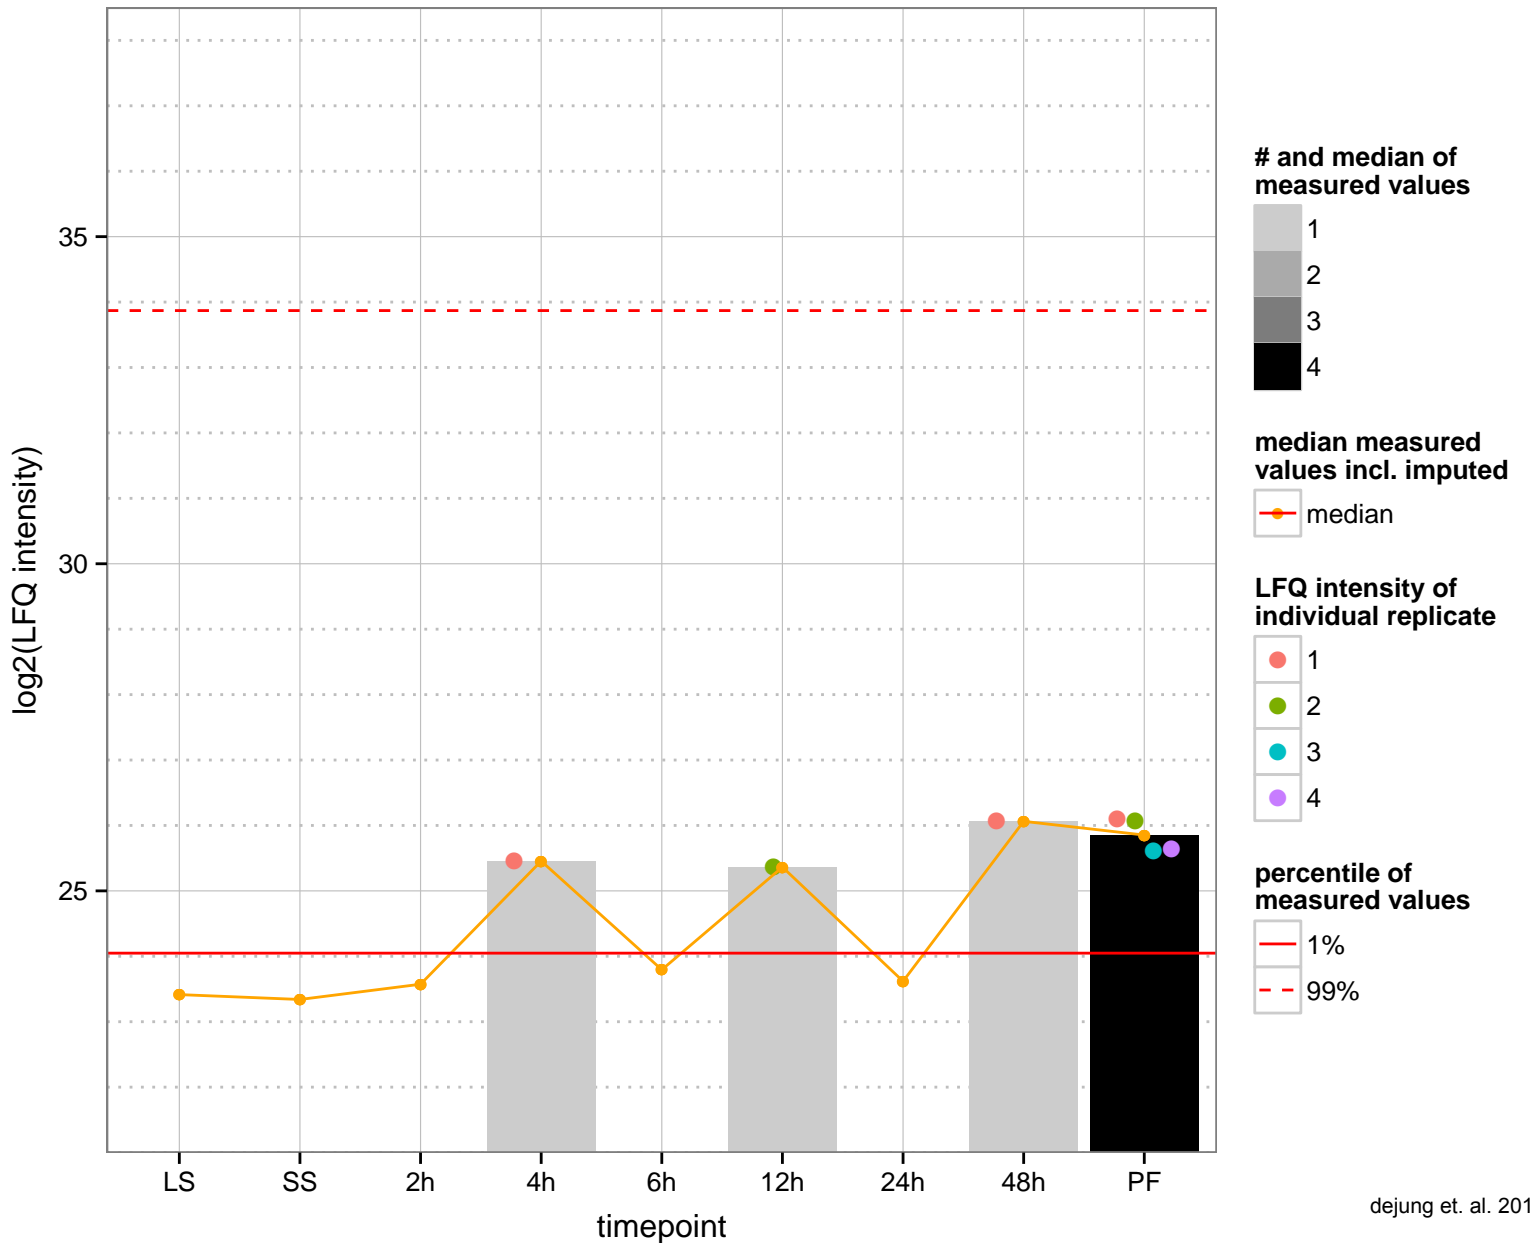

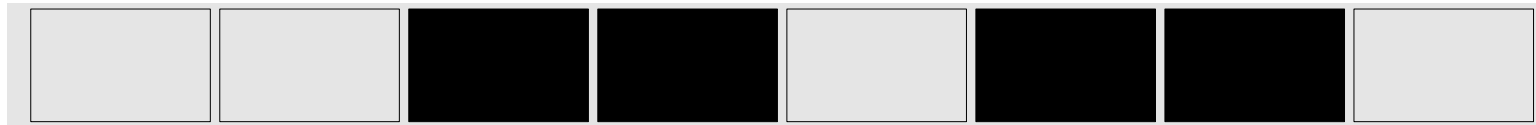

SS

2h

4h

6h

12h

24h

48h

PF

timepoint

**regulated**



not regulated



significant down



significant up



hypothetical protein, conserved  
 Tb927.11.11050  
 AGOF: null  
 AGOC: null  
 AGOP: null  
 PGO: null  
 PGOC: null  
 PGOP: null

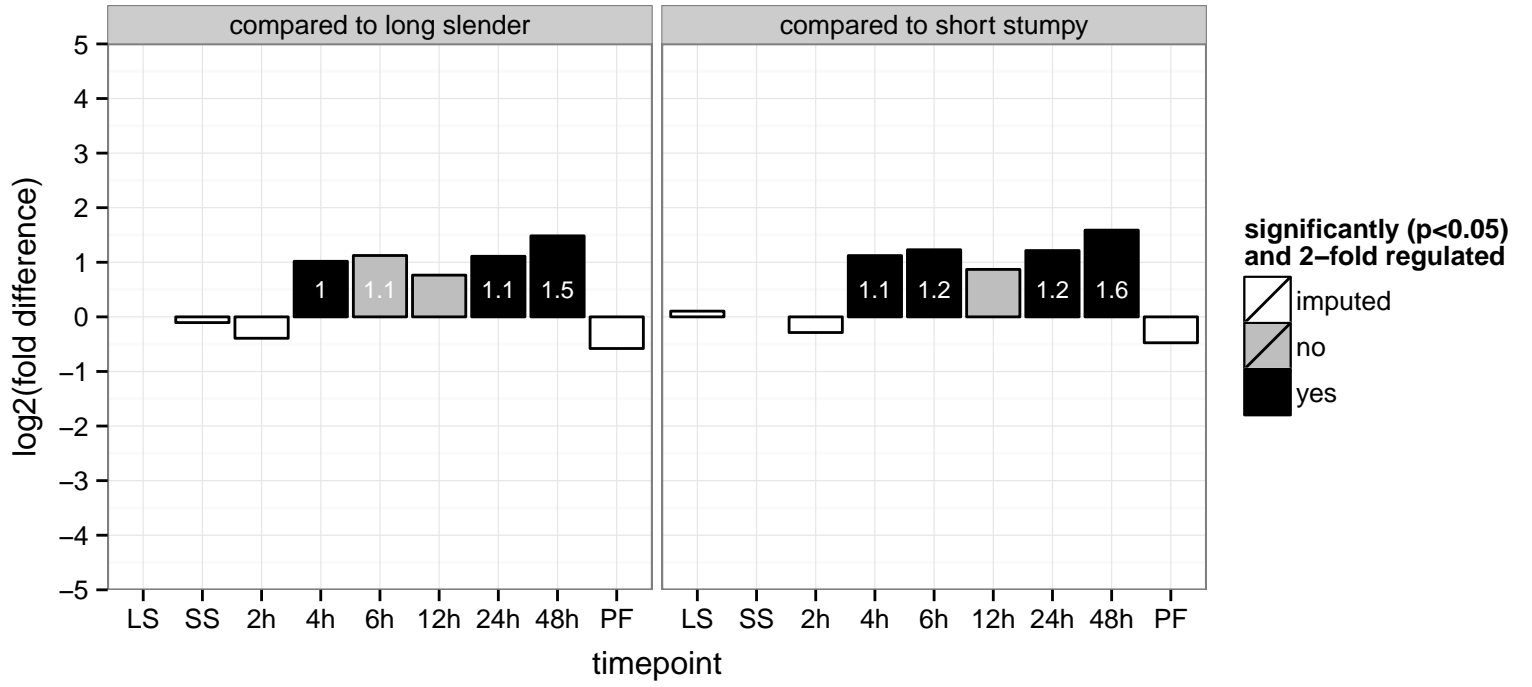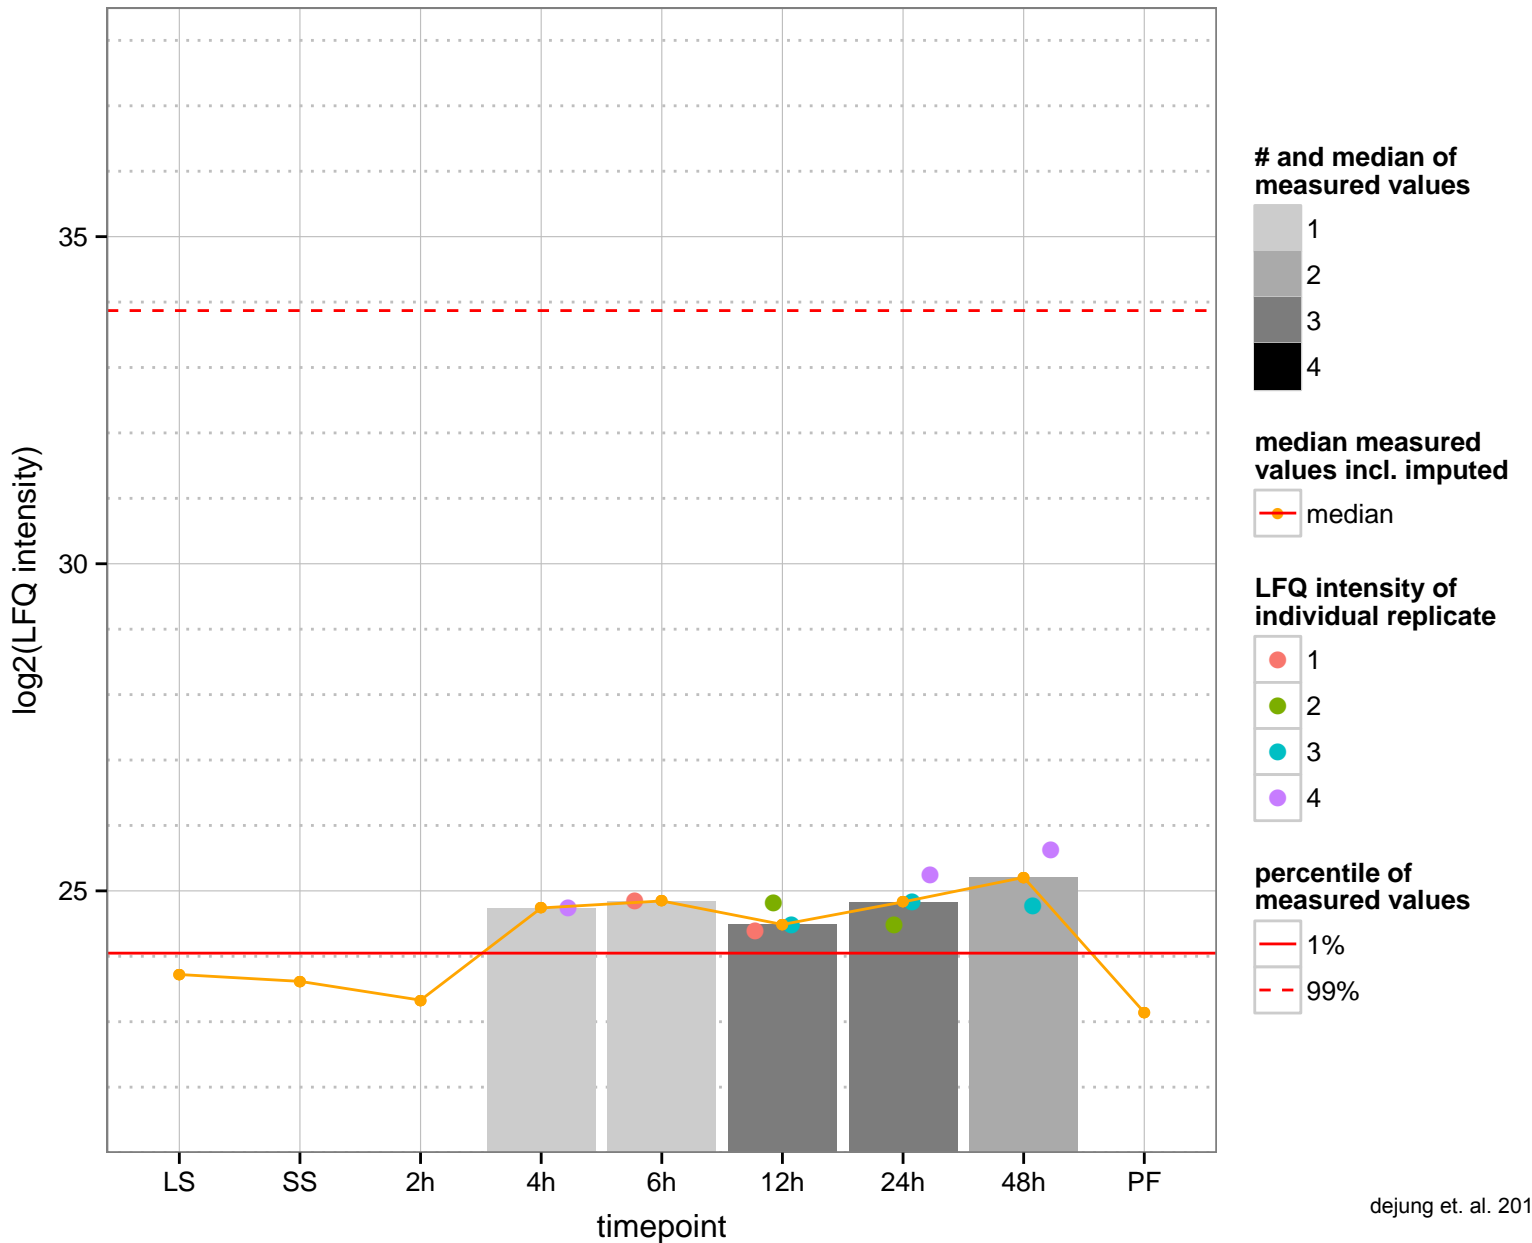

hypothetical protein, conserved  
 Tb927.11.14990  
 AGOF: null  
 AGOC: null  
 AGOP: null  
 PGOF: null  
 PGOC: null  
 PGOP: null

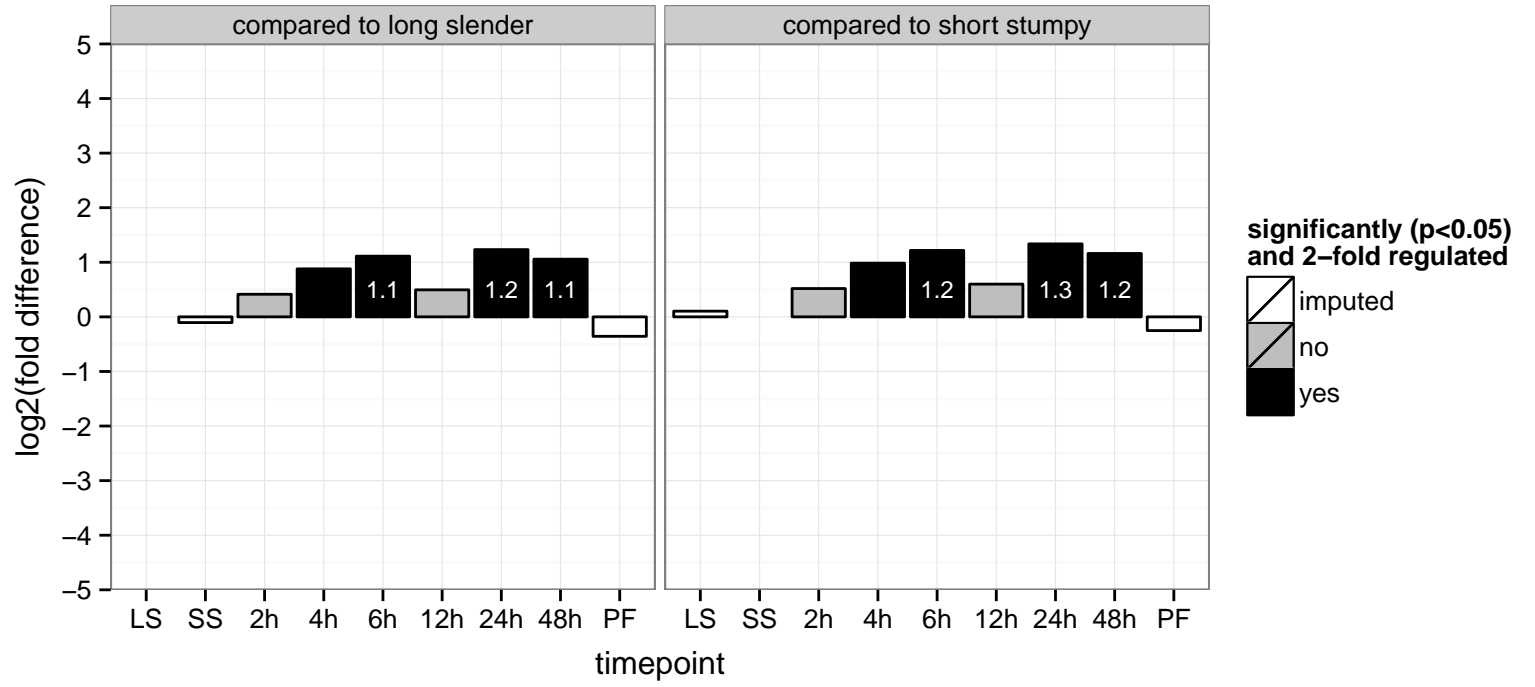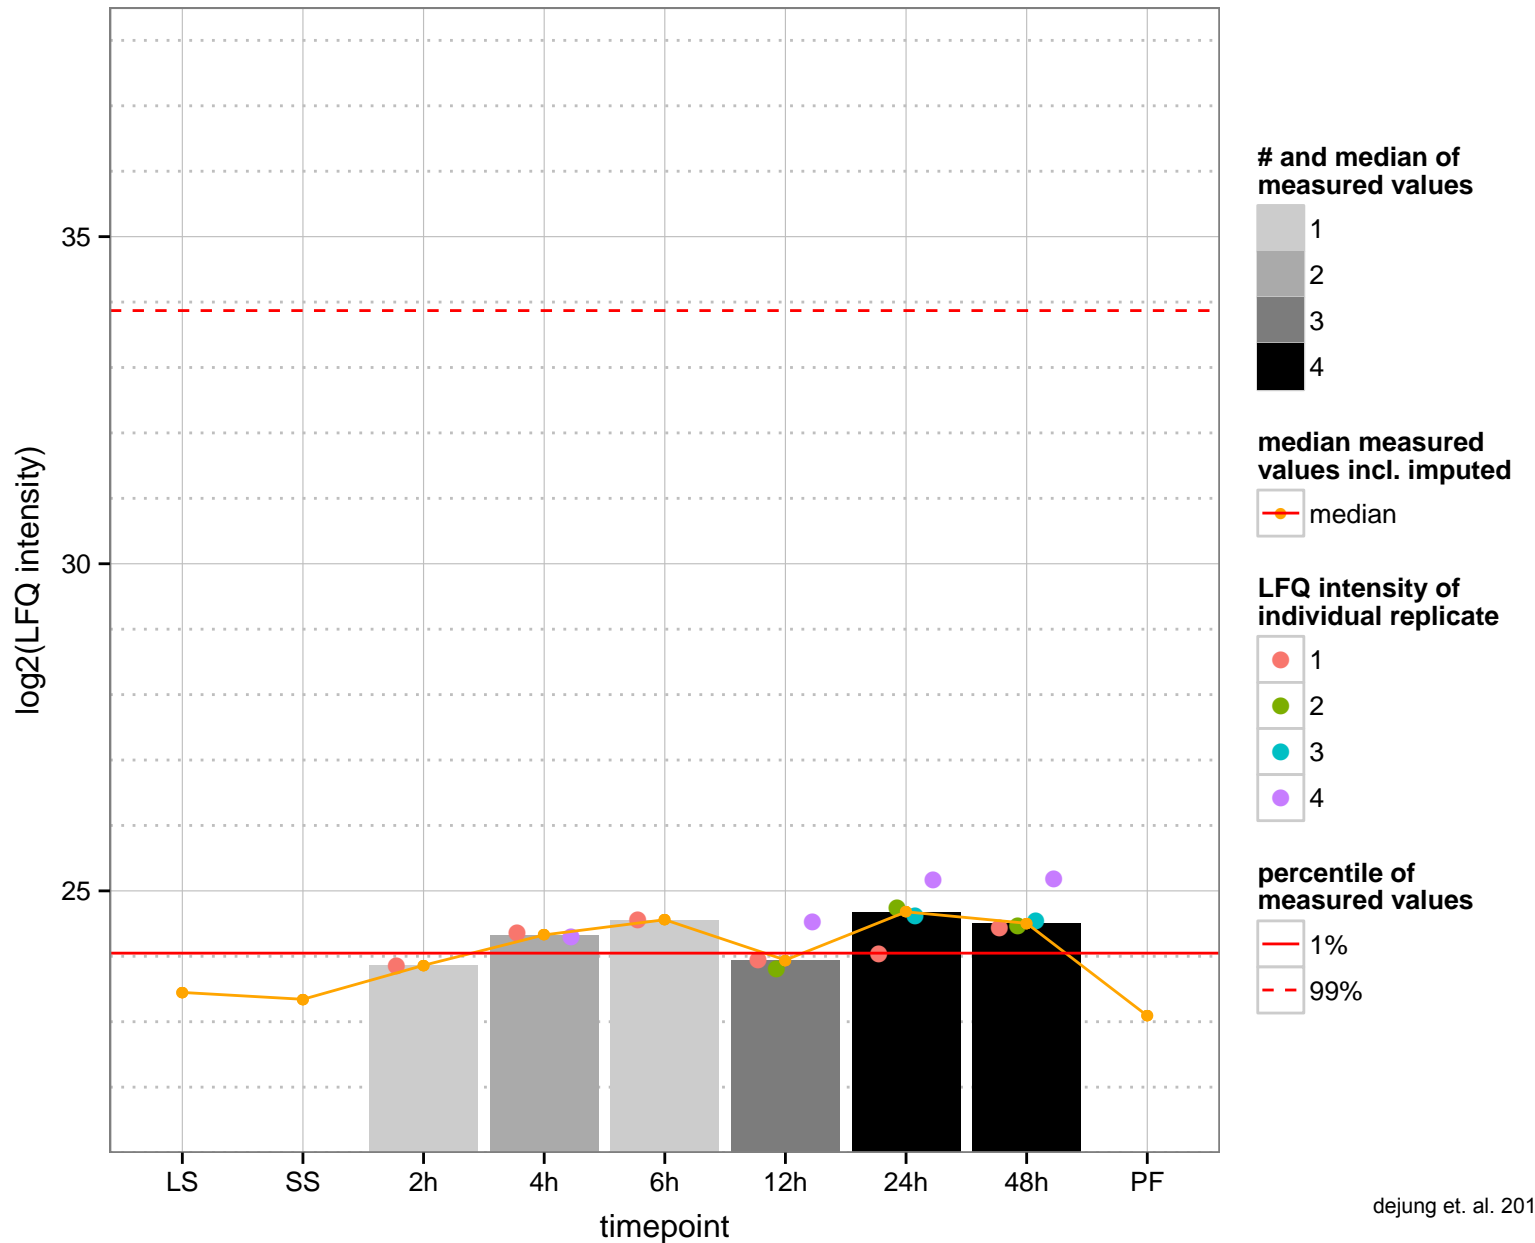

L-Lysine transport protein, putative

Tb927.11.15860;Tb927.11.15840

AGOF: L-lysine transmembrane transporter activity, amine transmembrane transporter activity

AGOC: flagellar pocket, integral to membrane, kinetoplast, nucleus, plasma membrane

AGOP: lysine transport, amino acid transport, lysine transport

PGOF: null

PGOC: null

PGOP: null

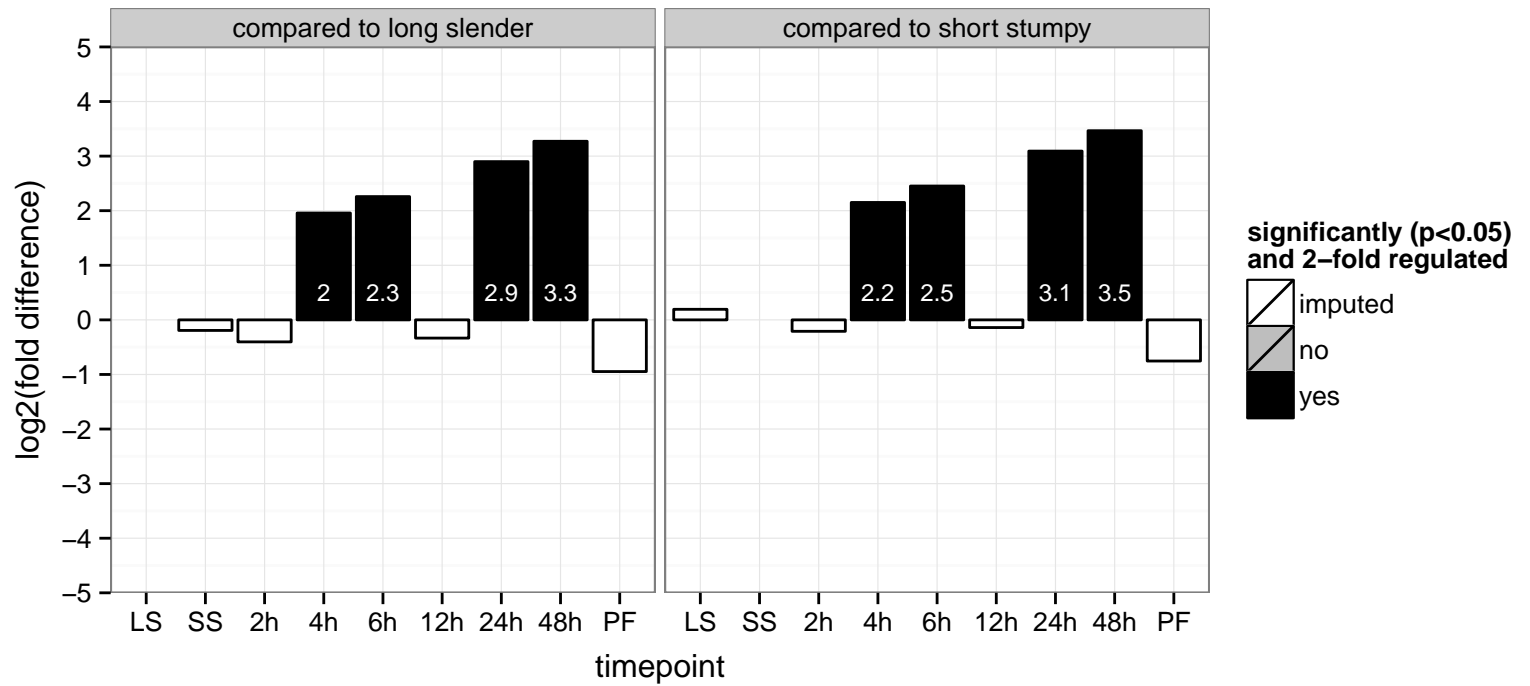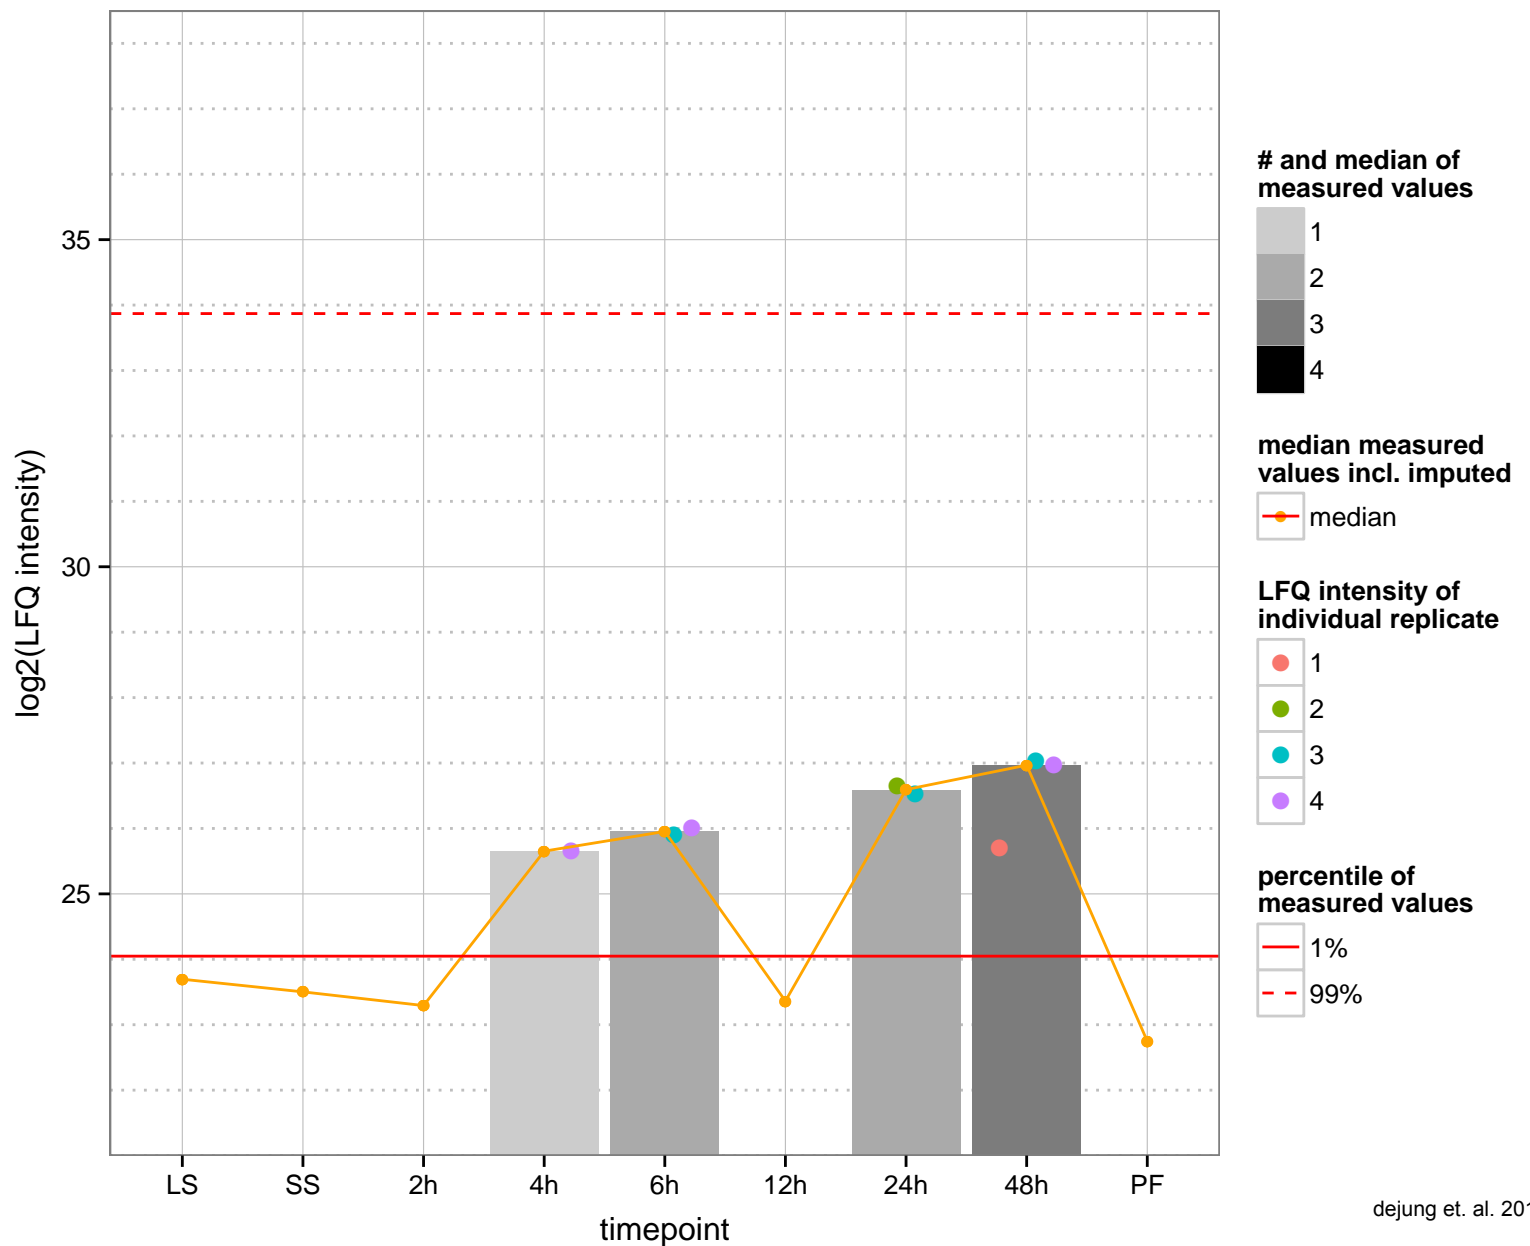

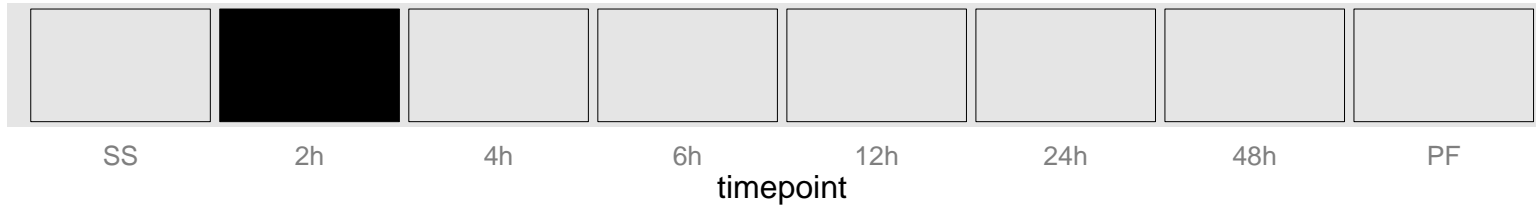

**regulated**  not regulated  significant down  significant up

hypothetical protein, conserved

Tb927.11.9290

AGOF: ATP binding, protein serine/threonine kinase activity, protein tyrosine kinase activity

AGOC: null

AGOP: protein phosphorylation

PGOF: ATP binding, protein kinase activity, transferase activity, transferring phosphorus-containing groups

PGOC: null

PGOP: protein phosphorylation

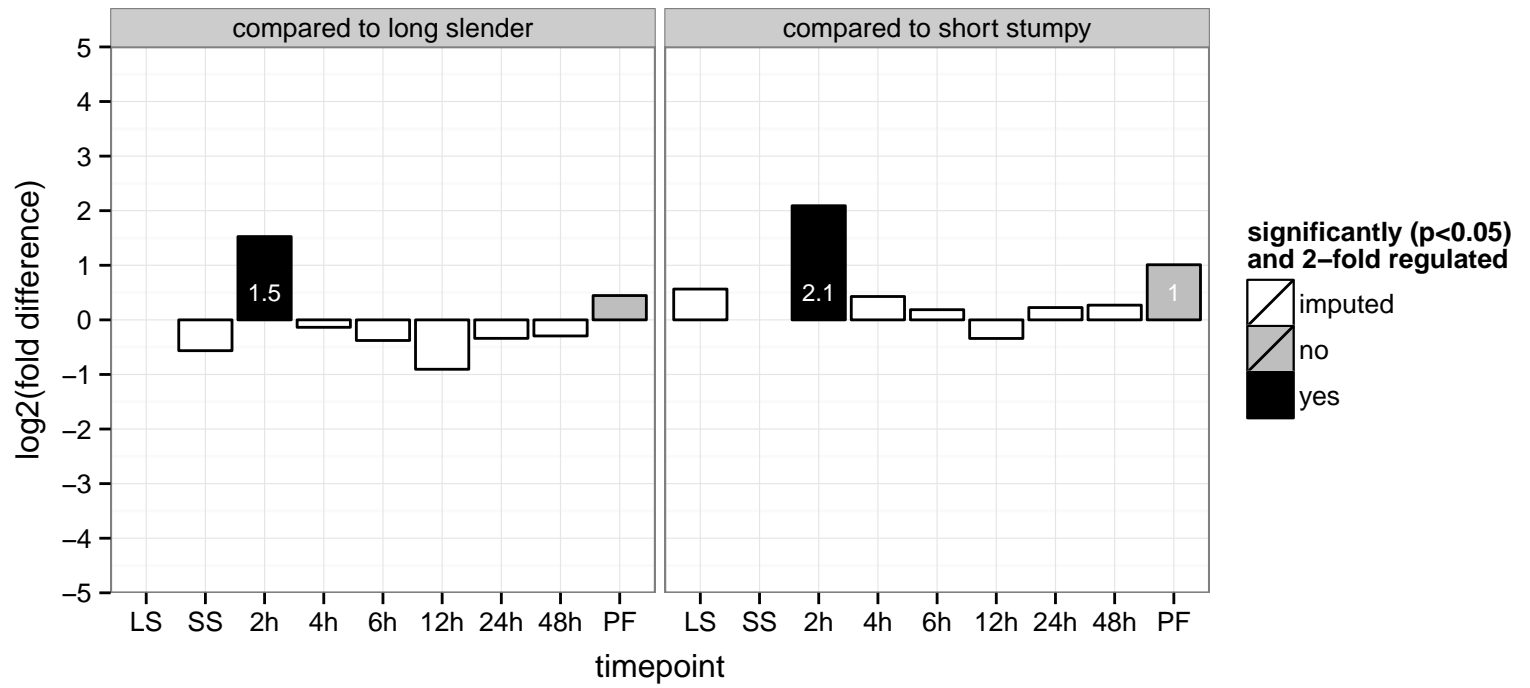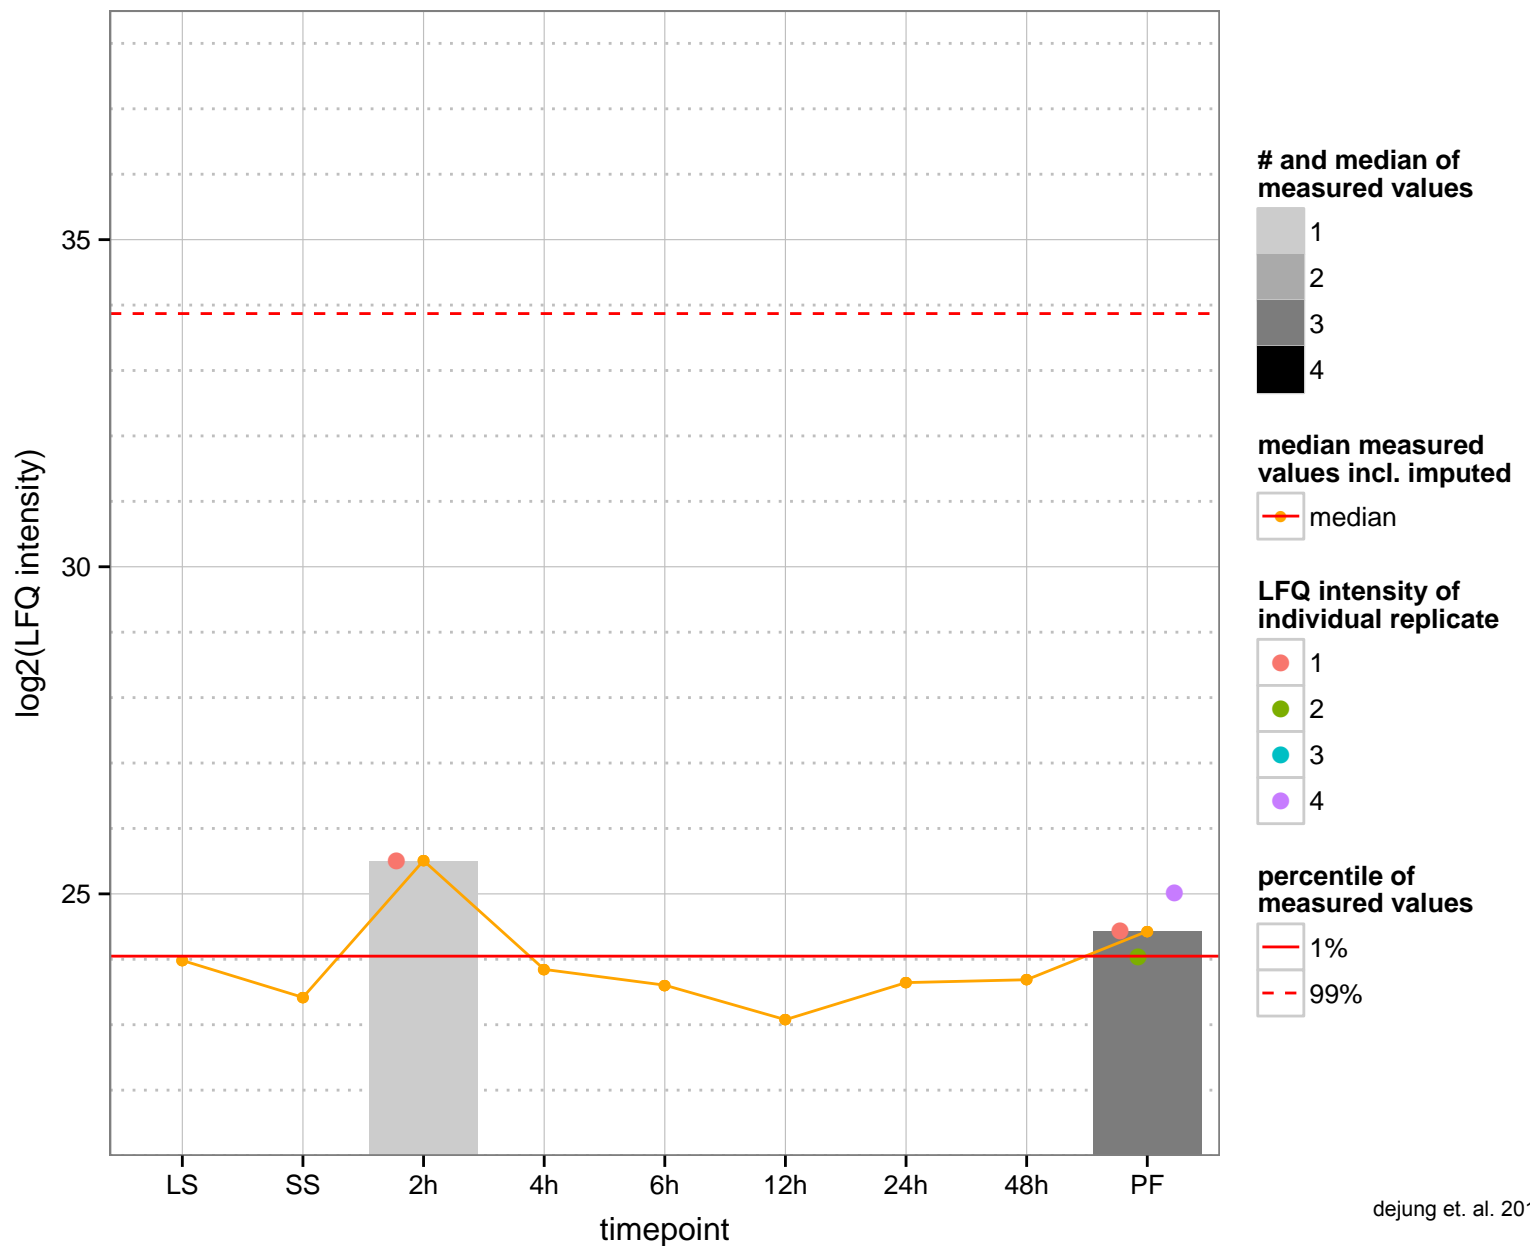

hypothetical protein, conserved  
 Tb927.5.2150  
 AGOF: null  
 AGOC: mitochondrion  
 AGOP: null  
 PGO: null  
 PGO: null  
 PGO: null

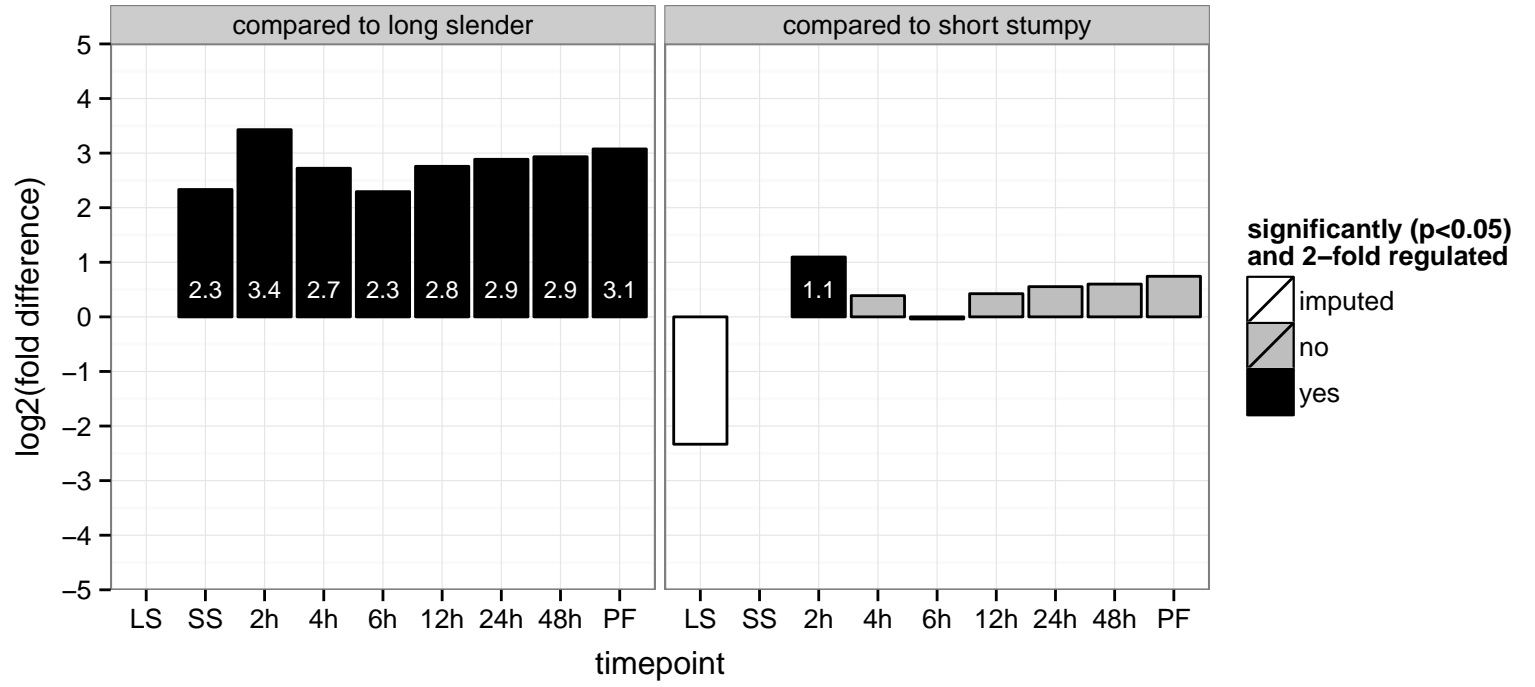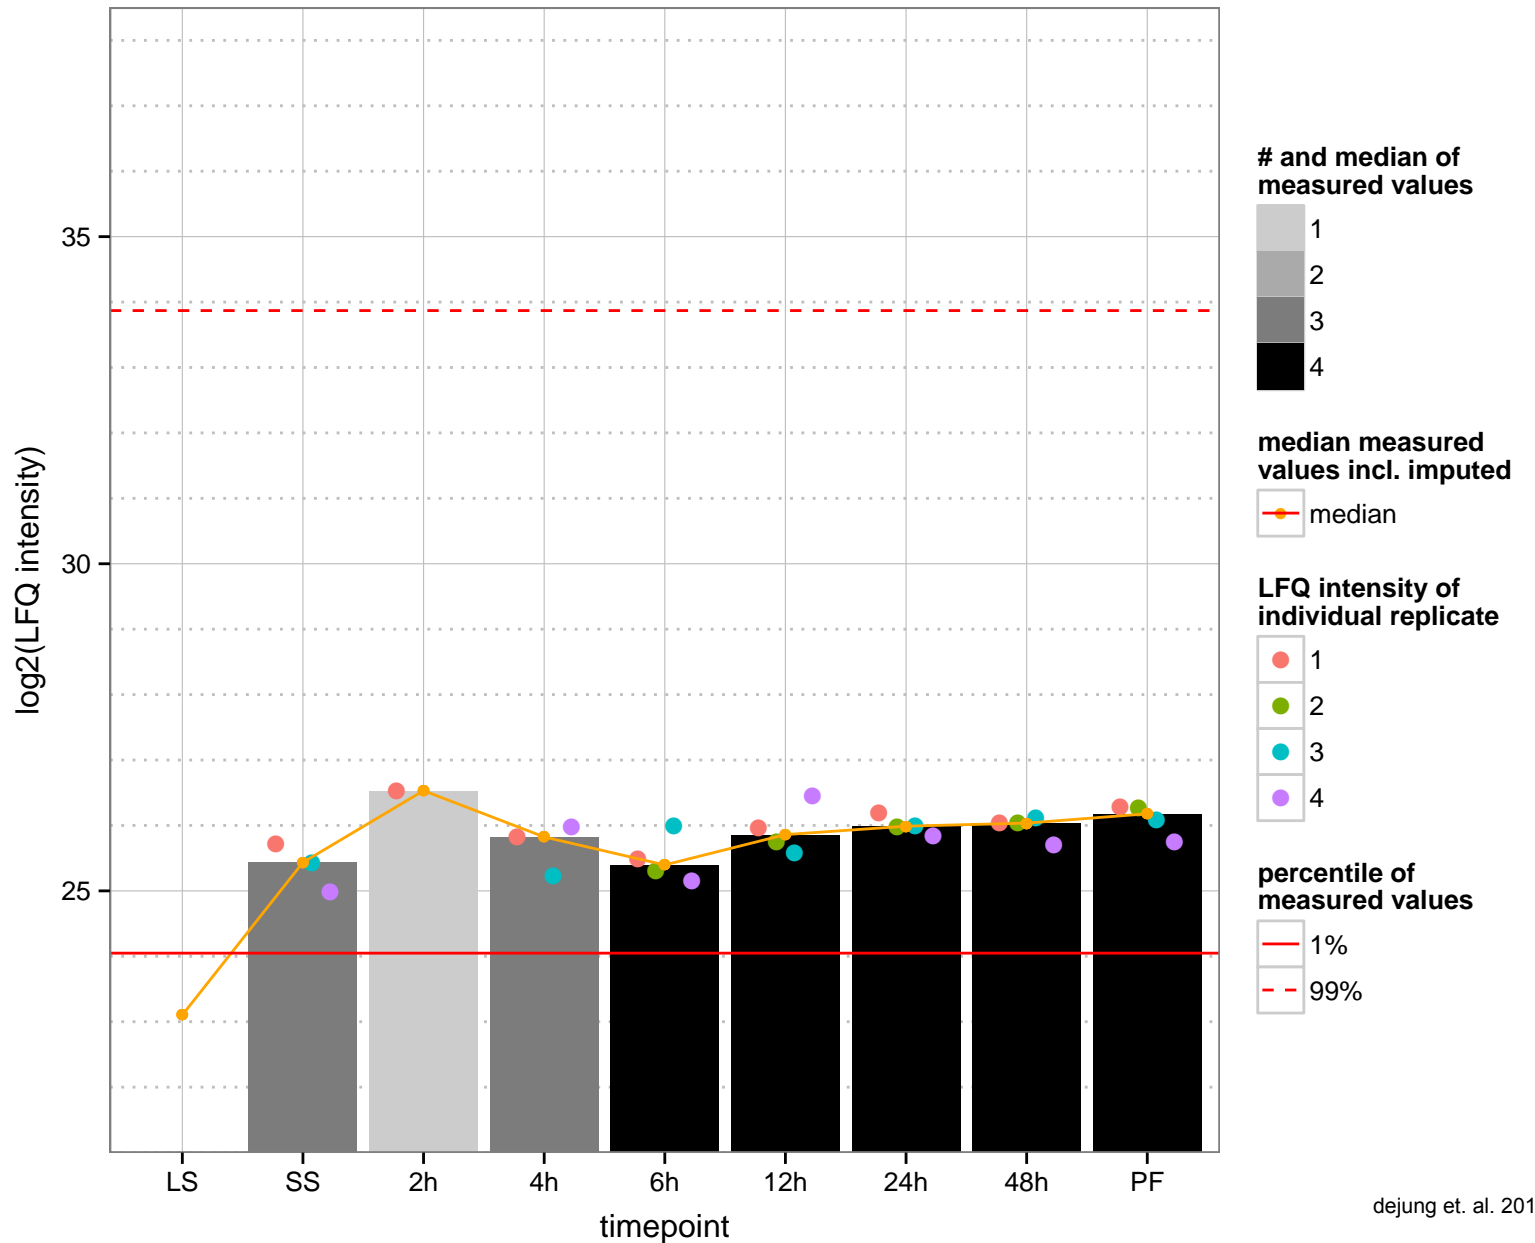

hypothetical protein, conserved  
 Tb927.9.13470  
 AGOF: null  
 AGOC: null  
 AGOP: null  
 PGO: protein binding  
 PGOC: null  
 PGOP: null

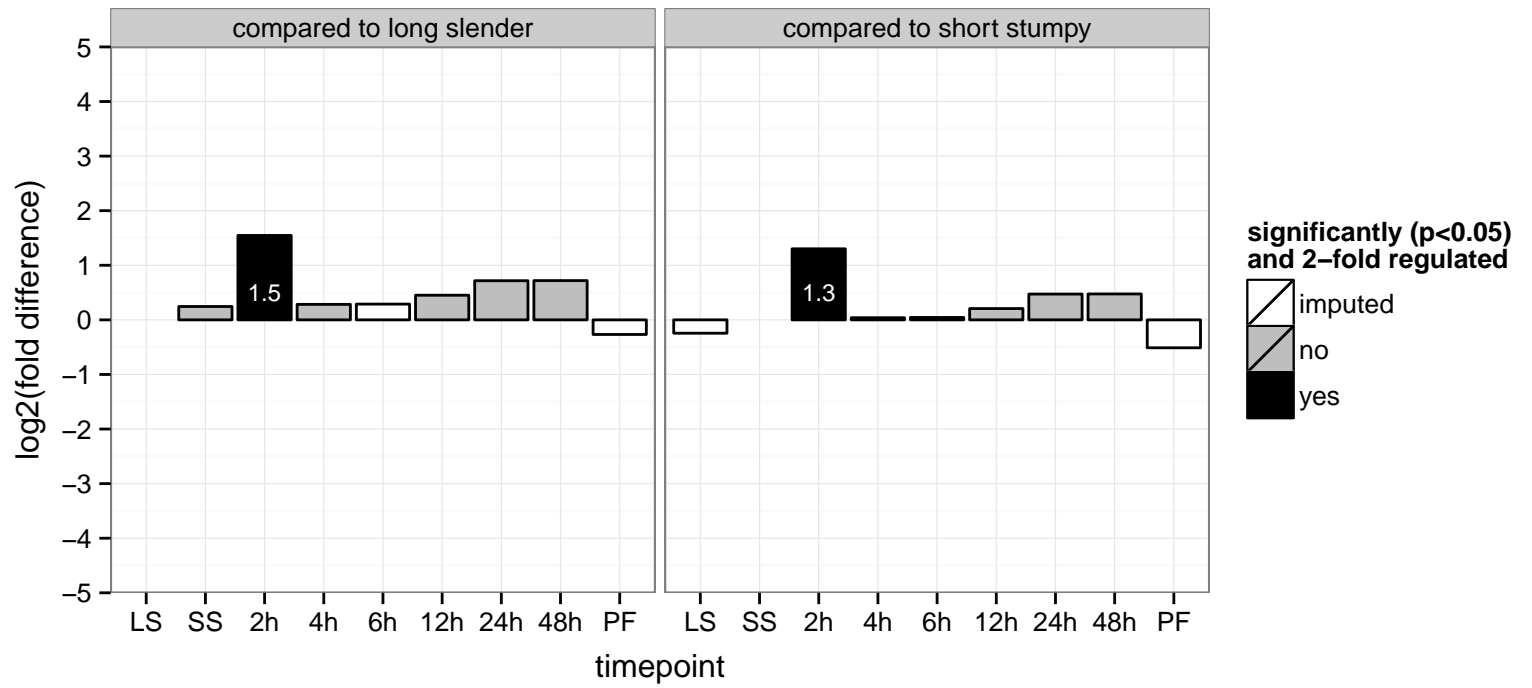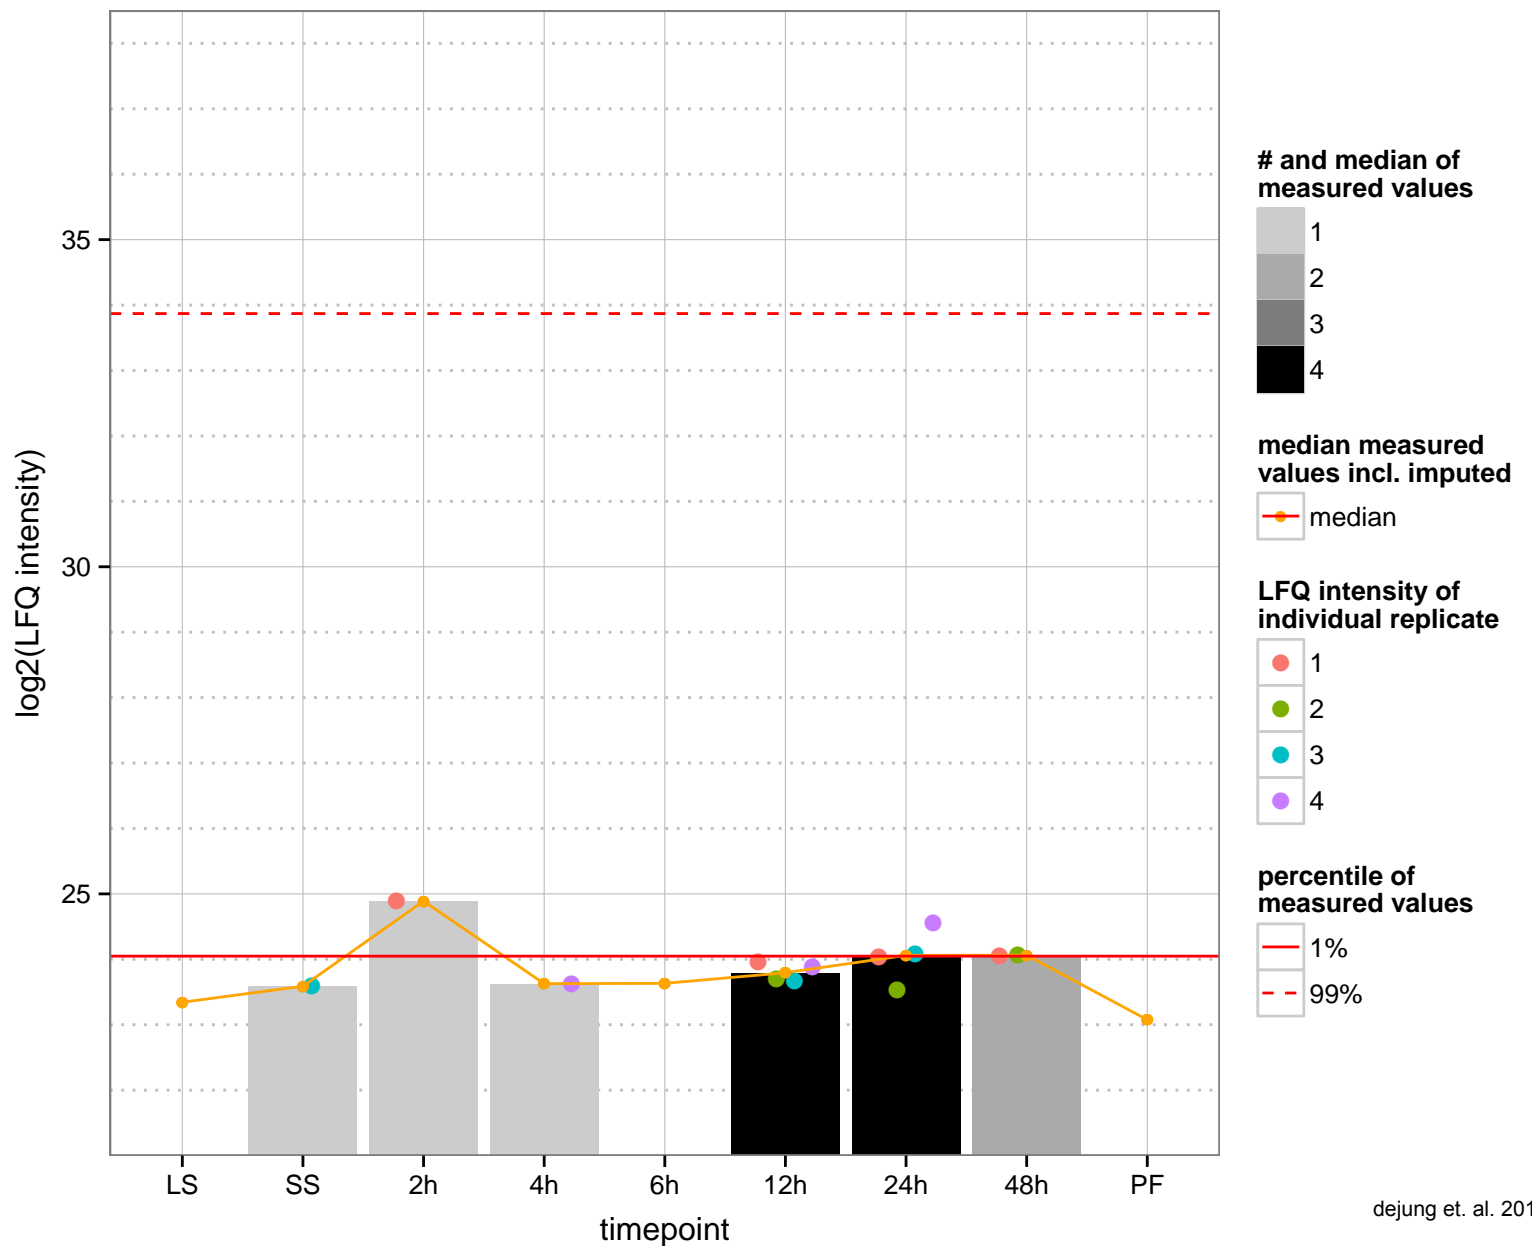

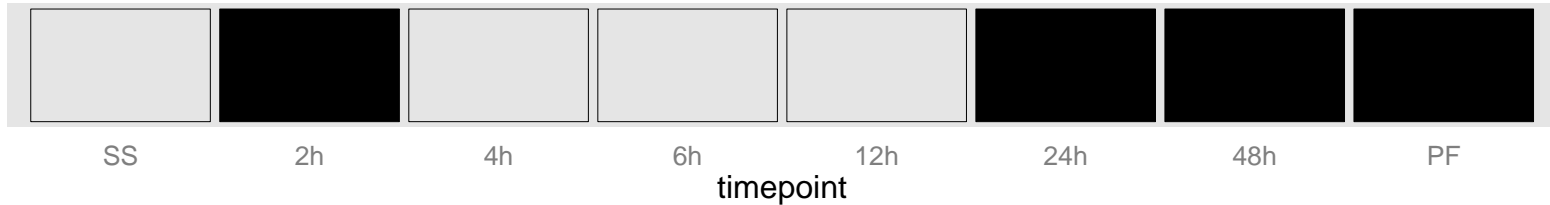

**regulated**  not regulated  significant down  significant up



acetyltransferase, putative  
 Tb927.5.2280  
 AGOF: transferase activity, transferring acyl groups  
 AGOC: null  
 AGOP: metabolic process  
 PGOF: transferase activity, transferring acyl groups  
 PGO: null  
 PGOP: metabolic process

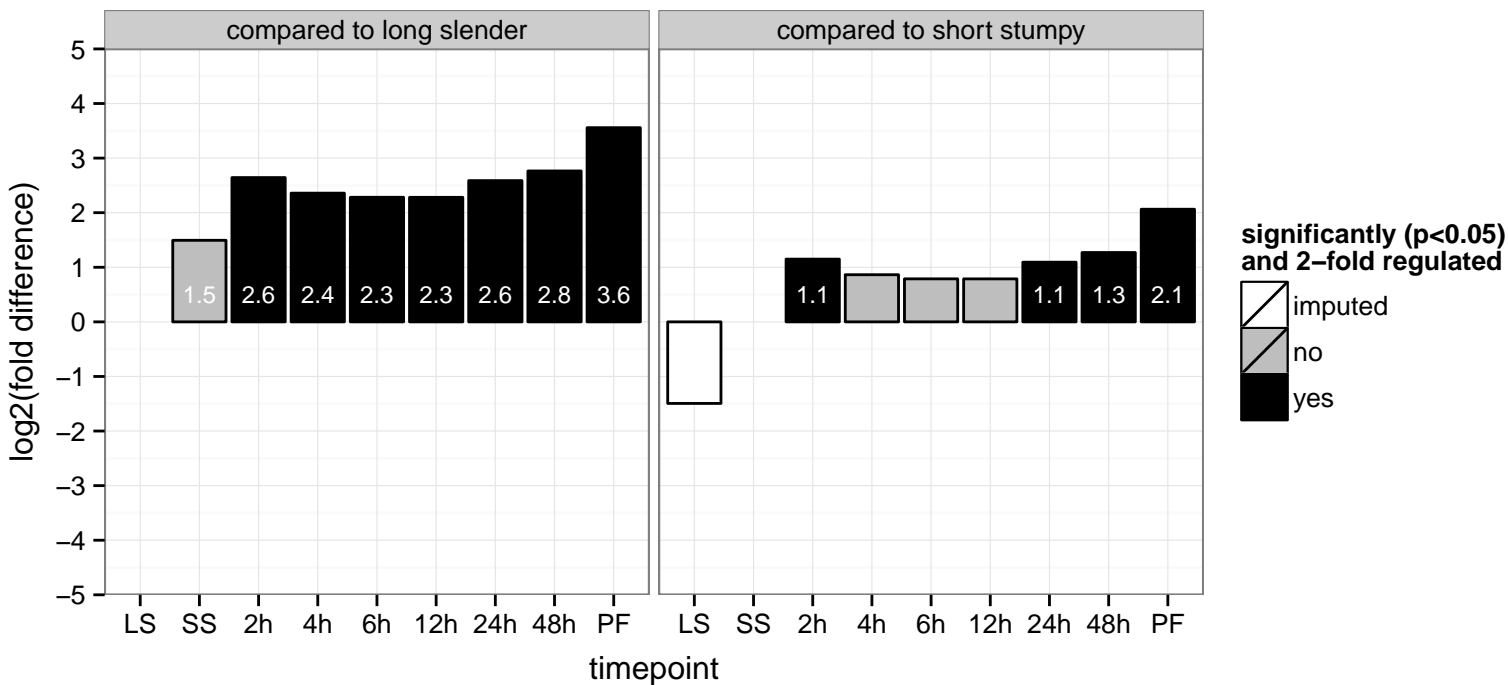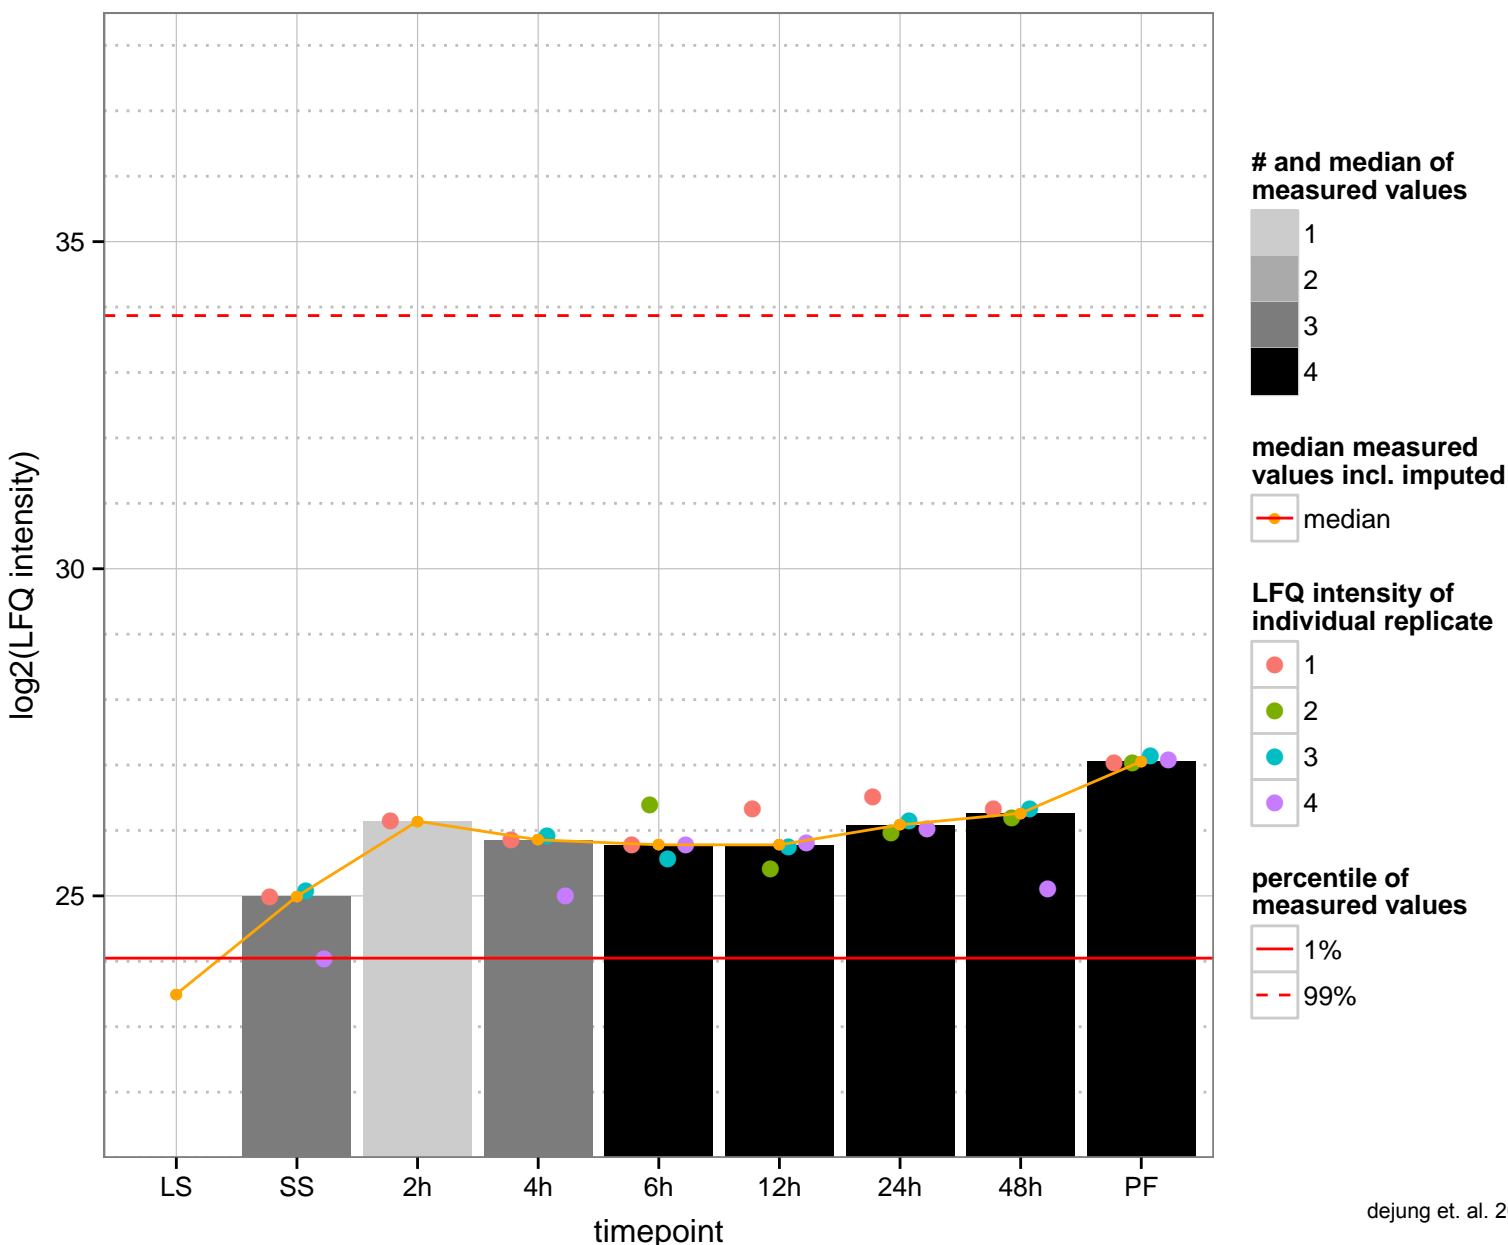

hypothetical protein, conserved  
 Tb927.5.2520  
 AGOF: null  
 AGOC: null  
 AGOP: null  
 PGO: protein binding  
 PGO: null  
 PGO: null

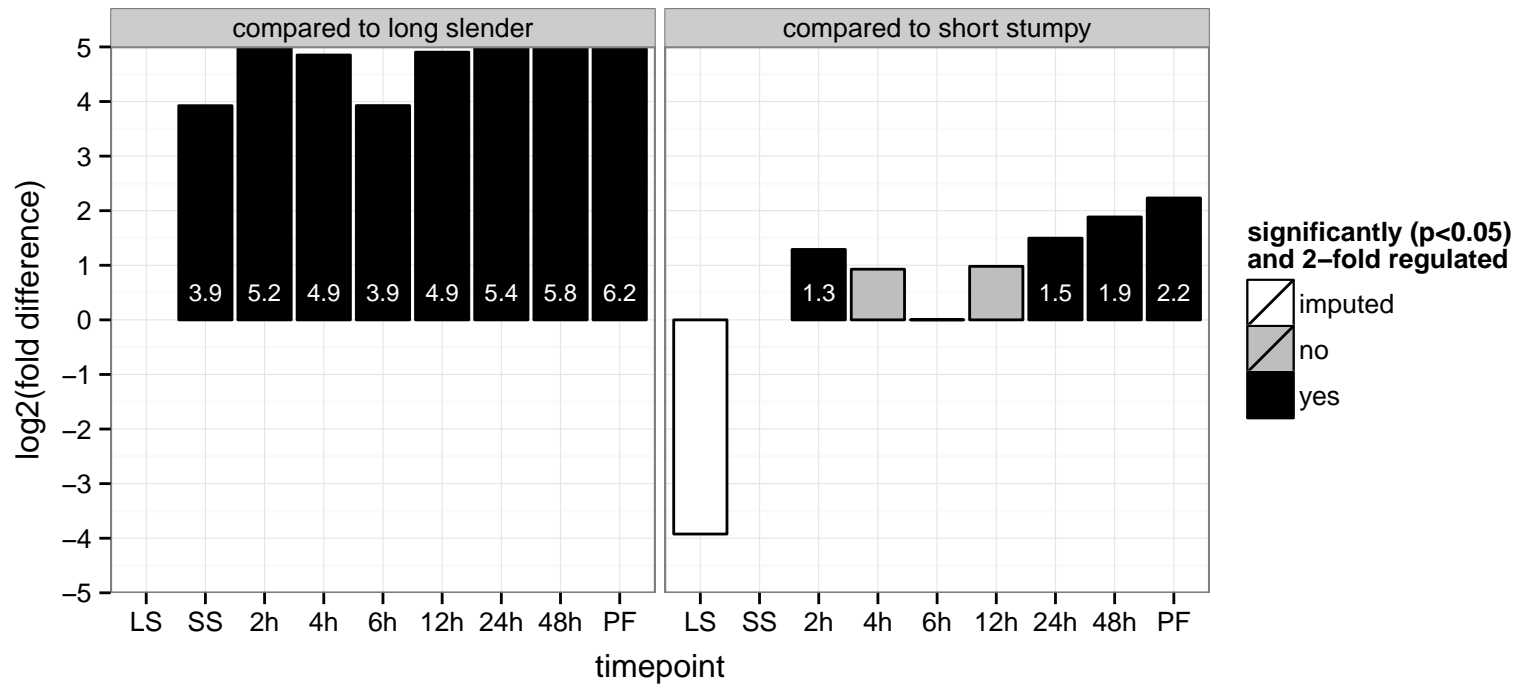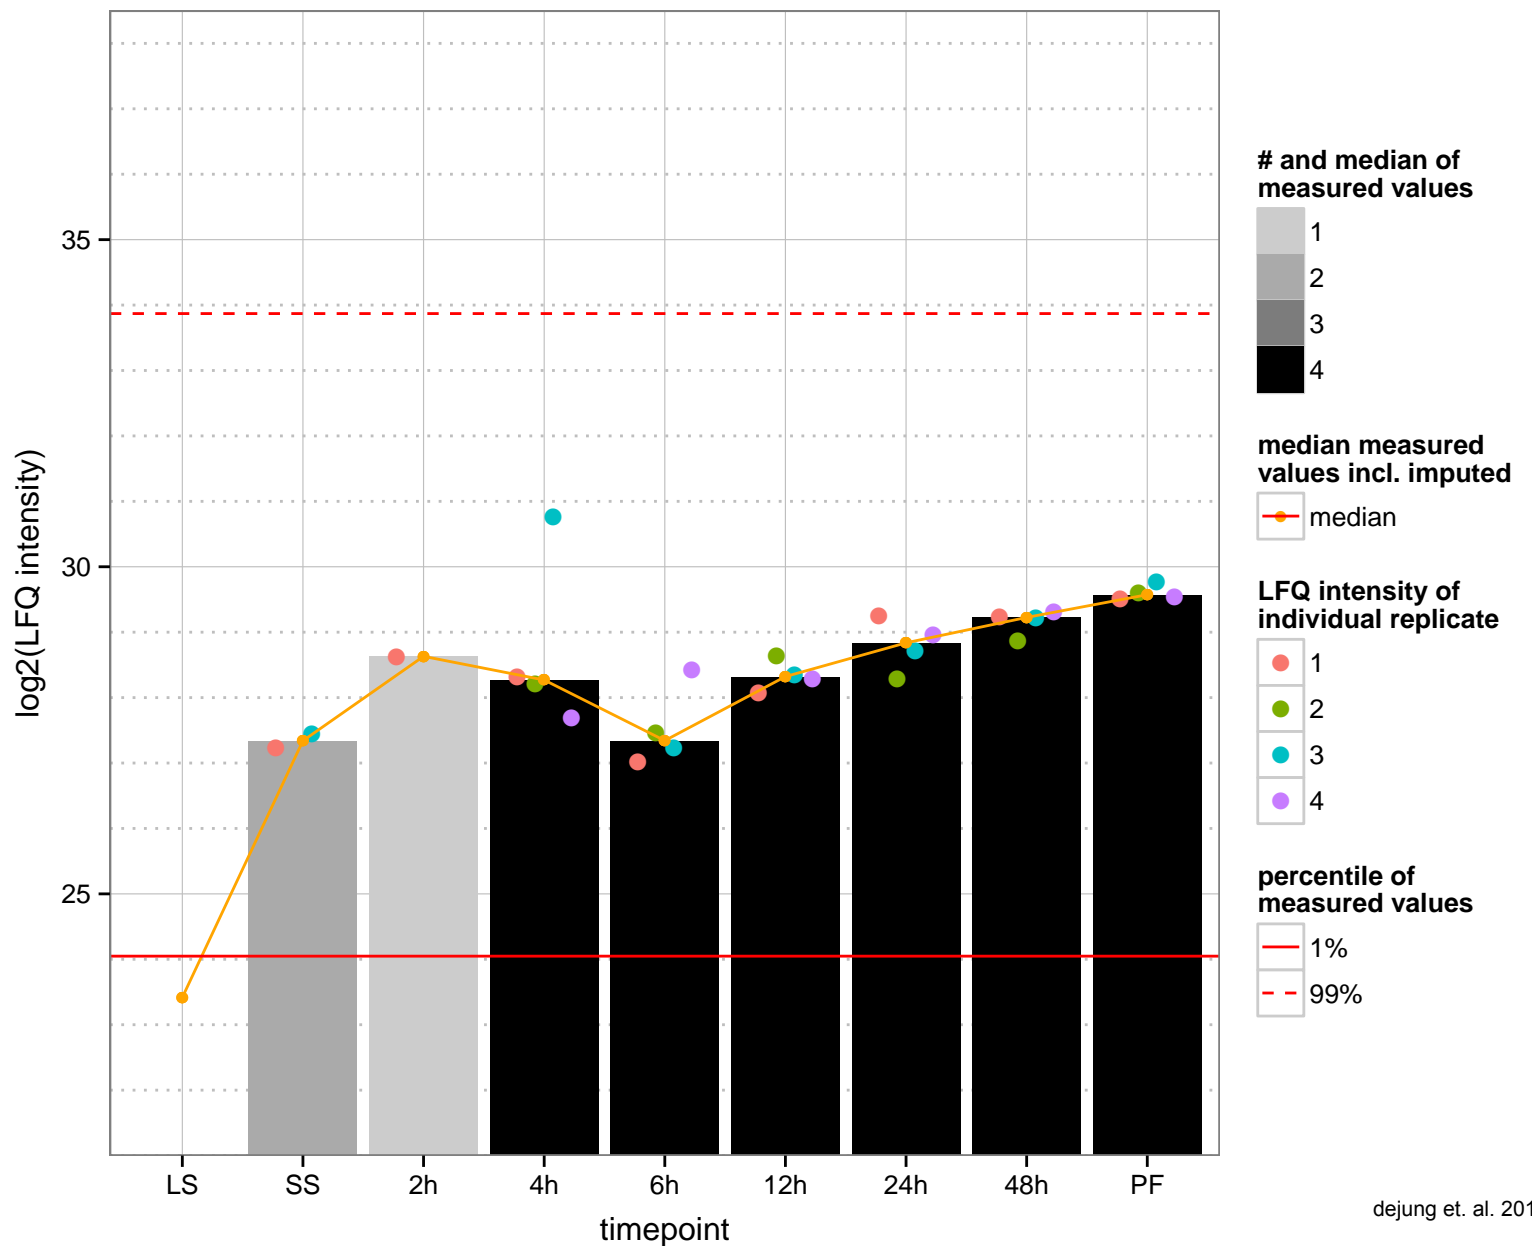

thiosulfate sulfurtransferase, mitochondrial, putative  
 Tb927.6.4930  
 AGOF: null  
 AGOC: mitochondrial small ribosomal subunit, mitochondrion  
 AGOP: null  
 PGO: null  
 PGO: null  
 PGO: null

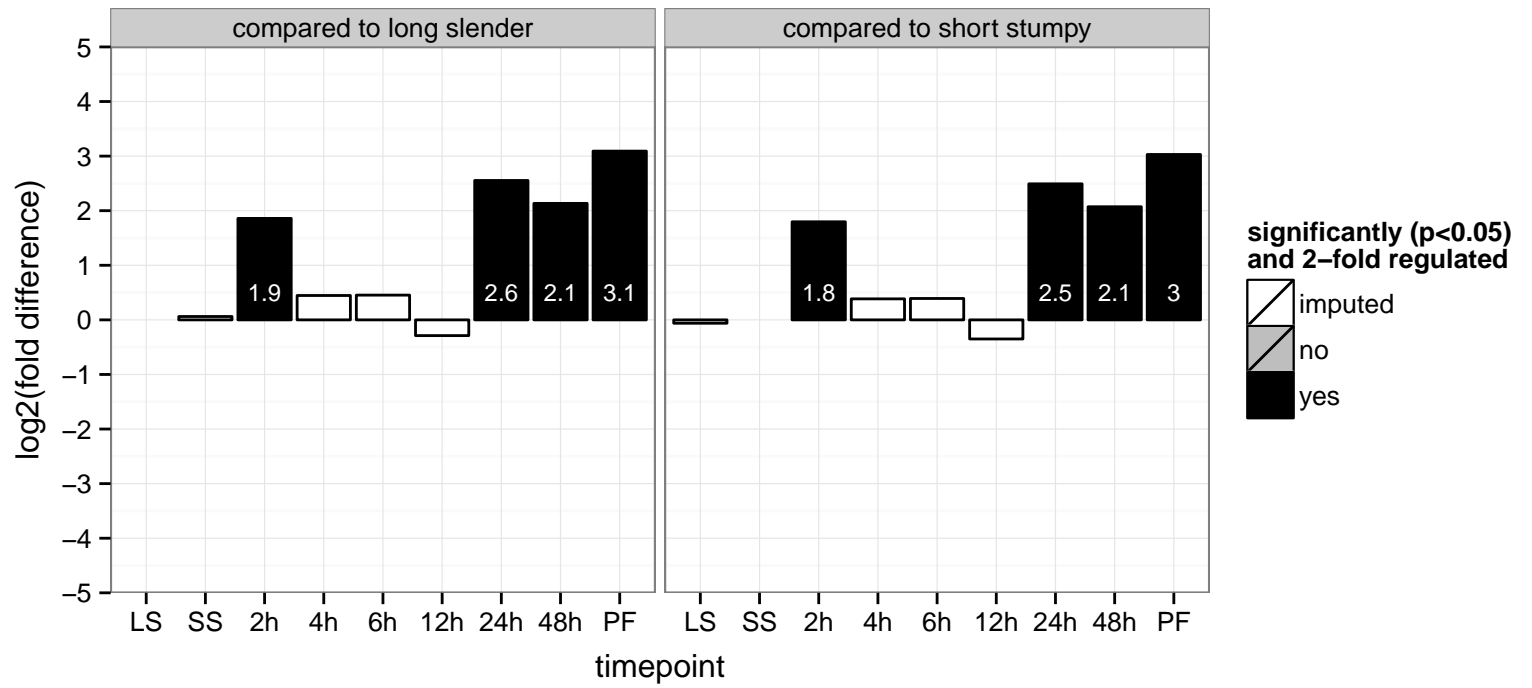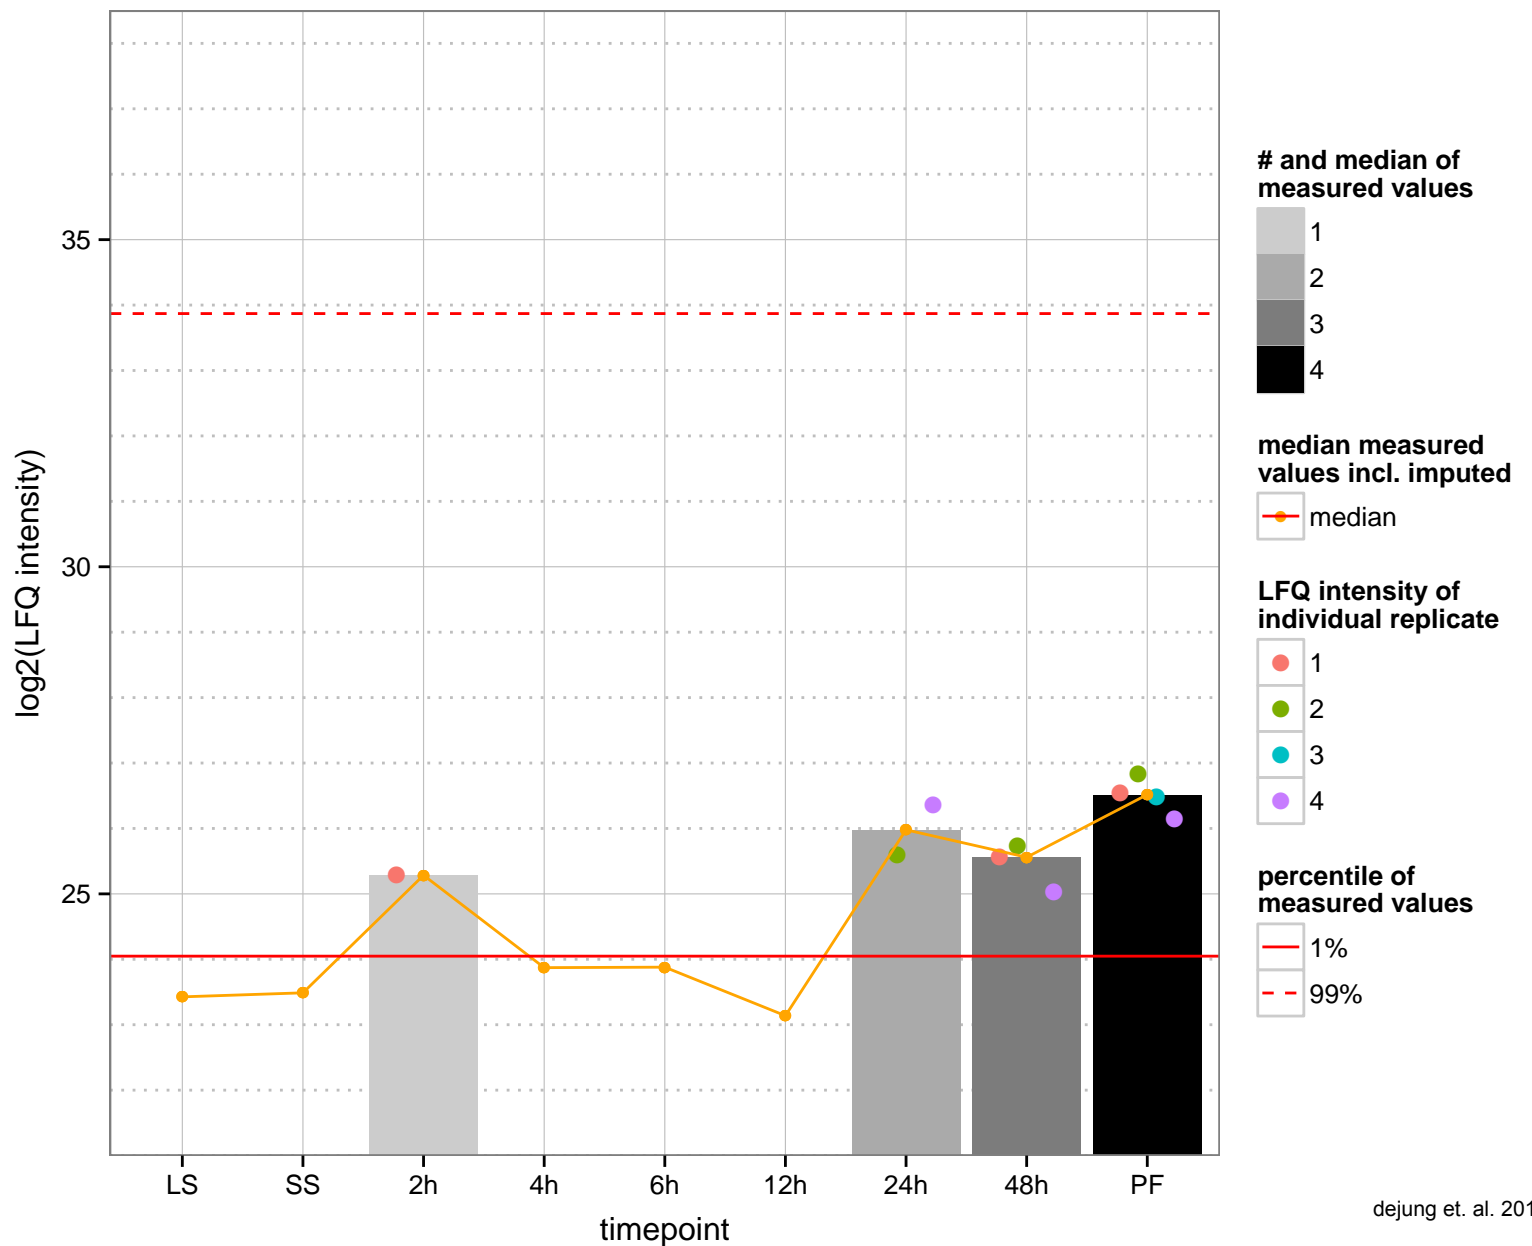

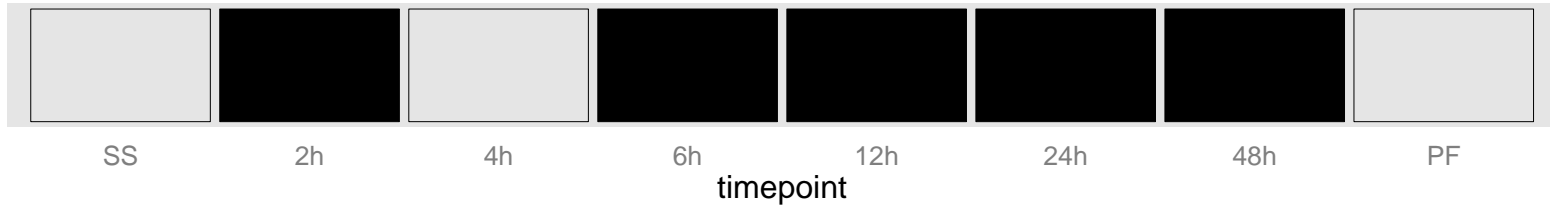

**regulated**  not regulated  significant down  significant up

RNA-binding protein, putative (RBP15)  
 Tb927.10.7470  
 AGOF: RNA binding  
 AGOC: null  
 AGOP: RNA processing  
 PGO: nucleic acid binding  
 PGO: null  
 PGO: null

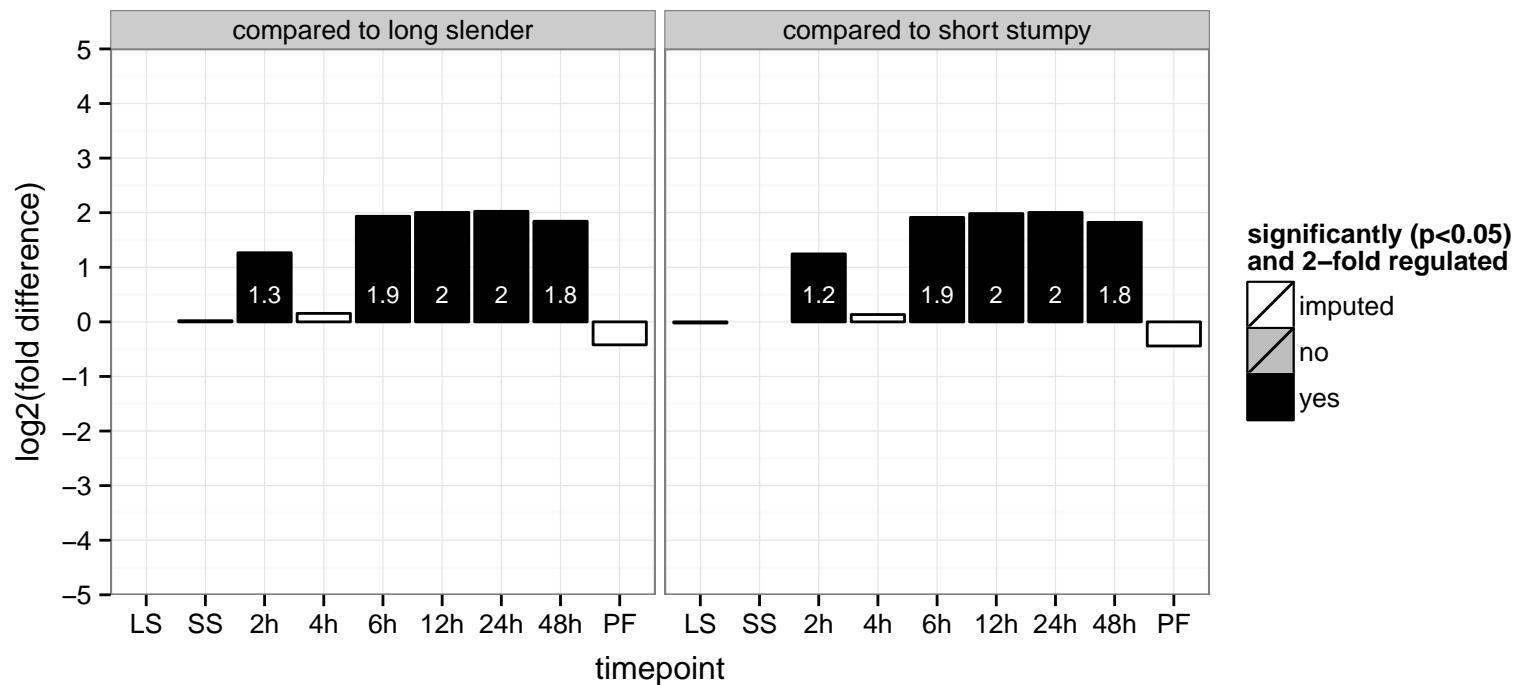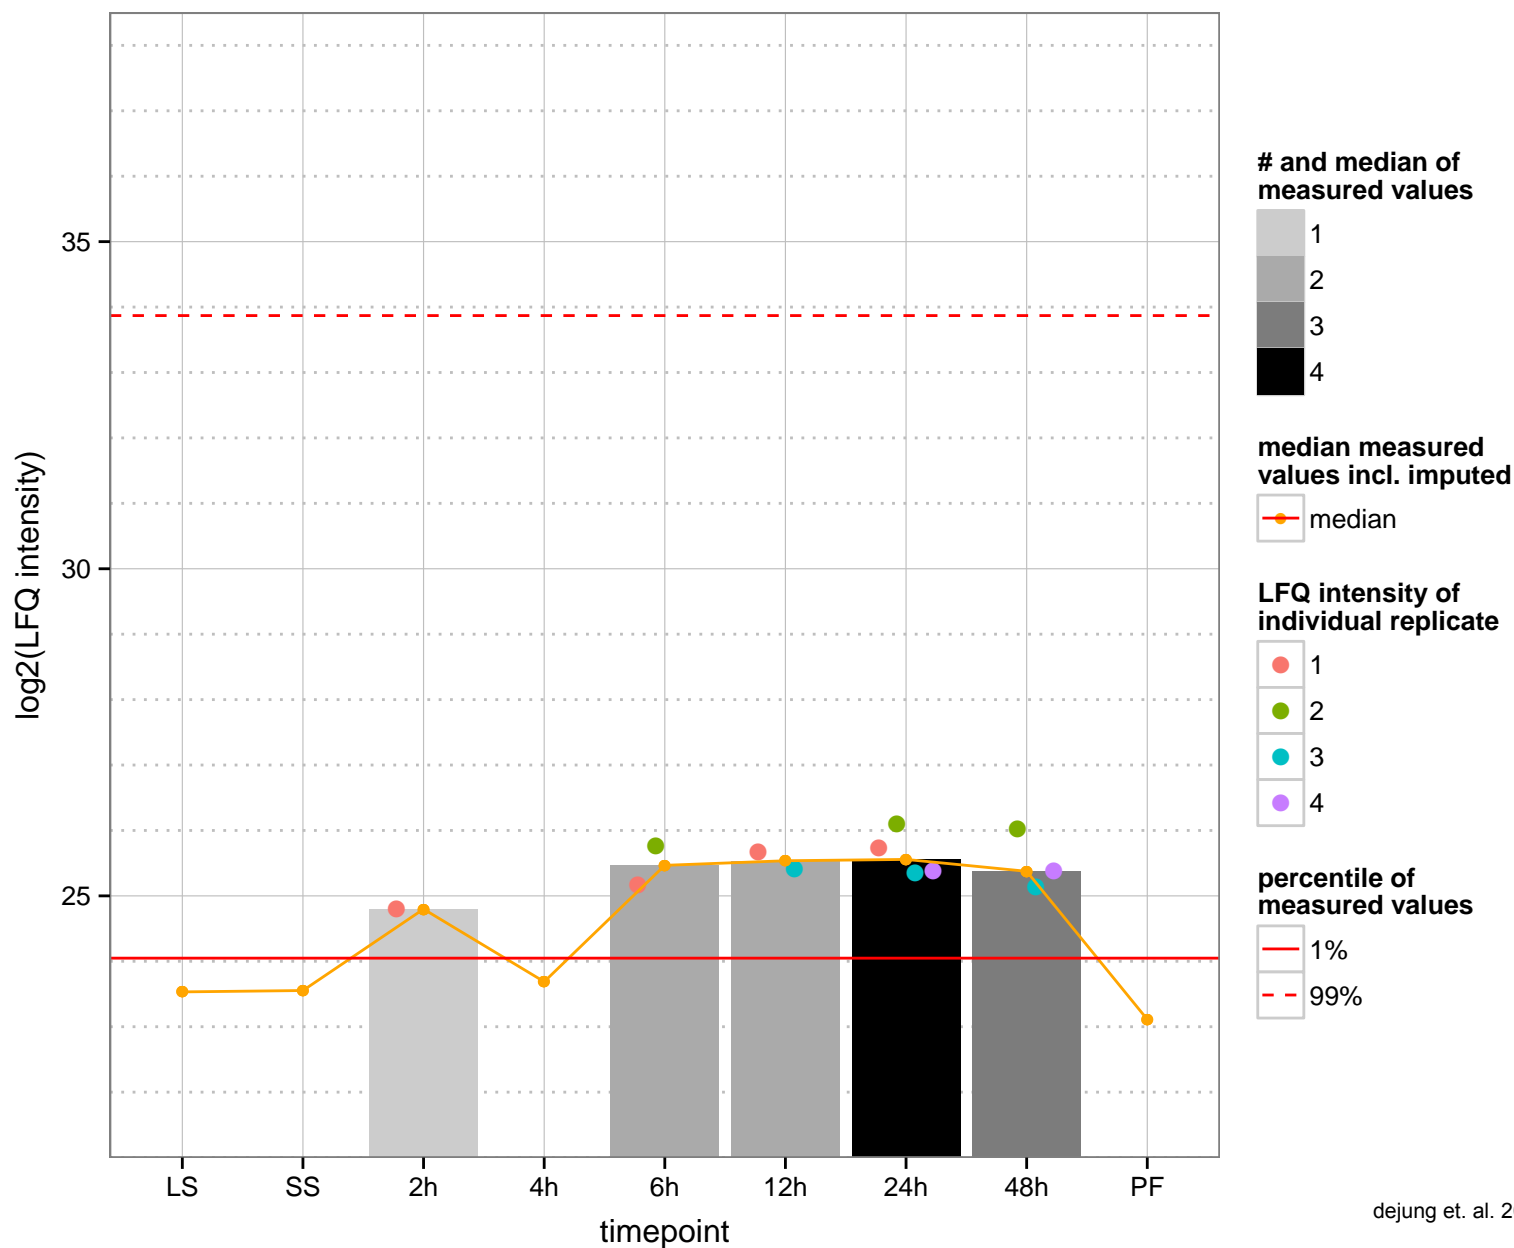

hypothetical protein, conserved  
 Tb927.3.1560  
 AGOF: null  
 AGOC: null  
 AGOP: null  
 PGOF: null  
 PGOC: null  
 PGOP: null

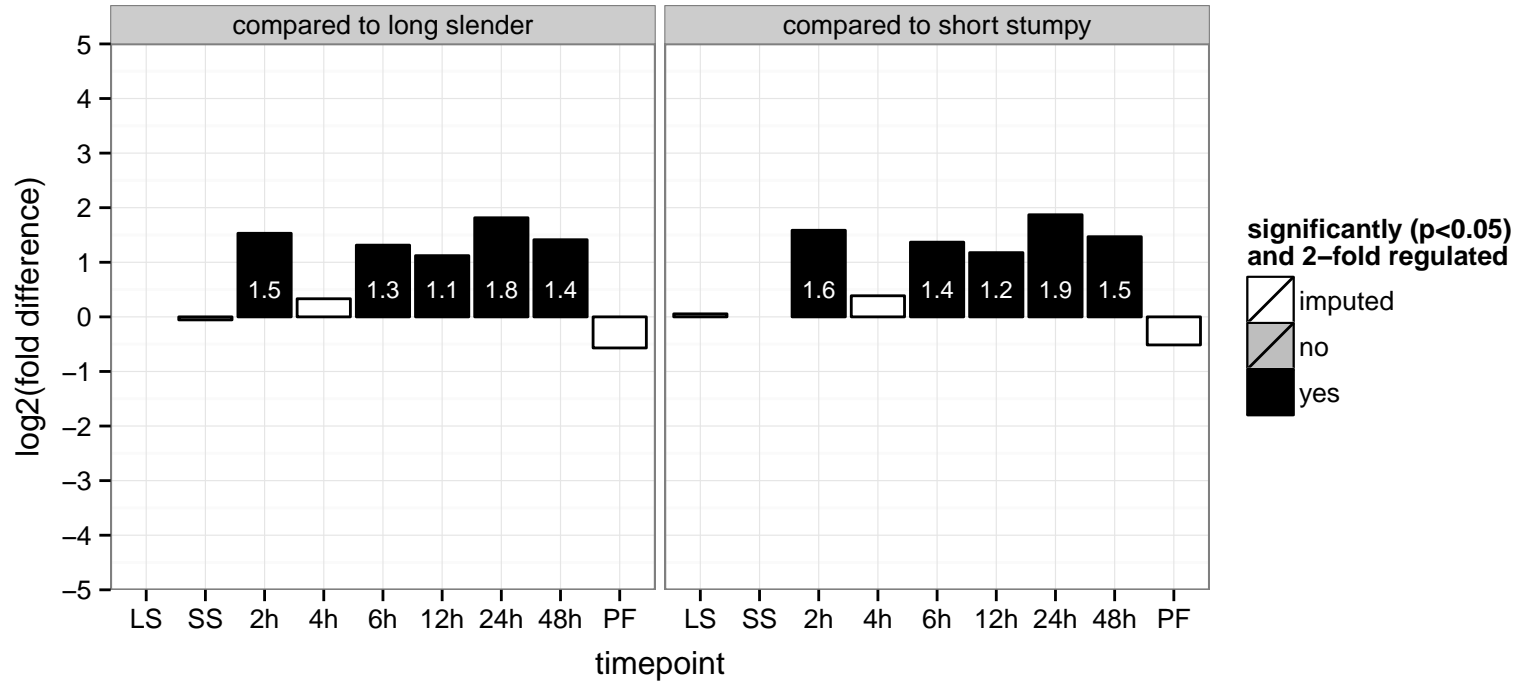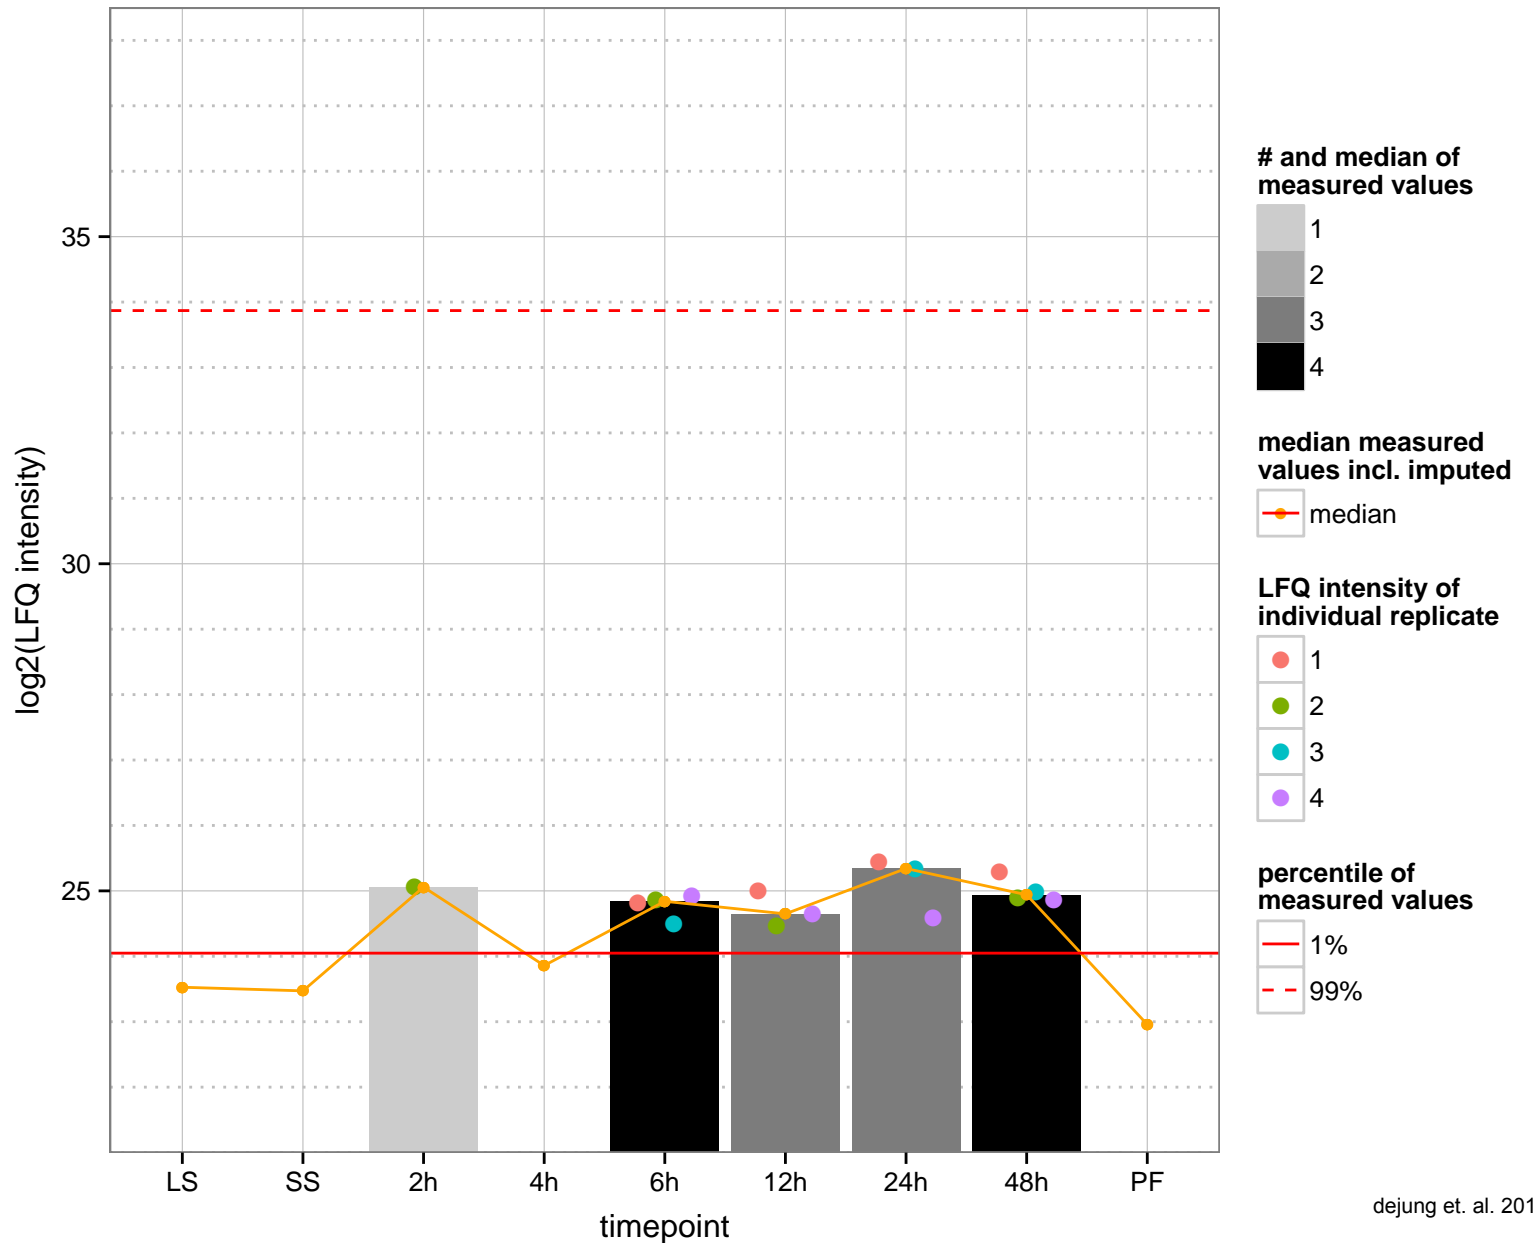

hypothetical protein, conserved  
 Tb927.7.3270  
 AGOF: null  
 AGOC: mitochondrion  
 AGOP: null  
 PGO: null  
 PGO: null  
 PGO: null

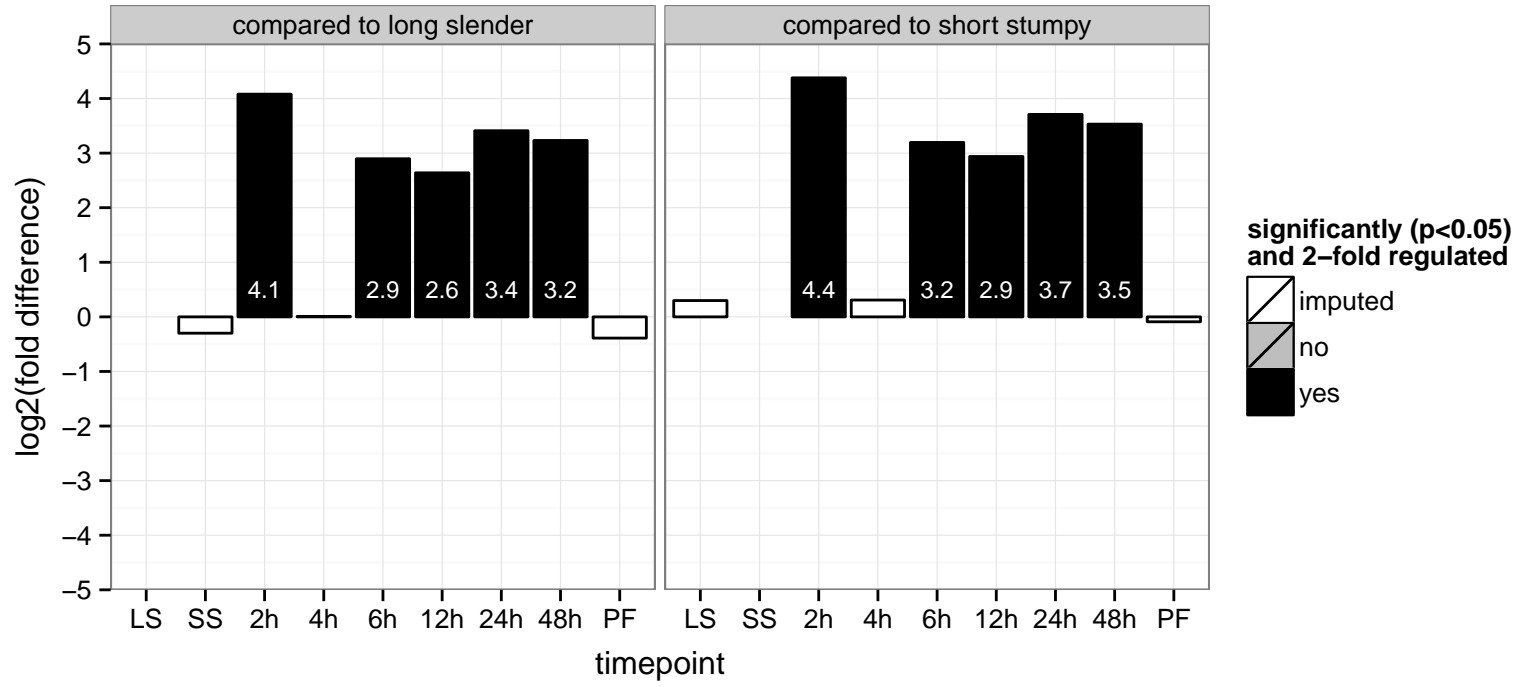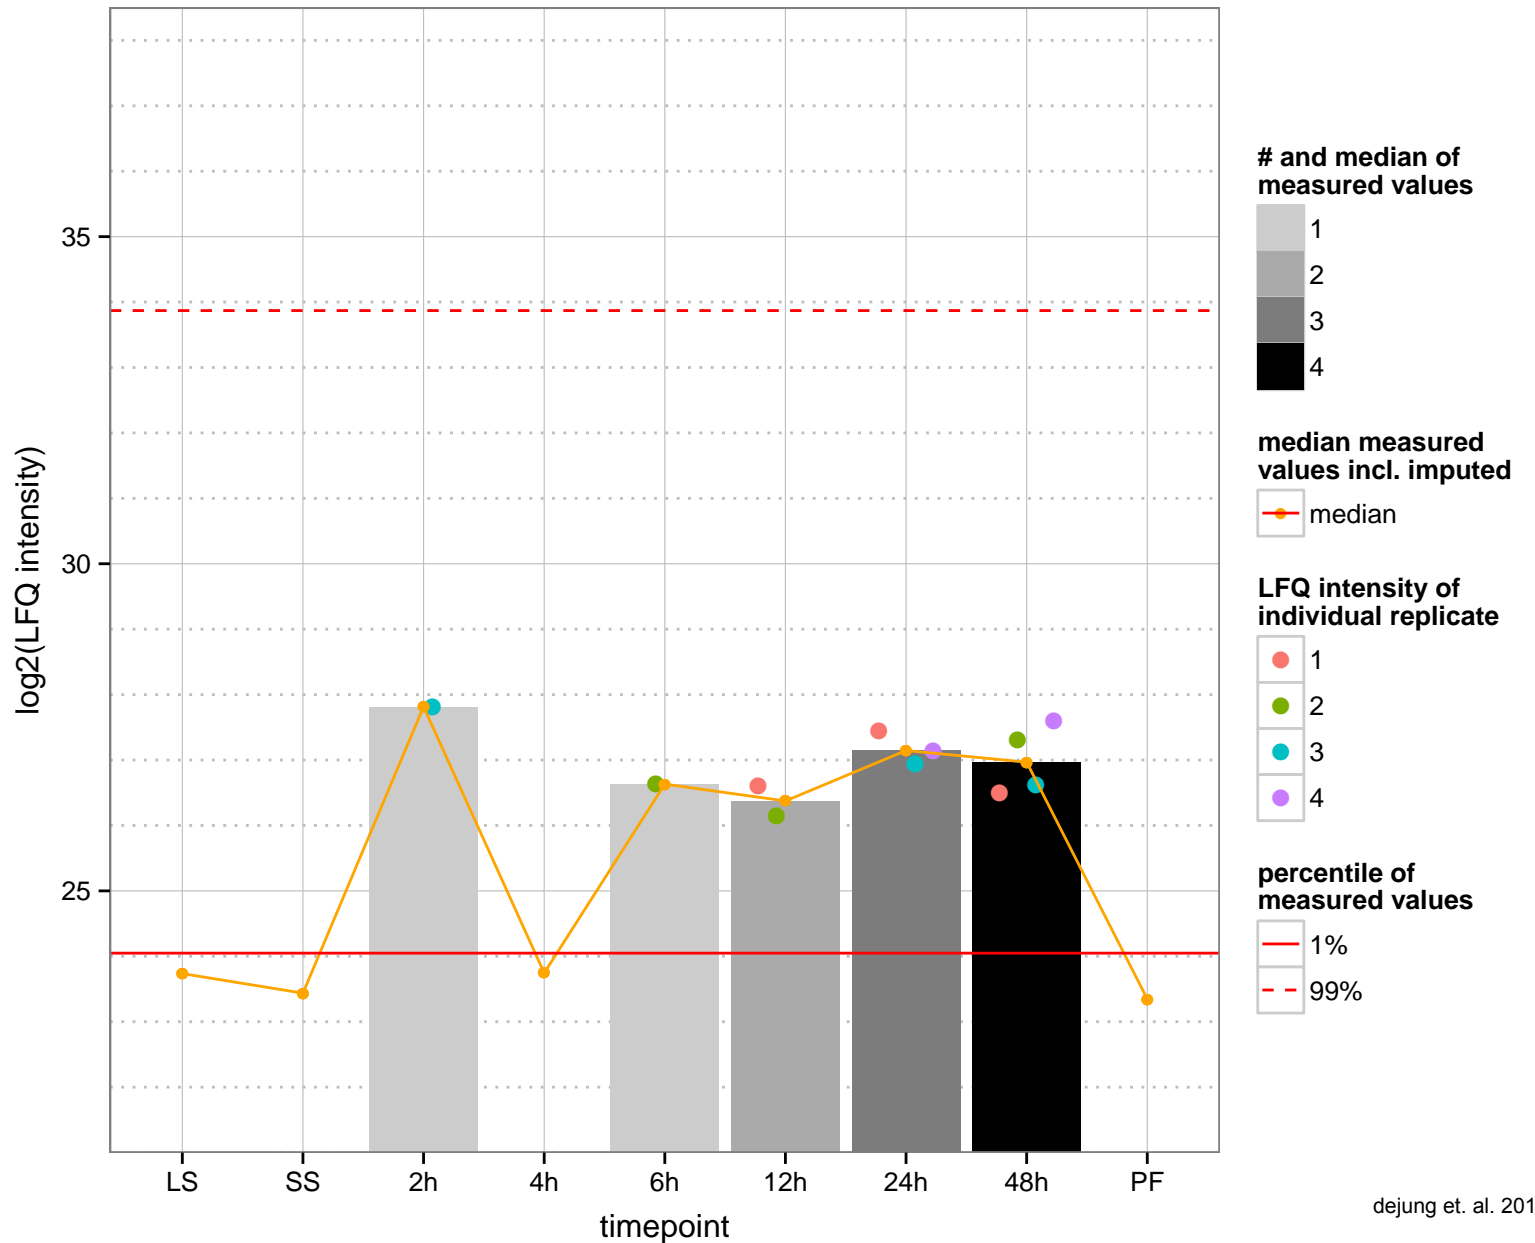

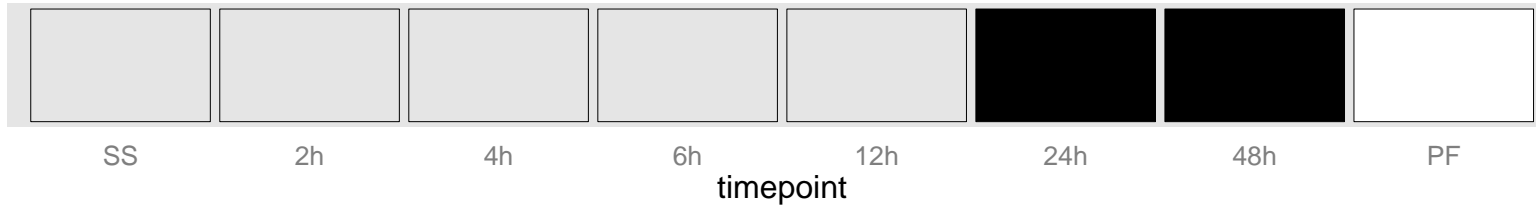

**regulated**  **not regulated**  **significant down**  **significant up**



hypothetical protein, conserved  
 Tb927.10.15830  
 AGOF: null  
 AGOC: mitochondrion  
 AGOP: null  
 PGO: null  
 PGOC: null  
 PGOP: null

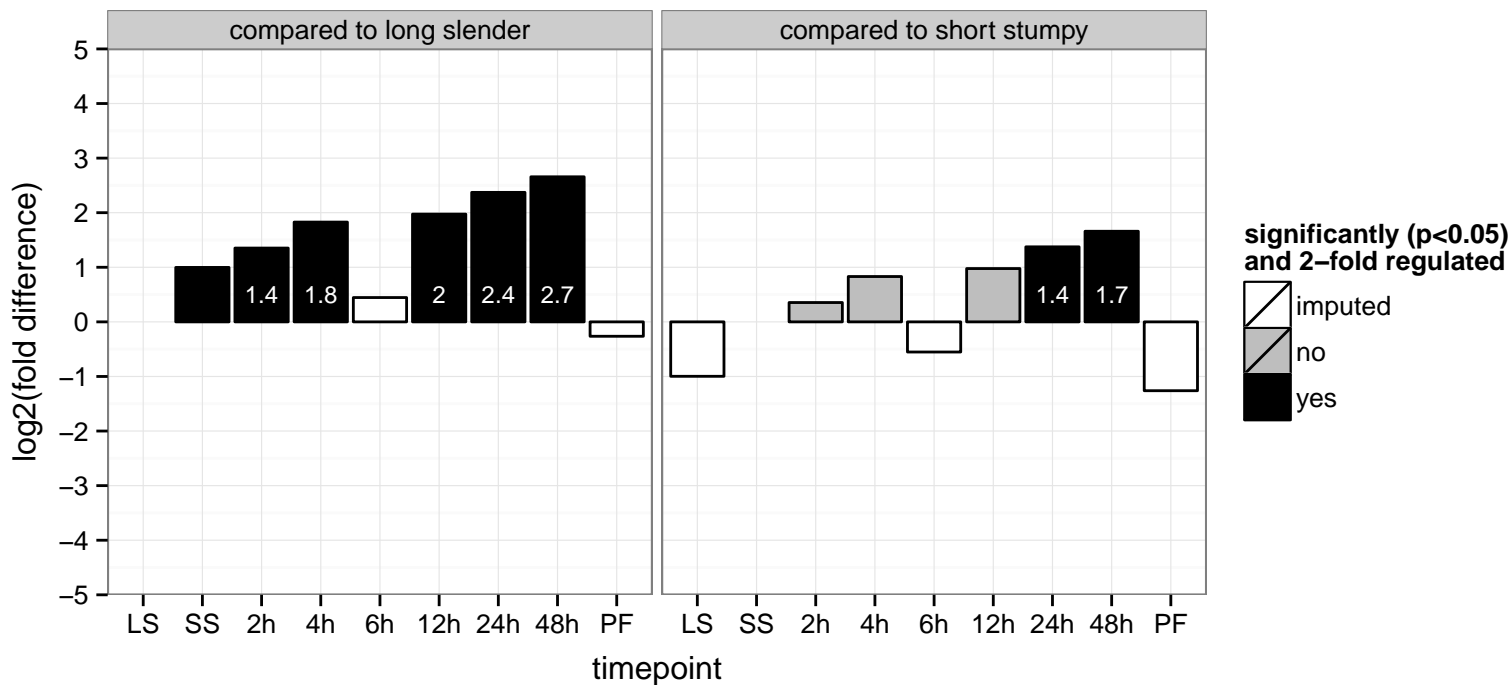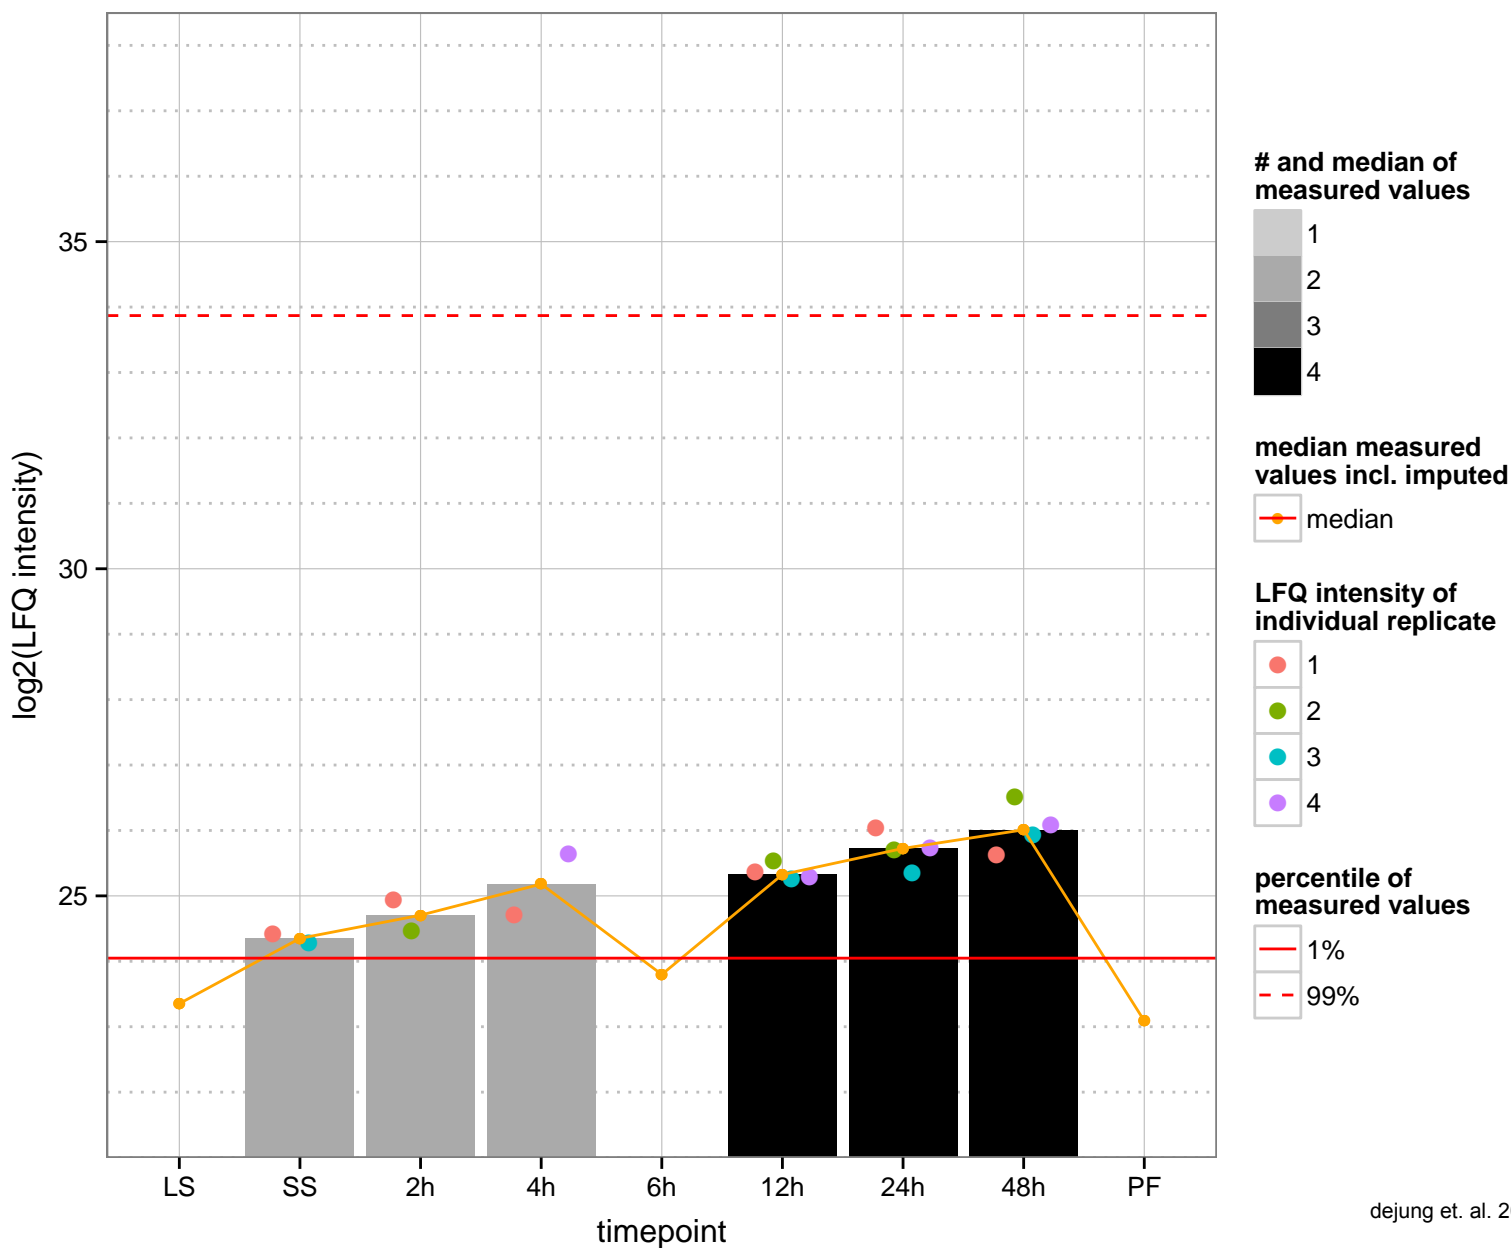

hypothetical protein, conserved  
 Tb927.5.1510  
 AGOF: null  
 AGOC: mitochondrion  
 AGOP: null  
 PGO: null  
 PGO: null  
 PGO: null

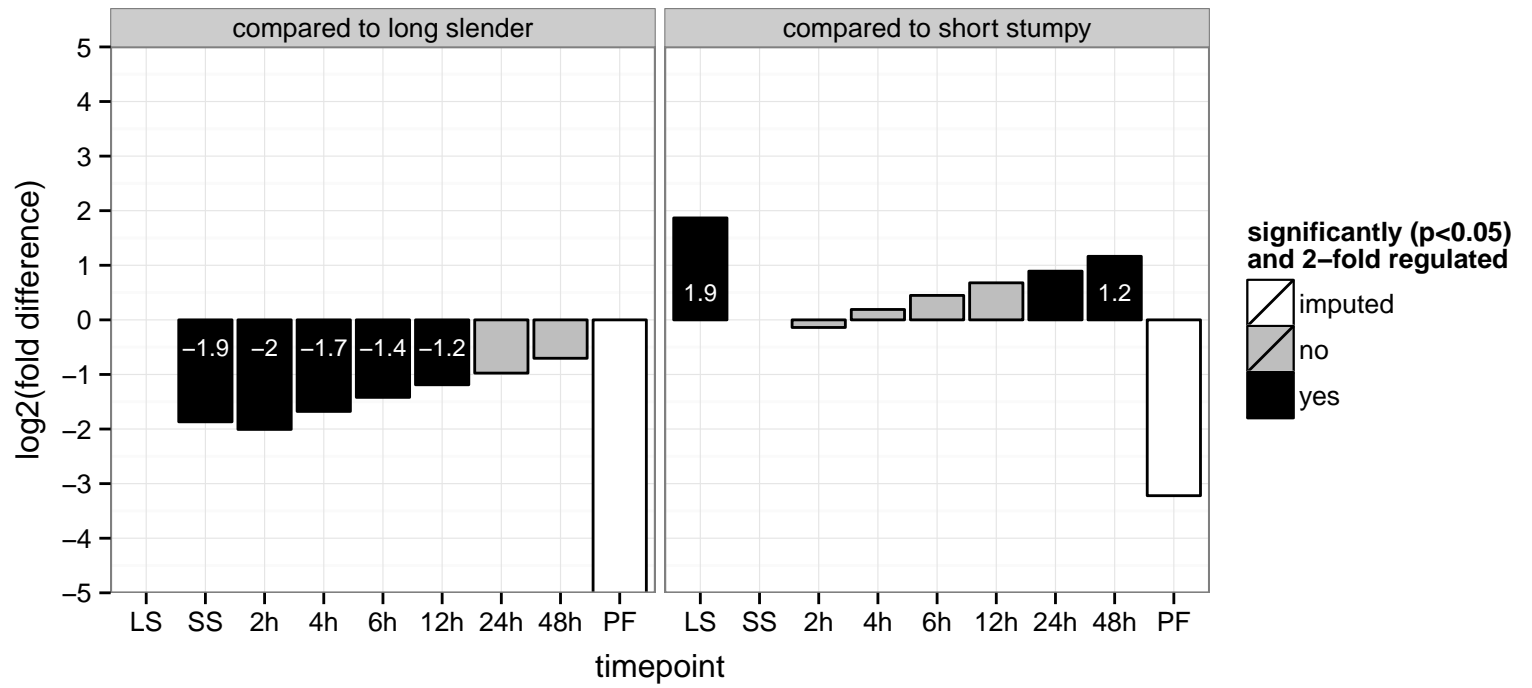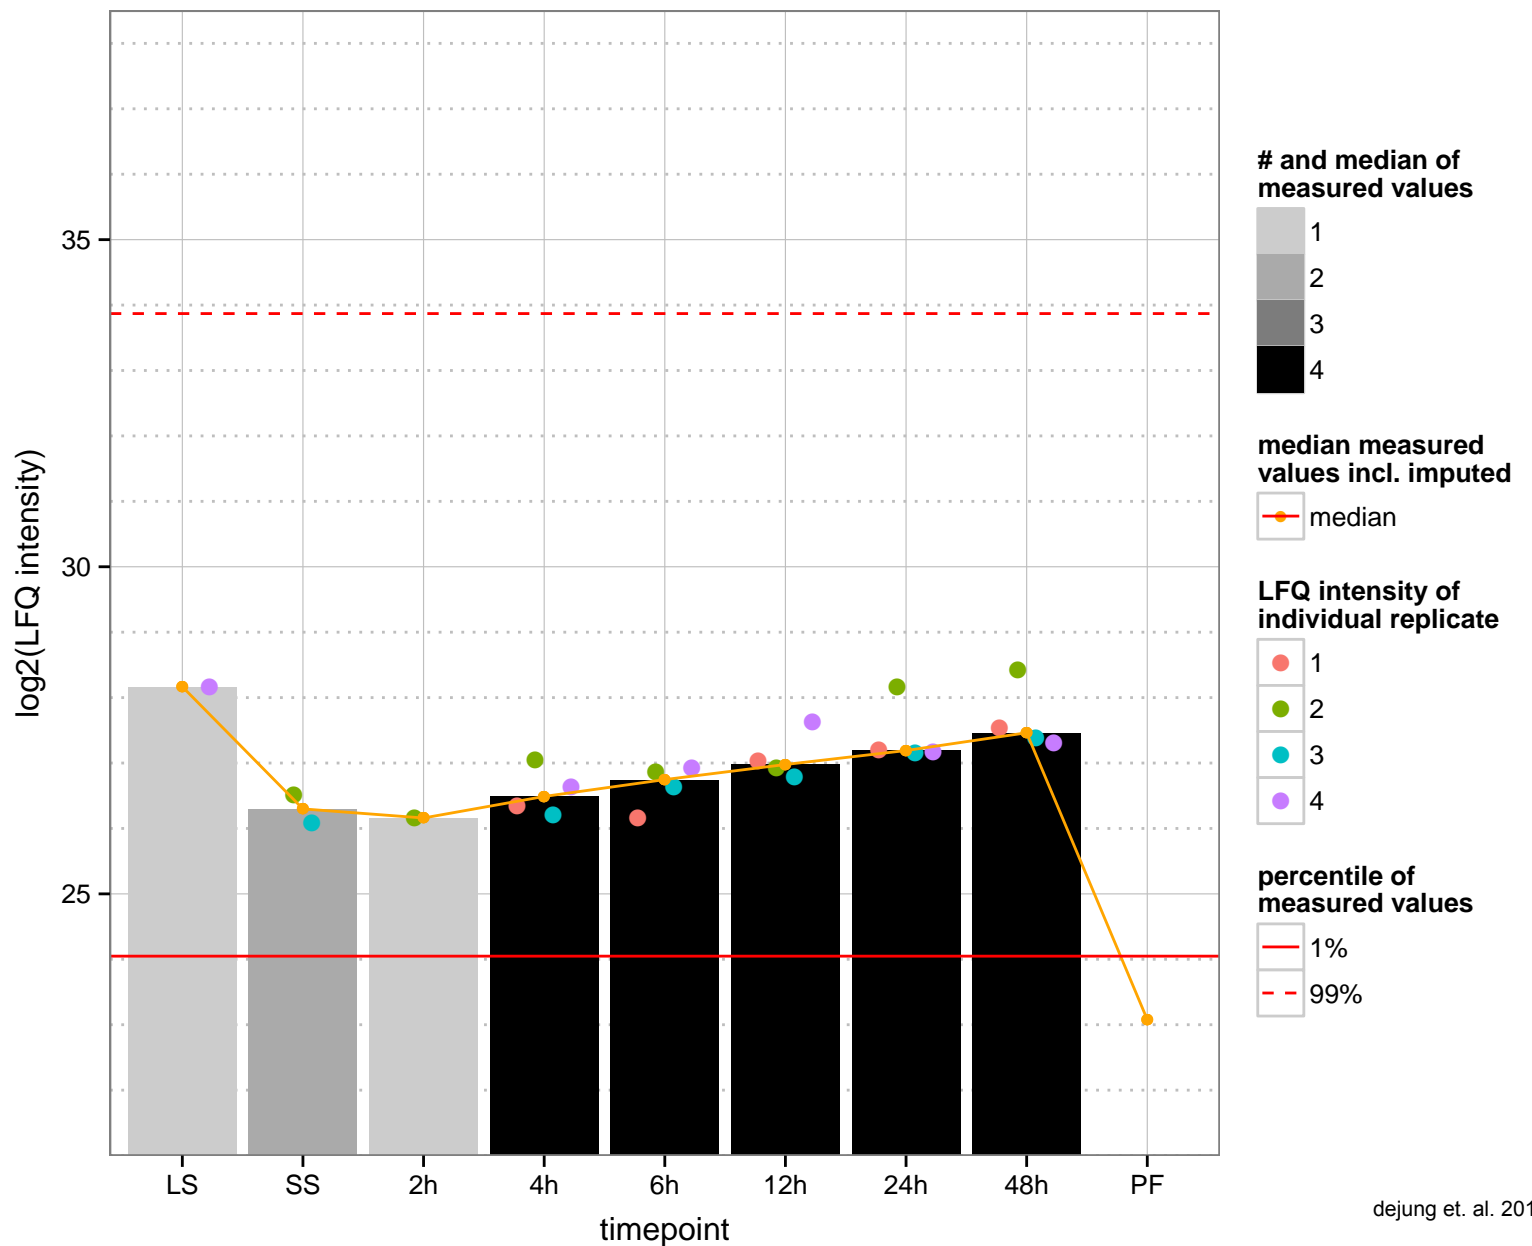

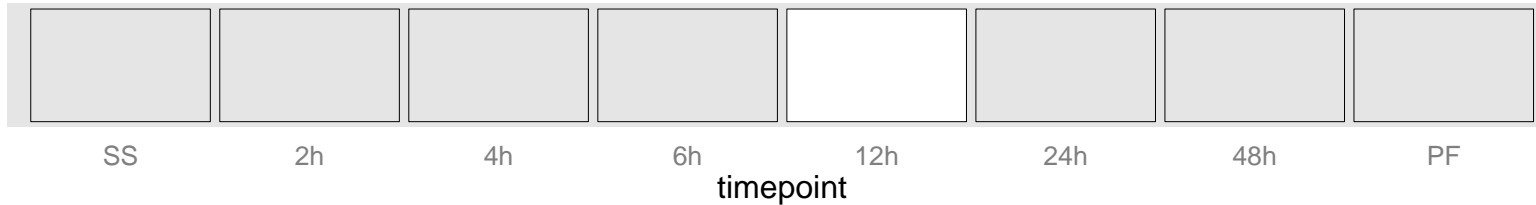

**regulated**  **not regulated**  **significant down**  **significant up**

hypothetical protein, conserved  
 Tb927.10.12130  
 AGOF: null  
 AGOC: null  
 AGOP: null  
 PGOF: protein binding  
 PGO: null  
 PGOP: null

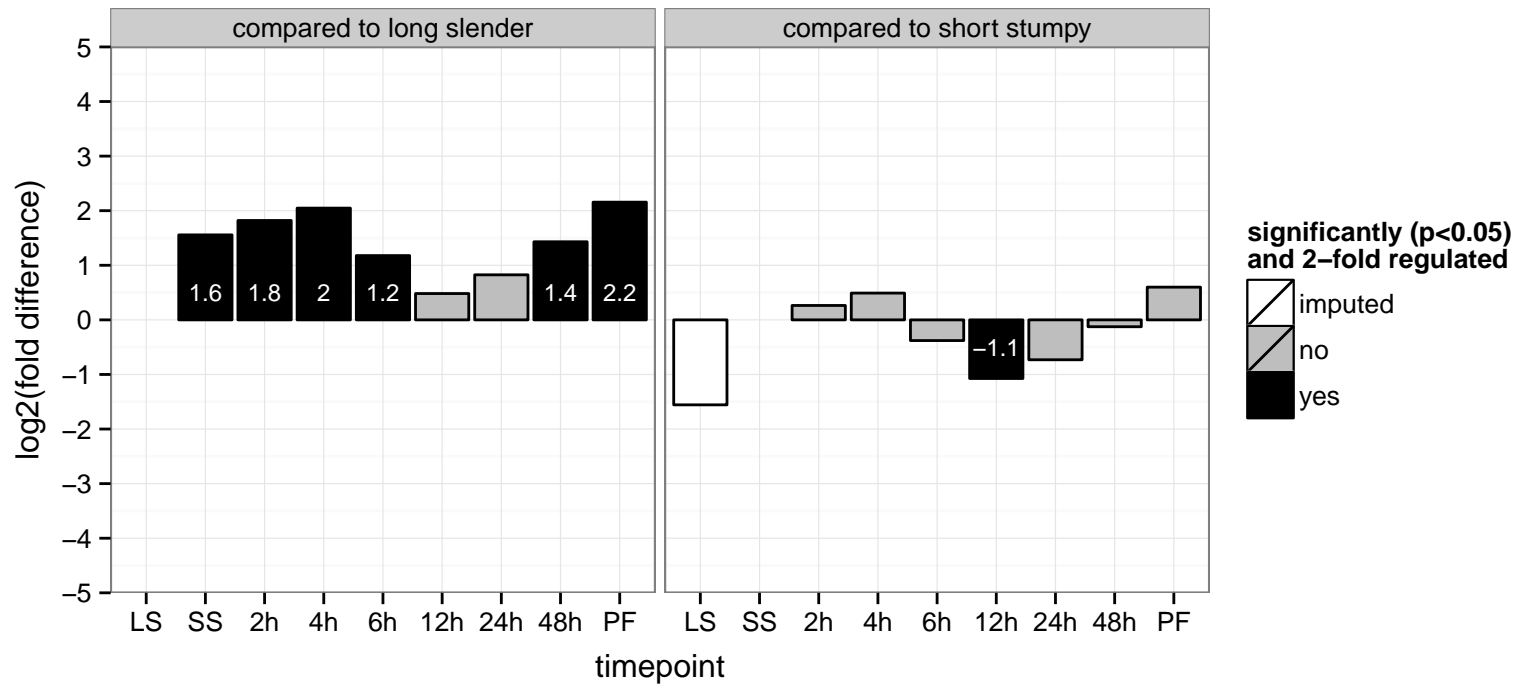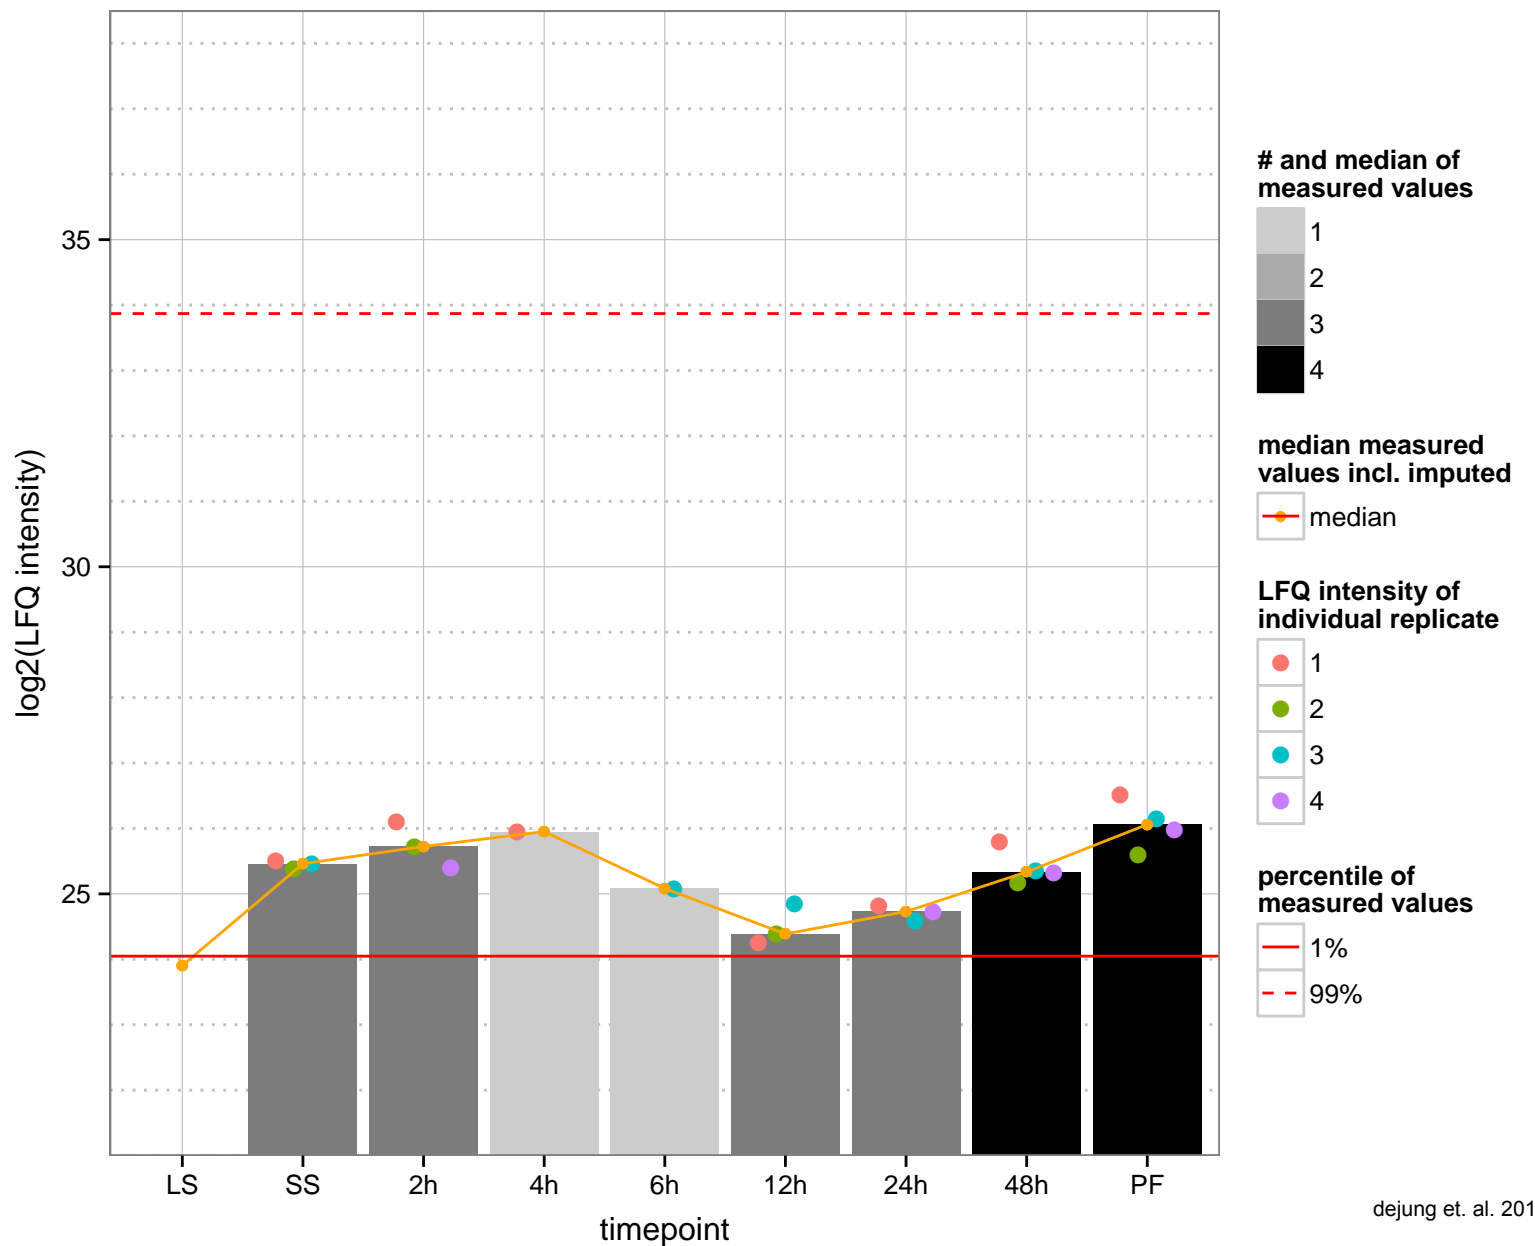

thymidylate kinase, putative  
 Tb927.8.3510;Tb927.8.3910;Tb11.v5.0738  
 AGOF: null, ATP binding, thymidylate kinase activity  
 AGOC: null  
 AGOP: null, TTP biosynthetic process, dTDP biosynthetic process, pyrimidine-containing compound salvage  
 PGO: null  
 PGOC: null  
 PGOP: null

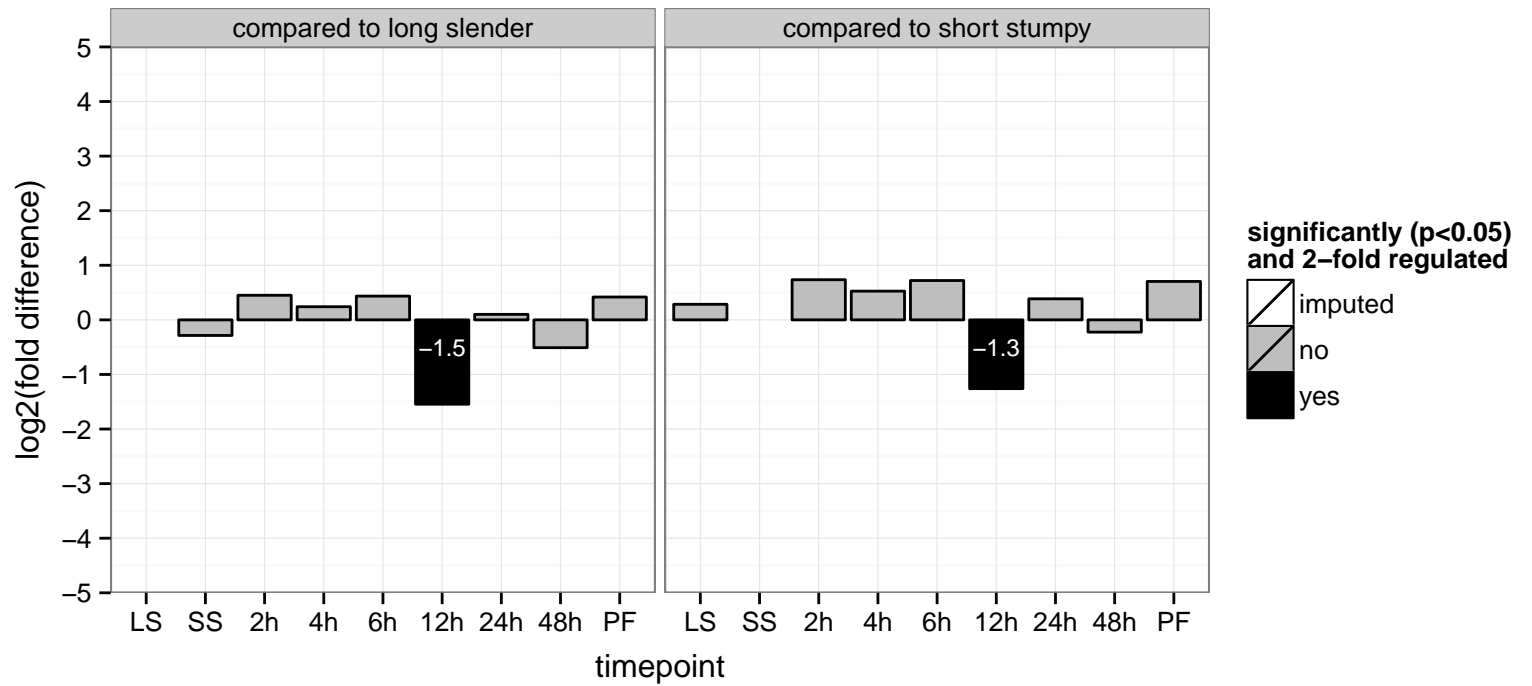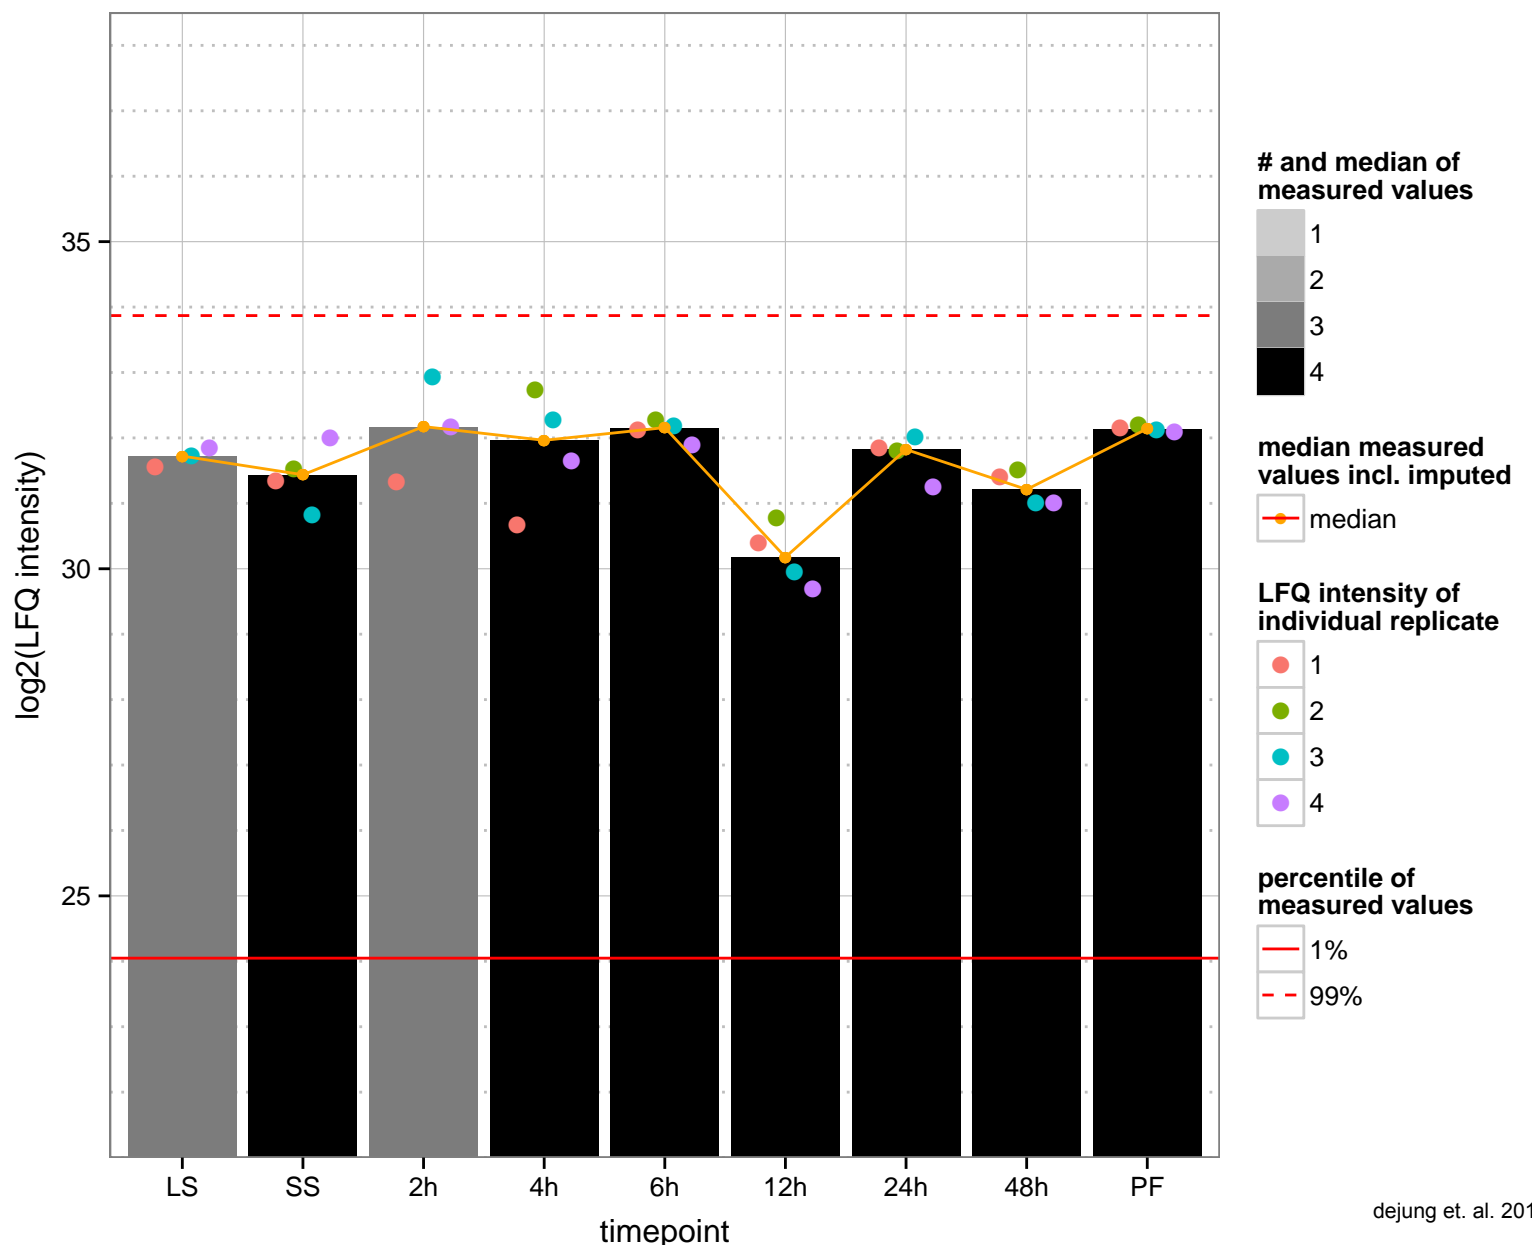

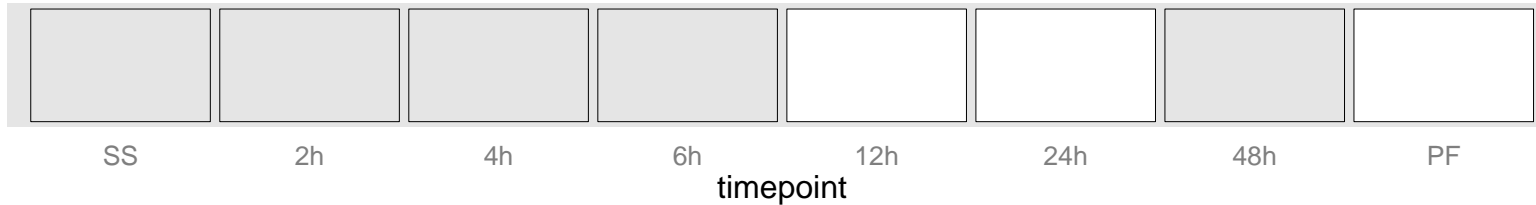

**regulated**  **not regulated**  **significant down**  **significant up**

mitochondrial carrier protein (MCP20)  
 Tb927.10.14280  
 AGOF: null  
 AGOC: membrane, mitochondrion  
 AGOP: transport  
 PGO: null  
 PGOC: null  
 PGOP: null

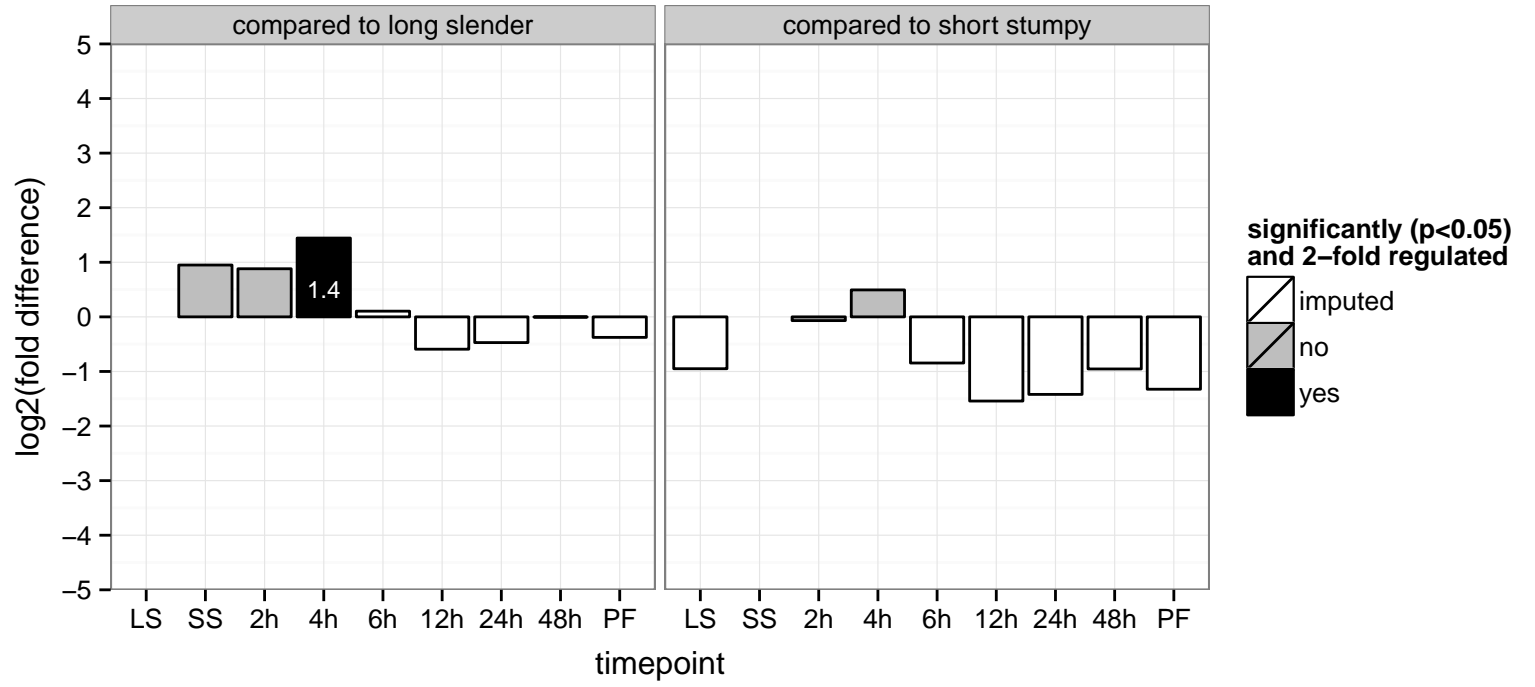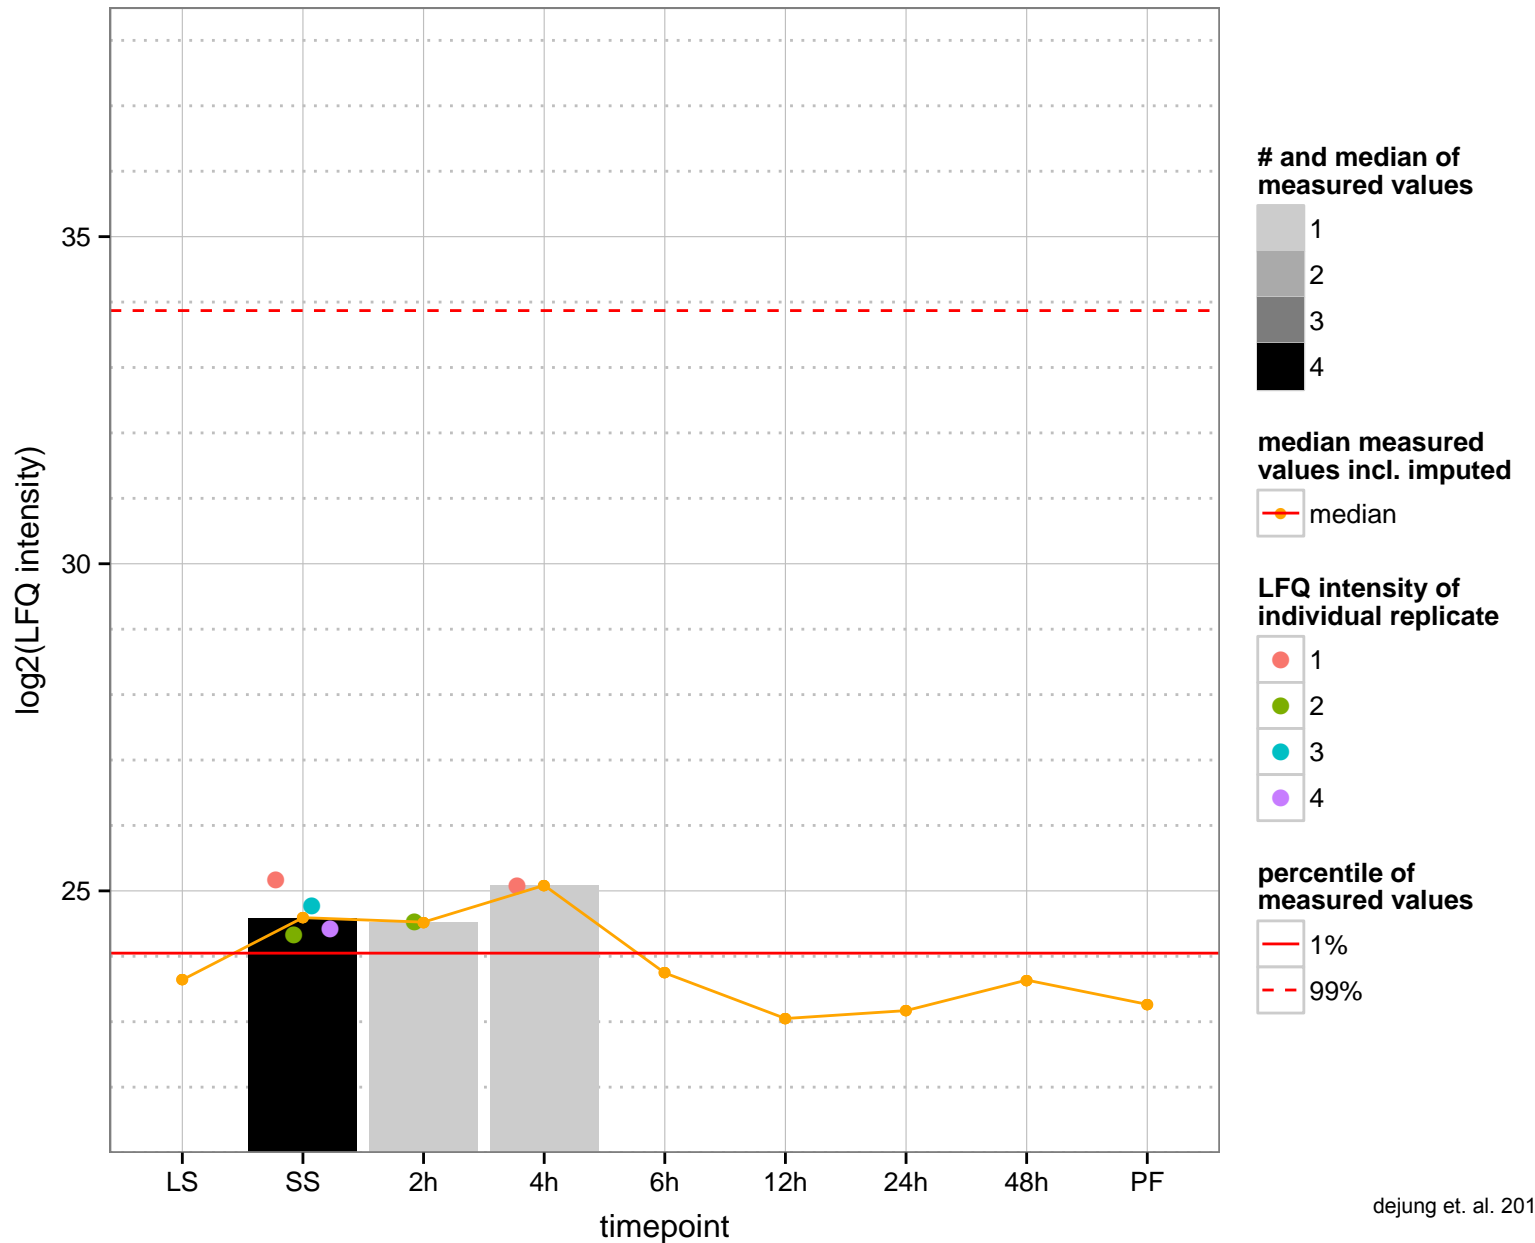

hypothetical protein, conserved  
 Tb927.11.5770  
 AGOF: null  
 AGOC: null  
 AGOP: null  
 PGO: protein binding  
 PGOC: null  
 PGOP: null

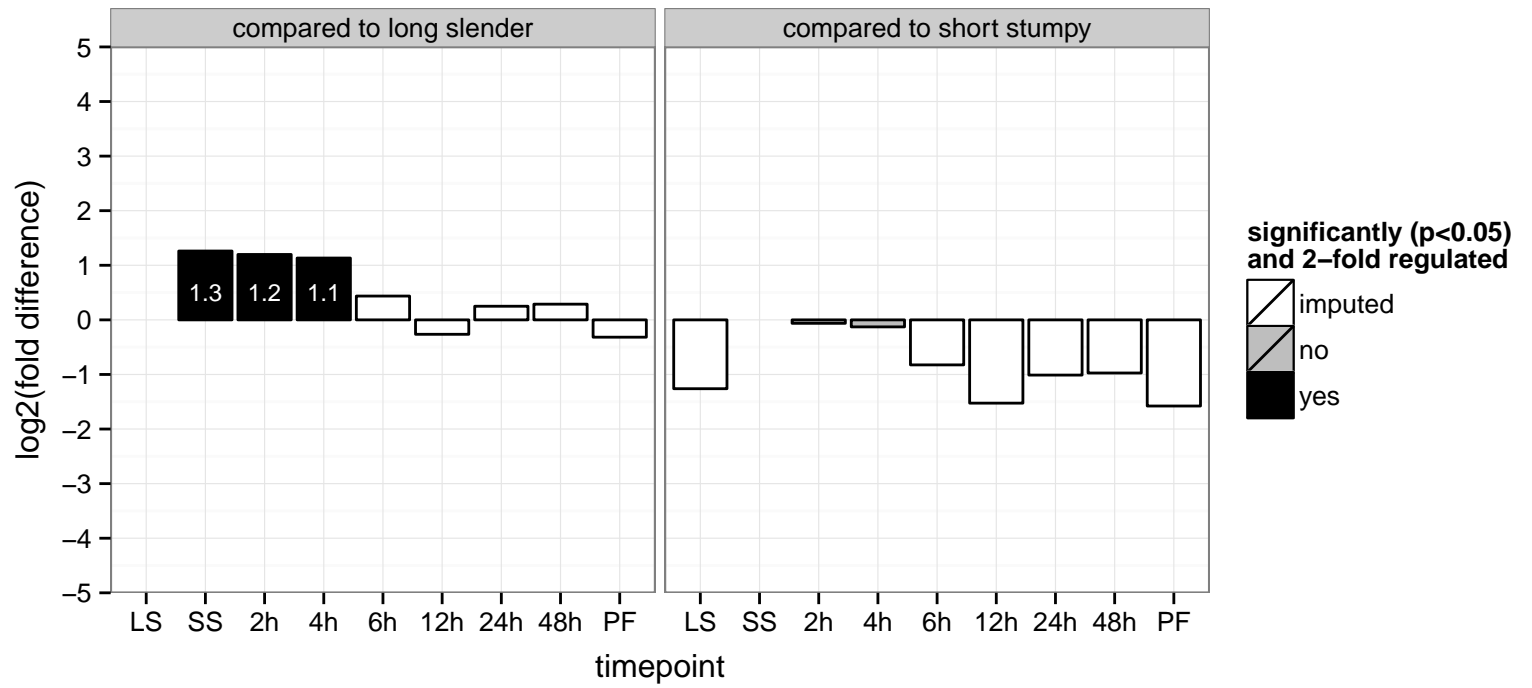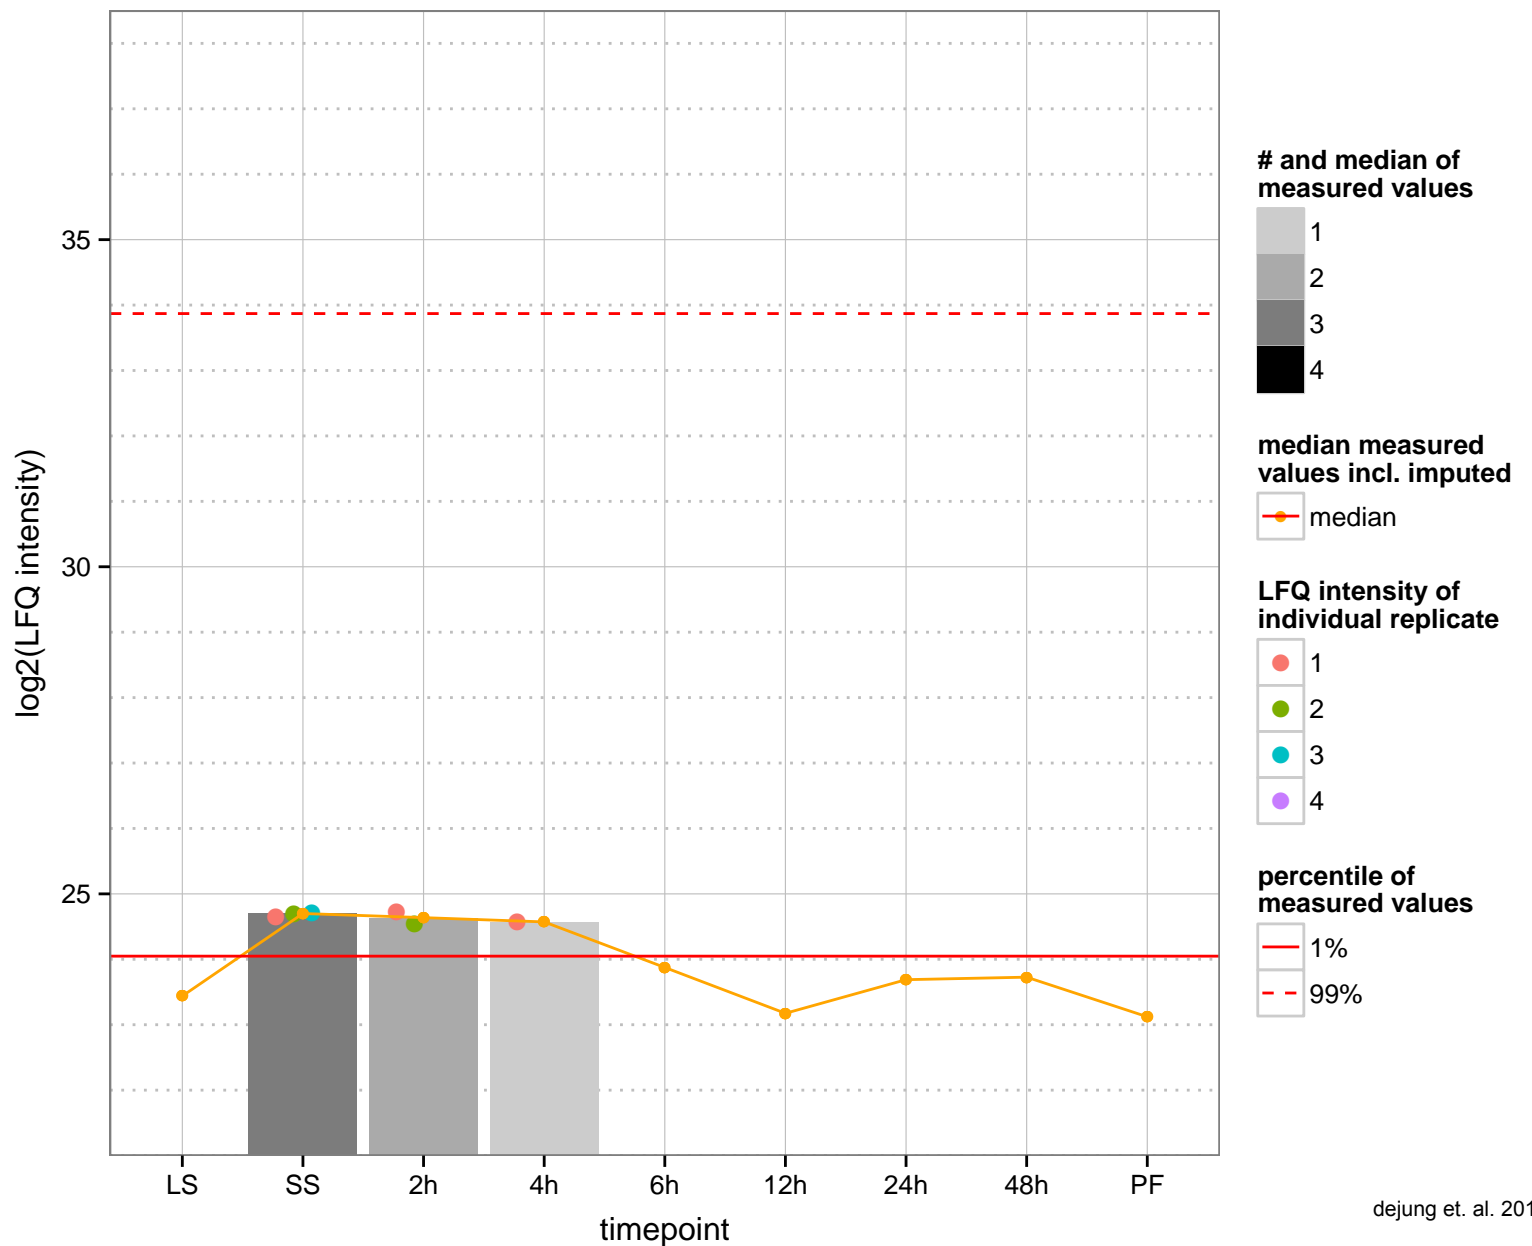



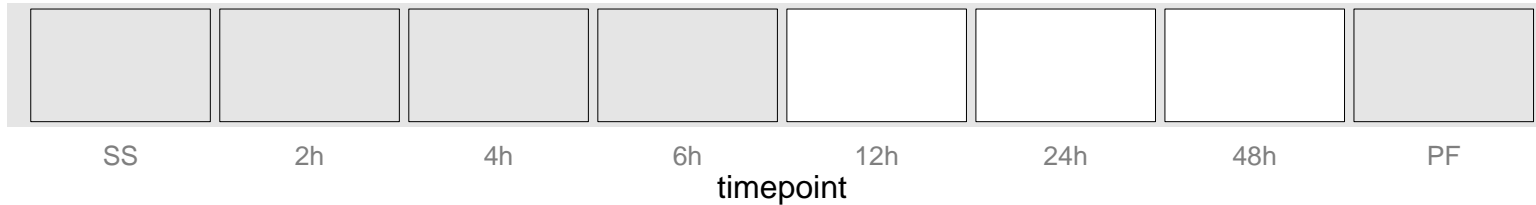

**regulated**  **not regulated**  **significant down**  **significant up**

vacuolar protein sorting–associated protein 45, putative (VPS45)  
 Tb927.10.6780  
 AGOF: SNARE binding  
 AGOC: null  
 AGOP: vesicle docking involved in exocytosis, vesicle–mediated transport  
 PGO: null  
 PGO: null  
 PGO: vesicle docking involved in exocytosis, vesicle–mediated transport

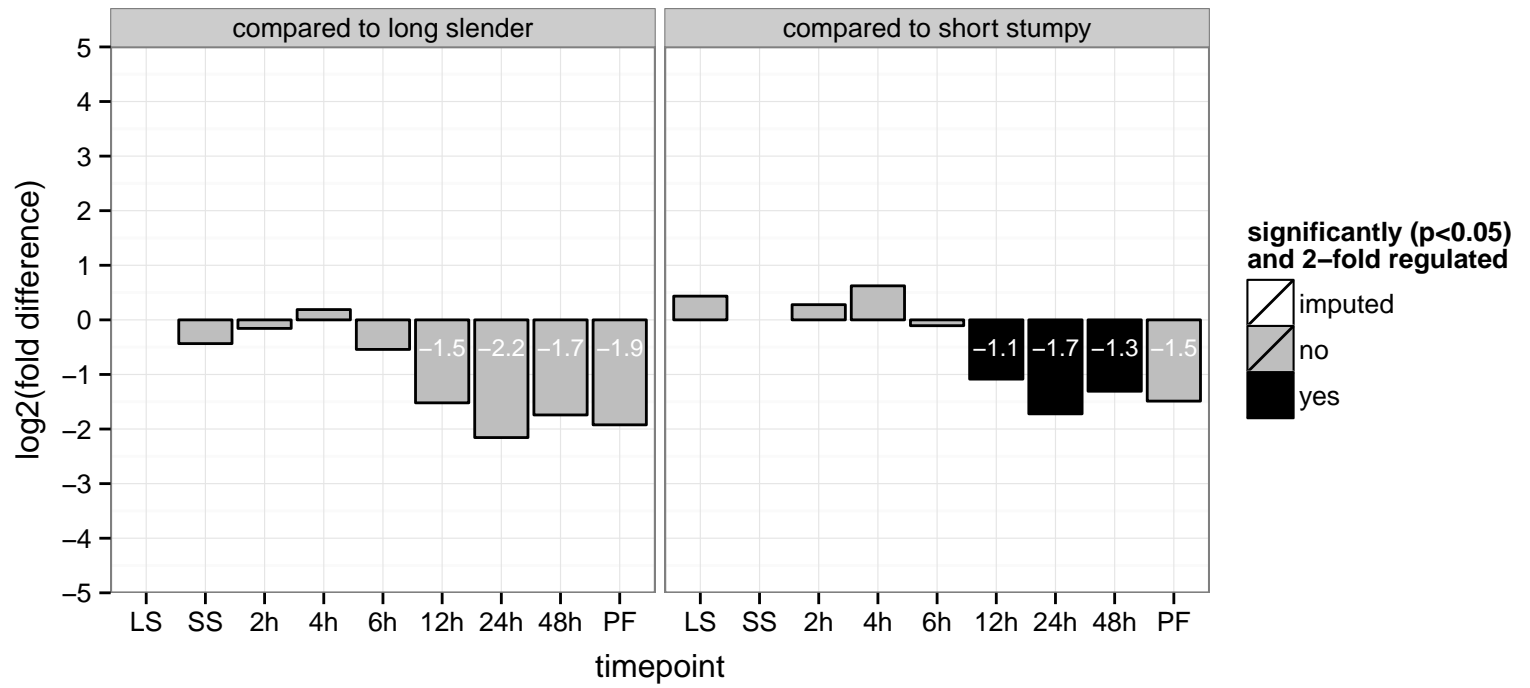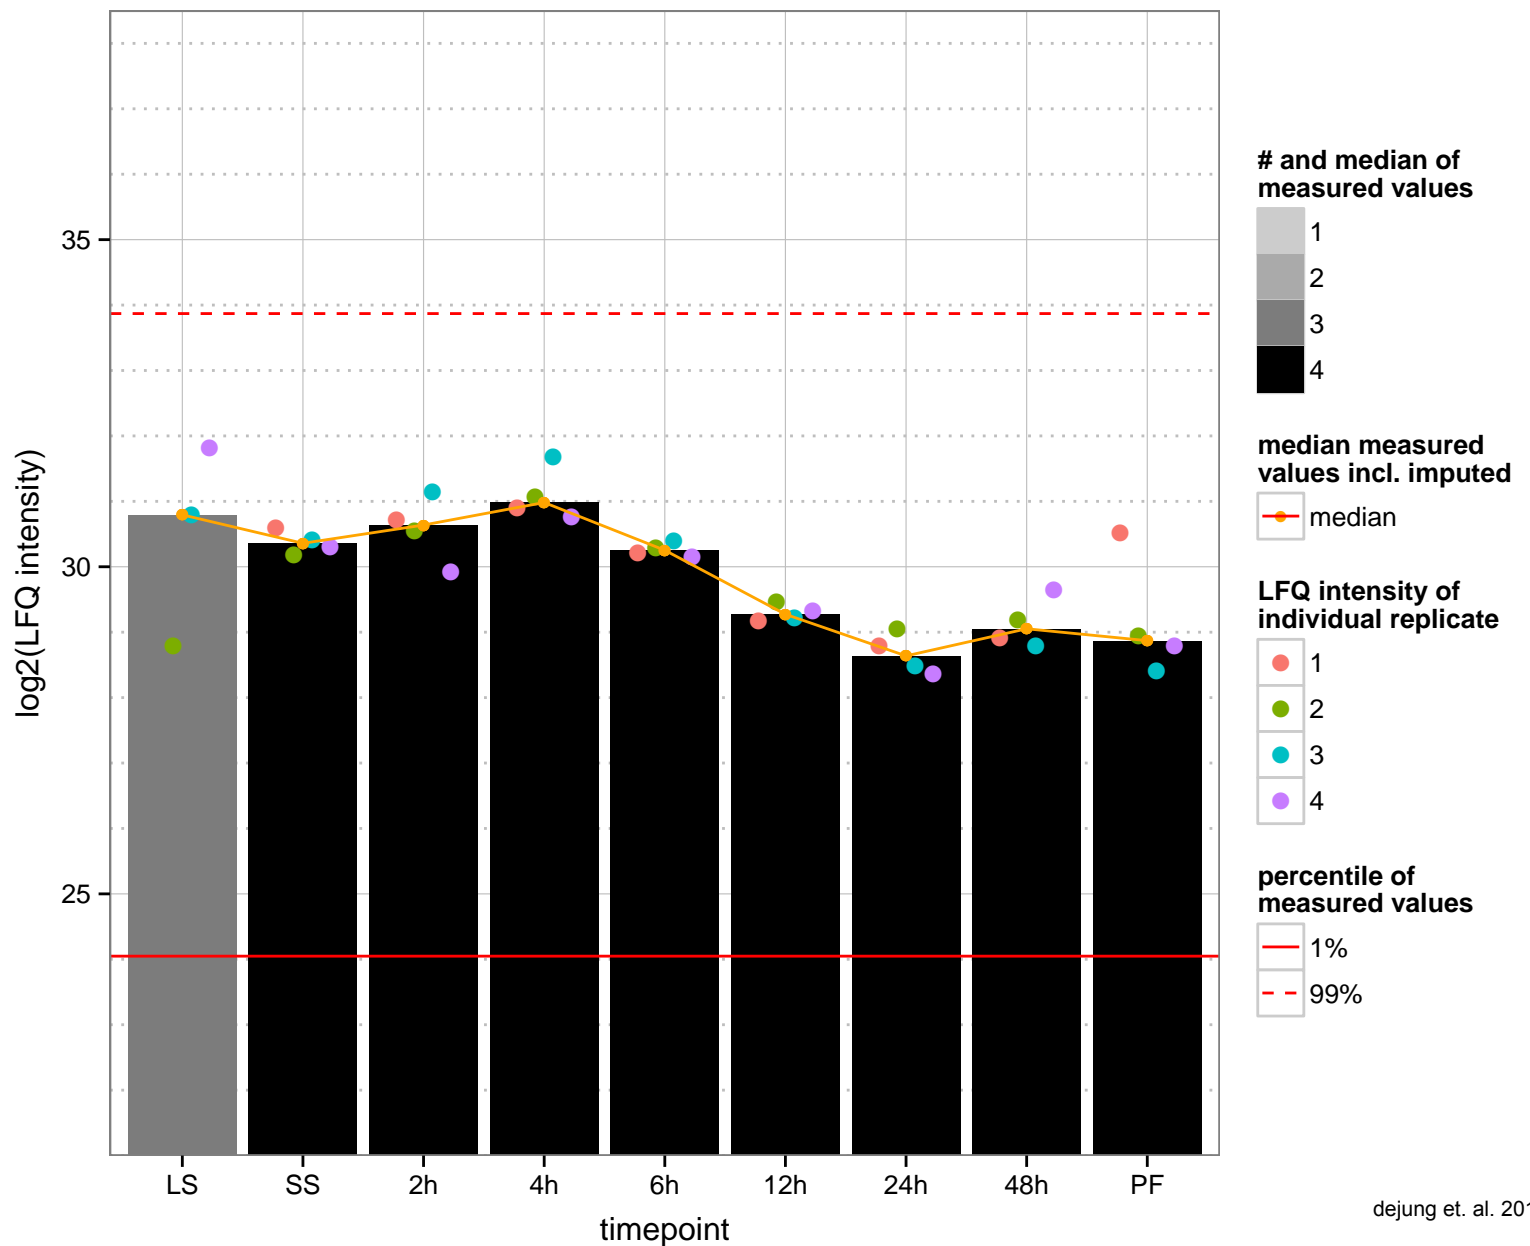

engulfment and cell motility domain 2, putative  
 Tb927.9.2670  
 AGOF: null  
 AGOC: cytoskeleton  
 AGOP: phagocytosis  
 PGO: null  
 PGOC: cytoskeleton  
 PGOP: phagocytosis

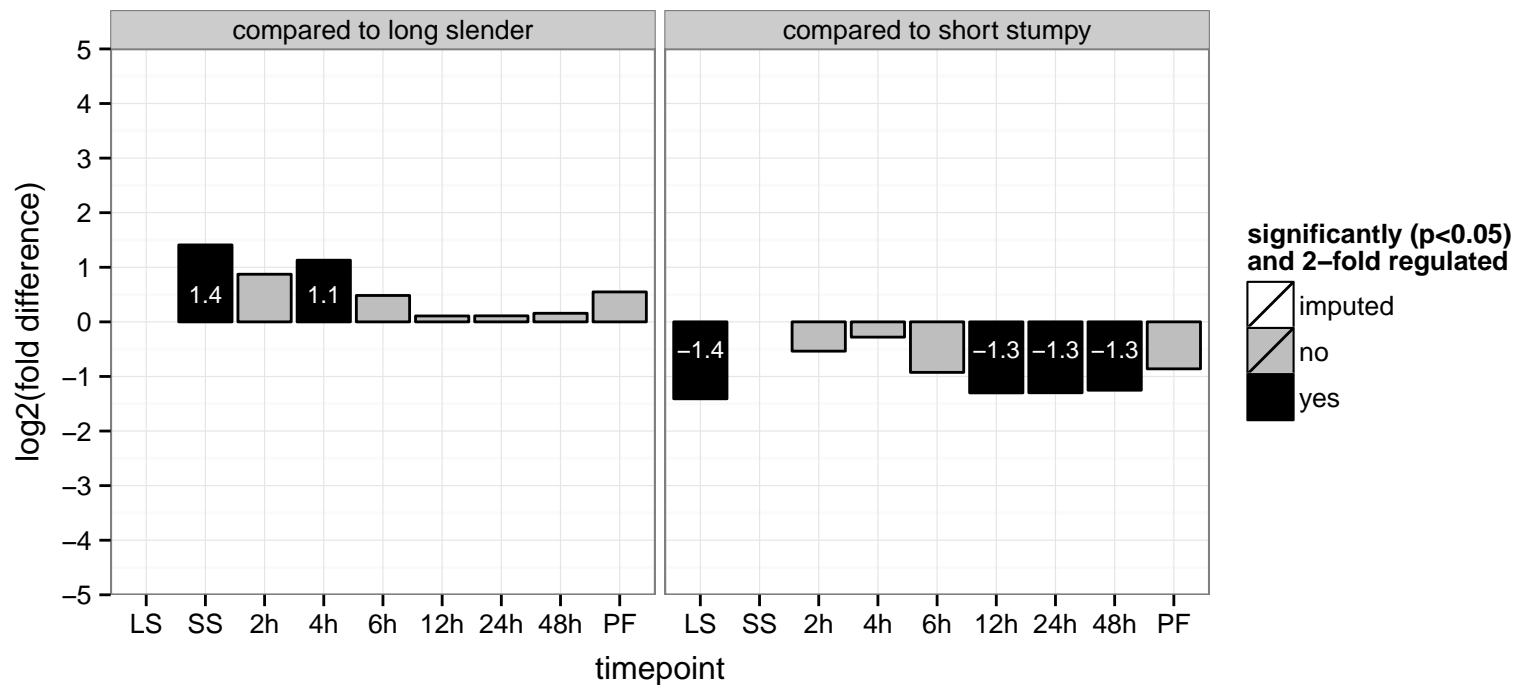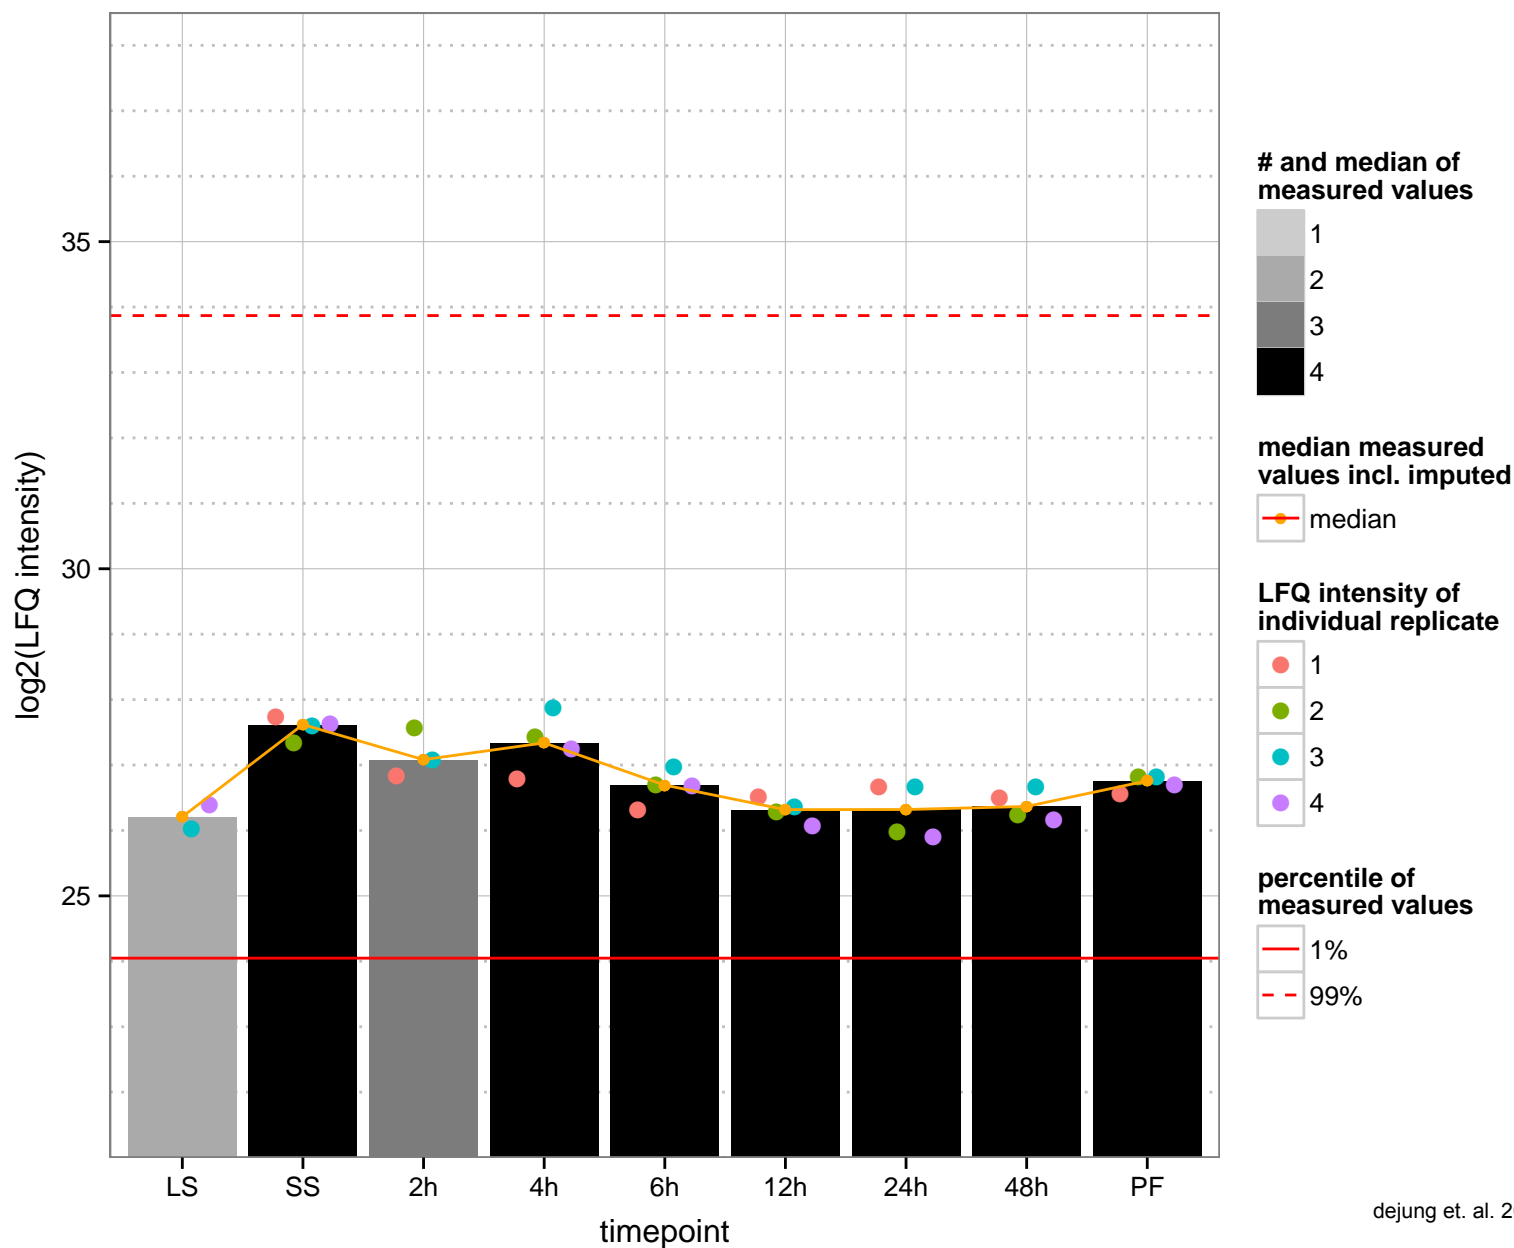

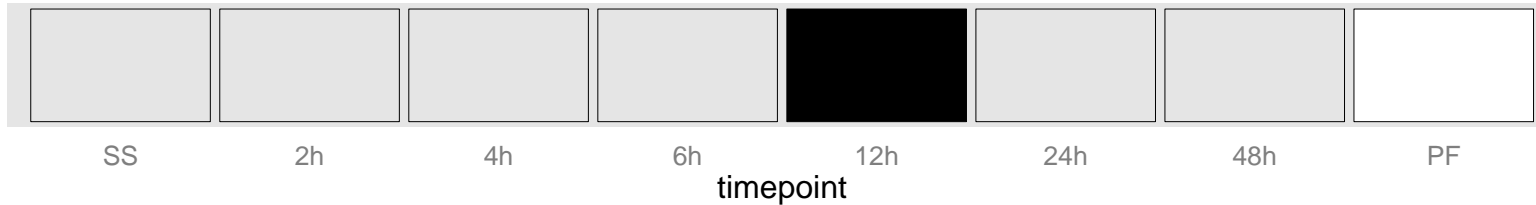

**regulated**  **not regulated**  **significant down**  **significant up**

Ribosomal RNA-processing protein 8, putative (RRP8)  
 Tb927.1.1120  
 AGOF: methyltransferase activity  
 AGOC: null  
 AGOP: null  
 PGOF: methyltransferase activity  
 PGOC: null  
 PGOP: null

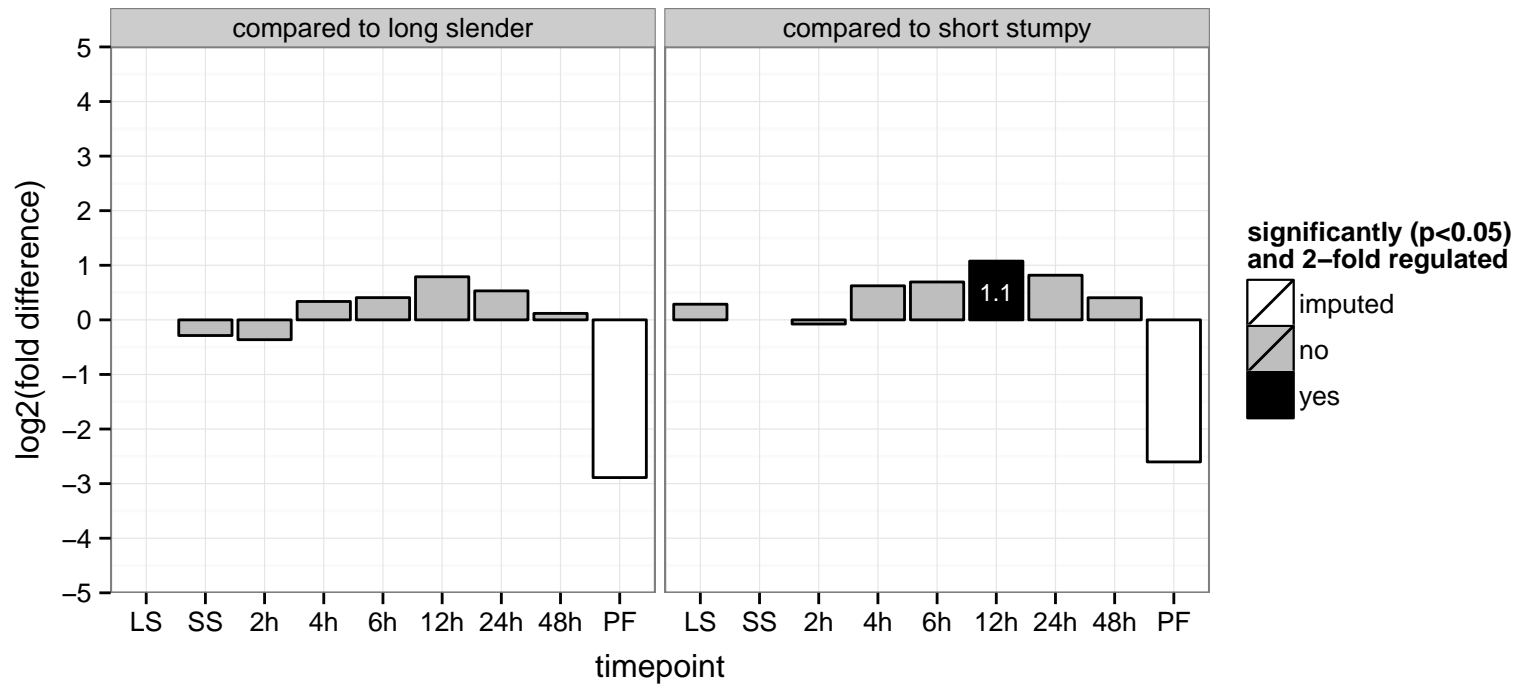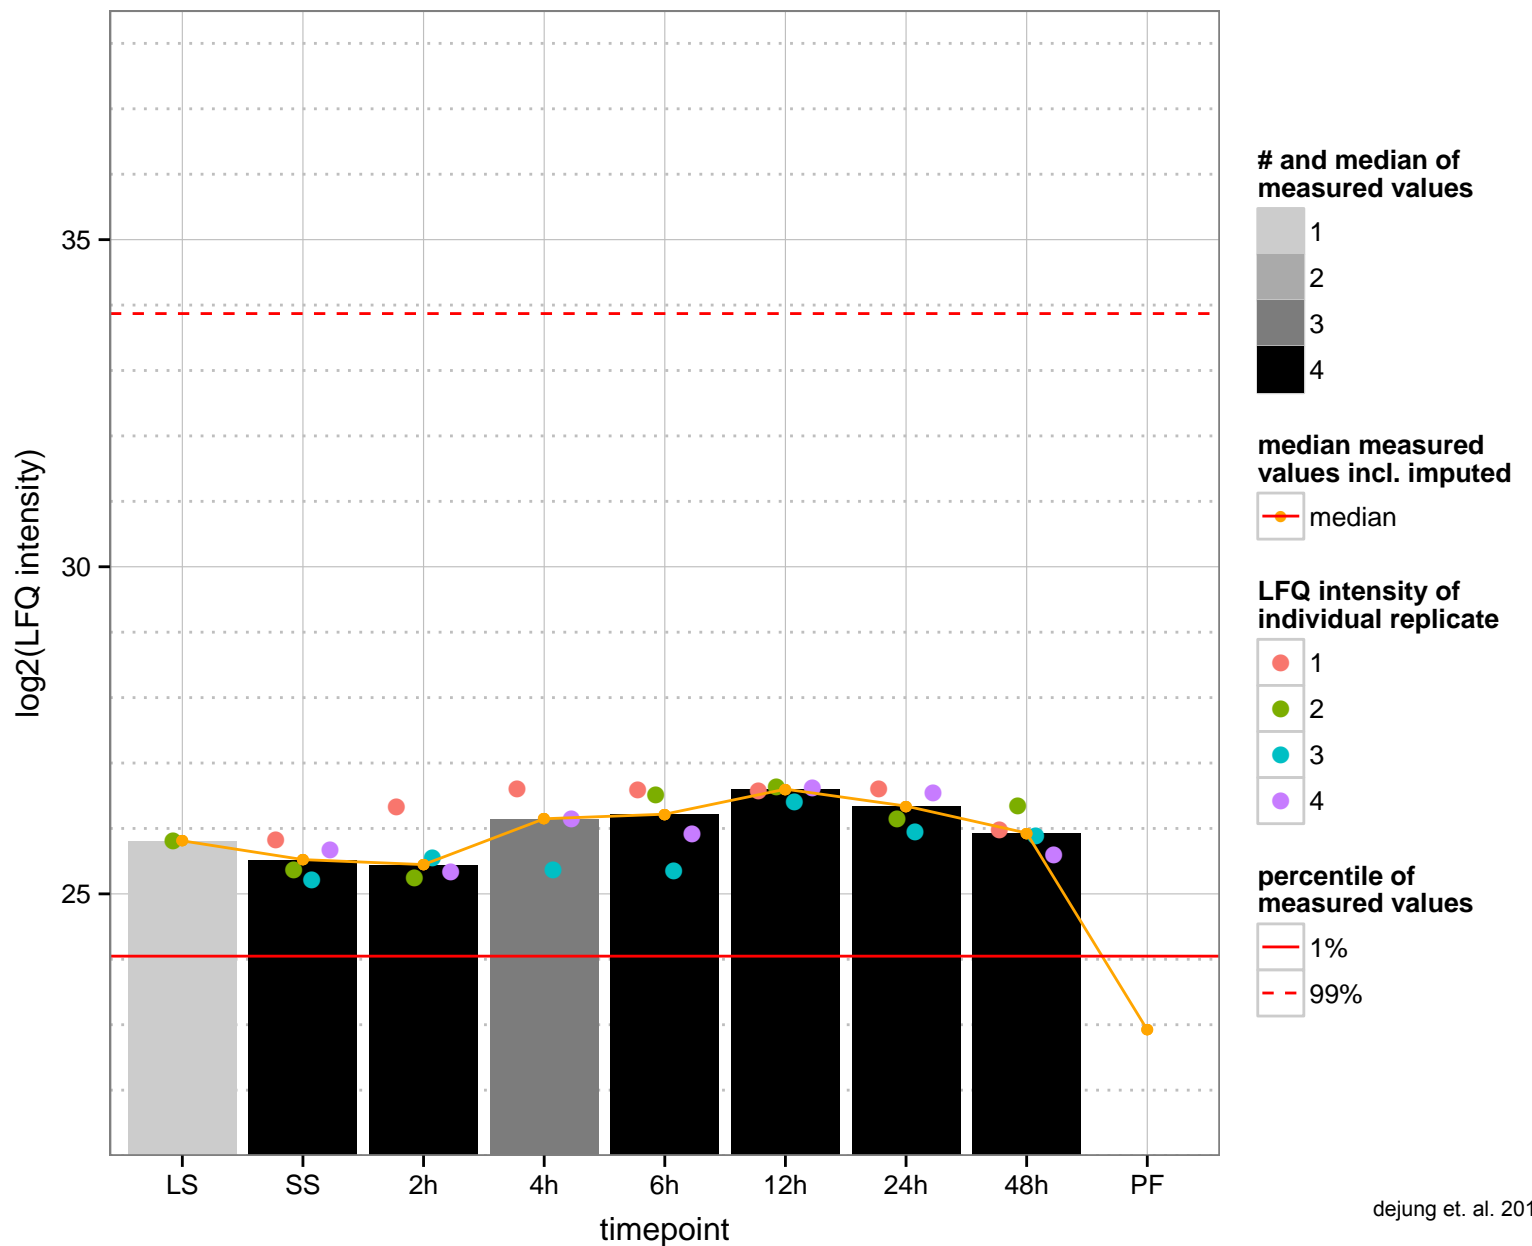

IgE-dependent histamine-releasing factor, putative  
 Tb927.8.6760  
 AGOF: null  
 AGOC: cytoplasm  
 AGOP: null  
 PGO: null  
 PGO: null  
 PGO: null

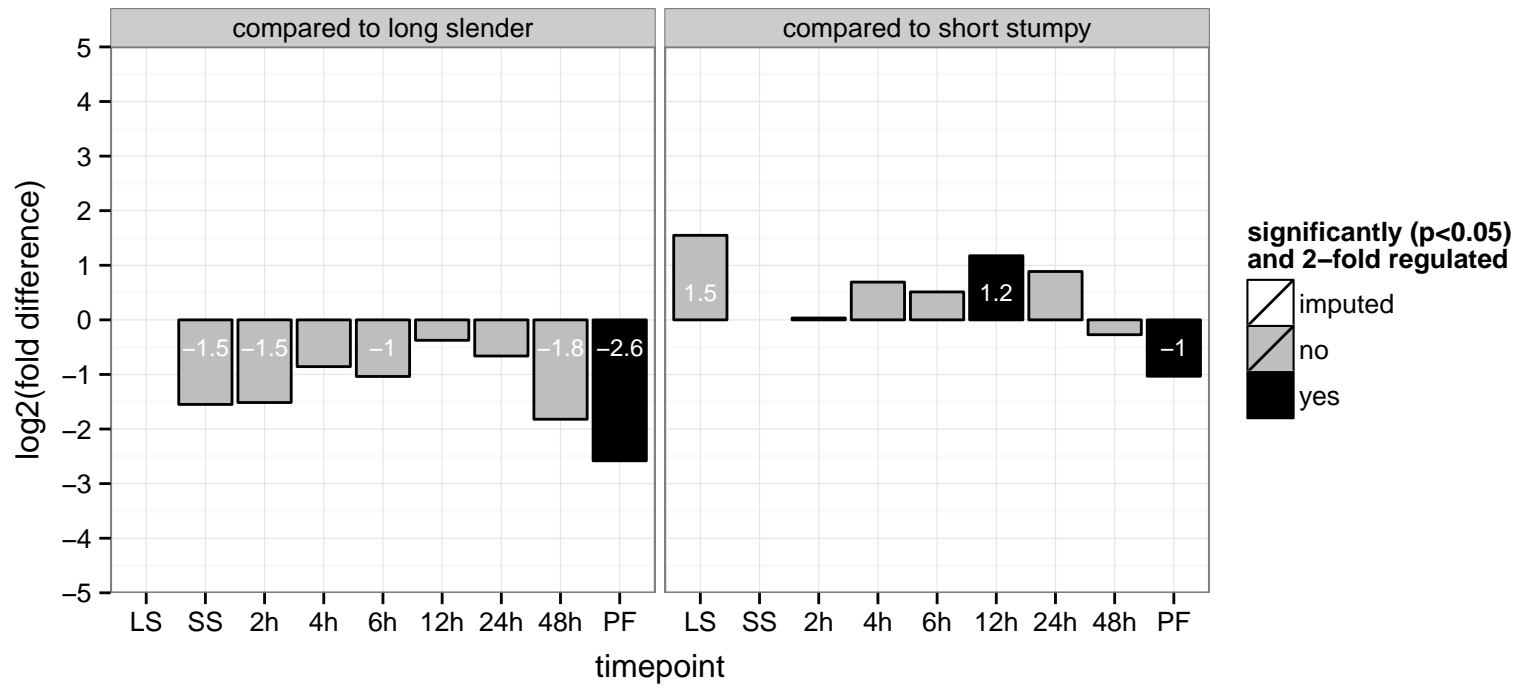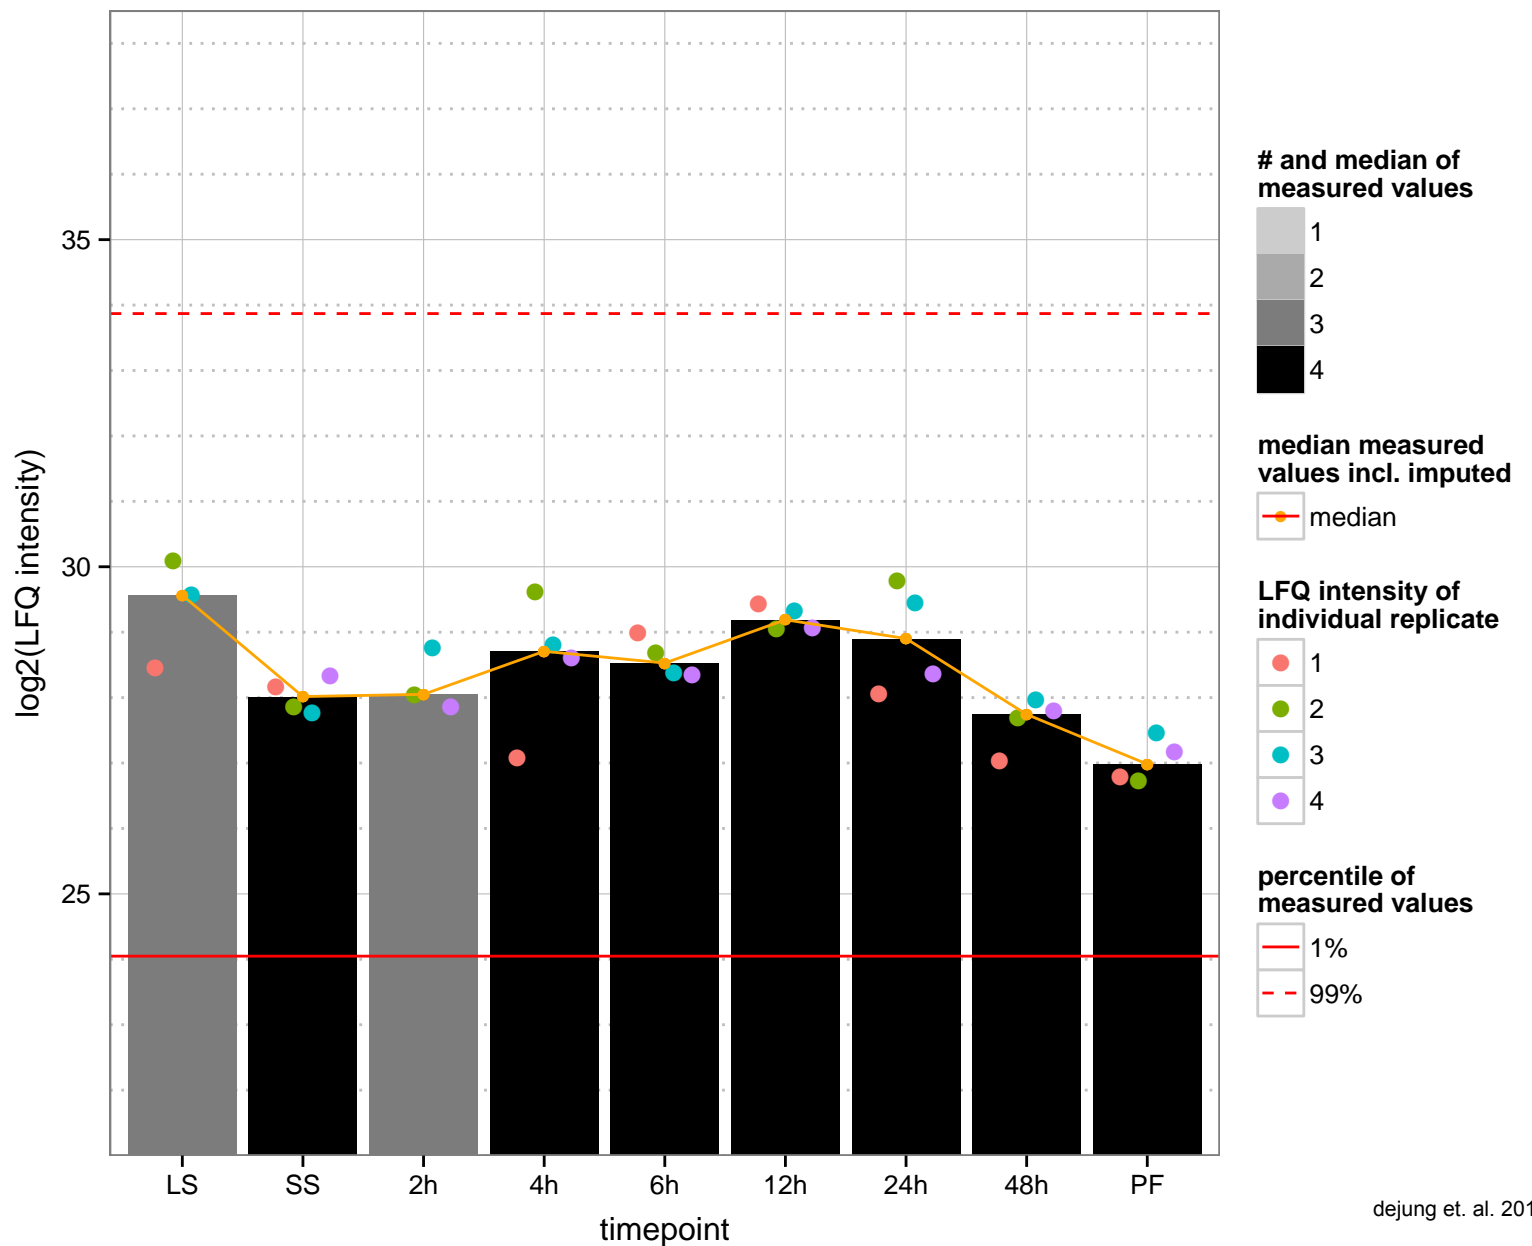

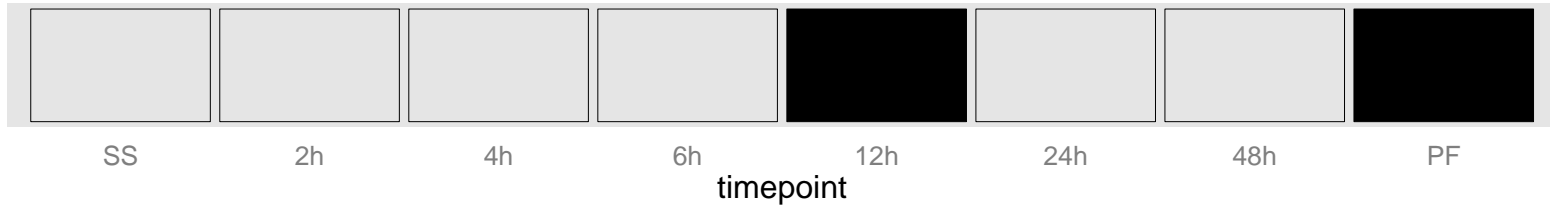

**regulated**  not regulated  significant down  significant up

chaperone protein DNAj, putative  
 Tb11.v5.0778;Tb927.7.680  
 AGOF: null, heat shock protein binding, unfolded protein binding  
 AGOC: null  
 AGOP: null, protein folding  
 PGOF: heat shock protein binding  
 PGO: null  
 PGOP: null

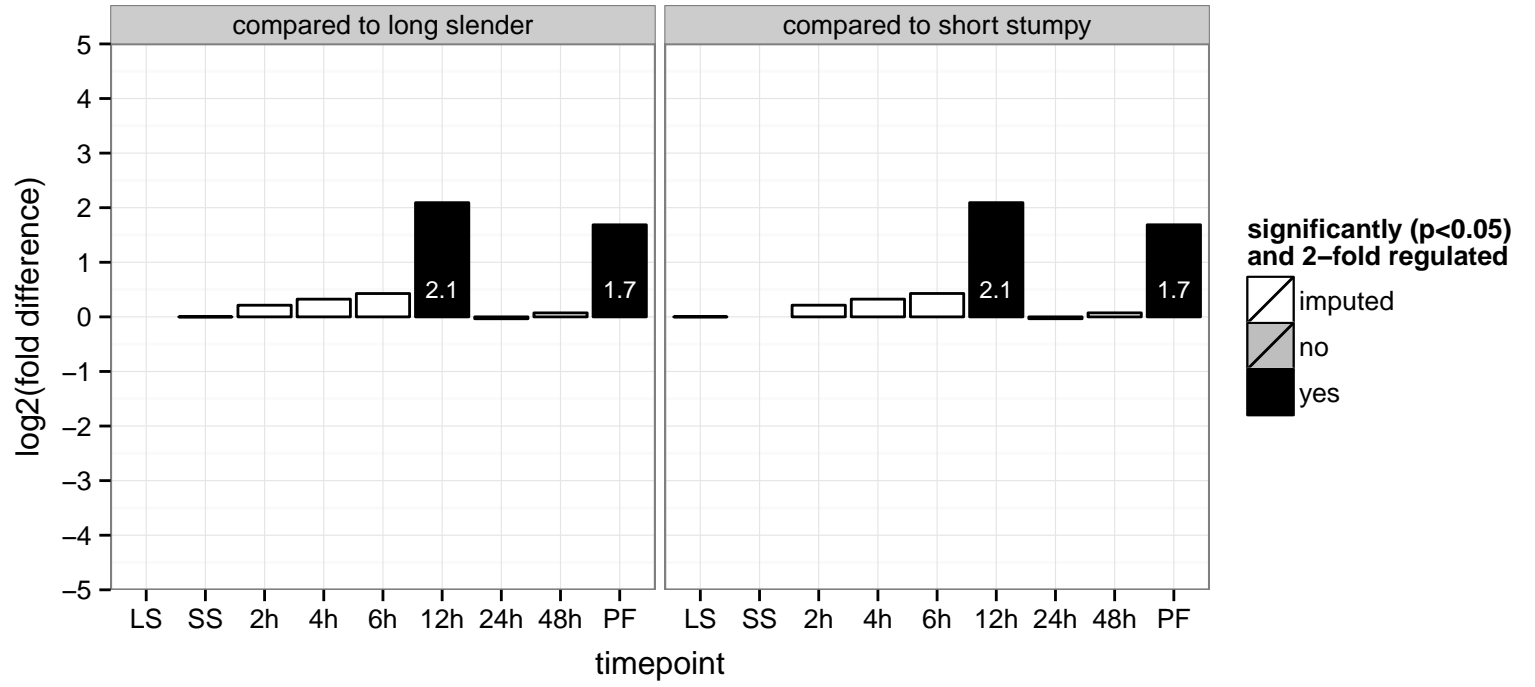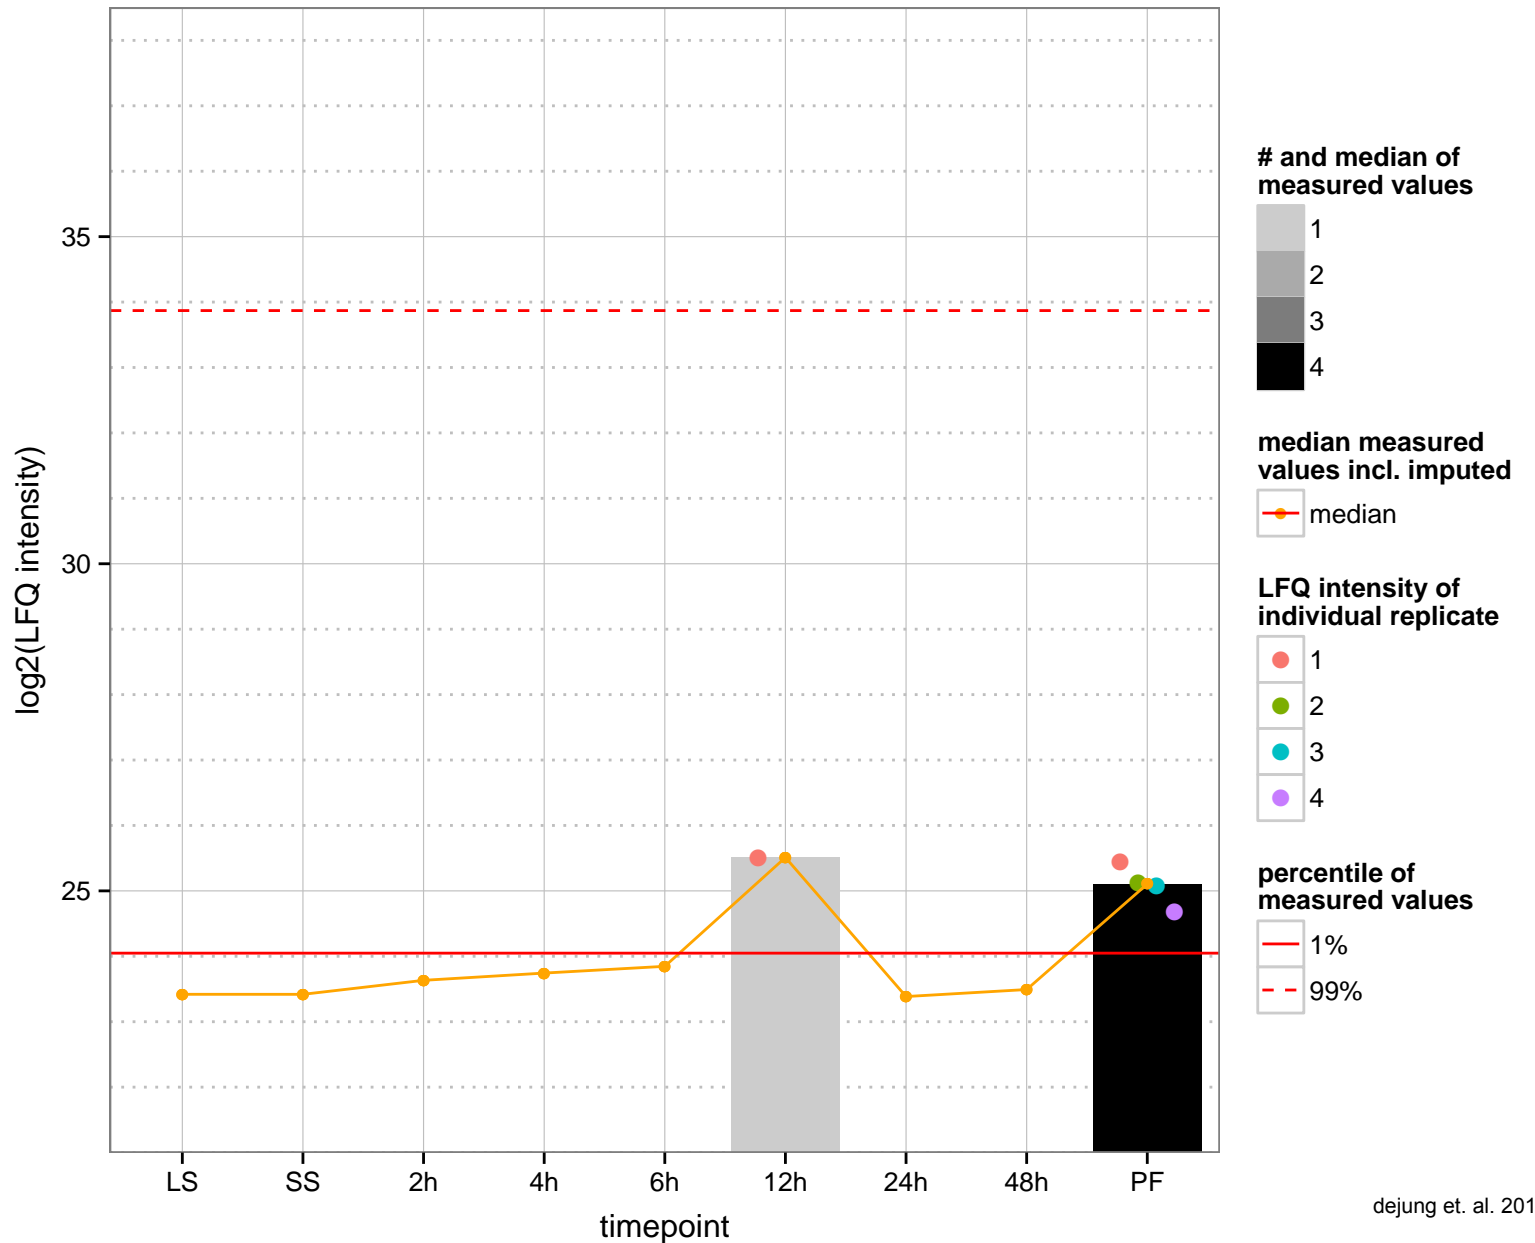



hypothetical protein, conserved  
 Tb927.11.13660  
 AGOF: null  
 AGOC: null  
 AGOP: null  
 PGO: null  
 PGOC: null  
 PGOP: null

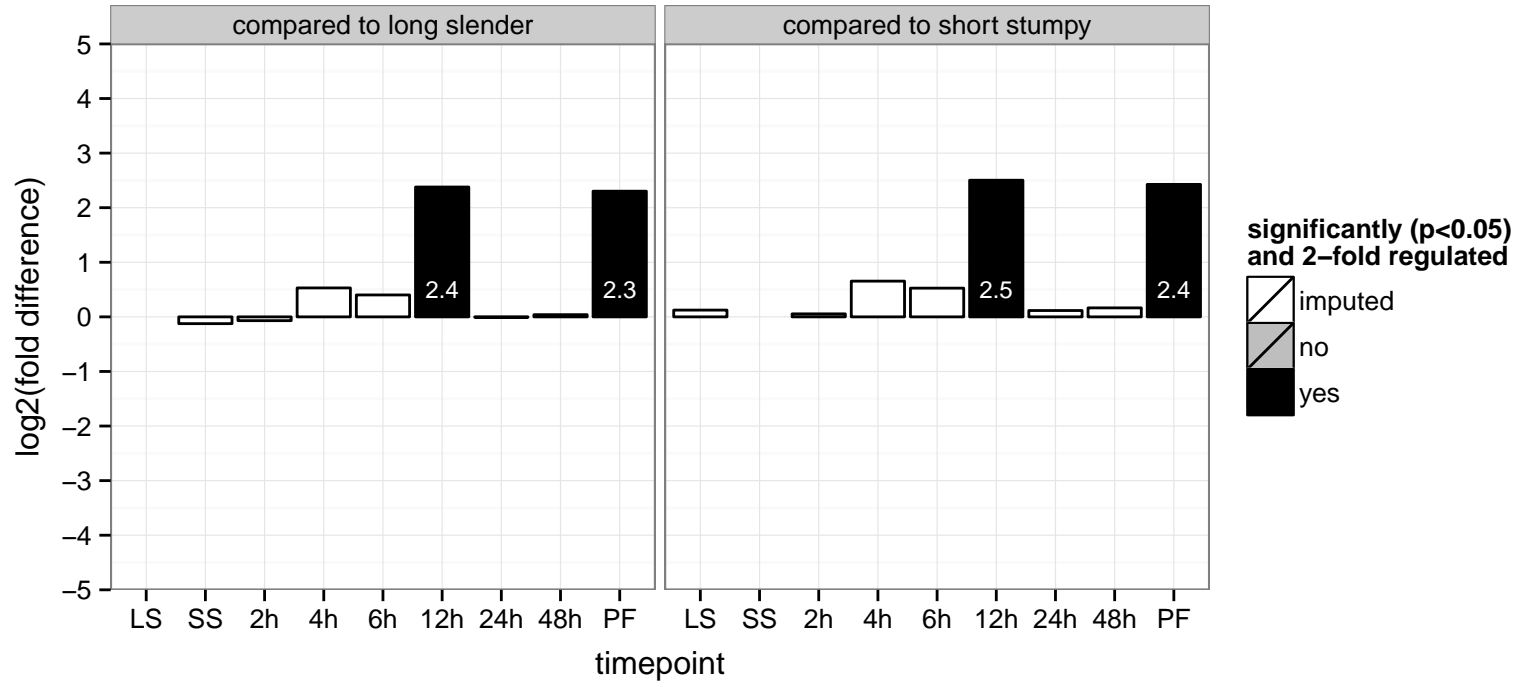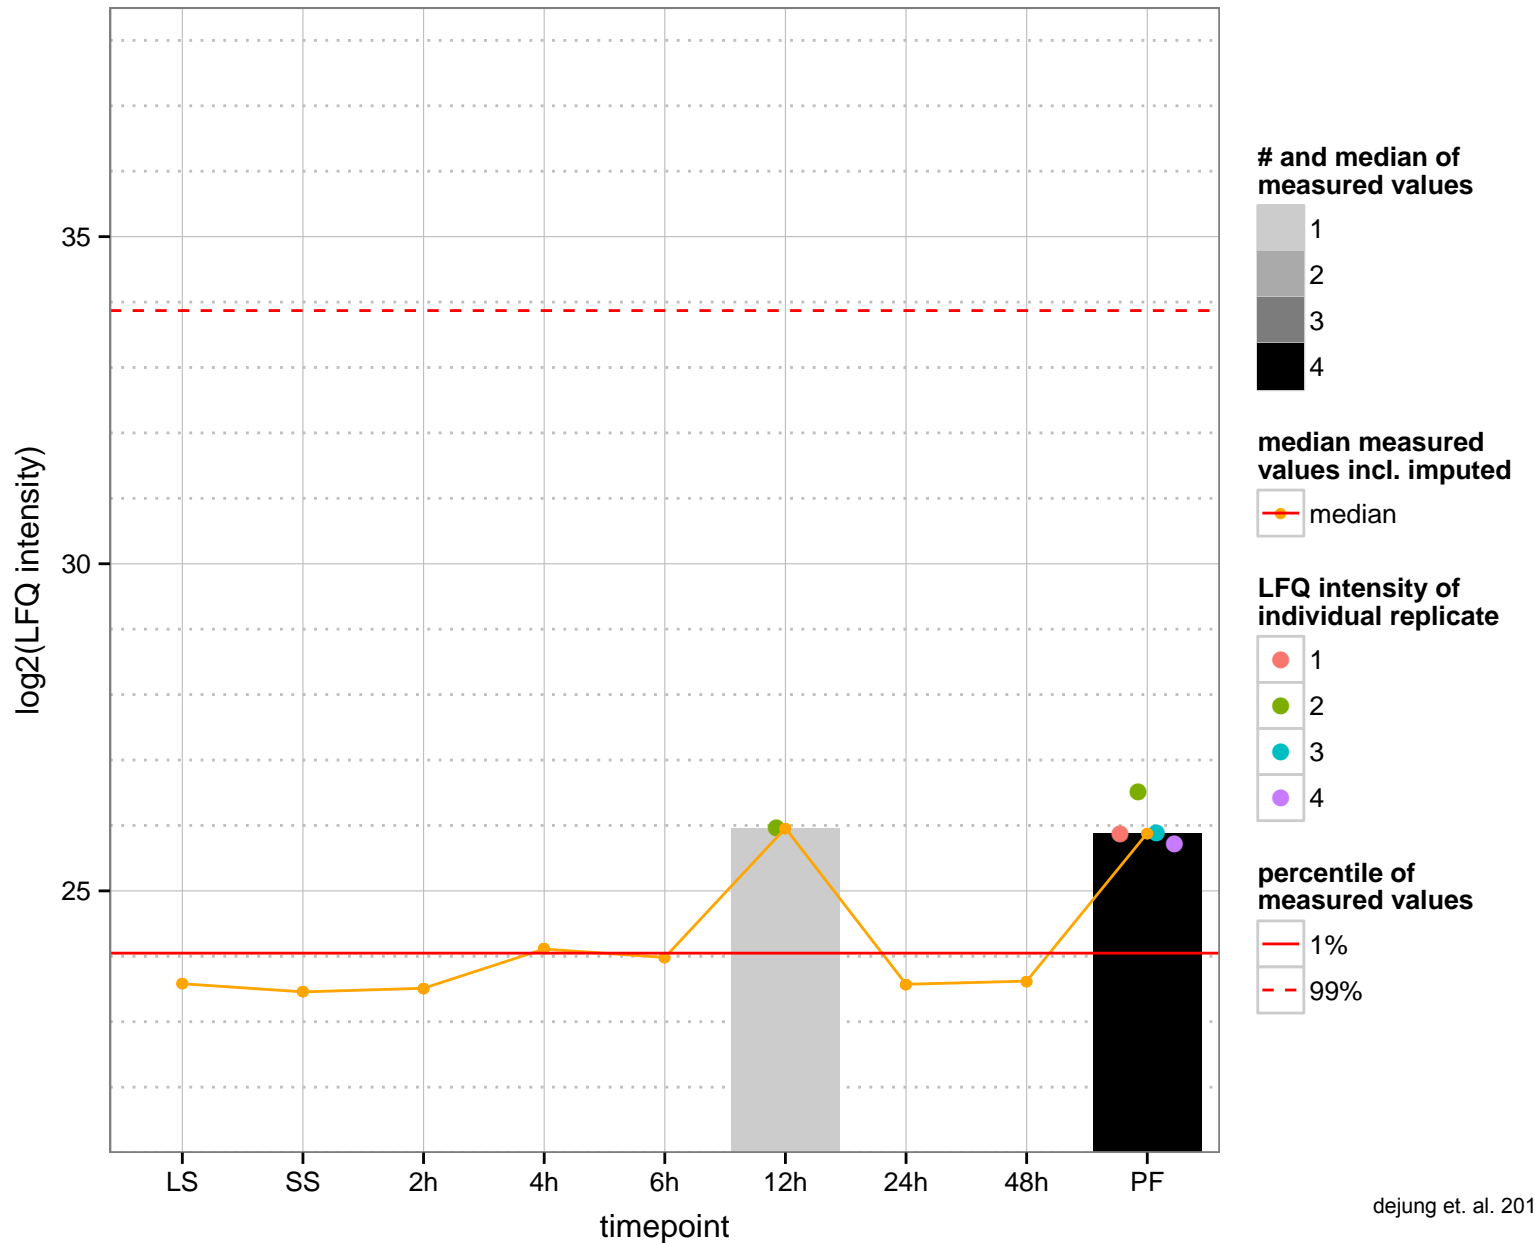

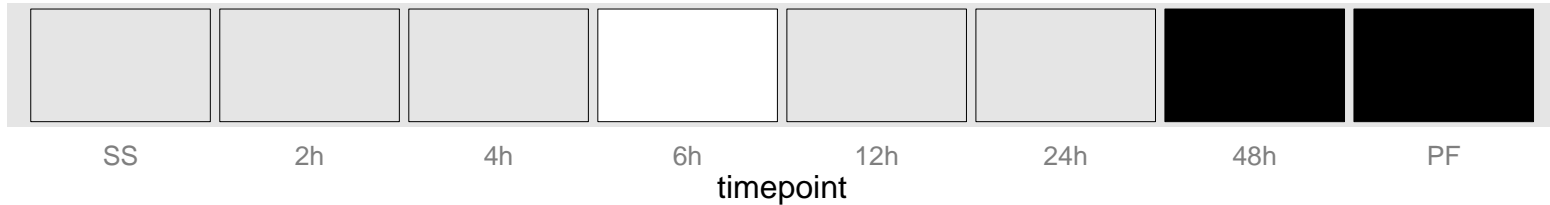

**regulated**  **not regulated**  **significant down**  **significant up**

conserved protein, unknown function  
 Tb927.1.1420  
 AGOF: null  
 AGOC: null  
 AGOP: null  
 PGO: null  
 PGOC: null  
 PGOP: null

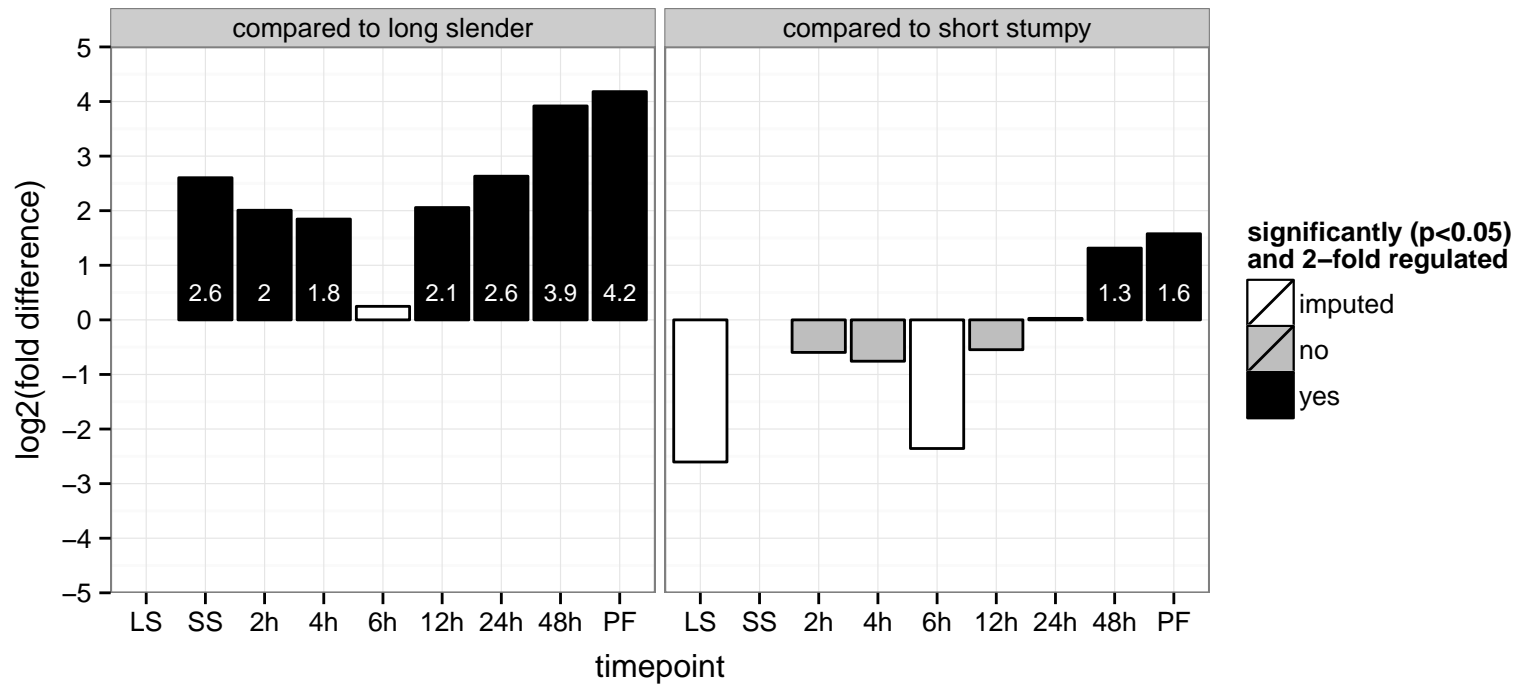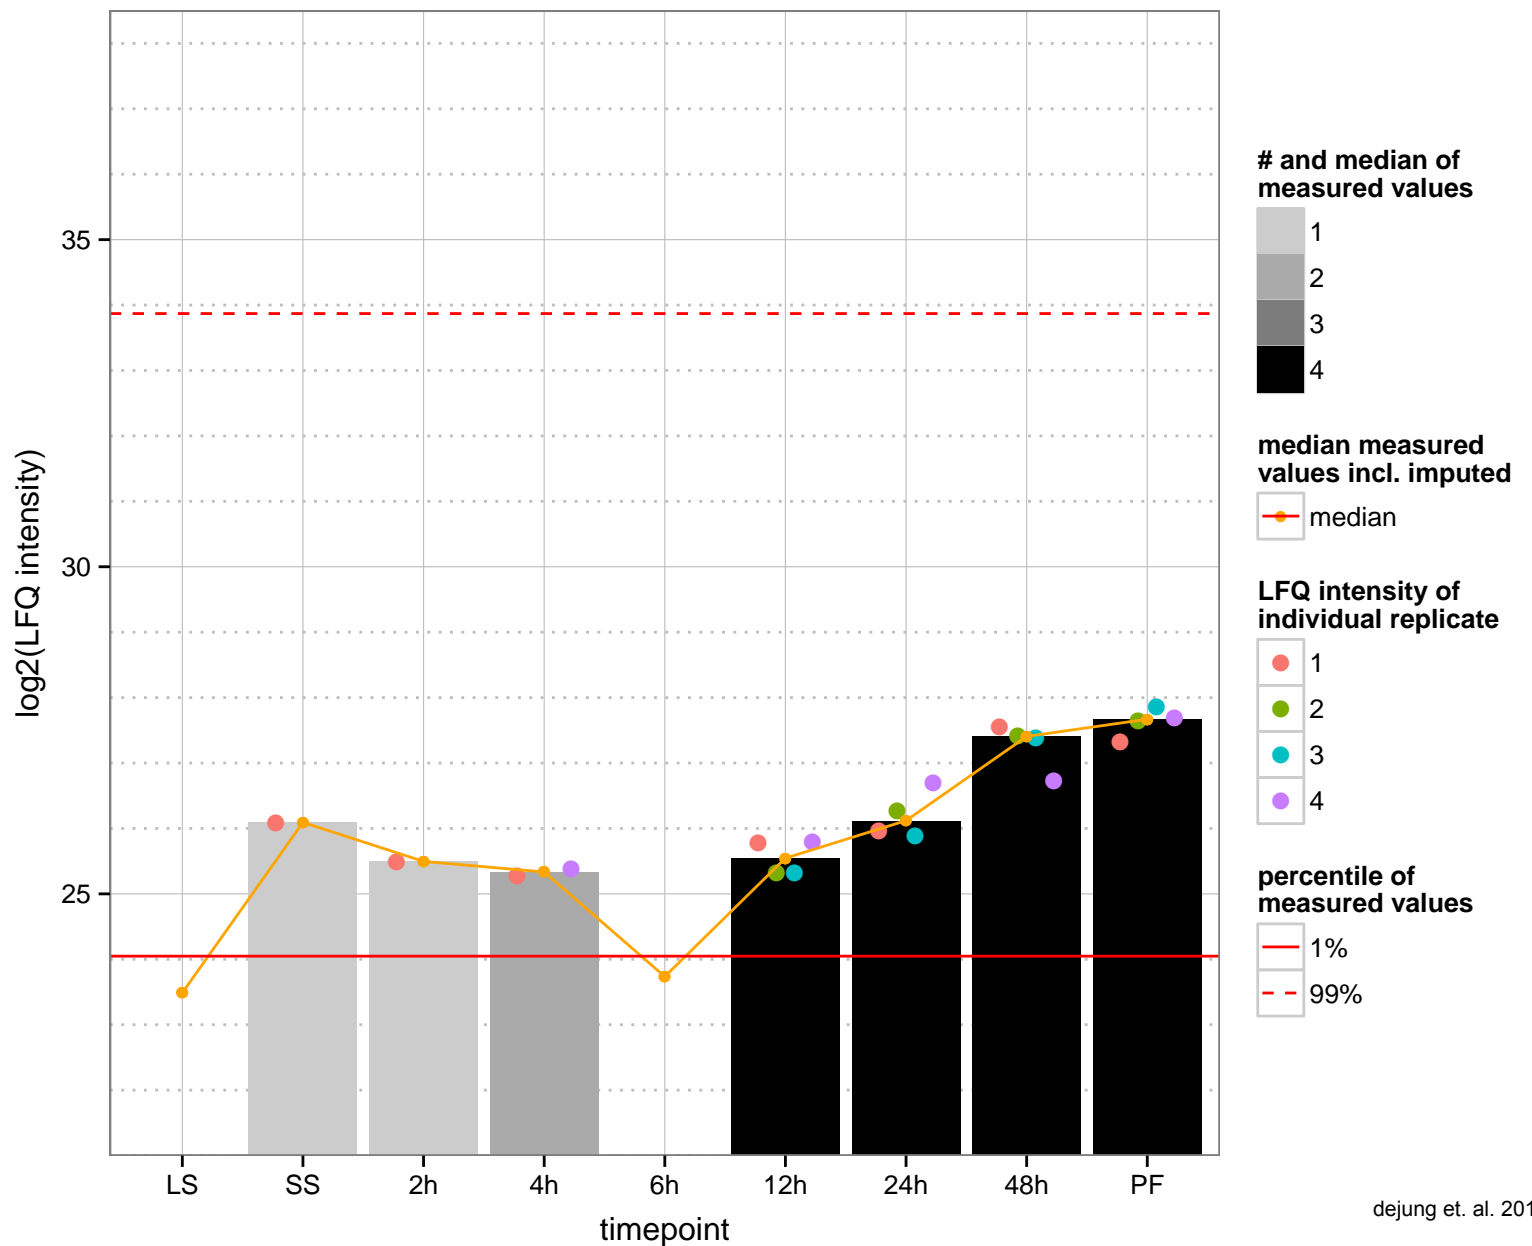

fatty acid desaturase, putative, oleate desaturase  
 Tb927.2.3080  
 AGOF: oxidoreductase activity  
 AGOC: null  
 AGOP: fatty acid biosynthetic process  
 PGO: null  
 PGOC: null  
 PGOP: lipid metabolic process

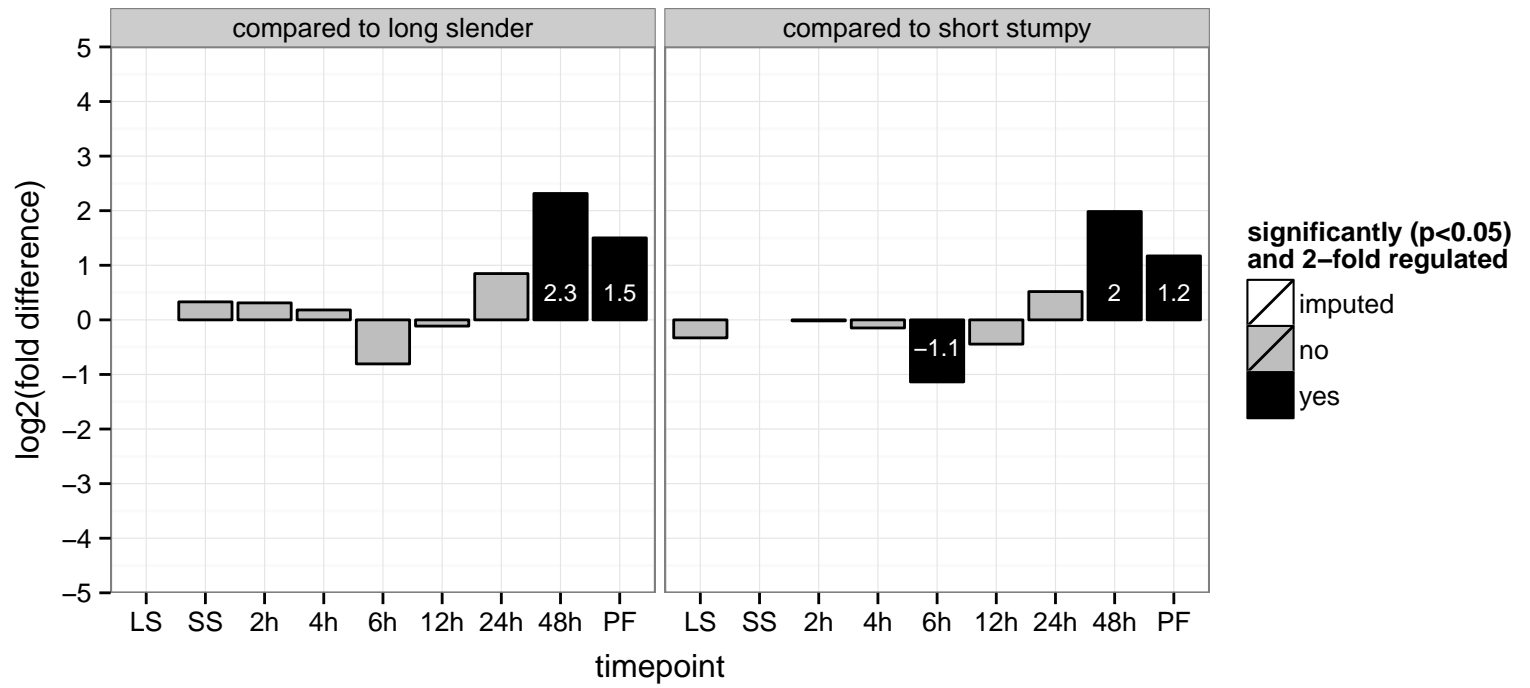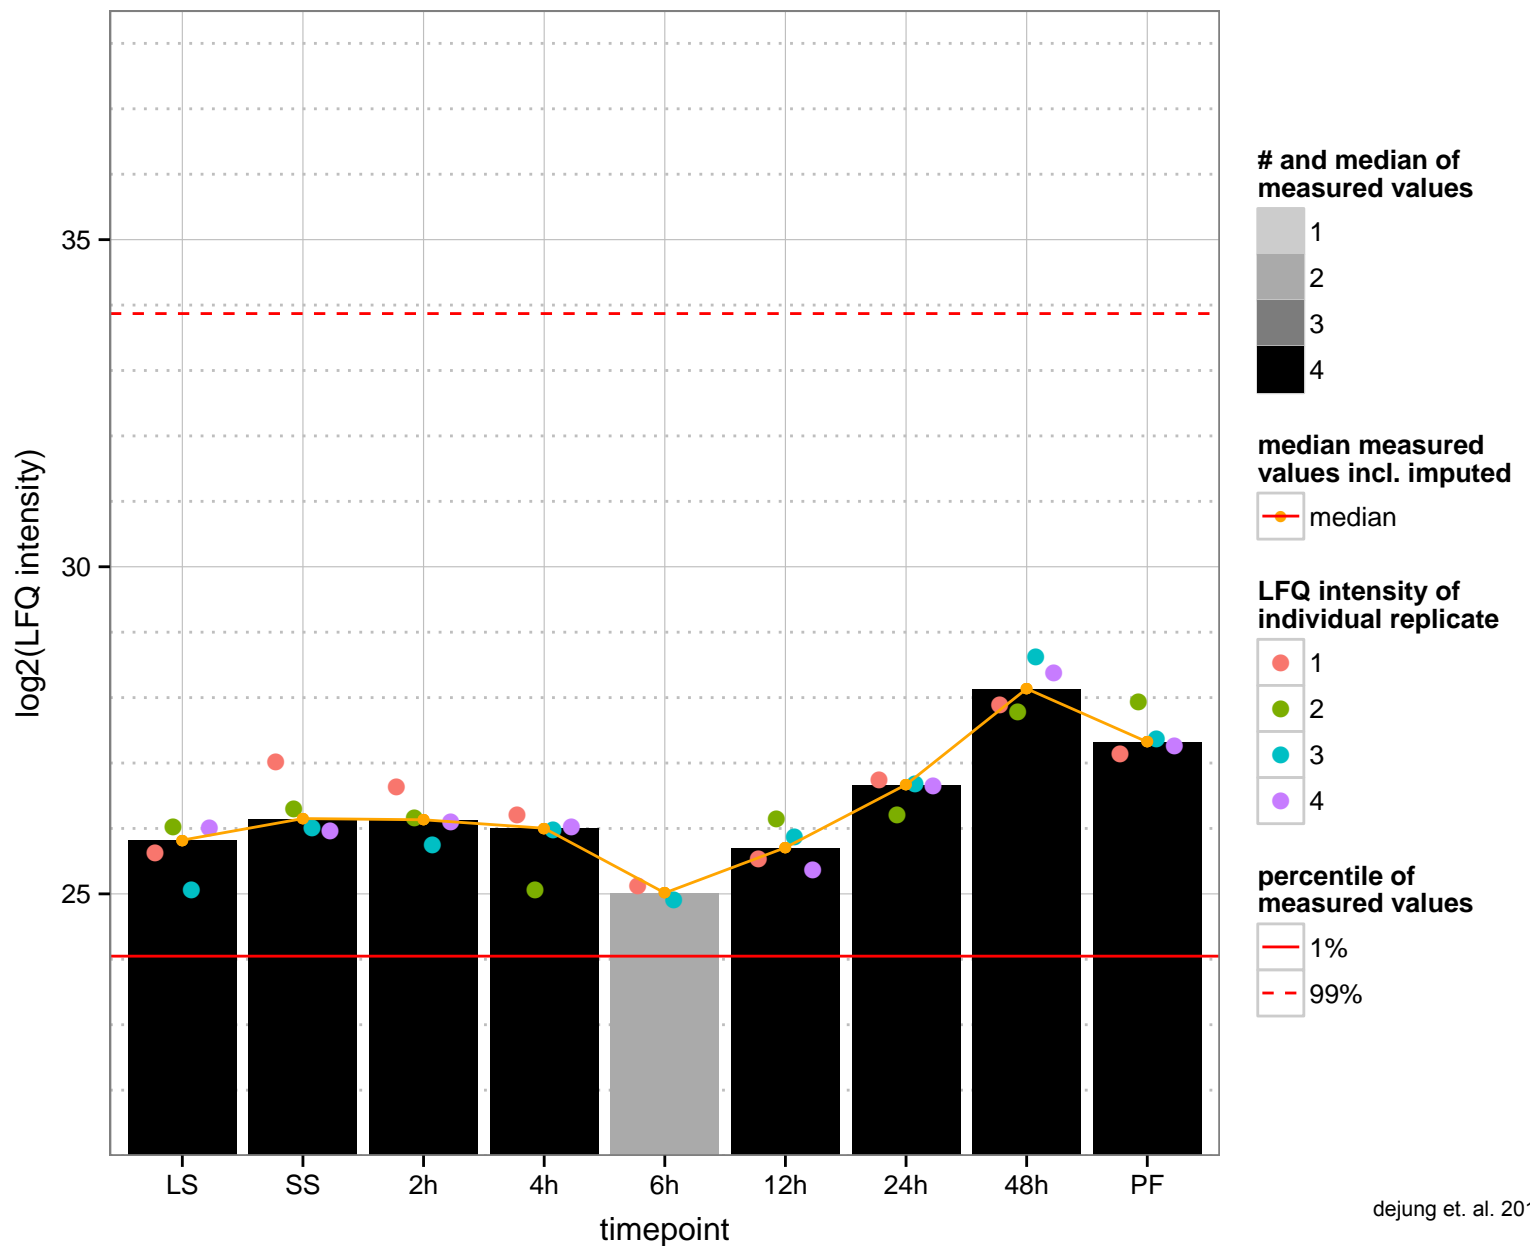

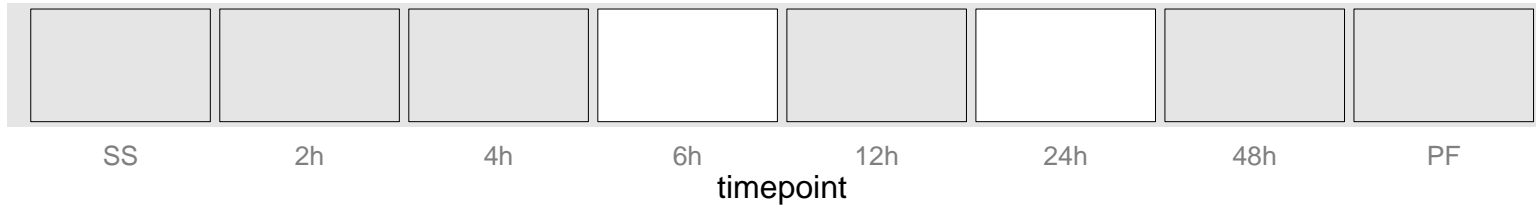

**regulated**  **not regulated**  **significant down**  **significant up**

short-chain dehydrogenase, putative  
 Tb927.10.6870  
 AGOF: oxidoreductase activity  
 AGOC: null  
 AGOP: metabolic process  
 PGOF: oxidoreductase activity  
 PGOC: null  
 PGOP: metabolic process

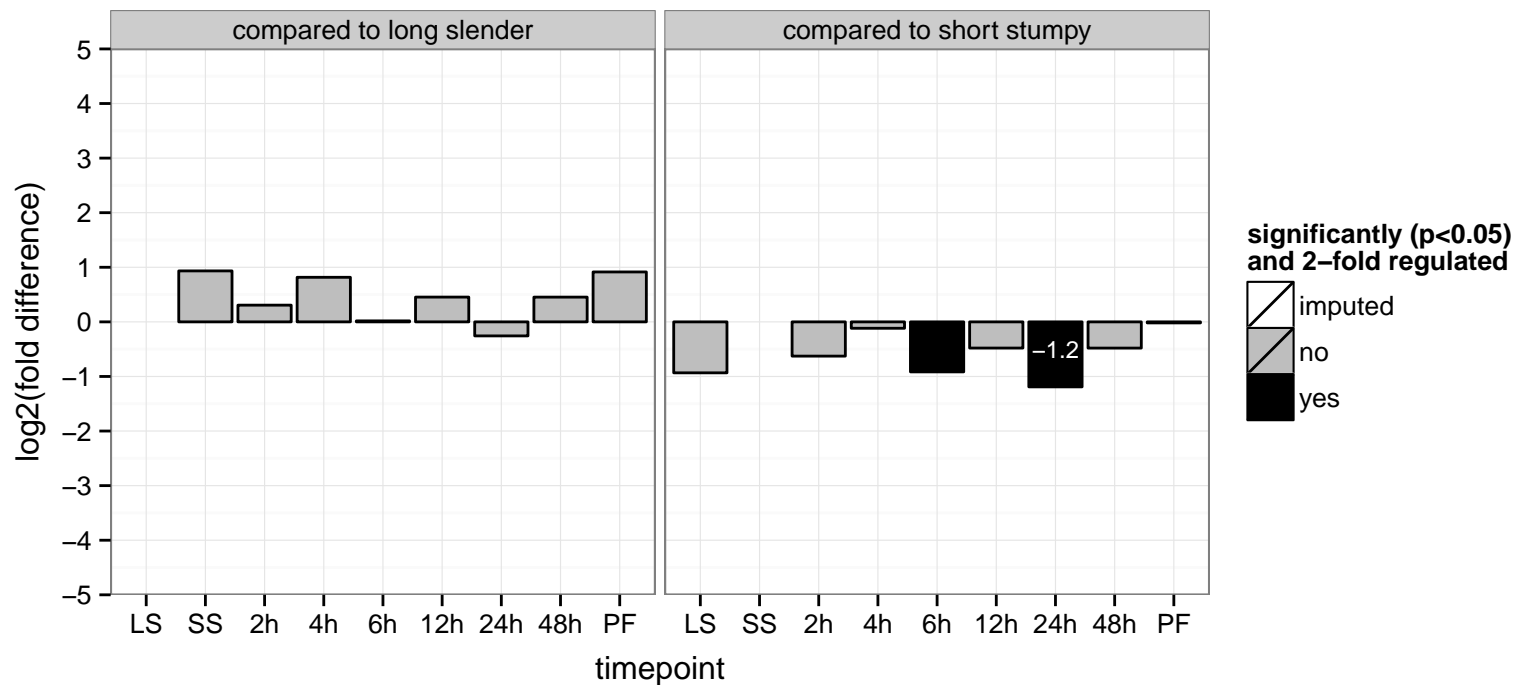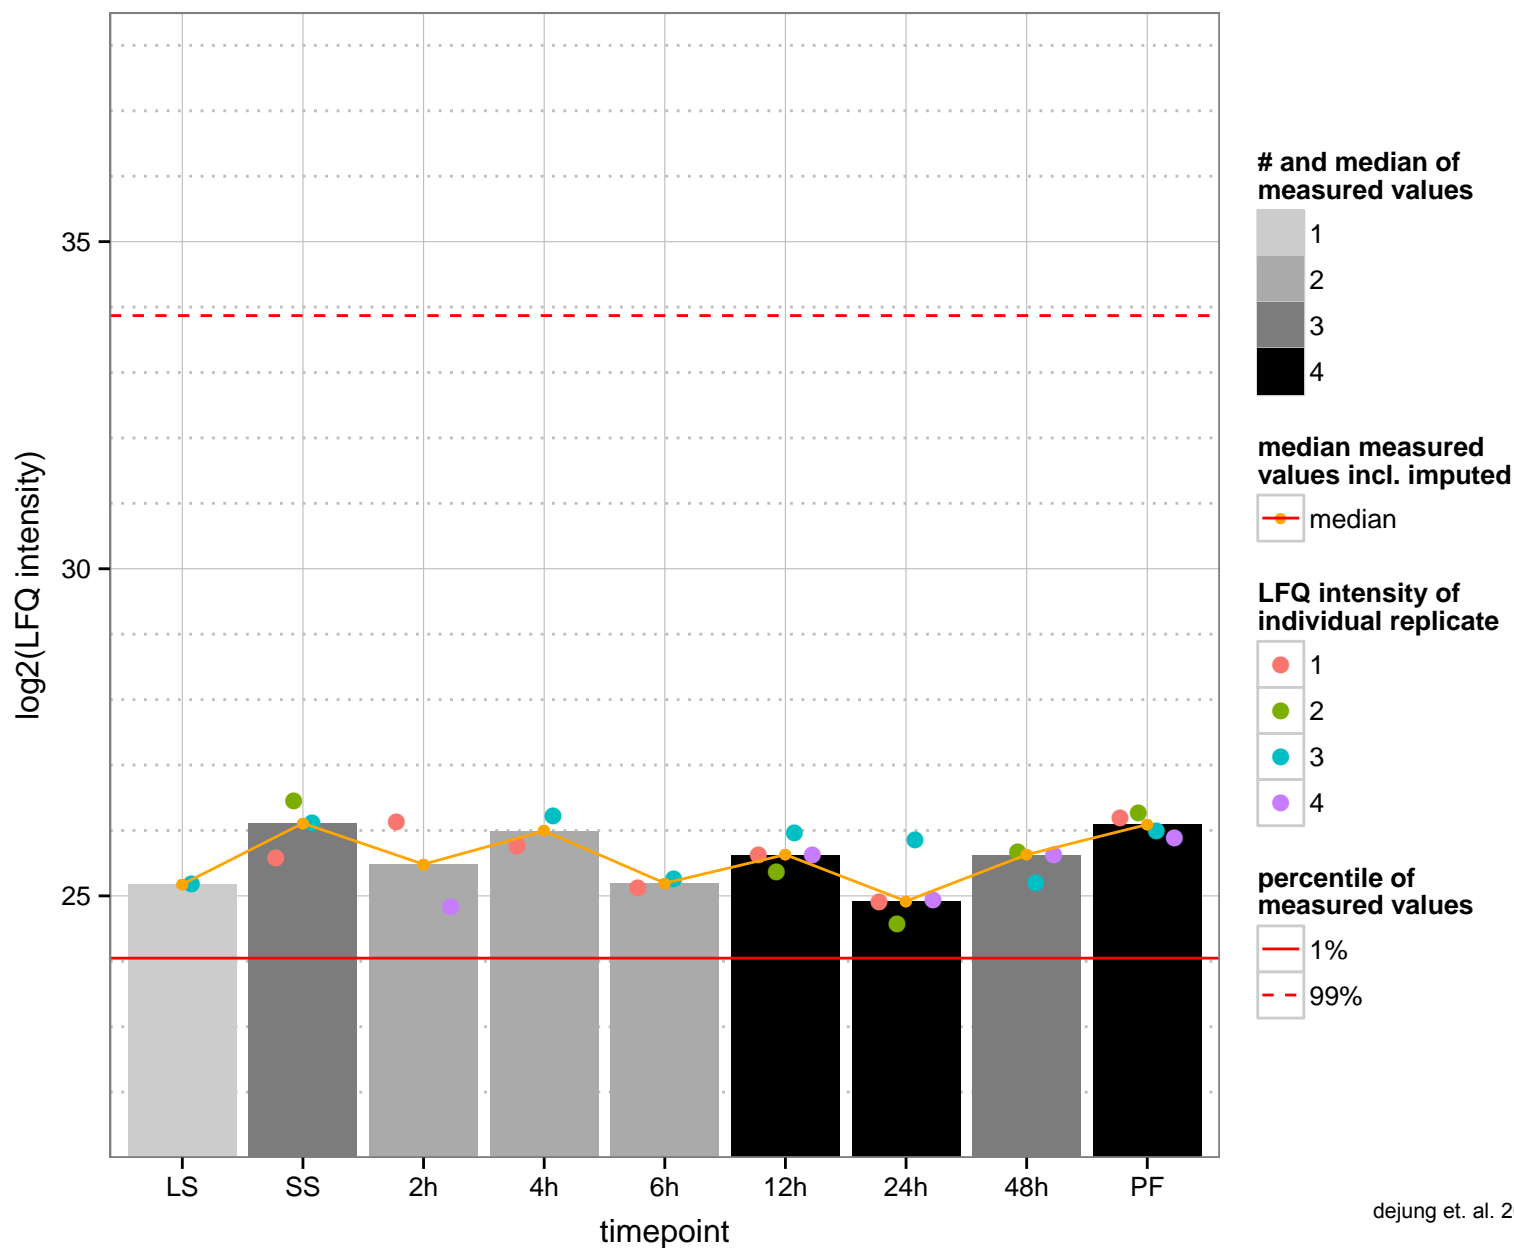

enolase, putative  
 Tb927.11.16410  
 AGOF: phosphopyruvate hydratase activity  
 AGOC: phosphopyruvate hydratase complex  
 AGOP: glycolysis  
 PGOF: magnesium ion binding, phosphopyruvate hydratase activity  
 PGOC: phosphopyruvate hydratase complex  
 PGOP: glycolysis

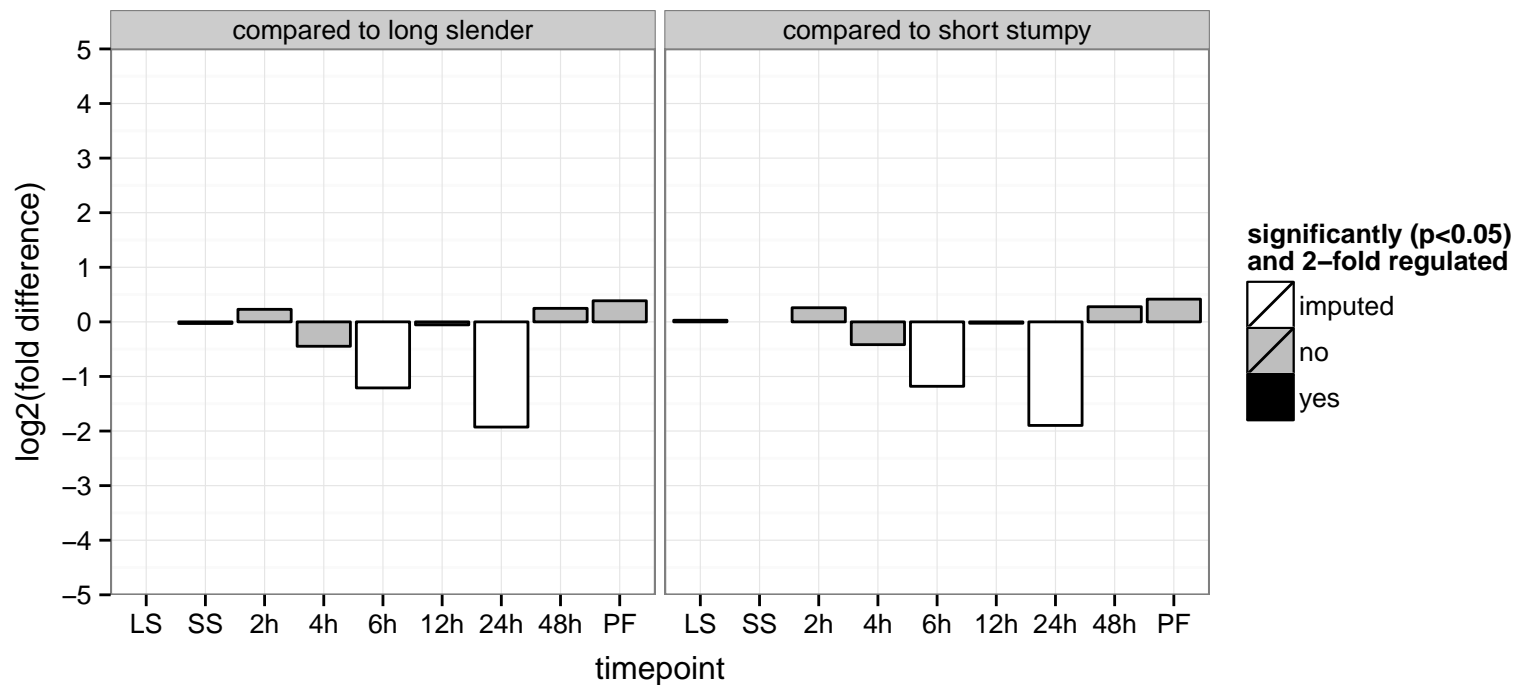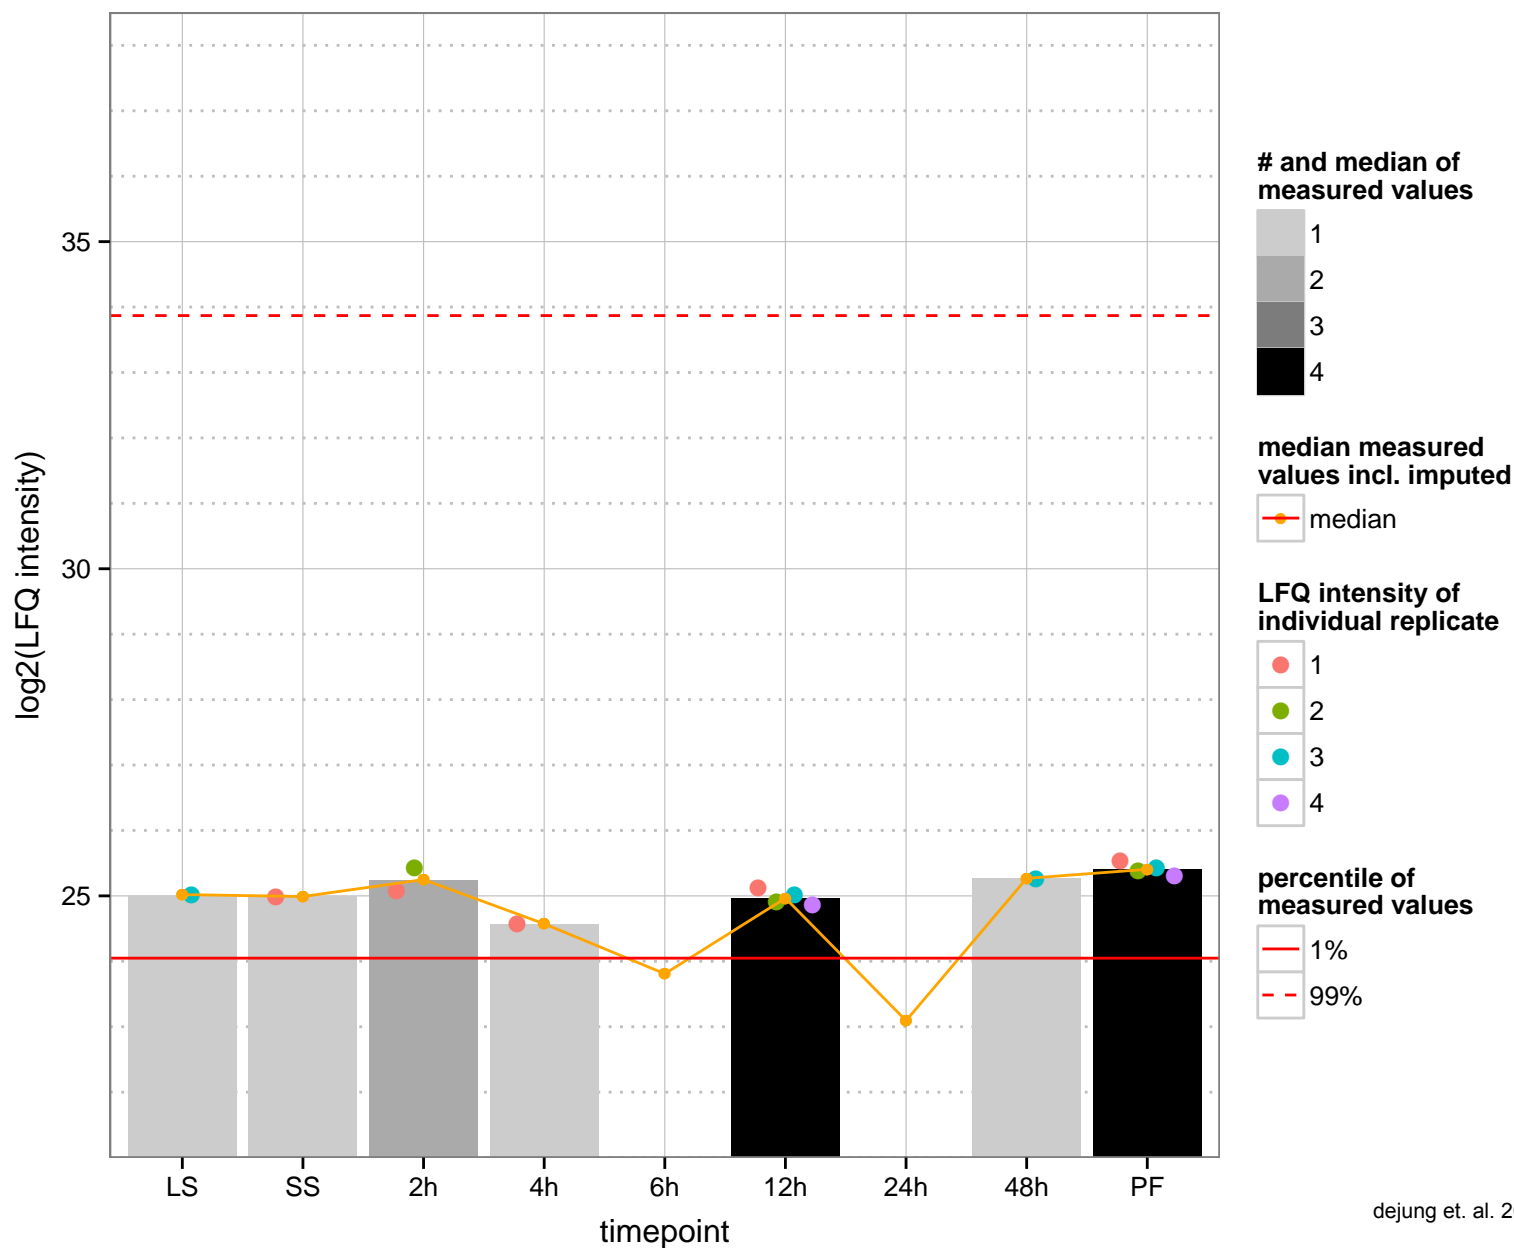

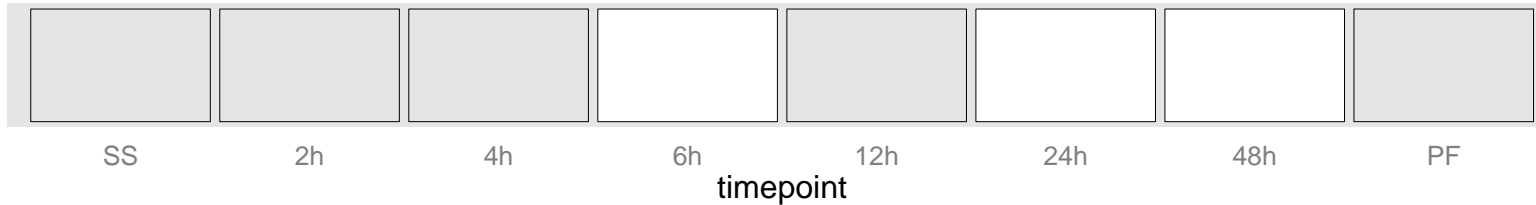

**regulated**  **not regulated**  **significant down**  **significant up**



vacuolar ATP synthase, putative

Tb927.5.550

AGOF: hydrogen ion transmembrane transporter activity

AGOC: proton-transporting V-type ATPase, V0 domain

AGOP: ATP synthesis coupled proton transport

PGOF: hydrogen ion transmembrane transporter activity

PGOC: proton-transporting V-type ATPase, V0 domain, proton-transporting two-sector ATPase complex, proton-transporting

PGOP: ATP hydrolysis coupled proton transport

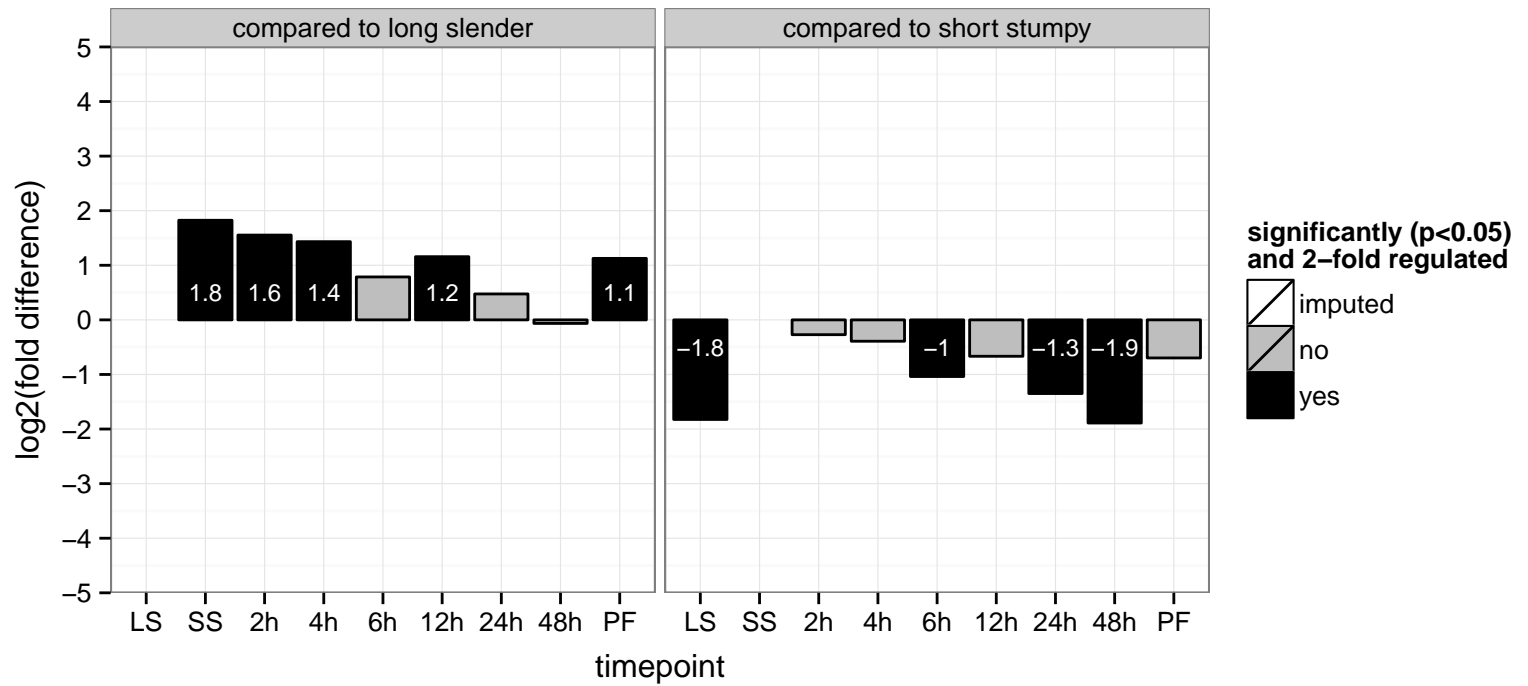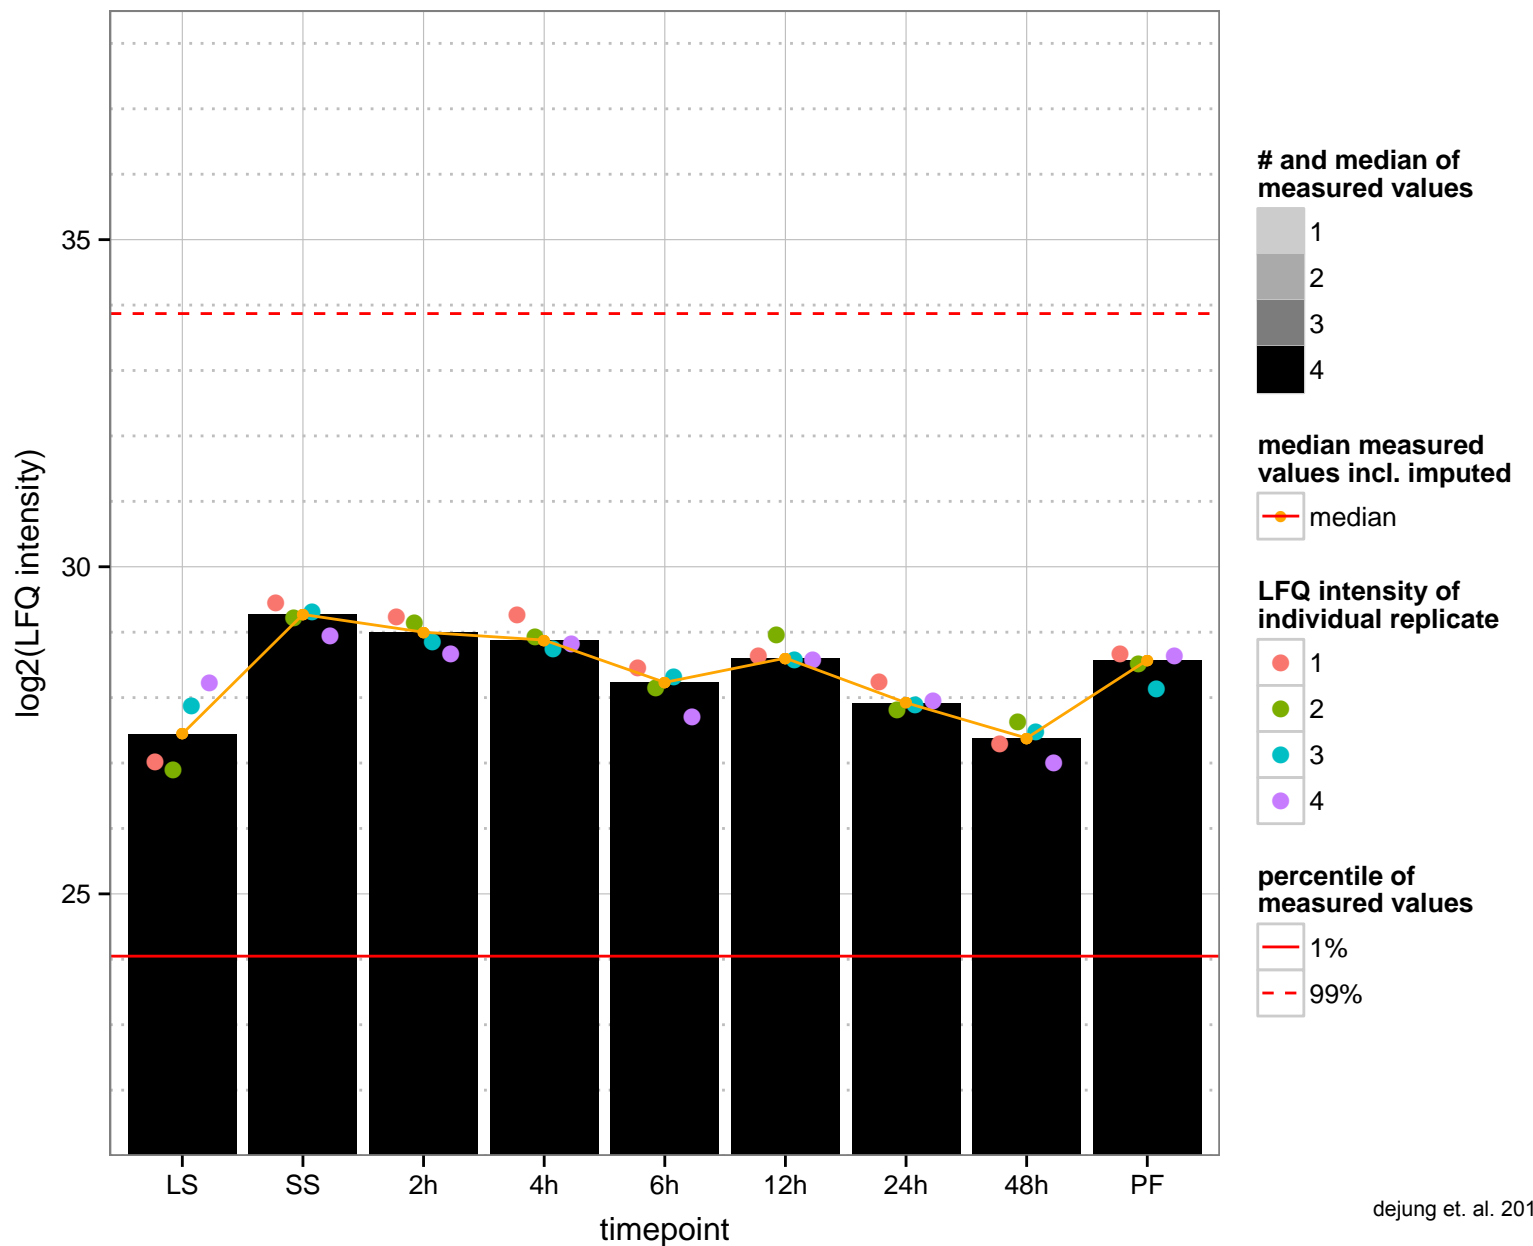

hypothetical protein, conserved  
 Tb927.8.7200  
 AGOF: zinc ion binding  
 AGOC: null  
 AGOP: null  
 PGOF: binding, protein binding, zinc ion binding  
 PGO: null  
 PGO: null  
 PGOP: intracellular protein transport, vesicle-mediated transport

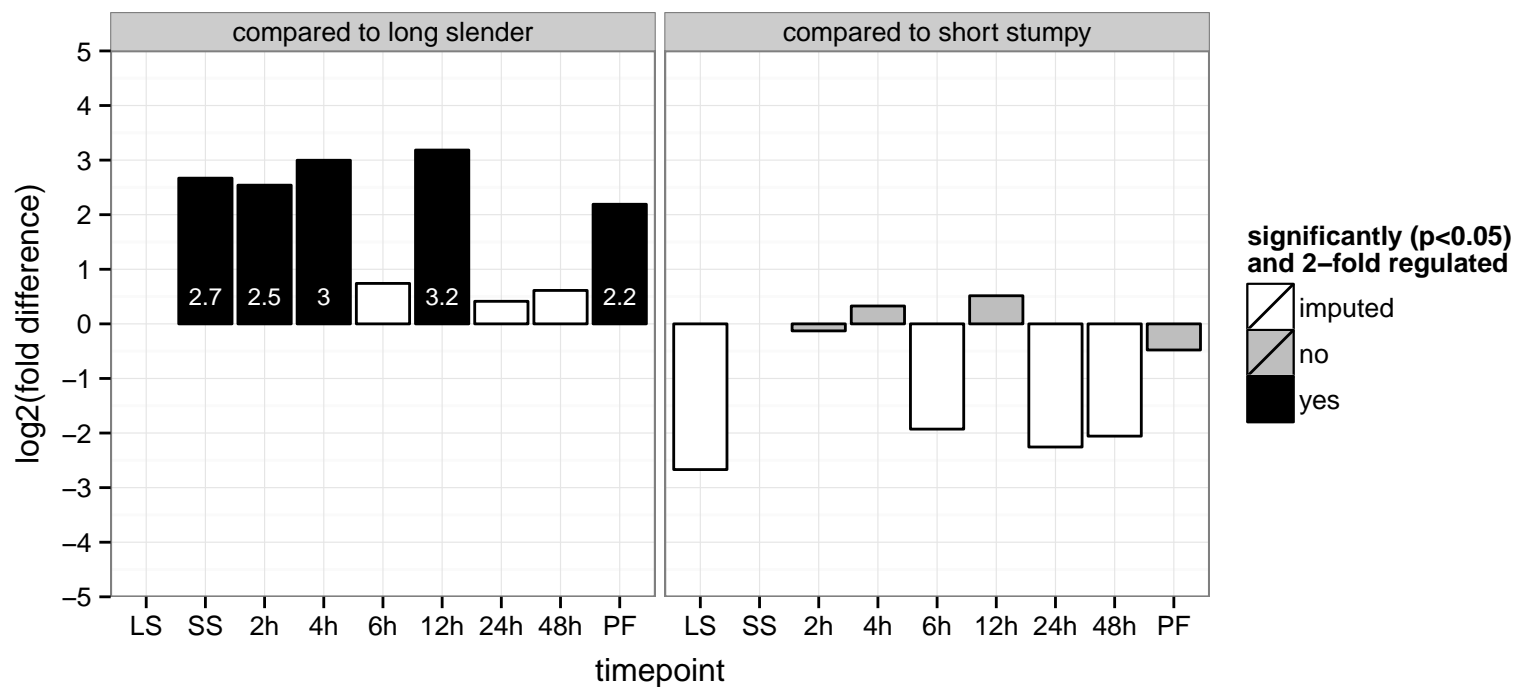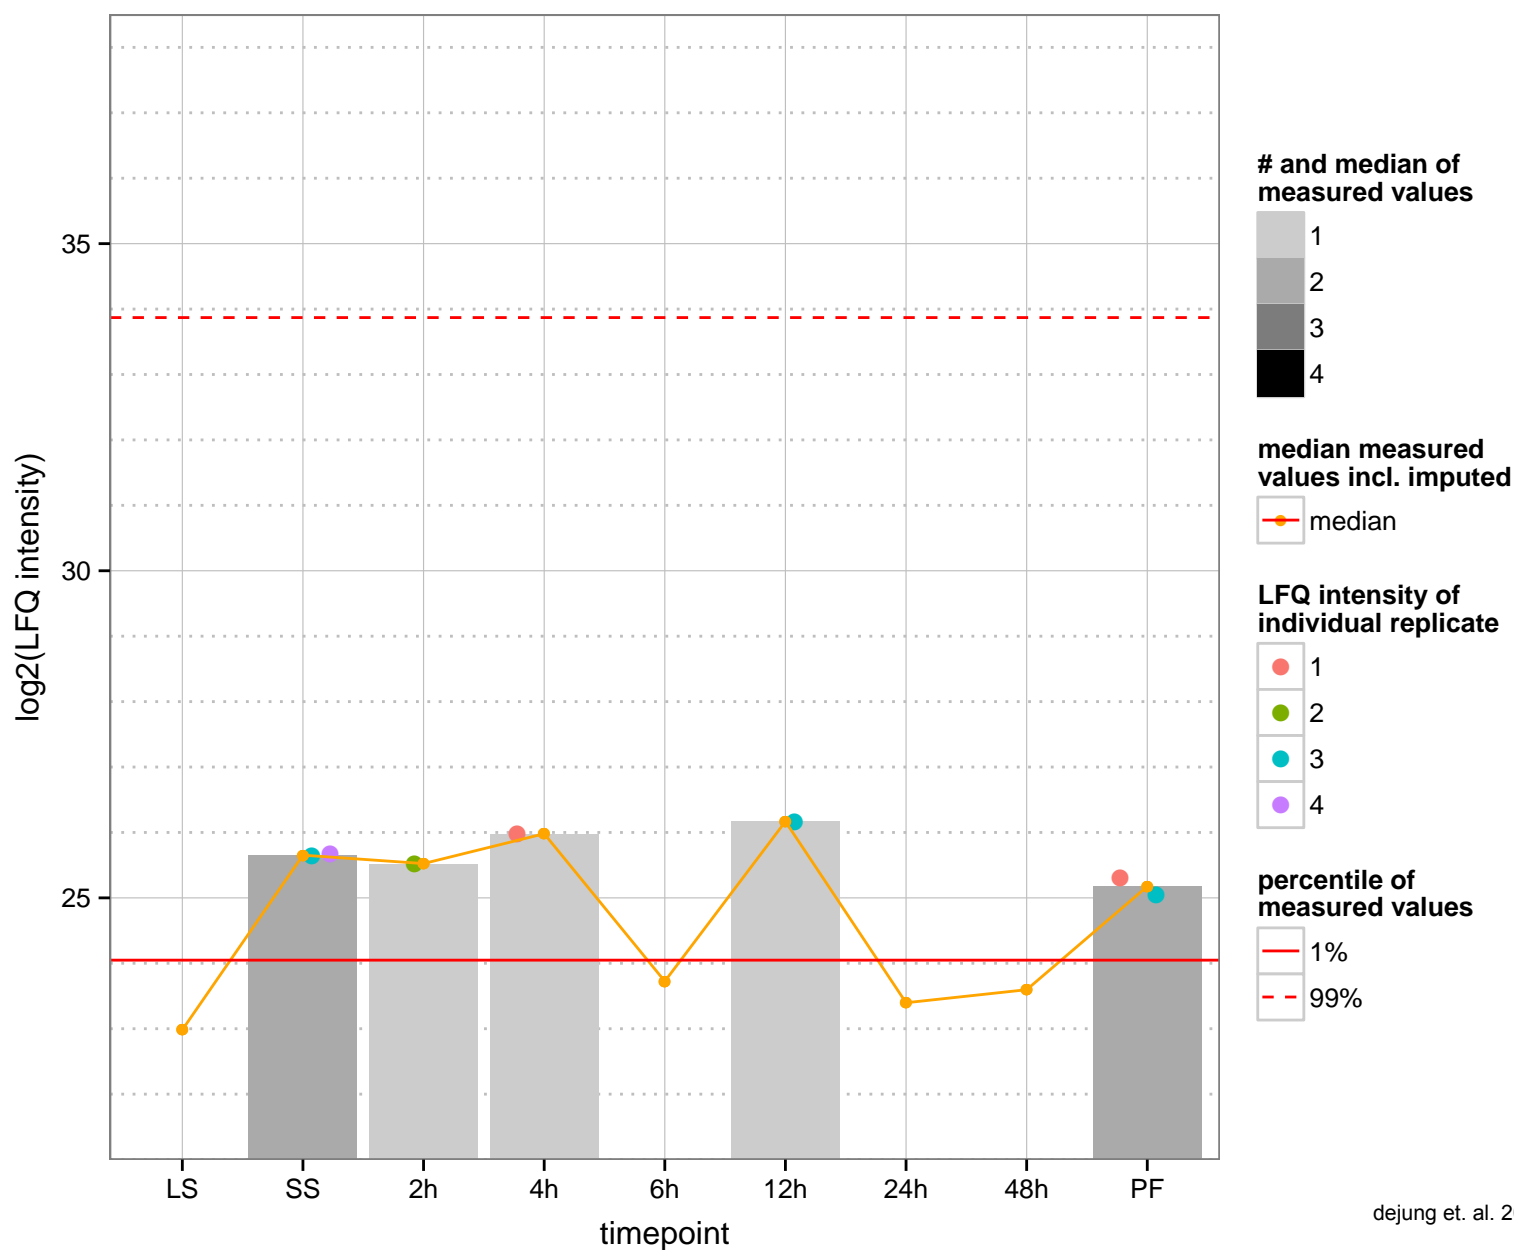

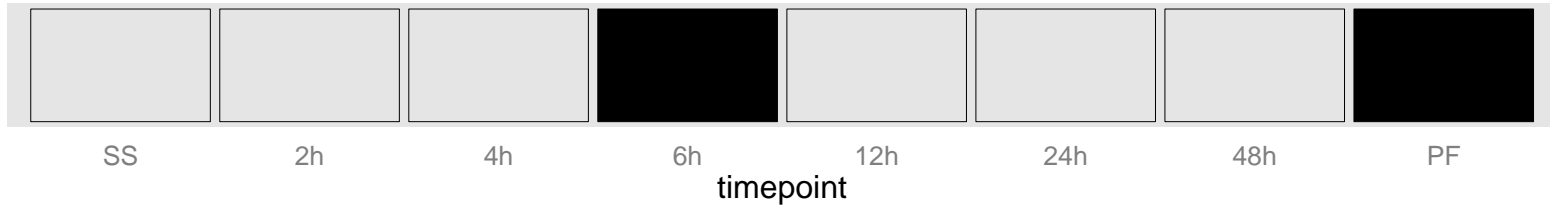

**regulated**  not regulated  significant down  significant up

glycosyltransferase, putative, dolichyl-P-Man:GDP-ManGlcNAc2-PP-dolichyl beta-1, 4-mannosyltransferase  
 Tb927.10.13210;Tb11.v5.0694  
 AGOF: null, dolichyl-phosphate beta-D-mannosyltransferase activity  
 AGOC: null, endoplasmic reticulum membrane  
 AGOP: null, protein mannosylation  
 PGO: null  
 PGOC: null  
 PGOP: null

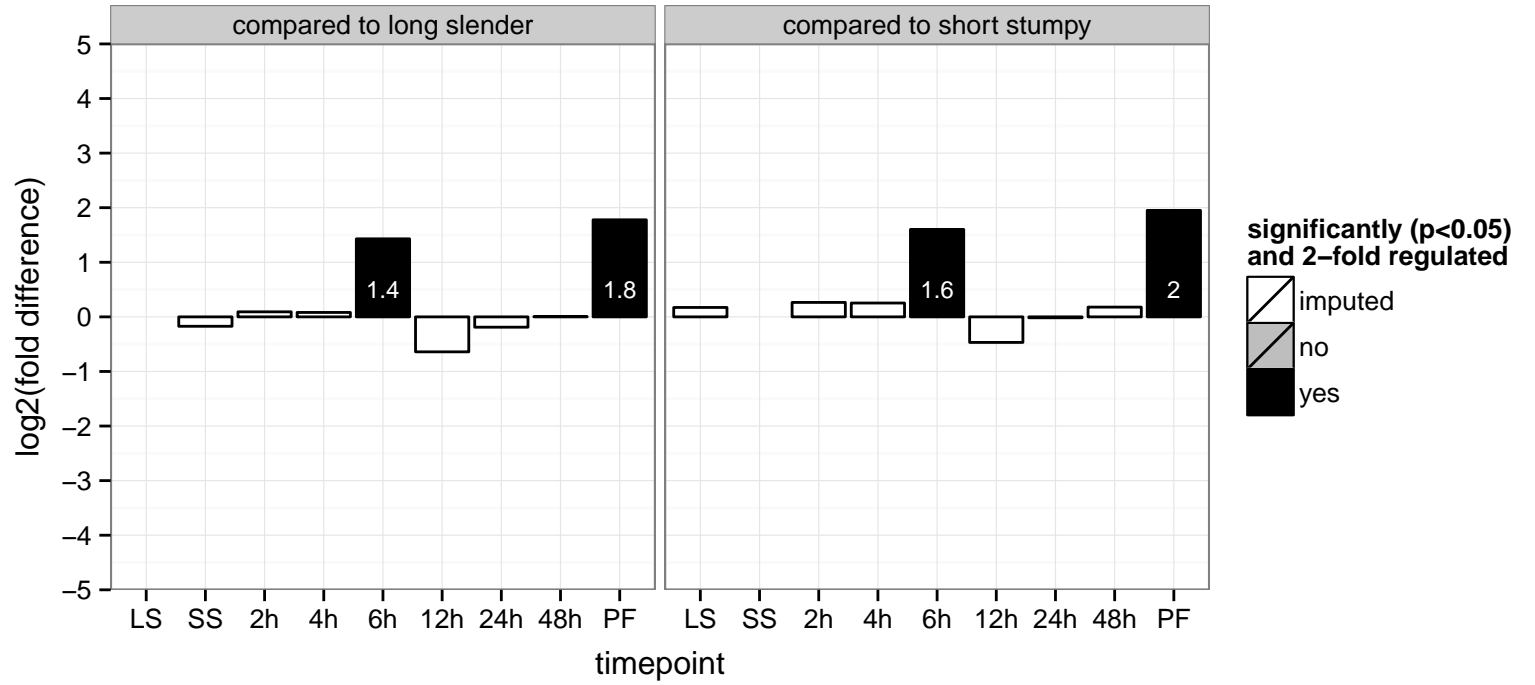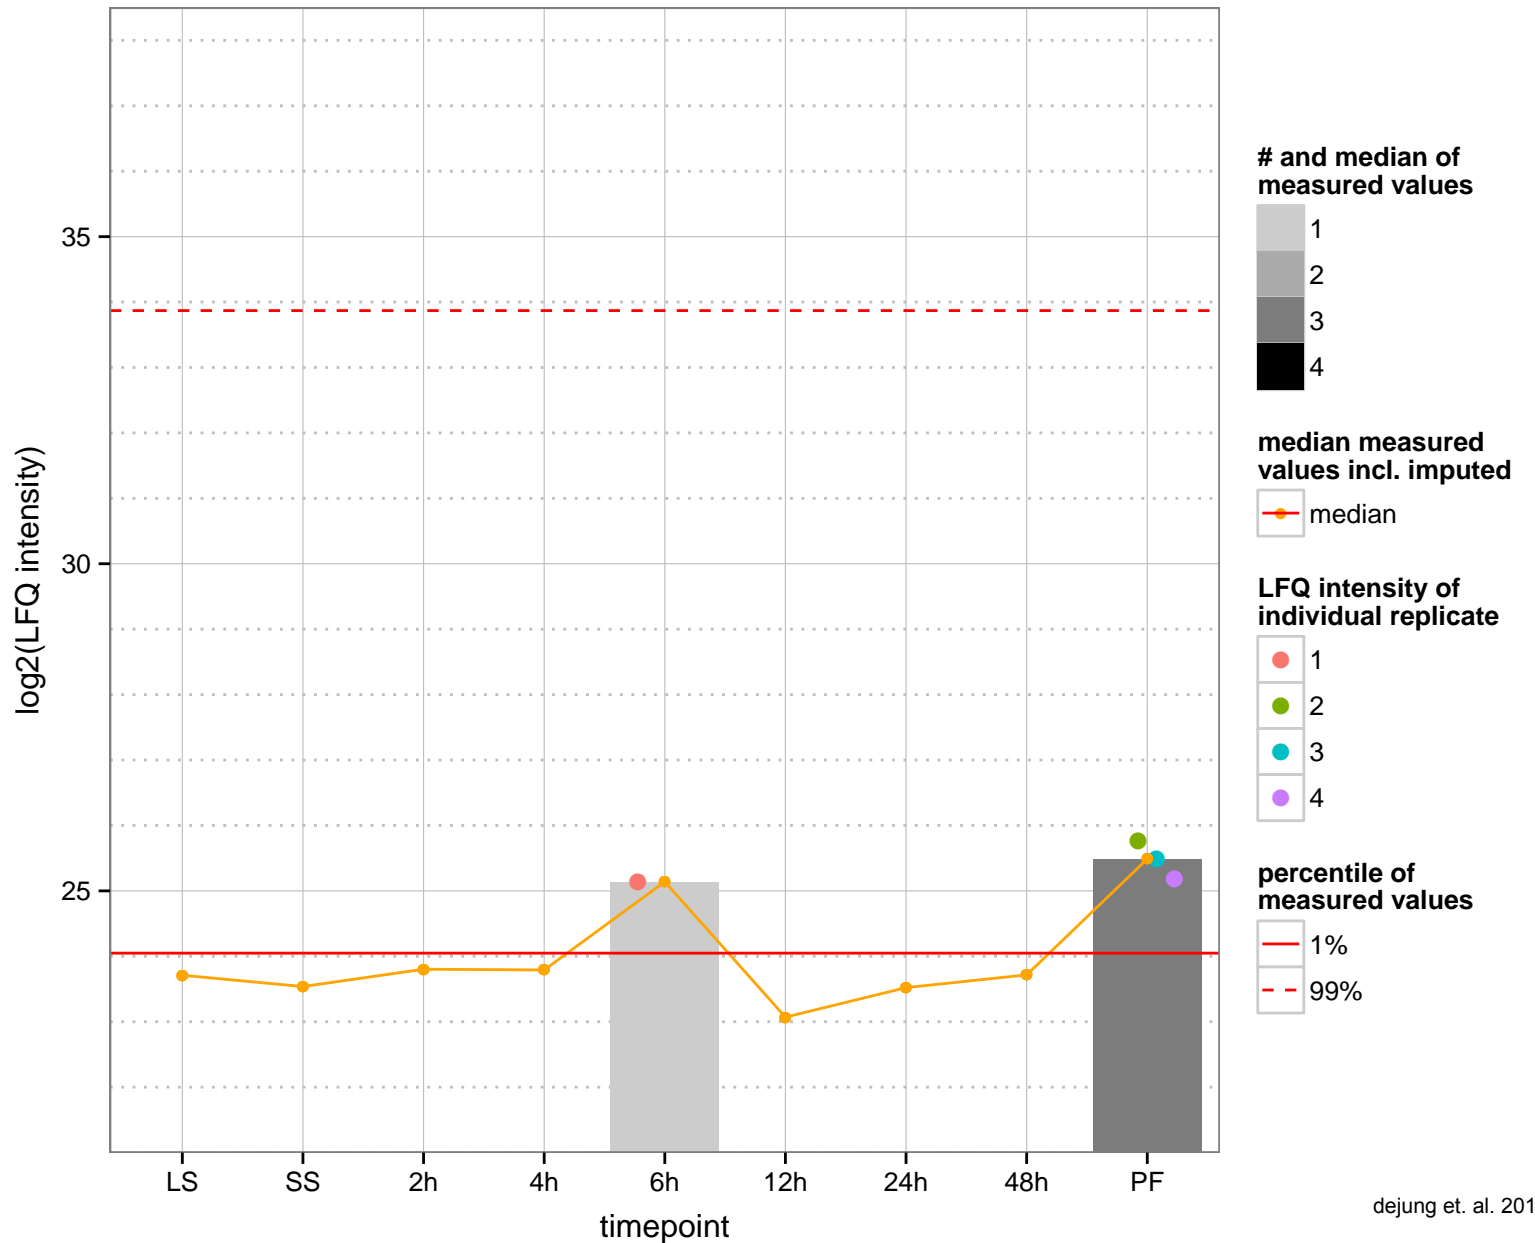

hypothetical protein, conserved  
 Tb927.11.7180  
 AGOF: null  
 AGOC: null  
 AGOP: null  
 PGOF: null  
 PGOC: null  
 PGOP: null

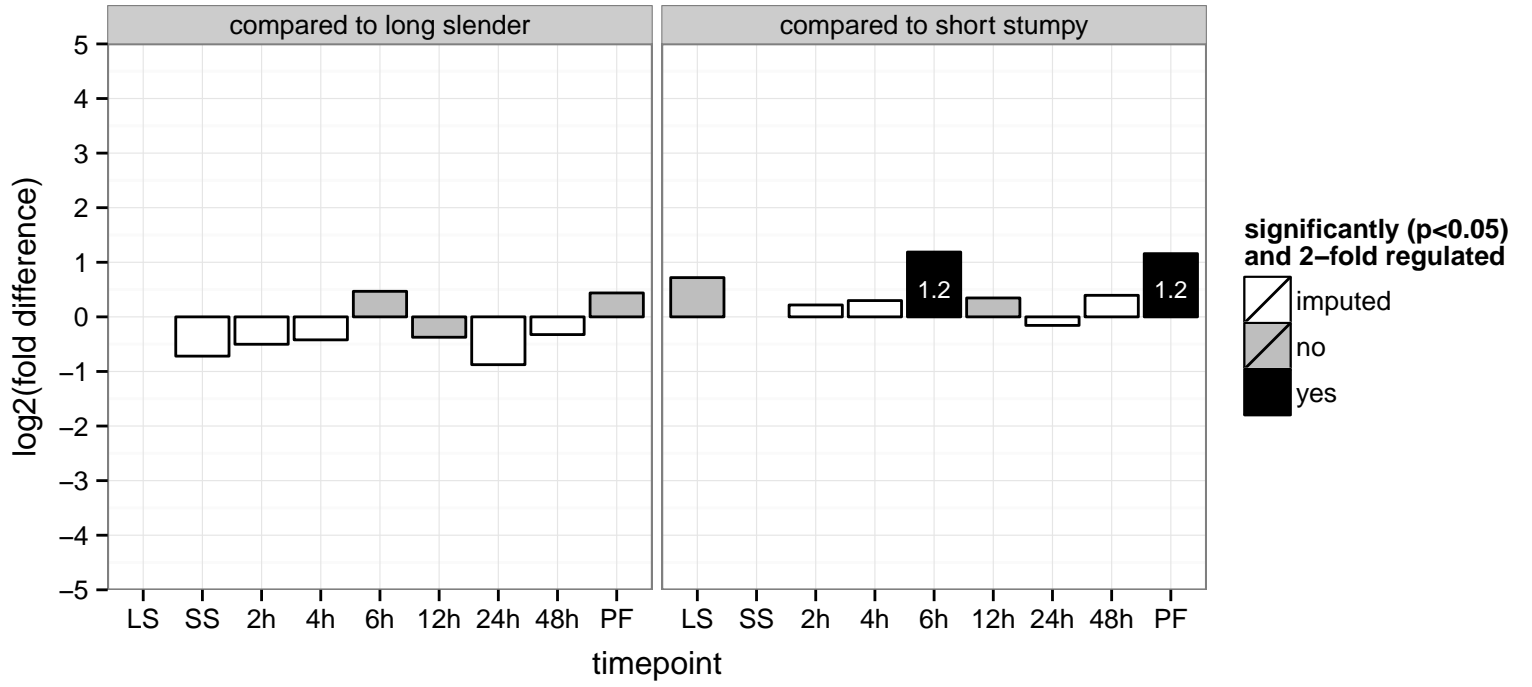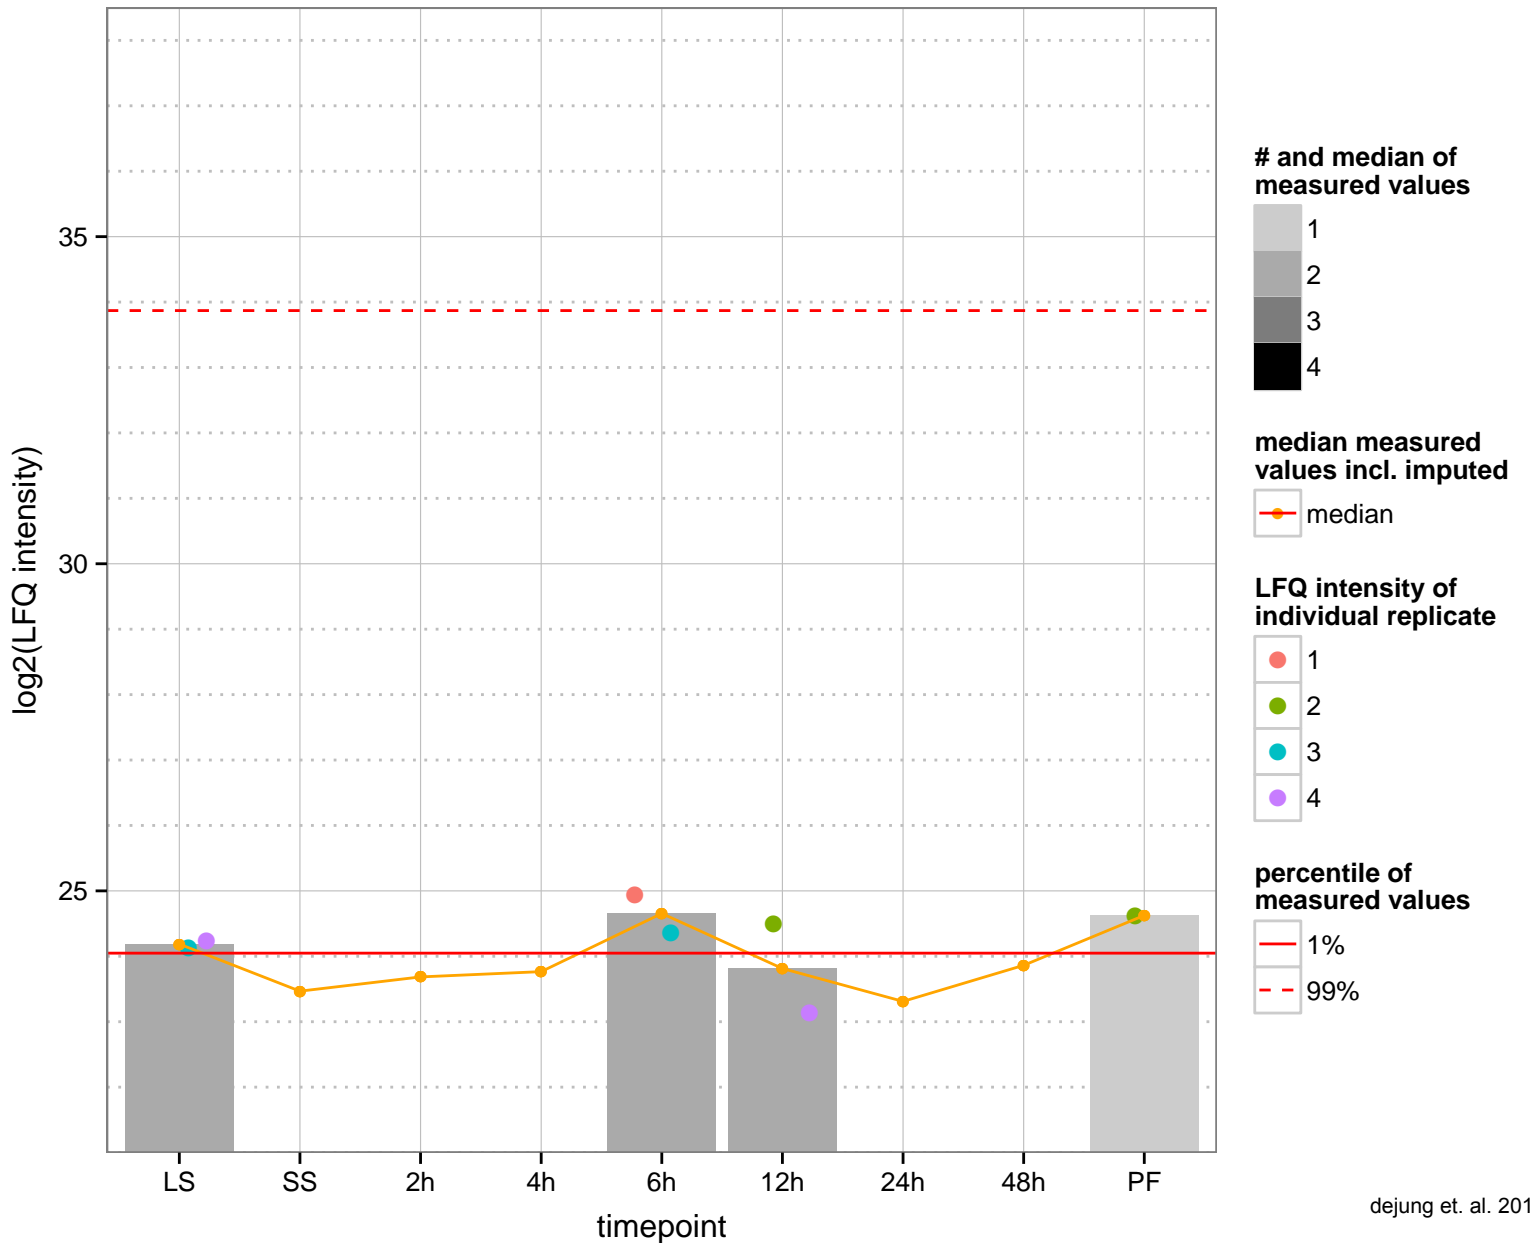

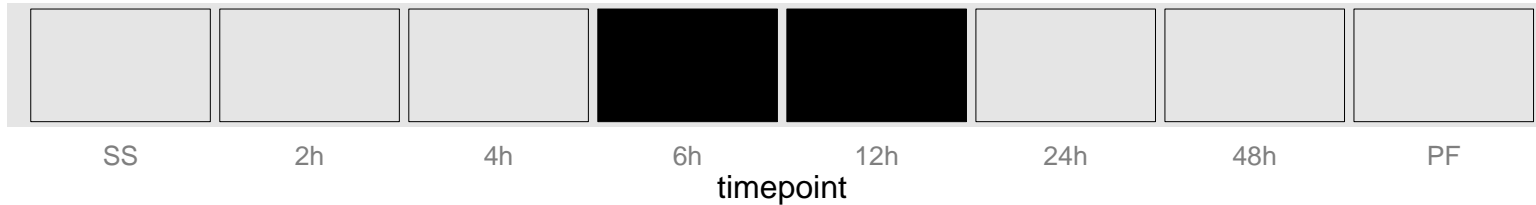

**regulated**  not regulated  significant down  significant up

hypothetical protein, conserved  
 Tb927.3.4510  
 AGOF: null  
 AGOC: null  
 AGOP: null  
 PGO: null  
 PGOC: null  
 PGOP: null

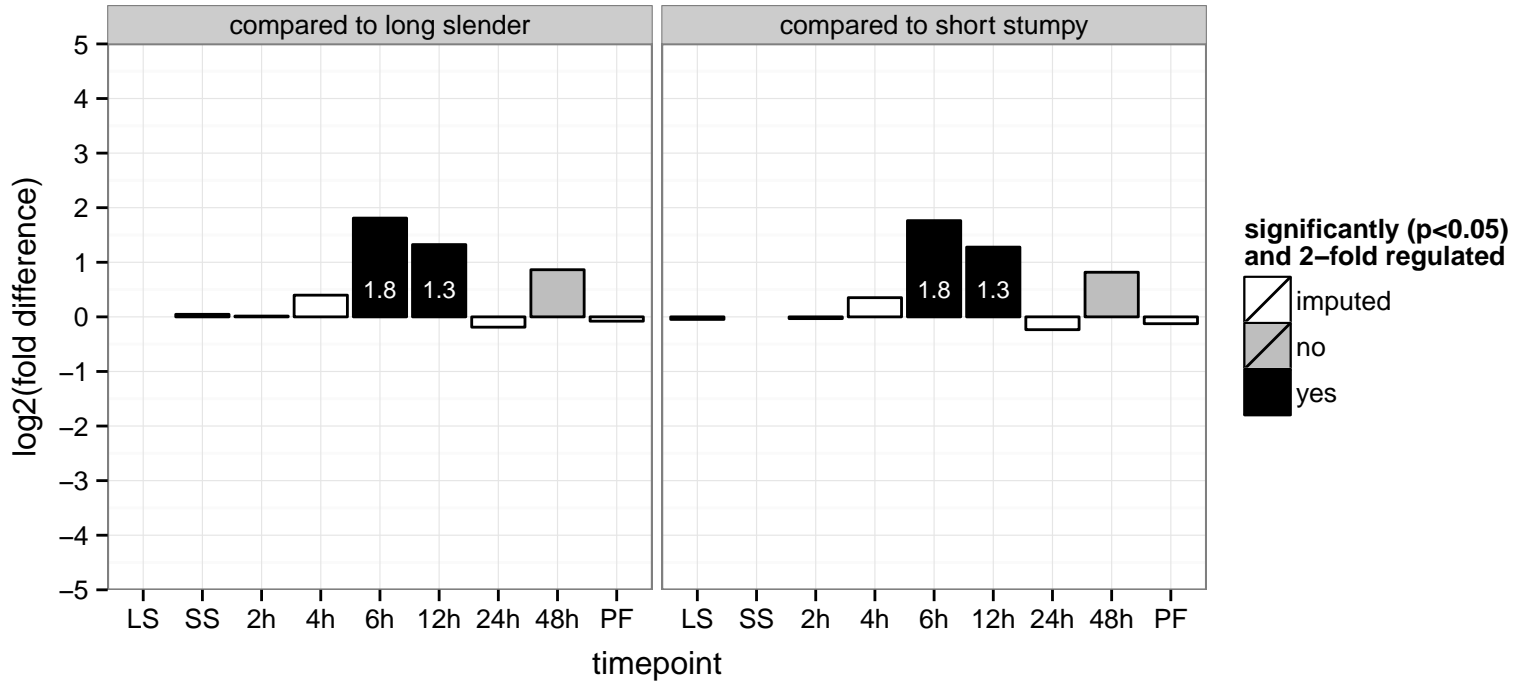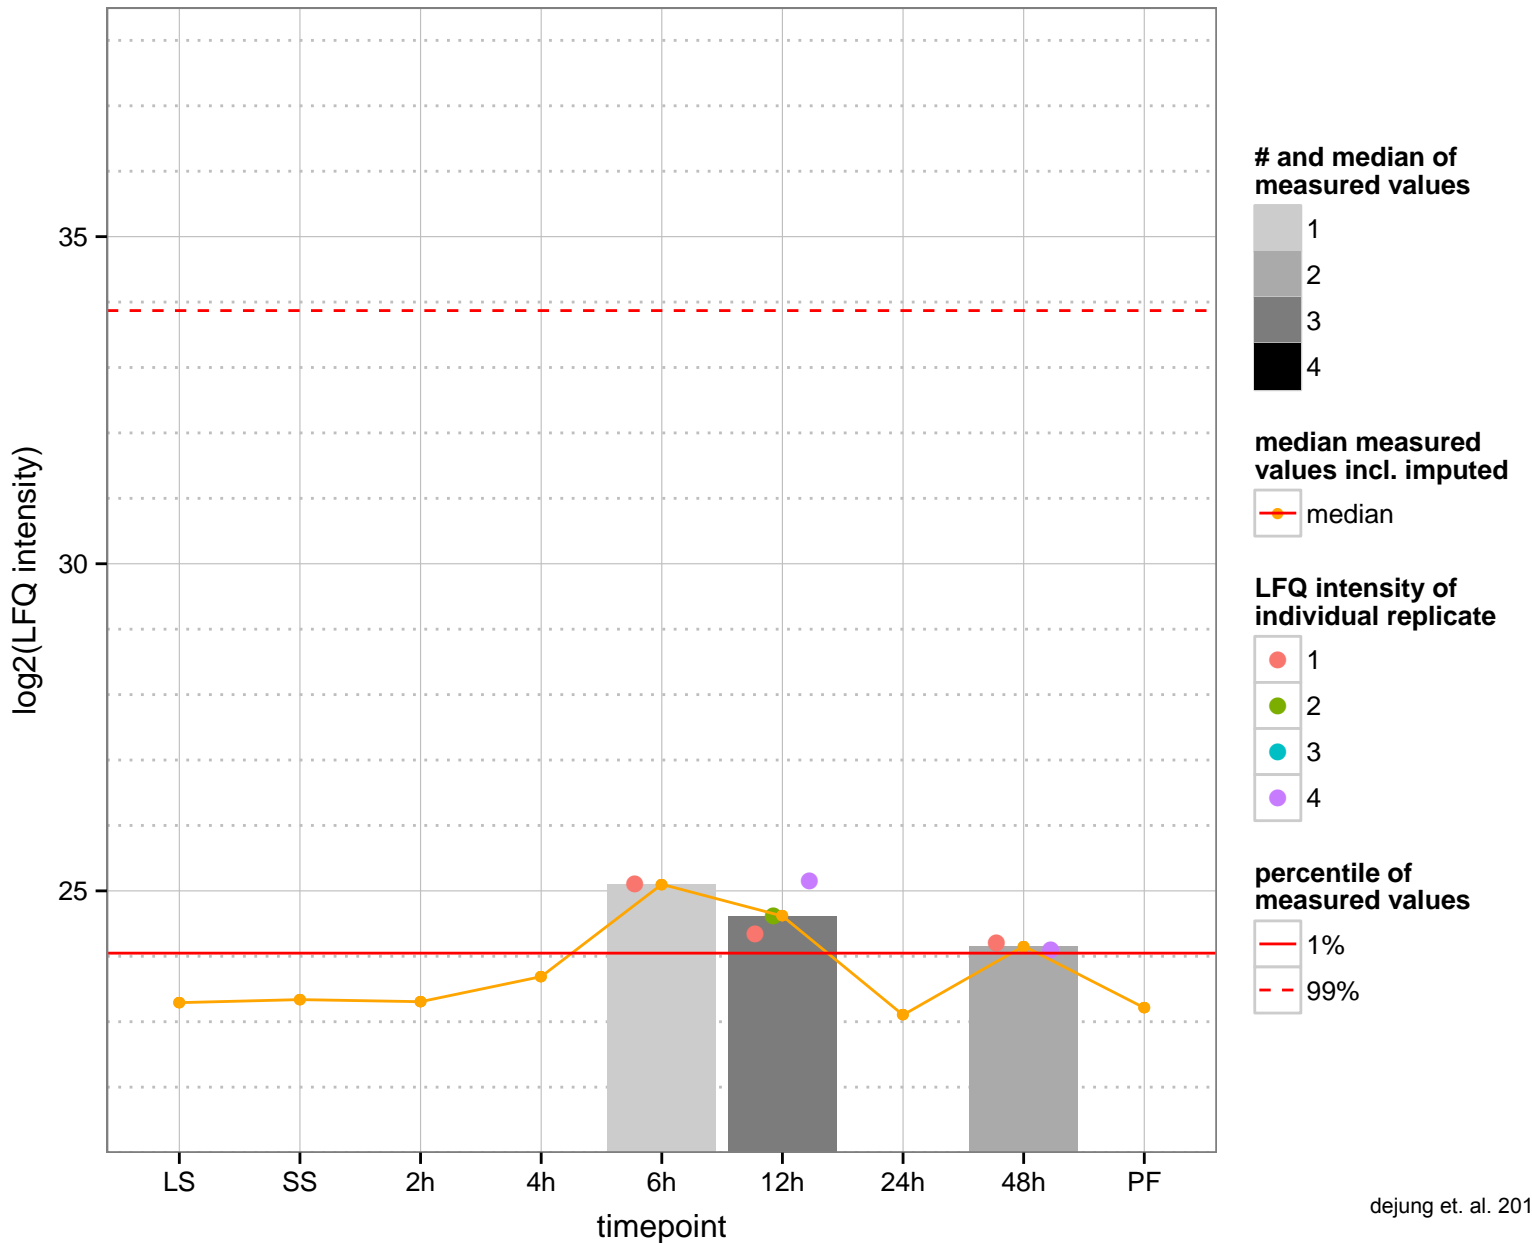

hypothetical protein, conserved  
 Tb927.9.10140  
 AGOF: null  
 AGOC: null  
 AGOP: null  
 PGO: null  
 PGOC: null  
 PGOP: null

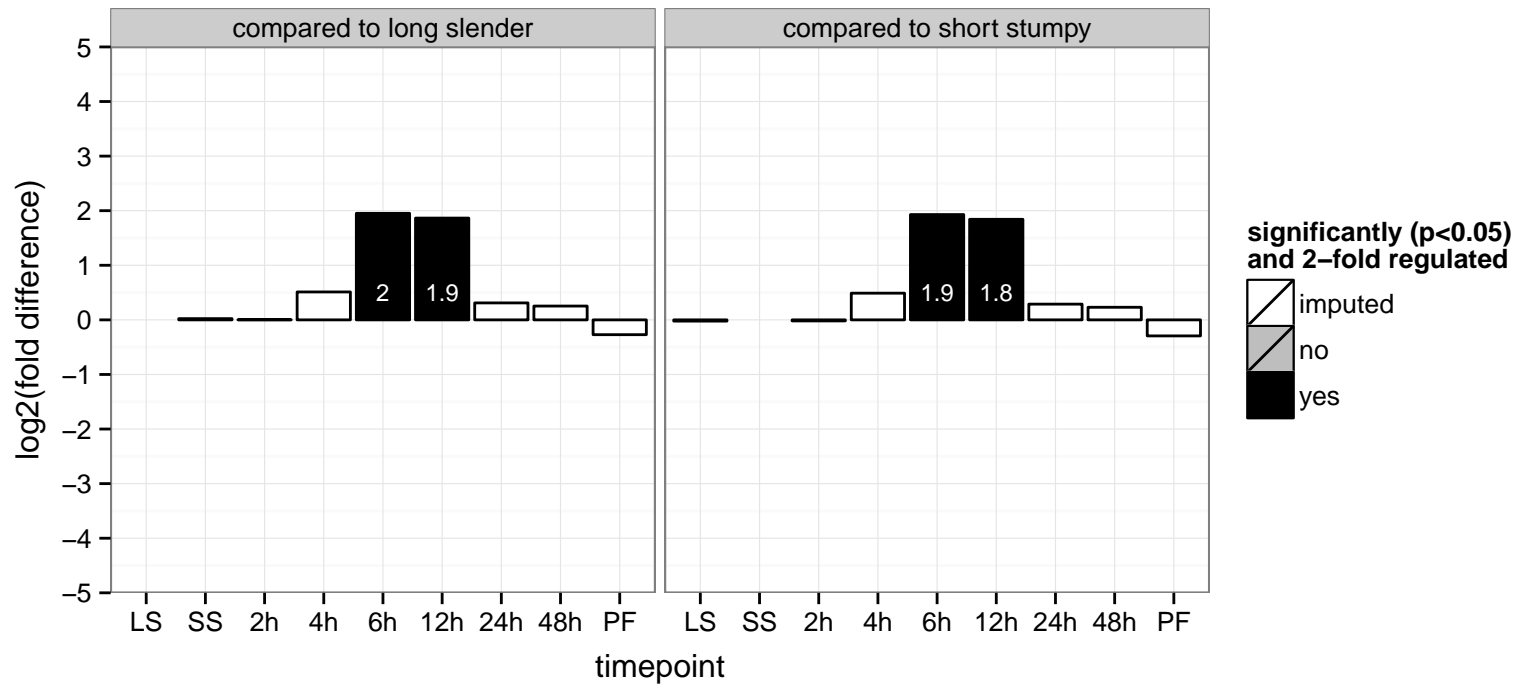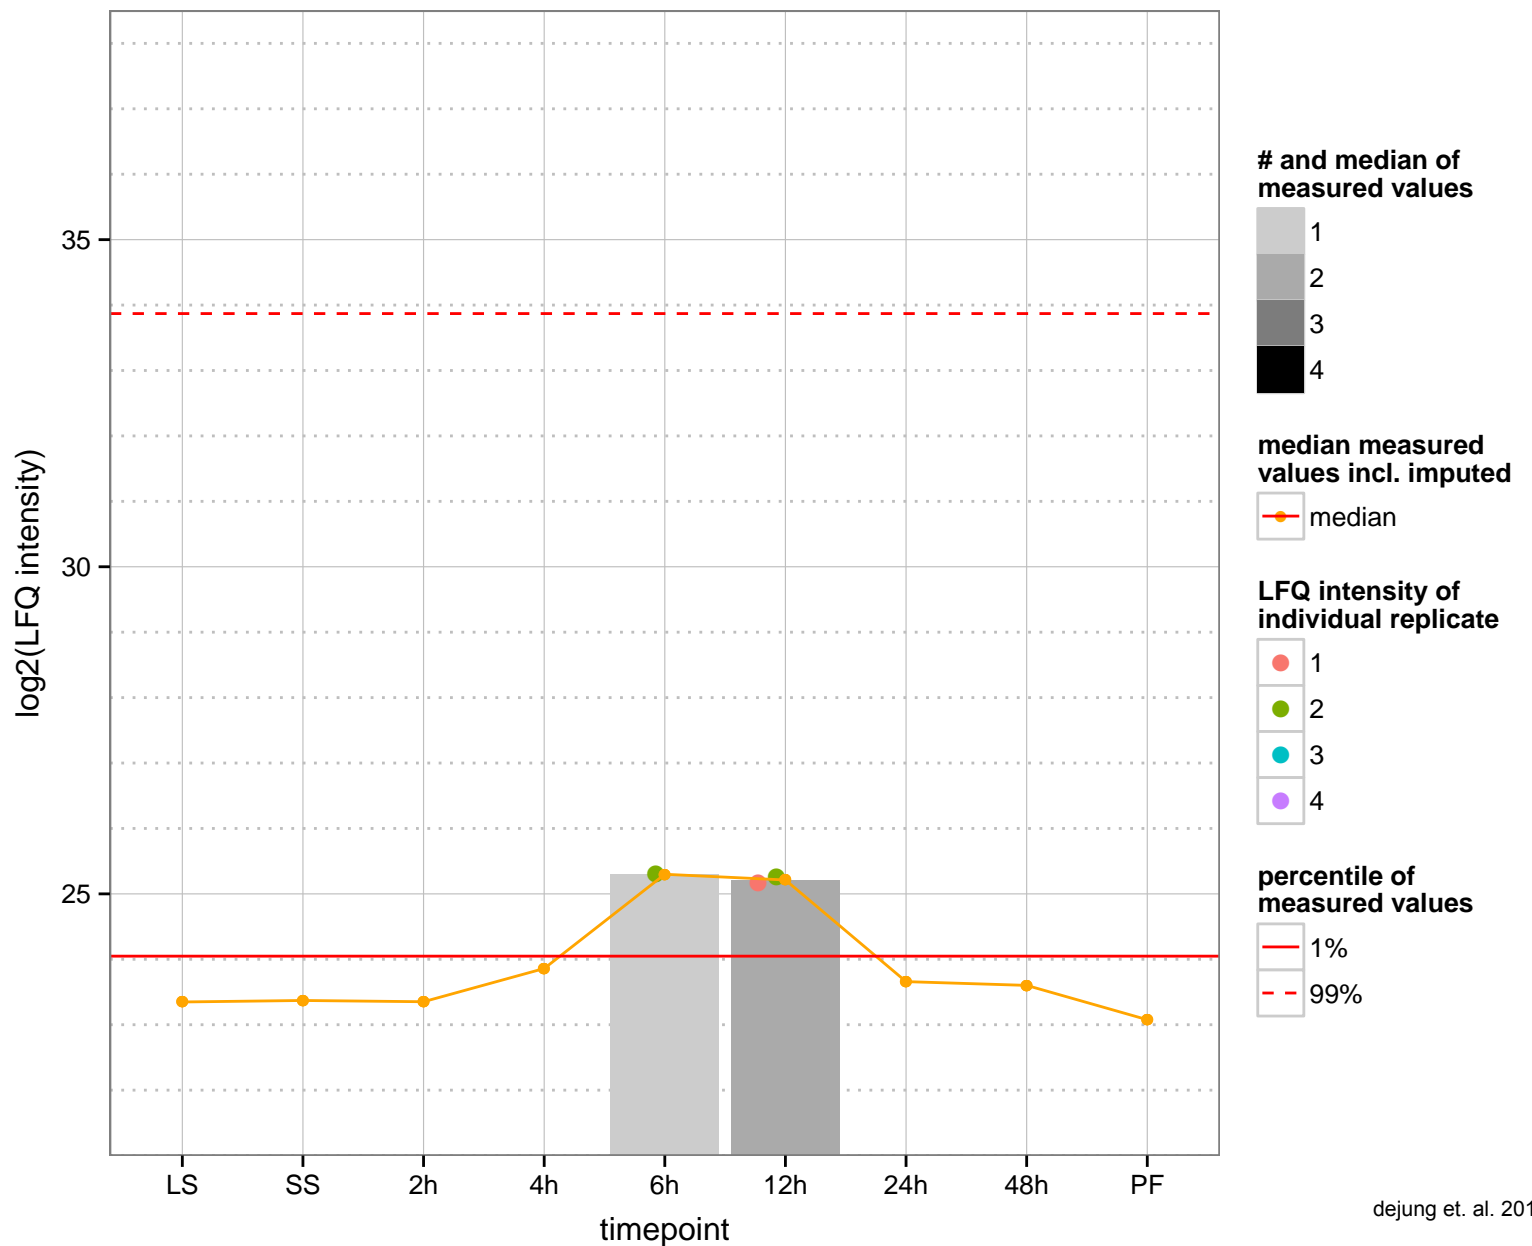



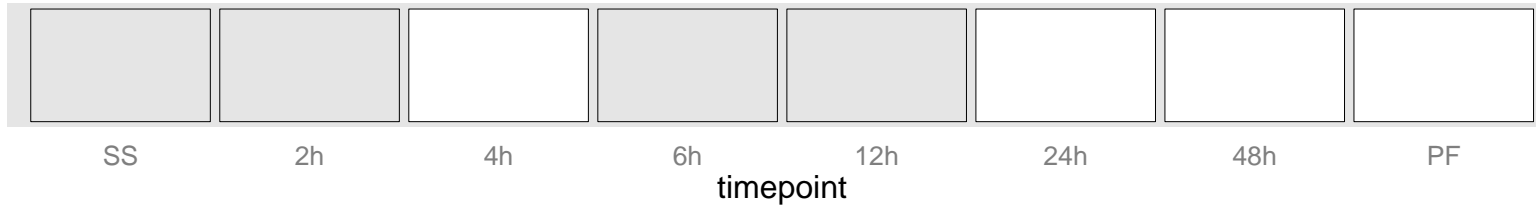

**regulated**  **not regulated**  **significant down**  **significant up**

leucine-rich repeat-containing protein  
 Tb927.1.1020  
 AGOF: null  
 AGOC: null  
 AGOP: null  
 PGO: null  
 PGOC: null  
 PGOP: null

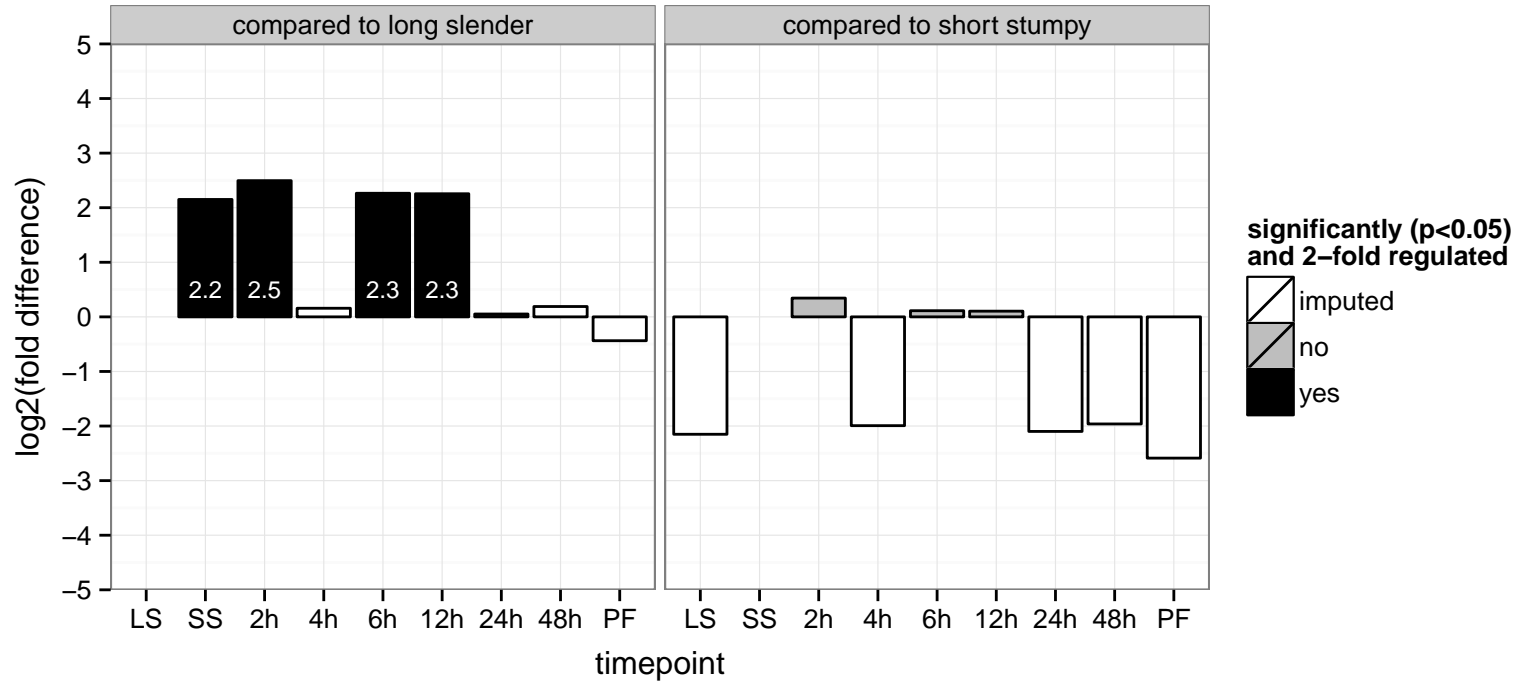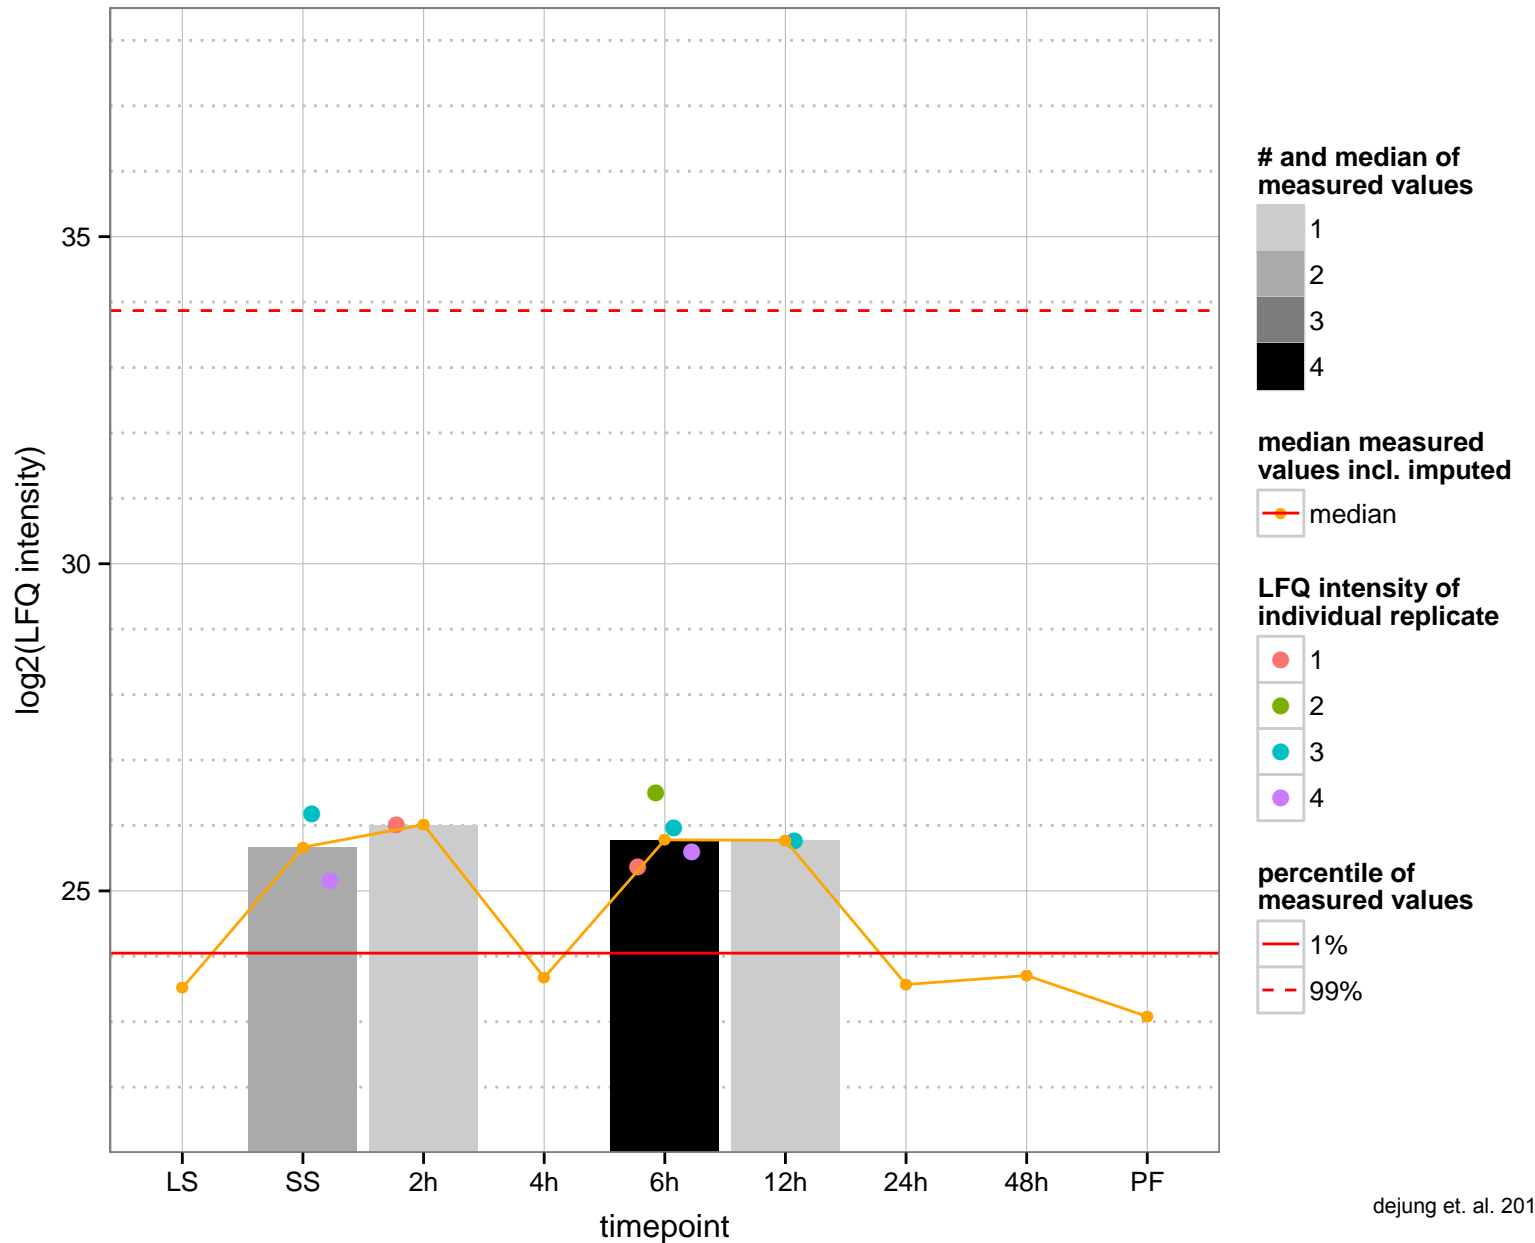

hypothetical protein, conserved  
 Tb927.8.6020  
 AGOF: nucleoside-triphosphatase activity, nucleotide binding  
 AGOC: null  
 AGOP: null  
 PGOF: nucleoside-triphosphatase activity, nucleotide binding  
 PGO: null  
 PGOP: null

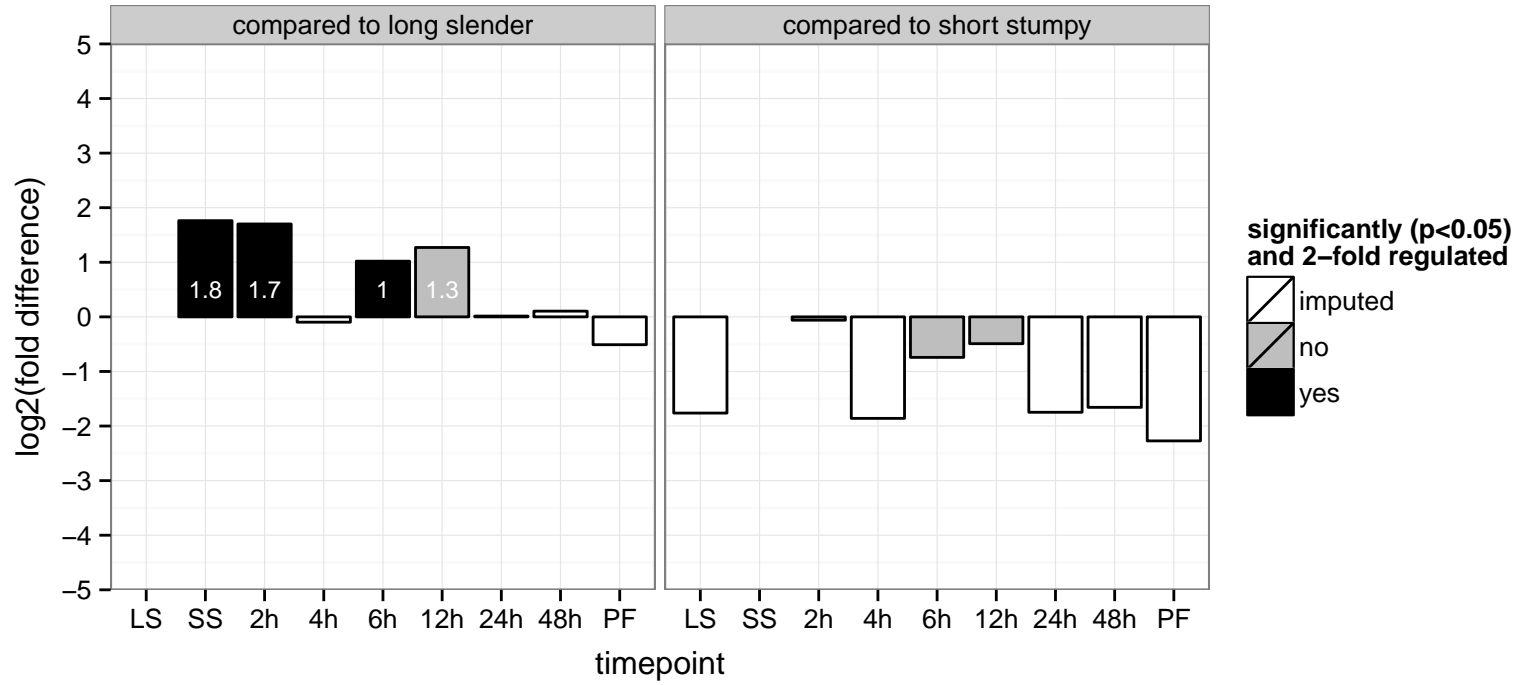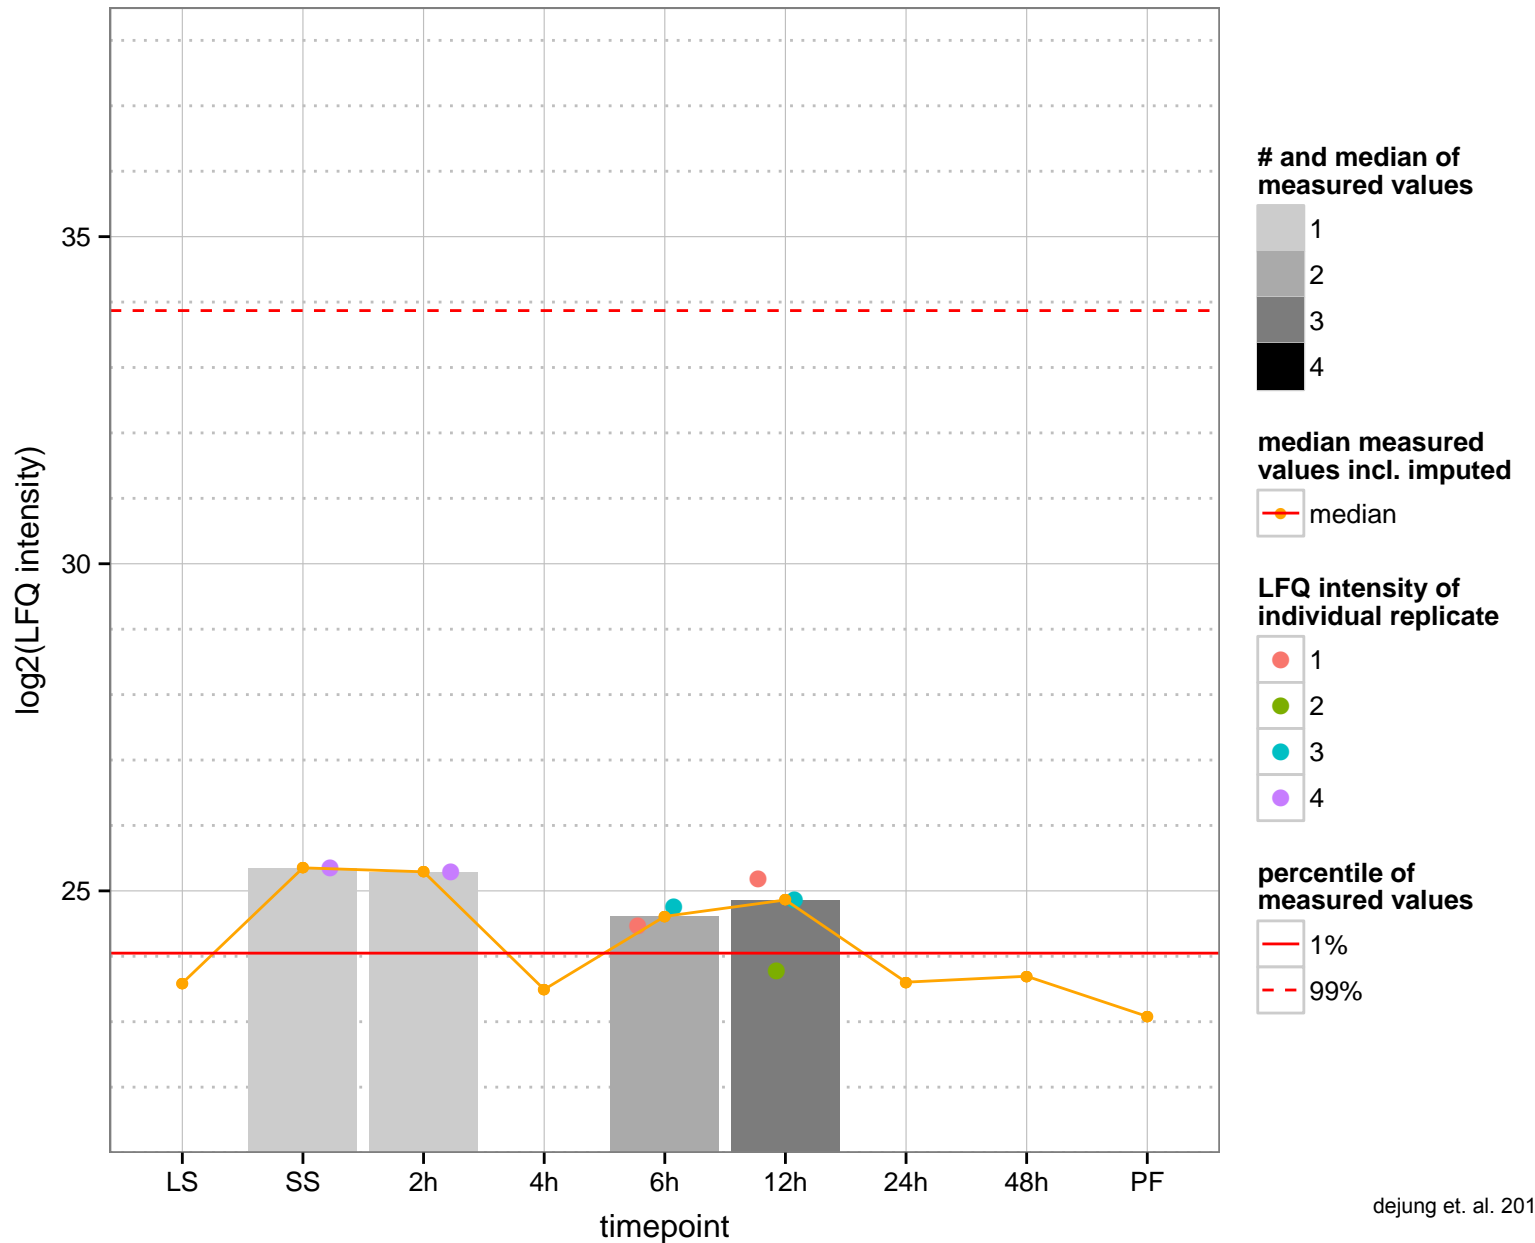

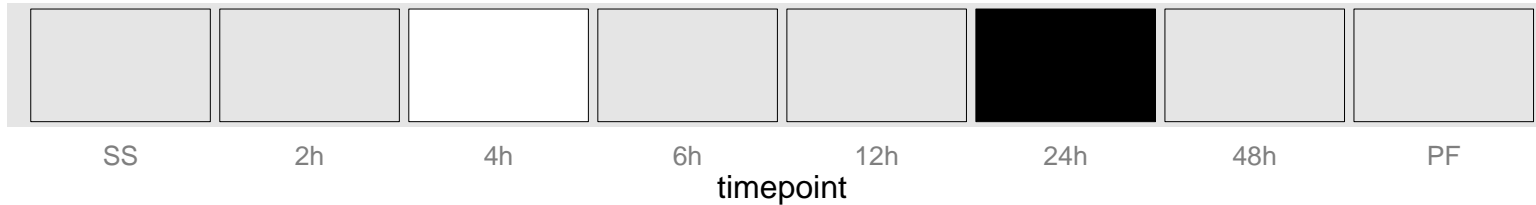

**regulated**  **not regulated**  **significant down**  **significant up**

retrotransposon hot spot protein 5 (RHS5), putative  
 Tb927.1.420  
 AGOF: null  
 AGOC: nucleus  
 AGOP: null  
 PGO: null  
 PGO: null  
 PGO: null

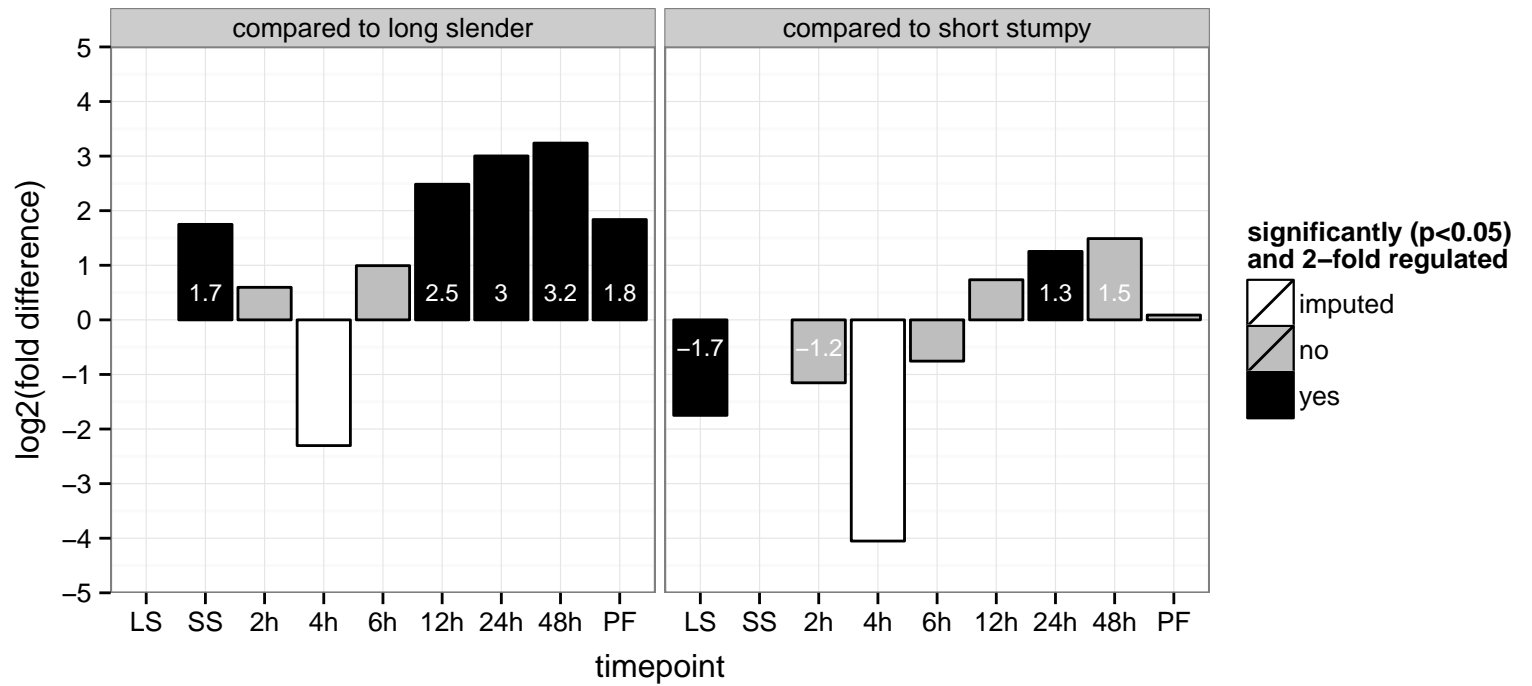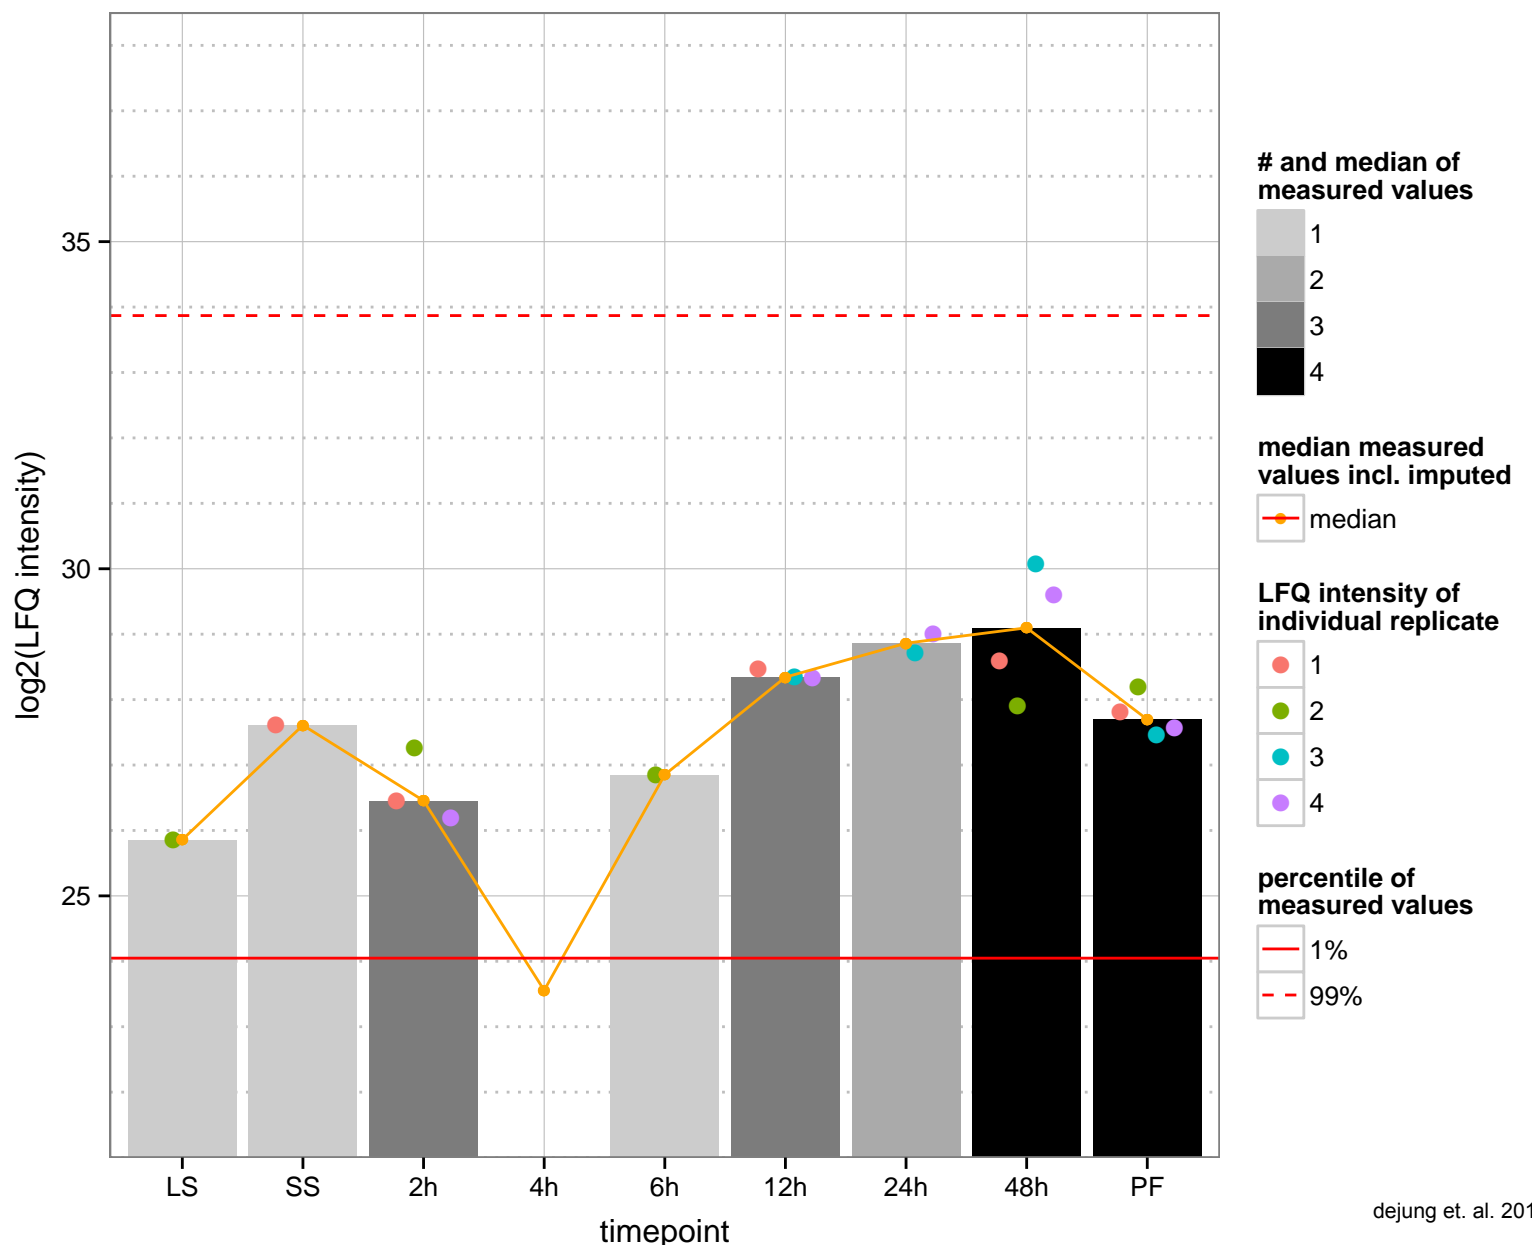

hypothetical protein, conserved  
 Tb927.4.3540  
 AGOF: null  
 AGOC: null  
 AGOP: null  
 PGOF: null  
 PGO: null  
 PGOP: null

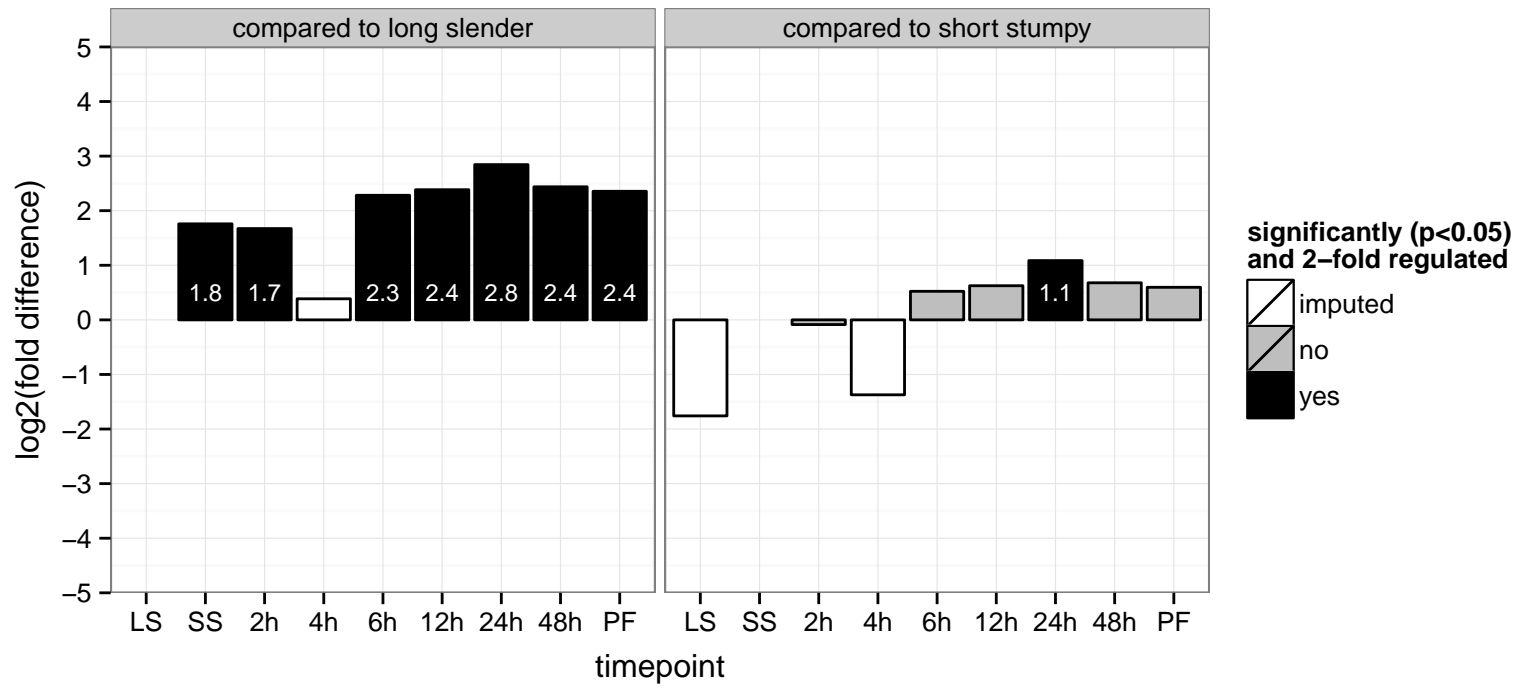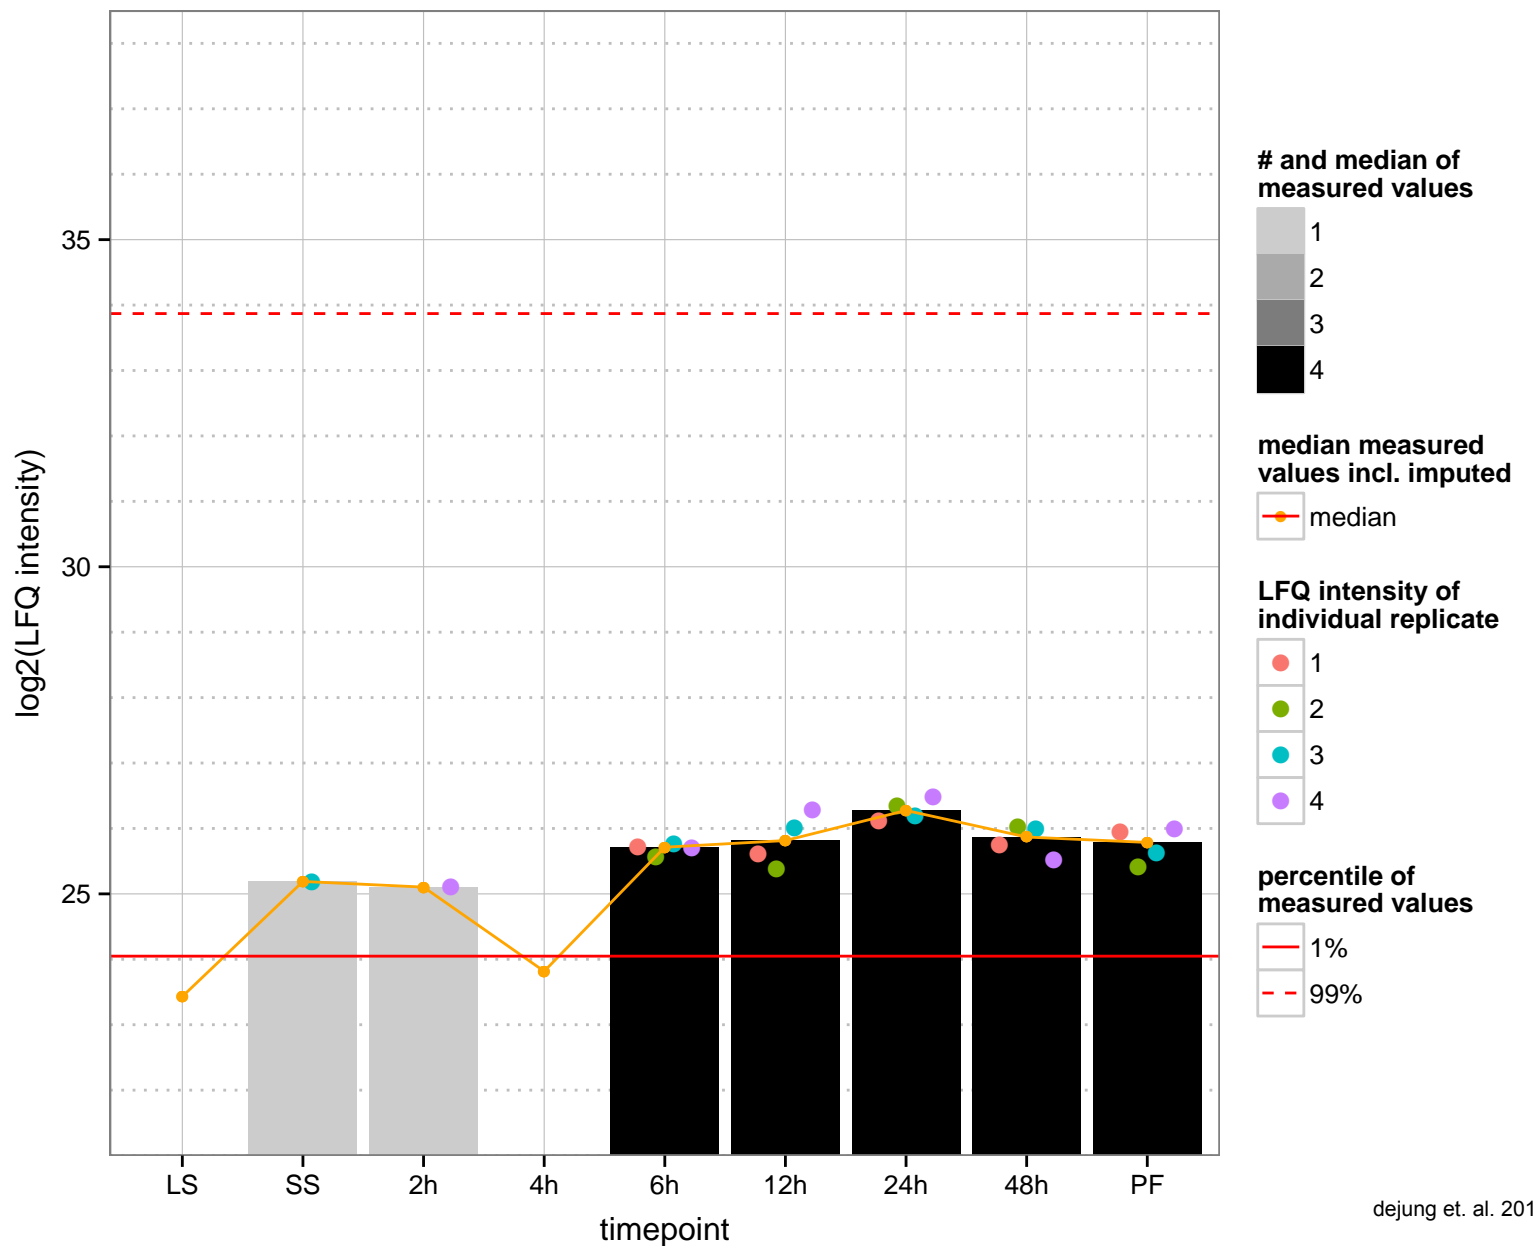

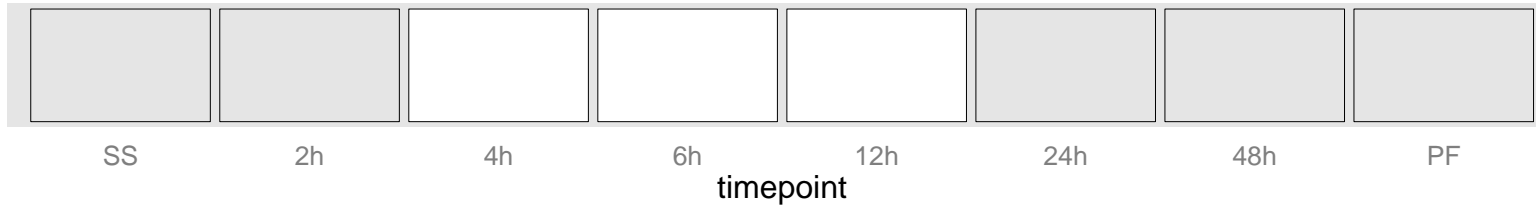

**regulated**  **not regulated**  **significant down**  **significant up**

NADH-ubiquinone oxidoreductase, mitochondrial, putative, putative (NUBM)

Tb927.5.450;Tb11.v5.0222

AGOF: null, 4 iron, 4 sulfur cluster binding, FMN binding, NAD binding, oxidoreductase activity, acting on NADH or NADPH

AGOC: null, mitochondrion, respiratory chain complex I

AGOP: null, oxidation-reduction process

PGOF: 4 iron, 4 sulfur cluster binding, FMN binding, NAD binding, oxidoreductase activity, acting on NADH or NADPH

PGOC: null

PGOP: oxidation-reduction process

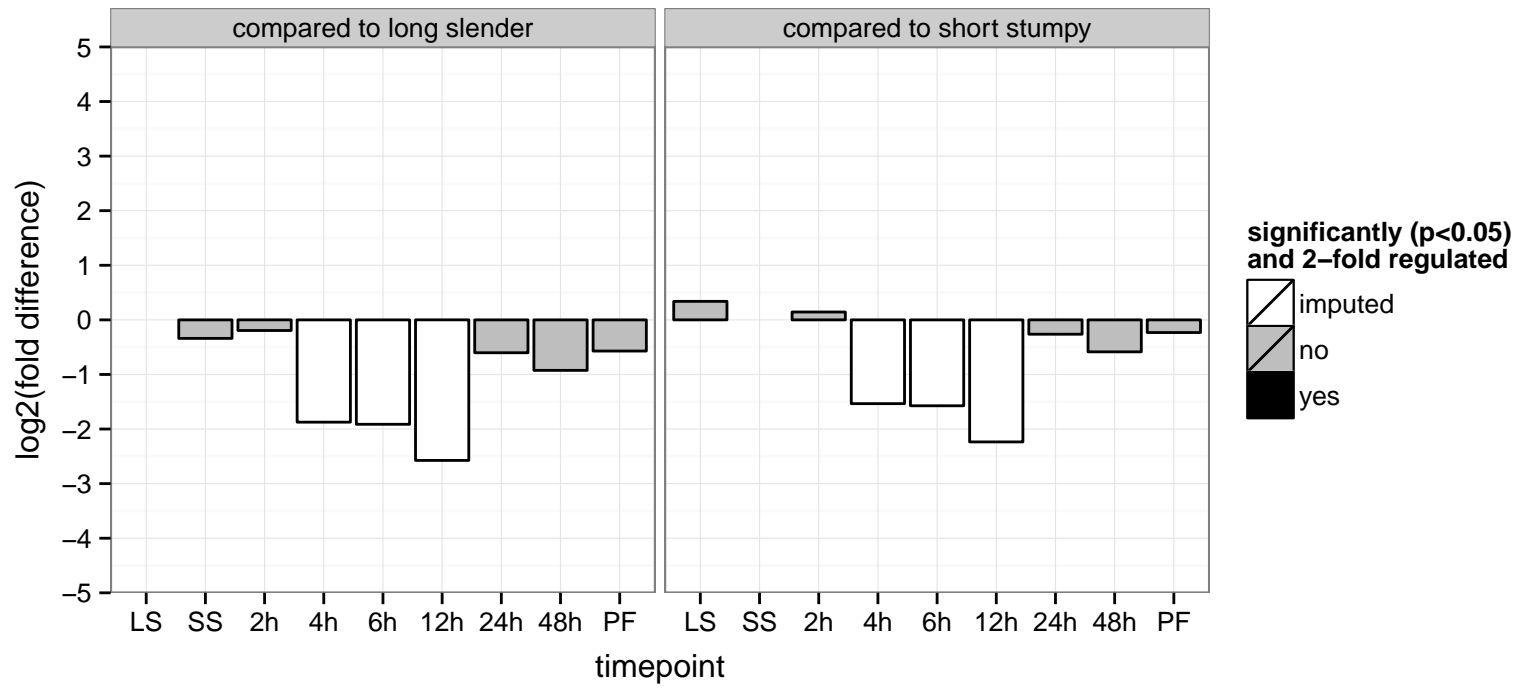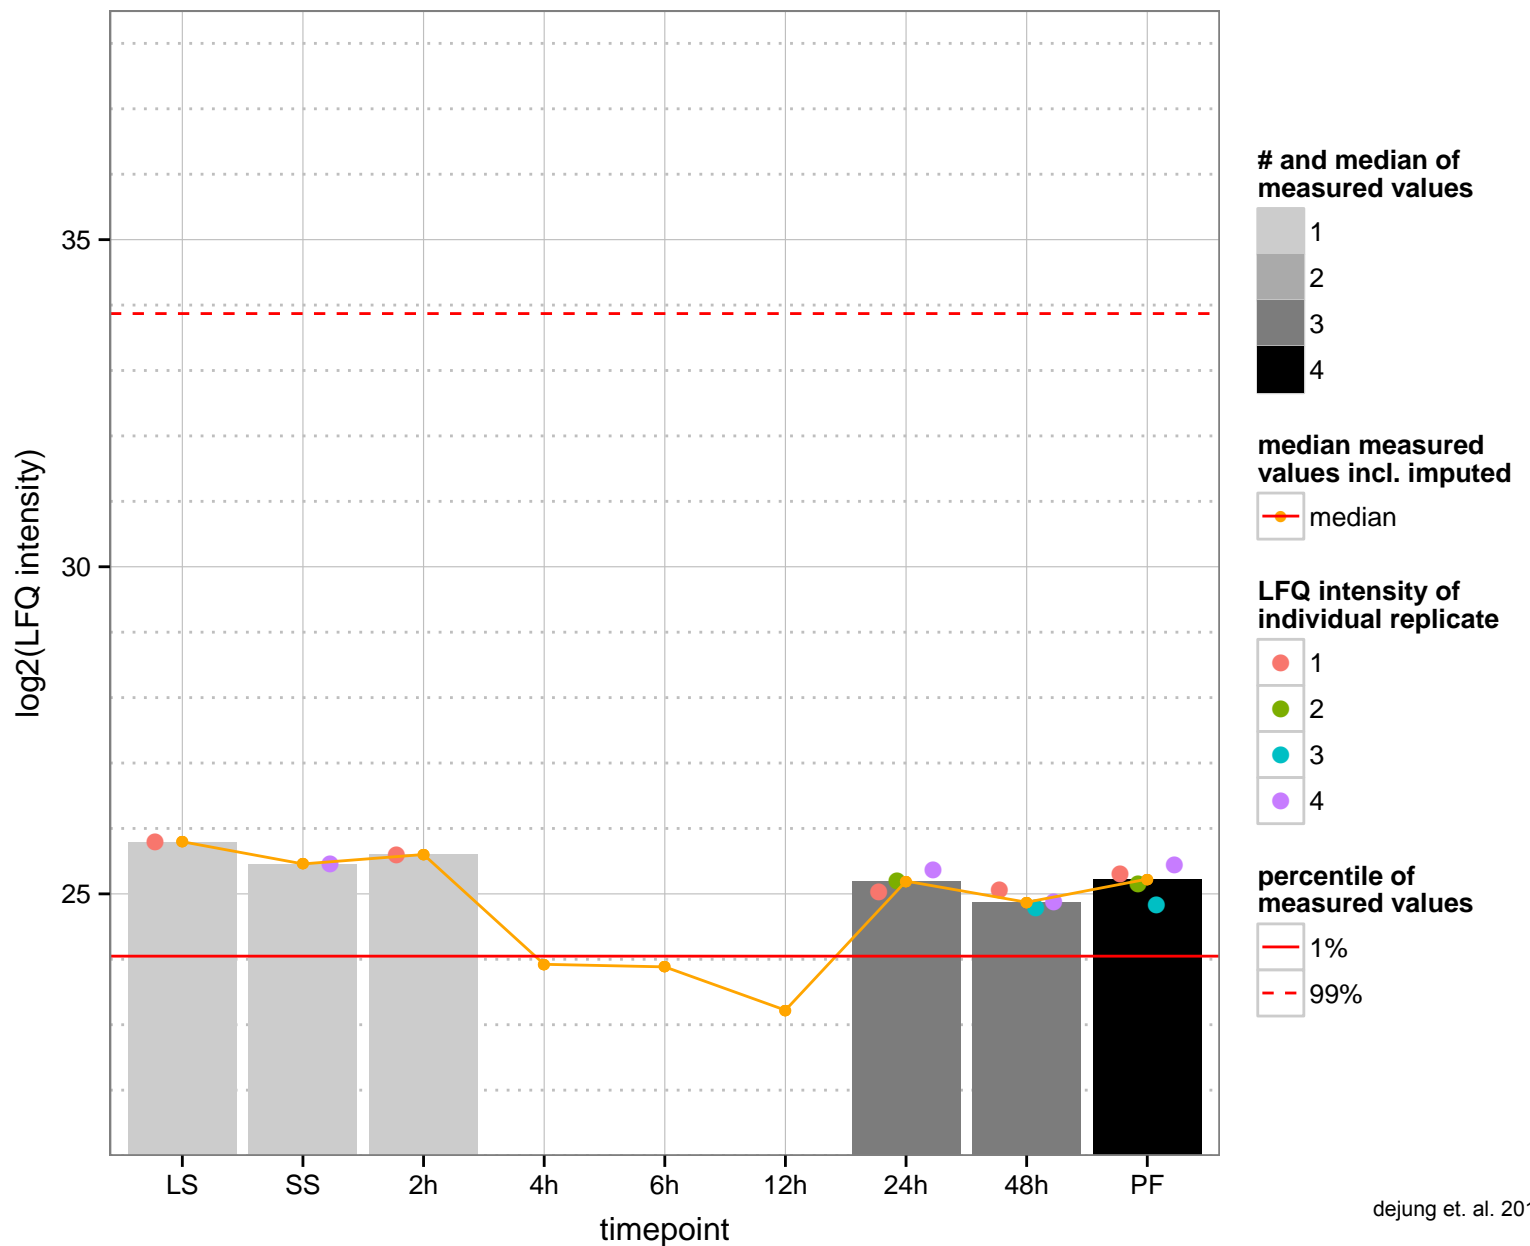



hypothetical protein, conserved  
 Tb927.10.3810  
 AGOF: null  
 AGOC: null  
 AGOP: null  
 PGO: null  
 PGO: null  
 PGO: null

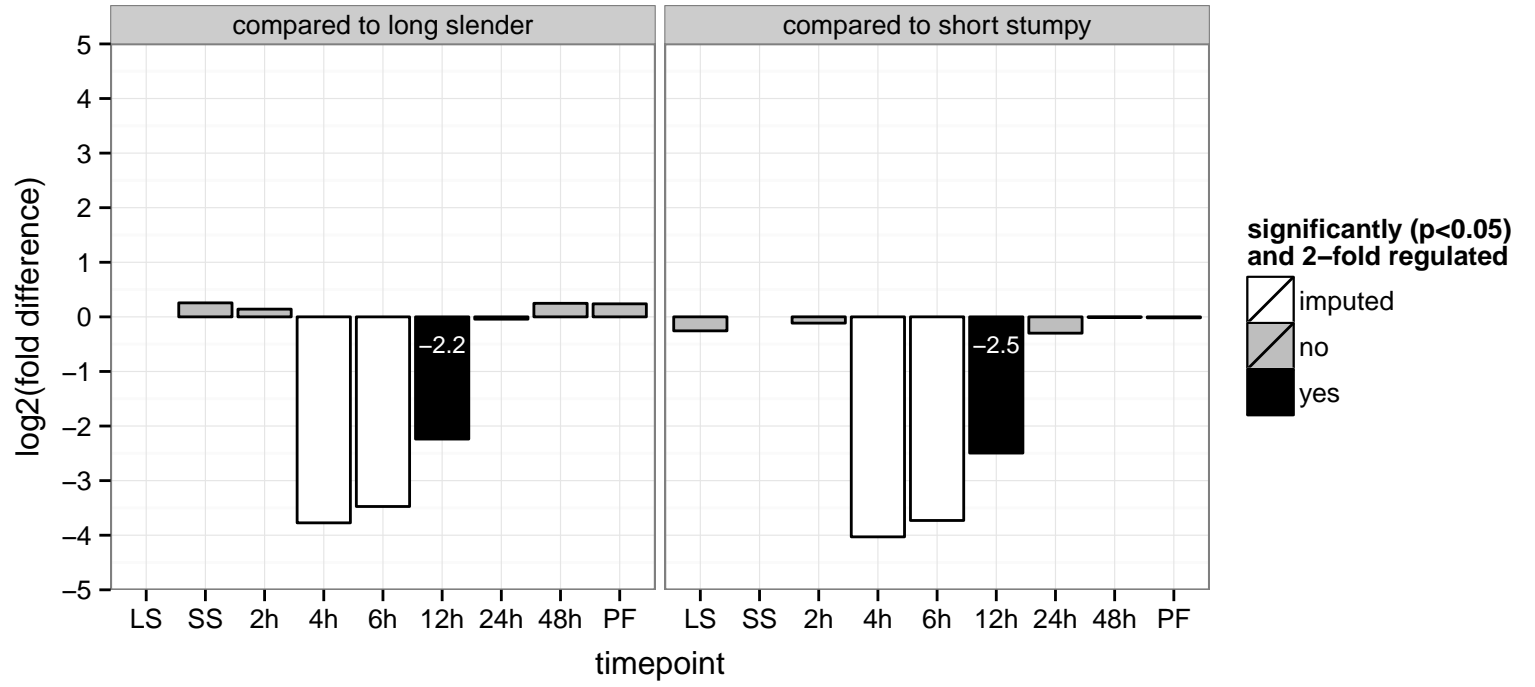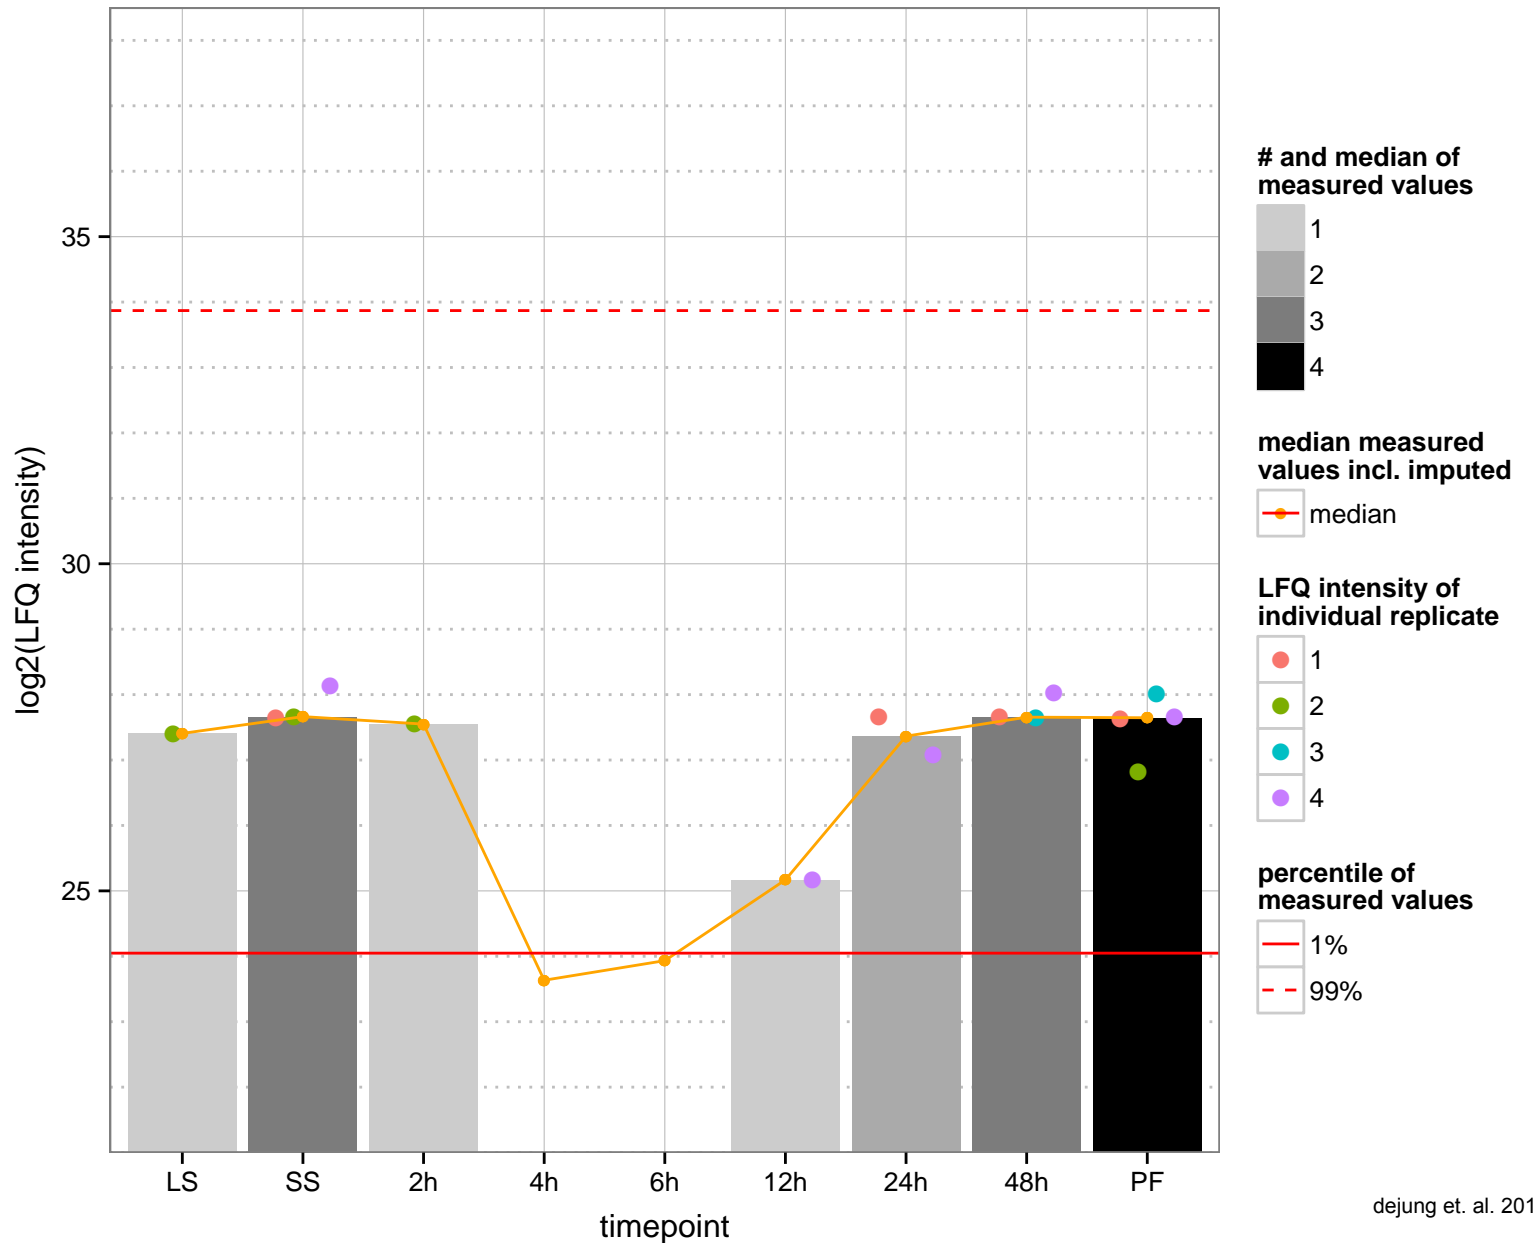

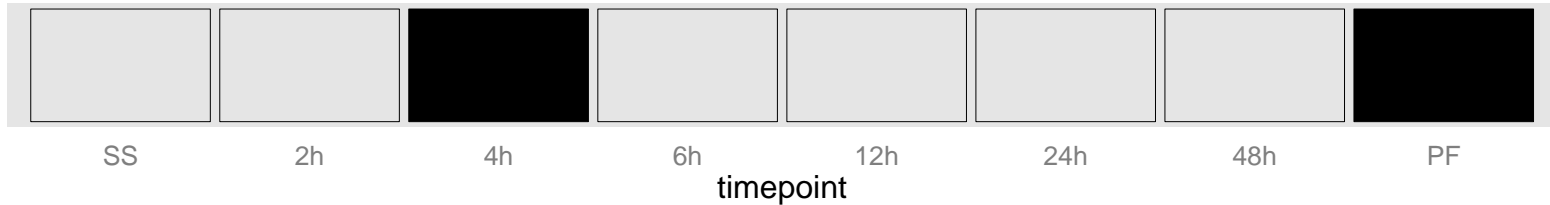

**regulated**  not regulated  significant down  significant up

hypothetical protein, conserved  
 Tb927.11.2220  
 AGOF: null  
 AGOC: null  
 AGOP: null  
 PGOF: null  
 PGOC: null  
 PGOP: null

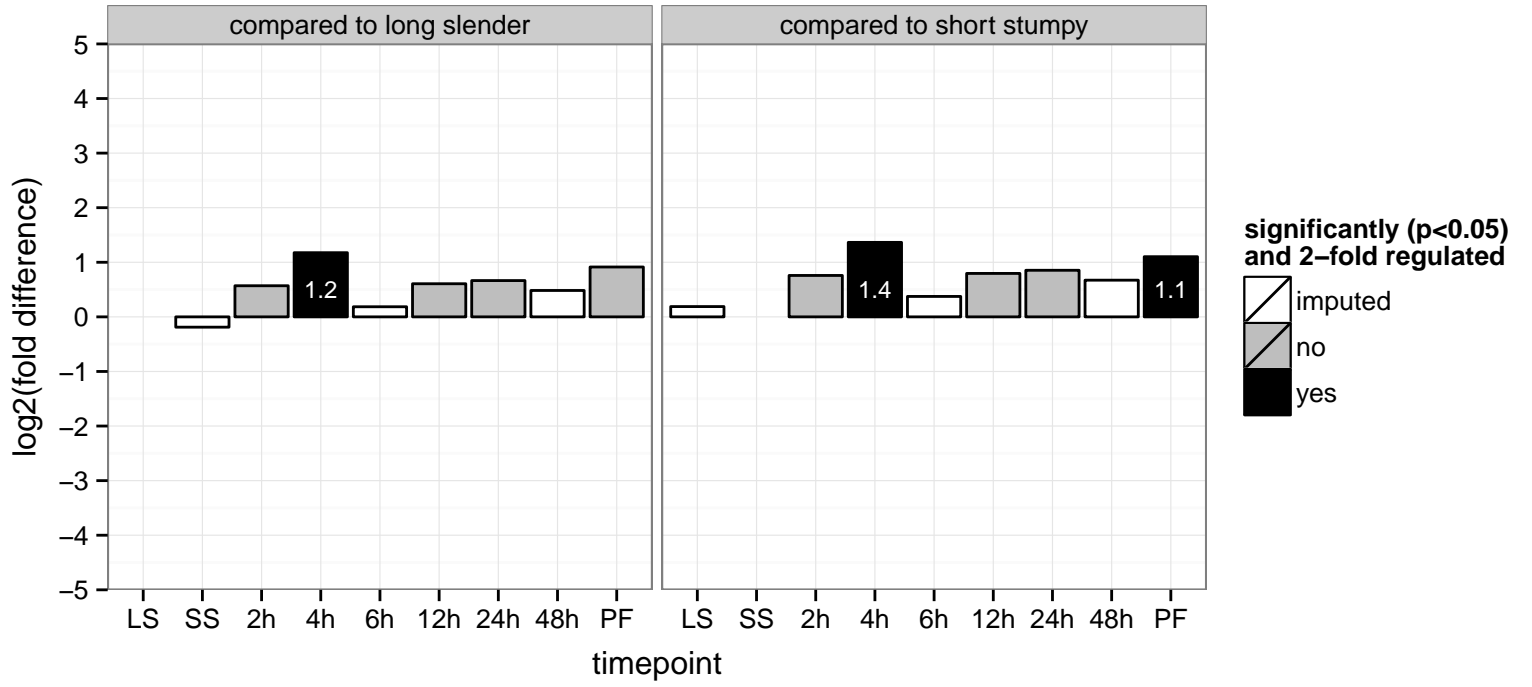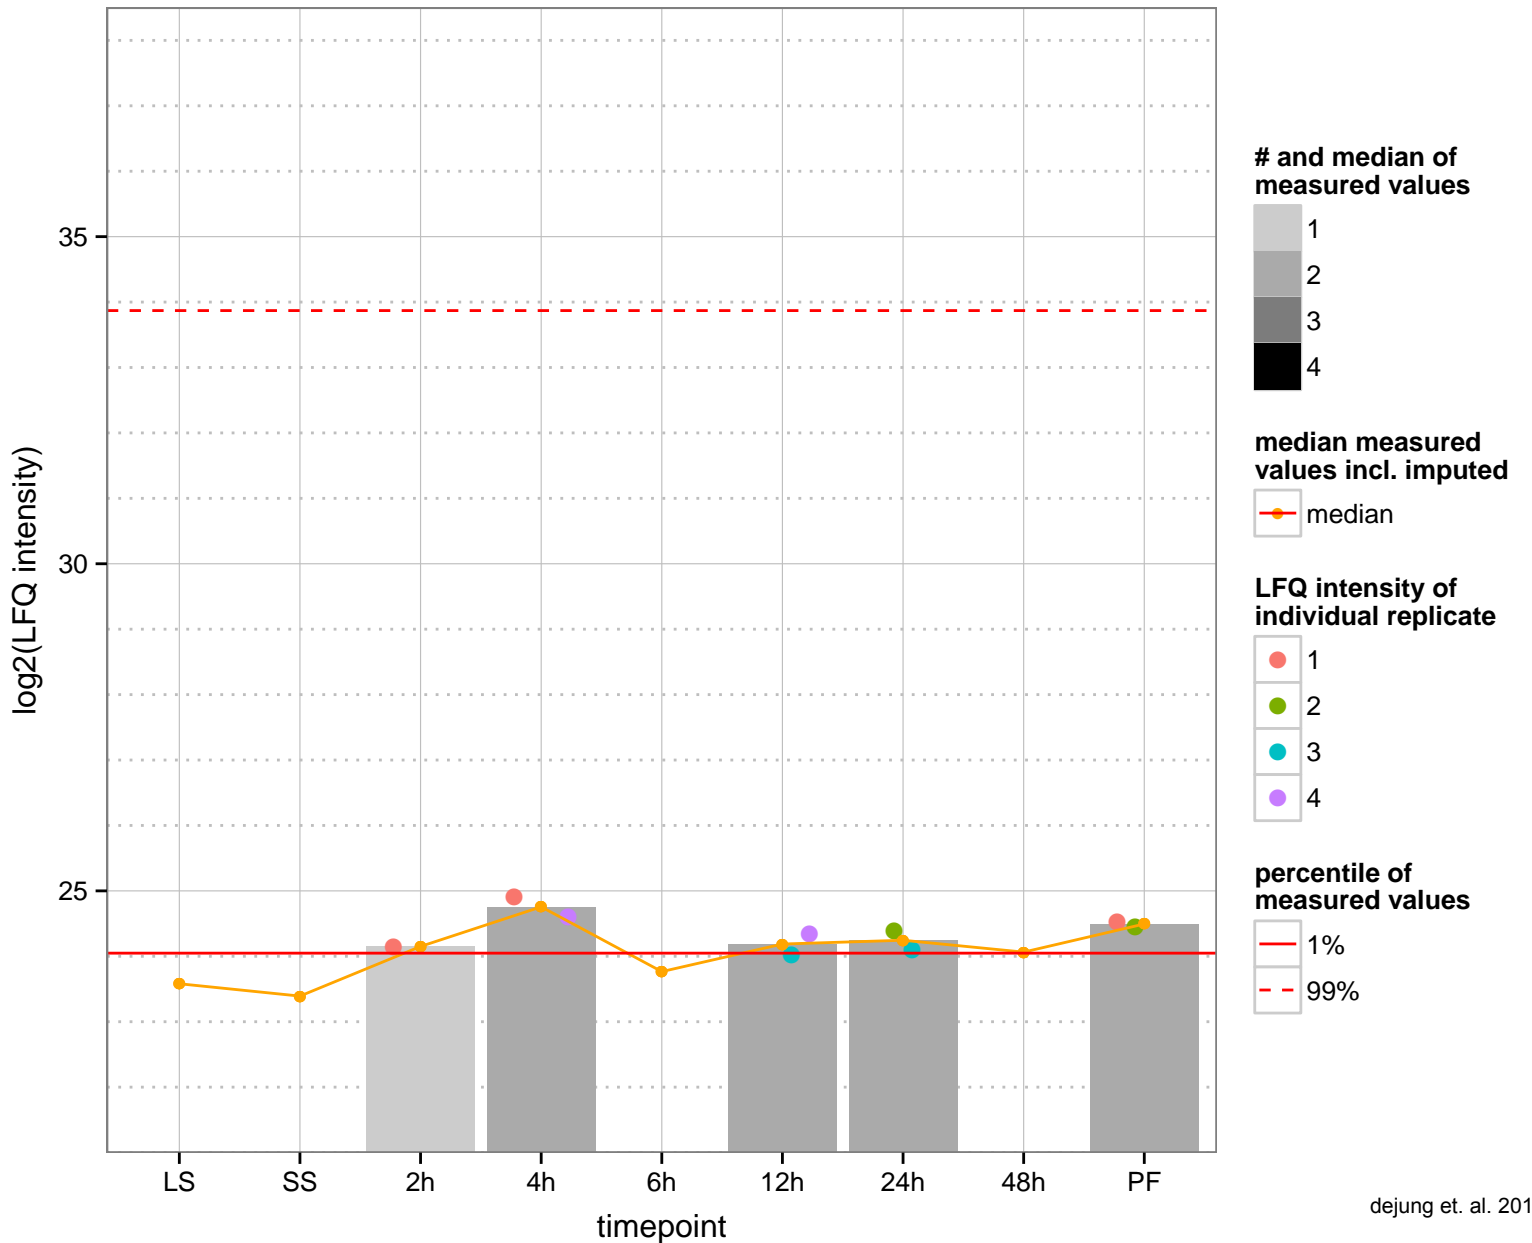

retrotransposon hot spot protein 1 (RHS1), putative  
 Tb927.6.160  
 AGOF: null  
 AGOC: null  
 AGOP: null  
 PGO: null  
 PGOC: null  
 PGOP: null

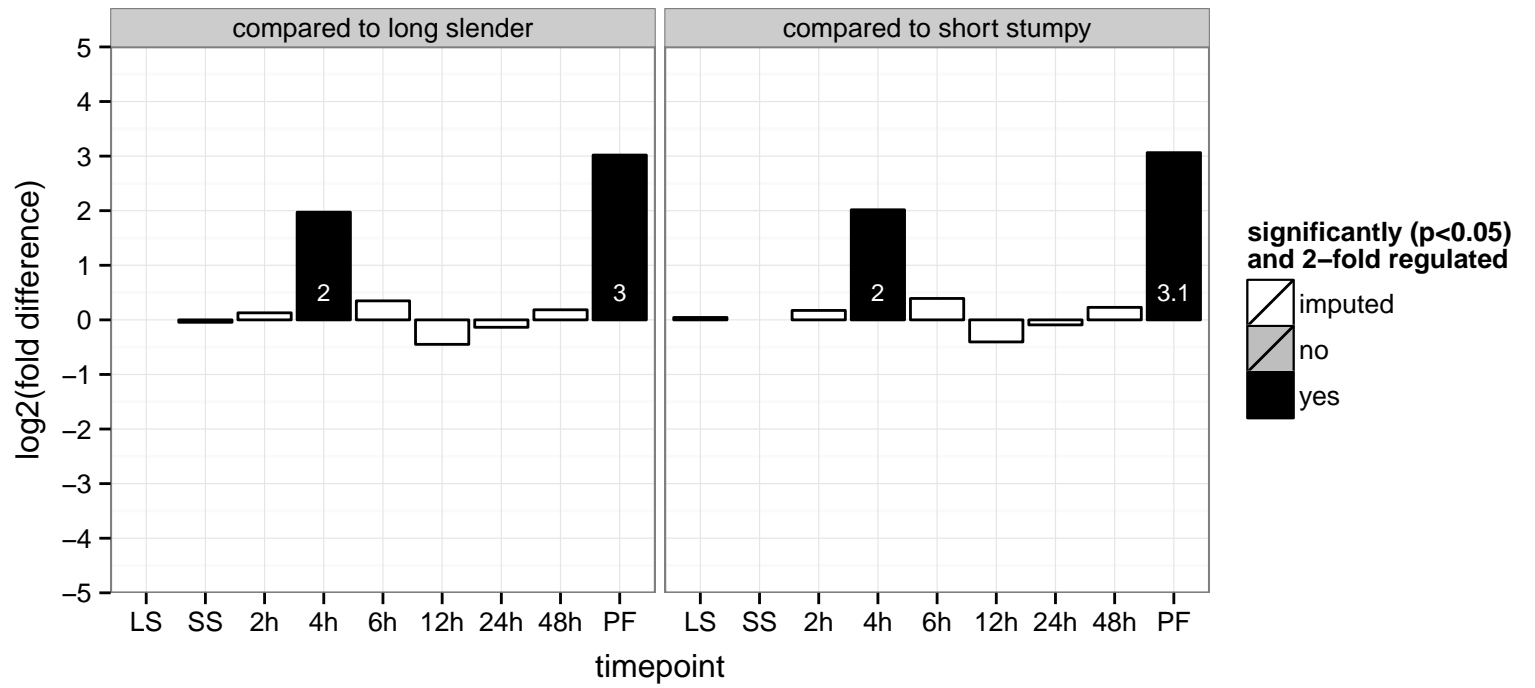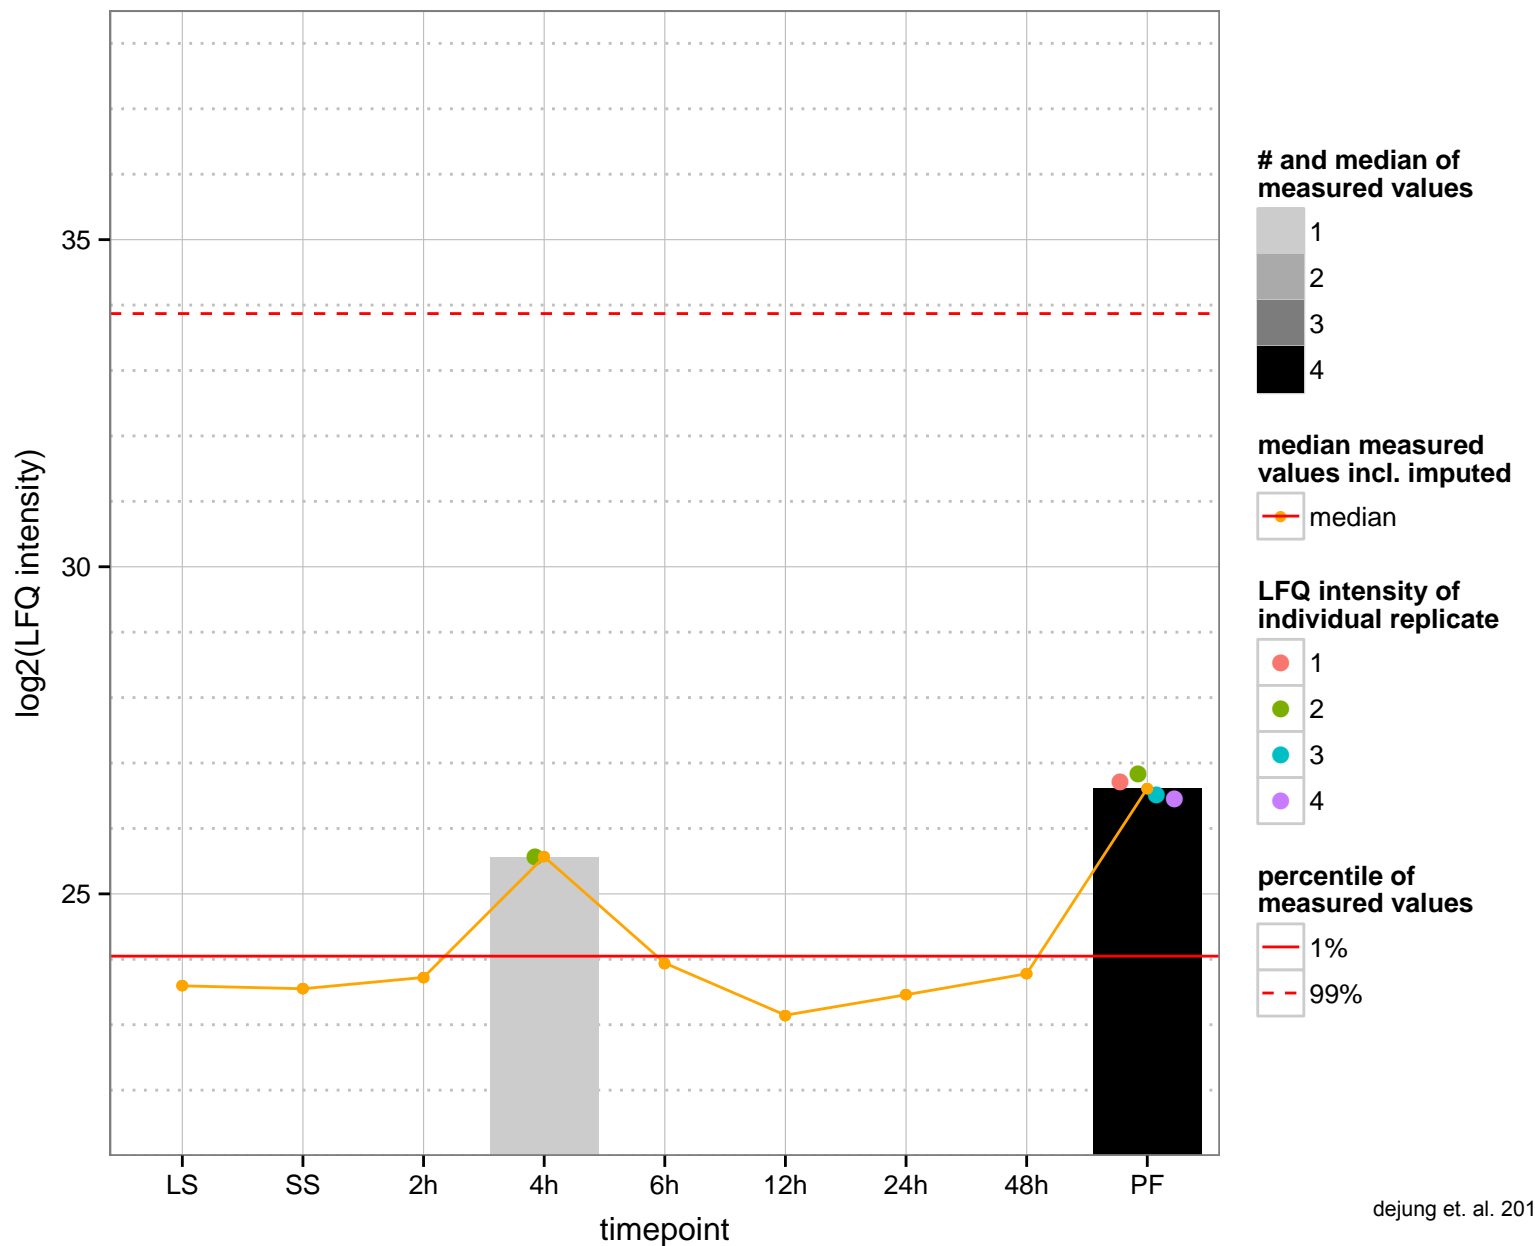

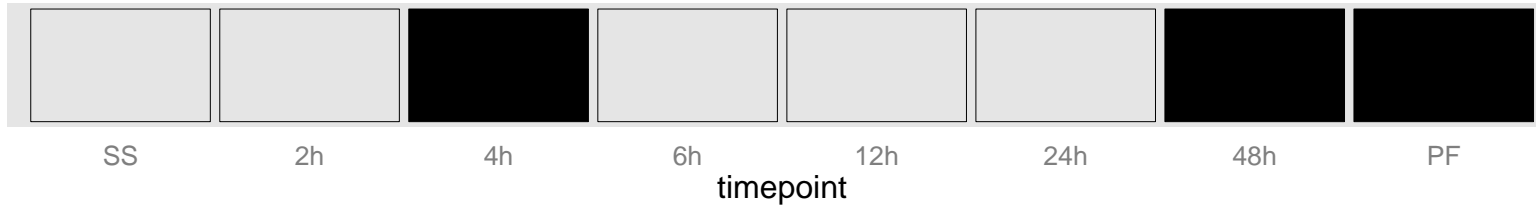

**regulated**  **not regulated**  **significant down**  **significant up**

tubulin tyrosine ligase protein, putative  
 Tb927.10.13870  
 AGOF: tubulin-tyrosine ligase activity  
 AGOC: null  
 AGOP: cellular protein modification process  
 PGO: tubulin-tyrosine ligase activity  
 PGOC: null  
 PGOP: cellular protein modification process

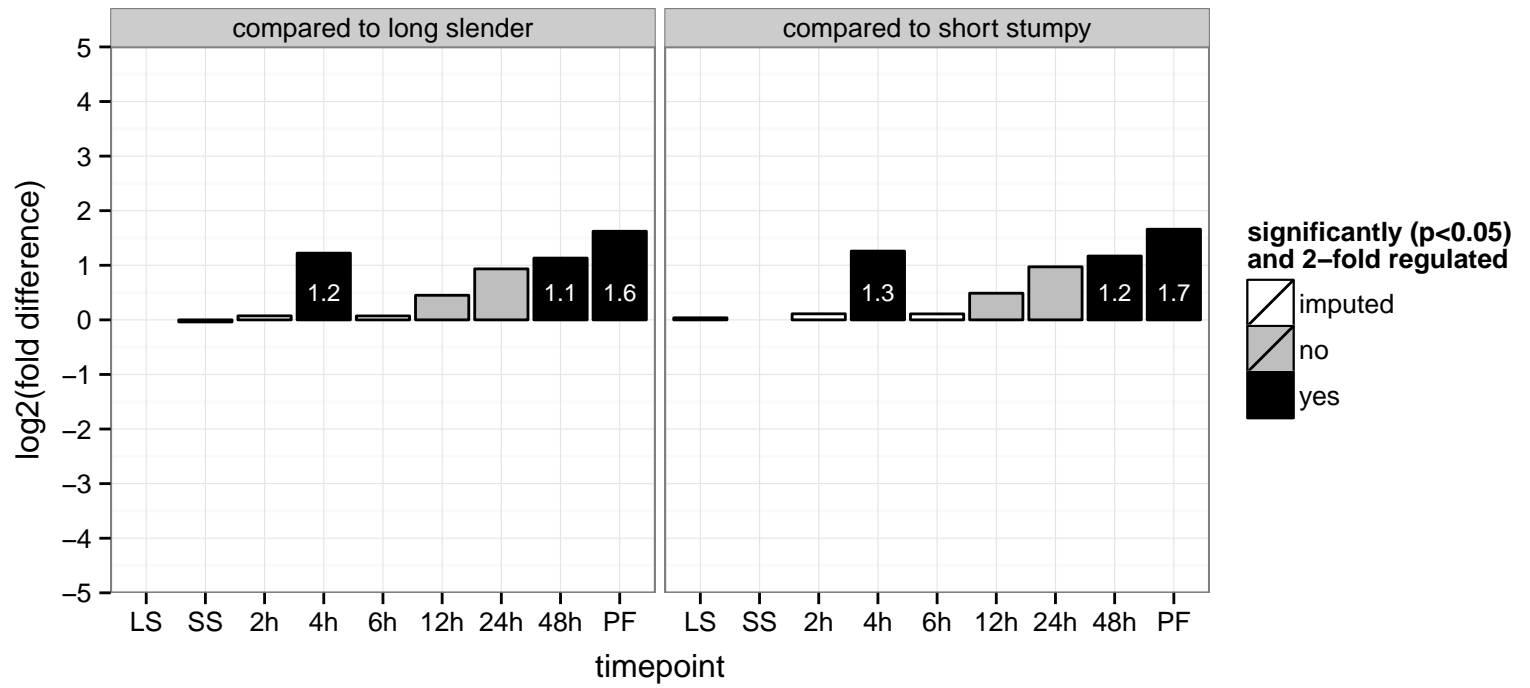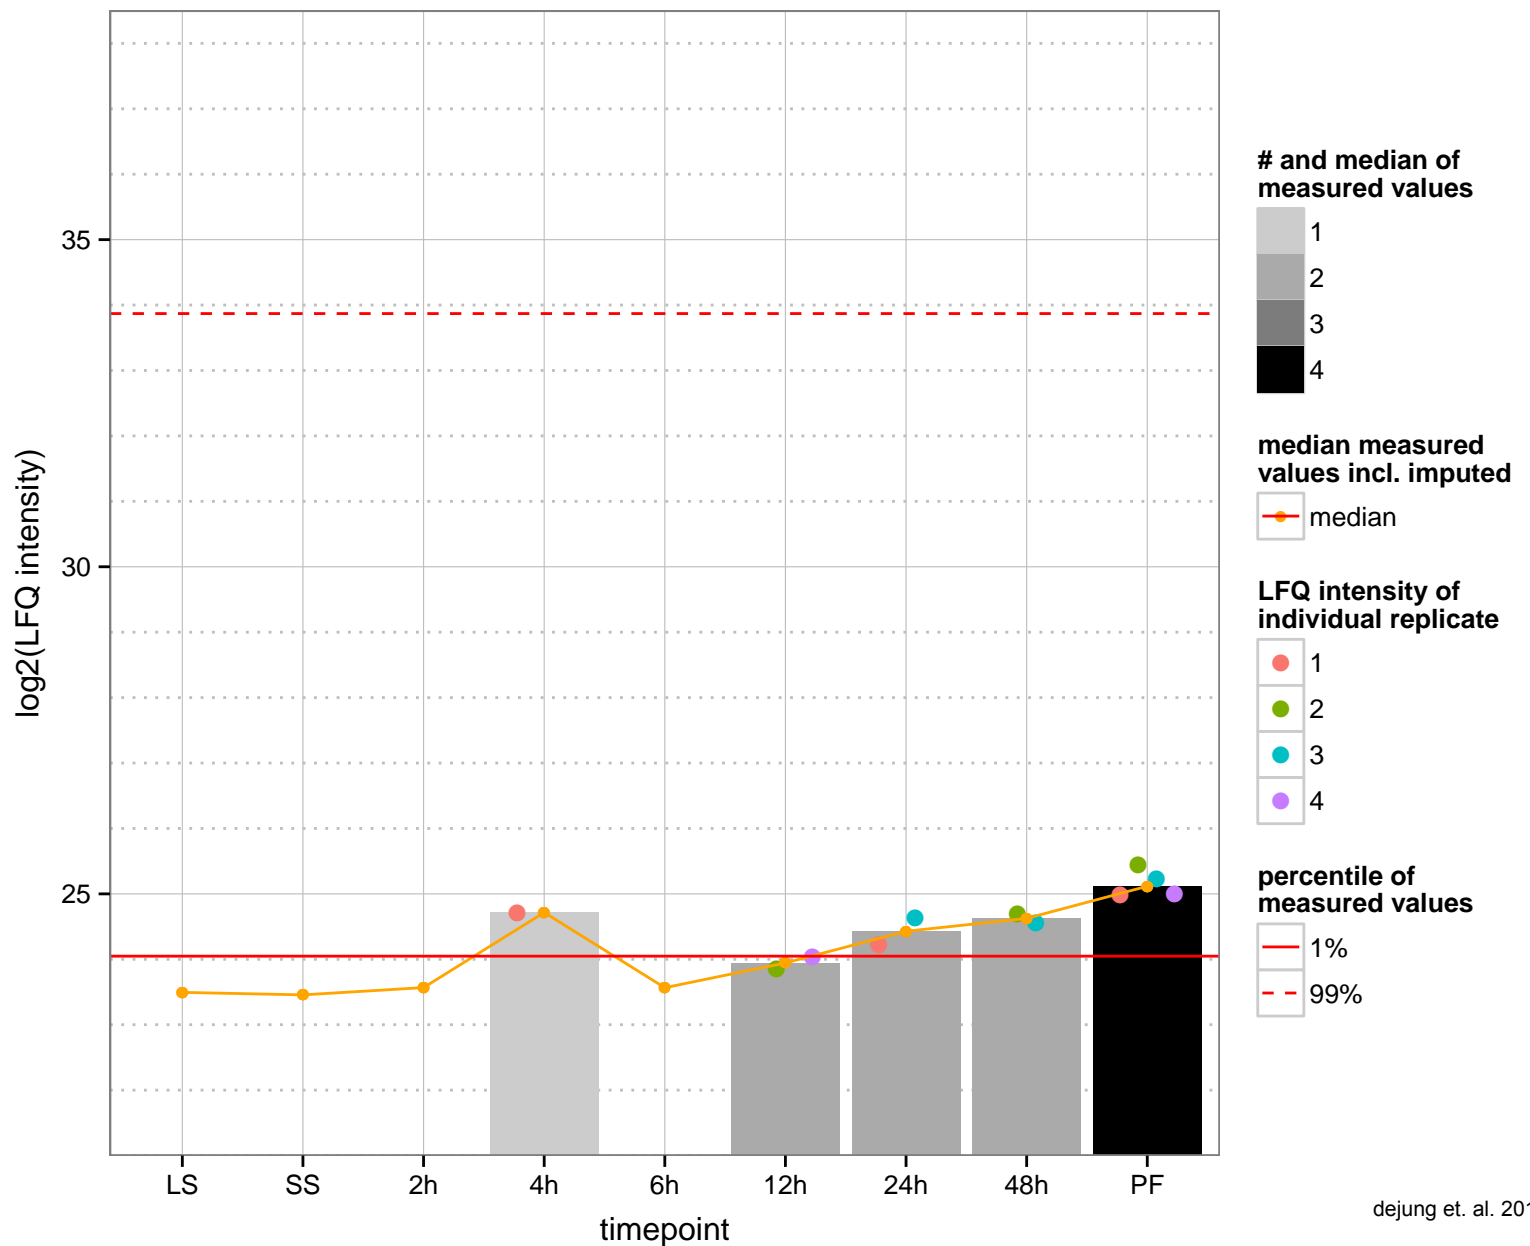

hydrolase, alpha/beta fold family, putative  
 Tb927.5.2370  
 AGOF: null  
 AGOC: null  
 AGOP: null  
 PGOF: null  
 PGOC: null  
 PGOP: null

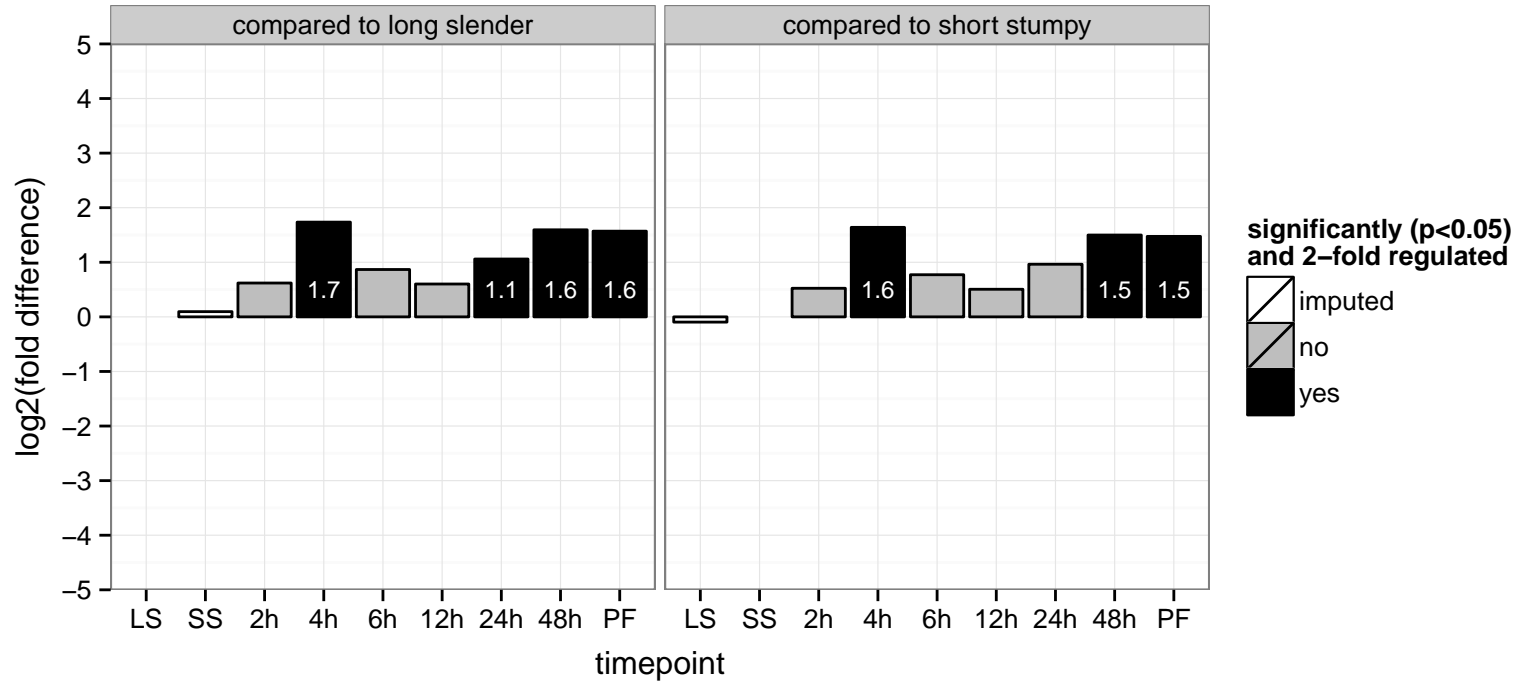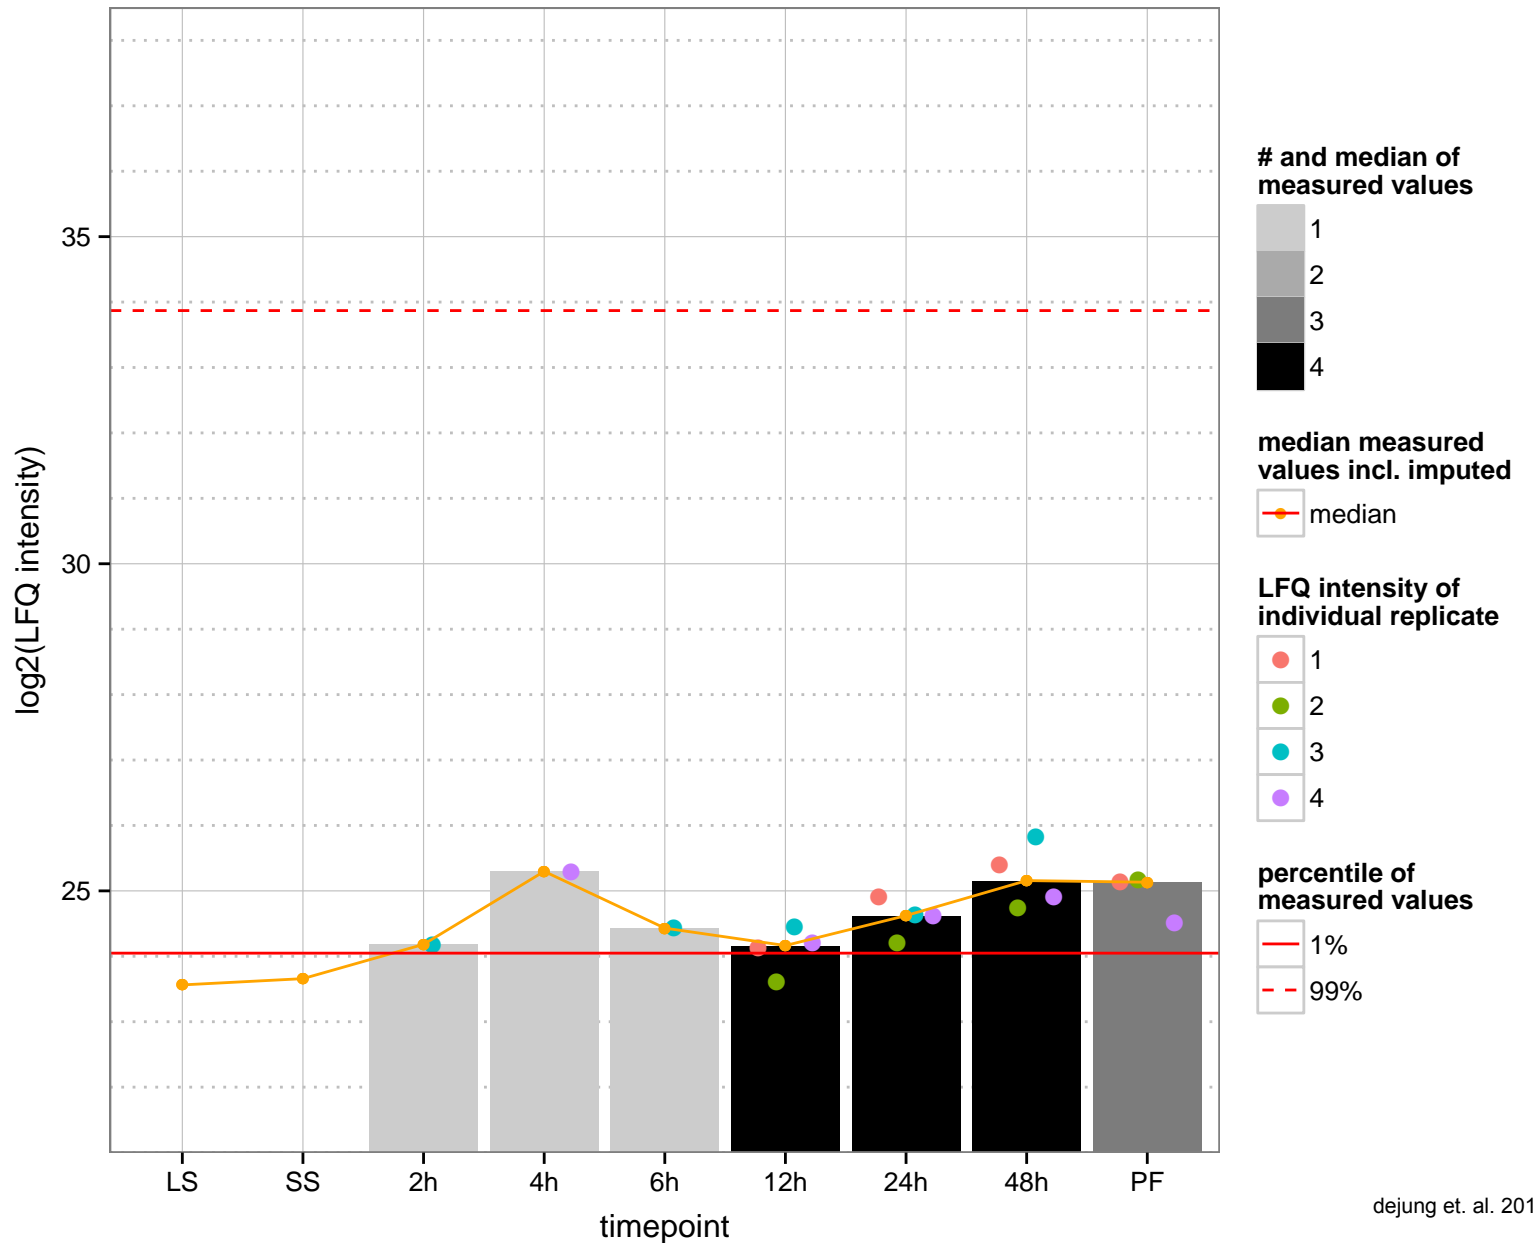

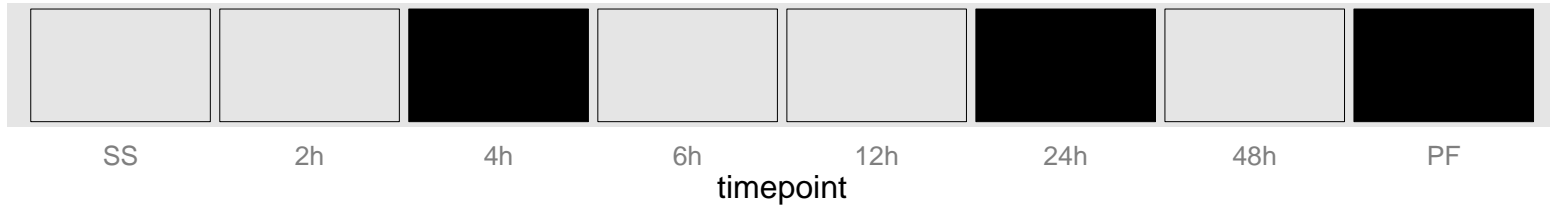

**regulated**  **not regulated**  **significant down**  **significant up**



hypothetical protein, conserved  
 Tb927.10.4550  
 AGOF: null  
 AGOC: mitochondrion  
 AGOP: null  
 PGO: null  
 PGOC: null  
 PGOP: null

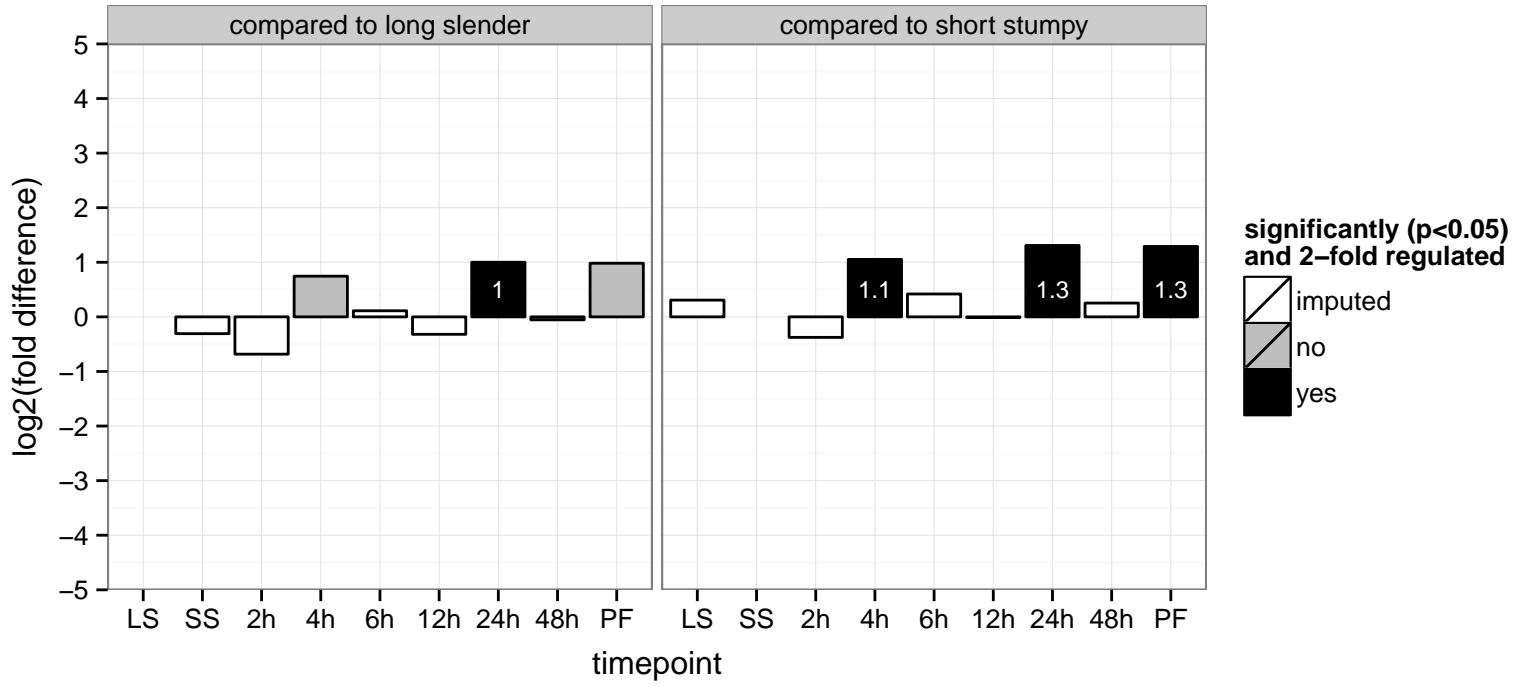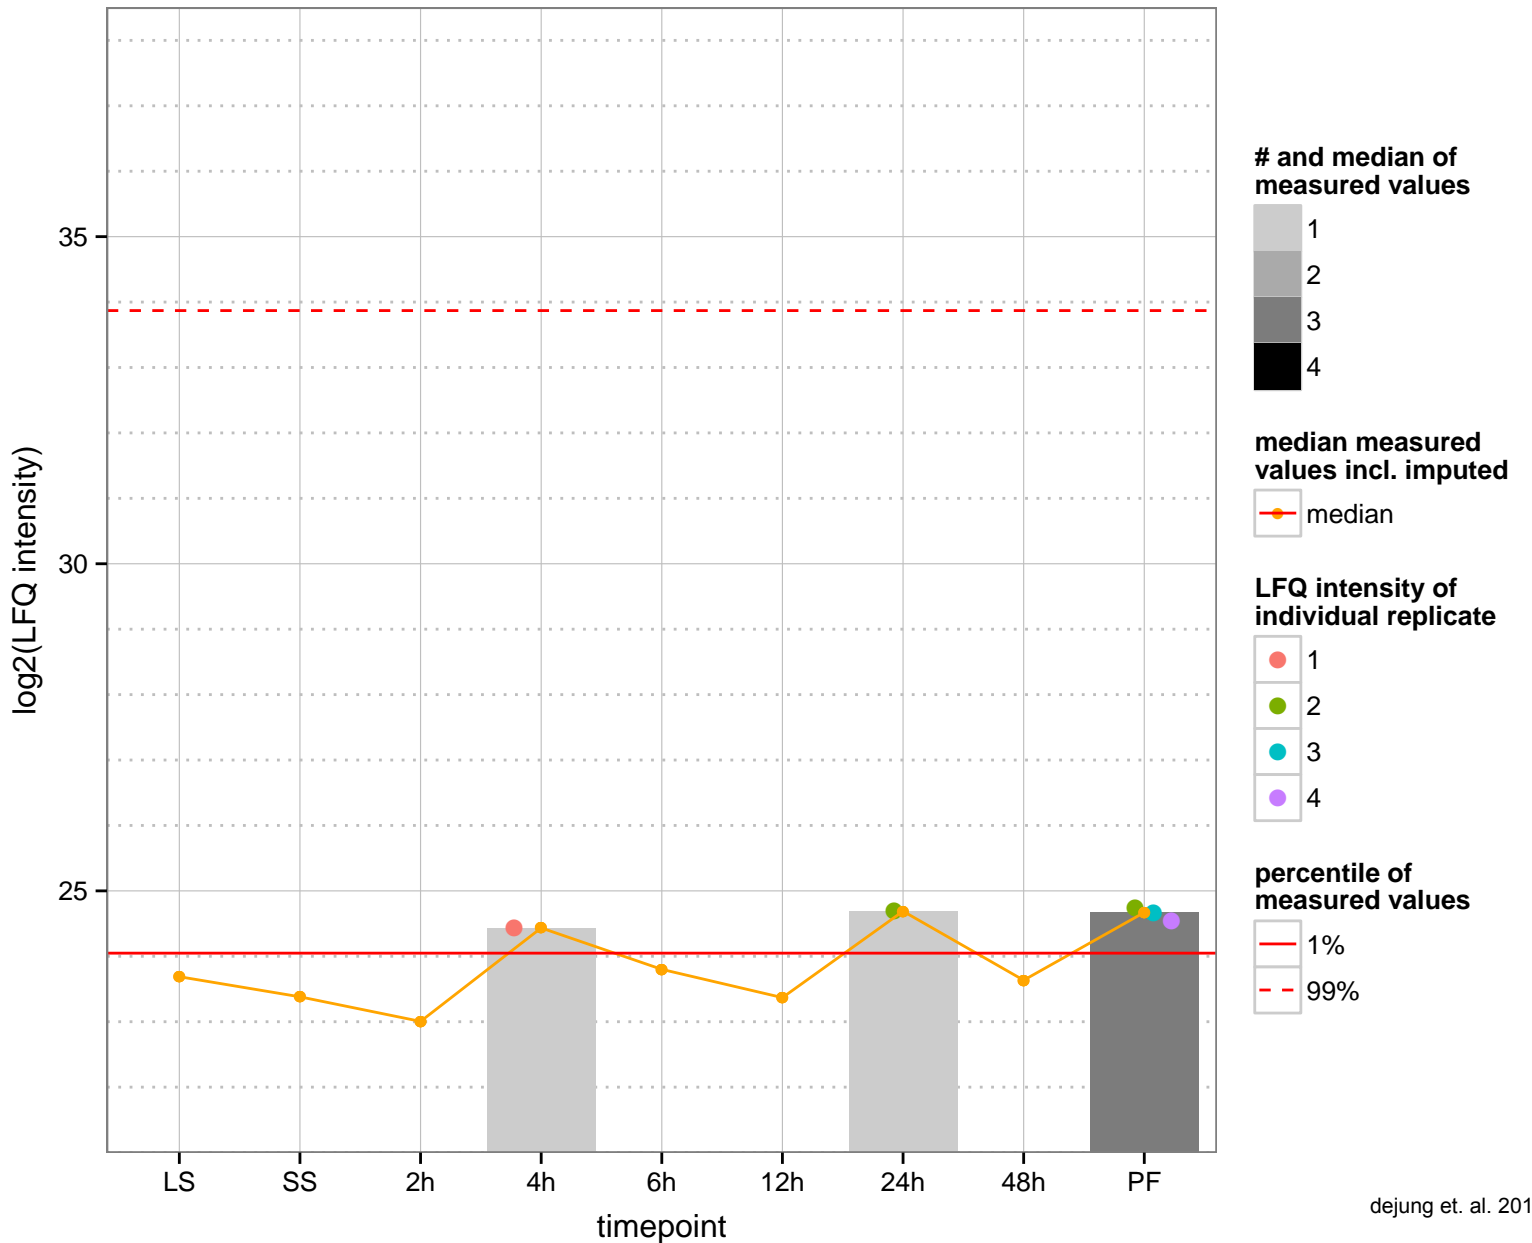

hypothetical protein, conserved  
 Tb927.11.9580.1;Tb927.11.9580.2  
 AGOF: null  
 AGOC: null  
 AGOP: null  
 PGO: null  
 PGOC: null  
 PGOP: null

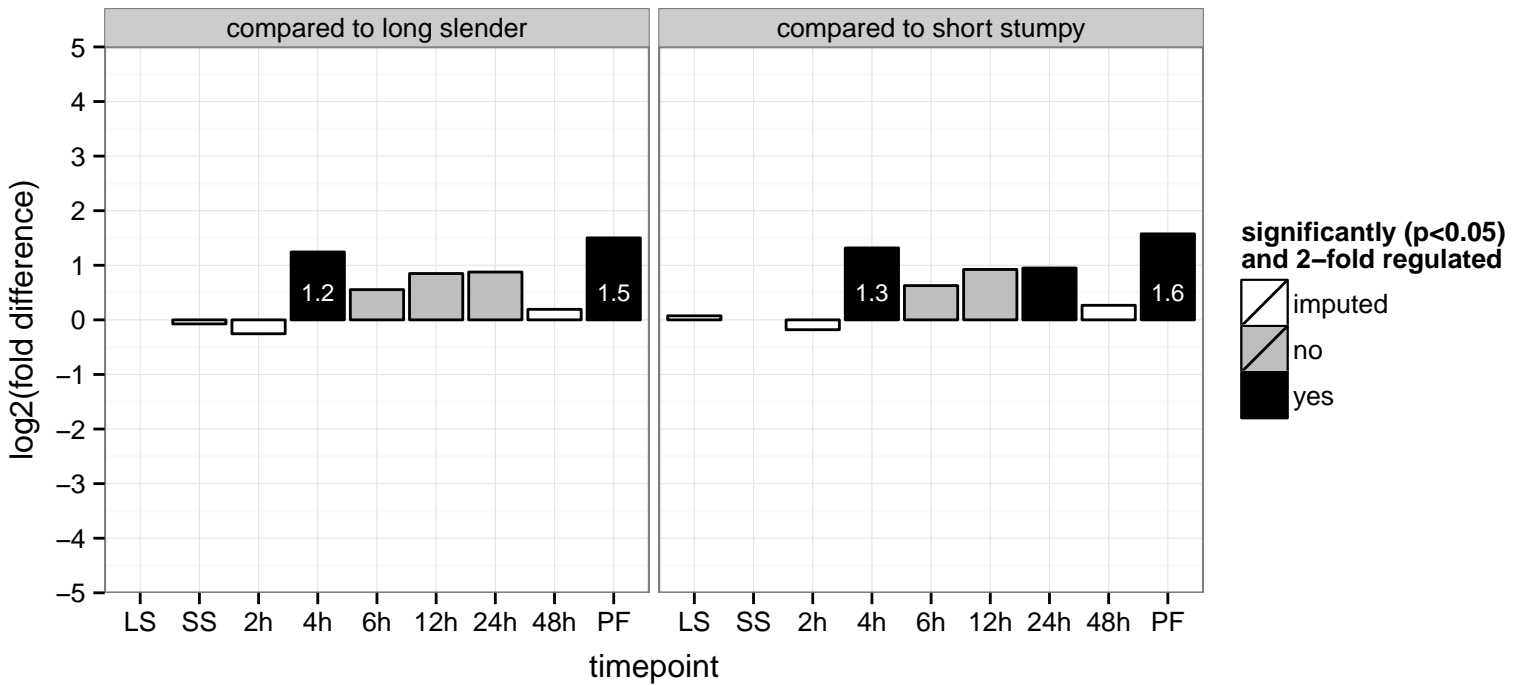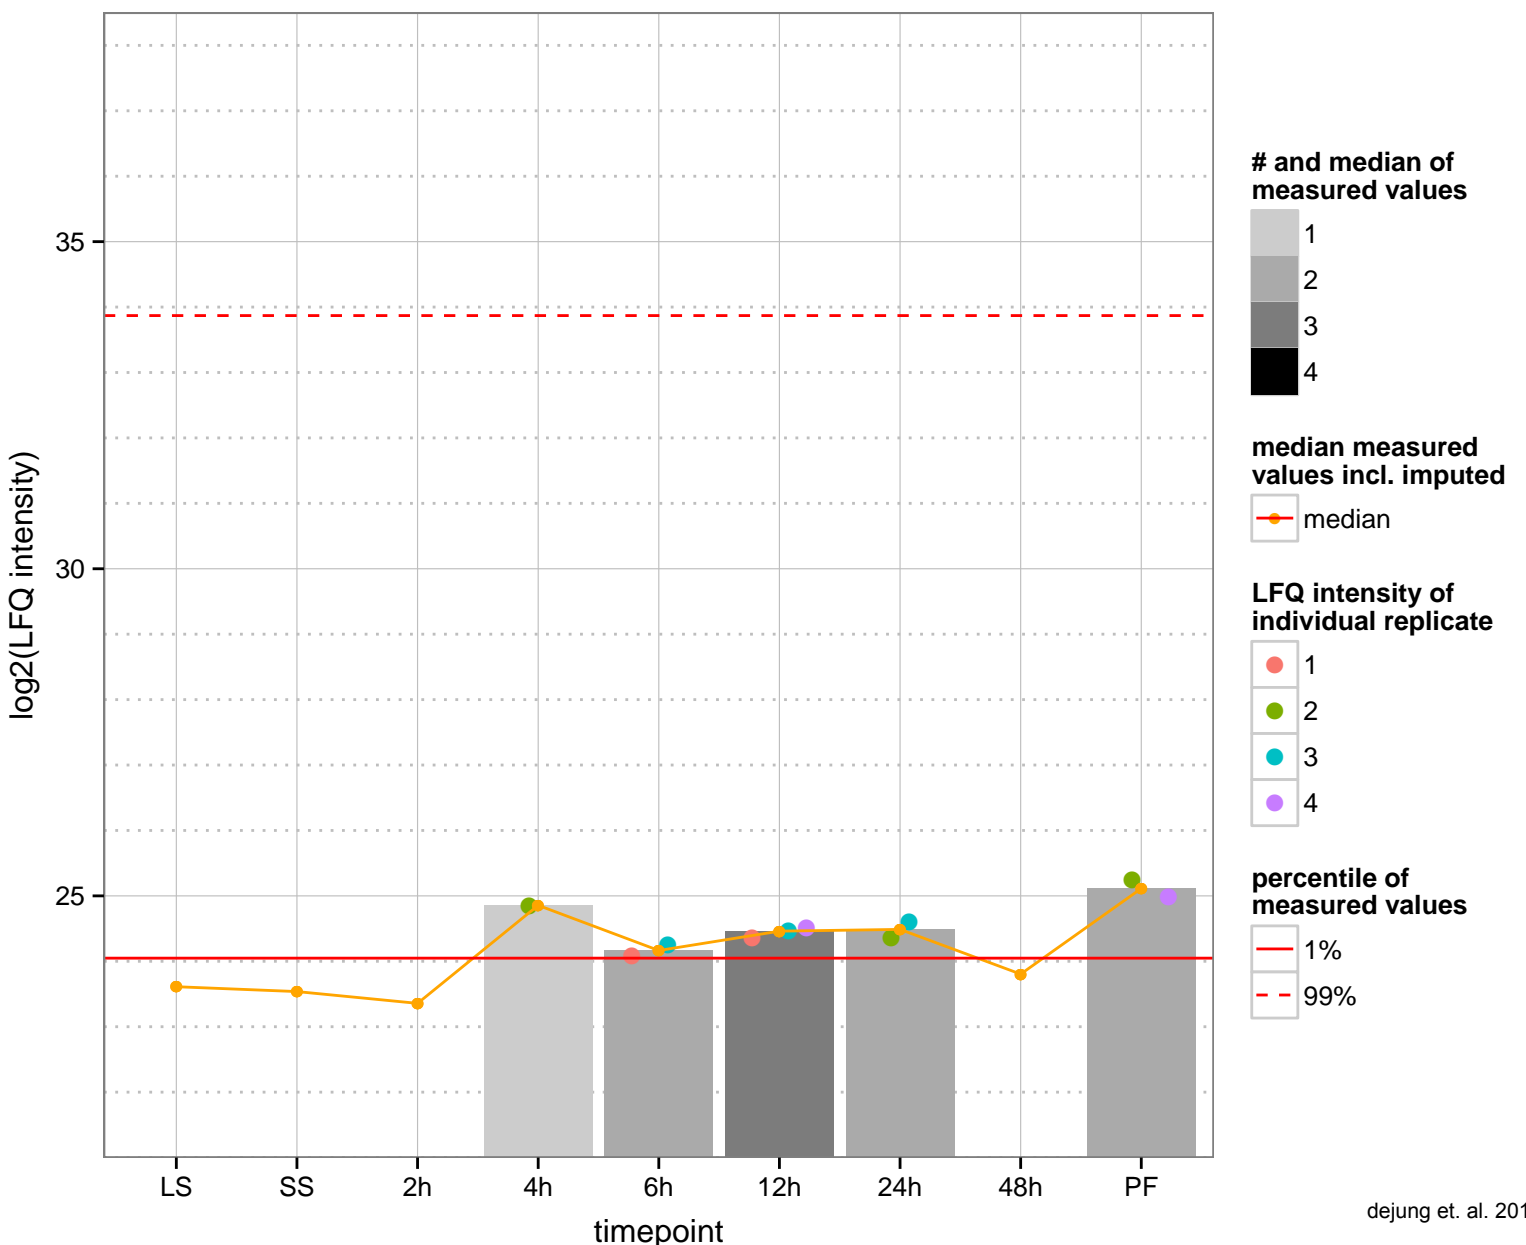

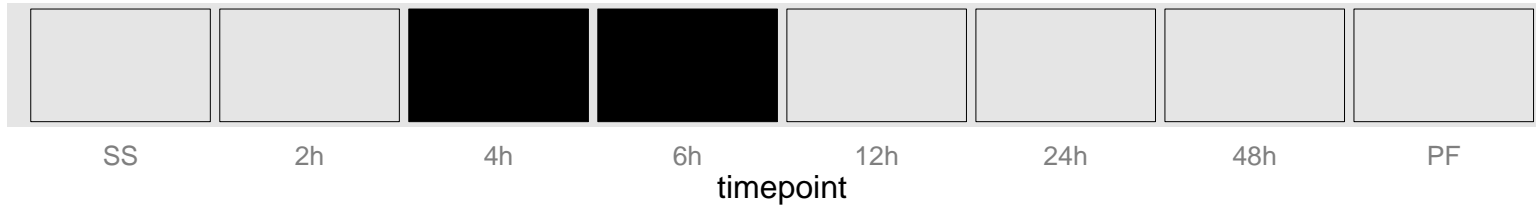

**regulated**  not regulated  significant down  significant up

ATP synthase subunit, putative

Tb927.1.3820

AGOF: hydrogen ion transporting ATP synthase activity, rotational mechanism, proton-transporting ATPase activity

AGOC: proton-transporting V-type ATPase, V1 domain

AGOP: ATP hydrolysis coupled proton transport

PGOF: hydrogen ion transporting ATP synthase activity, rotational mechanism, proton-transporting ATPase activity

PGOC: proton-transporting V-type ATPase, V1 domain, proton-transporting two-sector ATPase complex, catalytic domain

PGOP: ATP hydrolysis coupled proton transport

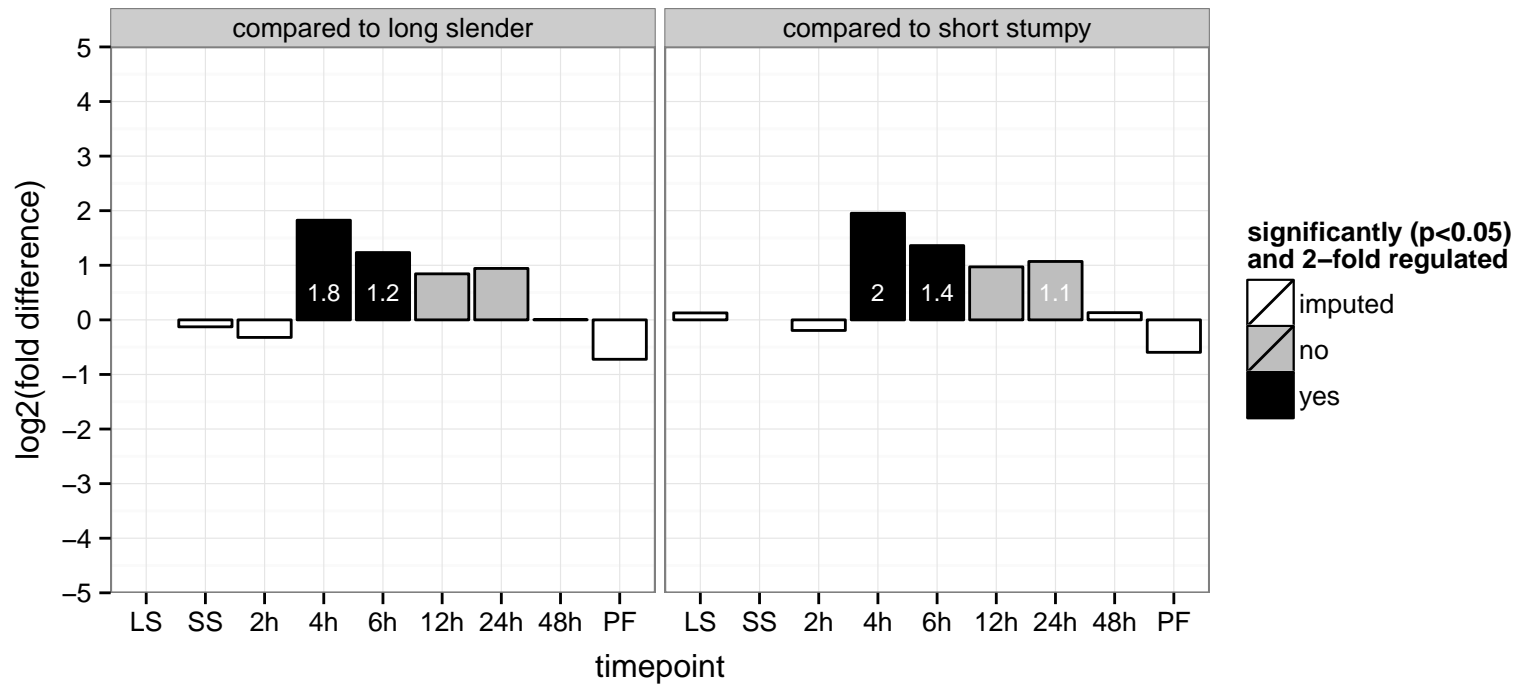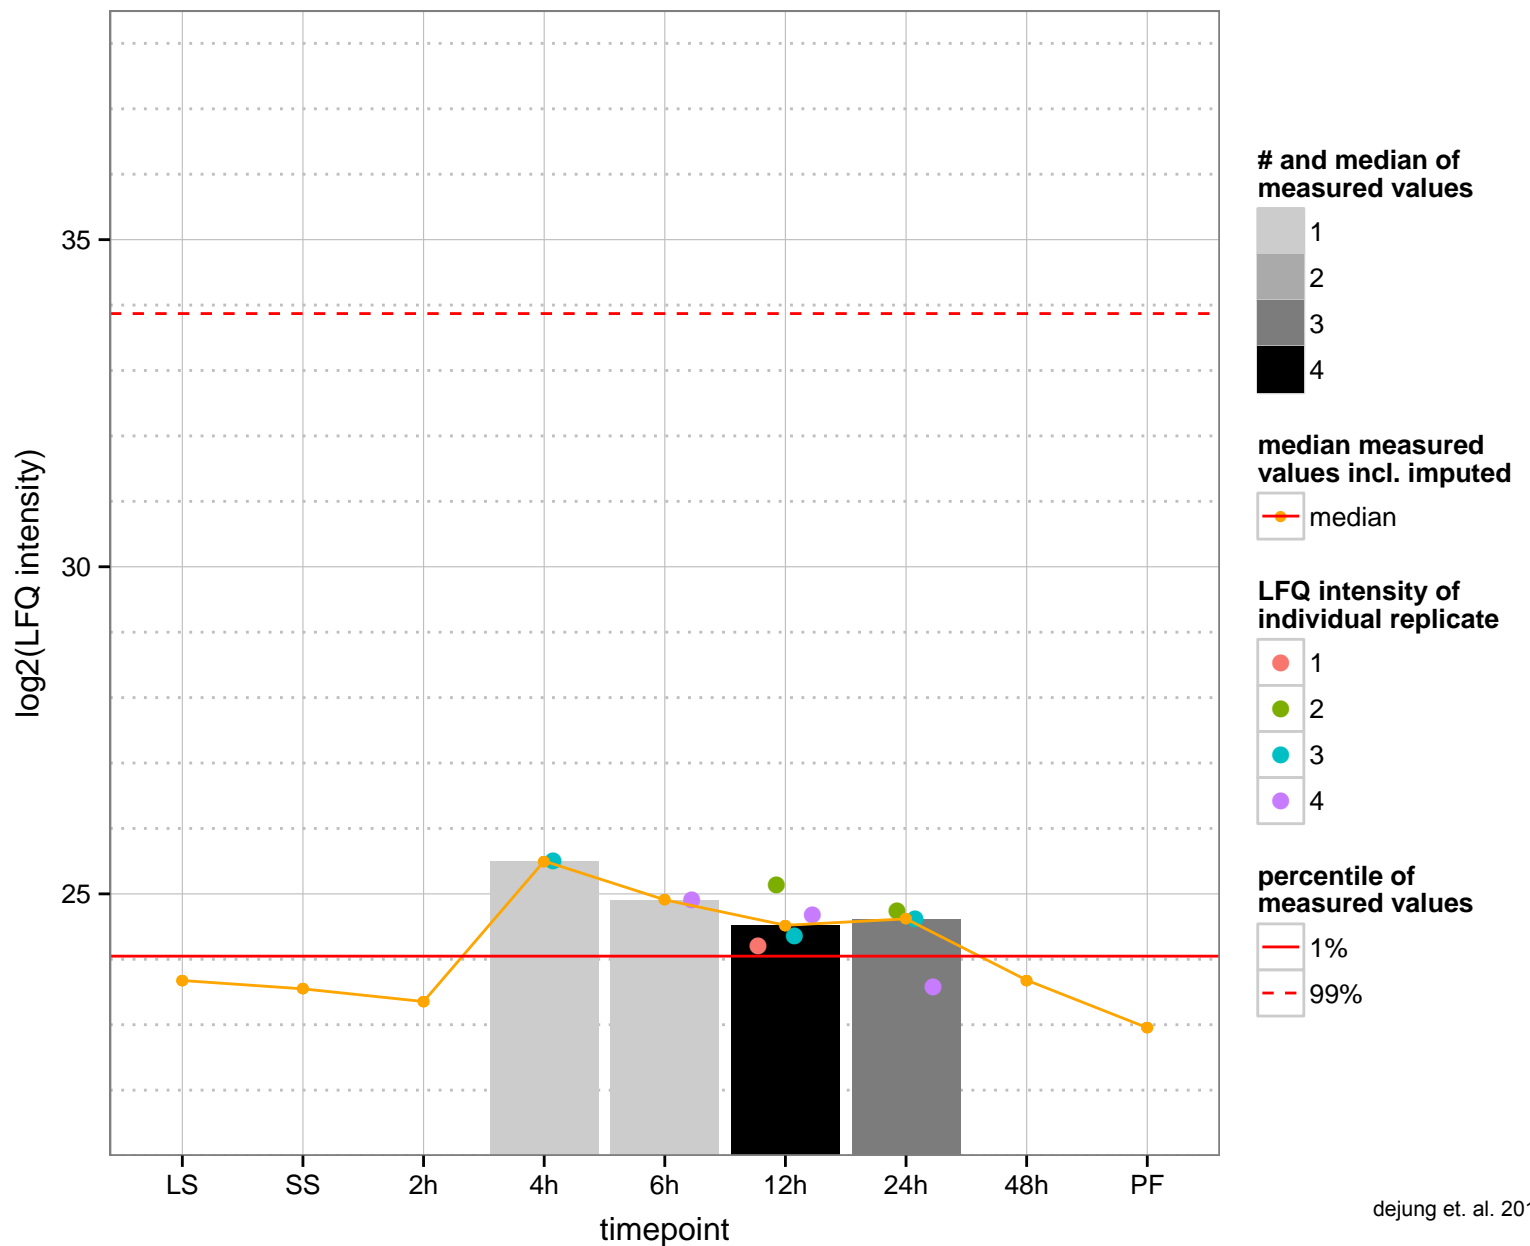

hypothetical protein, conserved  
 Tb927.9.8050  
 AGOF: null  
 AGOC: null  
 AGOP: null  
 PGO: null  
 PGOC: null  
 PGOP: null

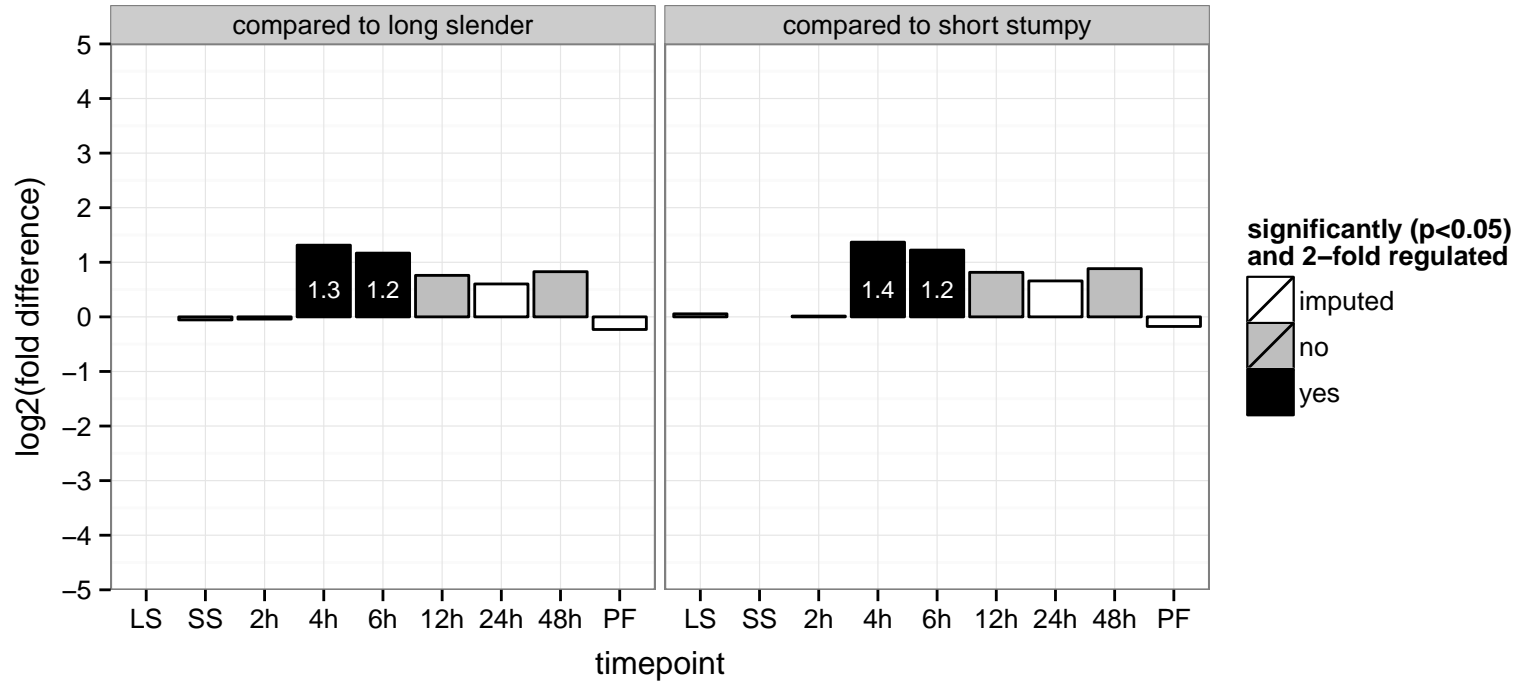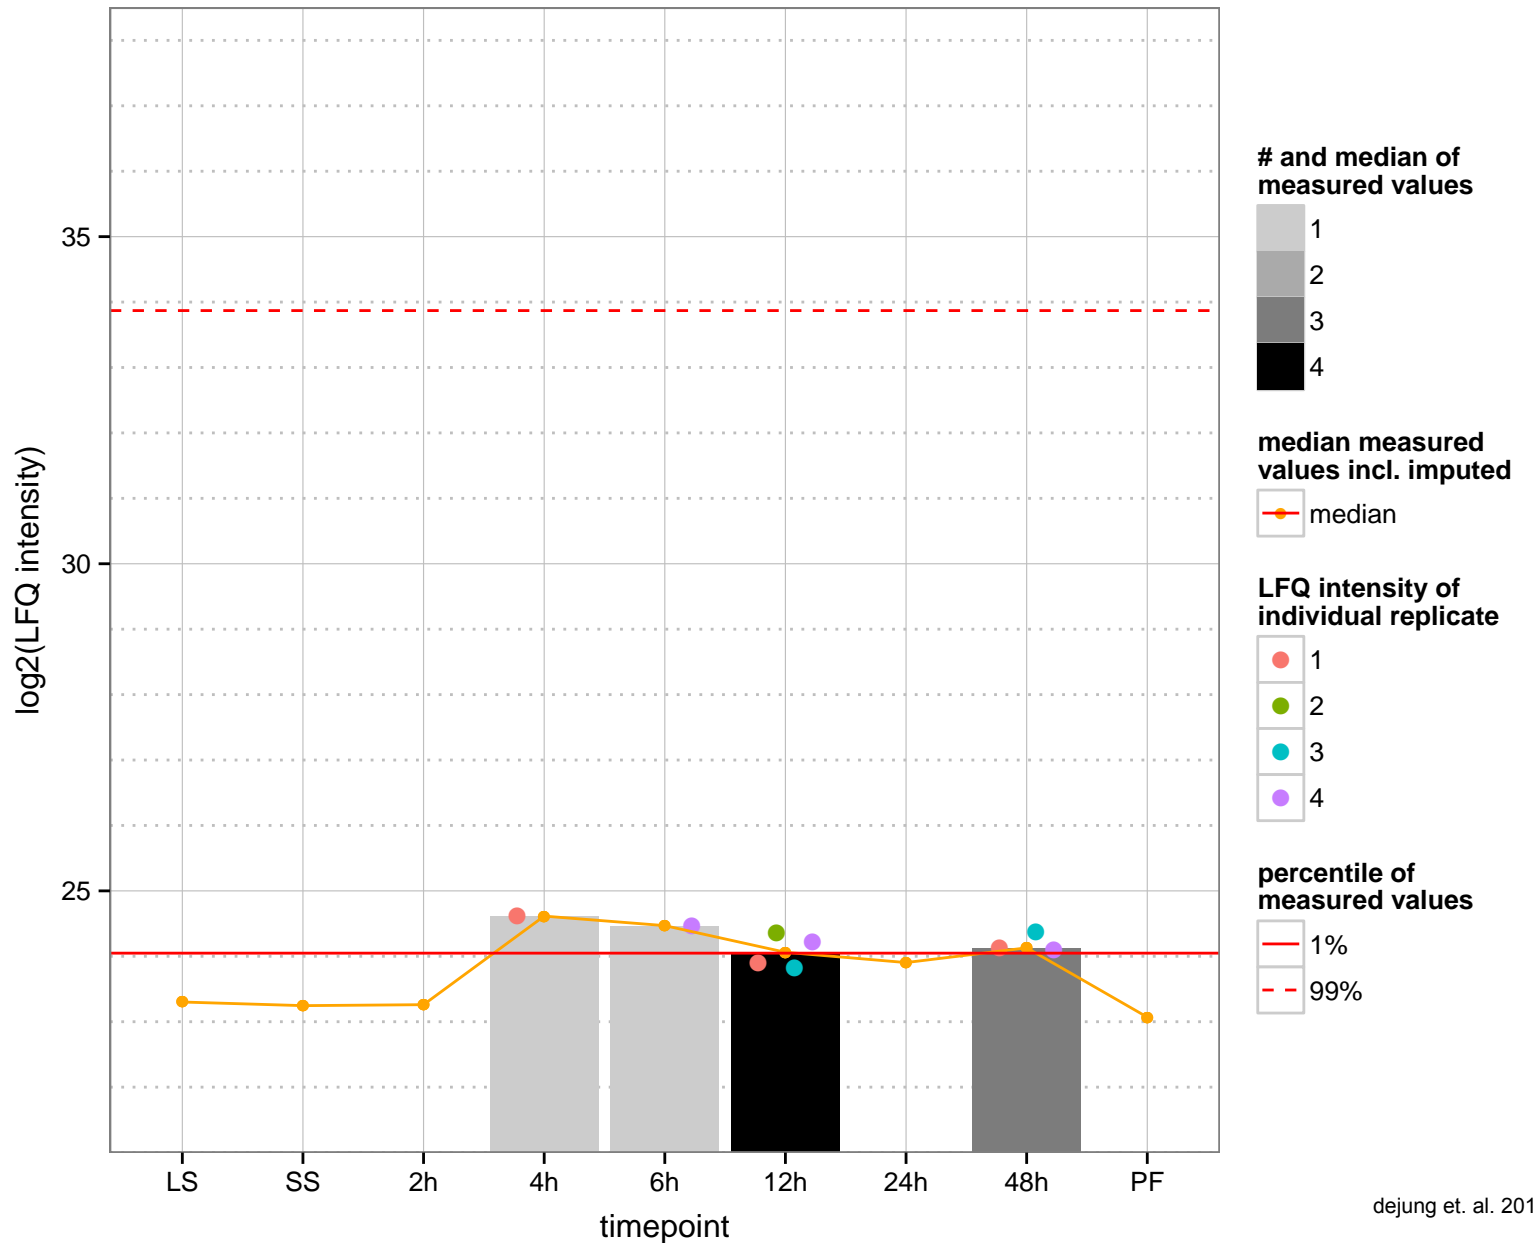

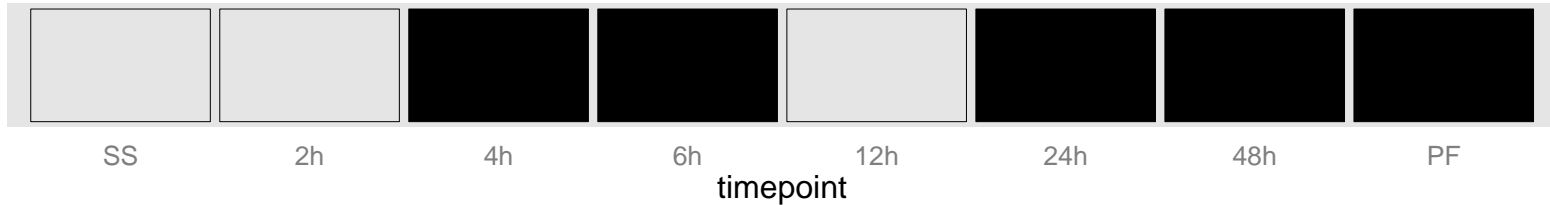

**regulated**  **not regulated**  **significant down**  **significant up**

hypothetical protein, conserved  
 Tb927.11.16080  
 AGOF: null  
 AGOC: Golgi apparatus, endoplasmic reticulum  
 AGOP: intracellular protein transport  
 PGO: null  
 PGOC: null  
 PGOP: null

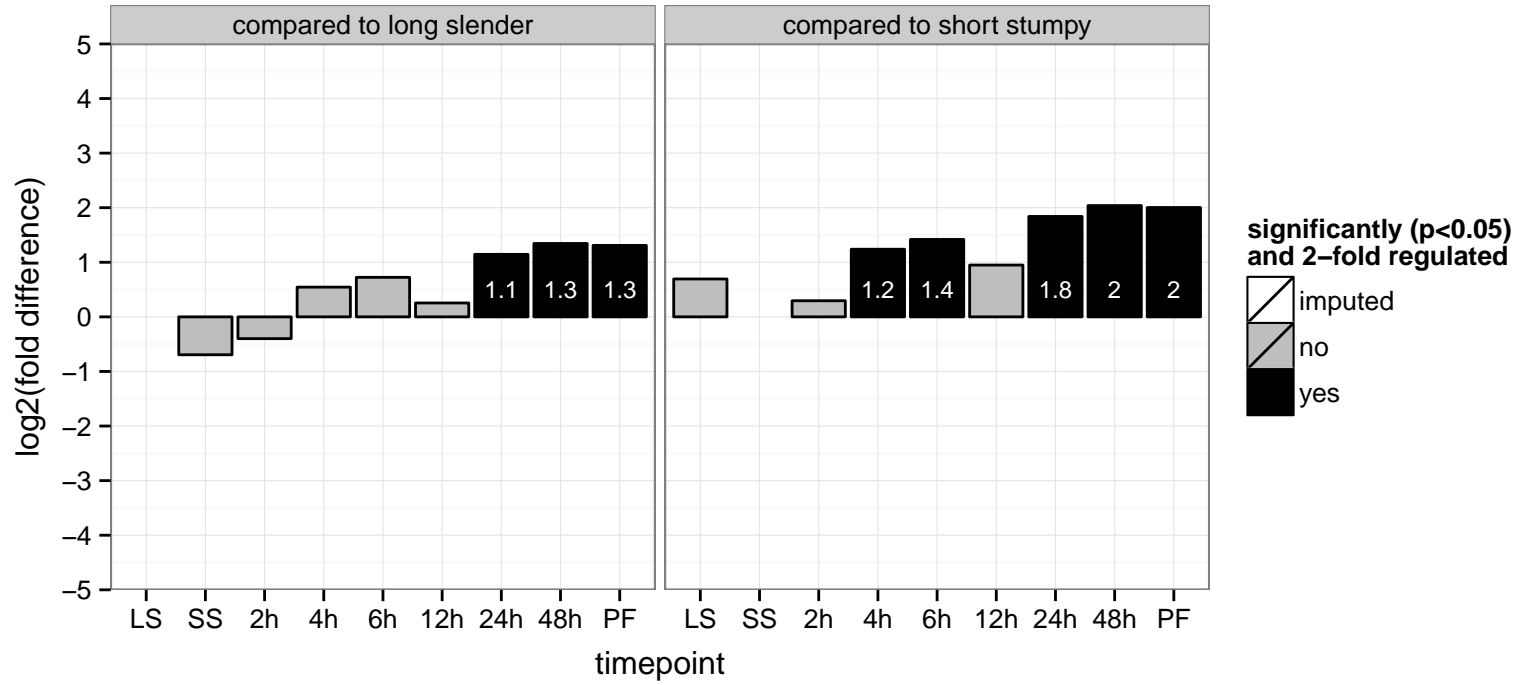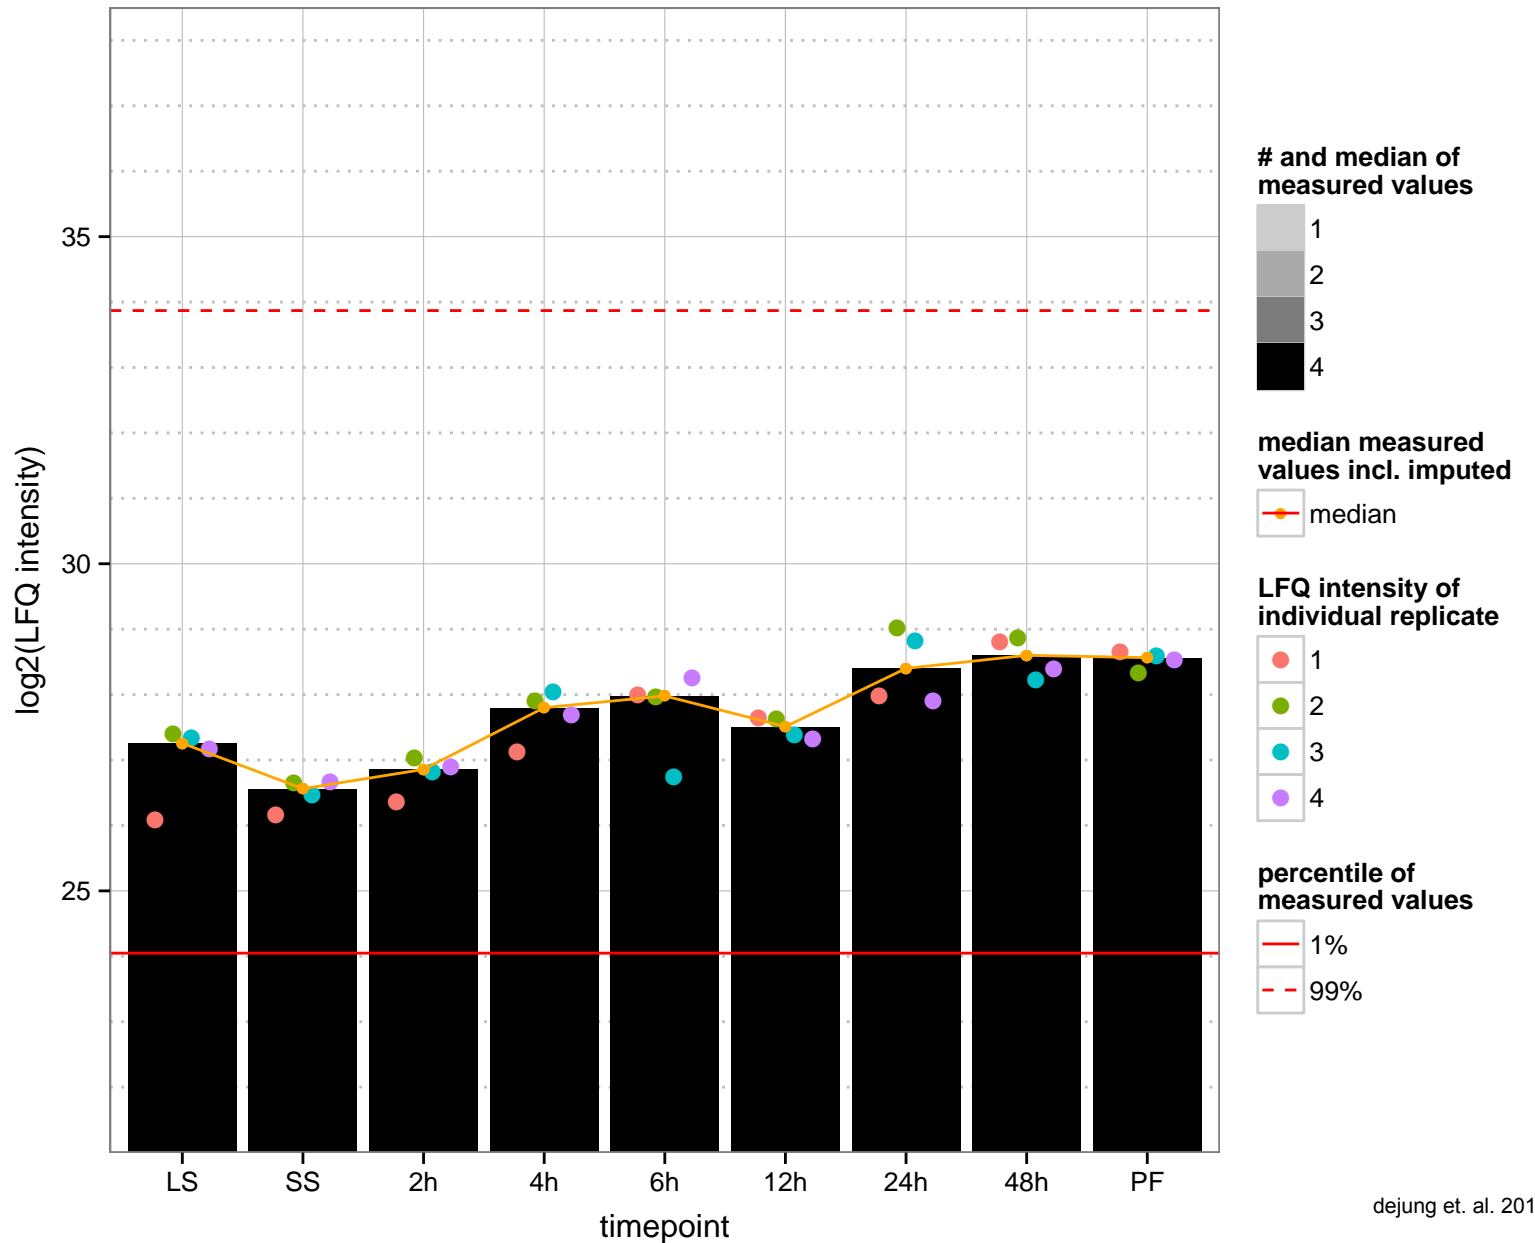

ATP-dependent chaperone, putative, mitochondrial chaperone BCS1

Tb927.8.3580

AGOF: ATP binding, nucleoside-triphosphatase activity

AGOC: mitochondrion

AGOP: aerobic respiration

PGOF: ATP binding, nucleoside-triphosphatase activity, nucleotide binding

PGOC: null

PGOP: null

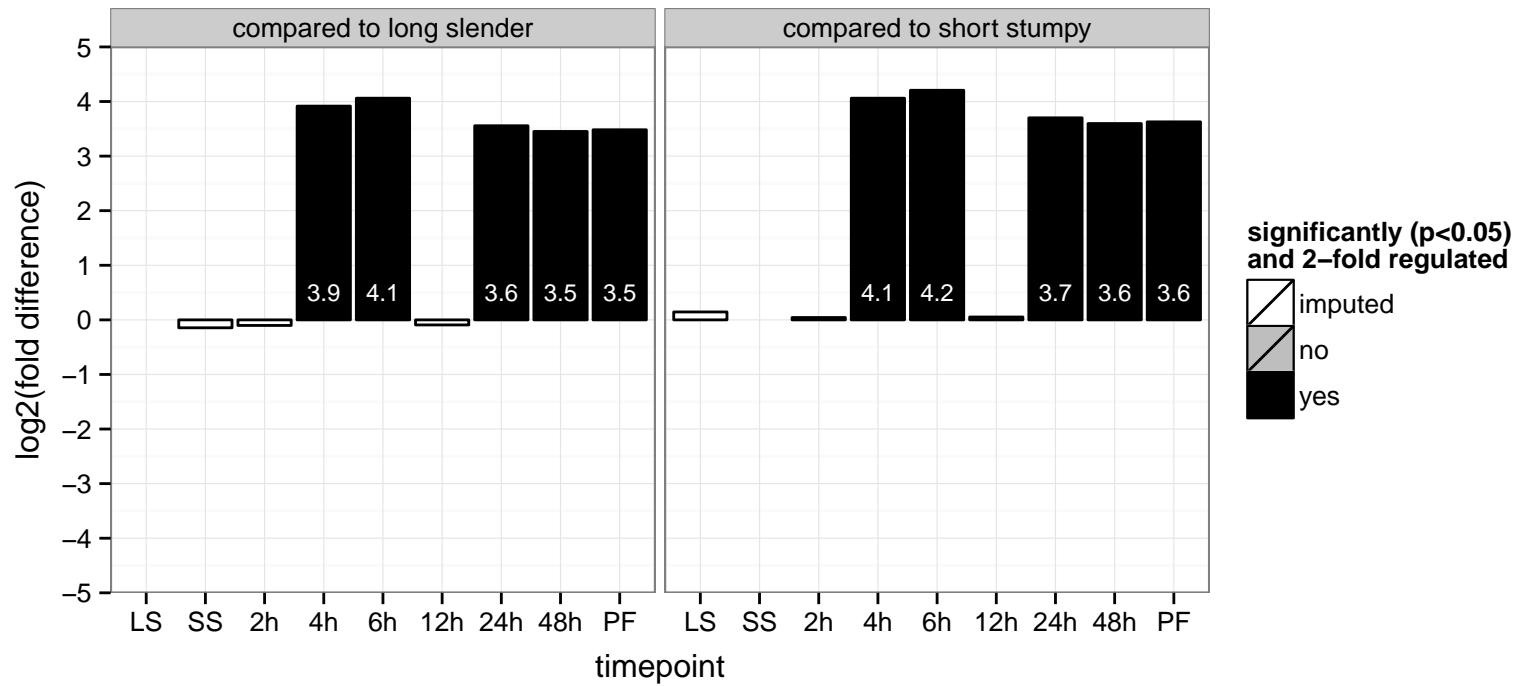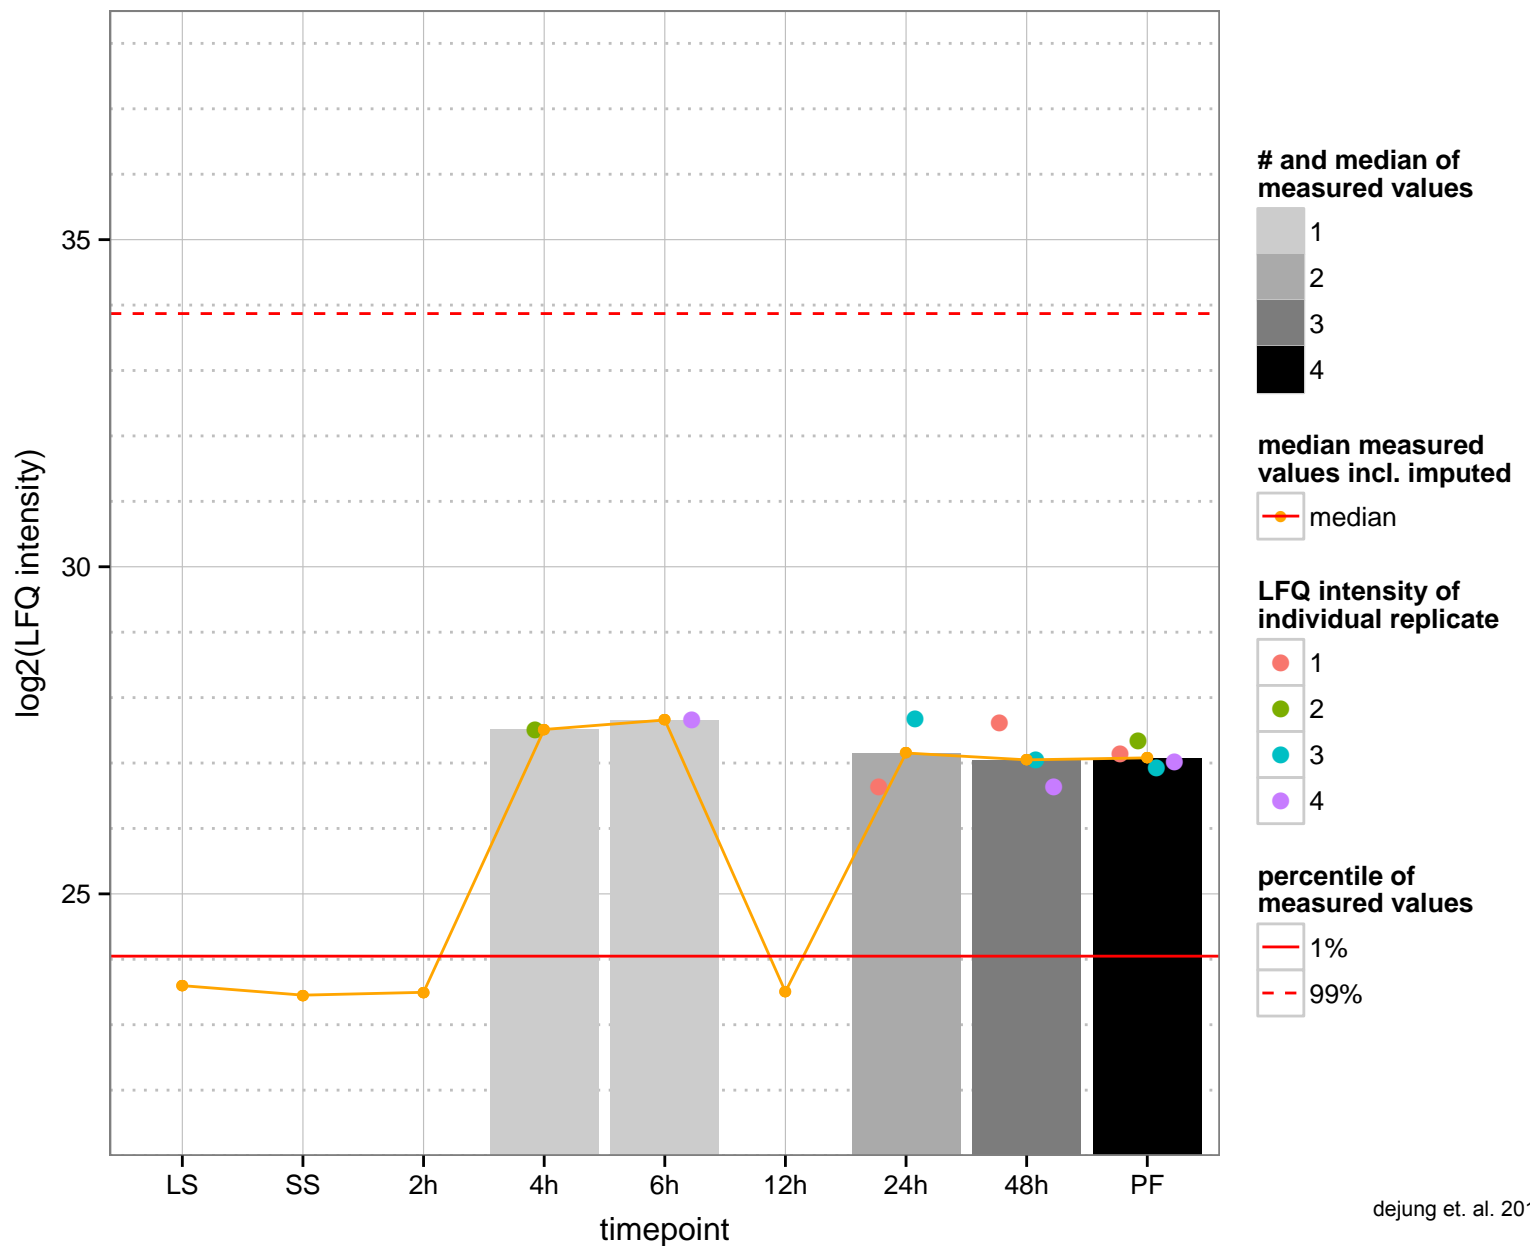



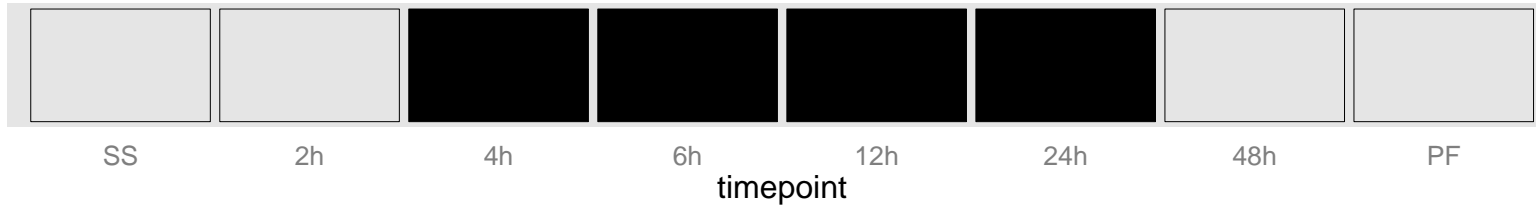

**regulated**  not regulated  significant down  significant up

hypothetical protein, conserved

Tb927.10.7290

AGOF: null

AGOC: null

AGOP: null

PGOF: glutathione gamma-glutamylcysteinyltransferase activity, metal ion binding

PGOC: null

PGOP: phytochelatin biosynthetic process, response to metal ion

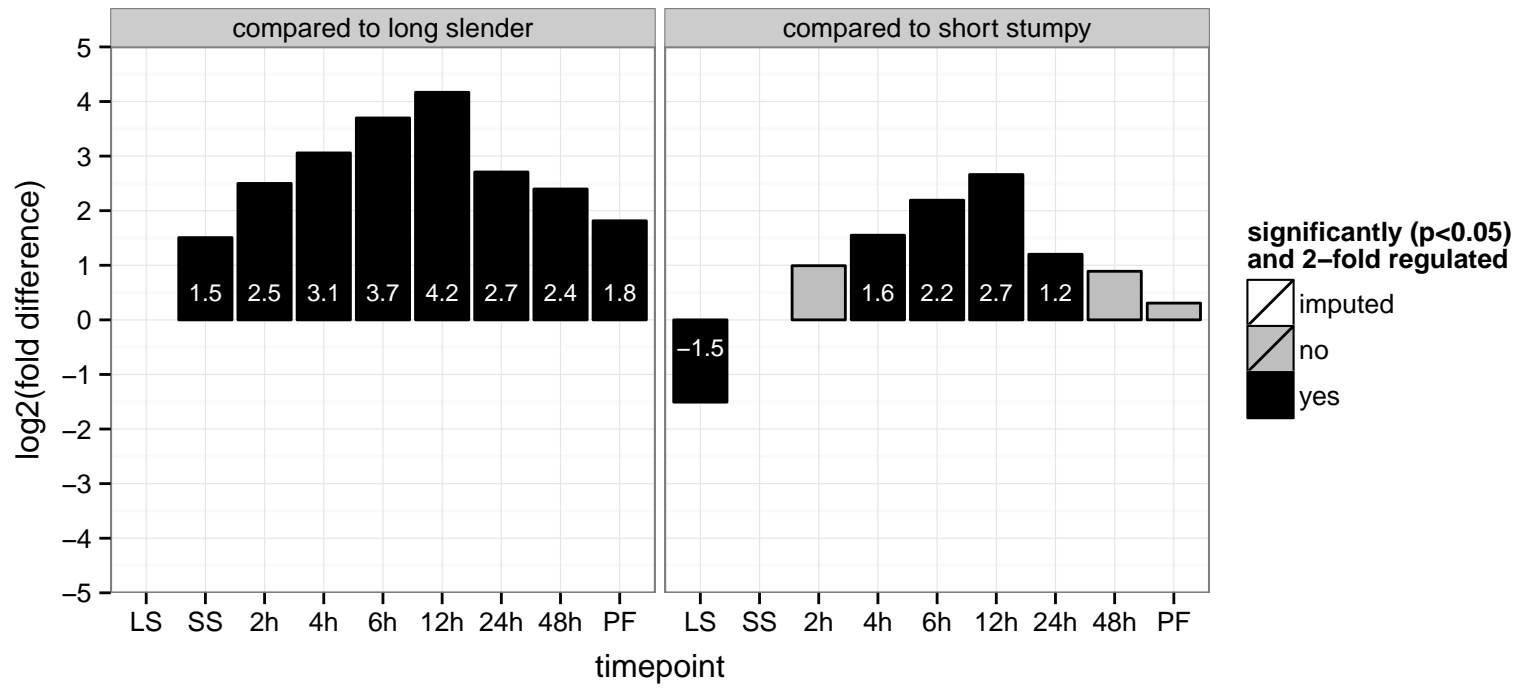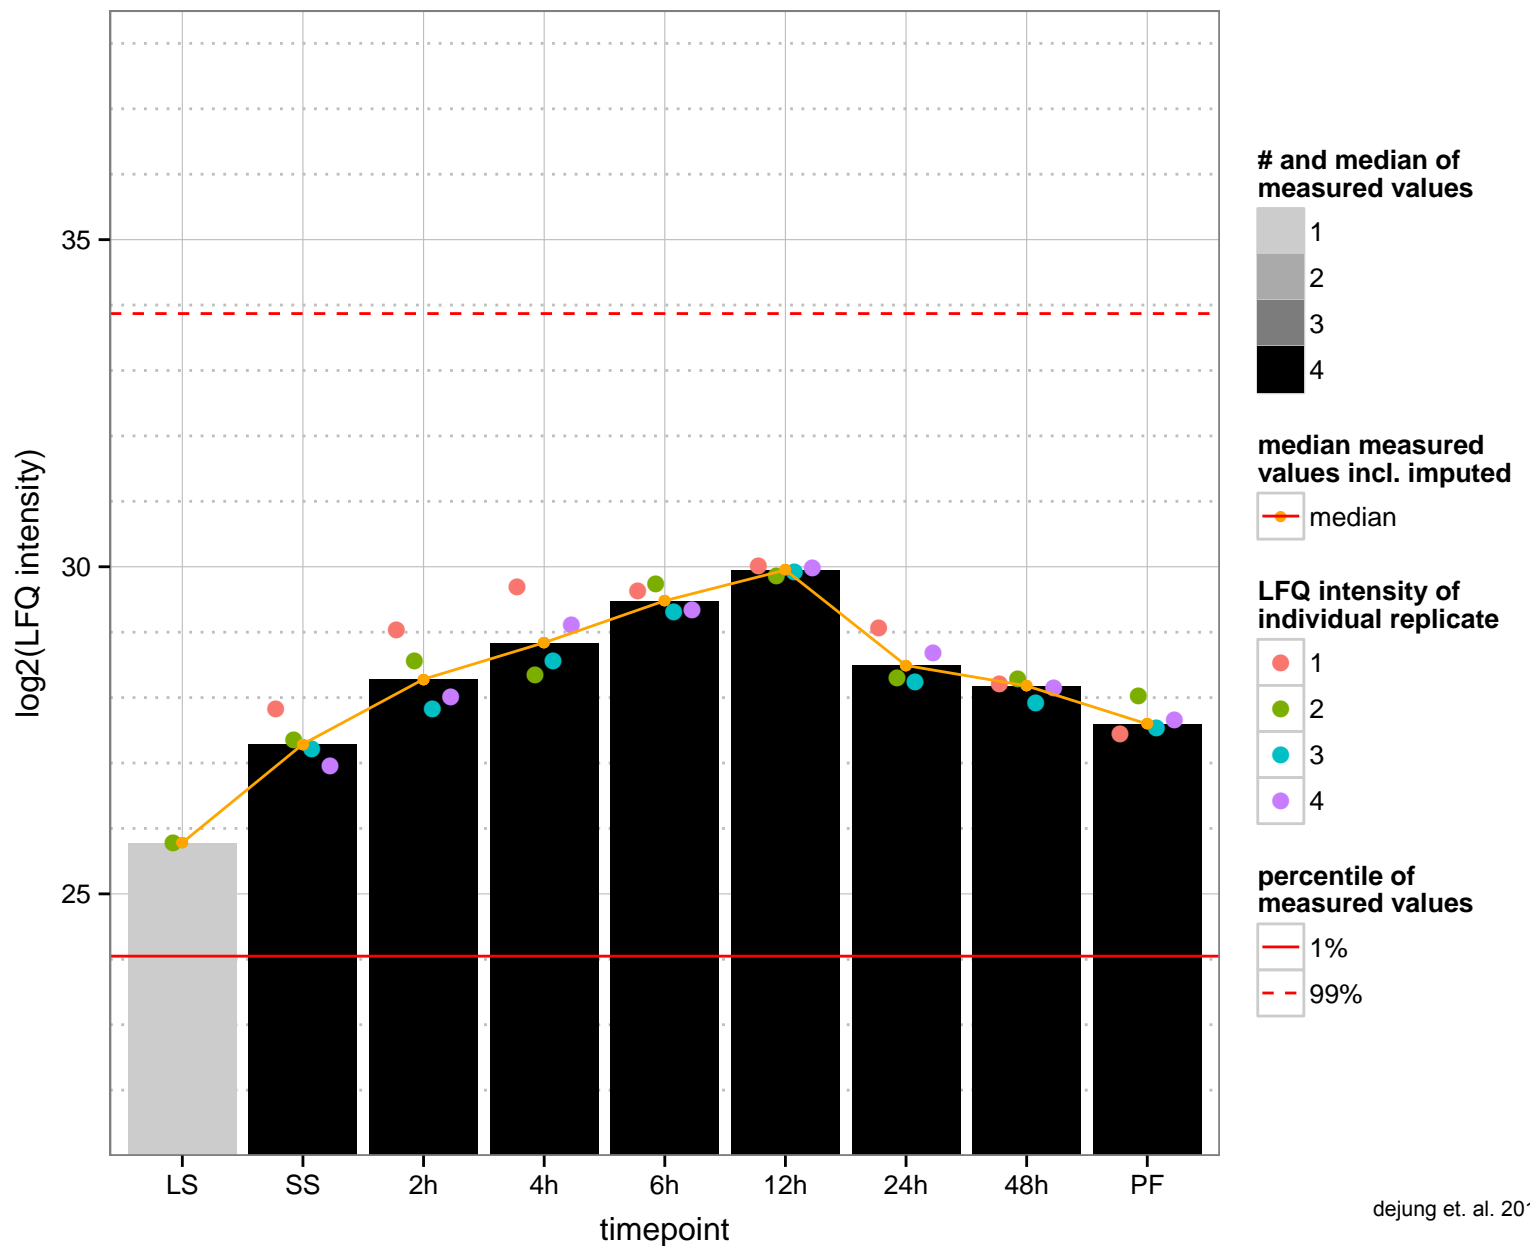

hypothetical protein, conserved  
 Tb927.4.4540  
 AGOF: null  
 AGOC: null  
 AGOP: null  
 PGOF: null  
 PGOC: null  
 PGOP: null

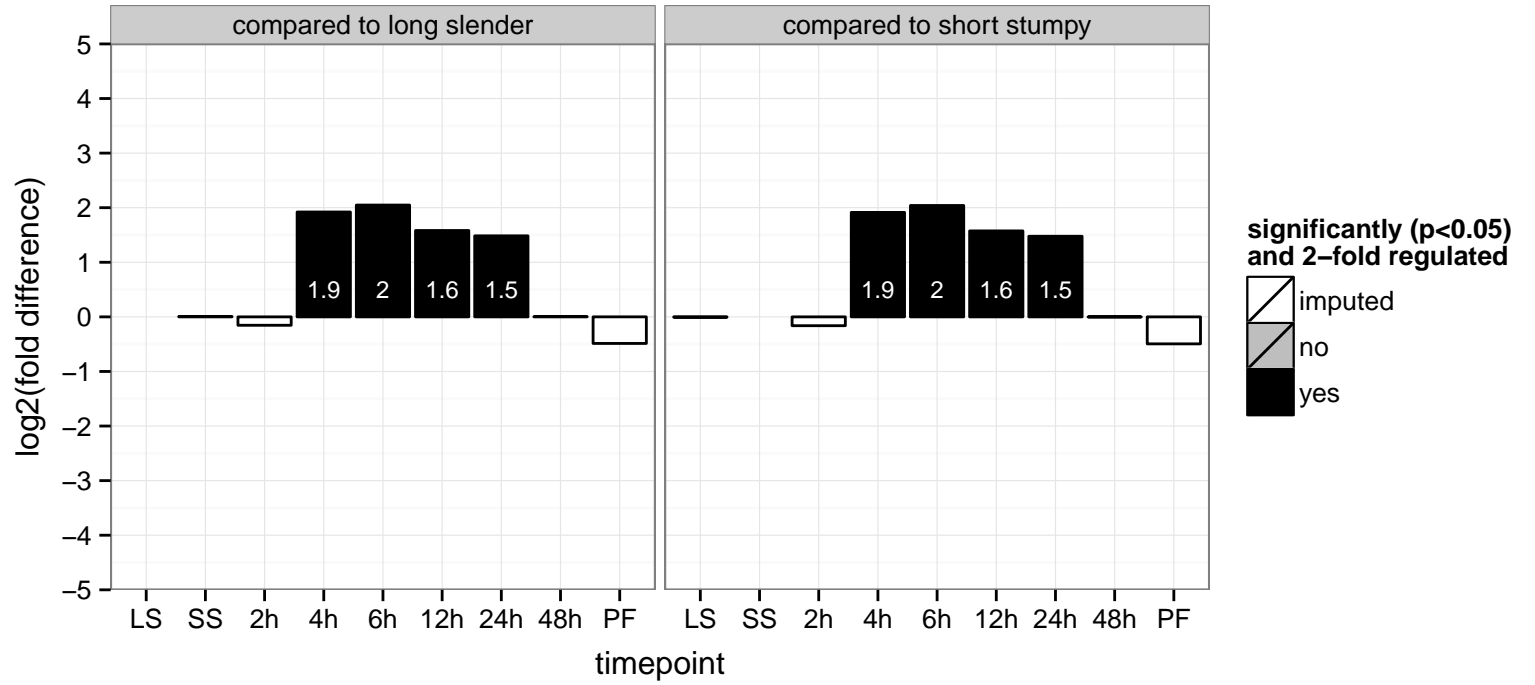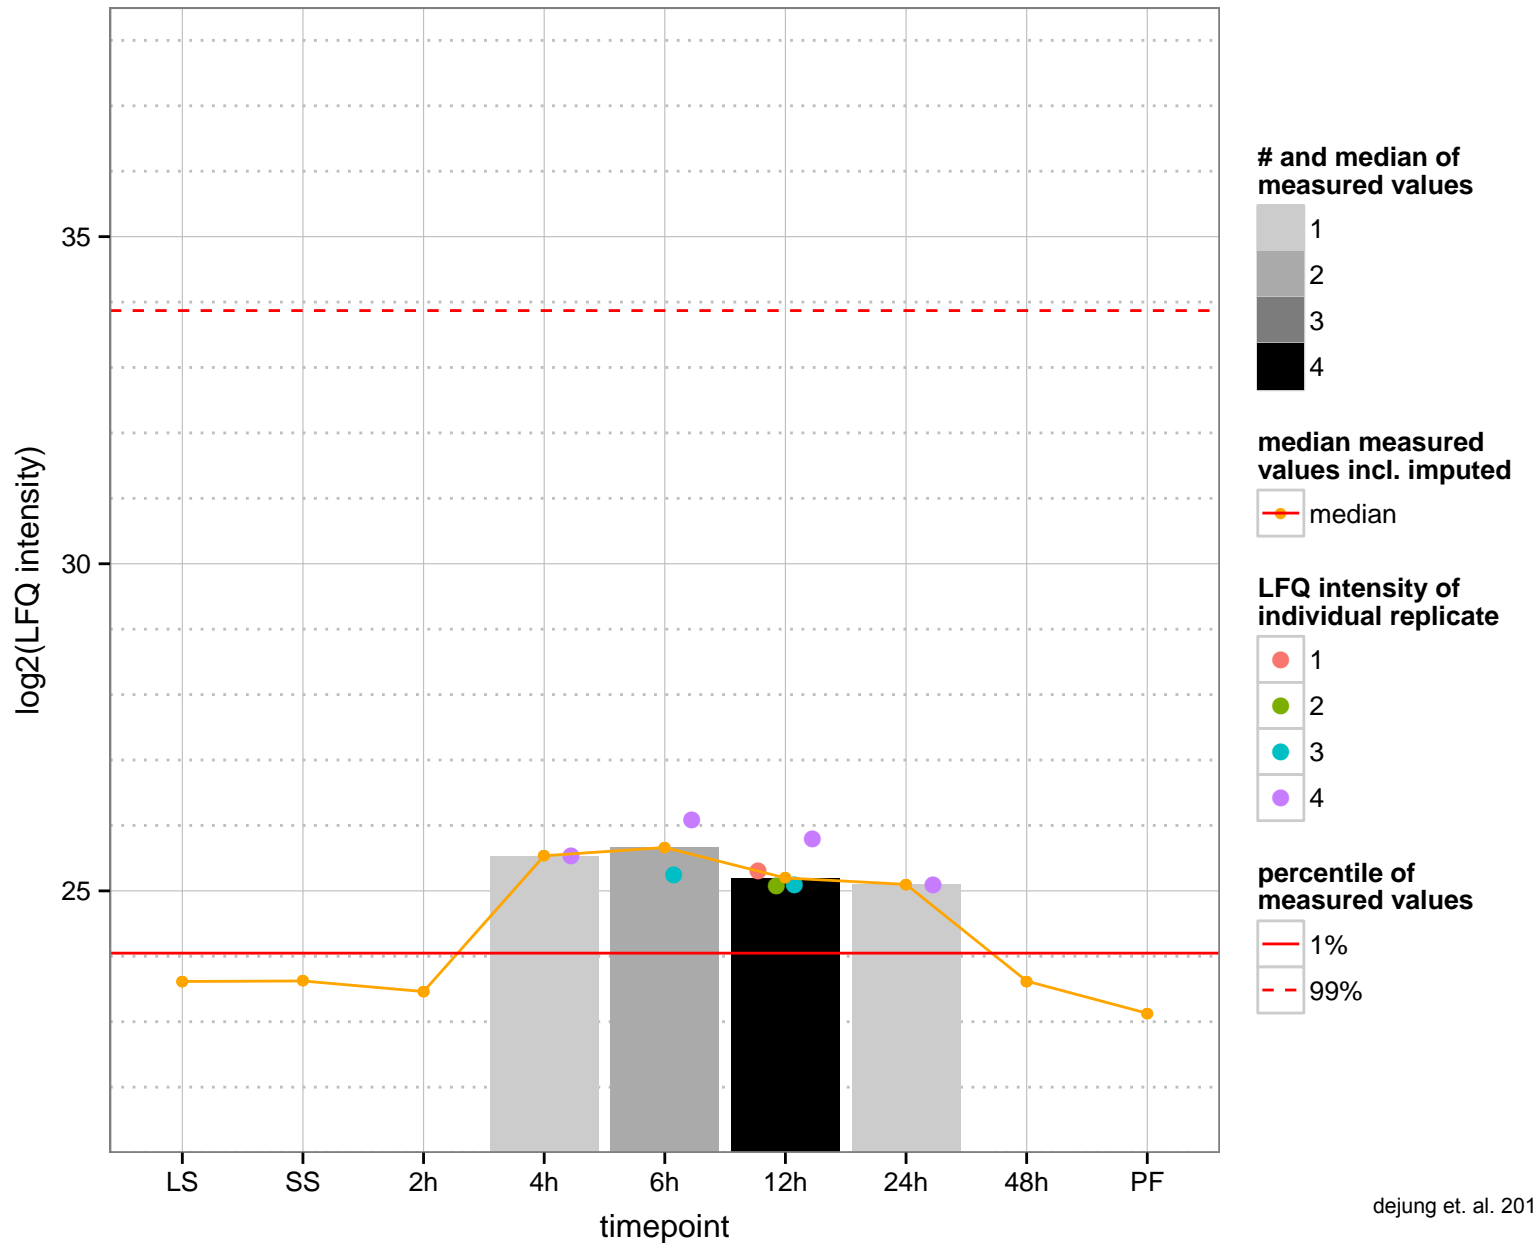

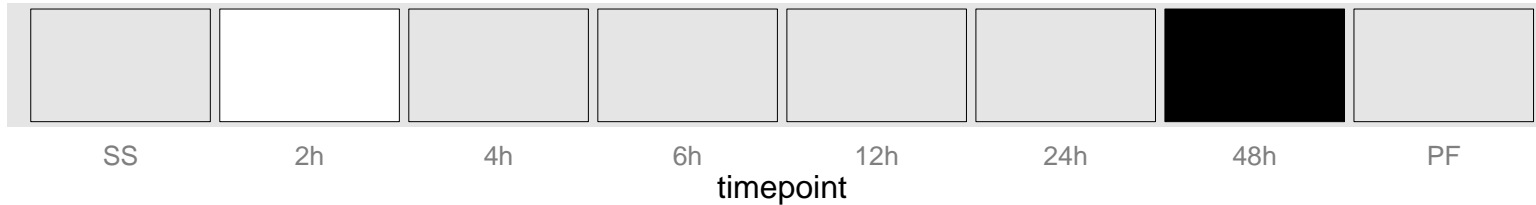

**regulated**  not regulated  significant down  significant up

hypothetical protein, conserved  
 Tb927.7.7030  
 AGOF: zinc ion binding  
 AGOC: null  
 AGOP: null  
 PGO: null  
 PGO: null  
 PGO: null  
 PGO: null

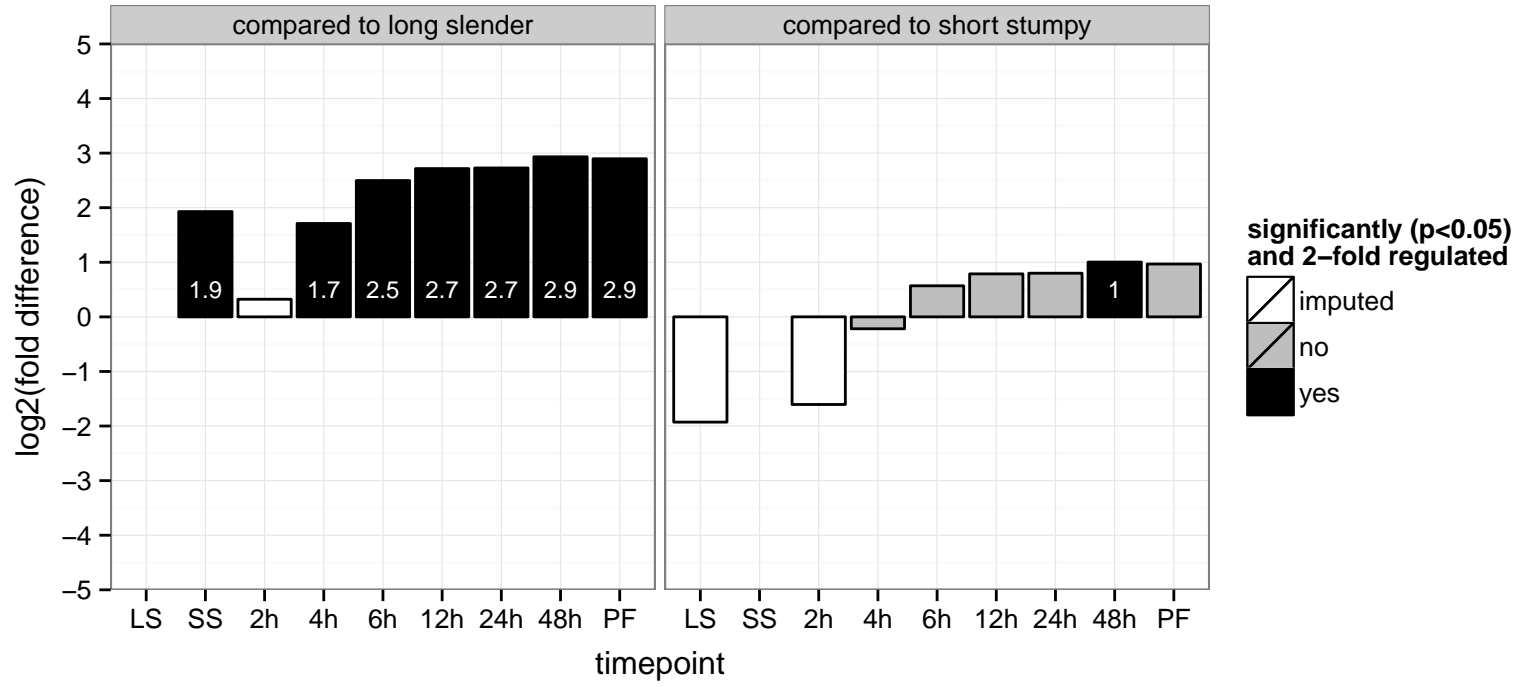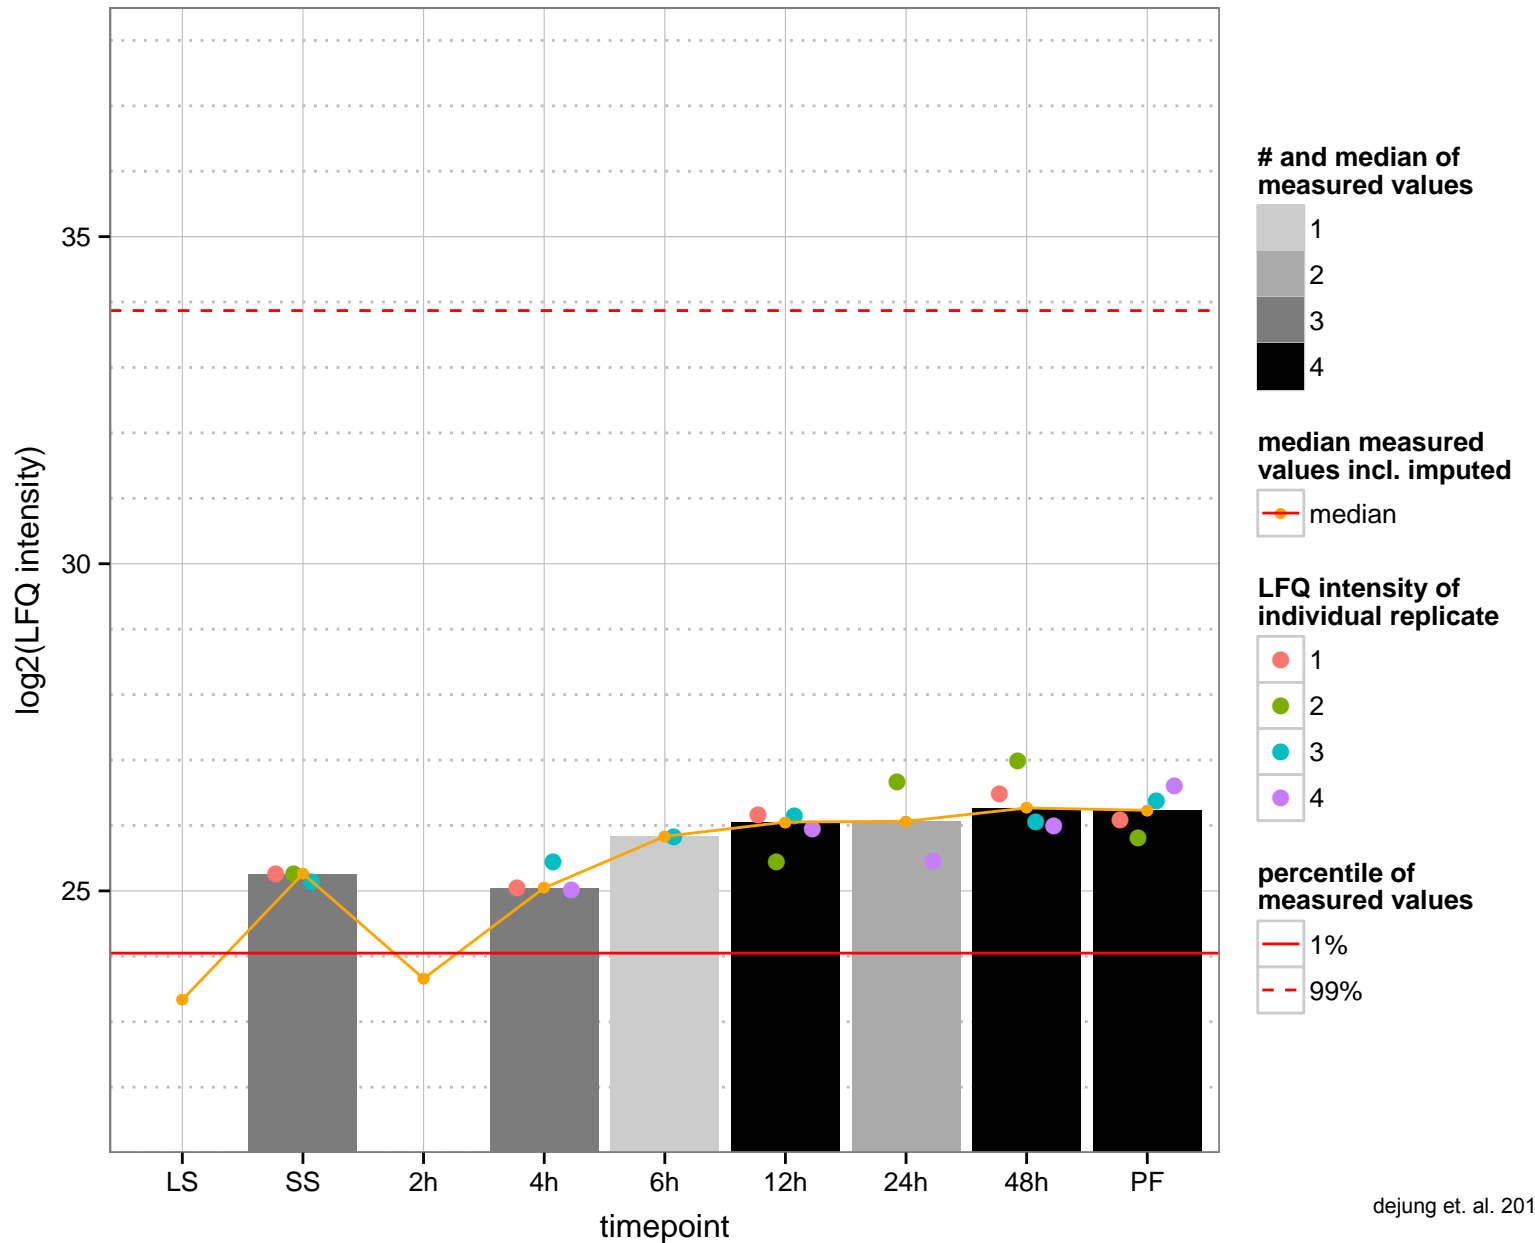

general transcription factor IIB (tf2b)

Tb927.9.5710

AGOF: null

AGOC: null

AGOP: transcription from RNA polymerase II promoter, transcription, DNA-dependent

PGOF: null

PGOC: null

PGOP: null

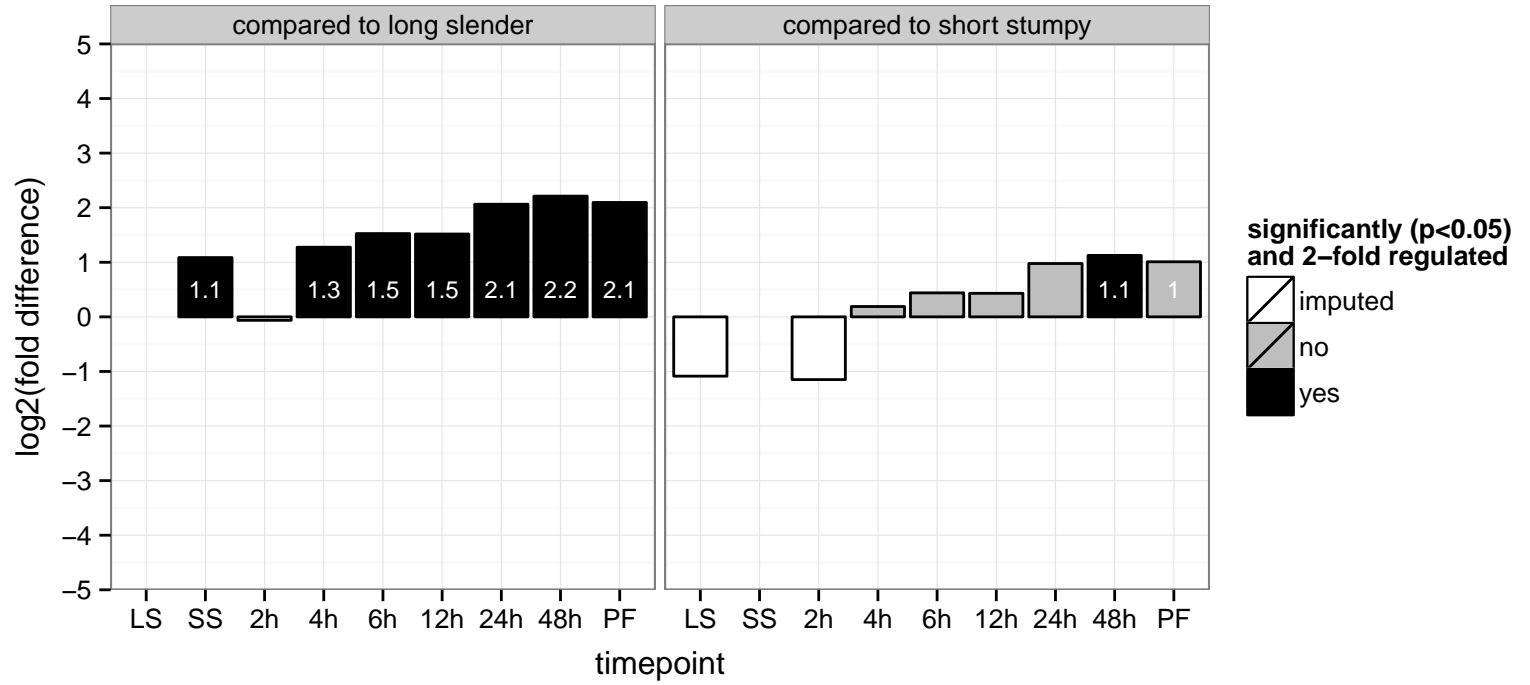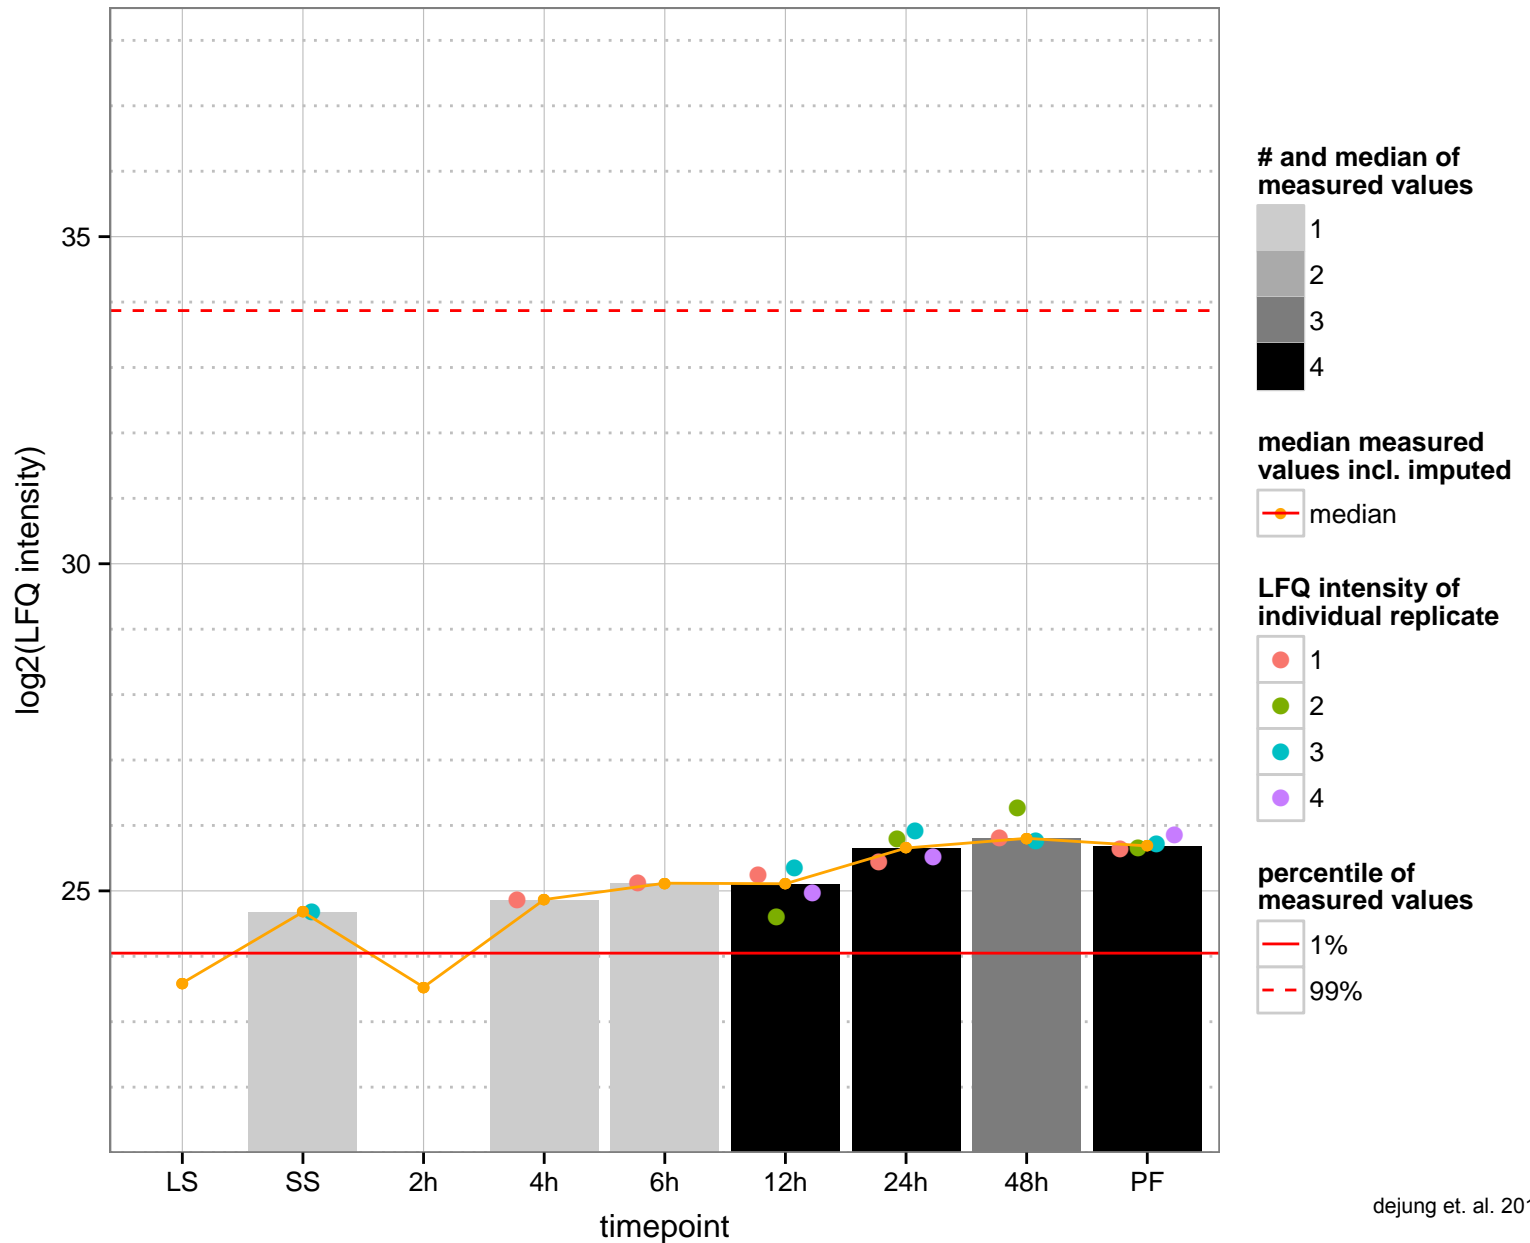

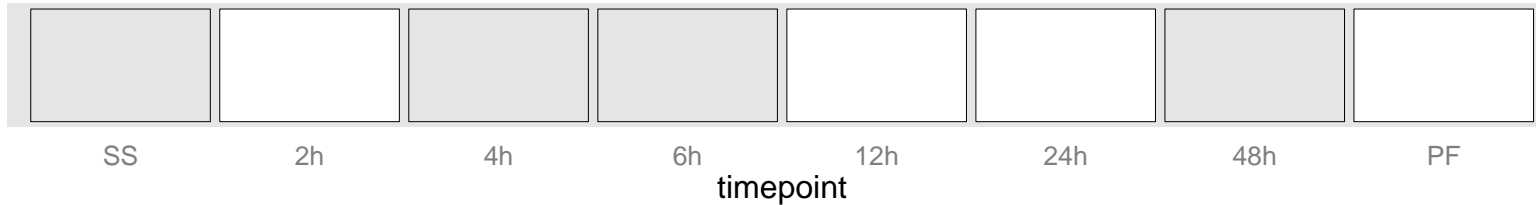

**regulated**  **not regulated**  **significant down**  **significant up**

hypothetical protein, conserved  
 Tb927.10.5000  
 AGOF: null  
 AGOC: null  
 AGOP: null  
 PGOF: null  
 PGO: null  
 PGOP: null

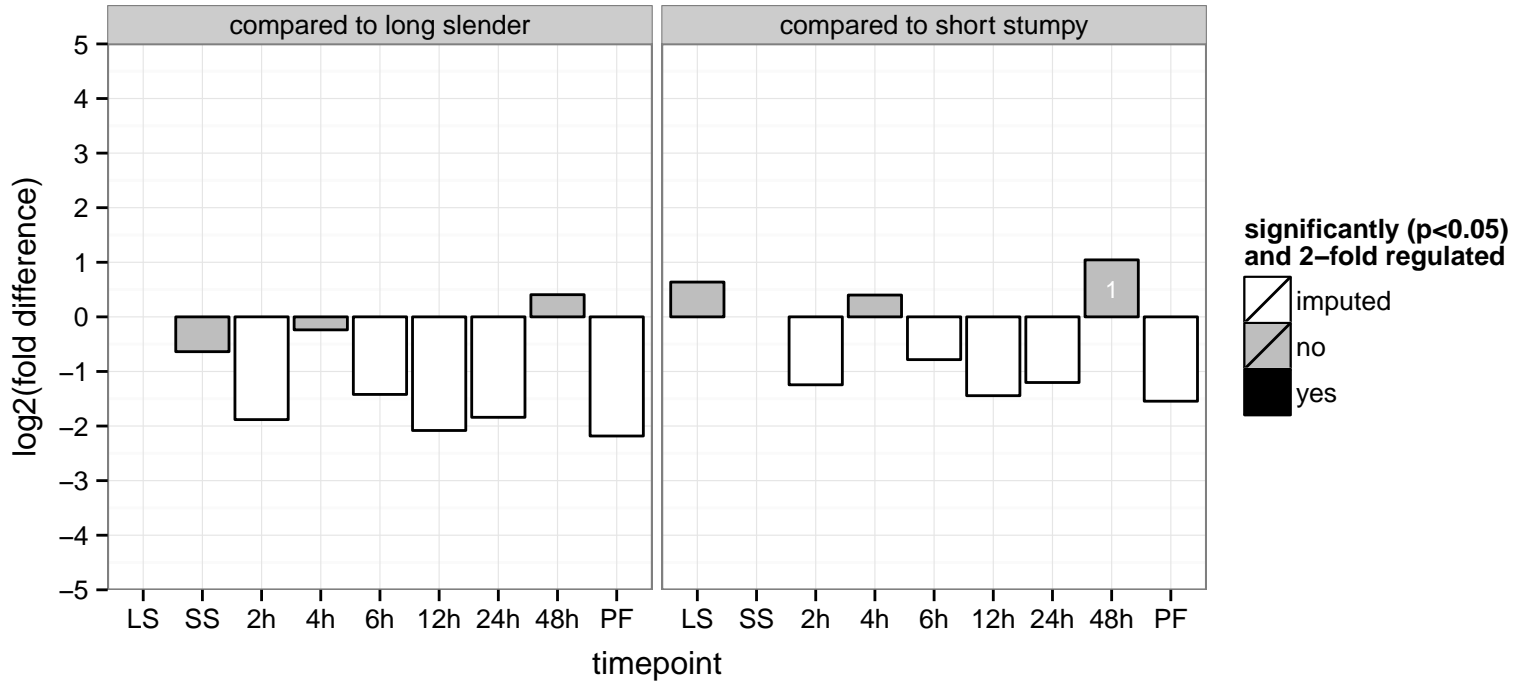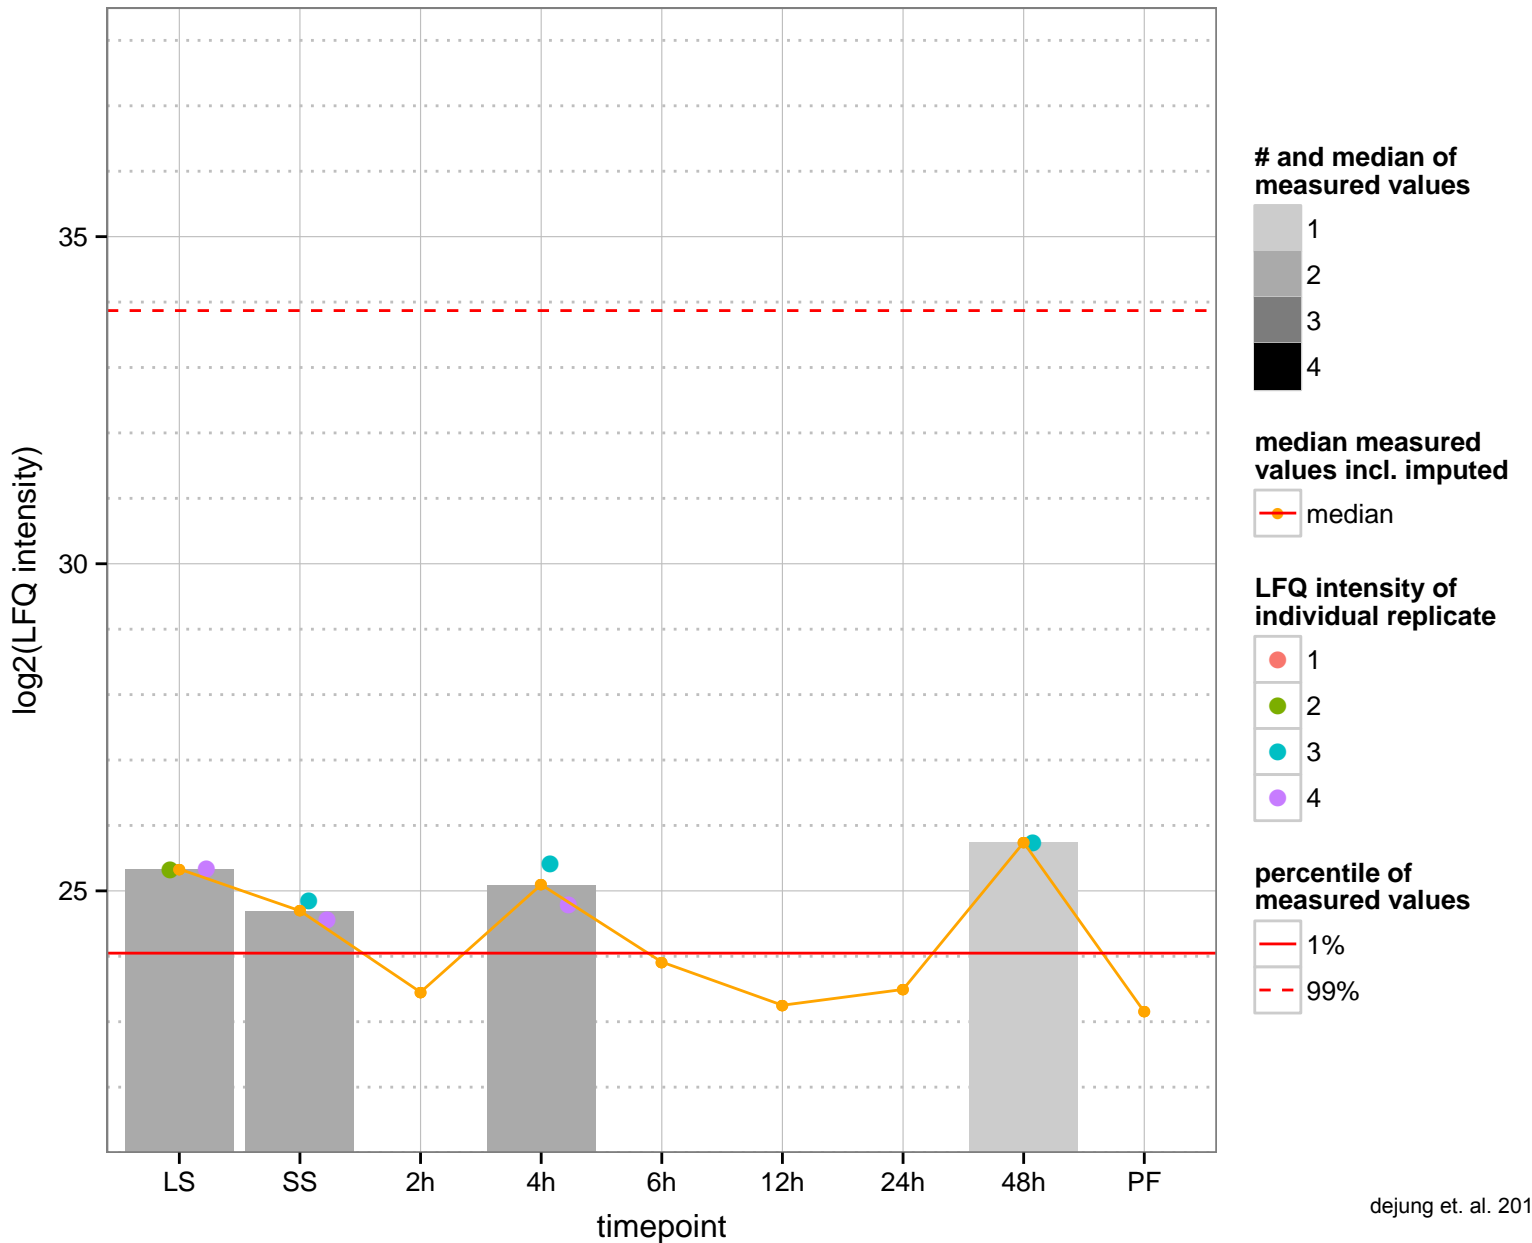



hypothetical protein, conserved  
 Tb927.11.9950  
 AGOF: null  
 AGOC: null  
 AGOP: null  
 PGOF: null  
 PGO: null  
 PGOP: null

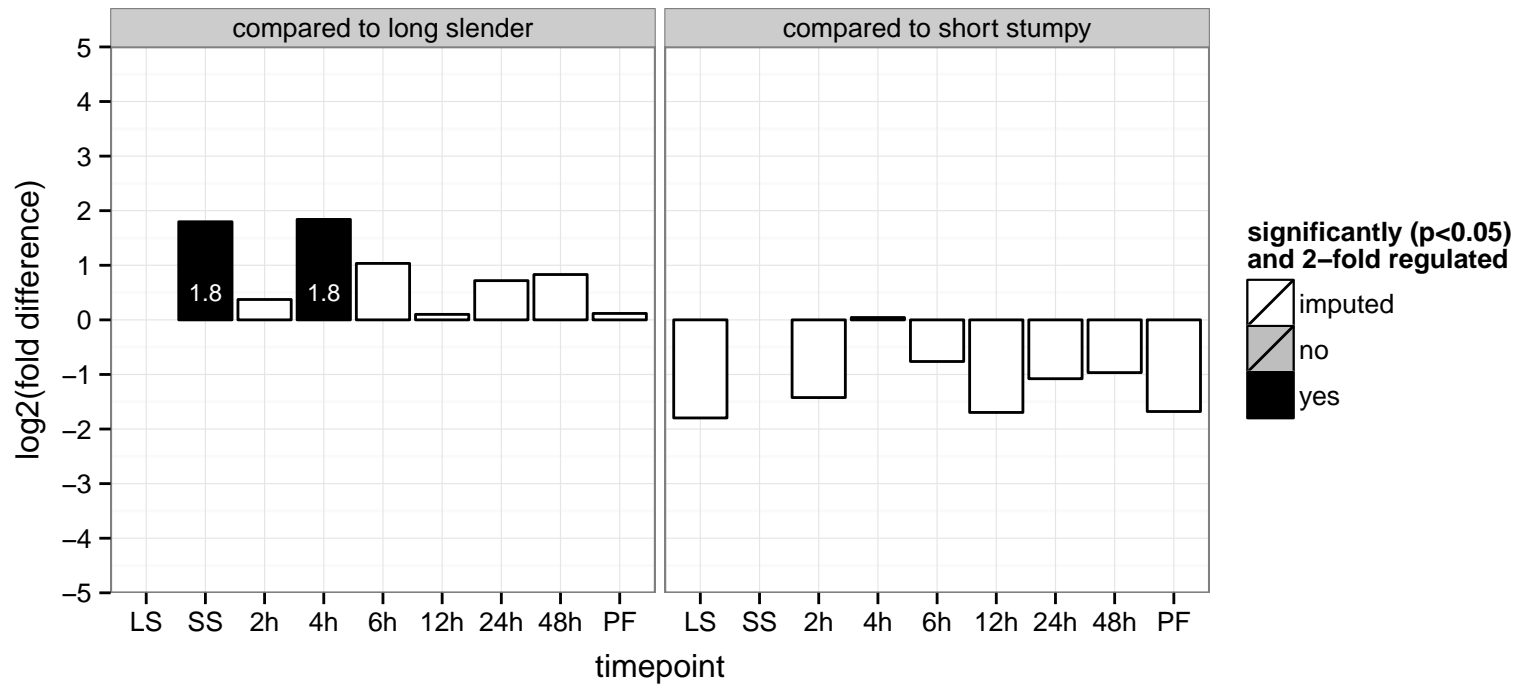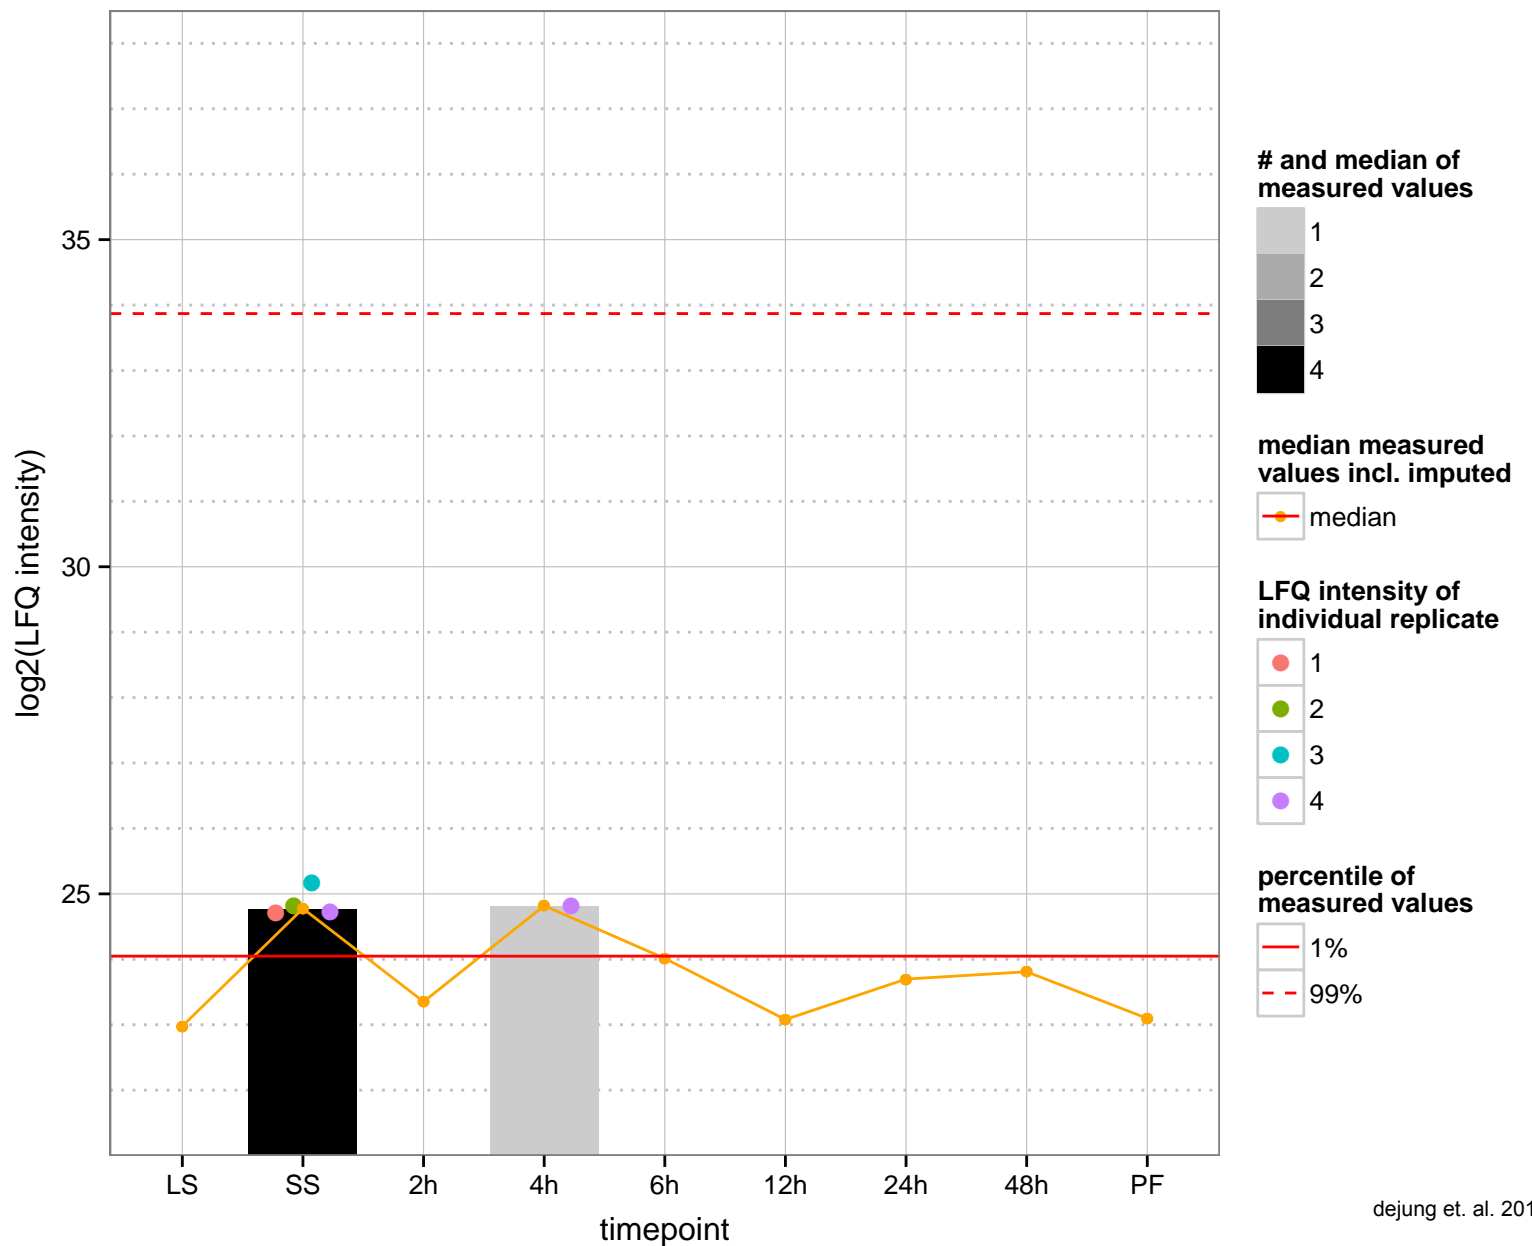

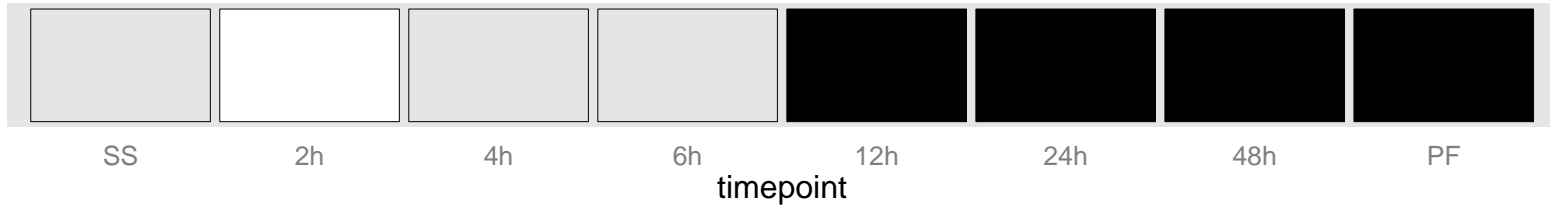

**regulated**  not regulated  significant down  significant up

hypothetical protein, conserved  
 Tb927.11.3860  
 AGOF: null  
 AGOC: mitochondrion  
 AGOP: null  
 PGO: null  
 PGO: null  
 PGO: null

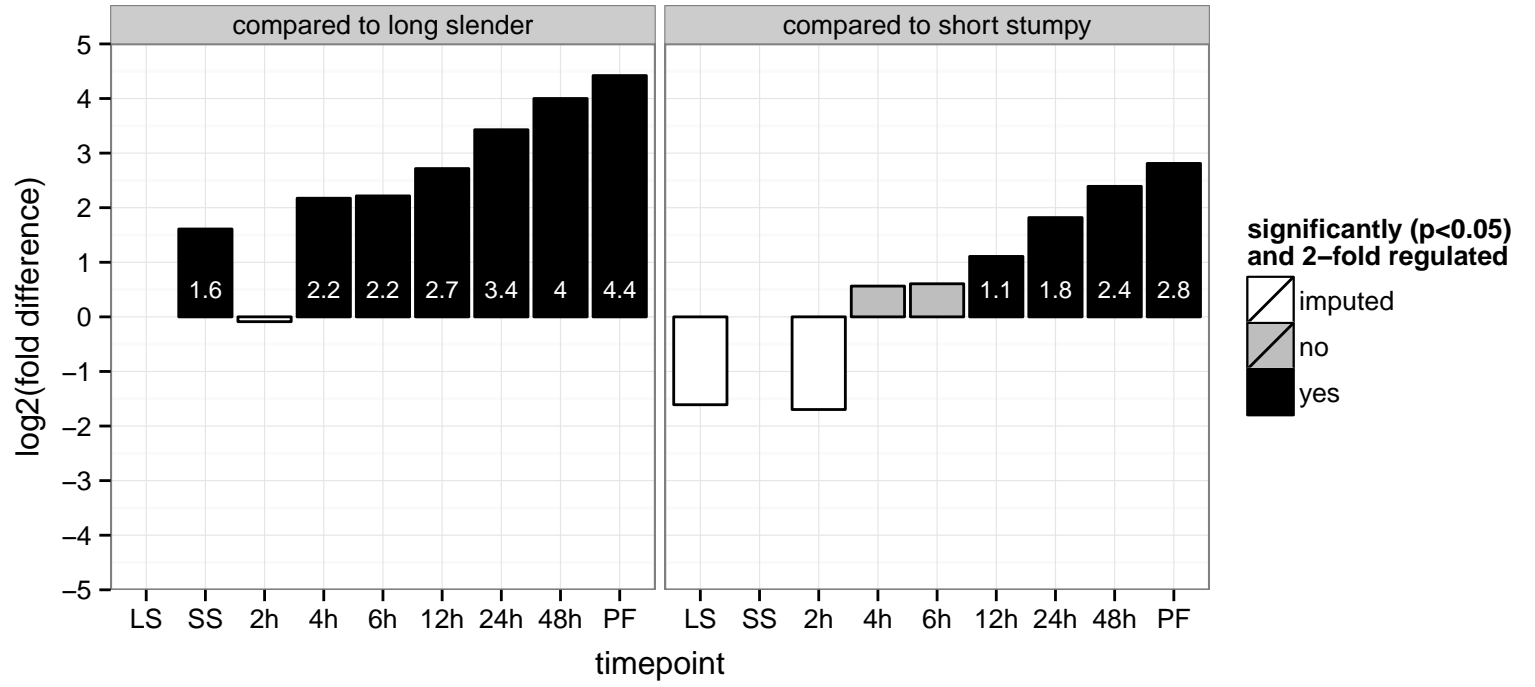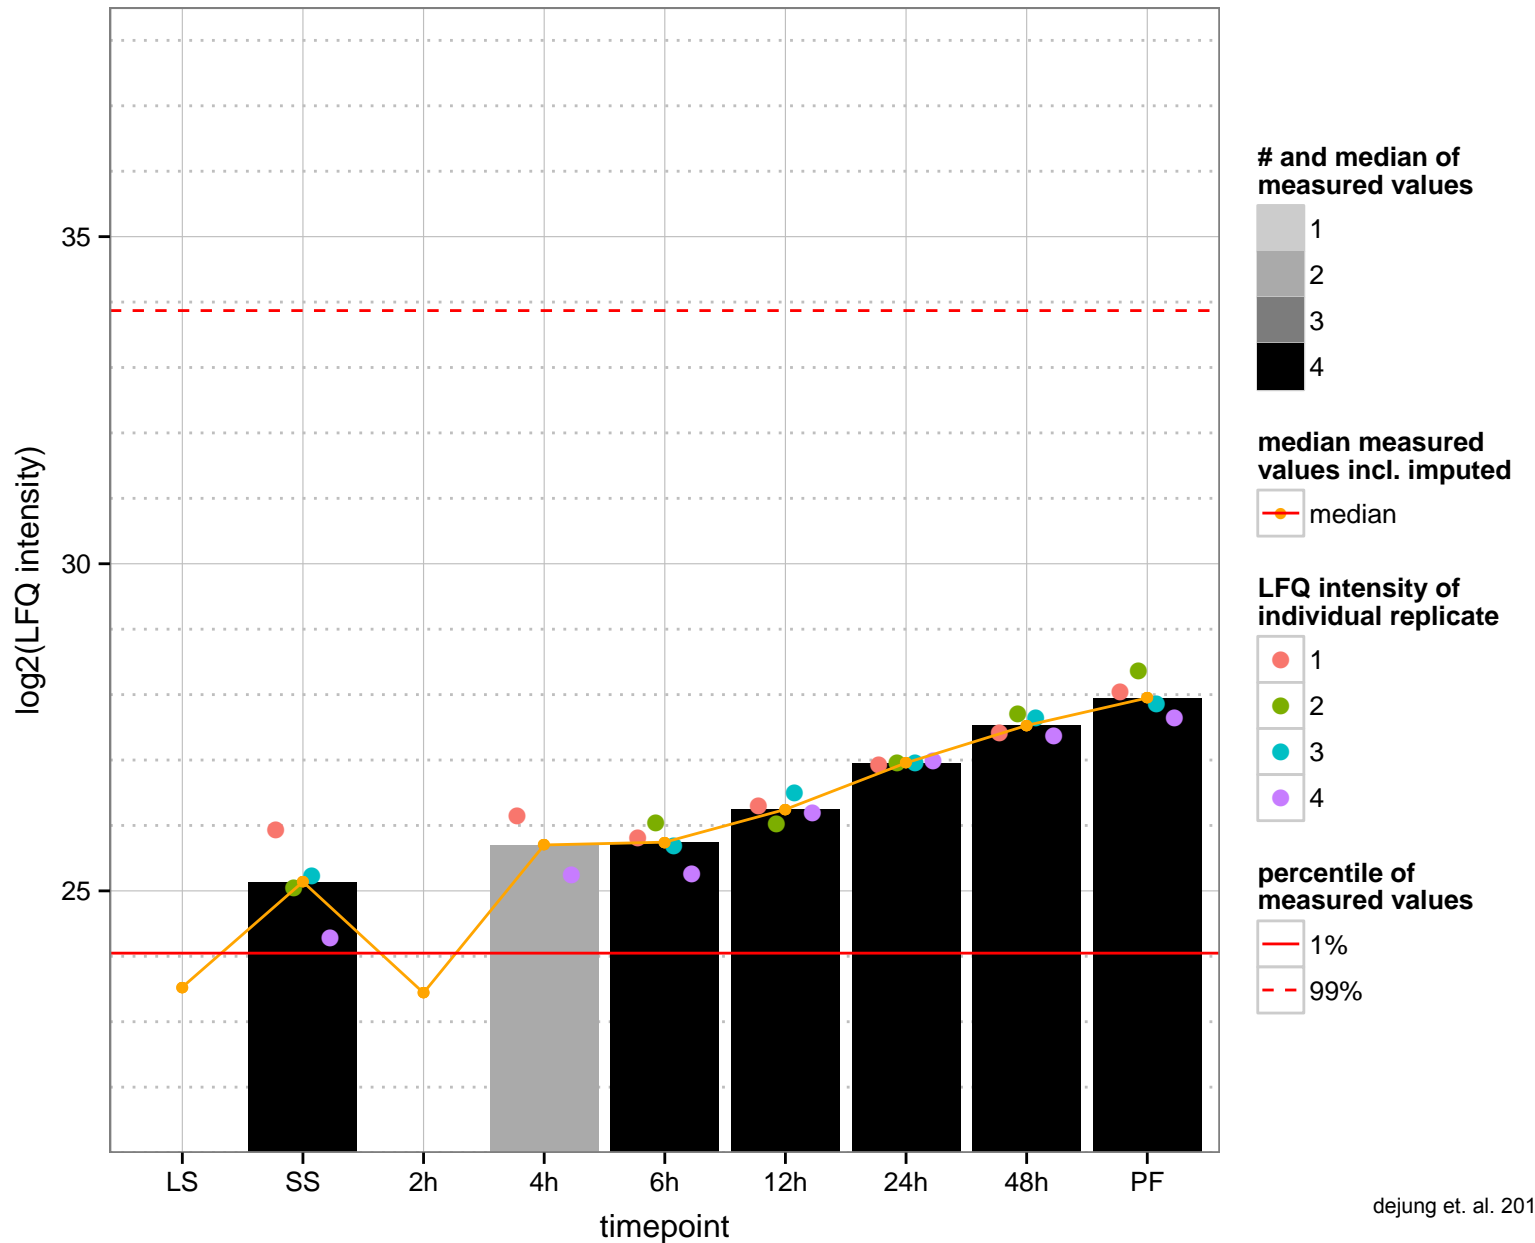

cytochrome P450, putative

Tb927.3.680

AGOF: electron carrier activity, heme binding, iron ion binding, monooxygenase activity

AGOC: null

AGOP: null

PGOF: electron carrier activity, heme binding, iron ion binding, oxidoreductase activity, acting on paired donors, with incorporation

PGOC: null

PGOP: oxidation–reduction process

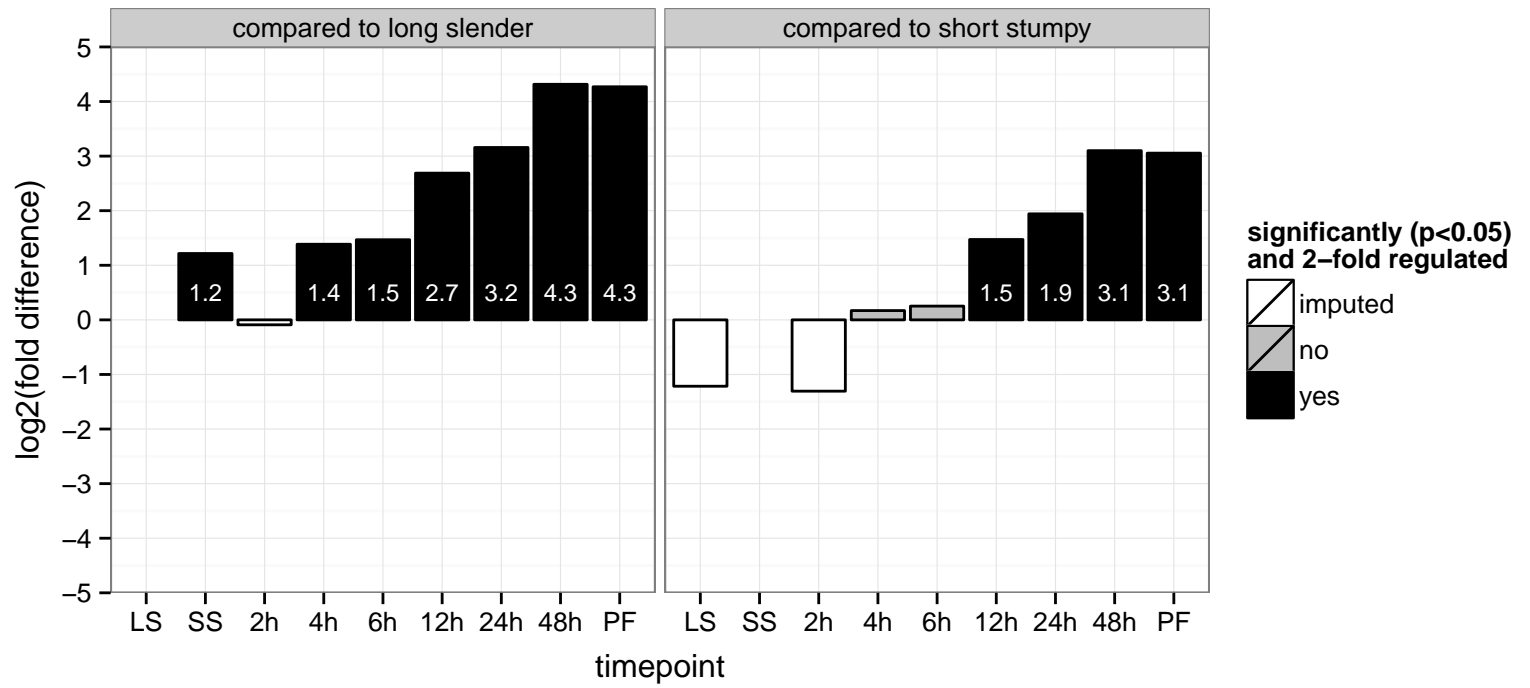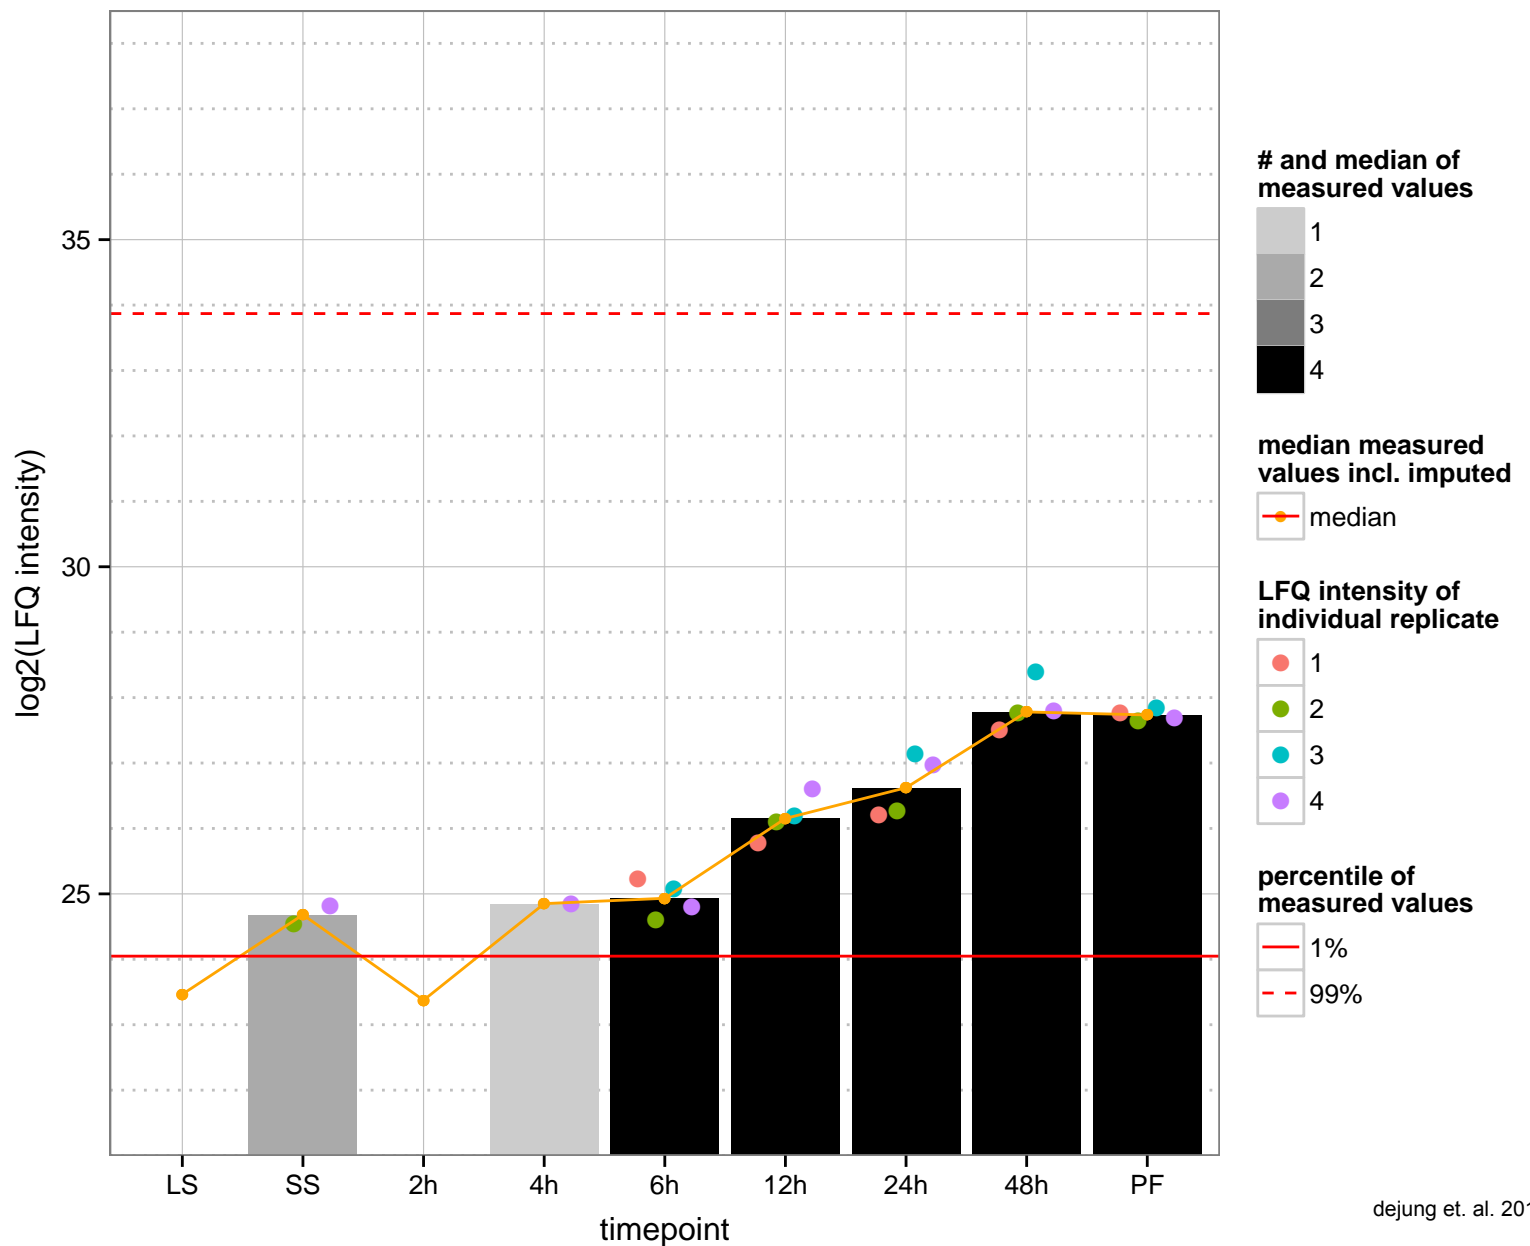

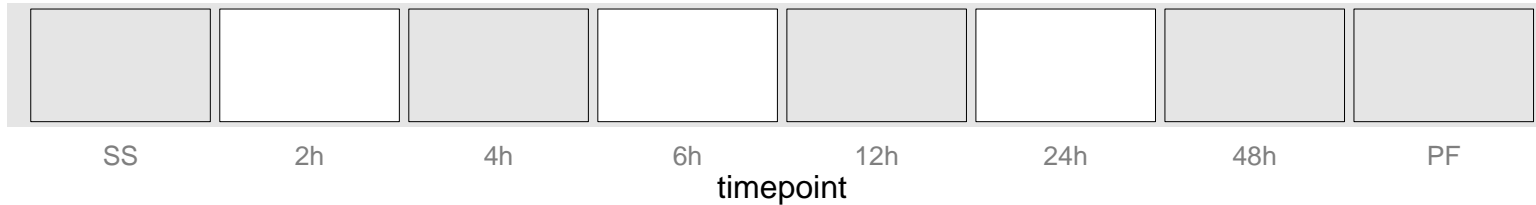

**regulated**  **not regulated**  **significant down**  **significant up**

hypothetical protein, conserved  
 Tb927.11.12720;Tb11.v5.0433  
 AGOF: null  
 AGOC: null  
 AGOP: null  
 PGOF: null  
 PGO: null  
 PGOP: null

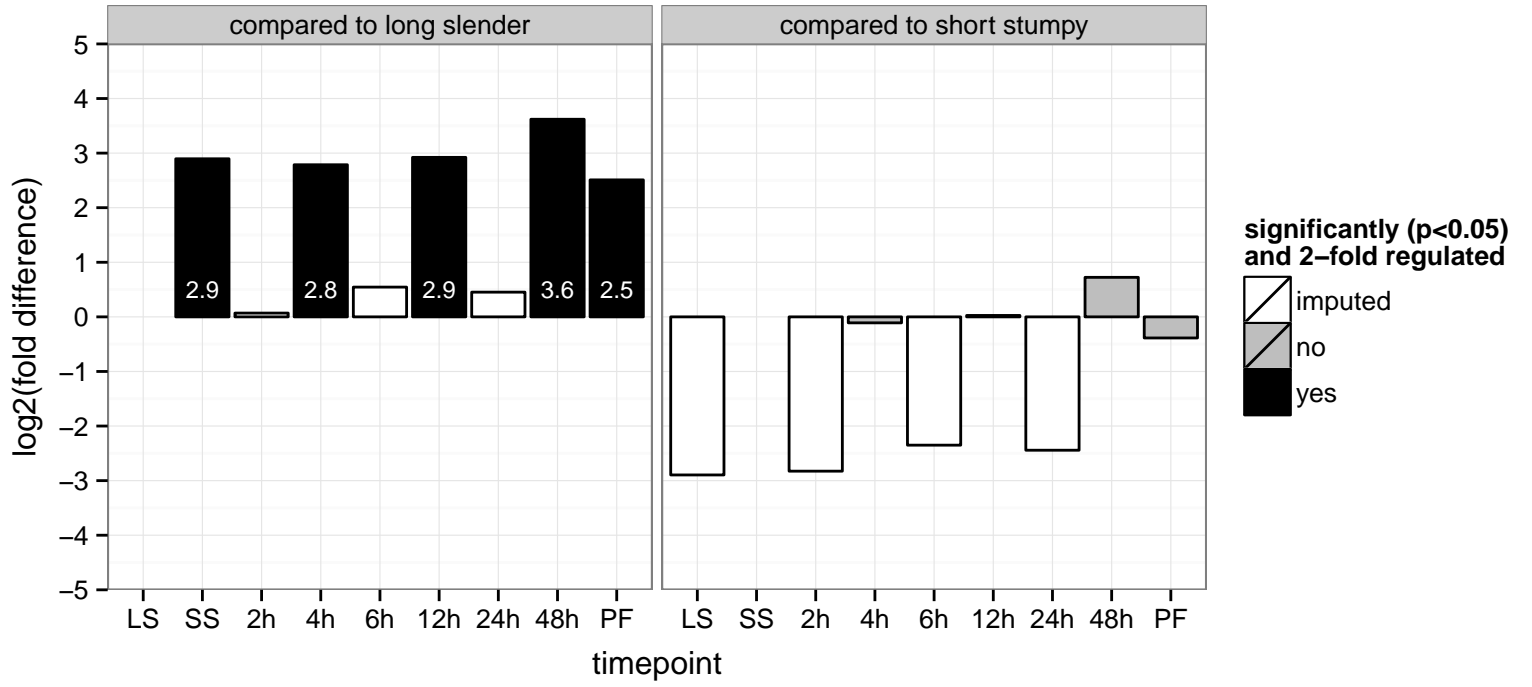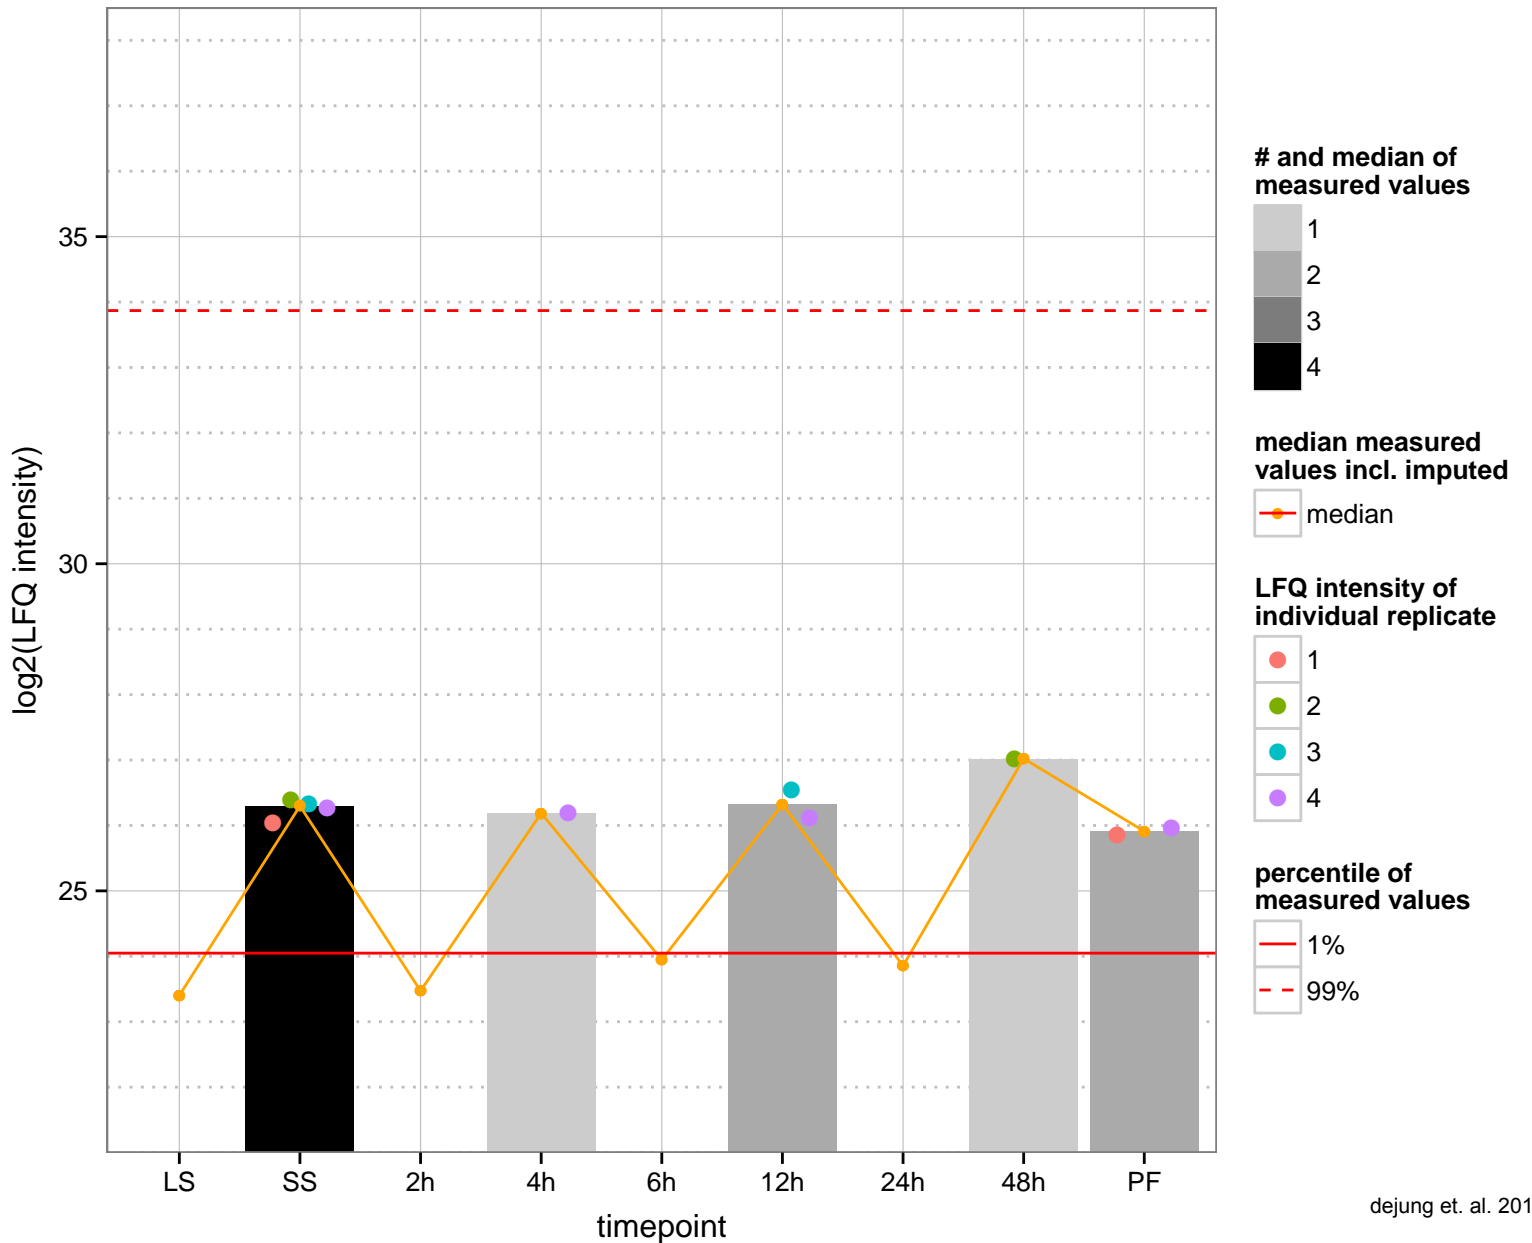

hypothetical protein, conserved  
 Tb927.4.2920  
 AGOF: null  
 AGOC: null  
 AGOP: null  
 PGO: null  
 PGOC: null  
 PGOP: null

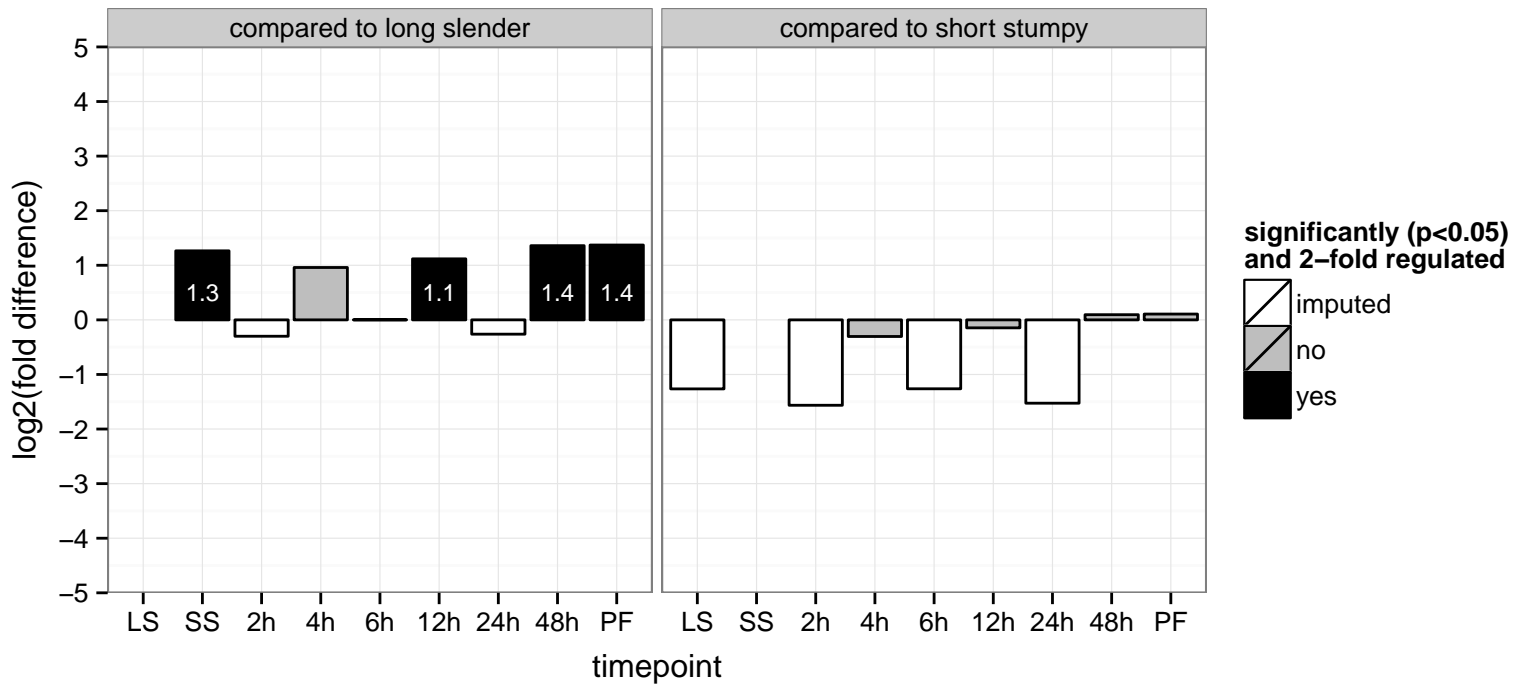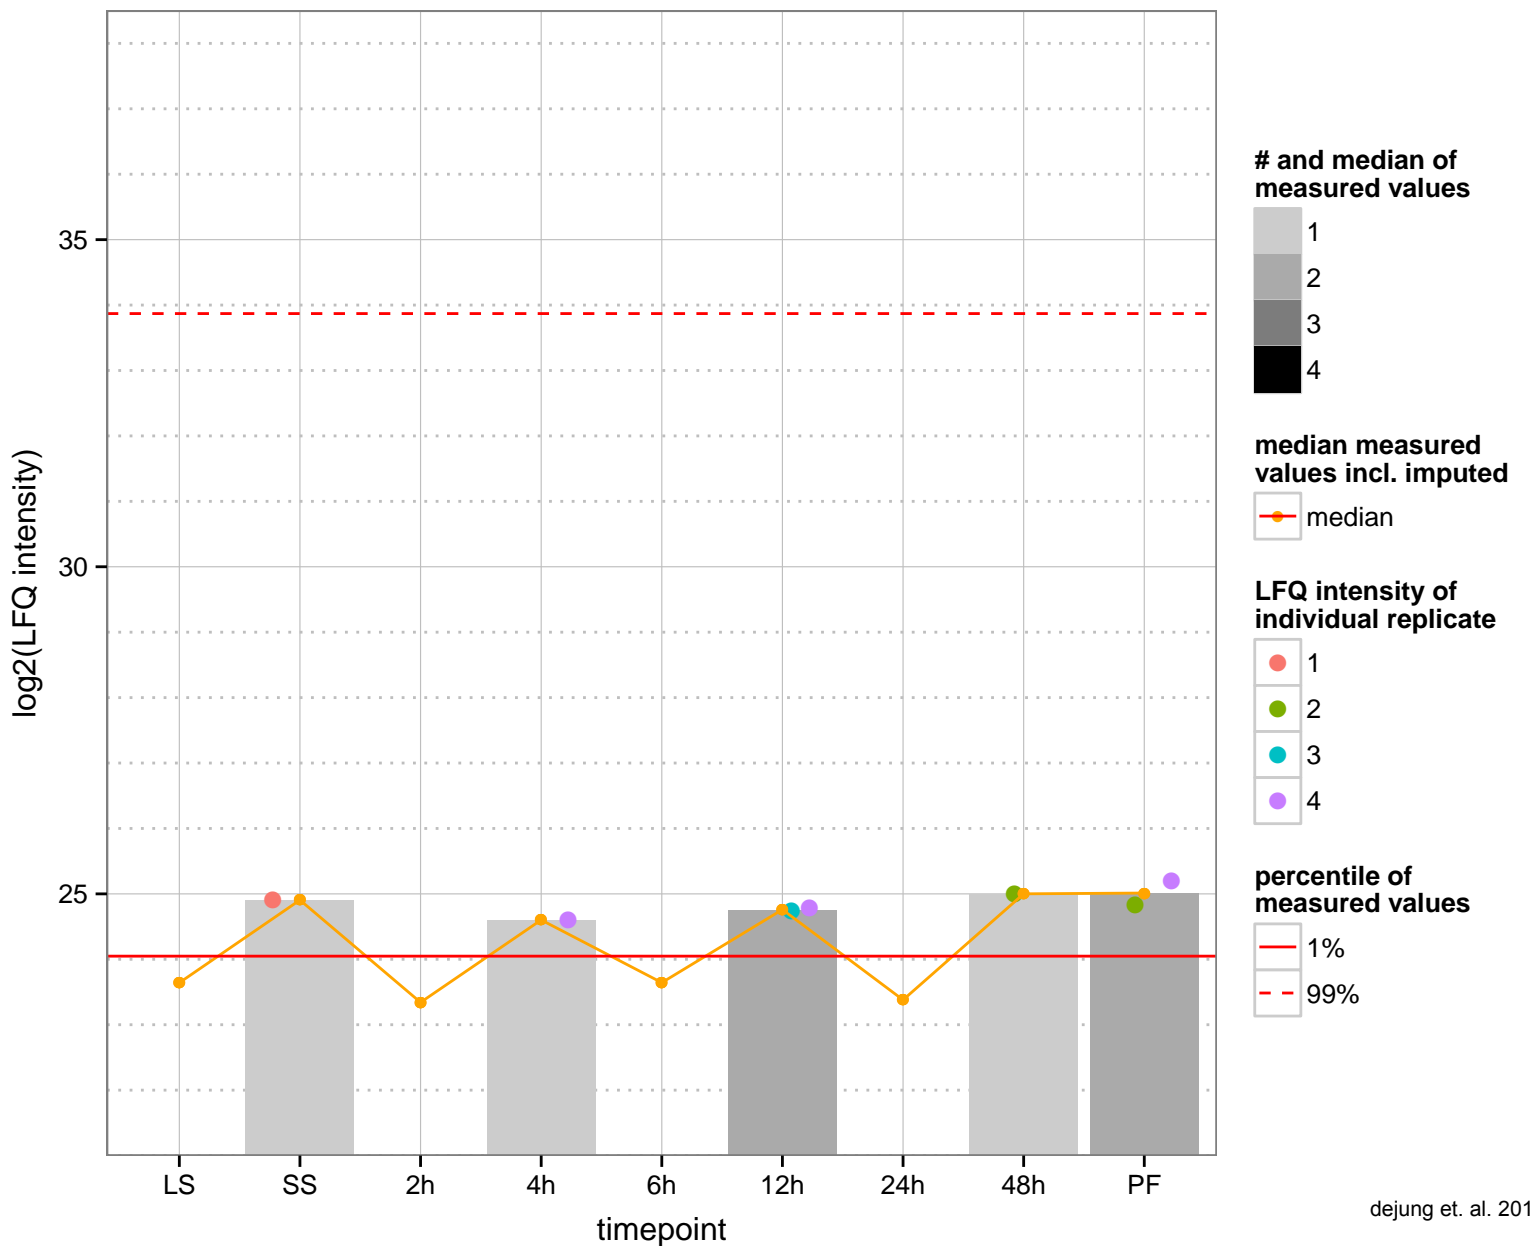

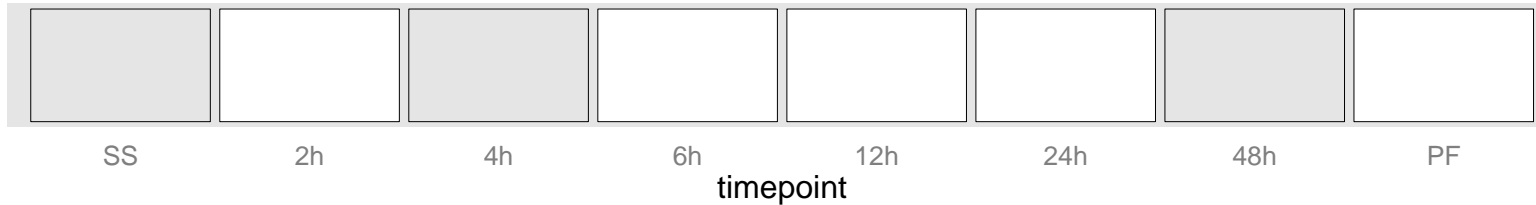

**regulated**  **not regulated**  **significant down**  **significant up**



hypothetical protein, conserved  
 Tb927.3.5190  
 AGOF: null  
 AGOC: null  
 AGOP: null  
 PGO: null  
 PGOC: null  
 PGOP: null

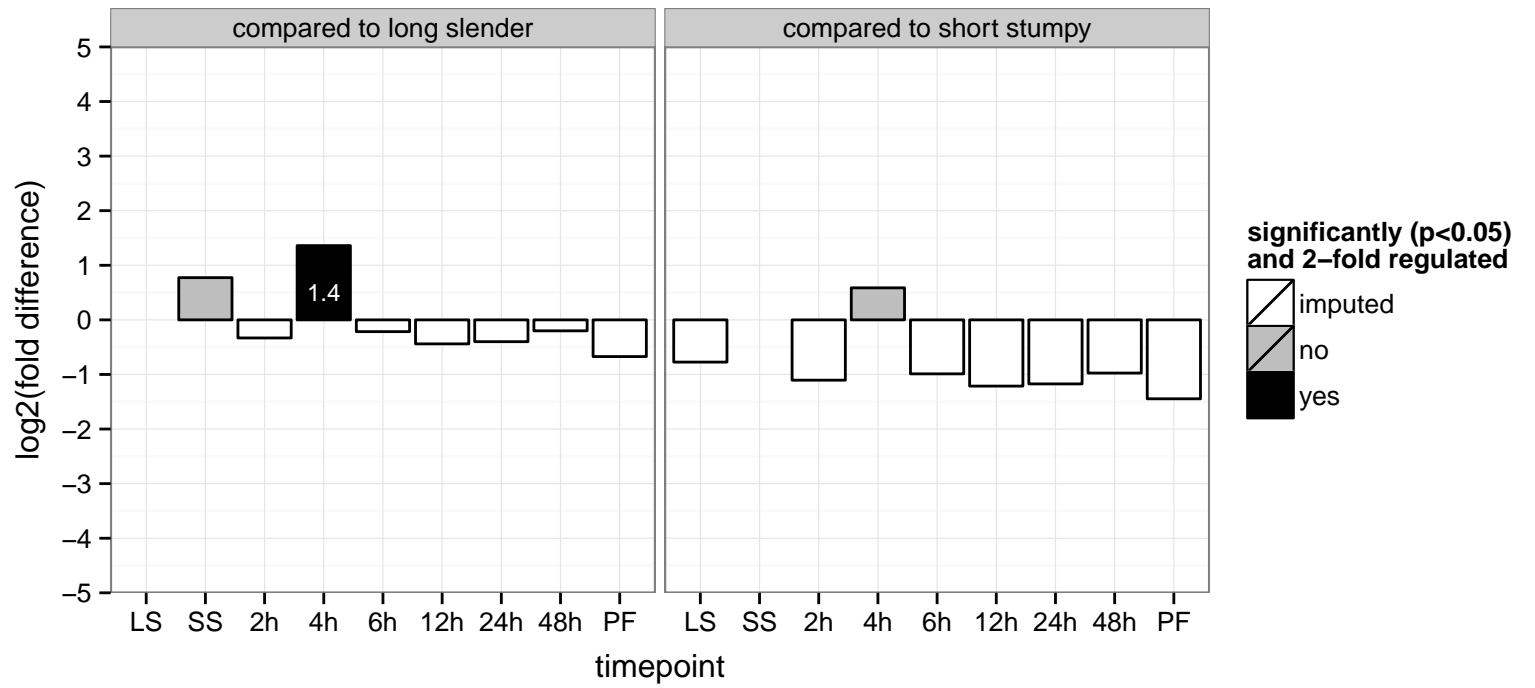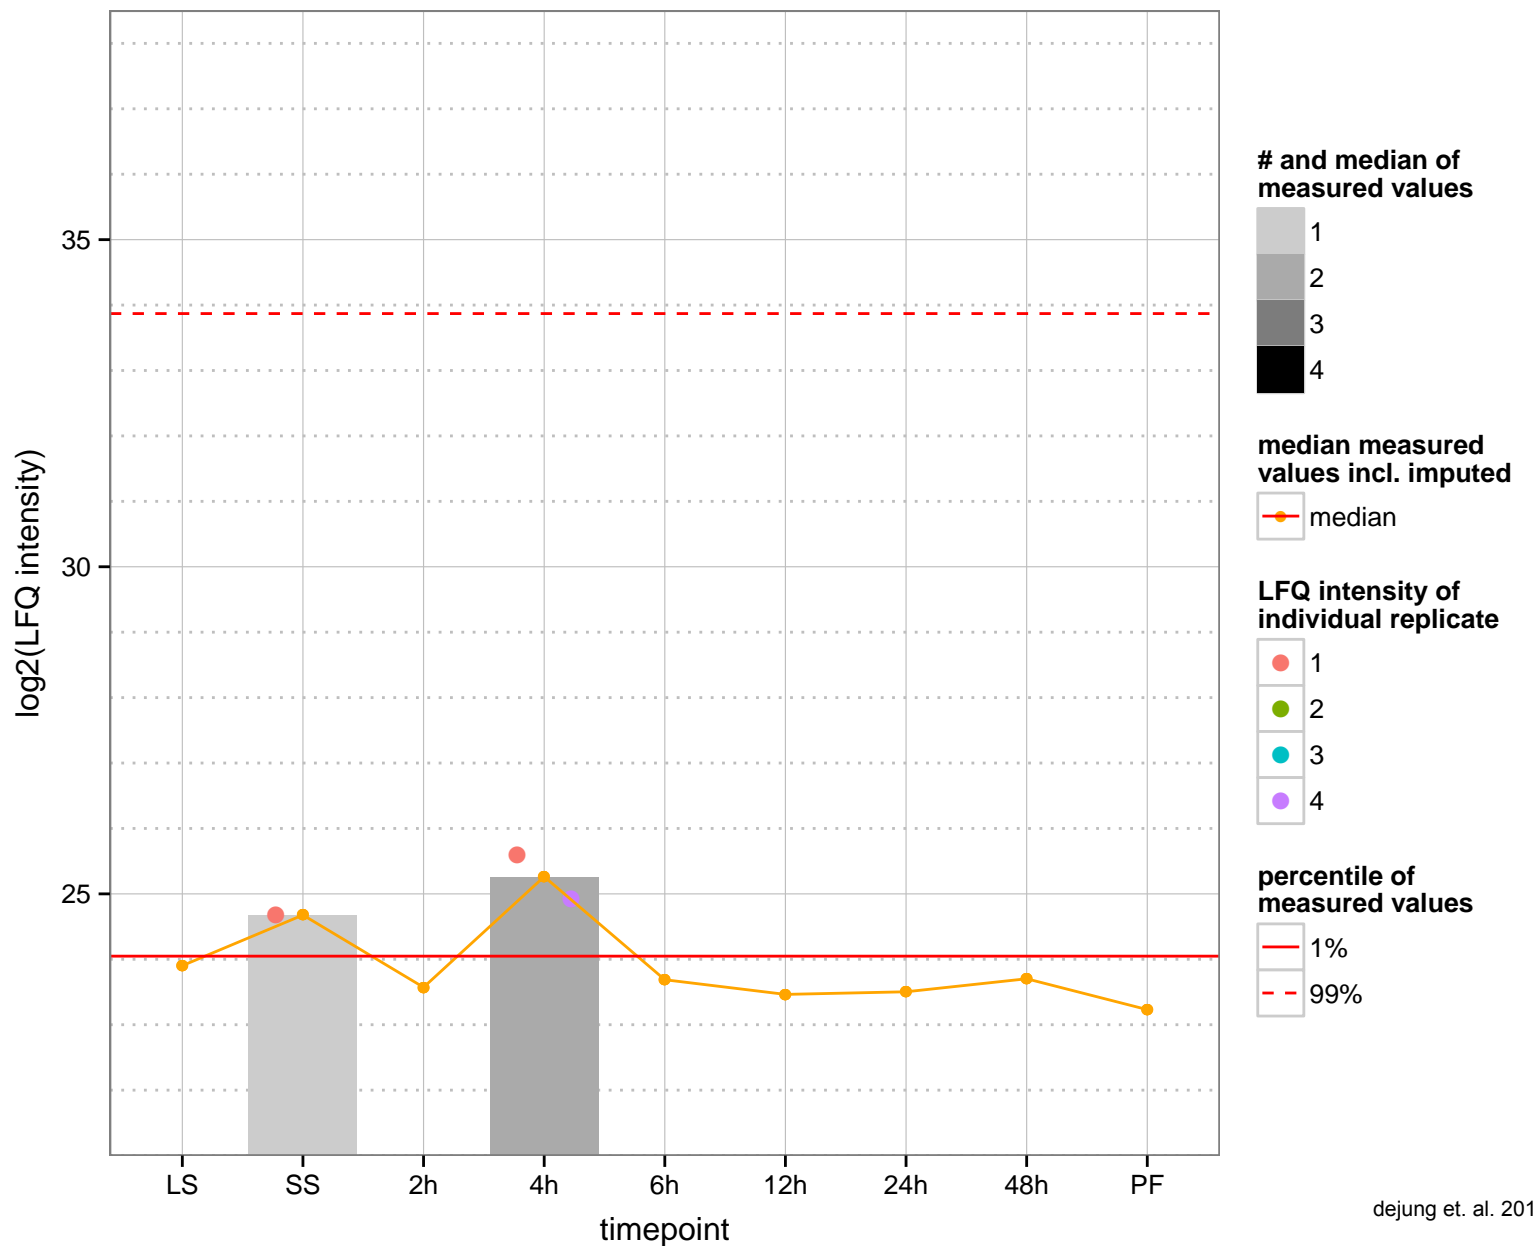

hypothetical protein, conserved  
 Tb927.8.3930  
 AGOF: null  
 AGOC: null  
 AGOP: null  
 PGOF: null  
 PGO: null  
 PGOP: null

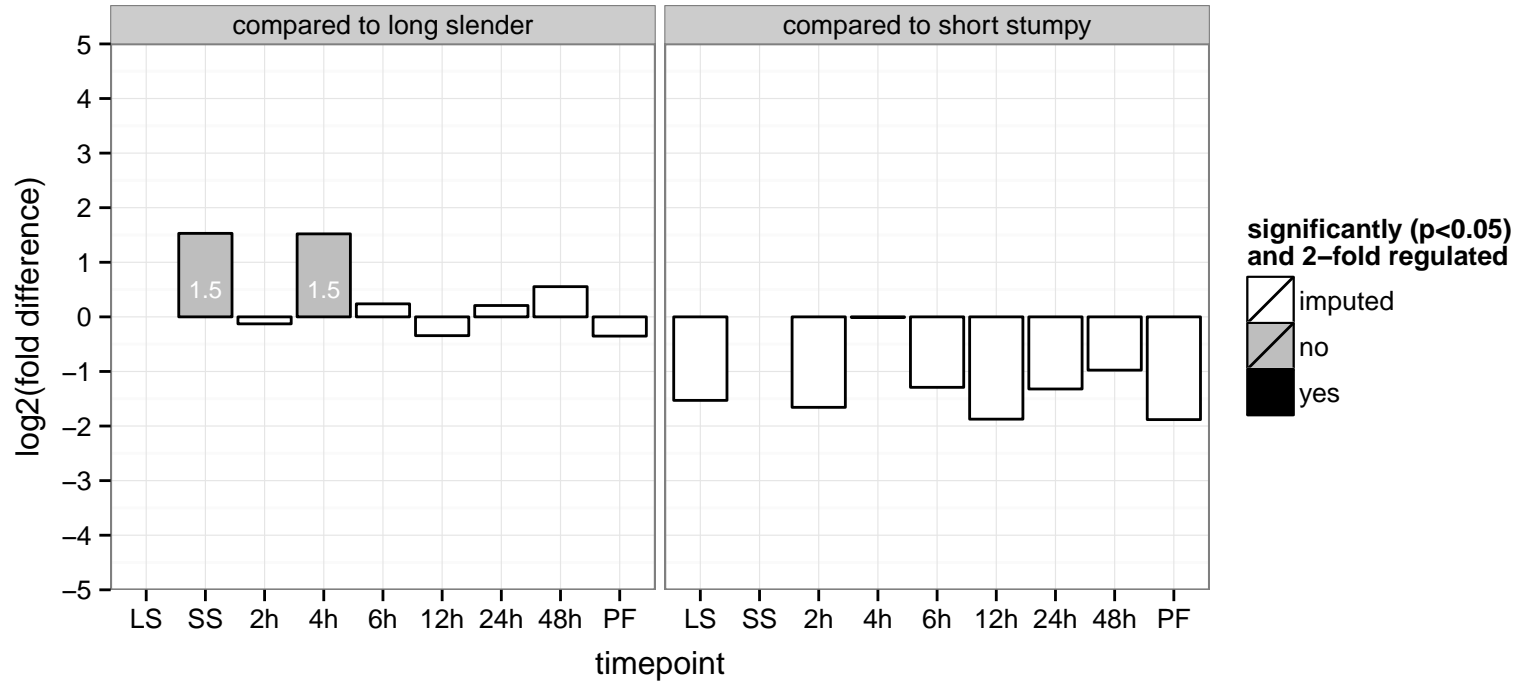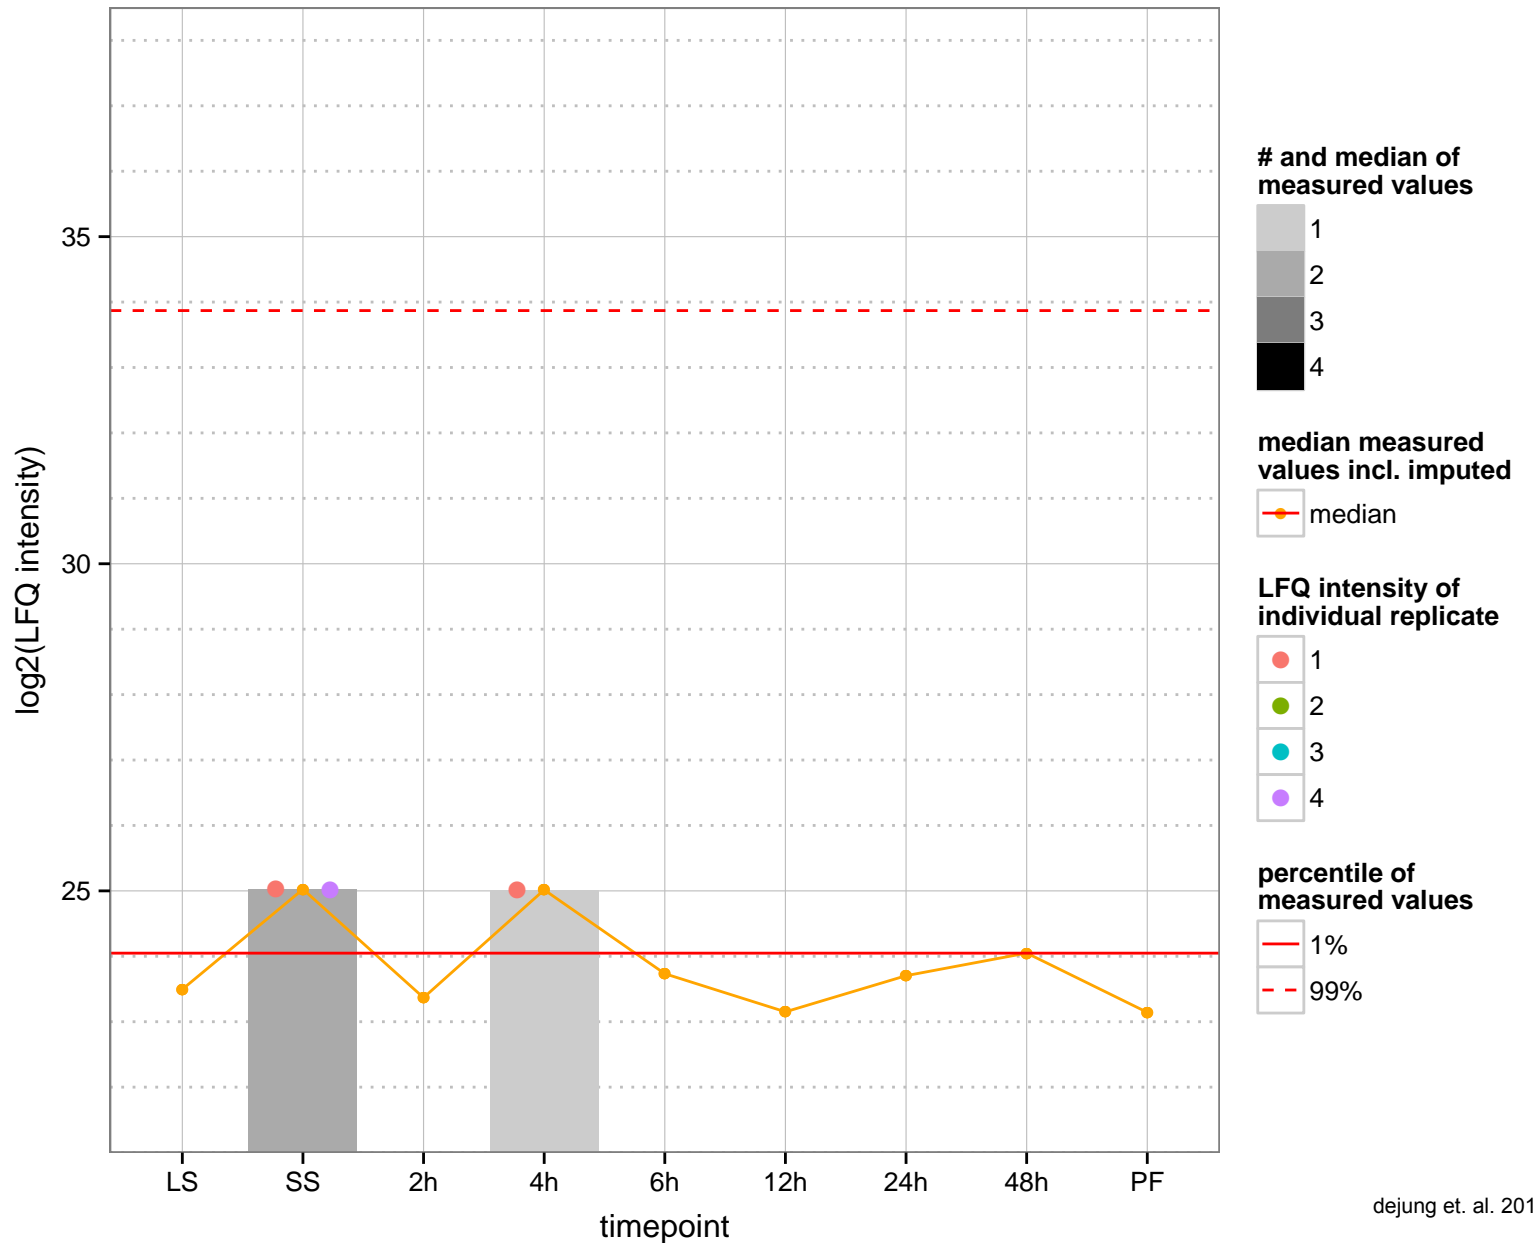

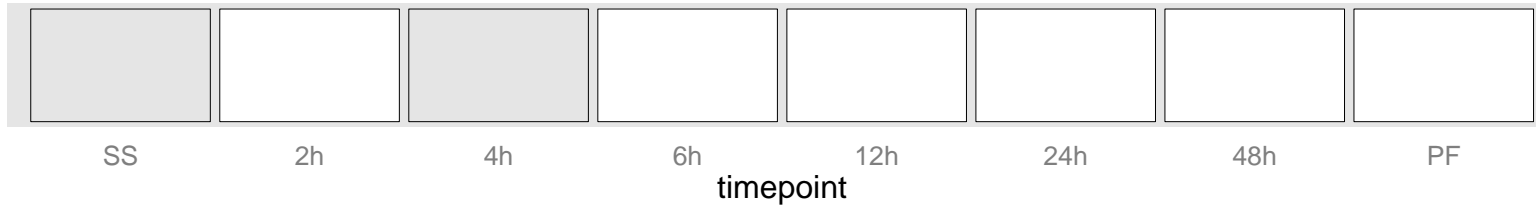

**regulated**  **not regulated**  **significant down**  **significant up**

conserved protein, unknown function  
 Tb927.1.1500  
 AGOF: null  
 AGOC: null  
 AGOP: null  
 PGO: null  
 PGOC: null  
 PGOP: null

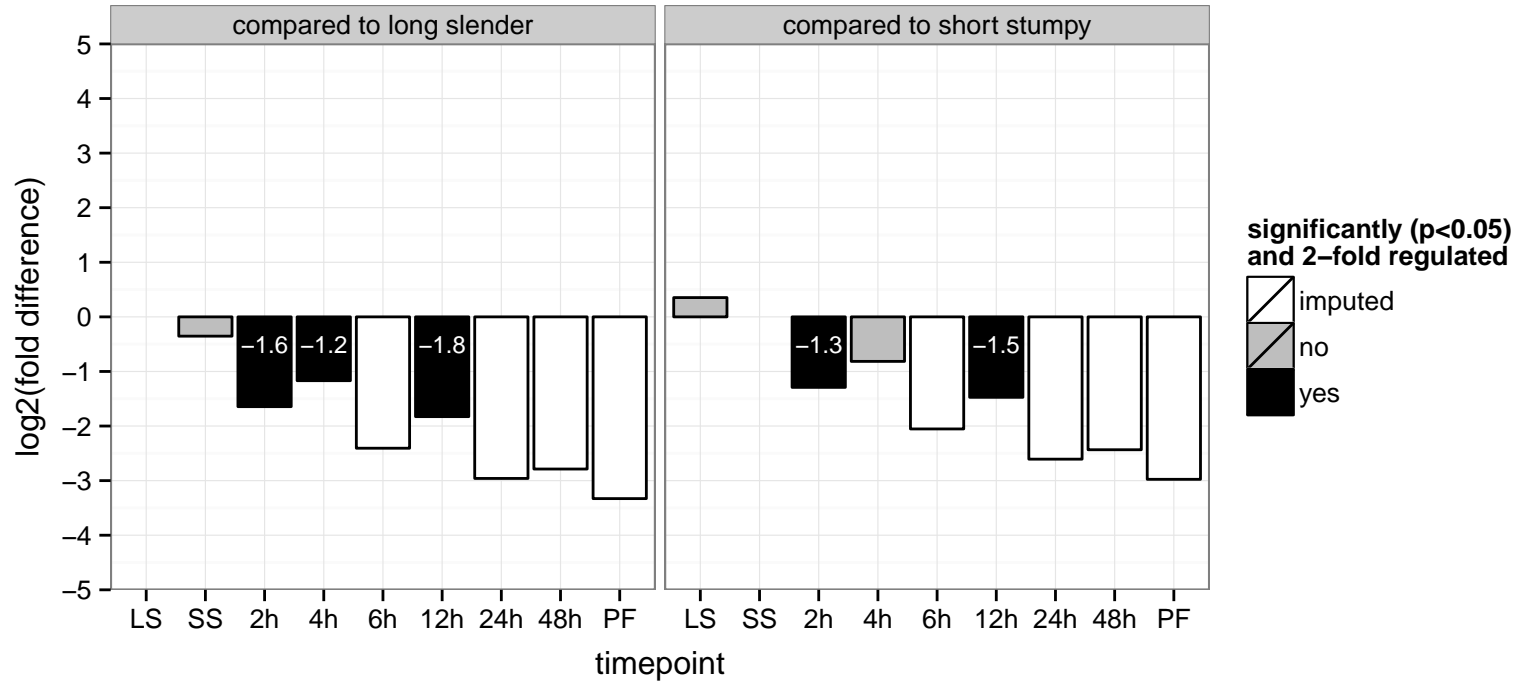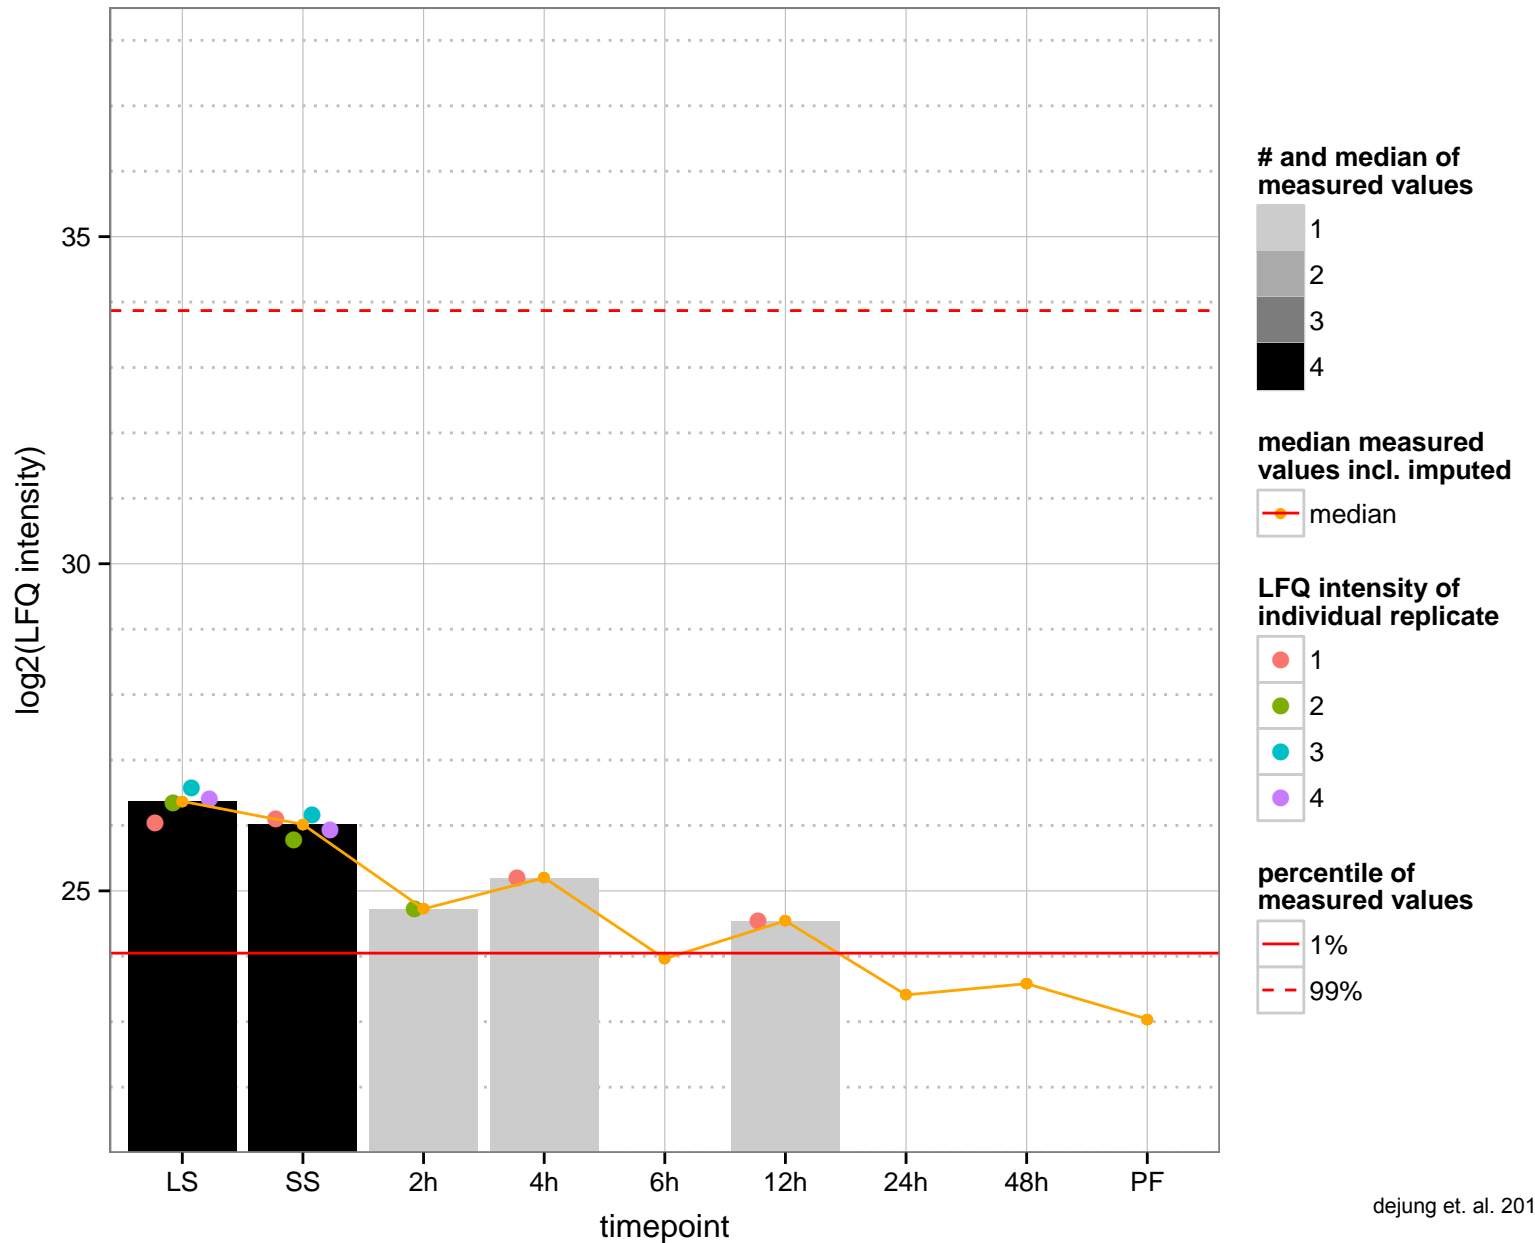

hypothetical PIN domain-containing protein  
 Tb927.1.1820  
 AGOF: RNA binding  
 AGOC: null  
 AGOP: null  
 PGO: null  
 PGOC: null  
 PGOP: null

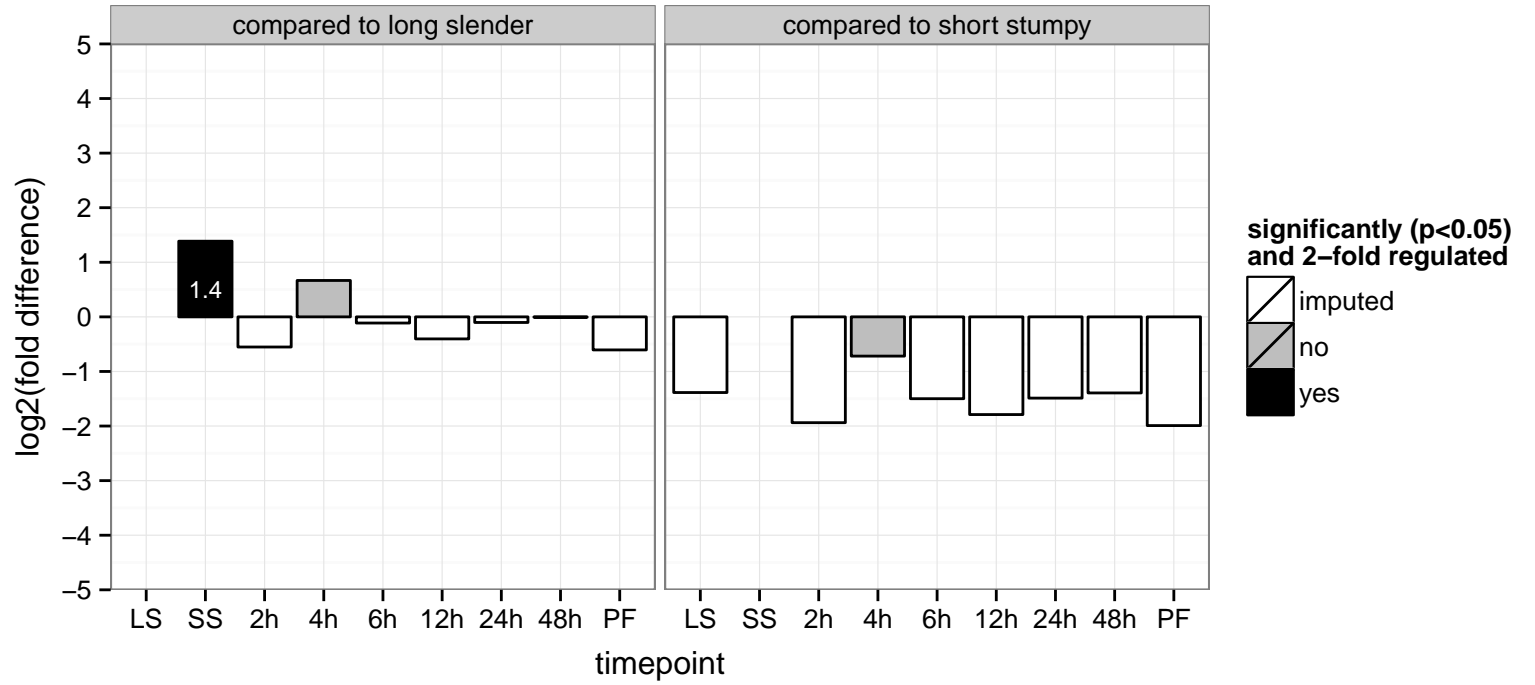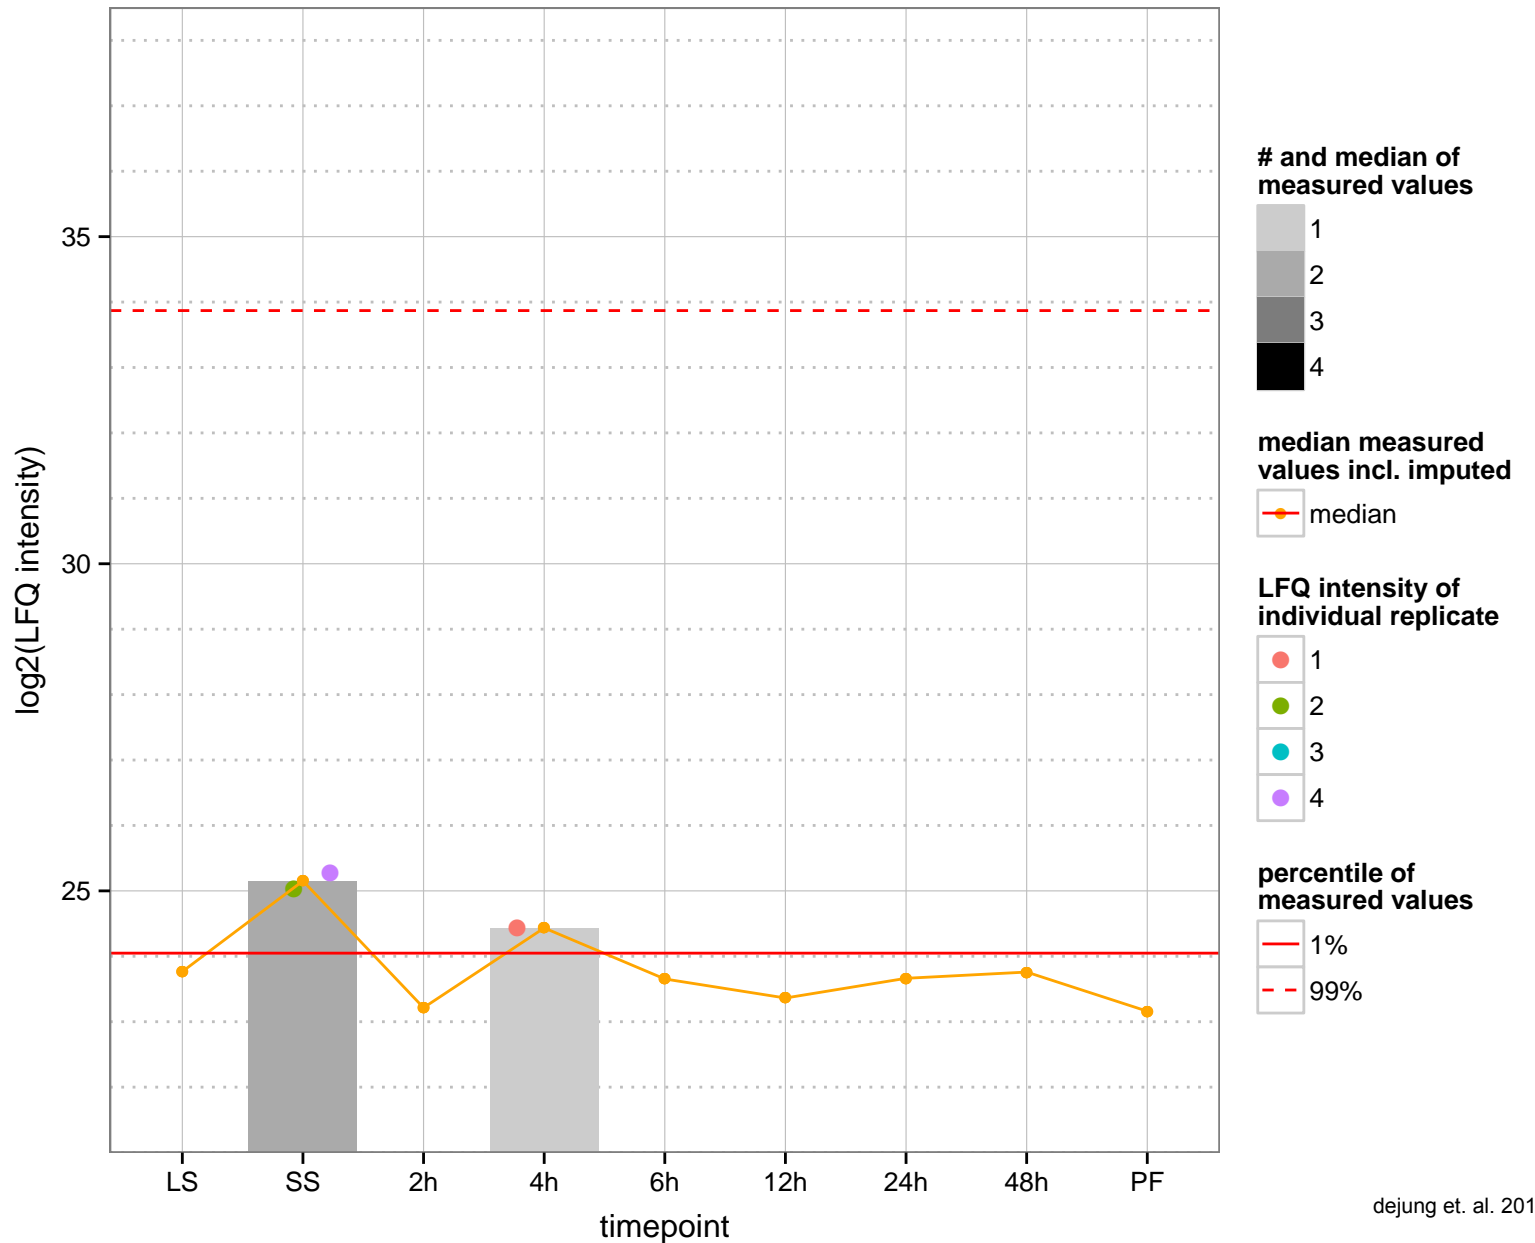

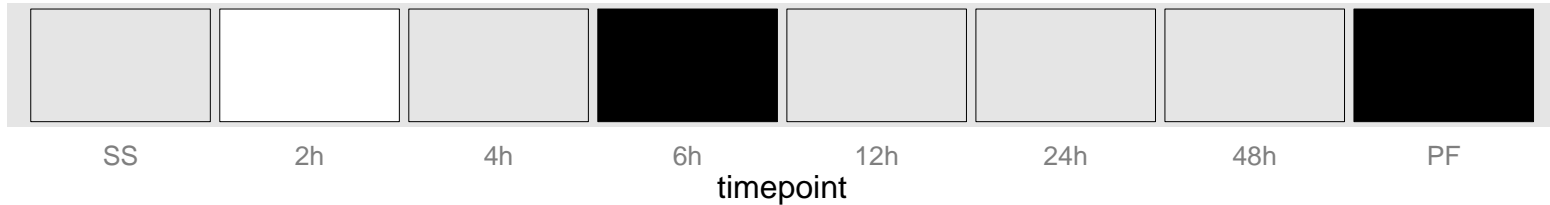

**regulated**  **not regulated**  **significant down**  **significant up**

zinc finger protein family member, putative (FIP1)  
 Tb927.5.4320  
 AGOF: RNA binding, zinc ion binding  
 AGOC: null  
 AGOP: null  
 PGOF: nucleic acid binding, zinc ion binding  
 PGO: null  
 PGOP: null

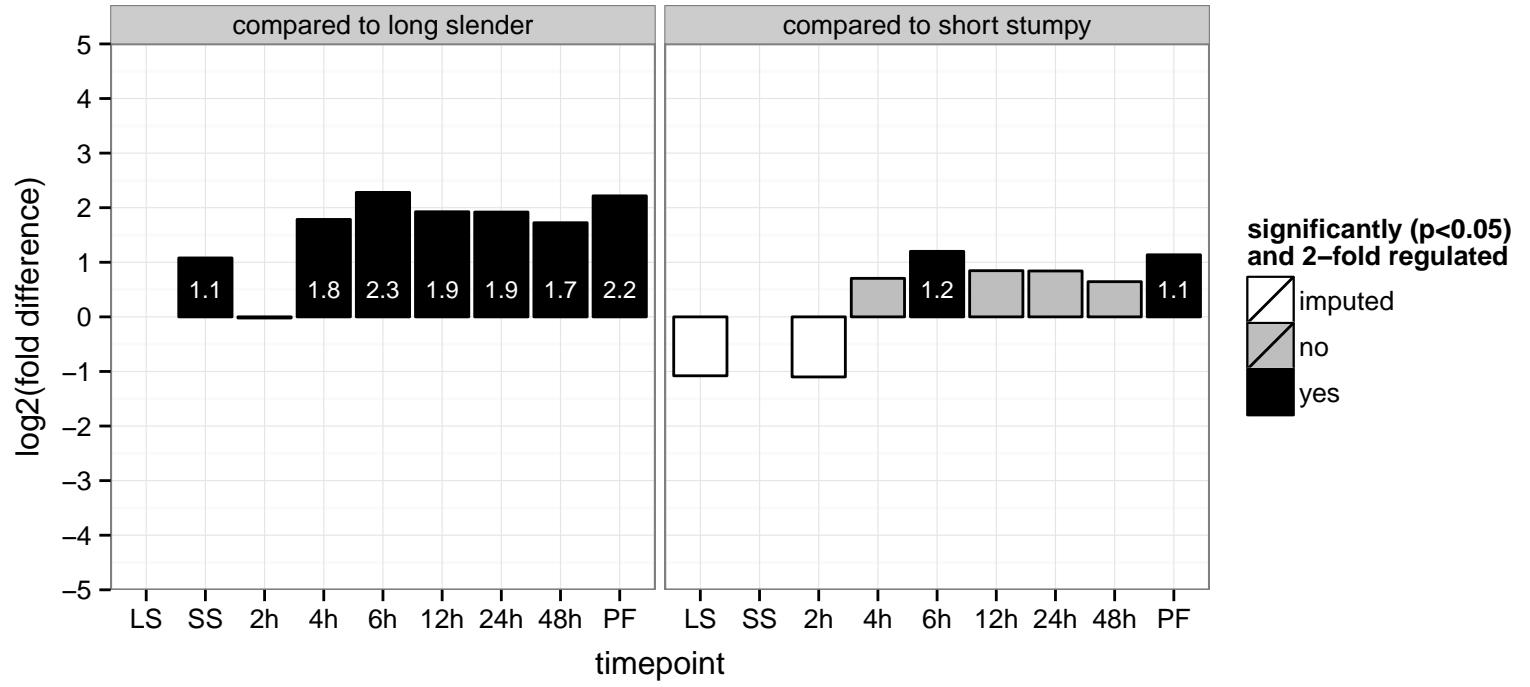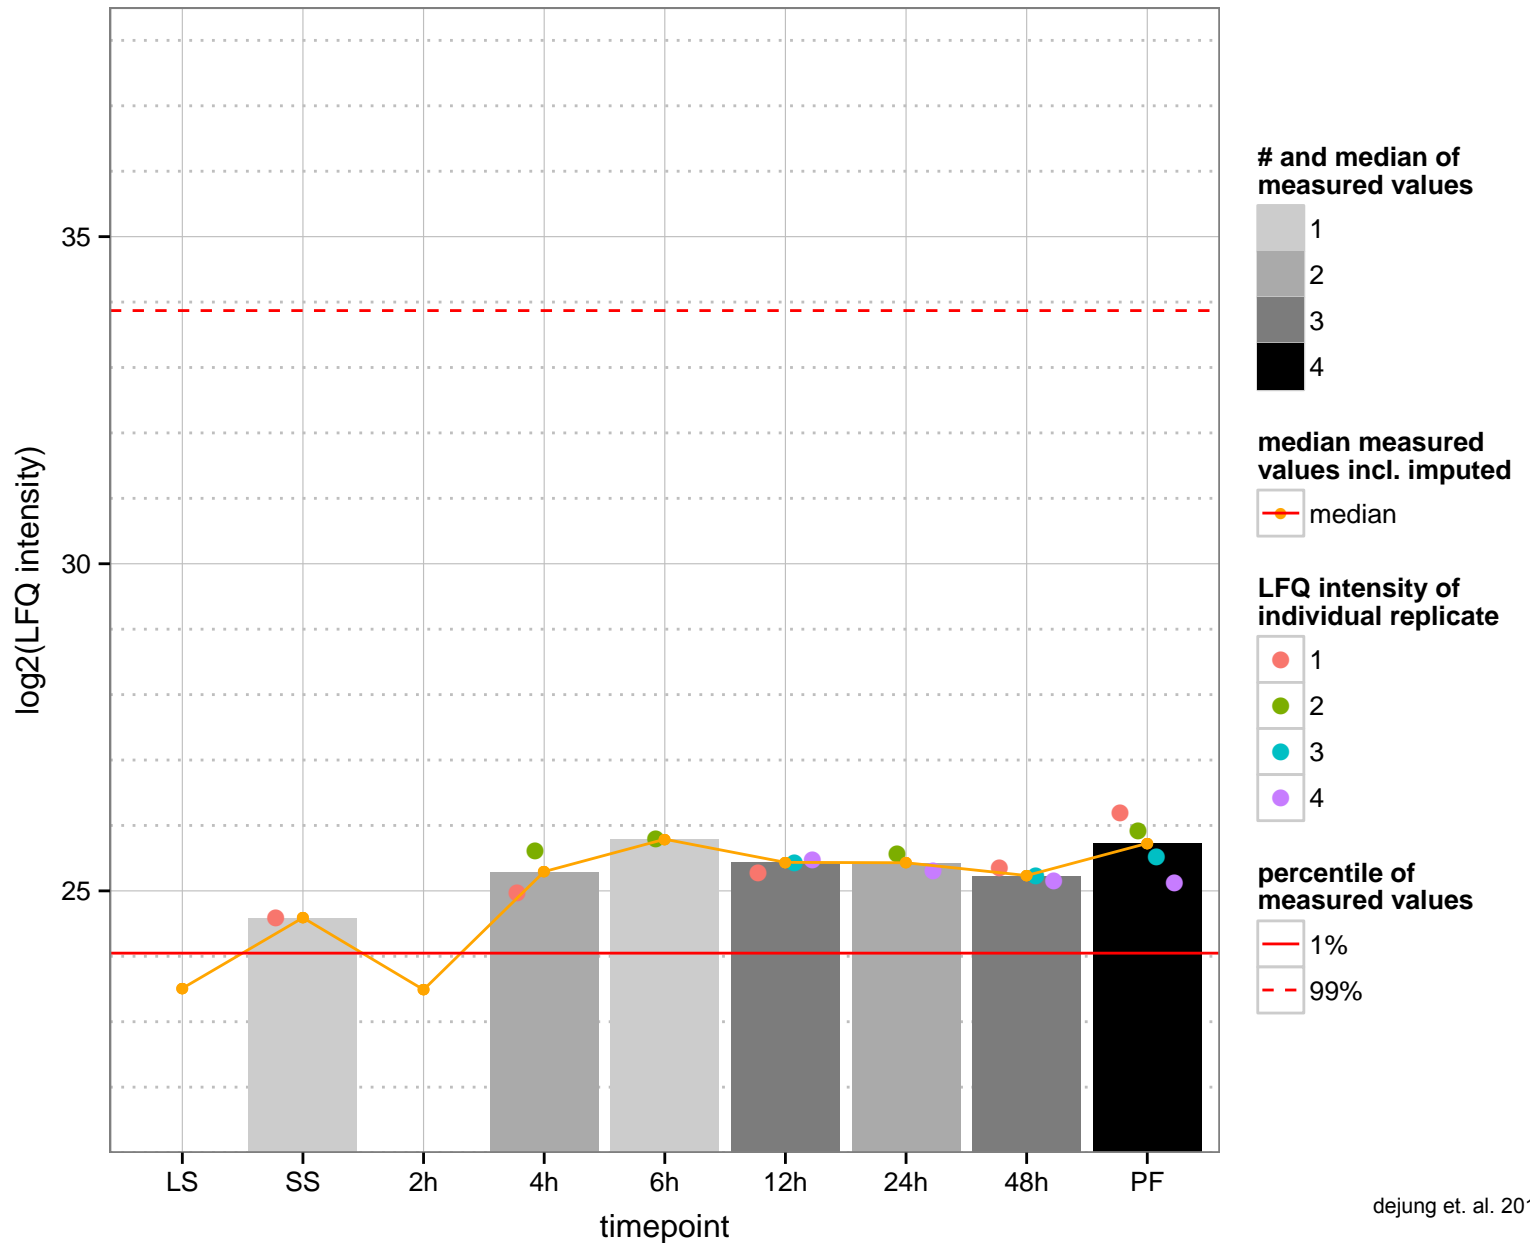

hypothetical protein, conserved  
 Tb927.8.3960  
 AGOF: null  
 AGOC: mitochondrion  
 AGOP: null  
 PGO: null  
 PGO: null  
 PGO: null

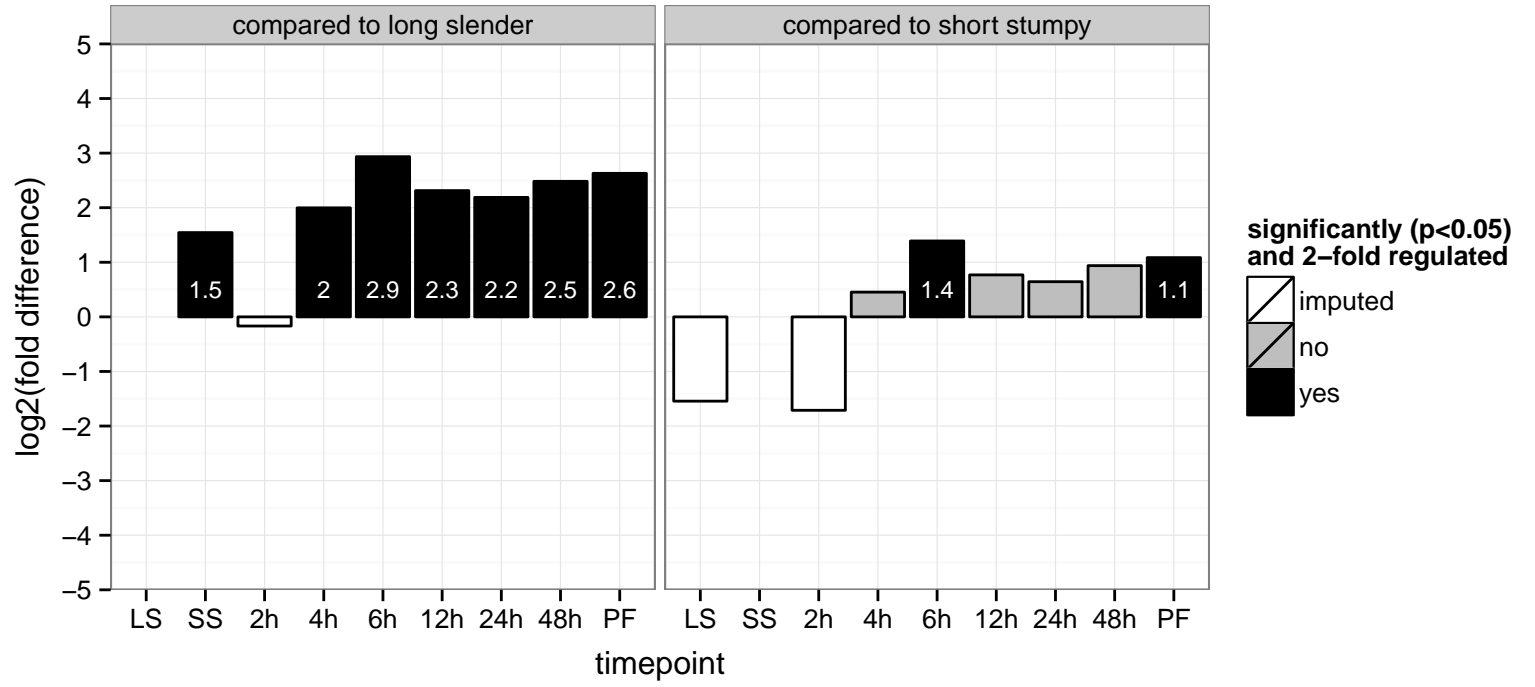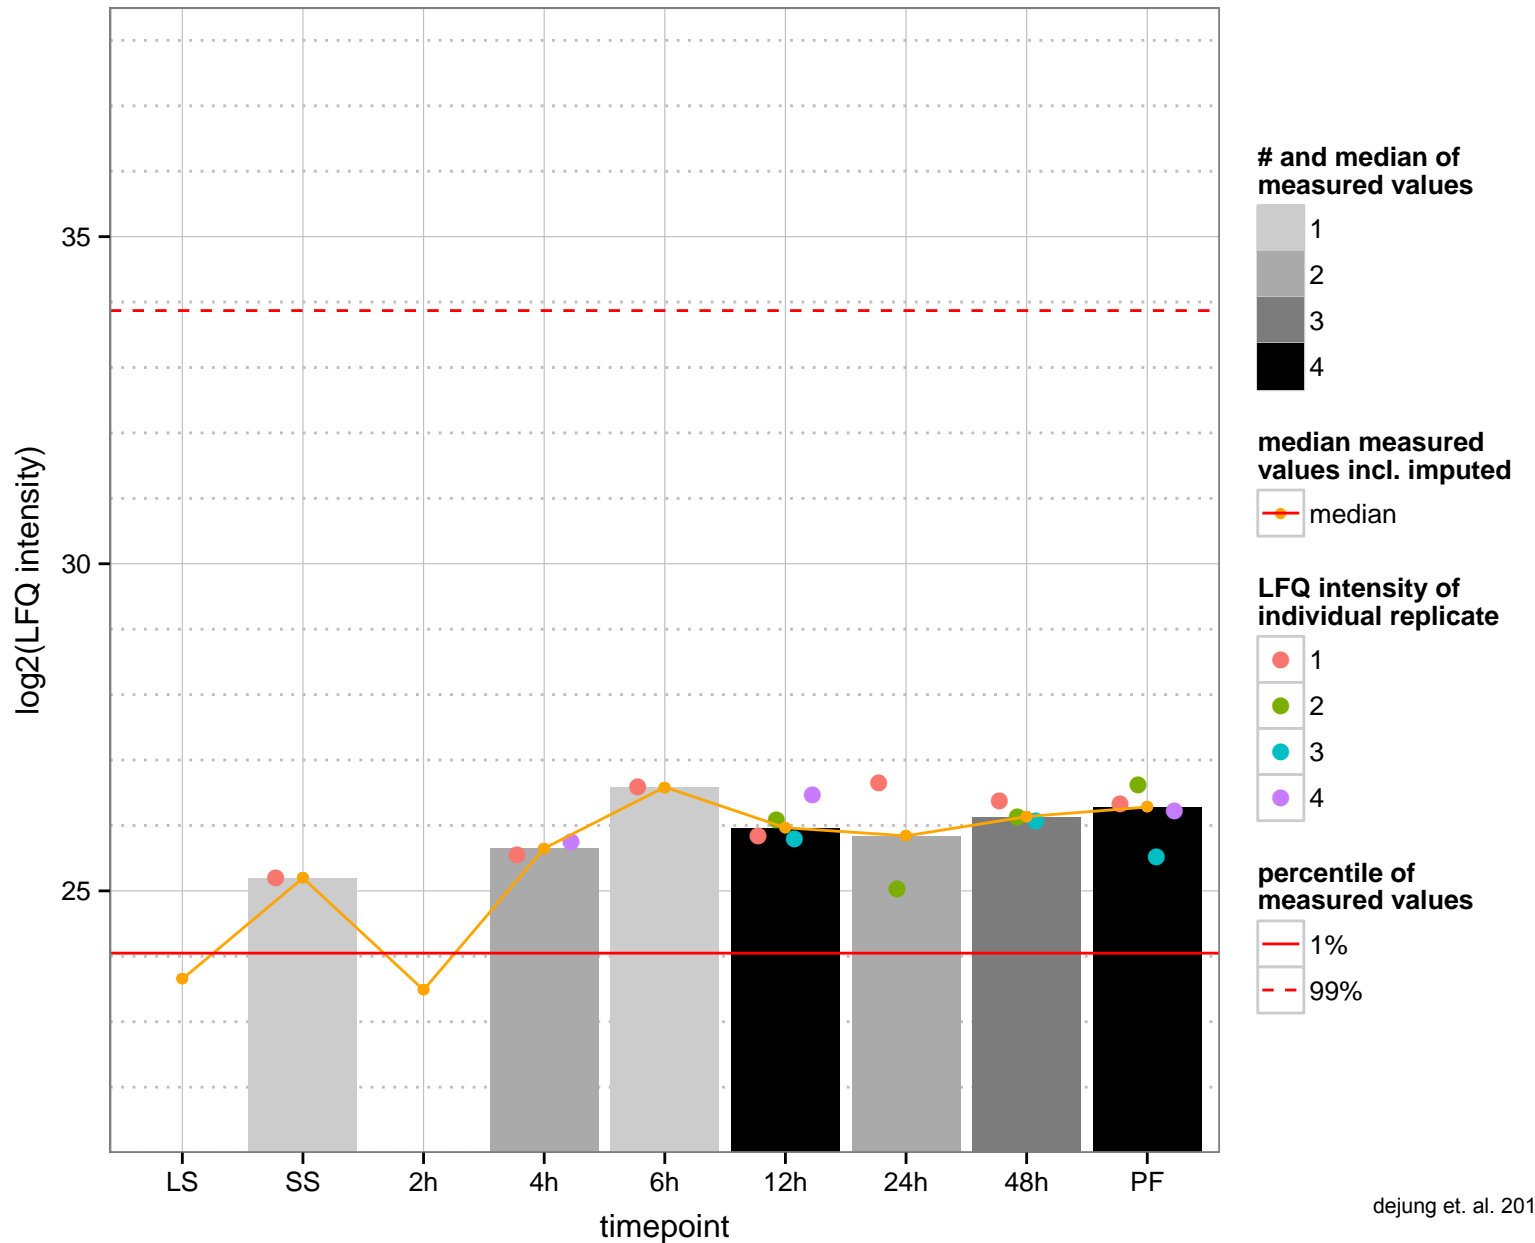



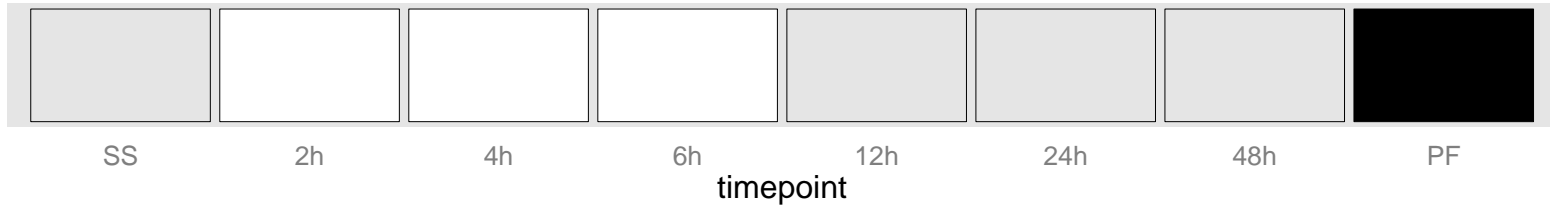

**regulated**  **not regulated**  **significant down**  **significant up**

hypothetical protein, conserved  
 Tb927.5.2540;Tb11.v5.0574  
 AGOF: null  
 AGOC: null  
 AGOP: null  
 PGO: null  
 PGOC: null  
 PGOP: null

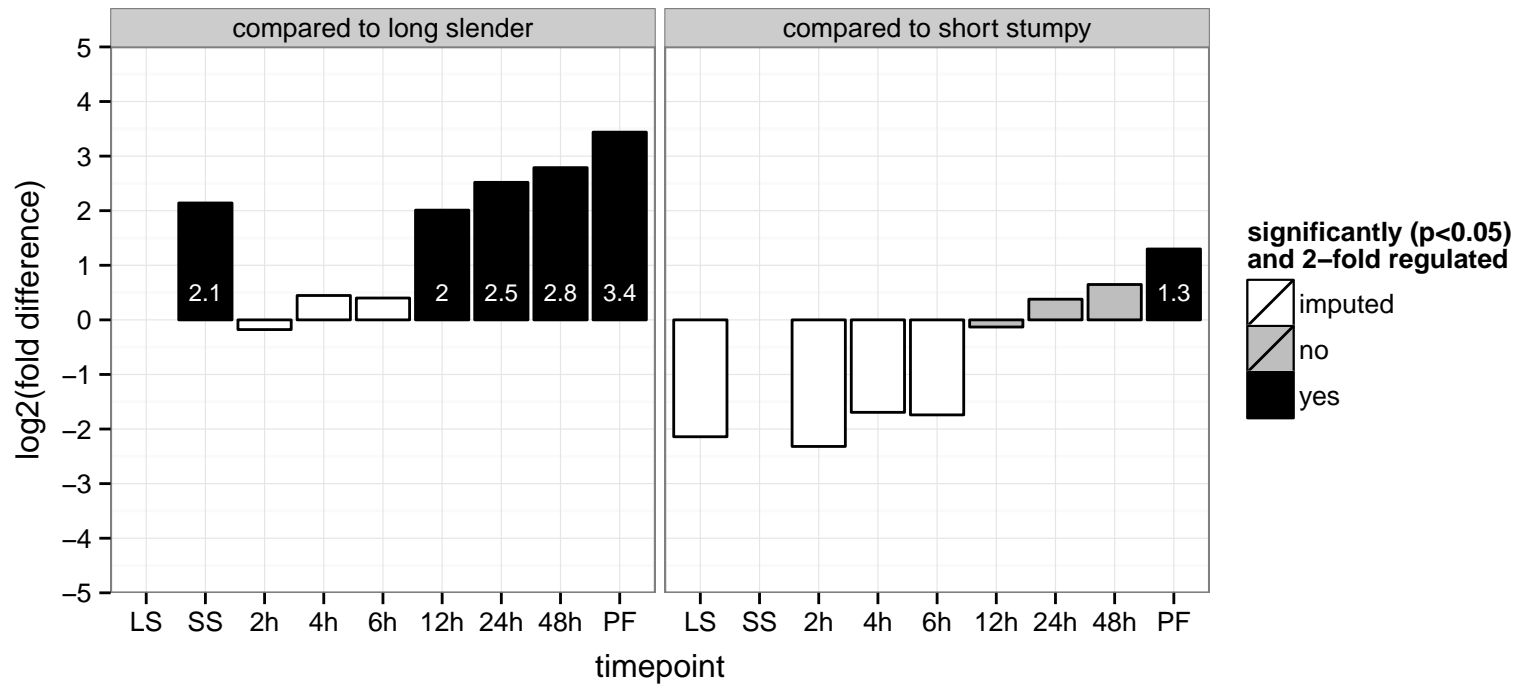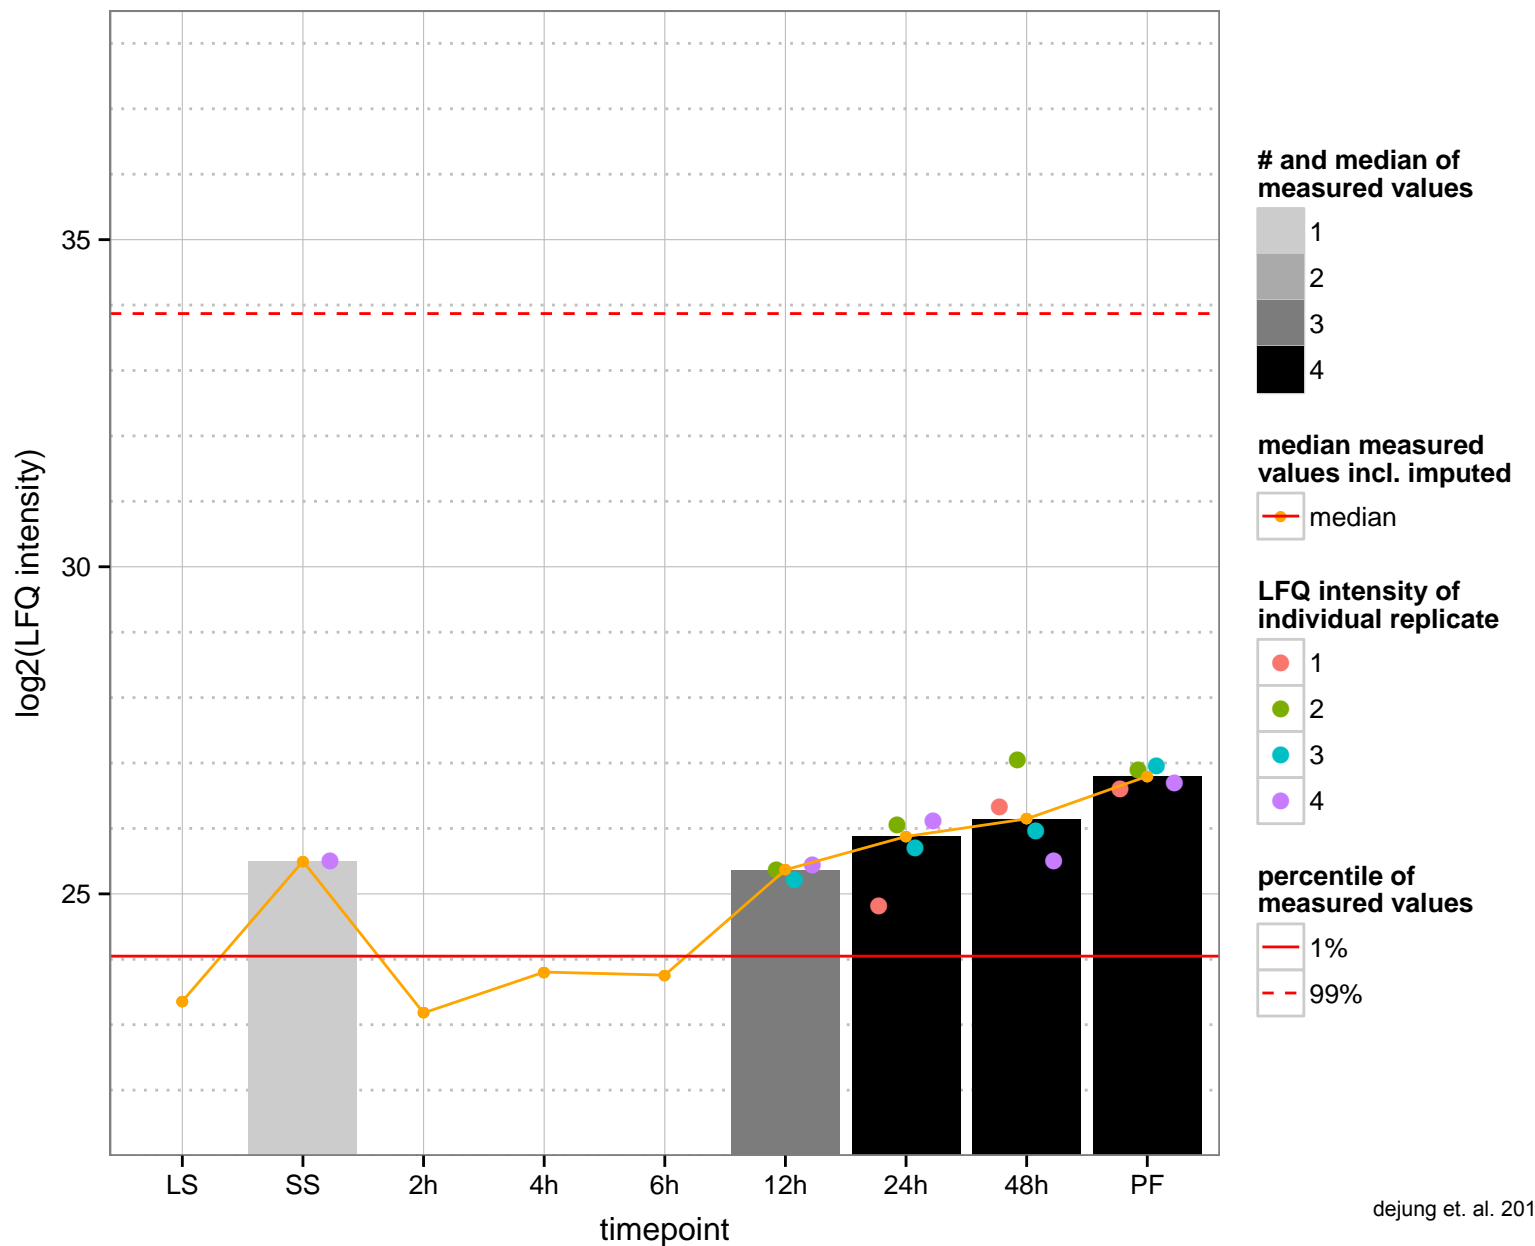

hypothetical protein, conserved  
 Tb927.1.3170  
 AGOF: null  
 AGOC: null  
 AGOP: null  
 PGO: null  
 PGO: null  
 PGO: null

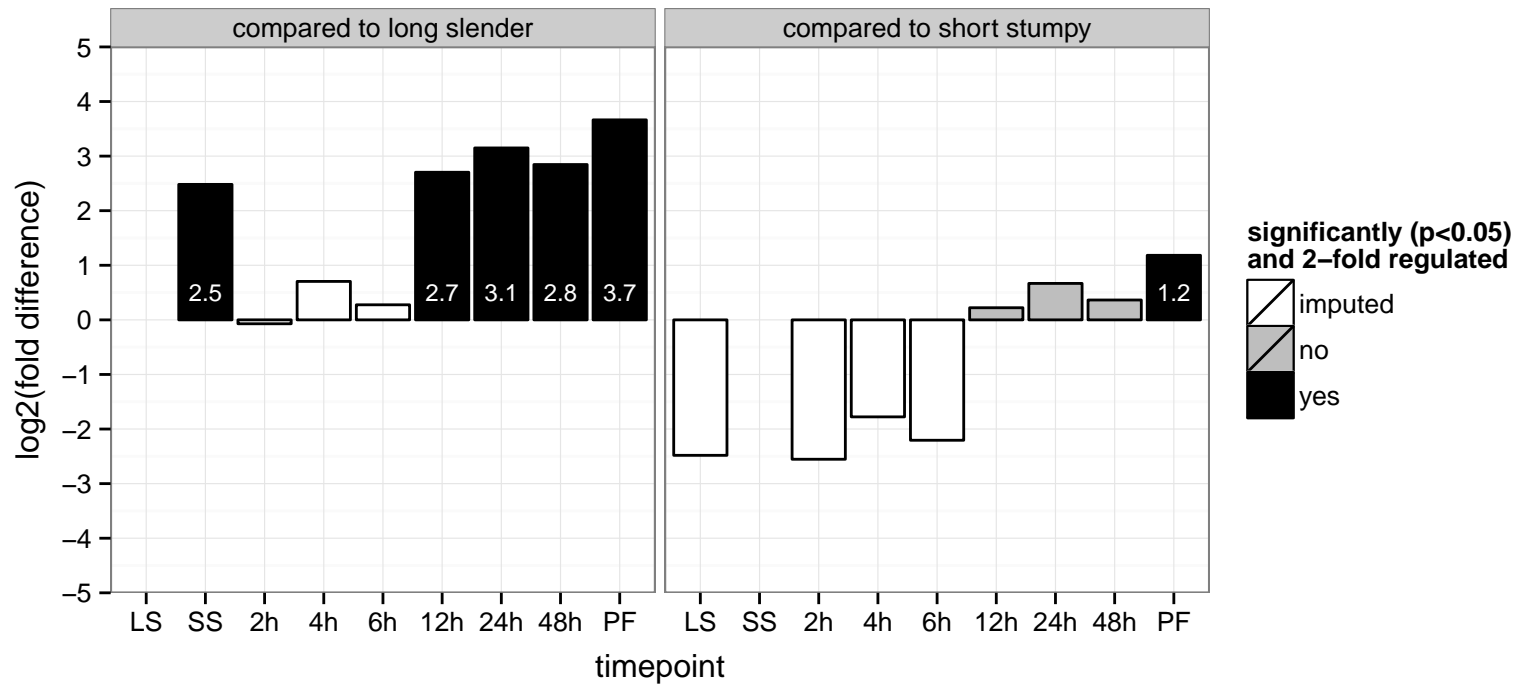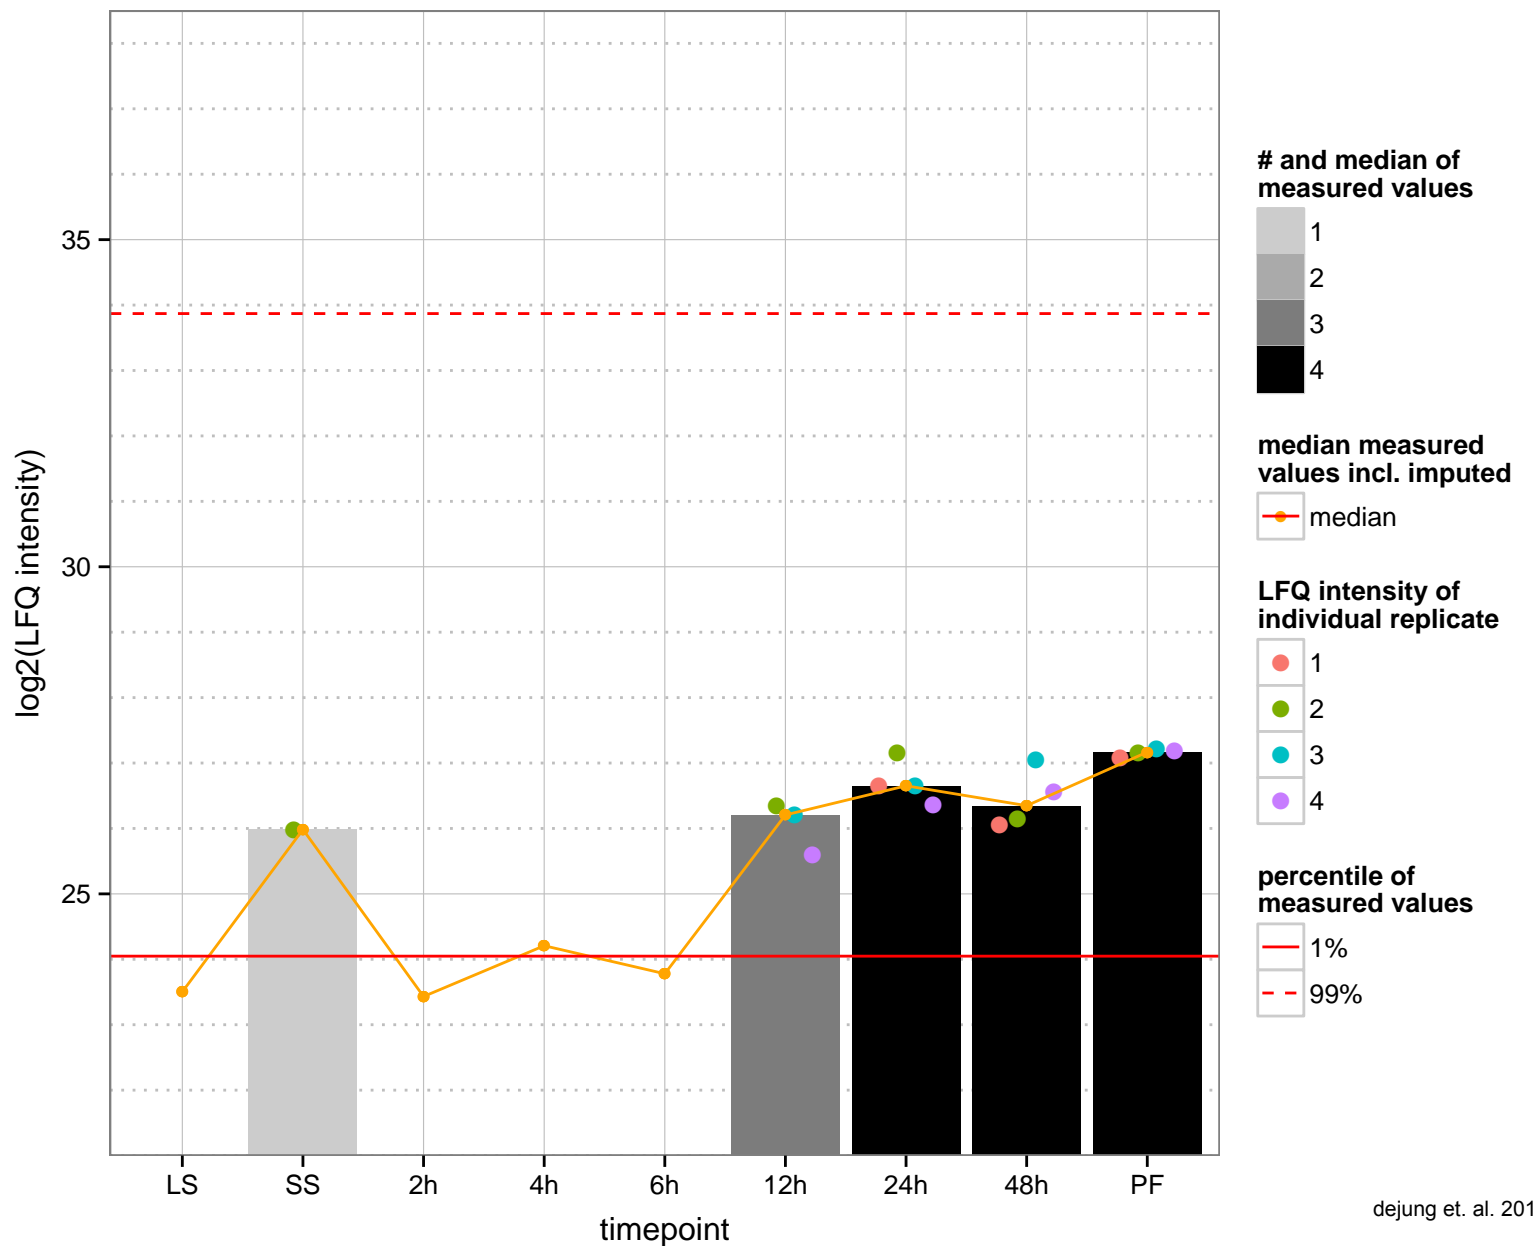

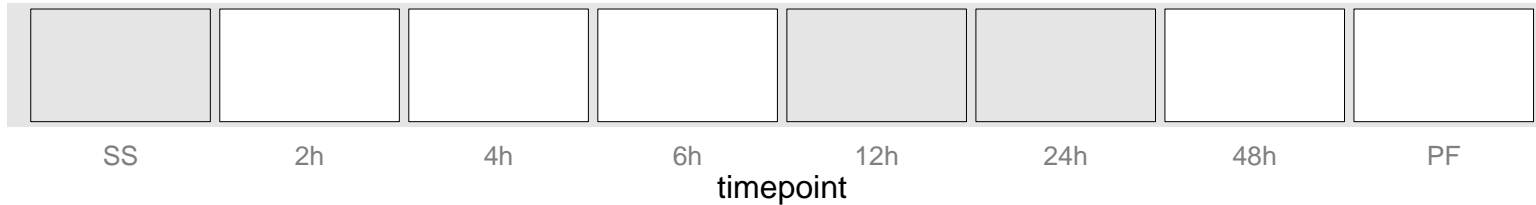

**regulated**  **not regulated**  **significant down**  **significant up**

hypothetical protein, conserved  
 Tb927.10.1740  
 AGOF: null  
 AGOC: null  
 AGOP: null  
 PGO: null  
 PGOC: null  
 PGOP: null

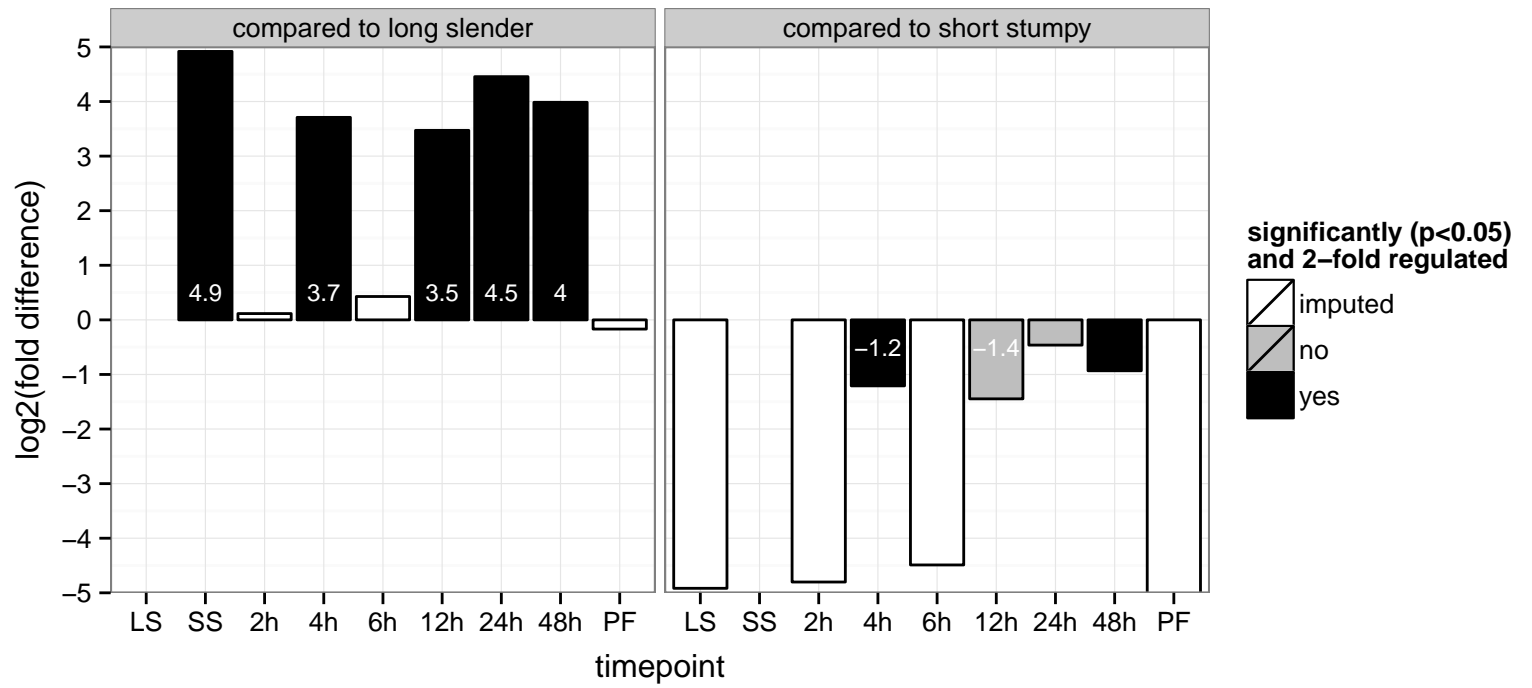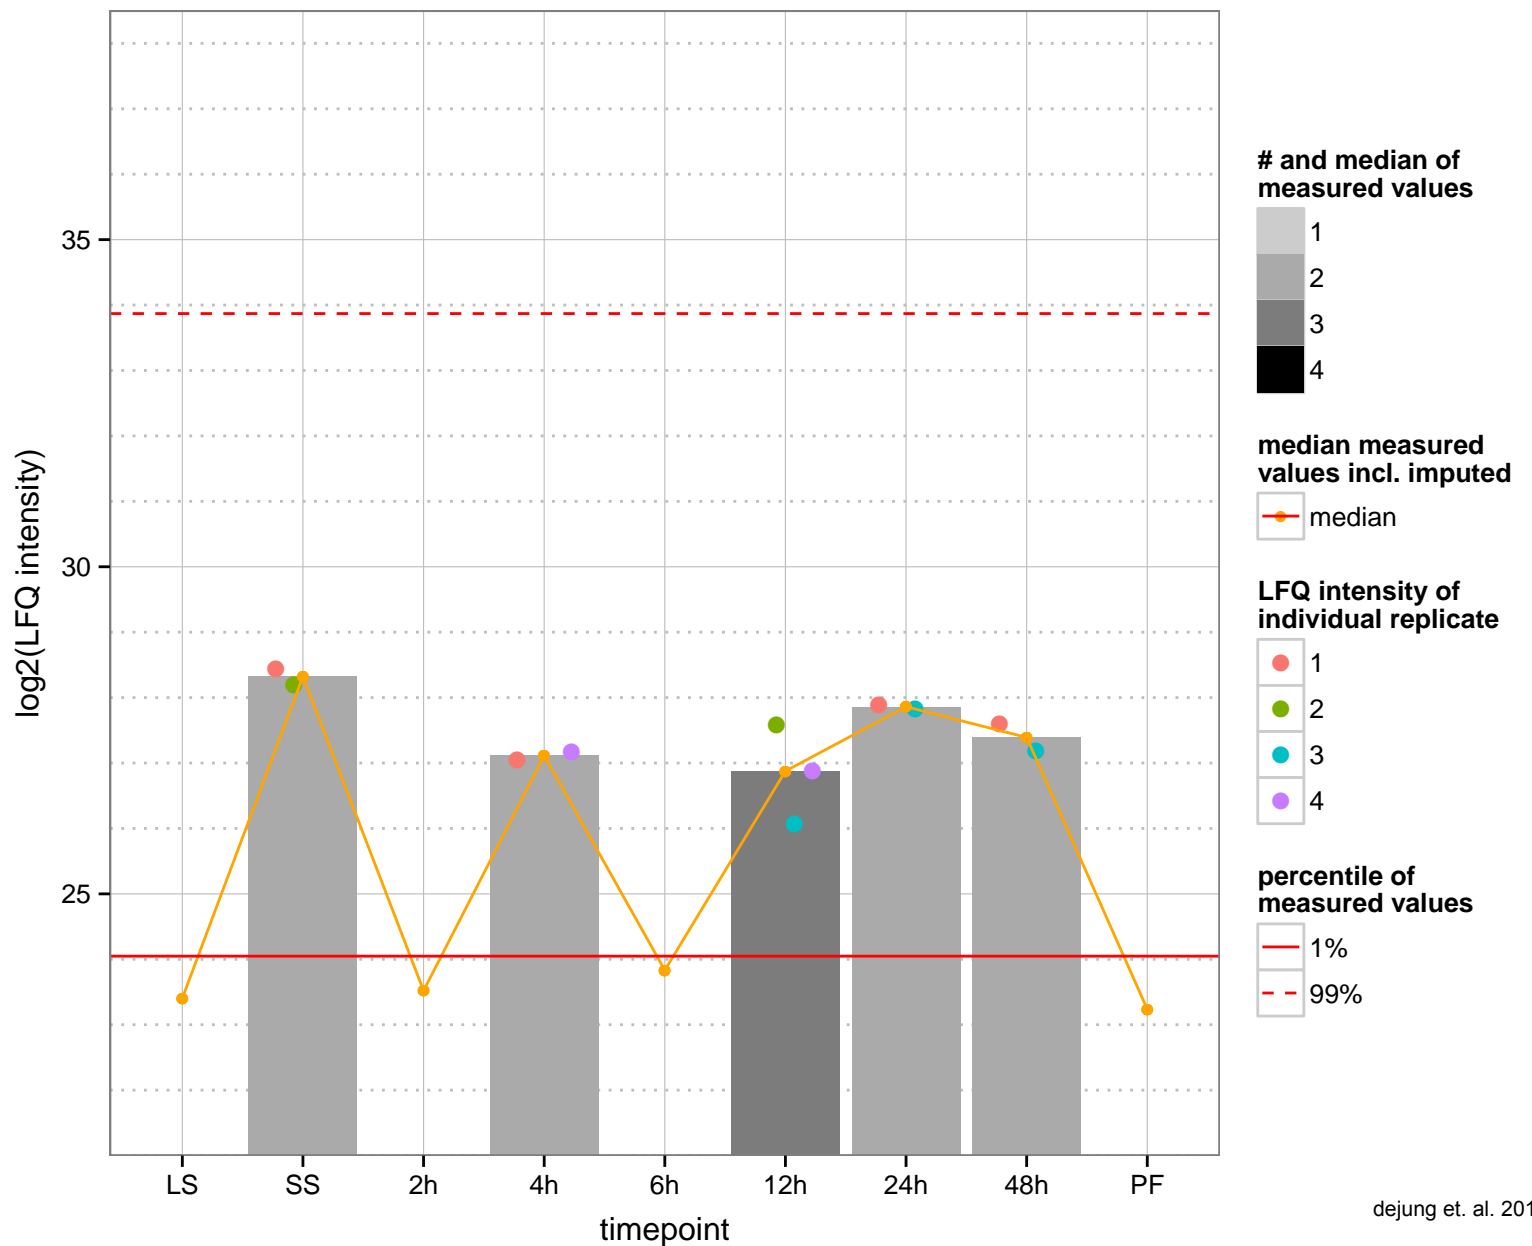

hypothetical protein, conserved  
 Tb927.10.8380  
 AGOF: null  
 AGOC: null  
 AGOP: null  
 PGOF: null  
 PGOC: null  
 PGOP: null

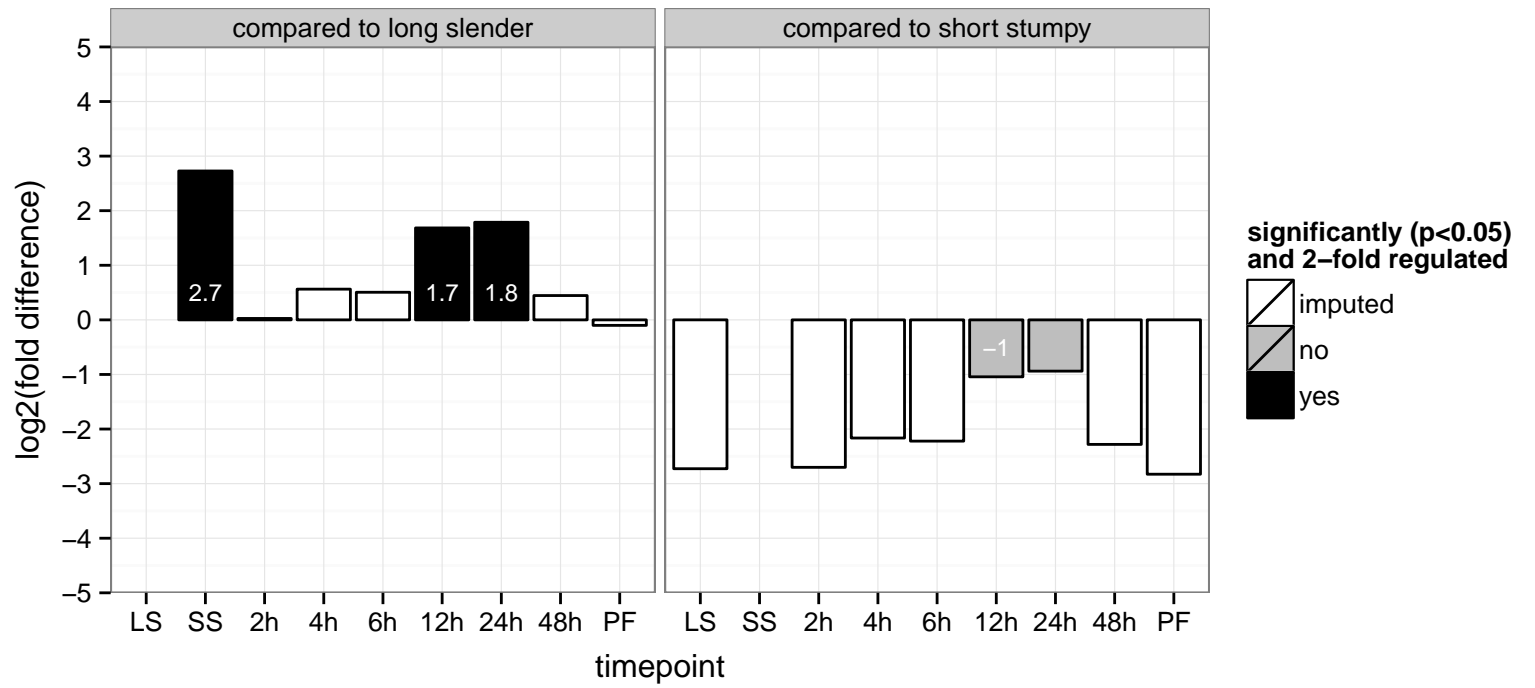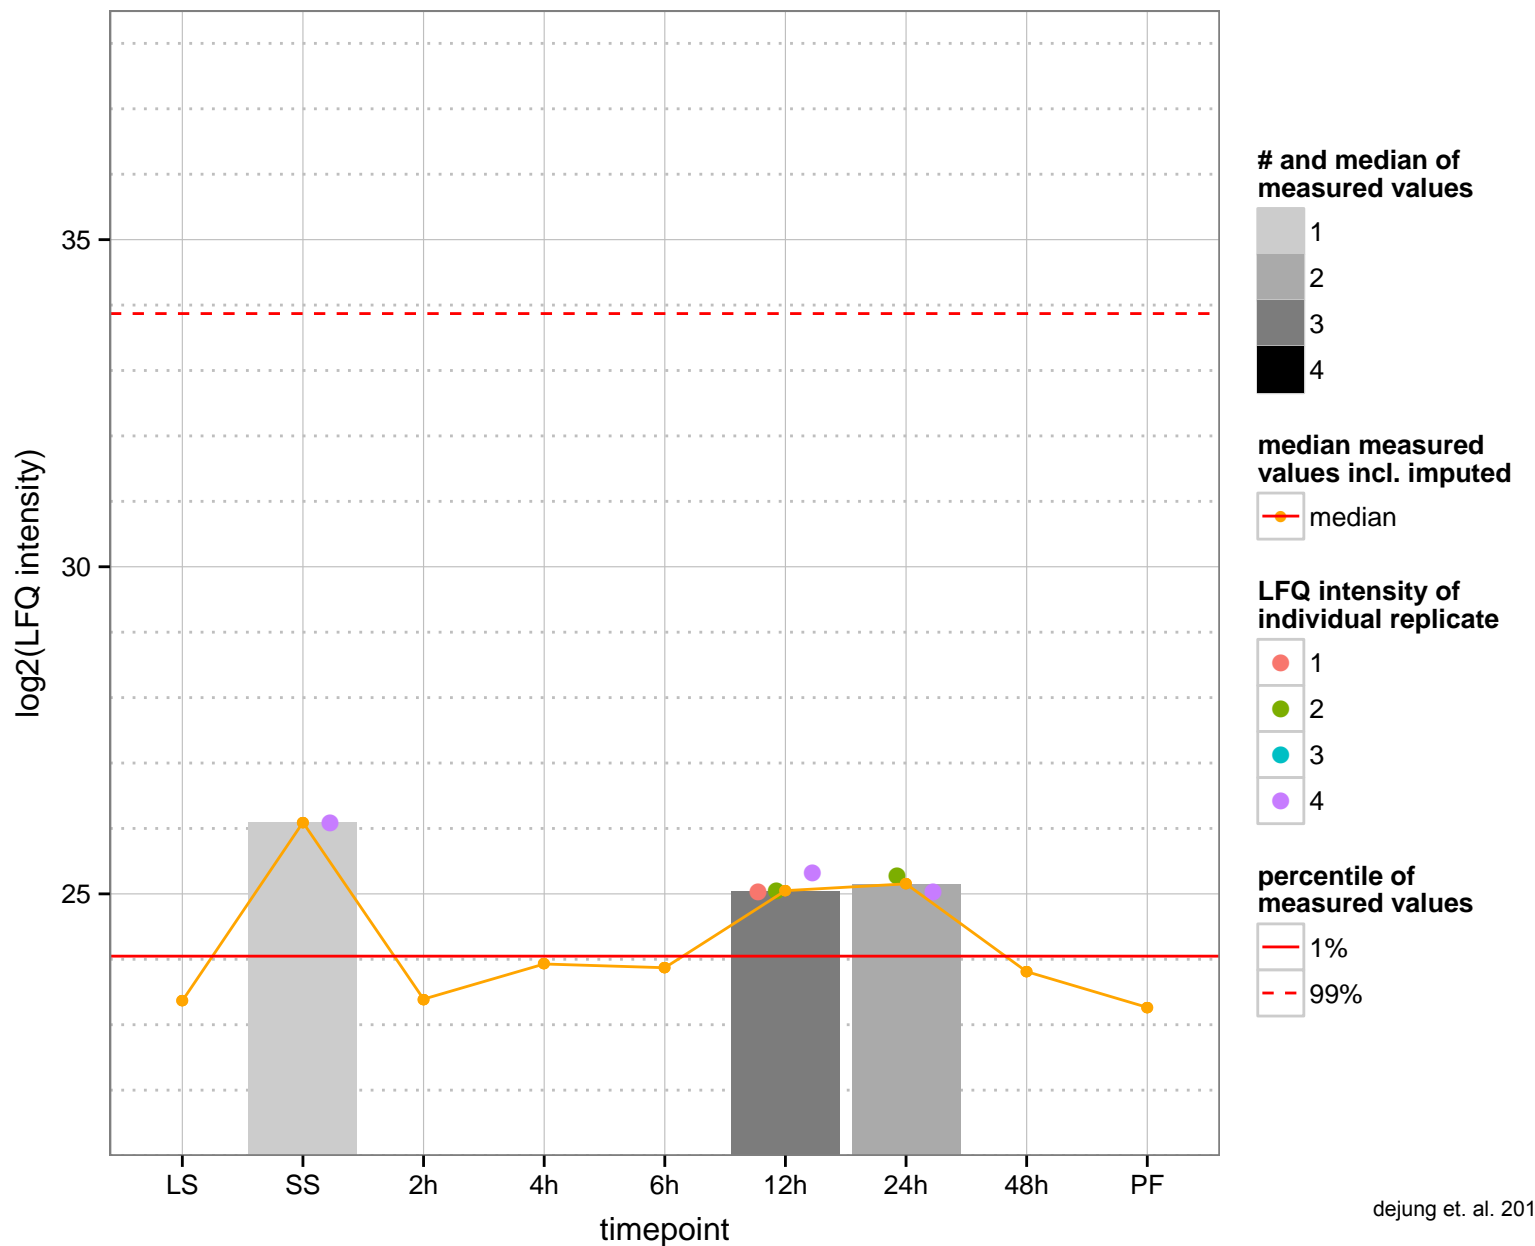

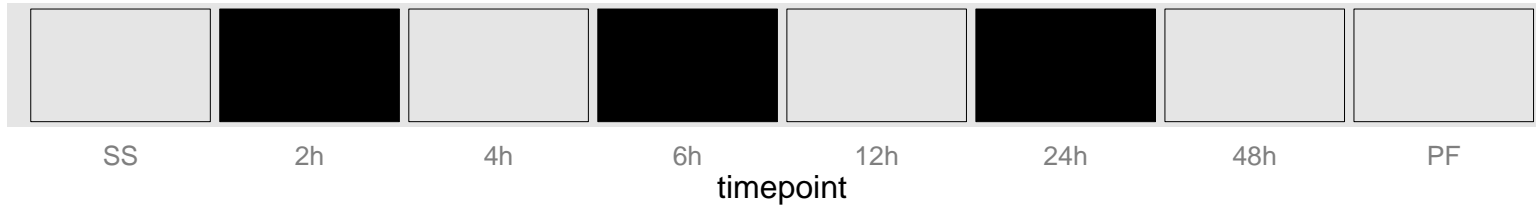

**regulated**  not regulated  significant down  significant up

hypothetical protein, conserved  
 Tb927.10.4070  
 AGOF: null  
 AGOC: null  
 AGOP: null  
 PGO: null  
 PGOC: null  
 PGOP: null

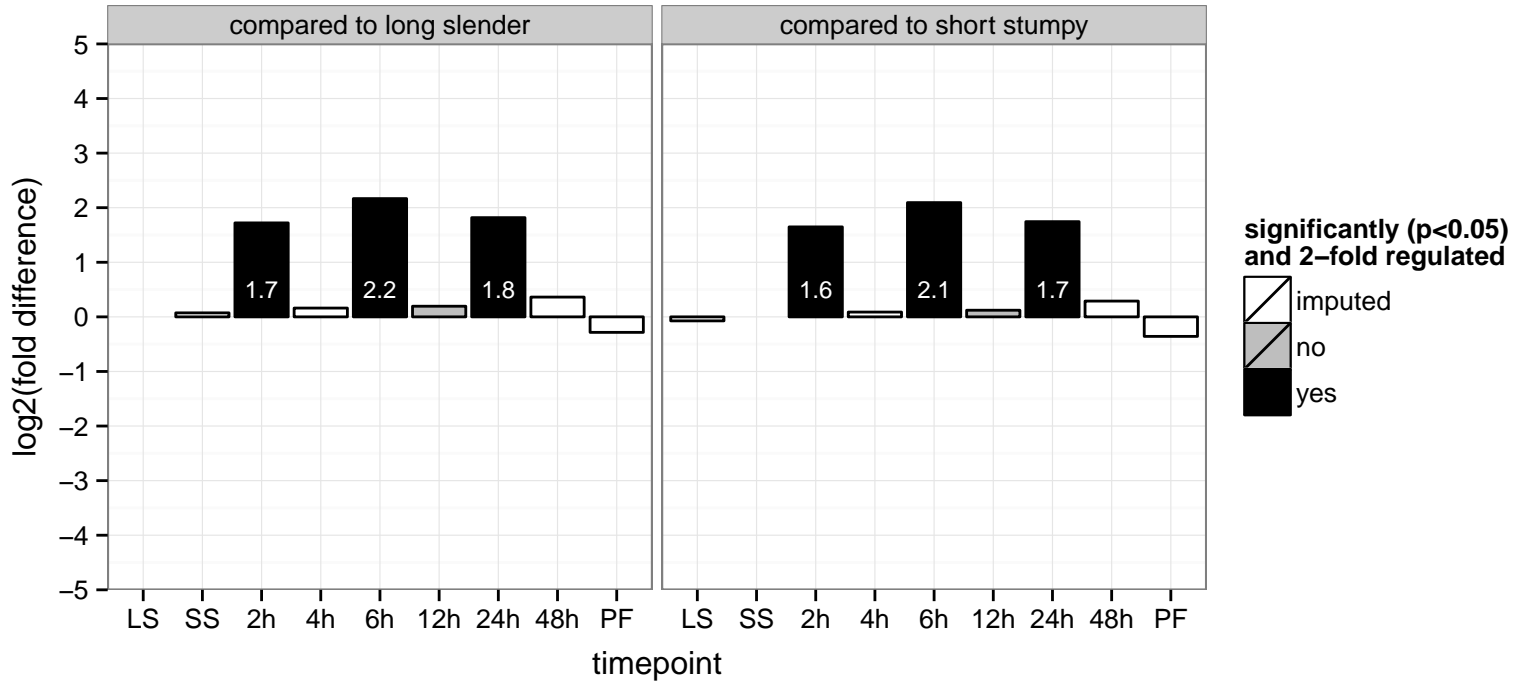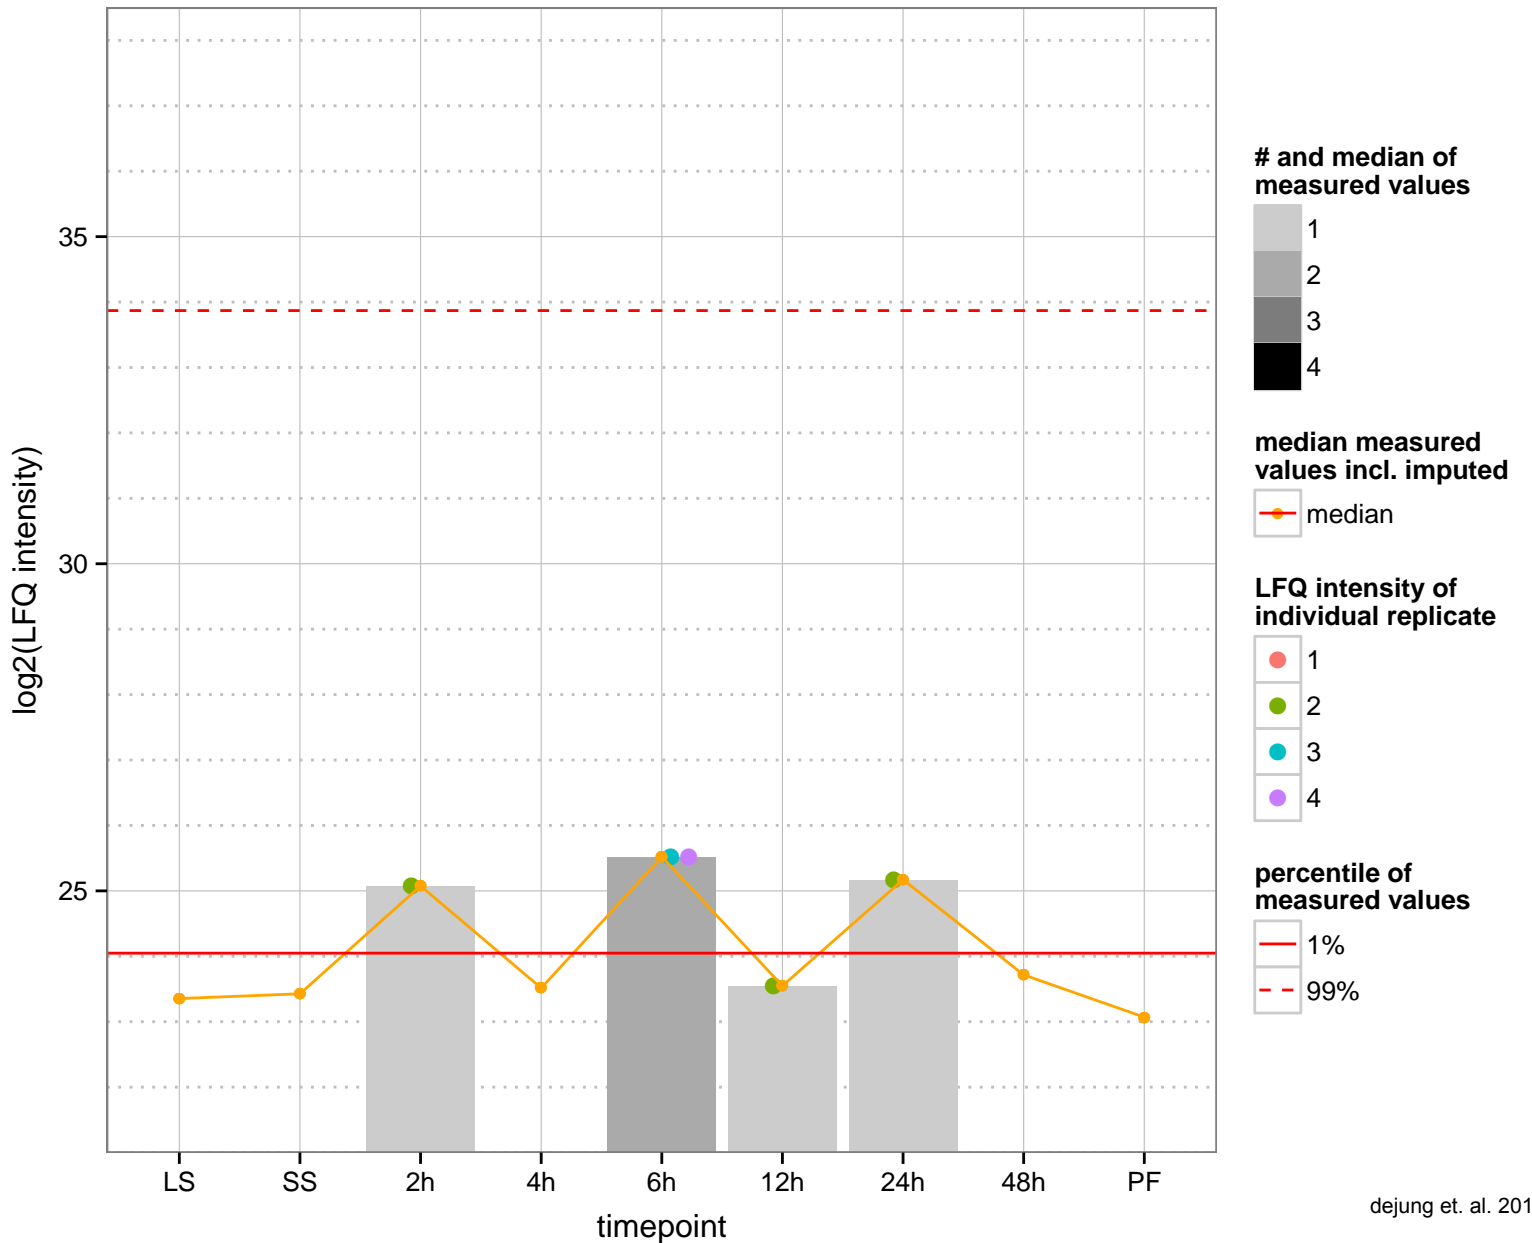



transcription elongation factor s-II, putative (TFIIS1)

Tb927.11.4960

AGOF: DNA binding, sequence-specific DNA binding transcription factor activity, zinc ion binding

AGOC: null

AGOP: DNA-dependent transcription, elongation, regulation of transcription, DNA-dependent, transcription

PGOF: nucleic acid binding, zinc ion binding

PGOC: null

PGOP: transcription, DNA-dependent

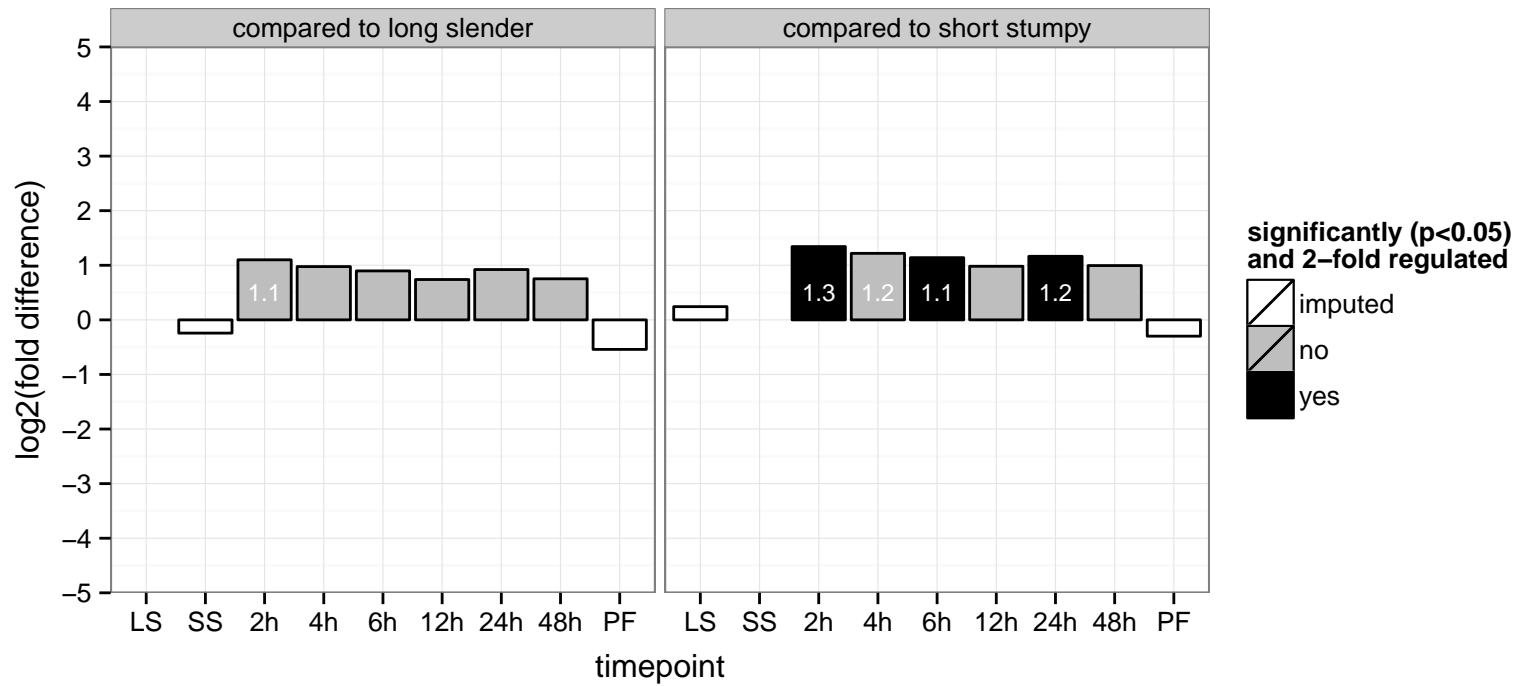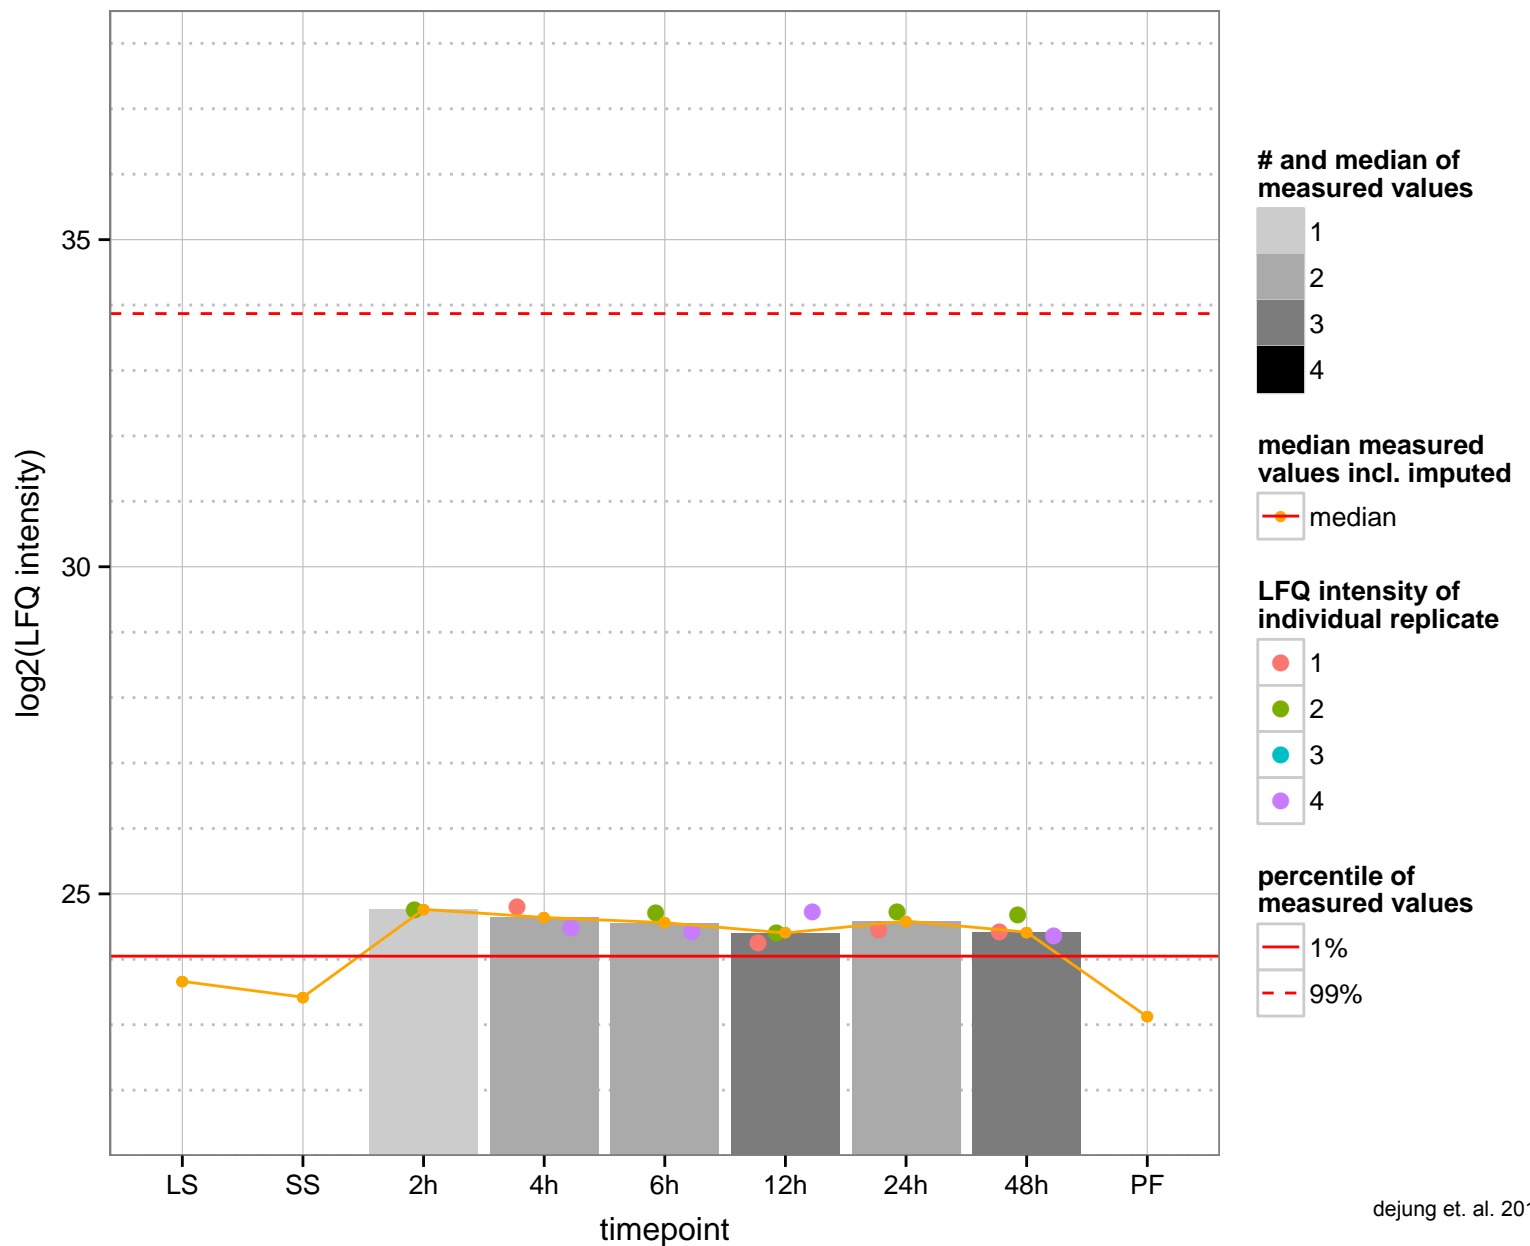

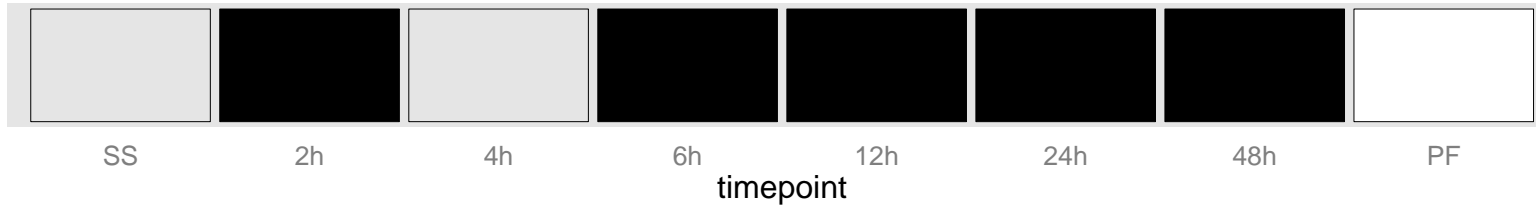

**regulated**  **not regulated**  **significant down**  **significant up**

calpain-like protein fragment, putative  
 Tb927.1.2230  
 AGOF: null  
 AGOC: null  
 AGOP: null  
 PGO: null  
 PGOC: null  
 PGOP: null

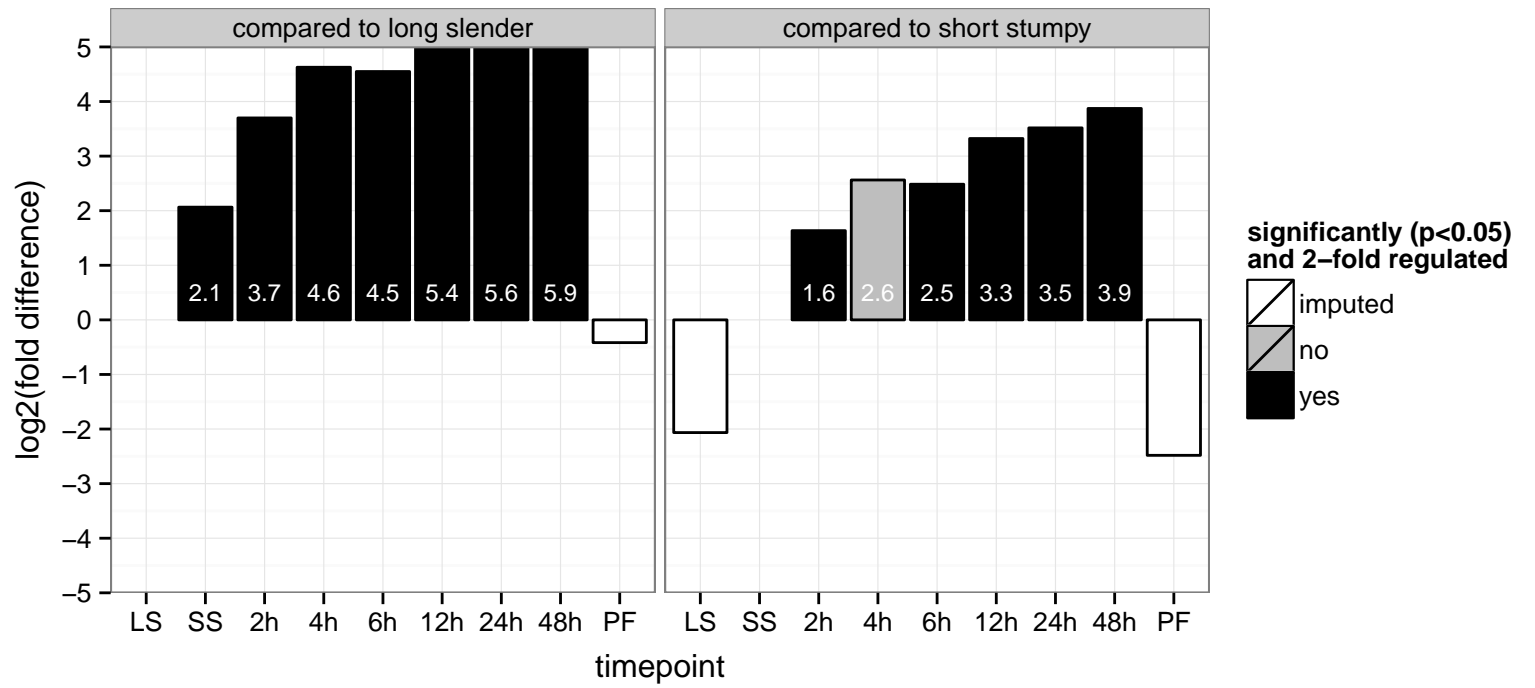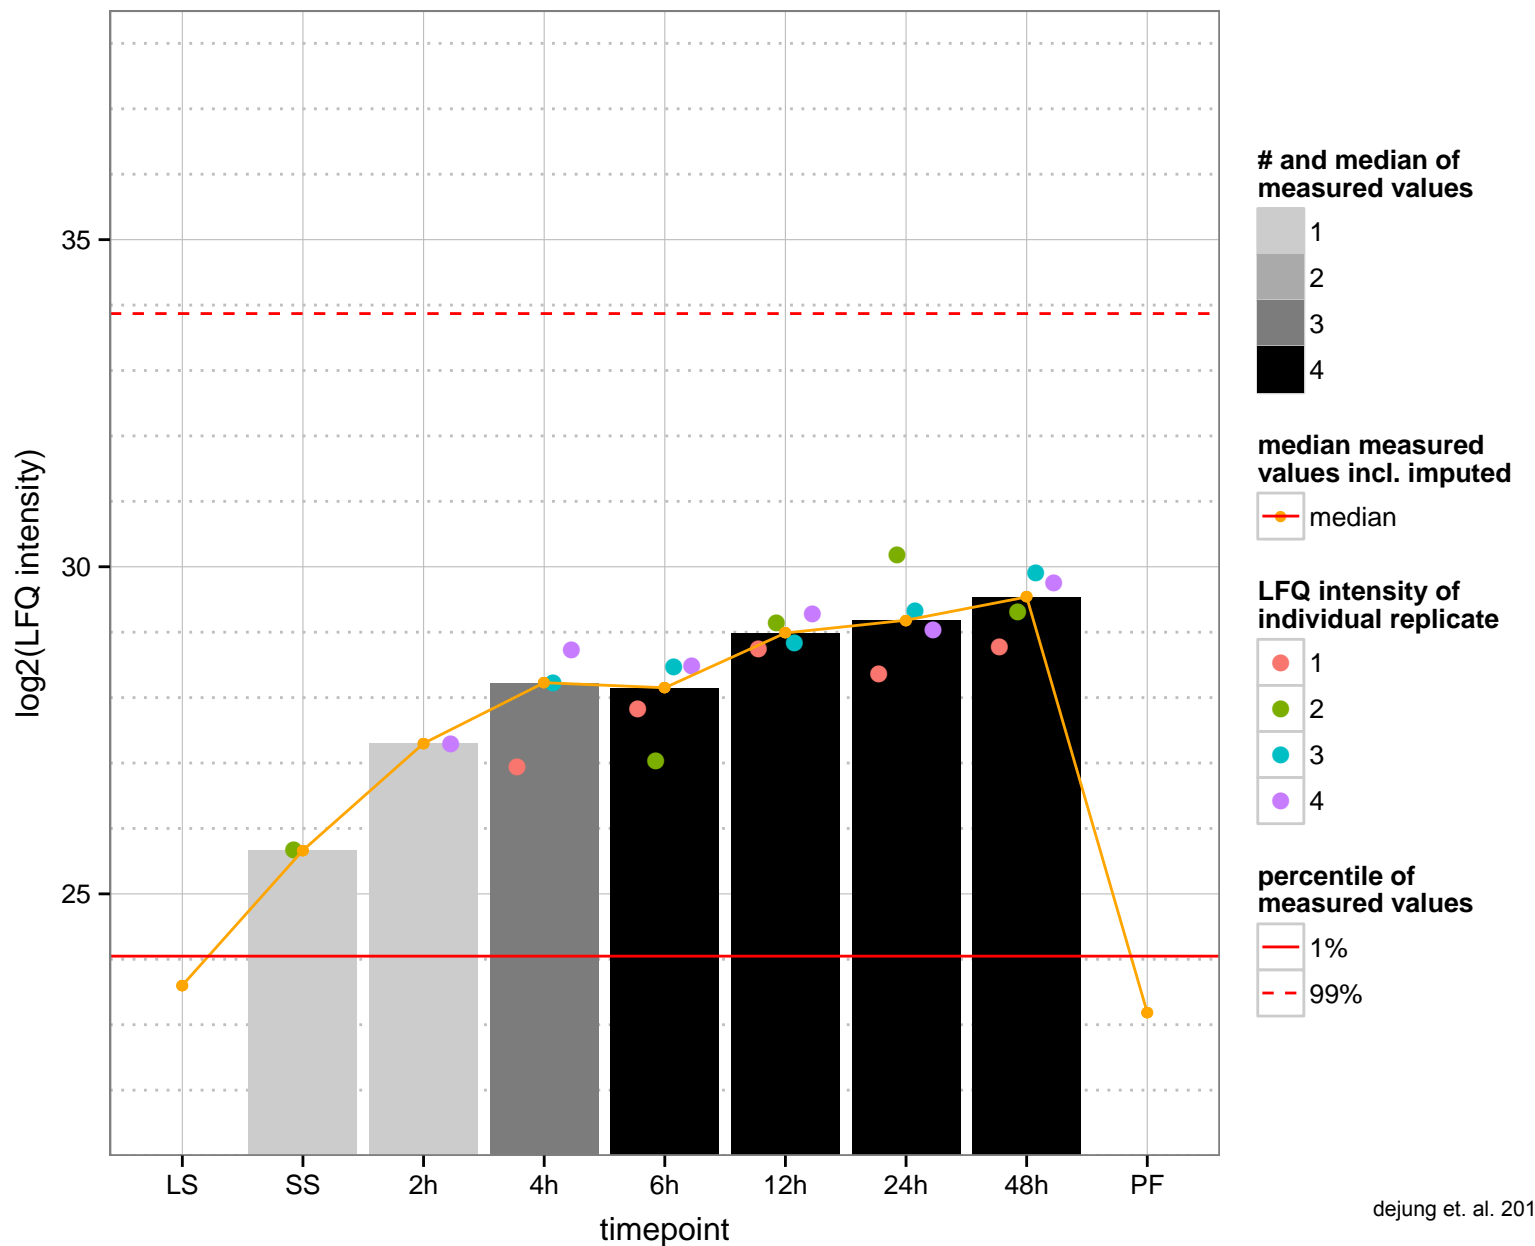

dynein heavy chain, cytosolic, putative, Cytoplasmic dynein 1 heavy chain (DYNC1H1)

Tb927.7.3160

AGOF: null, ATP binding, ATPase activity, microtubule motor activity

AGOC: null, dynein complex

AGOP: null, chromosome segregation, microtubule-based movement, minus-end-directed vesicle transport along microtubule

PGOF: null, ATP binding, ATPase activity, microtubule motor activity, nucleoside-triphosphatase activity, nucleotide binding

PGOC: null, dynein complex

PGOP: null, microtubule-based movement

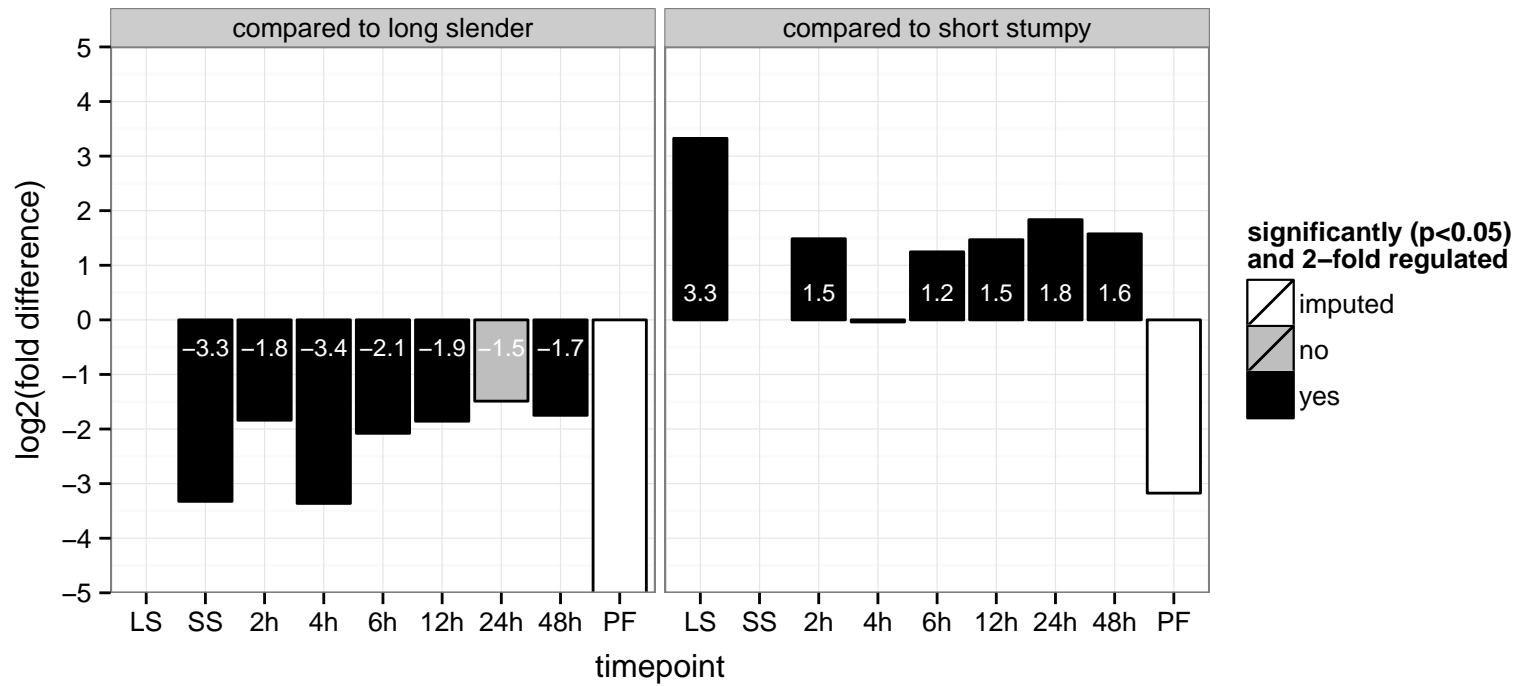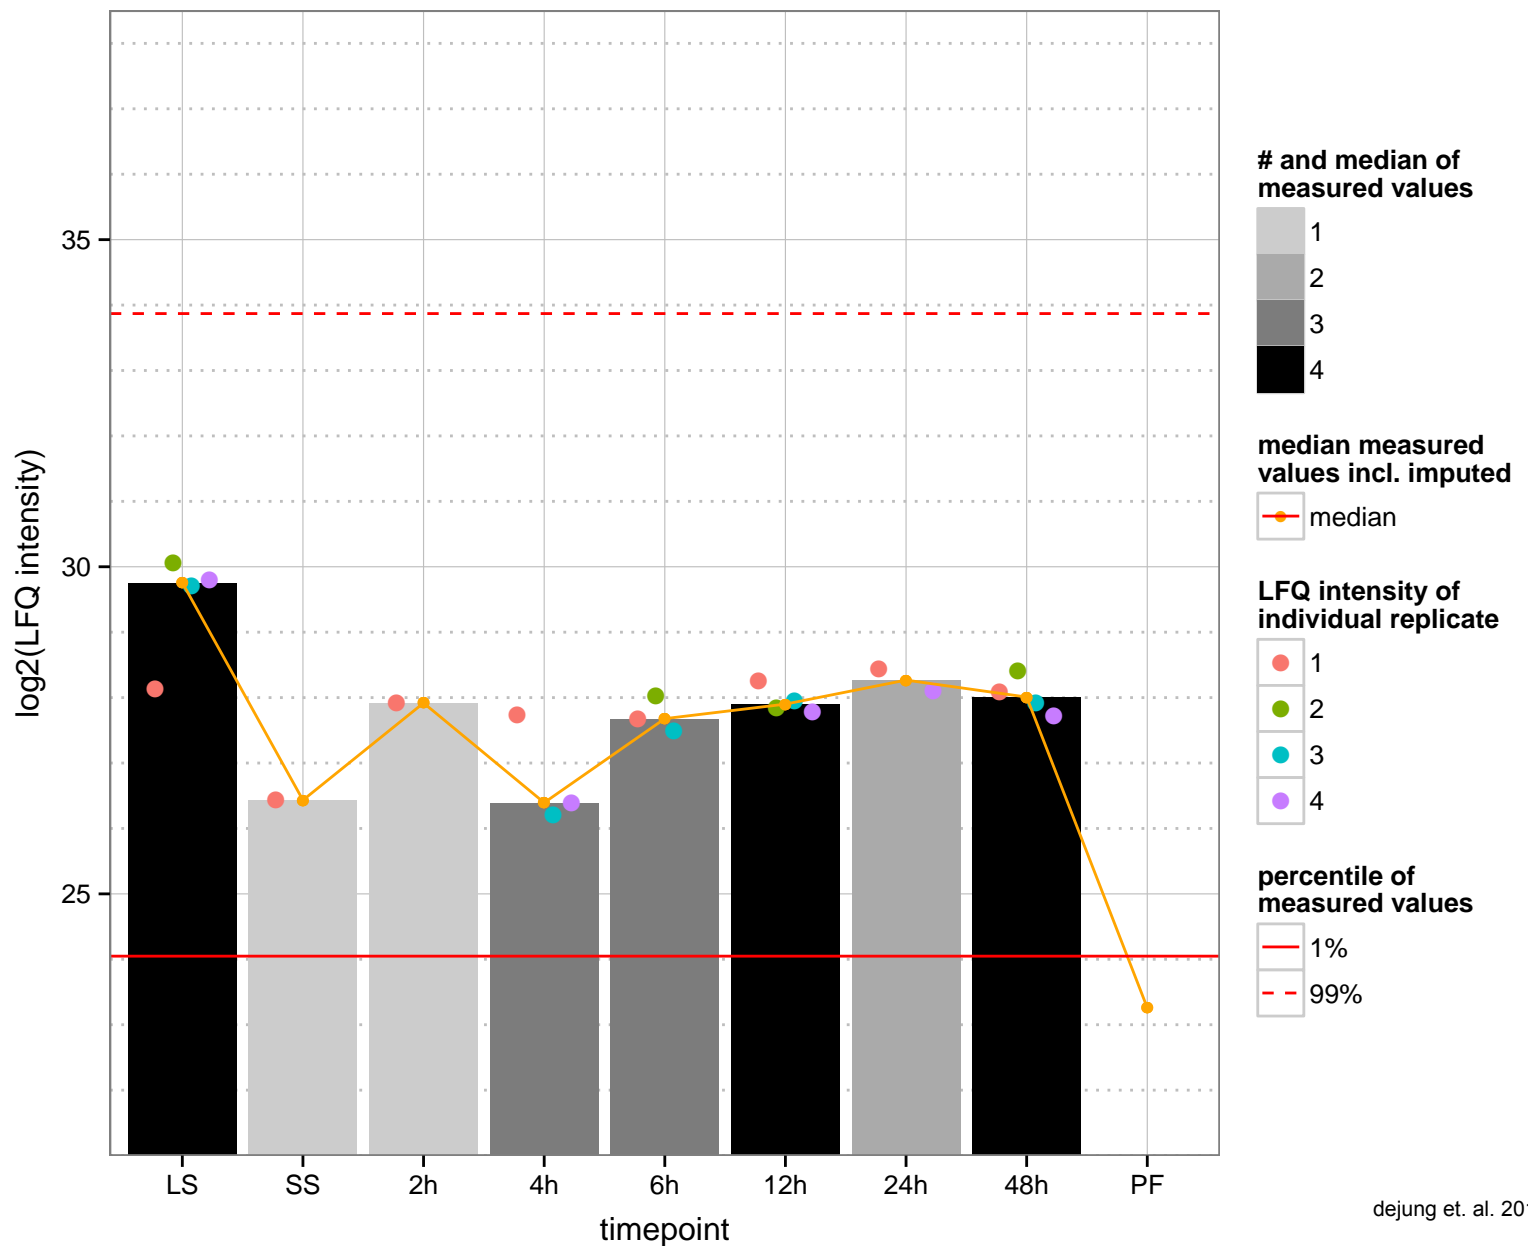

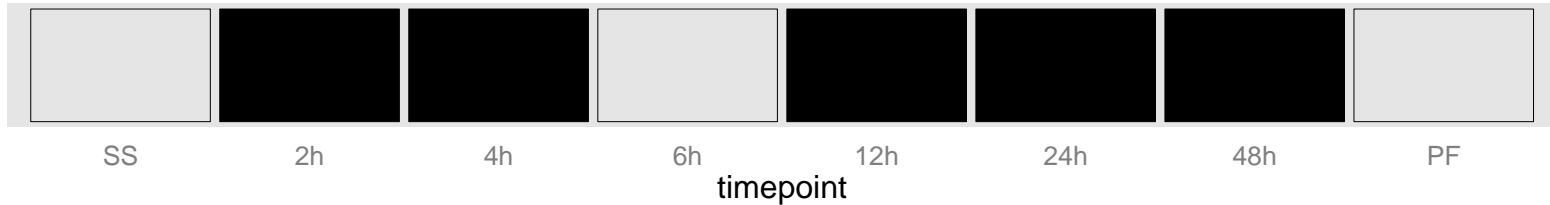

**regulated**  not regulated  significant down  significant up

iron-sulfur cluster assembly protein, putative  
 Tb927.10.12000  
 AGOF: iron-sulfur cluster binding  
 AGOC: cytoplasm, mitochondrion  
 AGOP: tRNA thio-modification  
 PGO: null  
 PGOC: null  
 PGOP: null

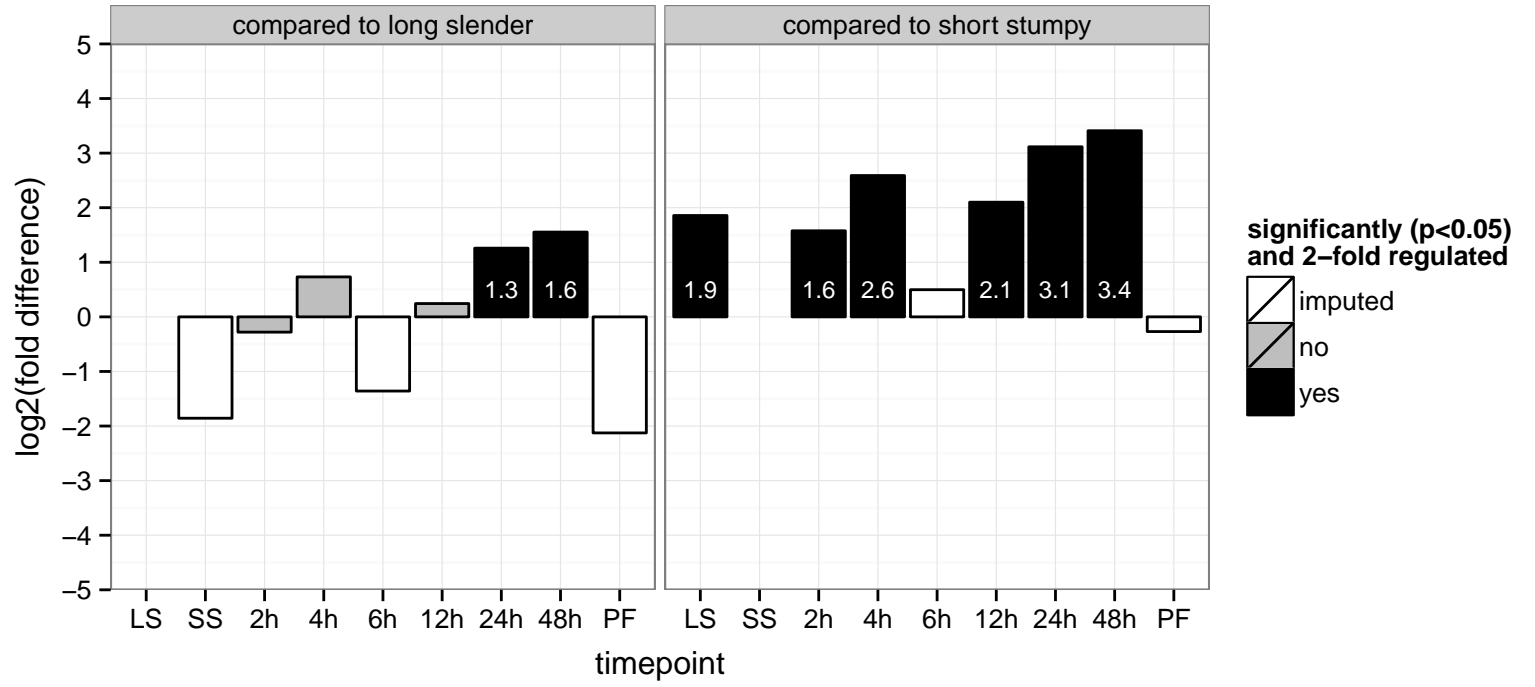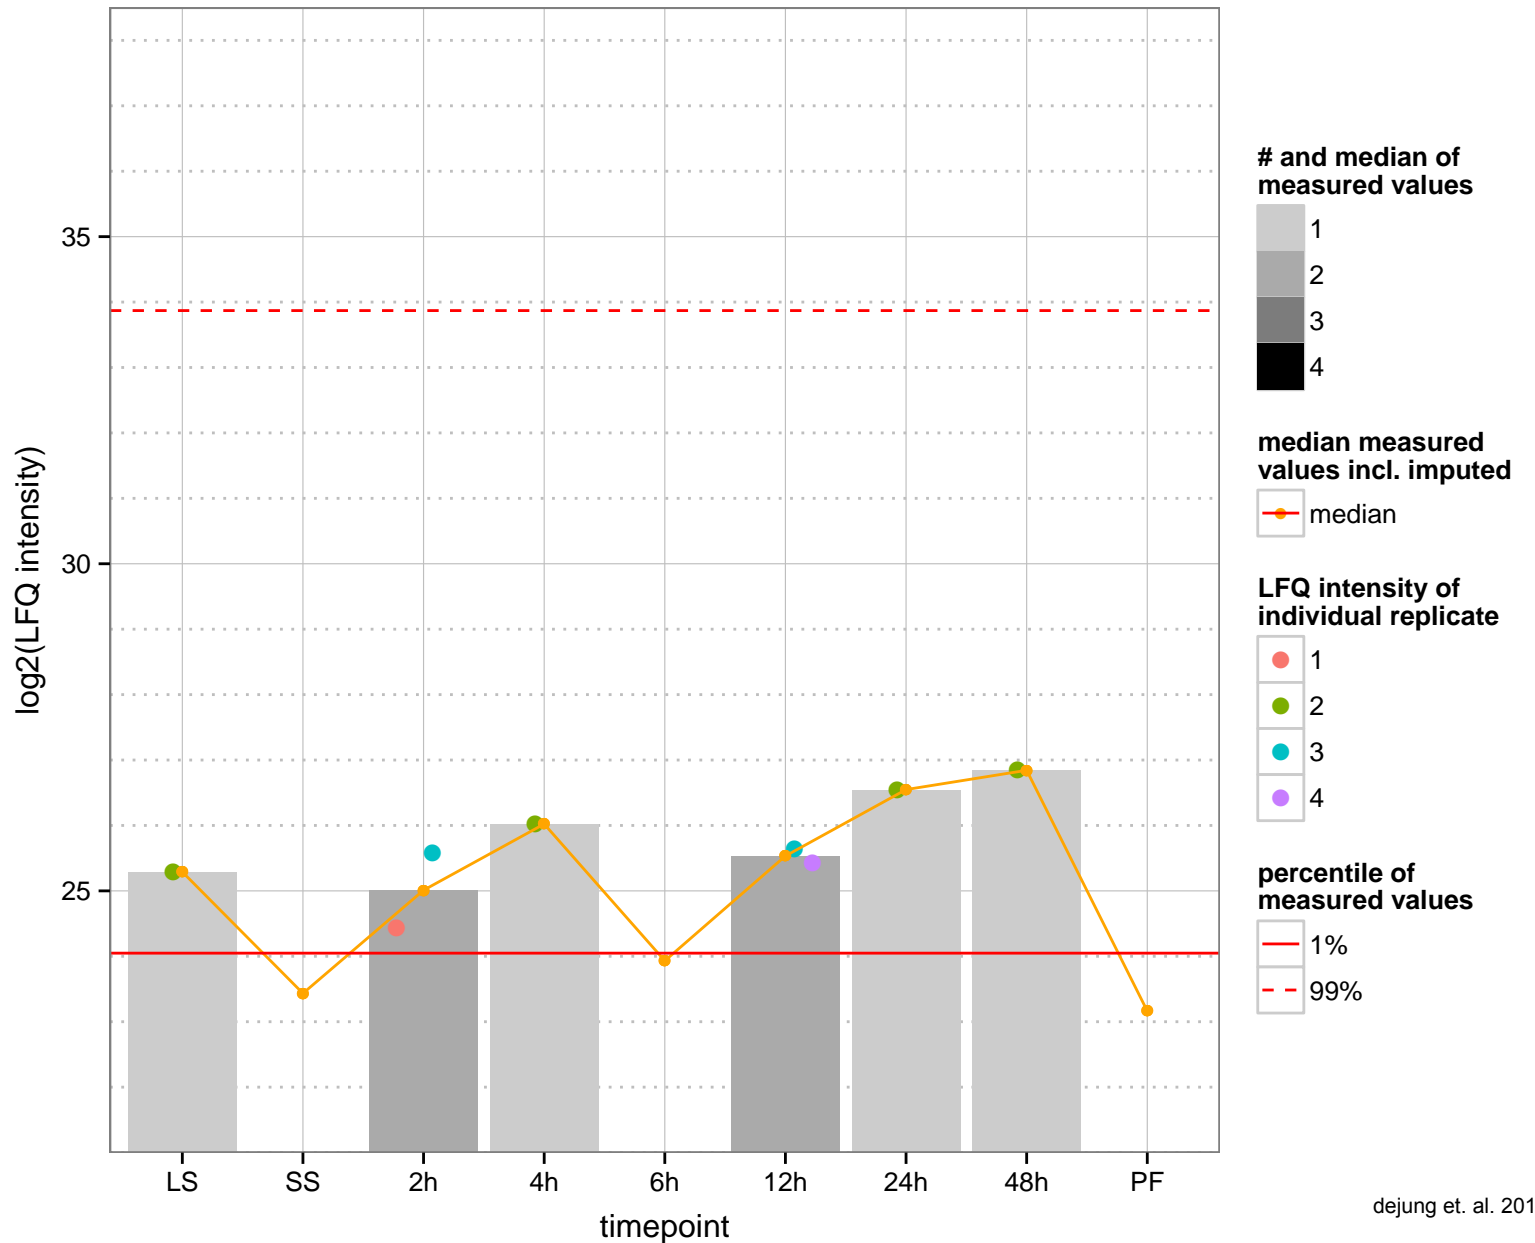

DNA-directed RNA polymerases II subunit, putative (RPB4)

Tb927.3.5270

AGOF: DNA-directed RNA polymerase activity, protein binding

AGOC: null

AGOP: transcription, DNA-dependent

PGOF: DNA-directed RNA polymerase activity, catalytic activity, nucleotide binding

PGOC: null

PGOP: cellular metabolic process, transcription, DNA-dependent

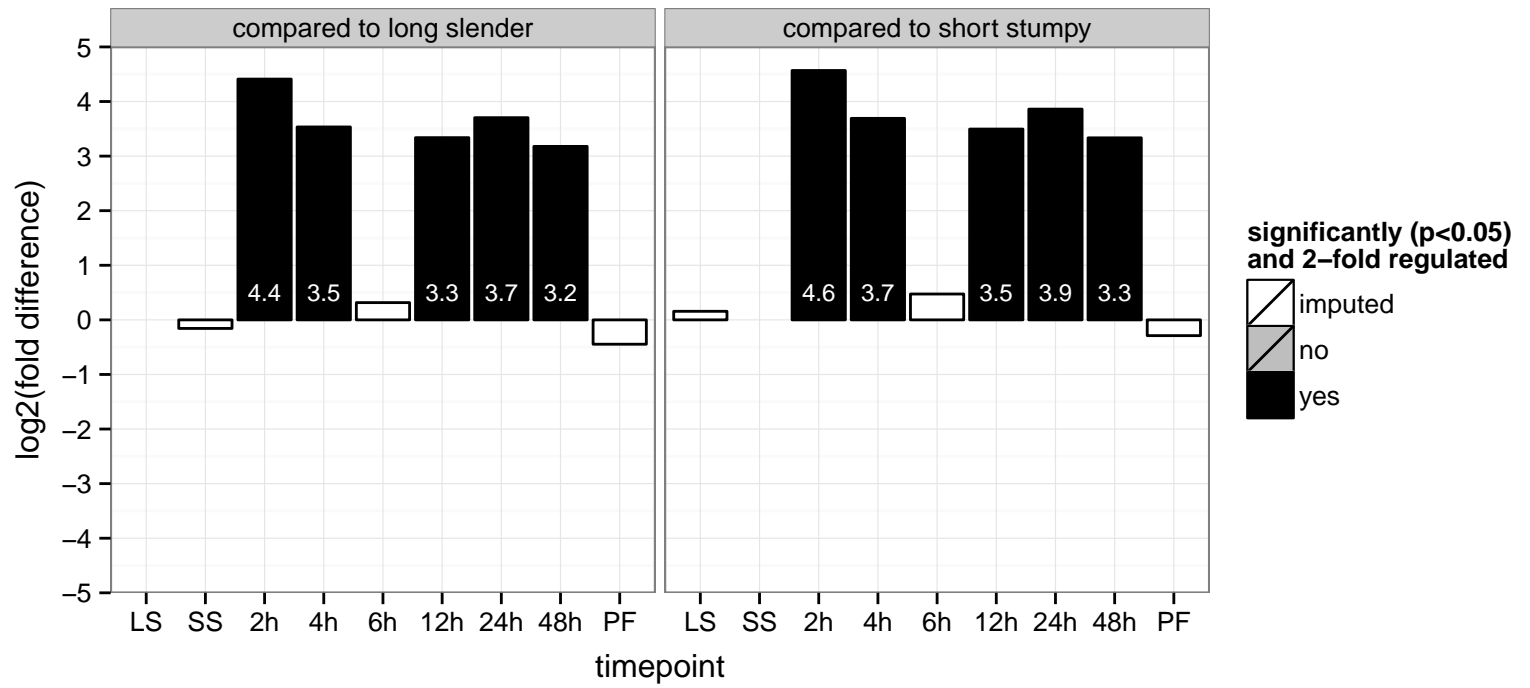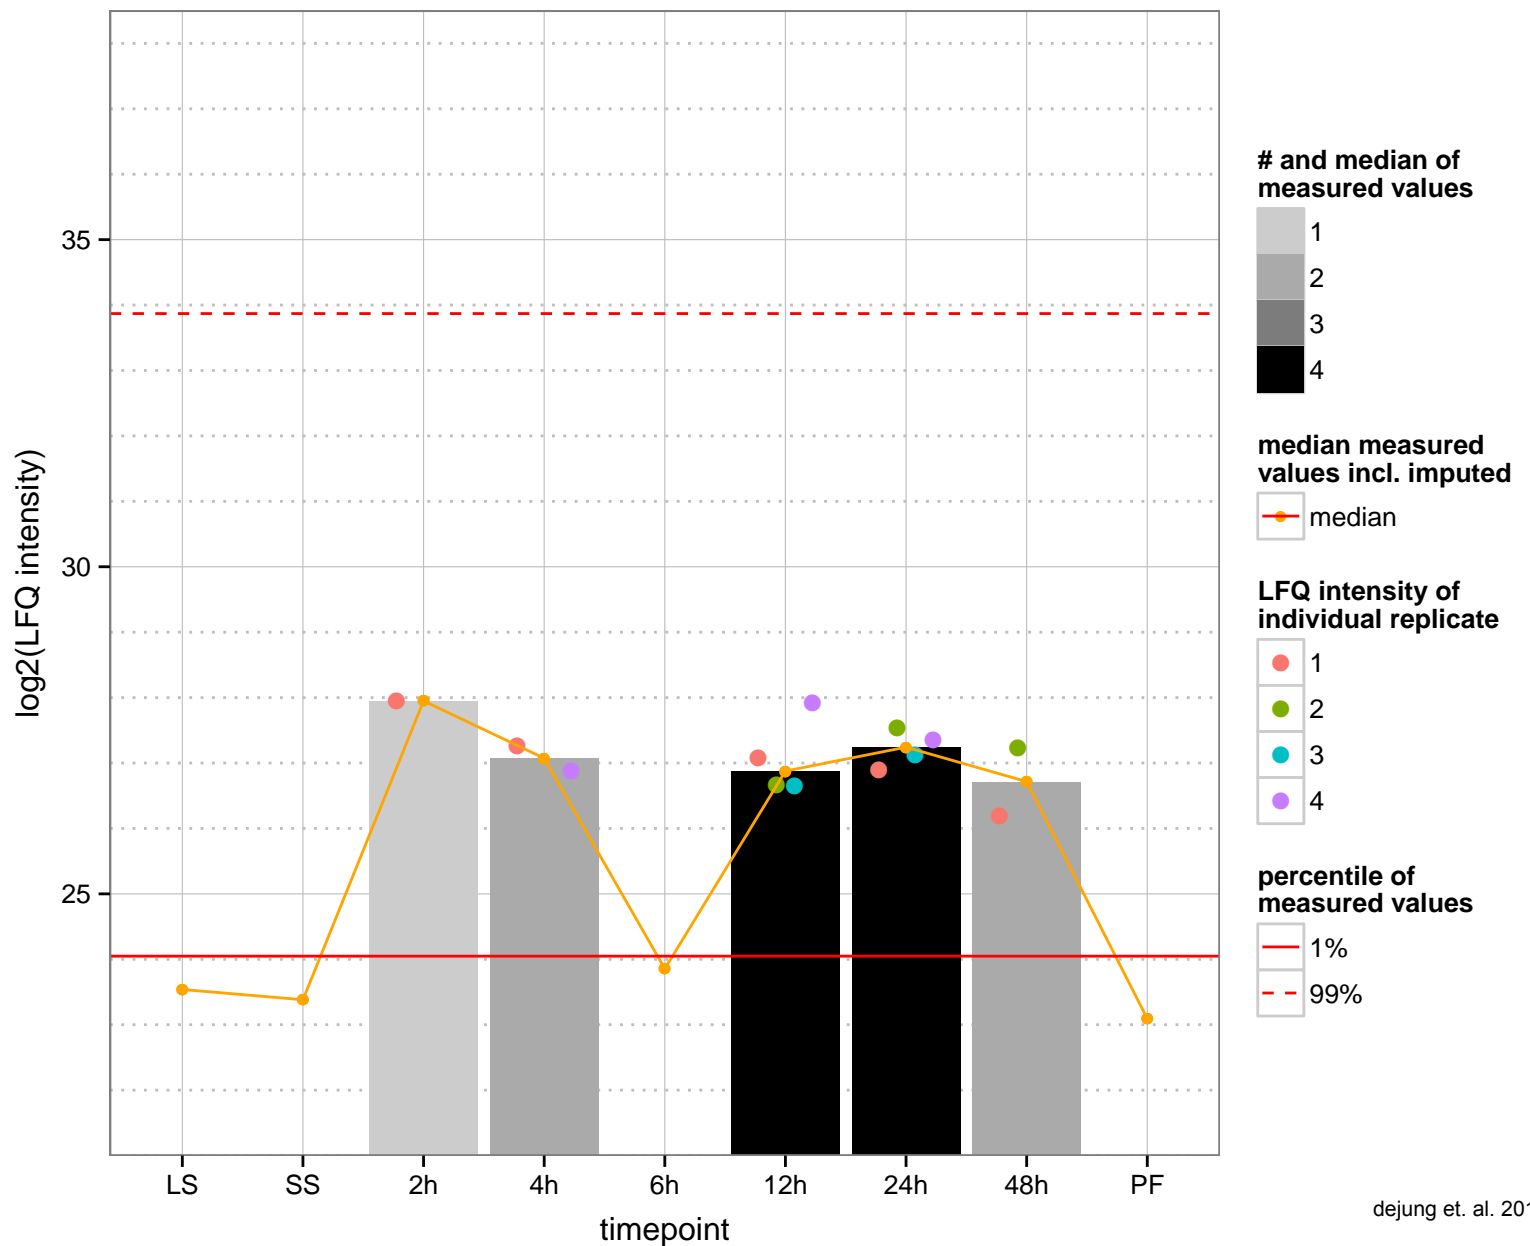

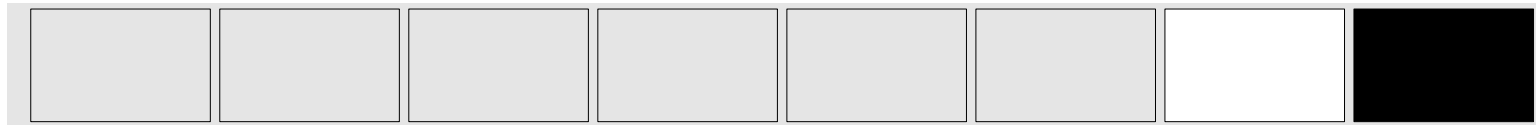

SS

2h

4h

6h

12h

24h

48h

PF

timepoint

**regulated**



not regulated



significant down



significant up



hypothetical protein, conserved  
 Tb927.11.10690  
 AGOF: null  
 AGOC: endoplasmic reticulum  
 AGOP: null  
 PGO: null  
 PGOC: null  
 PGOP: null

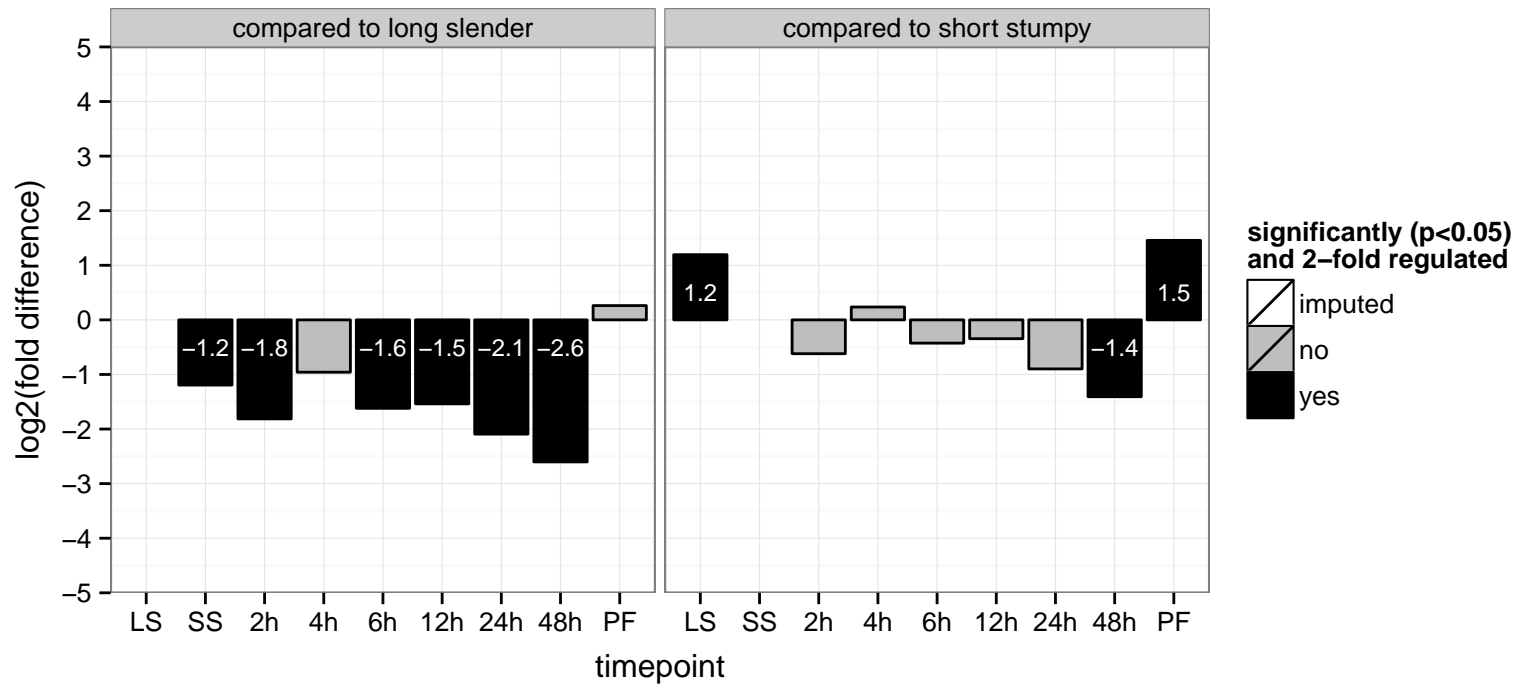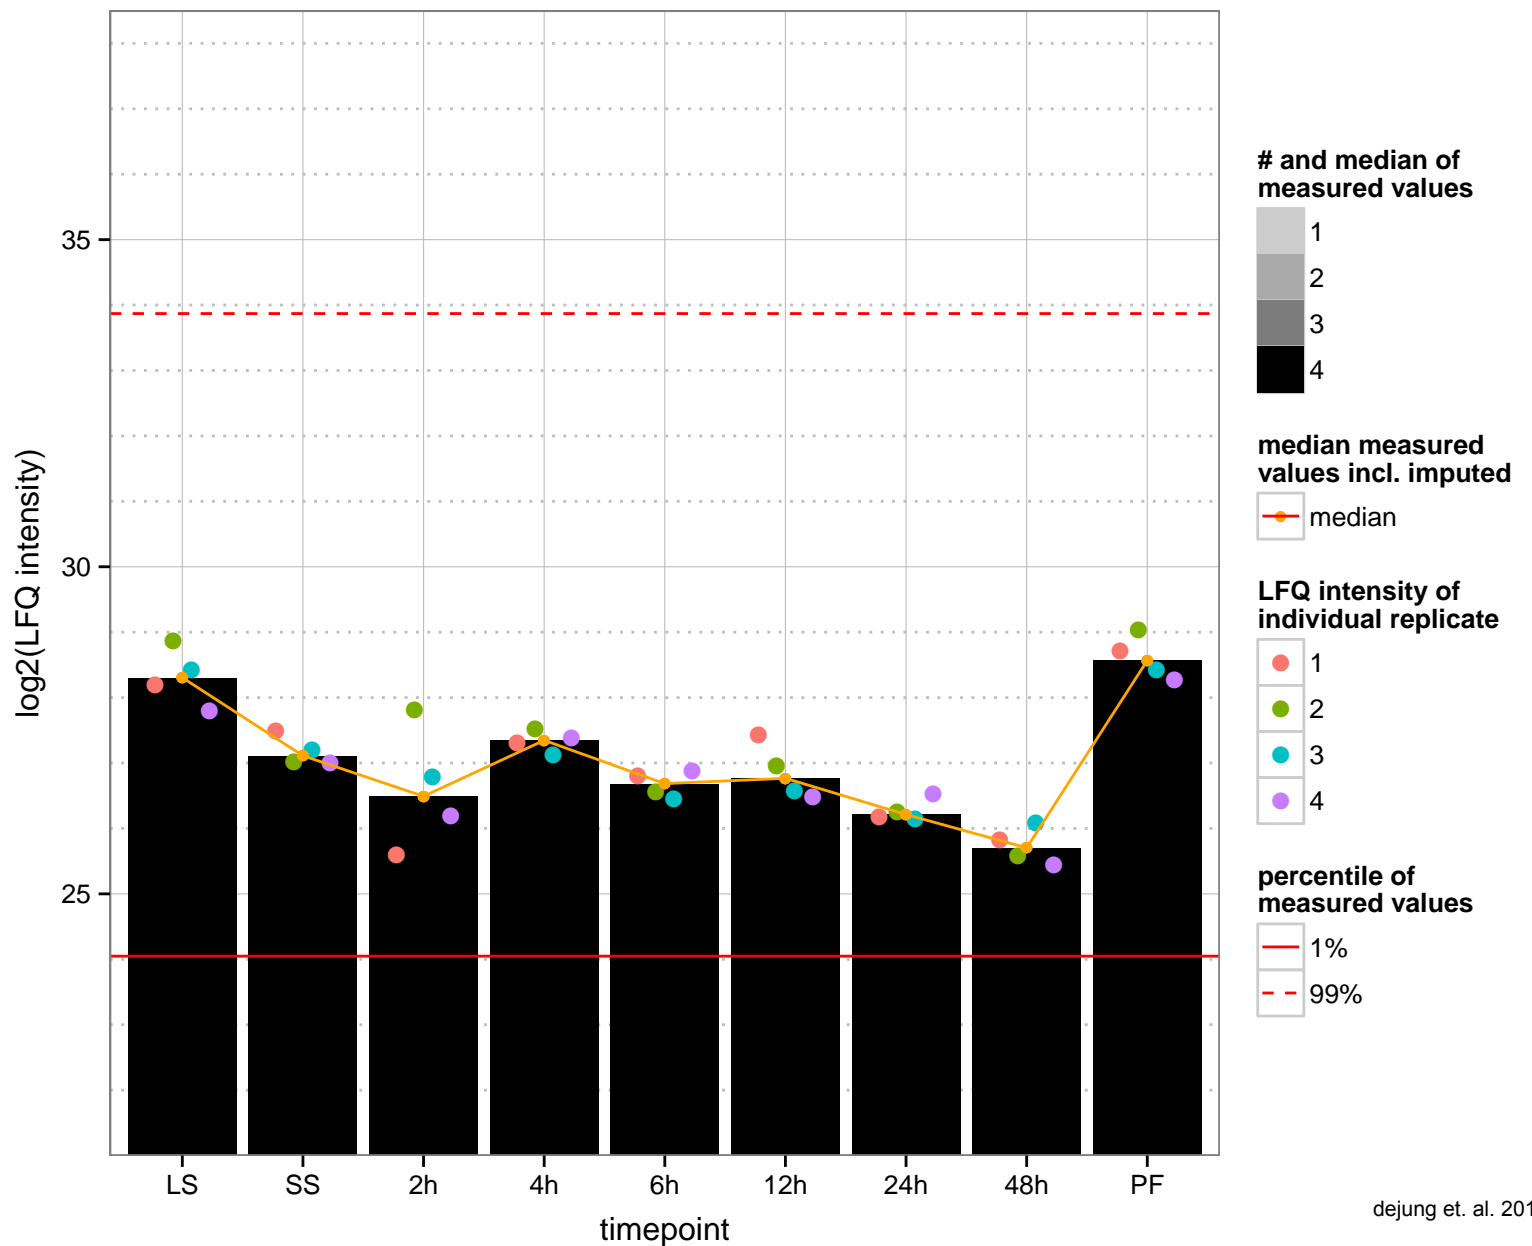

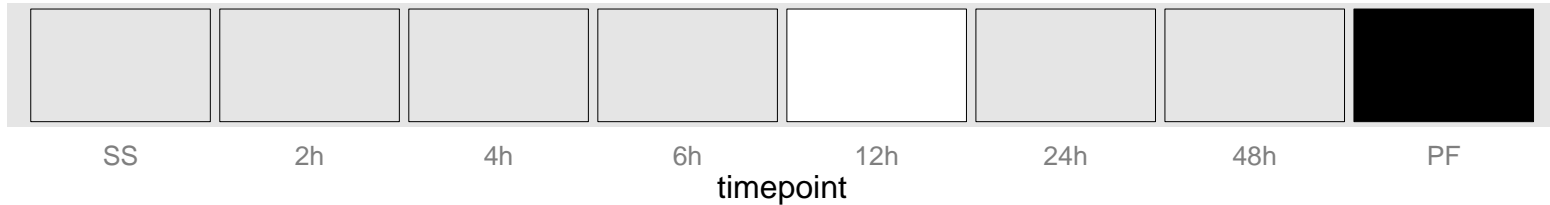

**regulated**  **not regulated**  **significant down**  **significant up**

hypothetical protein, conserved  
 Tb927.11.14700  
 AGOF: null  
 AGOC: mitochondrion  
 AGOP: null  
 PGO: null  
 PGOC: null  
 PGOP: null

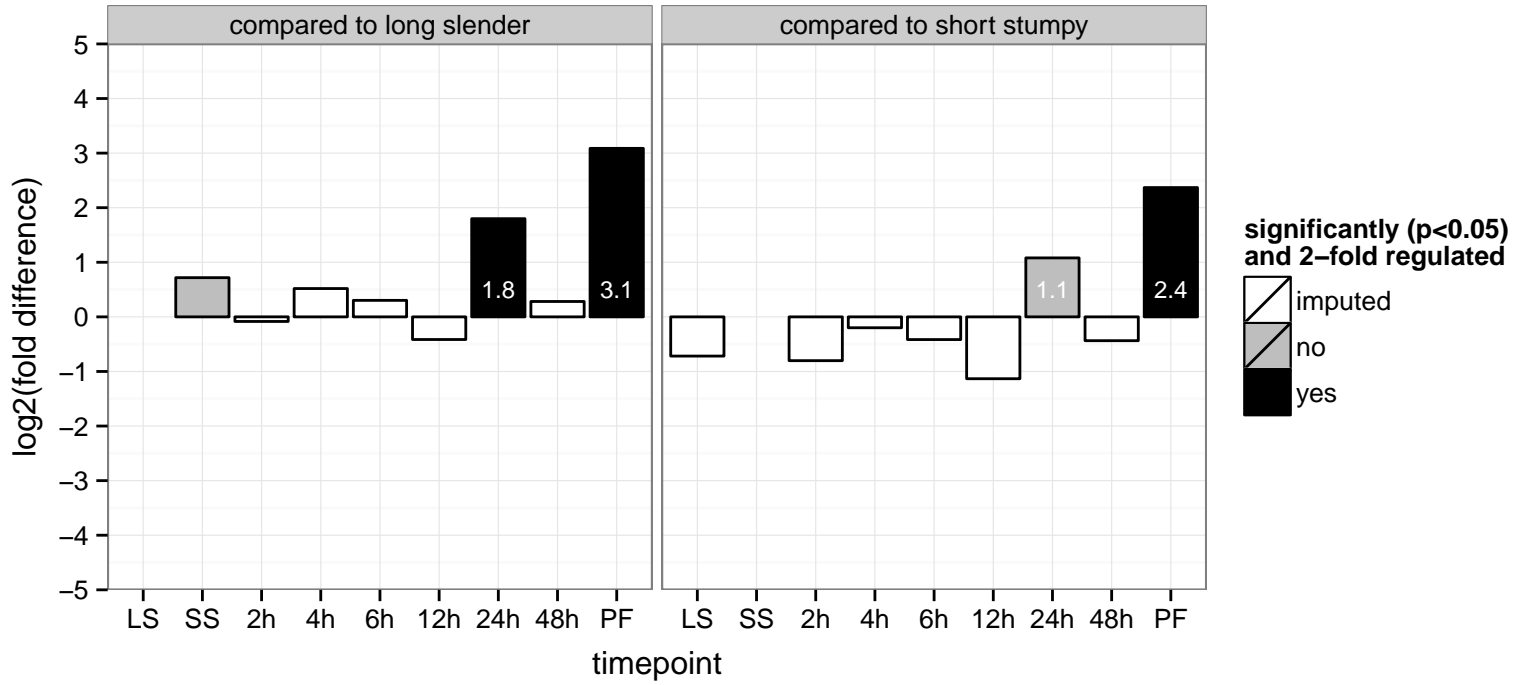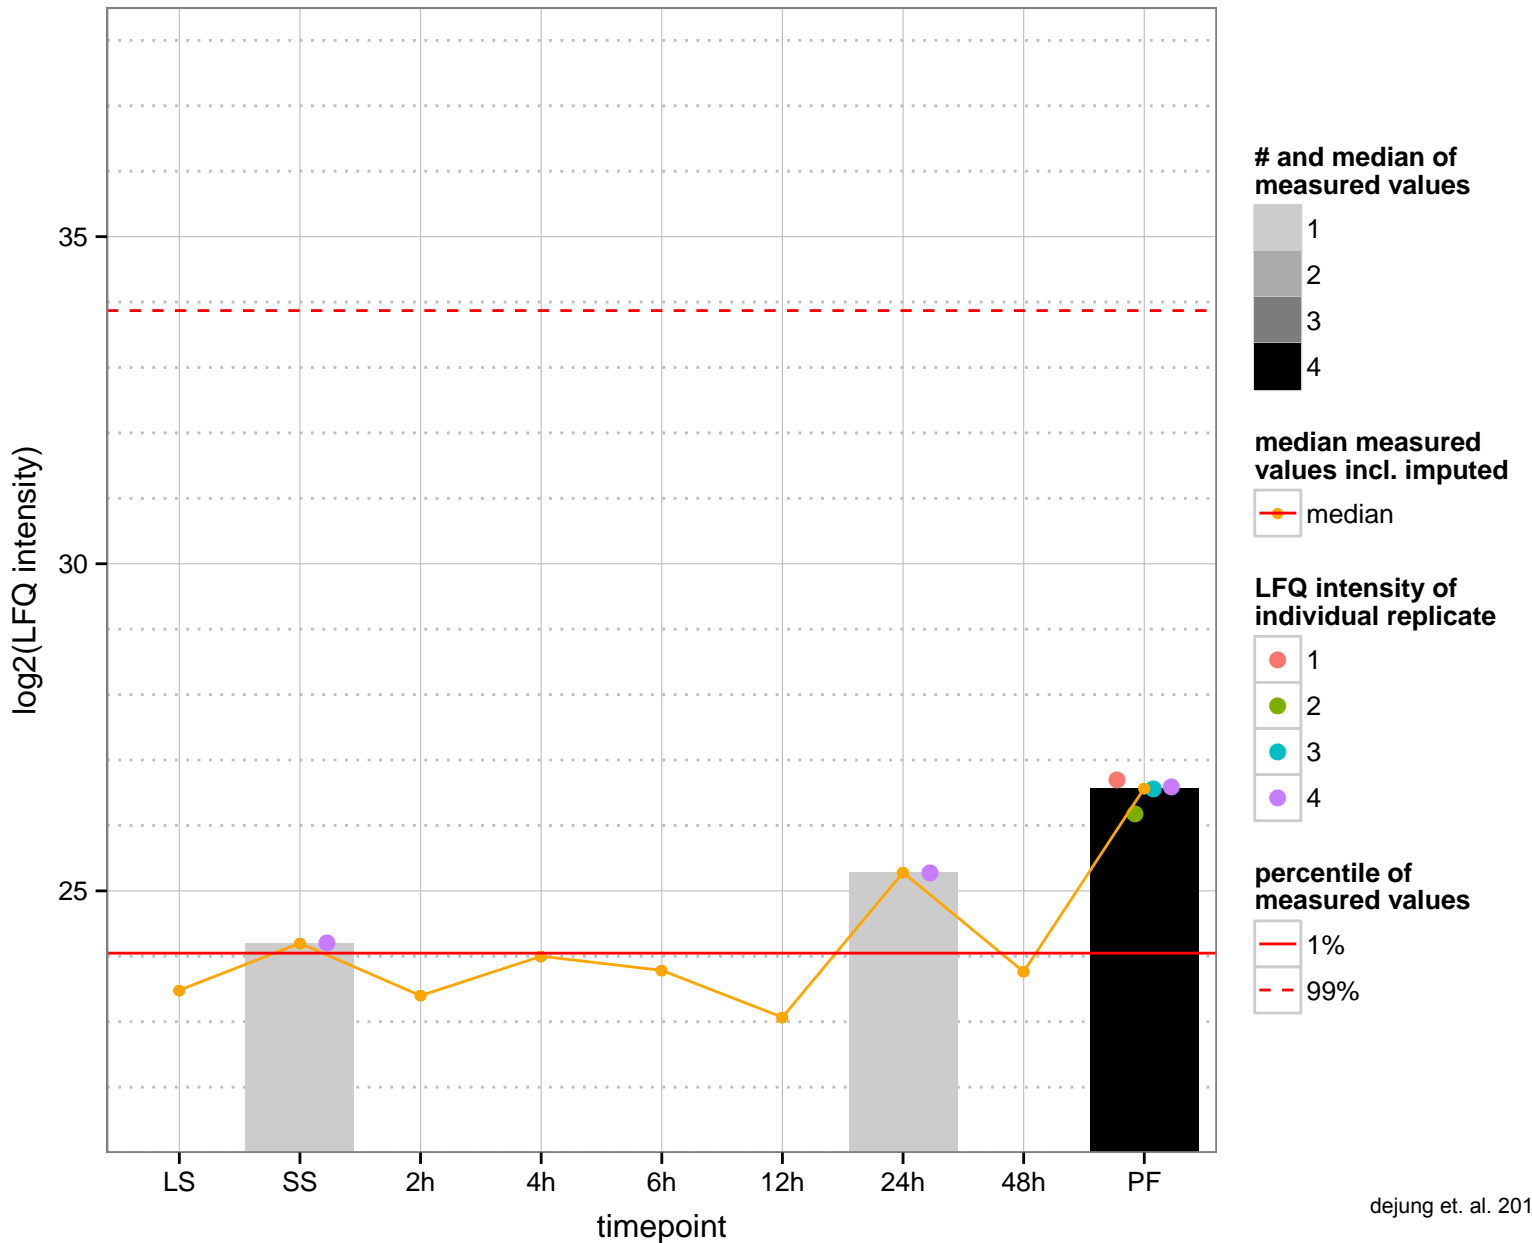

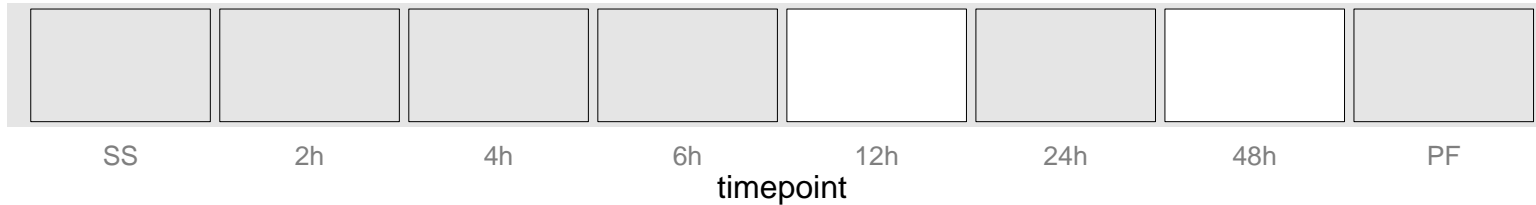

**regulated**  **not regulated**  **significant down**  **significant up**

ATP-binding protein, putative  
 Tb927.11.360  
 AGOF: null  
 AGOC: null  
 AGOP: null  
 PGO: null  
 PGOC: null  
 PGOP: null

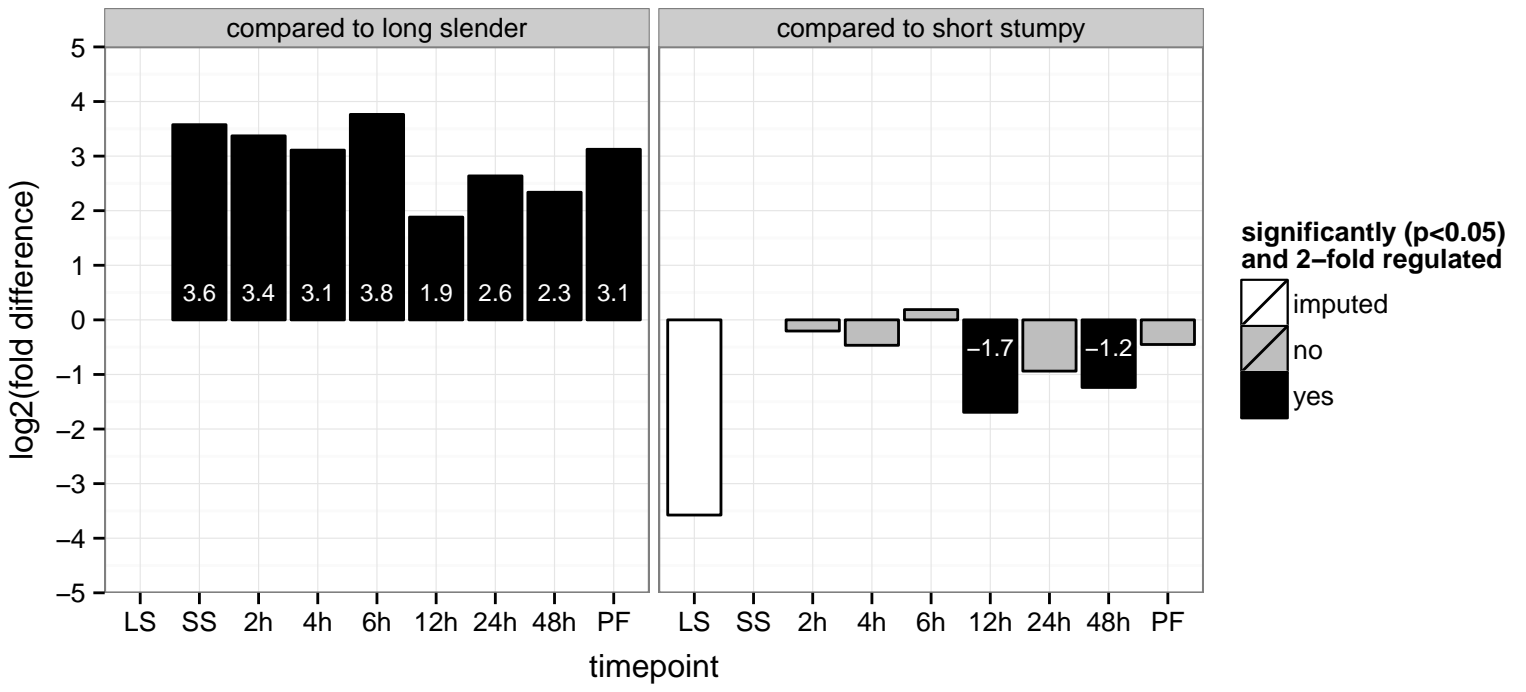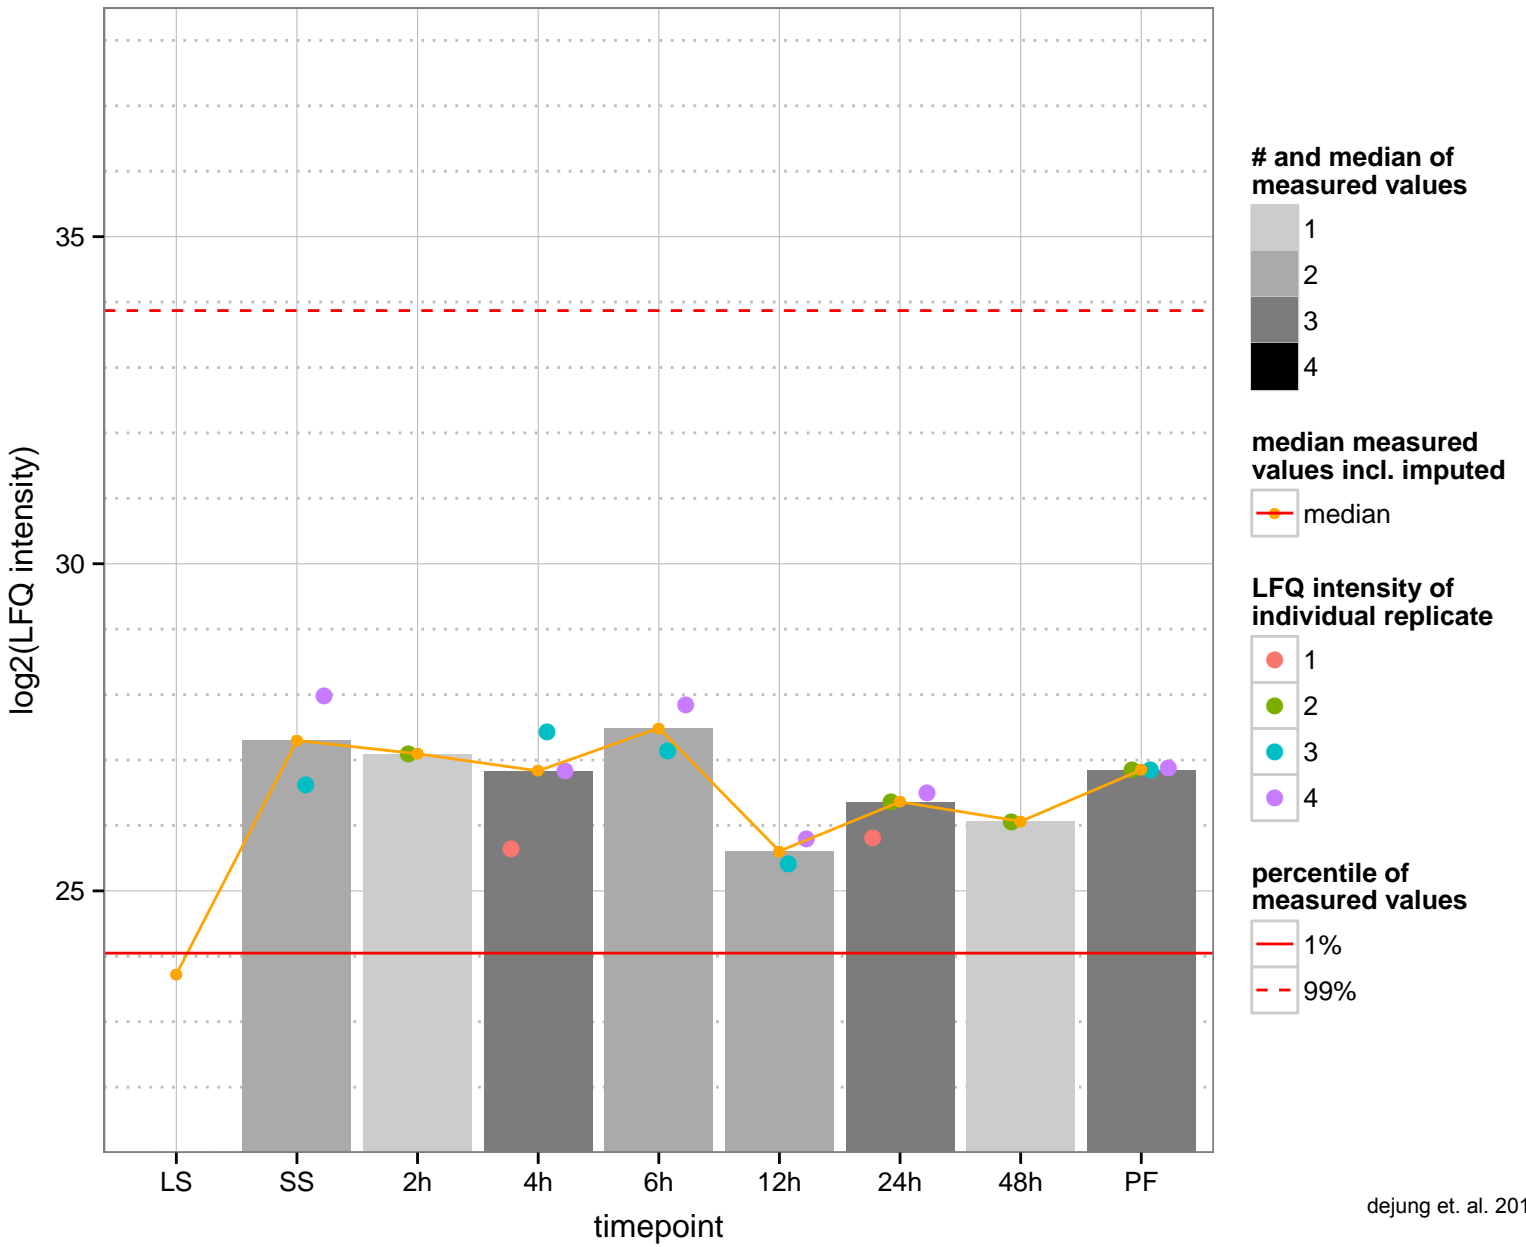

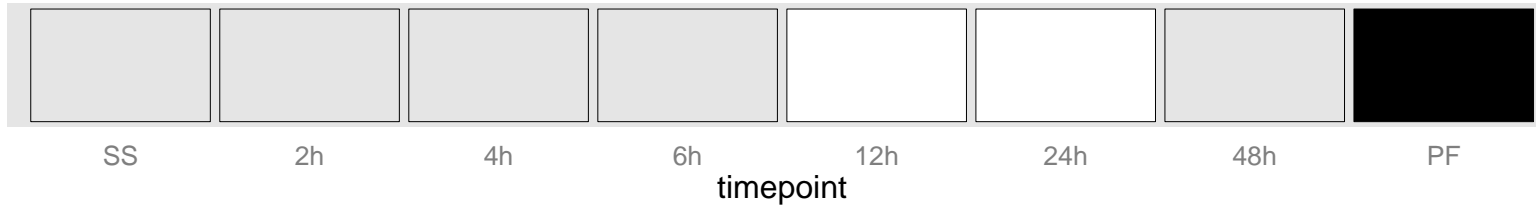

**regulated**  **not regulated**  **significant down**  **significant up**

hypothetical protein, conserved  
 Tb927.7.3860  
 AGOF: null  
 AGOC: null  
 AGOP: null  
 PGO: null  
 PGOC: null  
 PGOP: null

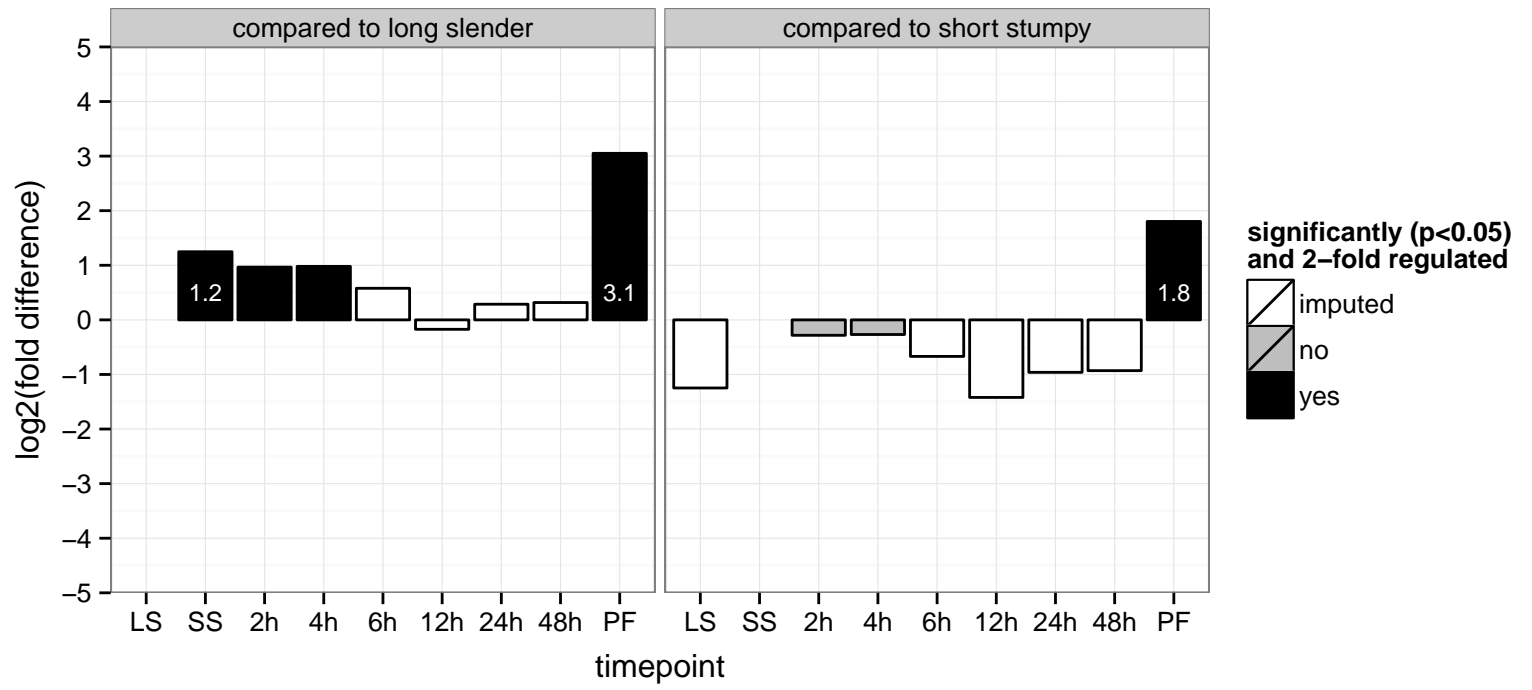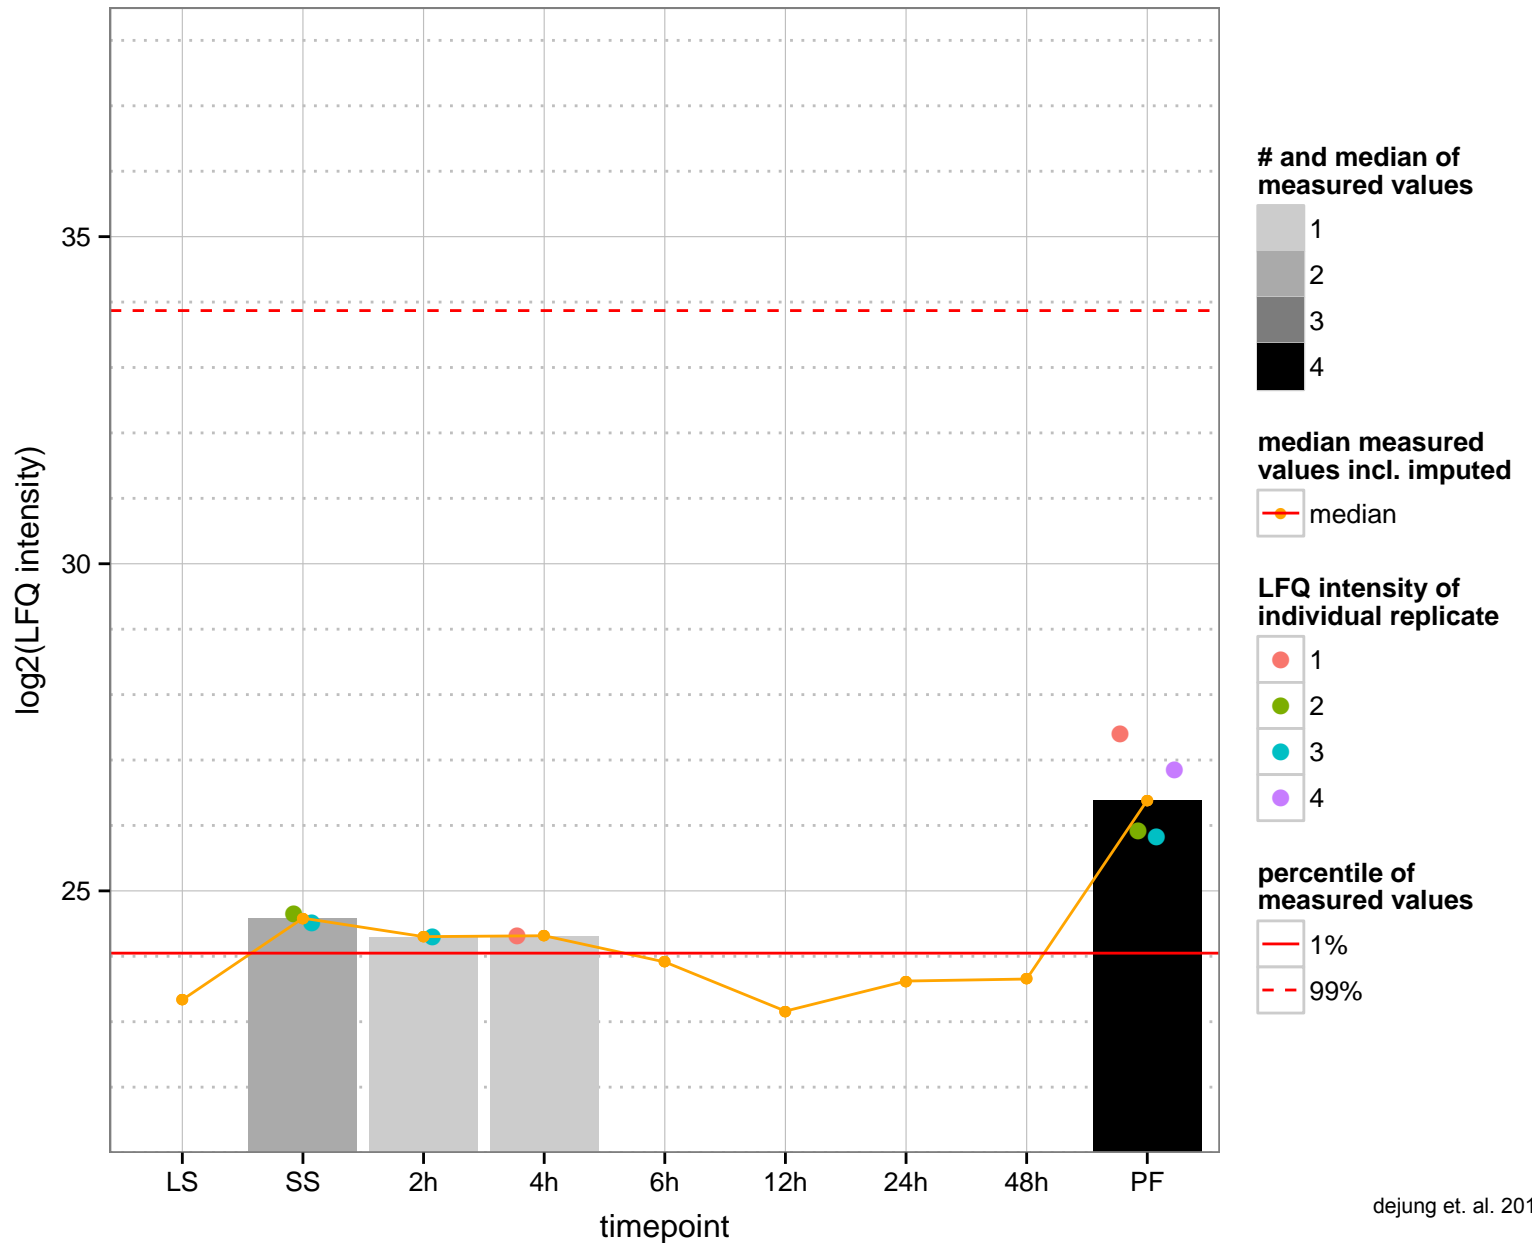

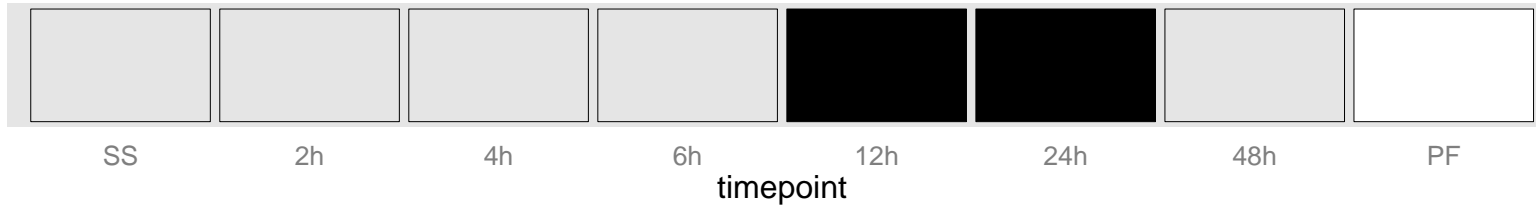

**regulated**  **not regulated**  **significant down**  **significant up**



hypothetical protein, conserved  
 Tb927.6.2220  
 AGOF: null  
 AGOC: null  
 AGOP: null  
 PGOF: null  
 PGOC: null  
 PGOP: null

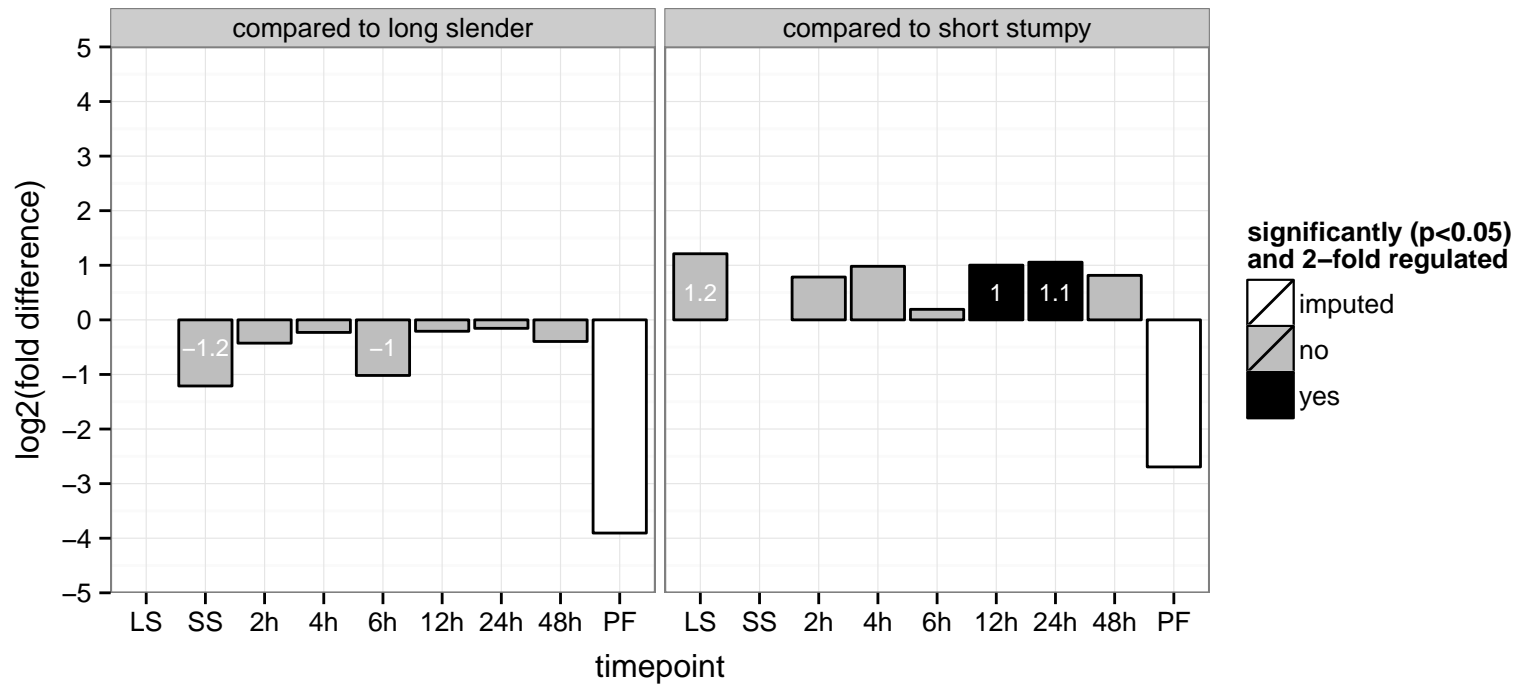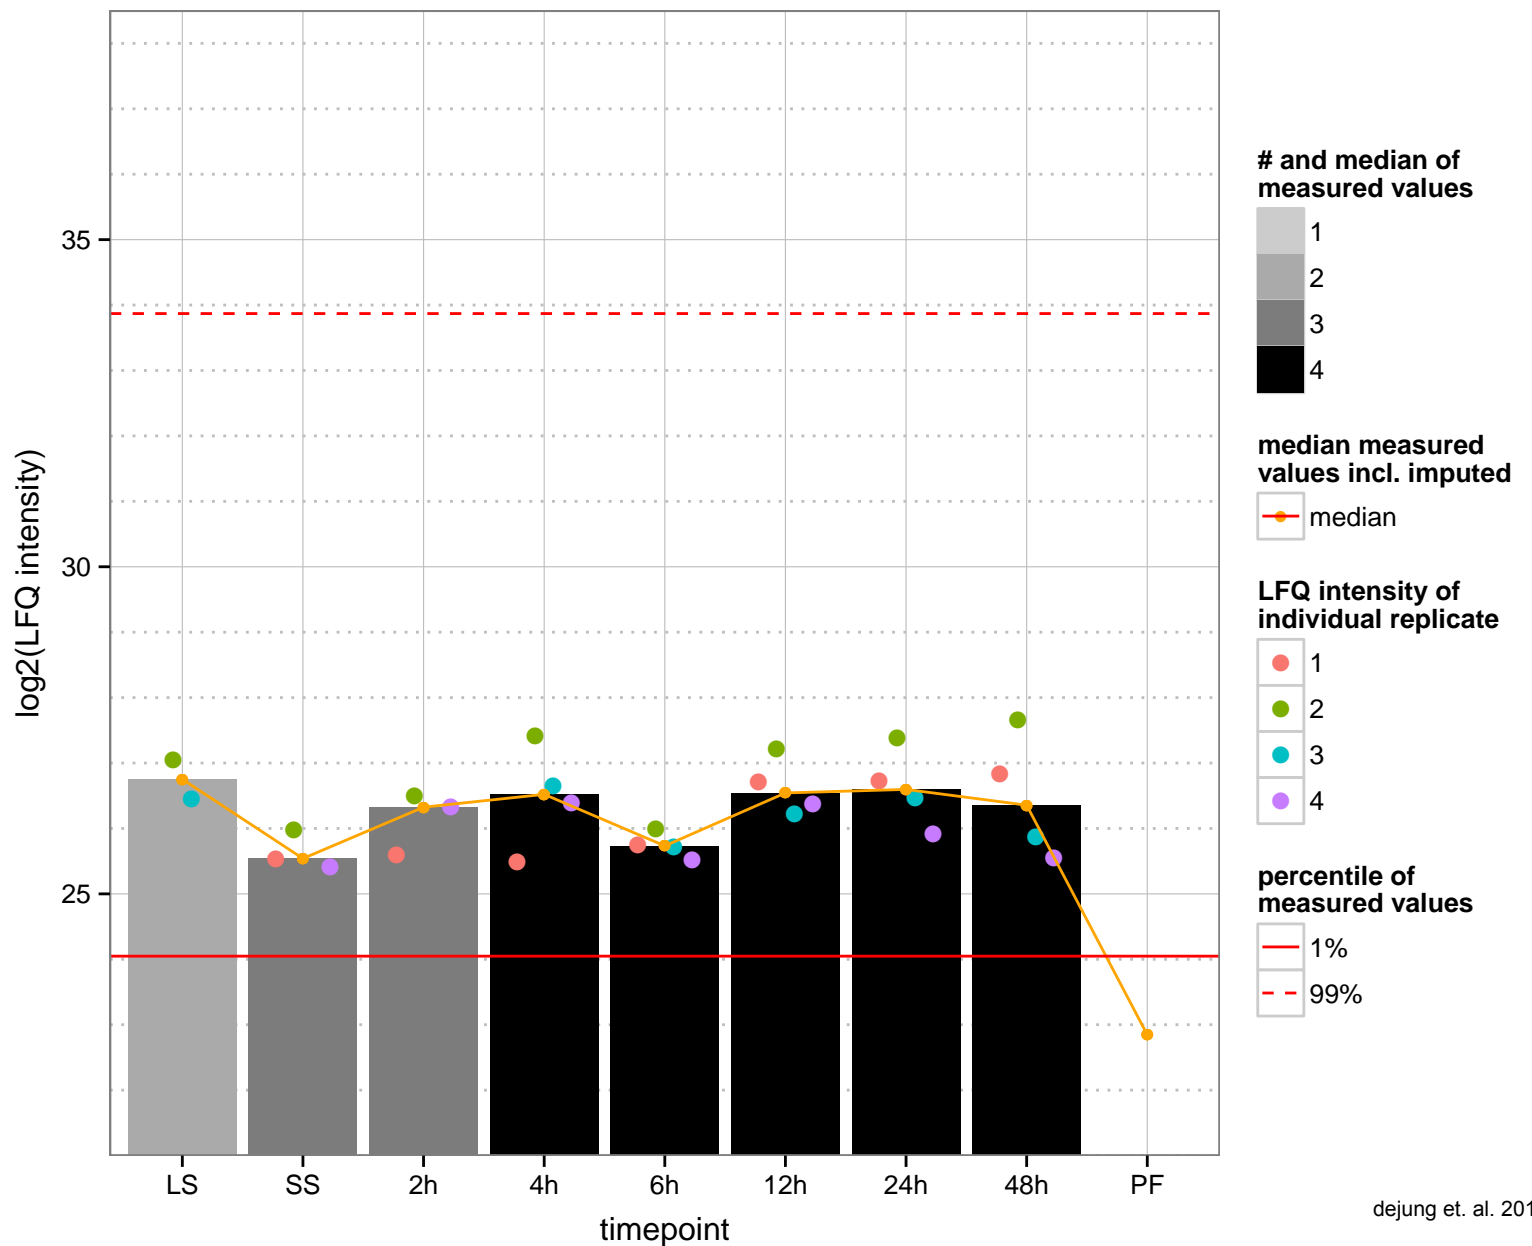

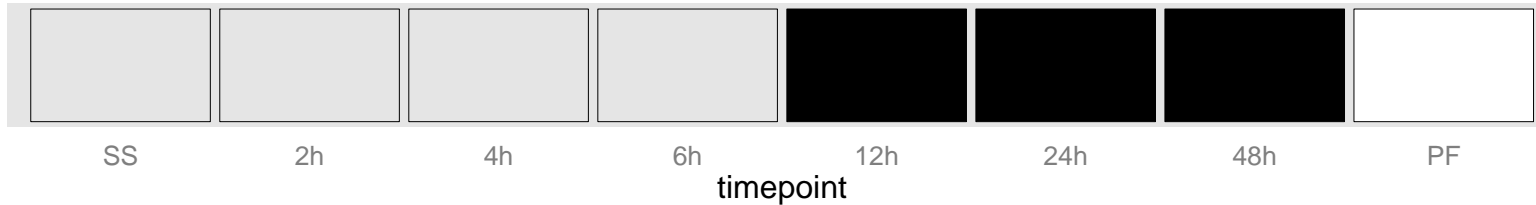

**regulated**  **not regulated**  **significant down**  **significant up**

hypothetical protein, conserved  
 Tb927.11.12840  
 AGOF: null  
 AGOC: null  
 AGOP: null  
 PGO: null  
 PGOC: null  
 PGOP: null

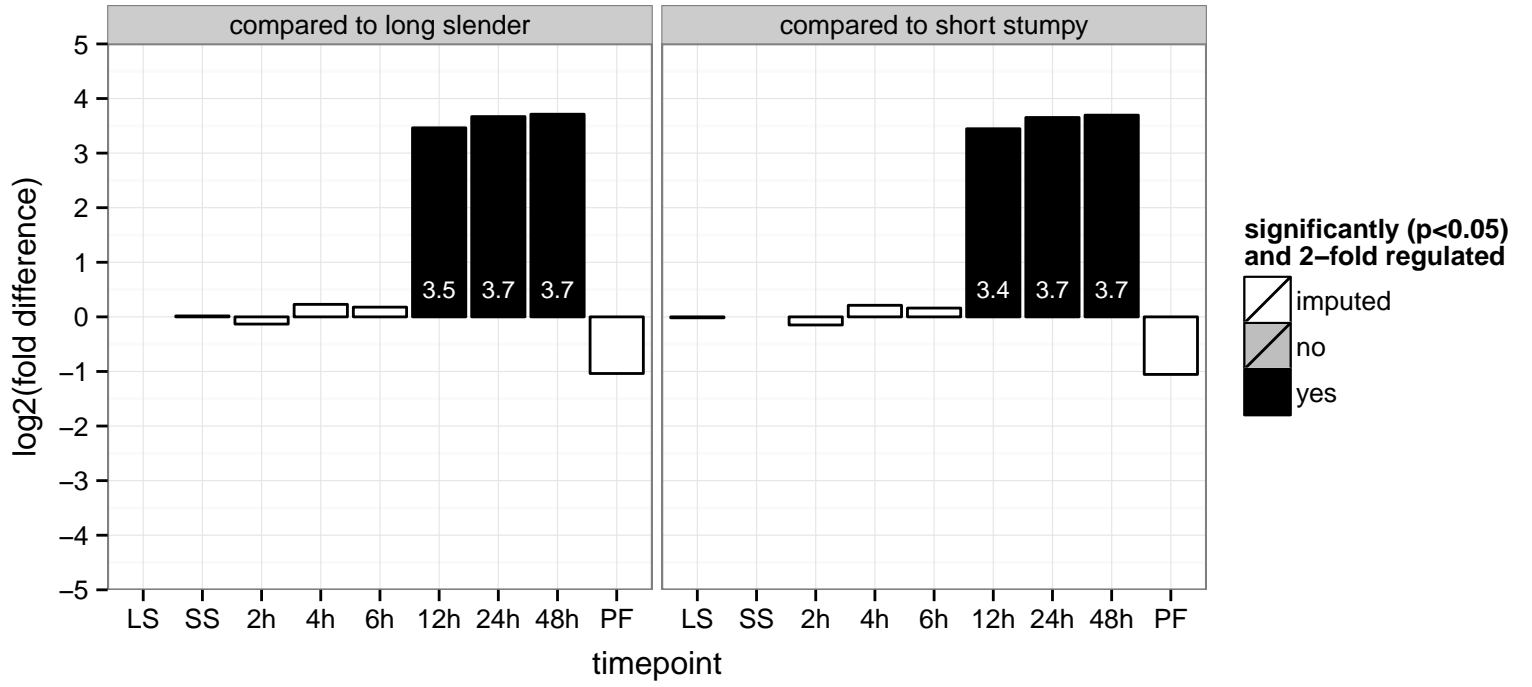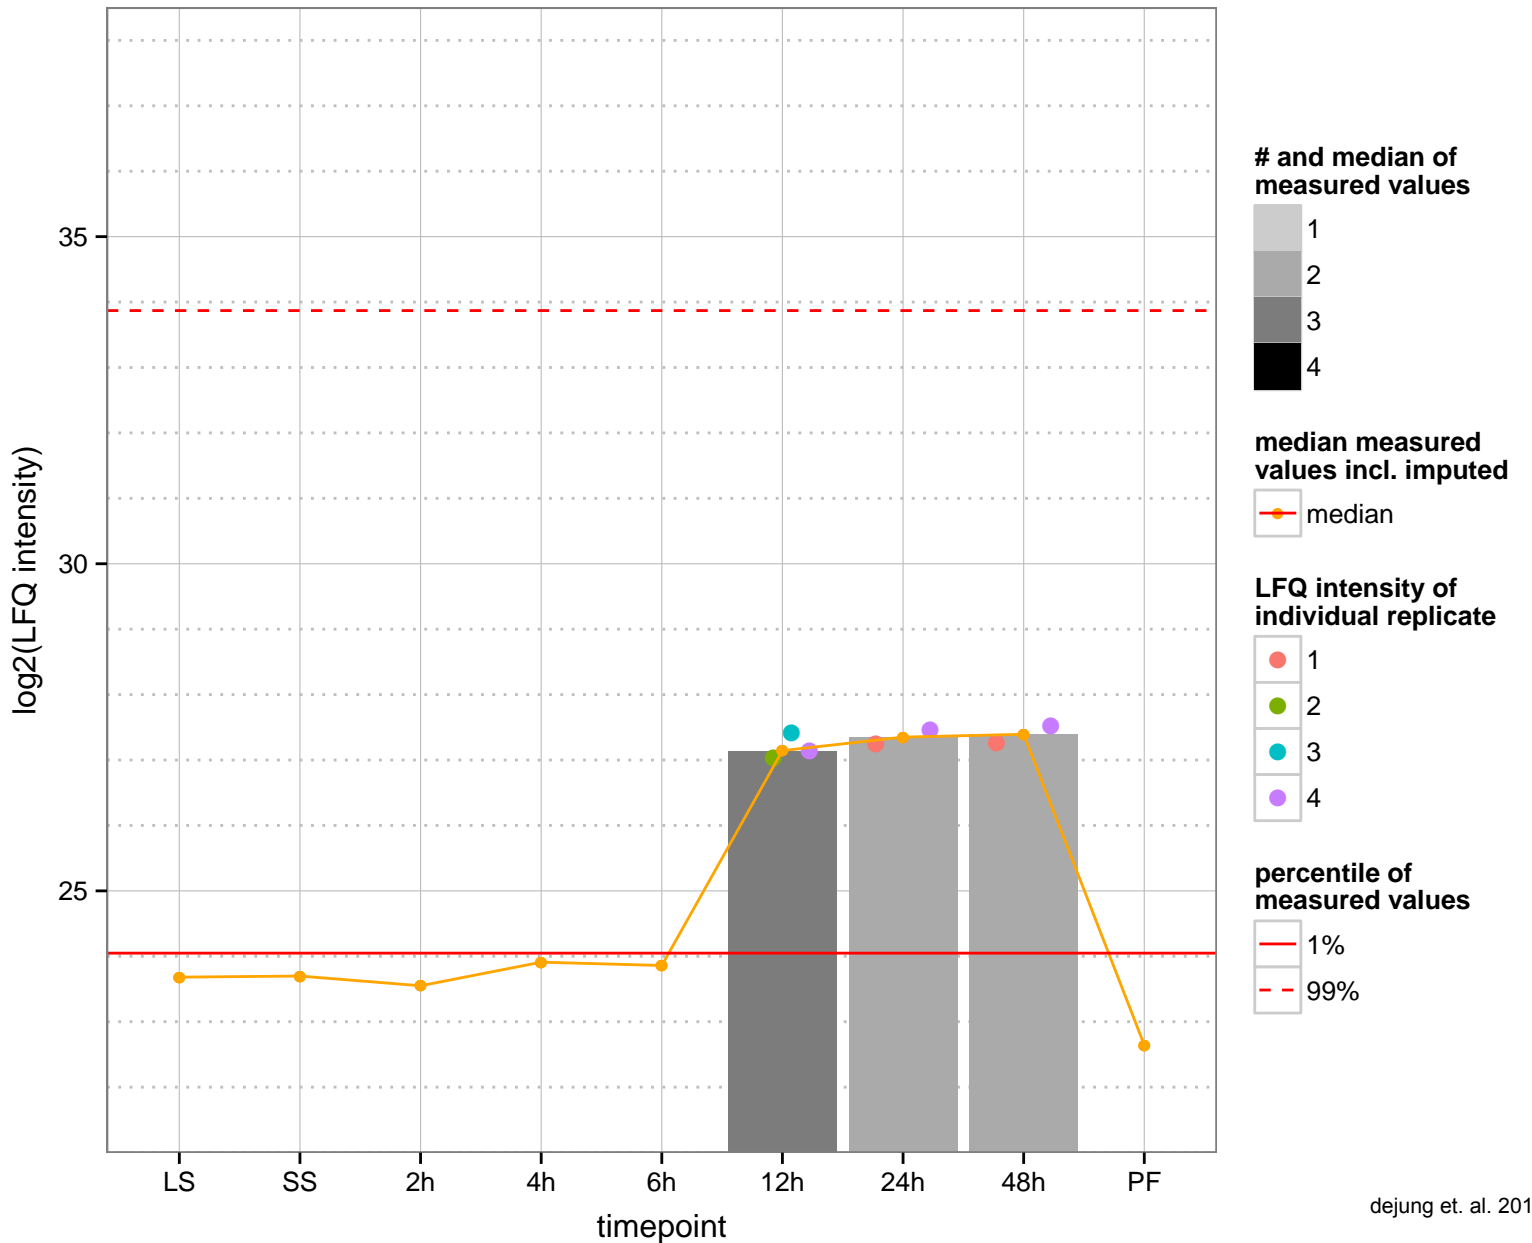

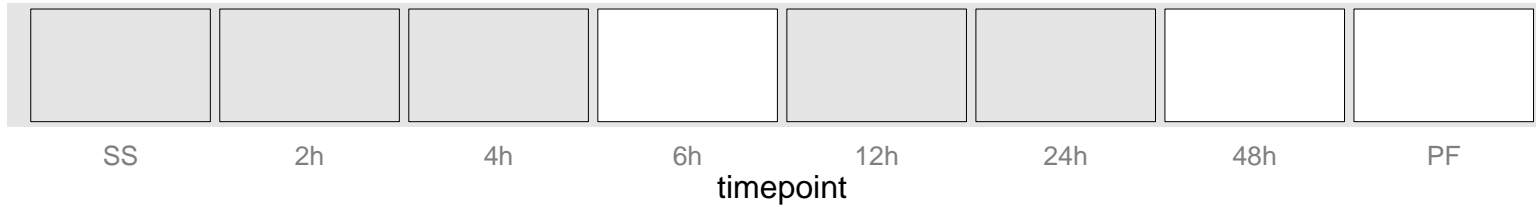

**regulated**  **not regulated**  **significant down**  **significant up**

hypothetical protein, conserved  
 Tb927.9.10060  
 AGOF: null  
 AGOC: null  
 AGOP: null  
 PGO: null  
 PGOC: null  
 PGOP: null

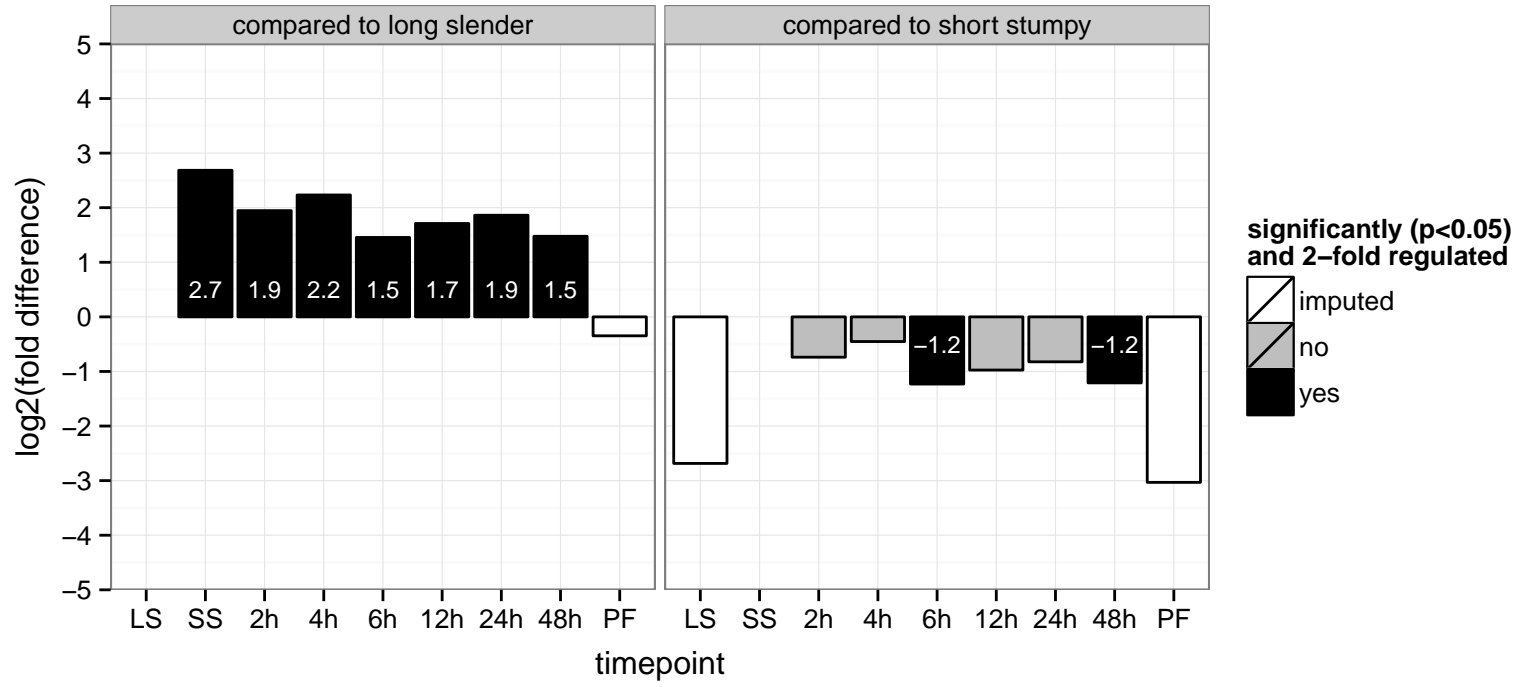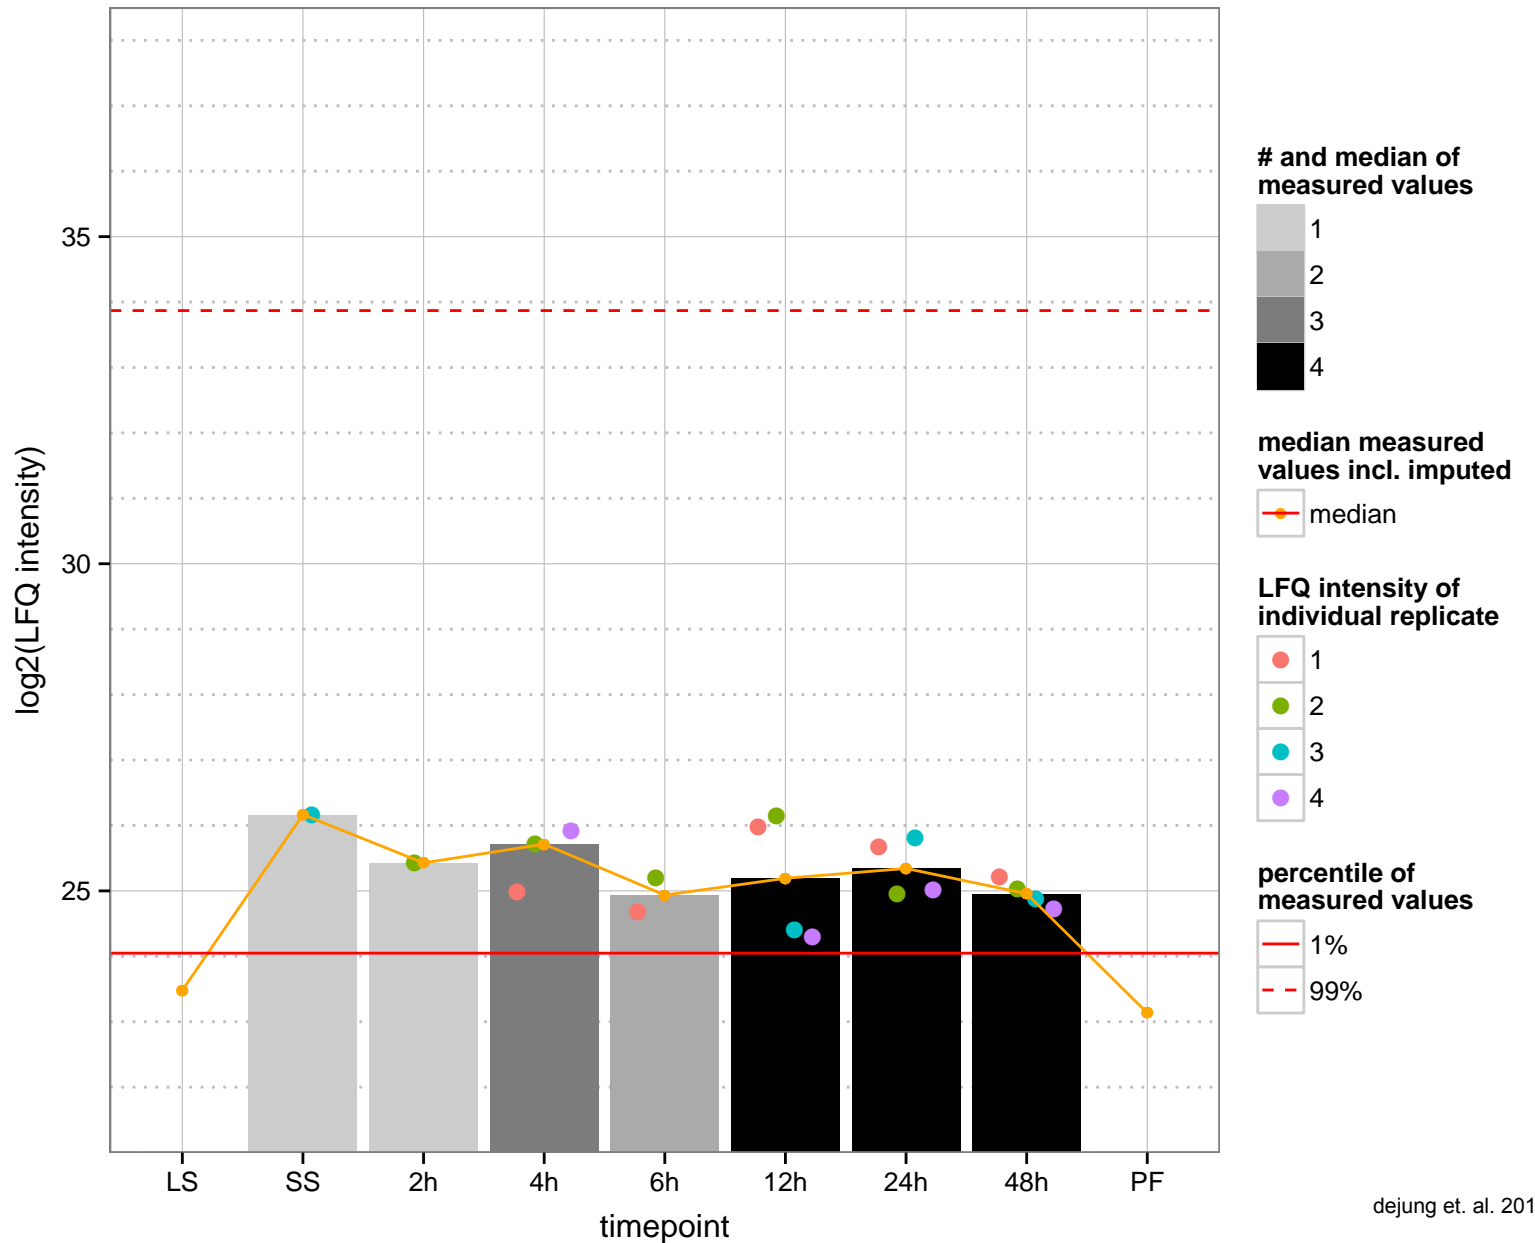

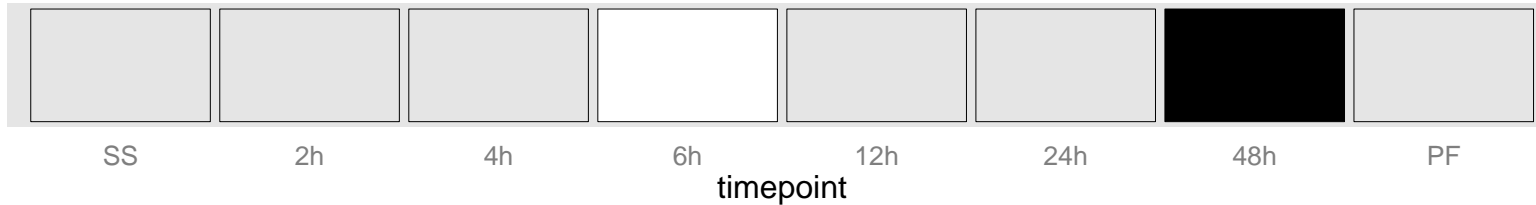

**regulated**  **not regulated**  **significant down**  **significant up**

phosphoglycerate kinase (PGKB)  
 Tb927.1.710  
 AGOF: phosphoglycerate kinase activity  
 AGOC: cytoplasm  
 AGOP: glycolysis  
 PGOF: phosphoglycerate kinase activity  
 PGOC: null  
 PGOP: glycolysis

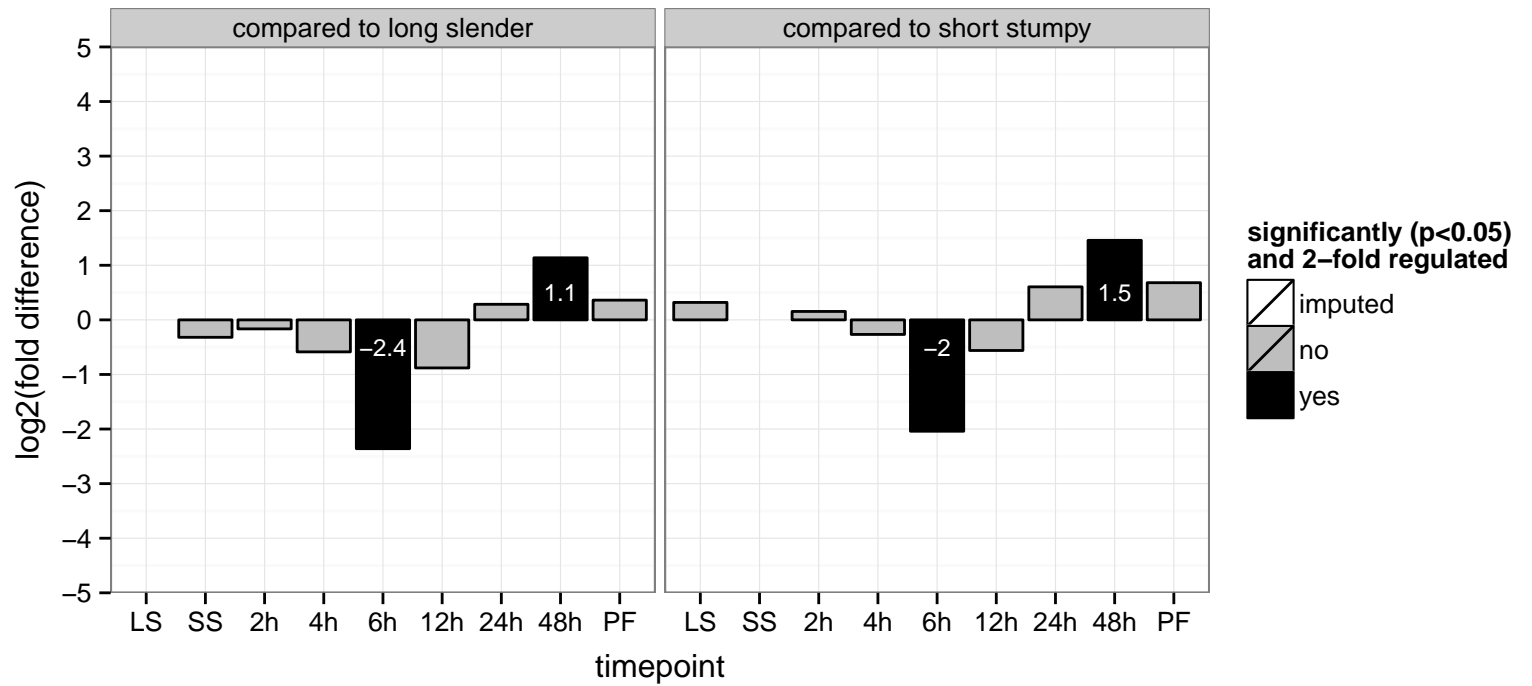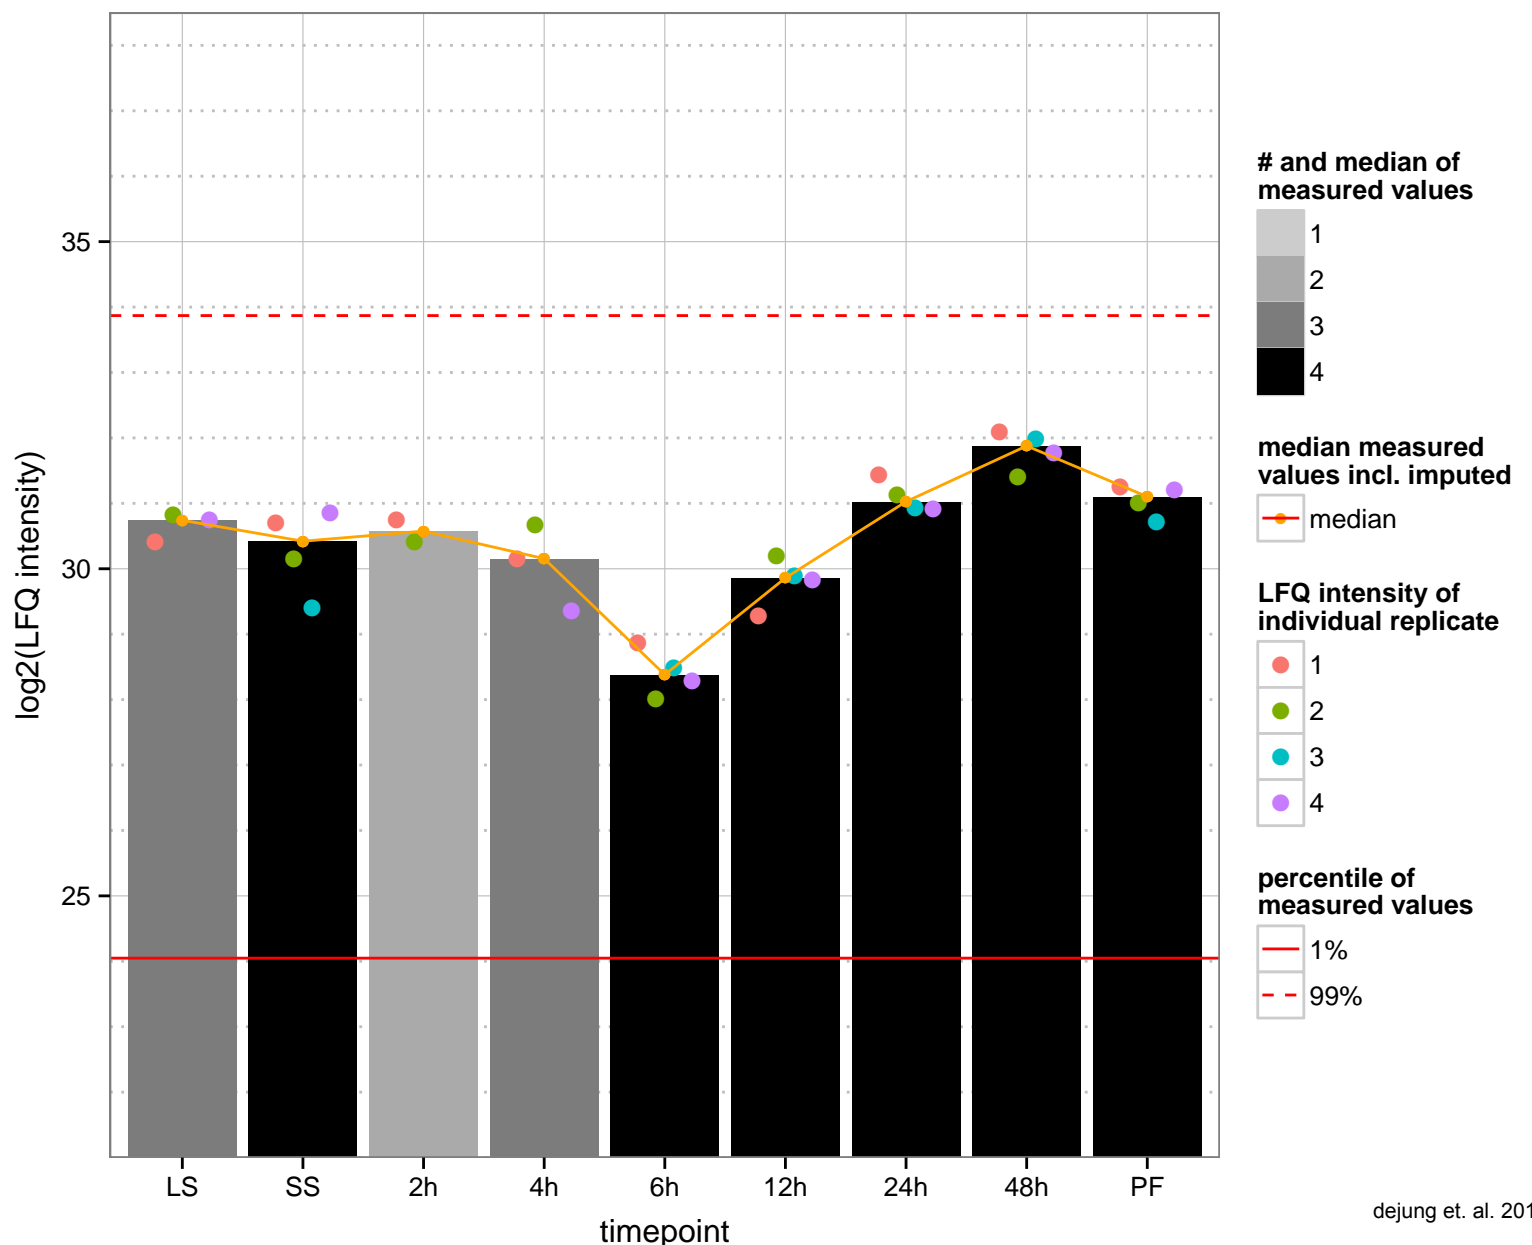

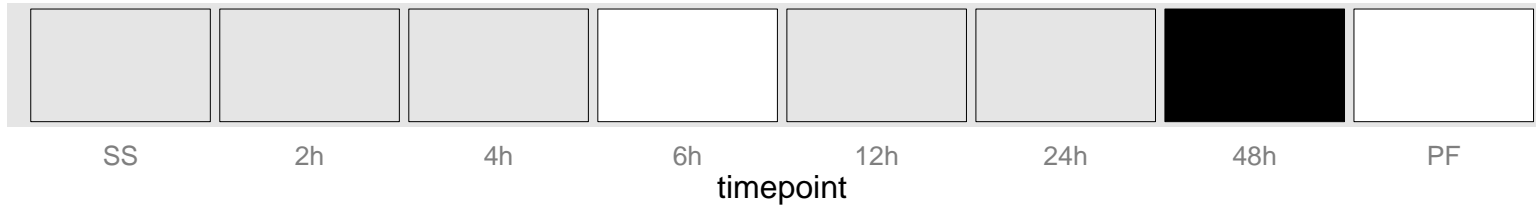

**regulated**  **not regulated**  **significant down**  **significant up**



chrX additional, unordered contigs, hypothetical protein, conserved  
 Tb927.10.1160;Tb11.0550  
 AGOF: null  
 AGOC: null, mitochondrion  
 AGOP: null  
 PGO: null  
 PGO: null  
 PGO: null

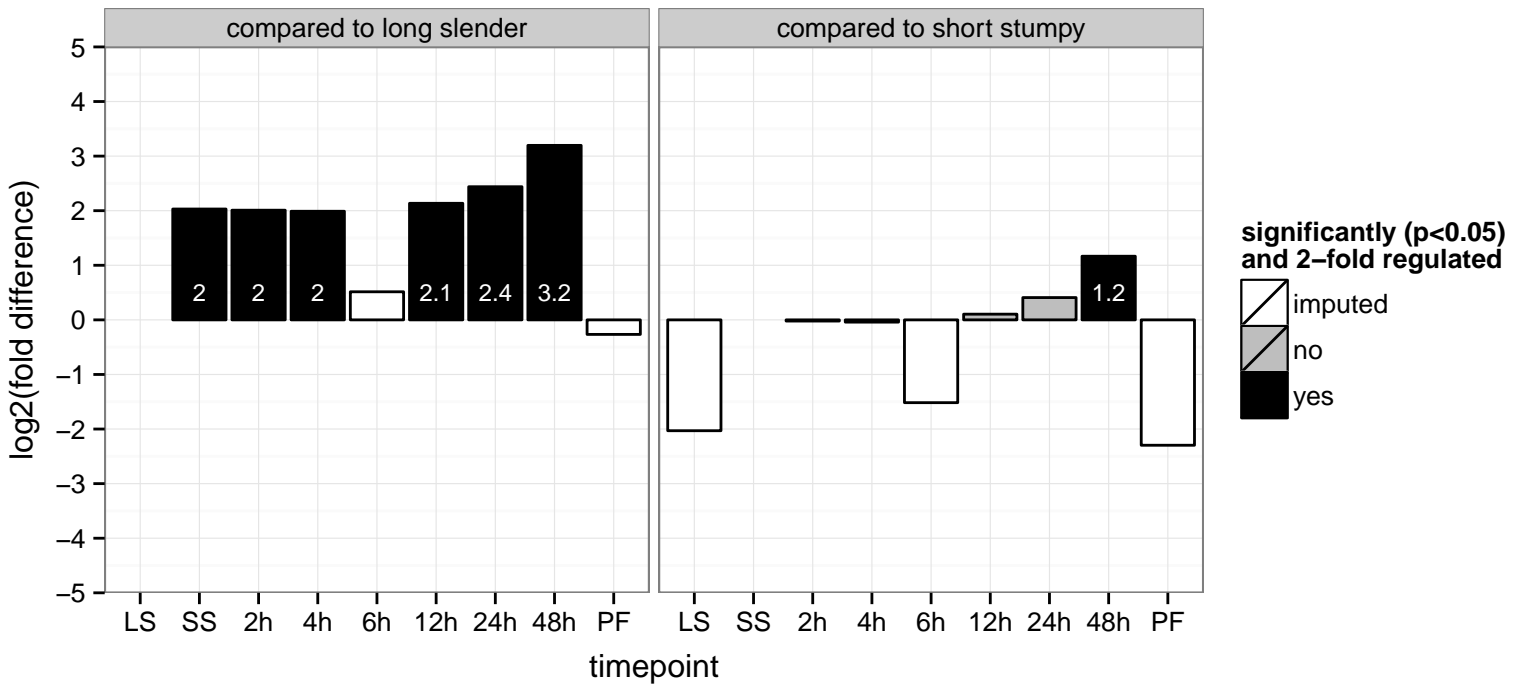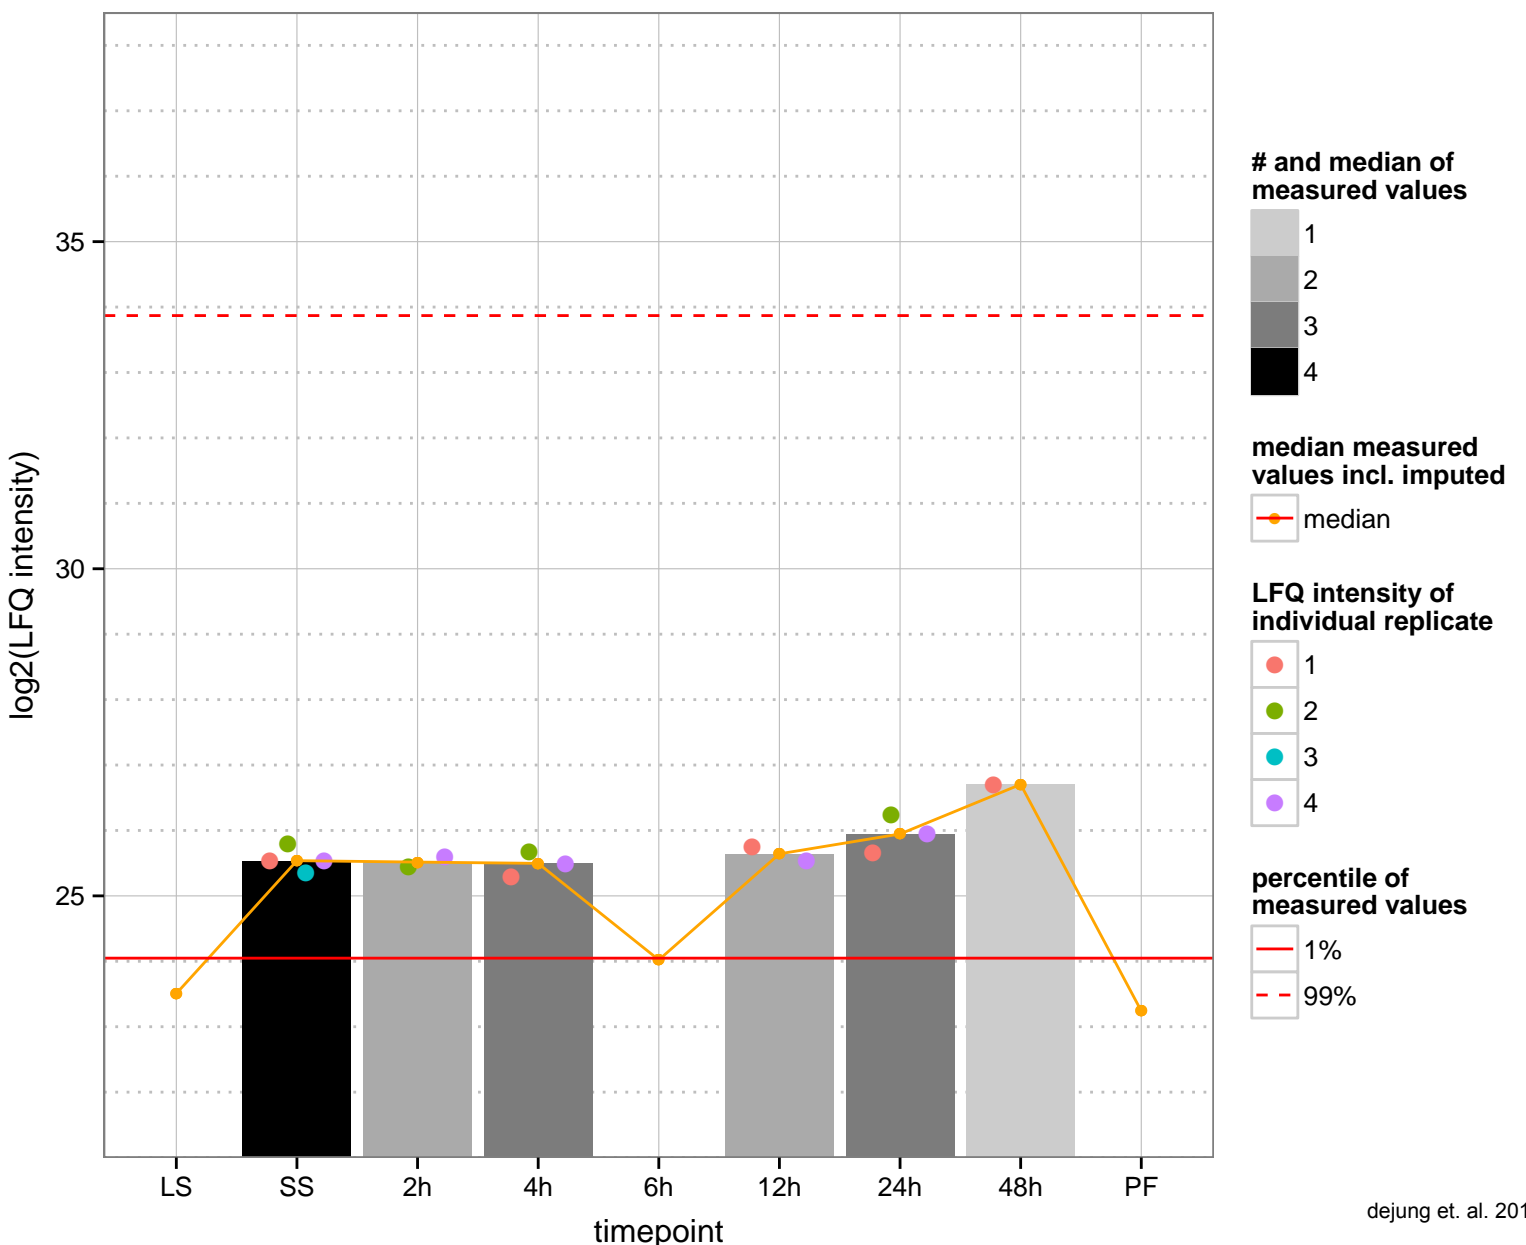

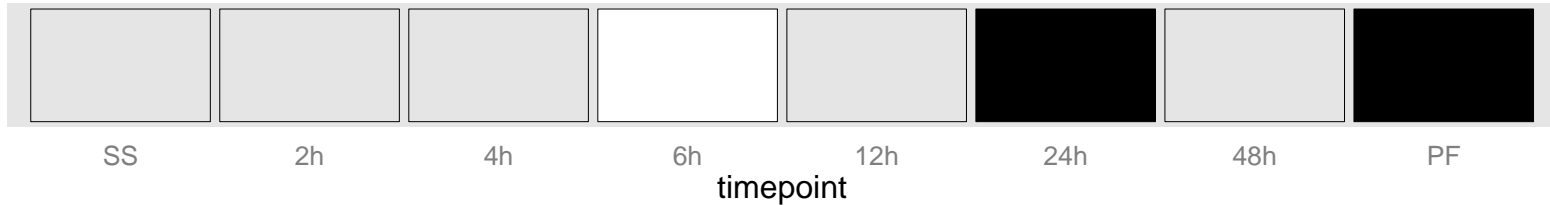

**regulated**  **not regulated**  **significant down**  **significant up**

hypothetical protein, conserved  
 Tb927.3.820  
 AGOF: null  
 AGOC: mitochondrion  
 AGOP: null  
 PGO: null  
 PGO: null  
 PGO: null

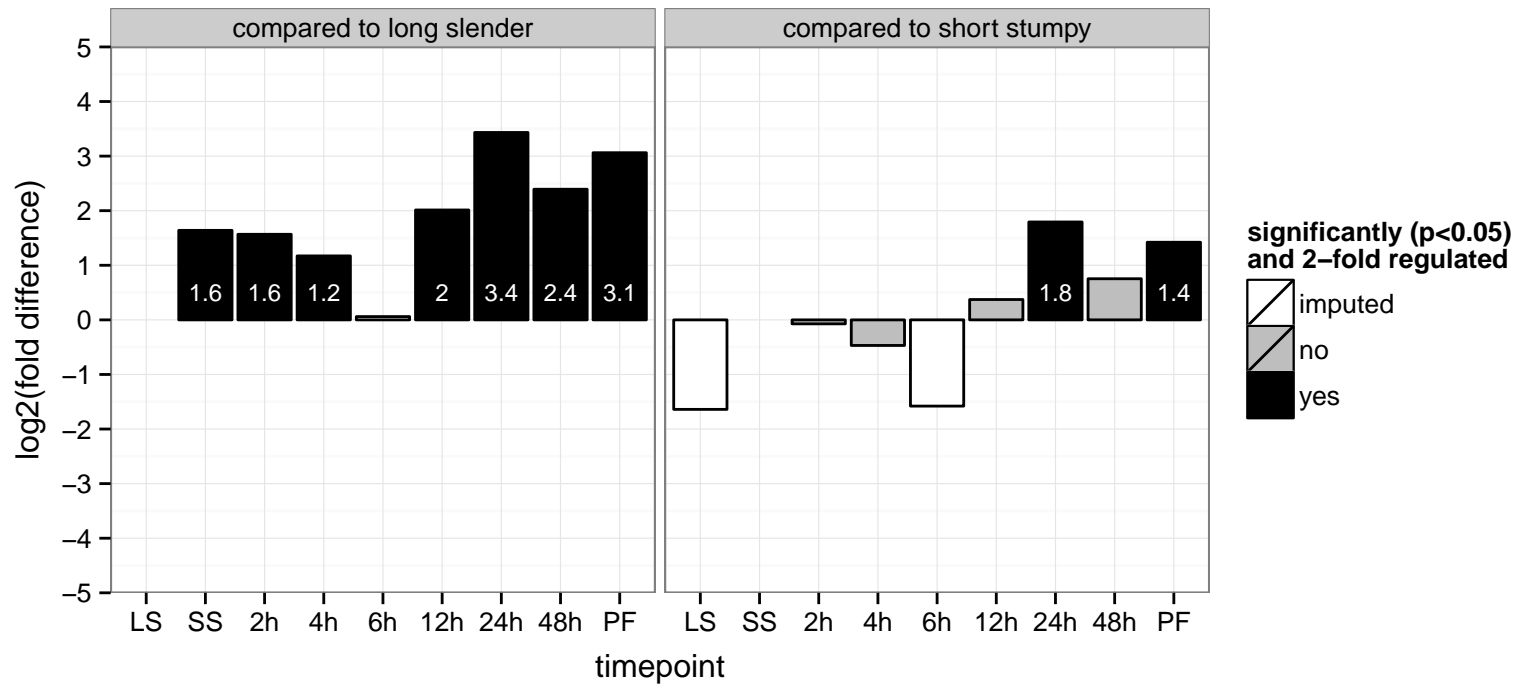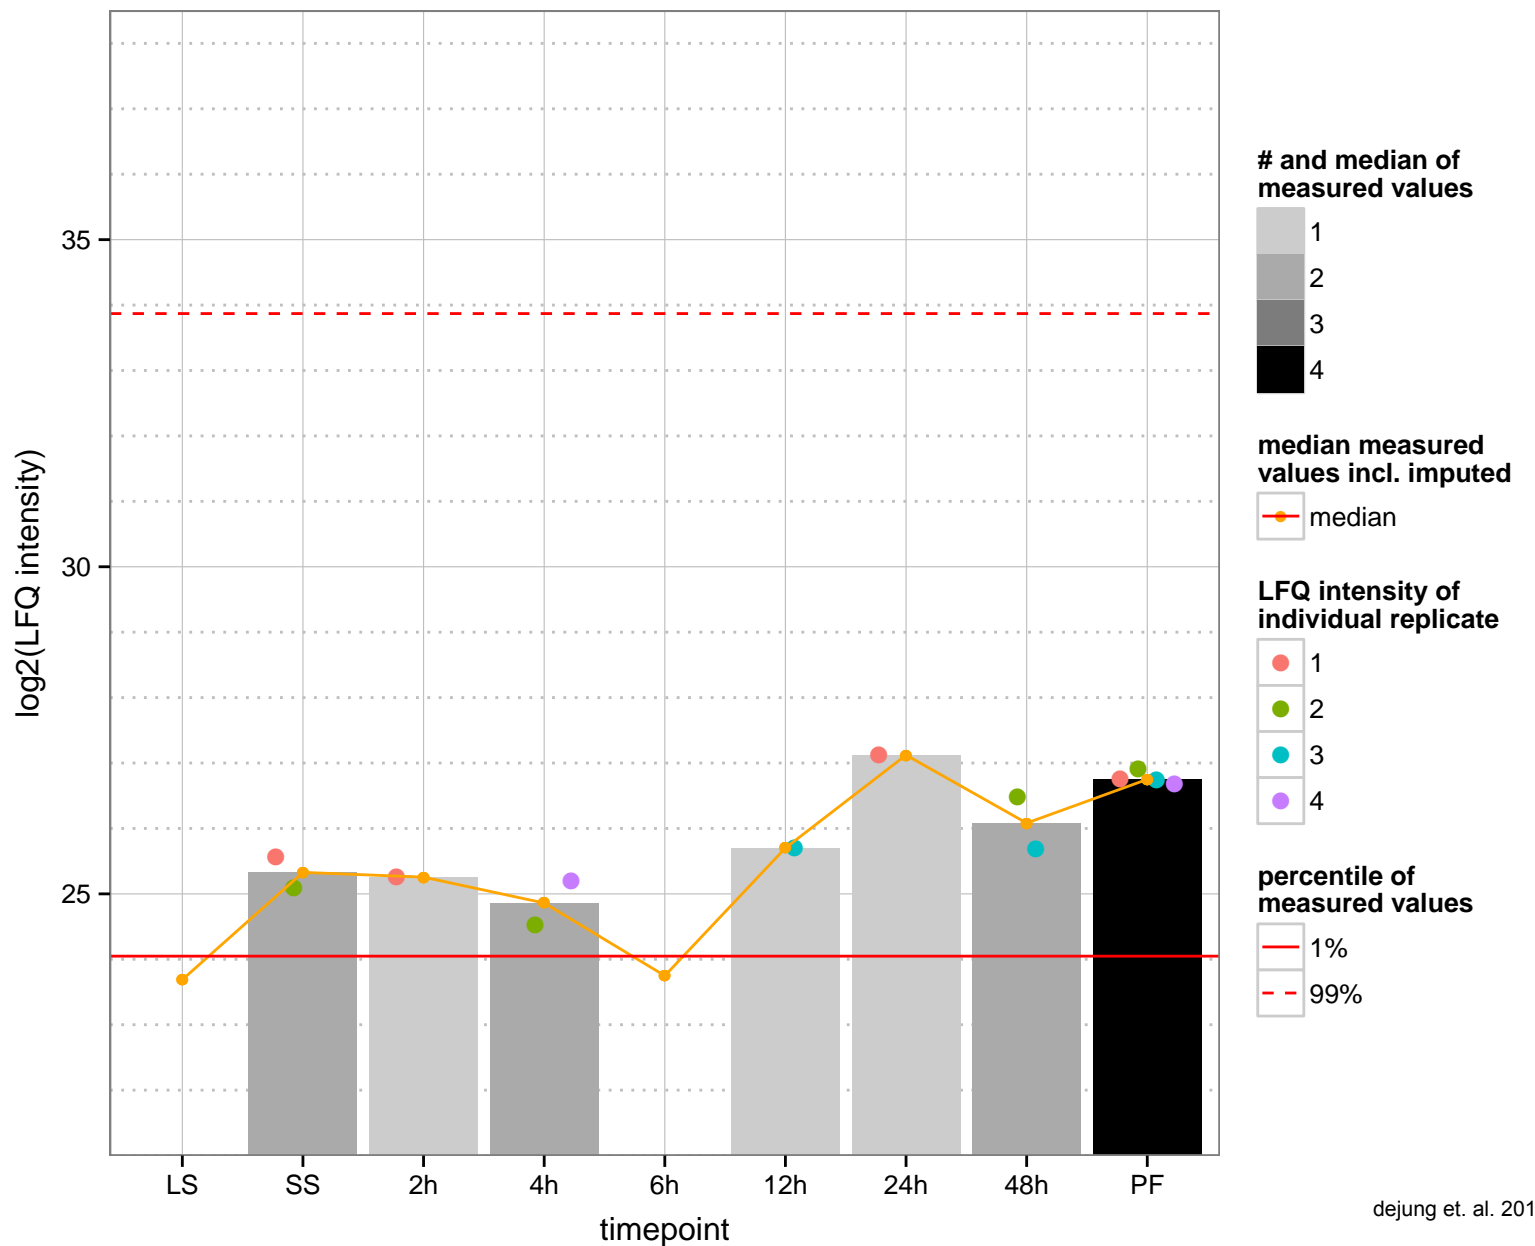

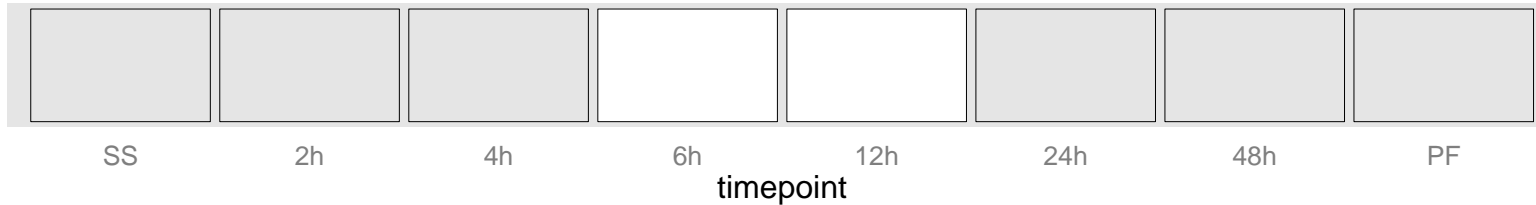

**regulated**  **not regulated**  **significant down**  **significant up**

class I transcription factor A, subunit 6 (CITFA-6)  
 Tb927.5.970  
 AGOF: null  
 AGOC: null  
 AGOP: null  
 PGOF: null  
 PGO: null  
 PGOP: null

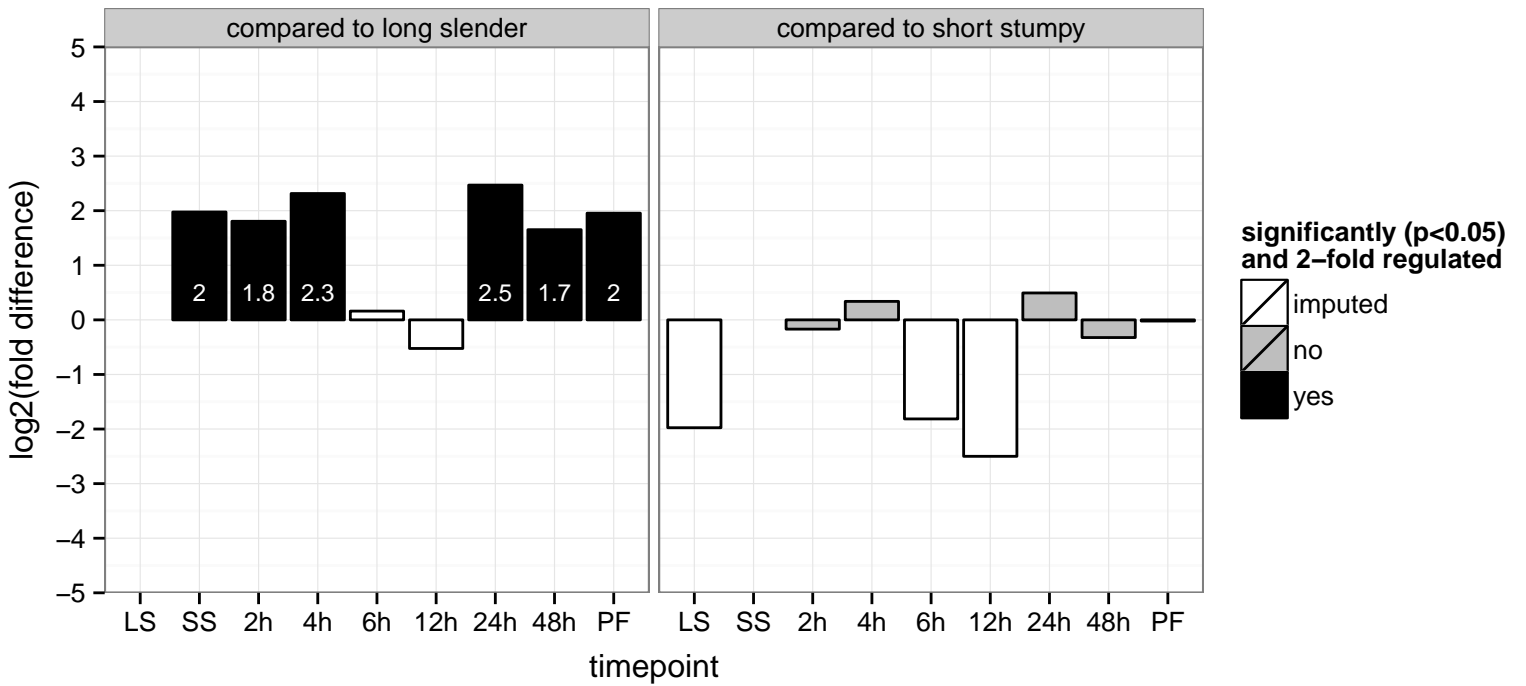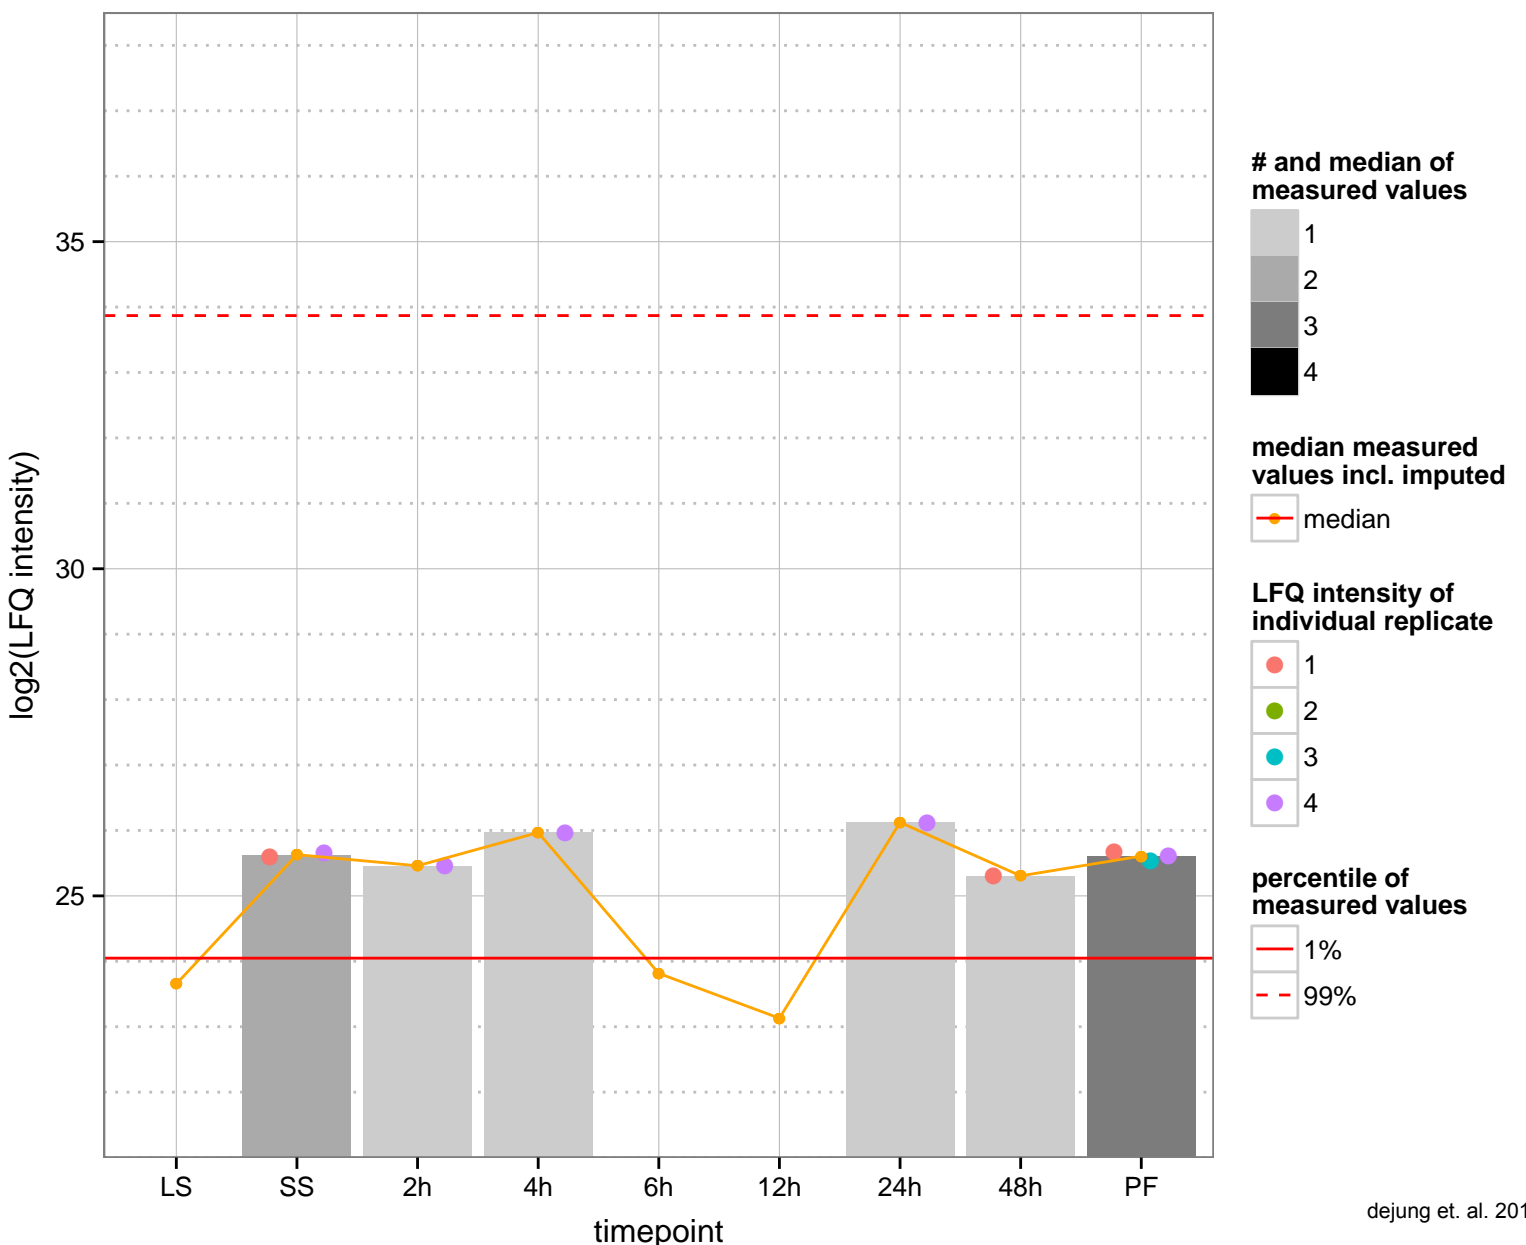

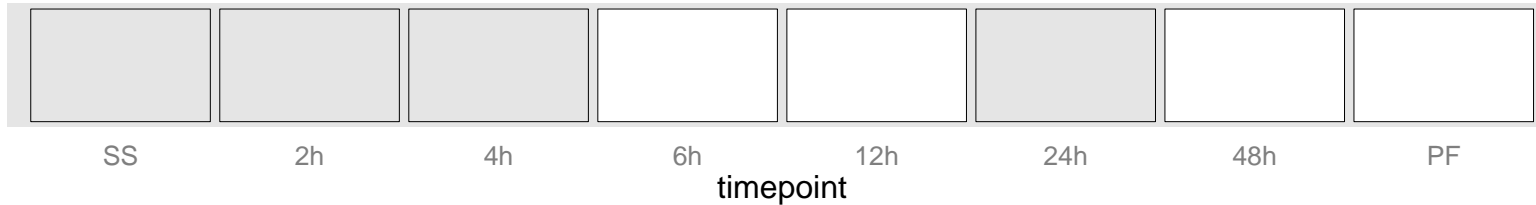

**regulated**  **not regulated**  **significant down**  **significant up**

ATG8/AUT7/APG8/PAZ2, putative, ubiquitin-like protein (ATG8A), ubiquitin-like protein (ATG8B)  
 Tb927.7.5910;Tb927.7.5900  
 AGOF: null  
 AGOC: null  
 AGOP: null  
 PGO: null  
 PGOC: null  
 PGOP: null

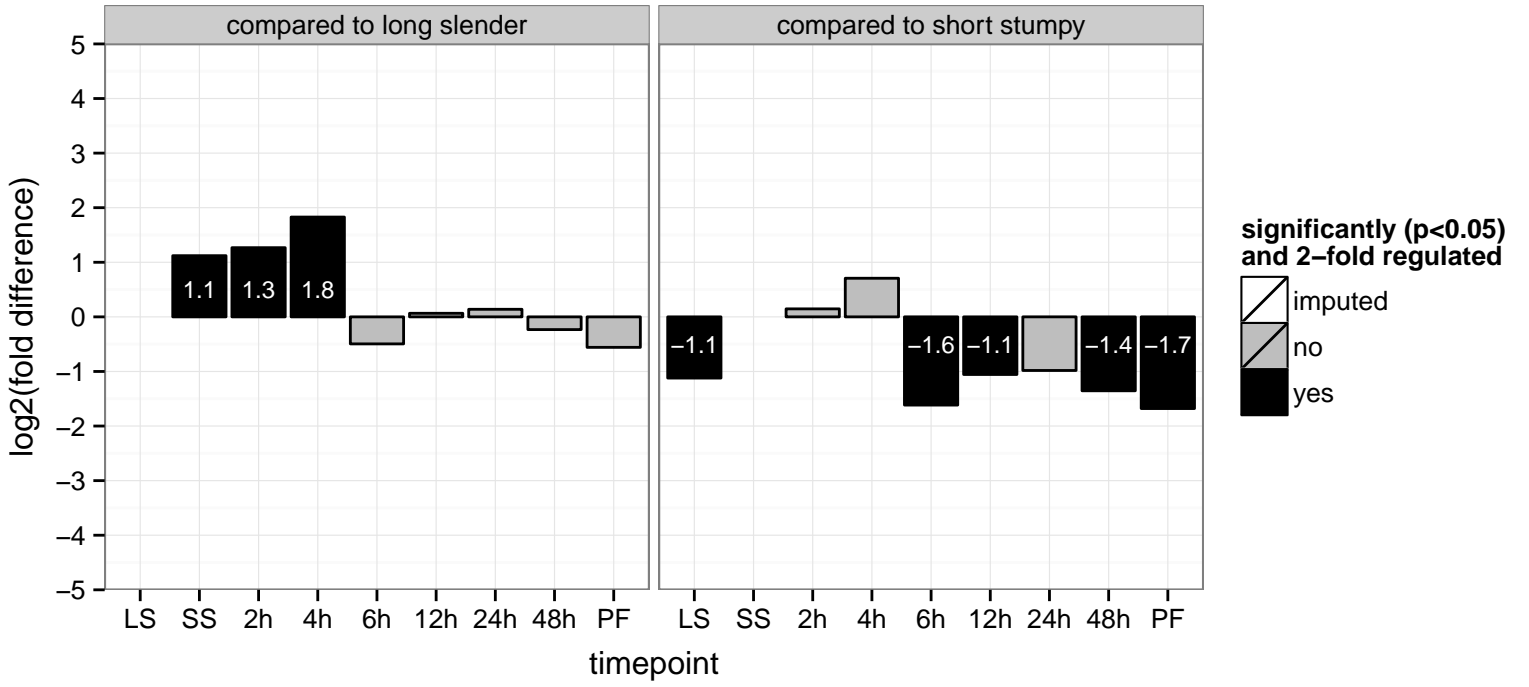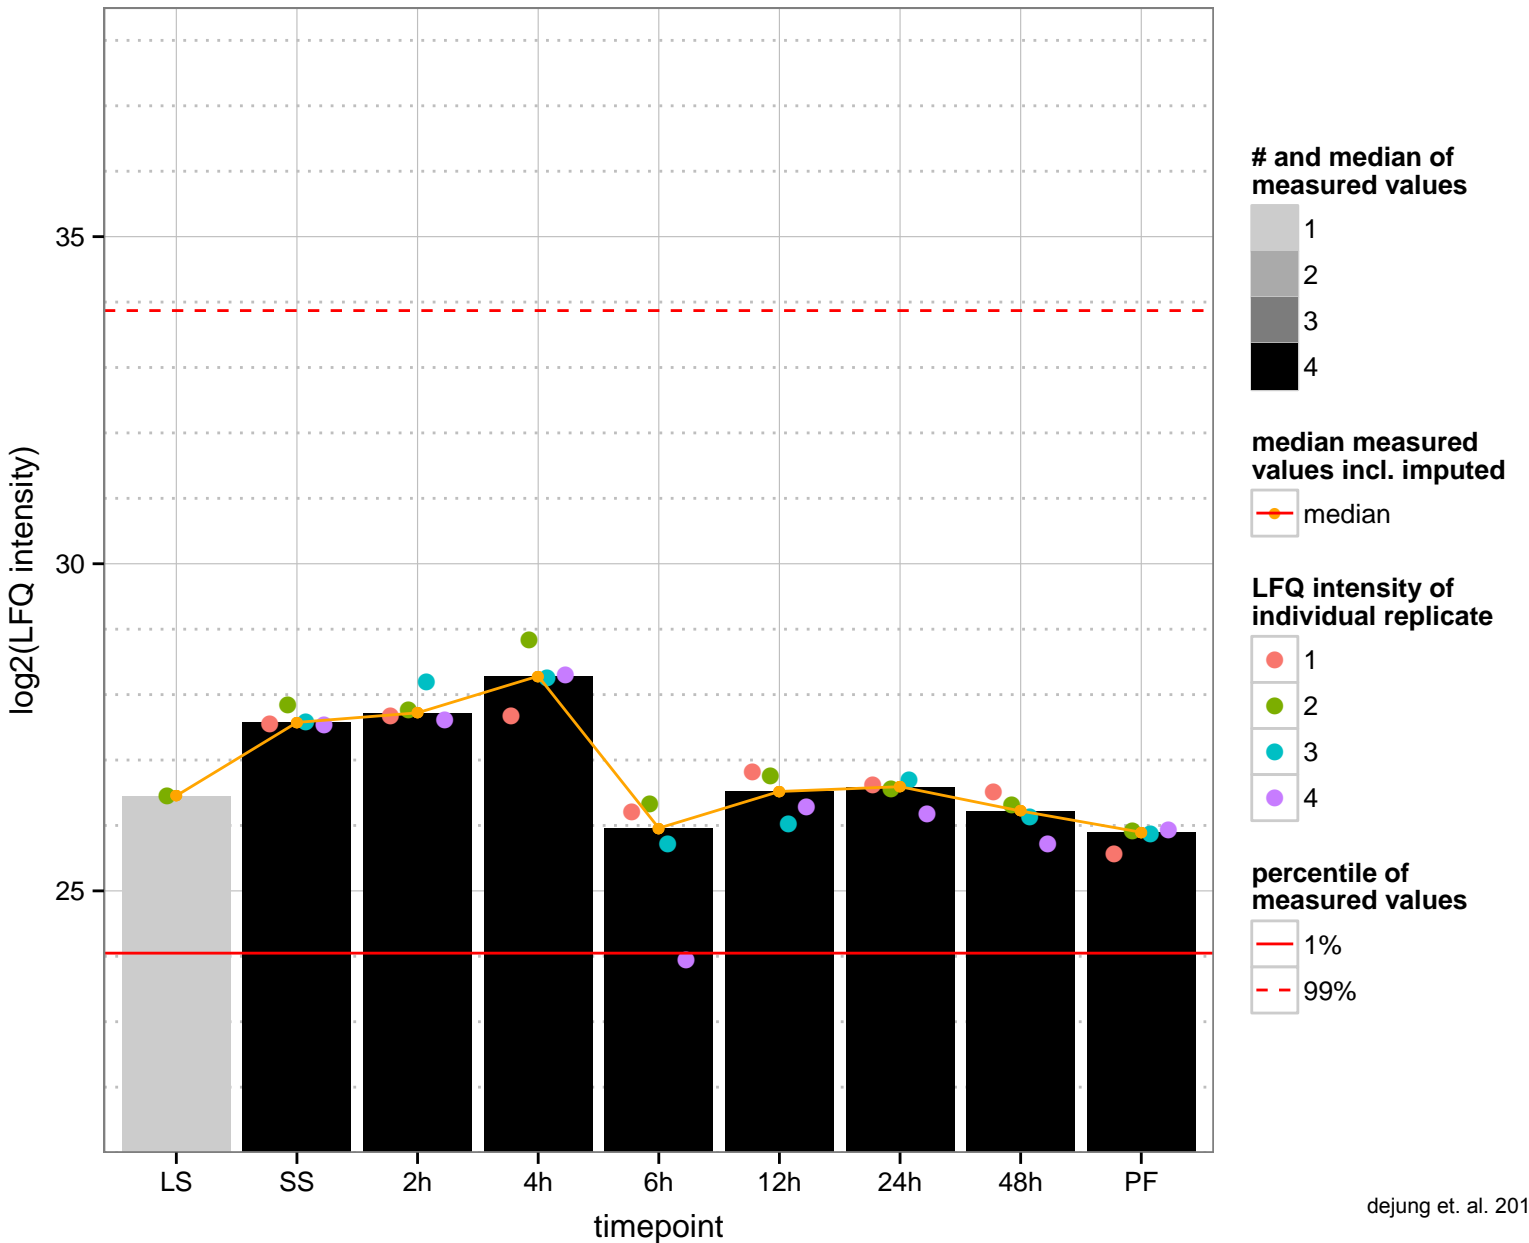

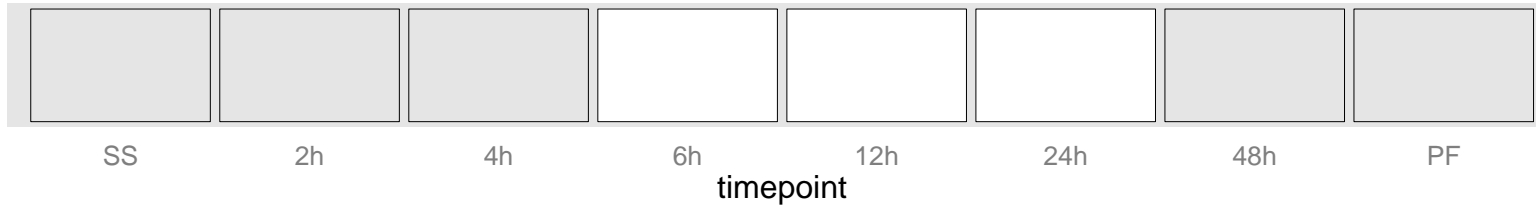

**regulated**  **not regulated**  **significant down**  **significant up**



hypothetical protein, conserved  
 Tb927.8.4910  
 AGOF: null  
 AGOC: null  
 AGOP: null  
 PGOF: null  
 PGO: null  
 PGOP: null

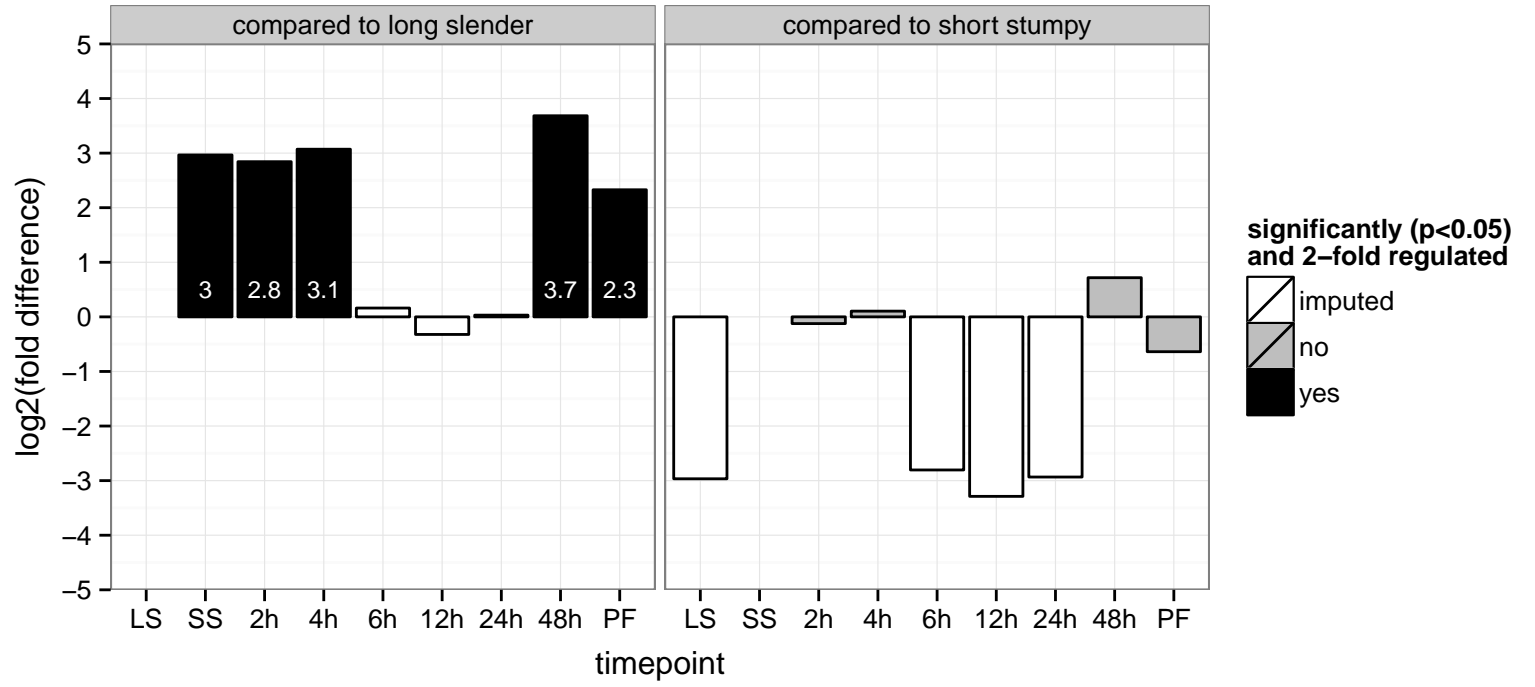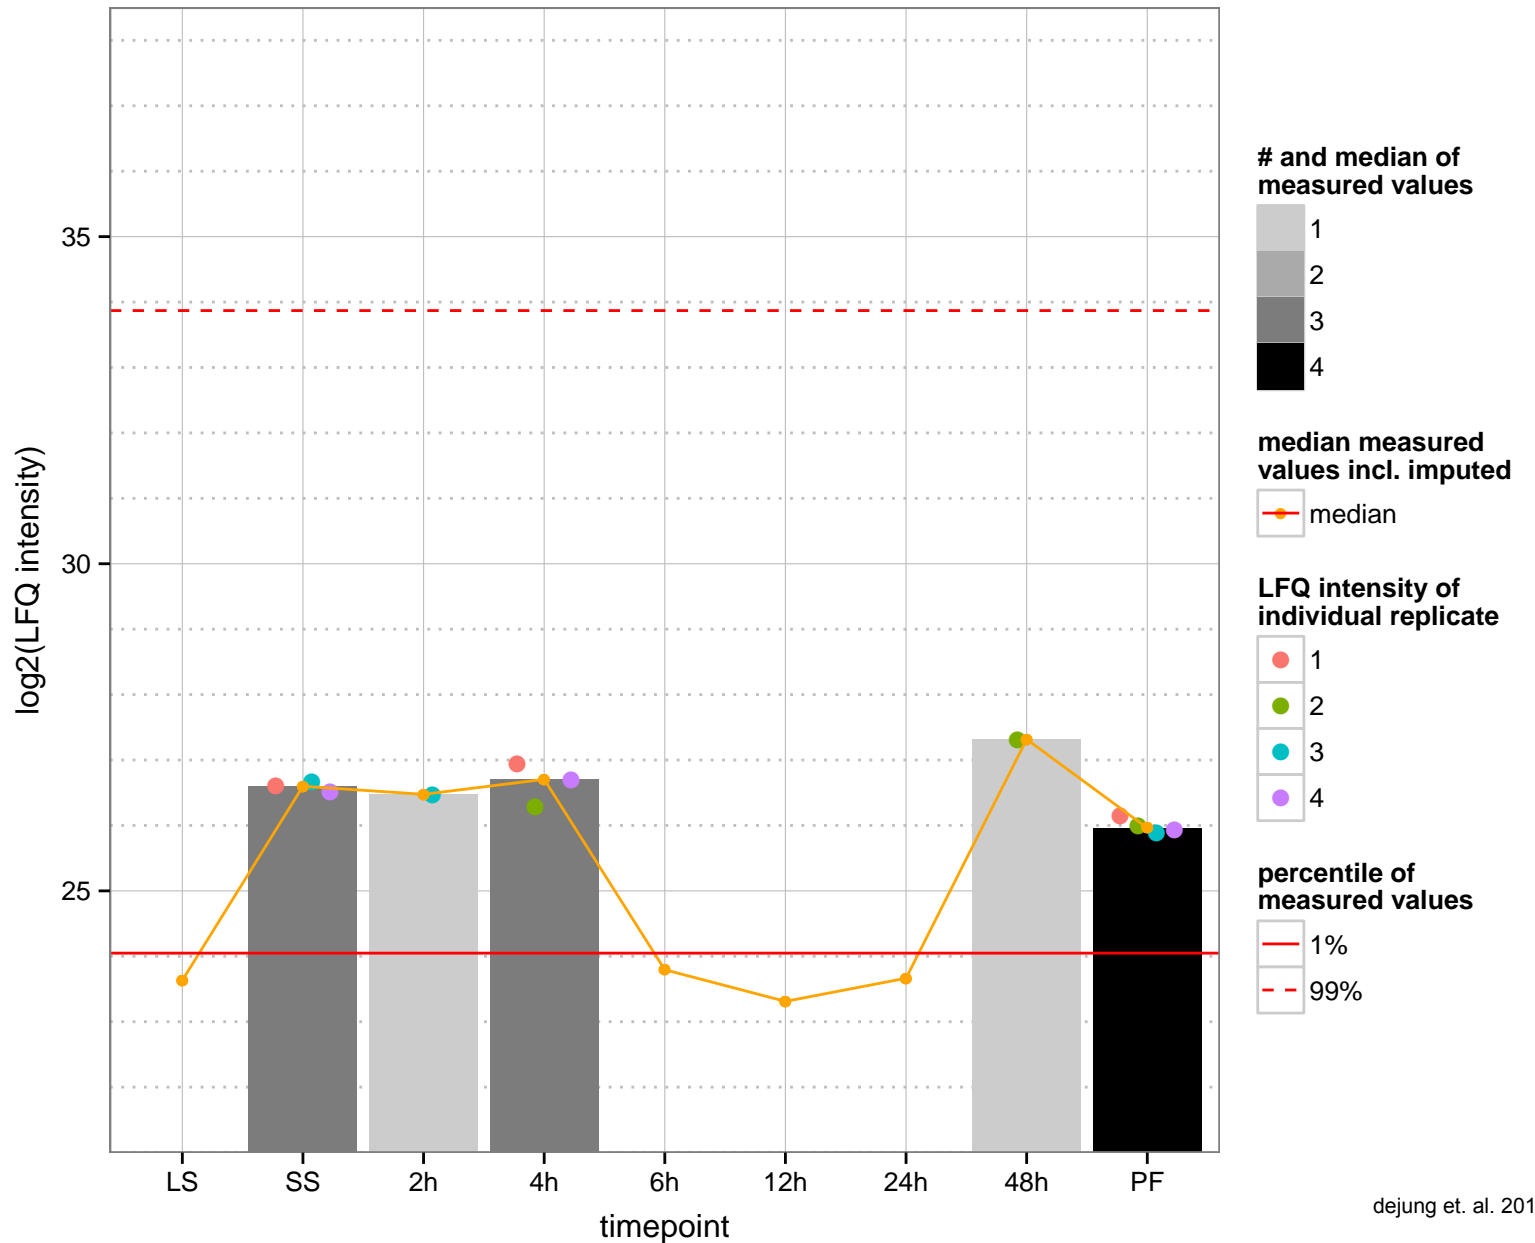

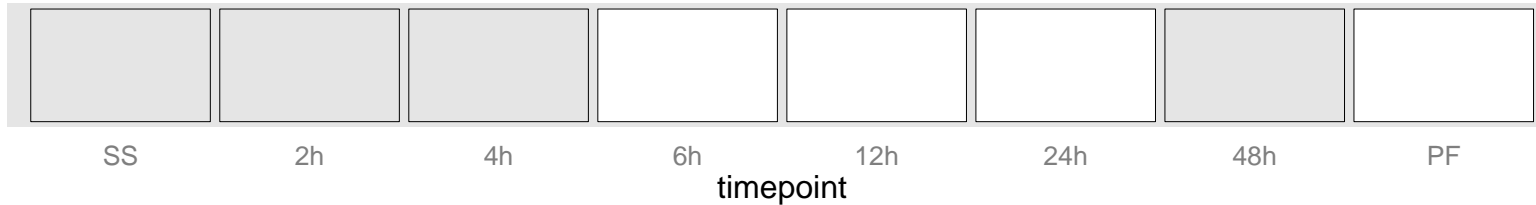

**regulated** 
**not regulated** 
**significant down** 
**significant up** 

hypothetical protein, conserved  
 Tb927.11.4550  
 AGOF: null  
 AGOC: null  
 AGOP: null  
 PGO: null  
 PGO: null  
 PGO: null

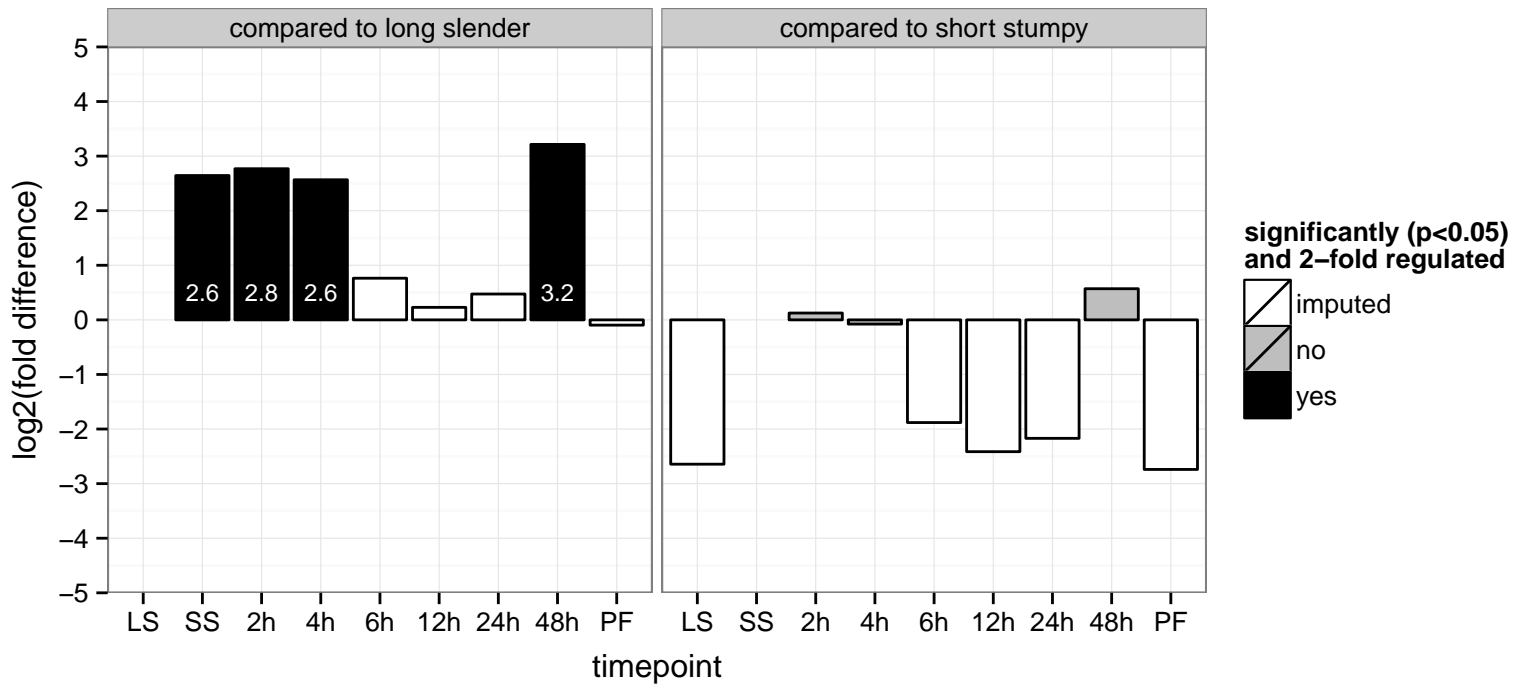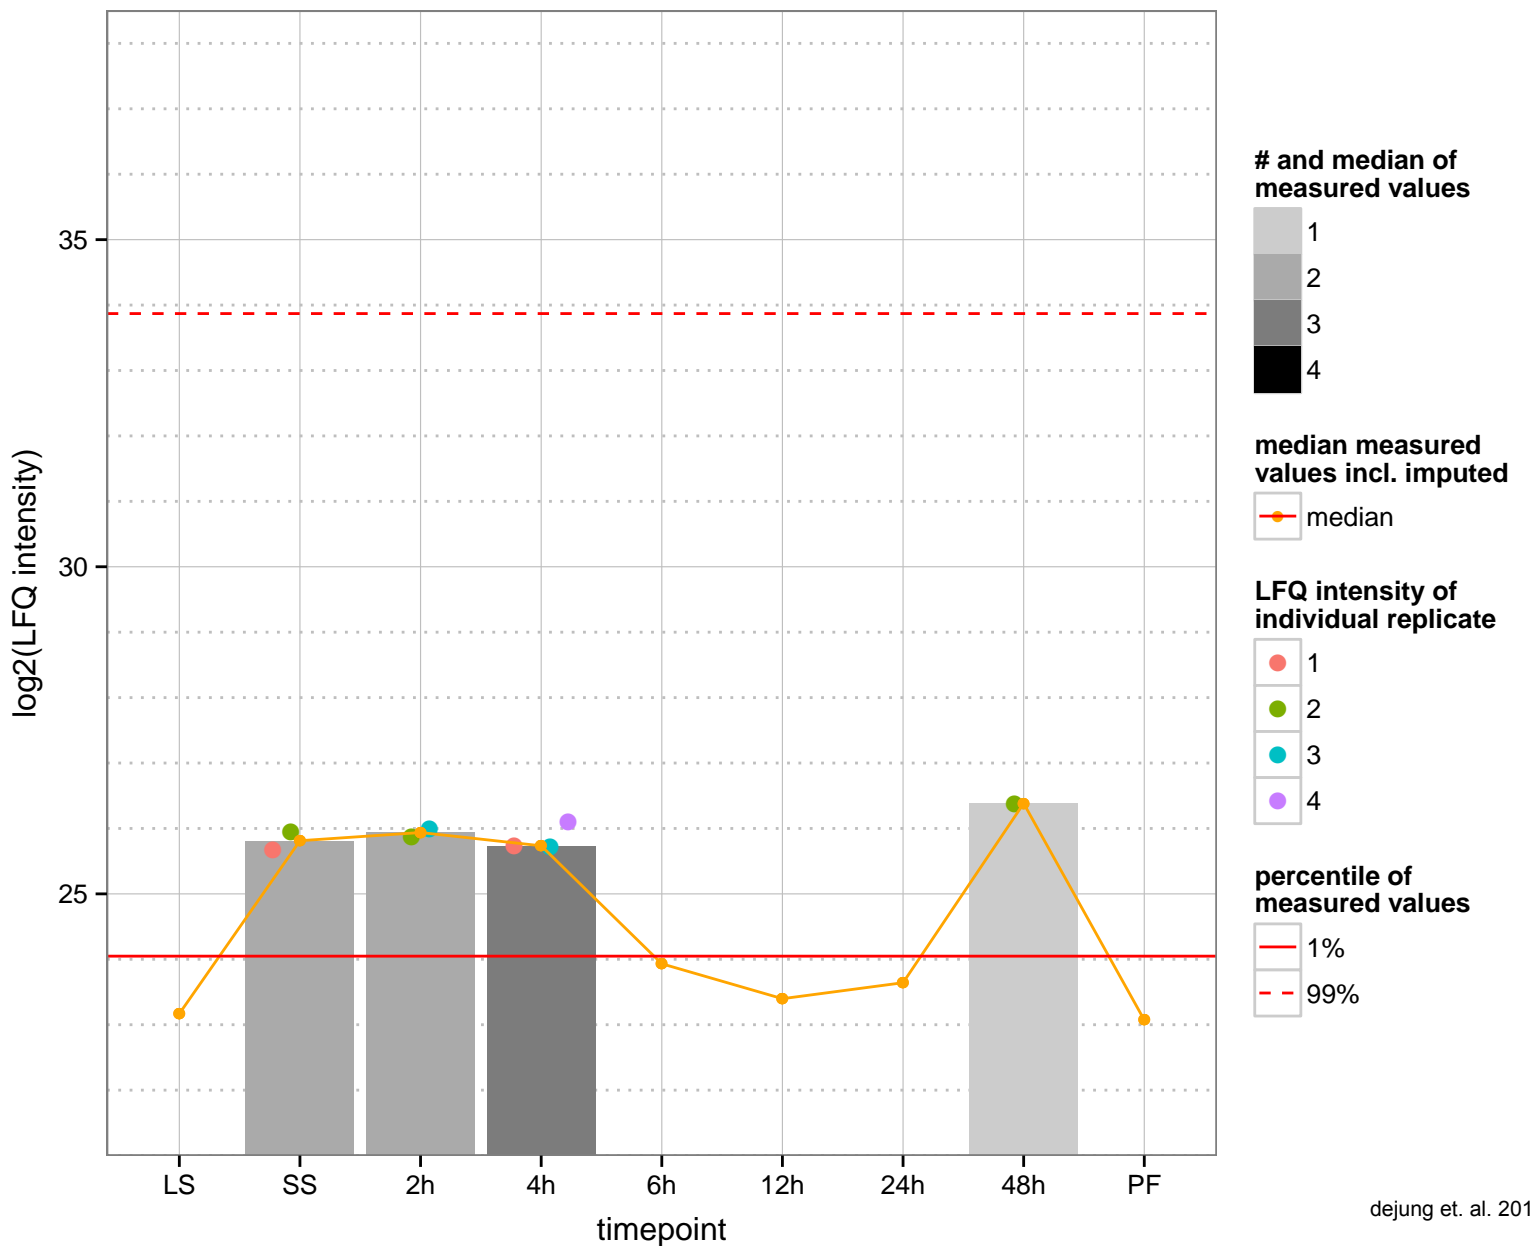

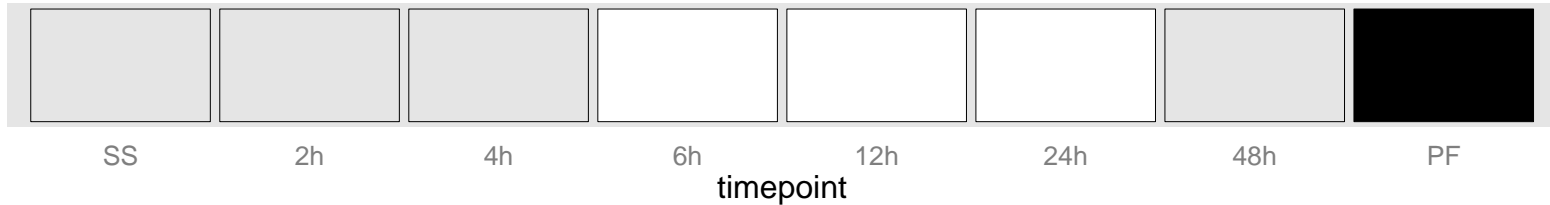

**regulated**  **not regulated**  **significant down**  **significant up**

endosomal integral membrane protein, putative  
 Tb927.8.1940  
 AGOF: null  
 AGOC: integral to membrane  
 AGOP: null  
 PGO: null  
 PGO: null  
 PGO: integral to membrane  
 PGO: null

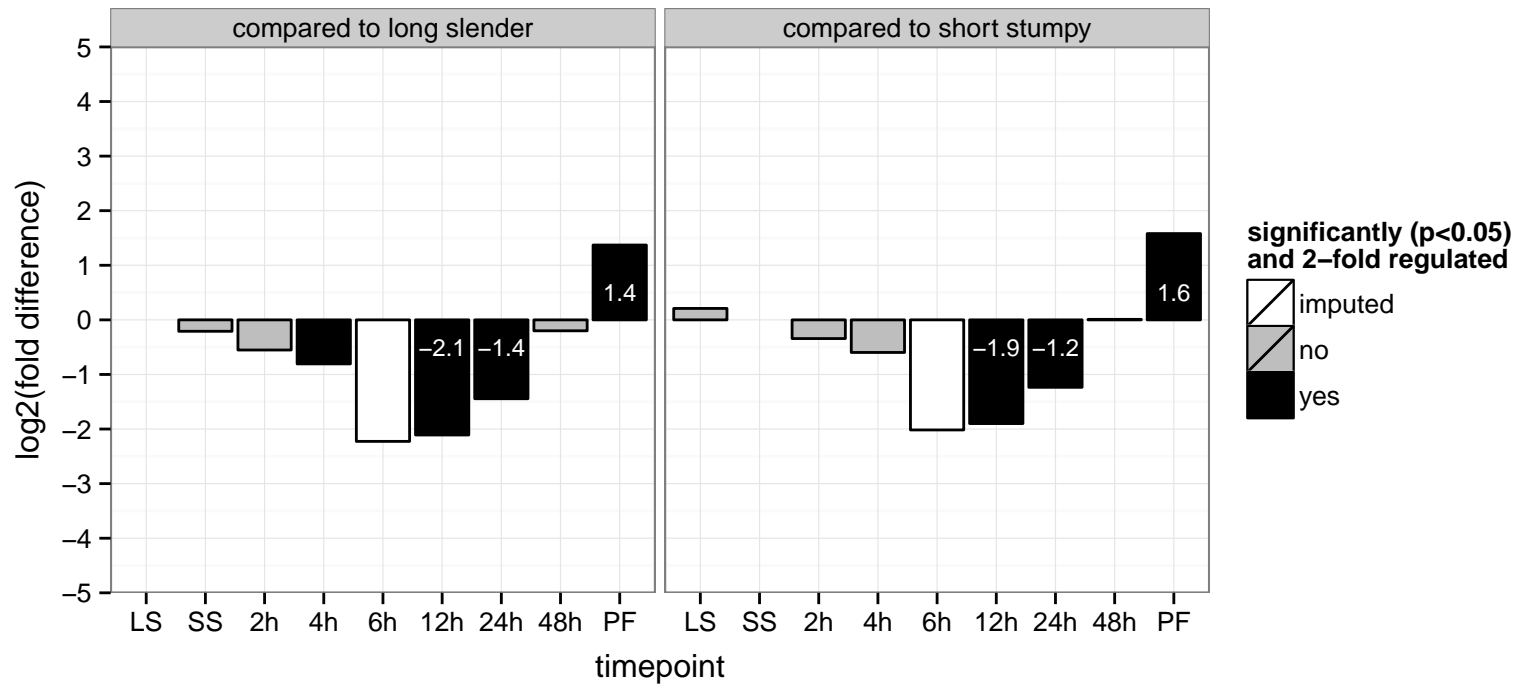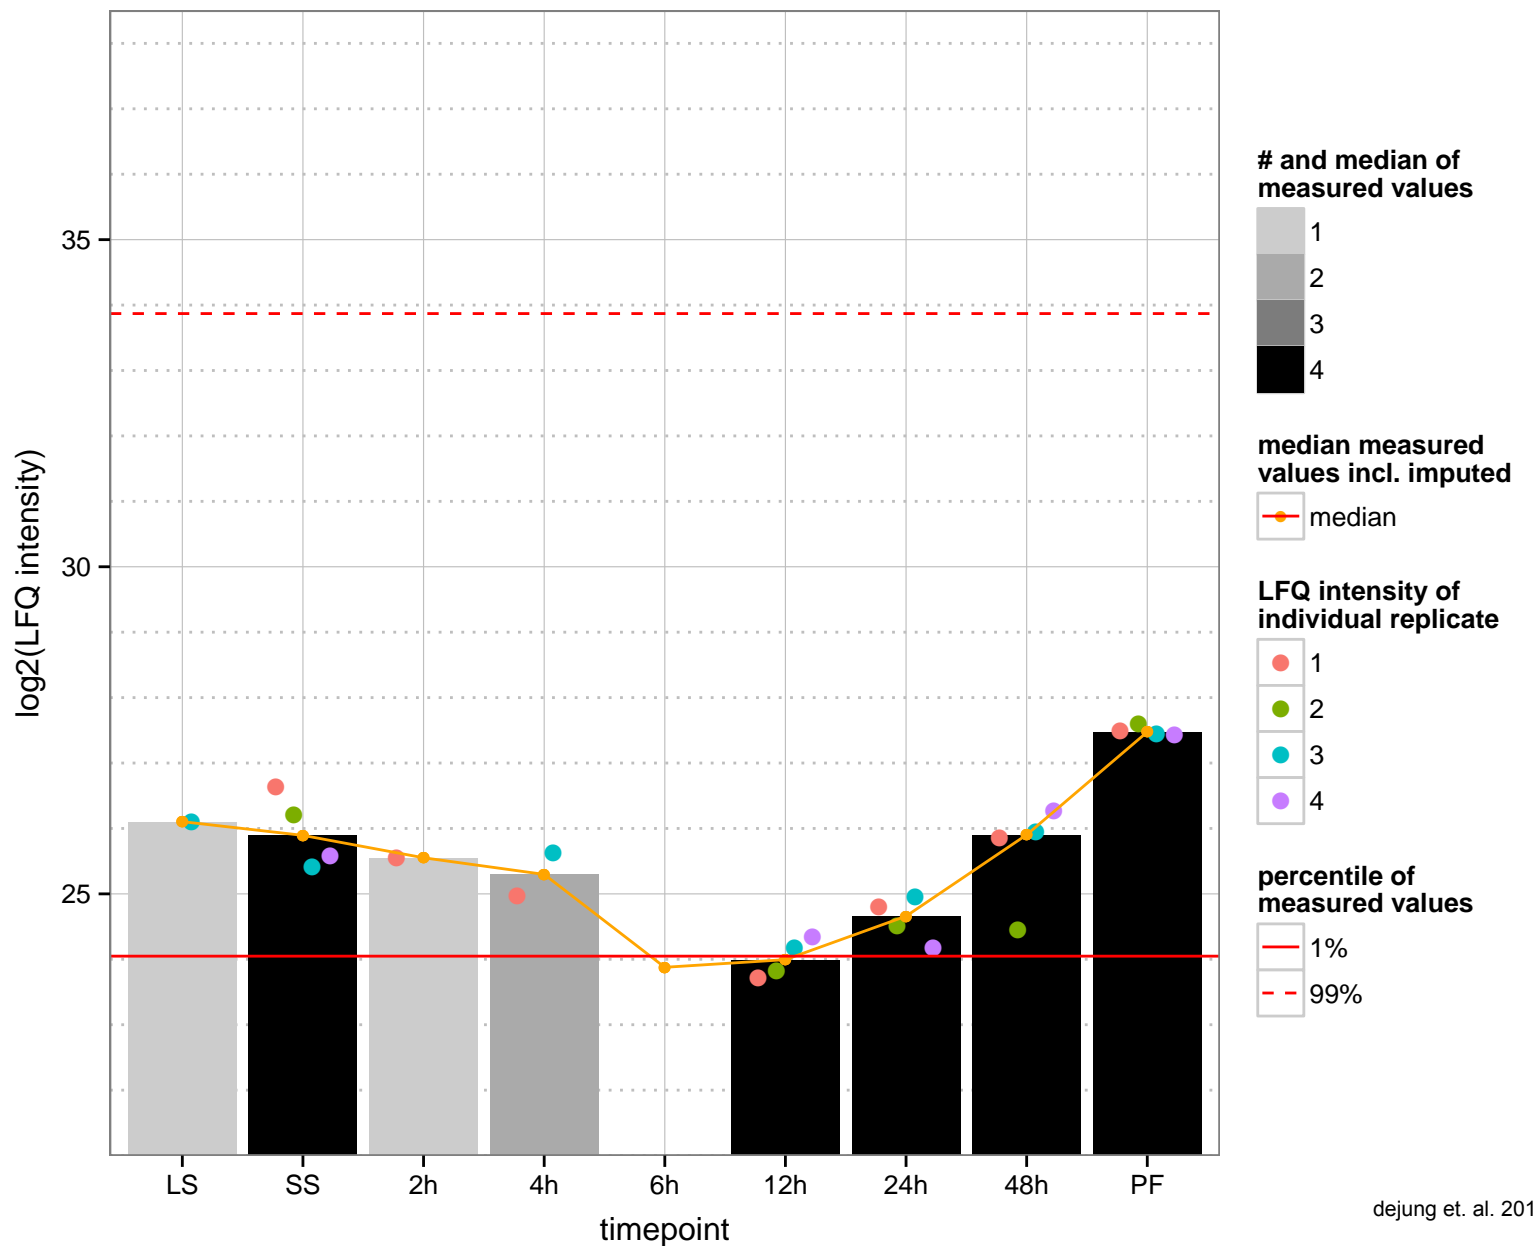

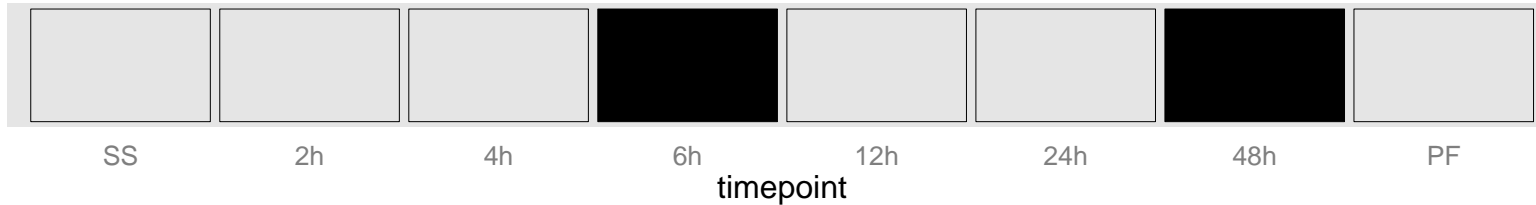

**regulated**  **not regulated**  **significant down**  **significant up**

expression site-associated gene (ESAG, pseudogene), putative, expression site-associated gene 4 (ESAG4), degenerate  
 Tb927.2.1260  
 AGOF: phosphorus-oxygen lyase activity  
 AGOC: null  
 AGOP: cyclic nucleotide biosynthetic process, intracellular signal transduction  
 PGO: phosphorus-oxygen lyase activity  
 PGOC: null  
 PGOP: cyclic nucleotide biosynthetic process, intracellular signal transduction

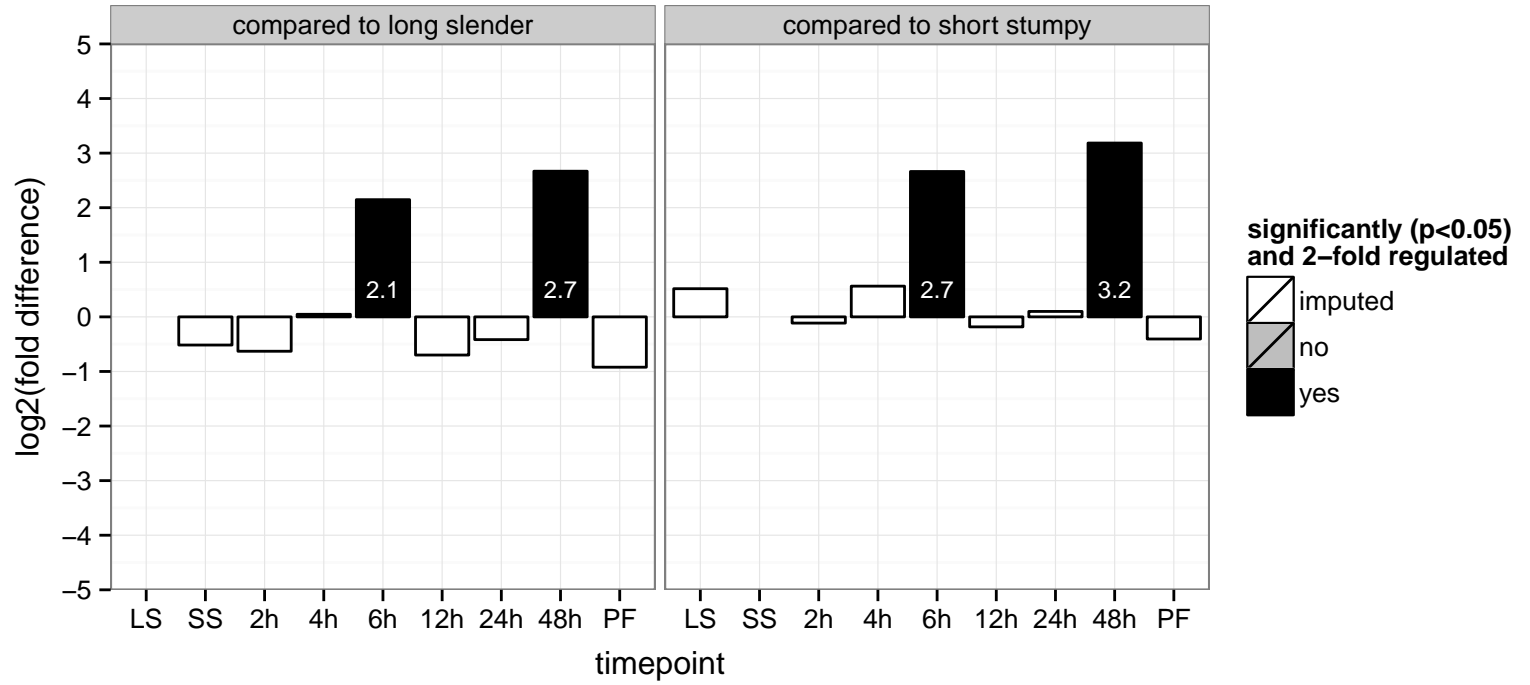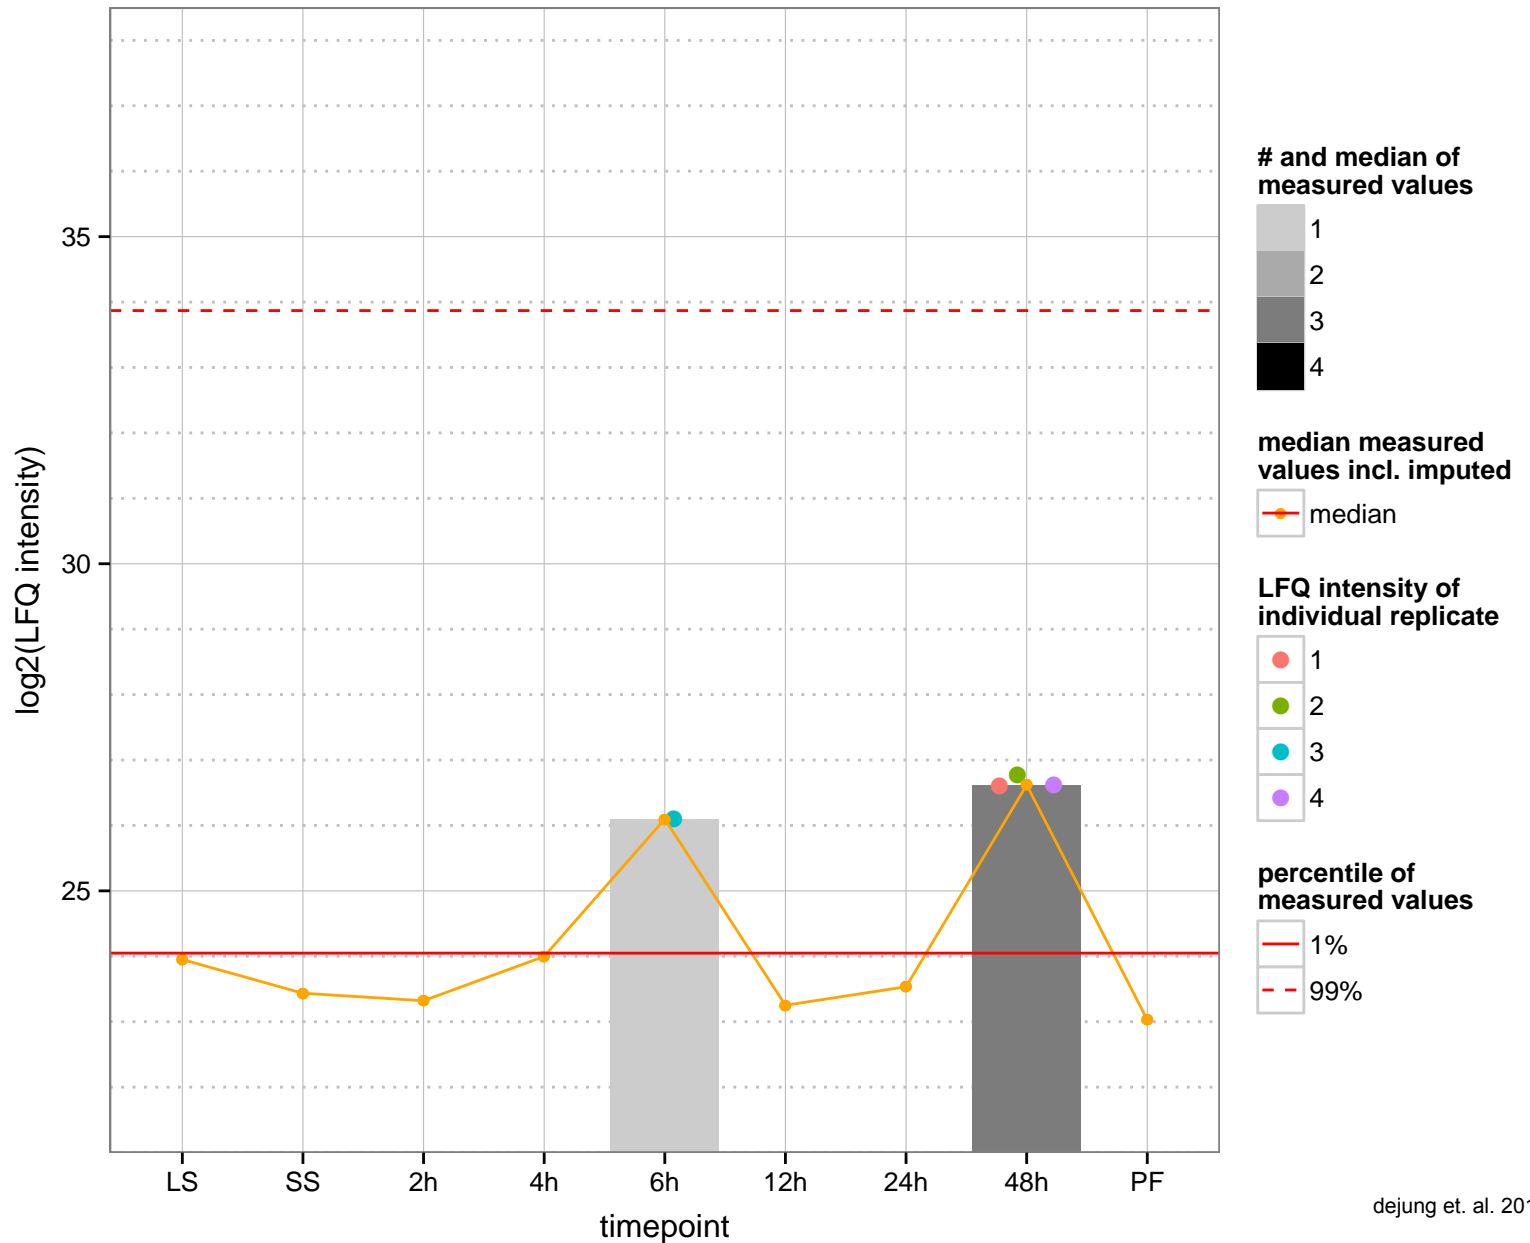

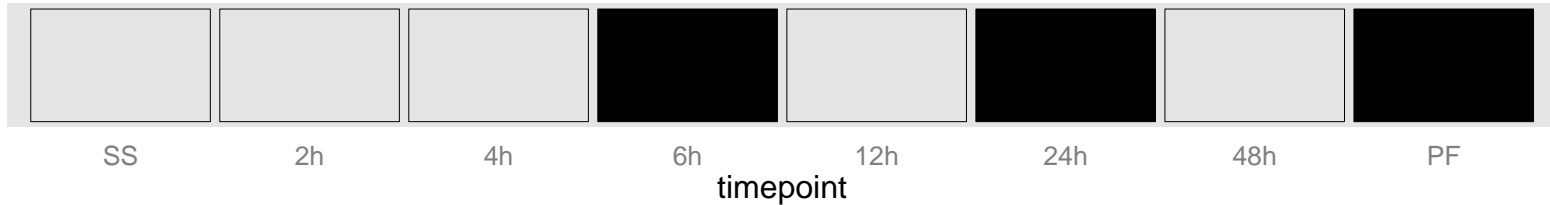

**regulated**  not regulated  significant down  significant up



COP9 signalosome complex subunit 5, putative, JAB-MPN domain protein  
 Tb927.8.5530  
 AGOF: null  
 AGOC: signalosome  
 AGOP: null  
 PGO: protein binding  
 PGOC: null  
 PGOP: null

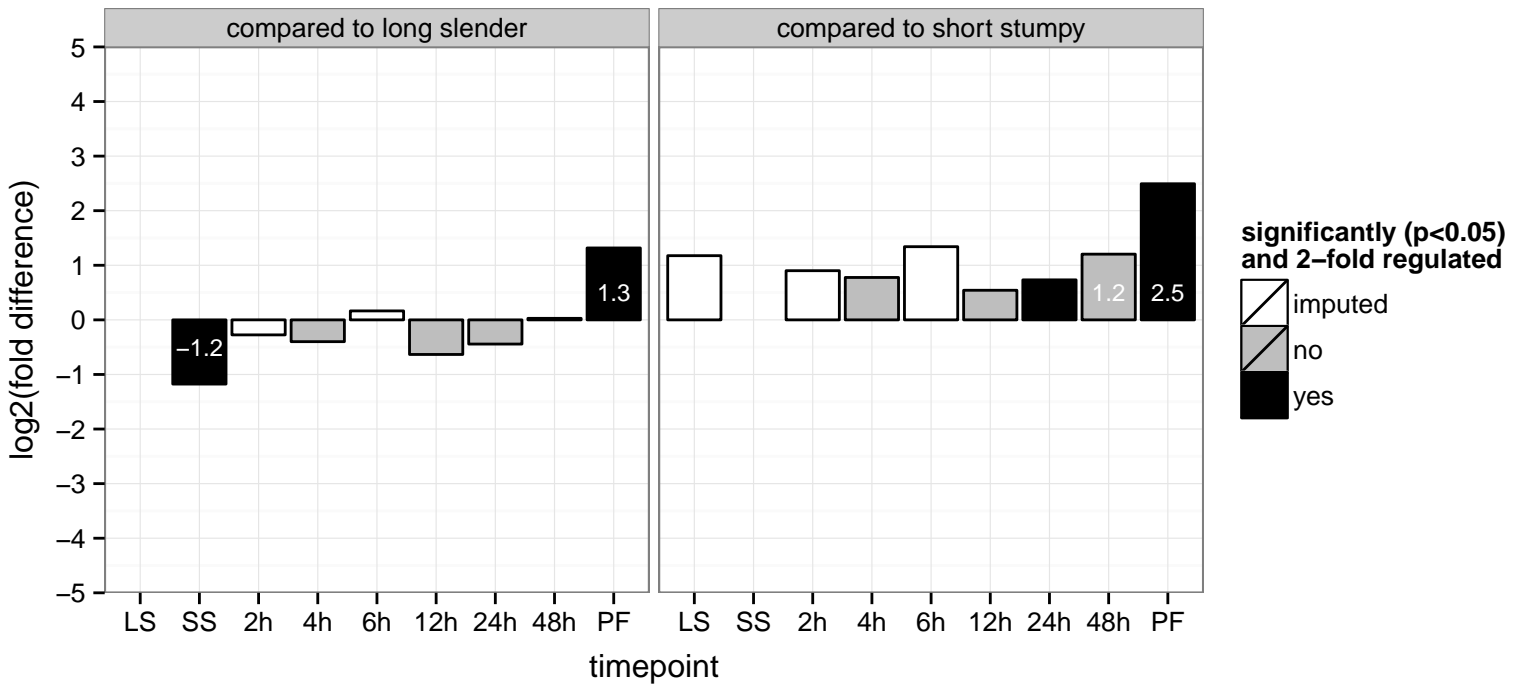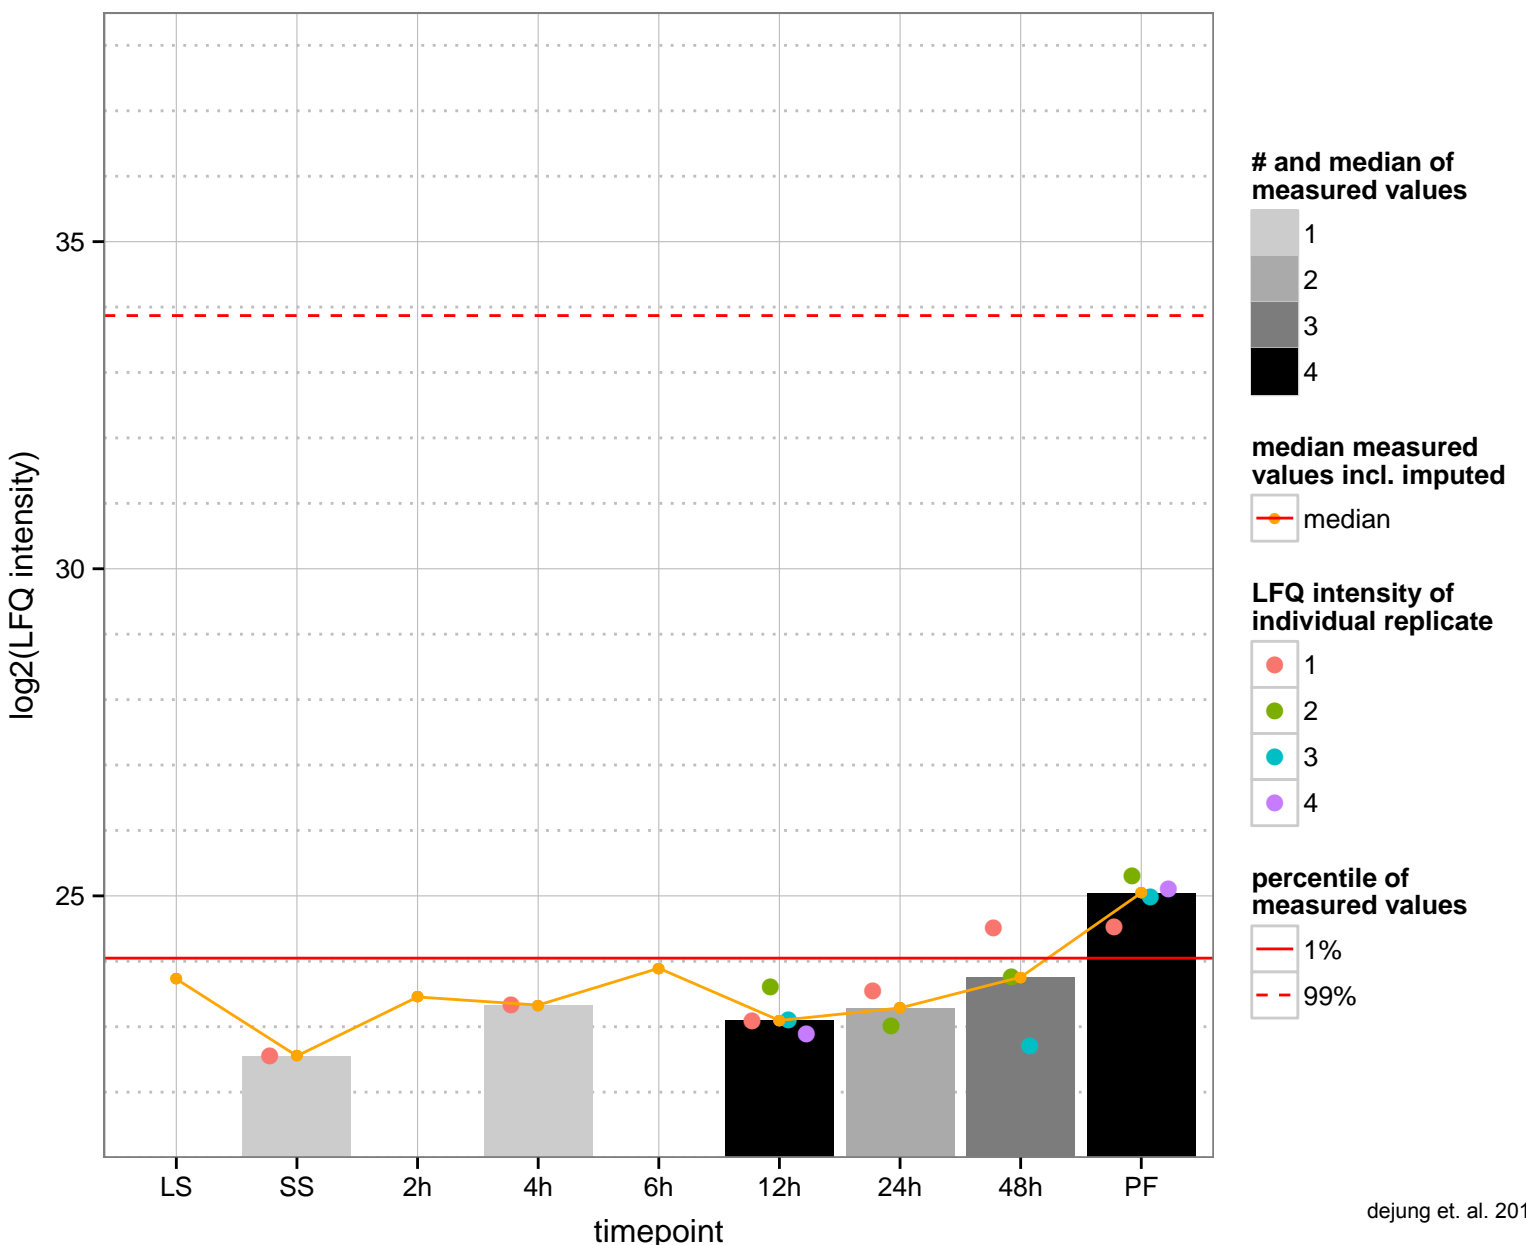

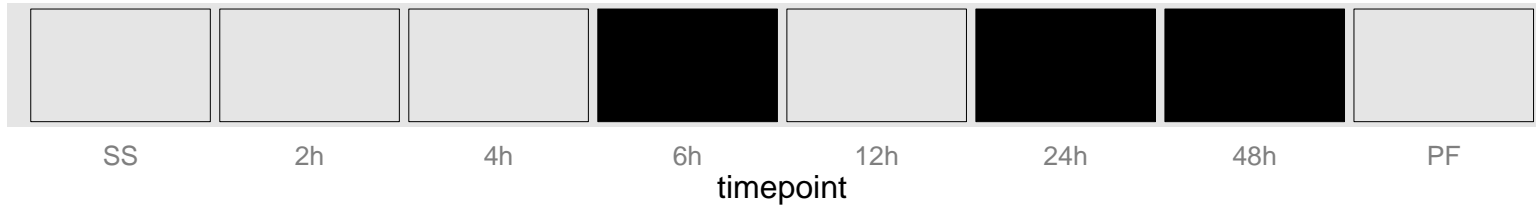

**regulated**  **not regulated**  **significant down**  **significant up**

hypothetical protein, conserved  
 Tb927.9.11940  
 AGOF: null  
 AGOC: mitochondrion  
 AGOP: null  
 PGO: null  
 PGOC: null  
 PGOP: null

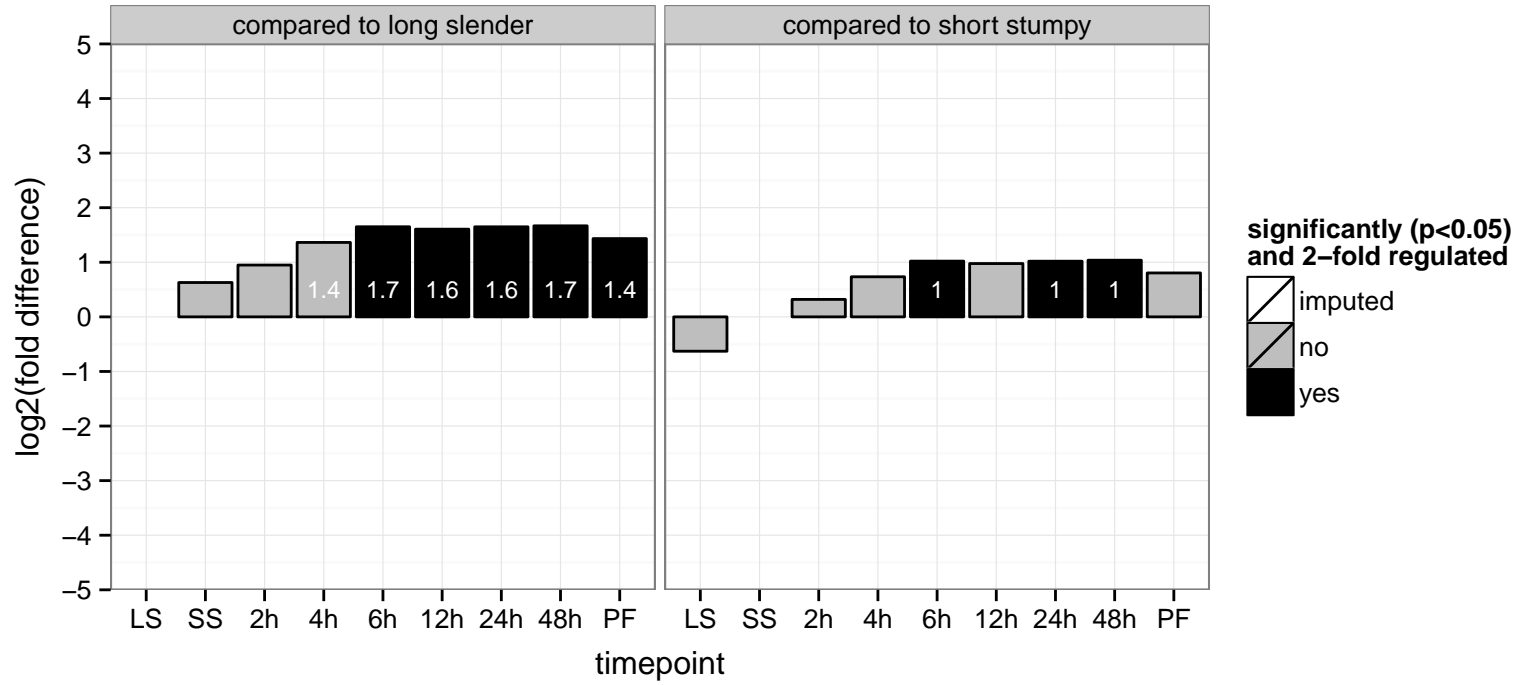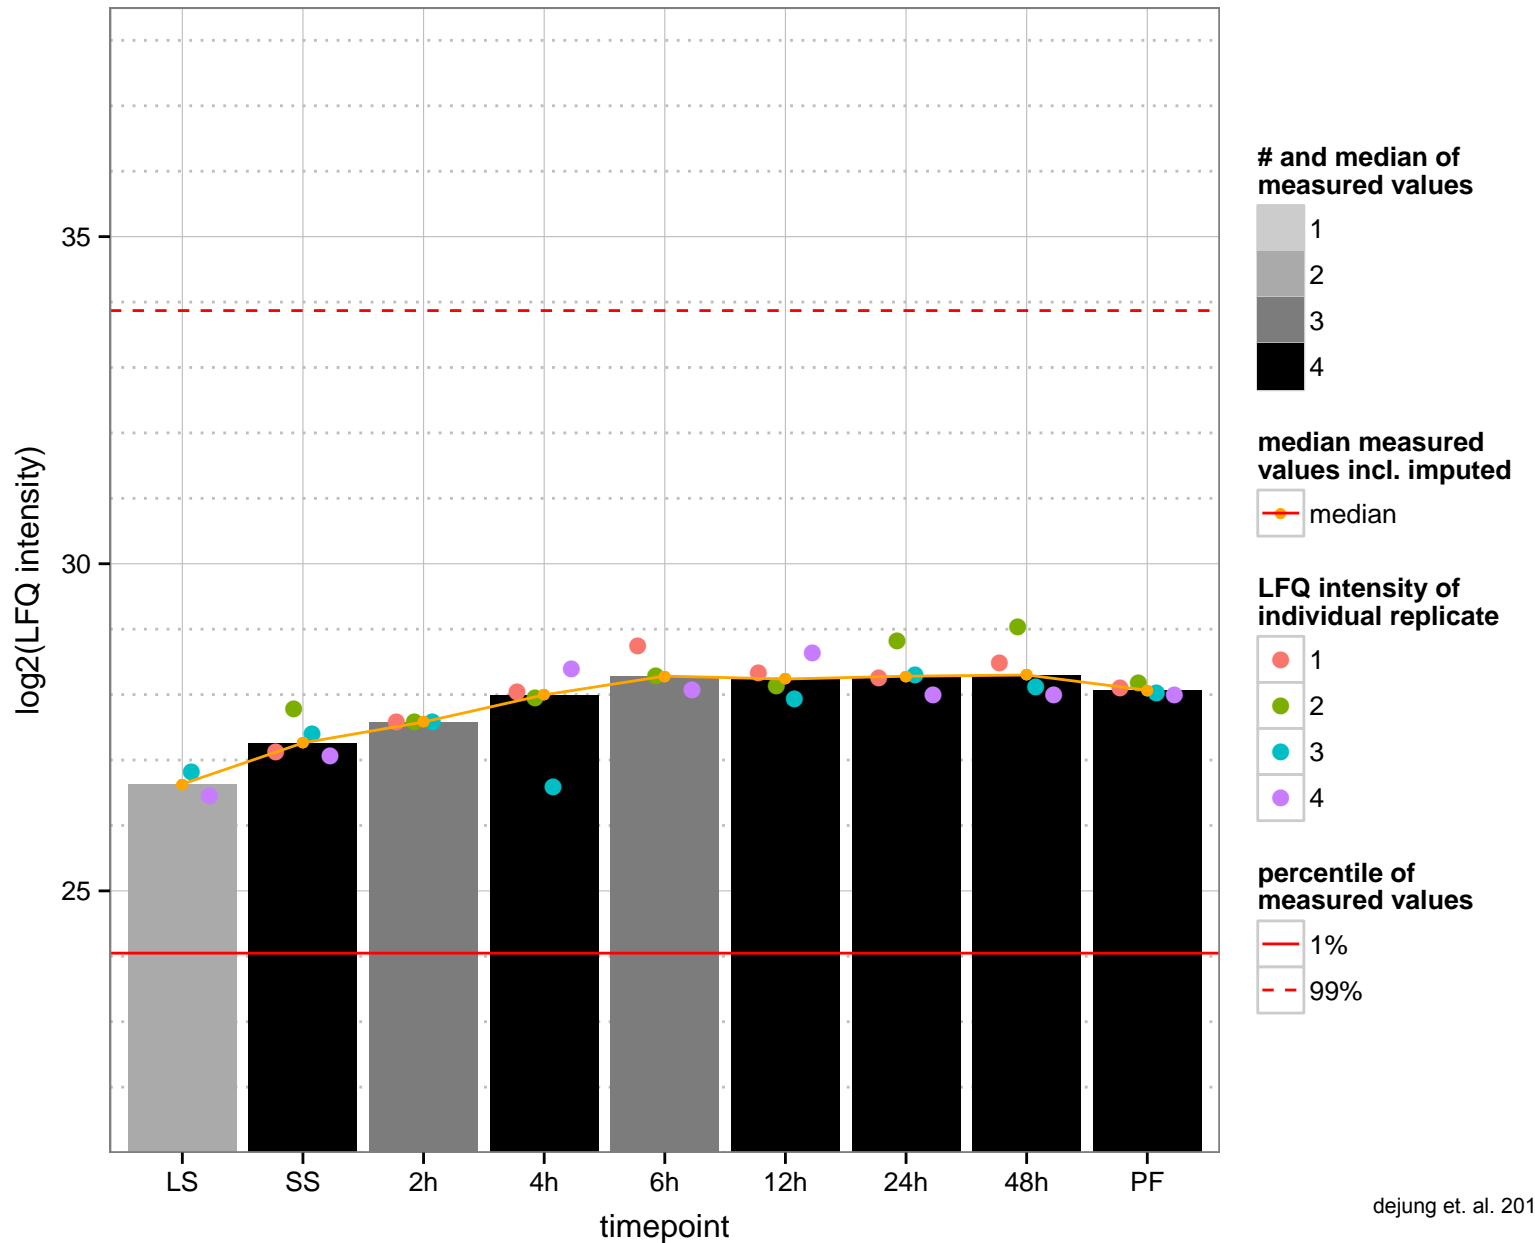

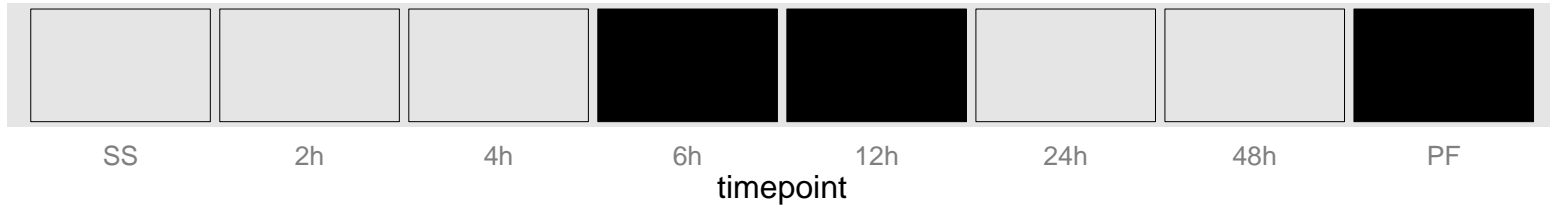

**regulated**  not regulated  significant down  significant up

hypothetical protein, conserved  
 Tb927.8.3810  
 AGOF: null  
 AGOC: mitochondrion  
 AGOP: null  
 PGO: null  
 PGOC: null  
 PGOP: null

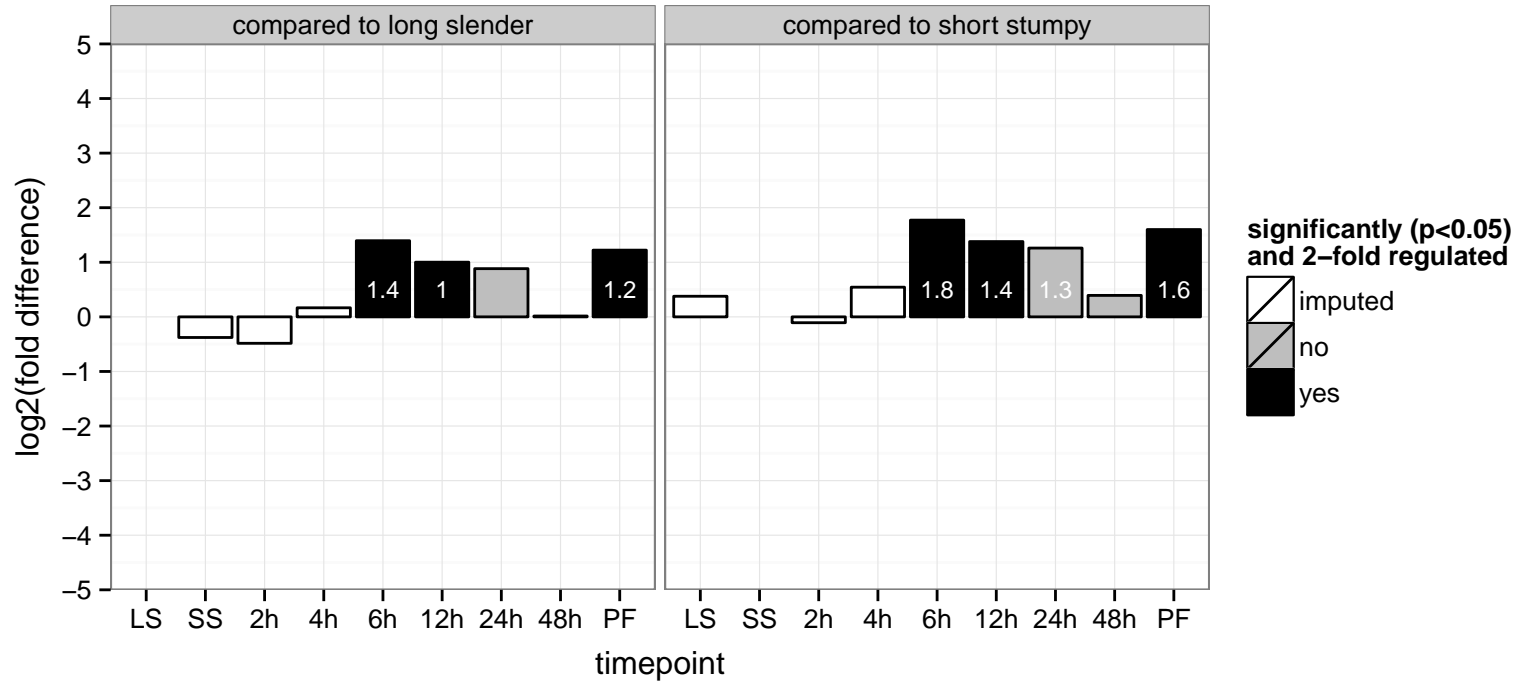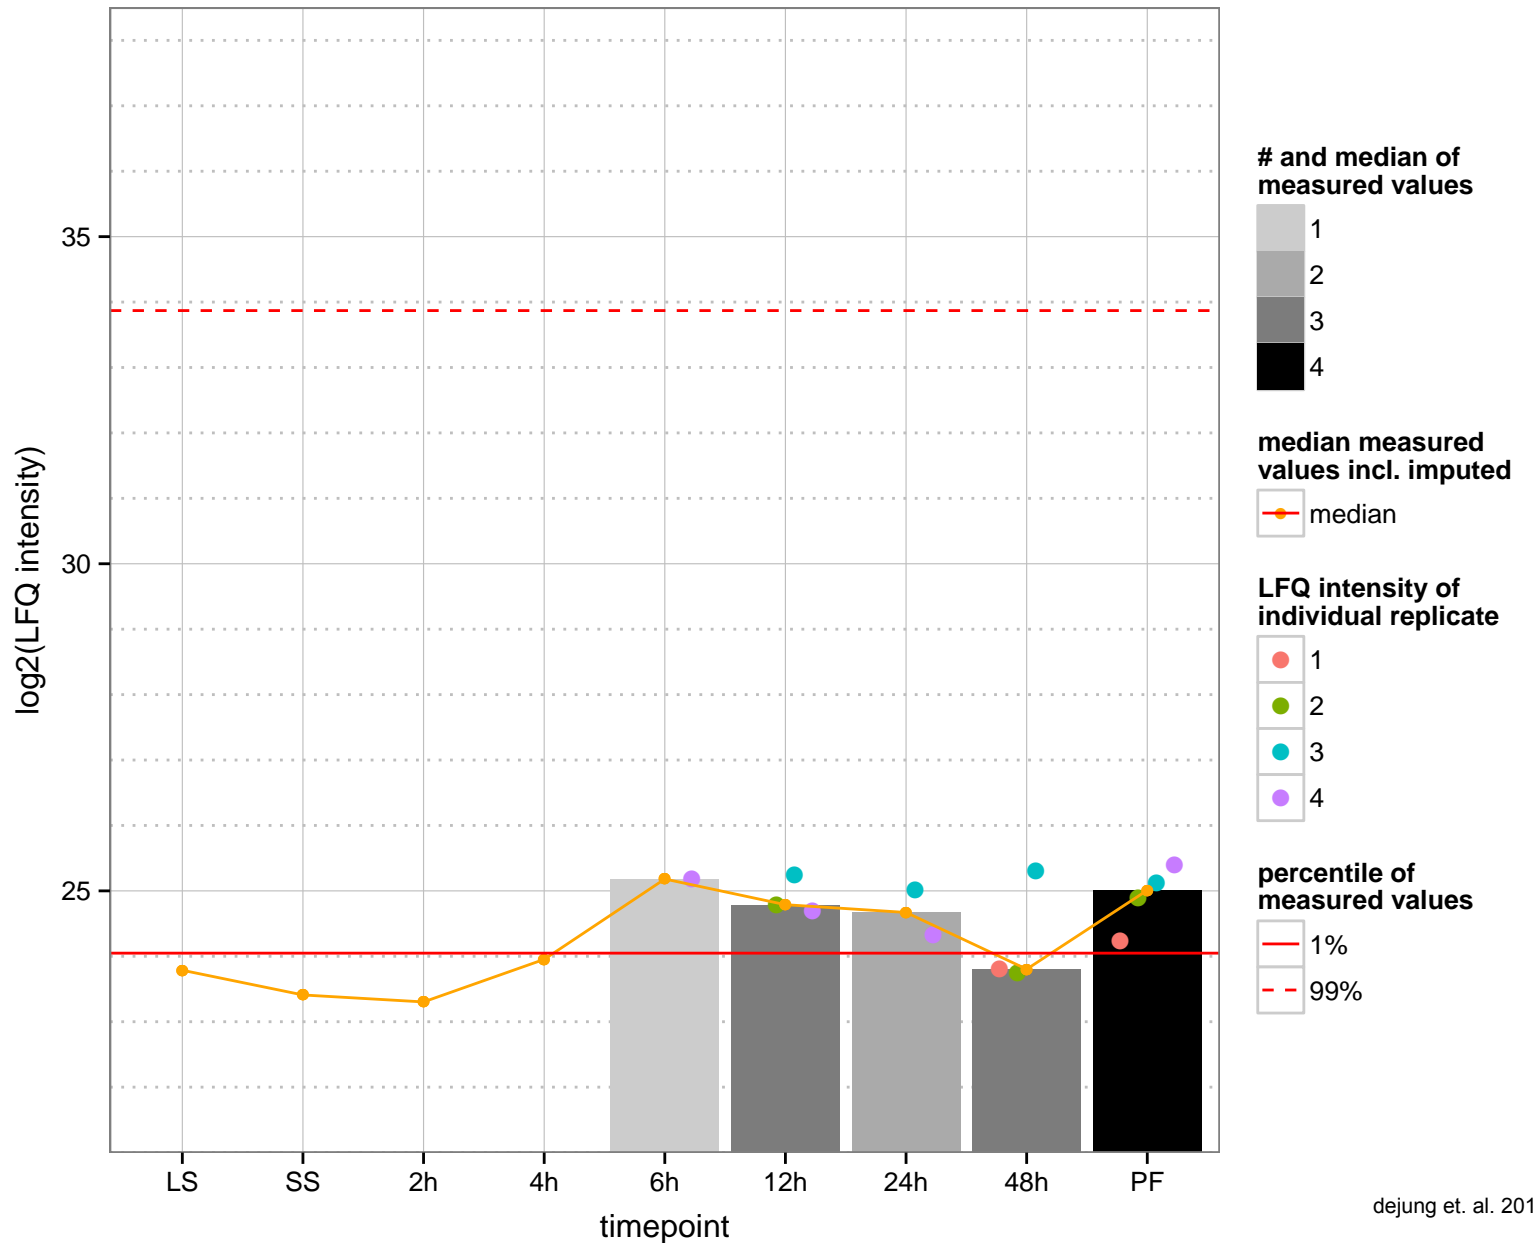

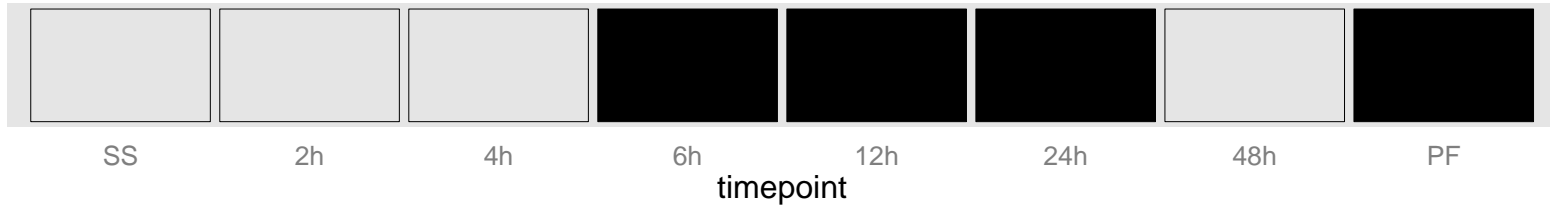

**regulated**  not regulated  significant down  significant up

beta-ketoacyl-ACP reductase 2 (KAR2)  
 Tb927.8.6420  
 AGOF: 3-oxoacyl-[acyl-carrier-protein] reductase (NADPH) activity  
 AGOC: mitochondrion  
 AGOP: fatty acid elongation  
 PGOF: oxidoreductase activity  
 PGO: null  
 PGOP: metabolic process

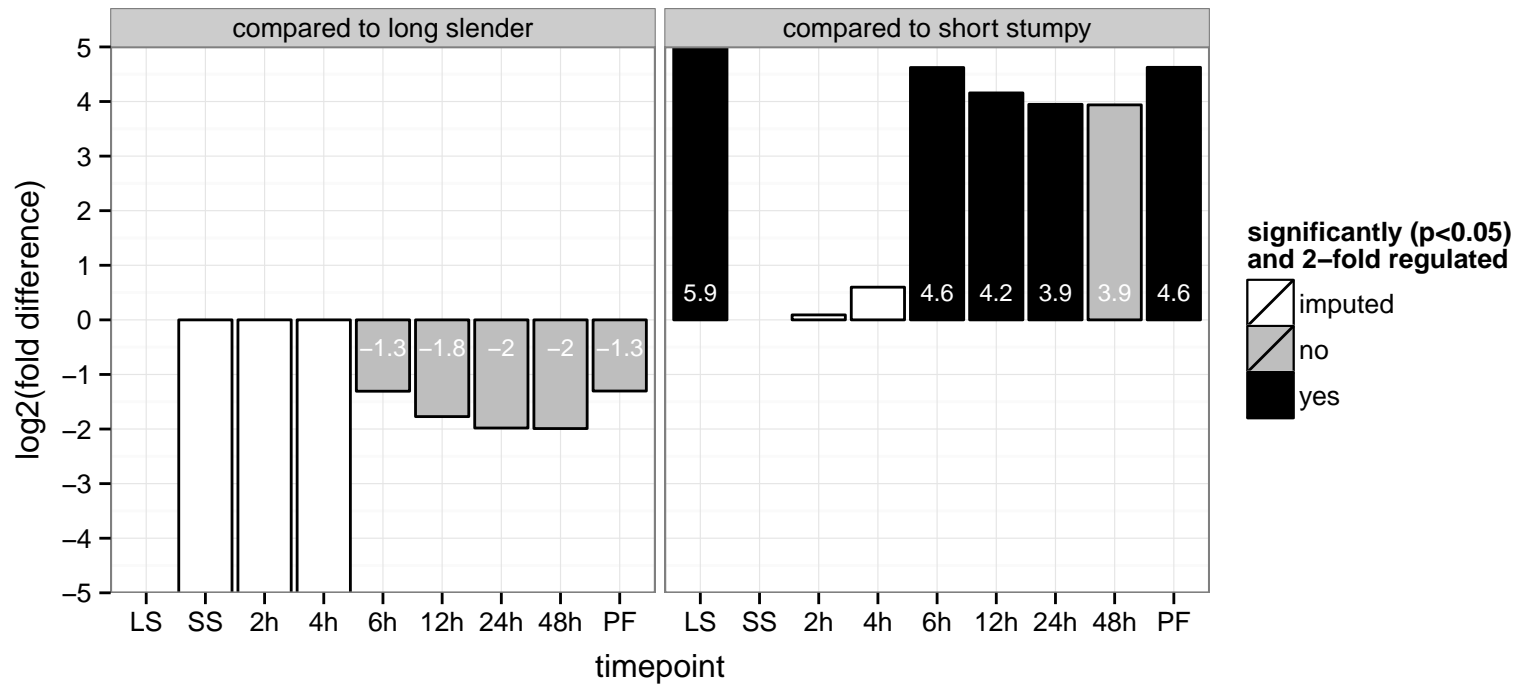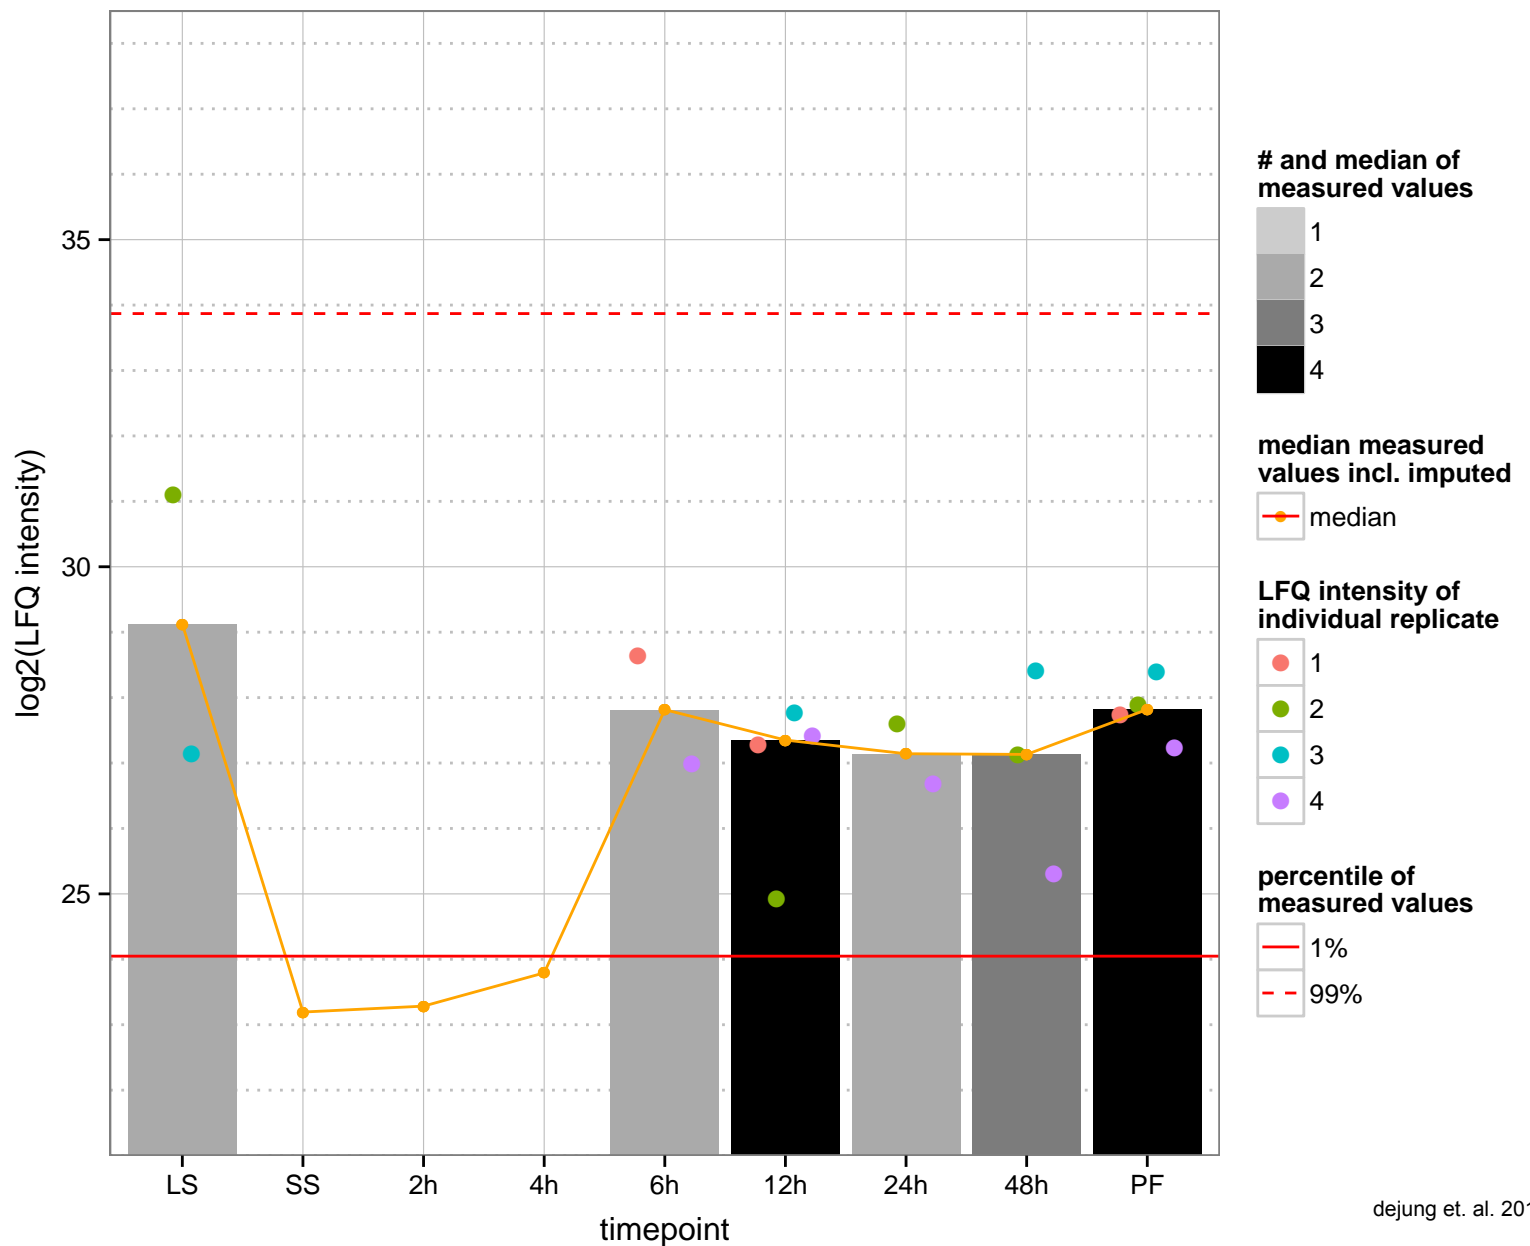

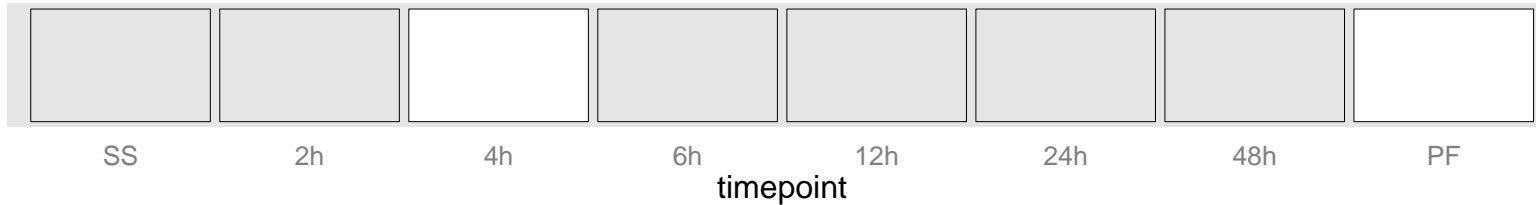

**regulated**  **not regulated**  **significant down**  **significant up**



hypothetical protein, conserved  
 Tb927.9.2940  
 AGOF: null  
 AGOC: null  
 AGOP: null  
 PGOF: null  
 PGO: null  
 PGOP: null

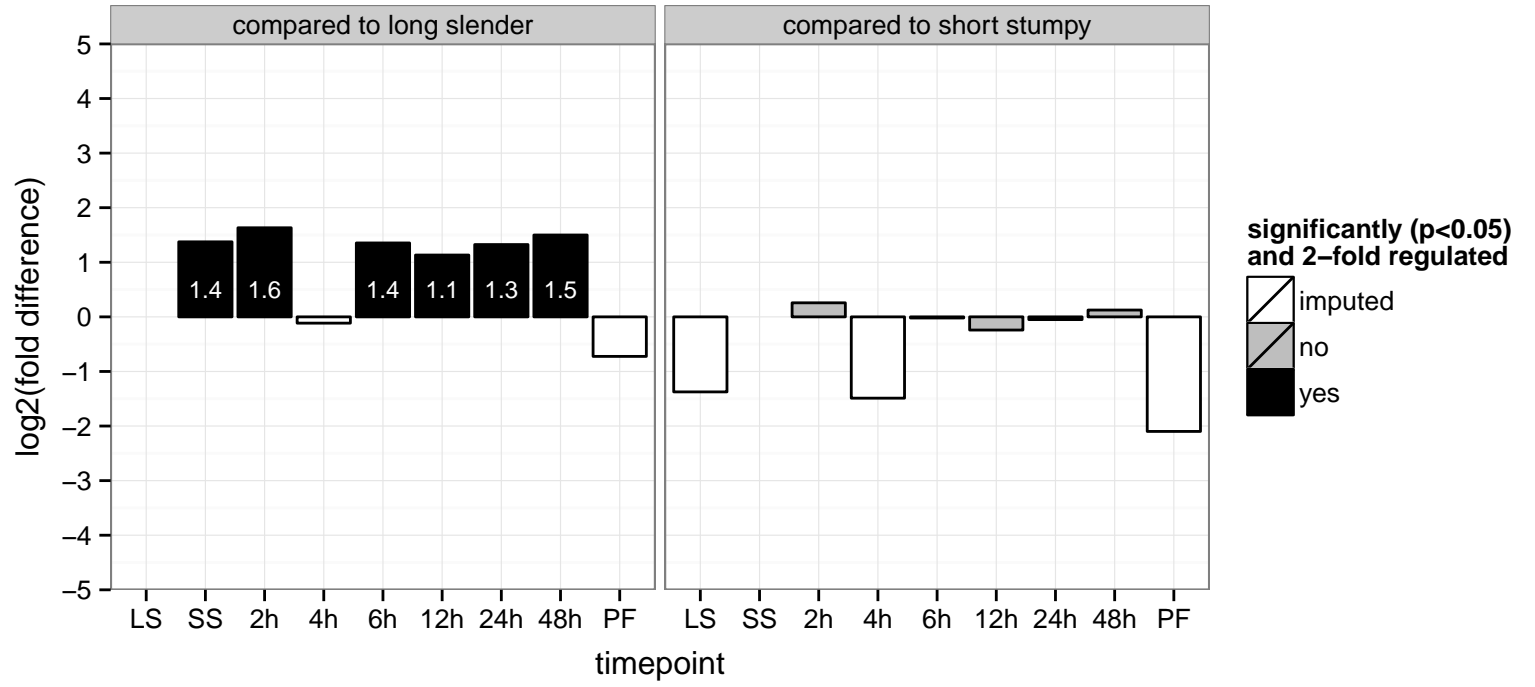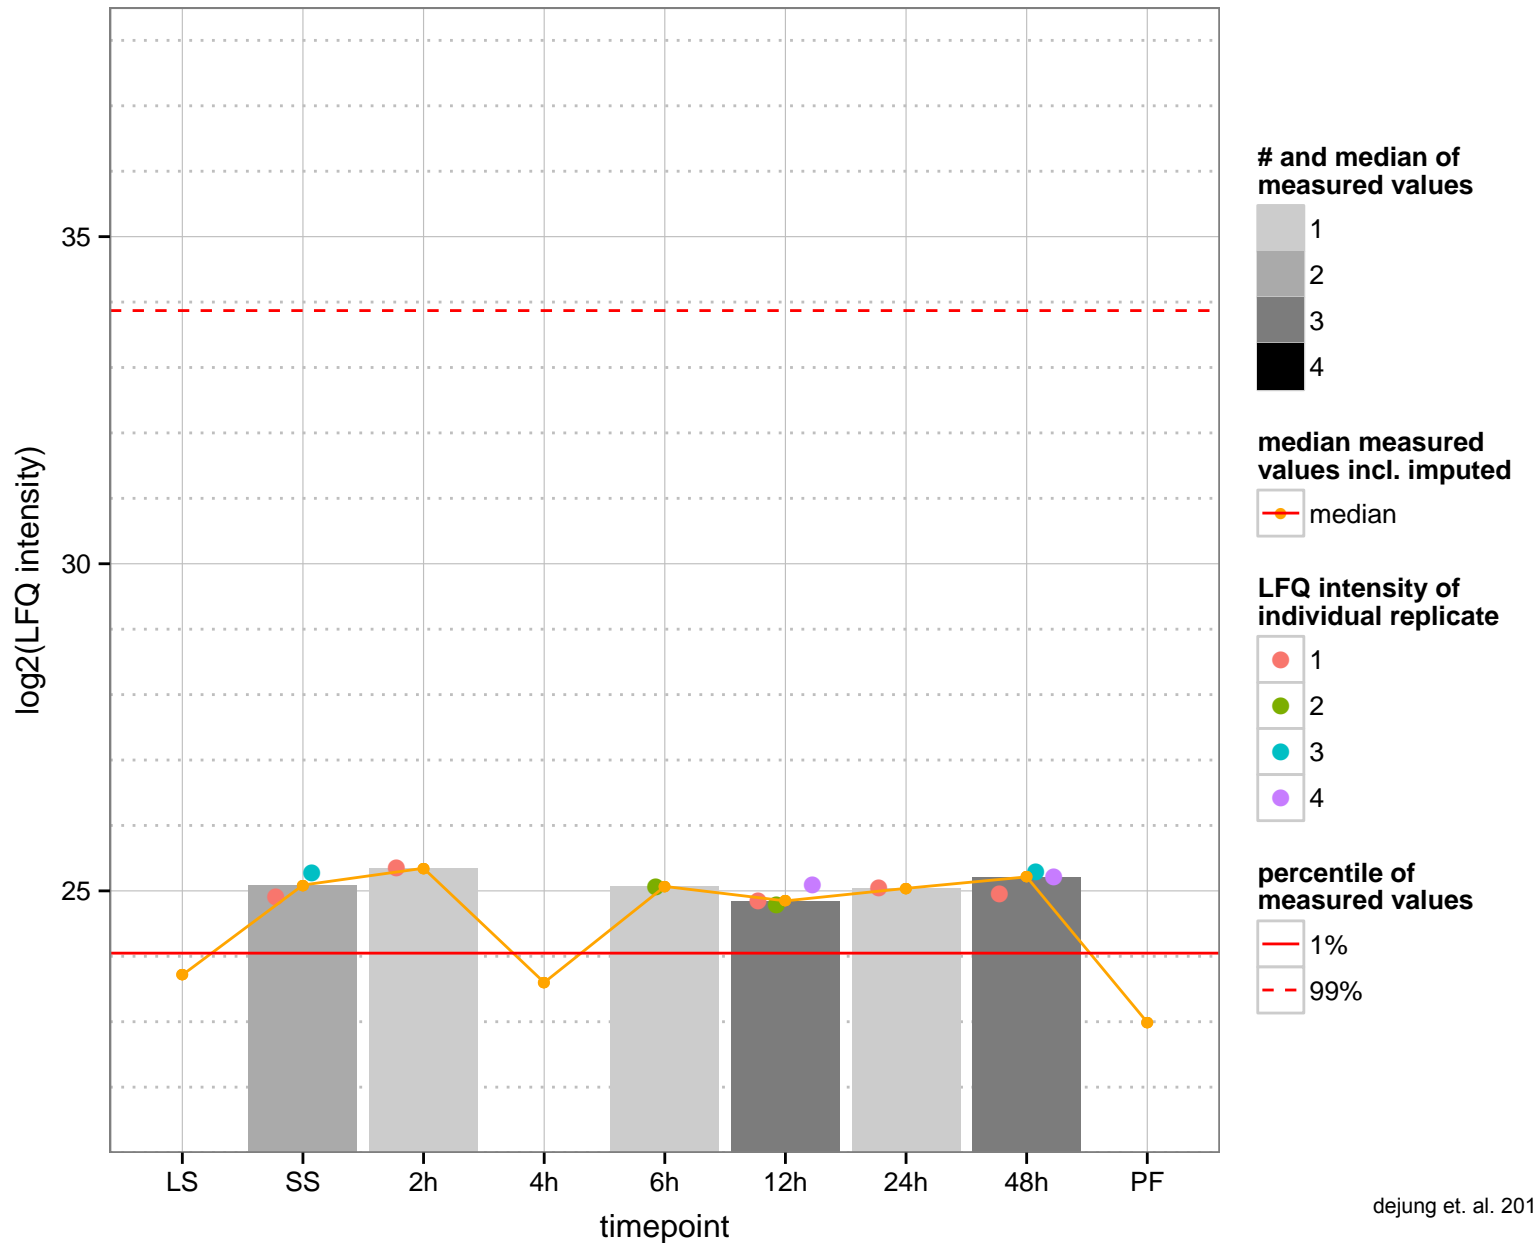

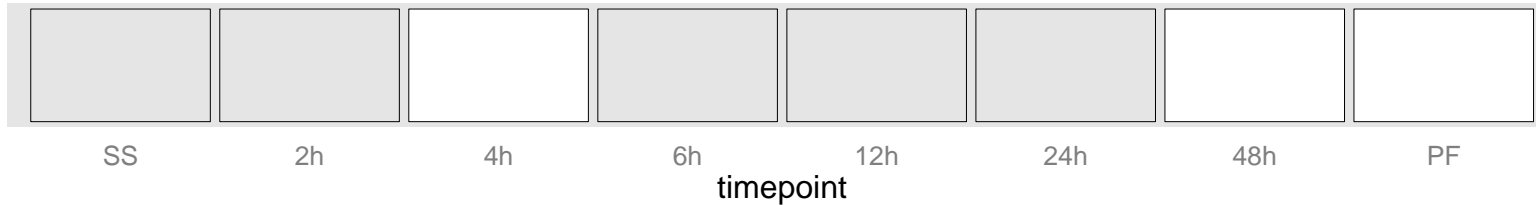

**regulated**  **not regulated**  **significant down**  **significant up**

cdc2-related kinase, putative, cell division control protein, putative (CRK10)

Tb927.3.4670

AGOF: ATP binding, protein kinase activity, protein serine/threonine kinase activity, protein tyrosine kinase activity

AGOC: null

AGOP: cell cycle, protein phosphorylation

PGOF: ATP binding, protein kinase activity, transferase activity, transferring phosphorus-containing groups

PGOC: null

PGOP: protein phosphorylation

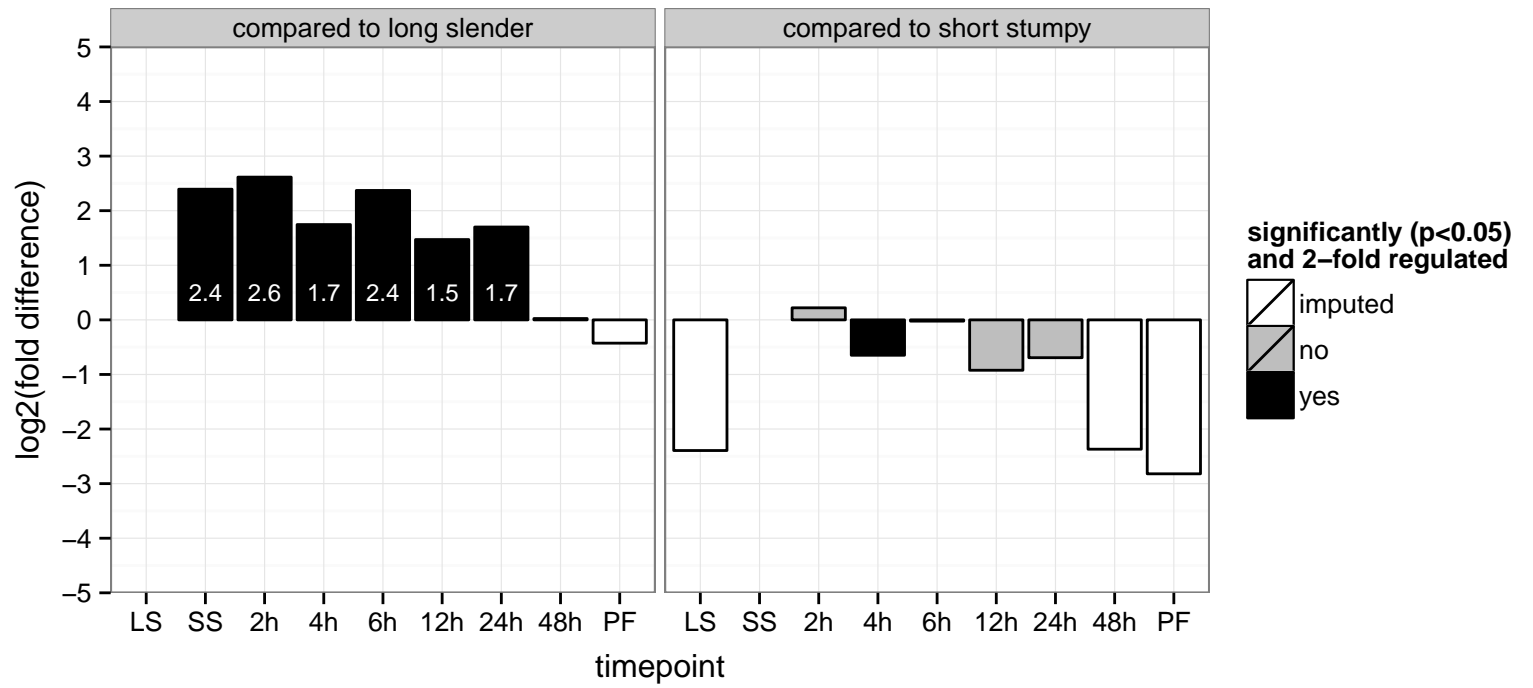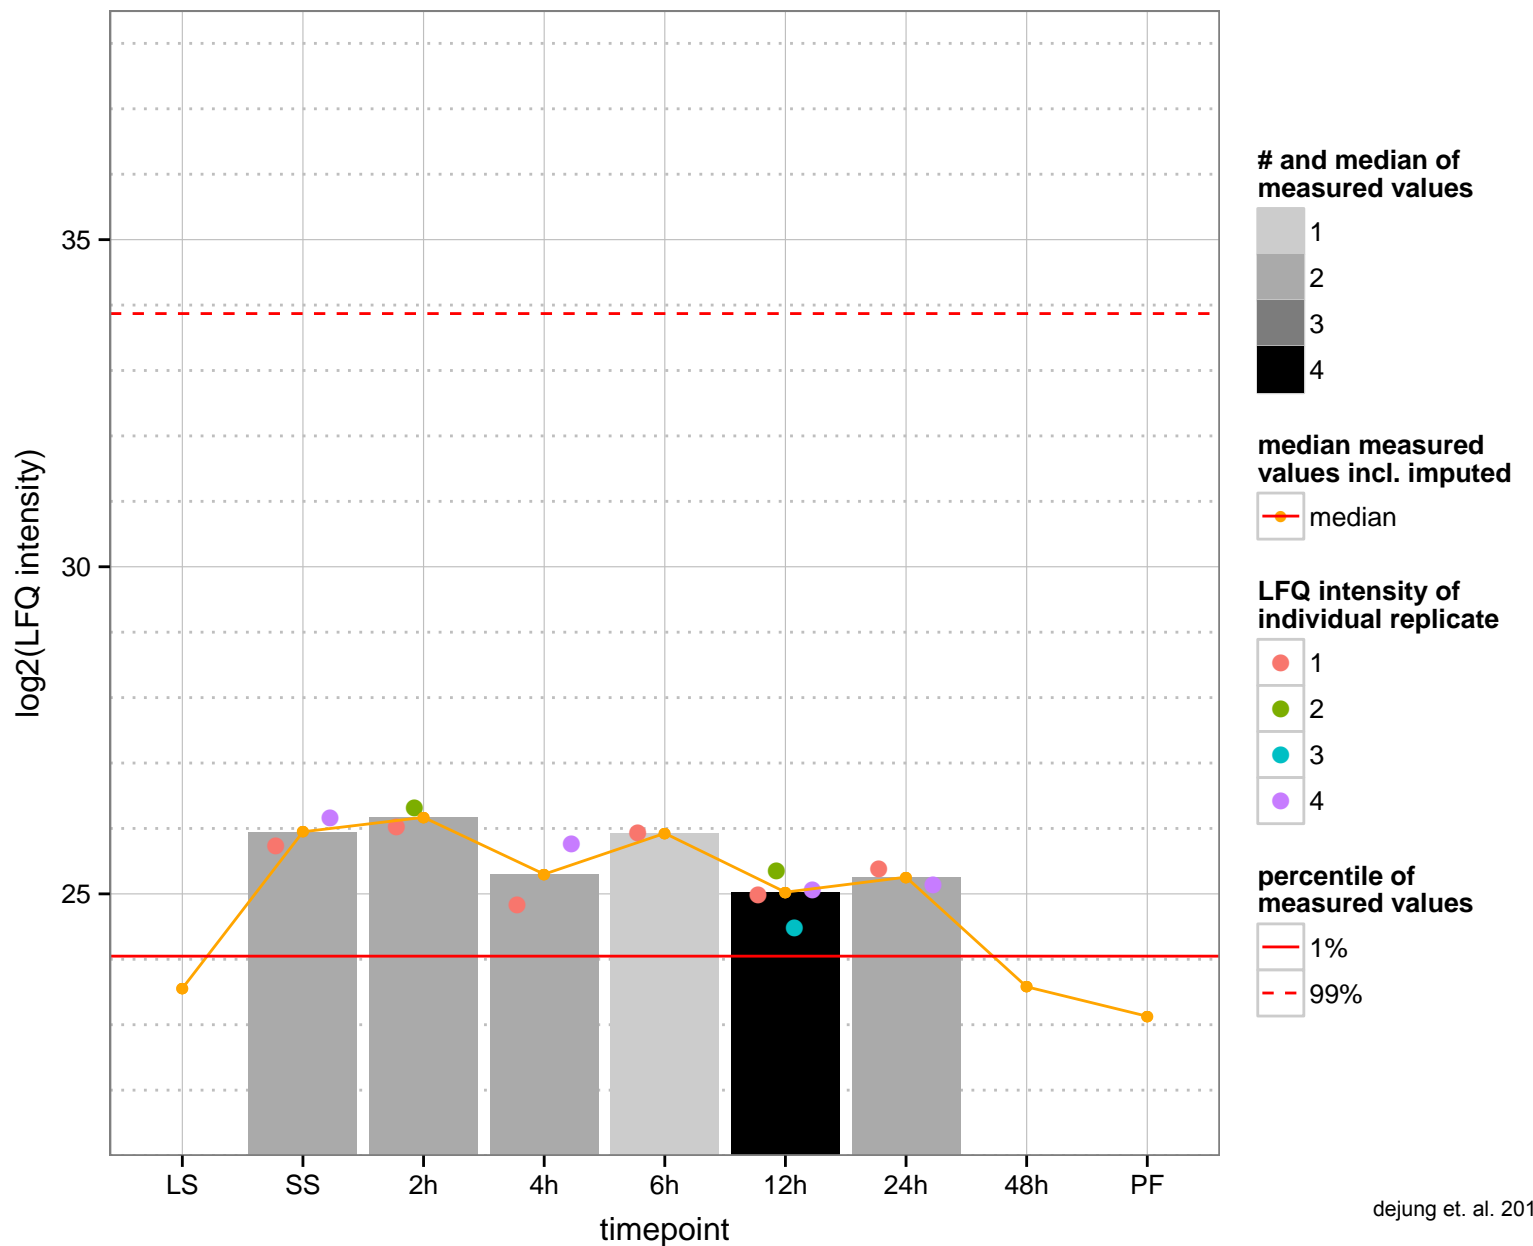

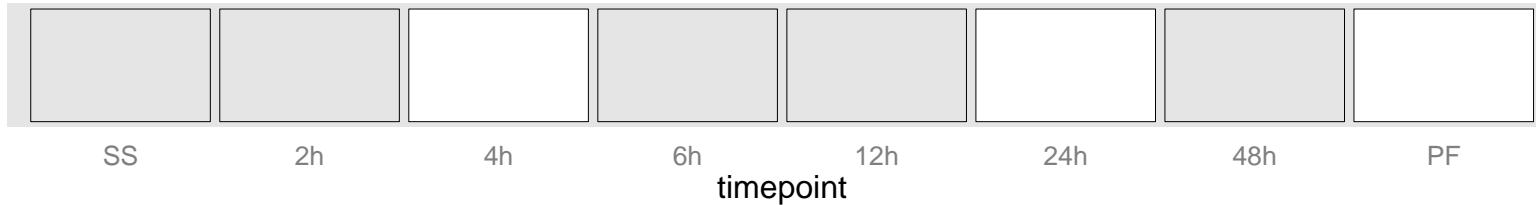

**regulated**  **not regulated**  **significant down**  **significant up**

hypothetical protein, conserved  
 Tb927.10.14310  
 AGOF: null  
 AGOC: null  
 AGOP: null  
 PGOF: null  
 PGOC: null  
 PGOP: null

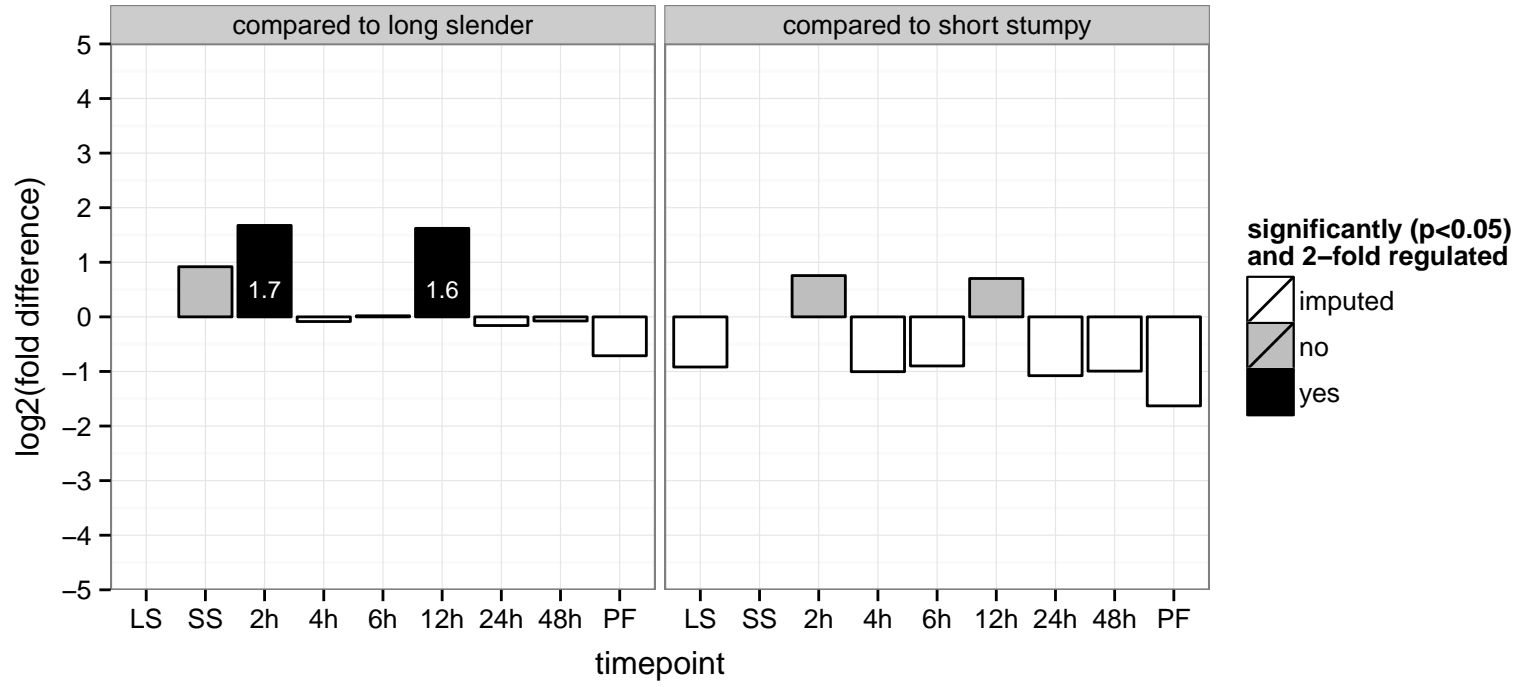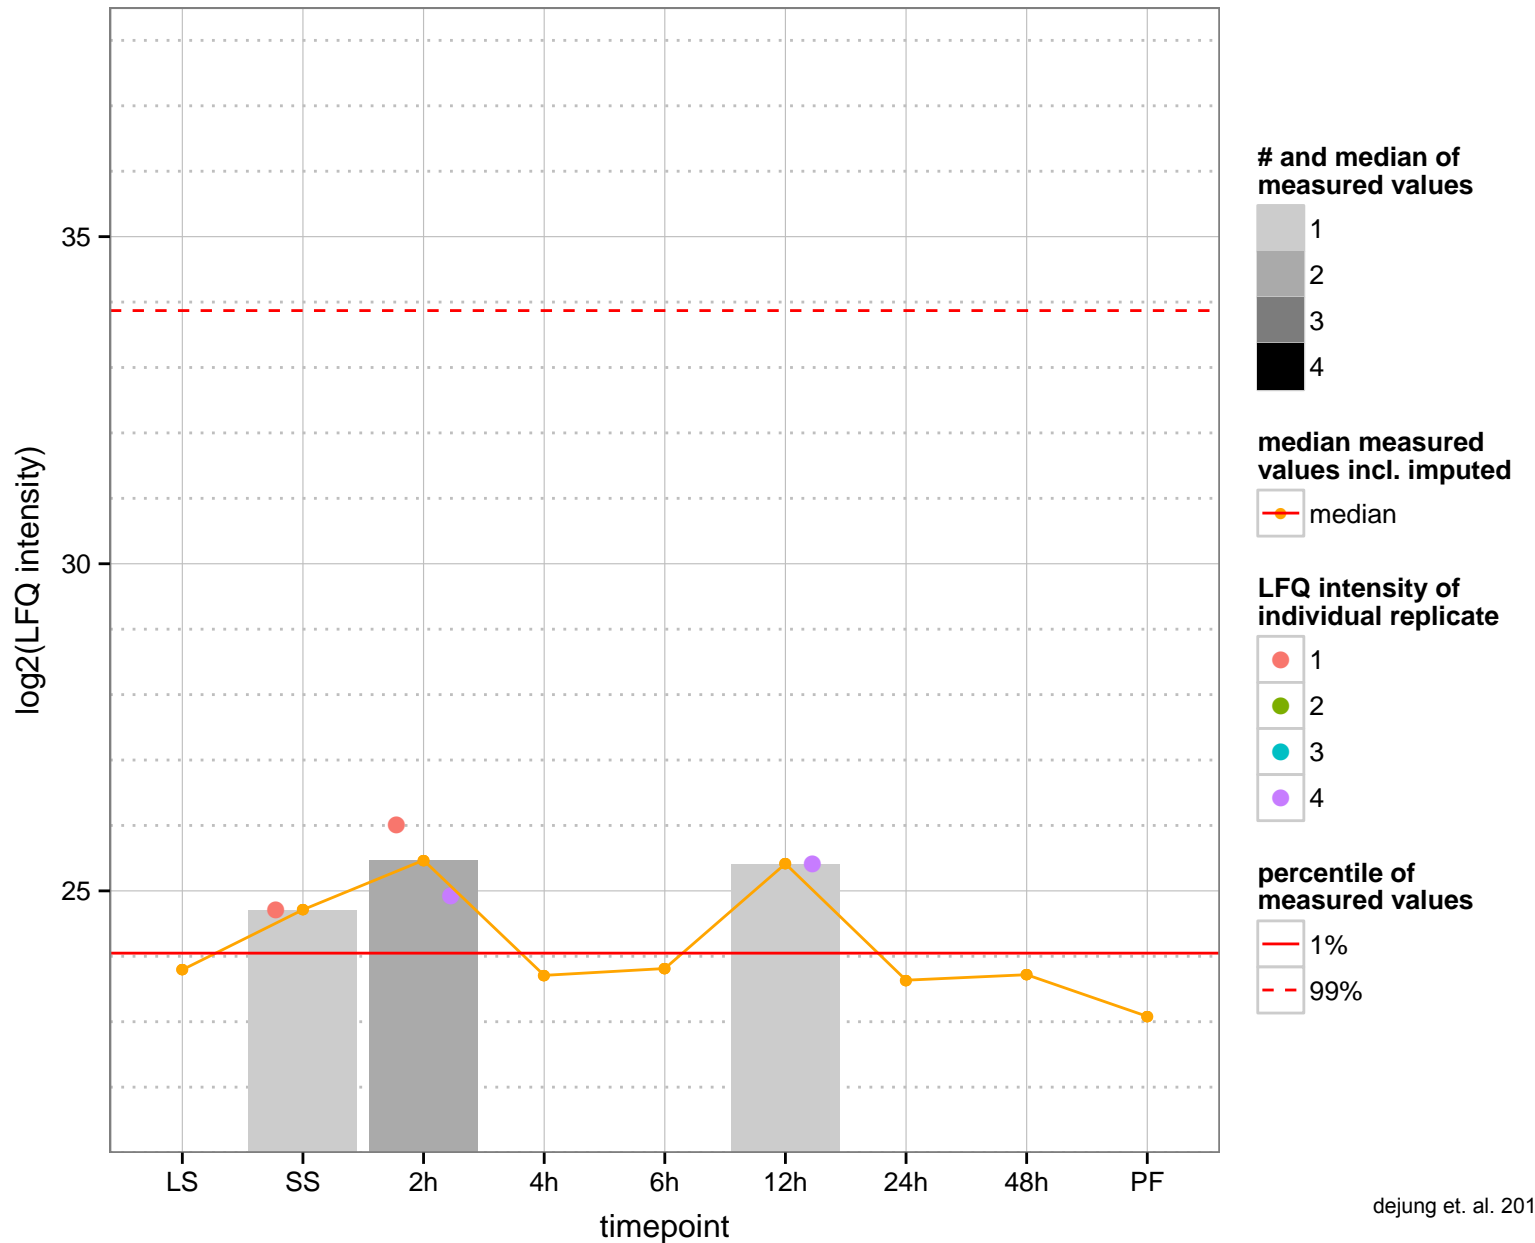

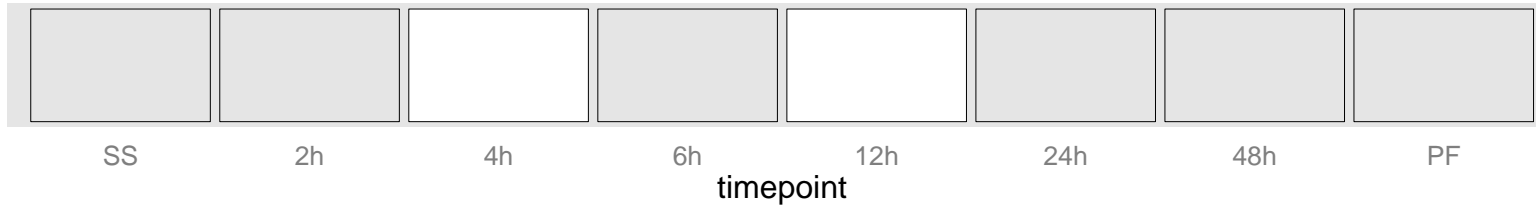

**regulated**  **not regulated**  **significant down**  **significant up**

hypothetical protein, conserved  
 Tb927.9.15260  
 AGOF: null  
 AGOC: null  
 AGOP: null  
 PGOF: protein binding  
 PGOC: null  
 PGOP: null

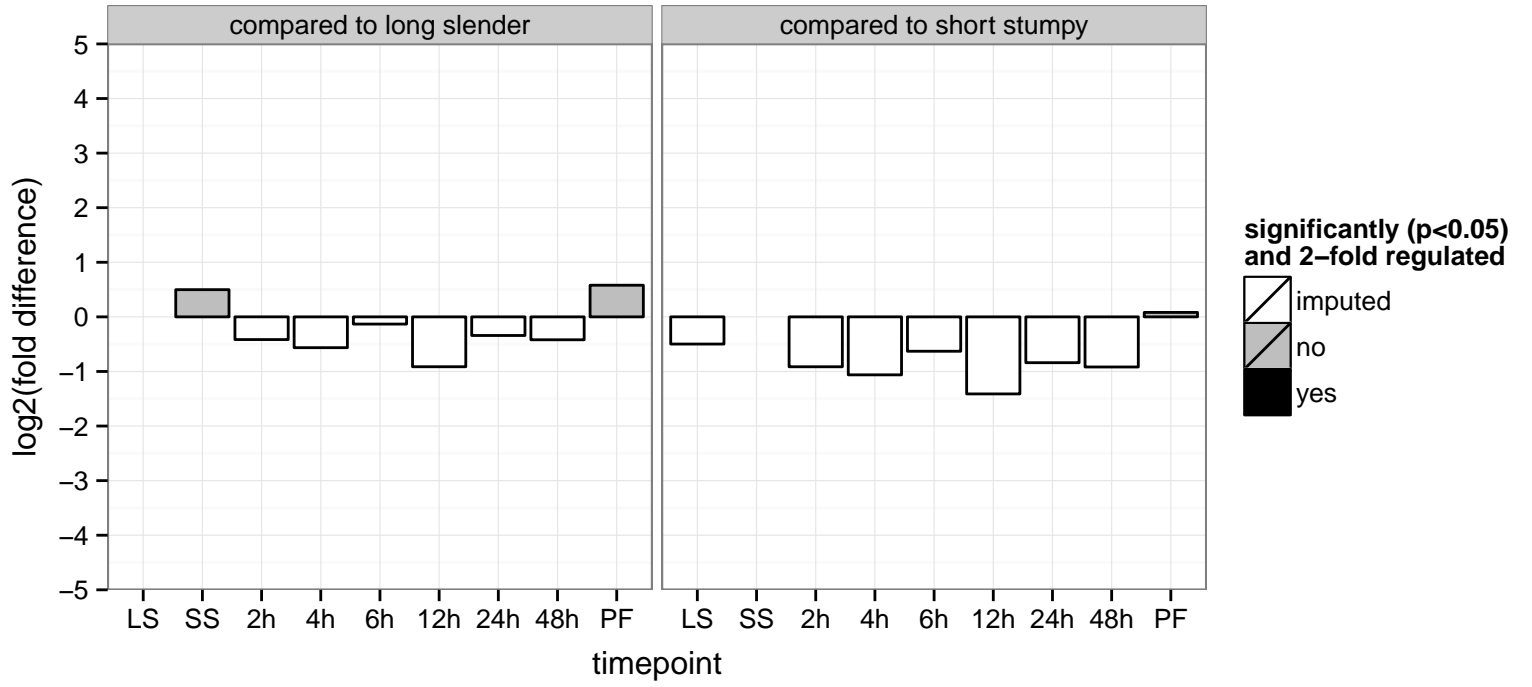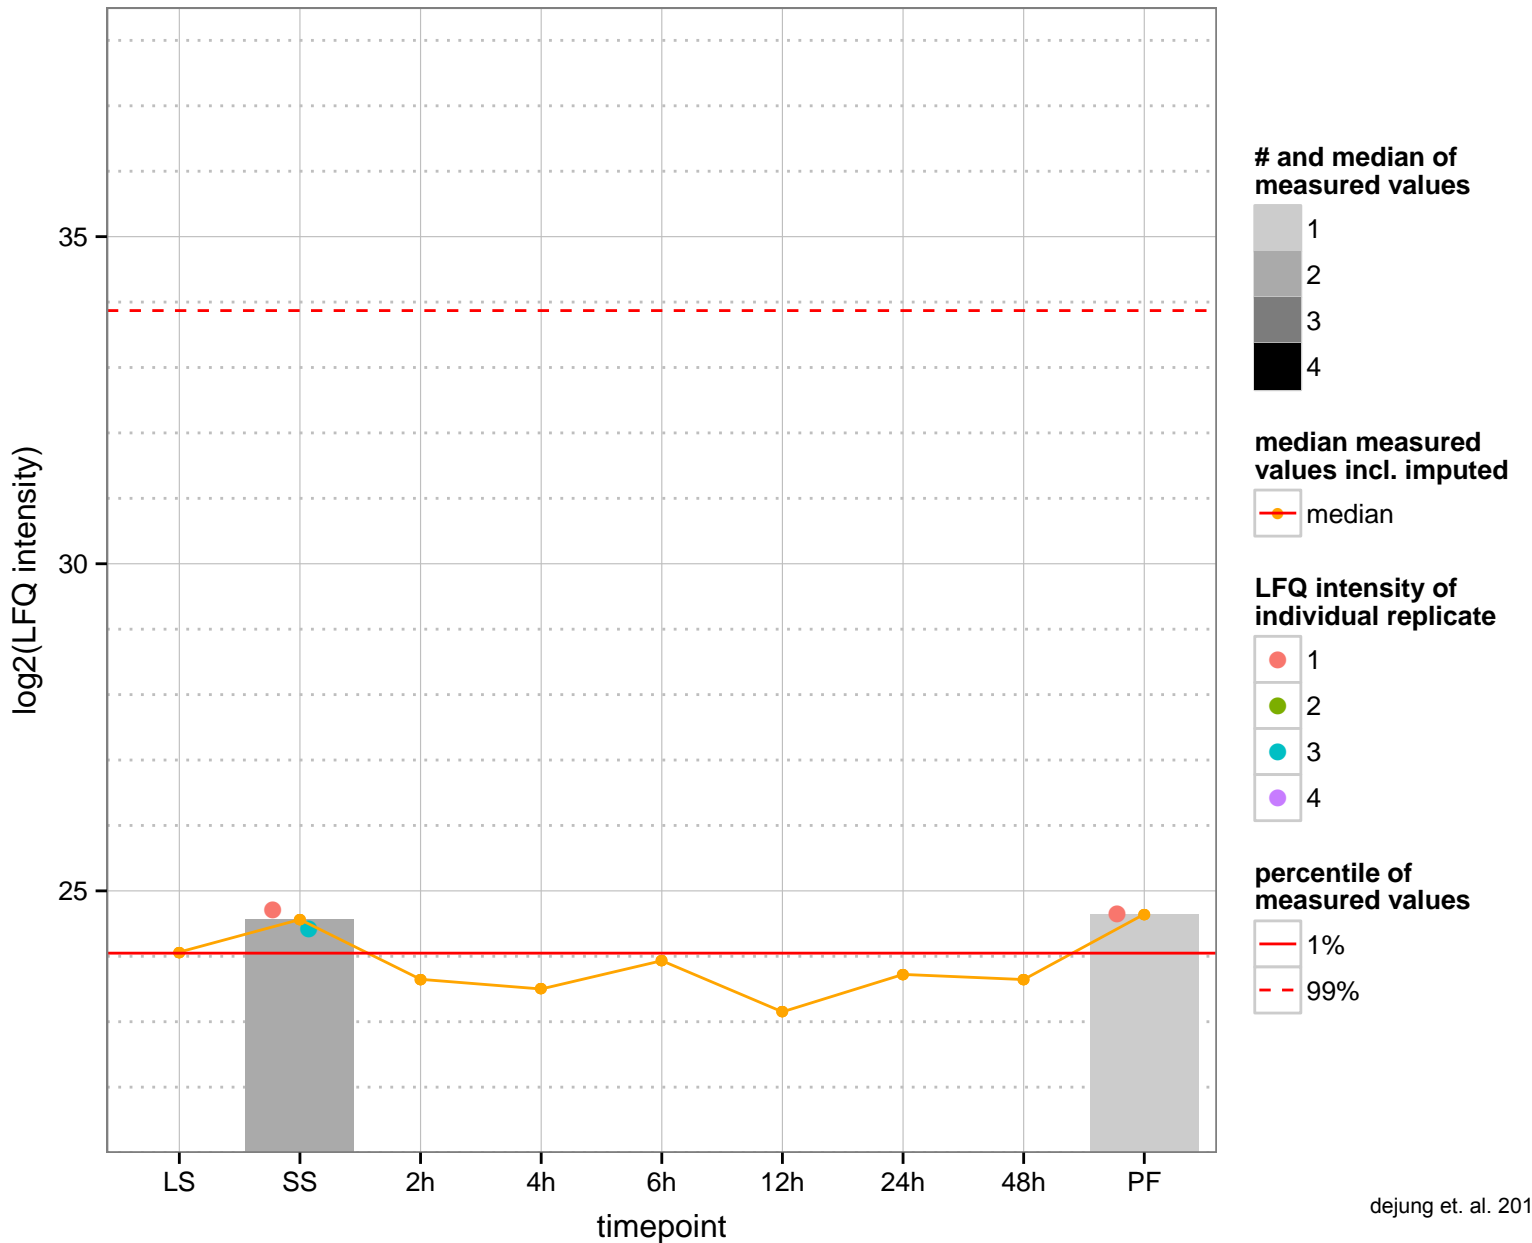

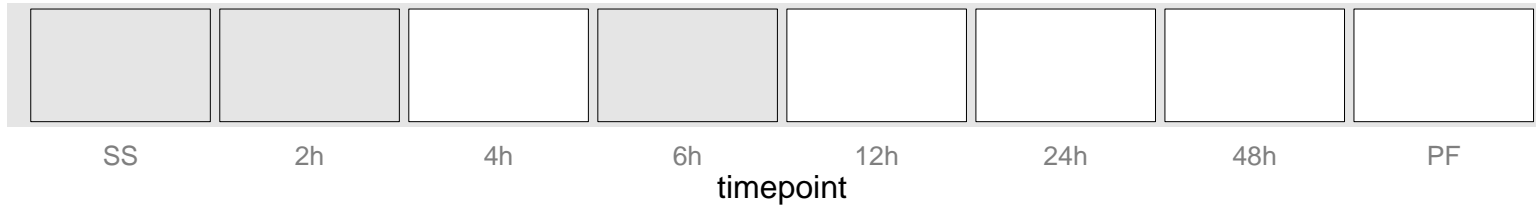

**regulated**  **not regulated**  **significant down**  **significant up**



ubiquitin–protein ligase, putative (upl3)  
 Tb927.9.13360  
 AGOF: ubiquitin–protein ligase activity  
 AGOC: intracellular  
 AGOP: cellular protein modification process  
 PGO: acid–amino acid ligase activity  
 PGO: intracellular  
 PGO: cellular protein modification process

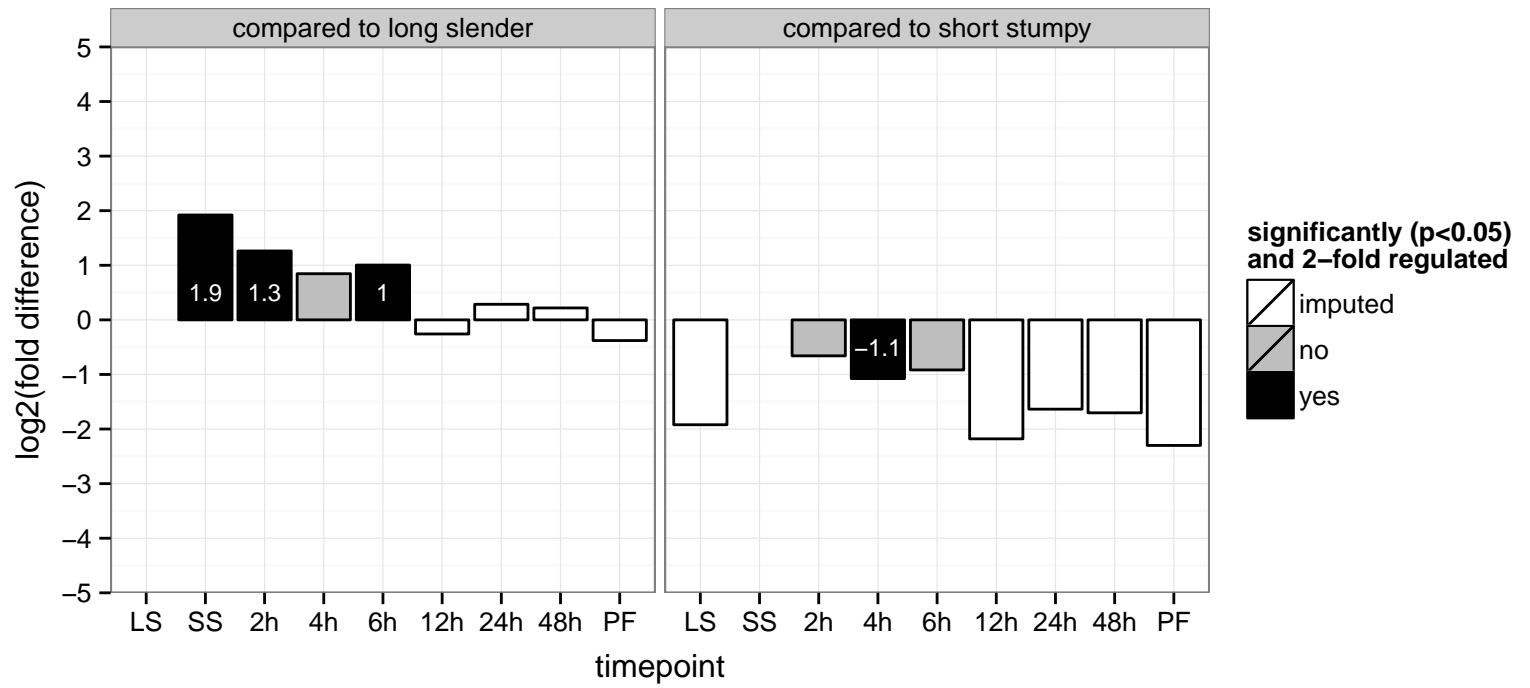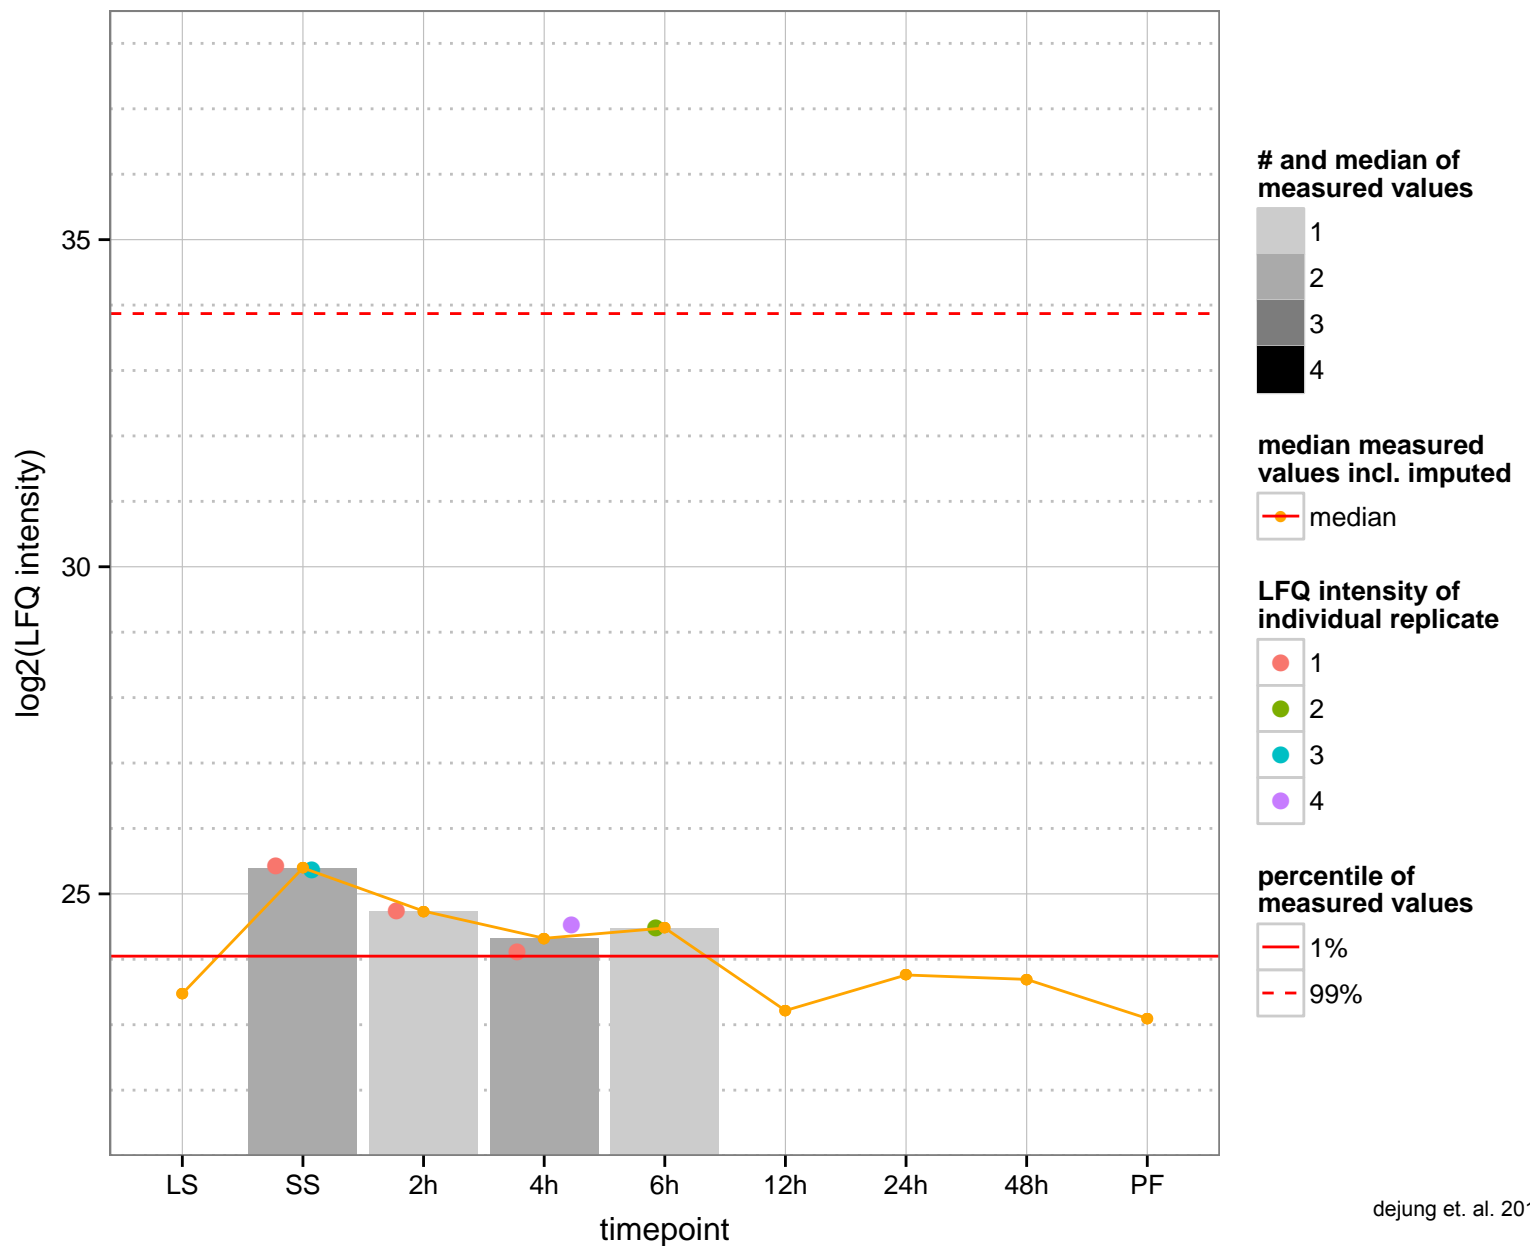

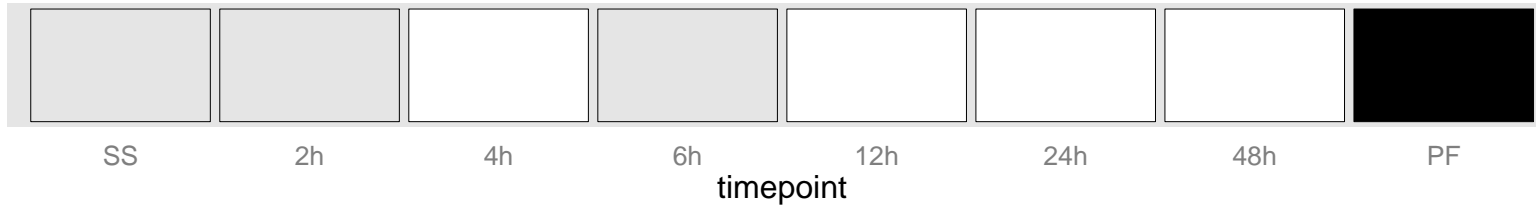

**regulated**  **not regulated**  **significant down**  **significant up**

amino acid transporter 8, putative, amino acid transporter 10, putative (AATP10), amino acid transporter 7, putative (AATP7), Tb927.4.4860;Tb11.v5.0540;Tb927.4.4840;Tb927.4.4820  
 AGOF: null, amine transmembrane transporter activity  
 AGOC: null, membrane  
 AGOP: null, amino acid transport  
 PGO: null  
 PGO: null  
 PGO: null

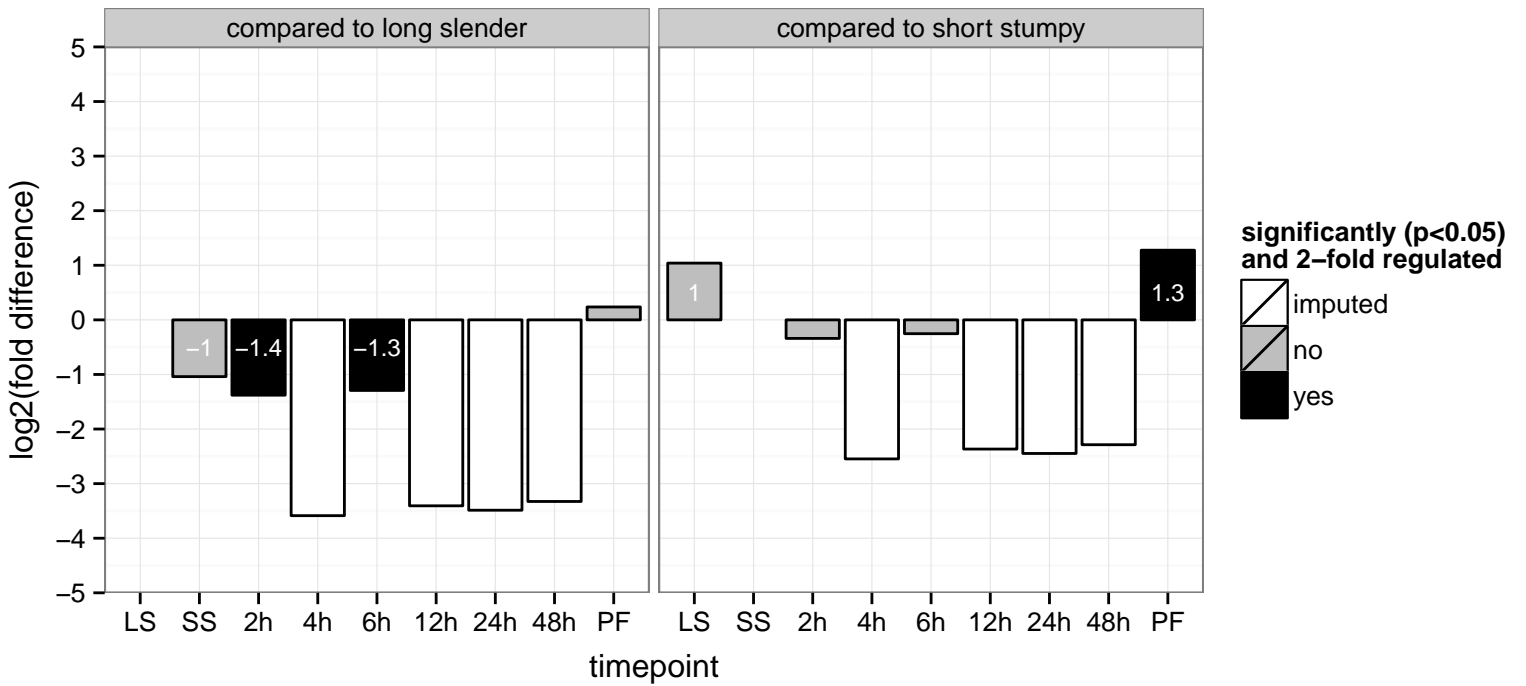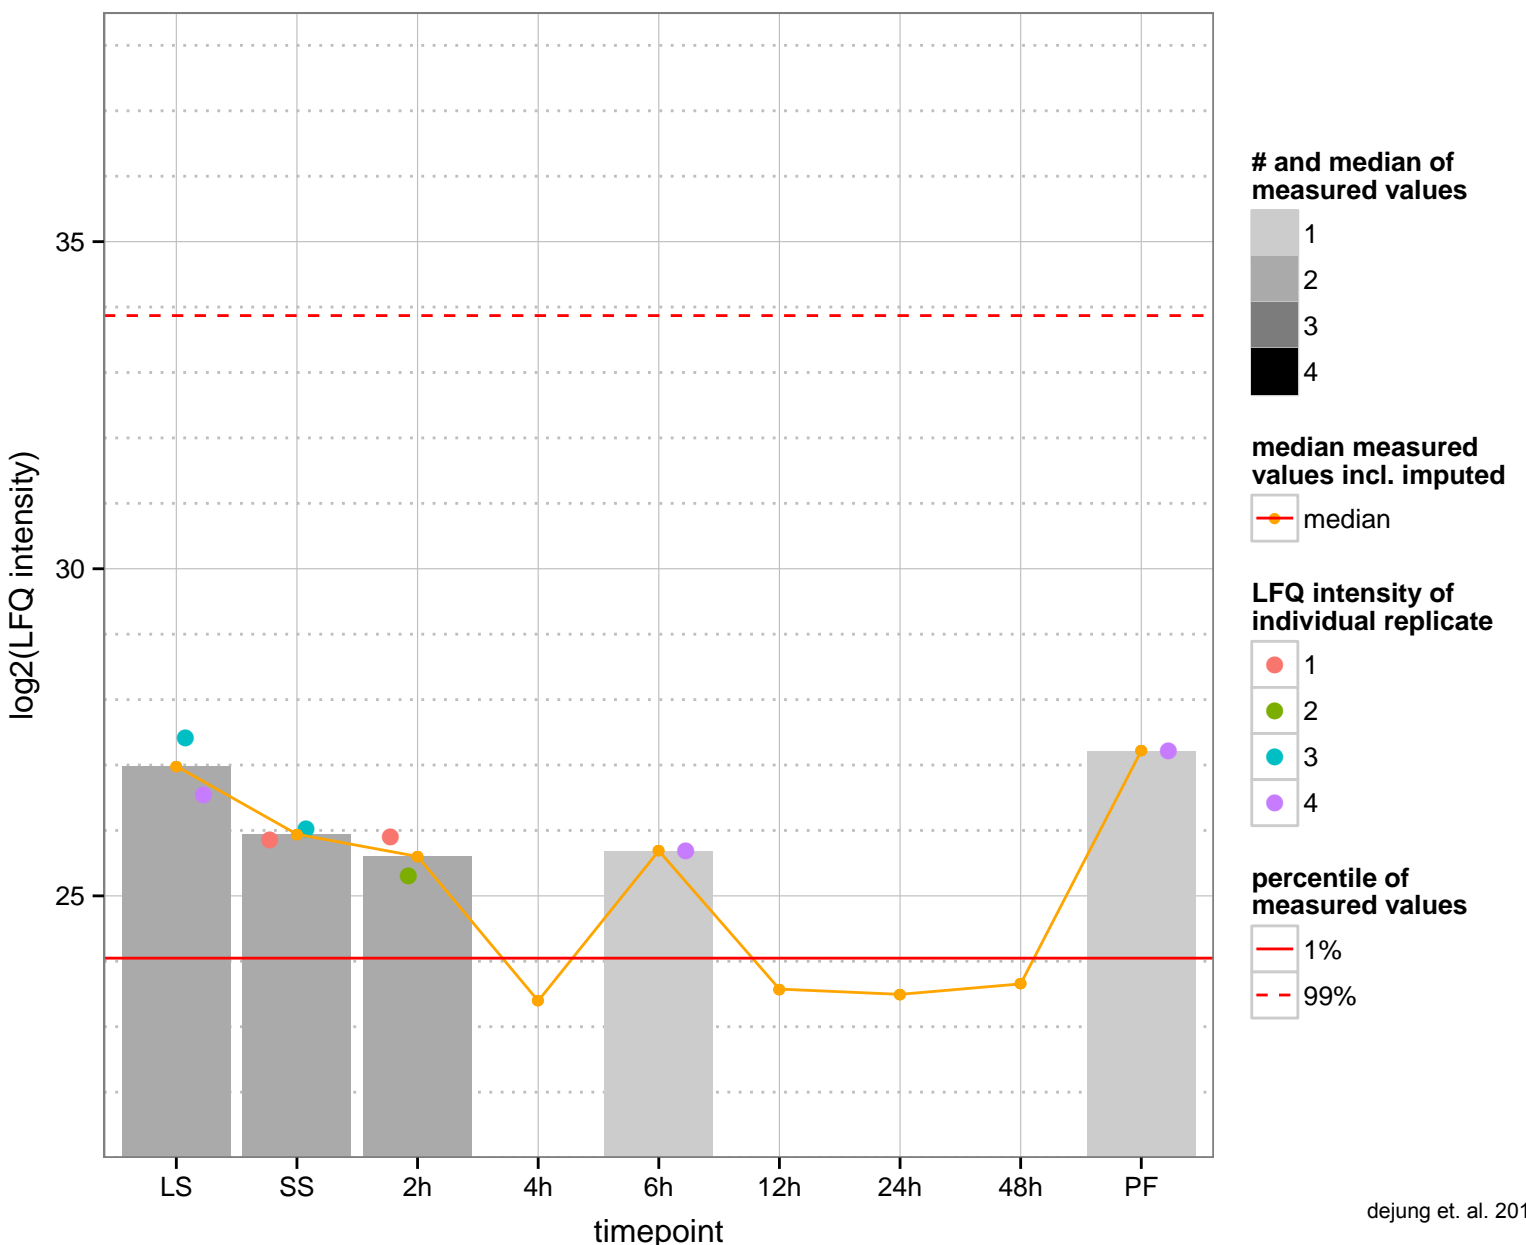

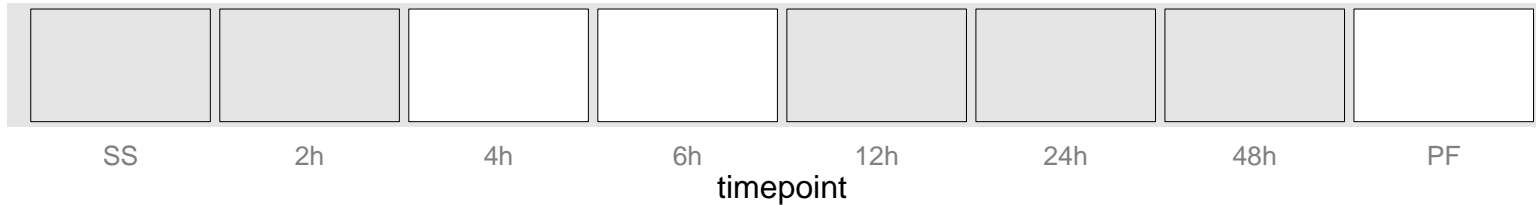

**regulated**  **not regulated**  **significant down**  **significant up**

hypothetical protein, conserved  
 Tb927.11.10120  
 AGOF: null  
 AGOC: null  
 AGOP: null  
 PGOF: null  
 PGO: null  
 PGOP: null

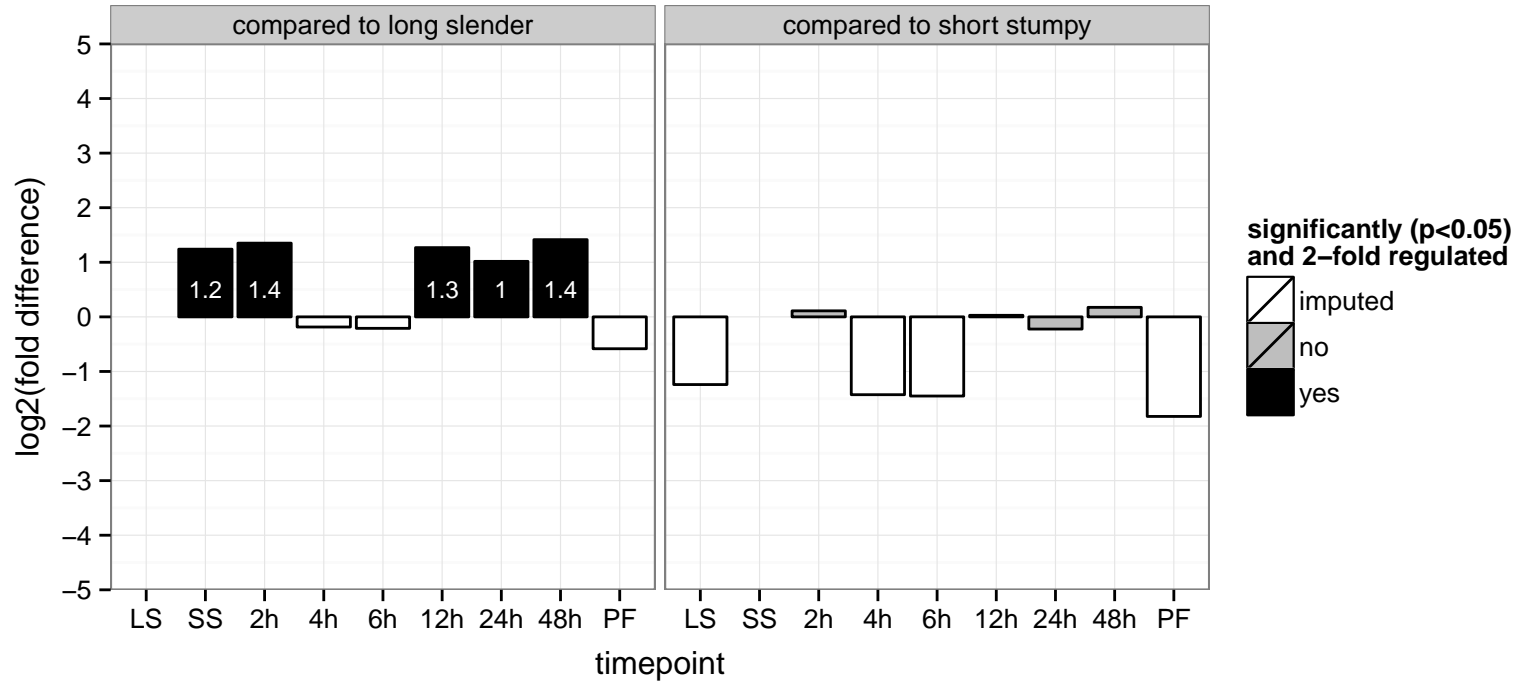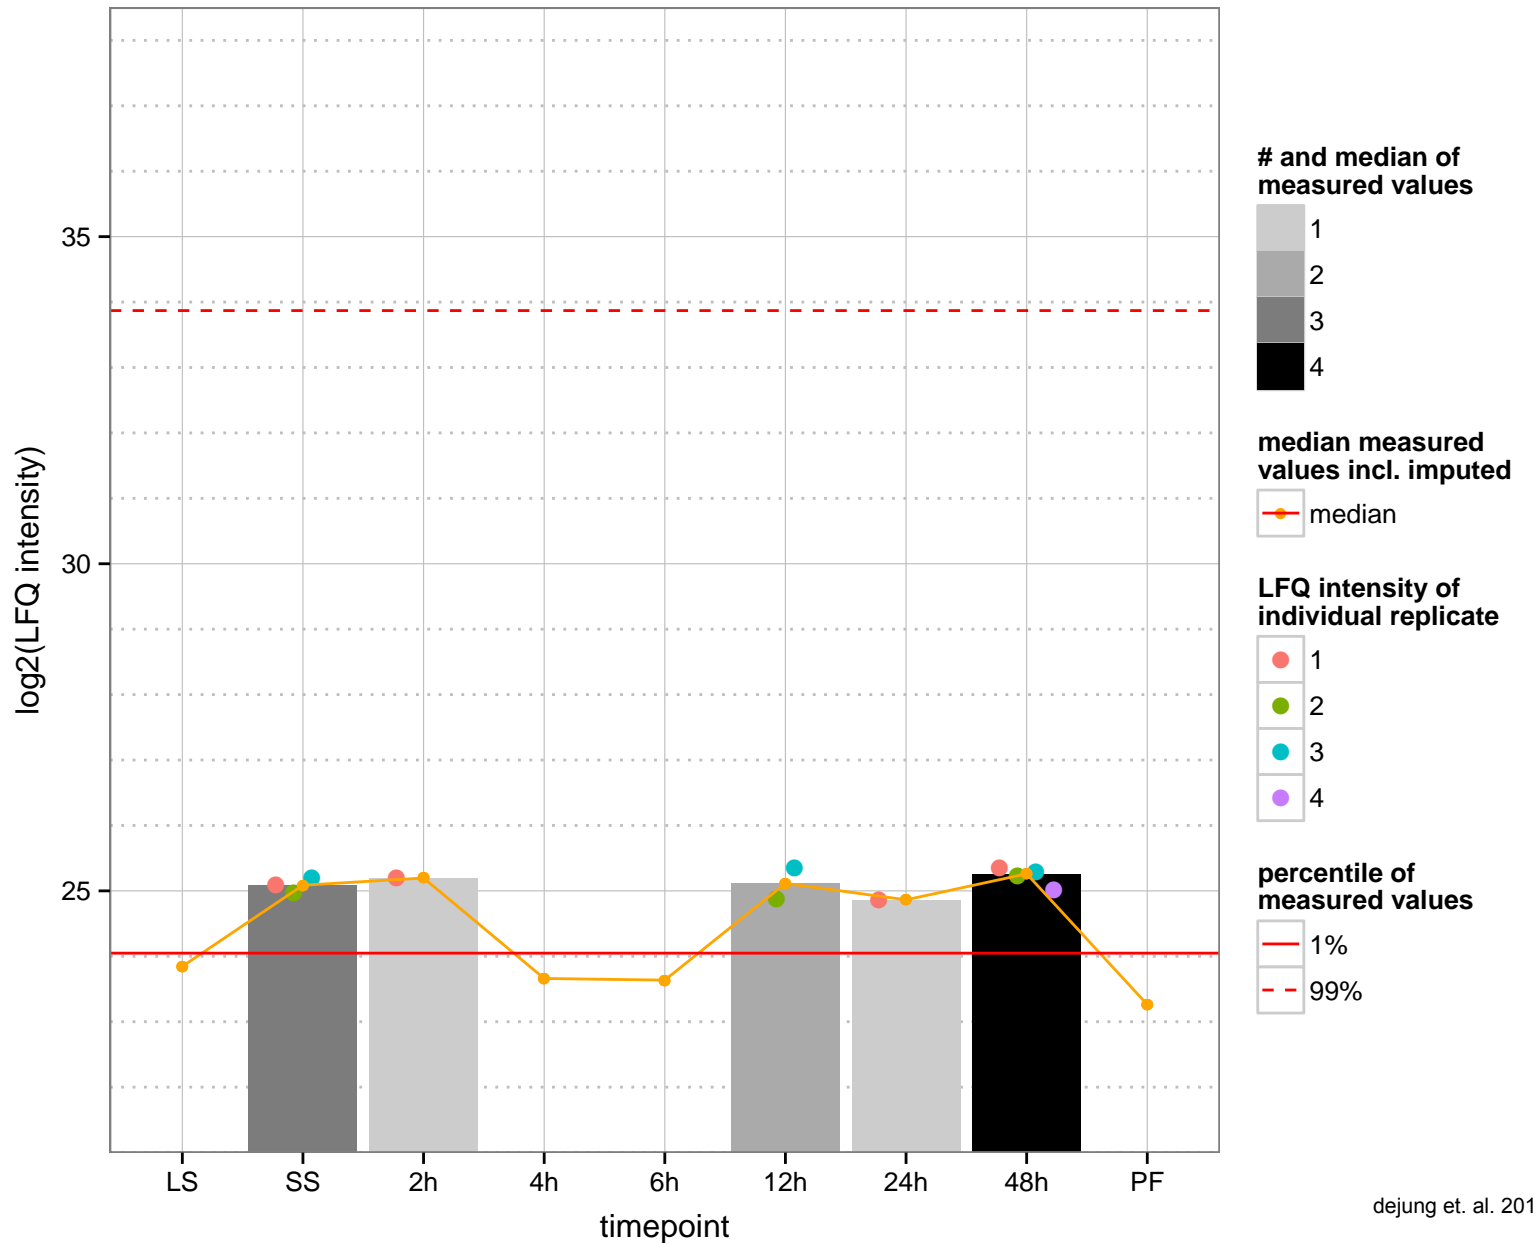

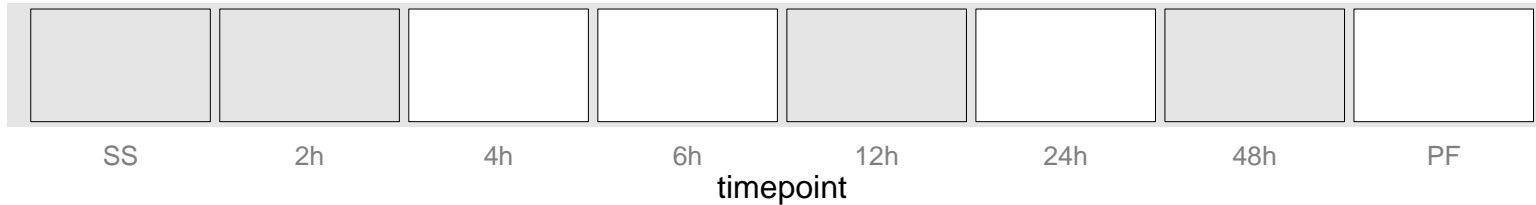

**regulated**  **not regulated**  **significant down**  **significant up**

hypothetical protein, conserved  
 Tb927.7.2520  
 AGOF: null  
 AGOC: null  
 AGOP: null  
 PGOF: null  
 PGO: null  
 PGOP: null

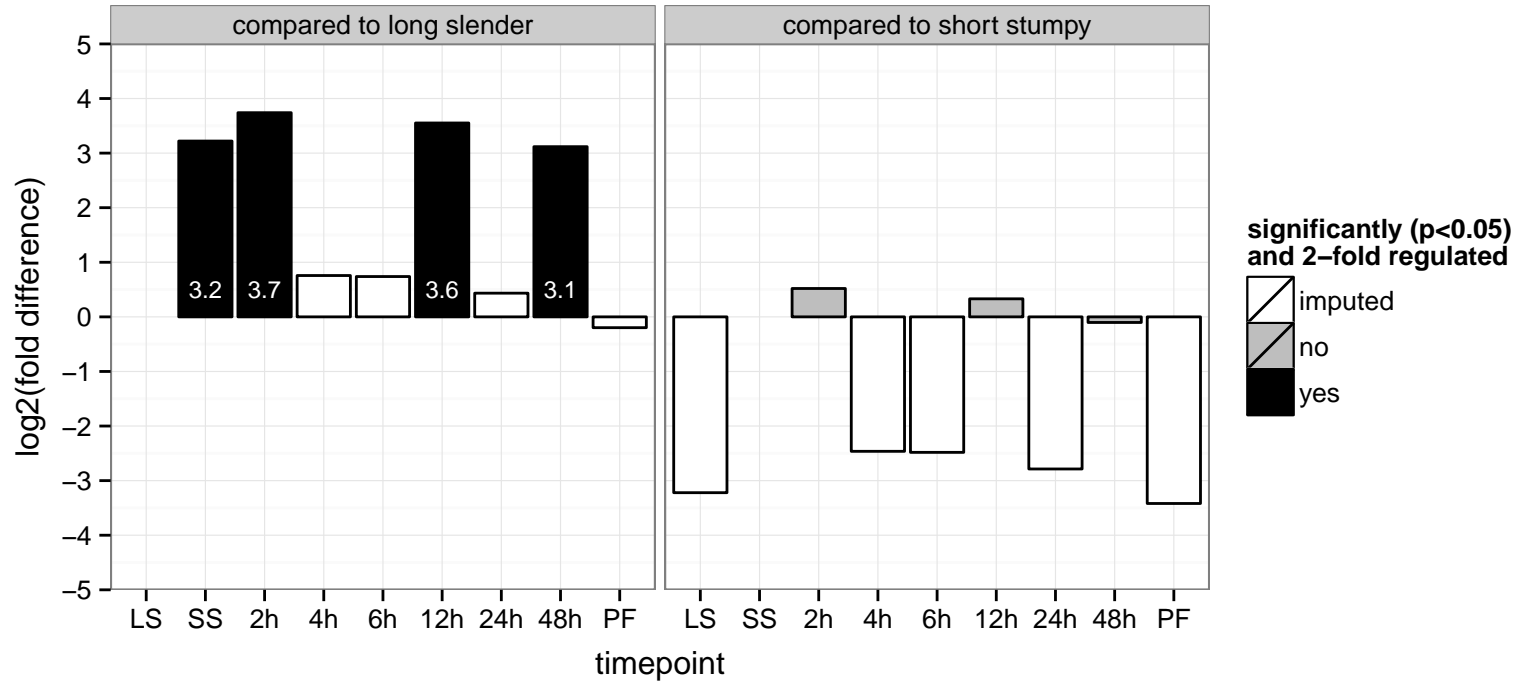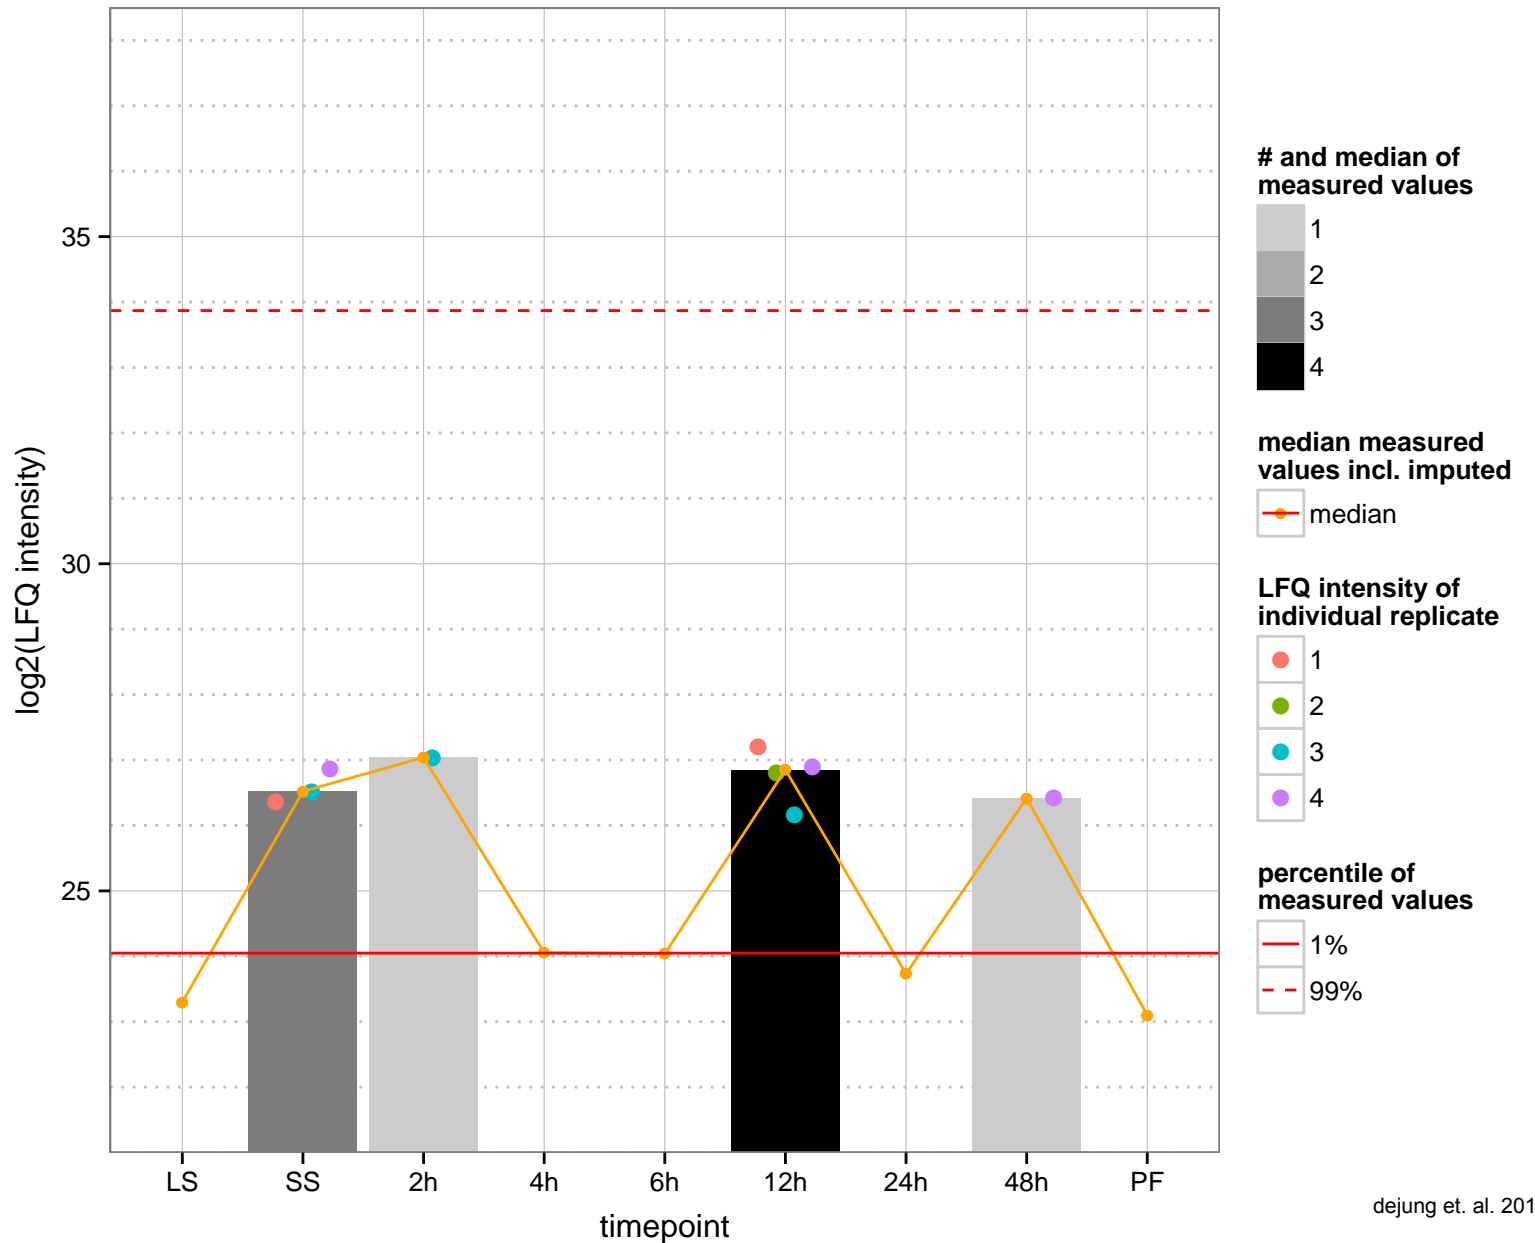

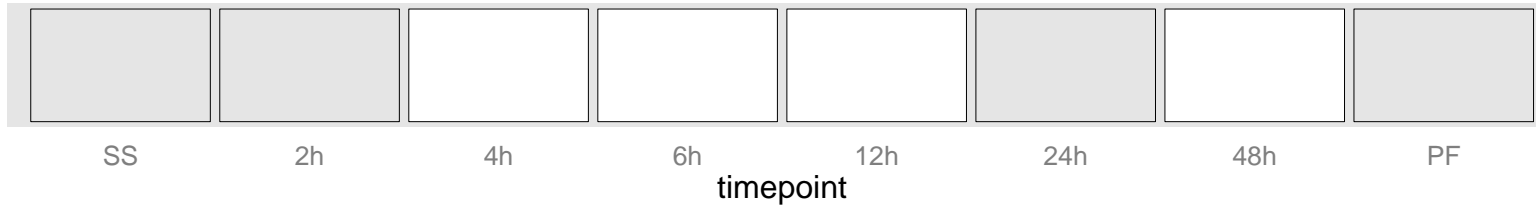

**regulated**  **not regulated**  **significant down**  **significant up**



Nuclear Dbf2-related kinase, PK53 (PK53)

Tb927.7.5770

AGOF: ATP binding, protein kinase activity, protein serine/threonine kinase activity, protein tyrosine kinase activity

AGOC: cytosol

AGOP: cell proliferation, cytokinesis, protein phosphorylation, regulation of cell cycle

PGOF: ATP binding, protein kinase activity, protein serine/threonine kinase activity, transferase activity, transferring phosphorus

PGOC: null

PGOP: protein phosphorylation

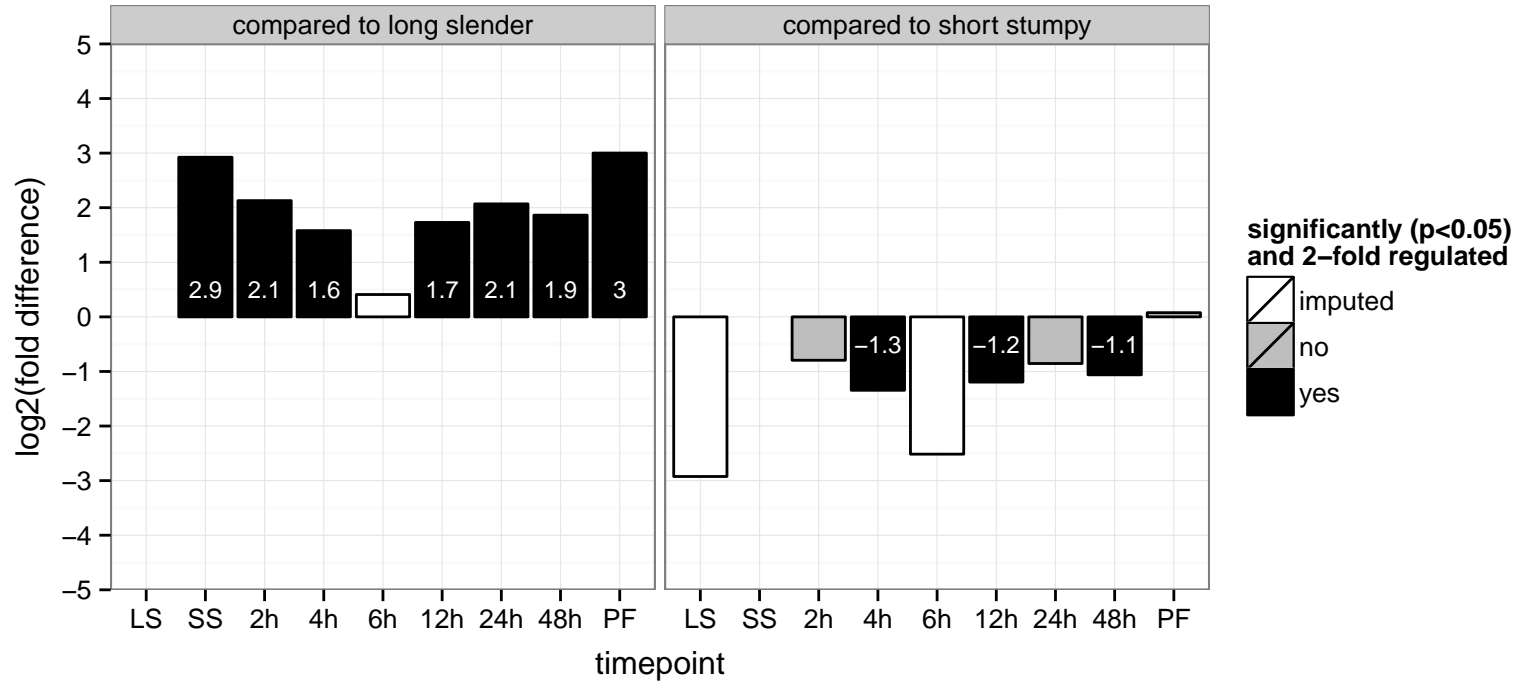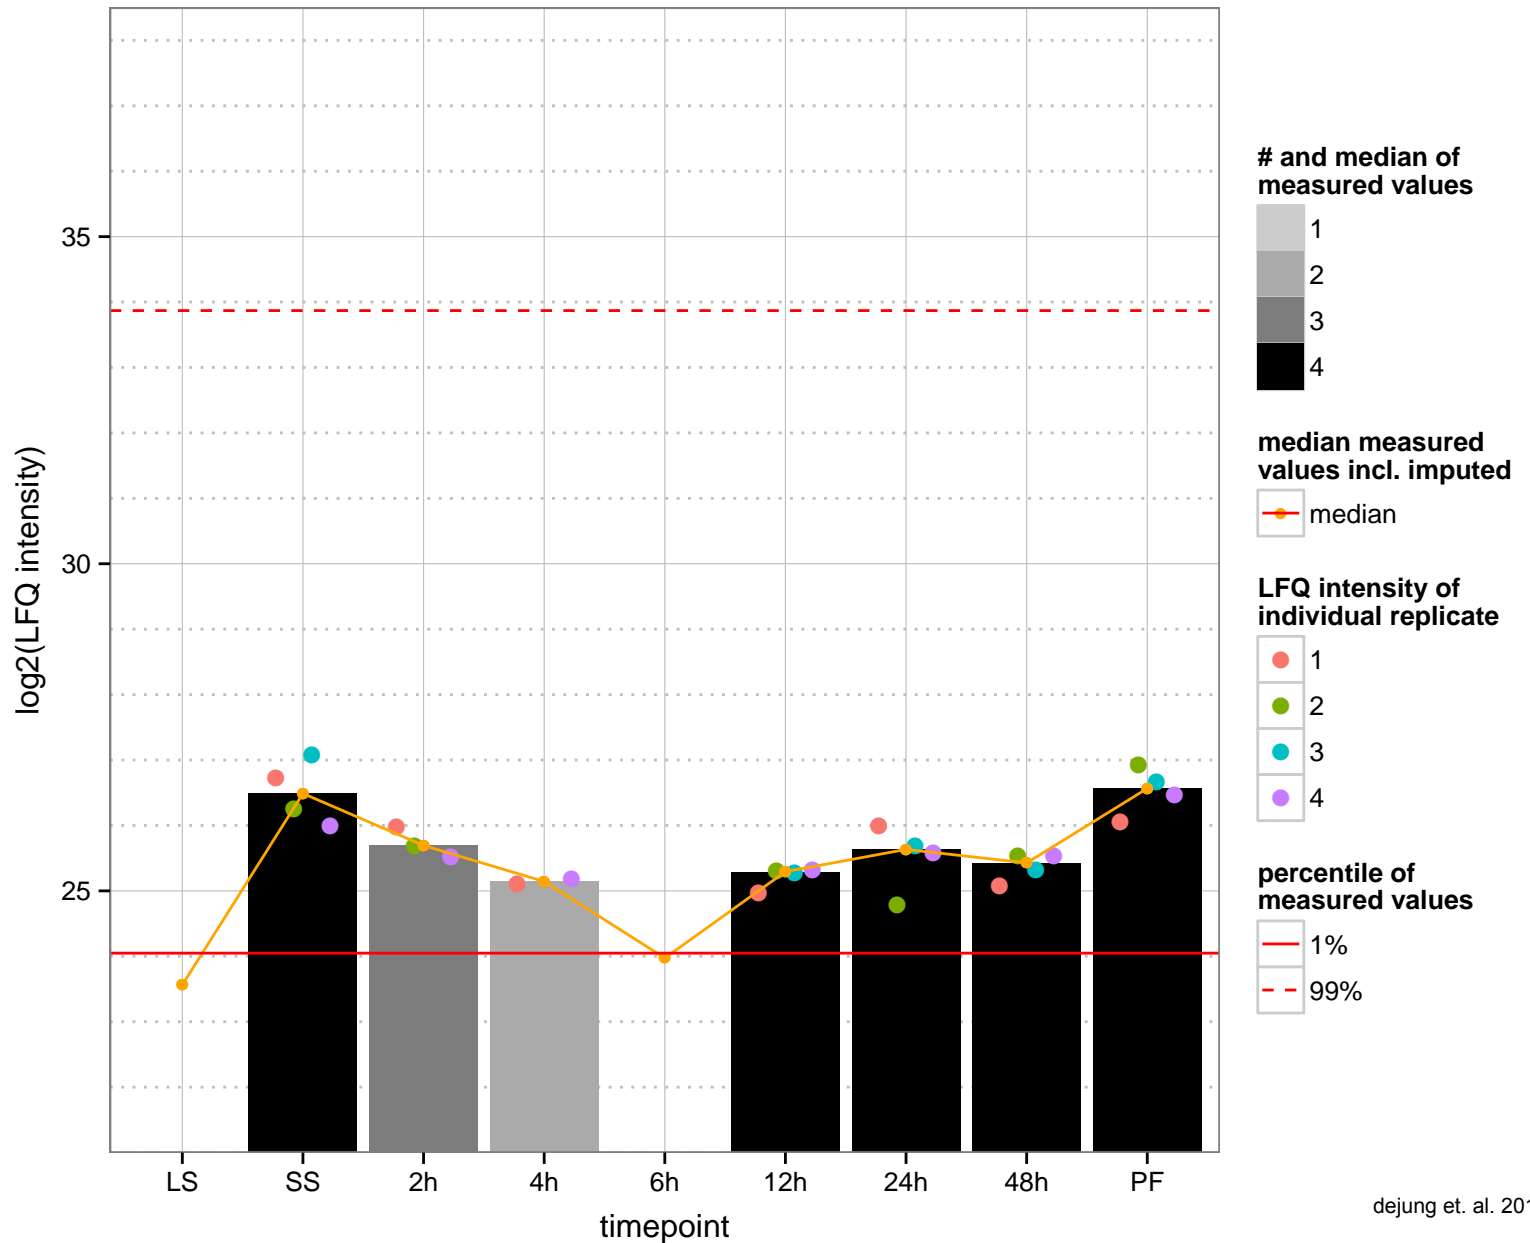

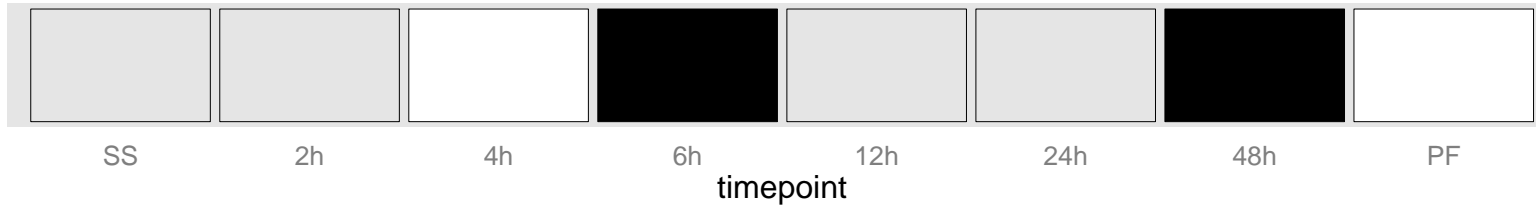

**regulated**  not regulated  significant down  significant up

hypothetical protein, conserved  
 Tb927.11.11170  
 AGOF: null  
 AGOC: null  
 AGOP: null  
 PGO: null  
 PGOC: null  
 PGOP: null

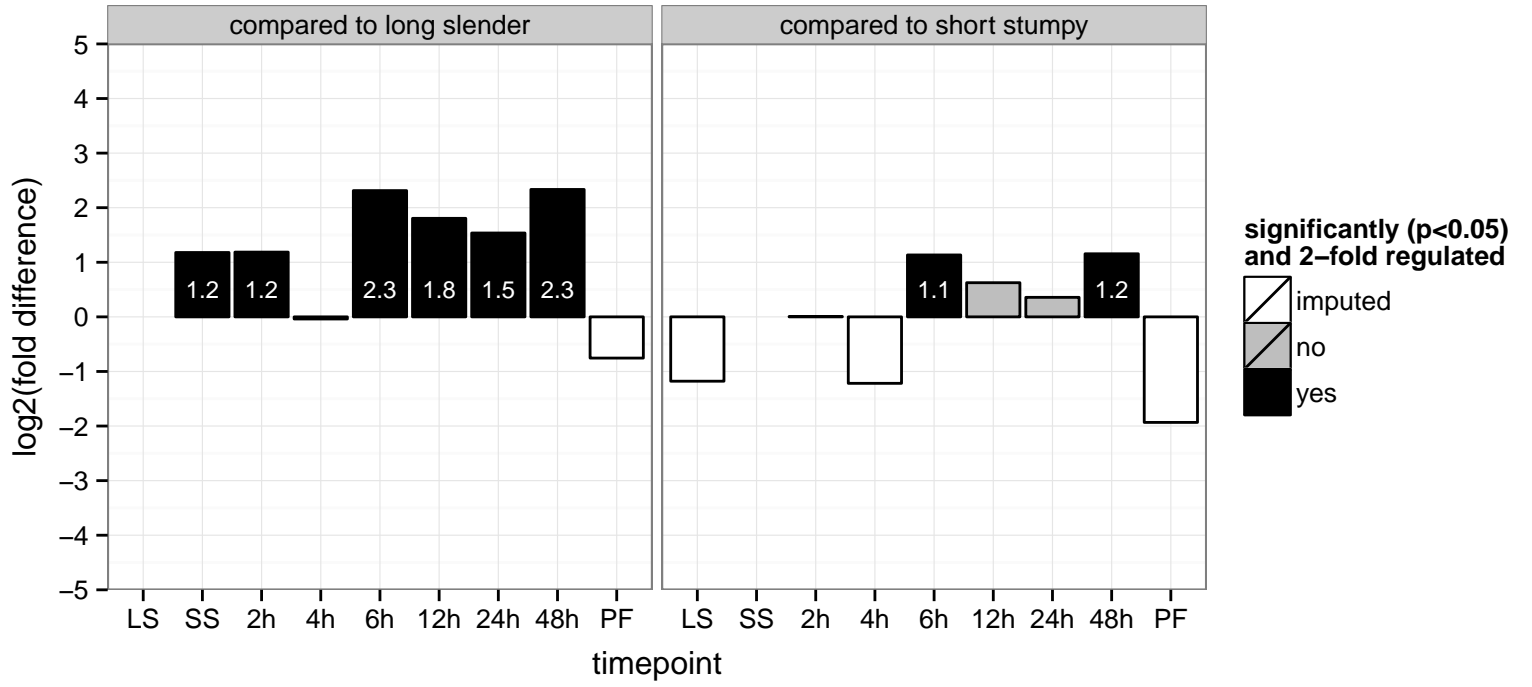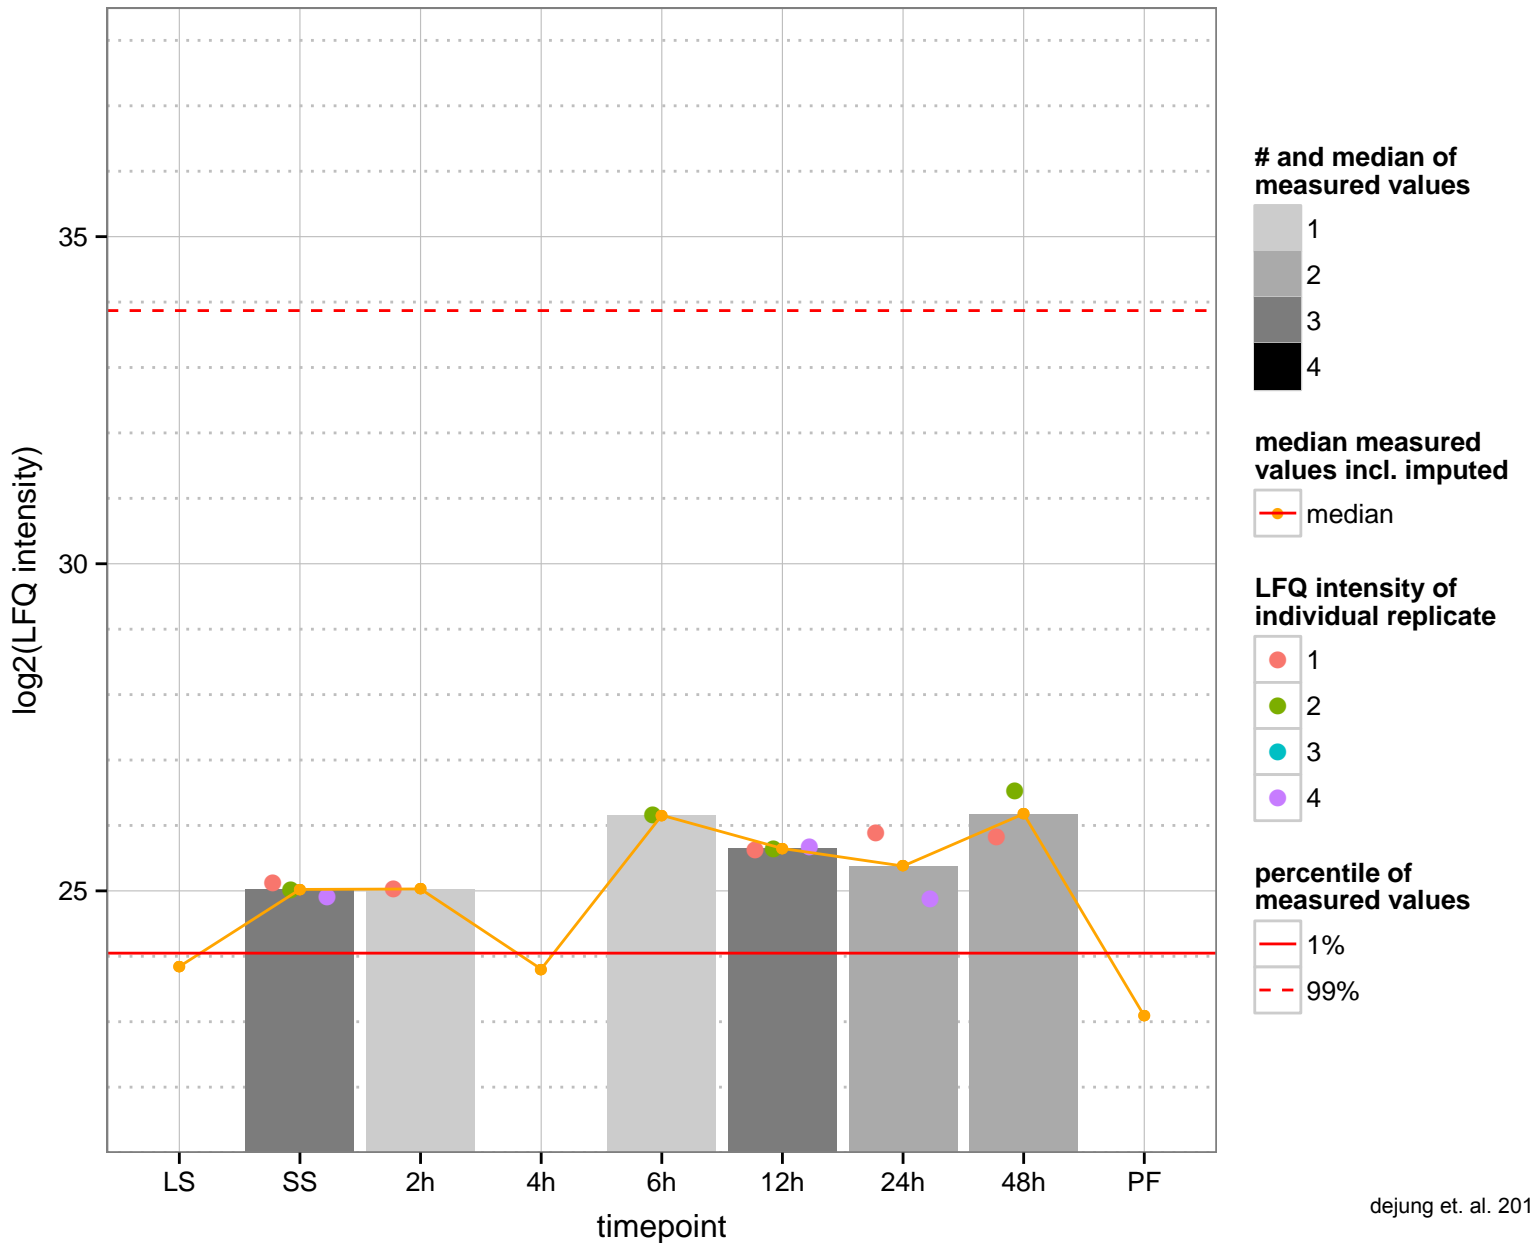

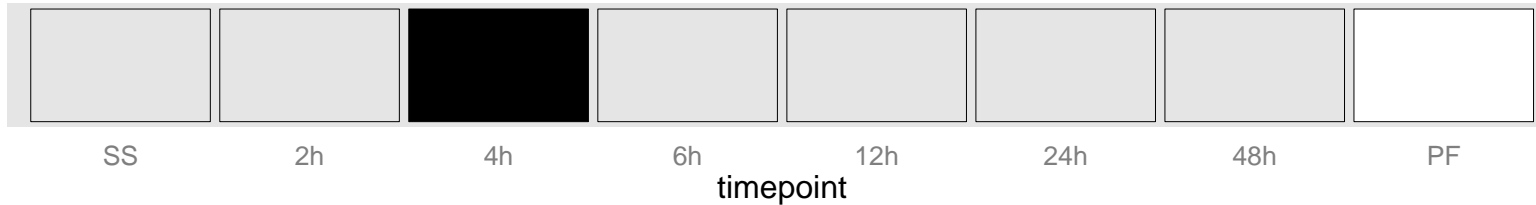

**regulated**  **not regulated**  **significant down**  **significant up**

SKP1-like protein  
 Tb927.10.11610  
 AGOF: null  
 AGOC: null  
 AGOP: ubiquitin-dependent protein catabolic process  
 PGO: null  
 PGOC: null  
 PGOP: ubiquitin-dependent protein catabolic process

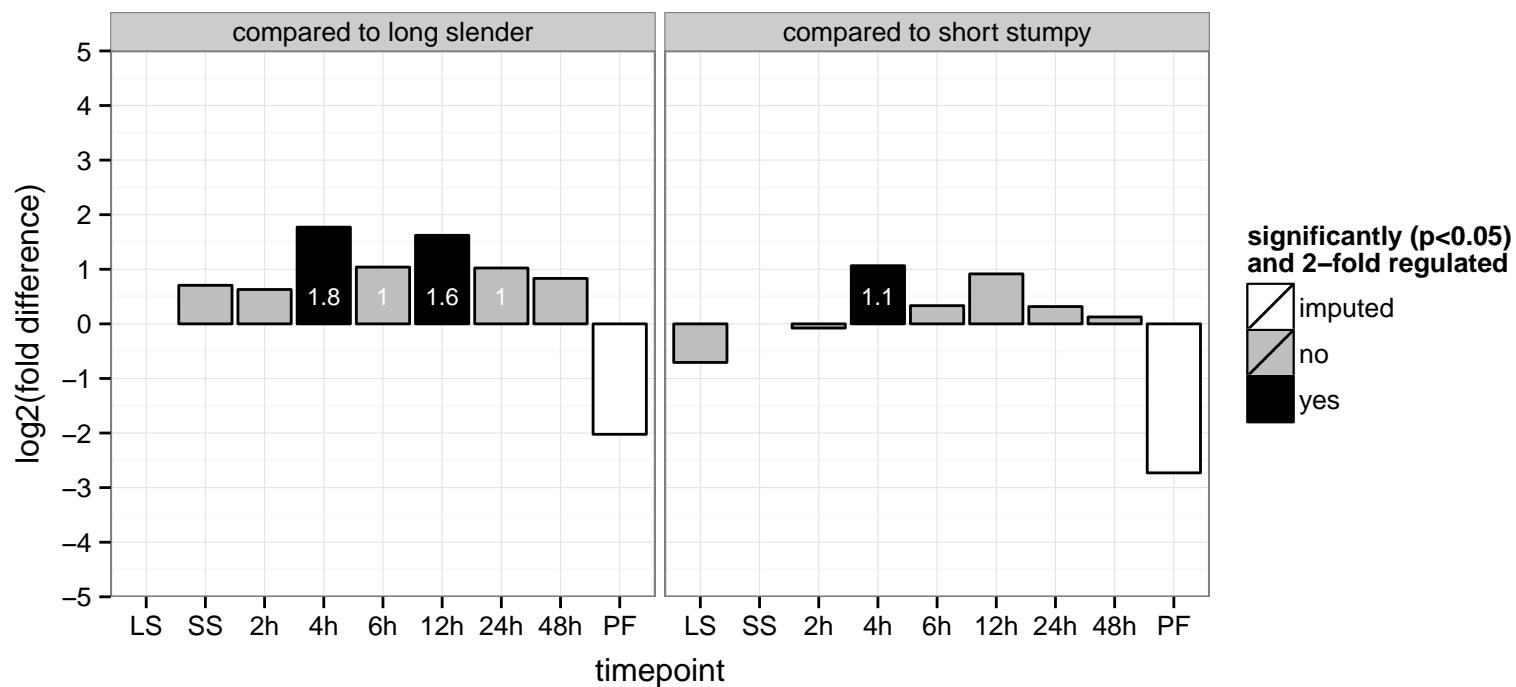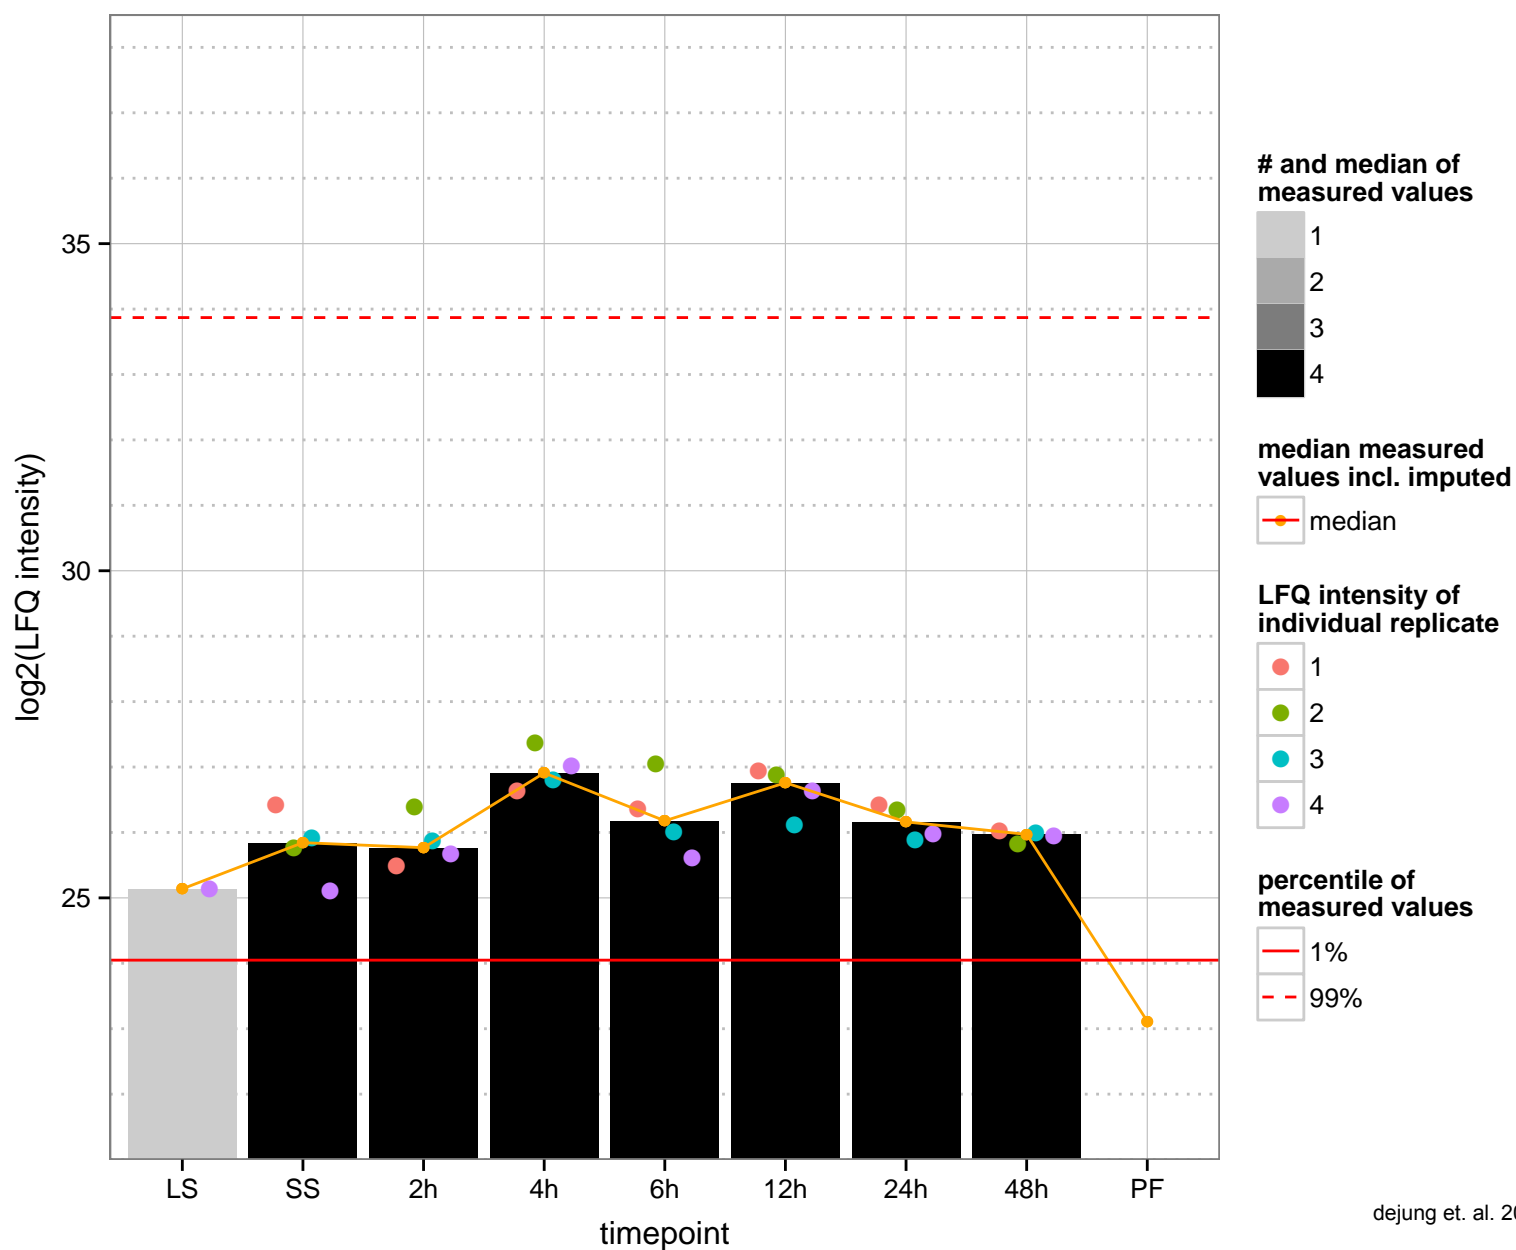

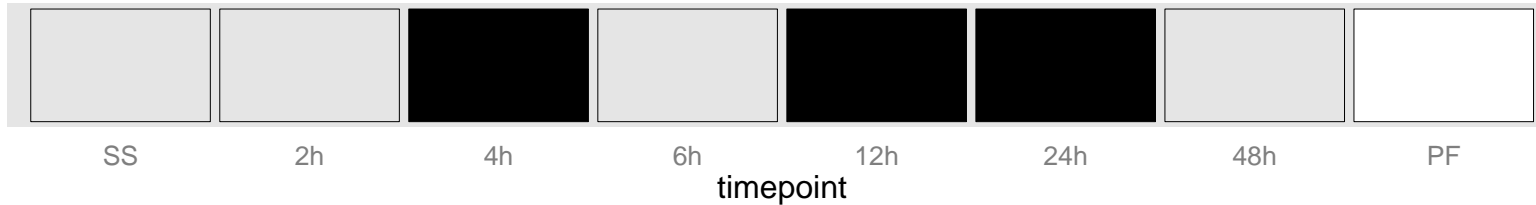

**regulated**  **not regulated**  **significant down**  **significant up**

prefoldin subunit, putative  
 Tb927.5.580  
 AGOF: unfolded protein binding  
 AGOC: prefoldin complex  
 AGOP: protein folding  
 PGOF: unfolded protein binding  
 PGOC: prefoldin complex  
 PGOP: protein folding

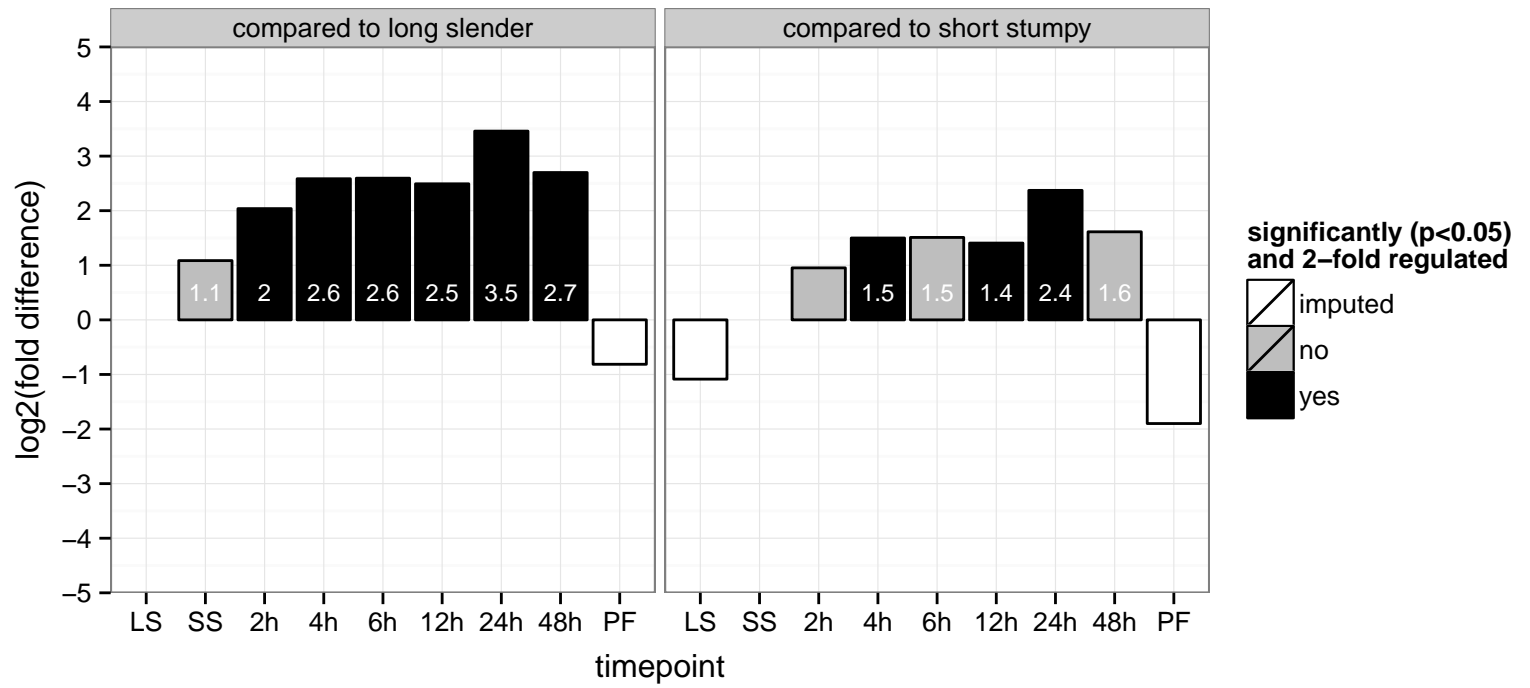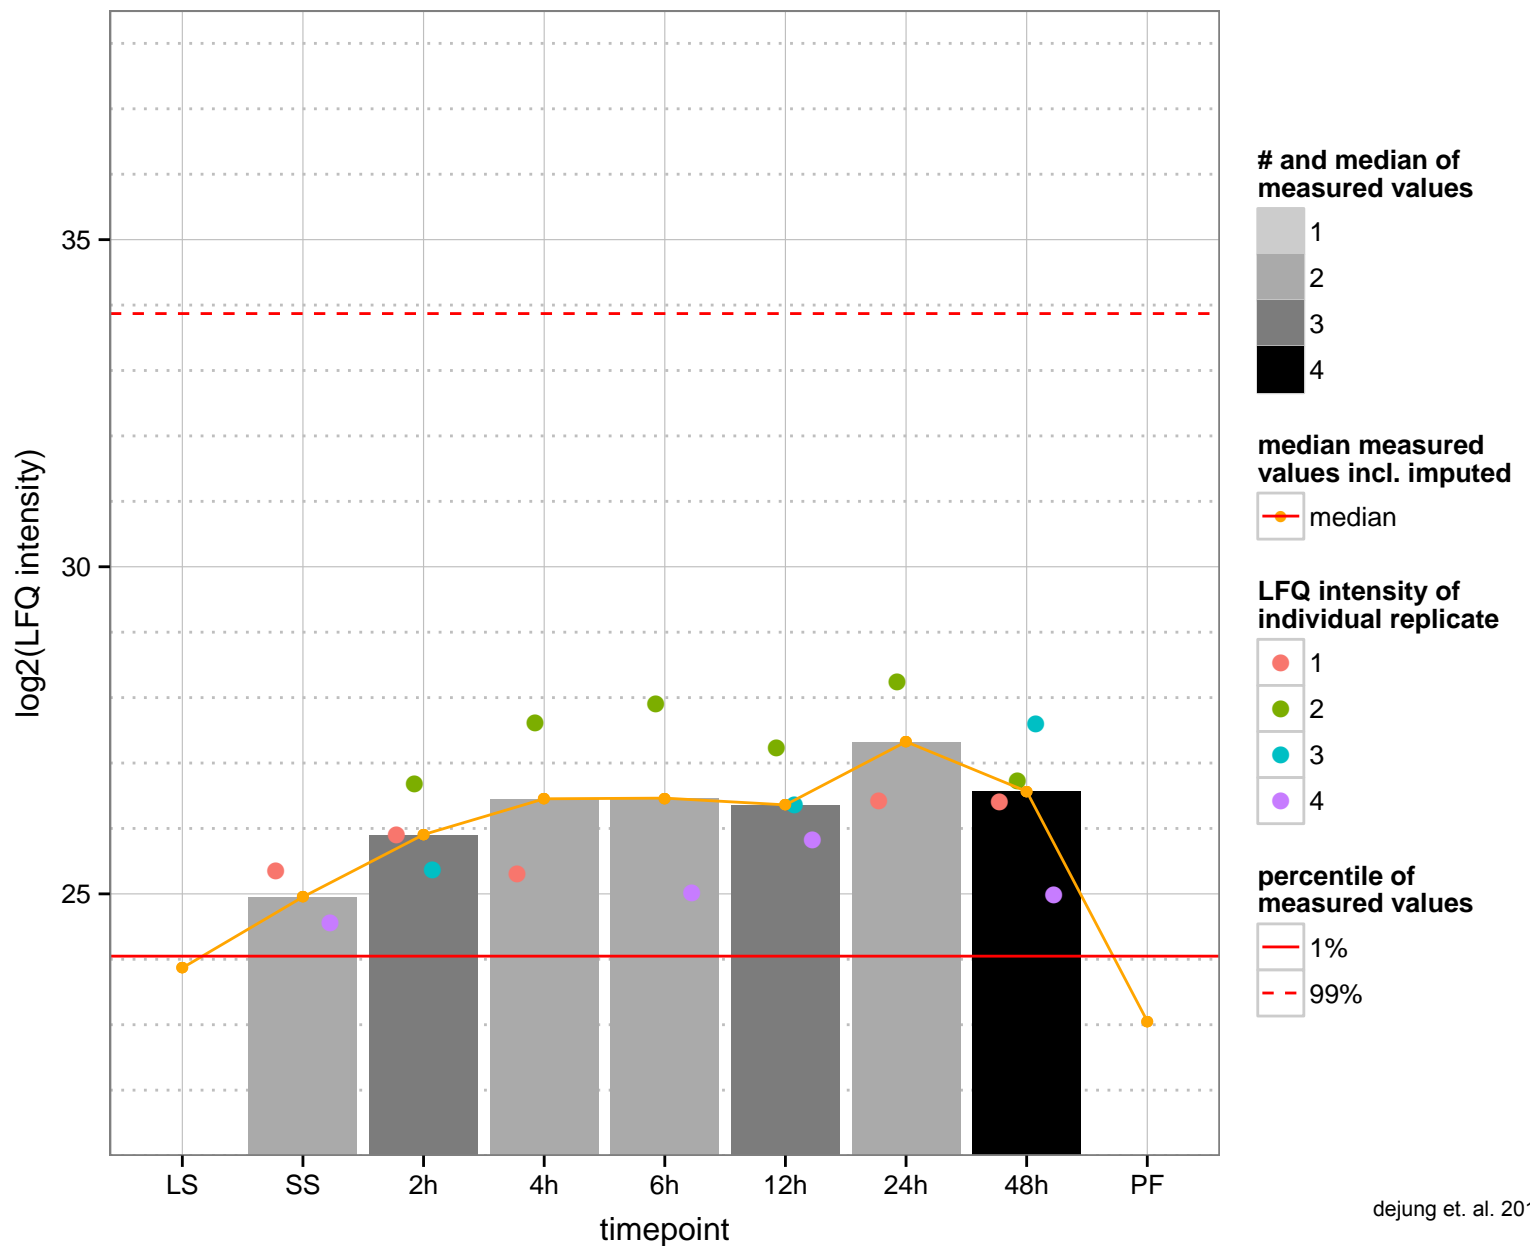

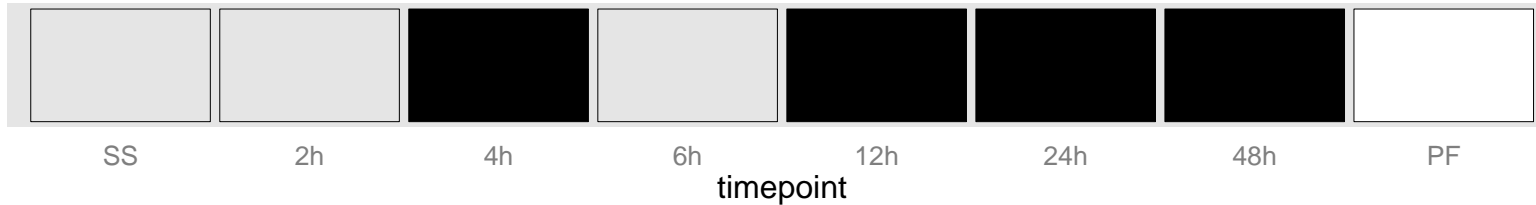

**regulated**  **not regulated**  **significant down**  **significant up**



hypothetical protein, conserved  
 Tb927.2.4445  
 AGOF: null  
 AGOC: null  
 AGOP: null  
 PGO: null  
 PGOC: null  
 PGOP: null

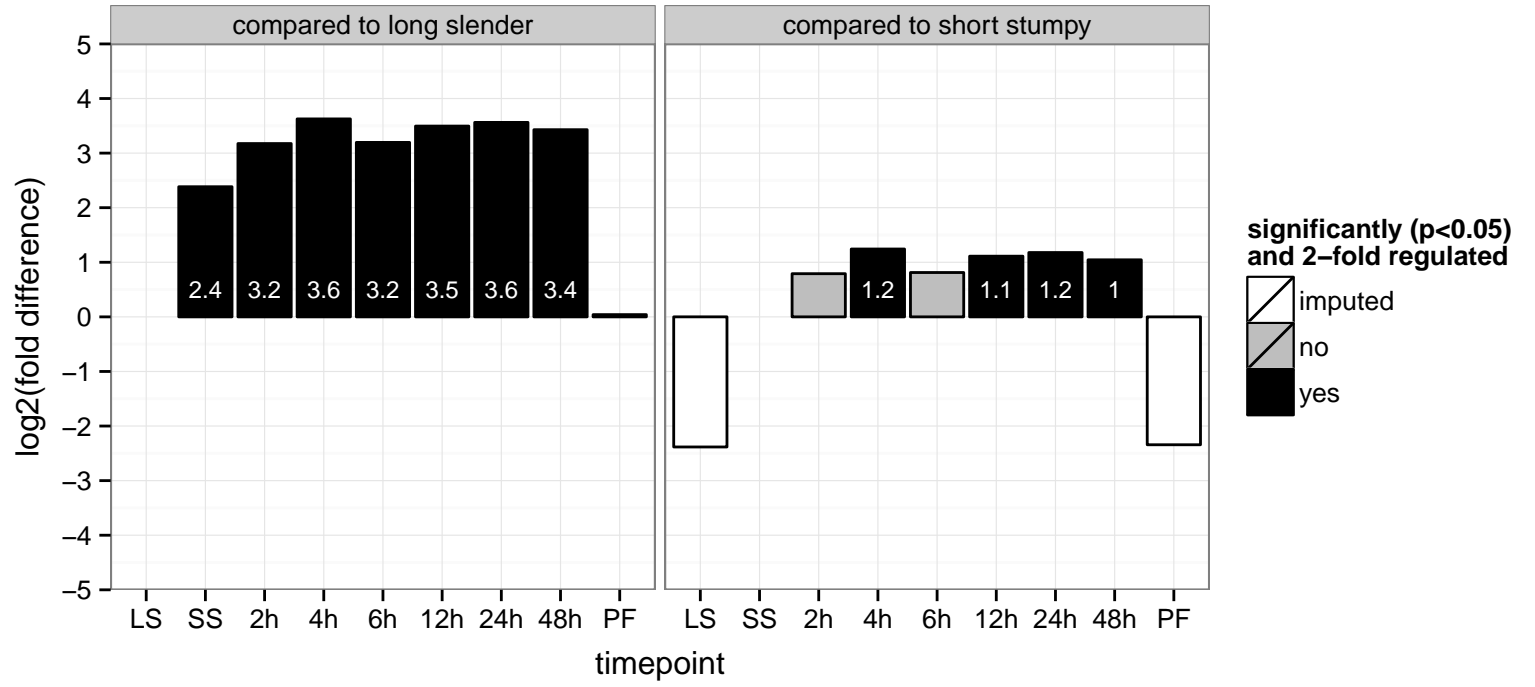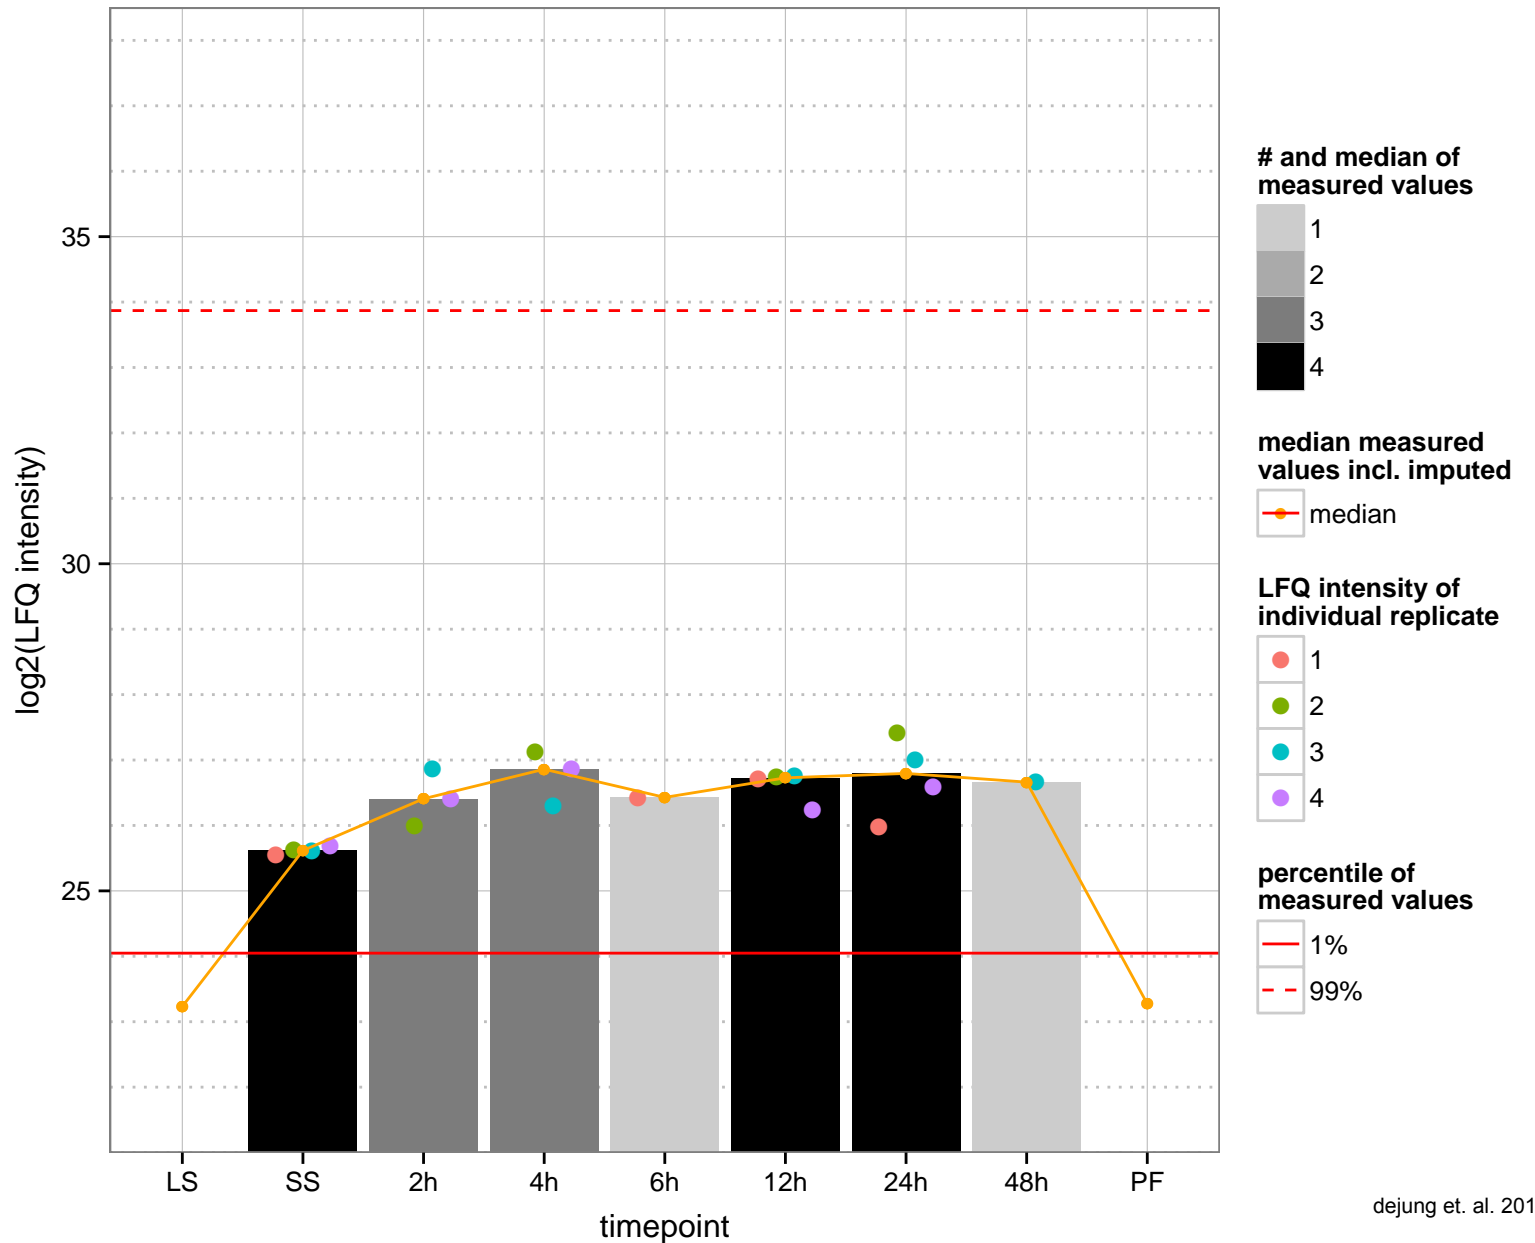

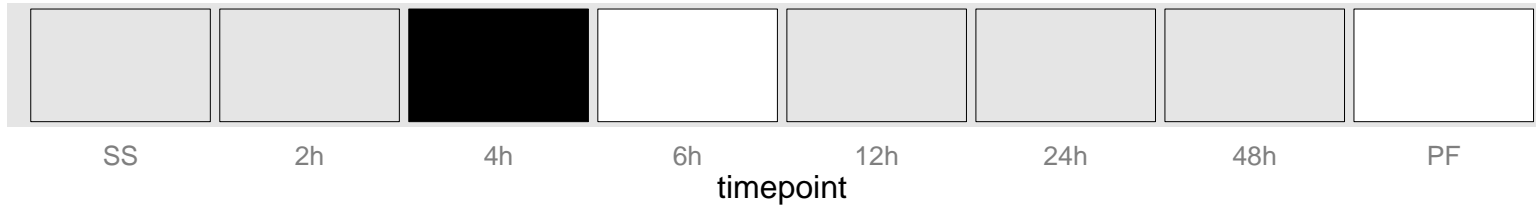

**regulated**  **not regulated**  **significant down**  **significant up**

hypothetical protein, conserved

Tb927.5.3950

AGOF: L-ascorbic acid binding, iron ion binding, oxidoreductase activity, acting on paired donors, with incorporation or reduction

AGOC: null

AGOP: oxidation-reduction process

PGOF: L-ascorbic acid binding, iron ion binding, oxidoreductase activity, acting on paired donors, with incorporation or reduction

PGOC: null

PGOP: oxidation-reduction process

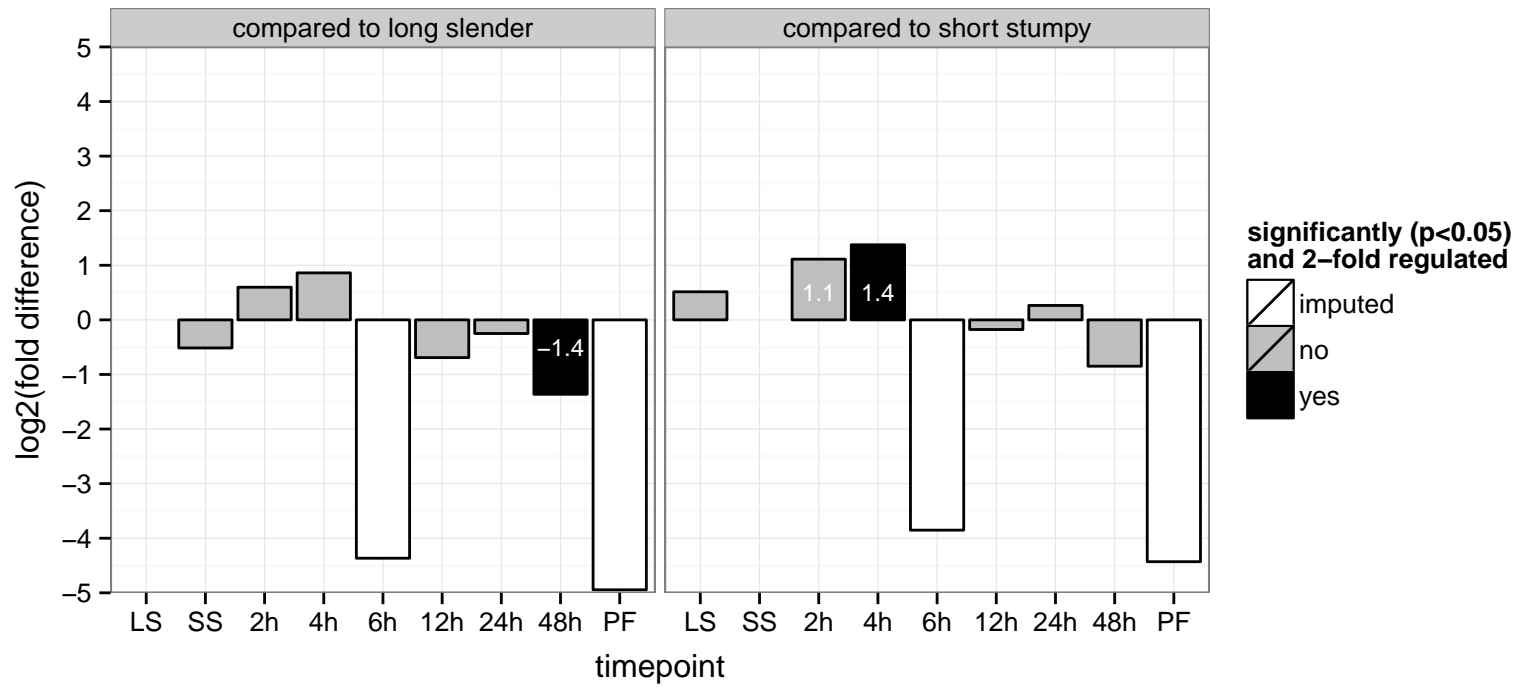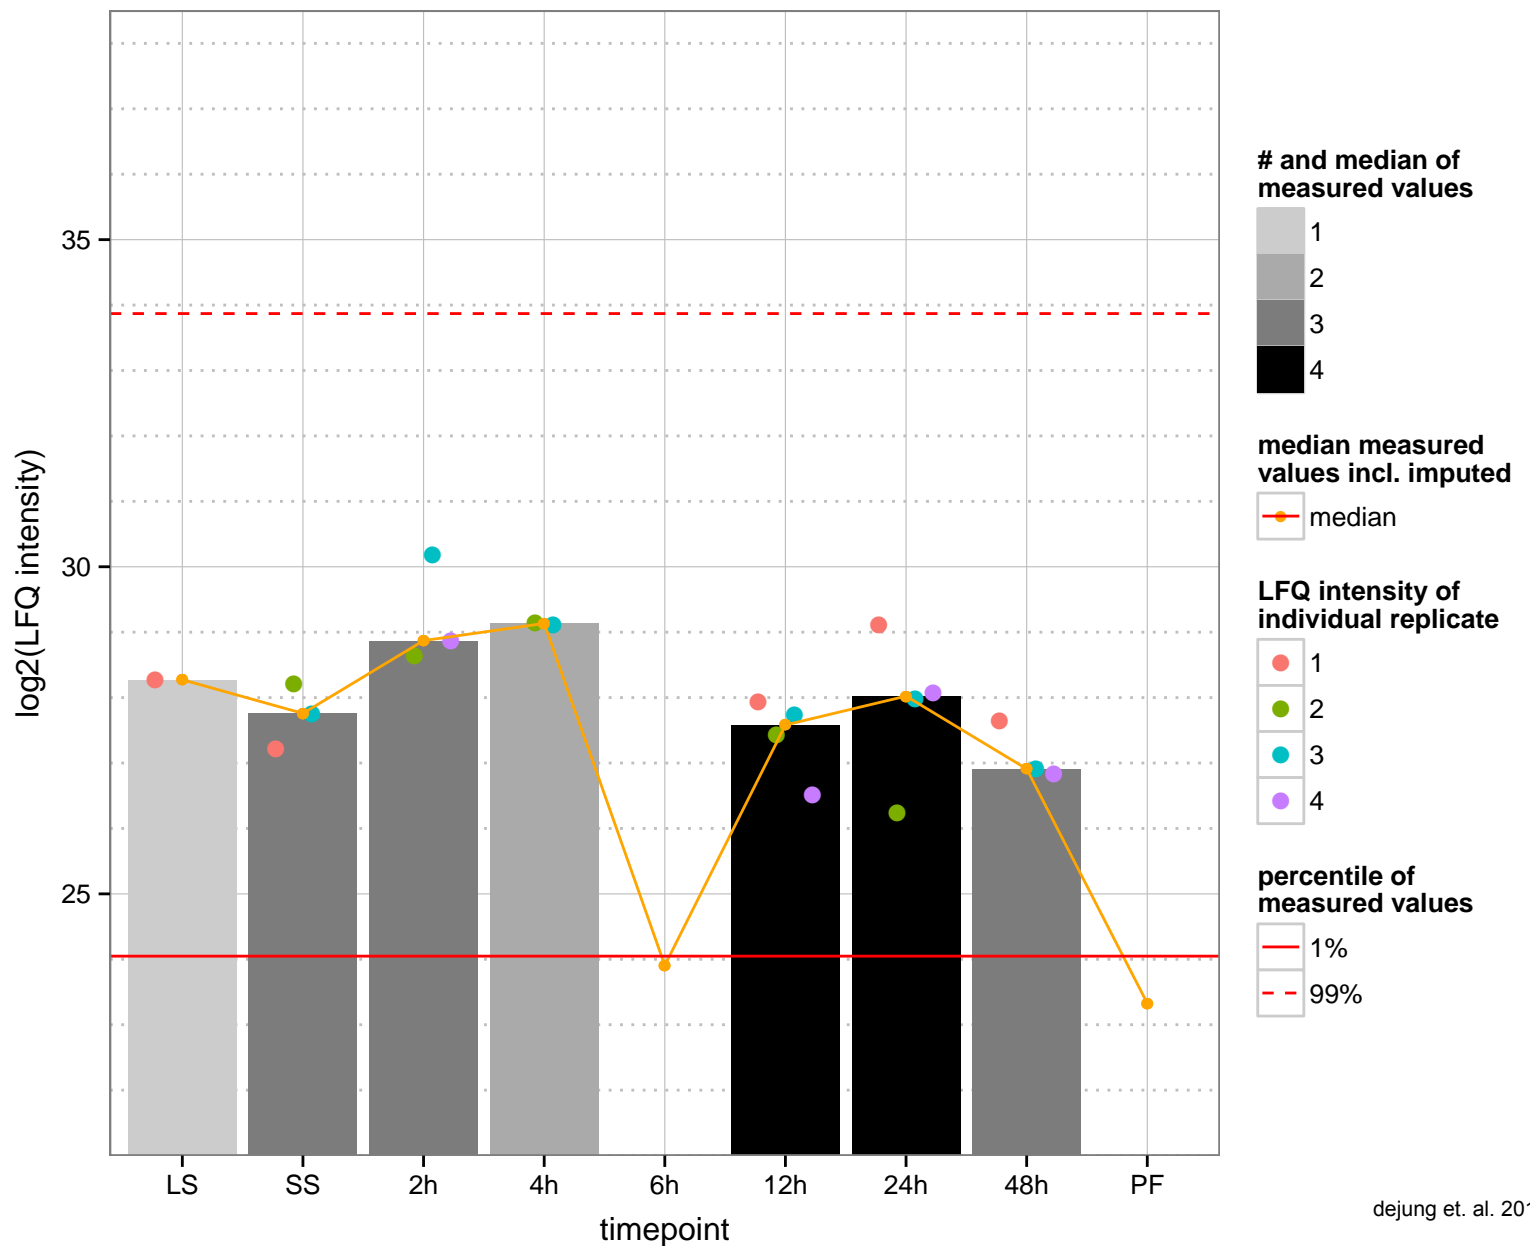

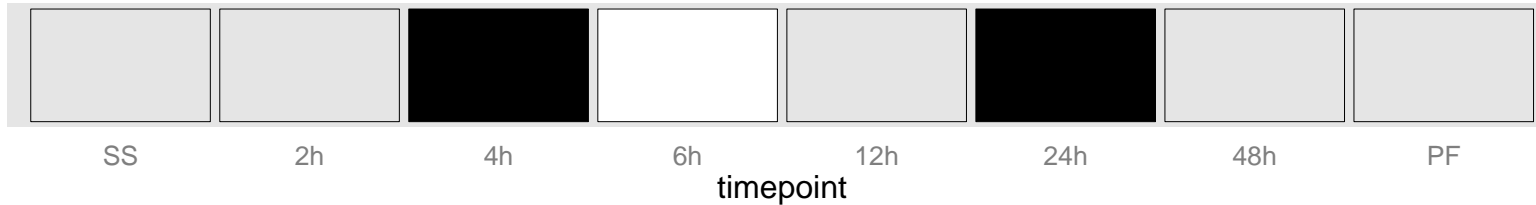

**regulated**  **not regulated**  **significant down**  **significant up**

hypothetical protein, conserved  
 Tb927.10.2340  
 AGOF: null  
 AGOC: null  
 AGOP: null  
 PGO: protein binding  
 PGOC: null  
 PGOP: null

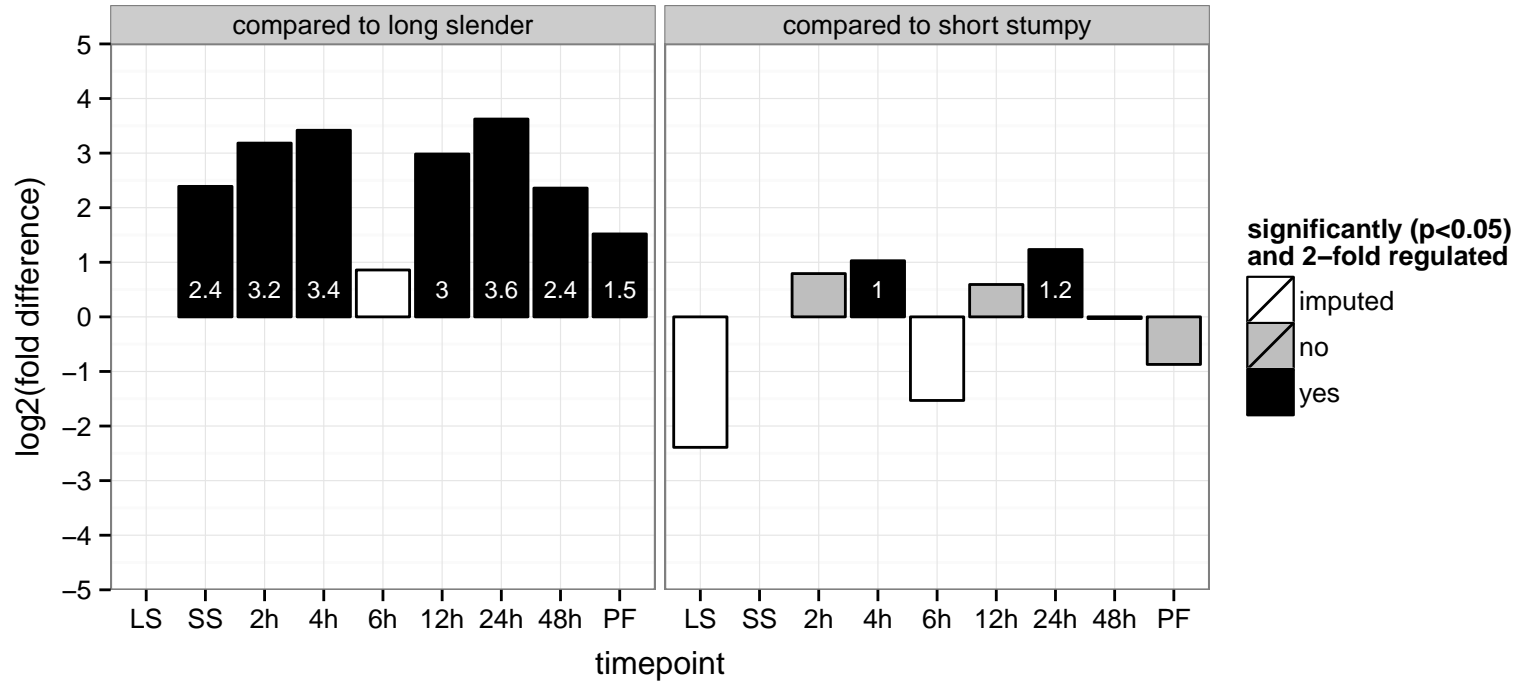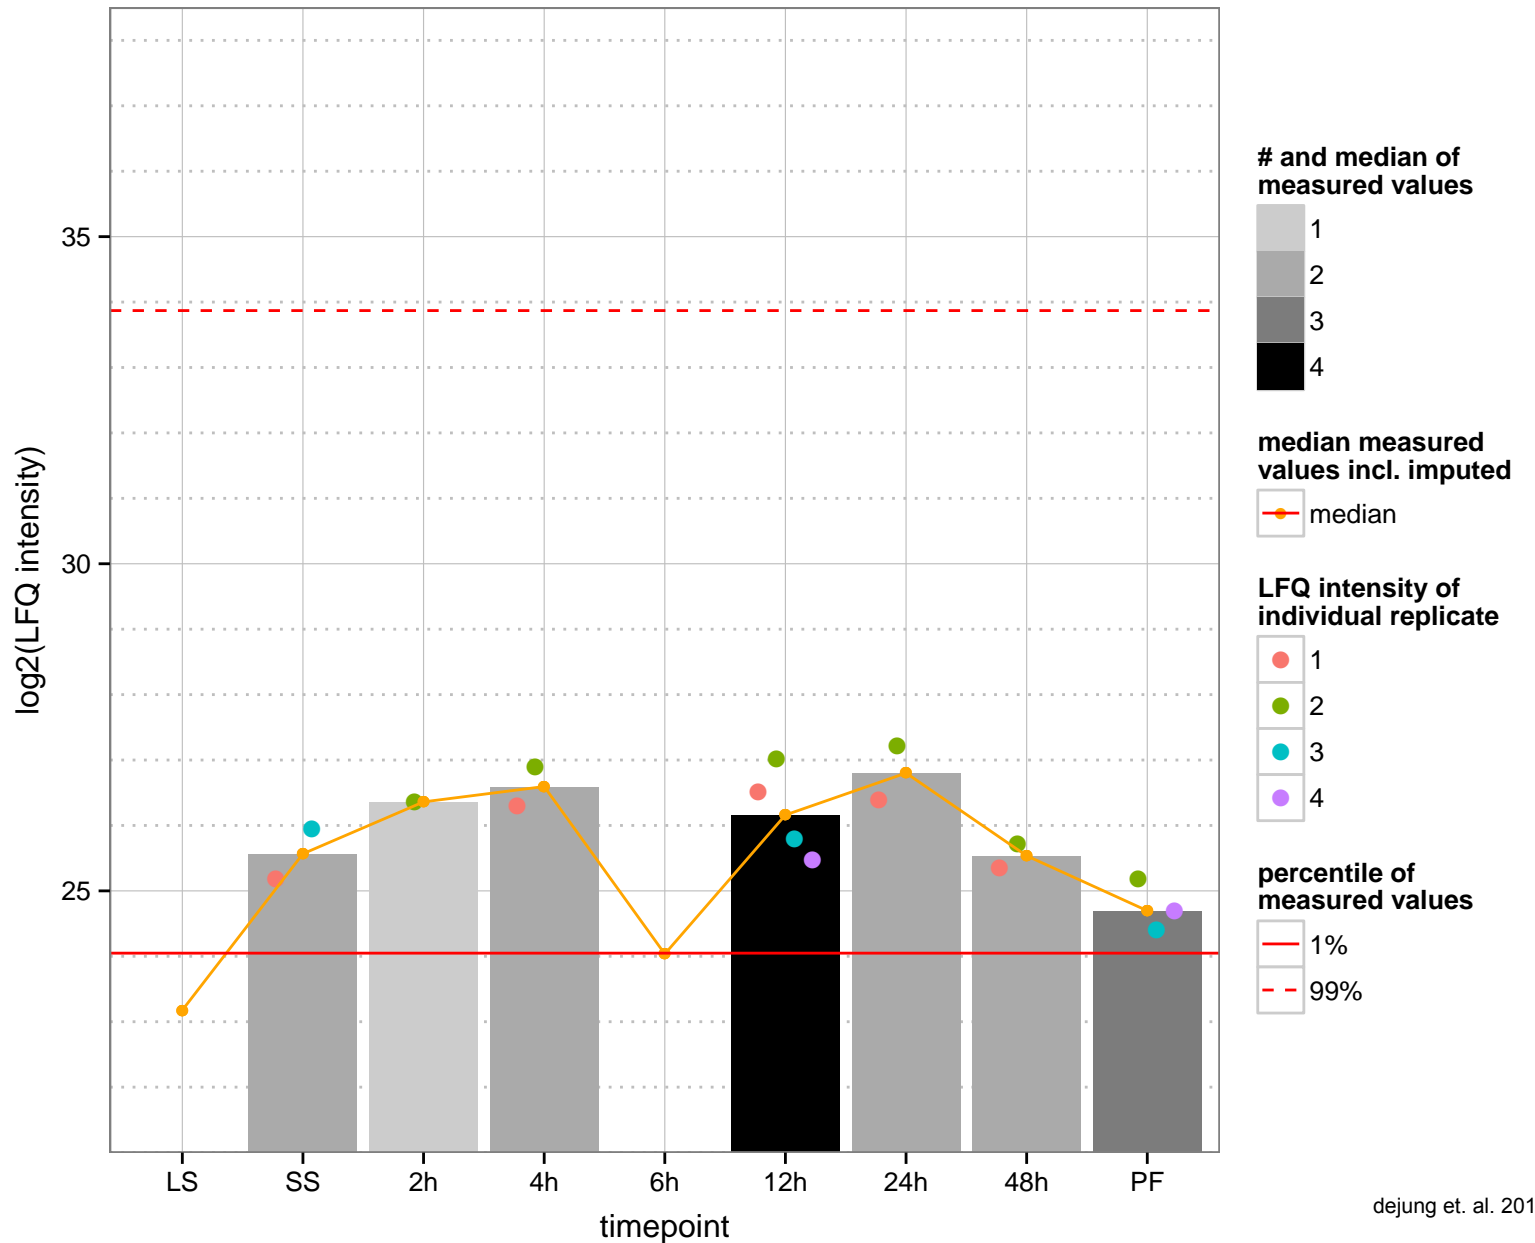

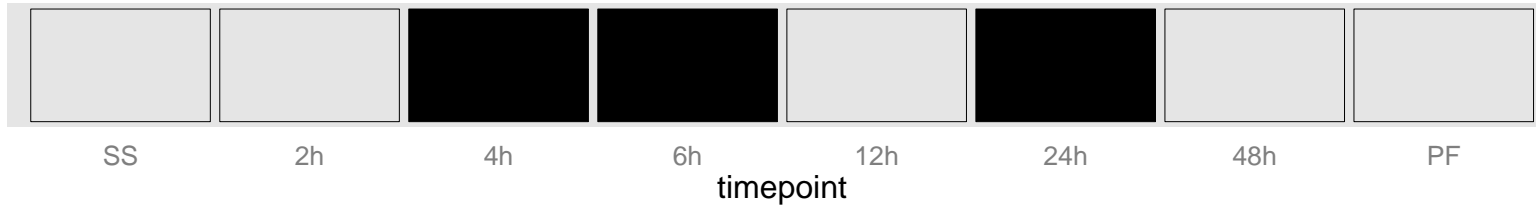

**regulated**  **not regulated**  **significant down**  **significant up**

hypothetical protein, conserved  
 Tb927.9.8290  
 AGOF: structural constituent of ribosome  
 AGOC: mitochondrion, ribosome  
 AGOP: translation  
 PGO: null  
 PGO: null  
 PGO: null

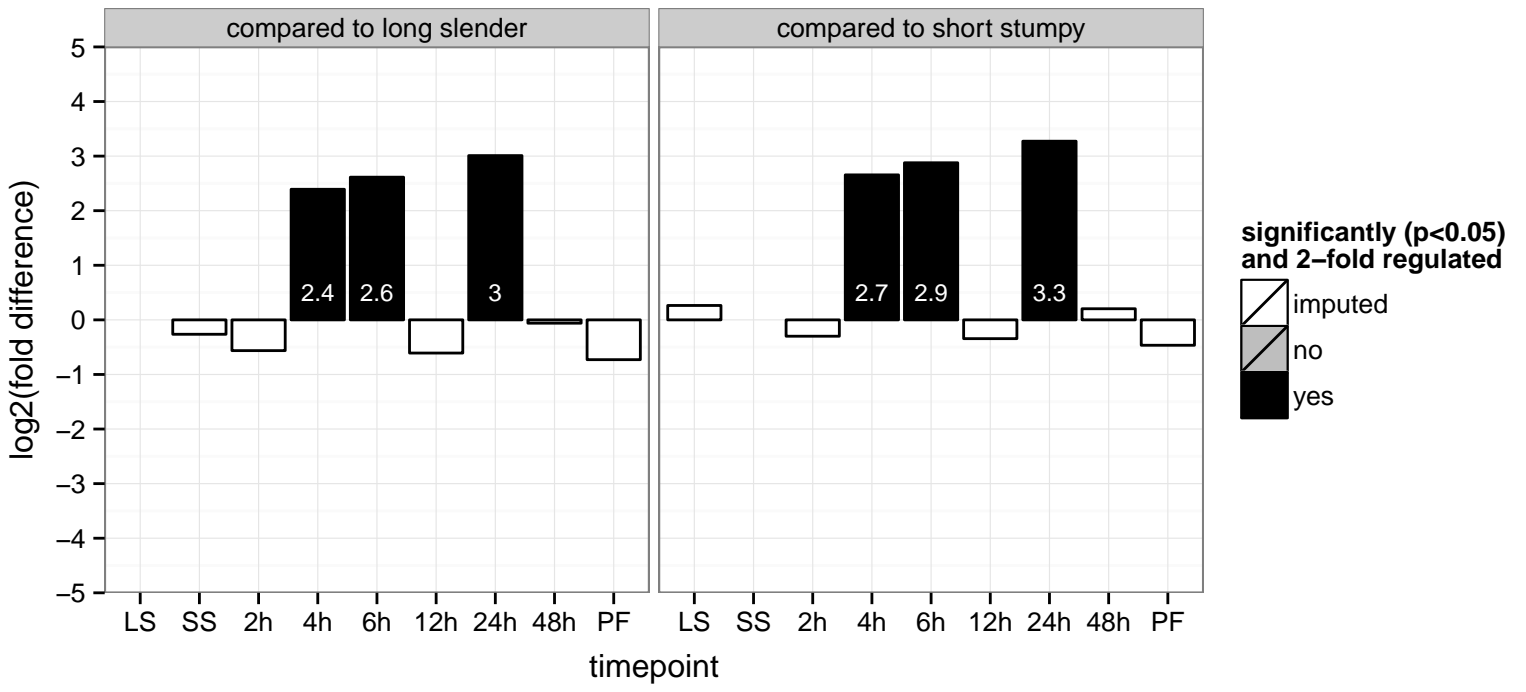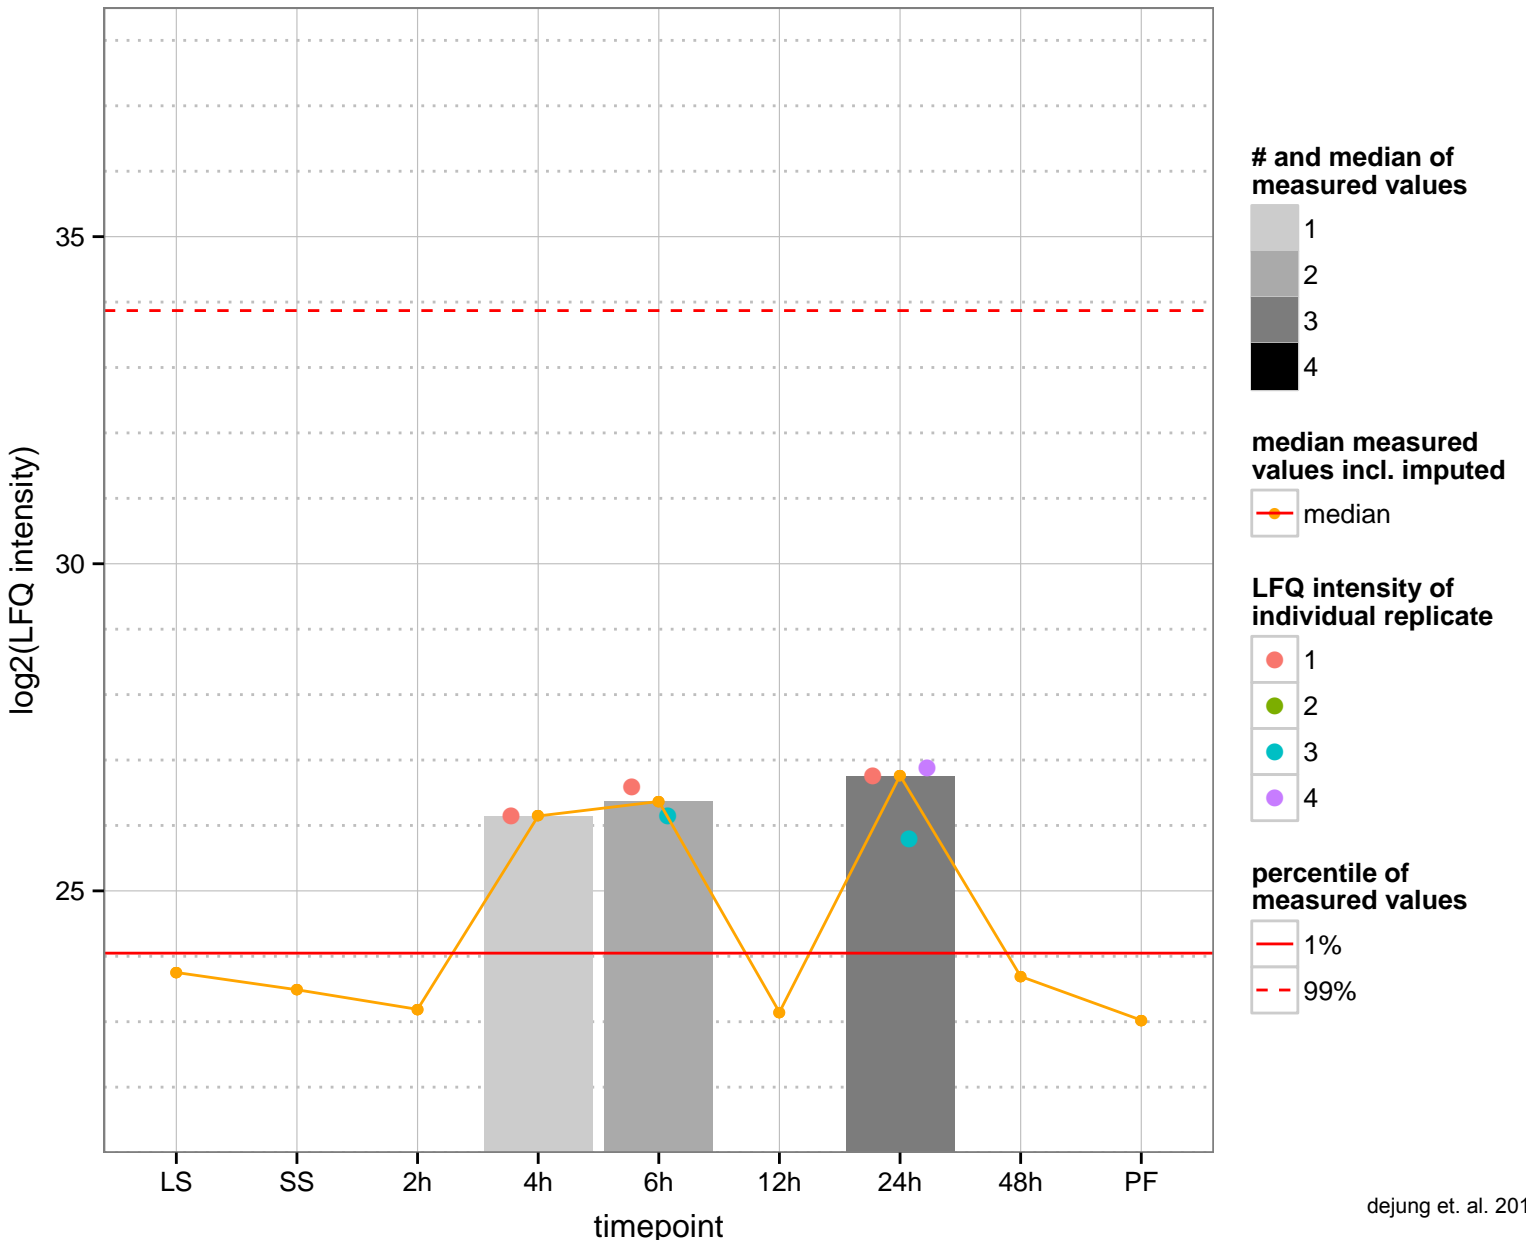

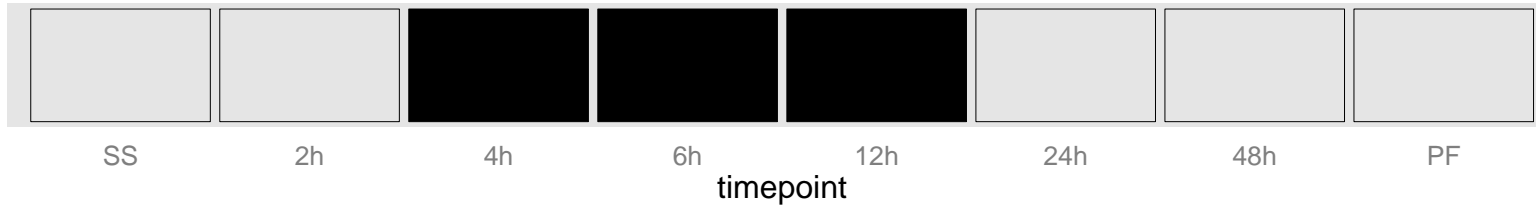

**regulated**  **not regulated**  **significant down**  **significant up**



ubiquitin-conjugating enzyme E2, putative, ubiquitin carrier protein, ubiquitin-protein ligase

Tb927.4.2710

AGOF: ubiquitin-protein ligase activity

AGOC: null

AGOP: cellular protein modification process, post-translational protein modification, regulation of protein metabolic process

PGOF: acid-amino acid ligase activity

PGOC: null

PGOP: null

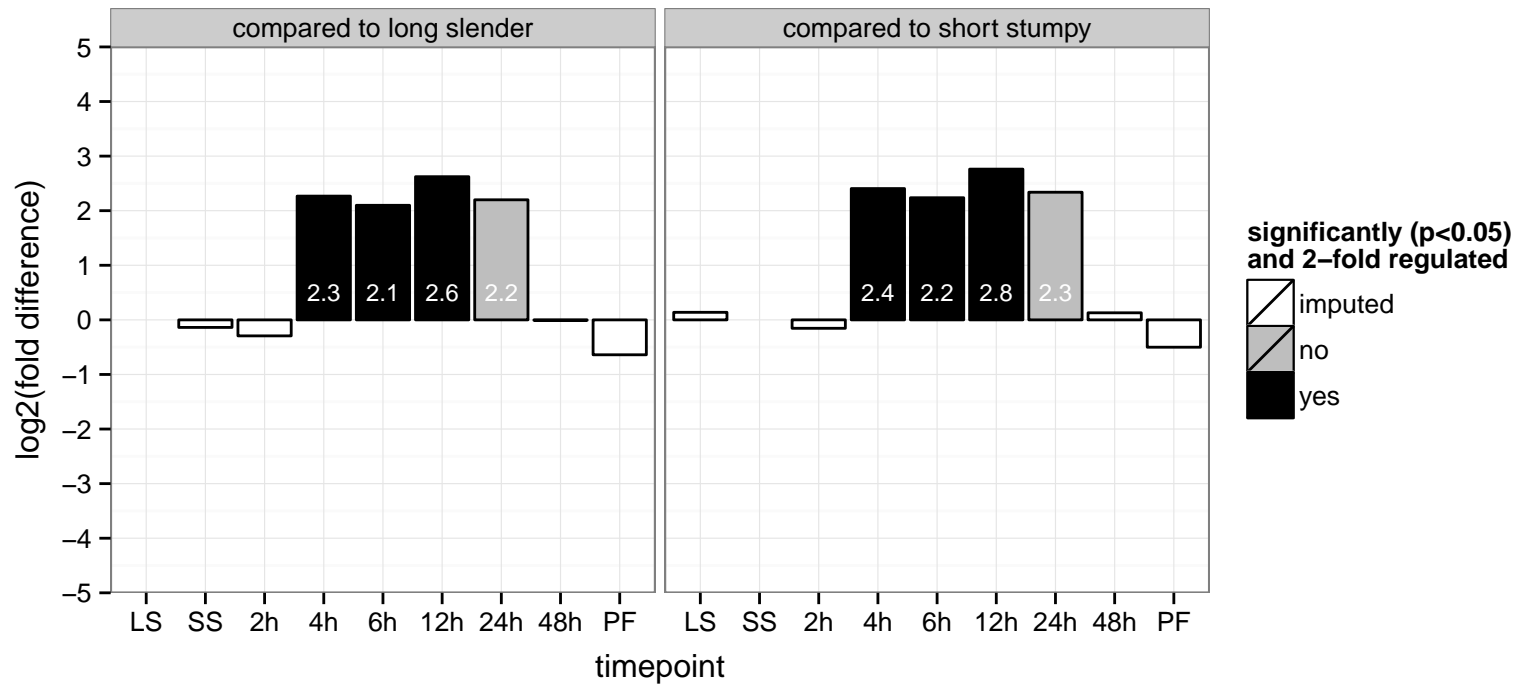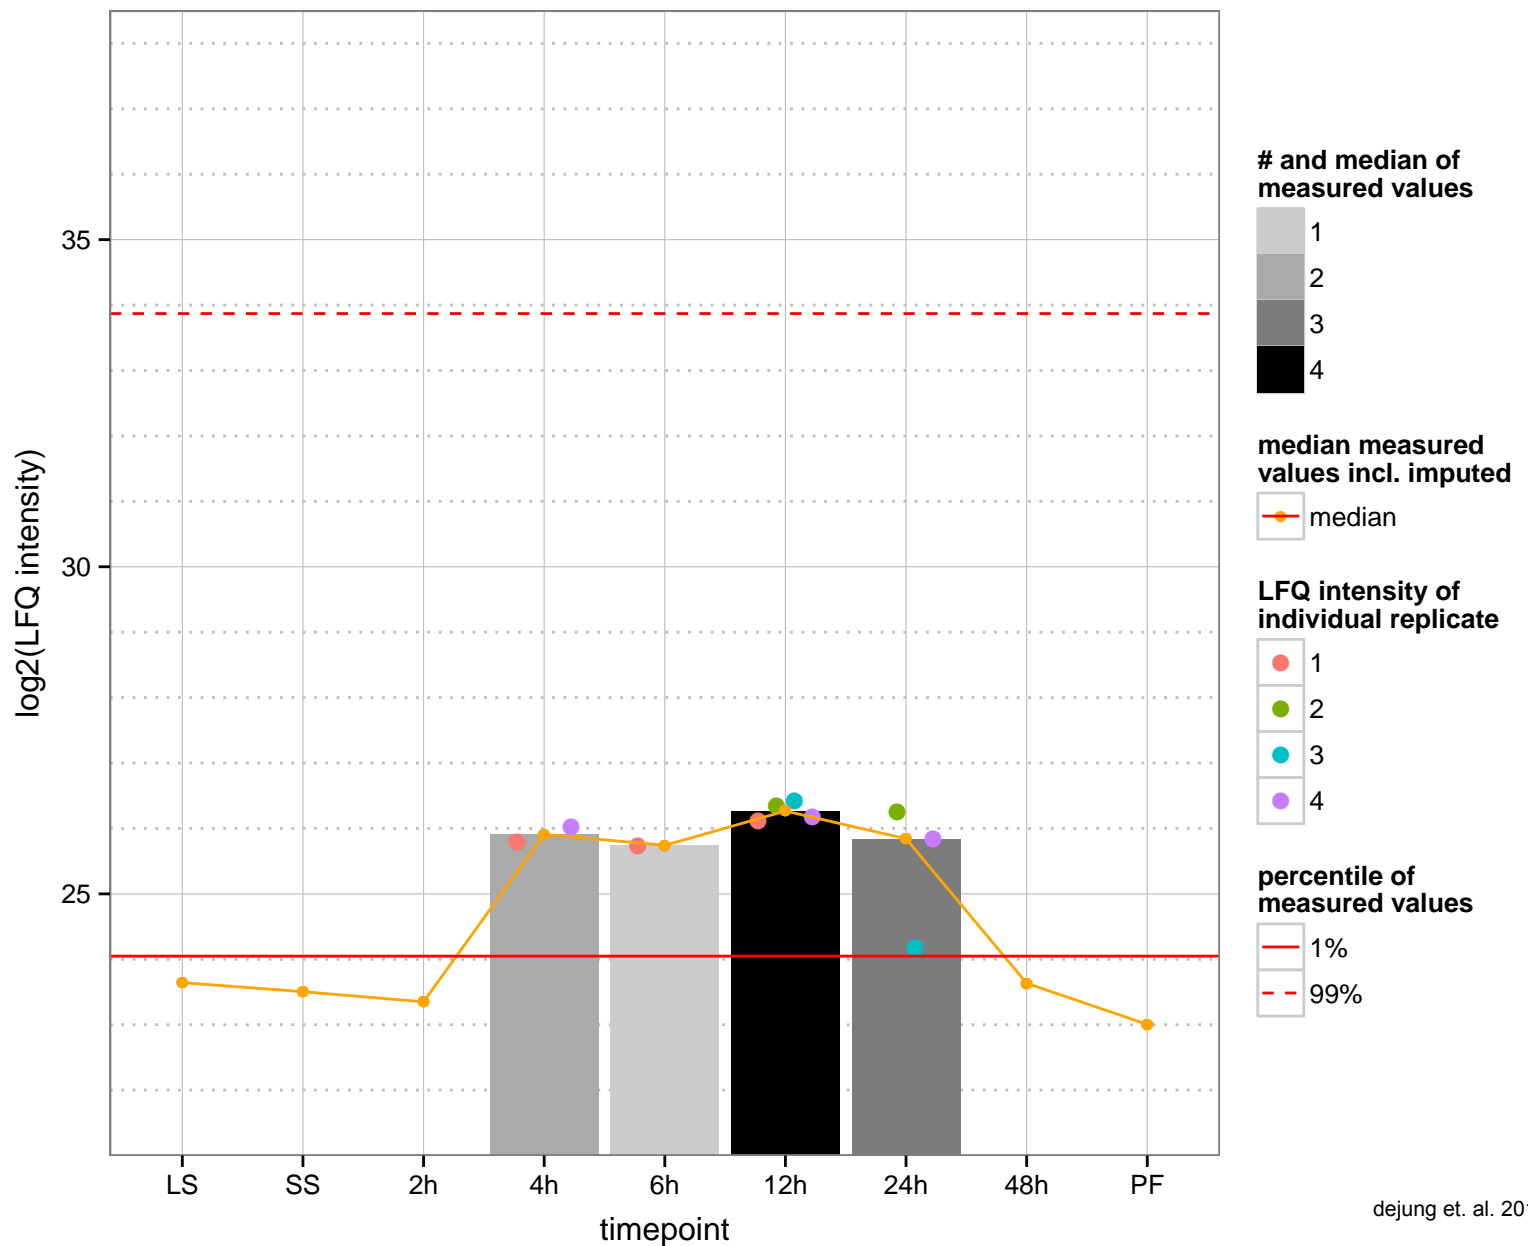

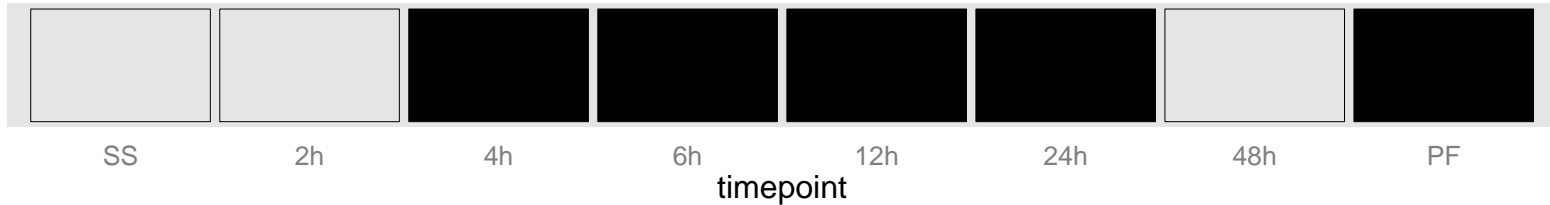

**regulated**  **not regulated**  **significant down**  **significant up**

chaperone protein DNAj, putative  
 Tb927.9.8160  
 AGOF: heat shock protein binding, unfolded protein binding  
 AGOC: integral to membrane  
 AGOP: protein folding  
 PGOF: heat shock protein binding  
 PGO: null  
 PGOP: null

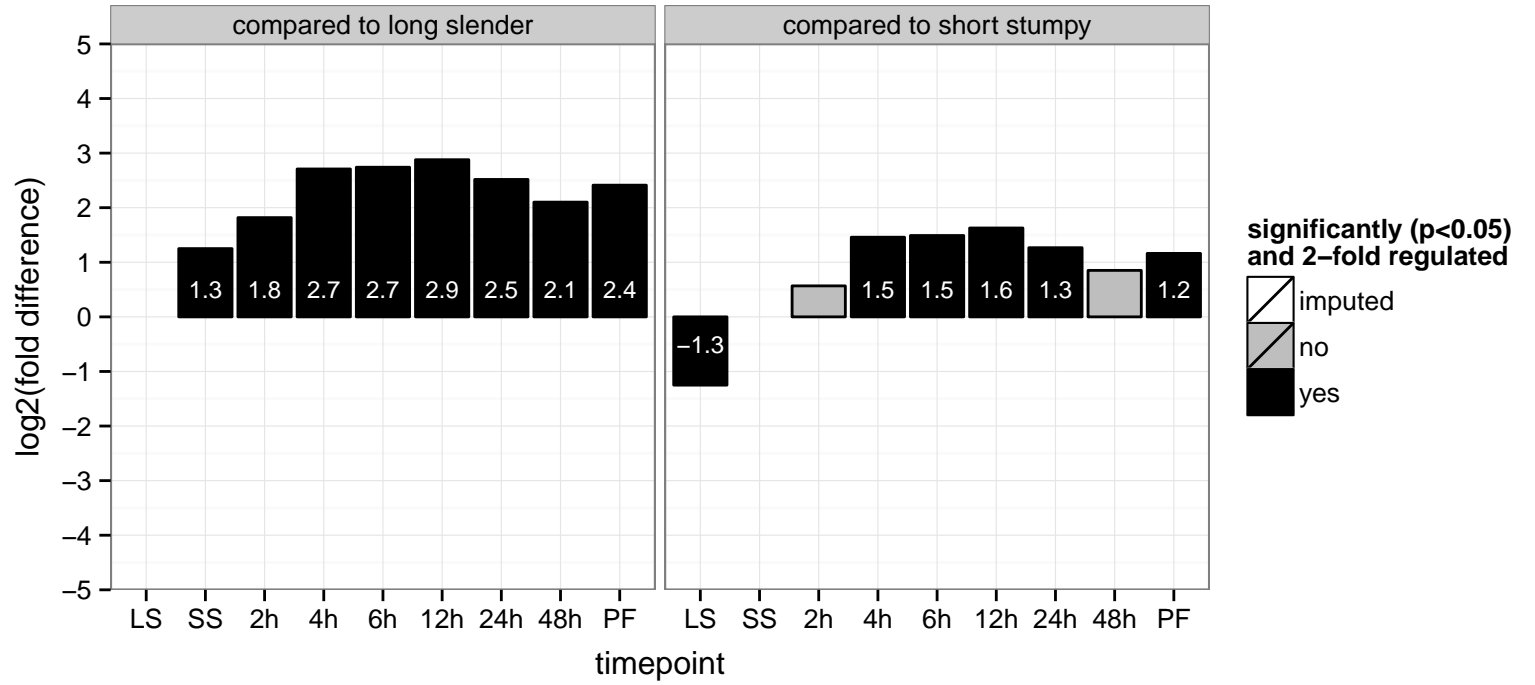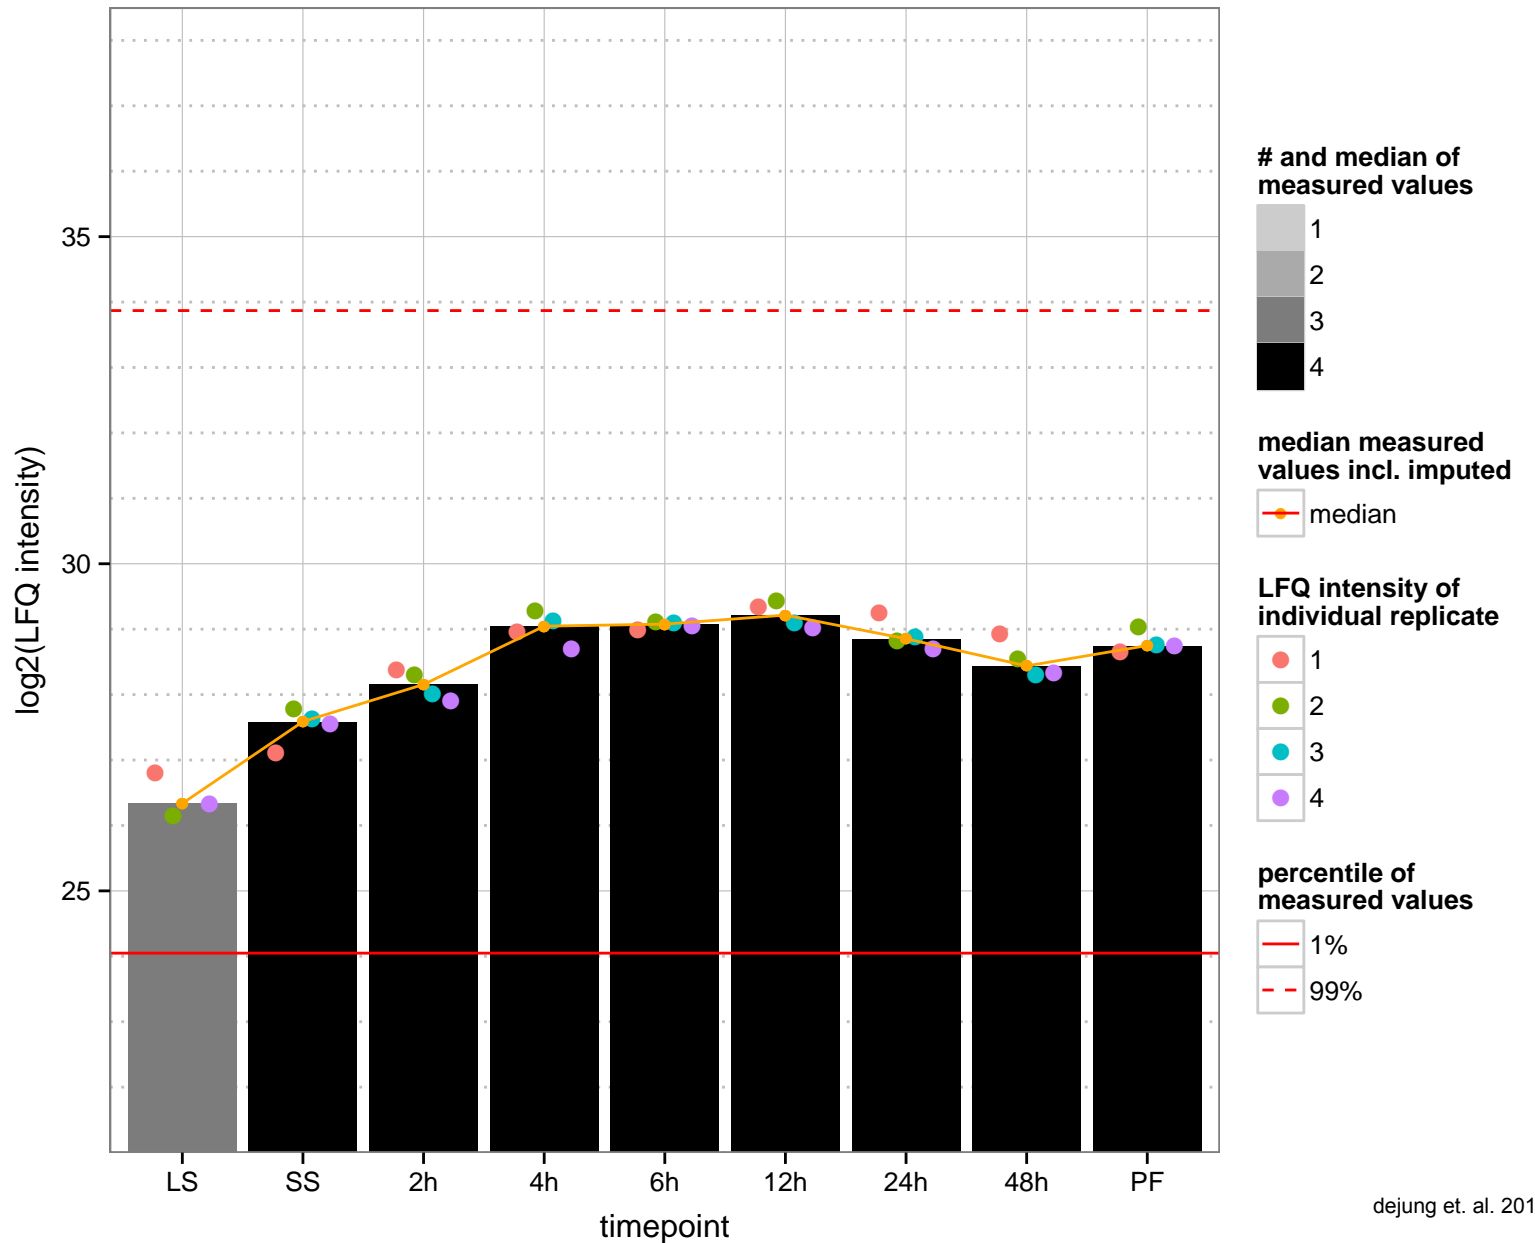

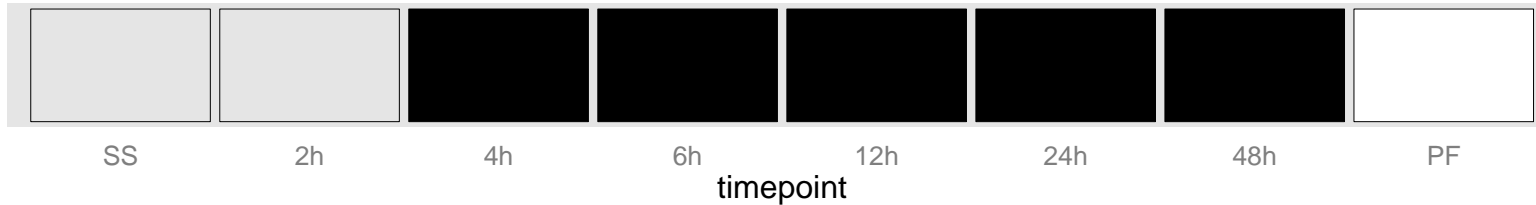

**regulated**  **not regulated**  **significant down**  **significant up**

hypothetical protein  
 Tb927.5.4020  
 AGOF: null  
 AGOC: null  
 AGOP: null  
 PGO: null  
 PGOC: null  
 PGOP: null

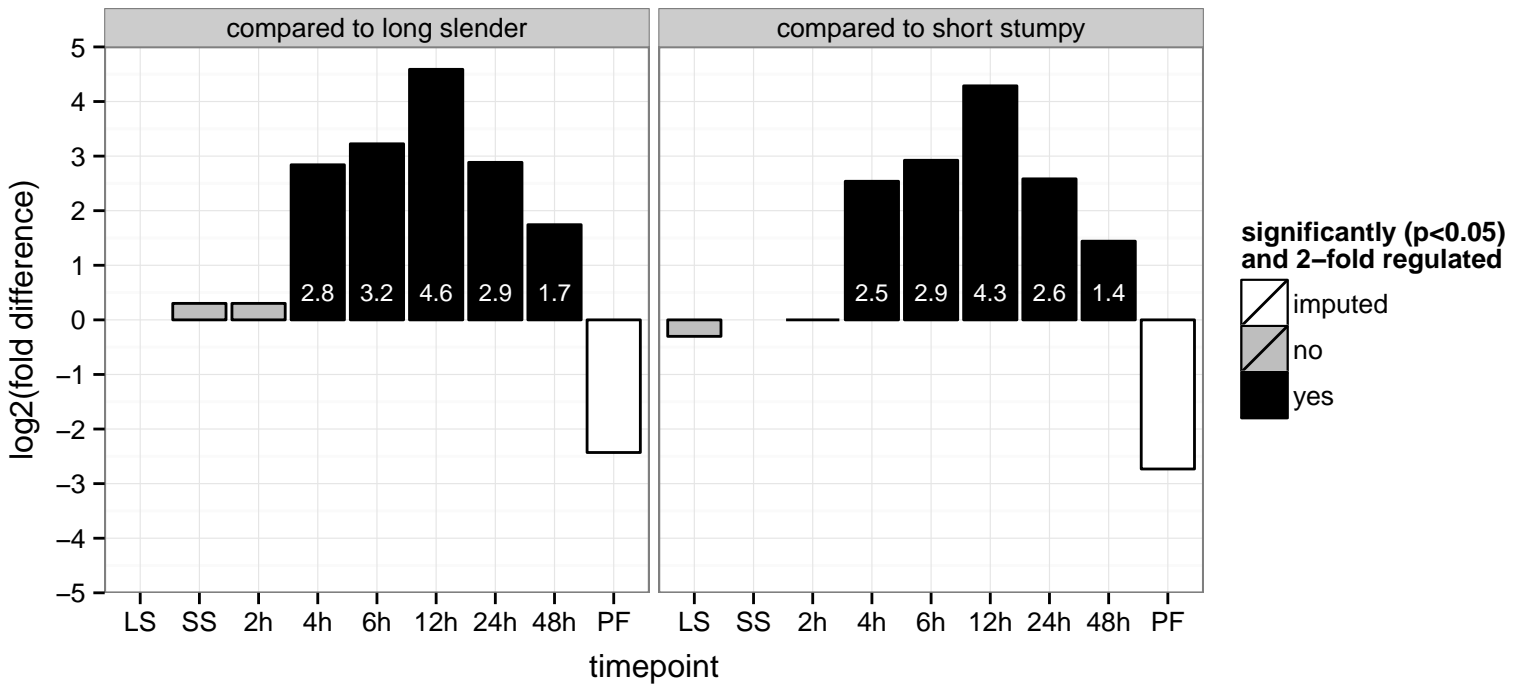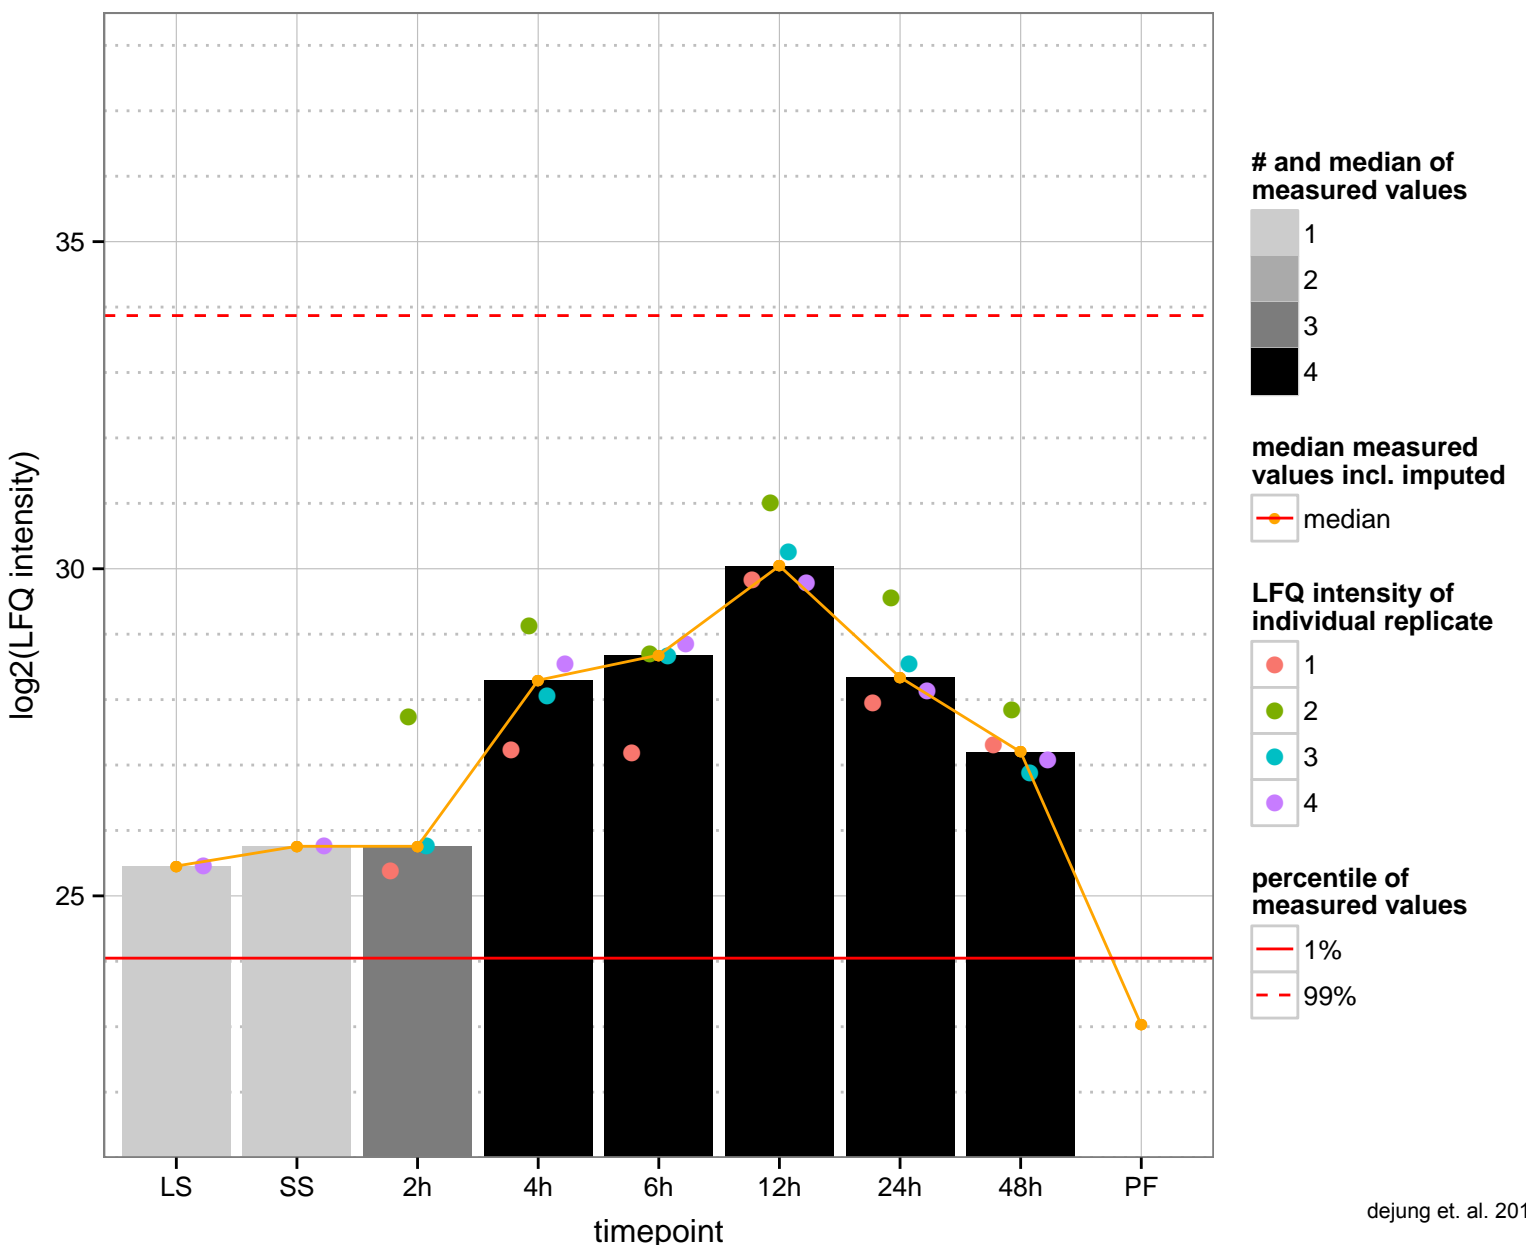

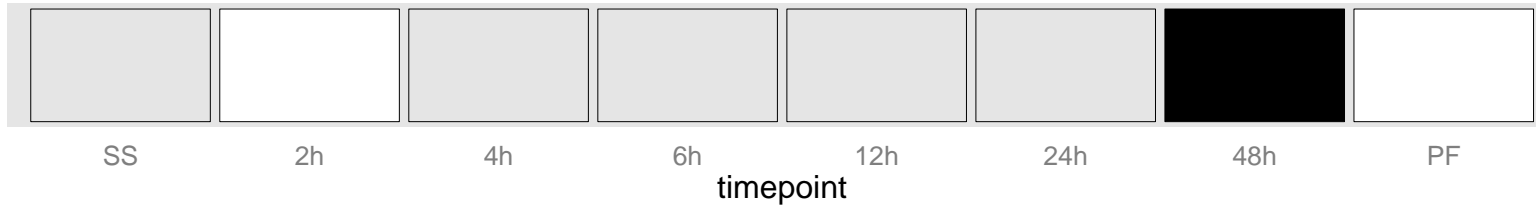

**regulated**  not regulated  significant down  significant up

hypothetical protein, conserved  
 Tb927.8.3980  
 AGOF: null  
 AGOC: null  
 AGOP: null  
 PGOF: null  
 PGOC: null  
 PGOP: null

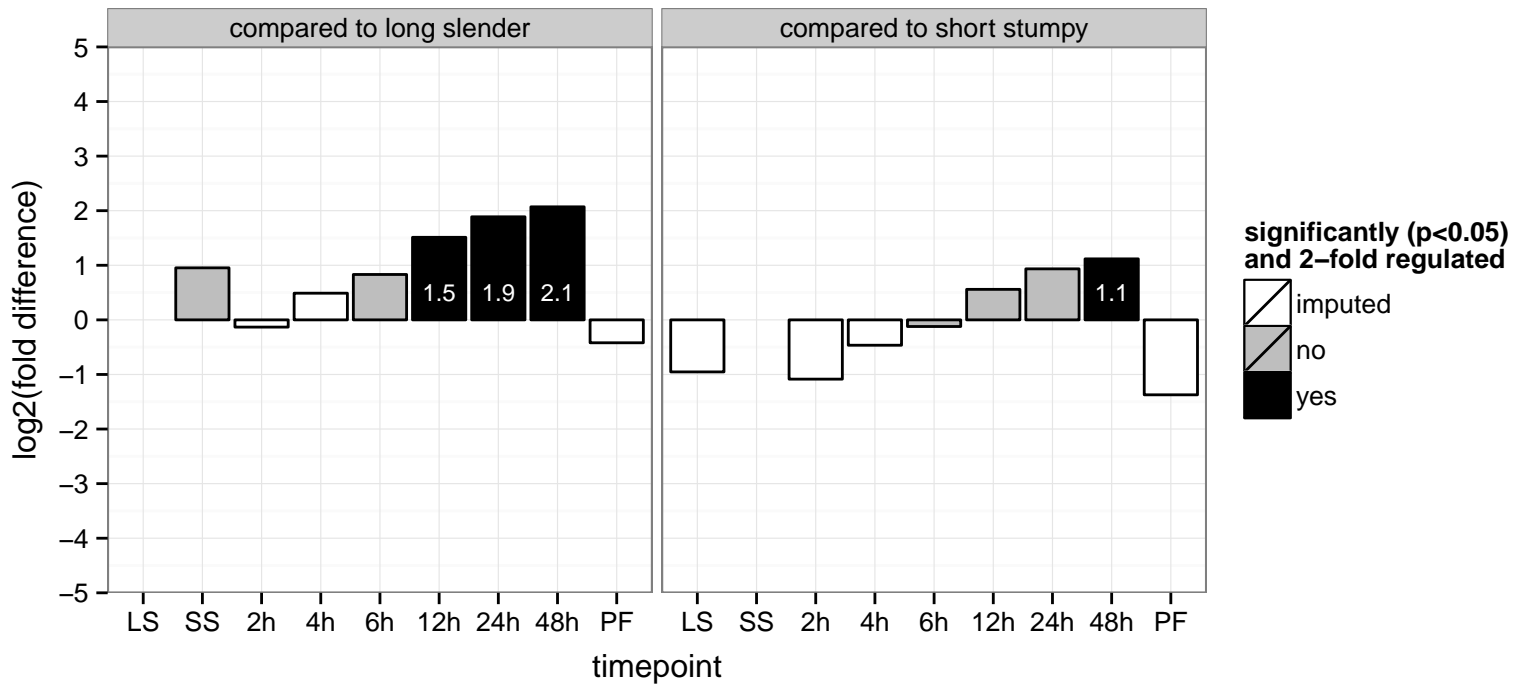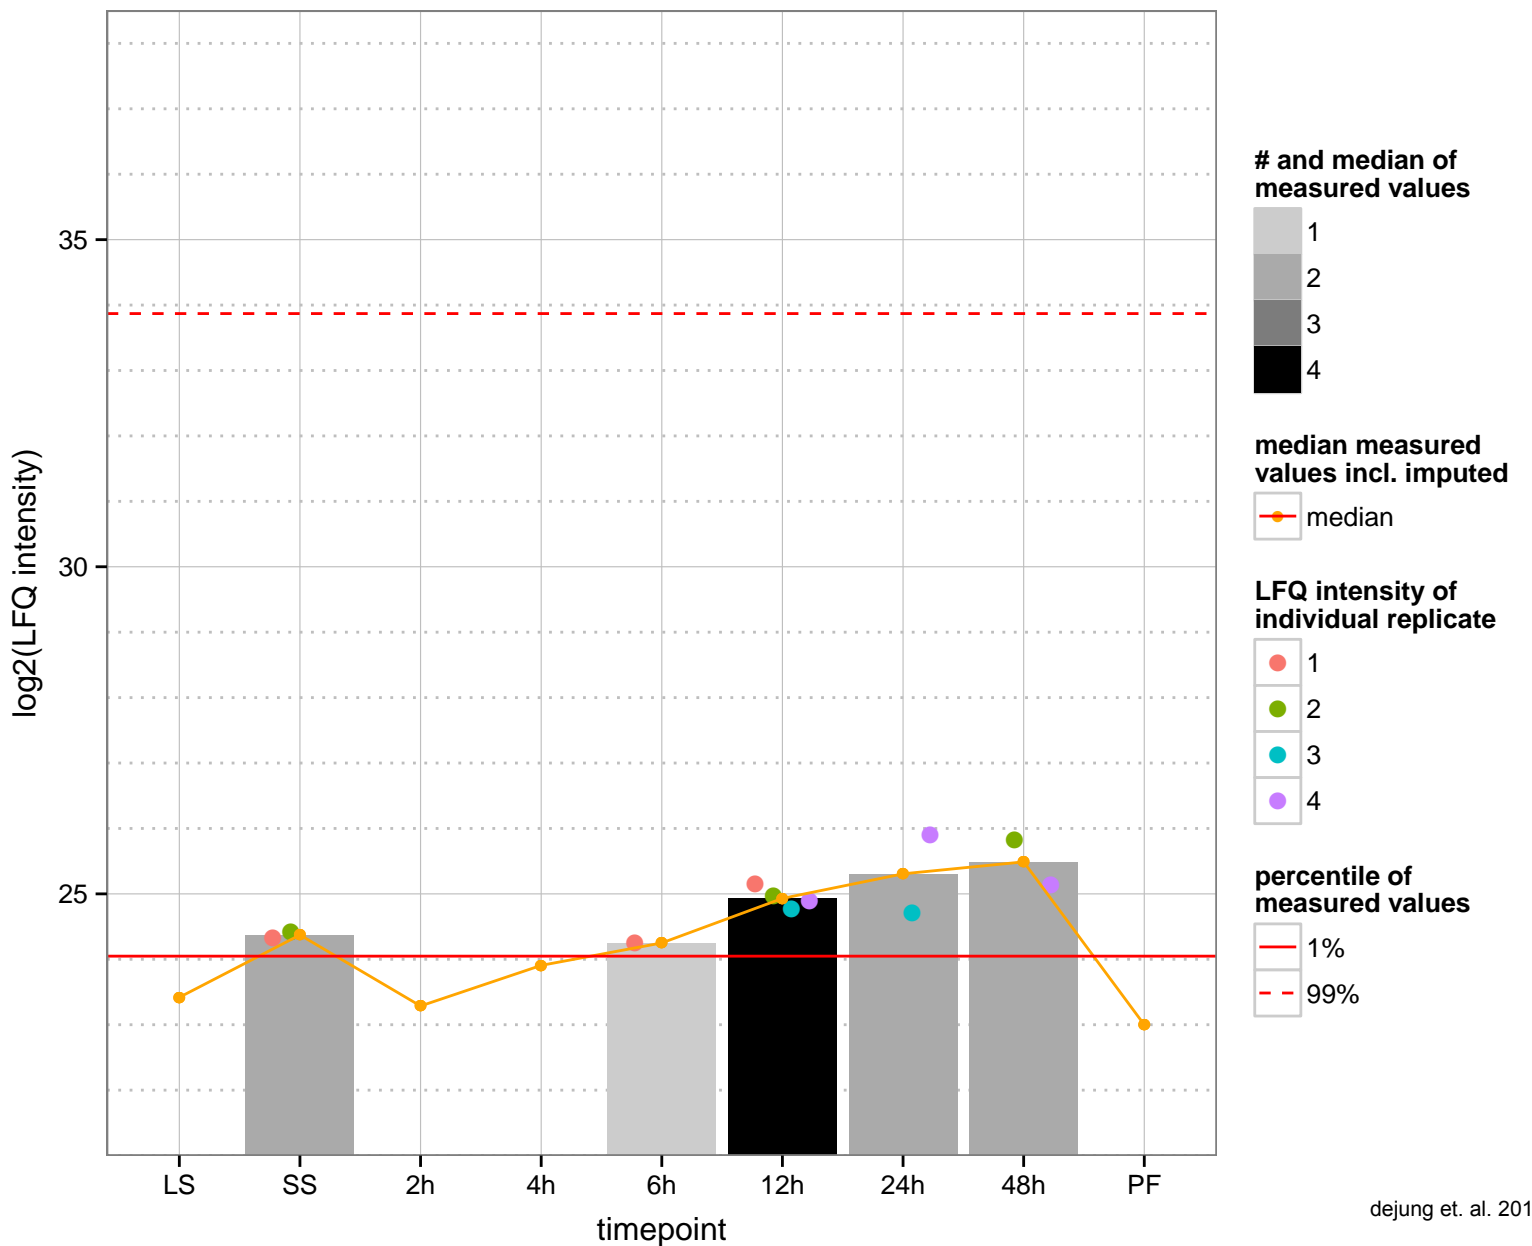

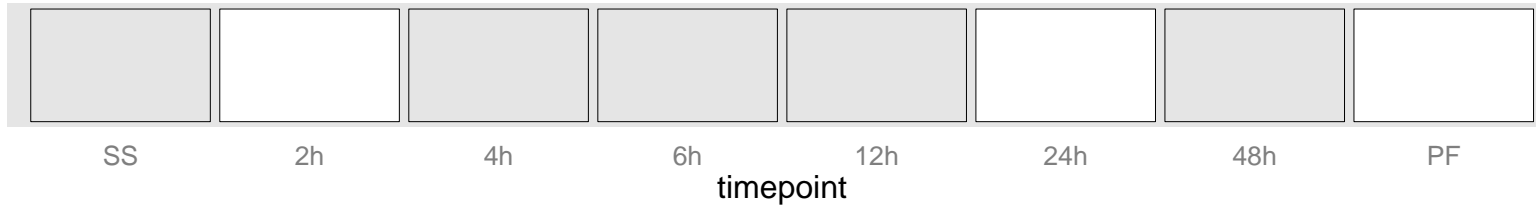

**regulated**  **not regulated**  **significant down**  **significant up**



hypothetical protein, conserved, class I transcription factor A, subunit 5a (CITFA-5a)

Tb927.8.4080;Tb927.8.4030;Tb11.v5.0861

AGOF: null

AGOC: null

AGOP: null

PGOF: null

PGOC: null

PGOP: null

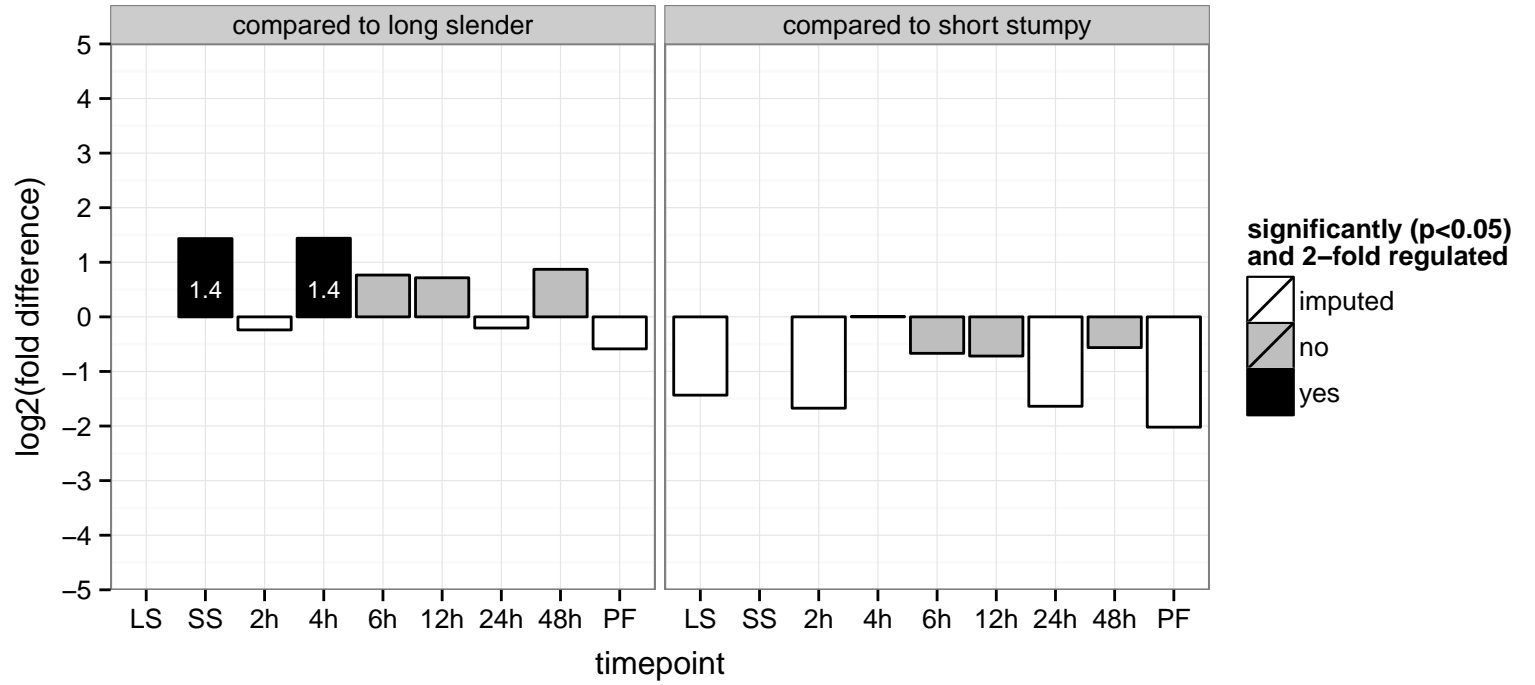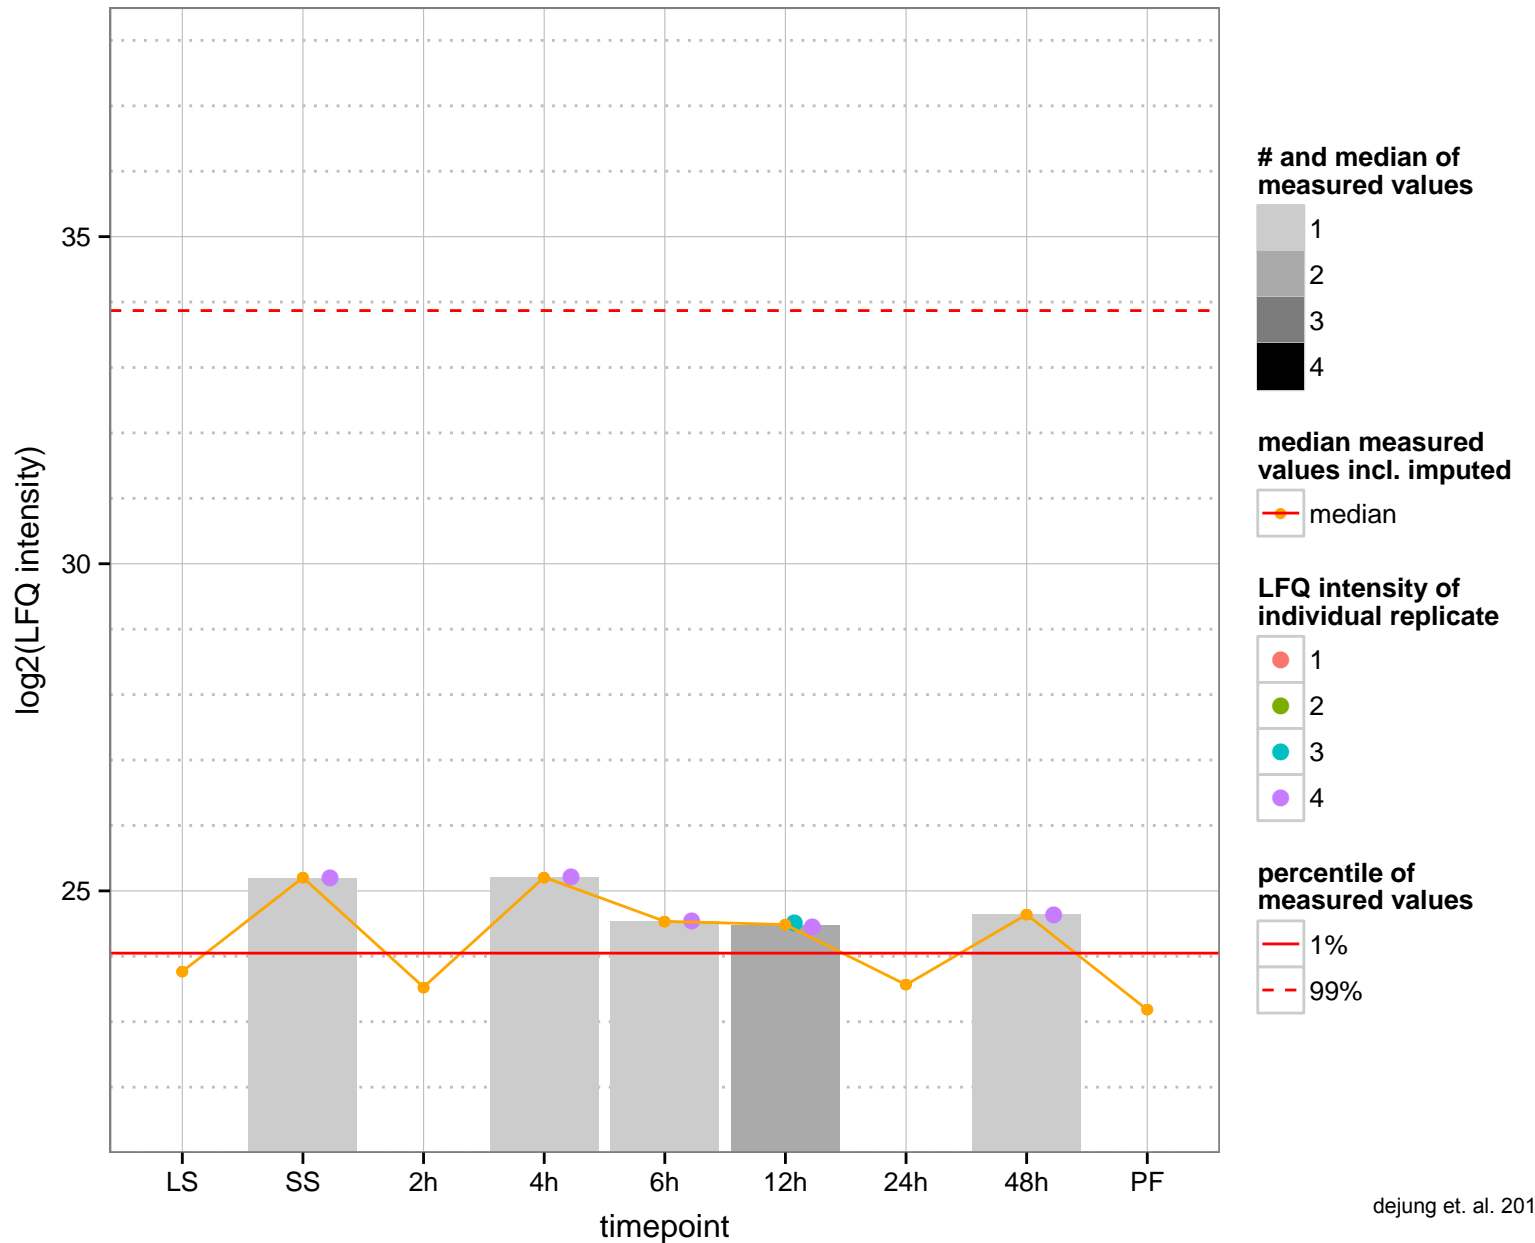

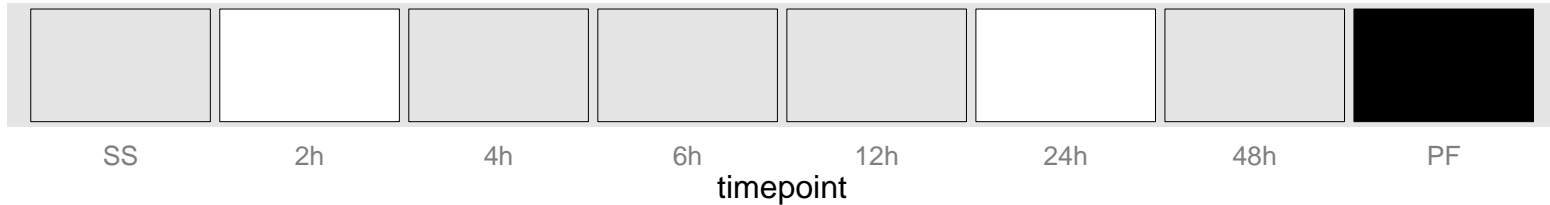

**regulated**  **not regulated**  **significant down**  **significant up**

hypothetical protein, conserved  
 Tb927.10.2200  
 AGOF: null  
 AGOC: null  
 AGOP: null  
 PGOF: null  
 PGO: null  
 PGOP: null

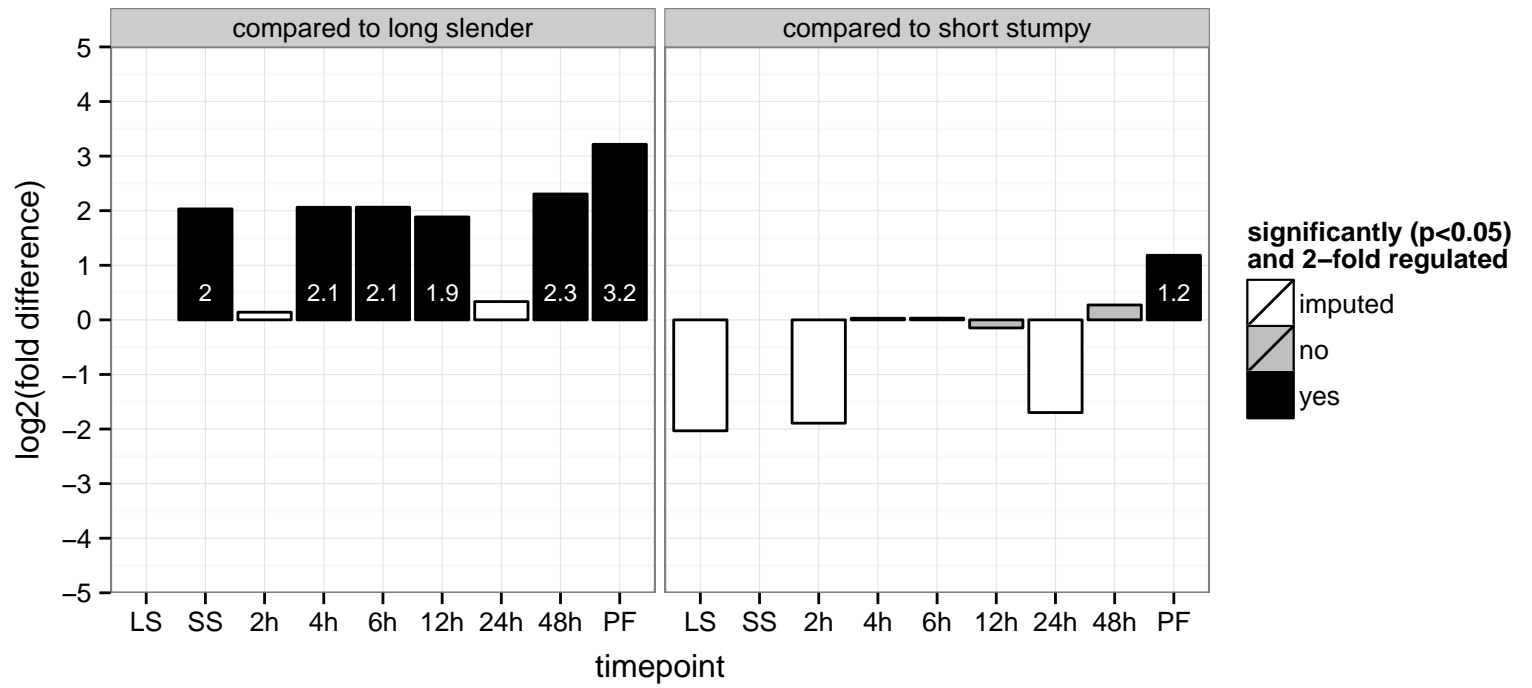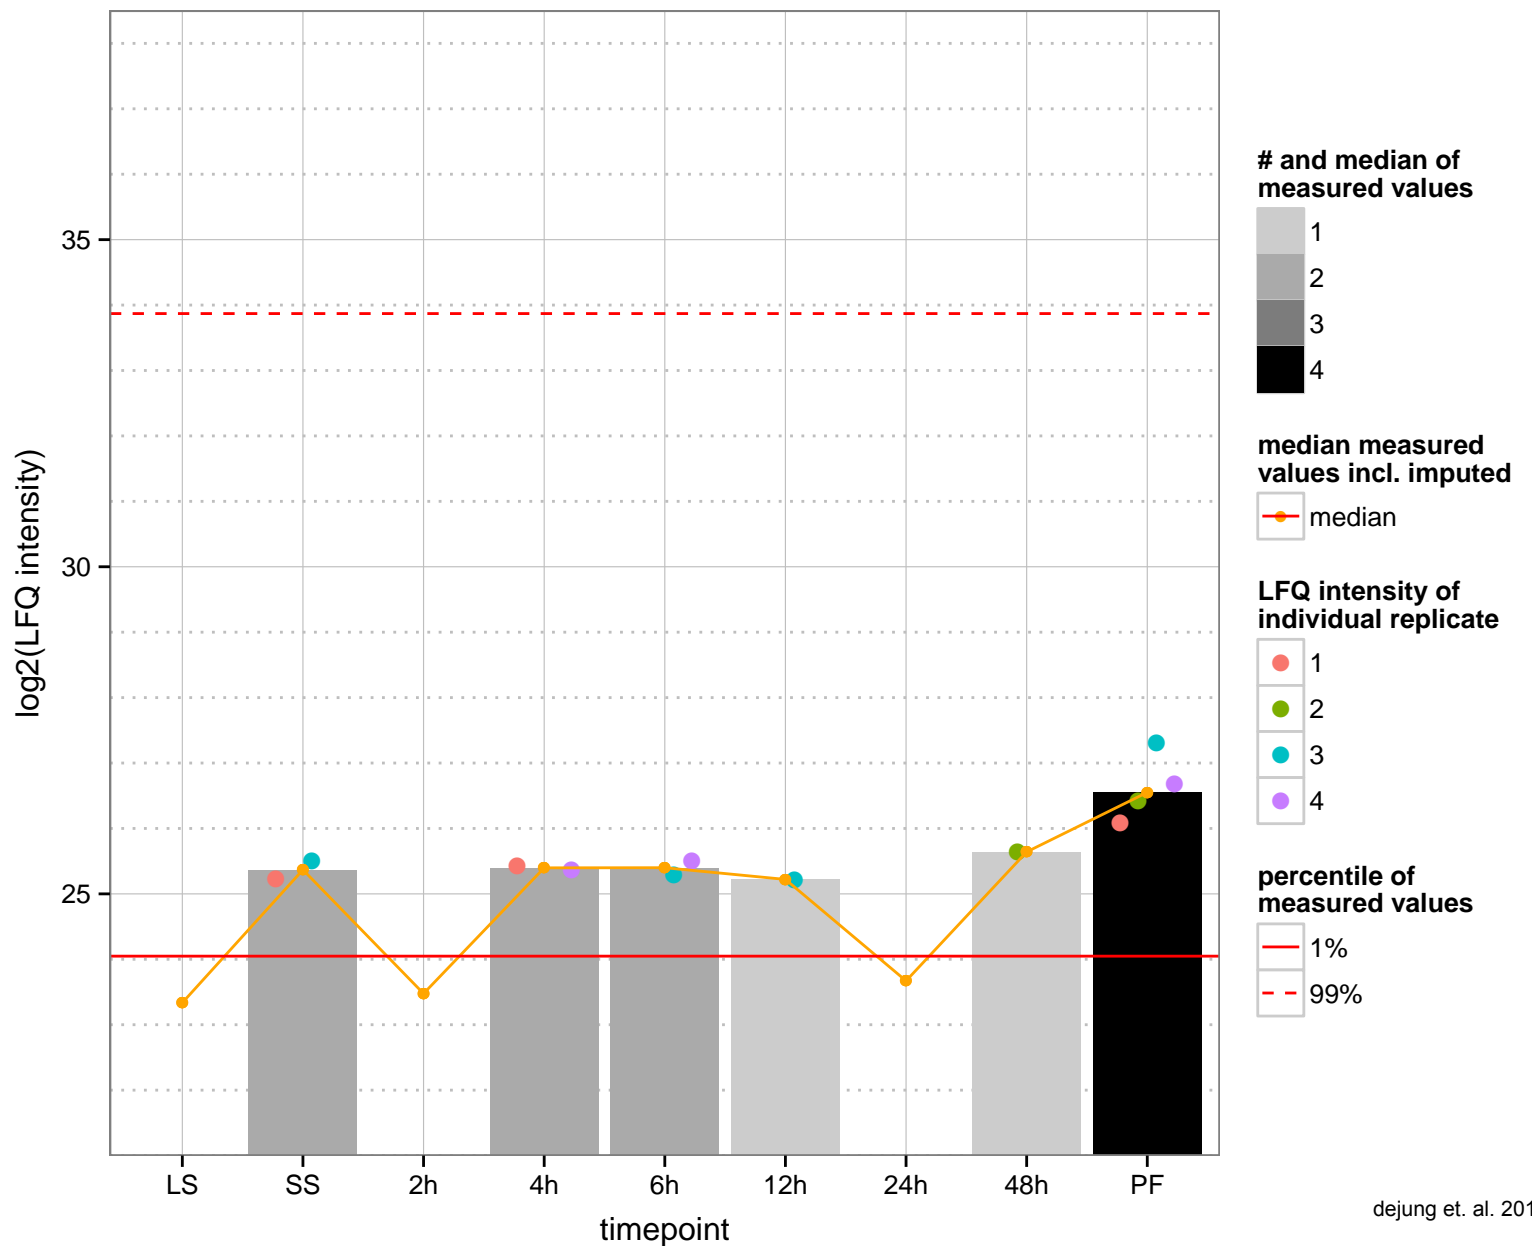

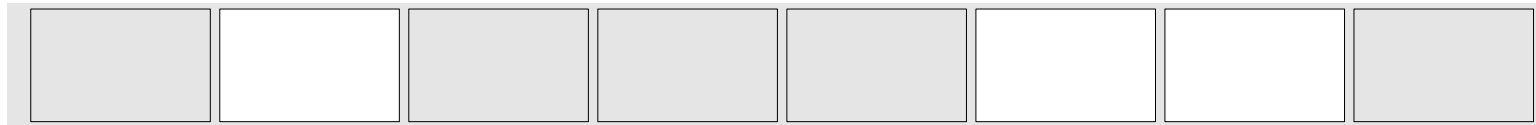

SS

2h

4h

6h

12h

24h

48h

PF

timepoint

**regulated**  not regulated  significant down  significant up

dejung et. al. 2015

trypanothione/tryparedoxin dependent peroxidase 1, cytosolic, glutathione peroxidase-like protein 1 (TDPX1)  
 Tb927.7.1120  
 AGOF: glutathione peroxidase activity  
 AGOC: null  
 AGOP: response to oxidative stress  
 PGOF: glutathione peroxidase activity  
 PGO: null  
 PGOP: oxidation-reduction process, response to oxidative stress

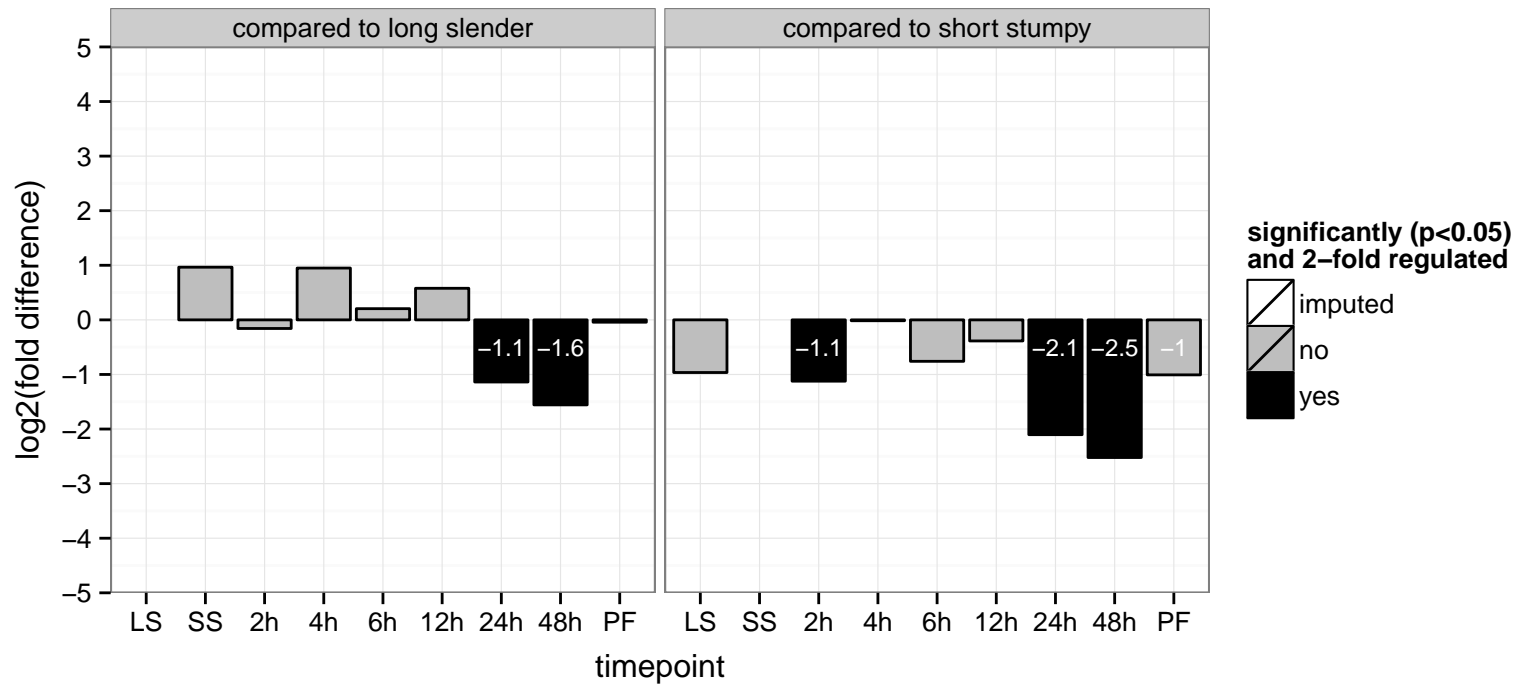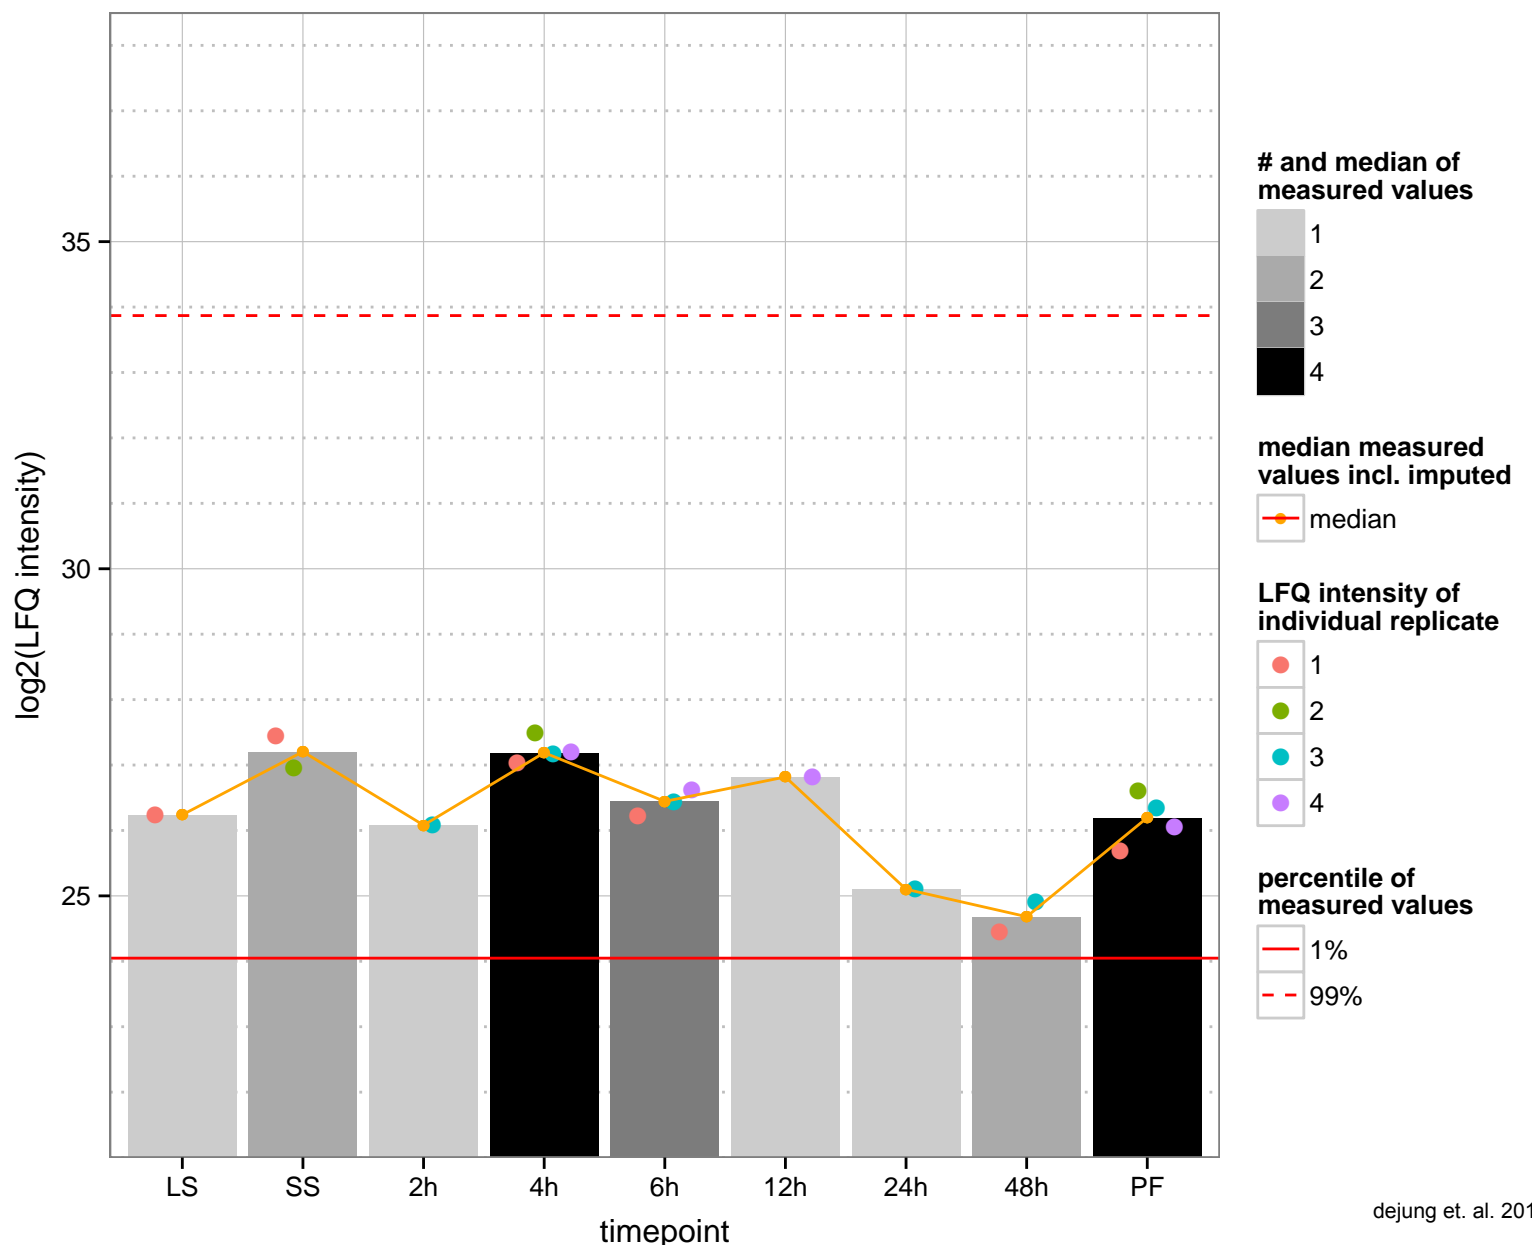

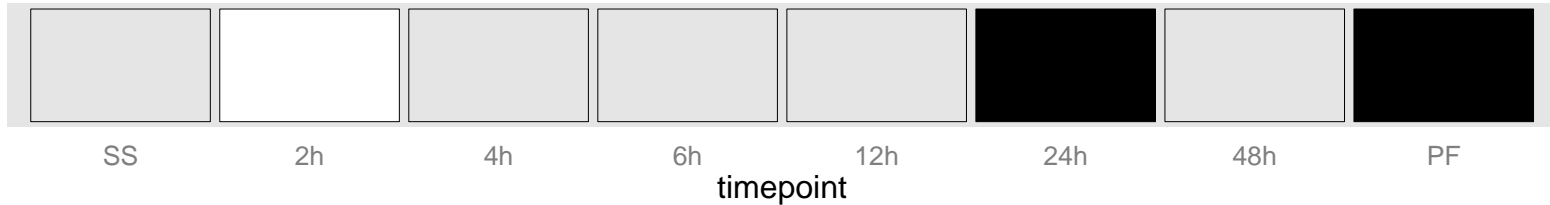

**regulated**  **not regulated**  **significant down**  **significant up**

hypothetical protein, conserved  
 Tb927.8.2570  
 AGOF: null  
 AGOC: null  
 AGOP: null  
 PGO: null  
 PGOC: null  
 PGOP: null

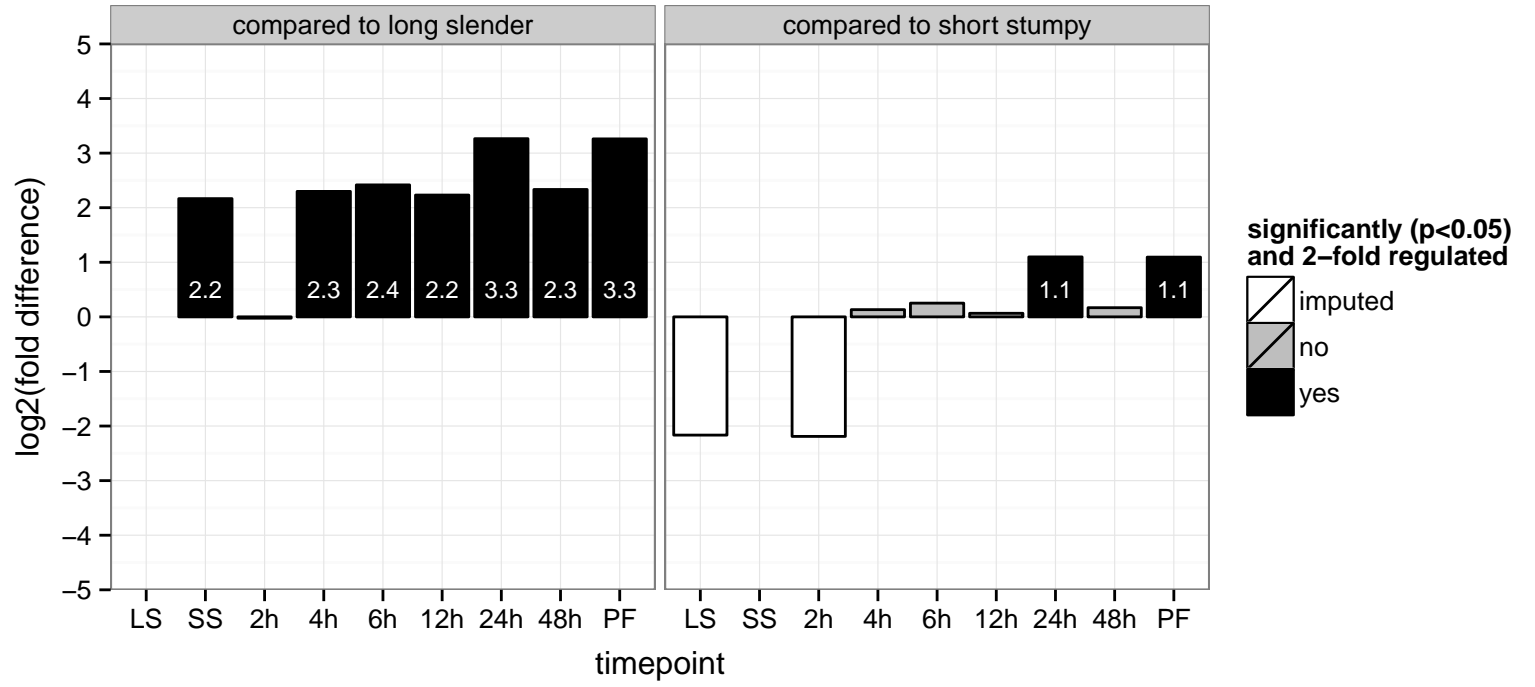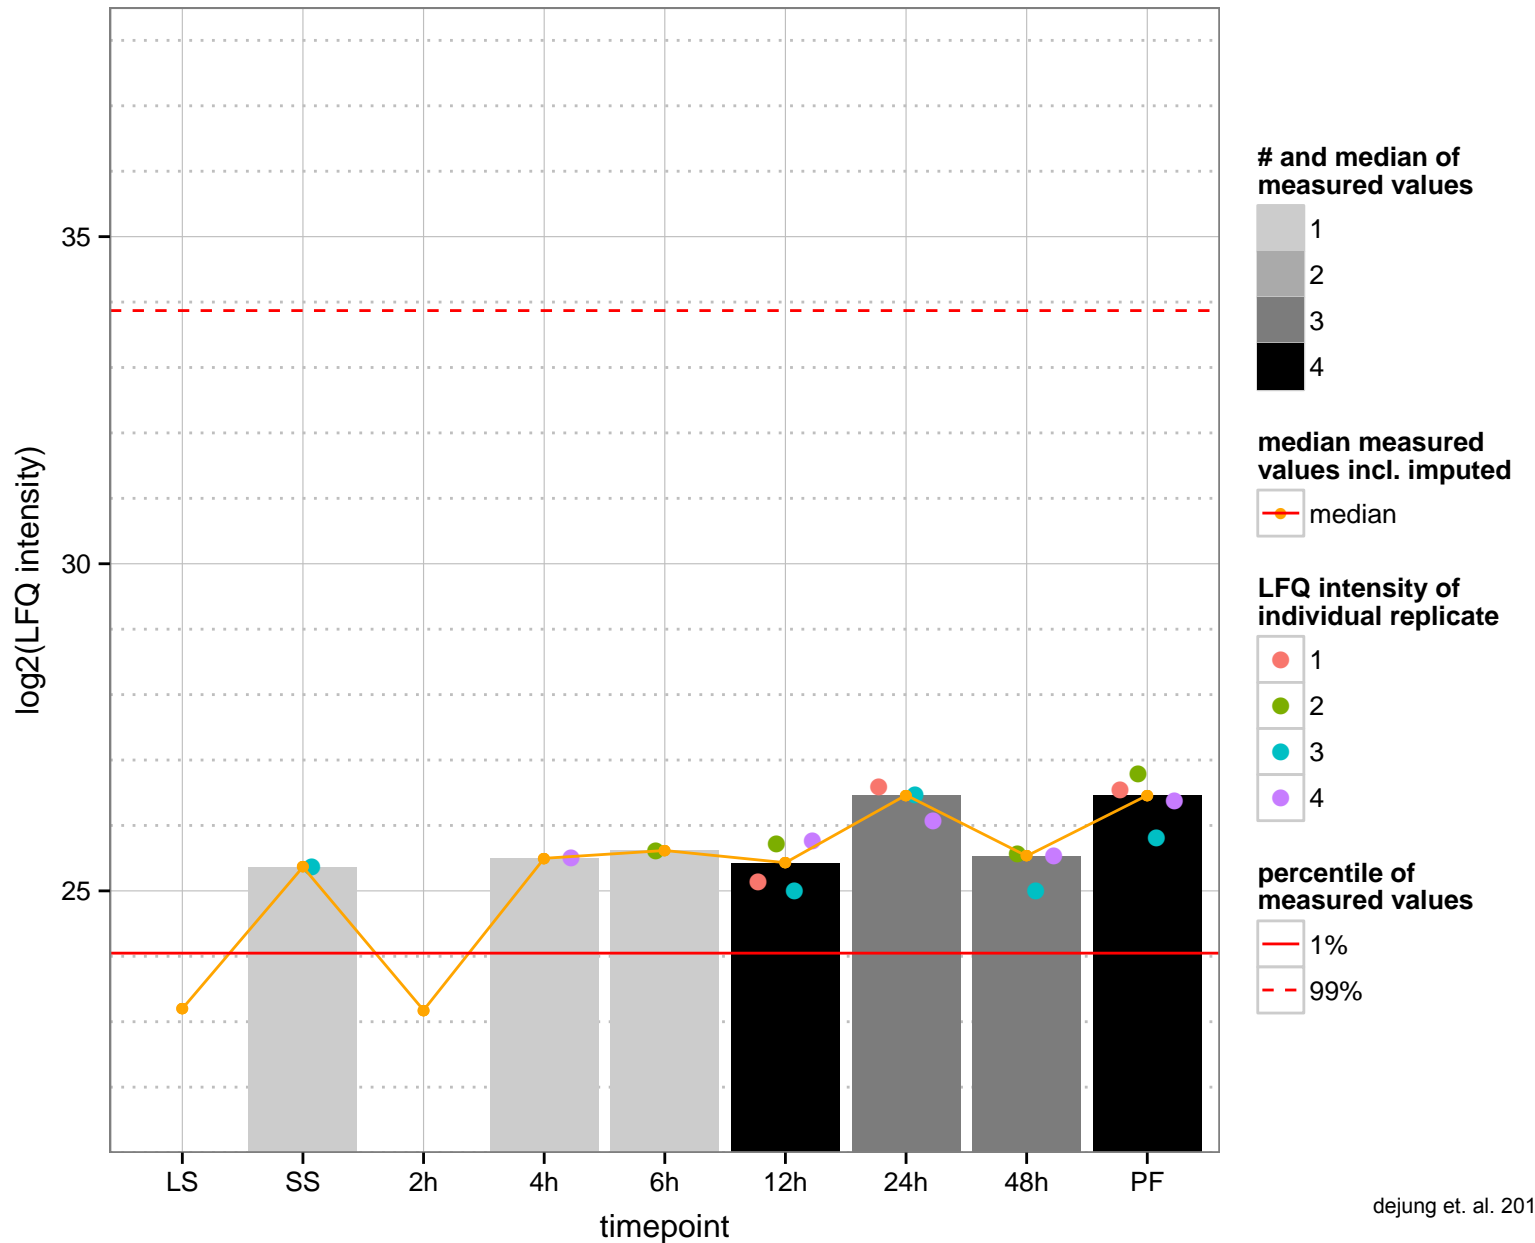

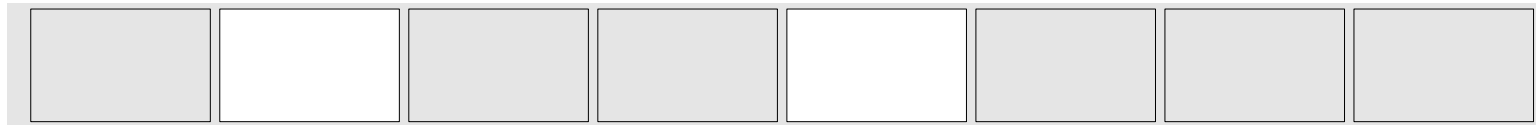

SS

2h

4h

6h

12h

24h

48h

PF

timepoint

**regulated**  not regulated  significant down  significant up

dejung et. al. 2015



hypothetical protein, conserved  
 Tb927.9.6010  
 AGOF: null  
 AGOC: null  
 AGOP: null  
 PGO: null  
 PGOC: null  
 PGOP: null

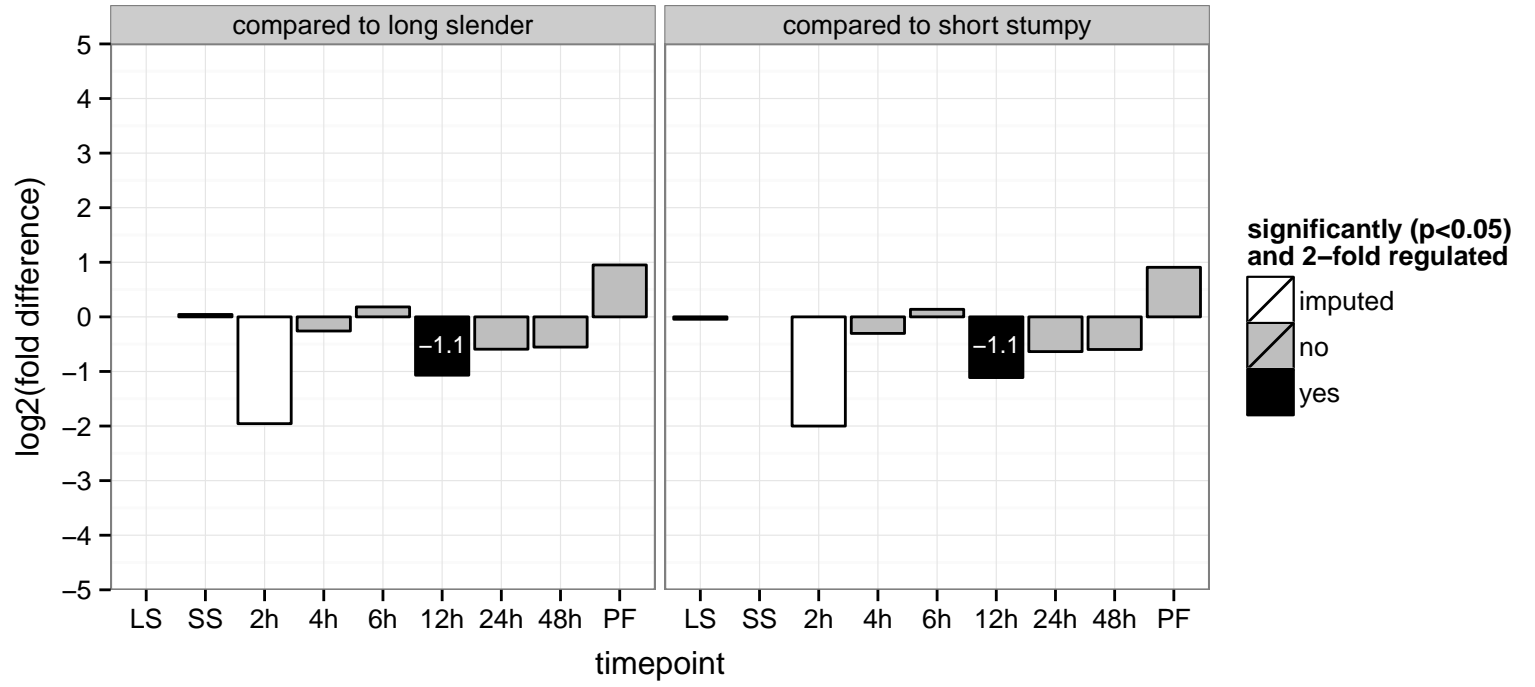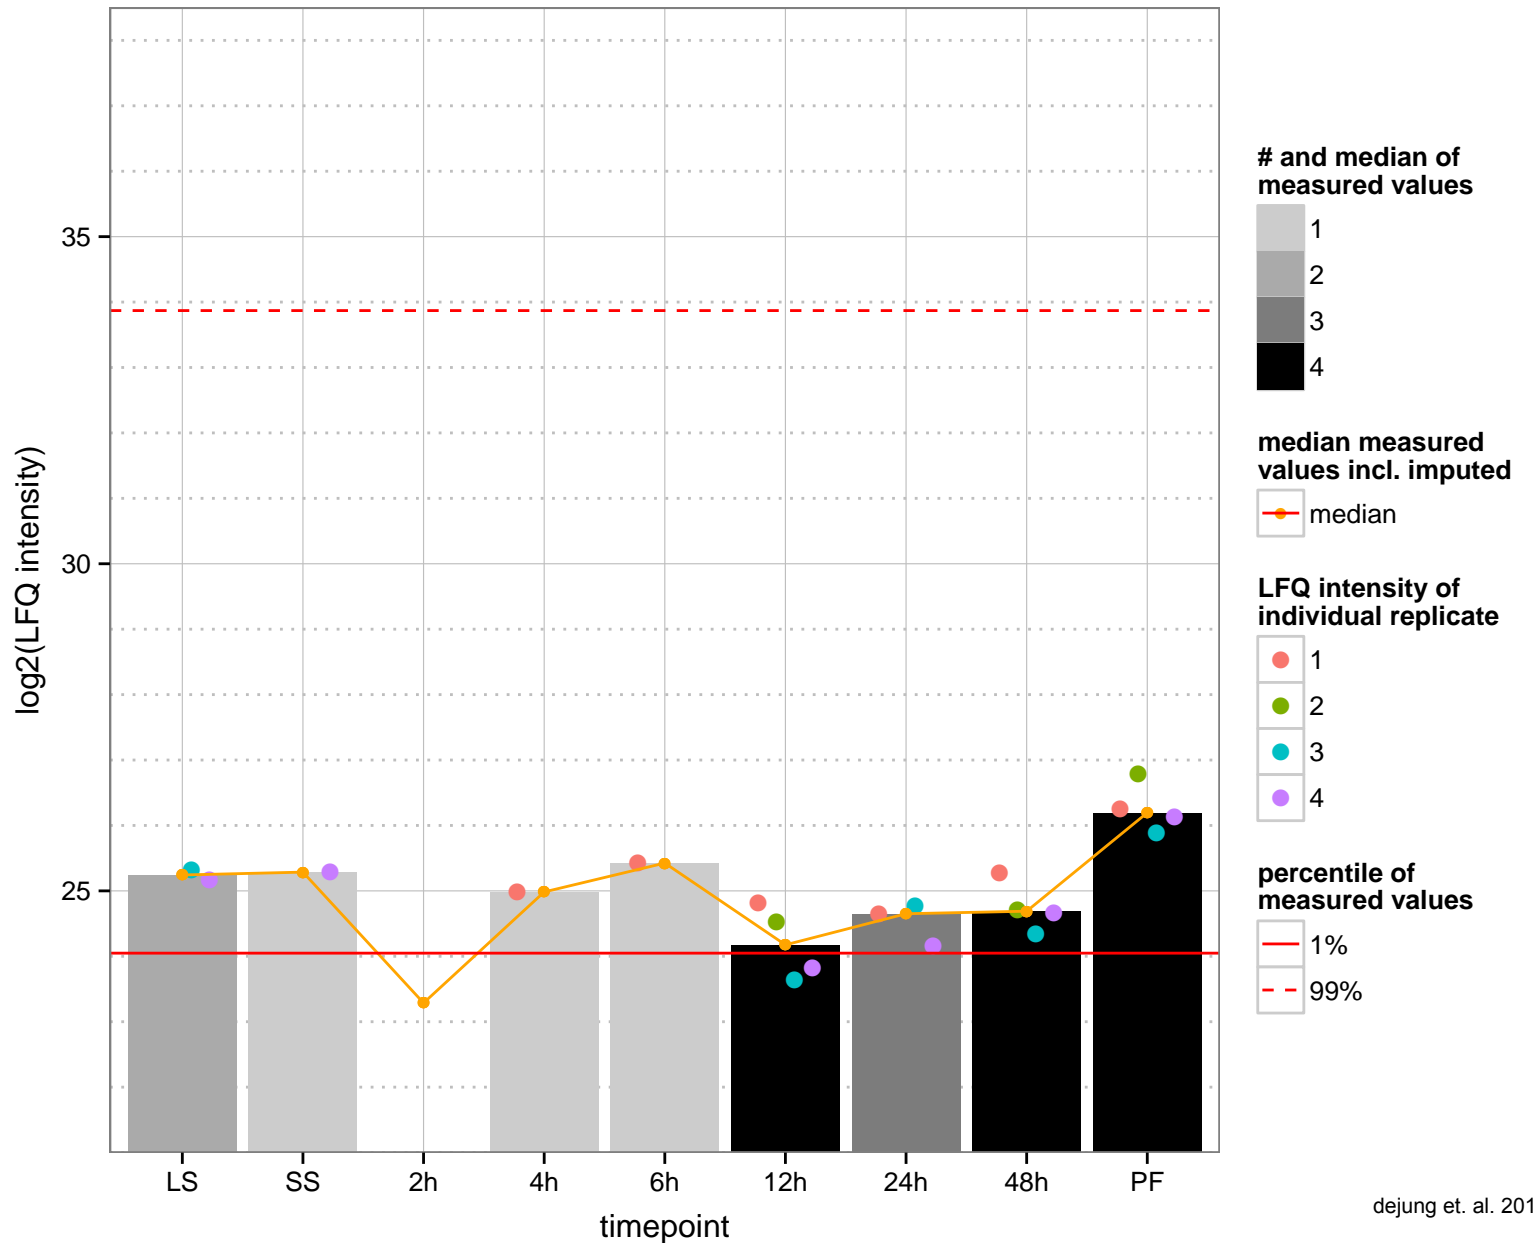

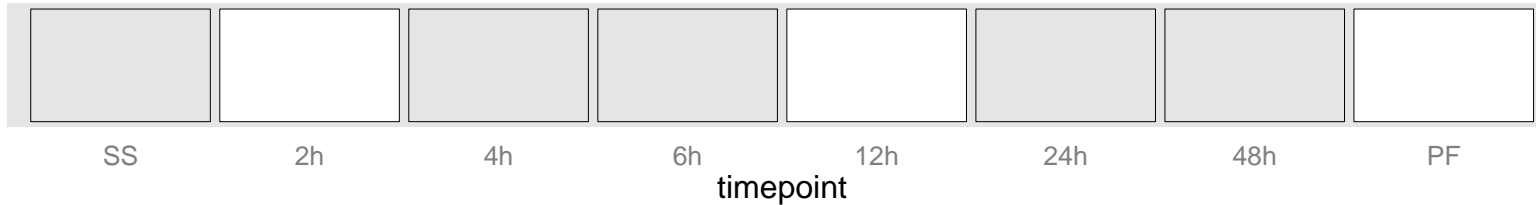

**regulated**  **not regulated**  **significant down**  **significant up**

5-methyltetrahydropteroyltriglutamate-homocysteine S-methyltransferase, putative, cobalamin-independent methionine synt  
 Tb927.8.2610  
 AGOF: 5-methyltetrahydropteroyltriglutamate-homocysteine S-methyltransferase activity, zinc ion binding  
 AGOC: null  
 AGOP: methionine biosynthetic process  
 PGOF: 5-methyltetrahydropteroyltriglutamate-homocysteine S-methyltransferase activity, zinc ion binding  
 PGOC: null  
 PGOP: cellular amino acid biosynthetic process, methionine biosynthetic process

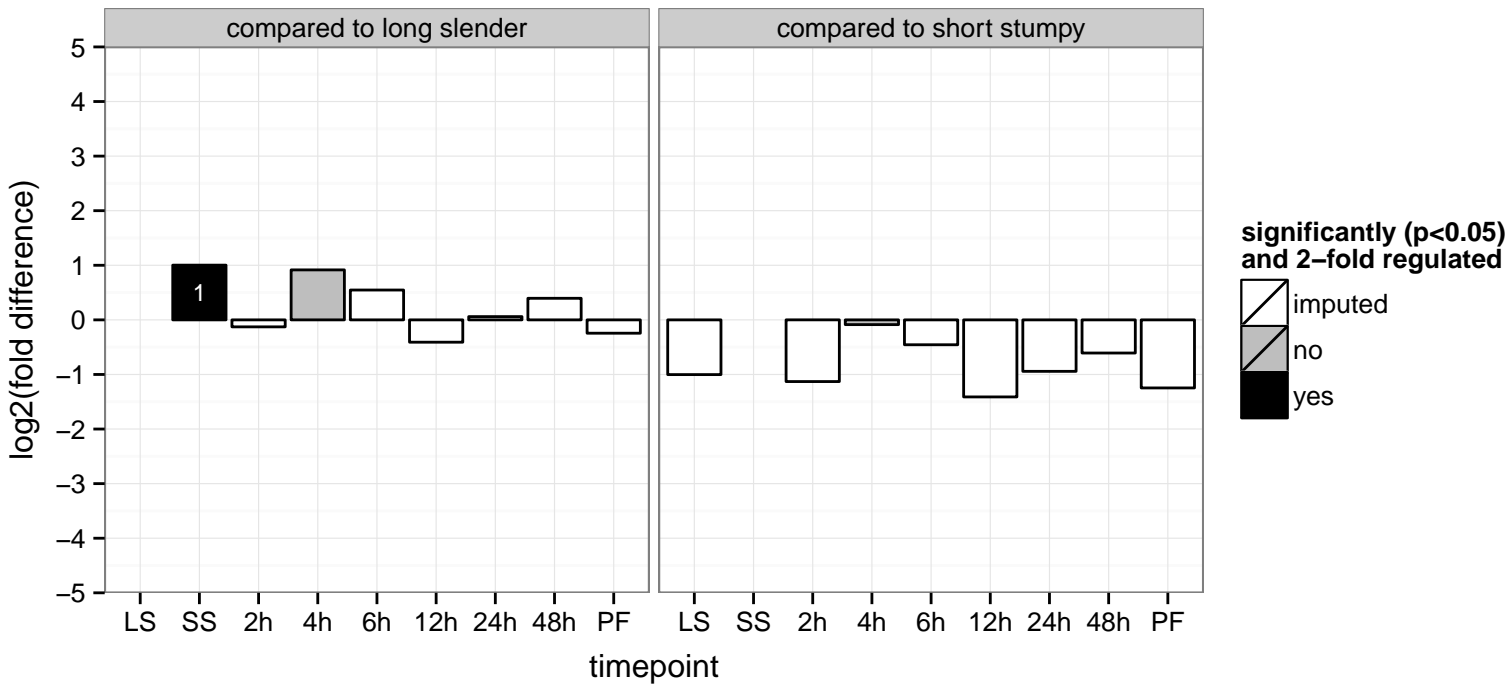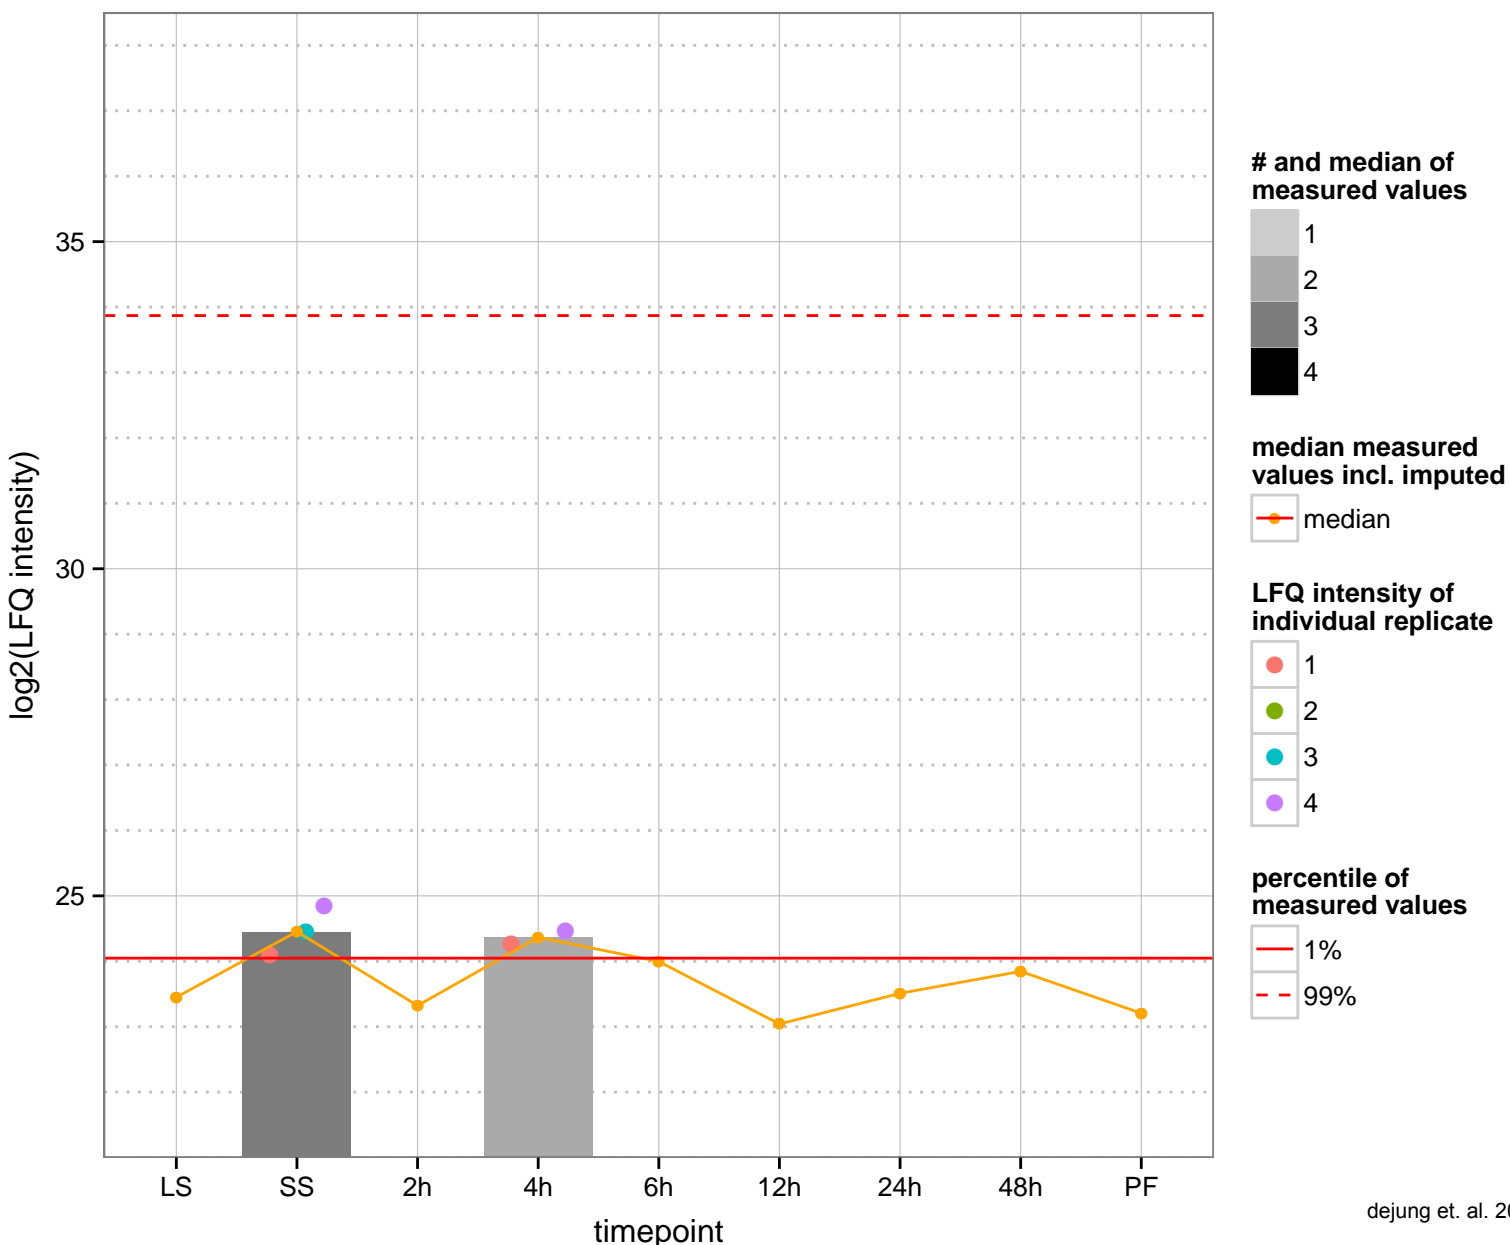

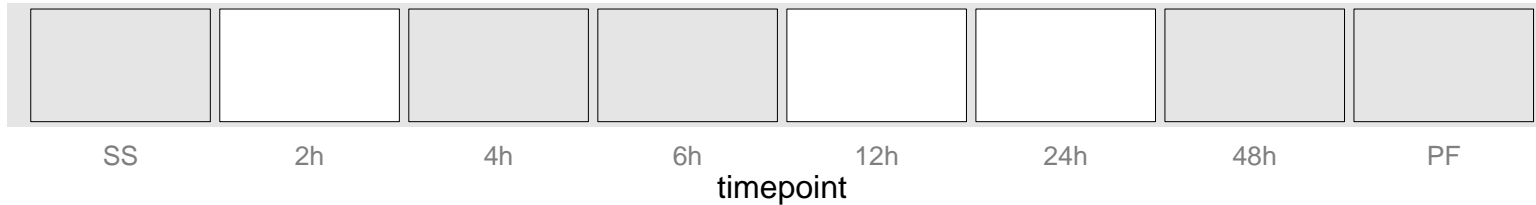

**regulated** 
**not regulated** 
**significant down** 
**significant up** 

kinetoplastid kinetochore protein 4 (kkt4)  
 Tb927.8.3680  
 AGOF: null  
 AGOC: intracellular, kinetochore  
 AGOP: chromosome segregation  
 PGO: null  
 PGOC: null  
 PGOP: null

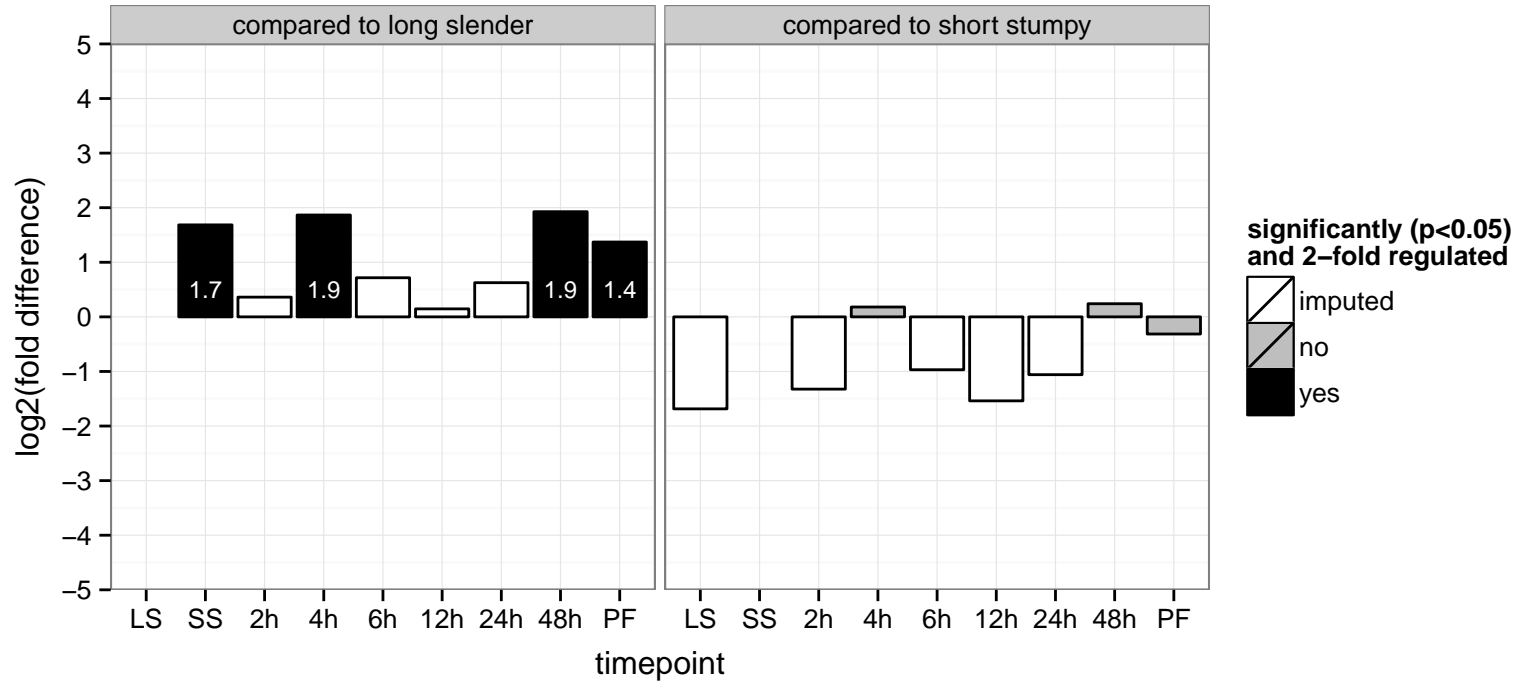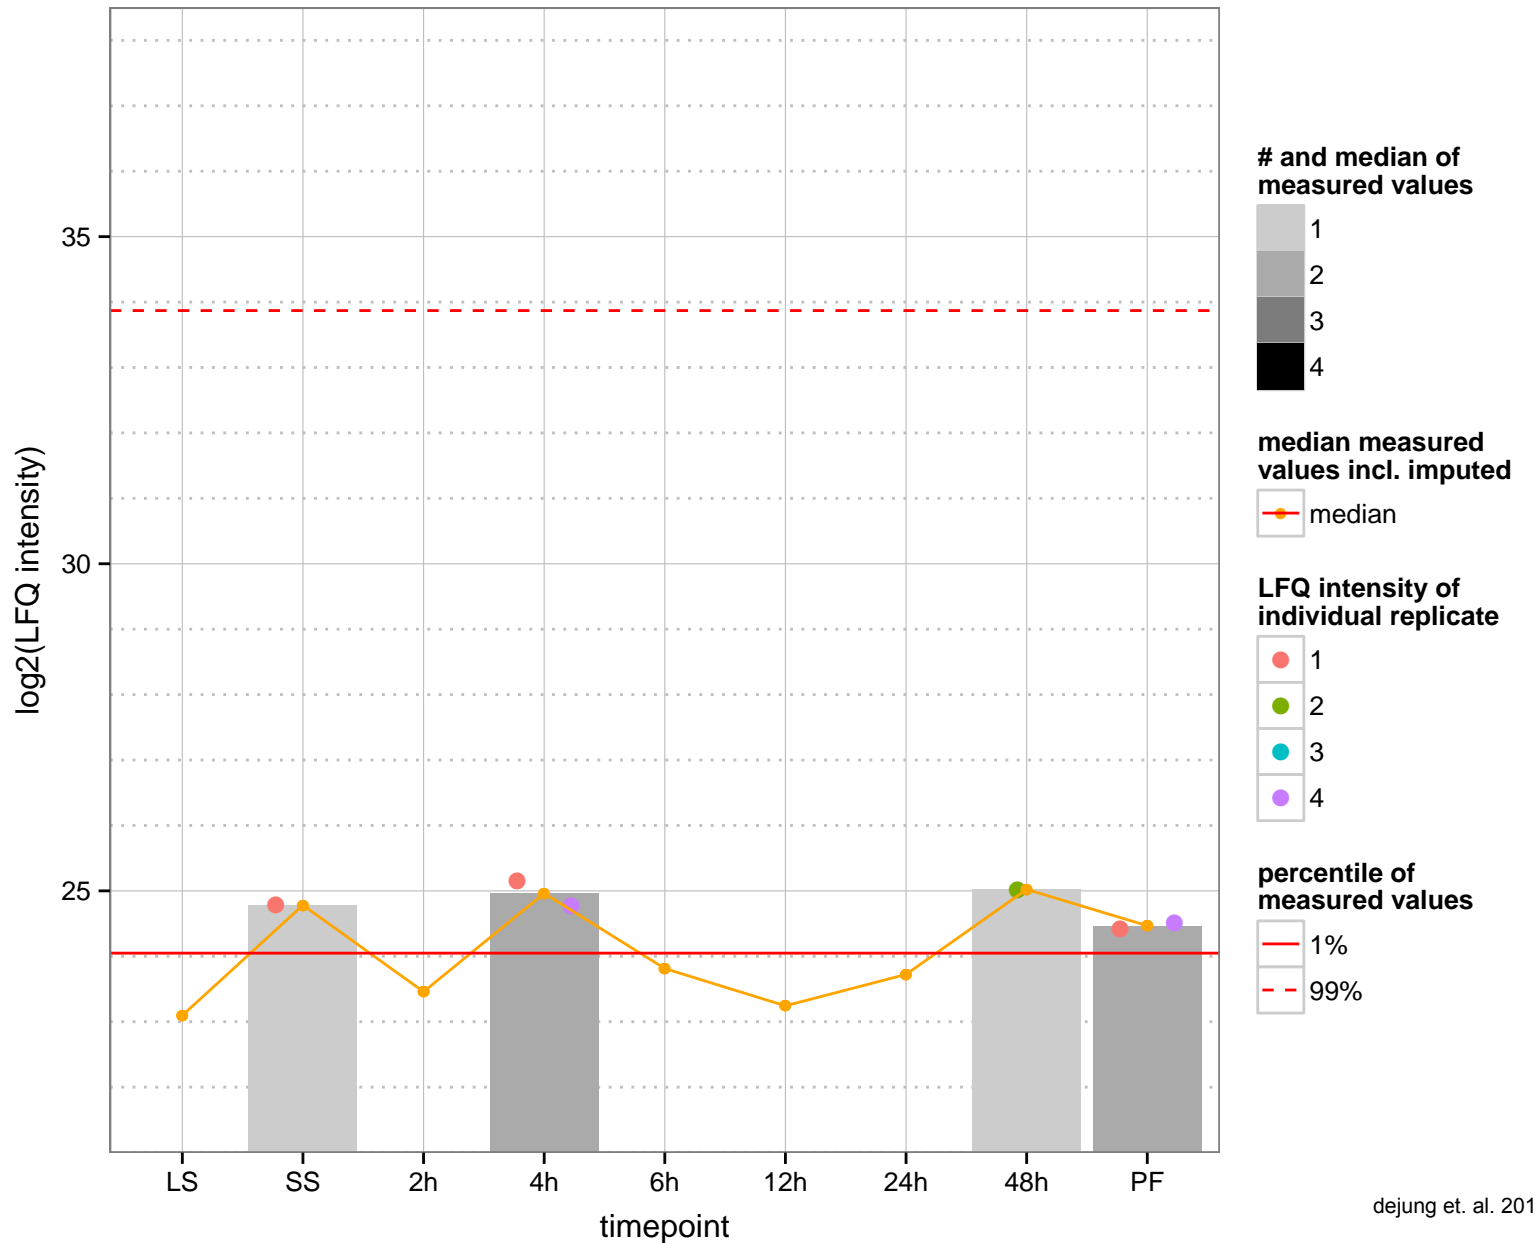

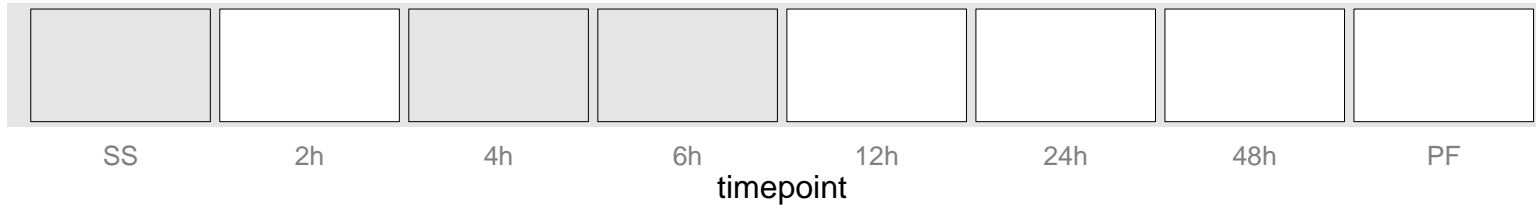

**regulated**  **not regulated**  **significant down**  **significant up**

hypothetical protein, conserved  
 Tb927.10.2760  
 AGOF: ATP binding, nucleoside-triphosphatase activity  
 AGOC: null  
 AGOP: null  
 PGO: ATP binding, nucleoside-triphosphatase activity, nucleotide binding  
 PGOC: null  
 PGOP: null

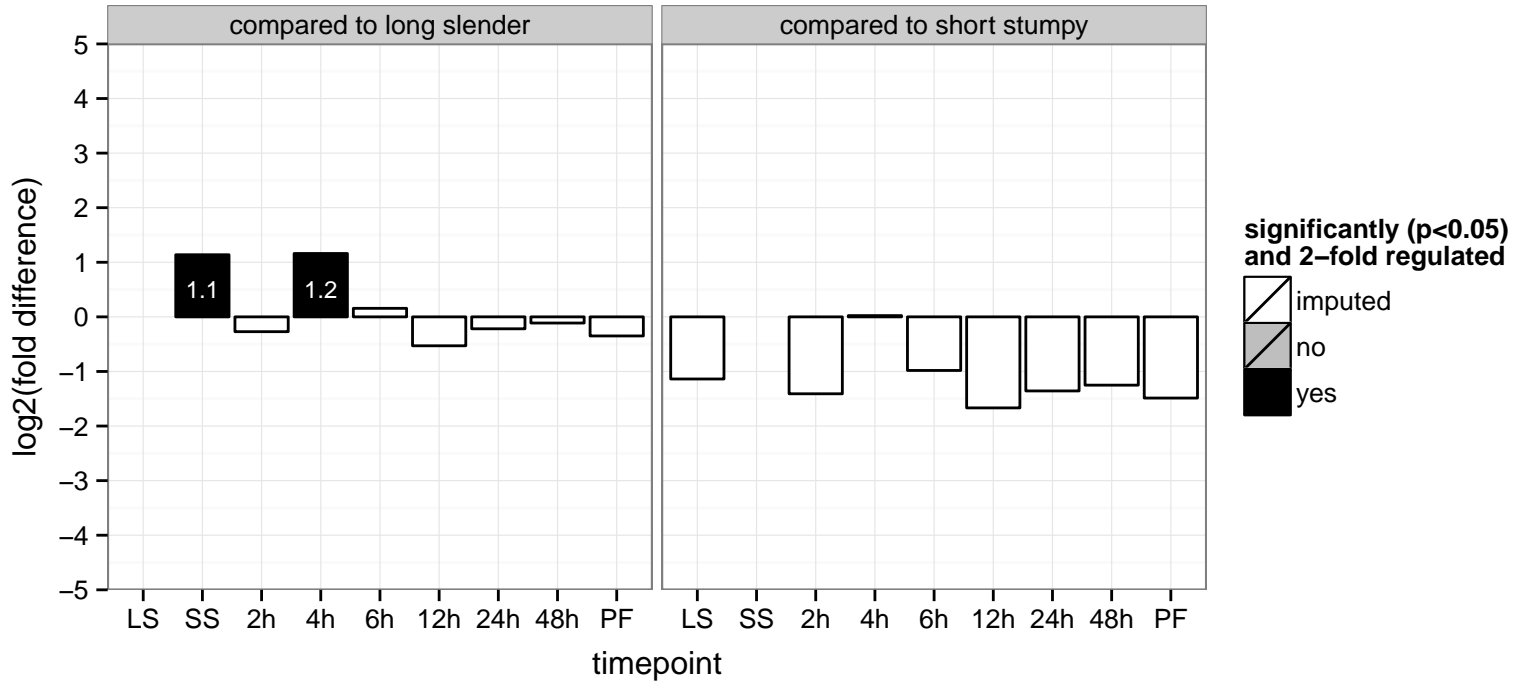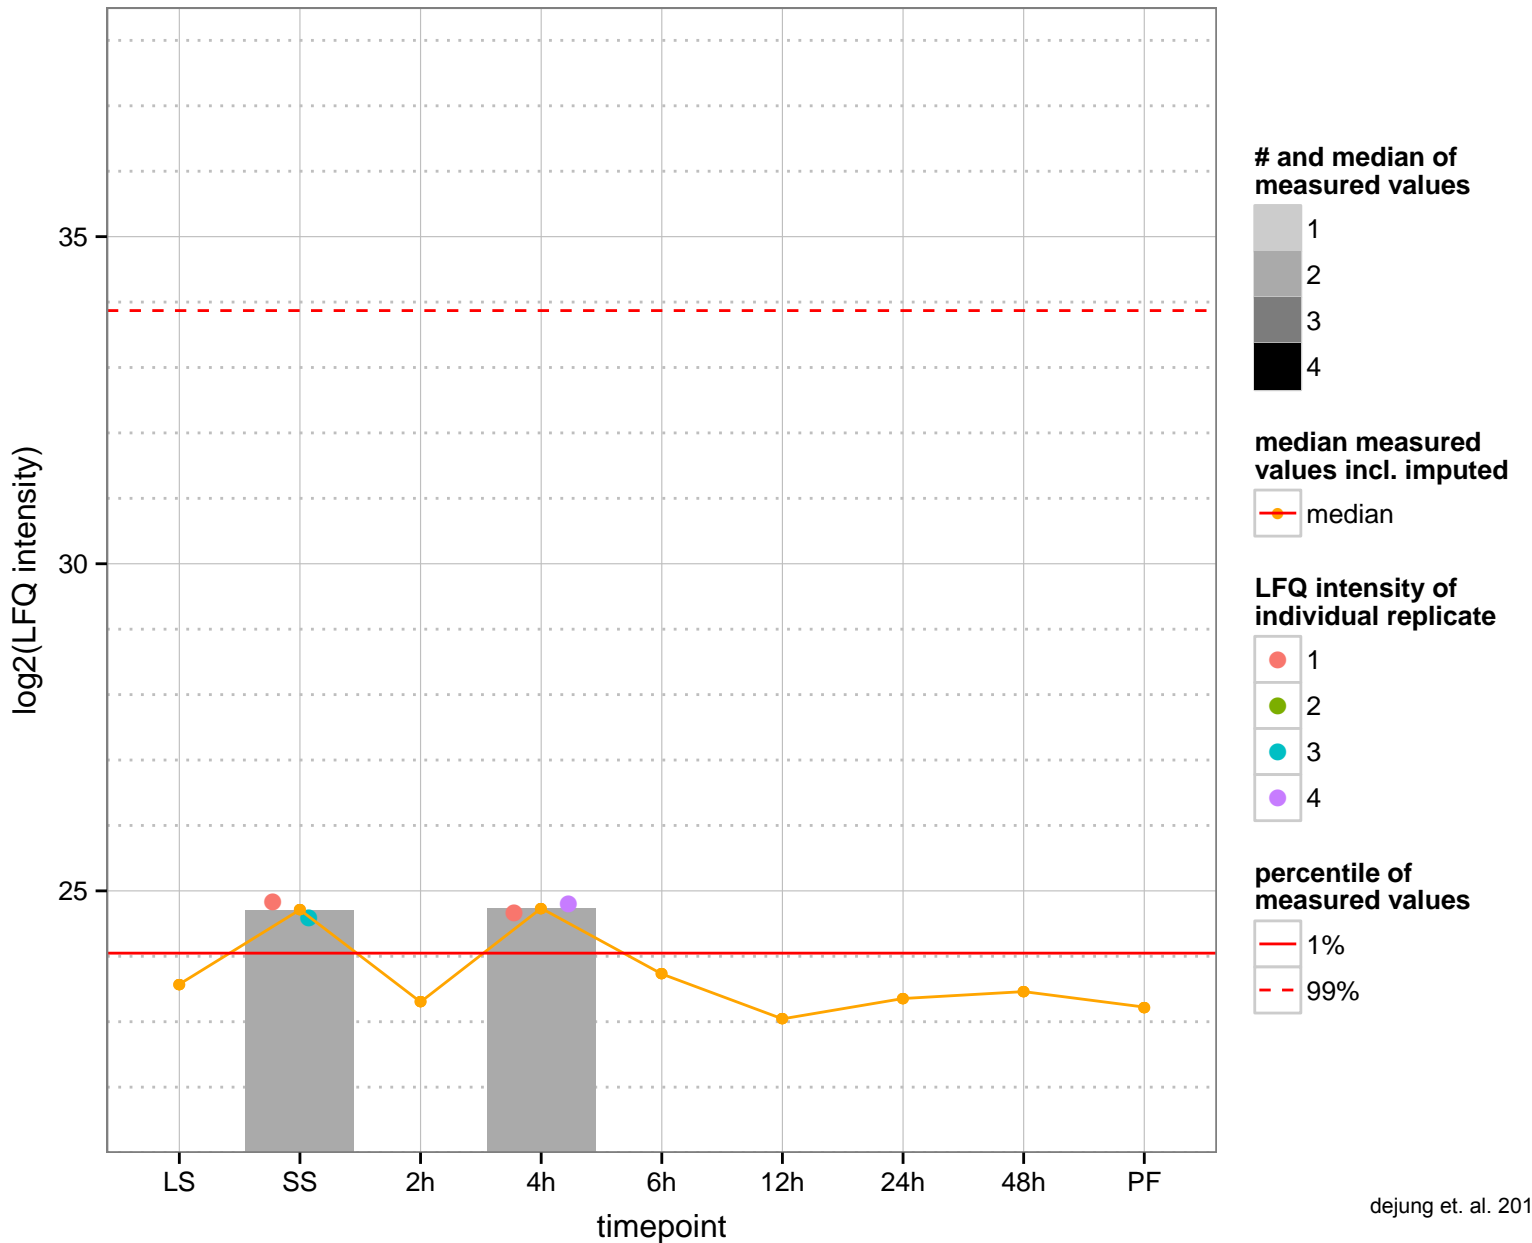

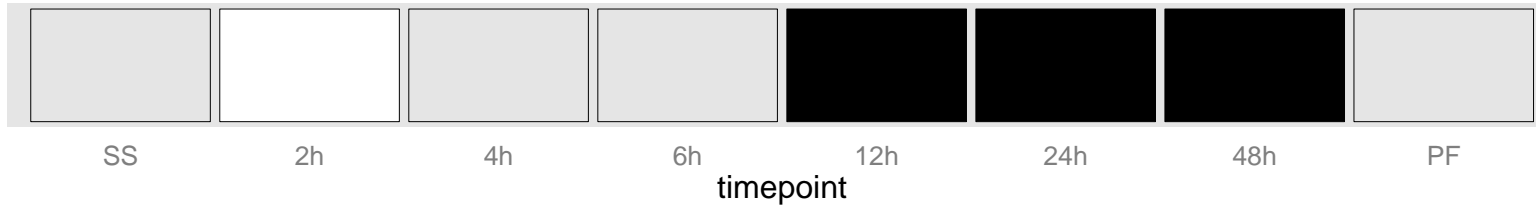

**regulated**  **not regulated**  **significant down**  **significant up**



hypothetical protein, conserved  
 Tb927.11.2630  
 AGOF: null  
 AGOC: null  
 AGOP: null  
 PGO: null  
 PGOC: cytoplasm  
 PGOP: peptidyl-diphthamide biosynthetic process from peptidyl-histidine

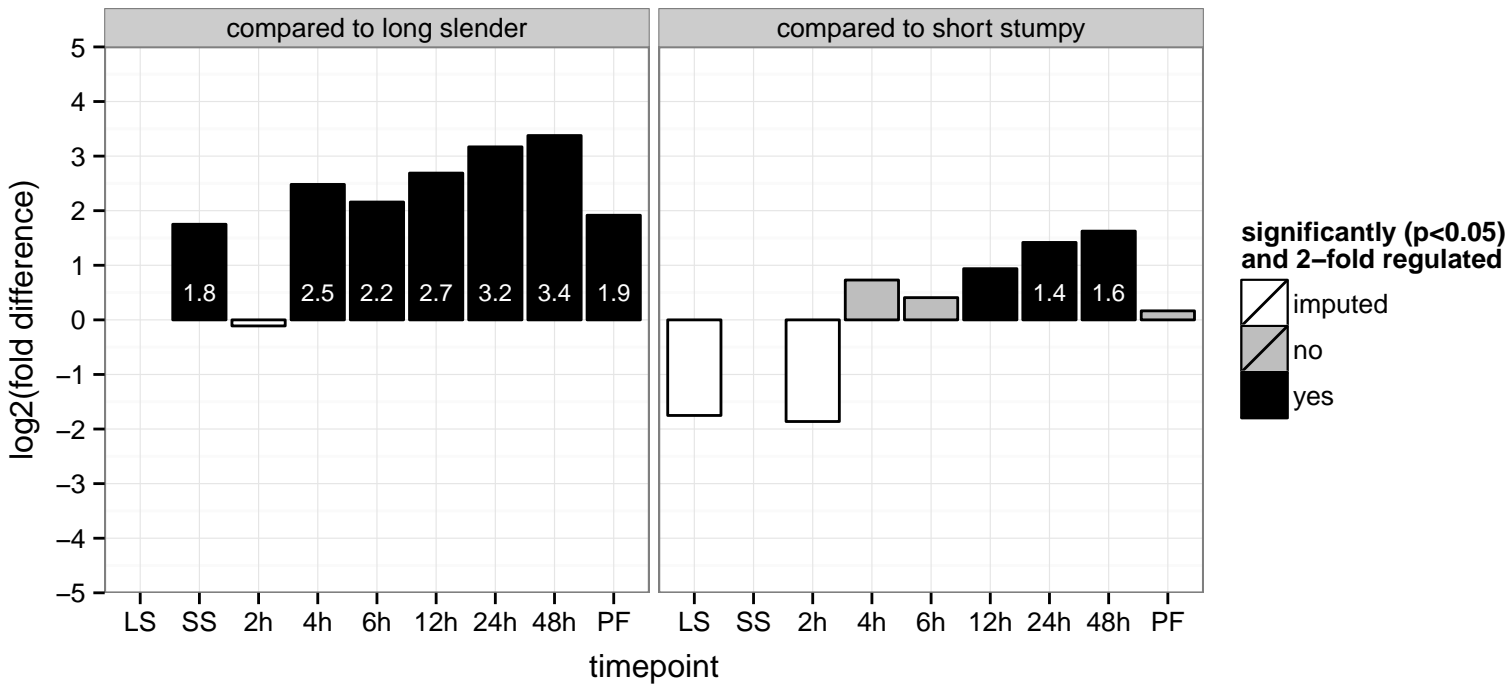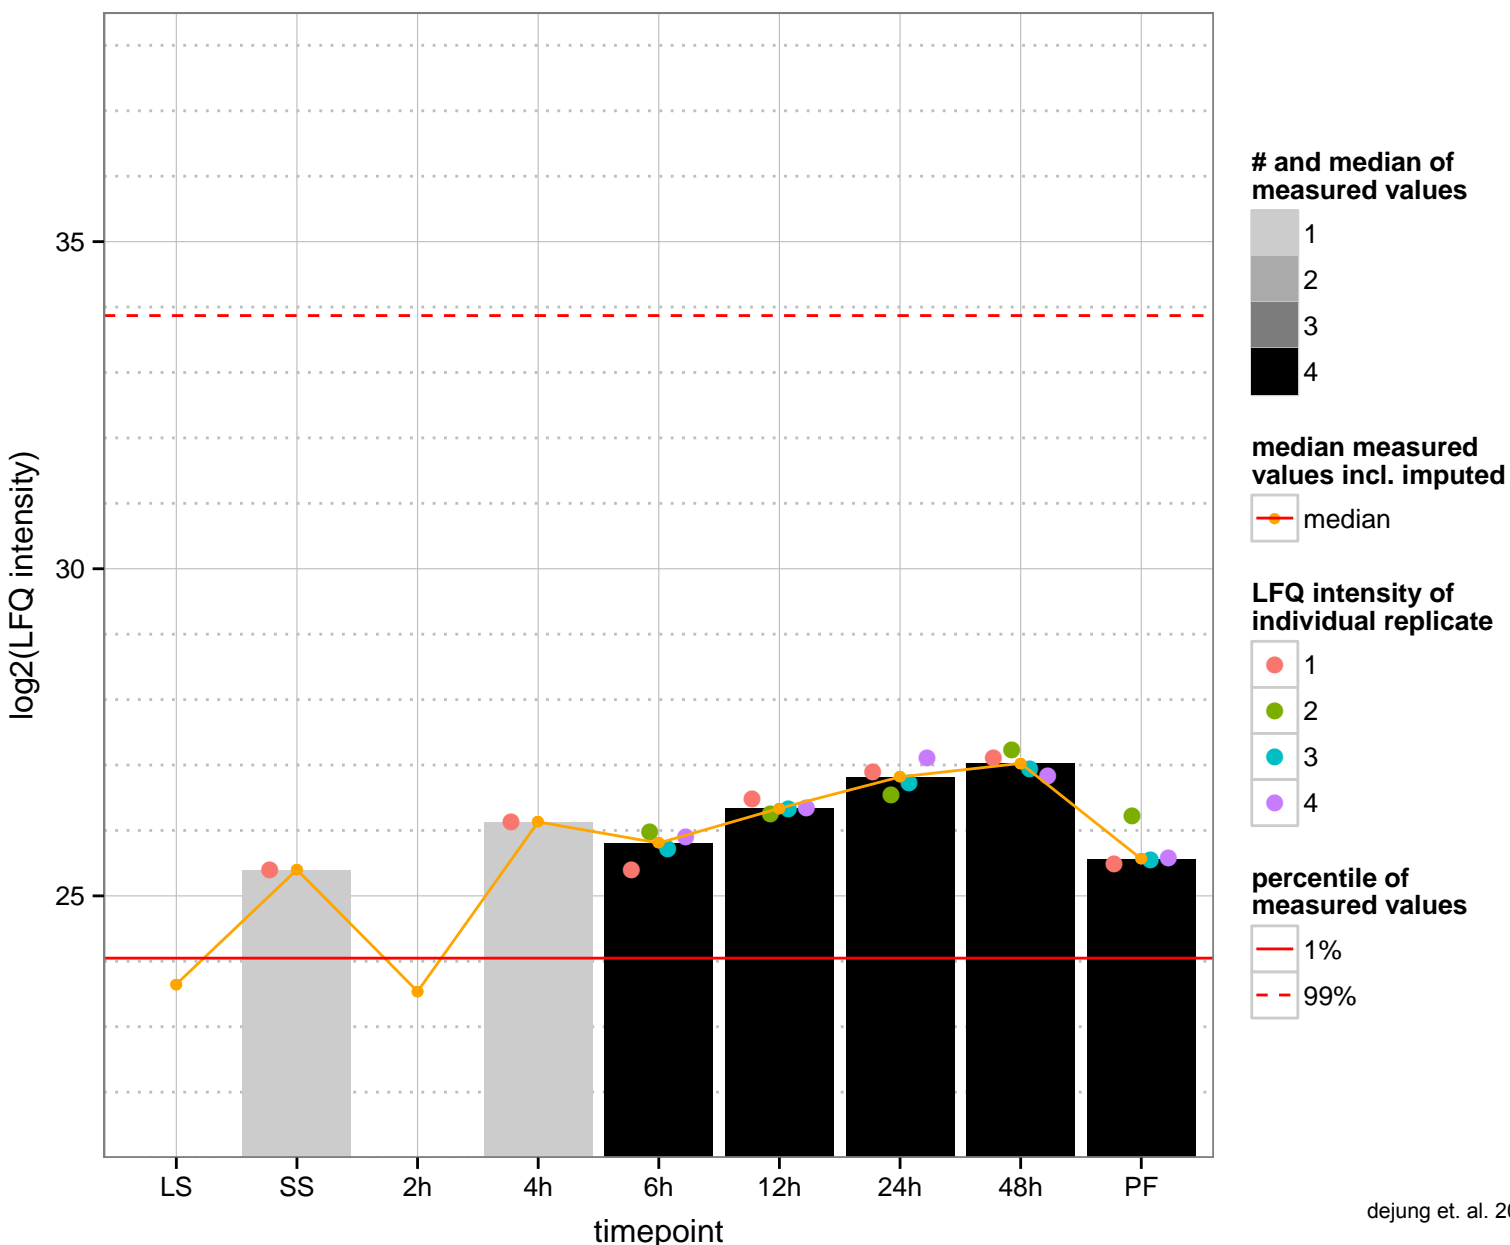

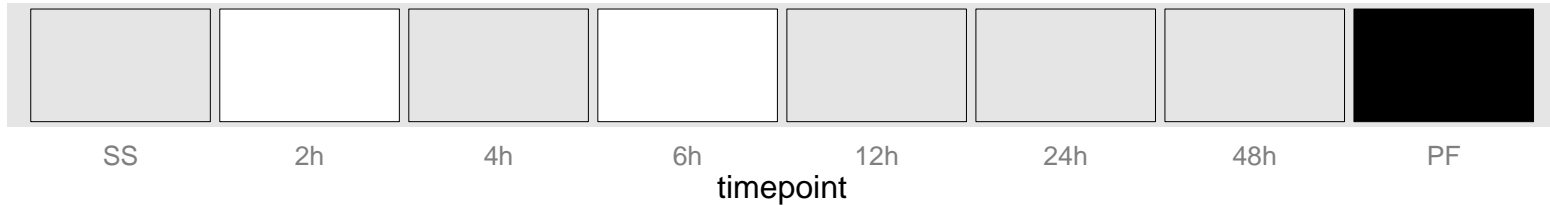

**regulated**  **not regulated**  **significant down**  **significant up**

retrotransposon hot spot (RHS) protein, putative, retrotransposon hot spot protein 5 (RHS5)  
 Tb11.v5.0567;Tb927.6.140  
 AGOF: null  
 AGOC: null  
 AGOP: null  
 PGO: null  
 PGOC: null  
 PGOP: null

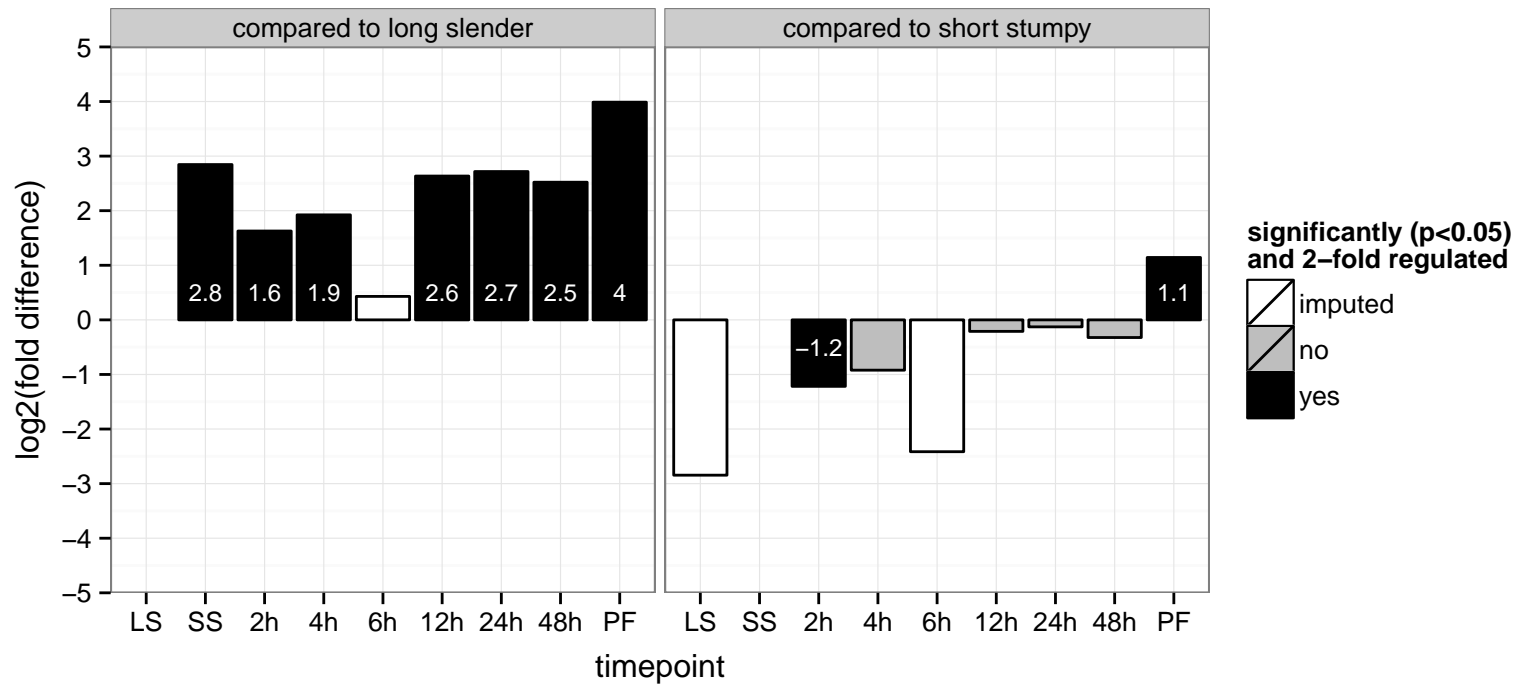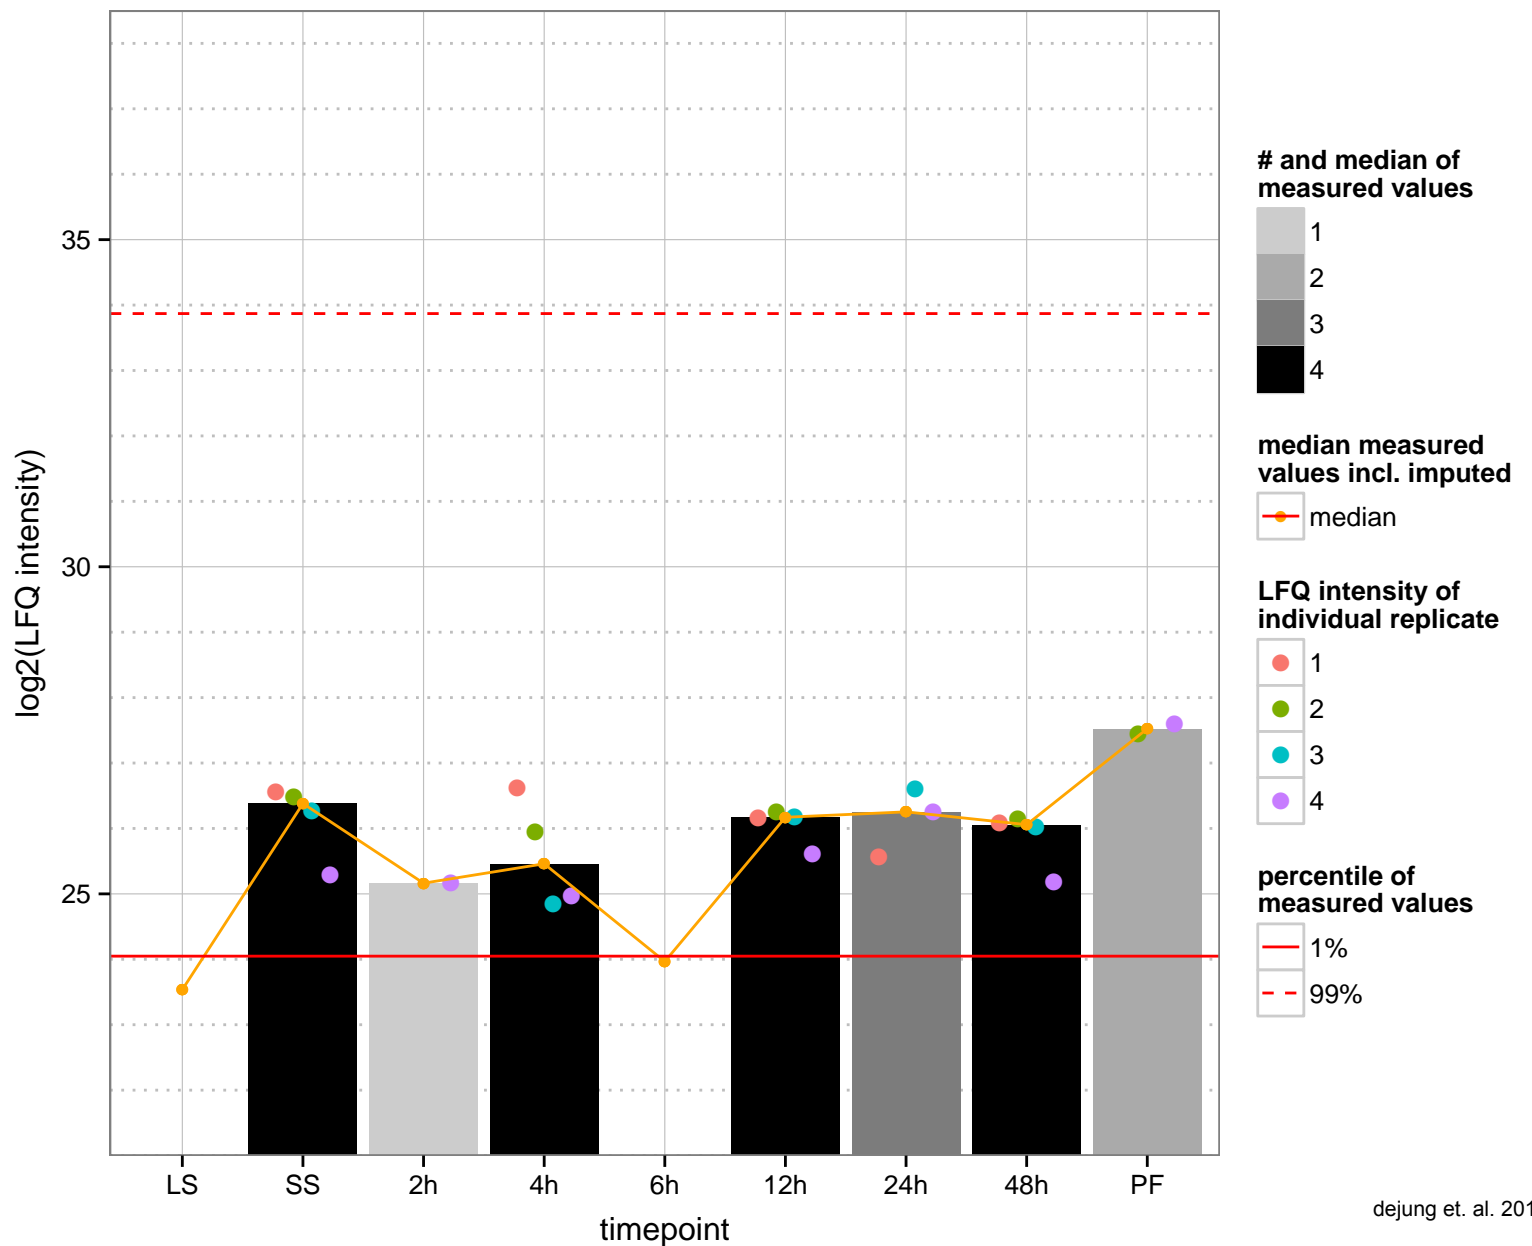

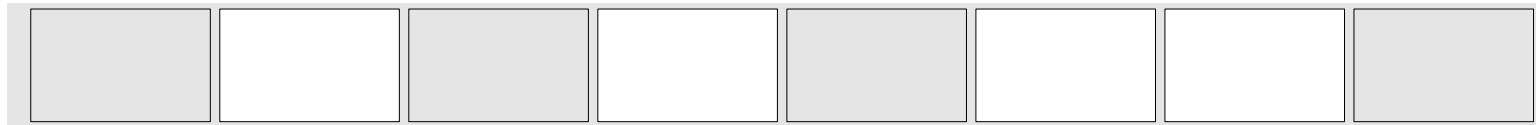

SS

2h

4h

6h

12h

24h

48h

PF

timepoint

**regulated**



not regulated



significant down



significant up

hypothetical protein, conserved  
 Tb927.11.12500  
 AGOF: null  
 AGOC: null  
 AGOP: null  
 PGOF: null  
 PGOC: null  
 PGOP: null

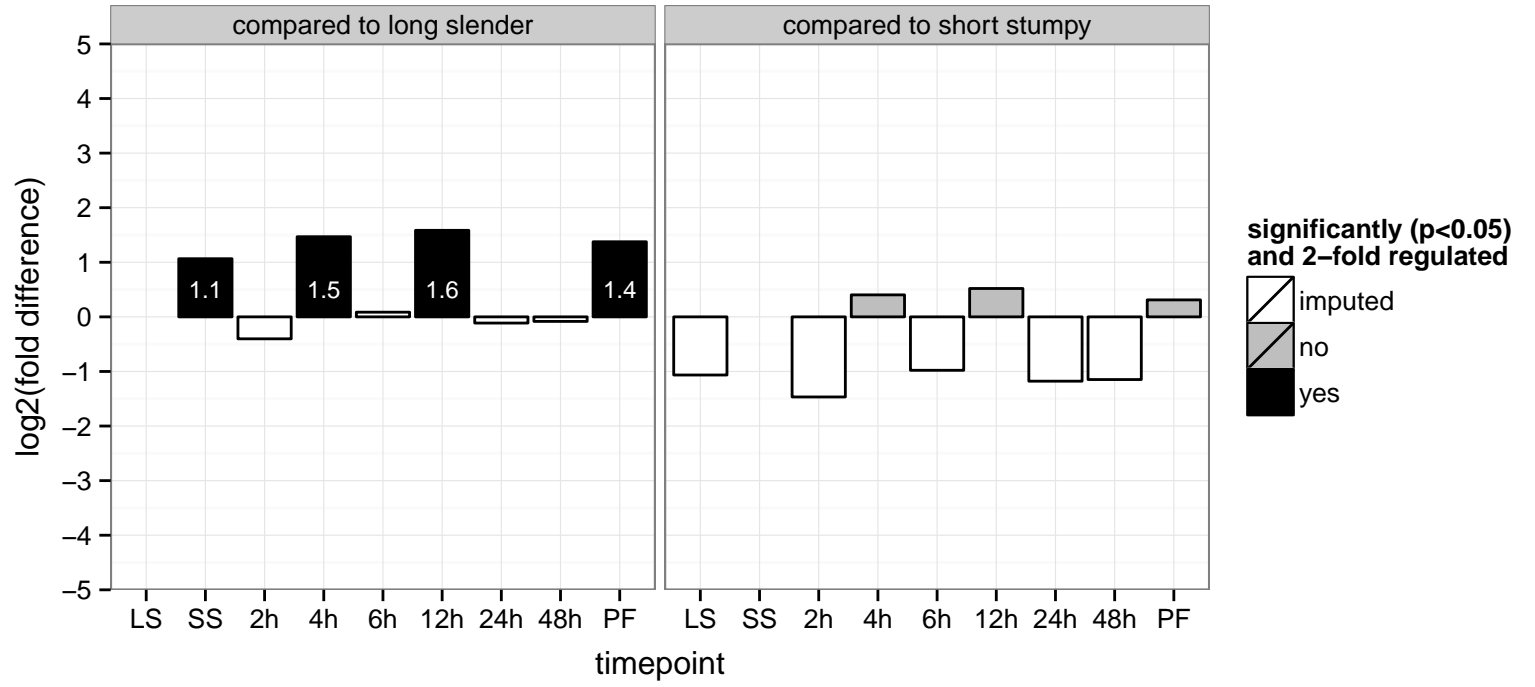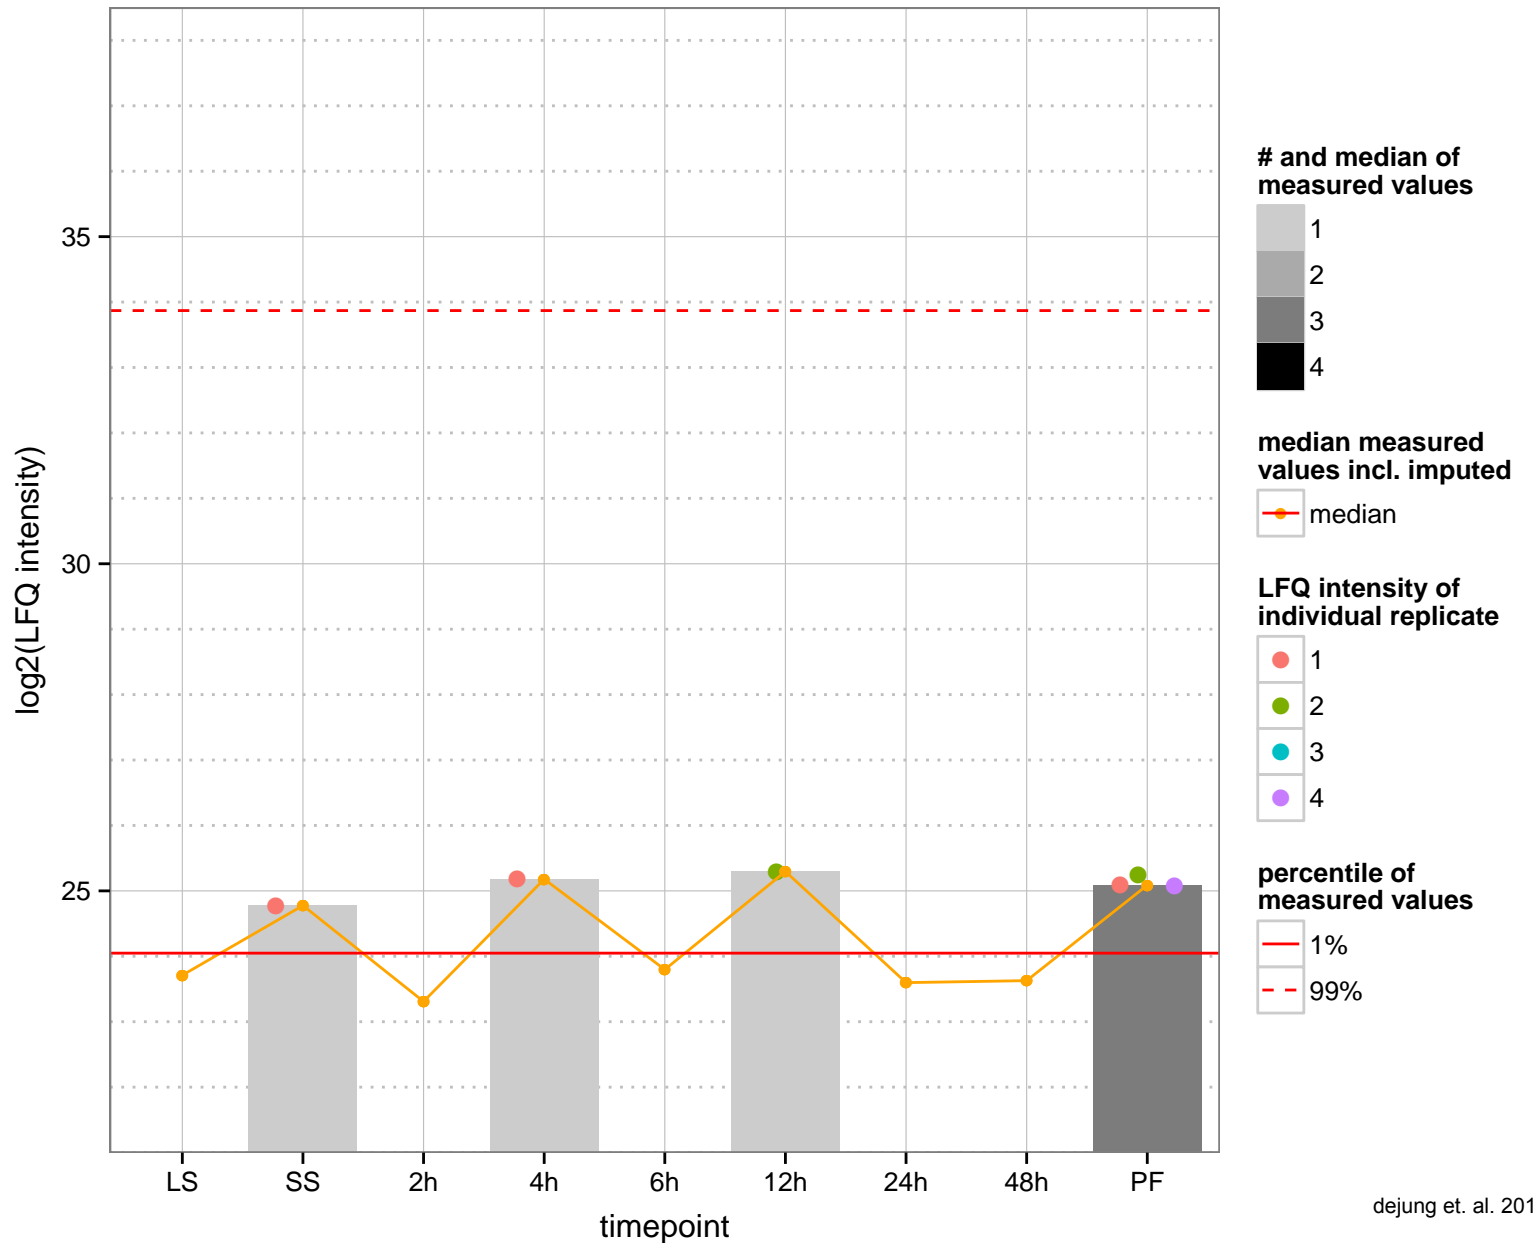

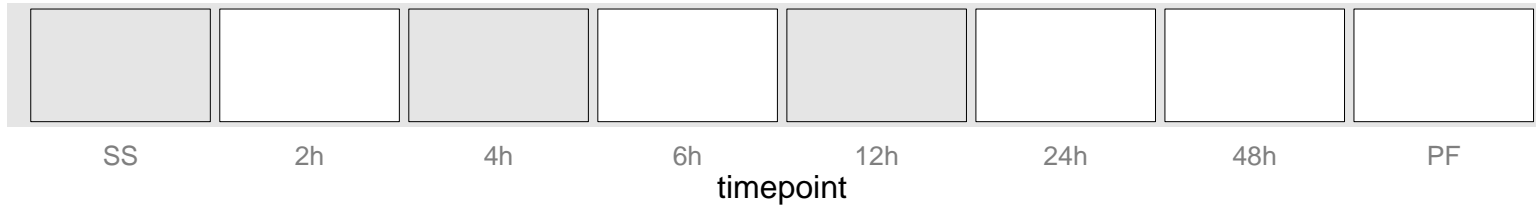

**regulated**  **not regulated**  **significant down**  **significant up**

hypothetical protein, chrIX additional, unordered contigs  
 Tb927.9.15850;Tb09.v4.01110;Tb09.v4.0014  
 AGOF: null  
 AGOC: null  
 AGOP: null  
 PGO: null  
 PGOC: null  
 PGOP: null

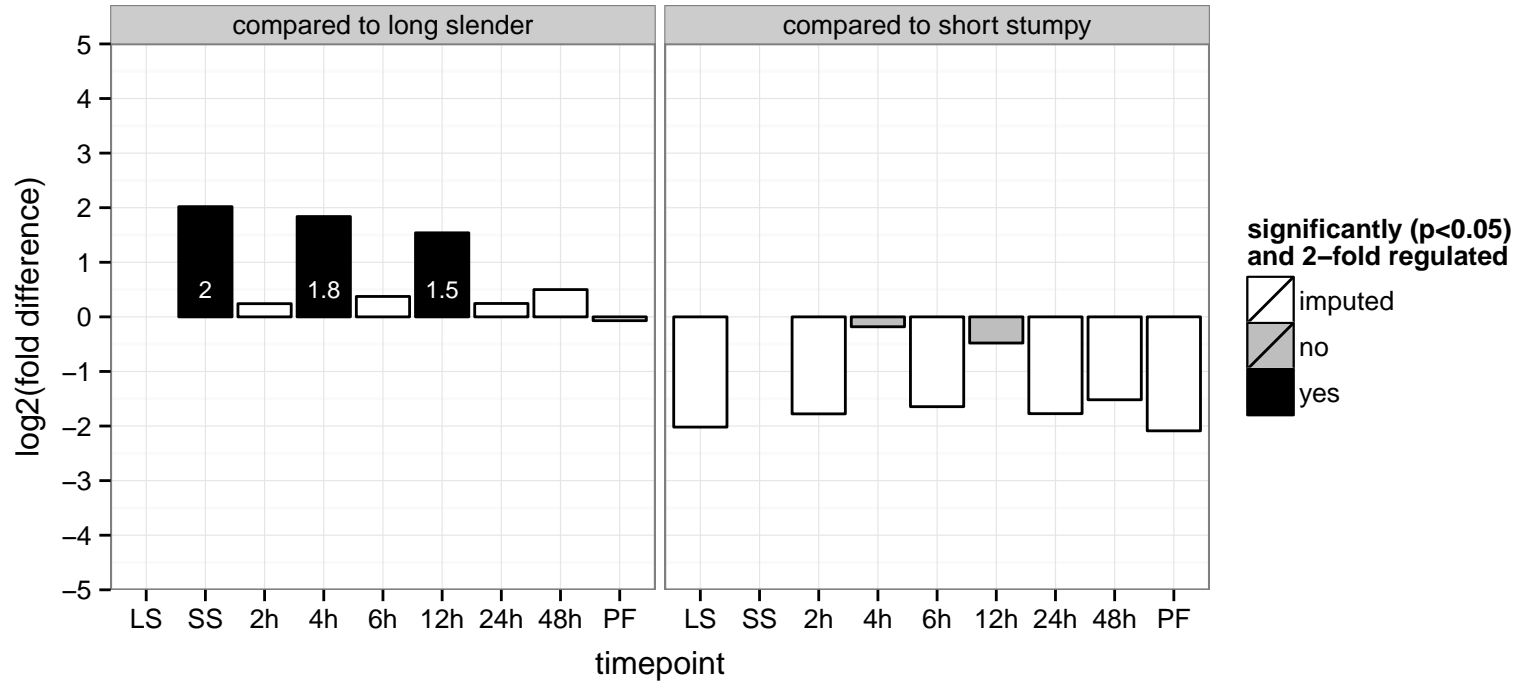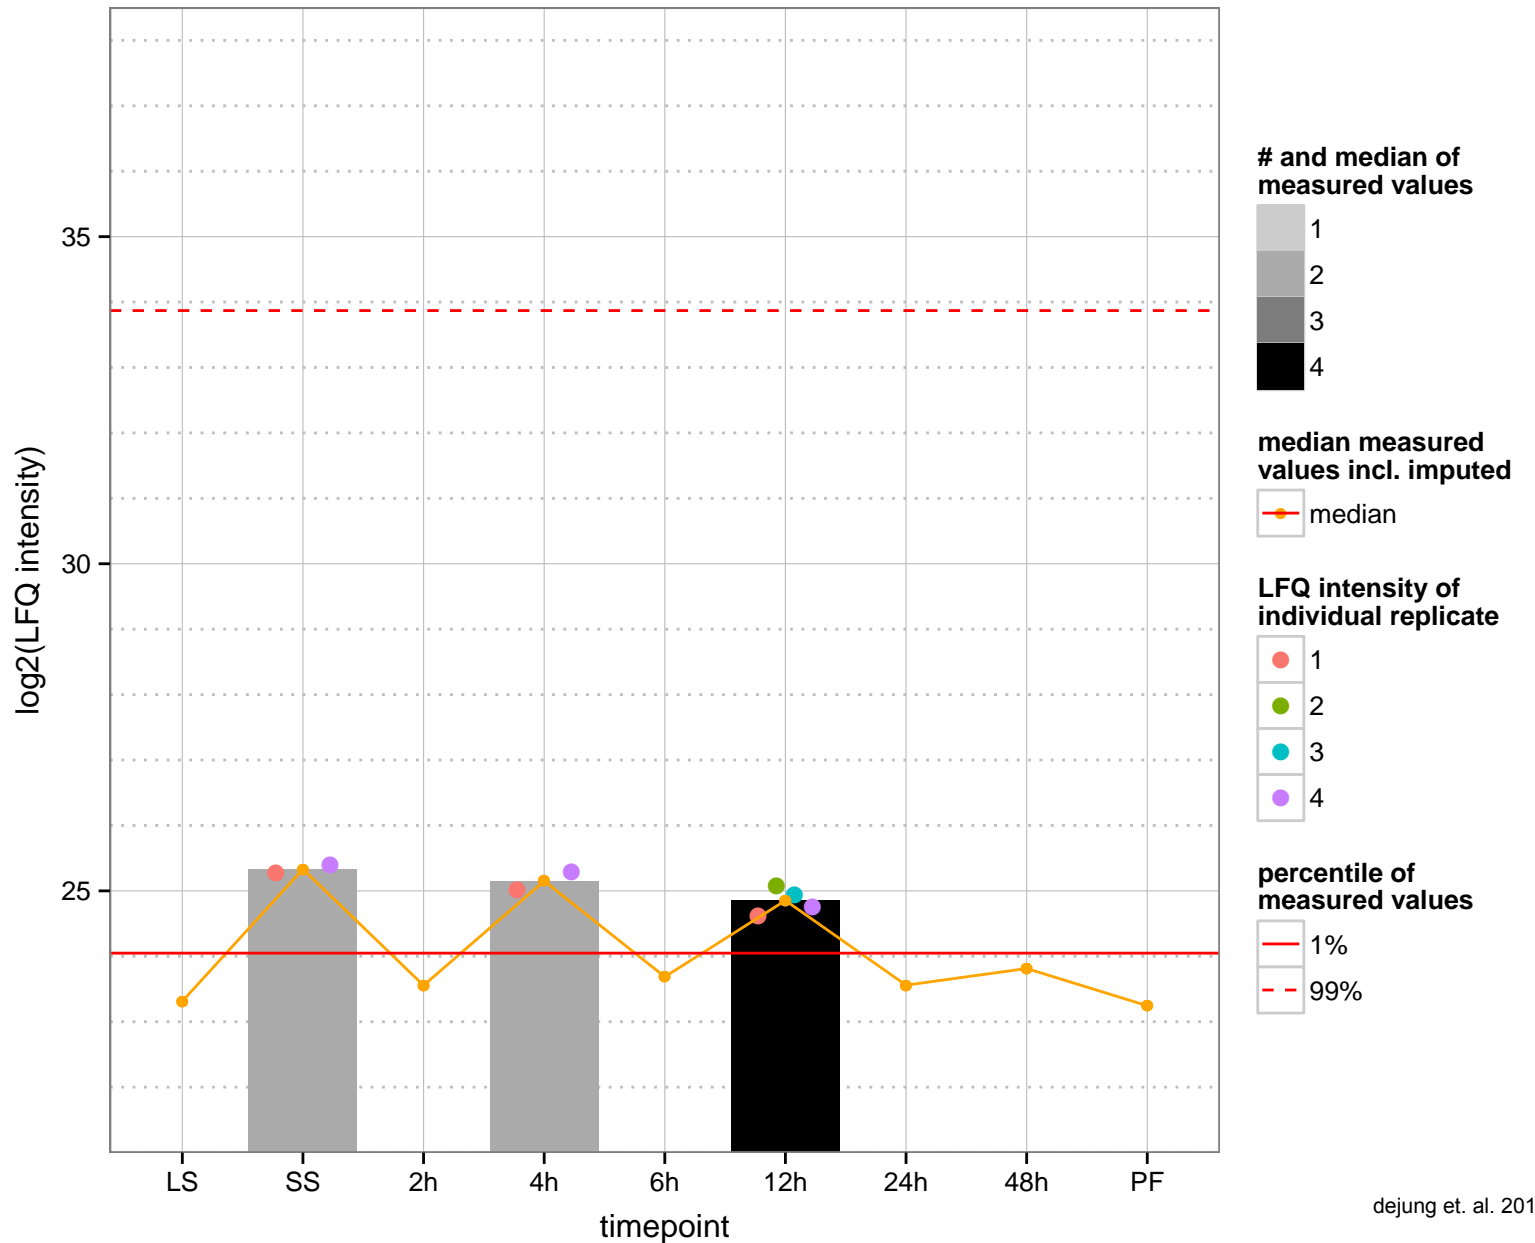

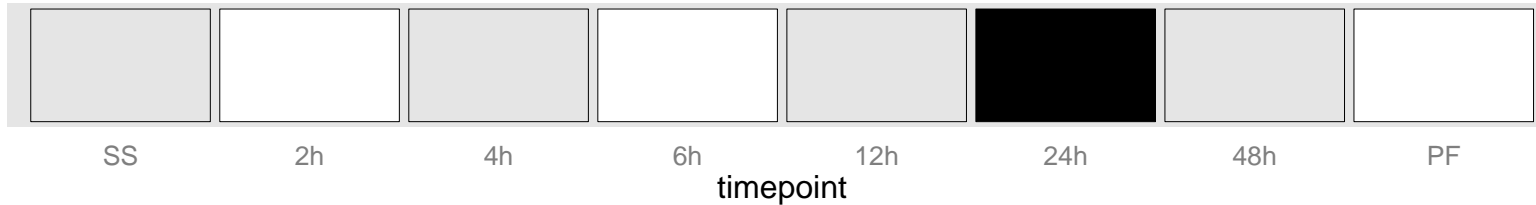

**regulated**  not regulated  significant down  significant up



hypothetical protein, conserved  
 Tb927.11.13570  
 AGOF: null  
 AGOC: null  
 AGOP: null  
 PGO: null  
 PGOC: null  
 PGOP: null

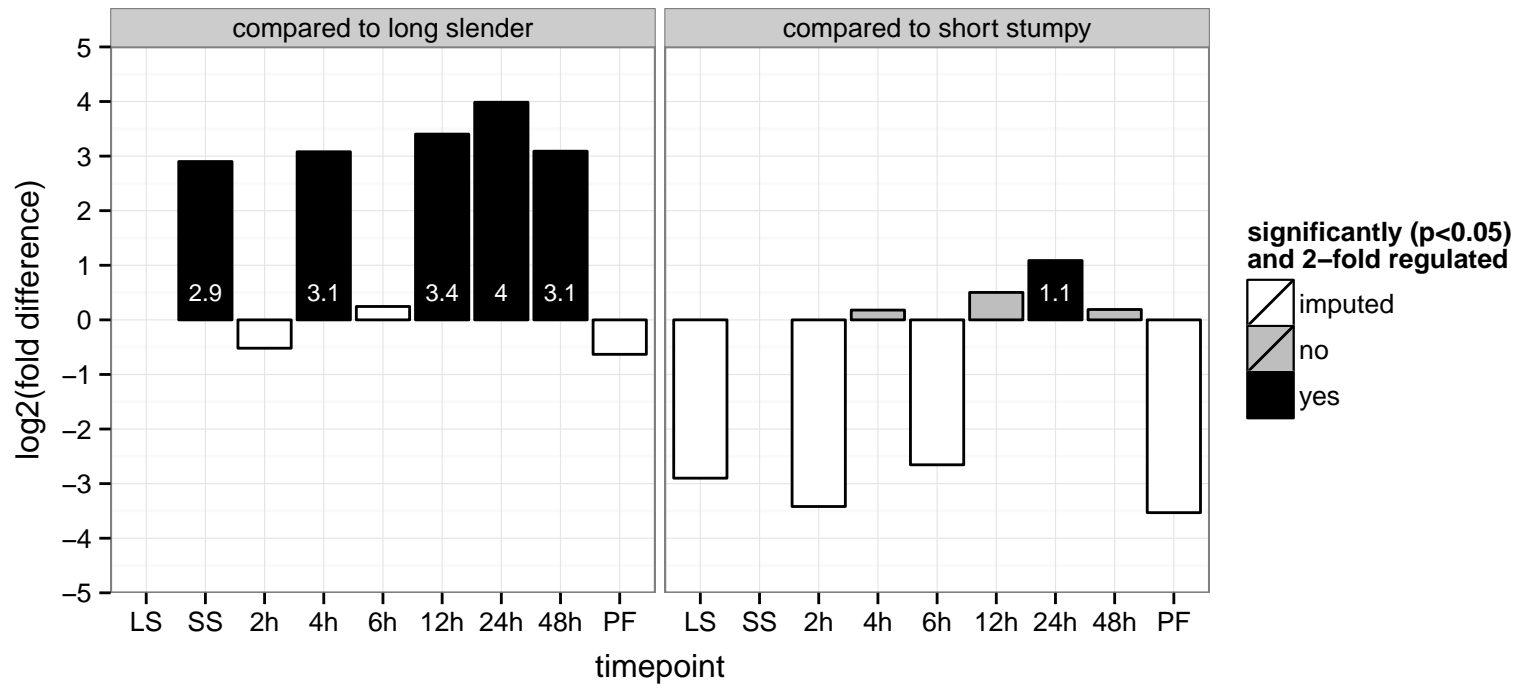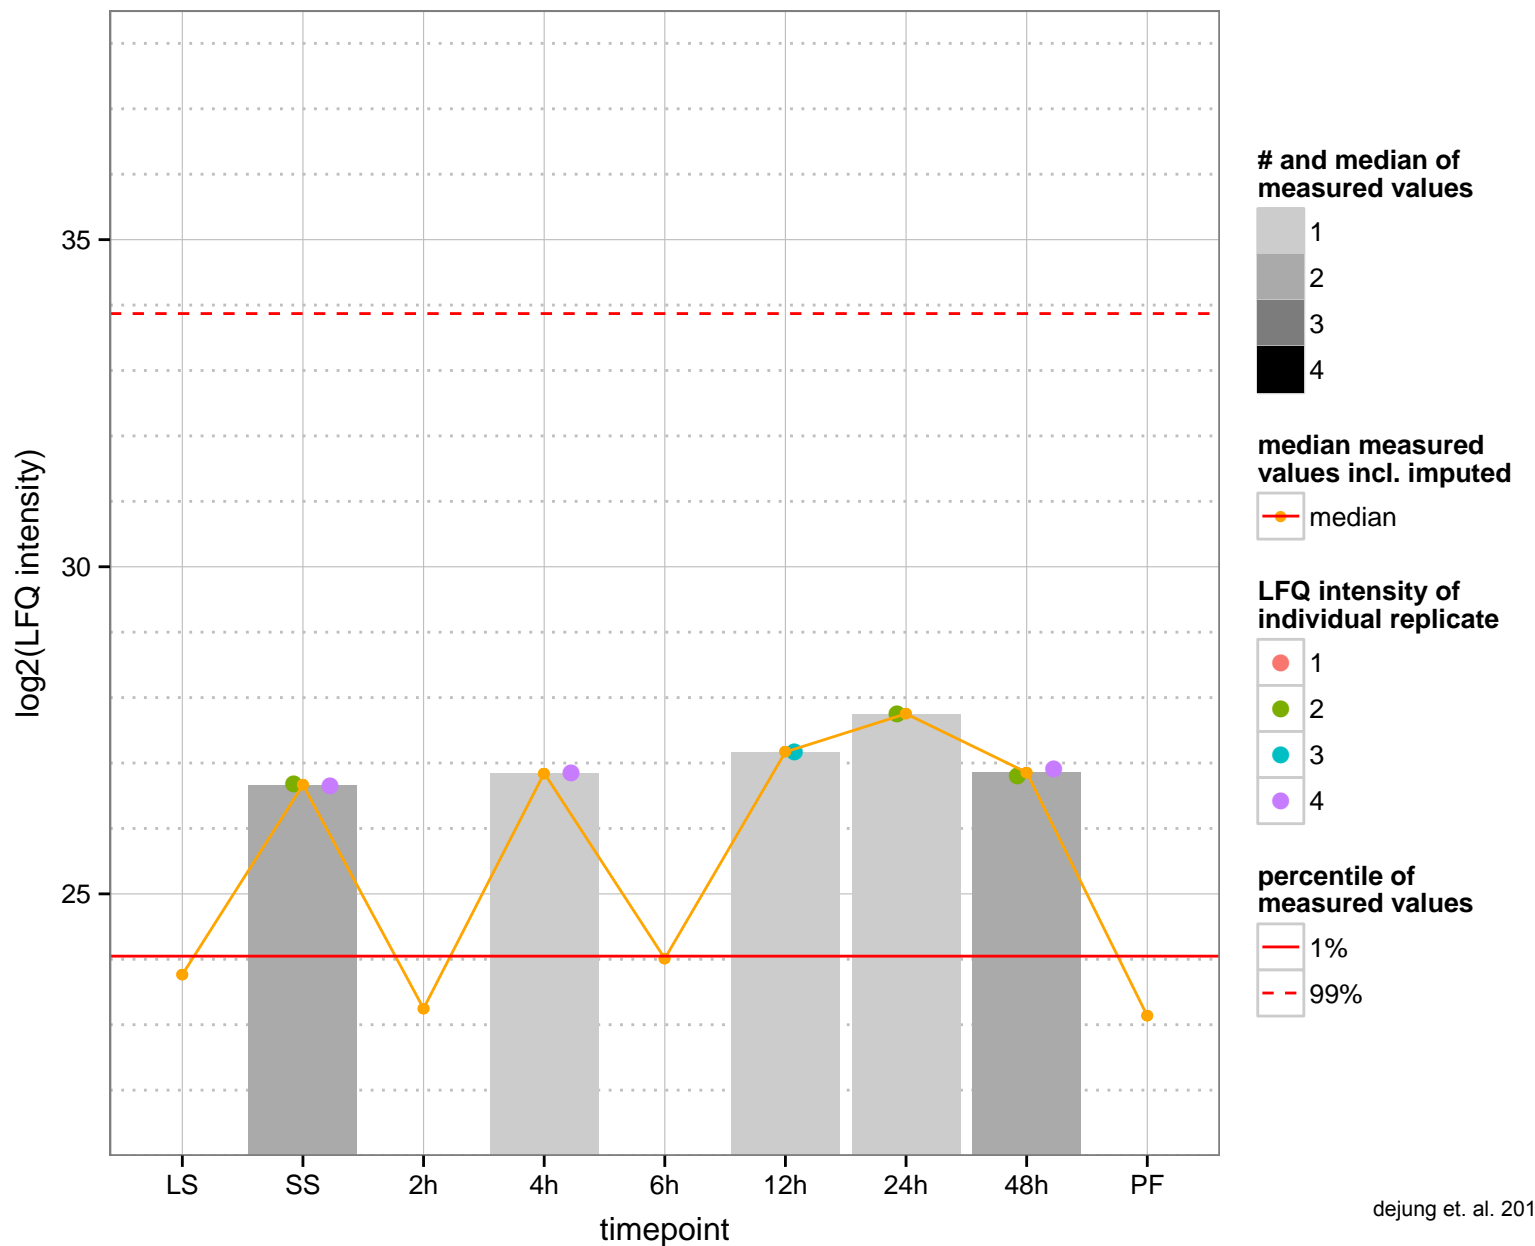

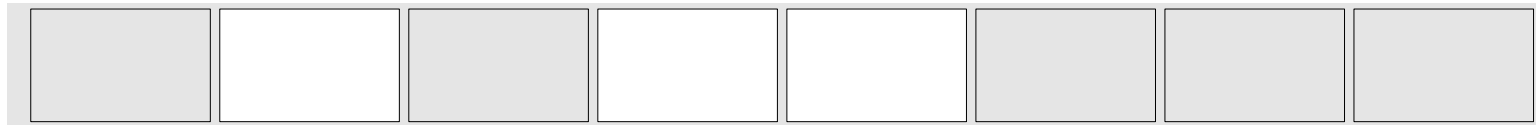

SS

2h

4h

6h

12h

24h

48h

PF

timepoint

**regulated**



not regulated



significant down



significant up

hypothetical protein, conserved  
 Tb927.11.2010  
 AGOF: null  
 AGOC: mitochondrion  
 AGOP: null  
 PGO: null  
 PGOC: null  
 PGOP: null

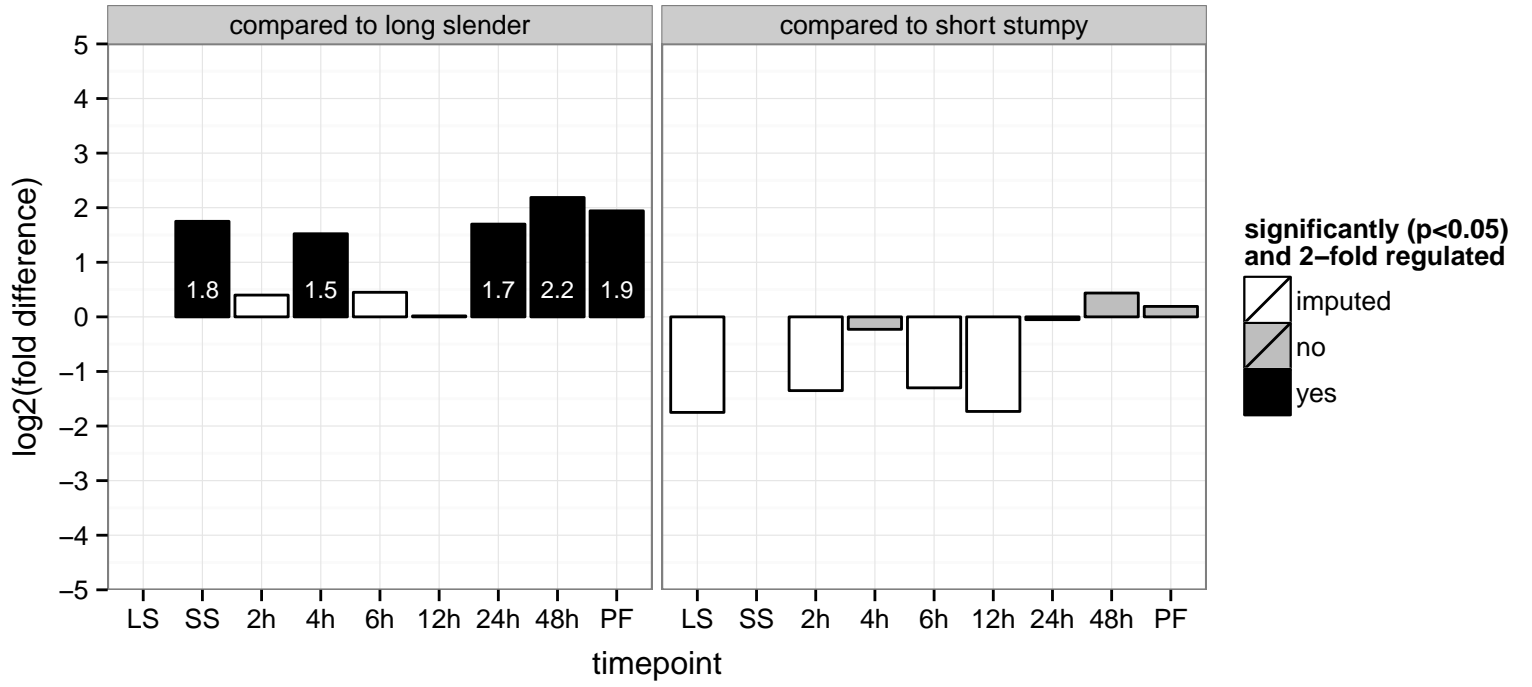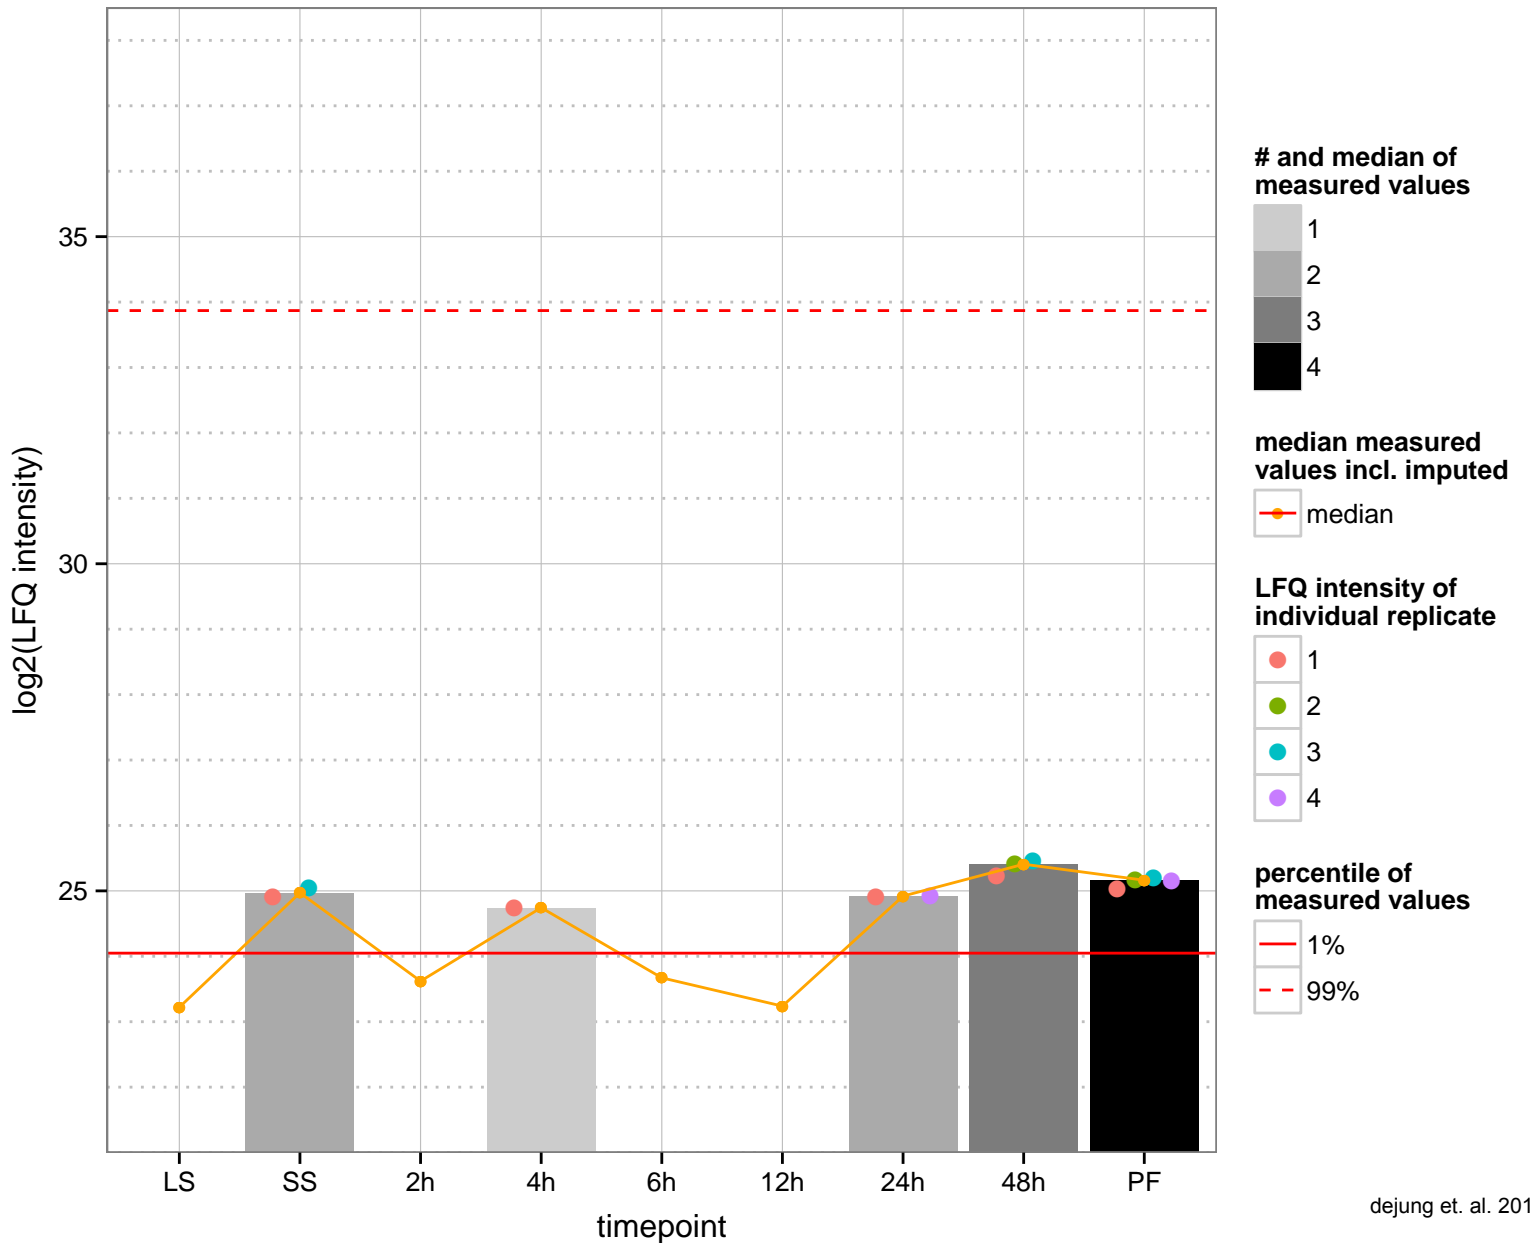

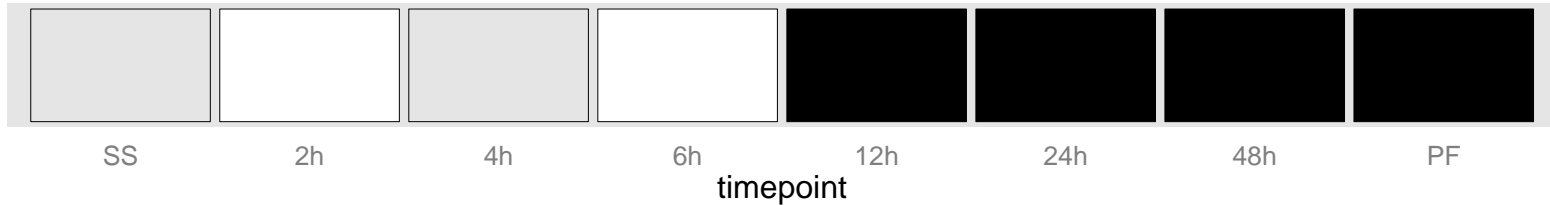

**regulated**  **not regulated**  **significant down**  **significant up**

cyclin 1, serine peptidase family S51, peptidase E, putative  
 Tb927.11.12610  
 AGOF: null  
 AGOC: null  
 AGOP: null  
 PGO: serine-type peptidase activity  
 PGO: null  
 PGO: proteolysis

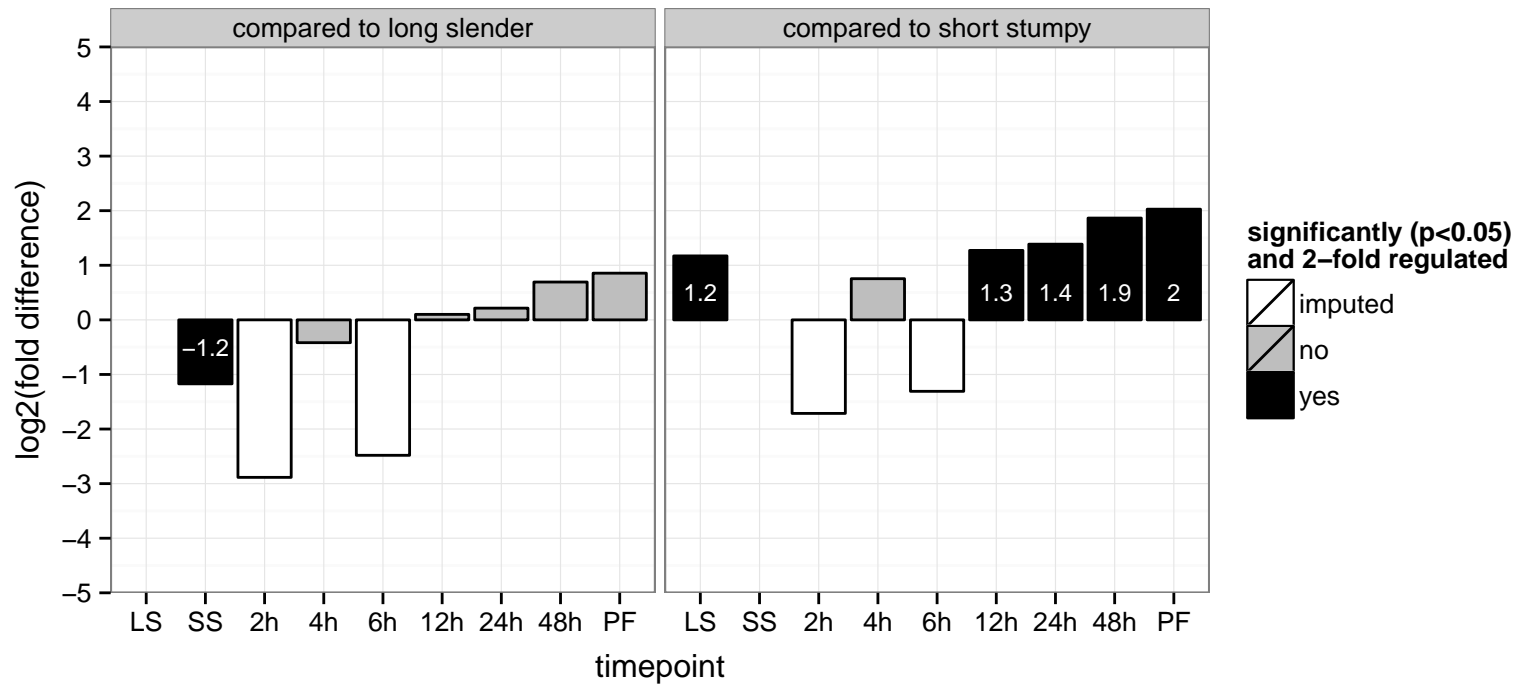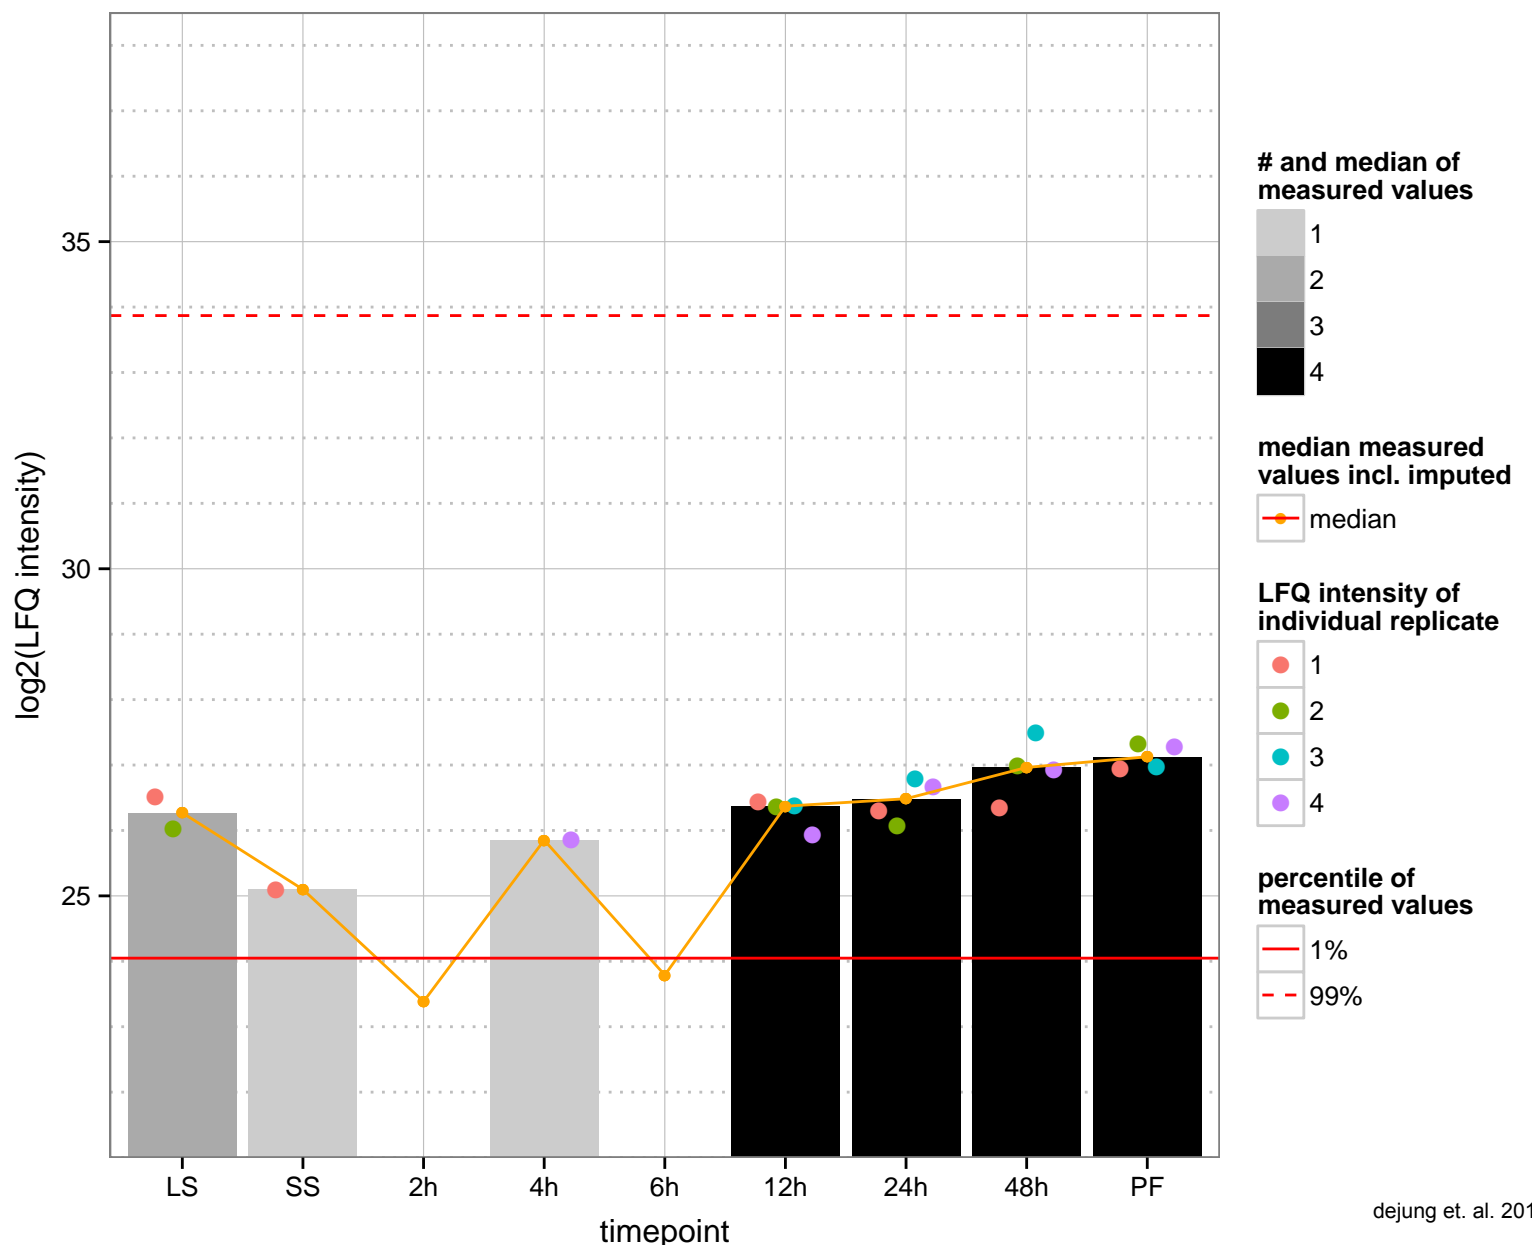

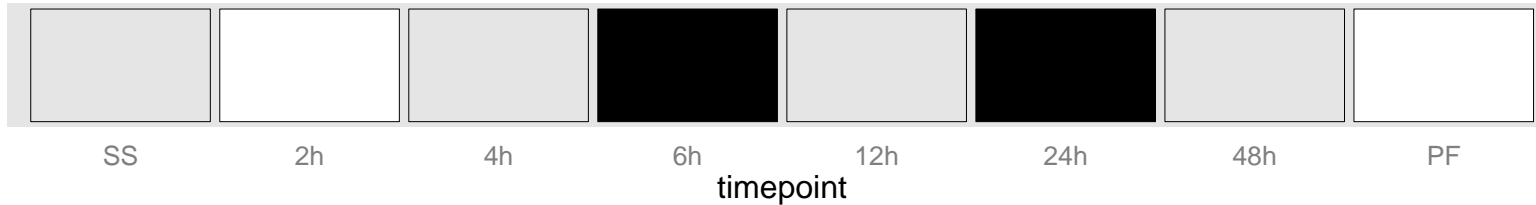

**regulated**  **not regulated**  **significant down**  **significant up**

small GTP-binding protein Rab7, putative (Trab7)

Tb927.8.4620

AGOF: GTP binding, GTPase activity

AGOC: intracellular

AGOP: intracellular protein transport, nucleocytoplasmic transport, small GTPase mediated signal transduction

PGOF: GTP binding, GTPase activity

PGOC: intracellular, membrane

PGOP: GTP catabolic process, intracellular protein transport, nucleocytoplasmic transport, protein transport, signal transduction

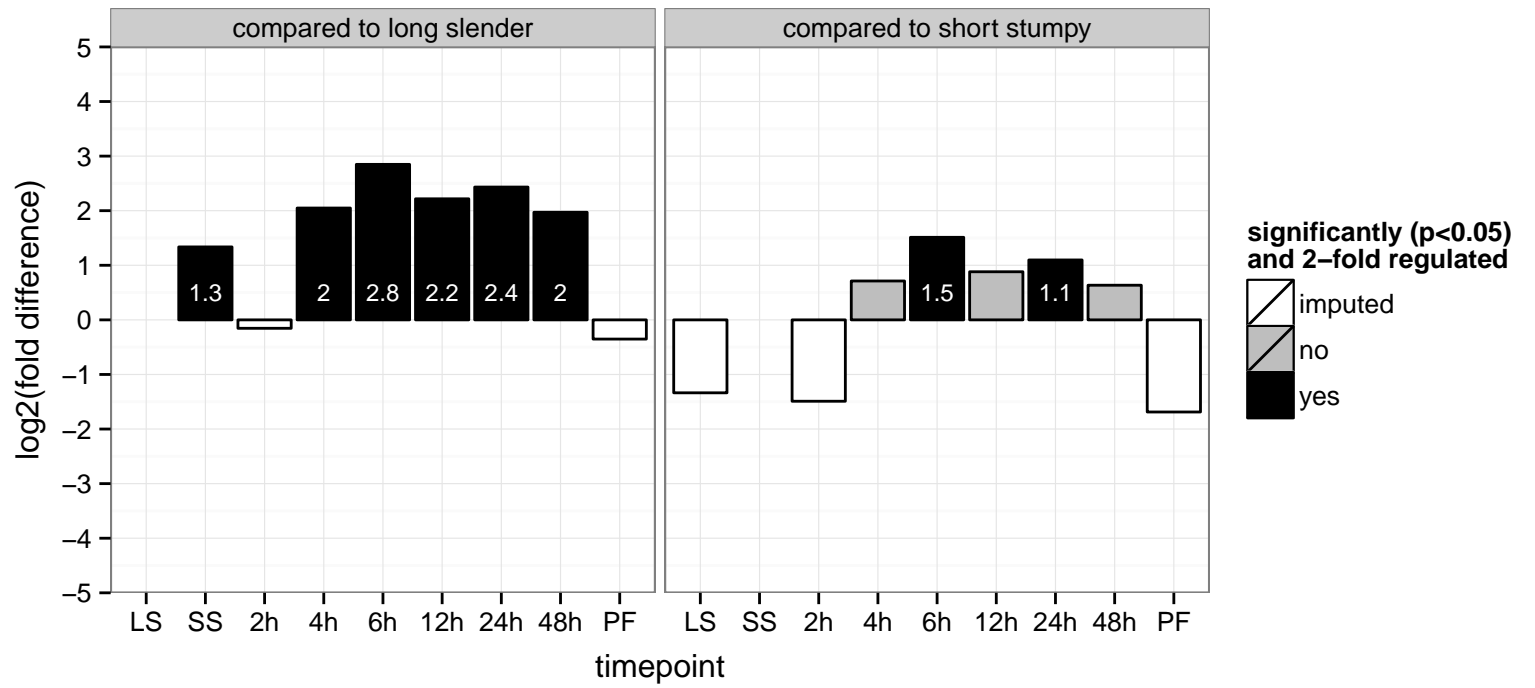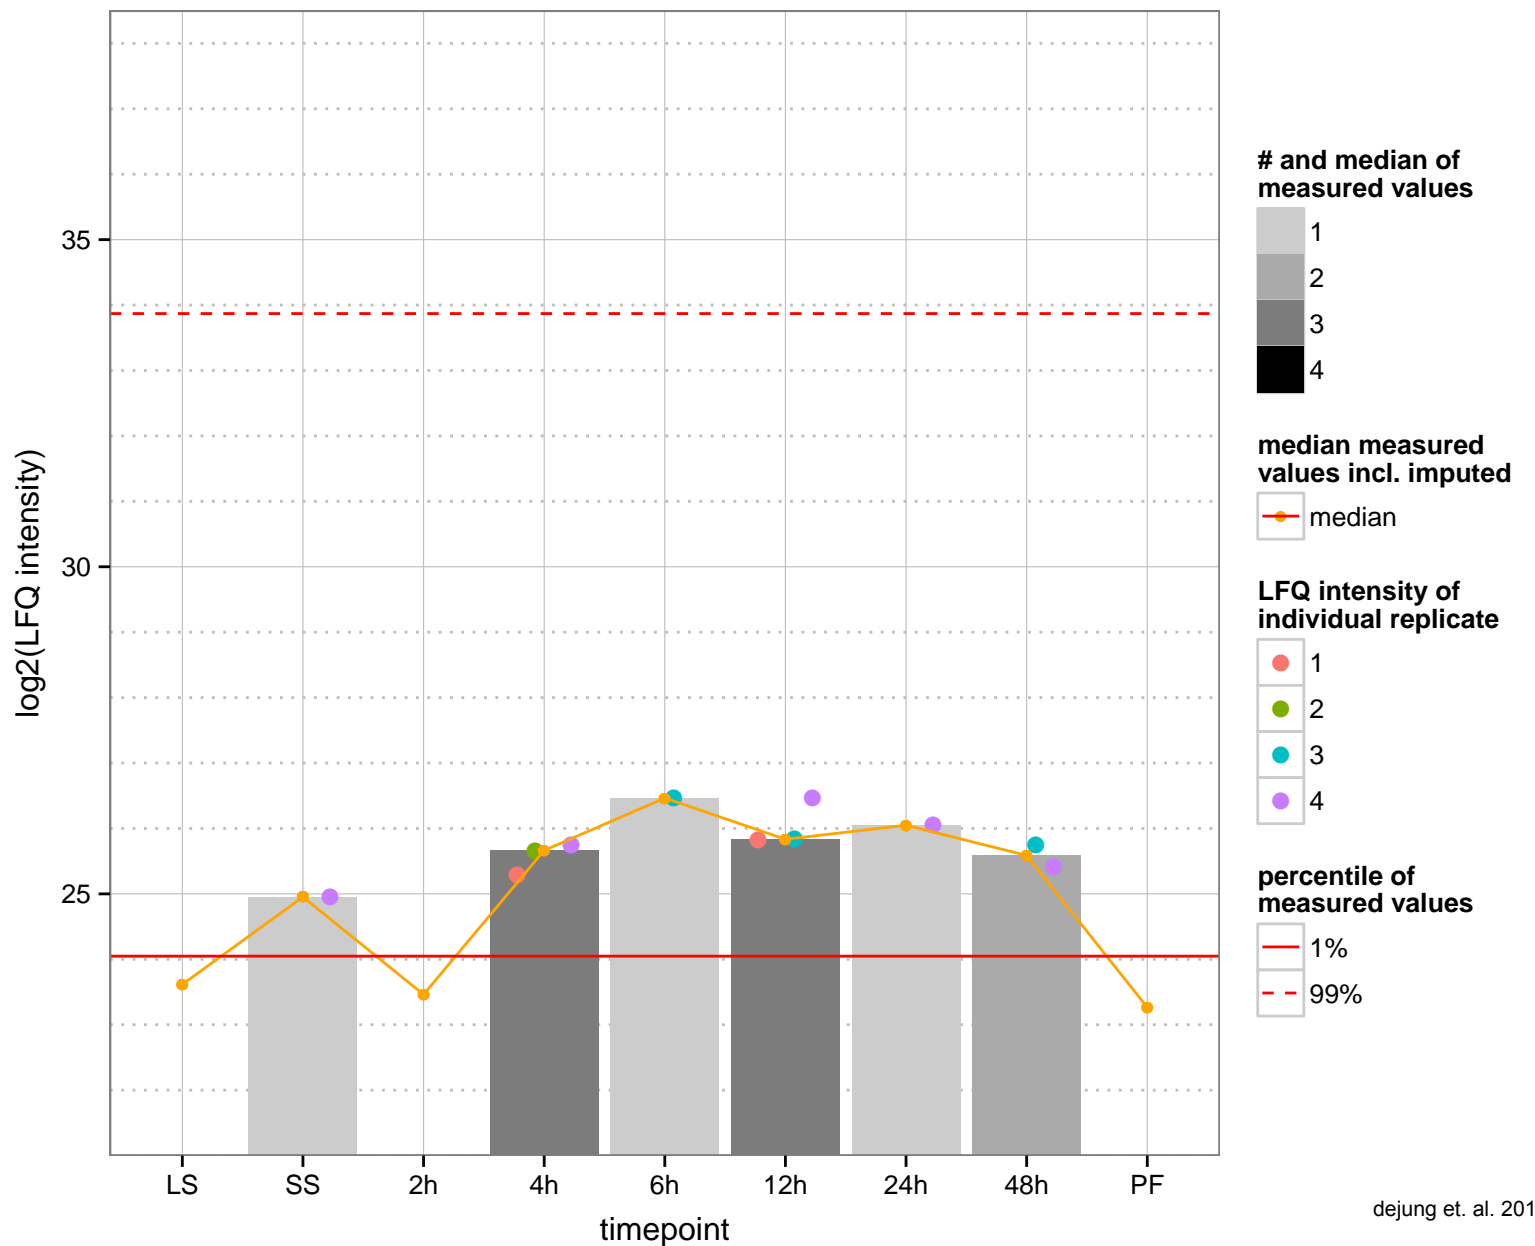

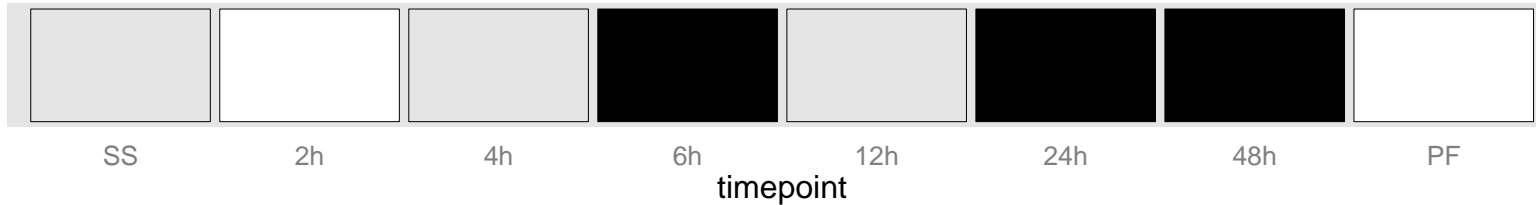

**regulated**  **not regulated**  **significant down**  **significant up**



hypothetical protein, conserved  
 Tb927.10.13980  
 AGOF: voltage-gated potassium channel activity  
 AGOC: membrane, voltage-gated potassium channel complex  
 AGOP: potassium ion transport  
 PGO: protein binding  
 PGO: null  
 PGO: protein homooligomerization

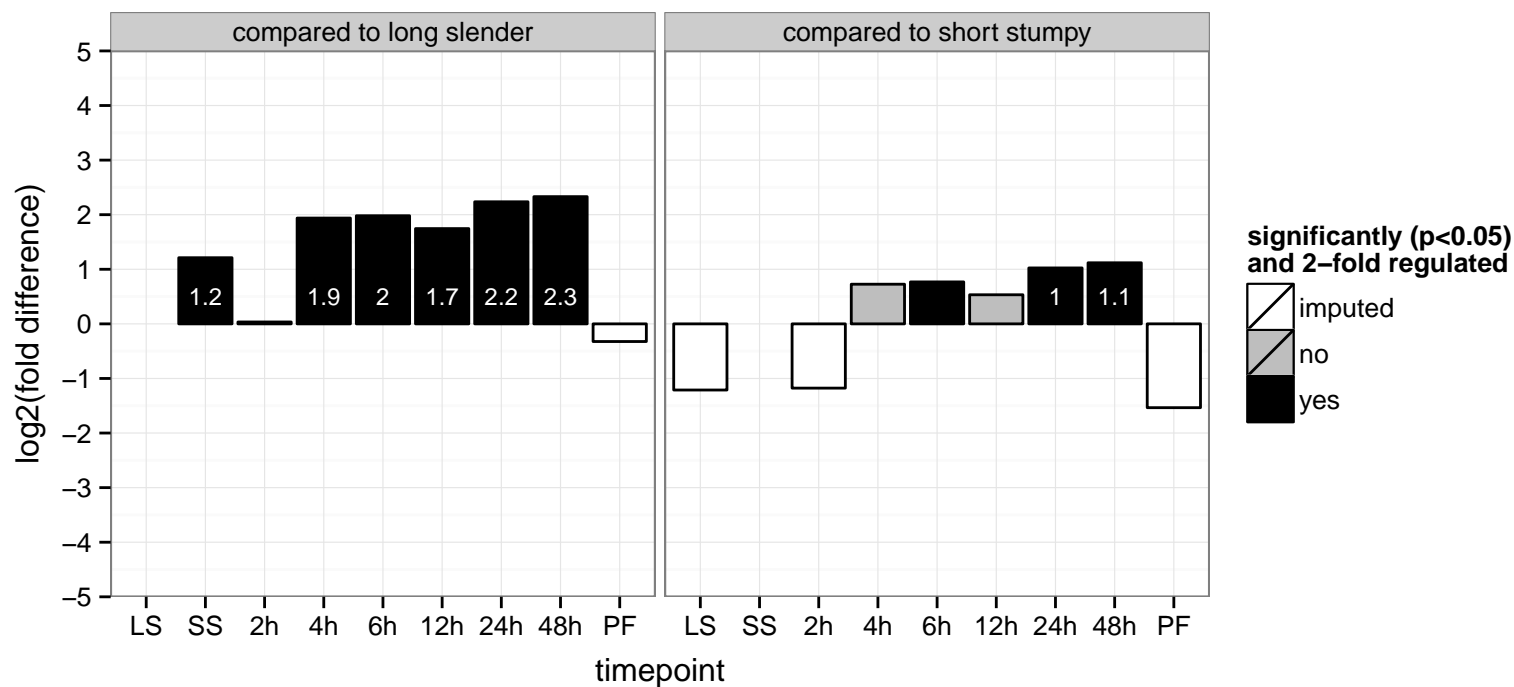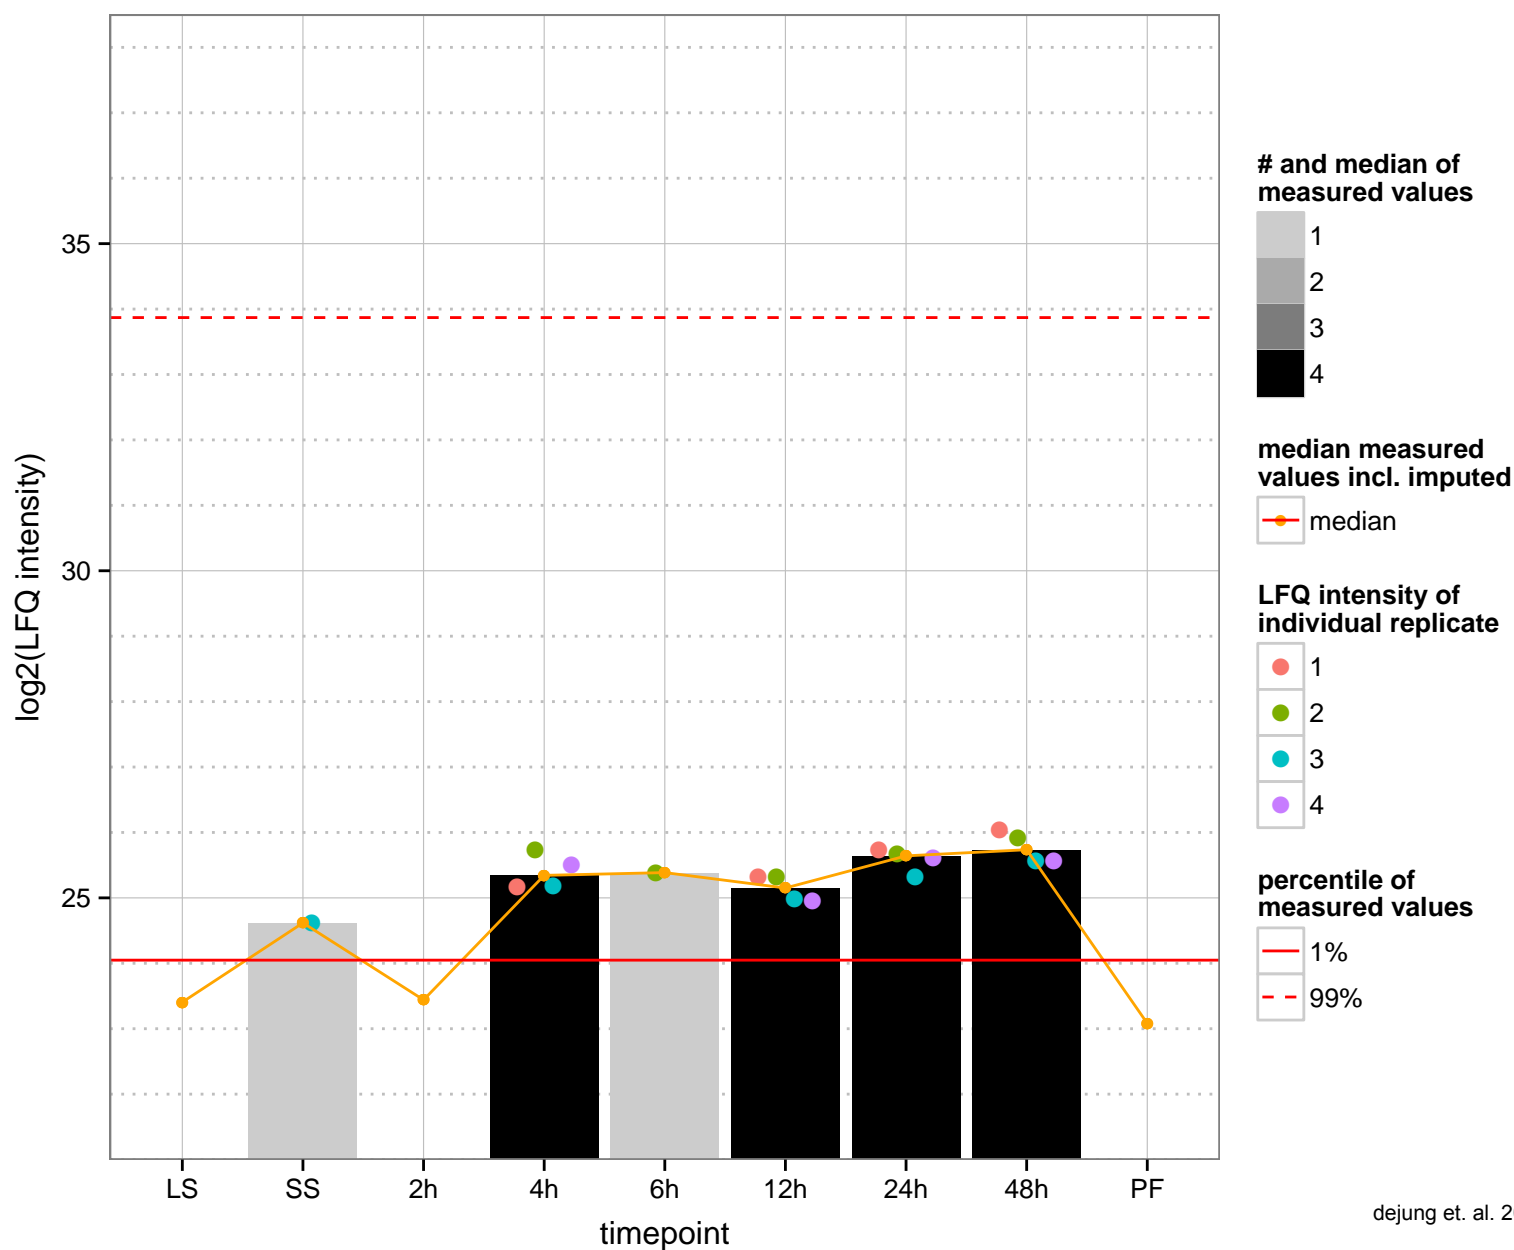

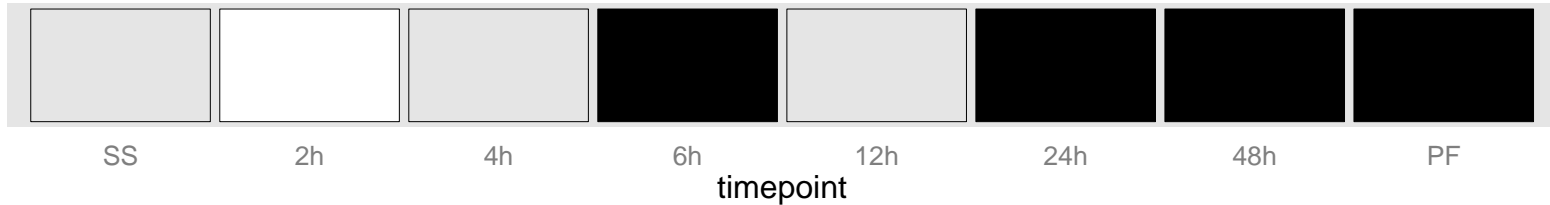

**regulated**  **not regulated**  **significant down**  **significant up**

60S ribosomal protein-like, putative  
 Tb927.7.4550;Tb11.v5.0268  
 AGOF: null, structural constituent of ribosome  
 AGOC: null, intracellular, ribosome  
 AGOP: null, translation  
 PGO: structural constituent of ribosome  
 PGO: intracellular, ribosome  
 PGO: translation

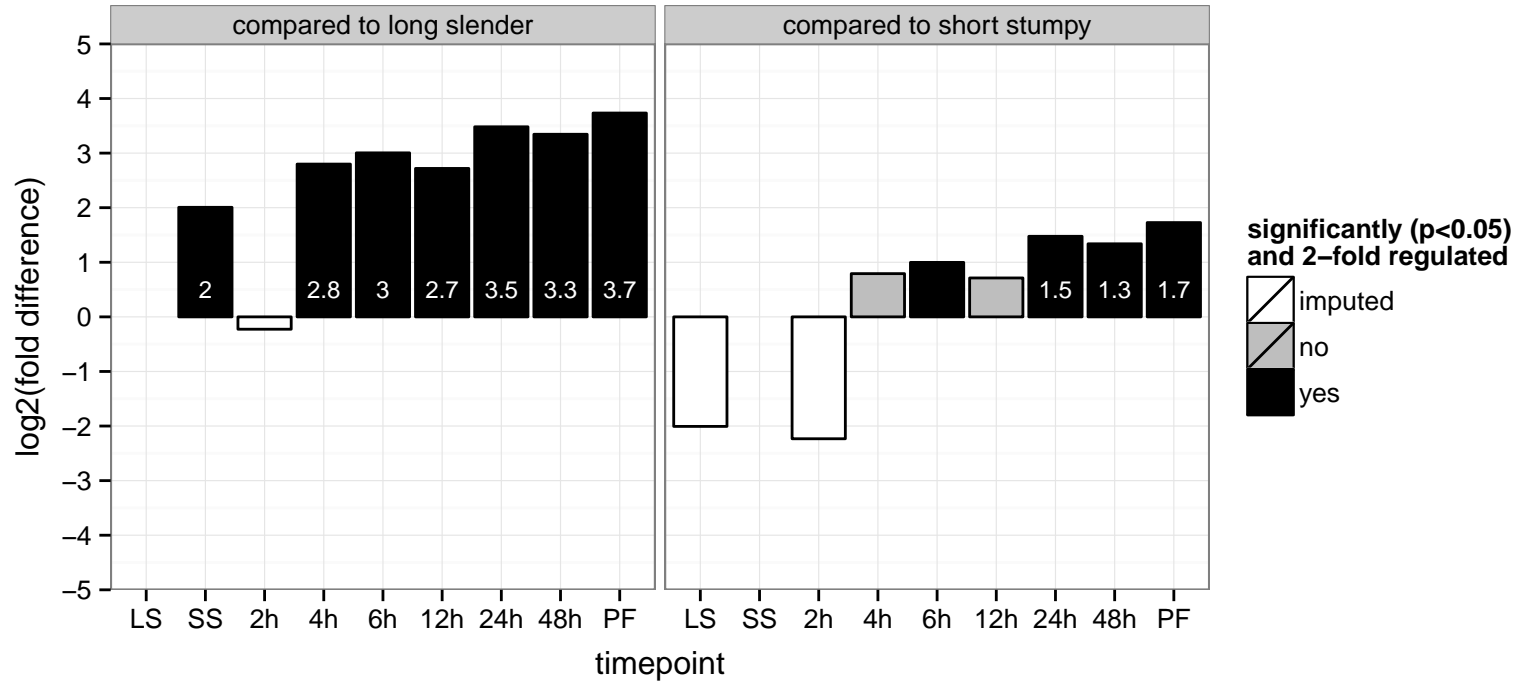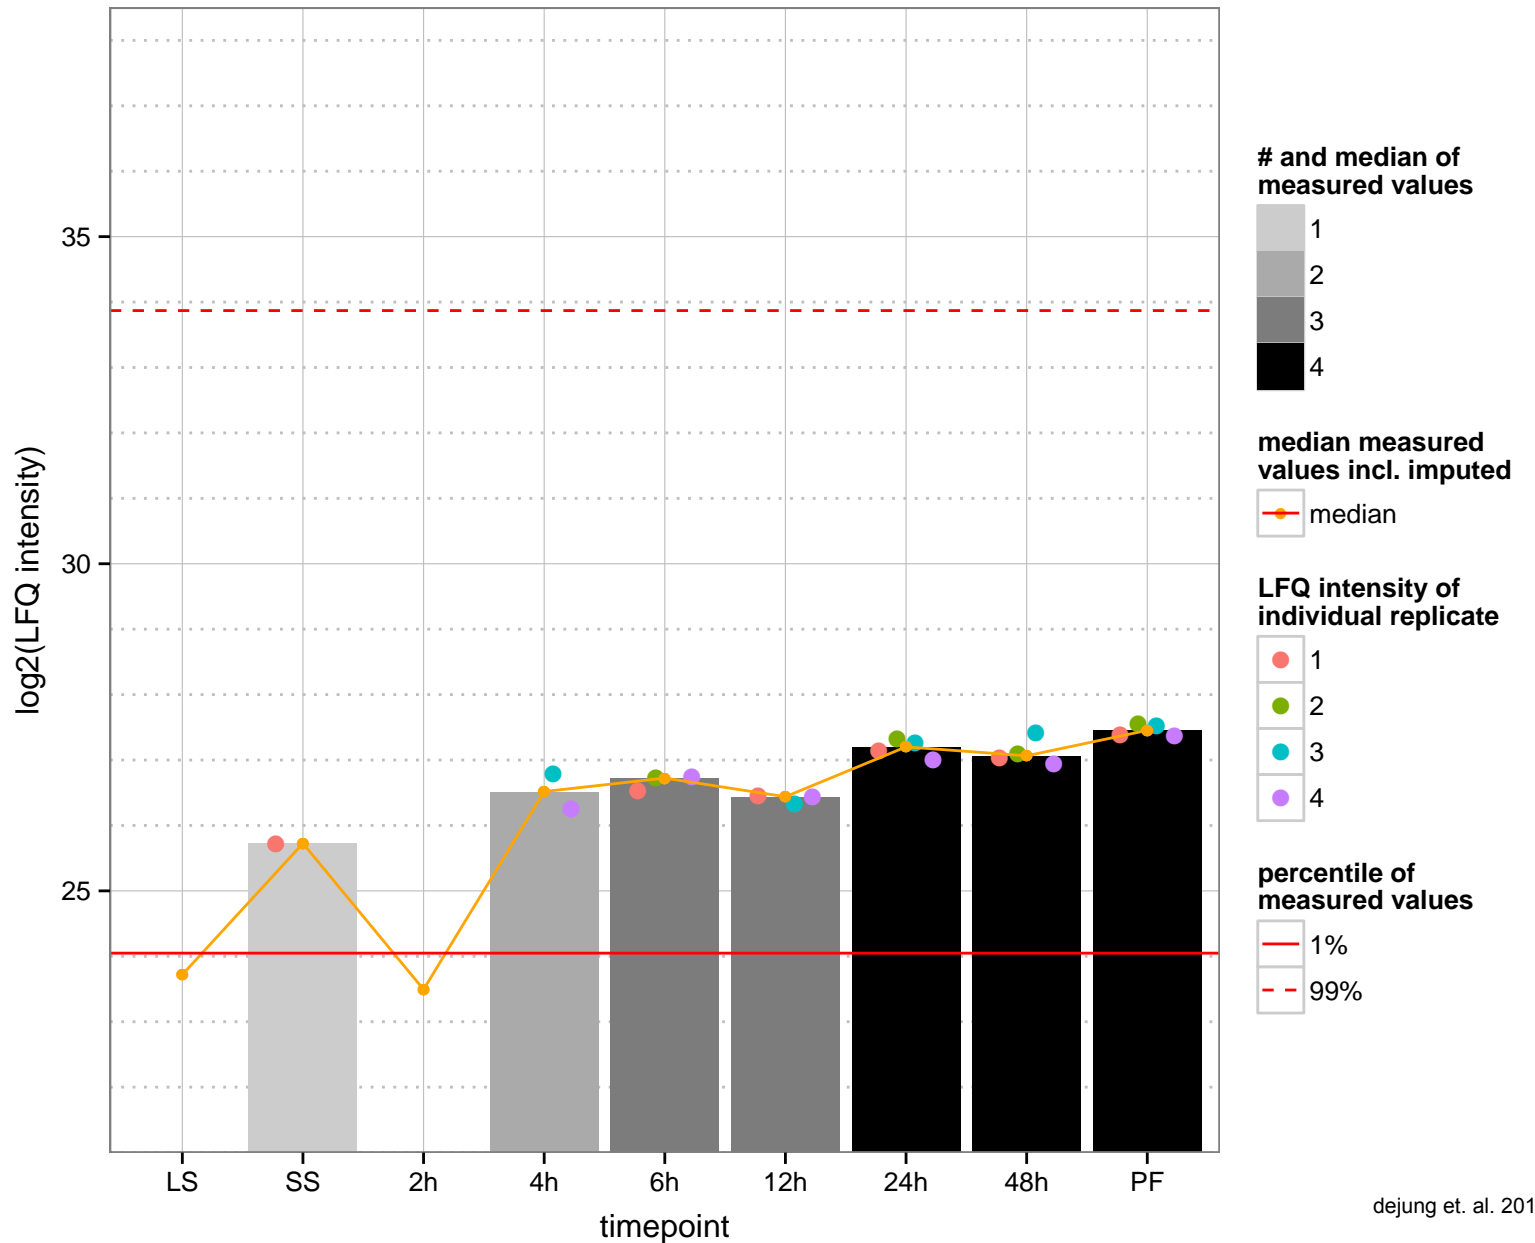

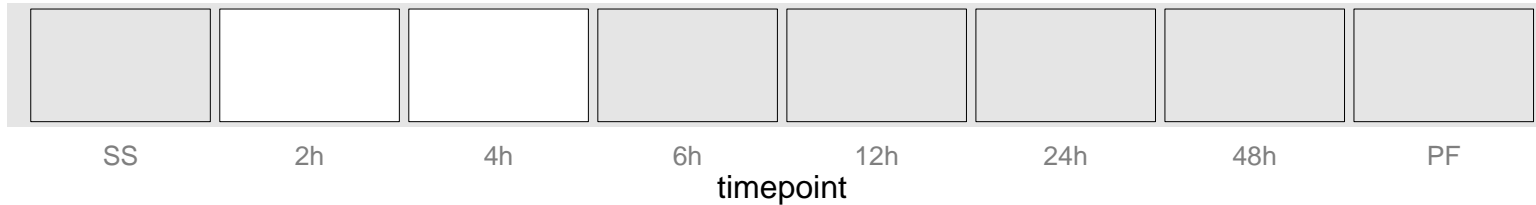

**regulated**  **not regulated**  **significant down**  **significant up**

hypothetical protein, conserved  
 Tb927.8.6800  
 AGOF: null  
 AGOC: mitochondrion  
 AGOP: null  
 PGO: null  
 PGOC: null  
 PGOP: null

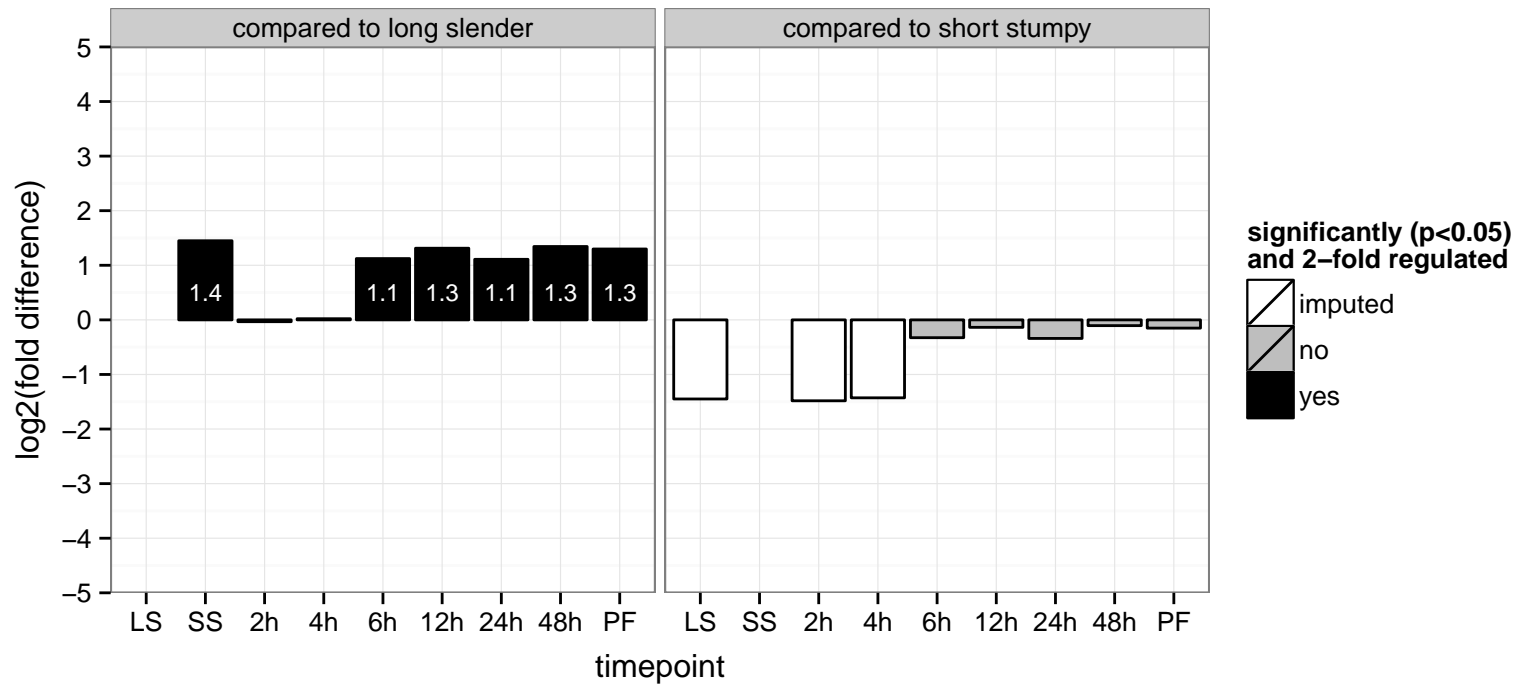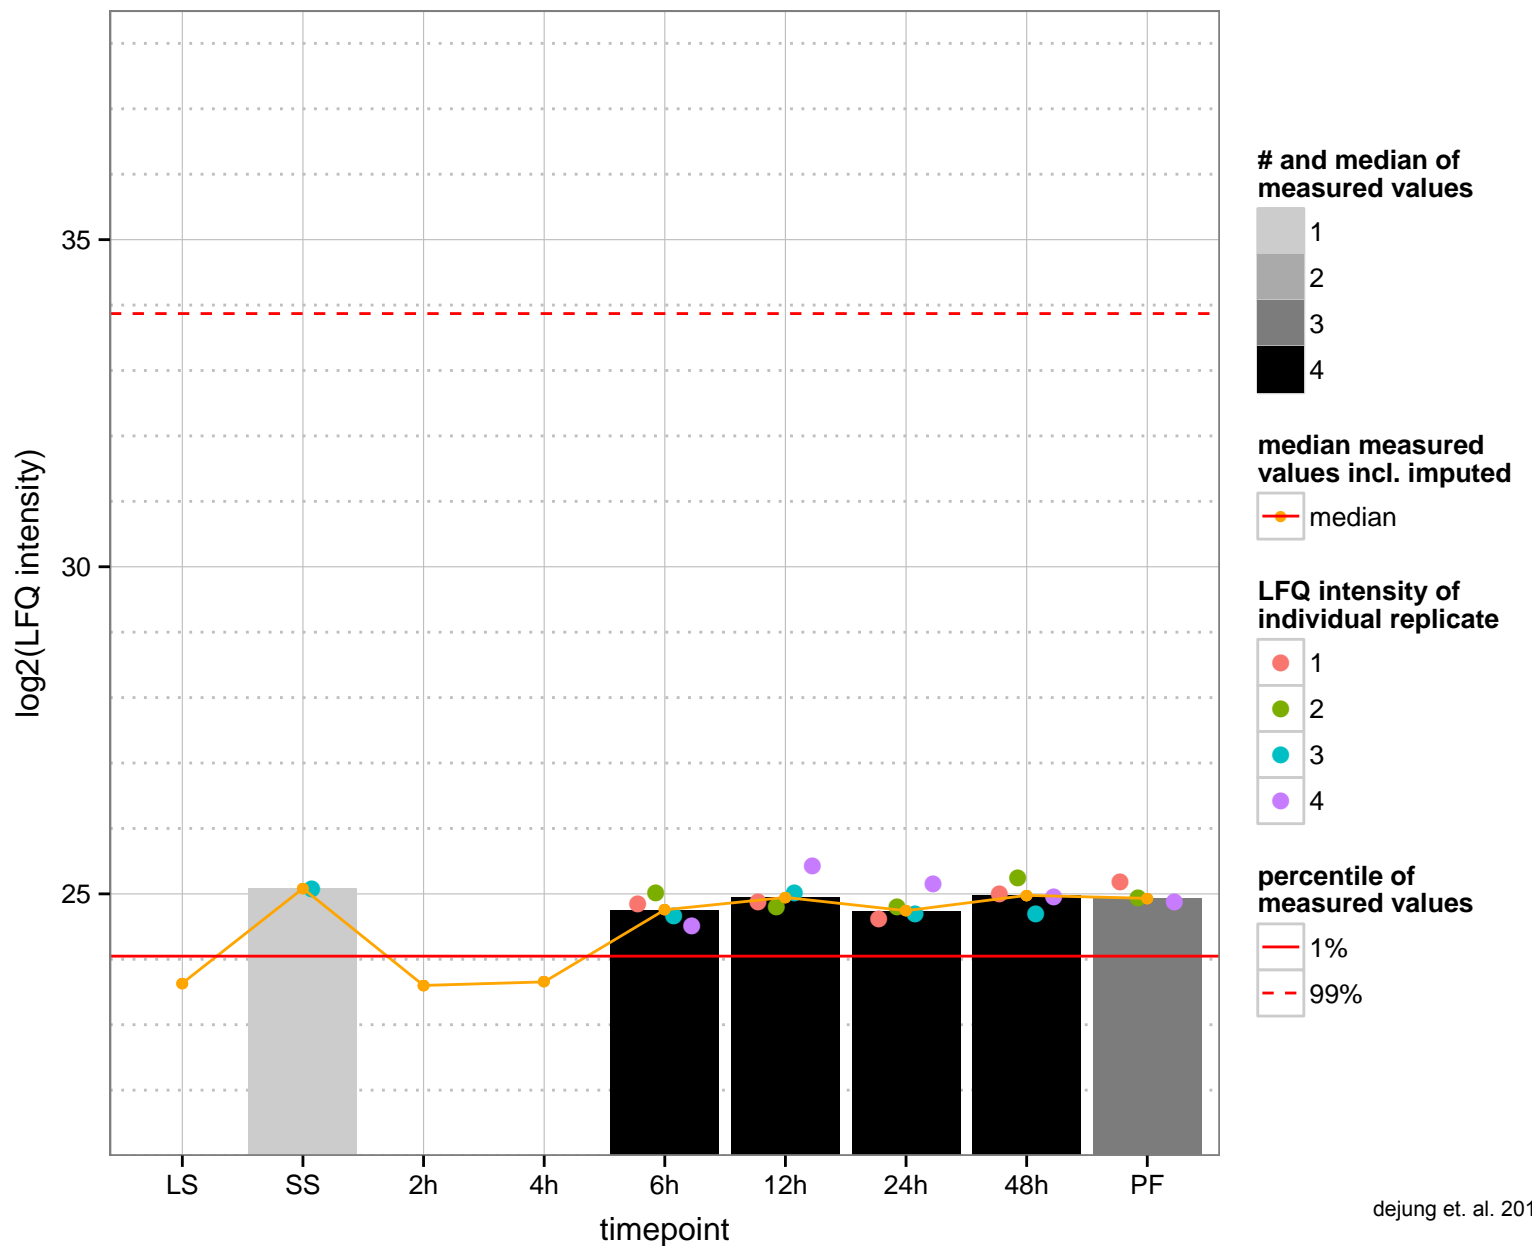

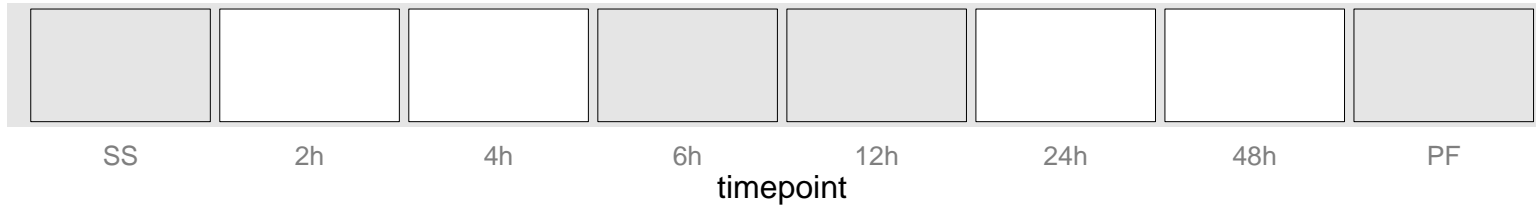

**regulated**  **not regulated**  **significant down**  **significant up**

GPI alpha-mannosyltransferase III, GPI10 (GPI10)

Tb927.10.5560

AGOF: mannosyltransferase activity

AGOC: integral to membrane, intrinsic to endoplasmic reticulum membrane

AGOP: GPI anchor biosynthetic process, growth

PGOF: transferase activity, transferring glycosyl groups

PGOC: intrinsic to endoplasmic reticulum membrane

PGOP: GPI anchor biosynthetic process

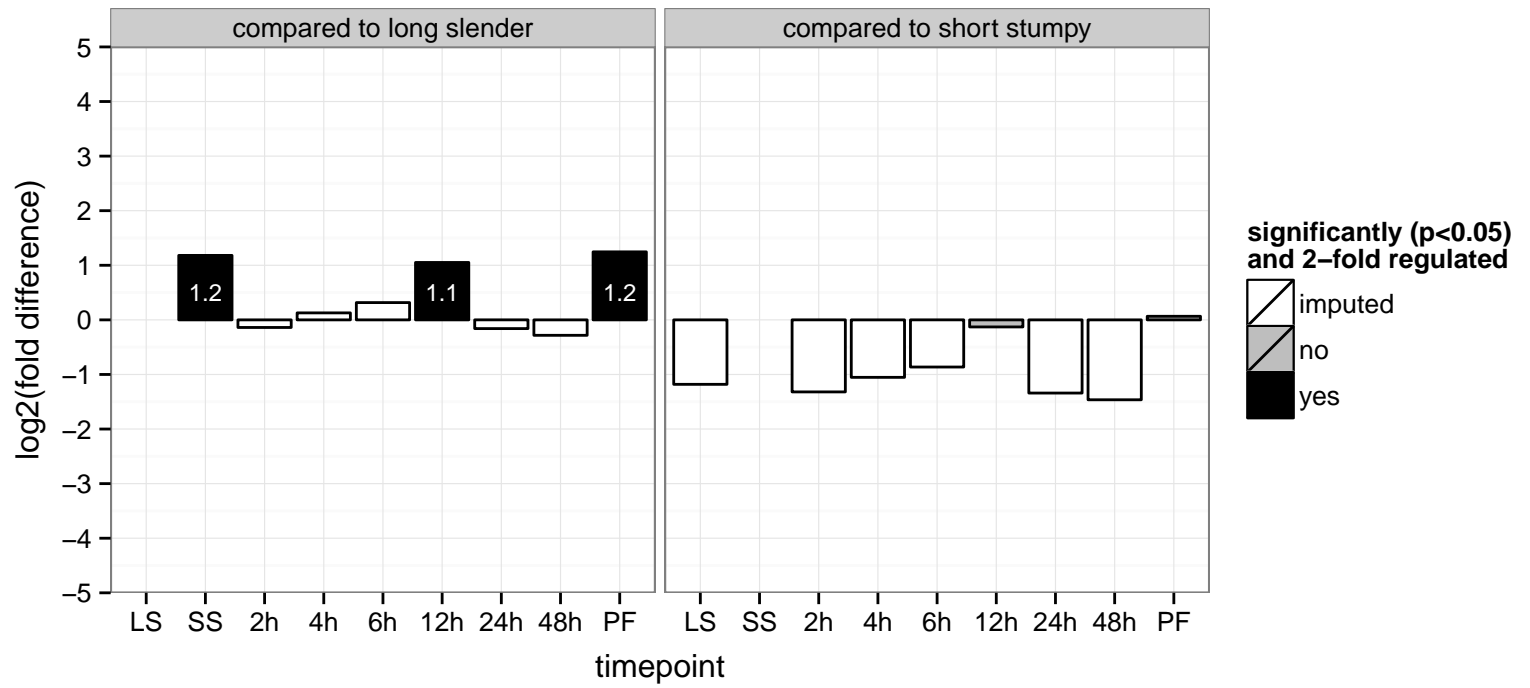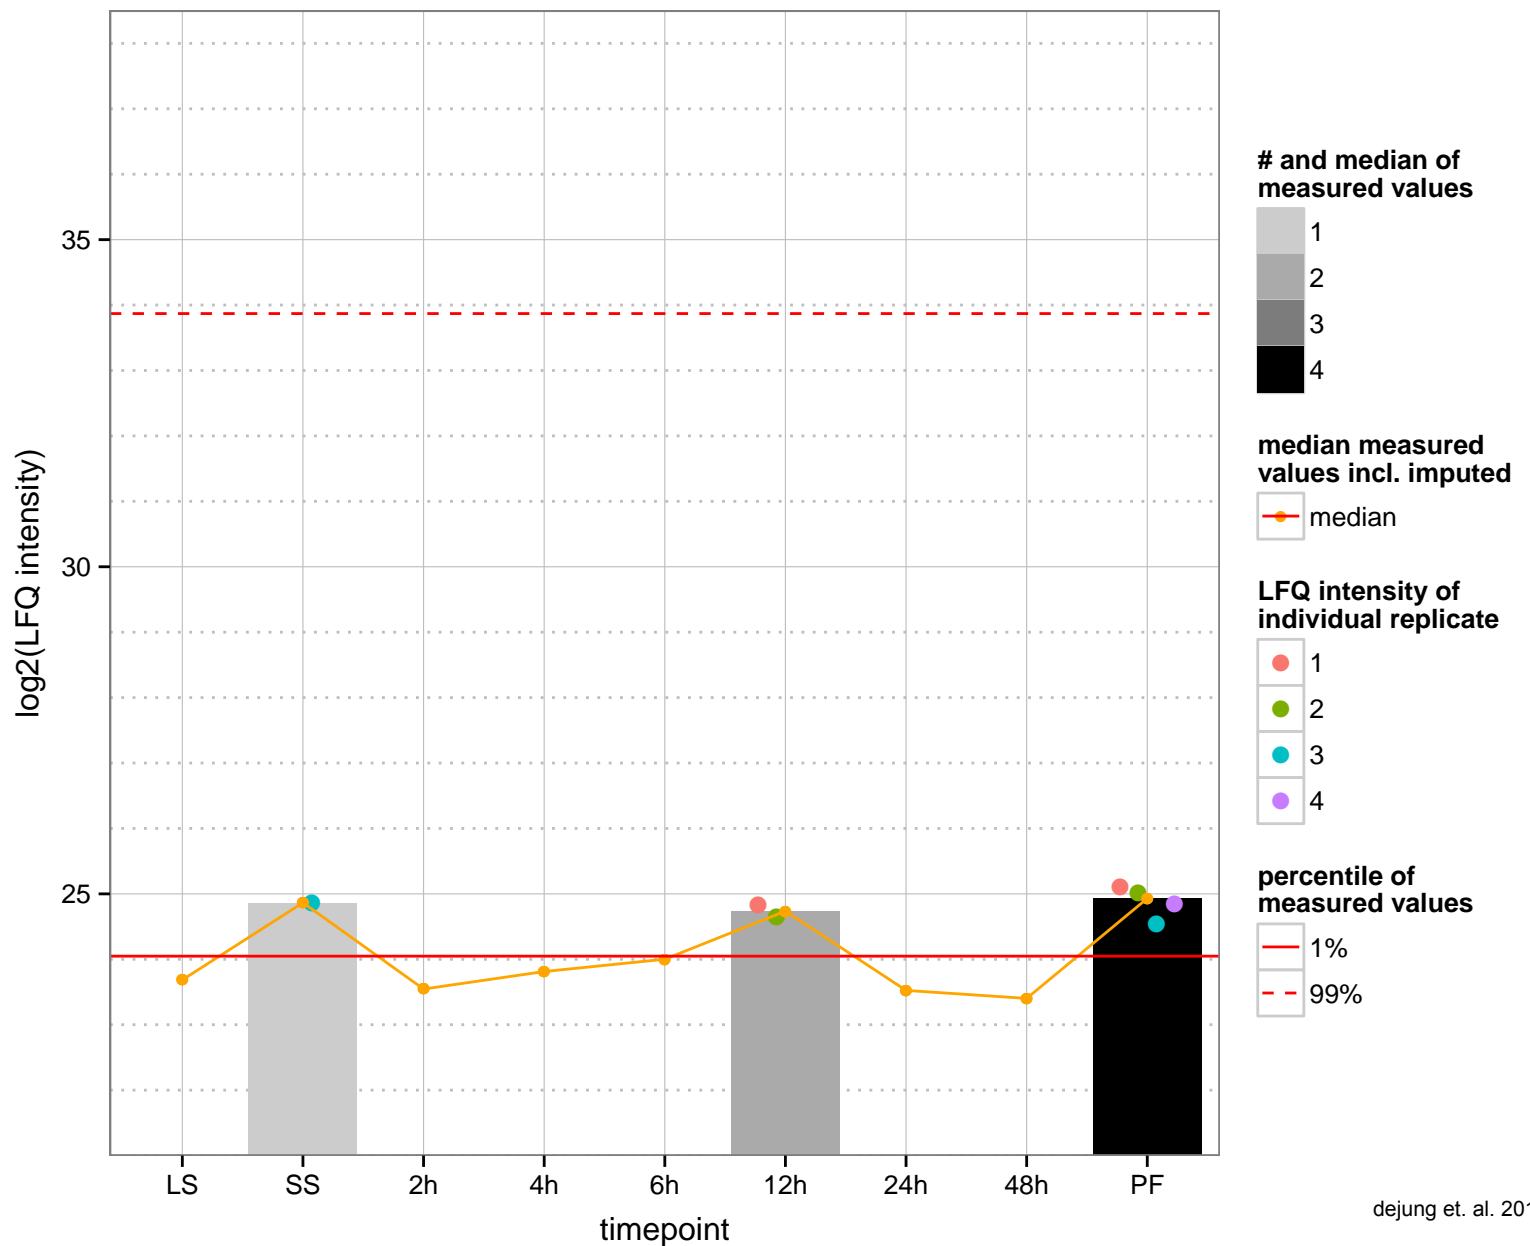

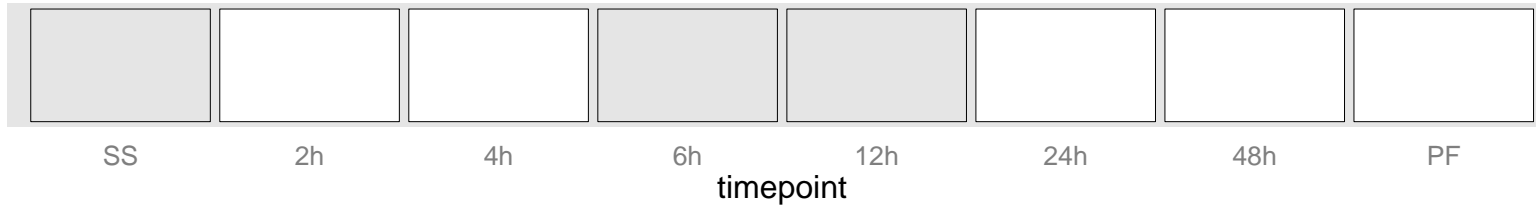

**regulated**  **not regulated**  **significant down**  **significant up**



variant surface glycoprotein, fragment, hypothetical protein, conserved, chrX additional, unordered contigs, predicted SAP domain  
 Tb927.10.4440;Tb10.v4.0034  
 AGOF: null, nucleic acid binding  
 AGOC: null  
 AGOP: null  
 PGO: null, nucleic acid binding  
 PGOC: null  
 PGOP: evasion or tolerance of host immune response, null

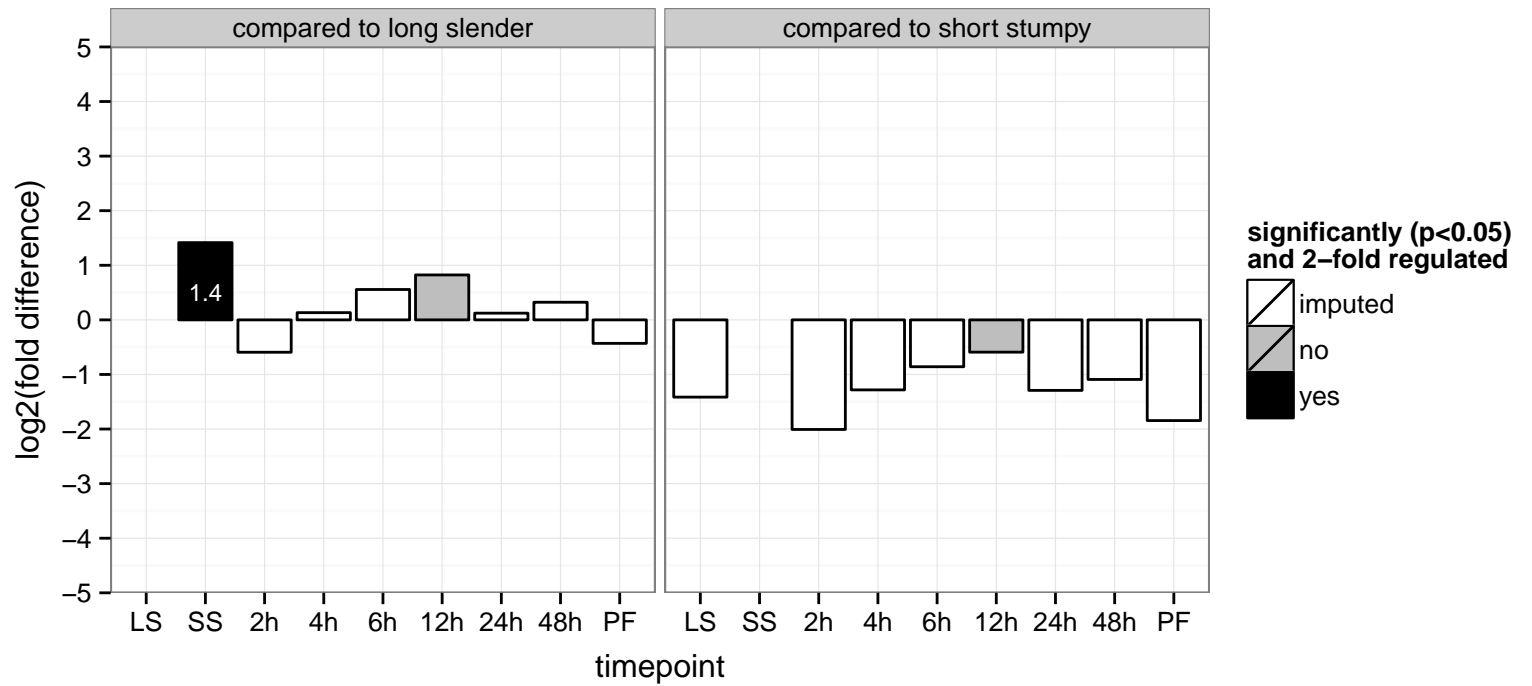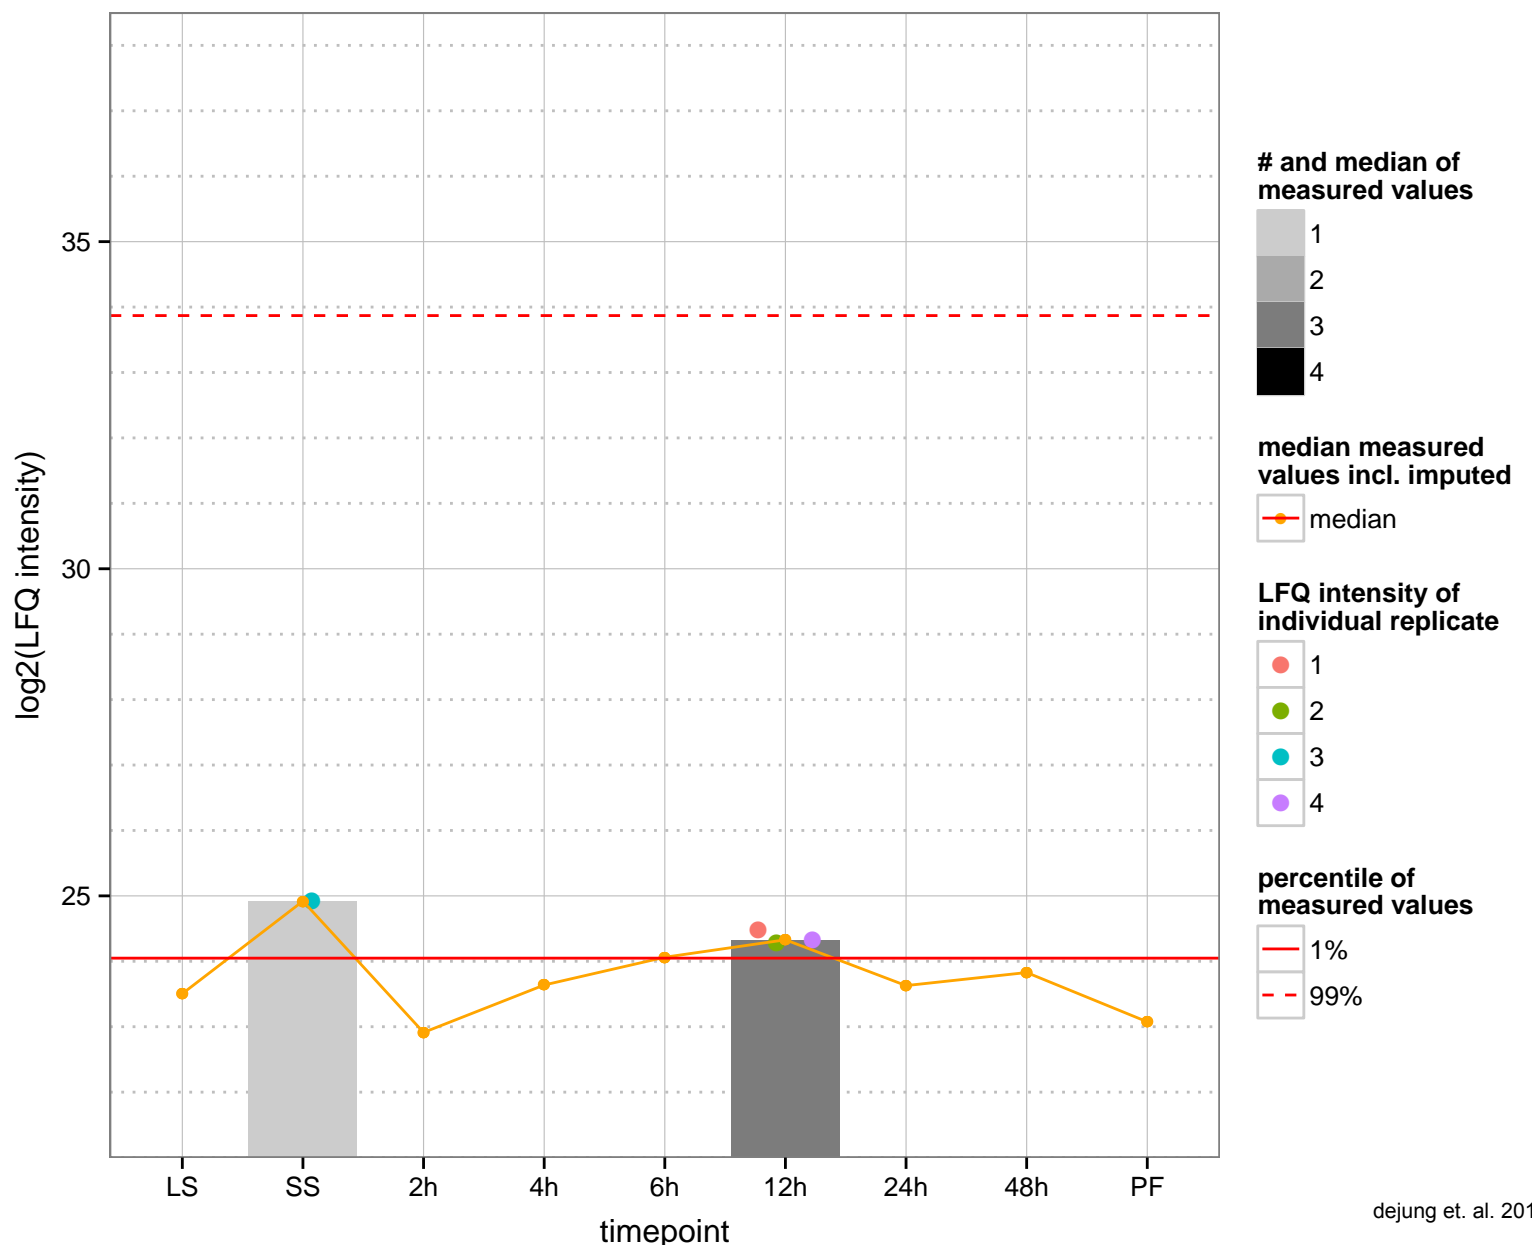

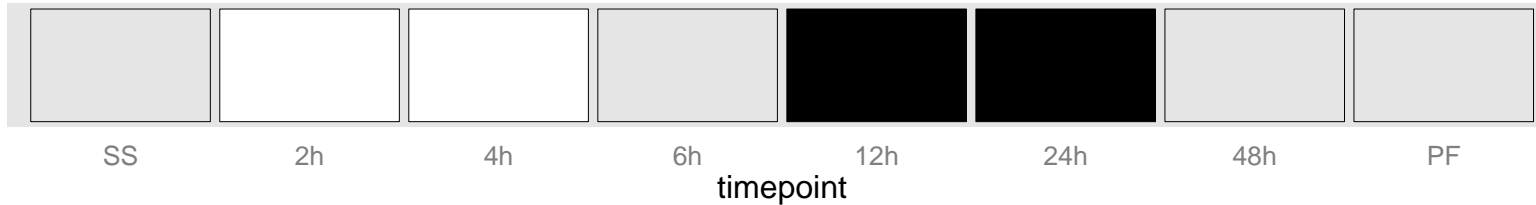

**regulated**  **not regulated**  **significant down**  **significant up**

hypothetical protein, conserved  
 Tb927.10.15810  
 AGOF: null  
 AGOC: null  
 AGOP: null  
 PGO: null  
 PGO: null  
 PGO: null

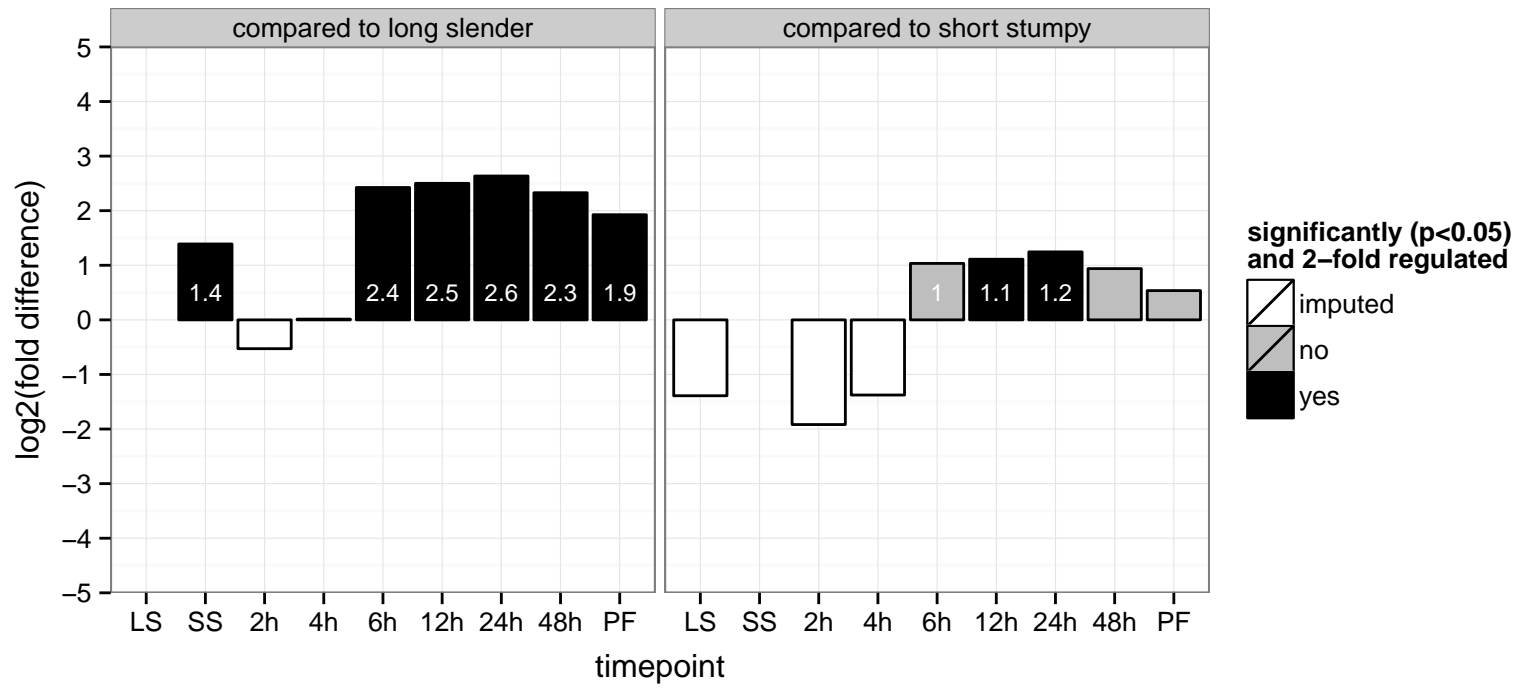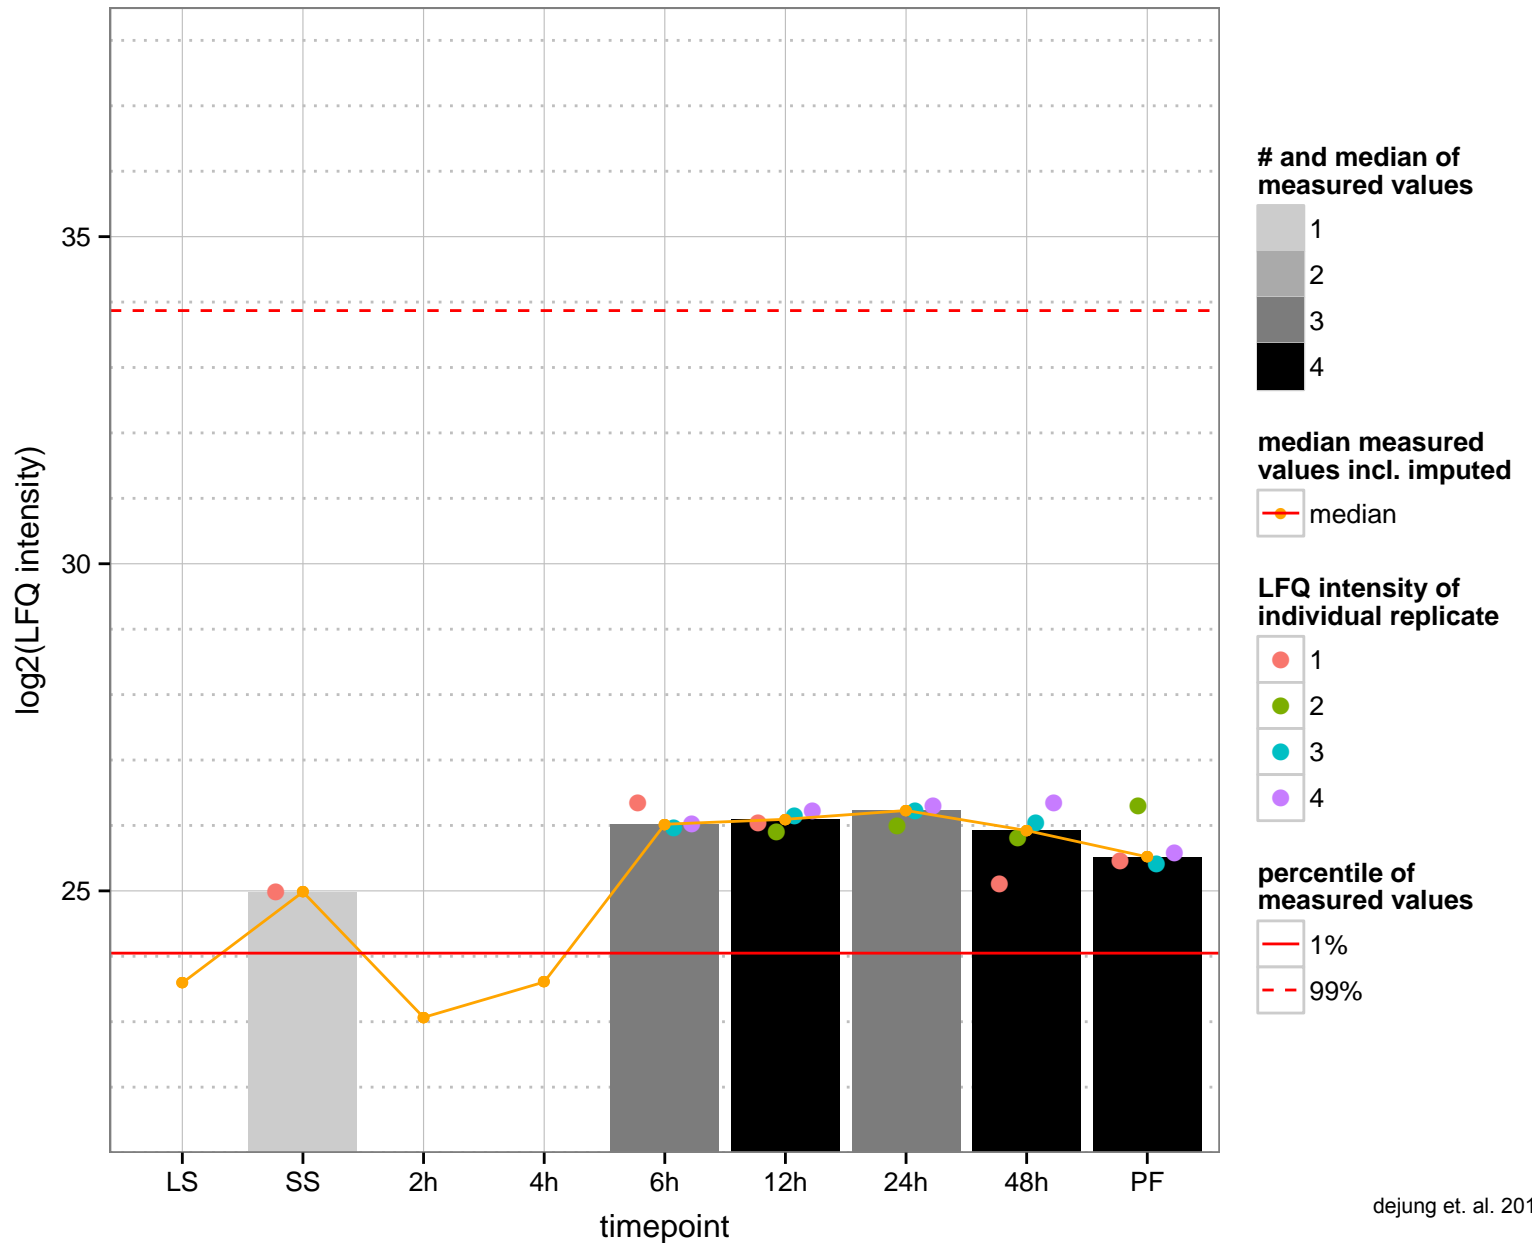

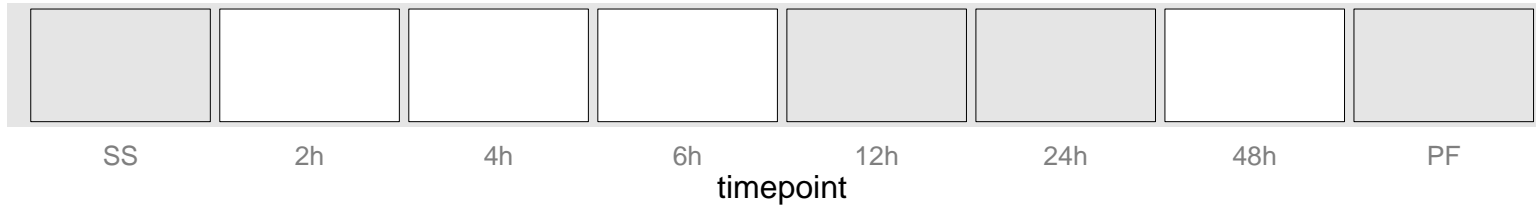

**regulated**  **not regulated**  **significant down**  **significant up**

hypothetical protein, conserved  
 Tb927.11.14230  
 AGOF: null  
 AGOC: null  
 AGOP: null  
 PGO: null  
 PGOC: null  
 PGOP: null

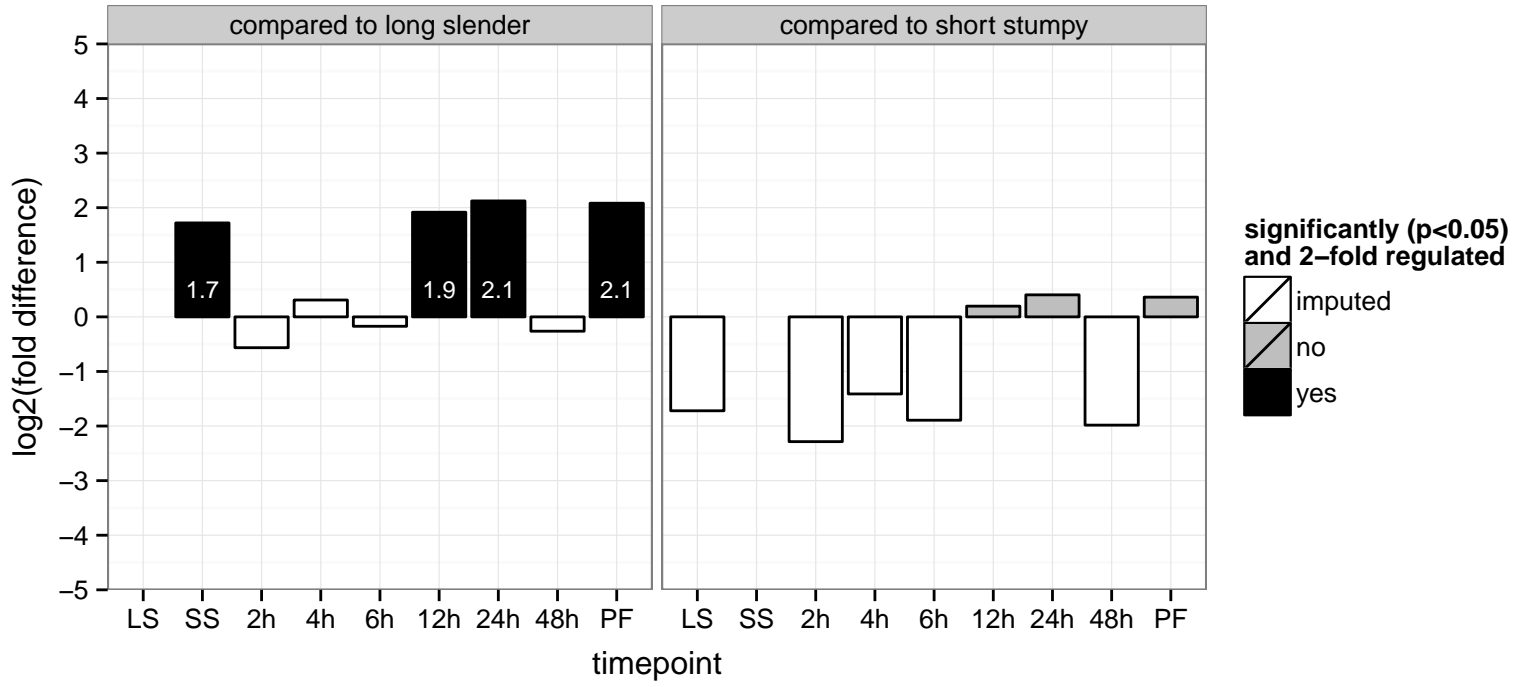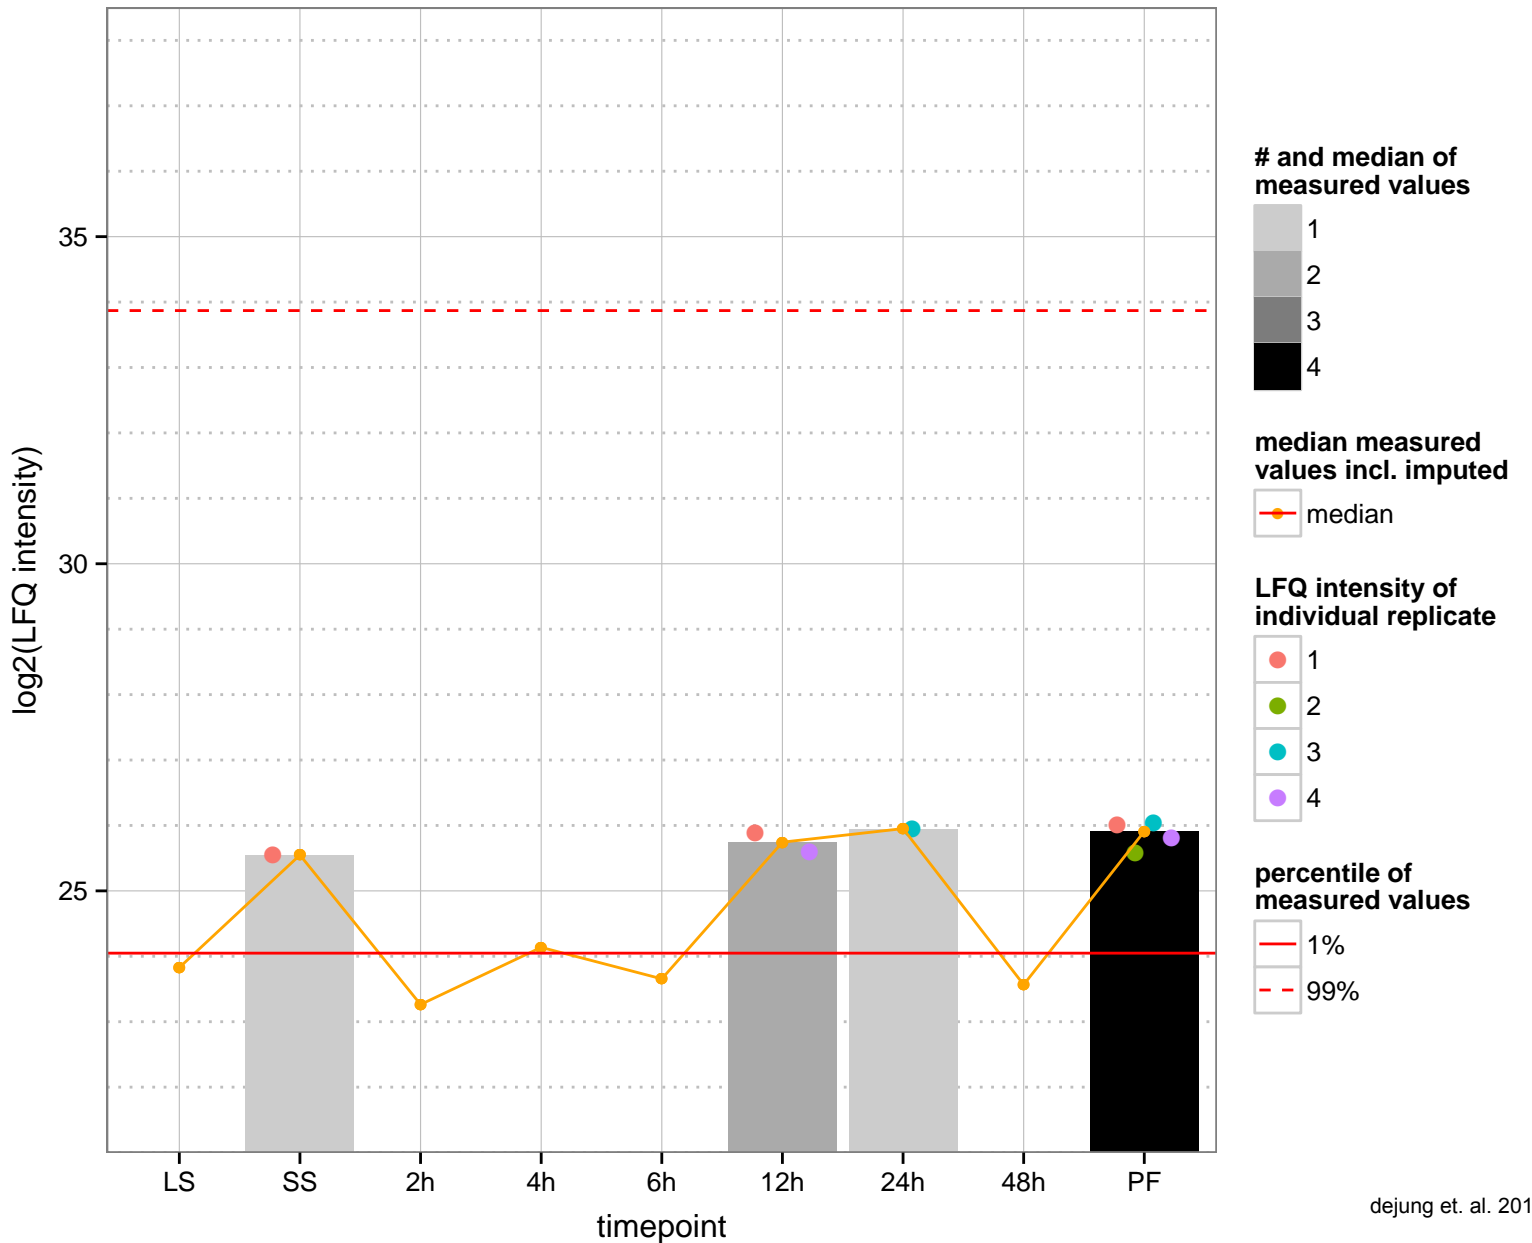

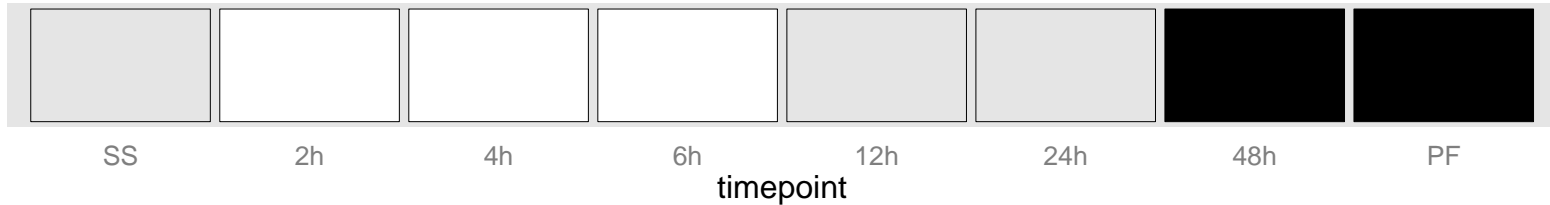

**regulated**  **not regulated**  **significant down**  **significant up**

hypothetical protein, conserved  
 Tb927.5.1780  
 AGOF: null  
 AGOC: null  
 AGOP: null  
 PGO: null  
 PGOC: null  
 PGOP: null

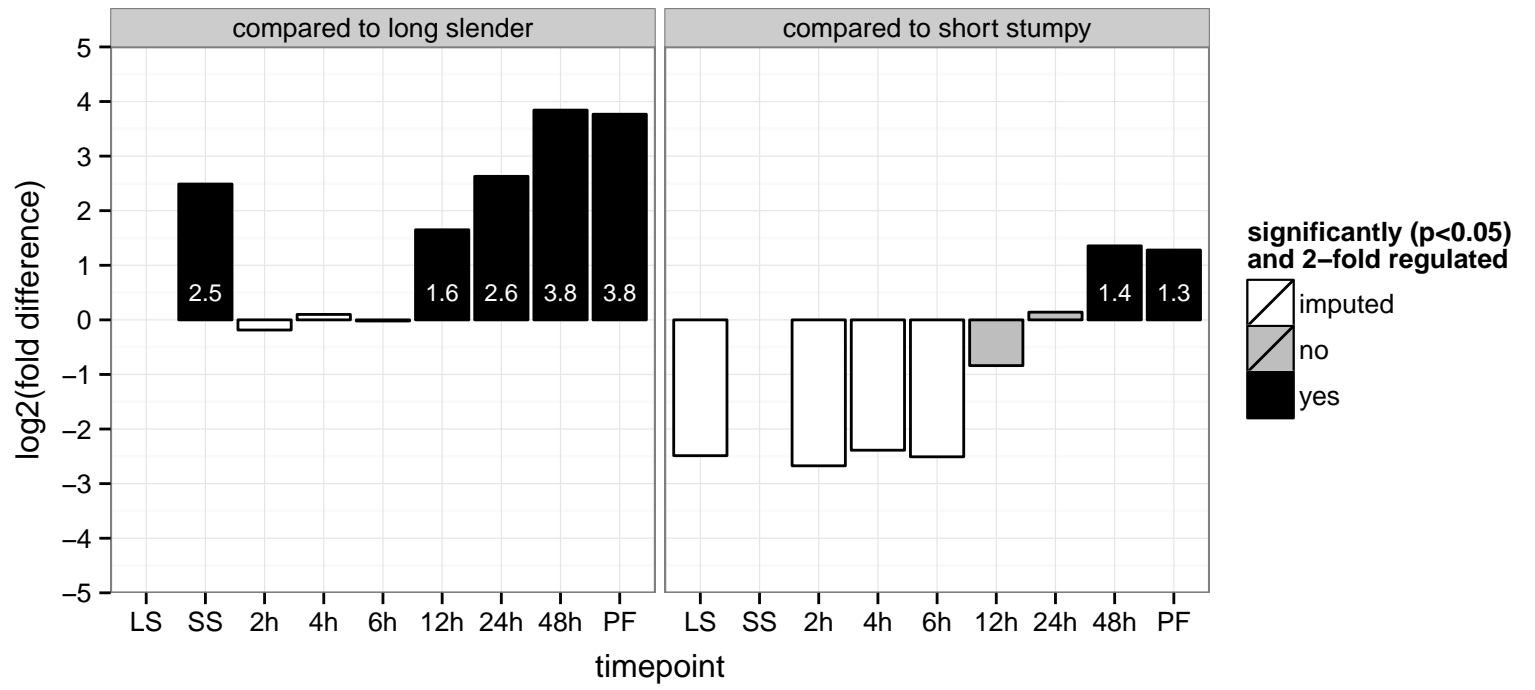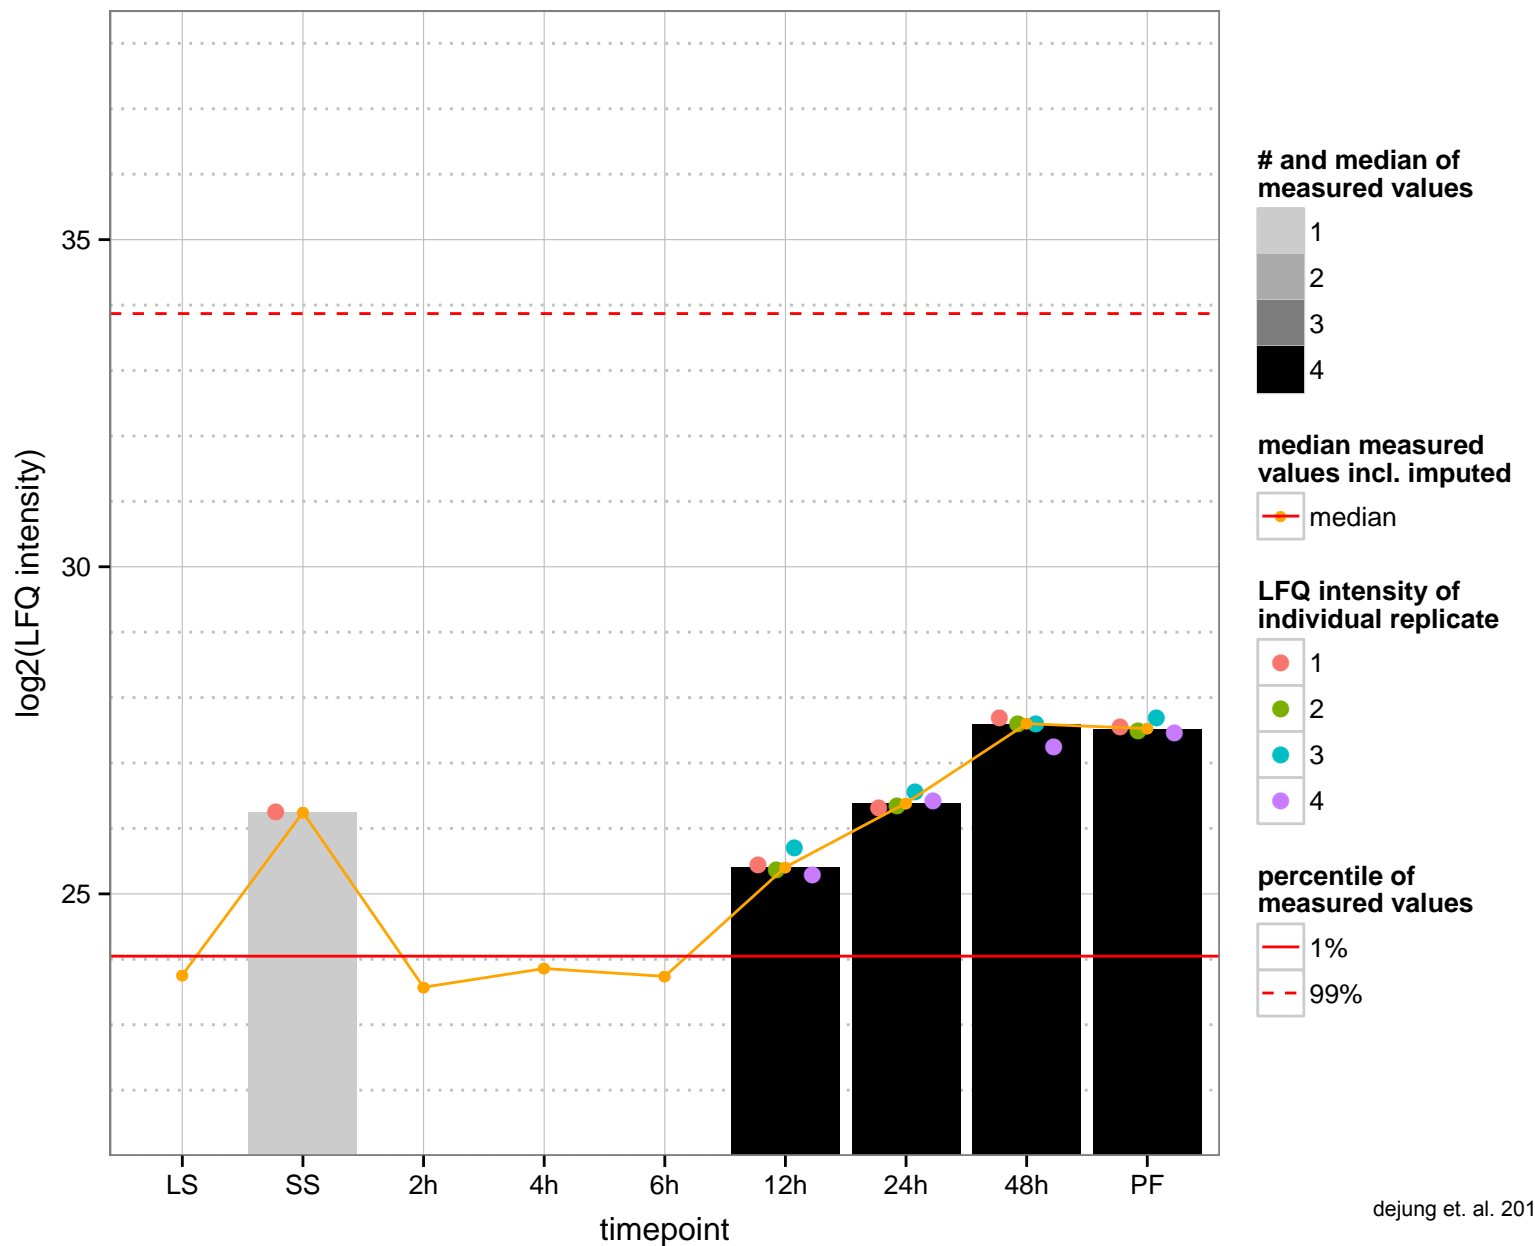

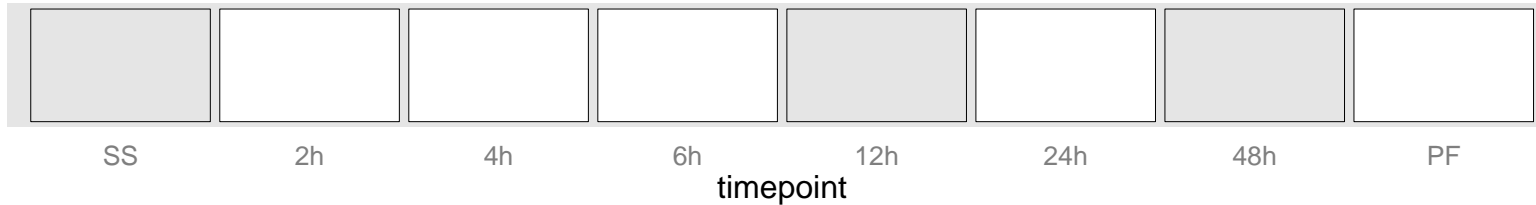

**regulated**  **not regulated**  **significant down**  **significant up**



hypothetical protein, conserved  
 Tb927.2.2530  
 AGOF: null  
 AGOC: null  
 AGOP: null  
 PGO: null  
 PGOC: null  
 PGOP: null

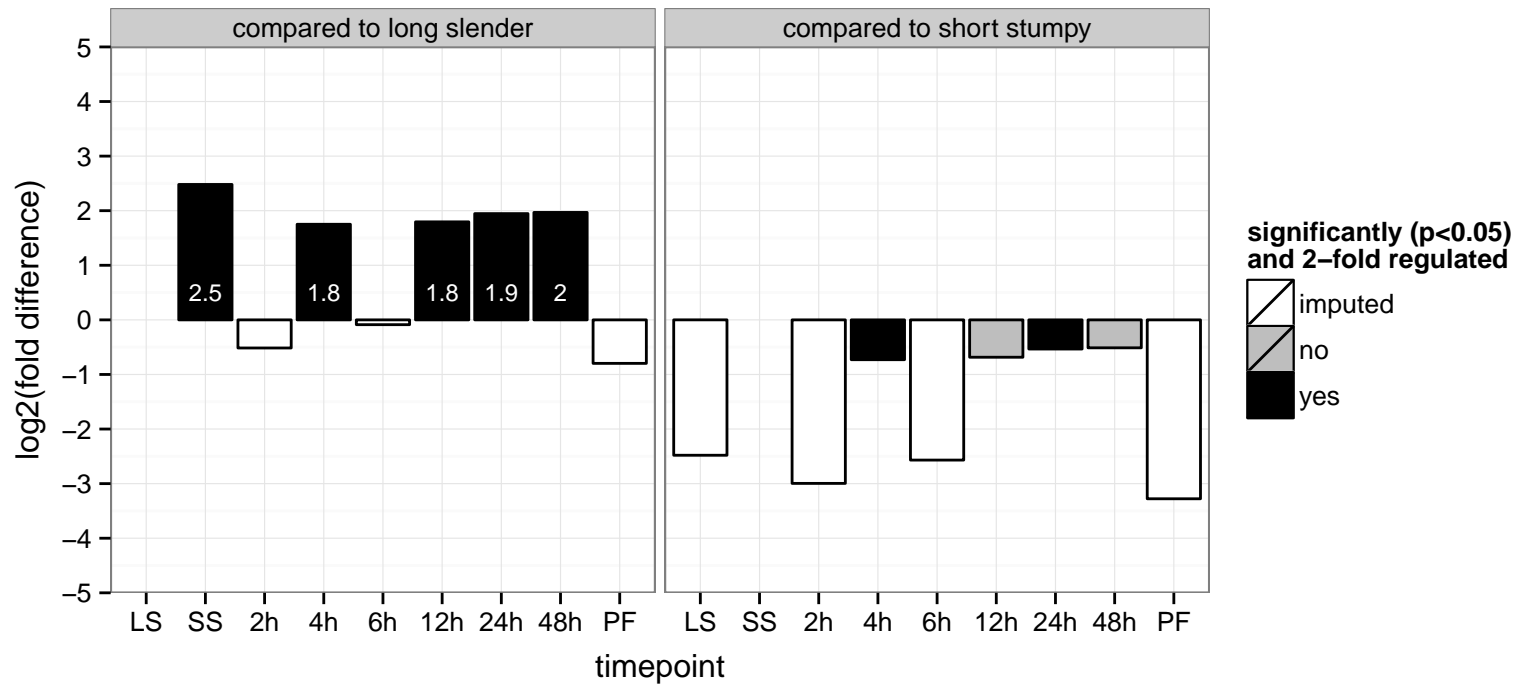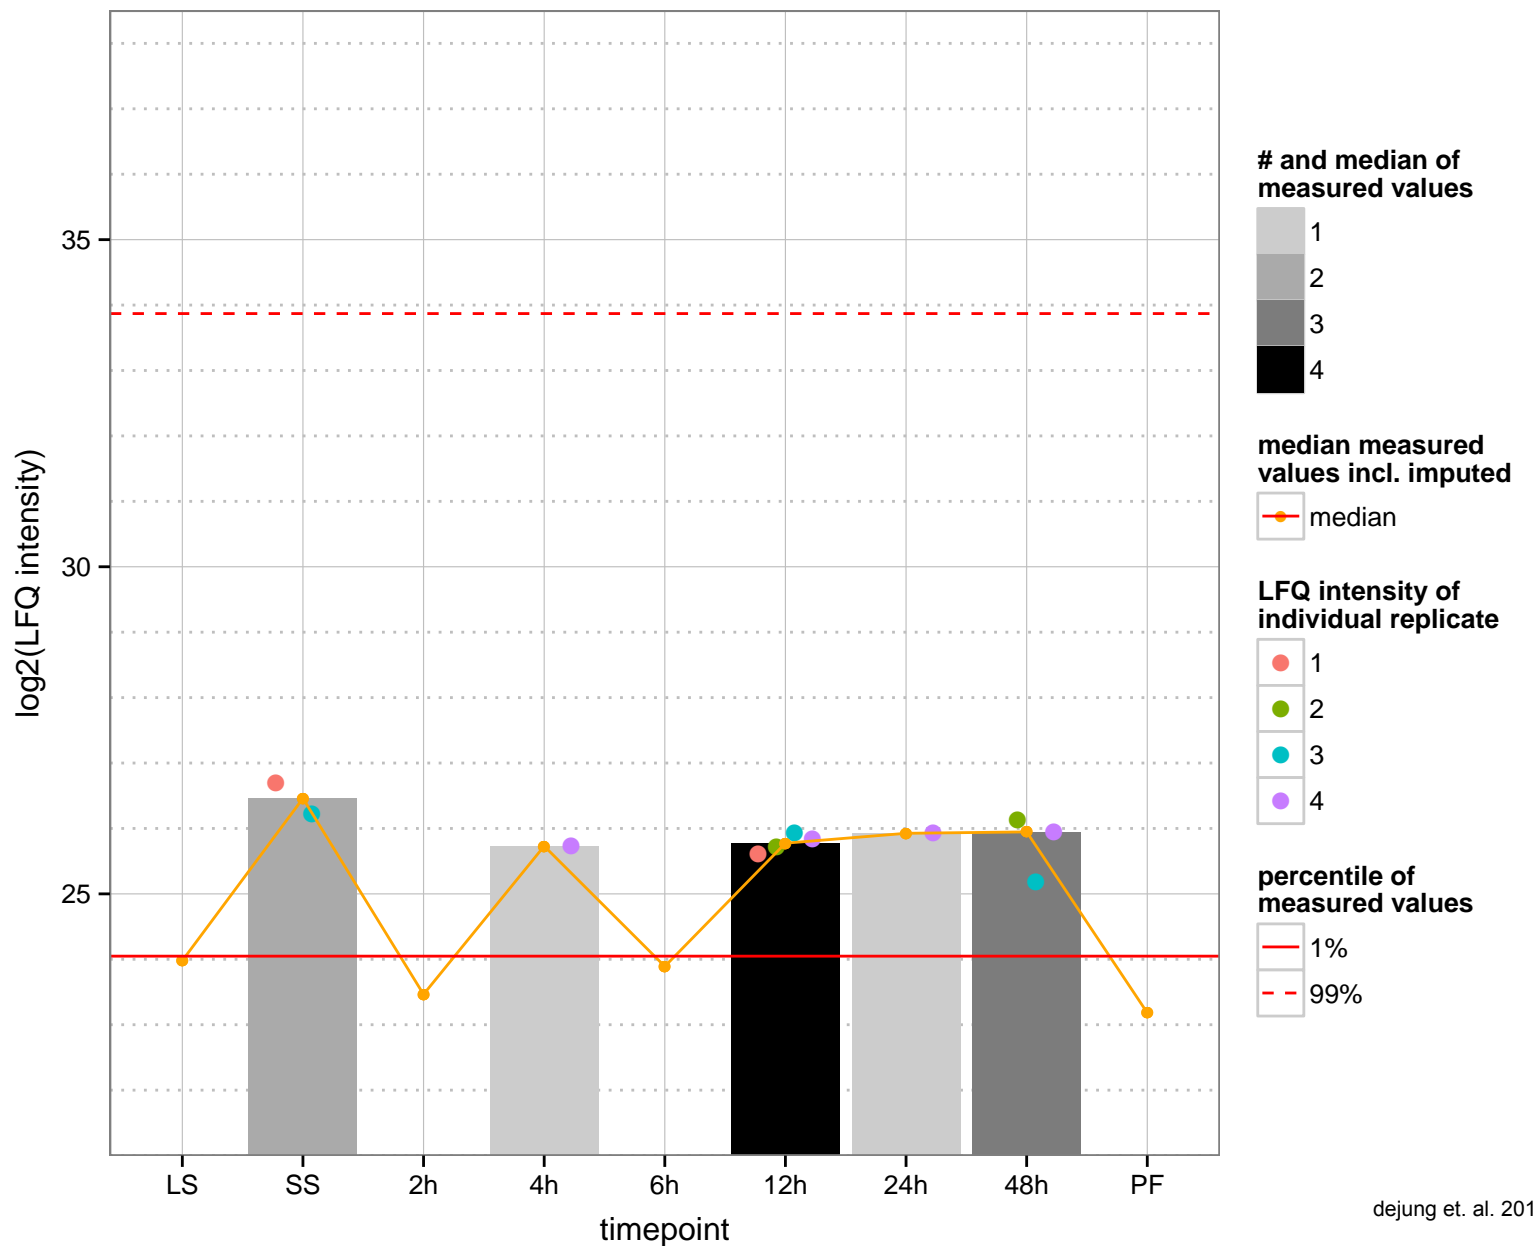

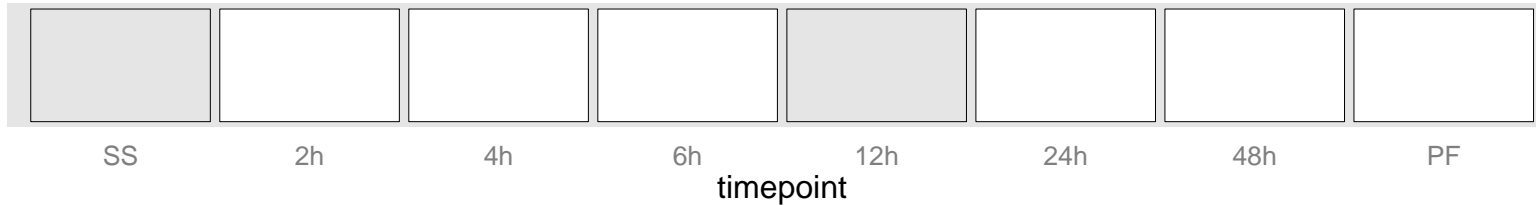

**regulated**  **not regulated**  **significant down**  **significant up**

AAA ATPase, putative  
 Tb927.11.6350  
 AGOF: ATP binding, ATPase activity  
 AGOC: null  
 AGOP: protein metabolic process  
 PGOF: ATP binding, nucleoside-triphosphatase activity, nucleotide binding  
 PGOC: null  
 PGOP: null

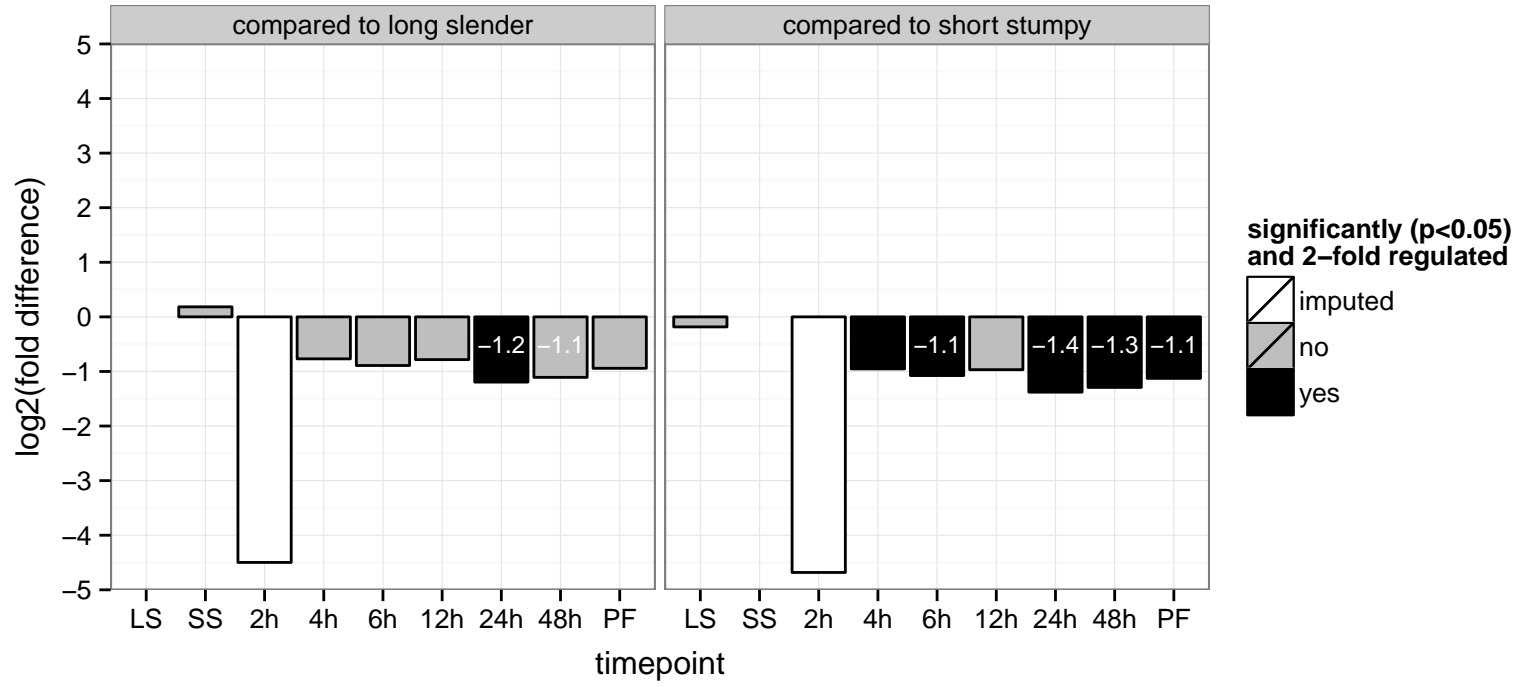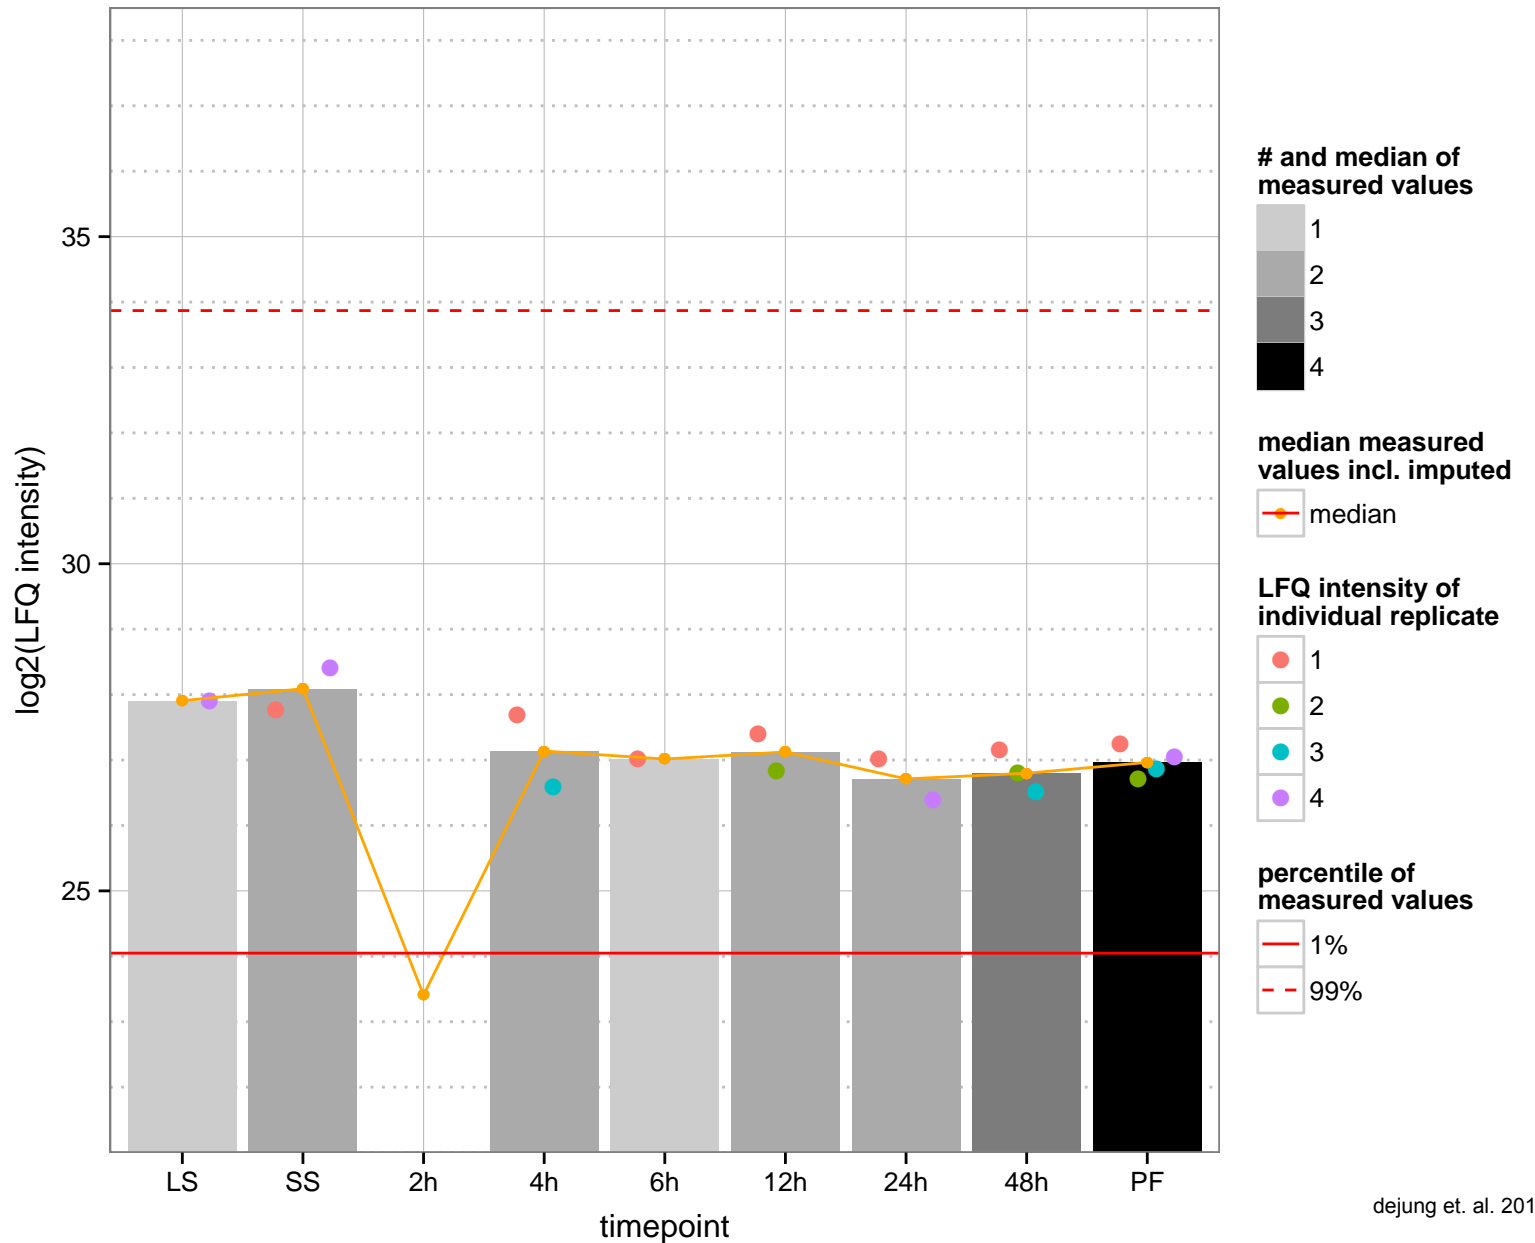

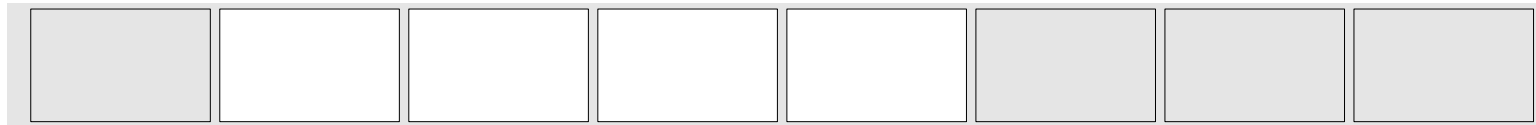

SS

2h

4h

6h

12h

24h

48h

PF

timepoint

**regulated**  **not regulated**  **significant down**  **significant up**

dejung et. al. 2015

amino acid transporter, putative (AATP11), putative  
 Tb927.4.4730;Tb927.8.7740  
 AGOF: amine transmembrane transporter activity  
 AGOC: null  
 AGOP: amino acid transport  
 PGO: null  
 PGOC: null  
 PGOP: null

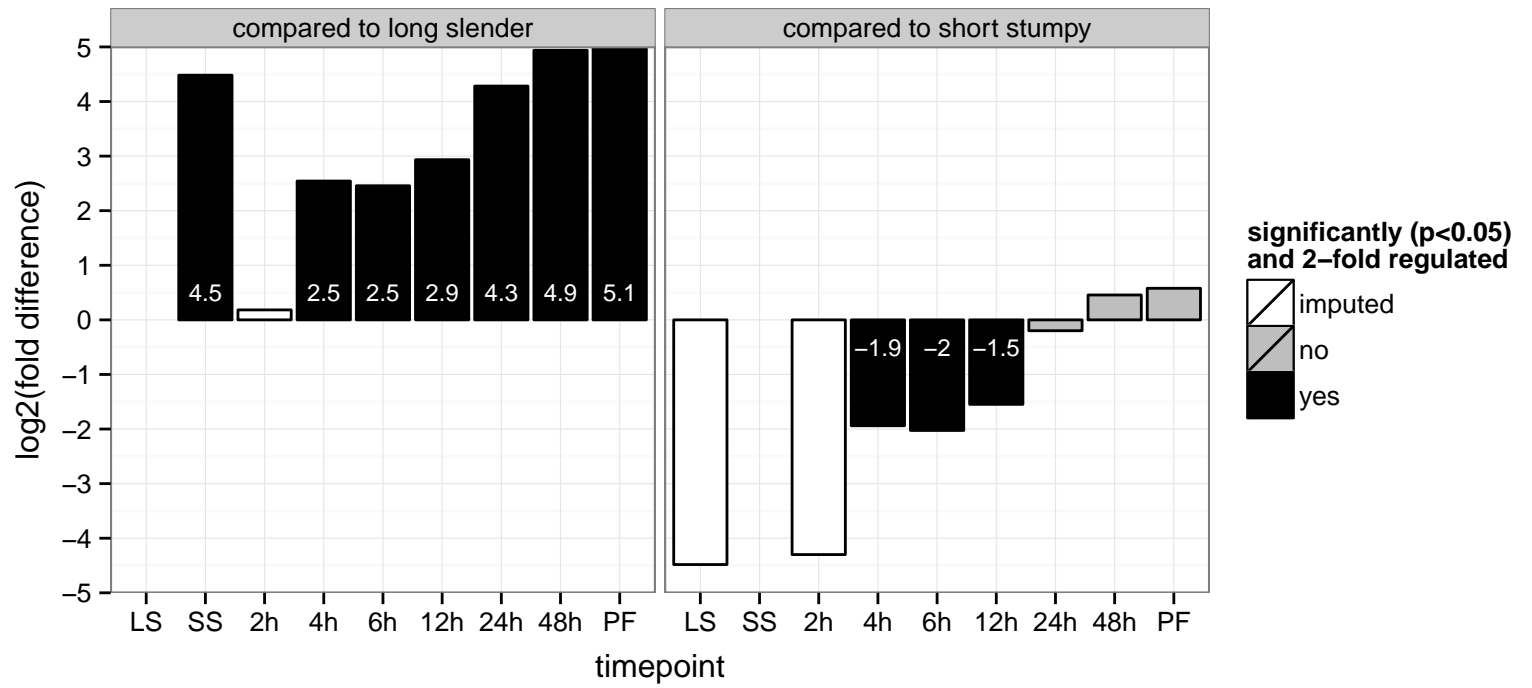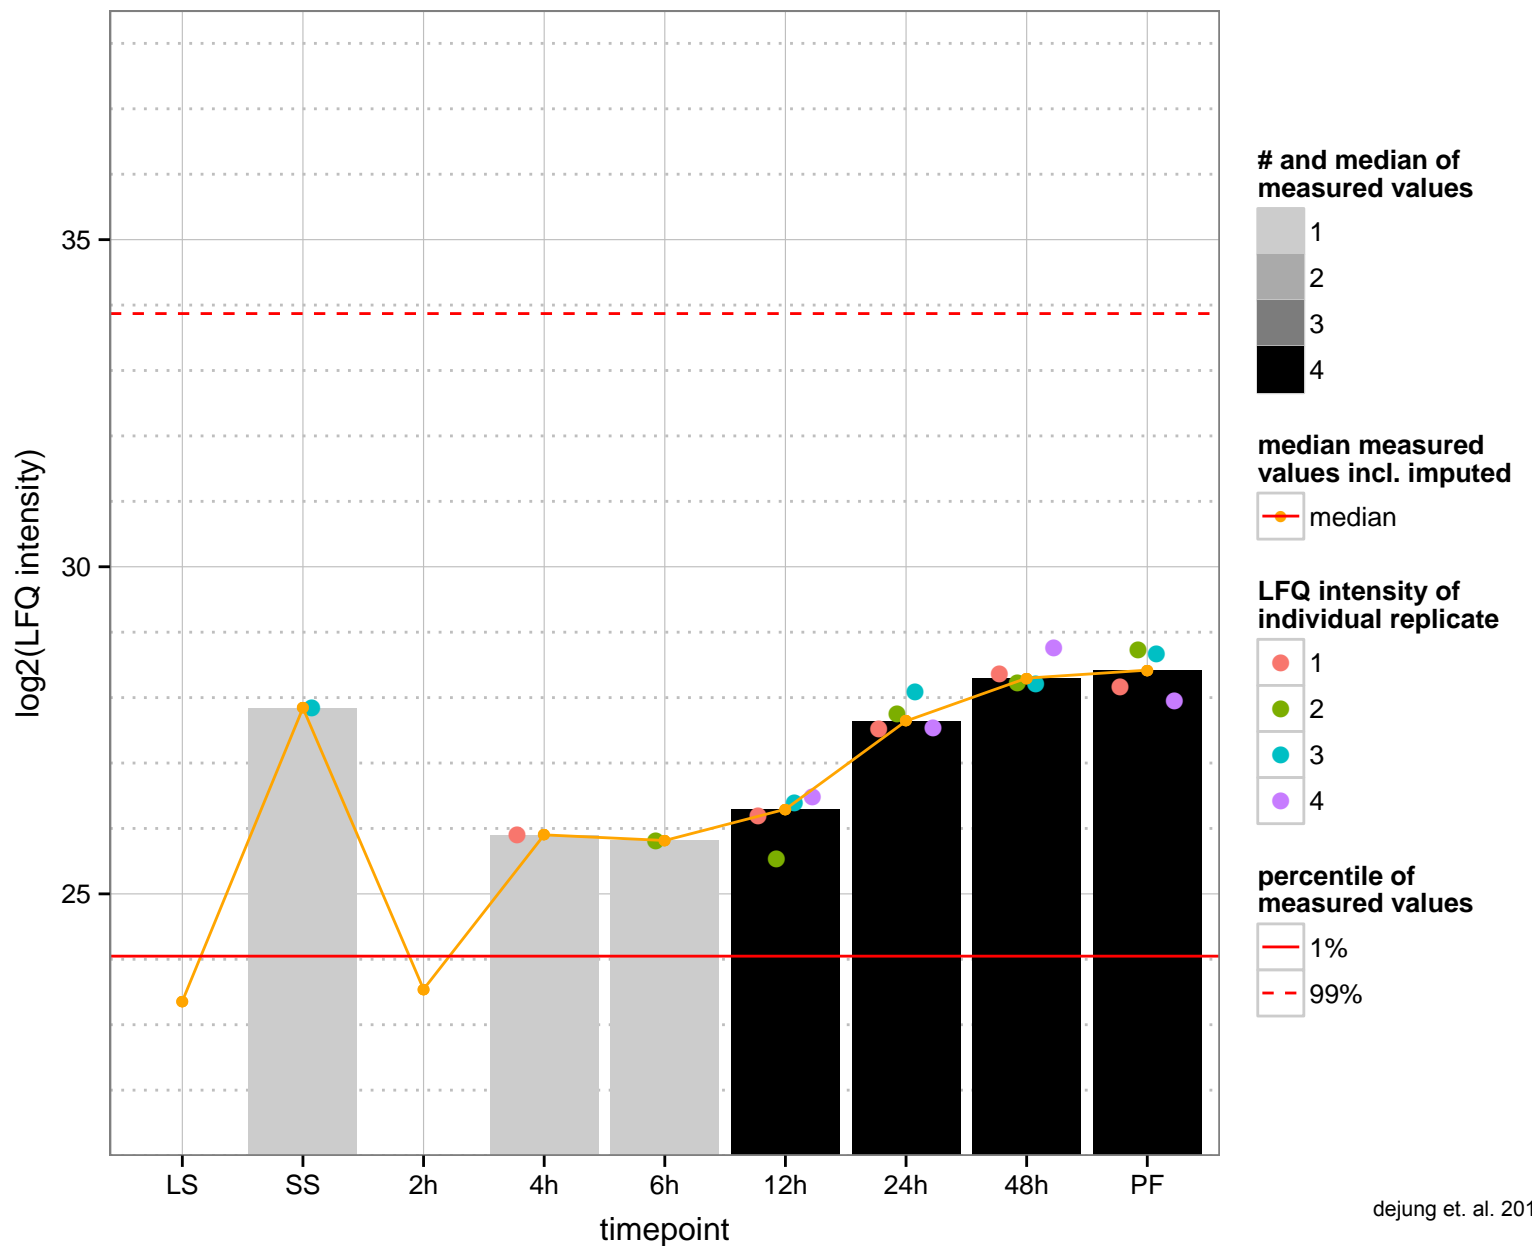

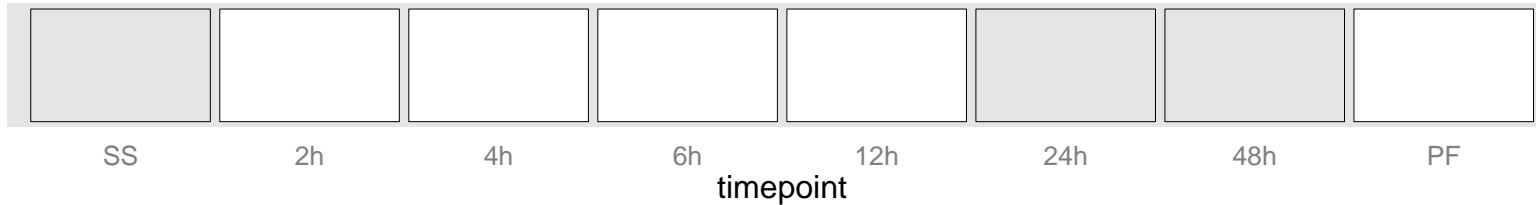

**regulated**  **not regulated**  **significant down**  **significant up**

mitochondrial RNA binding protein (MRB4160)  
 Tb927.4.4160  
 AGOF: RNA binding  
 AGOC: mitochondrion  
 AGOP: RNA metabolic process  
 PGO: null  
 PGOC: null  
 PGOP: null

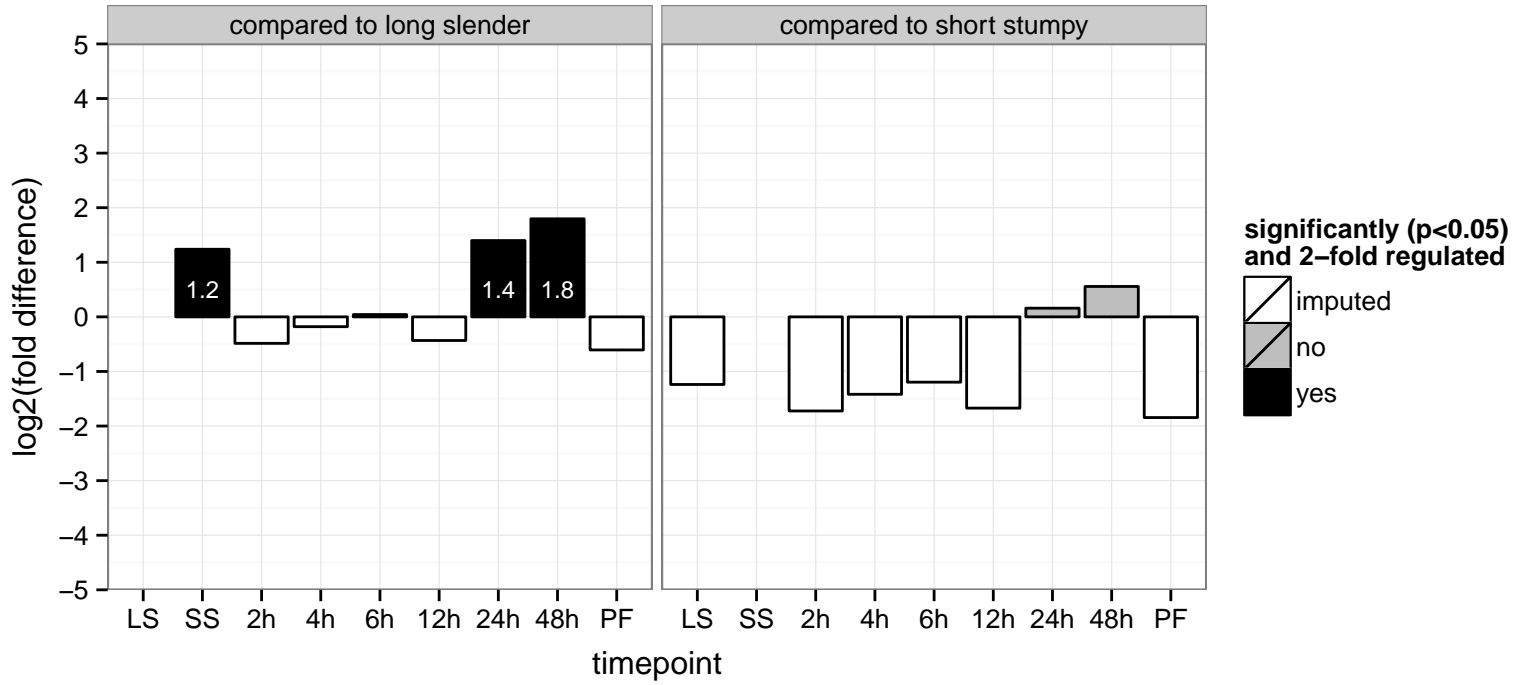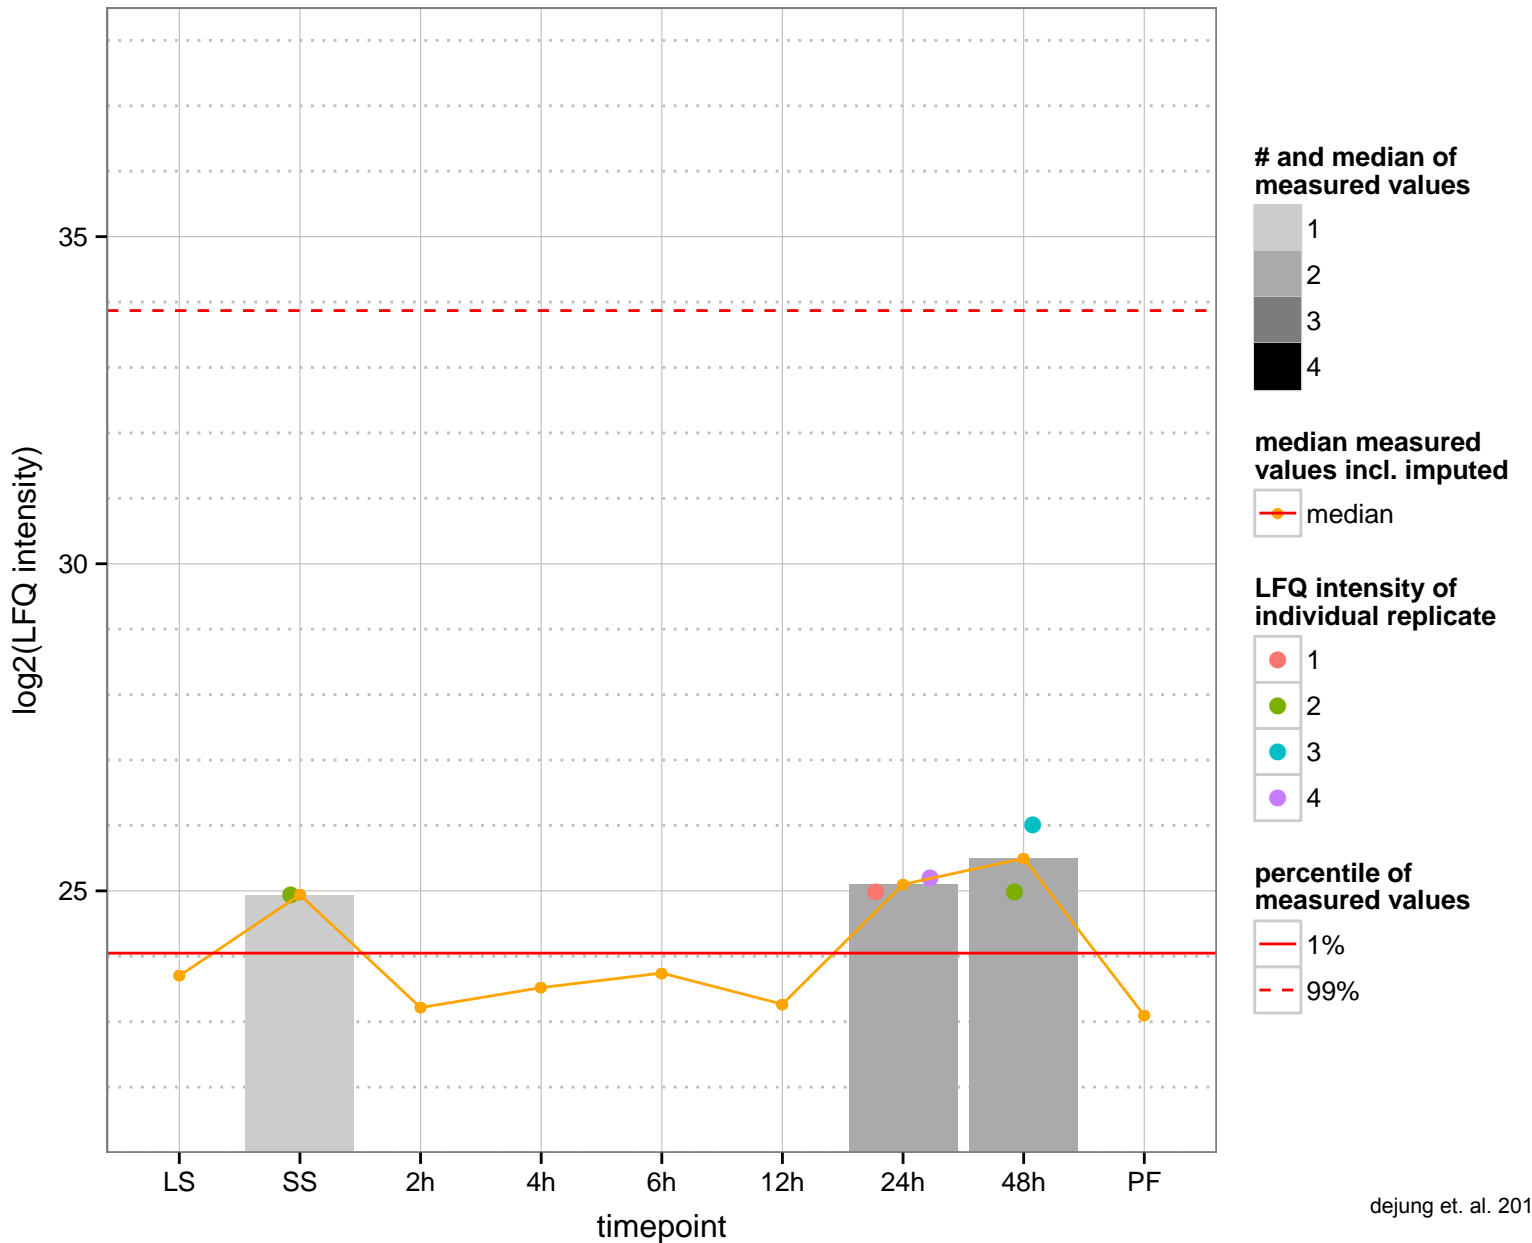

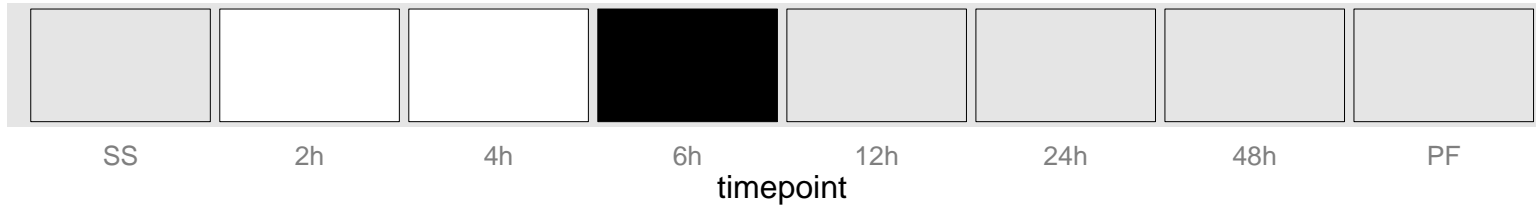

**regulated**  not regulated  significant down  significant up



TPR-repeat-containing chaperone protein DNAJ, putative  
 Tb927.4.2220  
 AGOF: heat shock protein binding  
 AGOC: null  
 AGOP: null  
 PGOF: heat shock protein binding, protein binding  
 PGO: null  
 PGOP: null

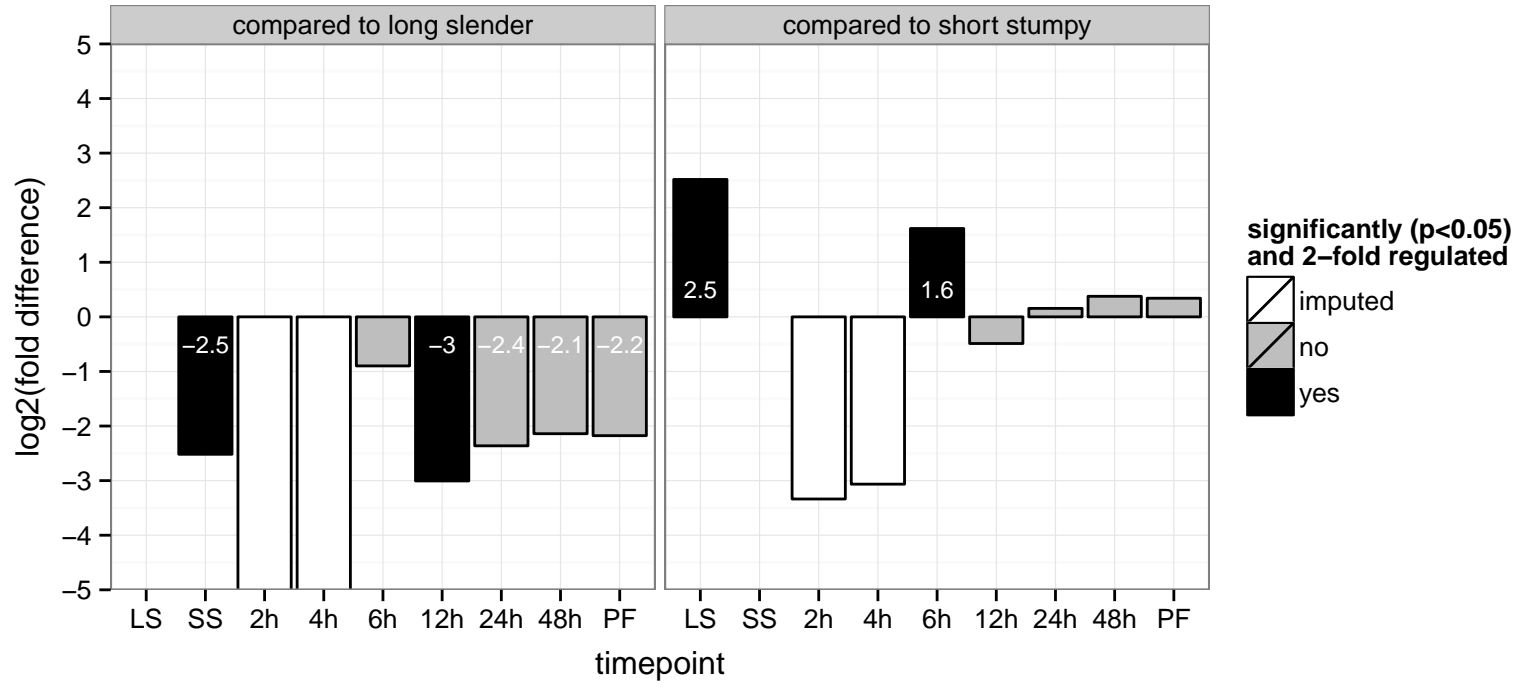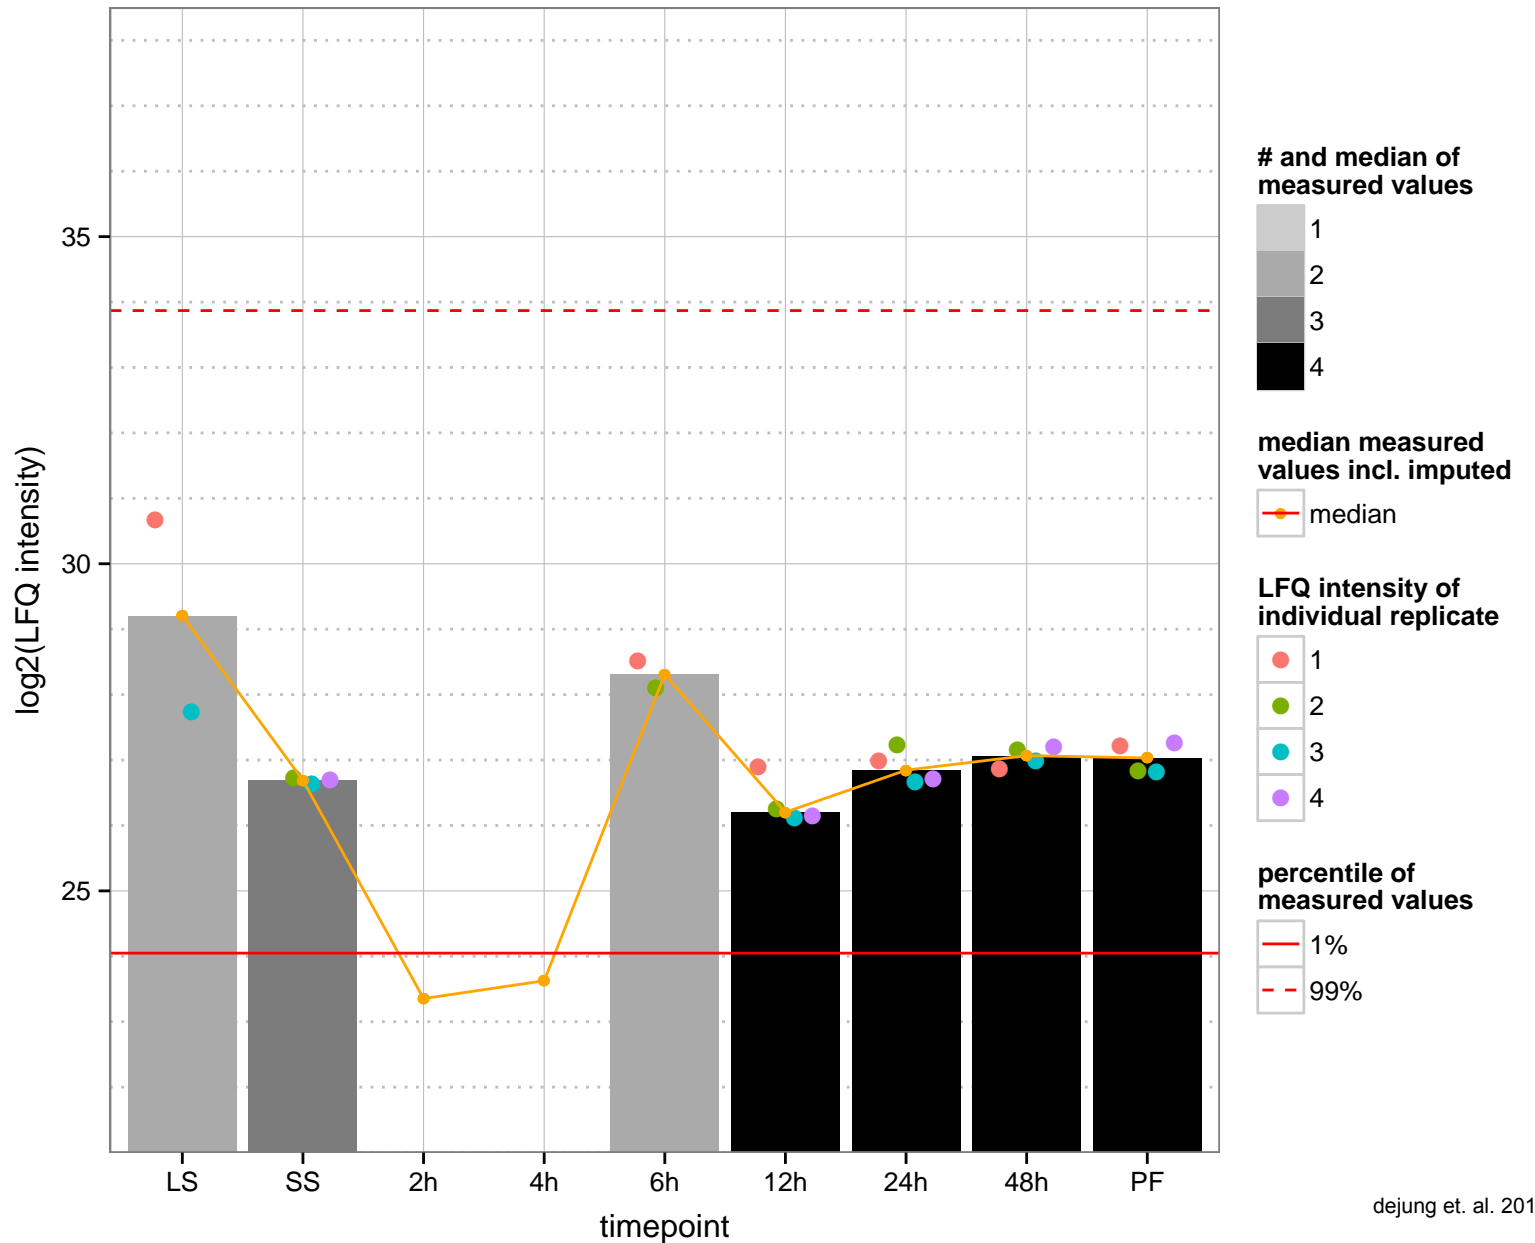

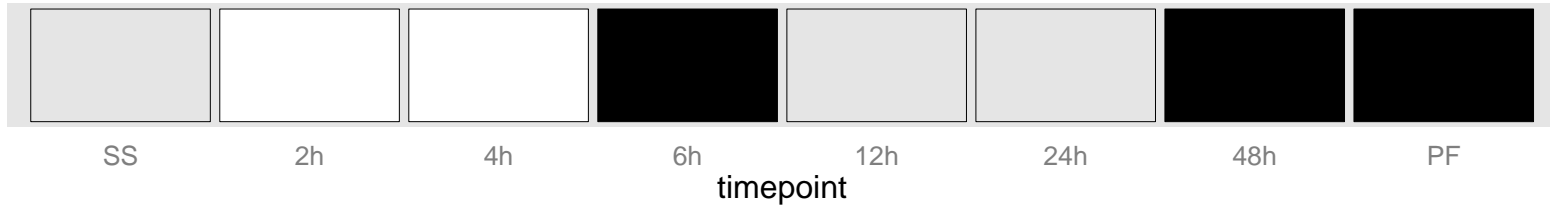

**regulated**  **not regulated**  **significant down**  **significant up**

metacaspase 5, putative (MCA5)

Tb927.9.14220

AGOF: cysteine-type endopeptidase activity

AGOC: null

AGOP: apoptotic process, cellular response to hydrogen peroxide, induction of apoptosis by oxidative stress, protein autoproc

PGOF: cysteine-type endopeptidase activity

PGOC: null

PGOP: proteolysis

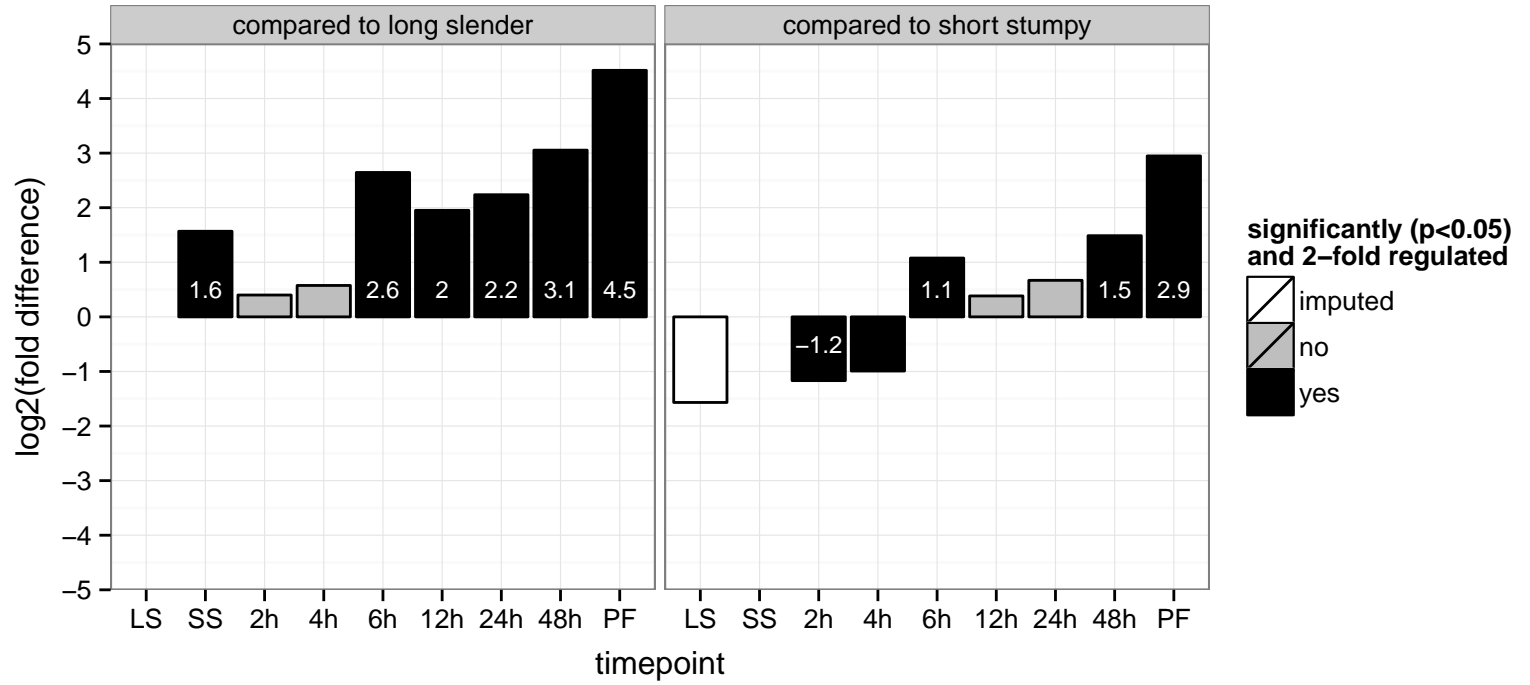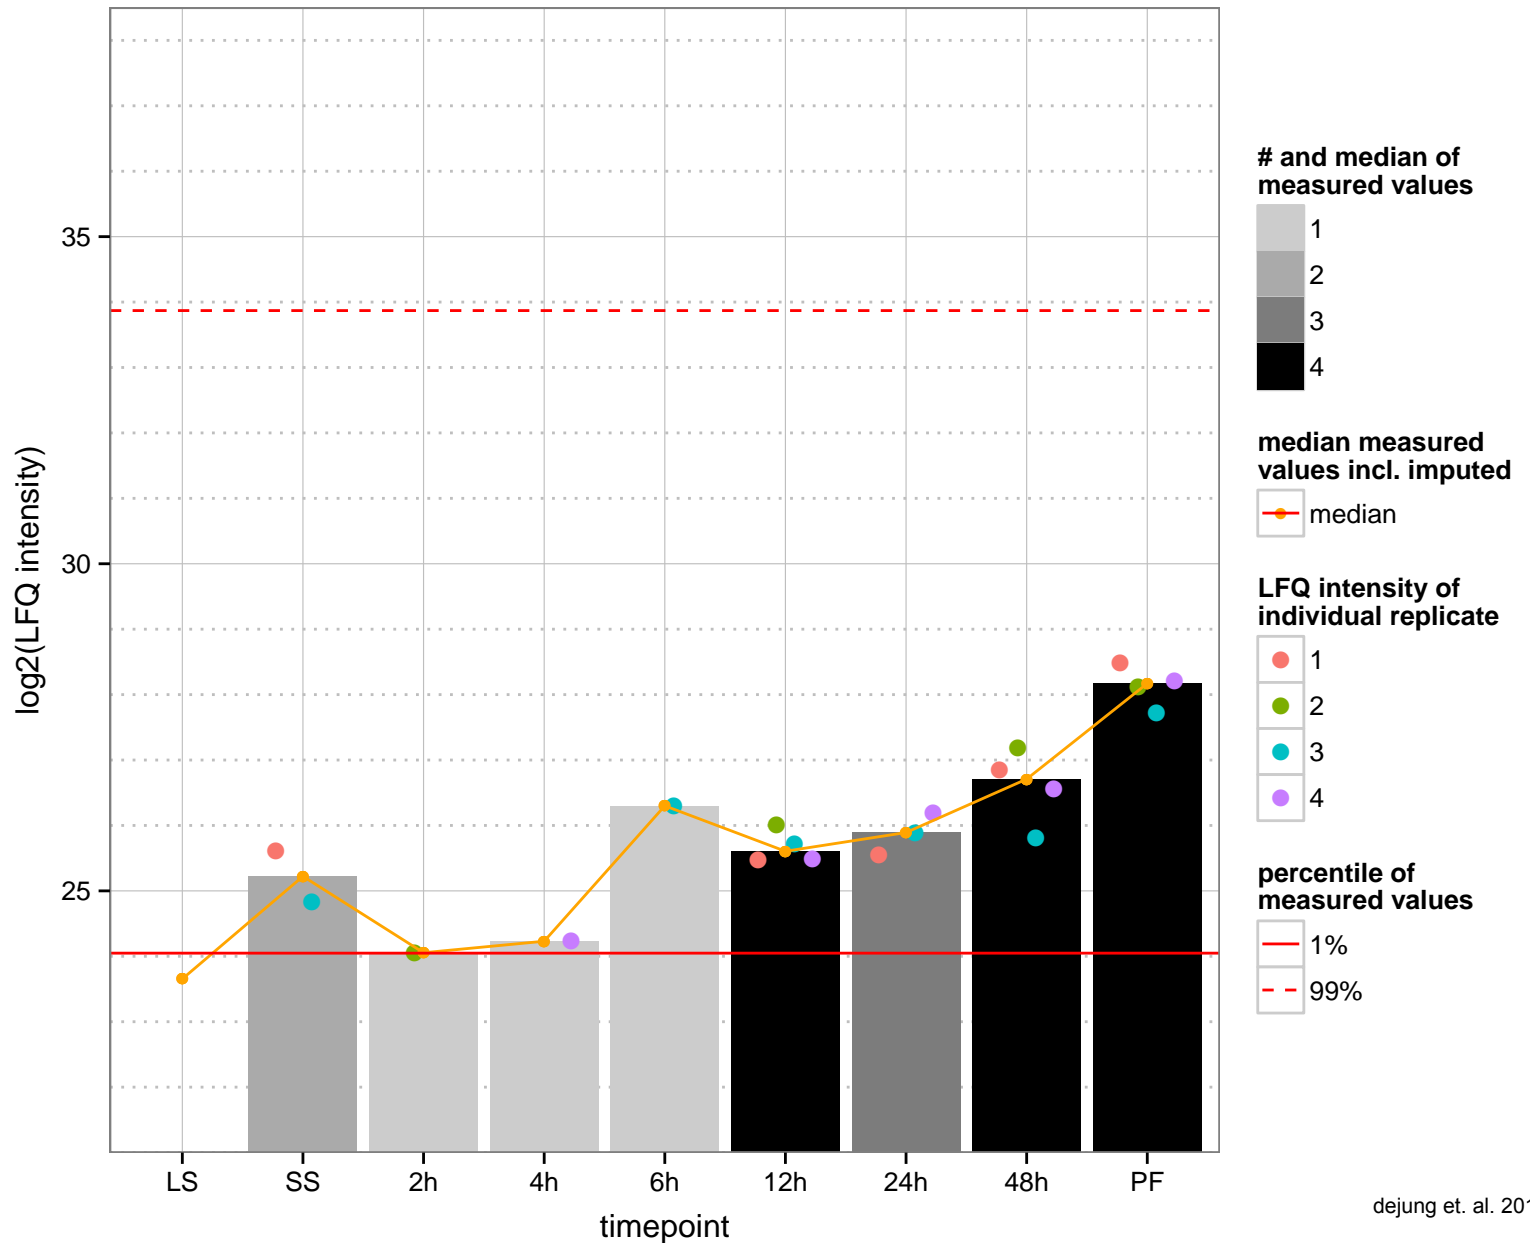

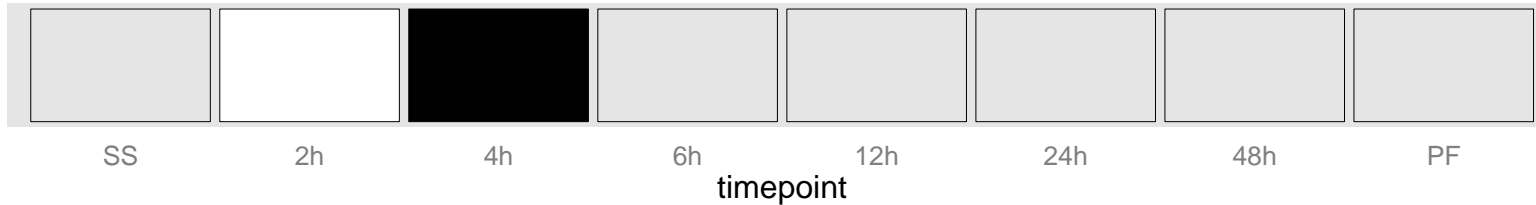

**regulated**  not regulated  significant down  significant up

Golgi reassembly stacking protein (GRASP homologue), putative  
 Tb927.11.2660  
 AGOF: null  
 AGOC: Golgi stack  
 AGOP: Golgi organization  
 PGO: protein binding  
 PGOC: null  
 PGOP: null

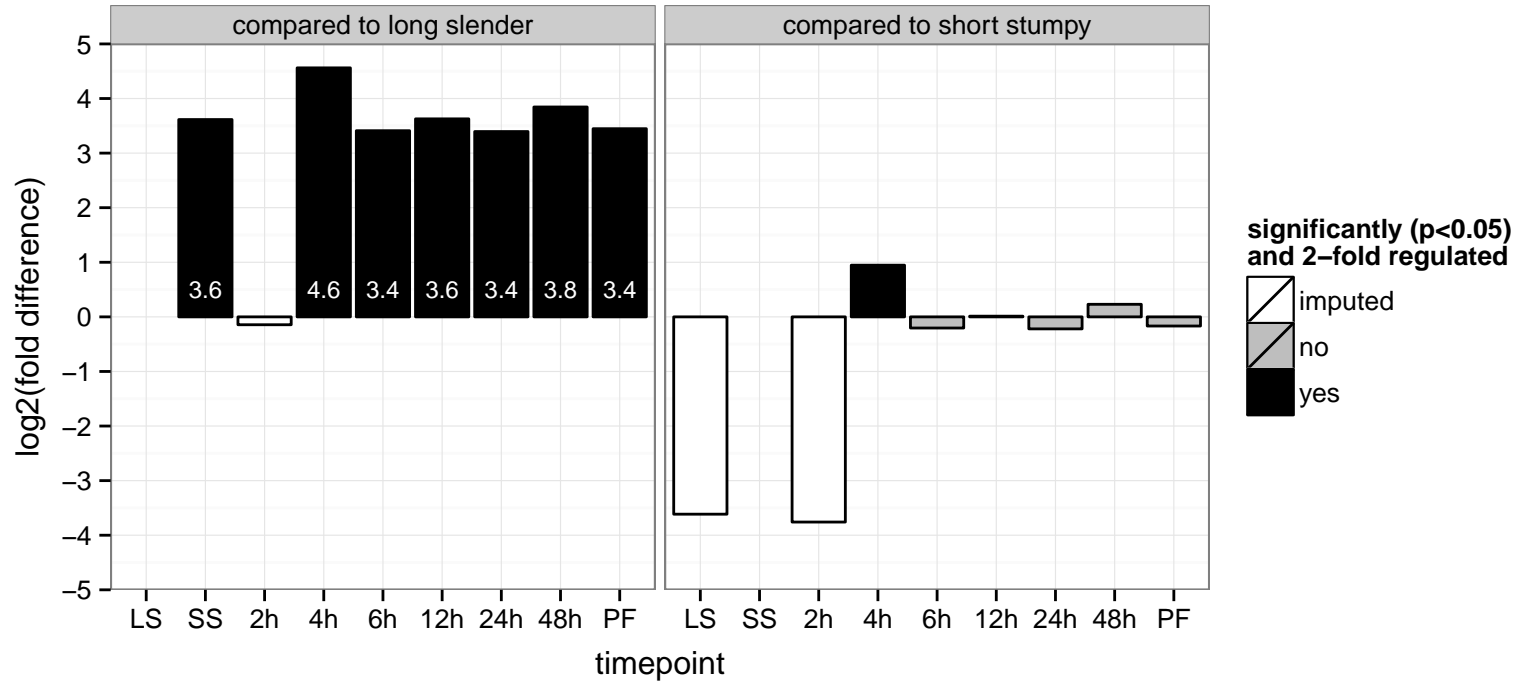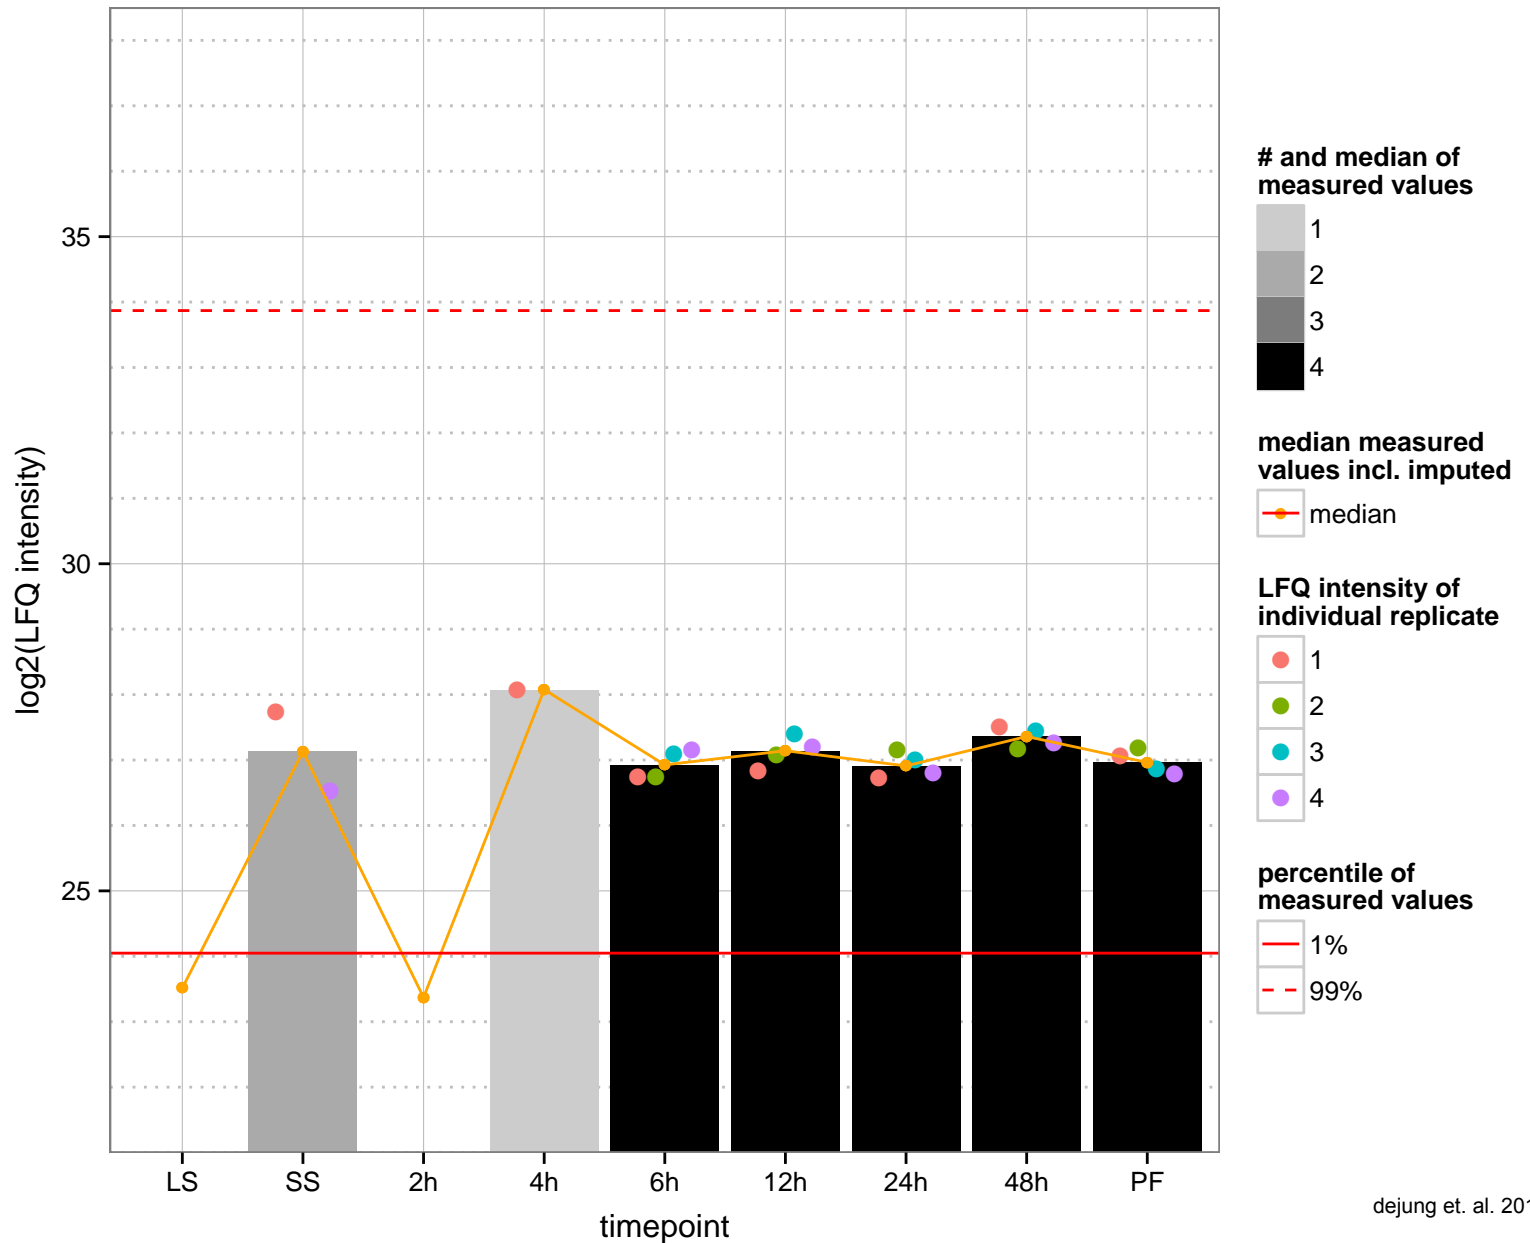

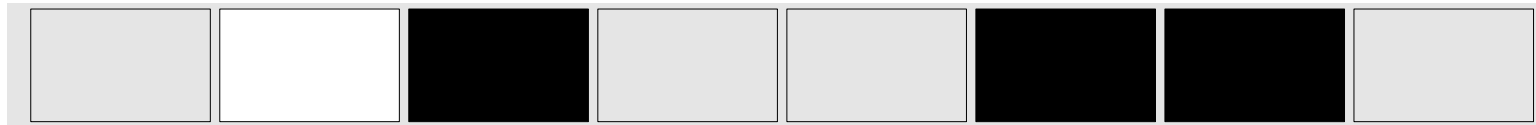

SS

2h

4h

6h

12h

24h

48h

PF

timepoint

**regulated**  **not regulated**  **significant down**  **significant up**

dejung et. al. 2015

hypothetical protein, conserved  
 Tb927.3.3110  
 AGOF: null  
 AGOC: null  
 AGOP: null  
 PGO: binding  
 PGOC: null  
 PGOP: null

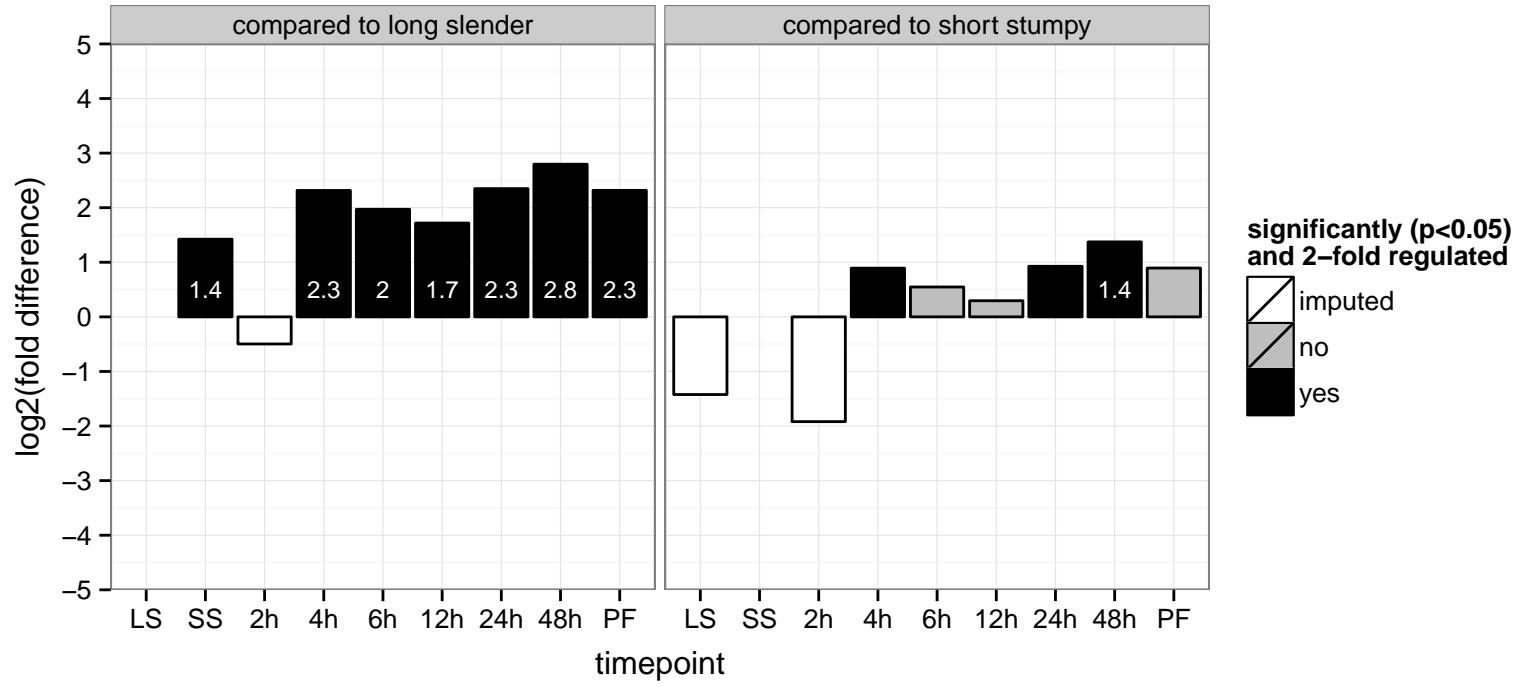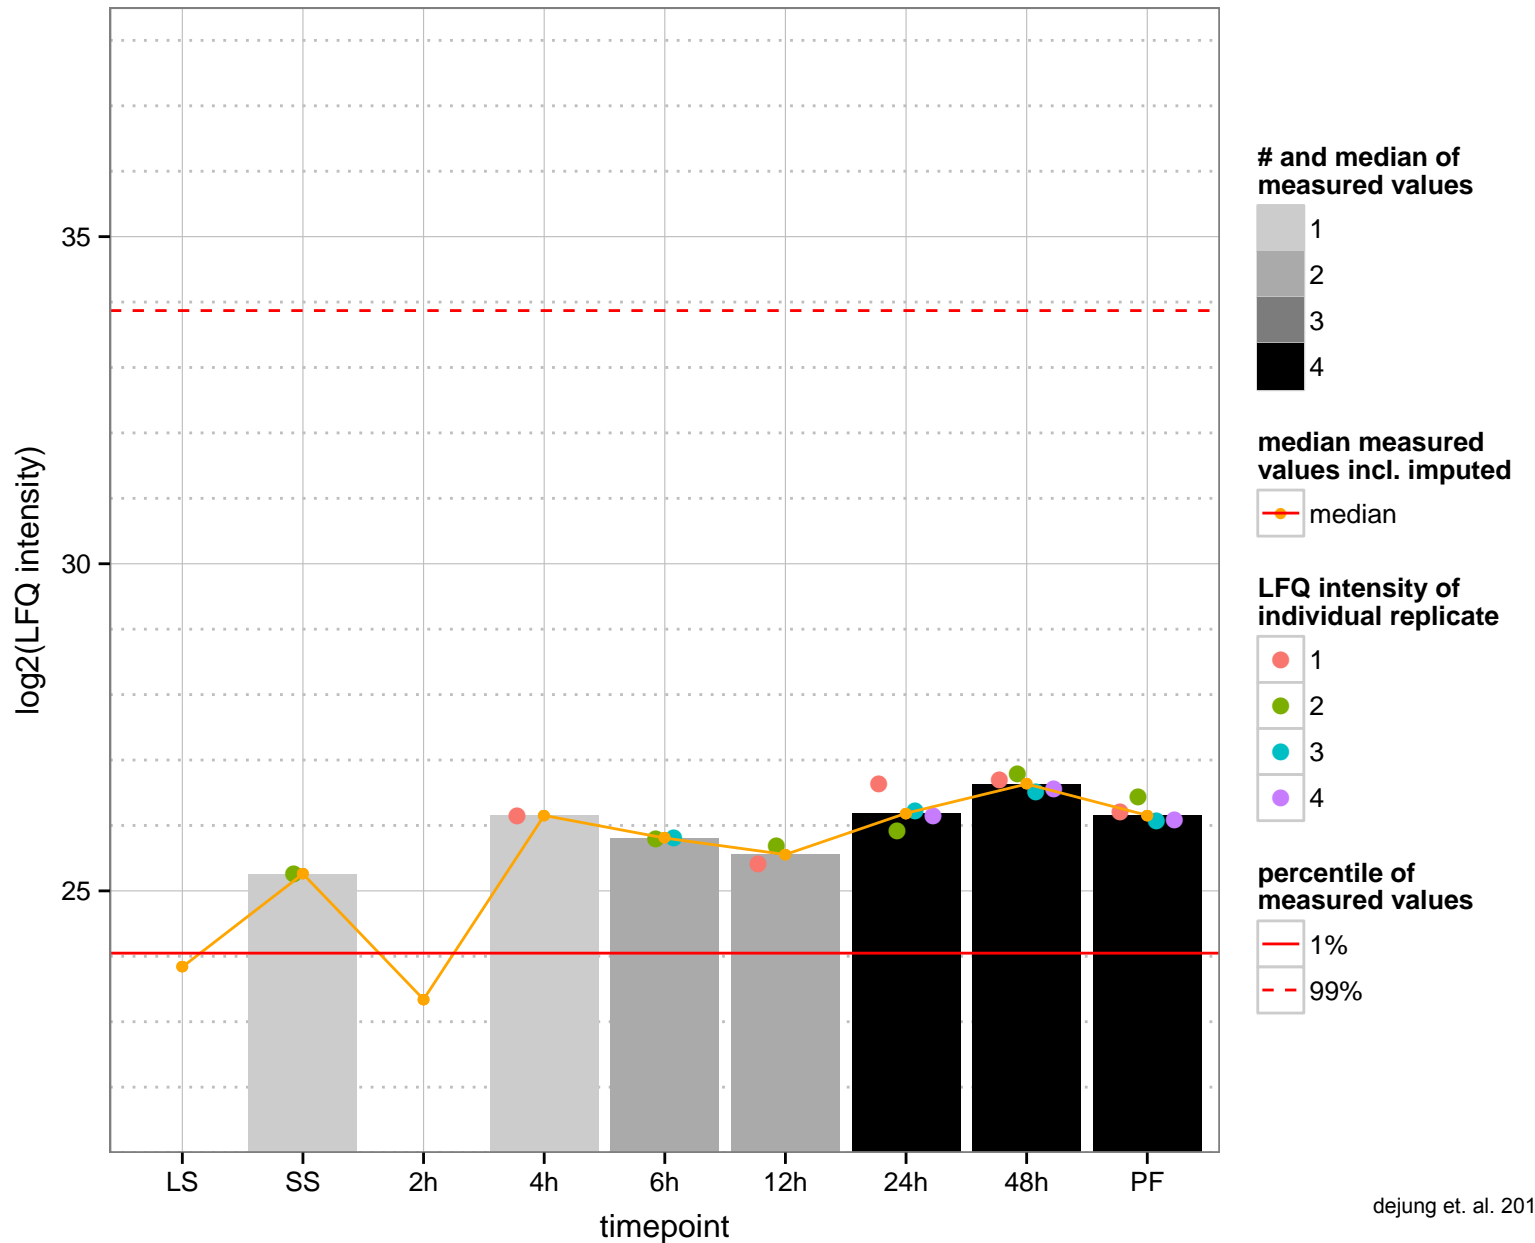

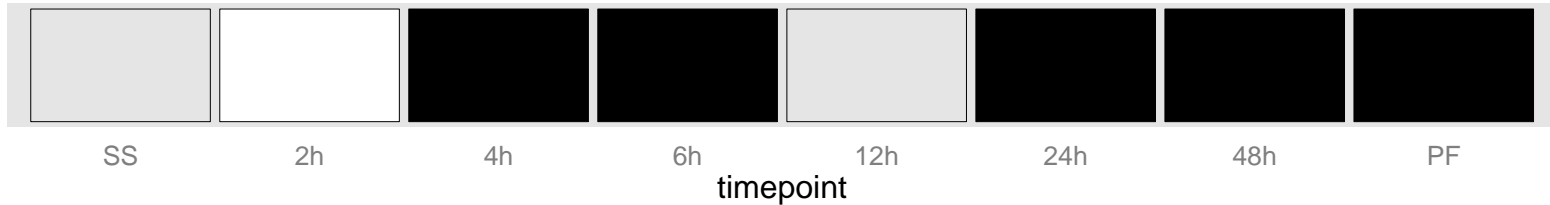

**regulated**  **not regulated**  **significant down**  **significant up**



hypothetical protein, conserved  
 Tb927.4.4370  
 AGOF: null  
 AGOC: null  
 AGOP: null  
 PGOF: null  
 PGOC: null  
 PGOP: null

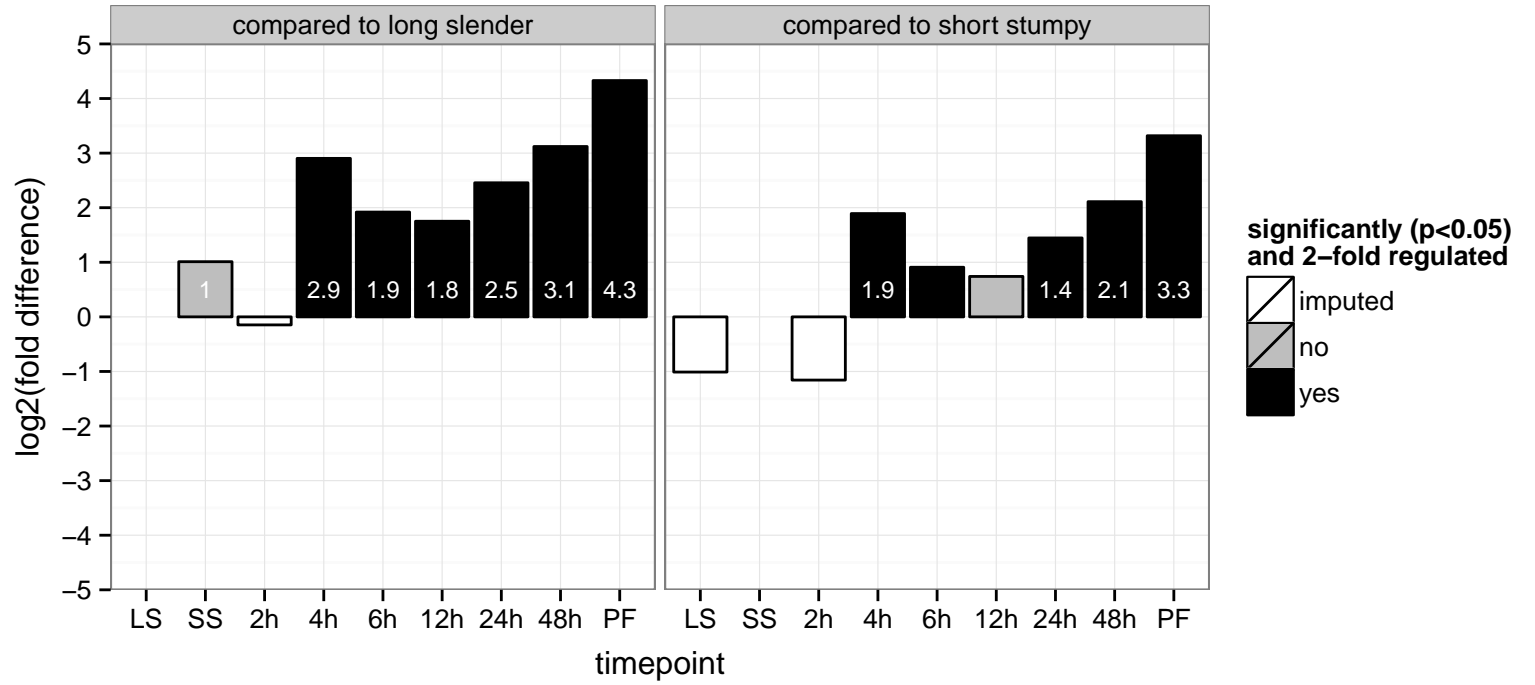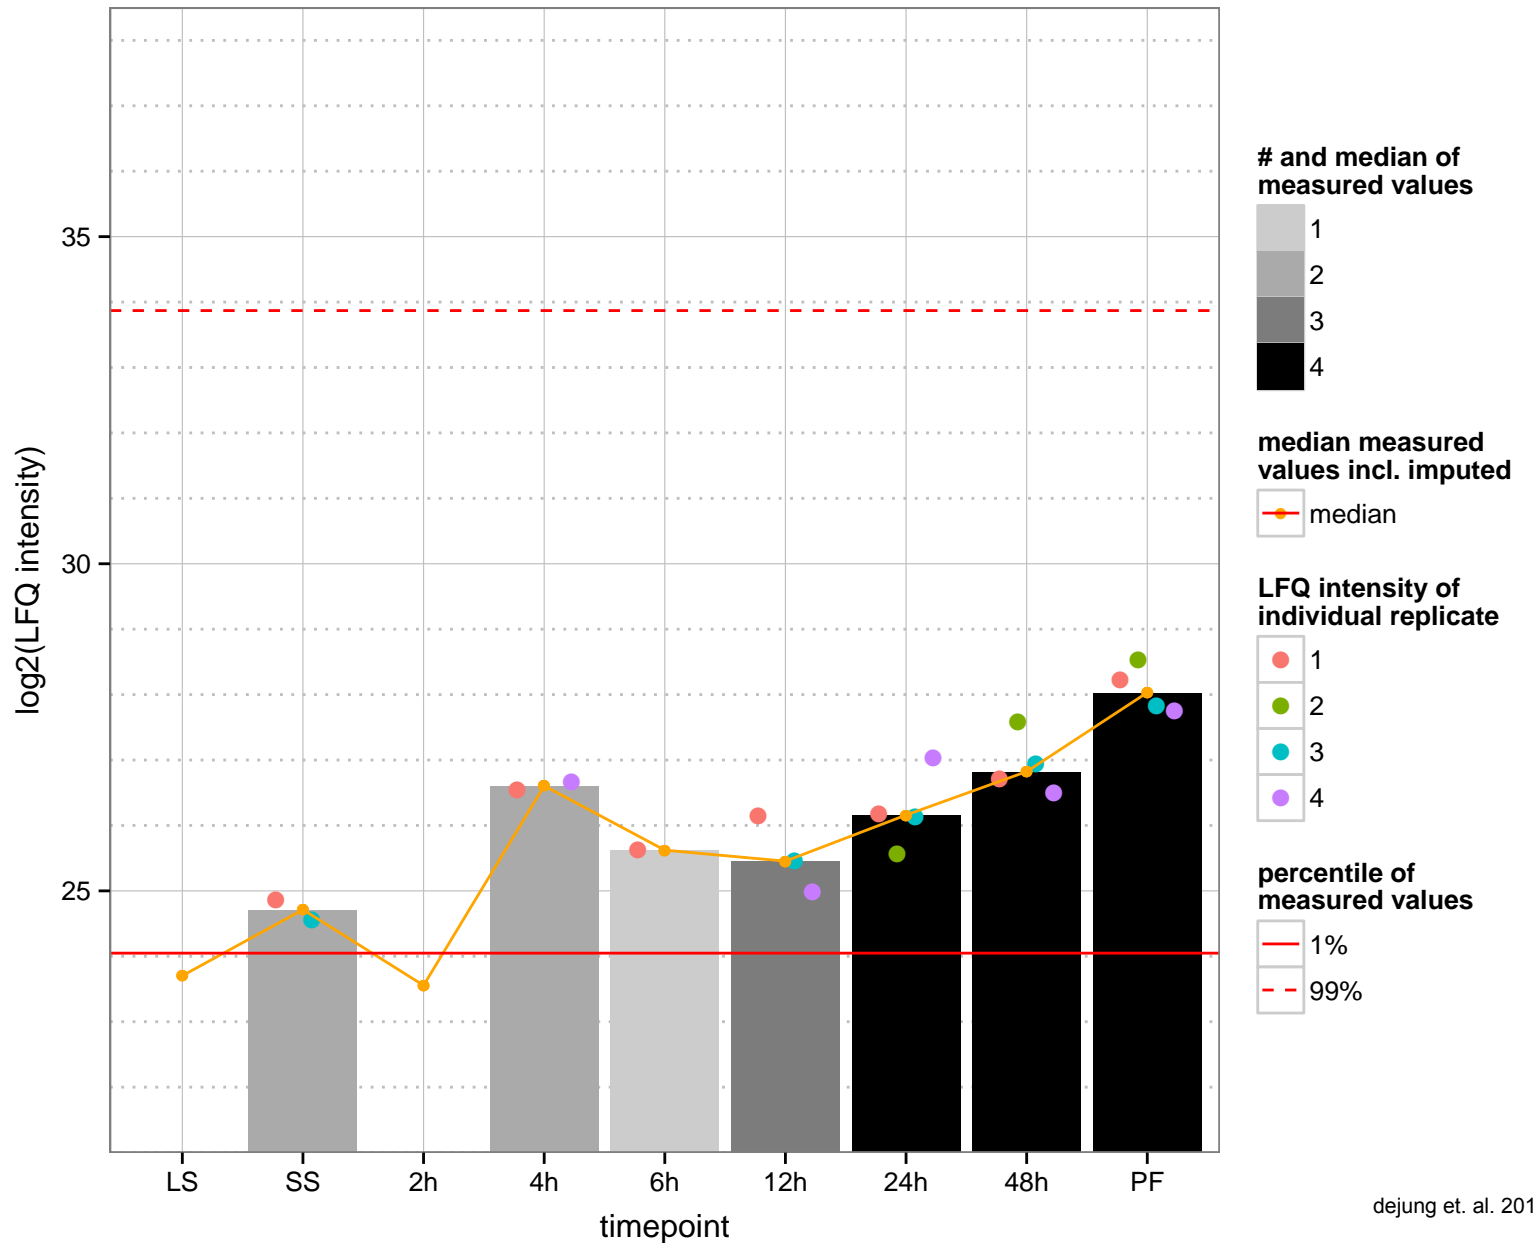

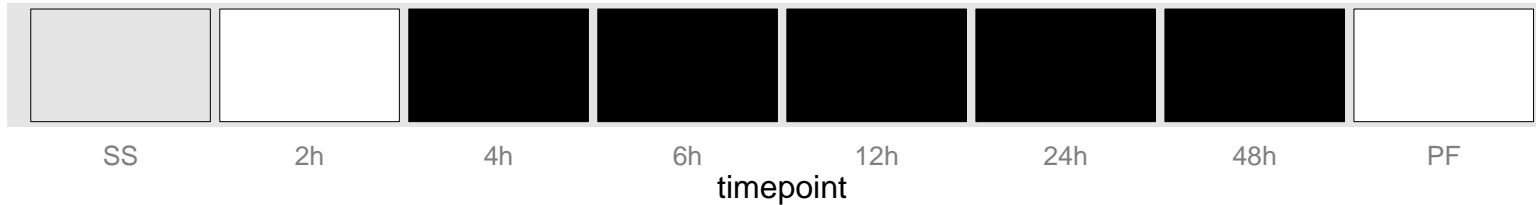

**regulated**  **not regulated**  **significant down**  **significant up**

TFIIF-stimulated CTD phosphatase, putative  
 Tb927.9.6100  
 AGOF: null  
 AGOC: mitochondrion  
 AGOP: null  
 PGO: protein binding  
 PGO: null  
 PGO: null

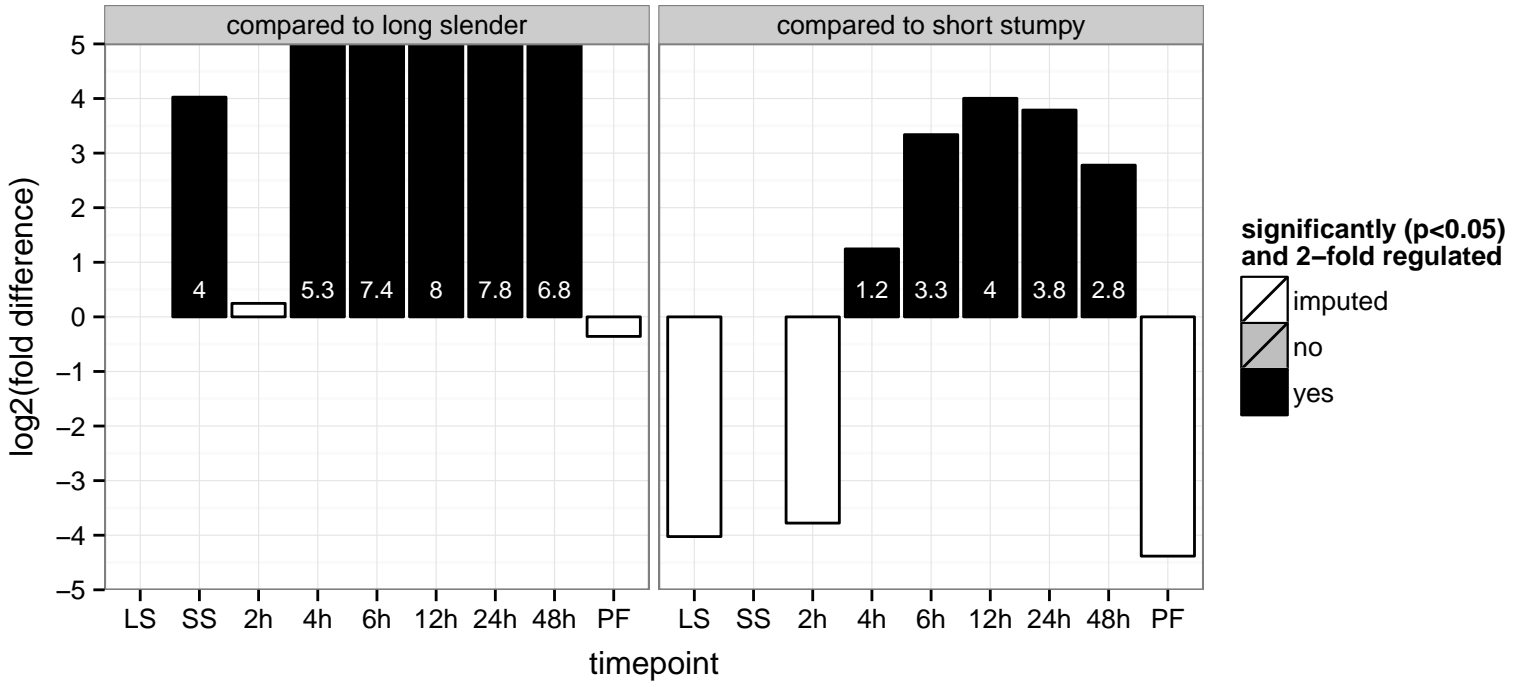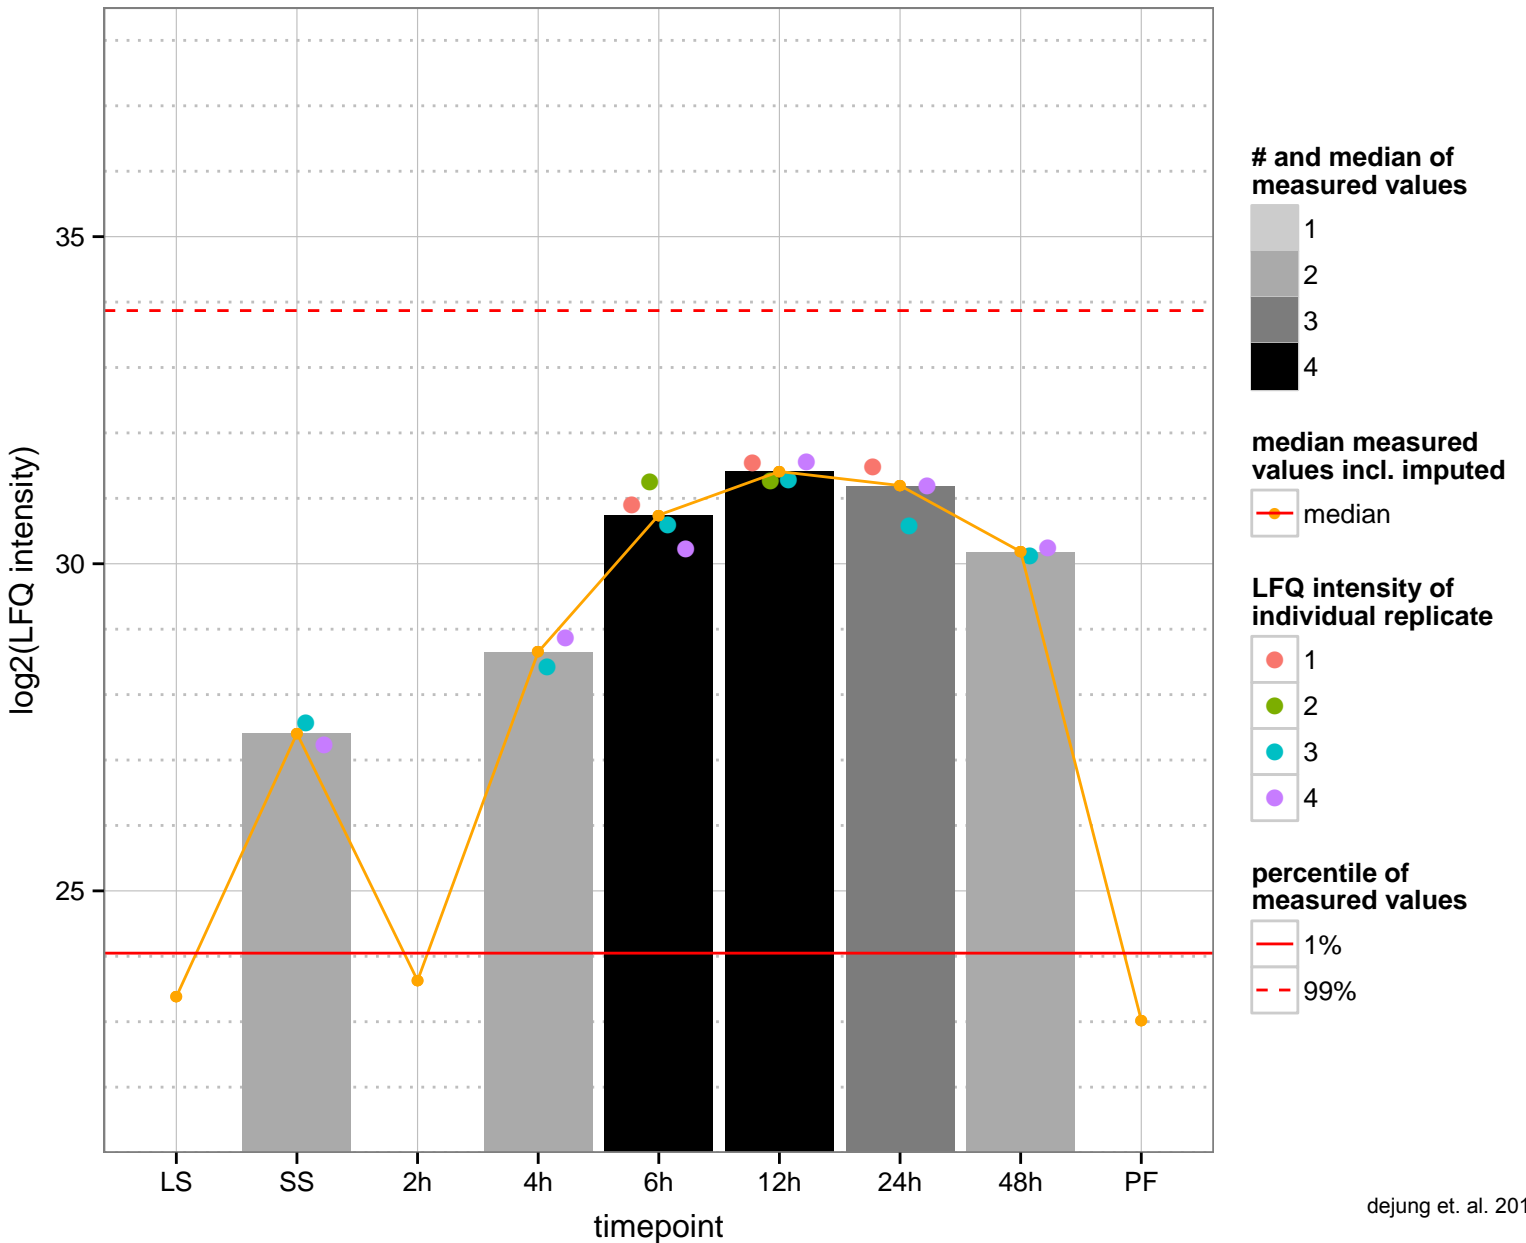

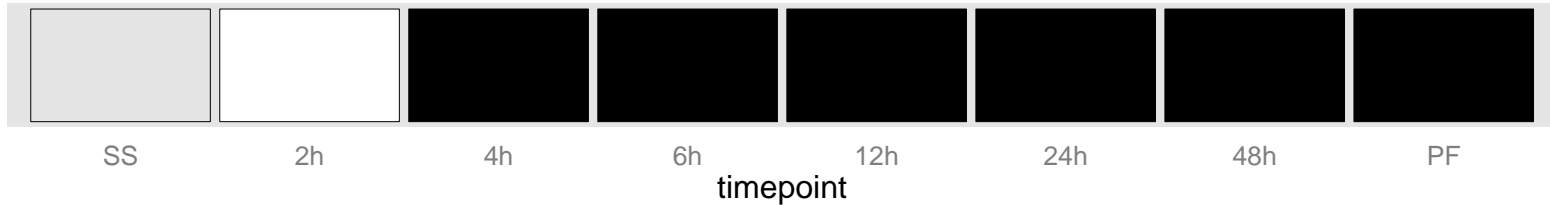

**regulated**  not regulated  significant down  significant up

gamma-glutamylcysteine synthetase (GCS)

Tb927.10.12370

AGOF: glutamate-cysteine ligase activity

AGOC: null

AGOP: glutathione biosynthetic process, response to reactive oxygen species, trypanothione biosynthetic process

PGOF: glutamate-cysteine ligase activity

PGOC: null

PGOP: glutathione biosynthetic process

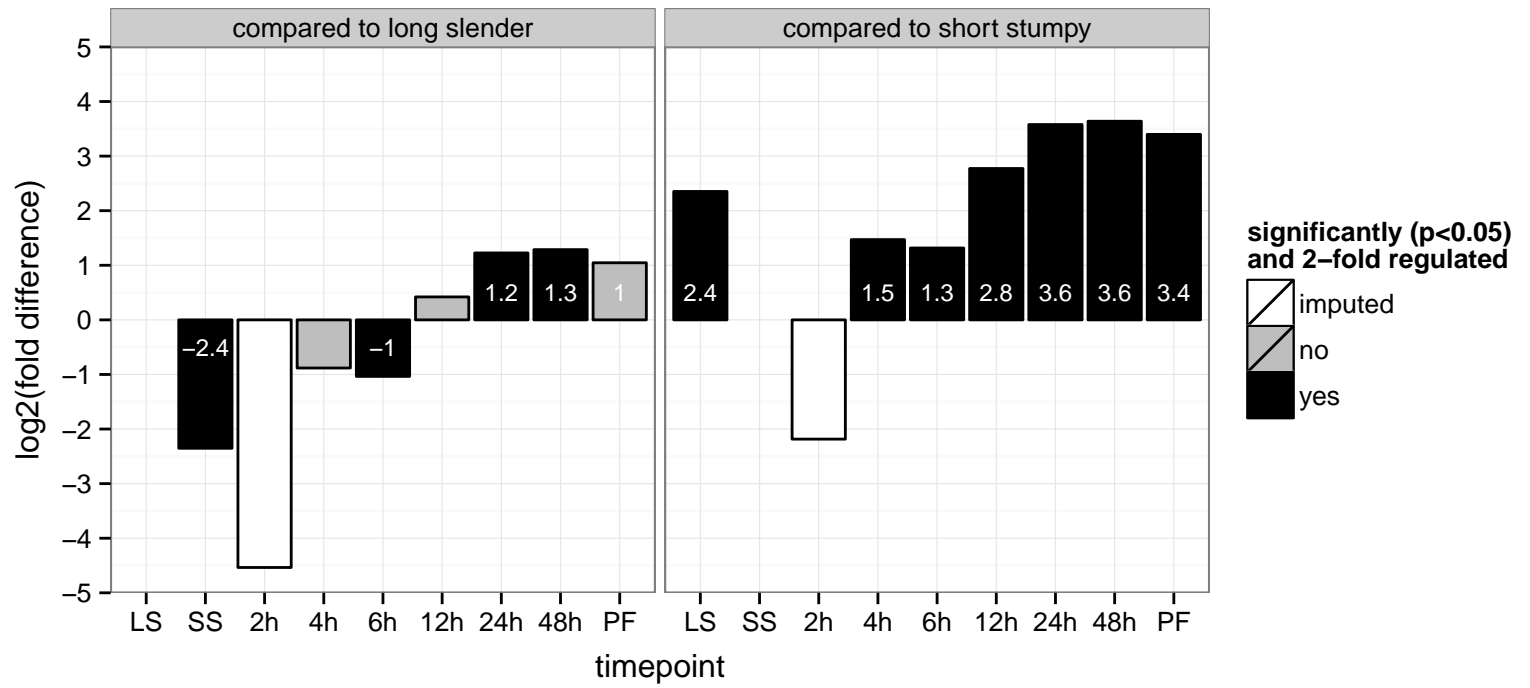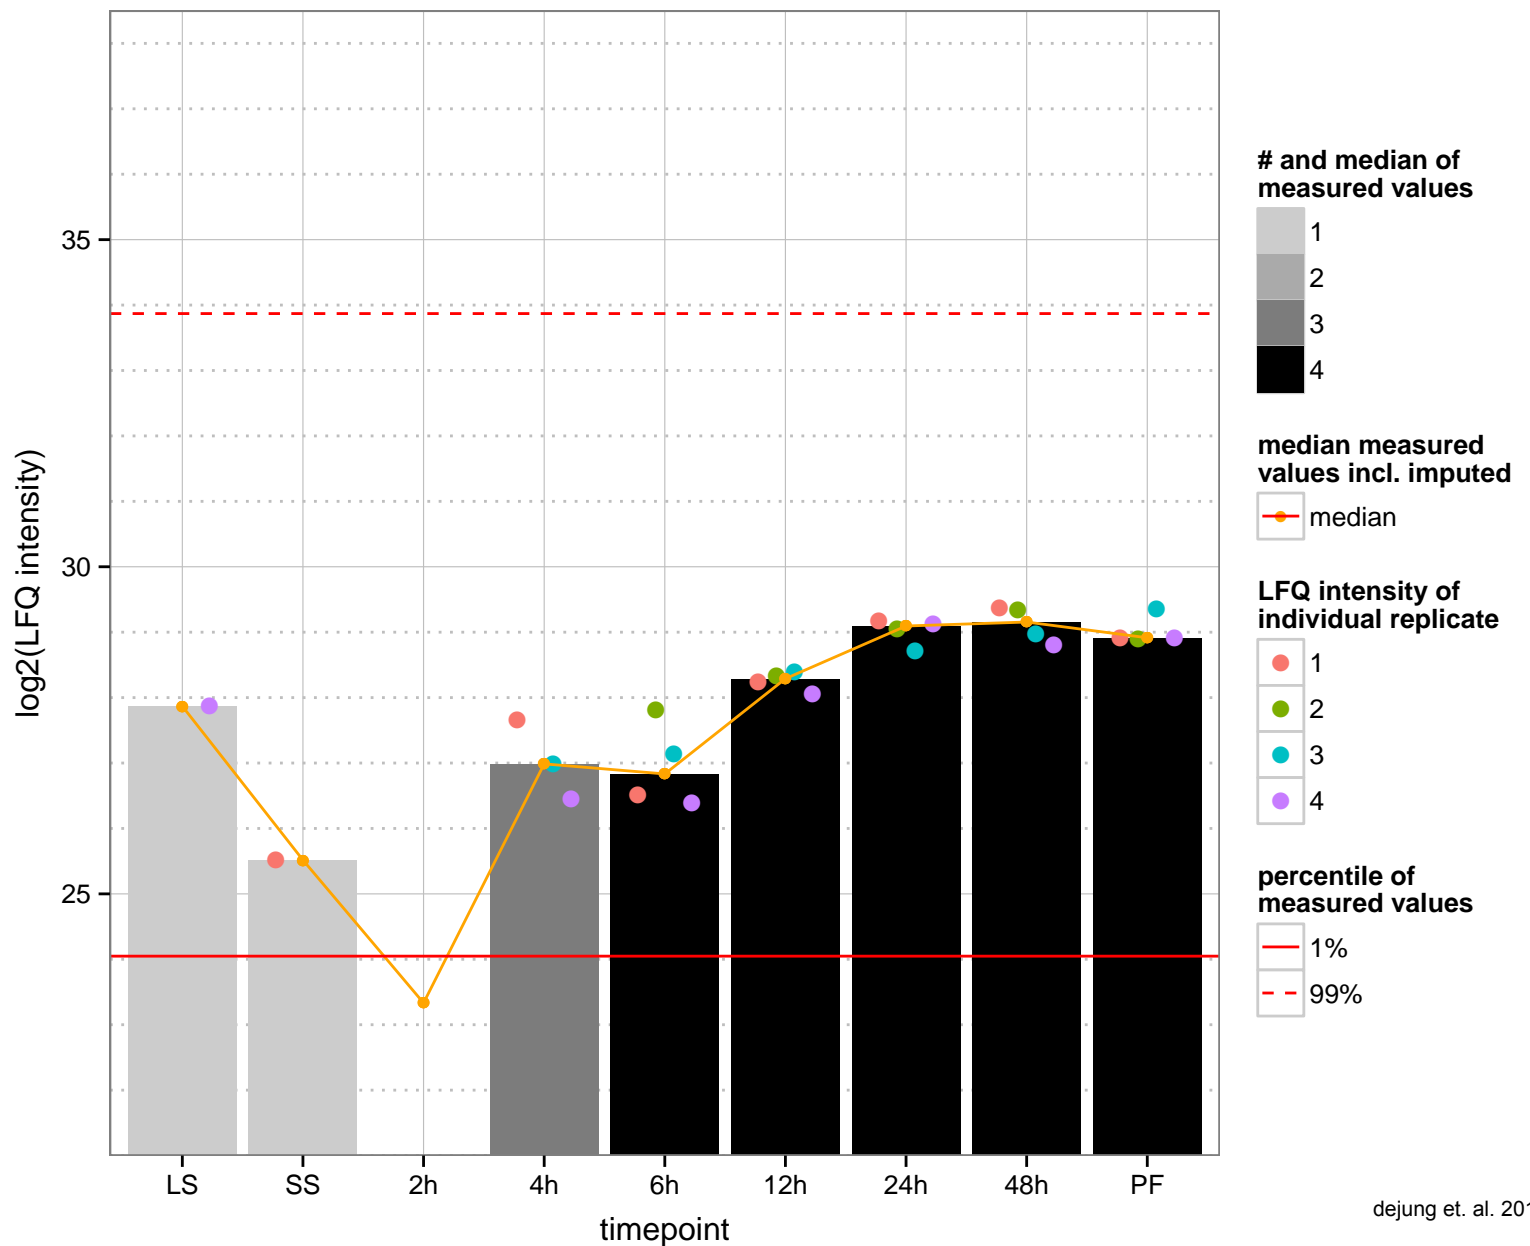

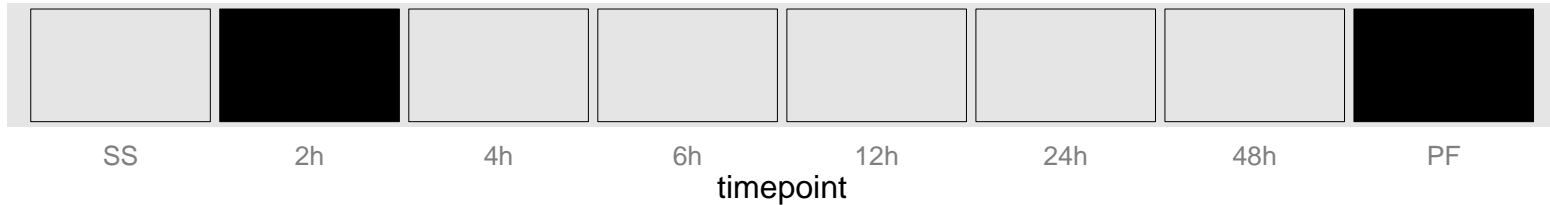

**regulated**  **not regulated**  **significant down**  **significant up**

hypothetical protein, conserved  
 Tb927.3.3500  
 AGOF: null  
 AGOC: null  
 AGOP: null  
 PGOF: null  
 PGOC: null  
 PGOP: null

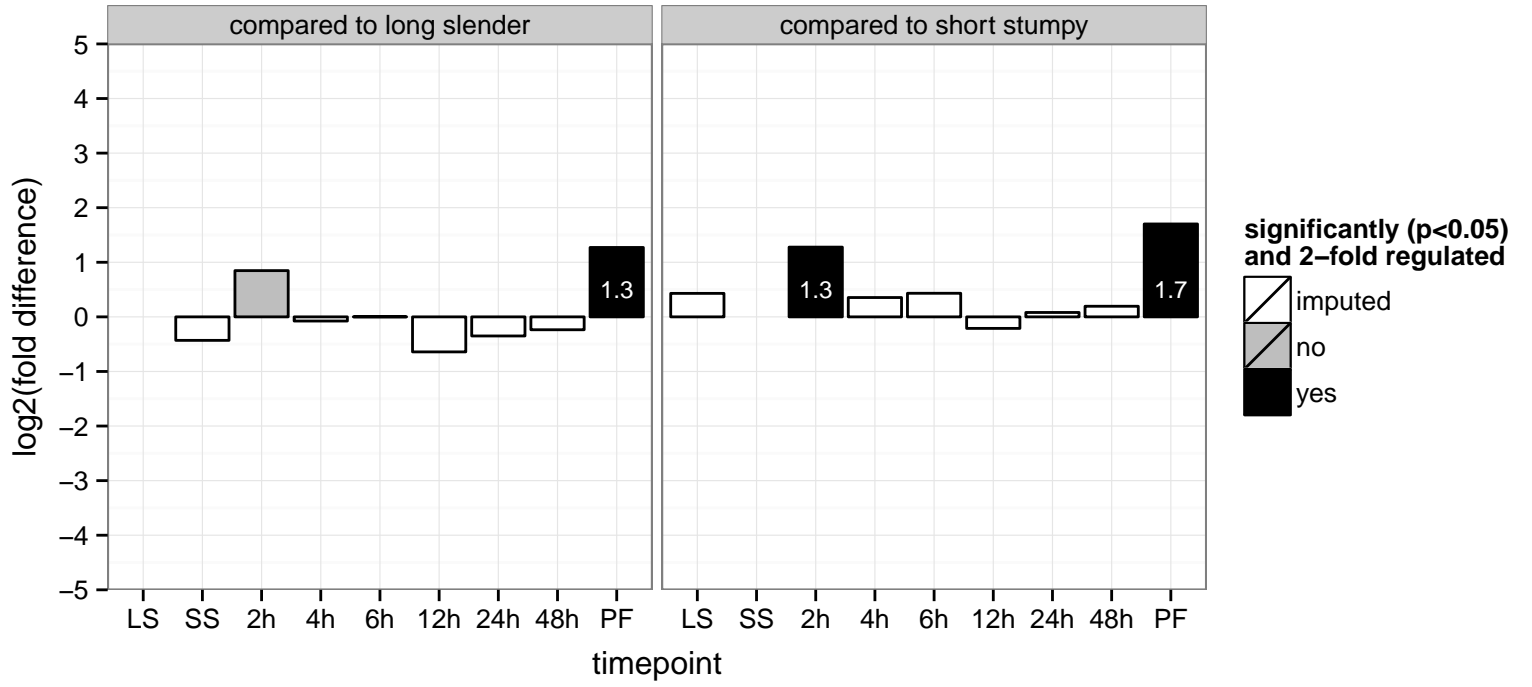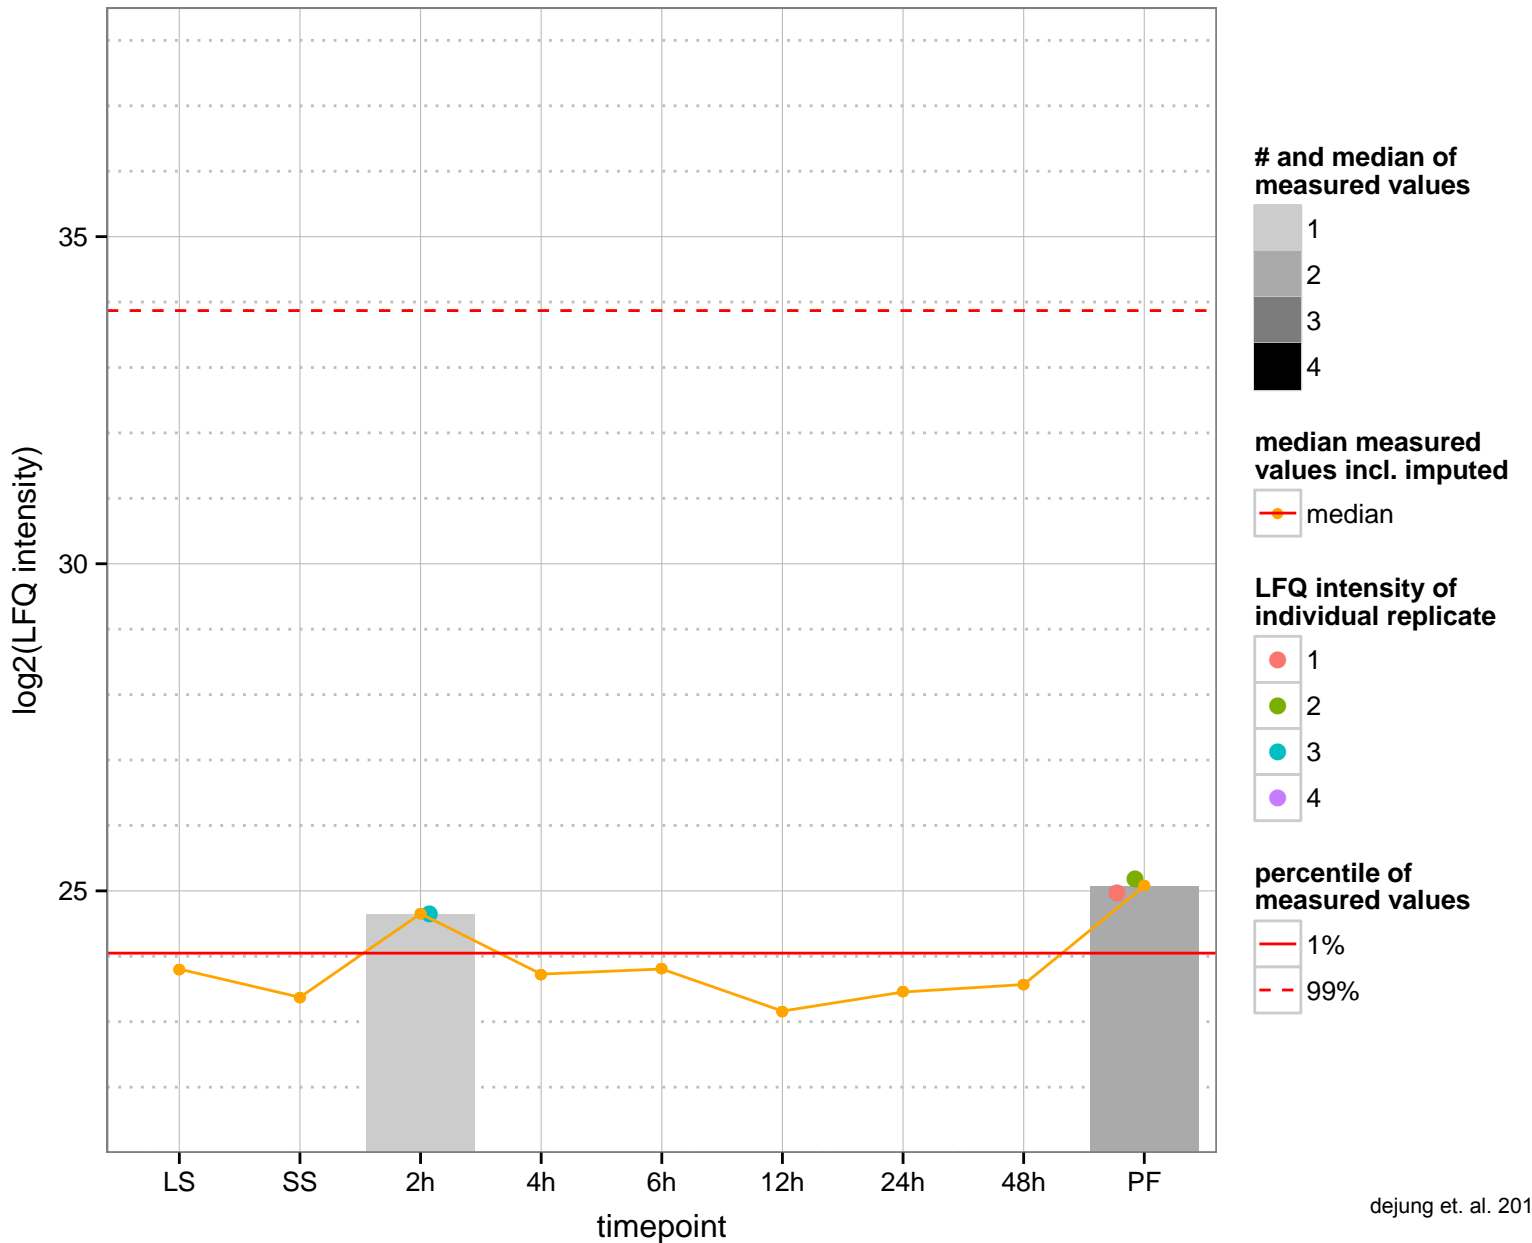

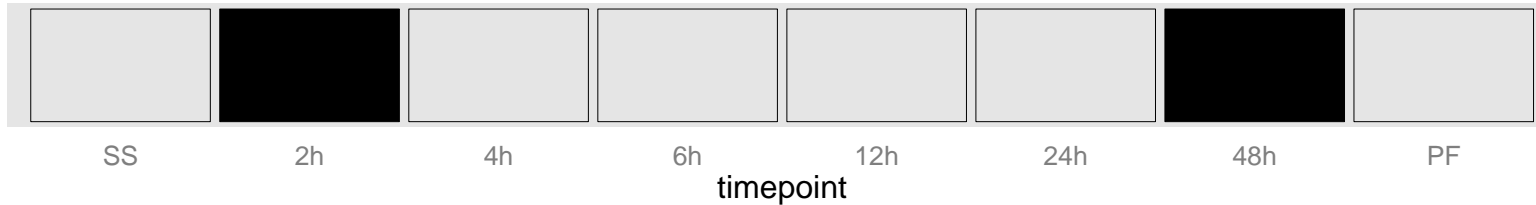

**regulated**  **not regulated**  **significant down**  **significant up**



hypothetical protein, conserved  
 Tb927.8.5170  
 AGOF: null  
 AGOC: null  
 AGOP: null  
 PGOF: null  
 PGOC: null  
 PGOP: null

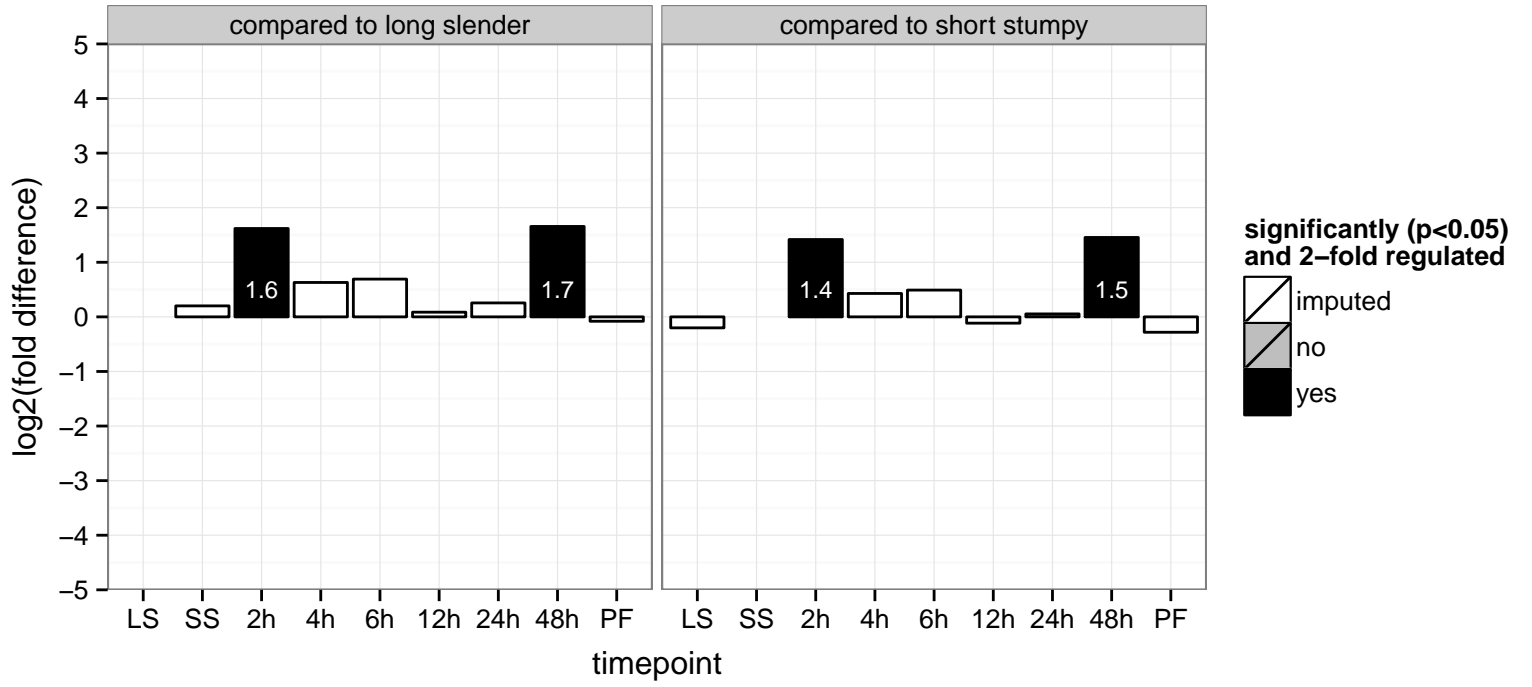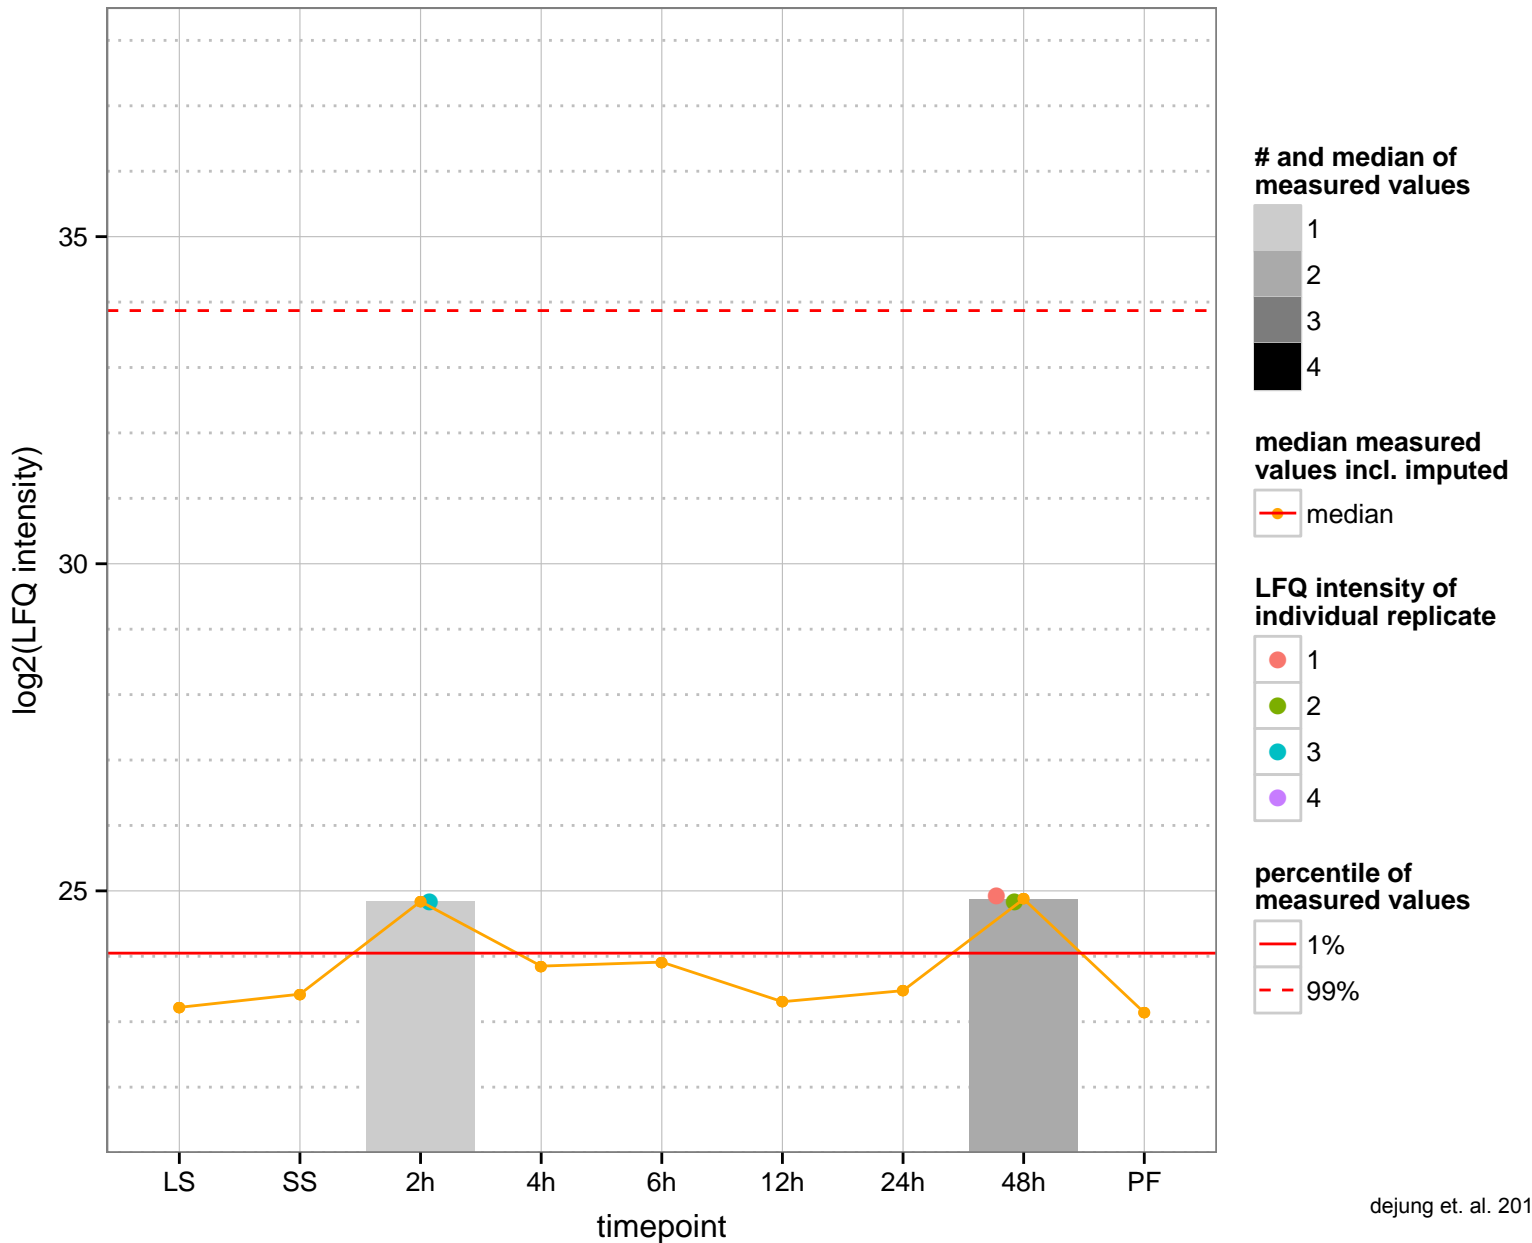

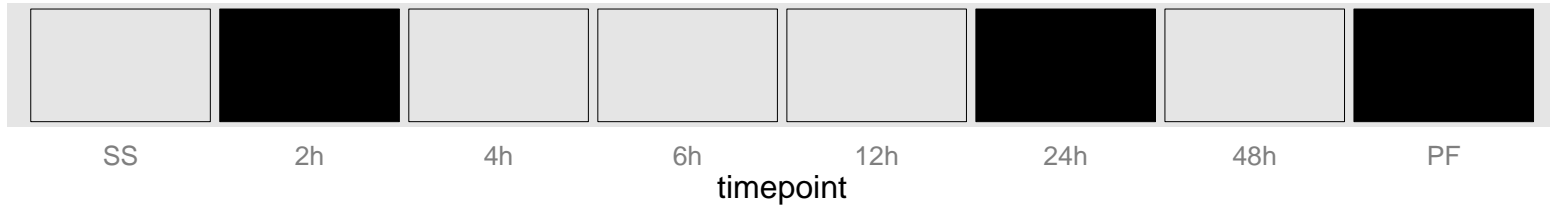

**regulated**  not regulated  significant down  significant up

cyclosome subunit 1, putative  
 Tb927.6.3280  
 AGOF: null  
 AGOC: null  
 AGOP: null  
 PGO: null  
 PGOC: null  
 PGOP: null

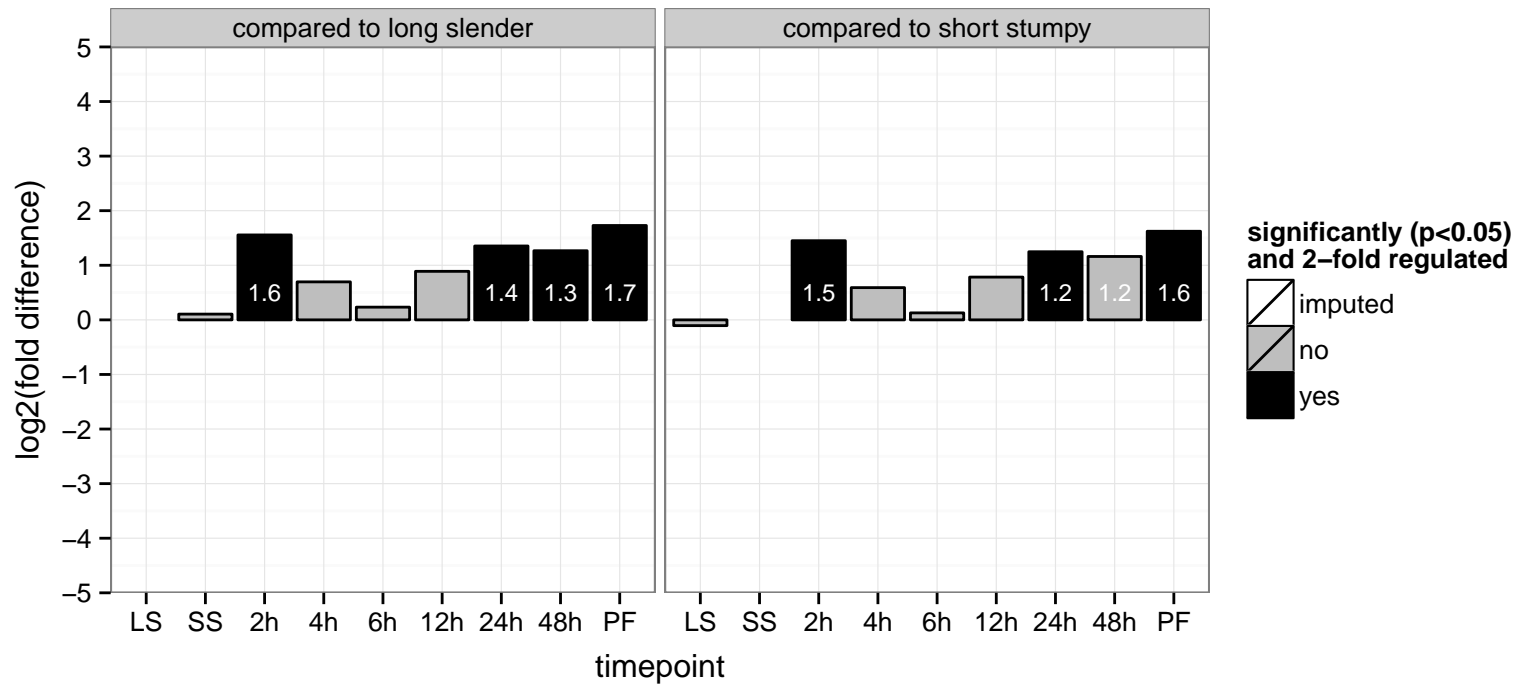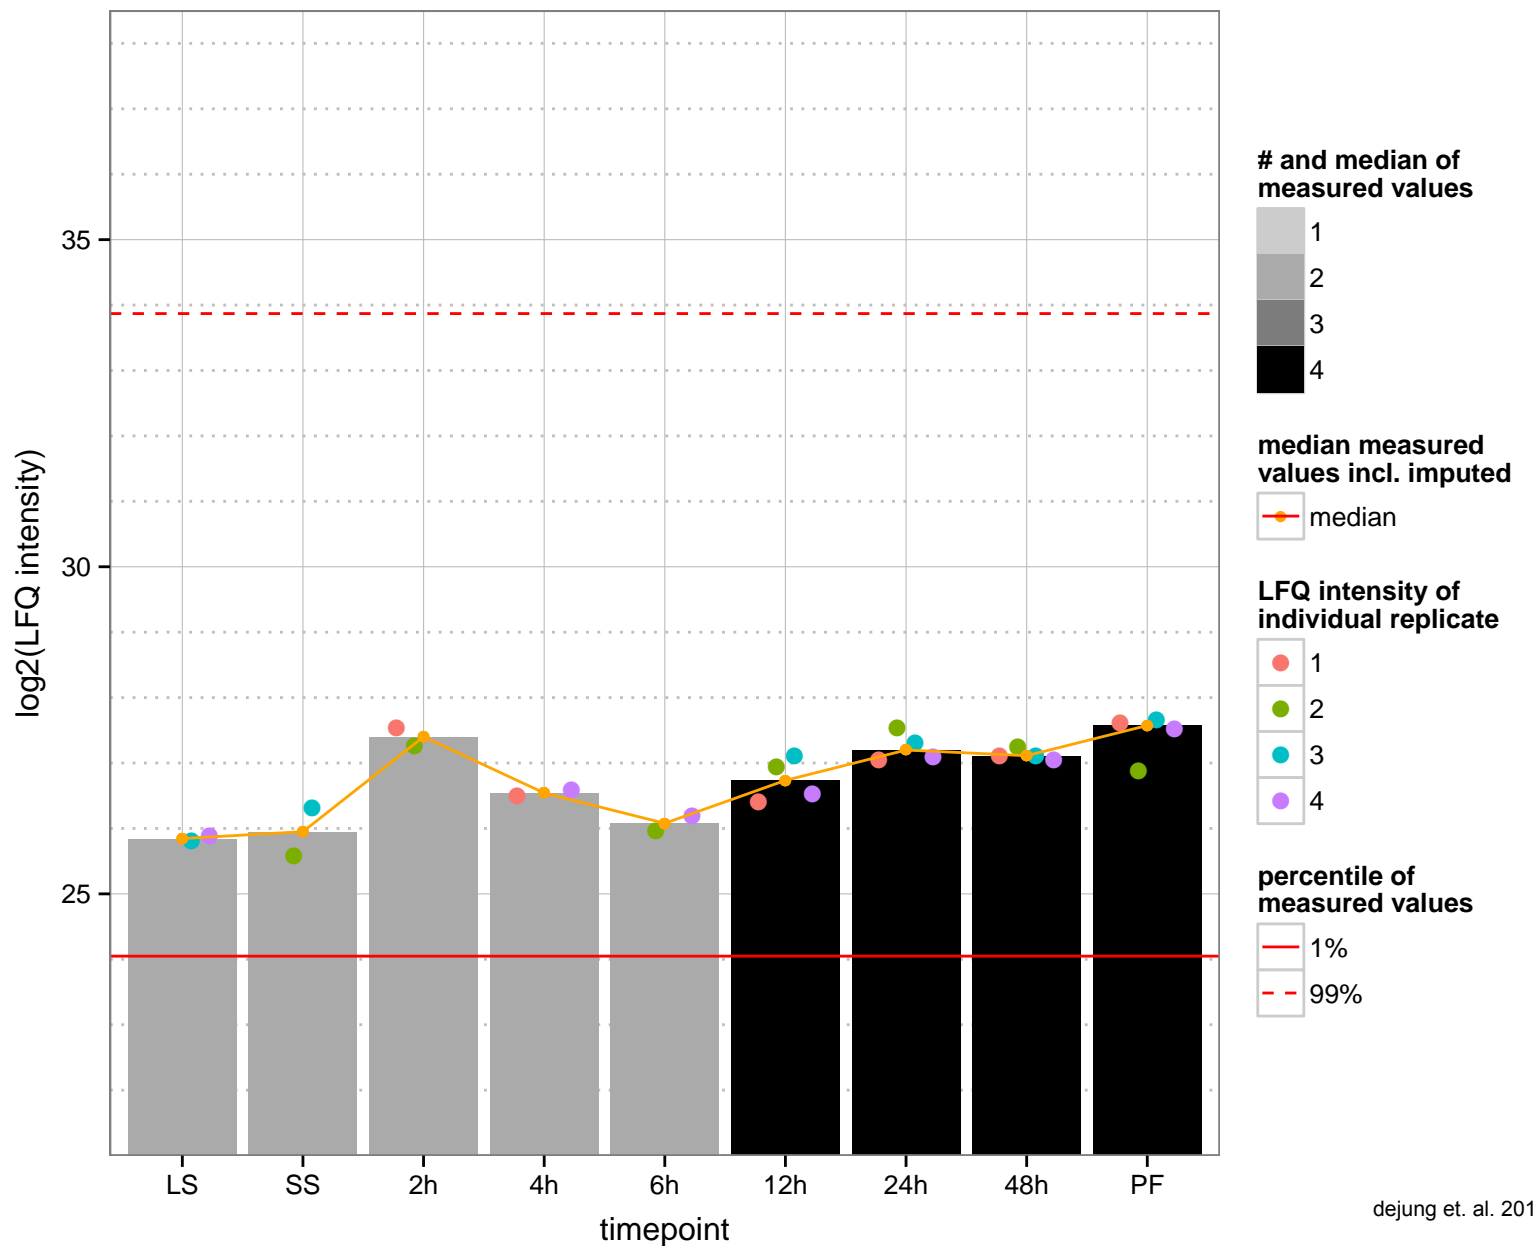

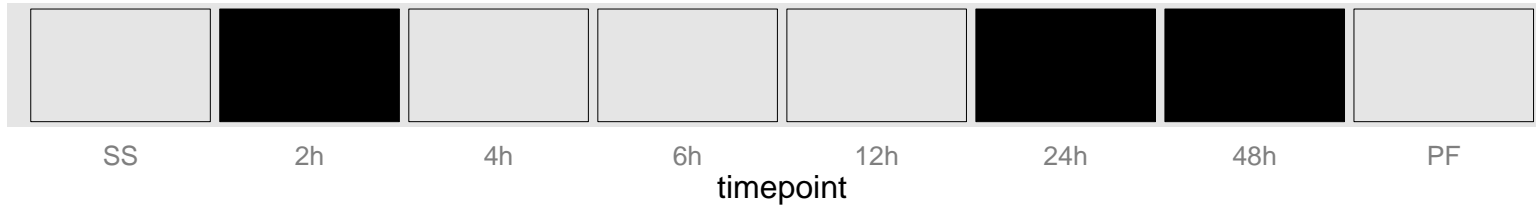

**regulated**  not regulated  significant down  significant up

peptide methionine sulfoxide reductase, putative, peptide Met(O) reductase, methionine-S-sulfoxide reductase  
 Tb927.8.550  
 AGOF: peptide-methionine-(S)-S-oxide reductase activity  
 AGOC: null  
 AGOP: cellular protein modification process, oxidation-reduction process  
 PGOF: oxidoreductase activity, acting on a sulfur group of donors, disulfide as acceptor  
 PGOC: null  
 PGOP: oxidation-reduction process, protein metabolic process

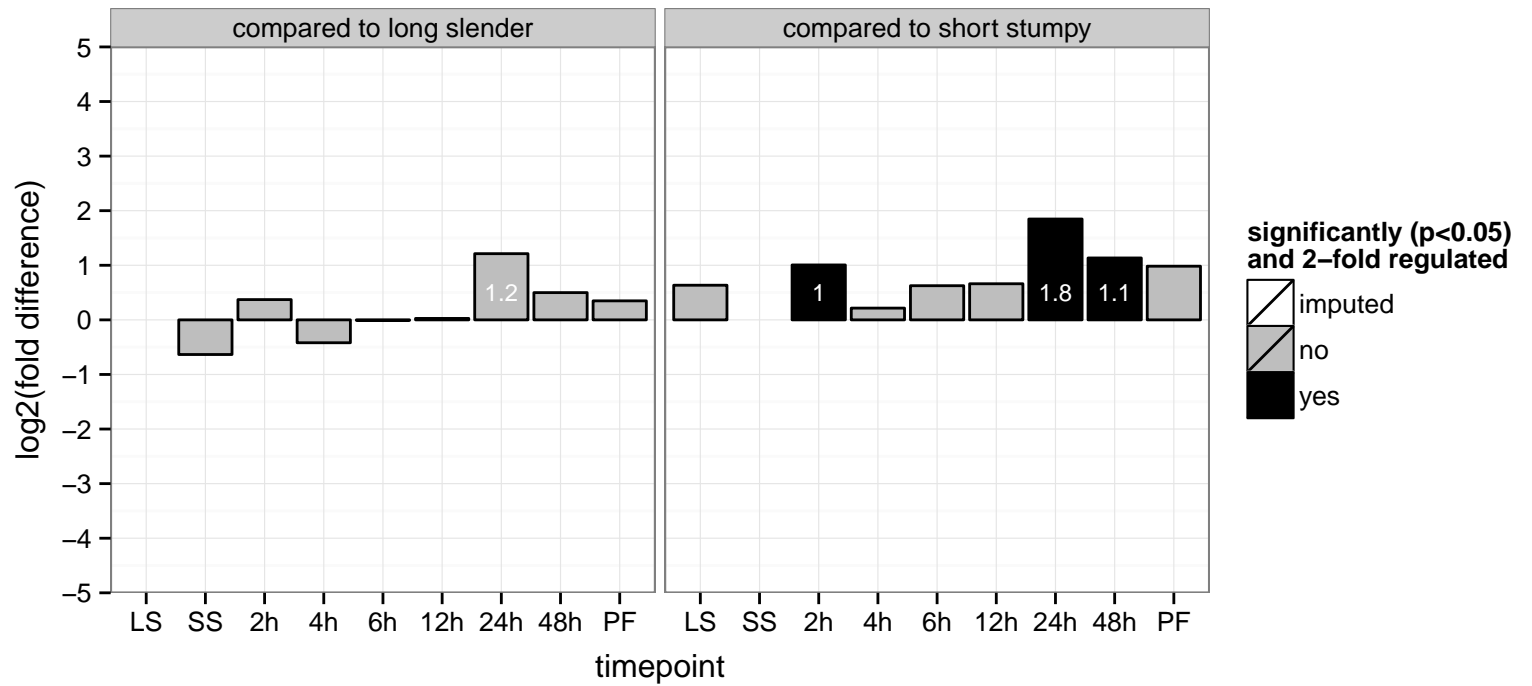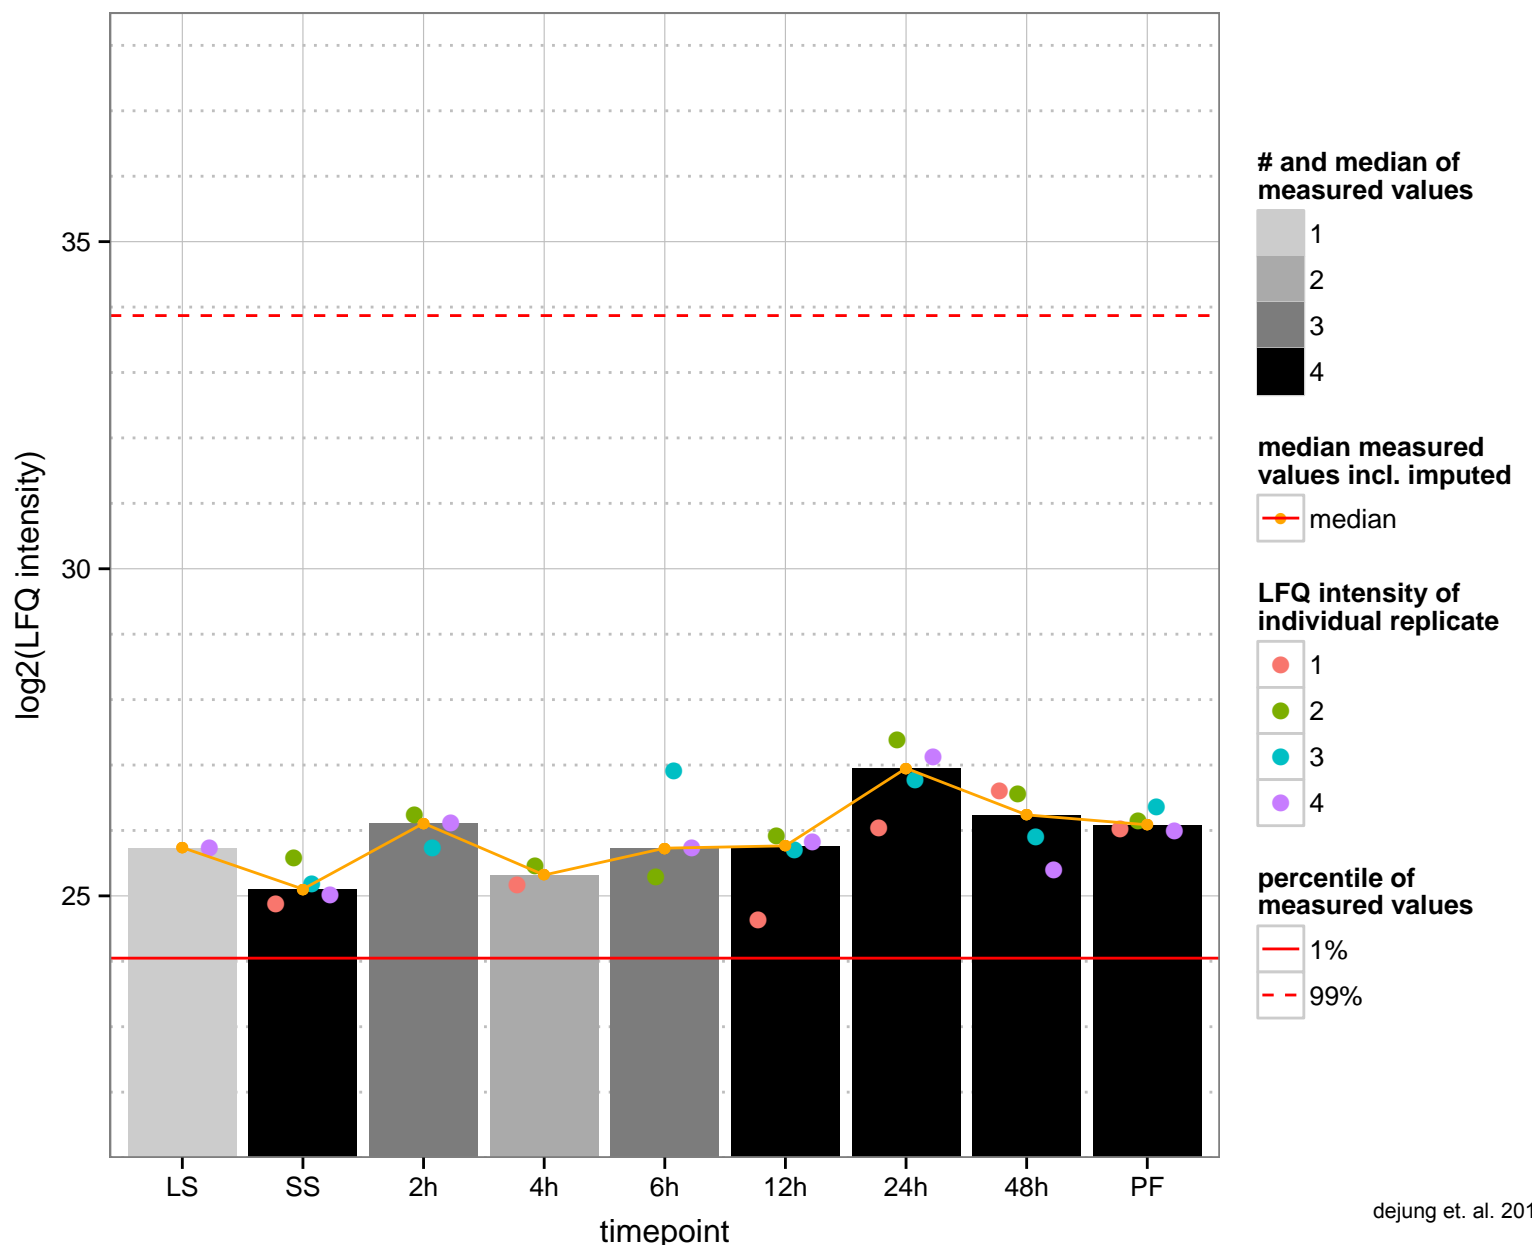

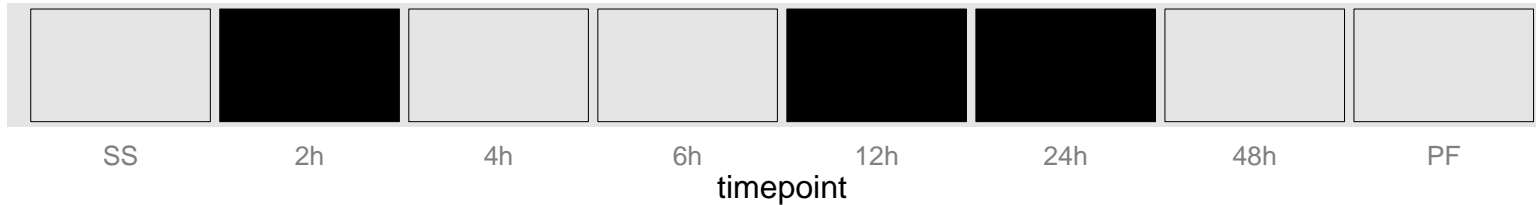

**regulated**  not regulated  significant down  significant up

kinesin, putative  
 Tb927.10.12490  
 AGOF: ATP binding, microtubule motor activity, motor activity  
 AGOC: microtubule associated complex  
 AGOP: microtubule-based movement  
 PGOF: ATP binding, microtubule motor activity  
 PGO: null  
 PGOP: microtubule-based movement

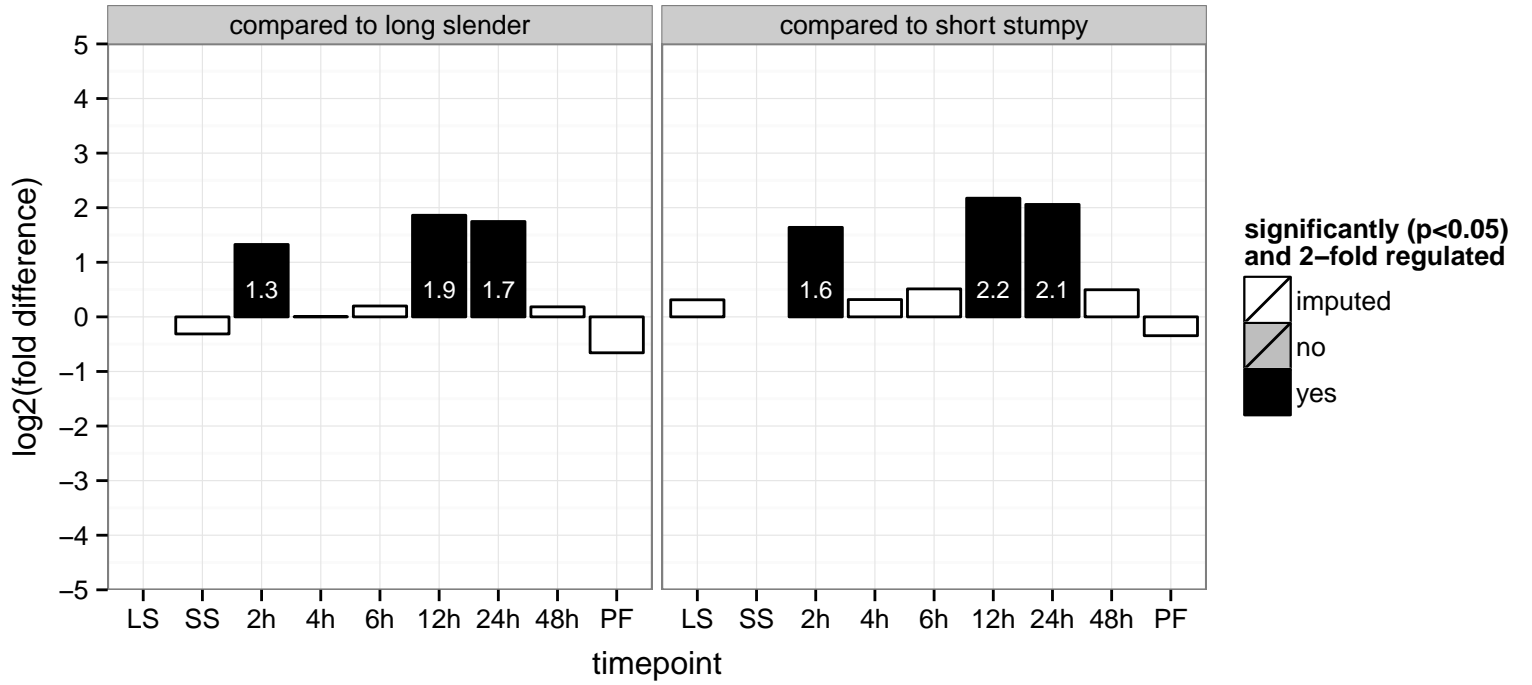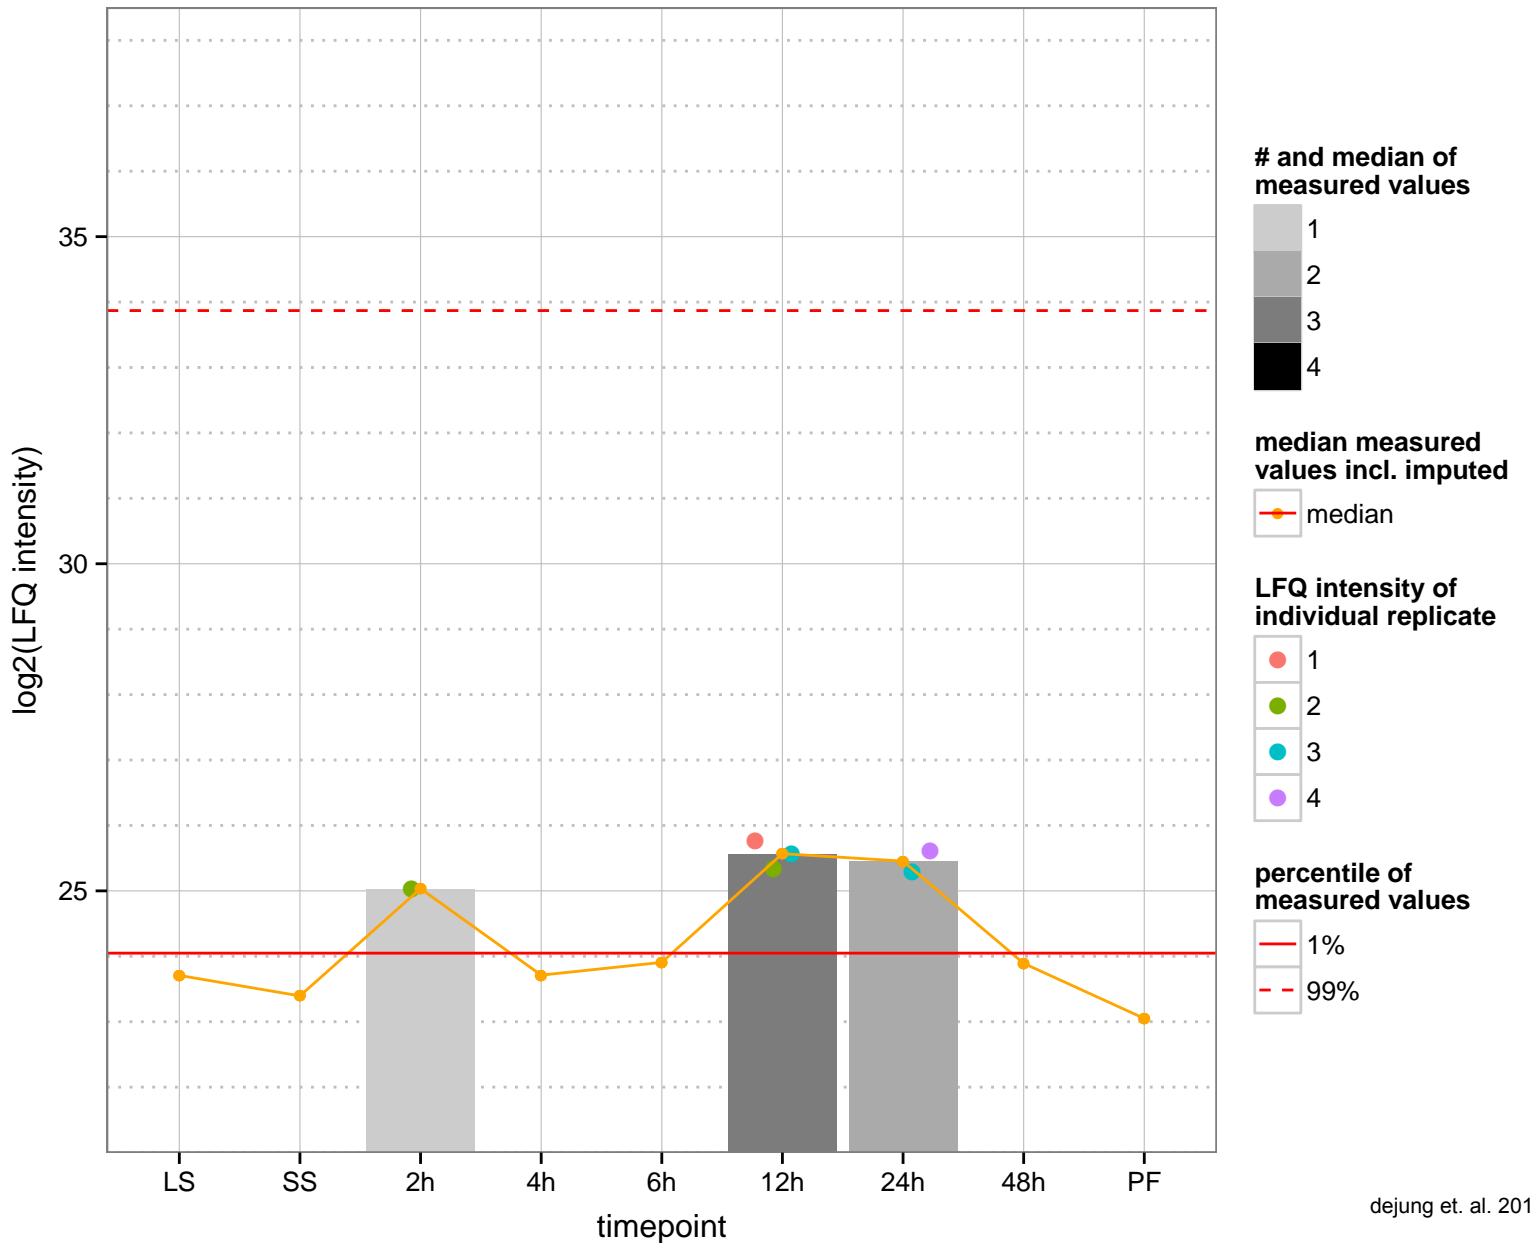

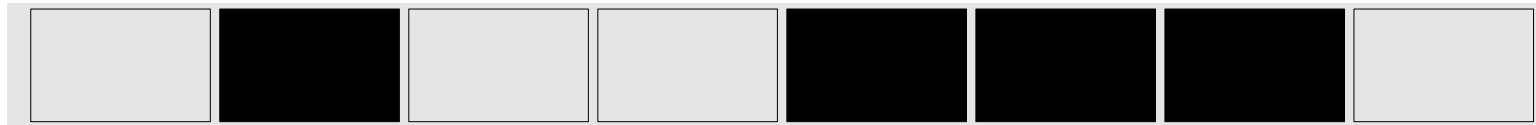

SS

2h

4h

6h

12h

24h

48h

PF

timepoint

**regulated**  not regulated  significant down  significant up

dejung et. al. 2015



hypothetical protein, conserved  
 Tb927.5.510  
 AGOF: null  
 AGOC: mitochondrial membrane, mitochondrion  
 AGOP: null  
 PGO: null  
 PGO: null  
 PGO: null

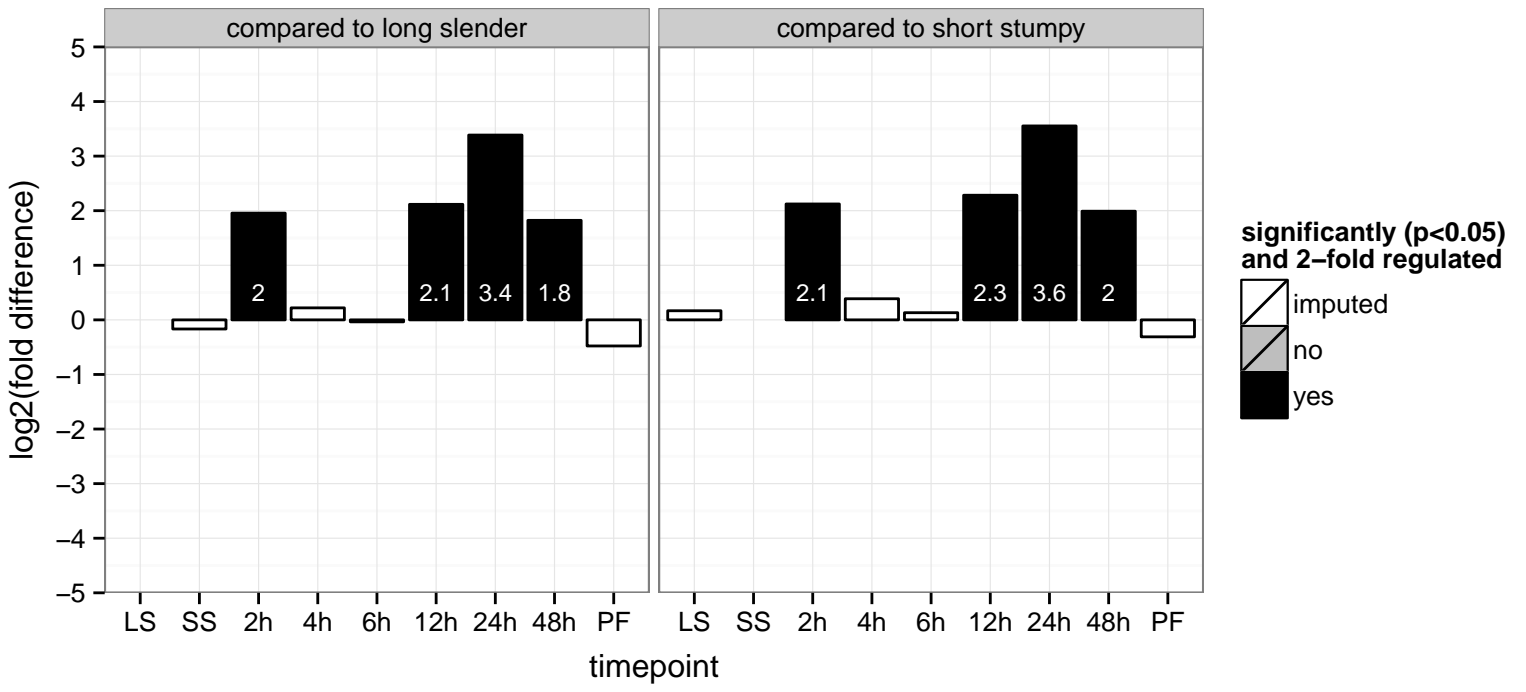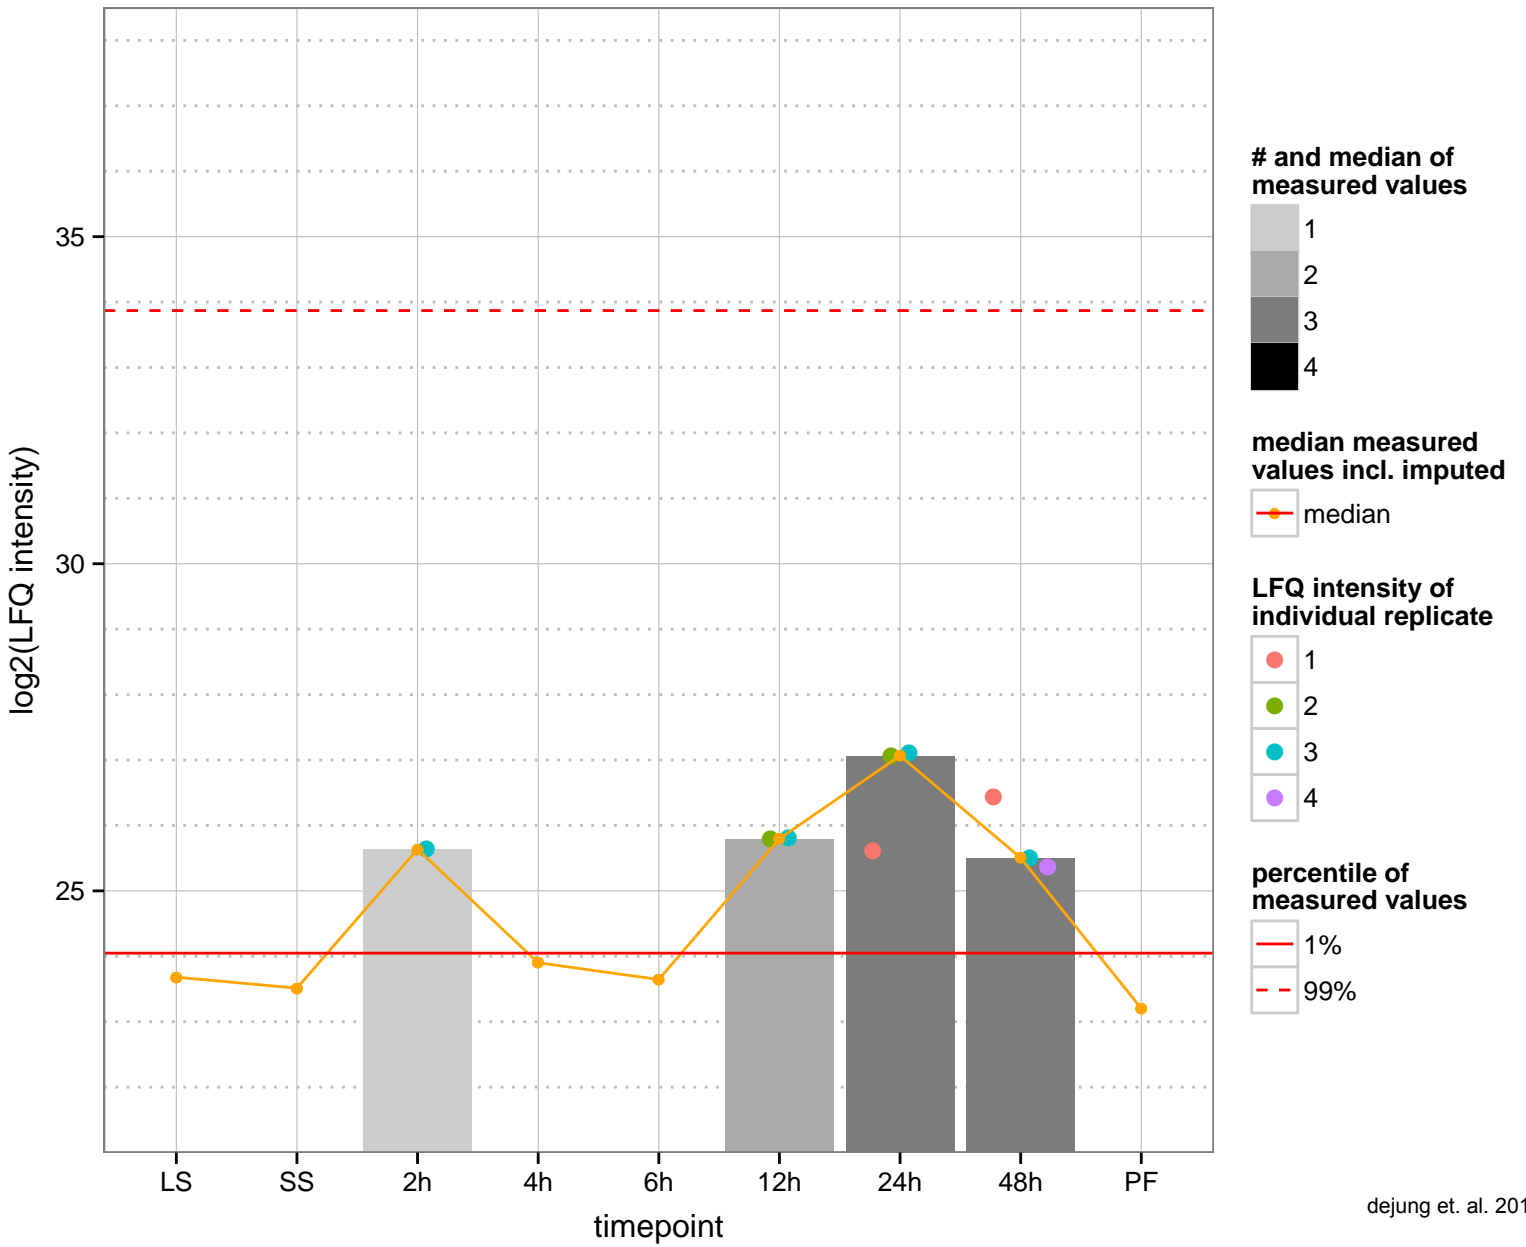

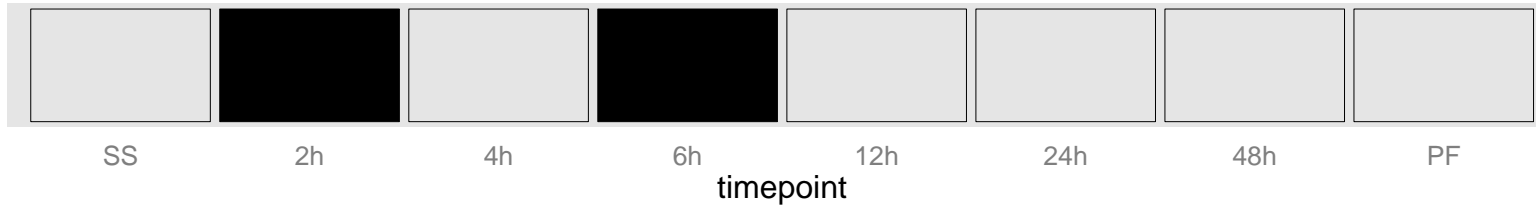

**regulated**  **not regulated**  **significant down**  **significant up**

65 kDa invariant surface glycoprotein  
 Tb927.2.3310;Tb927.2.3300;Tb927.2.3290;Tb927.2.3280  
 AGOF: null  
 AGOC: plasma membrane  
 AGOP: plasma membrane organization  
 PGO: null  
 PGOC: null  
 PGOP: null

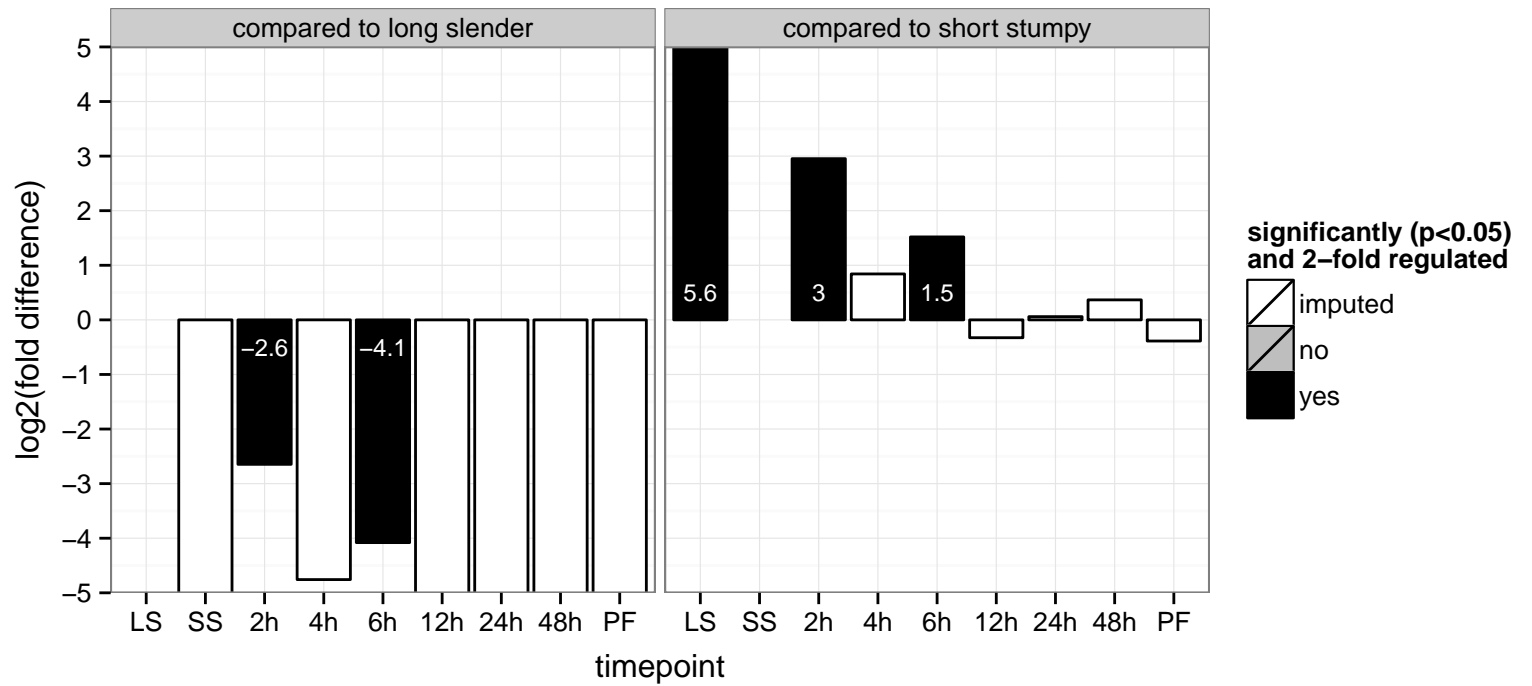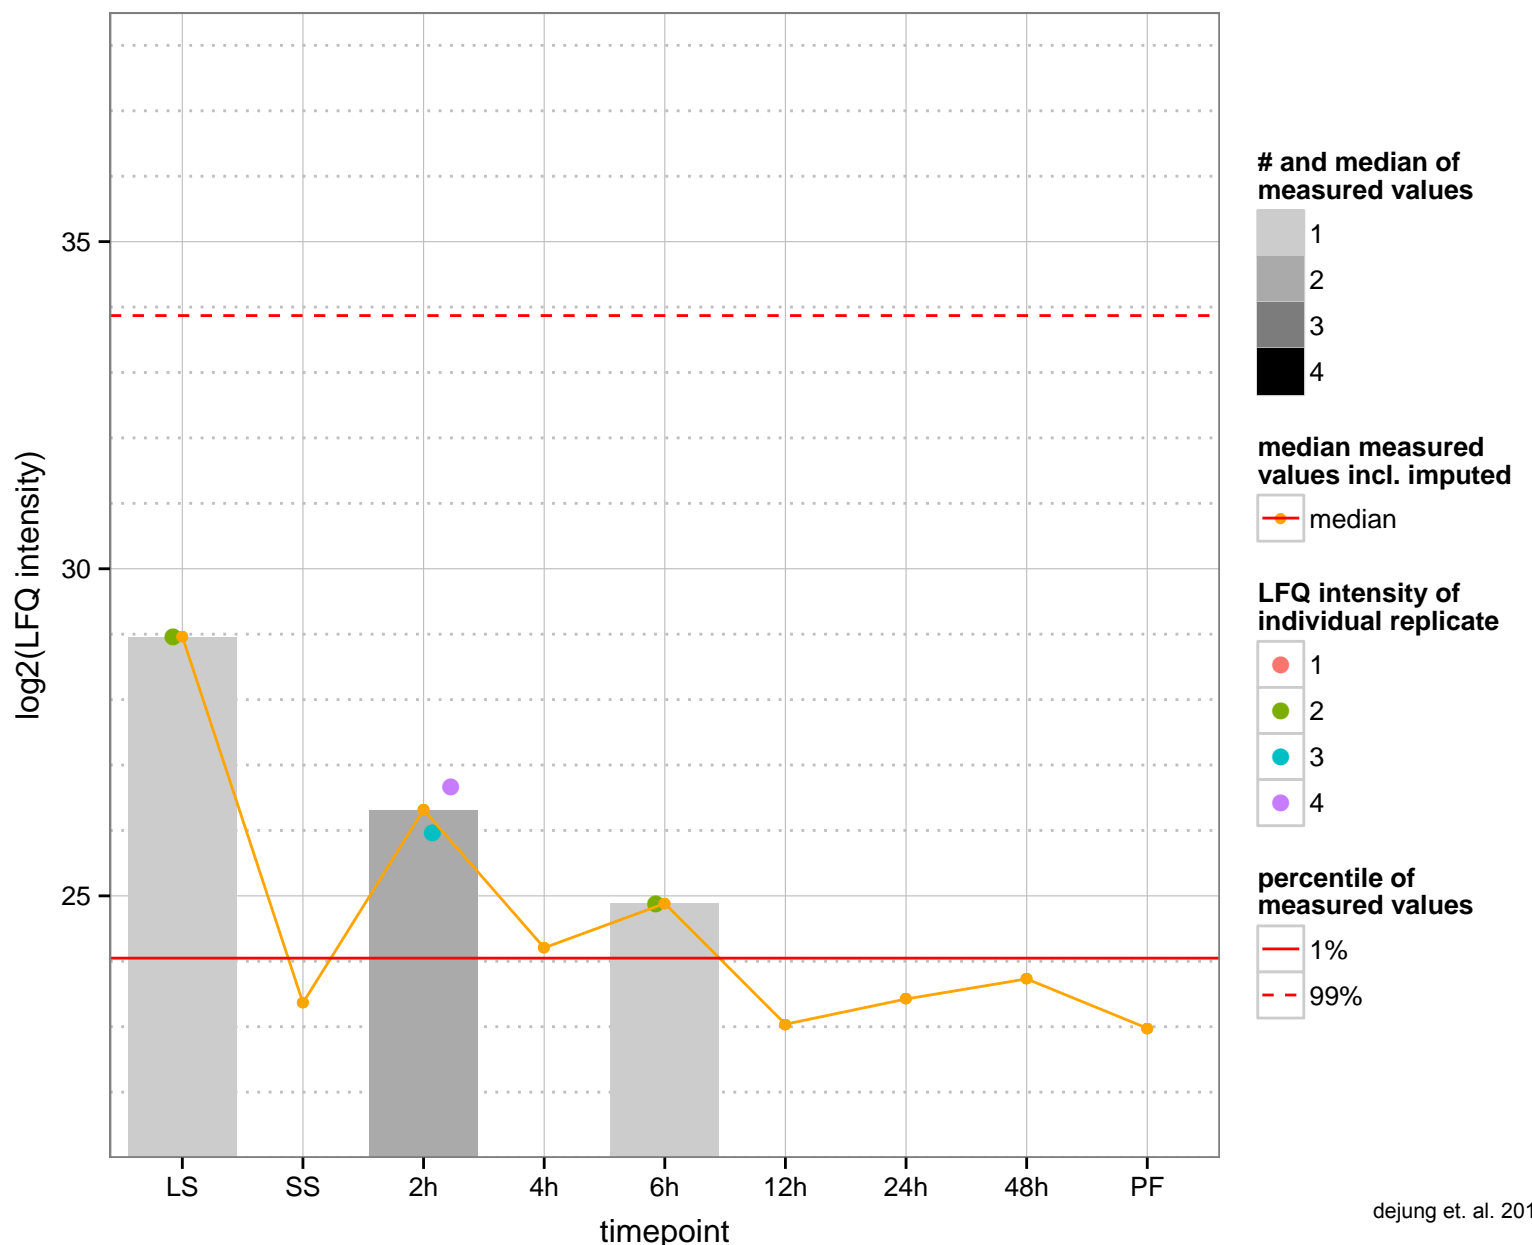

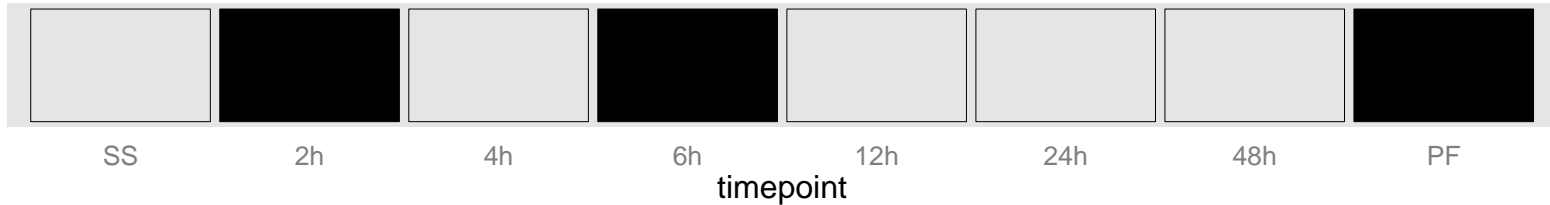

**regulated**  not regulated  significant down  significant up

hypothetical protein, conserved  
 Tb927.8.5280  
 AGOF: null  
 AGOC: mitochondrion  
 AGOP: null  
 PGO: null  
 PGOC: null  
 PGOP: null

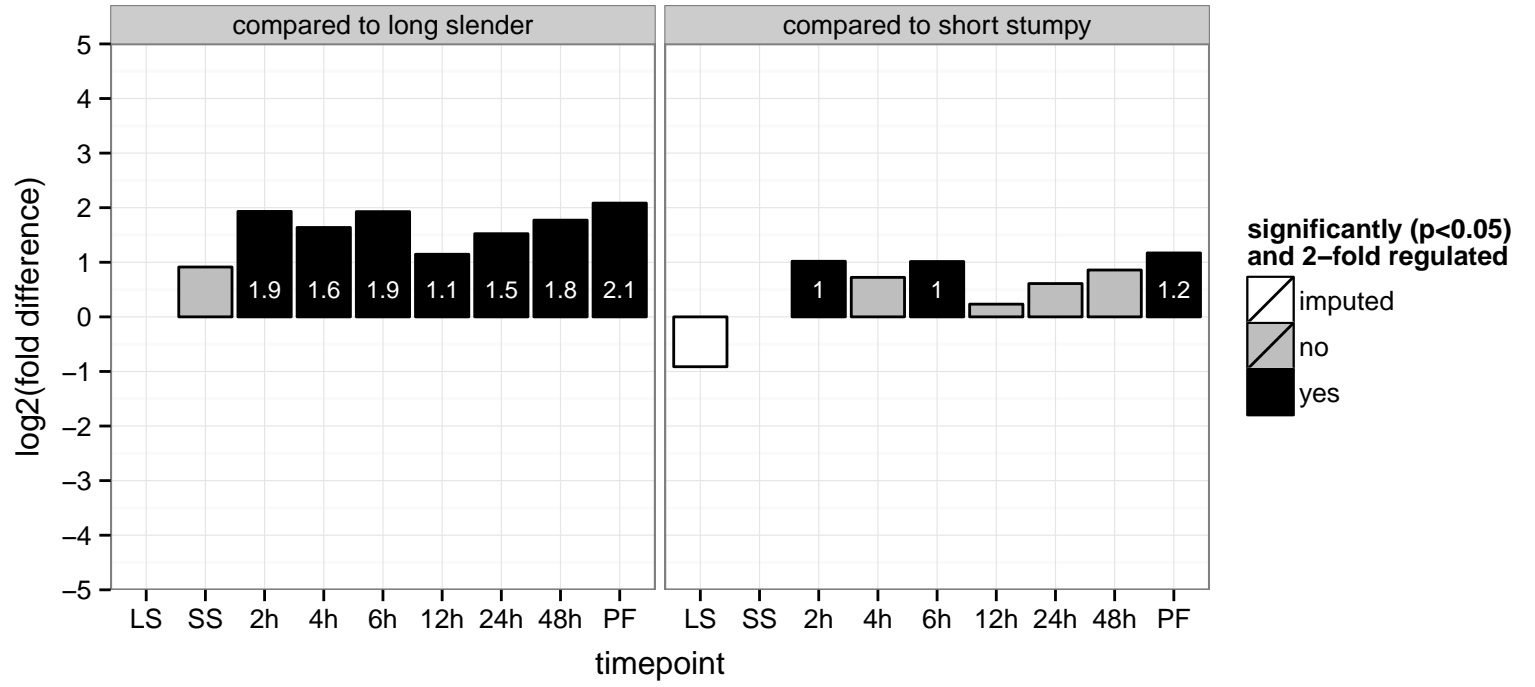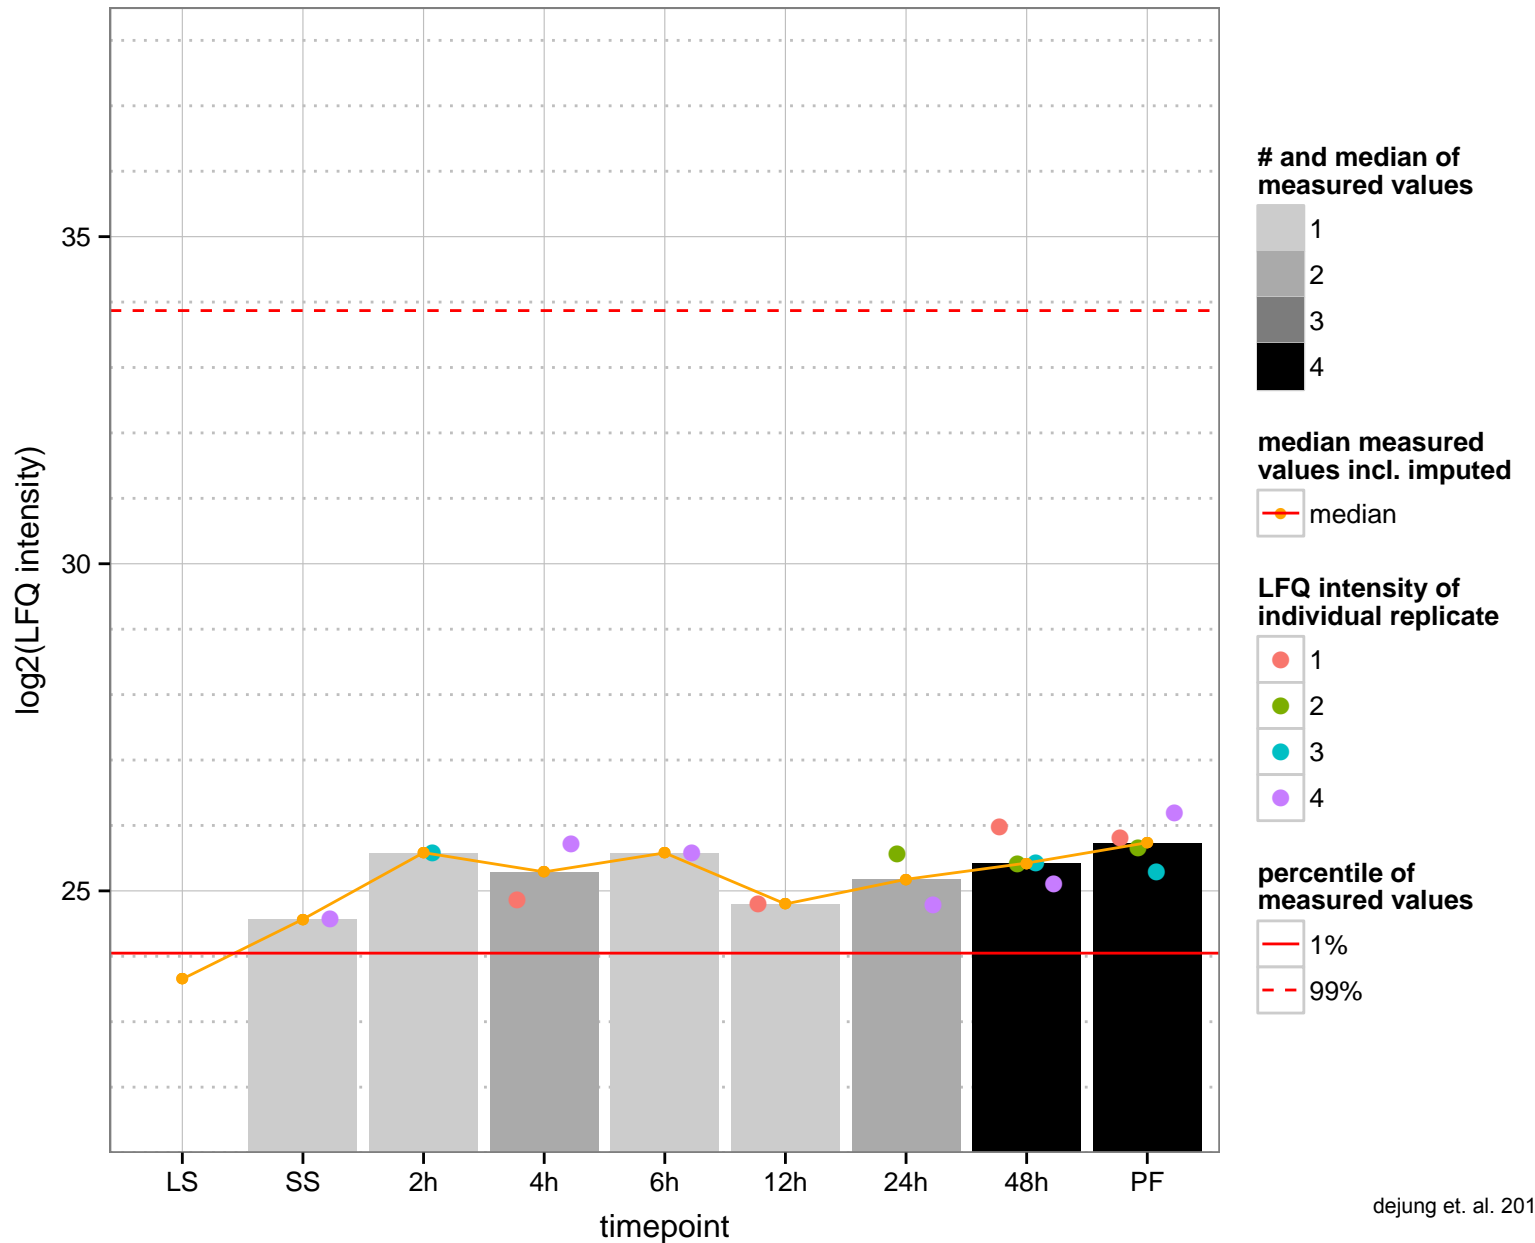

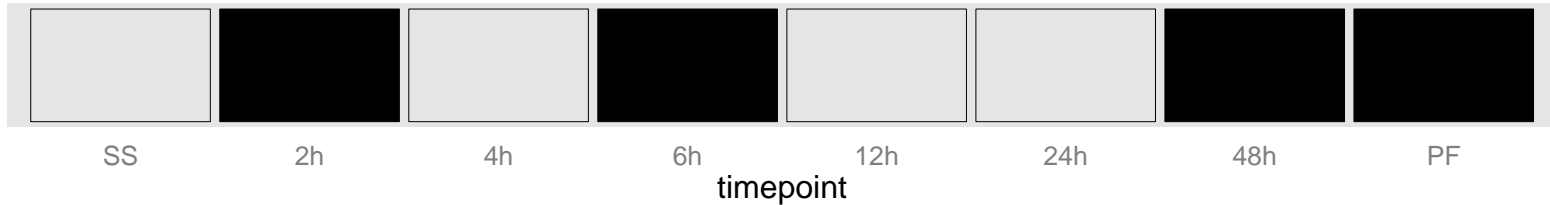

**regulated**  **not regulated**  **significant down**  **significant up**

RNA Interference Factor 5 (RIF5)  
 Tb927.10.10730  
 AGOF: null  
 AGOC: null  
 AGOP: null  
 PGOF: null  
 PGO: null  
 PGOP: null

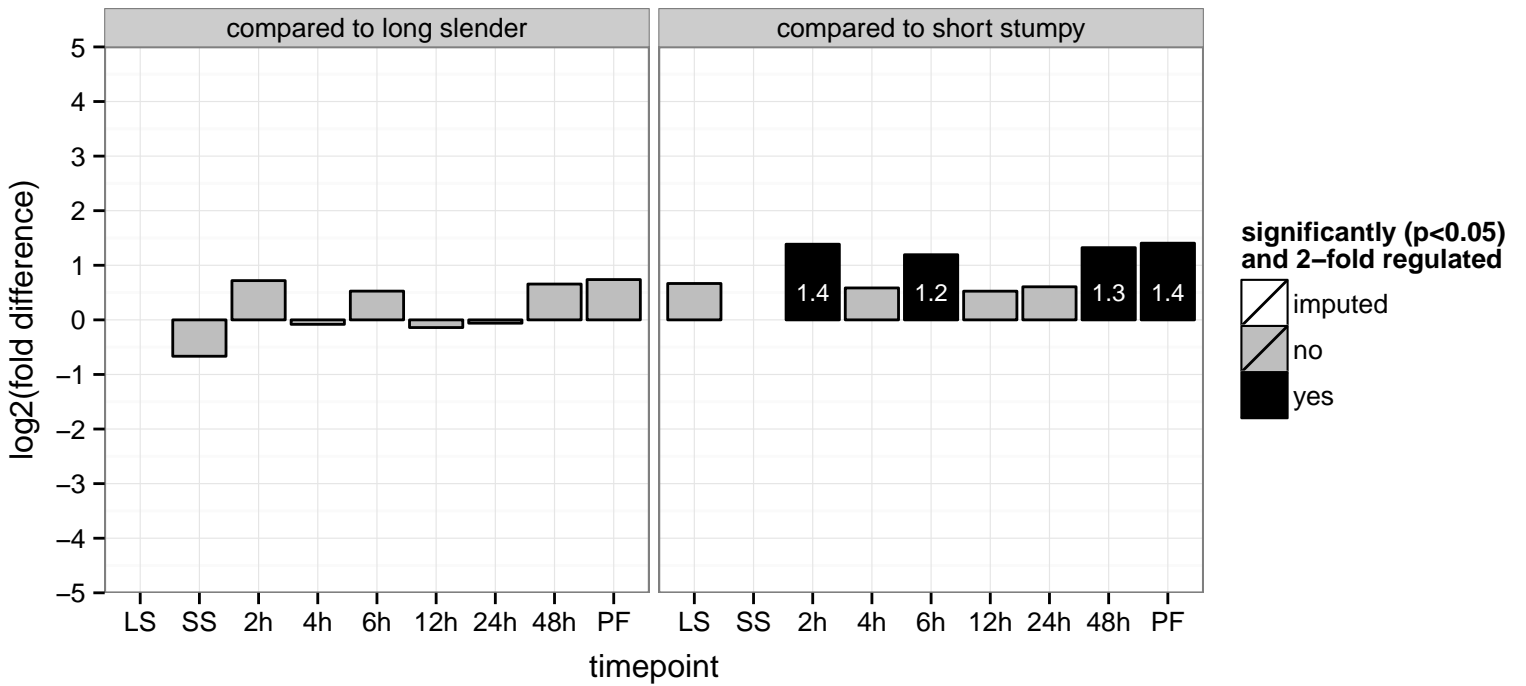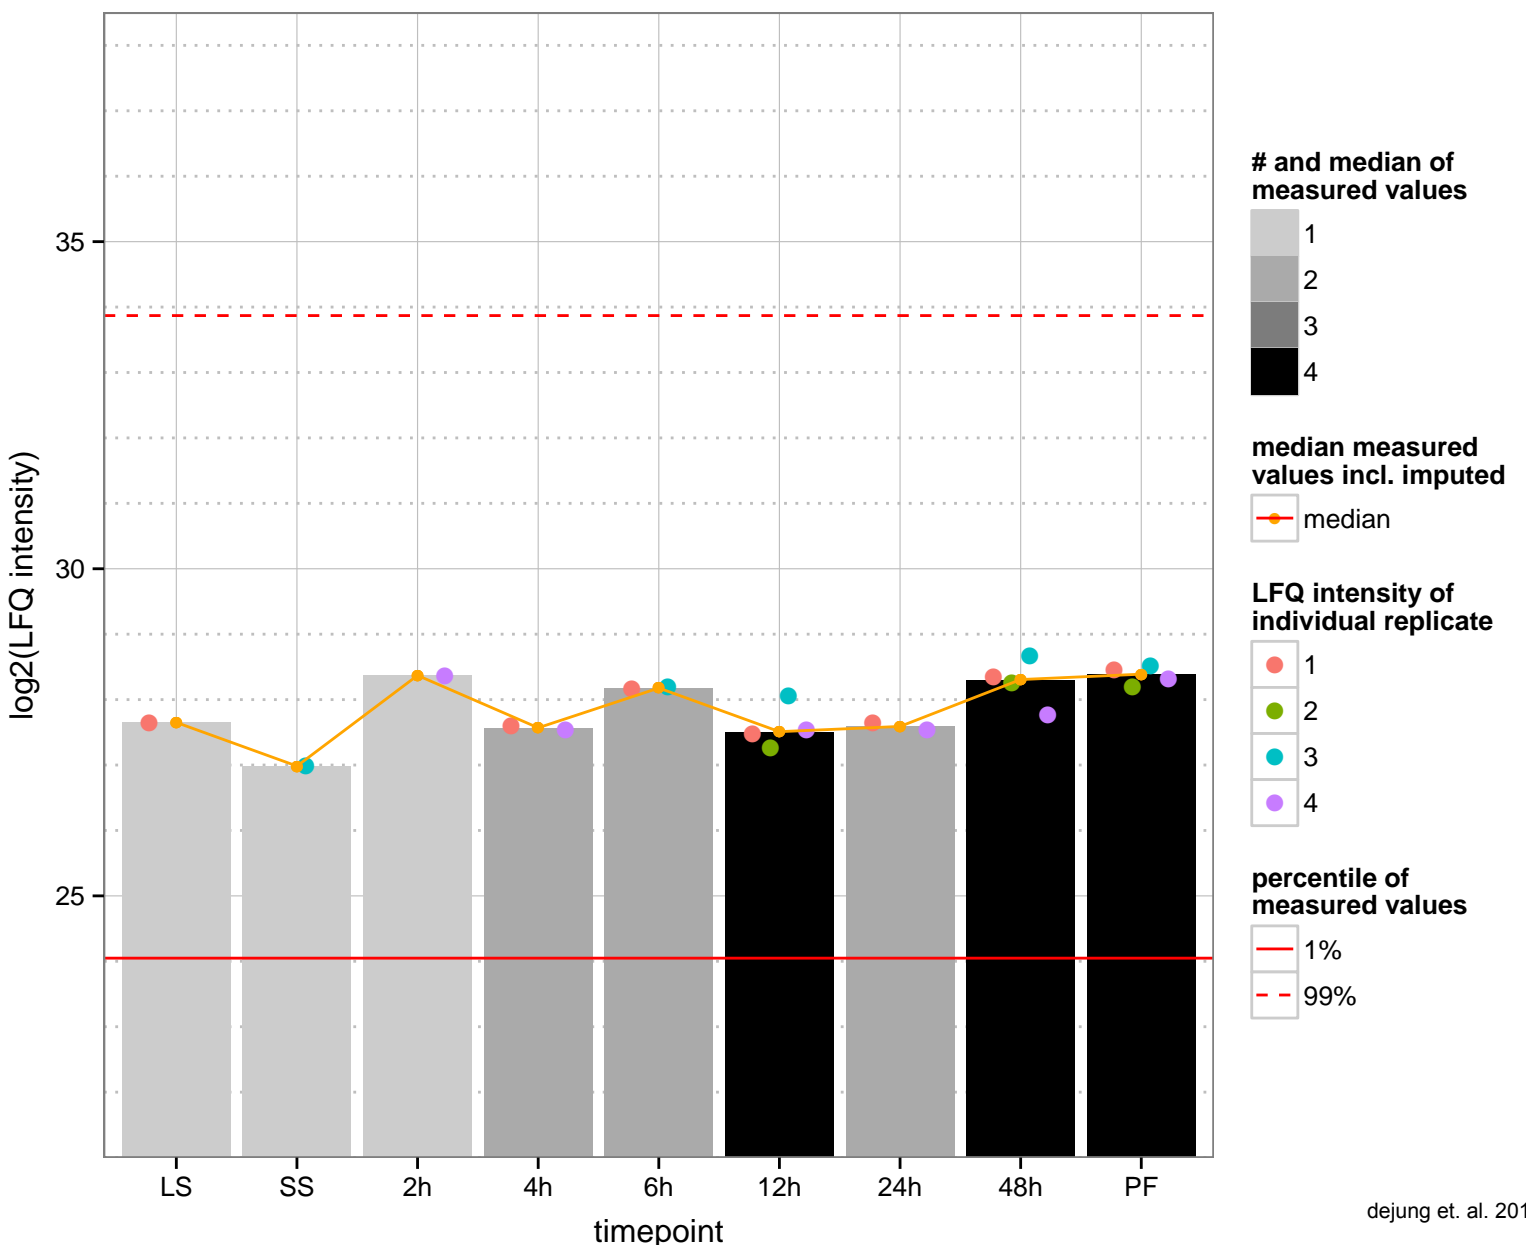

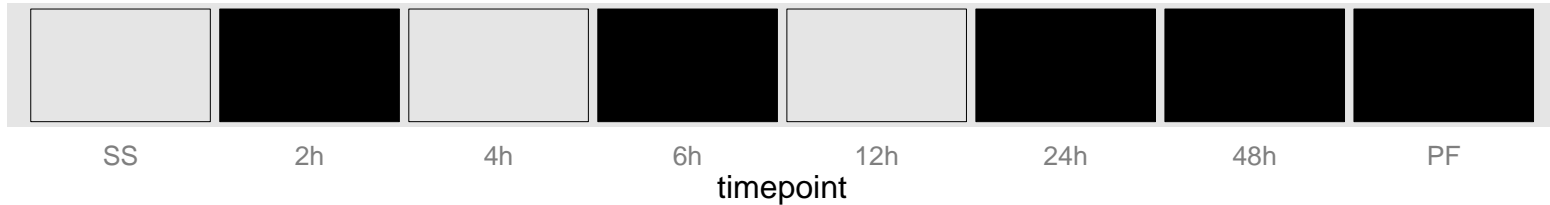

**regulated**  not regulated  significant down  significant up



protein kinase, putative

Tb927.3.690

AGOF: ATP binding, protein serine/threonine kinase activity, protein tyrosine kinase activity

AGOC: null

AGOP: cytokinesis after mitosis, protein phosphorylation

PGOF: ATP binding, protein kinase activity, transferase activity, transferring phosphorus-containing groups

PGOC: null

PGOP: protein phosphorylation

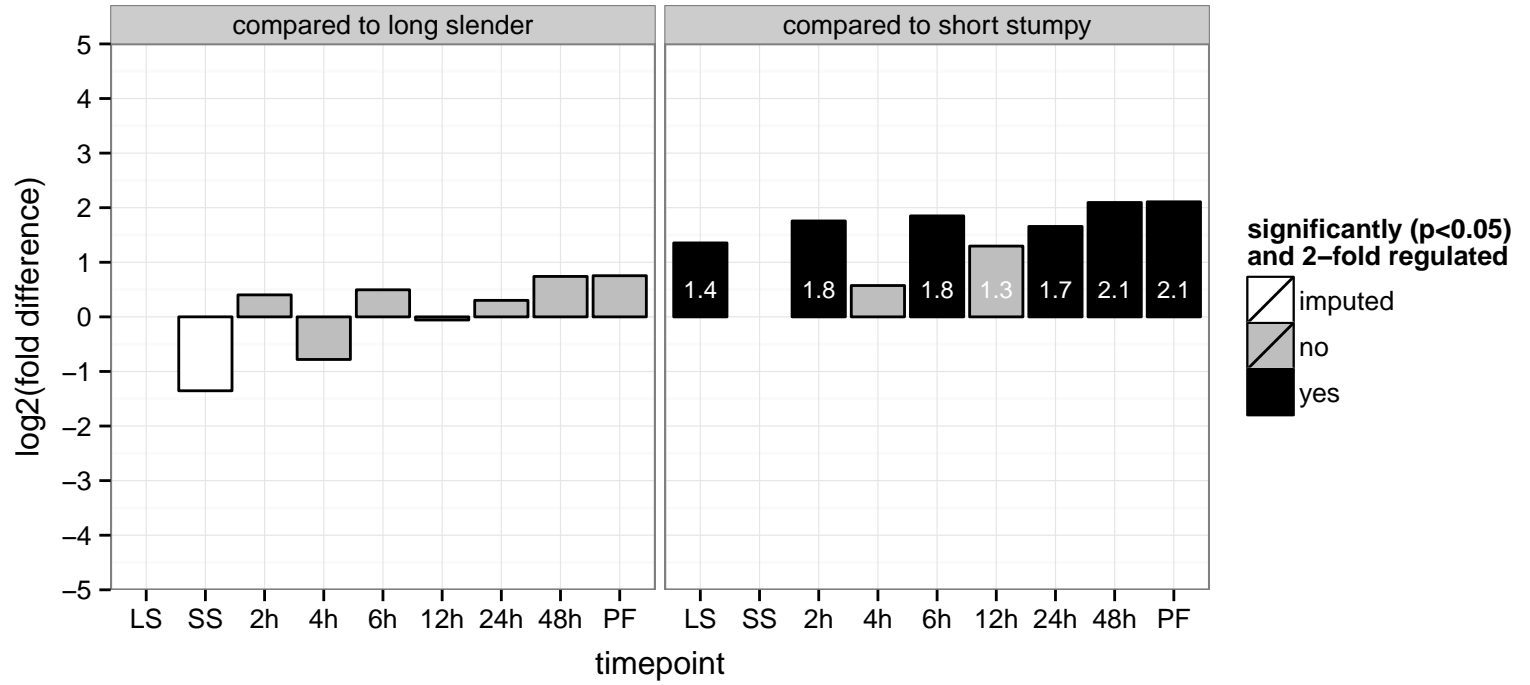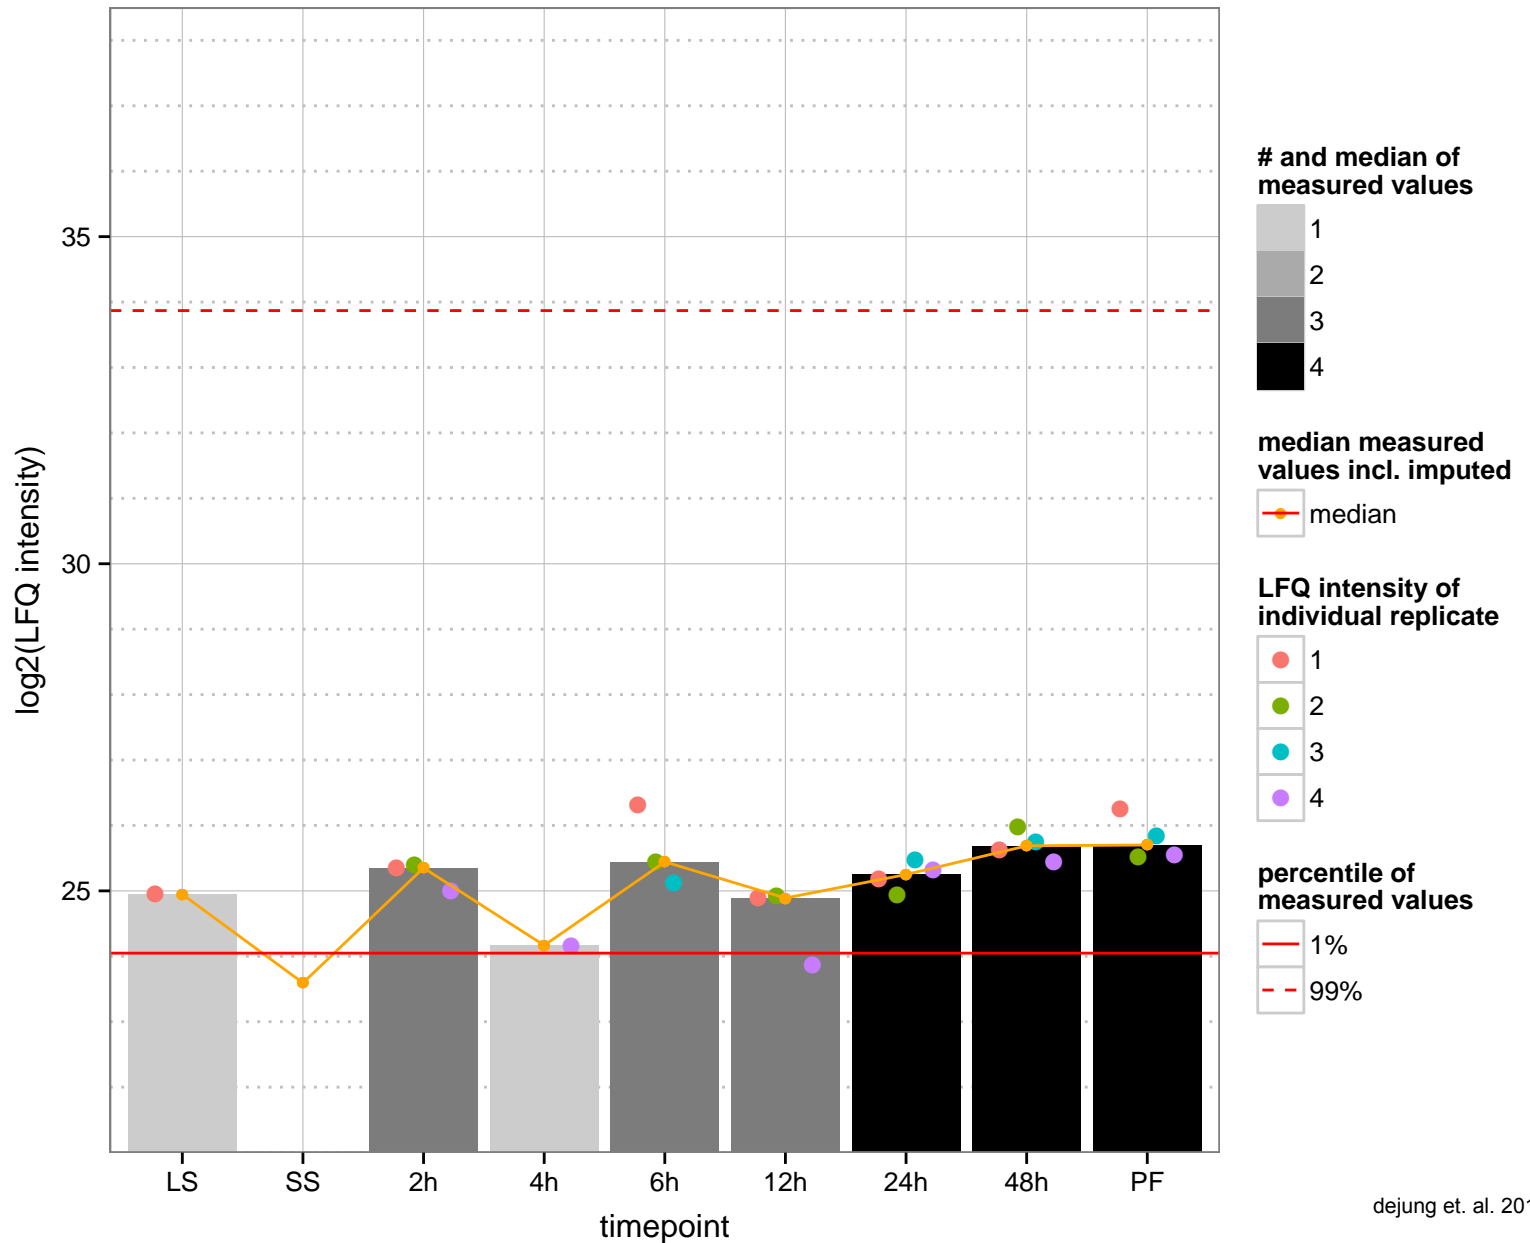

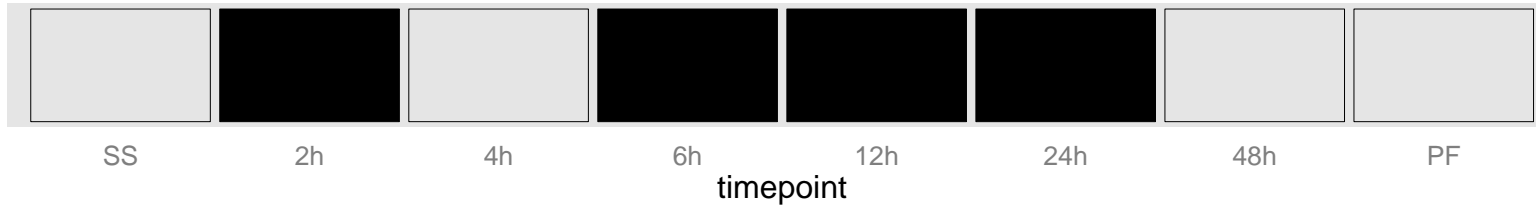

**regulated**  not regulated  significant down  significant up

kinetoplastid-specific phospho-protein phosphatase, putative  
 Tb927.4.1870  
 AGOF: protein serine/threonine phosphatase activity  
 AGOC: null  
 AGOP: protein dephosphorylation  
 PGO: hydrolase activity  
 PGOC: null  
 PGOP: null

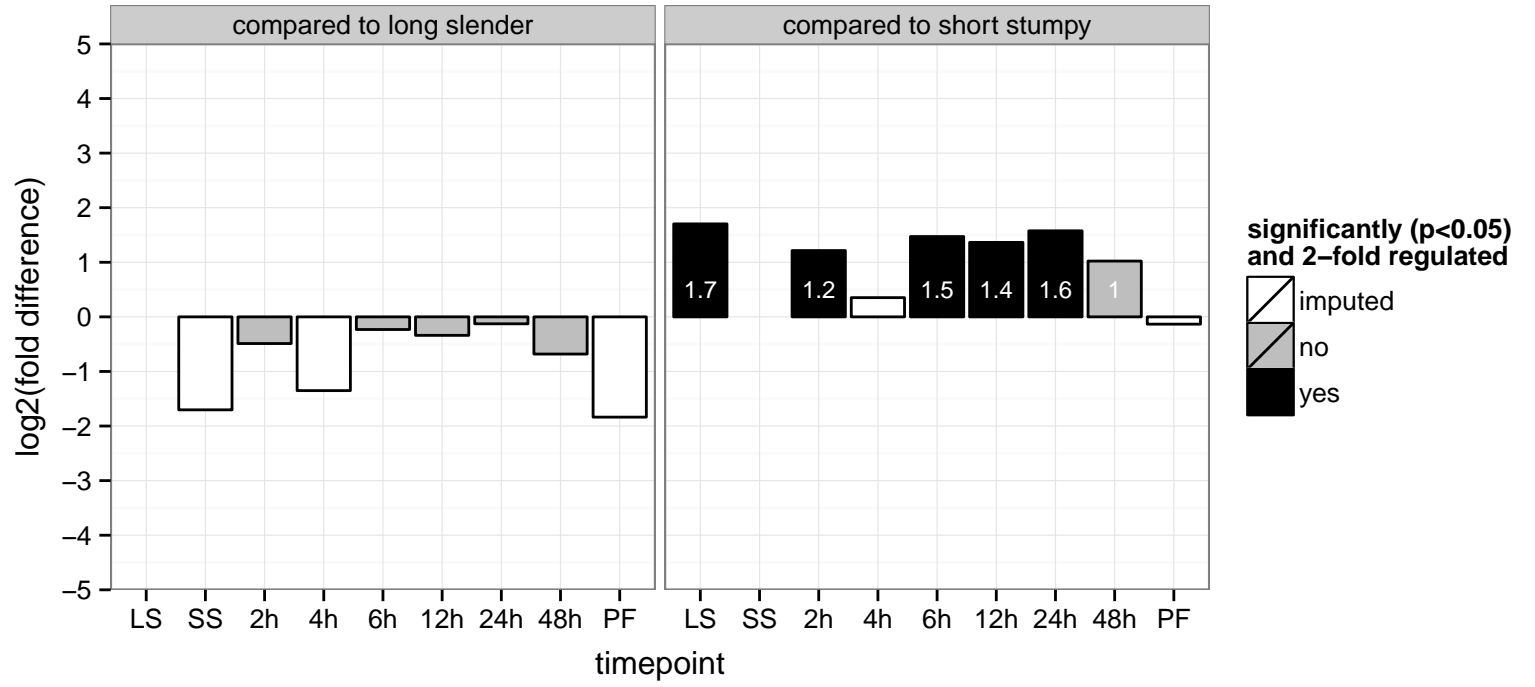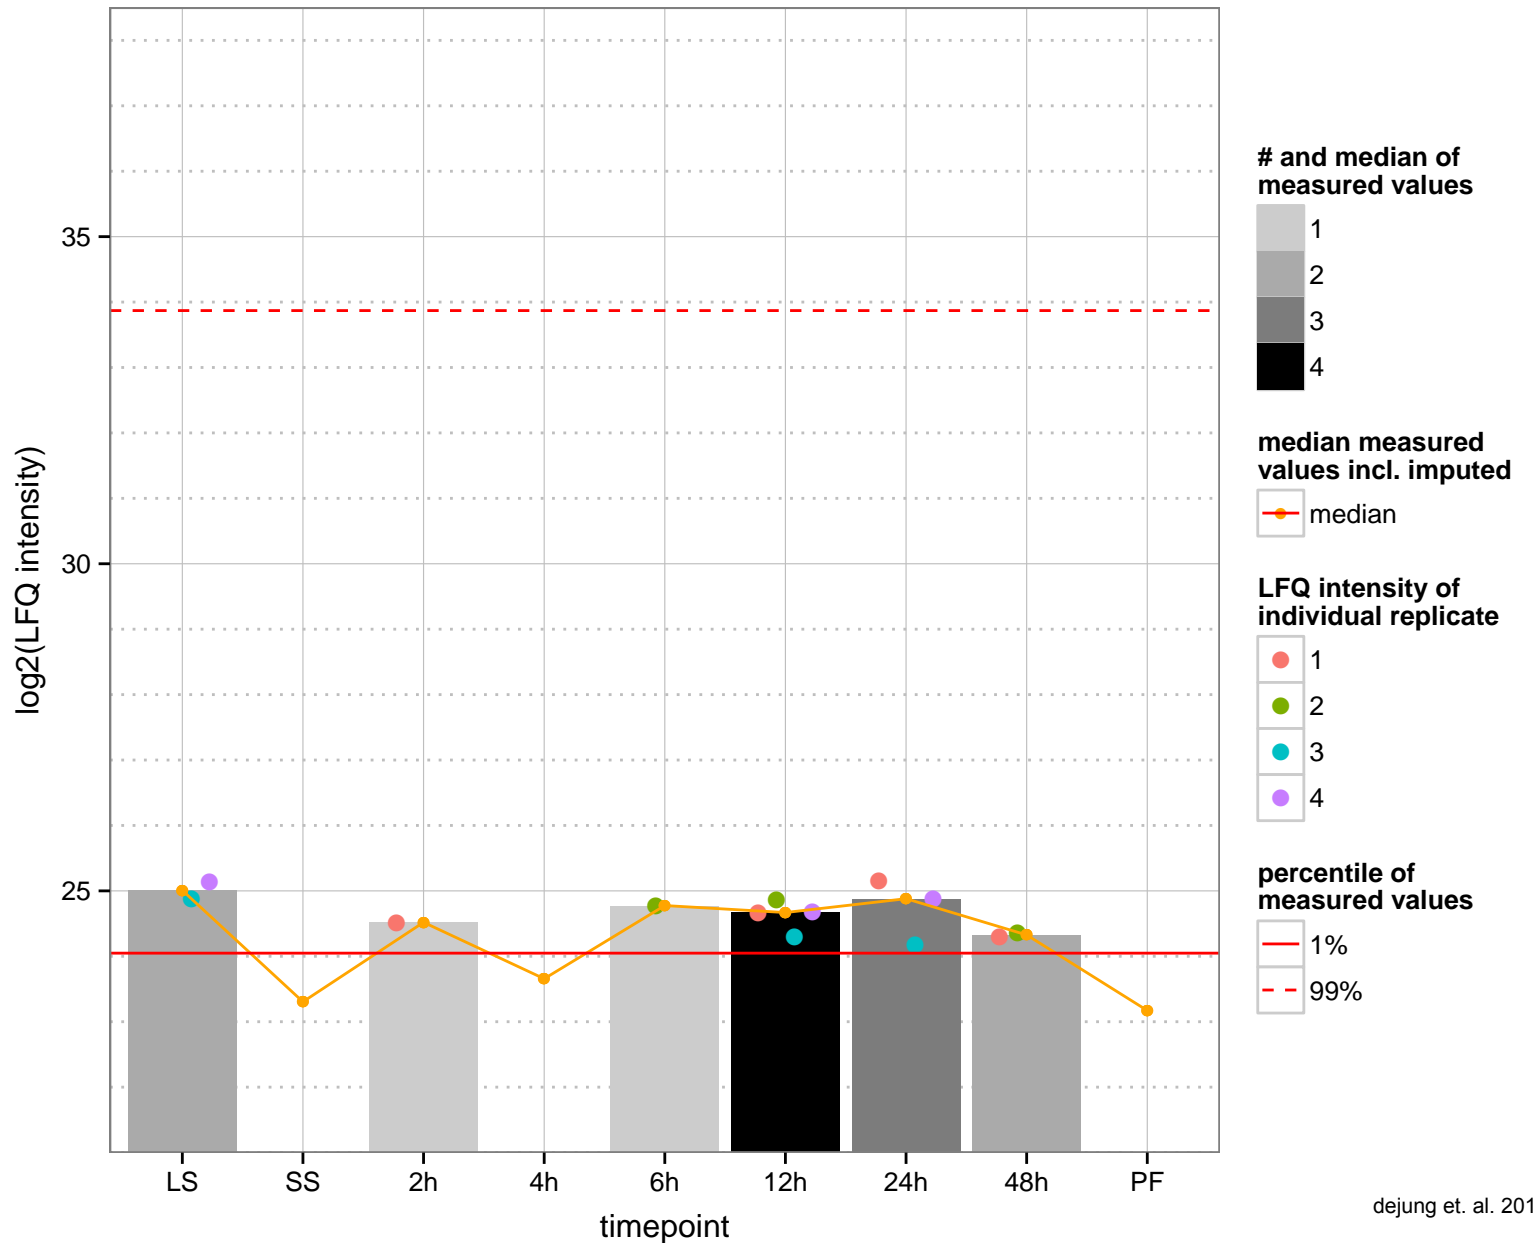

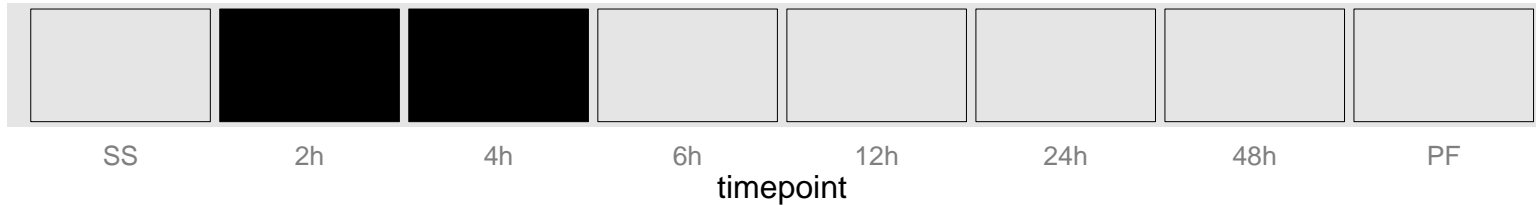

**regulated**  **not regulated**  **significant down**  **significant up**

double-strand-break repair protein rad21 homolog, putative  
 Tb927.7.6900  
 AGOF: null  
 AGOC: nuclear chromosome  
 AGOP: null  
 PGOF: protein binding  
 PGO: nuclear chromosome  
 PGOP: null

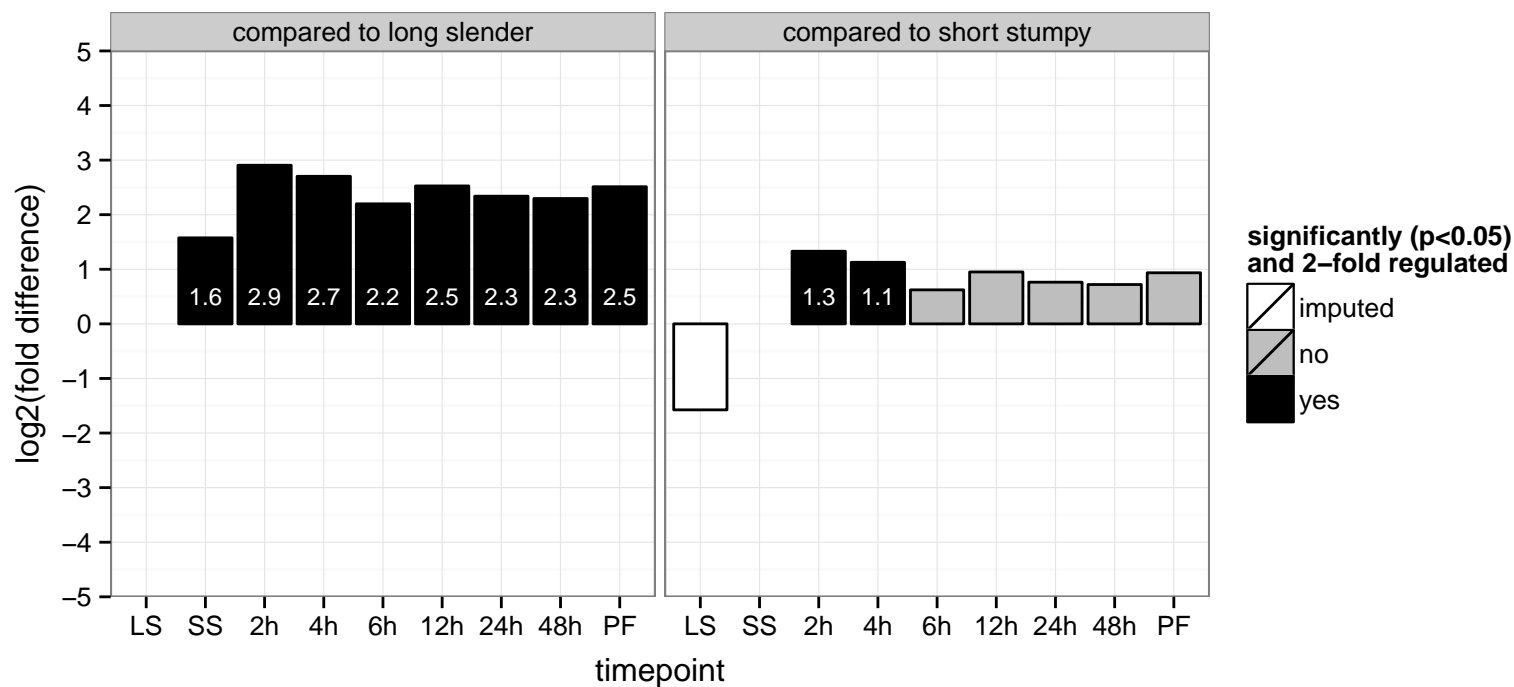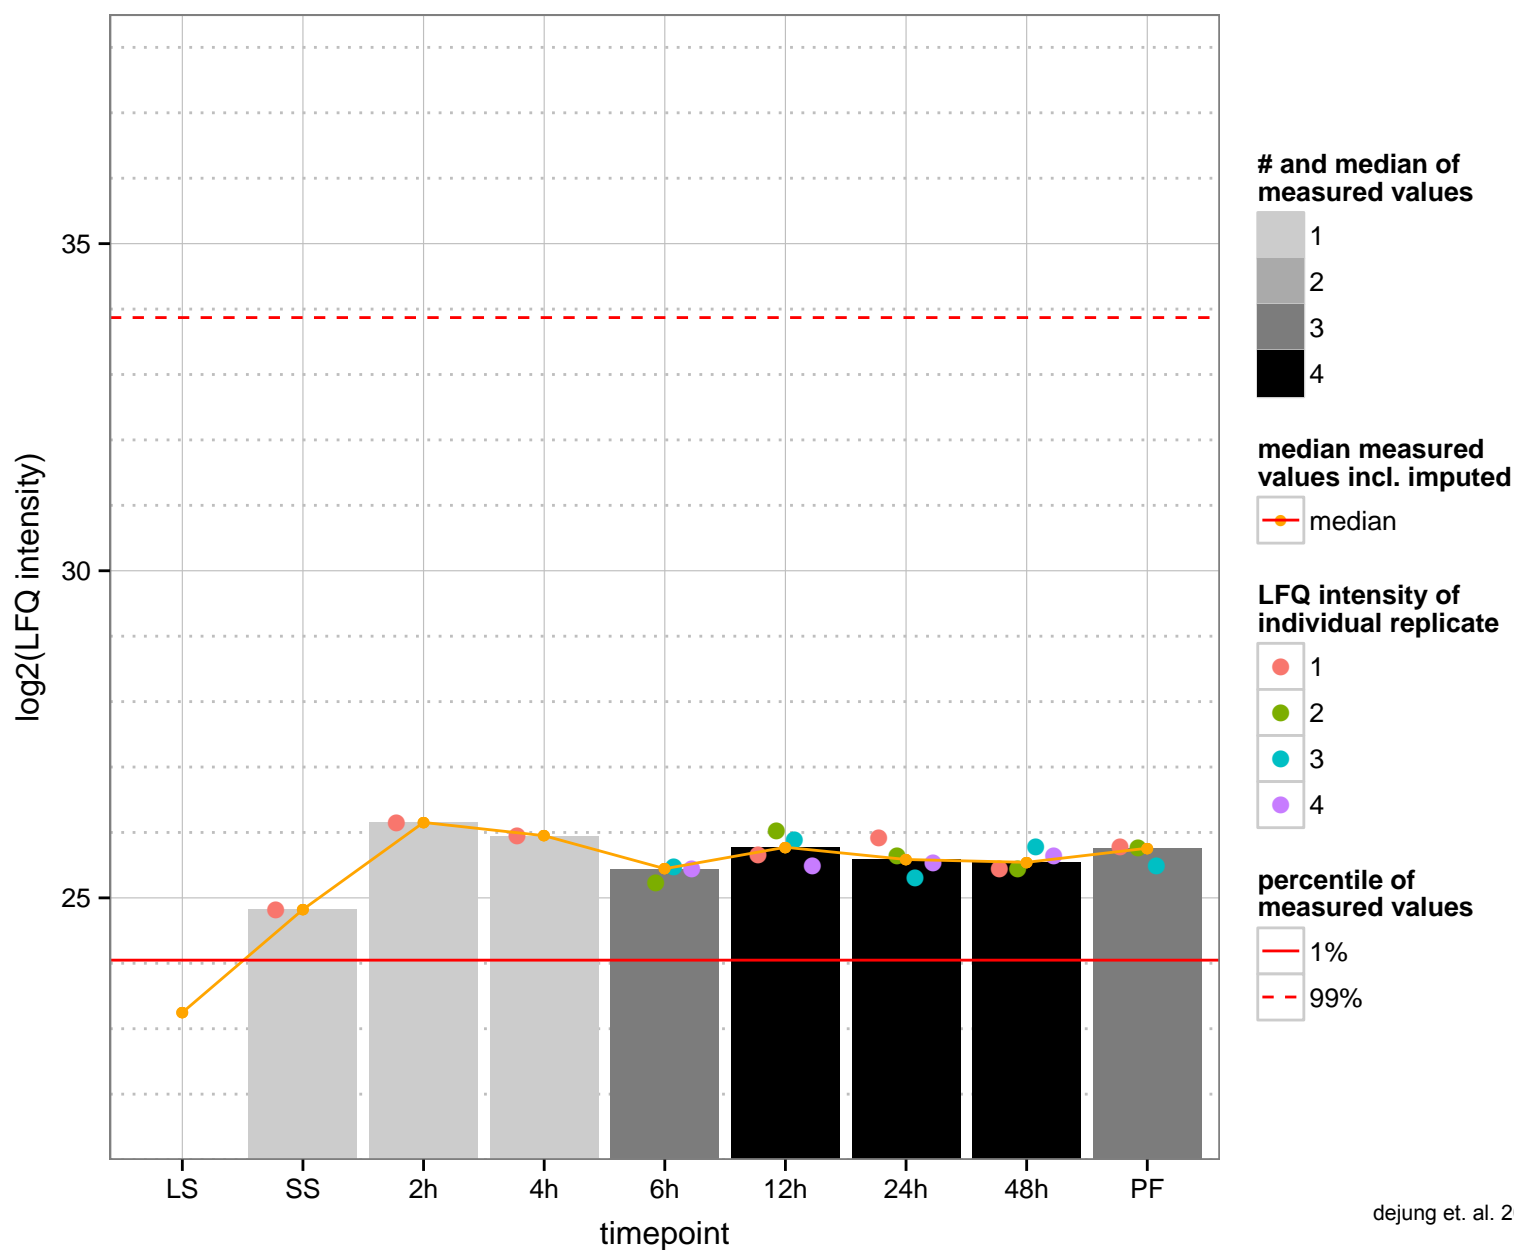

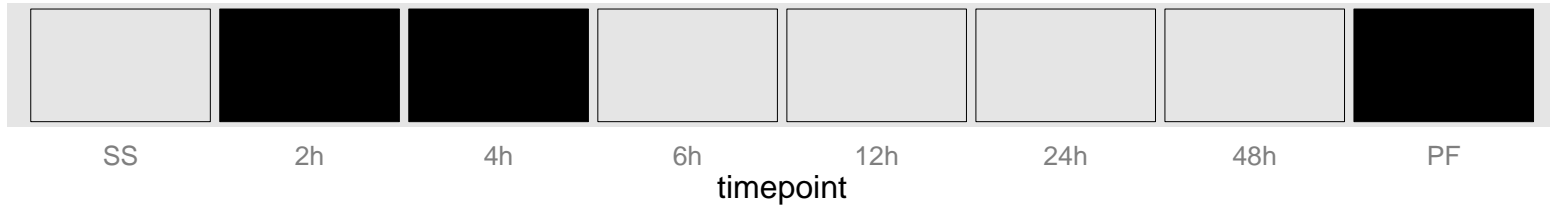

**regulated**  not regulated  significant down  significant up

hypothetical protein, conserved  
 Tb927.8.3890;Tb927.8.3900;Tb927.8.3880  
 AGOF: null, structural constituent of cell wall  
 AGOC: integral to membrane  
 AGOP: null, plant-type cell wall organization  
 PGO: null  
 PGOC: null  
 PGOP: null

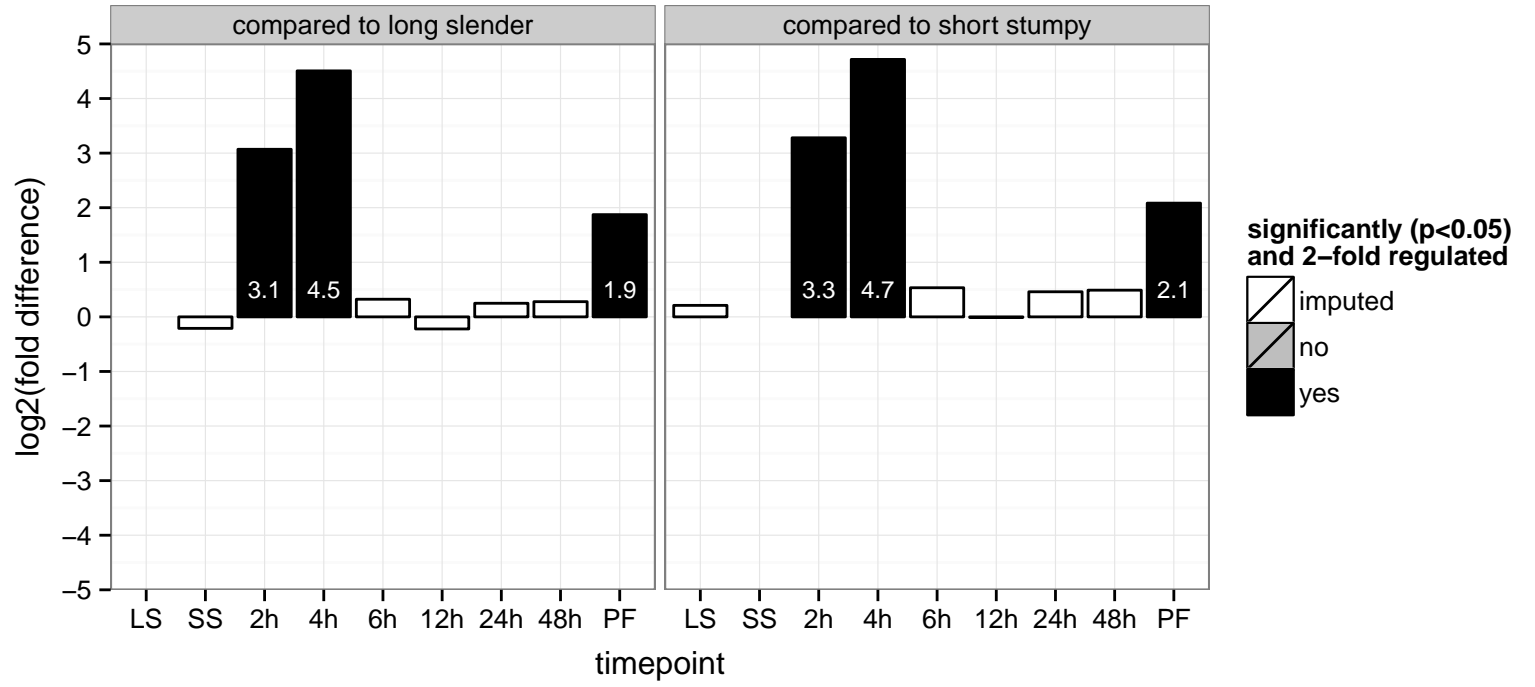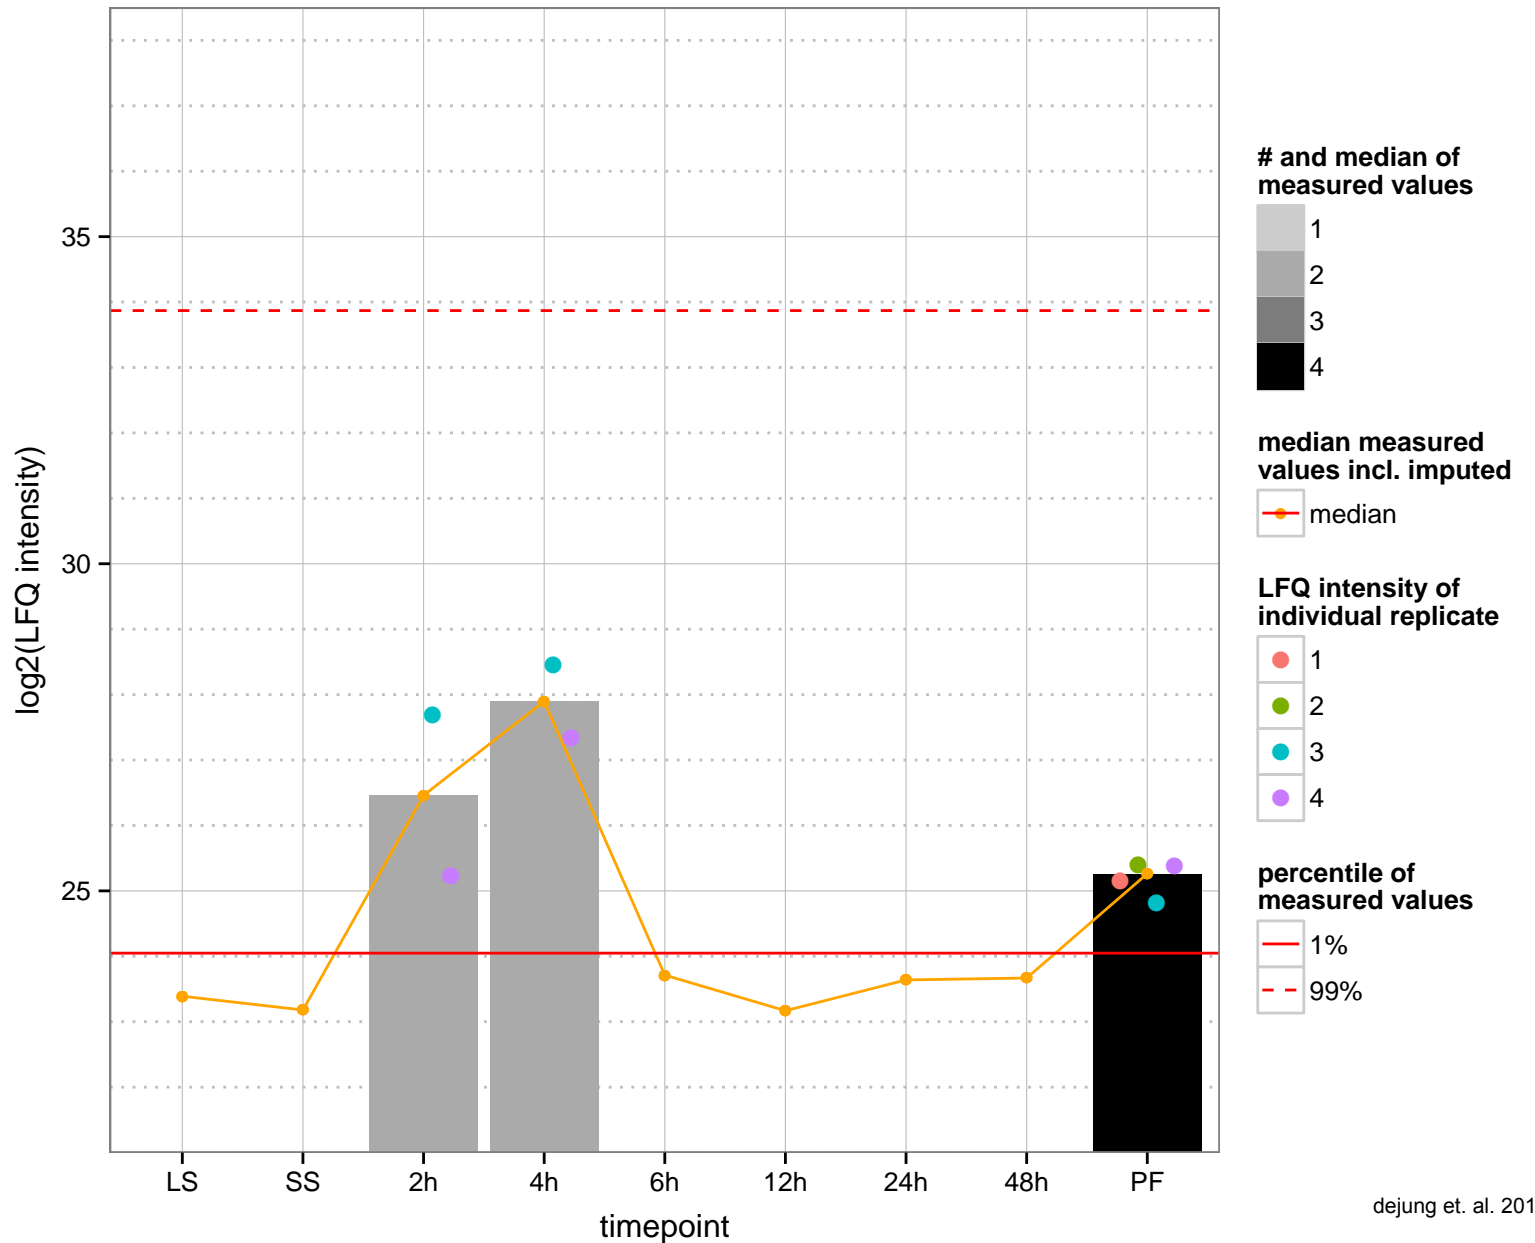

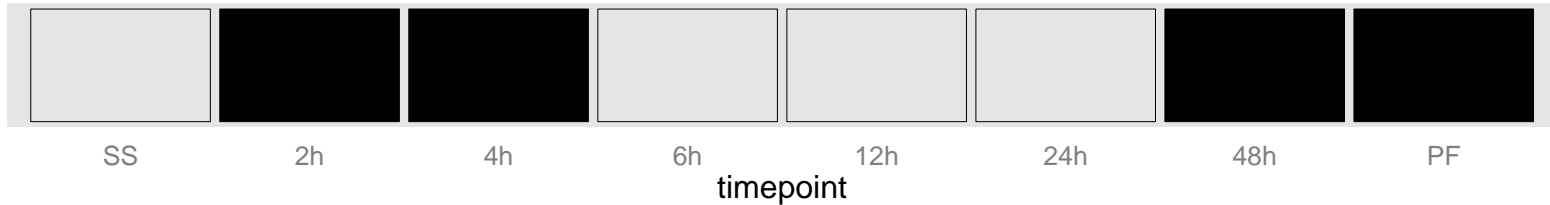

**regulated**  not regulated  significant down  significant up



60S ribosomal protein L39, putative  
 Tb927.8.5260  
 AGOF: structural constituent of ribosome  
 AGOC: intracellular, ribosome  
 AGOP: translation  
 PGOF: structural constituent of ribosome  
 PGO: intracellular, ribosome  
 PGOP: translation

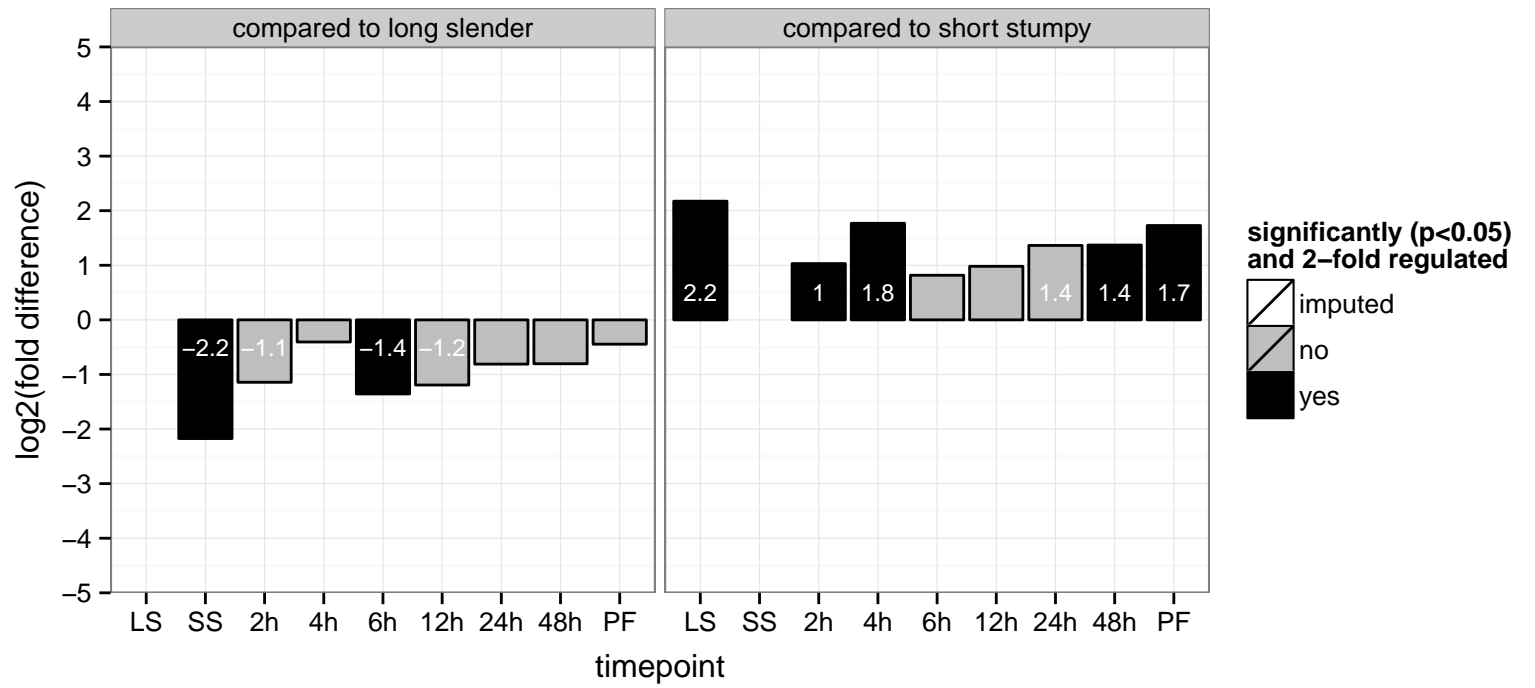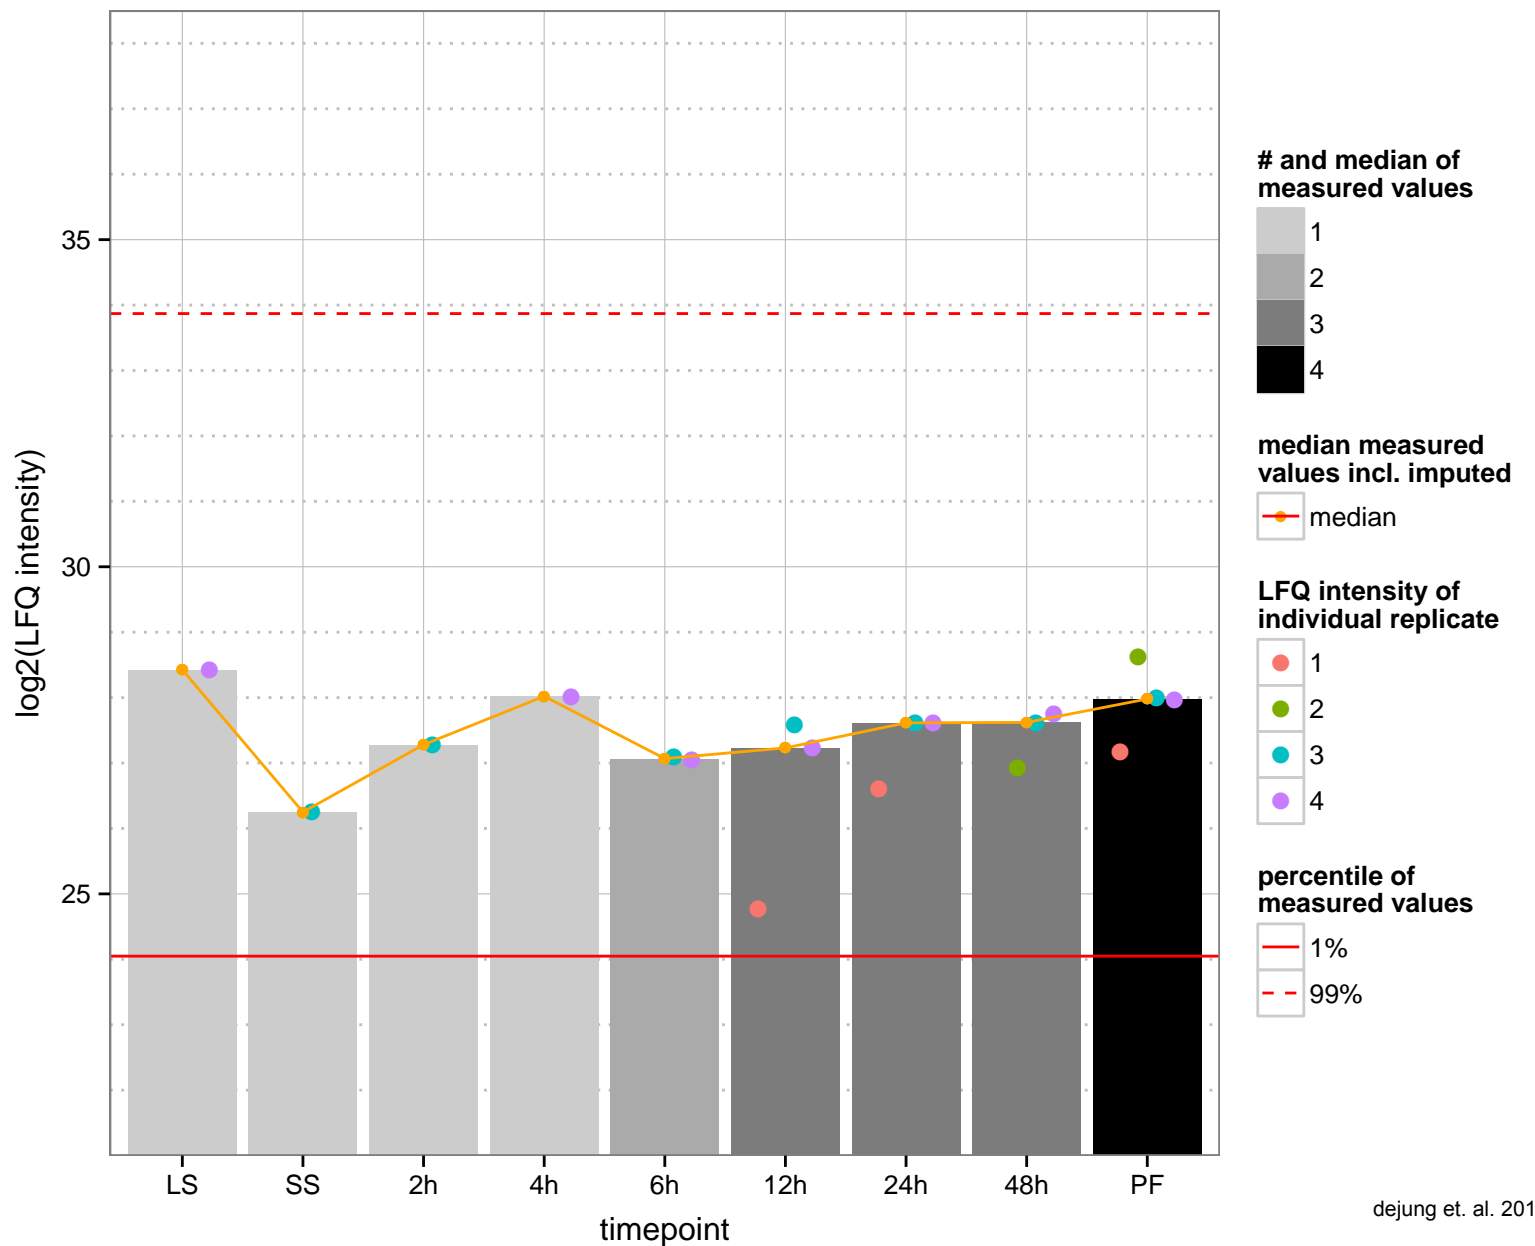

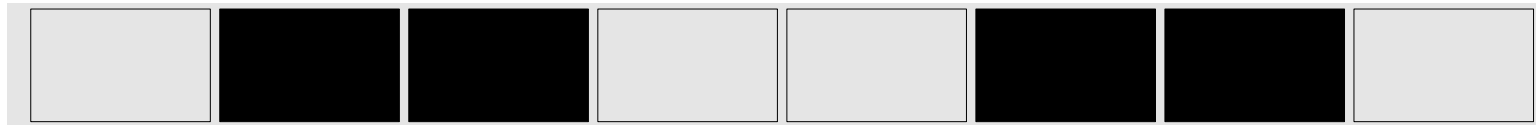

SS

2h

4h

6h

12h

24h

48h

PF

timepoint

**regulated**  not regulated  significant down  significant up

dejung et. al. 2015

ribulose-5-phosphate 3-epimerase, putative

Tb927.10.12210

AGOF: ribulose-phosphate 3-epimerase activity

AGOC: null

AGOP: pentose-phosphate shunt

PGOF: catalytic activity, racemase and epimerase activity, acting on carbohydrates and derivatives, ribulose-phosphate 3-epimerase activity

PGOC: null

PGOP: carbohydrate metabolic process, metabolic process, pentose-phosphate shunt

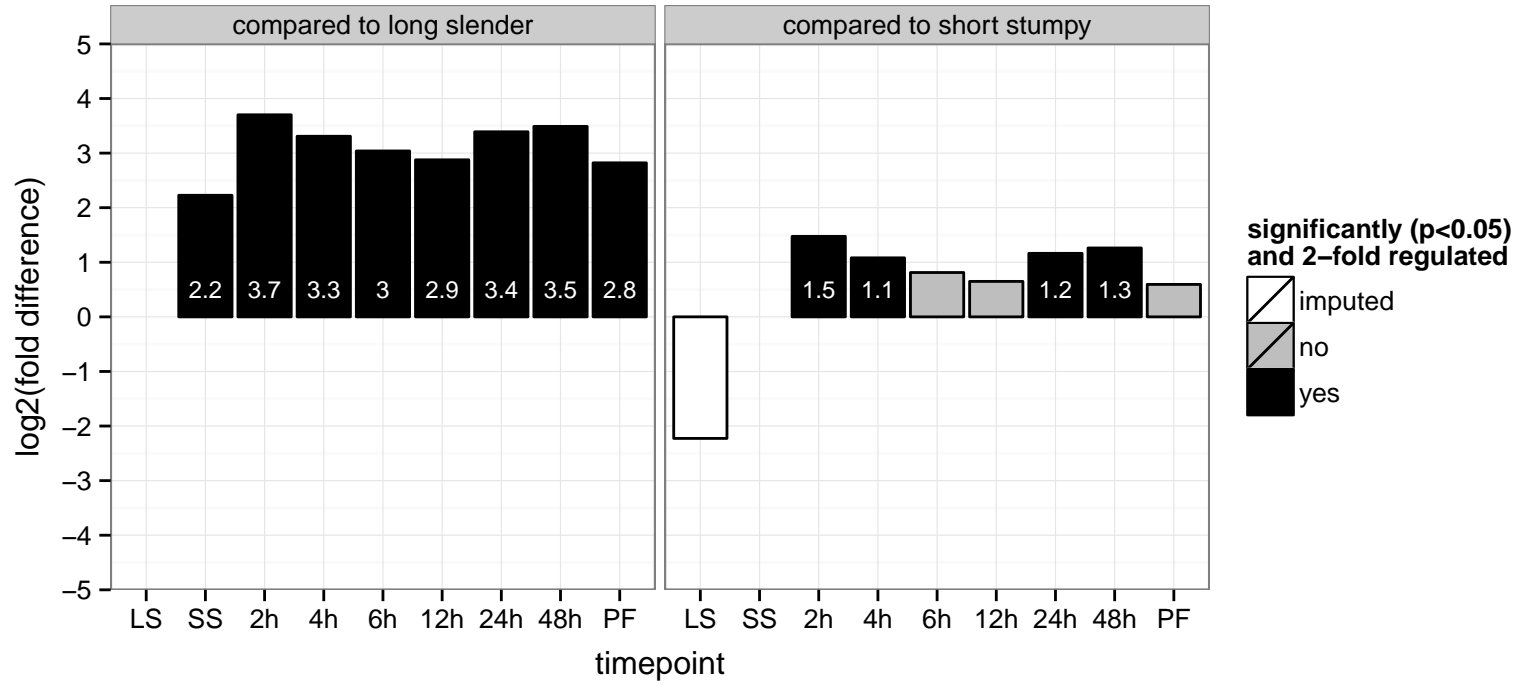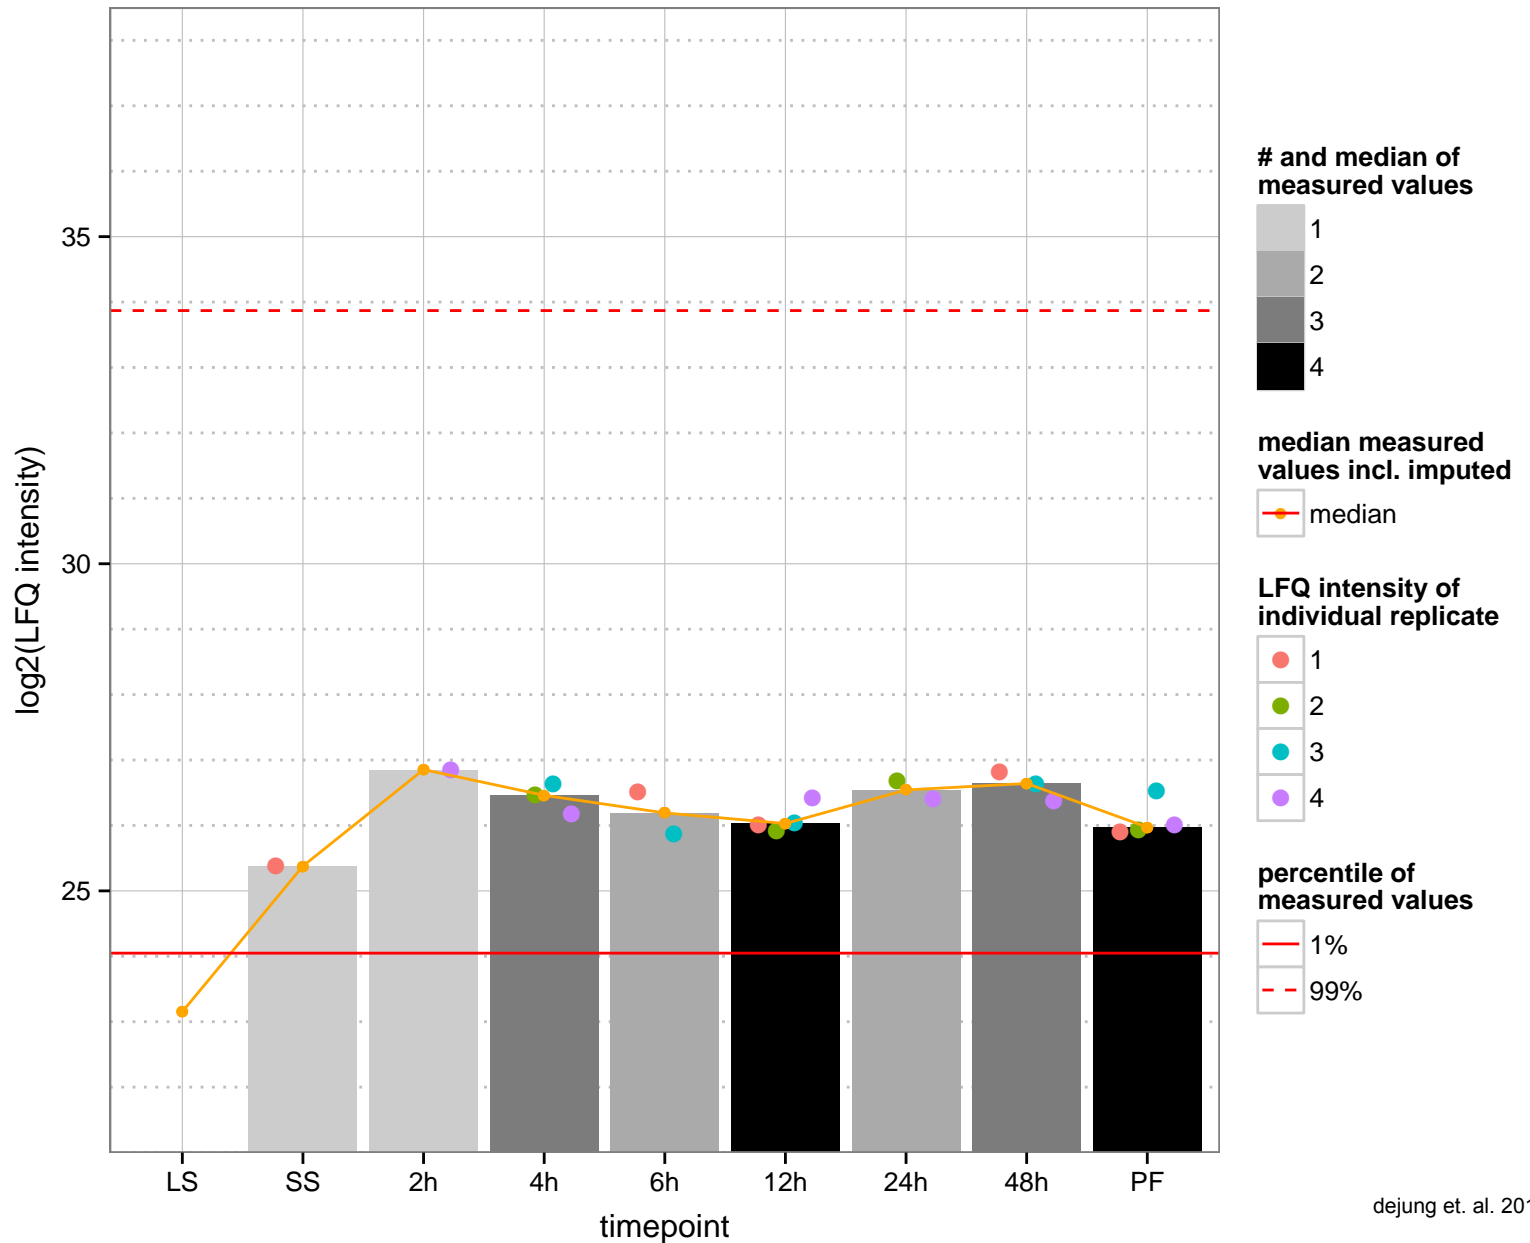

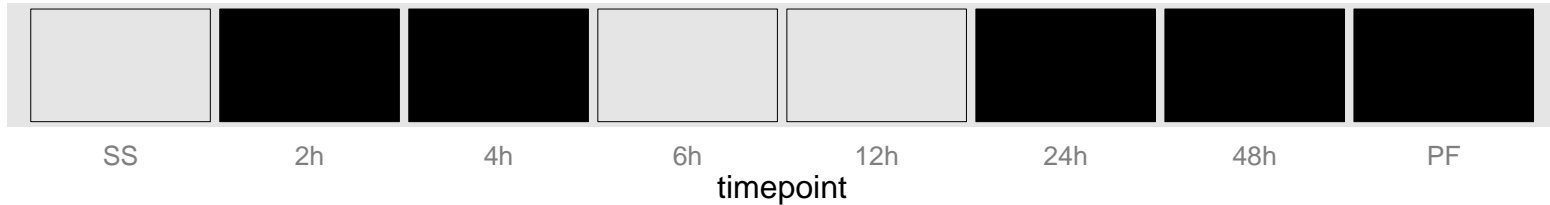

**regulated**  not regulated  significant down  significant up

hypothetical protein, conserved  
 Tb927.10.11520  
 AGOF: null  
 AGOC: mitochondrion  
 AGOP: null  
 PGO: null  
 PGOC: null  
 PGOP: null

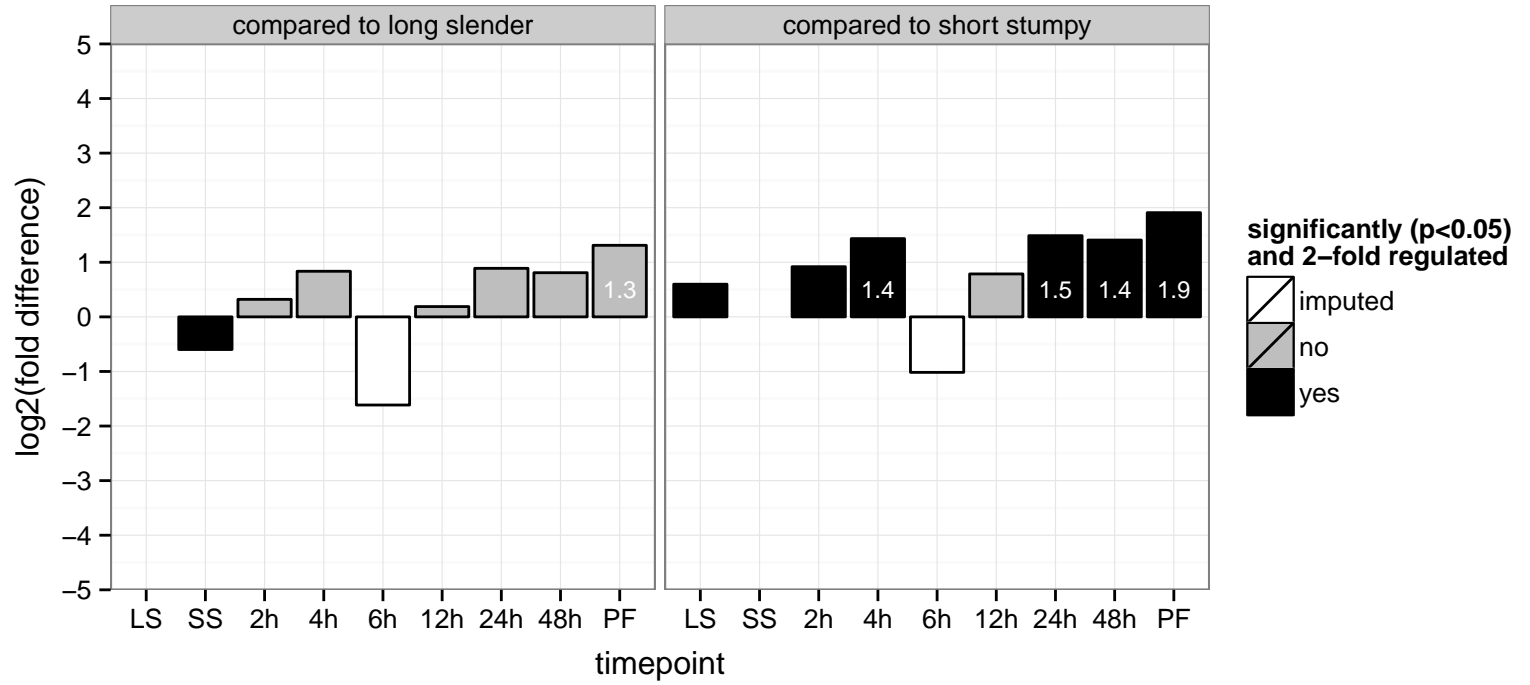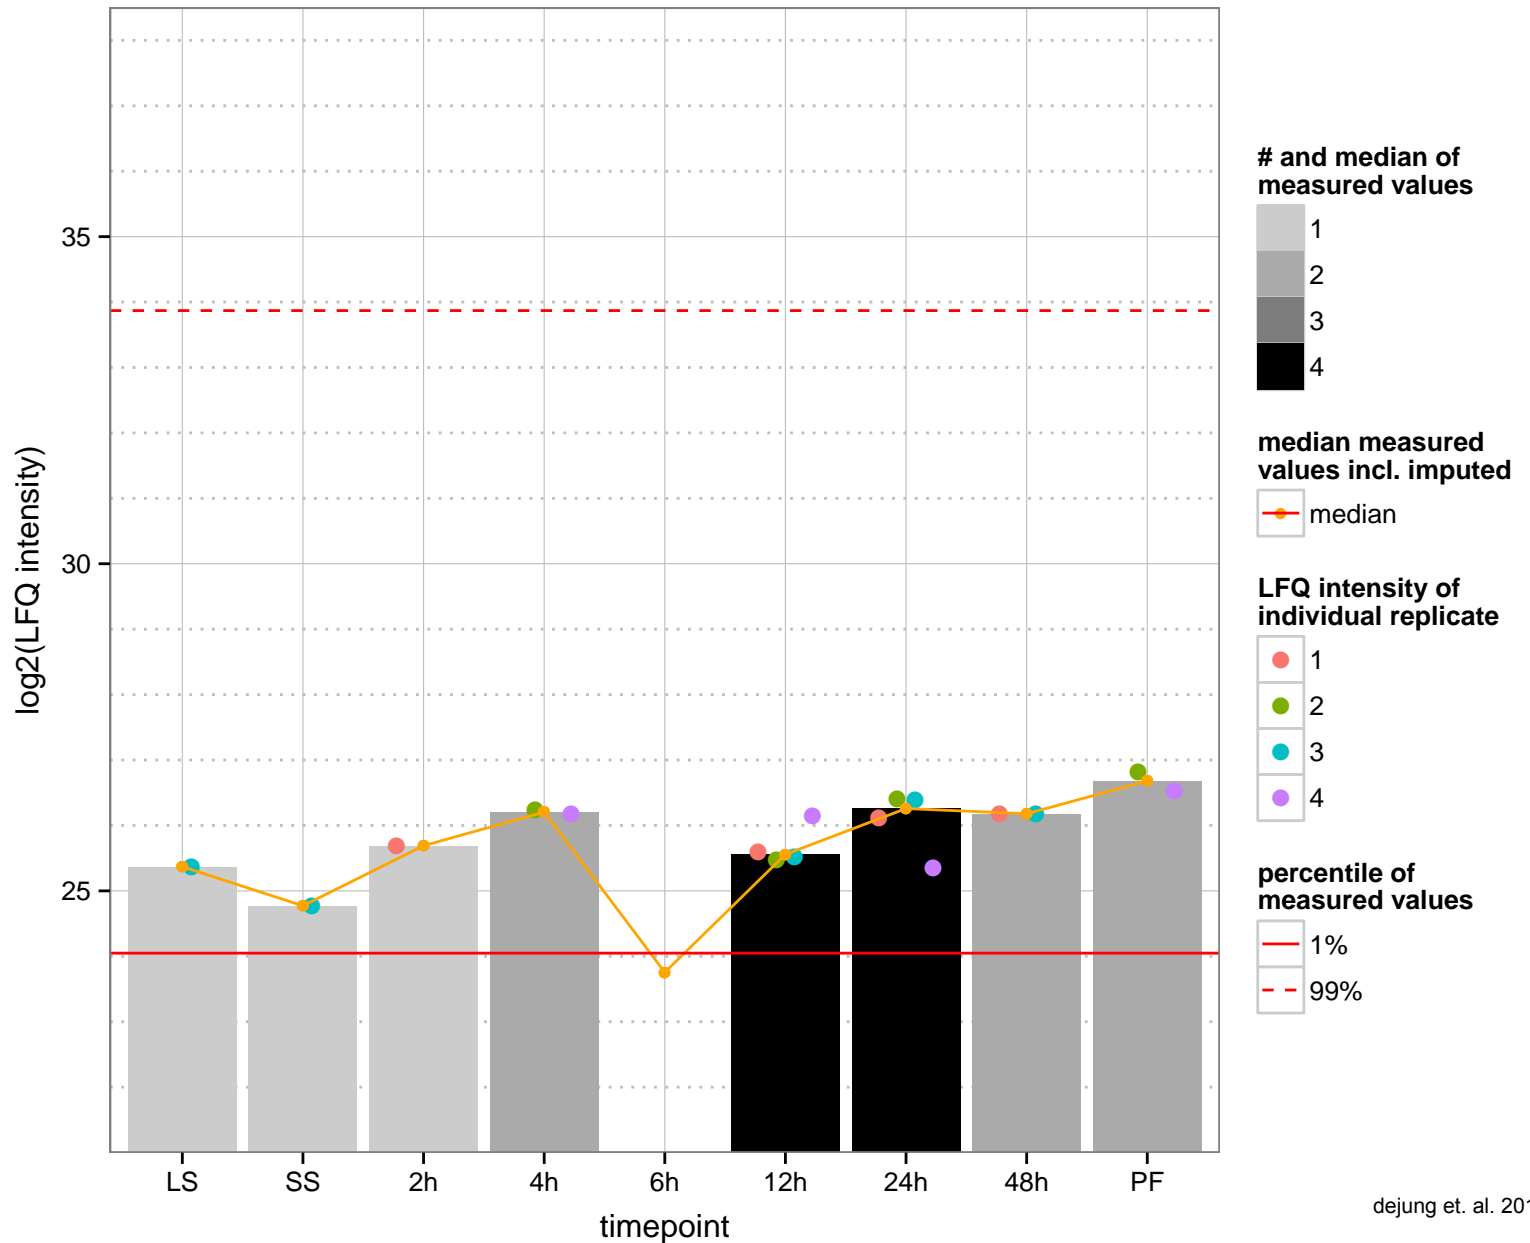

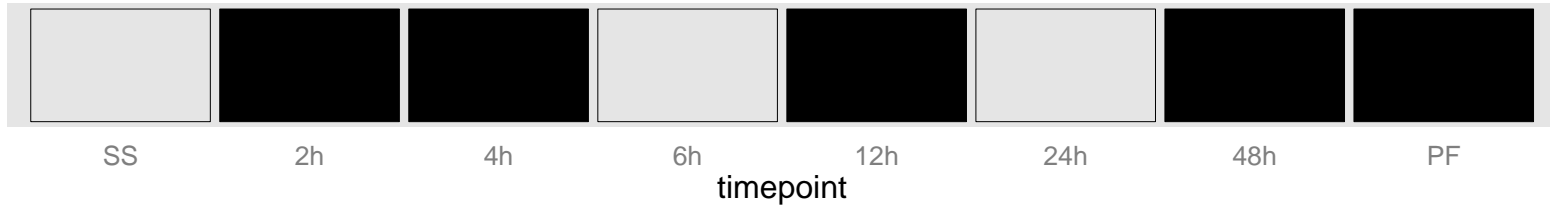

**regulated**  **not regulated**  **significant down**  **significant up**

hypothetical protein, conserved  
 Tb927.5.4120  
 AGOF: null  
 AGOC: mitochondrion  
 AGOP: null  
 PGO: null  
 PGOC: null  
 PGOP: null

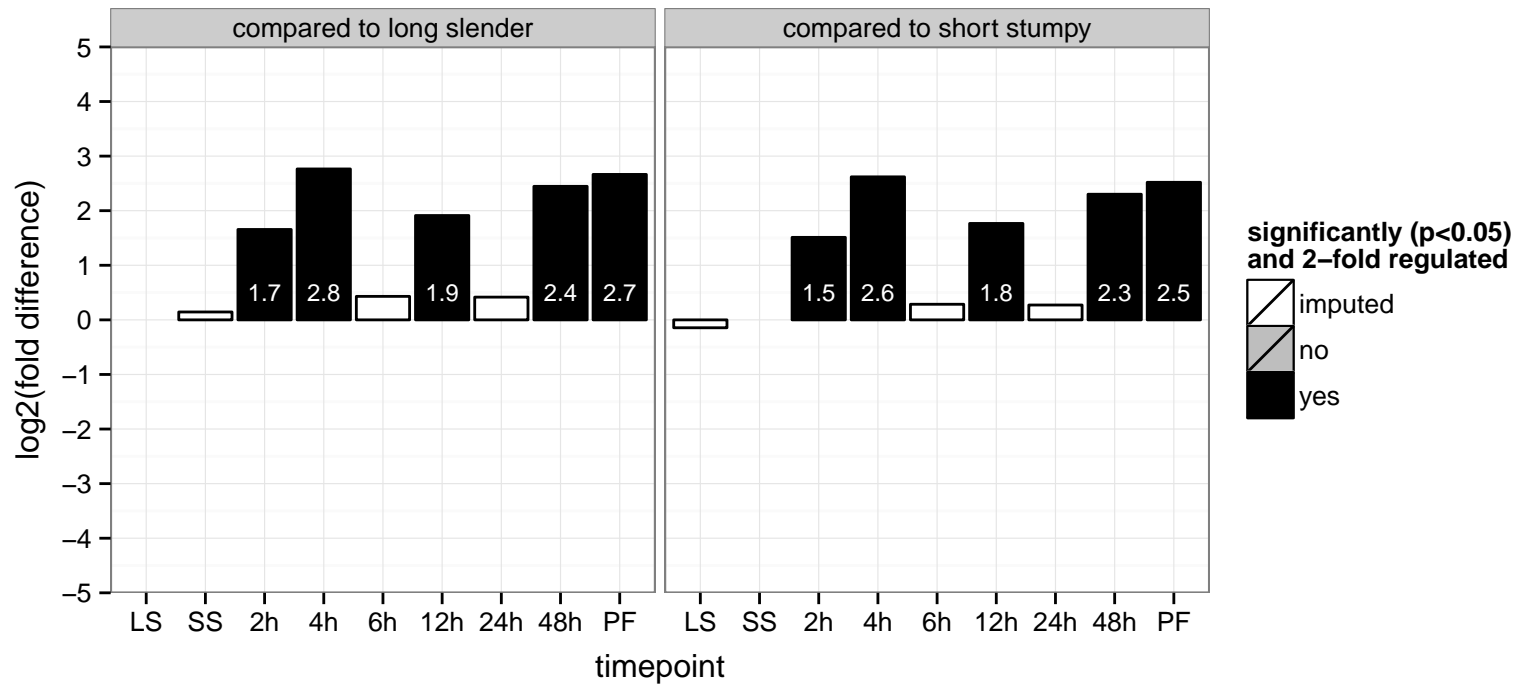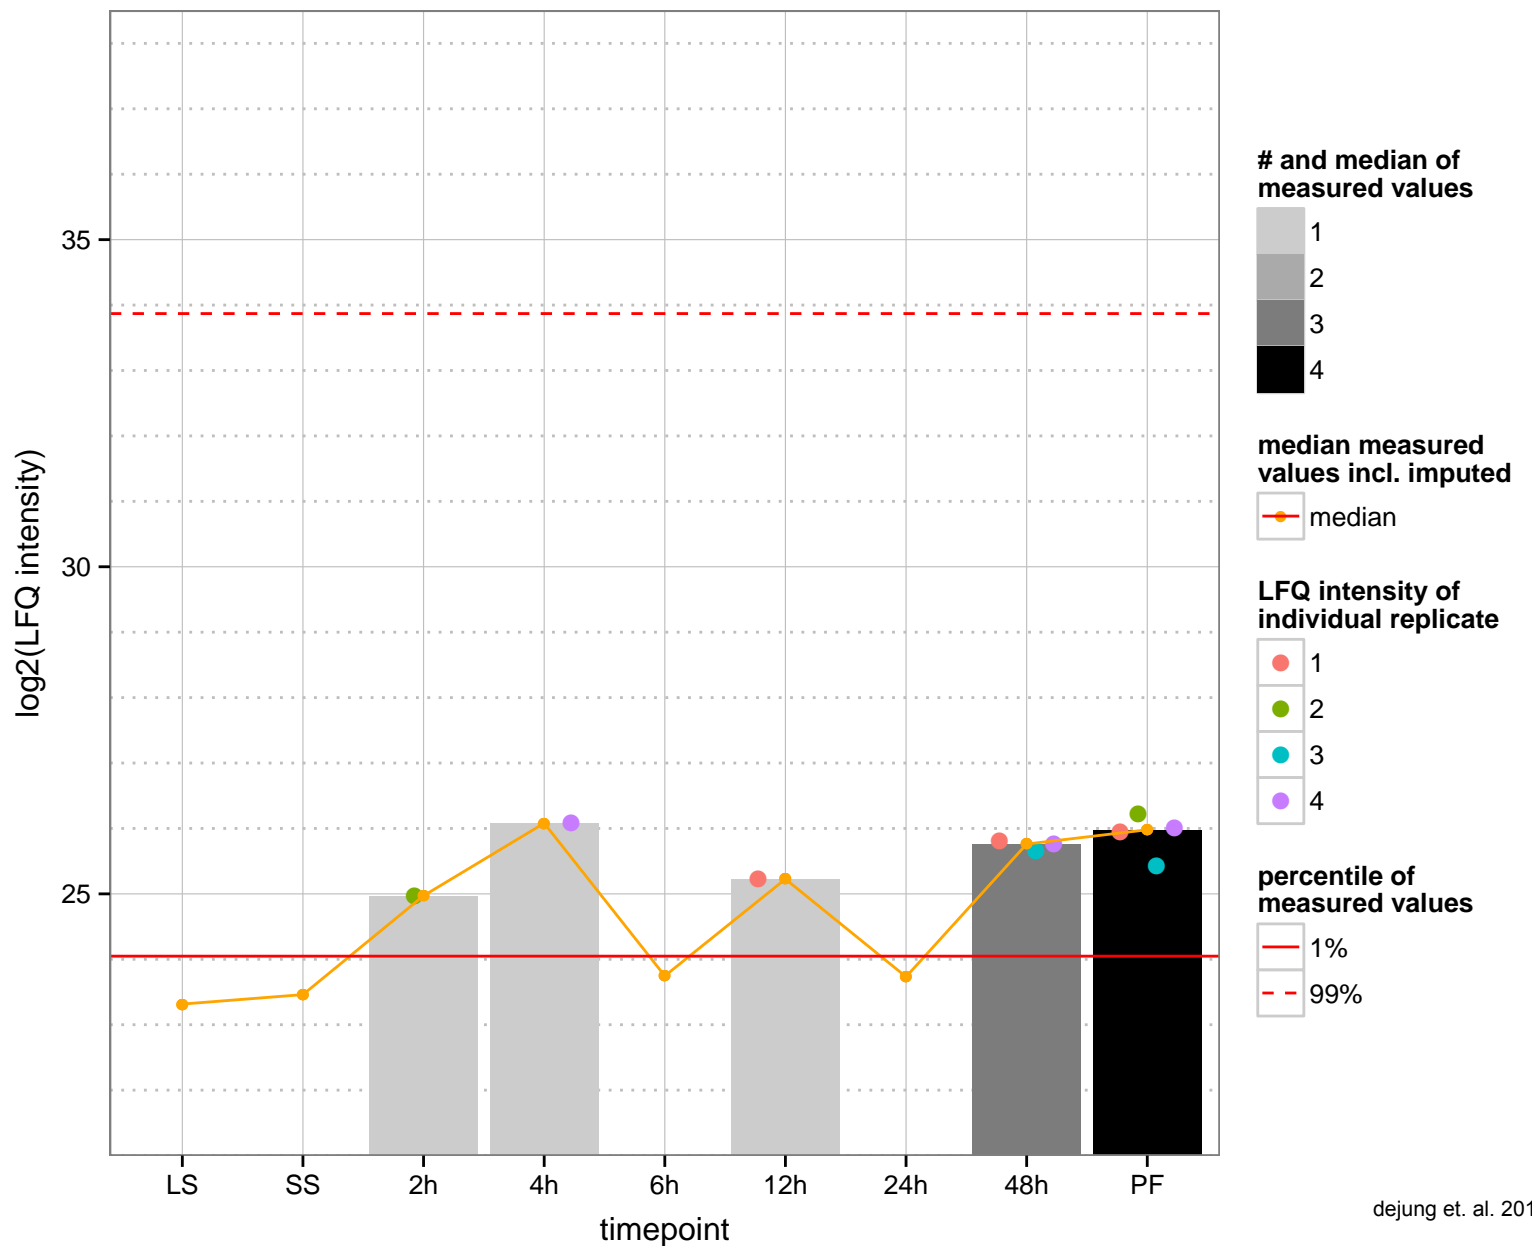

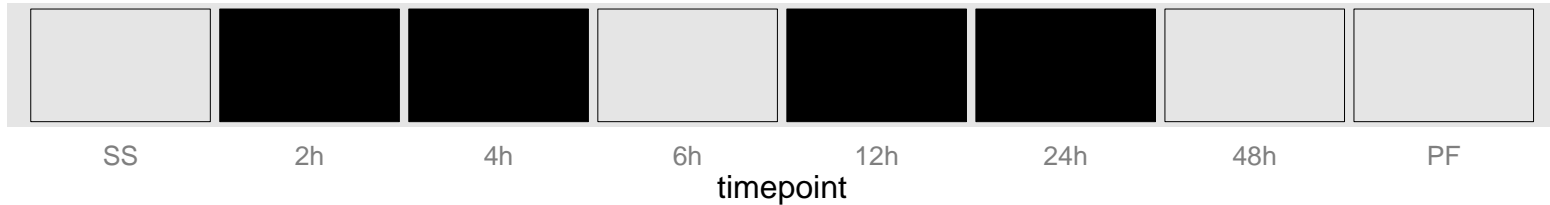

**regulated**  not regulated  significant down  significant up



hypothetical protein, conserved  
 Tb927.11.15210  
 AGOF: null  
 AGOC: null  
 AGOP: null  
 PGOF: null  
 PGOC: null  
 PGOP: null

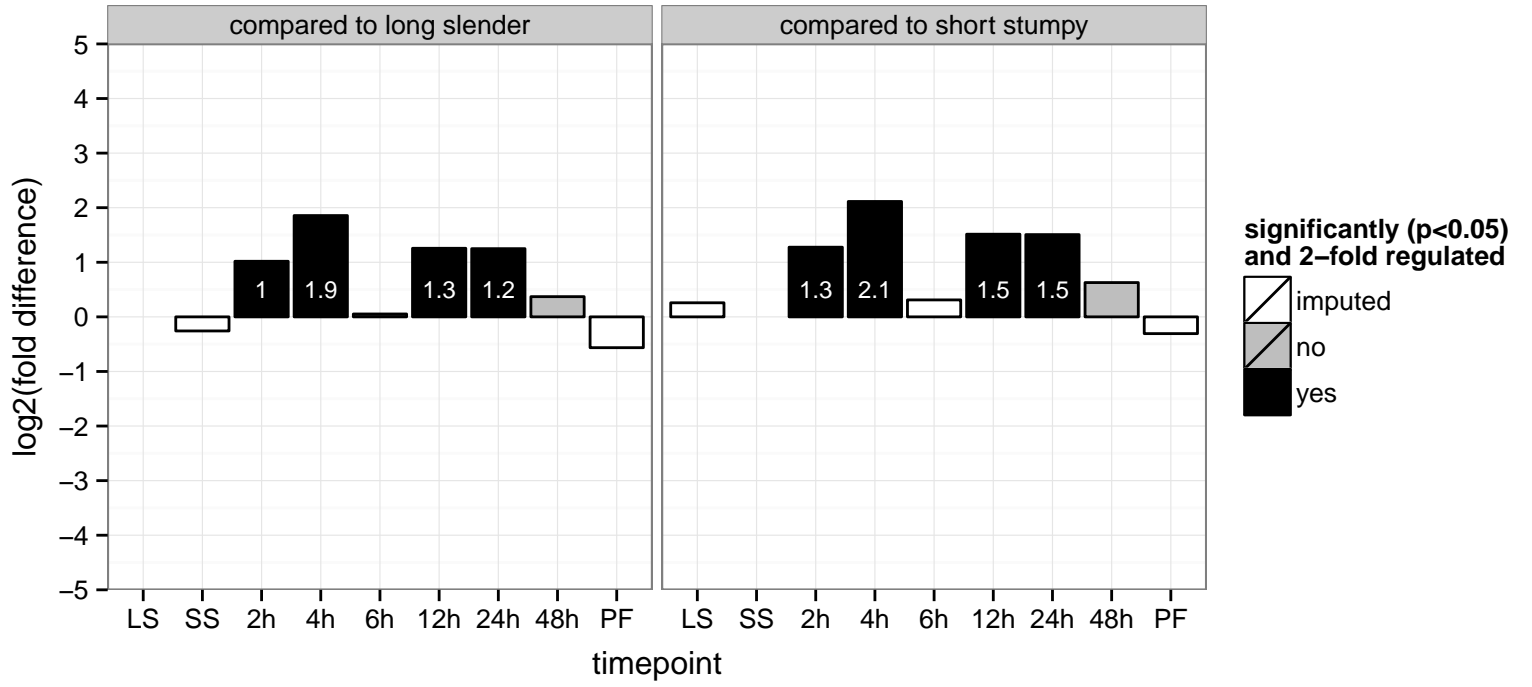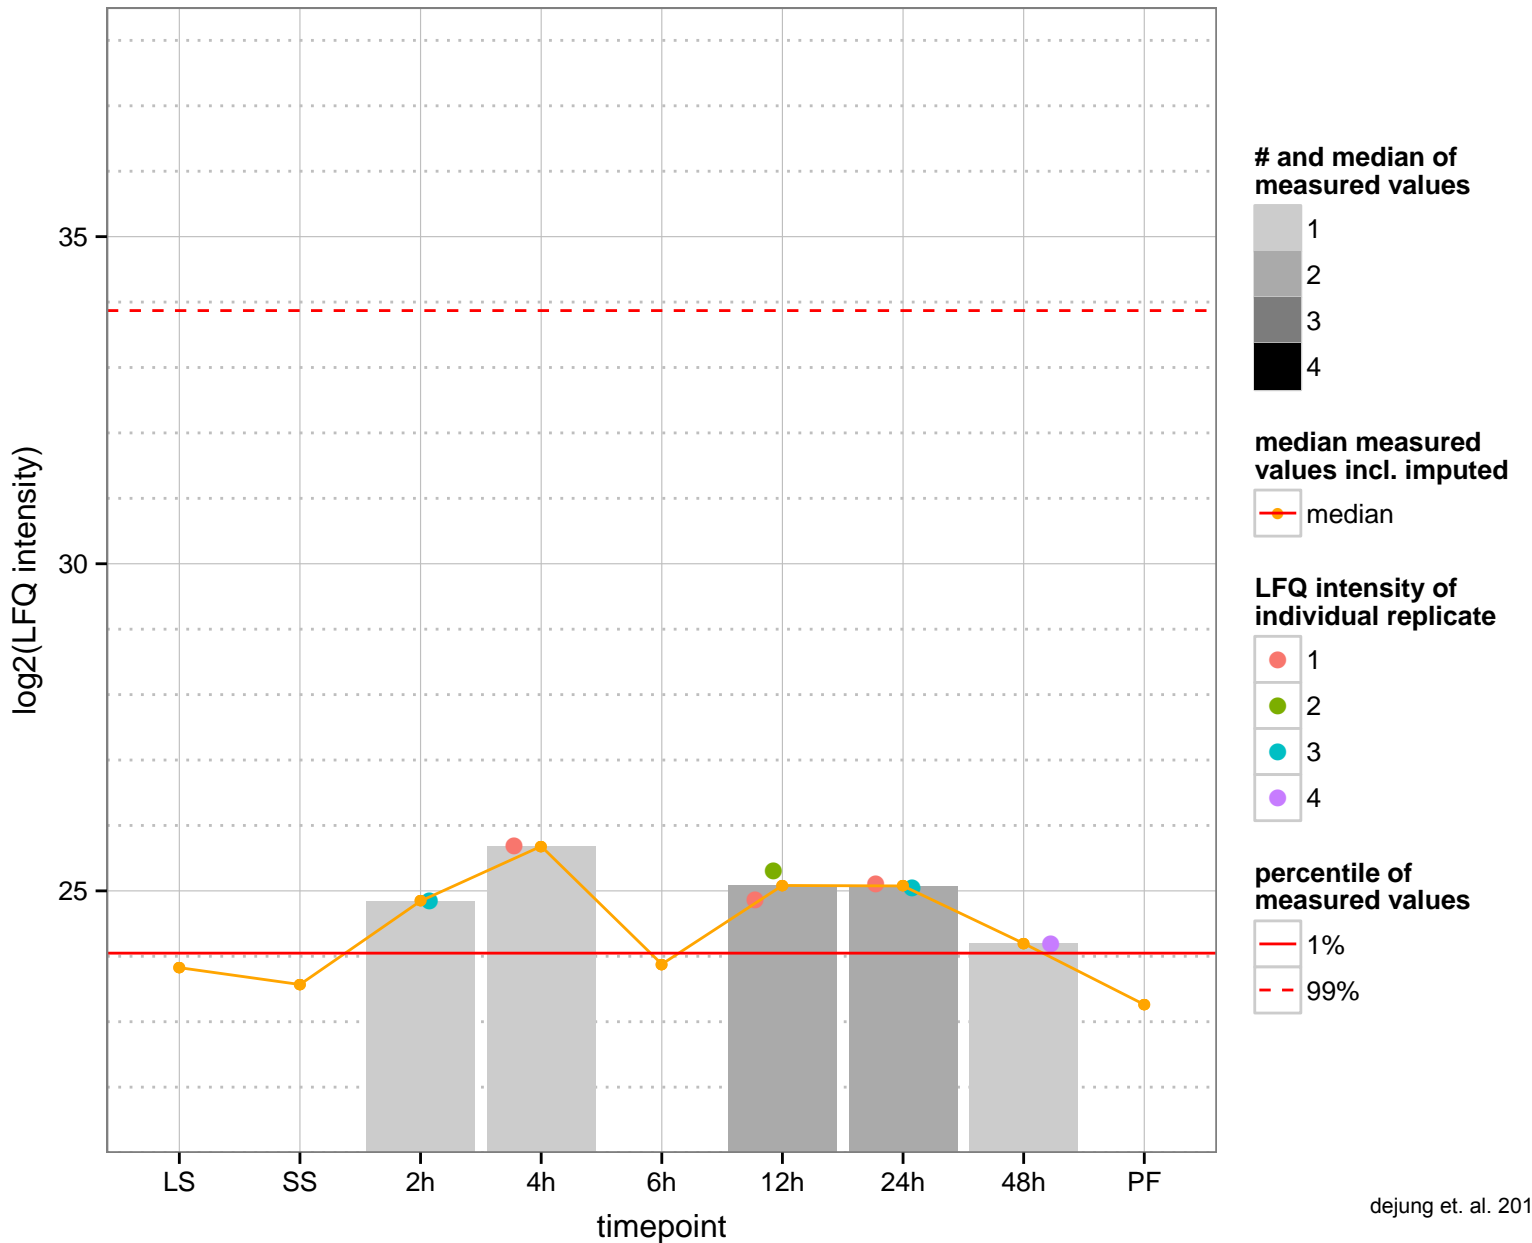

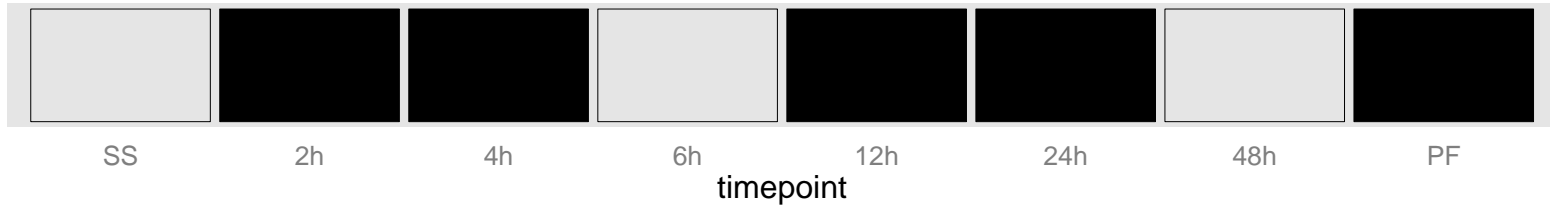

**regulated**  not regulated  significant down  significant up

hypothetical protein, conserved  
 Tb927.10.11890  
 AGOF: null  
 AGOC: mitochondrion  
 AGOP: null  
 PGO: null  
 PGOC: null  
 PGOP: null

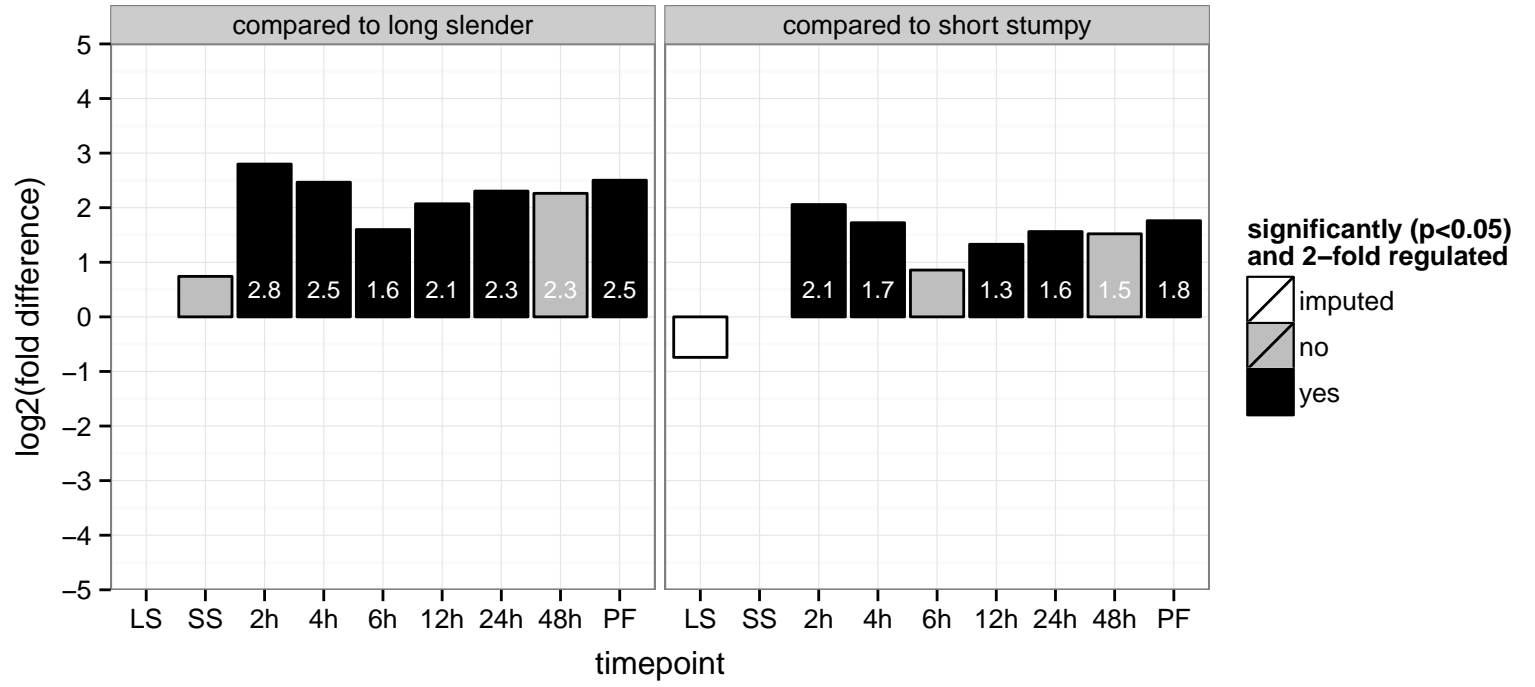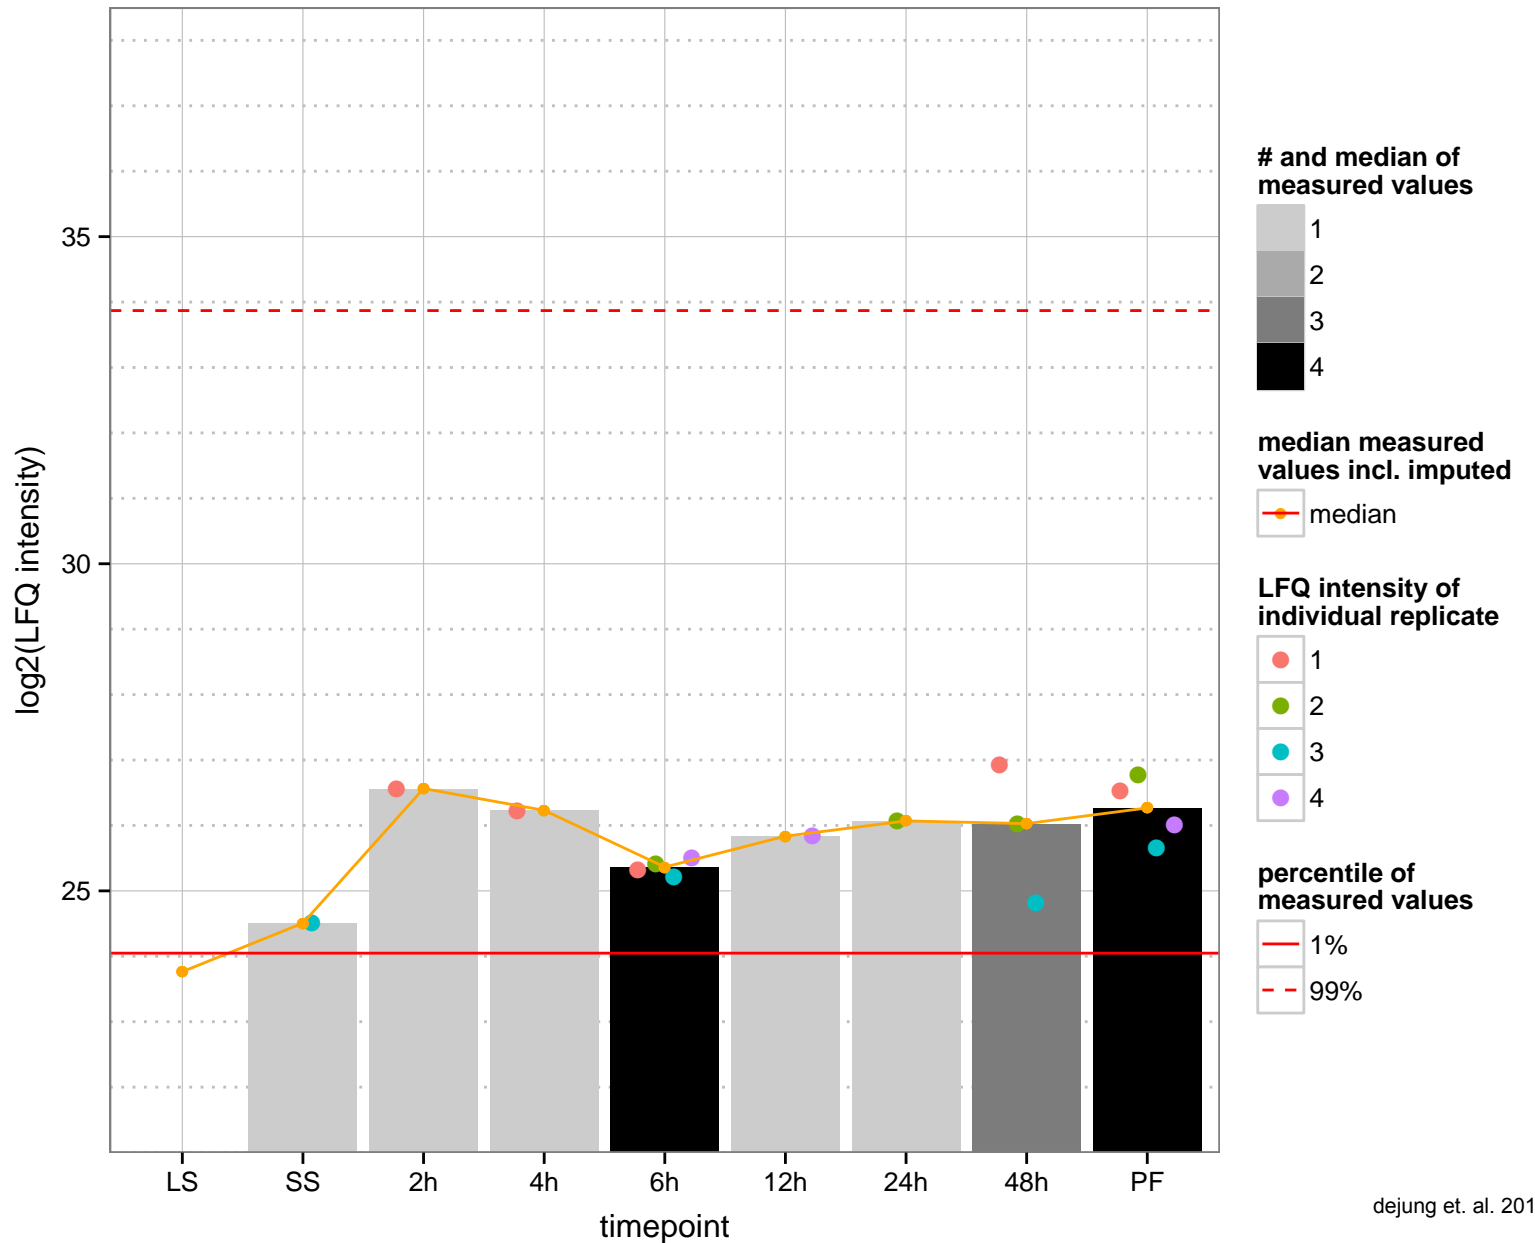

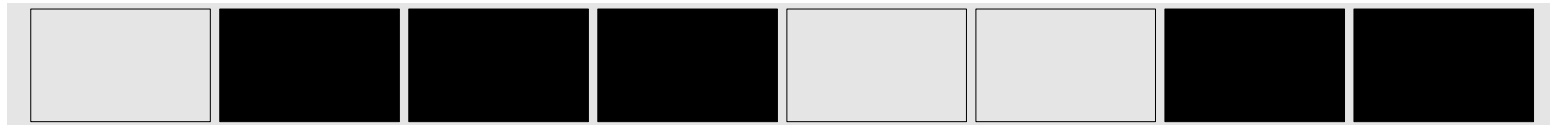

SS

2h

4h

6h

12h

24h

48h

PF

timepoint

**regulated**  not regulated  significant down  significant up

dejung et. al. 2015

hypothetical protein, conserved  
 Tb927.4.5160  
 AGOF: null  
 AGOC: null  
 AGOP: null  
 PGOF: null  
 PGO C: null  
 PGOP: null

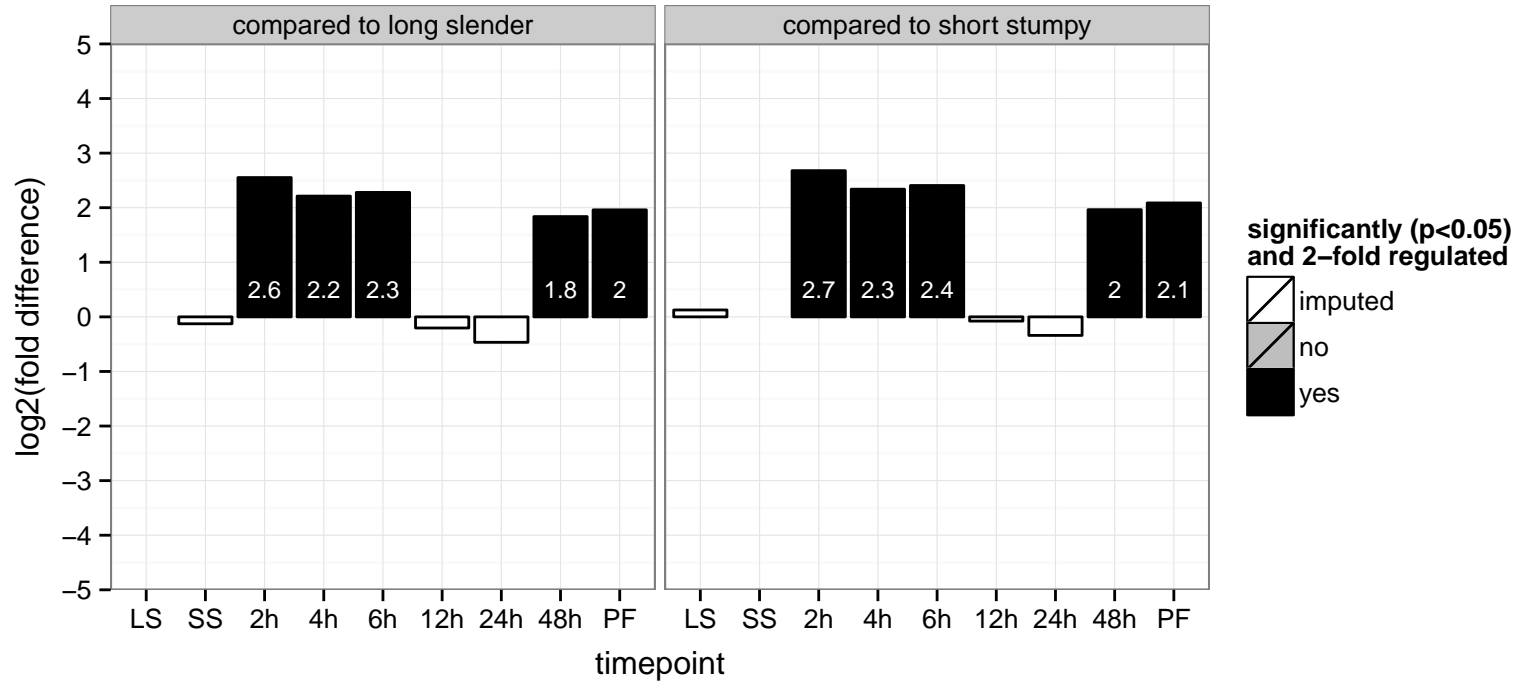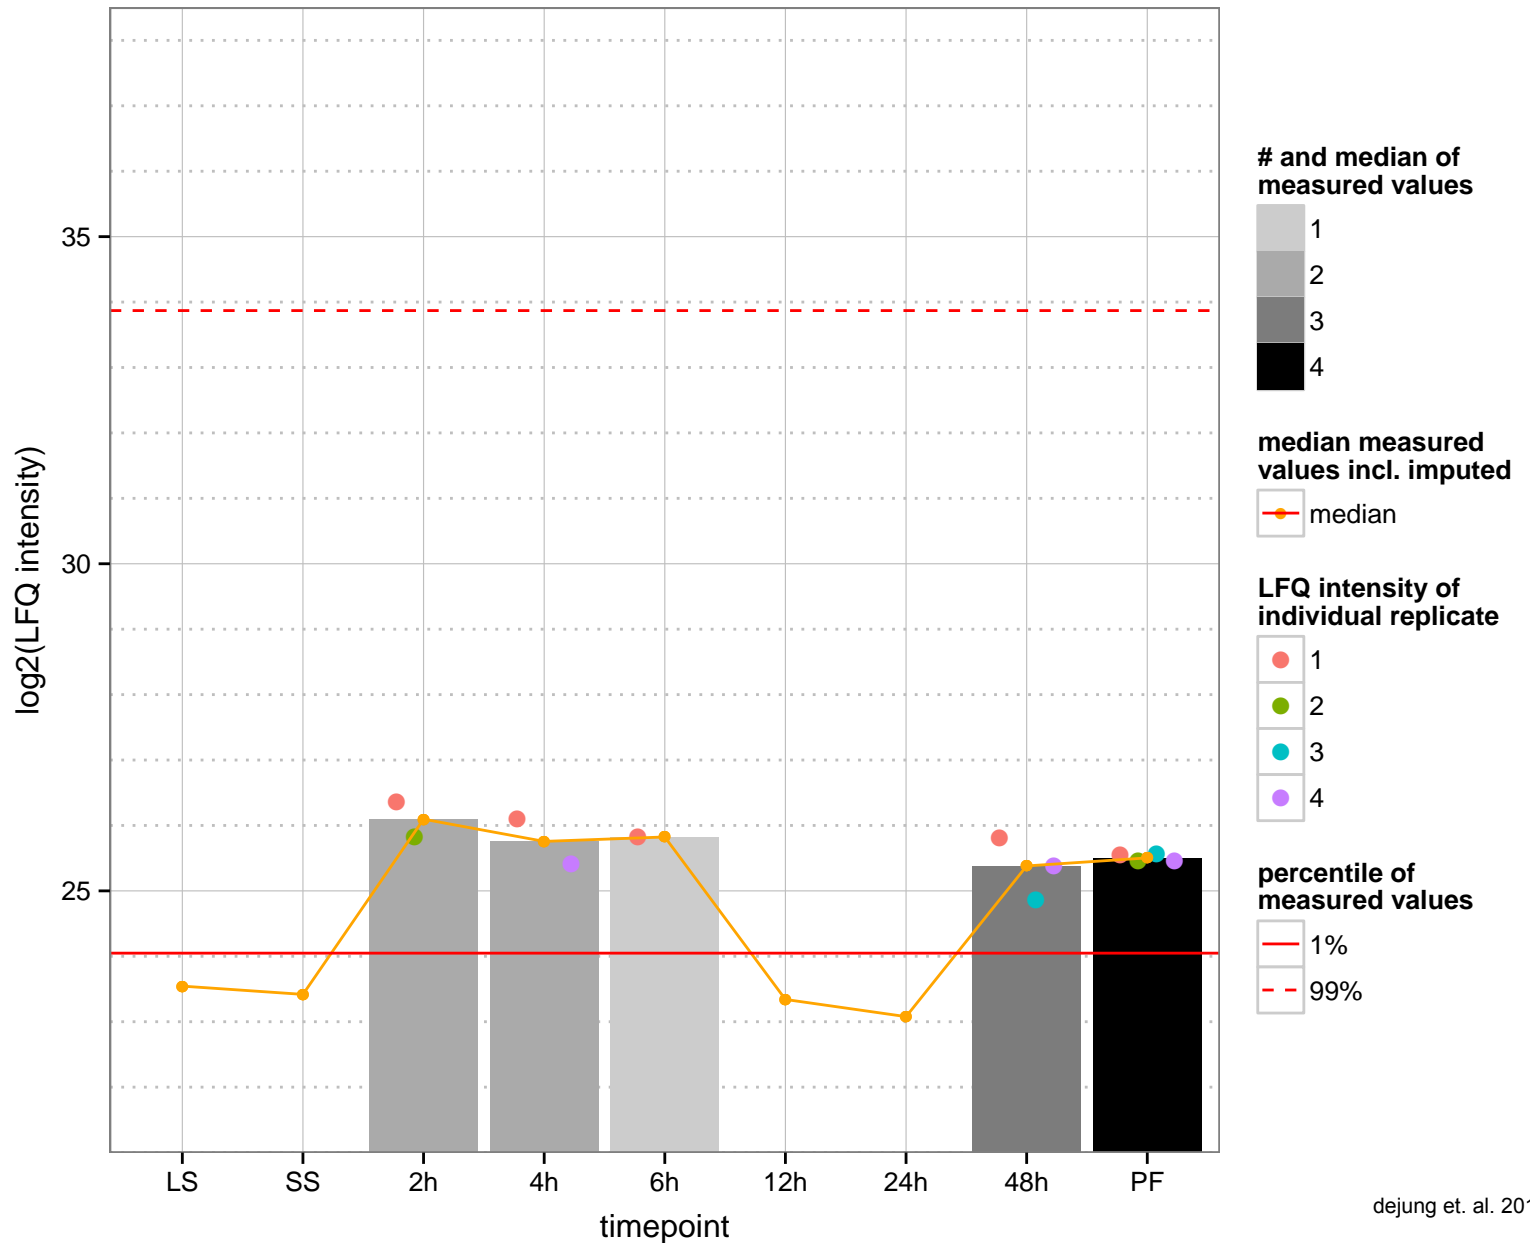

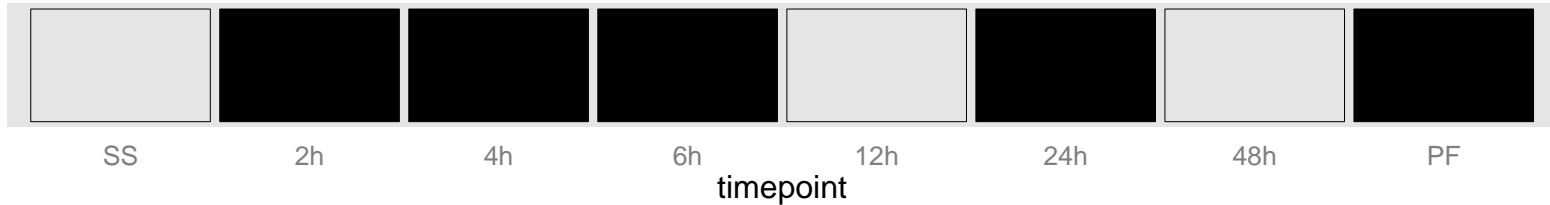

**regulated**  not regulated  significant down  significant up

hypothetical protein, conserved  
 Tb927.9.2260  
 AGOF: null  
 AGOC: null  
 AGOP: null  
 PGO: null  
 PGOC: null  
 PGOP: null

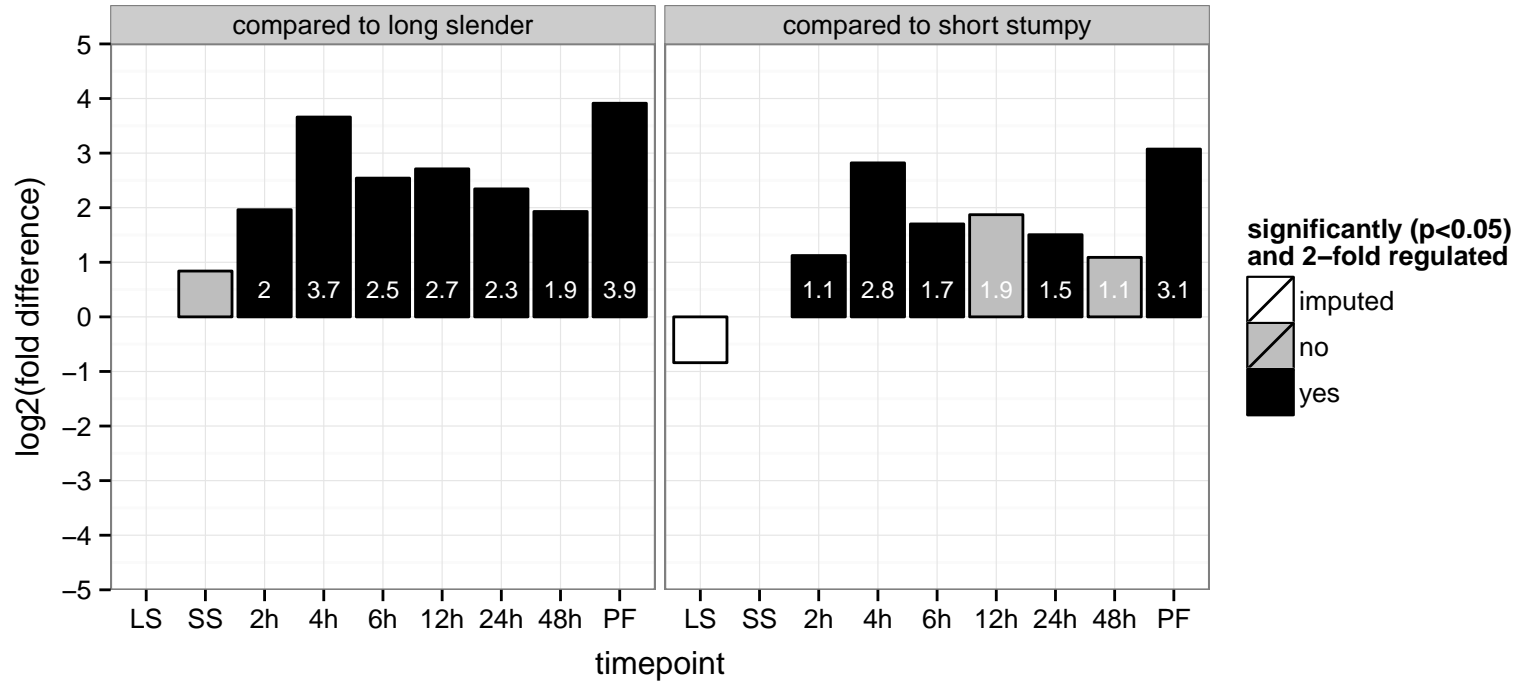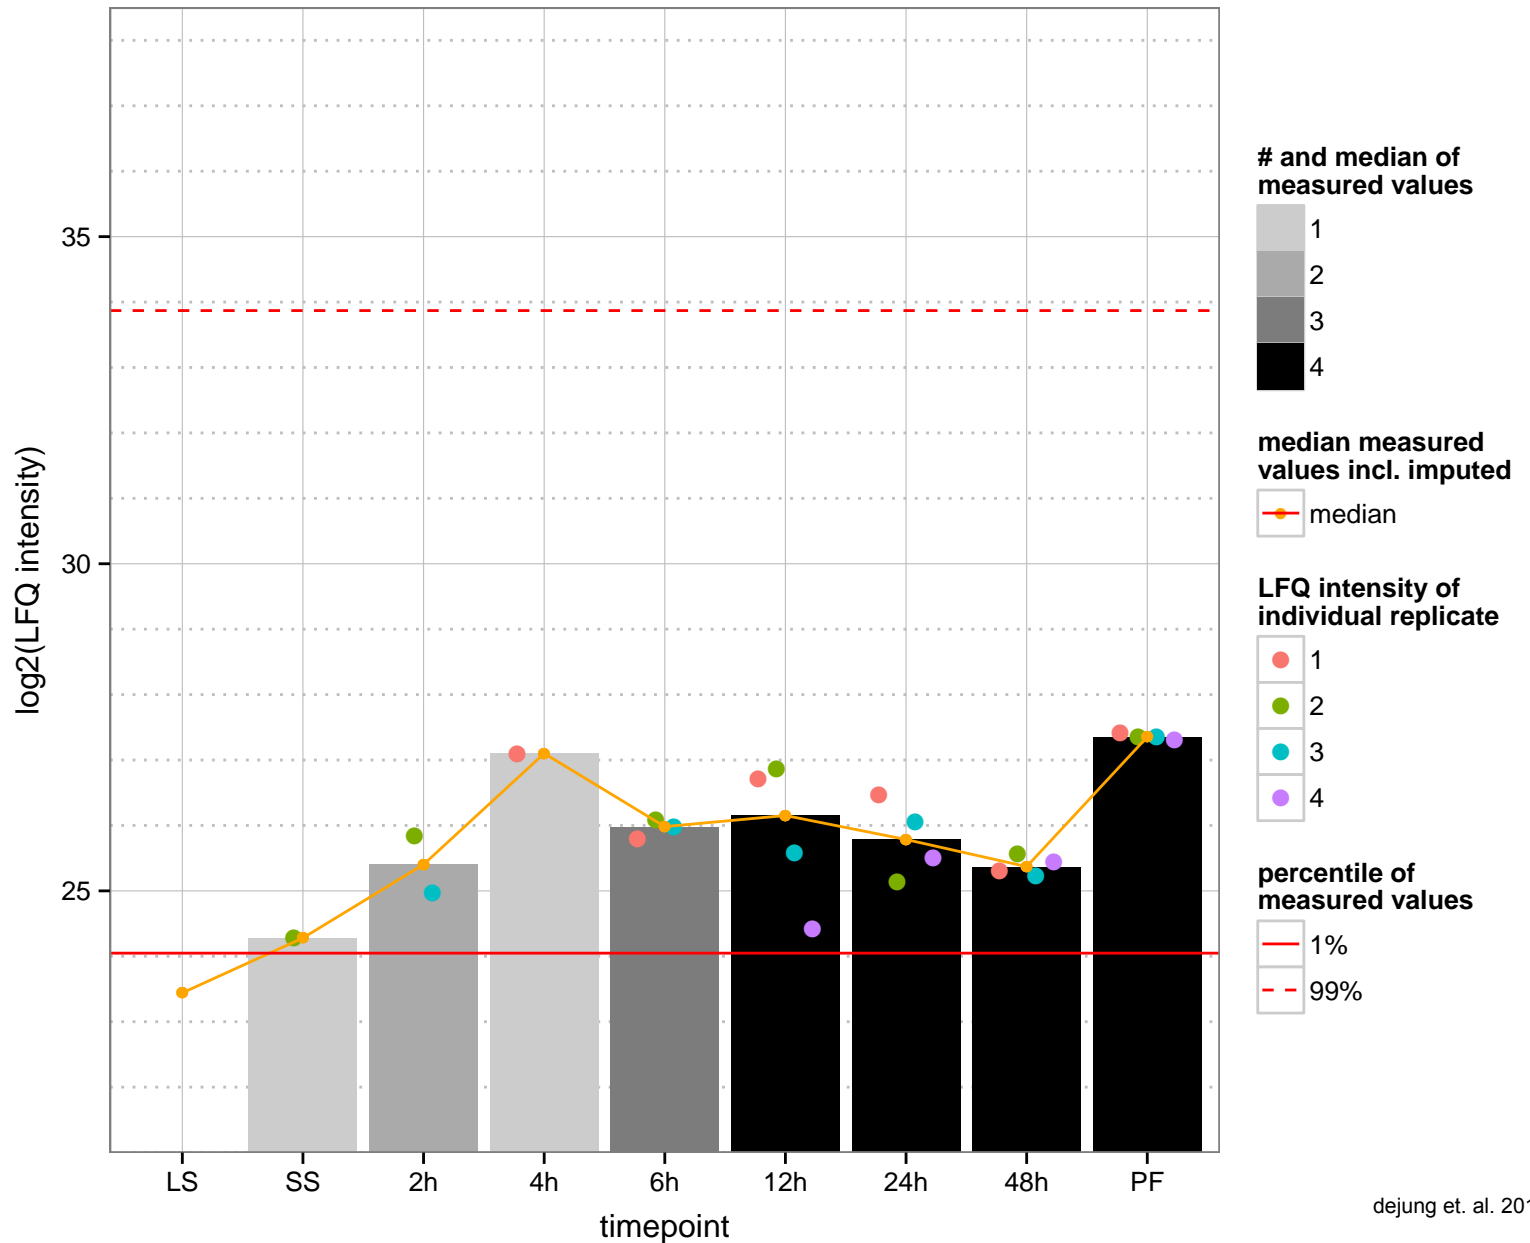

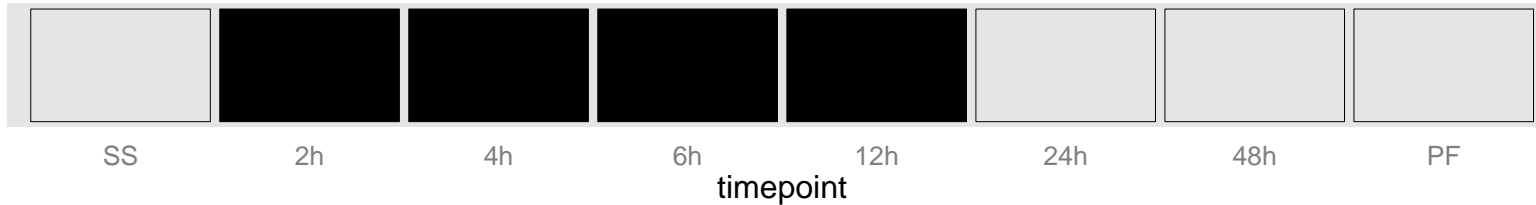

**regulated**  not regulated  significant down  significant up



hypothetical protein, conserved  
 Tb927.10.11630  
 AGOF: null  
 AGOC: null  
 AGOP: null  
 PGOF: null  
 PGOC: null  
 PGOP: null

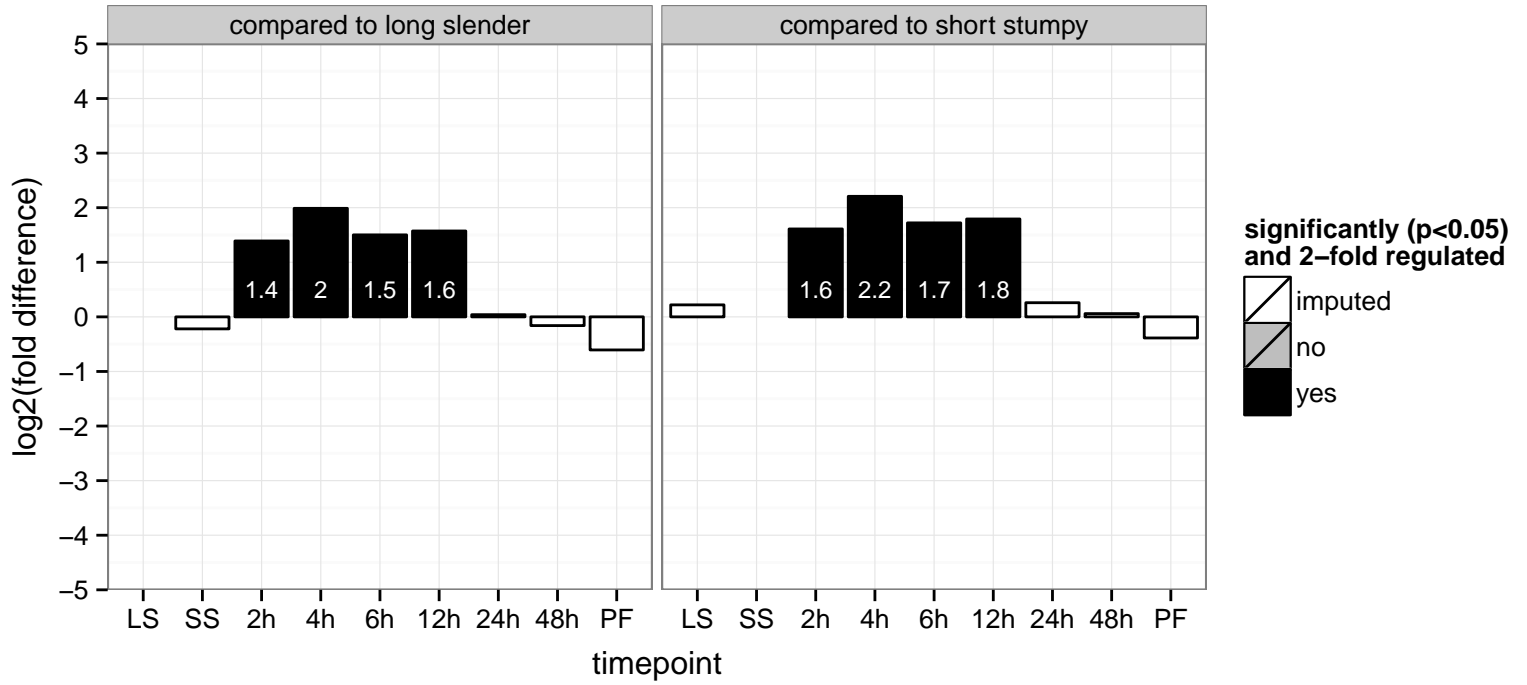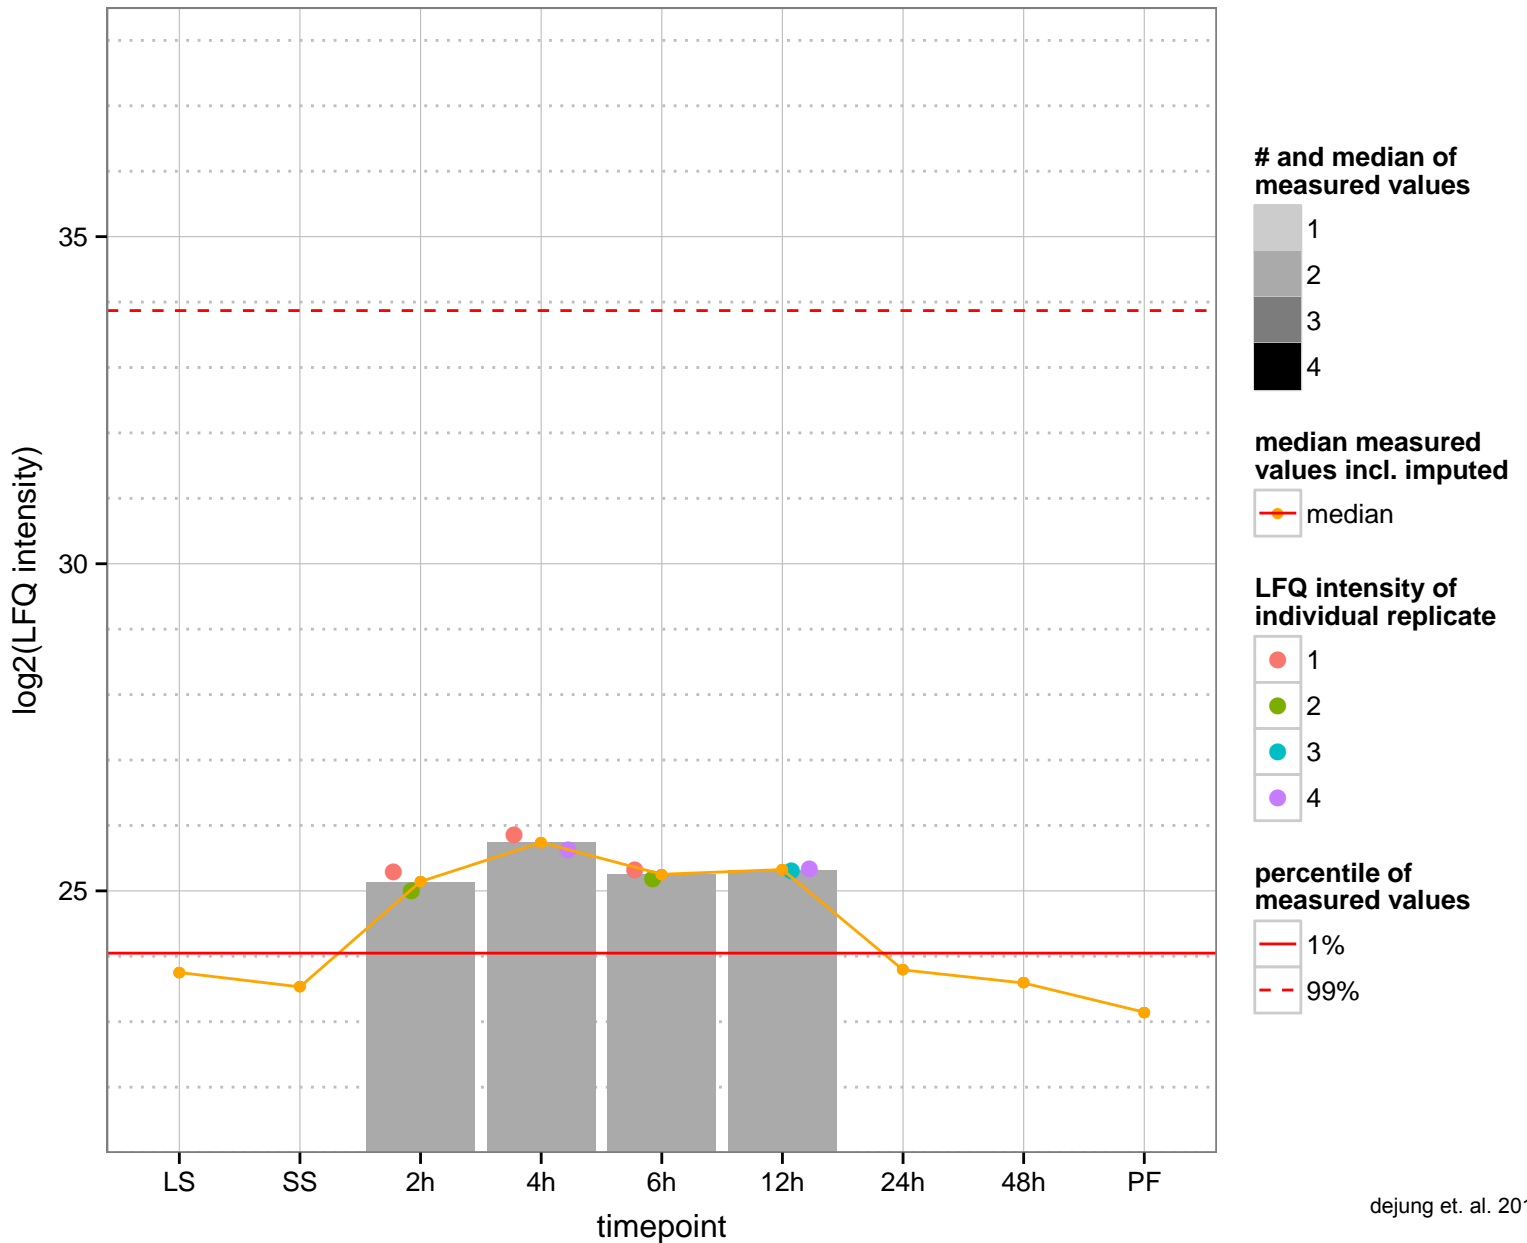

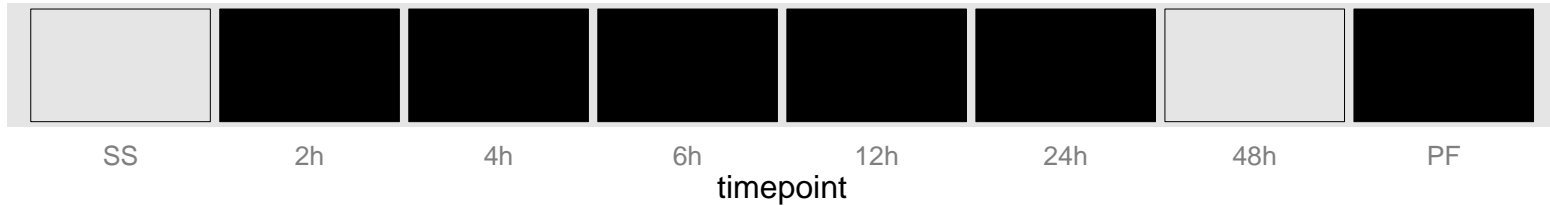

**regulated**  **not regulated**  **significant down**  **significant up**

hypothetical protein, conserved  
 Tb927.11.11300  
 AGOF: null  
 AGOC: null  
 AGOP: null  
 PGO: null  
 PGOC: null  
 PGOP: null

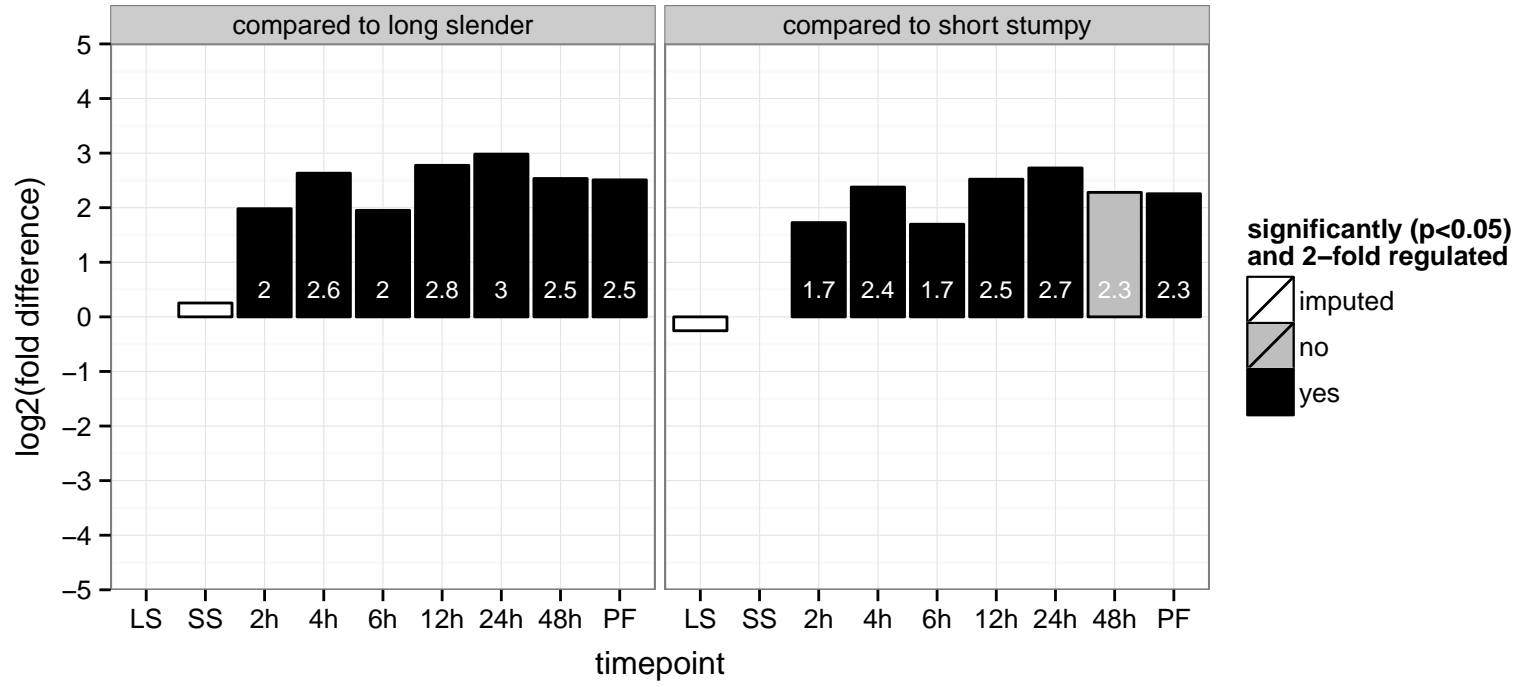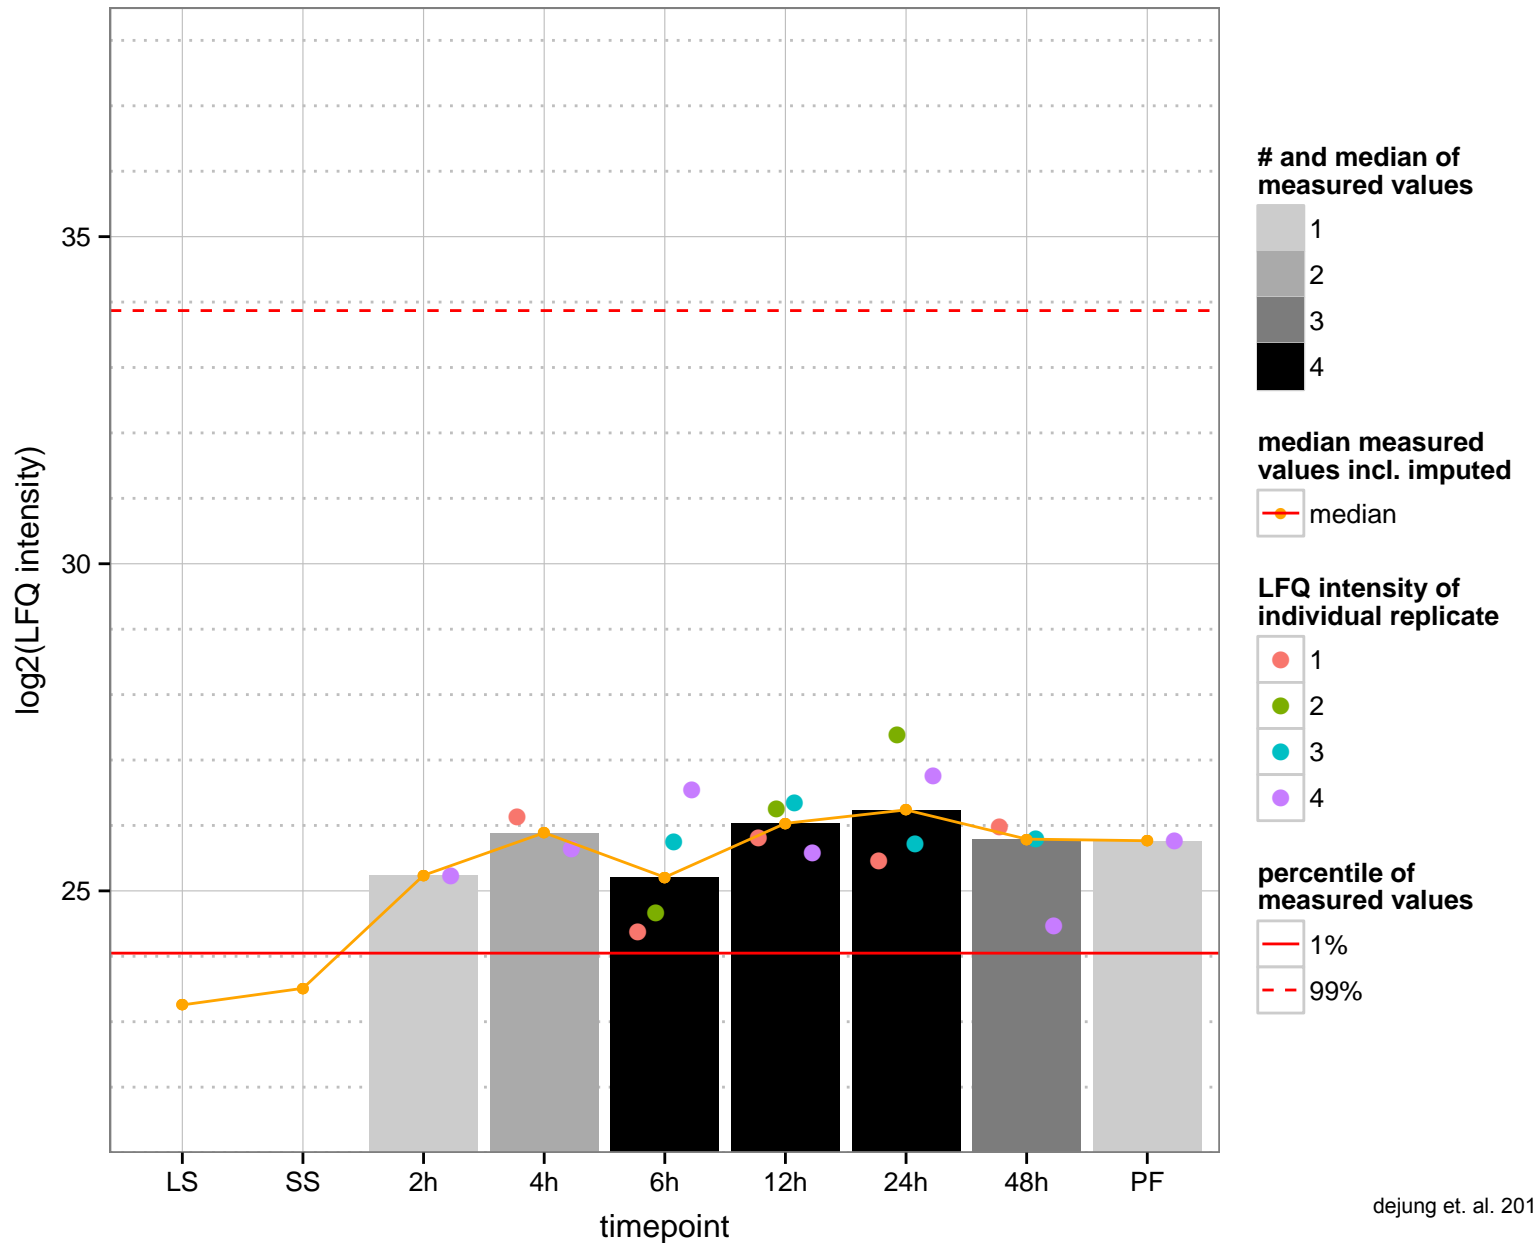

Supplement: ppat.1005439.s001.pdf [file ppat.1005439.s001.pdf]
