# Supplementary material for: Quantitative Proteomics Uncovers Novel Factors Involved in Developmental Differentiation of Trypanosoma brucei
Source: PubMed Central journal article supplement (PMC4765897; doi:10.1371/journal.ppat.1005439), 2016-02-24
Supplement: ppat.1005439.s002.pdf [file ppat.1005439.s002.pdf]

## Supplementary Figure 2

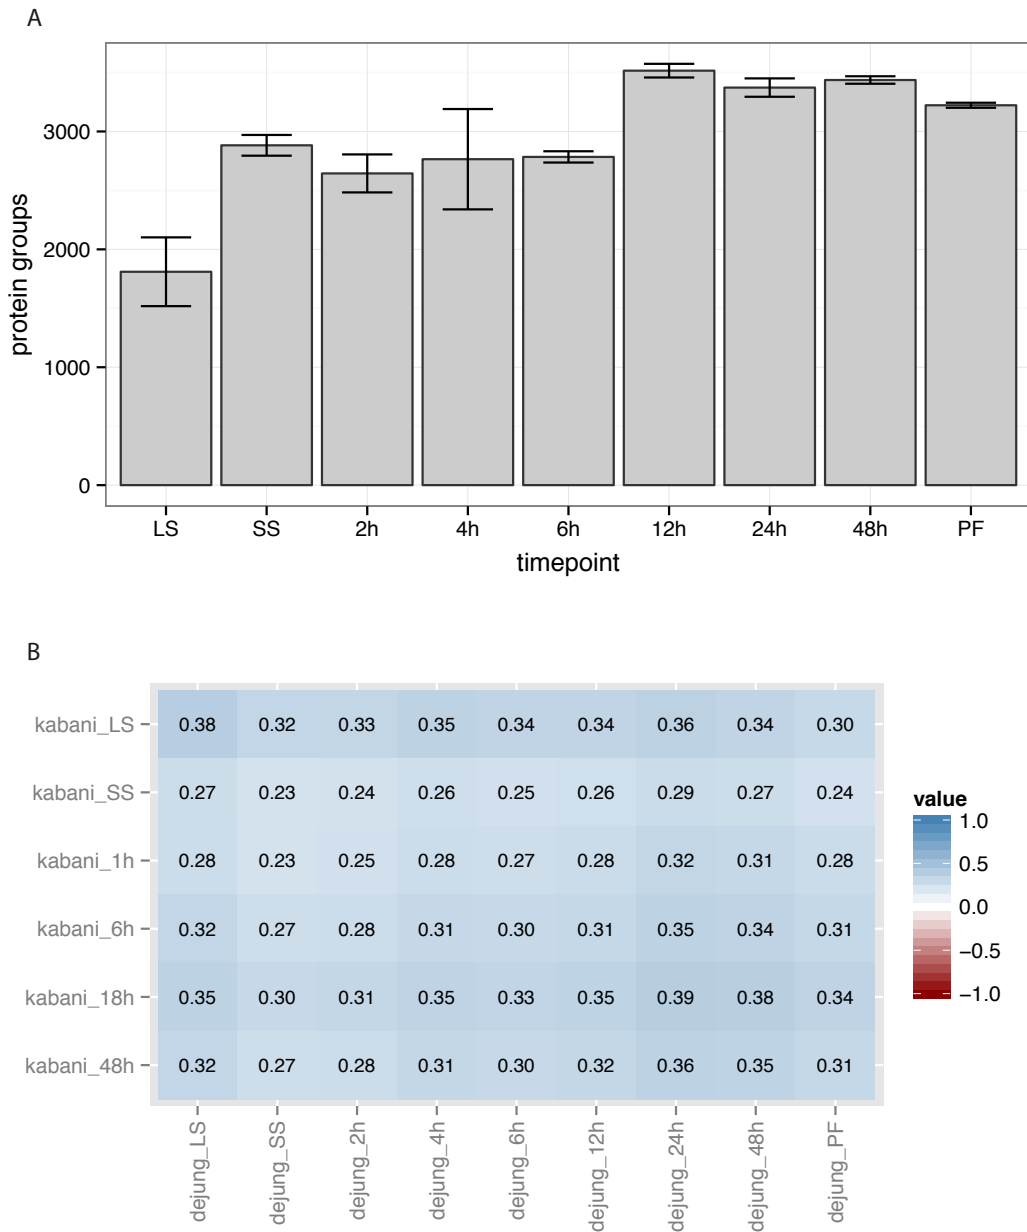

**Fig S2: Proteome complexity and comparison of proteome expression profiles with the transcriptome during the differentiation process. (A)** Protein groups count per timepoint. **(B)** The overall correlation ranges from  $r=0.23$  to  $r=0.39$ . A global maximum is found when comparing the transcriptome 18 h post induction with the proteome 24 h post induction. The transcriptome and proteome of the LS stage shows the second highest correlation.
