# Supplementary material for: Quantitative Proteomics Uncovers Novel Factors Involved in Developmental Differentiation of Trypanosoma brucei
Source: PubMed Central journal article supplement (PMC4765897; doi:10.1371/journal.ppat.1005439), 2016-02-24
Supplement: ppat.1005439.s003.pdf [file ppat.1005439.s003.pdf]

### Supplementary Figure 3

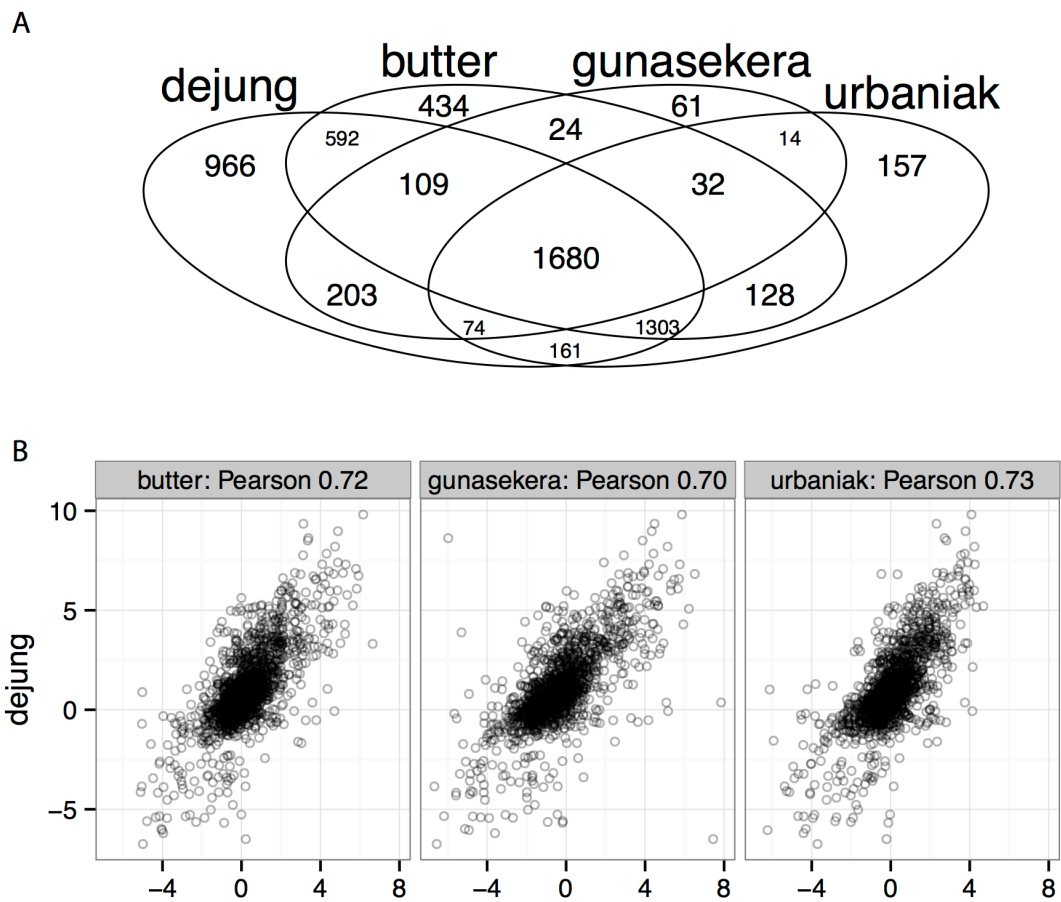

**Fig S3: Comparison with available SILAC proteomes of PF and LS states.** **(A)** Venn diagram with the number of individual protein IDs comparing to previously published datasets. **(B)** Scatterplot of LS/PF enrichment of 1680 protein groups overlapping with all previous studies. Each plot compares to the corresponding study. For each case, we obtain a pearson coefficient of  $r \sim 0.7$ .
