# Supplementary material for: Quantitative Proteomics Uncovers Novel Factors Involved in Developmental Differentiation of Trypanosoma brucei
Source: PubMed Central journal article supplement (PMC4765897; doi:10.1371/journal.ppat.1005439), 2016-02-24
Supplement: ppat.1005439.s004.pdf [file ppat.1005439.s004.pdf]

### Supplementary Figure 4

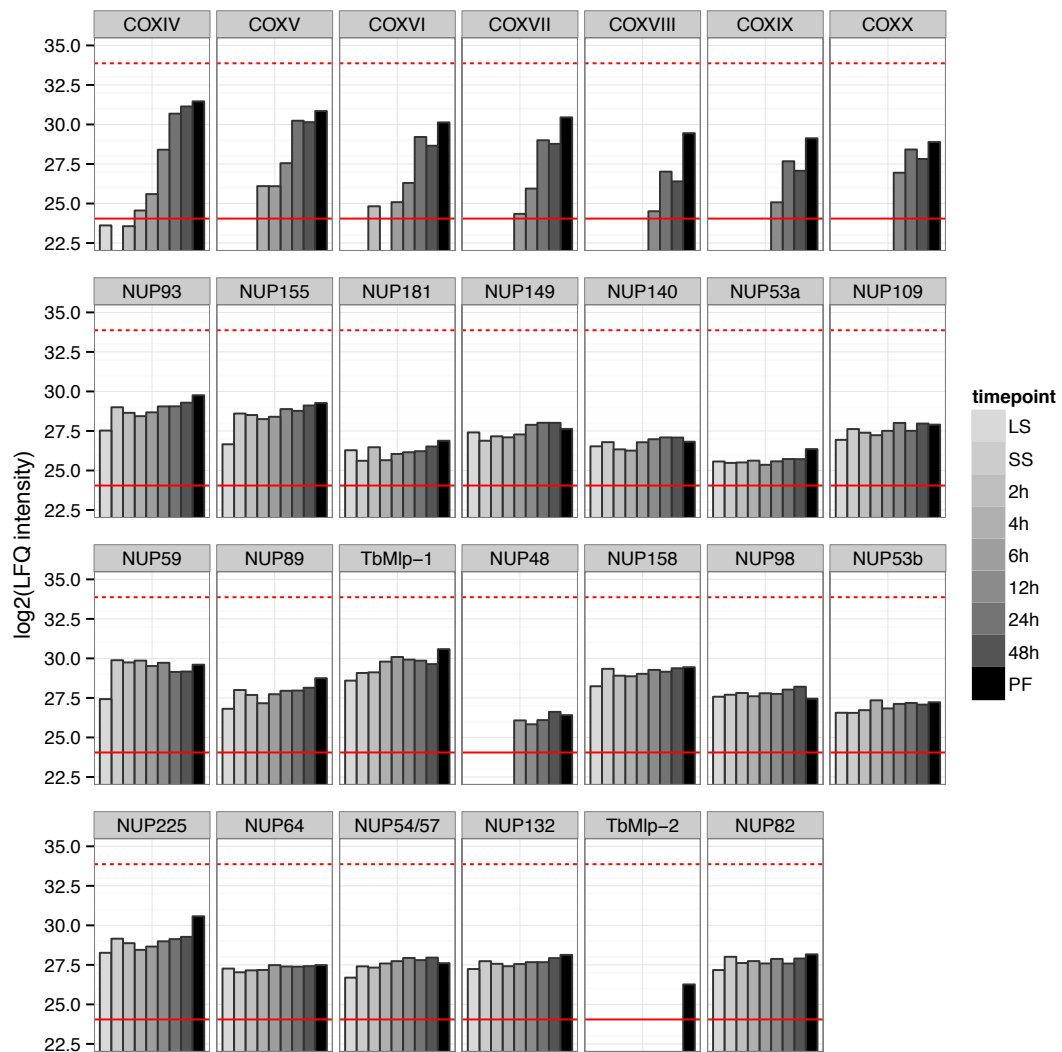

**Fig S4: Changes in LFQ intensity of cytochrome oxidase subunits and nuclear pore complex proteins.** Log<sub>2</sub> LFQ intensities of proteins are shown for long slender (LS) and short stumpy (SS) forms and consecutive time points during the differentiation as indicated.
